# Supplementary material for: Evaluation of viral genome assembly and diversity estimation in deep metagenomes
Source: PubMed Central journal article supplement (PMC4247695; doi:10.1186/1471-2164-15-989), 2014-11-18
Supplement: 12864_2014_6692_MOESM4_ESM.pdf [file 12864_2014_6692_MOESM4_ESM.pdf]

>NewGenomeName\_1

ACCGGCCACTTGGAGCCACGGAGCCCCTTGCAGCTATGCCTCCGCAAAGAGGGAAGCAG  
CGGCTAGGAGGTTGTGCTTACGCTGAATAACTACACAGATGAAGAGGTGTCCGCCGTGA  
AGGCGTGGAACGCGAGTGAGTACCATTACGCTGTCGTTGGACGCGACAAGGGGGAGAATG  
GTACGCCGCATTTGCAGGGCTACATTCATCTAAAGAAGAAGGCTCGGCTAAGCACTCTGA  
AAAATTACTTAGCCGTGCCATTGGGAGAAAGGTCGCGGTTCCGGACAGCGACAACGAGG  
CGTACTGTACGAAAGATGGGGACGTGATACTTACCCTTGGCATGCCGGTGGAAAGGGAACC  
GTAGCGATCTCCCCGGAGCTGTTGCCGCCGTGAAAGCCGGAAGTCGAATGGTGGATATCG  
CGCGAGAGTTCAGTGAAGTCTACGTCAAGTATGGGCGTGGCTTACGTGAACTGGCGCTTC  
TGATTGGACAGAAACGGCAAGATTTCAAACCGAATTTATCGTTGTCACCGGTCCGTCCG  
GCGTGGGCAAGAGCCGTTATGCTAATGAGTATCCAGGCACTAAGTTTTATAAGATGAAAG  
GGGACTGGTGGGACGGCTACTCTAACGAGGATGTTGTCGTTATTGACGACTTATATGGAT  
GGATACCTTTTTGTGAGTTACTGCGTCTACTGATAGGTATCCACATAAGGTTCCCGTGA  
AAGGATCCTATGTGGAGTTTACGTCGAAGGTCGTCACAGTGACCAGCAATACGCACACCG  
ACTCGTGGTACAATGAAGAGAAGTGCTATCTACCCGCGTTGTATCGGCGGATAAATAAGT  
GGCTGACGTGGAATGCCATCCGGTTCGAGGATGCACCGGATTGTATGAAGAATAACCTA  
TAACTATTGATTACGCCCCCTCCCTCATAGTGCCTTTCGAGGAAAGAGCAATCGCGGCC  
AGCCAAGGCGGCCGCGTTCACGGGTACTTCCGCGAGCGCACCGTCCGCGAGCGAAGTTCCT  
AGTGAAGTTCCCCGAGGAAAACACTTGAGATGAGGCGATTTATAATTTTTACTTAAATA  
AATAAAGACAGGAACCAGTATTGTGTGTCTGTACTTTATTTAGGGTTTTCGAGGTGGGT  
AGGTTTCAATTTGTCTGCACTCAACATATATCGTCACTTTTGCATGGAATAGTAAAGCATCG  
TGGGGCTGGGGCCAAGTATGGCGAGGCGTAGTGCTTACTCTAGAGCCCGAGCTGGGT  
AAGTTTTGGTCTCCTTTCTTCATCATAGGTATCCATGCGGATCTGGGGTGGTTAGCCAT  
TGCCTGGAGTAACGTTTCCCGCGTCCGGTGTCCGGAATGGTAATTTGGGGTCCGGGTCCG  
AAAAGACGCTTGAATCCTTTGCGGAGGTCCCACTGTCTTGCGCCGTCCAGTTTGCTAGC  
GGGTCTGTCTCCAGGACTGGCTTCTTGTAGAAGTCTTCAAGGTGGTTGTCTTGAATGGGC  
ACATTGTGCCCTATACCATGCCATGATCCCCAGTTCCTCGTTTGTGGACGCATTTTGAAT  
TTTGCCAGCCGATCCTGTAGTCTTCGAATGGTAGCCTCCAATTAATTGTTCCCGAGTCG  
AGGAAGTCGTCCAGCATTATGATGAGGCGTCCGGTAGCCATTTTCAGGGTAGTGTACCT  
GAGCCGCGCATTTCGTGGCTGTACATGCGGACAACTTGTATCGGTATACTCTGTTAGTT  
CTGTGACCACACCAATTGGTGTGAGTCTGCGTCTGCGCCAGTAACGTCGTCGCCATCGCCGT  
CTAATCGCCTGTGTCTGTGCGCGTCTCCTAGCAACCTGTATGAAAGAGCCAATCACGAGG  
TGTCACGTAACCGTGGCTCCAAGTGGCCGTTGAGTATT

>NewGenomeName\_2

ACCGCGGGCCGGGGCCATGGGGCCATCTGGCCCCTGGCCAAGCATGCGCAGTAGTGGTG  
CATGCTCGATGGCCGCGCAGCGGCCTTTATTTGCGGAGCATGCGCAGAAGGCCGCGCAGC  
GGCCGCTATTTGCGAAACATCACGGCAGCACGGCGAGACAGCGGAGCCCGTCGCTGGTGC  
TTTACTCTGAATAACTACACTCCCGAGGAAGAGGAGACCGCTCGCAATCTGATTCATGAT  
GCAGATAAGTACGCGTTTGCATAATCGGCAAAGAAGTTGGCGAAAGCGGTACTCCTCAT  
CTGCAAGGCTTCATGCATTTTAAAGCAAAGCAGCGGCATAACCGCTCTAAAGAACTTAAT  
CCTCGCGCGCATTTTGAGAAAGCTCGCGGCAGTGATCAGCAGAATGCTGATTATTGTGGT  
AAAGACGGCGAAATACTTACCATGATCGGTACTCAGAGTGATACTAATTCGAGTGATCTT  
GCGGGAGCTGTTGCCGCTGTGAAACGCGGAAGTCAAATAAGCGAAATCGCGCGAGAGTTC  
AGTGAAGTCTACGTCAAGTATGGGCGGGGCCCTCCGTGATCTCCAGTTCCTGATTGGTTGC  
CCGCCCCGCGATTTCAAACAGAAGTCATCGTTCTGATTGGCCCAGCTGGCTGTGGCAAG  
TCAAATTTGGCCAATGAGATGGAAGGGTCTAAGTTCTACAAGATGAAAGGTGATTGGTGG  
GATGGTTATGACAATCAAATATTGTCATAATCGATGACTTCTACGGTTGGCTCCCGTAC  
TGTGAGTGTCTACCTCTGTGTGACCGGAACCCTCACCGTGTGCCGGTGAAGGTTGACTAC  
GTGGAATTCACCAGCAAGAAGATTGTGTTTACCAGCAATCGCCATGTGGATGGGTGGTGG  
AAAGGTGAAATTGAGAAGAGTGCCCTTACCAGCGGATGAATGTGTACAAGTTTTATGAG  
ACTGGTGAATTCAGGACATGCCCGGACACATGCTCCCGCACCCAATCAATTATTCGGCG  
CGAGATGAAAACACCCCCCTCGGGATGACAGTCGTTTTTTCATCTCGCGCCCCCGAGTCGCG  
GAGTTCGCGAAGCGAACGGAGCGCGAGTGGCGCGCGAGATTGTGACGACCGACGCGCGT  
AGCGCGGAGGGAGGAGACCACTTGCTTTGAATTTAATATGCTATCTTTATTAAGAGATC  
CAGCAACATTCCTGTCTATGTCTTTTTTATTGTCAGTCATTGTTAAGCAGTCCCCGAACT  
TTGACAGGTCTTCTTCAGATTTCTTCAACATTATCTGAGCGAACTGCCTGAATGTTACAT  
ATATAGTTATTTCTGCATTATATCTCAGTGGCTGCCAGGTGAAGGCCTAGAGAATGCCA

GCCCGTAGTGC ACTACTCTTGTACCGTCCCTCTGGGGCCCTGCTGGCATT TTTTAAATGTA  
ACCAGCCTGATCTACTGCTATTCAGCCACATTGATGCTGAAAAGTTAGAGGCTGTCATAT  
CTGATATGGTTAGTTGAGGCTTTGGGCGTACCAGCCTCTTAAACCCTCTGACCAATTTCC  
ACGCCCTCGCCCCGTCCCAGTTATCCAGTGGGTCTTGCGTTTGATCCTGTAATTTTATAT  
CTTTAACTCTGGCGTCCAGA ACTGGGACTGTGTACCGCCAGCCCCTTGCAATTTTGTAG  
TGACACCTTCAGGCCTCAGCGCCACTTTTGTAAATTAATCCTGTAATCCTCGAACGGCC  
ATTCTGCCGGTATTCCCTCTTGACCTATAAAGTCATTCAGGTTGAAGGTGAAGAAATCTG  
AGGCCCACTTTTGTGGGTGAGTCTTAGATGGGAAGTCCACTGTGAATTGCCGTCTAAATC  
TGAACAAGTATATTCTGTTCAGTCTGTGCGCTCTTCGGTTCCTGGGCAACCTGTGACGTC  
TGCGCACTCGTCTGTGAAACCGCCTTCCCCGGAAACCGCGAGTAACACGCCTCCTTCTGG  
TTGCTGAGCGACGTACCTAAAAAAGAATGGCCCCACGGCCCCGCGTATAGTATT

>NewGenomeName\_3

CTAATAGTACATACAAAGTGTTTCCCCCTATGGCCTTCTCATGCTCACCCCAAAGAGAG  
CACCCCTATGGTGACTTTAGGTTTACTTTAGGTGTCCTTGAGGTGTACTTGAGGTGTACT  
TTAGGTGTACTTAGTGCCTAACCTTATGTGTGACATTGGGTTTACTACTAGCTGTAGTGC  
TTAGGGGGGACTTTAGGGGACTATATGTAGGCCTCCTTCTGTCTCTATCTGTAAGGGACC  
CTCTAAGTATCTCCTGATGTCACCACCTTAAGTCCTCTCCTTATGTCACCACCTTATGTC  
ACCACCTTAAGTCCTCTCCTTATGTCACCACCTTATGTCAGCCTCTATCCTTATGTTAAC  
CTTCAGTCGGTGCCTTCAGTCTATAGACCTTATGTTACCACTCTTAGAGATACTGCTTAG  
AGGCTACTTAGAGACTACATAGGGACTAGTTAGAGACTACTTAGCGACTCCTTATAGGCT  
ACTTAGCGACTGCTTAAAGGCTACCTAGAGACTACTTACAGGCTACCTAGAGACTACTTA  
TAGGCTACCTAGAGATACCCTTACAGTTAATACGACTCACTATTGGGAAGGTGTCTATTA  
CTATGCCTTTCCTTATAGGTATCACTTAGAGTGCTAATTTAAAGAACATTCCAAGAACAC  
TCAAAGAACACTTAAAGATGACTTTTTGTTACTCTAAGTATTGACTCTAAGATTAGATAC  
TGTATGGTTCATCTCACATCAACCCAGTGAGTCGGCCTCTGAAACAACATGAGGTGTCCA  
GGTGACAATCACTAGGTTGACAAGCAGTAACACTAAGACGTACAATGATTCACACAGATT  
CACATAGATTCACCGCTCTTTAAAAACTTGGATAGTAACACTCTTGAGAATGACCAATAG  
CGATTA ACTCAAGGTGACTCGAAGAGAGAAGCCTTTATGATAATCACTA ACTTATTA ACT  
AATGAGGTCATCACTATGAACGAATACCCTGGCTAGTTCTTGACATATAACTCATTCT  
CTAGGTACTTTGGGACACACCATTTGACAGGTCTAACGCCACTAGGTGTAGTGACTGCTG  
CTCTCTTAGTCATCGCAACGTATAAGGCAATCAAGTATGGCTTTAACTACTATCGCGGGA  
AGCAGCTCGTAAGTCTCTAATTGTTCTGAAGGGCCTCATAAAGGGTCTGAGGATACAC  
AACGCTAACCTCTAGCACTTGAAGCATGGCCTGCTCTTACA ACTAACCTTCTACTATCT  
TAAATAGGACACACTCTAATGAACTACACCGACATTCAGGCACGGCTAGCAATCAGCAAG  
TCTCTCCCTATTAGAGAACAGGACAAGCGCCAACCTCTTCTGGTTGAAAGAGCTGCTGAC  
ATTGTGAACGGTGAGACTAATAACGGTAACGATACAGATGTCTCTAAGGGTCTTGAGTAT  
CAGGACTGGTGGCATAGCTTAGGGTCACTCATGGGTGATGCAGGGTTCAACCTGTTAGGT  
AATGGTCACTTCAGTGCAGCTTACTCACACAAAATGTTACCCGGTCGAGTCATTAAGCTT  
GGCTTTAAGAATGAAGACTCAGGAGCTGCATACACTGCGTTCTGTAGGATGCACCAAGGT  
CGTGCTGGTATCCCTAACATCAATCACGTAGCACGGCACGCAGGCTGCTACACAGTTGTA  
CTTGACCATTTGAGTGACTGTAAGCTAGACACTAATGAGACTCACGCTAACTATGCGTAT  
GCTGCAAGGGCACTCATAGAATGTAACGATATCAATGTGCAAGCTTGTGCACATTTTGT  
AGCACTGAGTTCCTCGAAACGTGCAAGGTGATTCTGTGAGTTCTTCTACGGGATTGCGTCT  
TTCGATATGGACAGTGGGAACATTATGTTTCGATAAGAACGATCCGGCTTATATAACTGAC  
CCTGTTAGCTTCTCCACGACCGTGAACGTGAGGATGGCTTCCCTTTGGATCCTGATGCA  
CTGATTGCTGAGGTCGAGGCGATAGCTAACGAACGTATCATCGAACGTTGTGCGAACCGT  
AAGGCAAAGCGTGACCCTAATGGTACATTCCGTGCTGAACATAAGGCTGCAATGAACTC  
CGTAAGCGTAACCGTAAGTTATCTGAATGTAGAGCTGAACGGGTAGCTAAGTGTGAACT  
AAGCTGGACCACTTACACTTAATGTCCGTCCAAAGGGATCACAAGTAATCGTACGAAAC  
GAACGTCGTGCTGAGATGCTCATGGGGTCTGAATGGCATGACTTCAGGTTACTCAATGGG  
AACTCAACGATACACAAGGTTAACCAAGTGAACGACTTTAAGTGGCAAGTAGCTGACGGT  
CTGGCTATTCCGGCAGGATGTTCACTAATGATTGATAAAACACTTGACGCACA ACTGATG  
GGATGATAAGGTGTATCTTCAAGGTCCGTTACTA ACTGCTCGCCTTTATAGATAAACTTTC  
TTAACAACGTGAGGCAACAATGACTAACGTAATCATCGCACCAAAGAACGACTTCTCTGA  
TATCGCTAATGCAATCCAGCCGTACAACATCCTGGCTGACCATTACGGTGCACAGCCTGC  
AGCTACACAGCTTGAGTTGGAACATGAAGCGCACACTGAGGGCGGGAAGCGTTTCTTAA  
GGCAATGGAGCGTCAAATCAAAGCAGGTGAGTTCGGTGATAACACGGTAGCTAAACCGCT

CCTGTCATCCCTTGCACCAAAGTTTATCGAAGCGTGGAAACACTTGGTTCATTGATGTAGA  
AGCAAAGCGTGGTAAGCGTCCAGTGGCCTTCAATCGGGTACACAAGGTTGCACCTGAAGC  
TGCTGCTTTCATCACTCTGAAAGTAACACTGGCTTGCTTGACGAAAGAAGAGTTCACCAA  
CCTGCAGTCGGTAGCCACTTAGATTGGCCGTGGCATTGAGGACGAGTTACGCTTTGGGCG  
CATCCGTGACGAAGAAGCGCAGCACTTTAAGAACCACGTACAGGAAGCACTGAACTAGCG  
CGTTGGTATCGTCTACAGGAAAGCATTTCATGCAAGCTGTAGAGGGCAGGATGCTCGATGC  
CGGTGAACTGCAAACCAAATGGACTACTTGTACACATGAAGAAGTAATTCACGTTGGTGT  
ACGTATGGTAGAGTTACTCATTGGGTCTACTGGTCTCGTTGAGTCGCACCGTCCGTTTGG  
AGGCAACATTGAGAAAGACGGAGAGTACATCCAGTTAACCGAACAATATGTTGACCTACT  
GTCTAAACGTGCTGGTGCCTCGCTGCAATTGCTCCAATGTAATAACCTTTTGTAGTCCC  
TCCTAAGCCTTGGACTTCTCCAGTAGGTGGTGGCTATTGGGCTGCGGGTCGTAAGCCTTT  
CCCTATGGTCCGCACTGGTTCCAAGAAGGGCTTAGCGCGTTACAACGATGTGTATATGCC  
TGAAGTCTACAAGGCAGTGAACATCGCACAGAATACTCCTTGGAAGATTAACAAGAAGGT  
TCTGGCATTGGTCAACGAAATTGTGAACTGGAAGCATTCCCAGGTTGCTGACGTACCTGC  
TATGGAACGTGGTGAACCTACCAGTCAAACCTGTAGACATCGATACGAACGAAGCGTCTCT  
CAAAGCGTGGAAAGAAAGCAGCATCTGCAATCTATCGTAAAGATAAGGCTCGTGTGTCTCG  
TCCTATGAGCATGGAGGTCATGTTAGGTCAGGCCAATAAGTTCGCACAGTTTAAAGCTAT  
CTGGTTCCTATGAACACGGACTGGCGTGGTTCGTGTATACGCAGTACCAATGTTTAAACC  
ACAAGGTAACGACATGACTAAAGGTCTGCTGACATTAGCTAAAGGTAACCAATCGGTGT  
TGATGGGTTCTACTGGTTGAAGATTCATGGCGCTAACACTGCTGATGTTGACAAGGTGGA  
CTTCGCAGAACGCATCAAGTTCATTGAGGACAACAATGAGAACATCAAGAGCGTTGCAGC  
TGACCCTATTGCTAACACTTGGTGGACTGAACAAGACTCACCGTTCCTGCTTCCGCGCGTT  
CTGATTTGAGTATGCAGGTGTGCAACATCACGGGTTGAACTACAACCTGCTATATGCCTCT  
GGCGTTCGATGGTAGCTGCTCTGGTATTCAACACTTCTCTGCAATGCTGTGTGACGAAGT  
GGGTGGACGTGCTGTTAACCTGCTGCCAAGCAAAGAAGTACAAGACATCTATCGTATCGT  
AGCTGAGTGTGTGAACGAGATTCTTAATCAAGATATATTCAACGGTACTGACAGCGAAGT  
TGAATGACTGACCAATAAGGACACTGGAGAAATCACTGAGAAGCTCAAGCTGGGGACTAA  
AGAAGTGGCTGGTCAATGGTTGGCTTATGGTGTAAACACGTAAGGTAACCTACGCGTCCGT  
AATGACCTTGGCATATGGTTCCAAAGAGTATGGCTTCCGTGACCAAGTGTGTTGAGGATAC  
CATTTCATCCCGCTATCCACGATGGCAAGGGCTTGATGTTCACTCAACCTAACCAAGCTGC  
TGGATACATGGCTAAACTGATTTGGATTGCAGTAACAGTCCAGTGGTTCAGCAGTGA  
GGCAATGAAGTGGTTGAAGTCCGCAGCTAAACTTCTGGCTGCTGAAGTTAAAGACAAGAA  
GACTAAAGAGGTTCTTCGTAACCGTTCGCGCGGTATAATGGGTAACCTCCAGATGGCTTCCC  
TGTATGGCAGGAGTATCGCAAGCCAGTACAGACCCGCTTGAACCTAATGTTCTTAGGTCA  
GATTCGTCTACATCCTACTGTGGACACCAATAAGGATAGCGGAATTGATGCGCGTCAGTA  
GGAGTCAGGCATCGCACCTAACTTTGTCCACTCAATGGATGGAAGTCACCTTCAAATGAC  
TGTAGTTCGATCCTATGAGGTCTACGGTGTGGAATCCTTCGCACTGATTCATGACTCATT  
TGGTACTATCCCAGGCTGATACTGGTAACCTGTTCAAGGCTGTACGTGAAACTATGGTGAA  
CACATACGAAGAAAACGATGTGCTTGCAGACTTCTATGACCAGTTTGTGATCAATTACA  
TGAATCACAGCTTGATAAGATGCCTGAGATGCCAGCTAAAGGGTCTCTAGATATCCAAGA  
AATCCTCAAGTCAGACTTTGCGTTTGCCTAACGGAATTTAATACGACTCACTACTGGGAG  
ACCCAAGGTTTTACCTACTTTAAGATACACTTTAAGATATACTCTAAGATGCACTTTAAG  
TTTACTTTAAGAGGAAAGAACATCATGCGTACAACTTTGAACCAATCACTAAGCATAAC  
AACGTAATCAACGAACATGGTACTGAATGGCAGGAACGTAAGACCACATGAAGAAACGC  
CACAAGACACAGCGTGGTAACTCTGAGAAACGAACTGGAAGGAGGGACTCCTATGAGTC  
GCTTACATAGTGGGAACCTAACGCCTTCAAGGCTGCTACTGACAGAATATCTAAGATGG  
ACTTAGTGGTCGCTTGTGAGGAGTGGTATGAGTCACATGTAAGTCTGAACTTTATGTGGC  
TACGCATAGAGGACAAGGAACGTAACGGATTAACCTCCATCACTTGGAGTCATCACGTGC  
AGGACGTTCTATACAGTATGGGAACCGAGTGGTTGAACCGAATGTATGACCAGTTGAAAG  
ACTGGAAGTAATACGACTCACTATTGCGAAAGAGTTAACTCAAGGTCATCTAAAAGGTG  
GCCTTTGTGATTAACCTTTTGTGATTAACCTTTGATTAACCTTAACCAACACACACATA  
TACATCTATAGGAGTTCACAATGGAAATCCCATTCAAGACTTGAACACATAAAGCTGTT  
TCATTTCGTTGAGTCTTCCGTAATGAAAGCTCTCGACAAAGCTGGCTACCTTATCTGCGAT  
GTAAAGTATGATGGTATTCGTGGTAAACATTGTAGTTGACAATACGGATGACAGCATGTGG  
ATCTCCCGTGTCTCTAAGACCATCCCTGCCCTTGAGAACCTCAATGGGTTCCGACTCTCGC  
TGGCAGCGTCTTCTCAAAGATGACCGCTGTATCTTCCCTGATGGTTTCATGCTTGATTGT  
GAACTGATGGTCAAAGACGAAGACTTCAACACAGAGTCTGGCCTTCTGCGTACCAATGG

AGTGACCCTAAGAATTTTCAGTACCAACTGTAACCCTTTGGCCTCTGAGTTCACCAAGAAG  
TCTGCCAAGGTTCCCTACATGTTGTCCTCTGATAAGCTTAAGGTTGTTCTTTATGGTGTC  
ATGCCGTTTGACTCTATGGTTTCTGGTGAGACCTACGAAGTGATGAACCTACTGATGCGT  
GAGCACGTTAAGGCTTTGCTTCCGTTACTGAACGAGTACTTCCCTGAAATCGAATGGGAC  
ATCTCTGAGAGCTATGAAGTCTACGACTATGTGGAAGTACTGACAGCACTCTATGAGAAAGCT  
CGAGCCGATGGTCAGGAAGGCCTAGTAGTGAAAGACCCTCTGGCATTCTATCAGCGTGGT  
AAGAAGGCTGGCTTTTGGGAAGCTAAAACCTGAGTGTGAAGCAGCTGGTATCATTGAGTCT  
GTCAATTGGGGGACACCGGGTCTATCTAACGAAGGCTTGGTGATTGGCTTTAATGTTCTC  
TTAGAGACTGGTCGCCATGTTGCAGCTAACAAATATCTCACAGACTCTTATGGAAGAGCTC  
ACAGCTAACGCTAAGGAACACGGTGAGGATTACTACAATGGATGGGCCTGTCAGGTAGCC  
TACATGGGGGAGACGAGTGACGGGTCATTACGACATCCCTCATTTCGTTATGTTCCGTGGC  
TTTGAGTCAGACTCAATGGTCAAGGTCTGAATCACTCAATGGTCAAGTCTTAACAAGGGG  
CTGGCCTTTTGCCTTCTAATTAGACTCACTATGGAGGAACAACCACATGCTATTCCTAA  
TTGTTGCTAGCATTGCTGCCACACTTGCCTTAGTTATCGTTCACGACAAGTCTGGCCTG  
ATTGCCAATACGACTCACATATGGAGGACACACATATGCTACGATTACACCTCAATAAAT  
GTAATGGTATCTACTCGGTTTCGTGACTCTGGCCGCTCTCTGATCAAGGCTACCGAGAAAC  
ATGCAGTCATCCTAAAAGTGCTGGCCGCTACCATTGAGTTAGCACCTCGTATTCACGCTG  
TGATTACTACAGGCTTATTTAAAGAAGCGACAAGTGGCTCCCGGCCTTTCGTTCCGGTTC  
TCGTCACCCGTTTCCCTAAAGTCCGTCTGGTCATAGAGTGTATCAAGGAGGTGTTCTAAT  
GTATGGTTGCACTGCATGTATAGAGAATGACGACCGCTACCCACATACCTGTGAGCCTGT  
AGCTAAACCACAAGATATGGATGGTGTGCGCACTCCGAGCCACTATATGTTGTTTGATGA  
CATTGAGGCTATCGAAGTGATTGCCCGATCGATGACCCGTGAACAGTTCAAAGGGTACTG  
CTTAGGCAACATCCTTAAGTATCGTCTACGTGCTGGTAAGAAATCCGGACTGGCATCTTT  
AGAGAAGGGCATGGCGAAAGCTGGGCTCTATGGGAACTGTACGAGAAACATAAAGGAAT  
ATGTTATGCTTAAACCTAGTGAATGGTGTGAGGGAAAATTCAACGAGACTGGCAATGTCCG  
ACTATCTCGAAATGTACAACCTGTGGAAAGGGGAGAGGACAATGAGCATTTTAAACAAGGG  
GTCACTGGTTAATGGTGACAAGAAGTCTTTCGCTACTGTAGAAGGCCAAGGCCAATCATT  
CGACGTACCTGTGTTTCGCTGCGTCTTGAAGAGGCCACCGAATTAGCTGAGTGGCAATA  
TGACCCAGCTGGTTTTGCAAGTACACGCGATGCGTCCAGACCGAAAGGTTAATAGGACTC  
ACTATCGGGAGACTAATAGTTTCCCCTTTAACTTTTCAGAACTTAAGGAGAAACATCA  
TGGCTTTCACCTAAAGTAAAGTATTCAATTCTGCTAGTGCTATTGCTGAACCGTACTGCT  
ACCTGGCTAAGCCTGACTTTGGTAGTGGTACTTCTAGAACGAACGTGGTGTCAATAACG  
TATCACTAACTGTATCCAACGACGACCCTCGCTGTCAGAAAATGATTGACGAGATTGTCCG  
AAGCCCATGAGACGGATTATGCTGCACGTATGGAAGAGTACGCAGCTCACCCGCCGAAAG  
TTGTTAGAGGTAAGAAACCGCTGAAGCCATATGTTGGCGACATGCCTTTCATGGATAACG  
AAGATGGAACCACAACGTTACCTTCAAGTGCTATGGTTCATACACTGACAGGAAGACTG  
GGGAGCATAGAGCAATCGACTTGGCTATCGTGGACTCCAAAGGTAAGCGCATTTCGTGGT  
AGCCTCCGGCTATCTCTGGTGGCTCCGAGCTGAAGATTAATACACTCTGTTCCCTTATG  
GGTGGTCTGCTGTGGCAGGTGCTTCCGTTAAGCTACAAGTGGATTCCATTATGCTGATTA  
AGCTGGTTGAGTTCGGTGGCAGTGGTGGAGGATGACTGGGCTGATGAAATCGAAGAAGACG  
GTTGTGTTGCTGTTGAAGCACAGACCCGTAAGCCTCAGAACGACTCTGGCTGGGATGAAG  
AACCACAAGAGGACGATGAAGATGATGATGAGACCGGCGACTTTTAATATATGATAGGGA  
GGTCAGAGGGCAGGTTATGGTGCAAAAGGAATCAAGAAGGTAGGTATCTGCCGAAGTGGGA  
TTCGAAGAGAAGAACATGAAACTCTTAGAGTCCCAGGGTGTAAAGCTGAGTTCGAAATG  
TGGAGAGTTCCTTATGTTGTTCCCGCAAGGAATCACCATTACGCACAAGACATTTTATTA  
CCTAACGGTATCTTTGAGGAGACAAAAGGCTTATGGGAAAATGACGACCGCAACAAACAC  
TTGCTGATTTCGAGAACAGTGCCCCGACTTGGATATACGCCTGGTCTTCTCAAGCAGTCCG  
ACCAAGATTTACAAGGGGTCTTCTAAAAGTTATGCGGAGTTCTGTGAGAAACATGGCCTC  
TTATTTGCTGACAAGCTGATTCCAGTCGCGTAGCTGAAGGAAGCATCCCGGCCTGTACCA  
TTCGATAAGCTGAAGACCAAGAAGGAGAAGAATAAATGAGAAAGGTACAATTTAAACCAC  
GCAGTTCTACAGAAGCGATCTTAGTACACTGCAGTGCACCAAAGCCGACTATGGACGTGG  
GTGTCCGTGAAATCAGTCAGTGGCATAAAGAACAAGGTTGGTTAGCAATCGGCGATCATT  
TTGTGATTTCGCCGTGATGGGACCATTGAGGAAGGTGCCCCAGTAGAAGTCATTGGGTCTC  
ACGTTAAGAGCTGGAACAGAAAGTCAGTTGGCGTGTGTCTCGTTGGTGGTATTGACGATA  
GGGGCCACTTTGAGGCAAACCTTACGCCTGCTCAGATGGTCTCTCTTAAAGCGAAACTTG  
CAGACCTGATGAACATGTATCCAGAGGCTGAGGTGAAAGCTCATCATGATGTTGCACCTA  
AAGCGTACCCGTCATTCAAATTGTGCCACTGTCTTAAAGACTGGAGAAGTACTAGTCACAAGCG

ATGGGGGCTAATTAATAGAAGTCACTATGGGAGAGCCGAAAGGTTGCTCCGTTTGTTCGC  
TAAAAATGATTAAGGAGTAACCACAATGTATAACCTTAAAGAGCATGTGTTTCGTCATTTT  
AATCTGTGTACTIONTATTGGCGAAGCCTGCCTGCGTCCGTTCTTATAGGATGTATCTAA  
TGGATATGGAAGAACAGCAAGATAGCGTGTTCCTGTATCACCTGCCGTGTGAAAAGTGCG  
GGTCGTACAGATGGTGACTCAATGTACTCCGATGGACACAGGCACCTGCTTCGTGTGTAACA  
ACTATGGGCTCCACGGATAAGACTCGTGACCAAGCGTCAACCAAGTGTGCGTCGCTCAT  
ATAACACTGGAGGTGACAAAATGTCTAACCTTTTAAACTTTGGGGATTTCAGACGGTCGCT  
ATGCGGACCTCAAAGCTCGTGGCCTTATGGAAGCTATCTCTCGTAAGTATGGATATTGCG  
TAGCGATGGTCAAGGGAGAGATGCTTCAGGACGCGAACTACTATGACGTTGAGGGGAACC  
TTGTGGGTCAGAAGGTGCGCGACAAGAATAAAGAGTTCTCTGCAAAGGGGAAACTCAAAG  
CTGACCTATTGTTCCGTAATCAGATATGGAATGGTGGCAAGCAGATTGTAGTTACAGAAG  
GTGAGATTAATTGCTTGACTGTAGCTCAACTTCAAGAAGGGAAAGTATCCCGTTGTGAGTC  
TCCCGATGGGTGCTCAAGCCGCAAAGAAAACATGCTCTGCCAACTATGAATACTTTGACC  
CGTTCGACGAGATTATCCTTATGTTTCGATATGGATGAACACGGTTCGTAAGGCTATCGAAG  
AGTGTGCTCCTGTCCCACCTAGTGGGAAAGTTCGGAGTCGGTGTACTCCCTCTTAAAGGATG  
CCAATGAGTGTGACTCACTGGACAAGCCAAAGCAGTAACCGACCAGATTTGGAATGCAC  
AACCTTGGGTGCTGATGGTGTAGTCTCTGCTGTGGCTCTTAAAGGACGAGTGCGTGAAG  
CTATGGTCAAAGAGGAAACACCAGGTCTTCTATTTTCGGGTCAACCGAAACTAAATCATA  
TGGCACTGGGTGCTCGTGGTGGTGAAGTCATCATGGTCACTTCACGTTCCGGTATGAGTA  
AGTCCACGTTTCGTTTCGTAACAGATGCTCTAGTGGGGCAAGGGTGGTGCGAAGGTAGGCT  
TGGCTATGCTTGAAGAAGCCGTTGAGGAAACTGTTTCAGGACTTAATGGGCTTGAACAATC  
ATGTCCGCTACTTCAATACAAAGAACTCAAGATGAAAACCTGAGAGTATGGACGCTTCG  
ATGTATGGTATGGTGAACCTGTTTAAACACAGATATGTTCCACCTGTCTGATTCCCTTTGCGG  
AGTCACAGGAAGACCGTCTGTTTTCGAAGCTGGACTACATGGTTCGATGGCTTAGACTGTA  
ACGTCATCCTCTTAGACCATATCTCTACTGTGGTATCTGGGATGGAAGATAACTCTGATG  
ATCGTAAGATGATTGACCGCTTGATGACCAAGCGGAAAGCCTTTGCGAAGACTAAACGTG  
TGGTCGTTGTGGTAATCTGTACCTCAAGAATCCTGAGAAGGGGAAAGCACATGAAGAAG  
GTCGTCAGTTAGCATTACTGACCTACGTGGCAGCGGTTCTCTGCGCCAACCTATCAGATA  
CTATCATTGCTCTCGAACGCAACCAGCAAGGGGTTTATCCAAACCTTGTTCAACTTAGGC  
TACTTAAGTGTGAGTTTACTGGTGAGACTGGTGTGGCTGGGCATATGGCCTTCAAGAAGG  
AAACCGGATGGCTTGAACCGACTGTCTCACCTGAAGATGAAGGAAGCAGAGATAGCGGCT  
GGGAACCAGAAGAAGACGGTCAGAACTTCTGATAGTAAACCTATACAACTACTAAAAGG  
GCAGACAACCTGATCCCACCTTATCAATCCTCTTAAAGGAGAAGCACAATGTTTAACTTCAT  
CGACACTCTCGGTAAGCTGGTAGTTAAGCTGTACTTCTGTGAAGCTAAACGTATTAACAA  
AAAGGCTCGTAAAGGTGCTGATCGGGCACGGCGCTTGGCTAAAGATGCACGTATGCTATC  
TGAAGCTGCAAGTGCTGGTGTAAACGTCTGCTGCTTAGATTGCAGCTAAAGCAACCGACCT  
CGACAAATTCTTCTGTAAGGAGTAACATATCATGTCTATTAATTCCCTGGCAATACCA  
TTCGTCTATCTGACACCATTGACCACTATGCTCGTTCGAGTGCACGTCAACGTTTCGTAAGG  
GAAAAGTCACTTTGGTCTACCGTTGGCAAGACCATAAGTCCACCAAGGCGCACACACAGC  
GTGTAACCTTTGGATGTCATGCAGGCGGGTCGTCTAATATCTTCTGTTGCTGTAGCTGCTA  
CTGTGGCTGTAGGTGGGAATATTGTACGTCAGGCTATGCTAGGCAACACAATTGAAGCTG  
AAGGCAACATGCTTGCTGAGAAGTGTAGGAGTGGTAAGACTTAAACTAAAGGTCATCTC  
CGGGTGGCCTTCGTGTTTAACTTTTGTATGAAAACCTATTCAACTAACTAATGGAGTAAAC  
ACAATGTTACTATCCGACTTAGAAGCAAATGGGTTGCTGCACAGCGTTAGTCAATTTAC  
TGTGCGGTGACTTACGACTACTCAACTGACCAGTACATCCGTTATCGACCTGCTGACTTT  
GGGCATACATTGATGCTCTCGAAGATGAGGTGGCTCGCGGTGTTCTCATTGTGTTTCAT  
AATGGCCACAAGTATAACATCCCAGTAATCGAGTTGCTCGCCAAGAACTGTTAGGACGT  
GATGTCGAGTTCCTTAAAGAGAACGTCTTGGATACCCTAGTGCTGTCCCGCTTGGTTTAC  
TCTAACATCAAAGACACCGATGCTGGGCTGCTTGGTGCAGGCAAGCTACCAGGTAAACGC  
TTTGGTTCCACGCTCTGGAGGCTTGGGGTTATCGCTTAGGTGAAACGAAGGGTGAGTCC  
AAGGACGACTTCAAGGCCTCACTGGTTGAGTCTGGTGAAGACTACGTGGCTGGTCTGGAA  
TGGTTGATGTTCAACGAAGACATGATGGAATATAACGTTCAAGACGTTGTAGTAACCAA  
GCTCTCCTCGAGAACTTTGTAGTAACACATTTTATTTTCGGTGAGGTGGAACCTAATGGA  
AGCACTGTGGCAGAACGTTTCTGGGAGGGTAGCATTGAGGCTGTCAAGATGGAACACGAT  
GCTGCATGGTTGTTAGCTAAGATGGAACGTAATGGTTTCCCTATTGACGTCAAGTCCTTA  
GAGAATCTTTATGCTGAACTTGCTGGGCGCCGTGGTGAACCTTCTGGTTCGAGCTGACCAAC  
ACTTTCGGCTCATGGTATCAGGTCAAGGGTGGAGTTGAAGCATTCCGTCACCCAAGGACT

GGTAAGCCTCTCACTAAGTATCCTCGTGTGAAATATCCGAAACAGGGTGGTATCTTTAAG  
AATCCAAAGAACAAGAATCATCGCGAAGGTCTGGATCCTTGTGAAATGGACAATCGTGAT  
TACGTAGAGGGCGCTCCATATATGCCTGTAGAGCACGTTGTGTTTAAACCCTTCTAGTCGT  
GACCACATCACTCGTGTGCTTACTAAAGCTGGCTGGGTGCCCGTTGAGTTCCTCTAGT  
GGTGCACCAAAGGTAGACGATGAGGTCTTAGAGCACGTTAAGGTAGACGACCCTGATGCA  
CTTCGTTGCATTGAGTTGATTAAAGAATACCTTATGATTCAGAAGCGTGTCCGGTCAGGTT  
GCTCAAGGTGATAACGGTGGCTCCGAATGATTGGAGAGGATGGTTCGATTACCGGTAGC  
GTTAACCCGAACGGTGCAGTAACTGGACGTGCAACTCATAGTTTCCCTAACGTGGCACAC  
GTGCCTTCTAGCCGTGCAGCTTATGGTGAACCTTGCCGTGCTGCTTTCGGTGCAGAGCAC  
AACATGAAAGACGGTAAGCCACACCCTTGGATTCAAGTAGGTGTGGATGCGTCAGACCCT  
GAGCTACGTTGCTTGGGTCACTTCATGAATCGATATGTCGAAAGTGAGTACTTTGAGACT  
ATCCTTACTGGTTATATACATAGAAAGAACCAAATGGCCGCTGGGTTACCTACAAGAGAC  
AACGCTAAGACGTTTAAACACAATGGACGTCTATAAACCTATCTAATTTCGATGGACATCCC  
TATGGGACAATATCGAGCTAAATGATATTCGGTAGCCTTTAACTTAGGAGGCTCCATATG  
TATTCACTAAACCATAACAAACCTAAATCCTCACAGACCGCGACTCCCAGCAAGTACACT  
CAGGGGCACCTTGAAGGATAAGAAGTGTAAGTGTTGCAATCTGGTATTTAACCCCAAATCT  
CCTGATGAGTTATACTGCTCAGATAAGTGTAAGGATAGGGGAATCCAGACGGCATACTT  
ATGCGGAGCTACGGGATAACTCTTGGTGACTIONCGAAGAGATGTTGGAATCCCAGAAAGGT  
CTATGCAAGATATGTGGCACCGGGGGTTTTGCAATGAACCCAAAAGTGCACAAGATAATA  
CTTGTGTTGACCCTGTTCGCACCAAAGGTAATGTTAGAGGTTTATTGTGTCACAATTGC  
AATCGTGCATTAGGGCTTCTTAAAGATAACGTGAAGTCCCTACAGCCTGCTATTGAATAT  
TTAAATGTGTAACGACTATCCCGGAAGGGAGTAGGGCCAAGTGGCTCGAAACGGTAGGGC  
GCTGAGGCGCAAGATATAGTCTGCTCTGCATGGCAACATGTAGCAGTTCATAAGCGAACG  
GGCAGGGATTAACGACCCCTGTTGAACACTAAGGTATCTACGGATTTTTATATGGTCCTG  
GTGCTGCAAAGATTGGCCAGATTGTTGGAGGTACGTCTGAGGATGGTAAGAGACGCATCA  
AGAACTTCCTTGAGCAAACCTCCGGCTATCGCTGCTTTACGTGAAACAATCACAGGGGCAT  
TCGTCAAGGACTCCAAGTGGGTTGGTGGCGAACAGAAAGTAAGTTGGAGACGTCCTTGGG  
TTCGTGGGTTGGATGGTCGTAAGGTACACGTCCGAAGTCCCTCACGCTGCGTTCAACACCT  
TGTTGCAGTCTGCTAGTGCTCTCATTGTAAACTGTGGATTGTCAAGACAGAAGAGATGC  
TTCTTGAGATGGGCTACGCGCACGGCTGGGATGGTGACTIONCTGCCTAATGGGGTGGATAC  
ACGATGAGCAACAGCTTGCTTGCCGTACTGAAGGGATTGCAAAGTTGTAATCGAAGTGT  
CTAACAGGCAATTCGCTGGGTTGGAGACCACTTAACTTCCGGTGCCAACTGGATACTG  
AAGAAAAGATGGGACCGAATTGGGCTGTATGTCACTAATTAACAGGAGAAATATATCATG  
GCTATTACTAGACGTTTTTAAGTATCATTCTGAAGTAACCGCTGTAATCACCTCTGAGAAG  
GAGAAACAATGAACTGATGCATTGATTCAGTTGGCTAAGAAGGCTGCCGCTGGTGAGAAT  
CTTAGTCCCCTTGCCCGCAATTTCTGGTTCAAGCATTGACCCACGGTGTTCGAGGGTGT  
ATCTCCTTTTCTTCAAACACGGTATGCGCGAGTTTATCCCAAGAGTTACCGGAAGCT  
GGACTGACAATCTCTCCAGCAACTATTCGTGAGGTGAATTAATGGGTGAATATATACGTG  
TACTGGCGGCTATCAAAGCTGCCCTAAGACCTTTCAGTCAAACCTATGTTTCGTAACAACC  
CGTCACTGGTAGCTGAGGCTGCAAGCCGTGGTCATATCTCTTGCCTATCAATCGATGGGC  
GTAATGCTGATGCTTGGGAAGTAACAGGTGCTGGTCTCCGTTTCTGAAGCAGGTGGGAG  
GTTCTGTATGACTTTGCTTACTGACAACGTACAGGTGACTCGTGAAGCGTGGAATGACAT  
GCAGATGTACATTAGTCCCTTGAGAAAGACGAAGAGTTCCTGGATGCTCTGAGAGCCTG  
TGGTGTGGACAATTGGGATGGCTACCTAGATGCTGTCGAAATGGTATGTAGGGAGGATGA  
GTTATGAGTGCTATTACTGGGGGAGTTCTATAAGTTACGCCAAGGTAGATCCGATAAG  
GGAGTCTTGGTGATGGATGGCGTCTGGCTGGAATTCCAAGCGATGGCAGCAAGTGAAGTC  
GAGACCCAATGGGATGATGACATTTGGAGTTTLAGAGTGTGACCACGGGAAAGCGTGGAAC  
ATCCTGCTTGACTCCGTTAAGTCCTATGCGAGCCGTAAGAAGGCTTGGCGTGAYGCACCT  
ATCATGATGGCCTTCATTGACTCTGTGAACTGGCGTCAGGAATTAGTTGACCCAACTAT  
AAGGAGCACCGTAAGGCGTCTCGTAAGCCTGTAGGCTACCGTGCCTTCGTCAAGCGTGTT  
CAAGCCTTTGAGGACTGGACGTCTATCCTTTAGCCTCGCTTAGAAGGTGATGACGTAATG  
GGAATCATTGGGTCTGGTGTGAAAACCTTCGGGTTCAAGGAGGCTGTACTGGTCTCCTGT  
GATAAGGACTTTAAGAACATCCCTAATTGTGACTTCTTGTGGTGCCTACTGGTAACATC  
TTGACTTAAGCCAGACTACCGCTGACTATTGGCACATCTATCAGACCATTAAAGGTGAC  
TTGACTGATGGGTATGGTGGCATTCCGGGCTGGGGTGTGACAACCTGCCGACTGTTTAGAG  
AACCCGTATGCCTTTGAACAGGTTGAGAAAACCTTTAAGTCTGGTACTCGTAAGGGACAG  
ACAGTTATCGAATGGAAGAAGGTGGGCTAGGGAGACAGAACCTTGTGGGAAGCTACTGTG

ACCCTTGGTGCCAAAGCTGGGATGCCTGAAGAGGAAATCATTAACAAGATCAGATGGCT  
CGCATCCTTCGTTTCGAAGAGTACAACCTTTATCGACAAGGAGATTTCCCTATGGTCTCCT  
GAACAGTTACATTCGTGAGGGCTACACTTATAGCTAAGAGTGTGTAACCTCTAGGCATTCT  
TCTACATGTTAAATTAATACGACTCACTATTGGAGAGGGGTGCCCATATGATACCTACTT  
TAAGTTCTAATTGTAAGGAGAACATTAATTATGTTAACCCTATCAAGAAGTACATGGAG  
AACCCACAAGATATTACTAATGTTCCCTCGGAGTGTGATGGAGTATCTTCCGGTTTAATAC  
AATGCTGGATATGCTATTCAGTCTGGGCTTATCAACCGATTGAAACAGGCTGGGTGGTCT  
GAAAGCTACATCGCTGGGTTCCCTCGCGGGTCTCAACTATGCATCTCAAACCTTAGACGAT  
ATGGAGCCATTCGTAAAGAACAGGCAGAATCCTACTAACAGGAGGTAAGCTGATGTGTT  
TTTACTAAAGATTAATAATGCCAAAAGTAGATACCAATCAGGTACGTGCAATCGACCCTG  
CGCCACTAACAGAGAAACCAAAGGTATTCTGTTTGGTGGTGTGACTGAAAGCACC  
AAGATGGCACAAGTCCTGAAGTGTCTACAGGTGGCAGGAAGTCCCTCAAAGTGAACTTG  
AAGACACCCCATCCAAGGCACTTAGGAGTGACAATTTGAAGAGACGGACCGGGGCCAAAG  
CGTCTATCCGCAAGTCCGTATTCAACAACAACAAGTAATCAGGAGGTTTATCATGGGTTT  
GGGCAAGAGCTTAAAGAAAGCTATCCAGAAAGTAACTAAGCCAATCGAAGGTATTACTAA  
AGGTGCTCTAGGAGCTGCTGCTGGTATGCTGGATGGTGGTATGCCAGATGTCCCACAAGC  
TGCACAGACCGTTGAGCCACCAAGCAAAGGTGACGTGAACACTGATGACAGTTCTCAGAC  
TGAAAGTGGCAAGAAGAAAACACGTGCTAGCGGCAAGAAAGCACTGAGTGGCGCTCGCAG  
TTCTGGCGCAGGCCTAAATATCTAACAAGGAGGCGCTAAATGGCAAGCTCACAGAAACGT  
GAAGGCTTCGCTGAGAATGGTGCCAAGGCGGTGTATGATGCATTGAAGAACGACCGGAAC  
TCCATGAGACCCGTGCGGAGAAGTGTGCTAAGTACACAATCCCTCGTTGTTCCCGAAG  
GACTCCAATAACGCCTCTACTGACTACACAACCTCCGTGGCAAGCAGTGGGCGCTCGTGGT  
CTGAACAACCTGGCCTCTAAGCTCATGCTTGTCTGTTCCCTATGAAGACTTGGATGAAG  
CTGATCATCTCTGAGTTCGAAGCGAAACAATTGGAAGCACAAACCAGATGAACTGGCGAAG  
GTAGAAGAAGGTCTCTCTATGGTTCGAGCGAAGCTTGATGAACTACATCGAGTCAAACCTCA  
TACCGTGTGACTCTTTGAGACCCCTCAAGCAGTTGGTTCGTAGCGGGTAACGCTCTGGTG  
TGCATTCCCTGAACCTCAAGGTAACCAACCCCATGAAGTTATGCCGTCTGTCTTCTTAT  
GTTGTCCAACGAGACGCATTCGGCACGGTACTACAGATTGTGACCTTGGATAAGACTGCC  
TATGCAGCACTTCCCGAAGACGTAATGAACTCTATGGACTCTAGTCAGGAGCATAAGGGT  
GACGAGATGATTGATGTGTACACTCACATATATCTCGATGAGGAATCTGGAGACTACCTG  
AAGTACGAAGAGATTGATAGCGTTGAAGTCGATGGCACAGCTGCTTCTTATCCGGTGGAC  
GATTGTCCATATATCCCGGTTTCGCATGGTGCACATTGATGGAGAGTCATATAGTCGTTTCG  
TACTGTGAGGAATACTACGGTGACTTACGTTCACTTGAGAACCCTCCAGGAAGCAATCGTC  
TAGATGTCTATGATTAGTGCAAAGGTCATCGGCTTGGTTAACCAGCTGGTATCACACAG  
GTTTCGTGCTTAACGAAAGCACAGACAGGTGACTTTGTGTCTGGTCGTCCTGAAGACATC  
TCGTTCCCTCAGTTAGAAAAGGATGCTGACTTCTCTGTAGCGAGAGCTGTGAGTGAACAG  
ATAGAAGGCCGCTTGTCTATGCCTTTATGTTGAACTCAGTGGTACAGCGTACTGGAGAG  
CGTGTGACAGCCGAAGAGATTCGCTATGTTGCATCTGAACTGGAAGATACCCTTGGTGGT  
GTCTATTCTATTCTCTCACAGGAGCTCCAGTTACATATGGTTTCGTGTACTACTGAAGCAA  
CTTCAAGCAACCAATCAGATTCCTGAGTTACCTAAAGAGGCCGTTGAGCTAACTATCAGT  
ACCGGGATGGAAGCATTGGGGCGCGGTCAAGAGCTCGATAGGCTGGAACGTTGTATTGCC  
GCGTGGTCTGCTCTTGCTCCTATGCAGGGAGACCCGGACATCAACATTGCGAACATTAAG  
CTGCGCATTGCGAACGCTATTTGTATCGACACTTCTGGCATCCTTAAGACACCTGAAGAG  
AAGCAACAGGAAATGGCTGAGGCCGCTCAAGGTACTGCTATGCAGAATGTTGCTGCGCCT  
GCTGGTGCGGGTGCTGGTACAATGGCTACTGCAAGTCTGATAACATGAAAGCTGCTGCT  
GCACAGGCTGGCATGGCACCTAATTAATAACAACCTCACTAATGGGCGAGCCACTATGTCCT  
CCTTTGGAGTTATACATTTTATTATCAAAGGAGATAAAATATGTCCGGTGAATCTAATGC  
TGATGTTTACGCATCTTTCGGTGTGAACTCTGCGGTTGTGCGGTGGGTCTACTCCCCTGA  
CCACGAACAGGCCATGCATGAACTGGATGTTGCTGCCCCTGATGGCGATGATGCAATCGA  
GATAGTAGGCAATGATGACCCATACGGTAATCCAGACCCGTTTGGTGAAGAAGACGATAA  
TCGTACTGAGATTCGTATCTCCACTGATGGTGAACCAGAAGAGACTGAAGAGGGTGAAGAT  
AGATTACTCTGAAAGCACTGAAGAAGAATCCTCAGCAGAGTTTGCACCTGTGGGTGAAGT  
TCCAGAAGAAGTGAAGTGCAGCCTCACGTCAACTCGAAGAGCATCAAGCTGGCTTCGAAGA  
GATGGTCAATCAGGCTGCTGGACGTGGTCTGTCTGAAGAACTATCGTCCCTATCCAACA  
GGAGTATGGTGAAGATGGTCTGTCTGAAGAGTCTATGAAGAAGTGGCTAAGGCTGGTTA  
CTCTAAGTCTTCGTTGACTCCTACATTCGTGGACAGGGAGCACTGGTTCGAACAGTACGT  
TCAGTCTGTTATGGAGTATGCTGGTGGTGAAGCACAGTTCCAAACACTCTACAATCACCT

CGAAGTGTCCAACCCGGATGCTGCCGAGTCTCTGGTTAGTGCTCAGGAAAACCGTGACCT  
TGCGACCGTTAAGGCTATCGTGAATCCCGCTGGTGCAAGCCGTGCGAAGACTTTCGGTAC  
ACCTGCTGCCCCAAGTATTCCTAAACGTGCCGTTCCCTGCTGCACCTGTACGAGCCAAACA  
GTCTGGCTTTGAGTCACAGGCTGAGATGAGTGCTGCAATGTCTGACCCTCGCTACCGCTC  
GGACTCTAAGTTCGGTGCGGAAGTTGACCGTAAGATGATGTACAGTAACTTCTAAAATTA  
ATACGACTCACTATTGGGAGAGACATCACGTTCCCCACTTTGAGTGATACACAATGAGA  
ACCAACTCGTTTCAAGTAGTACCTCACAATTTAAAACCTTCTAAACCAACAGAAGGAGAT  
TCAACATGGCTAACATGAATGGTGGACAACAGATGGGTAAAGACCAAGGTAAAGGCATGA  
GCGCTGAGGACAAACTGGCTCTGTTCCCTGAAAGTCTTTGGTGGCGAAGTTCTGACAGCGT  
TTACCCGTACCTCCGTAACCTATGAACAAACACCGTGTTCCGCTCTATCCAATCTGGGAAGT  
CTGCTCAGTTCCTGTGCTGGGTCGTACAAAAGCTGCTTACCTACAACCAGGTGAGAACC  
TCGATGAGAAACGTAAAGACATGAAGCACACTGAGAAGACCATTAACATTGATGGGTTAC  
TACTGCTGACGTTTCAGGTTTACGACATCGAAGACGCTATGAACCACTATGACGTTCCGCT  
CTGAGTACACTGCACAGTTGGGTGAATCTCTTGCAATGGCTGCTGAAGGTGCTGTACTGG  
CTGAAATGGCTAAGTTATGTAACCTTACAACCTGCTAATAATGAGAACATTGCTGGTCTTG  
GTAAGGCTCACGTAAGTTCGAGTTCGAGGCTACCTGCAAGGTGACCAAGTTAAGC  
TAGGTCAGGCGATTATAGCACAGTTAACTCTGGCTCGTGCTAAACTGACTGGCAACTATG  
TACCATCTAGTTTCCGTGTGTTCTACACTACTCCTGATAACTACTCTGCGATTCTGGCTC  
CTCTGATGCCTAACGCTGCAAACCTATCAGGCTCTGATCGACCCATCTACTGGTTCTATCC  
GCAACGTAATGGGCTTTGAATTAATCGAAGTTCCTCACCTTACTGAGGGTGGTGCTGGTG  
ATAACCGCGCTGAAGAAGGTGTAGCACCTACTAATCAGAAACACGCATTCCCTGATACTG  
CTTCTGGTGATACTCGTGTTGCTTTGGATAACGTTGGTGGCCTGTTCAATCACCGTTCTG  
CCGTTGGTACTATTAAGTTGAAAGATATGGCTCTGAAACGTGCACGTCGTGCTAACGTCC  
AAGCAGACCAGATTATCGCTAAGTATGCAATGGGTACGGTGCTCTACGCCCGGAAGCAT  
GTGGTGCGCTGGTTTTCAAAAAGGCTTAACTTCTCGCAAACCTCGTAGGTGACACTGAGTC  
TCTTACTTAAGTTGAGCAAGAGCTAACGCCACAACAGAAAGCTGCCCGTACCCGTGCGGC  
AAACAAGGCTCGTAAAGAAGCTGAGTTAGCTGCTACTAAGTGACAAGTATATGAAACCC  
TTGGGTGCCTTCGCGGGTGCTTGAGGGGTTTTGTCACTACAAGGAGGATACCCTTATGCG  
TTCCTATGAAACTACCCTAGAGACAGTCGAAGAGTTGGCTGCTGTCAACGAGATGTTGGC  
CTCTATTGGTGAACCCCAAGTATCCACTCTGGACCGTGACACTAATGCTGATGTGGATAA  
CGCACGTCGAGTTCTCAATAAGATTAACCGACCGATTTAATCGAAAGGGTGGACGTTTAA  
CAATGAGGGAGGACAACAGTTGCTACCTGATGTGTTCAACGGTATGATTCCCTACATGTC  
AGACTACCTGTCTGTACTCTCGGAAGGTGGAGCAACTGCCTACGTTAACCGTGGTGGATA  
TGTGTTTGATCGGATGACCGGAAGTATCTTTGAGGGGCCAGTTACTGTGACCATCAT  
CAAACCTCCGAGAGTTCTATGAGATGCCTGAATGCTTCCGCTCATGGATTGTCACCAAGGC  
AGCCCGTCAGTTTAAACAACAGGTCCTTTGGTGCACCTGAGATTCACGCAGTGCTAGCTGA  
AGAGGAACAGGAAGCCAAGATCCAGTGTACGAGTATGAACTTGACTTTGGTAACTTCAA  
CATGCTTGATGGTGTATGCCTTACAGGTGGTCTACTATCTCGTTTACGATAACATTTTAA  
AGGAGGTCTCTAATGGCTCTTATTTACAATCCGTCAAGAACCTGAAGGGCTGTATCAGT  
CAAGAGCCGAACATCTTAAGGTTCCCCGAACAGGGTTCGAGCAGATTAATGGTTGGTCC  
TCGGAGACTTAGGGTCTTCAAGAAGCGTCCACCTTTTGTCTTCACTAAGACCATTGGAGAC  
CAGATTGCCCTTGGTGCCAAACCTCTAGTTCACCTCATCAACGGTGATAGTGCCGAACAG  
TATTACGTAGGGTTTACCGGACAGGGTGTTCGTCTTATCGATCTAAACGGTAAAGAGTAT  
GATGTAAAGGGTGATTTGTCTACGTTAAGGTAGAGAACCCTCGAGATGACTTAAGGATG  
GTCACTGTGGCTGACTACACATTTATCGTTAATCGCAATATGGTTGTGCGCCAGATACT  
ACCCCTTTGTATAACCCTAAGGAGAATGGAGACTGCTTGATTAACATCCGCGGGGGTATG  
TATGGTTCGTACGTTGGCATTCACTATTAACAACACAAGATTGCATACGAGATTGCCCAT  
GGGGACGCACCAGAACATTCTAAGCAGACTGCCGCACAGTGGCTCGTTAAGAACTTGCT  
GGTCTCGCGCGTCTGAATGTTGCCTTTAAGGGCTGGACGTTACCGAAGGGCCTGGGTAC  
ATCGATGTGATTGCTCCATGTAACAGTAAGATTAATACTGTTCACTGAAGATGGCTAC  
GCCGACCAGTTGATGAACGCAGTGTATGCACACCAGCCAGTCATTAGTTCGGTTGCCCGTT  
GTGGCGCCATTGGAAACACAGTGAAGATTGTTGGGGACACCTCTAAGACATCCGATATG  
TTCTAAGTTCAGTTCGACAATATGAAGAAGGTATAGAAAGAGGTTGCTGGTTGGGGAGTA  
CAGAAGGGACTTAATGGAGGCACGATGCCTCATGCTCTGGTACGTCAGGCTGATGGGTCA  
TTCCAGATGCAAGTTCTACCGTGGACACAACGTACCTGTGGTGACATGGACACTCACCT  
TCGCCGTCTATTGTTGACCAGAAGATTAACGATGTGGTCTTCGTCCGTAACCGCTTAGGG  
TTCCTCGCGGGTGACAACATTGTGATGTCCCGTACCTCTAAGTATTTTTTCATTGTTCCCT



GCATCAGTAGCTAACCTGTCCGACGATGACCCTATCGACGTGGCTGTGTCTCACAACCGA  
ATCTCTATCCTGAAGTACGCCGTACCGTTGTCTGAGGAGTTGCTCCTATGGTCAGACCAA  
GCACAGTTCGTGTTGTCTGCTCAAGGTATCCACTCACCTAAGTAATTAGAGTTGGACCGC  
ACGACCGAACTCGATGTGTCAGACCGAGCGAGACCTTTTGGCGTTGGGCGCGGTGTGTAC  
TTTGGCGTCACCTCGTGCTTCTATAACGTCACCTAACCCTTATTATGCGGTACAGGATGTT  
AGCTCTGTGAAGTCTGCTGAGGATATGTGTGCTCACGTTGCTAACTACATTCCGAACGGT  
GTGTTCTCTATACGAGGCTCCAGCACTGAGAACTTCATCTCTGTGTTGTCTTCAAATGCT  
CCAAGCAGAATCTTCTCTATCAGTTCCTCTACTTGAACGAAGAGATAGCACAAACAGTCG  
TGGTCACATTGGGATCTAGGAAGTAACATTACCGTACTGGCCGGTGACTCTATTGGTGCC  
ACCATGTACATTGTGTTTCGCAATCAGTCACACACTTGGATGTGTGCTGCTCACTTTACG  
AAGAACAGCATCGACTTCCCTGATGAGCCGTATCGTCTGTACATCGACAATAAGGCGAAG  
TATGTGATTCTGAAGGTTAATAACAATGATGACACTTACGCTACCACTGTGAAACCTGTA  
GACGCTATGGGATGAAATACTGGACCGGTAAGTTCTACATTGTGGCCTCTGAAGGACTG  
GTGTCATGGTTCGAGCCTCCTCGTGGTGGTGGCCTAATGGTGTACCTATGTTAACAATG  
AGTGGGAACCGTGAGAGTGAGACAATCTACGTTGGGTTGGCTATCAGCTTCCGCTATGTG  
TTTTCGAAGTTCCTCATTAAGCAGACCGCTGATGATGGCTCTATAGCTACCGATGACATT  
GGTCGTTTACAGTTACGCCGAGCATGGGTGAACTACGCGGACTCTGGTGCATTACAGTG  
GAAGTGGAGAACACCTCTCGACTGTTACGCTATGATATGGCAGGTTCTCGCTTGGGTTCC  
AATGTGTTACGTGCTGATGGACTTAATGTTGGTACGGGACAGTTCGCTTACCGGTGACT  
GGTAATGCACACTTGAATGAAGTACGTATTATCTCTGAACACACCACCACTGAACGTT  
ATCGGTTGTGGTGGGAGGGTAATTAACCTTCGTCGTTCTTCTGGTATCTAATTGAAACAC  
ACCCTCTGACTCACGCAGTGAACAATACGACTCACTATTGGGGAAGGGGGTTTATACTAT  
AGGAGAGAAACGCTATGATTATCCTACCTACAACAGAACGTGACTTTATGTGATTCAACC  
TATCAGAAGAGGACATTGCTGAGGCCAAAGCCTACGGGATTGAACCTTCACTTCCACAAG  
CCTCTGAGTGTGTGACCATGAGTTTACATGGGGTTCCTTAAGCTATTGGAGGCAACTGTG  
GTGACCTAGTGTGGTTCGTAACGCTCTGACGAAGTGTGGAGACTATCGAGACCTGCGAAAC  
GGGAGGTCCGCAAGCTCATCCTAGAGTACCGCGATACGGTGCTAAAACAGTATCCAGTAA  
TGTGGAAGTATGTCTGGATAGGCAACAAGTATAACATTAGGTTCTTGAAGTCTATCGGTG  
CGGTATCCACAATGTTTTTACTGGTGATAGTAATCAATTCCAATATCACAATAGGAG  
GCTAAATTATGTGCTGGATGGCGGCTATCCCTCTCGCTATGCAAGGTACTTCCATGATTA  
TGGGAGGTATGCAAGGTGAACTAGCAAAGGCTGCACAGATTGACCAAGGTTCGTCGAAAA  
ATTGGCAGATGCTGAAAGAGATGAATTATACCGATGCTGACCTTAAGTTAGAATCCCGTT  
ATCTCATCGAGTCAACTGTCCAATAGATGACCCAAGCCAATATGAACCGTGTGAGAAACA  
TGGGGACTATCCGTGCGGCTATCGGTGAAGGACTGCTTGAAGGTAACCTCTATGGACCGCG  
TACAACCGCTGACCGAGGGTGACTTCATTTCGAGAGTCTCAAGGTATCACCGAGAACTACC  
AACGTGACTATAGTGTATCTTAGGGAAGCGTTTAGCTAACCAGGAGAACACCGTTAGTC  
AGATTAAGAAATCAACGAGTGCAGGCAAACTAAAAGGTCGCTTAGAGCAAATCATCG  
ACCCGTTAGGTATGGGTATGGGTCAACTGGCTGGTATGGCAACTTCTGGTTGACTCTTCG  
ATGGCAAGTAGACTAAGAAGGCTACCACTAAGGGTAAGGCCCGGGCGTTAAGTGAGCAG  
ACCAAGATGGTAAATAAAGGAGGTACAGTTTATGAGTAAGTTAGCGTAAGCATTAGGTAG  
CATGAACGCTCCGTCTACTAGTCCTCTGCGTGGCACTGGTTCGCATGGAGGTCAAGGCTGC  
AACAGTCTATGAAGACCCTAAATATGCCGAGAAGTCTAAGCTGATTGGCACTGTAGGTAA  
ACGGGCTGAGATGGGTGCGGATGCGTATATGCAGTATGACCAGCGTCAGAAGGACAAGGC  
AGACGAACGCTCTAACGAGATTATTCGTAAGCTGACTCCTGAGCAACGCAGAGAGGCCAT  
TAAGGACGGAACGCTGTTATATCAGGGTGACCCATACGCAATGGAAGCACTCAAGCTTAA  
GACTGGACGTAACGCTGCGTATCTCGTCGATGACGAAGTGGCACAGAAGGTGAAGAACGG  
TGAGTTCCTCGCTCAGCAAGAGTTGGAAGAGTTCCTTACAGTCGACTGCAAGAAGCCTC  
TTAGA ACTATGCGGTACAGTTAGGTATCAATGAGACTGATGAGTTCTACCAGAAGGGTTT  
CAACTCCGACATTACTGAACGTAACATTGCCCTCTATGGTGCTCACGATAACTTCTGAG  
TGACCAAGCTAAGAAAGGTGCTGTCATCAACAGTCGCGTAGAGTTAAACTCTGTGTTGAA  
CGACCCGGAAATCCTACGTTCTCCGTATGCTGGTGAGTTCCTTTGTGAACTACTTCCGGTGC  
CGGATTGACGACTGGGAGTATCCCTGGTGATGACCAAGCGTTCACCATGATTAGCCAAGG  
TCTGTCTGACGTGGTACACCGTGAAGGTGGCGGGCAGTTCCTGCAACAGATTGAGAACCG  
TAAGGTGAAACTCCACGGAAAAGAGACAACCTACGAGGAACCGATGGGCGCCGAACGGTG  
GAACAATCTGATGGTTAAGGCTCAACATAATGAGTTCAGTTGAACGCTAAGAAGACCGA  
GGCGTCCCAACTTAATGTGAACTCTGCGTTGAACCAAGAGAACATAATCACTGGTTGGGA  
ACAGTTTCAATCTATCAAGGCTGAACTGGACACATTGCAACCGGGCGAAGAGATGACACC

TGAACGTCAGGCGTTAATCAATGCACAGACTCAGCTGCCGGACAGGATGAATCGGGAGAC  
CGCTGAGTTAGCCAAGCAGATGGACAAACAACAGAATTCGATCAAGAAGATGAACGTCAT  
AGAAACACAGTTCCAGAAGAGACTCAATGGTCAGTACGTGTCTACTGCGTATGGCGATAT  
GCCTACCAACGATAACACTGGTGAGTTCACTCATAGTGACATGGTTAACTATGCGAACAA  
GAAGCTGGCCGATATTGATGCTATGAATATTCCTGATGCGCAGAAAGACCGAATGAAGTT  
GGACTTCCTCAAGGCTGGCTCCGAGAAGGCTGCTTTCCTGACTGCGGTTGGTGAACCTAT  
TGGTGACTCTGAGAAGGAATGGACGTCCGCTGTGATTAACGGGAAGATGCCAGAAGATGG  
TGCTGTGGCACGTAACGCCCTTCGACGTGTTTCGTAATGCTGACCCCGACTTGTTTCGCTGC  
ATTGTATCCTGATAAGGCCGAAATGTTCCCTCACTATGGATATGATGGACAACCAAGGGAT  
TGACCCACAGATCTTACTGGATGCAGACAAGGCTCGGCAGTCTCTAACCAAGAGATGCA  
GTATGAGGATGATAAGTATTGGGCTTCTCTAATGAACAACCTCGCAGCCCCCTGAGATTAA  
GTACATGCCATCACTTCTCCAGAACGGTGCCAGTAAGATTTATGACTCTGTTAAGTACCG  
CACAGGTAACCCCTGATATGGCATTGCAACAGGTCGATAAGTATCTCACAGATAACACTAC  
GACTCTTACAGGTGATGATGTTGAAGGGGATACCATTGGTGTCTTAACGAGAACTCTCT  
GCGTGTCACTGATGACCCGGACTCTTGGAACAAGGTAAGGACATTATAGACACAGCCCG  
TAAGAACTCGCTGAGACTAACCCCTGGGGTACTCGCAAGCAACTCACTGTGTTTGAACG  
TGGTGATTCTATCTACCTGATGAACACGATCGGACAGGTAACGTTCCGGTACGACAAGCA  
GTTGCTCTCTAAGATGTACCAAGAGAACCAAGCGAAGCTGGATGAGGAAGCCCGTAATAA  
GGCACTCAAAGATGCCAACAAAGCGAACCCCTACATACACGAGCTATGAACCGCAAGCGTGA  
ACGTGAAGCTAAGAAGCCTAACCGCTCTGGCAGCATGTACGATAGCGTGAGTGGCAAAGG  
TATTCTGGTTACACTTACTGGTAAAGACTAATAGACCCGCGATAGGAGGTTCCAAGTGGAT  
AAGTATAACCCGAACGAACCCGCATGAATATGTTGCGTTATTTCAACAAGCTGCTGACACA  
CATGGAGTCTCCTATGACCTTCTTCGGAAGGTCGGTTGGGTACAGTCCCGCTTTAAGCCC  
ACGGCTCAATGACCAACAGGTCCAAGAGATGTCATGCAGTTCCTAAGGCAACAGGTCAG  
GCTTAAGGTCTCCAGAACGATGAAGACTTCACTGACCCTGGTAAGTCAATTGATGCAAGT  
GCTCGTTACCTTTCAGACCTCGTTAAGAAGTACGACGGTGTGAACTTACAGCTGCCTTA  
GCGTACAACCAAGGTGAAGGACGTAAGGTAAGCCTCAGTTAGATGCCTACGATTCTGGG  
AACTTTGCGAGCATTGGGGACGAAGGCCGTAACCTATCTGCGTTCCTGCTGGATGTTACT  
AAGTCTCCTAAGAGTGGAGACCTTGAGTCATTCGAGGGTATCACCACAAAGGCTAAAGGG  
ATTCCGCTTGAAGCTGCTATGAGCGGTATAGGGAAGAAAGGAAGTGTGACAACCTGAGCTC  
CCTGAGTCTCACGACATGTCCTTTCGAGGTAAGAAGACAGGCCGCTCCCAATCAGCCGTT  
GGAAAAGATTATTGGGAAGCGAAAGGTACAACCTCTGGATGAAGCAAACAAGCCTTCAACC  
TTCTTTGGATTTCGGTAATGCTACTGAAGCAGAACTCTCCAACCTCAACCTGGGGTGTGGC  
TTCCGTGCTGGTAAGCATGACGATGGTTTCGATGTTCTTACTGGCGTACTTCAACCCGACC  
CGTTTAAATAGCCCCGTTTGGACGCCTGAAGAAGCTTGAGAAGATTAGGACTGAAGTGAAG  
AACCTGTGTACATGAACGTTGTAAGTGGGGGTTCCGCTGAGAACCTTGACGAACTAATC  
AAGATGGCTAACGAGAAGTATGAGACTGACGTAAGACTGCAGACGCAGGCCTAGGTGCC  
AAGCTGTCCGCTGGTCTTATTGGTGCTGGTATTGACCCTCAGAACGATGTTCCAATCGCT  
GGGACTACCGCTAAGGGGTTAAAGTTGGTGAACAAAGCGTTAATGGTCCGTGCTCAAGCT  
GGTGCCTTAAATGTTGCCTCTGAGGGCCTACGTAAGTTCGATTGCTGGAGGTGAGGCCAC  
TATGCTGAAGCTGCCTTAGCTGGGATGCTACTTGGTGGTGGACTGACTGCAGTGGCAGAT  
GCTGTAGCTGCTGGTCTCCGTCAGTCTGGTGTGTAACAGATTGAGAACCCGTTTGGCGCT  
GCACAGATGCGCTTTGAGGCCCGTGAGACTGCACGCAACACTGGTGGTTATGACGCAAGC  
CCTATGCCTCCTAGTGAAGACCGAGTGTCTCACAGCACAAATGGCATTGAGTATGCACCA  
CTGGAAACCGAACCGGGTGTGTAGTAGTGAAGGATGGTTCCATTATTAGTGATACCACT  
CTAGCTAACCTATGACAGCCAAAGAGTTTGCCGAGGCGGACCCTGAACGTGCTGCTTGG  
GGATTGCCGATGCGTGGCCTGAGTGAATAGGTATGAGAACACTACGTTCCAAACATGCT  
GAAATCCGTGGTCTCGCCAAGCACTTAGTGCCTCACCTACAGGTATGGAGTCTGGCTCA  
CACGGTAAGTTTGGGGCCACTGCCGCCGATATCAAAGAGCGACTGCACAGTACCAACAG  
AGAACCCACAATGACCTCTATGGTGAATGAAGGAAGCAATGGCTGACCCTGAGTGGTCT  
GTGGGTGTGTTCAAGAGTGGTGTCAAGGTGCTCGTCAAGAAATCTATCGTCTGGCAGCT  
GTGGCTATCGAGCGTCCTGAACTTCAGGCTAACTTGACCAAGGCAGAGCGTAAGGTGATG  
GACATCATGAAGGAACACTTTGACCTCAAGCGTGAGATGATGGAGAACCCGTCGATGTT  
GGCAACAAGGCCAACTCTAAATTCCTAACAGTCGCCACAAAGGGACTTACGTTCCCTCAT  
GTGTACTCAAGGGAAGCCAAGCAGTTGTACTCACAGGCTCTGGGAGGTACCGATGGTCTA  
CAGGAAGCAATTGCAGCAAGCTGGATGACATCCTATCGTTCACGACCTGAAGTGAAGCT  
CGTGTTGATGAACACTTAGCGGAAACCTTGGGTATTGACGTTAAGGCTGTTACTTAAGAG

ATGGTTATGAAACACGCTAGTGACAAGGGATATGGTATCGCCAAGACTGATCAGTTCAAC  
TCTTCCAGTGTCTTGATGATAACATTTAGGGTATTGTTGGTGTCGTGAACAACCTCATT  
CTTGAGGCCCGTAACCTGTTCGACTCTGACATGCCGGTAACTCTCCCTAACGGACAACAG  
TTCTCCGTGAATGACTTACGTGACTTCGATATGAAAAGCGTCATGCCAGCCTATGACCGC  
CGTGTGATGGTGATATTGCGATCAAGGGTGGTACAGGGAAGACTACTGCTGAACTCGTA  
GCTGAAATCAGTACTCTCGATGAGAAGTTTGAAGGAAAAGGCACAGTGAAGGGTGAGGTA  
GGAGAACTGAAAGATACCATTAAGATTCTCACTGGCCGTGCTCGGCGTAATCACGATACG  
TTGGGAGACACTATGGTTAGCGCTCTGTCCGATATGTCCTTCTTTACGCAGAACGCATAC  
ATGGGCTTGCAGAACCTAACTGAAATCTCTGGTATGTTGGCAAAGGGTAACATCGGTGCG  
ATGCTCCATGGTGTCCATCACTACGTGACTTAGCGTGCCGCAACAAGCCTGTCTCTGGT  
AGTGAACCTAAAGAACTCCTCTCAATGGCGTTCGGCAGAGAGTTCGACCAGTTAATTCTGA  
CCGTCCCGTCTGGACATCATTACGCGTCTCCGAGAGTCCACCGATACATCAGATATAGCC  
GCTAAGGTTGCTGGTACTATCAAGCATACGACTCAAGAGTTAGCTGCCCGCTCACCTCTA  
ACCAAGTACCTCAATGGTAAGTCAAACCTACATTCTGGATATGGCTCGACAGGGTGTGATG  
GGTGATGTGGTAACTCATGCTGTTACAGGCAAAGGTGCCAACAAGTGGATTAAGGGTGAC  
ATGCTGAAGTCTGCGAGTATCTCTAAGGAACAGTGGGAAGGCATTACGTCTCTCATTAGG  
GAGAAGGTAACCTCGTGGTGAAGACGGTAAGTTCACCTTCAAGGATAAGCGTAGGCTGGCT  
AATGATCCTCGTGCCATGGATTTATGGCGTTTAGCTGATAAGGTTGCTGACGAAACGATG  
CTCCGACCTCGTAAGATTTCCATACAGGATTCCCATGCGTTTGGGGCCACCTCTAAGTTA  
GTCCTGCAGTTTAAAGTCGTTTGTTCATCAAGTCGATGAACTCTAAGTTTATCCGCACTGGT  
AACGAAGCCTTTAAGAACCATCGCGCTATGGACATGGCGTTGACCTATGCTATCTCTGGT  
GGTATTGCTGGATCCTACTATGTGGCACAGGCTCACTTGAAAGCTGCTGGCCTACCTAAA  
GAGCAACAGAAGGAGTACTTGAAGAAATCCCTCGACCCTAAGATGATTGCCTACGCTGCA  
GCCTCCAGAAGTTCACACTTAGGGGCTCCGCTGAGTATTGCTAACTTCGGTATGGGAGCT  
GCTGGTTATGACCAAGGTCTTATGGTACGCTCTACGATTCTACCTAAAGGTGAGGACAAA  
CGTGAGAGCAATAAGGCAGTATCTTCCCGTGACATGGGTGATTCCATTATGGGCGCTATT  
GGTGAACAGGTGCCTGCTCTCGGATTCGCCGGTGCAACTTTTGCTGCTTGTGCGAATGCT  
TATGGTGTCTTACAGTTCCGAAAAAACTGACCGAGCGTGAGATGATGAGTGGCTTAATG  
AATGCTCAACGAGAGTTGATACCTAACGACCCAATCTCTCAACAGATGCTCATTACAGTTC  
TATGAGGCCAACGGTGTGGATATTAAGTCTAACAAGAAGTAAACAATACGACTCACTATT  
GGGGAGGCTCTCATAGCTCCCCCTTTTTATTTACCCTTTATACCTCACCAAAAAGGAGGAT  
ACAGATGGCTAACAAAATTTCCACTATACGTACTTATCCGCTGAACGGTTCGGTGAACCT  
CACGTTTACCTTTGAGTATCTATCACGTAAGTTCGTCTAGTGACACTTATAGGGAAAGA  
CCGTAAGGAGTTGGTTCTTAATCAGGACGACCGCTTTACCACCAAGACCGAAATCAAAAC  
AGGCCGTACATGGACTGCTGCGGATGGCTATGAGATAATTGAGATTCGTAGATTCACTTC  
TGCAACCGACCGTCTGGTTGACTTTGCTGATGGCTCAATCCTTCGGGCATATGACCTTAA  
CATCTCACAGATTCAGACACTACACGTAGATGAGGAGGCACGAGGCCTTATTGCGGATAC  
TATGGGTGTCAACAATGATGGCAACCTAGATGCCCGTGGTCGTAAGGTTATGAACCTAGC  
GTTTGTACTAGTGATTATGATGCTGTCCCTCTGAAGCAGATTACAGACCGTGAGTCCTC  
TGTGTGGAACGCTGTGACCAAAGCTAGTGAACATGCTCACCGTTCTATCAAGGAAGCCAA  
TCTCTCACGGGACGAAGCTGACCGTGCTAAAGGTGAAGCTGACCGCTCGACCCAACAGGC  
AGGTGTCTCTGCGACACAATCAGTTGAGGCCAAGAAGCAAGCTGGCCGTTCCAACCTCTGA  
GGCCAACCGTTATAAAGGTTATGCTGATAGAATGACAGTCAGTGTGAGCTGCTAAGGG  
CCATGCTGAGCGTGCCAGTAAGGAAGCTAATCGTTCCCGTGCTGAGGCTAATCGTGCTGC  
TAATGAAGTTACTAAGGCCGCTGCTGAGGTTTCCAAAGCTGCTGCACATGTGGCTAGTGC  
TAAGAATCAGGCCGACCGTTCCAGTACTGAGGCTAATCGTGCTAAGAGTGACGCAGACCG  
TGCTAAGACTGAGGCCGATAAGTTAGGCAATATCAATGAGTTCGCTGGAACCTCTCGAGAA  
GGTGGTGGGAGTAACACCAACTTTCAAATCGGGGATTAAACTTCGTTCTGGTGAGCTCAA  
TGCCGGGAGTGCTAGCTTCACTAAGAAAAGACAGGGTGGCGATTGGAGCCAGTGGACTGG  
AGCTCTGACACCAGATGTACAACATGATATAGAAGGACAAGGGAACATCGCGTATCTCCT  
TGAGCGAGCTACAACCTTTGAGTAAAGAGCCCTTATATGCTAAGTGCCTATATAATAACCG  
TATTGGCGAAAACCTTCGTTATCAAGCAGTATCTTCGAAATGCACATTTTGACTTACGCGC  
CGATGGAGCTCTTATCAGCTCTTCTGGTTGGAGTATCCAGCCGATGGTAACTTATACAT  
CGAGAAGTATGGGTGCAATCTTGATACATGGGTTAATAAGCGCCTAAGTGACACACGGCTA  
CAGCAAGGGTGAAGTTAACAAGATGGTTCGATGGACCACTCACTACCGAACAAGGTGATGC  
TCGTTATGCACGCAAGAGCTCTGGTTGGAATGAGGCATGGCAAGGCTCTGCTGGTGGTGG  
TGTTTCAGTAAGCCTCTCACAGGATTTCCGCTGGAGAACTATCTGGATTCTAGTTAATGA

TGGCATGTGTTTTGTTTCAGATTGGAGCTGATGCTACTTACTTCGTGGTGGTCATGGGTGG  
TTGGTTGAAGTTCACAATTTCCAACAACGGGAGAAGCTTCCGTAACGACCAATATCGAAA  
TACAGTACCTGAGCAAATCTTAGTTCGAAACTGATAAGGACTATACAGAATGACCATGGA  
CGGTCTTTACCAATGAGGAGGACACCATGTTGTCTTTAGACTTTAACAATGAAGTAGTGA  
AGGCCGCTCCGATTGTAGGGACAGGTGTGGCGGATGGTGCTGCCCCGTCGGTTTTTCGGAC  
TGTCGCTTAACGAGTGGTTCTACGTGGCCGCAATTGCGTGCACAGTGGCTCAAATTTGTG  
CCAAGGTAGTCGATGTGATTCTCAAATGGAAGAAGAAGGGTAGAGGTGTCTAACGATAAG  
TCTTTAATAACAATTCCTTGAGATGCTGGACACTGAGATGGCACAACGTATGCTGAAAGAC  
CTTCAGGATGATGAGAAGCGCACACCTCAACTGTACAACGCAATGGGGAAACTGTTAAAG  
TGCCATAAGTTGCAAGTCTCCAAGTTACAGCCAGACCGTAACATCCTGGGTGGACTCGCA  
GATGGACTCGAAGAGTACCAGATCCTATTGGGTGCTGATGGTCTCACAGAAGACGAGACG  
TACACGCTGAACTGATGGAATAACTCAAGACCACTACATCTAGTGGTCTTTATGATATTT  
CAACACAACCTACGGTGACGCTACGTGAAATCTGAAAATACTGGAGGGTTCGTTATCCTCA  
AGAATTTAAAGAGCTACGGCATAATCGCTGCGTTTTGCCTTGGGGATTGCCCTTGCGTATA  
ACCACGGATATGACAAAGCTAGCACTAAATGGGAACAGGAGGTGCACAATGAGTACGTCA  
AGAAAGCTGAGGCGACTGCGGTTAAACAGGCTGCTATCAATGAAGTCTCACAGCAATACC  
AAGAAGACCTTCCGGCGCTGGAGGGTAGCACTTATAGGGTCATTAATGATTTGCGTAACG  
ATGGTAGGCGGATGCGTCTCAAACCTATCAGCCACCTCACGAGAACCCCAAGCTAACGGTG  
GATGCCTCGTTGATGGTCGAGCCGAACTTGACAAAGAGTTTAGTAGACGTCTTATCGGGG  
CAACTCAAAGAGGGGATGCGGGGATTAAGGCGCTCCAAAATACAATCTAAGAAATGGGAC  
ATAAGGAGAAACACAATAGCTAACGTAAGAATCAGAACCATATACACTCTCAGCGGACGT  
GCACCAGATAGTCGTGACGTATGGGATAAGAACAGTGTGGGCCTTCTAGTAGGTCGTATT  
GACCTTCCTGAGTCCTCTATGGTAACAGTAGAAGGATACACTAAGGTAGAATATCAGGTG  
AAACTGTCTGATGGGGCTATGGAGGTGTACCCCAACTTCTCTGCATTCCTCGCTGCTTGG  
AGCGGAACCATTGAGTCTAAAGTTGGCAGTGGATATATGACTGTGTTTCTTAATAGAGCT  
AAAGGTGACACATTGGGTCTAGTACAGATTGACGTACATAAATAGTGGGATGACTCTACT  
CCAGCCCCTGAGCCAGAACCGTCTCCTGAGATGGACGTAGCGGCTATCACTAAGTTCTTT  
ACGACCTATGTGGATAACCCTGAGTACCTCTTTGTGTGGAACGAGATGACCACGGTAGGT  
GGTTCAGAACGTAACCGTCGTCTGCCGCACGAGATGTTTGGTGTGCTCTGGTTAACTCT  
ATTAAGCATATGCGCCCACAGACCCTCAAGGCTCTTCATGATGCGCTAGGTATCACAGCA  
ACCACCGAGTAACATTAGGAGGCCTCAATGTCTAATCAAGCAAGCAAGAATCCGCACATA  
GTGGCGCAACTTAAGGGTGACTTCGTAGCTTTCTTGTTCGGCTTATGGAAGGCTCTGAAC  
TTACCTAAACCAACCAAGTGTGTCAGATTGATATGGCACGTACAATCGCTGATGGTGACCAC  
AAGAAGTTTATCCTTCAGGCGTTTCATGGTATCGGCAAGTCCTTTATCACTTGTGCGTTC  
GTTGTGTGGGTGTTATGGAGGGACCCTCAACTTAAGGTTCTCATTGTGTCTGCCTCTAAG  
GAACGTGCTGATGCTAACTTCATCTTCATCAAGAACATCATTGACCTGCTATCGTTCCTC  
GCTGAGCTGAAACCTCGACCCGGACAGCGTGACTCTGTGATTAGCTTTGATGTTGGCTTA  
GATAAACCTGACCATTCTCCCTCTGTGAAGTCTGTAGGTACTTGGTTCAGTAGACTGGT  
AGCCAGGCTGACATTATCATTGCGGATGACGTTGAGGTGCCTGGTAACAGTTCTACAAGT  
TCTGCTCGTGAGAAGCTGTGGTTCGCTGGTAACTGAGTTTGCTGAATTACTTAAGCCATTA  
CCAACCTCTCGTGTATCTACCTAGGGACGCCTCAAACCGAGATGACTCTCTACAAGGAA  
CTTGAGGATAACAAAGGGTACAGCACAGTAATCTGGCCCCGCACAGTATCCAAGCAATGAT  
GCTGAGGCTCTCTATTATAGGGACCGCTCGGCTCCTATGCTTAAGGCTGAATATGATGAA  
GGCTTTGAGTTACTCCGTGGACAACCTACTGACCCTGTTTCGATTCGATACGGATGACCTT  
CGTGAACGTGAACTCGAATATGGCAAAGCTGGTTACACTCTTCAGTTCATGCTTAACCCT  
AACCTTAGTGATGCCGAGAAGTACCTGTTACGTCTCCGTGACGCTATCGTGTGCGCTGTA  
GACCCTGAACGTGCCCCATTATCATAACCAGTGGTTGCCAAACGGTTCAGAACCGCAATGAG  
GAGCTTCCTAACGTGGGCCTGAAAGGTGATGACGTCCATAGTTTCCATACGTGCTCCTCT  
AGAACCGTGGAGTACCAGTCTAAGATTTTTTACATTGACCCAGTGGTTCGTGGTAAGGAT  
GAGACCGGGTTTGCAGTCTCTATTCCCTGAATGGCTGCATCTACTTCATGGAAGTTCGGT  
CCGTTCCGTGGAGGCTACGGTGATGCTACCCTAGAGAAGCTCGCTAAGAAGGCCAAGCAG  
TTGAAGGAACAAACAGTTGTCCACGAGTCCAACCTTGGGTGACGGTATGTTCCGGTAAGATT  
TTCTCTACTGTTCTCCTTAAGCACCACGAGGCTGCACTCGAAGAGATTCGAGCTAAGGGC  
ATCAAGGAGATGCGAATCTGCGATACCATTGAACCATTGATGGGCTCCCATAGCTAATC  
ATTCGTGATGAAGTTATCCGTGAAGACTATCAGACTTCTCGTGACCTAGATGGGAAACAC  
GATGTTTCGCTACAGTGCCTTCTATCAGATGACCCGTATGACTCGTGAGCGAGGGCGCTCTA  
GCACACGATCACCGACTTGATGCTATCGCATTGGGTATCGAATGGCTATGCGAGGGGATG

CTTGTAGATAGCAAGATAGGTGAAGAAGAGATGACCCTTGAGTTCCTTGAGGCACACATG  
GAGAAACAGACAATTGGTGGTGACCAGATTCATAGCCTTGATGTTGGTGGCGTGGACATG  
TATTATGAGGACGAGGAAGGAGGCTCTAGCTTCATCGACTGGTAACAGCTACACAAACAG  
AAGGAGGTGTGAGTAATGAGAGTGGCAATTGATAGTATAACTGGTTGCCACATCTTCTTA  
GGGTGTGACACTAAAGGTGGCTACGGTAGGAGTCGTGTTAATGGCGTACATTGGATGGAC  
CATAGATACGCTCTGCACGTCCACCTGAAGCGTCCCTACAAGGAAGGATGTGTGGTAACG  
CATTCGTGTGATAACCCTTCGTGTGTGAACCCAGAGCACTTATCTGAGGGAACACAGAAA  
GAGGACATAGAGGAGTGTAGGTCGAAAGGTAGTATGGTCCATAGTGATTCTTCAGGTAGT  
TCTTCAGGTAAGCATCAAAGTCACATAGATAAAGATTCAAAAGGCATTCAATAGACGACTG  
AAGGCTGTACTTGAAGCTGATGGTACGGATTCTGAGGTTGCTAAGATACTTGGCGTAAAC  
ATCCAGTGGGTCAAGAAGGCTCGGTCTGGTACACTGAGTATGCACATAAAGTGACTTAAT  
ATTCACAATGGGCACCGTATGGAGTGAGGTGAAAAACCTAAGGAAATCAAGGGTGTCCC  
TAATACGACTCACTATTGGGAAGGGCCCCCTAAGATAACTTAAAGACACTTAAAGATTGC  
ATATGCATAGTGCATACTTAGTGACTACTCTTAGTGACTACTCTTAGTGACTACTCTTAG  
TGACTACTCTTCGTGACTACTCTTAGTGACTACTCTTAGTGCCCTACTCTTAGTGACTACT  
CTTAGAGACCCTTACAGTGAGGGATGATAGTAATAGTAATTACATCCCCACTATCAGTGT  
AACCATCAAGTATAACAAGGAGGACGCTCTATGCGCTTACTATACGTGCTCAAGACACTG  
GCAACGCATCGAACGACTTATAAATTTCTCGTTGTACTIONGTCAGGTTCCATTGGTATTAGA  
TCTGGTTCTGAACACATCGGTCAACTGGAACTCTGCTTTGTCCTATACTCACTTGTGTT  
CATTAGACTACTCATTGACGCTTAGTGAGCTCGTAGTGATTATGGTTCGATGTACATCTTC  
CCCTATAATCACTGTAAGAAGTCAACTCTAAGAGTAACCCTTATGTGCCCTCTGCGAGCC  
TACAGGGTCTCTTAGAGTCTATCAAGGTCTCTTAGTACCTCTTAGTACCTCTCAGTGTCT  
CTATGGGCCTCTAGGGTGCCTCAGGACCACCTTATGATAGACACTCCAAGTGGTTAACC  
TTATGAGACTCTTGGTGTGCACCCTTTAAGAATCCTACAGAAAAATCTGAGTGAGTATCT  
AATAGTACATACAAAGTGTTCCTCCCTATGGCCTCCTTATGCTCACCCCATAGAGAGCA  
CGCTATGGTGGCTTTAGGTTTACTTTAGGTGTACTTGAGGTGTACTTGAGGTGTACTTG  
AGGTGTACTTAATGCCTAACCTTATGTGTGACATTGGGTTTACTACTAGATGTAGTGCTT  
AGGGGGGACTTTAGGGTACTATATGTATGCCTCTTTCTGTCTCT

>NewGenomeName\_4

CGATTATGTGGTTGAAATTGATTTGATTTGATTAGTTTTGAGGAGTGATTGAGTTGAAAT  
ATTCACACCTTGCCGATCTCGTGAAACTCTCCTGCAAAACAATCCTCCCTGGCTGGCGT  
TTGTATATTTTCGTTCTCGACCGTTCACGAAACCATCCGGCGTAGTTCTCCGACGGTGT  
TTCATTTAGCAACACAAAAAGAACCAATTATACCCCATATAATAATAATTAACAATA  
GGTTAATAACATATATTAATGTAGGTGATCTTTTATGTATAGCGTGTTCCTTAGGGTATG  
TGGTAGGGTGTGTTTGATTGATATTTCTATCTGTATATTATTTAGCCAATTGCGATTGAT  
TTTGGTATTTGGCTTCAATAATGTATATATGTATTTAAACCCGTGAAATATCGTGAACAC  
GTGAACAGCGACGGAACAAGGATTTATTTTCAGGAAAATCATCGACTTGAAATTTAATTT  
TGTGTGCACGTGGGTATGGATCGTTAGCACACAAAAACTACTTGACTAGAACAACGGC  
GGCGATACTATGCCTCCACCAACTAACCAACAGGAGGATAACCAATCATGGCAACTACC  
AAAGCGGTTTTCGACAGCTTTCGGATGCTGGCTGATAAGCTGTCAGACGGAGAGCCATAG  
GCATTCGTCATCACTGACGCAACCATTACCGATAAACTGGATGAAGATGACCAGAAGAAG  
CTTAAAGCTTCATATATGCGCACGATCATGAATCGTGTTCAGAGGTGAAGGAGATCTGA  
ACGGTTTCAATTACTCGCACTGAGCCGGTTCGAGGAGGCGCCAGGTTTAAAGGTGGCAATC  
AACCGCGAGGCAAAGCGGCAGGTAATCACCAAAAATGATATTCCGGCACTGGAAGAGCGG  
TTCGGTGAGCGAATCGCCAAACGATAGCTAAACACAATGCCAAATATCACGGATCTGGAA  
GGTGAACAACCTCAGGGCGCGCAATCGGAATTAAGCGTTATCAGGATCTGATTAAGTCA  
TTCGCAACGGGGGAATAAGCCATGAAATACGAACGCAAAGAGAAGATCGCAAAGGTTATT  
GTTTATGAGGTGGACGCGTCAACTAACACAGGAACAATGGGAGGAAATGCAGGAGGCT  
CACAGACACATGATTTACCACGCGTGATTGTCAGATCTGGAGGCAGGGAATTTAAATAC  
GTGGCTGATTCTCCAGCGCTTAAAACGGCTGTAAAAGTGTAGCTTAATAGTGCCGAAGAA  
TTCCAAGTTGTCAAGGAGCGCGTAGATTGAAAGGATTCGCCTTTGACGCCGCAATGTGAT  
GTGTTGTTATTGATAGTCCTGGCGTGGCGCTGGTTGTGATGGGTCTTATTTTATTGGGGG  
TATTTGATGAATTAGAAGCTTTTAGATCTGGCCGTGGTGTCTTTATCGCTGCTGCTGCA  
TTTTCGCTGTTGTCAATTCCTTTTTCAATCCTTGCTTTCGCCGCGTCAATGCTGAAATGA  
CGGATTACATCCTGATTGGTCAATACCCTTTTTGTTAAAACCTGAATTGGGGTGGTTTGA  
CATAATTACCCCTTGACACGAAATGAGGAAAATAAAAATGTTTGAACCTGAAACGCGTAAC  
AGTTGAGATCCTGAATGATGGCCCTTATAACGGCATGCAACACTTAACTTCCCGATCCG

CATTTAGAATTGCATTGATTATGGGATTGAAGGTGGAACGGTTGACGTTCCGCATGATGC  
ACTTATTGCGGCTGGCTATGACAAAGAGAAAGGCCAATGTTTTCGATATACCGGATAGCTA  
TGAAAGCGACACACATTTCCCGTTCACATATGGCTAATGCCGGATTGTTGATTGAGCTTA  
TAAAATGAGCAGTTGGCACAATGAGCACGTAATGCAATTCTACCGGCACAGAATAAGGAT  
ACTGCTAAATAACACGAATTGCTAAAATAAATCAGGGGCATTTGTTATAGTGTCCCTAG  
TTTAGTTAAGCAAAGGAAAATCTCTAATCTTAAGCATCGAGAAGATAAACTTCGCGATCA  
CATTTAAATTCTATCAGCCTGACAAGGAAGTTACCGTCACCCTAAAACGCGTGGAGAGT  
GGAAAGATGGTGGAAAGTACAGGATTGAAACTTGAGTATTTTCGTTAATATGCACAACA  
AATATCCAGATCATATCCCTGGCAAAGATGGGTATTACATCATGACGGCTTGTGGCCAAG  
AAGGAAAACACGAGGATAACGATCTGTTAGACGCTTTGAACTATTTAAATATCAAGCCTG  
TCCAGGTCAATTTAAACGGTGTGTTGATTCCCTGCGTCCGTAGATGCTAAAGATTACGATT  
ACATTTGCAATGTTGAAAATATGCCACTTGGCGCAACCCTGTTAGGTGTTTCATCGTGAAA  
ATGGCGAATGGCACGAATAGGAATCTAAACCGCGCCCGCCTTGAAGTACATGACGATGTTA  
TTTGCTTGCTTTTTTGGTTATGCTGGTGGCTACAAGAGCGGTAATAATTACGGCCCTGAAA  
TCAACATTAAGATCTGTACTAGCGTAAAAATCAAAAACACCACGAATTGCTAAAACACAA  
TTTTGGGCTTGCTGTATAGTAAGCTCATACCAAACAACGAAAGGGATCGAAAAATGGAAT  
TAACACGTCACGCGTTTATGGCTTACACGTCAAAGGCGGTAGAGGTTCAATATATGCGC  
ACCCGTTTCATGTTAACGAGCGCGGCCAGGTTGATATCTCAATGCATGTTGGCCAACCTGG  
TTAAAGGTAGTGAGTCCGACAAATTCAGACCGGATTTAATTGAATATGATCACGCGTACC  
GCCACGTCCACTGGCTATATGGTTATAAGTTTACAATGCTGGATAGCCATGTTATTGACA  
CAAGCAAGTCAACAAAACGAATCTATAAGCGCATGGCTCGCAAAAATCTTGAAGCAGAAAG  
CGCAATAGCTCGAAATGTCAAGCGGTTCATGTGTGCTGATTGGTACAATGACCGCATGAAC  
CAACAAGAGAGGAGAGAAAAATGTCATAATAATCAATTAAGCAGTTTCTGAAATACGGCT  
CTATGATGGTGTCTCGCTACCGTTGTGGTGGCTGGCATCGCGTATAGCATTATTGAGTTTG  
CGGGGTAATTGATTTTTACGATTAAGTGGGGTAGGGATTATGCTAATCCCATGTTG  
CGGCAAAACAGCGTTTCGTTATTTCCGACCTAGACGGCACATTGTCAAATGGTGAACCTCT  
GCTTGCACCTGACGCCACCAAGTTGATTTGCATCTAACAGATAGCTGGAGTGAGTTTAATC  
ACGCCGCAACGGATGATTTACCAGTCAAGGATAACATAGCCGTTTCGCAATGCCATGTTTG  
ATGCCGGATACCTAGTTATCATCCTAACTGGTCGGAGTGATGAAGTTGAGGCAGAAACGC  
GAGCATGGTTAGCTGAAAACGGCGTTTCCTTCGATTGGCTGCTTATGCGCCGCGCGGATC  
TCAACCGGGAAGATACCGTGATCAAAGAGGAAGTTTTTCGCACTATCGGACTTGATCGCA  
TTTTTCGATGTTAGGATGACTACCAAAGGTTATTTACACCTGCGCGGCCTGGGCTTGA  
ATGTTTACCAGGTGATTGTATACGGCGAGCCGTGACACGATCACTTAAAATCTGACGGGG  
TGGAGGAATTGAGCAATTACAGAAAAATGAATTGAAGATGGGCATGGCGATACTGTGCTG  
ATTTACAAAAAAGGTTAATCAGTGTGGATTGATTGCAAACATTGGGATGATACAAATTTG  
CAGTTTCGCGGAATCTTTGACAAGAAAGGATCGTTGGAGTTAGCGGAGCCCATCAAGCAG  
ATTGCGGAAGAATTACCAGAAATAGAGGGTTTATTATGTTGACTTTTATCTTCATCGCTAT  
CGTTTACTTCACTATGTTGGCGGCGCTTACCTGATGCCAGCGCTACTAAAAGACGCTGA  
CGCTGATGATAAAGATAGTTGGAAGCCTATTGTTTTGTGGCCTGGCTATATGATCGTGCC  
GATTTACGAACTAATCCGCGATGGTGTGAGTTTAAAGTGGTAAATAGCACTTTTTGCTAAAAC  
TTGCTAAGGCACAGTTGTTAAAGTGTGCCTTGTGCGAGACAAGCAAGGAGAATGACACATG  
AAACATTAGAGGTGCGGCAGTCTTATTTATCGTGACGATGGGGTTAATATTATTGTTGCA  
TATGATGACACGATGGAATTTTTTGAATCCATTTACACAAGGCGCGTTTTTAATTCAAAG  
GTTGATGCGGGATTCATGAAAGAGTGCGAGCCACCAAAAGCGAAGCCGTTTTATAAAAAT  
GTTGATTTCTGGCATAACGCCGTATTGATCACAATTCGTTAATTCGATCTATGGTGT  
ATTTTCTTATGATGAATGATAAGCTTAAAGAGACTGAAAAAAGATCAGCTATCTGCGTG  
TGCTTGCCGATAGACTGGAAAACGGCAAAGTTGGATTAATGATATTACTATTGAAGCGC  
GTAATATTTGTTGGATCGTTGAAGAAGAAACATTAACACTATAAACTGTTAAGGCGGTAA  
ATAATGGCAAAAATTATCATCCTTAATGCGCCTCCTGGTGTGGGAAAGTCACTATCGGC  
TAGATGGTTTCTTTCTATTCCCCGGGTGATCAATGCCGAATCATTAGCTTTAAGGAGCCA  
ATGTTTAAATATTGCATTTGCTACTCTGGGTAAAGAGAACTATCAGCGTTTCATGTTGGCT  
TATAGTGACAGAGGGAAAAAAGAAAGGCCGCAAACATTCCTGATGGGTATGTCACCGCGT  
GAGTTCATGATCTGGATCAGCGAGGATGTAATCAAACCTAAATTCGGCAAGGATTATTT  
GGCGTAAGATTTAACTAGAAAGTAAAAGAGTGTGATGCTTCGGTTGTTTGCATGATGTT  
GGTTTTCCATATGAAATTATCGCTCTCATCAATTCGGTAATGAGTTGAAGCTATGCCGC  
TTGCATCGCGACGGGATCACTTTTGCAGGCGATAGCCGCAACTACATTCGAATCAACCCC  
TATTACCATAAAAACGGATATAGGGAGCACGATTTCTATTTGACCGATAACAAGCCAATG

GGAACCGTTAACACGACTATCAGCATGTTCTTAAAATAGCACGAATTTCTAAAAATTGCG  
CAAGGCCATTTGATATAGTGGCCTTATTCAAGAGAAGCAACCAATCAGTGGAATAAGCGA  
TGCAGATTAATGAACATAATCAAACACCATGAATCTGACAGTTGGCGCGATTTACCATA  
GGGAAGAAGGTGTAAACGGGTTTACCCCAACTGTTACGCATGAATACGGCGGTCAATTCT  
TCTTAAACGGTAAAGACGGATTAGCTGAAGATGTTGGCTCTTTCGAGCTTGCAGAGTTG  
AGATCATGGAGGAATAAAATGTTCTGGATTCATTCGCCGCAAGGATTGCTTTATGTGCCT  
GGCGTTGAATTGGAAGAACGACCCGACGGCGAGACGGTAAACATCATTACGAAGGATACA  
AAAGGCAATACGCTTAAAATGTACGTTTTTAACTCCGGCTAAGGTTGATAAAGATGAT  
TACGATGTTGTTAATATTTATCCTGCGTGTATAATTGGCAATATTCTGATGGTCGCTGA  
TTGTGTTACGTTTGGTGGCACTGTTTTCGGTATGACTGGTTATTACGTTGGGTATAAAG  
GCATAAATTAGATTAATGGAAAAATGCTGGTACTCGCATTTCGTAAAGATTGCTAAAAGAT  
GGATTGATTCAGCTAAAACCTTTTCACTTCTAGCGTGTACGGTTACAAGAATGCTCGCG  
CATGGGGTTCGCATCATTGCTGATAGCTATGAATCCGAAATGCTGGAGGATTACGCATGCA  
TGATTGGTACGACCCTGAATGTAGGGGGCCAGGCTGAATATGATTGTTGCGCAGAAGAAG  
AAATTTATTGTTGGTAAGGAGAATTAACATGATTGCTAAAAATAACCTTCACAACCTTTT  
AACTACTGGTAATGATTATCGGGTACTGAATAGCACAATAGACCGTTATTTTATAGAATG  
TGATATTGGTATCCAATGTGGTTGCGTAAGGATTTTTTCGAAATCGAACACCTAAGCAA  
TGCAAAGCGGATCGCGGATGAAGCCAGCGCATTAGAAGAGCGTGAACGAATTCGTGAAT  
AGTAGCGGGGCAGGTTAGAAATTCTTGCTTTCCTGATGGCGATATCTTAAATTCAATGCG  
CGGTGAAATGACGGTTGGAATTCAAGATCGCGTAATTGAAAAGTCAGCTGATTATGTAAT  
TTAGAATGCGTAATTCAGTGCATGATTGACTCAGAGCATAACGAATACGTCAAAGTATT  
AGAGCAACAGCTTGAAGTGCTGCGAGTGGCGGTAGGTGAAAATATTGTGACTCATGCTAA  
GGTTGTAAGAGCGTTGGCTGATGCTTTCCTTGACGGTTACCCAGGAATGAAGTGCAAAAA  
GCACTTTTTGTAAAACCTTCCGCGAGGGCATTGTTAAGGTGTCTCATTGAAGCGAAAC  
ATGGAGATTTAGAAAATGCCTGTATACTGGAAAGATGTTTGTAAAGAGAAAACCTATT  
TACGGCGGCACTTATGTGCAATCATTGATGAAGATCGCGTAATTCCGGCTGAAGATGAT  
AACTAGGAATATTACGAAGTAGAAGCCGATAAACGGGATAACGACGTTATCTTTTTTGT  
GATATTAGCCGCATCAAGTTTTATGCAGTGGAGGAGGAAGAATGATCACAAATTAACCTGT  
CAGAAGAACAAGCGAAATCATTATTGCGCGGCCCTGGCTGGCGAATGGGTAGCGGTAGCG  
AGGCGGTTGTTAACATAAAAGAGGCAGTAGCAAGAGAGCTTCTGCATGGCTTGAGCATA  
AACTGATGCCAGCCTCAACAAGCGCGGGGAGTTGGCTGTGTGGAGGCATGAAAACGGCC  
TTAAAGAAGTGGATGTTGAGAAGTGGAAAGCGTAAAACGAGGTGTTAGCATGATTTACAC  
TCACTCTTACGGAGTTGGCAAGGTTGGCAACAATCAGATCCGAAAAATTCACGACAGGGT  
CGATGAAGCCATTCACAGCAACGCGTTTCAGGTGGAGGGGTTCTGGCGTTTGAGTGAGT  
GGAAAACCTTAGAAAGTGAATGGATGGATCGCGAGCATATAAAGGTTCTGATTGGTCATGA  
GGTGTGCATGCCTGATCGACGATCTCACACGCACTCGCCAGGGTCGCCGAGAACTATGA  
GCCACGCTCAACGCTATGGGATTGCTGGAAGGTCAAACGCTAAGCAACAGCCGTGATAT  
TCTGGACGGAAAATTTAACGAAAATTGATAGCTTTTAAAGCGCCACAATCGCATTCTAAG  
AGGCGCATTTTTTGGAAAGGTGATTCTAGGCCTGAATACATAAAAGCGTCGCAGTGGTTC  
GCACAGAAGCTAGAGGAAGCGTTAGAGCACGGCGACACTGACACGGAGTTGCACTACTTT  
GATATGTTTCAACTTTGGAAATCAAGAGGACCGTAAAATCTGAGGACTTAATGAGGCTGA  
ATATAACATTGTTAAACGTGCTGCAAAAGAGTGCATGAAGGAACTGAAAGTTGAAGTGAC  
AAGCGCAACAATAACGACCATATTGCGGCTGCAATTATCACCAAACCTCACACGCCAAT  
TTCTACCCCAATCACTCGAACAAAGTTTTGTATGGCTTGCTGGCTATGTTGCTGGTCGATG  
GGGTAAACCTGGCGAGTATGACTAATAAGCACTTGAATCAAAGAAGGTTGACGGCTTGT  
GTCTGATTGGTAGATTAACGCCGTGTACATAAGAGACTCAATAGAGCAGAGCGTGGCGC  
GTTAGCCGTAAATCCTAATCGGATGGGATTGCCTTGCCAATGACCGTCGCGGGAGCCGTA  
ACCCGCAATCACTCAGGAGATTATTTTATGAAATCCACATTGCTTTTCAAAAAAAGAGTT  
TTGCTCCCTCGTAGCGAACTTCTTGTTAATCGCGTGTATGGTTTCAGAAGAAGATTTTCGAT  
ATTGATGTTCAAACGAATGGTGTATAATCTCAAACAAAGAAGATACAAAGGCGTTTTCA  
TTCCCAAACACAACATCATCGTGATTATCGCAGTGGAAAGTAAATAACGCACAATAAAGA  
GATTGCAATGGTAACTATCATCATTGAACGTGACCGCAAGAAAACGCGATACAAAAAGCG  
TTGTGCAAAAGGCGAGGCGGTATTAGGCAGGAGCGGTGATTTTATGGTGAAATTGCAAGA  
GGATAAGCCGGATGTTGTTCAAGGTTAATTTAACTATCAGGCGCATGGGTTCGCAATTGCG  
GATCATGTAAGCAAGAATTTGAAACGGTGTACAGCATGCAGGGCTGAAATGGCTGTAA  
GATTTGCTAATCAATATTCTGGAGCAGATTCAGAAACGCGACGAATTTTCAATCTATTATG  
TGAGGGCTATATAATGCGGATGTTTATTACTGGTTTTTGGTTTTTGTGCGCTGCTTTGTTT

TGTTCTTTACCATTGCTTTTTCGTGGTTTTGCGCTTGGAAGAATTAAGAAAACGATCTTGT  
GATCGCGTCTTACAAAAACAAAAGCGATGTTTTGGGAAATTACACGAAATTACGAAAAGAT  
TGCTGATGAAATTGCATTCAAGTCGCAAGTTTTGGCAAGCCTGGAAGCATCAAGTTTATTGA  
TTGATTCAACGCAAAAAGATAACCCGCCTTGTGCGGGTTTTGTTTGTGCCTGCAATTTAGC  
TATTATCACGCCTCAACAGGAGGATTTTATTATGGCTAAAAAAACAGAAGCGCCAGCGGC  
GGAAAGTCTAAACTTTAAAACGTTATGAAATAAGCGTTCCTCCGATCTGGTAGGTTAGTGA  
GATTGAAAACGCGCAACGCTAACGCCGGCACAAGTCATGAACCTGATTGTTTATTATT  
TGAGTGGGCGGAGCTAAACGCCATTAAGCAGGTGAAACGGCATCATTTTCAAGGGTTCGAGT  
GTATCAGGATACGATTCAACAGCCGCGTATTTTTACATGGGAAGGGTTAAAGCTGTTTTG  
CGTTTTTTCCGGCACAGCACTAGCAAAGTGGAACCTTAAACCAGGCTATGATTTTTGTTAT  
TAAGTTTGCGGCATCGGTAATAAAAGAACAATAATACCAGTCAGCTGCAAACGGAATGAT  
TAACAGCACCATGATCGCAAAGGAGCTTCGCATTGATAAAGGCGACACGATCAATAATAG  
CGCCAACGCAAAAAGATCCAGACAATAACAAGCGATGAGAAAACGCAGTCGCAAACGT  
CCTAAGCAAGATTTAAAGGTGAATGCTATGTTGATTTGGGAAGATTTGACAAAGCTTGAA  
AAGCTGGCTACTAAGGAATTAAGCACACACGATTTTTGATACTTTTCGTTAAAAGCTGGTTC  
CCGATCCAGCAGGGCGAAAAAATGATTCCTAACTGGCATCACCTTTATATTGCAAGGGCA  
ATTGATGAAATTATTGAAGGTGTGCGCAAAGATAACATTTTTAACCTAACGCCAGGCTCA  
GGCAAACCGAATTGCGTTCGATCCACTTTCCGCCTTATTCATATTTGAAATTGAACAAC  
GTGCGAAATGGGAATATTTCTTTTGCTGATACACTAGTTAAACGTAACCTGCAAGCGTGTG  
CGAGATCTGGTTAACTCGCGAGAATGGCAAGAGCTTCACCCCGCAAAAACCTGGTACAAGC  
AAGGATGATGAATTCCAGAACCTTAATGACGCTGGCAAAGTGCGCCTGGTAACGATTAGT  
AATTCGATGGGAGGTCAGAATACTTGTAGCCGTGGCGGTTACATCACGTCTGGCGTTTAT  
TCCGGTTGTGTGACGCTTGATGATCCAGAAAAGCCGGATGATATGTTTTTGAAGGTGAAG  
CTTAAGTGCGGTCAAATGATCGCAAAGAACAACATGCGATCACGTGCGGCACATTCAGAA  
ACGCCGATTATCGTTATTCAGCAGCGTCTACACGCGCAGGATATGATCTGGTTTCTGAAG  
AATGGCGGAATGGGTATTGAATTCGTCAGATATCAATTCCGGCGATGGTTACGGAGGAA  
TACGGGATATCGCTTCCTGCTTGGTTACAGCCTCATTTTGAAGAAGATGTGCTTTCGTCT  
GAATCCCTCGTTATTGACGGCGTGAAGTATTAGTCTTTTTGGCCTAGCAAGGAAAGCATT  
CATGATCTTAAAACGCTGCGCGATGCCGATTTTTACAGGTTCTTTCTCATTATCAGCAA  
GAGCCAATTGCTCTTGGCGGTACCGCAATTAACGTTGGATCGCTCCAGTATTACGGATCC  
GGAGAAAATCAACGATGCCAAAACCGGATCGCCTTGATTATACGTTTATTACAGCAGCT  
ACCGCTCAGAAAGCACGTGAGCTAAACGACTACAGCGTTTCATGTTATTGGGGCATGTTT  
AAAGGCCGTATAAATTTTATTGACGCTGTGCGCGGAAGATGGGAAGCGCCAATGTTAGAG  
AGGCAGTTTAAAGTGTGTTGTTAAACAGTGCTGGAACCGAAAGAAAGAATGCGGAAACTTG  
GGTGAATTTACGTGGAACATAAAGTGAGCGGTACACGTTTGGTCCAGAATTGCCGCAA  
CCATTTCCGATAGAAATTACGCCAGTGCAACGCGGTAAGACAAAGTGACGCGCTGCATG  
GACGCACAGCCAGTGATCTAGAATGGTTATGTTGTATTGCCCTGAATCGCATCACACGCTT  
GCTGAATTTATGGCAGAGGCGGCGGCATTCACTTGTGATGATAGCCATCCTCATGTTGAT  
ATTATGGGTAACCTATTTGATGCGTATAATATTGAGCTTAACTTGTGATAATGCGGTT  
GATAGAATGAAGCGTTTACCTGGAATAGCGAAGCGTTAATGTATAAAATCAAAGGGTGGG  
ATATTCGGCCTTTTTATTATGGGGGTATTTATGAGCGACAAGGTAAAGGCCATTACTAA  
AGATGATGGTTACGACGAAATTTTCGGATCTAACGATGGCACGTATAGGCCAAAGGCTTT  
TTAAATGCAAAGATCGGCATTTAAAGCGTTATCGCAAGTTTATGAAGAAGATGGAATGGC  
GCGGCGCATTGTGATGTTATTCCCAAGAAATGGTAACACTTGGTTTTGAGGTGGACGG  
CGTGACAAATGAAAAGTCGTTTAAAACCTTGTGTTGGGATAAATTGCGATTAACGCTAAAAT  
TATTGATGCGCTTTCATGATCGCGTTTATTTGTCCGGTTCTGCAATGCTGGCTGTTGTTT  
TGATAACAAAATGCTGAATTCAACTGTAAAGCCTGGTGCACAACCTTGAAGATATTCCGCGT  
ATATGATCGCTATCAGATCACGACTCATGCACGCAAGACTAATGCGTGCAGGGTTCGTTA  
CGGTGAGCCAAAACCTGTATAAGATCTCACCAGGCGGAGAGATACCGGAATTCCTTGATCA  
CTACTCGCGTATTTGCATCATTGATGGTGAGCGCGTATCGAATGAAAACGCAGTCAAAA  
TCATGGTTGGATCGCAACTCTGTTAAACTAGCGTTTAAATTGAGGCGATGGTTGATTAGAA  
CCACTTCCACGTAATAGCAACGCAATTGCTACGCCGAAGACAACAAGAAGTTTTGAAAGC  
GCGTGATCTGGCTTTGATGTGCGACGATGAAGAAAGACGCTATGCGGCGCGTTTGCCTT  
GGCTCAGGTTGATGGCGAAAGCGGAGTTGGTAAGGCAATTGATATTGAGGCCACCGATGA  
GGAATATGAGGTTCTGAATTCTGACGGTTCGGCGTTCAGAGTTCTTACAGGAAAGGAT  
TTATCGAATTGTGCGACTAACTGTCATTTCATGACATCACCTCAAACCTATGAACACAGG  
CGGCGTTTGAAGCGAGTCAAAACACGGCGCTAGAGACTTTCTATACGTTGATTGATCGCAA



GCGCGTAGAGTATTACAAGCCGATTCTTGAATTCCTTTTGCCGTTTCATGAACTCAGAAAC  
GGAATGGTCTATTGAATGCGAACCGTTAAGCGTTCAGAGTGATAAGGACAAAGCTGAAAT  
TACGGATAAGAACGTTGAATCTGATGTTAAATTGAAAGCTGAACACGCAATTACTCTCAA  
AGACACATGAGACACTTTGCGATCCATTTGTCCAGATCTTAAAATTATGGACAATGACAA  
CATTGAATTGCCAGAACCGGAAGATTTAGATCCCGGGCCAGGGCAGGAGGGAGGATTGAA  
TAAATGATGTTTCCTGATGTGACAGAGAGCGACGTTGAAAGGGCGCTTGATGATCTGGCA  
GTTGATATCACTGAAAACAATGCTGATGTATAGGCCGCAATTGCCGGCTTTAGGTCTGCTG  
GTTTACGGGTTTCGCCGTTAGTACATACAAATACCACTCGTCAATTTATCAGAATGGCA  
AAGCAAACAGGAGGAGCAAATAATCGATCCGTTATCATTCTGATTGGTGGCGTTCCCGGT  
TGCATGAATGAACGTTGGTTCAATTCAAATACAAACCTGGCGATCACTTATTGAGGCA  
TCCGTAAGGAAATTTGCGTATAATGTGCCTGATGATTGGAAAGTGCAACGGCGTTTAAAT  
GAGTTACGGGAGCAAGCAGAAACAAGAGCGCAGAGCCGAAAGCGCCTAAGAAAATATAAG  
GCGTGGGCTAAAGATAGGGCGACTGGTTATGTTGGTTTGTGGTATTCCGTGTTAATATAT  
CAACGCGTGGTTGATACCGGAGTTACCCATTATATTTGGCGAACTCAGGAAGAGAAGAGG  
GTTTCGACCTGAACACGCTAAATTGGACATGAAACGGAACCTATTGGCAATAAAGCACATA  
TTCCAGGGCACGAATATAATTGTCGTTGTTGGGCGCTACCGGATTGGGAAACATAGGAA  
GAGGTATATTTATGAAGAAGGTGCAACGTTTTGAAAGCGTTAGAGTAAAGGCACATTTTG  
ATGCACACGGCTTTTTAGTGGATCGGCCTGTTGTGGCGCGAATTGGTTTTTCAGATTTATC  
AAACGCCGTAAGGCGAGCGTAGTGAAGTTAGGCGAGCAAGTGAATTGTTTAAAGCTGATA  
GCCTGGCGACTTACGGAGGGAAGCCAATCACAGTAGGTCACGTCACAGTAACGCCAGAAA  
ATGCGCGTGATGTTGTAGTTGGTACTTGTAGGCGCTGGCATTCCAAATGGGATCGGAG  
TTGAATCACCTTTGAATATTTACGCAAAGGATGCAATTGAAAGCGCCAAGAAAAACA  
CGGCTGAAATTAGCGTTGGTTATACGTCGATTGATATTGGTAAGCCTGGTTATGGATCTA  
ATCAAATGGTGAATTCATCTTTGAAGAAGATCTAAAAGATGATGAACAGCCGCCTGAAG  
ATTGGGTAAAATTTGATGCGCTGCATACAAGCATTAGTGTTAACCATATTGCGTTGGTGT  
TTAAGGGTGCCTCTGGCATTGCGAAAGTTAATCGTCATAGCGAGCAAGAATTCCGGAATG  
ATATCGACGTTACATTAATAAAGAGGACGAGGTTATGACCGTTAAAATTAACCTTGATA  
GTGCTGTTGTATTTGACGTACGAAAAGAAGTTGCTACTTTTGTGCGAAACCTAGAAAACAG  
ACGCTACAGCGGCAAAACCTAAAGCCGATAACCTGGAAGCAGAGCGCGATGCTCTAAAGG  
CGAAAGTTGACGGCGTTGCGGCGCAGATTGAAGAAGCCGTGAAAAAAGCAACAACCTGACG  
CTGATGAACATGCCGCACTGGTAGCTACCGCTTCAGAAGTAGACGTAAAATGCGACGGCC  
TAACAGCCAAAGAAATTTAGATTGCATATGCGAAAGAGGTCAGGGGTAATGACATTAGCG  
CAAAGGCTGATGCATATATTGATACCGCTTTTGATATCGCAAGAAAATCTGATAAAATGG  
CTACTCAACGTATCGCATTAGAAGGCGATGCAGCTAAAACAATCAGGATACAGCGGAAT  
CCGCTCTTGATCCTTCCGCACGTCTGAATAAAGCTAAGTAAGGAGAAAATATTATGGCTC  
AGATTTTCAGCAAGTTATCATGTTGCGATGGCTCGCGCCTTGCCTGGTCAAGTTTCTGACA  
CCTCCGCGTATAACATCGCTGGCGCTTGTGTTCTTGATGGTGTGATGCCGGATCAAAAATTT  
ATGTTGGAGTTGGTGTCAACATGGCGGAGTTATCGCAAGCGGTGAGAAATTAATTAAGG  
CTATGGCGGAGTCTGGTAATACTTATGGTGTGGCTATTCGATCGAACTTCAGACCCACAT  
CTAAAGATGGTCGCATGGTTTATGAGGCTGGTAGCGGCATTAACGTAATGACTAAAGGGC  
TCGGTTGGATGGTTTCTGTAGCATCAGAAGCGCCAGCATTAAAACATCTATCAAATTTG  
ATAATTCAGAACAGGTCGATTTAACGTCTGGATCAATTGAAACTACTTGGATCGCAACTG  
GAGACTTTACGGAATCCTAAGGTCTAAAACCTCGTTGAGGTTCTACTGGTATAATAAAG  
GCCGGATTATCCGGCCCTTTATATATGGTGGTTTTATGTCTGATTACGGTTCTATAATA  
GGTATAGTTGAAAATGGGTGCTTGGTAGATTCAAGCCTTTATAAGATAGTTGGCTCGCCT  
TTTTTTGATGTTTCAGCCGTGATAGGTAAGGCCGTATGTGTTGATCGCATAGCTTGCGGT  
TACAAAATAATCAGCCACAATTTAATGAAAATCAAAGCATTACCGAATCGTTACGCGT  
GATTATATGGATTTTTGCAAAGAATCTTACGACGCCGGAGATCCGGTTAACGTAAGA  
CAAGGTGCAATTGGGGTAATCACTCAGGACGAACTAGATATTTTCATGGTATAAAGATCCT  
GTTTTGGGTAAAGACAATGGCTATACCTCAACAAGTGGATTTCCTACCAGTTGGTTTGGT  
ACTGGCGAATACGTAAGATATTCGCACGGATATATCTCACTATCAGTTCAGTTGTAGCGT  
GCTAACACAAGAAACACTTGAACGTTTATCAAAAAATGCGATATTACAGCCATTATTATG  
ACGGCTTTTCTATGAGGGGGAATATTGTGTCTAAAGAAATGAAATATGATGACTTTGAAG  
CCAACGTGATCGACAACCATATGCAGTTACGCGGCGCTAAAACGACGCATCTGATATGG  
GTATTTGGACGTCTCAAGAGCGTCATAAACTTAAGGCTCAGGCCTATGAGAAAGTATAAC  
CGACAGGTTCCGAGCCGCTTGTATTCCCTGTGAGGTCGGAACCTTTTTGATACAGATAATA  
CCTTTGAATATCATACCTTGGACAAAGTAGGACACGCAAAAATTTATCGCTGATTCCACTG

ATGATCTGTCAACTCTTGACGCGCTGATGACTTCTGAATTCGGTAAAGTGTTCCGCCTTG  
GCAATGCGTTCCTTATTTCTTTGACGATACCAAAGCAGGTCAACGCACCGGCAAGATCC  
TCCCAACCCGGAAGGCCAACGCCGCACAGACTGTGCGTGATCAGCTTGTAATCACCTGG  
TTTTCTAAGGTTCCAAACCGCATAAAATTATCAGCGTGCTTGAACCTCCAAACCTGACAA  
CTTTCAACTCCGCAGGTTGGAACAACGCCGCAGGGCCTGGTAACAAGCTGGAAACCGCAC  
AGGATGAATTAGAGCATGCGATTGAAAAAATCGAAACGTTGACAAACGAGCAGCACCGCG  
CTAATATGATCCTGATTCCGCAGTCAATGCGTAAAGTTCTGATGGTTCGGATGCCGGAAA  
CCACGATGAGCTATCTGGATTATGTTAAGCAGCAGAATGGCGGTGACACTATCGAATCCA  
TGTCCGAGCTTGAGGATATAGACGGTGCAGGCACTAAAGCGGCGCTGGTTTACGAAAAAG  
ATCCGATGTACATGAGCAATGAGATTCCAGAAGCGTTTAAACATGCTTACCGCTTAACCTA  
AAGACCTGCATTTCAAAGTGCCTTGCACCTTTCAATGTACTGGCCTGGCGATTTATCGTT  
CGTTGACGCTTGTCTGATTAAGGTCTTGTAGTAGGCTGATAATTCAATTAATATAGGG  
AATCGTTAAAGGTTCCCTTTTGATATCTGGAGAAAAGCAAATGGCTAAAGATAAAGAAC  
TTACTGTTAAACACTGTCGTTGCACTGATTATTATAGATCGGGTTGACGTTATGCCAC  
GTAAAGAAATTACTGTTTCGGAAAGCGTGTTAGAACGGCAGCGTCCAAAATCGCTGCGTG  
CCCAGGGCAAGCTAACCGTAAAAGATAACAGCGAGCTAACGATAAGATCATTGAAGCGT  
TCAACGAAAACCGCAAGCCGAACCCATCCGAAGGCAAAGCAAGGCACATCTTGAGGAAG  
GCGGCGAGGATTAATTAGAAAGGGCGCTCATGTAGCGCCTTTTTTATTATGCAGAATACA  
CCAGGAATGATATTGAGATCCTAGAGCAAATTTATAAAATCGAGACAGCATTCAAGAAAG  
TAGATCCTGAATTGATTCATGCATGGATTGAACAGGCTAACGCTTTCGTTTGCGAAAAGC  
ATTTGAAAGACAAATATTTCCGCGCTGGTGCTCTTGACACTTTGCACCTTATGACTCTTG  
ACGGAGCTCTGAAACGGGAAAGTTAGAGCGTAGAAAGCGACTCGCACCTTATAGCGTCAT  
TTTCCCTGACTGGTAAGATTATGCAAACGTTTACGCAAAGTTAGCGACCACACAAGCTGTA  
ACACGTTGCGCCAACTCCGTGCGGTAACATGTACGAAGTTCACAACAAGAAAGAGAGG  
GCGGATTTGGCCTTACAACCTGCATTTTCATCGGAGGTGCTCACGATGAATTATGAACAAAT  
CAGATTTATGGCATCGGCTGGAATTAATTTTTTTAGCGATGGAATGGGTGAATTTGATTG  
CATTACTCAACTTGGAAGCGTTGACATTGTTGGCGTTATTGAGCTTGAAAAACCCGAAAT  
AAAGAGGAAGATTAAGGTCTTGTGAGAGCACCACGGACGCGAGAAGTTGACGGAGAGCT  
AATTAGAGTAACAGACAAGTTAGGCGTTTTTAATGCTGAGGTAGAGCTTAAAAACGGATA  
TCAGATTGATAAAGACAGCGAGCGTTATGTTATGTTTGAACAAGACCAATCATAACAAC  
AAGCATTACCGTTGCTTACCGTCCAATAATGCGGATGGTTGCGGGTCATGGCTGATTATT  
CGATCCGAGAATTTCTTTGAACTTTTGACAAATGGATCAAGTAAGTAGAAAGGGGATTGT  
ATGACGTGATTCAGATTTATGGTGAAGGTTTACGGCGCATTAGTGGATATTGCTCCAG  
TGGACACAGGACGATTAAGGCAATATGCCGATCACACCAAGCAAGCCGCCTCTTTTCG  
CGCTCAATCAATATGATCCTGATGGTGAAAAAATAAAGGCGGAAGTTCGCAGGACGCTTT  
ATGCTTAATTGCATGGCGGCGGCGCTATTAATCAAGATACTGTTCAAATATGCTGATTT  
ACGCCAATGCTCTTGAATATGGACATTCGAAGCAAGCGCCAGCGGGGGTATTTGGTATCG  
TTGCGATCCGGTTGCGCTCTTACATGACGGAAGCGATAAGGGAGGCGAGAAAGAAAAATG  
CACTATGAGTTATCTGTTGCGGCAAGAATGGCGCTGTCTCAAGAATATGAAAGTGCTTAT  
ATGAACGATTATGAAAACGTTGAATTTACGCCCCCAAAGTTCGGTGGCATTGTTGGCTGTAA  
TATAACTACAAAGAAGCAGATACAATAATACATGATCTTAAAAGGAAATGCATTAGCTAT  
ATTGGAATGGTTCAGATCGGAATTGAATTTCCACCAGGATCAGGAATTGATAAGGCTCGC  
AATCTGGCAAAAAATATTGCTGATTTCTTTGAAGATGGTAAAATGCTTTAGAATGGCTAT  
ATTTCAGAAGATCCAAAAGGGCATCAAGTTCAGAAATCAGAATCAAGCTGCTTTTTTTCCA  
GTGCGTTTTTATGTTTCGTTATGATGGTTAATAAAGGGGGCTATTATGCACTTACCTATCG  
GAGGACAGATTTATATTGAGAAAACCTCGCGCACAGTCAGTAAGCGCAACCAACGTAAGCA  
ATGCAACCAAACCCGAATTCACGCTTGAAAGCGGGCGGCTATGCATTCAATAAAGGTGATT  
ACATTATCGTTACCGCATCAAGTTGGGGTAAATTGCTTGATCGCGTTCGACGGGTGACGG  
ATGCTGAATCAACCAAGGTTACTGTTGAATGTATCGACGCAACCGATACTAACGTTTTTC  
CGGCCGATCTGTAACCTGCGAGCTTTGCAAAAATCACCGATTGGACAGAGATTCCTTGCA  
TACAGGACATGGGGCAGGACGGCGGGCAGCAGCAGTATTACAATTACCAGTGCTTAAGCG  
ATGACCAGGAGCAGCAGTTACGAACCTATAAAACTGCGGTATCACTGACTAACACATTTG  
CTCATGTATACGATAACCAGATTTATCCGCTCTTGCGTAAAGGCTGACGAATCCGGAGCCG  
TTAAAGCATTCCGCATGTATGTACCAAAGCGAAAGAAATGCGCCTTTGGGCTGGTGTGA  
TTTCTTTCAACGAGAACCACATGCGGCGGTAACCGTAATGGAAACCGTTTCTTTGTCGG  
CATCCGTTAAAGGTCGCTTTACTTTCCCTCCCTGCTAAGCAGGAATAATATGAAGGGGCGC  
ATTGCGTCCCTTTTTTATCTGATGTAATAGCTCCTGAATATTTAACCCTCAGGAGATAT

TACAATGGCTGAGATGAAATCGACTCTTGCCCCGCTTCCAGATTTCAAACCTCCAGTTAA  
ATTTGTATTGCCGGATGGTAACGTGCAGAAGATTGTGTTACCGTTTAAGCATAAAAAGGC  
CAGCGAGATTCAAGAGCTTTACCAGAAAGAAGGTATTAAGATCCTGAATTCCTCATGAA  
TGTTGCCGTTGGTTGGGATCTGGAAGAAGAATTCACGGAAGAAAACGCTCAACTGTTAGT  
TGATTATTATCCTGGCTCGGCGCTGGCTCTTATGGGTTCTGATTTAAGTGCAGCTGGCAGG  
GCAATGCGTAAAAGACTAAAACGGGCGGCTTATCTGTATTACCAGAAACCGCCGACAGAT  
GCAGAATTGCAAGCCGTAGGATTCACCCGCGCGGACTATGAAGGAGAGGATCCGCCAGAG  
GTCATATTTGATGAAAGTCTGATGCATTCATGGGATATATTTTGCAGGATGGGTACACAG  
TGGCGTAGTGCTCGCGCTGGTGCTTACGGTTTTGATTATAATGTTTTGCCTATGTTACTC  
AGAATCTATAAAATAGACGATGAAGAAATGGCCTTAAGTGACTTGCGCATCATGGAACAA  
AAAGCACTGGGAATGATGCAAGCAAATAACAAATAAAGCGCCTACGGGCGCTTTTTTTAT  
GAGGGTGATATATTGGGCTGAACTATTTGCAGGTTTAAACTTGGCGTTAACGTCTAGCA  
TTTAAACAGGGCTGTAAAGTCATTGCATGACTTGTAAGAAAAGCAAACGACGAAGCAATGA  
AAGGCGTTGATAGCTTTGTTGATGAGGAAGAAATTGCAAAGCAAAGAGCAAACAATTAG  
CTGAAGAAGAGGCGACACAGAGCCGTGAACCTTAAAGCATTTCAGGACACTGTTGATCCGA  
CAGCGGCGCATATGCGCAAGCTAATCCAGGCGCAAGTGATCTTGATAAGCTATGGCAAC  
AGGGAACGTTCCTGATGAAACGTTTTTCCAGTTGGGGAGTATGCAGGAAACTCAGATCA  
GTAAGCTCGACCGTACTAAAAGGCGTTAACGGAAGAAGGCCGCGCAGCGCTTCAGGAAT  
CAAAGCCAAAGAGAATGCGGCGATAGCCGGA AAAACTTTCTTGCCGATCTGGAATCGC  
AAGCCCCGCTCTTGTA AAAACAAAAGCTGGCTTGCTGGAAATGAAAGCGGCGCAACTTG  
GCGTAAGGGCTCAGGCAGCGCTATTTATCGCACAGCTTAAAGCGCAAGAAAACAGATGA  
AGTTAACCGGAATTAGCGCGGGGCAATATAACCAGGCCATGCGAATGCTTCCCGCTCAGA  
TCACTTACGTAGTAACGTGCTGGCTTCCGGTATGCCTGTTTGGTTGGTTGCAATCCAGC  
AGGGTGGACAGATTAAGATTCTTTCGGCCGTGTTGCTAATACGTTTAAAGCGCTGATGT  
CGTTTCTGAATCCGGTAAACGTTGGCCTTCCCGCATTAGCCTATTCAATGGGTGCTTTTG  
TTAAGGCTAGTTATGATGCGTATAAACCGCAACGTGACTTGCAAGAGGCGTTGGTGGTGA  
CTGGTGGACATGCTGGCACAAGCGGCGCACAGTTCGATAGGCTGGCGCGGGACAGTAATT  
ACAGCACTGATGCGCCGATAGGAAACATTCGATCCATCGCTACAGAGCTTGCAAATCCG  
GCCAGTTCACGATTAATCAGATTCAGCAATCACGAACACTACCGCTCAGTGGTCAACTG  
TAACTGGTGAATCAAGCGACAAGATAACCGCTTCCTTTAATAAGAGTGCTGGCGATCCGG  
TTAAAGGTCCTGCAGTGCTATACGAGCAATTCAACTTTTTAAGCGAAGGGCAGTTAACTT  
ATATTGCAGACCTGGGGAAAACGAAAGGCAAAAACGGAAGCGGTAACGGCGGCGAACAAGT  
TATCCGCTGATATTATGGATCAGAGATTAGCTAAAGTCGCAGACTGCGCAACGCCATTTG  
AAAAGATGTGGGCGAACATTCAAAAAATCGCGTCAGATGGATGGGGTTGGGCTGGGGATC  
ATACGATGGCGGCGCTTAACCTGATTATTGACGTTGGAGCCGGAACCAGTGAGCAGGTTT  
GTTACTTGCTTAATCAGGGTGATATTCTCATTGGTGTGTTTATCGTGTCTGCAACTAAGC  
CTAGGCAAAAATACTGGTCTTGATGGAGTTGGTCATTCAGTAATTGCACAGCAGCAAC  
AGATCATTAATAAATCAATAGAGCAAAAACAAGGAGTTATCAAAAATCTATTGCCGAACGTA  
ACGAGCGAGTCAGAAAAGGCGATCAAGGTTACATTGACATGATGAAAAACCGTGCGGCGG  
TTGAACAGCAATATCCTACTAAAACATAGGAGAATATCAGGAAGGATGCCGAGGAATTAG  
CCAAACGCGATAAAAAGCAAAAAGGCTGAAAAAGTTATAGTATCGGCTGGCGATATGCTGG  
AATAACAATACCAGCGTGATATCCCGGCTTAAGAACTCAATTAAGAGTTTTGAAAGAGC  
ATAAGACGATCACTGATAACCATAAGCCAGCACCGTAAATCTTTATGGGCTGAACAAGCTA  
ACATTCAGATTTTGCAAGTAGCCTCAACAAAGCGGCAACTTACTGATGAAGAAAAAAGCA  
TTTTAGCCAACAAGATAAGATCCTGGCGATGGCTGAACAAAAGCCATTTTAGGCGATC  
AAATTGTCGCACAAATTCGGCTTAATCAGTCGCAAGATAGCGCCATCAAGTTTATCCAGC  
AGCAGAAAGCACCAACGGAAGCACAAGCAAAAACCAGAGGGTTAAGCGAGCGTGTGGCAG  
CAAGAGAGCCGGCACGTGCACAGGTTGAATCTGATTATCTTGCTAAGGGAGGACAGAAAG  
AAGATCCGCAACTTAAAGCCTTGATAGATGCCTTAGACAACCGATATAAAAAAGAAGATG  
CTAAACGCGCTGATCGGTCATCTGGCGCTAAGGATGCCTTTGCGGAGTATGGTGAGGAAG  
CAATGAACATGTATGATAATATCGCCAACATTGCGAGCCAGGCGCTAAACGGCCTATCGC  
AGCAAATGGCTGACTTTTTGACTACTGGATAAGCCAACCTTTGAAGACTTTGCAAATCGA  
TCATTAGCCTTATAGTTCAGATGATCACAAAGATGATTATCTTCAATAGCATTTCCGGCA  
TGATGGGCGGCTCAACCTGGACGCGTGGAAGCCTTGTAAGCGGTGCTGGTTTTGCTCGGG  
GCGGTTATACTGGCGACGGCGGCAAAATATGATCCCGGTGGCGCTGTTTCATAAAGGTGACT  
GTGTTTTCCCCCAAAGGGGCAACGCAAAGAATGGGAGCTAAAACCTGTATCGCATGATGC  
GTGGTTATGCAAACGGCGGTCCAGTAGGAAGCCTCACAACTGGCGGCGCTAGCATCAATC

GCGGCGCATCTCAATTTGCGTTTGGTGATATCAACGGTAACATTGACAACGGTTAATATC  
CAAAGGGGATGGAACTTGTATTAAGATGATTTTCACCGAAATGATTC AACGTT CATGCT  
CGCAAGGTGGCGAGGTTTATTATTTTGTTCATGGGAGGGCTTAATGTTAGATGAATTTAC  
TTGCTGTACGCAGATTCAGAACGGCGGGCGGTGTAATGACAACCAACAACAACGACAGGGA  
TGTGATTTTTGGTATCGGTTATAGCCAAAAGGCAACTTCCGGATTTAACACGGAGCGGAG  
GGAGTTGTCTATTGCATACGCTGGCACTGATTATAAAAAAGTGAATGCCTTCATGACGGA  
TCACAGATTAAGCCTTTCTTGTGGAGGATGCCGGATGGTGATTTAGGGTTGTTTACGGT  
TAAAGCAGGAACGGTAGGGCTAACGCCAATAAGCCCAACCGCTCAGGAAGTCAAAGCAAC  
ATTTACCGCAGAATTTACATCCATGCGATAAATCAAAGCCGCCATTGTGCGGCTTTTTTA  
TTGTGTCTATAATGGTGCTTTATTGGAGGGCATAGAACATGGCAGAAAAACAGAACAAAA  
AGACTTTTGTCAATTGTCTGCAATCGCTTTTCCCTGGTGAAATAATTACGCTTGTTGTGG  
TGGACGGCACACAATTTGGTGCGCAGGTTTACCGCTTTCCTGCTGAAAATATCGCGTACA  
CTCCAGAGGAATTATTGCAAGCGCGTGAAACTGGAATATTGCCTCCGAAAGATATTAAT  
TTCGTGGCGAGGTTTACGGGGCGCGGACTTTTGGGATTAATGGAATTGGTTTTACAAGTG  
ACGGAACGGCAGCAAAACCACAATTAGCGCTTTCGAATTTAGATAGCCGCTTATCTGCAG  
TGATCAGATCACATAATGGAATGATGCAAGCCAAAGTGACAATTTGGGTTACATCAGGTG  
ATTTAATTAATGAAGAAGGAAACGTGGAGGACGGCGCATATAGAAAGTTTGTTTATTATA  
ATGAGCGTCCAAATTTTGTTAATCAGACAGTTGCACGTTTTGAATTAACATCACTTTTTG  
CAATGGATGAAATTATGATCCCGCCACGACTCACGCAAAGCGTTTGTATTGGGCGCAAT  
GGGGATGGTATAGAAGCGGGAAAGGTTGCGGATATAACGGATCGGCAATGTTCTATAAAG  
ACCATAATCCGGTAACAGATCCGGGCAAGGATAATTGCGCCGGCACAGTGACAGCCTGTA  
CATTGCGCTCTGGCGATCAAAAAGAATTAGATTTCCGGCGGTTGCGCGGTTGCATCAGTAT  
TGAGGAAAAACCAATGATTAACGTAAGAATTA AACTTGA ACTTCTGCGCCATGCCAATGA  
CGTTTACCCTAATGAATGAGGCGGCCTGGTAACTCAAAAATCACGAGTACAGAAATATCT  
ACGGATCGACAACGTAAGCAAGGAGCCGGAAAAACATTTTGAATCGACGCTGAACAATA  
TGCGGACGTTGAGGAAGGCGGCTCTGATATCATAGCGGTAGTTCACAGCCACACAGGGGA  
AGGGGCAACAACAATCTCGAGCGCACACCATTTGTGGATGTGGTATGAAGCTTGTGTTTC  
CTGGGTTATCGGTTTCGATACCAGAAGGAGACATCAGAATCATAGAGCCACAATCACGGCC  
TTTGATTGCTTGCCCCTGGTCGCTTGGCGCTTCTGATTGTGGGGGACTTATTATGGCCAG  
GCATAAAGAGCAAGGCGTGATCCTGAATGATTTCAAAAGCCTTATGAATGGTGGAAACC  
TGAATTTGGTGAAAACCTATATCAAGACAATTATTGGAAGAGGGTTTTTGTGAAACTGG  
CGAACAACCAAAAACACGGAGATATGATCATAATGCAGCTTCAACCGCCAGTATGGAACCA  
TGCCGGAATTTATTTAGGCAACCATCAACTATTACATCATGCATTCGGCAAGTGGTTCGCG  
GGTTGATTTATATTCAGGATGGTATCAGGCACTCTCAACAATGATTGGCAGAAATCAGGT  
TCTTAAAAATGAATAATGTGATTAACGTAATATAATCTGGCTCATTGGGTTCGCCGCTTTG  
GTGTTTTCCATACTTATGCTGTTCATAGTTGGCCTGAATGCGCAAGGGCATTATCAAGCC  
AAGTTGAAGGATTCAAAGA ACTGATGCACAGTGAAATCGGATCACAGTTAAAATTTGCTA  
TTTTCGTTGAAGGTA AAAATGTTGGACTGAATAATGATAGCGAATGGCGTTGCACTCGTG  
AGGTTAGAATCGTTCAGTTC AACC GTTTTTAAAATCTGGAGGCCTATGTCAAGTTGTAT  
TAGGAGCTGTAATTATGGTTGCTGCATTCTATACTGGTGGCGCTTCACTTGTTGCCATGC  
GGGCTATTTCTTCATCAGCTTTTATGATGGGCGGTGCTATGATGCTTGGCGGAGTAATGC  
AGATGATTAGACCACAACAGTGATGCCTAAGTATGGAGAGTCAAAGCGCGGAAAATAAAC  
CATCATATGCGTTTGGTGGTGTCTGTTAATACTAGGGCGGCAGCTTATCGGGTATGTTTAC  
CATATGGCTATAGAACGGTAGGCGGCGCTGTATTCAGAGATGGCTCATACGCAGAAGATA  
AATTTTAACTATATAAACCCGCCGTTGCGCGGGTTTTTTGTTACCTGTACAATGGCAGCA  
CGTTCAAATAGCACAAAAGCTTAAAAGCTATGATCAAAGATATGATAACTGGCAGTAAGG  
GCGGTTCTCTAAAGCCTCATAACCTGTTGAAATCGAAGATAACCTCATTTC AATCAACA  
GGATCAGAATCTTTTAGCCGTTTCTGATGGCGAAGTTGATCCAACGTTTTTCATTGAAAG  
ATTTATATTTTGATGACCTTCCGGTTATGAATCCGGATGGTTCACTAACTTT CAGTATT  
TTGAGGCAGAATTCAGACCAGGGACGGAAACGCAGGATTATATTCAGGGCTTTACTGATA  
CAGCCAGCGATGTTACTGCTGCTCGCGAACTGACAGCCGCAAAGCCTTATATTATGTCTG  
TTATCAATAAGATCCTTTCTGCGAACCGTATTA AAAATTTT AATGCCTCGCGGGGTTACTC  
AGGAAGATAACGGAGATCTAACAGGTGTTTCGCGTTGAATATGCTGTTGATATGGGTGTTG  
ATGGTGCTGAATATAAAGAGGTTTTGCTTGATGTA ACTGAAGGTA AAAACAATGAGCGGTT  
ACGAAAGAAGCCGCAGAATTGATTTACATGCTTTTTAATGAGCGTATTTGATTGCGCGTCC  
GTCGCCAGACAGATAGCCCGTCAGCAAGGGTAATGGATCTGATTTAAATGCAAAGCTATG  
CGGAAGATGTAGACGCTAAATTTCTGTTACCCACTGACTGGTTTAGTCTACGTTGAATTTG

ATTGCGAATTATTCCCTAATGCGTTATCGCATATGAGCATTAAAAAGAAATGGAACATCA  
TAAATGTTACGTTCGAATTACGATCCGATTAGCCGCATCTATTCAGGGGTATGGGATGGAC  
CCTGGAAAAGAGCCTGGTCTAATAATCCGGCTTTTGTGCTGTATGATTTAATTACCAATC  
AGCGTTACGGAGTCGATCAAAGAGAGTTCGGCATGGCGCTTGATAAATGGAGCATTACG  
CATGTGCGCAGTATTGCGATCAGATGGTTCAGACGGTAACGGCGGAACCGAGCCGCGAT  
ATGTTTGTACGTTGTGATCCAGAGCTAAGTAGAAGCGTATCAGCTTGAGCGTGATATTT  
GTTCAACCTTACGTGGCATGAGCTTTTGGAAATGGTGAGAGCCTTTCAATCGTGATCGATA  
AGCCTCGCGATGCGTCATACATCTTTACTGATGACAACGTGGTTAACGGTGAATTCATA  
ACACGTTTGGGAGGGAAAAAGCATGTACACGCAATTCGACGTGACTTTCGACGACGAAC  
AAAACATGTATCAACAGGATGTTGAGGGAGTTTTCGAAACAGAGGCCGGCGTTACGCTTTG  
GCTATAACCCAACGTCAATTACTGCGACTGGATGCACACGACGTAGAGACGCCAACCGCC  
GTGGACTCTGGATTTTGACAGCCCACGTCAAGAGCACAACGGTAAACTTTGCTACAGGTC  
TGGCAGGTATGATCCCAACCGTAAGTGATGTGGTTGTTGTATCTGATAACTTTTGGTCCA  
GGTCTCTTACGCTGAATCTATCAGATCGTTTGATGGAGTTTAGCGGGTTTAAGGTGTTCA  
CGCCGTTTAAGGTAGACGCAAGAGCAGGAGATCGCACTCTGGTAAATAAGCCGGATGGTA  
AACCAGTTGGTCGAACCATTGCGCGTGTGAGAGATGACGGTAAAACGCTAACGCTAAACC  
CGACATTTGGTTTTGACGTTTCACACGGATACCAATTTTGGAAATTGAGCGAACCGATAATG  
CACAGCAACGATATATTGTAACCGGAATCACTAAGGGTGATGGTGATGAAGAATCTACCT  
ACAACATAACGGCTGTTGAATACAATCCGAACAAATACGATGATATTGATTATGGCGTAA  
ACATTGATGACCGTCCGACTTGAATCGTGCAGCCCGAAATTTTGCCAGCACCGCAAAACG  
TCTAGATAGATTCTTATTCGCGTGTGTTCAAGGCGCGAGCGTGGAACAATGCATGTTT  
CATGGGATAAAGTTGAATATGCAAGCCTTTTTTAAATGCAGTGGAGAAAAGACAATGGCA  
ACTGGAACGGCACGCCGCGCACAGCCAACAAGGAAACGGAAGTTGAAGGAATTTATGCTG  
CTAACTATCACGTAAGGGTTAGATCTGTTGCAGCGAATGGTTCAGCGTCTGGATGGCCTG  
CGATCGTAAGTGCAGGATTAACCGGAAAAGATGGAGAGCCGGAAAAGCCAATTAACCTTA  
CAGCGTCGGACAATGAAGCTTTCGGAATAGTCGTAAGTAGGGTATGCCAGAAGGAAGCG  
GAGACAGGGCCTAAATAGAGTTGCATCATGCGCCAAACGGTTCTGATGGTCATCCTATTG  
TTGATGAAGGAACGCTCTTAAGGCTGGTACCGATCCCGCAATATGCGTATTGGCATTCAA  
TACTGCCAGCGGGTCATGTTGTCTGTTACAAGGCAAGGGCATTGACAAAATCGGTAACG  
TTTCTGATTGGACTGATTTTGTACGCGGCATGGCTTCCGACGATACGAGCATTATGACGG  
ATCAGATTAAGGTTCGATATTGAACATTCTGATGGCTATAAGTGGTTTCAGGAAAACGCAA  
TAAAGACCATTGATAAGATCCACAGCACAACAGGACCAGTGATTGAATACGCATTAGCTC  
ATGCTAGAGATGTTTCGACGTATGACGGTTTAAAACGGAAAGCGTAAAGCCAAGTTCTTGC  
AATCGCTGAAACTCATTGCAGACAAATCAGAAGCCAGGGTAATACAGGTCCTCTAATGA  
GTGCTCAATTTGACAAGAAATTAAGGGCTCAAACCTAGCGAGTTGAGAGGAGTGATTGCTA  
ACAGCACTGAGACCATTAGCCAAAGGATTAATCAGCTTACAGCTACGTTTGAGAGTGAAA  
TTGATGGTTTTAAGCAGAATTTCAAAGCACAGATAACTGATGATAACCAGGCAATAACTA  
ATGAAGCGGATGCGCGAGCGTCAGAGGATAGGGCGTTATCAACACAAATTGGAGATACGC  
AATTAGCAGTGAATCAGAACTTGATCCTTGGGTTAATACCGATAGCGTTGGTGCGCAGT  
ACGGCGTTAAGTTGGGAATCAGGTATAACGGGCAGGAATATAGCGCAGGTTTGGCGCTTT  
CTCTAGTCGCTGATGGTGGCGGAGTTAAATCACAATACCTGTTTGATGCAGGACGATTG  
CGACCATGAACAATGCACAAAGCGGAGCCTTTACATTGCTCTTTGTTGTTGAAAATAATC  
AGGTGTTTATCAAAGTTTGTCTTGTAAAAATGGTTCTATCGGTAACGCACGGCTTGCTA  
ATTGCATCAACTATAACACCTGGCAGAGCGGGGTTGCAGGATGGGCTATTAACAAAGATG  
GTTACGCAGAAGTTAACCAGATAACGGTAAAGGGTACTGTTTTCGCAACCGCCGGTTCAT  
TCACTGGTAACGTCTACGCTACTGATGGTTGGTTACGGGTAACGTTTACGCTGAAAAAA  
TTGAGAGTGACGTTGCAAAGGCTGTTGTGCTTCCGTTTAAACGGATGGGTTCTAATTCCGG  
CGGGGAACATAACAGACATCTTGTGACCCCTGATGTTGGTATTCAGGGGGACACATATT  
CAGGTGGGACATGGGGCAGAGGTAAGTTTGGGTTGATTCAGCATATGGCGGGCGCCTTG  
CTAACGTTTCAGGCAACTGCAATGCATGGCTGTTCAAGTGGTTATGTTCTGTGCGCCAGAAG  
GTAACGCAACCACGCTCTCATATGGAGGAGATCTAAACCATGCAAACGCAGTACCGATCT  
TTACATTTCTGCTCTTCAAAGCATAAAAAGGAGGTAATCAATGCCCTGGGTTAACGGTCG  
GGGCATTTTGTCTTTCTTTTCTTACACGATGTTTACAACCGAATGCGGGCGTAAAATTGAAA  
ATGTCTTGATAACAAAAGAACAATTTCAAATCTATCTAATACATACTTAGAGTTAA  
TTATTATTATATATATCTATTGGTATCCTTATTGTTTCCATTGTTCTATATGGTTTGTGG  
TGGTTGTGTGTTTTGTATTGTTGATGGTTATATATCACATGGTATGTATTTATATATGG  
TATGCAGTGCAAATGCGTGAACAATGGAACACAAAAACAACAATTAGTAAAATCATAAAC

TTACGATGTGATTTTGTGTTTTCAATGCTAGTTGTAACGTATTCAAAAACAAAAAGAATACC  
TAAATGTTATTGACTACATGAAACAAAGACATATAATGCAGCCATACCAACGAGAGGATG  
ACAAAATGAGCGATTGTAAAGTTTACACCTTTGACCAGGTAAACAATTATGAATATCACT  
ATCCTTAAACTTGGGCGGCTGAATACGTTAGCGGTTCAAGCCTGGCAGAAATCATTGCAA  
GTTATCCGGCAGCTTGGAAAAACAGACCACGCGAGGAAAGCAAAGCGCTTGTGTTTTCGGTT  
CGTAGTCCCATAACAATCATTCAAAGAAGTGAGTTGTTTCGCTAAAGAGTACCGACGAGCGC  
CAGCGCCGGAAGATTAAGACAACCTTAATCACAAGCCGAACGGGCTTAGCCAGCTAGTTAA  
AATCTTTTGGCCTGACTGGTACAATCGGGAAAACCTTATCCAGACCTGATAATAATGATGG  
TTGATTGTGGTGAGGATTTTAAGGTACAGTGGCTTATTGAAATGATCGCAGACAGCCAGG  
CGCGAGCGGATAACGTTGAATTGGTTCCGGCTAAAGATTACGACGCTTGCCTTATCATGC  
GCCGCGTACTGGAAGACATACGGGAACACAACGCTTGCATGAATAGCTCAACCGCACAAAC  
GCGAGCGATCAATTTTCGGCAGTATCAAAGGCGTGAAAGTAAAAGTAAGGATTGACCATG  
TAGATATTTCCCAGGATTTGCTTGCAACAGTGATTTCCGGCTATGATGGTGATGGTAATC  
CGCGATATGAAACAACGCGATCTGATGAAGCGATTATGATCACGGATTATAAAACCACGT  
GAAGCGGTAACCCGTCAGAGTTTGGAAAGGCTGGCTTTCAATCATGGCTACTACTTGAAAA  
TGACATTGCAGCATGACCTATTCAAGAAAGAGTATCCAGCAGAAACCCGCCCGTAGTAG  
TCAGATTGCTGTTCGGAGGAAAAGAAGGAGCCTTATTTACCGATTGCATACCGAATGACGG  
ATGAACAATTGAAGTTCGGACGGCTTCAATACATGAGTGCGAGAAACCAGTTTGCAGAAT  
GCCAGGCAAATGACAGTTGGCCTTGATACGCAAACGGAGAGCCTGAAATTGATCTTCAA  
GGCCTGATTGGGTTTCGTTCGTCATAACAAAGGTTATGTATAAATTGCACTTTCTGCTAAA  
AAGCCATTCGATGCGTGGTATACTAGACGCATCAACCAACGGGAGAGAGAAAATAAAAAAT  
GGCACAGCAACTCAATGAACAAGAAAATCATGATGTGCGCGATCACGTAGGCGGCTTTGT  
AAACGCATTAGGAATTATGCAACGCCACTTCGTGCGCGTACTTGAACCAATCGGATCACC  
GGAAACTATTGAAAATGTTTCGCAAGGGTGCATATTCGATTGATAACGTTGTGTTAACGGT  
TCTTCAAATGGAAAACAATAAAGAACATCGCAAGATGATTAATCAGGCAAGTGAAATCAT  
GATCCACAATTTGATTGATTATCACAACGAGAACGAAGAAGAGCATTATTTAACACGGCG  
GCGCAAGCCGCCATTATTAACCGGAGTCAATGAAATGAAATTTCCCGAACAAAACGCAA  
AGGTACTTAAGGCATTGTTTGAGGTGCGTCAATTATTCAACAAAGTAAAAAAGGGTAAGC  
AAAACGCGCACCTGAAAAATAAATATGCAACTCTTGACAGCGTGCTTGCAGCTATCATGC  
CTGGCTTTACTGATAAGGATTTATTCCTTACTCAAGATCAGAAAGTGGGCGAAGCTTTGA  
AATCAATGACGGATTTAACTCGCTTCATTCACGTTGAATCAAATGAATGGGTTGAATATA  
GTTGCACGTAGCCAATGCAGAAATTACAACCACAAGGCGGGCTCAACAAACAGCTATG  
CGCGACGTTATGCTCTTTGCACGGCCCTTAGCCTGGCAACGGCTGACGATGACGCAAATC  
ATGCCACCAAAAACGCGCAGGATTGGAAAAAAGAATTTGATGCTAGCGATAACCTTACAG  
ACTTGCAAGAGACGTTTAAAACCTGCTTACAAGCAATCTGACGCAGCGAACCGCCGAAACA  
TTAAAGAGCAATACGACAAGCTGAAAGCTGATATGGAAATCGGAAAGGCTCGCGGCTTTA  
ATCCGGCTGAACAAGCGGCGAATGTAGCTAAGGATGAAAAGCTTGAAAAGGAACCGCCAC  
AGGAAGTAAAATCACAGTCTATCACTGGATTTGATTGATAATTTGCCGGGCGTACTGCTC  
CGAAAAGGAAAAAGAATGCACGTTATCACTGGTGAATTCGCAAAGAGCCTTTTGTTAAG  
CAAGGGCAAAACAGCACACTTTATATTGTTGAACTTTCAGAATCATAGAAAGATCGAGAG  
GGTAACAGACAATACACAAATTACAAATTCTTCTTTAATGCTAAAAGCGAGGGAATGAAT  
AATTGGTATCGTGAAGCATTCCAGCAGGGTAAAATGATTTCTGTGTCGTGCGACCAGTTG  
CGCATTGATAGCAGCGAATATAGCGGGCAGATTTATAACACTCTAACAAGTGCCGGATTT  
GCGAACTTGCAATTTAGCCAGCGTGGTGGAAAGTCAAGCACCACAACAGCAACGACCACCT  
CAGCAACAGCCACAACCGAAACAACAAGCATCACAACAACGAGCCTTCAATGGACCTG  
GACGACGATATTCATTCTAAAAATAAAGGGGCTTGCGCCCTTTTCCACTTTCTTTGAT  
ACCCGAAACAGCAATTACCTTAACTGAGATCCGGCTTGAAGTTCAAGCTGGTGTGCGTT  
AATCGGTCCTGTATTTCATGATAGACAACTGTGCACACATAGGGCTAAGAGCGTTAAAATA  
AGTAAAGGCTGATTGCATAAATCCATTTGTTGATGACCATCATTAACAATCGCTTGTGC  
GCCTTATTCACCCAATAGAAATTGGTTCATTGTAAAGAATTGGTAAATAAAAAGAGGAGG  
CGTTGCGCCTCCCTTTGATTATGGAAGCTGTGGAATCGTTTCGGCATTACCTGCAGCCA  
ATCCAGCAACCATTTTTTTTAAATTGTTCAAATCAGCTTTTAAACTTCAAATTTCAATTT  
CTAACGCTTCATTTTTACCCTGCAACTCTTGAACAGCAACAATAAGATCAGAAATAACGG  
CGCGATCATTGTTCGTTTCATGATTTCTAATTCATCACCGTTTTTCATATGTAGCAGTGCCG  
CAAAGAAAACGTATGTGTCGACTATTTACAGCCATTTGTTGCGCAAGGACCCACGCTGCA  
GAACATGTTTTCCCTTATAATAAAAACCTCATAACACAAATCTGTTTGACGCGATCCCATG  
CGCCAGGCTTAGGAGCTTCAAATCTATCCTTAATGCGAACATCAGATCCTTGCATAGCGC

ATCGTCCCTCTGGGGCATCGAATCCATTATCGTTTCTCATTGAATACCATACGACATTAC  
CGCCGAATGTGTTTAAAGACCAAACATATTGATACGCCTGCCAGGAGTACCAACCAAAT  
AATTTTGAATTCCGAACCATGAGTTCTCAATATACGTAAGAAGGTTTGAGCCATCGCTTG  
ATTGCTGTGATTTCTCCTTTATTACAGCAGCAGTACAAGCTCCGCCTTGTGCGTAATTAG  
CCTTAGCCCATAACCGCATTAAATGTATCATCCTGATCAATTGCAACCCCTAAATTTTCGTC  
TAGCTTGAGCCACATTATCAGCAACAGGGCCACGAGATACGATTGGTAGCTCATTCTTA  
CTCCGGCGGAGCGATCAAAAACCCCAATCACCAGCGCTGTAAGCGAATAAATAAGTGT  
TTTTATCAGGTGCCCAAAGTAACGTTTGTCTCCAAGTCTATCAACCTGGTCAACAAGCA  
GGTTTTACGAGCTTTTGCAACAGTTGTTGCAACAGTACCACCTTGCTCAATACCTAGAG  
CCGACCAACCTTTTAGATCGGGATCGAACATACCCCATGTGCCATCATTCCCTACAGATA  
TCCTGTTTAAACCATCTGGAGAAAGCATTGACGTAAAAACAGAATCCTGAATTATTCTAT  
TAACTTGCAAATTTATTTTTGCTTGCGTCACGTATTCAGCACAAGTTCCGCCAGCGCCAC  
TAGAAAGTGCCGATGTGCTGTTGTTGTCATTACGTGCAACTCGCCATTCTCCATTGTTAG  
CGATCCGCAATTCATAAGTCCCTGCAGGATTTCCGAAACAGTTGTAAGTGGCAGTATCTT  
GATGTTTTACAGAATTATCAGCCTCAATTTTCAACGCTTCCCTTGCAAGGTCTTTGTTG  
CAAGATCATTAAGGTTTTGATCCTTATGCAGCAGATTTTCAGGTTGCACCTGTTGCGCC  
ATTGGCGAGCTTCATCACGCGCTTAACGCTTTATTTTTAATTACGGTTATCTCAGTAG  
CGGAAGAATCCTTAATCTGTTGAGTTTGGTTTTTTATTGCGTCCGTGTCTGCCTTAATCT  
GATTGTTTTACAGCAACGGCGGCATCTTTAATCCGTTGCGTTTGATTAACAGCGGTATCCT  
TATTCTGTTGCGTTTCAGTAACAGCGTGATCCTTTATTGTTTGCCTGTCGTTTTTTAAAT  
GTTTACGTCGCGGCTCGGTCTGCATCAGTTTTTTGCGCGGAAGCCTCTGCGCGAGCATCAA  
AAGCCTGTATTGATTCTTAATCAAACCTTCTTGAAAAATTCAATCGCTGCCTCAATAACAG  
TCTTGTACTTTGGTAATAACTCAGCGTGTCCGGTACATCTTGCGCCATTCCATCGATAG  
TTAGCGAGTCATTTAACAGGATCACATAATTTCCGTTTTCTACTGGCTCGACGTCAGTCT  
AGATCGCTTTTCAATTTCCGTGTCGTTTTCAATATCGCTATTCACAGCCAATTTACGAGGCG  
ATGTGAGAGATACGATTGTTGCGCCAGTACGGATAAGAGAAAGAGGATCACGCCACTTTG  
TGCCAGTACCAATAATAACGCCGTGCGCGTCCATTGCAGCCGTACCAGTTTGATAGAAAG  
TCATAATTACACCTCATGTTATTCCTTGAAATAGTTTAGTGATTATTCGAAATTGCTCTG  
TTACATGCAATAAAAACACCGCCTTAGCGGGTTCGTC AACCAACGAGAAAGTCAATGA  
AACAGATACATCGAAAAGTGTTAGTCGCAGGATTAATATTATAATAAGTCTCTTGCCTTG  
TAAAGTCTCCGCTCTATTCCATTTTTGAATTTACCGTTAACTGGTAACATTAAGTCTAAT  
TCGCGATCATCGGCAGCAATCAAAGTGTGCGGATCATTAAACATGGCACAGAACGCGCATT  
TACTCTCTCCTTTGTATCTGTATAACAATTTCAAAAATTTGAAGGTGAGAAACACGCC  
CATACTTCTTGCCCCGCCGCCAGCTGTAATGTTGCGCATCAATCCAATCATGGCAAAGG  
TAAATTGTTCTGTCAGGCTTGCCAGTTACCGCAACGCTTCCCTCGCGTGTACTCTTTGGCG  
TAAAACTGCTTTTACCTTCCCTCGTTGACGAAAAGACTATTGCACATATCATCATCCAAT  
TCATCACTATGCACCAGGTGGCAAGGAATGGCGTGTATATGCACGCAATATCCATTGTCA  
TGAGTTTTTACGCCAACTTGACACGATTCGCCGTCTAATGAATAAGAGGCCCTCAAAAACG  
CTTAGATTTATGATTCCCATGCGTTCAGCTTTATCCATCACCTCAACACAATTTTCATGT  
GGTGCTTGCGATCCCAAATTGTAACCTGAATCACGTTTTGCGCTTTGTGAGCCTTGTTG  
ACAACCTCAACAGGAACCAAGTTTGACCATTCGCCTAGAGTGTGATTGCTTCACTGTAA  
TTTTACCACGTATGCGCATGAATAATCCGATGACTGAATCATTCCCGCATTGGTTGCAA  
ATGTTGTGACGTCGCCTTTCTCGTTGATTATGTCAGTCCAACGAAAGCGATCTTTACCG  
CCGCAATAAGGGCAAGTCTGATGTTTCCCGTTAAAGGTTAATTGAGGAATCTCGCAAAGT  
TTCATTACTGCCGATTGCCACATGACGCGCATCTTTGGGATAACTTCTTCTTTTTGATAA  
TGCATTTCTCAACCTCCGAATAAAAACCTGGCACGATTATAAACCATGCCAGGCCGGAA  
TTTGTAGCATGCAGTGCTATCGACGGAAATCACAACGGGTTTCATCTGATTGGCTTCCTT  
TGCTTTGCGCCGTTCTTCTTTTCGCTTTTCCCGTTCAGCTTTGCGCCGCGCTTTCTCCTT  
CTCGGTTCTTCTGGACTCATAGAACGCAACGGATCGTAAGGCCGCACAAAACCTCTTGC  
TTCCGTTTCCGCTTTGGTTACAAATCGCATCAGCTTTCTGTTGCTGCAACGATTCTCTAA  
TGGCTTGCCGTTATTATCAAATTTGATATCTGGACGGCAATATGAAGCGCGGAAGCCGTT  
AAAACCTTTGCGTCGGTAATCTTTCTGGATCAGTTGTGCGCCTTTAGTTAAAATCATTCC  
GTGCTCTTTCCATCCCCATACTGTTTTAAGGTTAACGCCAATAGCACGAGCCAGGGCAGC  
GCGACCGCCGTAAGCGTTGACAACCTTCATCAAGCCGCGCTTTAATCCTGCTCTTACTTC  
TTCCTTTCATAACAAGATAACCGCTAACAGCTGATCGACGTTTACGATCTTTACCACGTCT  
TACGCCGTTGTTACCATTGATTGTGCGTTTATCGATTTCCGCCAGTTGAGGAAGCAATTTT  
GAATTCGGTCATATTTCCCTATAGCACTTTTTGCTAAAAAACTTGGTTAAGTTTGTGT

ATGATATACCGCAGATGGCATTAGTCAAAGGATAAAAAATGATTCCTAACATTGAAAA  
GCAGATTGCAGATCTGGGAGAGGATAGAATCAAGGCAATCCAGAAGCGTTTCACGGGTGG  
TGAGATTGTCCCGTATGAATACCAATGCGTTGCTTACGCTGAAATTTTAAAGCGCTTGAG  
TAAGTATGTTAATCCGTTTTTCGTTAAAGCGGGCGGTGTCGGCACGTAACAAACAGCTT  
TGCTATGGTTGCGGCTCTGTGCACGAAAATGGGATTGAAAGCGTTATTTCTGGCGTGTCT  
ATCTAAAATTGTGGATCAGGATACAAAAGAGATTAGCGCCTTTGGTGTCCCGAATCCCGT  
TTATTGCGCTGGCCTGAATACCAAACGCGCTTATTTTCCGACTGTTGTCGGATCGGAAGG  
TACTGTAATTGGCGGATTGCATAATGCGTTAGGTGATTACGTCGCATAGGTTTTAGGTAT  
AGATGAACGTCATCAAGTCAACGGGAATGATATTGTTGAAGCCGAGCAAAACAGCGAAAG  
CATAGAACAGATGATGACGCCGAAAGGTGAACCAGTTGAAGGCAATCCGTTGCTGTTAGG  
TTCAGGCCGCGCACAATACTCCATTATCATTGCAGAAATGCGCCGCGTGTCTTGAGAC  
TTACGGTCATCAGTTGCGTATATGTGGAATCACCGGATCGGAATATCGCGGAATTGAGCC  
GATACTTGTGCGAAGATAAAAGAATTCCTGGGTTTTGGCGTGAGCAGATCACAAACATTGA  
TACTGATTACCGGGTAAAATTTGGTTCAGTTGTTCCCACTTATTTTGGCAATGTAGGTGA  
TTTGGGTTACGACATATTAATAATTTACGCCAGTGCATGAATTTGGCGTTGATGATTATGA  
CCGGAAGCAATTAAGGCCATGAGTGACAAGATTCACCAATCAGTAACAATGACGCAGAC  
AATATTGCAGATGGTTCACGAGGTGATGAAAACCCGCTTGTGGGCTCTTCTCACTTCCGC  
TGATGATAGGCACTGCAAAGAGGGCGGCGGCGCTTCCGTCTGGCACGAAATTTTACAT  
TATTACCGGAAAACTGGAGAGAGACAGCGGCGCGTATGGGTTGATGATTCCTATGAATG  
GCGAGTGAAATATACTTTCATGGTTCCGGCGCTAACAACTGGCGTTAACTTTCCGCCGTG  
GGATACCTCTGTTATTTTGCGCAAGATCGGAACTCTTATGCTATTAACTCAGCTTTTGGG  
TCGTGGTATGCGTCAAGGAAAGACTTACCACAAAGAAGTTTTGGGAATGGACAAAACACA  
TCATCTTGTTTTGGACTTTTCCGGCACGATGTTTGAATGGGTAATTTGTATTTTCGATCC  
AATGCATGAGCAAGCGCAATTCCAGTTGCGTAAATCGCAGGATAAAGATCCGAAATTTTG  
CCCGAATTGCGGAACGGAAAATTCATTCGAAGCGCGGCGTTGCATTAACGAGGATGAAAA  
CGGAAATCGTTGTGAGCACTTTTGGACGTTCCAGGAATGTGAGGATCAGATTGATGAAAG  
TCCAAAGAAAGTTATTGTAACGGTTGCGGCGGAAAAAGTGACGTTGCTGCGCGTGTATG  
CCGCTGCTGTAATGTTTCAGTTACGAGATCCACATGATGACTTATGCGGCAAGGGGTCCCG  
TAAAAACGACTGGTGCAGCGTGTAGATTTTAAATGTGACGCTGACAAAAAACAGGCTGG  
CGTTAGATTCTGCTACACGCTGCGTGATAGTGGCGGCGTAGATTTTCAGACCATAGGAAAA  
ATGTTTCCCTAAATCAGAGCACAAGATATGCAAAACGCTTTGGACAAAGGCGGTTAGAAC  
ACACGTTGTAGATCGACAGTCTGCGAACTATATCATCACTTGCCGCCACGCAATTAAGAT  
CATGAGTTATGCGGCGCAAATATTGCCACCGAATCGCGTTACGCAACGCAAGAACACAAA  
GAGAGAAGATTTAATAGCACAGCAGGAATTCTAATATGGTTACTGATAAAGGTGAGTATC  
TGGAGTATTACGTCAAGTCAGATCCAGACGATAGAAAGGAGGAATCGCACCAGGGTGATT  
CTTATTCATGGCTAACATATGAGTTTCCCATGTGGCTTGTGTTGGCACACTAAAAACGAGG  
GGAAGAAAACAATAGGCACAGCCGTAAAGGATCAGCAAGCGGGTGTGAAGAGGGGAGTTA  
GCGACATTCTAATCCTGACTGGTTTTATGGGCTGCAAGTATTCATTTAAAGCCATTGAGC  
TTAAACGCGCCAACAAGAAAGTCACGAAGGTAAGCGACGAACAAAAGGAATTCTTGCGAC  
GTGTCAGAGAGTGCGGAGGATTTGCCGCCGTATGCTATGGAGTAGAGAAAGTAAAATTGG  
CTATCGCAGACGCTACAAAATAGCACTTTGTGTTAATACAGGGGCAACGAAATGCGCCAT  
GAGGCGCCCATCAGAACGAAACGGAGAATTAACCATGAAAAAGATGTTATGAGTAGTTGC  
GTTATCACTTGGTCTTGTGCGGCTGCATGGATAAACCAAAACCAAATATTTGCGGAACTGA  
AGCGTGTGAGGTTACAAGCGACTATATTAAGTTGTGCAAGGCAAAAGCAAAGGCGTTGT  
AATGGATACTATCAGCAAAAATCAATATAAGTTGTTACGCCAATTGGAACGGCTTTCTA  
CACAGTTAATGAAAACACAAATGATATTAAGTTGGCTTTTATCAGGACACTCTAACTTG  
CGAGGTAATAAATTTGGCTAAAGATATTCAGGACAAAGCCACAATTGACACTTTTCGCAC  
CGTAAATGGATTTTCATGAGCTGCAACACGGCAGATATTCAGATATTGCTTTGCGTTCAG  
GTGGCCATTATCAGCCAGTTAGAGAAAACCCAATGTACAAAGTTAGCAGCAACCGTTATG  
CAGGAAGTAAAACGACGGACGTTGTGCGGACTTGTGGGAAACTGCAGATGAAATGGTTG  
TATACATTGCTGAACGTTACGGCAAATATGATCTTGACACAGCAGCAACGGAAGATACTA  
AAAAATGCGATAAATTTTGCAGCAAACAACAAACTGCTTAAAGAGCTGGTGGGGTAGCA  
AGAAGCACGTTTGGTTAAATCCACCATACAGCAACCCAGATCTATTTATCAAAAAAGCAA  
CTGAGCAGATGGAACACGGTCACCAGATTGGTATTTACTTCCGGCTGAAAATTCAACTG  
CATGGTTTAGGGACGCTCAAAAACACGCGGCAGAAATTATCTGGATTACTGGTGAACCT  
GGAAGGATGAAGAAGGTCGCGAATATTCCCGAACTGGTCGAGTAGCGTTGATTTCTGGTA  
TGACAGGTGAGCCAGTTAGCGGAAACAATAAAGGTAGTGAATTTTTATCATGCGCCAAT



TGGAAGAAGGTGAGCAACAGGTAACGCACACTATGTGAAGATTAGGCACATTTGCCCTTCCG  
TAAAAAATAAACGAGCCAGAGCGCGGAGTATTTAAAATGAGCATTGTATTAGCCGATCAC  
ATTAAATGGGATTTGTCTGTCGGTATGACAATTCGCTTACTTGATAAGCATGGTTATAAC  
GCTGATAAAATGGAGTTGATAAACTGACTGGATATGACATTTGACGAAATTAAGTTGCT  
CCTTTATACATGTGGGAAAGAAACTTGAGCACGACCTGATACAATACAAACGCAGAGAC  
GGTGCACGAGTTTTTGTGTGAAATAGCACTTTTTGTAAAGACCCGCTACGGCGGGCTTT  
GTATTATGTTATTAACGGGAAACAAGAGGATTTCAAGAATGAAAATCGTAAACGTGCAAT  
ACTTCAAAGATGCGCAATGGCTGGCTAAGGAATCATTATTTATGCTTGATCGCAAAAATT  
AAAAGGTTATTGCACCAATACTATGGAATGACGCAATGGAGTTACTTAAAAAGGCTTACG  
GTTATGAAAGTGACAAAAGGTAAAAAGGAACTTGGGAGTTAGAGAAAAAAGGGGGTCTT  
GATGAGGGGATCGCCAAAATAGCGCAATATTTGAAATCAACGACGTGTGCGTTATTGTC  
TGTAATGAAATGGCCTATGTGGAAGAAAAGCAGCGCAAGGTTTCATCGCGTTCGGGCAATT  
GCGTCAACAATCGACTGTAAAGAAGTTATTAACAAAATAAAGAGCAAAAAAATATTTT  
AAATGAGATACATTTACGTGACTATTTTTCTCTCTGTTATAGCTTGGGTTATTGTTTCATT  
TTTTAGGTATGGGGTTGTCATGAAATATAATGATTTATTTTCATATGAAAATGGAGCGCT  
TACAACAAAGGTTGCGAAATCTAAATGATGTAGGATTGGCGATCCTGTTGGATTGATCAA  
CAGAAATTGTTACTTTCAAACAAGTGGATCAGGTAAAAATGTTCTTGTTGATCGTATAAT  
ATGGGAAATGCAAAACGGTAAAATTCCAATGGAATGGAATCGATCATGTAAATCACGA  
TAGAACTGATAACAGGATTGAAAATCTAAGAATTGTTGATCACAAGATAATCATAAAAA  
CGTATCAATGCAATCAGATAATAACTGGGGTTTTGTGGGGTCAGGTTTATAGTAAGATG  
GAATAAGTTCAGAGCATCAATAAAGGGAGACGGGGTAACTATATATTTGGGATACTTAAC  
CAGCATTGATGATGCTAACAAATGCAGGAAAGAAAGCAAATGATAGATTTAATTTTACAA  
AAACCACGGAATTTAATAAATGACTGCTAAAAAAATTACGGAAGAGCAATTGATTGCAGA  
GCGCGGAGCGGGTTTTAAAGTTGCGAGAGATTGCTGAAAAGTACGGAATGAGCTTACGCCA  
GATGGGGCACCGTAACAGCTAATTGGCTAAGCGTGGCGAAATCGCAACTATCAAATCACC  
TGGCTTTGCGGTAATTGGCGAATCGCACCTTATACGTGATCACGTTGAGGTTGTAATTAC  
TTGGACCACAAGGCAGAAAGATAAAGAGAAATTAGAAGCAATTCTGCAAGCTGCTATGGA  
TGCATATTCGGAAGAAGTGCCGCGCATTAAAGCCGCAACCCGGAGAAAATTACTGATTACTC  
GCAAAAGCTGGCGCTATATCCGATTTTTGTTATTCAGATTGGCGCAATGGCTCATAAGCC  
TGAAAGCGGTGAGCATTAGGACACGGCAACGGCGGAAACGTCATGAATGAGTTTATCGA  
TTATGCAGTTCATAAACC GCCAATACCGAAAATGCTGTGTTGCTAATTGGTGGTGATAT  
GATTCACAGCGACAGTCTGGAGGCTGTAACACCTGCAAGCGGTCACTTTGTGGATCAAGA  
TAGCCGTTACGTAAAACCTTGATTATGTTGCTATCAGAGCCACGCGTCGAGTAGTAAGCAG  
AAACCTGGAAAAACATAAAGAGGTTGAATTGCAGGTCATTGAAGGTAATCACGACCAATC  
AGGAATGATCTGGCTGCGTGCTGCAATGGCGGCGACGTATTAGAATGAGCCACGCGTAAA  
GGATGATGTTTCGCTGCATATCGTGATCACACGCAATATGGAATACCGTTCCTGGCTTA  
TCATCATGGTCACTAGATGCAAGCCAGAAACGCTTTTAAATGATGTGTGCAGCGGATGG  
GCGGCAAGGTCTTGGAAGTCCAATTCAATGTATGCGCATGTAGGGCATTGGCATCACCA  
GGCTGTTCCAGAAACGAAGCTCGGCATTGTTTAGGTGGATAGCACTATGGCGGCTAAAGA  
TACTTATGCCGCGCGTGGCGGTTGGTGTTCACGCCGACGAGCGGCGGTAATTATCTATGA  
TAAGGAATATGGTGAGATAGTGCCTTTATGTTCTACGCAGAAATGATTGCATAATTA  
TTATCACCTAAAAAGGCTAGCAAACCTGCTAGCCTTAGTTTTGTTTTTGTTCGTTAACATAAT  
CAGCCTATTTTTGACCTGGATAGTTAATTAACCTGAGGATCACATCATGATGGACTTTC  
TTTTAAGGGCGGAAAACCTTTTCGGAGGTGCAACCGTAGTTGGAACCTTTACTGGTGAGT  
TTTTGCTTGCACATGCAGCGTTATTTTGTACGCTATTTTCGGCTGTTGGGGCGCATGGC  
TGAAATCGCGTTATAGTAAAGCGATCCGAGAGGCTCTATATTCAGGGGATTTATAAACGG  
CGCTTAACCTAGGGCAGAAAGAGAGGTAGTAATGACAATCACGAAAGGTATAGCCGCCAC  
CGTCACAGGGGCGGCTTTAATGTTTGCATCGCCTTTGACTAAAGAAATTGAAGGCGTAAA  
GTATAAGCCTTACAAGGATATTGCTGGTATCTCGACTGTATGCCCCGGCATCACAGGAAA  
TGATGTGATTCTGGGAAAGGAATATAACCAGGCGAGAGTGTGCCGCACTATTAGCAAAGGA  
TATGAAAGTAGGCGCTGACACTGTTGATATAGCTGTTAAGGTTGATATTCCTATTTCTAT  
GCGAGCGGCTTTGTACTCATTACATTCAACGCCGGAACAGGGGCATTACAGGAAATCAAC  
CATATTGAAGAAGATCAATAATGGTGTTCTGAGTGGTTGTTGTGGCGAGCTTGGGAACTG  
GACATATCACCGGAACCCGAAAACGGGCAAAAAGGAAAAATCAAAGGGATTGAAGAATTG  
ACGCGCTGTTGAATATAAATATTGTGTAATGGATCTGAATAAATGAAAAGAAAATTACTG  
GCTATTATGATGTGCATTGGACTTTCTTGCTGTTTCAGCTTCAAGCGTGTTCCTGGTGTG  
ATTGGTAGCAAGCCTGATATAACGGCACAGGCTCGAGCGGAGAATGTGAAACAGACTGTT

GGTGTAAACCGCAAAGCAGCATACATCAAGCAAGCAGGAAACCACACTCAAAGAATCGGAA  
GTTGGTCATGATGACACATCCAACAAGAAGCAGGTGAGTACCTCAAGCATCAAGGCTGAT  
AACATTAAGGCGGAAAGAATAGAAATTCGCAACAATGACGGCCTTGACGTCCCGGCAATC  
GCAATGGGTATATTGATGTTCAATTGCTTGTATGCTGGCAGGTAGAACGCTAACACGTAAT  
AAGGCGGAATAAGCCGACTTTTCTTTTACTCAAATTTACTAACATCAATTAGCAATGCAC  
CATTAGGATTTGTAAGTTGATGCTCTTGATCCAAAAATGCTCGCATATCGCTGTAAAGCA  
ACAGCATTAAAGGCATAGACAAAATTATCATGCGGAGTTTGCATTGCTGAACTTTCTTTCA  
AAATAAGATCTATCAAATGCTAGCTTGCAGGAATAATTCTACATCGCTCATTTTCTCAATG  
TTCATGATCTCCACGCATAACGATTGGAGTCACCTTCCAGGCAATGCAACTCAAATTA  
AACGGCCTCTTCATATTGTTTATGCACCAGTACACGCAATGACCGCCGTCAAGATATGCA  
TAACCCATCACTCGCGCTAGAAACTCTTTGCTTGAGCTTGAGGCGAAATAGAGCGGCGTT  
AACCCCGCATTTTAGGCGAGCCTTACACATTAACGGTGACGGAATATAAATCTTGCTAAC  
TCCTGGCGGTTGAATTTCTAGCGAGACTCGCCAAAGCGATACAGCTCTAATAAGAACAAG  
ATCACCCCATTAACGCAGGATTTACATAGACAAAATTTACCAACGTTGCAAACATAATTCT  
TTTCTTCAAGCATTGGTAATAATTGTTCTCAAATCGTTTCATCACGCCTGATTGACCTG  
TAAACGGCTTAACCTTACGCGCACTTTCATAGATAGCTCTTGCAATTGGTAACGCTTTTAT  
TTTGACGTGAGATCTTAATTATGCGTTCAATTAACCTTGATCATTTCTGTATCATCGCCAG  
CGAGACCGGAAGCATTTCGCGGCGTTGATGTATGTTGTGCGTAATTCGCTGAACATCACCG  
AAGCCTCTTGCAATTGTCTCCACATAAATTTCTCGCGACTTTTGCGGCATACCGTTTGAT  
TAAACCAATTGCGGATCGTGTGCAATAGTGACGCAATGCGGATCCCTGGCTTATCCACTT  
TAACCAAATTACCACGCAACATTGTGTGTGAATATTTCCCGCCGTCTGCTAATTATGGCT  
CTAATTTCTGGCGAGCAATATTAAGAACACGCATTGGAGACCGTGACGGCTTCAATACAA  
CATTTTGCTCAGACATGATGTTATGAATCAATTGGAACCTATTGTGCCTTTAATTTCTTTAT  
CAACTGGCGTGTAATCAAGATCACCAATTTGATCAATAAAGACACGCTCGCCTAACATTG  
TTTTTTACGTACAAGCAAGAAACGTTCACTAACTCCAATACCCGGCGCCCCTGCATCCA  
CGATCCCTTTTATCGTTTCATCCTGGACAATGACGCTCAGGCAGCCAAACTCAACAAAAC  
TCATATTGTTTTTCAGAGTTGGCGGAGCTATTGAAACGTGTCCGGCGTCCCAAGCTTTTA  
GAACCAATTGCTGTTTGTCTAGCGATCACTATTAGCTAAAGTCAATCCGAGTAAGCTGT  
TGATGCTTGTGCTTCATCGGAAATGACGGCAAAGTTACCCTCCCGATTGTGGATCTTTC  
CTAACCTTCCGGCGTGGTGTCTGATACCTGAAAAACGATATCGCACATTTTTTTCTAACT  
TTTCTCTAATTCCTCTTTTCTCTCAAACAACGCCGCTAACTAAGTGCAGGAATGTTTCAG  
CTTTCAATTCCTTTTCAAAGCCTTTTAATTTAGCTGCGATCTTCTTTTCGCTCTTTCTTG  
GTTGTTGCTTGATTGGCCCTACTTCACAGCCATTGGCGCAATAGCAAGGCTGTTGAGTG  
CTGATTTACCAGTTGACGGTGGCTGACTGGTTACAACAGAAAGCGCAGTTGGTTGTTTCAG  
TGCCGTGGTACTCAACCTGGAAACGTCCAACCATAGCGGCGGAAACGCAACCAATGAAAT  
GCATGTAGGCCGATGATTCAGGAAATTGAACAGATTGCGGAATCCTACGTGACAGTTTAC  
CCACAACATCAACGTCATTCCCAAAGAGATCACAGGATAGCGGTCATTAGCGCCGTTGA  
TACCCTTTACGGCTTCTAAAAGCTTGACGATTGGCGGTATCCGTTAGACTGAATGGTAA  
CGCGAAGCGGTGATGTTTTCTGCGATTCTGCAATGGCTATAACTTGTGAGGTGTCAATT  
TGTTGGTGTCAAATCAAACATCTAAAAATCTCTTTCTTGTGCGGCTAATTATAACGGC  
AACATTCTACAGCCTTTTAGCCAGTCGTGCTATTTGATCGGCTCAACCCTAGGTAATAAC  
TATCCGTCTATAATGCTATGAAATTCAACAGTTTTAGGATCGAATGCAAGCGAACGATGG  
AACGTATGACCAATCAGCAACATAACCAGGCTTTTCCCTCACCTTGTAACCACTCATCGCCA  
GGTTTAAACATTGCCGAGTCGCTGTAAACGACTTTATACCGGAATTCGTGCATCGCTTTT  
GGGTAGTGCTTGTATATTCAACGCCTTTAACCAATTGTAAGTCCTTCAAACAGATAAG  
CGGCACCAGAGGCACAGAAGCCGACTTTCTCACGATACAGCGTGCAACGGCCCGCTTTT  
CGTCAACACATGTCCAGCAAGAGCACCTAACACTCGGCCTTGTTCGATCTGGTAACGCT  
TATCAGCTTTGAAAGTTTTCTTGATGTGCATGGAATGGTTTTCCCATGTGCATTTAATGG  
TTTTGGTCCCAACATTTTCGGAATGTTAATCCGGTTAAGTTCGCGTGAATCGAGTTCCCAT  
CTAACCTATCGAAGGTATCATCATTTTTCGTCTACCCGCGCTTTGTATAGGCGGTTATCAG  
ATCCGATTAGTTTGATTGTTTTGAATTTAGCAATTTGAATCATCTCCTTTTGGTTTTCGTT  
GAAAGCATTATGCCGATACGTGATCCGGCGTTTTAACAAAAAGTCCTATTCTTGATTGG  
CCAGGCTTACAGCAAGCGCAAAGCCGCGGAGTGAGTGAGCGGATCAGCTTTGTTCGCT  
TATACTTACTTCTAGCTTTTGCCAGCCCGGATTGTTGTTCCCTGTTGGCAATACTGCGT  
TTGTATCCGGCATCACAAAACCGTTACCCGTCCAAAGGCAAGTTTTTTTTGGGGTACGCAT  
TGTGAGCAGGAATGATGTCAGGAAAGTGAGGATGTTTATCATCTTACGGCAACAGACCGC  
CAAACGAGCAAGGATGAAATATAAAATCGGGCTGCCGCCACATCGATGACAGGACGCTAA

CAGGATGCTCGATCACGTATGGCACATTGAACCGATCCGCAATTTTCAGCCGCAATCACGC  
ATGTTGAAACTGCCTTATCCTGGAATAGCGGATCACGTTACGCGTTGCGGAAAAGTGAC  
GCGAACCGCCAACAGCTAAACCAGTGCAGGGAGGAAACACGAGCAATAAATCAGGCTTCC  
CGAAAACCTCATTCCGAGCCTTAAAGCTGAAATCTGAATCAATCCAAACGTTACAAAAC  
CAAGGCTGGGATGACTTATGCGCACTGAATGGTAATCACCATGATCGGCATCATCATAAT  
TGAAACAGATTACTTTGTGACCACATTCAGCCCACGGCAACGCATCATAACCGAAACCGC  
TAAAAAGAGAAAAAACTCACATACTTAAATCCTTTGTGTATGGCCTTGTGAGGCGTTTTG  
TTTGTGGTGTGCGCAACTGTATTGGCTACGGCCTGAATTCTAGCCATAATTCGAAACAGGG  
CGCGATTTTTTTACTTACAGAATGGGCATGTAGATTTGTCCCCGCTTCCGCCGTGTTTTG  
GACGGTAAATTTTATCAATAGGTGTCATTTTAAGTACTCCTTAGAATGGGAAATAACCGC  
TGCAAGATGGATCGAAGTTACAACCGCAATCATTGATTATTGCGTTAGGATCAGAAAGCA  
TCACGCTACGCTCTTGATCCATAGCCATACCGTCTAAAGCAACATCAAGCGTCATTTCAA  
GATAGGAAACTTTAAGTGCCCATTCCTTGTTGAGTCCAGCCGCTCCGCTTCATGTAGGC  
GAGCAAATAAAGCATCTTGAACATATCAACCCCACTTCTCAACAAAGAAGCTCATTTCG  
TCAATCATCGCCTAAGCACCGCCTTCAGTCATGCGGCGTATTTTTCCCCCTGGGTCTTCG  
CCAACAGCGAAACCAGTTTTTACGCGGGTAATCGTTAAGTGATCGAATCCAGAAGCGCGA  
TTCGTTACAAAACACTACTTATACGTGAGCTTTGACAATGTTTCATGGTTGATTTCAGTTTT  
AGTTACATGTGTGATTCTGCATTTTGTATTATGTGAAATTATGATAGCAATCAGTGCGATA  
TCGTTTTTAGCAATTCGTGCTCTTTACGGCGATAAACGGATATCCTGCTAAATCTGCATT  
TCTATAACGTGCAGACCTAACCCAACAGCCGCTTAGCTCATAATTCAACCGTTTTTATC  
GCGTATGTTACGCGGTACATTCTTGCGGTTTTTATGTTTTTGAAATATGTCATAATTTA  
ACCTCATGATATTCTATGAATTCTTGACATATGCGCATTCACGCGGCGACTCCTGGACT  
TTTAGGACTCCACAGCCACCATTAGACAGATAGCAATGTTGGTAACGGTTGCCGCCTACG  
TTTTCTCAGCGATCTGAATTCCGGTACACAAACCGCCACCAAACCTATGAACGAAATGA  
TAAGCGGAGCACCTGCAATTAATTTGCATACGCTTTCTTTTTGCCGTGGTTTTTCATGAAA  
ACCCCTGTTTATTTTTTCTCTCTGAATACCCATGCTAGCTAATTCAGAAGAATCCAAAAC  
ACCAATATGGATTTCTCTCGCGTCTACTTTAATCTTGCTCTCCATTTTTTAGCTGCGGA  
ATGCCACGACACACCGCTAAACCCTGATTTATTTGCTTTGCAATATGATTGATTTTTCCC  
GTTTTCATTTGACTAACAAAGCGTAGATTTTCTATCCTGTTATCAGTCGTATCGTGGTT  
TATATGATCAATCTGGATTCCATCTGGAATTTTGCCATTATGCATTTCCCAAAGACTCG  
ATGCGCAAGATAACTTTTATCATTACAGAGATATCTTTATGTAGCCATCATTCTTATGCT  
TCCGGCAACCTTCCCAGTCCATATTTTATCCATGCAGAGTCCCTATATGATCTTATGTT  
TGTGCGCGGCTTTCTTATAAGATTTCCGCAATCATATATAGAAAAGGCGTGCCGATTCAT  
TTCAAATTTCCGGTTCCTTTTCGATGAATGTATTATGCCAAAATAAACCGGATCGCTTTT  
TACAAAAGTGCTATTTAGTCAGATTCCATTACGATTACTGGTTCCAAACGCTCTAGCAC  
AACCTTGAAATCTGCAAAGGAAGTGGGACGTCGCGTAGTCAATTCCTCATAGTTATCAGT  
TGCAATGCAAGCGGATCACCTTCATAGCACACAACCCGTTTACTATATGCGCCACTAAT  
TGCAACAACGCGATATGTATTCTTGATCATTTCATCACCTCAATTGCATAACCATGTTCA  
ACGCCTGGCGCGTATACGCGATTTTTATCATCAGTAACGCAAAGGCAAAGAGGCAAGCGA  
CGATTGTCTGTAATATGCAAGTGATTTTGTATTATCCATCAAAAATTCATATTCGCGATCT  
TCATCTAAGCGCCAAACGCTCAACATAACCATCGCCCAGCATTTTTCATTTCTGCTTTCTTG  
CCTACAAATTTTTGACCGATCAGTTATTTATCCTCCACAGTTTCAAATACGGTATTAAT  
GCCAGTAGTTTAAATTTCTTTCCAGGCGCAACCACTGCGATATTCCAGGTAATTCCGCTG  
AGTTATGCAACCATATCATCAATATCGGCGGTGATTTGTGAGCCCTTCTTGAATAAGCCT  
TTTTCATTTGCTCGGATCGCGAACAGTAGCCACAGTTTCGCATTGCGTTTGTGTTCAAAG  
TTCATTTTCGATTCTCCTGATTGGTTGATGTGTGATTATGCCGGAATAAGATCAGGCAC  
GTTTAAACAACAAGTGCTATTTCAAACACAAAAGCCCTGGCGCTAACAGTATTATCTTTG  
ACTATTTGCCGCGACTCCAGGCAACGAGCTATGCTGTGAAATTCTTGCGCTGTTACCGCC  
TCACCTTGCAATTGTTTGACGCGCAATAATTAGCACGTGCATCATTTTTCGTAACCTTCAT  
TGTATGCAAGGTTAATGTGAATTGATGCACTTCCGAGAATTTTCATCGGTTCCAATCTCAA  
TCATGTATATCAATTCATGGCGGCTAAATGATGTGTATTTCGTGGAATTCTATTGCAATGC  
GCATAACCGGAAGTCCACTATATTTTGTGTTAGGCACTGCATATCCATTGCCAGTGCTCT  
TAATGCGTATGAGAATCATTTTATTTTCGCGCGATCCCAAAGATAGAAATTATTGAGTTT  
GTACGACTCCGGCCATACTTGCGAATAACAACAATTAAGTTTTCGCTTTGCCGATGCCCT  
AACGTGATCGGCATTTAAGTACCATCATCTAATTCATCACCAACCTTGTTGGGCGTTTTCT  
CGCCACGCGCAAATGAAACCAAATTTATCACGCGTGAGATAGCGGTAGATGTTAGGAAGG  
GGAAGCTTAACCCCTTCAAAGTCTAACGTTTGCGTGTAACCTGCGGAAACTGAGCGTGGA

TTCATAAATCACCTCTCCAAATTCTCCGATTACTCGCGACTTGTAATATCCTCCGCGATT  
AGCTAACAAATACGCCTGGCTCAGTGTTTCAAGCGCGCGGGTTACTGGCTTGCTGTTTTC  
GTGTTCCAGGTAATCAAGGTATTCATTGCTAAATCCTCAGTTCATTTCAATGAGGTAAT  
CATAGAAATTCGTGGCTGATTGGTTTTAGCAAAAAATGCTATTCATGCGTTAAACCGAAT  
GGGCTAGACCGATTGGTCTAATGAACACATCGTTTTCTGTATCGAACACATTCACGTTCC  
TGTTACGTGATCGTTATATGATCAGTTGATGATTGATGTGTG

>NewGenomeName\_5

TCCCCTACCGTGAATACCCGCGCGCCCCATGCCGCTACCTGCGGGTGTTCGCGGGTGC  
CTGCGCCGGGGACAGCTCGGGTCCGCTGTGCGTGCCTCGCAATTTGCAGGTTTCGTATGT  
GCATCGGGAGGTTAGGGCACTCGGTAGGTGAAGAGGTTCTAGATCGGTTTCGACCTTCTGG  
GGCTTGGGAATGTCGTAGGCGGCCCGTGGTTCTCTGGTGCCTCCCCTCCTCCCTTCTAT  
GATAGGGGTCCGGTTCCTGTTGCCCCCTGGCGTCTCTAATGCTCCCTAGGTCTGCCGCG  
CCACGTATGCCCTGCCCTGCCCTGGCGCTTACCCGCTCATTGCCATGGTTGCACTGTGA  
GCGTCCGGCTACCTTTACTGGTTTCCGCTCTTCGCCGCGCGGACTCGTGTAACAGCAGGGCC  
TCGTGCGCTCGGTCTAGCCCCGCGCCTTCGCTTCTCTCATTCTAGTGCGACAATTCTTT  
TAAATCTAAGTACGACTATGTTAAATGAAGAATGGGGACCGCATGGGCGACAGCAGGTCT  
GTCGAGTCCGCAGCCATGTTACGGGCATGAGCCATACGCACTAACTAACGCAAAGCGAGG  
TGGGGGTTCTGGCCTAACGACCAGGCGAGGCGGGCAATCATACTCCAAGTACTCG  
TCAATCACGGGACGCTGAAGGGTAGCCAGGCTTGACACGCTAAACGGATGGTGTAAGACG  
CGAGTCGAACTAAAGGTAGCCGCACAGCACAGGGCTCAGGCTGAGGGTTAACGTGCCAC  
ACTGTTACCCCTGGCTCTAGGCGTTCGACCGTGCTTGGCTGTGGTACGGTGAGCCGA  
TGCTTGAAGATTCCCTGCCATTGCGACGCACTCGTTCGCGATGGTAAGGCGCCACGGAGGAC  
GGTCCGGCCAGATAACGATGGTTCGACACTTTCACAGAGCTTTAACTATTCGAGTCTGCTA  
TGGAACGCCACTTAACCAGAGTTACGAATTTGCGCCACGAAGGCCAAGCTAACATCGCCT  
TTGTCAAGAACTCTAAAGCAAGTACGATACAGTACAAGGCATCATGTAAACGTGTCAGC  
CTTTTGCCTTTCGTATTGCCGTGCTGACCGCCAGCCAGAGTAATTCGGGTATGGTATGGT  
AAACGAACCTCCGTCGGGAGGGTACCATAGCCAACTAACAAAGCGAACGCCTGGTATTAA  
CGATGGGTACCAAGCAAGACGCAAAGGTGACCCGCAAGTACAGCGGGCCGCGCACCTGCAA  
CGAGTGAGTAGCTTGTGATGAAGGTCTACGACTTATTCGGGTGCACAGGTACACTGAGC  
GGATATTAATCTTACTCGATTATGCATCTCGAAGTGGAGTTGGACCGATGAGAGTAGACC  
ATTCGCACCGCCGGGCTTAGTGATCCTTGCCATAAAGGCGGAAAGTGATAGTCCGTTGTG  
AGTACCCTTACCTTGTGGCGAACCTTGGGCACGGCAGGCTTATCCTGCATTGGATCCAG  
GCAGCCCAGGAGTAATGCTCGGCCGCTGAAGATGCAGAAGCATGCCCGAGATCGAATAGG  
AGGCACAGTCATGCAAGTGAATATTCGCGGTTAGATCTCAAGCTGCGCCCCAAGGCGAA  
TCGTCAGCAGCGCCGAACCGCTGCCCTCCCGCCTGACTTAGGCGCTATGCAGAAGCGAGC  
CGAGCACGACCTACTCTGTGACGCCAGCTCATCCGCGACTCTAACCATGCTGACACGTT  
GAATGAGCCGCCCAGCCGCGTGGAGGCTGAGCGCCAGTCCAACGACGTGTGCAATAATCG  
TAATAGACGGAACCTGACCGGCTTCTTGACCCCGCAAGGATGATAGCCGACTGTCTGAGC  
CAGCAGCCTTCAAGCGACAAGGTTTGCCCTTGTGCGTTGACGCATTGCCTCGCCCACGAG  
CTCTATAAGGCTATGCGCCGCGTATACCACTTCGCGATAACACCATCAATCAACTGGGTA  
GTGTAGCCTTTCCACAACAAAACCGGGCGGCTTGTTCGCGAGTCGGAGACCCACCGGGCG  
TACTCAATAGTACATGCTGTCTGCCATGCAGCATTTTGTATATCATTGTCAAGCGCATTGA  
CTAATCCGTGTAACCGGTCCGCATGGGTCTGCGCCTTCACATTGGTGCTCACGTAGAAGT  
CAGTCTGCCCGACAAGCTCCTGAAGACGCTGCCAAAGGGCGCCCGCGTCACGGCATTGGC  
CGATTGATTCCAGAACCACGGCAAGACCACGGTGAGCCCAGTAACTCCACCGCCAGGCA  
ATTCCCGCTTGTATTCATCAAGGACGGCAGCACCGACCGAGTCGGCGCAGCTGCCACGGA  
ATGGTACTAGTGCATCGTTCGACGGAACCTGGCCGTGGAGTTTGATTTACCTCTCAATT  
ATCGTAACTGCTGAAGCATGCCGCGAAGCCGAAGCCAGGGCTTTGACGTAAAGGGCGC  
CGACGCCCTGTAGAAGTGCAAGGGCGTGATAGGGTTTGACCCATTCCGGGATAATAACG  
ACGTAGCAAGTACCTTCCGAGAATTAGCGATAGGGCCATTGTTACGGTGAACATAACATA  
AAATGCGCAAGCTCTGCAGCCGCAACACTGATAATTATTTGTGGTTCGTTGGCTGTACG  
TAGGCCGAGGCGAGCAAGTGCATCTATGCAAGCACGGGTCGTAACCTCGTCCCTGCTGCT  
CAGCGCCCTACAGCCTCGCGAGCTGAAGGTAACGACCCACCACCGTACCGAGAACCAGCCG  
CATAACGCTTGCACACGGCGCTCGAAAAGCGTGAAGACGAGGGGAGTATGCGTACTGTAA  
TCGAGAACATCCGTTCCGGCGCTCGCGGACCTACCGTAAACCGTGCGGTGTGGCGAAGTG  
GATGGAACCGCACCGGGTACACCTACGTCCACAGTTGCGCAGTCATCCACGATCTAATC  
TCAGCAGCAAACGTAATCCGGGCATGTTCCGCAAGGTGGGCTAGTATGCAAAGCGTGCAA

GACATCTTCCGAGTCGTCATCGATCATAAGCACTACGCCGTTAGCAACTAGCGGTTGGAG  
ATCACGTGTTGTGCAATTTGCTTCGCTCTGATGACACACTAAATCTGCCAGGACAAGTTC  
TGCGCGGAGAGTCGTGCCGTCTAAGAGTGCGTTGAATAATGGGGTGCCCCGCCGGGTAGT  
CGGATGTACGACGCCTTGCAGCGTCGCGGGCCTTGTCTGAGGATATGAGTGCTTCCGAG  
TAGGTTCCCTAGGCCGGTAAAGTGTCTACTACTTCTAGGGCGGGCACTCACGAAGTGAA  
AAGCAGCATGTCCGTAGACGTTCAAGAAGTTTTCAACAAAGGCATCGACGCCGGCCTGAA  
CTGGGCGGGCGAGGAATTCGAGCAGTTCATGTGACACGCCCGATTGCGTGAATTGACTCT  
GTACCTCATCAGCTACGACGATCGCAAGTCTGCCGGGAAAGGTATTGGGGCGTAGGTGCA  
TAGCACCTCCCATTGAGAACTCACTCGTTGGGGCACGGGGCAGGAAGCTGCGGCAGGC  
CCTGACCACGGCCGCCATGCGTGAAGTAATCCTAATAGA ACTGTACCGGGACTGGGTGGA  
CCGCGCGATAACCGCTACTGCCGGACTCGCAGCCCGAAACCCTTCTAGGTGAAGAGACACC  
GAGCATCTAGAACCTGAAATGCATTCTAGGACATGACGAGTAGGCCACCAACAAGCGCTA  
CTTGGGTATGCCGAGTACTAAGGTCGTCCGCATCTTACCGTAAGTAAGAAATCCGACCA  
CTCTCAGACACTGCACGCCAGCGGGAGTACGTCAAGTAGCACTGTAGACTCGACGTGGC  
AATGGCGCACGGGCAGACTAGCATCTACTGCAAAGCCAAGGCCAAAGCATGGTTCAGGC  
GTTCAACAGCTTGGGGCCCCTCGTCTACTACCGAGAGATCACCTACGAGGAGGAATTGTC  
GCTGGCGGTGACCCAGTTCGGCGAGCTTGTTCCTTCAAAGAGGTGGGGCGCCCCCAT  
GAGCCTGTGCGAAAACCTGTAAGGGCTAATCCTGTCCGACACTCTTGGTCAGAGCCGCTT  
CTTCTTGCCGACCGTGTGGATCCCGAACGAACAGGTGGTTTTTGGCGAAACCTTGCACGC  
CGCACTGGACTGGGAAGTGGACGGTGTGGGGTGGTGCGAACCGTGCATATACTTGTGAA  
TAACGACCTGTTCTGGAGTCGGTGTGATATATCTGTTCTGTTCTCGCTAATTTGAAGC  
CTCTCCACATGGGCGCTAATCAGCTTCCGTACAGATGTGCAACTACTGCGTAACCGCGAC  
GACAGCGCTGTATTTCCAATTGTACTACTAATAAGCTAGCCGAATAGCAATGCTGGGTC  
GGACTACGTGCAACTTCACGGAATACATCTATGCGTAAACCAGTGTCAAGCGTAGGCTA  
GCGCTTACGCACCGTGCGCCGCCCTGTGGCGCGCTCTATGTGCAACCCTGCTTCTCTCGA  
GCAAGACGATACGAGCGTCAGTGTACAGGCGTTCAAGAACTGCCAGCCTCCGTACGCACA  
GGACTTTGGGGCACTGGGCTCGGATAACGTTGTGCGCAGTAAGTCTGGAGGGACCGAGCCC  
AGTATTGTCGAGCTCTCCCGTTCCTGGCGTTATCGTTCGCAATGCCGGGGAGCAGCACGC  
CTGTCACTGCACTGACCAATCCTGTACGGCAGTACACGCGCCACGTAAGCGAGGAGTCGG  
GTGTTAGCAACTCCGCTACCTTCGGCGCTATCAAACCAGGCATTATAAGCACGCGGCAGA  
AGACCGAGCGCTTCGAGGGGTAGTCCCTCTCCGATAACAACGCAGCGAAGTAAGGAGTCG  
TTAAGTACGACCAACCAAAGAGAGTACCACCGTGTAGAGGGAGGCGCCCCGCCCATCT  
AGTTGCTCCTTTCGGTGACGCAGACGTACCACCTGTGAAAACCGATGCACGATGCCTTGT  
CTCGCCGAGCCTTGGATGAGACCGCGCTGCGTGCAGTTTCCGAAGACCTCTTATCCGACT  
TGGGGCTGGCTACTACATGTCTAGGTTATCAGCACGTATTCGACCGCCGTGGAGGGGAGG  
TGGGCTATACTGTCGCGCCAGTTCGTAGCACCATAGAGCGCCTCGGGGAACTCGATGCTC  
AAGGATGACGGTATAGTCGTATGGCTTATAAATCCGGCCAGTCCAGGAGCGCGCTAGTC  
GCTACCCGAAACGTTCCGGCCTGGCGGGCGACTTCACAGGCGAGATGCGCTTCTAGCGC  
CCCGGCAGTTAGGCAGGGGTGGCCGCCAAGGTGAACCTGTACCAGGACCCAGAGGCACTG  
GAGCATGGCCCGTACGAAGCAGGTATCAACCGCGGTAGTTGCCAAGATGGACATGGCTGG  
CAGTGCATATGATGCAGCTAAGATACTAGGTCAACCCGGTGAATCTTGGGTGGAGTATG  
TGGTGGTCGGGCCCTGTTGTCGTGACGCCCTGTACTGGGCGAATGATCGCCGCCGCGGAGCG  
AGTGTGTTTTCGGTTCAGAGACAACCGGCTCGTCCGCGGAGTGTGGCGGCGAATGGAGCTGG  
ACCAGGTTCCCGTCAATCAGCGTGGGTTGTGAGTACCCAAGCGCCAGATGGTCGCACCA  
GTAACCGCTACAGCAATGAGGCAGAAGCCGGCAAACGCGCGTAAACTCGCCTGTCTCT  
AAAAGGACGTGCCGTCTACTTGGCCCCGCTCAACGAGACGAGCACCCACCCCAAGCCGG  
GCCTGTGCGAACCATAGTCGACAAATTGTAATGATCGCGTACGCTAACCTCGCTGAAGT  
AGTGGCCACGGATGACGCACCGGGCTGGGCACTCCCACGCAGTACACGCTAAATCACAGG  
TGCATGTGTTCTCCGAGACCCAGCATCTTAGTCAGAATCGTTGTGGAAAAAGTAGACTT  
CGATGGGAGTATAGCCATCTCTGTCGGCTAGGACATGAACGAGGGGCCTAGACTGACCTA  
GGAAACCGCTGTCGAGCGGGGCGCCGCCGTAATCTGAAGTGGAGCCACTGTAGTGGCT  
AAAGCATGGCGTAAAAGCAGCTGCGAGAACACAGGCATCCGCCGCGTCGCGATCTTGGCT  
GGCAGAGCTTTCGGTGTGTACCCCGGTGTCAGTGCCCTCATGGCCTCGCTGCTGCGCCGG  
ACTGGTGTGGGGCAGGCGTAGGAATACTCGCTGAAGTCCCAGGAGGGCGTATTAGTCGCA  
AGAGATACTATAGAACCGGTTAACGGTTCGCGTGTCTAGGAGAGTAAGATAGACGTTG  
TGCAAAGCTAACGGCACTGGCAGTTGAAGCACATGCGGAAAGACGAACGCGGTCAACAACG  
TCGACCGAGACCTAGCCGCTGCTAAATAGAAGGGCATGGTCTGCGGATTTAGGAGGTGC

CCGTGGAGAAGTAGCAGATAACCGGGTTTTGCATAGAGTCCCGCTAAAGATCTTGCGTCCT  
CGCCGCTGGACCCCGGCGCTATCGCCAAGGCGCGGCAACATCTCCAACCATATCAAAAA  
AGTTAGCGACCATTTGCTTACCGTCGAAGCCAAGGCCGCCGAGCTGATAGCTAAGGCCAA  
AGCCCTTCGCGTGTAGGGGGTTTTCCAGGAGCGCATCCAGATGATCGCCTAGCGAGATGC  
CATCCCTTTCGTCATTGGCCGCCAGGACGACAAGCCGATCATCACCGTCGTGGTACTGGG  
CGAGGCTAAGACCGACGCCGGGAGGCAGATACGGGTCCTCGCTGAGGGCTGCTTCATCAG  
CACTACCTACACTCTCAAGTCTAATCATAACCGGGGACGAGTGGCGTCCGCAGGCTGGAGA  
GACTACTGCGGTGCTGAGCAGCCTGGCGAGTAGCATCGGGTCTTAGTCCAAGAGGATCG  
CCGCATAACCCACCCCTTTTTGCGGGTACCCGTAACCGCGGCACTAGCTGCTCAATTTCTG  
TAACGACGAGGTGAGACCATGAAAGCTGTTAAGACACTGAACGGCGCTGCTCGCGTGGCT  
GTCCAAGGTAAGCTGGATGCGGATGGCATGGAGCCGCGCATGTCCTTTGAGCAGGCGCAA  
CAGCGTACCGAGCATCTGGGGCGGGTGCCTAGACCGTGCAGCGGTACCCCGGGGAAAAC  
GAGGGCTCGTGCAACGAGCTTGCCACGCACAAAGCCAGATCTCATTGCTAGATTGCAGC  
TGGAGTAAGCAACTCGAGACCATCCAGGCCCTGGAGGCCAAGCAAGAGGACCACGACGAG  
TTTGTGATGAAGCTGGGACTGGATAAAGGACATTGCCGAGGCTCCGATTCAGGACCACGAG  
CCGCAAATTACTACTATGAAGCGGATTGCCGACGCCAGTGCAGCGGTACCCCGGGGAAAAC  
CACTGGAAGCTCCCCTAGGAAACCGGTTAATTTGAAATTGTGATGTTAGCCTGAACGCGG  
GCTGTAAGTACGTTGGGTGTACAAGAGAATCTAAGCGATATCGCCGACGACGTGAGTCA  
GATGCGTAGAGACTGGGTATAGTTTTCCACCTTAGGGGCCCGCTGATTTGCCAGGCCG  
AATCGATGATTCGACGCCGTGCACGCCGAGGCCGAGGTCTGCGGGCTCGGAATGCAA  
ATGGCAAAGAGGCCATCAAGATATACATGAGCCAGCAGTATGTGAAGCCCTTGCGTAGTT  
CCAAGCACACGCACCGAGCTGGATGGGGCGCACGGCCTGCTGCGCAATATTGTCCCCGC  
CGCGCGCATTAAACCCCTTAGCCAGCAGGGTACGGTAAATCCTTTACGCCGTGGCTACTG  
CGTTGACTTGTTAAGTGACGCATTCCAGGCCTCCACCCAGGCGCCGGTAGGGCGGGGCTG  
TATTAAGCGTCACCTCACAATGGCCGACTAGGGGGAGCGGCAGCAGGCAGTGGAGTGGGA  
GTTAACGAATAGCTCCGACGAGATTGTCAGCTTTGCGCCGATTTATTACGCTGAAGAATG  
CGCCATCAGTTGTCAAATGGCCGGACCCTTTTCCCTCTCGACACCACCCCTCATCCCGGC  
CCTTACGTCCGAGTGTGGTGGAGGCGATGGAAGGAATACTCGAGTATATACCATTGGGC  
AATTCTGACGGCGAGTACTTCAACATCGTCAAAGCCAAGACAGCCTTATCCGCACATTGC  
CACCCGCAATCGGTATGGCCATAACCCGAGAACGTGTTTGTGCAAAAGGCGCAGCAGCTGG  
CCATAGGGCAAACCTCGCGCACGTAGCACTGCGAGGACAAAACGTGAAAGCCCCGAGAACG  
GCAAAACCACCGAGCGTTGGTGGGCGTACAGCCACCGCTGTCACGAGCGCGGGCAGGTGC  
TGAAGAAACCTGTTATCGTCCGGTGCAGACAACCAGGCCAGGAACGCTTTATGCCATGGA  
CCGACGATGCTAAACGCGCAGTTAGCGACTAGCTGTCCGGCAGCGTGGACCGCAACCTGT  
TTGACAAAGGCATCAATCTCGTTGGTATTCTGCCTGGGGTCCCCGTTTAGAGGAGCCGCC  
GGCAGGGTAGCCTGATCCGCGCCATTGCGCACGGGTTGTTGGGTGCGGGCAAAGGCACAG  
TGCAGCCGAAGTGAAGCGCGGACTCAAACCCAGGTCAGCACCCGGCAGAGTTCCACCTC  
ATCAGCACCATCATATTACGAGGCAGTGTGTGATCACTGAGGAATACTTCTCAGCGATTT  
AGATAAGCTGGGCTTAGAATGATCCAGAAACTATTTGCAAAGCGGCACTCGGGAGTCGTG  
TGCACATACGCCCCGGCGGCTGCTCACCTCGGAGCAGATGAGTTGCTCTACGTCTTCGATG  
GGGATCGAACCAGGGTGTGACGGGTGGCCAGTAGCCCCCGGCCGCTTATGCGGGCTCGGCA  
AGTCAGTGTGGATCTGCGACGCCCTCTGGGTTTAGACCCCAAGGCTATCAAGACGCCAC  
AGGTACAGGAGTTGAAAAATGGGTGCGCCGCCAGTGCAGGAGGAATTGGAGGCTATCGAA  
CGTCCCCACGCTTCCGGGGTGAAGGAGCAGCGGGAGTACGGGCGGTACAACGTCCCCCG  
GGCATTGTTGGTACCGGATCGGGTCCGGTGCAGGTTATGCAGTGAATCACTGCGGCTGGCAG  
GACTTCCGGGATGTGCAATGAGAAACCGTGACCAACCGATCCACATGCTCAGGTAAGTGA  
TCAGTGATCATGGTATCGAGAGGCGGGCGGGCATTACCCAAAGCTGACCGAGGACGACG  
CCGCAATATGTGCGGCGTTGGAGCAACGTGCCCTGGTCGAGAGTGGGATGCATTCGGGG  
CGGATGACCTGCTGGACCGATCTGGCGACGTTGAAGATTATGGCCAGCAATATTTGATC  
CTTTAAGCGCCGCGGAGAAAGCAGACGTATCGACCGCTGATAGGCACCGTGCCTCCGGG  
GACCTTGGCACCGAGGCGAAGTTCCTATAGGCCTGGTATCCGTTAGCCCACCACGGGTAC  
GCTGTTTACGAGTACCCGTCCCTCGGCGCAATTGGTTCACAGGTGAAGCTCCTGTGCGGT  
TACAGCCGTGAGCAGATGGCGAGGGTACGCAACGCCCTGCAGAACCGGCGCCAGCACGTT  
GACCAGGATCCCATTACCGGCGTCTTGAATACTCTGCACGGGCGGGATTCGCCGTTCTG  
GACGGTGTCTGCTCGCCAGCACAACGCAGGGGGAGACGTTGATCTCATGTTGAGTTC  
ACTGGCATTGCGCAGGAGACGCATCTCGGCGTGCCCCAGGGGGCCAGCTCGGAGTGGTTA  
AGGGACAGCAACGACCGCATCCCGAAAGGGGAGGAGAGGGACTTCGCCCTACTGTTCCCG

CTGCAAGTCTTGGAGGGCGCACGTCTAAGGCCTCCTGGTAGGGCGCCCCAGTGATTTTGACG  
GGGCTCTCCGCGAATCGTAAGACGGGCCTCATTGGAACCATCCTAGCGCGCGTTGCGGGT  
CAGGTAGACCGATACTCCGTCCAGGAGCGACCTATCCGCTAGCTGAACACCAGGGGTCAG  
GGTCAGCGCTTCATCCCTCCGAACAAACAGCCCGGCCTCGGGGGGGTTCATGGACGTGCTG  
GTGGAGTTGAGCGACACCGTCACGCTGCGGGATGGGTACACCTGACAGGTTGGCAGTGTG  
GATCGTGTGAGTTTACCGGATAGGCACTCTGCGTGATTTCGCCGATATCGAGCAAGTCATC  
GAAGCAATCAAGCACGGTATTGTGCTCTTGGATCTGACGTCGAACGTCGGGCTGGCGCAC  
AGCGCCGGGCGTAGGAACAAGGTTCGATGAGGTGGAGGAGAAGGAGCCATCCCCGCGTGCT  
CGGTCGCTGCGCCACGCCCTGGGGAGCCTTGGGGCTGTCCAGATCAGCAACGAGGGGGAG  
AACATTCTGTAGCCGGCGTACGCCGCGCTCAAAGACAGCAAGACCGGTAGCCAGGGCGAC  
GTGGATCTCATGCTGACGATCGGGACGCTGGATGCACGTGCAATGCCGTGCCTACGTGAT  
ATCAGCACGCTGAAAATCAGGGTCCAGCTGCCCAATGTACCAAGCCATATTACCTTGGAA  
GTACTTTTGGGTGCAGCGAGATCTGAGTTCGACCAAGGTTCCCTAAACAGTGAAAAGTAGG  
CGTCTCAGACCATGCGTTATAGGCCGGGCACGGTCTCATCGTAAAGCAAGCGGGACACAA  
GTGCTACCACGCGTCAGTCAACATAACCGACGCCAGACCCGCCTATTTTCGAACAGCTGGA  
GGACCGCATGAAAATCCAGATCAACAATGTTCTGTACGGACTCGGTAGCATACTGGATG  
GCCCAAGACCTCACCTCGAGTGGAGCAGTATAGAGACTGACGAGGTGGACGGCGCACCT  
GATCACCCATGACTCCTTCCCCAGCTGTCTCAGAGTGACACCTGGTGACAGGCTGTACTC  
ACCCATTCCGACGCGCGCGCCCGTCTGAGCATATCATCATGCACGTACCACCGGAGCAA  
ACGAAAGATCACTGAACCTTTACGTTGGCCAGGTGCCTCGCCATATATTTACCCGATCGC  
GATATACAATGATCTCTACTACATGTTGTGCTTGGATGAGACCCAAGTAGGCACGTACCA  
GCAACTAACACTCGGCGGACGTTGGTTCACGTGCAATGTTGATGAGTAGCCTCCCTGGGA  
CGAGTTCGTGGGGGTGGCATTCCCTAAGGGGACAGTCGAACCTTAACCTCTACTGGAACGC  
GACTCAAACCTGCGTTGGTTGGCGCCAACCTGGGCTGACTAAGGTATTGAACCTCACTCT  
AAAAGCGAAGCGGGTTGGCTAGATTCGGGCACCTCCGCCATGCAAGCCCCGACCAGGCGCG  
GTCGATGCTGGAGCGTCCCCGTGACACAGGTGAAGCAAAGTACCAGGAGTTCTTGAATTA  
GCACTAAGATGCCCCCATGTGACATCCGACGGCGGACCATTTCGGTGGACGGGCACCAGA  
AGGCAGGCGAGATGCGAGTCGACCAAAGCCCGCTCCATGCATGTGAGATGGTGTCTGGGT  
TCCGCTACTGATCCACTTGACCTGCCAAGGGGAAGTGGCATTGACGTCACGCGAGGGCA  
TTGAATGCAGGCACTTGTCTAGACTTGCGGTTCACGTTTCTTGCACCCTGTTACGCCAG  
TTACACCACTGCGTAGATACTACGACCTGGAGCTCTCGATCAACGGCATCCCGTATGAGA  
AGATGACCGGAATACTACGCCTTATTACCCGCCTGCTCGGCCAGCACCTGAAGAACGTAC  
AGGTCCTGATGTTTCGACCTGGGAATATTAGGGGACTACGAAGGCCGGGGCGAGGATGGTG  
TTCCGAATGTGCCGACCTTAGACGAACGTCCTCGACTCATTGGTTTCTAGGGGGCGGGCCC  
CATTCTCCCGCTGATCGAGCGCCCGAGGTCCCTGTTGATCTAAGAGCAGTCTTGGACCG  
TCTGCGCACTGGCTCTTATCCGGGCCCTGCCCCAGCCTGCCCGGGCTGCCGAGTGCGAGG  
GCCTGATCCTCAAGGGGCCCTCTTCTTACTCCGCAACGGCAAGGTCTCCGGGTGCTGGA  
ATGTGAAGCATGGTTGCCGCGCCCTTTGCCGCGTCTGTACTAGACGGATGGTACTGTCA  
GCGACACCGTGTGGGGAGCCCCGATGCGTCGGACGCCGATAAATTCATCGAATGCCTAG  
TACGTATGGATCATGGGGCTGAAGTAAACGCAGCCGGTTTAAACGCAGCACACAGGTCTCT  
GAGACAACCAGAGTTACCACGCAAGCGCCTTTGAGGGTGGCATATCCCATACGCACTGCT  
ATCGCCTCGCCTGGAATTTCCCCTATATGGGGCCCACTACACTTGGCAGTATCCGCCCCC  
CCAAGTGCACGGGCTCCGAGATATCCACAGGGCTGTAGGTTTGAAGCGTGAAATAGTC  
TTTTATGTTGCAGCTTGGCCCGACGCCGAAGCGCGGGGTGACACTAGGGATTGGCCCGGT  
TTAATCCCGTCACTGGAAAGCGAGGTTTCGACCGGCTCGATGGTGGCCAGTTGGGAGCCTG  
GTCCCTCGGTGTGGGGCAGGATGGTTATTCTGCTGTTGGCAGAAATGAAGGTACGGACA  
ATAGATTTGGAGTACGATAACAAACCCTGGTCCGGGCAGCTCGCGTCCCCGCACAACCCT  
GATAGCTACGTGGACTTGACCCGTTTCATGTGGCCGCGGCCACGGCTTACCCCGTCGCCGC  
GTACAGCATCTGCAATTCACCTCGCTGGGGAATGAACGCAGGTGAGACTGGTTCAAATC  
GACGGGGTAGATCCCCTCGAAGCACCCATCGCTGGGCACGAGGTGTCGTGGATCATAACC  
CGCCACCTCAAAGAATTCGAGAAGTTCCGCTTACGTGCTGGCCGGGTGTTCTGTACCCAG  
ATCGCCGAGTACATCCTTTCAAACGCCCCGCAAACGTACACCAGGTTGGAGGAGACAGCA  
CCCATTACGGTGGTCTTCAACAAGATCGTTGCTGTAAAGGAAATGTGCAACGAGCGGCTC  
CTACCAGAAAGCTCGGACCGAAGTTCCGGGCCGAGTACGTCGCCGGTCCCAACCGTGAT  
TTTAAACACACCCCGCCGCATCTTCTGCGGGCTGTAGACGATGCTCCAGGAGCGCGTGCTG  
TGAGGGCAGTTGGTGGAGCGCTGCGTAGACCCGCTGGCTTTCGCTTACTGCGAGTTCTAT  
GGCTGGTACCTGAACACCGAGGGGACCGAGGCCAAACAGACCAAGGGGTAACCTGAGCTG

CCCCAGCTGCGAGCCGCGAGTATAGCAGCTCACGACCGATCTGTCTAATCGGTTGAACTTC  
AAGTGGGGCAATGACTACCATCGCAGCGCCGTTCTGTTTCGGCAGTTCGGTGATATGCCGG  
GCCCCGCGACGCCGCACCGGTGCCGGTGACCGCGCAGTTTACTAGAAGTATGAGTTTGCC  
ATGCTCGGTGACAAATTCATCGCTGTGGTCTACCTCAACGCCTCGGTTCGAGGCGGTGGTC  
GCACATCTATGCCGGGGACACGACAACCCTCATCGCCATAAGGCCGGCGAGAACAAGGGC  
GAGTTGAAGATTCATAAGGTTGAATCTGATCACAGGCCGATGAAGTGTGAGGATCCGGTG  
TTGGTGTCCCTCGGAGGCTTATGGATTCTGCAGCTGCCCTCAGACGTCATGGACGCGTAC  
GCGTAAACACGGCACGGACTCGCGCGAAAACGGGGTTTGGACCGGCCCGCCCTGCTGTGC  
GACGTGAAGGCCGCGGTGTATCACACCAGCTCGCAGGTGCCCGAGGTACTGGCCTATCAC  
GGCTTCGACGACGCCGATAAGCTTTAACGCACGGTATGCCTGGAGAAGGATAACGGCACT  
TACGAACCCTCTGTGGAGATCGCCAAGGAGTGGAAGACCAAGATGGTCATAGGGATGCTC  
CTGGACCACAGACGGACGGGATCATCCACATCAGCTTGAACCTTCACGCAACGGTCTCT  
GTTTGCCTGTCCCCCTCGTACCGGCTCCTCCAGAGCGTCACTCGAGCCGACAGCCGCTGG  
GTCAAGGTGAGGTTTCGAGTGTCTCTTCGGGACTGCGGGGCGGTTATTGGAAGTGGACTAC  
TCAGTACTGTAAATGGTGTATGTTGGCTACGCTCAGCTCCGACGAGAACCCTGGTAGGGCTA  
CCCGTACCCGGCTCACACTACAATGCCTGCGTCTGGCCGCGAATCTCTGTGAACCCTAC  
GAGCAGGTACTGCACAATGCAGTCGAGAACAAGCCGCATGCGGAGGACAAGGGGTACAAG  
TAGATGCGGACGTACATCCAGCCCCGTAGCTTCGCTGCACGGTACGGGCCCTGTGCCGAG  
GGTATCGCATAACGCCACCGATTTATCTGTGCGGTACGCCAAGGATTTCTGGAAACGGAT  
GCCCCGCTGTTCCCGCTCAGCATCCTAATCAATGGGATAATGCTGGCTAAGGTCTAGCGG  
AGCGGGCAGCTGACCAAGGGCCGGGAACGCGAGCATGACGACGCCACTGGGGCGTGACGC  
TTCCACAGCCGTGGTTACTGCCAGGCACCAGATGGTGCCTGTTACAGCTTGCGGGCGTG  
ACGCACCTGAACAAGGAGTTGGGCTATCAGGTTGTGGACTGAATCGACACCCGGATCGCC  
AATTGCTGGTGCCAGAGCGACGCATTCTAACTCATGGCTGTATCGGCAGTATGAGTACTG  
AGTTGGGTGCGTTCGAGAATTTGCCATCGAACTAGGAGTTCCCGCAAGGTTCGCGTGTGG  
TTGATCAACAAAGCGCACGAATGGCTATAGTGCAGCTAGACAAATTGTTTCGGACGGGTG  
GTCGGGCTCCAGGTTTCAGGGCATCATGCTAGACCAGTAGACGGAAAAGAGCGACCGCCTC  
CGCTTCAAAGCGCGCACTTCCCGTTCAGCATCCGCTCAGGCCGGGCTCTACATGGCA  
GATGAGGAGCACATACTGAGCAACTCCAATATCCCCACCAAGCACTGGCCCTAACGGC  
TGACTGGCTGTACGCAATACCGCTGGACGCTCGCGAGTCTTGGGACAGGCCGACTTCGTA  
TCGGGAAAGCGCAGGATAGGGTTACCATCATGACCCTGTCTGCGGAGGTCCTCTCTGTCC  
CGCGGGGACCCATGCTCTGGGGTACAAGGCATGAACGTCCCCACTTATAACGTGTGAT  
GGTATGCCGCGAGGGCGCCCGGACCCCGCAACAGCCCCCGAGCTGCCGACGAAATACGC  
CTGCTGCTACCAAACGCAGCTTAAGCCACCTGGCTACGCCGTTCCCATGGAGGACCCCA  
GTCCGGGCGAAATTACTTCTTCAACCTGAACGTAGGTGAGTGTCTTTGACGCCACCCCGT  
ACCGGAGAGAGTATGAGCCAGAAATTGCCAGAATACTCGCCCTTGCCAACGTTGGCGCC  
GAAACCGATTAGGTAGACCTAGGCTAAGTCTTCATGGGCAGAGACGATGGTAAGCACTAC  
CCCGCAGCCTACGTTTTTGACAAATTCGTGCGGTAGATCGAGTTCGATATGCACGCATAG  
GGGACGCAGGGAACGGCCAAGGACCCAGCCCTCCAGTACGACCTGGGCTTCACTCAGTTC  
GGTGGGGTCTACCAGCACGTTTACGGCATCCCCGGCCTCTTTTCGACCTATCACATAAAG  
ATCAGGGACGACGAAAAAACGGGCACGAAGATTATCTACGACAAGATGACCTGGATGGGC  
CCGGCCAAGGCCTTCGTGCAATACTCCGCGTCGCCGTCCTCGTGAAGATCGCGCGCAAG  
GTCGTCCAGGAACAGCCCGGGAATCATCGGAGTGTCATGAATCTGGACGAGACCCAGCCG  
CCACTCGACATGACCAGCAAGCACGCGTACAAGACTCCACAGATTCTCGACTACCCGCTC  
GCCCTGTTCTGTGATCACACCCGACTAAGGAAGCCTGGGACACCATGCACATGGAGGGC  
ACCAATGAGACCACCTGCACGTACAAGAACTGCTTGAAAGAGATGATCGTCTTGCTATC  
GACTTGCCTGGCTCGGCCCGGGAGCAGCGCCTGTGCGGCACGGGGATCCTGCCCTCGCCA  
GAGCAGCTCGACGCTTTGCCACCTGCGACGCCCGCAATAGCGCAAACGCCGGCCCCGCT  
AACATCCCGACAGCCCCGGCTATCCCCGCTGCCAGCGCGCCCGTTCGCGCCGGCTGGGCCA  
CAGGTCCCGGCAGTTCCTCAAGTGCCCGCTGCCGCACAGGTGCCGGTAGCGCCACTCCTC  
CCGGACTTGCCCTGTACGCCGGGTGTCCCGGCAGGGCCGGAGGTACCGATGGAATGGGGA  
TCATCCGAGACGTGGTGGTAACCGGGCACGATGACAAGTTCGAACGGATGGTGCCTAACC  
GAGTACTGCTGACGGATGGCGTTGGGGCGCGGTACCGCCCTAGCGCTATTGTGAAGACTC  
ATAATAATGATGATCGACGGGTGTCAGGGAGCCTCTCCCCGACCAGTGCCACACCCGGTC  
CCCAGGAGTCCCGCGTACACCTCGCCGGCCAGGGTGGTCCGAAGGCCGTAGAGGGCCTGT  
ATCGGACGAGGAATCCCTACCAGTGTACCCGTAAGGGTAAGCCTAAGACGGTGTCTTGG  
AGCCGCTGGGGTGGCTTCTGGCTACGGAGAGGCTATTCCATGACGGATTCCCCGAGAAGA



TCGGGGTCCACCTGCATCGATACAGGGAAGCCGGCGAGGCCCTGGTACAGGACGGCGTGC  
CCTACGGCGTTCGCTCCGTCAGGAAGTCTGATGACCAGGACCTCCGGTTCGACACCCGCC  
CGTTCTATGACTCGGAGAAGCGTAGGGTCGATGTCCTCCACGATGGCGACCGGATTGTCA  
GGATCAACGCCGGGTTACGTCATCGCTCTCGCTTTGTGTACGGGGCATAGGAGGAAGT  
TCTTCTGGCCACTGATGCTCATGGTGGAGACCGCGGATCACGGCCGTGGCCTCCAGCGCT  
GGGAGGGGAAGAGCGTCCGACAGACGCCGGTTCCTTGACGTGCGAGGTCCTGTAGAGAGCC  
ACAACGAGGCGGCCAACTGTATCTTTTGGGCCTACGGCAATATCGGCCAGGACGCTCTCG  
CAGAGGCCCATGTTCTGTTACTGCGCCGCTCCGTGCCGGACTGCGCGTCCCGCTACCTCT  
GTGAACTGGACCTTAACCCAAACCTGCGAATGTGGTTGTAAGTGAACGGCAACAACC  
CACGAGCCTACGAGCAGAAGCTAGAGGAACGTGATGCGTAAGGAGAGTGGGACGAAGCTC  
AGGGGCTGGCGGATCACCCACGTGCGGAAAGCGCTGGGATGGCGATGTCCACCCTGTGGT  
ATCACGACTGTTTCGAGCCTCGCACGGCAAGCGGTGGTTGATAACCACCACAGTCTACGC  
GAAAACCGGTACGGTCTTACCGATCCTGTAATGCGGCCGGGAGGCAAGGACAGCAAGGTC  
CCCGGTCTGAGGTGTACCAAGAGGAGTAGCTATGTGCGCAACTTCGCGTTCCTGGAGAAT  
GTGTTCCAGGACCTGAAAAGCTACGCTCCTGGGTTAATGTACCCAGGCCACAACCCACCC  
GATCCAACCGCTGAGGCGATCGGGGTGACAAGCAGCCCGCAGCAGCAGTGCGCCTGGCT  
TCCGCCGAGGGCCGCAAGAACCCGCGTATGGAGACCCACCGGGTAACGACCTAGTGACAC  
GAATTTGTTTCAAGGACAAGAACATAACCAATGCACTGTTGGTTGGCGGTGGTAACAAGC  
CCCACGCCGGACATCACCTCAGCTATATGGGACGAGGGGTAGTAAGTCGGGAACCTTTGC  
GACAATGTACACAACAGGGTAAACAGAAGGGTCGCACAAGCCAGAGTGAAACGACGGGGG  
AGCCGGCAGGAAGTGCCACGAGTGCTGGGGGAAAGGGTACGCGCGCATTGGAACACGGTC  
CATGAATCTGAGCATCGACATCGCGAGCGGTACCAAGGTAGGTTGAGTGTGGGGACTCT  
GGGAGTAGAACTTAGGACCAAACCAGTTCACCAACCTATGGAATATCCGCAGCTACTGTG  
CGCACTAGATGCCTGATCCGATCGCCATCTACTCCGACCTCACCTAGGGAGAGAGCATTG  
GAGAGGATTGGAAGCTAGTAGCTGAGCTGTACGAGCGGCAAAATGGAGCAGATCTTGTAG  
TGGCACAGAACGGTACCCGATTTCGATCGACCGAAGAATTAAGCCCAATTCGTGATGGATG  
GTTACAAGCCAGCTCGCCCGTTCGGGTAATCCACACCATGCTAATGCCGAATCAGCAGT  
ACGGTTCGCGAGAAAAAAGCTGGAGTGGATGAGCGACAAACTGTTACGACCTAGAAAC  
TCGAGCATTAGAAGTCCCCCGGTATGCCGTTGTGGCACCAAGTTCTAGGCCGGCAAACGCG  
GCGCCAGGCAGGAGATGCCGCACTACAAGATTGACGACTTAATCTCGTCAGAGGGGTTGT  
AGTTTTGCTTACAACCCTTCTACCATGGCCATAAAAACGTGCCTGTCTTCAACGATGAGC  
AGGGGATCGCCTGTCTGAAATGCGTCTCGCACGACCTAAAGCGCGAAGGGTGGACTGTCC  
CCTAGTCCTGTAAGCACGAGGTTTATCATGGTAACGGTTGAGGCGGTTACAACCTTAAAC  
GCAAATCATACTCGAAGCAGGTGCTTTATTCTCAGCCATCTAATTAATAACCCGAAG  
GCATCCGAGCGCTATTTCTACACAATCCCCAGCAAACCTAGGCCGAAGGTACGGGGATGAG  
TATTGTAGGAAGGAAGGTTCTGCATGCGAGGGTGGGTACGTTCCGGGCTGTACAAACGCC  
CTTGTGGGCCGGGAAAGGATCGACGCCGCTACAACGCGGACACCGACAAGTCTGGCTGG  
AACGTCCTTCTAAACTCCGCCAGCGGTTGTGGGCGAGCCGTGCGGGCCGTGGTTCATGTA  
CTGAATATCCCTGTGCGGGATATCCGTGAAGGCGGAAAGGGGAACATCCCGCCTTCCTAG  
CGTAAGTACCGGACGCAGGAACGCGCTATGAGGATGACCCGCAACGCCGATTTCGCCAT  
AACCGCGACGGTGAGACTCACGACGCCGAGTACGGCGAGTCGCTCTGGGGACAAGTTGAC  
ACGCACGCACGGTTACTCAGGGTACAGGATCATCAGAAGCAGAAGACTGATGAGTGAGTG  
CGTATCGTGCTTTCGCGGGCGTTGACAGCTGCAAACCGGTGCCACGGAGAGTCGTCAAACC  
AGAGGTAATCGACATCAACGAGCTGCGCCCGTACCACTCCAGGAGCCTAGAGCAACGCTT  
TGCCTCGCGGCTGAGGAGTTCAGCGAAAACAACATTGGTCGCGTGTGCCACAAGCCCTG  
AGGTCCCGTGAGGTTGGACTCTCGCATAACGCAGGTCCAGTGCGGGAAAGCGCCACAGCGC  
TGAGCCTAATTCGCACCCCTGCGCGACGTTCAAGAGGCCGCGGAGCCGGCAGGGTTCGA  
TGAAATCCAAGCGGCCCGTCACTTTAGCGCCCGTGTGTCCGATCAAGTGCGGGATGCAAT  
GGATCTGGTTATGCAGAACCAGGCACGCGGCCAGGAACAGCGCTGTGTGGCTGGCCGCG  
TCGGGGCCATACAGAGACCCCTCGACGGTCTGAGCATCGGCATCGTACTGGGGCACGTCAT  
GCGGGACACCCGCCGCTCACAGCCAACCTACACTGCATCGGACGCGCCCTGGGGCGGGC  
CATCGCGCTGGAGGCATTGGTGTAGGATGGATACCCTACGACAGGGCTATACCTCGACCT  
GACTTCGCTATACGTGCGCACAGCGGGCACGCCAGTAAACGGCACACCCAGACGACGTT  
GGGTGCTGTGGTACACACAGTCCGGGTTGCTCAGCTAGGCGGGAACCTTACGCCACTGA  
GTAATTCACATCGGCGATCACGGCCTACATGCGAGCATGGATACTGGGCGGGGGGAGCT  
GCGGGCACAAGGGCAGGGTGCCGAGACGTATGCGAACTGCGTCCTCGCGGCTGAGGTGCG  
GGCGGTCTCGGTTTCGTGCCGCTTAGATAGGCGGTGCCGCGCATATGATATTCGCTGA

GCCTATCGCATGGGACGGCGGGTTCGGGCGGTTGGTCTGCACAGGGCGTATGCAGCTCGA  
CTTCCCCTGAGACGTTTGAAGTCCGCTACTCGCGCGCCGTTGCGCCGCGACTTCCGGGA  
TATCTTGTGGTAATGCGCCGATGTGATGGCCTGTGCGAACTAGCTTCAGGTTCGAGGCGTT  
CAGGATACACACCTCCACACGGGAGCTGATCAAGGAGGTGTGACCCAGCGACCGTGGTGT  
CCTGGGCATACTAGCACGGCCACCTCCCGAGCTTGGCTTCGCATTACCAGCCAGCTG  
GGACATGGACTCAGATCCCTAAATGTAGCTGGAGCGGTTTACGAGTTGGAAGCGTCATTT  
GCTCGCCTGGCGCATGGGCAATATGGAAGGCGGCAAAGCTCAGCAATGCGTCGGCCAGGC  
CCCCATCTCGCCGCGGCGCTTCAGCTGGAGAGTGGCTGCCGACGTTTATTGACAGCAG  
TGGTGGGTACGAGTACCGTGGGGTGTGAAACCGGCGAGAGGACCAGATTTATAGGGAGCT  
GTTGCACCTCGCCGAGAAGCGCCCGATGGGCCAGAGACGCCTCTAACGGATCCAGGTACT  
TGTGCCAAATTTATCCGGCGAGGACAAGGCACGCTTCTATCCAAGGTCAGCGTAGGGTGT  
TGAGCCCACGGATAATTTGTACGCCGCCCTGGAAGCTCCTGCAGACACGTGCTTTGCCGA  
GGCCTACTCCTCGCTCGGGGCATCCGCTGCCTTGTGGCAATGGCGCGTGGCCGAGCGCTC  
TTGAAACCCATCAACTAACGGCACTCGGCTGTGGATCCACAAGGAAGCGACATGCTCTGG  
CAGCTAGCACATGTCAGCGATGCTCCACGACCCGGTGGGTGGGGAGTAAGTGGACCGCTA  
TGACTGCGTGGGGGACTCCAAGACTGACTTCTAGCTCAAGATGGCCGAGGTGGAGGAGGC  
CCCGCTCAACCGCGACATAGCCATCCCGGCCTATAAGGAACGGCACCTGGCCAAGCTCTA  
GACAAAGTGGGTGTCACCCTGCATCCTGACTAACGAGCCCGTAATCACCTACGTATTTGG  
AGCCAAACCGCGCGGTGTAGCGGAGGGCATTGCCGACCGGCTTGAAGACCGACCGGCGAT  
CGTACCCGATAGTGTACGTATCTTCGACCCATAATACGACCTGCGCCGTGTGGTGTCTC  
TGCAATCGAGTATGCTGCGCCTGCCGCCGCCGATCGATGCGTTGGGTGCGGGAGCAGGC  
TCGCAGCGCCGCTGGCTTCTCACCGATGTTGTGGTTAAGCCCTCTGGCCTACTGGGGGA  
GCTCGACGACCGCGGCTCCGCGAAGCACCGGGTAAAGATCGGTCCGTGCGGTATCACAGA  
CATCGTGGTGGCGGAGGCCCTCGACCTGACGCGAGACAATCGGCTGCAGAATGCCGCGCC  
AGAGGACTTCGTACACGCCCTGGACGACCCGCATCTAACCTACACGGCCCGACTGCTAGA  
GGTCCGGTGGACATGCAGTGGTGGCGATCACCGACAGGTCTAGTACCCACGCCTCTAGCGT  
GGATGAAATGCACACTGCTGCCGGGGAAGCGTTTGTGGGCTGTAAGTCCGAGTTTCAATC  
TAGCACTCTGTTCTAGGTGGGATCGGTACGAGAGTGTAGTACTACGGCCGAAAGGGTA  
CCTGGAGTTGACGCTGTTCCGAAGCTCGCAGTCTGGGTTCTTTGTACGGTTCGTAATAA  
TTACCAGGAGGAAATCGTCCCAAAGGAAAGCGAGGCAGAGGTTGAGTGCCCATCAGAACG  
GATCTTGTAGTTGCTCACGACCTTCGGTTCCAGCCCATCGGCCCTGGTTGGGATGTGCA  
CGCAGTCATGTACAGGGCAGGTAGGGGCACCGTGATTGCTGCCTGTATCGCCAGTGTCTC  
CACCCCGGTGACATTCCGCCTTGCCACATTGATCTACCACTGGCGGCAGTCAGCGGAAC  
GACTAACGGAAGCTGGTACATGGATCAGGCGTAGGGGGAGCAGTCCGAGCAGCATTGTA  
CACCTTTCATGATGTTAAGGGACGCGCGCAGGTGGTAGTGTGCTCAATCGAGCGCCTGG  
AGTCCTTGGCCACCATGGGCCGAAGGGCAGCCGGGATCGCTGTAGACGCAGGTGACGATG  
GTCTGCCGGTAGGCGAGTGCTCGCGTTGCAGTGGCCGTTTATCCTGCCTGAGTTCGGGA  
ACGAGGGGGTGTCCCAATCGTCCGTTTCGAGAGAAAGGAATCTTGGCCGACAATAACA  
TCACCACGAGATCCCTTACTCTCCGGATTGGTCCGAGGGATAGCCAGACAAGCTACAGGA  
GGTTATATGGCCAAAACGATCTTAAAGGAAGTGGGCAGTGTGTCGTCAGAGGCTCAATTGGC  
GGTGGGGAGAAGAGCGGTGCCGTCTTGCTTGGTGGCGGGGAGAAGGACTCCTCGAAATTA  
GCACCGGCAGCGCCGCTGGAGGAGCAGTGCCGTGTAGCCCAGAACCCCGAGGTGGACCTG  
AACGAAGAGAACATTCCACGAATGACTCTGGTGGCACTGACGATTCACAACCAGAAGCC  
GGCACTAAGGAGCGTGGTCGTCTTGCCGTAGTTGACGGAACTCCCTCGGCATTAACGTC  
GGACAGCGATAGGACGGCCAGCCCTGCAATGTGGGCGCGGCTACCAAGATTCGACTGCAA  
TCCAGAAGGCCAGGGCTTCAAACAGTTGACCATCGCCTCACTGATGGTGGCGACGATCG  
ACAAGACGCACCAGTCGGAACCTCGTTGAGTACGACTTGCCTTGTGCCCGCGCTTTCCTCC  
TAAACAACCTCGCCGGCCAAGGTGGCGGTGATCCTCTTCCCCCGGGCCGAGACAGCTGCC  
AGATCGACCTGGACGAGTCGCCACAAGATCTGGCAGCCGCTGACGGCATCGAGCAGTCCG  
GACTGCACAATCGCACTGCCGACCTGGAGCGACTCGTTGCTCCGCTCCGGTTCGTAAACG  
ATGGACTGTGCTAGCTGCACCGCCTGCTCATGCTTCTGATAGCCACAGGCAACGCCCGGT  
GATACCGCTAGCCAGGCACAGGTATGATTCCCATCTGGCCATGCAGCCGTACACGGTGA  
TCAGCAGCTCTTACTGCAACCCCGCCGTGGTTGTCCCCCGCCAGCAGATGCCGATCCAG  
AGCTGACTCCCCGGATCCATGCAGATGCCCATGCGAAGCAGATTGCCAAACGCTACTCAG  
ACAAGTGCCTTGTAAAGGTTGATCGAGGGACAAGCAACCCCGAACGGGAGATGCATCG  
CAGTATGGCACGAGCAAGAAGGTAAGTGCCTCGGCCCGGAATCGAGCTACCCTGAGCAGC  
TATACCCGTATGTTCCCGATGCGTGGATAGCATCCGACGGCGAGCAATTCGGTTCGCGGCC

ACGTCGAAGAGTACAGTGGCAAACCTCTCTCGTGTGTCCATCCTCCGCGGGCGCCTTGGCC  
TGTCCGAGTTCGAGGGCGGAGATTATGGTGAACCTCTTGGACGGGGCCAAGCTTGGCGGGG  
TGGTCGTCTCTCGTGACACTCAGACCGGTGGCTTCATACCGGTACAGGTTAATTCGATTG  
CGACGTAAGAGCACAGCGATTACAATCCGATCGCCCAGGCCGTGGCCAGCGTCGAGAGCA  
TCGTGACGCGCCAGACTAGAGGGTTCAAGTACACCGAGCAAGTACGAGCCCCTGAACTTG  
TGATGATCGAGGTGATTCTGTAATGAAGCTGAGGAGGCACCGAACCTCCTGGACGGCGTCA  
ACAATCTGCTGGATGAGTCGTTGCCGACGCCACTGGCCTACCTGACGATGCACGGGGCAT  
CGCGTCGTAACGGAGGTATGCTCCTCGCTATCGCCCAGGGTGTGTACCGCCCAGCATT  
GCATTGGTAACCCGGCGCAGACCAGGGCCCTAGAGACCACCAACATCCTCAGCGCAACAT  
TGGAGACCAGAGAGAGCGTGTGGCGCTGGACCAATCACCAAGCGATTTCGATCGTGAGA  
AGCTCGTAGATCGTGTCTCAGCCTTCATCCCTGTTCAATTCCTATGTTGTGAAAGACA  
CTGCCGTTATGGCTGCGGAAGCCGAGCAGGAATCTGCCTTTGGACAACAACCACTGGTTG  
TAGCTAGCGGGGCGCTGGTTGCCGACACATCAGCAGGAGTCCTAACCTCAGGTGTGCCGA  
GACACAAGCAGTGGTGTGACCCCGGCCCAAACGCTGAGCCCACGCCTTCGTGCGGCC  
TGCTCCTGTTGCTGGCCCGCCACCTTAGCTAGCTGCTGCTGCCTACGTTGCTCATTAGGT  
TTCGAACCAACCTGCTGAGTTCACGGCAGCCCCACCCGAGCGTGGTGGCCTCCTCGTCCA  
CATAGGCGAGGACGTGTTCAGTGATCCGACTGCATCCGTAAGTAGCGTTCCTGGTAAACCT  
CATCATGAAAGGTAAGCACCTGGATCTCGGACGCCCTTCTTGGAAAGGCTATCGAGGAGGA  
TGATCCATGCTTCATCGAAGAGCGCTATCTTATCGAGGTGCACGGCGAGCAGCAGACAAA  
GTTGCTTCGCCGGGAAGCTGGTAGGTAGCTTTCGTCTTCCACCCTTACCGGCGACCGCT  
GCGTGATCAGATGCTCAAGGACATCGCTGGCAGTAAGTATAACCTGACTAAAGGGGGTTA  
GGTGTTTTTCTCTGTGCGGGCCGAATCAATTCGGGCCGGGATCGCCGACCTTATCGAGAT  
TGGCGAACTCAAGCAAATGAAGTTCGGCCGCAAGCAGATTAAGGACTTTGCGACGGCCTC  
CGGGCGAGTCGTGGTGTACAACCAGCAACCTGGGGTCTCCTCGGGTGCATGGAGTGGAT  
TCTCCACGAGGCTTATAATGTGGACGTCAATGAGCGCAACCTCTCCCCGCAGAAGGATCA  
GCTACTGCGTGCCAGCTTAAGCCCAGCGTGCAGAGAGGTCCGTAAGTGCCTTGACCCAT  
GACGTATTGCGCTGCTGAGACCCCCACTCGGTCGGGTTTCGGGTCGTGCGAACGCGGATGT  
GCGCTTGCACTTCGAGGAGTCCCTTGCACTGGTGAATCGAGCTATATGTCCAGCTGGAA  
GCTCGCCTCCAAGATGAACGGCCGTTCCCGGCCCGGCACCCTCAAAGTGCCCGTCGACCG  
CGTATGTGCAAGCGCCATTGCAGGCCGGAAGGCCGGGGAGGGGGAGGTAGGCGAGAGGAG  
CGCCAGCGACAAGCTGAACCGGACCTCGGACACTGTGGTATACGCCCGCCACTTCTTCGA  
CAAGTCCGCCGGGAGGATCTCGAACCTGGATGTCCGCAGGTAAACCGCCCGGGTGGACCT  
TGGCGCTATGACCCGCCAGTACGACCAAGCGTGAATCGTACCGCTCCAGAATTGCGGGTA  
CCTACTAGCCCCGGCACATCTCAAGCCAGGCTTTGACAATGGTATACTGCTTCCGCTCTT  
TCTTTCTGGCCTTGCCGGTGATGCCACACCCGATGCCGACGCCCTGGTAGCCGCTCACA  
CCAAGTCTTAGAGGCCATGATTTGCCTCGCGATGGACGCCAGTTTCTGGTCTACGGTGT  
CACCTGCTGGACTTGATCATCTTCTCGGTCTGGTGGAAAATGTGCGCCTGATCAACGT  
CGACTTCGGCACCAACGAAGGTGCCAACTCATTAGGCGTTGGTCGTAGCGTCATGCTGAA  
CGGCGCTCGTATGGCCACACCCAGCGCTTCCAGTAGTCCGCGATCGCCTCGAACGCCGT  
GCGTGCCGACTTCAACGTCACCGACGTCGAGGTTCCACGTAAGAAGATCACCTTCATCAC  
GAGAATGGTTCTTCTCTCGGCCCGCGTGTACGCGTTAACCGCCCATCCCTAGTAGGAGAA  
GAGAGACTTGCACCAGTACCAGGGCACCTGCCAGGCGTAGATCATTGGCCAGCGTCGCC  
CTAAGCTGTTGGGTTGCCCGACGGCACCGTCACCTTCCAGTAAGGGTTGCGGTATCAGCA  
ATGACAAATCCCTCGGCGAAGGACCTTGTTTAGGTTCTGCTCTCGCTGAGAAGGCCAAACAA  
AAGGAGATTCCTATGAATCTTACTTTTCTTGAGGCGGTGAACCTAGCCCTATGTGCCCTT  
GGCGAGACCCCCCTGACCTAGGTAGCCGACACGTACCCGATACTGGCCTAGTGTCTAACC  
GCTAAGGACGACGCTCGCCGACACACCCTTGCAGAGGGTTGGTGATTCTCATCTTGGAC  
GCCTTACCCAGTTCCCTCCCGGTCGCGTGTAGAGCTTCTATCCGAGGTGTCTCCGCA  
TTGTATCCACACAATGTGGCGAAGTTCGCCTGCGCGGGGGCGTTACGTGCGGTGTTGCTTGT  
ACAGGGTCTAAGCTAGATGTCGCTCGGCTGAAGCGGCATGTCCTACTGGATATCCCCGAC  
GACGAGCGCCTGGAGGGTCCGCGATACCTCGTAGTTTCCCGCTGCGCCTACCCGGTGTGT  
CTAGCGGACCTCGGCGCGGTAACCTACCGCCAGGTCACTGTGAACTAGATGTCCGCAGCA  
TACGAGCAGGTGCCGGTGGTCCGCATCAGGCAGGGGATGCTCACCTGCGGTAGCGTACC  
CCGGCCACCAGAGTCATCAAGCGAGGTACAACCTAGTGAGTTACTGTGGGGGGCCGTTCCGG  
GCAGCTACTGTTTGGCGTAAGTCAACAGATTGCCAAGGGTGGCCTTAAAGGGCAGAGCAA  
GTCGCACTTGAACATGCTGAGTGTATGAAGACAGGTCTCTCGCCGCGTAGTCCGGTACA  
ACTGAACGCTGACGCCATAGCCGCTACCGATGCCAACTGCCACGTGTACTTCTGGCCAC

ATTGTCGGGGCACGAGGTGCTGCTCCTTGGGGCCACTCTAGACGGGACGCTGGCTATCCA  
CGGCGGTCCAAACGGCGATGGACAGTTCACGGGGTCAAACCTGCTACTGTAACGCACGTAC  
AGGGAGAAGCTCGGGATTCGCAACACTACATGACAGCATGTTTCGTGGCGTATATCTAAGT  
TATCTCGCTGACAAGGATATGGTCTGGTCCGAGTGCGCACCCCGGACCCAGACCGAGCTGG  
CTACCTGTAAGTTCACGGGGCGTTCTCGAAGCAGTACCCGCTATCCGTCATCAACCA  
AGTCACGTGGCTCAGGAATTCCTGTTGGAAGTGTCCACATCTGCAACAGAGGCCATTAGTA  
TGCCGATGAATTCCTGATCACGTAGCTCCGCGCGGGGACAGATGCGGGTGTAACTATTGT  
TACTGCCGCCGGTCTAGCGTACTACGATGAGAGTGCTGACCTGGTCCTTACCGCCCCAGA  
AGCAATCGCGGCCAGTACCGACTAAGGCAGTAACTTCCATCGTGCACGTAATGCAGCTAG  
TATCAGGGACCCCGCTGAGCTGCCTGCGAAGCTACCTGAAAGTGAGGACGGGTTGATAAT  
CGCTATCGGCGCGGCTTACAACAAGAAACACAACCGCTGTGTTCGGTCTTGTGCGGATATG  
AGACGAGGATACGTCTTAGGGTTCACAAGCTGATCTGATGGACATGTCGGGACGGGTAC  
GTAATCGGCTCCGACCTTACAGACCGACTGCTTTGAACTACGAGCGCCGCGCATCTGGGGA  
CGCTACGGCGAACCCTGCCTTTGAGTGCACCTAGACGGGAAACTCTGGAATAACGACCAC  
TCAGTGGCCGTTGGCCTTGGTGGCTGGCGATTACGTGTGCATGTCCGCACGCGGGAACCC  
CTTGCTTGGGTTCCGGGCTGTGTGAGGGCCAAACATTGACAACGATACTATCTAGGTGCA  
GGCTACTAAAACAGTGGCCTCCCCGATGAGTACGCCGTGGCCTTCAACAAGGACCTGGT  
ACTCGATGCCCAAACCCGCAATGACCAGGTGGCGAGGACGAACCTACTCACGAATCGCAG  
CGAGACAGCGGGGGTTCATCAGATAGTACAGCTTCCAGTCCCCGACTCGTCTGTGGTAGC  
TGGGCCACAGTGTTCCCTGGCCAATCCCCGTAGCCGTTACGCTAGCGCGGTGTGAGAGCT  
GCTTGAACCTAGTACGCTGATGCCAAAGTGGACCCGGGAGACAGTAAGTAGTACCTGCC  
AAAGTACATTGCGAGGGCGATACGCTTCATGGCGATTTCCAGTACAACGAACATCGTGTT  
CGTCCGTACGAGGTATCTCCACGAGATGGTTGCGCATGGATACCTCAGGCAGAGTGAGGA  
GTAGTTTAAACGGAGCGTTCCAAAAGTGGAGCCTCCTGCAGGACAGAACGCGTGCCTCCAT  
CAGGACCGACCGCTACAAGATGCGATTCAAGGTCACGATTCGGGTGATCCTCGGGGAGCT  
CTTCAATTAGCGACTTGGGGCTGCCAGACTATCCCATGTGGACTCCAGGACCTGTAGCG  
TGTCCGAGCTGCCAAATCGGGCTACGAAGCGGCAATCCAAGAGTTTCCTTCGGACGTGTA  
CCCGGAGGATAGCGCCTTCGCGTACAAGCGCCCGGGCCAGCTGCAGTCACTCGGCCAGCA  
CTGTGGGGATCGTTCGTGTAGACTCGGTCCCGGTGTACAGCAAAGCTGACCGGACAAAGAC  
GGGAGATCAGTACCGTATTCGGTATCGCCACCTCTCGTAGCTGGGGCCACCCCCCCCAT  
CCTCCGGGACCCCAACGACGTATCGAACACAACAACGCGCACGCAGTAGCATCGTGTAAC  
ATGGTATCTCGGGAATAACCGGGGTAGTAGCCTTCCGTGTGGCCGATCAGGCACGCAGGTC  
GTCAACGTACACGAACACGGCGATTTCGGCTCCACACCCGGGACCTTGGCGCGGGTTTGGC  
AGAAAAGCCTACGGCAACCTTCGGCACCCCTGCTATGGTGGATATGTAGACGACACATTT  
CTCACTTGGAAATGGCGACCGCTAGGAAGTCAAATTACCGGCCTGGAGTACGGATTCCA  
GTACAAGCAGCGCATTAGGAGGCAGTTATGGCATTACCAGCCGTAATCGCGTTCGGCAGG  
TATTCGGCAGCCCAAGGTATCTGCGACGTATTGCCAAAACGCGAGCAGACTAAGGCACAG  
CATATACTACAACGGAAGCCAACCGATGGGACGTCCACAGGCGTTCCAGGGCATATTG  
GCAACCGACGTGCAGTGCGGGCACGTACGCTCACATAACCGCCAATAAGTTTCAGTTCCCG  
GGACCTGTGGCGGTTCGAGGTGGGTGGAAGCCCACGCGCCGGCCAGGCGGCGTCCGGGGGTG  
AAGGGGGAAAGCGTTGGAGCCACCCAGGAGGAGATTGGCTCGCAGGGGGCCGAGGTATCT  
GTTGAGCTACATCATCAGGACCGTGCAGGGGGGGGACTGGAGCTACTGTATCCGGGAG  
CTGTTGCCCGGCACCCATGCATGCTTGGGCCAGCTCCAGGAGGTTCCGAGTACCCGGAGA  
TAATTTCTCGGGGACCCTGTACAGGTTGGGCTGTACAGCTGGTTCCGCATACGGCTCTATG  
ACGTTCTTGGTTGGTAGTGTGCGGTAGCACATCAACCACGTGCGCCACTAACGAGCAAAGC  
GGCGTAGCTGTTTCTGGTCCGGGTGGATTCCACCCGGGCGGAGGGCCCGACCGATAGGAG  
AGACATATAGCTGAACGCGATCCGCAGCTCTTGGGTCAAGCTACTGGCAAACCTGGTACAG  
GTGGGTGCTACAACCCGCATCGATTCCAGGCTGAGCGTGCAGGGCCAGGGCAACGGA  
GCGCTCCTGGCGCGGAGTATCCTACTGCAGATTCGCGCGAGTATTGTTTCAGGAGAAGTTC  
GCTTCCGGCGTGATGAATGAGTACATAACCGGGACAGCTGGCACTGATGCTCGGGCAGGCC  
CTGACGGATGTGGGGGGCTATCCCCTCGCCGACAGTTTGTTCGGGTGCTGTGCCAAGAT  
TAAGACTACCGTAACCGCCAGGCGGACACTGGTCAGCGCGTGCACGCGTTCATCCAAACC  
GACTGTCTGATATTGCCACCTGAGCAGTTCATACAGGACTTGTGTGACAGTCCCGGGCG  
ATCCTTGTGGGCATGGGTGACTGACTGTCTGATCAGGGCCCTGCCAGGCCCTCGCCCC  
CAGAATCTTCTGGAGGATGCCATCGACGGTGCCATTCTAAGGTCTGCGAGGGCGAGGGGT  
ATTGAGGAGGATAGGATGCGCAACTCTTCGTACGGCCACAGAATCCTTAAAAGCTACAGC  
GAGCCCAAGCTGGGCGGGGACCTCGATACGCAGCAGTAGTACGACTAGCAGATGGCATGC

TTCCACTGCGACGTGGATGCCTTAGATTCCCCGCCCGTGGACATGCAGCAGCAGGTGGCT  
GAGCAGTGCCTGATGAAAGCGCACAGTCAAGACCTCCGTGAGGTGGCAACAGCTATGAAG  
TTCTGGGGCCTCCTGGACACCCTTGAGTTCAACATCCAGATAAAGGAGAATGAGGGGATA  
CCAGTCTCGGAGGGCTGTACCAGCGCCCTGGACCGCGTGGGGACCAGCCGCAGAACTTCT  
GAGTTCGAGGCCCTGGTCTGGCAAAGGGCCATCACGCCCAGCAGATGCTACTTTATACG  
GCGCAGGTGGATACTGGGGGGAGCAAGACCGCGAATCAGCTGAGGGCCCTCTTGGACAAG  
TCGTACGCGGCGAGCTCGAGCAAGGAGGCTTTTGTGGATGTTTTGCAAGCCCAGCAAAGG  
GGTGCTAAGCAGGACCTGGACATTTTCGGCTGGTCGGTTCCCGAGGCCCTTGTGCTTGG  
GCGGTGCAGGCATACCTCCAGCAAAGACAGTGGCTACTCTGGCCGCTACGGCCCTGTGG  
ATGGGGGCACGCCTCGGCACCCTCGCGAAACGCGCAGCCACTGAGCGAATCGCCGCCGTG  
CGCCAGATCACCTACACCCGGATGCTGCAGCCCCTGGTCCGGTTTAGCTTGCTCGGGCC  
TTAGCGGACGCGGCCTATCTAATGACCACCACGCCCCGGAAGGGGAGACAACAGCCCTT  
AGCGGCCTGGAACGAGAGATTCCACGCAGTTTCAGCCAGATCACAGGGTACGTGACGAAG  
GGCACTGCGCCGGTGAAGGTCTACGCACTGCGCCCCTGCCCCAGCCAGCCTACGAACCG  
CTGGATCGGCCGTCCCGGCGAGCTCAGTCCCGCAAGCTCGAGGACGTTGTCGAGGATGAG  
ATGCAGACTGGCAAATTCTCCCAAATCCGGGGTCTTTCCACGGAAGGTAGCAGAACCCGG  
GACGAGGGTTAAGGTTTCGAGACGCGGCGTGCAGGAGCCGACTACGGAGGCTCGGGCCCCG  
GCTCGACAGACATACTACGCCGGTTCGGCGCCCAGTGGGATTGCCCAACTGGCTGCCGCC  
AGAGTCGAGCAACGCACGCTCCACGTCAGTCCGGAGGAGGGCAAGACTACGCGGGGAGTG  
CTTCCAAGAAACGTTGCACTAGAACGCCTATTAGATAACCCGAGAGCCACAAAAGATCGG  
GTGTCGCCTGCAATGTTGTCATTGTGCCCGCAATTCGACATGAGGCCGACGGGACTCC  
TACTGGGACGGTGTAGGCGTGTGGGCGATGGGAGTGTATGTCGATGGCGGCCCCGCATCG  
CAGCAGCTGGTGATTAGGCAGCACGTCAGTCTGCAGATCAACAAGAAGATCGACGAGACT  
GTCAGCAAGGCCAATGGTTGTGGCGTCCGTCATCTCGTGACGCACGGCGAGGTCGAGCTG  
AGTACCTAAGGCCACAAAAGGACGAGTAACCGACGGGACGATCTGTGCGACTGGCGCCGC  
GATTTTGTGCGAGCAAGAAGGTATTCGACTTCATGCGTAATAGGATAGTAACGCCTAAGCA  
ATAGGCGTCGGCGAGTAAGTCACTGGGAGCATGACGATCAGCAAAACGAGCACCCGCGAA  
TAAGCCTCGGTGGGATTGCTCGTCAGTTCCGGGAGGGTACTGCTGGAAGGCGAGCGCAAT  
GCACATGAGTTGGGCGTAATACTGTGTGATCGCAGCCGGCCCTCGACGGCGCAGTGTAT  
GAGCTCGGCCCAAGGTGCCCGTGATATCGAAAAGACCTTAGAGGTAATCCCCAAAAG  
ATCTTCGGCACCCACTAGGAGCATGAGCGGAAGTCCAAGTTGTACAAGCAAACCCAGTT  
TGTGGTGAATACTTCATCACCAAGAAAGAGGGGCAATACTTCACAACTTACGGCGGCTA  
TATCACCAACCCAACAGCACCAATATTCGACTCTCCCCGGAGGAGATCGTGCTATTGAT  
CGCGTGTGCTGCTACTTCGGTTACCCAGGAAAGGCCCCCCCGTGGACCTCGGCATGGCTTG  
ATAGATAGCAGAGCAGCAGCAACTGGTTCGAGTTCCGCCGTTGAAAGTCGCGCGTACAGA  
TGCTAATCGCAGCACTTGGGATACTCGGCCGGCCGGTCAGCAAGAGACCGAAACCTAGTA  
CTTGCAACGAGCATACTGGAGCATCAGCACGAGATGTTCCCTCTCCCCGACCCCTAATT  
CGACTTCAAGCGGTAGTACGGCGACATTCTTCTTGCCCACAATATTCAGGATACCGACGA  
CAATCTTACCACCACGGCGGATGTCAGGTTATCTGTGGAAGCGAGTTGGATCGCCACGGG  
TATTGGCGATAAGGAGGCCCGCGAGGCTATCTTAGACCGCATCGGACTCGTCGCCTTAC  
GACAGGTAGGGGCGATCCACTGACGATCTATGTGGACAGCGCAATCTACGGTGTACCCT  
GCTGCTGCAGATGGGGCTCCTTTCTGCGCCCTCGCTGGCGGGAGTCTACCCCCGCGGT  
GTCTTCCATGGCCTGCTACGTCGGTAAGGATTATGAGGCCCTGGACTACGCTATTAGCTG  
CCGCCTGACCGGCGGGGCCTTCTCCCTGGTGGATGGTCGAGGCATGGACGGTCTGCGTTC  
CAAAGCCGGGCATCCTGGGGGATCTGGGGGCATGTTCTGGGGTCTCACGAAATTCGTGTC  
AGCTATCGACAACCGCATCCCCCAGCCGTCGAGTCCGGGGAAAGGGCTGGCCAATCCGGT  
CGACGCTCCGGGGCGTGGTGCCGGTATCCTAACCAACTACAATGCGGCTCGTACCTTCCG  
AATGAACTTAAACATGCTCGACGGCAACTTTACCATTTTGACGATGGGTCTGGGGAGGTC  
TATCGCCCAGGTTTAACTCTTACACGTTTCAAGTAAAGTAGACGACAGTGGTTTACA  
CGGAGACGCGTGAGATGCTCGGGAGCGCAAGGTGGCAGGGGTGCTTGCCCCGCCGGCGTGC  
GGGCCGACCCGCTTCGGTGCCTTACGGATTGGCGCCTATACACGGACGTGAAGAGCCT  
TGCCGACGTGGAGTTGGCGATCATTCCAGGGGGCGGAGCTGGCCAAGCGCCAGGGACG  
AGCTGTGCTTGCGAATTGCACATCCAGCCGCGGTTATGGCCACCGCGCCTGGAGCCAGTT  
GAAGAGGCGTGCCTTTGAGGACCTTACGGTAGCAACACCGTTAAGAACCTGCTCACCGA  
GAGCATCGTGCGGGGTGTAATCCTGACCAAGAGGGAGGCTGGGTGCAACTGTTCTGCGAA  
TCTGACACGTACCCGATAACAAGGCCGCGGCCACCGCCCCGTTTTTCATCGCTGGCCCCGG  
CAAGACAGACACGGATCAAATAAGAGCTTTGCTCTGGGAGGCCGCTACAGACGACGCGAA

AATCAAGGGTCTCATGGGAAGGATCAAGGAGAAAGTTGATGAGGCCGGCATGTCCTAGGC  
CAGCGAGTCTCGCTTACCGCTGGAAATGACCGTCGAGATGACCACACCAGACGGTTCGCTC  
AATTTCCGGGGTGACATGACTGACACCGCTCTAAGTCGCCTGGCTGAGAACTACAACCA  
GCAGCTGGCGGGTTCGGTCAGCCCTCTCGGCAGCCGGTCTAGGCGGAGACTACGTAACCTT  
CCAGGCCACCAGTGTCTGCTACCTCGACACATTGGAGAAGGCAAAGCTTATGTATGCAA  
CAGTGACGATCGTATGCTTCAGTTCAATCACCTAATGTAAGAACTGGCCGGTCACTGCCC  
ACATGCCAGTGTGTTGTGTACAACCTGCCAACGGACTAAGAGCCTTGCGCCGGTCAAAA  
GGTGACTGCCTCTGTGCTGTGGTAAGTAGCTGAATTCTGGACACTGGCGTTCGTCACTG  
GACCGATCGTACCATGGTAGAGCTCTTCTAACCGTCCCCATTCGTAGTCGGGTTGCACCC  
TACGGCTGATCGCGATTCTGACTTCTGCTACCAGTGGTCTTCTATGGCTCGTATCGACCT  
CGATCTCGAGGTTCCGGTAAGTGCCTGGCTTAGTCAGTACTAGGCTATCCTCCGCTTCCG  
GGACAACTTGCTGGACCCCGAGCGTTATATGGGCAACCAGGCCACGCCGATCCTGGACGT  
GATGAACTATGTCCATGCGCACCAGGAGCGCCTGAACTCCGACTTCACCATGACCACGAG  
CGGCAGGGAGGGAAAGGGCTATCGTAACGCGTAGCAGATGCTACGCTAGTACGGCGTGGA  
CGACTCGGCCGGGGTAAGATCAAGAAAACCTGAGGATGACAACGCCGAGTTCAACGGGAA  
AAACGTAAGGAGTATGCACTGGGCGGGCTGGCCGGAGGATGCAGACGATGCCGTCATGAG  
CGGAGTTTCACGGCTCATGGACTACACGTCCCTGTGCGGTAGGTCGGTTCAGGGCACTAG  
TTTCGCGGAAGCCCGCTCGGGCAGAGTCTGGGCCAGTTCGGTAGCTACGTGATCTTCCG  
GCACAACAAGCTGATAAGCGGTACTATCCAGAACTCAGCTTAAACTGGACTGGTAGTCCC  
CCTAACGTAGCAGTACCCACTACCACGATGATTGTAGCTGGAAACGAGCTGGGCATAGG  
CGAGCAGGGGGACCTGGAGTCAGAGGCCGGCCTCAGGAGCTTGGCAAGCACAGACTTTGG  
CTAAGCTCCCGGTATCGGGTTTATCGATGACGCAGCAGGTTTCATCTGCCTGACTGGAGG  
ACGTGGTGGGCCCTCTGCCCTGTGACAGGCCTGGTCAACTCCCCTGGTGGTATTGCTCA  
GCGAGCAGTGCACCTACTCTAAGGTGAGAGCTCTGAGCTCCATGACGATTGCATGAAGGC  
TGCCTTACCGCACTTTCTTTCGTGGGAGTGATGGCGGGTACTGCACGACTACAGAGCGA  
ATTGAAGGAGCAACAACCATGTCGCAAACACGAAGTACATGGGACGACTACCTAGGGGAC  
GGCGTAGAGGATACGGTCCACGACAAATTTCCGGACCGGAATCAGCAGAGGGAGTTTGTG  
ACTTTGGGCGGGGATCCGGAACCTTACACATTCATCCCCGCAGGGGGGATTCAACTCACA  
GCGGGCCCGGTAAATGGGGTCGCAATCCGTGTACGGCGCAGCGCTGAGGCATTCCACCCT  
CGGCGGACTCCGCCTACGGCGTGCCATTATGTCCGCGATCCATGGCGGAGAAAGATAAG  
GTGTTTTTGTACTCTACAGAAGAGGCGCAGAATGAGACACATGACACTGGTCCCGAAGCT  
CTGAGTGTGCGAGAAGAGGCCAGCGGTATTGCGTAGGCGCCATCGTACTAAGTGGTATCT  
GCCGCCACTGACGCCGCCCGCCGTTGCTTCTAGATCCCGCCGACCCGGGGCAGGGGGCAA  
GGGCTGGTAACCTACGACCGAGGCGTAAGTTAATCGGACGGGTTCGGTCGATCAAAGCTTA  
CTGTTTCTGGATATGGGCCGGGACACACCAGCGCAATTTCCGCGGGTTGGTGAAGTCGCC  
AGGCACCCACTTTCCGCGCTATACGCGACCCTAGCGGAAGCTCAGATTGTCCATCCTCAT  
GCTGTGCGCTCTCCGACCACCTAGACTGGGCCGCCTTGACGCTGTGCTGGATTCAAGG  
GCTCCTGTACACACACCGTACGGGGACTATCAGATACAGAGTGTGATTAGCGGGAAGGGC  
TCACTACAGATTTGGGGTGAGGGCGCTATATATATTTTAAGCCTGTCTGCACCGAACACT  
GATAAATCCGTCCACAGTGGTGTGAGGGAATAAGCCGCCTCGCCGAGTATAGCCTTCGTG  
TCGACTGGTTCCCAACAACGACTATGCCCCACCCCTAATGTTGTGGCGGAGAATTTA  
ACGATCATCCATAACCGGCGTGGCAGCAGCTTCTCGGGAGTTCGCGCGAGCTATCCGGCT  
GGAGAGTTCTGTGAGGTCAGTGATCTTACAGGGACTACGGTGACAATCCGTTACGACCC  
TCTGCCGTGAACTCAGGGGGTACGGTTGCGATCTAAAATGTACTCTTTGGTGTAGTTGAT  
AAAGCTAGCAGTCACATCGTATGCAGGGCAGTACCAATGAATCGACTGCTAGTAGAGGTA  
GTCGTTTTACCGCGTGTGCTGACGTGACGATCACCTTGTCACACGACACCAGTGTATCT  
TTTGCCACCCTATGACCCTTAGCGCACTTTGGGGACAACATCGAACCTCGGCCGACCGG  
GGTTACGACATTTGAATAATCCTTGAGAACTCTCACGGCCGTGGGGCAGACATCTGTA  
GTCTTCACTAGTCCACCTGACATCGACACTAGCGGCCATGCAGAAGTAGGCTGGGTTCCG  
GTCCGTAAAGTGCGTATCTGTAGCTGCACACTTGGGAATGATATTGCCTTTCGGCAACAC  
GGCGTGGACGTCCACGTGAACGTGAGAAAGTGCACCAAGGAAAACCTGCACGGTCTGCGGT  
GGTATATTTTGGCAGGGTGCATTTCCGCTACACACACTGTAGAATGACTAACGCGTTG  
GGTGTCCGACTCTTATCTCCGCTGAGATTCTTGGTGGTACATGGCTTGTAACCACGGC  
GCGTTGTACACTCCCGGCGATCCGCAACCTGGTTGCTGTGGGTTTATCGAGGCAGGTCGA  
CGTACCGAGTCTGACTCCAAAACAACGCAACCGTGTGAATTCCTTATACAAGGCGGC  
TGTCTGCGTGCGCCAGATTAAATAAGTCTCGTTACCTATTGGGCAAACGTCTTGATTGG  
AGTACAGTTCAGAAAAAATACAGTCAAGCCGTCAGGCTATTGATGCATGTTCTCTGTCC

AAGTACTACTACGCGATATTGCCTCGTTCAGTGGCAATCGGGAGCACTTGATGGTGGAT  
ATTTAGCGGGGTTGGCAAGCTGCATCACGTAGCCGTCTACTACTGGCGGTTTCGCAAGT  
GCCCCGAGGCGGTTGCCTGTGCTGCGTGGTAGGGTTTAAGTAACAAGGGCAACCAATGCG  
AGTAGCGTACTCCACCACTAACGTTACGGTACCTTTATTCGAGGGGCACAACCGGCCAG  
GTCAATGGGACTGACAGGAGATACGGCGGTAGAAGGATCGGGCGGAGGTATCGCCAATACG  
ACCGAAGCGCCCTGAGCGACGTAGGGTCTGTTACGGAGCTCCCGACAACTTGAGCTCA  
GGCGTCCCTAAGCGGCTGAACTGGCAGGCGGGGAATTACGAGGTAACATTGTGCAAGCAA  
CGAGCGATGGTCTCGGGGAATTCCAAAGCGCACTGGCGCAGCTTATGTTGTACGAGCTGC  
GATGATCCCGAGAGCAGGAGCCTCCGCTTCCCTTTGTCCACGGCTGTTAAGGCTGATACCC  
TAAAATTCTTTAAGGATAACACCATTACGTGCGCTCCAACATGGGTGCGATGACCTAGGGG  
GGGGGCGCCAGCAGCGCCAGGGTAAACGAGCTGGGAGCTACACCCGCCACGTACCCAGC  
TAGAGCTTGCCAGGGGCTACGTGCAACACTGTACGGAGGATATCCAATGGAGGTCCGAG  
AACGGTTTGAACGGACGCAACGAGTGCGTATGATGTACCCGGAGTTCGTGGACTACTGCC  
GCTGCGGAAGGGAGTACTTCCATTACAGCAAGACGTGTATGCAGGAAGACATTGCAGAGT  
TGATGCACTTCGGGCTGAACCCTCAATGGTTCGCCGCCAACGGGTTCGAGCCCAAGCGTG  
CCATTGCATGTCTGTTCCGGCCTGTGGGACCTGGTGCAGGACCCACGCATCTTGTGGTCC  
CCGTCTGTAGCGGCTAGAATGAGGCTGAGGAGAAGCGCAATGTCATGCACCGGCTGATCC  
AGAAGTGGCCGCTGTTGCAGTACCTTGCCCCTACAAAGTACGCCGGGGACCGAACCTCTG  
TGCGGGAGTTCCCCGTGGCCTGGGCGTTGATGGGTGTCGACACGTCCGCATTCTGTGACCT  
ATCTGGGTGCCAGTCGGTCCCTATAAGGGTCTCGTTGCAACCAGTTAAACCCAGGGGTTA  
TCGCGAACACATAAAACGGGTCCACCGCCACCGCGCGTGCGAAGATCATCACGCACTCGG  
AGGAGTTCACCTCCATTGTGGCCGACAGGAACCGATGCATCTTATACCCGGGCAGACCCG  
AACCGCGTAAGTCTATTTTCGTGCACCCGGACTCTCCGTGGCTTCATTGTACGCGTATGGC  
CGGGACGATACACTGAAGTCCGCGAGCTTCCGAAGTGCCGCGATTTCGCTGGAACCCGGGA  
TTCTCGATAGGATTGGAGTACTCGGCGACCCCGTCACTCTAGTCGTGACCCGGACAGTA  
CTCGTCTGTAAGGACCGGGCCGGAGCGGTTCACTGCGGAGGCGGTGTGTGCTAAACAGC  
GGGACCAGGGGCGAGATAACTGAGAACTCCCGTTCCTGTTGAACACCGCCCTCGCAGACC  
CTGCACGTCCGCATATGCTGCTCCGCGAGCTGATCGTGGCCGACATTCACATGAGTCAT  
GACCGGAGAACGGTTTCAGGGCCGACGGCCTAAGAATCAAGGTTCGAATTGCCCTAGGGC  
TACCGCTTAAGTCAGTGGAGATAGTCCGCCGAGCAAGAGTTAATGTAAGCTTCGCGCAGA  
TCAAGGCGATCAGCCTGTTCTCAACCCCGCCGTAACGGCGGGGGTGAGCTCGCGTGTG  
CCAAGGGCTGTGCAGTTGTGGTGTACATCCACGTTCGTAGCCTTGTGCGGATCCAAGGACT  
CCGTCTCTGATGCCATCCTCTACACCCTGGTTCAGTTGAGGAATGACTTCGGGGTGAAGG  
TCGTCTTGTAGGGAAAAACAAGTGCAGGATGTACTGTGACCCATCTCTTCCGTAAACATT  
TCGAGGGCTTTGGCCCTTAGGGTAAGCATAGCCCCCTAGGCGTAGGTGTAGACGTGCGGC  
ATAAGACCGAGCTGAAGGAAGTGCGAACCCCTCAACACGATGCGTGCAGTGAGGCGGAAGA  
ATCGCCCCGCACTGCATCGCAACGCAGTAGACAGGGACCTGGGGTTGCACTAGCAGTACC  
CGTTGCAGGCCCCCGATGTGCGCTCGGGTCTGTACTAGAGGCACAAGATCACCTCAGCCG  
GAGGCCCTTAACCCAGGAAGCATGAATAGATGCTCTTGAGGGTGGGGTTGCGGAAGTCT  
GTGTTGTCCTGGTGACCGACGCGATGAAGGAACAAGAGCGGCGCGATGCTGGAGTAGTGC  
AGGAGTCTCTGCGTAAACCAATTGGCACGGGGCCGGATGTACGCCGCGCACTCCCGTCTT  
GCCAGCGCGCTATTCGAGAGAGGTTGGGAATATGACAAAGAAAAGTATTCCCGAGCAA  
CGCCGCGCTGCAGGCTAGCATTAAATGTACCTATCATCGGAGTGGCTGCAGCTACCTTTCT  
AGAGTACACCGTGAGGGACTGTCTGGTGCTTCGTCTGTGCTCTTTCAAGTAACGCCGCT  
GGGGTGCAACGTCCGGAAGTAGGACCTGCTGGGGCGGGGTACGGCCGCCGCTAGTCTCA  
AGGTTACATTGACCTCGGCCGCCCTTGCTCTCGTTCTGGGAACTGCCGGCGTGTACAACG  
CAGCCGTGTCCTTCGGTCCAGAGGACGCCCTCCCCACCCTCCCGTACAGGGGCCACGGGG  
GCGGCACTACCTCGTCAGATGGTCAGACTGTGGGAACCCCTAATGCCCGGTACACTGCGC  
ACAAGTGCCTGAGGCCCGGCTGACGGCTTTCCACGTGTACTGGGAAGGCATCAGCTAGT  
ACGGGCCCCAGGAGGACCCAGAGAGCGTCAGAGCCGCGATGCTATCCGTGCCGTACAGCG  
TGGGTGTGTACGGCCGGGTCTGGGTGCTAAAGGAGTGGGCTCGCAAGGTCCCCCTCGCT  
TCCGGGTAGCCCCGGCTTCACGCGACTATACAGCGACCTCCACGCCATCCAGGCCCCCT  
GGCAAGGAATCCACGGGGTAGCCTAAGGGTACAAGGTATCGGTGCAGAGTAAGCCTGTCC  
GGGTGCTTGATTAGCGTCGATGAGTTGATGATGTACCGTGTATGGAGGACGTGAGATGAG  
TATAAAGGTAGCCCTGCTCCTGGGCCTCGTTGTAGTGGTGGGAGTGGGCCTTTCCGCAAC  
GCATAAGGCGCGGCAGTACCATCACACCCCGATACCCTAGCGTCGCAGCTAGAGGCAGC  
AGAGGCCCGAGCGGAGCGTTTTCAAGGAGGGGGACTCCCTGTCAGGACCAGGGCCACCGC

AGTAAAACGACAGGAGCGGGGTGCGTTGAATTAACAGCCTGCTTGGAGAGATTCTCCTGT  
GCCTGCTGCCGGTCGGAGAGAACTGTGCGCGCATAACAACACCTGAACCTGTCCGCGGCC  
AGCATCCCGCTGAGCAAGTGACGTCCACCTCTGGTGTGGTCCTCGGACTGCTAGCGTAGC  
AACAGGCAGTAGCACTGTGCAATGCGCTGCACTGCTTCGTTGATTGAAAGAGATAGATAT  
GGGCATTAGTTCAGCAACTGCTGGTCACTTCCTGACCGCCCGAGATAATGCAGCGACCAC  
GCTGCCGTGTCGCCATGGCTTCACTCAGGGTGATTCAGACCCTCAGAATCTTGCCTTGGG  
TGCCACCTGGGTACCCGAGGTGCATGCTGGCCTGGATCTTGCCTTGTGGACGTAGCGAAT  
TGCCGGCGATGTACTGCTGGCCACGGGGATTGTCGTTGTTTATGGGCAGGCCCTGACCGG  
TGACGCCTCCGCCGTCACCTACAGCACCAATTGACCTTCACAGTTTTATACGGCGCCAT  
CACCGCTTTGGCCTTGAGTTAAGGATCCGGCGTGCTCAGGGTGCTCTTGTCTTAGCGGAC  
GCCTTGGCTCCGGCTCGTGTGACGGGTGGAGTGATCTTACTGGCGGCTGGAATTCGCTGCC  
ACGATCCGCCAGACCTCCCACGCCTGTGAAGTCCC CGAGTCCCCACGGTCCCTGAGTGCG  
GGTTTCTTCGCTCCAGTGCTGGGGGTACAGTTCGCGTGCTATGTGCGGGCGTAGTTGCAT  
TGCGGGTACCGACGTGCGTCCGGGAGGTTTGGGCCACGGCGCGTGGACAGGTTCTAGGGC  
GGACCTCCCTTCTGCGGCCTAGTGACTTAATAGGCGGCCAGTGGTTCCTGAGTGGTTC  
CCTACTCCCTTCCCCGGTCCGGTATGGGTTCTTGGCGCGCCCTGGTACCTCTCGTCTG  
CCTGGGGCTGCCT

>NewGenomeName\_6

CTCATTCGCTCCCGCCTGCGGGCTTCACCAAGTAAATTTTTTGCAAAGTGGATTACCGC  
AAACCCATATGCCAGACCGCGCCAGATAAAGGTTCCGCAAGGCATTGAGGATCTGAAAG  
GATCGAAAGGAATTGCAACGTTGTACAGTTCGAAAGAGCCAGGGATGGCAGTAGAGAAAA  
CGTAACCTGTCGAATCTATTGGGTACGTTATAATTTCCGTGGGCATTTGAATGAAGGGGG  
ATGACCTGATTAGTTGCATTGCTACGGTTGGAATGCGTTTTGTTTCAGGTGGTTAGGCAT  
GATGGGGCACCATCTCATAACTGAAATTTTAAAACCGGCGACAGCCCCGACGCTTTGGC  
TTCCCTCCAGCACGGAATACTGGCTCTCCACGTAGAGGCCCTTGAGTTTGGTTCTGATC  
CGGACCTGTGGCAGACTGCCCGCTCAGACAAAGAGCAGATAAAGAGCGGGAGAATTCTAA  
TGGTGCCCGGGGCCGACTCGAACCGACTCGTCTTGCAACGGCGGATTTTGAACCGATG  
GGATACCTTTTAAATCAATAAGTTACTGATTTAAAAGGGGCGGAAAAAGGCAATATGGCT  
AAATATGGCTAGATGTAACGGGCCTCGCTCGCCACGTTGTCGCTATTTTTTAGCGAGGTG  
ATCGGGTTGAGACGCACCGCATCTTCCAGGTGGTCCGGGGCCGAAGTGGGCATAGCGCGTG  
GTCTGCTTGATGTCGGTGTGGCCGAGGATGCGCTGTAGCACCTGGATGTTGCCGCCGTTT  
ATCATGAAGCGACTGGCGAATGTATGGCTCAGAACGTGGGTGCTCTGGCCGGCGTGCAAC  
TTAATGCCAGCCCGTCTGGTCGCCTTCTCGTAGTCGGCATAACAATCATCGAACAGGCGG  
CCAGTACGCCGGGGCAACATGGCCAGCATCCAGGCAGGAACGGCAACAGTCCGGTTTCGC  
TTGCCCTTGGTCTTGGTGAAGGTGAGCCGACCCATGCCGATCTGGGAGCGGCTGACCTTT  
TCTATCTCGGACCAACGGGGACCGATCGAGAGGCAGAGCAACACAATGAGCCACAGATCC  
GACTGCTCTTGGCAGGCATCAAGCTGTTCTCTATTTTCATCCTGGGAGAGATAGGCCAGC  
TCGCTTTCATGCACCTTGTACGGGCGCAGGTCCGGCCAGCGGGTTACCGCCGCTCCACACC  
CCCAGGCGTGCCGGGCCATTGAATACCGCCTACAGATAAAGCGGCTCCCGGATGATAGTG  
GTCGGCGTACCTGCTTGCCTGCTCAGGCACATAGCGCTCACCACCCAGCTGGCGCTCG  
CGGTATGCCGAAAAGAGCTCGGAGGTGAACACGGTCGCAATGGGGTTATCCAGTGCCTCG  
CACAGCCACACCAACCTGTCCCCTCGCCTTTCACCGTCCAGCCAGGGTCTGGCCGTGTCGT  
CCGAACCAAGCGGCCACGAGGTCAGAAAGCCGCCGCTCATCGCCGGTAGCGACAACCGCC  
ACTGTCTATTGCAAGGGCTTTACGGTGAGCATGTGGGATTCCCACGCCAGCGCCTCCCC  
TTGTTGGCAAAGCGCTTGCCTTACGGGGCCCATCTCGGCCATCGGGGAATATTTTCAGAC  
AGCCAGGGTTTTGACTTGTGATCTGTTTTACGAACCGACATGACCACACACCGCCAGTGC  
TTGTTTGTGGGATGTGGTGACCAGCGTCAGTAGTTCTGGTGCAGTCTGCACCGCACTGGC  
GTCACCATTTCTGGCGAAGGTATAGAGCTGGCCGACAAACGCATCCGTGCGCTGCACCAG  
GACAGCAGCCTGCCGGATAACCACATCATCATCCAGGTGGCAGGTACGCAAGCCGTTTCAT  
AGAACCACGAACGGCAAATATCATCGGATTGACAGTGCTTACCCGATACTCGGCGATCTG  
GTGATAGTCAATCTGCTGGCCATCAAGCACGCCGCCAAAGAGCGCCAACACGCCATCAGT  
GGTTTGGTTTCATCTGCAGATAGATTTCTGTTCCAGTCGACATTGCTCTGCGCGGGATAA  
GACACGCAGGGCCTTGGCTGGTTGTTGCTCTCTGCAACATCCCGGTTTCCGTTGGCGG  
CATAGGGGCATCAAACCCAGCCGGACGGAACAACCACGCGCCAGCGAGCGCTATTACCAA  
CAGCAACCACACAACCTGATCCGGCTTATCACGGCGTACTGATGCAGCCCTCTGAGCCCG  
TTCCTCTTTGCTCATCTTGAGTACAGACAGGGCATGACTGAAGAACAGCAGAATCCCATG  
CACTGCAGCCAACACGGCCAACAGCACCAATCCGCCAGACATCTCGATTTTTCTTCCGG



CACCATGCTGAGCAACGAAAACCGAGGAATGCATAGAGCCCGATAGAAAGCGCATTCAG  
CCGGCGCTGTGTCCAAACTAAGTCGGTTTAAACAAACTGATCACCGGCATCAACAAGCA  
TAAAAAGGCTGTCCAGATAGCCAACACAGAAAGCATGAGAACTCCTTAAAACTTCTGACC  
ATCCACACCACCCGGCCGACCAGGTCTAGCTCGGCCAGCTCGGCCTTGCTCAGGTCGCG  
AGATTTATACAGAGGGTTGTCAAAGATGATGGGAACCCCGCCTAGGTCGAACTGCAAGCG  
CTTGACGAACAGGCCGCCATCCAGGCGCAGGACATAGCGCCCATCGCGGGGTGCTTCCCC  
GTTGTTACAGGCGAACTAGGATCACATCACCATCATTGATGGTCGGCTCGATCGAGTCGCC  
CTTGCCCCGGATAACCGCCATCTTGGCCGGGTCAAACCCCTCTCGGCAGCCAGTCGGT  
ACGCAGCGCTATCGGCTCGGCGAGTGGTTCATCTGTGATATTGGCGCCCTGCCCTGCGCT  
AGCAAACACCTGATAGGCGGGAATCGTTGTGAACTCTTCGGTTACCTGAAAGCCTTGAC  
ATCAGAAGCGGGCGCAATAGGAGGATTTGTACGAGCGCTGGTCCCTGCCTCGCCGATAAC  
AAACACCAGTCGGTCAAAGGTGACACCGCCTGCTCGCGCCAAGTTTAAAGCTCGATAAGT  
AGGAGGAATGGTTCCTCATAACATAGCGCTTGAGGCCGCTACCGCTCATGTCTGCTCA  
TCGAGCGAAAGCGCGAATTGGTTCGTTGCCTATCACCTTAGTAAGTCGTTTCGGAGAAGGA  
TGACTGATCTAAATCAACCTTTAAAGCTTACTCCGTAGTCATAAAGCACCTTATAGAAAT  
TTATCGGGCTATTACTACTCCCTCAGCTTGACCAAGCAACTCTTTAGATCAACATTTAC  
TTTGTGAGATTGAATTGAAGCATTAGCGCTATATCGAGCCGTGTTGAGCAACGTTTAAAG  
GGAATATGATGTCAGAGATTGCACTCAAGATCGACACACCAGTCAAACCATCGAGCGG  
TATAGTGCCGATACCGGCATCCCTGTTGGCACCGTCAAGAAAATGATCTCCAGTGGTGAT  
CTGCAGATCATGCCAATAACAAGGCCAAAGCACCGCGGCCTGATCAACCTGGTCTCGCTC  
TACCACAAAGCCGACAGCAGCAGCCTACGTCTCTGCCACCTCCTGATCACTACGCCACTCA  
ATGGAGCGAGAACCATGTTTATCAGTAGCGACTGCAAACACACGCACCTCGAATCTGCAT  
GCTGCAGATGTAAATCCAATCACGTGATCAGCCAGATCGCCCCCTGCGCTGGCATCGACG  
CCCAGGTGCTGAGGAACAAGCTCAGTCCTGGCCAGCCGCACCAGCTGACCGTGGTTCGATT  
TGATCGCGCTCGACCACGCCACCGACGGGGACGAAACCCTGATCGACAGCATGCTGCTGG  
TGTGTGGCCTGACGGACATCGCCATCCCCAGCGCCGACCGAGCGCCCTACCTACCCGACC  
AGGCGATCCGCCGTAACGCTAACGTTGCCAGTATCGGCCTGCGTCCGGTGGAGCTGTCCG  
AAGGGGGGCGGGTCACCCGCACCGAACGCAACACCATCAACAGTGTGTCACCGCCACAA  
TGTGGTTCGCTAGCACTGCTCATCCACGACTTCGAGGCCCGCTTTCAAGCCGTTCCCGCCG  
TCGCATGTGCATTAGACATCCTGATGCAAACCGTGACCATGTAATGGGAAACCCATGCAA  
CAGACACAAATCAAACACGACGAACGCAATCTCGCGGGCCTGACTCCGCTAGAGCAAGTA  
GCCATGAACACCGCCGGCTGCCAGATCCTGCTGAAGTTGTTTCGGCAAACGCGCTACAGA  
CTGGATACCGACTGGCTGGCCCTGAAGCCGGCCAAAAGGGCGGCCTTCTGTCCCATCGCC  
AGACAGCCACAGGGCGAGCTGATGACCCCGACCATGTCAGGCCTGTCACATGCACAACGC  
GAGGCGGTAAGGCTTGCGGTGATCGCGCTCGAGTACCAGGGGGTGTTCGCGGAGGCTCT  
TACGCCAAGGTGTGGTACCCGGCGCCAGTGGCCAGGCCAATCGGGGATATCGAGAGAGAG  
AAGAAGGAGAGAGCCGACAAGCTTCGTATGAAGCGCGCCGTCATGGCAGCCAGCCAGATG  
ACACAAAGCGACCGGCTAGCAATCGGGCAAGAAAAACCCCGCAAAGGTGGTGGAAACACC  
GCGGGGCTTTCATCAGTGACTTATCGACTAGGAAAATCGACATGCCAACTCTAGCCATTC  
TCGACACAGTGCGCAACCTGCGCCTGCAAACCGCAAGCTGGCCCTCAAGGGTCAACGCT  
ACAAGTTCAGCCCTGACCTGATCCATGCAGTAGAACGCTCGGCCGCCATGGAGTGACGTG  
CGGTCTGGTGGTGCCTAACAGCCGTGGGGGGATCTGATCATAGCCGCCGTTATCGCTTG  
TCACACCGAACCGACCATCAAGGCCGCCAGCGCCTATCTGGTCAGCCGCAGTTACATCAA  
CTGCGCCACAACCTGGCTACGCGGCAAGAACGGGTACGCCCGGATGGAGCACCTGACCTC  
ATGCTCGATTCGCATCATCGACGGGGTGGCATAAAAAAGCTGTGCCACCCCATCACCCGG  
CAGGCCGACCTGGCCGATTTGGCCGATCTGCCGCACCGCATCAGGGCTAAGACCTACACC  
ACCAGGCGCGGCCCCCGGGGGCGGCAATCTGCGTGAGCAGGCCGGGCTGCAACTGCACTGG  
CACCAGCTATTCCACACCATGATTCGGAGGGCCCAAGCATGAGCATAGACGCTATTCATA  
TCGCCAAGCGGGCAGAGCGGCCCGTCCCTGCCGCTGTTCTCACACCTGCTGGCCACCGGCG  
AGCAGGGATAACGCATCGCGCTGGGCGAGCTCTAGTCCGGGGACGAGTTCATCCAGTTGC  
TACTGGTTCGTGACCAGGCGCCCTGCCGAGCTGCTTTAGGACGACTCAGTGATGGGGGATG  
AGGGATGACAGACCTGTTTGAAGTGGAGGCCCGCTGGACGGCCAGGGCACCAAGTGGC  
GGCCTCGCCATATGCAACCGCCGGTGACAGTCAGCCCGATGGCCAAGGATTGGCAAGC  
GGCACAGGATGTGTTTCAGCGCCTCGGGCAGCGACGCAACGAGAAACAGAAACAACCCCA  
GGAGCGGCTGGCCCTGGGCCCTATCCGCGACGTGTACTTGCTGGCGCTGGGTAGCAGTGA  
CGTCTCCCTGGCGAGAGAAATTGCCGAGTGGTGGGCCGACTGCGCACCGATTACGGGCT  
GGGGTAGACCATCAAATGAGCCACCGCCTGATCTCCGACCTGCAGACCCGCGTGGATAGA

TTGTTTCGACACCATGATGGACGACGAGGCCCGCCTGCGCAGCTGCCAGCGGAACTGCTG  
GCAATGCGTTCGGCTTTACCTCGCCACGCTGCACGGTATCCCTAACCTGCGCCAGTGT  
GCCGCAGCCCGAAAGTTGGTGGGGCATGCCCGTCGCACCCCGGACTCCTTCCGGAACAAC  
ATCAAAGAGCCGTGGGGTAGAAATCACCAATGACCAACGAACAAATAACAGGGCCAGCCG  
CCGAGGCTGACCAATTCGTTTTTTCCATCAGCCGTCTGCCGCCGCCGAAACGGAACCAGC  
GACCGCTGTGAAAAAGACCCTCAAGGCGCGTGATTATGCGCTCGCTAACGCCGTGCCGG  
GCACCAAGCTCGAAGCCGCATTTGTAGTGGCCCTGATGAATCCGATCTGGTCTGGGCGG  
TGCAACTGCTCGATGGTCTCACCACGCATTTAGCCAGGCTCTGTTCAAGCAGTATGTGC  
GCCGCCGCAAAGATGGCACCACCCGCAACTGCCGCAGCGCAAACATCTGGCTTTGCGAAC  
GGGTTAAGTGGGTCCGCTCCCTGGTGACGGCGCTGCCGGTCGATGCCAGCACCTGCGCG  
ACGAAGAAGGCCGCTAGCGTGTACCCACCAGTTCGCCAACAGACCAGCCATCTGGA  
ACAACATCGAGCAGAACAGCACCCGCCGTTGAGCTTGCTCTGATGGAGACATGGGAAGCCA  
TCAAGCAGCCAGCCGACCAATGGGCATTCATAGGCAAGATGCCGAAATTCAAACCAAAG  
AGGCAAGGGATAACTGGATCCGGAGCGTGATGGTGCACCTGCTCTCAGCCAAGTGGTGGC  
AGAAGCGCATCAACCGCTGCTGGGTGAGGCTGCAAGAACACATCGCCATTCTGCTAGGCA  
AGGGGCTCAAGGGGGTCTCCGCCTGGGTCTTGAACGCCACCATGAAGGTGGTGGCGCGC  
GCAAGCGGGCCATGATGCGCTGGCTGGCCGAGTCGGAGGTGATGAACGAGCAGCACGACC  
TTGTTGTCTAGATGAAGGATTGCTGGGAGGCCCTGCAATGCCAACCAAGTCATCCGCCTAG  
CCGAGATGATGACCCCAATGCGTGGCTTTGAAGACTAGGCCGAGGAACAGGGACATGTGA  
GGGTGTTCTTTACCTGGACAGCCCGAGCCGCTTCCATGCCTGGCAGACGGGCCGCAACG  
GCAAGACCATAGAGAACGACAAGTACCAGTGCGGCACCCCGCGCGACACCTGCGCTTATC  
TGGCCCAGCTCTGGATCCGGGACCGGTCATACCTGAAGCGCTGGGGCATGCCTATCTATG  
GCTTCCGGGTTTGTGAGCCGCACCACGATGTCACGCCTCACTGGCACATGCTGCTGTATC  
TGCGCAAATGCGACCGGAATGGGGTGATCAGCACCATGCAGCGTTACGCCCTGACGGATG  
ATCGGCAGGAGCTGGAGCGCAACAACCTGGGCATTCCTTACCGACTTTACGCCGCGCT  
TGGACTGTAAGGAGATCGGCCCGTCCAAGGGGGACGCCTCCGGCTACATCGGGCGCTATG  
TCGCCAAGAACATCGACGGCGAGCATGTTGATGGTGTGATGACGAGGCAGGTACCAAGGCTG  
ACCAGGGCGCACAACATGCATGCGCCTTGGCCAGTTGGTGGGGGATCCGCACGTTCCAGC  
AGATCGGAGCCACACCGGTTGGCGTATGGCGCGAGCTGCGCCGCATCAGTAACGCCAGGA  
AGAATGGCGATCTAGTGGAGCCACCCAAGCCGGTCTTGAAGACCCACGCTTTGCGGCCG  
CGCGCTATGCCGCCGATAACGCCATCTTTCTCTGCTACCTCGAAGCCATGGTCCGGGGCAC  
TGGCTACCAGAGCCGAGCACCCCATCAAGCTGGCCCACCTCATCGAAGATCATGCCAACA  
GCTACGGAGAAGACATCAAGCGCCTGATGGGGCTGCACATCGCTCATCTGGGTATCAAGA  
CTCGCCTGCAAGGGTGGGAAGTGGTACCAGCAGGCACCTTTGAGGACACCAAGGCCCTCCG  
GGGTTTCGGTTGGGGGTGTTGTGGTTAAGTCGGGCGAAAGCCGGGCTCCTTGGAGCTCTG  
ACAATAACTGTACGCAGCAGGATCTAGAGGCGTTCGCGGATCGTTTGTATGGCAGAGCAAT  
GCGGTTTATCTCCCTTCTCTATCGGGCATGTGCGGGCAGGTGCCAGCGTGACTACGGACG  
GCTACACCCTCCGGCTTGAGAACGGCCAGGTTCAATCGAGCCGGTCCGGAACCAAGCGAAC  
CGAACTGGGTGCCAGAGGGCCAGTCGCCAGCAGAGCCGAACCAGCAGGCTGAGTTCGCGG  
TACCGGAAGGCGATAAGGACTGGCCCACTGGTTGAACTGTCCGGTAAGGTTTACCAGG  
CACAGGGCCACGCCGTAAGCGCTGCTGGATAGAGATGCTGTGCGGAACCATATCAGTCAG  
AGATGTGGCGGGTATGGGAAGGGCTAGATGCACCGGAGTGGATGCAGGAACAGGACTACT  
ACAGCGCGGAGTGGGCATGAGCATGAGTAGCAAACGGACCGTCAGCCGCGAAGAGTACCG  
CCGCCTGGATAGCCGGGTGACCTGCATTCTCCAGCAGCGCTGGCCAGCCAACGAGATCAG  
CCGGTGGGTGGGGCTGCTCAAGGGTAAACAGCAGGCTGTGGAGTGCGCCATTCTGCGCCG  
CCGCCACCCTCGCCCAACATCGCAGGCCCTGCCGACCATCGTTGGCGACAAACCGAACCC  
ATTCAGGCCAAGGCCAACCGCTCCACCGCGTCCGGTGCTGACAGCTGGTGGCCGCGCGGT  
TGGCCGGCGCCATATCGTGGACGGACTGACCCCGGGGCCATCGACCAGAGCGGCACCTT  
CCGGTGGCGCCGTTACTGGCCGCCCTTATTGATCGCACCGGGCAGCGCCATCGACCAGCGC  
CAACCCGGCTGCCGCCGAACAGCTCAACGCAACCTACCGGCCGGCACCGCACAGGTA  
GGCTGACCTCTGTCAACATGTAGAAGCCGGGGAGTAAACATGAAGCATATCAACTGGAAT  
CAGGCGAGCGAACTGGGCCTTATCGTTCGCATCAACCGCGAGGTTCTTACCCAGAGGGA  
CTGGCCATGACCAGAAATCCGGAGAACCAGGATCGGATACGCTGCTGGTGGGTCCAGAT  
GGGATCTGGGAGTACGAACACCAGCTGATGACCAATGCACCAATAGTCAGCGAAGATGAA  
GCACGGGCAAAAATTGCAGAGTGGACGAAGGAGCAGCAGGCATGACCGACCCCGCTAAC  
ATCCAGTGCCGGACGACGTAACCCGCTTGTGTACCACCAGGGAAGTGACCGACATCA  
AGTGCAACAACCGTGGCACAGTCACCGATGTGGTGTTCGGCGATCCATCCACCGATGCC

TGGCGAAGGAGGCAACCATCTCTAACTGGCGGGCATGGGCCAAACGGGATGTTGTGGTGG  
TCAGAGAGGGAGCAGCATGGATCTGACCATCCCAATCAGCCCCATGGTTCGAGTTCAGTA  
GCTCCCACCCGAGTGAATTGAGATTGATATTCATAATACAGCCGTGCCTGAAGGCTGGTA  
ACTTGTGCCAGCGGAGCCTATGAGAGCCATGTGGCGAAGCCTTTGATAAGCCATAAAGA  
GTGGGAGAGCGGTAACGAATGGTAGCTCGTTCGTCTAACCACCAACGGAAAGCCATGTT  
GGCTAGGGCACCAAGGCCATAAGGGGAAGAAGGATGACCCCAGCCACGCAAGCAGGTCCA  
GTAGGCTAGACAGACAGCTATAGGTATCAAGCCGGTGGCGGTGCCGCTCGCCGAGCGAGA  
GCGCCAGAAGATCGCAACGCTGCGTATGGCCCCGGGCTGGTCGCTGTTAGCCCTACTCGAA  
CGATGGGTACTTTAGTACCCTGATCTAGCGGCACTGGAAACGCTGGCTGGATATGCTGAG  
CCAGCAAGACAGGGGAAGCATTCAAGCCGTGGCCTGGCTGGCCTCGCGCTTTATGAGCCTC  
ACCCAGGAGCTGGAGAATTTGGGCCAGTGCTCGCGCATCTATCACGCCCGCCAACGCGCC  
AACCGTAAGATCTCCAGCTATAAGTTACTGACTCGCCAGAGGCTAGA ACTCCCAGGCTCA  
TCGTTCCCATCGTTTACTAGTTGTCGCTCGTGATGGCTCTTAGTGGTTTTAAATAAACA  
TGTATACTTGCAAGAATTAATAAATGCGTATATTGACGGTCAGGCGCGTGTGTGCAAGCT  
ACGCCCTAATTCGAGGCCAGCCATTTGATTGTTGGGCTTTCGTGTATCTGAATCACGG  
AGGCTAAAATTGCTACACAGCGCCTATCTTGACGAGATTGGCAACGCAGGCCCTATCTT  
GGTAATGACCATCCAAAGCACCATAACCATTCAGTGTGTTGGTATTGGCGGCTTTGTGCTA  
CCGTCCTACAAGGTACTGGCATTCTCCTCTTTCTTCTTCCAGTTCAAAAATCATCTCCTA  
AGTACTGATCTTGGCGATACTCAAGCCAAGGCGATGACGGATCAGAAACCCTTCCTTCCC  
GCCAAGTGTGAGAAAAAAGGGACATCCGTCCTGACTGAGAAGAATCTCACCCGCTATCGT  
GAAACCAGGAGGGCAATTGACCGAGTCTTGAATTGTATCAGAGACGATGAGCGCTTCGCC  
TTCTATGTGGGCCAGCAGAAAAGACAGGGGCTAGA ACTCGACTCAACCAAGCTTTATCTC  
GATGTGATGAGAGAAGTGATCAAACGGCTCGATCAGTAATGCAGCACACATAAGAGCCAG  
TTGATGATCATCATCGCCAGGACACTGAACGGAAAAAAATTGTCGAGACAGCTTCAATC  
GAGATGTTTCGTTGAGCAAGGAAGACGCTGTCTACTCGAGGCGCCACCGCAGGTGCAACGT  
CACCTGTATCAA ACTCTCCAGTGTGCTGACTGGCGATGTGCTCTCTACGGCCGCTTGAGT  
CACCATAAATGTGAACCAGAAGGCGAGGCTGGGTTTCACGTCTTCGAAAAGTACTCCGGT  
GAGCGGTTAAGGCAAGTTCATAAAAAGAAGCCGGATTTCGGTCATTTGGCGGGCCAGCGAGC  
ACAGCCAGACTGCAACTGATGGCCTATAGGTA CTGAGCGGTCGGATGAGTCAAGGGGCGC  
TATTGGGCCCTAGTCCTTTCAGTATCAAGTGCCGCCCTCTGGCGTCAGTGATCCAAGT  
AGCCCCAGCACCCACCGGTTTCGTCGTCCTGGCCGACGGACTCTGCGTATGAGTGAACGAC  
AGTGTGGGTACCAGCTATGACCACACTCCGTATCAGTGC ACTGGCAATAGAGATCGGAG  
ACCTCATCACCCAGCCGATTTGACTTGGTAATATGGCCTCGATGTTAACACTCTTTGCAA  
AAAACCCGCATCACGCTCCCGATAATTGAGATCTCAATCACCAGGTTGCATCTTACAT  
CAATCTGACGGTGTTTTTATACAGCGGCACCTTTCGTTTCTCGAAACGTGACCCACAGCG  
CCCGGGGCAGGCCAGCGCTGTGGATGGCGTCCTGCACCAGTTCACACAGCGGCAGCACAT  
CGTTTCTGGCATA CGTGGCGTCGTCCTTCTCGGGATCCCTGAGCCCGCCCCCGCCATTGG  
TGGGGATAATGCCGGCCAGCGCTGGCGGGTACCGATGCGCCGTCAGCACATCCTGGTCAG  
TGATCCCCCTGATAGCCGCGAATTCGTCCTTGGTTGCGATGTGCCCCGCGGGGATGAGCT  
TGATGCCATCGGGCTTGCCATCGGGGATGTTACGAACATCGAGCGGAAGTTCCTACCC  
CTTTGGAGTTCGCGATCATCTCCTTTATCTCCTCATCGGTGTATTTCGTCCTTGTGGGGT  
CCGTGGCGTCGAAGATGAACCCCATGTGGGTGCCGTTGAGGAAGTAGCGGGCGTCGGAACA  
GGGTGGCGTCGTGTTTGAGCAGCGCAGACTCCAGGCCGCCAAGGTAACCGGGCATGCCAT  
AGACCTGCTTCGCGGGGTCATACTGGGGCAGCCAAAGCACGTCATCCGGGCGGTAATCA  
GGTTTGGATTGCCCTGCTGCAGGTAGACAAAGTAGCCATCCTCGCGACGGCGCAGCTAGA  
CGTAGTGAGCGGGTGCAACCCACCGCCTGGCCGAAACTGTTGCGCAGCTTCAGCAAGC  
CACCATCACCAA ACTGCAGGTAGTTGTGTACACACGCCGTGATGGTGGCGCGTGGTTGG  
TGAAGCGCCCCGCAACCATGTACCGTCTCGCCATCAGGATGGCCACATGGTGGGCATTGG  
CCCGGGCTACCTTAGCCAGCCCCTTGC GGTTGATGGGAGGCTGGTAGTATCCCCATAGG  
GGTTGTA AAAACACCCCGGTGTAATCGGTTCGTCAGGCCGTGGGGTTCGATGGCCTGCCGCA  
TGCTGAACACCACCGAGGGCCGGGGGATGAGGCGGCCCGCCTGGGCGGTTGCTGCTGTC  
GTTTGGTCATGCGAGGGCACTCTCCGGAGAGTCTTTGAATTGGCACATGAAGAGGTAATT  
GAACTCCTCCTGCGGGTACTCGTATTTGAGCTCATCAATGTCCATGAGATGGCAGCCGAG  
TCGAACGGCATCCTCAATGGTGTGACATAGCGCCCCTGACGTT CAGGGCAAAGCTGGCC  
GCCATCTCTCAACGATGAAGCGCTAGGGAAAGTTATCGCGTCTCTGCCAGGGTAGAGGTT  
CTTGCA GTGACCCACACCGGAAGTTTCGCGCCATACCGCGGCACGCGGAGAGCGTTGA  
ACAGTAGGTCCTGTGCCACGATTGTGCTTAGCCATAGCGCCGCCAAGTGCAGCGCTTT

TCCAAAATCTGGCATCCAGATATACTCATCAACGTAGGCACGGCCCGCTTTTTTCAGCAA  
CGTCAGATCATCAAGAGAATGAAAATGGATATGGGCACCGTTCGACAGGACGAAGGCGCC  
ACCGACCAGGGTTACGCCGATGAAATTCTTGGCTATATAACAAACATGGGTGCGGTAGAC  
ATCTGCCATATCTGGGGTGTCTGCCAAGAAAATCTGATTGTCACCAGTCAATAATGCATC  
TTCTAAAGCCTCCGCGGCGAACTAATAGGACATGACGATCTGATGAGCTTTCAAGATGTT  
GCGGGTGC GCGGAGGGACGGGTCTATCTGGGAGATTCGGCAGCGCAGTTGGTAGCCAA  
CAAGGTGCTGAGCCATACGTGAAAGTGATCTGCTGTCGAATGATTGATATCGTTCTTCAT  
TCTGCGTTTTTCTCCTGGCCTGTTGCCAGGTGGATTTGCGTTTTGCGGTGGGTATCGAGG  
GGCTCATTGGCCACACCGTGGGCGATGGCAAAAACACGTCGGCGTGAGCGGTACGTTG  
TCACGCGCATCCCGCGAAGTCTTTTGGCCGCCCGGTGGTGCTGCGCTCGGTGGCGAGG  
GAGGCGAAGGGGATTTACCGCTCCGAGCTGTCCACTCGATGCGGTATGCCACCAGCACA  
TCGATCATCTTGAGGACCAGCCGTGACTTGCTCTCGATGCCTTAGTTGATGGGGTGGCGC  
ACCCCTTTGAACCCGGGCTTCAAGAGGCCATATACCCCGGCCCGGTGCCGGAGACATCG  
ACTCCAGATATGTGACCCGGATCTTCTTGGCGATGCGCTCTATCTCCTGCGCCTGATAC  
AGTAATTTCAACCCGCCCCAGTAGTGCTTTTCCAGCACTCGGAAGCGCTCGCCAGCCTCC  
GTGGACGGGGCGACCACCACCAGGGTTCGATTGTCGCGGGTACGGCTCGAGTCATAACCC  
ATCCACACCTCGTGCCTCCCGAACGGGTGAGGACGCCCGGGCGTGAAGTTCTCCCAACGG  
GTGGGGTCCACCCCTGCCAGTTCCATGTCTGGAACCTTGTGCACAGACAGGGCATCGTCG  
ATAAAGCGGCACATGTAGAGGCGGTCGAACACCTCCTCCGGGTATTCGTCCTTGAGCTCC  
TCTTTGTTGATGAGGTGGCGATCGATGCGAATGGCCTCCTCGATGGTGATGACGTAGCGC  
CACTACCTGTCAGGGCTGATGAGGCCGCCGTCGCGTAGGTCATCTTACCAGGTAAGTCG  
ATGGCCACCCGGCTGAGCCGCTGTCCCTTCCAGTGATCCCGGTACAGAACCCGGTACGCC  
TCGTGCAGCTTGCTCGACGGGGTCGAGATGTAGGTCTTGCGCCAGTGGCTCTGGGTGCC  
ATGGCACTGGCCACATCAGAGAGCTTCTCGCAGTTGGGGATCCAGAAGTATTCGTCCATG  
AAGACGTTGCCGGAGCGCGACTGGGCAGTGTTGGAGTTGGTGAGGAGAAGTGCAGCTTG  
GCCCCGTTTCGACAGCACGATGGCGTTGCCGGTACGGGTGACGCCGAGGAAGGTCTGGGCG  
ATCTTGCAGAGATAAGAGCGGAACACCTCCGCTGGAGGCGGGTGGCGGACAGGAAAAAC  
TCGCTGCCACACGTCAGAATGGCATCCTCCCTCGCCTCGCCGACGAAATAGTAAGTACTC  
CCGATCTGACGGGACTCGAGAATGTTACGGGTACGCGGGAGCGCCGGGTGCTTCTTGCC  
TCCCACACACGCAACTGATAGCCTAACAGGGTGCCAGCCACTCGGTTAAGTCATCGTCC  
GACAGGGGCCCGATCTCGTTCTTGGCCTTCTTGCCACCCTTGCGGTGCACCTCCCTGG  
CTGTTGTGCTCACGCTTGCCACGGCTGGGCCCTGGCTCACTTCCCTCCGCCCGCTCGGCC  
TTGAGGTCTTGCACGCGCCCGGCCACTTGAGCGCCTTCTGTTTGAGGCTGCCATGATGG  
CCGATGAGCCTGTCCCGCTCCCCCTGCTCGCCCGGGGTTTTCTTCTCACGGTGCAGCAAC  
ACCTGCACCCGGCGAGTGATGGCATCCTCCACAGCCTCTTTCGGTTCAGCAGGTCACGCCAG  
CCGAGCTTGTCCGCCAGTAGTAGATGATGCGATACGAATTGAGCCCCATGTTGTCTTG  
ATATCCTGGGGTGTCCATCGTTTAAAGGTAGAGACCCTTCGCCGCATTGCGGATCTCTTCG  
AGGTACGCCACGGCGCCTCCATCCGGTGAATGATGCCCCCATCATAGCCAGCCCCCTCCC  
CCCCTTATCCCCTGATGTTCTGAGCAATCCGGATTTCCCGTTGGATCCGAATCCATCA  
GAACGCCGTAGGGTGAAACCCCATGCCGGGCCGATAGCCTGAGCCCGCTTCAATTGGGA  
GTAGGCATGAACACATCAACCTTGAGAACTGGCTGGGTCTGTATCGCCACCGAAGGGACC  
ACCGTCGATGGCAGTGAGATCACCGCCGCTTGGCTGACTGATATGGCCGAGGCCTACGAC  
CCGGAATAATACACAGCACTGCTATGGCCCGAGCACGACCGCAGGGCAAGCTTCGGCTAT  
GTGCAGGAGATCAAGACCGACGTCGTAGAGGGCAATCTCAAGCTGTCCGCCATCCTGAGT  
CCGAATCGCGATCTTGTTTATTACAACCAGGTTGGCCAGTACCAGTTCTGTTCCATCGAA  
CCACAAGCGCAGTTTGCCGATCTGGGCCGCACTTATCTGCTCGGCCTGGGGGTCACAGAC  
CTGCCAGCCAGCAAAGCCACCACCCACCCCAAGTTCAACAAGAAGGGGCGAGTCTCGCTTG  
ATCGGTACCAGCGAACCGCTAGTTCTCTCCATATTCAAGCTACCCAAGCACAGAAAGGCC  
GATGGCCTGATCGCCAAGTTTTTACCTTCATGGCCAGCCACGGCGAGACAGCTATCCAA  
CCTACCCCTGCCAACCCGAGGTTTCAGGAACTGACCAAAGAACAGTTCGATCAGATGCTG  
GGGGCCCTCAATGGCCTTGGCAGCAAGATCGATGGCTTCAGCACCAAGCTTGAAGCCAAA  
CCGGAACCACCGCCCCGGTGACCGAACCCAGCGAAACAAGAGAAGGCCGGCATCAGCGAC  
GAGCAGTTCAGCAAACCTGGAAGACTCCCTGAACGGTCTGGCCAGCACCGTCCGGCGAGCTG  
AAAGGCCAGGGCGACAAATTCGCCACAAAGTGCCGGGGCACCGCCCGGGCGCCATCGGC  
GGTGACGATAACCACCTACCAAGTTTGCTAAGGGGCTTCAGTGAGCCAAGCCCTGACCGT  
TTAGGCCGAACAGCGCCTGAACAAATACTGCGATGCGCTGGCCAAAGCCTACGGCATCGA  
CATCAGCAAGCTGGACAAGCAGCTCCGTGTCTCCGGCCCCGGTGAAAACCACCCTCCGATC

TGCCCTGCTCGCCTCTGTTCGAGTTCCGTGGCCTCATCACCTGCCTGGACGTGGACCACGT  
CAAGGGCCAGGTCGTGCAGGTTGGCGTGGGTCAGCTCTCCACCGGTCGTAACAAAGGTGG  
TAGCTTCAAGGGCAAAGTCGGCGTGGATGGCAACACCTACGATCTGACCGAGACCCACTC  
CTGCGCCTCGCTAGATTGGGCGACCCTCTGCACCTGGGCCAACGCCGGTAGCGAGGGCGA  
GTTTCATCAAGCTGGTAGGCAAGTTCGACAACAAGGCGGTTGCTCTCGACATGCTTCGGGT  
CGGCTGGAATGGCGTGTCTGCCGCCGATGACACCGATCCGACGGCGAACCCGCTGGTTCA  
AGACGTCAATAAGGGCTGGCACCAACTCGCACGCGAGTCGAAAGGTGGTAGCCAGATCAT  
CAAGGCCGCGGCAGGCGAGAAGATGTACTTCGACCCGGACGCCAAGGTCGAGGACAAGAC  
CCTGGACGAGATGGCCTCCGACCTCATCAACACCACCATTGACCCACTGTTCCAGCAGGA  
CCCCGTCTGGTGGTGCGGGTCGGCACCGATCTGGCCGCAAGCGCTCAGGCCAAGCTCTA  
CAGCGAAGCCGCCAAGCCGAGCGAGCAGATCGCCGCTCAGCAATTGGCCAAGTCCATCGC  
CGGTCGCAAGGCCTATATCCTGTCTTCTTCCCGGGCAAGCGGATGGTGGACACCACCCT  
GGACAACCTGCACTGCTACACCAGCGCAGCACCCGCAAGCGCAAGGCGGACGACAACCA  
GAACAGCAAGAGCTTCGGCAACCAGTACTGGCGCATGGAGGGCTATGCCCTGGGCGAGCA  
CAAGGCCTACGGCGGCTTCGAAGCGGCCGAGATCGGGAGCGGTGCTGATCCGGCAGTCCT  
CGCCGTCGAAGCCGCCTCTCAATCGGGCCAAGGCTAACCCATGAGCTCATCCGGTCAATG  
CCACAAACAGCGGGCACTCGCCAGGCAGGGGGCCGAGCAGGCCGCCTGCTCCGGCATCGC  
CACCGGCGCGGTGGCCGACAGCGTGCACCTGCAACTAATTGCCCTGGAGCAGGACATGGT  
TCGCTTGCGCAAGCTGGCCCGCATTGGGGACCGGGTTAACATGAAACGCGATGAGCTGAT  
GCCCAAGTACCGCCCTATTAGGAGCGCTAGCTGGCCGCTGTCGCTGAGTGCGGCCAGCC  
CTATCAGAACCAGCTGGCTCAGCGCATCATCATTTTGGGTTTCGATGTGGGCGACTTCGA  
CGACGGCATCGCCTGGGCCGATCTCGCCATCGCCCAGGGCCAGCGCACCCCGGCGAACAT  
CATGCGCGACTGGTCCAACCTTCGTGACCGACACCGTGCTGGAGTGGGCCAGAAAGCAGGC  
GGCCGAGGGGCACTCCGTCGCACCCTGCTTCTCCCGGGTATTCGACAAGGTGCTCAATGA  
CTGGCGCTTCAACGAGCGGCCGACCGCCAAGTGGTTCAAGGTGGCCGGTTGCCTGCTGTT  
GCGCGACCACGACGGTAATTCCCGCCCCAGCTCCGTTGGGGATAGCGCCACCCTGGAGCA  
GGCAGACCACTGGTAGGCCAGGCCGACAAACTGCTCGGCAAGGTGGGCGTCGACACCTT  
GCGCCAGAAGATTGACATGCGCCTGCGGGCGCTGAGTCCGGAGTAATCAAATCTCCGCGC  
CGTTCGCACCCCGGCTGGGAGGATAAGCGAGCCGCGAGGTTTCGCCCCGAATCCTGCGATCC  
GTGGCTACAGGGGTGCACCTTTTCTCGCCGCGCCATCGGGCAATCGGGCAACAGGGGCGAG  
TGGTGTTCACATTGGCAAGAATCAACAAAGGGCCAGACATGTTTGTAGGCTAGGACATCG  
ACTACACCGACGCCACTATCCGCAATGACGGGTTCTGGCCGGATGTGGCCGTCGCCGACT  
TCGAGCGCCGCGCCCTGCCTGCCGATCTGGGCCAGCTGACCCCGGCGCCGCCTTGC  
TGGCCGGCGTCCCTGAAACAAACCGTTCAGCTCGCCACCCTCCAGGCCCCCCCTGCAGGCC  
AGGGTTATGCCAGCGCCGCGGCTGTACCGGCGCCAGCCTGGAAGATGGTACCAATGCC  
TGACCGAGCAGTACCTGGCAGACATCTTCGCCCGGGCCAAGGCGGCCTGGCTGCCAACGA  
TCGCCACCGTACCGAGCGGGCGACCGCCAACAACAAGGTAAAGCGTTCGCCAGACCAAC  
GCAACCAACTGCTGGCAGAGAGTCCGCAGTTGGTCCGCAGCATCAAGGGCAAGCGCCGTG  
CCGGGGTATCGCAGGTATGAGTAACGACATGGACGAGCCGCGAGGCCAGGGCTACTTACT  
GCATGCGCTCCACGCCGAGCAGCTGCGGGTACTGCCGGCTAAGTGCCACAAGACGCTCGA  
TAGCTGGATGGAGAACGGCACCATCAAGTTGGAACCAAGAAGGTGGGGCCACCAGGGGT  
GGAAGTGGCTTGGCTCACCTATCAGGCGGTGTTACCATCGAGCAACTGCCGTTTCGAGA  
GCTGGATCAGGCCATCCTGCTGGCGGCCGTCGCCGCTCGGAGCAGGAGCACGACGAGGT  
GCGCGAGCAGCTCGGGCTTCCCGATCACGATTACGCCGTCACCCCGAACGAGGCGCAGAC  
GGCCGACCTCGAGACCCAGCTCCCTTTAGCCGAGCCTCTTCGTCTTATCAAGCACCCGCA  
AGGGCCCATCAACTGCCTCGGCAAGCGCTGGAACGCGGCCCCCTATGACATCTGGGTAGC  
CGAGCAGATTGACCTGAACGTGGGTGATTCCGGCGCTCACCAGGTAGGCGGCCTCTCATG  
ATCACCATCACCCTGGACACCCGTCGCGGCAAAGACCAGCTAACCTGCTGGCCCTGCCA  
CCCAAGAAGCGCAAGCGGCTGGTATGGCGAGCCGACAAGGAGATGAAAAAGCTGGCTACC  
CGTAACGTGCGCCAGCAGCAAGCCCCAAATTGCAATGGTTGGACACCAGCGCAAGCGGGGC  
AAGCGCGAGATGTAGCGTGGCCTGCCCAAGCCGTTGCAGATTCGCCAGCCTCGCCAGGAC  
ACGGCCGAGCTGGGGTTCACCACGGGCATCATGAGCGCCACGCAGCGGGCATCGCCAAG  
ACCCACCACAAGGTCCACACCTACAAGGTGAAGGCCGCCAGCCGGCGCCGATTGCCCC  
AGTGAAGTGGGCAAATACAAGGAGGCCAGCAAGGCACAGGCCGCGCAAGCTGCGCGAGCTT  
CGTTCAAGCGTCTGGCAAGCGCAAGCGAGCATGCCGCTCGGCATCGCTGGGTAGGATC  
ACCGCCAACCTCATCTACGCCAGGCGGGGTTGCTAATCAAGAAGCTCAAGGACGAACCG  
GTGAAAGAGAGCTGGGAGATCCAGCTACCAGCCCGCCGTTCTGGGCGCAAACGCCAGG

CATCGGCAGCAGGCCTTCGCCCTGCGCCCGGAGAGCATCAATTACGGATGGGACCTCAAC  
AAGCAAGACATGAAGCGGAAATAACGGCATGTGGCCTTACGTACAGATCTACAACCTTGAA  
CCGGATGCAGGGGCGCGTGACGGAAGTCGAGCGCCACCTGCTGTTTCATCGGCAGCGCCGC  
CAGCAACACCGGTAAGCTGGTCTCCCTCAACGCCAATCCGCCTTTGATCCGTTGCTCGG  
GGCCGCGGGCGGCGAGCTCAAGGCCAACCTGCTGGGCGCCCGTGATAACGCCGGCCAGAA  
CTGGTTCGGCGGGCGGCCTATGTCATTACACCGACAAGCCCTGGCTGGACGCGGCCCGCGA  
CTCGCAGCAGACCCCGCCGTTAGAGGGGGTCTGTTGGTCTCGGTCAAGAGTGTACCAGGC  
GGCCATCAACCACGCCAAGCCCTCAACCAGGAGCTGATCGAAAATGGGGGCGATGGCA  
GTTTCATGCTGCTGGCCGTGCCGGCAATCGCCGACGAACAGGACTGGACCGCCTTCGAGGC  
CGAACTGGCCACCCTGCAGGACGGTATCGCGGCAAGCTCGGTTTCCCTGATCCCGCAGCT  
TTGGCCGACCCTGGTTGGGGCCTACGCGGGCCGCCTCTGCAAGCGGGCAGTGAGCATCGC  
CGACAGCCCCTGCCGGGTGAAGACCGGCTCCCTAGTGGGCCTTGGCAAGAAGCCGGTGGG  
CAAGGAAGGGATTTCGCAGCCACTGGCCACCCTGCAGACCCTGGAGGCCAACCGCTACTC  
GGTGCCGATGTGGTACCCGGACTGTGACTGGATCTACTGGGCCGATGGCCGCAGGCTGGC  
GGACGAGGGCGGGGACTACCAGGTGATCGAGAACCTGCGCATTGCCTACAAGGTGGCGCG  
CCGGATGCGCCTGCGCTCCATCGCCCGCATCGGGGGTCTCGTTCGAACTCCAGCCCCTG  
CAGAACC GCCGGCGCCATCACCTACTTCGGCGAAGATCTGTGTGAGATGGCCAAGTCGAC  
CACCAGCAACGGCCAGCCGTTCCCGGGCGAAATCGCCTCCCCCAGGATGGCCGACATCCG  
CATCCAGTGGGTCCCAAGAACCTGGTCTCGGTTTTTGTGGTGGTGCACCCGTGGACTG  
CCCCAAGGGGATCACCGTCAATATCATGCTCGATTTGAGCCTAAACAATGGGGACGGCTA  
ACCCATGTCCCGTCGTATCTCCGGTGGCATCGTTGACACCACCCTCTTGGGGGCCGTGGT  
CCACGTGCAAAAGGCCAGCCTCTCCATCACCGACAATAGCGCCGTGGCGCAATCCCGGGG  
GATCGCGGACGGCTTCGTTCGATGGCGATGTCGCCGCCGAGCTGGAGTTCGTTTTCGACAC  
CAAGAATCTCTCGCAGTTGGCAGATGCCGCCTAACGCGCGGGGAGCTGGTGCGGAATGGA  
GCCGGACTATGTGCTGTTCTACGCCTACACCGTCAACCGAAACCATGAAGGGGGAGGCCTT  
CGCGGTGAAGCTCCTTGTCTCCGACCTGCTCGACATCGACTCCAAGGGCGGCAGCAGGAC  
CGTGCAACAAGGTGAAAGGCTTTGTGACCTCCCCGACTTCGTTACCTCAACGGCGTGCC  
TTACCTCTCCAAGGAAGACACCCGCCACCTGTTGGGATAAGGGGGATGATTGGACGACAT  
CGACCGCGCCACCCGCCACGCCGCCCGCATGCTGGCGGTCCAACCTGGACAACCAGGTGGG  
CAAGGGGCACTAGCAGGGGGGAGAGCCTGCCCCAGTGCGAAGAGTGCGGGGACGACATCCC  
CGAGGGACGACGCCGCCACGTACCCGGGGAGCGCCTTAGCGTCCCCTGCCACACCAGCCT  
TGAACGGTTGGCCCGCTAAACAGAGCAACGGACATGAGCATCATGCTCCATATAGAACCC  
ACTCTCTGGGCCCTGCTCTTGGGCTGGTTGATGGACAACATGCCACCGTATATGGCACT  
GCATTAGCAGTAATAACGGCCTGGCTGCGCATCCAGTATGGCGCAGGCAGTGGCCGTCGT  
AGGCTCCTGGAGTCCGTCTTATGCGGAGCCTTTACCTTGGCATTATCAGTGCCTTTGGC  
TGGTTCGGGATGCCAGGAGAGGCTGCTGGATTTGTGCGCGGCATGGTGGGCCTTATCGGT  
GTTGAGACCATTCGCGGCTTAGCCGAACGGTAGCTCACCACCAAATTACCGAAGGAGTGA  
ACAGTCGTGAGTACTGTTCAAATGCATATCCATAAACTTCACGAGTGCATCAAGCTGGTC  
AATGCAAATTCGTTGGCCTACCTGAAAACCTATGCCATCTCACAGCTTGGATCTTGTGGCT  
GTTGATCCGCCCTCCTCCGAGTGAAAGACCTGGTCTGCGGTAACCAATGGCCCGACGTC  
ACCGCCTACTTAGATTGGTTGGAAATATGTGTGATCGAGTTTGCCCGCATCCTCAAGCCA  
AACGGGCCACTATATCTGTATTGTGGCCCCGGGCTCAATGCCGAAATCGAACTGTTAGTG  
CGAAGCAGTTGAAGGTTCTGAGCCACATCGTCTGGTCAAACCCTCAGGCGTGTGGAAC  
CGGCCGGACAAGTCTACCTTGCCTATTTCTGGCCCGCGAGCGAACGCATTATTTTTGCG  
GGGCAACTGGACACCCATGGTGTGGCGCAACACAGCGGCTATGGCCAAGCCCGTCAGGCG  
CTTCGTAGCCAGGTGATGCAGCCGCTGATCGACTACTTCCAGCAGGCCAAAGCTGCCTGT  
GGCATCTCAAACAAGGGGATCGACCAGGCAATGGAGTGCCATATGGCTGGGCATTGGTTC  
GGTTCGAGCCAGTGGAGTCTGCCAACTGTAGCACGGTACGCCCGCTTGAAGCCCTGTTC  
GCCAAGAAGACTGACGCCCTTTGCCAGCCCCATCATCAGCTCAAAGAAGCCTATTGGGGA  
TTACATCGCACCTACCAAACCGTCGTGGCCAGTTATGACGAACTGAAGGCCGACTAGGAG  
CGACTGTGCCGCCCGTTCAGCGTCAACAAAGAGGAGCCCTTTACCTAGGTCTGGACCTAC  
CCCTCGGTGCAGGCTTACCCGGGCAAGCACCCCTTGTGAAAAGCCGGCTGCCATACTGGAG  
CACATCGTGCACACCAGCAGCCTGCCAGCTGATGTTGTTGGAGACTTCTTTATGGGGTCT  
GGTGTACAGGAAAAGCAGCCTGGCGGCTTGGCCGCTGATTCAGTGGTGAGGAGCTGGAA  
CCCCCGTGGTTTTCCCTAACATGCCAGGATTTTCAGACCCTAGTCAGTCAGGAGGAAAAG  
CACCATGCCGCGCAGTGTCTGCCACCCCCAGATTGCCGCCTTTCTCGACCAGCTCGCCTA  
GGCCGGGGGCACCAAGGGGCTGGGCGAGGACGATTACAACGAGCTGATCATCCCGGCCGG

GTTCTTCCAGGACTACCGCGAACACCCCGATGTGTTTGTGCGGGTCAACCCGGCCCTTCA  
CAGCACCGCTGCCGGACGCTATCAATTCCTGTCCTGTCATTGGGGCCACTACCAGGGCGGC  
GCCCCGGCCTGCCGGACTTATGCCCCGTCTCACAGGACACCTGGGCTATCCAGCTTTTCCG  
CGACCGCAAGGCGCTTGACGTCGTCATCATGGGGCGCATCCTCCAGGCGATCAGCAAGTG  
CGCCAACATGTGGGCCAGCCTGCCCCGGCGCCGGCTACGGGCAGCGCGAGCACAAGCTGGC  
GGATCTGCTGGCCAAGTTCACCGAGTTTGGCGGTGTGCTCGCATGATCACGGTCATCCGG  
TTGTTGCCGTCCCTGATGGGGTTGGTAATCGGGAGCTTGCTGTGTGCTCAGGGGGAGCGG  
CTACCCAGCGCACCCGGGAGCTCGCCACCGCCAACGACACCATTGCCACCCTGCGAGAG  
GCCAAGGACCAGACGGGCGATGCGCTCAAGATGCTGCGAGAAGAAGACAGCGCCCTGCGC  
CATCTGCTCTTCCATCCGAACCGCTCGTTGGCCGAACCTCGACACCTAGAAGAGGAAGACA  
GCCAATGACCTGTAACAAACCCTGGCCATACCGCCGTTGGGCCGCCCGGATTGCGCTCGC  
GAGCCTTTGCCTGCTGGCCCTCTCCGCCTGCTCCAGCCAGCCCACAACCGTGGTGCAAAC  
CCGGGTGCTCACGCGGATGCCGCCGCCGGGACTGGTGCCCCACTGCCCGGAGCCTGAAAT  
CACGGGGAGCACCTTCGGCGACACCGTGCGGTTTATCCCCACCGTGCAGATGGCGCTCCG  
CCGCTGCCAACCATATCACCACCCAGAACAAGGGGATACCGCAAGGGGACACAACCCC  
ATGAGAAAGACCCTGACCCTGACTGTGGCCGGTACCGACATCAGCTTTTGACCGACCATG  
ACCGCCTACAACGGCTTCATCAACGACATGATGCCGAGCGAAAAGGTGGCACCGGCCAC  
AACTACCTCAAGAAGATCGTCTGCCAGGAGAGTCAGGCAGAGCTCGACGAGCTGCTCAAG  
CGGCCGGGCGCAGCCCTGCAGTTGGCGGGGGCCATTAAGTAGCTGTTCCGCCCCACCCTG  
GAAATCACCGTAAAAAACTGACCGCGCGTGCCGAGGCCATCGAGCGCAATCCCCTGTAGC  
AGGTGCTGGCCCCGGCGGCGCTACTACCTGCCCATGAAGATGACTACCTCGACAGCCTGG  
CTCGCGCCATCTGGTTAGACAAACAGCACTGAGAGTCCAACGCCGCCGCCGTGGCCGAGG  
GCATTGCCAAAGCACTGAACGGGTACGACTGATGGCCTGGATGGAAAAATTGATGATGC  
AGGTGGCCCTGGTTGACCAGGTACCAAGCCCCTTGCCGGCATCAAAGCCCAGATGGACA  
AGGTCAGCAAGGCGGGCCCGCCAGGGGTGGAGCAACATTGCCATGGGGGCCACCACCCTAG  
GCGCCGGCGTGCCCCGCGGTGCTGGCGGCCACGGCCCCGCCATCGAGATGGACTGGGTCC  
TCTCCGAGGTGGCCTCCCTCGATGTGCAAAGGACGTGCTCGGCGCGCTCGGCCGTGAGG  
CCCTCAAGCTGTCCGTGCAGTACAGTAACTCGGCCACCGAGATTGTCCGCTCCTCCTACG  
AGATCCCATCCGCCATCGCAGGGCTGGAGGGCAACGAGCTGGCCGCCTTACCCGCGCCT  
CAACCGTCCTGGCCAAGGCCACCAAGGCCGACACCGCCACCATCACCAACTACATGGGCA  
CCATGTACGGCATCGACGAGCAGCAGGCCAAGAGAATGGGCAAGGCCAACTGGGTGGAAG  
ATGCGACGGGCAAGACGGGGCTGGCGGTACAGATGTTCAAGACCTCCGGCCAGGGCATGG  
CCGATGCCTTCGGGGCCATCGGTGCCAACGCCACGGCGGGCCGGGGTGTGATGGATGAAC  
AGTTCGCCGTGCTGGGGCAACTGCAGGCCACCATGGGCGGGCGGTGAGGCCGGGACCAAGT  
TCAAGGCGTTCCTGGCAGGGGTGGGCAGTGCCCTGACGGCGCTCGGCCGTGAAGTTCACGG  
ACTCAGCGGGCAACATGCTGCCGGTGGTCAACATGCTCGATAAACTCAAGGCGCGCTATG  
GCGGGACCCTGAGTGTGGCCAGGGAGACGAGATAAAGGACTCGTTTGGCTCGGATGAGG  
CGGTGGCCATCGTAAAACCTCCTGATGACCAACACCAAGGCCCTTCCACCAACATCAACG  
CCCTGGCCAACACCCACGGTATGGCCAAGGCAGAGCAGATGGCGGCGGCCATGACCCACC  
CTTGGGAACGGGTAACCCAGGCCTGGTTCGCCATCCCGGCAGCCGCCTTCGGGGTGGTGC  
TGCCGGCCACCGACCAGGTGTTGGGGGTCTTCCCGACGGGACCGACACCGTGCTGCGTT  
GGACCCACCTATTCCCGAACCTACCCGGGCGGTGAGCTATGCCCTGCTCGCCATCGTGG  
GCCTTGGCATGGTGTCCGGTGCCTGGATGCTGGTTCGCTGGCGTGGCCAAGCTGGCCACC  
TGGGGCTTGGCATCGCCTGGTCGCTACTGCTCGCCCCGCTAAACCTGCTCAAGGCCGGGA  
TGGTTGCCTTTCTTGCCATCCTGCTGGCCGTCAACATCATGATGGACGCGAACCCATCCT  
TGCTACTGGCCAATGTGGTTCGGCGGCCTGCTCGTCCGGTGTATTGGGGTGGCGAACTACT  
ACTGGGACGATCTCAAGAAGACCCTGGCGGATGGGGGCGTGTGTTGAGGCAGTCAAGGCGA  
TGATCGACGGGGCCCGCGCTGGCTGGGCCAGTTCATGCAGCTGCTCGGCAACCTGAGCC  
CCTTCCAGTTGCTGGGGCGGGCGGTGGACTGGCTAATCGAGAAGCTCAACTTGATCCCGG  
GGGTCAATATCGAGCTCGGGAGCTTGCCGGACCTGCAGATGCCCGCGCTACCCCGCTGA  
CCCTCGCGGTGATGCCTGGGACGGTGAAGGCCCCCATGGTGGCAGAGCCGCAACAGGCCT  
CGATCATCGCTCCCCTCCCCCCTATAGCCAGCCGGAGCAGAGCAAGGTGCCGGCCGGAG  
GACTGGGCAAGCAACTGATCCAGGCCAACGCGGCCGCGTGCTCTGTCAACCGGAAGCCGG  
CCAAGTCCCTGCACATCGGCGAGGTGCACATCACACACCAGAACCCCTGACCCCGGAGC  
AACTGGCTGAAAAAATCTGGCTGGAGACCAAGTGATGAACGAACCCAAGTACATCGACGT  
CCTGGTGGTGAACGGTGCCTGGCAGCCCGTTGCAGGGGGCCAGCCCCGCACCACCAGGA  
CCGCCACAGCATCGTTCAGGACATCAAGCACCCGCATCCTGGAATCCGGGATCGCCCCGAA

GCTCATCGGCGTGCCTAGCCCGACCTTGAGCAGCGCCTTGGTGTCCGAGATTGAGCTGCT  
GGTGAAGACGACGAGCGGCTGGTGCCTGGCACCATCTTCATCAGCGAAGAGGCCCCCGA  
CCGGGTGCTGGTCACGGCACGGA ACTATGAATTCGACGAACTGGAGGTAACCCTGGGAGT  
CTGCGCCCGACCGTGGACTTTACGACCCTGTTGGCCGAGGCTGGCGGACCGACCACCGAG  
GCGGCCATGTAGGCCGAGCTCAAGAAGGAAGTGGTGGCCGCCGGTTCCCTCATCACC AAC  
GGCAGCGATGTGAGCCCCTTCTGGCGGCTGGTGGGCGGCGTGGTCATCACCCCGGCCCTC  
CGGCTTATCCGCACCCTGCTGGCGAGCCATGTGCTGCCTAACACCGTCGGGGCCACCGCC  
ACCGATGCCTATCTGGACCTCAAGGCCTGGGATGTGGACCTTACTCGCAAGGCGGCCAG  
AAAACCCGGGGCCTGGTCAATTCGTCAAAGCCAACCCGAGCGACGCGTCAACATTTCGG  
GCCGAGATCTGGATCACC AACGAGCGCATCGACGGCACCATCTAGCGCCTGCGGCCATG  
CAGGCGGTGGT GAGCCCCGCCGGGAAGCGATAGCCCGGGTCGTGTGCGAGGCCGAGCTC  
ACCGGAGAAGCCTGGAACCAGGCTTCGGGGTATTACAACCTGCTGAGCAAATAGGTGACC  
GGCATTCTCTGCCCCGAACGATGACCAGGAGTGGATCACCACCCAGGGCAGCGACGTC  
GAGAGCAACGATGCACTCGGCCTGCGCATCCAGATCCAGTTTTCTGCGGTTGGGTGCTAC  
CTCATCGACGCGATTTACCGCTCCATGCTGGCGAGAGTCGCGGGGATCCGCGTCGATCTC  
ATCTTCTTCGAGCACGAAACCCCGCGGGGGCCCGGCACCGCCAACTCTTACATTCTGCTG  
GACGTGGGGGCCACCCCGGCCGGCCTCATCAATCCGCTCAACGACTACGTGGGGCGCCTG  
GGCAACCATGGCCATGTGGATGACCTGTTCTGTAATGAGCATCCCCGTGACCCAGCACAGC  
TTCACACTGGCGCTCTGGCCCCAGGCCAACCTCAGCGACGAGCTGCGGGCTGCGTTCAA  
GCGGGTACCGACTTCTGGCCCCGGCAGGGTTCGCCAGTCGGCAGATTTCCCGGCCGTC  
ACCCGCACCTGGCCGCGCTCCCCTCCTCGCTCTCCCAGCTTGCCCGCGAGCTGCACAGC  
CAGTTCCCGCAACTCCTGAGCCTACGCCTTGGCGAGAGTGACAACGTTGCAGGACTCGCC  
ATCCCTCGCCTGAGTACGCTGGAGGTGACCCTCCATGCCCGACCCGACGCCCTTGAGCA  
CGAGCGGCAGGCGCCGCTGCTAGCGGATGCCTGCGCCCCCTGGTGGGAAGATGGCTACAC  
CATCAGCCCCTCCATGCCGAGCCC GGTTCTGGGCAAGGGCATCAACGCCTTCTGGCA  
ACGCCTCAAGGGCTGGCTGGTGTGCGCTTGGCCCCGCAAGACCCGATGACTTGCTCGGA  
GTCCTGGCTGCCCTGCTGGCCTGGGAGCGAGACATCACCCGTTTCAATGGCGAGCCGCT  
GCTGCTCTTTGGCAAGCGGGTCATATTCGCCTTCATGAACGCCCGGGATGCCGGTGAAGT  
GGCAGGCTTTAAACCCATCTTAGAGCGCACGGGCATCGGCTGGTGGCAGATGCACGAACG  
CCCGGCCGGCACGCCCTGCGACGTAATCACCATCCAGGTCACCGATAGCGCTATCGAGAG  
CAACCAGCAGATGATGGA AACCTCATCCAACACTATGGCCGTACCTGCTGCCGCTACCG  
CATCCAGGTGGTTTACCCGGTCACCGCCACCCTGTGCCCCGGTTCGCATCGACATGGGTTA  
GCAGGTGTTTCGGCGCGACTCAAGAGGACCCCATGAGCCAGATCATTACCAGCGCTTTC  
ACCAGCTACCTGCAGGCGAGCCTCGCCAACCAGACGCCGGTGGTGTGCTCGATGAGTTCGTG  
CTGGCCAACGTGCCCGACCTAGACCCCGAGGCGGCTATTGAACCGGACATCGGCCAGCCG  
CCGGCGGGCCAGATTGTGCATCGTCACACAGTGGATCAACGCGGTTCGCATCAACAACGAC  
CCGGTGGACTACACCACCGTGATGGACACCACGTTTCGGCGATTTACAGCTTCAACGCCCTG  
TACCTCATCAACACAGCCAGTGGCATGGTGGGGATGGTTCGTACATAAGGGGGCTGGAGACC  
AAACTCAAGACCAATGAGACCATCGGCCAGACCGGTAACAGCCTGGTCAAGTCCATGCTG  
ATGGAGTACGACCGGGCAAGCCAGGCCACCACCACCCACATGGATGCCAGCACCTGGCAG  
TTTGACTATGCGGCCCGTTGCGCGGGATGGACGACGACCTGCGCCTGCAGGACCTGCGG  
TTCTTCGGGGCCGGCCACCTTCCACGGAGACGGCTTCAAGCTAGTAAGCGAATCTGGTGTG  
TATAAGGTGCAACCCAGGTGGCCTATGTGGACGGCCTGCGCTACCAGCTCGACGAAATG  
AGGAAGGTCACCGCCGGCTCCAAGCCGGTGGGGCTCTGGCACGACATCTACCGGGCGGGC  
TCCCTGCTCAACGCCTGGGTGAATCACTTCTCCCTCACTCTTAGCGTGCCAGACATGCTG  
GATGACGTGGACAGCAACGGCTCTATTCACCACGTCGCCAAGGTAGCAATCGTCAATAGC  
AAAGGCAGCATCACCGATGTGCGCCACAAGCGCACCATCGAGCTGACGGGGGTCTGTGACA  
GGAAAGGGCATTGTGGAATATGCCACGAGCGTTTCGATCTCTGTGGAGATCAAAGACGGC  
AGTCACCGCCACAAGTGGGATGAACTCTAGCAGGTGCCTGAGACCGCCAGCCGCTGGCCC  
AGCTACAACGAGGTGACCAATAAGCCGAATTTAGCCGCGGCCAATCATAGCCATATGGGC  
ACCCTGACCAATCCGAACCAGCTGTCCAACGAATTCCTGAATACTATCATGAGCCCCGGC  
ATCTATCGGCAGGACTGGAACGGCAATGCGACAGCCGGGCTCAATTACCCAGAGACACAT  
GCGGGGTGCTGATCGTGACAGTTGGCGCCGGCGGACAGCAGCTTTACCACGTATATAAC  
TCGAGTCGGGTCTATAGTCGCGCCCAGTACCACCCGGGGGCTTCACTGCCTGGGCCAGG  
GATTACAACAGCCAGAACAACCCGAGCGCCCGGATGTGGGGCTAGGGAACCTTGTGAAT  
AAGGGTGGGAATTATGTCGCCATAGCAGACAAGTATGCCGTTTCGCGAGACTTCCGGCGAC  
CTTAATGCTAGCCTGTTACAGGGCGACTTACCCTACGCGGCAACTTGCTGTGGAGCCTTG



GCCTTCCGGGTAAACAACGACAATAACTCTTACACCCGATACTGCAACAACCCGGCAGCG  
GTGCGAGCCTGGCAGAATTAACATAGAACATCGTGGGATATGGGGTGGCGGCATACATC  
GAGGCTCCCAGCAACCCGATGACCGAAAACACATTCCAGGTACGTACGCGTTAATTACC  
TAACCGACCGGGCAGCGGTACCTATTTGATTGCCTCATCCAACGGCGGGGGTGGTGAATA  
GTACAGCGTCTGCGCCTCGATACAAACGGCAACCTCAATGCCACCGGGCGGTGCCTGAT  
ATGGGGCATCGGGTATACAGCCCAGTCAACCCGCCCCACAACCTCTCATAATCACACGGCC  
GCCAAAGGCAACTCAGACATTGTTCGGCGGTGGCTGGGGGCTGGTCGGCACTCACATCCTT  
GCTTCCAACGCCTACGGCACCACCATGGGCTTAGGCTCAGTAGTCTCGGCTTCCAGCGTT  
GTGCCAGCCTCGGCAGGGGAACGGCACCATGACGGGGTCAGACTGCCAGGCACCTCGAAA  
TGTCTCGGCTATTCCGTTGGTTCGCTTGGCCCCCTTCGATACCCGCATCACTCTCTGGATA  
AGGATAGCCTGGTGGGGATCATCACCCCCAAACAAGGCATCGCCTACACCAACCGACCGG  
ACGCCCTGGACATGGTGGTTGCCTTCGACCACCTGCCCGGGCAGTTTGTCTCCTTTACCG  
CCAGAAAGGACGTCTCGGCCGAACATGGGCGCGAGCTCTATGTGCGCGCCATGTTTGGCG  
AGTTCGGCAAGATCCGCACGCAGGCCCAATCCGAGCACCTCCCAGCGAAGCCGAGCACC  
AGCGCAAGCTCGATGCCCTGCAGGCCGAGGTCACCTCTGCACATCGCTCCCCTGCAGGACG  
TCAAAGAGCTGAAGCTGGCCACCCCGCAAGAACTCGACAAGCTGGAAGCTCTGCAACGCT  
CTCGCATCGCCCTGATGCGCCTGCCGCAAAGCGAGGGCTGGCCAAGCTCAGTAACATGGC  
CGGAGATGCCCAATGAGCTGGGCCAGGGTGCCTGCGCTGGCCAGCAAGCGTTGACAC  
CCTGCACACCCGCGCCCGGGAGGTGCTGGGGCAGCCTCCGGAGAGCAAGGCGAGCGCCAT  
GGATCGAATCCTGGGATTGGCCGCGCGGGCCATTATCGGCGCCATCCGCTTAGCGAGGC  
GGCCGCGGGCTCGGCCGCTCTTCGGACCGAGTTCGACCCGTTGCTGGTGATTGGCCACTG  
CCTCACCATCACCCCCTATCAGCAAGGAGTGGGACAACCTGAAGGGCACCCAGCACCATCT  
GTCCGCCCACTACTCGGTGGCGGCACTGCCCGCCATGCTGCAGGATGGCGCCGACCGACG  
GTAGCCCGGCGGGCAACAGCATGCCCTCGCCTGGGTGCTGACAGGCAACAGCGCCGATGA  
CCTAGCCCGGCAGTTGGCGCTCCTCTGCGCCCTGCTGCCGTTGCCGGAGTGGTGCGCCAC  
CTTGGGCCGACTCACGGCCAGCAACGTCGCCATGCACCAGCCCAGCGCCCCCAGGGTGCC  
GCGCTGGCGCGCGGGGAGCCCCTTTGATGGGCACCGCTGCGCCCAGGGCCTGGCGGCACT  
TGGCGCAAGCTGTCCCAACTGGAGAGCCTCGCCCGGGACAGCCAGAGCCCCATCGACAA  
GCTGCAGGGGCTCGCCGTGCGCCGACCGCCCGCCTTGATGCGCTGGCCACCGCTCTGGC  
CCAACCTTGTAAGCTGTCCGGCACGCTCTGGCACTGGCATGGCCAGGGGGACGCGGGCGAG  
CCTCGGCACCCAACCTTAGCAGAGCAGGCCCCCCGACCACAGCATGCGCATGACGGTCGC  
TCCCCTGCTGCTCACCCCCTCCCCGCTCACCTTCTGGCAGGAGTTGACCCCATGAGCCAA  
GCCATGCAGACCCTGGATGGCGAACCCATCATCATGAAATCGATGCCGGTGTCCGCATCG  
AGGCAGTTTAAGAACAAGGACCAGAGCGGCCAGACCAGCGCGACCAGCAGTGCCGAGCAA  
GGCGCCAAGGGCAAGGAGCTCGACGTCTCGGGCCTCATCGCGTTCATGGAGGAGCGCATG  
TTGAGCCGGCTGTTTGGAGCTGGCCGATGCCAAATGTAGCGGCGGCAAGCGCCACATCTAC  
CGGGTCGGGTGATGCTGGCCAACGCGGTGAAGGTGCGCCAGGCGAGGTTCCGCCGGGCGC  
ATCACCGAGAGCGACCAGGAGGGGCTGCTTTCGTGGCAGGTGCAGTTCACCTTGAAGGAG  
TTCAACTCGGTACCGGAGAAGCGCGAACAGCGTTCGCCAAGCAAGCCCCGCCATGGGC  
CAGAGTATCTCCAAAACAGCGCCGCCAAGCCCGGCGACAAACGAACGAAGAAGGATTA  
AAAGGCCTCAGCAGTTTCGAGCGCTATGTCCTACAACCGATGGGTGACATGCTGGCATGA  
AACTGACCACCTCTCTGACCCTCGCGGGTCAACCGGTGTACCTCATCGACCATGATCTGG  
TGCTGGATCTCAACGCTGGAGGCCGCGCCGCGCTACCAGCGAGGGCACCGCCCGCAAGG  
GGCAGCCCTTACCCTGGACACCGGCTATAACGGCGACCTGCGGGCGCTGGTTCACGGGCT  
ACGTGTACGACGTGCACCCCGCCGCAACGATGCCAGCAAGCTGCTGTGGCGGGAGTTCC  
CCGGTGCTTTGGGATCCCGCCTCCCCGACAGTCAGCAGCATGCCACCCTGCGTGGCCTGC  
TCGCCTGGCTGACCGACCGCGGGGCTGTCTTCTGCTGCCCCAGGGGGCGGACTACA  
CTGACCGACCGAACCCTTACCAGCGCCGGCACCGGCTATCAGTTGCTCGATAACG  
CCGGGCGCGCCTTCGAGGTACCGGACATTGACTAGTACCAGCAACCGGATGCCTCCATCT  
ACGCGGGGAGCCTCGCCATAGCCGCTGGCATGGCAAGGAGGCGACGCTCGATCCCGCCT  
GGTCAGGGCGCCAAGCGGGTGCACCCCTCAGTCTGTGCGCCGGTGCCGGCCATCAGGCCCG  
GGCCATCATCAACGGCAAGCGGGTAATGCGGGTACGCTCCAGGGGAGACGAGATGACCC  
TCACCACCGTTACCCCGGCAAACCGGCGAAGTCGCCGGAGCGGCGCAAATAGAGAGCG  
AGTTCCCGAAGCTGGCGTACAAGATGCACCTACCCAAGTTCGGCAGGTCGAGGAGGTGA  
GCGATCAGGCCACTGCTGGCCAGCTCAATGATCCCTTTCGTCCCCGCTATGCGGTGGATG  
TGCAACTGCTGGGCGAGGATGGCGAGCCGGACAAGGCGGCCCGGCTGTATCCGGCGGTGC  
CGCTGCCGGTGTGTTTCGGCGAGCTGGAGCAGGGCCTGCTGCAGTTCCCCATTGAGGGGA

CTTTGGTTGAGCTGGGGTTCGCCTTCGGCCGGGCGACCGGCCCTTCATTCGCACCGTGC  
TCGGCAGCGCCTGGGCCTTGCCCAACATCACCCCGGGCGTGCAACTGCAGCAGCAACGGG  
CTGAGGTGTTTCAGTCGCACCGATATCGTGGGGGACCTCTGCCACCACACCGACCGTCGCG  
TGAACGACCAGGCCCTGCAGATGCAGCACCGAACCGATCACTACCTGGGGGATCATGGCC  
AGCATCGGCTGCAGGTGGCGCAGCGCAGCGTCGAGGAGGTGGGCGGGTTCAGCTCATTG  
CAGCACTGGGAGCCATCGAGCTGCTGACCGGCGACGCTCTCAGCCTGGGGAGCCTGGGCA  
ACCTGAACCAGACAACGGCCGGGGATCTGGTCGACGTGATGGGACAACAGCGCCGGGCGT  
TCGCCGGCGAACTGCAGCACTTGGAGGCGCCACGCTCCTGGGTGGGGACAGATAGCGTGA  
ACATCCTCCGGCTGCTGCTGCAACTGATGAACGTCGTGGAGCAACTGGCCTCCGCCACGG  
CTGGCCATACCCACGGCAGCGGACCAGCCCCAGGGAACACCGCAGCCATGACGGATCAGG  
GCCAGCAAACCAAGCACCTGGCCAACTCCCTCTCAGCCATCATCGAGTAACCTGCCAAAC  
CAAGAAGGCCCCAGAGTGTGGGGCCTTCTTCTTATGAGCCTGACAGCGCCTGAACCTGGC  
CAGGGAAATGTGCCGATTAAGACGCGCCACCGGGCAGCGCTACAACATGCGTGAAGCCT  
GCGCACGCTCACAGCCTCCTGACGAGTCACGGAAACACCCGCGGGCGGTCTGCGCCACG  
GAATCCGCGCTCATGCGCTCCCGCC

>NewGenomeName\_7

ACGAGGGGGGCTTATTATGACGCCCCCTGCTGGGCCGCGAGATCCTATTAGTAATGGGCT  
TAATACATAAATTGGCCGCTAAGTAACCGTACAGTTCAGTATCTTCGGTTTGGGCCTCGG  
CCAAAATTAACAGCACGTGTGCGCTTGCTTGGGTGGCCCGTAGGTCCGGTTCGAAGGC  
GGAATATTCCTTGCTTCTATAGGAAGAAACAGCGAAATAAAATAAATCGCTGTGACACGT  
GTCAGCGGACTATTAGTTCGCAGAGTTTAAGCATAACGCTTCAATTTGATGGGTGTGGTGC  
GCTCTCTTATGTCATACGTTGTGCCATGAGGAAGCCCTCCGGGGCGAAAGAAGGGCGG  
AGGTGGAGGCGCCGCCCCGCGTCCCTCCGACGAAGGATACGAAGTCGTAGGTATGTGA  
GGGTATTTATATAGGCCTCGTGTACGAAACGCGCCTGTATCCTCTGTGTATATGTGTATT  
AAAATATTTAAATACTAAACCTTAACGAATAAAATATATGTTTAATAAACTAAGACATGA  
CAATAAAAGAAAACAATGACACAATAATAAACTGTATTATGCCAACGGTGTATAATTA  
GGTCTGTTTAATAAACCTATATATATGTAGATTACAGTCTTGTTTAAATAAGTGACTIONG  
GAAGGAAATAATAATATTAATGATAAGCAATAAAATATACCGACTACATAAAAAGGGGAA  
AATGCAATTAAGACCTGTCACGTTTTTCACATTTTCGAACAAATTAAGGGCCGAAGGCCCT  
CAATCTGCAGGTATATGGGTGATTGCCTCGTGACGAAGCGAGGGTATTATTGTGAAAAAG  
AAAGCATCTGTCAGCTATAATAGTGGTCCCCTATACAGCTGTCATATGACAGCTGGCAA  
GGACCATTCGGGGGACTCCAAATATATACTAAATATAATATATTAATGTATAAGGTATA  
GATACTATTCTTAATTAATAAAAGGCGGGAACGAGGACACGTGCGCCGCACGCCATTTTAG  
TGGTGGGACCGATGTCCCGCGTTAGTGCGCTTACGTC

>NewGenomeName\_8

ACCGGCCACTTGGAGCCACGGAGCCACCACAATGGCACCTGTTAGATCTGCTGCTGCAAA  
GAGATGGTGCTTTACGTTGAATAACTATACGGCAGAAGAAGAAGCTAAAGTGAGGGCCCT  
GTTCCCTGGTGAGTTCACCTTTGCAATATGTGGGAAGGAACGGGGGAGCAGGAAACTCC  
TCATTTGCAGGGCTTTCTACATTTTAAAAAGAAGCAGCGACTGAGTGCCCTGAGGAACT  
AGTTGCCCGAGCTCACTGGGAAAAGGCCCGTGGCTCAGATCATGATAACGAGGAGTATTG  
TAGTAAGGAAAACGACGTGATACTACCATCGGGGAGCAAGTTCAAGGCAACCGGAGTGA  
CCTTGCCGGAGCTGCTGCCCGCGTGAAGGCCGGAAGGAGAATGGTGGATTTTCGCGCGAGA  
GTTACAGCGAGATCTACCTCAAATATGGGCGTGGTCTGAGGGATTTGGCCCTGATGATTGG  
ACAGAAACCCCGTGACTTCAAGACGGAAGTCGTGTTATCACGGGGCCTTCGGGGTGGG  
CTAGTCGAGACTTGCTCTGAAATGGTAGGATCGAAGTTCTACAAGATGACAGGTGACTG  
GTGGTATGGGTATTCCAATGAGGATATAGTCATCACGGATGATTTCTATGGGTGGCTGCC  
ATTCTGTGAAATGTTGAGATTAATGGACAGGTATCCACATAAAGTTCCCGTGAAGAGGTC  
TTATGTGGAGTTCATGTGCGAAGAAGATTGTCATAACGAGCAACACGCACCTGGAAAGTTG  
GTACTIONTCCGATAAGTGCTATCTGCCTGCTTTGTTTCAAGGAGAATCAATAAGTGGATGTA  
CTGGGATGGACTGAGATTCGAGTATGTGCCGGATGCTCTGAAGAAGCACCTGATCAACTA  
TTAACTCAGCCCCGAGAAAAGAGCGTCTTGCAGGTGATTAATAATAAAATGCGCGCGC  
AGCGCGCGGCGAAGGCCGAAGGCCGAAGCCGCTGAGACCGCGGGAAGCTCGGGCAGGCG  
CGAGCGACAGCGCGCGGGCAGACCCCGGGTCCCCCGGGTTCGCCCCGTCGAGGGGCCCT  
AAGGCCCGAAGAAAGCTATTTTGTACCCCATCAATAAAAAGACTTCAGACAAATAA  
ATGTTTGGTGTCTCTATTTTGGAGTTGCCAAGTGAGTTAAGTTCATTTGCCGGAATTCAC  
AGTAGATGGTGACCTTGACCTGGTGGTCCACCTGGTTGGTGGTGGTCTGGCCAACTGA  
AGGCTAACCCGAAGTGTGACCCTGGGTCCGGAGCTGGGAAGGTTCTGGTACGTTTCT

TCATGATCAGTATCCAGGGGGATTTGGGATTGTTGAGCCACAGGGCCGCCGTGACGTGAG  
CAGCCTCAGTGTTCGGTCACGCTTAGTTGTGGTCGTGGTTTAAATAGCCTTTTGAAGACTT  
TTCTGATATCCCATTTACGGGCCCCGTCCCAGTTGGCTACGGGGTCGGCATCAAGTCTTG  
TCTTTTTGAAGAAGTCCCTCTAGGTGATGGTCTTGGATAGGTACATTGTGCCCGAACCTT  
TCCACTCCTCCCAGCTTTCATTGAGGGGTCTCATTTCACCTTTTGCTAACCTGATTCTAT  
AATATTCAAAGGTAACCTCCAATTGATAGTACCCCAATCAACAAAGTCATCCAGTATAA  
TGTTGATTCCATCAGTTCCAAATGACAGGTGAGACCCCCCTGTCCCTATTTGTAGTACCT  
GACCGAACTCCCTATCAAATCTGACTCTATAGACCCTGTTGGTTCGGTGGCCCCCTCCTGT  
TGGCAGGGATCCTTCTCCTCCTCCYCCAGTCACGACGCCTCCATCTCCTCCTCCTGGGAG  
CAAAGGTCGTCGTCTCCTAGCAACCTGGTTAGAGGTTACGCACATCCGGGTAAATAATT  
AACAGTGGGYCCAAGAGGCCGTGRCAGTATT

>NewGenomeName\_9

TCGTTTTGAATACTTATTTTTAGGCTTGTTATTACGCATTTTATAAACTCCTTAATTGTTA  
TTTGATACCAATTTGATACCGTTTAATCAAATATGCTCATAGCTTGATGTTTTTTTATCAG  
TATATAAATGAGAGTACGTTTGAATTGTTTCTGTAATGTTAGAATGCCTCATTAATTCCA  
TTAATAAATTCATATCTACACCATTGTGAATAAAATAGCTAGCGTACGAGTGTCTTAAAT  
GGTGTATTTTTAGATTCGGGAATACAGATTTAAAATGATACGAATAAGTAACGTATCTAA  
TAGGTTCTAAACCCCGAATATAAAATAGTTTTCGTCAAATATTTATATCTTTTAGAAG  
ATTCATTATACATGTTTTTAAGCATCTCTCTAATTAATTTGGTACAGGTATTATCCCTT  
TAGAGCTTTCTTTTTTAGATTATATTCAATTTTCTATTACTTAAATTGATTTTCTTAT  
TTACGTCAATTCGCCTTTTATTTATCGTAATCTTTCCACTGCAAAGCTAAAGCTTCTC  
CTATTCTAAGACCAGAATAAAATAACAGTCTAGTTAGCTGACGAGAAGTATCATTGTGA  
TTTGTCTACTTTTTCATCAAATCTTCACGAGTGATAAATTTAGCTTGTGGTTTTGTTC  
CGGGAATAGGAGTTACCGATAATGTGGGGTCGTATAAGAGCTTGTAAATGCTTTTTGGCGT  
AATTGATAACTGCTTTAAAACCTGCCACACAGATCGTGCATAGTCAACAGAAAGACCTG  
CATCGTTTAAACAATAATTCCTGAAAGCAGTACATTGCGTAGTAGTATTTGCCAATAG  
GGATATTTCCGAACCTTTCTTTATGTGAGTATTATATTCTGTAGTTCGCTTTTCTATTG  
AGCGTGCAGAAAGATTTTCATTTTTTAAACGATCAAAAAATATATATTCAAAGGGTTGAT  
TGTCGAGTATCCATATTTAACATTTTGTATAAATTCGCTTTCAGCTAGTTTGACATCTT  
TCTTACGTTCAAACCCACGCTTCATTTTTTGTGTTGTTATTACCGTATACATCTTTATATC  
TAATGGAAAAATACCATTTACCTGTATTACCATCCTTATATACTGGCATTTTACTTCTCC  
CTCCTCAAATTTGGCAAAAAATAATAAGGGTAGGCGGGCTACCCGTGAAAATTGTATAAA  
AAAAGAGAGAGCGCAGATGCACCCTCTCATGTGCAAAATATTTTCAGCGACTTGTCTAATT  
TGAAGCTTGCCGCAAATATTTTCAGCGGCTTGTTTTGTATATATGTAATATACCATCAAAG  
AGAGTGTAGTTCAAGCGATTTAACTAAGAAATCTAATTTTTATCCTATTTTCAATTTTAT  
CTACTGTTTCTTTTGAATATGATATTTCTCCGGCAGGGTCATACCTATTAATTTTCGATA  
TTCTATCCTTGCTGATTGTAGTGATATTTAAAACGTTAGCATAGGTCTTTTTATACTTGA  
ATCGCTCATATCTTTGCGAACCTTCGAATATTTTTTGAAGTCGTCATTCAGCGATTTGT  
TTTCATCAAGTAATTTTTGATCGTATGGGTTTTCTGCTTTTGACACCTTTTCAAGATTGT  
TCATGATTTTTTTAGCTAAATCCTTACCCGTTACGTCCATTTTTTCCAATCCTAAAGGTA  
ACAAATCTTCTTCGATATGCACATTGAATTTACTTCTGGAAGATGTAAGTGGCACTACCG  
TTAATATTGGATTTTTATTTGAATCGTGATTATTAAGTACCATACAAAAATGGTTTCCAG  
AAAACCTCTGCCAACATTAACACCTAACTTTACATAAATTATAGTGCCTTTTTTATATC  
TGGTGTAACTTTTGTTTTCTGTAAACAATCTAACTTCATCCAATAAAAACTCTGAATATT  
CAAGACACCATGAATTCATATATTTAAATTTGTAATCTCGCTATTTTGAATCTTTTTAA  
AATGATTAACCTGCTGTTTCTAAAGGTGCGTTCTTCCATCCCTCATCTCCTCACGCCA  
CACAAGCGCTATTAATCAATATCCAATAAATTGTTGTTTTTTCTTATCGAACTCTTCCTGA  
GAAATTACTCCGACATCTAATAATTCTTTATATTTTATTATTTTCATCAGCAACAGAAAA  
CTCATTTTTTTCAGAATTGGATGGTTTCATAGAACTTTCTCGAATAGAGATTTGATCTTGT  
ATTGTTTCCGCCATTCTAGATACAGTGTTTTTTGATATGCTTCCCTATAGCGATACTTGAT  
GAACCGTGATGTATAATTATTTGCGCAAAAAGAAGTCCTTTTTTATACGAAACAGAATTG  
ATTTTCTCGAATGGAAATTCATGAAATTTCAAACCATATATCATACCTTTACCTAAGAAT  
ACAATCTTAGATAAGTACATACTATTAAGTAGGTATTATTATTGTACAATCCCGAAGTT  
ACATACATTATGTTTTTATTATCTTTTAAAATCATAGGTAGTTCTTTCACTTCTTTTTT  
GTACCAACAAATCCTCTCCACCTATTTGCAAAAATCTTTGGTAGATTTTAGATAAGTTT  
TCGTCAGATTTATTGATTTCACTTTCAAATTTCACTTCTTTTCTTGGTTTACTTTGGTAT  
TCTTTTAAAATTTCTCTTTTGTCTTCAACAGATAGTTGCTTGTATTGTTTCTTTTCTTCT

TTTGTTTTAGTTGCTAAATATTGACTCTCAATCATACTTTCTTTGAACGTTAATCTGCTC  
TTAGGTAATTCTTTCATGTTTCATTTCTCCTTTATTTATATTTCTTTATATTTAAAACTC  
TCAACGGCTCTAATGTAATCGAATACTCGCCATAGTGAGATCCAATACCATATATCTTTT  
TATATTGTTCTATTGCTTCTAATATGTATTCTTCGCTTAATTGTAGATACTCAGACAACT  
CATACAAGTTGCGTACGCCATAATTATAAGCTTCTCCAATTTTCGCGTAGCGGTACAGCTG  
AGATAAAGCCGTGTCGTCTTGCCTAATTTTCGAACTTGCCTGATTGTTGAATTTTCGATTGAT  
CTAAAATGTTGCCATACGTCAACTTGTGGTGGGCAAGTTCTTCATATAATACTTCTAAGT  
TGTTCTTTTCGGATAAGGAAGGTCTAATAAAAAATTTCTCCTTCTTGATACCAACCATCGA  
ATCCTCGAGGTACTCTTTGTGTTTCTTTCACTTCAACTTCACATTTTCATAAGCAATTCTT  
CGTATTTTCCCATGCGCCAAACCCCTTTGGTGTCTTATTTCTTTCTATCTCTAACCCATT  
GCATAAAATTTTCGATTTCTTCCCATTCTTCGGGAGTAAATTCATCTTTATTTGCATGAC  
CGGCTATAGTTTCTTGATGAATACTTCTTTCTTCTGTAATTCTCGATTTAGGTACATTAA  
AGTAATCTGCTAATTGTTGGACTTTTGATAATTCTAGGATATTTAAGTTCTTTAAGCCAGT  
TAGTGATTTTTGATTGACTTACCCCGATTGCTTCAGACAATTCTACTTTAGTAATGTTGT  
TCTCTTTCATAAGTTGCTCTAAGTTCTCTGATAAAATTTTTCTAGCACTCTTATATTCCA  
TAATTTTCTCCTTTAGTATTACTTAATGTAATACTAATTTACCATAAGTAATATCACTTT  
TCAATACAAAATATTACTTTTTTGAATAAATATCACTTTAGGTGTTGACATATTACTTT  
AAGTGATAGTATAGTTGTAATGTCAACGGGAGGTGATACGAAATGCCAGAAAATTTTAA  
AGAGTTCTCTGTAAAGGTCTGGAGAACTAATTCGAATATGACACAACAAGATGTCGCTGA  
TAAATTAGGCGTTACTAAACAATCTGTAATAAGATGGGAAAAAGATGACGCAGAATTTAA  
AGGCTTACAATTGTATGCTTTAGCCAAATTATTC AACACAGAAGTTGATTATATAAAGGC  
TAAAAAAATTTAACATTAATATCACTTTAAGTGATAAAGGAGGAACTCAGATGCAAGCAT  
TACTAACATTTAATTTTGAAGAATTACCAGTAAGAACATTAACAGTAAATGAGGAACCGT  
ATTTTGTAGGGAAAGATGTAGCAGATATTCTAGGTTACAAAAATGGCAGTCGTGATATTA  
ACGCTCATGTTGATGCAGAACATAAGCTGACGTACCAAATCAGTACCGCAGGTCAAAGAC  
GAAATCAAACAATCATCAACGAATCGGGTTTATACAGCCTAATCTTCTCATCAAACTAG  
AATCAGCTAAACGATTCAAACGTTGGGTAACTTCAGACGTCCTACCCGCTATTCGAAAAC  
ACGGTAACTACGCAACAGACAATGTAATTGAACAAACATTA AAAAGATCCAGACTACATCA  
TTAAAGTGTTGACTGAGTATAAGAAAGAAAAAGAGCGAACTTATTTTTACAACAAGAAA  
TTGGAGAGCTAAAACCCAAAGCAGACTATGTCGATGAAATCTTAAAGTCAACTGGCACAT  
TAGCCACAACCTCAAATCGCGGCAGACTACGGTATATCAGCACAAAAGTTAAACAAACTAC  
TACACGAAGCTAGATTACAACGAAAAGTGAATAAACAGTGGGTGCTTTACTCAGAACACA  
TGGGCAAGAGTTACACAGAATCAGACACTATACCAATTGTACGCTCTGACGGTAGAGAAG  
ACACAGTTTTACAACTAGATGGACACAAAAAGGCAGATTGAAAATACATGAAATCATGA  
CTGAATTCGGTTATGAAGCTAATTTAGGGGGAGCGTAAATGACACCAGAACA AAAAGAAA  
AGCTAAACAATATAGTATTAACACTTTATGCAGTTAAAGAAAACA AAAAGTCAAACATACA  
CACACAAAGATACTTACTGTGACATATGCAGGCGAGATTGAGCACACTTACGAAGTCG  
ACAGAGAGAAACACCTTGAATCAATGATTGAGTGGGCAATTGACCAAATCGAACAGCACT  
TTGATTTAGACGAAGAAGAATAACACACAATTTAACAACA ACTTAATAGGAGCAATTAC  
AAATGAATGCACTATACAAAACAACCCTCCTCACCACAATGGCAGTTGTGACGTGGAAGG  
TTGTAAAGATTGAGAAAAACACAAGATTTAACTTAGAAATTTTGATTATCCAAAAATTA  
ATAATGCTCAGAGCAAATCATTGTTGGAGATTGCTAGTCACGATCTAAAAGATATTTAAC  
TGTATTCAAATTTTTCATATCTTGTGAGCTTTTAAGCATTCTGATAGAAAGCTATTGAATA  
AATAATTTTCGTAAGATACGTTTTTCAGGAGCATCTTCTTTCACTTATTTATTCTATCCCT  
AAAAAAGTCACTGTCACCACCGAATTCTTTTTTCGGCTTGATTACTAAGTTCACCAAAGAA  
ATTTTGAAAATCATTAAATTCATACTTATCACCTCCTTTCACTAGGAGATAACTAAATT  
ATACACAACACAAAATAAAAAGGAGGAATAGATACGATAAAAAATAGTTTGCAAGCTAA  
AGA ACTTGCAAGTAATTTTATCTGTTTCTAAATCCAAAGCAGGACAAATAATAAGAGAACT  
GAATAAAGAGCTTGAAGACGAAGGTTACATTGCGATTCGAGGCAGAATAACCAGTCCAATT  
AGCTAGAGAAAAATCCCTTATCACGGCTTGTGACGAGAGAGAATAATGGAGGGCGTTGAA  
AAAAGAAAATGAGTAACATTTATAAAAAGCTACCTATTAGCAGTATTGTGCTTCACAGTCT  
TAGCGATTGTACTCATGCCGTTTCTATACTTCACTACAGCATGGTCAATTGCGGGATTTCG  
CAAGTATCGCAACATTCATATTTTCATAAAGAATACTTCTATGACAACAAAGGAGAATGAA  
AAGATGTCAGATAAAGACTTGATGGAAAAAGTTGACAAGAGAAGGAAAGAAAAAGATTTA  
ACGGTGAGAGAAATAGGATATTTGCTAGGTTTCTCTGATACTTATTTTATTAAGTTAAGA  
AATGGTTCAAGAAGAATTACCGATCGGAAGAGAGATAGAATTAATCGTTATTTAAACGGT  
GAATACGACAATGTA AAAAATTCCTAAATATTC AAGAGATTCTGAACAAGTAGCATATGAC

AAGGGATATAAACAAGCTTTAAAAGATTTAGAAGAATTTGTAAATAAGAAAAAACTGCT  
ACTTGCAGACAACAAGTAACAGTGACAAACACTTAAGAAAAAATTCATGTTCAATATAAAA  
CGAAATAAAGGAAGTGTCAACAATGTACAACAAAATTGGCGATGTATGTCAAAAAGTAAT  
TAATGTAGACCGATTCCATTTTAAAGTAGCAGTTAAGAAACAAGATTACAGCATTCTAGT  
GAATGTCTTAGATTTAGAAGATAGATTTATCGACGGTATAAATATAACAGATGAGAATGA  
TCTATACACAGCATTAGACATATTAATCAATTTATTTATGAATGGATTGAAGAGAACAC  
AGACGAAAGAGACAGGCTAATTAAGTACTGATGAGATGGTAGGAGGTCGCTATGAAGCA  
GACTGTAACCTTACATCATCCGTCATAGGGATATGCCAATTTATATAACTAACAACCAAC  
TGATAATAATTCAGATGTTAGTTACTCCACAAATAGAAATCGAGCTAGGGAATTTAACGG  
TATGGAAGAAGCGAGTATCAATATGGAATATCACAAAGCAATCAAGAAAACAGTGACAGA  
AACTATTGAGTACGAGGAGGTAGAACATGACTGAACAAACATTATTTGAACAGTTGAACA  
GTAAAAACGTGAATGATCATAACAGAACAAAAAATGGATTAACCTTATCTAGCATGGTCAT  
ATGCACACCAAGAGCTGAAAAAGATTGACCCAAACTACACAGTAAAAGTACACGAGTTTC  
CACATCCAGATATTAACACAGAAAATTATTTTGTACCTTATTTGGCTACACCAGAAGGCT  
ATTTTGTACAGGTATCTGTGACTGTGAAAGATAGTACAGAGACTGAGTGGCTTCCAGTAT  
TGGACTTTAGAAATAAATCGCTTGCTAAAGGTAGTGCAACAACATTCGATATTAACAAAG  
CGCAAAAACGATGTTTTGTTAAAGCTTCGGCTTTACACGGTTTAGGCTTATATATCTACA  
ACGGCGAGGAACCTACCAAGTGCAAGTGACCACGATATTACAGAATTAGAAGAGCGTATCA  
ATAAGTTCGTGAACTTATCTCAAGAAAAAGGGCGAGATGCAACTATCGATAAAACGATGA  
GATGGCTAAAAATATCTAACATTAATAAATTAAGTCAAAAACAAATCGCAGAAGCACACC  
AAAAATTAGATGCGGGATTAACAACAAATTGGATAGTGTGGAGAAACAATAATGTTAAACAG  
AGCAGTATTAGTAGGACGCTTAACAACAAAGACCCAGAATTAAGAAGCGCGCCAAATGCCGT  
AAATGTAGGTACATTCACATTGGCAGTAAACAGAACATTCACGAATGCTCAAGGCGAGCG  
TGAAGCAGATTTTATAAACGTAGTAGTGTTCAGAAACAAGCTGAAAATGTTAAAAACTA  
CCTTTCTAAAGGGTTCGCTGGCAGGTGTAGACGGGCGACTACAAACACGTAGCTACGAAAA  
AAAAGTCGGGCAACGTGTATTTGTGACAGAAGTAGTAGCGGACAGTGTTCATTCTTAGA  
ACCGAAGAATAACAACCAACAACCAACAACAATTATCACCAACAAGACAAACTCAAAC  
TGGTAATAATCCTTTGAAAATACCACTCCGATTACTGATGATGACTTACCGTTCTGATT  
GGAATGATTAATGCCGAAAATTAAGTTATATCACTCAAGACGACGGCACAACAACAG  
TTGTCATCTCTGATGTTGAATTAGGTAATAAAGAAACATTAAGTACTTGATAACGGGTTG  
ATGTAGAAGTCGATGTAAGCGTCATAGATCCATTTGCAATTACCGGCAAGCAACGCAAAT  
TGATATTCGCATTGTGTAACGATATAGAAGCTCATAACAGGACAACCTCGAGATTATATGA  
GGCAAATGTTCCAAGATTATGTGAAGTTTCTGTATGGCTATGAAGAACGCATATCTTTAC  
CAAATTGTTCTCGAACTATAACTAAGCAAATTATAGAAGCGATGTTTGAGTGGATTTTTA  
CAAATGCGATTCCATTAAATTATAAAACAAGCAAATTAATGAAAGAAGATAAAAATTATC  
TTTATTGGGCAACTGTGACGCGTCATTGCATTATATGCGGAAAGCCTCACGCTGACTTAG  
CACATTATGAAGCAGTCGGTAGAGGCATGAACAGAAACAAGATGAATCACTATGACAAAC  
ATGTATTAGCGTTATGTCGCGAACATCACAAACGAGCAACATGCAATTGGTGTTAAGTCGT  
TTGATGATAAATATCACTTGCATGACTCGTGGATAAAAGTTGATGAGAGGCTCAATAAAC  
TGTTGAAAGGAGAGAAAAAGGAATGAATAGACTAAGAATATTAATAAATAGCACTCCTAAT  
CGTCATCTTGGCGGAAGAGATTAGAAATGCTATGCATGCTGTAAAAGTGGAGAAAATTTT  
AAAATCTCCGTTTAGTTAATACAGGTTTTTACAAAAGCTTTACCATAGGCGGACAAACTA  
ATTGAGCCTTTTTTGTATGCTATTACCCAGGGGCTGTAATGTAACCTTTAATACTTCAAAT  
TCAATGCCAGAAAGTTTACTTATTGTTTTCTAGGTTGTGTCTGACTTTAACATTCTTTTA  
ACAAATTCTAATCCCGAAACAATCTTTGTTTTCTATAATCTTATTAAGTGATTTAAA  
AACTGAGGAGCATAAACTTATTATAAATTCCTTTTTTTGTTAAGTAAGACATGTCAAAA  
GTTTCATTTAAAACCCCTAACCTTACTAGGTTATTAATTGAAATTTCCGGTTGATTCTATA  
TCTAACGGAGAGTCTTTTATTAGCGTGTCCGATATATTCATACCGTCATTCTTTGGGTTT  
AAAACCGCTCTATATTTAACGGCAGGATGTACTTCGTGATTCTTTAAATGTTTTAAAAGA  
ATAGCATCATTTGGGGATAATTGTTTCATTATTTCAACAATGAATGGTGGGTTAATGAG  
TTTTTTCTGTCATCCATAGATGATGCTACTAGTTTTGCGAACATATTACTTAAAGTTTTT  
TCACTAATGTAAAACCTTTGAAGCTTCTAGAGCAGGACCTAGAAGAGAAAAGTGTGGTTCT  
TGTAATTAATTTTCAGGTACAGAAGATATTTCTTTTTTATATTGTTCTTTGAATTTTTCA  
AATTCTACTTCTTTGATAAATAACTTTATCCACATAAAGCTGGAATTTCCCAAAGACA  
AGTTCCCAAGTTTTAGAGAATGTTTCTACAGGCCCTTTTGTATGCGCCTTCAATAATTTTA  
TCAATACCTTTACCTAAAATAGGATCCATAATTATTCACCCCAATCTAACGCAATAGCG  
ATAATAAAATTAACCAGAAAGGAGATAACGAAATGGCAACATTTAGAACGATAAAAGAA

AGTGGCGATTTTGTAACTGTGCATAAATCTTTTGTGTTTCGATAGTAATTTAAGTGCTAAA  
GCTAAAGGGATATTATTGTATTTCCCTAAGTCGTCCTGGCAATTGGCAAATATACACGTCA  
GAAGTAGTTAAACATATGAATGATGGACAAAAATCAATCAATAGTGGCGTTCAAGAAGTT  
ATGGACAATAAATATGTTTCACAGAATACAAAAAAGAGCTGAAAACGGTGTGTTTAAAGGT  
TTTGAATATTTAGTATACGAAAACCAACCGAAATGCCATTTTCGGAAAACGGATTATCG  
GCAAACGGGTTTTTCGGAAAACGGAAAACGGAAAACCAAAGGGCGTACTACTAATAAT  
AATAGTACTAATAATGATTTAACTAATAATAACAATACTAATAATGATGGAAGTATATTG  
TCGGGCAACCCGACTGTGTATTCCATTCCCTATAAAGAAATTATCGAATACTTAAACAAA  
AAAGCAGGAAAGCATTTTTAAACATAATACAGCTAAAACAAAAGATTTTATTAAAGCAAGA  
TGGAATCAAGATTTTAGGTTGGTGGATTTTAAAAAGGTGATTGATATCAAACAGCTGAA  
TGGTTAAACACGGATAGCGATAAATACCTTAGACCAGAAACACTTTTTGGCAGTAAATTT  
GAGGGGTACCTCAATCAAAAAATACAACCAACTGGCACGAATCAATTGGAACGCATGAAG  
TACGACGAAAGTTATTGGGATTAGGGGGATATTATGAAACCACTATTCAGCGAAAAGATA  
AACGAAAGCTTGAAAAAATATCAACCTACTCATGTGCGAAAAGGATTGAAATGTGAGAGA  
TGTGGAAGTGAATACGACTTATATAAGTTTGTCTCCGACTAAAAAACCCGAATGGTTAC  
GAGTATAAAGACGGTTGCAAATGTGAAATCTATGAGGAATATAAGCGAAAACAAGCAACGG  
AAGATAAACAACATATTCAATCAATCAAACGTTAATCCGTCTTTAAGAGATGCAACAGTC  
AAAACTACAAGCCACAAAATGAAAAACAAGTACACGCTAAACAAACAGCAATAGAGTAC  
GTTCAAGGCTTCTCTACAAAAGAGCCAAAATCATTAAATATTGCAAGGTTTCATACGGAACT  
GGTAAAAGCCACCTAGCATAACGCTATCGCAAAGCAGTTAAAGCTAAAGGGCATAACGGTT  
GCTTTTATGCACATACCAATGTTGATGGATCGTATCAAAGCGACATACAACAAAAATGCA  
GTAGAGACTACAGACGAGCTAGTCAGATTGCTAAGTGATATTGATTTACTTGTACTAGAT  
GATATGGGTGTAGAAAACACAGAGCACACTTTAAATAAACTTTTCAGCATTGTTGATAAC  
AGAGTAGGTAAAAACAACATCTTTACAACCTAACTTTAGTGATAAAGAATAAATCAAAT  
ATAAACTGGCAACGTATCAATTCAAGAATGAAACACAATGCAAGAAAAGTAAGAGTAATC  
GGAGACGATTTTCAGGGAGCGAGACGCATGGTAACAAAAGAATTTTTGAAAATTAACCTTG  
AGTGTTTCAGATATGTACGCTCAGAACTCATAGACGAGGCACAGGGCGATGAAAATAAGT  
TATATGACCTATTTATCCAAAACCTTGCAGAGCGTCATACACGCCCCGCTATCGTCGAAT  
ATTAAGGAGTGTTAAAAACGCCGAAAGAAAAATATTACTTATACCGAGAAGATGGCACAG  
AAGATATTAAGGTCATCAAGTATAAAGAGAATGAGAATGAAGTGTAATCGCTCACAGGAG  
CCCATTTTCAGCGACGAAAAGAAAATTATGACTGATAGTGACCTAAAACGATTTAAAGGCG  
CTCACGGACTTCTATATGAGCAAGAGCTAGGTTTACAAGCAACGATATTTGATATTTAGA  
GGTGGACGATGAGTAAATACAACGCTAAGAAAAGTTGAGTACAAAGGAATTGTATTTGATA  
GCAAAGTAGAGTGTGAATATTACCAATATTTAGAAAAGTAATATGAATGGCACTAACTATG  
ATCGTATCGAACTACAACCTAAATTCGAACTACAACCTAAATTTGGGAAGCAAAGACCGA  
TTACGTATATAGCCGATTTCTCTTTGTGGAAGGAAGGGAACTGGTTAAAGTTATAGACG  
TTAAAGGTAAGGCGACTGAAGTTGCCAACATCAAAGCTAAGATATTCAGATATCAGTATA  
GAGATGTGAATTTAACGTGGATATGTAAGCGCCTAAATACACAGGTCAAGAATGGATGG  
TATATGAGGACTTAGTGAAAGTCAGACGTAAAAGAAAAAGAGAAATGAAGTGATCTAATG  
CAACAACAAGCATATATAAATGCAACGATTGATATAAGAATACCTACCGAAGTTGAATAT  
CAGCATTTTGATGATGTGGATAAAGAAAAAGAAACGCTGGCAAAGCGCTTAGATAACAAT  
CCGGACGAATTACTAAAATATGACAGCATAACAATAAGACATGCATATATAGAGGTGGAA  
TAAATGAGTATCGTAAAGATTAACGGTAAACCGTATAAATTTACCGAACATGAAAATGAA  
TTGATAAAAAAGAATGGTTTAACTCCAGGAATGGTTGCAAAAAGAGTACGAGGTGGCTGG  
GCGTTGTTAGAAGCCGTAAACGCACCTTATGGCATGCGCTTAGCTGAGTATAAAGAAATT  
GTGTTATCCAGAATTATGCAACGAGAGGCTAGAGAACGTGAAATAGCTAGACAACGACGT  
AAATAGGCTGAATTACGTAAGAAGAAGCCACATTTGTTTAAATGTACCTCAGAAACATTCA  
CGTGATCCGTAAGTTTGGATAATACTTATAACCAAATGTTCAAGAAATGGAGTGAAGCA  
TAATGAGCATAATCAGTAACAGAAAAGTAGATATGAACAAAACGCGAGACAATGTTAAGC  
AACCGGCGCATTACACATACGGCAACATTGAAATTATAGATTTTATTGAACAAGTTACGG  
CGCAGTACCCACCACAATTAGCATTGCAATAGGTAATGCAATCAAATACTTGTCTAGAG  
CACCGTTAAAGAATGGTCATGAGGATTTAGCAAAGCGAAGTTTTATGTCGATAGAGTAT  
TTGATTTGTGGGAGGGGTAGCGATGGCAACGCAAAAACAAGTTGATTACGTAATGTCATT  
ACAGGAGCAATTGGAATTAGAAGACTGCGAAAATAACACAGACGAACAAGTTAAAGCAAT  
GAGTCATAAAGAAGTTAGCAATGTGATTGAAAACCTATAAGGCAAGCATAAGTAATGAAGA  
GCTATACGAGGAATGCATGTCGTTTGGTCTGCCTAATTGTTAAAAGGAGGGATGACCATG  
ACAGATAGCGCGCGTAAAGAATACCTAAATCAATTCCTCGGATCTACGAGATATCTGTAT

CAGGATAACGAACGAGTGGCACATATCCATGTAGTAAACGGCACTTATTACTTTACGGT  
CATATCGGGCCAGGTTGGCAAGGCGTGAAAAAGACATTTGATACAGCGGAAGAGCTTGAA  
ACATATATAAAGCAACATGGTTTGGAAATACGAGTAACAGAAGCAACTAACTTTATTTTAA  
AAGGGCGGAAACAATGAAAATCAAATTTGAAAAAGAAATGAATTTACCTGAACTTATCCA  
ATGGGCTTGGGATAACCCCAAGTTATCAGGTAATAAAAGATTCTATTCAAATGATGTTGA  
ACGCAACTGTTGTGTGACTTTTGATGTTGATAGCATCTTATGTAATGTGACTGGATACGT  
ATCAATTAACGATAAATTTACTGTTCAAGAGGAGATATAACAATGAAAATCAAAGTTAAA  
AAAGAAATGAGATTAGATGAATTAATTAATGGGCGCGAGAAAATCAGGATCTATCACAA  
GGAACAACATTTTTTTTCAACAGGATTTAGTGATGGATTCGTTTCGCTTTCATCCAAATACA  
AATAAGTGTTTCGACGTCAAGTTTTATTTC AATTGATATCCCCTTCATAGTTGATATTGAA  
AAAGAAGTAACGGAAGAGACTAAGGTTGATAGGTTGATTGAATTATTCGAGATTCAAGAA  
GGAGACTATAACTCTACATTATATGAGAACGCTAGTATAAAAAGAATGTTTATATGGCAGA  
TGTGTGCCTACCAAAGCATTCTACATCTTAAACGATGACCTAACTATGACGTTAATCTGG  
AAAGATGGGGAGTTCCTAGTATGATGTTGAAATTTAAAGCTTGGGATAAAGATAAAAAAG  
TTATGAGTATTATTGACGAAATCGATTTTAATAGTGGGTACATTTTGATTTCAACAGGTT  
ATAAAAGTTTCAATGAAGTAAAATTTACAATACACAGGATTTAAAGATGTGCACGGTG  
TGGAGATTTATGAAGGGGATATTGTTCAAGATTGTTATTCGAGAGAAGTAAGTTTTATCG  
AGTTTAAAGAAGGAGCTTTTTATATAACTTTTAGCAATGTA ACTGAATTACTAAGTAAA  
ATGACGATATTATTGAAATTGTTGGAAATATTTTTGAAAATGAGATGCTATTGGAGGTTA  
TGAGATGACGTTACCTTATCAGTTGAACAATATAAAAATCTTTG TACTA ACTCTAACAA  
GTTATTAGATAAACTTCACAAAGCATTAAAAGATCGTGAAGAGTACAAGAAGCAACGAGA  
TGAGCTTATTGGGGATATAGCGAAGTTACGAGATTGTAACAAAGA ACTGGAGAAGAAAGC  
AAGCGCATGGGATAGGTTTGCAAGAGCGTTGAAAAAGATTTAATAAACGAATTCGGTAA  
CGATGATGAAAGAGTTAAATTCGGAATGGAATTAACAATAAAAATTTTTATGGAGGATGA  
CACTAATAAATAACCGTGAACAAATAGAACAATCCGTTATAAGTGCTAGTGCATATAACC  
GTAATGACACAGAGGGATTACTAAAAGAGATTGAGGACGTATATAAGAAAGCGCAAGCGT  
TTGATGAAATACTTAAGGGTTTACCTAATGCTATGCAAGATGCACTCAAAGAAGATATTG  
GTCTTGATGAGGCAGTAGGGATTATGACGGGTCAAGTGGTCTATAAATATGAGGAGGAGC  
AGGAAAATGACTAACACATTAACAATTGATCAGTTACAAGAGTTATTACAAATACAAAAG  
GACTTTGACGATAGAATACCAACACTAAATTTACGAGATAGCAAGATTGCGTATGTGGTT  
GAATTCCTTGAATGGTTTAAACACATTGGAAACGTTCAAGAATTGGAAGAAGAAACCAGGT  
AAACCGTTAGACGTACAGCTAGACCAGTTATCAGACATGTTAGCGTTTGGATTGAGTATT  
GCTAATCAACAAGCAGATAACATGGAAGAAATTTTGGGTTATTTAGATGACGGAGATTTT  
AACGACTATATAGAACGAGTTGAAATCGATTTTATCGATAGTGATGTAGTAGATGAATTT  
ATGTCAACTATAGATGAAATGTATGAAAGTCCATATCGTAGCAACTTATTTTTACCGTTT  
GCATTAGCGAACA ACTACTACACTATCGATCAACTCATTGACGCATACAAAAGAAAATG  
AAAAGGAACCACGAAAGACAAGATGGAACAGCAGACGCAGGGAAAGGATACGTATAAAGA  
CATATTAGATCGGGTCAAGGAGGTTTTGGGGAAAGTGACACAATACTTAGTCACAACACTC  
AAAGATTCAACAGGACAACCACATGAACATTTTACTACTGCTAGAGATAATCAGACGTTT  
ACAGTTGTTGAGGCAGAGAGTAAAGAAGAAGCGAAAGAAAAGTACGAGGCACAAGTTAAA  
AGAGATGCAATTATTA AATTAGGTCAGTGGTTTAAAAATATAAGGGAGTGTGCGAAATGA  
CGGATGTTAAAATTA AACTATTTACAGGTGGAGTTATTTTTGTAAAAACAGCTGAATCTT  
TTGAAAAATATGTTGAAAGAATGACGAGTTTTAATGGTTATATTTACGCAAGTACTATAA  
TCAAGCAACCAACGTATATTA AACAGATACGATTGAATCAATCACACTTATTGAGGAGC  
GTGGGAAATGAATCAGCTGAGAATTTTATTACATGACGGTAGTAGTTTGGTATTACATGA  
AGATGAATTATTAACGATATAGTATTTTTTTTTGGATGATTTTAGAAATGATGATGAGTA  
TTAACGATAGAAAAAGATTATGGCAGAGA ACTTGTATTGAACAAAGGTTATATAGTTGG  
GATTAATGTTGAGGAGGCAGACGATGACTAAACAAATATTAAGACTATTATTCTTACTAG  
CGATGTATGAGCTAGGTAAGTATGTAACGGAGCAAGTATATATTATGATGACGGCTAATG  
ATGATGTAGAGATGCCGAGTGACTTCGCAAAGTTGAGCGATCAGTCTGATTTGATGAGGG  
CGGAGGTGTCAGAGTAGATGATGTGGTTAGTCATAGCAATTATATTACTAGTCATCTTAT  
TGTTTTGGTGTGATGTTGCAAGCTGAACAGTTAAAAGGCGATGTGAAAGTTAAAGAGCGGG  
AGATAGAGATATTAAGAAGTAGATTGAGACATTTTGAAGATTAAACATATTTGTACGGAG  
GGTATTCATGACTAAAAGAAATACGGATTAAAATTATCAACAGTTTCGGAAATTAGAAGA  
CGAGTTGTGCGATTATCCTAATTATCATAAACA ACTTGAAGATTTAAGAAGTGAATAAT  
GACACCGTGGATTCCAACAGATACAAATATAGGCGGGGAGTTTGTACCATCTAATACATC  
AAAAACAGAAATGGCAGTAACTAATTATCTTTGTAGTATACGAAGAGGTAAAATTCTTGA

GTTTAAGAGTGCGATTGAACGTATAATCAACACATCAAGTAGGAAAGAACGCGAATTCAT  
TCAAGAGTATTATTTTAATAAAAAGACTTTGATTGCGGTTTGTATTGACATACACATCTC  
TGAAAGTACAGCGCATAGAGTCAAGAAGAAAATAGTGTCTAAACTAGCCGAAGAATTAGG  
AGAATACTAAATTTGACAGTAAAATGACAGTTTTTGACACCTATAACGAGATATTATGAT  
AGTGTAGGATATTGACTATCTTACTGCGTTTCCCTGATCGCAATTAGGAATAAAGGATCT  
ATGTGGGTTGGCTGATTATAGCCAATCCCTTTTTTAATTTTAAAAAGCGTATAGCGCGAG  
ACTTGGTGGTAAATGAAATGAACAAATTAATAAAAAGCAACGTTTGTTCAGAAAGTAT  
ATACAATACCTGGTACTGAATGTTATGGCAATGCTACTAAGTCAGCTGTGCATGCCGGAT  
ATAGCGAAAAGACGGCGTACTCACAAGGACAGCGTATGTTGAAGAATGTTGAAATTCAGA  
ATTATAACAAGGAGGTTGAAACAAAACCTCTTTGACGAGAATATTATGTCAGGGAAAGAAG  
TGTTGTATAGGCTAACTAGAACAGCTAGAGGAGAACACACGGAAGTTGAAGCTGTCGTAA  
CAAAAACCTGGAGACTATAAAGGGAATCCGGATACTGGCAAAAATGCAATTAGTATACGATG  
AACACATACAACCTTGTTACTAAGTCCCCTAAAATAAGTGACCAAAAACAAAGCCTGAGAGA  
TGTTAGGTAGACATCACAATATTATTACAGACAAAACAAGAAGTCGACCACAAAATACCGA  
TGTTTGTGATAATATTCCGGAAGATGATTAGTCATGTATGAAATACTTGATCTAAAAAA  
TAAAATCGGTGGTGGCTACAATAAGTTTTGGCACAACAAAATCTTTTACCGTGTGTAA  
AGGTTCAAGGGGTAGCAAGAAAAGTAAAACCTACCGCTATTAATCTCATTTATCGAATAAT  
GAAATATGATTGGGCAAATATACTTGTAGTCAGAAGATTTAGCAACACTAACAAACAATC  
AACGTATACAGATTTAAAGTGGGCAACTAACCAATTAGGCGTTGCTCACTTATTTAAATT  
CAAGGAAAGTTTGCCGGAATAACGTATAAACCTACTGGACAAAAAATACTGTTTAGAGG  
TTTAGACGACCCATTGAAAATAACATCGATTACTGTTGATACAGGCATTTTGTGTGGGC  
TTGGTTTGAAGAGGCTTATCAAATAGAAACATTCTCTAAGTTTAGCACTGTTGTTGAGTC  
AATACGTGGTAGCTACGATAGTCCGGAATTTTTCAAGCAAATCACAGTCACTTTTAACCC  
GTGGTCGGAAAGACATTGGTTGAAGCCTACATTTTTTGTATGAAGAAACAAAATTAACAA  
TACTTTTTTTCAGATACAACAACCTTATAGAGTTAATGAATGGCTAGATAAAGTCGATATTGT  
ACGATATGAAGATTTGTTTATAAAGAATCCTAGACGTGCAAGAATCGTTTGTGATGGAGA  
TTGGGGTGTTCAGAGGGGCTTGTATTCGATAATTTTAAAGTGGAAAGACTTTGATTGGTT  
TGAGGAGTTTAAAAGAACGCAAGAAATAACTCACGGAATGGATTTTGGATTTAGTCAAGA  
CCATACAACAGTTGTTAGTACGGTTGTAGATTTAAAAAACAAAAGTTATTCATCTATGA  
TGAACACTATAAAAAAGCGATGTTAACTGATGATATAAAACAAATGCTTATTAAAAAAGG  
ATTAGGTGATGTAGATATTGCAGCTGATTATGGGGCTGGTGGAGATAGAGTGATCAGTGA  
ATTGAAATCTACAGGGATTAAGGTATAAGAAAAGCGTTGAAAGGCGCTAATACTATTTT  
ACCAGGCATTCAATTCATTCAAGGCTTTGAAGTTATTATACACCCATCATGTGAACACGC  
TATTGAAGAGTTCAACACTTATACATTTGACCAAGATAATGATGGTAAGTGGTTGAACAA  
GCCTATAGATGCTAATAACCATATTATCGATGTATTGCGGTATAGTCTTGGGAAATATCA  
TATCGTCCGTAAAAACGTAAAAAGAATATAGAAAGCAAACAAAAGTAATTAATTTCT  
AGGATTATAGGAGGGAACAAATGTTAAAGGCAAACGAATTTGAAACGGATACTGATTTAC  
GAGAAAACAGAAATTACTTGTTTAAACGATGAAGCTAATGTTGTTTACACATATGACGGGA  
CAGAGTCTGATTTATTACAAAACATTAATGAAGTAAGTAAATACATTGACCATCACATGG  
ATTACCAACGACCTAGATTAAGGTGTTAAGTGATTATTACGAAGGTAACACTAAGAATC  
TGTTTGAAGTTAACACGACGCAAAGAAGAGTACATGGCAGATAACCGTGTAGCCCATGATT  
ACGCATCTTATATTAGCGATTTTATTAACGGTTATTTCTTAGGTAATCCGATTCAATGTC  
AAGATGATGATAAAGATGTATTAGAAGCTATTGAGGCGTTCAATGATTTAAATGATGTTG  
AGTCACACAATAGATCTTTAGGATTAGATTTGTCAATTTATGGCAAAGCTTATTAGTTAA  
TGATTAGAAACCAAGATGATGAAACGCGTGTATACAAGAGTGATGCAATGAGTACTTTTG  
TCATATACGACAATAAATTGAACGTAATAGTATCGCAGGCGTTAGATATTTAAGAATA  
AACCAATAGACAAGACTGACGAAGATGAAGTGTTTACAGTTGATTTATTTACTTCTCACG  
GTGTTTATAGATATCTTACCAGTAGAACAAATGGATTGAAGCTCACACCACGTGAAAACG  
GTTTTGAATCACACTCTTTTGAACGTATGCCTATTACAGAATTTAGCAACAACGAAAGAA  
GAAAAGGAGATTATGAGAAAGTAATCACTTTGATTGATTTGTATGGTAATGCAGAATCAG  
ATACTGCTAACTATATGAGTGATTTAAACGACGCTATGTTATTGATTAAGGTAAGTACTGAT  
CAATAGATCCAGATGAAGTAAAAAAACAAAAGAAGCCAACGTGTTATTTTTAGAGCCAA  
CCGTTTATGAGAATAGGGATACAGGTATCGAAACAGAAGGTTTCAAGTTGACGGCGGTTATA  
TTTATAAGCAATACGATGTACAAGGTACCGAAGCTTATAAAGACCGTTTGAACAGTGATA  
TACACATGTTTACCAACACGCCTAACATGAAAGATGATAACTTTAGTGGCACTCAATCGG  
GCGAGGCAATGAAATATCAATTGTTTCGGATTAGAACAACGTACTAAAACCTAAAGAAGGAT  
TGTTTACTAAAGGGTTAAGACGTCGTGCTAAGTTGTTAGGGACAATACTTAAAAATACAC



GGTCGATTGACGCTAACAAAGATTTCAATACTGTTAGATACGTATACAACAGAACTTAC  
CTAAATCATTAAATCGAAGAATTAAGCTTATATTGATTCTGGCGGGAAGATTAGTCAA  
CAACTTTAATGTCTCTATTCTCGTTCTTCCAAGACCCTGAATTGGAAATCAAGAAAATAG  
AAGAAGATGAGAAAGAATCTATTAAGAAAGCGCAAAAAGGTATTTATAAAGACCCTAGAG  
ACATCAATGATGACGAACAAGATGATGATACAAAAGATACTGTTGATAAAAAGGAATGAT  
TGTAATTGCCTAACAAAACACTCAAGAATATTGGGAAGAGCGCGGACGCAAAGCAATCG  
AGAATGAGTTGAAGCGTGATAAAACTAAAGCTGAAGAAATAGAACGTATATTGAATATGA  
TGATTAAGCGCATTGAAAAAGAAATCAATGCGTTTATTGTTAAGTACGGAGATTTTGCAG  
GCGTTACATTACAAGAAGCACAAAAGATTATTGATGAGTTCGATGTAAAAGCGTTTCAAG  
AAGAAGCAAAAAGATTGGTCGAAAACAAGGACTTTAGCGATAGAGCAAATGAAGAATTA  
AGAAGTATAACACTAAGATGTATGTATCAAGAGAACAGATGTTAAAGATTCAAATAGAAT  
TCTAAATTGCTTATGCAACAGCTCAAACAGAATTATCGATGAGGGAATATTTTGAATCAA  
CAGCTTATCGTGTGTTCAAGTATCAAGCGGGTATTTTAGGTGAAGGTGTACAAGTAGCTA  
AAGAAGTTATAGATACAATCGTTGATACACAATTTTATTGTTGTCGTTTGGTCAGAGCGAT  
TATGGACTAATACTGAAGCGATGAAACAAGAAGTAGAAGAAATAATTGCTAATGTGGTTA  
TTAGAGGTCGACATCCTAATGAATATGTTAAAGATATGCGCAAGCACCTAAACAAATTCG  
AAGGCACAGCAAGACAAAAGACTGCAGCAATTAATCATTGCTTTATACGGAATCGGCAC  
GTGTTACAGCACAATCAAGTATTGACAGCATGAAAGAAATTTACCGGAAGGATATTATA  
TGTATATTGCAAAAATGATAGTAGAACAATAAGTATGCAAGGGGCTTAATGGAGAAA  
TATTCAAAGTTAAAGACGCTAAAATTGGTGCTAATTTCTACCCTATGCATATCAATTGTC  
GTTTACAGATTGTGCATTACTACCTAAATCTATGTGGCCGAAAAACCAAACAAGAAACGAA  
AAACAAAATACTTCCGGAGGAAAAGTGAAAAGCGATGATTGATTTAAAAGTAAAAGTTTT  
AAAGGCAAGTTAGCATTGTATGATAGTAAATTAAGTGTTTGGAGGATATTGGTATGAGCA  
ATACTGACAAATACTTTAGAGACATAGCAAGAGAGTTAAAAGGTATACGTAAAGAGTTAC  
AAAAGCGAAATGAAACAGTTATTATTGAGGCAAACCTTAGACAGCGTAAGGTCGGCTGTAT  
TAGCCAATAAAGAAAAACCGAAATATAACGAACCCTTTTTAATAGCTAGCACTTAATT  
GTGTTGGCTATTTTTTATGTCCAAAATGTGCTGATGACATAAAAAGCACGCATGGAAAA  
CAGTCGACAGACTATAAATGGAGGTATATCTCATGGAAGAAAATAAACTTAAGTTAATT  
TGCAATTTTTTGCAGACCAATCAGATGATCCGGACGAACCAGGCGGAGATGGTAAAAAG  
GAAATCCTGATAAGAAAGAATATGACGAAGGTACTGAAATAACTTTACGCCAGAGCAAC  
TAAAGAAAGTTGATGAAATACTTGAACGTCGTGTAGCCCACGAAAAGAAAAAGCTGATG  
AGCATGCAAAAAGAAAAAGCAGAAGAAGCCGCTAAAGAAGCTGCTAAATTAGCGAAAATGA  
ACAAGGATCAAAAAGATGAATATGAACGCAAACAATTGGAAAAAGAGCTGGAGCAATTAC  
GCTCAGAAAAACAATTAATGAAATGCGTTCAGAAGCAAGGAAAATGTTAAGTGAAGCAG  
ACGTTGATTCATCAGATGAGGTTGTTAATTTAGTTGTAACAGATACTGCTGAACAACTA  
AATTGAATGTTGAAGCTTTTTCTAATGCAGTAAAAAAGCGGTTAATGAAGCGGTTAAGA  
TTAACGCTAGACAATCGCCATTGACTGGTGGAGATTCATTTAATCACTCGACTAAAAATA  
AACCGCAAACTTAGCTGAAATAGCTAGACAAAAAAGAAGTATTAATAAATTAACGGAGGC  
ATTTAAATGGAACAAACAAAAATTAATAAATTTGCAACATTTTGCAGTAACAAT  
GTTAAACCGCAAGTATTTAACCTGATAATGTAATGATGCACGAAAAGAAAGATGGCAG  
TTGATGAATGAATTCACAACGCCATCTTACAAGAGGTTATGGAAAACCTCTAAAATTATG  
CAATTAGGTAAGTAGGAACCAAGGGAAGGTAAGTACTGAGAAGAAGTTACTTTTTGGCCTGAT  
AAACCAGGTGCTTACTGGGTAGGTGAAGGTCAAAAATCGAAACATCTAAAGCTACATGG  
GTTAATGCTACTATGAGAGCGTTTTAATTAGGGGTTATCTTACATGTAACAAAAGAGTTT  
TTGAATTACACTTATTCACAATTTTGAAGAAATGAAGCCTATGATTGCTGAAGCATT  
TATAAAAAGTTTATGATGAAGCGGGTATTTTGAATCAAGGTAACAATCCATTCGGTAAATCA  
ATTGCACAATCAATTGAAAAACTAATAAGGTTATTAAGGTTGACTTCACACAAGATAAC  
ATTATTGATTTAGAGGCATTACTTGAAGATGACGAATTAGAAGCAAATGCGTTTATCTCA  
AAAACGCAAAACAGGAGCTTATTACGTAAAATTGTAGATCCTGAAACAAAAGAACGCATT  
TATGACCGTAACAGTGATTCATTAGACGGTTTACCTGTGGTTAATCTTAAATCAAGTAAC  
TTAAACGTGGTGAATTAATCACTGGTGATTTTCGATAAGTTGATTTACGGTATCCCTCAA  
TTAATTGAATACAAAATCGATGAAACAGCACAATTATCTACAGTTAAAACGAAGATGGC  
ACACCTGTAAACTTATTCGAACAAGATATGGTGGCCATTACGTGCAACTATGCATGTAGC  
ATTGCATATCGCTGATGATAAAGCATTGCTAAGTTAGTTTCTGCTGATGCAAAACCATC  
TTCAAATCCAGGAGAAGTTTAATAAATAATTAGGAGTGGTAACATGCCCGAAATCATTGG  
AATTGTTAAAGTAGATTTTACGGAGTTAGAAGATAACAGACATGACTATATGAAAGGGCA  
TGTCTACCCTCGCAAAGGTTATGATCCTACAAATGAACGTATAAAATCTTTAGCCAGCGT

TGAAAATAAACGCAATGAGCAAATGATTTACATTGTAATGACAAATTAACCAAAAAAGA  
ACTTGTTCGAAATAGCAAGTGTGTTGGCTTACAAGTTGATGAAAAACAACAAAAGCTGA  
AATTATCAACACTTTTGAGTCGCTAGAGTAGGTGGTTATATGACTACGCTAGCTGATGTA  
AAAAACGTATTGGTCTTAAAGATGAAAAGCAAGATGAACAATTAGAGGAAATTATAAAA  
AGTTGTGAAAGCCAGTTGTTATCAATGTTACCTATTGAAGTTGAACAAATACCGGAAAGG  
TTAGTTACATGATTAAGAAGGTGCAGTTAAACGCTACAACAGGATTGGTGCTGAAGGT  
ATGACATCAGAAGCGGTTGACGGACGTAGCAATGCGTATGAATTGAACGATTTCAAGGAG  
TATGAAGCTATTATTGATAATTACTTTAATGCTAGAACGAGAACTTAAAAAGGAAGGGCT  
GTGTTCTTTTGAGATATGAAGATAGAGTTATTTTTCAATTAGAACAATTAGCAACTTACA  
ATCCTAAACTAGCAAAAAAGAAAACGCACTAATCACTTATGATGCGATACCATGCAATA  
TTAACCCCATTTCTAGAGCAAGAAAGCAACTTGAATTTGGCGATGTAAAAAACGATGTAA  
GTGTCCTGAGGGTAAAAGAATCAATATCTTACCCTGTTAGCCACGTGTTGGTTAATGGCA  
TTCGCTACAAGATAGTTGATACAAGGATATACAGACACGAAACGTCATATTATATCGAAG  
AGGTCAATTGATGAATATAGATGGATTAGACGCACTGTTAAACCAATTTACGATATGAA  
AAACAACATCGATGATGATGATGATGACTTTACAAGAAAACGCCAAAGAATATGTAGT  
ACGAGCTAAATTGAAAGCTAGAGAAGTAATGAATAAGGGTTATTGGACTGGTAATCTATC  
ACGCAATATCAGATATAAAAAAACTCGCGATTTGCAATACACTATCACATCGCATGCAGC  
TTATAGTGGTTTCTTAGAGTTTGGTACTCGATACATGGAGGCAGAACCTTTTATGTGGCC  
AGTATATGAGGTAATAAGAAAATCGACTGTAGAAGAGTTGAAAGCGTTGTTTGAATAGGA  
GATAAAGCATGACACCAAACCTTACAACCTTATAATAATGCGTTTGAACGCTACAAGGA  
TATGGATTCCCTGTTATTTCTCGTAAAGAGATGCAACAAGAGGTTCCGTATCCTTTTTT  
GGAATAAAAATGCCGGAGTCAAACAGAAGTAAATACACGTTTGATAGTTATTCTGGTGAC  
ACGAATTTAGTTATTGATATTTGGAGTGTAAGTGATGATCTAGGACATCATGACGGACTT  
GTTAAAAGATGTATTGATGATTTAACACCTAGCGTTAAAACAACGATTATGACTTTGAA  
GAAGATGATACTAACATCACACAGTTAGTTGATGAGACTACCAATCAAGAATTGCTACAC  
ACATCAGTAACGATATCTTACAAAACATTTTAAAAAACGGAGGAATATTGAATGGCAAAT  
ATGAAAAATAGTAATGATCGTATTATTTTATTTAGAAAAGCTGGCGAAAAAGTAGATGCT  
ACTAAAATGCTTTTTTTAACTGAATACGGCTTATCACATGAAGCTGATACAGATACAGAG  
GATACAATGGACGGTTCTTATAACACTGGTGGTTCTGTTGATTCAACAATGTCTGGTACT  
GCTAAAATGTTTTATGGCGACGATTTTGCAGATGAAATTGAAGATGCAGTTGTAGATCGC  
GTATTGTATGAGGCTTGGGAAGTTGAAAGTAGAATACCAGGCAAAAATGGAGATGCCACT  
AAATTTAAAGCGAAATATTTCCAAGGTTTCCACAATAAATTTGAATTAAGCAGAAGCT  
AACGGTATTGATGAATATGAATATGAATATGGAGTGAATGGTCGTTTCCAACGTGGATTT  
GCAACACTACCTGAGGCTGTAACAAAGAACTTAAGGGCGACTGGATACAGATTCCATGAC  
ACTACAAAAGCAGATGCGTTAACTGGCGAAGATTTAACAGCAATTCACAACCTAAGGTA  
GATTCATCAACGGTTACACCAGGAGAGGTATAAAAAATAGGGCGTTAAGCCCTATTTATTT  
TGTTTTAAATTAATCATGAATGGAGATTTTAAAGTTATGAATGTAGAAATTAAGGAAAGTC  
ATTAGAATTAAGTTTTGTTTTAAATTTTAAAGAGAAATGGATAACCGATTAGGTTTAAA  
AGTTGAGCAAGCTTCTATCGGTCAAGGTGTATCAATGTTGCCGGTAGGTTTAGAGAGTGG  
AAATCCTGTTGTGATTGGCGAAGTTTTAATTGCAGCTACATCTCACTTGAAAAACAAGC  
AATTACTATTAATAACATTGATGAAGCGCTAGATGAAATCGCAGAAAATGTTCGGACTAGA  
AGAATTCGGTTCAGATATTTTAAACGGAGTTGGGAAAGCGACCTATGACCCGAAACCTAGT  
CGAAGTAGTGGAAGCGGAAGAGAAACCAGCGGAAGCGTAATAACTTACGACAGAATCGTT  
ATAACTTGTATGTCAACACTTGGTATTACGGATTTGAACGTTATTGAGCAAATGACATTA  
ACAGAATATAACTATCGAATGTATGCGAAAGAGTATGAAATGCTAACCCAAGAATTCGAA  
CGTTACAACTTGCCTTTGCTATTCGTGATGCTGCAGCTACTAAAAATGTTGGGACAGAA  
AATAAACCTAAAGAGGAATATGTTTTTAAACAACGCAAACGACGTATTGCCTTATGAAGAA  
AATATCCAACGGCTTAACGAAGGTAAAGATATAAGATTTAGTAGCGAACGTGATGAATAC  
GAACCACAAAATAATGAATTCTTTAAAGTTATAGCAGAATTTAAACAAGCAATAGAAAGAG  
AGGTGTTAATGTGACGGAATATAAAATTAAGCGACTATTGAAGCTAGTGTAGCCAAATT  
CAAAGGCAAATCGATAGTGCGGTTAAGTCTGTGCAAAGATTTAAACGAGTAGCAGATCA  
AACTAAAGATGTCGAATTAATGCTGATGATAAAAAATTACAAAAAACTATCAAAGTTGC  
TAAAAAGTCTTTAGATGCCTTTAGTAACAAAAAAGTAAAAGCTAAATTAGATGCTAGTAT  
ACAAGACTTGCAACAAAAGGTACTAGAATCGAATTTTGAACCTAGACAACTAAACTCTAA  
AGAAGTTACTCCAGAGATTAATTAACAAAAACAAGAATTGACTAAAGATATCGCTGAAGC  
AGAAGCTAAGTTATCCGAAGTAAAGAAAGCGTGTCAATATTGACATCAATGCTGATAA  
CAGTAAATTCAATCGAGTGTTAAAAGTATCTAAAGCTAGTCTTGAAGCTTTAAATAGGTC

TAAAGCCAAAGCTATTTTAGATGTAGACAACAGTGTGCTAATTCTAAAGCCAAACGTAC  
TAAAGAAGAGCTTAAAAGTATTCCAAATAAAACTAGATCTCGACTTGATGTAGATAACAAG  
GCTTTCTATACCAACTATTTATGCATTTAAAAAATCATTAGACGCATTGCCAAACAAAA  
AACAAACAAGGTAGATGTCGATACTAATGGTTTAAAGAAAGCTTATGCCTACATAATAAA  
AGCAAACGACAATATCCAAAGACAGATGGGGAATTTAGCTAATATGTTCCGTGTGTTCCG  
TACTGTAGGTTCTAATATGGTTGGTGGATTACTAACGTCATCTTTTAGCATTTTAATACC  
TGTAATAGCGAGCGTAGTACCTGTAGTGTGGTGCCTATTAAACGCTATCAAAGTGTTAAC  
TGGTGGTGTACTTGCTTTAGGTGGTGTGTAGCAATAGCTGGTGTGGCTTTGTAGCATT  
TGGCGCAATGGCTATCAGCGCTATAAAGATGCTTAGTGACGGCACGTTACAAGCTAGCTC  
AGCAACAAACGAATACAAAAAGCTTTAGATGGCGTAAAGTCAGCATGGACTGATATTAT  
AAAGCAAATCAATCCGCTATCTTCACAACCTCTTGCAAATGGTTTAAATACTCTTAAAC  
TGCAATGCAGAGCTTACAACCGTTTTTTAGTGGTATTTCAAGAGGAATGGAAGAGGCGTC  
TCAAAGTGTACTTAAATGGGCTCAAAATAGCGGTGTAGCATCAAGGTTCTTCAACATGAT  
CAATACAACCTGGTGTTCGGTATTTAACAAGCTATTAAGTGCTGCAGGCGGTTTCGGTGA  
CGTTTTAGTCAATGTATTCACACAATTAGCACCCTGTTTCAATGGTTCGGCTGATTGGTT  
GGATAGATTAGGTCAATCTTTCTCTAACTGGGCTAATAGTGCAGCTGGAGAAAATTCGAT  
TACTCGTTTTATTGAATACACAAAAACAAATTTACCTATCATTGGTACTATTTTTAAAA  
TGTTTTCGCTGGAATTAACAATTTGATGAATGCATTTAGTGGATCGTCAACTGGTATATT  
CCAGTCTCTCGAACAGATGACAGCTAAATTTAGGGAATGGTCTGAACAAGTAGGACAATC  
TCAAGGGTTCAAAGGCTTTGTCAGTTATATACAAACAAATGGACCACTAATAATGCAATT  
AATTGGGAACATTGCAAGAGGATTAGTTGCATTCGCAACAGCGATGGCTCCTATAGCTAG  
TGCAGTATTACGCGTTGCAGTAGCAATAACTGGTTGGATAGCTAACTTGTTGAGGCGCA  
TCCAGCTACAGCACAATTAGTTGGCGTCATTATAACTTTGGTTGGTGCATTTAGATTTTT  
AATTGCTCCAATATTAGCGGTAATGGATTTTCTGGGGCCATTAGCAGCAAGATTAGTCGC  
ATTAGTAACTAAGTTGGGTTGGGCTAAAACAGGAACTTTAGTATTAAGTAAGGCAATGAC  
ATCGTTAAAAGGTCCAATAAAATTAGTTACAGCTATATTCCAATTGTTATTCGGTAAGAT  
TGGATTAATTAGAAATGCTATCACAGGACTAGTAACTGTGTTTGGTATTTTAGGCGGTCC  
AATAACAATGGTAATTGGTGTAAATTGCTGCATTAATAGCTATATTCGTTTTATTGTGGAA  
TAAAAATGAAGGATTCAGAACTTTATAATAAATGCTTGGAAATGCGATAAAAACGTTTTAT  
GGTTAATGTTTGGAAATGTATTAAGCTGTAGCTTCGGTTGTATGGAATGCTATTTAAC  
AGCTATCACTACAGCAGTATCGAATGTTTACAATTTTATAATGATTGTTTGGAAATCAAT  
AGTCGCTTATTTACAAGGGCTATGGAATGGAATTATCGCTATTGCAACAACAGTAGGGAA  
CCTTTTAGTTACAATCATTACAACCTGTTTTACGACGATAATGACAATAGTTATGACGAT  
ATGGACAGCTATTTGGACGTTCTTAAGTACAATCTGGAATACGATAATTACAATCGCTAC  
AACGATTTGGAATTTGTTGGTCACTGTAATAACTACTGTGTTTACAACAATCATGACTAT  
CGCAAAGACAATTTGGAACGCTATTTGGACGTTCTTACAACCGTTGTGGAACACTATAGT  
TACTGTGGCAACTAAGGTTTAGAACGCTATCACTACAGCTATCTCTACTGCGTTACAAGC  
GGCATGGAGTTTCATTTCTAATATCTGGAATACGATTTGGAGTTTCTTATCTGGTATATT  
AACGACGATTTGGAATAAAGTTGTAAGTATATTCACACAAGTTGTATCAACTATATCAGA  
CAAATGTCTCAAGCTTGGAACTTCATTGTCCTAAAGGTATGCAATGGGTATCTACTAT  
AACAAAGTACGCTAATTAACCTTTGTTAATAGAGTTATTCAAGGATTCGTTAATGTTGTAAA  
CAAAGTTAGTCAAGGTATGACAAATGCAGTAAATAAAATAAAAAGTTTTATAGGAGATTT  
TGTGTCTGCAGGTGCTGATATGCTCCGTGGTTTAAATTAGAGGTATTGGACAAATGGCTGG  
CCAATTAGTAGATGCACCTAAAAATGTTGCTAAGAAAGCTTTAGATGCAGCTAAAAGTGC  
TTTGGGTATTCACCTCACGTTGCAATTCATGGATGTTGGTATGTATTCAATGCTAGG  
TTTTGTTAAAGGTATAGATAATCATTCAAGTAAAGTTATCCGTAATGTTTCTAATGTTGC  
AGATAAAGTAGTTTATGCATTTCAACCTACATTAACCGCACCTGACATTTCTAGTATTAC  
AGGAACTTAAGTAATTTAGGTGGAAATATAAATGCGCAAGTACAACACACACATTCTAT  
TGAAACATCACCGAACATGAAAACCTGTTAAAGTTGAATTCGATGTTAATAACGATGCGCT  
TACTAGTATTGTTAACGCCAGAAATGCTAAACGCAATTCGGAGTATTACTTATAAAGGAG  
GTTACAATGGACATAGAATTAACAAAAAAGATGGTACTGTAATCAAATTAAGTGAATA  
CGGGTTTATCGTTAACGATATATTAATTGATAGCATGCAAATCAACACAAAGTATCAAGA  
CAAAGAAAATATGAACGGTTCGCATATTAATGGGGAGCAATTATATCAGTAGAGATATAGT  
TGTTCCTTGTTTTTGTAAAGTAAAAAATCGTTCAGACAGTGCTTATATGCGAGATATGTT  
GTATTCGTTAACTACTGATATAGAACCAATGTATTTACGTGGAATCAGAAGAAAAGAAGA  
GTTGAATTACAGGTTTACTCAACCAACTTCTGATGATTACGTGAAATCAGATAAAAACAA  
CTTCCCGGATTATAAATCTTCAAGACACGATCAACAAATTTATGTAAACGGTAAACAGTA

TAAAGTTATTTTTAGCGGAGTTATAAATCCTAAACAAAAAGGTAACAAAGTTGCTTTTCGA  
ATTGAAGTTTGAAACTACAGAATTACCATACGGCGAAAGTATTGGAACAAGCCTAGAGTT  
AGAAGAAAACAAAAAGGTTGGATTGTGGTCGTTTGATTTAATATTGATTGGCATGCAGG  
TGGGGATAAGCGCCAGTATACATTTGAAAATGTTAGCAAAGATACAGTTTACTATCATGG  
TAGTGCTCCTAACGACCAATTCAACATGTATAAAAAGATAACAATTATTTGGGCGAAGA  
TACAGAATCGTTTGAATGGAATTTAACGCATGCTGAAATAATGAAAATCGAAGGTATCAA  
ACTAAAAGCTGGAGACAAAATTGTTGATGATAGCTTCCGAGTTTATAAAAACGGTGTGTA  
AATAAGTACCGAAACGAATATAGCCCAACCAAAAATTTAAATACGGAGCTAATAAATTTGA  
GTTTAATCAAACGGTACAAAAAGTTCAGTTTGATTTGAAATTTTATTATAAGTAGGTTGTC  
AGAATGACAATAATTGTAAGACCACCTAGAGGTAATGGCGTACCTGTACCAGTAGAAACA  
ACTTTAGTGAAAAAAGTTAATGCTGATGGTGTATTAACTTTTGATATTCTAGAAAATAAA  
TATACTTATGAAGTTATTAACGCTATAGGGAAAAGATGGATTGTTAGTCATGTTCGAAGGT  
GAAAACGACAAGAAAGAATATGTAATAACTGTCATCGATAGGAAATCAGAAGGCGACAGA  
CGACTGGTTGAATGTACTGATAGAGAGATTCCCATAGACAAGTTAATGATTGATAGAATT  
TATGTTAATGTAACAGGATCTTTTACAGTAGAAAGATATTTTAAACATTGTGTTTCAAGGT  
ACTGGAATGCTTTTTGAAGTCGAGGGCAAAGTTAAATCTTCAAAGTTTGAAAACGGCGGT  
GAAGGCGACACAAGGTTAGAAATGTTAAAAAAAGGTTTGGAACATTTTGGATTAGAATAT  
AAGATCACATATGACAAAAAGAAAGACAGATATAAGTTTGTATTGACGCCTTTTGCAAAT  
CAAAAAGCGTCTTATTTTATTCTGACGAAGTCAACGCCAACGCTATAAAAACCTCGAGGAA  
GATGCAAGTGATTTTCGCCACCTTCATTAGGGGATATGGTAATTATTCAGGAGAAGAAACA  
TTCGAACACGCTGGGCTCGTAATGGGAGCTAGAAGTGCATTAGCTGAAATATACGGCGAC  
ATCCACGCAGAACCACGTAAAGATGGTAAAGTGACTGACCAAGAACTATGGATAAAGAA  
TTACAATCGAGATTGAAAAAGTCGTTAAAACAATCTTTGTCTTTGGACTTTTTGGTGTTA  
AGAGAATCATATCCAGAAGCAGACCCACAACCCGGAGACATAGTACAAATAAAAATCTACC  
AAACTAGGTTTGAATGATTTATCCGTATAGTACAAGTTAAAACGATTAGGGGTATAAAC  
AATGTAATTGTTAAGCAAGATGTAACGCTTGGTGAGTTAATCGAGAACAACGATATATG  
AAAAAAGTTACTACTGCAGCTAACTATGTTTCTGGATTAAATGATGTTAACCTTTCTAAT  
CCTAGTAAAGCGGCAGAAAACCTTGAAGTCTAAAGTAGCGTCAATAGCTAAATCAACACTC  
GATTTGATGAGTAGAACTGATATAATTGAAGACAAACAACAGAAAGTGAGTTCTAAGACT  
GTA ACTACATCAGATGGCACTATCGTTCATGATTTTATAGATCAATCAAACATTAAGAT  
GTAAAAACAAGTGGAACGATTGGCGATTCTGTAGCTAGAGGATCACATGCGAAAACATAAT  
TTCACAGAAATGTTAGGCAAGAAGTTAAAAGCTAAAACGAGCAACCTTGCAATAGGTGGC  
GCAACAATGGCAACAGTTCCAATAGGTAAAGAAGCGGTAGAAAACCGCATTATTGACAA  
GCAGAGCAAATAAGAGGAGACCTAATCATATTACAAGGTACAGATGATGACTGGTTACAT  
GGTTATTGGGCAGGCGTACCGATAGGCACTGATAAAACCGACACTGAAACGTTTTACGGC  
GCCTTTTGTCTGCAATTGAAGTTATCAGGAAAAATAATCCAGCTTCAAAAATACTTGTA  
ATGACAGCTACTAGGCAATGCCCTATGAGTGGTACAATGATACGCCGTAAAGATACGGAC  
AAAAACAACCTAGGGTTAACGTTAGAGGATTATGTCAATGCTCAGATATTGGCTTGTAGT  
GAATTGGATGTACCAGTATATGATGCCTATCATAACAGATTATTTTAAGCCATATAATCCA  
GCGTTCAGAAAATCAAGTATGCCAGACGGATTGCATCCGAACGAGAGGGGTCATGAAGTT  
ATTATGTACGAACTTATTAATAAATTATTACCAGTTTTACGGATAGAAAAGGAGGAAGACA  
TGGATAACAAATTAATTACAGACTTAAGTAGAGTCTTTGACTACAGATATGTAGATGAAA  
ATGAGTATAACTTTAACTTATTTTCAGACATGCTGACGGATTTTAATTTCTCTCTTGAAT  
ACCATAGAAATAAAGAGGTATTTGCACATAATGGAGAGCAAATAAAGTATGAGCATTAA  
ATGTCACAAGTAGCGTCTCTGATTTTTTAAACGTATCTAAACGGCCGTTTCAGCAATATGG  
TACTAGGTCATAACGGCGACGGTATCAACGAAGTAAAAGACGCGCGCGTTGATAATACAG  
GTTATGGTCATAAGACATTGCAAGATCGTTTGTATCATGATTATTCAACACTAGATGCTT  
TCACTAAAAGGTTGAGAAAGCTGTAGATGAACACTATAAAGAATATCGAGCGACAGAAT  
ACCGATTCGAACCAAAAGAGCAAGAACCGGAATTCATCACAGATTTATCGCCATATACTA  
ACGCAGTAATGCAATCATTTTGGGTAGACCCTAGAACGAAAATTTATTTATATGACGCAAG  
CTCGTCCAGGTAATCATTACATGTTATCTAGATTGAAGCCCAACGGACAATTTATTGATA  
GATTGCTTGTTAAAAACGGCGGTCACGGTACACACAATGCGTATAGATACATTGATGGAG  
AATTATGGATTTATTCAGCTGTATTGGACAGTAACAAAAACAACAAGTTTGTACGTTTCC  
AATATAGAACTGGAGAAATAACTTATGGTAATGAAATGCAAGATGTCATGCCGAATATAT  
TTAACGACAGATATACGTCAGCGATTTATAATCCGGTAGAAAATTTAATGATTTTTAGAC  
GTGAATATAAACCCACTGAAAGACAACCTAAGAATTCGTTGAACTTTGTTGAGGTTAGAA  
GTGCTGACGATATTGATAAAGTTATAGACAAAGTATTGTATCAAATGGATATACCTATGG

AATACACTTCAGATACACAACCTATGCAAGGTATCACTTATGATGCAGGTATCTTATATT  
GGTATACAGGTGATTCGAATACAGCCAACCCTAACTACTTACAAGGTTTCGATATAAAAA  
CAAAGAATTGTTATTTAAACGACGTATCGATATTGGCGGTGTGAATAATAACTTTAAAG  
GAGACTTCCAAGAAGCTGAGGGTCTAGATATGTATTACGATCTAGAAACAGGACGCAAAG  
CGTTTTAATAGGGGTAACCTATTGGACCTGGTAACAACAGACATCACTCAATTTATTCCA  
TCGGCCAAAGAGGTGTTAACCAATTCTTAAAAAACATTGCACCTCAAGTATCGATGACTG  
ATTCAGGCGGACGTGTTAAACCGTTACCAATACAGAACCAGCATATCTAAGTGATATTA  
CGGAAGTTGGTCATTAGTATATCTATACGCAAGACACACAAAATGCATTAGATTTCCGGT  
TACCGAAAGCGTTTAGAGATGCAGGTTGGTTCTTTGATGTACTGCCTGGACACTATAATG  
GTGCTCTAAGACAAGTACTTACCAGAAATAGCACAGGTAGCAATATGCTTAAATTCGAAC  
GTGTCATTGACATTTTCAATAAGAAAAACAACGGAGCATGGAATTTCTGTCCGCAAACG  
CCGGTATTGGGAACATATCCCTAAGAGTATTACAAAATTATCAGATTTAAAAATCGTTG  
GTTTAGATTTCTATATCACTACTGAAGAATCAAAAACGATTTACTGATTTTCCTAAAGACT  
TTAAAGGTATTGCAGGTTGGATATTAGAAGTAAAATCGAATACACCAGGTAACACAACAC  
AAGTATTAAGACGTAATAACTTCCCGTCTGCACATCAATTTTTAGTTAGAACTTTGGTT  
CTGGTGGCGTTGGTAAATGGAGTTTATTCGAAGGAAAGGTGGTTGAATAATGGTAGTAGA  
TAATTTTTTCGAAAGATGATAACTTAATCGAGTTACAAACAACATCACAATATAATCCGGT  
TATTGACTCAAACATCAGTTTCTATGAATCAGATAGAGGAACTGGTGTTTTAAATTTGC  
AGTAACTAAGAATAACAGACCGTTATCTATAAGTTCTGAACATGTTAAAACATCTATCGT  
GTTAAAACCGATGATCATAACGTAGATAGAGGCGTTATATTTTCAGACGAATTAACGAT  
AGTAGACGCGATTAATGGGCGTTTGCAGTATGTGATACCGAATGAATTTTTAAAACATTC  
AGGCAAGGTGCATGCTCAGGCATTCTTTACACAAAACGGGAGTAATAATGTTGTTGTTGA  
ACGTCAATTTAGCTTCAATATTGAAAATGATTTAGTTAGTGGGTTTGATGGTATAACAAA  
GCTTGTTTATATCAAATCTATTCAAGATACTATCGAAGCTGTCGGTAAAGACTTTAACCA  
ATTAAGCAAAAATATGGCTGATACACAAACGTTAATAGCAAAAAGTGAATGATAGTGCGAC  
AAAAGGCATTCAACAAATCGAAATCAAGGAAAACGAAGCTATACAAGCTATTACTGCGAC  
GCAAACCTAGTGCAACACAAGCTGTTACAGCTGAATTCGATAAAAATAGTTGATAAAGAGCA  
AGCGATTTTTGAACGTGTTAACGAAGTTGAACAACAAATCAATGGCGCTGACCTTGTTAA  
AGGTAATTCACAACAAATTTGGCAAAGGTCTAAACTTACTGATGGTTACGGTATAGCAAT  
TGAATCGTCTGAGCAGTCCATAGATAGCGTTTTAAGCGCAATTAACACATCTAGGATTAT  
TCATATCACTAGCGCAACAGATGCGCCAACATTTAAAGATATAGGCACTTTAGAGACGCC  
TAAGGAAGATGGCGTTGATGATGGTTCTGAAGTTTCAGCAACTACGAATACTTTAGGGAA  
ATCAGGCTTGTTAGTTGGTTATGTTGTTGATGACAGTACAGCTCGTGCTACATGGTATCC  
AGACGATTCAAATGATGAGTACACAAAATATAAAATCGGTGGCACATGGTATCAGTTCTA  
TAAAAAAGTTGACGAAGAATTAACGAAGAAATTTGTTGAAGAAACGGCTAACAACGCTTT  
AAATCAAGCTAAGCAGTATGTAGATGATAAATTCGGAACAACGAGCTGGCAACAACATAA  
GATGACAGAGGCGAATGGTCAATCAATTCAGTTAACTTAAATAATGCGCAAGGCGATTT  
GGGATATTTAACTGCTGGTAATTACTATGCAACAAGAGTGCCGGATTTACCAGGTAGCGT  
TGAAAGTTATGAGGGTTATTTATCGGTATTCGTTAAAGATGATACAAACAAGCTATTTAA  
CTTCACACCTTATAACTCTAAAAAGATTTACACACGATCAATCACAACGGCAGACTTGA  
GCAACAGTGGACAGTTCCTAATGAACATAAATCAACGGTATTGTCCGACGGTGGCGCAA  
TGGTGTAGGTACAACAATCAATCTAACTGAACCGTACACAAACTATTCTATTTTGTGTTGGT  
AAGTGGAACCTTATCCAGGTGGCGTTATTGAGGGATTTCGGACTAACCGCATTACCTAACGC  
GATTCAATTGAGTAAAGCGAATGTAGTTGACTCAGACGGCAACGGTGGCGGTATTTATGA  
GTGCTTACTATCCAAAACAAGTAGCACTACTTTAAGAATAGATAACGATGTGTACTTTGA  
TTTAGGTA AAAACATCAGGTTCTGGAGCGAATGCCAACAAATTTACTATAACTAAAATTAT  
GGGGTGGAAATAATGAAAATCACAGTAAACGATAAAAACGTAGTTATCGGATTCGTTAAT  
ACTGGCGGTTTACGCAATGGTTTAGATGTAGATGATAACAATGTGCCTATTAATTTAAA  
GAAGAGTTCGAACCTAGAAAGTTTGTTTTCACTAACGGCGAAATTAATACAATAGCAAT  
TTCGAAAAAGAAGACGTACCGAATGCATCAAACCAACAAAGTGCGTCAGATTTAAGTGAT  
GAGGAACCTTCGCGGAATGGTTGCGAGTATGCAAATGCAGGTGGCACAAGTAAACGTATTA  
ACAATGGAATTAGCTCAACAAAACGCTATGTAAACACAACAGTTGACTGAACTGAAAATT  
AACAAAACAAGTACTGAGGGGGACGTTTAAATAATGAAGATGATTTATCCAACCTTTCAAG  
GACATTA AAAACTTTTTATGTGTGGGGTTGCTATAAAAATGACCAAATTAAGTGGTACGTA  
GACATGGGTGTAATCGACAAAGAAGAATATGCATTGATCACTGGAGAAAAATATCCAGAA  
ACAAAAGATGAAAAGTCACAGGTGTAATGCTTGTGGCTTTTTAATTTAACACAAAGTAGG  
TGCGTAATGTTTGGATGTACCAAACGGCACGAACATGAATGGCGAATTAGAAGATTAGA

AGAGAATGATAAAACATTGCTTAGCACTCTCAATGAGATTCAATTAGTTCAAAAACTCA  
AGAGAAAGTTAACATTAAATTAGATAAAACTTTAGATGCTATCCAGAGGGAAAGACAGAT  
AGACGAAAAAATAAGAAAGAAAACGACAAAAATATACGCTATATGAAAAGGTGGATTCT  
CGGTTTGTAGGGACTATCTTCAGTACGATTGTCATAGCTTTACTAAGAACTATTTTTGG  
TATTTAAAGGAGGTGATTACCATGCTTAAAGGGATTTTAGGATATAGCTTCTGGGCGTGC  
TTCTGGTTTGGTAAATGTAAATAACAGTTAAGAGTCAGTGCTTCGGCACTGGCTTTTTAT  
TTTGATTGAAATGAGGTGCATACATGGGATTACCTAATCCAAAGACTCGAAAACCTACAG  
CTAGTGAAGTAGTAGAGTGGGCGTTGTATATTGCTAAAAAGAAAATAGCTATTGATGTAC  
CTGGTTCTGGAATGGGGGCGCAATGTTGGGACTTGCCTAATTACTTGCTTGATAAATATT  
GGGGGTTTAGAACATGGGGAAATGCTGATGCTATGGCTCAGAAATCTAATTATAGAGGTA  
GAGATTTCAAGATAATTAGAAATACAAAAGATTTTGTACCACAACCAGGCGACTGGGGTG  
TTTGGACTGGTGGTTGGGCAGGACATGTAAACATTGTAGTGGGAGCATGCACAAAAGACT  
ATTGGTATGGTGTGGATCAAACTGGTATACAAATAATGCAACAGGAAGTCCGCCGTATA  
AAATCAAACACTCTTATCATGATGGACCAGGTGGAGGAGTTAAATATTTTGTAGACCAC  
CATATCATCCGGAGAAATCTACGCCGGCACCTAAACCCGAAGACAACAGTGATAATAACG  
AAAAAATAATAAAAAAGTTCCGATTTGGAAAGATGTAACAACCTATAAAGTACACTATTT  
CTAGCCAAGAGGTTAATTATCCAGAATATATTTATCACTTTATAGTAGAAGGTAATCGAC  
GACTCGAAAACCTAAGGGAATAATGATTAGAAACGCACAAACGATGAGCTCGGTAGAAA  
GTTTATATAACAGTAGGAAGAAATACAAACAGGATGTAGAATATCCCCACTTTTATGTTG  
ACAGACATAATTTGGGCACCTAGTAGAGCTGTATTTGAAGTTCCTAATGAACCTGATT  
ATATAGTTATAGACGTATGTGAAGATTATAGTGCAGTAAAAATGAATTTATTTTTAATG  
AGATTCACTCAATGGTTGTAGCTGTAGATATGATGGCCAAATATGAGATACCTCTAAGTA  
TTGAAAATTTAAAAGTAGACGACAGCATTGGCGTTCGATGTTGGAACATGTTAATTGGA  
ATATGATTGACGGCGGTGTTCCCCCTAAAGATAAATACGAAGCATTAGAAAAGGCATTAC  
TTAATATATTTAAAACAGAGAAAAATTATTAATTCTATAACTAAACCAACAGTAACAA  
AATCTAGAATAAAAGTTATGGTAGATAATAAAAACGCTGATATAGCGAATGTAAGAGACT  
CATCACCAACAGCTAATAATGGCTCGGCATCTAAACAACCGCAGATCATAACAGAAACGA  
GTCCTTATACATTCAAACAAGCACTGGATAAACAATGGCAAGAGGTAACCCGAAAAAAT  
CTAATGCTTGGGGTGGGCTAACGCTACACGAGCACAACGAGTTCAGCAATGAATGTTA  
AACGAATATGGGAAAGTAACACGCAGTGCTACCAAATGCTTAATTTAGGCAAGTATCAAG  
GCGTTTCAGTTAGTTCGCTTAATAAGATACTTAAAGGTAAGGGGACATTGAATAATGAAG  
GTAAAGCGTTCGCAGAAGCTTGTA AAAAAGCACAACATTAATGAAATTTATTTAATCGCGC  
ATGCTTTCTTAGAAAGTGGATATGGAACAAGCAACTTCGCTAACGGAAAAGATGGGGTAT  
ACA ACTACTTCGGCATCGGCGCTTACGACAACAATCCTAACTACGCAATGACGTTTGCTA  
GGAATAAAGGTTGGACATCTCCAGCAAAAGCAATCATGGGCGGTGCTAGCTTCGTAAGAA  
AGGATTACATCAATAAAGGTCAAACACGTTGTACCGAATTAGATGGAATCCTAAGAATC  
CAGCTACCCACCAATACGCTACTGCTATAGAGTGGTGTCAACATCGAGCAAGTACAATCG  
CTAAGTGATATAAACAATCGGCTTAAAAGGTATCTACTTCACAAGGGATAAATATAAAT  
AAAGAGGTGTATAAATGTACAAAATAAAAGATGTTGAAACGAGAATAAAAAATGATGGTG  
TTGACTTAGGTGACATTGGCTGTCGATTTTACTGAAAGATGAAAATACAGCATCTATAA  
GAATAGGTATCAATGACAAACAAGGTCGTATCGATCTAAAAGCACATGGCTTAACACCTA  
GATTACATTTGTTTATGGAAGATGGCTCTATATTCAAAAATGAGCCCCTTATTATCGACG  
ATGTTGTAAAAGGTTTCTTACCTACAAAATACCTAAAAGGTTATCAAACACGCTGGTT  
ATGTTGCTGTAAAGCTGTTTTTAGAGAAAGAAGAAGAAAAAATACATGTCGCAAACCTTT  
CTTTCAATATCGTTGATAGTGGTATTGAATCTGCTGTAGCAAAAAGAAATCGATGTTAAAT  
TGGTAGATGATGCTATTACGAGAATTTTAAAAGATAACGCGACAGATTTATTGAGCAAAG  
ACTTTAAAGAGAAAATAGATAAAGATGTCATTTCTTACATCGAAAAGAATGAAAGTAGAT  
TTAAAGGTGCGAAAGGTGATAAAGGCGAACCGGGACAACCTGGTGCGAAAGGTGATACAG  
GTAAAAAAGGAGAACAAGGCGCACCCGGTAAAAACGGTACTGTAGTATCAATCAATCCTG  
ACACTAAAATGTGGCAAATTTGACGGTAAAGATACAGATATCAAAGCAGAACCTGAGTTAT  
TGGATAAATCAATATCGCAAATGTTGAAGGTTAGAAGATAAATTGCAAGAAGTTAAAA  
AAATCAAAGATACAACTCTCAACGACTCTAAAACGTATACGGATTCAAAGATTGCTGAAC  
TAGTTGATAGCGCGCTGAATCTATGAATACATTAAGAGAATTAGCAGAAGCAATACAAA  
ACA ACTCTATTTAGAAAAGTGTATTGCAACAGATTGGCTCAAAGTTAGTACAGAAGACT  
TTGAGGAATTCAAACAACACTAAATGATTTATATGCTCCAAAAAATCATAATCATGACG  
AGCGGTATGTTTTGTCATCTCAAGCTTTTACTAAACAACAAGCGGATAATTTATATCAAC  
TAAAAAGCGCATCTCAACCGACGGTTAAAATTTGGACAGGAACAGAAAATGAATATAACT

ATATATATCAAAAAGACCCTAATACACTTTACTTAAATTAAGGGGTGATTTTTATGGAAGG  
TAATTTTAAAAATGTAAAGAAGTTTATTTACGAAGGTGAAGAATATACAAAAGTATATGC  
TGGAAATATCCAAGTATGGAAAAAGCCTTCATCTTTTGTAAATAAAACCCTTACCTAAAA  
TAAATATCCGGATAGCATAGAAGATTCAACAGCAAAATGGACAATAAATGGAGTTGAACC  
TAATAAAAGTTATCAGGTGACAATAGAAAATGTACGTAGCGGTATAATGAGGATTCGCA  
AACTAATTTAGGGTCAAGTGATTTAGGAATATCAGGAGTCAATAGCGGAGTGGCAAGTAA  
AAATATCAACTTTAGTAATCCTTCAGGGATGTTGTATGTCACTATAAGTGATGTTTATTC  
AGGATCTCCGACATTGACCATTGAATAATTTTAAACGACTAATTTATCAGTCGTTTTTTA  
TTTTGGATAAAAAGGAGCAAACAATGGATATTAAGTGGAAATTGAGATTTAAAAATAAAG  
CAGTATTAACAGGTTTAGTGGGTGCGTTGTTGTTATTTATCAAACAATCACAGATTTAT  
TCGGATTCGATTTATCAACTCAATTAATCAAGCCAGCGCCATCATAGGTGCTATCCTCA  
CGCTACTTACAGGGATTGGCGTTATTACTGACCCAACGTCAAAGGCGTCTCAGATTCAT  
CTATAGCACAGACATATCAAGCGCCTAGAGATAGCAATAAAGAAGAACATCAAGTTACGT  
GGAAATCATCACAAGACAGTAGTTTAAACGCCAGAATTAAGCGCGAAAGCACCAAAGAAT  
ATGATACATCACAACCTTTACAGACGCCTGTAACGATGTTGGCTTTGATGTGAATGAGT  
ATCATCATGGAGGTGGAGACAATGCAAGCAAAATTAATAAAAAAGAGTTTATAGAGTGG  
TTGAAAACCTTCTGAAGAAAAACAATTCAATGTGGACTTATGGTATGGATTTCAATGCTTT  
GATTATGCCAATGCTGCTTGGAAAGTTTTGTTGGATTACTTCTGAAAGGTTTAGGTGCA  
AAAGATATACCATTTGCAAACAATTTGATGGACTAGCCACTGTATACCAAATACGTCG  
GTCTTTTTGGCAAACCCGACGATATGGTTGTGTTCCGGTAGTAATTACGGTGCAGGATAC  
GGACACGTAGCATGGGTAATTGAAGCAACTTTAGATTATATCATTGTATATGAGCAGAAT  
TGGCTAGGCGGTGGCTGCACTGACGGAATCGAACAACCCGGCTGGGGTTGGGAAAAAGTT  
ACAAGACGACAACATGCTTATGATTTCCCTATGTGGTTTATCCGTCCGAATTTTAAAAGT  
GAGACAGCGCCACAATCAGTTCAATCTCCTACACAAGCACCTAAAAAAGAAACAGCTAAG  
CCACAACGTAAAGCAGTAGAACTTAAAATCATCAAAGATGTGGTTAAAGGTTATGACCTA  
CCTAAGCGTGGTAGTAACCCTAAAGGTATAGTTATACACAACGACGCAGGGAGCAAAGGG  
GCGACTGCTGAAGCATATCGTAACGGATTAGTAAACGCACCTTTATCAAGATTAGAAGCG  
GGCATTGCTCATAGTTACGTATCAGGCAACACAGTTTGGCAAGCCTTAGATGAATCACA  
GTAGGATGGCATAACCGCTAATCAAATAGGTAATAAATATTATTACGGTATTGAAGTATGT  
CAATCAATGGGCGCATATAACGCGACATTCTTAAAAAATGAACAGGCAACTTTCCAAGAA  
TGCCTAGATTGTTGAAAAAATGGGGATTACCAGCAAACAGAAATACAATCAGATTGCAC  
AATGAATTTACTTCAACATCATGCCCTCATAGAGGTTCCGGTTTTACACACTGGTTTTGAC  
CCAGTAACTCGCGGTCTATTGCCGGAAGATAAACAATTAACTTAAAGACTACTTTATC  
AAGCAAATCAGAGTGTATATGGACGGTAAGATACCAGTTGCCACTGTCTCTAATGAGTCA  
AGCGCTTCAAGTAATACAGTTAAACCAGTTGCGAGTGCATGGAATCGTAATAAATATGGT  
ACTTACTACATGGAAGAAAGTGCTAGATTACAAACGGTAATCAACCAATCATTGTAAGA  
AAAATAGGACCATTCTTATCATGCCCGGTAGCTTACCAATTCCAACCTGGTGGATATTGT  
GATTATACAGAAGTGATGTTACAAGATGGTCATGTTTGGGTAGGATATACATGGGAGGGG  
CAACGTTATTACTTGCCTATTAGAACATGGAATGGTTCAGCCCCACCTAATCAGATATTA  
CGTGACTTATGGGGAGAAATCAGTTAGAATGACATAGTCATGTCTATTTAAGCAGGTGCG  
TTACATACCTGCTTTCTATTTACATTTAAAGATAAAATGTGCTATTATTTTACTAGA  
TTTTAACATTTCTCTCAAGATTTAAATGTAGACAACAGGCAGGTAACGGTACTTGCCT  
ATTTTTTATGTTCTAATGTAATTACATTACCAGTAACCAATCTGGCTTAAACCACATTT  
CCCGTAGCCAATCCGGCTATGCAGAGGACTTACTTGCGTAAAGTAGTAAGAAGCTGACTG  
CATATTTAAACCACCATACTAGTTACTGGGTGGTTGTTTTTTTTTCGCCATTATGTTCTG  
TCTACATCTTTTTGCGCAAGTTGAGTATTATGTATATATAGTATAAATAAGGGATATTTT  
AAATGGAAGATAATAAAAATTTAGCAAAAATGTATTCATTCAAAGCTTTATATTTTTTTA  
CTGCAGCTTTTTGTAAATATATTGACTATTATAACAATAAAAATTTTGGAGTGCCTATGT  
TAGGTGTAACACTTTATTTTATGCCTATTGTTCTAGAAAATTACATGAAGAATGTTTACA  
ATAAAGCAACTAAGATTTTGGAGAAGAATAGGATATATATTTTCTAGTTTATTCATATTTA  
TAAACATTTTAAATATTTATTTTATGTTCTTATATGCCTACACATAAGTTTATCATTAGTA  
CAAATTGGCATGTCGGTGCTATTATAATAACAACAATACCTTTAGTTTTTATTAGTATAT  
TAGATATTTTTCTTTATGGCTTTAAACAACGAGGAAATCAAAGCTAGTAATGATACTAAAG  
AGTATTTGAGAAAGAACAGAGAACAAAGTAAAGAATAAAAATAAAGCAAGAGAAAGTAC  
TGAAAGAGGAAGAACGTCAATTTAAAATAGAACGTTCTAGAAGAAAGGGATGATAGTAAT  
GGTTATAACAATTATAAGCGTTTTTGTATAAGTGCTATCTTATTATTTTATTTGTCAGC  
GGTAACTTTTACCGCAGTTAGATCTTATGATTATAAATTAATTTAGTGTACCAACGCA

ATTTGCAATACCATTAATTTTGGTTCAGTACACATATAAAAATGTACAATACTTACAAATT  
GTCTGACAGAAAAAAGCCTTCAGAATGCTTTTATTTATATTTATAAAAATATCCGGTAGC  
AATAGCTATGTTTTTA ACTATTATTGCTACAAATATCGCTGAACAAAATGTTAAATTATC  
AAATGGTGCAACTTATAAGAAA ACTGAAAATTTACAGCAGAAGAAACGTAAAAAAATGAT  
TAACAAGGTTCTTCAAAGTAATACTTATGGAGAAATGCTTTTGGGAATATAAAGAAGTTA  
CTTAGTTTTTCTTATGATTTTAATATAATAGATTTATTATCTTTTCTTGATGAAATTATA  
ACCGTACCCTTTAAGATGCGGTTATTTTTATTCTTTACAATCAACAAAACCACAACACC  
TATTAATTTAGGAGTGTGGTTTTTTATATGTGAAGCTAAAATAACTACAAATGATACCAT  
TTTTGATACCATTTTGTGTGAAAACAGAAAAAATAAGGAAAATAAAAAAGGCAAAAAACG  
CATTAAATCAACGTTTATTGTCTCATGAAATTTAAATGTATATAAATTTCACTTCCCATG  
GG

>NewGenomeName\_10

AGCGCTGGGGACTATTATTACCCCTAGCGCTCGGCACGGGACATGGGCTAATGGATTGTG  
GATATAGGGCCCAAGGGCCCGTTTAGATGGGTTTTGGGCTCATGGGCTTTATCCAGAAG  
ACAAAAACAGGCGGGAACCGTCCCAAATTCAACTTCGATTGCTTGCCCTGCAACGCAT  
CTAGAAGTCTATAAATAACCAGTGTCTAGATAGATGTTTCAGACCAGAAATGGCTAGGTATC  
CGAAGAAATCCATCAAGAAGAGGGCGGGTTGGGCGCCGGAAGTATGGCAGCAAGGCGGCCA  
CGAGCCACGACTACTCGTCGTCAGGGTCAATATTAGTTCCTGAAAACACCGTCAAGGTAT  
TTCGGATTGAGCCTACTGATAAAACATTACCCAGATATTTTATCTGGAAAATGTTTATAC  
TTCTTGTGTGCAAGGTGAAGCCCGAAAGAATACTTCATTGGGCTATGATCAAGAGCTCTT  
GGGAAATCAACCATCCGACAACCTGTCTGGAAGCCCCAGGTTTATTTATTAACCTGAAC  
ACAGCCATCTGGTTAAACTGGTATGTAGTGGGGA ACTTGAAGCAGGAGTCGCAACAGGAA  
CATCAGATGTTGAATGTCTTTTGAGGAAGACAACCGTGTGAGGAAGAATGTAACAGAGG  
TGGATTATTTATATTTGGCATTCTATTGTAGTTCTGGAGTAAGTATAAACTACCAGAACA  
GAATTACATATCATGTTTGATATATTTATGTAAACATAAACTATTGTATGGAATGAAATC  
CAAATAACATAACAACACGCTATGAAATACAAGACGCTATGACAAAAGTACTGGTATATGA  
TTAGGTATCCTAACGA ACTAGGGCCGAAGGCCCGTGAGCAATATGCGTCGAAATAATGTT  
TGACAAAACAAATATACATGATACGGATAGTTGAATACATAAACAACGAGATATACAATAC  
AACAACTATAGTAAAGAAATAAAAAATAAGAAGAGAGAGTATATTTGTGTCTGGATCAGC  
ATCAGACCCACCACTTTAGTGGTGGGCCAGATGTCCCGAGTTAGTGCGCCACGTA

>NewGenomeName\_11

GGGGCGGGTCATAGTATAACCCCCGCCCGGGTTCAGAGTCACGTACGGAGTTACTTATG  
GCCTTTAGATTATGATACACGTGGACGATCAGGATCTGTGATTCGTGAAGCGAATCTGAC  
GGAAGATCGTCTGCAGCTTCGTGGTAGGTCCCAATTGTTGCTTTAGTTTCTTTTTTATA  
AGTAAAGTAAGATGCTGTCTCTAACTTTATTCCCTTTGAGTGAATACAGCTGTCTTTAC  
TTCCTCACGAAGCAAAGCATTATTTCTCTCTATAAAAAGCTGCGTTCGTCTTCGTTGT  
TCTTACAACGAAGATGGGTCTGAAATATTTCTCTCATCTTCCTGAAATGCTTAGAGAGAA  
GATTGTTACGATCATCTACAACAAGAGCGAAAGAAAGAGTTTCTTGAGAAGGCAATAGA  
AGATAGTTGCAGAAGGCATGTGTCTGTTATTAAGTCAGACCCAGCTCCTTCATAGATGTA  
TTCTCTGAGTACGTTTTTAGATTTCATTGGGTGATTACGTTGGTAGACAATTTAATACACG  
TTGTCTGATTAATGGAGGAAGGATCTTCCTGCTAATATCTAGTTTCAAGTTATGGAAGA  
GCAACACTTGAGGTTATATGGTTTTCTTGATATGGACGACTTATCATGTCTGTAATTACT  
GCCGCCTGAAGAGGACGACGATATTACATACGAAGAGGGTATGATTGTCAACTGCAGTGA  
ATTGGATAAATTTTGC GGCTCTAGGCATTAGAGTTGTTTATATTACTGTCAGTAATAA  
TTGTATTTGTA CTCTTTGAACAAGGATATTGTAATTAGTTGATTCAATGTAATTAATG  
ATATATTATTGTTAATGTTACTATCAAATACATATTTATTGTTTTTTAATACTCTGCGAA  
GCAGTATGTTAAGGCCCAATAGGCCCAATAGCACTAAGGCCCAATAAAATAATCTGTAA  
ATGAGTCAGCTGACGTGACTGACTCCTTGATGACGTAG

>NewGenomeName\_12

ATGGGTTCGGGGCTTAGTATGACCCCGGCCCCAGGATCACTCAAGTCACCACGTGAGAAGC  
ACATGACATCAAATGTTATCAGTCATAGCAAGTGGATCTTGGTCCCTACCACGGCACTTT  
AAAAGGCTGCACAGAATATATGCTTTGCTTCGTTAGTACGCAAAGGTAACGAAAATACAT  
GACTTCTGATTGCTTTATTCCATGTGCAGAGACTTTAAATGAATGGATCAGACTTAATCG  
CACATATATATCTTCCAATGGAAGATTGGTTATCCCACTATAAATATAGGAGACCTGTGG  
AGCTATTTTTTTGGGTATTCGGAATTCATAGTTGTTGTTCTTCGTCTGAAACAAGATGCC  
GTTGATTAGGCGTTTCAAGCTTTCTATGAGAGAATTGCATAAGCTGAAAGAACAACGAGA  
CTCTTTCTGGAAATCATAGCATGAGTATCTTGGAGCTAATGAAGAAGCGTTAGGAGAGTT



TTGTAGATACCATGGAAGGAGAATATTAGCTTATCCAAATATATCCAGTTATGCTCCAAC  
AAGGTGGTTGTTGAAAACCTCGGCCTTCTATGACATCAGAGTTGTGGATTGTGAGGAATG  
CCAGAAACACGAATAATGTAGAAGTCGTTTCTATGTCAGAAATACAGAAGGCCTGCAGGA  
CTTGGATCATTACGGTAATTACCGATTTCAAGTGTATTATGGTAATCATAATGATGTATT  
AAGATATTGTGTTAATAAACGACACCTATCATTGGAATATATTAAGATATGTTATAAAAG  
TTTATTATGGTTTGTGTTGTTGGGCCTTGGGGCTATTGGACCTATTGGTCCGGTAGTTAT  
TCAGTTCGTGTATTCCCTATACTAACTGTAACATGATTGTATCCATTGTTGTGCCATA  
AAGAATAAATATAAATGTTAACTTATATTTGCTATGATATTGATATAGTTTTTTATGACC  
TTAACGAAGCGATATGTATTTAATTGTATTA AAAAAGACGTCGCTAGATCCCTTGCGGAG

>NewGenomeName\_13

ACGAGGTGGGTTCTAGTATTACCTCGCCTCGTTACACTACCCCGTTACCTTTTCTCTCTC  
TAGAGTGAATGGCATCTAAGCGTTGGCGCTTACGGTGAACATAAAAACAGCGTTAGAGA  
GAGAAACATTCATTTCTCTCTCCCTCGCGACGAATTGAACTAGTACGTTTGTGGAGACG  
AATTCGCTTCCACTACTGGGCAGAAACATCTCAAAGGATCTGTTTCGATGAAGAAATTA  
TTCGTGTGGGTGGATTGAAGAAAATATGTGAATCTTTTGCTCATCGCGAGATCGCTAAGG  
GAGACGATTTTCAGTGTGCGGATTAATGTACGAAAGAAACGCAAATTGCAGAAATTGGGG  
CTCTGGTTAAGAAAGGCTCTAAGCGAAGGAAGATACTGGAGATATACGAAGAAGATCCAG  
AAGAAATGAAATTGCGAGATCCGGTACTGCCCTTCGCTGTAAGGCGAAGAAATTAAGAG  
AAGAGTATTGTTCTGTGGTTTCGGTGTCTTCTTCGACCACGGCAAATCGAGCTACGCA  
GAGCGTTAATGGAGGTTCTGACGAGAGAACAATTAATTTGGGCGTAGGGCCCAGATGGAG  
CCGAAGCTAAATCTACCTTCGCGAAGAATTAATCAAATATGGTTGGTTTTATACTGCTG  
GAGGAAAGACCCAGGACATACTGTATAGGTATCCGCAAGATCCTGAAAGAAATATTGAGT  
GCGATGTACCCAAGTGTCTTCTCATATGATGAACTATCAAGCATTGGAAATGATGAAGA  
ATAGAGTATTTGCAAGTACAAAATATAGGCCTGTAGATCTTTGTATAAGAAAGAAGGTGC  
ATTTAATTGTATTTGCCAACGTGGCACCCGAACCTACAAAATTAAGTGAGGACAGAATTG  
TTATTATCAATTGTTGATTAATGAATCATCTATTATTTTGTGGAACCTTAGCGCCAG  
CTGTCCTTTTTTTGGAGAGTGTCCAAACAAACCTCGTTACACTATATAT

>NewGenomeName\_14

ACGTAGGGGGCGGGGCTTAGTATTACCCCGCCCCAGGATCAGCGGAGTCATTTACACTCG  
CTATAGGCCGTTAGATGTGTATACACGTGGACGATCACGATCTGTGATTCGTGAAGCGAA  
TCTGACGGAAGATCGTCCGAAGCTTCGTGGTAGGGCCCCCATGTTGCTCTATCTTTACTC  
TAATAAAGTAAAGTAAGATGCTGTCCCTTGCTTTATTCGTTTGCTAGTTGTTTACAGCTG  
TCTTTGCTTCGCCGCGAAGCAAAGGACATTCTCATCGTCTATAAAAGCTGTGTTCTCCGT  
GTGTAATTCGTCGGAATTATCGAGCGAAAGTCTCGTTCTTGTCTATGGAAGCTTTCAAG  
CAACCAAAGCTCTCTTATGGAGAGATAGTTCAAATGAAGGAAGAACAAGATGCTTTCTGG  
AGTTGTTATCATGAGTTTCTCCGTCGCAATGAAGATGTTCTTGGAGAGATGTGCAGACGC  
CATGGAAGGAAATTGCCTGCATATCCAAAGCTCCCTACATATGCCCCGATACGGTGGGTT  
CTTAAGACTAAGGCAATTTATGATGTCAGAGTAGATGAATGTAAGTCATGTTTCGCATGAG  
GAAATTAGTAGAAGGGATTATAATCCATTAAGAAAGAAGGTTTAAAAGACCTGTATGAT  
TCAGGTAATTATAGATATCAAGTGTATTATTCTTCATCGTGTAAATAGAGATAAATCAGAT  
TAATAGATAAATAATTACAATTGTATTGTTTGTGCTATTGTTTATGTTTCATTAATAATT  
TATGGTTTGCAAAACCAGAGCTATTCAGAGGTAGAAGACAATTACAATTGATACCATATA  
CATTACAATGATATTTGAGAAATATATTATTTTAAATAACTCTGCGAAGCTATATGTCTT  
GGCCAATAGGCCCAAATGCTCTGAAGCCCAATGAAATTAACACTGAAGTGAGTCAGCTG  
ACGTCAGCTGACTCCTTGATG

>NewGenomeName\_15

TAGTATTACCCCGTGCCGGGATCAGAGACATTTGACCAATAGTAGACTAGTATAATAGC  
CCTTGGATTAAATGACACGTGGACGCTCAGCATCTGTGATGCTAGTGAAGCGCTTAAGCT  
AAACGAATCTGACGGAAGAGCTTTCACACTTAGATCTAGTTAGCGTACTTAGTACGCGTT  
GTCTTGGGTCTATAAATAGAGTGCTACTGAACAGATTGTTTCAGAAATTCATAGCGAGATG  
GATTCAGGTGATGGCTACGATACATACTCATATGAAGAAGGTGCTGGAGATGCGAAGAAG  
GAAGTTTTATATAAAATAGGTATTATTATGTTATGTATTGTAGGGATTGTAGTTTTATGG  
GTTTTAATTATATTATGATGTGCTGTTCCCTCGCTATGCTAAATCAACGATGCACGCTTGG  
TTATCTGCGTCTCCATTATGAAGTGGAAGATGGCTTCAAGGATTACTGGTACTCCGTTT  
GAAGAACTGGTCTCATCGTGAAAGAAGATGGGCTGAAAGAAGAACTGAAGCGACGAAC  
CAGAATAAATAATGATAATGTAATAGATTTAGTTGATATGTTGTTATTTTATATGGATTA  
ATGAGAATTATTATTCTGTTCTTCGTCTGTGTTTTTTAAGCTTTTTCTGTGTTTTAA

TGGCGTCTGGAGAGAGAAAGGAATAATTGTAAGGTAGACGACGATGTAGTCGATTACAGT  
TGTCTTTACTTCGCCTCGAAGAAAGACGCATTTCAAGTTGTGAGTGTATTGCTTTTGAG  
GAAGCTTCCTCGAAGCAGCGTATAACTTTAATTTGAATTTGGTTTTGGCGCGTTAGTGAA  
ATTGCGGCTGTAACGTGTCAAGTTGTGAGTGGCTGAAATAAGATAATAGATATATTATT  
ATTGTTTTAATTTAATTCCGCGAAGCGATATGTCAAGTGATAAATGAAACGAAGCGTTTT  
GATGACGTCATATGACTCCGTGCCTACGTCAGCACGGGGCT

>NewGenomeName\_16

ATGACTGAGCCTGGAGCATCGGAGTTCAGGTGGGGACCGGGAATGCATACGCATCCTGAC  
TTGGACTACGACGCGGGGAAGTCTCTCGCGCCCAACAATGTGGAGACGCTGCACGATCAG  
ATTGCGGATCTGCAGGCGAGCAAGCGGAGCAACGCCGCACGCGCTGGAGAGACGATGCGG  
GACATGTACTTTGCACTCGGGAATCCGGATCGCTACCGGCCCAAGCCCGCGCTTGTGCAA  
GGCGATGGCAAGCCGGAGCCTAGCCCCACGCCCCGAGGAGTCACCGCAGACATTCGAACGC  
AAGCCGTAATCGTTTTGTGCAATAACAGATGTGCAAGTCGGTCGGATTCGTGGCCAGGGAGG  
CCACTGCCGGCCGACAGTATTATTGAGGGACGAATCCGAGCCTGACAAAAGGGAATTGCA  
ATGCCACGAGGTGATAACCAAGGAGCTGACCGACCGCACCGTGGGGAAGCCCGACGGG  
CTAGAGGAGTTCGCCCCGAGTTTGAATCAAGGTCGGAACGTTTACAATGCGTTCGCAAG  
GATTTGGACCATCCCAACTATCGCAGCATGCCGTGTCTGATGTTCCATGTGCCGTTGCAG  
TTCCGCGGACACTATCGTGTGGAACGTCTCGCGAACTTCTCGGGCGACCCGGACGACTAT  
CGAATCGACATCCACGGCTACCGGCTGTGTGAGGCTCAGACGCCGCGACGGCCCACGGGT  
TGCCTCAAGCGTGCAAGCAACCGACAGCCGTAATTCGAGCTGCATGGCGCGCGCTACAC  
CCGCTGGACAAGGTGCGAGTTAATCCAGGGATCCCAGCACCATGACGCGCATGGAGCTG  
TTGACGACAGGGTACATTGATGTGGAAGACCTCACCGACGACGAACTCAAAAATGGGCTT  
GTGGCTCCGGGGCGTGGTGGTAATGCAATGATCCACTTGCCCAAGGACGTGTACACCAAG  
ATCGTCAACAGGCACCTTTGACCGTGTCAAGGAGCTGATGGTTGATGGGATGATCCCGGCC  
ATCAAGGTGCTCAGAGACATTGCAGAGAACAAAGCACGCCATCTACGAAGCCAAAGACCGC  
GTCAAGGCCGCCACCTACATTGTGGACAGAGTCCCTTGTAAGCAAACAGATACGGCACTG  
GTGCTGGGTGGTGTGATGGCGGGGCCAGGGGCCCTGGCACCAGATTGTGGCCTGGATC  
ATGGACAACACGCGTGCAGGAATCCCGTGCGGCGCGCGCTCCCTCTGGCGGAGAAGGC  
GCTACGCTCAACCACAACGGTGAGGCCGAGGAGGTTCTCGATCTTGAGGTTGTGGAAGAG  
TCGGCGGCAGATCATGATTCAGCGACGCCGCGAACGCCAGACGACACGGGACCTGATGCG  
AGGGCTCTCATCGCAGCCGTAGCTCCCAATGCAAAGCCCAAGCGCGCCAAGGCCAAGGCG  
TCTGCTGGCACGAGTGGCACGAGTGGCACGAGTGGCACGAGTGGAAAGCCCGCCAAGCTG  
CGGGTCAAGCGGCCGAAGCGCGACGCCAGGTAAGCTTCGCGGTGCGGGGTGGACGGCAGG  
CCGCCAAGCAACCGGAGTGGACCCGGGATTCGCGCAGATTCCCTTCTGTCCCGGGTTCAC  
TCCCAAGAACTGCAGGACTGGCAAGGAGCTGAGCATGGCGAAGCAGGGTGTGCGTCGGGA  
CATCAACGGTCCCACCAAGCAGGCACCGTCTGTACCAAGGCTGTGCAGCCCGCGCCGAA  
GACCAAGTTGCACCGGCCCAAGACAGCCTAGGAGGGCACCATGGCCAAGGGCGTGAAGAA  
GCTTCCAAAGCGCAAGGGCACCAACCCCATTCGCGGTGACAAGTGGAACTCTGACGACAT  
CGCTCGGCGTCAGCTCGAGCAGGACCAGAAGCTCCACCTCACCAAGGGTTCGCACAC  
CGGGACCAACGACAGCTTCAAGTAGCACCTCGCCATGGACAAGCTGCCCGTGGCGGTTAC  
CGGGAGTGGCACTGTCCAGGTGGCTGGGCGCGGTCCCGCTGGCGAGGCTGTGGTGTGCTAGA  
GACGACGCTCCAGCTCTGGCGGGCAGCCAACAATAAGTTCGAGCGCGTGGCCCATGCCCT  
CGGGTTACCGGCGCGAACCGACCCGACAGAGTAGGATCACGTGCATGCCCAAGAAGAAGG  
TCACCGGAGCCAAGCTCAAATGTGGTAGCGCTGCCCAGAAGCGTGCTCAGCGAAAGGCTG  
CAGAAGCCAGTGCCCGGAAACGGCGCAAACGGGGCCTGCAGGACATTTTGAAGCGCAAAA  
GGCGCGCAGCCGGTAGCTTCTCCGAGGTTCTGTAAGAGCTCGGTCAAGGTGGCCAGGGAGC  
ACGACCTGTGCGGCACCGGGTACGGGGCCAACAAGGAGGCCTACCGTGCCAGTGCAGCCG  
AGAGCCGCAAGATCAAGGCCGCTGGCGGGACGAGCTCGGCCGACCGCGTCTACAGCACTG  
CCCGCAAGCTCAAGTACACCGCGCCACGCGGTAAGGCAGGCAACCAAGGCAAGGTGGGCC  
TGAGCTCGCGTAAACAAGGGTTCAGGCTCGTTCGTCGGACAAGTTCAAGCAATGCGATACTG  
TCTATGCGGACGGCAAGTCTGGACAATAAGGAGTTTCCGCGAGGCCAATGGCAATACCT  
ATGTCGATGCCAAGGCCGACAACGGAACCGATCTCTCCCTCGTCATCAAGGGCACCGGCC  
TGGACAAGAAGACCATCCGGACGGCTGTGGGCGATCGCCCGCGTTCAGAGTCCAAGACTG  
TCAAGCCTGGCGACAGCGCTGCTGCACATCGCGCCAAGAGCTTCTCTCAGAATGCGCGTG  
GCGTGTGATGGGTGGCCCACGATCGAGCTCCAGAGCGCCCAAGGACCTGAGCAGCATGT  
CCGACCGCGACTTGCAGAACGGCATTCTGAACGCTCGGACCGCAGCCGACAAGAAGGCGT  
ACTCCAACGAGTTGGCCAAGCGCAATCTCGACAATCACTTTCCCAAGGGCAGCAAGAACG

CCTCGACAGAAGAGCTGCAGAACAAGGTGAAGGACGGCACCCTCCGTCTCGGTAAAGA  
CCGCCATCGCCGCCGAGCTGGACCGCCGAGCCAAGGCTAAGGCACCCGCGAAGGCCCGTG  
GTGGGCGTCGACCTGAGAAGCCGATCGCCAGGTGATGAAGCCGCCAAGGACGCGGTGC  
CGCTGGTTGACAAGAATGGCAATACGACCCCAGAGGCGATCCGCCGATACGGGAACGGCA  
AGAAGGAGTCTGGCTATCCCGACGCCGATGATCGTGCGGCCTGGAACAAGCTCGTGGGTC  
GCGAAACATAACCGCGACTTGAGAGACGACATGACACCGCGCCAGCGCGCCAACTACCGCA  
AGGAGCTGCAGCGTAAGCTGGACAACCCGCGCATCAGCGACACTGTCAAGAAGCAGGCC  
GCGATGAGATGGCTCTGCTGGATGCGCTCGACAAGGGGTCTGGCAGAGGATCCGCGAATT  
CGGGGGAGGCCAGGGCACAGCGCTACTTGATCTGCACGACCACGAGCTGCAGGACCTGG  
CCAGCGAGATGGCCCGTCTGGACTTGTACAAGCGGGATCTCAAGGGCGAAGGACACTTCG  
ACCGGAAGCCTTCCGAAATCTCCAAGGAAGAGCGCGTTCGCAATGCCATTCAGGGTCTGA  
TGC GTTACGTGCAAGAAGATCTTGGGTACGAGGTCGATTGGGACGAGCAGCGGCTCGACA  
ACGCCCTCAACAACGACCCGCGCATGAAGAAGCTGCGAGCCATCCTGGCCAAGCTGGGAA  
AATTGACAGGGCCGACCGAATCCCGGTTCGGCCAATCGCACAGAAATCAAGGGTAAGACTT  
CGGACGATGTGGATACGGCCATTGATAACCTCAAGGCTGCACAAGACAGCAACAATTCCG  
ACGCCAAGGCTAAGGTGCTCTGAAACGTA CTGGCACTACGACAGCCCCGCCGACTTCA  
AGCCTCCTCGATCTGCACAAGACAACAAACGCCAGAGTCTAGCCTCGTACCGGGATGTGT  
CCTCGGCGATCAACGGCTCACTGCGCTCTGGCGAGAATATCTCCAGGAACGCCTGGAAGC  
GTGGCGTTGTTGAGGATCTGGACAGCATGATCAGCGAGTCCACCCTCAAGCGGCCGATCA  
CCGTGCGCCGCTTATCGGCCCGAGCGCTGGCGGAAGTGGTATTTCGTGGCGACTATGCAA  
GGGTCAAGAATCAGCTAGAGTCTGGCACCTTCAAGGACAAAGGCTATATGTCCACAGAGG  
CCGTTACGCCGGGATACTCGGTTCGGCCAGATGGGACGGCTGTGGTCCGACCGAGAGAAGC  
CCGGTGAGAACGATTTTCGTGCTGGAAATGGATCTTCCCAAAGGTTTCAATGCGCTTGATC  
TCAGGAGGGGAGACCTCAACGACAAGCATCTCAGCGAGATCCTCCTGCCTCGGAACACCG  
AGTGGGAGGTGACCGGTACGCGCACCGAGGACGGCATCACCGTCTACAAGCTCCGGCCCA  
GACTAAGCCCACGTATGACGAGGTTCTTCCAAGCGACGCAAGAAGTCATGACCAGCAC  
AGCCAATCCTGCTGCTGCACA ACTTGATCGCTGGCAGATTTACGACACCGAGATCGAGGT  
CACCACCGAGCGCGGCCGAGAGCGCCGCAAGGTCTGGGACCCACACGCTGGTCAGCTCGC  
CATTGAGGAAAGCCCTGCGCGTAACAAGGTGGCCTCCTGTGGCCGACGCTTCGGCAAATC  
GGACCTGGGTGGCAAGCGGCTGGTTCCGCCTGCATTCCTGGCGTACTACCGACAGGACCT  
GCTCCGCACCACCAACAAGGCGATGATCTACTGGATTGTGGGGCCGGAGTACTCGGACGC  
CGAGAAGGAGTTCGCGTTCGTGGAACACCTTGGTATCATTGGGTGTACCCTTCGACAA  
GCCTGGCAGCTACTACGATGCCGTTGGCGGAAACATGCACCTGAGCCTTTGCCAGGGTGC  
ATACCAGGTGCATGCCAGGAGCGCTAAGTATCCCGACACGCTCGTGGGTGAGGGCTTGAG  
TGGCGTGATCATGGCCGAGGCCGCGAGGCAAAAGCCGTCGGTGTGGACTAAGCATGTGCG  
TCCGACGCTGGGAGACTTCACGGGCTGATCGCTTCTACGTCAACTCCTGAGGGCAAGAA  
CCACTTCCACGACAAGTTCAGATGGGCCAGGATCCTACCAATCCGGAGTGGGAGAGCTG  
GCGCATGCCAGCTGGGGCAATCCGTACGTGTACACGCGCACGGGCCGTCTGGTTCGCGAT  
GGCCAAGCTTCTCCCGAGACGCCCAAACCCGACCACGAGTACACGCTCGACCGACACCT  
CACCATCATGCAGCAGCTGATGCGAGAGAACCCGACGGTGTTCGCCATTCAAATCGTTGC  
GGACCATAAGCTTCGGGTGACCAAGAGGTGATTGAGCGCGCAGCCGACATGAGCATCGA  
GAGCTTCAACCAGGAGATCGGCGCGGACTTCACCGAGTACGTGGGCAAGGTGTTCAAGGA  
CTGGGACGAGGAATACCATGTTGCAGACCTGGTTGACTACAACGTCAAGCATTTCCGGAAC  
CTACTTCAACCCCAATTACGAGACCTATGCAGCTGCGGACTACGGTTACACAAACCCAAA  
TGTGTGGCTAGTCATACAGATTGGCAAATGGGGAGAGGTCAACGTCTCCGCGAGATCTA  
CATGCCGGGGCTGAGGGCCGATGCGTTCGCTGATGAGATTCGGCGTCAGAGGGCGCAACCC  
GCCAAACCTTCGAATCTTCTATCCGGACCCCGCTGACCCTAGGTTCGTGAGAGACGTTGAG  
CCAAAAGCTCGGCATCCGCTCCGCTGGCGGAACAGGTGGTGAGAACCGCATAACGCTCAA  
CCTGATTCGACAGTTCCTGAAGCGTGGGCGTAACGACCCACCGACGTCACGGGTATGGG  
ATGGCGTCCGCGAGCTGCTGTTTGATCGGAGCTGTGCGAATGCGCGCCGTGAGATGGAGGC  
GTACCGCTACCCTGACAGCAAGGACAAGCCGAATCCAAGCTCGCTGGTCTATGAGGAGCC  
GCTCAAGAAGGATGACCATGTGCCGAGGCGCTGGGTTCGATTCTTCGTGGGGCACTACGG  
CGAGAAGGCGCTGGTGAACGAGCGTGCCGTAACACGCATTTCCAAGGCCAACATCGAACA  
CCAGCGGACAAACCGCGAGCGCCGTAGCACTAACGCGCCCAAGGACATCAAGTACCAGCG  
CCTAACGGATGGTGAACCTCCTGCATACCAGTACAAGAATCCCGACGTGGGTTGGAGTAA  
AGAGCTGCTCGACTGATTCGGAGTTGGATAAACACCAATGGGCCAGGACAAACGCCAATA  
CGGCAGTTCGCGAGCAGGTGCGTGCAGGAGAAGCCATTTTCCCAACGCCGGAACGGATTT

CGACAAGGCGCGGCTGGCCAGTTACCGGCTGTACGTGGACATGTACCTCACCAACACGTC  
CGACTACCAGGTGATCTTTCGCTGGTGGCGACGAAGGTGACCAGCGGCCCATCTACGTGCC  
CAACGCGGAGAAGCTCATCGAGGCGAAGATGCGCTTCTCGGACAGGGGCTGCAGTGGGA  
GTTCTCCAAGAAGGATGCCAAAGTCGACGACGCCATCAGAGCCCTGTTTCGACCGGGAGAA  
CTGGGAGCAGAAGTTCGAAAGTCTCAAGCGCTGGACCGAAATCCGCGGTGACTATGTGCT  
GCTGCTGATCGGGCAGCACAAGAAGGACGAGGGATCCAGGCTCTCCTTGCACGAGGTGGA  
CCCAGCACGTATTTTCGCTACGAGGATCCGTGTGACCCTGGCCAGGTGCTGGGCGTGTA  
CTTGGTGGATGAGTATCCGCACCCGCATTCCGATAAGAAGAACGAGAAGTGTGCGCGCGT  
CCAGAAGTACATGAAGACGCTCGACGACGACGGGAAGCCAGTCCCCGGTGGCGCGATCAA  
ATACACAGAGGAGCTGTACGAGCCAGGAAAGTGGGACGACCGTCCCGAGTCACCTCTCGA  
GCCCCAGCAGCATCAAGAAGCTGAGCACCCCTCACTGAGGAAGAGCCTCTGCCCCAACAGAA  
CACGACACTGCCGGTGTGCCATTTCCGCGGACACCCGATTATGAACGCGATGTTTCGGACG  
CTCTAGCCTGGCGGGGCTCGAGTCGTTGATTGCATCTGTCAACCAGACCATGACGGTTCGA  
GGATCTGATCATGGTGTGTTGGGGGACTGGGCTTCTACGCAACAGGCTCAGCTCCGCCGCG  
TGATTCGCGCGGCAGTATGGTGCCGTGGACAATCAGCCCCTGGGCATGGTTCGAGCATGC  
CCAGAACAACAAGATCTACCGAGTCAATGGTGTGCAAGCCTTGAGCCTAGCCAGACTCA  
CATGAACAAGGCCGAAGAGGCCATGCAACAACAAGGGCATCCCCGACAGCGCTGTAGG  
CGTGGTGGACGCTGCGGTCGCCGAGAGCCGCATTGCCCTGGATCTCCAGCTCAGCGCAAT  
CCTCAGCAGTTGCGCAGAGCTGGAGCTAGAGCTGAAGTCAGTGCTCAAGCAATTCTTCTA  
TAATCTGGTGACGCAGTGGCTTCCGGCGTATGAGGGTGTGGGGATAGACGACGCTGACAA  
GAAGCTCACCGTCACCATAACCTTCCGAGATCCCAAGCCGGTCAACAACGAGAAGCGATT  
CGGACAACCTGTTGGAGTTGTGGGAGGCTGGGCTGATCCCTGCGAAGAAGCTCAGCGAGGA  
GCTCAGCAAGATCATGGGCTTCGAGCTGACCGAGGAAGACTTCAGGCAGGCCACCGAGGA  
CAAGAAGACCCAGGGCATTGGCCAAGCGGAAGCCGCCGACCCGTTCCGGGGCGCAAATGGC  
AGCAGAACAGGGTTTCCCCGACGAGGAGGACGACCAAGCCCTGAACGGACAACCGTTGTG  
AGGAGCTAGCCATGGCCAAGGGTAGGCGCAGCAGCAAGAAGCGCAAGACATATGCCTGCT  
TCAAGTCAAAGAGGTCGTGGCGCTGGGCTTTTTCGACCAAGCAGCCCTGGGCACGCGAGA  
AGTCCCACAAGACCAAGGGAGGACCCAAGGGCCGTTACCGTCGACTTCCAGAGAGCAAAC  
ACTCTGGTGCAGGCAAGAAGGTCTACAGAAGGAAGAAGCGTTGACGATCGAGCTGTAACG  
TCCTGAGGACGAGCAGGTTTGGACACGAGTTCGCGATGAGCTTCCCCAGGACGCCGTGGC  
TTGCCTGGTGCATATGTGTCAGCAGAGCCCCAAGGCCGAGATCTGCGGCTTTATCACCGC  
GAGCCATGGCATCACCCCGATTCCAAATGTATCATCAACGCCGGAACGCGAATTTCGTCAT  
GGACCAGGGTCAGATGATGCAGCCGCTGTTTCGAGAGAAGGTGATCGGCACCTACCATTCC  
CCACCCGACGGGTTCGACCCTGGCCAAGCGCTTACGATACTGATCACATTGGTTACCTGTA  
CCAGCAGGGCTGCCCGTGGGATTACTACATAGTGACGAATGCAGGAGTGTTCCGATAGGA  
GCACAGGGACAGGCGCGTGGCGGACGTCGTTGAATCCAGAGATGATGATAGTTTCATGTGA  
TGCCGGTGGACGACCTGATTGAGCATGTAGAATCGCCGGACTGCCCGTGCATCCGGACC  
TCAAGCTGATCGAGCGTACCGACGACCATTTTGGACAGATGTACAGCCACAATGCTGCCG  
ATGGTCGGAATGATGAGGCTGAGGAAGAGGATCTGTTTTGACCTCTCCACTCGAAGAGCC  
GTCAGTATCACCTCAGCGGCCTCGAAAACTGGCTCCTGAGATACCTTGGAGTACAGGA  
GAAATACGATGCAATCATCTCAACAGCCCTGCTTACGCTGCGGAAGATGCGGAACAAGG  
CATA CGCCAAGGCTTGGCGACGGCCGACCTGGATCCTCGACTCGAAGATATCAACTGCA  
GCTCGCGCAGTCTGCTGCACGTGACTCACTCAAGCTGCTTTTCCGAAACGTGCATTACAGC  
GATCACAGCGGGTCAATCGGAGGCAGCGGTGCGGGCGGTTCGAAGCAGGATTCCACGACGA  
TCGCCGCAATCTGAATCGGCTGTTCCCGAACCCCGCTCGGCGCGCCAAGTACGAAGACTC  
CATCCGGCAGAGCGCATCCCGTGGCGTTCAGGCCATGATGACGCGTGTGCTACAGAGCAA  
CCGACCCCTTAACCAGCGAGTTTACCACAAGCAAGCCCTGGCCAACGGCACGGTTCGACCG  
AGTGATCAACTCAGCACTGGTGAAGGGTGTGGTGCGGCCGCAATCGCCAAGGCCGTGCG  
CCAGAGTATCCGCCCGGACGTGCCTGGCGGAGTCAGCTACGCTGCAATGCGCTTGGGGCG  
CACCGAGAGTAACAATGCATTCCATGCTCAGGCGATGAACGACATCAACACCAAGCCATG  
GGTGGATCATGTGAGTGGCACCTGAGCAAAACACACAAGGAGCAGGGCTGTCGGTGGCA  
AGTGAATGCTCGCATCAAACGCTTTCCAAAGGAGGCGATTCCAGACAAGCCCCATCCGCA  
ATGCCTCTGCTATATCACGGCTTCGCTGACACCCTGGGAGGAATTCGAAAACAACCTTCT  
GATGGGAATGTACGACAGCTACATCGACAACAGTTTTCGGTAATAGGGTATGGTAATCCG  
CAGGAAGGAACTCTCATGACTGACACATTCCTCGCATGGCTCGCCGCTACCGGCTTGACG  
CTGTCTGGCCACGACGACGATGGCGATGGTGACTTCGATGGTTACGACGACGATTCCGGAT  
GATTCGGACGACGGTGCATCGGATCGAGGATCGTCTCGAAAGTCCGACGACGGTGATGAT

CGCGACAGTGGCGATGACGCCAATGATGCTTACGACGACGATCTTCGAGCAGATCGCAAG  
GCGAAGGACAAGAAGTTCGCCAAGCTCGAGCGGGACCTCGAAGACGCCCTCGAGATGATC  
CAGGCGGCAGAAACCAAGCGCCGAGGCGAGGTGATGATGACTACGATGACGACGACACC  
AAGTACCACGAGCTGCGCGACGAGAACGACAAGCTCCGCGCTCTGCTCAATGGTCCGTAC  
ATCCGTTTCGACAGATCTCGAGCTTCCGCGGCACGGACGGGAATCCCAAATGGGACAGGCAG  
GACCCGGAAACCGCGTTCGCGCTTCTGAAGACGGCAGACCTCGAGGTCGACGTCGAGACG  
GGCGAGATCGACGGTCTGGAGGAGCAGCTGCGAGATCTTGCACGGAACAAGCCGTCCTG  
TTGCGGCAGTGCAGCTCTCGTCGTGGCGCTTCCGGGTAAAGGTCCCGGTGGCTACAGCGAC  
AAGAAGAAACACAGTCGGGAAGACCTCGCGTCCGACTTCTCCGCATTCAACACCATGATC  
TGATTGAGAGGTTGACCAATGGCGAGGTATGCCAAGTACAACACCTACGGCGGAGGCTTT  
CGAGCCCCGCTGGCAGCCGACTGGACTGACGCCTACGCTGGCAAGCTGTATGCCGTTGGC  
ATCAACAACGTCGGGGCTGTCGTGAAGGGCGCAGGCCAGTCCGGCGTGGCTGGCGTGCTG  
GTGCTACCAAGGGGGCCAAGGCCGGATCCATCGTGGACGTCATGAAGGTTGGCGAGCTC  
GTCGAATTCGGTCCCACCTCGGGCACTCCCGGCACTGCCTTCGGCGCTGATGGTACGGCG  
TACTACGCCGACACCAGCACC GGCGCAATCAACTCCACGTCCGGCGAGGCCAAGGTCAAG  
GTCGGACACACCGTCGGTGCTCAGCGACTGATCGTCGCCGTGGCCGATGGCGTTGTCGAA  
CCTTCGCCGAACGAGGAGTGAGGCAGCCGATGAAAACGCAACAGAAGGAAGGGTCAAT  
AGGGGGAGTTTCTTCGAGATCATCGCTGCGGTGGGCCTCTCTGGTCATGACAACCAGGGT  
GGCTTCAACACTGCCGGTGACATCAAGTACAAGAACGCCGATGGCGTGTCTGACGACAGC  
CTGTGGAACCTGTTTCAGCAAGGTAACGGACGAGTGGAAACAAGCACAAGTCCAAGATGGTT  
CAGCTGATGACGTTCCCGGTCATCAACCAGACCGAGAGGGTGCCGCGCATCGGCCAGTTC  
GTCTTCGAGAAGGCCTCGGAGTTCGGCGTCCCCGAGAGCAAGCGGACCGAGCTGAGCTTC  
TACCAGCTCGCGTACGACTTCGAGGACTACGACCGGGCCTTCCGATACACCTGGAAGTTC  
CTGCGTGACGCTCCGTCGTGCGAGATCAAGGCGTACCACAACCAGGGTCTCCAGGCCGAC  
GCCAAGCTCATCCACCGCAAGGTGATGGAGGCGATCTTCGACAACCGCCAGCGCGAAGCG  
GACATCGAAGGCCTGCCCTACAAGGTCTATCCACTCTACAACGGCGACAACATGATCCCG  
CCGGAGTACAACGGCACGACCTACACCACCGCCATAACCACTACCTGGTCTCCGGTGGG  
ACGAAGATCGACTCCGCCCATGTGGAGATGGCTGCCGACCACATCCGTGAGCACGGCTAC  
ACGGAGGAAAACGGCACCCAGCTCATCGCTTCGCACACAAGGCCGAGATCCAGGAAGTC  
CGTCCGTTCCGCTTCGGACAGACGAACAACAACCTCGGCCGTGGCGAACTCCGACTTCGTG  
CAGTCGCAGGGCGAATCGCCCCTGTACCTGCCGAACGCGGACGGCCTGCTCGGCAAGCAG  
CCGCAGTCGATGTGGAAGGTCTTGCGCCTCAAGGGATCCTACGACGACGTGCTCTGGATT  
GAAGAGCCGACCATGCCGGCAGGCTGCGATCTGTTTCGTGGCCACTGGCGGAACGCTCGCC  
CAGCAGGACCTCGTCGGCTTGCGCGAGCACGAGGACGCGGCGTGGCGCGGTCTGCGTCAG  
ATCCCCGGGAACCAGACCCGGTACCCGCTGATCGACAGCTTCTTCCAGCAGTCGTTCCGT  
ACCGGTATCCGTGAGCGTGGTGGTGCCTTGTCTGCAAGGTCAAGGCCTCTGGCACTTAC  
GACATCCCGACCAAGTGGACGAACGGTGGTGGATTTCGAATGAGCCGTGTAATCCCAGAGG  
ACCGTCCGCTGTCCGATGAGGACCGCTCATGGCTCAACAAGCGCAGCATGGGGTTCGAAGG  
TCGAGCTGATCGACCGCGCCTACCCTCCGGGGTTCGGACAAGGTCGAGGATGACACCTCGA  
CCAAACCGTCCGAGCCGACGGGCGATGACGACGCGGAGGTGGAGGTCGACAAGGACTTCT  
CGAACTACGTCGGAGACCTCCCCAACAAGGACGCCGTCAAGGAGCGCCTGATCCTGGAGG  
AGGTGGAGTTCGAAGACGATGCGAAGCGTGAGGAACTCAATGGCCTCCTCGCGATCCACC  
TGCAGGAACAGCGGAACGCCGGCAAGGACGTCGAGCTCGGAGACGGATTGTGGCCTCCGA  
AGCAGATGTCCGGCTGTTTAAGACGCAGCTGTCCGGCGTCGATGGTATTTGGGAAGATTC  
CGAGATCTCAGATAACCATCGACGCCCTCCGGTCTGTCCGGCAAGGCAGTGCCTGCTTACTG  
GTCCAAGGGGGTCAACACCACATACTGTGACCGACGTGAGCGAGAGTGGCAGCTCGCG  
TAACGCAACCATCATCTACCGCAATGCCATGGGGCAGTTGCAACGGTGGGATGAGATCAT  
CAAGGAAGAGGACGCCAAACAGGAAGCCGAGACCGTCGGTAATGTGAGGTTCAACCGAAT  
TTCGAGGAATTTCTCGTCATGACCGTGTGACCCAGTGCGCAAAGGGGATTGGAATTCCTG  
CGTGCTGGCACACGCGCATTTCATCGACGATGATCCGACCACGATCGTCCTCAATCGTGGC  
CAAGCAACCCGCGTCGAGAAGCCTGGCGGCGGATACGATTTACCCCAGGGGCTCCACGA  
ACTGCACAGATCTTCAAGGTCATCAACCAAACCTGGCGACGGGTCCGGCCCTAACCGAGGCC  
CAAGACAGCATCCAGACGCTGGTACGCGAGTACATCCTGCTGGGGGCTCATGATTCTGTG  
GCCGAGGTTGGCGACTGGTGGGTGACGGCAACAATCGGTACACAGTGACCGAATTGCTC  
GTGGCAAATGGCTACGAGCGCAAATGGCGTGTCCGCAGCGTGGGGCTGGAGCCCAATTAT  
GGCTAAGATCGAGTTCAAGTTCAAGGACTTCGAGCTACGCCAGGGGGTGGAAAGATATGGA  
AGCCAAGGTCGACCGCGCCATGAAAGCCACCAGCAATTACCATGCGGTTCGAGGGCACGGC

CCACATGAAGGAGCATGCTCCCTGGACTGAGCGGACGGGTGCTGCGCGTGCTGGTTTGCA  
CGCTGTTGCCAGCACTCCACAGCCCCGACCGCTACGAAATCGTGTTTGCCACACGGTGCA  
CTATGGCATCTGGCTCGAGATCGCAAACAGCGGACGGTAAGAGATCATCATGCCACGGT  
CCATCATGAGGGCAAGCTCATGGCTCAGCGTCTTCGCGGCCTCCTGGGGAGACTCCGATG  
AGCAGAGCCGCAGTGCTAGATGCGCTCCGGGCCGATGTGGCGCTCGGGCAAATTCTCGTT  
CCGGGCAACATTCTGACGAATTACTIONCAAAGAGGGTCCGCCAACCATTTGGCTCCAGGG  
CCATTTGCAGTGATTTCGTTGGGGTGGCAAACGATTGACCCTGCGGTGAATCGCGGACCC  
AGAGACGTGAACATCTGGGTTACATCCCAGCAACGTCAAAGCACTGACTACACGCGGATC  
GATCGAATCCTCAAGCGCACCAAAGAGATCATGCTGTCTCTGGAAGACGTTGCTGGCGCT  
GATGGGGCCCACTTGGTCAGCACGCCCTTCCTGGCGGAGAGCGATGATCTCGTTGACCCG  
GGATTCGAAACGATCACGCGCTACGCGACATTCAGCGTGCTCAGCAGAAGCACCTGAAGT  
CAAGTACGATAACCAACAGGAAATGATGCTCTCATGGCGAATCAGATCACCCCTCCGCCC  
TCGGATGTCAAGCCCGCAGCGGCCTCTGCACCCGAGGCCAGGATTCGTGCTCGGGCAAG  
CGAAAGATCTCAAGTTCGTTGGCACGAAGAAGATCTCACCTTCGCATCGCGCCGGCAGT  
CACTACCACATCCCCGAGGCACAGCTGGTGGTAGCCGGTGTGCCGCGCGAAAGGTGCTTC  
AAGTGCAAGGGCTCTGGCAAGGTTGCGCTCGCGGTGACCGAGGTCACCTTCGGCGCCGAA  
ACTCAGCACAAGGTGCCGCTCGACGCCTTGTACAAGGAGGCCGCAGACCGGCTGTTACTG  
AAGCCGGACATCATACTCGTTGAGGAGTAGGGAACGCGTGAGTGCAATACCGATGCAAGG  
GCAAGGTTACGGGGAGCTGTGGAAGACGGTCTCCTCGTGTTTCATGTGCTCCACATCG  
CTTGACACAGAGGGAAGAAGCGATCGTTCGTCTTCACTACATGGACCCGAACACCGGCA  
CCATCAAATACACCTCGCGACCATAACCGGAACCCATTGAAAGGTAAGGAAAATGGCAATT  
GACACCGCATTGCCCTATGGTCTGAGGGACGTGAAGATCACACCCTATGCACACGAGGGT  
GGCACCGTTCCTCGGCGATACGAGCTACGACCTGCCGGACGCACAGACGTTTCAGCTTCAAC  
GAAACTGAGGAGTTAACCAGCTTCGTGGCGATGACCGGCTGGTAGCGACGCCCGGCAAT  
GGCGCACAGGTCGACTGGTCGCTAGAGGCCGGTGGCATCAGTCTGGTCATCTGGACGATC  
CTGACGGGTGGCCAGTTGATCCAGTCCGGGCTGACCCCGAATCGCAAGGAGCTCATGCGG  
AAGCGCGGCACCGACGTGCGTCTTACTTCCGCGTGGACGGCTAGGTCTTGTGCGGAGTCC  
GGCGGCGACATTGTGGCGCGCGTGTACCGCTGCCGCTGCAATGACAACATCGGCGGTGAC  
TTCGGCGACGTTACTTTCCACATCACAGCTGCTCGGGTGTGCGTCTGCCCTGCTGGAT  
GAGGCGAACGACCTGCTGCACGACATCATCCGTAACGAGACCAAGACGTCTCTGACGCTC  
ACCCCTGAGCCCAACCCGCTGCAGTCGCCGCAGAACCTGTGCGGCCGGCACGACCACCGCC  
ACCAGCGTCGTCTGTGTCGTGGACGGAAGTCGTTGGCGCGGACGAGTATCGGGTGCAGAAT  
TCTCCGGACGCCGGTGTACCTGGAGCCTCGTCGACGACGTGGAGGACCCACCATCACA  
GTGAGCGATCCCACCGCCAGCTCGGCTTACCAGTTCGTTGGCGTCCAAGGTCGGCAGT  
GCGCTGCCGGTGTCTCGGCTCCTTTGCCGGGCACCACGCTGCCCAAACCTAACCCAAG  
GCTCTCTGGGGCGCAGGGTGTGGCAACTCGACTGCGCCCCAGAGAATTCCATCTAGAGCC  
CAAGGGGGCCATGCTATGCCGGAATCAGCGAGCAAGAGTTCGAAGAGCTCAGACGGATC  
AGAGAACAGACTCTGGCACAGGAGAATGCCCGTATGTCTTCAGGAATCGAAGAATAGGCC  
AAAAGGGCCGCTCTTGATGCCCTGGCAGAGGCCGAGGAAGACAAGTTCGCCGTCAAGGGC  
TGGGGCAAGGATGTCGTCCGTAAGACATTCGACATCCAATGTCCCAGCGGACAGTGGTGC  
CACGCCAAGACTTTGACCATCGAGGACGCGATGTCGCTCGGTTTGTGGACAGCCCTTAT  
CTGTTACACAGTACGCTCATGGCTCCGATCATGGCCAACGATGAGGACAAGGAGCGCGCC  
GAAGAAGAGCGGAATGCTGGTCTCCTCAACAGCCTCAAGGCTTCTGGCAAGCGTGCCAGC  
GTCTTCGGCACGGTGAACCGTGTGACGACGCATTGCGTGCTGAAGCCGCGCGTGGTCTC  
GAGGACGACGGCAACCTCCCCGAAGGCACTGTCTTCGCCGACGACATCCCGTTCGCTGAC  
AAGATGCACATCTTCCGGAATGTGTTCCGGGGCAATGGGGAATTCCACGATGAACACGTTT  
CGCGAAGGACCGGAAGGCAGCGTGGCGGCTGTACCAGATGGCGCTCCTGTACAGGACGCG  
TCCGAGTGACCTAGTCGGTTTGGAGGATCCGTTGCTGCGATACTCCTCTGATCGAGGGCT  
GCGGATCTTCGGCGTAACGGTGCAGAACAGGGTTCGATGATGCTGGCCATGCTGCGGGCCG  
TGGCGCCAAGAACAACCGAAATAGGGAAGCGCTTCCAAACGGTGGCGCGCAAGCGCACCTT  
GGCCAAGCTGCTGGGCGAAGACATGGTGTAGTACTAAGCTGGCTTCCGAGATCCGGCGAA  
GGCGGTGTGACGTGCCAGATTACGACCTTGGGCGTGCCCATGGCAAGATCGTCTTCGACG  
TTGACAAGAGTGGTGTTCGACGCGCCGAAGGCGCGATGGACCGCATGGAGGAGTCGGCCC  
ACAGGGTAGCCGAAGGATTCGACGAGGCTGAGAAGTCAACCTCTCCTTGGGAGAAGACCA  
ATCGCAAGGCTGTGGGCGCCACTGAGGCTCAGGCGCGAGCGGTTCGATCGGTACAGCCGCA  
TTCAGGAGGAAGCCGAGCGCGCTGCCATTTAGCGTTCGCAAGGCCGAGAAGGAGCTCGAGG  
AAATCCTCGATGCCGGTAAGGCTACCGAGGAGGAGACCCAGAAGGCCCTTCGAGAAGACCA

ACAAGGCCAAGGGCAAAGCGCTACAGCTCGCCAAGGAGCGCAAGAAGGCTGAGCGCGATG  
TCGAGCGAGCTGCAGCTGGCTTGCCCACCGAGCACGAGACCAAGCTCAAGATCAACACCA  
AGGACGCCGATCGGGACGTCGATCGTTTCTTCGACAATGTTGATCGTCGTGCTGAACGTA  
GTGCGCTCGTCATCGCCAAGCTGGGCACAGGAACCATCAAGGCTGGTGCCGCGACGGCTG  
GCGTAGGTGCGCTGGGCGGGTTGCTGGGTGTAGCGGGGTGCGGGTGTACTGGCGTCGCAA  
GCATCGGCATCTTTCAGCTTGGCGCGGCGATCGCTGATCTGTCTGGTGCACCTGGGTGTTT  
TGCCAGGCGTCGTGGGTGCAGGTGCCATCGCGATGGGCACGATGCAGCTTGAACCAACC  
GATTCGGCGAGGCTCTTAAGGACCTCGGAACCGACGACTTCGCCGACGCGATCAAGGAGC  
TAGCTCCGGCTGCACAGTATGTGGCCGTTGAGCTCAACACGCTTCTGCCCGTGTTTAAGA  
ACTTCCAGAAGAACGCCGAACAGGGCGCTCTTCGTGCCGCTCAAGGGTGTGACCACTGAGC  
TGACGACGACCTTCTGCCGACGATCCAGGGTGTAACTAACCAGATCGCCAACATGTTTCG  
GTCGCACCGGCGCTCGCCTGGCGGAATGGCACATGAAGCCAGAACAGCAGCGCGACATCC  
AGAACTTCTGTGGAACACCGTTCGAGGGCTTCGAGCGTCTGTGCGGATGCTGCTCAGCCAC  
TGCTGCAGGCATTCACCGACATCATGACGGTAAGCGGGCGAGTTCCTGCCCCAGATCGGTG  
GTGAGATCGCTGAGGCTGCAAAGGAATTCGCTGGCTGGATCCGCACCATGCGGGAGAATG  
GCGGACCCGCCGCGTGGATCCGCGATGGCATCGAGGAGCTGAAGACCTTCTTGGTGCGC  
TCAAGAACTTTGGGCTGGGCCTGGTGTACAACGGCCGCATCGCCAACGAGTTCGGCAGCG  
GTTTCATCGCTCTGTTCGAGAACTTAGCCAGACTTTCCTTCTGGACGCAAAGTGTTG  
AGGGACAGGAAACCCTCACCAGTTCTTCATCGCGACGAGTGAGGCCGCGCGTGTGTTCA  
TGCCGCTGCTTGAGAAGCTGGGCACGCTGTTGTTTCGGCACCATCGGAGCAGGATTGGCGC  
GCTTGGGAATTGAGCTCGCTCCGGCGTTCAACTTCTGTTCGAGACGCTGAATGTCGGCT  
TCCATGATCTGATCCAGGTGCTGATCAACAGCGCACCCCAGATCACCCAGTTCCTCACGA  
CTCTGGGAAGTCTTTTCGTAGACATCATCAGACAAGTCGCACCGCACTTGCAGGCATTGC  
TCGGGACTATTGTAGATTTGTTCTACAAGCTCGGGCTGGCCATTAGTCCGCTAGCGAGCG  
CGCTGGTTCAGGGTGTCAACCTGATCATCAACGCTTTCATGATAAGTGGGACACAATCG  
CCAACAGCCTCAATGGCTTTGGGGCTTCTGTTGCGAAGGCGATTGAGACTGGTGATTGGT  
CTGATGTCGTTGATCGCATCACGAACCTGTTCCAGCCCTTGGGCGATGCTGCGATGCAGG  
CTCTGCTCGACGCTATCAATCGTTGGACCGAGGATATTGCGGAAGCCGGTCACAAAGTCA  
TAATCGCCTTGGCCGACGAGATCTCCCCCTGGATCGAGATCAATGCCCCGACATGGGGCG  
AGAAGCTCGTCAAGGGGCTGCTCGACGGCATGGTCGGAGCTATCCCGGTTCATCGGACCGG  
TGGCCAAGAAGGTCTTGGGGCGCTGAGCGATTGTTTCCAAGTTCTCCGGCCAAGAAGG  
GGCCGTTTTCGGGTACCGGCTGGACGCCGTACCGTGGCAAGGCGTTGATGGAGGGCTTCG  
CCGAAGGCATCCTGGCTGGCGGAGCAAGCGCACAGAAGGCCGTGGGATCGGCCGTGGGAG  
GCGCGAGCGCCGGGATGAACTCCGGCCTCAGCGACCTCGTCAGGGACCTCACCGAGCTCA  
CGAGCTTTGGTTCGGAGTCTGCCAGCTTTGTCCAGGGCATCACCGACGTCGTGTTCCAGA  
CGATTAAGTTCGCCACCACAGACTTCAAGACGGGCGAGAGCACCTGCCAAAGCGCTTCG  
TGCGCAATGTGAGCGATGAAGAGCTCGCCAAGCGTCGTGAGGACAAGGCGTATCGCGACA  
ACCTCAAGGAGCAGAAGGAGAGCGGCACCGGTCCCACGGGCGCTCTGTGCGCCGGAACCTC  
AGCGCCTGCTTGAGCAGTCGAATCCTGGTGGAAACAGGTGAAGCCGCAGTTCCTGTTGATCC  
AGTAGGAAGACGGCACCCAGGACTTCTCCGAACAAGGAGTGGGCCAAGCTCATTAGCGTG  
AGTCGAGTGGCAACGCCACAATCACCCAAGGCATTCAGGGCGCCAACCTCCGGCGGGGAATG  
AGGCCGAGGGGCTGTTCCAGATCACGCCGAGCACTTGGAAGGCGTACGGGGCCACAGACT  
TTGCTCCGAACGCGAAGGCCGCCACTCCGCAGCAGCAGGCGATCATCGTTGCGCGGATCA  
TCCAAAAGAATCCGAGCGGGTCTGACTGGGGTGCGAAACTTCCGGAGCGTGAGGACCCCG  
AAGAGCTGCTGAGAGGCTTGACGACTGCCAGCGCAACTAGCACGACGAGCAATCCATCGG  
CCAAGTCGAAGCCCAAGGCTGCAGGCAGCGAGGAAACGCTCAAGCCTGCGACTGGCCTCC  
AGATGGAGGAGTTCGGAGACGGTTTCTTCAAGGACAAGAAGACCGAGGCCGTCTATCGAG  
AGATCGATGGATCTTATTACAACGTCACCGATTTGGCCGTCGGCAAGGACGGCAAGCCGC  
TCCTCAACGAGGACGGCAAGCCCATCGCCCGCACGAGCGCCAACAAGAGCGCGTCTCGGC  
CATCTGCGCCAAAGGCACGGGAGCCGTATGGCCTCAAGCCTGGCACCGATAACGATGGCT  
ACGGGAATGGCAATGCCGATGTGTTCCCGGAGTGGGTTCATGGATCTAGACGATCAGTTTCG  
GCATCAAGGCCAGCACCTACAAGGGTTCATCAGGAGTCTGACCGCAACGAGCCTGGCTATG  
CACCAAATCCGCAGCGCCTCAACCGAGGGGTTGACTGGGTCCGACTAAGAACCCTGC  
AGGCGTTCGCCGAATATCTCGAGACGATAACCGGACGCCCTGGAGCAGGAGATCTGGAAGA  
ACCCCGACACCGGCCGCAAGACCCGGTACGGCTGGCGGAAAGATCAACCCTGGATACTATC  
CGCAGGACACCTATGATGTCCACGGCGGAATGATCCTAGCAACGTCCACGTTACACCC  
GGCAGTCGATGTCGATCCCGTTGCCGGGCGAGGATTAGGTGCCTGGTGAGACGCCGACCA

GCACGGGTGATTTCGATCCTGGACGAACTCCAGAAGATCACGGCGAACACCGAGGAAAGCA  
GCAGCACCGAGGACAAGACGCTGCGCCAATTCCTCGATCAGAATCCGATCCTGAACGAAC  
TCGTACGGCCGCACAGGATCCCAGCAGCTCGGATGAACAGGTACAGGCTGCCCTGGGCG  
GGCTGCAGAAAGCCATCGACGCTCTAAACCAAATGGACACGCCTGCCAGTCGGTATCTTG  
CCGATCAGCTGAGTGGCATGCAGAGCCAGATCTTGACAGATCGTGGCTTCGGCGTGGCCG  
ACAATCCTGTTGATGCGGCTCAGGCCATCGCCAATGGGGCGATGGGCCTGGTTGCCGACG  
TCTTCAAGATCATCGACGACACGCTCAAGTCCATTGAGTCGGCAAGCGAGATCAGCTCCA  
CTCTTGTTTCGCGGTATTGAGAATACCGAGGACATCATGAAGATCATCGACAACGTACAGA  
GCTTCATCCAGCTGGCGGGAACCATCGCCAGACGGAGACAGACGGCCCGAACTTCGCGA  
GCTCGATCGCGAGCACTGCCGGCGGAGCACCCGGTGGCCAGGGTGCCGTGGGCGGGCTTC  
AGGCGGCAGCGGCGATCTCGGGAGTCATCACGTCCGGTATCCAATCAGTCAATGCCGCAA  
TTGATCTGGGCCAGGAAGCGTACCGAATCACCAGCAAATACTACGGCAAGTTCCTCAGCT  
ACCTGCTGGGAGCTGGCGAAGGTTCTCTGATGGGCGACATCAGATTCCATCTGGTCAAGA  
ACGATTGGACGCTCAAGGCGTGGTCCGAGGACAATCCCGTGGACAAGCGCAGCCATCAGG  
TTCCGGCCTGGCTGCGGGATGAGCGGAGCGTCGCGGAGCAGGGCGGCAAGATCCGAGACC  
TCAACATGTACATCGGGCCTGGCACAGACGCGAATGAGGCCATGAACGAGGGCTCGTGGC  
GCGTGATGACTGACCAAGGAGGGGTGTTACCAGGGAGTATTAGTCTCGAACCTGGCCAG  
TACCAGATCGGAGATCTGGTGTTCGTCCGTGGCACCATGTATCCTGTGACAAGCATTAAAG  
ATCCAGAGCTCCCAAGTGCAGGCACAGGATTTCCAGGTGATTCGCAGCGACGAGGTGCAA  
TTCGGGCAGGGCAGCCTGCTGCCCGGCCAATCGTGTTCGAGCTCGGTGTGTATGATTTT  
AAACCAATCGCCAATGTGGAGCCGTACACAGGCCGTGTCTTCAACGAGGAGCCCTTCAAG  
AAGCTCCTCAACAAGGTCGCAGCCGAGTGGCGGTGTGACGACGTCCGCCAGAACTGGGGT  
GCGATGAAGGCGCTGAAATGCTGCGAGCGTGATGGTAAGGTACTTGTGTGGTACGGACGT  
CCCGGCAAGTTTCAGACCACCAAGCGATCACGGAAATCGTCTTCTTTCACGGTGACTGCA  
GAGTTTCGTAGTGCAGACACGCTCATGTACTCCGACAAGGAGTCTGGCGACAAGGTGCTC  
AAGGGTGATGTCCCGACAATCATCAATCGGGCTGACGGCGAGGCCAAGAGATGGTTGCGC  
GTGGTGGGCTATGGGCCGCTGACGCACCCGGTCATCACCATCGGAGACCAGCAGGTTCGAG  
CATGACGTTGATTTGGCAGATGGAGAACCCTTCGAGGTTCAGCTCGTATCCGTGGGAGCGT  
CGTGCTATCAACAATTCGGACAGAACATCAGTTCGAAGCTGATCGGCGACTCCCAGTAC  
CTCGACCGTCTGCAACTCCTTCCAGCCGTAGTTCGACGCCGGTACGGTGGACCTCCGAC  
GAGATCAACACATGGGTCCGCGAGCTGGGCAATCAGTCCTGGATGGAGACGATCGAAGGG  
GTGAACAACCTTCAATTTTCCCAACACCTTCAAGACGATCCATGGCCGGGTGGTCTGCGA  
TTTGACCTGTTCAATCCGGAGTTCGACGAGAAGTTCATCGGCTCGGGCATGCTTGGCGGA  
ATCAGCGCCTGCCTGTACACTAAGAAGACCTTCGCCACGCGGAGCCAGTACTGCGAAGCC  
AAAATCGTTGAGCCGTGGGGTGGTTCGGAGCGGCATCGTCATCATGAGCAATGCCACGATG  
ACCAACTTCGCACTGCTCGAGGTGACTTCAGGACCCAACAACGACTACCTTAGATCCGT  
ACTGGCAGCGCCTACAACACATACTCGAACGTCCGGAACAGGTGGAAGAATCCGAATAGC  
TGGAAGTGACGGACGTGGTGGGAATCGGCTCCTCGTACGATGAGGACACCGAGAGCACC  
ACCTACACAACGTTTTTCAATGGCGATCCCGTCGCTGAGTGGTCCGACGAGGAAAATGTC  
GTCAGCACAGCTGCGACCAATCGGTCACAGGGATTCATCTTCGACATGGACAGTCAGCTT  
CTGACCATCGGCACAGGGTTCAAGGACATTCTGGCTTACTACACTGGGACGGTGCAGGCT  
CCTACCGGCAGAGTGTTCGTGCTCTGGCGTGATGCATACAGGTGGCCTCATGAAAGCCC  
ATGACCGCAACCGCTTCATCATCGAGGAAGCGCGCACGGGCCGAATCCTCACCCGCGATC  
TTCACGTACAGAATCCGAAGATCCTCAAGAAGCTCAGTGGCCCTTTCGTTATTGAGTTTG  
ATGTCGATCACCGACACCCCTCGGTCCAACACCCCGACGGCACAGGCCCATCCTGTTCA  
AGCCCTGGGGCCACTGGTGCCATGTTGAGCGCGAGATTCGGGGCAAGCGCGTCATCATCG  
CCTCAGCCCTATTCCAGCCAGAGAGGTTCGACCAGGAGACAGACCTGCTGAAGGCGCAGT  
GGCAGGGCTTCTCGGGATATCCCAAAGACCTTCCCTGGTTACAGAACTGGAATCCGATCG  
CGGTGATCCATTCGAGATCGTGCACCGCATCTGGACGCACCTCCAGAGCTATAGCAATG  
GCAATCTCGGCGTACAGGTGTAATCTCCTGGCCCTGGCGGAACACGCGTCACTCCACCAA  
ACAGCAACACCGAGTTGCTTCCCTGGATTCTCCTTCGATAGCCAGCAGTTCATCCAAGACT  
TCTTCGCCATCTTCATTCGGCGCGTTGAGTTCACCGACTGCGGCGATTACATCAACAAGC  
TGGCTCGCGACATTCAGTTCGACTACTTCGAGGAGTCGGAATGGAACGAGGATCACACAG  
CCATCGACAAATTCATTCGGCTCGAGTATCCGCACCCGGGTGTATTCCAGGATAATCTGA  
GCTTCCGGATGAACGAGAATGTGATCCGGGGCAAGAGATAGCTCGAGACAGAGATTGAGT  
GGACCAGCGACATTGGCATTTCGCTGCTGGTTCCCGGCAAGGTCTACAGCTCTCAGATCA  
GCAACGCCGACCCAAACCGCTACAGACGCTTCATCCTTGAAGAAGATGCTCCCAACAACA



GCACCGAGCGGTCTGAAGCCTGGGCGCATCGGCAGCTGACCAGACGTCAATTCCCCTCGT  
ACTGGGAAACAATCACCATTAATTTGCATCGTCCGAATGCTCCGTTCCGGTACGTGGGATG  
TCAGCGACCAGATCAGAGTACAGGGGCTGATGCCGTGGGGCGGATATGTTGACCAGACGC  
ACAAGATCATTGCGTGGTCCCTTGACGAAACGTCGGCGACATTCGAATTGACACTTCGAG  
CTGAAGGCGCATTCAACTACGATCCGATCTTCTTTCGAAGGCAAGCTTCCGAACCTTCTGG  
CGAATCCGAGTTTCACCGCCAGCATGTTCAACTGGACTGCCGCTCTGGGCAGCTGGTTCGC  
GTGAAAGCCTGCGAGGCATGGATTCTCGCGGAGCGGCTCGTGTCACGTGTAACGGCCAAG  
AGAAGCTGCTCCTGAGCGAAGCCGTACCAGTTGCGGCAGGGCGATGATGTAACGCTGAGCA  
CGTGGGTGTATTGGCAGAATCTCGTGGCCACCGGCGAGCCGCTCGAGGTGATCCTCAACA  
CCTACAACCTCGGATGGCGAACTGATCAACACCGTTGTGTTTCGATAGCACATCGGGCTCTG  
GAGAGTCGCCGGGCTGGGTACAGCTCAGCAACGCATATACGATTCCCTCAGGAGTCGCGT  
CGATGCGGGCTGGTGCACGAGTCACCGAGGACGCCATGACCGGGTCTGTATGGTATGACG  
AGTTCTACTTCACGAACGACGACTGATGGCCTACGAGTGCGAGAGCAAGGAATCTCGGGC  
TCTGCGGTCTATCGAGAGCAAGAACTACCCTGACACCAACAAGGATTTTCGTC AAGAATCT  
GAGTCGGCTCAACAGTTCTGTTGATTACATCTCGTCTACATGATCATCATGCAAAAGGG  
CATTGATGACGCCAATAAGAACTTCATCGAGCAGATCCAAAGTTTCATCAATGATCTAAT  
CGTTCTGTTTGTGGCGGAGAGCCCACGGGCATCGAGCTCGGCGACCTCAAGTACATCAT  
CCAGGCTCTGGGCGCGCTGTTTCGGCTTCAACGGGCCATTCCCGATGAGCTTGATCAACGC  
GGTGCAGCACTTCTTCCTCGGGTATGTTGTTTCGCTGCCACAGTTTACAGACGTCATCAC  
CGACACCATCATCGCCTGGGCCGAAGAGCGCGGGCTGGACCCAGAGTTCGTTGATGCGCT  
GCGCGAGCGCGCCGACGCCATCAATGATCTTGGCATGAGCATTGGCGATTTGTTACCAA  
TATCATGAGTATCTTCAACATCTTTCAGATTCAGAGCTCGGTACAGGACCTGTCGCCGA  
ACCATGGGATCTGCTGGCAGGCATTTTCGATGGAACCAACGGGAATGCGCTGCGGCCGGT  
ATTCCTCGCCATCAGCAACTGGACCATTCCGTTTCATCGAAGGTCTCGCTTCACTGGTCAA  
CTATCTGGACGACCTGGTTCGACGGCCTTGCCAACGGAAAGTTCCCTCAACATAAACTCACC  
GCTGAATGCGGCAAATCTATTCGGTGCTATCGGATCTAATCTTATCAAGGTCGTTCCCTGC  
TGGTGC ACTGACCAATCGTTCGCGTTGAGCTAATCGACAATCCGCACTTACCGAGGATGC  
CATCGCTCCGGGCAACGAGTGGGCCGTGGACATGCTGTGCTCCCGCACCGACAATGATGG  
CACAGGTAGCGCGACGGTGATCGCCAACGGTCAGCCCCACGCACTCAACACCGGGGCAA  
CAAGGACGACAAGATTCCTTTCGGCCCCGGACAGCGTATTCCTTTGGGCATCTACATAAG  
TCATGACGGCGCTGTGCTACAGGACCGGCGATCATTCTGCAGGTTCCGGCGATTCAATGG  
CAACATCCCTATCGTTCGGCCTGTACGAAATTGGATCGTACAATCCTCCTGTGGAAGACCT  
GCCGTGGCCTGGCCACAAGCTCGAGGGTGTCTACACAGTCGAGGAAGATGTCACCCACAT  
CCAGGTGCGCGTGTACGTCACCGAAGCCGCCCTGGCGGGTCCGGTATCGCCTTGACGATGT  
GGATTTCCGCAAGGTCACCGACCTTGCCTTGATCCCTAGTCTGACACAAGCCTTGGAGGC  
GCTCGAGTCTGGCCAGCGTGCTCTGCAGCACGCAATCGCCAACGCGCTCAGCAACATCCC  
GATCATCGGCGATGGGCTCGAGGATCTGATCAATGCGCTACAGA ACTTCAATCCGGCCAA  
TATCGCTGGAGCTCTGGGCAGTTC ACTGCTGAAGGGCGAACTGTTCCGGGATCATCCGACA  
CATTATCGCTGCGGCGCGTGGTGTTCGGTTCGGCGGTAGCCGAGGATGCCACGCTCGC  
AGACCTGTACTACGCGATGAATGCGGCGCTCAACAATGTGCGCCGGATCCGACGAGACAAC  
CTTCGTCGATAACCACGACATTTCGTTCCGGTGAGTGCGGCTGGTACCCACTACATTGATGT  
CATCGGCGTGGGCAAGGGCAAGGACGGCATGGACGGCCCGACGGTGCCGCGGATCCCCGG  
TGTGTTCCGGACAGGGTGGGCACCTGGGAAAGGTGCTCGCCACCACATGGGTCAAAGCTGT  
CCACTACGACAATGATCTCACC GGCGTCCAGGTCACCTTCAACAGCAATGGCTCTGTGAC  
CTTCTCGATTCCCGGTTACAGCCTCACCTGTCTCTGCAAGCGGACCTACGCGCCAATT  
TCAATTCGGAACAGGCTGGCACGGCAAGGGTCCGGGCACATATGTCTACAACGACCGCCC  
ATACGCTGCTGGCGGAACACAAAACCACCCTGGAGGCAACGGAAATTGGACCGCGTGGCTC  
TGGCGCTGGTGGTTCGCGTGCTTCAGAGCGGTGGCCGAGGCGGACCTGCCGGCGGATGGGT  
GCGTCGGCGTGCTGCTGAAGCAGAGAATCCGTCTACTGGATCAGACACGACCCCTCCGAC  
CCCTCCGAAAGTTAGCGTTGTCAATGCGACGAATGACACTCTGTATCTGCTCCCGAGCGG  
AAGCGTGGACCAGTAATGGCTAATCATGTGACGCGCTTGGCCGGATATCTGTTCTACCTT  
GAGGACTCAACGGCACCCCTCAACCCAGAGCAGTTTCTGCCAGCTCTGGTCTGCCGTAT  
CCCATAACGAGGCTTGACGCAAACACTGACTATAGCAATCGCATCTACGCCACGGCGATC  
GACAATGCTGACAATGAGACCGACCCCATCTCGCTGGAGGAAGCTCTCGACGAGCTGAGC  
CCATTCGCCGACGACGCTCAGTCCCACGCCAGAACAATCGCCCATTA ACTCAACTCGC  
ACCACTGCCATCGACAACATCATCAAGCGATGCATCGCGGCTGGTTCGGGTCTTGGTGTG  
ACGGTGGGGATTACGAGCCCGTGGGGATACTACCTTGGCAGCTTCGGTGAGGGCACCGGC

GTCGACCGACACTTCCTCATGGGCAGCCAAACCAAGAGCTTCCTCATCTGGGCTGTGATG  
ATGGCCATTGACGAAGGCCGTCTCTCCCTCGACACAACAATCAACGACATTCTCGACACG  
CCGTGGAGCACC AATCCGACCATT CAGCAGCTGATGATGATGCGGTCGGGTATGTACAAC  
TACCAATCGGACTAGGCATTCGGTCTGCAGGTGGCGATGAACCCTGCGATGTCGTACAGC  
CTGCAGCAAATGATCGCCAAGAGTCGCAACGGCGCCAAGCACTTTGAGCCTGGCGAGAAG  
TATGACTACAACAACGGAACTCGGTTCGCTCTAGCATTGATGCTCGAGGAAACGGACCCC  
AAAGGCCGCAAGATCCAGGAAATCATCAAGCAGGACATCCTTGATCCGCTGGATCTCGTC  
AACACGAATTTCCCTACTGTCACCAGAGGACCTCCGGCACCTTCTGCCATCCTGTTCTCG  
TGGA ACTTCTTGTGTCGCTCATCGGCATCAAGCTCCGCCAGAACGTGACCATGCAGACC  
CCCAACATCACATGGGCGGCTGGCTGTATGACCAGTGTGCTTGCCGACATGCTGAAGTGG  
GGGAAGGAGCTTCGCGACTGCACGCTGCTGTCACCAGAATCAGCCGATCTGATCCACACA  
ACTCACATCATGTATCCCAGTGCACCCTATGGCCTCAACAAGGACGGTGCAACAGAATTC  
GGATACGGATTGCACGGCCATATCAAAGTTGGCTCCTGGCGGGGATCCCACCGCAGTTGG  
ATCGGCTGCGACTCTGCGACAATGTACGAGCCCACCACCGGCACCATCATCACGGTGTAC  
GAGAATTTTCAGACACCGGGATTGCTTTCTTGCCACAGTTTGGCACGAATGCGCGGAG  
TATCTGATGCCGGGGTCGGCGACGTATCCGGGCTACCAGACCGGCGAGAATGCGGCAGGT  
ACGGTCGGCACATCGGTGAAGAAGCTTGGCACGTTGTCCGAGGGTGCGGTGTTTGCTCCT  
GGCACCGAAGGCGTTGAATTCGACAATGCGAGTGCAGTGCAGCACGAATCGGGACGAAACC  
GCAGCATTCAACATCGCGCCCGATGCAAAGGCATTGGTGGCCTGGGTTTCTGCACAAGGT  
AGCACGGACTGGGGAGGCGCAGCCGTCAAGGCCAAGATTGATGGCATTGAAATGGAGAAG  
GTTGTGTCGACAACCGATGGCACCACCTCCGGGAATGGCCTGGCATGCTTCCGCCTCCTC  
AATCCGCCGACCGGGGCGAACAAGAAGGTGACATTCGAAGGGATGGGATCTCTTGCACAC  
TATTATGCCAATGGCGCAGCCTCGTACAAGAATGTCCGGGTCCTTCGGAGCGCCTGTGAAG  
AACAGGGGTTCCGGGGTCGTCTGCCAGCCTTACTGTCGGCGGCACAACATCTTTGGATATG  
GTTGTGGGCGGATACTATTTCCAGGGTGCGCACA ACTCCTTCAACAAGAATGTTTCGTGGT  
GTCAGAGGTCAGGCAGCATTTCGTCAACCAGGGCCTGTTGTCCGGAGACTCTTCCGCTGGC  
GGAGACGTCACCTTGACCGAGACATTCACGAGCTCGATT CAGTGGTCAGGGACGGCGTTC  
GTTCTTCGGGCTGGGGAGGGCTGATGGCTGTCCGATGGAAGGCTGAGAGCTTCTCGATAA  
TAGAGACCGAGCTTAACCTGCTCGTCAATGAATCTGTCCGGTGACCAGAGCCAGTATGGCC  
TTGCTACCGTTGAACTCCAGAAGCTTCGAACTGAAATGGAGGCAATCGCTTACGACTATC  
TAGTGTGTCGTCGGCGACTGAGTTCAAGAACTCTCCACGAGCGCCTCTGCTGGACAAGTGT  
ATTTCCGCAACATCCAGACAGCCGTGAAGAAGCTCGTGACCCAAGCGCTTGCCGGAGTCA  
CAGCTCCGGTAACATGGCAGGGCACAGGCCCGCTCCCGACAGGCGTCGGCATCCCTGTCC  
AGAACA ACTGGACAGCATCGGCTGGAACCGATGTGTACATCGCAGCCGTCATGGACCGCT  
CGGGCAGGTCCACCGGCGCGACATTCGGTTGCGAAGCGGGCACTCTGATGGCAGAAGTGT  
TGCACAACAACAACGCTAGCACAGGACGTACGGCGTTGTGGCGTTTCGCAGGCAAGGGCG  
ACGGCACCAACAAGACCTTCTCCATCACAGGTAGCGGCTATGGTTGGTTCCGGTGTGTGCA  
TCTTTGCCTTCTCTGGCGTTGTGTCGGTCCGGAACACCCGTGACCACGTACGGATCGGGCA  
CTTCGCCTTCGCAGGTGGTCACGGAACCAGGGGTGCAGATACTCGGACGAGGCGCTGGCG  
GAGCTGGTGT CAGCACACCGAGTGCCTTCTCTGGTGTGACCAACAGACTCAACCAGAACA  
TCAACGGTTTCGAGCCTCGCAGTCAATCAAGTTGAGGTGCCAGGAACAAAAGGGGCAACCA  
CGCAGAATTACCCTTATGGGTACATCTTCCCTGCCCTCCGGAATACATAGGAGTGCGAGT  
TGAATACAGAGTTGCAGGCGATCAAGGACGCAATAAATACCCTTGACTTCGATACTGCGC  
GTGATCTGGCCAAGTTGTATGTGCGAGAACCATCCGGAGGAGTTCGTCGACTATTACCAGA  
GTGTGGAGGAGTCGGCCAACGAGGAAGAAGCGATCGCCAAGGTCGTGAAGTCCATTGAGG  
TGTTGCGAGCTGCAGGCCTCACCCAGCAGCAGTATCGTGGTGAGACCTTCCATCTGTTCC  
GCTGGGAGCCG CAGACCATTGGCGCCACAACGGAACCTGTGGTGC GCAATCCAATCCC GC  
CGACTGTGAGGAATGACTGAACACGGCGAAGGCATATTCTGT CACGCTGGATGTGGCCCA  
GGGAATGCTCGGTGGTAGCACCAGCTACGCCGAAGCTCTTGGGTCCTCGCCAAAGATCAA  
GATTTACTCAGGCACTCCACCGGTCAATGCTGGGGCTGCGCTGAGCGGCAACCCGCTACT  
GGCACTCTCACATGCGCAAGCACGCCTATCGCCAGCCAGAGCGATACTGGCACTGCCGC  
GCGTGC GACGTGGGCCACGTTTCGCGTCTGCGGTGGCCG CAGCCG CAGGTACGGCCACCTT  
CTTCCGCACCACCACGTCGTCCGACACAGTGAGCGAC CAGGGTTCCATCGATACTACTGG  
GGCAGTCTCAACATGTCGACGACGTCATTGACCGCTGGGGCCACCATCGCAATGAGCTC  
GAGGACAACAGACTTTCTTACGGCCATAGGAGACAGCATGGCATT CATCCAAAAGCAG  
GGCTACTGGAAATCCGAGAATGGATGGCGCATGCGTGACACTGCCGAATTGGACTACAGG  
GCTGTGCCGGGGACCAGCTTCAAGCTCGGCGTTCTCAAGGGATCACCCAACATCATTCTC

AAAGCACTGATCTGGCGTCTTGACAAGATCGAACCATGATCACGTAGCAAATCGGTTGC  
TACACAGCCGAAAACCTCGATGGCGAACAGCAACCACAACCTCTGCGACGGCGATCGACTAC  
AACTGGAACAAGCACCCCTACCAGAAATGGGGGACATGGCCAAATCGTGCGGCCGTCGAT  
AAGATCGTCGACGATTTCCGCGGAATCATCGAATTCGGGGGTGACTGGACCTCGCCGCGT  
GACGAGATTCACCTTTGAGCTGCACTTCGCCGAGGGGCATGCTGGCACCGAGGCGCTCGCC  
AGGGATTTGGCCAATGGCCTATGGGTTATCTGGAAGCCCGGAGCAGCCCCAGCCCCACC  
CCCGCGCCTGGCGGAGGGAACGACGGCATTCTGCGGATCGGCTCCGAGGGGGCCGGAGGTG  
CTAAGATGCAGCGCGGTATGAACTCTGTGTTCAAGAATTACCGCGCCATGCCGCTGTTG  
GAAGACGGCATCTTCGGGGCCGAGACCAAGGAAGCTGTCGTCGAGTTCCAGCAGCGTGCA  
CTCATTGATGTGGACGGTGAAGTTGGCCCCGACACCAAGGCGAAGCTCGCCGAGTACGGC  
ATCGTGCTGACCGGAGCGACTGCTCCGACCGCTCCGACAGCCATCGTGCCGCAGAAGGTC  
TGGCCTCAGACCGCCGGTGACCGTGAGCTTCTCGAGTACATTGCGGCGCAGCTCGGGCCT  
GGCGACCCGTCGTGGCCGATCAAGCTCGGCAACAACGAGAAGGGCGATCCGCTCACGGTT  
CGCGATCGACTTGGCTTGACGACCAAGGACATTGAAGAGATCAAGGGAAGGCTGTCGCAG  
TGAAGAATCTTTCGAATTAAGTGGAAAGGCTGGCATTGCGCTGGTGGGTACGGCTGGCACAG  
CCGTGGCTACCCTCGCAGCTGACGAGAATGTTTCGACCCGCGTGGGGGAATCCGGTGTCA  
CCTGGCTGGCTGTTGCCGGTGTGCCCCACGACCGCGCTGACCTGGCTCAAGCGTAACG  
AGCCACGGTAAGTGAAGCAGAAGAGATCCTGCGCCGTGCAAAGGAACGCGCATCCTCGT  
CCTCCTCTGCATAGGAGGATGGGCGCAGTGGCTATGGTGCTGCTACTCGTATTGACCTGT  
GTGTCGTGTCCGCTGGCTGAGTGCCAGCCGACGGCAATGACCAGCACCATAGCCAGCTG  
TGCAGGGATGAGGAATACGCCAAAAGCATAACGGTCGAGTGTGGACGGGTGCAGAGTGGC  
CCCATATCAATCACGCCTCCGACTGGCGGACACGGTGGGGGAGCTCCGCGCCGAGGTTTG  
ATCGGGAGGATCCTGGACAAAGTAGGGCTGGGAGGGCTCCTCTGATGTTCCGTCCAACAG  
ACTCACGACGCTTGCAGCATATTCCGCAAGCCTCGTCGGATTGACCACGGCAGAATGT  
ACGTGTGTCGTATGATGGCGCTCTAGTTGTGGTCTCTGTTATTGCTGGTGTTCGGACCTG  
TTCGGAACCTCAACCATCGACGAGCTCATAGACTATGTCAAAACATCCTTGCTTCATGTA  
TCTTCATCGGCTCGTTCGTGTGTCTGTGCGGCATCGCCCTCGGCACTTAGTACGTCCACC  
CCAAAGCGGATATCCGCTTGTGATAACCGCTTCTCGTTGTGGGAATCCCCGCCTTGGCAG  
GGAGCGTCGGAACGTACGCATGGGCCATCGCCAAAATACTGGCTCATTTTGGGTATTGG  
CGTATGCAGCTTCCATCGGAACATTCATCTGCCTCGGAATCGTCTGGAATGGGATAGATT  
TGCTCTTCGAGATTGCTCGACTGAATGAGGAGATCAATTACCTCAAATACGGTGCGGGCT  
CTGAAGAGCGGCTAGAGGACAGGGACGATGAACGGAAATGTTGATGTTGGCTGGATCCTC  
ACATTCCTGGCCATCGTGTCTGCTAGCGGGCCAGTGCTTTCCGTTGTCTTGACTATCGC  
AGCCGCGAGCGTCAGGGAGAGGCAGAGGGCGAACAACAAGATGCCGATATCGGGATAAAG  
AAGGTTTCTGAGCAGGAACCTTTCGCAACGCGTTCCTGCAATGAATGATGAGCGCTGGATC  
ACGCGTGAGAAGCGATGGCAGGAGCGCGAAGACGCTCTCGAGCGCAAATTCAGAGCTG  
CGAAAAGAGATGGATAATTTGCACTCTGACATGAATGCCTAGCTTGAATTCATCGCCAAT  
GATGAGCAGTGGCATTCTATGACCGGATGCACCGCATCCAGCACGATCTCCCTGCGCCA  
CAGGATCGGATCACATTCCAGCAGTTCATGGAGTCGCGCCGAGAGGGCGGGGAGGATG  
TAACATGGAACCTCAAGGTTGGCTCAAGCGACGCGAACAACCTGATGGTGAGGTAACCTCGCTG  
GCAGAACTGGGTAAAGCGGTATGCCGCAAGATAGTCCGACATCATGGGCCCTATCGATGA  
GTACAATGGCTGCCCGGATGCCAACTTCACCCGTGAGCTACAGCGCCATCTGGGGCTGCC  
GATAACCGTCGTGTTTCGATGATGTGACAGACCTGCACCCAAAGGTCAATTACCGCTGGAA  
GGGGCAAGGCGCCGGGCAACGAGCCGCACGCCGAAGATCTCGTTCTACTCCAATCCCGG  
TTCGGTCGCAAACGAATTCGTCCGCCATCGTTCGAGGTCGGCGAATTCTGCAAGAACGT  
CCTGAAAATCAACCACCAGCCGGTGCCTTCGGCCAACGGCGGATATCTCGTACTGATGGG  
TGCGGACCCCAAGGTCAGCTACAACGACGTCATCTATGACCAGTACAAGTCGCTGGAGTG  
GTTGCTGGACAACAATCCTGACACCAAGGACCCAGACGTCGAGTTCTGGTTCTCGGGCTA  
CTCGCAGAAGGCCGACGGCCTCGAAGACGCACTCGAGATCTTGTTCCGGCGATGGGGGATT  
CCCCATCCCCAAGACGGGCGAAACCGAGGGTCCGGGTAAGTACCGGCACCTGCGGCCAAG  
AATCAACGGCACCATACAGTTTGGCAGTCGACAGAACGCAACCCGGCCCCACGCGCTCGG  
GAATCGCCACCCGGAAGCGGCATCTCCCGCAAGAAGCGGCCGACGTGGCTCAGCATGCT  
CACCTGGGACATCGTACCCTTCCCCAGGGGCACCGGACTTCTACGCTGCCTGCGACGA  
TGACATCCGACAGTTGTAACGAGTGGTTCATCAAGGCCGACACGGAACCTGCCCTTCGT  
GGTGTACACGCGCAGATCATCATCCCGGCGCTCCTGAATCTTCTGGCTCCATTCTTGGG  
AGGCTTCGAGGGGTGACGAGCCCGCTGGCTGACGGGATTCTGGCGAGCGCTACCGTCTT  
GCCGATGAACCTGCTCCACGGCCTGCTCTGCGGGGTGGCTGCAGCCGACAATGCTCCGAA

CCCCAAGCTCATCGAACTCCTCAGCGTGCGTGGTGTCTGACGAACATCCCCGAGCTCAT  
CAAGCTGCTGACCAACATCTCCGGCGTCCAGACGCACGGCGAATACCACCTTCCGAAGCC  
AGAGTTCAACGGCCGAGCGGAATCCAGGTCGGCTGCGACATCGTTGCGGGCTGCCGGCG  
GTAAGGAACACTCATGGAACGCGTGATAGTTTACCAAGACATCAACAACGAATGGCGCTG  
GCGGTTCAAAGCCAACAATGGCCGGGTGATGGCTGACAGCGGCGAGGGTTACCAGAACAA  
GCAGGACGCCCTCACAGCGATCGATGCTGTGTTTGGCGGGCTTCCGCCAGAGGTGGTGGA  
TGAGGCTGGCTAGCAGCTCCGGGTAGTGCCGAACGACCCAGCGCTCGAGGCCGCGCTGAC  
GCTCTTGACGCTGATGACAGGGGACGACTGGGACCGCCC GAAGCTCGTGAAGTGCTCAGC  
GAGCTTGCGCCAGTACGCTTGC GCAACGCTCGTGAAGCAAGGTATTGGCGTCGCACAAGC  
AGAGGCTATCGTGGGCGAGCGGTGGGCTGAATAAGGGAGCCCCGAACCAGCTGAGCATA  
TCCTGTAGCTGCAACGGCCGATCGCTCGGCAGAAGCCAACGTAGCACCCAAAATGGATCT  
GTCTCCGGGAACGCCTCCCACCGGCGAGGAGCTTCGGCTCAAGGCGCGCAGCCGTATCGA  
CAGATGGCGCAAAGTAAGAGCCGAAGCCCCTGAGGACTCCGGCTCCGATACTTAGCCAGA  
CTAGATTTCCAGCGCGGGCTGCTCGTCTCTTCTTGGAGGCCTGGAGCTCCTTGCGAGC  
TGCCTTGACGGTGAAC TTGAAGGCTTCGCCGAACCTCGCAATTTCTGTAGACCGGGCCGAT  
GCCAGGTAGACGCTCAGCTCCTCGGTCAACGTTCCGGGTGCAGACGCAGCAGATTCCGTA  
GATTGCGCCGAACCTCCTTCATCTCCTCGTAGCTCATCCGCTGCTCGTCCGGTCAGGCCTCG  
GAGCGGCCGCTTGCCCTCGAACTCGAAGTGAGCGGTGAAGACGGTGCCAGCAGTCTCGTC  
GTGGCGGTTTTCTCGACGACGACCAAGCGCTTGGCGACCTGGTGGCCGCGCTGGGTTTT  
GTAGACCTTG TAGATGGTACCGTCGGCGACGCGGTACATGCCATCTTCCAGTTCGTCCGT  
GGCAGGCTTCGCTTCTCGGCGACCGGGGTGATGTGGGTTCCCTGGATTTCCGACCGTCTC  
ACCAGCCATCTCGGTGGTCCGGATGACCGGATCTGCGCCCTTGATGGGCATGCTCTTCCAG  
CCAATCGATCAGGTTGCTGGCATCCTTCGACCTGAAGGACTTGTAGCAGAACTCGTAGCC  
GTCCGATGCACCGTGGTTGTCGACGACATAAGCCAGCGCAGCGTTCACGCGTTCGCCGAG  
CAGGTCGCTACTCATGGCCTTCTGATCTCATCCATGACATACGGGGTGCCGTCCACACC  
GTTGTCGTCGCGCTTGATGGCCAGTCGATCATCAGGCGGATGGTTCGAAGCGCGATACAC  
AGCCTTGTGGCGGTAGTCGCTGGCCACGCACGCTGCTCGAGCAGGTCCTTGATCCAGTT  
GATCTGCTTGTGGTTCGCGGGCTTGACGGTTCGCGGTCGCGTTCATTTTGGATTCCCTTCT  
CCGGTGTCCGAGGCGCTTGGGTAGCCTCGCTGACAAGACGAACGTTACGGCAGAAATTG  
CAGTTTCGCTACTCCTTTCAAAGTCAGCGCTCACGGCGCGTGGGTCCGGCTGGCCTACC  
AGGACAAACCTTCTGCAGTTGCACAAGACGCTCCTCGTCTCTCCAGCAAGCCGCATGG  
CCGCCACCGCGCGGCTGGTAGTGCGAGGACCACGGGTGTCCGCCGGCGCACTGGTCTACG  
GCGTACCGGGTGATGCGGAGAAGCTGCATTCCCCGCATCACCCACTGCCAACGCTCCATC  
AGGCGATGGCCCGGATCAGCGCCCGCACCGCGCGGCGCATGGCGTTCTCCGGCATGCCGG  
TGATGACCACGACAGTCTTGCCGTCGCGATTGACGACCCACTTGGCGCTATCGTCTTCGC  
CGACTGCGAGGGTGTCTGCCACCTGGCGGTCTGTCACGGTATGCCGTCACGCTATCGCGCA  
GCGTACGGACGGTGAGATCGTCTCATCGGTGTCATTGCCGGCCAACCCGGGAACGCTCA  
GCGCTTTCACGATGCTGTCCACCTTGTACATGAAGTTCAGGCTGTGGTCCGCGCTCCGGA  
CTGCCCCGTCAACCACCTTGTCCAGGTAGTTGGAGCGGACCAGA ACTTGCTTGGCCTGCC  
CGCGCTCGAAGGTGATCGCACTGGCCACCGTTTTTGTGCGGCGATCACCTGCTCGCGGGACG  
TCAATCCGAAATTAGCGGCAACTTCGGCGATCTGCATCCGCTGGTTGACGTTGGTGATGG  
GCATGAGGCCCTCCTGGGCTCGTGGGGATGTTTGCGCCCGAACGTTACGCCACCGCGCCG  
ATTCGGGCTACTGCCTTCTACATGCGTCTGTCGTAAGGGTGGCAACAATATTCGGCCCGGA  
GTAGCGCGAATCGGGTCGACTAGAGTAACGTTCCCTCCTGTCCGCCTCCCCACATCCCCAG  
GAGCCCCAATGAGCATCACATTCCAGCCCGGTCAGCAGGTTGAGGTCTACTCCGGCGACA  
ACGTGCTGCACCCCGAGACGCTGAAGCCCTTCAGGTATCGCATGGTCGTCACAGCCGGAC  
CCTTCGAGGTGAATAACGGCCACGAGGGGTACCGCGTCTCCTCGGTCCGGGGAAGCCGGAGC  
CGTCATTCGACCAGTATTGCAAGGCTGCGAATGGGATGCGTCCCGTCGCCGACGTCGATC  
CCGAGCTCGCTGCCCGGTACGACGCGTTCGGGAAGTGGGTCCGGCAAGTGATCCGGCTGGC  
ACGCCGCGCAGGTTACTGGGTCTGCAAGCGGTGCTGGCAGGGCAACCTTGGCGGAGAGAA  
GTGCCTGTACTGCGGGAGGGCCAAGTGAGCGAGCTGTGCGCCCTCTGCGGGCACGAGTTC  
GAGGAGCACTACTCGCAGGGAGACTCGAGCGGAAGGCTGGTGCAGGGTTGTGAGGCCTAT  
ATCAGGACACCCTGCCAGCCTACAACCACCGCGACCCGGAGCGTTGCGAGTGCGACTAC  
GTTCCCTGCGATTGCCCGGGATTCGAGAGCGAACCCGGCACCCGACCCCGACATTACCGAA  
ATCGACATGTACGACCCGGAAGGACGCTGATGGAGTACATCGACGTGCTAATCACCACGC  
ATAGCGCAGACGAAAGCAAGGATCTGGACCAGATCATCATGCCGACTCATATCGCCAAAG  
ATCTTGAGGCTGCTGGCTGGACTGTCCGCAGCACAATCGTTCTGGATCACAATACGGGGC

TGACGGGCAACTATCGCAACGAGAAGGTTTCAGCACCCGCATCGAGAAGGAAGCAGGACACT  
GAAATGGCCAAGGAAAGCATCATCAACCGAGTGCAGAAGCTGCTGAACCTCGCGATGGAC  
CAGAGCGCCACCGAGGACGAGCGCAAGCTCGCCAGGAACGCGCGGACGCGCTGATGGCG  
CAGCACATGATTGACCAGATGGACCTCAAGCCCAGGACCCCGGTCGTTTCGCGCGTACC  
AGCACAAAGTGGGAGTTCTTCTTCGAGTTCGAGTTCGCAGTGCAGCTAAAGGACTTGCTC  
GCAGCCGTCGTCCGGCACGCTACCTGCCGTGCCACGAGCACGCGCAGGATCGCCAAGGTC  
GGCGATCCCAACATGGTGGTGACCATTGTTGGTACGGCGGAGAACATCGTCTACGCCGAG  
CGCCTGTGGATGGTCGTTTTCTCCAGCTCACCAGGAACATGTTCCCGAAGATGGACCCC  
AACGAGAGCTTCGACAGAAATGTGGACAACTTCGTGAAGGCTGGCTTTAAGTGGCAGGAG  
ATCCATGAGCTGCTCTGGCGGCACAAGGACGATCCGCATTGGATGGAATTCCCCTTGAAC  
GACCCGTATCCGCCAGAGAAGCAGAGCGAATATAGCTGGCATGCCAAGGTGTATGGTGGC  
GACGGCGGACGTCTGAAGCGTGCCTACACTCGTAAGGTCAAGCGTCTCGGCCGAAAGCAGA  
GCGCACACACCACCCGACATGGCGTGTACCGCCGGAGCTATGTGCAGAGCTACTCGAGC  
ATAATCTCATTGCGGCTGCACGACATGCGGAGCAAGTGCAGGACGCTGTGAGCGATCGC  
GACAAGTTCGCCCTGGCGGTGCGCAGCTCGCAGGACGAAGCTGGCGCCGAGTTCTATCCG  
CTGTTCCCGCAGTTCGACCCGGAGAACATCCGCAAGCGGCGTGAGGAGATGCTCCGCCAG  
GAGCAGATCCGTTGGCAGAACAGGACTCCCGAGGAGCGGGCTCGCGCTGAGAAGGAGCGC  
CTCAAACGTGAAGAACGCGCTCGCAAGCACTGGGAGAAGACGCGGGACACGAGCTACGAC  
CAGGCTGGCTGGGCGCGCGGCAGTGCTGTGGCCATGAAGGTCAATCTCAACGACGACACG  
CAGATCCACCACAGCAAGAAGGAGATTGGGTGATGTGGATTGACGACTGGCTCGAGGCAG  
CCTACGAGGAGCGCACCCGAAGCTCCCGACGATCTGGACAACGACGAGTGGTGGCCGGAGG  
ACGATGGGGATGAGTGACCAAACGCTCAAGCTCGCAAGCGAACTCAACGAGGCAGCGATC  
GCCTTCCGGGACGGCTACGTCTACGGCAAGAGCCTCACCCGAGCTCTCGACAAGGCCATC  
CTCATGGCCGATGCGGCGGACCGGCTGAACGGCCATCTCCTCGACGTCATCAACGATCAG  
CAGTAGCAACACACCTGACCATCAGCAGCTAGGCTACGCCTTACCTCGTCTCAGAAGGGA  
ATCTGACACATGAGCAAGACCACCTCAGCCATCGCCACAGGCAAGACCGCCGACGTCTCC  
GCTCTGGCGGAGAAGCACGACTGGACGGCCGAAACCAAGGAAGACGTCAAGAACGACATC  
CCCACCCTAAGCTTATACGCGCGATGAGTGGGTTGAGATCCGCTGGGACGGGAACTCC  
TGCAAGGAGATGCCGACGGTCTGCCACGAATGGCAGCTCAGGTACGTCCGGAACGTTGCA  
GCTGCGAAGCGCGTCTCGAGGCTACTGCCGAGCAGAATGCGGAGCCTTTCAGAAAGCGG  
GCTGTGGCCAAGCAAACCTGCGCGCAAGACCACGCCTGCCAAGCGGCCTCGCCGGAAGGAC  
AAGCTCGAGGAGGCGCTTCCCGACAGCGACGACTAGCAGATCAAGGAAGCCCTCCTCGGC  
CGGAAGATCCTCTGGCGTAACAGCACGAGCGGCGAGTTTGAGGAGGATGTGGTGTGGCC  
GGCAAGAATCCGAATGGCCAGTACTATGTGTCCACGAGGGTGAGAAACGCCAGATCAAC  
TTCATCGGCGCATATGGTTTTTCGAGCGGTGAAGATTTCTGCGATTGCGCAGGTCAGATAG  
GCAAAACGAGTAGCCCGAATCGGATCGACTAAGGTACGATTGTCTTATCCAATCGGAAGC  
AAGAAGTGAATCTCAAAATGGACGTTTCGTACCCTCACCTACAGGGATCGCAAGGTTGCCG  
CCCAGCTGGCCCAGCTGGCCTCTGACGACCAGCTGACCTACCGGATAGCCGAAGGTGCGC  
GTCGGGCCAAGATCGGCCGTACCGTGTGGTACGAGATGGCTGCAACTCGTGTGTCTGACG  
GTAGGCAGTACCCCTATTGGCTTGCCAAAGACTCGGGTAGCTTCCGTGGCTCATTCTGA  
ACGGCTTCGACCTGTAGTAGCGGAATCGGGCCGATGGGGTAACGTTTCGGTCTGTCAACG  
AGGAAGGGAATCCAATGAGCGGGCTCAATGTAGGCGATCGAGCGCGAATCATCAGGGTCA  
GCGATCTGGACAACGACCCTAGGTCATCACCGACCCCGCCGGGGCAGCTGCGCTGTTCCG  
GAGGGTACGGACCTGGAATTGGCGATGTCGTGGTCATCACCGCGAAGACCCTCGGCGAAC  
TGTACGACTACGAAGCCGAATGGGAGATGGAGAAGGGCTACTAGACCTTCAGCTTTCTGG  
GGGAAGAGCTGGAGCCAGTCAAGTGAGTAAGCGCGAGTGGAAAGATATGGTTGGAGGACGG  
CAAGATCGTCCTGCTGACCGACGGGTACGATAACGGCGGTTCGTCGAGAACATCAAGCTGTA  
CTTGCCGACGCCGCGCTCGTTCCGGCGTACCACCAAGACGTGGCACGTCCCCCAGATGTG  
GGAGACTTGTGTGCGCCCTCCGCCACCTCGCCAATCGGCATCGAGCCGACCTGAAGATGAG  
CGACGAGCTCCGGCTGTGGGCTATGGCCGAGAAGCTCCGGCTGGCGAGCATCCCCGACGT  
CAACGAACACAACGTGCTGCAGCCATCCCGAACATTGAGCGCGAGCTGACAGCCATGGC  
GGAGGCGCTGAAGGCACGCCCTTCCAGACAGTGGGCGTTCGGTTCGGCGCCACAGCGCG  
GAACGTTCTGATCGCCGACCACCCCGGTCTGGGCAAGACGCTGCAAACGATCGGCGCTGT  
GGCCGAGTGCGGCCTGAAAGGACCCGTCCCGGTAGTTGCCGCGCCGAAGTCGGCGGCCGT  
CGTTACCTGGCCCAACGAGCTGCGGCAGTGGGTGCCGGACGACGTCGTGATCACGATCTC  
GGGGAGCATGAAGCCTGCAGAAAGCGCGGAAGCTGTCGAGCGCGCCAAGGCTTACGCCGA  
GCACGGCGACATGCGCGTCTGGGTCTGTCACGAGCCCCAACTACGTTTCGCATGCGGGCTGA

GCTCGACACCTACGGCAACTATGTGAACGAGGGTGGCCAGAAGATTGTGCGGCCGGTACG  
CGAGGCTCTGCAAGGGCTGGTCGACTTCGAGTGGTCAGCGATCGTTCGTGGACGAGTCGCA  
CAAGACGCTCGCCTGCGGTACGGGTAACCGCAAGAAGTGGTCTGCACAGCGCCTGGGCCT  
AGAGCTGCTCCGGGTGAAGAAGGATGGGCTGCGGATAGCCCTGAGCGGCACACCCTTCCG  
GGCAAGGAAGACAACGCCTACGGCACCTTGCAGTGGCTGCGACCCGACCTGTACACCGG  
ATTCTGGAAGTGGGGTGAGAAGCACTTCCAGATCTACGGCGATGGTTCGGGACAGATCGT  
GGGTGGGGTCAATGACTCAGAGGAGTTCTACAACAGCCTCAAGCCAGTCATGGTGCGGCG  
AACCAAGGCCGAGGTCGTCAAGGACCTGCCTCCGAAGATCTATGCCGGTGAGCATCTGGA  
CCACGAGGACCCGCATTCTGAGTGGCAATTTGGCTTCAGATGGAGGGGAAGCAGCTCAC  
GGCGTATCAGGCTATGGTCAAGGATGCAGCCGTCAAGCTGGAGAGCGGTGTCCTTTCTC  
CAACGGCGTTCTGGCGGAGATGAAGCGTCTGAAGCAGATGGCCTGCTCCTGTGGCGATCT  
GGCTATTGCTCCGACAGGCGAGCAGACGTTCCGTCCGTTCGTTGCCGAGCAACAAGTTTGA  
TTACCGTGTAGACCTTCTGAGCGATCGTGGCATCGGTAGTGGCGAGTTCGACCCTACCGG  
GAATGTGATTGTGCGCCAGCCAGTTCACCAAGCTGCTGAATCTCTTCTACGCCGAGCTGAA  
CAAGCTGGGCATCAAGTGCCACCTGCTCACCGGCGCGACTTCGGAGAAGGAGAGGGTCCG  
TATGGCAGACGCCTTCCAGAACACCAAGATTGGCGACGTCACGCCGCACGTGTTTCTGCT  
GAATACCATCGCTGGTGGCGCGTCTATCACTCTGGACGCTGCGGATGATGTTGTGACGCT  
TGACGAAACCTGGAACAAGGACGACCAGGAGCAGGTCGAAGATCGCGCTCACCGCATCAG  
CCGTACCGACCACACCGTAACCATCCACAACCTTCGCAGTAGGGGCAGCATCGAGGAGCG  
AATCGCCACGAGTGCCTTTGCTCAGGATCGAAACATCAAGTCCATCATCGACGGAGCGCG  
CGGTGTGAGTTCGCACTCGAGCTCCTGGAAGGAGTCAAGGCATGAGGACCCCTCAGCGCA  
TGCTTCATCACGGCCATGCTCAGCGGGTCATCAATGTATTTGCTGGCCTGGCAGATTCAC  
GGCAAGCCTCTCACGAGAGAGGAGATGCGGGATTACATGGAGCGGTATGTACACCGGGAG  
AAGGCAGAGCTGGCAGACCGCCGTCTCCAGGACCAGCTCTACAACGCTCGGCCGTCGGGCT  
GTGCCGCATCCGGACGCGGTTGCACCCGTGCGGATCACGAGGTTGCACGTGTCTAGAAAG  
GGGAGAGGCGAGCGAGAGGAGTAAAGTCAAATAAAAGTTCGGAAAAATTACCGATTCCGAC  
CAAGAACCAGTAAGCTTCATTACACGCCCAAAAACCTTCATAATCCCAACGAACAGAAGGA  
AAAACGATGTCCCCGAAGACCGCGTCCAAAGAGACCAGCACCACCCGCGAAGGCAAGGTG  
CGTTTCGATCCGTTTCGCCAATCCGGGCACCCCTCGCCGAGCAGGAGGCCGCGTGGCTGAAC  
GAGCAGTTCGCCGCTGAACGTCAAGGCCAGCCACGTCCGTGCGGTCATCAGCAACCAC  
ACGCGCTTCAGAAAGTCCGACCTTCGCCGCCAAGCGCGGGACGCCGAGCGAGCCAAGCTC  
GCCAGGATCGCGAGGCACGGAAGGCTGCCGCCGAGCAGCGCAAGGCCGACGCCGAACAG  
CGCAAGGCAGAGCGTGAGCAGCGCAAGGGAGAGCGTGCGGCCGAGGCAGCAGCCAAGGCT  
GCCGAGAAGCCGAAGCCAAGCCTGCTGCCAAGAAGGCCACTCCGGCCAAAGCCGCGCCC  
ACGCCTGCTCCCAAGAAGCGCGTCTCGCGTCCCCGGAAGCGCACCCGGTGACGTGCCCGCG  
GAGGACGCATTCTGATCCACCCACCCCTCGGGGTGGCTGAGCCTCTGGGACATGGGGA  
GGGCCAGAGTCTCGGTGGAGGTCGAGCAAGTGCCTCTGAGCATCGGATCACCATCAC  
AGGACTCCAGTCAAATCCAGGAATTACTCAGCCTCCTCCAAGACAAAAGCTCACTGACAG  
AAGGGAATCTGCAAAGTGAAACGCATCAAGAAAGCCGCGAGCGCCGGTGTGGTGGTTACC  
CAAGTCGGCCTCGGAATCCTCAGCGCCGCACCCGGCGAACGCCGACTATGTGATGGGGTGT  
GAGCGAGTCCGCTGGGGCTTCTGTTCAGTGGCTATCGCACCATCTGTGACGGCCCCAAG  
CGTCCGGACGGCAGCTGGGACCGGACGCGTTCGTGAATGGACCCAGCGCACATGGCTGGC  
GGATACTGCTCGGGCAGCAGGTATTACGTGAGCTGCACCCCGAGCTACTGGTTCAACGAG  
AGCACACGACGCCTCGAGACCTATCCGGTCACTGATGCCACTGTGTTGCCTGGCGAACC  
GGCTGGCTCCCTCCGGGCACGAACAGGATCCTCTGATCCATGGCACCCAAAAGCCACGA  
ACATAAGGGAATCCATGAAACTCAAGGTGTTGACATTCATTGCCTGCGAGCAGTGCGACA  
CCCCTTCGGTGGGCCAGAACTGGCGAATACGACTACCGAAATCTTCTGGCAAGATGA  
CGAGTGCCGAATATCTCGTCGAAGAAGCTCTGGCAAGTATGTGGATTTCGTGTCATCTGGG  
GAGCCGACGACGTAATTCTGTGTTACCCTGATTGCGTCAAGAGCTGGCTTGATGAGGTGG  
TGTCGCGTGGCAACTAGAATCCCGCTGCCCTGCTACTTACGAGCGAACGCACCCGTGTAC  
AAGAGGTGCCCGTGGAAAGTGGTACCAGAGCGTTGTGCGCGGCCCTCGTGCCTAACAATCCC  
CGCCAGGACGCGCGGTGGTTCGGTACTGGCATTACCTGTGCAAGGTCGAGTGGTACGTC  
CCCGGACGCAAGCGTGGCCGCGACATGCACGAGACCTGGGACGAGTTCTCACAGGGTACA  
TTCACCATAGTCAGCTCGCAAGGGCTGGTGAACGACGAATGGGAGAGCGAGTGGGTTGAC  
GCAAACAAGCTGGCGCACGCCATGATTGACACCCACCTACAGGCGTATGGGAACGACGAC  
AACTGGGAGGAGATCGCTGCTGAGCATCCATTTTCGGTCCCTGATCCCGCACCCCGACAAG  
ACAATCAACCGTGCGGTGTGCCGGTGCCTCGGCACCATCGACCGGATCATCCGCGAGCTG

GACACCGGCGAGATTTGGCTGGACGACACCAAGACCGCCGCGCGCATCTATACCCACCAC  
CTGACACTGTTGGAGCAGCCAGCTGCGTAGGTAGCTGTGGGCACGCACGTCCTCCGGGAG  
CAGGAGATGATTGGCCCCAAGGAGCGGGTCAAAGCATCATCTTCGACTTCATGCGGAAG  
GGCTTCCGGACGATCGACATCGCAACGAGCGCGGCGAGTATGGCAACAAGCCGGTCAAG  
AAGCACTTTGTCGAAGCCATCCTGAATTGTCGGGGTTATCAAGGTCCTCTGAACACCGAG  
CGAGATCTGCTTCGGCTTAAGCTCGACGAACTGCAACACATCGCCGATGAGCTCAACCTA  
ACGGTTCGGGCGATGTCTCAGCCAACCAGGGTGCGCCCTCCTGTTGCGAGAGAAGATC  
GTGAAGAGCCCCGAAGGAGTGCTCACGGCAGCTCCGCAGGATCTGCGAGGAGGTGCTACAC  
ATGAACGCTGTGCGCGCCGGTAAGCTCCCGATCCTCAAGACGCCGCAGGAGGACTGCAAC  
TTCTGCGATTACTTCGATCTCTGCGAGCTCGACGATTCTGGCGGAGACACGGAGTATTC  
GAGTCGCAGGCATTTGTGGTTCGTGATGCCTACGCGGTTTCATCGCGAAGGCGCTGAGAAT  
TCGAAGATCAGCGTCAAGAACAATAAAGACAGGAGTGCATGAGGTGGCCGGTAGCCT  
GAAAGATATGGGCCCTCAAGGAGGTGGCAGCCCTCAAGAAACGCGTGAACAGCCAGTACGC  
CTTCAATCGCATCAACGGTGGTGACCGAGACAACCTAATCGAGCTCATCAACGAGGTTCA  
GGCGTACATCATCAAAATGCCTGAAGGCGAACGAAGCATCCCCGATTTCTACTGAGAAAG  
GAAGGCTGATGGTCCAATCCAAGATCATCAAAGTCGCCGACGACGAGGACTACGTGAATC  
TCCTCGTGTACGGTGACTCCGGGGGGGGCAAGACGGTGTCTGCGGCAGTGACGACAAGG  
TGTTGTTGTTGCGCCGGAAGACAAATCAGACGGCCTGCTCTCCGCCAAGCTGGCGGGTA  
CCACGGCGGACAAGTGGCCATCCGGGACTGGGGTGATCTCGTTGAGGCGTACAACCTATC  
TCGACGAGCTCGAAGAGATTCCATACTGGATCGTGGTCGACTCGCTGACCGAGATGC  
AGCTCATGGCCATGCGGGACATCCTCGATCGTGCCGTCGAGGACAATCCGAGCCGTGATC  
CGGACATCCCGCAGATCCAGGACTGGCAGAAGTGTTACGAAATGGTGAAGCGGATGATCA  
AGTGATTCAACGCTTTGCCGGTCAACTTTCTGTACACGGCGCTGTGCGGCAGACCGAGG  
ACGAGGAAGGTACCGAGTACCTTCTCCCCGATCTGCAGGGCAAGAAGGACAACCTACGCC  
AGCAGGTGGTCAGCTGGATGACCAGCTTCGGTTGCATGCAGATCAAGCGCGTCCGTGTCA  
AGACGGACGACGCCATCGCCAAGAAGGTGAAGGAGGTGCGCCGAATCACCTGGAAGGACA  
CAGGTTTGGTGACTGGCAAGGACCGCACCAACGCTCTCACCCCGTACACCGACATCCGCG  
ATGTCACCGATCCTGAGGATGATGGACTCACCTCAAGGACATCAGGCTCCGCATCGATC  
GGAAGAAGTCCGGCTCTGCCAAGTCGTCAACCACCAACGTCGCCGACAGAAAACTGCGT  
CGGCTCGTACTCAGAAGGAGAGTGCATAAATGCCAAGCTCAAGCCATTCGGCATCGGCG  
ATGTCGAGGACATGATCAACGCCGAGAACTCCTTCAACACGGAGGTCGTGCCCAAGGGCG  
TGTACCAGGCGAAGGTCAAGCGCATGAAGCACGCCACCATCCAGAAGGAAGGTCCGAATA  
AGGGCGAGAGCCGCTTCAGGATCTTGATGGAGGTGTCGGCCCGAAGTCGACGCCGTAGA  
AGTACATCGGTGCCTCAATCTCGCACAATATCAGCGTGATCGAGTCCGGCGCTGGTTTCT  
GCAACGACTTACTCAACGCGCTGGCGGGACCGGAGCCCGCCAAGCAGGCCGCGCTGAAGC  
GTGCGCTCTGGGCAGCCGACATCGTTCGTCGATGCGGACGGGCACGTCATGAAGATCGGCA  
AGAAGCGTGTCAATGGCGACGGCAATGGCGAGCTCGTTGTCACCGTCAAGACCAAGCTCG  
GCAAGGACACTCGTTCGGGCGATCCGCAGGCACAGGTTGGCAAGTTCCTGGTCCCGCAGG  
CTAACGACGACGACGATGACGACGACCTCGATGAGGACCTCGAGGACGACAATGATCTCG  
CCGTTGTCGACGACGAGGCTTCGGACGACGATGATTCGGACGACGAGGATTCGGACGACG  
AAGACGACGAAGACGACGAAGACGACGAAGACGACGAAGACGACGAAGACGACGAAGACG  
ACGAGGACGACGAGGACGAGGACGAGGACGAAGACGACGAGGACGACGAGGACGAGGACG  
AGGACGAGGATGGTGAATCCGACTCGCGCCGTGCGGAACCTCGAAGCCCTGACCATCGCCA  
AGCTCCGCGTCGAGGCCACGAGGGTCCGGTGTACCGCCAGCAACGATCAATGGCCAGTCCA  
AGGACGAGCTCATCGATAACCATTAGCGACGCCGAGGCTGACTCGGACGGCGAGGACGACC  
CGTTCTGATCGGGTAGTACATCGGGTACCTGACAGACGAAACCGTCAAGCTAAGTCGTGG  
TAGGGACGTCCACAGCCCGACCCCAATAACTTTCAGCAAAGGAGCCATCATGGCCGATGA  
GCGTCGGTGCCTGCGGATGTATCATGGTCTGGTTCGAATGAAAACCACACATGGCTCTG  
CATCCACTGCGACCTCAACATCGAACCTCAGGAGTACGCCTCGTGAAATCTGTTGCCATC  
CTTGGTTCGTGGGCTTCTGGTCTCCTCGTGGCTCATGCAGCCGCCATGCTCGGCTGGGAC  
TTCCGAATCTACAGCAAGAAGCGCATGAGCTTCTCGATTGGCAGCCAATACCTACACGAG  
GCCATCCCCGGCATGACAGAACCAGTTGCGGCGATCGTGGCATAACAACCTTGTGGGTACG  
CCAGAAGGCTATCGGCAGAAGGTGTATGGCGCTGGCTACGATGGCAGCGTGTGCCAGAA  
GACCTCGAGCACGATCACTACCCCTGGAACATCCGCACCACCTGCGACAAGCTGTGGAAT  
GCCTATCACGACGAGATTGTCCACGTGGTGTGATCGACAAGCGCTGGGATTCGGCCGAATC  
TTCCGGAATGGCAGCACTGACTTCCGCCCCGACCTGATCATCAGCACGGTCCCTCGCAAG  
ATCTGGGCCAAAATTGGCGATGTGTTTCGCAAGCCAGAAGGTGTGGACGATCGGGGATGCG

CCCGAGCTAGGACAGACGGTTCGTTCCGTTTCGAGCCCAAACAGGACAACACGATCATTTGCGAC  
GGCACAGCCGATGTCGGCTGGTACCGGCTGAGAAAGGTGTTCCGGCTACACCACCATAGAG  
TGGCCACACGACCGCAAACCTCGTATCCCGAACATGGCTGAGGTCGAGAAGCCGCTCTGC  
CACAAAGTTCTGGAGCCAGCGACTTCATTCACATCGGTTCGGTACGGCGCCTGGGAGAAG  
GGCGTGGTGACGACATACGCCTTCCACCAGGCCATGAAGTACCTCGGACAGGACAAGTTG  
GGCTGAGCGATGATGGGCAAACCTGTTGTTGGACTTGACATTGATGGGACACTATTCGAC  
TACCATGGGGACTTCTTGCCTTTGCAGATGATTGGTATGGCCGACCAATGCCGGACCCG  
CAGGACATCAACCCAGGCCTGCCCTTCAAAAGTTTATGCGTACGTCGAAAGCTACGTAC  
CGGCAGTGTAAGCTGGCATTTCGCCAGGGAGGCCTTGAGCGCAGCATGCCGGTGTATGAT  
GGGGCGTCCGAGCTGACCCGAGCTATCCGCCGCGCTGGCCGAGAAGTGTGGATCTGTACG  
ACCCGTCCATATCTCAAGCTCGACACCCAAGCGCCAAACACCATAACACTTGTTCGGGCGC  
AACAGAATCCAATTCGATCACATGCTCAGCGGGCCACACAAGTATCGCGACCTCGTGAAT  
CAGGTGGGTGCGGACCGAATTGTCGGAGTGCTTGACGACCTGTCAGAGGTGTACGAGCAA  
GCAGAAATGTTGGGGCTCAACCCATACTTCGGGACCAGCCGTACAACCGACACATCACC  
GCAAACCGCATCAAACATCTGGACCTCACAAAGATCTCATTCCCTCGCGAGGATCGAAGTG  
TACAAAGAGAAACAGAAGGGAAGCTGATGGGCTCGACATATTCAACAGACAATCCGTTGA  
GCTTCGCGCTGTTCCGGCTGTCCCGCCAGGCAGAGTGGCCGGTCTGGCCGAGGCTGGACT  
GGGGATAACCCATCCTGCACCTCGGTCCTGGCGACAAGATAGTCCGGGGCGCTGAGGAAC  
TGGACTTCCCCGCATTCGATTTCCGGTGACCCAGAGATCAGCTTGCCGTACGATGACGGGT  
CAGTCGGCGGTGTCATCGCCACGCATGTGCTGGAGCATCTGGCTGATCCACGCCCAATCA  
TCCGGGAGGTGGCGCGTGTGTTGAACTTCGGGTGCCCATTC AACATCCTGGTGCCACACG  
GTCAGTCGCCGATGTATTTGCAGGACCTCGACCATAAGACACCGTTCGTGCTTGACACGT  
GGAAGAACTTCCTGCACAACGGACTCTATGACAACATTTACGGCGAGGGCGGATTGCCGC  
TCTGTATCGGGCGCCATCTTCAAGTTTGCCCTCAAGGAGGGCAACGAAACCATCATCACC  
AGCTCATCAAGGAGTGACAGTGTCCAACGAAAACAAGGGTGTTCAGTCATTCTGGAAGA  
GCTCACCTCCGAGTAGGCCAGTCCGGTGGATGACTTGATCGCCAAACATCTTCCGCGCGT  
GCCAGAGCTGTTCCGGAGCAAGGCGCGCGACTACAGCGACCGCTCCGGCATCTTCGCGGC  
CGAGTTGCTCGGTGCGCCGGGGCAGTTCGCCGAGATCTGGCGCAAGATTCCCAAGCTCAA  
AAAGGGCATGTGGGACCAGGACGCACTCGAGAACGAGACCGTCTAAGAGATCCTGTTTCA  
TCTTATCGGGCATTGCCTGCTCGCGTTCGGACATGATCCCAGACAGAATGCGGATCGGCCA  
GGCTCCCAGCGGACACTCATGGATACGAGGGTACGAGATCGGCGAAGTCAGGCGCGTTC  
TTCTGGCACCGAACGTTCACTGAATCAGACAAGGGTCCGATAACGGGCAAGCGCGATGC  
TAACGGTGGCGACTTCCGTCTCTAGGGCATGGGTGCTCGGTGGCACGTCCGGCGTCCGGA  
AGGCTTGCGCCGAGCGGCTCGGCGAATACATGGTGGCCACGAGCACCGGTCTACGACAAG  
GGGATTGGGACGTCCGCAGCGATTTGCGATCCATCTTCATACACGATGAGGTCGATACTC  
CGACCCACATCGTGTATGGTGCAGGTATCAACCATCTCGACTGGATCGGGAATGGTGCGC  
CGAGCCATGTCGAAGTTATCGACACCAACCTGAATGGATTCAATTCGTCTGATGGACGGCC  
TGGTGCGCTTTGGCTACTACAGCGCTGGCAAGCTGGGAGGGTATCCGTACCACATAAAGC  
CCAGCATCGTTCGTGATCAGCAGTGATGCGGCTGAGCGACCGCTCCGAACCTCTATCGGGT  
ACTGCGCAAGCAAGGAAGGGCTCAACATGGCCGTCAAGGTGGCTGCCCGAGA ACTCGGTC  
CGCAAGCCTGGCGGATCAATGCCGACTCGCCGGGGATGACTGCGCCACGGGCATGAGTG  
ATTACATCGACAAACGTGTTCCGGAAGCGCGAGGTTGGACTCCGATCGAAGCTGCGCAGT  
ACGAGGCACAGCAGGAGGTCGTCCCTGGACGCATCGATCCTCGAGAGGTGGCAGAAGTGG  
TGTTTCGATGTGCTCACCGGACCTGAGCACCTCCACGGGTCCATCATCACCATCAATGGCG  
GGCGCTGACCAGTAGGAATTCGGCCTCCCCGAGACGGGAGGCTGAATTTTCTCCGAAAC  
AACCCGATTCGCGCCGGTGTAGTAGGCTTCGGCCCAGTGTCTAGAAGGGAATATTGAGTT  
GAAGGACCTTGAGCTCAGCCAGCCAGACCCGATCCGCGAGAAGGGAATTTGGTGAGGAGCT  
CTCTTTTTTCCAAAACCAGCAATGGCTTGTTCGGTGAAACCGATGAAGTTCGTATCGCTTCA  
CACCCACTCAACGTTCTCCTACGGCGATGGCTACGGACCAGTCAAGGAGCACGTCCAGCG  
AGTTGCGGAGCTGGGCATGGGCGCTCTGGCGCTCACCGAGCACGGCATCCTGAGCAGCCA  
CGCACA ACTCGAGAAGGCCTGCAACGAAATTGGAATCAAGCCCATCTTCGGGTGCGAGCT  
GTACGTTGCTCCGCCAGGCGAGAACCGCAAGTGCCATCAGACGGTCTGGCAATGAACGA  
GGTCCGGGCTCCAGAATCTGAACCGCATCGTCAACCAAGAGCTGGAAGAACTTCTACCGCAG  
GCCACGACCAGCTGGAAGATGTTGGAGGAACACAATGAGGGGCTCATCGTACTTTCAGG  
ATGCGCCGATAACGTGCTATCATGCACGCTGCTGGGTGGTAAGCTTTACGGTGACAAGCG  
ACTCACCGCAAGCAAGCGCGACATCGCTCGTCCGCTGGGCTTATTGCACGGTACCAAGA  
GATATTTGGAGATCGGTACTACCTTGAAGCCCAGAGATTTCCAGGACTTGATCGCACTTG



CGCTCTCATTCCGCTCCTCGCACGGATATCGGAACTCACCGGAGCTCGTCTTGTTGGAAC  
GGCTGATGTTTATTATCCACGTGTATCCGACAATGATATGCAGAAGATTCTTCACGCGGC  
TCATCGCGGGTCTCCTGTGGAGCCTACTGATGCGTCCTGGGAGTATGACATTCTCCTCAC  
TTACCCGGAATACGACCGAGAAATCTATATGGACCTGGTGGGTACGGGGCTGACCAAAGC  
CCAAGCGCGCAAGCGGTTCTGGAGTCTGGCCGAAACGCTGAGCGCTGTAACGTGATTCT  
GCCGAAGAACCAGCCGATCCGTTTCCCAAGCCTACGAAGGAAGTTGACGGCACGCAGGT  
GCCGATGAGCGCCAACGAGCTGACCCGTAAGTGGCTCAACGAGGGCTGGCACTTCCGTAT  
GGCGACCAGCCCGAACATGCGGAAGAACCGCCAGGCATACAAAGCACGCGTCGAGCATGA  
GCTTGGCATGATGGAGGAGAAGGCCTTCCTTGATTACTTCTTGGTACTCAGCGATGCGGT  
CCGTTGGGCCAAAGACCACAAGATTCGGGTTGGGCCCGCTCGTGGTAGTGCTGCGGGCTC  
GCTTGTGTGCTACGGGCTTCGGATCACTGAAGTCGATCCGATGGTCTTCCCGCACATGCT  
GTTTGAACGTTTCTTGATCCCTCACGTACAGCGCTGCCCGACGTCGACCTTGACTTCTC  
AGACGGCCGGCGAATCGAAGTCAAGCGCTACCTAGAAGAGAAGTACGGTGCGGACCGTGT  
TGGTAACATCGGAAACTTCACGCGTTATCGTGGCAAGGACTCGATCGACGACGTGGCTCG  
CGTGTACAACATCCCGTCTGGGAAACGGAAATCGTCAAGAACCTCATCATCGAGCGCTC  
TGGCGGTGACAGTCGTATCAGTGATTCTCTCGAGGATACATTCAACATGTTTCCCAAGGC  
CGCAGCAATTCTGGAGCGTCACCCCGAGCTCGCCAACGCGATTTCGCTGGAGGGAAATTA  
CCGGGGGATGGGAGTTCATGCTACGGGCATCGTCATTAGTAACACTCCCATCACCGATAC  
CTGCGCAGTATACGAGCGGGAATCGGCCGGCAAGTCGACGCAGGTCATCGCATAACGACAA  
GACGGACGGCGAGTATGTGGGCATGATCAAGGCAGACTTCCCTCGGTCTGTAGAAGATGGG  
CATGATCGGTATCGCCCTTGACATGATTGGGATGGACCTTGAAGAGCTATATCGAATCCC  
TCTTGATGACCAGAAGGTGCTGCAGGCATTCCGGCGTGGAGACGTCACCGGCATCTTCA  
GTTTGAAGGACGAGCTACCCGGATCGTGTGCAGTGACGTTGTGCCAGACCACTTCCAACA  
CCTGGCGGATATCAACGCACTCAGCCGCCCGGGTCCGCTCTTCTCAGGAATGACTGCGGC  
TACTGCGAGGTCAAGCACGGCCGCAAGACTCCAGAGCGGTACCATCCCATTCTGGACAA  
TCTGACTGACTGGACATATGGTTCAGGTGGTGTAGCAGGAGCAGGTTCTCAGCACCATCAG  
GGAATCGGAGGCTTCCCGATGAACGAGGTCCACAATATCCGTAAGATCATCTCCCAAAA  
GCTCGGCGAGGCCAGTTCGAGGCCAAATACAAGATGTTTCGACGACAATGCTTGCCAGAA  
CCACGGCTGGACCCCGGAGCAGGCGCGGAAGATCTGGCGCTTCCCTGGCGACATCAGCCAC  
CTACTCATTCAACACCGCGCACTGCATCAGCTACAGCATGCTCACCTACTGGCTGATGTG  
GATCGAGCAGCACCAACCCACCGCTTCTATGCGGCCAGCTGCGCAAGGTCAACGACGA  
GAAGCTCTGCAAGTTGATGCGGGATGCGGTGCGGCACAACCTTATCTATCCTCCCGCAAAG  
CATCAACGAGTCGATGGCGAGCTGGTTCGGCTCTCATGGAAGGTGTTGTGCGCGCAGGTTT  
CCTGCAGATACCGGGAGTGGGTCCCAAGACATCGGAGGTGATAGTCGAATGGCGCAATCA  
GAAGATCAGGAAGGGACAGAAGGCAATCGCAGCCAGTGCCCCGGACCTCATGTGGTTCGGA  
CCTGCTTGAGGTAAAGGGGATTGGCCCCAAGTCCATCGAGAAGATCGTGGCATTCTGAGA  
GGCAGAGGACCCTTTCGGGCTCAACAGGGTTCAAGACCTGTTCAAGTCTCTGCGGGCAAT  
CATCAAGCCCAGCAAAGGGTATGGGGTGGCAGCGCCTACGCATAACACCGAGAGCATCCC  
GCGTACGGGCGACCACGACGGCATTGTCTGGATGGGCATCCCCAAGGCCAAGA ACTATCA  
GGACTATATCGAGAACCAGCGGTCTCGGTACGGCAAGGAAGAGGCCGAGATTCTCGCTGA  
GATGAAGGATCCGCTTCTGGTCAAGAGCTGTGTGGTGCAGTGCTTTGACGACTATGACGA  
CGACGTGTACTGCCGGTGGAAATCGCTGGCACTTCACCAAGTTTGAGAAGATGCTGGAATC  
GCTGGCCGTTGATGGCAGCAACGTCCCTCATTGTGCGCGGTCGCAAGCGTGAGGACTTCGG  
AGTGTCACTCCACGTGACGGATGCGTGGATGCTTGAGTGGGACGAGGACGATAGGCAGAA  
GTATGGGCAAGAAGAAGAAGCGTGTGGGCAAGCCCGGCCCAAGCACAAACCCGCTGAAGC  
TGGTTCGGTGGTGGCGAGGACTCGGCCGCACGCGTCACCAAGGTCATCCAGAACATGCTCA  
AGCCGCCAGAGACGGTGCTCGCGCACATCCAGCGCGTAGGGGCTCCGTTCTGGGTAGCAC  
CATTTGGAGTTTACAGGAGGGCGAGCAGTACGCGCGTCCGTGCCTGGTGGTGCCGTACG  
ACGACCAGATTTTCGGCCGAGCTGGCCCATCTGGCTGCTGGCGGGGAGCTTGCCGAGACGT  
ACACGGAGGAAGCCCGCAATGCGAGCCGCGCAGCTGCGCGTAGTGTGCGAGGCACACAGC  
CCAAGAGCGACCTGGACCCACAGCCATTCTGGCCCAGGTCTAGGAGATGCTGCAGCAGG  
TTCACGGCGCACAGTGGCGGGTTGCTGACACAGCATCAAAGATCGAACCACCGAGCTTT  
CGGACGAGGAGCGCGACGAGCTCCTCCGCAAGCTGCGCGGTTAATTCCAACAACAAGAAG  
GGAATCACATCATGACCGGGAAAGAGATCGCCAACCTACGCCGACGTGGCGATGTTCAAGG  
CCGAGAAGATCGACCGCACCAAGGGACCGCAGGTGTTCTGCTGAGCTGCAACAACGATC  
CTCTTGGGAGCATCGCGGCTGCTGCCAAGGCGTACAAGGGCGAGTTCGTTGAGTCACTGG  
CCCAGATCACCGACGACGAGCGCCGGTACTACCTCAAGGAGGTGCAGAAGTCGGTGCTTG

AAATGCCTCTGGAGGCTGTCCAGTTCCACTTCCGCATCACCGGTGTGACTCGCGGGTTCA  
CCCACCAGATGGTCCGGCAGCGCAACGCAGCCTACTCCCAGGAGAGCACGCGCTTCGCCG  
TCAAGGAAGACGTCCCAGACGGATTGCCACCCAGCCTGCAAGACACGATGCCATGGAACG  
AATGGGTCGAGGAATGTCCGATGGAGATCTATCCAGTTCGCAGCCAACGGCGTGAGTATC  
TTCCGGACACGCGTGACCAGGCTGAAGAGTTCGCCGAAACGATGGCCGACAAGGATCAGC  
TCTGCCGTCGTCGGTGGGATAGGGCTATCGGGCTCATCGAGGAGGAGTACAACGCTCTGG  
TCAACGAGGGGCATGCCAGCCGAGGACGCGCGTGGATTGCTGCCGACGCAGCTTCTGACCC  
AGATGAACTACATCACCGATCTGCGTGGCCTCAAAGGCCATGCAGGGCGTGCGGCTCTGCA  
CGCATGCGCAATTCGAGTGGCGTCAGGTCTGTGCCAGATCGTCCGGGCGATCCGTGAGT  
ACGGGAAGACCCAGACGTACATGACGAACGACAATGTCCATGACAATCCGGAGAACCAGA  
AGTCGTCGCAGTGGCAGTTCGATGCCTTGGCGGACATCTTCCGGCCGATCTGCTCCTACC  
GGGGGAGCAGCCAGGTCCAGGCAGACTTCGACCCGGCACTGCATAATCCGTGATCGCGTCG  
AGGAGAATGCCGGTATCAATCGGCCGAGCACCGACTGGGACAATGAATGGGTTCGGACCGA  
TTCTCTAAGCCCCACTGGCGCTGAGGGTTACATCGGACCGATCTTCCCGGTTGAGTGGC  
TCCTGGATCCCTCAGCGGCAAGGACGAAGTGACCAAGGAGACCGGCGCATGCCGACTGTG  
TGGGAGGGTGGTCGATCGGGCCGCCCTCACCAACACTGGCTACACAGCTTCATCTGCGC  
GCGATGCAGTGAAGGATTGAAACGATTGAGCGCGAAGCTATTTCCACGACAGGAGGGGA  
TTCAGTTGGGAATCATCGTCATTGATTTGGCCGAAGGGAGTTCGCACCGTGCCGCTATGC  
GTAATAAGAAGCGCAACAGAGACAGCGAAGCCGGCATCAACTATTCCACAGCACCGGTCA  
TCGCTGTTGATCCGGGCGGAACGACCGGTGGTGCTTCATGTGTGTGGAGCCATTGGCTC  
TGCACGACCCGCAGGAAATGGTACTCGAGAACGTCATTACTCATCAGCACGGCGAGCTCA  
GCAGCACTGTCCGATGCAATGTGCGCAGAAGGCGAAAACCTCTGCGTTCGACAGACCTGTATG  
AATTCATCTCGGCTTGGCCCCAGGCCGCTGTCTTGGTGGAGGACTTCGTTATCCGAAGCA  
ACAATCGCAGTCGCGTATTCCTTTTCGCCCGTGC GGATTACCGCCGCACTCAAGCACCTGC  
TATGGGCCGACAACCGATAACATCATCCGATAGACACCAGCAAACGCCAAGATCACTGCGA  
GCGATGACCGGCTGAAGAGCTGGGGCTTGTTCGACGAGCATGGCAGTCTTGGGCACGCAC  
GCGATGCCGATCGGCACGCAATTACATTCCTGCGCAAGGCCAAAAGCAAACCGAAGCTCC  
GGGCGATGGCTTGGCCGTACCTATTCGGAGAGGAGGGTATTTATGCAGTCGAAGACGACG  
GACAAAGCTGGTGCTGATGTGCCGCCAGCGTGGCTGGTTCGGGTGCTGGGCGAACACCAG  
CCGCAGATGACTGGGCTGTGGTCCACATGCTCTTGGAAAGAGCACCGACGCCTTCGGCGCT  
CCGAAGCACTACACAACCTTCTCTGCGGAACATCAAGCGGCCGAAGTACATCGCGCTCTG  
AGTGATGGCGTCGCAGCCCTTTTCTAGGAGGTTTCGGTGAGCAAATCGGACGAGTTCATG  
CCAAGGCGTTGGTTCGCGCTAGGTAATGCAGAAGCTGCGCAAGCTCACCTCAAGGAAAGCT  
TCGACGACAATCACAACACCTTCTGGTCTAAGCGCGTACTGGCGCACTGTGCCTTGGCGA  
ATGCCTATCTCAAGGTCGCAGAGTGGGAGCTCGGCGTCGAGGCCTGGAACAGGAAGGAAG  
AGGACCAGGTCTCGGTGCTCACCTTCGGCACAGACGAGGTGGTCGCGACGTTCCCCGACG  
ACATCGAGGAGCGCCGATGAGGCGCGCGGGCATGAACGACCTCTATCCGACAGTCGTCAA  
GAGCCAGAACGACGACCAATAACAAGATCCAAATCCCAAGGACGCCTTCACATTCGGGCG  
CACGTGCCCGGACTACGCTGGCGGGCTACAGGTCAAGTGGGACCGGATGAAGTTCGGGCC  
CAAGCGCAAGGTATGGATCTGTCTTGCCTCCTACGAGATTGAACTGGAAGGGCTGCCACC  
AATCAACACGGTTCGGCCCCGCATCGGAGGAGGAAGAATGCCCCGTGGAGCAGCGATGACT  
AAGGAGCAAATCGGAAGGGCGGAGGAGCTTTTGAACGAAGGCTGCTCTTACCTCGACGTC  
TCCCGAACCATCGGCATCGCCGAGTTCAGCATTCGCCTCAAGTTCCCCGGTTCGGGGCTGG  
ACACAAGAGCAAAAAGCCGAGCACAAACGTCTCAATGATCTGTTCAAGCATCTCGACGCC  
ATCTGGGGCTTGGAGAGGGCACAGAGAGGGCGAGAGGCGCGCATCATAGGTTCAGTAGCCC  
GCATCGGCCCGAACCAAGTACCATCAAACCGTAACAAGGAGGAACCATGAAGCTCACCGG  
AACTGCCCCGCGAACGTCGCGGGTGAAGCGGGTGGGTTCGAGCCAGAACTCGACCAAGCGCT  
CAAGGAGTATGCCCGGAGCTCGGCACCAAGACCTACCAGCCTTTCGCGCCGCGTCATCAT  
CCTTGGGTTGAGCCAAGAGGGCTTCCAGATCGACAGCGAAATGGTTCCCATGCCCGACAG  
ACCATCACACAGGAAGGATTGACCGATGAGCCGAGTGGAGGTGGCCCTAGCGAGCGTAGC  
GCTGTCTGCGGCGATGCTCCTGAGCCAGGCCGCTACTGTGGGCGCAGAGCCCAGCAGCT  
GTCCGGGAAGGACCAGTTGTACCTCACACCCCTAGTCATTGGCGAGGTGCCATACGGATC  
GGCTGCAAATGCCCTCTCCATTGCACGTCGTGTATGCCAGGCTACCACTGGCGGAGACTG  
GGACGCCACCTCTCTCGGGAAGCTCAGCCAAGAGAGCATCCGCAACAACCCGAAGTTCGA  
CGCCGACTCGGCAGCGAACATCATGGTGTGAGCATGACACTGTACTGCCCCGAGAACAT  
CCCCGACTGGTTCCACGCCGAGAGGGCCAAGTATCTCGCCGAGGACGCCGGTGTGGCTGT  
CCCTGTGGCGACGAATCCTGGTCCCTACAAACCCCTCCACGCTAGGAGCGTTTGCCATG

GAAACAGCGCCTTTTGGCGTATCTACCGCTGACTTCATCGTCTGGGGGATCACCTTCGCG  
CTCACGGCTCTCACAGCTTGGCTGCTGAAGCATGGTTGGCGCGTGAAGACTCCGCTAGAG  
CTTGTGCATCGCACCTTCAACAAGCACGGCATGCCACCAGCGGTATCTGCCACATGGC  
TTTGATCGTACGGCGCACCCTACGCGCTCCGAGGCTATGACCAGGTGCAAACCCAGGGG  
TGCGGCGAATGCCTGAAGGAGCTGACCCCAACTCAGTTTACCCACATCACTAGCTGTCCC  
AGCTGCTGGTTCGTGCGGGGCGCTACCGTTCGGCCCGATAGAAGCATACTTCAATCTCCA  
CCCGAGCAGACGATCTGGGTGCGAGAATAACGATGGCAGCGTCCATCTCCGCAAAGCCTTG  
GGAGAGAAGTGGGCCGACACCAAATACAAGGTCTGGGGAGAATGGCAGCGAGAATGCAAG  
ACCAAGGACCTGAATCTGATCCGGGAATTTGGGTGAAGCCTGTGGTGTACCGCATATGC  
CCGAGTTGCGCGTACACACGGTTTGAGCACTAACCGAAGGGAATACATCATGATAATGAA  
AACAGTTCGGAGGACGCACTGCGGAAGGCTGCAGCTGCATTTGCTCTGCGTCAAATTCG  
TGAGGTCAAGGAGCGCGCTGACTACATGCTCGTCCACGGCCTGACCGAGGCCGACGTGTA  
CGAAAGCATGCTCGTGAGGGCTGGGAGCAGCGCGAGAATCTTGGTTCGCTGGATCATCAC  
GCCAAAGGACTCAAGAGGGTAGTCCCAGACCCGGACGACGTCGTCGGCTGCGTGCCGGT  
TCTCGTCCGAGACCCGGACGACATTGGCGAGCACCGAGAGCGTAACGAAACGTTGCGCCG  
GTACTACGATCCGCGCTTCGGCAAGGATTGGTTCGGGCTTCGTCGGCAAGGTTCCCTACAA  
GCAGAGGTATCGGGAACACAAGGAGCCACAGCATCTACGGCACAAGCCCTATGGGTATCC  
GAGCCCGTCTGGGAGCTGAACTACTTCCGCGTCAACACCTTCGGTTGGACGCACTATGT  
CTGCCGAACCAAGCAGGACGAAAGCTGCTGGGGCACGAAGAGCCCAGAGGAGGTGATGGA  
CTGATGGACTGGAATCTCTGATCCGCGTTGCGATGGGCGCTGCGATGGGCGTGACGATC  
TATTTGGTTCGGATGCATGGTTCGGATACATCGTTCGGATACAGAGCAGACAAAAGGAGGCC  
CACCAATGAGAGGGCGTGAAGGGCTCTGGCCAGGGCACATGGGCAGCGCACTACGACAGCG  
TGTGCTCGGTGTGCCCGCACTGAATCTTCAAGGGTATCCAGTTCACAAGATGCACAACA  
AGGTAGGCCACGAGGAGTGCCATACGCTAGATGAGCGTGGCGGGTTCGGACTTGATGTCA  
GCGGCATTGAGCAAGAGCGCATCGACGGCCGATACGGCAAAGGCTACGAGGACCCGGCCGA  
GCCACACAGTCCGGGGCCGACGCAAGCACGAACGCAAATGTGGCGAGTGTTCAGATAC  
ATGCAGGAGAATGCCCATGAAACTCGAAGACACACACGGCGCATAACGCCGTAAGAGCTT  
GGCCGATAAGATGCAGGAGAACTCGACTCTGCTTACAAGGCGTGGCGCGATGCCGGTGG  
CAGTGATCATCGACAGAACTCGCAACAGGGACGGCACAAGAGGAACTTCGACCCGGTGA  
GGTTGTGCGGCGCAACTCTGAATCCTCAGGGGCACAAGTACAAAACATGAGATCGAGGA  
AGCGGAAAGGCGAGACAGATGAGGAATCCCTTCAAGTACGGTAGCCCGCAGCGGCTTGTG  
TTGGCGTACTGGCTGATGCGGTGGGCGTACCGGATCGTTGAGAGCATTGATCGCGGTCCC  
GTCCCGAAGATCAGCATGTGGACCTTCTCCTTTGAGCGTGGGAAGGGTGCGGTAGTTTCG  
TAGGACGATCGGGCAGAGAACAAGGGTTGCAGACTCGTGTACCTCAATGATCGTGAGTAT  
GACCGTGCCTGGTTCGGATAGTGCGTTCGTCGGCAAAGACGAGGACGAGGACCAAGACGCC  
TTCCTCACCTGGATCTGCCCATAAGCGGTACAGCCAAGTACGACAAGAAGATCGGCAT  
CAATGCCGACTGGCGGAAGACCACGACGCGCGGGCCACGAGGAGCGTACGGCAGTCGCCC  
AGACAGTCCAGGAGACCCAGAAGCACCCAGTTGTAAGGGATTTCGGGTCACGCTGGCTGCC  
AGACGGCACTTGCCCCGGCTGCGGCAGGCACTGGACCTGCGTGTACCAGACGCGCGACGC  
AAAACGCAATCCCTTCGGCACCAACGGAAAACCTACCATACTTCTCACAAGACCAAACC  
ATTGGAGGGACAATGAACGATCCAGGCGCCGAAGCCGGACAACGGGCGATGAGGAAGGTG  
CACGACTACCAAGGCCAACCATGACCTGATCGTTCGCCGCCCGTGAGGCGTTGAAGCCG  
ATCCGCGAACTGCACTACCCACAACCTGATGACCGAGCCCCCTTCTGCCCGGAATGCCTT  
GTCGAGTGGCACTGCGACACCGCCAAGCTGGTCTACACCACCGAGGAGCTGGAGCGATGA  
TCTTATGGCATGCTCGGCGTGAACCTCGAGCGCTCTCGGAAACATCGTTTCTACAATCGGC  
CGGTGGACAAGAGTGTCCAAGCTATGTACACCTGGTGGGAGTACATGGACGAGATCGACT  
TGGTGAATGGCGAGAACGACACCATAACGCATCACGGTCATGGAAGAAGAGACTCACCTC  
CTCCAGGAGATCTGCTCCCTGAAAAGCCCAAGGTCATTTCGCGCACTTCATCAGAGGTTGA  
CACCGATAATTAGCCTCGAGTACCAGATCAACACAGCGTACGTAGCCCAAAGCACCATCA  
GCCCCGCTCGAGGAGATCAGGGCCGACGGGTGGATGGGCGCTCGGCCACTATAAGATCCATC  
GGTACTGCATCCCAGGCCGCATCAGGCCTGGCGGAGACGGTTACGAGCCATATCGCATT  
TCATCCTGGCGGGTGAAGTTCAGCCCTCCGGGCATATGGTATCCGTGGTCAGAACAGCCCG  
AGGACGTGCCGAACGAGGTAATGACGGAACCTACCACGGGATGTTTATGGCAGATAAAT  
AGCCATCCCCAGAAACAAATACCATCCCCTCACAGAAAGACAGCATATATGTTCTGTG  
TAGGAATCGCGCGGCCGCAAAGAGAACGCGCGCATGTACAATCTCGGCAAGGTCTATGG  
CTACCTCGACGCTCTCAAGGAGCTACCACAGCCATAAAGTGGAAACTCAACTGCGCGA  
AGAGAAGGCGCATGTGGTGTCTCCGAGCGAGCCCGCGTGGACCCTCCACAGTTTTACCTG

CTGGTTAGAGGGCGAGGTGCTTCGAATGAGCAAGACAAAACAGATTCCGTCAGGCGAGTG  
GGTCAAGGAGGTTCGAGCGCGTACAGTCACGCCTAGACCGTCTCACGCGTCGTCGGAGGTG  
AACGACATGGATGTCGACCTCATGATGGCAGTACGTAAACAGCGGGCCACATGGCCTCGA  
CGAGGTGAGTGGAAGCCGCAACCCACCGACAAGCCCAAGGCTGAGCCTGTAAACGGTAA  
GCTATCTAGCTGCGGTAATAGGTTCGACCTTGCGGGTCTAGGCCAGAGAATAAGAGACACA  
TCTTATCATGTCAACAGCTGGAATATCAACAGCGCCAAGCCATTCCGACGCGCGGTAGA  
AGGCTACCGTGAACGGGGATGGGCGGGAACGCTACCGCTGTCGCCTCGGAGCAAGAAGAA  
GCCTCCAACAGGTTACACCGGGCACACAGCGCCGTACCCGAGCGACGATGACATCGCGAG  
CTGGCTGCGAATGCCAAGTACGCCAGGGCAATATCTGTCTGCACCTGGGTCAGGTAGC  
GACGCGTGGGCCGCACGGAGAACGCCTGGAGCTCATCGGGATTGACGTCGATGACTATGA  
GGAAGGTGACAACGACAAGGAGGGCGGCAAGCAGCTCGCCGCGCTCGAAGCCGAACCTCGG  
GCCACTCCCCAAGACGTATACCAGCAGCTCGCGCACAGGCGTGGGCGGGAACCGCTTCTT  
CCTGGTCCCCGCCAGCACGCATGGATGGGGAAGGCCGCGCCGCACATCGACATTGTCTG  
CAAGACATACCGTTACGCCATCGTATTACCAAGTTGGCACCCAGGCGAGGTTCGATGAGGA  
GACGGGGAAGGTCATCACCGAAGGTGGCCAGTACAAGTGGCCCGATCCGCAGGGGCGAGTT  
GCTGGATGGGCTAGAGGACATCCCTGACGTTAAGGATCTGCCCTCCTGCCCGATGCGTG  
GGTAGAGCGGCTGAGCCGTGGCGGCATGAAGCTCTCGGACGAGGACGCCGAGATCGACAT  
GGATCTGAACGTTGACGAGATGTTCCGGTGGGCCGTGGGTACGTTGCCGGGCGAGTGACGA  
GGACGCCAGCCCTGCTCCAAAATGAAAGCGGCAGTTAAGTACTGGCAGGGGCGAGATTGA  
GGAGGACGCTTACCCACGACAAGATCACC GGCTCGCACTGGAATCTGGCCTGCTTGGC  
GACCGAGGGGCGACACCGGCTAGCGGCAGGCCATGGCAGCTGTGGATGCGAGCGTCGCCGA  
AGACACCATCAAGAACCGTGGGAAGCGCGAAATCAGCGAGCCGCGCTCAGAAATCACGCA  
TAGCAAGGTGAATGCACTCCGAAAGCTCAAAGCCCAGATAGACAAGGGCAGGCGCAACGT  
ACTCACGGTGTGCACGTGCTACGAGCCCAGCGCAGACGAGCTCGACGCGTTCACCGCCAG  
CCTCAACAGCGCAAAGGCAGCTGCCAGCGTGCTACCGAGGAGCGCGCGGTTCGCCAGCGG  
CGAGGGGCGAGACGGATATTGGCGGGATGGCATGCTCAATGGCACCCCGCAGGACCCCGG  
CGACTACGAGCAAAGCGACCAGGGCAACGTCGATCACTGGATCAACCTGCACAAGGACAA  
TGCGTTCTACGTTCCGGCGCTGGGACAGTGGATCATGTGGACAGGGAAGAGCTGGATCGT  
GGGGGAAGGCTGTGCCGAGCGGAGCTACCGACGCGTGAAGGCTCGCCAGAAGCGGAATGC  
CGAACAGCTTATGCGGCGCGCGGCTGAGCTCAAGGCTGCGCAGGATCCTACGGCCAACGC  
GGCTGTGGCGATGGCCAAGAGCTGGCGTAGCTAGGCCACCCGCAGCGGCGATGTGGGGCT  
GATTGAGCGTGCCCTCAAGGCCGCCAGCATGGAGCTCGGCATCTAAGAAGGCGAGCACA  
CTCTAATCCGGCGCTGATCTGCTGCGGTAATGGCGTGCTCGAACTCGATCTGTGCCGCT  
CGACTCCCTGGCGGACGACTCCCAGAGCGCTGGGCGCAACGGGGATAGAGGTAGGCGCAA  
CGGACGCAACGGCACTGCAAATGTGGCTAGCTTGGCCGAGGACGACGAAGAGTTTGATCT  
TGACTACGAGGCTGTGGCCCGCAATAGCCATGTGCGCCTGCGTGAGATCCGGCGCGAAGA  
CTTGCTGACGCTGAGTACTGGGACTAACTACCTGCCCTGGCAGGAGCTGGTGGCCGCGGA  
GTTCCGGCAAACAGGAAGCGCTGTATGCGAGCACGTGGGCCCGCGCAGTAGAGATGTATCT  
GCCTGATGAGGAGGTGCGGATGTTCTGCAGAACTGCTAGGGTACAGCCGGCTCGTCGA  
CAACCGAGAGCGCATCGTCGTGTTTCCGCACGGGCCAACGGGCAGTGGTAAATCCACCTT  
CCTCAACGCCACGCTCAACGCGCTCGGCGAATATGCGGATGTGGTTGATCTGGGCATCTT  
CAAGGGCGACCGGCAGACCAACCCAGCTCAGGCCCTACGCCCTCCCCAAGCGCATTGTGAC  
GTGCTCCGAGGCTAGCCAGCGAAACGTGCTGCACGCCGACATGTTCTAGCGAATTACAGG  
CGGTGACCCGTTGAGTGCAGAACTGAAGTATAGCAACGAATCTGTCAAGCGGAAGCCCGC  
ATTTGTGCCGTGGAACGCCACCAACACACCACCCAGCATCCCTGGGGCCGATGCTGCGGT  
GGTTGATCGGACGGTGGTGGGATTCAATGAGCAGATCCGTAACAAGACGTCGGCAT  
GAATGCGATGCTGTCTAGTCCGAGGGCCAAAACGGCTGTGCTCGCGTGGGCGGTCGAGGG  
CTGGGGAATGAACCGGCGCGAGGGGATGAGGCGCGCTGATTTCCCGACTGCAGTCAAGCG  
TGAGAGCATTGAATTCACCAACCAGATCTCCGATGTGAGCGAGTTCCTGAGTGACTGCGT  
GGAGGAGGCTCCGATGAGCCTCCGGCGGAAGGCTGAGAGGCGCGCGTGGCGCGTGTGCCA  
CTGGCCCGAGGAATGGCACATAACGGTCAGCGAGGTGTACGACGTGTACGTCACCTGGTG  
CCAGGAGAACCGCGTTGCGGATCGTAACATCATGAAGAAAAATGGGTTCTCGCGCCAACT  
GAAGGACTATGGATATCGGGCCGAAGTTGTCAAGAAAGATGGCTTCACTTCGAGA ACTTA  
CGCTGGCTTCAAGCTCAACTCTCAAATGCACGCGTTTTGAAATTGCAAAAAGACAGCTG  
ATTATTGGACAAGAATGGCTCTGAGACGGGGCTGTTACGCAATGCGTATCCCAATCAGTA  
ACTACATTTGACCAGCGGAAACACATCATTTTGGTTACTGGTTGGGGTTCGTTTTCGCTT  
AGGGCTATACCTACTCTCGTTCTTATACCTCTACCCTGTTTTCCCTACTACCTATTATCT

AAAAAAGCGAAACGGGTAACCTCAGGAGGGTATGAAAATGCTGGTAGAGCAATGGATTTCG  
ATTTTTGAGAGACCCGGAGTGCCTACCGAATAGGTAACCCGAACACAGGCTACATGCGG  
AAACATGTTTCGTTTCGCATAATTTTCGGTGTGACGGATAGCCTGGGAGGGTATCAAGGAGC  
GTAATTTGTGGGATCAGAGATGGTTTGGACAGCAGCAATCAAGACTGATGGAATTGGAG  
GAATGGC

>NewGenomeName\_17

CTGAAGGACGGTCTTTCTTAATCACCAAAAACGACAAGCATAACGAGTTAGTAAAGTGCGAG  
ATATCAAAGAAAAGGTTAAACAAGATTACATAAAAAGGGATGAAACAAAAGGAAATTTCAA  
CAAAGTATGACAGTAGTTTAAACACTTTAAAGACATGGATAAAAACAGAAAATTGGGGTA  
GCGAGAAAACAATGGGTGCACCTAGAGATAAAAAGAGGTCCACCCATAGGTAATAAAAATC  
CCACTTGTCTCCTGGAACATAAAAATGCTGAAAAGTTTGGATTCTTCTTAAAATATCTAC  
CAGTAGAAGCTAGGGAATCAATACAAGAGATGTGCGATAAAAAGATAAATTTGTTATTCTTT  
GGGAACAAATATCAACTCAATATGCAGAAAATAATAAGAGCACAAAGTATAATGAATGTTT  
AAGACATGGAAGAAATAATTAAGGAATTAAGAAAACATGAAAGCACAGAAAATGGTGAGA  
AGACAGCGTATGAGTTTCAATTTGCATGGGATCGGCAAGCATTGTTTCTTGCTGCACAGA  
GTCGGGCTATAAGTAAGTTAGGGAGTTTAAATTAACAGTATGATGAAATGATGCATATGG  
ATTGGAACGTAGCTACAGAGGAGCAGAAAATAGAGCTGAAAGGTTAAAATGTGAAGTTC  
TTAACCTTAAGAAAAGTGATACTGGAGATGATTCAAAAATTTGGGTTGAAGCTATACAAA  
ATATTGCAATGAAACGTTGTGTTACCAATGGCTAAAGCTTTATTGTCGCTATTAGATTGT  
TATTGGGATAATCCTGTTTGGTTTGCAAAGGGTATGTTAAATGTTAGAGCTGACAAGTAG  
CCGTCTGATGATCTGATGTCTTTAGCCCAAACCCACAAGTATCTACTAGAAGTGGTCAG  
GGAGTAGGTAAACTGGATTACAAAGAATCGCTACTGTGTGGTATGTAAGCACTTGACCT  
TTCCCTAAAGCAGTTGTTACAGTTCCAACACGACAACAATTATCTGACCTACTATGGGCT  
GAAATAGCTAAATGGCTAAGTAATAGCAAGGTTGAGAAGCTACTTGAGAGGACTAAAACA  
AATGTGTATATGAATGGCTTTGATGAATGATGGTGGGCTACACCTAGAACAGCAGTAAAT  
CCCTAGAATATGCAATGTTTCAGTGATGATGATGTGTTATTTGTTGTTGATGAATCTCCG  
GGAGTTGCGGACCCATTATTGAAGCTAGATTGGGAACATTATCAGATGCAGAAAGTCAA  
CGTCTTTTGTGCGGAAACCCATCTCGAACGAGGGGAACGTTTTACGATAGCCATAATAGA  
GACAGAGGTTTATATAACAGTTAAAGTATCTTCTTTAGACAGGCCTAGAACAGCGATA  
GAAAATGTTGATATACGCAAAGAAAGTACCTTGAAGGTTCTGACCCTTGGAGTGTCAGA  
GTAAGTGGAGAAGTTCCAGAAGGTGAAAGTGATTCTTTAATATCTTTAGAAGCTGTTGGA  
ACAAGCGCAAATGAGAAGTGAATCTATTTAATGACTATATATTCAATATTTCTGCGAAT  
TTAGCAAGATATGGTGATGATGAACCCATAATAGTTCTTAGAATAGGCGTTAACGTTTTT  
GACTTATTAAGTTATTCAACCAAAGATACAATGGAAACCGGAGGAACTAGACTACGAGCA  
GTTGCTAAATTTAAAATATCTATCATCGAATTAACAGAGTAAAATAAAAACGGATGAT  
GATGGCTTAGTTGCAGGTGTAATAGATAGATTAAAAGAAGTTATAAGACATGAAAGACTT  
AAATATGAAGTAATACATATTTAAAATGGTCGATGTTCTATAGAAAAGATAAGTACTAT  
AAAAAAGCTTCTGAAATGTGGAATAAAATGAGGGGAGGAATTAGACGCAAATTTACGTAGT  
TTTATACTAAATAAATAAGCTATAATACCGCCTCCTAATGATGATAAACTTATTAACAA  
CTATCAAATATAAAATATCCAGTAGATTCAAAGGGGAAAATACAACGAGATAGTAAAAG  
GAAAGGAGAAAAGAATTGGAGAACCACCCGATAGCGCTGATGCAGTAATATATTAGTTT  
GCAGAAAGTAACAATACCGATTTATCTTTACTTAAAGGGGGTAGGGTATGGGGATAATAT  
CTTATTTAAAAGCTAGTTAAAACAGCTGCAGGCGCGATTATGCGTATCTCTACTGGTA  
AAATTGGAGGATATAAATTAGACGATACTACAATTGATTATGAGTTAGCAAAGAAATGT  
ATCAAATAAAAATCCTAATTACAAGTTAGGTTTCGAGTTTTGTTAGACCGATTGTCAAGT  
CAACAACCTCGTTTTATGTGTGGACCTCATTTCAAATAGAAGATGAAGAAGCACAAATATA  
TAATAGATGAATTTGTTTTATATAACACATCTAAAATGTTAAAAGCACATACAAATAGTT  
TAAAGCAAGGTGATTGTTAAATTTGGATAACTAGAGAAGAAAGAGAAAATCCCTTATCTA  
CCGCTTAAAAGTTAGATTAATATATACTTCATATCACCCGAAGAAGTCAAAGTAATAA  
TATTATACCCCAACAACAAAAGAGCCTATAGCTGATATATTAGAAAAGTCAAATGAATGGA  
CTGACTCAGGAGAAAACGAGAGAATGGCTCACGTTGATCAAATAAGAATTGCTGAGAGTA  
GAATTGTTGAGGTTGAAGGTGATAAGATAGAAGGTTTAGAAGAAGGGGAAACGCCTAATG  
TCTGGTGTTTTATACCAAAAATACATTTTAAAATGAAGCTGGTGAACATTGAAATATG  
GGCAAAGTGAAATGGCACCATAAGAAGCTTTTTAAAAGCTGATCATGATGTTATGTGAC  
ATGCGTAAAAGGTAGCAAATAACCTCTCCTCCAAGCTAAAGTTGAAATTCCTGCTG  
TTGCTAGTTTTTTAGCACACAATTTTGGTGTGTAAGACTCAGTTAAATTTGCCTAAGAAG  
GTGGAGAGATAAATCTTGATGGGCATGAAATACTATTCTTAAACCAAGATGAAGAAGCTC

AGTTTGTAGAAGTAAAATCAGCCATACGAGATGCTAAGGAGCATTACAGCTTCTTTTTT  
ACTGCATAGTAGACGTATCTGCAACACCCGAGTTTAAATTTGGAGTACATACACTTAGTG  
CTTTATCTTCTGTAAAAGAACAATGCCTATTATGGTAAATAAGATAAGTAGAAAGAGAG  
ACAATTTACAAATAGCTGGCAATTACTTGCAAGCATGGTTTTAATAATGAGTACTAATT  
CTAGTGGTATGGAATATTCATCTTATGATGTGACTATAGGTTAGGATGAAGTAAATCCAC  
GAGATGCTAAACAATTAGCTGACACGCTAGAAAAAGTAACTAGTGCATTAGATAAAGCTT  
TACAGGGTGGCTTTATTAGTGAAGAATCAACAGTGAACCTTTAGCACAGTATATATATA  
AAATGAGCTATTATATAAGTGATGACCATGAAATAGTTGGAAGAAGAGAAAAAGATAATAA  
AAACCACGATGTTAAAAAACAGATTAGATAATTCTCATGGTTTTAAATGATGAGCCAAAAG  
AATTTGAGAACGAAAGAAATATAATAAAGGATTATAAAGGGAATGAATAAATGTAATTCG  
GAATTAATAACTGTTGCAGGGGAGTACAAGAAATGGGCATTAGTAGCTAGAAAAAATTT  
ATAGATTAACGCTCAAGCAAGAGGATGAAATAAGAGCAATGTGTCTTAACATAACAAGA  
ATAATACAAAAGAAATAAGAAAAGGAAATCTTTCAGACTTTAACAGAGTTTGGTTAAAT  
CAGATACTAAAACAATTACCACAAGCAATAAAAATATTAATCAACAACACTAGTATTTAAT  
TTTGTGAACTTAAATAATAATGTTGAAATAGCTATTAATCACTCTAAAAATAATTTA  
ATTAATGCATTTGAGACAGCTGAAATAACTAAGGTAACATAAACAGTGATACAAAAGCT  
TTCTATGATATTAATAAGAACTCTTGAAGCTTATTATTCACGGGTTATGGATGGTTTA  
TTTTTCTCTGATAGAATTTAGTCTAAGTGTAAGAAGTACAGAGCAGATATGCAAGTTAGA  
TTACAAACAGCAGTAACAGAAGGTCGAGCCTGTGTTGAAACAGCTAAAATGGTAGACAAA  
TATGATCTAAAAGGTAGGAAAACTTTAGTTGATGGCCATCCAAATATGATAAACGAATA  
GGAAATAGAGTACCTCAAAATATAAGTTATGACGCTTTATGATTTGTAAGAAGTAAATG  
ACTTCAGATTATGGTGTCCGAGTTTTAGCTTCTGCAATGATTAACCCTGCAAGCATAGGT  
AGGCAGTTTATGATTTCCATGGAACATCCTCCCACAGATATATGAGACGAAATATGTGGA  
GAGGATAATTTTGTGGTAAAGGTGTTATTCCTATAAATGAAGCTCCTGTGTATCCA  
TTCCACCCTCATGTTTGTCTTTTATGCTTAATGTAGTCCAACCTTTAGACAGATTAGT  
GGAAGGTAGAAATATTGGATTAAAGATCCTATGAATAATGTACCTCTTGAAATATGGTAT  
CAAGAGGTGGATGGTAATTTGAATTTTTGAACAGAAAGGTGGTGATACAATGAATGTAAT  
AACTGGAGAAAGTGGACTCAATGAATGCGTTAATAACTAGTATAACGCCTTCTGATTTTCC  
TTAAGCTAAAGATATAGCCATAGACGCTTTAAAATCTATAGATGTAGAACCCTTTGAGGT  
AGTTGCTTAGATACCAGCTACAAAATCTAGATGGATGTGGAATTATACTGCTAAAAGCTT  
GAAAGATATCGTAGATAACACTAATGAAAATAATCTTAATGGCTTTTTTAGGACCACAAA  
AGCTGAAATTATATCGAATGAATTTGAACTACCTGTAAAGCATTGGATAGGTGCAGAACC  
GAAAGGGGATAAGGCTTTGATCAGAGGGCTGAGTGATGCTGAGGCAACAAATTTAAAAGG  
ATGGACTAGGACTAAATGGATAAACGAATGTAGTATAATTTGGTTGCTCCAAACTTAAAA  
GAGTGCTAAAGGCGAAATGAATGTTATAGGATATGAGCCACTATCTATTGATTGGACTGC  
TCTACATAGACCAGGTAAGACAACAAGTATCGTAGGTAGGGAAATGAGCCCTAATGGCGA  
ACAGTAAGATGCAACTTTTGAAGCTTTAAGAATAGATTTATGAGAAGCTTTAAAAGCCAA  
GTTTTCTATAAATCATAATAATTCATATCTCGATATACAAAACCTTAAGATATAAAACCAA  
TACTGTGAGATATGACTTAGACCAAATGTATTATGCAAGCTTTATGGTATAACCATTAG  
TATATTTGAAAATAAAGTAAATCTAGGTGAAGGAATAGAAGTAATCAAGAATATAAGCTA  
TGAACCTAAAGGAGAAATGGAAGTAGCGGAAAACAAATTGGAAGGAAAAGAGTTAATACA  
AAATGTCAAAGGACTACTGCAAACTAGTCACCTATCATAATTCAGAGGTCATACAACGAAT  
AGGCTTAACTAAGGAAATTTGACAGGAGAGATGGAAGACGTA AAAAGATCATAAATAGC  
AGAAAATAATTAGGAGAAGTGAAAAAGTACTAGGAATAGTAGGAGACATGGACACAGT  
TGAAGTGGCAAAAACGGCTTCATACGCTTTAAAAAATGAGAAAAAGGAAGCGTGGAACTG  
TATGGTTAATAAAGCAATTAAGATAAAGTGCCTGGTGAATAGGTCAAACATTAGTTAG  
AGAAGTGTTAAATCATCAGGAAGGCTCATGTTAAGGAGTAATAACAGGAGAAAGACAAA  
TGTATTAATTTATGTGTTTGTAAAATATACAATGTCTAATAGGTATAAAGATAATGCAAC  
ACAACAGGTCTGTTAAACTCTAGCAATGCTGGAAGTTTAGCATCTAAGAAAAATAGATT  
ATCAAGGAGTGATGTTTATATGTCATTTAAAGGTCAACCAACGCCAAGCACAGTAACACA  
GAAAACAAGAGTAAAATTAAGTGATGGGAACTCTGTAAGAGTTATTCTTTCAGACGGTGC  
AAGGACTAAAACACAACAATAGAATCCTATAAATGGATTCTTTGGCGACGCTATGCAAAA  
GGGAGAAAAAGGCGAAGAAATTTTTGCAAAAAGCGCCAGCTGAACACGAAACGGCTAA  
TATTTTTACATCAGAAGCTTTTGGAGGAGGAAATGACTTATAAGGATAATACAGCGCA  
GAAATTTACTACTACATCTGCACGTAATAGGCTAGTTGGTAGAGTAAAAGTTAGGTAAAA  
CAGTAATAATGTAATTTGCTTGATATTATTACCTCAACTAACATAAGGAGTGATAAATT  
TATGGAATTTAAAGTAATTAGTCAGGAAATTTTGTCTGGAACATAAAAAGAAAGGAACTTT

AAAAGAAGATATACCATTTATAGTATATGGTGAAATGGAATATGTAACAAAGAAAAAATC  
AAATGGAGAAATGGAAGCCTTGGACTTAAATGAGCCACTCGGTGACATGATGACTTTTAG  
CACGACTTCAAGTTTAAAAGAGTTATTAAGAAAAGTCGTATTCGATGTTGAACTAGGCAG  
AGAGAAAGTACGACTATTATATTAACCACGCTATGACAGTATAGCAGTTTCTAATCTACC  
ACAAGTTATGGATGCTAAGTGGGCTTTACAAGTTATCTGTGTATTCCTGGAGCATATTGA  
AGGTGAAGAAATTAATTCGGTACAATAAATGCAGAAAATGGTCCAGTTGCAAGGATACA  
AACTTACGCAACTCGTTTTGCGTATACTAAAGAAATGAAGGATTTTAACCAACCATTTAG  
TGTTGAGATATTAGGTACATCAATTGGTGAGAGTTACAATGCCTTGTTAAGCTTCATACA  
TCTAAGCCCAAGATTATAATTTAATTATAAAGCTTCAAATAAGACAGCTTTCAAAGGTGA  
TACTAATGACCCAATGTGGCTAGGAATTTGGAGAATACTAACAAAAGCACAAGATGATAC  
AGTTATTGCAAAAGGACAAGGTAACACATTAATGGGTTCTAGTGCTGAACAAATTGAACT  
AGAAATGGCGTTAAATGGAGGACATTTATTAATCGGAAGCATGTATCCATCTATAAAATT  
TATAGCAACAGTAATTTATTATGATGTGTGGGAGGTTACTGTTGGTAAAAAACATATTC  
TTACAAAGGTTTTACACCAGGCAAAGGATATTGATAAGACATCAGCGGGGATTCAAAGA  
GTTTATAAAGAGAGATTAAACAACACAGGTTGGAAATGCTGACTTATGTAAGTGAGTAGG  
AAATCAAATGGTAGGTCATTGTTATGGAGCTCCTATGGCAGCAGTAGAATAAAATGTACA  
AGAAATAAGTTTTAGATCAAACACTCATAATAGTGTTATTTTTATGAGGTGATAATTTAT  
GACATCATCAAGTAATTTGATAGAAAATTTAAGACTATTATTAATGATCATGATAAAAA  
TTCATTTACAGATGAAGAATTAACCTTGTTTTTAGAAGAAGCAGACTATTTTTACTGTGC  
ATCTTCTCAAGAATGGGCATTAATAATTTCTTCAATATGAATATACAGTAGGGGAAAAGTA  
TGAGTATAAAGTGGGTCAAGAAACATATAAAGCTCTAGTGTAATGACCTAGTATCTGT  
AGCTTTTCAAATGCAGAGAAATCAAGGATCTGGGTACTAACAAAAAAGTAAACGGTAG  
TCTTATGTTAGGAATAAGCTCAGAATTTGAAATATGCTAAATATTGAAAGAAGAAAAAAA  
GACATAATAAGATCTATTAATATGAACCCTACAGATATTACTATAACTAATATTAAAAA  
ACTGAAATAGAAGGAGCTTTAGCAGACACTGAAACAGAGATAAAATGTGTTCTTAGAAAA  
TTAATGAAAAGACAGCAGAGAAACAAATATCAAGTGAACAGCAAGGTACAATTAGTTCT  
ATTAGAACATATGGAATGTTAGTAAGTGGTGATGTTGTCTTAGATGTTAACAGTAGAGAT  
CCTTTGGAGTTTCAGCGCATATATGGCCGAATGAAAATAGTCAATGTATATCCTCTAATT  
GTAAAAGGTGAACATTGTGGGTATCCAGGTTCACTCGAAAGGATTGATTAATGAGTGC  
TATCACAAATGCAATAGATGATATAAATAGAAAAAAGCAGGTATGTTTGTACGTTGTAT  
GAGTGCAAGTGCAATGATAGAACTAAAGCTAAAGCAAATGCAAGTTGGACACACAGAAC  
ATCACAAAGAAAGAAAAAGTTGAAATGCAAAAACCTTTGGAGGAGGAAATAATTTTATTAT  
TAGATTATCGCATGGTGCAGAATATGGAGGAATACTTGAAGAAGGTTTCAGAACCACATGT  
TATTACTCCAAAATCAGCTTAAGCTTTATAGTGGAGAGGTGCTTCAGATACTGTAAAAGC  
AGTTCACCATCCTGGTACAAAAGCAAGGCCTATCATAAAACCAACTAGTGATAAAAAATAT  
AGAAAAAATAGGTAATATGATTTTTAGATATTGGGGTGATTAAATGAGGGCAGGAATAAG  
AAAAGGTTTTAATAGATAATATAAAGTATTGAAAGATTATTATGAACCTAATGTCCCAA  
CCAAGCTACAAATAGGCCTTATCTGGTAGGTGGACAAGGGCAAGACAATGACAAGGGAGA  
TTCGATAGGTTTTGAAATAACTATAGAAGACTGGATTTATGAAGGTAGAACTACATTTAA  
GAAGTTAGATACATTAACCAACTTATTGTAAGCTTCGACATGAATATTATAGTTGA  
TGAATGTGAAAATGAAGCTTTCACTTGCATTTATAAAGTGACAAATGAAAATGATATTGT  
GGGTCAGGAATGGGATGCGATAGCAAGATGCATAAGTTTTAGTGTTGTAGCTTCAGCAGA  
TTAAGAAGATGAACTAGCGTTAGAGGGGTAGAAGCTTTATCGAAGTACACAAAAGATTA  
CTTAGAAGTTGATAGTTATAAACATATTTGGATGAAAAACTTTATAGATCCTTGCGCATT  
ATGGCGTACTACAAATGCTGAAAACAAAAGAATAAATTATCATTGATTGAGATTACCAG  
AACTACGAAATGCCATCTTGTAAGCAAAAAGAAGGATGAAATCGTCACGGTTCGTGACGC  
ATAAGAAACAAGTTTAATAATAGATAAAGGAGTAAGACTAAGAGAGGATAAGAATAGATG  
TTTAACTCTTGTTAGAGTAGTTGAGGATAGGGACTCAGTCATGTTGACAACAGGACCATT  
AACAGTTGTTTTCAAATGATAGGTAAGATAAAAAGAGTAGGACCTGTTATGGACGAAAT  
TTATAGTAATGGAAGTTTACAATGGGAGGTGTAAGGGTTGGCAGAAACAATAAAAA  
GACTAATGTAAGTAAGCAGAAAGAAAAATATTTGAAAATTGCTTTCTTGAAAATAGTAA  
AGAACTTGTCTACGTAAAAATGGTAGTTGCAGGTGCTTTATTTAATTGTAAGAAAGAAGA  
ACTTACAAAATCAGAGTTTATGAAATTAATAAAAAGATTTTTTAGCAAGAGAGGTGAAGTA  
AAAACGCTACTGGTACTTGGATTGAAAAGACAAAAGAAGATACCGGGCTTTGATAACA  
GATTCAAAACACAAGCAGAAAAGTCTGCAAACACACGATTAAGGGTTCGATTAGCAATCC  
CAGTTAAGGGTAATTGCGGAGAAGATGGCAAGTTTTTAACAATAAAAAATGACTTGAGAC  
AGCTTAAACTTTGTTTGGTGGTGTGTTTGCCTAGTACGCGTATAAGTTACGTAAATTAG

CTTTCTTCTGAAATGTA AAAAGAGGTGTTATTATATCGGCTTGTTGATGGAAAAGAAATGA  
AGGGTAAATTAACACTACAGGATACTACAGAGAATAATGCAAAGATGAAATTAAGCTAG  
AGGCTAATTACCCAACAGCTAGAACTTTAATGTAACAATAAAATCTAATTTAGTAGATG  
CAGATAAATAGGACTTTATATACCTTGAAAATACTAAACAGTTATTTAGGTCAAGTTTTA  
ATGGCACTATAGATGAGATAGA ACTAGAAATAAACTCTAATTTAGATAATGAATAAGTAA  
TTGCAACTAAAGTAGCTGATAGTGTTACAACACTAGCAACCTTAGTAAATGTCGCACTTG  
AACGTGGTAATGATGGTTGCGTATCTATTACTAATGAGTTTTATTTAAAAGCTTTAGAAG  
ATTCTGAAAGATAAAGTTTTGATAGCGTTGCACTTGACGGTGTGGCTGATGAGGCATTGC  
AGGAACTCCAAAAGCTTGGGTAGCTTAAGATAAAGAATTAGGAAAAGATAATTCTACTTT  
TTCTAGGTGGAAA ACTGAGGATTATATAAACCAAATTAATGACAAATCGAAAGGTTTTA  
ATGATGGAAAGATAATCAATGTTGGGAGCTCAGCTTATTACGAGGAAACAAAGTATACAC  
CTAGTGAAGTAGCTGTTTATATAGGAGCATGGGCGGTAAGCAAAGGTATAACAGGAAGGA  
TACGTATTGCTAAGAATATATTTGAAGAAGTAGAACCACGATTAAGCCATTCAGAAGTTA  
GAGAGTGTGGAAA ACTGGTACAGTCGTCCTTAGATTTTGATGATGGACACGTGGTTAAAG  
TTGATCCTGTGACTACATTTAAAAAATATGTACATGATAAAAACGAAGCGACGGGAAATA  
GCTCTAATATCATGTTTATTAGTACTATAAATCAACATACTTCATTA AAAAAGAAAAGAGT  
TTCTAGGTAAAATATCTAATGATTCAACCGGTCAAACA ACTGTTATATGTGCATTGTAGA  
ATCATTTTGAAGAATTAATGAGTCAAGGTATTATATCAGAGTTTAATGTTGATATAGATA  
CAGAAATTCAGCAACTACCAAAGCAGGTTAATTTAATGGAAAAGGGATGGTGTAAAGG  
TTGATGTAATAAAGAAAATTTATGGTACTGGATACCTAGGATAGGTAGGTGTAAAGGTAA  
GGGAAAATATGATAAAAATATTATAGATGCTACAAGTGTGTCGATGGTTCAAATGCTAG  
AATAATAAATGATGTAGAAGAAGAAGGATAGGGAACAGAAGTTACAGGTGCAGTTGGAAA  
TGATAAGAAA ACTTTTTAGATTAAGTTGTTGTAAATGGGAACTAAACAAGGCATCCACTCA  
AAAAGGTACTTTTTCTTACTAGTACTTAAACTACATCTAAGTGGATTAAAAAAGGATT  
TAATAAATTTGAAATAATTACAGAAATAGTTATTCCTGGGCTAGTTGGATCTGAGAGAAT  
TAGATATAAAAATTTGTATGGTCGAGAAAATACA ACTAGCAAGCATAAAAATCTGATGAAA  
TCTAGAAATACAAGTAGATGGA ACTTATAAAGGATTTGAACTTTTAGATGAAATAACATA  
ATAACTAAATTA ACTTGCACGTAATTAATTTTATGTGTAGCTTTTTATAAACCTATAAC  
ATTGGAGGAAGTTAAAAATCGAAAATTAGATAAGGAATTTTGCATTGAAAGAATAGAAG  
AAGAAAGTGAGCTTACTAAAGATGAAATAACAAAGCAACAAGGATGTAATATAATTATGA  
CATTGACGGAGGATGCTATATTACCTGAAAAAATATTTTTTTTACAAAATTAGATGTAC  
CACTTACGCTTAGGGCCTTAACGGAAAAAGAGCCAAGTGCATTGCAAAAAAATATACCA  
AAGCTACTCAGGTAAGAGGTAGTAGGGAAAGCAAACA AATGGAAGATGAATTTAATATAG  
CTCTAATAGAAGAGGCTACAATATTCCTAATTT CAGTGATGCAAGACTTCTTAATTCCC  
TGAATGTATCTAAAGGTGTTGAATTTATAAGAAAAAAGTTCTTAGCAGGAGAAATCGCAT  
TAATTTGTGATGAGGTACTAGAATTGTCTGGATTTTATGAAGAATTAAGTGATGATGAAA  
TAAAAGCTAATAAAGAGAGCTGGGAAGATTACTATTTTATACAACGCATAGGTAAACA  
TAGTGTCTTCCAGAAGATATTCTGAAAAGCGAGAAA ACTCCTCAACAGCTCTTTAAAGT  
TTTTACACAGTATGAAATAGAGCAGGATAATAAAGCTATGAAAAATAAATAAAATTCAA  
CTGGAAGCGAAGTGAGAGAAATAGCTAAAATGAGATGTATCACATTGATGTTATCATTG  
ATGTTACAGAACATGAACAAACTAAAACATATTAAGTGCTATGGTAAGATACACGACAC  
AGACAGAAAAACAATATAAGCACTTAATAGGACAAACGCTAATCCAGTTATACACACTC  
GACTAAAACAGCTAGTGTTGTA ACTATAATTAGCAACA ACTTGAACAGAGTGAGTATAA  
CTATATCTACCACTATAAATGCAAAGCTAAAGCAACTCGTGTTGTAAATCGAGTGCAA  
ATAAAGTAAATAGTGTGCTTACACGTAGACAAAGAGAAGTTCTATTTAGGGCTAGAGACA  
GAGCTAGTCAAGTTGTAGATAAAGTAAAAGCTGAGTTACAAAATATGACTGCGGCTACTA  
TAATTAGTTTGA AATGAGAGCCGACCCAGCATTAAACAGTTATTTCTCAA ACTAAAAGGA  
AATTAGGAGA ACTCAAGAATAATACAATATCAAATATTAAGCAAAGGTGAAGAAGCTT  
TGAATACTATTTCTCGTACTAAGAGTAAAGTACAAGATTTTTCTAATAGA ACTTACCAAG  
CAATTGTAAA ACTAAAAGATGAAGCTAGTCCAAGATTGAGTGGCTTAGATGTCAAGATAA  
GTACTTTTCTAAGTAGTACTATTAGTGAGTTTACACAATCAGCGGTAACAGCCACAGCGT  
TAATTGGTGGGGTTGGGGTAGGAAGTGCTCTAAAAGGATTTGCAGACTTAGAACAACCAA  
TGAAAACGCACAACTGTATTAGGTGCAGATTCAAAAGAAATTGCAGAAATGACTGCAA  
TGCCAAGGGTAATGGGCCGTACA ACTAGCTTTACA ACTAAAGTTGAAGCGAATGCTATGT  
ATTTTATGGGGATGGCTGGCTGGAAAAGCATAGA AATGATTGCGGGTCTACTTGGTATAT  
TAAATTTGGCAGCAACAGGTCAGTCAGATTGAGCCCTAACAGGAGATATTGGGACTGATG  
GTTTAACTGCTTCACGGCTAACTGCAAAGGCTACAGGAATGTTTGTGATGCCATGGCAG



CAATAGTGGTAAACTATAATACAGACATAGATAGAATGGGTGAAACTTTGAAGTATATGT  
GAAGTGTGTAGGAGCATTAGGTGTTTCCATGAAAGATTTGAGTTTAGCAGATGGCTTAA  
CGGCTAGTGCATGTGTTAAAGGGAGCATGGCAGGTAAGTGCACCTTAGAGGTGGTTTAGTAA  
GATGAATAAAATCCCCAGCTGAGGTACAGAAAGCTATGAATAAAATTTGGAATATAAGCAA  
ATAAAACAAAAGATGGAAATTTAGATGTAGCGAGCAAATCGTTGGCCTTAGAGAAAAAT  
TAGGCGGACTTGGAGGAGTACAATAAGGTGGTGCAATAAGTCGTTTGTGGGCTTACAG  
CCATGGTAGGTTGGGCGGCTGTAGTAAACGCAAGCGAAAAGCATTTTAATAAAATTCACAA  
CAGCGATTGCAGAGAGTTAAGGAGAAGCTAAGAGAATTTCTGACATGAAATTAGATACTC  
TATCGGGACAATTTACTATTTTAAAAAGTGCTATTGATGATGTTAGAATATCAGTAGGAC  
AGAAGCTTGGGAAAGGTACAAGAGGTTCTGTTAAGCAAGTTACAAAAGATATGCCTAAAA  
TAGGAGATAAAGTAGCTGGCTTTGTAAGCGGTTTTATTAAAAATTTTGACAAAATCAAAC  
GTGTTATAACAAGGGGTAATTTTTATTATTGGTGGTGTGTTGCTGGATTTATGGCTTTGA  
AGTCTTTTACAGTAATTTCTAGCGTTATAAGTAGAATTACAAAGAAAGCCCCAGCATCAA  
GATTAATAGGAGGAATCGTTGGGGTTCTTGGACCTACTGGTGTAAATAGTTTTCGCTATAG  
GTATGTTGGCAGGAGCGTTTCCATTTGCTAAGCAAAAATCCGAAATTTTTAAAATTTGTA  
GTACGAATATAGGGACATCAATGTCTAATATTTTAAAACCTTTAAATACTTTTATAGTAC  
GAATGAAAAGTAAATTTAAAGAACTTATGAATGTGGTAGAACCTTTGTTTTTAGCTGTTT  
CTGAATTAGCCTCCATGATTATAAGCGCCTTATAACCACTTATATAATTTTTGGCGACAG  
TTTTCATAATAAAATATGTATATACGTTTAAAGGTAATTGTTATCAAGGTAAAAGCTGTAG  
TAAATCCAATAACAGGAGTAGTCAATGGTTTAGTAGAGATTTTAAAGGAATAGTTGATG  
TAGTTAAAGGCTTTATAAATGGAGATGTAAGCCAAGTAGCTAACGGGCCATAAATCTATTT  
TTAAGGGGATTATAGGTATTGTTACGTCGTTGTGGAGTTTGTAGTAGATTTTGTGACAT  
CACCAATTCAAACTGTAGTCGATATTTTGGATACTAGGTTTGGTAAAAAAGTGAAGACA  
TAAAGAAAAAATGGAATGAATTAAGGACCTTTTAAACAAATCCTGCAGAAGCAGTTCTAA  
TGGTTCAGCAAGTTATTTTATATAGCGAGAAAGCATCAAACGAGTTACAAGCCTCTTCAA  
ACGGAGCAAAGCATATATAAGCTCATTAAAGTCAAAAAATAGGGAAAGGTATCGGAATGA  
GTAAAGAGAGATTTGGAGAGCACAAAACATCTGCGACAGAAGGATGTAATAATATAGTAA  
CTTTTAGAGGCGGCAGAGCAGCTGAATTCAAAGACAACTTTTGAAGGCATAACACCTG  
CTTTAGATGCATTTAAAGAAGCTTTTTCTAATCTTAGAGAACTTTTCGGGGGCAATTTGG  
ACCGTATAAAAGCAGCTTTTGGCAGTTAAAAAACTGTATTTAATGAATATAATTAACAA  
CTTTTGAAAATTTAAAACAAAAGTTTTAGTAACAAAAGAGAGTTTAAAAGCAGTTTTTG  
ATAATTTAAAACTAGTTCTGCAGAGATAGGAAAAGCTCTTGAACCAAAAAAAGAGGACT  
TTAGTGGGATAAAAACAATATTTTTCAAATCTATATAAACGAATTGAAGATGATGGGGCAA  
CTAAGCCTAGAAAACTAATATGGATAAGTTAAAACAATCAACACAAAGTGCAGGAAGGT  
CTTTCTCAGAGCTAGGGAATGCTTATAATCAATTAAGAAGTAGCAAAACCTTTGTAG  
ATTAATTAACGAATAAAAGATGCTTTAGCATCTACTTTCCGAGATATGGGAGGAGAAT  
TACTAAAAGGTGTAGCAACTTGTATAGTTTTAGTTATAACTTCTGTTATTAATGCGAGTG  
CATCTATTAACAAACGCTGTAGCAGGTGCTATAAAAGGTGTAATTGACATAAGGCAAGTAA  
TATTCGAAATCATAGGTGGGATAATGTGCGGTTATGGCGAAAACATAAAACAAGGATTTT  
CTGATATTTTCTAAGGAAATGGGGAAGTAGTTAAATCATTGTGGGAAGGTATAAAAGGTG  
TTTTAGGAGCACCAATTAATCTGTTGTAGATTTTGTAACTAATGGTTTTTTCGGAAAAAG  
TAGGTCAGGTAAAACAATGGTGGACCGATTTAAAAACTAATGTCGGTCAAATATAAGGG  
GATTTGTTAGTTTTGTAAGCAATGGTTTTTCAGCAAAAAGTTCCACGAGTTGGTGTATGGT  
GGCAAGGATTAAGACTAAATAATCTGGTAAAATAAGTGGATTTGTAAGTCTTGCAGAAA  
ACGGATTTAAAAGTAATGTAGATTCAATTGAATCTGCTTGGGCTTCTATTAATGCAAC  
TATCAACCAAAATAAGTGGGTTTGTAAAGTCTAGTAAAACTGGAATACGTATTGTATTAG  
ACCGTTTTGCTGAGGGTGGAGATGCAAGTAAAACAAGCATTGTGGAGAAGCAGGCCCCCG  
AAATGGTTATTCCTCTTTCTGATAGCAAGAGAAGTAGAGCGCTAAGTTTGTATGAACAAG  
CAGGACAGATGCTTCGAACTCAAACAATTAATAATATTATTCCAATCTCTCAAAAATTAG  
GAAATAGTTTTAATTCTACAACCTAGAATCCAACATAGTAATACTAGTATTAGTAATAATG  
TTAGGCAATTTCTGCCAAAAAAGATGAATTTAAAAATACCGAAAATAGAATTTCCCAAG  
AATATCAACCCCAAAACATAATTAAGTGGAAAGTATTGCAAGTAATGTTGGTGGACCAT  
CTATAATTATTCAAGGTAGCAATTACAAAGAAGAAATGATGCAAGGAATATTGTCTCAAG  
TAGAAAGTGAATTAAGACAAGCAATAGCAAACATTGCATCATTGTAGAATTATTGTTGAA  
AAAATCCTCCTTATATATGCTATAATTTAATAATAAATCATGTGAGGGGGATTTTTACTA  
ATGTGGGAAAAGTGTAGAAGTCTAAACGTTTTTTTTAAAGATACTTATAGTAATTATAGCT  
GTTGGTATGTAACCAGCAACATTATTTCTTATGTCAATAATTCTTTTTGTACACTTTTT

AAAAAGAAAAAAAGATTGCATGCATAATGTCACCTATTTTAGTTGCTTTAACATTTAAC  
TTGGCACATTCTTGGTATTTGATGGATACAACCTGTTCCCTGCCCGTAATACAAAATCGGTA  
CAAATAAAAAAACTCATAAAAAGAAATGGGAAGTGAAAAAAGTACAGGGGAAGCACAT  
AAGAAGTAAGAACAAGGAGAACAATAACAAGAAGTAAAAAATGCAGATGAACAG  
AATAACATGCAGAAAAGAAAGTACCAACTGAACAACACAAAGAAGATGAAGAAGCAAAA  
AACACAGGAGGTGATAAGTAAAAACAAGTAGATGCTCACAGAAAAGCACAAAGCAGAACAA  
ACCAAAAATAATGAACTCGTGAAAATCCTAGCAACATATGAAAAATTATATTAATGATT  
CCTGCTAGTGTAGAAGTAACATCAGCTGCAAATAATGTACTTGGCATTCAAAAAACATTT  
GCAACGGGAAGAGATGTCGGTTCAAAAATATTGGAAAGAGCTAGATGATTTAAAAGATAAA  
TATAGTAGTGAATCAAATGAGTATAAAGCTATACAGAATTTGCAGTTCGCATGTTTTGTA  
GTAAAAGAGGCATGTAAAAATGGAACATAATTTTACACTAAAATGAATATATATATTAC  
GAGAAACATGAAAAAAATTGTAATGAAGCGTGTGCTTGGTGTGGTGATTTTGGAACTTTA  
AAAGAGAATATTAATAAAAAAATTAATAATCAATATCAAAACACCTACTAATTAGTGGGT  
GTTTTTAATATGCACTGAAATAAGTGAGGTGGTAACTTGGTAATAGGCCAAATATCTAAA  
AACGAAAAAGAAAAAATAGATTTCCATTTGCCAGTTAAACCACAAGATTCCCTATCTATT  
GAAAAAGAAAAAAGGTTTCGAACTCTAGACATATTAATTTAGGTGAATTTGACATTA  
AAAGATGTGGAGAAGATAATAGAAATATCATTCAAACCTTCTGACCCAACCTTTTATGAC  
GCTTTTTATTGCAGATACAGCGAGTTAAAAAATCCAATCGAAATAGTGTGTCAGTGATTGAT  
AAATGGGTAGACCAAGCCGAACCTTTAATACTTAATATCGCTGGTTTTGTTTTGAATGGA  
TTAGTCACAATATCTAATTTTAGCAATACTCAAACAGCAGGAAGAGAAGGAGATAGAGAC  
ATTGAGATAACATTTAGTACATACAGATCTGAAGATGGAGACATTGAAAAAAGAACT  
AAAAGTACTACTAAAACAATTCATGGATAATAGACCTAATACCCAACTATATCCAAA  
ATATATACAGTTACATCAACAGACACATTATGGAGCATTGCAAAGAAATTTTLAGGTAAA  
GGCTCAAGGTGGACAGAGAATTACAATATCCCCGAAAAACAAAAAAGTCATTGGTAAAAAT  
CCTATTGTGATTAAAAAAGGACAAAAGTTGGTGACACCAAGCAAGTGAAAATAATACTAA  
ATGGAAAATATGATATTATAAATTTAACCAGGGAATAACGTTACGTGAAGCTATAGACG  
GGTTGCATATAAAATGGATGTATCTATAGTAGGACCTAAACAACCTCAAGATACCGGAA  
TTAAAAGGGTGAGAATATAGTTCTAATTTACATTGCATATGAGAGTAAAAAAGAAGATA  
TGGTATTTGGTGATGTCAAATGGGATACTAGGAGAAGTGAAAAGATTAAGAACTGACAC  
TATCTTGTACAGAGAGAACGGTTACATGGAAGAATCAGAGGAACAATATTCGTTTAAAG  
AAAATACAGCAACACAGAGGATTGAGTCCTACAGTATACAATGGAATATATCTTACTTCA  
ATCTAGCAAATACAAGGAAGAACTTGCTAACGTAATACATAAGACTAATATGTTAGATA  
TGATTA AAAAGGAATTA AAAAGCAAATGTAACAAAAGGTGGAGACTTATTTAGAGTAAGAA  
TGGCTAATAAGCTTAAATTATTTAAAATTGGAACATAATGCAAATGTATACAACTGCATA  
GTATATTAGAAGATGCAAACCTGGACAAGTCGTTATAATGATGCAGTTACATCTGTAAAGG  
TTTTAGGAAAGAGTAAAGACAAAATACAAAAGCACCTATTATCGGAACATATAAGAGAG  
TCTCAGATAAGTCTGGAACACTACAAAAGATTA AACAAAATGAAAAGATAAAAAGATGCTA  
AAGTAGCTAAGAAATTAGCCGAAGAAATGTTTAAATTCGGGGGAAGAAACAATAAGTGAAG  
CTTGCATGGTAGATAGAAAGAGAATAAGGGCAGGTGACAAGGTAAGTATAAAAAGTAAAG  
AATATTCTGTTATAGATGTCACCTACACTGGATTGGAGACCAGAAATTAAGCTCAAGA  
TAGGGACTTTACAATATATAAGGAGGAAGTTCTATACAATTGGCTGATGCTAGATTTAAT  
GGAGTTGCTACAACATTGACAGAAAAAATGAATAAAAAGAGTTAATGATGTAGTTTTTGG  
ATAGTGTGCGAACTTGCAGGAATTACAATAAAAAGGTCTTAAGGTGGTTCGGTTATTAAGAT  
GAAAAACAGGATTCTTTAAAATGATAGAATTGGTCATTA AAAAGAAGATTATTTTACTTTT  
TCAGATTCAGCTTTAAGTGGAGCATCTCGGCATAAGCATAAAAATAGAACTATAAAAAGAA  
TTAAAATCATTGAACATAGGTGATAAGGTGTAAGTAGCCGTCATGGGTGCTGAGTTTTGTT  
GTCAGTGGGAGGTTGTAAATGGCAAACCTATTTCCAGTTAATGAAACCTTTGAAATTGT  
AGAATTAACAGTAAAAACGAGAATGAACTGGACCTAAAGGGTTCTTGGTTATTTGACTT  
AAGGAAAGGTGAATATGTTAAAATGCAGATGGAGCATTAAAATGATGTGATAAAGTTCA  
AGCATGTATACAATGGTGTCAAAGGCTCTATTAACACCTAGATACAAAAAAGCCGCGTA  
TACAACATTTCTGCAAGTGACATAAAAAGACTTAATTGCCAGTAACTTATCTCAAAGCGC  
AAAAGAGCGTGAATTAAGTATTAATAAAAAGAACTATTTTAGTGCTTCCATTTACAAA  
AGAAGTCAGTAATTTTAAATTTTATGGCTTGAAAACAGTAGACTTGTTAATTATGAATA  
TGATGTACTAACAATAGATGATGAAAACATAACCATAGATAGAAATATAAAAATGGGAGGT  
GAATACATGGAAAAGAGGTACCGTCACCAGTTTTTTTTGTCAGAAGATGAAGACACTATA  
CATGGAAGGATGTTAAGCAAGTTTCAAGATGTTTCTACATTAGAAGGTGAGTTTATCTAT  
GAGGCAACAAGACCTACAGCTGATCAAATAAACGAATTA AACGACTATGATTACAAAAT

AATTTAAAGATAGCATTACATCAAACCTTGATATAGAACTTACTTTGAATTGCTTGGTTAA  
TGTAAGGAAGTATTTAACAATCAACCTACGAAAGCAATGGGAACAATTACATATACAGGT  
GTACAAGGAACTGTCATTACTCAAGGAACTATAGTAACTACTATTGCAACTGAGGAAAA  
CAAACCATAGAATTTGAGCTTCTGAAACTAAAACCTATAGGAGAAAATGAAACAGTAGCT  
ATTAAGCAGAAAGTAGGATTGTACGAACGACAGGGAATTTGTCTAAAGGTAGTATATCC  
GTTTTACTAGGTTCTATTAGTGGTGTAAATCAGTTAATAATAAAGAAGATTTTCAGAGGT  
GGAACAAATATAGAAGATGAAGGACATATTAGAGAAAGAGTTCTTGTAGCGGAACAAGAA  
GATAAACTTAGTGGAGCTAGTTCAGATTATATTCGTTGGGCTCAAGAAGTTAATGGAGTT  
GGATATGCTTATGTAGTTCCCGAATGGGCTGCAGCAGGTACAGTAAAAGTATTACTACTA  
CATAAAAATAGATAAGCAGCAACCCAGGAATTGATAAAGAATGTTCAAGAATATATATAT  
CCAAATGTGGAAGAGGGTCAAAAACGAGATTCAAAGCTCATGAAGGTTCTATTGTGGCT  
ATAGCCACTCCACTAACATTATTAATTAATGTAAAAGCTAGTTTTGTTTTTTCAAATGGA  
TTTAGTCAAGAACTGTGACAAATATCTTAAAAAATAGAATTGACAAATATCTGGATTAA  
ATAGATATTGGAGGTACTGTTTTCTTATAGTTC AATTTATTCAGTACTAGGTTCTATGATG  
CTTGCAGATGAAGGAATACATGATTTTCTTA ACTTAAACAATAAATGATGGAACAACAAAG  
ATTATTTTAAATTACCAAGTTGTTGGCATAGGTGAAATAATCCATGAGGTGATAGCGTGA  
TAACTTCTAAAAAAGGTAGAGAAATGCTTCTAACATTATCTCCTATCTATGACCAATCTA  
TCATAATGCAAAGGTTATATGAAGCTATAGGAAGCGAATTTGATAATCTAGAGTTGTTGT  
ATGAAGAATTAGAATTACAATTATCCCCTCAGAGCGCACAATGGGGACTTGAATTTTGGG  
AAAATAGGGTAGGTTTATATACTAATATAGATGAAGGTATAGAAGTTAGAAGAGGAAAGG  
TCATTGCTAAGCGACAAATGAAATATATTGTTAACCCTGACACGTTAGCGACTATAATAA  
AAAGCTATACTGGTGCAGACGTATATCGAAAAGTAAATATAGCTCCATACGTTTTTAAAG  
TACTGCTAATGGAGGTGATGTTGTTAATTCTGAAGATTTAAAATTTAGAACAATAACAA  
TTAAAACAATCATCTTCATTGGATGCCTTCTTTGCACTCAAATACACAGATATAGAAA  
AATTCAGGTAAAGATGATTAACCGAATATTTAGAGATTTTAGAGGGAATATAAGAAATT  
TCTTAGATGCTATGTGGTTATTACATGGAGTTAAAACTTACGTGCTTCTATATTTTAA  
ATGAGTCAATAAGCTTAAATATGAAAAATAAGTTATTTGTAAAAGAAGGTGAATTATTTA  
CATATCTTCAACTAAAAATTA AAAAGA ACTTATATTACCTGAATGTGATACAAATGCTAA  
ATGGAAATAAACTGCTTAATACAGAAGTAAGAGAGGAAGTGTTATGAGTGGCAAGTGCAG  
GAACAACAGAAATTGCAAGACAAAAAATGTGTAAACATAGAGCAGTGGATGTACCATTGC  
CTCCGATAGTTGGTATGGTGTGTTGGAGATGGGGGGGTTGAGAATGATGGA ACTATAATAG  
CTCCACTTTCAAGTGAGACAGCGCTAAAAAATGAAGTTGTTAGGAAAGATATAGGAAGTT  
ACGTATATCCAAGCCCAGCTAATTGCAGATATTC AACTACTCTATTTAAAATATGAAGCAG  
AAGGAAAAAACATAAATGAAATAGGTTTAATAGATTTCGGTTGCTGACTTAATAGCAATAA  
AACTCTTGGAATAAGTATAAAGACAGTGATATGGAAATGGTTTTTTCAGATAGATGACG  
AGTTCTAGGAGATGAATAAATGACTAATGAAATACCTTTTAAATAATGAAATAGAAGAATA  
TTTAATAACTACACCAGCTCATGCGAATGAGTTTAAATAATCGACAACAAAAGTGGATAGG  
CAATCATAAATATTTAGATAATAAAAATTGCTACA ACTAAAAAAGAGTTAAACACTAGCAT  
TGACACAGAAAATGGTAAACACAACATTA AAAATTGACCAATTAATTGCAGGTGGTTCAAG  
TGCTGGATGCACTCAAAGGGTCGCAATTGATGATTGGGTGGAGGATGGGGAAAATGGATT  
CAAAGCAACTGTAACACATAGTTTGTGAACACAGAGAATAGTTGTAAATATTATAGATGC  
TACTACAAAAGAAAATGGAGATACAACTTTAAAATTATAGATGATAATTCTATTCAAAT  
TAGAAGTGGAACTAGGTTAGAATTAACGTATCTGTGATCAATGGAAATACAGAACTCA  
TTTTATTAATCCAAGTGTAGATGAAAACAGAGAGTCTGACATGACTACTTATTCATCTAA  
GAAAATAGAAGACAGCTTTGTTTCATATAGAGCAAAAAGTAAATGGTGTTTTTATGTAATAT  
TGCAACAAGTGTAATGAGTTGATTACTTATTGTTAGAGAGGAGAGTGAGAAAATGCAGA  
CTGAATGGAATTTTAATTATGCTAATTATGTACAAAATGTTTCATTGCAACCTGGGCGAT  
ATAAATATGAATGTTGGGGTGCTTGTGGTGGTCTTGTTCGATACCAGCGATTGGACTGATT  
GTGCAAAAAGTGGTTATTCAAAGGTGAGATTGTATTTAAAAAAGA ACTTATCTACAGA  
TTTGTGTCGCTGACTCTGGTTATTAGAAAAGATTCTGAAGGCTCAAGACTTACTAGAAGAG  
GTTTTAACGGTGCAGGCGCTGCTGGCAAAGTTACTACTGGTAGCTTTGCTTATTTTAAAT  
ACGGTGATGGAGCAACTGATATAAGGCTTTATGATCCGAGTGCAACTAGGGGTAACACCG  
AAAGTTTGCTTTCCCGCATATTTGTTGCAGGCGGTGGCGGAGGTAAGAAGAATAATTTCA  
CTTCTGCTCGTTCTATTGGTCAAGGTGGGGGTTATGTAGGCCTTAATGGAGTTGGTTCGTG  
ACCGAGATTTTTGTGGCGGTGGTTCTCAATTCTAAGGCGGCACAAGTTACGAGACCGAAG  
AGCACCATGGCTTATCAGGAAAAGGAGGTTATGGTAACATAGGAATAGGTGGTGGAGGGG  
GTTGGTACGGTGGTGTCTGGTTCTTATTCTATTGAATGTGGAGGACGTGGAAGTGGTTACG

CAATAAATAAAGATAATTATAAGGCACCCGGATATACACCAACACCTGAATATTATCTTG  
AAAATATAGTCATGACAATTGGAGGTAATACTACTAAAGCAGATGGTGATGCTAAGATAA  
CGTACTACAGGCCTTACCATTTTTAACAGGATCTTCCTATAATTCCATTACAGCAACAT  
TTAAACCTGACCACACAGACCCTACATTGCTTACGGAAATAGAATATTTTATAGATGATG  
TGTCAAAAGAACTAGAACAAGCGATTTAACTCTTGAAGAAACAATTAECTATACATTAG  
AATATAATGCACTATACACACTTAAGATAGTTGTTACAGCCAGTAATAATGCTACAGCAG  
AAATAGTGTTATGTATAAGTAAGGATATAATGCCACTGCCCGAAAATGTAAATTAGCAGC  
ATATAGCTTCTAAACTAATTGAAGTAAACGAAGGATTTACAACCTGATAAAAACAAGTATTA  
TAAATACTTTGGCATTAAAGAATAGACAAGCAAGTTAGAATAATACACTTGATGAGTTGT  
CCGTGAACATAAAAATCAAGTTTTGATAGTTCCGATGCTAGTGTACAGGATTTGATGAATC  
TGTTAAAACGAGCTACTAATACCATAACACAGTTAAATTCCTAATTTCAAGTAGCAGGTG  
TACTTCTGTTGCAAAAAGAAGCGACGGAACCTACTTACTGATGAGTATAAAAACGTCTA  
CAAGTTCTAAATTTGCTGGGTGGCTCAAAATTAATGGATCAGCTTTTAAACCTACCTTTT  
TTGTAGCTGAATGCGAATATTATGTCAGCGATTATAGAGTTGACTATAAATTTTTTACAT  
TTGCTTGTGTGGCGTTCCCTACAAGTGGTAAACAAGATTTTGTGTGCTGTAGCAATTTAAG  
GTCGCTCATGTGGTATAGATAATTACACTGATGACGGTTTTGTTTATAACAATAATGAAG  
TGGATTTAGGGTTTAAATGCTAGTGGCGTTTAAAGTTCCTGCTTATTTACCAGGTGGTGGTG  
AAAGTACGACTTATGCTTGGAGATCTGTCAAAGTTATGAATACTTTATAGAGGTGGTAAA  
GTAGATAGAGCAAATAGAATTAGATGTGACCAAACAGGTAAGATACTCTTGCCAACTGGA  
GAAGCAACAGGGGATGTATTACCACACAATAAAAATAACAGAATTACGTTTTATTGATCTT  
CCCTATGGAAGTATAGATTATATGAAATATAGAATTGTACGGATAAATAAAGAAACAAA  
CAGCCAATTTTGGCAGATATACCAGTAGATGTAAGAGAAGCAGAAAGAGAAAATAAGAT  
TTAGAAGATCAATTACTGTCATTAACACATCAAGAAATCCGAGGAGGTACTTTATAATGA  
ATACCAATAATGTAGTGGTAAGAATATTAGCAGAGAGAATATAAAAATGGAGGGTTAAACC  
GTTTGAAAAATAGAGAGTTTCAACTTGAGGTTGTAACATAACAGAAATATAGAAAAGCAG  
TAGAGGATTATATTATAAAAAATAGTGTAGTAGTAGAAGGAATAGAACCAGCAGCGCAGT  
AGGGCCTTTTTTTTATTGAAAGAAGGTGACTAAATGGCCTTTAAAGTGTTAGTTAATAAA  
GTTAGAAATCTTGTATTAGAAGCAAATAATGTAACCTATAGAAGATACAGAGAATAATTTT  
ACAAGTCTTAATATAGAAGGAGCATTAAAAGAGGTTTTTCAACGTGGAGTTAACGCTAAG  
AATAATATAGTAACAGCATAAACTCCCAAGGTCCAGAGGTTACTACAAGCGATACATGG  
GAAGAAATAAAGAATTAATTTGATATAAAAAGGGGGGCGATTAGATTTAATGGAAACAACA  
CTTGAAGATAACTATCCGTATTTAGTAACAAATGGAGCTATGAAATATATTGAAAGATGT  
AGTTGGAACCTTAAGGACATTTGAATATGACGAACCATATCTTTATGTAATTAAGTAACCT  
CATCTAATTAATAATGTTATTGCTGAAACAGTAGTGGTTGACATTACTTTAGCTAAT  
GCTAACTTCTCATGAATCTGTGTTACACAAGTGTATTTATTGATATCAGACAATACTATA  
TTATATAAAATACATAAGACACCCGGAATTGAAGTGAAGTCAATAGAAGGTGCTTATTAT  
AAGTTTTGTACTTAAGGGGAATTTATTCGTGTAGTATATGCAGATGAGACTTCTTCTATA  
CTTCATCAAATGTGAATATCTGATACGCATTTAATCTTAECTATGAATTTAGTTTGTAAAT  
GGTATTTACAAGTAGAAAGGAGGAAAGTTTGTTTGCAATAGGAATGCTATTAATACTGCA  
ATAAAACACTCAAATTCTAGTAGGATTACAACATGTCATTTATCTAAAATAAATTTTGAT  
TGTGCCATTGCTAAAGATTTTGGAAATTGGAGGATATTTGCATATGAAAAACATTAAGATT  
TTAAATGATTTTGTATTGTCATCTGATGCAGCAGGAGGTATAGAAATTGATGGCAAAGAA  
AAAAGTGCTTTAGTAGAATCTGACGTAATTTAAATTTAAATGTCAATTCAGACGATAGC  
CAATATGACAATTTTCATATATATAATGGATTTATATAAGCTATATAATCGCTATCTAGT  
AGTCATTTCCGAAAAATGAGTTTAAATGCTCTAAAAGGTAACGAAAGCCACTGAAAACCT  
ACTGAAACATACCGAAGTTCTAGTATGTTTGTAAATAAATGATATAGTTTTCTTATCAGT  
AGTGGAATTTTTAGAAATATATCGTTCGAAGAAGGTATATTCGGAAGAGCAAGGAGAATCA  
TTATAGTTTATCTATGAAATTTAATGGGTACAGAAGAACTAAACATAAAAATATGTTGCTA  
TGATACACTATGGACCGAATGTGTTATCGGAGGAAAACCTTAAAAGAAGGTATTTTCGATAG  
AGGAATTACGAACACCAAAAATACACTCTAATTAAGAAACAAAGTTATTTATAAAGATAG  
ATACTAAAGAGGTTTTCTATAGAGATACACATATTA AAAAGTAGCATAGAAGACAAAGAAA  
ATTCTACACAACGAACAATAGCAGATTTAACACTTCAATTAATGTCAAATGGGGTGTTAT  
AAATGAATTGGTTCAAGATAATAACAGATCTCTATTATAATGGTAATTGGACTAAAGAGC  
AAGATAAAACGGCACTAGAAAAGAATAAGATAACAGCCCGTGAATATAAAGACCTTGATC  
GAGAGGACTATATAGCTTAGTCTTTTTGAATTCAAAATTTAGGAGGTTTTTCATGAGAGAA  
GCACTTTTTCGATGCAGATTTAAAATAACATGAAACCAGAATAAATAATCATGGAGAAGAA  
ATAGACGCAACAAAATAGCAAATATAGAGTCTAAAGGAGAGTTAAAAGCAATGTGTGTG

AATCTAAACTCACTTGCATGTATGCTCAAAGGCTAATTGTTACAATGAGTACAACACTT  
GTAGGTTTCTTTCTATTTGCGAGATCAAAGTGGTATATTTTAATTAATTTCGGGGGATAAGC  
GATGGGTAATTTAATAAGTTTTATAACCAGAGGAGTTGCTATTTTTAGTAGCTGCTCTCTC  
TATCATAGGTCAGGGCTGTAAGATGTATAAGCAACTAGATAACAAATATATTCCAGTAGG  
GTTATTACTACTTGGTATAGGATTTTCTATTTGGAAGTTAGGACTAAGTCCTGTTGCAGG  
CTTACAAGGCGTGATTTGTTGGGGTATATAAATAGGTATAAACCAAACCTTACAAACAGTT  
GAAGGGGGAAAATAAATAATGAAAATATGTATACCAGTAGGGCACTGTATGTTAAAAAGT  
GTAGCATGTACTTCTGCTGATGGAGTAGTTGACCAGTATCAATACAACAAATCTCTTGCA  
CCAGTATTAGCACATACATTTAGAAAAGAAGGGCATTGGCTAGATGTAATAATATGCCCA  
GAAAAGCAGTTTAAAACCTAAGAATGAAGAAAATTCTGGAAAATACCTAGAGTTACTAGT  
GGAGGATATGTTTTACTTATAGAGTTACATTCAAGTGCAACTAACGGTCAAGGTGAAGGT  
TCAGCATTCTATACTATAGTAATTACGGCTTAGAATACACAGCTAGAGTATGTGCTAAA  
CTAGGTACAGTATTTAAAAATAGCGGTGCTAAATTAGATAAAAAGATTATATATCTTATAC  
AGGTCAAAGCCTACCGCAGTATTAATTGAAAGTTTCTCCTGTGATAATAAAGAGGATTAT  
GATAATGCTAAGAACTAGGACATCAAGATATTGCTGAGTTAATTGTAGAAGGTGTATTA  
AGTAAAAATATAAATTATGAGGGAGTTAAACAGATGTACAAACATACGATTGTTTATGAT  
GGAGAAGTTGACAACCTATCTGCAACTGTAGTTGGTTGTGGTTATAATGATGGGAAAATA  
CTGATTTGTGATATAAAAGATTACGTGCCAGGTTAGACGCAAAATCTTTATGTTGTAGGA  
GGTGGCGCATGTGAAAAGATAAGTCCTATTACTAAAGAAAAGTTTATTATGATAAAAAGGT  
AATGATAGATTGGATACACTTTATAAAGCATTGGCTTTTACTAAAAGACACATATAAGTT  
ATCAACAAGAAGTGGTTGTTGTGGTGATAACTCTATTATTGTAATATATTGTCAATATA  
TTATTGTGATAATGGAGGATTTATGTATGTATGCATTGGTTTATGAGAGATTTGTATGAG  
CAACTTTTAGTATTAACCTTAATACCTTGATTAATGGAAGCGAGGATTTAGGTGGATTGG  
ATGAAGTTGATATCTTGAGAGCAGCAAATAATATACATGAATTAATGAGATAAAAATAG  
GTACTGGGTATGCTATTGCAATCTTTAATAAGGAGATATTATAGTCTTTTAATGTTTCTT  
ATTATGTTAGCAATATAAATAAGAACTATTTGATAGAAGCTTAATTGCAAATTCAGGG  
AGGATATATTGGGTATAATAAGAGAATATGACACTTATAGAGTACGACACTTCACTTTCA  
ATTGGAAGAGATAGAATGCTTGAGTTAGGAAGTAGTTATTTTAGTTAGTTATTACTTTCT  
TTCACATCCTTTTATTATTTTTCAGTAAGAGTATTTCCAAATAATAATTTATTCAATAATAC  
TTAGTAGAAAATAAAATTTTGAATCATTATAAAATTAATGAAATGAGGTAGTAAAATAT  
GGGTGAAAATATAGACGTAACGCAGTTGAGAGTAAAGAGAATTGATTACTATATTGAAA  
AATCAGATAATAAAGCGAGTCTTTTTCTATTATTAAGTAGTGCAATTATATGTTTTTTAT  
TTTCAGGGAAGGACAAAATAATGAATCACTTAAGTATAAGAAAATATGAGATGTTTAGAGA  
TGCTATTTGACATTGTTATATAATATACATTTGTTGTTTCGAATGATTTTTTCGATTATGG  
TTTTAAAGCCAAGGAAATCTAAAATACAATATAAATATACATCGATTTTTTATAATAAAG  
AGATAGCATCTTTAAATAATGAACAGTACAAAGAAGCATTGAAAATGCATTTAAAGACA  
AAGAAAACCTTGATCAATGCAGCACTTGTTCAAATAAAAAGAATTATCTTTAATCAGTGATA  
AGAAAATGTATTATGTGAAAAGTCAGTAGAAGCTTTTAGTTTAGGTGGAATTATATTGT  
TTATATATACTAGTAGTAGTTTTTAATGCTATTTAGAAAATGTTTTATCTGGTTAGTA  
TTCCTCTATGAAGATAGAATCAAACAATAGAAGAATACCATTTACATATTTGTAGATTCT  
TGTCATTGATTTTAAGTTAATTTTTTAAATGCTAGTTTTACATTTTCTTTAAAATCAGGT  
ACTGTGTTTTTCATTAATAATCTTCAAGTTTATCCTCTCTTATCCATATAAGTTCTGTATGT  
TTTGATGTCGGTTCAAACCTAAGAAATGTCATATTCATTTATTATTTCTGCAAGAGTTATA  
ATCCCTTTGTGTAACCATCACTTGTTTTTAACTTGATAAATTGCTAGAGGTATAGATTGG  
CAATCATCTTTTCTTGTGCATTCACTAATATGATCAATGTTTATAGTAAAATGTTTTTCA  
TATTCACGTTTAAATAGTATTTATAATTGAAGTTTCTAGACTTGCATTAACACAACCAAAT  
ACCCATGTACTCGCATTATTATTTCTGTTATCACGTCTTTTCCCAATTAATATTTTGGAA  
GTTGATTCATAATAACAAACCGCAACACAGTGTCATTCCATTAATCTACTTTTATATAG  
TCTTTATCTATTGTATTTCTATCGTAATGGGGGTCTGTTTTAGAAAATCACGTCACCTATT  
TTTTCACTCTTAACACTAAGATTTCTGTGGATACGTATTTTATCCAAAGCCTACGCGACA  
GAATTAATATAAAAGAGTCAATTAGTAATTTACTTTCTCCTTTTTTATAAAAAAATAT  
GTTGGAACCAATTAATTTTCTTCTATTTAATCAACAGAAAACTATCATCAAATTATCTA  
TCATTATTTATTCCTTTTATATGATACCAAATGATAGGGTATGGTTTATATTTCCAGATA  
GCCTTTAATTTTTTATATGTAATTATATGTAATTTTGATAAAAATATCAGCTTTTCTTGAT  
CATATATAACCTTGTTACAACTCAGAAAAGTCTTTCTGGGCATGTTGGCTTTGATATT  
CTTAAACCAGCATCAATATCATTTCTTAAGAACTCAAGTATTTTATAATTATTGGAGAAA  
TCGTACATAGCAGAAATAGTTTCATATTGTTTATTATTTTCTAAAGCATTAAAATTAGGA

ATGCATGATACTATAGCAATCCAGGCCGCTCCTTTTAATAAAAATAAGATTTTGAAGGTTTC  
ATTAAGTTTTTTTTTCAGATTCAGAAAACCGTTCTAGTGTAGAGAATATATTTACAATTTTT  
TTATCTTTAGCAGTGCTTGTTAACATGTTAAAGTTCATATCTATGTATTTTTAAATTTCA  
TCATGATTTTTTCGTACGATAATGGAAATTACCTCATCACCAAGAACTCTCCAAAGTTGT  
GCTTAAAAGTTTTTCATAAACTCTATATTGTAACCTACGAGGTATATGTAATAATACCTTA  
GCCCATGCGCTATGATGTATATTTTTATATCATGATGAATTAGCTATATCAAATAAAGG  
AACAAAATCACTTGTGGATGCTTAGGTTCTTTTTCTTTACCATAAATTTTCAGTATTAATA  
CTTGCCTGATGCGTTTTCTTATACTTTTTAAGATTA AAAAGCGTTTTTTGTTTTTAGCTGCA  
CTATAAACATTATGTACATATTGAGCTTTATATTCTTTATCATCCACCATTGTAATATC  
CTAACCTTTCCCTCTATTAGATGCTCCATAAGAGGAAACCTTTAAGTTATCTGCACTTT  
TTGAAGTTTAGACCTTATTCCCTACTGTGTTTTTCATCCATAAATTCTTTTCATATTACGGTC  
TAGGCATCAACAAGGCTGGTGC GAATTCATTGGATTGATACTCCTTGTGGTATTGCTAC  
CTCTAAAATACTGACTTCCAGCTTGACTATTCCATAGTCCATCATCAATGCCATATCCCA  
TGTGTA AAAATAACATGTCCTAGTTCATGCTATATGGTAAGATTCTTTCTGGTATCTGGGT  
GATCAGGAGATGCCACTATTACAAATGAATCTTCAACTTTTCTAAAAAATCCTTCAGAGT  
ATCCACATAAAGA ACTATCTGCTATTACCTTTACTCCTAAAGCATCCACA ACTTGATTTA  
TATTTTCGTATTGGAAGTTGGATAGTGTATGTTGGTTATTATCTTGGGTTATATCATTAA  
TTAGCTCTCTGATTTTGG AATCCATTA AATCGCATTTCGTATATAATATTTTCATTTAAATA  
ATTATTTATTGTAATATTCATTATATCAAAA ACTATTTTTTTTTGTTACATTTAATATTA  
TTATTTTCATTAACCTTTTGTATTATACAATATAATTATACCATATATCAACAGTTTTTT  
GTCGAATGTATATTTGAAAAAATGAAAATTAGTAAATTATCTTAAACATAATTAGATATA  
CTTTGCAAGAAATAACAATCTTAAACAATAAGATAAATCGTTGAAATACCAATTTGTGTTA  
CATATACACAATAAACAAAAAATAAAAATTTTAGATTTTCAGAATATGAAAGGACCAAAAA  
CGATTA ACTAGTAATCTTAATGAAATTCATTTAGTTTTATGTTAAAGTTTCGAAAGCTACAG  
TAGAAGTTGTAATAATAAACGAACGAAAATTATGGTACTAAAACATAACACATGCTGTA  
ATTGTATTAGAGA ACTGATTGAATATATACCACAAGCAATCTTTATATAACAGTGCTTCT  
TGTTTCGAAATTCATCAACATATAAACTATCAAGAATATTACTCAACACACCTTCAAATT  
GTTTTAAATCTTTTGCATACACAAAGTTATAATATACAACAAAAGAGTACAGAAGTAAC  
CCCAACACATCTATCCTAATTCAACCAATATTATATAGAGCATTCTTCATTATGGAGAGT  
GCTTTTTTATCTCTTTGAATAATCATGTTGATTCTTTATAATATTTTCGATTTAACTTATC  
TTTTTCTATCAAATTTAATACACAATTAATACAAATGTGAGTTTTTCATATGACCTTTGTT  
ATGAAAAGTAATAGACTTATTATCAACTATATCTATTCCTTTATTACTGTAGTCACATAA  
AATAGTCCTAGTCATATTTTTATTCCGTTTATTTTTATATTTGGCATAATTAAGTTTAAACA  
TATTTTCGTATATCCCTATGTCTATAGAGTTAAAACAAAGTTTTTTTATCGCAACATACAAT  
ATATTGTATAAATAAAAAAATGGAGAAGAGATATTTGATAATTGTAAAATAATGTTTTAA  
TTAAAAGCAAGAATAATCTTGTGGA ACTACAATCTAAGAGTGGAGATTCATTTTCTACA  
TTCCATCCTTTAAAAGGAAGGAGGTGGATAAAAGAGCGAGTTTTTACCAGGAGTGTTAGC  
TAGTTTAAAGAGCTAGCTTTATTACATATACTATTACCAGTAAAGTAAAAGCCACCCTGG  
CAGGAGTGACTCTGAGCTTGATGGATAAATCAAGATTAATAAAAAACGACATTAATATTT  
AGTTCATGAAACTTCGCTCTCGGCTAAGGGTTTATAGTTTTATTGTTTTGTTTTGATACG  
AATTTACATCTTTATTA AATCTCCTTTTGCGAAAAAATAA ACTATGAAGATTAGA ACTC  
TGTTTTATTTTTATCTCTTAGTATATATATTATTAGCCACCTAAAAA ACTTTTCTAAAAAC  
AAGAAGAACAATATCTTTTTGGCAACTGGCTGGCATCTTTTACAAGAATTTTATAAATCT  
TACTCACTGTATCTTTGCGTCACTAATTTTCTCTAGTGTTGCCGATTTAGTTTTGTTATA  
CAACTAAAATAATACAATAGAATTAGTTAATGTTCAACAAGGTTGTATGAAA ACTAAAGA  
AATTTATATGTATGAATAGTGTATTTCCTGAAGAGGCACAGAGTATTTAAAGGTCAAGG  
CAAGTTAGAATAATATTGTGAAGTAACATTTGATTATGCGAAATTCTATGAAACAGGGAC  
CCTGTGACTTTAGTCACGGGAGGTTTCAGTGTATTTGCTTATTTCAATTGATATAAGTAT  
TCTATTTATTTGGGCTGACTAATAATAGCCAAGTGGATACTATATGTTAGGCCAAATAAT  
TATATAAGATTAATAGTGTATTTTTGTTATTTTTCTGTTCCCTCTATAGTCTATTATAGAT  
AACCAAAAACGTCTGCGTTCGACCCTGCTTAAATCACTAGACATCTCATTAAATATCAGTA  
TCTAAGAGTTTTTTTTATATTAGATGTATCAATAATTTGACTCTCCCGTTCTTCAGTTATA  
TTATCCAGTTGAGATTGTAATTTTTTCATAATCTTTTCTATAAGTCTCTTTATCGATCAA  
TCTCTAAATATAAATCTTTGATTTTATCTAATTTTTACATGATTTTCTTCTTTTCATCT  
TTTTTGTTAGATTTCCATTTTCGTCTGATGTCTTCATTTTGTGCTTCTAATTTACCATA  
TGTT CATATAATTGTGGCTTTAAGTTAGTCAAATGGTAGTTTCCTATATGTTTTTCATTA  
TGTGTTACCTTGTGTACACAGTTTTTTATTTATATAGAATGTAGA ACATCTATAAGATAAA

TAAACTTTTTCTCCAACAATACTAGAATTACCCTTTAATGTATAACCACACTCCTTACAT  
TCTAAAAGACCAGAGAAAATATGATAGTGTATGTTTTTATTAGGTGGAGCTTCTTTATTT  
TTTTCTAATATTCTTTTCGATTTGTTTAAATTGTTTTTTTCGATATAATAGGTTTCATAATA  
TCTTCAACATAAAATCCTTGTTTATTATATATTCCTATATAAAGTTCAATTTCTTAGAATA  
TCCTTTATTTTATTTTCACTCTATTATTCGCCATGAAGATTAACAATTGTTTCTATTAAA  
GATCTAACAGAACCTGATTTCTCGTATTCGTCAAGTATCGCTTTAACTATATATTTTTTT  
TCTTTATCAATAACTTGATGCTTATTTTCTATTTTGTAACTATGGGAATTGTACCACTT  
ATAACTTGATAGCGTCTCAATTTATTCTGAAAATCAAATTTTATTCTTTTCAGATGTTTGA  
GCTTCTTCATTTTCTGCTACAGAAAAGATAATGTTTATACGTAATCTACCAGCAGCAGTA  
CTAGAATCGTGGGTTTCTAAAATGGTTTGCCAATCACACTTATGTTTTTCCAGGGTTTCA  
ATGTTTTTATACTAGATTTTAAACGCCACGACTTCGTCTATCAATTTTAGACATTA AAACT  
ACGACTGCATAAGCGTTTTCCACATCTCTTAATAATCGCTGTCAGTTAGGTTTTTGTA  
TTAGTTGCAGAGCAACCTTCATCAATCTATTTACCAACTATCTTAAAATCATTATCTCTA  
GGATACTGCCCGAAAGCCTCTATTTGTGTCTGGTATGCTGTCTGCATTTAAATATTGTTCT  
TCTGTGGTAACAAGTATATAAAGTGCTACTCTTAACATTTTACATTCCCCTTATTGTAA  
ATTAAGTAGAGCTGGACGGCTCTAAGTTTACTATGAATTGTTACAAAAAAGTCGCATT  
CATAATACTAATTCTTGGCTCAAAAAATATCACATACTTATCTAGAATAGATGAAAAACC  
ATATTAACTTTTATAACACTCTAAAGCTTCATTTAGAACTTTACTGTTACATCAAGGTA  
TTCTGCCATTTGGGTTATAGTCTTACAAGCAGCATTAAAACCTATCTATTATAGGTTTAA  
ACCAATTAATTTGTTGCAAGCCATCAATCTACCTGTATATTCTTGTGTTGCTATTTTCA  
TTATTTAGGTCTAATATATTTCCATTTGAAGTATAATGATATACTAGTTCTTCTGTTGA  
CGACAAGCTTTTTTCGCTTATATGATTAAGCGTAGTATTATTTAAAGGTTTCCCATTATT  
TTCATATAATCCATGAGAATTCGAAATAGAAGGAACCTCTCAACAATAATATTCTTATC  
ATCTGCTTTTGAGAGTAACTTTTCATAATTATTCATAAGTTCACCTACCTATTTTACCAA  
TTATCCATATCATCTAAATCTTGATATATTTTTTCAATTTCTCCTTCTTTATGTAAATTT  
ACATTGTGTGCCGCTATTGTGTCTCTGTGATTGTTATTTACATATTTACCTATTTGAGTA  
AGTTCATCTAATCTTTCTATTGCTTCGTTTTGTCCTATATCGTTTAAAGGCTTCAAAGCTT  
GACAAAAGCTTATTTACTTTAATTTAATTTGATGGCCGTCTTCGTTCCACCCCATTTCTA  
AAAGCAGGAGATTCATCTAATGCATGTGCTAAAATTTCTAGCTTATCAAGAGGAATATTT  
TTAGAGCTCCCGTTTCATAGCTCTGTAAAGTGGCCTTTCTTTGACAAGTCTTGTTAACT  
AAATATTGATACGAGTTATTAATTTCTAATCGTTTATGTTTCGTTCAATTTGTAATCTCC  
AACATTTTAAATCATTTTCAGTAGTCAAATTTATCACGTCTATAATATATATTATAAAG  
TATTTTTTCATAAATGCAACACATATATTGGAAAATATAAAAAAATGTTGCATTTTGTGAC  
TTGACAATATAAATGGATGTATTAATTTGAATAAGCGCAAATAGGCGACGAGGTGATG  
TAATGAATATAAGTAAATTAAGGAAAATGGTCGAAAAGAAATACACTCAAAGAGAT  
TAGCAGAAGAGTAGGGTGTGACTGTTCAAGCTTTAAATGCGAAATTA AAAATTCGTTTCA  
ACTTCAAGATTGACGAAGCAGTTAAGATACCAGATCTTTTGCAAACCGAAGAGCCTGGTT  
AGATTTTTTTTGAGAATTACAGCCCAAATTTGCAACGAAATTAATAAGAAAACCTAAC  
GATAAAAATTA AAACTAGAGAGGTAGAAATTATGAGTAATAATTTACAAGTAATGGATAG  
AAACAACAAAATAGTTCTAACTACACACCGACTAGCAGATGTAGATGAATCTGACTCAAT  
GAATATAAGTAACAATTTCAACAATAACAAAGATAGGTTTATTCGAGGTTAACATTATTT  
GTTATTACACGGTGTGATTTAAGGAATTTTAAAGGTATTCATACGGACTATCAAGTGAT  
TTAAGTAAGAATTAAGTTAATAAACAAGTACCTTGAAAACCTGAATACAGAATATTCTA  
AAGAAGTGATTAGATCAAATAGATCAAACAACAATAGGCCTGCCTATATCAGGCGAATA  
AGCGCAAAGAGGACTTATTCTTATGTTTCTTTGCATTTTTCAGCATTAAATTTTCTAA  
ACCTAATTTGACTAATTTAATAGTAGCTTGAGTTCTATTTGGAAACCTTTTATCAAACGT  
AAAATCATCAATTTGTTTAAAAGTTTCATCATCAACAGTTATTGTGAAAACCTGGTTTTTG  
AGTAGCCATTATATCACCTCACCTTAAGTGTATTATACACCAGTGTTGAAACGGTGTGAA  
TATAAAAAATAATAATAATAAAAAGGTGTTGACATGGTTTACCAGTTCATCTATAATA  
AAAATTTAAAGACCTTCACCACTGGTGACAAAAGGAGGATGAAAATGCAAATTAATCTA  
AAAGCATTTCATAACTATATTTTCGAGAATTCGAAATAGATATAGATGCTTTAAAACAGG  
AAAAGTTTTATAAAGAATCTCACAGTCCAATGCTAAGATATCTTCTTAAACTTGGGCTTC  
AAGTAAATAAAGAAAAGGTCTATAAAAAGGAATAAAAAGAGGAGGTATAAGCTTGAATGAT  
TTGACAATAGTCTAGCAAATAATAAATTTCTTAATTGAGAGTAGAGAAGTCGCAGAGTTA  
ACAGGAAAGAAACGTGATAATTTCTTAAAGAGAGATAAGTGGATACAAGAAAATTTTAGAG  
GGCTCATTAATTTGAGGATTCATGATTTTTACATAGAAAGTACATAGCTAAATACTCAT  
AATGAAATTCAGCCTTGTTCCTTATTA ACTAAATAAGGTAGTGACATGGTAGCTAATAAG

ATGACAGGTGAAAAGGGAATTATATTGACAGACATTTGTATAACTAAGTTTGAAGAAATG  
GAACGAGAGATAAAAATAACAACAACCTAACTAATAACTCCATACAAGGAAGCATTGCAA  
CAGTTATTAATAGATGTTGACGAAAAAGAACAATGACAATTAGAAAATCAAGAAATAGAT  
AGGGTAATTCAGTAACAGCAACCAAAAGTACTGCTTGCTGATTCAGTAGTATCTTCAGAC  
ACTTCGATCTTAGTTGGAGAATTAGCAAAATAGCTTAGACAAAATTGAATTGATACAGGA  
CAAATAGATTATTTGACTGGTTAAGAAATAATGGTTACTTAATAGATCGTAAAGGCGAG  
GATTACAATAAACCAACTCAAAAAAGTGTAGAATGAGGAGTCATAGAAACAAGAGAAGGT  
ACAAGAGTACATGCAGATGGTCAGACAAGTATCACTAAAACACCCAAAATTGAAGGTAAG  
GGAGAAATATACTTTATTAATAAGTTTAAAAGGAACAATCGGATATCAATGTTAAGTTAA  
ATCATAACAGCACTTTGAAAACATAAATACGGAATATTTTGAAAGTAGCGGGGTGATTTAA  
ATGGGCAAAAAAAGTTAATACACAGTAACAACAGTTGGTGAACCAAATATACATGCGTAC  
GGCGAACCTTAAGCTAAAAGGCTTACAGAGAAATTTGGGGTACTAATAACTCATAACATAC  
ATTCAGAACTATGATTTTGATAAAGAGAGAGGGGTTGATGTAGATGGAGCTATTGAATGT  
GAACTTTTATCTAGGGAAATTA AAAAATAGTCAATGTAGTGAGTGAGGTTCTAAGAGGT  
TTGGGTAAATATTAATTGTATTGTAGTAGTACAACTGACCAGGGCCTAAATTTAGCTT  
ATTATCGCAAAGATAAAGTGATCTATTGAGTATGACGCACTGATACCAGAGGATATAAGAT  
ATGGTGATTATATTCTTGAAAGATTAGGTTAGGAGGAAATAAAAGGGCAGCTTTAATAAT  
AGTAGGCTTATTTGCAATCTGTTTAGTAGGATTAGTTCAAATAGAGATTAATTA AAAAGG  
GGGGTTTGATTATGGAAAGTTTAAAAATAGTTTGACAAAAGTTGAAGGACAGGTCAATT  
TTTCTAGGTAAGAAATCGACCGAAATAAGGAGACTTATGAGATTCTCAAAAATAAATCTT  
GCAGGGATAGGTCAGAGGACATAAATTTAACTGATGGATTTACAGAAGTAATAGTAAACG  
AACGATTA AAAAATATTTGCTAAGTCATTACTAGAGTTGTAAGATACACAAATCAAATAA  
AAGAGAGTGAAGAAAGTGAAGACTATGAAAGACTTTGTATGGGCGTAGACGAATTTGGAA  
GAGATAGACCTATAGATGTCCAGATATAAAAAAAGAGCCATTAGGAGTGGCTCGATTCAG  
AAAATGTTTAAAAATTA AAAATATGACTAAATTATAGCATAAAAGGAGGGTAATTATGAGT  
ACTTTATATGATTTAACTACAGATTTATTAGAAATCGAAGGAGGTGTAACACAGGTAACA  
GGAAATGAACCTTAAAAACTAGAGAAAATAAAAAGAATTAAGAAAACAAGGGATACAAAAT  
AGAAGCACTCGGATCGTTTCATTGATAATAGATATTGATACTGATATAAACTCTTTAGAC  
GTAGAGATTAAGAGAAAGCAAGAGTTAAAGATGAGTAAGAAGAATAGTCTTGATATATTA  
AAAAGTAAGAGAAAGGAATGTATGGAACCGCTTGGTATTATAAAGGTAGAAACATGTTTA  
GGAAATATAAGTATGTGAAAATCAGCAGGTAGCTTAGTCATAGAAGATGTAGGAAAGATT  
CTTGCTATATTTAAAACAGTAGAGCAAGCTGTAAAAGTAGATAAAAATTACCATTAAAGAC  
TTTATCAGAAAAGGTCATGAGGCTGAAGGGTGTAGGATTGAATATGGAACACTACTAACA  
ATTCCGAAAGCTAAAAAAGAGTAGGAGAGGACCATGGAACTAATAATGTTTATATAAGA  
CTTGTAATATCCCGAGTACATTCAAAGCTCGTAAAAGTTAATTTAATAGCTTTGGGAAA  
TACAACTATAGTAGTTGCGAGGATATACTAGAAGGTTTGAAGCCTATTCCAAAAGAAGAA  
AAAGCACTAGTTATATTAGATGATAAAATTATTCAGATATGCACTAGATTCTATGTAGAA  
GCTACAGCAACTTTAATAGATGCAGAAACAGAAGAAAAGTATCTGCAAATGCATTAGCG  
AGCGAAGATGAACTAAAAAAGGCATGGACTTAGCACAAGTGACTGGAAGTGTATCAAGT  
TATGCAAGAAAATATGCTTGAAATGGACTATACTGCATTGAGGATACAAAGGATAGTGAT  
CCAACAAATACACTTGTA AAAAGAATAAAAAGAAACACAAGTTAGTGAAGATGAATTAAGT  
ACACTATATTTTTTAGGTGAGTCTATAGATAAGGATATGAAGAGAGTCGATAGTGAGGTT  
TATAAGAAGTTTAGTAAAATAGCAATAGATTTGACGGAGCTAGAGTATGAAAAGGTTCTA  
AATTGATACAAGCGCTTTTTAGATAAGCAAAAGCAAGAGTAGGTGATATATTGAATTTA  
ATAAGGAAACATACTTTCACATAAACTTTGATGACCCATTTACCAGAGTACCTAATACAA  
TCCTTTATAGTGAAAACCTTAGTTATTA AACTATAGGAGTAGTTACTCAGATGTTAAGGT  
TTCAAAGGTGCGTAGTCATAAAGTTTATGCAAATCATTATTAAGCTATAGAAAAGATA  
GAAAGCCAAAAGTAAGTACTGCTTTAAAGGAGCTTATGCAGGAAGGTTTTGTTATTAGGA  
GACAATTAAGGGATGAAAAGCTCAAATGAAAGGTTATAAATATGATATTTTTGATACAC  
CTCAAACCTGTAAATTCTGAAAGTGTTGAAAGGACTGAACCTCACCCGTGTGCCGTTTTCC  
CAACACCGGTAAAACCGGAAGCTGGTAAAACCGAAGTGGGTGACGCCGGGAGCCGGCACA  
ACTGAGGTCGGGAAATCGGCAACATACAACAAAATAGTTTGAAAAAGAAAATAGGTTTAC  
GAGAAAATGATTGTATTACCACTGTTATTTCTAAACAATCTGAAAAAATAAGTTTGT  
ACATATAAAAATATTATGAATCTTAGATAGCTGTGATTACTCAAATTATTTTCTACAAC  
TACTCACTTATTTATATGATGGAAGGGTAGCTGATGTAATAATAAGAGATGTTGATGAAG  
CTGTAGACAGTGTAGAAAAGAGTTATAAGTAGGTAAGACAATTTTAAATAATTGGATAG  
AAGCAGGTTTAAAAACTGTTTTATTACTTCCAGAATAGCAGAATGCATTTGATAGAAAGA



AAAAGATTAAGCTGGAAAAGAAGCAGTCTAATAGTAAAACTGTGAATACTAAGAATGCGA  
ATAAAAATAAGTCTGCTAACTTCAATCAAACCTTTCCCTCAATATGCAGAAACAGAGCTAT  
ATGATATAATACAAAAGAGTCAGAAGGAAAAATGTAAATACAATTAACCTTGTAGGGAGC  
AAATATCAATATATTGCTTCTTAGAAAAGGGGCGGTATAAAATGGCGAGAATATATACAC  
AAAGAATTGCTTCTTTAAATGAACAAGATAGATTGAAGTTATTAAGATTACTAGGGAAAG  
CTGGACATAGACTAAAGCTGGCTAGAGCGAAGCAAATAGCAAGACAACCTCATAGTTACA  
TTGTTGATTATACAGAAGAACAGGAGGAAAAATAGAGGGGGGCTACTCGAATGAAGACAA  
TAGCCTTAGTTGGAAGATTAGTTCCAGAGGCAGAATTGAAGTACCTTCAAATTCAGGTA  
CTCCAAAAGTAACCTTTTCAATGGCAGTAGAAAAGGTTTAAAGATAAATATGGAAATA  
TAATACCTGATTCTATTCCATGCGAGCAATTAGTAACACATGCAGATTATATAGTACAAT  
ATCTTGTTAAAGGTAAGCCTATATATGCTAATAGAGAGTTAAATATAAATAATTACAAAG  
ATAAAAATGGTTACTGGATATCTACTAAGGTTAATGTAAATGCTTTAGAACTACTTT  
CTAGTAAAAATTATAAATAATGCTAAACAAGAATGTGTCCACCAGGATTAGACCCATAAG  
GTTTTCAAGCAATAGATGATTTTCGATCTACCTTTTTAATTAAGTTAAATAATCTAGGGAG  
AAATGATGCAATATTACTTTCTCGGAGTTAAAAAATTGGAGGGATGGTAGATGGAGGAAG  
AGTATAGAAAATTTTTTTAATGCGTAATGGTGAGAAAATTGAGATCGTACAAAATTGCG  
AAGGAGCAATAAAGATAAGCCTAAATAATATAAAAACAGATAATTCGCAAGGACCTTGGGA  
ATTTAAAGGCAGAAGGAACAGCTACAGTGCCGCTTACCTAGGTAAACTGCTTTTTGAAG  
TAAAGCTGTGGCTTAAAATATAATATCTGTTAGAAGTTATAGAAGAAAACTGATGATGG  
GGGATTCGGAGTGATAAATTACATGTCAAATAAATTAGATTTAATGAGCGTTAATC  
GAGTTGAAATAGATAGTAAATACGTATATGCAGTGTTTGAAGCTGAATCAAATGTTAGAG  
AACTAGGTAGGTATAAATCGGAAGAAAGAGCTCTTGAAGTATTAACAGAATACAGGAGG  
CTATTATAGCAAGAACTAAGTTTTACATTATATATAAATACGGGGTTAGATGCAACAAAG  
AACAACTGTTGGGAACGCCAGTTGAATAAGGATGGGGCTGAAATGTTAAAGGTTGATAGA  
TATTTAATGGTTCTGTTGCAGATAGTATATTTGAAGATGATTTGACTCTTAAGAATTAT  
TAAGCACTATATTGCTGTGTATATGGAGTAAACAAAAATGGAGAACCTGTATATCCAACA  
CGTGGAAAAATCCTAAAAGCGTTAATGTTGATAGGGATAGAAAAAAGAGAAAGACAGCT  
TCAAAGTAAAATTATTTAACTCAAACCTGGTGAAGAAAAAATGTTTGATTCTATGGAT  
AGTGCAGCATTTTTTTAAGACTACACAGTCAGGCAGTTTACCAAACGATTA AAAAGAAA  
ACTAAAACAAGAGGAGGCTGGAAAGCTGAATATATTGAGCAGGAATAATGGAAGTTTCAA  
GCACTGAATACACAATTAATGAGCAAAAGAGTTATATGATAATGGAGGGGATATATTTA  
TTGCTATAGCTAAGGCTAGAGAAGAATATGAGGTGTAGGTTAAAAGTGAATATCTTAGCT  
AGTGTGATATTAGAAATAGGGAGTTTTATAGATGGTAGAGTTCATGAGTATAGATTGGAT  
TTAAATTA AAAATGATGAAGCTGATTCAAAAGTACTTTTAGATGTTGTTAATGAAATTAGT  
GTGTTAAGAGAAGAATATGGAAGTCTTAAAGTAAAGTGACAAGAGTAAGATGTACTGTTT  
ATCAATAGATTA AAAAATTTTTTACATGATTA AAAAGATATCCGAATGTTGAATTTTTGAC  
TGTAAGATTGATGATATTGAATATGAGTGTGATTATTGTATCAAAAAGTGGCTTGCTAGC  
GAAGAACGTATATTAGAAAACAAGAAATATCTAATTA AAAACAATTTAGAGAGTTGCAAGA  
TGTTTTTTACTATAATTATCACTGAGATGTTTTGCACCTCTCAA AATTGAAGATAAGGAG  
GCGTTGTATTGCTTGCATTTTTAGATTTACTCGCAGGGATAGGTGGCTTTAGGCTACGGT  
TGGAAACATCCTGACAAACATGTTTGGGACATTGCGAATATGATAACTTGGCAGATTTAA  
GTTATAATGCCATGCACGATCCGAAGGACGATGAATGGTTTGAAAGAGATATTGGAGATA  
TTAGAACCGAAAATATCACGAGAGCAGGTGTCTGGTGTTTTGGATTCTCATGTCAAGACA  
TTTCTGTTTCAGGGAAACA ACTTGGATTCAGCGCAGAACGTTAAAGTTTATTTTTTACAG  
TTACTAACTCATTAGAGAACTCAAAGAACAAGACAGACCCAAGTATTTACTTATTGAAA  
ACTTTAAAATCTACCCATTATTAATGGAGGATTTGATTGCCTCGAAGTTCTGGTGGAGA  
TGGCTGAAATCGGCTATGCTGCGGACTGGCAAGTACTTAATTCTAAA AACTGCGGAGTAA  
CCTAAAATATTGAACAAATATGCATTGTTTGACATGTTAGAGGACGAAGTACAAGAAAAG  
TATTTCCCATCGAAAGAAAAAGTAGAAAAAATCTTGAGCTACTAAATACTCCA ACTCACA  
GGACAAATACAATTTATGATTCAGTTGGAATTGCTAGATGTATTAGAAGTCAGGCAGTAG  
GTGGAGGTGCTAAAACAGCACTATACTTTATAGACTTAATAAAA AACTCTAAAGTAACAA  
TAAATGCTACTTGCCTTAAAGCAACATCTTATGCAGGTGTGACAAATAGAAATTGTGATA  
ATAGTGGAGTTTTAGCTACTGCAGTTTGAAGGCCCGATTGGCTTGAGAAGGAGAAGTAAA  
TAATAAGAGCCTGCAAATTA AACTAGTTAGGAGGAATAACTTATGAAGATTTATTTATT  
GACTATACTGCTAATAATTATTTGTATATAAGCAAATTATGTGAGAAATCGCACATATAA  
AAAATCTATAAATAATCTATAAATAAATATTCTGTAGCGGAAAAGATTATATATCATCA  
AATAGCCTGTTTCTATAACCGAATGGTTGGTTGTGAAATCTTAGAAAAATGTTTTAGTAG

GAAATTTAGATAAAGAAATACCCCGCTTTATAAAAATAAAAGCCTATGTAGGTGATAACGG  
TAAATATGGGTTATAACCAGAGTGGAGAATTGAATGTCTTGCTACGAGTTATGGAGAATT  
TCCAAAACATTAATAATAGAAATTAGCTGGAGAAGGAGATTGTAAATTACGTTTTAATT  
CTATAAGGTGCAAATAAAGACAAAAAGCACATTGGAGCAGGTAAGAAGCTCAAAGCTTAGA  
CTTTGAGTATTAAGAAAAAGAATTAATAAAATACTCTGAAATACTAAAACCTGATTGAGGA  
TCTAAAAGTGTTAATTGTTAAATGTGGAGATGAATATTGTCTAGCTAATTACAATGAACA  
AGATAGTAAAATAATCATTGAAGCACATTATGTTTTAGAGCAGGTTGAATATACTGGATC  
TTATATAAATGAATATGAACGATTTAAAAAAGATTGGTACAATAGTAATCGTGATGGTGA  
AGCCTCTATTTTATTTTCAGATGATGGAATTGAGATAATTGAGAAGATAAGCGAGGCTTA  
AATATGAATAAAAGAATTAATAATGAAAAAAGATTAATGCATAAAAAGTTTTATGAAAGA  
TGTGTCAACAATGACTTTGTAATCAGCAACAACCTTAGAACTTATAAAGTGTGTATAGGA  
TACATATACAAAGAAAATGTGGATAAAGTATGTCAAGAGAAGCTATAAGAAATTAAGAAGT  
AAAAATAATAAAATAGTCAAGGTAAGTTGGTGAATGAAACTAGAATGTTATAGGCTTGAC  
TTATAAAGGAGTGCGTTAAATGGCTAAGAGATATTGTTAAAATTATTATTGTAAAAACT  
ACTTTGAAGATATGTGTATACTTGAAGGATTGAAATTAATAACATCAAAGAATGCGAAA  
GGTATCTTGAAGGTAAAGATGTGCTATATGAATTAGAAAGACGATATCCTTTACATCCTA  
AAGATTTGAAAAAGGCGAAAAGTAAAGATTATCCGTTGAAGTTACCCATATCCCAACTG  
GTGTTACAGTAAAATGCCGTTCTACAAATAGTATTTTTAAAAAATTAAGAAGCGTTTGG  
AAATTCTAGAAGAAAACTAATAAAAAATAAACTCTCACTTAGAGCTAGAGGATTTACGGT  
AGACAGGAAGTGATTTAAAGAAACGAAGAAGATGCAGTTCTTGCGGAAAATTTTTATC  
TCGTAGAAAAATCTAAGGATGTTTTTTGCCGTAAGAATGTAGGAAGAACGCTAAGATGC  
TCAAAAAATGAGAGCCTTTCCTCAAATAGATGGAGAACCAGTTCCTAAAGAAAGACCTAG  
ATTTAACTTAGCTACTAAAAGGACCTATACACCAAAGAAAATAAGGACTCAGAAGAATT  
AACAAAATGGTAATTCATCTAATGTTAGACTTTATTTGACTGGATACATAAAGATGAC  
TTTAAGATGTAATTAATCTATTGCAAAAAGTGACAGTGAAAAGATTAAGAGCCGAAAAG  
AAAAAATATGTTAAGCTACAATAAAAAACCAGATATCGATGATGTCGTCAGATTATTGC  
TGATTCCTCACTGAGATAGCTGATAAAAAATGATACGCAGATTGTTGAGGTTGTAGCTAG  
TAAATATTACAATGATGAACCAAGAGTTCATGTTATTTTAGAGGATGTTATTAGACCAAC  
GGAAAAATCCGTTTCGTTAGATTAGGTAAGTACTCAGGTTTTTCATAAAAATGTGAAAAGCTGAC  
TAGAGAATATATCAAATGGTAAATGAGAGATAAATTATGAATGAAAATATAATTAAGAA  
ATAACAGTACTTGGAAGCTTAAAAATCGACGGAATGAAATTTTCATAACATGGAGAGTAGA  
TTTGGAGAAGATAACCAAGCAATGCTAGTAAAAGTTATTGCTGACATACATAATAGTGAA  
TCTATACAGATTCAGGAGCTTATAAATAAGAATAGAAAAAGATTAAGAGATGGAAAAGAC  
ATATAAGATTTGTTAGGTGTTGGTTTGGACGAAACCAAACAATAGAATTAGGATTTACT  
CAGCAATCAATACATTCATATTGAGGGTTAAAAAACAAGCGTTACTATCTGGGATATAT  
ATATTAGCTGAAAGAAGTTATGCAACATTACCAAAAATATTAGAAGATGTTATAACTTGC  
GAAATATATGAGAAGTTAGTTGATGGATATTTCTCTATGAGAAAAGAACTAAATAATCCT  
CTTTAAGTGCATCAAAGGAGTACCAACCTATATTTATGCTAGATAAGAAACAAGAAGGC  
TTAGAAACTAAAATAGATAATGTTAATGAGAAGTTAGAAAACCTTTATGGATGATGCACCA  
TTATTAATATCGAGTGTGAGTGTATTGGTAAAGACGTTAAGAGAATAGCTACAAAATCA  
CTTGGTGGACATGGAAGTAAGGCTTATCAAAAATAAATCTCTAAGAGGAAAAGTTTATGGT  
GATATATACCATCCGATTAACGACAATTTGGAGTAGATAGTTATAAGTCTAAAAGCGT  
TGCCAGTTAGATAAAGTATTAGAGATTATAAATAGTTTTAAGTTACCTATAGTGTGTTGAA  
GAAGAAATAATACTTACGAATAGTCAATTATCAATTGTGAGTTAAGACAAGAATAGACTG  
TTCTCCTTTAAAGGGGAAAACCTGCCTAGTCAATTTAAAAGAAAAAAGGAGTGCTTTCAC  
ACTCCACTTGTCAATAATGAAACTTTTATATACAAATATAATCATAACATAAAAAACT  
GCTAGGAGTGTGGAAGAATGAATAAAAAGACACTTTTTCAAGAGGTTGAAGGTAGTATAT  
ATAACTATAAAAAACAAGACAGTTCGAATAAGAATAAAACATATATATATTAATAAATTAG  
AGAATGAATCTGACGGATGCAAGGCTCAAAGTTATGAAGAAAGAACAGGAAGTACCTATA  
ATATAAGATAAAGTGTGAAAATGAACTGGTTTAAAGAGAAGAAGATTAATAAATAATCAA  
ATGAAGATAAGAAAACATTAGAAATTGAAAAAGAACTATAGAACGTGCATTAAAAAGTT  
AGAACAGTTTTGAAACCGAGTTCTTCAATAAAAATGTGTACGCATAATGAAAAGATAAATC  
TGGATTATATGTGTAATGCTACGCCATAGATAGAAGTCAATGCTTTAGAATAAGAAAA  
GGATAGTTTGTGAGATTATGGAAATGTTATATCCAAAGATAAAGGAGTTTGAATTACCCA  
TTTTTTCATAGCAAGCTTACAATAAGACTATTTTGTGACTTTTTTCGAGACTATCATGAG  
ACTTTTTATTGGTAAAAACATGAGACTATCATACTGTGGAAATGAAGATTACCCTGTCAA  
AATTAATATAAATAAGGCTAGAGTTAAGGCATTCTCTTTGCTCTAGCCAAAGTAAATAC

TTTATATAATTAAGGGCATCATCTAAAAAGGTGAAAAATTTTCAAATGACGCTTTAAATA  
TAAATAATAATATATTTCTCTTTAGGTATTGACACTTTTACATAAGGCGCCTACAATAA  
ATATATAAAAATATATAGGAGATGCATGCCTGAGCGTCAAATAAACTAAGATTAGAAGTT  
CCCAATGAAATAGATTATAAGATTGTGCAATGCCTTAATAAGGCAAACGAAGAAATTA  
GAATATATAGGAAAACAAAACCTTACATCTAAAAATGGATTGCCATTTTCAGTTTTGGGAT  
TTGTTAAATGATGCAACTGTTACTGCATGTAATAGTTTTAATTTTAAAGCGTATAAACCT  
AACGTGGAGGTTGGAGAATGATTTTTATATATGATAAAAAATGGCAACTACCTTTATGTG  
TTAATGAAAGAGACAAGATATAAAAACTTCATAATAATGACAAAAAAGAGAAGAAATG  
CATTATGTTGATATTTTAACTAAAGTATTAATTCGAGATTTAACAGCCCCCTATTGAACAA  
CCAACAGATTTTTCATTAGAATTTGATAATGAAGATAAAATTGAGATATATTTACAGAAA  
TTAATTGATACCATAAAGACCGATGGTCGTATCATTGAACACCATGTATTATTGATATTT  
AATCAAACATCCGGATAGGATTTACGTCTATTCGTTCTCTGATCGTTGACTCAATTTGA  
AATATTGTCTCAGAACAAAATTTGAGGTCTTATATATCAATAGAAGAAAGTACAGTTGTA  
GAAAACGTTGATTAGACTAATTCTGTTGCAAATAATCCTACTCCTGGATTGAACCTAACT  
GCAAAAGCAGATGCAAGAAAGAAAACAGATCCTTTAAAAAAGGCGAAAAAGGAGGAAGAT  
GCCAAGTAGGCTCTTTTTGGTTAATAGATGGAGGAAATAATTATGGAAATTAATTTTAAAT  
GGAGAGCGTTTAAATTAATCTCGTATATATAAGGGAATGACAGTATCTGAAATAGCTGAG  
ATAATAGTCTGTCAAAGACTGACTGTTTCAGTGTATGTGTATAATAAATCGAAACGAAAA  
GATAATATTGTAGTGAAACGAATAGCAAAGGGGTTAGGTTTCCGAGTTAAATTCATTTA  
GAAACAGGAAATAATATTGCAATAGGTTCAACATATTTTCAGAGCATTATTGACTACAAAT  
TAAAAAATAGAGCAGAGCAAATTCAAAAAATGGAATTCCTAGCAGAAATATATTTCTTC  
TTACAAGATTATATTGCATTCCCAACATAAAATTTACCAGATTGTTCTGGGAAAACACCA  
GAAGAAGCTTCTTTAGTTTTAATAGAACTTGGGGATTAGAATTAACCTGTTGACCAT  
ATCATATATGAAGTAGAACAACACGGAATACATGTAACATATTTCTCGACTTCTACATAT  
GGTATAGCTGCATTCAGTCAGCTCGTAGATATGTCGGGTGAGTCATTTTGTCTGATTGGA  
TATTCTAGTAATAAGACTTCTGCTTCTAGAATTCATTTTGATATAGCCCATGAATTTGGG  
CATATATGATTGGATGAGTGGCGCGAGGATGTAGAAGCGTTAGAAAAACAAGAATTTAAT  
GACAGAGAATCAGAAGCTAATAGATTTGCATCCGTATTCTTATTACTAAAATAGACTTTT  
AAAATTGAGGCTAAGAGAACTCCTTTACGTATTCGAACTATACAGAATTGAAACGTAAA  
TGGAAAGTTTCCATTCAAGGACTGATTCGACGTTTCATATTGTTTAGGAATCATCAGCATG  
GATGAGTATCATTCTATGATTTCGACTTTACAACGTCGGGGACTCAGAAAATCAGAACCA  
TTAGATGATCAATTATTACTTCTCTACCAGTATTGTCAAAAACAGCAGTTTTGACGTTA  
TTAAATACCACGTATTTACTCCAAAAGAGGTTATGGATGAACTTTCATTTTCTATAAC  
TTAGTCTAGAGCCAGAAGAAGTCGAATATCTATTAAGTTTACCTAAAAATACTCTAACT  
TCTGGTAAATTTGTATAATTTCTGATTTACAACCTAAAAAATATGGTGAAATCATATTT  
TAAATAGAGCGAGGACTTGTGACCTCCCTTATATTCTATGAAATGGGGGGAAATATGAAA  
TGGGAGTATAAGAAGGTGCAAATAAAAATAAGAGAGATAGCCAAAAGATGGCTATAGAAA  
AAGGAATAACAGTTCAAGAGGCATGGAAGGATGCTATTAACGAGTACAAGGAAAAATATC  
AATTTAGTTAAGACCAATGAATGGTGTTTTTTTTTATTACTATGAACAGACTAGGAAGGGC  
GTGAGGACCCACTTAGTTCGATCCTAACTATGTTTCATATATTAATCATCGTATACACTAA  
AAGTAGAGAAATTGAGGGCAAATCTTATATTTTGTATCTTAAGTCGGAGGTCTAAAAAA  
CGAGTGGGGCTTGGTAACCTCACTCACCACGCAAGTACTGGTTTAGTTAGGTTCCATTC  
TTGAACTTGCTCCCTTAATAATTTGTATCCCCATTAAAAAGGCTTAGATTACCTTCT  
AGGTCTTTTTTAATAACAATTTATTATAAATGCACGGCATGCACTGTTTCAGATATGCA  
TGTCATGCTTGGCTAAATTCGAATAGTTAATATTTTCAATGGCTCGAATTGAGGGGTGCA  
AAAAAATACAGGAGGTAGCAGTATGTTGAAAATTTTACAAGAGAAAAACGTAAAAGTAA  
TGTGGTCCAAAATGGAGAAGAAGTTTGGTTTAAAGTAAATGACGGAGGAGAGGCACTAG  
ACATAGTAAATATTCGTAATACATTAAGAAGTTTAGAGAGTGAATATAATAAGAAATTTA  
ATGAGTCTACTGTAGGAGAGTCCTACACTAGAACTTTAAAGATAAAAATGCCTAACTTAG  
GTACTACTTTTGTACAGAAGAAGCTGTGTACAATATGTCATTTAGAAGTAAAAAACCAG  
AAGCAAAGTTATTCACAAAATGGGTTACAAAACCTTAAACCAATTAGAATACATCGTT  
ATGATATTGTTATAGAAAAAGACCAGCAATGGCCGGATATAAGCACAGAAGGCAAAAAAG  
TAAAAAATATTTTACAGATGAAATACAAGAGTTTGTATATTATGTTACTAGTCAAGGTA  
GCAATCAACCTCAGATGGATTATAAACATTGTACCGAACTTGTAGGAGAAAAATTAGGTA  
GTCAAAAGGTTGGGCAAAGAGATGAGTTAAATCAAAGCGAACTATTTGATATAAAAGCAC  
TTGCAAGAATTATATCTATGCAATTCCTAAGTTATTATATAAAGATATGAATTATAAAG  
AGGAATATAAAAAGCTTAAGCAATTATTAGAAATGATTTAAGGGACTGTC

>NewGenomeName\_18

TCCCGTCTCTGATCAGCCCACCCTTCCCCCGTAGGCCCTCCGCATGGTGGGCCATCCTCG  
CCTTGCCCGGGTGTGCTGGGTTATCCCTGGGAGCTTCCGGCTTCGCCGGTGGTCCGGT  
GGGCTTCCCTGCCCTGTCGCCAGCCATTCTACACGGCTCAGCGGGAGTGTCAACCCTTGG  
GATAGCGCTGTCGCTCTACCGGGCTTGGCCGTAGTACCTGGAGCGCTCCATCACGTCGCG  
GTGCATGGCCCTGGCTACCTCGTACTCCTGGGATGCCTGCCGATTCCGCCCGGGTGGTGC  
GTAGTGCCGGTGGTCTGCGCTGCGCACTGTGCTAGCTGCCTCTGCCATGCCGCGTCTCTG  
CTGGTACCAGGCACGCTCACCTCTGTTCTGTCTGCTCAGGATCCTCTGTGCCTCCTGTGG  
TCCTGTCGGGTGGTGGTGGGGAGTGGCTGGCCTTGCCTCTCAGCGTAGCCTTGCCTCTT  
GTCTTGCCATGGCTCTTCCCTGGCTACTCCCTGGGTATTCACTGGGGTTGCCTGGGTGGTC  
CTGGCCACTCCCTCTAGGCCACGTA CTACTCGCCTCTACCTGTCCTGTCTAGTCCTGC  
TCCCTGTCGCTCCCTGGGTGCTGGTCTGTCTCCCTGGCGCTGCACTGGTCCAGCTGTCTT  
ACCTCGCCGCTCCCTCGCCTGCTCGGTGCGACCTGCGGGCGCTGATGGACTCCTATTTGTC  
CATTGTGTGTGAGAGAACC CGCAGCCTTAGTGCCATGCGGGTTCCAGGGCGATGGCCTAGC  
TGGCTGGGTGGACCCTGGCTGTTCCCTGGGAACGATAATCCTGGCTAGCTAGACTGAGCC  
TCGCATGCGTGGGTCTCTATACGTGCGTTGAGGCTCCAGGCCGGGCCTAGGCGGGGTGTT  
GACAAGACAGGTAGGCGACTGTA CTATGCGCCCTGTCTCCACGCAACACCGCCTCTACAG  
GCAGCCTGGAGACAGGGTTGACACACTACCGGGACATCGGTAGCGTGCGTAGACAGAGGG  
ACGGAGCAACGCAACCTTCCAAGCGCGGCACATGCCATAGGCGCAAGGGACAAGGCGAGG  
TTCCAGGGCAAGACCGACTACGCGTAAGGCCGGCAGGCATCGCAGAGGGGATTGACAGTA  
ACACGCTCAGTCGGTACGATGGGCACCACTCGGCAAGCAACGCAACATCAGCTACCGGGT  
TGACACGACAAGGCCGAGTCGCTAACATGGCCACCAGCAACAAAGCGAACCGGCGGATAA  
CATGGTCCGGCAAGCTCCAGCAAACGGGCTGGGCTGGACGGGTAAGACGAGTGAAGCTGA  
CAGCGTAGGCCCTTCGTAGAAGGCAGCCGAGGTGGATCACGCACCAGAAGGTGAACTGTA  
GGAATCGGGCAGCGCAGTAGGACTGCCAGGGGGTCAAGGCTAACCCCGCAAAGAAACAG  
CCGAGCGTTAGGATCACGTCCC GGAGCAGTGTCCC GGGCAGTATCTTGTACAACCGACAG  
TAGTCGGATGCCTGCAAGCCGAATCAACGGCTGGCCTACGGGCTGGGCATCCCCTCGCAA  
GTCGGTTGTATCTGGCAAGAGCCATCGGGTTGGCGGATGGGCTGCGAATGGGCAGCGATG  
GCTCTTGACCAGATAACAACCAACCGGAGTAACCATGAGCAAGAACGCCTCTGGTGCAGCC  
AAGGCCGCAAGCTACGGGCCGATATGAAACGCTATCTCGCTGGCCACCGCGTCACGAAG  
GTAGCCGAAGTATCGCCATCGGCGTCAGCTCCGCACGGGCTGAACTGCGCAAGATGCGC  
GATGTTCCGGTACAGCACGGACAAGGCAACCACTCCC GGACACTTCTTCAATCCCAAGGGC  
AAGCACTTTGCCCGTGGTTCCGAAGGCAAGGCACGCAACATCCTCAAGGGCTTCAACGCC  
CGCAAATCCCAAGCAAAGGACTCTGACCATGACCAACCTACTGACCAAACCGTCATCG  
CTTTCGTCGGTCCC GCTGCCATCACC AACGCCATCGAAGCCATCAGCGTTCGTGGCAAGG  
AACTCGACGAGGCCATCCA ACTGACCGGCCTGTCCATCCTGAACCACGTCGATCTCCACG  
GCGACATGACCGTAGTCAAGGCGCTGTACGAAGCCATGCCGCAGGGTAGTCGCTGCAATG  
CGCTGGTTCGAGTGGCTGACCATGTTCCGGCCAGGTACAGGTGAACACCGACAAGAAAACCA  
ACAAGGAGCATCCGTTCCGTGTACAACAAGTTTGGCAAGACCGATCTCGTCGGCGCAACCA  
ACGAACCGTGGTACGGGTTCAAGCCGGAGAAATCGCTCGATCAGGAATTCAACCTCGCCG  
CCGCACTCGCCGCTGTCCGCAAGCAAGTGTCCAGGGCGCAGACCAAAGGCAAGGTGATCG  
TCGGCGCTGAACTGCTGGCCGACCTGGAAGTCCCTGGCCGCCAAGGCCGCACCCATGGTCCG  
AGAAAGCCGAGCGCGCTACTGCCGACTAACTAGCTCAAGTCGAGCGCCTGCGAGGCGGGC  
GCTCCGCTGGATCTAGTACA ACTGGAGACACCACGATGACTTTCAAGCAACGTCTGCAAC  
GTCAAATCGCTCTGGCTCAGTATAGCCGGCCCGCCACTATCCCTACGGCGAGCAGGCCG  
TACAGGAGGCAAAGTAATGGATATCTGGATCGCTCTTCCCTTCTTCGAATTCGGCCTGAA  
CGTTAGCGAGTGGGCCGTGCAATTCACGCTGGGCATGATCGCAACCGCCCTGTTTCATCCA  
TCTGCTGCTGAATCGGTGACTCGAGTCATGGCCCTGGCGGGCGACCCTCGCCTACTCTGG  
GGCCATCGCTGGACCCATCACAAGACAGAACTAAACAATGCAAGCTTTGAATACTCTGTA  
GATGGCAATTCCAAAGGACCCGCCAGGCCGATTCAACGCAGCCGACAAGGCGCTGTGCGC  
CCATGGCTTCCCTTATGGGTGACCTGAACCGCGCCCACGTCCCTGACCCCTGGCGGGTTCTC  
CGTGGTAGGCGCCGGCGTGACCGTCAACCGCTACGACGAAGCGTATCGCTTGAGCCGCGA  
TATCGACTCCGCAGGCTTTGACGTA CTGCTGGTCCAGGGCAGCCCGCTGTCCGGGCACGT  
CACCTGCCAGGCGTACGGCTGGATCAACGCTGAGTACCACAAGGGCTGCGCAAACGGGCG  
CCCGATCTTCGACATTG CAGGAACCACGTACCATGTCCCTCGCGCGATCCCTACCGTATCG  
GCCACCGCGTGGGGCTGGTGA ACTACAGCGACCGCTACCTGGGTGCCGACGCGGCAGGCA  
CCCGGGGCATCATTGGAGCCATAACCCGACCGACCCGCTGTATGACGATCTACCACGTAC

GCTGCGAGCGGACCCTGCGCCTTATCGAGGCCGAGGCCCGTAGCGTGGGGTTCATCAGAC  
AGCTACCGACCCGCAAATGACGTGGCTCATCATCGGTGTCAGCCCGTCGGGCGGTTGCGC  
CTTCGTGTGGAGTCGCAAGCGACCGGTGCGTCCATTGCGATTCTACTCACACAAGGCAGC  
TAAACGCTGGCTTCGCAAGCATCGCCGCAAGGCCTTGCTTGGGAGCCGATTCCATAGT  
GAATTGGAGCAAACGCATATGGATCCTACTTACGTTCGTCGTCGTCGTCGTCGTCGTCGTC  
CGCCAGGTGGCCGCGGACACCATCACCACCGGCCACAACCTTCGTCGAACTCTGGTTCCTC  
GGTGGCGTGGTCGCTATCTACCCGGCCTGTGAAGTACAAGAGGTGCATCGCACTGACCTC  
GTGAAGGAGGGCGAGTAATGACCGTCGAGACCGTGTATGTCAAGCCTGAAGACCCGGCGC  
CACCAGTCTTGTCCGTAGGACGCCTGTCACCAGGTGAACTCTACAAGGTGGTGACGCCTA  
GCTCGGCAGAGGGCGCCGTTATGCTGGCGACCAAGCAGACGCCTGCCCTCGCTCAGGCAG  
TCATCGTACTGCACAGCATGAACCCCGCGCAGTAGGCGGTGGGCACGGCCATACTAAACA  
TAGACTGGCGGTGCCGCCGCTGGGTTCCGGCGAGTACATCAAGCTCGTTCAAGGGGAGG  
CCGACCAATGATCGCTGCCCTGTTTCGTA CTGACCTGTACTGCTGCCTCGGCCTGCTTGC  
AGGCGACTGCTACTGCATCGCAGTGGCGCCGCGTTCGAGAACCCTACGGAAGTGCAGTT  
CCAGGACGCCTGCCTGATCGGGTGCCTCTGGCCCTTCGTGCTCGTAATCATGGTCTACCT  
AGGGGTGCGATCCTTCTTCTGTGGCGCTCTGGGTGGCTTGCGCCGCCATCGGCAACGTCT  
TCACAACAAGCGATAAGGAACTGCGATGATCCGTACCCATATCCACGGCACCAACCGTAA  
GCGACTCCGTCTTCACAAGGACACTGAATTAGAGGGCGGGCGAGCTGTACCGAGTCGTGCA  
GCCCCGAGTCCCGTCGGGGCACGCTGGTACTCGGCCTGGGGAGCACGACCGACCGTGGCGT  
CCGCACGGTGGTGCGTGCAGTCATCCACGATGAAGTTGAGGGGAACGTGTCTACTCCGAG  
TCCTACCGGGCTGCGTAACGACACCTGGCGCATGGTGCTCGTGAACAAGGGCACCCAACT  
GACTCACC GCCGAGTGACCAAGGCGAAGGCTGGCGCGCCAGCCTTCCACCGTGGCCAT  
TCCTTGCCGCGAACCAACTCAACTGAGGAGCTACAGCATGACCAACGTCAACACCGCCAC  
CGAGACCACCACCGCTGCCGTCCTGGGCGCCAAGATCGTCAAGAAGCCGGCTACCGTGGA  
AGACTTCCGCAACAACGTGGTCTTCCACTACACCGCCCTGGCCAAGCTGACCGAGGCCTA  
CAACGCGGGCGGTCGCTGCCCTGCAAACCGCCGAGCGCCTGTCCAGCCTCGTCGCCGGTGA  
CGTTATCACCTTCGACCACGGCAAGGGCGAGAAGGCCGAAGTGCTGAGCGGCGAAGTCAT  
CAGCGTGGTTCGCCGGCGACTATCAGGTGCTGGTGCATCAGCGACAGCGACCCGGCCAA  
GCTGCTAGACGTGAAGGCTGGCGCCATCCGCGCCGTCCAAGCTCCTGCTGCTCCGGCTGA  
ATCCCTGGACGAAGCCATCGCCCAGGGCGAGTAAGGCCCGCACGTAATAGGTCTGGCCCT  
GCCGGGCCTATTGCGAGCTAGCCATACCATAGGAGGAGTCAACGTGAGCAAGCACAACCC  
CGAACACATCAGCGGCCCGGTACGCAGCGTGAGCGTAGCAAAGTCTCCCGTCGTCCAGGA  
CCAGGAAGACCGCCTGGAATCCGCCCTGGGCGTGTGCCAGGAACGCGCCAGGATATCGA  
CACCTGAGCCGCCGGCTCCAGGCTGCCGGGCGGACACGCCGCTGGGACATCGACGAGAT  
TCGCAACCGTCAGGCGACGATCCGTCTACTCTAGAACGACTTGAACGCAGCGCATGATGC  
CCACGAGGCACAAGAGCGCCGTGCACGCAAGGCAACCATCATGGCCTGGGTATGCCTGCT  
GACCGCATGTTTGGCCGTCACCCCGAACTGGCAGGAGCGTGACCATGCAGTGCAAAGAC  
CTTTACACGAACCTCGCACCCGGACATGTTTCAGCGTACCGTGCTCCAGGTGACCCCGGAG  
ATGCGCCGCGTGGCCAAGAGCCGGGCATTGCCCCACGCCTATACGCCCAAGAAACAGGCT  
TCTGGCGGGACTTACACCGCCCGTGTGAGCGGCGTCACCTTTGACGGTGGTAAGGTGGAG  
GTGCGCCTGGATAACGTGGAGCGCGTCAGCACCTGTGACTATGCCGATCTAGAGGCGCTG  
GTAGCGGCCAGCTTGTGCCAGGCCGATGCGAAGCGCGCCGACGAGTACGAAAAGTTGCTG  
CTCAAGGCATTCCCGCTGGTATCGAAGAAGGCCGCGCCCGCTGTCTGCCAAGGACTTCGAG  
GTACGTCTGCACGATTTGCTCGTAACCAAGCTGGCGGTAAACCGTGCCCTGCGCGATGCC  
GGAATAGAGATGGACGGACCGCTGCGCAGCCGGGTACGGAAGCTTGGCGACCGGAATAAC  
GAGATGGGCGCCAACTGTTACGCCTCCAGCAGGGCTTGACCCGGCTGGTGGAGGTAGGT  
CAACGGGCGGCCCTGTATTGGGACGACGCGGAGACTCAGCGATTGCTGACGGTGGCCCCG  
ACCAAGGGCGTCTGTCCGGTTCATCAGCGACCTGACCGGCGTGCGGTATGCCTCCCGCGCT  
TCCGTGGCGAAGGCTGAGGCCGAGGCTCGTGAGCGGGCGAAGGCGGGCGGCTAAGCACACC  
TGGCAGGCAGCAACCTTCGCATCCACAATCGCCGGCGGCGTTCGTGGGCAGCGTGCTGACG  
TACCTGCTCGCCTAAGCGACCGGGGCCTACTCCGGGGTCAAATCCGAGGGCGTTCCTAGA  
GCGCCCTCTCGTGTGCGTCTGGAGGATCACGAACATGCAATACCACTTCACGCATTACAA  
CGGATACTGCTTCCGGCGTCGAGCTGGAGGACGAAGCCGTCTTCCCGTGATCAACGGAAA  
GCGGGCTACCTGGGACAAGGTGGCGGCGTGTGCCGGTAGCCTTGTGCATTACATGGCGCA  
GGACCTGATGGACTTCGGCCAGCGCAAGTTGAGAGAGATCGAAGATCAGCAAGACGAGTC  
TGTACCCGCTGACCCTGAATCCCGGCCTGATACAGATCAAGACGATCCACGTATTCAGCA  
TCCAGGTGTGCAAGGACGAGCCGAACTGGTGGCAGTGGTTCCTGTGGCAGCGGAAGTACC

ACCCACTCCGCGACAGCCTGGACACGGCGGGGGAAGTGAAGTGCAGTATCGCCGAGTATG  
TCCACCGCCTCCGCCGGAATGGATGTCGAGATAGGGACATCTGGAGCAACAAGGGCGGCG  
TGCTGGCCCTCGGTGCCTTCAGCCTCGCCGGCGAGATGATTGGCTCCTGCCTCGTGGTGG  
ACAACGAAGTGCAGCGCCCTGTGCGTGGACGACCGGGACAAGGGGCAGGGTATTGGCGCTG  
AGCTGGTGCAGCGCTGCCGAGCTGGCAGGTGCCGACCACCTGAGGTGCTTCGAGTTCCTGG  
AACCGTTCTACGCCGGCTTGGGCTGGCGCACCCGAGCGCCGCGCGGCAAACCTTGACTGATG  
GTGAGCCGGACGTGCTGCACATGAGGGCGCCCGGTTATGACGCATGAGGTGATGACATGG  
CTTATCGGAACAACCGCTGGTCATCGGAGTCGCCTTCAGTCTGGTGGCCCTGGGCGTT  
CTGATAACGCAGGACAACGGCGGCCCGCCTACGGCACCCGCATGACCTGGGACCTCCAGG  
ACATGTTTCGAGGCCCGAGGGCGGGCTGCGTCCCCTGTGGGAGGGGTGGTATCAATGGCATT  
GCGCCGCGACTCCTGGGTGAAGCAGGCGCAGGCGCTCGCCGTAGACCAGACTGGCAGGGT  
CCGGCACGTCCCTGGGATGCAAGAGCATGAGCCGGGGAGGGACCAACATGACCGTCAAAAA  
TCTGCCGGACCGTTGGGTAGCGTATTGCTACCCCTGCCAGGAAGGTGGCGTGGTTCGAGAA  
AACGCATGTGCGGAGGGTGAATGCGCGGATCAAGAACGCTTTATGCCCTGGCCCGAAGA  
TGCCTCGGACTGGACGCGGGCCCGCCTGCTATCAGTCGCTCTAGGGTTTGCTGCTGTCCAA  
GGGCATCGACTACAACGTGATGACCCAGGGCTGCCGCTGCTGTACAGCGGAAGGCAGCA  
TCGGCCTATCTTCCCTACCGACGCGGGCTGGATTGGGCGCGCTACTGCCGACCAAAATCC  
CAAGTGGGTGGGCTACGTGTATCCTGCCCCGGATTACCATGGATGGCCCCAGGACTTATC  
AAAGGGCAGGGCATGGGTGCTGACGGAAGACTACTTGTGCGCGCTGAAGGTGCGGTGGGC  
CTGTCTCGAAGTCTCTGCTGTGCGTCTGAACGGTACAAGGTGCGCGACAGGCTGGCGGC  
GATCATTTTGCAGCAGACCTGCAAGCGCGCCTTCATCTTCTTGGATGGCGACCCGGCAGG  
TGTCCGTGGTAGTGCACGCGTGATGCGTCCGGTCCCTGCGTATCGAAGGCCAAGT  
AATACCTACGCCGGGCGGGTTCGACCCCAAGGACCTGACCCGCGAGCAGATAAAGGAGCCT  
AGTAATTGGACGTATTGACGCTACACGCACTGAGTGACAGGGACCGCTTCCGCACGTTGC  
GGTGTGTGGTGCCTGAAGGGATGATGGGGCCGGAGACGTGCTTTGTCATCGACTGGATCG  
ACCAATACTGGCAGGTCTACCCCGCGCATCAGAAGGCGGACCCGCAGGCGCTGCGCGAAC  
TGATCAAGCTGCGAGGTGGCTACCAAGCGGAACAACCTGGCGGTAGTCCTGAACCTCGTCA  
ACCAACTGGACAAGCCGGTAGACCCGGACTCGCTACAGGGCGTCGTGTCCAGCTCAACG  
AGCTGTATTTTCAGGGCGGGTGGATGCCCTCCTGGCGCAGTACAACCAGGGCGAGGACA  
TCGACCTAGCGGATGAGCCGCGCAGGCTGAGCGACGAGGCCCTGCGCCGCGAAGGGGTCA  
GCAAGCCGACTGACTACGTGACGGACGACGTGTTTCGATATCCTGGCCGAGGAGCAGGCTG  
ACCTCGGCATCAAGCTGCCGGGGCTTGTGCTACCAGCGTATATGAAGGGCCTCCACGCCG  
GGCCTCGGTGCTGGTGGCTGCGCCACCGGATGCGGGCATGCCCTCGTTCATGGCCTGGA  
TCGCCGTACACATTGCACCCGACGCTCAAGCGGTACTTCGACCCAGGCCGGCCATCCTAT  
GGCTGAATAACGAGGGCAAGGGGCGGCGGATCAAGCCGCGCCTGTACTCGGCGGCCTTGG  
GCATGACCGTGGGCGAGATCCTTGCCATGGACCCGGAAGTGGTACGCAAGCAGTACGCCG  
ACATGATCGCCGGCGACTCCGAGCTGATTCGCATCAAGGCCTTCCATGGTGGGTCCCTGG  
CCCAGGCCGAGCAGGTCATTGACGCGATGAAGCCGGCGGTGGTGTTTTGGGACATGATGG  
GTCACGTCAAGGATGGCCCGCGCAAGGACCAGAACCAGCACCGACGAGATGGAGTATAAGG  
TGGCCGAGGTCCGCGAGATGGCGGTGCGCCACGACTTCATCAGCTTTATGACGTGGCAGG  
TCAGTAACGATGGCCACGACCAGTTGTTCCCGCCGAGTCTGCTCAAGGATTTCGAAGA  
CAGCGGTACAGGGCGCCGTGGATGTGCAAATCCACCTGGGCCGTGCAACGGTGGCGATC  
AACAGGTGATGCGTGGCCTGTCCCTGCCGAAGAACAAGTTCCAGATGGACGGGAAGCCTA  
CGAACGTGGAGGCGATGATTAACCTCGACACCGCTCGGTGTCGTTTCTTGGAGAGTGTA  
ACCATGCAAGCTAAGCATAGCCGGGTGCTCGAAGGCACCAAGAAATCCACTGGGTTC  
ATTGCCCTGCCGACCGCGGCAAGGCCCTGTTGCTGCGCCTGACTCTGATGCACGGCCC  
AACGAGGGCGTCGCCCTAGCCGGTGGGTTCCTCGCGACCTCATGCATGGCGCCACTCCA  
AAGGACGGGGACATCGCCCTGTACGGCATGACGCAAGTATCAGGCTGAAGTGCTCATCAAC  
AGCGTGTTCCTACCCTGGACCCGCGCTTCGTCCGGGACGGTGGCTGGAGTACCGAGTAC  
GCCAACGCAGGTGAGGGCCGTATCTTCAAGGGCGTGCTGTCCCTCGTAGGCTCCCGTGGC  
CTGGAGGGCATGGACGTGGATTTTAACTACTACGACGCCGACAGCCTTGTCCGGGTGATG  
GAGTCGTTTCGACTTCACCATCAACCAGGTAGGCATTGCGTACTACCGGCCCGACCCCGAA  
GGCGGCCCGCGCCTGGCTGCGTACCTGCACAAGGACGTTACCTGGGGCGTGAACAAGGAA  
GTCGGTGCAGGCTCACGTCTGCCGGAACGATGCGAGAAAATGCGAGCCAAGGCCGCGTGC  
TACGGATGGGGTAACGTATGATGAGCAAGCGCGACGTGGTACTGGATATCGAGAAAGGCA  
TCTGGCGTGGTGTGACCAGAACGACAAGGCCGTCGAGGCCATCATCAAGAAGAACGGGT  
AAGTGATCCTCGAGCCTACGATCGACGGGTGCCGTGCCATCGTCCGTGCGCATGGCGTGG

TGTC CCGCAGCGGGCACCGCTTCCCTGCCCTGGACGGCCTGGAGGATCGCATCCTCGCGA  
AACTGTCCCGGTCCGGCCTGGACTCCGGTCTGGTGTGACTGTGAGATGTACCTGGAAG  
GCATGCCCTTCAGTGAGGCGACAGGGCGTATGGCCGGCAAGACCCCGCTGACCGAGGCCG  
AGCTGAAGTGCCTTCATTTCCCGTATTTGACGCCACCCATATCGGCGTGCTCCGCAAGT  
CGCGCAAGTCCCACCTCGTGTAGGTTGAGCGCCGCGCCATGGTCCGCAGCCTCATGGAAG  
ATTGCCCGCGGGGCGACACCTCGTACTTCTTCCAGTTAGCCGCACAATCCTGCCGTGCTA  
TGGAGGCGGTACTATGCTGGTACGGCTACCACCGCTCCATGGGCTTCGAGGGGTTCGATGG  
AGAAAGACCCGAGCCTGACCTACCGGAACGGCAAGGTTGCAGGCTGCTACAAGCGCAAGC  
CGGAGATCACCGTGGACGGGCGTATCGTCGGGTACGTGATGGGCAAGACTGGCAAGAACG  
TGGGCCGCGTTCGTGGGGTACCGTGTGGAGCTGGAAGATGGTTCCGGCACCGTGGCCGCCA  
CCGGCCTGAGCGAGGAGCACATCCAGCTCCTCACCTGCTCCACGTCAACGCCACATCG  
ACGAGGCCATGCCGAACCTACGGTGGTATCGTCGAGGTCTCCGCGATGGAGCGCTCGGCCA  
ACACCCTCCGCCATCCAGCTTTAGCCGCTTCCGCGACCTGGCCAGTAACCCTGGAGTGA  
AGGTATGAAGATTCGAAAGTCCCATAACCGCAACTACCCGGAAGATATGGTATACCAAGC  
CACCAACCGGGATTCGCTGCTGTATCCGAAGTACGTTCATGGGTTCCGTGTTTCAGCAGCCA  
GGACGGAACATTCGCATCTGCGTCATGGCAGGGACTTGGGACCACGTTGGGTCCGAAGT  
TCGGCATCAGGCGCGGGACATCAAATCCCTCGGCGCCGGTTCGCCGGAAGTTGCACCGCGT  
CATGCGACGGCTGCGTTCGCAATCTGCGACAGGTAGCAGTCAAAGTATGAGAATACCCCC  
GCGGAAGAACGTATGATCCGCTGCTTGCTGGCGTATATCCACGAACCCCTGGGCTGCTG  
TTCCCCGGCCTCCGCACCAAGGCCACGTGGACCCTCAAGCGGAAGAGCTGTTCGATTCTGA  
ATTGACTACGACCTTGCGAAGCTGGGCCGTATGGGATTCTGCCACGCGGTCTCCCTGTAC  
CAACTGACCAGATGGGGACGTGAAGGAATGGACCGCTACCTGATGCAGGAGATTCCCCGC  
CGTGTGCTGGAAGGTCTGCTGGTCAAGGCGCAGCAGTACAGTCAAAGCAACTGGTACAGC  
AAATGACGACTATCCGAATCCTCGACCTCGAAACCGAGAGCTACGAGCACAAGGGTTCGCA  
AGGCGTCCGCCCTTTGACCCCGCAACTACATCGTCATGGCCGGCTGGCGGGACGATGTTG  
ACGGCAAGGTTCGGCCAGAAGGTGGAACATCGCTTCCGCAGCCGGGCCGAAGCCGAAGACC  
CGAACAACCGCTGGTTCAACCTCGACGGCGTGGACGTGATCGGAGCTCACAATGCCATGT  
TCGAGCCGAACCTGGATCTTACCCGCTACCGTGACGAGTACCTGGCCTTCTGCGACGCG  
GGGGCCGGGTCTGGTGTACCCAGCAGGCCGAGTATCTGCTGAGTCATCAGACGTGGCTGT  
ACCCATCACTCGACGAGCTGGCTCCGAAGTACGGCGGCACCCACAAGGTGGACGGCATCA  
AGATGGTGTGGGACCAGGGAGTGCTCACCTCGGAGATGGGCCAGGACCGGCTGAGCGAGT  
ACCTGTCCGGCCCCCTGCGGTGATATCGAGAACACCGCCCTCGTTTTCTACGGCCAGTTGT  
TGAAGCTTCAGGCCCGTTGTATGTCGGCAGGTTACCTGGATCGCTGCGAGGCCCTGATCG  
GTTTCTCGGCGATGGAGTGCGCCGGCCTGAAGGTGGACCTCGAAGTCGCCAAGGTGAACC  
ACGCCAAGCAACTGGAAGAGGTGGCCGGGATCGAGGCTGAGCTGAAGAAGCTCATGCCCG  
ACTTCCCGGAATACTTCGAGTTCAAGTATAACCAGCCTGTATCATGAGCGCATGGCTCT  
ACGGCGGCGAAGTGCGGTACAAGGGCCGGGTGCCCTACGGAGATGGCCGGATGGAGAAAG  
CCGACTTCGTGCGCTTCGGTACGGCCAAGCGGGGGACACCAATCAAGAGTACCTCGGTGC  
GGGTCCCGCTCAGCGAGGTGATCCTGGACGACGACCAATGGAACCTGGGCGGCCATCACCG  
AGCTGGCGACCAAGTACGGCCCCGGTTCATCACGTTCTCCGCCGGCAAGAACAAGGGCAGCA  
TCAAGGTGTTCCGCGAGGACACGGACATTCCGGCGAACAAGTGGGATGACGACCAGCAAT  
TCCGGTTCCCCGGCCTGATCAACCTGCCCAACCAGCCGGAAGTAGTGCGTGAGACAGTCC  
TGGGCAAACGCCCCGAGTTCAGTGCGCCCTACCCTTCCGGATGGATCGCCCGTGTTC  
GCACCAGCGGTGAAGCCCTCAAGGCTCTGGAGAAACAGGGCTTCGAGGCGGCCAAGCTGT  
TGATGCGCCTGGCCGAGCTCCACAAGGACAACCTCTTGTCTACATCACCCATACCTACA  
ATAAGGATGGGACGATTAAGGACACGAAGGGGATGCTCCAGTACGTGGACGACGACGGTA  
TCATCCACCATTCACTGAATACGACGGCGACGGCGACAACGCGCCTGTTCGTCCAGCCGCC  
CGTACCTCCAGCAGCTCCCGTTCGAAGGACGAGGACGACCCGGAAGCCGGCAGCCGCGTGA  
AGGAGATGTTTCGTGTCTCGCTTCGGCGCGGACGGGATGATCGGCGAGACCGACTATACCG  
CCCTGGAGGTGGTGTATTGGCGGCCCTGTTCGAAGGATCGGAACCTCCTGGCGAAACTGA  
TGGCCGGCACTGACATGCACTTGTACCGCCTGGCAGGGAAACACAACAACCTGGAACGGGT  
TCGACTACGACCAGCTCGTGGCCATCAAGAATGACCCCGACCAACCGTGGCACGGTCGCA  
TGATGCAGGCTCGAAAGCACATCAAGCCCAAGGCATTCTCGGCGCAGTACGGCGCGAGTG  
CGGCTGGTATCGCATTC AACACCGGCTGTACCGTGGAAAGAGGCCAGGAATTCCTGGACA  
ACGAGGCGGCCCTGTTCCCAGAGTCCATCGCATTCCGGCAGATCGTCCGCGACAGTGCAG  
AGGCCACCAGCCTCGTCATGTACAAGGCCGAGGACCAGATGCCGGCAGGCGCCTTCAGCG  
AGATGGGGCCGGATGGCAACTGGCGCCAGTACCGCCGGGGATTCTGGCAAGCGCCGGGTG

GCACCTGCTACAGCTTCCGCCAACACGAGCGCTGTGACAAGGAACAGCGCAAGACGGTAA  
TGGACTGCAAGGACACGCAGATCGCCA ACTACTGGAACCAGGGCGAGGCTGGGTTCATGA  
TGACCGTGAGCCTAGGGCGCATCTTCCGTTGGATGCTGCATCGCCCAGGATTCATGGTTA  
CCGATTTCTGATCAACGACATACAGATGCCGTGTACACCGACTGCCACAAGGACACCG  
CCGCCGAGGTCAACAATGGGGTGCGCGACATCATGGCCGACGCCGCCCGCTACATGAGCG  
AGCGCCTGGGCTACGACATCGCCGACGTTCCCTTCCCGGCAGTGGCTGAGATGGGGCCGA  
ACATGTTCAATATGGAGGTGATCCAGTGAAAGATCTGCACCCGCTGCACACGCCTGAGTT  
CGTCAAGACATTCTGGACCAGACCGGGTGCCTGCCGGGAGTACGCCGTACGGGCCGCAC  
CACCGGCAGTGCTCTACAGGCCATTGGCATGGCGCTGTCCCATCCGAGGGAAACCCTGAC  
GTTCTGTGGACCACCCGGACGGCAGCGCGGCAGCACTGGTGGCCAGCATTGAAACCATACT  
GGCGACCTTGGGCTACGAGAACGTCTCTCGTTTCGACCCACAACCCGTGCGGATGGGCGCAG  
CGTGAGAATCGTCTTCAAGACGCTGCCGAACGCCTGATGACCCTTCTCTACTCCGGCCTT  
AAATCTTCATCCGACACGAGAGAGACCACGCATGACTCAACGACTCAACGCTCTGCAAGC  
CGCCCTCGCCCTGGCCAACAAGGCTGCCGAGACCGCAACCATCGACATGTCCGAAACCTC  
CACCGGGGGTGGCGACGGTTCGCATCTTCCGGCGGGCACCGCCCTGGGCCGCTTCTTCAT  
CTACATCGAGCTGGGGGACCACGCCAAGGAATTCCAGGGCAAGCTCAAGAATACGGCCCC  
TCAAATCCGCCTGGGCTTCGCATTGTGGGGCTACGTGAACCCGCAGGCCGGTAACCCGCA  
GAGCCGCCCGGACGACCTGTTCCACACCTACGAGGCCGACGGCTCGATCAAGCCCGGCCCT  
GTTCCGTACCTTCGAGATGACCCTCGGCAACAACGAAAAGTCCAAGACCAAGCTGGCCTT  
CGACAAGATGAACTTGAGCGGGCAGCATACCCACTTCGCTCAGAGGCTCGGCCAGGCGTT  
CATCATCCCGATAAAGCGCTCCAAGATCACCAACGGCAACAACGCCGGTAAGGAACGCAA  
CGACATCGATTGGGGCGGCATCATGAAGCCCTATAACCCGGTTCGATGGCAGCCCGTATAA  
CGTGCCGGA ACTGCCGACGGA ACTGTTGCAGTATTTCTTCTTCCACGCGCCGACCAAGGA  
GACCTGGGACGCCCTGTATATCGAGGGCACCTCGGACAACGGCAAGTCCAAGA ACTTCT  
GCAAGAGACCATTTCGCTCGGCCACCAACTTCCCGGGCTCGGCCCTGCACCTCATGTTGGG  
CGGGGGCGACGATCTGATCATCAAGCCTACGAGCCAGGCCGACGGCAGTAACCTGCCGGC  
AGTGCCCAACGTGGCCGCCGATGCAAGCGTAGCAGCAGCCCCCGCCGTCCCGGCAGTCCC  
GCAGGCAGTTGCTCAGGCGGCCCCAGCGTGCCCCAGGTGGCGAATGTGGCTGCCCTGT  
GGTTCGGTACTGCCGAGGCGCAGAACGTGCTGCTGACGTCCCGCAGGTGGCCAGGTGGC  
GGCTCCGGCAGCAGTTCGAAGTGCCGTTCGGTCCCGGTAGTCCCGGAAGTACCGCAGGGTTA  
AAGCGGTGCCATCGGAAGAGTTCCTGTCAGGACTATCCGAGCAGTTCGACCGTACCAGG  
GCAGGCGGGACGTTGGTGTGTGACACCGACGGTCCCGCTTACGTGGCTTCGGCTACTGCA  
AAGACCCTGTACACTGCGCTCCGGCGTTTCTGGAAGATCATACTGGAGCAGCAGTTCCTG  
GCGCACTGTACAGGGACACGGGTCCACCTCACGGCAGCAGGTGGGGCTAAGGCGTACCGC  
GACGTGTATCCGACCATGAAACCCTACCAGGGCCAGCGCAAGGGGAAGGCAAAGCCCGCC  
CTGCTGGAGCCGCTCCGGCGGGCTGTGGCCGACGTGCATGAACGAAGCGGGGCGCCTGAA  
GGGATCGCCGTTATCTGACACGTTCTTCGAGGCGGACGACGGCATGATGATGGATGCC  
TACGCCATGCAGGACAAGGCCATCATCCAATCCGACGACAAGGACTTACGGATGACGATC  
TACCCGTATTGGGAGATCGATACAGCGTGTGTGAGCAGGATCGACGGGGGCTTCGGCTAC  
CTCAAGGAGGCGTATACGCCGTCCGGTCAAGTTCAGCTCAAAGGGCACGGACGCAAGTTG  
TTCCTGGCGCAGTGGCTCGGCGGGGATAACCGCTGACAACATCCGAGGAATCGATCGATTC  
AACGGTAAGCTCTGCGGGATGAAGACGGCCTTCGATATCCTCCATCTGATCACGGACGAG  
GACGAGGCCATCGACATGATCCTGGAGGCGTACGCCAAGGTCAAGCAAACCCGCTGGCA  
GAGGCCGAGGTGCCGTGGATGCGCCGAAGGCCTACCGACAATGCAGCGCCGTACCTGTTA  
AGCCGAGACCTTCGTCCGGCCTTCCGCCAGTGGATCATCGAGCTGGACGCCTACCACGAG  
GCGCCGCTCCAGAAGCGGAGGGAGAGTGACTATGACGAGTGATCCGAAGGTCTATCAGAT  
ACCGCGCAGCCAACAGCGCACTTTCCTCCCTGAAGCTGTGGGCCGAGCAGGGCAAGCTGTG  
GCCGCTCTGCGGTAAGCCCATCGATATCAGCGTGAAGGGCGAGGCGGTGATGGACCACGA  
CCACGAGGCGGGGCTGGTGCGGGGCGTCTGATCGATTCTGTAACACCGCAGAAGGCAA  
GATCACGAACGCGGGCGGGTTCCTGGGGATGCAAGTCGATGAAATACACCGACATCATCCC  
CTACCTTCGTGCCCTCCTGACGTACCTGGAGGGGGCCGAAGCATCCGCTGATCTACCCCT  
GCACAAGACCGACGAGGAGAAACCCGAAGCGAAGCTGGCCACGCGCCGGCAGGCAGTGGC  
CAAACGCAAGGCGGCATGGCCGTGCAAAAGCACAACGCGAGGAACGTATGAGCAA ACTC  
CGCAAGCAATTCACCAATGAGTACCTGCGCAACGTCTATGTGAGCTGGGTCTCAAGACG  
GGCGACCAGCATCTAACCAGGCATTTCGCGCTTCGGCGAAGTGAGCCGCCAGTGCTTCCGC  
AACTGGTGCATCAAGCTGGCCTTCCACGACAGCAGGACACGCGGCACGTACGCCAAGAAG  
GGCGCTCAGCACTGGCTGGACCGAAAGGCCGCCGAGGTAGTGCGCAAGTTCCTGGCGCC



GTGGGCAACGTTGTTGGCAAGGGTCCGAAGGTAAGTACTGAGCCTGGACATCGAGACCTCGCCT  
ATCGAGGGTGGTCTGGTTCGCTCTGGAAGCAGAACGTTGGCCTCAACCAGATCAAGCGG  
GACTGGACCATTCTGGCGTTCTGCGCGAAGTGGAAGCACGGCGACGAGGTGATCTACATG  
GAGTGCCAAGGTGATCCCTTGGACGACATGCACCTGCTTGTTCGCCCTGCATAAGCTGCTG  
GACGAGGCCGACATCATCATCGTCCAGAACGGCAAGCGCTTCGACGTGCCCAAGATCAAC  
GCCCTGTTCTTCTGAACAAAATGCCGCCGCCGCGACCGTTCAAGGTGATCGACACCTTG  
ATCATCGCCAAGCAGCAATTCGCGTTCACCAGCAGCAAGCTGGAGTACATGACCCACAAG  
GCGTGCGCCATCAAGAAACGCCTCCACGGCAAGTTCCTCGGATTCGACCTGTGGGCAGCC  
GGCCTCCAGGACAACCCGGATGCCTGGGAGGAGATGCGCCTGTACAACATTGACGACGTA  
CGGTCGATGGAGGAGCTGTACATCCTGATGCGCCCCTGGTTCGTTCGGTTCATCCCAACGTG  
GCCGTGTAATTCAACGACGCCGAGCCGACCATCCGATGCCCGACGTGTGGCGACACGGAT  
GTCAAGCAAGAAGACTGGGTGCATACGCAGACCCGGCAAGTACGAGCACTATCACAGCGGC  
GGCTGCGGTGGCTGGAGCCGAGGGCGCTACACCCGCAACACCTCGGAACGGCGCAAGGCC  
CTGCTGAGCAACTAAGGAGACACCATGATCGTTCGACACGTCGTATGAGGTCGCGCTAGCT  
GAGCGCTACTAGAAGGGCGCCGCCCTGGACGAACGCAAGGTTCGGCAAACCTCCCGATGCAC  
CTGGTGGTTCGATGGCTTCCCGCTGCTCAAGCGGGAGCTTGCCTGCATGATGCAGTGGGCC  
GCCGAGGTCAAGGGCTACAAGCCGCACGACTGGAAGAAGATGTCGGTTGGCGAGTTCAAG  
GCCGCACAGCGTCCGGCACGAGTCCAAGCGCCTGCTTGAAGGGCCCCCTGGATTACGAGTCG  
GGCCTGATGCACCTCGAGCATGAGGCATAACAACAATGGCTGCCGCCGAGGTGGCCCTG  
ATGGATCGGGAGAAAGGCAATGAGTAAAATCTGTTGGTGTACCCGACCCGCACGAGACCGA  
TGAAGGTGTTCCGGTTCATCTGGGCCTTCAACGAGCGGGGCATCGGGGTCAACTACGTCAC  
AGCGTACATCACGCCGGCGATGGTCAGCCATCGGGACTGGAGCGATGTCATACTCCCGGA  
CATTCTCCGGGTGATGGCGGAGCGCCTGGAGCGGGAAGTGAAGCTGGTGGAACTGCGCTG  
GTTCCGCGCTGAGATTCTGAGCTGCGGGGAATGGCGTACTACCGAGCGATGACGCTGGA  
TGGGGCGGTTAGCCTGGCCGAGGCCGAGTGGGGTCCCGAGGATATCGGGCGCGTAATCGA  
AAGACGATAGGAGACGGAATCGACCTGATACAACAGCAGCTCGCCACGAAGAGGCCCTG  
GTCGGGGCGGCGCAGAATGACGCCCGCATTGCCTTGGAAAAGGCGATTGCCCAAGGGTCC  
ATCGACCGCATCCCGAGGGCGCGCATCATATTGATGCGGATGCTCCCCATCGTGACCGAA  
CCGATCTACGCCACCAGGAAGCGAAGGCGGGCGGGGCAGGCAGCGAAGCTACGGCACCTG  
CTGCGGATCATCGACGCCAGGACCTCGCGGTTCATGGCGCTGCGGGCTGGGCTGTTCGATG  
CTCATCAACTACCAACGATCACTGCGACGAAGTATTACACCCACATGGGCAAGATGCTC  
TGTCGCGAGATCGAAGTGCGGTTGGCCTTCAAGGTCAACCAACCTCTTACGACCGGACG  
CTGGACTACCTCAAGACCAGCAGGACTCGCAGCGTCCGGCACATCCAGTAGACGATGGAC  
GCTCTTCTGGACGCGGTGCTGCCCGAAGAGGCGCGCATCGACCTGCCCGATGGCGACTAT  
CTGCGCCTGGGCAAGTTCATCGGCGATCCGCTCATCCAGTGCGGCCTACTCGAGCCGAAC  
CGGTTTGTAGGGCGAGGCGGCACGAGTGTCCACCTGGAGACGTCGCCGGAGGCCAAGGAG  
TTCTACAGGACCCCTCGGCGGCAATGACGTGGGGCGGCCAGGGCGTAGCGTGATGCTG  
GCCCGCCAAGACCCTGGCAGGACTGGTGCATGGAGGCTACTACAGCGCCAAGGGGCAG  
AAGCACCACGTACTGGTGCAGCACCAAGCACCAGACCAAGCGGGCACGGCAGATGCAG  
CTCCGCCACCTGGGCCGGGACAAGATGCCCCGAGTCTACGAGGCGGTCAACGTGCTGCAA  
TCGGTAGCCTACGAGATCAACCACGACGTGTACGAGATCATCGAGCGCGTCTGTCACCTCC  
GGTGGCGGCGTGTGGGCATCCCCAGCGCACGTACCCGGACAAGCCTGAGCTCCCGCTC  
GGCGACGAGTGGGCCAAGGAGAATGCCAGTGAAGCAAGAGCTGGAGGCCTTCAACCGTTGG  
AAACGCACCGTCCACCGGTAGTACACCGAGGAGCGAGAGCATAACCGCAAGCTTCGCGAA  
TTTGCTCCACTCTACCTAGTTGTTTCGAGAGCATCATGGCAAGGCAGTGTACTTCCCCATG  
CACGTTGACTCCCGTGGCCGATGTAATTTGGGGCACACCGAATCCCAAGGGTCCGAC  
ATCGTCAAGGCCGGCCTGCGCTTCCACGAGAAGCGAGTGCTCGGCAAGCGCGGACTGTAC  
TGGCTCAAGGTCCACGTCGCCAACTCCCTCGGATGCGATAAGGTGTACTTCGACGACCGG  
GCAGCCTGGGTCAAGAGCGATGGGATGACTTCCAGCGAGAGCTCGACGAGGGGCCGGAG  
AACTATGCGAGTCTCTTTCCCGAAGCCGAGTCCGCCCTGTGCGCCATCGCAGGTCTGCCG  
GAACTTCGGGCGGCTTACGCCTCCGGCAACCCCGAAGGGTACGCCAGCGGCTTCATCGTC  
CACATGGACGCCACCTGCTCCGGTCTCCAGCACTACTCGGCTATTCTCCGAGATGAGAGT  
GGCGGAGTCTACGTCAACCTCCTACCTCCTGGACTTGCCAAAGCTGACATCTACTCCCGA  
GTGCTCGGACTCGATAATGAGGCTCTGGAGAGAGACCGAGCGGAAGGCGCGGATGGCGAG  
GCGCGGGGTTATGCCCTTCTATAGGATAAAGCTGGTCTGACGTGGAACCTGACCAAGAAT  
CCCTGCATGACGCTGGTGTAAAGGCACCACGTTCAAGGGCGTTCGTGGCCCACTGCCTGGAC  
TACCTCGACGAGTCCGGCGTGGAGATTCCCGAGGGTGGCCCGTCATACCGCCTGGGAAGC

TACATTGCGACGCTCAAACCTGGACGCAATCCGCGAGACAGTACCATCGGCAGTCTTCGCC  
ATGGAGTGGCTCCAGCGGCTTGCTAAGGCCCTTCTTGACGCATCCAAGGGTTTGCAGTGG  
ACAACGCCGCTCGGCATGCAGGTCTTCCAGTCGTACCCGAAGACCGAGGAGGTGCGGCTA  
CGGCTGCGAGGCGAGGCTGTTCGAGTACGTGACCCTGTACGAGGCCAACGACGAGCTAGAC  
CCGCTGCGCAACGCCACCGGCATCGCTCCGAACCTTCGTGCATGGCCTCGACAGCAGCCAC  
CTGGGACTGACGGCCCTGGCCTGTGCGGCAGAGGGAATCCCGATCCAAGCCATCCACGAC  
AGCATGGGGACCTACGCTGGCGACGTGGACCGGATGCACGTCCACATCAGGGAGCAGGTC  
GTCACCATGTACAGCGGCCCTGCGTGTCTGTAGAGCTGGCTCGACAGCTTGGGGTAGAG  
GCTACCCCGCCCCGTCGGGGATCGTTGAATCTGGAGGCTGTGCGGGACTCCTGGGCGTTC  
TTCTGCTGAGTAGATTATGTACCCACATAGGAGCAAGTGCATCCGTCCAGAGGCCTCGT  
AGAGGAAGAGGGCTCAGGAAAGACCCAAGAGGAGGAGAAGTGAGAGAAGACGACTACCAA  
GGATTCTAGATAGAGTAGAATAACCAGCATAGGAGATATGATAGATGGTTACTATGAAGA  
GTAAAGGGCCAAGGATTATGTACCCACAGTGAAGGATCGAGAACAGGCAAGGGTAAGG  
CCCACCTGTGACGTTACCTCTCAGCAGATCGAGTGGCTAGAACAGACCTTCCCCGAAC  
ATCAGATCACTCCTGGAACCACGATGGAAGACATCCAGTTTCAGGCTGGCCGCCGCGATG  
TGGTGCGGGCTATCCGCCTGCGTCGCAGCGATGCAATCGCAGTGGAGCTTACAGGATGAA  
CAAGTCACTCTGGCGAGTCCACGCAAAGCCGGCGCCCTTCCGAACCTGATGGGGCTGTG  
CTGGCTGGCAGTACAGGAGCTGGAAGAGTTCACCTCTTCTCTCGAACGAAGAAGCCCT  
GGAAGCGATGCTCGTCAGTATCGAGGGCAATGATCGGACCGAGCTGCTGGTATTCCGTGA  
TGGCCAACTGGCCGGCGGAGCCTGCATTGTGTTTCGAGGACGATCCCCACATCGGCCCGTG  
CGTCACCGCGCAGTGGCAGTACGTTTGGCCACGCTCCCGCAATACAGGCGTGGCGCGAGA  
GTTTCATCCGCGAACTGCACCGACAGGCCGGCTGGGGTCAAATCCCCCTCGTGTGCTGGAG  
CCTTCGCGAGAGCGATAGCCGGTATACGATCCACTACCGGAGAGCCAAGCCTTATGGGCA  
AGAAAGTGAAAAAGGTACTGGGCAAGACGATGATCGGCAAATTCGCTGATGGCCTGCTCG  
GCACTGACCTGATCGGCGCACAATCCGATGCCCGCAAGATGGAAGAGCCGAACCGCCTCA  
TGCAACAGCAGGCGGTCCAGCTCGCAAGAAACCAGCAGGTTGACCTAACACCGAGAACG  
TGGCGCAGGTTGACCTAGGAGCGATGGCCGATGCCACTGGCACCGGCAATCGAAGACGCC  
GGAATCAGGCAGGCACTGGCGTATCGCAAACCTCGGTATCAACTACTGACGAGGTACGC  
CATGAAGTCTACCGCAGCAATGCTGTGGGAAAAGCTTCGGGATGGGAGCGTGGAGCAGCG  
AGCTATCGAGTTCGACAAGACCACGCTACCCTACCTGATGGTTCGATCCCATGTCCGGCAT  
CCGAGGAGTCGTAGAGCACGACTTCCAAGCTGCCGATGCCCTGCTCGTGAACAACCTCGC  
CGCAAAGTTCGCGCGGTGCTGTTCCCGACGGGGATTCCGTTCTTACGTTCCGAACCTTAC  
CGATGCGATCCGGCGCGAAGCCGACAGCCGGGACACTGACATCACCGAAGTGACTGCTTC  
CCTGGCCCGCGTGGATCGCAAAGCAACACAGCGCCTGTTCCAGAACGCCTCCCTGGCGGA  
CCTGACGCAGGTGATCAAGCTACTGATCGTGACTGGCAACGCCCCGCTATACCGCAACAG  
CGACGAGGCCACGGTAGTCGCATGGTTCGCTCCGCTACTACGCGGTGCGCCGAGATGCGAC  
CGGCCGATGGATGGACGTCGTGCTCAAGCAGCGCTACAAGTCCATGGACCTGGAGGAGGC  
GTACAAGCAGGACCTGATGCGTGCGGGTCGCAACCTGTCCGGTTCGGGCAGTGTTTACCT  
CTACACGCATGTTACGCGCAAGAATGGCACGGCGATGGAATACGGCGAGCTGTACCACGA  
GATCGACGGCGTGCGTGTGGGCGAGGAAGGCAGCTGGCCTATTCACCTCTGCCCGTACAT  
CGTACCGACCTGGAACCTCGCCCCGGCGAGCACTACAGTCGAGGCCACGTCGAGGCCTA  
CATCGGCGACTTCGCCAAGCTGTCCCTGCTGAGCGAGAATCTCGGCCTGTACGAGCTGGA  
GTCGCTGGAGGTCCTAACCTCGTGGACGAGGCCAAGGGCGCGGTGGTTCGATTACTACCA  
GGACGCTGAGATGGGCGACTACGTGCCGGGTGGCGCGGAGGCCGTCCGGGCCTATGAGCG  
AGGCGACTACAACAAGATGGCTGCTATCCAGCAGGGTCTCCAGGCTGTAGTCGTCGGCT  
GAACCAAGCGTTCATGTACGGCGCCAACCAGCGCGACGCCGAGGGCGTCACCGCCGAAGA  
GGTCCGCATCACTGCGGAGGAGGCGGAGAACACGCTGGGTGGCACCTACTCGCTGCTCAC  
CGAGAATCTCCAGTCGCCCTGGCGTACGTCTGCCTCTCGGAGGTGGATGATGCGCCCCT  
CCAGGGCTTGATACCAAGCAGCACAAGCCGGCTATCGAGACGGGCCTCCAGCCCTGTG  
CCGGTCCGCCCGCGTGCAGAGCATGCTCAACGCATCCCAGGTCATCGCAGGCTTGGCCCC  
GATTGCTCAGCTCGACCCACTCATCTCGCTACCGAAGATGATGGACACGATTTGGGCCGC  
TTTCAGCGTCGACACCTCGCAGTTCTACAAGAGCGAGGAAGAGCTACAAGCCGAGGCAGA  
ACAGCGGCGCCAGCAGGCCGCGCAGGCCAGGCCGCACAGGAGACCTTGCTGTAAGGCGC  
TTCCGACATGACCAACGCACTCGCTGGCGTCTGATAGATGCAACAGAACGAACAGCAACT  
GCCACCAGGCCTCGCTAACCTGGTTGCCAACGTCCCGCCCGTCGCCGCACCGACCCCGAG  
TCATGTGCAGGTGATGCCGAATCCCGTCCATCCAGCCGCAGCCCCAGTATGCGGCGCAGCC  
GGGACAGGCAGGGTCCCGCAGCAACTGGCTATCCCGACCCAGCAGCCCCAACCCGTTCC

GACCAGCGCCATGACGCCGCACTACCAGCCGGTAGCGGTGCCCGCCGCTTGCCAACCCGT  
TGTACCGCAAGCGACCGCACAGCCGGCTCCGGTAGCTCCTCCGGCTCCGGGCGCAGTTCC  
TCCCGAGAACCTGGAGGTTCCGCCGCCGCCGCATTCCTCCCAACGGAGAGATCGTAGG  
CACCTGGCGGGGAATCTGGAAGGCGACCCGCAACTGGCGCCGTTTCATCAGCTATCTGGA  
AGCGTTCACCGACAAGATCGACACCGTTCGGGCCTCCGGTAAGGCCGCCGAGCACCGCGT  
TCCCGCTTCATCGACGAGCACTATCTGAAAGACGCCCTGGGCGAGGCCAAGCGCAGCA  
CGTCATCAACGTGGCGAAGGGCGTTCTGACCTACGTGGATGCTCAGACCCAGGCAGTCCT  
GAACCAGACCTATGCCGCCGTCGGCGGTGAGGCTCTGCTCAAGTAGGCCGCCAGCGTCTT  
CAACCAACACGCTGACCCGGCTACCAAGACCGCCATCGGTGCTGATGGACTCGGGCGA  
TGCTCAGTCCATGCAATACCCCGCGAAGCTGATCGTTGCCTTCGCTCAAGGCTCCGGTGC  
CGTGGTGAAGGCAACCGGCCAACCCCTTGGCGCAGCGGCCTGCCCTGGCGGCCCTGTC  
CGCTGAGCAGTACCGTGCCGAGGTCTCGAAGCTCCCGTTGAACGCATCGGAAGCCGACAT  
AGCCGCTCTGCGTGAGCGCCGCAAGGCAGGTATGGCGCATGGTCACTAACGACCTTGCCC  
TACGCCGGCCTTAAACCAACATCCAAAAGAGAGAGAATCTCATGAGCTTTCTGAACGACT  
TGACCCGTCCGAACTACGCTGGCAAGAACGCGGACGTTGAAATCCACCTGGAAGAGCACC  
TCGGCATCGTCGACAAGCACTTCGCCTACACCTCCAAGTTCGCGCCGCTGATGAACATCC  
GCGACCTGCGCGGCTCCAACGTCGTCCGCCTGGATCGCCTGGGTAAACGAGCAAGTCAAGG  
GCCGTCGTGCCGGCGAAGAGCTGGAGCGCAGCCGAGTCGTGAACGACAAGTGGAACCTGA  
CCGTCGACACCCCGCTGTACCCCGCCACCAGTTCGATCACCAGGGCGAGTGGACCCAAT  
CCTTCGACATGCGCAAGGAAGTCGCCGTGCTGGACGGCCAGGAACTGGCCCGTAAGTTCCG  
ACCAAGCCTGCCTGATCCATGTGATCAAGGCCGACGCGATGGATGCTCCGGTGGACCTGG  
AAGATTCTTCTCGCCGGGCGTGCTGGAGAAGCTGGACCTCACCGGCGTCACCTCCTCCA  
CGGAAGCCGCCAACAAGATCGTCCGCATGCACCGCAAGGTGGTTCGAGTCCTTCATCAACC  
GCGACCTCGGCGATGCCGTCTACTCCGAGGGCCTGACTCCGATGTCGCCTCGTGTGTTCA  
GCCTCCTGCAGGAGCAGACAAGCTGATGAACGTCGAGAACCAAGCCACCGGCGCGACCA  
ACGACTACGTGAAGTCGCGTGTGGCCATCCTCAATGGCGTGAAGGTGCTGGAGACTCCGC  
GCTTCGCCACCGAGGCCATCGCAGCACATCCGCTGGGCCGCCACTTCAACGTGAGCGCCG  
AGGAAGCCGAGCGCCAGATCGCCCTGTTCTCCCGAGCAACACCTGATCACCGCCAGG  
GGGCGCCGGCTCAGGCCAAGCTGTGGGAAGACCACGATCAGTTCTCGTGGGTCTTGATA  
CCTTGCAGATGTACAACATCGGTGCCCGTCGCCCGGATACCGCTGGCGCCATCGAACTGA  
AAGGCATCAACGCCTTCGACATCACCGAGTGATGCCGCGAAACCCCGCACTTCGGTGTGG  
GGTTTCTTCAAAGCCTAACGACCCGCGCAGATTCCCTGCGTGGGTTTTTTCGCTTTAGGA  
GGAACCTATGCTACTACTCGACTCAGTGAATGTCATCCTGGGCAAGATCGGCGAGTTGC  
CGATCCCGAGCATGGATGAAACGTACCCAACCAGGGCCATCGCCCTCCCGAGTTGGAGG  
ACCAGCGCATCCAGTTGCTGACGCAAGGCTGGTGGTTCAACACCTGGTGGAAAGCACAAGC  
TGACACCCGACCCGCAGGGCTGTATCAACCTGCCAAAGGACACCTTGCGCTTCTACCCGG  
ATTCCCCCAACTCCAGTGGGACGGCCTGGGAGTGCGCGACGCCAACACCGGCGACGACC  
GTATCGGCAAGGTAGTAGAGGGCTGGCTCGTGTCTCCCGTGAGTGGGACCGTATCCCCG  
AGATTGCCAGCGCGTCATAGCGCACCAAGCCGCCCTGGCCGTGTACACCCACGAGATCG  
GGCCGGACGAGACGGCGCAGGTCATCGCCAGGAGTTGCAGGCGTACCAGAACGAACTGA  
GCCGCATGCACACCCGATCCCGCCCGCTAACACCCAGGCCAAGCGCAGCTCTAGCCGGT  
GGCGGCGCAGCTTGAGGACCTGACCATGAGCTACAAGCAATCCGCGTACCCCAACCTGCT  
GATGGGCGTGAGCCAGCAGGTGCCGTTTCGAGCGCCTGCCAGGGCAGCTCAGCGAGCAGAT  
CAACATGGAGTCGGACCCCGTGTCCGGCCTTCGCCGCCGTAGCGGTATCGAGCTGATGGC  
GCACCTGCTGCACACTGACCAGCCTTGGCCGAGGCCGTTCTGTACCACACCAACCTGGG  
CGGTCGACGATTGCGATGCTGGTGGCGCAGCACCGGGGCGAGCTAAACCTGTTTCGACGA  
GCGGGATGGCCGCATGCTGATGGGGCAGCCCCTGGTCCACGACTACCTCAAAGCCGCCGA  
CTTCCGGCAGCTTCGCGCCGCCACGGTGGCTGATGACCTGTTTCATCGCCAACCTGAGCGT  
GAAGCCGGAAGCCGACCGCACTGACGTGAAGGGCGTGGACCCCAATAAGGCGGGCTGGCT  
CTACATCAAGGCGGGTTCAGTATTCGAAGGCGTTCTCCATGACCATCATGGTCAAGGACAA  
TGCCACCGGTACGACCTACAGCCACAGGGCCACCTACGTGACGCCGGACAACGCCAGCAC  
CAACCCCAACCTCGCCGAGGCCCGTTCCAGACGAGCGTGGGCTACATCGCGTGGCAGCT  
CTACGGCAAGTTCTTCGGCGCCCCGGAGTACACCTGCCCGACTCCACGAAGAGGTACCC  
CAAGGTTGACCCCGAAACGGCTGCGGCTACGGTAGCCGGCTATCTCAACCAGCGGGGCGT  
GCAGGACGGCTACATCGCCTTCGGGGGCGACGGTGACATCGTGGTTCGAGGTGTCTACCAA  
TATGGGCAACAACACTACGGCATCGCCTCGGGTGGCATGAGCCTCAATGCCACCGCAGACCT  
ACCGGCCCTACTGCCGGGTGCGGGTACGCCGGGCACTGGCGCGTAGTTCATGGACGGGGC

CGTCATGGCCAGTGGCTCGACCAAGGCGCCAGTCTACTTCGAGTGGGATTCGGCGAACCG  
CCGCTGGGCGGAGCGCGCAGCCTACGGGACCGATTGGGTCTTGAAGAAGATGCCCTTGGC  
CCTACGCTGGGACGAGGCGACCCACACCTACAGCTTGAACGAGCAGAACTACGACCGGCG  
CGGCTCCGGCGACGAGCACACGAACCCACGTTCAACTTCGTACCCGGGCCATCACCGG  
CATGACGACCTTCCAGGGCCAGCTGGTCTCTGTCTCAGGAGTACGTCTGTATGTTCGGC  
GAGCAACATCCCGCACCGCTGGTTCAAGAAGTTCGGCGGCGGGCGCTCAACGACGATGACCC  
CATCGAGATCGCGGCCAGGGCAGCCTGACCGAGCCGTACGAGCACGAAGTCACCTTCAA  
CAAGGACTTGATCGTCTTCGCCAAGAAGTATCAGGCCGTGGTCCCTGGCGGGCGGTATCGT  
GACCCGGAGAACGGCGGTATCAGCATTACCACGCAGAACGACCTCGATAACCCGAGCGGC  
ACCCGCCGTACAGGCCGTAGCGTGTCTTCGCCGCTGAGCGTGCCCTGGGCTTCATGGG  
CCTGCACGAGATGGCCCCATCGCCATCCACGGACAGCCACTACGTTCGCTGAGGACGTGAC  
CAGCCACATCCCGAGCTACATGCCAGGGCCGGCAGAGTACATCCAAGCGGGCGGCCTCAAG  
CGGCTACCTCGTGTTCGGCACCAGTACGGCGGACGAGATGATTTGCGACCAGTACCTGTG  
GCAGGGCTACGAGAAAGTGCAGAACGCATTCCACCGCTGGACGCTACGGCACCAGATCAT  
CGGGACCTACTTCACCTGGGACAACCTGATGGTCTTGATCCAGAAGCGTCAGGAGATAGC  
CCGGGGCCGGATGCACGTGAACAGCCTGCCTGCACGGGAGGGCCTGCAATATCCGAAGTA  
CGACGACTGGCGGGCTATCGAAGCGACTGTCGAGGGCGGGCTGGAGCTGACCAAGCAGCA  
TTGGGACCTGATCAAGGACGCCCTGCCGTGTACCAGCTACAGCGCGTGGCCGGCGCATT  
CATGGAGCGCTACCAGCTCGGCGTGAAGCGCGAGACCAACACCAATGTGTGCCTCGACGT  
TCCCGAGGCCGTTGTTCGGCTCCGTCTACGTGGTTGGCTGCGAGTTCTGGTCCAAGGTGGA  
GTTACCCCGCCAGTGCGGCGGGACCACAACGGCCTGCCGATGACCGCGGCCCGTGCAGT  
GCTGCACCGCTACAACGTCAACTTCGGATGGACCGGAGAGTTCTGTGGCGCATCAGCGA  
CACGGCCCGGCCAACCAGCCGGGGTACGACACGACGCCTCTACGGCTGTTTCAGCCGGCA  
ACTCAACGCCGGCGAGCCGCTGGTGGACAGCGCCGTGGTGGCGCTGCCGGCCCGGGTCCG  
TATGGCGACCTCCAAGTTCGAGTTGAGCTGCCATAGCCCTTACGATATGAACGTGCGGGC  
CGTGGAGTACAACCTCAAGTCCAACCAACCTACAGGAGGGTGTGATGGCATTCTGGCTA  
CCACTACTGGCCGCTGGCGGCATGTTCGGCTCTCCAGCAGGGCCTATCCAACAAGGAAGAA  
CGCCGAACGATCAAGGCCGAGAACAAGGCCCGCCTCAAGACGGACCTCGACAACCTGGGC  
GCCGCTGCCTGCGACATCGCCAACCTGGGCGTCATGGCTGCAAGCTACCGCAAGCAGGCC  
GTGGCCTCCCAGCTCGAGGCCAAGCGGCATGGCATGCTCGCCGGCGGGGTGCGCCTCGGCA  
CAGGCAGGGGCCTTCGGGGTCAAGGGTGCATCCGTAGATGCGGTGGCCCTGGACATCGAG  
CGCGAGGTGGGCGAGGCCCTGATCCAGATTGACGATAACCTGGACAACCAGATGTGGAAC  
CTCGCAGAGGAGGCACACTCCAGCCAGGCCAGGCTAAGGCCGGCCTGCTGGGGCAGAAG  
AGCACACAGCGGGGCAACGCTCCCCGCTGGTTCGCCGGCCTGATGTCTGCGGGTTCCCTA  
TACGCAAGCCAGTACTTCAAGTTCGTTCGCCACGCCTAAAGGAGGCAACTGATGGCGGAAT  
CGAACGTGCCTCCCAGGAGCTTAGGATCAACGTTCGGACAGACTCAACTCCAGCCGGGCC  
AGAGCGCCCGGGCGCGGGGTGCGAGACTCCGAGGTCAACCATAGCGGCCCCAGCGTGGGTT  
CGCAGATTCTCGACGGCATACTTGGTGCAGGTCATCAGATCGCTGGCAAGTGGTTCGAGC  
ACAACGTGCAGCAGGAAGTCTTCGCGGGCGAGCGTGCCCGCATGGCCGGGGAGGCCGAGG  
ACGCCGTAGACAGCAACATCCTGGCCAAGCCCTTCGTGAAGGGCGGGCTGGCGCAAGCAGG  
ACTACCGGATCGCCAGGCTGACTTTCAGTATCAAGATGCAGCAGTTTATCGCCACCAAGA  
GCCGGGAGATGACTCCCGACGAGTTCGAAAGCACCTGTTCGAGGAAGCGGCCACAGTGC  
TGGACTCCACCGAGGGCATGAACCCCAACGACGCCCTACAGGCGCTGGCCAGCAGCAGA  
AGGCCGAAGAACAACCTTTCGGCATGCAGGCCTAGGCCTACATGGACTGGTCCATCGACC  
AAGCCGCCCGAGGCTTCCGCACCCAGGGTAACAGCATCCTGGCCAAGGCCGTGCAGACCC  
AGGCCACAGGCGACGAGCTGTCCCGCAGTTGAGCCTGGAAGAGGCCGGCCTGTTCTACA  
CCAACATCATGACCTCCGAGGACATCCCGCTGGAGGTGCGCGACAAGGTGGGCATGCAGT  
TCCTGGCCGCCAGCCCGGATATGAACCAGCGGGGCATCTACGAGAGTCTGCGCGACGCCG  
GCTTCTCGACGGCATGGCCTTCGACGACCGACGTGCGCTTAATGGCCTCTACGAGAAGT  
CGAAGGCACAGACCCTGGCCAAGGACTCGATGGCCACGCTACGGGCCTACGCGGACTTCC  
AGCAGCGGGTGGCCAACGGCGCCATCACCGACCTTGCAGAGGTTCGAGGCGTATTCTCGGG  
GAATGGTGGCGGAAGGCCGGTGGAGCGACGCACAGGCCATCTCCTTCATGACCAAGGCTA  
TGACCGGCCTGGGCAACGCACAGCGCATGCAGGGCATCATGGCGGCCCTGGAGGCCGGCG  
ACATCAACGCACTGCACACCCTCGGGACCAACGTTACCGAGGCCCTGGGGCAGTGGGATA  
AGATGCAGGCGGCCAACTGCTCCAGTCTCTCCGATCGGTTGGTACAGGGCACGCAACTCG  
GCCTACGCCTGGGGACCTTCCCGAAGACCTACGGCGAGTCCGTTGGCAGCGCGGTCCGCA  
TGATCCAGGCCGCCAAGGAAGGCCGAGGCCAACC CGGAGTTGGTCTACACGCTGAACAGCA

TCTTCGAGCAGGTGGCCTCCGTGCAGGAGATCAACCCATCTGCCGGCAACGTGATGCTCT  
CGGGTATCCCGGAGGGCGAGCAGGCCGCGGTAGCCTGGGCACTCACGCAGATGAGGATGG  
TCATCGCCCCGGCGCAGGCCCTGCGGGAGTTCAGCGCCAACGCGGAAGTCGTCAAGGAGA  
TGGACGCGTTTGAGAAGGGCCAGAACACCAAGCCCTTCAAGGACCACCTCGGTAAGCAGA  
TCAACGACAAGTTCGTGAACAACATCTTCGGTTCGGGCTGGAACATGCTGACCGGACAGA  
GCGACCTCAGCAACAACGCGGCCGTCTAAGCATGTACCGCCGTGCAACCATCGACGAGG  
CCAACCTGGCTGGCAAGCGACCGCAAGCACGCAGGACTCCTCACCAGCGACACAGGCCGGG  
AGGCTCTGCTGGAGATCGCCGCCGCAACGTCCGCAACCGGACTATCCAGGTCGGTGAGT  
CCCCAACCTCAAGGAGGGGGAGCTGTTTCAGCCGCCGCGACAGCGCGCCGCTGATCCTGG  
CGAGAGGCACTACCGCCGAGCAGCTATTCGGCACCCACGACACCGAGACCACCGGCCGAG  
TCCTGGCCGAGCAGCACAAGCCGACAGGTTGAGGGCCTCCTGGGCTACAAATCCGTGGTGG  
CGTTTGAGTTCGACCGCACCAGTGGCAGCCTACTCGGCGTCGAGTACGCCGAGAGCGGGG  
TGGCCCTGGACCGTACGCGGGTCCATCCATAGGCCGTGGGTAAACGAAGTGCTCAAGCGCA  
ACTTCGACAAGCTGAACGCTGTAAGGGGGCGCGGAGTATGGGGCCAACGTCAAGGTCAGCG  
GCACGGACATTCGCATGAACGGCGGCAACAGCGCCGGCATATTGAAGCAGGATGTGTTCA  
ACTGGCGTAAGGAGCTGGCACAGTTCGAGGCCTATCGAGGGGAGGCGTACAAGGATGCAG  
ACGGTTATAGCGTGGGCCTGGGTCCCTACCTAGGCAGTGGCAATGCTGGGGCAGGAACTA  
CGGTCACGCCTGAGCAGGCCGCGCAGTGGTTCGCCGAGGACACCGACCGAGCGCTCGACC  
AGGGCGTGAGGCTGGCCGACGAGCTGGGCGTTACGAACAATGCTTCGATCCTGGGCTTGG  
CCTGTATGGCCTTCCAGATGGGCGAAGGACGTGCCCGGCAGTTCGCAACACCTTCCAGG  
CGATCCGGGATCGCAACAAGGAGGCCTTCGAGGGCCGGTGCAGGAACAGCAAGTGGTACA  
CGCAGACGCCCAACCGGGCAGAGGCATTCATCAAGCGCATGGCGCCCCACTTCGATACCC  
CGAGTCAAGTCGGGGTTCGACTGGTACAGCGCCGCAACAGCGGAGTAAGATATGGCAAAGC  
AATTCAAGGGCCGTATGACGCCCAAGTATCCCCTCGACCAAGCAGTCCCTCGACGAGGCC  
AAGTACAGGGTCTGCTCGATGCATTGTCCACCGTGGAGTTCGACGCCCTGACGGGCCGCG  
AGATCGGAGAACGGAATGTGGCGGGAGGCCAACGTGCCAACGCTCGGGAACCTGGAGCGCA  
TCGTGCGAGACCACAACCTGCCGGCCCTTGACCGTGCTTCTGCACTCTGGAATCAGTCCA  
CTCTCGTCGGCCGCTGGGACGATTCGCTCCAACACGACGCAGACCTTGCGGGCAACAGCA  
CCGGCGAGGTGGACCCCAACTTCGACGCCGGGACCTACGGGGTCCAGGCGCTCCAGGCGG  
CTGGCATCCAGCCGACTGACAACCTCCAGATCATGGCCCCGCGCCGGCAACGCCGAGG  
ACGCGGCCTACCTACTGTGCGAGGATTCAACGGTATGAGCAAGACGAGCAAATCGTGCGGG  
ACAACCCGTAAGTACTGGAACCTTCGACGCGGGCATGCTGGACCCGGCTGCGCCGGCAGTGCATG  
CGTTACTTTCGGTGCTGGCCGCGTCTACGGCTCGGTCGTGCTGGCATGGCTGCTGCTG  
GCGGCGCTGGCCAAGTCGGGTAAGTTGCTTGGCTGGATGCCGCAGGTGCCGACGTGGATG  
CCGGAACCTACATCGTCGCTGGCGCTCTGGGTGCTGGCGTGGGTGCTCTGCTGGGGTCTG  
GTGCTGGACGCAGTGCCGCCGAAGCCCCAACGCAACCGCATGTGCCCGAAGTATCGGCC  
CTACTGTGCGGGCTGCCAGGAGAAGCGATGACCGCCGAGGAAGCCGCCGCTCGTGGCTTCA  
AGGCAGGCGATGTGGTGGACCTGCTGGACGAGGGGCACTGTCCTGTCCCGGGTAAGCTACC  
GAGTGGAGCAGGCCGAGATAACGGCCATCCCGCGCCTGGACACTGCCTTCGGTGACGAGC  
TGCACGGCCTGTGCGGGCCGCAAGCTGTGCGAGGTGGTGGACCACCTCAAGACCCACGCCG  
AGGTGCCCAAGCCGTTGCACGGCGTGGCCGCCAAGGTGGCCGAGACGTTGAAGACCCTGG  
AGGGCCTGGGGCAGCGCACCATGTTCCGCGTGGTGCAGGGGCGGGGATACCGCTAGCTCCG  
CCTCCTCAAGCCAAGCACGGCTGGTCTGCATTCGACGCAGGGATTGGACACTCTGGTCC  
AGGTGCGTGGCAGCACGGCGCCGGGCGCGTGAGAACCAACCCTGTCACGGTCCCTCCAG  
AGGCGGTTACGCCGCCATGGTAGGCGTGATGAATACCGCCCTGCGGAATCCTGGCGCGT  
TGAATCCCAAGGTGGCCCAGGCAATGCAGACCCTGGAGAACGTCCGGGGTAACGTGCTCA  
ACGCCTTGAAGCAGGACCGGGCCCGCCGGACGGCAACTTTCGAGTTCGAGGAAACCCTGC  
TGGCGGGCAACTCCAATACCCTGGCGAACGTCAAGGAGCTGGTGGCCTGGGGCCTGACGG  
ACACCCGCTGCCAGAAGACCCTGAACCGGCTGCGCTACGGCGACGGCGGGAAGGGCCTCT  
GGTCCCGGTTTCGTGAGGGCATCCGCAGTCTGCTGGGCCTGCGGCCTGATGCGGACACGG  
CGCTGAGCCGCATTCTGGCGGCCTCAGAGACAATCATGGACTCCATGCCGGGGTACACCA  
AGGCCAGGCCAAGTGGGCCAACAAAGGGCGCGCCAGTGACCGAGGAGGCCAGCCTGGAGA  
CCATCGTGCGATCCACCCGGGAACGTGCCCGAGAGGGTGCCGGCTTCGTGAACCGATTCT  
ATAGCGAGGCCGACCTCCTGGCACAGCCGGGAGAGGGTGCGCGGCTACTCCTGAGCCGTC  
TTATCGATGACCCGGTACGTCGGGATGGGTAGAGCACCAAAGACAACGCAGCGAGCTATT  
TGCGCCGCTACCGCAACGAGTTCGAGGGCTACGTCAAGTCCAACGACGAGATGATGGCGA  
AGGCGATGGCTGAGCAGGGCGTGGGCCTGACCGCTCGGGCACTCAACTCCCGCCGCGCTA

TGGCCGTCCGGGATCAGCTCAACGAGCAGGTCACCCGGGAGGTGCTGCGCTGGGACCGGG  
AGTGGACCGCCTATGGCAGCGTCCGCGTAGACCCGAACCTACCGGGCACCATCAAGGCGC  
TGGCTGACCACTCCGACGAGATTCACGGACTGATGGGCCAGCGTGCACGGGAGGCCGGCG  
TGCCTGGGTTTCGAGA ACTTCGCACCACGCCCGGGTACTTCCACCGCTCGTGGA ACTGGT  
CGAAGATGGCGCAGCTTGACGAGGCCGCCAGGCTTGGCTCGCCGCGCTATCAGCGACG  
CCGTATTCCGGGGCATCCCTGGATTGGAACGTGCGGATGCTGACACCATCGCACAGGCCA  
TCGTATAGCGGGCACGAGACCGGGCGAGCGGTATCCGCTCCGAGTTCATGGGCGCGATGG  
GCGTGGCTGATACGGCCTTCATCCGGCAGGCGCTGGAAGAGGCCAGCGTGTCCAGGCCA  
AGTTCGACAGCATCATGGCGAAGATCGAGCAGAAGCAGTCCGAGCAGGGCACCTTCAAGT  
ACGGCAAGGGCCGGCTGTGCGGGGACATGACCGCCGAGCTCAACCACAACGGCACCGTGT  
ACCGCGTACAGGACCTGATCGACCGGGACCTCGACCGACTGATGGAGAGCTATTAAGGCA  
GTATGTGCGGGCCTCTCGGCGCTGGCTCGGGCAGGTATGCCGGGCGACTCCGAGGTCGAGG  
CGTACATCCGTGAGTACCAGCGGTAGGCCGCGCACCTGGGCACCGACAAGGTGCAGGAGC  
TGACGGGGCAACTGCGGGGCATCTTCGGGGACTTACCGGGCAACGTGCCGCGCGAGCACC  
AGCTCGGCCCCGTCGCTCAGCGGGCCAGCGGGCTGACCAGTGCCACCATGGTGGGGTCTCT  
CCGGCGTGTACCAGCTTGCAGAGCTGGCCACGATAGACCACCGCCATGGCGTCTTCAACG  
TCATGAAGGCCATAATGAACTCCCGCCTCGGGGACTTCGTAGGCGCCATGCGCCGTAACC  
CGGACCTCGCCGACGAGATGCAGACCGTCTCGGCCTGAACCTCGCCAACGACATCCGCA  
TGAAGGCCTGGAAGCGGCAGTTCGACACCTTCCCCGCCAGCCAGGATACCTTCATGGATC  
GCTTCTGCACGCAGGTGAGCAGGCTATCCCTGTCTCAACGGCATGAAGTTTATCCACA  
ACTGGCAATCCCGCATGAACGCCAACCTCACCTTGAACAAGGTGGCGCGGGCCGCGCAGG  
GGGATGAAGCAGCCCTTCGAGTGCTCCAGCAGTACGGGAAGGACTTGGACTGGATGCCAG  
TGCTGGCGCGGGTTCGCGGTTATGTACATACAGAGGAAGGAACGCCAATCTATGAATT  
GGGGCGTCTGGAGCCAAGCAGACGTGAACACCGTTCATGAACACCGCACTGCGGATCATGG  
ACGACTCGCTGCTGTATGGTAGGGTTCGGTTCAGAACTCGGGCTCTGCCCGGTCCCCTGTCG  
GTCAGATCCTGGGGCAGTTCGCGCAGCTTCGTGGCCTTCGCGCACAAACAAGCTCCTCCGGG  
GAACCTACGAGAACTCCGGCGTGCTTGGCGTGGCCTCTCTCCTCGCATTCCAGTATCCGC  
TCACAGCGCTGATGATGGGTGCCAAGGCAGCGATCAACGGCAAGTTCGACACCTCTGATG  
AAGGCATCCGCAAGATGGCCATCGACGTCATCGGCTACACTGCGGGCCTCGGCTCCACCG  
CCGACATGTGGGGCGTAGTACACCGGGCACTCCCCGCGGTCCGCCCCGGTCTTCGGGGCTGG  
CGGAGCACTCCAACGAGGTGTTCCGTGGCGTCAAGGACCTAGTAACCGGCGACGACCCCCG  
CAGCCGCCACCGGCGATATCGTCAGCGGCGCCGCGAGCGGCACTGCCTTTCGTCAACGTAT  
TCCCGGCGACCAAGTTGCTGCTGGAATCCATCAAAGGGGAATAACGTGGCTCGGTTCAAG  
TATCCCGAGACCTCCACGTTGCAGATGGGGTTCGAGGCTGTCTTCAGTCTCGACTTCCCG  
TTCCTGCGGCGTGAGGACGTATTAGTCCAGGTCGATAAGATACTCGTCACCGACTATAACG  
TGGGTAGACGACACCAACTTCCAATTGGGGGTGGTGACGAAGAAGGACCAAGAGGTCCGC  
ATCTTCCGCGACGCGCCCCCAGGTCCGGGACACACTTCAGCCAGGGCATCCCGTTC  
CTGCCTCGATACATCGACGCGAACAACAAGCAGCTCCTGTACGCTGTGCTGGAACGCATC  
AACACCGCGATCCTCGCTCTCGCTGGCGTACTCGACGCGATCCGTATCGCCGAGGAGGCT  
CGTCGCTGGCGCAGGAAGGACTCGACGCCGCAATGCGGGCGCTTCGCCGTGCCCTGGGC  
TTCGCTGAGATTTCGCACCGTGTCCGAGGACTCGGCTATTGATCCGAGCTGGCGGGGTTAC  
TGGAACCGCTGCATCACTGCCGACAAGCCTCTGACCTTGACCATGCAGATGGAAGACCCG  
GATGCACCGTGGGTTCGAGTTCATCGAGGTTCACTTCGAGCAGGCCGGTGTGCGTGACCTA  
AACATCGTAGCCGGTCTGCGGTTACCATCAACCGTTTGCAGAACACCACCACGCAGCTC  
TACGGCGAGAATGGCGTGTGACTCTCAAGCGGCTGGGGCGTAACCACTGGATCGTGTT  
GGGGCCATGGAGGACGAATAAAGCACGGCATTATCGCGGGCATCATGGCCTCCCAAATTC  
GACGGCCAAAGCCATCCTGGCGACCTACCCGTATCCCATCATGCAGGCGGATAATCGCT  
GGGCTGCTCGGCCAATATGGTGGCAGCTCTGACCAGGGACACTCTGAAGGAGGTCCGGC  
CAGAAGACACGCTGGAGCACTACAGTGCAGCCACCGCTGTACTGGACGCCAGCATGCGCA  
GCCTGACACAAACGGGCTACGGCGGGGCTGGCCGTACCAGCTCCTAACAGGTGTGGCAG  
ATACCACCCTCCGGTTCGCTGGTGAATCTACTACGGTTCGAGGCTCAGCCCTATCTAGCCA  
CGCCGGCGATCCACTCGGCGGACCTGCGGGTAGTGCTCATTATCTCGAATTACGAGGTAG  
AGCCGTTCCATTACACCCTGACCAACAGCCTTGTACAGGCGGAGCTGAAAAATGTTTAAAG  
ACCGAAGTAAAGAGACGTTACACCCTGATTCGCCGCAAGGCGGACGGCACTCCTGTGGAG  
ACTCTGGAGTTCGACAACATCATTACGAATGCGGGCCTGGATTGGATCGCCGCTATGGAT  
ACCGACCTCATGGGCGAACCCGTAGCGGTTCAGCACTTCTACAGCCGATCCCAACCCGAGC  
GCACCCGCCATCCGGGAGGTTGTGCAACGCACGTCCGCATCTGCCCTGGTGGAGGTACT

ACATCGGGCCTGGATGGCGAGTGGCTGTTCTGGCGGAAGCGTTGGAGATTCCCGCAGGGC  
ACCCTAGCTGGTCAAGTCCTGGCCACCGTGGGCCTCATCTGCAACTCGGATCGTTCGCTTC  
GAGAATAACACGGGTGAGCTGATCCCGAAGGATACCCCGCTGTCGTACACTCGCATCAAG  
GACGCCCGGGCAGCCTACTACTCTGGTGGTGGCCGCTGACGAGATTCTGGATGTCCAG  
TACGAGTTCGCGAGCCGGCCCGTAGGAACGGCTGAGGCCAAGTTCGTGATCTCCGGCGTG  
GAACGCACCTTCCGGCTGATCCCACAGCCATTTGCGGACCGTGCTAATCTCTCCGGGGAA  
CGCTACATCTTCTACAACACCAACCCCTACATCAACGGAAAGGACGCCTCCGGCGGCAAT  
GTCCTAGACGGTCAGTGGCAGAAGAAATATCCCAAGTACGTGCGCGCCTCTTACAAGGCG  
CAGATCACGCTGCTGACCCAGGTCCAAAACGGCAATATGGCTGGCGGCATCACCGGCACC  
GAGGAACTCAAGATTTACAGTGGACGTA ACTATGTGCTCGATATCAACCCGCCTGTTGTG  
AAGAACAATACCCAGGAGTTCACCGTGACCCCGGAGTGTACGGTGGCGAGGGCATAACCT  
ATGGCACTGATCTACGACTTCAACCCGGACCTTGATCCGAAGGCTAAGTCCAAGTTCGTA  
GGTGC GCGTGGCCGTAGGGACTTCAGCGACGTGCTGGACTTCTGCGAGGGGGGTCTGGCT  
ATCCAGGACCCGTGCGAGGGCATGATGGTCCGCGTGTGGCGAACAGACCTTCGCCAGGAC  
GGGACCTACCTGGGTACAGAGGACGCCTCGAACGAGATTTCGCATCCGCGGAGGTATCGAA  
GAAGGTATCTCCAGATGTCCCTCGACTTCGACAGCAACATGAACTACGTGTGTGCTTTC  
GTACGAGCCGACCGGACTGGTGAATGTCCTACTCCAACGTGCAGCAGCGCCCGGCTC  
CTCGTGGAGCTTGGGCAGGTTGACTATGCCAAGGTGGCTCTGGACGACAATCGTCCGGGG  
GCTACCGCCTTGGAGCAGGTTATCGTGCCCTACACACGCAACGGGAACCTCTACGTCCGC  
ACGCAAAACGAGAACTACACCGAAGAGCACCTGGAGGTGGATACCGGCAAGGTATTCTGG  
CCTCTGGTGAAATGCGGTATGGGCACCAACCTCCGCTTCCAAGTCCAATTCAGAGGGCAC  
ATGTAATGAGTAAAAGCAGACCCGCGAGTGTGAGCGGCTGGGCCTGCTTCACGAGCTGG  
TCTGCACCGCTATCGAGCGCAACTTCAAGTGGTACATGGACAAAGACATCCCGATCCCG  
CATCGGATATCGCTGCCGCCACCAAGTTCCTCAAGGACAACGAGATCACCTGTGATCCGT  
CCGACACCATCAACATCGACCGTCTCCGCGAGGAGATGCGGCAGGCGCAGGCCGAGAATC  
GCCGAATTGCCTTGGAGGGCTTCATCGCTGGCGAGACCGACGACGAGATGGAACGCCTGT  
ACACCCACTAAGGAGGCAGCATGACGCCGCAAGAACGATTCCAGATAGCCACGAAGTGC  
GGGATATGTACCCGCGCTTCCGGGACTTCTGCCTGGACGCCATGCTGTTCTCCGGCTTCA  
AGATGACCTGGATGCAGCTCGACATCGCCGACTTCATGCAGGACTCGCCCAACAAGGCGA  
TGGTTGCTGCCAGCGTGGCGAAGCTAAGTCCACCATCGCCTGTATCTACGTGGTCTGGG  
GCATCGCGCAGAACCCGGCCACCCGTGTCATGCTGGTCTCCGGCTCCGGGGACAAGGCCG  
AAGAAGACAGCCACTTGATCACGAAGCTGATCATGCATTGGGACCTGTTGGCGTACCTGC  
GCCCGGACGCCCGCATGGGCGACCGTACCTCGGCTACCAGCTTCGATGAGAACTGGGCGT  
TGAAGGGCGTGCAGAAAGTCGGCCTCCATCAACTGCATCCGGATCACCGCCGCCCTCCAGG  
GCTACCGGGCTGACATCCTGATCCCTGACGACATCGAGACCACGAAGAACGGCCTGACCG  
CAACCGAGCGGGCAAGCTGACGCGGCAGTCGCAGGAGTTCACCTCCCTCTGTACCCACG  
GTAAGATTCTGTGCCTGGGCACTCCGCAGTCGCGGGAATCCATCTACAACGGCCTGCCTG  
CGCGGGGCTTCTCATGCGCATCTGGCCGGGCCCGTGCCCGACCCTGGACGAGCAGAAGC  
GCTACGGCGAGTGGCTGGCCCCCTCTATCGTGGACCGTATCGCCCGCCTGGAAGAGAAGG  
ACCACAACCCCGCAAAGGCAAGGGCCTGGACGGCACCCGTGGCTGGGCCGATGACCCGC  
AGCGCTACAACGAAGAGGACCTGCTCGACAAGGAACTGGACCAGGGTGCCGAGGGCTTCC  
AGCTCCAGTACATGCTGGACACAAGCCTCGCCGACGAGCAGCGCATGCAGCTGAAGGTTT  
GTGACCTGCTGTTTATCGACGCGACGCACGAGAGCGTACCCGAGCAGGTGGCCTGGGCTG  
CCGACGAGCGCTTCAAGCTCAAGTTCGACGCCACCGATTCCCGGTCATCAAGCCTGAGC  
TGTACCTGCCGGCGCTGATGGCTGGCGGCTGGGCCTCGCTCCAGCAAATGACGATGTTTCG  
TGGACCCTGCCGGCGACGGTGGCGACGAGCTGTCGTATGCCGTGGGCGGGACTCTTGGCC  
CGTACATCCACGTCGTGAGCATCGGCGGCAGGAAGGGCGGCTTTGCCGAGGAGAACCTGG  
AGAAATGTATTGCCCTGGCTGCGCGCTATGGCGTCAAGGTGATCTATGTGAGAAAAACA  
TCGGCGCTGGTGCAGTTGGCCAGCTCTCCCGCCACCACATGCGATCCATCGACCCGGACA  
CCAACAAGCCCCGCTATGAGGGGATCGGCGTAGAAGACCGCCAGAAGTCCGGACAGAAAG  
AGCGTCCGATCATCGACACCCTGCGGCCCATCATGCAGCGGCACCGTCTGATCTTCCACG  
TATCGGCGATGGATTCCGACCAAGTGGCCTGTAAGCAGTACCCAGCGGACAAGCGCAATG  
AGCGCTCCGTGTTCCACCAGATTCACAACATCACCACGGACTGAGGCTCACTGCCTAAGG  
ACGACCGGATCGATGCCCTTGAGGGCCTTGTCGCGAGCTGACACCATCGCTCGTAAAGG  
ACTACGAAGCCGCAACCCGCGCTCGTGAAGAGGCTGCCAAGAAGGAATGGCTGAACAACC  
CGATGGGTTACTACTAAGTCTGTCTTCCGGTCTCTCGGCATGGGGCGGGATCGTTCGCAAGG  
GCCGTCCAAAAGGACGAAGACTATGATGATTGATACCGCTACCGAGGCGGGCAAAGGCAC

CCTCGCCGTCTCCGGCGTGGGGATCGCCGTTTACTCGCCCTATGAGATCGCCAGCCTCTG  
TGCTGCGGTACTCACCGCGCTCTACGTAGGCGCCAGCTCATCACCCTGCTCCCGAAGAT  
GCTCGATAGCCTCGCGGAGTTTCGCCGGAGGTTCAAGAAGTGAACAAGCCCCTGCGCGGC  
GCAGCCCTTGCGGCTGCCCTCGGCGGCCTTGTGCCCCTGGAAGGCAGTGAGACCACCGCC  
TACCGAGACATCGCCGGCGTCCCCACCATCTGCTCCGGAACACTGCGCGGGGTCAAATG  
GGCGACAAAGCCACACCAGAGCAGTGCTACCAGATGACGCTCAAGGACTACCAACGCTTC  
GAGTGCATCGTCTGGACGCCATCAAGGTGTCGCTGAACGTCAACGAGCAGACCGCCCTG  
ACGTTCTTCTGCTAAAACGTGGTTCTAGTCTGTACAACCAGCACAGCGTTCAAGCGCTTC  
AACCAAGGCCGCGCCACTGAGGGCTGCCAAGCCCTGGCCATGTGGAGCAAGGTCACGATC  
AACGGCCAGAAGGTCGTATCCAAGGGCCTCGTGAATCGCCGCAACGCGGAGATCAAACAA  
TGCCTCGAACCATCGTCGCAATACTCGTCCTTGCTGTGGTAGCCCTGGGAGCCTCGTACG  
GCTTCGTCCAGGGCTACCGGGCCTTGGGTATCGCCAGGAGGAGATCAAGCGGCAGACGG  
CCCGTGCGGAGGCCCTGGAGGTGCGCTACGCCACCTTGCAGCGCCACGTCCAGGAGGTCT  
CTGCCAGGACCAACACCCAGCGCCAGGAGGTTGACCATGCCCTGGACCAGAACCCTCCGT  
GGGCTGGCCGTCTGTGCCTGCTGCTGTTGGTGGCAGCCTGTGTAACCGCCCCGGCGCCC  
GCTGTGCTGTGCGAACACCCACTGATTGACCCTACCACCCAGGCTAGCCTGATCCGCGCT  
GTAGCGGCCTATCAGGACGCCCTGGACCTATGCAACGCCCTAAATCAAGGAGATTGACAA  
GGCGAACACCCGCGAGCGGTACCTCGCTGGCCGGGTACCCGGCCTGACCTTCTACCAGGT  
GTGCCAGCCCGGCACGAACAACCGCATCGCCCTACACGACATGGACGAGGCCGATGTCAG  
GGCCAAGGCCACCGCTGTGATCGCAGCAGCCACTGCCCTGGGCGGCGAGGGCGGCGCTAC  
CCCACCGGACCCGCTCACCGCCTACAAGGTGAAGAACGGTAACACCCTGCCCGTGGACGG  
CGGTGGTTCGCTGAAGGTGACCATAGCCAACGGCGCCATACCAAGGTGCTGTACACCGC  
ACCGGCGGGCTGAGCTTCAGCCCCTCAACCTGACTCCATCCGTAACACAAGGAACTGAA  
CCATGGCAACCTTCGCCGGTGAACCTCAGAAAGACCTCCGCGCCTTCGCCGGCACCATCA  
AGAACCTGATCCGTCCGCTGGAAGAAGCGGCCCTGGGTTCTGGCTACAACGAGACCAAGG  
TGCGAGCTGAGCTGGTTCGCACACCTCGACGAGCTGATGGCTGCTGTCGAGTCTGACAAGG  
TCACGGTCTACGCGTAGTAGGTCCAGCCGAGCACCTGCATAGTCGGGTGCTCCACTGGAA  
CTACTGGAATTTTTATTGAGGGTGTGTGTGGGCTGGGTTGGCTGGTGTGGGCGGGAGTAG  
TACTCCGGGTCTAATTTTGGTATCGTCGTGTGAGAACCCTCCCGACTCTGATCAGCCCA  
CCCTTCCCCCGTAGGCCCTCGGCCTGGTGGGCCATCCTCGCCTTGCGTGGGTGTCGCCTG  
GGTCATCCCTGGGAGCTTCCGGCTTCGCCGGTGGTGCGGTGGGCTTCCCTGCGCTGTGCG  
CAGCCATTCTACCCGGCTCAGCGGGAGTGTATCCCTTGGGCTAGCGCTGTGCTCTACC  
GGGCTTGGCCGTAGTACCTGGTGCCTCCAGCGCGTCCGCGGTGCATGGCCCTGGCTACCT  
CGTACTCCTGGGATCCCTGCCGCTTCCGCCAGGGTGCTGCGTAGTGCCTGTGGTCTGCG  
CTGCCACTGTGCTAGCTGCCTCTGCCATGCCGCGTCCCTGCTGGTACCAGGCACGCTTAC  
CTGTGTGCTGTCTGCTCAGCATCCTCTGTGCCTCCTGTGGTCTGTCGGGTGGTGGTGCG  
GGAGTGGCTGGC

>NewGenomeName\_19

TTAAAATTTAACATTCTTAACCAGTTTCATAAAGTCTTATGCGCGTTTGTGCGTTATGCAG  
AATACGATACCAGTTAGCTACAATATCATAACAGTAACGGGCTATTCTCTTTAAACTCCGC  
ACAAACTGCTTTAATTCGATCGTTTGTGCGTGAATTTTTTCATCACAGATCTTTTTAGT  
TTCTTCGTCCATAATCCAACGAGTATGAAGGAGTAACCTGGAAACCTCGTTATTATAATG  
ACGACCGTACAGTCTGTCAATAAATTCTGGAATACAGCGTTCTAGTTCATCGCCATGAAA  
CAACATAGTGATCACACCAGATATTCGCCATACCCAGATGATTGGTCTTAACCTTCTT  
CGCCAGACCAGCCAGCTTACCGCGAACAAATTCTAGCGCACATTCCAATTGTTTCGTAAC  
GAGATATTTTTGTGTCTCCTTTCGAGTAATAATACTTTGTTACCCCGAAGTAGTCAAG  
CGCCGTATGTAATGTATTTTCACTATAGATCGATTTACGACTACGGCTTTCGAATGCATC  
ACCTACGCGGAACATGTGCAAGCCGGATAACTCGCGAATCTCTACCGCTTTCATGTGATG  
GCTGGTTTTATGCCACCTGTCACCAATCTGTTCCATGATATAAACGTTAGGCAGCTTGGG  
AGTCGCTTACGTTGTGTACGCTCGGTCTTCTCCGGCTAAACTGCTTTAGCACGCAGATC  
ATCGGCCTCAGAACTTTAATCACGGTCATTTCAGAATCATCATAATACTGTTTGATGTA  
CTCGAAATTCTCCATATGTTTTTCGTTGCGCTGACGGAACACAAGTACCTTTTTATTGAT  
GCCGATTCCTGGACCATGCCGTTAAGAGTCAGTGCACGCAGTTTCGGTTTATCGGTATC  
ATCAATAAGACACATAATATCTTCTTTATGCATCCATACAAAATGCGTAATGTTGTATTG  
ACTGCTAACGAAAGCAGGGCGCAATTTACTGATTGTGAGACGAGTACGATACAGAGTATA  
CACCTGACCTACTACGTCATTAGGCGAATCTTTACCCGCATTCACAAACTTATTATAGAT  
TGCTACCGGATCGTCCATTGTCCGATCTTACCCATCTTGCTAATAATATTGCGTTGCGT



CGATGAATACTCGCTCATAAATTGAGCAAGTTTACGCTCTGTTTTAATGTTGGCGATCTT  
TTCTTTAACCTTTTCCAACATCACTTCATTCATTTCTGCAATGCGTTTTTCGATGTTTCGC  
TTTAGTCTAAATTGACAAGTGAACCTTCTTCACGCGATGGCATCAGGTCCAGATCACCCAA  
CTCAAATAATGTAATGGTCTGGTGTGGCGGTTTACAGCTTCTAACCATGTTCCGCG  
AACATATTCATACGGGATCGGATACTGGATCTTACCCATGATTGCATATACTACATAGGA  
ATCGTTATCACGCCATTACAAACATAATAATTATCAAAGCTAGGGAAATAACTAATTCA  
GATTGCATTGATATTCGGTTTTGTGATCCCCAAAATGACGCAGTACAAATTGCGCTTCTCG  
ATGCCCTGTCTGAATGTCTTTTTCTTTCACCGGAATAGTGATTTTTCAGACCATTGTCTTC  
ACAGTTCGGTTCGTCGAAAATCTGCACCATTTTCGGCATAGAGCTTTGCACAAATGCCGT  
AAAGCCATAAGCGCGACCATTGTAATAGTTTACGATTGTAAGGGTGTCCGGTATAGCTATA  
AGCAGACTTCGCACCTAAACCAAAGATCCGATATAATCATTAGTCTGGTCTTTTGTGTA  
TTCAAAGTAAACCGTAAACAGTTGTTCTAATTCCTTCTTAGACGGAATACCAGTACCATA  
ATCACGCACAGAAAAATACGGTTCGATTGCAGTCGGTAAATGAATATCAACCGGACGATC  
TAATGTTCCGGCTTCTTTGTGAGTGTGGGTAGCATTACATGAATACTCACGGACGCAAGC  
ACGCTCACAAATATTGATAAGTGTCTTAGAAAGCACCATAAAAGCCTTGCTACTTGCTTT  
CAGTGAAAAATCAACCGCACCGCTCAAGTCACTGCCAAATACTTCTTATTATCAATATG  
CATTTTCATAATATAATCCTCACTTAATTAATAATCTTCTTTGTCCATCACTGCGTAGATT  
ACATCCCACGCCATAAATCAATAAACGCATTATATGTCACGGTGCATCGTTGTCAATC  
ACTTCTTTCGCATATTTCTTGATGTTTTCGTAGGAACTTGC GGATCAATTCCGTGTTTA  
CGAAGGTGTGCATATTGATACCTCAAACATTTCAATAAACAGGTCCATCGATTTCTTTTCT  
CGATGGCACTTGGCGATCAGAAAATCAAACCTTTGACTCATTTTCAACTCCTTATACATT  
TTCAATCACCCATTGCAGATGGCCTTCTGCGTCAACCAGTTCAGCGCGGCTTTTCTCTAA  
GCACTTGCTGTATTCTTTACGTTCCCCTCGGCAATTTTCGGTTTTTCAGGACGTCTTCATA  
GTAGGCAATTACGCCTTTCAGGTCTGAACTTTACGGCTTGCCTATTCGATGTAATGGTT  
ACGCATTTTGATTCTCCTTAGTGGTATCTCGTTTCGATGGGGACATTATGATATATCCCC  
GATCCAGTGTCAACAGATTTTAAATCTTTTTTCAATGCATCCATTACTCGCTCTGCGATC  
AGTTCTCGTAAGCACTAATAACCATGATATTTGATGGCAATGTCACGCAGATCATTAAAC  
AGTTCCCGTACTTCATGGTCTTTCAGATCGTCTCTGTATTTTCGATTTAACCGTGTCTTTA  
GGTGGATTGTGGATAACCTGAAACCTTGTTCGGCAATCACTGCGGCTTCGCGCTGGCGG  
TCATGCTGTACTGTATTTTTGATCAGGTCTGCTTCCATGAACTTCGCCATACTCATCATC  
ATGTTATTCTTTTTGCTCATTATTAATCCTCAGAAAAGAAAAGGGAGACTCCCATTATA  
GAGAATCTCCCTTGTATGTCAACTAAAATTTAAAGATGCAAACCTCCCGTGGTGAATTTT  
TGCATATTCATCATATGCTCTAGCGGCTTCTCCTGAGTAGCAAACGAACCTATGTATTT  
TCTGTATCCGTTTATCCTTATTTGTGCTTGCCACGGTCTTTTGCTCGATCCTTTGCGATG  
AGTAACACCATTATATATGCTCGTACACCCGTCCATTTTCTTTTTATTGTACATGTTTTG  
TTGTTGTGTTGCCTCCCGTAAATTTGGTGGATTGTTGTTTTCTGGATTACCGTCTATGTG  
GTCTATTACCTTAACCTGTGTTTCGATATTCAGAAACAGACAATTCTATGTACAAGATA  
TG TAGATGTTCTTTTTAACCTTATTGTAAACATCTATTGCTAAATGACCGTAATTTAA  
CTTTTTTGTTTTTTCTTTATCCCCGACTTGGTAGAAATATCCCTCTGGTAGACCATTAAA  
AGACGGACTATTTATTTTGTGATATAGTACACCTTCCGTGTGTCCAAATCTTCGTTTTAA  
TTCCTCTTGAATTTTCGCTATTCCAAAATTTTCGCACTGTTTCATATTATGACGCCATCTATG  
CCTTCTCATGTCTGAATCTTCACTATAGAGCAAATCGAATAGCTCTTTATAGTTTTCCG  
GTAACGTGATGATCTCCATGACAGGTTTCGTTGATCACGCGATGATAGTCTGATTCTGTGA  
GCGATGCTAAACCTTTGATATATCGATTGTTGTAACCTTTGATATTATCTCGGTCTGTTCT  
CGAAATCTTCTAGGTCATAATACCATCAAACATCATCACCTTTCTTTGGTTCAGCAATGA  
TAATAGGTGTTTTGATAAACCGGATTCGTCCATCTTCGAACAATTCAGGCCAACGTGCAA  
AGAAAGAGATCAGACTAGGTTTAATAGACCCGATCCCGTCAGTATCAGCGTCCGGTCATAA  
TCGCAATATTTTTGTATTACATAACTTCCAATGCATCAACACCAAATTGCAAGCCAGTGA  
TCGCCATGATGTTAAAAATTTTCGACGTTCTTAAACAATCTTTGCCTCCGGTTGTTCCACG  
TTGTAAGAGTTTTGCCTCGTAAACGGGAAACCTCCATGTAAATCTTGATCACGTACAGAGA  
TCAGATAGATGATCGCGGAATCACCTTCCGTCAAAAACAGGGTAGTTTCTGCGTACAGTTC  
CAATAAGTTTAGCTTTAACGTGTTTTGCTACCTTAGCCGTTTTGCTGCCTTTGCTGCCT  
TAGTCGCTGCCGCTTTATCTGCTGCCTCTTTGCGTGCCAGGACTACAGCAATAATAGGCA  
TGATAATGTTTTCTTCTTCGCAATGACTTTAGCCAGCTTTTTAAATCAAGATCAATAT  
GACGGTTGATATCACAGTTGGGTTAGTCAAGCGTCTTTTTGTCTGTGAATCAAACGAA  
GGTTAGGCAATTCACGAACAATCAAATAACAGGTCAATCCAGACTTAACCGCAGCTTTAG  
TAACATCAACCTTATATTCTTTCTTGATTTCGTTTTACAATCTATTCATAAAGATCATCTG

GCACGTAGTCTACGTGTGTTCCCCGTTTTTGGTAAACAGACCGTTAGCAAATGATACTG  
ATTTAAAACCTTCTCCCTCGACCGCCGGGACTAGGGCAAGTGAAAAGTATTTATCTTCAA  
TGACAAACGGATCATCATTGTATAGGTTAGCATAATCCTTGAACCTACTAACAATACGTT  
TACCGTTAAACTTAAACGTGATCTTAGGAAATATTACGCTCAATGATTGCAGACGATCAT  
GAACAATATCTAAAACAGAGTTGTCCATCATATAACCTTCGAAGTGGTTCGAAGTCTGGGC  
AAAATGTAACCTTTGTTCCCTTCAATTTTGATGGTTACGATGACCATGTGATATTTTTAG  
CACCGTTTGTACATTGAACGGTCATTTCTGTTTCGCCGTCACAGGTCACACCAGTAAACC  
AATCTCTAAAGAAATTTGATAACGACGACCCAACACCGTTCATCCCTTGCCTTAATCGAT  
TGGTATCATCAAAGTTAGACCCTGCTTGTGTTTCGTGTCCATGCGGCTACAGGTTGCGGAA  
TCTGCGTACCCTCTGGGGTAGTAACCATATGTTGAGGAATACCGCGACCGTTGTCTGTTA  
CCGTAACAATATTGTTTTGGATATCGACGCTAATCACATTGGCAAATTCAAAATTAGTGC  
GAATCGCCTCGTCTACAGAGTTGTCGATGATCTCATCAATGATTTTACCCGCCCAGGAA  
CATATGAAATTTTTGTCCATTTACCGAACAGGAAACGTTGATGTTCTTCGTAAGTTGTTG  
ATCCTATATACATTCCTGCACGCTTAAGGACATGCTCACGATCAGATAACATGCGAAACT  
CACTCATTATTAACCTCTTCATAACATAACCATAACTTACTGCAACCGCCACAAAGACG  
GCTGCAACAATCATATTA AAAAATTGAGTGATTGTCAAGTATATGACTCATGACACGCGCA  
CATTTTTATCATAGTACCCGCCATTAAGACCGCGCGGGGAGTTAATCCCTGTTTCCATT  
CTTACCACATTCAGGGCATTATGCCTTTTACGTTAGGAAATTTGCGGATTTTCTGAA  
ATTGACCGTGTCTTCAACAAGAATAATCATATAATGGCATATTATCCCCTTTGTTTCTTA  
ACTGAATTTGGATCTGGATTTTCTGGCAAGTCTTCCAGACCCATAGCATAACGTTGTGCA  
TAAATTAGCATAAGAATATCGCGAGCGCAATCATGCATTGCGTCATGCGCGATAAATGCG  
TCTAGCGTACTCATTGGTAACGGGCATTACACATAACCACGATGCATCAATGTACGCTCA  
ATGGCGGTGCGAACATCTCGGATATTCCAGAATCGCACAGGTTCAAGGCTGAACGTCTCG  
CGTGTATTGTGTGCACGGCGGATCATATCAACTAGTAACGGAATATCAAACGCCTTACCA  
CGTGTGCACATTACGGATTTAACCGGATCTACTCCTACGGCTTACAGAAATGCGTTAAAA  
CGCGCTAAACCTTCTTTAGTTGATACTTCCGTACCATTTGTGATTAATTGCTTCTCATG  
CCTTCTGAGGCGGTATTCTTCCACCATTCAACCACACCATGATCAAACACCCTTACACCT  
TTCTGGGAAGGAATATCAAATTTTATCAGAAAGGAATTGTCAACCAGTTCTTTAAATGTA  
GGTGGATTGTGCGGATCTTCTTTAAATCCGATTGCCGCCATATTGATAACCGCCCCATCA  
GGCGGATAACCTAATCTTCAAAGTCAATCATTAAATCCACTGGAAGCATTTTAAATAAC  
CTCCGCGATATGCCGGAACAACCTCCAGATCGTTTTTATCCAGAATGAGACCGCTACAATC  
AATAATGCCGTTACCGTAATTATCGGTTAACAGTCGTTCCGTTGCCACGTATGCGCGTAC  
TTTGTGTTAAAATTCATTACATGTTGTGCATAGTCACAATGAATCTTTTGACGGTTCCA  
CGCGACAATTGATTGTAGATGTATTACATTAGCCACATTATTAATAACAACCATATCAA  
AACCTCGCTTAGTGAAATGCTCGATCATTTTATTGATACATGCAGCTTCACTATCGCCGG  
ACACGTTCCAGCCGTATAGACCCCATCTAAAGCACATGGTAACAGTTCCATTGTGACGGC  
TTACCGTCACATCATTAAAGTTCTGGGATACTTCGCATAATCATAAATTTCTCAAATA  
TAGTCTACTCGATACCGCGCGCGGGTAACACCAACATATAATAACTGCATTGCCAATTCA  
AAGTCAACATTGTCTGTACACATGCAAGGAGTATACAGGAACACGCGGTCTACGCTGATC  
CCTTGTGACTTATGAATGATGCAAGCTGGTAATGCATTTACATTCAAGAACATACGGTTC  
ATCGTCCAGAATGAATCCCAATCTGGTTTAAATTTGGATTCTCTTTCTTCATTTGCGGA  
TATTGTCCGGCGACCGTATTCAGATAGAAAGAGAAAATGTTCTTCTGACGTTGTTCTGTC  
AGAATGTTCAATTTCTACTAAATCCGGTTTATCTGTAGAGATTCCGACTGCATCTAAACCG  
ACTTTCTGATTTAGGATCTATTTGTCTTCGTCATGATCGACGCTTCCACTGTCAGAGTA  
TATCCTAAAACCTGGTTGCGGATCTACCCCGTACAACGTAATGTAAATTCGCGCGGTATA  
ACCTCTTAACTCGCATCATCTCACCATTGTTAAAAATAACACTAGGAATCTTCTTCCCG  
CGTTCATCTCGCAGATATTCGATCAATGGTTCCTGAGTAACCAGAATTTTCATCTACAATC  
ACTGGTTCATCGGTGTTATAAACGCGCTTACGGACAATTTCAATTGAGTTTTTTCGACGCTC  
TTGTTAGTGTAGGCCAGAATACGGTTTTTCTCGAAGGTCTTCCGGCGTTTTTAACGTTTTCG  
AATTAATGCTTCATAAACTCCGGCAGAGTTGAGCTATGGAATACACCCTCGTTACCGCAC  
TGCTTTTTCGAATCCCCATTTACCATTACGGACAGCGGTGCGCCACATCAATTATTGGCGCA  
TCAGATCGTTTAAATCTCTGTAAGTTCTACATTCTGAAACCTTTCATCCGTGAAGAAAGGA  
GAGATCGACGTTGCACCGCTCGGATCAACTGGTCGTAACCTGGTGCAGGATCGCCAACCTGCA  
ATAATAACAATTCGACCGTTGATACTTTCATGAGAATATCAAATAGTTCTTATCGACC  
ATACTCGCCTCATCAACAATGATGATCTGAACATCATCTAGCTTAGGAGTATCTTTTTGC  
TCAAATAGTTGAGTATCTTCATAGTTGGTCGGGTTTAGTCGCAGTAGTGCATGTAAAGTA  
AATGCTTGACGACCTACCGCTTACTCAAACCTTTTTTAGCCTGGTGGGTAGGCGTTGCG

AAAACCACACCAGTTACACCACGGCGGACCATTTCTCTGAACAATGAATTTTCATCATTGCG  
GTTTTACCAGTACCCGCCGCACCTCGGACAGTTGTATGCTTCTTTTGTTCATGCGTTTC  
ATTAGAACATCAAAAGCATGTTTTTGCCCGTCTGTAAACATATCGAAACTTAATACTCTG  
CTCATTATCCTAAAATCCTCACCTTGCGAACACAGATAGTATTGAGTTCTCGCCGTACCC  
GTTCTTTTTTCATATTCAGGAATTTATCATCGATACCATCTCGAACAATTTTCAGAAGACC  
GGATTATGCCAAATTTTCGTTTAGGTACAACCTTGTATTACGGTTCACCCGCCAAAAGAC  
TCTACAATAATCTATCTGATCACACATTGACTCCAACGCAGCATCATCTGTTTCGCGAG  
TTAGGACGCGACCCTTCGCGTCCACTGAGTATTGAAAGAATCCGTCTTTATCACGATAAC  
ATACAGCAAATACATGCATGGTAAACCTACCTTCGCTTTCATCAATTCAATCCACCACGC  
ATCAATCGGAAGCCCGTATTTAACGCGTTCCTTTTTGTGCTGGCGGTAAGTTCTCATACTT  
AGAAAGAGATTCAATCAAAACGCTGGTATATTTTAGCACGACTTCGGTATTGTTTGCAAT  
AGCCTTAAGTTTTTCTTCTTTCTTGTGATTTCGCTTAGGGCTTGCTTGAGATCTGCAAT  
TTTCTGATAACGTTCTTCCATACGGAAGAGAGTATTTTTAATAGCTCGCTCGACTGCCTC  
TGCTTTCTACGGTTTGTGTTGTGCTTTTTGTGGCACTCGATTGCCAATTTCTTTTCTTCGAT  
TGCTATTTCTGATTTTTGATGCGATTCTCGTTAAGTTCGATCCACTCTATGTACATCGC  
ACGTTGGGCAATTTTCATCATCAGAAAGTTTACCGTTAGTTCCTAGTTCATGGATCTCTTT  
AAGAGATTCGATAGTGTGATTGCCACGGAAAGAATTGTATTTTCAGTTTAAACCGGCATTAC  
ATTGCCATCAACATATCCCAGATTGCAATCAATGCGCTCTAAGGAGAGTCCATCATCACC  
TTCACCGAAAGCCTCACCGGAATAGGCGCAATGAGTCTGTGCGTAAATGTTACGCACAGT  
GACTAAGCTCATAGAGAAGTCTTTGTTGCGACGTGACGCACCAGCCATGATAGAGTTCAG  
ACGGAAAACAACCAGCGCCAATTTCTCGTTAGTTTTAAAAGCAAACAGTTTCATAATTGA  
TTCTCCTTAGTTGGTATGTGTGATTATTGTCTATCTGGATTGTGCTGTCAACACTTAAA  
TTAAAGAAAATTTGTCAATCTCAATCAGATCGCCATAACACGCGTAAACTTCCTCGATCT  
CATCAAGGATCATGGTCGTCCCTGTCTTGGATATGCATTCGCGCTCATCTGCCAACATAG  
CATACAAAGACAGTCGCGTAGTCGGATTGTCATACTCTTTAGACACCACTCGGTCAATAG  
CATGTTTCGTAATAATTCATGCAAGGCTTGGTAGGTTTTATTGCAATAATCTTTCCTGTTG  
CATAAACGTCTGTTGCAAAGTCCTCTGCTGTTGATTGCAGTGGCGTAAAGCTCATAGGAC  
GCTCTACAACGACAGAATCACCTACAATTAAGGTATCCAGCTTACGGCCTTCTCTTTTGC  
TCACACCGCGATACAAGGCTTCATGATGCACTAACCGCTCAGTCTTTTCAATCAATCCAT  
TAAGGATCGACATATCGATATTTTCTTTAGAGTTCATCACTTCATCAATGATGTTAAGTT  
CTTCTGGTGTAAATTGCATAAAAAAAAAAGCCTCCAATCTTTCGACGGGAGGCATAATAAA  
ACCATTGATTGAGTTTGTCAATCACAAAGTGTATGTGATCTATAAATAAGTTTGTAAAA  
CTAAAGGAGATCACAAAATGAACTATAAACGTATTTATGATAACCTGATTGAGCGTGCTA  
AGACTAGAAATCTCGACGGATACACAGAAAAGCATCACATCATAACCACGTTGGATGCATG  
GAAGCGATCACCCACCAACCTAGTAAGACTTACACCTGAAGAACATTATATGGCACATC  
TTTTGTTAGGAAAGATATATCCAGATAATAATAAACTGATATATGCCGCTTACATGATGT  
GCGTTTCTTGTTCATGGACAAAGACAAACAATAAGCGTCACGGATGATTGCGTAGAAAAA  
CGACGGAAGCGCATAGTAAAAGAATACGCGATAGAATGGAGAACGATCCAGAATATAGAT  
CTAAGTTTCGGAATGGGCTAGAAAAATGGGCAAAGCCATGAAAGGCGTTAAGCGAGGAC  
CGGAATTTAGCAGAAAGTTGGCAGTAAGAAACAGAAATACCGTGATGAGAGAAGAACTA  
AACGTAAGATCGGGGAAGCCAATAAAGGAAAGAAACGTACAGAAGAATATAAAAGAAAAC  
ATAGTGAAAGGTATAACGGTGAAGGTAAATCCGATGTATGGTAAACGAGGAAAGGACCATC  
CGGCATATGGTACTAAACCGTGAACAACCAACATCATTGTTGAACAGAAAGCATGGT  
GACGGTTCGCTGGCATGTTTTATGACTGGTATCGGAGAGATATTGACCGTGGAACACATA  
AACGCCACGGTCATAAGAGAATGTTGGATGAGTTAGGTTTCGTTGGTTGGCGAGAAAAAG  
AGCCAGCCGCAGCAAGACGATCAATTGAGATGTTTCGCTAAAGGCTGGAATCCTTATGAAG  
ACCAAGAATGGTTAGATTATGTTAATACCCGCTGTCCAACGACGATAGTTTTCCGCGTT  
CTTCAACATATAACAAGACAAACAGATCCTTCGCAGTAAGCCCCAACGCCAAGAAGTTACA  
CATAATGAAATGGAGTTGGTCGACGGCTTCTAGGTATGTTTCCAACGATCCGCCTCAGA  
TAAATCACTAAAGAGGCGGTTGCGTGCTTCCATATGATTGGCTTTCCAGTGTTTCCACAC  
CGCGCTAGCGTCTTTCCCGTTAGACATAACCACCAACGCAGTGTACAGTTCTCGCGTTTC  
GTCGTCAAGCGCATTATCATTAGCTCGAATAGAATCTAAAATCTCTCCACATGTTTTCAA  
TTCATCAATTTTTGCTACCCACGGACGGTCATTAGATACCTGGTCTTGTAGTGCTTTCTG  
CATGTCCATCATGTGTTGAAATGGGTTATCACCGTTTTCGATAATCTCTTTATATTTTC  
TTGTGCAAATTCAGAGTTTCCGCTTTACTAAGTGTGCACAAGAATTAATTTCTGACAT  
ATTCACCTCATTAAATTAATAATTTACAATATTTTCATAAACCGCATTTTAGCCATCAGACCT  
TGACGGTGTCTCTTTGATAAATCCATGATCTGGTTCGCGTGTAGCGCCCTCGTCCTGA

ATCATGGCATTAAACGTCTTTAGAAAGCCGCGGGCAACGATCCCACAATACAATCTTTTCC  
CCTGCATTGATAAACTTTTCCAGTCGGCGCATTGTATCGGCAGATCGTGGTTCGCATCA  
AGTACAAACACTCGCTGGTCTGGGAAAGGTATTTTCATCTAATCCCAAAGTACCGCCAGTA  
ATTGCACACCCGTTATCAATAAAACAATGAATCGATCGGACCTTCTAAGAAATACACTGGT  
TACTCGGATCGGCGCGTTCAAGACCATAGACCTTACTCGCTAACACATGAGTTTTAATC  
GTCATATATTTGGTCTTTCCGTAATCCTTTCTCAATGCTCGCCCCTGAATGGATTCTATC  
TTGTTCTCTCGGTTAAAGATAGCAATCACTAAACGCGGCTCAGGTTGTGGATTCTTGAAA  
GTATCAGCCTTAATGTGATTTGCTACCTTTTGCCATTCTCTCGTGAAATACAGAAGATCC  
CATTTATCGTGGGGAATGCAACGATCACTGACATACTTTCTTATAGGATGATTAGTCGGA  
AGAGTATCTAATCTCTCGCAGAAAGGCAATGTTTGCACCTTTCTTAATCTCCGGCTTTTCT  
ACCTTTTTTAGTGGCTTAAACGTGGTGTCTTGTGGTCGCCTTGTTCCCTCCGTCGTTCC  
ATAAGCCATTCCCTGAATAAGTCCGGCTTATACTGTTTGAGAAATTCACCTCACGGCTGA  
TTGTAGTTACAGTTGAAACAACCACAACGCAAACCTATCCTTATAGGTATAGATACGGAAT  
CGCGCTTGAGTATGATTTTTCTTTGAGTCACCGCAGATCGGACAACACTACAGACCACCGTA  
AATGAGCTAGTATGCAACCGTTTAAAATTTGGTTTCGCCGTATATGGCTTTTTCCGCTATT  
TCATAATCTACGTAGTAAATCATACTAACCTCTTATAGCTCAAATTTTCATGAAAGTTACC  
ACACTTTCATTTTCACTCTCTCCGTTTTTCATCTAAGCAAAAATTTGTAGACACTACCATCT  
GGCGATATGTAAGAGAATACTCGAAAACGGCCTACCGGGTCAAGTTCTGTAAATTCATAT  
TCTTTTTCCGGCTTCAAAAAGTGCATATGCGCTTTTAAAGACATTTTCATCGTAATCATTAA  
GCGCCACCGATGAGAACATGATAATAATACCAGAATACATAACAGTCTCAGAAATTTTTT  
CTGTTTTTGTCTTTTATCCAGACAACCCGAAAAGACAACCCCGAAATAGCCGTCACAA  
GCCGATAATGAATACAATAAACTAACCATTTGTCTTTCTCCTTTTTGCGTTTATCTTTA  
CCCGCTACACTAGGTCCACGATTGGTAATAGATCCGCTCGTTTCCCCTGCTGCGATCTTC  
TCAGGATTGCCGCCAGCATCGCCAGCGGTCATATCTTCTTTGAGTTTATTTTTCTTCAACA  
AACGGTTTAAAACCAATCATAGAATAATCTCTTTCAGTAAGTCAACAATCTGGTCTTTTCG  
TCAGTTTATCCTGATTCTCTACAATCTTGATAACACAAGCGTTAACAACCTTTGCGAGTCA  
CGCGGGACATCGTTTTAATACGATGAAACGGTTCGTAGAAATATACTGCTTCATTATAGG  
TCGCAGCAATTTTTTGACGCATTTGATCTTTATCGGCCATAAAAACAATTGCAATTTTTCG  
GATCTACACCAGCCACATCATAAAGTTCGGCGACTCCCCAGCGTCCCTCCCTGTTCAATCA  
TCCCAGCGTGTTTACCGTTAATAAAGATAAGAATGTCTCCGTTATTTGCGGTTTAAAATG  
CTACATCTTCCGGCGTACTCATATTCTTCATAATATCGTCTCCTTAGAGTTTCATTATAG  
ATCAAGAGAACGTAGAAAGCTAATGTTTGATTTCTTTCAGTTGTCGTTAAAGGTCTTTGC  
GTTTCTCTTTCAACTGTCGTTTAGCATTGTTTCGTTGTTTTTCAACATCTTTATCAATGT  
GCTTAGTACAATTATCAATATCAGCATAAGTTGGCATAACCAATTCTAGACCTAATGCGG  
TTGGATGCAGGGTAACAGTCCATAAACCGCTAATCTTCTTAAATAGGTCTGGGTGTAGTG  
TACTATCTACATCGTCCGGTGTCAACTCTTTTTCTTCTTTCTGTGGTGGGATCTCGTCAT  
ATGGTTCCAATGCATTTACTTTAATATCAGATACCTCATCAAAGAATCCGCGTACATCCG  
CAGGAAATACACAAGCAATTTCCCAACCGTGATCACGCAGAGAAGTAATATTTTTCACTC  
CCCACCATGTGTGATGATTGATGTGACATTGCCATCGAGGTCCACCGAATTTACGAGAA  
ATGGCTTATCGTCTGTGATCATTATAAACTGTGCTTCGGCTGTAGTCATCTCCAGAA  
ACAGATCTCGGATCAGACGACCATCAGGTGCGTTACCTTCCTTGAGAGTATAAAAGCGAC  
TTACGATCCATTTTGGCGGTAAAGCATTAGCGATCATGTTATATCTCCTATCAAATCATT  
CACCAGCGCCCCGAGGGCGCATTGTATTAGAAAGTCATGTTGTTTGCTAGCTCGTCGAG  
TTTTTCTCGTTTCTCGGCTTGCTGTGCGCTTTGTGGTTTAACTTGTGCATTCTCCTGATC  
TGCGATCTGGTTTGGTACTTCATAACCAACGCTGATTGCCTTTCTTACACCAACGTA  
CCGTGAATAATAGTTTTTGTACCCGAAAAAAGACTTGATCTGCTTCATGAGTTGGACGCC  
CATTTTAGCCGGGTCTTCGGTTTTCGATAACACCCAACATAAAGTCCGGCAGTAGCAGGAAG  
ACCTGCTGATTCAGCGGCATCACTCATGTTAAGGTCCGAAGCATCCCAACCCGCGCGGGT  
AGTCTGTGCCGAGTCCAACCAACGACATCCCCTTAAACAAAAATCCTCGCAGTTCTTC  
CGCAATCGCCTTAACTAGTGTGTAACCTATTTTCAGAGTATAACGCAAGCGAGACGATGC  
GCAAATCCCAGATAGTCAACAATCACAACATCAGGTTTAACTGTTTCTTGAGTCGCAA  
TTCATTCATTAACGCCTCAAAGTCATTGGAGTTCGCGCCACCAGTAGGATACTGCTTGAT  
CATCAATTTTCCAACCGTCTTCTCCGACCTTCTTATTCTTAAACGCTTCATGCGTGC  
GGAATATTCGCAAAAAGAAACATTACCATTATCCAATTCATCTAATGTAATGTCAAGCAA  
GTTTGCCTCGATACGTTTGGCTACGACATGCTCTGCCATCTCCATTGAGATATAACAAGAC  
ATCATAACCACATTCATATAATCCGCAGCAAGAGAACACAAGCCAAGCGATTTACCAAC  
GTTTACACCAGCAAGCAACACATTTAGCGTTTTTCTTTCCGCCCTCCTTTCGTGATTTT

ATTCAACATCGGCATCTTAAACGGGATCTTATTCGCCTTAGTCTGATATAGCAAGAATCG  
TTTATCAAAGTCATTGAACCAGTCATGACCTACATCAGAATCAAACGTAATGGATAGTGC  
TTCCTGCATGATCTCAGGAATAGCACCCCTCACGAGGCAATTTCTTATTCTGGTTCTCTTT  
TGGTAGTTGTGCGTTTCGCCTGAATCTCTAGCGCCCGTGACATTGCATTATACATGGCAGC  
GTCACGAATAAATTTTTTCGGTTTCCTTCATTAACCAATCAAGGTCTTCCGGTGTATTCTC  
AAGCGAATCAAGAAGAGTTTTAGCCCCCTTCATATGTTGTCTGATTGCCTCTCTCCTTGT  
TAAAGCAATCTGTAATGCAGTTGGTGTAGGAATATTGGAATATTTCGTCTACGTGCTTTTT  
AATCAGCTTATAAATCAGTTTTTTCTTCGTCTTCGGTGAAGTAGTCAGCTTTAAGGTGAGG  
CCATACATTTCGTAAAGAATGCGCCATTGTAAATCAACTGTGTAAAGATAGTTTTAATCAA  
ACATATCCCCCAACTACACGCATAACAAAGGTCTTGAGTTTATACCAGAAAGTTTCTTTT  
TTCAACTTTTCTTCTGCTTCTTTGATCTGCGCGGTTAACGCCTTAATGACGTGTGGATAT  
ACCACATCACGCTCTGACGGCGTGGAGTAGTCGACCACAATACCTTTTCGGGTCTGGATCG  
TATTC AAGATTATGAATATAGACAATATGATGTTCTCCCTCTTCATCAACAAATATCAAT  
TCCTGAATAACTGTCTTCATTGCTTCTTGAATCAAGCCGTGTGCTTCTTCTAAACTTGTT  
GGTTTCTTATCCACAATATAATCCTCTCTAGATATGAAAAAGGGGCACGTAGCCACTTTA  
CTACCATTGTTATGCTAACATATCTTCGATTTCTTTGTCAACTGCTTCGTTCGATGATCAC  
TGGCCCCAGCTTATAATGATCGTTGATTGCTTCGTTAAACTTATCGTTTGTGTCAGAAGTGG  
TTTCCAGAACTCAATGCTATTGGTTTCTTTAGCACAGAACTTGCGTTCTTCGGTTTCCAT  
CTCTCCGGTCTCAGTATTCAGGATTGAACGAGAATACCAGCCGTTTGACGGTTTCACTAC  
CCAGCCTAACTCTACAGCCAACTCCAGCAAACCGGAATAAGGATCGATACCACCGCTATA  
TGTTACGCAAATCGGGAACCTAGATTTTTCTTTAACGGTTCGTCAATTTTTCCGCATTAG  
GATAAAATCATAACCAGCAATTTCCGGCTCCTTCTTTCTGCTGACGACGACCAATAATGAA  
AACTTCATTGGCTGAATACATCGCGCCCGTACCGCCGGACATAACGGTCTTACTAAACAT  
TTCTTGCCTTTCGTAACCTGTGGTTCATAGCGATGCACGGGATATCATTATAGTCAGATA  
CGGCGTAACCATAACGGAACAAGCCTTTAAGTGCTTTCGCTCGCGTCATATCCTGTGCGGA  
TTTCTCATTAAATCGCGTCTTCAACTTCTTTTTTACTTGCTAAGTTACCGATTGAGTCAAT  
AAAGATGATCACTTTATCTTCACGGGTAATTTGCTCAAGCTGGTTCATGATTTCAAATTT  
AAGTTCTTCGATGTTCTTGATTGGAACATGCACCACGCGATCAGGATCTACACCCATAGA  
TTAAAGATAAGCGGGTGTAAATACCGAACTCAGAATCAAAGAACAACACGCCGCATCAGG  
ATTCTGTTTCATGTATGCACTAACACAAGTTAATCCCATGTTTGATTTAAAGTGCTTAGA  
CGGACCAGCAAAGAAAATCAGACCAGATTGAAAGCCTTTTTTAAGATCACCTGAAAACGC  
AATATTCAGCATCGGGATCTTAGTGCGAGTATTTGTTTTTTCGTTAAAGAGGCTGGATTT  
AGACAGTACCGCAGTAGTTTTTCAGGGTAGAGTTCTTTTTTCAGTTTTTCCAGTACAGACAT  
TATTAATACCTCTATTCAGTTAATCCGTAATACTTTAATAGCTTCATTGTTATTTCGATCT  
TTGTAGTGCTCTTGTATTAACTTTTTCATCGCATCAACATTGATCGTCACAAATACTTCG  
TTGCTGTGATTTCCGTGAACTTTTCTTGAAATGCTCTATGCCTTCCTCACGTTACGTTTA  
ATCTTTTCAATGTCTCTCATAGTATATTTCTCACGTTGGCGGGTATCGTCACCCAACACC  
CGCCATTATACACACTTTATCTTAAATGTCAAACAGGTCCGTCAGTGAAGTAACTTTTTT  
ATATTGCAGCTTCGCAGCCGTGGTAATGTTCTCCAGTGGTTTGACGAAAGTCTTATTAAA  
CAACAAAGGCCAATCCAACCACTTCAACACCTCTGATTCAAATTTCTGGCGGAATACGAGT  
ACCCGACAACCAACCAAAACAGATTTCTCAAACGGATTTTCGGTCTTTAAGCGGTACAAT  
CATAACCTTCTCGCCTTCACGAATCGGATCTAGTCCGAATTTTCGAGCATTACGATTATA  
ACACAATAACTCTTAAACCGCATAACGGACAACCCTTAATCGGATAACCCGTTTGAATCGCT  
GTATTTCTGTAGGTTGTTTGCAGATGATACCGCAGCAACATCAAGATAGTCAAGTTTTCT  
AAATTCCTTGCTCAAAAATACCGTAGTATTCGTGCAATGACTCTTCACCTTCCTGCAACAT  
ACGGCGAATACATTCTTTCAGTGATTTCTGGCATGCTTTAGGGGTGGAGCTACGTTGCGT  
TTCCAAGCCCATGAATTTTAGCTTAAAGTTCAGCAAAGCGCGTTCCTTGCATATACCAAAC  
ATTAAGAGCATACCGCTTTTTTAGCAGTCCAGAATCCACCGATAACCCGCAGATTTCAACGG  
AGGACCAGCAATTGCCTCACGGTCCATAAACATCAAGTGCTCATAGTTGTTTCATGTACTC  
GCATAACTCGCGATATCCCTTGTGATAATAGGTTCCATTTCGATGTTTACCGAAATTATC  
AAGGAAGTCAACAAGTTTTTCGGTATCGTTCGAAACGGTCTTCCCCGCCAACCTTATCAAT  
AACATTGTTAACCAGCACATAAACGGAGTCAGTATCACAATAACGAACATATGCAAAATC  
AGTCGTTCCGCAAAGCTCGTTTAAAGTATTCGTTAATCCTACGCTCAATCCACTGAATTGC  
AAGCTGACCGAACAGTGTGATCGCACTAGCGTTACGGAGATCATAAAAACGGAAATTTAGG  
ATTCCCCAACGCACCATTAAGGGAGTTGATCAAACTTTACGAGCAAGCTGGTTTGAATT  
GCACAAGATCGACTCGTCTTTACATTCTTCCAGTAATTTCTCTAATGCATCTTTACTCAA  
TTCAGAAAGCATCGATTTAAACGCTTCATCGAAGTCGTGACGCACTTCAACGCTATAGCT

AATGGTTCCCCCATAAACATGATTTTCATCGTTTAGAATCGCTTTACAGAGTTCAGCATT  
GCGGTCACATGCCAACATCATGTTTTTGTACTGCTTACGCTGATCGAATACCTTTTTAAT  
CTCAATCGGTACGATACCGTGAATATCTTTTCTATACATCCAACCGTTAGGCGAGCAAGA  
ATACTCATCACTCGGACGTGGTGCAGTTTTATTGATATACTCGTGCATCGGTGCAGCATC  
AACAGATCCGGCGATTGTTGCCGGCGAAATATTAACCTGACGGATGATTGACGGATACCA  
TTATGTTACAGCGTGGTTCGCTACTCCC GCGCCCGTTCTCTTGCGAACTGCTACATGTCAC  
CATGTAGATCAGACTATATCACATGCTCATAGAGAATCCTGCCATTTCGAATCGTTTTGAT  
TCTACTCTACTCGGTTTCGTTACCTTTTCGATAGTCGTTGAACAACCTGCATCTTTAAGCTC  
ATTTTGATCAAACGGAGTTCTCTTACAGTATCCGCTATAATTCTTCACCCTGATACGGAA  
TAGACACCAGTTTAATGTAGTCGTTAATGCTTCCTCGTTATGTATTTTCGTA CTTTCTTA  
AAATGTCTTTTCATCTCGCGCCTCCAATGTATATCAATATCTATATACAGTATAAGACACG  
TTAGCTCAA AATGCAACTACTGCTGATTGTCTCCTTAGAGATTTCCAGCAATTAAGCAG  
GTTATTCGATCACTGTCACCAGTGAAAGCCCCATATCAGTTCAGGGAAGTAAGGTCAAAG  
CTCATCATCCAACGGTAAGCATTCCGGCACAGGTTCTTTACTAATGCTCCC GGATAAGTC  
TGCTTAGGCTGTATCTTGTTCTCTGGTACTACTTTACCCTCAGCTTTCAGAGATCCGAAG  
ATAATAGCATCCCATACTTTTCATCGGGTTATAAACATGGTTAAATTTAATCTTTGCATAG  
AAACATAGGCTATACACCAGATCGATAAATCCGCGCTTTTTATCAATCGCCAACACACGG  
TCAACGTCGCCGATGTTATAATCGATGTAAAGTTGATGGTTGTCATCACGCAATTTGTTT  
AACGGACCATCATAATTAACCATAACCGATTCCAGTCTCCTATTCAGCAACATAATCTAAC  
GCATATGTTGGTTGAGTCGTAAAGCTAACTTTCTTGACAGGTCAATATAATCAAGGCTT  
TCGATCCCATGATCGTAAATGCTTCAAGCTCGTTGCCAAAATCATCCTGTGAGATTCGG  
GATTTAATCTTACCGCACGGGCTTAGACGGTTAGCGGTTCTACTTCCGA ACTTATTACTG  
ATACGTTTAACGATATATGGAATATCGAATGTTTCTGTGTTCCAGCCAGTGAAACCAACG  
GGTCGGTTTTCTCAAAGAATCGGATGTATTCTAACAGCAATTCATATTCTGTGTCATAG  
ACGTTATAAACAACGCGCTCTACAATATCAGGTCGAAGAATAGACTTGCTAGATTCCCAG  
ATTCACCGTTTTTTCTTTCAAATCAAATACAAAGAAACGATCATGTACGGAAACATAA  
TGCGTAATTGCACCGATAGGATATTTGCTTCTTCTGGTTTAGGAAATTCTGGGGCAGTG  
ACCTCGATATCAACCCATGCTACACGGATTTTATTTCCGGTCATATCGAATCTCGCCTTTA  
TACGTATCAGACAGATAGGAGGTGATAAAGTCATCCATCCCTAGCGCCTCCTGCCCCATT  
TCTCCTATCTTTTTACGCCGTTTGTGGCCCTCGTTCATAGATGGGAATTTTTTAGCAATG  
CAAGGCTTGGCATAGATATCTTTATAATTCGTAACCATAACCAGGCGCGGCATGATGAAAT  
AAAGTTGGCGTATATTCAACGTAACGCTCTTGTTCTTGTCAGCATCAACAATATAACGC  
TCGTAGATCTTATCACCCTCGCACACCTGACAGAAAATACATAATATAAACTCCTTCA  
CTTACGAAAGACACTCATTATAGGGGAATCGACTTAGTTTGTC AATACCCCTATCCCATC  
AGTATCTTAGCGTCCGATCTGATATTTCTCTATCAGCGTCCACTCTTCTTTCTGTTTGAA  
AGACAGTACACGGAAATTATTA ACTTCGGTAGTTTCAA AATCACTATCAATCAGGGTACA  
CAGATTCCACTGCGCAAGAAGTTTTGCAATGATATTACGGCGTAATTCATCTTCCCACGT  
CATTTTAACACTACGACCATCTAATTTCAACA ACTCCTTGAAATGAACGATGTAATAGCG  
CCGTTTCTTCTGGAGAATATGACAAGACTGATACAGTGTCTTGTCTCGATTGTTGGCAAT  
GCCG CAGCGGGTTAAAGTTTCTTAATTTTTAAGGAAGTTTTTCAGGACTAATCAAATTAAT  
TTCAATCATTTTACCACCTTTCTATAATCTTTTTAAGTCGTTTCTTTCTGTCTGATTCT  
TAGTAACACCCGCCAAAAGTACATCGGTCGCATACGGTTTATTGTGCTTCAATAACTTGT  
CCATATATCCCTTTTCATTAGCCAAATCGAGATAAAACCGGGCGTCATCCATATTTACAC  
AATATGCTTTCCGCACTGCCATTA AAACCAATTTTTGGTCCAATTTCTTCTGTTAGTTTAG  
CCCGTTTACCGTATCGTTTCCCCTTAGAAATACTCTGTAAAAGATAATCAA AATGCATTT  
GATATGGGAGGCCATGACCGTTTAAATTCATCACATACGCGCTATATAGGCAATCTGCGT  
GCTGGGCAAGAGCGGTGTTAATCCATCTCTGATTATATGCAGAATTGTTTCCCACATTAA  
CACGCTGTTTATCTAAGGTGATATGATCCATGAGAGCAAATAATGCATTGTGCGTTTTCT  
CGGTGAATGTGACAGCTAATGCAGACACCTTTTCCCAATCACGAGAGCGCCATGCAATTT  
CATGCTCGTTTAAATTGTGTATCATCTTCACCGAAAAATTGACCTAACATTATACGAACTC  
CAATTC AACCATTAATTGCATTAACAAAAAGACAATGAGACTCTCTTGATCAGCCGCGTG  
CGCAAACATCTGATTATTTTACC GATAATCTCAGTGAGACGAATAATAGAGGCTGGCTT  
AACTTGAGTATACAACTCAGTATAAAGTTTCTTGACAAATTGAGCGTATGTATTGGTATA  
GCGTGGTGCGAGTTTACGCACATTAGCAA ACTGTTTAGTTTTAAGTGCTTCCACCACATC  
GGTACTTCCGGTATTGCTACTTTTCGATAACCATGCTCAATACGCCAGCATGAATTTTACC  
CTGTTTAGCGTAGCGGTCCAAAAGTTTCATTACGCGCCGGAAGTCTGGGAAGTTCTGCTT  
AACCAGTTCGCTAATACGCGCATTTCTTCTACTGGCACACCTTCTTTATCAAGAATTGC

TTTACACCGGACGATCATTTCTTTCAACATGCGAAGCTGATCATCTCTAGTCGGAGATCC  
AAACGTGATGGGGTCAAACGAGATCGTAACGCTGGGATAATACCTTCTAGATCGTTTGC  
TGTGATAATGAATGTCACATTGTTTGAGTATGCCTCAGAGAACTACGCAAGTGTCTTTG  
AGCGTCAGCCAACCCCGCTCGGTCATACTCATCGATAATAACAACTTTGCCTTGTCTCG  
TTTTTCTTCATCGAGTGATACTCTGCGCAAAGCGTGTAATCTCATCGCGGATAAAATC  
AATCTTACAATCTGCGCCGTTAACAACAGATAGTCGACACCCACATCTTCGCAAAGCGC  
CTTAGCAACGGTTGTTTTACCAGTACCCGGCGAGGGGCTATGCAGGATCATAGAAGGGAT  
TCGGCCTTGCTTAAACAATCTGCGCGAAGATCTTTTTATCTGCTTCCGGCAGAATACATTC  
AGAAATTGATTTGCGGACGGTATTTCTGTTCCCACTGAAACTCATTTTCATTAACACTCAG  
CATATAATCACCTCTCACAAATTCATCATTAATAATGTTGGGAGTATTTACTCCCAACA  
ACATTATATTAGTCGGTGTAGCTGGCGTCAAGGTCACACGCTATCATGTAAGATATGGTT  
TCACTTGCCAGCCATACAGCCTTACGGCGTGTGAAGCTCAGTTTGTAAATCGCCGAAGTCC  
GTAGCAACCAGTTTCATGTTATCTTTACGAATAAAGAAATGGAAGTCTGCGGTTCCGGTA  
TATTCGCCCATATCAACACAAAACATCTCATTAGGATTATTTTTGTCAATCTCTTCCCAA  
CCTTTGATCATCAGACGACCATCAATCGGTAGAAATTCAAGGCGATCCACTTTAAGCTGA  
TTGCTCATTTTTCATAAGCTGTCTCAGATCGTCGTTGCTCAGTTCGTAATCTACATCGCTT  
GCAGGTGGAGTAACTCGGCCTTTCGGTGATACGATAGCAGCAGCACTAGCACCAGGATAA  
TTAATTTCCAGACGATCATTAGACACACGAATGTTTCCGGTGCAGGTTATCAACCGTAATA  
TCTGCTTCATCGCCCACCAGATTCAGAATGCCAGTAACGAGTTAAGATCATAGATCCCG  
ATTACGTGTTCCAGTTCCTTGATTCAGAGTCGCTTACCATATAACAACGATTGTCATGTTT  
TTGGTGATTAGGACGTTTCTTTTTTTCAGGATGATACCTGGGTTAATAGCGGTAAGTTT  
TTCAGGGTAGCAATGGTTTCTTTAGTCAGTTTCATCAAATCACCTTTATCATGTTAATCA  
ATTAATTACGGGTTTACTTCGTGCTCATTTTGAATCTTTAGCATTCTTTCGATAAATTTT  
TTCTCGACTTCTTATCGGATGAGTGAGTATACTTCAATCCAATGTAAGCTGTCAAGTAT  
TGTTGCAGAGCATAGACAGTAACAGGATTCTTTGCGGTCTTTTTTCCGTCGAGATATACC  
AGATCACCACGAACATCAAACGCAGGTTTACGACGAATCACATCATCAACAAATTTATCT  
AGGACAAAATACCACTCAATACACTCTATCCCGTGACGGTAGTTCATTACATCATTATCT  
TTGATATAGTCAAACGGAATAGGACATAATTTACTATTTTGTAGGATGAATAGCATTGT  
TCTTTTAAGCTCATAAGTTTCTTATCACTTCCCATCAGCAATTGCGATAAGACGAGT  
TACTACTACGCTAGCGGCTTCAATCAGCAGTTCATCAGTGTCAATCTGATAACCCTTTTC  
GAGAATATCTTTACCTCGAATAGTTGTAGCGCCTTTAGCAATTGAATCATCGTAATACTT  
GCGCATTGCCGCGATCCATTCTTTTTGCACCATATCATCAATATGCGCGTACAGTTCAA  
GCGTGCTTGCTGGGGGATAACCTTCATTTTAGGTTTCTCGCTTTCTGGCATTGGTAGTAC  
CCAAGCTTACGGATCTTGCTCATTGCTCGGTCAAATTCGAGACTGGTTCTCTTGTTCTG  
AATGTCTGCTACATTAATTTTAGCCAGGTTTGCAGGAAAGTAGTCATAATATTAATCTCCAA  
AATAAAATCAGTATATTACGTTCTAAAGTTTGTGCAACCCAGCATCAGGGTAATCAAG  
TTTATCAAAGTTGGGGACCAGCATAAACTCATGATGTCGACAAGACAACATTTTGTAT  
GTCCGGATCGCTGTATATGCTGTTTTTCATATCCCGCATACTAATACTACATATTCTTACC  
GGAATATAGATTGATTAATGTATAACAATTCTAACTCCGGCTGCGTTACTATGTCAAATGT  
TAGCATTCAATTCAGTGAATCGCCACGTTTAAACCATCTTGAGATGACGGCTAAAATCAT  
CAGGGTTATGGTCACGATGGCTGATAATATACAGTTATCATCTAACTTGTCAATGATGG  
AATCAAGTTCTTTTACGCCCTGAACGTCCGTAGCCCCATCATAAATTCGTCGAGTACCA  
ACAAGGAAAAATTAGTACCAGATACTTTACCAGCAACATCACGCCATGTAAGAGCATCG  
CAAGGTCAATACGTGCCTTTTCGCCTTGACTGAATGATGTATACGAAAACGATTCACGCC  
CCCGTGATTTGATTGTTTCGATAAACTCTTCATCTAGCGTAAAGATATCATCCGCTTCCA  
TGATATCAAGATAATACGCAATCCGATCATTGAAATATGGAATATATTTCTTGACGATAG  
ACGCCTTAACACCGGAATCCTTCAACATTTCTGTTACAAATCCACGGTGATATTTTTCAA  
GAACTAGCATTGATTTTTCACTAGTAATCTCTACCAGTTCGTGTTCCAGTTTAGCAAGTT  
CTTCGGAATTGTCAACCCTTTCTTTTTGCAAGTTCCTGCATTGCTTTCTGGATCTGTTTAG  
CCCGACCTACAGATGCCGTTAAATTCGCTCTCTGTGACTCTATAGCGCGTTAATTTCCA  
AGACCTTAGTTTGTGCTGTCTGGAAAGAATTGGCCTTCTCTCCGTATTCTACGCGTTTCT  
CGTCAATCAGAGACAGTTTATGTTCTGCTTGTGCTTTTTGTTTCGCGTACAGCTTGATCAT  
TACCTTGAATGATCGGTTGTGTGCACGTAGGACAGATCCCGCCTTTCTCGTGCATATGGA  
TAACACGGTCAAAGTTCTGGATCTGCGCACCAATGTGTGCGATAGCCGTATTAATTTAG  
CCAATGCCGCGCTAGGATCTTCCGGCATAACAACAGCCAATAGCTCATCGGTCAAGCGCG  
TTTCGTCGGCTTTAACTGCTTTAGCCGATTCTACCTCTTTATCATAACATATTCTGCAAAC  
GCTGTAGATTCTCGGCACTAGCCTTGCTCGCGTCTCTATGTACTTTTTATGAGTGTGA

TTTGTTGATGAACGTGATTAGCTTTTCATTTCTGATTTGGATATTCTGGGTAATCTCGC  
GCACATACGCTTTATTCAGTTTATCCATTTTCGCTAGCGTAGCAATATCAAGCAAATCCT  
CGACCAGTTTACGGCGACCCGCTGCCGGACGACTCATAAACGGAACATAACCAGCAGTGC  
CTAAAACAACGATCTGTTTAAAGCTGGCTAGGTTTCATTCCTATGATACCTTCAAATAAT  
CCTGAAAGTCTTTGGTGCTTGGCTCTCGTCGATCTTTTGACCGTCTCGATGCACTTCGA  
ATACTTCCGGTTTTTGACCACGTTTGATATAAAACTCTTTTCGCGTCCAGCTCAAACCAGA  
CTTCGACTAACAGTTTCTTTTTGTTGACGCTGTTAATCAATTGGCCTTTCTTGATACTAC  
GCAACGGTTTACCGAACACAAAGCAAAGCGCCTCGATCATGGTCGATTTACCAGCAC  
CGTTAACACCAGTGATTACTGTCTTTTTGAATCCGTCTAGCTGAATCTAACAGGTTTCAG  
CACCCACGCTCATTATATTTTGATAGCGCAAAGTTTTAAAATTTCACTTTGCCATTAAGC  
CACTCCGCAATCACACATTCCATAATATTAAGTCTAACACATCTTCATCAATGTTGTAA  
ACACTTGCTGCCTTCACTTTAACTAATGTGTCTCTGCGATCAGGCAGCATGATCACATAA  
TCCAGTGTGCGCAGGATCATATGTCATAAAGGGATCAACATAAATCCCTTTATTCAATGCC  
AGATATTCGCGAAGACATTCTATAACCCTGTGTCTAAGGTAGGTCATCGATAGAATCATT  
TTAGTTTATGTTCTCTAAAATTCTTCAATTTACCTTGCAGGTCTTCCGCTTGCTTTT  
CCAGAATATCGCGAAATTCACCTACAGTCAAGCGGTAATCACATTTACCAGTCGATGCG  
GGAGAATATAACCCTTTATACATTGTCTCTGAGGCTTCTAGGAATACCCCACTATGCATGA  
CAGAGGTCCAACCTGTTAACGTCAATGGAGTATTCGGAAAATAATACTTGCTGGATTGTT  
TCCACTGGACGAAAGCACCATATACAATCGGATTATATTCACCAACCACACTCTTAATAA  
TGGATTCTACTTCGTCTTTCACAAAGTCGCCAATGCCCATAGTCACCATCAATTCTTGTG  
GGTGAATCACTTTAAGGTAACGACGGTAGCCGTCATCATAACCACAGCTTAACCCTGGCT  
GACCCACATTTTAGCAATACGCGCTTTCAGATAACCATAGATCGGATTCTTGTAATATG  
ATTGTTTTAGTGTGTACGCGTGCATCAATTCAATAAAATATTCCATTGCTATCGAATCAG  
GATCAGCCGCGACCATAGTCGTATTTCATAATATGTTCTCGTTCAATTTTCATATTGTTTC  
AGGTCTGCTAAAAGTTCATCCACTGCTTGTTCAGCACATGACGCAGCGTAAAACAATAG  
CTGTCATCAATTTCTATTTCCGCGCGAGAAATAGATCGAATCTTACACTCAGCAGTAGTA  
TCGGTGAGTCGCTTTTCGACCATCATCCGAACTTCTTCATGCTCTTTGGAATACCATAA  
TCAACGGAGATTCCCTTGCCTCGAGCAAACATAGGCAATGCCGCATTAATTTCCATTACC  
TTTTGTGCAAGTGTTCATCATAACAGACTCCATAGACCAACGAGCAATAACATTCTGGG  
TAATATCAGCAACCTTACTGGATACGATATTTGTTAGCCCCTCTTTGGTGATATTTTAC  
GATCAAATGGGATTTTCGTCATGAGTCCACAAACCATAGTTAGACCGAAATGATAGCATAT  
ACTGACCATCTCGCACAACTCAAATACATGGATCTTAGTGAATTTTCGACAAACCTTCGT  
TGATTTCTTTCAGTGAATTAGCAATCATAACAACCTCCAATCAATTTTLAGAGAGTATAA  
CGGGGATTTCTCCCCGCGTCAACTAACTTTTTGCGTTATTTACTTTCGGCTAAAAGTTCAT  
CAGAAATACGCTTGACCGCCGCAAGTCTTCCGGTTCTAGGTTTTGTTCTTCCAGATATT  
CATAGACCATCTGAATAGTGCTTTTAACTTCAATAACACCTGTTTCTGTGATGCGCTAC  
TCTCCAGTTTATTGACCACCTTTAGCTTGTGTA AAAAGGCCTTAACGCGCTTTCTAACT  
TAGTTAACCCATTATCAGCGACCGTTGCGATAAGACGCACACTAAGCCCTTTAAAGCGTT  
CTACATCGATTTTATCGTCTGACGGGTAAGTGCTACGCACATGATAAGTTTAGTCATTCT  
GAATAAACTCTTTTTTGTGTGTATCGGTATCGAATACCCAAAACACGCGGACCGTTTA  
CGTCACCCGCGGTTAGTGTGTATGGTGTACCAATATACGTTACGTTACCGCCGTCCTGA  
TAGTATGAAAGTGTCTCGAAATCACTTCACGGTATTTCTTGAGGAAGTCCGCGCTATAAC  
CTTCGGATTTTAGCCCTTTATAGAAATAGTATCCAGACAATTCCAATGGCCTACAGAAT  
ATTCGCTGAATGAGTTTTGAATAAACTCTAAAATCTCTGATTTATTGTCATCACAAAACC  
ACGGGAACAGGTCAAATGATACACCATCAAAGGTAAGTGGTTCCGGTTTATCGATAACCT  
TAATGCAATCATACTGGCTTAACTTTCACGCGGTGCGTTAGGCTGTATCTTATGACGTT  
TGAATAGATCATGGTTCCCTACGGTACATAACAGGTGATTCCAGATTCTTCCAGTAACG  
GGATGACCTTAGTACGGTTACAACCTCATCGTCGCATGAGTAATAGCTTTTCGGCAATCAA  
ACCAATCCCCTGTTTGAATCCATGTCTTAATATTATGCTCTTTGGAGTATTCAACCGCTT  
TCTTGATGGTATCAAGAATATACTCATCCACCCACGGATCATCGCCACCGATACCAGTAT  
GCAGATCACCTAAAAGAAAAATTTTCTTAGTCTCTTCTCTCTGCGTTTTTCGATGCTCTC  
ACTATATCACAGAAAAATAACAAGGGAAACCCCTTTCAGAGGCTCCCGTATAAAAAGCCAT  
TACAGCATACTTAATATCGTTTGGCGTGTACTGACCCACATAGCAGAAGTTAGTTCTGGC  
GTGTGTGGCTGTTTGTAGATATCACGTAATTTTCCGATAGCGTAGATCTACGCATCACGA  
TTATCATCGATGATAGCTTGTTACGCCACCGCTTAAGTCGTGCAATCTCTCGCGAGTTC  
TTACGCAAGATCTTTTCCGCTTTCTTAGCGGCTTTAGCCTCTAGTTCTGCTTGTACTTTG  
TCTACTTCATTCAGTCAATCTTGTGATGCTGTTTCATCGTAAGTCATGTTATTTTACCTC



TGGGATATAATCAATTATTAAGAAAATTCATCTTCTGATACATTATAGCTATGTGAGAT  
TGTACCCGTC AAGACCTCAAGATCCGGTGATTTGATATTGCACGGATAGATAATCACCGG  
AACGCCGCAATCTCTTAAAAATAATTTGGCGAAATACGGCACGAGGTCAGTTACAAACTC  
TGCTTCTTCCAGCAAACGGGAAATGTTAATTTTCAATCTCATAAAAATTGGTCCAGGCTAG  
GCAATTCCTCAGTCAATACATCTTCAACCTTTGGCGCTTTCGGTATATTGACCGATTCT  
CGTAGTTGTTGATTTTATCGTAAATGTCCTGTATGAACGCCTCATCAGCAATCTGGCACA  
TATCAGCGTCGCGTACGTCATATACATGATGCACAAAATATTTGTATTTTGGGGCTGTG  
CTGTTCTCTCTTTTTTAATGCGCTGTACAAAAGCATTAAAGCACGCTTGCGTGATGTAAG  
CATGAGGATTTTTATACTTTGTCTCGTCAAAAATTATTCAAACCCTTGACCGCCGCTTCGA  
TTCCGTCGTCGATCATTTCTTCGCGCCATGTTTGACTATAACCAGAAAAGTTAAAACGAC  
GTGATAGATTTTTAGACATTTGCATAATTGCTAGGCCGATTTGATCGCTCATTGGAACTT  
GCCGACCTTCTGCTGCAATTTGTTGTTTCCAACGGCAAATTTCTTCGTAAAGCCCTTTAT  
TGTTTACATAATCAGACACTTCGCACCCTCGCTATTATTTAGGAAATAACCCTTTCCGGG  
TATCCCCATTGCCATTATACTTTCTTTGCTTGGTTATCCACACTCTAACCATCTCTACT  
GATTCACCGTCAGACGGATCAAGAGTTTTTCTTTTTACTTCATGCGATACTTAAATCCG  
TTAAATCTTGCATTTCTTACTCGTTAAAGTCGAACATCTTTTTAAATGATTTTCGCCCT  
TTACGCTCACCACATTCTAGCGGAATCATTCCGGTCTGTTATTACATTGGCATTAGGTAGA  
AACGTTTTTAGATAATCTACCGACGCCAATCAGGAACATATAGATTAACATTCTCCTTG  
CTCTCGTTGTCTCTCAGGTTCCAACGCAAACATAATTGAAATGCTGGTTCCAGATAATCA  
GACACATGACGCGCTTTCGAAAACCTCGTTTGTGCGGAGATCGCAACTATTAGCAAGACCT  
TTAAAATATCAATCTCCCATCGTTGAGGGTTAAAGCTGAACATCAGAGTAACATTTTTA  
TGATGAATGTAAGAGTTAAGACCATAAGATCCGTAAGGTATCCGCTCACCAATACCATT  
GTGCACGCTTCTCGGTCCCGATTCACGGTATAAATGAAGTCATCGCCACATGCATTTTTA  
ACCAAATCAACAAGACGTTCAAAGGTATTGCTTGTCTGACTGGTGACGCGACCAGCGT  
TCGAAGTCAGTCATTAGGATGATGTTAACTATATCTGTATTTTTAAACTCGTTGATATAT  
AGTCTGGATTCTAGCGCACTCGGAACAAAATCGCAATTTGCATAGTATCGTAGATACTTC  
CCGCTATATGTATCAAAGAGATTTGCACATGCTATCGTAACCTTTTTAAAGCCTCCCCAC  
GTACCGTGTTTGTATCGTTCAAGAAAACAATTTTCGACCCATTCTTCCGGTGTCTTCG  
TTATGTTTTACCATAACGTTGATTTTCTTCTCTAATAACGCCTCATAAAGCCCTCGAAGA  
GAAGAATCGATCATATCAGTACCATCCTTTGCACCTTCTATCTTTTCTTTGATAGCGGCC  
TTCTCAGAGTCTTTTAGAATAAGTTCTGTAGGCAGTCCGATTCGTGACGATTGGTTTCG  
CAATGCTTCGTGATAAGTTCAAGATTAGACTTAAACGGATACTCATTAAATTC AACCAAT  
TGAGGAAATTCATCAATGTAAAGAGCATAATCACCAAACATTTTTGAACGTTCCATATTA  
GATAACGCTGTATGTGTAATGAATATCACATCAGCACCGTCTTAACTGATTGCATTATC  
GACGCTTGCACCTGTTTTAAGGCTTTTTAGTCTTGTGCTATCGATCAAGACAGCACGACCG  
CCCATTCTTTTAACTTATTGTAAGATTGTTCACTTAAAACACGAGATGGCGAAGCAATA  
ACCGCTTTTTCTTTTGTCTCTAGGACGTGGGAAAGTATAGCATCAGTTTTCCCGCCACT  
GGCAATGCGATTAATGTTTCAATTTTCATTAGAAACCCTTACGTCGTGCTTTCTGGCATT  
TCTTGATCATTTTTATCAGAAATTGCGCGCTTAGGTGCAATCTGTTTCACACCGAAAGCAC  
TAATGCCAAATTCAGAGAGAATATATTCAACTAACAATTCACGCACACGCGCTTTACCGA  
TATTCACGCCGTTATTTTTAGATATGTCTGGCCTTCGACTTGCATCAGATCTAAATCTG  
CGTCGGTAATATTGATTTCTTCCATGCGCCCAAATCGAGAATAAACCATGTGTGCGATTG  
CATTGTGTAATAACATAATATATTCTCACTCAAGAATTACTTAATGATACTTACTTTAC  
CAGATCCGTGACAATGAGCACAACACCTATCACACGCAATCCTGTTCCGTTACAGTGTT  
TACACTTCTCCAACGGTAAAGCCATTATAGCAAACAAAGCAATAATGAAGATCGAAACTA  
AATTCTCAATAAGCATAATTCTCCCTAAGTTCTTTATAGCCGCCAATGTGCTCGTTGTCA  
ATGAATATCTGGGGGTATACAAATCGGAGGCTCTTTGAGTTCAGCCTCCCCGCCAGTTCT  
TCTATCATATCCCGGGCGGGAATAATGTCAACCCAAACCTGCTTGAATACTGGTTTAAAGT  
GTATACGGAATACCCAGATCATCCAGTAGCGTCATTGCACTAATAACAACCATAACAATGA  
TTAGCCTCTTTCGGTATGCCGTATATCTCGATCATTCTCAGCCTTTAATCGTTCTAGTT  
CTTCTTCCAGTTCCTTGATCCGTTGGTACGTTCAAAGTCACGCTGCAACTTAGTGGCGA  
ATACTCGTTTAACTGATTGTAATCATCGATTTTAAACACTTCTTCTTCGCCATAGCGAC  
GTACAGAACTTCGAAGTTATTGAAGAATTGTTGCATCATTGCTTCGGATGATAGTTCTG  
CCGATACTACTTTAAAATATTGATCTTCTGTAGGCGAAAACCAATTGCAAGCATAAAGAT  
AAACCTTTTCATTGTCTGGAGACTGGTAAGCCTTACCATCGATTTCAATCACAGAAACAT  
ATTCAGGTATAGTAGATGAATCAATAGCTAAGACTTTAAACGAACGGTCCCCGATAAACT  
CGGAGATCACACGATTTCGCATCACTGGTTGCAAATACTTTACGCGCTTATTCGTTTTTCC

ACTGATAGGTCATACCAACAACAACATATTACCAACCTCGTCTCCTTACCAATCAAAAAT  
TCAACTTCACGACGTTTAATGTCTTCTTGAAGGTCTTTAATCTTCTGGCGATCTTGCATT  
ATTTTCGTCCATCTTGTCAAGTGCTGCGATGAAATCATCGAAACGTTTCGAAGGTTTTACCT  
TCATTTGCTTCGCCAAATTTAACCATTGTCAGGCCGTAACGACTACTAAACAGACGTTTC  
AACTGTCCAACGATTTTAGAATCAGTGGTTATAACTTCCAATTCTTCTACTTCACGAAAG  
AATTTTCTATCAGAATCAATAAACCAGCTAGTTCCTTATGGTTCGCTATCTTCTGTTGCG  
CTCAGTAGAGTATGGTCTTTACCATCAATTTCAATTACATCAATTTGCCACATGGACTA  
ACATTTTTAACAGTAAAAGGTCTATAATTTATTGCTCGAGCAATAACATAATTAAGGTTA  
GATACGTTTTTCAGCATAATGGCAGAAGTCTGTCATAGCATTTCGCATCTTTCCAAGTATAA  
GTTTTACCAACTTCCCATTTCTGGGGAAGTCTTCAACTTCACGAAAGAATTTTCTATCA  
AATGGACTAAAGAAATATGTTGCAGTCCAAATGTCTTTTCTGTAGCAGTTTTTCGCCGTA  
TGATAAACACCGTCTAGCTCTATTGCATCAATCCAACCGTTACCCTCGATCTCGATGATG  
GTAAATGGCTTGTACCAATAGCTGCACTAATATCGCTGTTAAGTGGAGAAAGAACACCT  
TCTCCGTTAGTAATAAAGTTCAGTTTTAGCGTTTTTCGTCTTTCCAGGTGTAAGTTTTACCA  
ATTTCCATTTTCATAATATATTTCCCTTAACCGATTTTATCAAGTTCGTTTAATACTTTC  
TCTGCTTCTGTATAGCTTGCACCCTTTCCGGCATTTTGTCAAGAAAATCTTTCAACTCT  
TCAAAACTGGAGATATGACGCAAGGCGTTAGCACCGATAGCCGCATGTGATTTGCATTCA  
AAGCGGATTTTATAATTATCCATCGCCAATTTGAGAAGATCAATTAATTTAGATTCTTCT  
GGAATAATAATTTCTTCAAATCTGCTACGGTTCATGATCCAGAAACCAACAAGATAGACCT  
ACATCGGTTGAACTCATATAAGTTCATCATGAAGATAAACAGACCGCACGTATCCTTTT  
TTCGCATCAACCGACGCAACTTTAAACGGTAATCTCAGATATTTCAAATAATCAACATCA  
TACCATTTAAAAAATTGGTTTGCATCTTTTACATCTTTCCACGCATAGGTCTTACCAACT  
TCCCATTTTCATAATATCATCTCTCATTTTTTGATACGTGCTTCTAATTGGATCATATGGTC  
GCGCGTTTGCTTGTATTTCGCGGATAGCACCGATCCGGCTAGGCATACCATCAAGCACGCT  
CTTAATACCTTCCAGGGTAGTAATTTTGGCAATGCTATTATGTAACCCCATCTTATCGAT  
CAACTGAATGTCGTAGGCTTCCATAAGCAGCCCCAGGCGTTCTAAAGTTAGGTCTTCTTC  
TTTTTCTTCCGATTCTGGAATCTTAGGTTCAATAGTAACTTCGGTAAAGAAACGTCGCTC  
ACCCGACCAAAACCACACACCGGAACAGCCAATAGGGGATTCTTTTAAACGTCATAGAGTC  
GAAATTACTACCAATAATAGTAATTTCTGTAAACATCACCATCATCGTCAAGGTCTTCTAC  
CCTAAACGGGCGAGCAGCCACGAAGTCCACAATACATCTGTTAATAGACGACGAAAATTT  
AGACAGTTCGGCTTTCGACGCTTCGCATTCAATCTTGTAAAGTTTTACCAACTTCCCATTC  
CATAATAATCACCTCAAATAATTTTCTCTGGAATACTATTAACAATCTTGTATTGTACTT  
GATTGTCAGACCCCCGCCACGGCTTCTTCGTTGGCATAATCTTTAATAAACGCCCATCGA  
TGAACATGTCAACTGATTCTACAATTTTTCTTTGCTCATCATTCAATTGGTCAAGAGTAT  
AACCGGACCATAGCCAAATATCTTTATTTGGCATCCATGATTTTACTTCATCGATGATCC  
GCTGTACACCCTTTAAACTGCGTTTATACAACGGATCACCACCTAAGAATGTTAGCCCCT  
GCATAAAATCAGGTCTAAGCAGATCCAGAATCAATCCCATTGTATCATCGGTGAATGGTT  
CCCCGTTCTTAGGATTGAGTAGGCTAGCATTAAAGCAACCATCACATGCGTGTGAACATC  
CGGTAACGTAAAGGGAGACTCTCACTCCCTCACCGTTAACCATTTTACAATCTTTAATAT  
CGGCATAGCGTAGTTTGCCGTATGTATCAGAATCATATTCAATTACCCCGAACTCGTTT  
ACAATCTGCGCTTTATAGTAACCACCGCTAGATGCTAATAGAGAAGCTGGGCTTAGGTAT  
TCGTATTCACGGATTTCTACTTGTGCGTTTTTCAGTTTCCCAAATCAGTAAAGTCCACATA  
TTTGATTCTCCTGTAAAGTTGTATCTCGTCTTGATGAATATAGTATAGGGGATCTCGCGA  
TCCCCGTCAAGCATTTATTTAAATTTTTTCGAGAGATTTCAACCACAGGCGGCCTGGTAGG  
TACTCTCCGGCAAACATGAAATTGTATCTGGATAAGAACGCAGCATATTCAAAATAAAC  
TTCCGGCACTCTTCGTAATCTTTACGTTTAAAGATAAATCACATTCTCGCCAGTACCGATC  
ACACCTTTTCTATATCCATGCTCTTTACGCACAGACCATTGTACAGTATCTTTTTTTAACCC  
CGAATCACAACAGGTTCCCAATACCCAGCGCATCCGGCTACACCACACGAACAGGTGAGG  
AAGTATTGACCTTTTGCTTTGTTTTCTCCACCCGATATTAACCGGATGCCATTCGTGA  
TACTAGGCTAAAGCATCGTGTGTCGCTTCGATCTGTTTATTGTCAATTCTTACCGTAACC  
ATCCATACAGGGATCTTATTTGTTGGTTCATCATCATAACATGAATCATCATCAATATGT  
TCTAATGTCATGTCAACATCAATTGATTTTTCGCTGTTCCATGTATCGTTGTGCTTTACGC  
TTACGATTCAATAATTTAGACATATTCACCTCACATTATAAACGAAATTGTACGCCATCA  
AAATGAGAAGTTGCATTACAGCTATTATAGATAATAAATCCTGTATCTGGCGCTTGTACT  
ACAAATTGACTTGCATTAACAGCGGCAACAGTAAAAATACGATCCGTGAGACTATGTTTA  
ATTTCTGTCCCAACTTCCAATGGGATGTACTCTTCTCTTCGGCCCCAACACCAAAACAG  
CCTTCTTCATGATACGCCTGAATCTTTTTATCACAATTACACGGTTTAGCAAAATCAAGC

GTATACAATTCACGAGAGTTGTTCGGTATAAACCAACACAGATTGATTATGATAGCGAATC  
ACATACAGGTTATTATCTTCGTCAACGACACAAAACACTACGGATTTGTGTGCCTTCGCCT  
TACTCCAGCAGATATTAACAACCGTTCCATAATAAAGAACTTTCTTTTGTACCAAAG  
CTAGCCAGTGTGCTAGCGTGCATTTTAACAACACTACCCATCACCAATTTCTAACTTGCGA  
ATTTAATTTCTTTATTCAATATACAAAACATAATGTTGTCTCTCTTGTTTTTCGATGTG  
AGCATTATACACGAGCTAATCCGGTTGTCAACACCCCAAAACGAAAAGCCGGGCCTTTC  
GGATCGACAAAACAATTACATGTGCTTAACGCGGTTTACCATCTCGGAGTGTTCGCGTGG  
TTACATGGACGCAGATCAACAGATCCAAGATATCCACTAACGCGACGGATAACATTCATC  
TTTTCCAGATTGTCAATTTCCGCAATCAGGGCAAACAACCAGACTCGGTGCTCTCATT  
TCCTTATTAGATCCGAATACATGACATACATCAGAAGGAGTATTAACACCGAAGTAGTGC  
AATTTATCCATTGCATAGTCTACTACAGTTTCAAGACCTTTCAGGTTGTTTTTCATGTCT  
GGAACTCAACATAAGAGATCATGCCACCGGACGCCAGCCAGTGATAATCTTTCTCAAAG  
TCGATTTTCTCAAATGGTGTAACTTTCCGGTCTACGTCAAGGTGGAATGAGTTGGTGTAC  
CAGTCTTTTTTCGGTAGCACCTTAACAATACCAAATTTGCTCTCTGTCCAGTCGATTAAC  
CGATAGCAAAGGCTCTCGGCTGGCGTACCGTAAAGACTAAACCCAGGTCCGGTTTCGTCC  
TTCCATTTTTTCAGTATAATGACGCGAGATCTTAAGAATATGTATACCGTATCGCTGCGCA  
TCTTCCGAATCAAACGGATGAACACCAAACAGGACGCTCAGTACCTCATGTAAACCAATA  
TATCCAAGAGAGATACTAGCGCGACCATCTTCCAGCACTTCCAAAATTTTCATCGTTTTGA  
TGAATACGCAAAAATGCACCTTCTGTATACAGTACAGGAGCAACATTGGCTTTAGCCCCT  
TTTAAAGCGTCTACGCGACTCATAAGCGCATCAAAGCAAATAGGCATACGATTAGCTAGC  
TCTTGTTCGAATAGCTCAATTCTGCGCATTATAGACGCTTTACCAGCACGACGCGCGGCA  
ATAAGAGCAATACGCGGAAGATTCAGGGTCCACAACACCCAAGTTATTACGTCGGTCTAAT  
ACTTCTCGCCTTTGTGCTTATGCCACACACCCAGGAACTTCTACACATTATTTGTTCA  
GGGTAGGTCGCTAGTCTACCCCCGCCTTTCCGGCTGCTACATGTGCGCCATGCAGATCAGAC  
TATATCTTCTATCTTTCGATAGTCTACCATTTCCGGATCACTTGATCCTACGCCGCTACAT  
TCATCACGGCTAGTCGTTAGGCATTTTCATAGCGGAACTCATATTCATAAGTATTGGTTTT  
TTTACCATCAAGAATTGCAGATACATTTTTACGATGCAAGCCCAATGGTTCAGAAAGACT  
TCTCACGCTTTTAAATGTTTGCTCTTGTCCGGTTTCTTTATGGATCGCAGTAACCTTATA  
TGAACGACGTTTTAACTTATAGCACCCGTGTTGTAACCTTCTTTTCGTGTTTTTCGCTGTT  
AGTCCCCCACTCAAGGTTAGATGCATCGTTTATAGTTTTATCGTCGTTTTTATGTTTCAC  
ATATCGATAGCCGTTAGGATTCGGAATCCAACATTCAGCCACAATAACATGAACACGCAA  
ACATAAGGGTTTTCTTGTCTCTCCTTACCCTTACTAATGTATATCCGGTATTGTTTTCTAT  
CCAGGTACTCAACTGTTTACCTTTAGGAGAAAACACCCGTCATCTTTCGCTACCATATA  
TTCGGTATCACGAATTTTTCTAAGTTCATAATATATCCTCTTATACACATTGGCGTAAA  
GAGAATATGACCGCTATGTTTAGCACGGGATTGTCTTCTAGAGAGTTCCCCCGTTAAGGC  
AGATTTTAGATGAGCTGTTTAAAGTTTACCATCGGGCTAACCGGAACACTAGATCCAGC  
GATGCTACGGTTATTCTTCGCAGAGATATAATCAGGGTAAAGACGCTTACTAGGACATTC  
CAATGCATGTTGCTTAATGTCGTAGTTCGGATCTTCCGGTTTAAAGGTTTAACTCTTCTC  
TAAGAACATCACAGCTTAGGAAACACCGGAGTTCTACCGGCTTACCTAAACCTTTAGT  
TCGAACTTTACGGATCGCTTTCTGAATCAGTTTTTCTTCCAGCTAGTACCCATAACAAA  
GGTTAAAGTCACAAAAGGTTTTTGACCGTTGGTAGAGAACAACGTGTTGATCTCACATTC  
CAACGCCGATATCCGTCTAACGTTTCTTTTTCTGTTTTCTTGTGCATAGAGAGTAAC  
AGCTTTGATTCCGTAGGTTTCGGCATCAGCAAGGTGTTTATGATATGTTTTCTTAACATA  
CGGCGCTAACACCTGGTCGATGTTTGCAATTGTGGTCCCGCCATATTGATGACTTACCAC  
CTGTGCGATAATTTGAGCGGTTACAGCACATGCAACACCGATCGATTTAGGACTTTCGAT  
TTGTGCGCTACCCAATTTAAAACCATTTCTAACATGTCTTTGAGATTAACAAGACAGCA  
GTTAGTAAAAGGCATAGCTGGTGCATAATCCATATCATGATAATGAATATCACCGTCTAC  
ATGCGCTTTATAGATGTGCTCAGGTAACCCGGTTTTAGCAATATGTTTAGACACAGCGCC  
AGAAATCAGATCTCGACGTGTCGGGAATGTTTCGCGCGTCTTTGTTTCGCGTCTCTTTGCT  
TACTTCGTTGTCTTTACCCGTTGCGATCTCTGTAATGTCTCTGATTAGTTTTTCCATTGT  
ATCACCTATGAAAAGCGGGATTTCTCACGCTCGTTGATAGTTATTTTACCAGTTCTGCT  
AATCTTTTTCTTTAGCTTCTAGTTCAGCTTTAAGCTGTTTAACTCTTTGTCGCTTCTTA  
TTAGCGGCTTCTGCTTACTATTTCCGATAACCTGATCTAGATACAACTCCCAACCCTGA  
ATATTTTTGATAATGTATCCGTCAACATTAATTGGTTCGGAGATTCTGTACAGCTTCCAGT  
TTAGTTGCAAAAACCTTTAATTGCTGGGGTGAAGTATTCATATTCGTTATCTTCAAACCAA  
TAACCTAGACTTGCATTCTCAATACGAAGATGAAGTTTAAAGATCAAGGTCTTTATCATCG  
GAATATAGGTCTTTTACACACCCCATAGAATTAACAACAACCTTTAAAACGAATTTTATCT

ACACCACCAAAAACATCTTCAAGAATATCAGCAATTGAGCTATTAGCGCAAGAATGGTCCG  
CTGAATGCGTCAAGGTTTTTCGTTAGTTACAGTATACCAAACATCTTGTACCCACATAATA  
TAATTCTCTCGTTGTTAAGTGGGAGTATTATAGCATACTCCCTTCGCATGTCAAGCACTC  
ACTTTTTCTTTACTGCTTTACCTTCTGGCGAATTACTCGAATCTCTTCGATCTCTTTT  
TCAGTCTCTTTAACAATTTCTTTGCGATTCTGAATATCTGTATCGAGATTATCATCAAGT  
TTAGGCAGCATGTCAATCAAGAACTTTTTAAAGTCTTTCAGGTTTCGGATAACAGCACCT  
TCACCCATTACCGCCACACCTACACCGTCCGGCAGATCACCAAACAGTTTAACCAGTTCA  
GACAGATGATCATGGTCTTCTAATGCTTCCCTCCGTTTCAGACGGCAGTTCAACAAAGTTA  
TAACGTTTCATCATTGCTGATCAAGTGTACCAGCAAAGCCCGAAAGATTTTCGGTGTATAT  
TCTACACCATCAATTTCAACCGCGTCAACACTTCCATAATCATCTACTTTAGTTACCTTA  
AATCCTTGTCCCAGCTTTTGAACAATTTCAACAACATGACTTGATACAGTTTCAGCGGTA  
AACCAATATGGCAAATTATGCTGATTTGGCTTGTAGCGTTCACCTACTTTCAATCTCTGA  
CCATCCGCTTGCATAGCATGAAATTGTTGTTTCGTGATTTCCGCGAAGTATTCAAATTCG  
CCACCATCAAACACACAAGCCCATTGATCACAAAACGATCTGCCTTAACAGTTTCACCT  
TTCGCGTTGATCATGGTAGCTGATCCGTGCAATTCTTCTTCAACTAAATAGCCATATTTCG  
ACAATAACAACAAGTTTCATAGCTTCTTTGTGATCTGGATCATGCTCTCCCCAGAATCGC  
TTAAATTCTCGCAAACCTTCTGGTGTAAACGAATAACATTTACCTTATTCAAAGTAAGTC  
GGCATTGCATCCTCTTTCTTGTTCATCGCTTCGTATGCCTCTTTTGAGATGCGTTTAAAG  
TATTTACGCTCATCGTGCATAATCATAGTCGCCCAATAATAAACGATATCCTCAGCGGAA  
TAAACTACCTCTCCAGCTTCAATAGTAATAACATGACCGTTGTCATCTTTTTCTAATACT  
TTAAAGCCCTTTTCGACGATTTACGCAACCCGAATATGACCACGGCGCGAAGCATTGGTC  
AGAATAATTGAATAGCGAGAAAAGTCTAGAAACTCATCTTTACCACCTTCACGGAATGCA  
TAGTAATGACCTTCAAAGAATTTAGCCATAATATAATCCTCTCGTTGTTTAAATGGGAGT  
ATCTTACTACTCCCGTTTCATCATGTCAAGCGTTAAATGACTTTTTGGATCTCTTTCAGT  
TCAGTACTTTATCGGCGCTGAATTTAGCGTAGGTATCATGTCGAATAATTTCACTTTCA  
AGAAAGGTTTCCAGCCGAGATCTATTTTCAATAAGGAACTCTTTCAGATCTTCCGCGTTC  
TTGATAAAGATTTTATTGTCAGTAATGTCATCTTCAATCGCAAAGGAGATAGAGCGAACT  
TTACCAAACAAGTTAATCAGATCTTCCAGCGATTCTTCTTCTTAACTGGTTTCATTCT  
TCAAACCTGCTTTTTAGTGATGCGTTTAAAGTATTTGCACTCGCTTGCATCAATCATGATT  
AACGCACCCTCATAATCATGAGTTACTACCAAATACACTTTACCCATAACATTAACCGTA  
AGAACTTTAAAGCCCCTGTGAAGCACACCATAACAGGAACTTGTATGTTGTGGATAGCGT  
TTAACAATTCCTCTGCGGACTCAGCATTACGGAAGGTGTAATAACGACCTCGTTCAAAA  
ACAGCATCATTTGAAGACTTGGCTGGTTACAATTTATACGTTTTTCTGTACCATAATATAA  
TCCTCTATAATTTCACTGATAGAACAGCACGAGACAGAATGCGGTCACACGGAAGAAGCA  
TAAATTCCCAACGCGGATCAAAGTCTTTAGCGGTATATGTTTTCCCATCAACCGAGATT  
CACTTACATAACCAATAGGTGACACTTTAAGAACAGTAAACCCATTCTTGATGACTTCGT  
AGGTATCTTTCAATCCTTCGTAGTCATCCTCTAGGAAGTCTTTACGTGCTTGCTCAGATT  
TAAAAACATAGGCCACACCGGATTTAAACATCTTACGCATTGTTGATTCTCCTTCTTGAT  
TAGATGGGAGTATTTTACTACTCCCATTCTTATTGTCAACTACTATCGTAATCTTTGTA  
TAAATTGTTTCTTATACTTCTTCGTGATCTCTTGACTTGTATCAGCGTCACAGTAATCGA  
AACCTTCTGCGTCCATGATAGCAACCATTTCCGCGCGTGTCAAGCGTGAAAATCGTTTTA  
CTTTATCAACAGCATATTGAGGATGTAAATGATTGTTGGTGTAGTCTCCTTTGATGTAAT  
TAACATAGTTTGTAGCCCAAACAACGAAATCAGCACCTAAAGCACCAACACCAAACCGTT  
TAAAGTCTCCGGTCAACGATCCTTCTAGGCGGTTGCAACACGAATGAAGCAATCCCCTTA  
CACGGCCTTGCCCTTTCGCATCTAGATCGTGGTTCGTGGTCAAGATGGTTTTTGTCCATAT  
CCTCAAAAAGTGGAAATTGACAAAGGGGGCAAATACCCCCCTGTTTTTTCGAATAGTTCTT  
GTTTGTACTCTTTAGCACTCTTAGCAGTCAGTAACATAAATTCACCCTCCAAAGAAGGTA  
TTTAACCATGAATCTTGTTTTTGACTACAAAGGATCGGAACTCATCAAAGCCACCAATAG  
AATCACCATCATAGAAAATCTGCGGCATGGTGGCAATATCTTCTACCCCTGCGCGATCCT  
GAATGTCGGCAATGATAGAATCAATCTTTACAGGGCGACCGTTTTTCGTCCACACCATCAT  
TGACAGGAATATAGATGTAAGGGATCTTACGCGATTTCATAAAGGCGCTTTGCATTCTGGC  
AATACTTACAGTTGTAACCCTCAAACCAAATAATTTCTACCATGATGTACCTCAATCTAC  
GTTAGTTACATCAACTTCTTGTGTATCAGAAGACTTACCACCTGAACGATCTAGGCAAGA  
GGTCTTATTCAACAGGACGCAGTTTAAATCATTCCGCTTGATAAAGTCAAGGAGATGATC  
ATTTACCTTTCCCTTATGATGTGTGACATTACTGATACCAAACCGAAAACCACGCTCCAT  
AATAGATTCTACCCACTGATAGAATTTAATCTCTTCCCTCGTCACTCCAGAATTTATTGTA  
TTCCGCAGAAGTGATAAGGTACGGCGGGTCCAAATAAACGAAATCACCTGGCAAGATCTC

GATCTCGTCATAGCGACCAGACGTAAAACCTGATTCGACCGTCTTTGTTTTCTTCCTTAAA  
ATTCAGGACACGCTCAATCGCGTTTTTCGTTAAAAGTCCGGCGACCAAATTAGCATTAAA  
TTCTCCCTTCCTGTTATGGCGGTTAATGTTGCTAAAACCTGTGCTGAATCAGAAGAAACAG  
AGATAGCGGATCTGGATTCTCATTATACTTCTTACGGAATGCCATGTAAGCGTCTTTATC  
TTTGGGAGACAAACCATTCTCGGCAATAATCCGCTTGATCGTAGAAACCGGGTCAGGACA  
CTCGTCAATCGCTTTGTACGCGTCAATTAAGCGGCGATCATAGTCATTAGCCAGCACATC  
CCCTTCGACGTACAGAGACACGCTCAAGCCGCCACAAAAGGCATCAACAAAGCGGTTATA  
GTGCTTAGGGAAATACTTACTAACACCAGGCAATAACTTTTTCTTATTGCCAGTATAGGG  
AATTAACCTAATGCTTTCTTCAATTATCGCTTCTCAATTAAGTTCTCTCGATCTCTACC  
AGTTGAAAAATTCTTGCCAATCACACGGAAAATTGCAGTTTCCGAAATGAACCTCTTTG  
TAAAGTTCTTTACCGGATGGCAGCTTAATATCTGTTACGCTGTAGTATCCGCAACAATCG  
CAATCACCATCTGTATATTCTGTTTTAGTCGGAATATCCATCATTGCCAGATACAAAGGT  
ACATCGTCTTGCTCAAAGTTCTTGTAACCTTCATGGTCGCATGAAACAAAGTTATCATCA  
ACACCGAAAGGGATATAATGGTCATAATCGGTTACAGGGTGACCGAGTAATTCCCATTCT  
ACAATTTTAACATTACCACTAAGCTTTATACCCATAATTTCAACAAGAAAATGAGTATCG  
TCAATGTAAATCTTACTAGGGGTTGGATAAACCATAATATAATCCTCATACTCAGAGAA  
TAGAATCTCTGTTAGCTTCACTGACTGCTCTCAGAATGTTAGCGTATACTCGAAAGGAAA  
GTCAATACCCAACCTTCAAAGAGAATAGCCTACCGCCTCTTTATGCTTATCGGTTAGGGC  
GATCCTAACCAATTCCCGTTGAATCTCTTTAGGCGGTGAATGGATAGTAACAGGGGTATC  
ATGCAATGTCCAGTCACCATTACGAATCAAGATTAACGGTTTATCGTCATTGAAGATCAC  
CGACCCCATTCGGTTCGGTGAGTGTTTTATACTAATCATCAAATTTCTAAGAAATATTCTG  
GAACGATATAACCGTTAAAGTCATTACACTTATAAAAATGGGGTGCATTTAAGGCTGGAT  
GAGCATTAGTAATGAGTTTACCCTCTAGAAACAGAATGTAATTAATAGGTCTAATACCTA  
CAGAATCAGGGTCTAAACCTTTTTCTTTTTCAGTTTCAGCCAGCGGTAAAACCTCGTCCAGATC  
GTAACCTTATCCATGATTTACCCCAATTCATCAAGGTTATGTCGCAGCATTTCAGAGTAT  
TTTTCTACTTCTTAATCTTAGTGTGGATCTCCACGATCTCATCTTCACTATCAGAAAGT  
TTAATGGCAATAGCGGTACTTCTTGACCTGTCTTGATCGCTTCTTTCAGTTCAACCAAC  
ATGTCCCGGTGTTTCAATAGCAATTTCTTACGTCGAACATAAGCGACGGTCAAAGCCTCA  
TCAGCGATTTCTAAAGCATTTTCAGCAACACCAACAACCATTTTACGAGTAGACAGCATA  
AATTCACCTCACATTATTTACGTTAACGCCGTCATCAATCCAGCCGACGCTATTTGGTT  
TAACAGTTTACCATAGGATGCATACTTAATCAAGCAGGGTTAACAGCATTATCAAATC  
TTCCTAAACGTACTCCCAAATCAGGAATATCCATGTATGCGGCTTTATATCCCATGTAC  
CGTATTCAGAATCAATCTCAACAGGACGGCCTTTAAAAGCATAACTACACCGTGACGGT  
CAACGATAACATAGCGATAGCCAGCCGGAAGATACACAGTTTCGCCGTAACCTTTAACTG  
GAGTAGCAGAAGAGATAAACATAATATAATCCTCACATCGTTCATTTGATGTGGTCATTA  
TATGATAACCGCATTTTTCATGTGAACAGTTTTTTAAAATCTTCTTCCGGTTTATATCGA  
CCGTCATCGACTGGTTTTGGACTGAATCCTTTATGCGTGCGCGGCTTCGCTTCCGGTTTA  
CCAGCAGTCATCAAACCAAACATTTTCAGCCCCTTATAACACATAACATTATCAACCACG  
GTCCAAGTTATAGGCCATACGATTGCAGCAATACAAAATGCTCCTGTATCGACCTCTTTG  
GTGTCCTTGTGCAATCTGGCGTACAAGCAGAATACTAGATACGAGCTCATTGCACCAGTA  
GTCCAGATATAAAGCACATTAACAATATCTTGTGTTGTCACATTATCTTCTTACATTTT  
TTGCAGTGCATAAAAGCATTTTTCTTCATAGTAATAGAAAATGTCAAAGTATGCTTTTTT  
TACATACTCGCCACTAATCCAAGCGGCAGTAACAATCAGAGTGGTCCAGTTAGATCCGCT  
CTCAACGGTAAAGGTTTTAATAACCAGCTTCACTGCCAAGTCGAACGCAAACCGGACGCA  
ACCACGGCAGGAAGTGATATTGGAAGTTTTGATTTTAAAGCCACCGCGAGTTTTAGAAAT  
TTCTACTTTAGCGAAAGACAGGTTGCTCATTTTGTGCTCCTTAAGAAAGTGTGTTAGC  
TTTGATGTGTGTAGTATAGGGGTTACGTGATCCCCTGTCAACAAATTATTTATGATTTTA  
GTGAATTAACCACTACATCAAATGATGGACAGAGCACACCTTATTAACCACATACTCAT  
CGTGTTTAGGAATAGCGCCTAACCGCTTTATTTTCGCTCGCTGACACGATAAACCGTTTAT  
CAGGTGCATTTACCTTACATGCTTCAACAACGCACGGGAAACGCGTTTCAGAGAGTTCTG  
GACAGTTTTGTGAATCCATCAGGACAATGAATACCCTGTTACATTGATTGTAGAATCCTG  
TTTTTGATTTTCATCAAGTTTTCTTCTGTACAATTCGTGCAATCTTCTTTTCATGATTT  
CGTTGGTTCTTGTCTTACAGTTTACCATTCAACAAGATCTTTACCCAACCTCGAAAGCC  
CATTCTCGGTCTTCTTTACGTTTTGTAGGTATGGACTTTCTGACTCTCTACGAAGTGAT  
GTTGTCGTAACAAGAATGATCCCAGGAATGGTGGGATGTTCCCTTTCCATATACAATAGGA  
CGCGAGTCACTATCAATACCTTGTAAGAAGGTGTATCCTGAATCACTTAGAATCATATAC  
TCTTTCAATTCACACATCACAGTTTCTTCAACCAGTTATTAAGCGAGCAAACCATGACG

CTTTTCGTGCTTCTTTTACTTTATGTGCACGAAAACCACTGAAACACCATTTCATAATCAT  
CACCGAAACATGATTCAACAGGAACACCCGCATTTTCGTAGTTCTCTGGTCTTTATTATAA  
ATCCTTGACATAAGGGTCGACCTTCAACAATGATAGGAAGTTTAACTTTTTCTATGAAAG  
TATACCCAGCACGGTCAATAATTTCAATTTTTCATTTTACATTATCTCCATAGATCTTTCC  
AGCAATATCAATTTACCAGCGCGAACATCTAGGAAAAGATGCGGTAGGTGTATGCAGTT  
TTCCACCCCACTCGCTTCATATCTGAAACCGTGACGTAAGCCCATCCGTTTCGCTGTAAT  
AAAGTCTACTTCAACCTTGAGAGGAAAGCAAGACTTTTCTATGTCTTCAAATCCGATAAC  
GTGTTTTGTGCTTGAATATGGAATTTATCCGCTGATCATTTTGTGATCTCCTTATACTCA  
ACACACCATAAGCAGGTAGCCCATGATAAACGCTCATAACGCTGGCAGAAATCGGACCAT  
AGACATTGTGCACCGTTTCGGCATAGTTGAAATATGCGTTTTTCTCTCCAACCTTTCACGAAA  
TAAGTATTCGATTTTGTGATCTCGACCGGAGTATATCCGAAAGCGGGTTCCAACCTCAACA  
TCTGAACTAAATGCCAATTTAACAGAATTTGTTTTCTGACCGCTGTCCGGTTTCCTTCT  
GGGTACAGCACAGCAGGTTTAGCGCCTAAGCGGATAAACTCAGTATTTTTAATGAACAGA  
ATAGCATGATAACCGTCATATTCCGACACTTCCATAGTAGCAGGAAAATCGACATGTGCT  
AAACCTGGTAGATCTCGCATATCATGAAAGGTCCGATCAACTTTTTCTTTCTATATTCC  
TCACTCTTCTGTTTCATTTCTTTTATATGGTAATATAACAGGATTAATACAGCAAGCACC  
AATTACGTTATGAGCCCCACAAGTTAAACATTTATAGTCATGGAACCTTATTAAGGAATCG  
ACCAAACCTCATAACCGACTAGCGCCGCGTGTACTTGAGTCTCGATCTCATCCATATCAGC  
CAATGTTTTAACCTTCATAGTATAATCCTCCAATGGTAGTTTTGCGAAGATGGTAATTAC  
ATGCTTTTTAATGCATCAGTCGCGGTGTCATAGCGAGTATTATCATAGCACCAGTAACCAT  
CTGTCAACTGATAAGTCAATCCGTCCTTTTTAGCTTCAATGAAAGACAATCTTTGAAAG  
TTTCTACTTTCTTTGCTGATACTCCACGGTACGGCTTTTATAGAGTTTAGCTAAAATGC  
GTTACGCTTGTTCCTCTTTATTGCCAGACAGATCCCAGATGATGTTTCTTATATGCTTGA  
TTAATTGTTTCAAGTGGTCAATTTTTGATTCTCCTTAGTTGGTATGCGTGCATTATAGCATTG  
TGATTATCTTTGTCAACACCCAACAACAAAAAAGGCTATCCCGCAGGATAGCCATAAAA  
TTACACGCGAGCACCGTAGATCGTGCCTACTTTATCCCAGCGTGGAGCATTACCAGTAAC  
GGCTTTACCAGCAGCACACCGTCATATTCTGTACCGTTCCCCTGAGTATTACATCTTCC  
TCCAGCAGCACCAACGTTACCGCCCGCACCGCCTGTATATGCACTAAGAGACCCCTCACC  
AACAGATCCTTTACCAGGAGCGGAAATATTACCAGCAGTTGCACCGGAACTCATATGAGA  
GGAAGACCCACCAGCACCGAATGGGCGACCACCGCCACCACCAATACTAGTCGACCCCT  
GTTACCGCCGCCACCGCCGCCACCGCCGCCAGCGATAGCACCGTTATTTGTAATTCGTAG  
ACGTGTACCGATAGCGTTATTGATTGCGTTTTCCACCAGCAGCGCAAGCAGCGTTACTACC  
ACCATTACCCCCACGTCCGTAGACAGTCACACCGGACTGAATGATCAATGTTACATATTC  
GTTTGTAAACGAGCAAGGGAAGTCAAGACAAGGAATGCCAGTAGATTGGGAAACAATATC  
ACCAGTGATAGTAATAACTCCAGGAGTAGATCCTTGTGCTTTCATCCAGTTAATAAGAGT  
GTCTTGATTGTAAGAGTTACTAGCACCAATGCTATAATGAATCTCTTTAGAGCGTCCGAC  
CATTGCCGACATATACGCCGGACGACCTAAGCGTACAGCTTCCATTGCGGCACTCATCCA  
CCGTTGACCAGTCTCGGACACAGCAGATGATCCCACCCATCCAGAAGATATTGCCATAAA  
ATTTCTCACAAAGAAAAGCCCCATTTAAGGGGCATTGATTGATAAATACTTAGATGAT  
CTCTGCTTACCATCCAAGAAGAAAGACCATGTTTTGTTAGGATAGCGAAGCGCCATGA  
TTCGGCAGTTTTAACACCAGTTTCGAACAACACTGACGGCTGGTCACTTTAGCCATAACCATC  
TTCGATGGCAACGTTTTCAATAATCATCGGGTACTTAGCGCCACGCATGAAACCGAAGCC  
AGCGGAAGATTTGATAATTTAACAGTTGCCATTTTTGATTCTCCTAGAAAGTGTCGTGT  
TTCGATGGGTGTATTATGCAATAACACCGGATCGCTGTCAACACTTTCTAAGAAAAATTT  
TTAAACTAATCGAATATAGCCAGAATTCAGCACCTTTAGCCAGTCCATAAACTTCCCA  
TTCAAGGTCCCGTAGTCATAATTTGCAACCATCAACTGACCATTTTTCATGCAGCAATC  
ATGAGAGAAAATTTGCCCGCATAAACTACGATAGTAATAAGCTTTCCTGATTCTGGCGG  
TGTGGAAGACAAAGCGACCATATGACCATTCAGCTTAGTAACCAGTGATGGAACAATAAA  
ATTCGGGCTAACCTTAATACCGTTAAATTCGTTTTGTGTCTTTCATGCCAGACCTCGCAA  
ACACTAATAGCATAATCATGCTGGTTATTCATAATATCAATTGCATTGTGATAACGAGCT  
AAACCATCAAGGATAAGTTCTTGTTTATCCTGTTTCAGTTTGGTATCACGCGCAGCCATA  
AGAGCATCAAGAACGGGTCCAAAGTGATTATCTAAATCATCTTCGGTTGCAATGTTTCCT  
ATTGCCCTCGTCTATCCGTGATTCTAATGCTTGTCTTTTCGTTGATCACATGCTGGGTATAT  
TCCAACACATCAAGACTATCGCGGGTAGCGTCGCCATGATAAGGTATTCCCAGCATGAAGA  
TGATCAATTAGTCGTTGAATGTCAATGTTTCAATTTGTAACCCTCCTCTGAAAGCACATCCC  
AGATCGTTGTGTCAAGGTGCATTAAATTCACATAATAGAGTCATAACTACCGAAGCCAG  
AAGTAAAAATTACATCACACAGGCGATATGTCTTATGAAAATCGGTGGCTGTCTCTGCAT

CAATAGGCATATCGTCACCTGACAGCACCAGACATTTAAGAATCATAACTCTGTAGCCG  
TTGGCGCTTGCTTAGTCTTTACAGCATATTTTCGATGATCCGCTTGCCTTTTCTTCTT  
TGATACGTCCAGACCAACTCCGGTTTCGGTATTGATTCATAATAATTTCAATCACATCAT  
TTTGCATTCTTCACGGTCTCCATAATGGTTTTGTAAGCCAGTTTAAGACGATCACCGAAA  
AACTTTGCGGTGTTACCCTTCGGATCGCGGAGCATGGTTTCTACGATCTCATCGGCAGTA  
ACAATTTCTCCTTTCTTTGCTGCATGTTCTACCATATACTTCAAAGATTCTTCGGAAGCA  
AGTGCTGCGGCTACTGGATTAATCATTTTTGATTCTCCTTTGTTGTCGATGTGTGCATTA  
TGCTATAACCCTATTCCGGTTGTCAACACCTAAAAACGAAAAAGCCACCCTTTCGGATGGC  
TTTTTGATCATATTTTATTACAGGTCCATTTGTATAGTAGTGTGTTGAATCGACCTTTGCTA  
AACTAGTTAAACATAGTAACCAATTCACCATCCCTTTCCAATGATAACCCTTCGCGTCT  
TAGACGGGTCTTCCGATTCCGGTAGTAATTGAACACGCGAAAGTATGAGGAAGCCAAATAG  
TTGAGTTAATGCTAGTATTCTTTTACTTCTGGTAGGCATCCCACGGTGAATAACATTAAG  
CCAGTCGAGTTAGTTTATAAATTGTTTTAAAGCATAACAGCTTTGATATCGTCTAAAACGC  
TCTGTAACGAGCTATCAACATCATTATAAATCTCACTAGCCATTTGCGTTAACTCTTGCA  
AATAGGCAATTTTCGCTAATCTCCTTTCGGGACGACCAACTTTGGCTGATAACGACCAGTGA  
TCCCAATATTGGTTTCAGTGAATTATCAACCAATTTCTTGCACCTCAAGATAGAACTCTT  
CTAGAGCCTTATGTTTTGCATAAGATCCAGGACCAGTTACCCCAAAATGCTCGGCATGCA  
TATAAGCAACACTTATCAGACATTCACCGATAAAGAGGTCGACTTTATTAGCCTTTCCCT  
CTTCGGACGTCTTTAGAAAAGCACTGAATTTTATGTTCTAGATTCTCCATATTATGCGAC  
AGAACAAATTGTTGTGCGGCATATCCCCCATAATAAAACACTGCCTAGAATCCATACAT  
TTACTACGAGCATAACATCTTCTAATATGGGCATGAAATTTCTGGCTGGTTTCAATGGAA  
GGAGATATGTTGTTTACATATACTATCATTGCGCCGTCGAAATAATCAGTAAAGTCACCA  
GTTGGATCATATTGATCAGCACCGACACTTCCGACCGCAGTCAAGCATATTGCCGCTGTT  
AGAGTTTTACGAATAAATGACATAAGTCAATCCCCCAGATTGAAAATATTAGTTATATT  
TATAATCTGGGGCTTTATTTATGATTAACTCTTATTTGGTAGTACCGTCAATAAAATGTT  
TACTACACACAGAAACATATTTATCCTCTGCACCAACTTCTATTTGAGCACCATCGCGAA  
TAACATTACCCTCTTTATCTACACGAAGGACCATTGTTGCTTTCTTGCCACAATGACAAA  
TACCCTTCATTTTCGACCAGTTTATCAGCAAATGCCATTAATGCCGCAGATCCTTCAAAAA  
GATTGCCCTGAAAGTCAGTGCGAAGCCCATATCACAGTACAGGGATATTAGCATCATCAA  
CAAGCGCACACAAGCCTAAAACATGCGCTTTAGTCATAAATTGGGCTTCATCTACAAATA  
CAGCATCAGGACGCCAGCGATCCGGTCTACGTTACCTAACGATTCACGAGAAACCAAAT  
CGAAAAGATCATCCGATTTAGTGAAGGTGATCGCTGGGGCACTTAGGCCAATTCGGGAAA  
CGACTTCACTTTATGAATCTCGATTATCAATCGCTGGCTTAAGAATTAATACTCGCATAT  
CACGTTCTGTATAGTTATAAGCACTTTGTAACAGAGAAGTTGATTTGCCAGCGTTCATAG  
ATGCATAGTAGAAATATAATTGCGCCATTAATTAATCTACAAAAATCCAACAAGGCCTAA  
ACCGATATAAGTCCAGATACCAATAAAAAAGAAGTTAATGCTCATGGCAAGGATAAACCC  
TATCAGCGTTTTGGGATACCCGACCCAATATTCCCGACCATCTTCAAACCGGAACAGTTT  
ATTGCCCTTGAGAGTCCATATCAACCACAACATGTTTATTTTCGAGATTGCAATAGATATTG  
TTTTACAATCTCAACACCCGCCATAATAACAATAACGAAAATAAAAGTCCACACAACAAG  
ATTAATGATAGTCTCAAGCATTTTTCTATCACCTCCACCCAATCAGGTGTTTCTGAAAGA  
CTCCTTCTCCTTCATGATGGTCGCAACCTTTATTGCTACATTACATCCACCAATCCCACA  
TTCCCCACGGAAAACGCTGCATATCGTCGTTACAGCAAGTGAAGATAATAGGCCAACCCAC  
ATCTAACACATCGGCAGTTTTCTTTCAATTTGAGCGGTATTCCGGCTTCTTCATAGATGACT  
CCAATATAATCGACATTTACATTTAGGGCAATGCGGTTCTTCAATATAATACCCGTCTGT  
CTTTGGAACACTAACAGGAGCGGTTTTTATATTGATTCAGTGAAACAACGAAAACAAGT  
TACGTTTTCTACAGACTGACGTTTCACCCAATCACCGGAATATAGATCATTTTTATTTGT  
CATATTCAACCACCACAATGTTAATGTCTGGAGTTGCAATATTAATGATCTCCTCTACAC  
ATTCCCCTCAAGGCCACCGATACCGCAACCGATTTTAGGAATATAGAAAGGCTGTATAG  
CACCTTCAAAAACATCATTGATAGTCTCAAATCCTTTTACAGGATAGCACCATATTCAGCTT  
TTGGACCCGGTCGGAATTGGGTATATAGATTCACCCCGCACCAGTTATAACCATTAACCTT  
GATGCGTCCAGACACTAAACCCACCCAGCTTTTCTACCTTACCGCGAGAAGTTTGCTTGT  
CAATCTCTAACGCTTTCGCGGAACTCTTTCGCGATCTTTGCTGCAATACCAGCACCCATAG  
TATGAAAACGATTACAACCATGAATTAATGATCGTTTCTTGTGTTAAACATGGCGATGA  
GATCGCCCTTACAGTATCACTAATCATAATAAACCTCTCATTAGTCACGGGAAGACA  
ACCCAGCCATAAAACGGCTTAACAGTGTGTCGCGATAAGCAAAGCACAATTGCTTATCAG  
GGGCAGTATCACAAGGTTGCGTTTTGTTTTAGCAAAGCTGGCAATACTCAGATCCCACG  
CTCGATTTTTTCGTTTTTCGTCTCGACCTTGTGTTGTATGCTTCGTCGAGTTCAAGTGCGC

TAAAATCACTACACATGTTATCATCATCACAGAAAGTTTTAATGATCTTTTTGTTGATCT  
CAAATCCTTTGTATTTCGAAATTTGGATAAGGGCGCTCATAACTAGCAAGCGCACCAGCCG  
AGAACATCATAGCAATCATAGCAATTATGGTCAACTTTTTTCATATATTCCTTAATAGCGT  
TTAGTCTTAAGGATGCCTTTACTCTTTAGATGGTTAGCCTTTTTTAGTACACCATCAGCA  
TAACCTAACCCGGCTTTATAGTTCATCCAGCATTGTAAGAAGCTAGCGCGAGTCGGAAA  
TTACCGTTTCGAACATCCAGCCAGTATGCTAACTCATCCATCGCGTAGAATGCAGAAACC  
TCGCGATTATGATAAAGTTGATAGTCTGGCGATCACTCATTTTAACACCCGCGCTTTGCA  
TTTTTCGCTTTACCGTTTTAAGGTAATTTTGAATAATCCATCAGCATGATGATTTTTTC  
TTTGGTGCTAAGTTTGCACCCGCGCTTGATTCTTGCCATGCGATACCCGCCAGGCTGTGA  
CCTAAACCCTTTCCGTTATAGCGAATATTCGGATGGTCCTTTTTCAACTTACCGCTTTTC  
TCGAATTGCTCGCCGTATTGATAGGCGAAATGTAAATTATCTAGTTGGTGTGCTGTAAAG  
TTGTCTATCGGCGCCTTTTTGATCGCTGCGCTAGTCGATGCGTGTGTAGCACCAACGGCT  
AGTGACAGACTCAATACTATCGCTTTTAGAACTTTTAACATTAATTTCTCCCCTTTGGCT  
TAACTTTCTGATTCCATAATATAGCCCTATCACCAGAAAGTCAAGCATTATTTTTAACCA  
ATTTCCATTATTGGTCTACCTTCAAACAACCGCCGACATTTTACCCGCCAGTCGTTTTG  
GATTCTCTATAATCATTTCGGCAGCATAGACCGTGATATGGCTTACCCCTTCGATTAGAT  
CTACTGTCATCCCGATCCACATGTTACCGTCAGTAATTTCTAATCGATTCCGGTCGGTCTT  
CCATTTTCAGGAAGTCGAAGACCTCCGGCAAACGAGTTTCTATCTTATTGAATAGTTCCA  
TTGTCTTATGTTTCATCGAAAAGACGATCGGTTAGACGGTCGATCATATGCGGACTAAAGC  
GAATGAAAATATACTACCGTAACCATCATTCAAGCACTTTTCTTTGATCTGCGCATTGG  
TTTTGCGCATTTCGGTTTCGAAGAATCTACGCAGCTTACTACGGCGAACATGTACGTTAA  
TTGTTTCCATTATATTATCGTTTCTTAAACAAATTGCGAATCCAGTATACAAACGGGATT  
TCTTTAAACTTGAATTTCTCTATAGTTAATTTCTTTAGTAGCAAGTTGAATACCATAAGCA  
TCATGTGTAACTATATGCCATTTTCTATAGCCCAAATGTGAACAACCGTCTGGATCTAGG  
TTAATAAGAGTTTCTCGCTCACTAGGATTATTTTTCCACAATTTTGAATAGGATCGCAC  
ATAATTGACCTAGCGTACCATGAATAATCTCACAACGGTAAAGTTTCCAGCAGTGAGA  
TAGGCGGACCCGTCATAGTCGGTATAAACAACACTTCTTTAACACTCATTTTAATACTC  
CTTTGTTGTTTCGATGGGGGTATATTGCTACCCCGATCATGTGTGTCAACTACTTTTTC  
AAGATTTTTTTGATTGCATTCCAAGACCTTTATTTTCAGGTTGTTTTGGTTCTTCGAT  
CAGTGTCCATGTTTCGACCGTCTATGTGTGCACAATTTTTAAGGCAAATAAAAATCTGGTG  
TCCCTTATCAGCACGGATATAACCACTATTCGCAAATCTTTCATGCGGTGTATATTCATA  
CAGTGTATTAGGTGTAATATACTTGCGGTACTATAAGGTGTCATCACATACATCATGGT  
ACTAACTCCCAACGATCACCGCGAAGATGAGAACATCCACCATCAAGAAGTATCGTAATA  
CGATAACCTATATCATCTCTGATGTAACCGATTGTCGGTGGATTTTCGTCGTCTCGTGCC  
GGGGTAAAATCATAACATCTTTCCGGGCGTAATATCTTGTCTTTATTGGTATTGGTATAA  
CCTTGCATTTTCTTAATCTCCTATATTAATACTAACCAACGGGTATAGTGTCCAGAACAACG  
GTCAGATGAATATATTCTAATAGATCTTTCCAAAAGTCAACATCTGGTCTTCCGGCATA  
CCGTTTTTCTTTGCCTCTTCACGCGCGAGTTTAAACACGCTCGTAGAGATCTTTCAATTCT  
TCCCGCACATTATCAAAGGTTCTTTCCCCTAACTTACACGCTAAAATAGAAGAACGTCCG  
GCGAGCGGGAATTGTAGATCACCTGTCTGATAGATTTCAAGTAGCTGATAACCAACATGC  
AGAGCATGAGAAAGATCTTTCCAGTACTGAAATACTTTTCAGCATTGGCTACCTGCTTT  
TTGAGATAGCCAGACAAACCCACATAACCAACATGATAGAATTTATCTCGATGTGTTCCG  
ATGTATTCCCATTCTCTGGAGGATTCAACCAACATGTTACTAGGCGCGTGCACCATATCA  
ATAGCGCCGATATCGCCTTTACATGCCAGATTGATAAACCGTTTTAGACTGAACATATTA  
ACGTCAATGTCGTCTTTGGTGTCTTGATCCCTTGACCGCTAGTGCTTTGATCATAGTGT  
TCTTTCATCGATCCTAAGATAATTTCTTTTCGAGTCGGAACAAAGATACCACGATAATCT  
TTATCGGAATTTTCAGTATCAAGGCCGTATAAGTGAGATCCGAAGACCATTTTAACCATT  
GTATGCATAATTAACCCCTCATTAGTATTTTACGTTACGTTCGAACGCCTTTTCGAATCTG  
ACAAATAGCAGACGGTGAAACATTATATTTTCTTGCAAGTTCTACACCCTTCATATGGGG  
AGAAGATAAAAATCTCTTCCACTTGGTCGTGCGTAAGTTGTGCGTTTTCCGTGGTTCTCTCC  
CCAATTTTTGTTAATCCTTCTTCTTTCGCATGAACAAGATTTCCGGTAGCTGTGCTCCA  
TTCAAGATTATAAAGGTCATAGTTTTGTTTGGTTCCATCCTTATGATTAATACTACACGGTA  
GTTATTTGGATTTCGAATAAACGCAACCGCCATAGCTTTATGGATGTTACGGTTTTTCT  
AAATCCATCCGGCTTATAACATACTGTAATTTAGAATAACCAGTTTTACCATAAACACT  
AATATAATTTCCGGTCTCCGTATTTCTAACCCTACCATGAGAGCTAATCTCAAATTGAGT  
GTAGGGCAACAGCGCATCAATTACTTTCCATTCTTCGACAGGATGGTCATCACAATATCT  
TTAATCATCATATCACCTCATAAAAATAAAGCCAACCCTTTCGGATTGGCTTAAAAATT



TACATTGCTTCCGTAAAGGTGCGCGAAATAACGTCACGTTGTTGGTCTGGAGTCAGACTA  
TTGAATCTTACGGCATATCCGCGAACGCGAATGGTTAGTTGCGGATACTTATCAGGATTA  
GCAACCGCATCGAGAAGAAGATCGCGACTCGTAACATTGAAATTAGCGTGCTCACCACCT  
TCGACAACCGGAGCACCATTATCTACAATCACCGGACGGAAGCTAGTTGTGTGCAGTGCC  
AGAGAATCGACATCTTCTGCGGCGATCACATGGTCTTCTGCGAATGTTTTACTAACA  
ACTTTAGCGCCGATCAGTGCTATCGGTTCCGATACCAGAATCATAGGCGCGAAGTGGCCA  
CCAATAATAGTACCTTTATGCTCACCTTTCATGATTTGAATTGCTTTAAATTCCATAA  
CACCTCTTATAGATCAGGACCTTCGTCATTAATTTTACCAACCAAAACACCAAAGAGTTT  
ATCAGGTTGGACTTTACGATTCTTTTTAATTGTGGCACGGAATCGACGAGCTACGCTATC  
TTTTATTTTCATTAGTTGATACCTAAGCCAATGAAAATAGGTTGGTCTTCTACATTACCC  
ATCCCAACACTAAGTAGATTCAATTCTAAAACTGCAATACGCTGTCAGTAAATCCGCGC  
ATGGTAGTATCTAGGCTAAAAATTGTTTTGTCAAGACTACGACCTCGCCATGTGATCGGA  
TTCAGGAAAGTTCGGATAGATGTACAATCTACATCTGAAATATTTACATTTTCACCGCGA  
CCGCGATCTCGGATCGTTTTGGCATGTTCCCGCGTCGTTGAAACGATAAAGACACTATAG  
CCTTTTCGCGTATAATGGTCATATAACTTGATTGTAGCGTCTGTATGCCCTGTCTGACGG  
CCTAAATTGATTGAGACGATGGAATCTAGGTCATCAGCAAAATTGCGTTCGCTCACGGCGT  
TCTATGATGCCATTTACGGGAGATACACACGCAGCATAAATCAAATCTTTACTTTCTAAT  
TTTACATCAATATTCATGATAAAGTCTCCAGTGAAGGGGGAGAGATCCTTAGATTGTGCG  
CCCGTTGATGGTAAATATTTTATTTTGGATCTGGGAAATTCAATAGAGCATATTGTCCAT  
AAAATTTCTAGCTGCATTATCATAAGCGATTGCAGCTTCGATTTCTGTGTCATATTGTC  
CAAGAACATGTCTTTGTAGGTTGACCATTATACTAGCTCTCCATTTCTTACGCAAATCCT  
TCCTGTTACACTTACTAACACCCTTATACACACTAGAAAACCTGTTTAGACTTCTTCTTTC  
TATTATGTGGATTTTTCGCGTCGGTTGCCTCCCTAAGATTTGGAGGATTGTTATTAGCAG  
GATTACCGTCAATATGATCAATTAATCTAACTTTCGCTCCCATGTTCTAGAAACCAAACAA  
CCCTATGCACGAATAGATGAACTCTAGGAAGACCGTCATCTCTACTATGCCAAAATCAAA  
GATGACCATCTTTATTTGTTCTGAGTTAACTAAATCACCGTGTTTATATCTACTCCCTA  
ATGGTCGTCCTTTGATAGCTTTACTATCGACTCTATAATATAAGATACCCTCTATATGAG  
CATATCTAAGTTTTATCTCGTTTTGTAGGGATTCATCCCAATATTTAAAAGCGATTTTAT  
AATCCTCACAAAGCCAGCGATTAAGCTGGCTTTATTTTAGTTATACCGGGTCTGGATAGA  
CCTTTTTATCGAGTTCCATATGCGGTCGGTCTTTAAAAGTAACCCAATCAACACCGCAGA  
TAACAGGAACACCCAATTCTCGACCAGCTTGTTTAAATGCATCAGCGATCATAACGGTAGT  
ATTTTCATGTTCCATGTATCCTTATCTTTCGGATACGCTACAACGTCAACCGCGAAACCGT  
GAAGATGACGAGATCTCATAGTCTTAGATTTACCTTCCGCAACATATTTCTTTTTCGTTT  
CTAGACTACGTACACCTTCCGTAATACCAAAGTCGACCGGAGTCAGTTCTAACGCACGAT  
GAACGACTTTTACCAGGTCTGGATGCACACCAACAAGCCGATCTTTGCTTCTTTGAGATA  
ATTTAAGCATTATTCACCCCCTTTGTGAGTGATAATATTTAGATCCCGGTGATCCTGCAT  
AGAGTTCTTGATTAGCACCAATAAGGATAGCATTACGGCAACCATTCCCCAATCAACT  
CACTGATTATAAGAAATGCTAAATCCGTTTGCTAGGCCAAATACAAGCAATCCGGTACAC  
ATACTCAGAGCAATAATCAACATCACGGTAAAACCAAATGCAAATCTCATATTATTTTCC  
TTTTCTCTGTATACGTTTATAAAAAGTAATACTTTACCTCATCGCGTCCGGTGATCCAACG  
TGCTAGGGCGGTAAACAGGTTTACAATTCCCAACACACCTACTGACGCGGCGCTGTCAAC  
AGACATAGGAACAGTAAAGGCCATAGCTAACATAGCAACGCCACAAATGACATTAAGCAC  
CATTATAATAAGACCGAAAAAAACCATTGTCAATCCTCCGACACAAGAAAACCAACAATC  
ACGCCAGTGATAAGACATGATGCGCCGCTAATCAGACAACCCGCACCACGTGCTTCCCAC  
CAGATCAGAGAAGCGACAATAACACAGAATCCCCATACTACCGCAATCACAACATAGGCA  
AGGGTCGCCAAAACATATATTTGTTTATAATAAATCCCATTACCAAACAAATAAGAAA  
AAAGCCATATCAACAGATACGAGGCAATTGACGCGGCAAGCAAAGGAGATTAGAGAATC  
CGCCGTCTATCCAGGCGACAAAACAGAATACGCCAGTATAGAAGCATAAACCAATTACAA  
AGCATATTATAAGCAACCATAGATAAAACGCCATAGAAAGCCCTCCATCGAGATAAATTA  
GTGCGGGTAGTACATTACCCTACCCGCATTGTTAGTCATCGCAGAGCGGGTTCTAGGACG  
ATTCCACACCAACCGCTAACCACACCCAAACACACAGCAACAAGCAGATTCATTCCGGTCT  
TTTGGAATCATCGCAAACAGAACACACCCACACAGAAGGCCATTACCATTGAAGTTAAC  
ATTTGTTCAACCATTATCACACCTTTAAAGTCATAGACGCATAAACATTAATGTCAGGCC  
AGTTAGGTTTCGCAATTATACTCAACATCCCACAAATAAAGCGGTTTAGATGTATCAGCCA  
AGTTTTTAAATCTTCTTCCCCTTTTCAAGGCTATATGATGGATAAACTAGGCCATCAT  
ATCCGCCGTAACGTTGGCTTACTGGTCGGTCAGCAAAAACCTACCTCAAGATCCGGTAATT  
CTTTTTCAAGGATAACCGCCAGCGCATAAATCAGACGGTCTTCTTGTACGCTGCCGAA

GGACCGTTGTCAGTGGGTTTTCTGGTTCAGTACTAGCAAGCACCTCCACATTATCACAGAAT  
GAAATTTTCACAGACACAATTTTACCATAAGTGAAGAATGAATATACATTATCGAGATAT  
TCAACGTCACCTACAATCACATCAAACCTGCGGATCAGCAACCGCCGCAAATATTCTACC  
AGTTCATCAAGAGAATGCAACTTAATTTTCATCAATTCGGCTGTATTTGGTGGCATCTTTG  
ATTTTAAAACCACGTTCTTTCAGCTTATCATTTAGAATTTACGCGGAGTTTCAAACAGT  
TTCCTCATAATATAATCCTCACATAGTTAATCAATGGTCAATAATCTTTTACATTATAAC  
AGAAAGAACAAAGACCGCAACCCACATATAGATCCCATCAATCAATGCAATTTCAATATC  
ACAATATCCAAGATATAACAACAGGAATAAAAAACAAACATACAGACCACCGCAAAGAACT  
AGCAAAGACGCTAGAAAATCCGATAGCAGTATTAGTAATATTCATATTAACAATCCTCGC  
GGCTTAAGTCAACAGCAGTTGCATACAGCATAATGAATATGCTGGCCGATCCGAGAATCA  
ATGCACCCTCACATTTTGAAGTCGCTCAACAAAATGTAACATTATCCATCCGAGGATGT  
TAAAGGCGCAGACCAGCCTATGTTTCGCTAACCAATTAATCTTTTTTATAATATATCTTA  
GAAAGAAACAGTTTTCAAGAAATCCAGATTTTTAGTACCGAAAACAGAAAAGTAGTGTTT  
TCCTTTTTTCGGTTTTAGAGAAAGCGATTGTCTTCTCTACATGGTGCCGGAAGTCAGACAG  
ACGATCACCCAGGTCAAGGCGGCAAGCGTAAGTAGTGCCGTTTTTCGAAAGTAACCTCGAT  
TTGAGTTTTGTATATTTCGCTTTCATAGGCTTTTGTGCTGCCGCTTCTGTGCTTTACGCTC  
GAAGTCTTCGAAGTGAATACTTCGTTTTGCGTTAGCGAATACAGAAGATTCAGAGAAGAA  
AACTTTAACAGATACTGGTTACATTTTGATACTCCTTAGTAGTTCGTGTTTCGTTTTCGAT  
GGGTGTATTATGCAATACACCCTTCTCGTGTCAACAACCTTTTTAGTCTTTTTTATAAT  
TTCTAGAGCAGTTTCTACAGCACCTTTCCAACCTTCCACATAATGGACATAGTAAGGAA  
GTAAAGCACCCGCGAGGAATCAACCTTTAAGAGATAAACCATTCTACAAACGCTTCGCT  
CATACCATGCTCTTTAGCGGATTCGCGTAATTGTTCAATTTGGTCTTCCATAGTATCACC  
TCAACACTTAACGTTATTCATACTCAAACGGTCTATTTCATCCTATTGTAAGTACATAT  
AACAAAGCGTAGTTATGTTTTGGTTGTACCGTATCAGATAGACACGCTTTTACAGCCTCAC  
GGTCCGCTGGGTCTACACCCTCAGCTTTAAGTAATGCTAAAATCTGGTTATAGCGTACTC  
TTAGTTGTAATAATGGTTTATCCCCCATATTACCCCTTATAGTTGATCAGCGATGTAAG  
CGTGACAAGCGCGGAGTTTCATGAATGCACTACCTTTCCTTCGCCTACGATGTTTATAA  
CTTCGAAGCGGTTCGGATGGATTTCATCTTAGAGCACCAGATCTGGTTAGCCAATTCCAGTT  
TACTCATATTTGGTTCCATCTCAAAGAGTTCACGCTCAAAGTCGATAATTTCTTTTGTG  
CGTCTTTAAAATTAATCATTTTGATTCTCCCGTTTTCGTTGATGGTTGTATTGTAGGGGAG  
TTATCCTCCCCTGTCAACACTTTTATCAGAAATATGCAATATAGTTTGCCAGTCCGACAG  
AGTCATCATTTCGGCATTGCTATTACTGCCAGTTCAAACCTGCTTCAACTTTCTATTTAG  
CGGATTCTTCGTTATAACCCAGATTACCAGAATAGCTACTACGTTTTTCTTTGCTTACTG  
CTTTCAGTGCTTTAGTGATGCGACGTGCCATAATTTGATTCTCCGTTAAGAAAGTGTGT  
TTCTTTTCGATGGGTGAATTATGCTATAGGCCGGATCTGGTGTAAACAACCTTTTTTTAAA  
AAAAATTTTTAGGCAATAAAAAAGCCACTCCGAAGAGTGGCTTATAGGGAAGGTAGCGAA  
TCTTCTTGTCTCCAACCTGCTAGCGGCCTAGCAAGTGAATGCTTTAGCGTACCGGATCG  
CCCATACGCTGCAATAAATGCGGCTAGGTGGCGTCCAAATCATTCTAACCGCGCTGTCTT  
TAGTTCACTATTAGTTATATCGCTTCTCTCGTGACGTATTTGATTTTCTTCTTCTGATAG  
AGTTAAATGCATCAAAAAGACACATGACACTAATAATAAACATAACCGTATTTTCTACGA  
TATCCCAGGGCTTCGCATCAGTACAGATCCCCCAAACGGTAAGAAATGCAAATAGTGCAG  
AAGAGATCACAAGCATGATAGTTGCTAAGATATAAAAAGTCATTTTCATGGTTTTACCTC  
AATTCTTCGATATTCATCACACATCCACGCAGTAAGCAAGAATCCTAACACATAAGCAAC  
AAAATACGTTAATGCTTCTTCTGGTTCTGTGCTGTGTATCATCATTAAACCAGCTAGAAC  
GGTCTTAACAATTACATTTAAAATAATTAGCCACGCAAATAATTTTCATCGTTTTGCCCAT  
TTCGGTTCGAGTCTTTCAAACCTTGATACATTCCGTAACAATCTCGAATTATCCACGTAACA  
AGAGCACCGTCAACACAGACAATACACAGAAGAAGTAAAACGGTCCAGTTGCATTATCA  
ACATGAGCAAGCTATGTAAAGAAAACACATGCTAAGAATGTAAAGAACATCATAAAAACAC  
AAGAAAGCAAATATTTTATGCTACTCATAGCGCCACCATAACAACAGATCATAAGAAAAC  
CCAACGCAATAAGAATTGCATCAAATTTAGTGAACCTCAGGTCCACCTATCAACGTCCTC  
GTTCTGTTTATTTCATAGATCCCAGAGCCATCTTACAGCACCATATAAAGCGATCAAAG  
ACTAGGTATAAACGAGATTACAACAAGTTTACAAAAATCATCTAAGGTAACACCGGAATA  
GCTACCTACTGTAACAACACCGATCATCAGACACAGAAAGAAAACAAATGCAATCAGAAA  
CAAAGTACTGCTAAACAGTTTAGTGATCATTAGACACCCCCACGACGATCACTTTCAAAA  
ACTTTTTTACCAACAACGAAGCATGTCACAACCTGCCTCGTTGACTTCCGCAAATTGTTGT  
GTCACCCACTTAAGGTGAGAGCGAAACAATGTTCTATTAATAACAATGTTTTACCGCTC  
TTATCCTTACCATAAATTTTGTCTTAAACCATCTCCAATACCATATTATCACCTTATTTG

CTAATCGCTAAACCCAATCCGAGGAGAGCACCCGATGCTACAGTATACCCGAAAGTTTCA  
AATGCAGTAAAGATATCTAAGCCACCAGCTAACAGAGTTGCAGTAAACAGAGTACCAGCT  
ACGAACATAAAAGTTTTACCGATAAAATTTCATTTTGATTCTCCTTTCGTTTATTTGTGGG  
GGTATCTTACTACCCCGTTTTATCTTGTCAACTGTTTTTAAGAAAATTTTACTTCGTCT  
ACAACGTCTTTCATGACATTGATTCCATTCCGGTCAGAACACGTTGGAACATGTGCTGC  
ACATACGCTTTCAGGTATTCATTTGATGGCATGATATCGAAAGTCTTCTTAGTGTAGTAG  
TCATCACCGAAAGCTACTGTAATTACATTTTCGTCGTCGGTCCAAGCGATATAAGCAAAT  
TTGCCGTTATCCCAGAAGCGAGCACTAATTGCTACTTTTGTGAATCGAATCCTACTTCG  
CTGTGAGATTCAAGAATACTTGGTACCAGTTTCTTTATGAATGTAGTAGCGGGATACT  
AAGTCAAAGTTACGGGTGTAGTGACATTCGAATTTATCTTTAAACATCATCATTTTGTATT  
CTCCAAAGTGTGTTTCGTTTCGATATGTGCATTGTGCTATAGTCGTTTATGGTTGTCAAC  
ACCTAACAAACAAAAACCCCGAAAAATTTTCGGGGTATTAATACAGTTTGGTTCGTTCA  
CTCCAGGTCTAGATCTTCGACATACTCATGAGATCGGACAATCTCTAAATCGAACTCTAG  
GTCAGTGCCAAATTTACGCGCACCAACATCATAAGAAAGCGTGATATGCGGTACATATTC  
AGGATAATCCCACGTCGCGCCTAAAGCAGTGCCGATATCGTGTCTGAATTGCATGTAGTC  
GCTTTCAAATGCCAACACAAGCGAATTAGTACCGGATTGAGTTTCAAACACTTTCAGATG  
GCATAGAGAGCCAAAAAACTTTTCACCCTCTTCTGGGATAAACGGAACATAGACACGAGA  
ATATAAGATAGTGCTATGCAGTTTATCACGAGGAACGGCATTAGGCAGATCGTAGAACTC  
CTGCAATTTTTCAATGCGGTCTACTGTATCCTCAGTGCATTTAAGAGCCGCATATGTACC  
TTTAAACGGATTCTCGAAACGGGGTCATAATCAAGCCTCCGTGATCAGTTCTACTTCTGT  
TCTGCCTCTTCCGCTGCTTCGTCTTTAGGGAGAAGTGCTTTCACTTCTTCGACAATAGCA  
TCAAGGGAAACAGTCCCGTTTTCGTCTGCCTGAATACCCAGAATGCGTACCAGTTCATC  
AATACACGCTCACGATCTTTCAGTTGGCCTTCTAAGAATGCGGCCTTTTCTTGAGTGGA  
AACAGACGTAATTCAGGACATTAATCATTTGTTTCATGCTGATTGGACATATTCACATCT  
CCTACTTGTGATAACTTTTTATTAATGTTTCGCGAGAATCGCGCTTTCAAATTTCTTCTA  
ATGTACCATTATGTATGATAATGGTTTCACCGTCAATAGGCAAAATTCCTTTTTCGGTGG  
AGTGAGTCGATACAATAACCAGAATCACGCTGAATATGCAACACCTTAGCACCCATAGCAC  
GCACGAGAGCAATTTCAATAGGCTGAAGCACATCAACCACTACAAAATAACCTTCTTCAT  
TTTTGCGCTTCATAAACTCATTACGAATAGATTACACCAATAAAGCGGATTGATCAAGT  
TAACCATTATATCAGTACCGAGAGTGGTTAACATGAGACGAATAGACCAGACGTTATTAT  
GTTGTTCCCAATCTCATTAAACGACCTTGTAATCTCAGCCAGACGATCACAAGTAAAGG  
AACTACCGCCATACTTCGAATCTAGCATAAGCAGACACTGAATAAACCACTTATGCGCGG  
TATAGGTATCAATACCTAGATCGGCTTCTCTGTCACGCCCTAACCCGTCAAAGTCAAGAT  
AAGTCAGACCTAAGTCTGGTTAACATTCGCACAATATTTCTTTGATCGGTGCTGCCAGTT  
GATAACTATGTCCATCAATGATTAACGCGGCAGTATCTTTTCTACTCGCTTTTTACCAC  
AAAGTGCAATCAATTTTCATGATATAAGCCTCTTAGTACTTTCTAAAAGCAGGGTGCATAG  
CTTTAATAACTTCCACCCTCTGACGATCCGCCGCCTGAATTGCTGGGCGAGGAACGATCA  
GTTGACCATCACGTTCCATGCTCATTGTTTTAAAGGGAAGAATTGCAGTACACACCAGAG  
AATCATGCATATCATCGGTGTATGTTAACTCAAGTGCCCCCAATTGTGAACACCAACAAC  
CATAAAAGTTAAAAGTGCACACAATGTTACGTCGTTTCGTTGTCCATCATGTGAGCTTGAA  
CGGCTTCCGGCATTGAATCCTTCCACGCAGTGGAGTTACCGTTATTGTAGTCTACTATAG  
AAAGCATCCATGTGTAAGGTTTAGATAGCTTTCCAAATGCTCATCGACAATAAACCGGA  
CTACCAACGGGTCAAACCTCCACATGACTAGACGGATAATCACCGACCGCAAACCATATT  
GACCAGCAACTTGCTTAGTCGGTGGAAATGGTTATAGCCGGAAGTGTAACACCTTGGGCAT  
TTAAAGTAAAGCCTTTTGTAGTTGTCCATCTGGAATATTGATCTGCCAGTTGCTGGGGT  
TAGCATAGTTAAAGAGATTAGACATTACTGATTCTCAAATGCAAATATTTATTAACAAT  
TGTCGCTTTGCGACGTGCCGGAGGCACTGACTACTTTTTAACCGAAACAAATTTTCTATT  
ATTCTAAAGATCTTTCTTCGTTTTGGTTATGTTTTAACCAATAACTATCTTTTTTATACAG  
TTATAAATAAAACGGGTACTATACGAGGACTTCTTATGACAGAAGACATTTTGTAAAC  
TCTATGATCGTCTGGATAACGAATTAGCAACATTGCGGGGTGAAGTTCTCTATTTGTCTA  
AATGCAATACAGATCTGCTTAAGCAGATTGCAGAAAGGGATGATCAAATAAAATCCCTTT  
CAGGTGCATTACGTGATCGCGACAAGGCATTAGAGCTTTTACAGCTTGTTACCAATAGGG  
AGAATTAAGACTTCTCAAATGGTTATGCTCATGCCATCGATCTATAATAAAAAAGCC  
CGTTATTGACGGGCTTAATGTTAACTATTGATCATATCAATGACGTTTTGTAGCTCTGAT  
ATGGATAGCGTTTCTGTATATCCATCTGGCACATCTACTTTACTAACATAGAAACCTTTA  
TACTTTTTCTTTATTGCACATTCATAGAACGAGCATCATCACCGTAATCGTATTTTTTA  
TAAACTGTCAACTCATGACGAAATATAGATTTTGAAGATTGGTTTTGTATTCTTTTTATT

AATCTGTTGTTGGTTATACCAAATTTTATAGCAACCGCAACATCTTCTTTGTATAAAGTT  
TGTACATAAATGTATGCAGGTTTATTCCTCTTAAATCCATGATTGCTACACATAGGGCAA  
CCGCTATTTTTGATACGCAGTCTCCTAAGTTTGGCGTAAATTCATGTCCGCTACTACAA  
CGCATTACCAATTTTGTTTTTAGGATTCTCTGTACTACCGCCAACAAAATCAACAAAT  
GTATCACGTTTATCAATCGCCTTATCTGTTATTTCTTTACTACTTGCTCAGTTGACTTC  
TTGTTTTTACCTAAACATAGTTTACATCTAGATCCATTAATAAAAACGAGTGACCGGAT  
GCAGTATATTCATGTTCTTTAGGGCATTAACTAAGATATTTCTTTTCATAAAAATCTTTA  
TAATCAGACACATAGCCAATGGTTTCGTGGTCTTTTTGGTTATTCCTCATCTCTGTTAGC  
AACTCTTCGCTATCCCAGCGTTTACCCTTAAACGCAGAGACAACCATGACCTTGATAAAGA  
TATATAAATTTCTTAGTAAAGTTTTTGTGCAATCAGGACAAAGCATTAGTAATTCTGTG  
ATTTGACCTGTATATCCTTTAGGAATATCGATCAATGTGTATTTTCCGCATATTGTCGTT  
AATGCATCATCTATTCTTTCTTTGGTCCAGCGTAAGCGACCAGTGCATTTCATGACATTTT  
ACACCCAGTCTAAGAGTATCTAAACTAAATATAGTTGACGTATGTCCTTTATCACATTTT  
AACTTAAATCTAGTATCCTTTGCGTTGGTGTATTCTCCGACTAGACCATAACCATTCATAA  
CAACATGGGATATGTTCTTTTACCTTCTCTAGATATACACCGAACGGTCTAGGAACTGAA  
TTGGGTTTTCTTTCTTTAGTCATATTTTTATATCCTGTAAATTAAGCGCCGTCACCCGC  
GGCGCTATTTTTATAATCATTAAAACAATTTCCACACCTTACGAGCATCATATTTCTTGT  
CTTTGCTCATAAACTGGTAGATCGGAAGATACACAACCGTGCTCCAATCTTTTGGTGCGA  
TCTCAATCAGTTTTGTTTGGATGTGTCCAGGCAAATATGCTTTGATCATGTGGTCTGCGC  
CTCTCATATCTTTAACATCACTCCATTTAATTTTTAAACGAGTTTTATTAAGAGTAG  
GTGTACTCGCGTATTGTCGCAACAACGCTTCTAAGAACTGCTGGCGAGCTTTAGGTGGCG  
CATAGTGCAAGTTCAAACCTAGCATAATCTCGTTTCCCGCTTTAGATGTTCCAAATCCTA  
GACAGATAATCAAGGGGTATCGGTCAAAGAATGGCCAAGAATCCCGATATTTTGGGTTAT  
ACGCATAAGTCTAGATCCGTCCCACCTTGTGGTATTACTACCTGATGACCTTTTACACCAT  
CCTTGATGGTCTTCATAAACCACTCCTGTGATTTTTCTTTAGGACGACTCTTTGATACAG  
GACGCATAGACGCACGAAAATCATTAAATCACCATCATTTCGCGTTGCTGCTTATTGAGAC  
CCTTTGCACCTTTCCCTTTTAGTTTTCAACTTCTATTGCTGTTTTAATTTGCTGGTAT  
AACGAGACATACTTTTAGTGAAAGTAGCATAGGCTATTCCCTTAGAATCTGCAAATGCTT  
TAACTGTCATGCCTTTGGCTTTTGGCTTTTCGCAAATTCTACACCCAATTCGACCCACTGTT  
TAGACATTCGTTTTTGGGGAAGACGGCTTTTCGTGTTCTGTGATAATTTCAAATACGCTC  
ATAATATTATCCTCTATTTGTAAAGCCCTTTAAAGCCAAACACTTTCTTTAATGCATGTT  
CGGTGATGATCTTAAACTCCATGTTATGCTTTTTGGCATAATTTACGGCAGCTAACCATT  
TATCAGTATTTTTGTGTATGTTTACTTTCATGCATATATCGTTGCTTTGTCTTCGCGG  
TCATTCTTTTTGGCTTTTCCGGTGGCCTTGTCTCTTTAGCTGGTTTAACTTCCCATAAAT  
GCTCCTTGCCATCATCAATCTTAATGTAAAAATCCATAAAGTATATGTGTCTTTTTCCGT  
CTGTTGATGACTCATAAGGAATTACTACGGTCTCAGATCCCCATTTTGAACCTCTAGGAT  
TGCGGTCTAGCCACTGAATGATCCATCTTTCCAGCTTGAACGGTATGTGATCTTACGTA  
TATCCCCTTTATACTTTTCCCTTATTCTCAGGAACATACTTGCCCTTATAAGTGTTAAATT  
CTCCCATTTTACCACCCTTTATTATAAATACATAATACTATTTATCAATTGAGGGTGATA  
AAATGCTCTTTTCTTTCTTCCCTGCCATTGAATACAACGGCAAGATGATTACTGACATTG  
TGCGCAATTACCGCGCATATTTCAACGCTATAATTTCTGATTATAACATACAAACATATT  
ACATTCAAGGTAGTCCACGACCGGTACAAGTTGCATATGAAGTATACGGAAACCAACAAC  
TTTACTGCATCTTGCTGATGCTTAATGACGTATACGATCCGTTCCATGACTGGATCACCG  
ATCAAGAGACAGCATATGAATCAGCCGAACAACGATATGCAAATGTTCGGAGCAAATCAAG  
TATTATAACCACGTTGATATTGACGGAAACAAGTATCGGAATCTTACCGAATATCCGAAAG  
GATCAAGCAATTGGTATGATAAAGGGGATATTCATCACCGTCATTTGCAGTTTCATGTTG  
CATTGTTCGGCAGTGGACACACTGGAAGATGCGATCCTCCGTAATGAGGAACGACACAAGA  
TCAAGATCATAGCTCCTACACAAATTAACAATTTATTAACGCATTCATTTCGAGAAATGG  
AAAAGGCTGATGTGTAAGGTGATTAATTATGCTAATGTTTAAATAACTCCGTTAAATGGTT  
TACCGGAATTGTAGAAAACAGGGAAGACCCATTAATGCTGGGGCGTGTTTCAAGGTTAGGAT  
TCATGGTATACATCCCTCGCTATCCGCGCACGGTGACATTCAAGCTCTTCCAACAGAAGA  
TCTATTATGGATTACGCCAGTACAAGATATTACAAGCGCGGGTCTCCGGTATAGGTCA  
AAGCCCTACTGGTATTGTTGAAGGTTCAATCGTATTTGGTTTGGCTTTAGATGAACGTTA  
TTTATACTGCGTTATTCTGGGTAATTTGCCGGACAATATACAGAGAAACCACTCACTAC  
AGAAGGTTTTTGCACCTTCTGGTGCATATCCTCGTTATATTGGTAATGATGTTAATAT  
TCTTGCTCGTGGCGGTATTAACCCAGAAACCGGACAAACAACAAAACCTGATAGTGTCTA  
TATTCGAGTTGAAAACACTGGAGTTGCAGTAAATCCAGACGACGAGCCATTAGACCAAAT

TCCGGTTGATGATAATCCTGATTTTACAATAGAAAAAATGCTGAGGGGCGATGAGGGATA  
TCGCGAGAAATGGTATCTTGATTCAGAAGGATATCCGACAATAGGCATCGGGCATTGAT  
CATTTATAAGAAAACCAAGTATCTGGGTATTATCAATAATGAACTTTCTAAGCTGGTAGG  
GCGTGAAGTTACAAACGGAAGACTTACCGCCGAAGAAGTTAGTAAAGTATTTGCTGACGA  
TATAGAAAGGACTCGTTCGTGATATGCGCAAACATCCAGGAATTGCACCTGTCTATAATAA  
ATGTAATGCCTCTCGTTCGTAGGGCATTAGAAAATATGGCGTTTCAAATGGGTGTTGGTGG  
ATTGGGTAAATTTAAGAATAGTCTTGCTGCGATGTTAGCGGAAGAATGGAAACAAGCCTA  
TGATGGATTACGTCAATCTGTATGGGCTAATCAAACCTCAGGACGGTCAAGCCGTGTTTC  
TAAAATTATTCTTACTGGTAACTTAGAATCATATGGCGTAATTGCTCCAAAGAAAGAGGA  
ATCTGTTTCTGATGATCCGCGAGCACGTTGGAGAAATGCCCGTATTGCTGCCTATAAGAC  
GCAGAGAGCAGAAGAAGACCCAGAAGCACCGTTTACCCCAAGACACACGAATCATGTT  
TAAAGAGCCTAAGAGTTCGTATTCTGCGAGGTATCCTTATAACCATGTGTACGAGTCAGA  
GAGCGGTCATATTATCGAGATTGATGATACTCCATCTCATGAGCGTTATCACCGCAAACA  
TCCTTCTGGTACATTTGAAGAAACCAGACCCGGACGGAACGAGGGTAGAAAAGATTGAAGG  
TGATGATTATCTAATCGTTAAACAAGGCCGGAAGTAAACGTTAAGGGTAATTTGCAAGT  
TGTTGTTGAAGGTGACGCGCAAGTTTATTATATGGGTAAATGTGATGCAAACCGTTGATGG  
TAACGTCACTGAATTTATTCGTGGCAATGTTAATCAGACCGTTGAAGGTACGGCTAACAT  
GCATGTTGTAGGTGATGTTACCGCACAACTTGACGCTAATTTAACGGCTAATGTCAAGGG  
TAATGCTGAATTAATGATAGAGGGTAACACTACCGAAACAATTAAGGTAACTATGATTT  
AACCGTTGAGGGTAATTTTAAATATGACCGTCAATGGCACTAAATCAGATCTGGTTAATGG  
TGACTGGTCCCTTAATTGTGGTGCAAGCGTTAAAGATATTGCATCTGGTACAGTTCAAAT  
TGATGGTAGCCGTATTGATTTTGGGTGAGGTAACATAATGGTTGAAATTCTTCCGATGAAT  
TCAAATTTGGAGGATATCAGCGAGCGAGAAATCTTTGAGGTGGTGTCTCCTATAGAGCA  
ACGCCACCGGATGCAAATACCACATACACAATTAAGAGTTTAAAGATCAGCGAGTATCGC  
CCTAATAAGGGCGTTACCGTTGAAGAACTAAAATATCTGGTGGGTATCGGGATAGTTTT  
TCGCTTGGCGCGGATTCTCTTAAATATATAACGAAAGATAGAATTAAAAAATCTGCCGGA  
AGTTTTGATGATTTACCAGATCCAACCTACCGCAGATCTATATTTTTTTAACGCTCCTACA  
CGTCTACAGGAGGTTTATACTTATAAAGTAACCCTAACCTATATCCAATCTGTTTCAGAG  
TCTTCTGGTGGTGTGGTGAAGGAAATAGTGGTGGTTCCAATAGCCGAGAGGGTGCTGGT  
GAACTAATCCTCCTCCGGTAGTAACCGAACACACAATAGAGAAAGTTTATACTCAAACC  
GTTTTTGGAAATTGGGATGTGTGGGAGCAGCAACTAAGAGTTTATGTACATAGGGGTGTT  
TAATGGCTGGATTATCCTACGATAAAGCTAAAACCTACAGGGCACGGAAACTACCCACCTA  
CGGTAATTAATGCAACTCAATCTAAGGTATTTGTTGAGGGTATCCCTGTATTAGTCGAAG  
GAGACCCAATTACACCACACACAAAACAACAAGCCTTATGATACACACGGGGGAACTA  
CGGTCGCCAGTACCCCGAAAGTACTTGTTACCGGAAAGATAGCAATTCAAATGGCAGATC  
GTAGTAGCTGTGGCGATACCGTTCGCTATGGCATCACCGAAGGTATTCATAAAACGATAAA  
GCAAAGATTACACAAATTCCTGATATTTTTAATGCTGCTACATTCGATGAAATTAAGG  
CGCATTAACAGACTGGATGAGAAACCAGGAAGAATTTAAAGATTTTGATTTAATGGTGC  
TGGTATTAACGTATTGATGGACTTGCTCGCATATAACACTCTGTATATTCAGCAATTCGC  
TAACGCCGCGCTATATGAATCTTTTATCAGAACGGCCATTAAGCGTAGTTCAGTTGTTCA  
AGCCGCGCAAGATATAGGATATTTGCCAGCAAGTAAAACCTAGTGCATCGACTACAATTAT  
GTTGCACGTAACACATCCTCGAAATCCGGCAAGTATTCGAATCCCACGAGGAACTAAATT  
TATTGCAAGTGTTGATCGCCAGACGTCTTATCCGTTTGTGACTACAGAAGACGTTTTGAG  
CGTTTTAGGTTCAAATGGTTTATATACGCCTATGCTTTAAGTTCGCACAAGGTCGTATTGT  
TCGTACAGAAATGTTATTTAATCCGAAGAAACAATTTCTGATCCGCGATCCTGATATTGA  
CCGCGCTCAGGGTAAATTGTGGGTAGACGGTGCTGAATGGAAAGACTGGACACGAGAAAG  
CATTGTTAACGCAACTGGTGCAAGCAATATTTTCTATATGCGTGAAACCGTAGACGGTCA  
TACAGAAATCTTCTTTGGTAAAGGTGAATCAACTTTATCTGCTGCTGGCGGTGCACTGGA  
AGCAAATTATATTGGTGGACTTAAGCCGTCAACTGGTGCTAATATTGTTATCGAATATAT  
CAGCACTAAAGGCGCGGAAGCTAACGGATCTGTCAATTTACATACGCGGATACATTGGC  
ATCTATCTCTATTGTTAAAATTAATGAGAATCCGACAAATGATCGTGATTATGTGGTGC  
AGATGGTGGTGGTATCCTGAATCAATCGAACGTATGCGTGAACCTTGCTCCGGTAATGCG  
TGAATCTCAGAGTCGTTGTGTTACTGCTTCTGACTATGAGGCTTTTGTATCTAGCCGTTT  
TGGTAGTATTGTTACAGGCGGTACAATGTTTACCAGCCGAGAAAACCGGGTAATGCTTT  
TGTTGCTGTTAAGCCTAAATCTGGCTTGCGTTTGACAACCTGTTCAAAAAGAAGATATGCG  
CGATTATCTGGCAAATATAATCTTGCCCTATCACGCTGAGCATCATTGACCCAAACTA  
TCTGTATATTAACAGAATATTAAGTTTCTTATTCAATCAATGACTTGTCAGAATCAGA

GCAGTGGTTGCGCGGTGCGGTTATTGATCAGATTGATGCATATTATACCGACGTAGTGGA  
AATTTTAAACCAGACCTTTAGTAAGTCTAAAATGCTTGCTCGTATTGACAAAGCTGATGT  
ATCTGTGATAGGTTCTAGTGCAGAAATCGAGATGGTGCGAGAGATCGACAACCTTCTATAA  
AGCACCTATGGCTGGAATCAAGTTTTTAAACCAGTATAAGAGCGGAATCAAGTCTAGTTC  
ATTCAACTTAGAAAAGGACGACAAGCAATATCCGATCCATTATGTAAGTACAGAAATGAA  
CAAAGAATCCGGTTTAGCTAAATTGCTGGTTGGACCTTCCCTGTTGGTTCTGCAATCGC  
TTTACCGCACTATTCCGGCACTGATTTTGATAAAGAGGTTATCGACGGTGCGGACCTATA  
CTTTGAGGTTGGAGCGGTTACGATTATGACGACCTTATCTCATGGGATCTGGGTAAACT  
GAATATCAATAGCGATCGCTTTACTGGTTCATATATTGAGTTGACAGCTAAACCGATTGG  
TGATAACATCTTTAATAAAGACGGTTCCTTTGATCGTGTGTTGAAAAGGATCTCCGTCCTCA  
GTACACAACCTATTAGTCTGGAGGCAATTGCTCAATGATTAAAGCGCCTAGTGTAAGTACG  
TTGACAATAGAAAATTGTCTGCTAATCAGGCGTATATCACATGGGATGACATTGGCGAA  
AACTTCTTTTATTTTGTGGAGTTAGCCGAAACCAGAACACGAGACGGGGAGATCATCCCC  
GTCGATGAGTTAAGCTGGGTAAACCTGGGATATACTGCCGCACAAAACCTGGTTTGAGGAT  
AAAAACCTTTTTCCAGAATATTATTACAAATTTTCGTGTAGCCGTAGCCGCAGAAGGATTT  
GAACAAAGTAAATGGATTGAAACCGAAGAGTTTCAGACATTTAAAACAAACGCATTTAAT  
TTGTCTATGATGCGAGAGTTCAACCTTGCAAACGAGTTTGTAAACAAAAGTGTACATAT  
GATAATCGTGATTATATTAAATTCAATAGTGATTAAATCAAGCATCATTGATGAAGGAA  
GATTTTGTCTTTAGTCCTGAATATGCAAACATGACAAATATCTCAAACCTACATTGTAGTT  
GATGAGAACTTTTCATGAAATACAGGATCACATAGAAAACGTTTGTATTGATATAAACCGC  
ACTATGTTAGCGGAAATGAACGGTGTTTTGTACATTTTCGAACGGTTCAGCCGATTGTG  
AAAGTGTCAAATGATAAAGGTCAATCATGGAAAGCATAACAAGGCTTTAATGACCGTGTA  
GGCAATCCGGTTTCCCGTACATGCGTTTATCAGTCTAAAACCACTACTTACGTTTTAGGA  
TATGACCGAATCTTTTACGGACGACAAGCTAGAGATACTCGATGGAGCGCGGACGATGTT  
CGATTTAGTGATGATACGATCACTTTTGCAAAGGTTGGTGACGAGAAGGATTTAGGCTTT  
GCCGTTGAGGTCTTTGGTGTATTCTCCAGATTGACAGGTGACACCACAAAATACGCCGAA  
GCTATGGCGTGCAGTGCCGATTATTTGTGGGTTGGTGCTAAAGATGTTATTCGCCGGATT  
CGTCTTAAGAATACTCCTGTTGATACCGTACAGGGTTCGCCTACGTTTGGAGAAAAATA  
TTCGATCCTGATGTTATCCGAGTAACAGGAAATGATAAAGCTGTCATTCATAAGATGGAT  
GTGATCGACGGTAAATTGCTTGTATTTGTTACGGGGGAAGTTAAACAGCGTTATCAAGAT  
CCAACCTAAACCAGAAAACGTTGTTCCGTCGGATGATGCGGGTGTATACTTAATAGGGAGA  
GATGGTCTGTCTTTTACAGAGAGTATTTGGCAACACTCCGCAGGAAAGGGAATATATTAG  
CATGGGTTTCAGTAATATGTCAACCAATGGGGATGAGGTGTTTCATAAGCAATTATAATCAT  
CACTTTGAAAGTATTTTACCTGATCCAGAAACTGCCGCGAAATATGAATTAGGCGAAGCT  
TTGAAATATTCTCAGGAGCCAACCTTATCTAACTGATAAGAAAATACATCAAACCTACTTTC  
AGAGCAATTTATGATGATTTGCGTATTTGGGAGTTGGGACCGCAAGCGTATTATAATGAG  
GCTGATTATTCATGGATGGGTGCAAACGGTGTCCGTGTGTGGATCACAAATGATAATCGC  
CCGTTGGTTGTTTATCCAGAGGTTATCTATACTCAAGAAGTTGATACATCTGGCATTCTT  
GACCAAATAGGGTCAACCGAGAAGTTTATGATAAAAGGACCGTGGCCTGTTATCTTAAC  
AATGTTAAATTTGAAGGATTCAAACAATATGCATCCGGTGTAAATGTTCCATAAAAACACG  
GGAGAGATCATAGGATTCTATCAATTTAATTATCCTGTTGGTGACCAAGTTGGTGTATAT  
TGGAAACCTACATATGTCGCATTTGTTGCTGAATTGCAAATCAGGTTCCGGGCGGTTCCC  
TGGGTTCCCTGTTTATTATGACAGAGAGCAAGATCCAGAAATTCGTCCTTTACTGAATAAG  
ATGACGCCTGATAGCTTTTCACTTGAGAAGGAAAATTTAGAAAATTTCTCTGAATATTAT  
CTGCAATTTCTAAGTGATGGTTCAGGAACATATTATAATAAACTAAAAAATCTGATTA  
AACAAATATCCACGCGAGCAAGATGCATATGAGTATCTTTGGTCAGAGATGAACAAACGA  
AACATCTATGCAGATAAAAACGAGCGAGATGCGGTTCGTAAGATTCTTTGAATCTCGCAA  
TCAGATTTTTATTCCACTAAGGGCGTGGAGGCTTCTTACAAGTTCTAGTTAAGTTACTT  
GATAATGAAGGTGTGAAATTGAGGTTGAATCACAAGCCGGACTAGAGTATGATATTGTT  
GTTAGTTCAACGAACATTGACGAGGATATCGTAGGACGCACGATCTATACTCCAACCGGA  
CGGGCTAACGTGACTTATCTTGAAAGGGAATATGAAGGTGGACGTCTACGCTGGCGAGTA  
ACCATTATAACCTGATCGGGCGGTTTGACGAAGGTCAAGTGATCAAATCAGAGAAAACA  
GCGTTTGAGGGGATGATCCTTGGTGTACGTGGTAAAGAGTTGTTGAGTAGTTCAATC  
GACTATATCAACCGCTCACGAAGCCAATACACCATGAAGATTAAGAGTGCATTGCCAGTT  
TCGCGCTATGAAAATGATGTAATGCGATTCTGTTTCATCCTGTCGGCTTTGGTTTCATAGGC  
GTTACTCTTCTTACAATGTTTATTAATAGCGGGTTAAGTATGAGACACGTAGAAACTATA  
ATTCAATCTCTGAAAAATTATAAGTTTGACAGCGGATTGCCAGCGTGTATCCTGATCAT

GTTGCTGATCTTGATGTTGATGGAAATATTAAGATTGACCCACTAACAGGGAAACCATTA  
TACTTAACGTCACCGACAATCGGGCAAGAGTTCCTTGTTCCTCCTGAATATGATCACGAG  
AACAGCGAATTGTTCCACGGACTTAAAGCAAGCGAACGAAGATTTGCAATGAGTCCACTG  
TTTGACCAGTCGGCGGTAACATTCTCAATGTTCCGTCAACTTGTAGATAAACGGTTGAAG  
GATAATATAGGGAATCCACGCGATCCGAAGAATCCGACACAGAGGAAAATTAATGGCTAA  
TGAAAATAGTGTGATCTATCGCTCACTCATTACTAGCAAATTCAGAACAGAAAACTTCT  
GAACTTCTATAATTCTGTAGGCGATGGAGCAAATCAAATTACAATTTATGGAACGTTTGG  
ACGTTTCGGAGCCGTGGTCAGAAAACGAAAAAGAGGTGGGCTTTGCCCCACCTTATCCGAC  
CGATTCCACGGCTGGTGTGTTGACATGTGGACCCATATGATGGGGGCGGTTAAGATTAA  
CAAATCACTTCTTGATGCGGTTATCCCTCGTAAAGATTGGGGTGATACCGGACAGGATAA  
CCCGCGCACATTCTTTATCAATGACATTGTTGTTGTTAACTCAGCACCATATAACCGAAC  
TGATGTTGGTAGCGGCTGGATGGTGTATCGCGTAACCGATGTTTCCTGAACGCGGTTACTG  
CTCGGTTTCAAGCATTGACGCTAAGGTAGAGTGTGTTGAAGTTGGGCGGAAAGTGGACCCA  
CACTCATGAATCAATTGCGCCACCTGTAGGAAAGGGCGATTCTTTTGATATGGGTGATGG  
GTATCGTTGGGAATATCTGTACACAATTCCACCTGATGCGGCGATCAACCGTTGCACCAA  
TGAACATATTGTTGTACCGTTCCCGATGAACTGCGACAAGATCCGGCGCGTTGGGGCTA  
TGACAATGTGATCACGTGGTATAATGACTATAATCTTCTTTATCGGCTGAAAGTAGTAAC  
TTTGCGTTTTTCAGGCTTATATGGACTCTGCGCGATTCCCAACTACCGCGTTAGTGGGTAA  
TACTGGCTTCCGTCAGTTAGGCATTATCCTTAACCCATTGGAAAAGAAAGCACGCCCTAG  
CGATCCAGATGTTAAAGCGGTCAAAGATAAGTACCGACCGCAAGACTTAGAGCCCCAGTC  
AGGCGAAATGATCTACATGGAAAACCGACAACCTATCGTTCGGTCATTAGGTCAAACAGA  
ACTTGTCTGTATTGTTGAGTTCTAAGTGTATGATTTTAAAAGCCAATTCGAGAGAGT  
TGGCTTTTCCCATTTTGGAGTTGACGATCTTATTTGGTAAGGTATAATACACACATCTA  
AACAACTGAGGATAAATTATGGCACGTCGTAAATTTACAGATACTTGTGAAGAAATTCAG  
GTATCCCCTTGCAGTTGGGATGTGATCGCGAACGGTGAAAAGATCGGCGAGATCATCGAT  
CATACTCATTCACTAGCCGATTACACCGATGAACTATGGGAGGGTATCAACTTCATG  
AATGACACTAAACGATTCAAGACTATCGACGAAGCTATCTAATTCGTGTATAATCCAAC  
TTCGGTATGTGGGGAAGTAAAGATAAGTACCGACCGCAAGACTTAGAGCCCCAGTC  
ATAAAGCTAAGTTCCCAATGCAAAGCATTACTATGGTCTACGTGCACAAGATCCTAAC  
TCTATGGTACTCATTGGTTTTGTAAACATGATAACCAATGGCACACATACGAAGAAATGC  
ATGAGATGATGAAACAGGGTATTGAATTTAGTTGTTCTAATTATGACCATCGTATAACTT  
GCATTCGAAAATTGAAACGATGGATTTCGTAAGAATCCGCAATTTAAAAACTTTGTGTTCT  
TTATGTCTCATGTTTATTTGGGACATAGCGTTACCGTACAGCAAAGGTTAAATACTGGC  
ACGACTTTCTAAACAAGAACAATAAATTACACGATCGGGTGTGAGTTGATTTATTCAGA  
TCGCCCATTGACATATGAAGAAAAAGAATTTTGCTATAATAACTATCATGGCGATGGTCT  
AGGCGGTTTCAGGTGCATTGTTTACCCAGAAAGGGCTTGCATGGGATTTTACCATCGATGC  
ACATTGCACAGGAAAAGTATTAGATCTTTGTGCTGGGATCGGTCGCTTATCTTTTTGTAT  
GTTACATCGTTGTAAGCCAGAAAAGATCGTATGCGTCAACTCAATCAAGAATTTGCGCG  
AATTGGCAAGAGACTATTACCGGCGGCAGAAATGGATCACCAGCGATGTATTGCAATTTGA  
GTCAAACGAAAACCTTCGATGTGGTGATCAGCAATCCACCTTTTCGGGAAAATCAATACAAC  
CGACACAAAGGATGTATTTGAGTACACTGGCGGCGAATTTGAATTTAAGGTTATGACATT  
AGGCCAGAAGTTTGCCGATGTAGGTTATTTTATTGTTCCCTGCTGGTTCCGCTGGTTTTGC  
TTATTCGGCAGACCTTATTATGACGGGAGCATGAAGTATAATAAATATCTAAAATGGAG  
CAAACAAACTGGTTTTGGTGACTTACGCCGGATGGGGGATCGATACATCAATCTATCGCGA  
TGAATGGCATAGTACCAACATTTTAAACAGAAGTGGTTGAGGTTTCGGTATTACGAGAAAGA  
ATCTGTAGGAGCGCCTAAATCACGTCCTAACGAACAAATAAAAGAAAGTAAGGAGATTAC  
CTTACCGAAACAGGAAATCGAGTCTGGGACGCTCTCAGATTTGTTTGACATTTAATTATA  
AGCCGTCCTTGTGGGCGGCTTTTTTGTATGTATTCTATAAATAATACATCATAACATGAG  
GAATTAACAATGGCACAAGTTCCAAAGAAAAGAATAGACACAGGTAAGTGTGCGGCAATCC  
CAGCACCGGGGACCTCCTCTATGACGGCGGTAATAAAATTAACGATAACTTTGATTCAAT  
ATATGACGCATTTGCTGATCAACGTTTTAAAGACGTAGACCACGGCGTAGGAAGAATGGT  
TATTCATGCAACCGGATACTATCAGAAACATCCACGTCAAACCTACTCTGGTTCCGCTGT  
TGAGATTGGGAGTCTACACGTTATCGATACAACCTCAAGGCGCACTTATTGCTATTCTACC  
TAAAGCAAAGGTCGGTGAGGGTGTGTTTATCATAAATAGTAACGGTAGCCTTTC AACGAC  
TACACCGCTCAATATTCGAACTCAAGCAGGTGATTCTATTAGCGGGTATTCCGGTGATGC  
TACAATAACACAACCATTTTCAAAGTCACTGTTTGGTGTACTGCCGTTGAAGGTAGTCG  
CGTAACATGGCGATTGGGTATCGAAAGTATGTTTACCGATACAACAACGCCATTAGATAA

AACAGTTAACGTAACACTGGAGTAGCAACAAACGTTGCAATTGCTGCAAAAACAGAATACGT  
TTCCATCAAATTATTAACACTACCGCTAGCAATACATCCGGTTCAAAAATGCGTTCAAGTGA  
AACCCACTGATGATCGATTCTAAAGCCGGAAAAGTTTATGCGACGGAATATGCAGTTTT  
GCCGAAGACAGAAGACGAATTATACACGGTTCGTTATTTTCATCGGTTCCGGCGATAAAGT  
ATATGCAGAGTATAAGGCTACTGGCGAAAATATTCGTTTAGAAGTTAAAGCCGTAGACAC  
AATTA AAAATCGGGGTTGCTACATGAAACAATTAATTAATATCGGTATCGTTGTTGATGAC  
GGTACAGGTGATTATCTAAGAAAAGGCGGTCAAAAAGATTAATGACAACACTTTTCTGAACTT  
TATGCTAAGCAGGGGGATGGTGATATCCCTCATGCATCCGGCGCGTGGAAAACACACA  
CAACCAGTATTA AAAACCAAATTTTGGTGATGCATGGGCGATTAATACAACGAACAACGCT  
GTTTCTGTTGAATTGGCTAAAGGTGGAGTTGGTGATTATAACAAGACAATTA AACTTCGT  
GATGTTTGGCGCTCGTGGGCGTCTCATAACGTAACACTTAAGCCAGCACAAGGTGATACC  
ATTAAGGGATCTCCAATCGACCGTGAGTTGTATAAAGATTTTATGGATGTTGAACTGGTT  
TATTGTGCGCCTGGACGCTGGGAATATATCGAAAACAAGCGAGTTGACACGATCAGCACG  
TCTGACCTAAGCACAGTAGCTAAGGAGGTTTATGTTGCCACATAAGGGCAAACAGATTC  
CCTAATGTATTTGGTTATAACACATATAACACTCGAAATGTTGAAGTATATTATTGAGGA  
AACCTTTTATATTATGGCAAGTCTGTTAGTAATGACTCTAACTACGGTTCAATTGGTGAG  
GATGGATCACTTGTTGAACTTGATGGCAAAGCATAAAAACCTTCGTTTTCCTTGTTCCGGCT  
GGGGATACCGTCCAATTATTACATATATGGACGGAATTGCATCATTCCGATCTAGTTAC  
ATCACACACACAATTAGAGTGTATGATACCGGAATGACAGCACTAGAAACTATTCCTGGT  
GAAGTGTGGGTAGGTGATTTATCGACGAAGAAAGAATTTACCAATGCTGATTTGGGAGTT  
AGTAAACGTGATATAATTAACCCAAATTCATTTGAGTTATTAATAAATGGTACTCAAATG  
ATTAAGCTGGTGATGCGGATCTTCCTTCGTTTGTGTTGTGAAGGTGATGACTGAGAAACC  
GAAGAGAGTTGCGCACTTGCGGGCGGTCAAGTGGGTACAGTCTGGAGAAGATTATTCAGTG  
GTATTTGATGAGAATAGCATTGTAACAGGGATTA AATTATCTAAAGGGTTGGACAATAGG  
GATACTATAACAATTCGTTGGTTAATAACGATATCGGAACTCTATTAGAATGGGATGGT  
GTCGGCGGAATTAAGAAAAGCAGACAAGATTTATCTCAATAACGAAGACGAAGTTAAT  
TTAACA AAAACAAATTGAATATACCGACTTCCAGAATCCTAGCCAGAAAACATTCGTCCG  
GAGGAAGAGTATTCAAGTCGAATTATGGATATATATGCACTGTTTGATATTTTCCATCCG  
ATCGGCACGATATATGAAAACGCACATAACCAAGCTAACCCAGCGACATATATGGGTATT  
GGTATCTGGGTTCCGGTATGCGGAAGGAGAATTACTAGCTGGTTGGTCTTCCGATGCCAGC  
GACCAGAATTTTGCATTAACAATAACGATCTTGATATTCATGGACAACCTACACACACC  
GCTGGTGGTACTGTTGGTGAAGTTGCCTATCAATTCAAGAAAGATATGATTCCTGAATTA  
CAATCCAGCGATCGTGTTTTGGTGAAGACGATACAGGGTCAATTATCATTGGTGGTTGT  
CAAGTTGACCCTGATGCGGCAGGTCCAGCGTTTACGAAATATAGAGAGGATATCGTAAAA  
GTTAATACTGGAAATGCTGATCCATCAATGATGGGTATTCTTCCTCCATATCACACCGTT  
CATCGCTGGTGAAGGGTAGGTTAATATGATTTCTCAAACGCGTTCTAAAGCAAGCGTATT  
TTCTAGCGACGCAGCATTCAATTCATACGATCCAGGGTCTAAAGACCCCATTTATTGGTGA  
CATTGCCCCAATTGGTGGATTAAACGTAGACCAATCTCGCAAAGGTTCTTTTATTAACAA  
CGTACAATCAGCCATTGATGATTTGTATAGCATTCTATGCTTAATGTCGGTGATGTATT  
GGTAACTACAAATTCAACTCCACCGGAAGCGGCGGGACAAATAGAAACTCTTTCTTTTAC  
TGGAACGGTAACAAATAAACACGATCCAGCCGCGAAAAAAGTTGTGATTGAAGTTTTCGG  
TTATCCATTTGTTGTTAATGTTGGAACATCGAATGTTGCATTATGCGAAATGGTCACAAC  
AAAATTTACTGAATTGGAAGACAAAAGCATCCTGTTCTCTAAAGTTCAGAGGAAAGGCAC  
TGGCAACGATCAAATAGAGATTCAGTATATTGATTCAAACGCACACGAAGCAACGGTCTG  
AGAAAAATATGGTATTAGCGTTCATGGGGAAATAAATTCCTGCTTGTATTGGTTATGG  
TGCATGGGTCAGATTGGGAACGGAAGAAAATTTGATTCAACACTATTTTATTTAAGCG  
TATTGCGTAAGGTCTAGAATTATGAATAACACTATTAATCACGTAAAAGACGATGCACAG  
TATGTTAAGTTTGACCCTACCGGAAATTGGCCTAGCAATATAAAAAACGTACAAGCGGCA  
TTAGCCGCTATTCAGGGATTTGCTATTGCAGGTCTTCCAACGGCAACCGAAGAAACAGCG  
GGTATTGCTGAAATTGCTACTCAACAAGAAGTAGATGATGGGTTGGATGGAACATAAATT  
GTTACCCCAAACATTGGCTGTTAAGCTGTCAAGACCGGACGCAACAAAATTTGTCAA  
GGGATCACTCGCTATGCTAATAACGATGAAGCTATGGGCGATACTCCAATATTGCAATT  
GGTCTGATACATTAACCCATGTATTCGAGAATAAGAAAGCAACGGAAACTGTACAGGGT  
ACAATTA AAAATCTGTTCTATGGATGCGGCAAAAATCGGTAGTGATGATACTATGGCGGTC  
ACGCCTAAAAGATGCACGCTGCTATTGCTCAGAATGTTACTGGGTTGATTCCAGAACAA  
AACACGGCGACCGAGTCCCGTGAGGGTTTAGTTGCGACTGGCGACAAGCCACCAAACGCTT  
GCTGGTACTATCAGAGAAGGATTTGCCGTTAGCCCATATGCATTTTCCAACGCAAGAGCC



AATGAAAATCAGGCGGGTACTGTTAAAATTGCGTCATCCCAACAAATGATTGACGGTAAT  
GACAACACAGTAGTAGTATCAGCACAAAAATTTGCGAACACTAAAGCAACCACTGGACAA  
TTCGGTGTGTTAAGCTAACAGATAACCCAGGATCAGGCGAGGCAAACACAGCACTGTCTG  
GCAAACGCTCGTGTATCGCCTCTAAGTGATGGTGTCTGTTACTGGTGATGTGTATCGTCAT  
AGTGGAGGCGACGGAAACCAGTTTATCATTAAAAATGAACTGGATGGTCTTTGTATGCC  
ATTGGTGGCATCATTCTTACAGCATTAAACAGTTCCGACCACGCACACTTCAAATCTGC  
AACGGTCAATGATTAAATAAACACCAATATCCAGTATTATTTTCACGAATCGGTTTCACT  
TACGGCGGAGATGGCGGAGACAACCTTGTCTACCCGATATGCGAGGGCTTGTGCTAGA  
GGATGCGACCACGGTCGAGGACTAGATCCAGGTCGTGGATTTGGTACTTATCAAGACGAC  
ACCATGCAACATATGACAGGTAACCTCCCTGTAACCAACCGTTGGCGAGGTTGGACTGGT  
GGTGTATTTGCCATCACAGGCGGTTAATGGAGCACGAACTATAAAAACGGTGGTGGTGAT  
GATTGGGGTAGTATTGTTAACTTTGACAGCGCAAGACAGGTTAGAACGTCTGGCGAACT  
CGCGTTAAGAGCCTTGCATTAACTACATGATAAGGGTACAATAATGATCGAACAGTTAA  
ACATTCGAAAGATCCCTAACGTTCGATGGTGTCCCTGGAGAGGGACAGCATTCTATTAGCT  
GGATTA AAAATGGTGAATGTCTAAGCGCAGGAACCACAGAAACAGGACACGAGGGGACGC  
TTAACCGCGCCCCTTATGCGATTCAAGAAAATATTGTTTCGTCTAGATGAAAATTCTAAGA  
CAACGGTAACAAAAGTTAACGAAGTTGATACAGCAGTTAATGATATTA AAACTACTTTAG  
GCGCGGTTGCTGATGGTAGTATTATTGATATTGTCAATCAA ACTATTGCAAAGGTTGATT  
CTGTAGAAGAAAATATAGGAGAACTTCAAAGATATTACAAACCACAGTAGATGAATTGG  
CAGAGACAGGAAAGAAAATTGGTGTTCGTCCGGCAGCAGCTCCGAGTACACGAACAATAT  
ATAATGATATTTCTTTCATCAAACAAGAATTGGGCGCTTTCCCTAACTTCAATATCAACG  
GTTCTCCAGATACGGGTAGTTCGGTTCGGGTATCAAATATCGAGTTATCCAGAATACGG  
AAGCATTAAACAACCACGGTCAGCGAATCCGCCAACTAGAAAACGACTGGCAAGATTCTG  
ACGTTGGAGAGCTAACAAAACAAGTTAACAAAGATGCGAAGCGAGCTAGGCGATACATCAC  
TAGCAACACAGGACAATGTTTATCTTCGTCTTCGCACAAATACTCGCAATATCGCTAGTA  
TATCAAACGAAGTTAAAGAAGTAAAGAAAGCGATTCTATTTGAATAAATTCCTGATATCG  
GGACTAAAGTAACTAAGCTACAATCTGATTATACACAGCTAAATGATGAAGTCAACGGCG  
TTGACGCTGGTATCCGTCCTCGTTTAACTCTTCTGGAAAATAATAATGGCAATCCTCAAG  
CCGCTGGAAGTATTGATTATCGATTGACTAATCAAGATCGGGAATTTGTAGATCTTAAAT  
CTGTTGTCTGGTGTAGTGGTGTCTGCGGTCTACGTGGTGAGGTTGCACGAATCTCTAACA  
CAGTTGGTACTGATAGTGAGCGTCATACTATCGCAGGTCGTCTAAAATCGTCGAAAACA  
CACAGGGTCGACTAGAAGCTAGCGTAAAGGATATCGAGCAAATGATCGGCGATCGAGATT  
CCGGTCTAGCCGCTGGGGTTATTAAGCTGTCAAGCGCCATGTACGGCAATCCAGAAGGAA  
GCACGCAGCTTGAACAAGATGGGATCGTGAAA ACTGTTAAGGAATTGAGCACATCAGATG  
CAAGCAAGGTAACAGACGTTCTGATGATGGTTTCCATTGTCTACGTAAGCACGGGGAAT  
GGGTT CAGGTCGCATGGGCGGCTGGTGCATTTAAAACACCGCTCAGATTGATATTACTC  
TCGACGGACAAGATCAATACAAAGGAATCCCGCTAAACGATATGACCGAAGAAGTTCTG  
CGCGTGGAATGGTTAAGAGCGAATCACTTGTTACGGTTAACGACAAAGGCTTATTCCGTT  
GTGATTTCCGTTGTTCTGTAAATGCGGCACATAACGCTACTTTTCGTAGTCGGTATTCCTA  
AAAATGGTCTGATTGTACATGAGGTACGGAATGGTCATTATGGACCTGATGATTTAATTA  
GCTATTCTACCAGTGT TTTCTCTAAATATTGAAAAGGGCGACCGGATCGATATTTCGATTA  
AGGGCGTATCCGAAGAAGCATTAGCGCAACAGCTACAAATTAAGAGTTCTCTTTGGAA  
TTTCTCCGGTATAAGAAATTAAGGGGCGTTAAGCCCCTTTTTCGTTTATAGGTGATATT  
ATGTCAGGATATGTAACCAATAACCAAGAGAATTA AAAAGACGCTATTCTGCGTCGTTA  
GGCGCACCAGTAATTAACGTAGAAGTAACAGAAGACCAGATTTACGATTGTATTCAGAGA  
GCATTAGA ACTCTATGGGGAATATCATTTCGATGGTGTGAATAAAGGATATAAAGTATTT  
CGTGTTAGTGCAGAGCAAGCGCAACACGGGGTATTTGATTTAAGCGATTCTGGAGTATTC  
GCAGTAACTAAAATAATTCGAACAAACGTAGGTAGCGCGGCTACGATGGATGGTACTGCC  
GTTTATCCGTGGTTTACTGACTTTCTGTTGGGTTAAGCGGGTGTAAATGGCGGTTTAGGA  
TCTGGCTGTAGTAAATTTTATGGACCAAATGCAATGGGCGGTAATCTAGGATATTTCGAA  
CAGCATATGAGCTATCGAGCCACTATGCAAAAATATGCTTAATCCGCTGCCAGATTATTGG  
TATAATAGCGCAAACGGACA ACTTAAGATAACAGGAACTTCCGAGAAGGTGATCTCATT  
GTTGTTGAATTATATGTTAAAAGTTATCTTGATGTACCTGATATGATCGGCGCGGTTGCT  
GGTTATGCTCATGCGGGAGGATGTTCTACCGCTGGCGGGATTAGCGCCGTTTATGATAAC  
CCC ACTGCTGGTTTAAAGCGGGATTGTTGCTGCCATGGGACCGATCCGTGATAACAAGCAG  
GGCGCATATAATAACCGTTGGGTTAAGACTGCGCGACTGCGTTTACTCGTTAGCTATGG  
GGGCAGATCTTAGCTAAACATCAAGGGTTGCAATTACCAGGTGGTGGCACTGTTGATGGG

GTCGGAATCATCGAAGAAGCACGCGCGGATATTGAGAAATTGCGACAAGAACTACTTGAC  
TTAGATCCTCCGTTCCGGCATCCTCATGATTTGATTTATTGGGGGAGGATTCCCCCATTTG  
GAGTAACATATGTTTAAACAAGACTCTTTTTGCTCGCCTTGAATCGCAAAGGTTTATGAG  
AATACTACAAACCGAGATTCTCAATCCTTACGTAAATTTCAACCGTCATACAAACACC  
CAGACGTTAGCCGACGTTATGGTCGCCGAAGCTATTCAGATGCGAGGTGTAGAATTATAT  
TACATCCCTCGTGAATTTCTCAAACCAGATATGATCTTTGGTGAGGATGTTCAAAGCAA  
TTTACTAAAGCATGGAAATTTGCTGCGTATATAAACTCTTTCGACGGGTATGAAGGTGCA  
GGAAACTTTTTTCAATCTATGGGTTACAAGGCAAACGACGAATTAACGTTTACGGTGAAT  
CCTAACCTATTCAAGCATCAAGTAGATGATCAAGAGCCAAAATCAGGTGGCTTGATTTAT  
ATTCCAATGAGTAATGATCTCTTTGAAATTAATTACGTCGCTCCATATCAGCCGTTTTTT  
CAGGCTGGCAAAAATGCCATGCGTAAAATTATTGCAGAGAAATTTGTGTATAGCGGTGAG  
GAGTTGCGACCAGAATTACAACGCAATGAGGGAATTAATGTTGATGAGTTTGCGGATTTG  
GATCTTGACCGATCACTAATCTGGACGCGTTAACAGATATCAACTTAGATCAGTACAAA  
GAAGATAAGCAATTCAGAAGCGAAGGACAAGATTTTATTGATCCGTTTGATCCTATTAAT  
GGCAAGGGTTCACCTTTCTCCGATTTTTTGATAAATACTTGTATTGATATAATATTAGGAT  
CTAATGACTTATGAAAACTATTATCTATACGAAATAAAGAACAATATAAATGGTAAGAT  
ATATGTTGGCATTCTGTTGGTATGATGGTGACATAAGTCAAGATCCTTATACGGGTAGTGG  
ATTGACTCTTAAGAGGTCTATTA AAAAGAACGGGATAGAAA ACTTCACAAAACAATTCT  
GTAAACGTTTGACTCATGGAAAGAGGCAAGGAAAGCAGAAAGAGAAATAGTTACAGAGGA  
ATTTGTAAAAGAGAAGAGACCTATAATGTTTTCGGTTGGTGGACATGGTGGAAATACTCA  
CGCTGGGATCAGCGAAGAACGAAGAAA ACTTGCAAGCGAAAGACACGCTGAAGCAAACCG  
AAATAGCGTATGGAAGCAAGAATCTAGAGATAAGGTTAGCGCAAGATTCAAAGGTCATAA  
GCTATCACAGAAGCAGATAGACGCGCTAAAGAAGGCAAACACAGGAAGAAAGTTCACAGA  
AGAAAACAAGTTCAAAATAGGTAAAACGTGGCGAGGAAAGAAACGAACAGATATAGGAGA  
GAAGGCTGCGGCAAATTAACAGGGAGAAA ACTACCCCCAGAACATGTGGCAGCAATAAC  
GCAAATAACCCGAGAGGAAAACAACACTTTAGAGCAAAGGATTCTTCATCGACGATAT  
GGAATTTTATATTTTGAGTAATGCAGCTATAATGTTTGGTATAAGTCATAAAACGGTTAG  
AGCTAGACTTCTCTCAGATAAGTTTCTACATGGAGATATGAATAAATGTTTTACATTT  
TTACAATTCGTCAATTAGAAGGTATATTGTATTGCTGGGTAATTTATTACCCGGCGTACA  
AATTAAGGGGTGCGTAGTGACGGTGAGCGTTTTATTAAAGTTCCTATCACCTACGCAA  
GAAAGAAAATATCATGATGAGTCCGGACAAATATAACAATATCTTAAGCGAGGAAGACGT  
CGCAAAGGTAGAACTATTTTACCTCGTATGTGTCTTTCTTTGATTGATATGACATACGC  
CCAGA ACTTTAAAACCAATATTGCAAATAAGACAGTACCAAATATACGGCTGATGGAAT  
CAGGAGCGTAACACAATATAATCCTGGACCATATAAGTTACTTTTCGAGTTAGGGATTTA  
TACGCGTAACGAAGATGATATGTTTCAGATAATTAACAGATTCTTCCTTACTTCCAGCC  
TCATTTTAACTGTAAGATTAAGA ACTACACGGTAATGATGTATGGATTGATCGAGATAT  
TCAGGTACAATTAGTTCTATTACTCCAGATGAACAGGTAGGCGAAGATAAGTTTTCTCG  
TCGTCGTCTTGAGTGGACCATTATGTTTACTTCATCGGGTTTATCTATCCTCCAGCCAC  
CGACGTTAAGGGGGAAATCAGAACGATTTATCTTGATTTTCATGCTAATTCTCGTAAATT  
AAATCCTAGCGGTAATTTTGAATCAGTGGATCATGAAGTTGTTAAACGTGATGTTGAGCA  
AGAAGAATGGGACGGA ACTATCAAAGAATCATATTCTAGTGATATTCCAATACCAGTTGC  
ACCGACTCCACCGGGTCCACGTATTGTAAGAGAATTTTAAAGAGGTAATTTATTATGTCAG  
ATCTAGGCTTAGATATGAAGCAATTAATGAATTTTCGAAAGTCTAGGTCTTCCGGGGTCAT  
TCGACGAGGAAGAAGATCGAGTGAGCTATGATCCGCTCGTCTTGACTCCGGTTCGAAAGCC  
ATCCAGAAGATCGTAATATTGACTTACAACGAGATTATAAGGAGGCACGTCAGAATATTC  
ATTTTCAGAATCAGATGATGATGGACGCCGAAAAGATTTATCTTGA ACTTGCTAAAATA  
GTGAGTCTCCAAGGTTCTACAGGCATTTAACGGCCTCATGCAGCAAATGAACAACAACA  
ATAAAGAATTGCTGAACATCCATAAGGATATGAAGAAAATCACCGAGCAAGCTGGAGAGA  
AAAAGAAAGATAATACCCAGCCGCGCCAGTTAATATCCAGAATGCGACCGTCTTTATGG  
GTTCTCCTAGTGATTTAATGGATGAAATCGAAGACGAGGAAGCGCGAGTTATTGAAGGCG  
AGACAGTATGAGCGTGATTGAAGGGATTAACGCAATGGCGACGGATGAACACCCGCTGCA  
TTTAGCTCATCCGTCTCCACTAGAACTAAAATTGATTCAAATGGTATTGAATGGATTTT  
ATCAATGCATGATGATAAATGGTATCCTAAAAGTTTTCTGACTATCTGAAATTAACAG  
ACCGCAGAAAATAAGGATGCAAAGCACTGATCCAACAATTATAAGTTCTATAAAGATAG  
TGACAATATCCGCACGCGGTATATGCGGTTAAAGA ACTTGCGAAGGGCGAATATTAAAC  
TCAGTATACCCCTGAAATGATCGCGGAGTGGAACAATGCCGTAAAGATATTGTATATTT  
CGCAGAAACCTATTGCGCAATTACACACATCGACTACGGTACAATCAAAGTACAATTGCG

TGATTATCAGAAAGATATGCTTAAGATCATGCATGAAAACCGCATGAGCGCCATAAACT  
CAGTCGTCAGCTAGGGAAAACCTACCGCTGTAGCAATATTCCTTGCTCACTACGTTTGCTT  
TAATAAAGACAAAGCGGTAGGTATACTGGCACACAAAGGATCAATGGCAGTTGAGGTTCT  
AGAACGTACTAATCAAGCAATTGAACTATTGCCGGACTTCTTCCAGCCTTGTATTGTAGA  
ATGGAACAAGAAATCTATTGTGTAAGAAAACGGGTCTAGTATCGGCGCTTATGCATCGTC  
ACCAGATGCGGTTTCGCGGAAACTCCTTTAGTTTCATATACATAGACGAGGCAGCCTTTAT  
TAGTGCGTGGCAGGACGCATGGTTAGCTATTCAACCAGTTATCTCATCCGGTCGTGAATC  
TAAGCTGCACATGCCAACAACTCCGAACGGGCTTAATCACTTTTATGACATTTGGCAATC  
AGCCATTGATGGTAAAAGCGGTTATGTACCTTATGAGGCGGTTTGGCATTCTGTAAAGA  
ACGTCTTTACAAAAAGCTGATATATTCGATGATGGTTATGAGTGGTCATCTCAGGCGAT  
GGCCGGATCTAGTATTGAGCAATTCTTACAGGAACATAACGCTGAATTTTCCGGTAGTTC  
CGGTACTCTGATCAGGGCAACCACTATCAAGATTATCATTTATTGACGTTGTTAATGA  
AACGGGTTTAATCAGTTTGAGAAACCGAAAGAAGGTAGAAAATATGTTGCTACACTAGA  
TTGCTCAGAAGGTTCGAGGACAGGACTATCATGCAGTGCAAATCATTGATATTACAGAATT  
TCCTTATAAGCAGGTTGCAGTATATCACAGCAATACTACGTCCCATTTTATATTACCGGA  
TATTGTCTTTAAATATCTCATGATGTATAACGAATGTCCAGTTTATATCGAGCTAAATAG  
TACGGGTGTATCTATTGCTAAGTCTCTTGCATGGATCTTGAATATGATAATACTATTTG  
CGACTCATTCATAGATCTAGGGATGAAACAATCCAAAAGATCTAAAGCAATGGGATGCTC  
GGCACTAAAAGACTTAATAGAAAAAGATAAGCTGATCATTAAATCATAAAGGAACTATTCA  
GGAGTTGCGCACATGCTCCGAGAAGGGAGTAAGCTGGGCGGCAGAAGAAGGTTTTACCGA  
TGATTTGGTCATGCGTCTGGTAATATTCGTTGGTTAACAACCTCAAGAAAAATTCGCCGA  
ATACGCAGGAAAAGACGAAATGCGGATCGCCTCCGAAATATTCGAAAGAAATTAGATGA  
ATTGGGGGAAGAATACGCGCCCGTGGGAATATATGACGGTGCAAACGGCATCGAAGAATA  
TAGGCCGCGTGAAGGTCTAACAATGATCTAAATACGAGAATGCATAAAAAGATGAGGAAA  
TTCTGATGACTCTATTATCACCGGGTTTCGAAACGAAAGAACTACTCTCTCCACTACCA  
TTGTGCAATCTGCGACTGGTCGCGCGGCGCTGGTAGGTAATTTCAATGGGCTCCAGCTT  
TCCAGATTGTTCAAGTAACTAATGAAGTTGAATTAGTTAATAAACTTGGTCAGCCGGATA  
ATAAAACCGCAGACTATTTTATGAGCGGGGCTAACTTCTTCCAATATGGCAATGACCTGC  
GTGTTGTTTCGTGTACTCAATCAAGAAAAAGCAAAAAACGCAACTGCCCTAGCTGGTAACG  
TAGAGTTTGAAATCACAAACGAAGGTTCAAACCTATGAAGTATGCGATACCATCAAGATTA  
AACATAACCGTCAAGATATTGAAACGGCAGGTAAGTAACCAAAGTTGATGGTGTATGGTA  
AAGTTAAGGGCGTATTTATCCCAACTGGTAAAATTATCGCTCACGCTAAAGCAATCGGCG  
TATATCCAGAACTTGATGGCGGTTGGACGGCAGAGTTCACTTCTTCGTCAGGTAACGGTA  
GTGCGGCGTTGTCAGTAACTAAAATTGTTACCGATTCCGGTCTTCTCTTAAACGGATCTGG  
AACTTCCCGAGCCAATATCACCAATCAAGATTTTTTGACAAAGCTCAAAAAGTATGATA  
TGCCAGCGGTAAATGCAATCTATGCTGGTGAGATCGGCAACTCTCTGGAAGTTGAAATTC  
TGGCACGTAGCTCGTTCAGTGGCGCGGTAGCACCTGAATTAATTAATGATCCGTTCCGGCG  
GAACTCGTGCCGCAGCACGCAACCTAATTCATATGGACCGCAGAATGATAATCAATATA  
CGTTTATTGTTTCGTCGAGATGGTGTGTGGTAGAATCCTATGTACTGTCTACTCTGAAAG  
GGGATAAAGACGTATACGGCAATTCTATCTACATGGACGACTTCTTTGGTTCGTGGTTCTA  
GCCAGTACATCTATGCAACCGCTCAAGGGTGGGTAGATGGTTTCAGTGGTATTATCTCTC  
TTGCTGGGGGTGTGTCTGCTAACGAAGCCAGTACGGGCGACCGTGGAATGATCCGTTCA  
TTGGTGCGATGATGCAAGGTTGGGATCTGTTTGCTGAACGAGAATCTATTACGTAACC  
TGTTGATTGCTGGTGCATGTGCTGGCGAAGGCGATGCGTCTCTACCGTACAGAAACATG  
CTGTTTCCATCGGTGATGAGCGTCAGGATTGCTTAGTAAGGGTTTCTCCGCCGCGTAGCA  
CTGTTGTTAATATTCGGTCACTACCGCAATCGATAATCTGATCGCATGCCGAGAAGGAA  
ATAGCAATTATTCAGACAACAACATGAACATTAATACCACTTACGCGGTTATTGATGGTA  
ACTACAAATATCAGTATGACAAATAACAACGACGTACACCGATGGGTTCCGTTGGCTGCTG  
ATATTGCTGGTTTGTGCGCTCGTACTTATGCTGTATCCCATCCGTGGATGAGTCCGGCAG  
TTTATAACCGTGGTCAGATCATGAACGTGGTTAACTGGCTATTGAGCCTCGCAAGGCAC  
ACCGTGATCGTCTGTATCAGGCTGCAATTAACCCGGTGATCGGTGCTGGTGGTGAAGGGT  
TTATCCTGATGGGTGATAAAACCGCTACGACTGTTCCCTAGCCCGTTTGACCGCATTAAACG  
TTCGTGCTGTTTAAACATGCTGAAAAAGAATACCGGCGATTCAAGCAAATACAACTAT  
TTGTAAACAACGATAACTTTACTCGCGCTTCCCTCCGATGGAGGTTTCGCAATATCTCA  
GCACGATTGCTCTCTTGGTGGCATTATGACTTCCGAGTACAATGCGACACCACGAACA  
ACACGCCGGATGTAATGGATCGTAACGGATTTGTTGATGGTATGTTTCATCAAACCAGCAA  
AATCGATCAACTATATCATGCTCAATTTCACTGCTGTTGCAACTGGTGTGATTTTGACG

AAATTATCGGTCCAGCTAACCAGGCATAATCAGTAAATTAGCATAGATTA AAAAGTTAAAT  
CAAGCGGGGATTTTCTCCCCGCTCTATTAAGGAATATCAATTATGGCACTCGATTTGAAT  
GATATTACACGCGGTTTCGAGTCTGACGATTTTGCTCGTCCTAACCTGTTTGAAGTTGAG  
ATCCCGTATCTGGGGCAAACCTTTAAGCTGATGTGTAAGGTTGCGACTGTCTCGGCTGCT  
ACCGTAGAAAAAATTGCTGTAGGCTATCAAACCGTAAAATTAACATCGCTCGCGACCGT  
GTATACGACGATTGGACCATCACTGTATTCAACGATGACGCACACAAGATCCGTGATGCT  
ATCGTTGCATGGAGCGATCAGACACATGGCACAGGTTCCGGCGATCACTGGTGCAACTCCT  
GCACAGTATAAGAAACAAGCTATTGTTCTGCTGACTTAACCGTAACACCGAATCAACTAGC  
GAAAAAACATTGTACGGTATTTTCCCGACCAACGTTGGTGAAGTAACCCCGATTTGGGA  
CAAACAACGAAGTTGAAACGTTTGAAGTTACTTTTGCTATCGATTGGGTACAATAAATA  
TATTATCATGCGGGGAGAAGTTCCCGCTTAATTTCTCCCAATTCGAGGTGAATAATGTT  
TAGTAGATTA AAAATGCTTGC GCGTTGGGCTGATTTTGACAACGACAAATACGAAGATCA  
AATTAAGATAAAGCAGAGTCTATCGCCGCACCTAAAAACAATGATGGTGCTACGGAAGT  
AGAAATTAATGATAATTCACCTTCTAGCGCGTGGCACTCTATTACCCAGCAATTTTCCAG  
CACCGACCAGAAAATCAGCACA ACTAAGCAATTAGTTAACACATATCGCGGGTTGATGAA  
TAACAATGAAGTCGAAAACGCTGTACAAAATATCGTTAATGATGCGATTGTATTTGAAGA  
AGGTCATGAAGTTGTTTCATTAAATCTTGAGGGCGACTGGCTTTAGTGAATCTTTAAAAGA  
GCGCATTTCATGAAGAATTTAAAGATCTTTTAAACACTATCCAGTTTGATAAGCGTGGTCA  
GGATATGTTCCGTCGCTGGTATGTCGATTTCGCGTATTTTCTTCCAAAAAATCATCGGCAA  
AAATCGAAAAGATGGTATCGTAGAATTACGCCAGCTTGACCCACGAAATCTTGAATACGT  
TCGAGAGATCGTTACAGAAGACACACCGGAAGCTAAAATTTATAAAGCAATAAAAAGAATA  
TTTCATTTACTGTAGGCAATAGCTCTTATTGGGCAGGTGGTCAAGTATTCTCTCCTAA  
TAGTCGCGTTACAATCCCGCGTAGTGCTATTACATACGCTCACAGCGGCTTGATGGATTG  
CGATGATAAATATATCATTGGTTATTTGCATCGGGCTGTTAAGCCAGCAAACCGACTTAA  
ATTGTTGGAAGACGCAATGGTCGTTTATCGTATCACGCGTGCACCGGAACGCCGAGTGTT  
CTTTATTGATACCGGAAACATGAACAACCGCAAGGCTGCACAGCACATGAACTCAGTGGC  
ACAGTCTTTTAAAACCGCGTTGTTTATGATGCATCGACTGGTAAACTTAAAACCGCA  
AGCAAATCTATCAATGACAGAGGACTACTGGTTACAGCGTCGAGATGGTAAAGCAATCAC  
CGACGTTACTACTTTCCCGAGTGCATCCGGTATGAGTGATATCGATGATATTCGCTACTT  
TAACCGTAAATTGTATGAAGCGTTGCGTGTGCCATTGTCACGTAGCAATCTCTCCGATGC  
TAATATGGTGATCGGTGGTGTATGGTTCAGAAATTA CTGCGATGAGTTGGAATTTTCGAA  
ATTCATTAGA ACTCTGCAATCACAGTTTTTCGGAAGCATTGCGCGATCCTCTGAAATATAA  
TCTGATTCTCAAAAATGTACTTACGGAGGATGATTGGGATCGTGAAATAAATAATATCAA  
GGTGGTTTTCCATCGGGACTCTTACTATACAGAAGTTAAAGACGCGGAAATTTTAGAACG  
TCGAATCGGTCTAATCGAACGTATTACACCTTACAATGGTAAATATTTCTCTAACCGAC  
AGTGCTGCGTGACATTCTGAAATATACCGATGACCAGATGGACACCGAGAAGAAACAGAT  
CGAAGAAGAAGCGAACGATCCCGCGCTTTAAACAAACTCCCGATGAAATAGAGGATTTTAA  
AATGAAACAATTTATCGAAGCAATTA AAACTCGCGATCTAACGTTGATCGAAAAAGGATT  
TGATAAGATCATGGAGGCTAAAAAAGCCAGATCATCGAATCCCGCGTACCGAAATCGC  
ATCCAGTATCATGATCGAAGGTGAAGAAGAAAAAGACCGCGGTGATGAAGAAGATATGGA  
AGATGAAGATCAGGACGTCGAAGATCGCAAAGACGATAAAAAAGACAAAGAAGACGACGA  
ATAATAGGAAGCCAACATGATTAAGATTTTACACCTAAAGCTGACTTAGAACTTTTCT  
GCCGGAAGCACAGGAAAAATTGGACATGTTGGCTATGTTTGAGTCAGAAGAACTATTGAA  
AATCGTTGAAGGTATCTCCGAGGATGAGCCGGA ACTGGCGGTAGCAATGCTGTCTATCAT  
CGACGGAATTACTGTAAATGAAGCAATGGTTAAACATGTAAACGCACGCGGGGAAGTCGA  
ACGTAAGAAAGATCGCAAACCCGTGAGCGTAATGCTTACATGACTACTGGCCTAAGCAA  
AGCTAAACGCCGTCAAATTGCCCGTCTGTGCTGCAAAAACCAAACGTGCAAATCCACCTAT  
CGAACGTATGCGGAACGTAAGCGCAAAAAAGCAATGCGTAAACGTAAGGCGTTAGGATT  
ATAACAGGAAACAACATGGAAAAGAACGAATTACTGATCGAACAATGGGGCGTTCCTTGT  
GCTCGCGGTAGTTCGTCATTGCTTGAATCATTTGATGATAAGGGTACAGGAAATCTCTAT  
ATTCAAGGGATTTTCTGCAAGCCGAAACGGTAAACCGTAATAAACGCTGGTATCCTCGC  
AGTGTTCTAGAAAATGCGGTTACTAAATACATACATGAACAAGTTGAGACACATCAAGCT  
CTAGGCGAACTTAATCACCCAGCAAGAGCAATGCCAGATCCATCTAATGCTTGCATCATG  
ATTGAAAAATTGTGGTGGGAAGGTAATAACGTGATGGGTAAAGCCCGTGTATTGATGGG  
GATAAAGGCGCAGGTGATAAACTTGCTGCACTGATTTCGCGCTGGCTGGATTCTGGCGTT  
TCCTCCCGTGGATTGGGTGCGTTGAAAGACTCTGGTCGCGGATACAATATTGTACAGGAA  
GGTTTTGTGTTGACGGTTGGTGTGATGTTGTTTGGGGTCCGACCGCACCGGATGCGTGG

GTAACCTCTGTGGTTGAGTCAACGGATAGTGATTCTAGCGCGTAAGACGCACCAGAAAGC  
GATAAAACCGAAAAAGTGCCTAACCTACAGCGTCACAACAAAACATCGTTCGAATCGAAT  
AATATCGCGTTTATGGCGCTCGCAGAAGCGTTATCTAAACGCTATAAATAATAACGGCGT  
TATCAACAAGAAGGTTATAACCATGCTTAAAGAAATGCTGCTCGAAGAAGCAAAACAGAT  
CACCGTAGACGTTGCTCTCGATGACCAGTTTGAATCCGTCGAACTGTGCGCCGGAAGTAAA  
AGAAAATTTTGGTTCTATCTACGCTCAGGCGGTAAGGCTAATGCTGTTGCTCTGGCAGA  
AAGCCACATTGAAAAAATCGCCGCTAAAGCCGATGAACTGGTAGAATCAAAGGTGCAAGA  
AGCACGCACCGAGATTGAAACCAAACGTACGAAGATGCAGATAAATTCCTGAATCACTT  
AGGCGCTCAATGGCTGGCAGAAAATAAAGAAGCCGTTCCCGTAATATTAAGCGGATCT  
GTGCGAATCCCTGATTGGTTCTCTGAAAGATGTTTTCGTTACTCACAATGTTGTAGTGCC  
GGAAGAATCTGTAGACGTTGTTGCTGAACTTGACGAAGCACTCAAAGAAGAAAAAGAAAA  
AACCTCCGAACTCTTTGATGCCAACTGCAACTTGAAAGCGAAATTCGTGGTATGAAGCG  
CGAACAAGCGATCAATGAAAGCACTCGTGATCTTTCCGATACTCAGAAAGAAAAAGTAAAC  
CGCGCTGATTGAAGGTCTGGAATAGAGCGAAACTTTCGATAAGAAATTAAGTCAATTGT  
CGAAATGGTGGCTAAGAAAGAAGACAAACCAGCGAAGATTGAAGAATCACTAAATAATGA  
TGCCGACAAACTGAATGTTATTGCAGAAGCGGTGCAAGAATCAGAGAAAAAAGCATCTGT  
AGATTCGCGGTATCTCGCTACCTGAATTCATCGAATGCAATTCAAATCTACTAATAAAA  
TACTTTAGGTTAACAACAACAAGGTTTAAAGAACATGAAAACCTACCAAAGAACTGATGG  
AAAAATGGTCCCGCTGCTGGAGAACGAAAAACTGCCGAAATCGCAACTGCGTCTAAGC  
AGAAACTGGTTGCTAAAATTCTGGAATCTCAGGAAGCGGACTTTGCTGTAGATCCGATCT  
ATAAGGATGAAAAAGTTGTTGAAGCATTCCGGTGGCTTTATCGCAGAAGCCGAAGTTGCTG  
GCGACCACGGTTATAACGCATCTAATATCGCGTCTGGTCAGACTACTGGTGCAATCACCA  
ACGTAGGTCCGGCTGTTATCGGCATGGTTCGCCGTGCTATTCCTAACCTGAACGCATTTG  
ATATTTGTGCTGTTTCAGCCGATGAGCACTCCGACTAGCCAGATCTTTGCAATCCGTTCTG  
TATACGGGGGCGACCCGCTGGCTGAACACGCTAAAGAAGCATTCCATCCGATGTACTCTC  
CGAATGCGTTCCATAGCTCTCTGGCTGCTAAAGATGCAACGACTGTTTCTCCTACTGGCA  
CTGCGTTCCAGAAACGCACTCTCAGTACTCCGATTGCCGCAGGTGATATTGTACACCACA  
CCTTCGCAGAACTGGCATCGCATATCTGCAAAACGTTACCCGCAGAACAAAGTAACCCCGA  
CCAAAGCTGACAGCGAGTCAGATGATGAAGTTGTCATGAAGCTGATGGAAGAAGGTAAAC  
TGGCTGAAATCGCTGTCCGGTATGGCTACTTCCATCGCTGAATTGCATCAAGGGTTAATG  
GTTCTCAGAATAACCCGTGGAACGAAATGTCAATGCGTATTGACAAACAGATTGTTGAAG  
CGAAATCTCGCCAACTGAAAGCCCGTTATTCTATCGAAGTTGCGCAGGATCTGCGTGCTG  
TTCACGGTATGGGTGCTGATGCTGAACTGAATGCTATCCTGGCGAACGAAGTTCTGCTGG  
AAATCAACCGTGATATCGTTGACGTGTTCAACTTTACCGCTCAGGTTGGGAAAACCTGGTA  
TGGCTCAGACCGTTGGTTCTAAACCTGGTGTATTTGACCTGCAAGACCCGATTGATACTC  
GCGGTGCTCGTGGGGCTGGTTAATCCTTCAAGTCTCTGATCTATCAGATCGACAAAGAAG  
CTGCTGAAATCGCTCGTCAGACTGGTCGCGGTGCTGGTAACTTTGTTATCGCTTCCCGTA  
ACGTTGTAAACATTCTGGCTTCTGCTGATCAGGGTTTCAGTCTTGCTATGCAGGGTGCTG  
CACAGGGTCTGAATACCGACACCACTAAAGCTGTTTTTCGCTGGTGTCTGGCTGGTAAAGT  
ACAAAGTATTCATCGACCAGTATGCTCGTCAGGACTACCTCACCTTAGGTTACAAAGGCG  
ATAACGAAATGGATGCTGGTATCTACTATGCTCCGTATGTTGCTCTGACTCCGCTGCGTG  
CAACTGATCCGCAGTCTTTCCACCCGGTTCAGGGCTTCAAGACTCGCTACGGCATCGGCA  
TCAACCCGCTTGCTGACAGCGAATCCCAGGCGCCGTCCGCTCGCATCACCTCCAGTATGT  
TGAGCAGAGACAGCGTAGGTAAAAACGCATACTTCCGTCGTGTATGGGTCAAAGGTTGCT  
AATATAAGCCATTCCTGAAAACTCCGGTCCGGTGGAAATACCCGACTTATCATAAACCTTA  
TGACAGTGTAAGTGTTAATTCCAAAGGGAAGACTCGAAAGGGTCTTCCCTTTTTGCGTA  
TTATAACCCGTCATAAATTAGGTTGAAAGCCTATACTCTATTGGGAGCTAAAATAGATAT  
ACACAACAACAATTCGACCAATTTTCGTAGTAACTGCATGGCAAAGGGACCAATGAATG  
AAATGAACGTTTCATGTTTCATATTGGGTCCGATAGATTTGGTAGATATACAGATCTGGTGT  
ATGCCGACCTTGTTATGACATTCCAGCGTGACGCTAGCGGTACTTTTGGTCTTGGTACGC  
TGTTCCCTGAATTAACCCCAAATTTCTCCATAAGGAGGAAATGCATGAGTAAGAAAGAAAA  
CAGCTATGTTATGACTCGTAAGGAATACAACGAATTGATCTTAGCATTAGCTTATGCAAT  
TATTCGTTCTGATCATGCAATCAATCTGGTAAACAAAGTTAACCGTAGCGTTGATAATGT  
TTCTAGGAAGAAGTAAGTTTATTCTGGAATCCTTCCGATTCCCTATTCTTTTTGTATAAA  
TATGATATATCCATTAAGGCAAATACAGGATTCATAAACATGACTCAAATTTTTACTGAA  
CTGTTGCGGGAATCTACTTCCCTCAGTAGCTAACAGACAGCGCGACCCGCAACTATTATCA  
ATAACTCGCGCGGTAAACAACCTCATTTTCTCTGATCTGGTAGCAATCCAGCCAACGGAT

CAACCAGTACCTGCATTGTACGGCCTACGTTATCTTAATCGTGATGGTCAGATGACTTTC  
CGAAATGCTACAACCTACGGTGGCGCGGCTGGTGATCGCACAGAGATTGAAGAGTTTTC  
AAAGAAAAATCTTATGACGAAGGCGCACTGTTCAAATCAGACAATGTTTTATACGAAGTT  
GTGACCGCTGGTACAGTCGGTGCAGATGCCGAAACTCCAGAAGCTGCAATCTTTAAAGGC  
ATAATGACAAACAATATTCGTTTCTATAGCGATTGTGCATCGGTAGAATACTTTGAAGAT  
AAAACACCGAAATTTTCGTCTACCTCTATGCAGTTTGATAAATGGCAGGTTAATGTAGGT  
TCTCGTAAACTGAAAACCTCATTGACGACCGAATTGATGCAGGATCTTGAGGCAAGCCAA  
ATCAACTCTGAAAACCTCTGTAATTGATCTTCTGGCTACGATCGCTTCAGAAGAGATCAAC  
AAAGATATTATTCAGAAGTTGATCACTGTATCATCTCGCTATAGAATTAAGGGATCACC  
CCTGACGGCGTACTTTCTCTCGTTAGCGTTCAGGATGCACCAGCACAAGCGCGTGAACCT  
TACCGCTATGCTTGCGAAATGACCTATCAAATGTTGCGGACTTCCTCCTTTTCTGGTACA  
TACGTTTTGGCGTCTTCTCGCGTGGTTGGCCTCCTACAATCTACCGGATGGATGGAAGAA  
ACCGACAATGCTCTAAGCGAAGGTCGTCTACGTTGCGGTCTGGAAGTGTACGCAGACACG  
ACAGCACCTTTCGATTATATGCTCGTTGGTTGTAAGCACATGATCGGTGATATGGAGAGT  
GTAGGTTCTCTGTTCCACTCCCCATATACAGAAGCCGACGGCGCTGGCGCGTATAAGAGT  
GTAATTGACCCTAATAGCTTCCAGCATCATGTAGCTATTATGAATCGTTATTCACTCTCT  
GTCAACCCATATACATCAAAAGTTGATCAGGAAGAACAAGTCCATCAAGGGTGACGAT  
TGGGGTAAAATGGCTGGACGTTTCAGAAATGTCCTACATTTTAGGAATCGAACTGCCACCG  
CTTGAGATTGACAACGCTTAACTAAATATCTAACCAAGACAAGTCAGATCCGCCCAAGTT  
TTTTTCGACGGCGGGTCTATTTTCTTGATGATATAAGTTAAAACATGGTATCCCATGTCT  
ACGGGCAACATAAACAGCAATTCTAGTTCCTCCCGAAACGATTCCATTAACCTTCTTCGC  
CCAGAATATCACACAATCTACAGGATCATCAAGTGTCTCACCTAAGACTTGAGCAACATT  
TCTAGAAAACAGATTTTGCATGTATAACGGTATAGAACGAGGATTATCATAAACGTGTTC  
TAATTCATCCATCGCCAAATTTTTTTGTTCTAAGGTTTGCCATGCAATAATATCATGACC  
GTTATGCTTGTGGTCATAAAACTTCCAGTTTGGAATGAAAATTTTTCTATAATCTGGATC  
GTAATACTTCATGAAAGCATTGTCCATACCGTAAGCCCCTCCAGAATGCGCTACAACGCG  
ATTTTCTGACAATACCCTCCAATGGTACAAGCCATTATCAATATGTCGCTAGGCCCTTT  
TCTAGAGCCTATTAAAGCACATCTACGAAGTGGTTTTACTCCAAATAGATCTTGTAACCT  
GTCAAACATAATATTTCTCCATAGAAAGCAATATCATACTACAAGTTAATAACAAATAC  
AAGTATCCGCGTAGCGGAAGCGAGCACGGCGAGCAATAAAACACTTCCAGTAATTGATTA  
ATAAATGGTTCGAAACAAATTTTTATTATTCTATAAGCTAAGTCTTCGTTTTGATCATTAT  
TTAATCACACATGTAAAAACTACTCAAAGGATATCGCTTCGCGAACTCCTACGGAGTAT  
AACATTTGTGTTACAATATGTAGTGATTAATAATTAACCAAAGATACATTTTCTATGTTT  
TAAAGATCTTCTTCGTTTTGATCATAATTTAATCAAACAGTATTAATATTGTGCACATG  
TAAACTAAAATTATGTTATTAACAGACAACAAAAACGCCGACCCGGAGGACGGCTAATG  
TTAATTATTTGTTGATAACGATCTGATTTTCGGCGAATGGTAACATTACTCTTAGAGATGA  
TCAGATCATCCGGCACTACGTTAGTTTTGTATAGCTGTAAGCGAACAAGCATCTGATTGC  
CTTAGACCCTTCTTAATCTTGATTTCATCTGGATATTGTTGCCTACGTGAGCAACCG  
CAATTTACCTTTATTCTCATAGACCCACTTGCTGGTAACGTCTCCTGCAAAGCCTTAA  
TAACTTGCAATGCTTTGTCGTATGCGTTCGAGCTGTGAACTTTCAGAAGGCCAGCCGTAG  
CAATACGGGAGCAGGTGATCGCCGGAGATTGCCAAACATCAACTTTAATTTGCTCAATCA  
GAGTAACACCGCCCTGATCAACTGCTTTGAATGCTTAGAACATTGCCTTTTTTCATTGCTA  
CGTGGTTGTTACGGAATTCATAATTAGTCACCTCTATTGATTAGTTATTCAGAATATTA  
ATTACAAATCAGGACATTGCCCGTGTGAATGCGTCCATTATAACAGTGTTATTTGGCTTG  
TCGACACGTTTTTTGAACTTTATTTTTAAATTTTTTGTGATGTGGTGTTTACGATAAACA  
ACTTTTACGGCTGGCGTAAGCCTCGCGTGCATCTTTACCATCAATCATGCCTTAGCC  
GCATCTTGTCCGCTGATCCCGCAATCTTCTTAGCAATACCAACAAAATTAAGACCGTGG  
TCTTCGCGTAGCATGTAAACCATTAACGCTGTTTTCTTGTCCATCACTTCGCCCCATTGA  
CGATTAACAGGATAGTTATCAGTACCGGAAACTGGATCATGACAGTACCAATAAACCAGG  
TAAACGCATTTTCTGACTTCCACACATGACATGCGACTAGCTGATAGCCCATTTGTTGCAA  
CCAAAGCCAGAAAATACATCTCGATTGGTGCTTCTTTGATCAATCGTACAATCTCATTCA  
TACTACACCTCATACTTATAAACAACAACAACGAATAATACAGTAACAGTTATCAACGC  
CATTTTCAACCCATATTCATAAATTTTTCTTCGTTCACTATTGACAGTAGCATGTGCA  
TGCGTGCCATTATAGGCATCTAAATCGCTCTGTCAAGCACAAAAACAAAAAGCCACCCC  
GAAGGATGGCTGATAGATTTCTTTAAGCAGGATGCGTTTCAGGAATTCGTAGAACTCGCT  
CTAACGTATCTCGGTCCGGTTGATGTAAATCTTTGGAATGATACATGAAACCATTGCGAG  
ATTCCATGCAAGTGCAATCACTATATTGTTCTTCCGCTGCCGCGATTGTTCCAGATCTT

TGGCGTACTTGCTGGTTGAATAAACTTCTTGATCACGCCACTCTAACCCAGCCTCATTGA  
ATTTAACAAATCTCGTCAAATAACCACCATCCAATGTAGATAAATGAAGTTTTGCGCCACG  
GGATCGGGTGTCCGTAACGAAACATTTCAACAACCTTCCATTGAACATTTTCGGCTTGTAC  
TTGCTGCAACTTCTACTGTTTCATCTTCGATCTGTTGATTTAGTTTAGCAACACACCAGA  
ATTTGGCTGTGTCATCGTAAGTAGCACTCTCTTTGAAAAGATGACCGTCTGGCATGATAG  
AAAATCCTTCCAGTGCTTCGCCGTCCTCACTAACGATTAGAGTCCGGTGACAGTTGCCCTT  
CGCGCTGCAAATACCAGTTATGTTTTGTTTCGTC AATTCAGGCATACCGCTAGAATCGCCTA  
CAATGTCCTCTGACACAACATAATTAAGTAAGATCTCATTACCTAGTGCCACGGTCTTTG  
ATTCCACCACATCCTGTTCTACGTTCAATTGTTGCCAGCATGATTTTAGTCGATGCGCTAT  
CAGCTGAATTTCCGACTCACCCACACTTTTACAGTATACACGCCGTTTTTATCTGCTG  
TAAATTTTTTGATTGTAGTATTCTGTTTTGTGTCTATAACTTCTTCGCGCTTACTCCAAC  
TATAATGTAGTTCATAGTTGTCTGCTGGAGTCTTCCCACCCGAAAAATTTACTGTTGCAT  
GTAATTCTACATCTTTTTGTGATGATACGTAGAAATGCGGCGGTTCCGGTGATATTGATGA  
TTAATTCCGCTTCTTCCATGAGGAAAACCTCAGATTCTACTGATTCCATCGTATCAGTAT  
CTTGTACCTTGACTTTATAGCTACCCGCATTTTCACTTGTTGCGCCTTCTACAGTTAGCG  
TAGCTGTGTTAGTTTGATGCTGTTGGTCGCTTTTTGTCCATGTATATGTCAAATTGCTTG  
GTAATGGTTCGTCACCCGCTAAAGTCGCCATTAAGGTGAAACCATCTCCAGCAAGAAAAC  
ATCTTTTGTAGATTGTATGGATAGTGTGAAAGCCATATAAAGCCACTCCCATAGAAAAT  
CCGAATTTAATTAATTGAAATTGTTGATTGCCACCAACCAGATAACCATTGCGATATTCC  
AATACATGAGTATTAGAATAGTGAGGCAACGAGGCCGAAATAGTCTCGATCTCGTCTGGG  
TATTTGTTCTGTTTGATGTAATACATTTGATTTTGTTAGGCATGTAGTATCCTCTTTTTAA  
TTGCATAACGGAECTACAATTAATAAATTATAACGAATATTTACAACCTTTTATCACCCAAA  
AATTACTTGAGTGTGTGGAATTGGCTATGTTTAGTCTCTTGCACCTTGACAGACCCATCG  
CGTTTGATATTATAGATCAGTGACTTGAGGGTGTACGTACATACGAGTGCGGGAATCGT  
TCTGGATACTTCTTCCAATCTGGAGTATTAACGATCCAGTCGAAAATCCACCACGGGCAG  
GAGTAGTAACCACGACCGCCACCGATCAAGCAAATGGTCTGACGGAAGCCAGTAAGATCG  
CAAATGAATCAGTGTGCATGTGCTAGGGAACGATGCTCTGCTTCGTCAGAGAAAATGTT  
GCTACCGGAGATTTCACTTTAACTTCCGGTGCTTCTTCAACATCTGACTTAACTTCTTAG  
ACCCTGGTTCAACTGCTGGAGATTCTTCTTTTGTTGCTTCAATGACGATCTCAGGTTCT  
TTCATTGCTTCAACCAGAGACGGATCAACTTCGTCGAATACTATTTTATCATCTGCGGGT  
TCTGCTGCCAGAATAAGATCGTTAATACTGGTTCCTTCTGCCGGAGTTTCTTCTTCCATT  
TCGGAAGCCAGTTTAGTTAATTCGGTCTCTACGAACTCGATCATGTTCTCTAGTGATAAA  
GTCTTTTTGACCTTAATATCAAATTGTTTTGCGTAGTCAGCTAATTCTGTTTTAGCTGTT  
TTCTTTGCTTCTTTGTCGTCGGACGCCGCAATAGCGCGGAGTTCTTTCGAAATATTCTTTA  
TCAAACATGTTATTCTCCTGATTGGGGGTGTTTGTATAAATCTTTGTATAATGTATTTAT  
TGAGTGAGGCTATTCGCTATGCAAGATATTAATAAATTCTCTTTCTGAACTATTCCCATGAT  
CAAATTGAATGTAGCGATTCAATTTAATAGAAATACGAGATTATTTTAGTTTTGAAGTC  
GAGGGAGCGCGGTTTCAAAAACGAGTAAAATACGGAGGCTGGGATGGGCGTATTCGTCTT  
TTAGAGTACAACGGAAAGCTGCCAATCGGCCTAACTAAAACCGTGGGAATCTTCGCTAAA  
AATATGGGCTATAGTGTATGGGTAGATCCTCGCTTATTCGAAAAGAACAACCTTACAGAA  
GAAGAAATTACAAAATGGTGTAAATGCCTTAGAATTATATTCGGGTGCTAACAGGATCACC  
TCGCATTGGTATCAATCTTAGGCTGTCTTTGAAGGTATCCATCATAGACGCCGTATGTTA  
GTTTTGCCTACGTCCGCTGGTAAATCTGCGATTGCTTGTATGTTGTCTCGCTGGTACTTA  
GAGAACTACGAAGGGAAAGTGCTGATCATCGTTCCTACGACGTTGCTAGTGCTGCAAATG  
CGTGATGACTTTGTTGATTATCGCCAGTTTCTTATGAAGCAATTCATACTATCATGAGC  
GGTACTAGTAAACACGTAGGTGATCGCCTGATCGTTGTTAGTACGTGGCAATCTGCATGT  
AAACAACCTCGTGAGTGGTTCAGCAATTTGGGATGGTTATTGTTGACGAATGTCACAAA  
GCCACTGCTAAAACCTGCTAAACATCGTTACTGATATGGATCATTGCCAGTTTAAGATC  
GGCATGACTGGTTCCCCTCGTGACGGGCAAGCTAACATGATGCAGTATGTCGGGCTTTTC  
GGTGATATTTCTAAGATCGTGAGTATTGACCGCCTGATGGAAGACGGGCAGGTGACAAAA  
CAGAAAATTA ACTGTCTTTTCTTTCGTTATACCGATGAGGAATGTAGCGCGGTTAAGGGG  
CGAGAATATGCGGAAGAGATCAAGTATATTACATCTAACCCACGACGAAATAAGTTTGCT  
TGTAATTTGGCGCTAAAACCTCGCTAGGAAGGGCGAAAACGTATTCCTGATGTTCCGCAAC  
ACTAAGCACGGAAAACCTTATGTATGACGCGTTACAGAAGGTACACGACAAGGTTTATTAT  
ATTGACGGTGGAGTTAAGACAGAAGAACGAGACGAGTTCAAAAAATTAGCGGAAGGGGAA  
ACAGGGATCATTGTGTTGCGTCTTATGGTGTATTCTCTACTGGTGTTCATTAGGAAT  
TTGCATCATGTTATTTTCGGTCATCCAGTGAAGGAATCAACTATCGTTCGTCAGAGCATC

GGTCGTGCATTGCGTAAACATGGTTCTAAGGATATTGCAACGGTCTGGGATGTTATCTAT  
CATTTGGCAGCTAAGACAAAGAGCAAGAATGCTAAGAAACAGTTTAGCCACCTAAATTAT  
GCCCTTAAACATGCGCTTGAAAGAATAAAAATTTACAACACCGATCGATTCTGAATATGTC  
ACGAAAACAATCGTGATCTAATAAACAGGGGCTTTAATGTCCCTTTATTCTACGGAGATT  
AAAATGATTAGCTTTAAACGTTTTTTGGTTGAGGCCGCTATTGACGGTTTCATGAGTAA  
GATTTATCCTTGTAATCCTATCGACGGATTAATGAACTTGAGGCATATTATGAGAAGCG  
CAAGAAAGAATCAGAATTGAAACCTGCTGACGACATTTTCGATCCGTGATGCTATCGCTGG  
ACGCCGTAAGCATCTGGAAGCGGACAACGAGCCAGAAGAGGAGCCGGAAGAGGATTTTTTA  
AGATATAAAAAAGCCCCATCAATGATGGGGCAAAAATAAACCAATTAATAATCGGTTATCAA  
CAAATTACATTAACAGCATTGTTTGGCTCTACGAGTTGTTCTTGTCTTCGCCGTTTCGCAT  
CTTCACTAATCGAACGTTCTGTTACTAGCTGTAAGCAGTAGCCAGTGTGCACAACGCCGT  
TTTCTGTCCGGACTGATAACGCATCCTCGACAGGTTGTTTACAACAAATACAGATTTTCA  
TAAAAATTCCTCCTGCATGATTTAGCGACCAGATTCAGCATAACGAATTCTATAGCAT  
TCTTGATCGCAAATCCACGAGATTTAACGATATCAAGTGCGCGACCAGCAAATCCATTA  
CCATCTGGTAATATGCAATTTTTGTATCAAGCTGTAAGATCTCGTCGTCTGCTGCCATGA  
CAACTTTCAATTCTGATTTCTCATATTCAGCACGACACCAGTCATCACTACGGTTAGTGT  
AAAAGTCAAGACGATTTTTTCATAGCCTTTTTCTTTTTAGCCTCAAGAGCAATCGTCCCTC  
TTTTCGCCTCGCTGTAATCCTTAACCACTTTGAGTATACTACCGGATTATTCAGCGCCT  
CCCATTGCAACTTAGTCGCATCGATCTTCGTGTCAGCTTCTAATTGTTCTTTCAAATCGT  
TTAGGTCCATTATATCCCCTTATTCACACTAAGACCTATATTATATCACACACAAAATCA  
CTTTGCAAGTCTTATGCGTAGTTGTTCAAGATCATCTGGGTTATCTATTACTGAAAAGTA  
GATTGATACTATGATTGAGTTATCGTCGTAAGTACTGCGGAGTTACTTCTACTGTCAGGTTTCG  
GACCCGTGGTTCATAGTTTCGGATCGCCTCATTGATGTTTTTTTGATACGGTATCCACTGT  
CATTGGGTTTCATGTTCTCAAACAGTGATATATTGAGATCGCATCCAAACAGTGGATCAA  
TGGACGAGATCCCTTGCGAGTAGTCACGATCAGTAGAATAGAATCTTTAACCGCTTTAAT  
CCCTATGTTCTTTTTAACGTCGTTATTCCACGATCTGGATATATTGACATCCAAATCAGT  
ATACATCTGATTAATAGTTGCCATGTTATAGCTCAAATAATTTTTAAGGAAACTGGATAGA  
CCTGATAATGAATATACACCAGATTCCCCGCATTTCGCACTTGATCGGTACTGCCAGCGTG  
ATTTGATTTCTTGTTAGCTCGTCGATCACTTCTTCCACTTTATCCGTGGTAAGCATATCC  
AGCACGCGGTCAAAGTCCGTGCGTTCAGGTGGTCTATATTGAATTGCTGATCGCCGATC  
ACGATATATTCGATACATGCAATTACCATCTGCATAATATCAACATCTTCTGTAACTTA  
GGTTGACTAAACTTGATTTTTACTTGTCTAAGTCCAGAATATACGGTTCAACTTCTGGT  
ATCTGTGTGCATGAAACATCAAGAGGGTATACTTTCTCTTTATTGCATACACCACACACC  
CAAGTAGCATCAATTTTCATCTTATTGAGGCTGTGACACCATAAGAGAAGAAAAATATAT  
TCTGCTTCGCATTTCTCTAGCTGTAATGCATTGATCCCCGTACATTCATGTATTATCTCT  
ATAACAACCGCTGACAGCTTGCCAGTCTCTTTTGTGCTACCAGTTTTTGAAATTCGCCG  
AAGGTGAAAGCACGGGCGTGATCAACTTTTCGCCTAATTGGATCTTGAAAAAGTATTGC  
ATAATAAAACACCCTTTATAAACACATAGAATTATTGAGTATTTTATAAATACCCGAAAG  
GGGATTATACCATGAATAGTATCCGAATAAAACTGCCGGAAGATATGCAGAGGTTTAA  
CCATTCACGGTAAAAGATTATAGAGATTTCTTCTGGTGTCAACTTAAATTAAGATGAAT  
CCAGAAGAAGAACAACGATTCTGGATGAGCTATTAGAAGAAATATGTCGAGAAGTAGAT  
CCGGCATTTCGTGAAAATATTTTCTGAATGTCTTTACTAGCTCAATTGGTAAAACAAAG  
ATACCGCCTTGTTTTAGTTGCCGACTTGCAACAAAGAAAGAAAAATGTTGCTTAACTTA  
CAGGTTGAAGCACTAAAACCAATCGCTCTAGAGGCCGCAGGGCTTAAATAACTTTCCGG  
TATGTTAAACCATCAACCGACTATGCAAAAACGTTTCTGGATGCGATAGGGCGTGTATCT  
GATGGTATTAATGATTATCTATGGACTGAATTACCGGAAGAAGTTAGAGAACAGGTTATC  
GATTCAATCTCATTGCTGAATTTGAAGAAGTTGTTAAGCAGATGCACACAATCCAGATC  
GAACAAAAGATATGTTGTTGTGAAAGTCATGACCTGAAATACATAGGTCTTCTTCCATTA  
TTCAAATTGTTGTTGAATCCAGATGAGTTATTCATCTTTTATCGAGTAAACCATCTATTG  
GCAAAATCAAATTATTCTATCAGTGATCTTATGGATATGTTACCGATTGAGAGAAACATT  
GCACTGACACTGGTCGAGAAAGACATAAAAGAGGCAAATAATGCAAAGAACGGGGTTTCC  
TAATGTCTAAATAAAAGCTTATCAGGATTATGAGGCATTTCTAAATCATCGCTTTCTAGA  
GTTGGGTGCTACCTTCGTTACAATGACTCTGCGTGATTCGATTCGTGGGGTGAATGAAGG  
ATTGTTGCAATTCTATGATAATAAGGTGATGCATACAAAATTAACGGGAGAGAGATCAT  
TCAGATTTTCGCTATCCACTGCTAATACAGCTGAAGTGTAAACCGAATATATGGGATCTC  
TCATAGTAATGTAACAATTGACCAAAAATCCGACAACATTTTAAACATAACAGTTAAAGAT  
CTATCACGAAACCCTAACCTTAAATTTTTCTCGCTCATTGACAAATAACGCGGTTAATAA



CGTAACTAGCATGATTGATGCCATCTATAAGTAAGTTCCTTTATGGAAACCTACTATAAA  
GGGTGATAACGTTGTTATTCCTGGTTGTCCGTGGGTTAGTACCATAAATGACTATATGGA  
TTTTGTTAGGGCATAACGGGCAAAGCGTAGAAAGCGAGTCTTTCGTGTATTGCTGGGAAGA  
TTTTGATAGTATAACGATTGCTGGATACGATACAATATTAATAAATGAGCCAATACCAGC  
TATAATCTGTGAGCCTAGACTCATGGGGCAATTTATTGATATGTCGCCTAATCTGATGGT  
TTTAAATTTTGAGTGGCAGACTAAGAGCAATGCTAAAGTTAAAAAATTCATTTAGCAATG  
TGACATACACCACTATTGATTTTGTACTAAGCAGTATAATAAAATTATTGTTGGTAATG  
GGGATAATATTGCACACTTTGCTCATGGTGGCGCTTATGGCGATTTAACTTATAAGAATG  
CGTTTTTGGAAAGGTTCTAAACTTGCCACAATAGAACAATATGATTCATATGCTACCGCCG  
TGTGTCACGGTAATTTTTTCATTGCGCCCCGGTATGGTTATTCGATTCTTTGATGAGATGC  
AACAAAGCACGCACTGATTTTATTGTTGACGAAGTGGTGCATGAAATTAGCCGAGAGCAAT  
CAATAACTCACCTGTATATGATCGGTAACAGCGAACAATTACAGGAAGTCAAATTTGAAG  
GTAAGATATAATGACAGAACTAAACCTATGTTAAAAATTTGTTGTTTCTGTACAAAAAT  
AGAGATAAACGGGAAACATATTAAGATCCCAAAAATGGGGATTAAGCAACATCGATTATT  
AAAAGATGTTTCGTAGCTGTGATGAAACATTAAGATTCTGCTTGATTCAATCTGTCCTGG  
GTTAAACGCAGCCGAGACTGAGTTGATTATGCTTAACCTTTGTGCGTTTAAATGGTAAGTG  
TCTGGAAGAAAAAGATGGTCTTAAGTTGTCTGATGTATATTTGTACAGAGACTGAATT  
TACTTTAACTGGTAAAGCCTTTAAATTTAAAAATCCAATGTATACTTCTGACCGCATTAT  
CGATGACGCTGATTTTCGTGAGTCATCATTATCACGATCCTAGCGTAGACTTCCATGATTT  
CCCAGCTTTTATTATGGATTGGGCTACAGGATTAAGAAAAATTATTGCACTGGATACACC  
GGAAGGTACTATCTATGGTGGAAATTAACATATTGGATCGCCTATCATGAATGACGCATTA  
ACATCATTTTCGCGGGATGCGGAAGGAAGCGGAAGAAAACCCGATTGATAAACTTAACAAA  
TTAGATAAACTTAATTCTACTGATAATTTGCAAGCCGTTACCGAATTGGTGGCAGAGACA  
GTAGAGCAAAAATCTAATGAAGTTGTTGGTGCAGGATAACACCGCAGCCAATGAA  
TTGACGGCAGAAAATACACAATCTACCGCTGGCAATACCCAAAAAACTTATGAAGAATTG  
CAAAAACACAATAATTACTCTTCTCAGATGAATGAGAAATTACGTCGTTTTGGTGTATG  
ATGGAACGTAGATTTGGTGTGTCAGTAAAATGGCTAGCGGTATTGGTGCCATTGAAGAA  
GCATTGAAAAAACCGGAACAACCGCAAACAATGCCATCACCTCAGCCAGTTTTGCCTACT  
GTACCGGAACAGCCTAACAATGACAACCTATCAAGGTCTTCCAAGAAAAAACAGATGCT  
GATGACCAAAAAGAAAAAGAACGCCACAGATAAGCGTAATGCTGATTCTATGGAAAATCTT  
CTTACAGTTGTTTCGTGGAGGATTTAAAGAAACCATAGGTATCTCTAATAAGGTCTTAGGG  
ATGTTATTTAAGATCACTTTGACCGCTATGGCAGAAGCCGCAAAAATGGGGTGCTATTTTG  
ATGGGTATTGTTTTTGGCATTGATACCCTGATGGTTCATTTTCAGATATTGGAGTGATTTA  
TTCGAAACAAAATTCAATGAATTTATGGATAAAGCCGGAGGATGGGCTGGTCCATTAGC  
GATATTTTAACTACTGTTTCGTCAGGTTTCGAGATTATTGGTCTAAAGGCCGAATATGGAGAG  
TTAATTAATCTCTTGTATGGGTATTGGTGATGCATTCTATAAAACCTTTATCCAATT  
GATCGAATTATCACTACGGGTATTGCTAAAATCTTCGTATGATCCCTGGCATGGGTGAT  
TATGCCGATAAGTTAGAATATGGTGCTTTAAAATCTGCTGTCGCTCAAGGCTATACGCCA  
AATGAAAGAGAACTCGAATTAATGGATAAGGTTCGAGTCTGAACACGACGAAGACAAATAT  
GGAGAGCGCACAGGGTGGACCGGAAAAGCCCGTGATATTGGCGAGGCCATAGGCCGAATCT  
ATTAAGGTTAAAGTTAACGAAGGTCTTGTAGTCTGGGCTGGAGAGAACAAAAGGAGGTT  
GACGCAGAGAAACGACAAGAAGAAATTAAGGGCGGAGAATATAAGTCTGTTTCTGCTGAA  
CAACGATCTGCTAGTCGTAACCTTAGAATTAAGCGAGGGCGCGATCAATAATATTAAT  
GAAGTTATGGAGAATTTGAGCGGTGACTATGACAAAGAAAGAATGGGAGATTTGAAAAAG  
GATATTGATGTTTACCGTGAGCAAGTTCAAGATCCTACATTAGTTGAAAGTGATCCTTCT  
CAGTTAGAGCGTTTTATTGAAAAATTTGATGAGATGTATGCTGATAAACTAAGGGTGTG  
GTTCCAATAAATCAGTTCCGGCAACTGAAACGGAAACAGCAAAAACAAGCGGAACGTACT  
GAACAAATGCAGAAACAAGCTACAATCCAGCAACAAACGACAAATCAGACCTCAAACGTA  
AATAATACACAAATTGTAACGAACAATAGAATTAACAGGGTGCACCAACAACCTAGA  
ATTGATGCCCCAGGTACAATTAGTATGGGGAACTTTTAATGAAAATTAGTGTTATCAATG  
ATGCCGTTGATAGCTTTAAAGCGGGGGTTAAAACCTCCGCTGGTTTTACCTCAAAAATA  
AAGGGAAAACATTAACCGCTCAATCCCGCTGAACGTGCTAGCGGTAATGATGCTAGCG  
GTTATTATATCAACGACTTATATAACGATGGTCTGTTATTCCTGCATACGATTACACAT  
CCCGTACTAGTGGATCGTTGCGTGATTTACAGGAAAAAGAAAAATGTTGCTAGCGGTTTTG  
GCGGTAGCGTTAATATCGCTGGTTTTGATTTAAAGTTGGGTGGGAGAAATGCTGCATTTG  
ACCGAGAGGCAATTGCTAATATTCTTCTTCTCGTAGTCAATCTGACGTTGACGCTGCCA  
GCCATAAGTGTAATGATGTTGGTGAATCTGTTATTTCTCGCGCGGTGGTACTTTAGGCCG

GTGCTCTTTCTAATATGCCATCTACTGCTGTTTTTTGGTGGTATCGAAAGTATTACTGGTG  
GATACCTTGCCGATCACGGTGAACAGATTTATAATACTGCGCGAAGCATGTATGCGGGTG  
CTGACGCACGAACGAAAACTACGTATGGCATCTAACCCACGTAGTATTGAAGACCTTC  
TCAATATTCTGATCATATACGAAACGTTTTTAGAGTTGTCTTATGATTCTAGTGGTATTT  
CCAGCACCGCAAAAAGAAATTAAGCGGAAGTTGATGCGTGGTATAAAAATACACTATTGA  
GCAAATCCACTCCAGCTGAGGCAAAGAGAAATGATACGCTGTTGGAAGGGATCACCGATT  
TTCTATCCAACGTAATTACTGTATCTAACCCGACAATATGGATGATCTCTAACTTCGGCA  
AGCGTCCATCGTTTGAAGGGCGTAGCGATGTAGTTGGTCCCCTCAGATCTCAAGTGTAC  
GTCTGGACAAGTCGCCTGATGGTAAGTTAATGGCCTTGCTATTTCTCCTAACTTGCCGA  
GTACCTTTGTTCTGGAAGTATCATTTAGAGAGATCTTGACACTTTCCCGTGGTACTATAT  
TTGGGAGTGCGGCATAATGTTTGATTTAAATGACTTTAACTAACAAGCCGCTAACCTTGA  
CTTTCAGCGATCTAGCTTATTATGCGTGGCATTGTCACCCTCCAAGTAATAAGACACA  
AGCGATCCTAGAAAGTATGGGTGGTGCGGTATATGATATTATACCAAATGCATTAAATGA  
CTATTTCCGGGGTTACTCGTGGTGATTATACTTACGCATTAACAATCTTGCTGTACAGGG  
TGTTAGGCGTGCTGTTGATTCATCTGGTGTCAAAAAGTATCTTTTAGGTGCAATGTCATC  
CCGCGTAGTTCAATCTCTTCTGGGGCAATTTGATGTTGGTACATATGCGCTTGACTGGTT  
CAATATGGCATATAAGACAAGCGGTCTTCTGGTGTATGCTGTTAAGGATCCAGAAAACAG  
ATTGAATTATGAAATGGACCGTAACCACAATGCGCCAAACATTGCAATTACCGGACGTGA  
TTTTGATCCGCTTGTATTGAGCTTTAGAATGGACTCTAGCGGATCAAACCTATAGAGCAAT  
GCAGGACTGGGTAACTCAGTAGAAGACCCCGTTACAGGGCTTCGTGCGCTTCCTGTTGA  
CGTTGAAGCAGATATTCAGGTCAACTTACATAACCGAATGGGAGCTCCTCACACGATCAT  
GATGTTAATGGTTGTGTTCCCTGTTGGTGTGAGTGCCTGGAATTAACCTATGAAAACAA  
CAACGAAATCACAACATTCGATGTTACTTTCGCATATCGTTCTATGCAAACCTGGTGCTGT  
AGGAGAGCATGCCGCGCGAGAATGGATCGAGGATAAGGCAATAAACGCAATAACAAACAC  
TTTCGGTAATAATTTACTTGATAGTGGGATATCTGCTGCTGGTAATGCTTTATCGCGTCT  
AAATGGCGTTGGTGGGCGTGTGGTGAATACTGTCACTAACTGGTTCTGATAATCGAAAGG  
CGGGGATAATCCCCGCCTTTTTATTTTGCTAAATCATTGCAATATTTTAGTGCCTTAGTT  
TGAAATTCTGCGCTGTTAAGTTCTTCATAACGGTCACAATCACCGTTAATGCTGCCTTT  
CTTGCTTCTTGCTCTATCTGCATGTCAGACATGATAATACAGCGATCCCCTGCTTTCATC  
TTCTCAAGTTGTATAGACTCTTCTTTCTGTTTGCGCAATCTTCTTGACGCTTCTTTTCT  
TCTCGTGCTTTCTTCTCCCGCGCTTCTTTGATTGCATCCTTGAACATCTGCGTTTGTGGT  
GCTAAACCAACTTTAACGCGATCCACGTCTCGACGTTCCATTTTAGAAATTAAGCATGAT  
TCGATCTGATCATCACTTGCATATGCTGCTTTACATTCACGAAGCAAGAAAACCGGATCT  
GATTTAGCATTATCATAGCTTCCATGTTAGCACTACCAGTAAGAATGAATGCAGTCGCA  
AGACCAATCAGTTTGATCATTTCATTTAGTCACCTCACCGAAAATTGTAAATTGTCTAC  
GATTCTCATCGCCGAAAGATTCTACTACGTCGTTACCTTGACGCAAGTCCCCTGCGCGGTA  
AAATTACTTACATTCGCAAGGGTTCCATGCAATGGACCCAACAACAAAACCTTTATGAT  
CTTTTACATCAATCAACCATGATACATTACAAGAATGTTGCATCTTCCCGGTCATTGACT  
CATATCGATTCTCACAATAAAGGCTAGTGCTGTTTGATAGCCATCCTCCAAAGATGATCG  
GTGTCATGCTGGTCGATAACAAAGTTTTTAAAGGTAACCTCCTTATCTTCAATGATGCGCT  
CTATTGTCTGAATGTCAAGATGTTGACCGCGATAAAGAGTACCCTTTAACTTTTCGGTTT  
TATCCATGACGCAATCCATCAAATCAACAATCTCTGATATCTCATCGGTCATGTCTTCTT  
CGCCTAAGAGAGCACCATTTACCATTCGTATTGTTTCAGACACATAATCACAGATTGCAG  
TATATTCTTCTGGGGTTATGTTGTTATGTTTGTACTGTTTGAATACATTATCTCCAAAGT  
CTTCGGAGTGTACTTCATACATCACATTAATGATTTTCTTGACAAATCCATAATCTTGTG  
TCTCACGCTCAAGGAAGCGGATAACCTTCACATAATCATCAAAGTTAATCTGATCGCTGA  
TCATCTCATTGATCATGTAACCATTATTCTCCTCAATGTCATATGTTGCGATGTAATTAT  
CCATACGTTCCATCATTGATTGCGGTGATTCTTCCGAAAGACGAAAATCCTGTAATTGTT  
TGAACATTTTAAACCTCCCATATAACAGAAAACGGGGCTAGTATAAACTAGTCCCCGTT  
TGAGTCAACCATTATTTCTTAAAATTACATTTTAAATTTGTCTGGCATTGCGTCTACAG  
ATACCAGATCAGCGATAAGCTGACGTAGAGTTGCCTTATCTGCTTTCTTACGTTCCGGTTT  
TAGCTTCGCTAATGAAGCTGGAGAAAGACAGGTCAGAAGCAGGTTTAAACAACACCTTCAC  
GGATGAATGCATCACCGTCTGCGATCATCTCGCCAGATTCTTGTAAATGCTGCCAGTTCAT  
TTTTGTTTATAAATGTTGCCTCAATGTAATGAGTTTCTTGTGAATCCGTCGATGCCGTAG  
CACGAGTTACCGTATGAAAGGATAACACAACATCGCGAGGAAGTAAAATCTCGCATTCTT  
TGTAAGCAAATGCTTTGTTACCTACTGGCAATACAGGGATGTTTTCCGCGCCAGCAATGG  
AGAAAGCAACATTAGCGCCACCTTCACCGCGAGAGCCAGCCATAGAATCAACACCAGCAA

CGGCACTAGCCACGTTTGAATTCCAGCCGCCAAAATGTTAGGTGCAAGGGAAGTGCTCA  
CATAGTTTTTAAAGTAAAACGCTTTTTGCTTACGTGCAGTTTCCACATTTGCGACCGGA  
AGTCCATAACCACGATACTGAATAGTACCCGGATCAAGTTTAAACGCCATAGTTGGAGAAGG  
CATTATCCATTGCATCGCACATCTTGACCAATTCTTCTGGATCTGAGATTCCTTCAAAC  
CTTCCAGCTTACGGTTCGGGTAGGAAGTTGTTTCATATTGATGTATGCTGCATCGGCATATT  
CGCTCAACACAAAACCTTCCGCGCCTGGCAGATCAAGATCAATATTTGCCATCATTTCAC  
CCATGTTGCTAGCAATTGCTTCAAACATAACCGGAATCAACATTACGTAGGGCATCGGTTT  
TAATCTGGGTGATAATACTACGCAGCATTTCAGCTTTTACATCTGCTGGCATAGACTGGT  
CTACTCGATCCATTGCCAGTGCAGGTGATCTTGTCTTTCGAATACTTCCCTCGCTCATGATT  
CTATTAAGCGTTTGTTTAATGCTGCGATAACTTCCGCAGACAACGGATCATATTGATCCT  
GAACTTTTACCAGTTCGCTTACTGCGTATTTTGCATCGGCTTCGCTTTCAAAAATAGTAC  
GCATGAAACCATAGCGAGTGATAATCACTTGTCCAGTCATTTCAGAGAATGGGCGGTTG  
AACGTTCTAAGGCTTGACGATCAATCAGAGTATTAACCTGTTTCTTAGGTTCTGCTTCGG  
TGATATCTTCTTCCGGTTTAAAGATTAATTTTTTCTGGATGATTCACGTAGTTCGCTTTTAT  
AGGTCGCTTGAGTTTTTACGATTTTCTTCTTTAGTCGAACGAGATTTAGCCGCTACGCGTT  
GTTCCGCTTCCGCGTTTTCGTTCTTCTTCTGACACAAGACTAGCCGCATACGCTTCATCTT  
TAGTCAGAGATTCACCAGTAGCCTTAGATAACCAGCGATCAGCTAAATCACTTTCTACTT  
TAGTGAACAAGGAATCATCAAGTTTAAATCCCTTTAATCATATCAATCGCCATACCGCGAC  
GATTGACAACAATAAGCGATCTTTTTGCTGGTCATTACTTCTGCTGGAATACTTCAA  
ACTTCGGTGTACGACGCACCAAACGCTCTATAACGCGCTTAAACCAGTTCGGTCTTACCTT  
TCATGCGGGATACGTTAAAACGGAACATCACAGCGTCTAGTTGCGCTTTACGGGCTGTTG  
CCATAACCACGTCAAAGCACTTGACATAACTGCAATCGGGATATCGCCTAGACCATTTT  
TAAGCTGTACAATACGACCGCTTTTGTTCATTTTCGCACAGTACAACATGTGCGGTCTTGT  
CCCCATACGAATGATTTTAGGTTGTTTTGTTCTGTGAAGTTACAAAGACGGACAATCACAT  
CTTTATCGCGTGTCTGTACTGCAAAAAGCTGTTTAGGATTCTGCTTAGGCTTTCAGCACT  
GTACCGGGGCAATACTACCAAAGTTTTCTTCTCTTTCGTCAACAGCCATTTCTCGAAAG  
ATTCAATCATTAGATCGTCGATTTCTAAGTTAAACATTTTATATCCTCTAGTTGAGAACC  
AATAAACCTATATTTATGAAAACGGGGCTTAAACGCCCTTTTTATTATAATGCACCATCG  
AGCAATTGCTCTAAGGTGTATCCTGAATAGTCTTTTTCAATCAGGATATACTTTCCTACT  
CGTTTAAATACAACCGCGCATTTCACAGTATTCTGCGTAGTTGATGGTACGAGTTGTTCCA  
TCTTCCAGTAATGCAGTACCGAGTTTGTAAATGCGGTCATAAGTTACGTTCGGTAATGATG  
ATTTTCGATGTTAGCCATTTGATACTCCTTAGTAGTTTCGTTTTCTGTATGGGTGTATTATGA  
TATACACCCTCTGTTATGTCAACAACCTTTTAGAACATTTTTGAAATTAATTCTGGTTTGA  
TTTCGCAGAGAACATCTAAAGATTTCTCGTCCCCCGCTTTTGTGCTTCTGCTTGCATTT  
TTGAAATGGCTTCAATCTCAGTGCAATTATAAGCCGCTTGAACCTTAGCGATTGCGATGA  
TTGCCGATTTCGATGGTTAAGCGTTTCATGTTTGATTCTCCTTTCGTTTCGGTATGTGTGT  
ATTATAGGGGATCGATGATCTCCTGTCAACAACGTTTTTLAGTTATTTTTTAATTGCTCAT  
CTTGCAATAGGGCCATCACATGCTGGCGATGTTCTTCCGATTGAGGCACACCGAAAAGT  
TTGTTTTGTAGAAATACTCTATTTCGGTATTCTCGTGAGCTCTCTTCCATCATGATCGCGG  
GTAGTCCGAGATTTTCGGAAACGTCGCTTTTCTGCTGGCGTAAAATCACTGTAATACAACA  
TAGGATCATCATTACCCGCAATGCTAAACTCATCCTTCATAAAGGAGAATATTGCGTTTA  
AACGCTGTTTACCGTCCACGATTTTCGATCTCATAGCGAGAGCCATCATCAATCTTAGCCA  
TTGCGATAGCACCAACCGGAAAATCATTAAATCAGGTTTTTCGATAAACATACGTTTGT  
CTGTGTCCATACTAAAGGACGCTGATAATCTGGGTTTCATGTTGATATAGCCATCTTCTA  
ACCATGCATCATAAACAGAGATGACAACGTTTTTLAGTATTGGTATAGTAACGGCGTTT  
GCGTTAAACGGTTCATGTTATAGTCTCCTGAATGGATCATCACGTAAATCAATATCTTTT  
AAGAACTCATCCCATGAATGCCGGATATTGTTCTTAATTCTCCAGATAAGCGCAGGGATT  
GAACGCTCTCCCATCTGGAAGTAAGGATCGTATGATCCGTATGCCAATATGCTACTACA  
ATTCCACAATCAGCGCAATAGTATTCTATTTCACTTGGCTGGCGACCAAAGTCCATCAATA  
TGATCGGTGATCTTGTCTTCGATGTTATGGCTATGACAACCAGGGCAACGGATGCAATGA  
CCTTGTATATCGTAATTTGACGTTAGCGAATACTTAAACAATCTCATTATAGATCCTTAT  
TTGCTTCAAATACTGCCTTTGCGAATCCTCGCGGGGTGAGTGACCTTATAGTCTTTCTTT  
TCGTTCTTTCCCGCCTCGCTTAGAATGCTGTTTACTGTACCCTTTATTAATCTGCAACG  
GTTTCTTTTCTGGCATTATAAAGCCTTGTCGGACCATAAGCAAGTCTTTTTCGGGTACA  
TATCACGGGCGGCAATATACTCAGGAAACGTAGGATGCTTATCATCTTCCGGCAAATAAC  
CGCCATATTCCACGGATGGAACACATAATCAGGTTTACGCCACATGCTAGAGATAACGC  
TTACAGGATTCTCTATCATGTAGGGAACCTTAGCCATTCACCCAAATAAGCGGTTATTT

TAGCTGCCCCGTACATCATGAACCTTGAATCAATGGTCCTTGTCTCTCGTTTCTATCGTTCAA  
AGTGTGCAGCGCCCCTAACAGCTAAATTGGTGCACGGTGGGACTGCAAAGATAATATCCG  
GTTTCCCCCATTTCGAGGTCCATTGCTCTTCCAGCCAGTTCAAATCAATCCAGGTGTTTA  
CATAGGTAATGTTTGGATGTTCAAATCTGGTATTATACTTTTTGTATGTACCGTGGTCCG  
CGTCATCCTCATTAAAGCAGACTACCTGATGACCTGCTTTAGCCCATCTAGCCCCATTA  
TCCCCGATCCGTCAAAGTTGCAGAATATTAATTTTTGTTTCACGCTGCCCCCATTTGGTTT  
GATAGTAACAGAATCTAAAAGACCCTTGTTAGCCAGTTCGCGGCAAGTTTTTCAGATCCGC  
AACTTCCCAGCCAGCCGCAATCAGGTTATCAATGAGGCTGTTAGCAACTTCTTCGCTCAT  
GAAAGAGCACTGTTTGGCGATGGTGTAGCGTACACGCTGTAATTCAGTTTACGGAAGCC  
TCTAACGTTACAGGTCTTTAGCGATTTTTCTTTGCGGTTTCGATGTTAGCCATTGTTTGATT  
CTCCTAAGTGGTATCTAGTCTTTATGGTTGTATTGTAGGGGAGTTATCCTCCCCTGTCAA  
CACTTTTTATAAAATTATTTGTTAATTTCTGGTGCCTTGGTAGGATAGTAACCTTCTTTA  
ACTCCGAGATATTTTCGCAACCATCCCTACAATCTTCTGTGCTACTACAATGTCAAATTC  
AGATAATCTTCGCCGTGGGTTTCAATGATATATGCTTTCACATGCTGCTTTAGTCTCGAAC  
ATTTTGATTCTCCTATTTTCGTTTTCGGTATGGGTGTATTATAGGGGATCGGTGATCCCCTT  
TCAACAACCTTTTAGCGACGGCGACGATGTTTTTTGCGAGTTGCCTTTTTGTATGCTTTAT  
ATGCCTTTTTACCCTTTTTATATGCTTTTTTTGGTATATGATTGATTTTTCTTATTGTTTT  
TGTATGTTTCCCGGTGAGTATTAATTTTCGTTACATTCCACGAAACGGTGTGATGTTCTT  
GTGGTATGATCAAACATTTATCATAATTAACATTTTCGTTTTTCGTTGTTTGTGGTTTCT  
TTGGTGTGTTGTTTGCCTAACAGACCCACCAAAGAGAATGAGTATAGCGCTCATTAACG  
AAAACATTGTTTTCTTAATCATAATTTTTCTTTAGTTTCTGCGGGAGTGTGAATATAA  
CACTCCCTTAATATTTTGTATTATTCGTGATTAGTTTCGATGTTGTGCATTTTGCACCAG  
TTCAGCCAATCGCCAGATCTTGATAGTTAATGCTTTTATCTGCTGCCATCGTTTTTGTCT  
TTGATACCCATATGTGCGTTATGAGTAAGCATTTTTACAGTGAACCTCGATTTTATCGTCT  
TTAGCTTTAACATCAACCCGTTTGGTCCACTGGCTACCAGCAACGCGAATGTTTCATACCA  
ACGATGTTTCCGATGAATGCTTCTTTGTTTTTTCAGGGTTTCGGTTGCTTTGATGAATTC  
ATTTTTGATTCTTCAGTTCGTTTTCGGTATGGGTGTATTATGCTATGTTCTTACTTTGGTG  
TCAACAACCTTTTTTAGATATTTTCAGAAATAAATTTTAAAACCTTGACGTAAATGTTTCT  
CATCTTTGATTGTAGCCGGAAGTTCTTCTTTTACTTCTGTGCAAGATAGATATTTCCGT  
TCCAAGTGAAAGATCCGTCTTCGTTACTCGATAGCTGATCATCCACTCGCAATCATTTT  
CGATTTTCATATACACACAGAAGGGTGTAAATCGTTAAAGCTATTGATTTTCAGGGTTCGAAGC  
CGTGACGTTTTGCAAAGTTGGTAGTGGTTTTAGTACAGTACCATTGTTTATTCTCCTAAG  
TGGTATCTCGTCTTGATGGGTGTATTATGCTATACACAGGATCTGGTGTCAATGCCTTTT  
TTAAAATTTTATGCAATAAAAAAGCCGACGCTAAGGTTCGGCTAATAAAAATCATTTAGACA  
AATAATCATTTCAGTGAATCCGGTTCGGCGTATGCTGGTCTTACGTCAAGCGCAATCACTT  
TAACGCGTGCTTTCTTTCGACCTGGGTTTTCTCGTAACCCAGTGCATGACCGTGAACAT  
TTTATACTGCGATGCTTCTTCGAAAGTACGGACCCGACAAGGGTAATCAGCGTAAAGGAT  
CTCTAGCTCTTCGGTGTGTAATAAATATACATCATAATTAATGCTGCTCTAGTTTAAAGCAG  
AGACTTTCGGAACATTGGGAGATTTTCGCGGGTAAATTCAAAGATATTTTCTTTCATAGT  
ATTATCCTCAATAGTTGGATGGAAAGGGGGCTTAATGCCCCATATATTAACAGTCCCT  
TCCTGTACACCGTAGTAGAGTTCATCGATGATAATTTTCAATTAATGCGACGGTGTGCATAT  
TCCTGATTTGCGAAGTTGTCAGCAAGTTCTACCTTAGTTTCGCCATCATGAGTCCATTTA  
GTGATAACTTTACCATCGGCAAATTTGAAGTTGAACTCTTTAGCTACCGCATCGCGTACC  
AGACGTGCAAACCTTATTGTTGCGGATTGCATTGTGCGTTTTCGTGTGCAGCGTGAGCGAAT  
TTGTTAACTTTTCAGAGTGATAGTAATGTATGCCATAATTTGATTCTCCTAGTTAGAAAGT  
GTATCTCGTTTTCTACGGGTGTATTATGCTATACACCCGATCCATTGTCAACGCCTTTTTA  
TAAAATAATTTTCGATATCTTTATGATGTTTTTCTCGTGCTTGGTCTGCCTCGGCTGGCG  
ATACGTTGGAAGCGATAATCTTCGCTACTGTTGCACCTTCTTCGGTGTCCGACACCCAAT  
GATTATGGAAACCGCTATTATTAACACTTGATAATAAAAATGATTTAATGTTAGGGAAAT  
TATAAGTGTAATAACGTACCCTTAATTTCTGAATCTACGTTTAGATAGATCAACGCACCTA  
GATAGACCGTCTCACTCGTTCGTTCAACTAACAGTAGAGTATTTTCGCAATTCTTCTAATT  
TGTCTTTTTGTAAGAAAAATCATAGTATAATCCTCAATTAACCAAATTAACCTTTGGTGT  
GTGGTGTCTTTTCTCGTGCCTCGTCCGCTTCTTCGGTGTACGTTACGAGCGACTACAAT  
AACCTTGCTGCCTCTCCGTGATGATAGATCTTACCCAATGGTTATGATTTGCGAATCC  
GTGTTTTATTGCGTAAGCGAACGGCTTAGACGTCCAGTATTAACATAATATCGTACATT  
AAGATCGCTATCAATGTACAACCTATGTGCTGTGCTTTACATTGCCACTAACACAAAAAC  
AAGACAATTGCGAAGATCTGACAATATTTTGTCTGTCAATTTTATAATGTGACTGTTTCA

AATTAACACCCTCAAGAGTTTTTGGAAAACACATCTATCCATTGTTGAGTATATGCGGTT  
TCTTTCCATGACACAATACCAGTCGAATAATGGTTTTTGTTCAGAAAAGGACGGGCAT  
TTTGATGCATCTTCCATCATCTTTTCGGCGAACTCTGGTTCGTATACCTGCAGAATCTGT  
TGATATCCTTTGTATTCTTTAAATTTGCTCATAATCATTCACTACCTTATCAGCTTCTTT  
TGTTGTTTTTACATCAACTGCGATAACCCGTAAAGGTTTCGTTCATGGTTCCACCAATGATC  
GTGAATATCGGCTTGTGATTTATCACCAAAGGAATCACGAATATCATTTTTACATCTATA  
GCTAATGTGACCGTCATAGTCAACATAAAGGTAATTACCGAAAATCGGCGTTTTTAAGAT  
CATAACGAAAATCTTTCTTCGTGTGTCTTATCCAATGTTGCAGTAATTCGCATCATAAT  
ATATTCCTCTTAGAAAGGGATGGTCATTTCTTGAGCTTGTACATAGTCGTTAGGATTA  
CTTCATCCAACCGATATTGTCTACCAGCATATGCACATTTTTATCATATCCTACGTTGGT  
AGTCAATACTGTATGTGCTTTACCTTCAACGATGATTTCCACGTACTTCTGAACTTCGAT  
AGCTTTCATTTTGATTCTCCGTTTGTGTCTTGATGGGAGTATCTTACTACTCCCTTTAA  
TCATTGTCAACTATTATTTGGGAATTTCCGGTGCGTTGCTCGGATAGTAGCCTTCTTTAA  
CACCCAGATATTTTGAACCATTCGGGTGATCTTCTGTGCTACTACGATATCGAATTTCA  
GGTAGTCTTCACCGTGGTTTGTACAATGTATGCTTCGCATTCTGCTTTAGTCTGGAACA  
TTTTTGATTCTCCTATATCTCGTTGGTATGTGTGCATTATAGGGGATCACCGGTCCCCTG  
TCAACAACCTTTATAATGCTTTATATGCGTATTTTATAAATTTGTCTGCCACTTCATTGGC  
ATGTTTCAGATTCTACGCCTGATTCGAGAACAATAGCTAGGTTCGGTTTCGTTCATTCCC  
GTACCAATGATTTGATGTTTCGATTTTTTTTCAATTGGAAATTGGTCACTTTTATCTGTGCG  
ACAAAATACATCTAACTGCTCATCGATGTAAAAGATCCAATCTTCATAAAGAATAACGGG  
TATTAGCAAGATTTTTATTGGCTTCAACGAAAGGTTTCGGCTACAAACAAATTAGGATGTT  
CCATAGTAATTTCCCTCAAATTATACAGCTTCGTAAACTTCCCAATGTCCAACACCAGCA  
CGCTTAACGAAAAGGTTTTCTTTGATGTTATTCATAAACGTGTGGATGGATTTAATGCGG  
TTTGAAGGTTTCCATTATTCGTTGGAATTGCGGCGATACATAAATAACATTACCAGTTCGA  
TTATATTCAGCAACCATTTAAGACAACACATAATAGTATCCTCAATTTGTGGGAGAGTA  
TTACCCCTCCCGATGTTGTTATATTACATTACACAAAATGGCGTGTCAATGCTTCTTTTG  
CGTTCCGCTAAGACTTTCGATCTCGCCTGGGATAACATCAACCGCCAGAACTTCTACAA  
CATCCTCGGACCCTAACAGTGAGTATGGCCTTTGTAGAACTTGATAACCAGACTACCTT  
CCTCGTCCCATTAAACGCTATCGCTAGCCCACCACACATCACCGTCTATAAAGTTGATGT  
AAAGCACACTACGCCACATTGAATTAATTACTTTCAATACTGCGCCTTTCATCTCTTCCA  
CGGTATGGTCTTCCATTTTGAAGACCTCACCTACCTGAACTTTTGCCATGTTACATGCTC  
CGAATATGTTTAGCTGCATCTTCCAGTTCGTGATACTGACACTGTGTGCCAGTAAGTGT  
ACTGGTTGTGGTTCTTCACTTTCCATAGTATTGATCAGATGACCGTTTCTGGGTGGAAT  
GTATTGTTGCCGTTCCAAATAGGATACACATCATCTTCTGTTACGTAGATACTAAGTCCA  
ATCGGTGATTCTGGTAATTGAAAAATTTTACCCACTGCATCTTTGCGATTGTTTACGATA  
TCTTTTACTGTCTTCAATTTAGTTACCTCTCGTTAAATTACATCACAAATCACGCCAGCCGT  
TGAAAGTTGATGTTTCAACTGGGCATTTTCTGCTACTGTCAAATCAATGATTTCTTGTGA  
CGCTGCAATCATATAGCCATTGGTGATATTGTTTTGCATCAGTTAAATGGTTTCTTCGTT  
GTAGCGGATTTTAGCGATGATTTTCGTTGAAGTTCATGTTTGTATTCTCCTAGTTCGTTTCG  
GTATGTGTGATTATAGGGGAGTTTAACTCCCCTGTCAAGAACTTTTTTGAAGTTTTTC  
CATGATAACGGTCATAATTACATCTTCTGCGCGAGCGGTCAGATTATCAGCGTCAGCATG  
TGGGCGGTTGGTTGTTACAGAGATAACACCGTTGCGCACTGGTTTGATATTGATATCAAG  
ATGATCCGCGAAACGTTCCGACGTTACAGAATGAATTTTGGTGTAAATTCTTTTGGCAG  
TGCCTTGCGAACCTCACGAATCAGGATAGCGTTTTTTCAGTTGGTTCTCCGCGCTCATGGT  
CTTCTGGGTGTTTCATGGTTCCGTCGAAGTCAATCATTGGCAGCATTACGATGTATTTAT  
TTTTGATTCTCCGTTTAAAGAAAGTGTGTTTTCGTTTTGATGTGTGTAGTATAGGGGATACG  
TGATCCCCTGTCAACAACCTTTTGTGAATTATTGTTTCATGAGCTTAATGGCTTCTTCCAT  
AGCCAGCACATTTTCGATAGTTAGGGTATCGTGTTAGATCGTCATACATTTCGCTTAAGGGT  
GGAAACTTCTCAAACCTCTGGGTTTTCTAGATACAGTTGAACACATTGTTTCTTACCAT  
CTCGGCTTTTAGTTTGTCTGCTTGTTCCTGTTTCAGATGATTTTCGTTGGACCCAACACCAA  
CAAATGATAAAGGTGATCAACGGGCTAATGATCAATGATAGGATAACATAACCGATAAC  
GCTACGGTTTAAACGGCTTTCGTACATGCCTACCAGGAAAACAGAAAGGATATAGATACA  
CAGAAAGAACATATAATAGTTACTCCTTATTTTCTCGCTTGTACTTTTCGAAATAAAAT  
CTACTGGCTGGTCATGAATTGACAGCAAGCCAAAGCGTTTAGCCGCTCGCAATCCCATAT  
TGGCGTGAATATACTTCTGGAAGTTCTCGCGTATACACTTACGCCAGTATTCTAAGCCCA  
TACAGCTTTTATAAAGATTGCATTGTACACACGCCGATTTCATGTTATCAAGTATATCAT  
GTTCCGGTTTATGCATTCTACGACCTGATACTTCCACGATCCATCATCATTACGGGCAA

TTCGTCCATTTTCATCATAGACTACCTTTGAGCGTCGCAATACTGGTTTGATGTGGTCTG  
CGTGCCAGCGATCCCCTAGTTCCTCGCCACAATAGGCACAACGTCCACCATATTTCAATTT  
TCAGGATCTGGCGTTGCTCTTTCTTTGACAATTTTTTAGGTTTAGGGGCTTTTCGCACCTT  
CATTATCACACATCGGATACCTCTTTTACCGTATTTGCAGTGGTCTTGTCTGATGCGAATA  
CGTTTGATGATTGGGAGAAATAAAGAGAACTCCGGTTCATCTTCTTTACGTGATTTGCTG  
CGGATATACCCGTTGCATGTCATCTCAATGACTTTTCCAATCAGGTTATGACGGTCCAGCC  
CATAACATTTCTCGGTGAGTTCATTTTCGACGATCGTACGGAATTACACGTTTCAGTACCA  
TCATCACCTTTTTTCGGTTGTAGTGTGATAAATCCCGATCCGGTGTAGTCATCTTTTCGT  
CCGCACGCACTACGGACAGTAAAACCGCCTACCTTATTGGGGTCTTTACTATGCGGATAT  
ACATCAACAATTTCCGCGGCGAAGTCAATCACTTCTTTAAATTTAACTTGATCTTTAGTA  
CGGCGATCGTCAAATACACCATGTAAATTTTTAAGGGTAATACCTTCTAAGCCCATGTTT  
ACATAGCGATGATACTGCGCGAGCTTCATCTATATTGTTAACTACAGTGTTTTCGATT  
ATCTGAACACGAGGATCGTTAAGTTCCTTCAACAATCTGTTTTAGTTCCTCGAATCGATCT  
TTATATTGCTTCGTTGCTTTCTCGTTTCCGTAATACACATCACGGTCGATAACATCCCAG  
ACAGTGTAACAATAACATTGGGCTTCTTCTTTTGGAAATAGTTCCTTTTCAGTGATTTGTTG  
AGGATACCATTTCCGGTCTGACGATATGCAACAACGGATTCTTTTACTGCTTCCGCTACT  
GGCGTTAATGGCATTTCCTCTTCTTCAAATATCCATGACAGAGTACCATCATAAACGCTT  
TCAACGAAGTTCGCGGCTGGTGTGTTGCGAAAGGGTAGGCATATATACCAATTCCCCATCT  
AGAACAATTCCCCGGCCTCGCAGACGCTCTAAAACAGCATACAAATCATCCAGCCCCTGA  
TAGGTATTACCTGAACGGGTATAGATTGCTAATGTTTCCCGTCAATATCAGCCATCCCA  
CCAGCGCCATCGCTTTTAAAGTTGTGCATACGCCAGATACTTGATATTAGCAATAGTCTTA  
TCAGAACATGACGATGCAAGGTGACACGGTGTGCTGGGGGATCAGTTTCTTCCATAGCTTG  
TTTGCAGTGGTAGCTGAGCAACCGAATTCCAGATCACGATTCAGGACCATCATTGCAACT  
TTAGCATCATACTCTGACAAGCATGTCAGAGTATCGGTAAGTACTAGCTGTAATGCTGCATTA  
CCAGTACTTGACGCGTGGCAAGTTTATTTTTAAAGACCTGTAATGCACCGGATAAATAC  
AATACATACGAATAACGCGATGGTTTATCGTATTTCTTTACGCCAAACGTAACCTGTTTG  
CAATATGTCGGATAAAAACATTCTTTTCAGTGTTCATTGCTTGCAGATTCTTTTCAGGATC  
TTTTCTTGCAGCGATGTTTTGTCTGTTGCTGCAAACCTGGTTAATGATATTGAGAATTGAC  
ATTTTCACCTCGTTTTGTTAAACGTTACGAATATCATTGAGGATACTACAAAATTCGGA  
TTCAGTCAATATAGTCTTTAACGGATCAGTTCACCTATGATATGACGTAATTTCTTATT  
TCCTGTAGCGAGTCATGCTTTACAAAATTCTGGGTTATTCCGTGCCATCGTAACAAATGC  
CAGATGTACCAGTCTGTAATAATGCTCACTCATTTCGATGAATCGGGCGAACCTGAAAATA  
TAACATGTGATTCTCAATCTTTTCAGTTCCTTCCGGTCTTTTTTGCTTTGCCACCGTGCAT  
CAACAAGATTTCTCTTTGTCTCTGAGGGTCTTAAATCTTAGCCCCGTGAAAAATCCTTC  
TGTGCTGTTAATATCGCAACCAAATAGACGGAATGGTCTTTTATTGATATTACTCAATTC  
ACCCGATGGATAAAGTCCACCCGCATAGAGATCAATTTTCAGAAGTCATTGAAACTAATCT  
CGCTAATCAGAGAGAACGGATCATAATCGTCATTAGGAATATCGATAGTAATCGAATGAG  
GATTTACCCATACACCAAACCTGGTCTTCTTCGGTGAATACTTCGGTATGGATTTTCGTGGA  
TGTTTACATTCATAGTTTTTCATACTAAAACCTCTTAATAATCAATAACTTACAAAATCAT  
ATAGCCAAAATATAGGCGGGATTATTTCCCGCCGTTTAAAATCATTAAACCGTAAACTACC  
ACAATATTCTGTTTGTGTGTTACAGTCCATTTTCAGGTGATCTCTTCTTACTTCTTAAACG  
CCGTTAATAACGTCTGGGTGAGGAACTTTATTCATCTTGCCATGTGGCAGTAGAACAGTT  
TTACCCAGCAATTCTTTCTCTACAGTCTCGCCAATATCAATGATCTTACCTACCAGCGGA  
ATCTCGCCATAGTGCCTTTTGCTCAATAATGATCCCCATAGAGCTTTTTACTTCGGTC  
CCTGCGCTTTCTGCTTTAGCTTCGATAATTACATAATCACCAGTGCTATAGGAGTTTTA  
ACGGTCATAATTTTATTACGTCTTCAAATCAATACAGTATAATGATGAATTATTTATAAA  
TTTTCGACGATCTGCGCGGGAGTCAGCCCATCTACATTAATCAGACTATCAAGCCCAAAC  
TACGGAAACCTTCAACTGCAATTTTCATATACTGGCAAAGATGTTTCTGATTCTTTACGCG  
GTTTTTCAACGTTTCGGAACCTAACCACTTTTCGATGTTTTCGAACGGCATCAGTGCCGGAT  
CTCGCGTGGCGATCATCTCAGGGACAGTACCATCTTTCTTAGTAAACTGCAAAGAGTAAG  
TACCGACCGAAAACATTTTTCTTTAGTGCTTCACGAAGTGCGATATTATCAATTTGTTTCAG  
TCATTATCAATACCCTTCAAATCAGTCAGTAATGCTTTTGGAAATACGCGCGATCGTAATA  
TCTGCATTATTCAGAATATCAGCCCAATCACGCCACCAGTTCGATCGTATGTGTGCGCAA  
TACTATAGATGTTTAAATCCACTGTTTGCAATTGCTTTAGCGCAATCTGGACACGGTGAA  
GCAGTACACCACATAACCAGCGCCTTCAATCGATACACCGCTACGGGCAGCAAACAAAATA  
GCATTTAATTCAGCGTGGATCTCGTTTTTCTGTGACCATGCACTATGCTCTGGTTCGTTTT  
TCTGGGATCATTTTTGCCGTATCATCCAGCCAACCGTTTTTATGTGCATGACAGCTACAA

TTTACTTGCCCTGCTGGAGTTCGGTTAAATCCAGTAGAAATGATTCGCCCGTCTTTTTTCG  
ATCAGTGCGCATACCTTCCACGAAACACATTTAGAGTTCCTTACGATTAGATAGTCGATC  
TGCATGTAAGTTTGTGACAACATAATATAATCCTCACATATTAATTAACCGTATACGCGA  
AAGTATTCTACCGATCCGTCGCTATACTGTTTTACATTGAATGTATTCACACCATGATCA  
TTGCTCATAATGACATATAAACTCCGACGCTCATCACCAAACGGGTTAACTAGTGCGGGT  
TCAATTACAACATTAACACCGTTCAGCAAGTGCTTCGCCTAATTGCTTGAGTTTATCG  
GTAAACATTAAGTCTCCGTAGTTAACCTGAAAACATTCTACACCAATTGAGCGGTACA  
TGCAACCACTTGGTCACGGTCATCTACTGCCAAAACAACATGATAACGCGGTGCAATTT  
TCGAGAAGAAGATCTCTTCTTCACTTCATGGTCTGGACGTCGATCATTAGTTTCACGCT  
GGAAGTGATCGCTAGGTTCAATACCCTGTTACGCAGCCATTGCAGAGTATCTTCTTCGC  
AACATCCTCACGCCCTGAGCATGTAATGATACGATAACCATTATCACGATACAGTTTAA  
GCATTTTCGATCACTTGCGGACGCGGTTTATCTTCTTTGACCTTTGTCCAGTCAAACGGAT  
GACGACCGCCCTTATCCGCTAATGGCCCATCAATACCAAAGATCACCGCTTTCGGTAGCA  
TGGTATTCGGTTTGTATACTTCTCGACCCATATATTCTGCATAAGATAAAATTGGTTGC  
GCAGATGAGAAAGTGGAGTTGCTTTCTCGCCGCGATAGAAGTTACGTTTCTTTAGTGTCT  
CAAATAATTCATTGAACACTTGTTTCAGTATACACCGCGTTAAATTCTTTTGCAAGTTCTT  
TGTAGAATACACGATGTTTTTTCGTTTCAGGGTGGTATCAGAGATCATGATACTCAATCCGC  
GTGATAGAGTCTCGCGAGCAATCATTCTCTGAATAGACTCTACCAGCTTTTCTTTTTCT  
TAGTATACCTGTGTTTCAAAGTGAGTCAACACCAAACAACATAAGTCGAAGATCATCAC  
GATTCACATTACGATAATTATTAACCGTTTACATGTTTCCATAGCCCATCTAGTTTAC  
CGGACACAGAACAACCAACGGTTAAAATCACTTCACATTTCCGGCATTATTTCTCCTTCGG  
TTTGCACCGTTCCCTCATTAAAGTTCTTTGCGATAATAACACATGATCAACTTACTTTCAAG  
TGTATATCTCTTAATATCAGCCAACCAGACTCTAAATTTTTGGGAGTCCTCCCACGCCAT  
AGAAACTTTAGGTTTACCGTATATTGTATCCACTTTCAGGTCAATGTCAACTTTTTCTAT  
TGGTGCTGGTAGTGGAGGATGTAATTTCCGGTTCCTGTGAATAATGGTCCATTGTACACGA  
AGAAAGAGCAAATACAATAGGTACAGCGAAGACATGGATTATGGCGGTCTGAAAATTCTT  
ATGTGCTTTCTTAAACAACCAGTGTATCACGAAAATTGAAAACACCATAAGGGTAATAAT  
GCTTGCACCTATCCCCAGTTAATCAACCAGATTAATAATTGCTTATCTGCTCTTGCGTAGG  
CAATATTTCTATGCTCATTTAGTAGCCTCCTTAAATTCTTCGGTAAACTCCTTAAATGAA  
TCATTAAGCTGTTTCTCTACCAACTTGGCTTTTGGTGCTACTACATAGCCTCGTGTAGCG  
TCTTTCATTGCTTTGTTTTGTTCTTCTGCAAACCTTAGTTCTTATTCCGTACATCTCCTTT  
TGTAGTGAGTCTACGACCTTCATCTTTTCATCTGTCTTTTTCTTATACTCTGTAAAAGCC  
TGATTGACTCGGTCCACCTCCTTTTTATTTCCACCACATATTGCCACCTACCCCCAGC  
AACACAGATATGATAACAATGTATATCAGCTTTGACATATTACCCCCAACGACAAAAGGC  
GGGGAAGTAGCCCCGGTTATTATTACCAATCAATCTTATCAGCCGGAATCAGTTTCTTAT  
AATTCGTAGATAGTAAGTTTTTATTGAAGCCAGAATACGGTCATAATCAAGGCCATCAA  
ATGCAATCATCAGACACATGAAAATATATGATTGTGCATCACCATGTGCACGTGAGTCGA  
TAGTCGCATTGGATGCATATGTCTTCTGTCTTCTCCCGGGTGTGCGTTATAAAATTCTG  
TTGCTGTCGTAAGGCATTGCGAAGAATGGACCTGAATGCTTCCTCGAATAGCTCAATTC  
GTTCCAGTGCTTCCGGTTCGCCTTCATATGCAGCACGCAAATCATCGGTTTCGCTTTCTA  
CGACATAGTAGATCAGGTTATTAGGAAACATCGATGTGTTTTTAATGTTTTGCACACCAA  
TATACCATTCACTCTTCACCTTGAACATTTGACCGTCTTTAGTGCGTGCAACACTTCCTT  
CGATACCTTCTGCGGTCCGAACCTCATCAAGAATATTGCTAAAACGCGCTGAATCAACCT  
GTAACGCATTTACCAGATGAGGACGTAGGATTGCGTCAGCAAATAGCATTTGATGCGGTA  
CGTACTCTCCTGTGACGTTATGGCGTACATTCAGAAGTGTTAGCGACGGTTCAGAATATT  
CTACAACAATTCGGTTGCTGGGTGCTGTATATTCAAAGTTGAAATTATAATCAGACCCAA  
TATCGGCGATCTTAGCGCGTAGATCCGCATACTTCTCTGAATACAGAAGACCGTTTGCTC  
TCTCTGCCTGGCTTGAGTACAAGGCCGCTTTAGACTTCAACTGAACATAGCCGTTATCAA  
TGTATGTGCTTACTAGACTACCCTCCATTTTGTCCATGACCATTTCCACATCTTCCGGCT  
TAAAGCGAACGCGATCATTCTCACCAAATTAAAAACTTCTCCATAGGACGAGATGCAA  
TGCGGACAGGTGCGTCTTTATAATCGATTTCAAACATGATCCCGCAACACTCTAACGCAT  
CTGGTTTATTCCACATATCCGGTTTGTCAAGTACAGATAACTAAAAATGCGCATAACGGG  
TTTGCATCGCCGTAATTTTCATCTTTGTAATAGAACGTATCAGATCCGTCACATAGTGCCA  
TCAGATTTTTGAACAATGCTAAAACTTTTTTTGTGTTTTCTTTTGTGACATAATTTGT  
GTTCCATTCTGGTTTAAATTTGGTGATCAAACAGGTTCTTCGATATCGGCAGTGCTTAT  
AATATCTTTACCGTTGGATTCTCGATGTACAACCTCAAACATTGGCGGTAATAGAATGT  
TACTGTCTTACCTTCTAGCGCCTTATGAATATTCTTACTCTTGCAGATATCCGCTGT

TGGTGTGGTCTGTGTTAATGCTCGTCCGGTAATAATTGATCCGCTTTCTGAGATTAACAGT  
CTGACCAATGTATAACCAGTTCATCATCAACCAGAATAGCGTAAAGAACATTTAAACGGTT  
TTTCTGAGGCGGTAGAATCACATCACCATCTTTACACTCTAAACATGAATATTTAACGAA  
TCCATAGTTTTCTATTAGCTCATTAAATCATTATCCTTTCCACGTCACAACAAAGGCGG  
GATTTCTCCCGCCACCTTATTAACCTTTCCAGAATATCGCGAGCTTCGTTACGCTCCTTG  
ATGATTTTCAGGACAAATTCCAGTTTTTCTTTGTTTCAGTGTTCGGTTTTCCATTGCTTCT  
TTGACGGTAAACACTCCGCCACCTTGCCCGTATACAGTGACAGTGATTTACACCTAACATC  
GTGGTATGAAAACCGCCAATTTTCGGTGATTTCGAAAGAAATAATCACCTCACGGATAGTA  
TTGCCATCGTTGATTTCTTCCAGCGTAATATCGCTTTTGTAAAGCGGTTGCTTTAACATA  
CGGATCAGCATAGTCTGATCTAGGGGGATGGTCATTTTGTCCATTGCATGTTGCAATGCA  
GCGTAACCGAAAACCTTTAACGACGTCCAGAACGTCTTTGCGAGTTTGAAATTTGATCATC  
TTGATACTCCTTAGTAAGTTAGTTTCGTTTTCGATGGGGTATCTTACTACCCCGGTTTCAG  
GCTGTCAACTACTTTTTAATGTCAAGTTCGAATTTTGTACCTTACGTCCCTCGTTTATTG  
AAAGCAACCCACGGACGGGTTTTCAATGTAGAACAATTCTTCGCCAATAATGAATACTGGC  
TGATTGTAAAGGCGACCCATCAGGTCACGCTGGCGAATGCTAGTAGATTCGTATACTTCG  
CCTACTACAAAGTGTTTGTGATAGAGTCGGTGCAAGTAAATTTTCAATTTGATTCTCCTG  
TGTTTCGTTTCGATGGGGGTATCTTACTACCCCGCTATTCAGTGTCAACTACTTTTTA  
CTTGTTGTATTCAATCCACCATTGAGTGAGCTTATCAATTTATTTTGTGTTTCTATCCAA  
CTTATCCCACCGTTTTTCGAGGGTTTATCAACCGGAATAGGTAAGGTGTACTTGTTAAGTG  
AACTCGGTCACTGTAGCGATTGATGTACTGCTTTTCAATTCTAAGTTTCATCTTTTTACG  
GTGAAAATATGCAATGACTTGTCTTCTGTTTCCATATGTTCCCTCCGTTTCGATGTGCGT  
AATATGCTATGTTAAGATCCGATTGTCAACACCCAATAACAAAACAGTCGCCACTATGG  
GCGACTTTGAACAAACATTAATCATGACCGTGATTTGCAATATCCGCTCGTGTGCTGTCT  
TTGTGATTACCTACGTCAAAGACACGATAACCATTTTACGAAGAAGTTTAAACACTTCT  
GGGTTATCCTCAAAGACTCCGACAACCTTCTTATCAAAGGATTTAATTACCTCTAAT  
TTGATGTGATAGTCTTTACGGGAATCATTGCGACCTCTCATAAAGATTTTATCGAAACAC  
ACATCATTAGCGATCAACCATTCCACCGTTTCCATGTAAGCATGTGAACGTCGTCCGGTG  
AGGATGTAAATCAAATGCCCGTTCTCGGAAAGAGCATTGATAACACGGATTACATCGTAA  
ATGGGGGAATCTCCCCACATGCCTTGTTATATTCGATCCACGACTCGACTTTATCAAGA  
TTTTCGGTTGGCATCTTTGCTAGTCGATGTGTTGGATCTGTGATCGTAAAATCTAAATCG  
ACAAGATATATCATAGATATTTCCCGAATCGGTTGTAGTCATCGTCTGTTAAATCGGTAT  
TTACCTGAGACACCAGATAACATAATCTTACTTCTGCGCTGCATTCTGCACTTCGTCAG  
AGTTGAACGACTTACGCATCCACGGTAAAGGATGACGACGAACACTAAACGGGCTTTTCA  
GTCCGGCAGCACGCATACGTGAATCTGCCAGGTATTCTACATAGGTTTTCCAGAATTCAG  
GTGACAGGTTAGGAATTGCCCCATTGCGAATAGGTGGTCTACCCATTCTTTTTCTTGCT  
CGACAACATCCAGAAAGATTTTCGTTGCTTCGCCTTCAAGTTCTACCGCAATCTGTTTCC  
ACTCATCACCATCAACCCCGTTTGCCATTGACGAATAATGTATTGTGTGCCATTTAAGT  
GAAGTTGTTTCATCACGCGCAATAATTTTCATGATCTTCGCGTTACCTTCCAGTAAACCAC  
GTTCCGCAAAGCTGAAAGTACATGCAAAGGACACATAAAAACGAATTGCATCCAGTGCGT  
TGACGCAGTGTGCACACAGATAAATCGAAGCCATCAGATCTCGTTTTGTTTCTTCAAAA  
ATCTTCTTGATAATCTAATGCTGTCTGGTCTCGTCTCGTTCTTCCCAATAGCGGAGATCTT  
CTTTTGCATTCTCATACTTACGGATCCAATAAAGAACATCATCATAAATTTCCCGATAG  
ATTCCGCTCGCTTCATGATAGAAGGGTTATCGATGATCTGGTCTGAACTCACTAGCCGGAT  
CAATGAAACAGTTACGCATAATGTGTGTATAGCTTCGGCTATGAATCGTTTCGCTGAATG  
TCCATGTTTGCAACCATGTATCGAGAGTTGGATCAGATACAATTGGACCAAATGCTGCGG  
ACGGTGCGGACCTTGAATAGAATCAAGTAATGTCTGATACTTCAAGTTTTCTGTAAAGA  
AACGCTTTTCAACGTCACCCATATTAAGATATTGAATGCGGTGGGTTGCAAGTGAAATTT  
CTTCTGGACGCCAGAAAAATGACAGAGATTTTTCAATTAATTCTTCAAATACTTGATGAC  
GCTGAATGTCATAACGAGCGATACCTAAACCGCTACCCAGAAACATCGGTTTCATTCATAA  
TATCAACGTGTTACGATTAATAACCGTATTTCCCATTCACATAATCCTCATTTTACAGT  
TATCAAAGTGGCATCGTAGAGCATTGCCTTTATTGGTAATTTTCCCGCAATGCGGACAAG  
GATCTGCCATTGTTGCTTCTTTGTCCGTTGTGAAATCAGCTTTCTCATTTCTCGCTAT  
TTGGTATTCCTTTAGTTGGCGATGGTTTCCCAAACATAGGATTTTTACTTCCATTCTAG  
CTTTTGAAATGTTTAAACGCGTGCTCCTTTGTTTTTGGCTTACGCATTTTAGCTTTTGTCT  
CTTCTGATTTCAATACACCTTTCGAAGATTCGCTAATCTTCTTCGCGTTTCTTCTTTCA  
TCGGCTTGCCCTTTCTTTGTTTCAGAGATCAGTACCCTAGCTTGTTTCATATACCCTAGACC  
AAACAATATACTCTCTTTTATTGGTCTTCGCATTTTTTGTAAACACATCATACCAAATG



CTTGTGCGATAGGTCCACCATGAATTTTGGCCAGCAGATGATGAATCACGAAATGTTCTT  
TTGCTGTCAACTCAATCAGGTTATCAACTTAATCACCGCCACCCATAGATCGCGGTA  
TATGATGTGTTTCCTTATATCCTTCAACGGTTCCTCTGATCTTTGCTTTTTCTATGATTG  
CGTCATGTAGTTTTGTAAAGTTCATGAATTAATCCTCTTTTCTGTATACCATTATTTATC  
AGGTATCCAGAAGAAGGATTAATTGAACTCACTATTATCCGACAACCTCAAACATTTAT  
CATCAGGAAGAATAGCCATTCTACGCCGTATTCATCCTCAACGTAGTAGCAAGTCCCAT  
CATGTCGAGCATCATATTCATCACCGACAACAAGCTATCAGCTAGCTCAAATCTACAG  
CAACACATTTTAATTTGGTTCATAATAAAATCCTCACTTGTTTTTGATGGTTGTCTTATAG  
CGGGGATTTCTCCCCGCATCAACACTTATTTTACAGCTTGCAAGATGAGCACTCGCTAGC  
GTCTTCCGTACCATCTGCACCGTCGCGAACGTGCGCATAATACAGGGTTTTTCAGACCGAA  
ATATTGAGCAAACAACATATCATCTAACACAGCAGCAATATCGACGTTACCAGTCTTATA  
AGTGCTTGGATCGTATGATGTATTGGAATAATCGCCTGATCCACAAACTTCTGCATGAT  
CGCTGCCAGTGTGAGATAAGGCTTGTTACCTTTCTTGATCAGTGTCCAAAGCAGGTCAAT  
AACATCAGCATTATTCTCTACGTTTCGGAATAACCTGATTAATTTGCCCTTCTTTTCGATCC  
TTTAAACCGATACAATCCCGCGAGGCGGTTCAATACCGTTGGTGCTGTTAGATACCTGAGA  
AGACGACTCACAAGGCATCAGCGCCGACAGTGTACTGTTACGAATGCCATATTGTTTCAG  
GTGTTTCGCGCAGTTCTTCCAATCCATCTCATAACCGGATCCACCAGTTCATCTACTGT  
CTTTTTGTACCAGTCGATAGGAAGTTCACCGCGACCATATCGTGTTTTCGTGCATCAGTTC  
GCAAGCACCTTCTCTTTAGCCAGTCGCACACTAGCCTTAATCAGAGCATATTGCAAGCG  
TTCAAACGTTTTATGCGTAAACTCGTTAGCGTCTTCATATGTGAAGAAATTATCTGCTAG  
ATATGATGCAAAGTTAGTCACACCAACACCCAGAGAGCGACGTTTTTTGGCTGTCAGCGC  
TTGTTCTGCAGGATAATCCTGATAATCTAGCAGGTTGTCAAGAGCACGCACCATAACCAT  
AGCAATGCGTTCCTACTTCTTCCATATTTTCGATATCGAAATTACCTAAAACATATGCTGC  
CAAAGTACATAGGCTAATTTCTTAATCATCACGACCCATCGGTTTTGTAGGCAGAGCAAT  
TTCACAACACAGGTTAGATTGTTAATCGGTGCTACATTACGAATAAAGGCCCCCGTGATT  
GTTTCATGTTGTCTGTGAACGTTGGGTAGATTTCGACCAGTGTAAAACGTTCAATTGCCAC  
CGCTAAAACAGGTCTTCGGCATTAAACACGAGTTTTACGAACACTCGGATCTTTATCCAG  
TATTACGTAAAGCTGGCGGAAACCTTCCTCGTCTCGGAAGTAGAGATCCACACAACAGCC  
ACCCGCAACATCTGGACTAAACAGAGTAATGTAATCCCGTTTAAGGAATCGCTCTACCAT  
CAGGTTATTAATCTGTACGCCGTAATCAAGATGACGAATGCGGTTATCTTCCACCCCTT  
ATTGTTCTTTAACACAATCAGACTTTCAAACCTCTAAATGCCATATTGGGTAATAGAGAGT  
CGCCGCCCGCCAGGAATGCCGCCTTGTGAGCATGACTTAACGGCAGTCTGAAAATGTTT  
CCAGAATGGGATAACGCCAATATGACGAACTTCCCCATGCCCGATCTTAGATCCTTCCGC  
GCGAATCATGCCAGCGTTGATACCGATACCAGCACGCTTGCTAATACTTGATGATTGC  
ATTTGCTGTTTCGTTGATGCCCTGCAATGAGTCATCACTTTCGATCACCACACACGAACT  
AAATTGGCGTGTGGGGTACGCACACCTGCCATAATCGGAGTAGGTAGAGAGATTTGCTT  
ATTCGCAACAGCATTATAAAAAATCAATCACATTTTCAAGTCGATTTTCTGTCTCTTCTTG  
ATGCAAGCTCATACCGATCAGCATATACGCAAATGGTGGTGTTCGATGATTTTCTTAGT  
GCTGCGATCCTGAACAAGATATTTCTCTTTTAACTGCATCGCACCAGCATTGGTCATTTT  
AAAATCAAGTTTATGGTCGATGAATTTCTCCAGATATTCCACTTCTTCATGGGAATAGTT  
TTGCAGAATTTTCGCGATCATATTTTCCGGTTGCAATATTACGCTCAATATGGCTGTAAAA  
ATCAATCGGTTGGAATTGACCGTATAGTGATTTGCGAAGCGCGAACATTGCAAGGTTACT  
TGCTACATGTTGATAATCGGGTGTCTTCTACAGTAATGTTATCTGCTGCGACCTTAATCAA  
TTCTTTGTGGATATCGTTGGTAGACATACCTTCTGTGAGAAGTGGTTCAACCATATCAA  
CAATTCATATGGATCAACGTTATGACCTTCGGCTGCCGCTTCAGAAATTTTCATTACTTT  
TTCTTTTCAAACGGAACAGTCAGACCGGAAGACTTAACAACATTTTAAATCATATTACC  
TCAGTTCAAATTTTAGCAGGAACGAGTTTATCCTCCATATTGGGGGCCTTGGCCCCCTTT  
GTTATACTGCCATTTGAGCGGTGATCGCTGGATGGCTTTGATAGTTGTGAATTTTAAAT  
CTTTCGGAGTCTTTGTCAATACCTCATCTAAAGATTTAAAATCCGGCAACTCAATTATTG  
GTTTATCAAACGGAACACGGCTTAACTGGTCCATAACTTGATCAAATGGTTTTTTGTAGA  
TGTGGCAATCCCCACCCTGATAAACCAGTTCGCCAACTTCTAATCCGCAAATCTTCGCGA  
TGATATGCGTTAACAGTGCATAGCTCGCTACGTTGAACGGATTCCCTAAAAAGGGATCAT  
TCGAACGCATGAAAAATAAACAACCTCAATTTGTTGTGCTGGCAACATAAACTGTACAA  
TCCGATGACATACACCTAACACAGCATTATGCGTTTCTGTACGTTCCATGAATCAATGA  
TAATTCGACGACTATATGGATCATTCTTGATCATGTCAATAACTTTTTGTAACCTGGTCTT  
CCCAAATCTTCGGCCGATAGACATATTCTTCATCGTCTTTAGTGCTTGATGTGTCTACGT  
CCATACTAACAAACATCGTGGTATCCGGTGCTATAATATCCCCACCCAGATAATCACTAT

CAAGCAGATAACCGAAATAACCATCATCTACCCATTCCTGGAATCCCCACAAGCAATATG  
CATCATTAAACAAAATTAGATTGAGTCTTCCAGTGGTCTGCTACCAGAATATAATCAA  
CTTCATAACGCATACCACGCCAGATAGCACATAAACGGTCTTCTGTTTCATTGGTTGGT  
TAAACTATTCCACCCACGGGTGCTTAAATGTATGTGTATATTTGCTCTTAACGCGCTTAA  
TTTTGATTCACCGTGTGGCTAAATCGGTTTTTCGTCGCCATGCCATGCCATACATATTAC  
CGACATTATAATCATTGAATCGCAAGGGAGTCTTTTCTTTCATATCAAGACAATTGCCGA  
ACCAAATATCAAAGGCTTCTCGTCAAACCTTACCGCGTGTAAATTTCCCGTAAGCGACGGC  
GGTCAAGTGATCCCTCCATAAACCATAGCAATTCGCCAATTACAGCGGCTGTAGCCATCT  
TTTTAGTGGTCAGTAAGGGGAAACCTCGCTTAAATCAATTCGCATTTCCGCACCGAATT  
TAGAGAGCGTACCTACCCAGTTCGGTCTTCACGAAGCCAGCCATTATCAAGAACATCAC  
GCAATAGTTTCAAATATTCTTTCATCTCACACCACCTTTTTCTTAGTGATTGCTTTCTTA  
CGCAGTTTTGCTACTGTCTCGTCAATGTCTATAAAGATAACACCACGGTTCGAATACAGTT  
GCAGGTCTTGAGATATCGCTATTTTCTTGCACAGGAAGCCATGATGCGCTCGCTTCATCA  
TAGAGATATTGTAAACCGTAATAATCTACGGTACTGCGTTGTTTTCACTGGTAGCCGTC  
CATAATTGAATAATACCGACTTTCATTATTGTTCCCGTCCACAATGTAAACACCGACTAC  
CAGCAAACATCCAAGATGCACCACAATGTTTGCCTCATAATCTGTCAGAATTTTCCAGT  
TACGCCTTCTTACGTTCTAAAATTTGTTTCGCTGATCAGGTAATCAGCAAGGAAGTAATTA  
TGTGCTTCTTTTGTGCAAATCAAATATAATTCCTGAATCATTTCCTTAGAGATACCA  
ACATCATATTCGAACGGATCATTAAATTCCTGCTCGTTAACATATGTTAACACAATACGG  
TCCGCAAAGTCAACCGCTTTTTCAATCAGGGAAGGTCCACCAATAACGCTTACCAAACCT  
TGCAATTTCTCTATGACTTCTAATAATTCCTTCAATCCACCATCATTAGTAATCGCGGAA  
TACACATCTGGTTGGTCGCCGTTACTTGCTTTCGGTGGCTTACTGGTATCGGTCCTA  
ACAACCACATTCACGCGACCATCCAGTGCTTTAGGAAGACTTTCAAAGGTATTACGTCCC  
ATTACCACCGCCGCAAGATCAACATCTCCCATAGTGCGCATTTTAAAGTTTTCCATGTCC  
TTTTTGATTGGACGACCCACGGTAAACCGGCTTTAAACCAAAAGGCCAATTTTCATCC  
GACATTTTAGTGTCACCAATCGCAAATACACATTGAATCATAATAAATCTCCTATCAA  
ACCAGCTTGAGATAGTTTTCGTTAACGTTTTCTTCTGTGATGTCGGTTTTAAACTCAATA  
CCAACACCAGGAGAAACATAATAGCGTTCGGAATAATCACGCCACATTTTCAGTAGGCTG  
ACACCAACATTAACACCATTTTCCCAGAAACGGAAGATAATTTTATTTGCGGTGTGGGGG  
TAATCGCTTTGAATCAAGCTGCCATCACCGCGACGTGATTCATAAACCGTAATACATTCA  
CGTTAGCGGCTTTAAGACATTCTTCAATAGTACCGCATGAGATAATTTTCGGTTGAGTCG  
TTTACGATTTGTTCTACAGTCCACATAATAATCCTCTCTTTGTTTCGATGTGTGATT  
ATACATTACCACATAAGCATGTCAACACCTTTTTTCATAAATTTTTAGGCAATAAAAAAGC  
CTCCCCGAAGGAAGGCTTTAAAATTCATTACATCCCTAACAGAGCGTCAAGATCATCCAG  
ATCAGAAGCGGAGGAAGTACCGCCACCAGATCCAGCGATGCCATCAGGTCAACAGCGGA  
AGAATCTAACGCCGTGCTAGCTGCGTTAATAACCAACTACAGTGCTAGCTGCGTTAATACC  
AGCATCGAATGGATTCATCTGTGCGTCAAAAACGTCAAGCTGGCTGTTAATCGCTGCCGC  
AGCACTGGAAGCCGAAGCACCAGCGACCATAGAAACGCCCATAGTTTTCTTAAATTTGGT  
TTCCAGTTCATCGAACGGATTAACCTGGCTAGGCGCTACAATCTCACTCAGGTCAACCAT  
GTGTTCCATCAGATATTTCTGATATGCTTCGTCTTCAATTTTTCGGAAGCTGTGATTGCTG  
CATGAAACGAGAATCATCATAGTTCTGGTGTATCAACCTTCTTAGCTTTCAGGAGGAA  
GTTAGCACCGGAGAACACACAAGTTACATCTACCGGAACCTTCGCCCATATTGGTATTCCC  
GTTACCATTGCAACGATCTTATCATAAATTTTCTGACCGAAGCGGAATTTGAATACCTT  
ACCTTCATTTTCTGGTGCTTGAGGATCTTTCAGTACCAGAATATTTGCGTAATAAGAGGC  
TTTACGCTTAATCAGTTGCCATTCGGTTTTATCGGTATTGTACAGATCTTTTTCGTTAAT  
ATATTTGCACACAGGGCAAGAATCAAATCACCGTGGGTGCTGGAGCAGTTTTCACAAATA  
CCATTTGCCATTAACCTTTGAAGGAATGGATTACCAGTTTCACAATCGGCAGACCGTCTTC  
TGTCTTAGACGGCAGGAAGCGAATCAGGGCTTCACCTTTACCTGCTGCATCAGTCTTAAT  
CTTCCACTCTTTTCGGATCTTCTTTGGAGAAACCGTTGCCACCTTTCAGTGCGGCCAGTTG  
GGCTTGCAGTTTGAAGAATCTTGGCGTTTAAACATATTCATTTCTTCTTTTGATTA  
ATTTACTAGACTATTATACAGATTTAAATTTACTTGTCAAACATTTGTTTCCGTTTTTAA  
TTGAGATATTTCTTTACACTCTTTAACTACTTTAACAAATAATGCTCTTGCTTTTGC  
GTCAATTACATGTAGTTTCTTGTACGCCTTCATTTTAACTATAAGTTTGCCAAATCAA  
GTCTTTGGCTACCTTGTGCGTTCGTCGGTTATATTTAGAAAGCTATCTAACAAATAAA  
CGACTCAAACGATATAATCCGATTTTGCAGTAGTTTAAAGATACCGCTAGTTTTCGGTTGC  
GGGATTGTATGTAATTAGCTCTTTAAGAGTAACCCCGCGTTTCTCGGAGAAGTATACCAG  
ACTTTAATGTCATCGTCAAATCGTGTTGCTGCATCGGTTATCTTTCCTATGTATTCCAT

ATAAAAGCCGTATGCGTCAACATCAGTGATTTACCTACCCATGCATCGGTATTAGCTAC  
CAGATTGCTTAGGAATAGGAAGTATAATTCTCTTAGATTGTACTTTTCCGCTAATTTTGC  
GAAATAGTACGTATCTCTGCGTTTATTGAATGCGGCATCAGACAACCGCATCCTCAAATT  
GTATTTTACGCAATCATAACGTCCGTTTCATGTGAGCTTTCATCATGCAATATAACATATA  
CACAGATTTAGCATTAAATTCGCATATCTGGATCTGGAGGAAGACGGTTTCTGATCATA  
TACCCCTTAAATATCGAGAGTGTTGGTCCGTTTCGTCGATCACTCCCTTCTGAGCGTTCT  
ATTTACTATACATTCTTGTGTGATCTTGTCAATAATGGACATCGGAATATACTTCTGATA  
GTGACCATATTCGATAGAGTTTTCTCTACAACTGCGTTGTCGCTTCAAGATAAGTCAA  
TCCCTCTTCAACAACCAGTTTTTTCGATTGCAAGACCGTTTGCTGTTTTGTTTCGCGGCCT  
TACCGCATGTTCAATTAAGCATTGAACACCCGATCATAGAGTTCTACCGCTTCGTCGCGTT  
CTGCTTCGAACGTTTCGCGCGGTTGCTGGTGATACAGTTTAAACAGAATGCCCCACATTT  
TACCATCGACGCCTAATTCTTCTTTAGCACGCAGTTTGATCTCTTTGATCTTATCGCCGT  
ATGCTTCTTGAATGGTTTTCTGATCGCTGGCTTCTTTAATCAGTTGTGCCAGGGTATTT  
CGTGCCTGCTTCGTCAAATACTACTTTTTCTTTTTCTGTTTCAGTCAAATATTAACCC  
TCTTTCGTCATTAATTGAAAACCACGTTTCAGCTTTTGAAATTTTCGCTAGGACTTAAATCG  
TCACCAACATATTCTAGCATCATTCTCGGATAATGTCTAGTGCTTTTTTCATCACTTGAT  
TTAACTCGAACTCAAGTTCATTGTGAGCATCTCCCATTTCTTCGCCGACTTTGCAATAA  
TAGAAAGTGTCTTTGCACATTTCCACTATAGCACCCCTCAAGGTCAAGTGTCAATGACTTG  
CGGTATGTCATTACTTGAATAGAGGAACGATAAAGGTCGGAGTTTACGCCTAGACTATCA  
ACATAATGATAGAAATCATCCATTGTTGAAAAAGTGATTTCTTCTCGGTTGAATAGTCCA  
GATTCACTAACACCTATTTTGACCATAATCAATGATCTATTAACGTCAAGTCGAGCATAA  
ATTCCTTTTCTACGCATTGCATGATCTTCGGTATCATAATAAAATTCGTGTTTTAGAGTG  
TTAGCACGATCTACTAGATTGTACCCGTCATACATTGCTACCCACAAATCTCAGATTGTT  
TCGACGCCAATTTGTGAGTGTGCATAGTATCTTAATTCAAGTCCTTTTCATATGTCAACCC  
TTAGAACTCACCAATTTTCTGCAACATTTTAACTAACGCATTGGTTACAAAGTAGTTATA  
AATTTTACCGCGTGGTGCTGGTTATGATTTCTCCCATGCTAACAAAATTTTCATATTCGAT  
GTTATCAGGAATAAATTCAAATCAATAAAGTTCGCGGTTTTTCGTCAAAGCGTAGTGCTTC  
TTCCTCTGTCATCAAAGACTTTGGATCTTCGGCATCGAAAATTTGCTCTAACCATTTAGT  
TGCAATTGGTTTAGCTCGTTCCCTTCCAGTCGTGAGATAATGAAATCACTACGACACTT  
GATAGGAGCTACACCGTCCATTGCGTCACCCCTAACACATTTTACCATAAAGGTCTTTGTA  
AGGGCTAGCATATTTGCATTTCTTCTATGCTTTCTGTACTGGCGCCACTGTTTCACGTT  
TTTGTATTTGTGCAACTGTGTGTAGTCACCATCGCCGGAGTTGATTAGCACCTGGCGACC  
TTCTACAGAAAACTTTTAGTTAACACAGCGATTATATCATCTGCTTCAACTTTGTCAAC  
CTTAATAACGTGATAAAGGCATGTGCTCTTTAATCTCTTCGGTGATCTTATTGATCGCAGC  
AAAGATCATCTCCAATCACGCGGATCTGCGTCTCGTTTTTCTTACGGTTGCGTTTATA  
GTAAGGGGCGATATCACGTGGCCAGTAACCTTTACTTGAATCAAAGGCAAGTACCGTAAT  
TGGGTATTGCTCTTTGAATTTTGTCAATTTATAACGCATGGTGTCAAGGATAAGATGACG  
AATCATGCCTTCATTAATAGGATCTTCCGGTTTAAAGGAATGCGAGATAGTAGCAATCAT  
AAGCTGCGACACATCAATCAAATGCACACCTTCCGGCAGTTTATCTTCTGGATCATCGAA  
GAAATCATTAAAGTGTAGCGGTAGTTTTTGTAAACGGGTTATACGTCATAATTAAGTTCTC  
TCCACTATCACAACAACATATTTGCCAAACGAGTTAGATACTTCACGATCATAACCCGTAT  
TTCTCCATAACTCGCAGAATTGCATTGTTTAAATTCGGCACGGAAATAATTATAATCCTTA  
TCAGGGATTCTGTCAACTACCCATTTTGCACCTTCTGACAAATCAACTTTAACCATAATA  
CATCATCCTCTTTTGTCTATCAAGCCTCATTTTATAAATATGAACATACTATAAAAAGG  
AGACCCAATAATGGCAGATTTTTCTCAACATTTCAAGGCCACATTTGGCTTTGACGCTGG  
TAATGAAAAGGTCGTCAATGTAGCATAACGCAGTTAAAAACACATCAACGGATGCGGTCAA  
CGTTGAATTTTCCAATTACGATAATGGTATTACTCAGTATGACACAACCTCGCGGTTATGA  
TCAATACGGAACACTACAATCTATCAAAAACCGTCCGTTTTATGCAAAAAGAAGATATCACAAA  
GCCAGCAGGTGATTTTACCCGACTAAATGGCAAGCACTGCGCACGGACCCACGTTGGGA  
TTATATTGCAGCAACTTCCAGTGATACTCCATTAAAGTCTGGTGATTATATCGCAGCAGA  
TGGTCAATTTGCAAACTTGACTTTCTCTATGCCAACTATAACCAGCAGAGGGAGACACTAT  
AACAGTAAAAGATATCGGTGGCAAGTGTGGTGTAAACGAATTATCGTTCTTGAGTTCATG  
ACATGAGTTTTACCATAACGGCAATGTGTATAACCGAAAATGGTATTGCGCTACCCCGTA  
TGCAATGAACTATTTTCATCTTTGTTTCGGAATCGTTGGCATGTTAATCAGACGGGAACAGA  
GCCGCGCGGTGTATACGCACAGCCAGCGATTGATGCTATTCAAATGCGAAATGGTGATCA  
GGTATATCGTCGTAGTTTCGTTGGGTAATATTACCTTAGTGCTTCTTAAGTTTGCCAACAA  
TGCGGACTTGATCCAGACTACAGACCTTGACGGATTAACCGCAACCAACCACGTTACGGT

TAAAGTTCATGAGCACGCAGAAGAACAATCAATTGGCACGTCCGGTCTAAAAGAGATTAT  
CGGTAAGCGTAGCGGTTCATGGTCTATTCATCTTTGACAAGACGGAAAAATTATGGCGTTT  
GTGGGATGGTGATCAGTCTGTTTCGTCTTAAACCGATCATCGATGACACTCGCTTGCGACC  
TAATAGCTATGTTGCTGTATTTGGTTGTCGTGATGTTACTCTGACGCTGCCGACCAATGT  
CGAGCCGGGTGATCGTATTCAAGTTTCTATGCAGTATATGCAAGGAAACCAGAATTGCCG  
TATTATCACCGCCACAGAGGATACAAAAATCCTTATGCAGAAAAACATGGTTCAGTTTCC  
TAAGCGTAGCGAGTACCCATTCAATGGGACTGATACATGGACTGGAGTCTCTGAATTGTC  
TTTCCACGCTGCAAATGATTATATACCTTATCTGGAGTTCTCTTATTCAGAAGGTGATGA  
TGGTAAGAAATACTGGTTGGTGGCACATGCTCACCCGATTGTAGAACGAGTAGATCCGAC  
TCGTAAGATCGTGTTGGTGTAAATTGCACTGGCTACCCAACTGAAACGAATAAAAACCA  
TGAAGAGAATCCTACCGACGAAGTTGCAGTAACACCAAAAAATGCTGGCTAATAAAACCGC  
CAACGAACTCGACGCGGTATTGCTCGCATTGCGACTCAAGCGGAAACGCATCAAGATAC  
TGGTTCCAACCTTCCCTGGATGATGTTATCGATACGCCTAAAAAGTTAACTGACTGTGTTCC  
TACCGAAGCCCGTTCGTGTTGTGATGGAAATTGCAACCCAGCACGAAACCAATGAAGTTTT  
AGACGATACCCGCGCTATTACTCCTAAGAAATTAGAAGAACGTCGCGCTTCCGAAGATCT  
CGCTGGTATTGCTGAAATTGTTCAAGGCTGGCAGGAGTGTGGCGCTCGACGTGGCGAAGC  
TGGTACAGGGATCTATAACATCAATGACCATGCTAAAATTGTTACGCCAAAAAACATCAA  
CGAAGTCAAGGCGACCGAACTTCCCGTGGTGTGGCTATCTGGCAACCGACGCGGAAGT  
GCAAGGGGCTACAGAATCAACCCCGCAAGATGCTTTACTCATCAGACTCGCACGCTAAC  
GAAACGTACTGCTACCGAATCGCGCACTGGTATCGCTGAACTGCAACTCAGGAAGAAAC  
AACTTAGGTCAAAGTGATAACCATATCATCACGCCTAAAAAGTTGCATACTCGCCGCGC  
AACGGAACTTTACACGGTTTAGCCGAAATTGCAACTCAGCCGGAATTTGACGCAGGTCT  
TGACGATGCTCGCATTCTACCCCATGAAGATTAACCTTCTTTGAGAATGCACAGCG  
TTTGAAAGTCGATCCGACTCAGGGGCTTAACCTTACTGGTGAATTTGTGGCAAGGTATCAC  
GATTCGCGGTTTGGATGCAACCGAAGATACAAAAGGTGTCGCTAAAGTTGCTACTACTCA  
GCTTACGGATGCTGGTCAAGATGATACTACAATCATCACGCCTAAAAAGCTGCAAGCCAA  
AAAGGCCACCGAAGGTAAAGAAGGTATTATCCGAGTTGGTACTCAAGCCGAAACCGTGGC  
TGGTGCCTGGCTAATGTAGCAATTTCTCCGAAGAACTTCAAATATGTTGTTTCAGACAGA  
GGATACATGGAAAGCAACCGAAGCACGTCGTGGTTTCTTGAAAGTTGCTACTCAGGAAAA  
CTGTTTCGTTGGTGATAATCTGCAGGGTTCTACTCAAGAACTAGGAAACTACCAGCATGA  
CGGAATTGCTGTTACCCCTAAAGGATTAACCTACGCCTTGTAAATTTCTTACCTATGAT  
GGCAACCGCTCAGAATAGTTTGAAATTGGGTAACTAGAGGCCGCTAAATGGGCGCGTAG  
AGACATTGACCAGACCATAGAGAGCAATTACACGTTTAATAAAAAACGTTAACGTGAAGGG  
CGATTTAGAGTGCTTAAAATCAGGTTCCCTTTGAAACTCTGTCTGTGACTAAGAACTCAAC  
CGACGATCCGAGTAATGGTCATCTGGTGTGGGTGAGCGTGGCGTTGACGGTCACACCGG  
AATTACTCTGCATAGCACAACCGCATCGGAAGGCATGAAAACTCGTGGTCTATTATCGT  
TGGTGGTACTGGAACAGCGCAAGTTGTTGATAGTGATGCTATCGCTTTCCGGTAAATCAA  
TGATGGTGGAGTCGTCGAGCATTACGCCTTTGCTATGGAACACAATGGCGACGCGACAGC  
ATATAAAGACTTTATTGCAGGTCGTAACCTGTATGCGAAACAAGGCGGTTTATACATCGT  
TGACCAGTCTAATCCGGCAATGACTCGTTCCCCAGATGCTATGCTGAATATCGGTCACGG  
TGGAAGTGTTAACATCAAAGCAGGTCATCAAACGTTAACTACAGAGATCGCCGGACAGAA  
ATATCAGATCGTACACGCAGGAAACGCTGATGAAGTTCTTAACCGTCAGTTTGTAAAGAA  
TGCTGGCGATACGATGGTCCGTAAGCTGACTATGGATAATGCGCCTATTGGTTCTGTAA  
GCATGAAGCTAGCGCGGCAACCGCTCCGGCAATCAGCAACATCGGTTTCTGGAATATGCG  
CGTACTATCCAGAACATCAAAGAACTTATCCAGAGAAGAAAAACGGTACTCTGATGCA  
ATGGGGTACTGACGCGGACGGGCTTACCCAGCTTTGGTCCCCAGATGGTACTCATAAACA  
TTATATCCGTTCCGGTACTGGTGGTCAATGGACCGCATGGGGTGAAACTCACACCAAACA  
GAATAAGCCTACCGCTCAGGAAATCGGGGCAGTAGTTGCAGAAGGTGGTTTAATGAACTC  
TATGACGGTGCCTGACTGGATCAAAGTTGGTAATGTTAAAATCATCGCCAATAATCTGAC  
TCGTACCGTAGACTTTATCTGGGAAGACTAATTAAGGGGGGCGAAGGCCCCCTATGGGGT  
TATTATGACACAAGATATAGAACTACGCAACACTGGAATTAGGTTTGCGCATTTTCGACGA  
AGACTCTGCGACATTTACCAGCATTTTCAGAAAATAACTCTGTGATGTATAAGCTGGAAGT  
GCGCGGATCTAATGCGGATTCGACCAACCGCAAGGATTAGATTTAATGGAGTGGAGAT  
CGTTGGCACTGGCTATGAAAATGGCCTAAATGTTAAAGTTCTTACTCCAACCTGGACAAC  
ACACGAATAAAAGGAGTTCTATGGTTCGCGGTGCTGTTTTGGCAATGCGTGATTATCTTTA  
TTTGCTGAAAGGTGACTATATCATTGCGATGGCAACACATGGAGAATTGTTTGCAGATCC  
GATAAGTGATGATATATTTTCTAAGCTGGGATCTGTATCATTCCCGAATCACATTTTGT

TCAGCAAATGCCTCGTGTATCCTATGCAGCAATTTATTCTACTAAAATGGGTAAAATTGT  
GTGCGAAGGGATGCAAGCAACGCACGGAGAAGGTCAAGATTCGTCTATACAAATTGAGAA  
AGTTTATGATACTATAGACGATCTTGCAATAACAGGAACACCACAACGATTTTTAGATTA  
TCCGGTTGAATATGTTAGCGAAGATGCCGAACATTTGAGCTAATACAATGGCCTCATGA  
TGAGATCAGCGCACCCTTGAATATTTTAAACATAAAGGCAGGTGACAACTATCAATATC  
CTTTGAATTGTTCCGTGATAGTGCCGACGCCGACCCAACGTAACAGCGCGTTTCTATAA  
CAACTACTTCACTGATGGACAATATCAAACCTGGCGTTCGTTATAATACCAGCCAGAAGGA  
TCAATGGGAAAAGTTTGAAGCCGTCTATACCGTACCGGAAGGAGTTGATAGTGTACCAC  
TGGTTGTATCAGATATCCAACCACTCAAATGAAGGTATTGTTAAAATTAGAAACATACT  
AATAACGCCGATCAGCGGAGTAGACAAAACCTACTGGTCCGACATCATTGGTGTAAATGG  
TGTTAAAAAACTCATATTCAGGATAACGGTCATTTTACTAACCCCTGTAATGAGTCTTCT  
TAAACTGCCTAGAGTTAATAAACACATCACATCCAACAACCTTTAAAGAGTTTCGATGTTGA  
TTAACATTTTTTAAACAAGCCGATCCTCGTGGTCCGGCTTTATTTTTATACAGTTGGTTAAAA  
CATAACCGAAACGAAGAAAGATCTTTAGAATAATAGAAAATTTGTTTCGGTTAAAAAATA  
GTCAGTGCCTACGGCACGTGCGGAAGCGATATTTTGTAAACATTCTATAAATACTCGGAA  
CTATAACTAATTTTTGAGGGTGCTTTATGGCAGATTTGAAACATGGATCTACTGTAGGCG  
GATCTCCCATTTGGACGCAAGGAACTTGACGAGCCAGCCAGCGGGGGATCAGCTTTTCT  
ACAAAGGTCATAAAATCTATACCGCTTTTGATAAACCTTCGGCTGCCGATTTTGATGCTG  
TTAGTGCTAACGACGGTGGCACATTTCAAAGGAGGTCCAGTTTGAGGAAGGTTAAGCG  
TAGGTAGCGCATCGGCTGGAGAAAACCAAAAAGAACGGGATCTTTAAAGGAAATAGTGATG  
CGGCTAACTTTGATGGTGAAGTTGGGGTTTGCATTCGTGGAAATCTATTGGTTTTGTTA  
ATGCCCGTGATGGCGTTATCATGGCTTATATTGACACTACCACAGGTGATTTTAAAACCTA  
AAGGGACTATCGAAGGGACAACCATTAAAGACACAGGTCAACGAGTCTATAGCCCTGTTA  
ATAAACCAACGAATAATGATTTAGATTTGGTGTCTCGTCGCGGTGATACCCTCACAGGAA  
CATATAATTTAAACACTGTCACTGTAAACTATCGGTTGATTCGAAATTAATTGCAGGGG  
AACGTGATTTAATTAATTTGATGCGACTAAGTTCTATTATGGTAACGTTCTTGATACGT  
CGGTCTTCCGAAGTAAAGATGAGCCTACCATTTTTGTAAATGGCAGAGAAGGTCGTTTTT  
ATCACACCAACAATAAACCAACTAAAGCCGATGTTGGGCTAGCCAATGTCACCAATGATG  
CACAGGTTAAACGTGCTGGTGATATTATTGAAGGTAACCTGCAAGCGCCTAGAATGTTGG  
CAACAAACGATCCGCCTGGTCCTAATGAATTGGTGCGTTTGAGCTACTTTGAGAGAAAAT  
CAATGGTAGCAAATCCAACCATCATTGGCAACGTTGATTGGAACACTCTTATTAATCGCG  
GTATCTATCGTGTGAAAATGCTGGGTCAGGTAATAAAACCGTCTGATAGCTATTATA  
ACGGCGTTTTGATGGTATATCGCCCAGAAGATGCGGTCGGTACTCGTCGAATTGTTTCAGG  
TGTATTATCCTGAATCTATTGACCATCCGATGTGCTGGCGTTTCGTGTTCTAATGAATCAT  
GGACTGCATGGAACCTATGTAGATCACCGTAAATTAGGCGATATTCGCTATGTTAACGTAA  
CTGGCGATACCATGACAGGACCGTTAACTGTTCCGGCTGCAAACGGTGTTAGAACAGCTA  
GAGGTGCATATAATGGTGATAACTACTATGCTGGGTTAAATAGTGCCGATGGCACGGCTA  
TGATTCACCGTATCAGCGATATTAAAGCCACTGAAAAATTGGGTAATACACATGATTCGA  
AAGCTGTTTTCGTTAAATCGCGTGGAATACTCAAGCCACAGACCGCTATAAACTTTACC  
ACGAAGGGCGTAAACCTACCCCTGCCGAAGTTGGCGCGGTTCCACTTAATGCGGTGATTG  
ATTTTGGTACTTTCTAATTTTAGCGGGGATTATCTCCCCGCTTTTCTAAATAATATTATT  
CTAATAACCGTTTAAAGGATTTTATAAAATGGCAGATTTAAACAGAATCCAATTTAAACGT  
ACTAGCACGAAAGGTTGTAAACCTGATGCTACTACAATGACGCAAGGTGAACCTTGCTATC  
AACCTGCATGATTATTATTTGTTTACAAAAAATGACTCTGGTCTATTATTAACCTTAAGC  
TGTCCTCCGATCTATGACCGCGATGTTACCATGGCTGGTAAAGTAAAGGGAGATTATTAC  
ATTTTAGGTAACCGCCAATTATCTTGAAGATCAGACAGCGGGAGACCTTAACCGTTTT  
GGAGCATTCCGTACCAACGGTCTAAATGGATTTTTAGATTTGACCTTGCATGTTCCCTCAT  
TCTGCTGGCGTTCAACATGGTTCGAGGATTTACTTTCCATTATGCGACTGGCGGATCTCGT  
GTTGAAACATATGGGTATAATGCACAGGGACTAAAAGCATTTAGCTAGAAAATGTATCAT  
GAAGGTGATAAACCAACTCCAGGAGAAGTGAACGTTTATAGCAAACAAGAAGTAGATAGA  
ATGTGTGTTAAAAACGTTATACTTTCTACAGGTTCTGGTGATATCGTTGACGGTTATTTT  
AAATTAGCGACTGCGATGATTCCACAAGACGGTCGTAGTGTATTTTTCCGTATTCGTGGT  
GGTAACGGATATAACATTACTCCATACGATCAAGTTGATATTGTAAAAATTGTTATTCGC  
AGTGGAATAATCGTCCTAAAGGTGTTAACGTTATTGCATACCGCCGAAATACAAACAAA  
GCATTTGATGTTTTGGCTGTTAATACTTCTGGTGATAACTATCATATCTACGTGAAATAT  
CAGCGTTACACTTATAACGTTATTGTTGAATTTGGTAAAAGTGTGTTGATGTTAATCTGGTA  
GTCCATGACGTTCCAGACTTTGTTGTTGATCGTCCTGTTGGCGATAATGTTATTGGCGGT

CGCGCGGTAACCTTTTTCAACACCGAAAACAAACGAGGTATGTTGAGTTTTGACGACAAT  
ACACAAAACAGCTATGATATTGTTACATGAGTAATGATAAAGGTACTGGACGAAAATAT  
ATTCCTAAATTCCGTCGTAACCTATAATGAAATGATCTGGCATGAGACGGTTCAAGGTAAC  
GTATATCGTTTTAGCTACTGGAACCTACCGACGCAAACGAAGTTCTCAAAAATTACCGACCGC  
ACGTTGCAAACCTGGCAAGGCTGTTTTTGGACGGTGGTAATAATAATGTTTCGTTTACATCGT  
AAACCCGGAAAAAGTAACCTATCTGGAATATTATGATGCCCGTGACGGAGCAAATAAACGT  
CAGGGATATATTGGGTATGGCGATGCCACAACCTAACAGTTGTCAATTATTAACGAACTC  
TCCGAAGGTAATAACCCGATTTTTCTTTAACGAGACAGGTCAAATTTCTCTTAACGTAGGA  
AAGACAAAAATTGTTTCATAGCAACGGACAATATATTTCTACCAACGCCGATAACTATCGT  
ATAATTTATGGTAATTATGGAACATTCTGGCGAAATGATAGCGTTAAACTTTATCTCATG  
TCCACTGCCGAAAATGATAAATGGGGTACTTGGAAATAGCTATCGACCATTCAATTTACAAC  
CTAACCGCGGGCGATGTTCAATTGGGTGGTGTAGGTAGCGAATCGGCATTAACGTTAGAA  
TGTGCTTCTCGTGCCGCTCGCTTTAGTAATGACGTTTACATTAAGAAAGGGCTTTTGACT  
TTCGACGCTGGGCGATTAGGATCTCGCGATTATATTAATTTAATCATTGGAGCGATAGC  
AATAACGGTTCGCGATAACATCCTACAGAGTGAAGACAGTCAGGGGCGCACATTTTACCCT  
CAACGTGCTATGGGAACTGGTAACATAACAGCACGTTTTAAACGCTTTGTTTCGTGTTGAC  
TCTGGTGAGATTGCATTTGATGCTAATCGGGGGTTCGCAGTCTCAAGTTACCTTACACACA  
TGGGGTAACGAGCAACGCGAACACGTTTTTGAATGTAAGGATGCTACAAGTTATCACTGG  
TATACTGAACGTAACCTCAGGGTGGCACTGGACCTATTCTGTTTCGTTATGGCGGGTAGTCTA  
AACGTTGGTAGCAATATCACAACTGGTCCGGATATTACGTTTAAACGCGCTGGCAAT  
AAGCACATCTGGTTTAGAGATCCAAACGGCTTAGAGTTAGGCTTGATGTACTGCGATGAT  
GCTGGTGCTATTTCGTTCCGTTGGACAGAAACAAGCCAGGCGTGGAAATTTGCAGCTAAA  
ATGATCCAGTTGGAATCTGGCACTGTATCCGGTGGCGGTAATGGCCTGATTCGTGGTGAA  
GTTGCTGGCGGTAGTGGGGCTAGCTGGCGTGACCGTGCTGCTGGCCTTATGGTTGGGTGT  
CCTCAATCAACCAATTCCGCTCATAACATCTGGAAAGCTACTCATTGGGGACAATATCAC  
ATTGCAGCAACCGGTGTACATGTTCCCTAACGGTACTATCGGTGATGCTATAGCTCGCCTA  
AACGTTTCATGACGCCAACTTTGACTTTAGCGCCTCCGGTGACATGCCGGCAGGGCGTAAC  
GGTTCGTTTAAACGATGTTTGTATTTCGTTCTGATGCTCGCCTTAAAATCAATAAGGAAGAG  
TATAAGGAGATTGCCACTGATAAAGTTAATCGCTTGACTGTGTACACCTACGATAAGGTT  
AAATCTTTAACTGACCGTAGTGTTATCGCCCATGAAGTTGGTATTATTGCTCAGGATCTT  
GAGAAAGAATTGCCGGGAGCAGTAACAACCTTCTAAGGTCGGCGACCCAGATAAACCCAGAA  
GAGATCTTAAACAATTTCTAACTCTGCTGTCAACGCTCGTTTAAATTAAGGCGTTTCAGGAA  
ATGAGCGAAGAAATGAAAGCCGTTAAAGCTGAACTAGCGGAACTTAAAAGGAATTAAGGA  
AACTCCCAGGGAAGGGAACCTACTAAGGAGAAACGGCTATGGTCTATAATATCGTCATTGG  
TGCTTTTTCTAATTTCCGAATGAAATTATTATCAAAGTTAATTAGTGAAAAGATGCTCAC  
TAAAATTTTCTTCTATTGCGCTCGTCTTTCGCGCTTATACCAATACGCCAATTGATGA  
TCGTTTTGTGGAAGAACATTATAAGGAGTTTAAATAAAGATCTGTCAGAAGATGGTAACGA  
GCAAGATAAACCTAGTGATAGTCAACTACCTAAATAAGAGTACACGGTCATAGTTATCAT  
AGGGCATTATATGCAAGTTTCTGAAAAAGGGAAAGACTTTGCTATCTCAAATGTCCTGCG  
CGCTATTTTCACTAAAGCAGGAGTTGCTCGTACTTCGTGGTTTTGCTGCCGTCGT  
GTTGTCCATAGTGGCATTGTCGTTTATAGTAAAAACGAGTTATTTGCGCTTTATAAAGA  
GCCTCGTTATGAGACTTATGCTCACATTCTCCAGGTAGAGAAAGACCGCAATTTTGATAA  
TGCAGCACAGGAGCAGTTACAGATAGTTCATGTATCGGCTGATGACGATTTTTCTGCTGT  
TTTTAGTTTTCGTCCGAAAACCTAACTATTTTGTGATTTGGTGGCATATGAAGGAAA  
GCTACCGCATACAATCGATGAAAAGAACTTAGGGCGATTCCCTACCAATAAAACGAGTGA  
AGTATATCGTAGGCATCTTTTAGGTAATCATATTTTACCGATAAAGATTTCCAGTATAT  
TCCATCAAGAGAAAAGAAATTAGAGAGTATCGATATAGGGGTTATGTATTCTTGTCTTAT  
ATTCAATTTTCGACAATGTCTATGCTGGTAGTATCTCCATTGCATGGAAGAATAAACCGGA  
TATTGACATTGAGAATTTAGATACTCTTTGCAATCAATCTGCCAGAATCCTCGGAAGGAT  
TAGATACCTTAAAGGGGAAGCCTTTAGGCCTCCCTTCTTTTTATTGGCGCATAGAAGCC  
CCTGAATCACATTTTGTGCTGTATGATGAAAACAGGTAGCGTACCAGTCATCGGCTTGT  
TCGTCTTCGTCAGAAAACGCGTAATTGCGTTGTATAACGTTTTCTACTTTGACCAGTGCA  
ATAGCTGTTTCTGGAAGATCAATCAATCGGACAAAATCACCATCTTCCACTCTACACGA  
GCAATATCATAGCCATCTCAAAGTATACAATCGCTTGTCTAATTTCAATCTGGAACT  
TCCCGTAAACATTCTCTGCCAACTTACGTGCATCTTTTACAATATCTTACATGTAATGAC  
TATAATTTTTAGTTAGATCAATGTTGCAATCAACAAAGAAGTAATAGCGTCGCAGTGCTA  
CCAGCACAAACATCTCAAGATGACCATTTTCTCCAATCGCTGAAATGTGTTTAAATTCCT

TTCGGATCGCATCCATCACTACATTAACCTCTTTTATAATATCTTTTCGTATTATATGCAC  
CTCGGCTAATCAAATTTTGGTTAGGTCTTCTGCTTTTTCTTGAAAGTTGTCAATTTCAA  
ACTCAATCATAATCACCTCTCATAATTTACGCAGTTGTTTCAACATTTTTTCGTGGTTT  
GCTAATTCTATACCTTGTAAATAGCATAACCAGTGCAAGTTTCAATGATTCATCATCTTTC  
ATAATCAAATTTACCGAAAATGTTCTCTGTACATAATCTTGTCTTCGTCGATAATTTTCG  
TCATGTTTCATGGTGTAGTTATGATCATTTAGTGCTTTAATAACAACGAGCAAGGAATCTA  
AAAACACTCGATACCGGGTATATTCTACGCTATTTGTGAATACCGATGTTTTCTCCACTT  
TATCGATCAGATAGCCTAAAACCGATAGCGCCTCGTTTACTTCCCTTGTTACTTTATCGG  
CGCTAAACAACACCGGATAAAGACGCGGTGTGATTAACCGCGCTGCCTCTTTC AATTGCGA  
TCGCTTTCCATGATTCATATTTGTCATAGTTAAACATTATATAATCCTCTTACAGATGAA  
AACCTGTTACGATCACCGCATCGATCATAACCGCTAGGAATAAACGGTTCGCCCTCTTTTA  
TTTCAACTTTGAATTGATTCCATTTTCGCTAATACTTCTTCCGGTACACCCAGCGATTTCGG  
CGTCTGCATTAGTTTCATCCATAATCCAATTAGGCTGCATGAGCGCATAGTTTACATAGT  
CCATTTCTGGGGTCATGTCATCAATGTTAATATATTTGCAGTTGACGCGTTTCCGAATTT  
CAAATTTCTTAAATATCAACCTGTACCATGTATAATTCAGTAGTTTCTGGGATCAGTTCCC  
ACACAATCAGTACATTTTTTCATAGTTACCTCACTTAACAAAAGATTTTCTTAAATGCTTT  
CAGGATCGTTGCTTCCGGTGCTTCTTCCGGTGGAGGAAGCAATTCTACCACTTCCCTCTTC  
CAACTCGATATAGTCTACCAGATATTCTACATAGAATGCAAGTGCTTCCATGAAATTAGA  
TGCTACATCCGATTCACCACAAGCGCCTACATGCATTGTATAAACATCACTGCGATCAAG  
TTTGTGGAGGCTTCCCAGATAGTTTCGGTCTACCAGACTTCCCACACTTTCAGCTTTC  
GGTTTGGTTGCTGTTTATAATCAGTTTCGTAATGATGCAATTGACGTAGCAAATAATA  
GATAATAACACATTTTTTCGTAATTGTTTTGAATTTCCATGATGTAATCCTCACTTATCGT  
TAAGAAGTTCTAAAACCTTCTGTCTACTTTGTCAATATTAGTTGATTCAAAAACCTGTAC  
GGTATCCCAGCTTTGACCGTATGATCGCGAGCAATCCCATATCCCATTGTTCAACCT  
GATAGTATTCAACGAATGGGTGCTGCCGA ACTATGACACCATCGCGATTA AAAAATTACCA  
TAATATAATCCTCACGTCAACA ACTTATTTTCGGCTGTACTTCTGCCACTTTCGGTAATA  
CTGTTTGTAAAATTGTTTTACTTTTTACCATCTTACTATACATGTTATCTACCATCAA  
CTCAATAAGACCTCCCGGTGTCGGGTAGTTCCCCTCGGATAAGTTCTTAAATTAAGT  
GTCCTGATGATCTTTGTATACTACGTTAATGATGGTCTTTTCTGCTTCTTCGTCCCAGC  
CATCCGGTGATTAGCTTTCATCGCATCCCACCAATCTTTTGTGATCTTCATGTTATTA  
TTTCATCACTTAACCTCTTCGCAAGTATATCTCCACTCAATACGTTTTTCGTTTCCACCG  
CGCTCAGCATCATAGATATGACGGAATGTCAATTTGCTTTCATCATCAACAAGTTTATTT  
CCTTCGAATTTAGCGCCATGTTTTGCAGAGAATATCAATCCGATTTTATAATCTTCGCTG  
TTGATCATAGTTCCGTTATCTGTGATTACAAAATCCATAACTACAGGGTCTTGCATTGTG  
CTGGAGATCATGATTTTAGCAATGTCACCTCTCTTAGAACTTTAATTTTTGCATTTCTG  
TTCATAATATCATCATCTTCTACACTCATGCCATTGATTGTAGTAATTTAACA ACTTTC  
GGGCAAATGTAGGAAAACGTGGTTTTCTTCGGATTGATTACTTCCGGCTGTTTCTCTTCA  
ACCTTCGGTTCTTCCACCACTTTTTCTTCCCTGTTTCCGGTTGTTCTTCTTCAACCTTCGCA  
GAAGTCTCTGAATCGCTTTCTGGTGCTGTTTCTTCTTTAGGTAATACATTCATCATGTTT  
TGAATTTGAGCGTTATATACAGCCTCCAGTGGCTGAATCTGCCCGATATTGATCATTGTA  
TCACGAACAGTTTTATTCCAGTTGCGTTGCTCTTGTTCAGAGACGGATCAATCTTAACA  
GCCTTAACATACACCTCATGAAGTTTAGAGTCCAGTGCCGAGATTGACTCATTAGCACAA  
ATAAACTTCTCTGATTTGTTAGTAGCTTTAGCGCAATCAAAGGACGCAGCCTTAGCACCG  
AAAGCAGTAGCAGAAAGAACGATAGCAGCGATAATGTTTTTCATAATATATTCCTCAGTG  
TTTTGTCTTGATGGGAGTATCTTACTACTCCCTTAATCCGGTGTCAACTACTTTTTTAAA  
TTTCTTCTACAGTAAAATCATCAATGTTGTTGTGCTCGGCGAACGTTGCAAGACCAGCAT  
TCCATGCATCATCCTCAGAGAAGAATACACCGTAACGTTTCATATCCTTTAGCGCCTTCAC  
ATTTAACCATTAATTTGTGAGTATGTTTCATTTTGATTCTCCTTCGTTGTCTTGATGAGT  
TTAGTATAGGGGATCGCCGATCCCCTGTCAACA ACTACTTTTTAATTTTTACCCGCTCGT  
GCATTAATACGCATTTTCTGCATAGCCATGATCTGGCTTACTACTTCTTCTTACGTTCT  
TGCGTGATAACGTGACCAGATTCCGCAAACTCTCCCGCAACTTCTTCTACGATCTCGCGA  
ACTTGAGAACGTCCAAAGATGCGGTTTCTTTCGTAGCTCATAAATCTGTTACTACTTGC  
TCGATAGATTTTCATGTGATTCTCGTTTTCGTTCCGGTATGGGGGTATAATACTACTCCCATT  
TCTTTACGTCAACA ACTATTTTAAATATTTTCGACCTTACCCATTCCGCGTATTCTTG  
CGCGGCTACTTTCGGATTACAGGCCGTCTTCGTACATTGCTTCAAGTAATTCTTCGTCCGGT  
GGGCTTATACCCTAGATAAGCCTCCACCTGATTTTTCCAAATTTTATACCAGTTCATATT  
ATCACCAGTCAAGAGCGCGTGTCTCTGCGTCTTCCCATGCTTGATCCATAACAGCCTTGA

AAACATATTCTAGAGTATCATCTTTAGGGAATCCGAAGACTTTAGACGGAATATCTTCAA  
TTGCTCCTCCAGCAACTTCTGCATTACGCGCTTGGCAATAATGCAACTCTAAGTTATCGA  
GATAGCGACCGCCTAATTTACCATATCATCCCAGCATTTCAGTAACCTACTTTATTTG  
CAATTAACACTTTGCTGTTTTCGTTGCTCATCTTTGATTCTCCTTTTTGTTGGTATG  
TGTGTATTATGCGAGTCTGGATTCGTGAAGTCAACAACTTTTTAAAAATAAAAAAGCCGAC  
CACAAGGATCGGCTTAATAATCAGTTACTTACTAAATTTCTTTTTGGCTTCGTCTACCGC  
ATGAGATGCCAGTACCGCAGCCGCATGTGCACTTTTATCTGTGTTGCAGAGAACGCCAG  
ATAAACATCACGCCAAAGGTTAATCATCTCGTAGATCATATCAATATCATTTTCTTGTT  
GTTGGCGATGCTATTCGTGTTATCTGGTAAGGTAACGGCTTGATCTGTACTGGTTCCGC  
CATCGGGCTAATCGGTTTCGGATCAGTCAAATAGGTGCTGTTGTGGGTGGTGTTTTCCA  
TACCCCATTAATCCACGGTTTAATCGTTGTGTAGTAAAGTTTATAAGGATTTTTGTCTGG  
GTCAACCATCCATGCATGATGAGTACCCAAACCATTTGAAGTGATGCGTCGTTTCAGTCAT  
AATTTATTTCTCTCTGAAAATTTCTTCATCAAGCTGTCGATCTTTGCTCTGGGTTCTGG  
TGTGTTTGTATCTCTGCTAATTTGCTCAGAGATTCAGTGGTGATCCGGTTGGATTCTTC  
CAGTGTTC AACGACCATTGGCACAATCTTTTTATTTTTGTACACAAATGCAATATAACC  
GCCTTCTGGATATTTCTTTCATAATCAACCCTTCTTAAGTTCTTTAAGATCTTTCTTATAT  
TCCTTCATTGCGGTCGCTTTGTCCAATACTCATATTCATATGATGTTTATCTGCATCT  
TTGACCAGTCGATCATACTCTTCTTGAGTAACGCTATAACAATGGCATAGAACTAGCTTA  
TCGGCGTATGGACGCAGTTTTTCATGTCCATTGATGGATTGCATTACCTCGGCCTTTTTC  
TTGCCCTGTAGCTTGATTTTCGCCCTTAATTACGCGATCGATAAACTCGGCTTTAGCCATT  
TCATAATTGTATGCTTCCAGCGTTTCAGCTTGCATCAATTC AATGCGTTTATCGACATAC  
CCTAAGCGGATTTTCGACGAATCGACGGATCAGATCGCTCGCTTCTCGAATACTTCTACT  
ATACCACGTTCAATTAACCACTACTATATTCTGGGCTACTAACTGTGTTAGTTTAAAATCC  
TTCATGATTTGCTCATGTGCGAGCGGATTAATCTTCGCTTTTGAAATAATCGCGTTTCAGT  
GTTACTTCAAATCTGAATCCATCCTTAGAGCAACGGTCAATTATACGATACAATCAGATCT  
TTTTCTTCCAGTGCATCCAGTACCGCTACATATTCTTACGGTTCGAACCTTATAAGGAACT  
TCTGATATAGTCAGCTTAGTCTTGCCGTTTAGTTCATATGTACCCTCAAGAATCACACCA  
TCACGGTCATCACGAGGGATAACTTTACCCGCGAATTTTCGAGAATTGAACACTAGGTTCT  
TTATCCAGTTTTCCGGCAAGTGCTAGCTCTGTGCATTC AATAAGGCTTTCCAGTGAATGC  
GGTAAAATGTCAGTTTTATACCCTGTAGCAATACCACTAATACCATTAGCCAATACCATT  
GGCACAACCTGGCAAGTAGAACGCTGGCGGGATGTGTTCCAGATCTTCGTGCTTAGGTGCG  
CAATTCATATCTTTATAGATTTTTAAAGAAGTTTTTCATGCACACGAGCAAAGATATAACCT  
GCCGCACCTGCTTTCTGGACTAAACGCGATCCGAAGTTACCTTGACCGTCAAGCAGTGGA  
GTATTATTGCTCCATGTATTTCGCCATGAGTGATCCGGCTTCTACGGCATTAGTTTCCCCG  
TGGTGATAACCCAACCTCAGCAACACCACATCCAATATCTGCCATCTTACGGAATTTCTTA  
CGGTGCGCTTTACTCTTTTGAACCTGCGCACTCCAGAACAAGCGTTGCACTGGTTTAAAGT  
CCATCCACCAATTGAGGAATCCGGCGATCCTCGGCAGAATAGATCGCATATTCCTTAGCT  
TCATTATGTACAATGCTTTCAAGGCTGCGGTAAGTAAATGTGTTTACAATTTGACTAATT  
ATATCCATCTTACCTCATAACGCTTACAAAACACATTCTTTACTTTATCAGACTTATC  
AGCCCAATCCAATAGCCATTTTAAACGGAAGGATTGACACAATAAACGGGGCAGCAATCAA  
AGCAAACATGATACACCTGATAATCAGGAAAACGCAAGTGACAAAACCTAGCGATAGTGAT  
CCCGACAAAACAAAATACCATAGAAAACAGAGTAATGAGATAGAAAGGCCAGAATACCCA  
CTCCCGCAGCTGAACGCCTTTGTATGCTCTGAATTGCTTAATTTCTACAAAACACTCTCG  
GATATACGCGTACAGGACCGAAAAATCATCTTTCAATTGCTCTGAATGAGCAATCTTCTAT  
TTTAGAATGACCTAGCATTATTAACCGCCTTTCAACATTGATACAGGAATTGTTTTCTGA  
TTTGTGTATAATTGGCCTGCTTCAATTTTTTCTTGAATCACCACGACGTTACAATATCCA  
CTGTCTTTAAGTTTTCTGACAATGACTCGCTTGTGTTGCTCGGTGATAGCATTGACTGTT  
CTCACCAATTCACCGCAAATAATAGCACCATCTTTACAATTGCCAGTAACTTTTCATGCTA  
CGACCGTGAACAACAACCACATCACCGTAAATCACATTTTCGTCGTCGATTTGGTAATA  
ACCGTGACCGTCATAATGTATTCCCTCTGAGAAAGGACGCGCAAAGCGGCCTATGTTGAT  
TATTGTTCTACAGTATAACCGATGTTTTCAAGCCATGCAATAACAATCTTTTTCGCCAATT  
TCATCGAGAATTTTCATCAGCGCCGATTCTTTAATGAAAGTAGATGGATCATTATTTCTT  
ACTACGTGCTGGATCACAATATGTTT CAGGAGTTGCGTCTAGCAGTTC ACTATGATCATT  
TCATTAACGATATCTTCGACACTAACATTATTACCCAAATCAACATCATCCATCGTCACA  
GTAATGCGACCGGACGGACGCAACGAATATTGGCTACTTTCAACTTCAATATGTCCACTT  
TCGCAAGTAACTTTTCATATCAATCATAATTAATTCCTCTGTTAGTAATGGCTAAACCCTT  
CGGTCACATCTTCAACCACATAGTAACGATGACAGCGCATTTTGGCATTTCGATGATCTT



TCGGGATACTAACAACGTGACGCGGATCAACTTTACATTTTTATGATTTCGGCCTCGTCCAC  
CGCCATAGTGCGGAATATAGTGTTCGCTGCAACGTGGAGGCCATTAGAGCAAGTGCGAT  
CATCATCTGGGTCCACGTCTTTACGATTCATTTTAACCGTGCGCCCTGGGCTATTATCAA  
ACGTATGAGTAAAGAAATCTTTATAATCAACATCAACACGTTTCCATGCATAGAAACAAC  
CATCTTCCCCGATCTCAATGTCGTTGTGCTCTAAGAAGTCAAATAGACGATCTACCGCCT  
TACGGCTAGGGTTTTTCTTGCACCTTCTCAAAGAAATTCAGATAGTGCATATATGGCTTAT  
TCTCTTAAATCGACTCAACAACCTCGACGAGTCAGATTAATATCAAGAACAATATTATGAT  
AATACACAATAACATTTTTCGAAACGGAAAGCACCATGATAATATACTTCAACCGCTTTCT  
TAATGTCAATCAGCGTAATAGCTTTGATGATATCATTATGTTTAATCGCTTCCAGTGCTT  
CATTAAAGTTAACAAGCGACGGATCAGCAGTATAAACGATGTCACCACATGTAATAGTAA  
TAAACTTAGTTGAGGCTATTGCTACGATTTTTGAGGAAGTAGTCACGGGCTCTTTTGCGC  
GTTACCGCCTTTTCTTTACTGGTTTTACGGCGTGCTTTACGTTTTTCTAGTGCCTTGC  
GACCTTCCGCTACAGCGTCTTTCTGAATCAGTAATACACGGGAGGCAGTACTACGAGATA  
CCCCAAATGCTGCCGCAAGTGCTTCGCGGGTAGTAAACTTACCTTCGCCCCACTGTATAG  
CCAGTTTGATTTGTTTCGCAGAATCCAGGCATTGATCGTTACGGTCAGAGACGGTAATTT  
TTGCTTTAGACATAGTATTCATTCCTCTATTAGTTGGGCGACTATCGCTGCCCGATTAC  
ATCATTATAACCAGAATTAATTTGCTTCTACAACCTTGCGGATTGTGCGGTCTGATACATT  
ATAGATTCGTGCCAGTTCGCCTTTAGTCAAGCCGCGAGCGTATTGTTTACGGATGGTTTC  
TTTCTGGATAGCGGTACGTTTAGTCATAATATCACCTC

>NewGenomeName\_20

GGTAAATGTTCTATAGCTAATTAACCTAACAACCTGTGGTTTTCCCATACAACACGAATAT  
CGTATACGGTATTACCAGATTTTTTCCACCCATTTTCAAGTTTCACCTCTTTGTTCATATA  
GTCTGTAATTTCTGGAGAACAAATTTCTTTGCATTAACACCTCTGACCACATCCAATTAT  
TGTTAATTATGCGTGGTATTAACCTCTCTCATTAAAGGATGCTTTATTACTATGTTTTCAT  
TTATTGATGCATACGGTCTGTGCCAATGAATTTTATATTTTTCTTGTCTCTTCCAATC  
CAAGATGATCAATGTCCTTGAGATATTCTATTTACAATGCTTTCCTCAAGCTGAAACTGTG  
CATTACGGCATTGTAAGCACCATAAGAAAATATTGTTGATATTAAGAATAAAAAGAAA  
AATATATTCTTGATATTAACCTGCTTATCTTCAAAGCATGGAATACGCATAGGCATCAAA  
AAAACATAAAGCCACCATAACCAATCAATACCTTCGGTGCGTATATTGGTGATTTTAGAA  
AAATCATTGGTCCGATGATGAAAACATTGATGCCAATAAAATTAAACTACTAGCAAGA  
ACTTTGTTTTCTTAATTTTCATCTCTTTTGATTACTTTTAAAACCTATGACTATCAAAGAAC  
TGATTAGCGCAAAGAACAGCGAGTAGTAGATTAAGTAATTATCGCCATTGAAGATCGTGC  
TAAACATTCTATAAAATGATAAGACGTTAGAAATTATCCCTTCAAATAAACTTGAGTTTA  
TCTCTATAATCTTACTATGTTTCGATATTGTAAGAACCTGTTACAAGTCTTTTTGCCATAA  
AGTAAGAATTGGCAAAATATCCTACTGTTAAACCAGCGACAGAAGACGCTGTATTTTTTG  
TGATATTTGAAATTGAGTTTTTCTTAACCACATCTGAAATTATAAAGGCCAACAAAGAATA  
TTGCGTAAGTATTCAGCGCAGCCTGATAAAGACTAAGGAATGCAATGGTTAAAATGGATG  
ATATTATGATATTTATAGGCTTGTATTGATAAGCGACATACGATGAGATAATAGATATTG  
TCACACTCATGCACATTGTTAATGAATCATATCTATATGATAGATTTTCAATAAAGAATG  
GGTTTGCCAAAATCATCATAAAACAAAGAGATGCTGTGATGTAGTCATCTCAAACAGCT  
TTTCCCTGATGCAGGATAGTGCCAATGCTAAAATAACTATCCCTAGCATTAAGGTAGCG  
GAGAAGCATCTATAATTGGGGTTCCAAAATTAATGATAGAGAAAATAAAGTCGGAAAGTG  
GGCGACCATTGCCTGACCAACCCAACCCGCCATATAAAGACCTAGCTAAGTCATCAACGA  
AAAATGATTGATGTGTCAATAAAGGAAATGTATATATAATCGCCAATCCAAGAAAGATTG  
ATATAAATATCCTATCATTACTATTAATTTCACTTTTAAAACCCTGGCGCTTTAATGTG  
TATTTAGGCCGCTGTTTGGTTTCTATGTAAATTCTACCAATATATTCTCCAAGAATACCT  
ATTCCTATCAATTGAACGCCACCCAGGAAAAGAACAGAAACAAGAAGAGACGGGTAGCCA  
GGAACATTATTTCAAATATTAATTCATCAATAATCATCCATGCACCGAAAAGGAATGAC  
ATACCTGCAATAAACAATCCAATGTAAGTCCATATGCGGAGCGGAAATGTTGAGAAAGAA  
GTTATTTCCCTCCAGCGCCAGGTTCCATAATTTCCAGCCGTTGAAGTTCAATCACCGGCC  
ACGCGTTCGGCACGGGCATATTTAAGAACATCCGTTTTTCCGCGAACCCAACCTGAGCACA  
CCCTTCATAAACAAGTTGCGTTCTGGCATTGTTTGTGATGTTCTCGACAACCGCACGGCTC  
ATAAACCGAAAGACGCCAACATTTTCTTCGATTTTTGGATTGCTGATTTTATTGAGCAGC  
TAATAAAACCCTCAGCTGTCGTACGCTTCAACCTCCCATCTGTTGAGCGGTCTGAGCGC  
TTATCCAGCACCATATCCGCGCCAGCCTGCCACTTCTCAATGAGATGAGGGATAACTTCT  
ATCGGATCCTCTAAATCGACATTAATAGGAATGACCGCATCTCCGGTTGCATGGTCGAGA  
CCCGCGAAAAGAGCAGGTTCTTTACCGAAGTTTCGCGTAAACGAAAGCGGAATAACGAGC

GGATCAGATGCGGCTATTTTGTAAATTATTGATTCAGTCGCATCTTTACTACCATCATTAA  
ATAAAAACGATCTCAATTTTCATATTCTTTTAGCTCATTAAACTCACGTACCGTTTTATAG  
AAAATCGGTATCGTGTCTTCTTCGTTAAAACTGGAACGACAAGAGAGATTTTCATCTTA  
TATCCCTGAAAACAATGAATCTGGAATAGATGAACCCGCATACCAGGCTAATTGCCGAGA  
AAGTGATAAGGGTAATCAATGGTGGCAAGGAACATTGGTCAGCCATCCAGTCAACAACAG  
CGCTCAGTGTTCCCATGAATCCCACATACATCATGTAGCGAAGCGTGGTGGTGGTGGCAT  
TAAAGGTGACACGCGCATTGGCATAGAAGCTGAACGATACGGCGATAACAAAACCGGAAA  
AGTTCGCCAGCGCCTGATGCGTATGCATCCCATACACAAAAAGCAAATACGCCCAAT  
GAATAAGCGTGTTAAGAACACCGATCGATGTGTACTTAGCGAATAACTTCAACATTATGA  
AAATCAGCGGATTTCGGAAAGGTCTGGAGTGTAGCACTACAAATTTCTTTGATAGATATAA  
ACGATCAATAATGTCAACTTTGATAGTTTAAAGTTATTGTTTGCTCGTTAATTGATCGTT  
GTTACCGATCAATTTTTATTGCTGATTGCTAAGTGGTTTGGGACAAAAACGGGACACACA  
AAGCTTTGCATCGGCTTGCCAGGCTTTGCATGTTTTTCGAAGATGGGACGTGTGAGCGCA  
GGTATGACGCGGTATGTTGTTGACTTAAAAGGTAGTTCCTTGTAAATTCGTAATGCGAAGGT  
CGTAGGTTTCGACTCCTATTATCGGCACCAGTTAAATCAAATACTTACGTATTATTCGTGC  
CTTCCTTATTTTTACTGTGGGACATATTAGGGACAGAAGTACCAAAAATCGAGTCAACTT  
GTCGAGCATGTTTCAGTCATGTGATTTGGTGCCAGATGAGCATACTGTGAACCAATTCGA  
TAGACTCCCAGCCACCCATTTCTGCAATACCGAAATCGGAACGCCAGCCTGAACTAACC  
AGCTTGCCACGTGTGCCTCAGGTCATGAAAACGGAAGTCTTCAATGCCTGCTCGTTTTA  
ATGCTTACCACCATGCAGTATTAGCGTCATAGCGCATCTTCCTCACTACAGGTGATTTAG  
TTCCGTCTGGCTTGGTGTCTTTCCTTGTAGACGAACACCCATTTGTGATGGTTGCCA  
TTTGCTTTTTTCAGCACCCGGCAAGCAGTATCATTACGCGCCACGCCAATGGCCTGATTTG  
ACTTACTTTGTTCCGGGTGTAACCATGCCACCTTTCGCTGCATGTCTATATGCTGCCACT  
CCAGATTGATAATGTTAGACCGCCTTAAGCCAGTAGAAAGCGCAAACCTCTACGACTGACT  
TTAGCGGTTCCGGGCATTCATCAATCAACCTTTTTGCCTCGTGAGGCTCAAGCCAGCGGA  
TACGCTTATTTTTCGGCTGAGGAACTTTGATGATCGGAGCCTTATCCAGCATCTTCCATT  
CGCGTTCAGCAGCCCGGAGGAGTGCCTTAATGAATGAAAGGTGAGTTGCTTTTGTGGCTA  
ATGCTGCCGGCTTAGGCTTGAATACTGGAGGTTTCTTCCCATTCTTCCTGCAAGCTTCAT  
CCATTAACCTCCAGTTTTCTCATGCCGCCGATTAGTCATCTTCTGGATGGCGGAGTAAA  
TCTTCGTCTCGGTAATATCCTTCAACTGCATCCCTGCAAAAATGCTGGAACCAGAATCCTA  
TCCGACTCTTGTGTCATCCAGCGACTTCTTATGCGCCTTCTCCTCTAACCACCTGACAC  
AGGCCTCCTCAAAAGTCATGTCAGGCGTCTCTCCTAATTTACTTACCCTCCATGGTTCTG  
CCTTCAGCTTGTGATGAAGCTCTGTGGCCTGCCTTTTTGTCTTTTGTCTTAAGAGACTGCT  
TAAGTCTTTTGCCTCCGGCAATGTGAAACTGGCGTACCAGGTATCACCTCTTTGCAATA  
GTGACATTTAGTTCTCTGTTATGTCATCACCCGCGCTCACCTGGACAGTATGCAGCGG  
AGACTGAAGTGCCGCAATGCAGGCTTGTGCTGTGGTGGTGGTAAAGGGGATTTCCGGTTTGGT  
GGGTCTTTACGTGTTGCCTGTAGTCGGCCTGTGCGAATCCAGTCGGTGGCGGTAGGTCT  
GGATATCTTGAGAAATGCACAGGCCTAATCGAGTGTGAGACTGTGTGATTCCATGATTAC  
TCCCGAGCTTCTTCTTCAACTTCATTTCGCGATGTCGTAGAAATTTCTGTAAAGTTATTTTC  
TTGAAGCTGTCAGGGATAACAACCTTCGCCAGGCCTCTCTTCTTTGTTATTTGGTATTGCA  
AAAATAAGACAATCATTGCGCTTCGGGTGCTTACCGCCATAAGTTGATAACATAACGAAA  
CCAAGTCCACGGCCCGATTGACCACCAATTCCTGAACGCATAATCCCGTAGTGGTTGGT  
ATGTAGTAATTGCATTCAGGCAAGGATTTTAGCTTGGCGTTAGCGTTATGTATGATTGCA  
TCCAGCTCTTTGTTGTATGCGCGGCCTTCTTTGTGTTTCCCTTTCCTCGCGCTATCACA  
ACTCTTCCCGTCCCAAAAATCCTCGTGTGTTGATTGTTATCTGGCATGGGAATTCATAT  
CCTTTTTCCCAAACGAAGCTTTGTAGAAGTCCGCCTTCTCCACCCAGCTACTGGTTGTA  
GTCCATGGGTTTGCGCCAACCTTTTCAGCGGCTGTGGTTAGGATTGAATTTCTGTTGGTGC  
TTAATGGTGTGCTGTGACTGGATAAGCTCCTTAACATCCTCACCTCTACCATGTAGTAG  
TCGTAATATTTGCTCTGGTCTGACATTTCTTGTCTCCAATAAAAAACCGCCATCAGGCGG  
CTTGGTGTCTTTGAGTTCTTCAATTGGAATATTGGTTACATTGTTTTTCATATATGAATA  
AATAAATTAGCTTTTTTTCGTTGCCTTTGCGTTCCTTATTAATTCTGACAACTCGTTTTT  
ACCACGCTCTCCAAATGCGTCTTTAGAGTCGTTGTTTCCGCAATCGCAGCACACATAATC  
ATCAGACCATCCACGCATTGTTTTTTCTTTTGAATATTTCCAGAACCGCATTTTTGACA  
AGACATGTCACCTCCACAGCATGAGTGAGATGACAACGTAACATTGATTGGAGATTA  
ACAATAGATTGCTGATGTAAGATATGGATAAGCTTCGCTATCAAAGGGGAGGATCTGG  
TAGCTGCATCCAGTGGCTTACACCGATACTTTCCATACCCTCCATTAGTCAAAGAACCC  
ATCATCGTCGTATGTAGCAACGAACATCCCCTGACCCAGACATTTTCCGGTAAAAATTGC

GATGGGTTT TAGATT CATCAT TATCTGGCATT CGCTCACTACACCTTATCCAGCCACCCGG  
AATTACCGGAGAGTTGCCATTACATCGAAATTTGGTTCAGCGTCCTGAACCAGACGAAT  
GTAGACATTCTTTGCTGTGTCCAGTTCTGATACCTCGGTGACAGTACCGAAATAGCGATT  
CTCGGCATCAGCATCACAAGTGCTGACATCAATGGACACCTCCATGCCTTCGATTAATTC  
TGGCAACTCGTAAGTTTGGCTTACAGGTTGGTTT TAGTTTTCTAAATCATGATGCAGGGC  
GGCGGAACTGTACGCGCAATTCGTTACGTA ACTGTTGTGTGCCGTGATACTCAATAGC  
AATATCATGCAGCTCGTTTACAATCTCCCGGATTAGATTATCTTTCACGATTGACCTCCG  
TTGAGCATGGCATTGCGGCAGGCGTTATAGCCTTGCGCAAAGCTCTTTTGATAAAGATTC  
ATGTCATCAGATGTCGCCATTCATCAGGCACTACCGGCGCAGGCTGCTCTTTGATATGC  
AGCCGCGGCTCGCCGTCTTTCGGCTCCGGCCACTGGCGGGCCTTGTTTATCGCTAGCTTT  
TCCACCATCGCCATTGTAATCTTCTCGTCAGTAACACCAGCACCGCGTTGAGCATCCCAT  
AGCAGGAACTGCATATCAGCCCATTCAAGCGGATCGGATGGGTGCGCAGCGGCCTCCAAT  
GCTTTTTTCGAGAGATGTTTCAGCGGACCGACAGGGCCAACATCGCCGAATGTCTTATCT  
GACCACTCGGCGTGCTCACGGCGTATCCGGTTGCGTTCTGGTGCAGGCTGCTCTTTGCCA  
ACCAGACGCGTTATTTCTGATTCCAGGAGTGAGCCTAAA ACTGTACTCGTGCAGTGCTCA  
GCCCGTTCGTTTTTTTTTTCATCAGGCCGATGATATTGAGCACATCATTGTA AACGCCAGTG  
TCCTGCACTGGCGGGGCGGCGTAGAGCGGTATATACAGGCAACATCATCAGCAGCATT  
GGCTGCCGCTCTAACGTCCCGCATGTACCGGAAAATTTATTCAGGTATCGCACAGACTCA  
GCATACAGCGATGCCGGCGCACGCTTCAGCACAATAAGAATTTTGGCGTCATCATCGTCG  
AGGCCAAACGGAATATCGTCGCGAGTGTTTTGAAATTCAGCGATAGTTTGCTGTAGCCAT  
TCTTTGGTAATAGTGGTCATGGGATAGCCCTCAGCCTGCCGTGCTTCAACTGGAGATGG  
GAAATCAATAGCCCCTTCAATATGCGCACCTGCTACACGGCACGCCGGGGACCAGTCTGC  
CGTTTTGCCAGTGTCCAGCGCCTTTTCAACTTCGTTGTATTTGCGCAGGTCATACAGGTG  
AATATTCGAATCGCCGATGGTGTA AAAACCGATTTTTTTTCGGTGACGGGCAACGGGCCAG  
CACCGCGTTAACCTCATCAAGCCAGGCTTGTTCTTCTTCGTTAATTTTGCCATTTGTTT  
TTAGCCTCCACATCAATGAATGCACCGCAGCAGCCGCATTCATATTCGTTGATGAATCGA  
CCGTTTTCTGTCTAGTCGTTAGACTTGCATATGTTGCAGCGAATCTCATAATTACCAAGT  
CGTGCTATATCAGTGGCGCTTACCCACTGACCATCATCAAACCTAAATCGGGCTATCTCA  
TGCGGCACATAGCGGATAACCATTCCGCCCCGCGTCGTTCTCACATTCGTTGGGATAGCGT  
AAAAAATCCGAGCCATTCTGTTACGCCCTTGTTGGGTGCTCTCCGTTAATTAGGTGCTC  
CAGTACGTTAATTCTTCAGCTACGTGATAATTGGCGTCATCCTGGTCCTCAAGTGGCGGA  
TCTGTATTGAGGTGTTCTTCAGCTGTGATTGCCGCATTCTCCCGACAGAATGCTTTCCAC  
GCTTTACGGCCACCTTTCCAGCATTGCCCTGATGCCATGCCAAAGCCTCTGTTTCGGTA  
CGCCATGCCCGGTTTGCTAGCTGCATTTGTGTCTTAGCCATGCGCACCCCTTAACCTTGA  
TGCCAGGGGTGCGTGTTTCGTGTATCGCATTATCATTACCAGCACACCAACCCTCGGCAT  
AATCCCGGCTGAATCCGCTCATGTGCATGACTTCTCAAACGCTGAGTTTTGACAGGTTGA  
ACTTCCGCGCCTCCAGTTCTGCCACCCGGCGAGCCTCACGGGTTGCAATTCGCGGTATT  
CAATCAGGCGTTGGTCCAGTTCGGCTATGAGGCGTTCTGCTGTATCCAAATCCTCGCCTA  
ACTTCTGCTCCATCCGAAACCAATTGGCGCGCTGTTCTCTTTGGTTTCCAGCGCATCCA  
GCAGCGCCAGCATAGTGGCGGGGTTGGTTTGCGGCGATAAATTCCGCGTCACGTTTCTCA  
ACAGTATGGGCCAACGTC ACTTCTTCACCGCAAAGAGAAAATGGCGTTACCGTGATGCCA  
TTGAACAGTGATGAGGTGCGGCGCCAATTCCCCGGCGTAGCCCTCTCAGCCACTTCACGA  
AGCGCCCGTTTGTGATGTTGCTCATTGGGCGGCCTCCTGGCGAAGTTGGGTTTCCCATT  
CTTCTATCGCCTTCTCCGCGTATTCACCTGACAAACCGTCATCCGCGGGTAGTGGGTCAT  
TGGCTAAATCCTCTTTTCGCCGACAAAATCATGCGTGTACGTCGAGAACTTCTGATACAG  
GTTTATCGAGGAATCCCTGATTGAATGCGGCGGCGAGGCGGCTGGCGGCATAGTTGATAC  
CTTCATTACGCGCACTTGCCAGCACCTCAGCCAGCGCCGCGTATTTATCCTCAAGCTCCG  
CATAATCACTATGACGCACCATGTGAGTACAGAATGATTCTCCTGTTATTGGTGGTGATA  
ACTGGTCACTGACAATCGTGTATATTTTCACTTCTTTTCACTTCTTCCACTCCGCAACAT  
TGCATTCAGATATTTGTTTTTCAATTAACAGAACCGAAACTATTTTCGCTTAAGCATTCTTC  
GCGTGGAATATCGTTGATGGGTTTGGAGCGGTGCCGAATAATCATTTCCGATGGAAGGAT  
GCCGGGGTCGTAGGACAAACCTCTCATGATGAATTCCTCAGTTATTGCTGATAGCGCCGT  
AACCGGAACGGTAATTTTTAAGGCGCGGGTCTATTTCAATGAATTTGGTGTATGTGGCTT  
TGCGGAATGGCCGGATGGATGTCTGGTAAATTCGCTCGCGTTCTTCTTTCTCTGCAAGCC  
ATATACAGTGGCGAAATTCCTTTTCTCTTTCTGTTTCTGCGGTAGCGACATTATCAGGT  
CGTAGTTCTTTCTGAATTTTTCCAGCATCTCCGATACAGAATTGCCGGAACAGCGGCGCG  
TGTCATCCGCACCATATAGAGGCGCTGGCATAATTTACTCCAGGGTAGGTTATCCGAATA

ATGTGGTACGTATAGGGTTATTTTCGTTTCGTAACGTGATAGCCTGCTTACTACCGACTCT  
TCACTTCGCCCCGAGAATTTTTGCTACATTTCTTTGTGTATAGCCTGATGAGATAATCGCC  
TGCATCTTTTTGTCTTCGTCGTCGCTCCATCTTGGCTTAACGAATGCCGTTTTTAATGAC  
AGTTTTTTAGCTATGTAATAAAACTGATTTATGTTTAGGCCCCGTTTTTCTGCTGCACGG  
CAAGCTACCATGCGACCGCAAACCTGACTCCATCTCAGCTGGAGTTATGTTTAATCTTCTC  
ATTAAGCCACCTGTTTAAGCTCATTATTTCTGATATTCATTACCTGAACGCATCTTGTCT  
GCGCATCATCGTGACCAGCCAATAATTGCCAGTCATGCTGGTATCTCTCAATTAGTTTTT  
TCTTGTCCGTTTTCTGTTGCTGCATAATCGCTGAAGTCTTTCAGGATTTGTTTCGCAGTCAA  
CCGATGGAGATTTCTGGTTGGTATTTTTCTGGTGATGGTTGATTGCATGATGCTGGCATGG  
CTCAGTCCGGCAGCGATGGAGGGAGCCAGTAAAATCGTGTTCCATCCTTCAGTTTGCCCC  
TGTGCCATCCTTGTTCCTTATCACTGGATATCTGCGCAAACCTTCCTCAAGGTTATATA  
GATACCGACCAATCCCCACTGAACGGCAGCACGCTTCATTGCGCCGGAGCGACCACCTT  
TGACGGCTTCTACCTGTGTGTTTTCAGCAGCATCCCATTTAGTTACCCATTTCGGAATCAA  
TCTTGATTGATATGCCGCATTCAACGCCACCGTTGTTGGGAATATCGCGGTATTCATTGC  
GCCATCATTCTTTGCCGAAACATCGTCCAGGCGTTTCATGATTGCCCTGTCCGTGACAT  
AAGCCAGCACCATAGCCACACTTTGCCATCGCGTGTTTTACCGCTTTGCTGTATTCGCC  
ATTCGATATCTTCAGGATTGAATGGGGCGTCGAATTTATTCAAATCTATAATTCACCTCA  
GAATGGTAATTCGGAAGGATTAGCCAGAAATTCACCTATGTTTATTCTCTCGTTTTTGGC  
TAATGAAAGGCAATTTTCGTTTCATCGATTTATTACCTGACTTGCGCCAGTACATTGCCTC  
TGTCAGGTGATACTGACGTTTTAACCTGCTCAACTCCGGTGTCTTGCTAAAATCTACTGG  
TATCATTTC AACCTCCATTCGCGAAAGGCTTCTAAAGCTTCGCGATAACATTTTTGTCA  
CCAAGTTAAACAGCAATTGCGAATTTAGACTGAATAGCCATAAGTGATTTATCCATTACA  
CGGCACTCCTGGTTGATTGAGGATATCGACCAGACGTTTCCATCCGGCCCCGTAATTTTCT  
GGAGATACGCTCTAAAAGTGATTCATTAAGGTGTGCGATAACCATGACGGCACCGCCCCG  
GATAGCAAATGTCATCGTGGGATTCTCCATTTTGATTTATTGGCATAGCTAAAACGCCTC  
GATATGAAGCGCTGTGGATATGCGATAAAAACAGCCGCACTCAGGCGGGCGGCTGTTGTTTC  
TTCTTTCAGGCTTTCGATATATTCACGAGGGTCGTCGTAACACTGGCATTTCGCTATACCA  
ATCCACCCAGCGATCCGTAAGCTCCATTTTCATCCAAATCCTGGTCAGTAAGGCTCTCATC  
CCACATCTCAAGGCCGTTAGCGTTGCTGTAGTCAGGTTTGATGTTGTTGTCATACTGAAA  
TGCGTCATAATCAGCCAGTGCATCCATCACTGGCACACCCTCTTCAACACTTGCTACTTC  
TACAATGAATGGCTTAATAGGAACCTTGCGGGATATGCCAGACACGTAATTTTCATATTTCC  
TCCAGGTAAAAATAATGCCACCCATATAGAGCGGCAAATAACATCAAGGGATGATTTTTTC  
GATTAACCAGAACGAGTCGTCGCTCCTCGCTTGGTTACGAGCGATATTGCTCACATAGCAG  
ACTCCTAAATCTGCTATAGGTCCTTATTCGCAGCCAAAAATACGCTTACCCAGTTACTTC  
ATCTGCATATTTACTTGTAAACCAATCCGGGCGTTCACCTTTACCAATATAGAAATC  
GATAATGTCCAGAAGACGTGGATAAAAATTTAAGAGCTTTACGACCATCCATCTCAGCAAT  
GTCCTGCTTACTATATTTTCTCCATTCCTCAAATGTGTGGTTCTGGCATCCTGCTCGTAC  
ATATTC AACGTTTCGTTATACTTATGAAGTATTTCTCACCCAGAATTACGAAAGTGTGATC  
AGGCAGGTCGGCATCGCACAGGTTGGCACCCGCGCAGGTCGGCACCCGCGCAGGTCGGCACC  
GCGCAGGTTGGTACCGCACAGCTCGGCACCCGCGCAGGTTGGTACCGCACAGGTCGGCACC  
GCGCAGGTCGGCACCCGCGCAGGTCGGCACCCGGAAGGTCGGCACCCGCGCAGGTCGGCACC  
GCGCAGGTCGACACCCGCGCAGGTTGGTACCGCACAGGTCGGCTCTAGATCCGCTCTCAG  
CACTGAGGTAATCCTCACTTTGTGTTCTTCAAGAATCTTCGATACATCTGCTGAATTCAT  
GTTGTTATTCCTGAAATTTTGGCAATAAAAAAGGCCGATTGCGACCTGATTAGATATTT  
GAAGTGAGATAAAGAAGACCAACTATGTAGCCTTTAGTTTTTCCAGCTCTCTGGCAATC  
ATTGCGGTGGTCTGATTGCCATTTATCGACAATCGTTCCATCTTCTCTCACCAGAGCC  
ATTTCTCAGGCTTACCATGCATTCAGCATCAATCTTGCAGCCTTTGCATTTCACAAAG  
CGACTACACCATTGGTTGGTATCAATAGTCGTAGTCATATTGGTACTCCTGGTATTGTTTC  
CATCACATCCTGAGGATGCTCTTCGAACTCTTCAAATTCGTCTTTCATATCTCATCTCAA  
TCGTAATAAGCCGGAATTGATTTTCCGCGCTGCTTCTGTACGGCGTGTATTTTATTTCCC  
AGCGGGTTAACGTCCCAGTAGTAAATGCGGTTCTTCTTAACCGCTGTTACTTCAACTTTC  
TTCTGACGCGTTCGGGCAAGCGAAATGGCTTTGGTAACGCGGTCAATTCTTTTGGCTTTG  
ACCTCATGAGAAGCATCAGGAACATCGCAGCCAAAAATTGAATCGATGATATTGCAGATG  
GTGTCTCGCTCTATGGCTAGCGTTCTGCGCCGCTCATGACGGCGAGTTTTAGCATTGCCCT  
GCAAACGTTGACTTCCCAGTAGGTTGATAACCGTAATGATTTATCCCTAAAGAAATTTTATT  
GATTGAAGTTAAAAGAAAGACGACGTACCAGGAGTGGTGCCCGGTAAAATGGTTTATCTA  
AAAACGAATATTTGTGAAACCAAACACGACCTCGCTCGTCTCCATTTCTGTTGCCTTCAG

GGCGACGCTTTAAGGTGAAATGAATAATTGTTTTTGTAGTGGTTTTTGGCTTACGCATCT  
GTTTACCCTCATGTGAAATGGCTTTGGTGTACAGATAGCCAGGCGTCTAACCTGACAG  
CGTACTCATTGCCGAGCGCCTCCGCCGAAGAGGTTGGCTTCTACCTGCAACCCAAACCCA  
TCTCGTTTTGGTATTTGTTTCGCGCTTTGTCAGCGCATCATCGAAGTTAAAGAGCGTTGCCT  
TTCCGTTTTGGCTACCAGCGTCTGCTGATGGCTAAACAATACAAAATTTACTTAATATCG  
TCAATACAAAATGTACTTAAAATTGATAAATAAATAATATGTGTATGAACTGAATGGAA  
AAAATATTTTGGTATTAATAAAACCCGCATAGGCGGGCTAGGGGAGGGAATTGTTAGAGGC  
CTTGCCATTTTGGCTTCAATGACAACACCGATAATGCGGCAATTTCCGTTTATGGGGATCA  
TGTGATAGCTGGGGTTTAAACGGTTTAAAGATAATTTCTGTCCAGCGTCAACAATATATTTCT  
TGAAGGTTGCCTCATTTTCAGACTCAAGCTTTGCCACCACGAGTCTACCATTAGTCGGTT  
CGATAGCCGGATCAACAAGAATTTGCATTCCTTCCGGTATGCTTAATCCTGTAGGAGATG  
TCATAGAGTCGCCACGAACGGTTAGCCAGAATGACCTTTCGCTTGCATGTGCAGTTGTCT  
CAGGCCACACCTCTATTTCTCGGAGTTGATAAGGTTCAACAGCCTCACGCCAGTTACCTA  
CGCTCACCAAGCTAATCAGGGGAAATCTTCTTATTTCTGTGTGTGGACGAGGACTTGAAA  
CATTGCTCAGGCTGGAGTCTGGATAATCAACCATCCCATCAGAGCTTAATACAAGCTCCT  
TCAATCCTAGCTGTTTCATGATCGCTGCAATATCTTCAATACTTGGTTCACGGCGGCCAT  
TAAGCCAATGACCTGTCGCCCCCTGAGTCTTACCGAGGGCTTCAGCAAGTTTATCCTGGG  
TTAGGCCTATTTGTTTCATTCTGGCTTTCGCCAGCTCATTCCACGGTGTTTTTCATGCGCA  
GATTATTACGAGATGTATTGACTGTGACAACACACATATTGTATTAATTACCTTGCTTTT  
ATCTAGTACGAAATGTATTATTGAGTTACGTACCATCCTGACGAGATATACCGATGAGCA  
ATCTTCGGGACATCCGGGAAACCATGAAGGTATCCCAGGCCGTTCTGGCCGAAAAGATTG  
GGTGTACTCAGGGAGCGATTGGTCAATACGAATCAGGGCGACGCCATCCGGTTTTGAGAA  
TGTGCCGCCAGCTCGTAGAGGCGCTCAACAGTTTTTGGCGCGAATGTTTCAGCTAGACGATG  
TGTTCCACCTGAACTTAATGCTGCCTAAGTAGTACCGCTCTTTACCAATCTGAACCGCC  
GACAACGCGGTAAATCTATCCAACGGATTTGCGTGTATTTGCGAATCCAACCTCTATCTAA  
TTTCTAAGGAATATTTTGAATGAACGTAGTTGCAACTAAAAGCAAGAAGGCGGCTCGCAT  
TGAGTCCACTTTACTCAACAAGTTAGCCATGATGGGCCAGAAGACATTCGCTAAAGCTAT  
GGGTGTTCTGAATAACCAGGTAAGCCGATGGAAGAACGGTTTTCTTCTCAGGTCAGCAT  
GTTGCTTGCTGTTCTGGAGTATGGAATCGAAGACGAGGAAATGGCAGAGCTCACCAGGCG  
ACTTGCTACCTACCTGACAAAAGAAAAAGCCCCGAAGAACGGCGAATTCCTTCGAGGCCTG  
ATGTAGAAAGACTGGATCAATCCACAGGAGTAATTATGCCAAAACAACCTCAGTCCTGACC  
AGGACAAATTACACAAAAACATACTACGTGATCGGTTCTATCCAGCTTCAAACAGCCTG  
GTCGATTTCCGGGCTGAGTTGGAGAAAGTGAAGCTAATACTGAAGAGGAAAGGTCATGAGT  
AACATATCCAATCTAGCCGAAGCCAGAGAGGCCAGAAGGATCCAGAAGCCGCGTACAAAT  
GGCGGCAAGGGGTTTTGCCTTGATTCACCGCCAATTCATGGATAGCAAGCTATAAAAGGAT  
TCTCAGGCTGTACATCTTTTCTGCATCTGATACTGAAAGCCAATCACACTGCGGCCGTC  
GTAACCTACCGACATTGGTGAGATGTTGGTTGAGCGAGGACAGCTAATTACCGGACGGCCA  
AACTGGTACGTGAAACATTCATCCCGGATAACAAAGTGAAAAGTTTGCTTCGTTCTTTT  
GAATGGAATGGAATGATTTGTATCGAGTCGAAAGGGAGAAAATTCAGCCAGAGAACAGTG  
TTGAAATATGATGATTTTTCAGGCTCCAAATTGTGCAACGGATGTCCAACGGATGTCCAAC  
GCAAACACCCGTAATGACGCGGCTCACAGCAAATGTTGTCCAACGGATGTCCAACGGTTG  
TCCATAAACAATAATATAAATAATATCTCTAATACTAACGTATTAGAAACTACCGCAGCA  
GACGAAAATCCTGACAAGAAAAAATCTGCTCCCAGTTGTCAGGATGGTGTGATGATTAC  
CACGAATTACTTCTGAAGCTTCCAGGGTTCGCGCACTGAATGACAAACGTAAAAACCAG  
ATCCGAGCTTTCTGGCGAAAAGCCGAAGTGATAACACGCCAACTTGACGGGCATGGGTTT  
ACGATGCAGGACTGGAGAAATTATCTGAGCTACGTAGGCCGAAAATTGCCGATGGATGTTT  
GAAGAGCGCCAAAACCATCAACGCGGAACCGTCTGGCACAAAAGGGATTTGATTTCTCTG  
CTTAACGATAATACCTACCTGAAAGTTCGTGAGGGTGAACACGATGACCGATAATTTTTTA  
CGCGCCGCCACATAGCATCGAGGCGGAGCAGGCGGTGATTGGTGGATTGCTTCTGGATGA  
TGACAGCAGTGAGCGGTCCAGAAAGTTCTGGCGACGCTGAAGCCTGATTCATTTTACAG  
CCGACCACACAAAATCCTTTTTCGAAGAAATAACCGGAATGCACCGGGAGCAAAGCCAGT  
AGATGGCCTGACGCTTTTTCGATGAACTGGTGCGTAAATCGTTAACGGTGTGAGTTGGCGG  
TTTTGCTTATATCGCTGATATCGCAAAGAACACGCCAAGCGCAGCAAACATCGTTGCCTA  
TGCAATGCAGGTTTCGCGAAACCGCAATGGAACGCTACGCCATCAACCGCATGTCTGAAGC  
GCCGGAATTGCTCTATTCCTGCAACGGAATGACTGCAACGCAGAAGTACGAAGCTATTCA  
GGCGATCTTCACGCAACTGACAGACCATGCAAAAACCGGATCACGTCGCGGCCCTTCGCTC  
ATTTGGTGAGGTCATGGAGGACTGGGTTGGTGACCTTGAAAAGCGATTTGACCCGTCAGG

CGAACACGAGGAATGAGCACAGGGATCCCATCGTTGGACAGGATGCTGTCACCTAAAGG  
TCTGGTAAAAGGCTCTCTGTTTCGTCATTGGCGCTCGCCCTAAGATGGGGAAAACCTACGCT  
ATACAGCCAGATGGCAATCAACTGCGCAGTGCATGAGAAAAACCTGCCCTGATGTTTACG  
CCTTGAATGCCAGGCGACCAGATACTGGAAAACTGGTAGGGCAAAGTCAGGTGTTAA  
CCCGAATATTTTTTACCTTCCGGAGACAAATGACGCTGATGACGGCTATCAGGGTGATTA  
CGATGGTACTTCAACAAGGCGATCGAAACAGCCAATCGCTTGAGTGAAATTGACATGCT  
TTACATCGACGACACGCCGGATTATCTCTGGCTCAAATCGTCAGCGAAAGCCGTGCAAT  
CAAGCGAGAAAAAGGATGTATTGGCATGATTCTGGTCGATTACCTGACACTAATGACCGC  
TGAAAAGGCCGATCGCAACGACCTTGCCTACGGCATGATCACCAAAGGACTGAAGAACCT  
TGCCAAAGAGCTTGATTGCGTTGTTGTGCTTCTGATGCAGCTTAACCGCGCACTGGAAAA  
CCGAACCAATAAACGCCATTACCAAGTGGCTCACGAGATACAGGGCAGATTGAACAGGA  
TTGCGATTATTGGGTTGGGATCCATCGTGAAGGTGCTTATGATGACAGTGTTCACCTGG  
TGAAACCGAACTAATCCTTCGTCTCAATCGTCAATACCGGCACGGTGTATTGCAT  
TCAGGCAAATGGCGCTATCTATGACACAGACCGACAGTCTGCTGAAATGCGCTGCCGTGA  
ACGCGAGGAACCGCAGTCCAAGAAGAAAGGAGGGTTCTGATGACCATCTACATCACTGAG  
CTAATAACAGGCCTGCTGGTAATCGCAGGTCTTTTTATTTGGGGGAGAGGGTAAATGAAG  
GATTTATTAGTAACGCTAAATGTCGGTTAAAGCCTTCTGGTTACGCCTACATTATGTTC  
AAAACAGGCCAGTGGATTATTACAAATGCACTTAAGCAGTGGGATAAGCGTAGAAAAGTG  
TCAGCCAAGCACAAGGCGGGTGTATGCGCTATATGAAGCATAACGAACTGGATAAGGTAAGC  
GAAGGAGATACTGTAAAAGTGGCGACAAAAGAAGGTCTGGTAATCATGATTTGCAGACAT  
GAAAAGACTAACACCCAGCACACTGATGGAGAGGAATGATGAGTACATTGGCTCAATTC  
ATTAATGCCGACCTTGAAGAGTCAGGAGCACGGCATTATCGCTATTGGAAAGCTTCGGGA  
CTTCCGACTAGGGAGCGATAACAAGCGTAGGCCAAAACCAAAGAGCAGCTAGCGAGACAGG  
GTACTTAAGCGCCTAATGCAGATAAACATGTCGCAGTTTACTGATTTACCTGGTTCAAG  
CGGTGATGGAGAGGAATATGGACGAATCAAGAAAGGCTTTCGAGCAATGGTTCCAGAGCA  
AATACAAATGCACTATGGGAACGATGAAGGTTATGCAAATCAAAGTCGAACTTGCTTGGG  
AGGCATGGCAGGCCAGCCGTGAAGCTATCGAGATAAAGCTCGATGACAAAGTAATGGTTG  
AGGATGAGTTCGACAAAGGCCACAACCTGCGCAATCGACTATTGCGCTGATGTCATCCGCG  
CCGCCGAATCAAAGTGAAGGAGTGAGTATGAGCAAAGTATCAAGAGGAATGAAAATATA  
GCTTATTTTCATCCTTAATCCGCATCGTATCTTTTTGGCTTCAGCAGTATGGCTGTCAGA  
TTTTGTTTATTGGTTAGCAGATAAATTGGATGATTTTTCGAGATGGCTTGAGAGTTCTGC  
GAATGCGAGGTTTTGGTTATGGCCGCTTATCGGAGAGAGGATGTCTGACGAATTAACCG  
GTATTACGCGGATAAGCGCAAGGAGAAGAGCAGGAGGGCAAAGTGAAGCAATTATTCCTGC  
TTCGCAACGTAGCAGTCAGAAATAACGCCATAGACGCGATTCTCTCACTACTCATCGACG  
ACAAGTCACCCACGAAGTCCACGTTAAAGCACCCAAGCGAACCAAAGCACAGAACGACC  
GTATGTGGCCGATGCTTCATGATGTCTCCCGTCAGGTGCTTTGGCATGGTCAACGACTGT  
CTCCGGAAGACTGGAAAGACATATTCCTGCGCTGTGGCTCAAGACTAAAAGCTGGAGC  
AAAGAAGCGTACCAAGTATTGATGGCGGTGTTGTTCTTCTTGGGGTACGTACCAGCAAGA  
TGAGGAAGGCGAGCATGACAGAACTTATCGAAATCACGTTCTGGTTCGGATCAGAACGTA  
ACGTGCGATGGAGTGATGATTCCCGGAGAGAGTGCGAATGGTCACAATAACAGGGAGAG  
TTGCATGAAACGATGTTACCGATGTGGAGAAAGCAAAGACGATTATCGATTCCGGCCAAA  
TCAACCTTATTGGCAACAATGGTGTATCAGATGTGATCGGTCCGAGTAGGTAATTTCCC  
GCTGCCAGAGACGAAGGAGGACGTATGGCACGACAGCGACGAAGTATCACCGACATAATC  
TGCGAAAACCTGCAAATACCTACCAACGAAACGCTCCAGAAATAAACCCAAGCCAATCCCC  
AAAGAATCTGACGTAAAAACCTTCAATTACACGGCTCACCTGTCGGATATCCGGTGGCTT  
ATAGAACGTGCGAGGAAATGACAATGGAGTATTCACAGTTAAGAGATTTTGAATTAACC  
GAATGGTAGGAGACATAATTTTTAAAGCCCTTTGGGCATGTAAGCCGGAAACGTCAGGGA  
ATAACACCAACAAATGGTATTACGGAAACGCTGATACAACCTTTTGGAGCCATTAACCAATT  
TACCTGACTACTGCAATGATCCGAGTGCCTCATGGCCGATTATTGAGAAACACAGGATTT  
CTATCTTAGACCAGTAAACTGAATGGTGTGTTGATGCAAAGGCGTAAGCCCAATATTTG  
ATACCAGACCTCTCCGCGCCGCCACGATTGTCTTTCTCATGATGCAGGACGCCAATAATG  
CTTAGCCCATCCCAATCCCTTCAATACCAGAAAGAAAGCGTTGATCGGGCTTTAACGTGC  
GCTAACTGCGGTGAGAAGCTGCATGTGCTGGAAGTTCACGTGTGCTCCGATTGCTGCGCA  
GAGTTAATGGCAGACCCTAACGGACAAATGCTGGAGGAAGATGATGAGTGAGTTACGCGC  
AGGTGGCATCGCAATAGTCATTTTTTCAGAAAAGAAACCCGAAATTGGCAGATGCGTTGA  
GTTAATCGAAAAAGTAACAAACGGATATGTATTTAATTTTCTGGTGCAGGTACGCATGG  
GTGGCGTGAGGATGCCCTGCGTGGTTAGTTAAAGGCGATGTATCGATTTATACAAACAA

GCCTTCAGGTGGTTTTCTCTTATTTTTACAGTGATGAACTCATGCCAATCGACGGAGAAGA  
CTTCTCTCACGAAGATGAGCAACAGAAGGAGCTGGCAAATGGCTAATCTACACAAAGAAG  
CGCGCGGCAGAGAATGCCAGGTACGTATTTATGGCGTATGTACTGGCAATCCTGAAATTA  
CAGTTCTGGCACGTTACCGGATGGCTGGAATTTGCGGAACGGGGATGAAGCCTGACGACC  
TGATAGGTGCATGGGCTTGTAGCGCGTGTACGATGAAATCGATCGACGAACCCATATTC  
TCGACAACAAAGACGCCAGACTTTACCACCTCGAAGGCGTGATCAGAACGCAGGGCGATAC  
TGCTGAAGGAGGGGAAGATTAAGGCATGAAAACATACCGAATAAAAATTGCCGTGGCCTCC  
TTCAAACAACCGATATGGGCGACACTCAAGAGGGGTCCACTACATCAGCGATTGGGGAAA  
GCGATACCGGCGAGAAGTAATCGAAATAATTCAGCAACAACAGCTAGACCTTAAAATCAC  
ACCCCGCAACAGGATCACCATTCTCGCAGGACCTCCCGATAACCGCAAACGCGACCTGGA  
CAATCTACCAAAGCCGTTTTTGACGCACTCACTAGTGCGGGCTTCTGGCTGGATGACGG  
CCAGATAGACGATATGCGCATCAAGCGCTGTCAGGCGATTAAAGGCGGAATGCTTGTGCT  
GGTAGTGACTGAGACGTGCGGGAATTTGCCAATGATTACGGAACACTGGAGGCCGCATG  
ACACACACTGTCAAACCAATTCAGATATGCCCATAGAGACATACGGAAACCAGACAGAA  
GTAGCCAGGCGATTGTCTGTGCCATCGAAACACAGTCAGGCGCTATCTGTACGACAAAGAA  
GCTAGGTATTACGCCATCGTTAACGGCGTTTTAATGATTCATCAGGGCGTGAGAGGTGTT  
TATGACCGTAACCAGCATTAAACCAGGCGAAACAGCAGCGTGAGCGTGACGAACCCGAATT  
GCGCAGCGTCAGTGAGATGACGGAGCAACACCAGAGGGCAATGAAATATCTGCATGAGCG  
AGAGCGCGAACTGGTGAACCGGCTTGGATTGAACAAGCCAGCGGTAGGCGATGCTGCATG  
AGTATACGAGAATTGAACCTCACTAAAGAGCAGCATGACTGGCTTAATGGGTGGCTTGG  
CCATGGGGGGCATGGGTTTTATTCGGGTCGTCTGGAAAAGCGCATGAGCAGCGTAATAGCG  
AAGTTCATGGAGAGCGTAGAGCCGGGAAGAGTTATGACAAGACCAATGTGCAATGATGAT  
GATGGAATGTTGATTTCTCAGGTCGTCTGATTCCGTCATGTACATTGACAAGAAAGCCTTT  
GGCATCCTCCTCAGCTACTTCGCTCATGGTTCATCCAAGCGAGCAATTGCATCCTACTGT  
CACGCGACTGCAAAGCCACGCAAGATGTGTGGACGGGGTGGCGATGGATTGAGAAAACCT  
TCACAGGCAACCTGTAGAAATGAAATTGACGAAATCCTGAAAGCGTCATTATTTGTTTTA  
TACCAGCCAATGCAAAATGCTTTCAAATGCGTAAACGTGTTGAGAAAGTTAAGCATGTT  
GCTGTAAAAGTCTTGACATGCAATTATCCATTTAGCCATAATTAGAGGGTAAGCTGCCG  
TTAGTGACTCTTAAGTTGCAACGGTGGCTTTTTATTTGGGTCAGTCGTATAAAGGTCAT  
TACGGAAGGCTGTTAACCTTCTTATCGTGGTTCGAGTCCACGCTGTCCCGCCAAACATGC  
TGGTTTAGCTCAATGGTTGGAGCGCCTTCCTAAGAAGGGAGTTGCGGTTCAAGTCCGTCA  
ATCAGCACCAACCAATCCCGCTGCCAGGGATTGCAGGCCGTAGAGTATACGTGCCTTACC  
CTCTTATCTTCTTTCCACCTAGCCGTGGGCTTTTTATTTCAGGCCGCGACAATCACCT  
CATAAGCAACGTAGCTATCATGTTCGGACGGCCTTTCCCACTACAAATACAGCACCCCGT  
TTCTTCGGAGGTGGTATGGCAAACGTATGAATGACGACCATAAAGTTGTAGGCCTGTCC  
TGGCTAATTCTGCTTGGAAATGCTGTGGGGCGGCTTGGTTCGCTACCTGATTGACGTA  
ACGCAGAAATAAGCAACATGGAGTTGGATAAACGCTTTCGCACAGATCGCGGTATCTGGC  
TTTACCGGCCTGATTGGCGGGTTGATAAGCGTTGAGGGTGGGCTTAGTTTTACATGATC  
CTGGTAAAGTCGGGAATTAGCGGGGCAATGGGTTCCGTTGCGCTAACCTACTTCTGCGAG  
CGTCTTACAGGGATGAAAAATGCAAACCAATAAGTTTAAATTTTCTCAGCGTAGCGAGAA  
GAACCTGAACGGAGTTAATCCTGACCTGGTCAAAGTGATCCGCCGAGCACTGGAAATTAC  
ACCAGTAGACTTCATCGTTATCGAAGGGGTGAGAACACAAGCCAGGCAGAAAGATATGGT  
TGCTTCTGGGAAGTCACAGACGATGAACAGCCGCCACCTGAGTGGTAATGCTGTCGACAT  
CATCCCGTTAACACTACCTGGCAGATTGAAGAGTTCAAGCCGTTGCTCAAGGCGGTAA  
ACAGGCAGCTTATGAACAGGGCATGAATCTACGATTCGGCACTGACTGGAAGCATGATCC  
GTCACTGCTCATTAAAACCAATTCATCGATGCCCCCACGTTGAGATACCCGCATGAAA  
ATCAGCCTGAAGTCGCTGATTGTGCCTGTTGTAATGCTGTTGCTAACGGCAACGGCATA  
ATCTATCACGGCAAATATCAGGATGAATTGGCGCGAGCGGAACCAGCCGAAAGCAACCTG  
GTGCTGGCCAATCTAACAATAGCTGACATGCAGAAGCGTCAACGCGACGTAGCGAAGCAC  
GATGCCAGATACAAAAGGAGCTTGCTGATGCTAACGCGACTATCGAAAGTCTCCGTGCT  
GATGTATCTGCTGGTTCGTAAGCGCCTGCAAGTCGCCGCCACCTGTGCAAAGTCAACGACC  
GGAGCCGGCGGCATGGTCGATGGAGAAAGCCCAAGACTTACAGCAAATGCTGTACTCAAT  
TATTACCGTCTCCGAAGTGGAATCGACAGCATAACCGCGCAGGTAACTACCTGCAGGAG  
TATGTAAGGACTCAGTGCTGAAATGATTTGTCAACCAAGCGGAAGCAAAAGCGAAGTA  
GCCATAACAAAGCCATCTACGGGTGGGCTTGATAATGAAACCGGAGTTAATTTCTGGTC  
ACCAATTAACGGCAGTACCACGTAGCAACCCAAGCCAGTAAGTGGGGAAATAACACTGGC  
AGCCACTGAAAGATGAACCTCCTGCCTTATGGCAAAAAGATTCTTTGTGGTGTCCGACT

GATGGAAAGACATCGGTTATTGCAGGGGCTATTCAATGAGTGGTCTCGACAATGGCTTAT  
CCCAACAACCGGAGCCAACACAATCGCAGAGATTACAGCATTGACACAATTACAGCAGAT  
GAACCTCGATATCCTCCGTTTAGTTCAAAGCGACACCGCAGCAGCAGAGAAAGCGATCGC  
ATTCGTTGCTGGAAGTAAGCTGAACTTCGAACTGTTCAAAGACCAACTGGTTTTGGCGCA  
GGGTGTAGGAACGGCATTAGCTCGCGCAGAAAAGTCTATTCTTGAGGCAAAAGAAGCGTT  
AGACCTGTTCACTGCCGGAGCATAACGAATGGCAAAGACGAAGTGGCCTAAACTTCCCGG  
GTTCTTCGTGCCATTGTTCCATAGCGCCTATGTCTACCTGTGTCTGTTCAAAGGAAGAGTG  
GGATCAGGCTTGCATTCATCTTGGAGTTGGTAGCGGGCGGAATGAGATGCTGGCGGGGGC  
AACACAGTCATATTGCAATACCGAAACAGGGCGAGAATCTTTACCTGCTTGGTGTATTCAA  
TGGTGAGGCGGCCACATTGGTTCATGAATGCGCTCACGTTGCATTTTATGTCTGCCGAGA  
TGTTGGTGTAACCACTTATCCTGGCGACGCAAACGAAACCTACTGCTACATGCTTGACAG  
AATGTTCAAGTCACTTCCGGCCGTTCTTTTCATGAACCATAAAAAGAAGGAGCCAAGTAATG  
GCAAACCCAAACTTCACGCCAGCATGGCCTCTATACAAAGATGGTGACGGTGTATATGTG  
TCTGCGCTTCCGATTAAGCTATCAAATACGCTAATGACGGAAGTGCAAACGCAGAATTC  
GACGGCCCGTAGGCTGACCAGTACATGTCAGCGCAAACAGTAGCCGTATTCAAGCCGGAG  
GTTGGCGGATATCTGTTCCGGAGCCAGTACGGCGAGCTGCTCTATATGAGCAAGACAGCA  
TTTGAAGCTAACTACACTTCTGCAAGCGGTTACAGTAGCTAATGCAGAGACGGCGGATAAG  
TTATCTACTGCCCGCACTATCACACTAACCGGAGGGGTCACAGGTTACAGCGTCCTTTGAT  
GGTTCGGCTAACGTGACTATCGAAACAACATCAGGAAGTTAACTTATGGCAGCACCAAAG  
GGCAACCGATTCTGGGAGGCCCGCAGTAGCCATGGGCGTAACCCGAAATTCGAGTCGCT  
GAGGCGCTGTGGGCTGCTTGTGTGAATGCTTCGAGTGGGTGGAGGCTAACCCACGATGG  
GAGATGAAGGCTTTCTCATATCAAGGAGAAGTTACACAACAGCCTATTGCCAAGATGAGG  
GCGATGACCATCACTGGGCTAACGCTATTCCTCGATGTGACGCTTGAGAGATGGCGACAA  
TACAGGGTGAGAGAACACTTATCTGAGGTCGTTACGCGAGCAGAGCAAATCATCTACGAC  
CAGAAATTCTGCGGCGCAGCCGCTGATCTTCTCAACGCTAACATCATCGCCCGCGATTTG  
GGCCTCAAAGAGCAGTCGCAATTTGAAGACGTGACACCTGATAAGGGAGATCGCGATAAC  
CGCCGCTCTCGTATCAAGGAGCTACTCAACCGTGGAACCTGGACGCGATTCTTGATAACCT  
GAGCGACGAAGAGCAAATCGAATTGCTCGAGCCACTCGAAGAAGAAGAGAACTACCGAAA  
TACACACTTGCTATATGAGTTTACGCCATACAGCAAACAGCGTGAGTTGATCGACGCAGG  
TCATGATTATCCAGAGCGATGTTTTAAGGCTGGTAACCAGCTTGGTCAGTCATTTACTGG  
CGCTGCTGAAGTCGCGTTCACCTTACCGGGCGATACCCGGGAACGAAAGGTTATCCGGC  
TGATGGTAAATATGGCGGAGAGTGGAAGGTAAGCGTTTCTATGAGCCAGTTGTCTTCTG  
GGTTGGCGGTGAAACAACGAGACTGTAACCAAACGACTCAACGCATCCTGTGCGGGCG  
TATCGAAGAGAATGATGAACCTGGCTATGGGTCAATCCCGAAAGAGGACATCATTAGCTG  
GAAGAAGTCTCCGTTCTTCCCTAATCTTGTTGATCACCTTCTTGTTAAGCACACACGCC  
AGAAGGCGTCGAAGATGGCATCTCAATATGCTACTTTAAGCCTTACTCACAGGGCCGCGC  
CCGCTGGCAGGGCGACACAATTCACGGCGTCTGGTTTGACGAAGAGCCGCCATATAGCAT  
CTATGGCGAAGGTCTTACCCGTACAAAAAATACGGGCAATTCTCAATTCTGACGTTTAC  
CCCGCTGATGGAGATGTCTGACGTTGTTACGAAGTTCCTGAAGAATCCAGTAAGTCGCA  
GAAAGTGGTCAACATGACCATCTATGATGCTGAGCACTACACCGACGAGCAGAAAGAGCA  
AATCATAGCATCCTATCCTGAGCATGAGAGAGAAGCACGTGCTCGTGGTAGTCCTACGAT  
GGGTAGCGGTGCAATATCCAGATACCGGAAGAGACGATTAAGTGCCAGCCGTTTGAGTG  
TCCCGATCACTTCTATGTTATCGACGCTCAGGACTTCGGATGGAACCACCCGCAAGCTCA  
CATCCAGCTTTGGTGGGACAAAGACGCAGATGTTTTCTATCTGGCGCGTGTGTGGAAGAA  
ATCAGAGAACACCGCAGTTCAGGCATGGGGTGCTGTTAAGTCGTGGGCTAACAAAATACC  
TGTCGCGTGGCCTCATGACGGTCACCAACACGAAAAGGGCGGTGGTGAGCAACTTAAAC  
CCAATATGCGGACGCCGGGTTCTCTATGCTTCCCGAACACGCAACGTTCCCGGATGGCGG  
TAACTCAGTAGAGTCAGGCATTGGTGAACCTTCGTGACCTGATGCTTGAAGGAAGATTCAA  
AGTCTTCAACACATGCGAACCATTTTTTGAAGAGTTCGCTCTATATCATCGCGACCAGAA  
CGGCAAGATTGTCAAGACCAACGATGATGTGCTCGATGCTACTCGCTACGGCTACATGAT  
GCGCCGCTTCGCCAGGATGATGCGCGATATCAGAAAGCCGCGAGAAAAGAAAATCCCCGC  
ACCGATTAGACCAGTACGCAGAGGACGATAATGGCCGACAATGAAAACAGGCTGGAGAGC  
ATCCTGTGCGCTTTGATGCGGACTGGACAGCCAGCGATGACGCCAGACGCGAGGCAAAG  
AACGACCTGTTCTTTAGTCGGATCAGCCAATGGGATGACTGGCTATCACAAATACACAACC  
CTGCAGTATCGCGGGCAGTTCGATGTTGTACGACCAGTGGTGCGCAAACCTCGTTTCTGAG  
ATGCGTCAGAACCCTATTGATGTTCTGTATCGCCAAAGGATGGAGCAAGTCCTGACGCC  
GCTGATGTGCTTATGGGTATGTATCGTACAGACATGCGGCACAACACGGCAAAAATCGCG



GTCAATGTGGCTGATGGTGAGCAGATTGAATCTGGCGTAGGTGCGTGGGGTCTGGTCACT  
GACTACGAAGGTCAAAGTCCAACGAGCAACAATCAGGTTATCCGTCGAGAGCCTATCCAT  
AGTGCCTGCTCCCATGTTATCTGGGACAGTAACAGCAAGCTGATGGACAAGTCCGACTCC  
CGTCACTGCACAGTTATCCACTCAATGAGCCAGAATGGTTGGGAGGATTTTCGCTGAAAA  
TACGACCTCGATGCTGATGAAATTCATCATTCCAGAACCCCAACGATTGGGTATTCCA  
TGGCTGACGCAGGACACAATTCAGATCGCTGAGTTTTACGAAGTGGTTCGAGAAGAAAGAG  
ACGGCGTTTATCTACCAAGACCCGTTACGGGTGAGCCGGTAAGCTACTTTAAGCGCGAT  
ATTAAGACGTCATCTACGACCTGGCTGATAGTGGATTTATCAAATTGCAGAGCGCCAG  
TTAAGCGTCGCCGGGTATACAAATCGATTATCACCTGCACCGCTATACTCAAAGACTAG  
CAGCTCATTGCTGGCGAGCATATCCCAATTGTTCCGGTATTTCGGAGAGTGGGGCTTCGTT  
GAAGATAAAGAGGTGTATGAGGGCGTCGTCCGCCTGACAAAAGACGGTCAGCGTCTACGC  
AACATAATTATGTCGTTCAACGCCGACATCGTGGCCCGCACCCCGAAGAAGAAGCCTTTG  
TTCTGGCCTGAGCAGATTGCAGGGTTTGAGCATATGTATGACGGTAACGACGATTACCCG  
TATTACCTGCTCAATCGCACGGATGAGCACAATGGAGAAACGCCAACTCAGCCGCTGGCA  
TATTACGAAAACACTGAGGTACCGCAAGCCAACGCCTACATGCTGGAAGCAGCCACCGCA  
GCAGTGAAAGAGGTAGCGACGCTCGGCGTTGATGCAGAAGCAGTAAACGGTGGACAGGTA  
GCCTACGACACTGTTAACCAGCTAAACATGCGCGCTGACCTTGAGACATATGTGTTTTAG  
GAGAATCTGGCTACCGCTATGCGCCGTGACGGTGAGATTTACCAGTCGATAGTTAATGAC  
ATCTACGATGTTCTCGCAACGTGACAATCACCTTGAGGATGGCAGTCAAAAAGAGGTT  
CAGCTAATGGGTGAGGTTGTTGACCTTGCCACTGGTGAACGGCAGTTACTGAACGATATC  
AGGGGGCGCTATGAATGCTACACGGATGTTGGACCATCATTCCAGTCCATGAAGCAGCAA  
AACCGCGCAGAAATCTTGAGTCGCTCGGCAAGACGCCACAGGGAACGCCAGAATATCAA  
CTGCTGCTGCTTCAGTACTTCACCCTGCTTGATGGTAAAGGTGTTGAGATGATGCGTGAC  
TATGCCAACAAGCAGCTTATACAGATGGGCGTTAAGAAGCCAGAAACGCCTGAAGAGCAG  
CAATGGTTAGTAGAGGGCGCAACAAGCCAAAGAAGGTCAACAAGACCCGGCAATGGTTCAG  
GCTCAGGGCGTACTCCTGCAGGGGTAGGCTGAACTGGCTAAAGCTCAGAACCCGACGCTG  
TCCCTGCAAATCGATGCAGCTAAAGTCGAAGCGCAGAACCAGCTTAACGCGGTCAGAATC  
GCACAAATCTTCAACAACATGGACCTCAGTAAACAATCTGAGTTTAGAGAGTTCCTTAAA  
ACCGTTGCTTCATTCCAGCAGGACCGCAGCGAAGACGCTCGCGCAAATGCTGAGTTACTC  
CTAATGTCAATGAACAGACGCACAAGCAGCGAATGGACATTGCCAACATCCTGCAATCG  
CAGAGACAAAATCAACCTTCCGGCAGTGTAGCCGAGACACCTCAATAAGAGAGAGTTAAT  
CATGGGACCAACCACCGAAATTCAGGCAACTGAAGACTTAACCCTGTCCGGCGATCATGC  
AGCGGCATCTGCTGATAGCTTAGTTGTCGATAATGCCAACGACAATGCAGGTCAGGAAGA  
GGGCTTTGAGATTGTCCTGAAGTACGATGAGAAAGCACCAAAAACAAGACCCGGCAAAGAA  
CGCAGAATTCGCCCGCCGCGCATCGAGCGCAAACGACAGCGCGAGCTTGAGCAGCAGAT  
GGAAGCAGTTAAACGCGGAGAATTGCCGGAGAGTTTACGAGTAAACCCTGACCTTCCACC  
TCAGCCGGATATTAATGCCTATCTGTGAGAAGAAGGCCTGGCCAAATATGACTATGACAA  
CAGCCGTGCGCTTGCCGCTTCAATGCTGCTCATACCGAATGGCTAATGAAAGCGCAGGA  
CGACCGCAGCAATGCCGTAGCAGAACAGGGCCGCAAGACTCAGGAGTTTACCAGAAATC  
AGCGCAATACGTCGAAGCTGCACGCAAACACTATGACGCGGCGGAAAAGCTCAATATCCC  
TACTATCAGGAGAAAGGAGATGCATTTATGCATCTGGTTCCGCTACGGTTGGGGCCGA  
CATTATGCGCCTGTTCCCGGAGAAGTCCGCCGCGCTCATGTATCACCTGGGTGCAAACCC  
GGAGAAAGCCCGCCAGTTACTGGCGATGGATGGGCAGTCCGCGCTGAATGAACTCACTCG  
ACTATCCGAACGCTTAACTCTCAAGCCTCGCGGTAAACAAATCTCTTCCGCTCCCCCAGC  
TGACCAGCCGATTACCGGTGATGTCAGCGCAGCAAATAAAGATGCCATTCGTAAACAGAT  
GGACGCAGCTGCGAGCAAGGCAGATGTGGAAACCTACCGCAAGCTAAAGGCCAAAACCTAA  
AGGAATCCGATAATGGCTTTGAACGAAGGTCAAATTGTTACACTGGCGGTGGATGAGATT  
ATTGAAACCATCTCCGCAATCACTCCAATGGCGCAGAAAGCCAAGAAATACACCCCGCCT  
GCTGCTTCCATGCAGCGCTCCAGCAATACCATCTGGATGCCTGTAGAGCAGGAGTCCCCC  
ACTCAGGAGGGTTGGGATTTAACTGATAAAGCGACAGGGTTACTGGAGCTTAACGTCGCG  
GTAACATGGGAGAGCCAGATAACGACTTCTTCCAGTTACGCGCCGATGATTTGCGTGAT  
GAGACAGCGTATCCTCACCGAATCCAGTCCGCAGCCCGCAAACCTGGCTAACAACGTTGAG  
CTGAAAGTCGCAAACATGGCCGCCGAGATGGGGTCATTGGTTATCACTTCGCCGGACGCT  
ATCGGCACTAACACCGCACACGCATGGAACCTTGTGGCCGATGCAGAAGAACTGATGTT  
TCCCGGGAACCTAACCGCGACATGGGGACATCGTACTTCTTCAACCCACAGGACTACAAA  
AAGGCGGGTTATTACCTGACTAAACGCGATATCTTCGGGCGCCTTCCTGTAGAAGCGTAC  
CGCGATGGCACTATCCAGCGTCAGGTTGCTGGCTTCGATGATGTCCTGCGCTCTCCGAAA

CTTCCTGTGCTGACCAAATCTACTGCAACTGGCATCACTTTATCCGGTGCGCAGTCCTTC  
AAGCCTGTGCGCATGGCTACTGGATAACGATGGCATCAAAGTTAACGTTGATAACCGTATT  
ACTACCGTCACCCTGTCTGCAACTACCGGCCTGAAACGAGGCGACAAAATTTCTGTTACT  
GGCGTGAAGTTCCTTGGTTCAGATGGCTAAGAACCTACTGGCGCAGGACGCAACTTTCTCC  
GTAGTTCGCGTGTGATGGTACTCACGTTGAAATAACGCCGAAGCCTGTAGCACTGGAT  
GATGTTTCTCTTTCTCCTGAGCAACGCGCCTACGCCAACGTTAACACCTCACTGGCTGAT  
GCAATGGCCGTGAACATCCTGAACGTTAAGGATGCCCGTACTAACGTGTTCTGGGCTGAT  
TACGCCATCCGATTGTGTCTCAGCCGATTCTGCTAACCACGAATTGTTTGCAGGTATG  
TAACTACCTCATTACAGCATCCCGGATGTCGGCCTTAACGGTATCTTCGCTACACAGGGT  
GATATTTCCACCCTGTCCGGCCTGTGCCGTATTGCGCTGTGGTACGGCGTAAACGCGACA  
CGACCGGAAACAATCGGTGTTGGTCTGCCTGGTCAGACTGCGTAACTAACAGGGGCTTCG  
GCCCTTTCTTATTTGAGGTGACATATGGGCGTAATGCTATATAAGCAGGGTTCGTGGAAC  
GAAGGTATGGGGCAAGGAAGTTCAGGCTAAAGTTGTGACGACAGCGATGTCGAAGATCA  
CCTTGACGATGGTTGGGTTAAGCACCCAAATGAGGGGCCGGAGACTAATGACGAACCAAT  
CGGCGAGTCAGGAGTGGCCAAGAAAGACATGGGTGAAGTATCTGATGGATAACCACACCTT  
TAACGAACTCTATGCACATCGCGTGCCTGTTTTCAACACTAATGAATGCCTTCCCAGA  
AAGCGCATGGTGGAGCTTCCAGCATCATGACGGCCAGCAATGGGATGGATGGGTGTTAGC  
TGGCATCGACACCCCAAAGGCGCGGTAACATAACCACCCCCAGAGAGTGAAATTGAACA  
TCTGCCTAAAAGCACAGAAATTGAGTTTGGCAAGGAATGGGACGGGCACACAGCAGATGA  
TGTGTTGAATCGTCTGCTAAGCCTGCGACCGAAAGAACCGGCAACCAAAGAACGCAAAAA  
GCCAGGACCAAAGCCTAAGGCGGAAAGCGATGCAGATAAAGACTAAAGGCGATCTGGCCA  
GGGTGGCGCTGCGTTAGCTTGGTGTAGCATCAGATGCAACTCTCACTGATATCGAACCTC  
AGTCTATGCAGGATGCTGTTGACGACCTTGAAGCGATGATGGCTGAGTGGTATCAGGACG  
GAAAGGAAATCATCACCGGATATATATTCTCAGATGATGATAATCCTCCCGCTGAAGGTG  
ATGATCACCGTCTTCGCTCAAGCGCAGTCAGCGCAGTATTCCACAATCTGGCCTGCAGAA  
TTGCTCCGGATTATGCGCTTGAGGCTACCGCCAAAATTATCGCAACCGCTAAATATGGGA  
AGGAACTTCTCTATAAGCAGACCGCCATCGCCAGAGCTAAACGAGCGCCTTACCCGTCAC  
GTATGCCAACTGGCAGTGGAAACAGATTCGCCAATCTGAACGAATGGCATTATTTCCCC  
GAGAGCAGAATGCCGATTCAACAACCTCCCATGATGAAGGGAATCGGTAAGGACTTCAAG  
AATGCCGACTAAATTGATTACCTACCAATCAACATGTTGGCCACACCAAATAAAGTCCTT  
GACTCATCGGGTTATTTACGCTCATTCCCGGGCATAGCGAAGCGCAACGATGTAATGGA  
GTATCGCGCGGAGATGAGTATAACACCGCTCAGAACGCTGTATATCGTGTGTTGTGGCGGC  
AAGCTCTACAAAGGTGAAGCCGTAGTCGGTGTGTTGCCGGAAGTGGTTCGCGTATCAATG  
GCACATGATCGCACATCACAGGCGGTAGGCGTTAATGGTTCAGCTCATCGAGTATCGCTAT  
GATGGCGCGGTTAAAACCGTCTCAAACCTGGCCTGCAGACAGCGGATTCACGCAGTATGAG  
TTAGGCTCAGTCCGTGACATTACTCGCTTACGTGGGCGTTATGCATGGTCAAAGACGGT  
ACAGATTCATGGTTTATCACTGACCTTGAAGATGATTTCGCATCCTGACCGCTACAGTGCA  
GAATATCGCGCAGAATCGCAGCCTGACGGGATAATTGGCATAGGTTTATGGCGAGATTTC  
ATCGTCTGCTTTGGCTCGTCGACGATAGAGTATTTCTCCCTGACAGGGCGCATCCACCGTT  
GGCGCTGCGTTGGATGTCGCGCAGCCATCATTAATGGTACAGAAGGGGATTGCCGGAACA  
TACTGTAAAACGCCATTCGCTGATTCATATGCATTCATCAGTCACCCGGCTACTGGCGCC  
CCTTCCGTCTACATCATCGGGTCAGGGCAGGCTTACCAATTGCGACGGCCAGTATTGAG  
AAAATTATCCGCTCATAACCGGCTGATGAACTGGCAACCGGGGTGATGGAGGCGTTGAGG  
TTCGATTCGCATGAACTGCTGATTATCCATCTCCCGCGTCATTTGCTGGTTTACGATGCC  
TCATCAAGCCAGAACGGGCCGAATGGTGCCTACTGAAAACCGGTTTATACGACGATGTT  
TATCGCGCCATCGATTCATGTACGAAGGCAACCAGATTGCGTGTGGCGACAAGTCAGAA  
GCGGTGACAGGGCAGTTGCAATTTCGACATTAGTAGTACGACAAGCAGCAAGAACAT  
CTGCTGTTTACTCCCATCTTCAAGGCTGATCACGCCAGATGCTTCGATCTGGAAGTTGAA  
TCCTCGACAGGCGTTGCGCAGTACGCTGACCGCCTGTTCTGTCTGCGACCACAGACGGA  
ATCAATTACGGCCGCGAACAATGATTGAGCAGAATGAGCCGTTTGTGTGCGACAAGAGA  
GCTTTATGGAAGCGTGTAGGTCGTATTCGTTCGATTAATCGCATTCAAACCTGCGTGTAAATC  
ACCAAATCACCAGTAACACTATCCGGGTGTCAAATGCGTCTGGAGTAACATATCGCAGAC  
CCGTCACTTAATAAGCCTGTCGTGGTTTACGGCTACACGCATGGATGCATCTATTCTCCCT  
CGCAACATATTCAGTCAGTTTTACCTTCTGTATGTCATAAATCAGGGTAATGATGTTGGC  
TCCATTGCAGAAAAGGCAAATCAGGCAGGAGGCGGTGCTTATGATGCGCAGGTCAGAAAT  
GATGAGCAGGATTTAATTCTTGTGATGAGCACGAAAAAAGAATTGCAAAAACCTGAAGAGGAT  
ATTTACAGGAATAAAAAGTAAAGCTTCTTGAATAGAGAATGATGTTAATGGCCTGAAAATA

AAAGTTCAGGATTTTCGAGGGTAAGGTATCAGAGATAATCGTCGATTATGTTTCACTCAGC  
AGAACAGGAACCTCAAACACTTTCCTCATCCCTTAGCGTATCAGGAAATCATTCTGTTAAC  
GGTACAAAAGTTGTTGGCGCTCGCCAGACTGGATGGACCGCGGCAACAGGTACGGCGAAT  
AAAGGCGTATTCAATGCTGACCTGACATTCACCGTTAGCGATACTTACACGCAATCTGAA  
ATACAGGCTATAGCCAATGCTCTAATTGCTGAGCGTCGGCGCACTAAGGCTTTGGAAGAC  
ACTTGCGTGCACATGGGTTGTTTGATTAATGATTACATTTACTCCAACACGCAACATCG  
ACCTGATAGAACTGTGCGCAACCATCCTGACATTATTGCCGGGAGCAACAACGGTGACG  
GGTACGACTCCAAGCCTGAGTGCCGCTATTTTCGAAGTGAACGTACATGGTCAGTTGGGTG  
GCATCGTGTATTACAACGAGATTCAGCCGCTGACCTTTGACTGCCACGCCATGTATCTGC  
CTGAGATTAGAGGATTCAGTAAGGAAATCGGGCTGACGTGATGGCGATACATCCTCGCCA  
ACACCACCGTTCAGTGCGTTACATCATTGCTGCACGCAAATTTCCGACCGGTCAAATGT  
ACTGCGCAATGATTGGCCTTAAGCGTGTAGGAACCATCAAGTAATACTTCAAAGGCGTGG  
ATGACGTGACCTTTTACAGCGCCACACGCGAAGAATAATCGACTTCTGAATCACGGGA  
GATAGCCATGTTATATGCATTGAAGCTGGGCAGGAACTGCGCGGTGAGGAACTCTTTA  
CCCTGAAAAGCCGGTAAAGGCGGCTCATCAAGCAGCGGAGCAAAGAGGCGCAAGAGC  
AACACAGTACGCCGACACCTGCAAAACCAACAATTCAATCGCGTGATGGAACAGTTGGC  
ACTTACGCCCGCCGAGGTTTGGCGGCTCTCCAGCAGATTCAGCAGCTATCAACGCTGGA  
GGGTCAGAACAGCGCTCTCAATCAGTATTACAACCTCAGACCAGTATAAACAGTTGGATGA  
TCAGGCTCGCTATCAAAGCCTGAATGCAGCGGAAGCCACCGGAGGTCTTGGCTCTACAGC  
AACATCAAACCAAATTGCATCCATTGCACCAACGCTCGGGCAGAACTGGTTGTCAGGACA  
GATGCAAAGCTATGGCGACCTGTTAAACGTTGGTCAGTCTGCGGCAGCAGGCCAGGCATC  
GGCAGGACAGAACTATGCAAATAACGCAGGTAATCTTGCGCAACAGATGGCGGCGATCCG  
CTCTCAGGGTTCTGGTCAATCAACGTTTGGAAAGTGCCATTAGCGGTGGTACAAGTGGTGC  
TCCTGCAGGAGCTGGTCTTGCCGGGATGCTCGGTGCATCGACGCCATGGGGTGCTGGTAT  
TGGCGCAGGTATCGGATTGCTTGGCTCACTCTTCTAAGGAGTTATCGTGGCTACATTTCC  
ACTTGCTGGTTTGGCATCAATGCAGGTGGCGAACCAGAACGCTCCCGGGCAGCCATCACT  
ATCAAACCTACGACTTTAGCCAGCGACCAAACGTTGGAGTTCAACTTGCTCAGGGTCTTGG  
TGCAGTTGGTCAGGCAATGAGGCTTTCTGACTTTCAAAAACCTTTCCGGTCAGGCTTATGC  
GGCAGGTGACCGGGATGCCTTGCCTCAACTTGGGGCCACCAATCCAGGCCAGATTGAAAC  
AATTCGTCAGGGCATTGGGTTTGTGATGCTGATCGCAATCAGGCAATGGGAGATATGTC  
TGCACGATTGAACATTGCCGCCGCTCAGGGGCTGAAGCGGTGATGCGAGAGCTTGCCAC  
GCACCACAATACTGCAGCAAATTGGCGTATCTCCTGAACAGGCGTGGCAGACATATCA  
ACAAAGCCCTGAAGGCTTCACGCAGTTAACAGACCTTATTGGAATGCACGCGGTAGGACC  
AGCAAAGTATTTAGATATTCAGGACAAGTTGACAGGTCGCGAGATTGATCGAGGTGACT  
TGCTGAAACAATCCGCAGCAATAAAGCAGGGGAAGGACTTCAGGCTCGCGGGCAAATAT  
TACTATGCGCGGACAAGACATGTCAGCCTCTACAGCCCAGCGCGGTGAGGATTTGGCAAT  
GCAAAGGGCAAACGCCAGAACGATCTCAGGAGTTGAGGGGAATCGGGTCGTTTCAGCTTGC  
AGATGGTAGAACAGTCAACATTGACGGAAAACCTCACGGCGCAGGGGCTAATGCATTTTA  
CGAAGGTATTGACGATAACAGCAATATGGTTCGTGTCCAGCAAGTGCTATTGCAGCGCC  
TCCAACGTCTGCAGCAAGCGCACAGACCTACGCCATGAAGAAAGACATTGACGCAATCGC  
AAATGCACATGCTTCTGCTCTCGATTTTCATGACTGGCATGACTGGAGGAGCAGGAAATCC  
GGCAATTGGTGCAGATGTTTCGAGCCGACTCACAGGCAAAGAACAACGACAGTTATATAA  
CTCCGACAACGTATTCAGGGAAGAATGCAGAATCAGGGCGTGGCAGCAGCAAGAGATAT  
GGGTGCTAGCGGTATCAACACCATTGCAGAAGCAAAGATGTATTTTCAGGGTATGCCGCA  
GGTTGACTACACAAGCCCGGAGGCTATGCAGCAGTCGATTCGTGAGATTCAGGAATACAC  
CAACAATTATAACAAGCAGTACAACGTTATTGTTGGTAAATGGCAGTATCAGCAATCTCA  
ACCTGTACAGGAATCACAGCCTGCATCCAACAGCAACTTTTCTTCACAATGGGGTGATTA  
ATGGCTAAGGCATGGAAAGACGTTATTGCCTCTCAAAGTACCAGGCATTAGCACCAGAG  
CAGAAAGCACAGGCGCAGGAGCAATACTTCAATGTAGTAGTAGCACCGCAAGCCGAAAC  
GATGCCGAACAGTCTAAACAGGCTTTCTGTGCTGCTTATCCACCTCCAACGGCTCAACAA  
CCAGCAAATCAACCACATGGACCGGCGCAGCCACAGCAACAAGGTGGCTTCATGTCTGAC  
CTTAGCAATGGTGCTGCGGAGACGGGGCGTGGATTGCTTCAGGCTGGCGTTAATCTGGCA  
AATATCCCGGCATCAATGGCTGATGCAGTCGCCAGCGCCGGGGCATGGGCTGGTCAGAAG  
CTTGGCATTGGTGACGGAATTCAGCCATCGCCTCGCGTCACGGCACAAGGACTTGAG  
CAGGACTTTGGCTTGAACAAGGTGCGCTTACTCCACAGACGACAGAAGGCAAATCTTC  
TCTGAAGCACTGCCATATTTGACTCCTGTTGGGGCCGAGAGAATTGCAGCGCAGGCATCA  
TCTATTGCCGGTCGAGTTGCTCAGTGTGCATCACGCTTGTGGCGGAGAACGCTGTTGGT

TCATTGGCTGCAAACAGTGAGCGTGATGATCCAGGAGCACTGGCAACAGACTTAGGAACT  
GGTGTTCATTAGGCGGGGCAATGAATCAGTTAGGCCGTGCCGCTGGTGTCTTATCGT  
GGGATTCGCGGGACGATCGCACCAGAAGCGCAGCAGGCTATTCAGTTCGCTAATGCTGCT  
GATGTTCCCTTGCATACTGACGTTTTGCAGCCAAATCCCAGCGTCGGGCGCATGGCA  
CAGACCACCGCTGAAAACATCCCATTTGCTGGAACAAGCACTATGCGAGCTAATCAGCAA  
GAAGCGCGCAGCCAGTTGGTAGAGGAATTTGCATCACGGTCTGGTGAGTAAGATCCGTC  
ATTGTTATTGGCAGCCTGAAGGCAAAAACATCAGGAATTCGGAAAGCAGCAGGGAACCGT  
CTTGAGCAAGTTCAGAGCGCAATGACAGGAGTCAACATTCAGCCAACGCGAGCAATTCAG  
CAGATAGATGATGAGATTGGAAAACGCAAAAATTAGGACAAGTTGCCGACACGGATA  
ATTAGCAAACCTCAGGCATACAGGAATGAATTGGCTAAAGGTGATGTTAACCTGGAACAG  
TTAAGCAGACTGAGAACGCACTTTAGGATGGATGTCAGTGGAGAAAGGACACAAATGCCA  
CCGCCAGCTGAGGCGGCAGTGCAGCGTGTATACAGGGCAATGACAGGAGACATTGATAAC  
TCCATTGGCCAGAACCTTGGAACGACACTCTGCGCAGATACAAGCAGGCCAATGCGGTA  
TACGCAGATGAGGCTAGTAAGCTCCAGAATACCCGCTTGAAGAACGTTCTGATGAAAGGG  
GATCTAACTCCTGACGTTGTCAACAACATGTTGTTTCAGCAAGAATAAATCAGAAGTTCAG  
AATCTGTACCGGTCAGTCGGTCAGGTGGGACGCGCTCAGATGCGTAACGGCATCATCGGA  
AAGGCTATGGAGAAATCAGGCGGTTCTCCGGATCAGTTCCTGCGCCAGGTTAATTTAATG  
TCTACCCAGACGGGAATCGCTTTTTAAAGGACGAGATGCTGCGTATCTGAAAGGACTGAAG  
AACTATCTTGAGTCAACCAAGCGTGTGGTCAGGCAGGAGTAACAACGCCTACAGGTCAG  
CAAATAACCGTTCATCCTAGGTATTGGAACGGTAACTACCCCTGCGCGGGTAGGTGTT  
GGTGGCGGGTATGGTTTGTGGCAAGAATGGATGAGAGTGAACCAGCACGTAATGCAATG  
CTTCGCCTGGCTAATACTCCACGTGGTTCTACCGCATTCGAGAAAGCGTTAGCCGAAGTT  
GAGCGGGCTGTTAACTCTGTTGCTCAAGGTGCTAAATCAGATGCATTAAGCGAATAGCAG  
TCTACCAACTACGATGCCGAAGATAAAGGAATGCAAAGTTCAATAAGTCTCTGTTTATAAA  
TCATCGTAGGAACCAATAGAGATCATTCTTTGATCTATATATTATCTGAATCCCTTACTT  
AATTGGGTGATGATAATGAAAAAAGGTGTGATGGTTGGCTGTTTTTGTGTATTTCTCGCT  
GGGTGCGCCACAGCAACAAAAACGTATGCTCCAGATGGAAGAGAGGCATATACGATAGAA  
TGCTCTGGAGTAGGGGGTTCATGGGCTATGTGTACAGGCCGAGGCCGGAGATCTTTGTGGT  
TCCAAAGGCTATGACCTGTTTAGCACTGGTAGTGATCAGGGAGCTATTGCAAACATTGAC  
GCAAGTACTGGCAACGCATTTGCAGCAAACACCATATCAAGAAGCATGTATATAGCTTGC  
AAAAAATGAGTAAAGCCTGGTTCGCCGGGCTATTTTTTTTCGATAGATATCTTTCACTTT  
TCGAATACTAATTCTTGAATTTCTCTGGAACGATGTCTGCTTCGAGTTCAGCATTATAC  
CGGTATCCGATTACAGGCGTAGGCTTTTCAAGTGAATCAGCCACTATCTGCACTAGCCCT  
GCACTTAGTGACCTTCCGTTTGCCTTTGCCCTGTGCTTAACCTTTTCTTTCAGCTCGTAG  
GGTAGCCTGAGGTTAAATTGCGGGTTCATCTCTTCCATTTCTGATGCCCCACTTTGGTAA  
GTGGATCGGCATCATATGATCTACTGGTTATATCCACAATAAGACCACCGTGGTCTTAAT  
GACGCACTGCCGTAGCCACGCTGCGGGCATTCTTGCCTCTGGAGCACATTAATGACAG  
ATATCACTGCCAACGTAGTTGTTTCTAACCCCTCGCCCAATCTTACTGAATCCCGTTCGT  
TTAAAGCTGTTGCTAATGGGAAAATTTACATTGGTTCAGATTGATACCGATCCGGTTAATC  
CTGCCAATCAGATACCCGTATACATTGAAAATGAGGATGGCTCTCACGTCCAGATTGCTC  
ACCAGCTAATTATCAACGCAGCCGGTAAAATCGTATACAACGGCCAACCTGGTGAAAATTG  
TCACCGTTCAGGGTCATAGCATGGCAATCTATGATGCCAGTGGTTCTCAGGTTGACTATA  
TTGCTAACCTATTGAAGTACGATCCAGATCAATATTCAATAGAAGCTGATAAAAAATTTA  
AGTATTCAGTAAAATTATCAGATTATCCAACATTGCAGGATGCAGCATCTGCTGCGGTTG  
ATGGCCTTCTTATCGATGTTGATTATCATTTTTATAATGGAGAGAAAGTTGAGTTTGGTG  
GTAAGGTTCTGACTATAGAATGTAAAGCTAAGTTTATAGGAGATGGAAATCTTATTTTTA  
CGAAATTAGGCAAAGGTGCCCGCATTGCCGGGGTTTTTATGGAAAGCACTACAACACCAT  
GGGTTATCAAACCTTGGACGGATGACAATCAGTGGCCAACGGATGCCGCAGCGGTTCGTTG  
ACACTTTAAAACAATCGAAAACCGATGGGTATCAGCCAACCGTAAGCGATTACGTCAAAT  
TCCCAGGAATAGAAACGTTACTCCCACCTAATGCAAAGGGCAAACATAACGTCTACGT  
TAGAAATTAGAGAATGTATAGGGGTCGAAGTTCATCGGGCTAGCGGTCTAATGGCTGGTT  
TTTTGTTTAGAGGGTGTCACTTCTGCAAGATGGTAGACGCCAATAATCCAAGCGGAGGTA  
AAGATGGCATTATAACCTTCGAAAACCTTAGCGGCGATTGGGGTAAGGGTAACTATGTCA  
TTGGCGTACGAACCAGCTATGGATCAGTAAGTAGCGCCCAATTTTTACGTGATAATGGCG  
GCTTTGAACGTGATGGTGGAGTTATTGGGTTTACTTCACATCGCGTTGGGGAGAGTGGTG  
TCAAACCTTGGCAAGGTACTGTGGGCTCGACAACCTCTCGCAACTATAATCTGCAATTCC  
GCGACTCGGTCGTTATTTACCCCGTATGGGACGGATTTCGATTTAGGTGCTGACACTGACA

TGAATCCGGAGTTGGACAGGCCTGGGGACTACCCTATAACCCAATACCCACTGCATCAGT  
TACCCCTAAATCACCTGATTGATAATCTTCTGGTTCGCGGGGCGTTAGGTGTAGGTTTTG  
GTATGGATGGTAAGGGCATGTATGCGTCTAATATTACCGTAGAAGATTGCGCTGGCTCTG  
GCGCGTACCTACTAACCCATGAATCAGTATTTACCAATATAGCCATAATTGATACCAATA  
CTAAGCATTTCGGCTAGTCAGATATATATATCTGGGGCTTGCCGTGTGAACGGTTTAC  
GTTTAATTGGGATCCGCTCAACCGATGGGCAGGGTCTAACCATAGACGCGCCTAACTCTA  
CCGTAAGCGGTATCACCGGGATGGTAGACCCCTCTAGAATTAATGTTGCTAATTTGGCAG  
AAGAAGGGTTAGGTAATATCCGCGCTAATAGTTTCGGGTATGATAGCGCAGCGAGTAAAC  
TTCGGATTCAATAAGTTATCAAAGACCTTAGATAGCGGAGCATTGTACTCCACATTAACG  
TGGGGCCCGGTTCTGGCTCAGCGTGGACTCAACTTACTGCTCTTTCAGGTAACACACTTG  
AGGCTGTATCATTAAAAGTTAACCACAAAGATTGCAGGGGGGCAGAGAGACCATTTGTCT  
CTGACATCGCGTCAGATGATTTTATAAAGGATTCCTCATGTTTTTTGCCATATTGGGAAA  
ATAATTCTACTTCTTTAAAGGCTTTAGTGAAAAAACTCAATGGAGAATTAGTTAGATTAA  
CCTTAGGAACACTTTAGATATGTAATAAAAATGGGTGTAAACACCCATTTTTATTTTTAT

>NewGenomeName\_21

ACCCCCGCCCCAGGTTTCAGCGGAGTCATTGAGACTCCATCGCATCCGTTTCATTGAATAGA  
CACGTGTGCAATGAGGATCTGTAATTCATGACGCGCATCTGACGTAAGATTGTACACACT  
AACGTTGGTGGCCGACAATGCTCTTCTGTACTTTTTAAAAGTAAAGAAAGATTCTTTTTA  
TTATTATATTATATGTAATATATTTTATCATTGCTTCTTCATGAAGCACAGAACTTTATC  
TCTCTATAAATACCAGTTCTGTTTTCGTTGTTTCATACAACGAAAAATGGTGAGCAATTGG  
AATTGGTCAGGCAAGAAGGGTAGAAGAACACCTCGTCGTGGTTACACCAGGCCTTTCAAG  
TCACCTCTTCCTACAATCAGAGTCGTCGTTTCATCAGTCAGATGTATTAAGAAAGATGAC  
GTGTCTAGTAGTTAAATTAAGCCTGAAGGTGATGTTGCGCGTTACAAAATTCGTAAGGTG  
ATGTTGAGTTGGACCCTGAGGATGTGTCAGGGAGAGTTGGTGAATTATCTGATCATCAAG  
TGTAGTTCACCTATCGTTAATTCGTCTGAAGCTTTCCAGCACCTGCTCTAATGGTGAAA  
GAGAGTTGACAAGATATGATTACTATCATATGTAAAGGTAAAGTTGAATCGAATGGCGTA  
GCTTGATCAGATTGTACTAAATCATTCAATAAGTTTATCAGATTAGGAGCGGGTATTAGT  
CTAACACAACATTTGTACGTTGTAATGTATACCAGTGAAGCTGTTAAGACTGTATTAGAA  
CATAGAGTCTATATTGAAGTTTAATTCAGTGTGTAACGAAGAACATATGGGTAATGAAT  
AAATATTGCACTGGATCTATTTACTCCGCGTAGCGGTATGTTTTGTTGTCTTAGTTTCCA  
TAGATACCCTACGTTAATGAACGGGTAATGTCTATTTTGCCCTTATGTGACGTCATTTGA  
TCCCGTGCTGAGCTGGGGCGCGGCTTAGTATT

>NewGenomeName\_22

TTGGCGGTCTGATTATCTTGGCTGAATTAATACCAGAAAATAAATTAACCCTGGCTTCG  
GTCAGGGCTTTTTCTTTACAAAAGAACGGAAAGTTATATAATGTTCTGTTCCAAAAT  
ACTTTTTTCATAAAGTTTATCCTAAGCGTCCCTCTCCTAACTGGGGCGCTTTTTTTATGC  
TATAATATAGTCGGGATGTTTGTTAGATTTTCATCCTATTCCCTAGAGTCAAGCCATTCTTC  
GGAGTGGCTTTTTTCATAGCTTCTTTTACTTCATCAGTTAGAGGTCTGCCATCAAATGAA  
ACCCACTTGTCCCAATCAACTTTGCTATCATCTACTAAATCGGCAAGGTCAATACCTTGT  
TTTTGTTGTTTCAGTTTTAATAGAAACAATTTTAGATTTTCGGCTCTTCTTGTCTTTTAAAT  
TGAACATTTGCAGTATCTAAAACATTTTTTTGACTTGGCTCTTCCAATTTTCGTCATAACT  
GTAATAGTTTCTTCTATAGTTTCAGAATCATTTTCTGATTCTCGCGGTTCAATCATCGGA  
AGGTCATAACCCATTAACCACGGCTCACTAACTCCCAAAGTTTGAGATAATAATATCAAT  
TTTTGTTTATCGAGATTAGATTTTCCATTTATATAATTAGATAAATGAGTTTTTTGGCATT  
TTTTTACCCAATTTATCTTGAAAAGGTTTTGATTTTTCAAGTATATCAACCAGTCTTAAT  
CCTCGGTCGTTCAATTTTTCTTTAATCTCATTGAGAGTTTTCTTTTTTCATGAACCTTA  
TTATAAAAATATTTATAAAAAGTTCTAACTTTTTATACTTTTTCTTGACAATTATTTT  
CCAAATGATATAAATTAATCATAAAGTTCAAACATTTGAACTTTATATCAAACAAGCGA  
ACGATCATGGAGCATTACGTACGGCAGACGGAACAGGCTCAAATCAAGGTACACGACGTA  
TCCACCGCGACGTAAGTAGCAAGTTTGCCAAATAAAAAGCCCCAGAGGGGCAGAAAGGAT  
GTATAATGACTATTGATTATTCTAAATTGAAAGGTCGCATTAAGAAAAGTATGGTAGTC  
AGCAAGATGTTGCAAAGGCTATAGGTTTATCAGAAAAAATTATTTCCGATAAGCGTAATA  
ATAAATCATACTGGAAACAATCAGATATCGATGCCGCTACAGAACTTCTGGTATTGAAA  
AAGAAGATATTGGTATTTACTTTTTTAATAAAAAAATCCAAAAAATTTGAACTTTATAAA  
AAGAAAGGATTCGAAAATGAATCAATTAATTACAATCACACAAAACGAAAACAACGAACA  
AGTAGTAAGCGGTCGTGAACTACATCAATTTTTAGGAGTAAAAACTCGATATAATGACTG  
GTTTGAAGATATGGTCAAGTACGGGTTTACAGAGAACGTTGATTTTATAGGTTTTACTGA

AAAAGAGTAAAAGCTCGAGGCGGTCGTCCAAGCGTTGACCACGCTCTTAAACTTGACAT  
GGCAAAGAAATTTCTATGATTCAACGTAACGAAAAAGGAAAACAAGCTCGTCAATATTT  
CATTGAAGTTGAAAAAGAACCCAAACAACAGCTTTTACCGCAAACCTCTGAACAACAAAT  
TGCATTACTCGCTCAAGGTAACGTGAACCTTGAATAAAAAAGTTGAGCAAATCGAAAATTC  
AGTTCTTGATTTGACTGACGGATTTCGGGCTTCCTTCAAATAAAGCTAACGTTTTGCAAAA  
GAAAGTAGCAAGCAAAGTTTATATGTTTACTGGCGTTAAGTATTCAAATGCTCATCAGAA  
ATTAGGAGCTAAGGTATTCAGAGAGTTCTATAAAGATTTGAACAATCGCTTCGATGTTGT  
TAAATATAGCGATATTCCACTAAGCCGTTATGACGAAGCAACAGAATATCTTGACATGTG  
GCAACCATCTTTCGATACAACGCTTGAAATTCGTGGATTGAACTCACAACTAACTTTGA  
CTTTGAAGAATAGAGAGGAAAACACATGGAACAAACACTTGAAGTACAAGCAACTATTTTC  
AGTTTTAATTCCAGAAGAAAAGATTCTTGTAGATAAAGTTGAATATCAAGAGCTTAAAGA  
AAAAGACTTTGACGGTTGGGTTGGTATGGATGTATTCATAAAAAAATCAAACCGTAGTAT  
TCCAACAGTTTCCAAGGTTTTAACAACCTGATTTAAGAAAAAGAATATCAGTTGAAAA  
CGGAGGTTGGGTATATTTCCCAACTGGTAAAGGAGATAACTGGTCGTTTAGGTTTAAAGA  
AATGATGGATTTTATAAACAAAGAATTTTATCAAAAGTTTTTCAGGAGGGAGTAAATAAAA  
TGTTCCGATTTAAAACAAGAAAGAAAGTGCATTCTTGCAGACCATAATAATACGGTTA  
GAGATATTAAGAGATGATGGCATTGATTGTCCAAATGTCAGCTACAATCGCAACACAAG  
CTCAAATGATTGGTACAAGAGATCAATTGGTCGATGAAGCATATTTAAAACCTTGAATCAG  
CCGAAACAGAATTAATTATTCGGCGCAAAAATGATGAATATCGTCAAAAGTTGGCGGTGA  
TGAAATTAATAAATCAAGAAAAACAATTAATCATCTTGGTCAAGTAGTTTATCAAGAGTC  
AGTCGAATTTATAAAGAAAACTTTCTGTTTACTCAAAAGATTTTCTTAAAAATTCGCT  
CCTCCCACAGCTTTATGAATGGTCAAATGCTTATAAAGCAGCGGTTGAACTGACAAAATA  
AAAAGCCCGCACTGACTTGCAGGACTCGGTAGAAAATTTACGAGAATTTCTACCTCTAGT  
ATAACAACCTTGGAGGAAAATGACAATTAATCAAGGGGGGGATATGGAAATGAAATCAAT  
TCCAGACTATCCTAACTATGCTGTGACTCGAGATGGGAGAGTTTGGTCCTATATAAGTAA  
TAAATTTATAAGACCAAGGGTATCTAAAGAGAATTCCGTCATAGTAAATTTGAATTTTGA  
AGGAATAAGGTTTCAAGGAATGTTGCTAGGCTAGTATTTATAGTTTTAAAAGGATATGA  
GCCTGAAATGGTACGTCATATTGGTGGTAATCCTCTTAATAATAATATTGATAGCCTCAA  
AGCAATGATTAGAAATGAACACTTGAAAAGTTTAGGTAACCCTAGCAATTTCAAAAATTA  
TAATCGTAACCTTAAAATGATTAAAGTTGATGTTGAATCAGAAAGTAAGCAGGTTGTTGC  
ATACCATAACAGGTCAACTGAATATGATTCAGCTTACTATGTTGCAATTTAAAAGATT  
CACTTACAAAGGAGCTTTGTACTTTTGGGAGAATCGGAAAAATGAATTAATTGAGGAATT  
GAAAGTTAGAATTATGCTAAATAATTTACGTTTGAATTTCTGATATAAGGGAATTTAGCA  
GATTGGAATGTATAAAGAAATATAAAAAACAACAAAATATCTTGAAATACTAGAAAA  
AATTTAGAGGAGAAAAAATAAATGCTTGACAATTGCCTATGGGTTCTAATGGCAGAACGT  
CAAATAAAAATTTCTAGTATTAGTCATGATACGGGTATATCTAGGACAACACTAACTAGC  
CTAAAATATCGTCGAGAAAGCAGAATTGACTTTAAAACCTTAGATATACTATGCCAATAC  
TTGCGTATTACTCCAGGAGAATTTTTTGAATATAAACCAGAAAAGAACGGATTTTAAATA  
ATGGCAGAAGAAAAGCCAAGATTTAGTTTTTCTGATATTAGAATTTTCAGGAATGTCCT  
GTTAGATTAAGGGAAAGAAAAGCAAAACGATATAAGGAATCTCCTACAGAAGCCATGCTA  
GTTGGCTCTTATGCTCATGCAATGCTTGAGGGAGATAAAAGCACCGATGATTTTATCCAA  
GAGCATTATACGGATACGATGGGCAATATTGGTAAGAAAACCAAGGCATTAAAAAAGTT  
TTTAAAGATATTGTGATCGCGGTTAATGAAGTCAAAAATACTAAAACCTTATCAGTCTTTC  
GATACTTTACATACTATAAAGAACGTTATATCAGAGCAGATTATGATGATTTTGTGATT  
AGTGGAAGAATTGATGTCTTAAGGTTTGACCACGAAAATAAGATCAGTGATATAATTGAC  
TGAAAACCTGCCGAAGCTTTGAAGATATATTCGATAAAAATATCCGAGCTGATTTGGAA  
TGGTACTTCCATTATAGAGAGCAATTAGCTTTATACGCATGGTTAGTTGCTCAAGAATTC  
GGTGATTATACAAAACCTAGATTATAAAGTGGTAGGTAATAATCGTAGGTTTTACCAAGAAA  
CTTCCAGTAAACATTAAGACAATTACAATGGATTTTGGAAAACCTTGCTGATATTTAGAT  
AAAATTCTTGTTCAAACCTGGGTTATCTGAGTTAGATAAATATCGCTCATAAATATTGAGCAT  
GAGGGAATGGATGGATACTTTTGTACATAATTGCGACTGATGTATCCAAAATAAAAAATAC  
GAAGAATGAGAGGTAGAAGTATGTTAATGCAAATTAACCTGCAGGGACTAGAAGCCCTA  
AACTGACACGAGTCCTTATTTACAGGAGGCGGGCTTTCAGGAAAACGACACTAGCGGCGA  
AGTTTGCCAGTAGTAATGATAGAGCCTTATTTATCACTACTGACGGGAATGCATCCAAAC  
AAGGGTATCAAGCGATAGATTTTGTAGTTTTACAAAAGGCCGAACAAATCATCACAACT  
TACTCAAGCATTAAATATGGCAGAACAAAATGCTGAAAGCTGGGATGTCCTTGTAAATTG  
ATTTGATTGAAGACTTTGACGAACGGGCCAAACCTTATTGCGTGGCGCACTTAATGATT

TTAAATCGACAATGAAAGCATGGGGTAAAATTAACAGTTTGTATAAGGATATGCAAAGTT  
TAATGATGAGCAAGTTCCATGAGAAGACAATTGTTTTGCTTAGTCGAGATGTTGAAGAAA  
TTGGCCAAAATCAGGCGAAGTCATTGGATATAGGCCTGCTTTAAGAAAATCTCTCAAAA  
ATATCATTCTAAAAGACCAAGATGTTAAAATCAGAGCTTATTTTGGTAGAAGCGGTAATC  
GTCAATTTGATATTTCTAATTTAAGGTATGAAGAAATGAAAGGGATGCTTCAACAGATTA  
TTGCTAAACCGTTTGAGATTCTCAACCTGCCATTGACCCAAAAGAGCAACAAGAATCAA  
AGGAAAAAGCTAATAAATTTAAAAGCACAATATGATAAAGCTTTTGCGGCTGCAGCATCTC  
ATAAAGCAAGTGATAAAGATATTGAGTATTGAAAAATATGGAACCGTCAGAAGCGATTA  
TGTCTATTGCAGATTGGATTGCAATTAAGAATCTGCTCAGTCAGGCGTTGATGAAGAAG  
AACTAATTGTGGATGAATTATTTCCAGTAGGTCAAACCTAAACCTATGAGCAAACCGCAG  
TCCTCACTAATCCTGTGCAGTAGAATTAGAAATAATTCAACTTTAGCAAAGCCACCTTGG  
GCGGTCGTTTCGTATCTAGGCAAAGCTGGAGGGTGGCGTAACGTCCGTAAAATCCATGAG  
TATTCAGTGCCTGCACATAAACACTCATTGCCAGCTTTTAATTTGAAAAATAAACTTGA  
AATAAATACTCCATAGAAAGGGGAAGTGTGGCAAAAACAAGCAAAAAGAAAATATATTTT  
TGGTTAAAACCTGGATGAAAACCTTTTTCAAAAATATATTAACAAAAAAGCAGGAGAATCT  
GCTGGTGGAGATACAATGGTGTCTATGTATCAGCGCATGATGCTGCAGTCGTTAAGTAGT  
GAAGGTGTTCTTTATTATGAAGGAGCACTTGATAATCTTTCTGAAGATATATCGCTTAGC  
TTGGATGAAGATGTCGAAAAAATATTAATGACTTTAGCTTTCTTTCAAAAATATGGATTG  
ATACAAATTGATGAAGAACAAAATGCCGAAATGTTACAAGTTCATGCGATTGTAGACCAA  
GAAACAGACTGGGCTAGATATAAGAGAAATCAAAGATCCAGCCAAAATTTGGACAATGTC  
CAATCAGTGTCCAATACTTGTCCAACAGAGACAGAGTTAGAGACAGAGTTAGAGACAGAG  
TTAGAGAAAGAGAAAGAGAAAGAGAAAGATATAGAGTTAAAGAAAGATATAGCGATTAGA  
GATATAGATTCAAACCTTTACTTTCCAAATTTCTAGATACTCTCATTATTTTTTCAAGT  
AAAAACCGTTCAAACCGTGATGTAGCAACTGCTGAGTTTATAAACTCCCTTCTTTTCAA  
AGAGAACAGGCAGTTATTGGGGCCATGAACTACATACAGTCTTATAAAAACCTAGCATCCT  
GAGGATGAAACTGCTCGATATAGTGTAAATGCAGCTAATTTCTTGTCCAACATGATGTTT  
ATGGATTATCAAGAAAAAGTGAAAGCAGATACTGGATATGATGAGGATTTGGGCTTTACG  
AAGGAATACATGCAGTCAATGGCAGATGGAATCCGAGAGTTCCATAAAAATGAGAGAAGTT  
AAAACAGGTCTATTTTGTGAAGAACATCAACAAACCGAACTGGTTAGATATAAACATCCA  
GTAAGTATAGGTTATGATCGGTTGATTCATGGCGAGTTAGTTGATGGTTTGCAGGTAACC  
TCAATGAGTTATTGTGCAGAATGTGCTAAAGAGGGAATATACCAACATGACCAACAATCA  
AGTGCTTAAATAAAAAGCAAATGAAGATTTCTTGAATAAAAAGTAAGTATGGAAAATATAGC  
TTGCTTAAAACACAAAGCCTTGTAGGCAAGAAATCGCTCTGGTTTGCACGTTTCAACACT  
TTTAAGGCAAATAGCTCAGAAGAGCAAACCTTGTTAAATCAAGCCCAAAGAATAGCCAGA  
GAGTACACTCAAGGTCAAATGTTTAAACAGTGTATTGCTGGTGGAGCTGGTAAAGGGAAA  
TCTCACTTAGCAATGGCTATTTTGCAAGAAGTAAATGAAAATCTTAAAGATAATAAATTC  
TCAACATTGTTTATCAATATTAGTGAATTAATTCGAGAAATTAATAAATAGTTGGAATTAC  
TCTGTTACCAAACCAGAAGAAGAACGACTGACAACATTAATGCGAACAGTTGATTTGCTT  
GTTATTGACGATTTGGGAACCTGAAAGCACGTTTTCTAAAGATAATAGCTGGGTATAAGGT  
GTTATTTACAATATTTACAATGCAAGAGAAGACAATACGATTATCACATCAAATGTAAC  
GGTAAAGAAATGCGTTCATCTTATGACGATCTAATAGTTTCTCGAATCATGGAAGCCTCA  
AAAAATAGTGTTGGTAAATTTGAGGGCATTACTGATAAGAGGAAAAGTAAATGAAAACAA  
TAATCATTGAGCAGTGGGAAAACGAGCATTACCCACTCGGAAGAATTAATAAAGCAGAAGC  
TGGCTGAGAAATCTGAGCATGAGATTATTTTTATTCTTAAGCGCATTGCTCAGATGCCTG  
CAATTGCTAGATTTGGGGAAAGCAAGTGAACCTTGTGATTATTTGCCGGGATTGGTGG  
TTAGACTTGGCCTTGAGCAAGCCGGACATGAATGTGTAGGGTTTTGCGAAATCGATAAA  
TTTGCCCGGCAGAGTTATAAAGCCATTACAATACAGAAGGAGAACGAGAATATCATGAC  
ATTACAACAGTCAGCAATGAAGAGTGGCGAACCTTACGCGAACAGTTTAGCTTATTTGC  
GGAGGATTCCTTGCCAAGCTTTCTCCATTGCAGGTAAGAAAAGGATTCCTTGATGAA  
ACTCGTGGAACGTTATTCTTCGAGATTGCCAGAGCGGCTGAACAAATCAAACCACGGACT  
TTATTCCTTGAAAACGTTAGAGGGCTTTTATCTCCAGACAAAGGGAGAACTTTTGA  
ACTATCATATCCACCCTTGATGAATTGGGGTACGATGCAGAATGGCAGATACTTGACAGCAA  
TATTTCCGGTGTTCACAAAACCGAGAGAGGGTGTTCATTATCAGACATCTTAGAGAAGAA  
CGTGGACGAGAAGTATTACCTATCACCAGAGAAAGCAAATGAAATGGAAAGATTTATACA  
AAACACTTGAAGAATTGACCAAAGATAAACAAATAGACCTGTAATAGCTCTAATTCATGA  
AAATTACGTTACATTGAGCGCTTAAACCATTTTCATGGACAATTGATCACGAACAAGCTA  
AAAGCGCTTAGAAGCTAAAATATGAGGTAGTAATATGTTTCAGCAAAAATGAAATAAGGCG

TGGAGATAAGATATGCTTCCGCGACACAAAATTCTTAAAAGTTATCGAAGTTACTGACAA  
ATACATAACGGTTGAAAAAGACCAGTTCCTACTAAAAATCGGTTAAGCGTGAGGTTTTTAG  
AATTGTGAAAATCAATGAAAGATACCATGCATGTGAACTCTTTGACACAGTTGTGAAGTG  
AGGGATGAGATGAAGTGTAAAAAATGCGGTAACAAAATAGATTGTGATTGTATGGGATGC  
CATGAGTGCCAACCAGAATATACTTGTGAAACGTGCGGAATTTGCCATATTGACGGTTGG  
GAAGCTGGGGCATGTTGGAGTTTAGCCAATGACCCTGATTATGACCGATTTGACATTTAA  
AGGAGATATGAAATGACAAATTTGTATGATGCAACAGTCACGATTATAGAAAGCCACGAT  
AAAAAAATTGCCGATATTGAATATATTGGTAGTTCAGAGACAAAAATTAATACAAGTAAA  
GCGCTCGAACTGATGAAAAAGACAAAGTATTATAGCGGTTATGGCGGTAAAGAAATAGCA  
GAAAACCTAATGATTAAGGGAATGGTTTCATCATGACACGAGGGGAATATGATGGCTCT  
GAATGGTGGGATTATATGCAAACAGACCCGTCTTTACCGCAAGTAGAGAGAGATGTTAAA  
AGTTTTAAAGCAAACATAGGCTGGGACAGCTCAGCGGGAATTAATAGCTTGGAGGACACG  
AAAAATGACTAAGTTTGAAGAAGAATTTAACTACTTGATTGAATTATCAGGAAAACTATT  
ACTTGGACAAGTAGAAGCTGAAACATTTAAAAAAAACAGAATTGCATTTTTTTAAAAGTA  
TGAAACAGACCAACAGCAAGACCTACCAGTCCTGCCTGAAGATGTTGATAAAGCGATCAA  
ATACTTGAAAACCTCAGAATAATTTTTCCACACTTACTGATTTGAAGAATCTTGATATTTT  
GACAGAAAAAGGCTTTTGGTGGCTGAATGATTTCCAATTTTAAGATAGACGATTTGGTTT  
TGGAGGTCTAAATAAGAAGTTATTTATCCTTTCTCATTTAGCTATTACAGGCTATCAAGT  
AGAAAAACCGCAGCTGTTCTATATTGACTTACCAAATATTTTGGATTAAGCGATTCAAC  
TAGCGATTCAACCTTCGTATCAAAAAGCGGAAAGTGGAATAATCCTAGAATTTACAAACGG  
GAAAGATTATGCATTAATAAATAAAGAACAAGAAATCAAGTCAATTGATGAGCGTTACTG  
GCAGTTTGCTGTGCCTGTGGAGGTGCAAGAATGAGCGAGAAAAAATATTATGTGTTTCTT  
AGTCCGTTAAATAATGGGAACAAGCCATTTTTTCACTAGTAAGTTTTTCGGTTTATGGCA  
GAATTATTTGGTTTTTGCTAAATGTAATACCAAATAAAAAACGGTAGATATGAGCACAAA  
TACTCTAAATTCACAAAATCAGAACGTGCAGAAATCATGGGCGGTGCTTTGTATAAACAA  
ACAGATTCTTTACCATTTGAATGGCTTTATTCGTTTTGAATCGTTAAAAGAAAAGCTTGGG  
TGGGGATTTACGAAAATATTGAAAAATGGGAGTATTATAATCCAATAATTGAGCTTGTG  
CCTGTGGAGGACCGAGAATGACAATTACTGAGCAACAATTCTATGACATGCTCAATGTTG  
ATGAACATATGAATTTACAAATCGAATTCGAGAACTTGTTTTTGATAAAAAAGGACGTG  
AAGAATTTTACTCTAAAATCTTAAATATCCACCATGACATGAGTGTGATTTTTTTCAGAG  
ATTATTTTATGACTCACTCGGCTGTTTCGTCAAAGGGCAGCATTATACACCAGATGCAA  
TTGGTAAACTCACAGCATTGCTTGTAGGTGGTTCTGGAGGGGCTGATTTAACTGGAGCAG  
GAACAGGAACTCTAATTATTCAAAAATGGCAAGATGACCGATTGAATGCAGACTTTTTTA  
ACTATTTGCCGAGTAACTATTGGTACCAGGCATTAGAATTATCGGATGAAGCTATTTTCA  
TCTTGATTCATGCTTTTGGAAATTAGAGGAATGAATGGCGTGATTATTCCTGTAATGCAT  
TGGAAGTGGCCGTGAAACAAGTTTATTTCAATCAAACAGTGCTAATAATCCAATTGGTT  
TCTCATAGATAAATGTTATCCCTCACGGCAAAAATGCAATGCAATTTATAGGGATTCATG  
AATTGACGGAACAGCCAATTGAACATATTGAAAGTAAATTTCTGACTGGATTCCTACTAA  
TAGAATAAAATAAGGAAAATTAATAATGAAAGTATATGTCTTAAGCGCAGATACCTATGGT  
GAACGTAATGAAACAACACCGTAAATCACGGTACTTTAGTGCCGTGAGTGTTC AAGGAGA  
ATATCAAATGAAAATTACAAAAATTAGCCAGCTTATCAAAGCTCTTGAATACACGAAAGA  
AAATCTACAATCAGATGATTTATCAGAAGTCATGTCTGTTTATGTTTCAAATCAAGCACG  
AGAAGACGGAGTTCAAATCACAGACCCAGCATCTTTCTCAGAAGATGATGGAGATCCATC  
AATTTCAATTAATATGGTTGCGGTTGATGCATTGTCCTATATTTTAAAAGATGATGAACC  
GTCACGGATGGGAAGGGAGTGCTATTAATGAACTTTTGTGCAAGCTGTACGGGCATAAG  
TGGAGATTC AATCCCATGGATGATATTCGTCCATATTGTGCTAGATGTTGGATTGAAGAA  
ACTTCACTCGATAAAGAGATAGACCAACGAATTAATCTTGGAACCGCTCAGACCTTGAC  
GTGTCTGAGAACGTGTTCTGAAAAATGGCTTGATAAGCATATGGATTGAGGTGGAGAAT  
GCGTAAAAAAATAAGAGATTACTTGACAAAATTTGTTATATTCGTAGTTGTTTTTCATGAC  
TACTTCTAATATGATTAGTATGTTTTCTAAAAATGCAACACCTAGCGAATGGACTTTTAC  
TATTGTTATGTCTTTAATCGCAGCATATCTATATCTGGATTGAGGTGGATATGAAAAAAT  
TTGAGTTATATAGCGCTGCCATCTGCAAGCCAGAAGGAATTGCATTTGAAAAAATAACAG  
TTAAAGCTGATAGTTTTGCTGATGTTATTGAGTATATCGAAAGCAACGCAGGTTGGTACA  
CTGCTATCAACTGAGCTTTCAAAGTCGCCTATATCGAGGAGGTTGTGGAATGAAATTACT  
TAAATCGTTATTGATAGCAATTGGCATTGTAACCTTTAGGTTTTACCATTGTTATAGGAGA  
AGTATTAATATTTAAAGTTTTTGGAACAGTCGCTTTTCTTTTAGTAATGGCTCTGCTCTT  
AGTCATTGCTTATACGACTTTGTTTTACTTAAACGGAAAAGGATAATTGAACGCGAAAAAA



GCCCAAGCTGACCAAGCTTGAGCGTTTATTGTA AAAAATTATGGAACAACACCGAAAAACT  
CGGTACTTTAGTGCCGTGAGTGTTCAAATGTTAAATTAATTAATTAGTAGAAAGAGGAAT  
AAATAATGAAAGACATTAACAAGTACCATTGATTCAAAGAGTGCTATTAGAAGTTGGAC  
AATTTAAAAAACATAAGCTAAATGAATTTTTAGTAGGGGAAACGGACTGGTGGTATTCTC  
CTATCAATGATATTGTAATGGCGATGACTAATGGAGAAAAACCTGGACCTTTTAAATATG  
CTGAAGTAGAAACAAACGATTGGCTATGGGTTATGTCAACAATACACGGAAATCTTGTAT  
TGGAGGGAAAAGGCGGAATAGGAATCGAGGTTGAATAGAATGTTTAATAAATATAAAGAC  
TTAGAATATCGAATTAACGACTTGCAAAAAGGCAAATGAAAAGTTATGTTAGATTTAAAGA  
CTGGTAAAACAATTGATTTTGTTC AATAAAAAGGAGAAAAAATGAAGCAACGGACAGATGA  
GTTATCTCAAAGCTTAGATATAAACGTTCTGATTTAAAACCTGAATCGCGGTAAGCTTTG  
TAAAATATTACAAATAGGTAGCCATACATTA AAAACTTTAGAGGAAGGTTCTTGC GAAAT  
TAAACAATCAACTTATATAAAATTGCTTGTATGGTTAGTTGGTTAAATAAAAACAAAAGC  
CCGCTGGGAACGGGCTTCGGCATGATTGTATCTAATATCATTATACCATAGACGGAGGAA  
TCTTTTAAACGGCGGATAGATTAGATTTGTTATTAAGTGACTACATGACTGGAATGCTTC  
AAGTTAGAATTAATTCAAGAGAACGATGGATCACTCGTGAGAAACATGAGGAAAGAATCG  
GAAGTGGTGGGAGTAGTTGAAACACTGCACCACAAGAGCGCAAATATTTGATTAAGAAG  
CTGACAAAGA ACTTGGAA GACTTAATGACCAGAAACAAACGCTTGATGAATTAATGGAAG  
TTATA CAAGGTACAATTGCAAAAGATATTAGTATTGCTAGATTTAAGCACAGAATTTCTT  
GGCATAACGTGGCTATCAGAGTTTGCTTAGAAGAGAGTACAGCTAGAAAGCAGTATGATT  
CATTTAAAAAACTTTGAGAGATGGATTATGGAGAGAACTTTAGACTAATCTCACTTTC  
CTTTTTATTACGTTTTATTACGTTTATATCCTAATTTAAGTGCGATAATGGTAGCATG  
AAGTTATCAGCGAAAGCAAACAAAATGTAATTCGTTCCGTTGGATATAGTTCTAACGTTG  
CTGGACGACAAAACCAGCGTAGCAAGTAAAGCACCCTGGAGAGTGCGCAGGCTTCGACT  
CCCTGACTTGCTATTATAATTTATTACAGGTTGTCCAATGGGCAGCCTTTTTATTGTTGAT  
GAGAGGAGATTCTATCTTGCCGATGACTGGACGTTGTCGTGAGCCCAACTGCCACGCTGT  
AGTTATTAGACCACTACACTATTGTA CTAAGCACGCTGATAAAGAAGCTGCATATCAAGC  
AAGCTGAGAGCGATGGACTAATCGTAATGATAATACAAAAAGATATAAGGACTATACCAA  
ACGCAAGCGTGAGTATAGCCACATTAAGTAGAACAGAATAAGTTCTACCAAAGCAAGCA  
ATGGAAGTCTATACGTGATGTAGTAAGACGTAGAGACA ACTTCCTTTGTCAGTACTGTAA  
AGCGCATAATAGAGTAAGA ACTGGTAAGATAGTGGACCACATCGTGCCAGTGGAGTTTGA  
CTTGAATGGTAAGACCGTGATGGATAACTTGGCTTCTGTTGTAGCAAATACCACACAAG  
GAAGACTAAGTGGGAACAAATTTATTATGGA ACTGGGTACGGAAATAAAACTAAAAATCT  
AATCCCCATAAAAAATGTAAAAGATGTCCCTGATTTTCAAAAAAATGAACGATGATTTTT  
TACAACCCTCCCCCTATCTTTTTAAAGGGAAAGCACACACATAGGTTTAGAAACGTTTT  
AAAGTCCAATTTTGAAAATTTTTATATAGGGGGGGTCAAAACACTAAAAGAAAGGAGAAA  
AAATGACAGCTAAGAAGTTCAGAGACAGTAATGACGGCAAGTTGTCCTATCGTGACCTA  
AGCACCTTCTCCTCTCGCAAGTGCTTGTGGCGCAAACTGTTGCCTTGCTTCAGGAAC  
AAAAGCCAGTTGATAAGATTGATTCGTTTTTAGTTGAAATGTACTGTACTCAGTATGAAA  
TTTATAGAAATTCATATGAACATCTCAAAAAACATGGTGAGGTTCAAGAAATTTATAAAC  
CAGTTCAAGATATGACTGGTGAATTTATTGACAGACAATTTCAAGGTTTCAAACGTAATC  
CAATGACTCAAATTTACTCGGATGCTATAAAAAATCTTAAAAAGATTGGTTCTGAATTAG  
GGTTATCTCCAAAATCTCGTTCTGAATTGATGGA ACTTAATATGCAAACAAACGAAAATG  
AAGATGAGGGAATGGGGGATTTCTTCGATGCAGATTGATTTAACTCAAACCCATGATATT  
ATCGGTACATATCATTAGCTAAATTATGAAGATATTAGAGAAGAATATCGAGACCATGCT  
ACAAAATATGCTTTTGATGTCTTAGATGAAAAGTACACAACAGGATATTTAATGCAATTA  
GCATGTTTTAGGCATTTACAGGACTTAAAAGGATAGGAAATGAAGAATTTCCTTTTAAT  
TACGAAGTAAAACATGTAGAAAGGTTAATGAAATTTCTTAAAATGGCTCAAACGTTAGAT  
ACTATGGAACCGACTAAATTAATGGAGTGGCAGAAGTTTATGCTATCTTTATTAATAGGT  
TGGAGAAACAAAGAAGGTGGTAAACTTTTTCAGTCGTGCAATTATATCTGTAGGACGCGGT  
CAAGGGAAA ACTTATATGTTAGCCATATTAATGGCCTATTCATTTTTTTGTAGAAAGTCGT  
GGTTTAAGTAACCAGGACTTTTTAGTTTCATCCATTAATGCAAACAAACAGGTA AATTA  
TATGGCTATTTGAAATCGATGATTAATGTCCTTAGAACAATTAATCCATGTAGAAAAATA  
GCTGATAAAAACCGACCTAAGCTTACAAGCTGACAAAATTATTATGAAAAACCATAATAAT  
GTGATTCCGCCAATTTCTCATGAAGCTGGACAGTATGATTCATATCACTTTACAACCGCT  
ATCTTTGATCAAATAGGCGAAGTAAAAGCCGTGAGAACATTACTAGGATTGTGTCAGGG  
CAAGTTAAAGTTCCTAACCGTCAATTTGTTCAAATTTCAACAGCATATCCTGACCCTACA  
GTTCCCTTTCATGAAGATGAGATGATGCTGCAACAAGCAATGGAACAAGACTTTTTAGGA

GATGCTGATACTTATCCATGTTAATTTGGAGTAATGACAGTTTATAGATGAACTTATAAG  
CCAGAACTTGGGTAAAATCAAATCCTTTATTAGATTTAGCTTCAGAACATGATAATCTC  
ATGCAAGGACTACTTGATACGCGTGATAACGATGTACTTACTGGTGCTGTTTCATGACTTC  
CAATGTAAGAATCTTAACATGTGGCTTTCAACAGATATAGACAGTTATTTAAAGCTAGCA  
GATGTTGAAAAGCGATTGTTCCCTGAATTTAATATCTATGGTCAACGCTGTTATGTTAGT  
GTTGACTATTCTATGTCATCAGATAATACAGCAGTTGCTTTTGTTCACCTTATGTAAGC  
GAAGAAGGGCAGGCAAAATGGCATGTTGAACAACATTCGTTTATTCCTTTTCAAGCTGCA  
GGGTCAATTGAAGCCAAAGAAAAGCAAGATGGTATTA ACTATAGAGA ACTTGA AACCAA  
GGATTCTGTACAATCACAAGTCATCAACGGGGATTAATCAATGATGATGAATTCTATGAG  
TGGATTGTAATTCTATAGAAGAAAATTCACTTAACGTTTATTTTGGATATGATGCA  
ATGGGAGTGACTAAAGTAATTCAAATGCTGCTTTATAATACTGGATTTAATTTGCAACCT  
ATTAGGCAACGGACAGGAGAACAGGCAAAGCCCCTAAATTCTTACAAAAGATATTTGTT  
GAAGGAACAATTAGCCGTCTGGATGACAAAAAATGGAAAAAGCATTATTA ACTGCTGTA  
TTGCGTGAAGATTCAGTTGGTATTCAAGTAGATTAGCGAAAAGCTACACTTAAAATTGAC  
GTTGTTGATGCAATTATAGATGCTCTATACCAAGGTATGAATCATTTTGAAGATTATGGT  
ATGGCTAATGATAGAAGTTGGCAAGTTGAGCATATGACACCAGAACAAGTAAAAGAATGG  
GTTACTAGCCAAGAATCTGGCTAATTAGACCTTGAGGATGAAATAGATGATGATTGGGGA  
TTCGATGAAGATTTTAAAGCGTTTTTAAAAAATATGGGATGTTTTTGGATGTTCTATG  
CTTCTCTTAGCAGCTATTACGTTAAATATCACGATTTTTCTAATGAACTTATTTGCTGG  
TGGAATTACATTGACAGTAACATTTATTATTTGGAGTTAGTTCTTGGTTTATTAGTTC  
CAAATTACGAAGGGAGGTGATTGAATTTGCCAATATTA ACTTTATCAACCAAACAAAT  
GATGCGCCAGAAGCCGGTAGTGTTCAAAGCTATTTCCAGATGGAAATGATGCTCAAATA  
ATGGAAAGTTTGCTTGGAGATAATAATGGATGGGTTTCAGCTCGTGCAGCATTAGGAAAT  
TCAGACCTATTTCTATTATTTGCAACTATATAGTGATTTAGCAATAGTTAAGATCAAC  
GCTGAAAAGAAAAGAATCGAGGAATCATTATAATCCAAGTACTAATGCTAATAAACAT  
GGTTTTGGCAATCAATGTTTACACAGTTGCTTTTAGGAGGCGAAGCATTTCGCTTATCGT  
TGGAGAAATGCTAACGGCGCTGATATGAAATGGGAATATTTAAGACCATCTCAAGTGAAT  
ACTTATTATTTGAGTATGAAAATGGAATGTATTACAACATCACTTTTGATGAACCTAAG  
TTAGAACCTATTTACGAGCACCACAGAGCGATTTGATTCATATGAACTACTATCAATC  
GATGGTGGTAAA ACTGGAATTAGTCCACTTCACTCTTTGAGGCGTGAATCAAAAATCCAA  
AGAGCCTCTGATAGATTAACAATTACTTCATTGAATAGTTGATTAAATGTTCCCTGGTGTA  
CTTACTGTTAAAGGTGGTGGGCTTCTTAGTGATAAAGATAAAGCATCTCGTTCTCGTTCTG  
TTGATGAAACGTTCAAGAAGTGGTGGCCCTGTAGTATTAGATGACCTTGCAGAA TTTACT  
GCACTAGAAATGAAATCAAATGTAGCTCAATTATTATCACAAACAGATTGGACTTCTAAG  
CAATATGCTAAAGTATATGGGCTTCTGACAGCTATATTGGTGGACAAGGTGACCAACAA  
TCTTCAATCCAACAAATAAGTGGAATGTACGCAAGTGCATTAAATCGCTATTTAAGACCT  
GCTATAAGTGAATTAGAGTATAAGTTTAGCGACCACATAAGCGTTAACATGAGACCAGCT  
ATTGACCCTCTTGGTGATAATTACTTATCTACTATTAGTACTGCTACAAGATGGGGTGCA  
TTGGCTGACAATCAAGCTACGTTTGTCTTGAAGAAGCAGGATATATTACAAAAGACCTA  
CCGGCTCCTGAAAATACAAATAAAAAGACA ACTGGCCAAAGTAATGAGCCAGTGCCATAG  
GAAAGGAGGTGGTCATGGTGATTATTCTTAGAAAGGAGGTAAATGATGACAGTAATCGAC  
ATTAAGGAGATGTACTTGATAATAGTTACGGAATGATGTATGACTGGTTTGGAAATCGAT  
TATACAAGTCCATCTAAAGTTAATGATGCCTTGGTAAATGCTGATGATGAAGAAATTGTT  
TTAAATATCGCTTCTAATGGCGGAGATGATTTGCAGCTTCTGAGATTTATACTGCTATT  
AAGATGAATGGTAAACCTGTA ACTGTAAATATTCAAGGGTTGGCAGCATCTGCAGCATCG  
GTAATTGCAATGGCTGGCGATACGGCAAATATCTCTCCAACAGCCCAATTGATGATTCAT  
AAGGCTATGAGTGGTAGCCAAGGAAATGCTGATGACTTTGAGCAAGAAGCTAAAGTTTTA  
AATGGCGTTGACCAATCTATTGCTGCAGCTTATGAATTA AACACTAGTATGAAACAATCT  
GACTTATTGCAGTTGATGTCTAACGAAACATGGATGACAGCTCCAGATGCAGTGGATAAA  
GGATTTGCAGATAATATTATGTTTGTAGATGCTAATAAACAGTATTTTCTAACTCAATC  
GGCAATATTCCA ACTGCTGATAAACTTACTGAATTTATGAATGTCATGAATTTCAAAAAT  
CGGAATAACCCTCCGAAAGAAGAAACAATTATAAAAAACAAACAAGCTGATTTACGTTCT  
CGTAAGTTGGCTATTTTATTAGAAAGATAAAGGAGACTCAAATGGGAGTTAAATTAACAG  
TAAATCAATTGAACGAAGCATGGATTGCTTCAGGAGATAAAGTACAGACTTTAATGACC  
AAATTAACATGGCTCTTAATGATGATAATTTTTCAGCAGAGGCTATGTCAGAATTA AAA  
ATAAACGTGATAATGAAAAGTTCCGCCGACGCATTGAGAGAACA ACTTGTGTAAGCTC  
AACGTGAGCAAGTAGTTAATATGCGTGAAGAAGAAAAGGTCCATTGAACAAAAGCGAAA

ATGAACTCAAAGACAAATTTGTTAAGGACTTCGAGAATATGGTTTCGTAACCCTATGGCAT  
TTCTCAATACCGTTTCATCTAAAACCTGAAACTAGCTAAAGTGATAGTGCTGCTGGACTTA  
CTATTCCGCAAGATATCCGTACTATGATTAACACATTGGTTTCGCCAATATGACTCGCTAC  
ACAATATGCACGTGTTGAGAGTGTCTACTTGAAGCGGTAGTCGTGTATAGGAAAAAT  
GGACTGAAGTTACTCCGTTGAAAGCAATGGATGAAGACGATGGAAAAATTCCTGATCTTG  
ATAATCCACTTTTGACAATTATTAATACTTGAATTAACGTTGTTTCGGGAATCATCACTG  
CAACTAATACATTGCTTAAAGATACAGGAGAAAAATATTCTTGCATGGTTATCAAGCTGGA  
TTGCTAAGAAAGTGGTTGTGACTTGTAAACCAAGCGATTATTGCAGCAATGGGTACAGTTC  
CTAAAAACCAACAATCGCTAAGTGTGACGATGTTATTACTATGATTAATACATCTGTTG  
ATCCTGCGATTATCGCTAGTTCAAGTCTTTTGACTAACAGTCAGGGTTGAATAAACTTG  
CTTTGGTTAAAACCTGCTGAAGGTAAATATTTGCTCGAACCAGACCCAACAAAACCTAATT  
CATATCTAATTAAGGTAAACAAGTTATTGTTGTTGCAGATCGCTGGCTTCCAAATAGTG  
GATCAACAGTTTATCCACTTTTCTATGGAGATATGTCTCAAGCTATTACATTGTTTGACC  
GTGAAAACATGTCATTGCTTCCAACAAATATTGGTGCTGGTGCATTGGAAACTGATACTA  
CTAAAATTCGTGTAATCGATCGCTTCGATGTAAAAGCGACTGACTCAGAAGCTTTAGTTA  
CTGGTTCATTTACTGCAATTGCAGACCAAGTAGGTAACCTCAAACACTACAACGTCTACTG  
CCGTATAATCAGGAGGTATTTAAATGAGTCTAACTGTTGATAACTTACTAGATCAGTTAT  
CAGAAGATGATGATCGCAAACCACAACCTCAAATTTATTTTGATACAGCTACAGCATATG  
TGAAAAATGCAGTGAGTGCTGATACAGTTGATGCTCCATTTTTCAATGTAGAAAACGTTT  
CTCCAATTTATGATGTAGCTGTTCTTAGCTATTCGATGGATTTGTTGATTAATCGTTCTA  
CAACTATGCCTCCTACTACGGCTGTAGATCACATAGTCGGTCAGTTGAGAGGTCTTTATT  
CTTCGTGGGAGGAGGAGCAAGCTGGCCAAAACCTTACAAACCGAATGATTTTCACAGAAAA  
TGTAAGATTGGAGTTACTAAAACAGTAACTACTCCAACCTGGAGGTAAGATTGAAATAATT  
GACCCAGCTACGGATTTAAATGTTTCGATTTGCGGCTAAAATGAGATCACTTGCCTTCAA  
ATTCAGATAAATGGTACAACACTACGGCTGATACTTTCGACATTGCAATTAGACAGAATAAG  
CTAGTTACAAAGAAAATGTTTGTTCAAATAGATGACGTTCTTTACAACATTATTAATATT  
TCTTCAGATGAATCTGCAAAGCTTATTAATTTGATATTTTGACTCTTCAAGCGAAGAAG  
AAAGGAGCATAATATGGCTACTTTTGAGGAAGCAATGCAATTAATGATTAATCAAGCAGA  
ATCATTAAAGCACAAAGATGACTGTAGAAGATAAAGCCGTAGTTACAAAGGCGAGCGCTAA  
AGTTTTTGAGCAAGCATTAGCTTATGAAGTTAGAAATAGACACTACCGTCATCGTGATAC  
TGGAGAAGACCCACATTTAGCTGATAGTATTGTTATGAAGAATAAGAATATTGACGGTGT  
TAAAGATGGCCAAAGTGTGTCGGATGGGAAAGAAGTACGGAAAAACGTACTCATACAAAA  
AGGTTATATCGCTAATATTATTAATAACGGTAGTCGTTTTCTCAGTACACAACACGTTT  
AGGAAGAAAGTACAAAAAGCCTGGTGAAGTTGCAGTTCATGCAGAGCATTTTATTGAAGA  
AACAAAGAAATGACCCTCATTGTTTCAGCAAGGAATATTAAGAAAGCTGAAGCTGAGGCAATGAG  
GAAAATAATTAATAGAAAAAAGAAGGAGAATAACTTATGAAAAGACCAGTTGAAATTGTT  
CAAGACATAATTGCAGCGAGTGACTTTCCGCATGATGAAATCTTTCTTGATTTTATTCTT  
AGTGA AAAATTAGATTCTAGTAATGAAACTCAGGTTTTACTTACAGAATCAGAGAATGGT  
CCTAATGATTATTGTAACCTCAGATTTTATTTTCAGTCATGTATGGTGTTTATATTCAAATC  
TTTTACACGAACGCTGAAGATTCGGATATAAATATTATTCAAAGCGAAATTAATCTGATG  
AAATCATTATACAAAATGATTGGCTTATTGCGCAATCAAAAAGTCACTATATAGACCCT  
GATACACGGCAAATTATTA AAAATTTATCGGTGCAACGCATCATGACATTAAGCGAGATA  
GCAAATAGCTAACTGATTTTTTATTTAAGAAAGGAATTTAAAATGGCAACAAAAGGTTTA  
AAAATGGTTACTTGTCTATTGGATGAAAAAGGAGTGATCGTTAAAGGAGACAGTGGT  
TTATCTACCAATGGAGTCTTCCAATTACTGATGAAATGTTAGGTACAAAAACTGCAAAC  
ATCACTAATTTATCAAGCGCTCCAACAATGATTTATGGTAATGATGGTCAAGTAGATGCA  
GATATTGCAACAGGAACTCCTTCAGTAGCTTTTGCATTTAATGGTCTACCAGTAGATATT  
AAAAACAAATTGCCTGGTCGTGTAACGATACTAACGGTGGTTATACACAAGGAAGTATT  
CCAAAAGTAGCAGTCTTGATTCAAACAACACTACAATCGGTACTGCGAAGCCACAATATGTT  
GCTTTTGCTGCTGGTAAAATGAACGAAACAGCAATGAATTTGCAAACAAATACTAATGCA  
GTTGTTTCGTGTTGATGACGCATTGACATTTACTGCATTCTCTGTAAGTCGTTGGGGCGGA  
GAATCTGTCAAATCTTTGATGATGGAGATTCCAAATTTAATGAAGACGTGATGATGGAA  
GATGTATTTAATGGTTATGCTGGAGATGAAGTTTAAATAAATTATACAACGACTATAACTA  
GACATTAATAATTAAGGCGGAGTAATCCGCTTTTTATGTGGGATAGATAGATGGTCTA  
TTATATTAGGTTTCGATACCTGACTATTCCTTTACACAAAGTAAAATAGAGGAGATATACA  
ATGAAATTATCATTACCAGAAATTAGAGAAGAATCATTGAAAGTTAAAACCTTCAATTAAG  
AACATTA AAAAATGCATGCCTACCAATTGGAACCTAGCAAAAAGCGAAGAAAAACTTGCT

GCAGTTCAGGATGGAACACTAGAAGAACTAACCAAAGCAATCGCTCTTGATGATATGTCA  
GTAATTAATAATGCTTAAAAATTTATTACTGAAATTCAGGTTTAAATAAAAAAGAAGTA  
GAGAAATTACAAGAATTTGACCGTGGGCAATTTATGATTTTACAATCTAAACTTGTTCTT  
TCACTTCAAGGGTATGATGATGATCAAATCGATACTATGTTTACTGAGGAGGTTGACTCT  
GCCGAAAAAAAAGTTCAAGCATTGAAGAACGAAAAGGCTACCACCAGAACCAATTAATAG  
CTTTACAACATTTAAAAAAAATATTATCGAAAATTGGCACTGGACATTAGAGCAAGTAG  
ATAATCATGATTATTATGACTTAATTGATGTGTTTAAAGCAAATGAAGATAATATAATGG  
CTTCATTTGATGATTTGAAGAAAATGTTTGGACAATAATAAATATTATCTTGTAATATGA  
ACTATATAGGGGAATAATTTACTTATTAATAAATCAGGAGAGATTCATGAAATATTGCCCT  
AATTGTGGAAAAGAAATAATAAGTTCATCTAATTTTTGCTCAAATTGTGCTTTTAATTTT  
AACCATAAAACTGATATTAACAAGAATCTGGTGCTATTAATGTACCTAAAAAAGTGTT  
GAAGAATTCAAAAATGCTTACTTAGCCAATATTATTTTAGCTGTGATAACTGGGATTTAC  
GTTGTTTTAAAAATTTTTACAAATTTTTGGAACATATACTATTAACCTGAAAAATTTCCCA  
TTTATAATTTTAGCTTGTGCTATCTATGCAATTGTTATTAATAAAAAGTTCAAATTAACT  
TATACAGCTTCAATTATTATTTATATTTTTAGTATATTTTCAATATTTTTCTCAAGATTT  
CTATCTCTTGGACTTATGTTCTATTTTGCTTTAATATTGATAGTAGTACCATATGGAGCA  
TCGGCTGTCCTAAGTGCAACTTTAGCATATGGAATAAAGCAGAACATTTTAAAGTGATAA  
AAGACTCAATTCAATAAAAAATAAAACGTCTAGATGAATTAGGCGTTTTTTTTATACTCAA  
AATTAGAAAGGAGTAAAAATGGCATATATAATGGTTGATTCAGTCACCACAGGGATTGAC  
TTTAATGAGACAAAGGCTGTTGAGGCTATCAACCGCTTAAAATCAGCATTTAAAGATAGT  
ACTCGTGAATGACAGATAAATGAAGCACAGGCTAAATCTGCTGAAGATGCTGTTTCTGCA  
TCAAAATATCGCTATGAAGGTCTTAGTGAAGCAATGGAAAAGCAAAAAGCTTATATTGCT  
AACCTTTCAGAAGGTATGAAGACAATCAATAGAGATACTGATGCTGGTGAAAAGGCTTAT  
CAAAAATATAATGCTCAGTTAACCACGGCAAAACGTTCTCTTGCCTCAATGACAGTGCAA  
CTAAACCGTACGAAATCAGCTTATGAATATCAACAAACAGGAATTGAGGATTTAAATAAA  
TCTCTCAGTCGTAATGATAAACTCATGCAGTCTCAAATTGATTTATGTGAGAAAACCTCGT  
AATAAAATGGGAGCTGCCAAAGCTGAAGTTTCTGGTCTATCTACTTCATACGCAAAGCAA  
ACTGAGATTTATAGAGCCCAAGTAACTGAGCTTAAACGTTTAGAATCTGCTGAGGGCACA  
AGTTCAGAACTGTTGTCAAACAAAAACAAGAGTAAATGAAGCTGCGTCGTCATTATTG  
AACTACAGAAATAAACTTTTAGAAGCTAACTTGGCAGTTACAAAGATGCAACCGTTAAT  
TCTGAGTCTCTCATTGTTAAAGGTTTAGATACTGTTTATCAAACAACCTGAGAACGCTACC  
GATGTAATGACAGCAGGATATCAGAAAGTAAAAAATGCAGCATATCAAAGCGCTTTTGGT  
ATTGCAGCAATTCGAGCGGCAGCTATAAAAGGCTCTCAAATGGCAGCTGATTTGCAGGAT  
AGTTATATTAGAACATCCAATCTTGCTGTAGCTGGTGGAGAAAAGTTGCGGAAGTAACG  
AAAAATGTTGCTCAAATGCAAAAAGATGGGGCTCAATACTCTGTAGAATATGGTAAATCG  
CAAAAAGAAATTGCTGAAGGTTATCAAGAATTATTAACGTTGGATATACTTCTACTGAA  
GCTTTGGGTGCTATGCGTTCAGAATCCAAGCCTCTGTTGCTTCTGGCGATGATTTAAT  
AATGTATTGACCGTAACCTCTCAAGCTGTCGATGCTTACGGCATGCGTACTGATAATGCA  
GCACAAATGACTCAAATAACAAAAGATGTAGTTAAACAATTAGCTTATGCAGCAGATATG  
ACAGCGACAGATTTTGCAAGTATGGGTAAAGCTATGGAGTATGTTGGTGATTCATCTCAT  
TCAGCAGGTTTTCAATTATCAGAGGCATCTTCAGCAATTGGTATTCTTTTCGAACACGGT  
TTAGAAGCTGATAAAGCTGGTACTGGACTTCGTAGAGTAATTAACGCAATTACTGGTGCA  
TTAAGTGTTCAAGTCAAGTCAAGTCAAGTCAAGTCAAGTCAAGTCAAGTCAAGTCAAGT  
AAAATTGCAGAGCACCAAAAAGAAACATGAACAAGCTCAAGCGGTTGTTAATTCTGGTACA  
GGGAATACTAAAGCAGCAACTAAAGCTATTGAAAAGCAAAAAGAAGCAATAGGGAAGCTT  
CAAGATAAAGTAGACCAATTGCAATCTGGTGGTGCTGCCAAAGATATGCTTGCTAAACTT  
GGAATTAATAAATAGTGATTTAGTAGATGCTAATGGTATCCTAAAGGATTTAACAACCTATT  
ATGTCCATAGTAAATGATCATACAAAAAATATGGGAACGGCTGAAAAAACTCTGTTTTT  
CAAAAATTATTTGGAACAACAGGGCAACAAGCTGGTATTATTCTCGCTCAAAATAATAAA  
GAACTTGAAGAGCTAAATAATAAAGTAAAAAACTCTGCTGATGGTCAAGCATATGTTGCA  
AATCTTGCAAAGAAAAATATGGGATCGGTTAAGTCGGAGATAAAACAATTCAAGGCAGCT  
GGTGAGGCTCTTTAATTATGATTGGTCAAAGTTCTAGCCAGTTTAACTCTGATGCAGCT  
ACTTCAATGGCTAAGGCTTTTAAATTCTAAAGAAGGTAAGCAAGGGCTTGAAGAAATAGGT  
AGTTGGATTGCAAAGATTTTCCAAGGTATTGTTGATACTGTCAAAGTCATTGGAACCTCAT  
AAAGATGAAGTAGTAACCTTTGGTAAAATCTTTGCTGGAATTTGGGCCACTAAGAAAATT  
GGAGATGTTATTGTATGGCTTGAAAAATTGAAAAAATCTTTACTTGAATTGAAGCTATT  
GATGCATTATGAGGAGGTTTAGGAACAGGAGGCATTAATCTTGTGTAGGTAAGGTGTC

GCTGCTGAAGCTGGAACAGTTGCTTCAACAGTAACTAAAAGAGGCGTAGTTGCTGAAGGC  
GAAGCGCTTGTTCCTCTGGCGGTTTATCAAAAGCTACTTCCTTAATTCCAAGACTATTA  
GGAATTATTGGTTCTGTAGGCGGAAGTACAGTCTTGTCTGGCGGAATAAATGCAGGAGCT  
GAATTACTCAGTAAAGATAGTACAGCTCAGAAAAGCTGGTGGAGTTGCTGGCTCACTCGGT  
GGAGCAGCAGCAGGTGCAGCTATTGGTTCTCTTACCGATCCTGGTATTGGTACAGCAATT  
GGTGCAGCGATTGGCGGAATGGGTGGTAAAAACTTAGGTAAAAGCTTGGGGATTTGATT  
AATTATGGATTAAGAATCTTCATTAAGAAAGCGAAAAGCTACCAGTTGTTAAGTTCGAC  
CCAAAAGCACCAACAAAAGATATGAAAGAGTTCTCCAAGGACTACCAAGGTTTCTTGAT  
AAAATTAACAAGGCATCAAATGTTGATATTGTTCGATGAGAAGTCACTTGAAAAAGCTAAG  
AAAGCAACTGCTGATGCTTATGCACAAATGTCTAAAGATGTTCGATAAATTCGACCAAAAA  
CAAGAAAAGGATTCTAAAAAGCAAATTTACATTCTAGTTAAAAATGGTGTAATTACTCAA  
GCTCAGGCTGACCAATTAACAAAAGGTCAAAAAGACTCAGACGATAAGCAGAAGGCAGCT  
CAGAAAAAGAATCTTGATGAGATGAAGAAGAATACTGATAAATATTATTCGAGGTTGGCC  
AAATCTCAAAAAAGTTATGACACACAATCTCAAAAGGATGCTAGTAACCATGCTGCAGCA  
CTTAAAAAATTAAGTCAGGCAATACCGATGCGCTCTTAGCTATTGAAAAAATATGGT  
AAAAATTCACCTCAATATCAAAAAGAGATGAATAAAGAAATTGCTAAAGAAAATAGTGAT  
TTCAATAAAGCTGAAAAAGCTGCTAAGAAGAAACATAATGAAGCGATGGATAAGCTTGAA  
AAAGCTTATGCAAAAAATCAAACCAAAGCCGAAGAGCAGATGAATAGTCAAATCAACACT  
GCTACCAAAATCGCCAAAACAAGCAAATGGATCTTTTAGAAGATTTAAAAAATAAAAA  
GGTAAATTAATCAGAAACAATTTATTGATACTATTGAAAAGCTGACTATGAATATAAA  
GGAGTTAAGGATAAGGCTCAAAAGCAAAAAGATGAAGCTGTTAAAGCAGCTAACGAAAA  
TACAAGAAGACAGTAGCAGCAGCGGAAAAAGAACGTGCAGAGAATGGATCAATGTCTAAA  
GCCCAATATGATGAAATTGTTAAAAATGCTAAAAAGCAACGAGATGATACAATTCATCA  
GTCAAAAAGCAACAAGAAGATGTTACTGATAAAGCACAAAAACCCATGATAAACAGTT  
GAATTAGCGAATAGTAAAGCCGATAAAAATGTGAAAGCTGCAGCTAAAGAGCAAGGAGAG  
ACTGTCGAACAATATACAAAAGGATTTAAGGATTCTAGAAATTTAATCAATTCATTCATT  
GATGGAATTAACGGAGTTCTTAACTTCTTACATAAAGCTTGGGGGAATATTGGGCATGTA  
AGCCTCAAAGGTTTTGCGACAGGTACTAGTGGTTTAGCTCAAGATGAAACAGCTTTAGTT  
GGTGAAGATGGATTTGAACTTGCTCACCATCCAAACCGAGGTATTTTTGCGGTTGGTCAA  
CAAGGCCCTGAAATTCGTAGTTTGAAAGCTGGAACCTCAATTCCTCCCACTCAATGTCA  
AAAGAGTTTCTTTCATTAACAGCAAATTTACCAACTCATGCGGACGGTGTATCTGGCTTC  
CTAGCAGATGCGCTTGGATGGGTAAATCAAGATATAAAGATGTTACTAGCGTTATTTCA  
AAAGGTCCTAAAGGTGTTGTAGAAGCTATTTACAACGGATTAGGATTAGATGATTTAGAA  
AATGACTTTCCGCCAGGTGTAAGTACTAGGATGGCAAAGGTTCTGCCCAAACAGCACAAAGAT  
AATTTTGTAAAATTCTTACAATCATTTTTCAAAAAGCTGAATCAGATGCCGGAGGTTCA  
CAAGGCTCGCCATCTGGTTCCGGTGTTCACGTTGGGCTGGACACGTTAAACAGGCGCTT  
GCAGCTAACGGCTTAAGCACAAAGCCAAGACATGATTGACCGTGTGCTCCGTCAAATTTCT  
TCTGAATCAAGCGGAAATGAAAAAGCCGTTCAAGGGAACATCGGAGATATTAACAAATTC  
ACTGGTGACATTGCTAAAGGGTTGATGCAAACCATTTCTCAACTTTCAACGCCGATAAA  
TTCCCTGGTCACGGTGATATTTTTATTGGTTACGATAACTTATTAGTTGCTCTTAAGTAT  
GCTAAAAAAAAGTATGGTCCAAGTTTGTTCATTCCTTGGGAATGGACATGGCTATGAAAAT  
GGTGAATCATAAATGCTCATGGTTTCTATGATATTCCTGAAGGAAACCGTCCTGAGATG  
GTTATCCCCCTTGACCCACAGAAGAAATCAAGGGCTAATCAGCTATTAACCAAGCTAAA  
CAAACAATTCATTCAAATTCATCACATCAAAGTAATTCCTTAGGAGATGGTGGACAGTTA  
GCTGCTTTAGTTTCAAGTCTTTTAACTATTAAAAACGGTCAAGCAGATCCTATTATC  
CACTTATGTTAGATAAAAACGGTTTTGCACAAGAATTGGCAGAGCCTATGAACAAACAA  
TTAAGTGTTTTAAATAGCCGCAATAAAATAATAAATGCAGGAAGGACAACATAATGACAT  
TTTCAGTTAATTAGAATGGTGTGAACTATCTGAATTAGTAAGTGGATTCACAGCAATTG  
ATAGAGGGTTTGGTTCAGTCTGGAATAATACTATCAAATCAAGTAGCTAGATATGGTC  
AATCATTTGTAAAGAATACATTAAGCGCAAAAAAATTAATTAACCATTAGAAAAAGCG  
GAATTCGAAGTGATTGGATAGGCTTAAAAAAGGAATTAGCAAAGGTGCTGGACGTCATG  
AACCAGCGCCTTTAATTTTTGGTGATTAGCCTAATAAAGTTTGGTATGCAGTAGCAGATG  
GAACTCAAGCCGTATCAGAAGATATCTCTAACTTAATTGCTACTGGAACCTTACATTTA  
TAGTCCAGGAAGGGCACGCTTATTCGACATATACTAATGTTTTAAACGCAGATAATTCAG  
GTGGCGTCAATGGTTCTAACACTCCTAATGCTGATGGTTCGGTTGATATACAATTAATA  
ATCAAGGAACATTACCGACTTGGATTGATTTAAAGCTTACCAATAATCATGACAATGGGT  
ATTTTGGTATTGCTGCGGTTAACGGAAGCTGAGAATTAGGTAATCGAGAAGAACTCGATG

GTGTTACTATCAAGCATAGCGATATTCTTTATGATAGTAAAACCTGATCCTAAATTTTCTA  
AATTTGTATCAGCCGCAGGTCAACCCCATCCAGAATGGGCTGGTGCAGGAACAAATGGAA  
CAATTAGGTATCAAGAATATCATTATAAGTCTTCCAATGGGCAACAGAAAACAATGAAGG  
CTGTTAAGTTGATTGATCCTGGAAGTCAGACAGGATTCGTGGGGGCATGACAGAGCTTG  
TGTTACCACCAGATTCACATGGGGATTCTGGTGCAGTTAATTTCTATGCTAGGTTTCAGAT  
TATTTACTTGGACAACCTGTTCTCGGCCAACTGGGGCGATGCAAATTTCTAGTCACTGATG  
AAAATGATAAATTTTGTGGCTGGTTATGGGACATTAAGGATGATAAACAGGAAATATTC  
GGACTGTTGGATTTTGGATTGGCGGAGCTAACAAAGGGCAATGGAAACATATTCCTTATG  
TCGCAAATAATGGAGAACAAGCTGGATTAAGATAATAACGATGCTTAATGATAATC  
GAGGGCAATTAGAGTTCGCTAACAAAGGAGCAACTATTGGTTTTTATTAGAAAGGTGGCC  
ATCAAACAATTGTAGTTCAGTACTTCAAGATGTCGCAATTCATAAGGTTAAGTTCTTCT  
TTGGGAACTGGTCAACTAACCGAAGAGGAACGATGACACATATGGTTATTCGCGACTTTT  
GGTGCCGCAAAGACTTTGTTAATACATGGAATGACGTACCAAATCGCTATAATAATGGCT  
CAGTCGTTGAAATTGATATGGCTAGTGGTAATGTATCCAATGATGGAATATCAGCCAATA  
CAGAGGTAGTAAATGGAACACAACCTTTCAATATTCCATCTGGAATTAGTCAGACCAAAA  
TCATTCAATCATTTTGGAAATAACACCACCAGACGTTGAAATATCATGGAAAGAAAGGA  
TTTTATAATGCTCATTAAATGTTTTAAATGGTTCATTAATAAAGTAGCGATCTTAAGTAA  
TGAACCTCCCAATGCACCTAGTTATTATAACGATGAGTTTCATGACTATTTAGAACAAGG  
AGCAACTACATTTAGTTTTACAGTTGCTAAAGTGATTAATAATCAGCTACAGGATTATAC  
ACATTTCTTAAGTGATCAAAGTTATTTTAGCTACAGGAAAACCTGGTCGCGACTACTTGAT  
GACTCCTTCATCCGAGCAATCAGTTCATGAAACAAGTACTGAAATTTTCAATTTTCTGCGT  
TTCTTTAGACCGAGAACTTATTAATGAGCAAGCAAATTCATTAGCGAATACTGGAAGCCA  
TATTATTCAATGGTATTTTGTCCGAATGGGTTTAAATCTCTAGGACTAAAATTACTATTGG  
AATTAACGAAGTTTCAAATCTAACACGAGTGATTAATTATGATGCGCAAGAATCTACATT  
ATCAAGACTTATTTTCGCTAATCAATAATTTTAAACGCTGAATTTGATTTTGTAAACGACTTT  
AAATAATGATGGTTCTCTTGGAACTGTTGTTCTACATATCTATAAAGAAAATGACGGTCT  
AAATATTCAAGGTGTGGGAACAAAACGTGATGATGTCAGACTAACATTTGGCAAAAACAT  
CGAGGATCTCGAAGTAGATGTTAGTGATGACGGATTTTTTAAACGCCGCTTATGTGACTGG  
TGCTGACGGTTTTAGTTGGAAAATTATTATTTAGTTCTTAAATTCAGACGGTGTAGA  
AGAGTTCTATAAAGAAAGGGTCTGAAATAGCTCATGCTCCATTATCTGCCAAAATGTT  
CCCTCCTCAATTGAAAACAGACACAGGAGACATTTGGACAACTCAGACCGAACTACTGA  
ATATAAAAATGACAATGATATGTGGGGCTATATTGTCAGTCAATTTAAGCAATATGCCTA  
CAAACAAATCACATATACCGTTACTCCTTCATCTACTTTAGTTAATCAACTTATTGGAGA  
TGGAAGACCTCTCCAAAAGTGAGATACAGTTATTATCCAAGATGATAACTACATGGATAT  
TGATGGCAATGTGGGTCTAATTTTATCTGCAAGAGTCTCTGAAATCATGACATCAGATAC  
AAACCCTGCTAATAATAAAATTGTTTTTTCAAATTATAAAAAAGTAAAGAGCGATGCTTC  
TTCTGATATCAAAGCGATTGTCAGTCAGTTAGTCAATGATGCTACACCGTATTTTCGCAGT  
CATAGCAACTTCAAATGGAGTTCAGTTCAAAACCGGCACTGGTTCAACAACCTTTATCAGC  
TCATATCTATAAAGGCTCTGCAACGACTGAAGCAACCGCAGACAGCTACGAATGGTCGAA  
GGATGGAACCTATTGTCGCTCCAACCTCAGACTATTACAGTTGATGCCAGCGGAGTTGCGGA  
TAAGGAAGTTTATAGTTTTAAAGCAACGGTTGCGGGTAAAGTGGTCGCTAGTCAGTCGGT  
GACTTTCACTAATGTGAATGATGGAACAAATGGACGTTCTGTTACAAACGTTTCTCAAAA  
GTGGCGTTTGACAACGACTACTGCAACACCAACGCAAGCGTGGTCAGACCCAGGTTGGCT  
CACTACTCAACCAACAACGACAGCTACTGATAAATATCTATGGTCTATCACTCTAACAAAC  
TTTCAATATAGCACCTTTAACGCAAGATGTTATTGAACAAAAGCAGTTTATGGTGATAA  
AGGCGATAAGGGAGATACTGGAAAAGATGGAAGAGCAGGTAAGGACGGTGTGGAAATTA  
TTCAACTACAATTACGTACGCTATATCTTCAAGCGGTACAGTTACCCCAACGGCTGGATG  
GAATTCGCAAGTCCCTACTTTAGTCAAAGGGCAATATCTCTGGACGAAAACAGTTTGGAA  
TTACTCAGACGGAACGAGTGAATCGGCATATACAGTCTCTTACATTGCGAAAGACGGGAA  
CAACGGTAATGATGGAATTGCTGGTAAAGATGGTACTGGTATCAAAACTACGACCATTAC  
CTATGCAGGCTCAACAAGTGGAAACAACAGCACCAACTAGCGGTTGGACTTCTACAGTTCC  
GACAGTTGCAGCAGGTAGTTATCTGTGGACTAAGACCGTTTGGGCTTATACGGACAGTAC  
CAGTGAACAGGGTATTCAGTTGCGATGATGGGAGTTAAAGGCGAAGAGGGAGATCAAGG  
TATTCAGGTATTCAAGGTGTTGATGGACGTCAAGGTATTCCTGGACCTAAAGGCGCTGA  
CGGAAAACACAATATACACATATCGCTTACGCAAATAGTGCCGATGGTAGCAAAGACTT  
TTCAACTTCTGATTCTAATCCTACCTATATCGGGATGTCTGTTGATTTTAAACGTCAATGA  
TTCAACCACTCCGAGTGATTACTCATGGACACTCGTAAAAGGAGCGGATGGAACGCAAGG

GACACCGGGTAAACCTCGGACAGACGGTATGACACCGTATTTTCACACAGCATGGACTTA  
CAGCGCATAACGGTACTGATGGTTTCACGACTGTTTATCCGAATTTGAATCTAGGAGATAA  
TACCAAACTTTTGTTCGGCTCAGAGTATGAGTTAAGTAATATAAGAGGTTCTATTAGAAT  
AGACCCATCAACTCAAAAAACACAGGATGGAGATTTTTATCATTAAACCGTTAAAGCACC  
AAGAGATAATTATCATTGGTTTAGATTCTATTTAAGACCAAAGTCAACAACGCCTAATAT  
GACGAAAGTCGCGATTAAACCAAATACATAATATACATTTAGTGTTATGCTAAAAGGTAC  
TGGACAACATAACGATTTATGCATACCAAATTGGACTGCTCCCAACACGCCTTGGACTTT  
ACAAATTAATCTAACTAGTGAATGGAAGATATATACATTTACAGTAACATCATCAAATGT  
TATTCCAGATAGAGATGTTCAATTCTTTATAAGAAGTAACAATGGAACAGAAATTAATCT  
TAAATACCCTAAAGTAGAAGAAGGCTCAACTGCTACTCCATAGATGCAATCAGCTAGCGA  
AGTCACAACCTGCTGATTATCCAAGCTACATCGGTCAGTACACAGATTTTTCGCAAGCTGA  
CAGAACTAATCCATCCGCCTATACTTGGAGTCTGATACGGGGGAATGACGGGGAAAGAGG  
TCTATAAGGATTAAGGTTGAGCCTGGCGCAACTGGTATCCCCGGACAACCCGGAGCTGA  
CGGAAAACAAGCTATCTGCACATCGCCTATGCCACGAACTCAACTGGTACGGCTGGATT  
TGATGTATCAAATGCGACTGGTAAAACCTTATATTGGACAATATACAGACTTTACGAGTGC  
TGATTCTACAGACCCAAGTAAGTACACATGGAGCTTGATTAAGGTTGATAAAGGCGAAAA  
GGGAGATACTGGAAAGGATGGGAGAGCAGGTAAGCACGGTGTTGGAATTAATTCAACTAC  
AATTACGTACGCTATATCTTCAAGCGGAACAGTTACCCCAACGGCTGGATGGAATTCACA  
AGTCCCTACTTTAGTCAAAGGGCAATATCTCTGGACGAAAACAGTTTGGAATTAATCAGA  
CGGAACGAGTGATTCGGGATATACAGTCTCTTACATTGCGAACGACGGGAACAACGGTAA  
TGATGGAATTGCTGCTAAAGATGGTACTGGCATCAAACTACGACCATTACCTATGCAGG  
CTCAACAAGTGGACCAACAGCACCAAGGATCGGTTGGACTTCTACAGTTCCGACAGTTGC  
AGCAGGTAGTTATCTGTGGTCTAAGACAGTTTGGGCTTATACGGACAATACCAGTGAAAC  
AGGGTATTCAGTTGCGATGCTGGGAGTTAACGGCGATAAAGGGAGAGCGAGGCATCAAAGG  
TCCTGCTGGAAACAACGGTGACCATGGTAAAATCGTTTCCGATACTGGGCTAAATACACG  
CTTCAAAGGCTTGACTTGGAAAGTATTTAGGTATGTCTGACCTTACAGCTAGTGATGGAAC  
AGTTATATTATCTGGCACCGAATATTATTGGCCGGGAACTAAGTGGATATTAACGAAAT  
AAATGCACATAATATCAATGGTGATAATCTAAGTGTTACAAACGGAACCTTTACCGACGG  
GAAAATAAAAAGTACATGGAACCTCAGCTACAACATCGTGTAGCACGCAAATTGAAAATAG  
TCACATCAACATGAGTGCAACAAATTCATCATGTAAAGTTACAAATAGTTTAGGACTGGA  
TATCCAACAAGGTTTTGGGATGCGTTGGACTGATCCAGCTTCTAATCAATCAAGATCAGT  
TTCACTTGATTATGGAACTTAGCTTTTGATAGAAATGGAGTTGCAGCAGGAATAAACTT  
TGATGGTACCAATTTATCAAGTTCTATGCCTATTCAAGCCCAGAACAACAAATTGTTAAGTC  
AACTCAGTTTAGCGTTAGTGGGATAGGAATCCGTTTAGACCGAATGATGTCATTTGTTGC  
AGTTCCTTTTTTCAGGGCAAGCTTCTTCAACGATTAACAACCTCTCCAACAATTATCAATGT  
TCTTCCAGAAGGATTTAGACCAATTAGTCCATACTCAATAGATTATATGGTACCTGGTAA  
TTCAGCTAATAATGGTTATATCTATTTAATCCAGATGGTTCAATTAGTATTATGGCAAC  
AATTAATAGTGGTTATTACATTAGGGGAACAAGATTTTATATCACTAATGATGTTTATCC  
CTCATAAAAAAGAAAGGAATTTATTATGACAGTAAAAGCAACGGGCGAGTCTATGAATCG  
CGAATTTAGAAATGAAAATGGAGAAGTAATTGTTTCATCATCAGCCAATGTTGTAATAAA  
GACCATCGGATCAATGACCCTTAGATTATTAGATGCTCAAAAAATAAAAAGATTCAGAAAC  
AATTGTAGAAGAAATAAAAATTTTTGATTGATGATGTATTGGCAATGTCCGCTAAATACTT  
GAATTAGAAAGCAGGGGTTATGGAATTAACAACAGCTCGTAGAGCAGCATGAGACTAACT  
CAACCAACATGATAAGGAACTGTCTCGACTCAACGACATGTCGGTTGAAATGCAAAAACA  
AATGAGTGAAGGACTTGCTCGTGTGGATGAATCCAATCGCTTTTTAAGAGAACAGAATAT  
TCGACAATCTGAACAAAATGCGCAAAATTTGCAAGCCGTCATCAAAGGCAATGAAAGTTC  
AGATGCACGGCACTTTCAGTTGAAGCTGCTTGATAAACTAACTTATGGAAATAGATTTT  
CGGAATTGGCGGAGCTTCGGCGGCCATATATACGATTCTCATCGCAGTTATAAAATTAAT  
TAAATAAAAGAGGAAAAATAAAAATGGATCAGAATTTAATGATAATCTTTAGTGGTATTTT  
AATAGTAGTCGGCTCTGTAGTCTCTTACTTCATTTACAGACTGCTAAAAAACATAGCAA  
TGTGAAAAACATTGATGCTTTAGCAAAATTGGCTAATCAAGGGGTAAGTTGGGCACAGAA  
ATACTTCAATGAGAATCCTGAAAAGTTATCTGAAGCTATTAATTATGTGACACAAGAAGC  
TAAGAACTTAAAATTAAGACTAATCCAGCTCAGATTGAAGCTCAGATTGAAGCTTCTTT  
GGCTCAATTGAAAAGAACTTTACTGCTGACCCTGCTAAAACAATTAAGATGTTGCACA  
TGCTACATCTGAACTTGCTCAATCAGTATCTAAAACAGCAGATACTATGTCTACTAACGC  
TGAAGAACTGTCTAATCTTGTAGACCCAATTATTAATGGAATAGAAGGACTCACTGAAGA  
ATAGGGGGGTATTATGAATGGAATTGACATTTCCAGCTATCAAGCAGAATTGAATGCTGG

AATTGTTCTTCTGACTTTGTATTTATTAAGCAACGGAGGGAACAAAATATATTAATAC  
AACTTGGAGAGAACAAGCTGGTCAAATCACTCAGGCAAATAAGCTTCTAGGTTTCTATCA  
TTTCGCTAGTACTGGCAATCCAATTGCGGAGGCAGACTTCTTTATCAGCGTTGTTAAAGA  
CTATATTAGTAAAGCAGTTCTGGTCTTAGACTTTGAAGCTGGGGCAATTAATGCATGGGG  
AAATGTAGGTGCTCGTCAATTTTTGAATCGTGTAAGAAATACTGGCATCAATCCAAT  
GATTTACATGTCAGCAGAAGTACTCGTCAGTTTAATTGGAGTACTATTTCAAATAGTAA  
TGCTTTGTGGGTTGCTCAGTATGCTTCTACAAGTCCTACTGGTTATCAATCAGAACCTTG  
GTCCGATGGCAAAGGGTATGGCGCTTGGAGTTCTGCTGCGATTTCATCAGTGCAGTTCGTC  
AGGGACTTTAATGAACTGGAACGGATACCTTGATTTAACTTGGCTTATATTGATGCTAA  
TCAATGGAAACAGCTAGCTAGTGGAAGTCTACATCGCAAATAACAACAACCTCAAATAC  
TAATTCAAAATTGGCGGATGATGACCTTATGAAATTTACATATCGAATTATTGATGCAAA  
AACAGGAAACACGCAAGGAACCTTTACTACTATGATGGAAATAAAGTAGTTGCTTTATC  
TCATGAAGATCAACTTAAAATTATCCGTCAAATCTATAAAGAGACGACAGGAAAAGACTT  
GAAACAGTATAGTTGGAGAAGTACTGATGCTCCTTGGTACGTTTCATTTTCATGCAAGCAATCAA  
CCAAAAACAGTAGAAGTTGCTTGGAAATAAACTATGGTAGAATTTTTCCAAAGAATTA  
AGAATTGCCCGACCTGAAACTATTTTTAGACTACTGGTGGGTTTGGCTGATTATAG

>NewGenomeName\_23

TTCCCGCGAAGCGCCTGTGCGGTGCGGTGGTGGACGAAACCGGATAAAACAACCGCATT  
GTGCAGATATCGATTGAATTTGGTGTGCTGAGTGATATCTGAACAATCACAGCGGTGAG  
TCTTCATGAGTTTTAACACGGGGCCTCAGAACGTGACATGGCAAAGCTGGAATGGTAAA  
AGCTGGAGCAGGCATTCCGATACCAACATGCGGAAACGGGAATAACACTACTATAATGGT  
GCCGGAAGAAAAGATTAATTACAACACCGGCAGAACCCGTATAGAAATGGGCAGAAATCG  
ATCATGAAAGTGATCATAAGACCGCACATGAAATAGATCATGACATCTCAGATGAAGGAC  
CCAGCAATGACGCGGGTTCCGGCGATGAAAAATATGAAAAAACTCTGAAAAAACAGCG  
CAAATTCGGCAGAAACGAAACGGATTGGTAGTTCCCGGCTTTTGCCACCTTCAAACGCTT  
TATCTCAGAGAAACCCACGCGTAAGAAACCGTGGATATCCGAAGTATCTTGAGGCAG  
AAAACCTCATGGATGGTGCCTCCGACAAGCTAATATTCGATGGACTGGTGTTCACCGGG  
CCCGCGCACTTTTACGTAATAAGGCCCTTAAAGGGATGTGCCCGACTTGGACGAGGTAG  
ATGACGTGTGAACCCGTGTTGCTCTTACGGCAAATTACTCACACCTGAACAGGCCCTTG  
ACCGAAATATTGACCGTATCGAGTCAACTGTACGCTCAATGCTGACGCAGGACGTCTTGG  
GTGAGCCAGCAGCATAACTTCGTGGTGACCGGGAAGGAATCCACGCTGCCATAGATAAAC  
TCACCGCTGAAAACAATATTCTGACCAACCATCGTCGGGGCATTGTTACGCCTCTCAGTG  
ACACCGTGTACCGCTTCCCTGAAATGAGTAATTCGGGGGAGACTGTACGACATTCGGGAAG  
AATGAACCGCGATGTGATGAGCCGTCAGAAATTACCGAGGCTGAACTACGTCGGTTCATC  
ATAACAAAACCTGAACAATCCCAGGTGGCGGCTCAATCACCTCTACAACATACTGAACGAA  
ATAGGTGAACTGGGCACCTTCAGTACGCGATCGACGCAGCGCAAGTGTTCGGGAGCATG  
CACAATAAAAATATTATCTTGAAAGCACGCCGGCCGGGATTTGCCACGGCCATTGATATT  
TATCTTCTTACCACCCATTATTCATCCCGCTTCTCAAATGCGGGATCGTCGCTCAGGAT  
TACCAGGCTGCCAATGAAATTCTCCGCACAGAAATTGCAGTACCGATTGATCATCTCCGT  
GATTGGCTAAGAGCCTCATTACCATCGTTGAACGTCGCAGCGGTGCCAGCGGTGGCTAT  
AGCATGTTTGGTCACGGCTCTAGTGTCAAGTGGGCAACCTCATTCCGTTCAAGAACGGTG  
CAGCGCTCCATATCTCAGATCAAGGTAAAATTTGCGCGAAATATCCGGCTAAGGCGGAA  
GAACTGCGAGTCAGTACTCTTAATGCCGTCTCTGATGCAGGCATTATTTTTGATGGGTCA  
ATACCAGAAGGCGTGGGTGGTATTAACGAGATGAGTAACCGAGCACAGGAGATCACT  
GCATCAGGCTCATTGTTGACGGCACGGGATTATATATTCCATGTTTACATCTGGTGGCAG  
GATCCTCAGTACAGCACCAAGTGCCGGATAGCGGGCTGAAGCTGTCAGGCGAATAAAGG  
AGTTTTTTTGCTACGGCTGAGAACGCAATGAACATCAAGCTGACTGACGAACCGAAGCAT  
TGGAACATCAATAAGGAAACGGAATAACGTGAGGAAACGAAGCAGGCGATTCCCTCAACG  
CCACAGGACGCGTGTCTGACGTCCGGACTACGTGTTGTGAGTCCGAAAGTATATTGCAG  
GCCGAATCATTCCGGATCCCCACCGATGATTGTTTACAACATTGACAATGTTACAGGAACG  
AGGACTAAAGCTCAGTCTCCACGTGAAGGAAATAAAAACCTAGTTGCAGCGTACGCTGATG  
AGTGATCTGCTGGTATGGGAACTTCCGGATGCGGAGGAAGCGTATGTTTGTGGAGCAGAT  
ACTGCCGAAGGGCTGGAACACTGAGACCGCTCATCGCTGTATGTTGTGAAATGCAGTAGT  
GGCGAGCAGGTTGGTCAGTGGTTCGGGCATTTTCGCTGCTTACTTTTTCTCATCTCATT  
TCGCAGGTCAGTCGTATGTTTATCAAAGCGTATTTGGGGCCGGAGCGGAATACTCACGGT  
TATGCAGTTAACCTGAAACTCCGGGAGCTCTATCCGACACGTCATATATACAACGAATTG  
CATCTTGAGCAGCCATCCGACGACGATACGCCCCGCCCTGGCTGGCTGACAGCCCATCAG



AGGAAACCTGTCCTGACGCAAGTAATGAAAACGCTTCTGAATAATGGAATATCAGGGATC  
CGCTGGGCAGGCACATTATCGGAAATGGACACCTACGATGATTACGCGAAAGGCTGCAAG  
AATGCACAAGACGGATGCTTCGATGATCAGCTCATGAGGTTTCATAATTGCCCGGTGATG  
CTCGCCAGAATGCCGGGGGGGGTAAAACCGACAACGGATAAACGCAGAACACACACTGG  
ATGCCTCACTGATGTAATAATGAAACTAACCCCATGGGGCCGAAAAACGACAATGGAGCCA  
CGCCGCGTTTTTCTCAGCGCCAGTTTCAGGTGCTTTGTTCTGCCATTGACCGCCAGCCTA  
AATGGTGTGATGCCCAAACAAGGTCTGTGCGTATTACGATGGCTATCAGCTGCTACGGG  
CAGTTCTCCAGGTATTGAAGGATCGGGGTCGTCCGATGACTATCCATAACCTCATCGCGC  
GTACCGTCAATGGCGTTCTCGGCATGGAGGCCAAAACACGGACTGATCGGGCGCTTATGA  
CAAACGAGCCAGACGATGACAATGAAAAATTGGCTGAACCTATGAATGCTGAACTTGCGG  
AGGCATGTAGCCTTGGCAGTATGAATAAAGCCCGCTCTCATGCCTATGCGGAACTAAACA  
AAGCGGGCCTCAGTTGTAAGGAGGTCTGTGCAACAGCGATCCGGCAGAGCCTGGATATT  
AAGTGCTACTGTCAGCCGGAATGAGGTTTTCTGGGACGGGCTGAGCGGGGAGGCTGATT  
TAAGTGA CTGCCGATGGCTGATGCGTCGCGTCTGGATGGATACCGTTGAGGCAGAAGCAA  
CATTCTTGGAATGGCACAGGTGATCGATTAAGCCATTGACGAATGGCGTGGTATTGTCT  
ATACCACGGTTGCTGAAGGCCAGCCCAGTCCGTTTATGAGTGCATGACTCGAGTATAAAT  
CATGGGATCGAAAGCCGAACGAATGTCCTCAGCGTGAACGCCGACGTGTGCTGCTTGATG  
TACTTTATTACCGTACAATCGAGCGTCTTTCGGTGATTGAAGTCAGTAAGGGACGGGTGG  
TGGCCTTTGCTAAAGCAAACCTTACGTAGGCGGCAGCCGTGGGGTCCGCGTGGGTTTCAGG  
CGAAAGCTAGGCGGGAAAGACGTATTCGTCAAGCCTGGTTTATCGGCCACACTTTATTG  
TGGATCGCCTCTGTA CTGCTCCGCATGGGATGTTTCCGCTGTTCCCTTTAGGGGGCTACC  
GAAAGGATAAAAACCGGGGAGCCAGACGGGCTAATTTCCCGCGCCATTCCGGCACAGGACG  
TGGTGAAC TTTTCGTCGATCCAGCTGACCTGGTTGCTTCAGGCCGAATGCGCGATTATGG  
ACGAGGATGCCACGACGTTGTCAGACAACCACCCGATGGAGCATATCGAACGTCGGGATG  
GCACTCTTATACTGAACCCGGTCCGAAAAAATCACCAGAGTGTTGCAGATGTTTTTTCGGA  
TTGAGCACGATTTTCAGGTTGCCAACCAGCTGTTTCAGGTCATGCAGGAACCGTATAAAC  
ATATCCAGGAAACCACGCGAGTTTATTCCACATTTCTTGGGCAGGATTCATGTGCGACGT  
CAGGCATTTCTATCAGTAAACTGGTGAAACAGGGGGCGACAACCCTTTCGCAAATCAACC  
CTAACTACCAGTTTGCATGCAAGCAGGTGGGTCGACAGTTGCTGCCTTATTTTCTCGATG  
ACCTGCAAAAACGCCGTAGTCATGCAGTAGTGATTCCCTCGCGAAGATCGCCAGCGTCGCC  
TGACCATTGTCCGCAATGCTGAAGGTGATAATGGTGAAC T GACCAATGATAGTTGAAGGT  
TATATACACATATTGCCCTGGCGCGTGTTCAGCAGACACCAGCGTTTAATGCATAGCGTG  
CGCCGCGAATGTCAGTGTTATTTCAGGGGCAGACGCCCCCGGTGCAGGCTGTTGTGCTGG  
ACCTGGGGGTTAATCGTCTGGATGTGCCACAGAAACAGGAGTTTATTGAGCGTATTCGTG  
CCGCGCTGGCGCCACCCTAAGCACCGGAGGAAAGGACGCAGGAAGAACAGGAAGTAGCGG  
CCCAACAACAGACACTTCATCTACAACACGCGGAACTGCAGATGCGCGAGATGGCTGGGA  
TAGTGGCTAAACAGGAAGCTAACGCCGCGGGGCACATGCCGCTGCACACCGGGATAATG  
CCAGTGTCCAGCGCGAAGTTCGCACTGAAACAGGGGCACCGTTATGTGGATGGGCTTAAGC  
AGGCACATACCGCAGAAATTATTACGGGCGTACAGAATATGGAACAGGAGGTGTACGATC  
CTCAGTAACGGATGCTGTATACGTTACAACAGGGGACGACGGTAATGTCGCTCTGAAAAT  
TCTGGCTTCAATTGAACCCCGTCATAGTACGGGGTTTTTTGTGTCCGGAGGTAATCGTTC  
CGGAAGCGGTGCGTTTTCTTCGCGGGGGCTGCGATAAGCCTTATTTACTCACTCATCCCTA  
CCTGTCTCATAACATCGACCATGGGGAGTTATTTATGAATTTT GAGCTTACGGGCGAAGCA  
AGCCCGGAACA ACTAGAAACACTGCTGGCCGACTTAGGGATGTCGATATAGGCACTCTC  
GCACAGGACGTCGTCACGGAAGCTACCACGGAAAAAGATGCGGATGAGGAACTTCAGACT  
CAGACGGGCGATAA CACTGTTGCACCGACGCCCGATGCCAATGTGGAGCAGACGCAGGAC  
GTGAAGGTGTCCGAAGTGAAGGGGGGGCTCACCCGCGACGGTAAACACGTCATTCCCTAT  
GATGTCCTAGAGGCTGAACGTGACGGTAAGCAACAGGACGAACAGGAAGCCGCACTTCTC  
CGTGGGCGGCCAGCTGGAGAACAACGCAGGGGCGGAACCGCTGACATCTCAGATCCACCAT  
GCCGGTAGGAACCCCACTCCGTTACCGGAAAAACGAAAAAATTTCCGATAAGCAGATTGCC  
CGTATCAGGGAGATGTAGCGGGAAATTTGTGACGCGATAGCCTCTCTCATCCATAATAAT  
ATCTATCTCCAGGCCCGTGTTCAGCATT CAGCACCGTATGCAACAGGGAATGGTGATGAG  
GATTTATCAGCCGTTCTTAATTCGATGAATGCCGTGCGGGTGCTGAAAACGTGGCAGGAG  
TCCGATCCATATCGCTTTTCGGTTGCTGTATCCATCGACGGGAAGCTCCAGAATGACCAC  
TCATGGAAAGACAATAACGCACACTGAACGTTTTCGCTGAAGTAGCCGGTCATACGCATGTG  
GCTTTTCGGAGAAACCAGTGAATCGTCCGCTGACAACAAGGAAAAACAAAAGGGATATCCGG  
AAAACGCCGGAAGAGAAAGTGAAGACCGCTGAAGAGGTGCAGGCAGTACCTGCTTCCCCC

TCAGATTTAGGCACGACGGCTTACGGCGGAACCGGTAATAATTTTGAACGGTTACTTTGC  
GCTTCGCATTCAGAGGCAGAGGCGATTATGCGCGGTGTGACGAATGCTGAGATAGACGCG  
ATTCTGGAGAAGCTCGGGAACTTGCTGAAGAAGAAGCTGAAATAATGACGAATGTAACAT  
CAGCCCAGTTCGAATAAGCAGCATCAGGTGGCGCTTTTTATCGCTCGCAACCGCAACCGAT  
CGATGGTAAATATCCTCATTGAACAGCAGGACGCGACAGAAGCGGTTTCGCCGGACAAGA  
CAATCACGAAGTAGTCCGGCGGGAGTGCAGCGGGTTGCCCGTGTACAAACCTTAACAAAC  
TGGGCCGTGCTGAAGTGACCATCAGCGTCAAGCACCAACTCTCTAAACGTCCGACTCTGG  
GAGATGAGCGTGTGAGGGTAGAGGTGAGGATCTCAGCCATGCGGACTACTCCCTGAAAA  
TCCATCACGGACGTAACCTGGTGTATGCAGCCGGACTGATGAGGCAGCAGCGCTCGAAGT  
TTAACCTGGCATCCTCAGCCAGAACGTTTCTGGGGACGTACTTCAATGACCTGCAGGAAC  
GTAGTGCGATAGTGCATCTTGCTGTAGCTCGTCCTGATTATGATGCTGGCTCAGTATTCT  
GCCTACGCCGGAGCACGCTGAAATCAAAAAAAGCTTGATTAACGATGTACTGCCACCGAC  
ACATGACCGTCCCTCTTTTGGCGGTGATGCGACAGGCTTTGAGCATATTGAAGCGGCAGA  
TATTTTTTCTATTGGCCTGGTAGACAATCTCACCCCTGTTTATTGACAAAATGCCGCATGC  
GGAAAAGCCGGTTCCTTTGTCCGGTGTGAACTTTACGGAGAAGAGCCATATTACGTCTCT  
GTCCGTCACGCCGCGTCAGGGGAATGAGTGGTACACCTCGAGGTCCGGTAAGGACTGGGA  
CCGTATGATGGTTCGTGCCGTGAAGCCTGCAAAAGGTTTTAATCATGCGCTGTTCAAAGG  
TGAATGTGATATGAGGTGCAAAATCCTGGATCGTAAGCGAGCGGCAATGCCGAACCATTT  
CTATCAGGGGTCAAAGGTTCTAGTATCAAAGACTAACCTGACGGCAACCGCGTAAGAGGT  
CGCTATTGCAACCAATCTTGACGGCGCCATGTTAATGGGGGCTCACGGGCTGGCCAATGC  
TTACGATGAGAAGGCGGGCGGTTACTTCAGCATGGTTGAGAAGAAAACGACTATGGATAT  
CCGTACTGAGATAGCAATCATCTTGATCAACAGTCTGAAAAAAATCCGTTTGCCCCAGAG  
GAGCGTCAAGATGCAGGGTCCCGGCGTGATTGGCGTTGATTCAGTCGTGAAGCTCTGATT  
ACTTCTTTCCCTATGCCGGGGTTTCGCGCCGCTTTTTTCATGAGTCATTAATTATGGCAA  
AGACTATCCTTGCCCCGTCCCTGAGTGAACGTGTGTATACGGGTACACAGGGTAATGAGT  
CAGTGTGAGAAGGCGTAATTACGGTGAATGCTGCGGAAGCGGAAAGTGTTATTCATCTTA  
TTTCACTACCAGTGGGCATCCGTATCAACCCGCTCCAACCTGGTCTCGACGGGTGGTCTGG  
CACCTGCAACCTTCAGCATTCTGTCCGGTGAGCATGCTCTCTTAGATATCAGCGATGCTA  
TTTCTGCAAAATTTGCGAGAGATGTGCCAGTGGAACCGAATAACACACTGCGTGACGGGG  
AGCTGGTTACTGTCACGCTTAAGACTGCCGCTTCAACCGGCATCCTGAATGTTGTGCTGC  
GTTATACAGTGGTGGGATACTGATTAACCCGTCGCGCCCGCGTCATGCGCGCTTTTTGC  
CCGGGAAATTATATGAGTGAGAAAATTGCCGTTTTCTATATCGGTCCAAAACCCGCGGAA  
AAGGACACCATTACCGGAAGTCGAATGCTGTTCCACGTCTCGAGCCGGTGTATGTTGAC  
AGCGCGATAGCCTCGCAACAGCTGCGGTTTCCGGTTTTCTGGTTTCGTGCTGAAGAGCAT  
GGTGATGCTCTGAAAAAGCAACAAAATAATGATCAGTGCCGGCAGGCACAGTAGGCGCAT  
GAAAGAGTGCTTGCTGCGCTGGCAGATGCGCAGAACAGTTTTGTTGTTTCTGTTGACGGC  
CCGGAGGGGGATTAAAGTGAGCTCACCTCAGCACGGCTGGCGACGCAGTGTCAGGCAGAA  
GAGCTGGATATTCACAAAGACCCGAAACAAACGGCAGAGGCATTCCGTATCCGGGTGCGT  
GAGGCATTTCCCGTTCGTGTTGCGGAGACTGACCAGCAGGGCGGAACAGATGGCCTCTGT  
ACCGTATGTCCGTCGTATATGATCCGTCCACTGAACATTATGATTACGGATGCACTGTC  
AATGACTGCCGTGGCATTTCAGCAGCCAGTCGTTGGTGTGCCGTCGGGTGATTACTCTCGT  
ACCAGTAGCAGAAAAGAACGCGTGCTTCCGTATGACAAAGACGCTGAGGAGTGCGATCA  
TAGCATCCGTATCTCGGGAGATAATCATGAGCTTTTTGTGGCTCGGGATGTGTATATCAT  
CACCGGGCACTCCCTGCGATTGGCCTGTTCTCCCGGTGAGGTGAGCGTGCTTCATGGCGT  
CGCTCCTAAAGCCGGACGCAGCCAGATACCGGATGAACTCCTCACATGGCCACAAGAAGT  
CGCTGCGGGGGCGCTTGGGCGTGTTCATGCAGTCTGGTGTTCATGGTACATCCGTT  
ACGCGCAGAGTATTTTTCTGTGCAGTTTTCTGCGGGGATTTGTGCGGGCATTGTTGTCATAC  
AATGGCGCCAAGCCCCTACTCTTGATACCGCAACCCTGTAATCAGGCAGAGGTTGTTCTG  
ATGACGTCGGTTATAGAAATCATCGGACGTGTAATAACAAAGCAGGTTGACCCGGTGTG  
GTTTACTGGCCCCTGCACGAATTGTGCGATGATTACAATGATGCTGTGAGGACAGGGATT  
CTGGCGAGACTGGATGGTGGCGGAAGCCTGAAAACAATTAGTGGTGTGCCGGGCGCCCGT  
CTGGTTGTGCCCGATGTTGTAATAACCCCTCTTGACGTGATATGCCTCAGGGACGGTAGT  
GCAGTGAGACCATTATCACGAGATGTGCTGGATGCACAGTATCGTGAGTGGCCACAATG  
AAAGGTATTCTGAATGTTTTATCAGCAACCACTTGTTCCCGCGTACATTCAGGCTGATT  
CCTGCGCCTGACAAAAAAAAGTAATGATGCAGTGGTGAAGCCTCATAACAGGAGGCAGTG  
TATGTTCTGATGCAGGCAGATGATACGCCAGTACCCTGGAAGAAGCTTATTTTTGACCCA  
CTGCTGGAGTGGAGGTTGTTTCGTGCTTTCAGTTATAATGCGGCCGGTGGCGAAGAATCG

GGGATGGCTGCGCTGCATTACCAGAGTTTTGTTGAGCAACTTGGGATCCAGCAGGGGGCA  
GAAAGTGCCTGTATAACCCGTAAGAAAGTGTTTAACGTAGGGTCAGAATGAGCGTTGTTG  
TTCCGGGGACGCAAAAATCTCCTGCTGGTGTGGCGATATCAGGAGCAAATACTACCCTGT  
CGGCCCTGCCAGTTTCACCGGATACGCTAAGCGGCACCAGTGGGTTCGGCAGCGCCTAGTG  
AAGCTGGATATTACGGAATGTCGATGTATCCGGGGGAGTAGGCTGTTTCGGTGACGGTGA  
AAGGGAAGACTGCTGTCTACGGACGTGTGCGTATTGTAGACCCCGAAAGTACGGTGACGC  
TGAATATGATGTCATGACACAGTATTGTTGAGGTTAGCATAACCCGGAGAACTGGCGACAG  
ATTTCCGGCAGATATAGAGTTACGTGGCTGATGACCTTGCCACTATTCTTCGCCTGAATG  
AAGACACGTGGACGAAAAACACAGAGGACACACAGGAAAAAAGAAGTGAAGCATCCCGTG  
CTAAGTGTGCATTTGACAGTGC AAAGAGGGCAACCAGCAGGGCGGCTGCAGCAGGACAAA  
AAGCCACTGATGTCCTGAGGCTGGGACCCGTGCAGTCACAGCAACGGGGGAATGCAGATG  
GAAGCTCGACCCGTGCCGGATAGTCTAAAAAAGCTGCCGCCGCTGATGCAAAAAAAGCCA  
GACCGGCTGCTCAAAAGGCCAGGCTGGCGAAGGAGAGCGCCGGAGAGATCGCTAAGCGGG  
CAGAGCCTGGCACTGTACGGGCTGAAGAGGACAGACGTATGGCTGAGAATGCACGGGGGC  
CTCGGGGGCCTCAGGGAGAACTGGTCCGTAGGGGGATGTCGGTCTAAAGGCGATAACG  
GTCCAGTGGGCCCTCAAGGGCCCGCAGGGCCGAAAGGAGAGCGTGGTGACGTTGGTGCTC  
AGCGGGCTGTAGGGCCTGCTGGGCCGATGGTGAAAACGGTGGACATGGGGGGTGAGGAC  
CGCAGGGAATCTCAGGCTTGAAGGGGCATACCGGAGAGCGGGGGCCTTAAGGGGACCAGG  
GGTATATGGAGCCAAAAGGCGAAAGAGGTGATCCGGGGGGTCTGCAGGCCCGCAAGGTC  
CTAAAGGGGAACGAGCAGAAGCCGGACCACAGGGACCGATGTAAGCACGGGGTCAGCCGG  
AGGAGACTGGCCCCGAGGTGAACCTGGTCCACTGGTCCGAGAGGGCGAACGCGGAGAGC  
CCGGACCTCAGGGACCACGTGGAGAGCCATGTCCGGCAGGCATCGCTGCATATGTGGGTG  
ATGCAACGACGGCACACAAGGGAATTGTGGAGTTAAGCAGCGCACCGGTTCGGTTATGATG  
GCATGAAGGCTGCCACCCCGAAAGCGGTGCATGCGGCAATGGATGTGGCAAATTAAGCGA  
AAACAAAGGCAGAAGAGGCTGCAGCAGGAGGTGGAGTTCCAGTCCGAAAGAAGATAAAG  
TGGACACGGGGCCAGCATGTCCGGCTGGGTTCGGAGGCTGATAAGGGAGAGGGCGGTGCCA  
CCGGCCCTGTCGGGGCACCCGGCAAACGGGGACCGGCAGATCTTACTTGTCCGGCAGGCC  
CGCAGGGGCCCATGGTGACAGGGGAGAGCGGGGAGAGACCGGTCTGACGGGAAATGCCG  
GTCCACAGGGTCCAAAGGGAGATACCGGTGCGGCAGCCCCGGCAGTCCACATGGACTAA  
AAAGAGAAACAGGTGCGGCAGGCCCGGTAGGGGGCAGCCGGACCTCAGGGGGCCGAAGGGCG  
ACCCGGGGGATACGCAAAGACGGTTCGCTCTGGGGCTGGGAAACATTATTGAGACAAAA  
GCCATAGCTGGTTCCCGGATACATATGGCGCACTCATCACGTGAGTGACCTTTCTTGACC  
CCCAAGATGCCACCCGGGTTCTGGGTTTTTTCCAGCATTTGCAAGTCAGGCTTCGTGACG  
GGCCGTGCCAGGATGTCAGGGGGCTGGGTGAAGTGGACAGAGATACAGGCAGAACAGGAG  
AATGACTTGAATATTTTGAGAAAGCTTATGAAGAGTCTGTGTGGTTGTGGATAGCATGAG  
GACTGTGAGGACAGGCAGTCGCTTACAGTAGAACTGCGATTGAGACCTGGAGAGATTCTG  
TCGTGAGATGAGAAGGGCATAGTTCCGGAGCAGGTTCGGGGTAATCACACAGGTGCTGATA  
CTGAGTTCTGATAAAAATCAGACACAGTGTGTGGTAAGACCGCTGCAAATCTTGAGTGCT  
GAAGGGTTCGTGGGAAAATAGTGGCGGGATGAAATAGCCGACAGCTTCAGAAAAACCGTAG  
CCCGGCTCGGGTTTTTTGTTGTCATGTATAGGCGGGGGTTACTAGAGAGTGAAGTAATAAA  
TATGTTAATAGGATGGTGTGAAGGTTGCCGTGTAATTCTGGTTCAAGAGTTTTTTATGCC  
GGGAAATCGCATGACTATTGTGGATAGTATAGAATCCTGGTTAATAATCTGTGATAGTCA  
CTTGGGCCATTAATGTGCAGTATGTATCAGGGACGCCGTTTTATTACAGCTGAATCGGGA  
AACATTGAAAGGGGTACATTGTGTGGCCTTGC GCGTGAATTGGGAATTCACACGAACACA  
GTGAATAGCTTTCCATATACGGGAAAGGCGAAAAATGGACGGTATGGTGTGAGTGAGTAC  
CATCTAGCGTGTGCGGAGTGATGCGTCTCGTTGCCACAGCGGCAAAGATAATGCTATGCA  
AAGAGGGTAGGAATATGCTCACCCAAACCGAAAGAAAATTGCAATGATCAATGAAGTTGT  
TTAGTCATCATCAGAATTTTCATGCAAGACATTTTGTACAGTGATGCTGCTCGCGATTTT  
AGCGAAGTCCCTCATATATCCCCAGACTTAAAAGCCTGAAGCAGTCAAAGCACTCTCTAT  
GCCCTGTATCGATATACCAAGATGCGTGGGATGATGACGCGCGTTGTGACATCCATGCT  
GCTCGAGCATTCCGCTGTACTGGCGGAAGACTGCCATTTCCAGTTTGGTGGTATTACACG  
AGACTGTCAGATATTCGGGGTAGAGAAAACATTCACAATGAAGCCAATAACCATTTTTCA  
TTAGCGTGCCGATTTCTTGTGTGCATGGCCGGATGTGGTGGATGAGATCCGCACAACGAT  
CGCTCAGGACCCCCACGAGCGTATTTACGACACTGACGGGCGTATTCCTAAAGTGGCTGA  
TGCGACTATTGCCACAAAAGGAGATGTGAATCACCCGACATCAGAGTATGGTATGGCGAT  
CTCGGCGCCTACGACCACTCCTGTCTGAACTGTTCCGGCAGGGCGTCGATGTTTCCGTCGA  
TAACCCGGAGGATGATGAAGCCCGGTCTTATACGGGAGCCTTTGTCCAGATTATGGTGA

AGAAGGTACGCCAGGTCTGGCGTCTCTGGAGGTGGCACTCCGTACTCGAGCTACTGCGGT  
ACACATGACGCTGGATCCGGTGCCATTGGTGAATTCCAGTATTAACGTCGCCGGCTTTA  
TCGCTCGGCATCAGGTGGGGGGCAGGCGGGTTTTTTACTTGTGGCTGAGTTGTATGCATC  
CGTGTTACAGTTACACGGACGAGGTACCGGCGATAAACCTCGCACCTTCTTGGCGACATG  
GGATCACCTACCGCCACCAGTGAATATGACAGGCCTTTGCCTGATGGCTAACGGTATCGC  
CGCCGGGTTTGCCGTAATGAAGTGATGTTTTTCGGAAGCGTATCTGCCGTATCCATCGCC  
GGAAGTGAATCGAGACACAACCGCAGACGATATTGTAGCTATCTGTAAGCTGGGAACGTT  
ACTGGTGGTGGCGACAAATGGGGAGCCTTATTAGTTCAGTGTGGCATCACTGTCCACTAT  
TTCTGGTTCCAAAATCCCTTCAATGCAGGCGTGTGTGAGCAGGGGGAGTATGGCTGCGAT  
GGAGGGGTTTGTGCTGTATGAAGGAACATATGGCCTGGTGTCTGTAAAGCAAACGGGAA  
TGTCGCGCTGGCGAAGGAACAGATTGTTTCACCGGAACACTGGCAGAGTCAGTTTAATCC  
GGCCTCCATTGTGGCTTATCCCTGGCGTGGTGAATACGTTGCCTGTTACCAGAAACCGGA  
TGTTAAGCAGGATGTGGTTGATTTCCGTCCGGTGTACATGGATATCCGTTATCACAGTAC  
ACCGTTTGAGTGCGCAGGACTTAATCTCGCGAAAGATATGATGCGTGTGGTGACAGGAGA  
CCAAAGGTCAGTGCTTGCCGGGGAGGCTCTGCCCTCCAGGATAAGGTGGAATCCAAAAAT  
TTTTTGATACCCTGAAAGAATCTCTTCTTCTCTATCAGGGTGAAATCTCCAGCGCCTGA  
GGGGCTCTGGATGACCATTAGGGCTGATGATGTTACTGTGATTCATTTTGCGCCGGGTAC  
GTTAAAGGGAAGTGTGGTGAGTCGTCCGGCAGCAACCGGGCAAACACTGGCACGGGCCAGC  
ATCCGGATTCGGGCAGCTTCAACAAATAACCTGACTACATCAATGTCGGAGATGACGAT  
ATGTCCATAAAACCGTGGCGTACGGGGAAGGATTTATCCACTGTTGTGGAGAATATGGAT  
ATTGGCACCGGGCAGCGCGGTGGAGGACGTCATGCATTTGTAACCCGTGGGGAACCTGATT  
GGTCTTAAACTGGCCC GGCGACGAACATTGGGTGGTGGCTCATATGCACCGAATCCGCGT  
TTTAAGATTGACAGTACTTTAATGACTGTTGATTTTCTAACAAAACCGCTGAATTTTAAG  
GCGACCGGTGGATTTGCCTCGATTATTGTTGAATTAGATATGCCTAATTAGCGCAGACAT  
TCAGTGACTGAAATCTAGCGGGGTACGGAGCATGTCCTTCTGATGCAGTGCTGGTTCCC  
ACGACGCCGGGGCAGGTTTACGGCGATCCGATTGACCCTGGCTGGTTCGGGATTTTGCTGG  
ATACGTTTTGTTAACGAGGCAGAACTGAAAGGTCCATGGAATACGGAAAAAGGCACTCCG  
GCACAAACACAGATGGGCGTGAAGGCCATTAGTGACCAGATCCGAGATGAGGCTGCACAG  
TCGACGATTGTGTCGGAGCTGCGTAAAGAAATCACAAATGCGCAGGAGCAGGCGGTAAAG  
GATGCTGCAATTGAGACAACCGAAGTTGTAGGGACTCTAAGGCAAGAAACGACCAGAACG  
ATTGGTGGTATTGAAACCCGCATTAGCACACCGGATTCGTCAACCAGTGGACCGCTTAAT  
GAGGTGCAAAAGCGCATCACTAAATTGGATAAAGAACGCGGTGAAGCTTTTCTCGCAATG  
TGGTCAAACAAAGCTGGATTTGATGGTATCTCAACGGGAATCGGGATTTCGAGCCGGAAAA  
GACAGTGAAGGGAGACCGGTATGTCACGGTACACTTTCTGCGTCGAAGTTATTTGTCTTT  
TATCCGAATCTTCAGGATAACAGAGCCTATCTGTTTTCGGTATCAGGTTGCAAGGTAGTG  
ATCCCGAAAGCGATGATCTATGACGTGGTGAATTGAAACGCTGGGGTCGCGGAAGGTTTTA  
GCATATCAGGTTAAAGCCGGGTTAAGTATCACTTACCCGTTAGCCGGTGTGCCGTTATA  
CAGAACGGGAACTTTCAGGTTGATTCTCAGGGTACCAAGAATATTTGAAGCCTTTTATGT  
GTTACTTCACAAGGGCAACTGACCATTCTGTTACTCTAATCAGAATGTAGGACAGGTGATC  
CGCAATGATAAAATTGAGCTTTAAGACCAGAATGGAGGACTTGCTGTACGAACAGTCAGC  
TTACGCTGATCAGTAGGTGAGTATTGGAATGCGGTTGTGCCATGTATAACAGAAATAATG  
TCAATGTTACGGGCCTGCTAACTCCAGCAATTTTCTGACAGATTTACAGCGGAGGCTG  
ACTCAAAGCCGTACTCTAATAAACCCGACGGGAAATCATTGCTAGCCGTATGTTGTTTAT  
TTCCTTGGAATAATGATTTTGCGAATCGGAAAGTTCCGAAGATGACCCATAAGGACAATA  
CGGTGACGTGGTTCGAATCTTGAGCAGGGTTTAGGCTCTTACATTTATACATTTCCGGGGAT  
AAGTATTCTGTACGGTTTGAAGGTTATGAAGGCGGGTGGTAGCGTATGGTTAAGTCCAGG  
TTTTGCGCCGACGTGTCTGATCAACAAAGGCACCTTGCCTGGCGACTGAAAAGTCCTTCTT  
GAAAACATCAAACACGTCAAGCAAAGTTGTTTCTTCTTTATCAAACAGAGTAGAAGGC  
GGAAGTCATGTAGAAGTATGGTCAGATCGAAGGATATCAAGCACTAAGGTTTCAAGTAAT  
TGTCAGGGGAACGAACCCTGGTTTACGACGGCTTATGTGTACTCGGATATGGTTACTCC  
ACCTTCTGAGTAGGGGATCGCCCTGTAGAACCCGGACGGTGAGATGATTTATCAAGGCCGA  
ACTGATGCTGCTGGACGCGAAGTTAATAACCGGCTGGTAGCAGTATTGAAAAGCACCTTGG  
ATATCAATACGCAATAATAACCCGCACTAGTCGGGTATTATAACTGGAGAAGA ACTCCTTA  
AGATCGACCGAATAATATGTCATCCTCTGGTGTGCAAGAAATAGATTATATTCCTGTGA  
GCAATGTTCCGGTGGTGCAACATGGGATATTCGAAAGCCGTATATAGATGAGGTCCTGGT  
TATTAACCGTCAGTATATGATTAGTTGCAGCGAGTCTTTAATGTTTATTGAAAATGTCT  
ATAGAGATGATTATTA AAAAGTTTAGCGTGTGTCTGAATACAGGATGTCTTAAATGAA

GAGTATAGCAACACTGGTTGATTGTGCAATCTCCGGGATGGCCTGTGTAAATTTACCTGC  
ACATGCAGCAGAACGAGAGCATAACAATTTCTCTGGGCTATGGGCACTTTCAGTTTCCGGG  
ACTAGAGAATTTGGTCGATGATGCGACTGCTCATAAGAGGGAGACATTTAGTCATCTCGT  
CAACAGAACTACTTTTCATCATTGGGCGAATATACAGACGGTAATGTGAGTAGATATGA  
AGGCAAGGATATAAGTCCACAGGGAATTGATATCAGGTCTAGCTACGAAATAACGGATGA  
TTTTGGCGTTAGCTGCTCTTTTACATGGGCACCTTCTCTACTAAGTACTGAGAGACATTTAT  
TGATGTTTACAGTCAGCCGATCATTCCAGGAAGATTAAGAAACCGGCAGCTTCTGCCAGCAC  
GGATCTCAGGGCGAATTACTCGAGTCTGTTAGCGGGGCTTTCGTGCCGTGTTAATCAGTA  
CATGAGTTTGTAAAGCGATGGCATGGATGGGCGTTGCTAAAGTTAGCGCTTACCAGAAAAT  
TAATGCCAATACTAACAGGAGAGGGCGGATTTTCTGAAAGCAACCGGACGAAGACAACCTC  
CCTTGCGTGTGCTGCAGGTGCACGGTTTAACTGAATGAGAGTGTGACACTGGATGTGGC  
TTTCTAAGATTGCGGCTCTAGAGACTGGCGCACGCGCGGCTTACCCTGGCATTCCGCT  
GAACTTCTGACCTGTATCCGGTAACCTTTACTCCCCGCTGTGATGGCGGGTTTTTACT  
GCCCCAACAGGGAAACAACACTGTGTATTATGTGAGGGGGCTTTTCGGCTGTTGACTGGAGG  
GTGAGCCTGATGGCCTGATGTGAAAGGGCCCCGATACGAGTTAAGGTTGACCCGAGACCC  
CAACCCTAATTACCTTAAGCAAGTAGATTGTTAGCGCCTCTGTGTAAAAGGAGTCAAGCG  
CTATGTCGCAAAAAGCGCTTATGACCGTCTCGATTTGCATGACGGTTATCTTACCATCT  
GGATGTTGCACGGTTCACAGTGTGAATTCCGGCTGAATTCGACGGGAGCGGAGATTGCGG  
GGTTCTTACAGAGTAAGCAGTAGGAAAAGCGCGACGGGGACGAAAGTCCCCGTCAACTGG  
TTGCTGAGGTTTACCCGATATGCCACCCGTTTCCGGTGAGAGAATGAACGATAAAAATACT  
CGGGTATAGGCATCGTGTGTGAGCAATTCGCGCAACTATGAATTTATGAATGAACTGAA  
AGAGGCCGGCCTTAAAAGCAGGCAGTTTGTGTTGAGGTACCTGATGGCTCTTAGGCGCT  
GCGTTCTGTGGACTGTCCTGATCGTATCCCTTACGTTCTAGTGTCGTTGGGCGTGTGTAC  
GGGAGAAAACAGCGTTGGGCGTTACCAGCCGGATGGGAAGACATTAACCCATCTGGCTGG  
CGGACACTGGGATGAGTTCATACCGCAAGCCGGTGATTTATCCGGCTGGGAAACCGAGT  
GGGCTTTGATCGAATGCCGGATGAAGACGATGGCTTTATGGTCTTGAGGATAGCGGACTG  
ACGGCTAAAGTTTTCTTCAATTGTGTTAATCCAACATTGTAAGTCACATTCAGACCCTGC  
TCCGGCAGGGTTTTTTGATATCCAGGGGGCCATGATGGGTGGAAGTGAAGGCGGTGGTGA  
TACTACAGTAAAACCAACTGCAGCGCAAATATCACAGGAAGAGGTGGCCTCGAAAGGGTG  
GCTGGATTACAAAATATCCTCCAACCGGCTGCGGATAACTACATGGTAAAGGTGGATGA  
CCTGAACACTGAGCAGCATTACGACAATACCGCGGGCACCACAAAGCTGGGGTATCAGAA  
ACAGTTTGGAGAGGCACGGCAGGTCCTTGTAGTGATCTTGTCTAGTCCGGCGTTGACCC  
ATCGAGTGGTCGTTTTAATGCGGTAATCCATGCCAACCAGAGTGACCAGGTAACCGGGCA  
GATAGACACACCCACACTGGGGCAGATATCGCAGGCGGATAAGTATGTTGCCCGTCTACG  
GGATGTGGCTGCTCTCGGTGCCGGTCAGCAGGCGGATGCGTTACAGAGGTCTAACTCTCT  
GCCAGACAGCAGTCTAGCAAAAAGCAAAAATGGGCTGCACAGGCGACGTTTACAAAACAGCA  
GGGGCGAGCCTCTCTTGTGTTGGCGCTGGTCTGGGTGCGGGCGGTGCATCTGCGATGCATGA  
GCCTGGCGGTAGGGGAGTAAGTGGCGGTCCCTGGTACCCCGGCACCAGCGCTAATGCCTT  
TCTTGATCAGGCTCAGAATTGGACACTGTAATTATGGAGTATGGCAAATACGAAACTCTC  
GCATGGGCGGTTATTCAGGAGCAGCCCACCCCGGGTACTGGCAGACGTCAGCAACG  
CTGACACCCTAACACACGACGAATGGCGAATCAGATATTTGCCCGCGTCCGCAAGGCAA  
GATGAACTTGGGGAGAACAACAGCCTGATGAATGCACGGCTTGCACGGGTGGGAGGACTT  
GCAACTTCCGGTCTCCGGACAGCTCAGCTGGCGCAGGATAACCAGATAGTGAGAAATGGG  
GTAAACCGCCTGGATAATCCCGACAGGAGTACGCTGGGTTTACGTAATGCACTGGCAATT  
GCTGGCGCGAAGCATGGTATACGTGAAGCCGAACAGGATCGACAGCTGACTATTCTGACC  
GGGGCCTCTGCACAGGCAAGACAGAACTGAGTGTGTTGGCGGCCGACTGGTGGAAAGCCTAA  
GGCGGCGATATGGGATACGCAGTAGTGGATATTGCAAATCTGTGCGGGCGAGAGGCATTA  
CAAGGAATAAGTGACGGAGACAGACGACGTGAAGAAATTGAGGCTGCGTACAAAAGATG  
GCGACGCAACACATAGCGTAGAACAAGCAGAATATCGGTAAGTGGCATTAGTACGGGGGCG  
GCTATTGGCGCATCCGGTGTGTTGGTCTGTTGGTGTGTTTCTTGGAAACAGTCATTGGCGGC  
GTTGCTGGTTCATTGTTTTAAGGTGTGGTGCATGTTCCGGAGTAGCACAGGGGTTACTTGC  
CGGATTCAGCAGCGTCGACCAGGCAAGGACCCTTCGTAAGGAGCTTGGTCTGCGTTAAGC  
ACAGCTTGCCCGGCTCCAGAAAAATAACGAGCGCGATTTTGCCTTACGGAATCTCAGTT  
TGAACACAATAAAGACGGTGATCAGCGGAACCTTTGATTACAGAGCAAAAGATGACGATCG  
TTATCATGCACTAAAGGAGAGTGAGTTTAAACGCTAACCCAGGATTACCGGCACGCGTCACT  
GCGTATGGCGCAGCAGCGACTCCAGTTGCAGAAACACAACACTAGCGACGGCTTGAGTATAA  
CGATATAATTGCCCATAGCGAGGCACTAATGGACGCGCTAAGAAAGGCAATTGAGGATGT

CGATAAGCACGCTGTAACGCTTAAGTTAGGGCAGCTGCCAAAGGGACATCCATTAATTCT  
TATGTCGAACGGAGACTACGCATCTAAAGTGGGAGAGGCCGTGTGCAACCTGCAAAAAAT  
ATTTGGTGATAAACCATACATGGCGATCGATTCATGGAATAGCCCTGAAAATCTCGATGT  
GCTTTCAGGCGTGTTCGCCCCGCGACTACAACAGCGTATCGGCATGCCTGATGCAACCGG  
TGACCAAACCATAACAAGAGGCCACGATTGGCCCTATCGTACCAGCGCAGCGGTAAGGCAA  
CGTACCTATCGGCCTAGATTTACATACAGCGATGCCTCCACCGCGCATAAAGCTTTAAC  
GGAGTACGGCAGTGC GCGCCCTGATGATCAAACCGTCTTGGCGCTACCCGTTGATAAGGC  
TATCGCTCTGGTCAGAGCTTGCAGCAAATTTGCAGAGATATCGAAGAATTATGGGTATCT  
TATGCCGACGCAGCAGGGACTTCATCCGAAAGAGCTTTAGAAGGGCGACAGCAACGTAGC  
GTCGGACGCGATCAAGAATGGCGGAACGGCCCCGGCTGCGGGGGATGAATATTATGCTGC  
GCCGGGGTCTCCACCGCATCAACAGAAAATTGAGCAACAACAACACTGCAGCAGCAGATTAT  
TAACTGGGCGGGAAATGATCATGATAAGCTTTTCGTTGGCCAGTAATGTAGCGGCCCGTCA  
GCCTGAAATGCTGGAACCTCAGAATAAGAGATTGCTGGGGAAACGGGCATACGAATCTTTT  
CCGTACTCAAAGGCCAGGGGGGAACAGGCCAGAGATGAAATAGCTTCATCTGCATCTCA  
GTTTATACGTGGACTGAAACAGAATTACGCCAGTAATTCACGATATTCCATTAATACCA  
ATTGCTGAAGACCGGCCAATGTGCCGGGTTTTTTTTATGGTGTCTGTATGATCGATGCAGC  
GGTACAGCTTCCTGAGGCGCAACTTGGTAACCAAATCGTAAAAGGCAGAACATTCTGCA  
ACCCGCCGAAACTAACAGCAATAAAGCATTTGTCTCTGAACCGAATGGCTGGAAGAAGAA  
CACTACGTCGCGCAGCCTGGGTGATGCATTGCCAACAATGGGTAAAGGTTTTCGCCAGTC  
CGTCCGGGGAATATGGGAAATAACCCGTGGACTCGGTCATGCGATGATTCAGAGCTCGGT  
ATAAACAGGGGCGCGGATTGTAAATGAGTTCAGCCGAATGGGTATGCCGGGTGTTCCAAC  
TGTGAAGGATATTTTTGCCGGTGGCAGCAGGTGGACTGATGATGTCATCGATACCCTCCG  
TAATGGCAAAAACGCGGTTACTGATACTATCGGTAAGGTCTGAGGGTAAACGGTAAGGC  
TGTCAGTGCTGGTGCCAATGCCACTGATGAATGACTGACTGGTAAGATGTCGCCGGGTGC  
AGTTCGCGCGCTGAATGCGCCGATGACCGAAGGCTCTAATGAATCTGCGGTATGGGAGGC  
GAAGGCTGTAAACCTGATTGGTGCCTTTTACCTGATATGATTGCTGTCGGTGTGGCTAG  
AAAGGTGGGTGAGGGCCCACTGCGTAATGTGCTAAGCGCCGGGCTGGAGTAAAAATGCCT  
CGCGGAAGGGGTGCAACTGGCAAGAGCCACAGCACTGTCAGCAGAAGCTGTCGATAAAAA  
AATGCCGGATTTATTCAAGGCGGGAGTGATCACCCATTCCACTGTGAGTGCATAGGACCG  
GCGTGCAATAGCGGCATCAGATGCTGTTCTTAATGCAGATTGCCCTGAGCTGGCCGAGTC  
ACGGAAAGTTCAGCAGACGTTTATGTCCATTGAAGCCGACCCGCAGCGCGCAAAGCTAAC  
CGAACGCCAGAACATGGATCTAGCAAAAGATCGTGTTGACGATAAGTAGCGTACGCCGCT  
GGCAACCGATCCTGAATAGAGGGCTGTGAGTGCCATAGCGGGAAAACCTGTTAGGCGCACT  
ACTGTTAATCTGGTGACACGAGGCACAGTGAAGACCGGTAAAAGCCGCAGTGTGAGGAA  
TGCCGCGGAACAGGGGCCGATTATTGCGGCCAGATCGGCTATTCACGCTATCAAGAAAA  
CACGGCATTGCGTGGGACCGCCGAAAGGGTGTGTCACCGCGGGAAGGCGTGGCTGATGC  
AACGATCCAAGGTGCAGCCTTTGGTGATGCGATAGGGGCTCCGTTCCGGTGAGCTTGCCGA  
ATATCGTGGCTGACGTCAGGCCGAGAAGCAACCGCCATGCGTGATACTGAATCGGTGCC  
GCAGGGCTTCGACGCTCCCAACCCGAATCTGTTTCTCCGGTTGCGCAGCAGCGTGAACG  
CATTAAAGGGGATGAATCGCGAGCAGCTTCTGGAGCAGTATGCTGATCCGGATGTGGGGAC  
AGTGGCTGACGTATCTGCGGCTCAGCGCCAGGACGCTACCAACCAGTGGTGAATGAACT  
GGACGACCAGACGAAGCGACAGGCTGCGATGAATGAGCTCAAGGCTAGGCCGCTTTCTGA  
ACTGCGTGTGGCATAACGGCAGGCTCAGCCAGAATGAGGGGCGCACCCAGACTGAAGACAA  
ACAGTTTCCGGGAATAGGCGGAGTCATTCGCCCGGAACATGAAGTAACGGCGGAAGCACA  
GTCACAGCCTGAAAATGCGGAGGATCGTAGCGGGAGAATTTACCGGACGGTGCCTTCCG  
GGATCCGAAGGAAGTCCGCAATGATATTCGCGGATGGAGCGTCCAGACCAGCCCAACG  
CATTGAGAAGGTGCGCCCGGACAACCGTTATTTTACGGATGAGAGAAGCGCCATGGGGAT  
TGATGTTTTCCGTAATGCCACCGCCACCGGCCTGAAAGCGTCTGTAGTGAAGAAAGGCGA  
GAATGAGTAGGGCGTGGAAATGGAGCAGCCTGCGTTCTCTGAAGATGTGGCAACGGAAAC  
CTTAAACACCCTTCCTGGCGACAAGCGTATTGCTGATGGTGACCCGATGGAGCAGCCTCC  
GTTGATGCGTAACCAGCGATTTCGGAAGTTTCACGGGGGATGATACGGACGTACAGGCATG  
TCTTGTCCGTGGCGACGCGCCGACGGCAGAGGACCTTGTAGGTTACAGATGGTTGAAGA  
TGATGCCGGTCCGCAAGCACATGAGTTAACAGAGAGTCCACGCCTGCCCGCTCATGGCGA  
TATTCCTTCCGGACAGGGATATCCTTTCCCGGAGAAAGTGGCGCATAACGCCGATTAAAA  
TCAAGCCGGACGTGCTGGTTCGTTTTATCAAACCGGTGAGGTTTCAGGGCCAGAGATTCCA  
GAAAGAACAAGCTCGGGCCCCGAAAACGTGCTGGTGCACCGGGGGAAACACTCGAGCG  
TGACCTGGTTTTGTGGGGGTCTGCCGTCACCGGATTCGCAGAACGCGACAGCACCGGTACG

TGAAGGACTACCGGCTCCGGACATTGCGCGTAATGTTTCGTATGCCTCATTCTGAATCGCT  
TCCCCGCACTGTACGGGACTCACTTCCTGAGCTTGCACAGCAGGCAGAAGTACGCCGACA  
GGCCTGAGGAAATCGTGAAATCCCCGAGCCTGAGCCAATCACACCTGAATCTAAACCAAC  
TGTCTCTACTGATAGGGATACTACAGTGCGCGGAAGTGAAGTTAGGGGCAAAAAAATTGA  
AGACTTTGGTGAAGATATTAAGGGGCGCGGCAAAACACCGTTATGCCAGTCTGCTGAAAC  
ACTGGGTAAAACGCTGGAAGACAGGGATTATGTCACGCAGCCGCCAGCAAACCTGTTCCC  
GAAACCGGACTACGTAAAACCTGGCGAAGAAAGGTGCTGATGGTGCTACCCTGAGTATGAT  
ACCGCTGTATCGTAACGAGATTGCGGGCAAGAGGAAACACAATACGGCAGGATGGGGGGG  
GAGCATAAAAAGAGTACGCGACAGTATATCGGGAATTATGAACGTAACGGTCAACGCGAA  
ACGGCTCGCAGAATGGATGGAAGGCAGAAGGCCCTCCCGTTGCGCGGATACCTGGCAACT  
GTTACGCACTCTTCCGCTCTCACAGATAGAGCGGGCTTCTGCTTATCTGGTGGGAACGGG  
TGTGTATCAGGCGGGACGAGGGCAGCGTTTCGATTTCGACACAGACACCTTATTCAGTGC  
CGATAAGGACAGTAAGGGGCGTAACCTCTTCCCGGAATGCAGGGATGAATCACTAGT  
AAACGCGAGATTCTGGTTTGACGAGCAGGAGGAAAAATCACAGGCGAAAGGTGGTGAAGA  
AACAGCACCGTCACCGGGTGACAAAATGAGCTTTAACGTTTTCCCGAATACCCGCACTGG  
CGTCATTTTTATCGCTTAAGTTAAAAAGAGAATGAGGGTGAGAGGTGGCTTTAAGTCAGC  
CAGTGAGGCGCGTATGTACATTGATCCACATCGTGATGAGCTTGTTCGTGATGTTAAGGA  
GATGCGGGAGATTTGCGGAGAGGAGCAGCGAAACCCCCGAACCGCTACCGTACCGGACC  
AGAACGCTGTAAGGGGAATGTTTCGCCGGAGCAGTTCAGTGTTGCGTTCGGTTTCCGTGG  
TTTGCAGTTTTGTAACCTACGGGGTATGTTTCGCGTCGTTAGGCTGATTTTAACCGGCATTA  
TGACTCGCTGCATAACCTTACGGGAGTACTGAATGTACCGACAAAAGCGTTTTCCCTGAT  
CGGTCGACTTGGACTGGCATTGTTGGTGTCCGTGGTAAGGGTAAAGCCTCGCCACACTAGGA  
ATCGGGTGACGTGGCATTCAACCTGACAAAAGTAACGGACCGGGTGCGCTGGCGCACAA  
AAGGTTCCATTCTCTTGATAATTATTTAGGCCGTTATGACGTTTCCACTTTCGGGAAAAT  
TACGTCAGGTCGCCACTCGATGACGGCAGCACAGCGTCTCCGGCGCATATCTAAAGACGG  
CAGGTATGTTGGTGCCGAATAGCCGGTGCCTCAGAAGGTTTACGACGCCTTTAAAGGTGT  
GATTCCGGCCATTA AAAACAGTGACATGTCGCGTCGTTACGCGGTTCTCGATGAGGTGCG  
CACAAAACCTTACTGGTCAACGGAGGTTGAAATCGCGGCACGTTCCCTGAAGCGTTATGT  
TCAGGAACAGGCGCGTATGGCTGGCGTGGAATGAATATCTGGTCTATATCCGTAACGT  
ACCTGAGTACAACACAGAGAACACCGACGCTTATACGACGAATCCGGAACCTGGATGGCGG  
TAGTCGTGAGGCATTTCGATCACCTGTTCCGCACCCTGAAAATCCCTGAGCCGGACAAGGG  
CGATTTCGTATTATTCACGTAAGGGCGTTACCCGCACACCTGAAAGTAATCCATTACGGA  
TATTAACCGTAGTGCGGGAGCCGAAGGCCGCCCGGTGCCGCAGGTTGGAGAGGTTGCCCG  
TGGCGTGACGAGCAGCATTGTGGACAGTCACCTGAAGGTCCGCGTGGTGACGTCAAAGCA  
AGAGGCTGAAGCGCTGGCGCGTACTTGTTTAATGGTTACGGCAGGGGGCGTTCATTCTGA  
TCGTCCGGACAAACGAGAAATTGTCCTTGTGGCGGATAACATCCCTGACGGGCCTACCGC  
TCGCGAGAAGCTGCGTCAGGAGGTCATTTCGTCAAGCCGTGGAGCATGTTGTACAGCAGC  
GGAACATCAGGCGATTTCAATACCGTGCTTAAAACCCGCGACAGTGATAACGTAGCCCT  
GCGTGAAGCCTGGCGTAAGATTGATGATTCCTAAGGTTCAGGAATCACCGGAAGTACAGGT  
AGGTGAATTTTTGGCACATATGGCGGATATATTGCCGAAAAAATTCGTGGCGGCATGGGA  
GCGTGTGTTACCCTGGTTAATGAGGTTCTGCTTCGTACGGGGTTACTTAAGCCGACTAA  
ACTGAATAATATCGGACTTGTTCGCGGGCTATGCGTACGTTAGGCCAGCGTGTGAGGCA  
AGGTTACACGCCGCGTGAGAATGGCGCGGGCGCATCGATTAAATCCTACTGTCGTTGTAA  
ACGTGATCCGTTCAAAGTGCAGGCAGATGAGGGCGAGCGTTATCGTGATGAGCTTGCAAG  
AATGATGAAATCTCAGCGCACCAAAGATTTACGGTCAACATCGGGCGTATGCCACCGTT  
ATTGCGTGACCTTAGTGTACCGGACTTGACTTTGGTAATTTCCCGCGATACTGTGCTGAA  
GGTCCCCAATGGTGTGAAAAATGGGGTGCCGATGGAATTTATCGAGAGACTACCGGAACT  
AATGCACGATCCGGATGCAATTCACGGCTCAGCGCCAAAAGCAATGCAGTTGTGATGCT  
GCTCGATGACGTGGAGAAAAATGGTGATCCGGTGGAGTCAGTGACACACATGAAGGGTGT  
ACGGTCTCGTCTGGAAACCAACTAGGTAGCTTTTTGTTTTCCGGTACAGAGTATGGCTAAAA  
ACTGAAGAGTATAGGAATGACAGGGTCAACGTTGTACCGGAGCGAAGAATTAAGCCGCGA  
TAACCTTCTGCACAGAGGGCTCCAATTGCCAAAGGGGCACATTCTTATAGCGGCTCTGC  
GGATAAGATACTCTATCCAGAAGACATTCGGAAGGGGCCGTATGACTCCCGAACCCAGCAC  
TCTGACACAGGAAGAGAAAATTGCCTCGCGTTTTGTACGCCAGAACCAGGATAAAGTCCA  
GGCGCTGAATGCCGTTACAGGATAAGATCCGAAAAAATTGCGGCAAAGTGGCCGACAGTCA  
CAACGCTAAGATGGCGGAAGACCTCTTCCACGGAAAGGCGGAAAACGACCTTAACGTGAT  
GAAGGTGCGCTACGTGCAGTCACTGGCTAAACTTCTGGCGGAGTACAAAATTGCGCAGGC

CGATCTTGAGGGGTACCTCTACCCCCGTCACGCGCCGGAACGCAACGCGCATAACGCGAA  
ATTCAACCCGAAAATGCCGGACGGCACTTCCGAGATGCCACCGACGACGCGGGCGGAAAT  
CATACAGCGTGGATGTAACAGTGGCAAACAGGCACAGTGTGTCCGTCCGGCAGGGATTAT  
TGACGATATGCTGGCCATCGCCGTGAGGTTATCCGTTAGCAGGGACTTGAAGAGACCGT  
TGTGGTGGATGACTGGCGGAACGCCTACCGTACTACGTTCCCTGTAAAGGTCAGGATGT  
TGACGGTGTGGTGTCACTGCCACGCACAGGTAAGGGCTTCAGCATCTGCATACGTGAAAG  
CAGTCAGGCTACGTGGCGTGCATCCCGGGCACTGTCTCCGTCCACTCAGGCGATACAGGA  
CCTGAGCGAATCGGTGAACCGTTATCGCAAAAACGAAGTGGGGGACGCCTTCTGAAACC  
GGTGCAGGATAATCCCGACAAGGATTACTGCCAGGTAATCACCGATGACAGACCGGATAA  
CATCCGAACGGTTCTAGAGCGCAACGAGCAGGCAACTGGTGAAAACATTCGCTAGGTTGT  
AGGACGACCGGTACCGATGGCCATGATGGCAGACCCGTACTTCACCACTGAAAAGAACGG  
CAAAATGTACTACATCAAACCTCCATGATCCGCGCCTGATCCGTTTCGATGAAGAGTATGGG  
ACCGGAGACCATCAATGCCTTTGGTAGTATGCGGGGGAAAGATAACCGCTGCCTGGCAAC  
GGTAAACACGTCGTATAACCCGGAATTGCTGGTCAGTAACTTCATCCGTGACGTACTGAA  
GTCCGTGATGAATCTGAAGGCGGAGCAGGGAATGAGCGACGGTAAACTGAAATGGCTGCA  
TAACTTATCCGCCCGGGCTGAGGTGATAGGCAGCCGTTCTTCCAAGTCAGCCATATAAGC  
CAGTCTGCGTAGTAAAACCCTCACGGGAACAGGTGCACAGTGGCACAAAGTGTGGAAGGA  
GTTTGTGAGGACGGAGGGAAAACCGGCTGGTTCTACACGGGTGGCCTTGAAGGCCCGAA  
GAAGGAAATGGATCGCCTTGTCTCACTGGCGAAGGGGGGATAGAAAGGCCAGAGAATCGG  
GGCGTGAATTCGTTCCCTAACCGTGGCGCGGATGCCAACGGTGCCTTGAACGCTCT  
GCCTCTTCTGCCTATAAGCACGCGCGTATGCCTCATTGTCACGGCAGCAGACGGCGTC  
CCTTGACACAAACATGACGGAGGACTTTGACCGTAGTGGTGAGCAGGGCGCGCTGATGAA  
TTCGCTGCACATGTTCCGCCGAGGCGAACATTCCGGGAACGGCAAATCTGGTGAGAACGCT  
CGGACACCCTAATAGTGAGGGACCTTTAGTGGAGCCCCTTCCCTTGAAGTATCTGAACGT  
TCTGGAGAAAATCGCGCTTGCCGCTGTGGGGGACAGGTTACCTGTTTGGCTCGCTGCACCG  
CAGCATGGCAGGTGAGGATGACGATGGGAATAACTGGTATGAAAAGGTGCCCACTCATGA  
CAAAGAGCGTAACCTCGTCAATATGAAATCTGAGTTCGGGGGAAATGCCGGAGAGAACTA  
GAATATTCCTCTGTCTTACGGGTACAACGTTTTCTCCTGCTCGGGCATACTACTGAAGG  
TGTGGCGGGGGTACCTGACGGCGTCCCGTGTGCCTGCAATGGTGTTCGTGGTGTCT  
CGGTGCACTCAGCCCGATGGGCAGCGAGACGGCGGAAACACTGTCCGGGGCACTGCTGAA  
CAATGCAGCGCCGTACATTCTGTGTCAAGTTTTCTAACCTTGCCATGAATGAAGTTGTCAT  
GGGGAAGTAGGTTTACCTGGAGAACATGCCTTTTGGTATACCAAATCTGGCAACCAGCT  
GGGGAGACGTTCAACGCCAGAAGCATAACATGGCCTTTGCATCCTGGCTGAATGCGTTCTC  
CGGTGGCAGCCAGTACCGTCCCGGGGCGGTGGATATCACACCGGAATGGCTGAAATTCTG  
CATTGATTACACCCCGGCGGGACAGGGCGCTTCATTTCCATAACTACGGTTGCGGGCGC  
TAAAGCGCTGACCGGTATTGATATCCCGGAACAGCAGGTGCCCTTCTGATGAAACCTTC  
GCAAGAGGTGATGCCGTATGCAGACCAGGCGAATATGTACGACCGGATGGCGGATCTAGC  
GCAGTCTCACGCAGAGCTGAGAAGTCTGGCCGTTGCAGAAAGGACAGCGTGCATTGCCTA  
GTGCAACGGAAGATCGTCAATGAACGGGCTTATGTATGATACCCGGCAGAGTCTGAAAGA  
TTTGCGTAATCAGCGTGTGCTATTTACGCCGACCGAACTCTAAGTCTGTGCAACAGTC  
GGCGAAGGTGATATCGCTAGTGCGGGATATGCAAATTGCCGTGCATCGGTTTAAACCGCGA  
GTACAACAAAAAAGTGGGACTGGATTAACAAAAATGGCACCGGAGGGAAGTGTGGGGCTG  
ATTAAGAAATCAACACTCATTGACCTGTAATTACCGAAGGGTTTAACTCATAGTCAGATC  
AGCATTTTCATGTGATGCACAGAGCCGATTTATTTTTAATGATGAAAAAGTTGCGGAAATG  
GCAGTATATTTGCTGAAAGAGCATGGCGGATGTATGTGTTTGAATTAAGCTTAAGCAGGAG  
CGGTAATGGCGAATGGCAGTTATGAGATAAATAATCTTGATATGTAAGTAAGCGTACTGA  
TGCAGGCGAAATGATGTTACCCCTTATCGCCAGGAAACAATACCGGCAAGCAGAATTGC  
GGATGGAACCTTACAGGCCACGAGGAGATCGATGAGGAGTTTTTTTACCCAGCATTGGA  
TGGCTTTCTTATATCCAAAGATAGGCCCTTTGACATCCTCCACGACCTAATGACGGAGT  
TTTAGACCGCAGCGGACAACACTCGGTGTTTTTTTTGGAAAAACCTGTGATAACTCACAGA  
AACCCCGTCAGTAAGACGGGCTTAGCAAGCTGGGACGGTACTATAATAATTTCAAGTGCC  
TTTTATATCCACTTTAACACTGCTCAAGCATTTAGCTATTTACCCCTCAATTCTTACTTTG  
TTTTTCGGAGAGATAATCTGCGAGGCCCATATGCTGTCATCGAAATACGTGACAATTGTA  
CCGCTATTGTCGCGGAACTCATAACGTTTCATCACCCACTTTTTTAAACGATTCTCCCTTA  
AGGATACCCCATGGATCATCCTTCAGTTCTTTTTGCCTGCGCTACTGTAGAACGCTCTGCT  
TCAGGCCCTTGAAACCGCCCTGCTGTGCAAAAGCGCCAAAAGACACAGAATAAATAGAG  
GCTGCAACCAATATCTTTTTTATTTCATAGTCTCTTTCTTAGATGAACATTCAAACAGCA



TTTTCAGTACGGTAATGCGCGGGTGGGTTGACGATGCCTGAAACATCAGTGGTGATGGTA  
GATTACTCCCCTGCTAGGTCTCTTAGTTGTCAGAGTCGGAGTCTACGAAGACAGCGACCT  
CCGTGCGACCGCTTCGGACTCGCACCTGACAGACGTCTTTCTTCGGTGCCAGTGCCGTCA  
ATATGACGGTCAACCAGATGACAAGCAGGGCGATTAACATCGCCCATTGCTGCTTTATAG  
CCTGCTTCTCCTTCCCTTTCGGCACGTAAGAGACTTATCTACCTGTATTCAGCATGGATT  
GAGCCTCAGATTAATGTTAAGCGTCTTGTGCGGACCCGTATGTAACCTGGGGCTTTTCTA  
TATCTGCCCTAGGTGTTTCATGCCCCGAGGAAGATGGCCTCAAGCACCCGCAGCAATTCTCC  
TTAACTCTCTTTTTCCGGCAAGACGTTTTTATCTCCAGCGAAAAAGCGAATAAAACAACAA  
ACACCTCTGCCATTACTGCTCCTACTTCTGCGAATCCTACAGGCCGGGTCATTGATTCAC  
CTTCTTGTCAATATTTTTAATGTCATTGTCCGCATACCGTATTTTCAGTCTTCTCCTTCCCG  
CAACCGTGCTTTGGTGTCTGTTCTTCACGCTCGAGACTGGCAACAGATTCTCGGAGCTG  
ATCGTGTCTGTTATGAAACTGTCGATCGTCTCTCACCACAGCCTCACCATCGTTTCGAACA  
CCGCAGAACTTACCCAAATGCGACCACAGCACATCCACACTGGAAGCCCAGCAAAAACGCG  
ATCCTGTTACCAACCTCAATGGCGCAACTTTTAAAGCTCTGGTGTGTGTAGTTTTTTCT  
GCCATTTATTGCAATGTTTCAGCAGCTTCTCTTCATCGCGCTTCGCTGCACCAGTGTGAT  
GATATTATCGTCTTCATTATCGATCAGTTCACATACTGCGGCGGTTGTGATAGCGGCAAC  
CAGTCTTACGGTTTCCACGTCGCACCCGGAATTCATCACCCGTCATTAGCGTCAGGATGC  
CCCAGCATGAAGGTGGCCCCCTTCACTCGCCAGTCACCTTTCCTGTCAAACCTCCACGGCA  
ACAAGAACGGCTGTCATGGTATTCAACATTCGCTCACTTCGACTTATCCAACCATCCCCA  
GTTAGCGGAGAGTTGTCAAACACCGCATTCTGCAACCGTAACAGGTAACAGTATTCTTGA  
ACTCTGTTTCCGTCGCACGCCTGAAGCCATTGCTCAGCCTTACCAGCATCAATGTGAAAG  
GCACAAGTTCCACCGCCACCAAATTGCATTTTCGACAGAGGTCCGCAATCTGTTCAAACCGC  
GTGTGTGGCAACTTGTAAGTTTGGCTTACGAGTTCGGCTTCCTGTTCCGGATATGCGCTTC  
TCTGATGCTCCAATAACGCATGCTTATCGCGTAGCGCTTCTTCCGGTTCGGCAACATGG  
CATTCACTATCATTAAAGGTCGTTCTATGCTGCTCCACCTCACCTCTCAGCTTCCCATAC  
GTAAGCGCAATCTCCTCGTTGTCCTGGTTCGTTGGCGTTCGATGTATTGCTGCTTCTTTCC  
CGTTCATCCAGCAGTTCCAGCACGGTAGCCTGGTTAGTGTCTGCTATGAATTCAGCGTTT  
CATAAGCCTGCGCATCTGTTTCACTCATGCTATTAACATGACATTCTGCAATCACACCAC  
CGTGTCTCGTTTCCATTTTTGGGCAACAAACACTCCTGTTAAATAGCCGTGCTGGTTAA  
CAGATGTACGCCCTACGATGTAGCTTCCCTCAGTTGCTTTCTCTGCCCTATAACGGAGTG  
CCTGATAGGCAATCTTGCTCATTTTACTCTTCACTCGGGTATACATGGATTACTACGCC  
CCTCATCTAATTGCGCAAGCTGGATACCCTGGTTCATGCCGTCAAACCTAAGGTTTCG  
AAAAATGCATCTATTTACTTACGGCGTTGCTCCTGCTCTCGGCGTTTCGTCCATTTTTTC  
ACGGACAACATTGACAGCCCACCTCCTCTGCAGAACGTGATGTAGAAAGAACCCAGGAGA  
GCTAGGCCGGTGTTCAGGGCTGTAGTGATCGTTGTCGTGGTGTATTATGTTTCATGTTACAC  
CTCTCTGTTTGTGATAAGTTTCATTATCCTGCTAGCAACTGGCGCAAGCTCTGCATCCAC  
GAACAGCCAGGCGTCGCCGCTCCTCTATCGGAGCCCCACACTCGCAAAAATGAATAGAAG  
ATGGGGCATTCTGACGGATTTGTATTTTCGAAGGGAGAGATTGCGCTGAGATTCTTCGA  
TTTCATCGGCGTGTGTCGACGCAATCTGCCGATTTCCCTTTCCTTCAGGCATGAAACAAGGA  
GCCGAAGCTCCTTTGTTTTTAGTATTCGAATTGCCTTGCCTCAGGCTTTTCAACTTTGG  
TCTGGCCCCGCTGAAATACGAAACTCGACTGGTCAAGCCGTGCAGCCTCTCTCAGTATCAC  
AAATCTGTTCTTCGTCACCATGGAGAGGGTCGCATACCCAATGTCATACAACTTGTTCTG  
GTAGGAGGAGTTCAGCTCTTTCACGATCGGATACAGGTGATTGCTGAGGTCCTGGTCTTT  
TTCCACCCAGAGTTGCTTGTAGCAGAGGAGGATCATTTCCTCGTCTGTGAGTTGTTGCTG  
TAATTATGATTGTGCTGACTCCGTGTTGCGCAGTTTGTTCGCACTCGATGTAGTATCT  
GCGTATCTGTTGGCCTATTTTCGTTACGATCTAACGCCGCCGTTTCTTTGACTGTATCGAG  
GGTAGGGAGATGACCATTTTTCCCTCGCCATAACCTATTTCCCGGTTCTGGGAAATAGC  
TATATAGTCCCTGGTTTACTACGAATCCGCACTATTCAATACGTTCTGTAATCCGGTTTAC  
CAAGCGTTTTCTTCTCCAAGAATAGTATGTAAATCACGGGCATTAACCAGAAGGGTGT  
TTAGTTGGCGATATTCCCGTTGAATACGGGGATTAGTTGCCCTGGTTCATGATGATCACTTT  
TTATGTTTGTGTTATAACCTCCCGTTAGTATCTGGCGGTTCGGGTGTCAACTGAGCCAAAT  
AAGAAGCTCAGGGCATATTTCCCTTGCAGGGGTTGTATTACGCCTCTCCACCCACCTTT  
GTACGGCTGTAACATGCCAAATTCAGGCATAAAAAGGACGCAATGCTACGGGGTTCGG  
AGCACGCTTATTTTTTCAGAGCTCTAAGTATGCGATAGCTGTGGAGGATTTGTCAATCGG  
CGAATCTGGATGTACGCGTAACGGTAAATGCCTCATCCAGTAAATTAACGCAAAATCTC  
ATCTCAAACCTTGCCTGAATTATCGGAAATATAAAGTTAATTTCCCTTAAATGTATGGGGC  
ACTATTGGGGCTAAATGTGGTGGTTTGGGGCATATTTGGGGCAAAAACAACGTATAAAG

AAGGGTGTAAACATTGATTTGTTTCATGGTCAAAATGAGTTGTAACAGATTGAATAAGATAT  
GCTCTTGGACGAGGTTCCGGTAATTGTGTGTTTTTAATGCTTCTTGGTTTGAACACGTCTA  
AGGATATGGTTTATCGTTTTGAAAAAATAATTTTGTTCATCCTCCTGGTGACTTAGGG  
TCACCTCTGGGGCACGGGCATGACGGACATTATCCAGCCTGGCATCTTGACTCACGCTCC  
GTTACAGGCATCCATGCACCATAAACATTGTAGACAATGCTAGAGCTGGAGTGCCTCATCT  
GTGTTTCAATAAACGTCGGGTCTGCTCGGTAAGATAAAGCCCAGCACGCATAGGTATGGC  
GTGTCAGCTAGGCTTTACGGGATTAGATACCCGCTCTTGTTATTGATGAATCCCATGTGG  
CTCCGATGGGGCTTATCGCGTAGGTAATAGCCGCCGTGTGATTCTTGCGAACGATTTGAG  
GACAGAAAACAAAAGTGCACCTCGTGACAGTTGTTTCATCCGTAAGTGAACAG  
TGATCTGATGCTGCGTGCTACGACGAGGAGGCATCGCCTGGTTTTTAAGCGCTTCACTTG  
CTGGTGCCAGAAGATGTATGCCCGGTTGGTGCCTGAGTCGGTCATTGGTAGGGTAAAAT  
CGCCTATTTTTGTAAAATTTTCGTGCGACTGTTATCGGGACGGCTTTCAGGTCCATAGCCT  
CCCATGTAAGTCCAGCAATTTGACCGTGTGCGAACCTTGTA AAAACAGCCGCTGCCCAGC  
GGTTTTTGGTCTGTTGATGATGGCAGGCATGAATGAAACGGCTAAAGTCATCTCTGGTCA  
GTGGTGCCGGCTCTGGTTTTAATTTCCACAGCGGTGTTCTTGAAGTAAACGAGTTTTTCT  
CCGCATGCCAGTTTTTCGGCAGCAAAGCTGAACATTCCGGCTGTTGTTGTCATGTAACAGT  
TCACTGTGGGTACGGTTCATCCTTTTCGGGACGTGCTGGTTTGCCAGGTTCCCTCTTCGC  
CGGGCTGTAAATCTTTCCTGATACACAACAGCTCTTCTTATGTAATCGCTGACGCCAGCC  
TGCCAGGACCCAGCCTCGGTAGCATATTTTTTCATCACTGATTGATAATGATTTAAGGCGT  
TACTACTGATTACCTTGCTTTCAGAGTAAGCTATTTCTGTGCCAGTTCACCCACGTTGA  
TATCTTTTTTTTCCAGTTCAAATAGCTTGAGGTCAGGTGAGACGGGAAATCGATCGGCAT  
AATTAACGCTGCTTGTCTGATTCCAGAGTAGACCGTAGCCCTAAACTCACCAGCGATCT  
TTCTGTTTTGTCAGTGTATCCGGCACGCGAAGATTTTCGCGCACTCGTTTACCCCTGTACT  
CAAACGTTATTTGGAGTTTTCTCCGTGATTGTCAACGCCGGTTGGATAAGCTGAATTCG  
CCATTGTTCCCTCCTGCGTCCAAGAACATGCTCAGGTTACACTCAGATGGATAAGATTTAA  
ACACCCTGAGATAGTAAGCGTTAGTTTTTGATCCAAGTGTTGGTGGTACGAAGATGTTAG  
AGAGATTCGCAGTTTTTCTTTGGCGTCCGTCTGGGGCTATTTGTTTATATTCTCTGCCG  
TTCATCCTCGCACTGTCCCTGACGCGTGATAGTGTCCCTTTTCTCAGGCCTGATACCGAA  
ACTATGAGCTCCACTGTTACCCAATCATTTCGCATTTATCCGTACATCAGGTGTGATGACT  
GGCTGAATGCCATGCTTTTGTAGGTTTCATCACTCACCCATAAGTTGCCTCTGCATGTGT  
AAGAAAACCCGTCCTCGGGGGGCTTGGTGTCTTTTTAGTCTTTCAATTTCGAATCTTGGT  
TACGTCTTCTTCGATACGAACTCCTTGTTTTTTCGTCTTTTGATAGTGCTAAGTCATAAAT  
TTGCGCGGGCGCTTACCATCTCGCATCCATGAATTTAAGGCGCGAACAGCCTCGCTACG  
CTTTTTATCTTCTCTCGCATTTTTGATATTGACGAGGACATCAACGCAAGTATGGAAAAT  
GTGGATTTTGACTTTACATGCGAGCATGACGGCTTCGCCATCATTTCGGCCACACAGTGA  
GTACAAATCTTCAGGGTCTGGCTGGTATTTCTATAACGTTAGAGGGTTGAATGGTGAACA  
AGCCATAATCATCCCATAAAACAAAACCTCGCCGTAGGGAGTTCAGATAAAAGAAATCCT  
CGCGAGTGCAGGAATGTTATACAGTGGCGATATTCATCTCTATAGCGATTCCCTTTGAC  
GGTTTATCACCGAAGTGCAGGATGTGTGATTGTCTTGATTTTCATATCCCTCTTACGGAACT  
TTAATTCTTCGGCTGGAATCGTTGCGCTTCGGGTATCACTTTGTTGTTATCATGCGGTCA  
TACTCGCGGAACATAAATCGCTTATTCCAGTAGTATTAAACAGGCGATACTCTACCGTT  
TTCTGTCCGGGAGTAATGGCATCCAAGTATTCACCTTAACTGCAAGTGGCAGGTTAGTC  
ACGGTTAGCCTCCTGCGGCGGTTCTGGTAGCGGCATCCCGTGAGTTGCTTGCTCAATACC  
ATCTCCCGGCTTAACCGTTGCATCTCCGCGCCGAAAGGTGCTTGCGGAGTACCGTGCGTA  
CCATATTAGCGCTTAACCCAGACAGCGATCGAGATTCACCGAAATAAGCACGTTCTGACC  
TTTTTTAGGCAAGCGACCACTACAGCTTATCCAATACTTCGGAGTTACCGGAGATTTACC  
TGCCTCATCAGCGGATTTTCATCCAGTGCCTAAGCGTTGAGTTGCTTACACATAACCAATC  
AACGTTTATGTTTTCTTTTTTTCTGACAACCATTTGGAATGGACGCTTGGCAGTCCG  
GCTTTCTGCATCAATTCGTGGTTGGCAGATATATAGTGGTACATTTCCCGGCTTCATCGT  
ATTGTCTCGACAAATAAACGTGATAACAACCATATTTAACGACCTCAATTTCCACTGTGTA  
ATTAGGGGCGAATGGTTTATGTTCAATGCAGTCAACGCCATTTCTGAAGCACGGCGCTC  
ACTATTATCTCGCAAGTCGAGGCTGCCGATTCGCTCTTTGGTTTCTTTAGTCATTTCTTT  
CTCGGTGTACATTGTTCATGTGTTAGTACTTCTACTTTCGAGGCCATCTTTCAGCGTGAA  
GCCGTGGTAATCATCAGCCAAACTGGTTAACCCAGGCGCATGAAGGGTAGGAATATAGAC  
GCTTGCAGTGGGGTAGCCCTTATCGTTATTAATGCTGGCAACGTGCTCGCCGTTGTATGC  
GCTCAGCGTGTCTAGGACACAATAAAAATTTCTACGGCTGCCCTGAAATGCTTTACTGC  
CTTACAAAGTGGTTTCCACGCTTTTTCTTCTGGCGTCAGGACGATTAATTCCTCCAA

AGATGCCATTTTCAGTCTTCGTAATATGGGTTGCTTTTAATTTGCTGTGTGTTGAGCGACG  
CCCATACCACGTAATTATACAACCTCATTAAGTAGATCAATGATTTTCCGGTTTGCCCAGA  
CAAAAATTTGCGGGGATATCGGTATCAGCAGCCCGATAAACAGAATGAGAAAGAAAAATC  
CTGTTCGATTAATTTTCCCGGCTACTCTTTTCAGGATAATGTAGGCACATCATTCTCCT  
TTCTTGCTCCTCAAAATTTTATGCCCTGGCGCATAAGCACGCGTTCTGTCTTTGCTTATT  
CGACAGCGATTCTTGCACGCCTCTTTTGTACATCAAGCCCATGACCGACCGATAGAGTCA  
CCGAAGCCTGGCCACTTATCCTTGCCATCTGTACAGTGGAGGCAATCACTATAGAGATGC  
ATGGTTTAACTTGCAGCAAAAGCCATATCACTCTCTTTTAGTGCGCAAGTGGTTTTACCT  
GCGGTTTTGCTCCGCGCTGGGCTTTTTTGCAAAAACCACAATCCCTCATCCCGTAATATTT  
CATCAACCCCATGCGTTCGGTTGTTGAGTCAACCCCACTGCCATACGCCAGGAGCGTTTCT  
ACGAACTAACAGAATCTTTGCATTACGGTATTTTCATCGGTTTGCTCTCCTGCATCTCTTT  
GGTGCTCGGCGTGCCGATGTAATCCCGGTAGGGCGGCGCTTTGGTGTGCGGATGATGTTT  
TTTGCCATTAGCGCAGAAGCCCGAAAACGAGACGGATACAGTAACAAGCAGATACATGCC  
ACACGCACTATTCACCTCTTTTCGATGGGACTGCCAGCGGGCGCGCTCGGCTACACTTTGTC  
CCCAGAACCACATGTGAAGCGCCATAAGCTTGTCTGTCATCGATGCATATTTGCGATTAG  
AGTAGGCCTGAGCATCATTCTCAGGTTTCGCCAGGTAATTCGCCCGGGCCAAACACTTTGT  
TATAAATCCATATTAGTCCGTTGTTAGCGTCCGCCAGTTAGCTGCCATTCGGTAATCGTAG  
CCTGCATGACCATAATGCTAAGCCCGATTAATAGGTTTCAGATTTTTGTACCGTGTGCGGA  
TGTTTGCACTCTCGCTTTGTACTTTTACGTTGCGCTTTTTTTGAGCCTTCATGTAACGCCT  
GCTTATCGCGTAGAGCTTCTACCAGTTCAGCAACATGGCATTCACTCTCAATAAGGTTGT  
TTTCTGCTGCTTCAAGCTCAACACGCAGCTTCCCAACCGTACGCTCAATCTCCGCGTTCT  
CCTGGTTCGCGGCGTTTGATGCATGGCAGGTATCTTTCCTGTTTCATCGCGCAGTACCAGCT  
TGGAAGCCGGGTTAGTCTAAGCTATGAGTCCAGCGTTAGCATAAGCGTGATCTTCTGTGT  
CAATCAGGCGTTTAAACATGACATTCGGCAATTACGCCACCGGGTTATCCTTTCCATTTAT  
GGCAAACAACAACACTACTGTTAAATGGCCGCGCTGGTTAACGGACGCATGCCCTACGAGGT  
AGCTTCTTTGGATGGTTTCTCTGCCTTCTCACGCAGTCCCTGATAATTAATTTTCGCTCA  
CTTCGAACCTCTCTGTTTACTGATCAGCTACAGCTCCTCCTGACAACTTGCACAAGTCCG  
ACAACCCTAAACGGACAAGCGTCTCCGCTCATCGAGGGAATTGCCCACTCACAACACTG  
ATTGGCAGAAATTGCCTGGTGGTTCAGGCGGCGCAATTTTATTGCTGTGTTGCGCTGTAA  
TTCTTCAGTTTCCGATGTTGAATCAATGAGGTCTGCGATCTTTCATTAATCACTAAATTG  
TTAGGGAAGACGCTTGAGGGTGAACGCGAATAATAAAAAAGGAGCCTGTAGCTCCATGGT  
GATTTTGCTTTTCATCTACTCGGTTTCTTATAGACGCCGTTTAAAATGCCGATCGCCAGA  
CCTAAATGAGTCGGAGTGAATCCCATTAGCGTTACCGACTCGCGGAGGTTCTTCAACA  
CGTCCGCAAACGTGATCGTAGTTTTTATCTGGAAACCGCTGTCTGGCTTTTTTTGATTTCA  
GTATTTGCCGGACGAGCAATGCTGCGAAGGGCGTTTTTCTGCTCAGGTGTCATTCAACAA  
GTCCCGTGTGCGCAAACCTAAGCAAACAGAATAAGAAGCCTGCTGCCAGAAAAATGCATT  
CTGTTGTTGTCAAGCCGGTCTCTCTAGTTTGCTTCTGCTTTCGCAGCCATCATTCTAG  
CTTTTGTAAGGAATGTGACTGACGTATGAAATTCTTCGCTCTGTTTCTACTGGTATTGG  
CACAAACCTGACTGCAATTTTAGCGAGGCTATGTGCCACAGTGAAACTCGTTCTTATCTC  
AACGGGAGATGCTGTATGCGGACAGATGCCCGTTTATTATTTATCTCCTAAGCCAGCTGT  
TGTGCTTTCAGGTTATTTCTGATAACACAAAGGCCGGGAAATACCCCGCCTAGCTTTGTA  
ACGGAGTAGACGAAAGCGCTCTAACCTACCCGGATATTATCGTGAGGATACTTCATCGGC  
ATTACTACCAAATACAAAACCACTTTCAGCCAGTGCCTCGTCCAATTTGTCAATGAACT  
ACGGCAGCATCTCGTCAAAACTCGCCATGTACTTGTTCATCCCGCTCAACCACAACATAAT  
GCAGGCTCCAGGCTTTATACCTGGGTAAGTGGCAAAAGACAAGGCATCTTTTCGTG  
TCACCCACATGCTGGACTGCACCTGGGCCCTGTAAGCCGGCTTTATGGCCTCGAAACCAC  
CGAGTCGGAACCTCATGAAATCCCGGTAGGTAATCGGGAAATTCAGTTCAATGCCATTTG  
AGGCACTGCATAAAGCATCGGGAGAGCAGGCGGTACGCATACTCTCATCGCGATAGATGA  
TGGGGGATTCAATAACAGTCACTCCGGAGGTGAACTCAAACAGGGTTCTGACATCGATCT  
CGTACTGTTTTCCCGAGTCGAGTGCTTTAGCGTTAACTTCCGTAGCCACACCCGGTGCAA  
CTTCGGCAAGCAGGTTGTCGAAGTAGTAAATTTTCATGTCAGGCCAGATCTTTCCTCAGC  
GTGGCAGTGCTATCACGTTGTACACTTCTGAAGTGGTGTGATGACGCCGAGCCGTAATTTGA  
GCCGTGTATCAACCCCTTTTCGACAGCTCTGTCTGTCAGTTCGGTAAGCTGCAGGATAA  
TGTGCGGTGTCATGCAGCCACCTTCTGCTCAGAGGCTTCTGTTTCAGGAACGCAAGAAC  
TTCCCTGCTTCGGCCTGTGTGACGTTCTGACGATGCGTGAATGTCGAAGCGAAATATCTG  
GGAACAAAGCGACGATAAGTCTGTCATCCCATGTTTTATCCAGGGCGAACAGCAGTGTGTT  
AATCTCCTGCACGGTTTCATTGTTAACCGGAGTGATGTTGCGTTCGCGCTGGCGTGCTGC

AGTCTAGGCAGTATTTGCGACAATGCGCTCGGCTTCATCCTTGTCAGAGATACGAGCCAA  
TCCGAAGGCTAGACGGGCACACTGAATCATGGCTTTATGCCGTATCATCAGGTTGGGATG  
CGACTGCCACGGGCCTGTGATTTCTCTGGCTTTGCGGGTTTTGAATGGCTCGCTGCGGCA  
TTCATCCATCCACTCCGTAACGCAGATCGGATGATTACGGTCCATGCGGTAAATCCGGGA  
TGTAGAGCATTCAATTGTGCCGCTCAAAGCCCTTGCCATCAAACCTGCCGGTTTTAATTGAT  
GACGCGGGGCCACCCACCAACGCCATCACCGGAACGATGCCGTTCTGCTTATCAGGGAA  
GGCGTAAATTTCAATTCGTCCACCCATTATGGCAGTACTGGTGGGCGACGATCAACAAGGC  
GATGAACTGCGAATCTATGGCATCACCTATAAATGCCGTCTGGCGATGAGTGGTGAACAG  
TTCCTCTCGATCGACTGAATCCATGAAGACACGTTTCAGACAGGTTCCCTGCCAGCGTTTC  
GACTGCTGTACTCTTCCGGTTTTATACCTCAGAATCAATATCAACCTGCGGGGCGGCCACTT  
GTTTCAACCATGTCCTGGATGTGCTCTACCTTGCCTTAACTCAAATCGTCATTA  
AACGCATGGGTAATAGCTTTTTTGGCGGCCCGAGGCGTTGCTAATGATCCCTGCAGAGT  
GATTCAAACAGTTGCTGGGACAGACCTATCCCAAGTCGTCTGCCAGCTCTGCGTCTTTC  
TTTTACGGGCGATCTGCTGGTAGTGTGCGTCCAGCGCTGAGCCTCAAGACAATCCTGA  
AAGGTATTAGCGTTCATGGTTGAACTACTGATGTAGCGCAGAAAATATCGCCGGCGAAAA  
GGCGGGCTGATTGGGAAAACAGGAAAGGGGGTTAGTGAATGCTTTAGCTTGATCTCAGTT  
CCAGTATTACTATCCATCTATTATAAGCGTCGACGGCCTCAGGAAACATCTTTTCATCGT  
TAACAAAAGTGGCGGTAGTGAATTTAGTCGGGATAGCCATAAGTGTGGATCCATTTTTG  
GGACTCTTGGCTGATTTAGTCTGTCGATAAAGGCGTTCCATCCTTCACGTAATTTACGG  
CTGATTCGTTCAAGTAAAGATTCGGAAGGGCAGCCAGCAACAGGCTACCTCGCAATGGCA  
CAGTACATGGTGTGCTCCTTATTTATACATGAGGAAATCCGCCTCGAATGAAGCGTTATG  
GGTATGCGGTAACGCCGCGCTCAGACGGCTTTGCTTGTACATCATCTGAATCAAATAGA  
AATGAAGTATCGAGATCGGTAATTCTTATTCCTTCGCTACCATCCATTGGGGGCCATGCT  
TCTTGACCATTTCTATCATTCCAGTCGAACTCACACAAAACACCATATGCCTTTAAGTAG  
CTTGAAAAAGCCATAAGCAGAGCACCTCGCGCAAGCCTGATCAATACACCATTTAATAAA  
GAGCCGTGTTTATTGAGTGGGTATTCAGAGTCTGACCAGAAATTATTAACCTGGTGAAGT  
TTTTCTCTATCATTACGTCATGGTCGTTTGAAATTTCTATAGATTCTTTTCAGTCGTAA  
TCAATGTTTTATATTTTGATGTTTGGCATCTGTTTCATATCCTCCCTGATAAAAAATCACC  
CTCACATTGGATGGCGAAGAAGATTACCAATAATCAGGTCAAGTCGGCCACTGTTTAGTT  
ACGAGCGTGATTGCTCCGTGTTGTCACTCGTGGGTATCAATACACAGTGCTCTGTTTATT  
CTGTTGTTTATGCTAGAAATAAAGGCCACCATCAGCTAGCCTTGTTGTAATTGTTGCAGG  
TACAAAGTAAGTGATTAGATGGAGCGCCATACATTATCAATTCATGCTATGTCGGGTTCA  
TCTCCACCTCTTGTGGTATGGGCATTCTTGCCTTAGTGTGTAAGCGGAGAAACATAAAA  
CAGCCCAGGCACCGATTGTTTTAAAAGAACAGCAATGGGCTGTGGTTTTGCTGCATTTG  
CGGTAACGCGACAATCACGAATCGCGGTTTCATGAAATTCCATATATCACCTAAAATTAG  
TGATTTGCTGCCTAATTTCACTTTCTGGCAACCAACACAAGTCATCTTGCTGTCAGTTGT  
TTGGATTTCCGCCAGCCTGCCGCTTAAAGAGCTACATTTGGAAGACGAGTTGAGTCTTCA  
TATTTTCTGATCAAAGTTGTCGGTGATATTTCTTCTGCTCTGATCGCTGGTTTTGCGTTTCG  
CTTTGTAAGACCACTCGTGATGGGCTTGGGCTGTGTGGTTTGAGGGAGACAATCGCCTCG  
TGACTTTGCATGTTTGCAGACGAGCTCTACGGCGAGAAGCTGCGGCGCCTTTACATTCT  
GTTTTTCGGGACATAGATTCATCTCGAATAATCGTTCTCGATGCCATCTCGAACCTCCTC  
CTGAGTCGGGCGCTTCTCCATAGCACTCCACAGCTTATGCGGTTGGGTGATTTGGTTTTT  
CAGCCACGTAGTCGAGAGTCCACGTTGTTTAAAGAGCCTGCCACTATGTTCCACTTGGCT  
TGCAGCGTCTGCTGATGGTTAAAGGGTAAGATATGCAATTCACTTGGTTAATACAATTT  
GTTCTAAAACGAGGCGTCTTTTTGCAACGCTTTGTATTTAATAGTATTGTTTTTTATCGT  
GTGTGATTGCGTCGGCGATGTAAGGAAAGATCAGAATTGCGTTGTTGAGTGAGTTGTAT  
CACTTTCCTTGCCAATAAATAAATTGTCTATGTGGCTTTTTGGGCGAGAAGAAGAGAAA  
ACCCTGAATGGAGGCTGGGTTGATGATTACCCGTGTGGCCTTGAGCGAGAATGCTCAGAC  
ACATGTTCAAGATCTCTATGCCATGATCGTTCACAGGCATTCGCTTGAACCTGCTCGATTG  
AATTGGTCTTTCAATTTGTATGTAGACATCTGTATTTTCTCATATTGGCCGCAGCCGAAC  
AACCGCATGAAAAAAGGTACCGGACTCGCCAAGGTTACATCGCAAATACTGTGTGCCTTT  
ACAATGAATCCTTTTGGAGGCTCTGGTTAACTGCATCATTGGCGGACTTGGGAGTTGGA  
CATTGTGCAGAATGCTTTTGCATTATTGAGGCAGTACGTAACCTTTCAGCATTGAAGAGT  
TGCCTTCGGCTTCTTCGTTTGTGAGATCGTTAGGAAGGCCGTTAATCGTAACTGTAACCG  
CTGATTCGGGTTGAAGAAGTACTGGAAGATCATAGCTATGATGTGCCTTAGCCTCGCCTT  
CGACTTTTGTGGTTCGCCAGTCAAATCTTTTTCTCACTGGATTCTTTGTTAATCGGAG  
CGACTGGGATTTCTTCACCTCCGTGGGCAGCTTTAACTTTTTGATTTCTTTTGCATGC

GGCTTTTATATGCAGTCATGCTGCTGTCGGTAGTCTTCTGCTCAGATCCATTGATGTATC  
GCTCGGCACGCTCATTACATCAAGTTGAGTAACATCACACATTTCTCTTCTTGGACGA  
CCGTTAAGAGGGGATCGAATGAGTCTTTTAAATTTTCGAGCGGTGTCATCCTTCATTATGT  
TCAGTGACAGAAGATCTTCAAGAAATTGCTTGAATGCCTGCACGCTAACGTATGAATTAG  
CCATTTGCTCTCTCTGAGTTATTGACTCAGATCGTGTATCCAGGAATTGATTTGCA  
TGAAAGACTCAAGTCTTCAGAGTTTCCCTTCGAGATCCACTCTCAGTAAAAAAGGCCGCA  
GCTCTGCGACCTTTCATCTCCTAAATATCTTTTCTCCTACCTATAGAAAACAGCAGGGTGC  
GTAAGCCCTAACAACCTTCAAGCGCATCGTTCAGAGAAAGCTCCATGCTATATAGGTCTTA  
TTTCATATCTTTTTCGAGCGAAGAAATTTTCCCTCTGTGCAGAGAGCGTATGCCCTTGAT  
TCTGGTTGATGGTATGACGCTTTTCCCCAGCCTCACCTGCCATACAGGACGCTGCTCA  
TCGATATTTATCGGCCGGTCATTGATCTTAGAGACAATATCAAGCTCACGACGGATGTAC  
TCAGATGGCCTTCTGCTTTCAATGAATAGCTGAACTTCTTTTTTTCCGCTTAATACTCAT  
AGCCATTAAGTCCAGCTATCCTCTTTACCCATACGTCTTTCAGGGCATTGGCTGACGA  
TAGCTTTCCACCCAACGGAACAACCTCTCAGTGCATGGGATCATTGGATATTGCGGGTTTA  
GTGGTTGTAGAAAGAGCAGACCGCTATCCCTGATCAGTTTGTGACCGTAAATCCATCAC  
CACCTAGTCTGGCGATGTAGAAATCGCCGGGCTAAACAGCTTCCTCAGGGTCAACCAGAA  
TTAACATCCCGTCATCAGAACGAGGTTTGGAAACCAGTTGGTGCGGTCATTGACTTACCTT  
CGACCCCAAGCTGGACGGCAGAGTCACTGGCCCTTTTGGTTGTGCGTACTAATCTCTCCG  
CATCACCTTTGGTAAAGGTTCCGAGTTCTGGAGAGAACATCCAGGCTAAATATGAGAAA  
AGACAGTGTACTCATATTGTTTCTTAATTGGGGCCGACGACTATTCGCCACCAGGTGAAA  
ATGTCCCGTCGTGGTTAAATGATATGTTATCAATACCTAAGTATTTCAACACCACACCAG  
AATCACTAAGAGATGGATGACGAGACCCTCGCAACCCTGTCTTATTCACCGTGCGGCA  
TACCTAGCCTCTCGGCGCACTTCGCTTGAGTTATGCCGAGCTCTTAATTCCGAATCTAG  
CTAGTTCATACCATTTTCATTTTCATGCCCTTATTATTACGCTCGGTACAGGAACCACCA  
TGCACAATGTGTATTTTACTTGTATTTGAGAAGTATATATTGTATTCTTTTATTAATGG  
TTACTATGGAGGGCATATGAGCATCCTACGAAAATATCTAGGGTCACTGAATATCTCTCC  
TACAACACTTGCTAAGGCAGTTTGATGCACACAGGGAACCTATCGGACATTGCGAAGCTGG  
TCGTGCTTCCCATACTTAACACATGCCGTGCCCTTCTTGCTGTCTAAATAACTTAGC  
CGCAAAGAAAGTCTTGATGACGTGTTCTCGCTGGAGCAAAAACGGCTTAATAAGCAGT  
GCAGCTCTTTGTAACAACGTACATTCTGTTCTATGTGCTTGAAGTCGAGTCCCAAGATAT  
CTGACCAACTAAGGCCATATGCGTTTCCACGTATACCTCTCAACTAGCAATTCATCTATCT  
GAAATCTTTAGAAATGGAACCAGCAAGTTACAGCAAACCTATCACAGCCAGAGATTGAACG  
CGCTGAAACTGATTTACTCATCAACCTGTCAACGCTTACCCGGCGCGGTCTGGCAAAGAT  
GATTGGGCGTCAGGAAGCGAAGACAAGGAGATCGGACTGGAGAGTGATTGCTTCGGTCTT  
GTGTGGTTTCGGAATGGCAGCAGATATCAGTCCGATTAGCAGGGCGTTTAAGTACGCGCT  
TCAAGAAATCACACGGAAAAAATCCCCGGCCGCCACCGAGGTTTTAAAGAAAATTTATTT  
GCAATTCTGAGGGAATTACTGGATCAATCCACAGGAGCAATTATCACAGAACAACCTCAGT  
GCTGGCCAGGACAAAAGTCACAAACACGTCCTACGTGTTTCGCTTACTGTCCAGCTTCAAT  
CAGGCTGGTTCGATTCTGGGCTTAGTTGGAAAAAGTGAAGCTGATGCAGAAGGAGAAGGGT  
CATGAGTGACACACCTAATCTAGCGGACGCAAGGGAGGCAGGAACGCTACAACAACCGTA  
TCAAAACAGCGGTAAGGGGTATGCCTTGCCTCACCGTAAATTTATGGATGTGCCGTTTTA  
CAAGTCCGCAGAAACAGCGCATTGTGGGTCCGCTTAATCCTCAACGCAAAAACATACGCC  
TGAGTATGTAATGACTGGCGCAGGGGAAGTTCTGGTAGGCAGAGGGAAGCTACGTGGCGG  
AAGAACTCTCTGGCGCATGGAACAGGACTCAAACCAGTCCGCTTTCAGTACCTGCGCAG  
AAAGGTCAAAGTCTCGCCGTGATTGGCTGGGTTTTACACGGTAAATTCTCAGTTTTCTC  
GGTAGAGAAATATGTCGATTATCATTATTTTTGTACCAGCAGATTAACAGCAAATTAC  
CACCGCAAAGCCAGCAATACGAATGCCTGCAAGCAATACTGTACCAGCAGATTACCAGCA  
AATTACCACAGATAAAGAATATGAGCATATTATCTATAAGACTAACGTATTAGAGGGTGC  
CACAGAAGACACAAAGTCTGTCAAGAAAAACCCTTCCGTTAGCTGTCAGGATATTGTCGT  
TGCATACCACGAGATACTTCTGAAGCGCCAAACAGCCGCGCACTGAATGACAAGCGTAA  
AATCGCGATCCGTACGTTCTGGCGCAAGGCCGAAGATATAACCAGCCGACTTGACTGGCC  
TGCCTCACGATACAGGACTGGATAAATTATTCGAGCTACGTAGGCCAAAATTGCCGATG  
TACGCTCCAAGAGCGCCCAACAATCACCCCGGAACCGGCTCGCACAAAAGGAGTTTTA  
GTTCCCGCTTAACGATTAGACCGACTTGAACGTTTCGTGAGGGTGAACACGATGACCGATA  
ATTTTTTTTTGCCGCCCATAGCATCGAGGGAGAGCAGGCAGTGATGGGTGGATTCTCTGC  
TGGATGATGACAGTGGTGAGCGCGTCCACAAAGGTCTGGCGGTGCTGCAGCCTGATTGAT  
AATACAGCCGAACACACAAAATCATTTTCGACGAAATAACCAGAATGCACCGGGAGTAAA

AGATAGTCAATGGCCTGAAGCTTTTTTCGATGAACTCGAGCATAAATCGTTAACGGCGACTG  
TTAGCGGTATAGCGTATATCGCTGAGATCACTAAGAACACGCCAAGCGCAGGTAACCTAG  
TTGCCTATGCGATGGAGCTTTGTGAAACCGTAATGGAACGCTACGCCATCAACCGGAAGC  
CTGAAGCGAGGGAATTGCATTCTTCCCGTAACAGAATGAGTGCAACGCAAAACTACGCAG  
CTATCCAGGCGATTTTCACGCAACTGACAGACCATCCAACATCACGATCACGTTGCGGCT  
TTCGGTTATGCGGCGAGGTCATGGAAGACTGGGTTAGGGATCTTGAGAAGCGATTTGACC  
CGTCAGGCGAACACAGAGAAATGACCACAGTGATCCCATCGGTGGACAGAATGCTATCAC  
CGTAAGGTCTGGTGAAAGGTTGTATCTTTGTCCGGGGCGCTCGCCCTAAGATAGGGAAAA  
TGACGCTATACAGCCAGATGGCAATCTTTTTTCGAGAGCATGGGCAAAAGCCCGCTCAGA  
CGTTCTGCCGTGAAATGCCAGGTGATTAGATACTGGCAAAACTGGTAGGACAGAAGTCAG  
GTGTTAACCCGAATATTAGTTACCTTCCGGCGACAAACGACCGCGATAACGGCTACCAGG  
GTTCTAACGATGGCTACTGCAACAGGGCGATCGAAACAGCTAATCGCTTGAGTGAAATCG  
ACTTGCTTTACATCGACGACACGTCGGGATTATCTCTGGATCGAATGATCAGCGAAAGCA  
GTCGAATCAAACGAGAAAAAGGATGCGTTGGCATGATTCTGGTCGATTAAGTAACACTAG  
TGACCGCTGAGACAGCAGATCGCAAGAACCTTGGTTACGGCGTGATCACCAAAGGACTGA  
AGAACCTTGCCACAGAGCTTGATCGCGTTGTTGTGCTTCTGACGCATCTTGACCACGTAC  
TGCAAAGCCGACCCAATAATCCCACACTACCAAGTGACTGAAGAAATACAGGCGAGATTG  
AACAGGATTGGGATTATTAGGAGAGGATCCATCGTGAAGGTGCTTTTTTATGACAGTGTTT  
CACCTGGTGAAACCGAACTAATCCTCCGTCTCACTCGTCATGGCAATTCCGACACTGTGT  
AATGCATCCAGGCACGTGGCGCTATTTGTGACCCAGACCAGGAGTCTGCTGAAATGCGCC  
GAGGCGAACGCTAGGAACCGCCGGCCGAGAAGAAAGGAGGATTCTGATGAATAAAAAAAA  
ATTTGCCATTGTGGAAAAGGCATGGGATGCACAAATATCCTTAGCTTTGAAAGAACAGGC  
ACTACAGGTAATCCAGACCGAATCGAAAGTCGCCAGGCAGTTCTGCGATGGCAGGATTCCT  
GAGCGAAATTTAAATAACGCGCCAGATGATGACGTTTAAAGGGAATGATGTAGATCATCA  
AGGTAGAGCGGCGTATTGCTCCCATCTGCCCGATGACGTGGACGTTGATGAAATGGTTAG  
GGAGAACAAGCATTGACCATCTACATCCCTGAGCTAATAACAGGCCTGCCGGTAATCGCA  
GGCCTCTTAACCTTGTGGGAGAGGGAAGTCAACGATAGCTGCCGTCAGTTTGAAAACCTGGG  
GGTTATAAGAGAAAGGCCAGTTCACGGGATATGATGAATTAAGAGGTTTACCTGGGTGA  
TATGGTAGGCATCGCGCTCTGCTATTGAACTTGATATCGACTCGCCCGAATCGAATGACG  
ACTTTTGGTAGGATGGTGAGGAAGGTGCTTATGCGATGGGCTATGAGTATGGGCGGCACA  
AAACGGTAATTGCAGTAATCAAAGCCATCAGCGCCGAGGAATCAAAGAAAAGAATTTTCG  
ATTAAGCAAATAAGAAGTCAATAAATCACTTTTTAGGGATCACAAACGCTCTGTAGCGAG  
GTAAACGCGGGCAAGGCATGCCAATAAGCAGCGAGAATGCAAGAGGCGTGAGAATGTGTG  
TGAGGAGGTGTTAAGAAGTGAGTACGAGAGCTGAGCTTGTGAGGGCTAAGTTTCGCTAAG  
AGTAGGTGCGTACGTATCTGTATAGTTCATCGTCCAGTTTGCCGTATGATGAGTATTATG  
AGCATTATCCTGCCGCACGACGCTATCCGCGTGACCGTGTTTTTTCGACGGTTGGTCAAAC  
TCAACATTGAGTTTAAAGCGCAACACGATTATCCGGAGTCAGGATTAAGTGTGAGGGACTT  
AGCATGAGCGACCGATCCTTAACCCACCCAACGCTAAAAGAATTTCCGTTTTGCGGCGGT  
GATGCTGGTCTGTGGGTTGAAGCCGAATAAATAATGAGGTGTGGAGCTATGCAGAAGGT  
GACCTCTGTGAAGGCTGAGTGTCAAGGGCACCAACAGTTGCTTTGGCGGCTAAAAAATGT  
AACCGGAGAGCCGGAGATGAAGCAAACATTTCTGCTTCGAAACGAATCAATCAGAAATAA  
CGCCATAGACGCCATTCTCTCACTACCCATAGAAGACAACCTCACCCGGCGAAGTCCCTGT  
TAAAGAACCCAAGCGCAGCAAAGCCCAAATGACGGTATGTGGCCGATGCTGAACGATGT  
TTCTCGTCAGGTAAGTGTGGCATGGTCAACAGCTGGCGCCGGAATACTGGAAAGACCTGTT  
CACTGCCCTGTGCTTAAAGCCCAAAAAACTGGAGGAACGAAGTGTACCTGGTATCGACTG  
TGGCGTTGTCATGCTTGGCGTGCGTATCAGCAAATTGCGCAAGGCCAGCATGACTGCGCT  
TATCGAAGTCATGTTCTGGCTCGGCTCACAGCACAACGTACGGTGGATTGATTACTACCG  
GCGAAAGTATGAATGCTCACAACATAAAAGTAGGGCTGTATGATTATCAAAGCAAATACG  
CCACCAGACGACGAGGACTGCTAGCTAACGCCGCTTTGGCTTTTTTGTGACTGGATATT  
GGGATTAGATTCTGGCTGGAATCAGCTGCGAGCGACAAAACGCTCGGTGTGCGCCCTGG  
CGAACTGGGGCTCACGACGCATCAATTTCTACGGGGATAAGTCACGATGCTGTCTGGAAT  
AACCCATCGTCCAGCAATATCAGGCCGTGGGTGGATAAAGCCGCAGAGCAGTGCATACAA  
AACCCACAGACGGTAGTGATGAATCTCCCAGAGGATATGTCAGTAGGATGGTTACAGCATG  
GCTCTGGAGAGTCTGGACGACGTTCCGCATCATCGCTGATGGACGGATTAATTCTATGGAC  
CCGCCGACTGGGCTGCAGATGAAGGGAAACAGCTAAGGCTGAATGTTGCTGATTTGTCGA  
CCGTTTCATCAGTTCTCGACGGATGTTTACTATCGTATACAAAGCGGCATTGACGGCGAGC  
GGGCTGGGCGTAAGGAGGGCTGCATGAGGCCACAGCGACAAAGTATCACAGACATCATCT

CCGAAAACCTGCATATAACTTCCAACGAAACGATCCGGAATTAACGCAAGCCAATCCCAA  
AAGAATCTGACGTCAAACCTTCAATTACACCGCTCACCCGTCGGATATCCGGTGGCTAA  
GATATCGCGCGACATAATGACAATGCTGTCAATGCAACCTGGATTTGGAGTTAAAATCAA  
AAAAGGCCTCATGTTTGTGCGACAAAGAGTCACAACGAAAAATGGCGTCTATCCGATCGCC  
CTTTATCAGTCTTTGTTGGCTCAACATGGAGGCAACAAATTATTGGTATACATGCGCCAG  
AGCCGCATTTAATGACCCAGACTGGTTTGTGAAAAACCACCGCGCGGTTTCGTTAGGCAA  
GAGAACGGCCAATATCACATACATGAAGGCTTAGCAAAAAGCATGGAAAGGACACCGCGA  
TCGATACCATCAAGACATGGGAAAGCTTAAATCAGAAAACATGGAACTAAGATGAAAGCT  
CGGTGACGCAATACGAAACATTGATGCCTACAATCGACGTGTAATGGTGACAGCAATGC  
TTAGCCCATCCTAATCCCTTCAATACCAGAAAGAAAGCGTCGAGAGGGCTTTAAGGTGCG  
CTAACAGCAGTCATAAGCTGCATGTGCTTGAAGTTCACATGTCTGGGTACTGCTGTGCTC  
AACTGAGGAGCGATCAGGATACCTCAATGTACGAGAAAGAACACGATGGACAAACCTGCG  
CGATGGAAATCCAATATATGCAAGGAGTGGTGTGACCCGCCATTCTCAAATTAGCGGTGG  
TACTGCCCGGAGCACGGAACCTCAGTTAGCACTCAAACCTAGAAAGTAAACAGCGAGAAAA  
GTGAAAACGCGCAGCAGCGGAGAAAGGCCGACGAGAGGGCCAGAAACAGAAAGATAGAATG  
GAGATTAGAAAACCTCGCCTTAAAGGCCCGCAGTTACTGGAATAAACAAGCCAAACTCGCC  
GGAAACGCCC GCATCAGAAACTGAGCCC GCGACTTACGATGTATCGGGTGCGGAACGCTA  
ATGTCTGCTCAGTGGGATGCCGGACATTACCGGACAACCTGCTGCGGGCGCCTCAATTCTGA  
TTTAATGAAGGCAACATTCACAAGCAGTGCGTGGAGTGAAACCAGCATAAAAGCGGAATT  
CTCATTCCCTATCGCGTCGAACTGATGAACCGAATCGGAAAGGAAGCTGTATACGAAATC  
GAAGCAAACCATAACCTCCACCACTGGACTATAGAAGAGTGCAGGGCCATCACGGCAAAG  
TAACAGCAGAAACTCAAAGACCTGCGGATCAGCAGAATTGATGCGGCATGACGTTCTCAG  
GAAAAACCATTCTGACATGCTCGTTGAGGCAAATGAAAAGCAGACCGAGGTACCCAGAA  
TACTGAACTTTAGTCGCAACTCTACCAGTAAATAAACGGGCGATAAAGAAGGAAAAAGAC  
TCGCTATGGCCATCGGTGTTCTTATAGTACATCGCGGATAGGGTAAAGCTACCGATGCGT  
GATATCCGGCAGGATCTTGAGTGCTGGGGGGTACGAGCGGCAAATAACCATGAGGCTGTG  
ACCTGGTCACCCATTGCCGCCGGATTTAAGGGACTGATCCCCGAAAAAGTAAAATCTCGC  
CCGCAGTGCTTTGACGATGATGAGATGGTGATATGCGGCTGTATAGCCCGCCTTTACCGG  
ACAATCGCGATCCGCATGTCTTGCTGGTTGATTATTACGTGCTGGGGAGGACGTTTCATG  
GCGCTGGCACCGAGGCATGGGTACTCTGACACCAAGATAGCTAAACGCCTTCACAAAGCG  
GAGGGGATCGTTGAAGGCCTGCTGATGATGCTGGGAGTGAGGCTTGACGTGGATCGGCAT  
GTTGAGTGTGAATAGCCGTGAGGGATAACCTCTGTATTTTGTGAGCGAAAAAATAGTTGA  
CGTTCGTAAAAGTCTGCATATCATGATAAGAGTGGTAACATTGCCACGCTGCTTCACCCC  
CCGATGCGCGGGATTTTTGGTAATCATAATCCTGTCAGCTAGTCGAAAAGTATACAGAAA  
GGTAGGTGCGACCACAATTATTACCACAATCTTAAAAATTGCACATGGCACTATTAGTTT  
TCTATATATTGTGTATTTTTGTATTGCAGGGTGATCGTGTAACGAATTTTCCGTAAAAG  
CATTTTGCTCCACGTGTTTGCCAGCCTCCCCCAATGGATGGCTTTTTTATGCCCGTAAAC  
TCCTGGGTATCAATAATTATTGTTGTCTACGTACGTCAATCCGTCGCATTTGATCTCACC  
TGATATGTGAAGGTTGCAGCGCTCCTTGAATAGAATTATCATTTTTATTACGTTACTGTT  
TCGTTAATCCGGAGCGCCGTAAAAGGCCGTCTTCAGCGGATGGAGGATGTCAAGAATAT  
AGGTATTGTATGGTTCTCAAGGAGTATTGTGTATCATGAAAATAATTATTTTGGAGAGTGC  
TCGATTTTTCTTTGTTATCTTTTCTGTTAATGTGGTTGCGAGGGAACTTACCTTAGACT  
TCTCGACCGCAAAGACGTATGTAGATTCGCTGTATGTCATTTCGCTCCGCAACAGGTACAC  
CATTACAGACTAGTACACCAGGAGATACGTCTTTACCGATGAAGGATAGTGGCTCAGGGG  
ATAATCTGTTTGCAGTCGGTGTGAGAGGATCAATCCAGAGGAAGGGCGATTTTATAATC  
AATAGCTTATTGTTGATCGAAATAATTTATATGTGGCAGGGTTTGTAAACAGGACTTATA  
ATGGTTTTTCTCGGTTTACTGATGTTTTACAGGTTAGCTTTCTAGGTACAACAGCGGTTA  
CAATGTCTGGTGACAGCAGCTATAACCACTTTACAGCGTGTTCAGGTATCAGGCGTACGG  
GGATACAGATAAATCGCCTTTCGTAGACAACCTCATATCTGGTTTTTATGTCAAATATTG  
GAACCTCACTGACGCATTCTGTGGCAAGAGCGATGTCTACGTCTGTTACTGTGACAGCTG  
AAGCTTTAGGTTTTTCGGCAAATACCGAGGGGATTTTCGTACGACACTGGAGGATCTCAGTG  
GGCGGTCTTATGGAATGACTGCTAAACATGTTGATCTTACAGGTAACCTGGCGAAGGTTGA  
GTAGTGTCTGCCTGATTTTGTGAGCAAGACTCTGTTTCGTGTAGGAAGACTTACTTTTG  
GAAGCATTAAATGCAATTCAGGGAAGCGTGGCATTAACTGAATCGTCATCATCAGGCAT  
CGCGAGTTGCCAGAATGGAGTCTGATGAGTTTCTTCTATGTGGCCGGCAGATGGAAGAG  
TCCGTGGCATAACGCACAATAATATCTTGTGGGATGCATACGCTCTGGGGGCAATTCTGA  
TGCGCATTACCAGTAGCAGGTGAGGAGGTTAAATGAAAAAACATTATTGATAGCTGCAT

CGCTTTCATTACTTTCAGCAAGTGCGCTAGCGGCACCTGATTGCGTCACTGGAAAGGTGG  
AGTATACAAAATATAATGCTGCCGATACCGTTACAGTCAACGTGGGTGATAAAGAATTAT  
ATACCAAAGATGGAATCTTCGGTCTCTGCTTCTCGGTGCGCAAATTACTGGGCTGACTG  
TAGCCATTAAGCTGATGCCTGTCATAATGGAGGGGGATTTAGCGAAGTTATTTTTCGTT  
GACTTACAATAGCTCAGTGAAAATAGCAGGGTGAGATTCAAAAATGTTAAATACATCTCA  
AGTCAGTCAGTTCTTGCCGGTCTGTTAATGGATGCCTTAGAGATTTTCTGCATGCGGAAT  
CCCCCTGTGCGGAGGGGCGACATGTGAACGGTAAGATCTCTTTGATGAGCGTAAGCGAAA  
ATACGCGGGTTTGGTGGCCCCGGGCGTGCTCGCCGGGAGGCACCCGGCACTTTGCAATG  
GCACAGAGCGCTACCCTCCAACCCCTCTCCGGAGGGGCTTTCTTTTTTACAGCAGAAGCC  
CGCACAGGGAGACGCTGCCGGGGACGAATAAACAACCAAACGTGAAGTAGTATTTACAGCT  
TGCGCCTAATATGCGACAGTAATCACTCTGCGCAATACCGCGGCCGATTTTCGTATTGCGA  
GATGTTGTCTATCTTCTCCCGTTCTCCTATAGCTTCCGCATTTACAGCACGCTCATCATTT  
TACACACAATATTATCCCGGCCGGGACGATTCATGGCATTGCCACACTACGATGCGGTCA  
GGGCGGCATCGCCGTCAGACCTTGCTGATGCCCTTGCGCAAAAAATCTGTCAAGGATGGC  
AACGATTCCGTGTGCCGTTGTCTTTCGTTTACGGATGATCGCGCGCCACTGATTCAGGCGA  
TTGTCACAGAAGGTGATGTGAGCACACCTGTTGTGGTGAAGCTGAGAGGTGGTTAAGCTG  
CAGTAACCAGCGCCACCAGGGACCCCGGGTATTACTTTGTTGTCGTTCTGCCAGGGCAGA  
CAAACGCCCTGTCTATGGTGCAGGTCTTCTGTTTCAGGAGACATACGACCGTCCGGACC  
CGCCATAAAGTAGTCGGCGCGTTCGACGTACGATGACACCGGACGGTGTGCGCTGTAAAT  
ATAACGACATCATTCCGGCGGACATTTTCTGCATGATATGCAGGACATTATCCGCCTTA  
GCCATCCGAAAGCGGACCTTTTAAAGGGGCAGTAAGGAACCGTGGGGACGGGGCTACATA  
TCGCCAAAAAATCGCAGCCGTTTATACCGGAGAATCCGGGCATTCTGTTGGTCCCGTACT  
GTCGGGGTGGTTAAGCGTTCACCACCGGGGGCGAGGGGCACATACAGTGCCGCGAGCGGTG  
CCTCGAAGAATTCAACCCGCTGAGGTGTGGACAAGCCGCTGTATAAGGACCTTATCGGTC  
TAACAAAAGCAGCAATCAAGAAGTATCCGGAATATGTTCTGATTCCAGTGGTGAGGACGC  
AGGGGGAATTTATTTGGGCGGTACGCCGGCAAATCACGCAGCATAAGTTGGTGAGGTGCG  
TTGATAAATTCCGTGTAGACCTGGCGGAAATGACAGGTGAGTGTGTCGTTTGCTCTCCTG  
AGGTTGTTCCCTGGATATGCGGGTACAGGACGTATTTCTGGAAGCAGAATAACGAATCCT  
CGTACCAGACGGTTTATGGCGGCTGCTAAAACAAAACGGAAAAGCATATCCATTTTCGTAC  
CGTCCATGACGGATCAGAATTGGGTGAATGTGCCGACGAACAAACCGGATGATGACCCGG  
ACATTCGGGGTATCGGCTATTGCGGTTTCGAAATGGCGTGACAGCTCAGCCACCTGGACGT  
CACAGGACAGGGCGACCCATTTACAGCGCCTAGGCAAGCCGTCGGATTATTTCCACCGTC  
TGGCAACGGCGATTTTTCGCCATTCCGGAAGATTGGCGCTAATCGCGGGGGGCATCATCGA  
CAGTATCAGAGGTGGGCCCGACATCGCCTTCCGGTGCAGAACCCACAGCCGTCACAACAC  
TGCTCTTTACCTTGGCAGCGAGACAGAGGGAAGCCTGAAAGTACAGGGATGGTCAGCAC  
GTGGCGGGAGGGGTCCAGTCGTCGGCTAGACGGAGGGATCCGGAGGTTAGGCAGGGAAGC  
TGACCAAGGAAGCCGGTAGAAGGAGCTGGGTGTTGGTGTACGCCGCGGGCAATGGTGCGG  
ATCTGTTCCAGATAGGGTGGCAGATTCGCTGCCAGTTTTAGCTTTCGGGAGTGCTAGCTG  
CGAACAGTATGTTTTGCCGTTTTACTGGGCCGTATCTTCGCTGGCACAGGGGGTTGCGC  
TGACCAGAGACGGGTCGAATAACCAGGTGGCTGCGTTCTACATCTAGACAGACGCGATAG  
AACTGAATGTGATGTACCACAATGCGAAAGTGGCGATAAACAACCTTGATACAGGGAACTT  
GTGGTGGATTTGCTAACGTATCGCATAACGGTTGCCCTTCCCCCTCGCCGGGAATAACAGCC  
TTCAGGTGACGCCGCTTGTGCGATGTTACAGGATGGCATTCCGTTCCCGCTGAAGCAGTCAC  
CGGTCAGTGGAATTACGGCGGATCAACCGCATGTGACAAACATAACCAAAGGTGCTACTT  
ACCCGGTGCTGATGGACAGCATTGCAGTGGAATTGTACAACACGGACACCCCGGCATGAT  
AAAAAAAACCGTCAGCGACAGGAATCCAAGCTGGCCGTGGTAATACCTATGGAGAAAAAA  
TAAACGAGCGATACATTCGTGGTATGTACTCTTAAATGAACACAGTTCTTAGTGTCAACC  
ATAACGGAAAGAAATTTTAAACATTTATGTACCAGTTAAAGCTGTACTTCTGTAGGGTGGT  
CTGTGGGCTTTATCTCCTATCAGGTGGGTACTCGGCCATGCGTGACTTGTGGCACAGACG  
GATTGCCAAAATGGCCGCTTAGAAAAGCAGTGCCAGTCACTCAGCCGTAACAAGCCCGA  
AGTGCCGCACATTTAGCGGCAACTTTCTTAATCACATCTTTTCGACGACAAAATCCCCTGT  
CAGGTATTACATCAGTGGTGACTGCTTAAGCACTGAAGGAAGACCTGGGCTCTGAAGGAG  
TCCGGAGTGCCCTGAAACAGATACTTCGGCAAAACCTGGAAACGCGTCTTGAAGCAGAGG  
TTGATGCCATTTCTGCAAGAGCTCCTGGCCGCACCCGGCAGCTCCGGAGCCGGAAGGCATCT  
CGGGTGAGGGGAGTACTTCGGAATGCGGTTACCCACACCCGGACAGCGACATGATGATGT  
GAGCATGCGTCATGGACCATCGGTGTGCGCCGTTGGTCTTTTTTCTGCTGTGTCCCTCC  
GGATTGCGAGAAAGGGGGTATGTACTAGATGGAAAAAATCAAACCGGTGTGGCGTACAC



CACGTAAGCGGAGGGAATGGGCTATTGGTTCCTGCAGTTGCTGGAGAGGGTTGCCCGTC  
TCAGTGGGCGACCATAGGCGTGCTGGGGATGCTGCTGTTTGGGATGCTGACATATCTGAC  
GAACCTGTATATAAAGATTA AATTAGACCGCCATATGGAGGTTCCGGGAGAGTTAGCTCA  
TGAGCAGGAACTCCGCTATGGTTTATCGCCTGCCGTTCTAGCGCTGATTGCCGCAGGTG  
CTTCTGCGCCTGCAATCCTTGACCAGTATCTGGATGAAAAACAAGGTGACCACAACACAG  
CATCCCGTGATAGTGCGGGTA ACTAGACCATCTGGCGTGGAGCGACCCGGGTGATTGGTA  
AGCGTGTTATTTCTGTAATGAAGCTCTCGAAGGATAAAAGCGACCCGGTTAACGCCATTG  
ACCGCGCTAAGGCGCTGGCATGGCTGGAGAAAAACATCAAAGTGCCGCTGACCGAATACC  
AGAAAGCGGGGATCGGGTCATTTTGGCCGTGCAACATTGGACCCGGTAAGTGTTCCCTT  
CCACGTTATACAGAGGAATTAAGGCAGGTGATTGCAATGGTGCATCCGAAGCCATTGCT  
GGTGGATTAAGGACGGTAGCAGAGACTGCCGCTTTCGTTCAAACAAATGTTACGGTCAGG  
TATCCCATCGTGACCAGCAGAGCGCGCCGGCGTGCCCGGATTTCGACAGATACGATGAAT  
ATTCTGCTGGGAAATGATGATTGTTTACAGGTACGGTTAACACGAAATGCCGCAAATCGG  
CAAATGTAAGTGCATAAAGTCAAACAGTTGTATAACACTTAGGCACCGTACCCAAGCC  
TTTGTCAATTATGCGTATCTCACGCGCATCTCCCAACACAGATCGTTTCAGGATGACCTT  
TCAGGATACCGGTTTAGCTGTGCGGTGCCTTTCTGTGGGCTGGATTCCAGTGGGACAACGT  
TCGTCACTACAAGGAAGTAACCGATGAATACGATGGCCATGCCGTTTCACGGCAACTCTC  
TTTATGTACTTAACCATAATGGCCAACCATAACATTCCATAAAAATTTCTCGTTGCGGGGA  
TGGGGGTAGCCTCGAAATCCAGGTGGGTAAAGTTAAGATTGCGTTTTGCGTCAACTATAA  
CGGAAATCGTTATGGCTGCTGAGGATGAGAAACAACGCCATAGGGTATCCATGCCACTTC  
GAAGACTTGCCAGCTGCCTACAAACCATAAATCCCAATAGAGTAAAACCCGAAATTCGCG  
AGAAGGTCATCCAGGATCAGGAAGAGTGCAACGATGGTCAATTACGCGTACTGGACGTAGG  
GTTTTGGCGTTACTCACCGTAAAATGAGCGTGATGGAAGAACTCAACCAGCATTGTGCGG  
GCATGAAACGGGATAAAAAGCATTGCCGGTGTGTTTGTGCGGGGCTGAATGAGTGGAAC  
AGGTACGTGCCTCGCATGTATCAAACCTCCTTACGCTGGTAGGTGAAGCCAATATGCTGA  
TTGATTTTGTCTGGGTGATACAGGCAAAGGGAAAATAAAAAAGGAGGATTAATGGGGTG  
GTCAATGATATCACATGAACTCATAACGCCGGTGAAGAGCCTCTATCTACTTGTCTGCAT  
ATCATACTTAGTCCTGCAGGTTGCCATTTTCTTTTCCACCGCCTGTCGAGTCCTGACGTT  
ATCGGGACTGGTGGGGTCAAACCGAGATGAACCGTGTTTCGGTGGGTGGCGATTCTTGTC  
TGGCGGTTGGCTATGGTGCCTATGGCTGGCAACAAGCCATTACGGTGACAACCTCGCTCA  
CCTATAAAGCTCAGGTGATACAAAAGCCAGACAGCTGGAACAGGCTAATGCCAGCGTTA  
CTGACATGAAGGTGCGCCAACGTGCTTTGGCTGCGCTCGATGAAAATTGATCGAGGGAGT  
TAGTCGATGCGAGTGCTGAAAATGATACTCTGCGCGCTGAAGTTGCCTCTGGTCTTAAGC  
GCCTGCGGATCAACGCAAACCTGCGCCGGTACCGTGCATGTAGCCACCCGCACCTCCCTCG  
TGGATAATGCAACCGGCCCGCCACGGGCAGAAAACGCTGAACGGGATTATTGGGTCCTCG  
GAGGGAGGCTCGTCACTATTCAAAAACCACTGGAAGGAACCGAGAAGTATATTAATGAGC  
TGTTTCAGATAGAGTTGCACATATCGATGGGCAATTCATGCAATTATTGTCAGCAATAGAC  
CCGCGCTTTCAGCGGAGTATAAATTACTATAGTAATAAAAACCGTGCAATCCATATAAGAT  
TATTTGCTGGGTTTTTGTCTTAACAACCTTGTTAGTGCCGCGACAATGTTTGGCTGTACC  
TACAGTTTTCTGCTGCCATTTCCAGAAACGCAGAACTGATGGGTGATGGTTGTCTATTG  
TGCAATTGCTGTCTGTTTCTTTTGAACAGTAAACGTCTGTTGAGCCCTTCGTGTAATAAG  
AAGGGCCAGCCAGTAGTGAGTCGCATTTTCTTCACGGCGATAATCACGATGCTCTTTGA  
AGTTCGCAGAATCGTATGTGTGGAATAAACAACCACTAAACAATGAGTTGAAATTTT  
ATATTGTTAATATTTATTAATGAAGGTGAGGTGCGATGAAAAGACATTGTTTCCCCGGGT  
TAACTATGTCCACAGCCCTGACGGGGCACTTCCCTGCGGGAGTGTACGGCGATAATCAAG  
ACCGATGCACACCGGGTTTTCTCACTTTTACAGAGATGGGAGCGAT

>NewGenomeName\_24

CAGTCGGTGAAGCTGCAGATATTATGAACTGTGTTTGTGACATCCTGTATTTGCAATACA  
AGGCAGATTATCCTGAACTCAGTGAAACTCAGATTGTGGATTTGATTAAAACCGAATTGA  
ATTTCCAACCTCAACTTAAAAGCTGAAAAATGGATGATGAAAGCATGTACCAAGTAATTTT  
TATCGAAATTGTCATAGTCGTCCTTATTGCGTGTACATGTCCATGTGGGATGACTATTG  
GAACGGTAAATGCAAAAACGAAATCACTGAAATTAACGCATGGCTCAAAAAGTATGATAT  
GACACTGTGGCCAAAAGACCGGAAAGCTGGTCCATTTCCAAAGTGGGTAAATTTGTTAGAT  
GACACTTTGAAAGACATCAAATAAGCCAATGCCAGGGTATCAGTTTCCGAAAATTGTAT  
AAAGCTCTAGCTGAAATTCGCAAAGACGATATTGCTAATCCTGATTTTCGATCAAACCTGGA  
AATTTGTTGTCTTTGCTTTACAGATCGCAAATGAAAGATGTTAAAAAAAATCCATTTGGG  
AGGACTAAATGTCAACTGCAGCTGTCATTGCGAGTATTGTGCTCATGTTTCGCAAAAACAC

AAAGTAGTGATATAATGGCAACTACTCTATCAATTCATTTTGAGGAATATTAATGTCTGA  
TGAATTCAAAGTTCTAACTCCTCGCGAACACGTAATTCTTGGCCCAAATATGTATGTAGG  
TTCTGTTCGCATATGAACCACATGAGCGATTCTTGTGGTAAGTATCAATCCGTTTCCTA  
TGTTCCGGGCTGGTAAAAATCAACGATGAAATCATCGATAACTCGGTTGACGAAGGTAT  
TCGTACCGATTTTAAATTTGCAAATAAGATTGATATTCGCTTTGATTTGCTTGAAGGTT  
TCTGACGGTAGCGGATAACGGCCGAGGTATTCTCAATCACTGGTAAACACTCCAGACGG  
AGAAATCCCTAAGCCTGTTGCTGCCTGGACACAACTATGGCAGGCTCAAACCTTGTATGA  
TACCAACCGCGTATCAATGGGGATGAATGGCGTAGGTTCTTCTCTGACAACTCCTGCTC  
CAAGACTTTTATCGGTGAAACGTGCGATGGCAAAAACCTTCTCACTGTCACCTGCTCTGA  
TGGTGCATCTCAAGTCAATTGGGAAACCAAGCCGGGTAATATCAAAGGAACGTCGGTATA  
TTGCATCCTTGATGAAAAGCAGTTTGAAGGAAAAACGAAGGATCCGCAGATAGTAGATAT  
CATTTAGATCGAATCACGGCATTGTCTGTGGTGTCCCGAAGATTAATTCACCATCAA  
CGGTGAAGTGGGTTCAATGAAGTTTGCAGCATAACGCTAAAATGGTTCGGTGATGAATCTCT  
CATTCTCGAAAATGATAATTTTAGCATCGCAATCTGCAATTCTCCTGAAGGATTCCGTC  
AGTCAGTTATGTCAATGGTTAGAATATCAAGAATGGTGGTCCCACATCGATTACTTGAT  
AGATGGCATTGGCGACGAACTTATTCCATCAATCAAACGAAAGTATAAAATTGAAATAAG  
CAAAGCTCGAATTAAGAATGCTTGACAATGATTGTGGTTGCTCGTGAATGAGTAATCT  
TCGGTTTGATTCTCAGACAAAGGAACGTTTGACCAATCCGCTTGGCGAAGTGAACCTACA  
CATTGAGCTGGATTTCAAAAAGTTAGGAAAGCAAATCATGAACAATGATGCTATCCTGAT  
GCCAATCATCGAGGCTGCTCTTGCTCGTCATCTGGCTTCAGAAAAAGCAGCATTGACGAA  
AGCCCAAAAAGCAGCAGCAAAAACCAAAGTCGCTAAGCATATAAAGGCCGGTTCCTGGGG  
TGACATTTCCAAAGAAACAACCTCTGTTCCCTGACAGAAGGTGATTTCGGCCATTGGTTATTT  
GTTGTGTGTTTCGTGACAGCGAGTTGCATGGTGGATATGCTCATCGAGGAAAGGTTATGAA  
CACTTGGGGAATGAAAGGTTCTGACGTGCTAAAGAACCGAGTATTGGCCGATATCTGTGC  
AATCATGGGTCTCGATTTAGCTAATCCGGAAGATGTCGAAAATCGCAAATACAAAATGT  
TGCAATCATGACCGACGCCGATCCAGATGGCCAAGGCTCAATTTACCCATGTCGACTGGC  
GTTCTTAGCCGTTTGCCAAAGTTGTATGATCTCGGTTGCGTACGATTTGTAAAACTCC  
GGTAGTCATTCTTTCTAAAGGAAAGCAGACCAAGTGGTTTTAAACCATAACTGAGTTTGA  
TGCGCAAAAGTAAAAGTACAAAGGTTGGGAACTTCGATATATCAAAGGATTGGGTTCACT  
TCGCGAACATGAATATCCGAAGTTGTTAATAACCCTCAGTATGATATCGTCGATCTTGG  
ACCCGATTGGGAAGAATTGTTTCGAAATGCTGCTTGGCGATGAAGCAGAAGTTCGAAAACA  
AGGGATGTCACAATGAAAAGGGCTCTTCGGAGCCCTTTGTTGTTTTTGAAAAACAGTGTA  
CAACGCTTAATGTGAATGGTATTATGGCTCCATCAAATCAACCAAGGAGTACATCATGAA  
ATTCGTTTCGAGTTAAATTCAAATCCCCGGAACATCGTAAAGCTTTTGCTAAATCTGCCTC  
GTACAAAGCCGAATTTGAGAAATTCATGCCAGACGAATTTTGGCTAGGTTTGACCCACA  
CAAAAATGTTCAATACCGTTTGGTTCGATTCTGATGGTGTGATGATCGAGCTGCCGGAATC  
AACTGGTGGTGGCGGAATCATTTTAGACGACGAAGAAGTTCATTATTTTCATGGAAATTAT  
TGAATAATTTACAAACAAAGCAGTTTACAATCGTGAGGCTATGGGATACTATAGCCTCAA  
GTTAAACGAACTAGCAAAAACATGGAGTAATTTAAAATCATCAACTTCACCGAAGCATT  
GGCAACGTTAAATCCCATGCGATGTTCTTCTCCCGGTATCTTGATACCTTTATCAGTGTT  
TACGGTGTGAAACTGATTCTCCGTCAGTCTTCATGTACAACAAAGGCACAAAGAAAGCA  
TAGCGTCTCGGCGGCAAGAAAGGTGCTTCATACATCGAATACGTTCAAATGAAATTGGCG  
ATAGGAGAATAAAATGAAAGCACGTTTCAAATCTGAAGAAGCACGTCAGCAGTTCATCGA  
CTACGGCGAAAAGCGTTGGGCTATTGGCCCTCTGGGCGACACAAATAACAACCGTCGCAT  
CGCTCGTCATTTAGGAATGAAAGAGTTCGATGTTGTCAAATCGATTTTCCATTTGCTGG  
CTGGTTCGACATCGTCATTGATGACATGGTGTTCGAGTCTATCGCTAGTGACGAAGTTG  
CTTCTTCGAGTTCATTGATTGATTAACCTGGCCGGGCAGCCGCCCGGCTTTTTTGTATCAA  
AACAGTTTGAGGCTTTGCCTCTTCGAGCGAAGCTCGAATTTATCCTTTTAGTTATAATAT  
CTATTAAGCCATAAAGGATAAAAATATCTAGTTCGACTGGGTGGAACCAGGTAAACCTGG  
CTGAACTCAATAGTTTAGTCAATAATACATTCACATAAGAATAAGGTATTATCCAGGTT  
AACCCAGTTAATCCAAAAATTATTTAACTTTAACTGTGTCATTGTAATGTTTACTGTGT  
TAGGATAACACCAGTAGAAAAACAAAGGAGGTCAATATGACCCTGCATGAAGAAATATCT  
GAAGCTCTGGTTCGAATTTGTTCGCATCAACGTACGATTCATGGGTGATGAAGAAACAGCC  
GATGAACTGAGCGACGAAGTTAACCCAATTATAGCTAATATCAAAGCTGGTATTGCAACC  
CGAAAGAACTCGGCCGGCTGTGTCATTTGGGTCTTGTGCACGAAGCTAATCTTTATGGT  
TCCGATTGGGGCAAAATGTTTCCAAAATGGAACACCGCATGAAAAGGAACATAGTTAT  
GCAAATCACCTTTAAATCCGAAGAACATCGCAAAGAATTTGCACGTATTGCCAAATGCAA

TGAATGGATTGCTCACACTCTCGGTATGGACACATGGGAATGCCGAGAAGAACCGGCAGA  
TGAATATGACAAAACCCAGTATTCGCTGTTCTTGACGGTTTCGGCGATCAGGTCGCCGG  
AGTGTTTGTGTATGACGGCGGTTCAGTGTGAAGATCATGCATGGATTTTCTGGGGTGAGCG  
CAAATATTTTCGATATTACTGAATAAAGGAAACACATAATGATTATCGATTCTAACGAACA  
AGGTGTGATGATTGGTAATGCACCTTCTAAACGGACCGGGTTTAAAATCCAGGCTGGGCG  
GAAGGCCCTTCCAAGTACTTTCTGAAAAGCTTTATAAAGACAAAGCTGAAGCAGTTTTACG  
TAAGCTCTCGTGCAACGCGGTTGATATCCATTGCGAACTTGGAAGGACATATTCGGTT  
CAACGTCACTCTCCCAACTTCAAGTTACCCATGGTTCGTAATCCGTGGTTTTGGAGCTGG  
GCTGACGCAAGAGCAAGTTGATGAAATTTTCACTGTCTATTTTGCTTCCACCAAGATGG  
TTCCGATGATTCAATCGGTGGTTTTCGGCCTTGGTTGCAAGTCTCGATTTGCATACAGCGA  
GTCGGGTGGCGGTTTCACTGTAAAAAGCTATCAAAATGGCCTGTGTACTGTCTACAACAT  
GTATATGGATAATGGAGAACCATTTGCTACACCGATGTGCGACTACTCCGACGCCCGAAGA  
AGATGGTCTCGAGATTCTCGTTCCTATCCCTGAGCACGAACATGCTCGCTGGGAAGTACT  
AGCTCGCAAAGTGTACCGGGCATTGATCGCTGCAAACCTTACATCACAAATATGGATGC  
AAGCAGCATTGAAGAATTTCCGAATCAAGATTCGTTCTTCAATACTGACGAATTCGCCCG  
TCCAGGAGAAGTGTATGCTGTAATCGGTGGAGTAGTGTACCCGATCCCTCAACGTCTCCT  
GGAATCCGATATGGTATTCGATATGCTGGTAAAGCTGCATATACCAAGTGCCCTATTGG  
CTCAGACGACATTGCTCCTTCTCGGGAAGAAGTGTGCTTGACCAAGAAGGCGAAGATTA  
CATTATTGGTCGACTTCGTGATTTTTCTGATAACTTTGCCGAATCGATAAAGAAGGAATT  
TGACGGAATAACCGATAAACGAAAAGCCGTAATTAAGCCAGTGGATACAACAACACTATGT  
TCGTCAAGCTATTTTAGATTTGACCATTGATGGCGAGCGAATTAACGATCTTATTGATCG  
ATATACGGATATGTCAAAGCTTAGTGACATTACCGTTTGCGTATATCGTGGCGGTAGTTT  
GCGCTAGCATATTACGCGTTCGGGATATTCGTGGAGAAGTTCCAATATAGATGCAAAAAGA  
AGTCTTTGGCATCAGTCGGGGTAAAGTGCATGTTCTCATCAATGATACAGGTGAAGGTAT  
TCCGAATATGGTTCGGGCGTATCATCCTCATATTGGTGATACCATTCCAGTCGTTGTGTC  
GAACAAAACCTCGCAAACCTAAAGAAGAGTGAGTACGCCCGATATGGACGAACCATGAAAGC  
TATTTGCGAAAAATTTAGCGTTGACGAACGCTCAATTCTCAAATTTAGCGAAATGAATGA  
TATTCGAAAAGCATTACCCATACATAAGCGCAAAACATCTACTTCTCGCGATGCTAAACC  
AAACGTTCAACGTCATTACATCAATGACTCCGACCTTCGTACGTTGAATTAATTTACAT  
GACATCCGATGAAATAAAAGCTCTTGAAGGAATTGCGGTTATTTTCGTATAGCGATACATT  
TGACAGAATTGCGCTTAAAGCTTCGCAGTATACAATGCGTAGTGCCCTAGCAAATTTGAT  
AGAGCTTGAGCAACCGAAGTTTACGTCATCGATAATGGAAAGCGTTCTGCCCGCTGTGA  
AGGCTCCTGGTTTGAATGCGGTTTTAAGTGGGCATATGACCAGTACAAAGTGTGCAAG  
ATGCTTTTGTATTTCTTAGTGCCGAGTGCCCTAATATCGGAGACTATGAAGAAGCAATTC  
GTCTTAAGCAAATGGGCATTCTTGAATTGATATAACCGAAAAGTTTACTAAAACAATG  
ATGATTTCTGAATGATGCATCCCAATGGGTTGAAATCGGAAATCCCGATTATGCCGATT  
TTGCTGAAATCAAAGAATATGTTGATGAACAGAATATCAAGTATTACGAAATGTTCTATG  
ATCATAGGGAGTCATTGAAAATTAACACCCGCTATTGTTTGCAGTTGCCGTTAGTGGTA  
TATAATTAAGTCTGAAATCATGAAAGATATCGAAATTTCTCCGGGCTCAGTAAGAGCCCT  
TAAAACAAAGAGGTATGATATGGCTAAGGTTAAAATTTGTTAAGTGTTTTGATAATGAAAC  
CAAGCAACAGATTTTTGACAAATATTCTCTTGGGAATGTGTCTCAAGCTTATTTGGCAAG  
TGAATACTGCGTATCGTTAGATACAATTGCTCGGGCGCTGAAAGAAGTCCGAAATTGGGA  
TATCTCTGCTGCAACGTCAGAGGATTCACCTGCCGAGGAAGAAATTGCTGATAAGCTGGA  
ATGTACCTGGATGGCCAATTCCAAGTTCCTTTCTGTGACCATCGGCGCCGAAACTTATAA  
CGCTTCTGGCGATCACCCACAGTTCATGGAAATCATCAGTCTTCTGCGCAAGAAAAATA  
CGATGAAGCAATGGAAATGTTGAATATCAAGCGTGGTCTTGCAGGATATGTCTCTGGCGA  
TCTGGTTATCGAAGGCGGCACACTGAAATGCAAAGATCTGATCATTGATTCTGGTCTTAC  
TCGTGCGATCGTCGAAAGATGCAAAACGGCGAACCTTTTCGAGCCGCTCGTTGCATTCTT  
TGAAAATCTGATGGCTAACCCGAGTCGTGAGCCGTATATCAGCTGTACGACTTCTGGA  
ACACAACGACATTGAAATCACCGATGATGGTTATTTCAATTGCTTGAAGCGTGTAACAG  
CAATTTCAAAGACATGGACACTGGCAAATTCGATAACTCTCCTGGAACAGTGGTTAAGGT  
TAATCGCTTCCAGATTGACGAAAACCCTAACGTTACCTGCTCTCACGGTCTTACGTTGC  
TGCCAAGTCTTATATCCCTCATTATGGTGGTGGTTCTGGAAAAGTGATTGCATGCAAGGT  
CAACCCAGCAGATGTCGTCGCTATTCCAACCGACTACAACAATGCCAAAATGCGTTGTGC  
CGGGTATGAAGTTCTTTACGAAGTAACTTCCGACTTCAAAGAAATGAAGCACTACTAATT  
TTCATAAGCCCTCTTCGGAGGGCTTGTGTTGTAAGGGGTTGTATGAGCTCACCATTTAGCA  
TTATATTTTACAAAGACGATGACAGTGTGGTTTCGGGTTATGGAAATCATAGTTGGATTT

CGCCGAATGACTTACAGTAAGCGAAGAACAATAATTGCAATTGTTGAAGGAACATCTTGGC  
AGTTAGGACCATTTCGAAAAAGAATGGACTCATTTCATTGCTGCTGGCCGAGTGTTTTATG  
CTCAAGATTACGAGAAAATGAAACAAATCATTCTCTTATAGAAAGCTTTGATTTATCCG  
ATTTTTTCATTGTCATATTCTGAAATTGTGAGGAAATTGTAATGACGGTACCGATGAACGT  
ATCCCATGACGAATTTATCGCCCTTCGTCATATCCAGCCGTTTGACGCGGATATTATTCG  
TCTTCAGATCTGCGACCAACTCAAAAAGCATCCTGACACGAGGGATGAGCTTTTTGAAAA  
ACGGTAAAGGAGATATGATGATACCATCCAATACGCTCTCGATGAAGCGGCTGGGAATGA  
TATTCCTCGGCAAGAGGTCATTGATAGAACGGTTCGTTCACTGAATGCCGAAATGGGTGT  
CGCATATATCCTGGGTGGTGTCTGGGGGGTGTGTTGACTGGTTAGACAATGACAATATCTC  
CTTTGATGTGCCAACACCTGGGTTC AATCTGAAAATAAAGACTTCTTTTGCGAAATGGCC  
AACAAATGCATACCGCTGGTGCTAAACCGTATGGCAAATCAGAAGGGCTGTGCTTGTACGC  
TGGTTTGCGCGGAGATGCTGATGTTTACTTGGTATTGAACATCAATGAATCTGCTGGCCG  
TATCACATATAGGCCGAAATACTTCTTAACAAAGCGAGCTATGGAAAATTATCCGTATGT  
GATCTACGTTCCCAAGCGCGGCGGTGGAGCATAATCAATAGACAGCAGAACAATTTGT  
TTATTTTTATAACAAGTGGTGTACACTCTGATTGTGCGTGATAAAAATGCTCCTATCAACA  
ACACTGGAGCATTGTCATCTAGGAAATGAAAATGAGA ACTCACGATTTTCTGAAAAGAC  
GCGCCAGGCCAGGCTGTGCCGAGCAAAAAGAACGAGCTGATAGCTGAGTACAGAATGCTTT  
GCTCAATGATCGATCATCACATCATCATGTGCTATGACCGCGAGGACTCACCTGAGCTCA  
TTCAAGCCAAGAAAGACCGCGATGCAATCGAAAACTCCTAATGGAGATTACTAAATGAA  
AACTAATACACATCACGTCACAGCTATTGATGCCCCGTGTGTTGGCACTTTTGA ACTTGA  
ACCGGCAAACTTGCGGATTCAAAGTACACTTTCGAAGAAGTGATGCATAGAATCGGTTA  
TACGATGGTTGATTCGTTAGCAACGCTTGAAAGCTCCCTCGAAGGTATTGAAGCACTTGT  
TTATGAAAACATGATCACCTTCCCCTGCTGGGTAAAACGGGTTGGGAATCACTTCGATGA  
AATGTATGACGTGAACTGGGTTTTCTTTGATTTTGTTCCTTCTGAATAAAAACAAGTT  
TACAACTCGTGGCTATAGGTTACTATAGCCTCAAGTTAAACAAATAGATAAACACGGAG  
TATTTTTATGATCAACTATACTTCAAATGCGAACTTCTACCGAAGCCTTCAATTATGT  
TGTCGGCACCAAGCGTGGTAAAGCCTGGGCAAATAAACTCTTCGCGAGTATCTGGATGA  
AACTGGCGATAAGGATGCCACTATCACCTCATGAAAGAAGAAAACTGTAAATGGAGTA  
AGTTATGAAAGGCCCTAAAACATTCGACAGCCAATTCAGGCCTCGCGGCGGTTTTGCGCA  
AGACATCAGCAACGGCGAAATCAAGAACGAGCCAATGTTTTTCAACTCAGACTTGGAATT  
CGCGTACGAGAACGGCGGCCCTATCACTCGCAGTTTTATCGAGAATCTCCCGCTCGATTG  
GAAAAGCATTGTGATTTTCGATTCGCGTGTTCACATGCTTATGCCTGGGTGGTACCCAGC  
GATTCCCGGATATCACCATGATGACGTGCCGCGCCCGCCGATTCCGGTAGGCCAGCACTT  
TGCAACTGCAGGACAGCCAGACTATGACAATCCTCGTTATCTGTCTCGCCATATCATTGG  
TTTGGTTAACGGCGATATCTGTCCTAGTCATTTTCCAGTAGGACGATGGGAATTCAGCCA  
AATTCCTGATGGTGA ACTTATCTATCGGCAATGGCAACAGGAAGTCATGGCTAACTCGA  
AACTGGCGAGTTAAGTAAGCATATTGCTCCTGATCGAACTCTTGTAGAGTTTACTGGCA  
AACCTGGCACACTGGGTCAAAGCGGTTAGAAACGGCTGGCGTTGGTTTGGTTCGAGTTTC  
TCGCGACACTGATCGAGTTCTGACACCGTCAATGAAATTCGACGTCAAGTTCAAGTTTA  
CATGGAATTCCCGATGGAGGGTTGGTGTGTTAAGTATCGTTTTTGTAGTGAAGAGCAA  
TTCAACGCATGGGCCAAGCAAAATTATGCACAGGAATTCGCATTTGCTTTTGATTCATGG  
GATACAATCTTCGAAATGGAAGACATCGGGCGTAAAGTTTGCTCTGACACTACCAAAATC  
GACGGCGAAATTTACATGAGTACTCAATGGTACCCATTCAATATAACAGACCGTGGCAAT  
CGCATCATCGAGGTGAAAGAATGAAACTCTACTTCTTGCAGCACATTGAAATCAAATAGC  
TGGCATGACTTCTGCGAATTTGAAATCGGAAGTTATGGTGCAAAAAGATTATCACGTTGTT  
TGCTTAACAGCTGTGTTAGTTTAAAATACAAGTCAACCAATTGAATAGAGAAAAATATCA  
TGAAAATAATCTTACTGCTCAACGTATTGTAGTTACTGGTGCCCAACGTGTTGGTGCTT  
TTGAATTTGACGCAGGAAAATTCCTGGATGTGAAATTCATTTTTCGCGCCTGGCAAAAATC  
GTGAAAGCATTAGCAAGCCCGGCATTTATGTTATCGCTAAAGATCGTGTTGCTGTAGCTC  
GTA CTTTTGCTGGCCAACAAGAAAAGAGTGTGGTTTTAACGAGACTATTTTCGCGAGTAA  
TTAGCTGCTGTTGGAAATATACTGACGGTCTCCGCGGAAGATTTACCGCTAAGTCACAG  
GTCAAAAACAAGACACATACGGTTTACCATATCCCGATGTCCTTGGTGCCAAGACTGTTGA  
ATATGCAACA ACTTGAGCTGTTTGAAGATAACACCACCAAATTTTCAGTCGCTCACTGCTG  
TTTCGCGTCAACTGTTTAAAGGTATATAATTCGAATACCAAAAACGATAAGGAATACCCA  
TGGCATTTAGTTTAGATGATTTTTTTGATCAAGAGCCGATTTTGCCGGTTCCAAAACCGG  
CATCTAATCCCGAAACTACGCCTTGAATGAAAGCAAAGATGATGAATTGTTTCTCCGG  
CAGGAATTACCATCAACCAGGTCACCGATGAAACGGTAATCGAAACTGAAGTACTCGATT

CTTCGGTTGTTAAAGAAGTCGATGAAACTGAAGTACTTGAAGACCAAATTCGGCAATGCC  
AATCTGAAATTGATTCAGATATTCCGGAATGGAAGAAAGCCGTATTGCAAAGTCATTTAA  
CTAATCTGCATAATCGACATCTGCAATCGATCATCAACAATGAAGCTCTTGAATTTGCGA  
TGTATACACTTGAAGAACGTGCAATCCCATCTATCATCGATGGCTTTAAACCGGTTCAAC  
GCTTTTTTCATGTATCGCGCATTGGAATATGCGAATCAAAATAAGACCAGGTTTAAACAAAG  
TTGCAGCGCTTGCAGGCGGTGTTTCTGAGGCAGCTTATCACCATGGCGAAGGTTCTGCCG  
CAAGTGCTGGACAACCTTATTGCAAATACATGGAACAACAACATTCCAGTATTGGAAGGAG  
ACGGAAACCTTGGTTCTCGTCTTGTTCACAACAAGCAGCTGCACCACGAAATGTGTTTTGTC  
GTGTCCATCAGAATTTCTGGGACATCTATAAAGACATTTCTCTTTCTCCGGTGCATCCAG  
ACCCTGAGCATTGCGCGCCGCTTTTTATCTGCCTGTTATTCTATGGTTCTCGCGAATG  
GCGTAAAAGGTATTGCCACTGGCTATGCTACTACAATTTTCCCGCATTCTTACGAGAGTC  
TAGTGAAGTGCACACTGGCTGCAGTAAAAGGCGAAGAAATCCCCGAGCCGGAAGTGCAGT  
TCCCATGCTTTAAAGGTATTGTTTCGTCGAATCAATTCAAAATCTATCGAGATCGAAGGTC  
TATTTGAGCTAGTTGGACAAACCAAACCTCATTATTACCGAAGTTCAGTTCGATATGATC  
GTCTTGAGCACGTCAGTATTCTCGACAAGCTCGAAGAACAGGGAAAAATCGTAGGTTACA  
AGGAACAAACAAGTGATGGAATCCGGTTTGAAGTAACTCTCAAACGTCAGGATAAACTTG  
GCGAATTGATGTAAAAAAATCCGGAAGTTGCACATGAGCGTATCATCATAATGTTCAACC  
TTCGCCAAAATCTTTCGCAAAACATCACCGTTCTCGGCGAGAATGGAAAATTGGCAGAGT  
ATCAATGTGGCGCCGATCTGATTCGAGACTTTGTGGAGTATCGCAAAAAATACACCAATC  
AGCGTGTTATCTTCGAAAAAGAAAAGGCAGAAATTCGCGTGATTTGGCTTGGGCCAAAT  
TTGCCTTTGTTAATGAAGTGATTGAAGCAAAAATTGTTCTTCGTGGAAAATCAAAAGCGC  
AACTTATTGCCGAAGTAAAGTCCAAGCCGAATATGGCAGGATTTGAAAACGAGCTAGTTG  
GCATGAGCATTACCGTCTAACTGAAGACGAAACTCATAAACTTCAGGAAGAAGCTCCGA  
AACAGACCAAAGAATACGACTACTGGTCGAGCACTACTCCAGAAAACGAATATGTTAAAG  
ACCTCGAAACTTTAACAAAATAAAAAACAAAGGCCTTTCGGAGGCCTTTGTTGTTTCTAG  
ACAAAAGTGTGTACAAATGCTTTAGATTGTATAGAATAGCCTCAAGTTAAACTAACTGTC  
ATGGAGCATATTATGATTTCAACAAGCGCTGAAAAACAAAATCAGCAGGTATTATGAGGAA  
CGCGTACAGTGGATGCGCGAAAATCATATCGTTGACGTTACAACCTCAACTTATACTCTC  
AAGTTTATAAATCACAAGGCTTATGTTGGTCAATGTCATTACTCTAACCGTGAAAACAGT  
ATTCAGAAAAACAAAATCAATATGCAACATGGGAGTCCATTAAGACACAATCAACCAT  
GTGCTGGCTCACTGGGCAACCATAGGTCATGGCCACGATGAAGCATGGCAGCAAATGGCC  
GTTTCGTCTTGGAGCAACTCCTGCGAAAACCTGCAACCCTTGGCCATCTGCAAAAACCGTAT  
GTCAAAATGTGCAAAGGCAAAGTTGTAGGATATTCTGAGGTATTGCGAGTTGGTTCAGAC  
GCTGCCACACGATACATCAAAGGAAAAAAGAAACAAACTCTTGGATTTTTGGAGTATAAG  
GTAAATCCAGAATTCATCGATAACTCCCCTGGAGCGAACCAAGTGTCGAAATGCCAACA  
CGAATCAAAAAGACAAACAGCATTATCGCCGATTTTCTCAGCGATCTTTGAGGAAAAGAA  
TGAAATTTTCAAAATAATGCAAAAACCTAGTGTACTCCGTTTGGTATGGTGATACTCTAGC  
ATCATACCAAACAAATTGATTAAAAACAACGGAGTATATCAAATGTTCAAAATCACCAA  
ATCCAAGTAATGCAGATCAACCTCATGAAGAAAGCTGTTGAAAATTTCCAAGGTTTTGAA  
ATCAACGCAGTAATCATGAATCCGCTCAACAAAATGATGATCAACGAAGTTCTCGATAAG  
CGTGAAATGAATCGCTGCGAACAGTTCTTCAACGACATTATTCAAGACGATCTGATGTGG  
CAAATGCTGATTGCGCTAAACTCGCAAGATCCATGAAGCGTAAACTTGCTGCAGCGATG  
AAAAAAGCTTAAGTTATTTCAACAAGCGGTTTACAACGCTAAACCGCTTGATTAATA  
GCTACAAGTTAAACAAACTACCACAAAGCAAACGGAGTATTTAAAATGACCATGACCAA  
ATCGAAGCTATCGCAAAAGTTCTGAACAACCTCCAGCATCTCTGAAAACGCTACTTCTGTC  
TTCATTCAAGTTGCAAAGAAAGCTTTCGTTACTGCTGTTGAAATTGCGGAAGCCACTAAA  
ATGAACAAAACGCAGTTTACTCCAATATCGGCGTGATGATGAAAAAGGGTTTGATCGAA  
AAATCTGGCGACGGCTACGTAACCACCGAAAGTGGTGATGCCATTCTCATCGAAGCTGCC  
GAAATGTGGAAAGCTGCCCAACCTGAAGTTGAAGCACCTAAAGTAGAAAAGAAAAAGGA  
ACTCGTAAAGCTCGCGAAATCACAGTCGAAATGACTAAAAATATCGAGCTCGTCGAGCGG  
CTGCTGGCTAACCTCGGGATCGAGCACAAGCAAGCAGTCATCAATCGCCAAAACCTACGAA  
ATCACTCTGAACAAACGCCACGCTGATGGATACCGCAAATTCGAAATTCTCAACCGCGGA  
ATCTTCCGTATCGTTGGTTACAAAGTATCTGAAGAAATCATCAACAACCTTCAAACTTTG  
GGTTGTGAAATCAAGCAAGGTCCGGCAAACCTGCTACATCGACATCACCGCGAATGAAAAC  
AACATCGTTCGTCTGATGGAAGAAATCAAGCCGCTAACTAATGCGACTAAATACTAGCG  
ACTAAGAAAACCTATCAGCCATCGCATGTTATAATGTGATGGTTGATTTCAATTTGAGGAAA  
AATATGAAAATTTTAATTGTTGGTGCTGGTTTACTGGAGCAATTATTGCGCGTTGTCTC

GCTGAACAAGGGCATGACATCACAGTCATTGACAAACGGAAACACATCGGCGGAAACTGC  
TATGACGAAGTTCGAATTGGTACACTAGTACGTAAGTACGGACCACATCTTTTGCATCAT  
AGCGACTTGGGTGTGCACAATTCCTTTACGCTGGACTTCCTGGATTCCCTATGAGCAC  
AAGGTAAGTTCGAATATAGAGATACATTAATCTCTTTCCCGTGAATCTGAAAACACTC  
CAAGAGCTCTATGGTATTGAAACGGAGCAAGAGGCCATCAAGTATTTTGAAAAGGTTCTGA  
GACACGAAATCTCCACCAACTGTGATGAACTTTTCGATCATTCCGTAGGAAAAGACCTT  
GCCGATAATTTCTTTAGACCATAACACGAAGAAAATGTGGGGCACTGATCCTAAAAACATT  
GAGTGTGCGGTTGGCGCAAGGATTCCCGTGAGCACCTCTGATGATGACCGATATTTTAGT  
GATAAGTACCAATATATGCCCGAAGGCGGTTACACTAAGATGTTTGAAAGAATGCTTGAC  
CATGAACGAATTGAGGTCAAATTCGCACGCCATTTCGAAAATGAAATGGAAGCTCACTAT  
GACTTCATTTTCAACTCGATGCCTATCGATGCGTACTATGACTTCAAATTTGGCAAATTG  
CCGTACCGTTCTTTGCGCATGGAAGTAAAAGAAGAGAAGCATGATAATGGAATTATTACC  
GTGAATAACTCTGCTTCTGAAGAAGATCATAACCCGTTACACCGTTTGGAAGAATATTCCC  
GGCCATGGCGATGGTGACATGGTGACTTACGAGTACCCGTGCGACTACGATGGCACAAC  
GAGCCGATTATCCAGTGACTCACAGAAAAGAAGTCTATGCTAAGTATGCCGAGCTTGCA  
AAGAGTGATAAAATGATGTTTATCGGCCGTATGGGTGCATATCAGTATATCGATAGGTGG  
AAAGCAGTTCGCACTGGCCTCGATATCTTTTCAGATTTCAAAGCATAACTCATAGCCGGC  
CGTTGGCCGGCTTTTCAAAGGAGATAAAATGAAAATTCTTGTAAGTGGCACTAATAACT  
ATCATGCTCGCCCCAACTGGCATCTGGAAAACGTTCTCGCTATCGTCTCGTGACTGCGA  
CTACCGGTCTCGTCGAAGCTCTCAAAGATATGGGCCACGATGTTGATCAACGCTTCGTTA  
CCCAGGCGAAGACCTGAGTGGCTACGACAAAGTCTTCACTGCTTATTTGATTTCTACTG  
GCGGTATGCAACCAGGTGGTTATTGCGTTTACTGGCTTCTGGCAAATCGTCCCAGCGCA  
TTATTGTCATTGATGACTGGCACACTCCCGAACGTTTGATGAAAGGCTTCAAAAAGTCTG  
CCACTCGCACCCGTGAACAATTTGAAGAAGTCTGTTCCGCGAATTTATGCTGAACGACC  
AGCACAAAGAAGCTACTGATGCAATCACTGCTGATCCTTCGTTGAAAGAAGATATCGTCC  
GCGGTTATGCTAAGAACGTCTTCGATTCTCACCGAATTCTGCATTGCGCATTTCGACAAAT  
TCGAAGTTTCCAAGATTTTCGATTATCCACATGAATCTTATTCGTTCTGTCCCGAATCCT  
ATGTTCTAGCCCAGATGATCGGCTGCGCGAAATGGGTCTGGCACGTCAAGATATTTTGC  
GCGAACGTAAATGGATTATCGCCGGTATCGGTGGTCTTCCTACAAAGAAGCATGTAAGT  
TCATAGACAACCTTCACTTGGGATGTAGAAGTATTTGGTTCGTGCAACTATCGACGTTGATG  
CCAAACTTGCAAAAAGAGCCCAGTAATTCAAGCCTACTCGGGTGCCCGCGCTGTTTTCT  
ACCCAGACCAAAAACAACCTTCGGCTCCAACCTGGTGTGCAATCGACCACGCCAATGCGCTG  
ATTTGGGTGCTGTTCTCTTTATGATGTCTGATCAAGAAGCTTCATTGTTTGGCCCATCTT  
ATATGGGGCTTTTCGATCGAGAAGTTAGAAGCCATGACTGACGAAGAGCTCGATGATCTTG  
CTGCTCGTCAGAAGGCCGATTATTACAAGTCAAATCCTCTGGACAAAGAAAAAGTTAAAT  
CTTGTCTTGATTTGATTATGGCGTGATGAGTTTTACCAAAGCGGCTTCGGCCGCTTTTTTC  
GGGAATTTTATGAAGCAAATTATCGTAAGGCTGTTTACGCCGATTTACGCAACTAGAAA  
TCACACAAAATGGCATGGGCACGAGTGTGGCAAGCTGCTATCGAACACCACACTGGGTTT  
CCATGTGAGTTGATCCATGAGGCTAAACCATGGTCAGAATATGATCGGGTCTATGTCTAT  
TTCAATCTCGAGCCGTATGACAGATTGAGTTAGTTTGGCGGTCTCAGCCACAATACGCT  
GAGTTTATTAATGTGCTGAAGGATTCACCGGTGAAGTTGTTGCATTAGACAAACCTTTG  
GCCCGTTTTGGTGAATTCTGCAAAGCACGTTGTTTCAACGAACATGGTGAACCCAACATG  
AAAGTTCGAGCTATGGAGAGGAATTGATTGGGATTCCATTCAAGCGCAATTTGACAAA  
GCCACCTGTTTAAACGATGGCTTCTTTGCCGCTTGAAGATGTTACACTCGGTGATTCTCAC  
AGTATTTCAAGTGTGGCAGCCAGGCTATACGGCTTATCGCTGCGACGCGCAAACATTACGT  
GGAGCTTTGAAAAGGGGATTGTCAAGTATCCTTCTGATAAAGTTCGGAATTTGACAATT  
TATTTTGAAAACATCGACGTTCCGGTATCATTTCGGTTTACACAATAACCCGATTTCCGGAT  
GTAAGTAAAAGCTCGACGAGTATGAAAACAACACTAGTCGGACTAAAGGAGTCTGGACAA  
TTTACCGGAGAAATCGAACTTGTGCACCTGCTTCCGATCGAAGATGAGTCAAGAAAAATC  
CCAACAACAAGATGCTTAAACGAAAATCGGTTAACGGCAGTTGGGCTTAAAGAAATTCA  
TGGATGAGCATTCTTATAATGGATTATCGGAAATAGCATTCAAACACGGTTTCAAGGTT  
CATACTTGGCCAAACAGTTGGTATGTTGAAACGTATAAAGACCCAAAATCATTCTTTACT  
CGCTTGGAAAGCCATGAAAGTTTTGCATCTTGCTTACCATTCTATCGGTATGAAGGGTTT  
AAAGATAGCAACACTCTAGAGTTGTTTGACATCTAAAGGCCTTCGGGCCTTTTTTGGGAT  
AAAAGTGTGTACATGTGTTTTATGCTTGATATTATGGCATTGCTTGATAAAGGAGAATT  
GAAAATGTCAAACGACCAACATGTTAAAGCGACAATTAACGGCTCGAGTACAAAAGTGC  
GCTGTATCGCTGCTGCCATGGGGCTAAAGTTTCCGGGAACCGAAATTTGTGAATTTAT

CAGTCTTGAAGTATAACAACGACTGGCTGAATCGTGAAGATGACGATGGCCTAATGAAATA  
TGACGGCAAATTCGATCCGACCCACCCGTTTCGTCGTAACAGTCAAGCAGGCTGGTTCTCG  
GAAAATCTATGTTGAGATCATCGGCTAAGAAAGTCAACCTTTGGTAGATTGCGAGTACTA  
TGCCTTTGTTCTGAAGATTCAGACTCATTGCAAAAAGTATAAGGACACAGTAGGCTTCA  
GAAAATGCGATAAAGAGTGAAAATAAATGTGTACTACAATGAGGCTATTGATACTATAG  
CCTCATCAAATAAACGAATACACAAACACGGAGTATATAAAATGCAAGTAACCATCAAAA  
ACGGTCTTTACTTTGGTAATGTTGTTAACGGTACTTTTGGAACTAACGGAAACACCTGGT  
GGGATGCCAGCGAGAACGATCCCCGCGAAGGTAAAGTTAACGCCGTTCTGAAAGGCAAAT  
CTCGGATGGTTTGGGTAAATCGCAATGACATTGTGATTACCGAAAGTTTTGATGGTGTTG  
CTCAAACCTGATGTCGCTGAAGAACTGTTGACGAAATGCGTTCTCGAGTCGCAAAACGCT  
CCGATGTAATGGACAAAATGACCTTAGGACTTGTAAAGGCAGCATTTCGTTCTCTGATTA  
TCTCTGGTGCTCCTGGAATCGGCAAGACCTTCAGCTTGGAGAAAAAGCTGAAACATGCTG  
ATGGAATTGGCGACATCTCTTTCTCTTCCATCAAAGGAAAGTGCTCTCCCATCGGCCTCT  
ACATCCACCTCTGGGAAAACCGTGATGAAGACTGTGTTGTGCTGCTGGATGACGTCGATG  
TGTTCTCCAACGAAGACACTCTCAACGTAAGTAAACCTGCTCTTGACACTGGCGAAGAAC  
GCATTATGACATGGGGTACTGCCAGCAACTACTTGGCAGAACGCGATATCCCCAACAACT  
TCGAGTTCAAAGGTTCCATCGTCTTCATCACTAACGCAGATATCGACGCTGAAATCGATC  
GTGGCACTAAACTTGCACCGCACCTCGATGCTCTGCAGTCTCGCTCCATCTACCTAGACC  
TTGGGGTTCACACTAGCCGCGAAATCATGGTTCGAGTGGAATACGTAATCACTAAAACCTG  
ATATGCTGCAAAAACGCGGACTGTCTGAAGCACAATTGTAAATGCGTTGGAATGGATGA  
AAGAGAACGTGGACCGCCTCCGCTCTGTATCTCTGCGAACTGCCCTCTACCTCGGCGATT  
TCATCAACACTGATAGTGATTGGGCCGATGTTGCTGAAGTTACACTCCTGAAGTAATACG  
GATGAGCTGGAGGAATTCCTCCAGCTCCTTAATATTGTTATTGATCTTTGTAAAAACAAT  
CAAGCTGGTTCACACTGGTTAACCCAAATGGAGAAATGAAATGAATCCGAAAAAATGGTC  
TTATCATGAAATATTTTGGGAGTGCAGAAGCAAAGCCCCAAATTCCTAGGGTTGAAGGTA  
TTCGAGCAAATGCTCTTGAATTTTCAAGCAACTCGAAGATCGAATCGCTGCTGATTCCG  
AGACTCTTGACCAAATTGCCACTCGCCGGCAAAACGAACCGCAACCGCATGAACTTGCCA  
TCAAGAATTTGATGGAACGTCATTCGGCCATAGTGAACAATTTGTCTGCTGAGCAAACCTC  
AAGTGAGTGACTCCATCAAACTGCTCAAGTTATGAAGGCTAATATTGCTCAAATTTGCT  
AATAACCAGAGGGCTCCTGAGGAGCCCTCGTTTTTTGGAATCAATATGCAATACAGTTAT  
GGCAAATCACGTTTTTGGTATTTGCTCTATTATTCATTATGTGGCTTTTTGTATAAAGCT  
CGACATTTTCATATTGGATATTTTGGATGCTGTTTGTGGCACGTTTGATTAGGAGAGATTT  
TGAATCCAGTTGCTAAACATGACTTCAACAAAGGTGGAGCTCATGTAGACAAGAAACGAC  
GCTTAAATGAAAAGCGCAAACATAAAGAGGTGTACAATGATGGAACATAATTATT  
GATGTTTGGAAAATTGTAAGCGTCGCAATCGGCGCATTATCATCATGCGATTGATCGTA  
ATTGCTTTAGCTAGCAAAGGCTTTATTTCTGCAAGCGACCAAATCAACGAAATTTTAGAC  
AAATGGCCAAGTTTGAATCTTCGGGTCAAGAGTTGTTTGGTAATTACAGCATTGTTGTC  
ACCCTTTTGGTCATTGCTCTCCTTCTTGTTTTGTATCTCTGTTTTGGCCAATTCTGTTG  
CTGTATATTATCGCAAAATAAAAAGGTATGTACTTTTTGAAAAGATTTTTGTAGAATGTA  
ACATATCAAATTTTGGCGTATTGATAAGAGAAACAACATGTCATACAATGAAACAATAAA  
AGAAATCATTTCAATTGCGTCAGTTCTGATCAAATTTGGCTGTGAAGACATTCGGAACAA  
TCAAGAATTTTTCGTATCGTTCTTGAACGAATTGGCTTTAAAATCACCAAGTGGGGAAGA  
GTTCACTCGAGCTGGTTTTAGGACAAATGATGAAGCGTCTACCAGCTGATCAGCGTGAAG  
AATTAGTAGAAATGTTCAACCAAGGTCATCGCGACATCAATCACCAAATGATCATGTATA  
CAAACAGCAACAATGGAAATATTATGGAAATCGAAATCGATAAAAAGTACCGTGTAAGCG  
ACGCCTCTCGTTTTGAAAACGAGCACGGCATCAAAAATGGCCATGAATTCCTTCTTGGATT  
CGCTAGACGAGGATGGAGATATTAGGTCTCGCGGAATTGCTTGGAAATGGAGTAGACGGCG  
ACAGCAACGATGCTCCATACTCCGGTTGGGCATTGCTGATGAAAGGCTATCAAGATCATT  
GTCCAGAAACACCAGCGGATTACTCAGGCGCTATTGAACAAGTATGAAAAAAGGGAACCG  
TAAGGTTCCCTTTGTTTTATCTAGATCTACTCTAAAAGTCTTTCGGCTTGATTGCAAATA  
ACGAAAAGATTGTTTTTCAATTAATTAATGCTTTTTTACGCCAAAACATCGATACTGCCCA  
GCATAAACGTTGTCTACGTTCAACAATCGGGCAACAGTACATGTATTCAAACCTCACTGTGC  
CCCGCAGGAAGAAACGCACAATCCTTGTAATTGCTAAAATGTCTTCCTGAAAAATGGACC  
ATATATTCATTAGATGTTTTGTTTATTGGATACCCGCCCTTTCCATATCTACAAGTTCC  
AACGGCGTTTTCCCTCCGTGGCGACCATGTCAACGAAATAGTTCAAGCTTCTAGGTCTA  
AAAGAAAATATAACTGAAAAATCTGCTCGACTTGAAACATGTGCTATTTCAAGCTGTTCT  
TGTGTCGCTACCTGAAATTTTCTATCGCGTTCGGCTTGAAGAATTCCTGGTAATTTTGA

AAACGAGTATCTCGATAAACATTGAAGATTTTCGTCCTTGTTGTACCAACTGAAACCAAGT  
ATGAATACAAGGATCAGCAAATTGCCCGATAAAATACAACCTTCGCCGGTGACAGCGTCT  
TTGAACAATCGGTCCAGAATTTCCATCAGAATCCCCGCACGACCAGGGGTTTGAGCTCCC  
TGCCTTTGGTTTCCTGTACTCATAAAGTTGTTACTCCTGTATAACAGCTCTATTTAATGC  
TTTCGGCACCTAACGGTGCCGAAATGTCATTTAAAAGAATCCATTGTGCCAGTTAGTACA  
ACTTTTGCAACTCGCATTGCCCTGTTGGGGGTTTGCTTTGCCCAAGATGAATTAAGCAAT  
TCAGAGTATGCTTTAGACCAGTCCTTATTGGCTATGAATGCGAGTGATATTTTGAATCCA  
GATAGACGAGGACCTCCCATTTGGAACATTAAGTTACAAATAGCATTTTTTCTAATAGGG  
TCACAAGGATCATATGCTAATTTGATATTAGGATATTTCTTGATTTCACTTTTGACTGTT  
TGAACATCAGATCTAAACAGGGCACTGCATTCACTCTCAGAGATAACCCCGTTCACCTGG  
CGACCAACCTGTTTACTCAATGTATGGTTTATTAAGGCCATATCGGTTGTCTTCTGGGGT  
ATAATCAGGTGACCTATCCCAACAGTAGGGTACCCTAGATGGTCCCAATACACTTTCAA  
ACTCTTCCCTCATCGTAGATGAGCATGTCTTCTAACGTCATATGCTTTCTCCATAATTAT  
TTTCCGAATATTGACGTGTTTGGTGGCCAGAAAATGATTTAAACAGCTCGCCGTTATACG  
CCGCAAGATGCCCGGCACCCGGCAAAGCCATATTCAAATATGGCGACCATGACGAATTTT  
GACCTCTATCACCCACATCATGTTGATCAAATCTCCATAGTTTCCAACACTTCAAATT  
GTATTCGGCCTCGGCCCGTTGGATGCGTGAAGTTGAAAGTACGTGAGCCATAACCAATCGG  
AAACATATTGAGCTGGTGGCGTGTATACTCGAGTTTCTTGCTACGGCTGGTTATCCCATC  
TCCATCGTAGATTAACGTATCCGAGATCTCCGCCGCGAAGAGACGCCCGGCCAGTTCCGA  
TGTATCCGATTTTTATGGTTGCACGTTGACTTGAGTGAATTCCGTGGAGTAACTGAAAT  
TGTGATTTCTGTTGTACGGATATCTAGAGCCAGACCTCATGTAGCACCGCGATGGCGATC  
TGCTTTTATTGAAGTAACTCGATACCCACCAATTTATAGGTGACGCACCTTGTCCATAAT  
AAAACGCCGAAAGTTGTGGGTCTGCCGCGTTGCCTGCGGCAGATAGTCCGGCAAATCGCC  
GGACGTTGGTAAACCAATTTGGCTTTTTGATATCACCGGTATAACCAATCGCGTTATACC  
CAATGCTCCAAAATCGCCCATGTCGTTGAGACATTTTGCCTCCTAATGTTATATAACGTT  
CAACGCAGCGTTCACAGTATAAACTATTGTTCCGCCTTCAGTGGCAGCGAACTCGTAAGT  
TTGAGATCGAACTGTTCCCTTGTTTGGATTTAATAACCCCGCGCTGCACACCATCTACTTG  
ATACCATCGAGCCTCTGTGCAGTTGATATATGTGATTCCACCATTTTCGTATACGCACGCA  
TGCCCTGCCGTCGAAAATAGGGTAAGATTTAACGGTTGTGCCATCTATATAAGTGTAGAT  
TGTCTGACGGGTTGATGCATTATAGCTAAACGTCGCATATGGCGGTGTATTGTTCCAGT  
GACAACGGATTGTATAGATGCAATCTGCTTAAGACTGGCCATACCAGCCAACTGCCCGAG  
TAAACCGGTTGTGCCAAGACCGGCTTTACTCAGAATGTTGGAGCCCCATCCATTGGCCTG  
GAACTCGGTGTTTGCCTGAGACAACCAGAAGGGAACGTTAGGTACGGCCATATTCCAAC  
CCTTCACCTTCTCGGAGAGTTCCCTTGACTGCCCCACCAGTAGCGCAATCAATGCGGAGT  
TTGATAGCGTCATGATTTCCGTCCCGTCTTTGTTCCCTGAATCCACTACACGAGTAACAG  
CTTCGGGTAGCACCTGCTCGACGTCTTGTCGAATCAATCCGACCTCTTTTTTGTGCTACT  
CAGTGGCTTCAAGCGTCTGCTTCTTGTCGTAGGAGTAGGCGGTGAGTGTGACTTTCC  
GTAGCGCGTCACGTACTTCCACAAAGTTCTTCTTAAGTCGCCGGTATGACCGGATGTA  
CGTCATTCGCGTTCACATTCCCTGTCATAATCCCTGCATACGAAGCGAGTCCTTGTGTGT  
GGAAGCGGAAGTCCCCTCCCTCCACAAGTGTAACGTACTGGCAAAGCGGCCTGCCATGT  
GGAACCCGACGCCCGGGCGACTGTCGATAGCGGGGTTACCGTTCACCTCGATGTGCGACT  
GGTAGTAGTCGTTTCCACGGCATTATTTGCCACAAACCTGTCGCCTTGTTTACCAGCT  
CGAAAGGCCCTTCTGGGCACCGGCTCCTGTCCGCCAATCCACGCTTTAGTTCCAGCAA  
AGTTGATAGCCAAGTACCCGAAGAATACTGCTGCGTTTCCGTGAGCTTGGTTGAAGAGAT  
ATGTCCATTAGTATTCGGAATGCCCGCAATGTTGGGTCTTGGGAAGAATCCAGATTGAC  
GACGGAGATTACAATCGCCAAAACCTGTGGAAATGCCAGTTCGGTACGTCCCAAAAGCAA  
AACCTGCCGGAGCCGCACCAACATCCGAGGCAGTCGGCTTGTTCCCTTCATGGTAAATCT  
TGCACATAGCCCCACGTGCGCCACTACGCCATGTGAGAGAGTTATCAGCCCCTATCGTGC  
CCCCAATCCACAGGCGTCTCGCTCAGTGCCATCAGGTGCGCTCCACACGATGTCTGCCA  
TGCTACTAGCAGAGTGCCCTACAAGGTCAAGTATCCCTGTGACTCCTAGCATCCCGGATA  
GAGTCCCACCAGCAACAGGCAGAGCCCCGATTTACAGACAGCGACCAAGACACGTCACCCG  
CACCGTTAACGACTTAGCAGCGTTGCCGATAGTCAGGGTGCGGGCTGTACCCAGTTTCG  
CCGTGGTGTGTTGCCGGGAACGTCAAAGTTGGTGCCGTTAATCTGGCGAGCCGTAGCCA  
GCTTGGTTGCCGTGGCCGCATTGCCAGCAAGAGCGCCCGTGCATGTCGGAGCGGTACCC  
CAGCAGCCACGACAAGCCCTGTAGGCTTTAGTGACATCCAATCCGGTAGTGTTCCGCTCCGT  
TTACTCTGCCACTTGAAGTATTCGTTACCGTTATCCCGGTTTTTGAACCACATGTAGC  
TGTCGGTGTGTCGTCAGAGGCATTCTTGAAACAAATCTTCGCGTAATCAGAATTGAAGA



CCCAGCCAGCTCGCAGGCAGCATCGACGAACGTAAGCCCACCGGTCATTGCATCGCCAG  
CTTTAGCAACCGCACCAACGTTAGTTGCAGAAATCGAAATATTCGATGTGCCATCAAAG  
GAACACCTGCAATAAGTCTAGCTGTCTGTAATCTAGAAGCCGTAACGGTATTTCCATTGA  
CTGGAAGAGCTCCTACTGCTTCTGGAGTTGGGTTATATCCGTTATCGTAAAAACGATTGC  
TTCCGTTATAAGTACCAGAGCCCTTATCAAATTCGCAAGAACAATGGTTTTTGTATTTT  
CACTTACTTGGCCATTAACCGCAAAGATAGATGTTCCATATGTAACATCAGTTGCACAGG  
CGGTGACGGCTGTTTCGATATCGACTCTAACTCATATCGGGAAAGCACGTGTTTCAACGT  
AAACAACAATCCCATCTACGGCCTCAGATGGTCCGTGGATTGAGTGAATTGCTCTTTCTG  
ATGTAGAATAAATCGTAAACTGGCCTACGGCATAACTTGCACCGTCACCCCATCCACTGG  
CGGAACATTACCGGTAATGAACAATTGTTTCATTGGAAGTGTGTTGATGGCCAGATAAAG  
TATCGATATAGACAAATGAGTTGGATGCACCATTTGTTTCAAAAAGAAGTGGAAATATATC  
CTGAAGCAGGTGCTCCAGCAGGAAGTGTGATCGTCATATCTTTCACACCTTTACCTGAAG  
CAGTAACAGTCGATTCAACAAAATCACGACGTGCCACAGAATTAGCTTCGGTGCCTTGCG  
CGGCAGACAAAAGAAGTCTTGGAAACAGTCAAATTGCCAGACATAGTGTGCGCCGATTTTT  
TAACGTAATCGGAGCGTGTATGGCTGTCGTTTGTACTGTCACTGCTAGAGAAGCATTTG  
CACTACCGTTCGAACGATACTGAGCCAGTTGCGCCTCCGGTCAAAGTATAGTTCTTGCGC  
TTTGCAACTTTGATGCAGATACAGCAGTTGCACCGGCAGCTAATGCACCAATTTCTGCAG  
GAGTAGGTTTATCAGCTTCGGGATAAATCTTTTGGTTTGCTAATTTAGTGTCTGCCGAGT  
CGTATGCGTATGTGTACATAACCATAACCGATACTTCCGTAATCGAAAGTAATACTACGGG  
CATTGCGACCGTTACTGGCCGATGGATGAGAAACGTTAATAGTCAATCCACTGAATCCGC  
CCAGACTGTTATGTCTGAAGAATCCGGAATAGCCCATTGACAAGTTATGAGGTGTTCCCA  
TATCAGACGATTTGCTCAGCAAGTATCCATTTTTTCGCGAGTATAGGTGTTCACTGTGATA  
AACCGTGCATCAGCCTCGCTCTGGTTATAGTATGGATTATCCATAGCAGCGCGTTGGATA  
AGACCGGTGTCGTAATCAAAGTCCGCCCGTTCGATTGTATACGGCGGAATCAAAGCGA  
ATTTTAGTGGTAGTCATTCCATCTTGGGCATAACCGAGTACTAAATCAGTTCCACCAGGT  
GCGCCAATATACAGGTTTTTAGACGTGTTTGTCTGAATGAACTGGACACTTCCATACTTT  
ATATCAAAGTTTTCCAGTATTAGCGGATACCAACGCTCCTATCAGAGAAACATCACCATTT  
AGATTTAGCGATTTTAAAGTCCTTCAAATGCCCATGCGCCGTTGGTGTCCGTCATTGCCAC  
TTTAAAGTACCAGCCGCATCAGTTCCAACATATGACTGAGGTGATTTCCCTTTGGAAA  
ACGAATATAAGCAGGACCACTAACGCTTACTTAAGCGCTAATGGGTAATCAGTGGAAGT  
TTCGATGTACAGAACACCCGAGATAGGATCGCCAGCACGAGATACTACTTGGAGTTCATT  
TGCCTTGGTTTATCGTTTTCCGAATAAATTCTTGCACCCTTGTACAGGATAGCATTACC  
GCTTGGTACCAGCGCAAGATTGCCTTGGTGCCAAACAGGTGAACAAACGATCGTGGTTC  
AACTTTTAAATCTGCCATATGGGCTCCCTTGTTTAACGAATGATTGGTGATTTCTTATTA  
TATTTAAAGCACTCAAATTTAAAGCAATCCTGGCTCCAGGTTCAAGCTTGTGTAACCTTA  
TCTTTTTATCCTTTTAGTTATAATATCAATTTAGCCATAAAGGATAAGTTTTGGCAGGGC  
CAAACCTGGAAGCCAGGATCTTATATTCTATTTAAAGCAAACAAAGGGCAAAGAGGCC  
TTATCTTTCGTTAAAATCGTTTGAAGTAATGATATTCTTTTGTTCAGATTCAAAGCTG  
TAATACAGGATTTGTGTAATTACCGTTATTGCTTATGATATTAGCTCTAATACCATTAC  
ACCAATTGCTGCATCCGCCACTTTATCATCATCGTCCCTTGTAAACCCGCGTTATAGTGAC  
ATTTGCGACACCTGCTGTTCCAGCACTGACGCTTGCAGGATATCGGTATGCTGCAGAAGC  
AAAATCTTCGCCCTGAGCTTTGCGTTGGCAGTTTGAATAACCTTCAAATTTTGTCTA  
CACACCTGGGGCCGGTGTGTGCGTTCCTAGCCATATACTGGTTTTCCATATGCCTGAAGA  
GTCTTGAGTGCATACATAAAAAAACATCTTCCACCGGCGGTAAGTGTCTAGTGCCT  
GTGCAGCTCGCATTGGATATGATATATTGATTCCCATTGCGTTGTTATTTTTAGACAA  
ATAACGCTTAAATTCGTATTGATTCCCCTGAGAAATATTCATTTATGTCATCGACATT  
TCTTGACGGTAATCCACACGCTCCAATATCGACACCGTTCGTCAAAAACAAGTTGCAAATA  
GGCATTGTGTCTTCTGCGAAACTGTTAGGATTATTCCCAACAAAATTCTCGTAACAAA  
ACGCTTTAATGTTGATTGAAAATTGCAACGTACGAACTTCTATATGCTCTCGGAGTAAA  
AAGAGCATCGGATTGTGATTTAGATAACTAGAAACAGGCCACGACATAGCTCCCTATTG  
TTTCATGAATGTGTCAAATCCTATGACGATCTGATAGCATCATGCGAACTACTACTAC  
TATATTGTCAGATGGTGCAGACATTAGATATGTTCTTAAAGTGTCAAGATGCTCGCGTCT  
AGCATATATGTCCAACGTCGAAAATTAGATGCTACTCCGGTTGGAGAAATAGTGATAGC  
GTTCAAACCCCTCCCGTACGAAGGCAAACCGGAAACACCATTTGATTTTGACATACGGCAC  
TCTGACACTGGAGTCATCATTGACTCCAAGTGCCTGTATCATATACTTTATTGCGTTATT  
TTCACCTAAGTGATTTGATTCAACGTAAGATGGCCCAAGATGGGCCATAAATTGTTCTGC  
CATAACGATTCCTTATTCTTCCAGATAAACTCAACTGTCTTGGTCAAGTTGTTGGCAAC

GATTTTCACATTACCAATTTTGTTCCTCTAATCGTTATATTATTGGAAGATGAACC  
TGTAATATCAACTGCACCTACGTCTTGTGCAGTAGGTTTGTACCCTTGTGATAAATCTC  
GTACTCAAAGTTTCCGATCTTTACGATTGGATTCTGATTTCGTATCAAGACACACACGGCC  
TCTCGCTGTATCGGTATTTCCGAAAACGAAGTCATTTCCACGAGAGGTAATGTAACGATT  
TGAGTTTTTGAATTGCAAATACTTAACATAGTCACCAGTGTGACAGAAGCATTGCTAC  
AGTCATAGTCGATGTACCATCACGACGAAGATATGTTCCGGTTGAGCTTTGTCTGAGCGTT  
GGCAGTATTAATTACCGGTGAGCCATTAATTGTGAAGGCATCAGTAGAGCTTGCCAATAC  
AGCCATTGTTGAACTAGCATTAAACAATATGAATCCGCCTGCAACAGATTGTGCAAATTG  
ATTCGCCGCTAATTCGGTTACACCCAGATAAATTCTCGCACCTATGTTTTCCATAACAAG  
GAAACCAGCAGTTGATTTTATATGTTGTGCAATTCGTACATCACCGGCTCTATTAACCTT  
CAGCTTACTAGAGAAAGTTGAACCGTCTTTAGTTGCAATAGCAATTTCACTGCCAGAAAC  
TTCAGAACCACCAACGCCACCTGCAATAAATGCCCAATCGTTTATTGCAGCATCACTTCC  
AGCCATTATGGTGATATCATTGGCTCCATCAGCAGCTCTAGTTTTAGCTATTTGAACAGA  
GTTTGTGCGACGTATTATCGTTAATCACTCTTGCCTAGTTGTGTCGTAGCATTGGTAATATC  
TGCAGTACCATTGCGGCAGTAAAAGTCATTCCGCCTGTTACGGTTTGAGCAACAGTTCG  
ACGGACGCAATCGTTAGCAACAACACCACCAAGTTTCAGTGAGTTCTGGGCGGTTGCCAT  
TTTCGGCATAATAGTTTTGCAACGCATAGTTCAGACTCAGTGGACTAACGGCCAGCCCATC  
ATTTGAATATGATGTGTACGCTTGGGTTGAACCGACAGTATCGTGTCCAACGAAAGTTGA  
CTCTACTGTTGCCGCTTTGACAAACCCACGGCTTGTTCATTTCTGACCATGTCGGTTC  
AGTTTGCCTATATATATGAAGTCTTCTGGACTAACAGCCAAATTAGTTACTGTTCCAGT  
TCTAACTCCAGCGGTTGTGCAACCCGGATAAATACCGTCCAGAGTTCTTGTGCTTTTCT  
TCCATCGAGTTTCTTTGGAGTTACGATGGTATTGTCTGAACTAGATCCATTCGCCTCAAG  
TTGGGTTGAAACACGCAATGTCCACGTTGAGCTTCTGTAGCAAGACTTATTCCAACAGA  
AACAGTGCTCCAAATGGTTCAGATTGGGTCAAACCATCAGTCGTGTTTACCGAAATTCT  
TGCCGTATTGTTGAAACGATTCTTCAATTTCAATGGAGTGACGATAGTTAAATCGTTTGT  
CGCAGTATCTATTTAGACGTCGTGGCAATACGGGCAATACCTGTGAGAGTTTCTGTTGA  
AGTGCGATCATTCAACTTTTTGGGAGTAATAGCACGGGTATCATCAGTTCCGGCATTGT  
TTCAGTCTGGGTTGCAATCTCAATCAGATCATGATTTGATTCTGTGCTCGTCGAGCTCC  
CAATCTTTCGGCTGTTACAAGCAAAGGCCAAGTGGATCAGATGAACCCCGTCGACTTC  
CGCCTGTGTGACAATATAACCTATAACCCTTAGCTGTTTCGGTAGCCTTGAATTCATCCAG  
GGTTAACGGTGTGACAGCTTTAGACTGATCGGCTTTGTTATAAACAACAGTCCCAGCAGC  
TGAGCGAGTTGTACCAGCTGTTCCATTTTTAGAAACCACGGCTAAGATACTGGTCAGAGT  
TTCTGACGCAATACGATTATGCAACTTTTTGGGAGTCACAATTGTTATGTGCGCCAGTTGA  
GCCGTTTGCTTCTGCTTGAAGTTGCAATCTCCGCTAAACCACACCGAGGTTCCGGTAGCAGT  
TCTTTCATTTAACTTTTTCGGAGTGACGATAATGTCATCCAAATAAGTTGAAGTGCTTAA  
CTGATTGACTTCAGCGGTTGTTGCCAAACGGGCAATGCCACGACGAGTTTAAAGTAGCAGT  
CTTATTAGCTAATGATTTTGGAGTGACAATAGTTTCGTCAATTCGGGTTATCTTCGTGATT  
TTTGTTTACTTCTGCTTGATCCGCGAGAGAAGCCACGCCCAGACGATCACGACGAGTTGC  
ATCAACACGTTCAACTTTTTGGTTGAACATTTCCGATCATCCATCCGTATTGCGAAGAAGT  
AACACCCACCAGGGACGGGTCTAAGTGTGCGTACATTAGCTCGACATATGGAACGTAATC  
TGTGTCAGCACTTATAGAAATAGATGAAACCAATTCCCACCCATTTGTCATCCGGTATTC  
CGAACGACGCTGGAACCTGCATTTGAGCTTTCGACCAAACAATCAGCTCATTGAACTGG  
ATTTACTCGGATTGTACAAGTTTGACCTTTTCTCAGATAATCCATAGTGATTGAAACAG  
GTCACCTATGGCTACTTCGTCTGGAAGAGTCAGCACGGTGGTCTGACTTGGCAAATTACT  
GTTGCCAGTCACCAGAATGTGTTCAATCGGCAGCAGTGCTGTGTCAGTTTTGGTAACACG  
AATGCGTGTCTTTGGTCTCCATCCATACTTTCCAAATCAAAGAAGGAAAATCGACCAC  
GAATGATCCGTAACCAGATGTGCGGATTTCGATTTTTGTAACACCGGTTTCATTAATATT  
GTGACCTGAACCTGGGTAAATCTAAAGAGTCGAGTGGTTAATCGGGTTCATCCCATCAAT  
ATCATGGGTTGTAATTACATCGCCATGCCTAGCATGTTTTGGCTGAACAAGACGAATTGT  
TCCTGCAGCAGTACGTCTCCAGGTAACCATCCCTGACTGCAACTGGAATCCTTGAATCGA  
TGGCTCAACAAAATAACTGTTCAATTGCTGTAGCTGCTATATCTACTTGCCATCTGTTTCC  
AGCTGCTTTATAGACGAACATATATTGGCAGAATGGGACAGTTGCACGGAAGCGAGCGCC  
GACACTGGCTGCCTTATATTCGATGACTGATGTTCTATAGATACAACTTCCAGATCGTT  
AACACCTGGCTGACCGCCTACGTCCTTTATTAATAAAGTATCGCCATCGACTGGTGATGT  
TGGCAAGTTGAAAACAGATTGTTGAATCTATTGTCAGCAGTGATATATTGACCAGAACT  
CAACTGAAGTGCGGGCCAGTCGAGTTAATGAACTGCCATGTTGGGTCAACACCGAGACC  
AGTCCATTTTGTGACGTCGAAAGCTCGAGCCGGGGAAGCAATATCTGCTTTTGCCTAATA

AATTCGACGCTCGAAAATTACAGCATGTTTTGCATCATACCCACTGGTGCTGTCATATTC  
GTAAATTGTGTTATATTTGTGGAAAAATCCAACGCTAACGCCATCGGACAAAATTGTCTT  
ATCGGCCCTTGCAACGTTGATCAGTTTTTCGCCAGCTGCATCAAGGCCGCTTGTGGCGCG  
AAAGGCTTGTCTAACATTTTTGAAGCTCTCCTGTTACTAAGTTAGTTATTTATGTTAGT  
ATGTCTAGGTGTTCAATAAGAGAAATTGATATGAACTTAAATGATTTTCATGGGTGAAACC  
ACAAAGGATGCTGTCAATATTATTGACGCATCTCAATTAATTATCGCGACAATAATGGAT  
AACTTTACTCCTGAAGATGTAAATGAGCGAATGCTCAGACATTTAATTCTGGATACGGTT  
CGAAACAAAGTCAAAAAGTTCAAAAACGAATATCCCGAACTATTATCACATTTGACGAT  
TCTGCCAATGGTTATTGGAGACGTGACATTGCTTGGTATTACAAATTAACCAGAAAGGCT  
AATAAAGAAGAATCTCCATCGGATCGGGAACCTTCTCTTTAGTATTATCAATAAAGTGGTC  
AACGAAATGCTTAATATCTACCCAGGTGTTAAGATGATCAAACCTTGATAAAACTGAGGCT  
GACGATATTATTGCAGTTTTGGTCAAAAAGTTCACCCAAGAAGGTCGATGTGTTATGATT  
TTTTCTTCTGACTCTGACTTTACTCAATTGCACAAATACAAGGGTGTCAAGCAATATTCA  
CCTGCTCAGAAGAAAGCAGTAAAGCCAAAATATGGTAGTCCAAAGCATGACCTGTTTGT  
AAACTGATTAAGGGTGATGCAAAAGATGGTGTTCGGGAATAAAAAGTTGGTGATACATTT  
GTCCTTGATCGTGTGCAAGGTGAACGTGCTCCACCTTGTCTACCAAGTGGATTAATTCA  
ATCGTTGAATCTGAAGACCCTCGAGCTGCATTGGAAAATGAAGAATGGCAAAAGCGTTGG  
GATATGAATGTTTCGGTTGCTTATTGGATAAAATTCAGCACATGTTTCGGATCGAATC  
ATTCAAGCTTATAATTCTTCAGTAGTCAATCCTCGTGGTAAATTGTACAGCTATTTTGT  
AAAATGGCTTGGTTAACTTCTCCATAAAGTAAATCAATTCTAAGGAAATAACATGAAA  
GAACCGAAGAAAAAGAAAGAAACAGTACGAATTCACCCGGCTGTTTCATGGCGAACGACT  
CCAAGAAATTATTACCGAAGCATCAAATCTGCGCACCATGCAAGAATCTTATGCTGAAAA  
GGTAAAAGAGCAGCGCAACTTTGCCATTACTGAATGCGGTGTTTACGGCAAACCTGTTCAA  
TCAGCTGTTCCCGATTTACCACAAGCAGGAACGTGAGCAGTTTGAAGATGCTGCCGATGA  
AGTTACTTCAGTGTGTTGACCAAACCTTTAAAGGCAAATGATGTCAAATCCGAACAATCTG  
AATGATAAAACCGCAAACGGGATAGAGATAGAAAATCTGGTTAAAACTGGATTGACATAT  
CTGGAAGCATGTGTTTCAGTGGTTGGAAGAAAATTCTTTAGAAATTAACCTCGTGCCACAAA  
TATATCCCGCGAGCGGTAATTGACAAACTTTCAAAGAATGTGTGCGATTCCGACATGCTT  
AGACCTTCCATTGCAAAATCGATGACACGAAATAGTTTGGACTTTTTGATGTGAGATTTG  
TATGATCGCTCTCCGATATCCGCCTAGACCTGATAGATTTATTAGTGCAAAGGGCGCGTT  
TATGCTTTATTTGATGATGAAACAACATATGGCTGGAAAATATGACATAATCAAATATAG  
TTGGAATATGAAAGTTACTGATGCTGCGTTTAAATAAACGCAGAGATAAGTACTTCTTTGA  
TAAGACGAGCGATAAATTTACCTTAAAGACTTGACAGAGATATTTCTGGCAACGTTTTT  
GGAAAATTCAAATGGCTGGGCGGAGATCTTGTCTTGAAGATGCAATGGCAGCCCATCG  
AGAATTGTTGGGAAGATACATCAGATTCCCTGAAAGATAACAGGGAAGACCTGAAAAGCCT  
GGTGTATTTTTCCAATAAAGTCAATGTTCCGATAGGTAAACTATTGGAGTATAATGAAA  
ACAACAAACGAGCCCAATTTCAAATTAACCTCAATCTGGCCTGATCAAAACAGAAACAT  
TTTTGGTTATTGATTCATTCCTTCGTATAATCGACAAAATCGATGAGAAAATGTCAGCTG  
ATATAATCTTGCAGAACTGGCATAACCAAATTGGTCAATTACCGGAAATTGGTAGGAATAA  
ATAATGACATAGCTAAAGCCAAGTTTATTCAACACGTAAAAGAGTTTAAAGCTGAAGTTT  
AGCTATATCAAAATTGATGTAAAATGTAAAAACGCAAAAACAACCTGTCAAAAATAAGATA  
GGAAAATAAATATCTTCAAGCGCAGCAATCCTTCTCAACTTCAAGCTCAACTGGCCGCTC  
TGAAAGGTAATGCAGGTGGTTTCGGTGGAGATAAGAATGAATGGAAACTGAAAACCTGATG  
CAGCTGGTAATGGTCAAGCAGTAATTCGTTTCGTTCCCGGTAAAGGTGATGAAGGTCTTC  
CGTTTGTTAAGCTGATTAACCACGGCTTCAAGAAAAATAACAAATGGTATATCGAAAATT  
GTTCTTCTACCCACGGTGATTTTGACAACCTGCCCGGTTTGCCAACATCTCAGCCGCAATG  
ATTCTTACAGCACCAACGTTGAAGAATATAAGCTGCTGCAGCGTAAGACTTCCTATTGGG  
AAAACATTCTGGTAATCAAAGACCCTGCCACTCCTGAAAATGAAGGCAAGGTGATGAAGA  
TTCGCATTGGCGCAAAGGTAATGGAAAAAATTACTGCCATGATCAACGTCGACCCGGAAA  
TGGGCGAAACCCAGTAGACGTAACCTTGCCTTTTCGAAGGTGCAAACCTTCGTTTACAAAA  
CCAAGAAAGTTGGCGGTTTTACCAACTATGATGACTGCAAATTCCTGGCTCAATCCGAAA  
TTGCAAAAATCCACGATCCCGAATTCCAAAAGTTCCTCACTGATGGCATGGAAGATTTGA  
GCAAAAATCGTTGCTCCTTCCGAATTCAAGCCTCTTTAAGAACTGGAGAAGAAATTCAG  
CAAGTAATGGGTACTTCCATCGCTGCTGGCTCTGCCGCTTCTGCCGCATCTTCTCTGTCT  
AGCGAACTGAATGACTTCGACGAACAGCTTACCTCGTTCGACACTGATGTAGTTCAGCCA  
TCCGTGCCTAATGCTTCTTCTGATCTCGATGACGATCTGGATGCTCTTCTCGGCTAATAT  
AGAAAAGCAACCTTCGGGTCTTTTTTTGCATCAAAATCTTCAAAGTAGTGTACAAC

TATGCCATACAGTGTAGAATGTCTCCATCAAATCAACCAAGGAGTAATAAAAATGAAAGA  
CATTCTCGATTATCCAGTTGACACCAAGGGTTCCGATTTGCCACAAGAAATTTCTCGCTTT  
GCACGTAAGTCGTTGTGAAAAGACGGTTGCCGCGTTTGGAGGTCAAGATGAATTTTTCGA  
ACTCATCAACACTAATGCATGTGGCGGTTGGGTTGTGGACTATAAGGCCAAGTTTGAAGA  
AGTAAATGGCGTCAAATTTCCCAGCAATATCAGATTCGAATTATAAGGAACTTGAAATG  
TCATCGAACAAAGTTCTCATCAAATTCAAATCTCCTAAAGCTCGTGCTAAATTTGCAGCT  
TCCTCTGCAGCTAATAGCGCAATTGCTGAATATATGCAGCATTACGAGCTGACTGCTGTC  
AATAAAGGGAATGGCGATATTGTCATTCTCGGAGATGGCAAAGAATTTGAGCTCGATGGA  
TACTGGACTCCCAGGATTTTTATGTCAGAGCGTCGATATTTTGACATCGACGTGATTTAA  
CTCAAACATTGTTCAAAGGAAATATTATGAAAGTTGACACTAAATCTTGGCACTATCG  
TTTTCTGAATTTCTCAACACAAATATCCCGAATTTCTTTATGCCCGTATTTGTGGAAAGT  
CGTGTTTACGATCGCATGGATCACGGGCTCGATTTACTGCTCATTGCTTTTTTTCACATC  
TATTGGTGCCAGAATCTTCGAAGGACTTGGCTTTGCCCTCGATAATATGGTATTGTACTG  
GAGCCTTGCCGCTGTAGTAGTACTGTCACCGTACATCTGCTATTGTGCTGGTTGTGCG  
AGTAATATTCGGATTTGTTTGGGCCAAAGAAAATTTCAAGCCACCATACAAAGAAGAACC  
GTTGATTATCACCTTTGTCAAGAACAAAAGTCTAAAATTTGCCCGCGTCTAGAATTTGA  
AGACATGAGCAAAAAGACTGAAGAATAAGTTCGCAACCAGTGAGGTCATGATAAAATGAC  
CTCACTAAAATAAAACAATCTCCGGCTTATAATGTTTCACTAAGTAAGGAATGATTAATA  
TGATTATTAATAATGAACGTCAACTGGCTTCTATTCGCAAATTTGCCGATCTTCAGCCGA  
TCCCGGGTGCTGATGCTATCGAATGCGCAACCATCGACGGCTGGGAAATAGTCGTGAAGA  
AAGGCGAATTCGCAATTGATGATGATTGCGTATATTTGCAAATTTGATTCCATGCTACCGA  
CAGATAATCCTGCTTTCAAATTTCTTGGAAATCCCGTGCCAGGATGTACGAAAGCAAATGC  
GAGCTCGAGTGAAGACCATTAACTTCGCGGCCAACTTTCTCAAGGTATAGCTTTGCCGG  
TTAACGCATTTACCATCGGAGAAGTCTCGGTGTTTATGAAATGGACAAAGGTCTTGACC  
AAATTTCTCGGTATTATCAAATATGAGCCGGCTCAAGACGGTCTGGCTGTAACCCGGCCG  
GTAGTTTCCCTGTTTTTCAATTCGAAAAGTGAAGAACGCTGCCAAAACATTTTCAGCA  
AATACAGCGCTCGTTACAAAGATGTTGTGTTCCAAAAGTCTCTGAAGCTGGATGGTAGTT  
CTATCACCATGGCATGGGTAACAGATCCTGACCTGTTCTCCTCGAGCTTGGAAACCGAAGATG  
AACCATATGCTCACGATTACGACGACGCTCAATTGATCCTAGCTTCTCGTAATCCGGTTC  
TCCGCTATAACCCCGAAAGCAAGTGGTGGATAGGTGTTGAAAAGTACCAAATCATCGAAC  
AACTGAAGAAGATGGGCAAATCTGTCGCAATTCAGGGTGAAGTATGAGGTCCTGGTATCC  
AGAAAACCCGCGAAAAGTTCGACAAGTACCGGATTTTCGCATTCCGTGCCTGGTTTATCG  
AAGAGCAACGTTTTTGTACCGACGAAGCGTTCACGACCTGTGCCGTGCTCTCGGCATGG  
AAATGGTGCCGACGCTTGGTCTGTTGCAAGCCGTTTGAACAATTTGAAACTGTCACAGAAA  
TGTTGGCTGATGCGGATGTTCCGTCCATCAACCACACGATTGCTGACGGTGTGCTTTATA  
AGTCTGTTGACCTTGTAGATGGCGAGATGATTCACCTCAAAGCAATCAACAATAAATTTCT  
TGCTGAAATGTGAGGACTAACATGAAAATTAAGAAATTTGCAACCTTTACAAGTCTTGTGT  
CCGAAATGCTGGATAATTGAAGATTATTGCTACTGCTATTGAGAATTCTATGTCTAACAG  
ATTGGGGCTTAAATGCCCTTTTCTCTTGAAGAGATGAAACAGATATCAAGTCATTTAAC  
CGAATCCAACACGGAGGTTTCAAGTGTGATTAAGCCGATTTTGTCTTGGTGTACCGTCCG  
ATTTTCATAAGCAGGGAGTTTTTGTATTTGGTAGAGATGGCGATTTACCATGGCCATCGA  
TCCCGAAGACTTTAAACTTTTCAGGGAAAAAACCGATGGGACTATCTGTGTTATGGGTG  
CAAATACATTCCAGTCGCTCCCAAAGAATCTTCAGGGAAGGGTAATGGTTGTTATTGGCG  
ATCCTAAGCGTTAGTGCCGGAACAAATCAGGTGAACTTCTCATAATTTTCGTCAATCTTG  
ATATGGACTGGATTTCTGTGGTCAAAGAATATCCAGAAAATGATATATCGATTATCG  
GTGGCCTTGGTCTGATTCTGTGTCAGTCGCCCACAAGTGTGATGAACTCCATATCAATTTT  
TTATGCTTACTTCTGACTATGATACAATTGACCCAACAGTTTATATCACTGATACCGCAC  
TAGGAGTTTTTCTGTGTAACCGGAAAATGAATGCTATCGCGTATCGAGTTGATCGTGAAC  
ATTGCACCAACATTAAGCAGAAATTTGGAAATGATTCAATAAACCGATTTAGTATGCGA  
TATTATACCAATGGGCGACAGAAGACTGATCGCACTGGAGTAGGCACCCGTTCCGGTATT  
CGGTGGAATGCTTTCGCTTTGACCTCAGCAAAGGCTTCCCGGCCACCACATGCAAACGTCT  
AGCATTTGTTCCAGTTGTGGTTAAATTGCTGTGGTTTATGCAAGGTTCAACCAATGTCGA  
ACATCTGCGCAAATGACCTATGGCGAAAAGTCTGATCGTTAAACCATCTGGGATGATAA  
CTATAACGAGCAAGCCGTTGATCTTGGATATTCTGATGGATACCTTGGTCCCGTTTATGG  
CAAGCAATGGCGTATGTTCCGGTAATAAAAACCCGGTTCGAACAAGTCAAATGTGATCGA  
TCAAATCAAACAACCCCGACAGTCGTCGTCGTTTGGTTGTTGCATGAAATCCTGAAGA  
TATCGAAAATGGCTTTGCCTCCATGTCACCTTTGCGCTCCAGTTTGAAGTATATGAAGGC

AAACTCAGTTTGGATGTGGAGCCAACGCTCCGTCGATGTTGGTCTTGGTCTGCCATTCAAT  
ATTGCGTCTTATGCGCTACTTGTCCATATTGTAGCTCGAATTTGCAATTTGGAAGTTGGT  
GAATTGGTATTCTCTGGTGCAGATGTCCACATTTACGAAAATCACCTGAGTCATCTCGGC  
GGTATGCTTTCTCGTGAAGAACGCCCTTTGCCTACGTTGAGTTTCCCGGATATTGACAGT  
TTGAGTGATCTGCGTTTACTGGAAGAAGCCGATTTCCGTCTGGACGGGTATGACCGACAT  
CCAACAATTAACCTACCGATGGCTGTGTAATGACTATATGCACCGTTGTAAACGTCAAG  
CATGAAAGATGTGACGTTTCGTATACAGCGAGGCACTATATGGGGTAATCCAGACGGAGAA  
CCCCATTGGAAACGGCAGGATTATCTTGACAATTACAAAAGCATTAAAAACACCAAATA  
AAAACCTGGGGTTTACTCTTGCCGATTTAGAATCACTACGAGGCAAGAAATTGGGGTGT  
GGTTGCAAACCATTGCCATGCCACGGAGATATTCTTGCTGATCTAGTTAATCGCATGTTT  
AAGGATGTGTCAAGCGTAGATGATTTTCATATGACATTAAGAAGAACACGGATTCATTCAGA  
TAGCAGAATTGACCATAGGTAAAAACGGACGTATATCCAGAGATTTTTGCTAAAGACCCA  
TCACTAAAACACATCATTTATTTGTTTACAATTGATGATGAAGTTGTGTATATTGGTCAA  
ACTAAGAATTTGCACAAACGAATGGACTCATATGCTAATGGCAAGTATTGGAAAAATACG  
AACAAAGTCACATATCCAAAAATCCAATTTTCTGGAAGAAGCAGTAAACTCGGGTAAGAGA  
GTTTGTGTTTGGATAAAGCATTGCTTCCAAATCGTTATAAACCCTCCTGCTGGGTCAAAC  
GTTATAGCTGACCTAGACGCGGAAGAGAAAAATTTATCGGGATTTTTAATCCGGTTCTAA  
ATTCAAAACCTGAAGGTTAAATTATGAGCAGAACAACCTGAACTTTTTAATAACTTGATGTC  
TGTTGTGGAAAAATCCGAAAAGGGCAATTTCTACTTCAAGGACGTCATTACGAGTATGGG  
GACAAAAGCTCGAATTTTCAGCTATTTTATCGCTTCATATACCGATTGGCTGCAAGATGA  
TGCTTTGGAATGTGGAGGCATTACGTTTGGAGCTAAATGATAAAAACGAGCCAGTTCGAAT  
CATGGCTCGCCCAATGCAGAAGTTCTTCAATCAGAAAGAACACCCCATGACCATTGGGCT  
CGATTAACCTAAGATGATCGGTTTGGATGGAAAAAGCGGATGGGTCGCTGATTAGCAGTTA  
TCATGATCGAGGCTACGTTTAACTGAAATCTAAAGCTGCGGTTTTCTCCGATCAAGCCAA  
TAAAGCAATGGTGATGTTGAATTCGCCTGCTTATGAAAAATTGCGCGATGCAATTGTACG  
AGCCGGTCCCGATTCTACTTTCAATATGGAATATGTTGGACCAAGCAATCGGGTTGTCTT  
TCCATACGAGGAAGAAGAATTGATTGTTCTCAACGTACGTCACAATGAAACAGGTCAATA  
TGTAGAATTTTCTACTCTGCTGGATGACCCATTGATTCGTCATCGTATGATCGGGGTTTA  
TCCTTGCCCGGATTGGAGTAAAGTACTCCCGAAGAATGGGAAGCTGAGACTCGTGCCGA  
GACCGATATTGAAGGAGTTATCGGTATTATGCCAGATGGCCAGCTGTTCAAACCTGAAGAC  
CGACTGGTACTCCTCTTTCATCGTACCAAAGACTCGATCAATAACAATAAGGCATTGTT  
CCAAGCCATCAAAGAACGTGCTTCCGACGATCTTCGTGGCCTGTTTTCCGATGATAATGT  
CGTTTTGGCAAAAATCGAGGCCTTTGAATCCGCTTATATTGATACTGTTGCTAAATACCA  
CAAAATTTGCGCAGAAGTGTTTTACGATTTGCGAGGTTTTGACCGTCGAAGTTTTGCTAT  
CGAAGCACAAGCGAGAATGAAAGACTTTCCGGTATCTTTTTAACGTAGTTATGCAACAGTA  
CGGCCGCGATTGGGACGGCGAACTCGCTGACGAGAAAAATCGAAGAGCACATCATCAAAGA  
ATACGCAACATACGTTCCAATGGCGTACCGTTAAATAAAGTTGCAAAAACCTGTGTACATT  
TGAGGTTGTAATGCTTAGAATAAATCCATAATCAACATGGAGTTAACCGAATGAATCATT  
ACAATTACACCGTCGAAATTCTCATCAACACGTACGCTCTCGGCGGCAGTTCGGATGGAA  
TTCGAATTTTCGACAAAAACGGTAAAGTTGTAGGGTATATTACTGATTTGCGCAAAGCTG  
CTCATTCTGCAGCCGAAAAGAAAGAAAAATCCTAATCGTACTCTCGGGAATACTATCAAC  
AAGCTAAAACCTAACATTGGCCCAATGGTCAATGAAGTTGTGAACGAGTTGAAAAATGTTT  
TTGCAGGCACACCCGCAAAGGTGTTTATTAACGAAACGATGCCGAATGTCAATTTTCATGG  
GAGCCAAGTTCTATTTTATCTTGTCTCCACTGACTGACAAAATTCGTGTATACATCACTC  
ATAAGGATGCATGCCGCATGAAGTATGTTTTCCCGCAACATGCCAAACTTGATATTCGTC  
AAGGCGGAAAAAGCATTGATTGATGGTTTGACACAGAGCGAAGGCATCGCTCTTGTC  
AAGGATTCTGCGGAACTGTTGTTAACTTTGAGTTCTCTGCTCAGTTGGTTAAAAAGTAAT  
GCGTTATATCTCATCATAATGGTCTTAATGGCCATTATGATGAAAAATCAACACGACGAA  
ATCTCTACGATAAAAAATAGTTTAGAATCGATGAAATCATTCCAAACTAAGTCGTATGAG  
AATGCAAAAACCCGTCCTGAGGCCCCTGCAGAAATCTCCAAAAGCTACAAAGCAAATGGAA  
AAAATTGCGGAAAAGAAACCGCAACTATTAGAAAAACGAATGAATATGGGCTTCCAGAAG  
TTAGCTGATCAACTTCAGGAGAGTACGAAATGAGGTATATCATCATTTCATCTCGGATGTC  
TCCTGATCACATCCTGTGCATCTAAGCCCATGTTGCCAAAACCATCGCCGATACATAAAC  
TCGATATAACATGGAAAGCAACCGAAAATGGAGCTTTACTAAGTTTTGAGGATTACAATA  
AGTTGGGTGTATGGTTAACCGATGTCAACAGATATATCAAAGCTCAAAAAGAAATAATTC  
AAATATGTGAGGATACAATTAATGACTGAACGTTTTCGCATCTCAACAACCTGATTTTACT  
GTTGGTCTTACGTGTTCCGGAAAAAGCACCTGGGCAAATGAGCAAGTTCCGGGCAAATCCT

ACGAAATACGTTAATTTGACTCGTGATGATTTTCGTTTTAGCCTTTTTGGCTGCCGGACT  
TGGTCTGACTACAAGTTCAATAAGCATAATGAGCAACTGGTAACGAATGCTATCCAAAA  
GCAGCGATTGAAGCTATTGCCATGAGCAAGACTATCATTATTTCCGACACCAATCTGAAT  
AAGACGACTCAAGGAAC TTGGAAAATTTTCGGAGATACTCATAACGTTGAGTTTGTGCTGA  
AATATTTTGCGCCGGCCTTCTGTCTACTCTCATGGAGCGTAATCGCTAGAGGGCGAGCAG  
GCTTTGCCTGAATTCGTTGTGAAGCGTCAATATGTCCAATATATGGTTGATTTTGGAGGC  
CAGCGGGTTTATACTCCCGACTTTGCAAATCCTCGGGCAATCATTTTTGACCTGGATGGC  
ACCCTGTTTGATAACAGCCAACGGCGTGCCTTCGATTGGTTCGATAGTTCTGGATGACACT  
CCCCGTGACTCTGTCTGAGAACTTTTCAAAAATGTACGTTGATCGCGGTTATGGTTGCATT  
ACCGTTTCTGGCCGTGATGGTGTCTTCTGAAGCAGATTCTATCAAGGCTCTGAATAACGCC  
GGTCTTTTCCCTGCGGCCATTACCAACGCGCTGCAGGCGATTCTCGTTCTGATGATATC  
GTAAGAGAAGAAATTTTCTGGCAACAGATCGAGCCCAATTGGTGTGCTGTTTCGTGCAATC  
GATGATCGTCAAAAGGTTGTTGATATGTGGCGTCGTATCGGGCTGGAATGCTGGCAAGTT  
CAACCTGCTGATTTCTGATTCAAAGGCCCTCTTCGGAGCGCATT TTTTGTAAAGAAATCAAT  
AAAAAGTAGTGTACAGGTCGGTTTAGTGTACATAATATAGTCACATGAACAAAATGGAGTA  
AAAAAATGTTTTTTGACACCTACGGCACTGCGCTGGCAGAGTTGGAAAAGCGCTGCGGCG  
AATTCCAGAACAAGTTAAAGCTCGCGACTAAAATGCGATGGTTTCAATAACTCAAATTA  
GCATCAACGAATTTGAGTTGATCGTCCCAATGGTGCAGGCGGGCGTGACAATTATTTGT  
TTGCAATTTTCGTTGGCCCAACCTCCTGTGCCGAAGTTTATCATCGGCTGCTCTCGGGTAA  
TCGCATGAAAGATAACAAGTGTATTACAACATGCCTATATCGTTGCACAAGAATCTCATTG  
TGTTTCGTGGAAAGTAGGTGCTATCATTTCGAAAGATGGTTCGAATTATTTAGACCGGTTA  
TAACGGAACCTCCAGCTGGTTGCAACCATGCCAATTGTGATGACCATGCCAAGAAAAGTGG  
TTGGCTTGATTCTTACGGTAAGTTGCGAGGAATGTATCGGCAAGCACACAGTGAATGGAC  
AAAGGCAAATGAAATTCACGCAGAATTGAACGCCATTCTGTATGCCGCGAAAACCGGGCA  
AAGTATCGATGGTGTGAAATGCACGTTACTGTTTCTCCGTGTCCAGATTGTGCAAAAAGC  
CATAGCTCATTCCGGGGATTAAGCGAGTCGTCTATAATGAGTTATATGATCGTAATCCGTC  
TGGCTGGGATGACATACTCATTAAAGTCTGGAGTAGAAGTAGTGAAAAACGAACAGCCTCT  
CAACATTATCAAGAAAATTTACACCACCAGCAACCAAAAATTGAGGAATTGATTATGATCG  
TTGAAGTATCTCCTAACGCCGAAGCACTTGAAGTCAAATTCCTTTGAAGTTAATAGCGTCG  
CAGAAGCTGCCGTTCTGGGAATCGATCCC GAATGGGTTGACGATGTCAAAGCCGTCGTCA  
AAGTTGACAAAACGAACCGCTGTTTGGTTATTATCCGTGCCTTATCGGTTTTGTCACTG  
GTCATCCGGATTTTTCGGATGGTAAAGTGATTCGCACTTCTACTGTAGATATGGTAATTC  
ATACTCGTGGTGAGTTCGAAGAACGTACTATCGTTTTCACTCGCAATTCTCGTTATGAGG  
TGATTAATGAAAATTCAGCTCGATACTAAAGCACTCGAATCACTTTTCCCCGAAGGTTT  
GGAGGCTCGTGTAGAACTGCAAAAATGCAGTTATTGCTAACTTCGCAAAGAAAATGCAAGA  
AAAGCATCTTGAAGATGTAACACGGGACCAGATTCGTACAGCTGTTCAAGAGGCTGGTGT  
TTCGATGGATTCATATTCATTGTTTCGTAACATGCTGAACAAAACGATCACCAACAACGG  
TTGGGATGCATCAAGTGCGCAATTGAAGACCAATTCCAGTTTGGCTCGTGCTATCCATAA  
CTATGCCATTCAGCAAGACCTGAAATTGATGAAGGGTATGGAAGCATGGGCCAATGAAAT  
GGTTAGTAAAGAACTTGGAAAGCGCGAAGAAGCTGGCAAAGGTTACGTTGAGCATTACAT  
ACAAGAAGCTGAAATGAATAGCGCAAAAAGCAAAGAACCAAGCTTTTTCGGAAAGCGAATC  
TCGGATTGTTGCTGCCTGTAAGCAAAAATATGCCGGAATCATTTCGTCGTGAAATGGCGAA  
TTATCTGAACAAACCAATACTACTGTAAGGAAATAAAAATGTCTAAGCAATATGTA CTTC  
ACAAATGCTGTTCTATTTTTGGCTGACGGCGAACATGAACTGATTTTTCGAAAAGCAGA  
CGATTTCGCATCGGGTAATGCTGGCTACTCGTGACACTGTCTGATTGAGGTTGCTGAAAA  
AGGTGACAAAGCTTTTACGGCAGCAGAACCTGAAGAAAAGAAAGAACGCAAAGAATGTAA  
TATTTTGAACGTCGTCGTTTACGATTTGGAAGCAAAGCTTGGCGATCGTTCCGAGTCGA  
TCGACTCGTATCTATCAACGGTACTGGTATGGCCACGCTGGCATCTCTTATCGGTGCTCA  
ACATCGCAATCAACTGAAAATGGGCCACATCGAAGAGCGTTACGTTTCTACCGAAAGCAA  
GGTTACGTGAATTTTAAATCCGTTGACCCCGATGAGTTGAGCGATTGTTGGCCGAAAACCTC  
TTCGCGATTTGAACTTTTGTCCGACGAACACGGTACCAATACATGGTTCCCTGTAGAAGA  
CGAATCCAATTTTTAATCTGTGCTGAAGTTTGAATACGATGGGATAACTTATAATTATC  
CCAGCAATAAAAACAGTTAAAGAGAAAATCATGACTAACGTAACACCTATTGCTCAATTTG  
AAAGGATTATCTTGAATCAAAAAATTTGGCATCCGCAGGTGATGAAATCATTTCAGATT  
CTGGATTTGTTCTTGGAAAACGCGATCTTCTCTGAAGTTCTCTCACTGCAGAGATTATCT  
CAGTCGGTAAAGACGTACCGAACCATTTGAAAGTAGGTATGCAAGTTTTGATTCAAATG  
CCCGTATGCACAATTTACCCGATCCTCGTTATCTGTCCGGCGAAATCAGTGCGAACAATA

GTCGAAAGCTGTCAGCATGCCACTGGAAAGATATTCAAGTCCTGTATGCTCAATTGATTG  
TCAATATAAGATTAACAGATTAACAAAAGGAAATGAAAATGGCTAAGAAAAAGAAAGC  
AGTTGAGAAAAAGTAGAAGCTCCGAAAAGTGGCCGTCAAGGTTACAAGCGTAAATCCAA  
CAGCCGTGTTGATCAAGTTGGTGATGCTCTGGTAGCTCGTGTTATGCGCCAAGTCAAACA  
TGTTGATAAGTTTGGTCAGCCTAAGCACGAAGGTCGCAAGCGCCAGAAGTGATTAATGGG  
ACCTTCGGGTCCCATTTTATTTTAAAAGCGGTTTAAAAGGAAATATAATGCAATACGA  
AAGACTGATTATTTGACTGATGTCGACGGGGTTTTGGTTCAATGGACATCTGGCCTCCC  
ATATTTTCGCTCAGAAAAATGGCATTTCGGACCGACGAAATTTTAAAACACTGGTTCGACGA  
ACGATTCCGCACTGGTGAAGAATTGTTTCGGTGTCAACGCGCGTATTGCAAATATTTTGAT  
GCGCGAGTATATCAACTCAGATTTTCATCAAATATCTTTCTGGATATGTCGATGCAATCGA  
TGTTGTAATCGAATGAAAGACCCATATGACTTTATTGCCATTACTGCGCGAGGTGATTC  
TAACCAAGCTCTGCTCAACCGGTGTTGCAACCTGAACACACTTTTCCCGGGCGCGTTCAA  
AGATATTCTGTGTGTTGACATCGGCGAAACCAAAATGCCACATTACATTTCCGTAAAGCA  
AAAATATAAAAATCGTTTGGTTTGTGTTTGTGATGATTTGCTAACTAATCTCCAAGATTG  
TCATGATGCGATGTCGCAATTGCCTCAAATTCATATGCTTTCGAACTGAAGGCGCGCGTGA  
AGTAAAACATGATATCAACAAATACCACACTGCTAAAAATTGGTACGATGTTGAAAAGCT  
ATTAGATCAACTTGATCCAAAACCAAAATACAATCGATTTGTACATCATTTCGACTTGGCA  
AGATAAACCTGCCGTCTCTGAGGTAATAATGAAATGCATATTTTAGACATTCTGAACGAAA  
TTTCCTCAACTGATTCGTCAAAGAAAAAGAAAAAATCCTGAATCGCAACAAAGAAAAT  
AACCTTCTCAAACCTGTTTTACCCCTTGCCTATAACCGTCAGTTAACGTACGGCATTACA  
CCAAAAGGTTTGAATTTCCGGCGGTTCCGGTTGGACCTATGAGTTTGGAAAATTTCTGCGAC  
GAGCTTGTCAAAAAATATTCCACCCGAAATTTGACAGGTAACGCAGGTATTCCTACTACATG  
CAACAGATGCTTGATAGTATGTCAAGTTCTAGTTGTGAAGTTGCCAGACGTATTCTTTCA  
AGGGACCTCAACTGTGGAGCATCTGTTGCTCTTGGAAACAAACATGGCCCGGCATTATT  
CCTGAACAACCTCAGTTTCTTGCAGCACCATACAGGGAAAAGAATTTGAAGAAAATCCGT  
TGGCCTGCTATTCTCAATTGAAAGCCGATGGTGGCCGTTGCATGGCTCTCGTATCTGCG  
GATGGCTCACAGGTATCACTGGTGTACGGAACGGTAATGAATATCTGAAGTTGTATGAC  
ATTACATCACAGTTGAAGGAACTCGCTCAGGTTGTGAGAGACTCTGCAACATTATGGT  
GATTTTGTATAGACAGCGAATTGATTCATCTAGCTCCATTCTCTGCATCCATTAACG  
GCTAAACAACATACACTGGATGATCTGTTTGAATTCCTGAGACAAATGATGAAGAAGAA  
ATCGAATCAGATCGAAACAAGTCCTATGGTTTAAAGTAATAAAGCTCTAAATGGAACAATT  
AGCGACGTTGAACAATCAGAAATGATTTTAAACGTATGGGATATTATTCCGCAGGAAGTT  
TATTACGAGCGGAAAAGAGCACATCGTACTACGAGAATCGATTTCTACTCTTGCTTGC  
CTGACTGAAGCTGTCGATGGTACCCAAAATATCAAACATTCAACTCATTGAATCCGAA  
GAAGTTGAGACATACGAGCAAGCTATAAAAATTTATCAGAGATATGTTGATCAAGACCGA  
GAAGGTACCATTCTTAAAAATAAAGATGGCCTGTGGGCAAACGCTAGAACAACTGACCAA  
ATCAAGTTCAAGGTAGAAGTAGAAATTGTTTTGAAGATTGTGCAAGCTTATCCTCATGGA  
AAAGATGCGTTCGAAGGTAGGTGGCTTTGTTCTGAAAGATTCTTCAGGTCAAATCAGGGTT  
CGTTGCGGTTCCGGCTTAAAAGACACAACCCATAAAAAGGTAATGGCGCTAAAATCGAA  
ATTCCTATCAGCGAAAGGCATGAATATGACCGCGAAGCGCTTATGCTGATAAAAAATGAG  
TTGATCGGCCAGATTGTTCAATGCAAATGCAATGGATTGCAAGAGAGGAAGGGGCGTAAG  
CCGAATGAAGCAAATTCAGCTGTTTCTTCTATTTTCCAACCTCATCCGACGTGGCAA  
TCAAACCAAATCATAACCATGATGTTTTCCACATGCTATTCTGGACTGAAAAGGCCT  
TCGGCCCTTTTTTCGTTTCTGTTGTGTACATGTTGATTCCGGCTTTGATAGTATGAATACG  
TACACAACCTATTGGAGAAATTCACATGATAGTTTAAAGTTTCGATACAATTTTGAAGAACAC  
ACTGGCGAAGCCGACGACGCTCAAACCGCTTTTGAGAAAGCAACTGAAGTTATGCTGTCA  
CAGCTTCCCCAAAACAGAAAACACGTTTTACGCCACTGTTCCAAATGCAAGCCGTTTT  
GGCAGCGGTGATATTCGTGCAATGAAAGTTATCCGTATGACCCGTGTTGACCTCATGGCT  
GTTCCGGGCGGACGACTTCGAATTTCCGTTCTTTGTAAGAAGTAGGTGAATAAGCTCCTTCG  
GGAGCTTATTGGAGAAAATTATGCTAAACCTTCAACTGTTGTACCTGTGGCTATTGAAA  
AGCCCATATTTTTCAAATCACATCTGTCAATCGGCGGATCTACCGCGGACACAATAAATT  
CCCCAATAACTTTTTGAAGAATTAGAGTGGGCATGTAAAAACGTAGAATACGCTCATGATG  
TTAGCAGCCACGGAAACATGCCATGGATGAATTTGGAATTGGGGTCATATGAGCAAGTGC  
GGCTAATTTTTGACTATCATGGTAAAAACTCCCAGATATAATCAGAATGTGCAATCGTA  
TAGCCGAGCAACGATACACCGACAGTTGCATGTGTATTTGAAAAAATATGACGACTACG  
TGTCTAGCTATTGCGATGAAGAATTTTCAAACGTTTCTGCTGCTTTGCGGTCTGGAATAT  
TCGACGATGGAAATAAAAAATTCGTAACCGAGTGCATACGACGGATGGATTCACATATGG

CAGAATCTGAAAATTTTAATAAATCTGTATGGAGAGGAATGTCTCTCAATAAGGCAGATT  
ATATGAAATTTAAAGATAGTGGGTCTATTCTCTTTAAAAATCCCGTATCGACATCATTTT  
GCCCCGTTTTTTTCAATTACGGCATTGCGCAATGCAGACATCTCGATTTTAACGAAATCA  
CACGCGAAATTGTTATCGATGGCGACCCACATCGACCTGTCACTATAAACATGCACATTG  
ACTGTCATAATGTGAAACACCTGATTCCGGGAAACCTTAGTCCCTACCCGGAGGAGTGCG  
AAGTAATTTTGGACAAAACACTGTACTCGTAATATATGAGATTTTCGAATATGTGTCTC  
ACGTCGACAGTTTTTGTGTTTGTAAAGCGAAAGCGGTTCCGTTAAGTCAATTCACTGGAA  
CAACATTAGTAGTGTAATAACATTTTAGACCTATAAGGAAAACAAAATGATGCTATTTG  
AGATGACAGATGAGCAATTGGACGAGGTATTCGACGGTGGAGTTGGAAAATACCCGCGTGG  
TCAATCTTTTGCCAAAGACAAAAGTTCCGATATGTATTAACATCCAAGTTCCTGGTTCAG  
AAAATCTGGCTTTGCGATTCTGTAATTTTACTTCAAAGGGTGATTCCGCGAAGCAGATCA  
AACCTGGCGACAAATTCATGCAAACACAGGTCATCCAGATTTTCAGAAAAAGGAACACCAC  
AGATTCTGAGAGATGGTCTCGGTAGTGACCCCATGGCGCAATGAATATGATAACTGACG  
AAATCGTTAATATGCTTGTGACGGTATAGAATGGATGCAACGCTTCTGATGTTTCCGACAA  
AGGCACTGAAAGGCCAAGCTAAAAATATTGCGCGAATTACATCCCGGCTTTTGCAAAAAC  
GATCGGGTGGAAAGTTTATTGTTTTGCCAGAATTGTTGGAAAGAGGCAAAAAATATACAT  
ACATTATGATTTACCGAAAATCAACAGGAAGCACTAGTGTCAAAGGATTGGAAACTGATC  
CTGAGCTTTATACGGTTTCATCTACCAGTGTAGGCGATGTCGTCATTGATGTGAAAACCTG  
GTGAAAAAGTCGCAAAGGCAGAAGCTATTGCTGGGTCAATTGAAAAGAGAGAAGAAAAAC  
GCTCTACTAAGTCAATGACAACTTCAAGATACCACGTGGAGATTTGATCAAGGCATTCA  
CAACCAGTATTGCCTCTTCGGACAAGGAAAACAATTACTACGACCCTTTGGTGTGGCC  
CAGTCGAGAAAAAACCGCCAAGTACGATGCTGAGGAAGCAGATATCAATGCTTATAACA  
CGATAACCAGAGAACAATAACGAAATCGCATTATTACAAATTCTCTAATTTAGCCGCTG  
CTAATTGTCTTGACAAAATTGACTTCGACAAATATGATGCGTCAAGCCATGAATTGCTTG  
CTCTCTATGCGGAGACGGTTCGTCAAACGTCAGAGAAAGCCGCACAGAAATGGGTAGATG  
AAAATATTCCGGATGAACATCCGGGTGTGAAGAAAGGAAAAGTTCGATTTTCATGGTTTATA  
AGGAGGTGAGACGCGCTATTATGGAATGGGCGAATTATCTTGGTAACAAATTTGATGATA  
CTGTGCGCAGTGTTAATATGAGAAAAAGATTGCCACCTGCATGTGTTTCATGCTATACAAA  
CTTACACTTCGAATGACTATCGTAAGATTAATAATGTTTTTCATCGCCAAGGTAACCAT  
CAGCTAAAACCGTAAATGATATACAGAATCTCGACAGAGCTGTTGACATTGCAGGAATTA  
AACTTCTGAGAATCTCACCTTTGGCGGGGTATAACATGCCCAAATTATCCAGTTAAAG  
TAGCTTTGGAAAATAAAAATGTTTTATTTTTCTAACTACGTCTCATGTTCTGCTGTTCTA  
TTGTATTTTTAGGTGGGTCTATTGCCGAGTATGACATTGACATTCTTAATGCTAAAGAGA  
ATGATGACGCGCAGGTTGAAACAGCCAAAAAACACGGGGCTCATTTCGCATTTGCTATC  
AAAAATGTCCAGGTCCCAGCTCTTATAGTTAACGGGATGTCGAATTATACGAAAGAACGC  
GAAATTGTTCTTCCACGAGGAACAATTTTTGAATTTAAAGAGGTCAGTAATGTTGGTGAA  
TTTACTTCAGTAAAAGGAAATAGCTGATAGATTGTTCTGCCGTTTTCAAAGTCAAATC  
GACGAATCAACAGAGATTTACGACGGTGATTTGCTAATGCAAACAGGCGAAGTCAAACCTG  
ATTGAAGGTTTTTCTGGATTCATGAAATCTCGCGAAGATGAAGAAAAGAAAGATTCAA  
GCTGAAAGGATACAAAGAGACAATTATTTCTCAACTCTCATCGACTTAGGTGGAGAAACC  
AAATTTGTCCAGGTAGTAGAATAAAAAAGGGAGCCGTATGGCTCCCTTTTTGTTATCCAA  
ATGAACCAATTTTGACAACCATCCACCAGCTTGTTTGCCGAGTTCAGGTAATAAATCAC  
CCTTAAGCCAGTCTTTAAGCATTGCTTGATTAACCGCACCAAGTGTTCATGACTCGATACG  
CGAATGTAACGTCAAACGTTGTAATAGCATTGTTATCCTCGTAGCTAAGTTCAGGTGCTG  
ATACGCTGACAGGTATGCATCCATTAACATCGTCACAGTGTGGGGTATACCGTCTCTGG  
AGTGCAAATTCATTTGTATATCTTCTTCAACATCACCAGGCAGTGAACGCAGTCCGGTGA  
CAGGGTCTTCGACCCGATTTACCCAATCCTGCATAGCCCGGTCATTGGCAGCCTAATGGT  
CCATTCTGAAACTAATTATGAGAGGATCATACTCGCGCCCATCAATTTGATGTTTGGAG  
CGTTGTGAAATTTGTCCATTTTATAATTTAGCCGGTTTTCTGGCATTTTTTACAGAATAAA  
CCGTTAAACCAGTATGTGTATTGCCAGCATTGAAAAAGTCAAGCAAACACGTACCGACTT  
CAAATGACCAAGTAGGGACTGTATAGTTTCGAGACGTCATTGCGCCGCTCAAGTATCTCG  
AAATACCTGATTTGCGTATGATACTTTTGTGTGCCTTGAACAATGACTTTATTCAAGGTG  
CTCGAAAGCATACTTGTGTCAACCCGGCAAAATCTTTCCCAAATGGAAGATTGTTATAG  
AGATATGCACCGAATCCATCAAGCAAATCGGTTTGTGTTTAGATGATGGGGTTGTTGCGAA  
AACAAACAGAGAACATATTTGTTCTGTGAAAGTCTTTATTCAATCCTTGTTGAAATTCATC  
TAATGTATACATGATTATTCCTCATCATATAGATTAGATCAATTGCGGGCAAGAATCTCT  
CTGAAAGTGACTTCAAGTACAAAACCTTGAAGGCAAATTAATGTGCTATTGCTAAACCCCGG



AAGTGACCGTCAGGGCTCTTATCGAACCGTAGACTTTGAATTTGCGCTGGCCCAAATAAA  
TCAGACCGCATATCAAATGAACCTGTTTCACCGAAATTTCTAATAGTCCAATAATTGGA  
TTAGAAACAACGTTAACATTACTCAAAAATGATGTTATTCTTTCAAACATCGTAGTTTGA  
CCATGAGTTGCTTCTGGTGTGACTGCGTTAATGAATGTTTCCCTGTATGCTTCATCAAGA  
GTGCTTTTTATTTGACTCGCCGTTTTGACTTTTCTAGTGCTCCGTACGAGTAATACGAG  
AGCATTTCGTAAATTATCAAAATTTGCATTAGGTTCGTATACATTACGAGGCGTTAATTGC  
CAGGTATATGCTTTTGTACGATTCTCTGCGCCAGCGTACAGTGCCCTGGATGCGATGTAT  
ACTTGCTCACCACGGTCAGCAAATGCTCCCTGGGTAATAGACTCCAATCCGCCATACAAT  
GCATGAGAAGCCATCGAGCTCAGTGCCCCGGTCTCAGAAGTGTGCGCTCGTTCAACCAGT  
GATTGCTGGACATCATTGAATTTATGGCTAATAGTATCTACATCTGTCTGTCCCCGAGGC  
ATCAGGATGTTAGCTATGGCTTCCTTGACAACACCCTTACGATAATCGCCAATGTTATTT  
TGACCTGATCTGAACGAACGCAAATCCCCAGTCTGTCTGCCGGCATAGTTAAATGCTGAC  
AATATCAAACCGTTTTTATACAGATCATTAAACATTGAACTCTTGCGCACAGTCATTGCT  
GAATTTCTCTCGGCAGGGAATTGGGCTATGTCAATTTTGCTAATAGGCCTGCGAGGTGAA  
GAACCCGTTGCCGGGTTCTCTCCTTTCAATATTCCGCCTACCACATCCTGAACCCCGCCG  
TCTAAAAGTTCAGTACTCTCATAAGATGTTATTTCTATAACCAGGTCCAGGCGAAGATT  
TTCTTGAGCCTGGACAAATGTTTGATTCTGATTTTTGACAATGTTAGCCTTTGTCTGAT  
CGTTGTTTTGACTGGCTGCCTCTTGCTTCTTGCTTGCAACTCTCTTCACTTCTTTGTCTGA  
TAGATTTAACAGTCGAAACCTCTGGTTCAGGAGCAGGTTTTATTGCTGCTGTCGGCACA  
CCAATGTTTTCTCATGCTCGGCCAAGAATTTAGTCTGTTTGTCTATTTCCACTCTAAGTT  
GTTCATAAGATTCTTAGTCAACTTACCTTCTTGATAAGACTGTTCAACTTCATTTCGAAC  
GATCATCGAGCAACTCGCGGTGTTTGTTCATAAATTCAGGAGAAGTTTCATTCTTTTTAG  
CAGTAACGCCAACATGGTTTATTTTCCCGCTCAGAACGTCATATCTGCCAAATTGCTCTG  
CTGTAGTATTTTTGGCAATTACCATGCGTTTTTACGCTTTTTCTTCTCGTCAGGGGTCT  
CTTCATCTTCCCCATTCACTTTACGCCATTGCTTTTTAAACCAATTTGCTTCGGTGTTAT  
TTGCGTCTTCAGCTTCGCGTCTTCTAACACGGCCGATTACTTCTTCTTCTTTTTGAAG  
GAGTATATCCGACTTCTGATGCAGCAACTGATATTGCAGGAGCTTCGAGCGAATCGGCTT  
TTTCATCTGCACCGAGAGCTCTTAATATAGTTGCGCCAAGTTTGGCCAAACCGACCATCA  
TCATATTGACCATATATTTCAATTTGGTCAAAGGCACCTTCGGCAAGACGAACAAACATTT  
TTGTATATTCATCACTCTTGAATAATTCATCAGGTCTGTTATAACTCCATGAACATTTT  
CAAATGGTGTGCTAAAGAGCCCAATTGATTTTTAAATTCGGCGTAATTCTCTTCAAACA  
TTTTAGTGCAATGAGTAAAATGACGAGATAAAAACGTCAAATGTCATAATCAAGGAAAGCA  
CGAGTGCAGCCATTTTGGCAAATTGAGAACGGCAGTCAAAGTGTATTTGAACAACGTTG  
AACTTATTGAATCGGCAACGCTAATAGTTTTCTTAAAACGATTATCGACTGACGACACAA  
TACGATCTCCGATTCCGTCAATCGCACGTTTCATCATTTTTCTTCTTTGTCTGGTTAACTT  
TATCCTCTTTTTCTTCTTCTTTGGCTTATCGTTTTTTAGGAATTTGATATCTTCAGAAA  
TAGTTTTCAAATACCCTAAAACAGGGTTATTTTTGGGTGTTTGTCTTCTTCTCTACTA  
TCTTTTTATCTGTTGGTCACTAGTGTTTGTGCGTAATTGGATTTTTTTCACCATCCG  
CTGAGAAATTATTTTTAGCTTTTCAGCAAATTCAGTTAGTTTGCTAAATGTTTTCTTGG  
AAGTATCTGAAATCTCTTTCAAGTGCTGATTAGAAATTTCAAGTGGCTTCCGCGGAAAGTT  
CTGTTGCAGCAGCAATATTTTCGGTTTCAGAAGTGTGTTAACTATTTTACGAAGTTCGG  
AATTACCTTGTTCAACTGTTTCAGCTATAAGCTCAGATGAAGCTAAAAGATCGCCAGTGT  
TGTCTGGCGGATTTTCCAAGCAGTTTTGATATTAGATTGCTCAGAATCTCTTTGCCTAT  
CTCTTCTCAAGTCTCTTAGTGCTTTTTGAGTAGCCATTAATTAATCCAATAATGTTTGA  
GCCACCATTTATTTTGCCAAATGGTGTATCAAGTGAAATAGTAGAGACTATAAAATCTGC  
CCAATCCAATACAAGCGCAGGTGCATCTTCGAAATTAAGTCAAACCCGCTTTTTTCTTT  
GTCGTATTGCTTGGTCAAGTATGTCCAATTTTCGATACAAACGTATCAGTTATCATGGGAGG  
TTTGAAATACAGAATATTTCCGTTTAGCTCGAATTCATATTTTGGCGCTAATATAAGCTTT  
GTCAATATGAACGTCAAACCGTTAATGGTTTGAACGGTCGGCAACTTTTTGTTGAATGC  
CAGCAGATGCAAATTACCATATCTCGTTCAGCGGCAGTCAAACCCGAGCGAATAGAATC  
AAGCAATTCGATCATAACATGAGTCTACACCCTGCATATCGTTCAGCAATTTGATATGCCT  
GAAACCAAGTTTTGGAATTGTGATCTCTTTTCCATTGACTTTTATGGTCTTAACAGCAGG  
GATGATGTTCAATTTTGGTTTCATGTTATTTGCCTTTCGTTAAAATCTGTATGAGCTTTC  
GAGTTGTTGAAAAGATACATATTTGTTATAGATTGCTCTCTGCTTATTTTCATGTATAACT  
TCATCAACGAAATACTCGCCTCTAAATTGATTCTTTTTGATCGTAGAATTCCAACGCATG  
CCTGGTACGAGACCAAATTCTCCGTATGTTTTTGTGCAATACGCATCGGATTCTGAA  
AATATTAGAGACCTATTGACTCTGCGGCACCAGGGCGGCTTATTTGGTCATAATATGCA

CCAGAACGGCTAATACAAACTGAATTTAGCCCTTCGCCAGTAACAACCCGAGTTTGCATT  
TTGTTTATGAATGAGTGAGCATAAAACGAGGTATTCTCGTATGGGTTACGGGTATACGCG  
TTTGCTTTTGTCAACCATTCAAATCAAAGCATATTTTTTTATCTACCATCGCAATAGTT  
TCACCAAACAAACGCGGCTCCGTCACGACGTATTGTATTGGATCATTTTTGCTAATAGAT  
TCAAACCTGACATATGAATGCCTAACATATCTTCCCAGACGAATGGAACACTTTCGTAT  
CCAGTCGTTTGGCCATGTTCGGCTAACAACTTGTAGTATGCATTTATGTCCAACACCCAA  
TTTGTCAATTGGCACTCTAGTGCCGATCGAATTGATTGTTCGGCGCGAGTTTGGGAGTTCCA  
GAATACCAATAATCAATCATCTCGTTCACGGATGCTACAGCATCATTGTAAACATTCTG  
CTAAACTTGAGATTACGTACCGAATGTAATGAACCCAACTGGACTGTTATGATGTTGTCG  
CCTTTCATATCTACGTTTGGAGAAAGATGTTTGTATGCCATAACAACCGGTTATAAGTTATT  
TCAGTGTTTCGCTGTTTTGAGAGATGTTTGGATTATTTTCATCACCAGTCAAACGTGTCTGT  
AAACCGTTTTAAGTCATAAATTTGCAGCAGCCCTTCATTTATACCATTGGTTAGACCATCT  
CTCATGGTCATGGTAATAAAAGTTGCTGCTAATTCAATAAACCTATTCTCCATCCAGGCA  
TCATAATTCTGGTAAAGTTTTATGGAGACATTGGGATAACCAGCGCGTTGTAACATTAAT  
TTTTCTCCTTTAATTCTTTTTCCACCAGGCTGAGAACAATGGACCTTTCGACTGGTAGCA  
TATTAATTATGTCGGCCAGAGAATAGTCATGTCTTACTAGCGCTCTGTTTATCTTGTA  
AATTGAAAATTTGATCAGGACTAACCAAAACCTCAGACAAATGGAGCATATTAGTAAAA  
TGATGTCATAATCTTTACAACATTTGATTTTTTGTATTTACTAAAATCGGGTTGAATGATT  
TTGATAGTTCAACAAATTATTCGTTTGAATCATATCAACCAATTGACTGCGCTCATCTT  
CACCCAGTTCATCCCAGGTGTATTTCGTTGTGCCCGTCATATATCCTATCAACAGTCTCAT  
AGAAGAGTTCGTCGGGTGAACCTGATTTACGAGGCATACGAAATTTGAACGTTATGTTGT  
TTACCTGCAACTCTGGAGTTTTTGTGGCTCTTGTGTCAACTTCAATCTAAGATTGTGCA  
TCGACTTGCAGTGCGGGCATGTGAAAGTTGCGTCCACAAGTGATTTGCCCAAACCTCCAG  
AAAAAACTATCAGAAAAATATGTTACGTTCAAACGGCGTATAATCCGGATACATTTCTT  
CGAGCAAATCGGAAAATATCTCAGATTTCTCTAAAGGCTTACTTCTCATCTCATTCTGA  
TCAATAATAAATCACGATATTCTGTAACCTGTTATCGGTTTAAATCTGTGTGTGCCGCTCG  
GAAGCTTTATGCGGATTATATTCATAATAGATACACTCCTTTTAGGTTATTTAAATACAT  
TCAGGAGGACTGTATGGACATTAATAATCACAGTTGGAAATAAGCAAGTAGAAACTACCAT  
GTTGTTCGGTGC GCGAATATCTGTCTATCGTAAATGACGCAGATGAAATGATTCCGAAAT  
CATTTTCAATAAAATAGGTCAGCCGTTACCGAAACATCTAACTGAGCAAGCTCTCATCAA  
ATTGATAGCGATCTAAAAGAAAAAAGTCATCAAATGAAATCAGAGTGCACGCTATGTCA  
AAAAGAAAATAAGTTTGAAGTGCATCCCGATAATGTCTGTGTTTCTGACGGATTGGGGCT  
ATCGCATGTTCGCTGGCGGAATGGTTATCAATATGAGATACCCGATGATGTTTCGAAGATCG  
GGATATGTTTGTAGATGATAGACAGATGTATCGTGTCAATTTGAATATGCAGATCAGCTATT  
CAAGTGGGAAGATTCAACAGAAAACGAAAAAGACATTTTATTTAAGCATTTGACGTTTTT  
AGATATTGAAGCTATCGTAGAAAACTTCAATCTCCACAGGTATATGCTGCAGTTCCAAT  
CGAGTGTGAATGTGGAAATCAGTACCCAGCGGCTATATATGGTGCTAGTAAATTGTCAGA  
TTCACTGGGGGTAAAATGAATATAAATCTGCTTTATACAGATCTTGACCCAGATTTCAAC  
AAATCGTGGGACAATGATGTGTTAATGACACGAGGAGCTCGTGCCGTAAAAAATTCTATC  
ATAGGGATAGTTTCTACTCCCATTGGTGCGAGACCATTTAACCATACTTTGGCTGCGAC  
TTACCAGACCAGCTATTTGAAAACATTACGCCGTTGGTGATAGACACGGTTAGGCGAAAT  
ATTCAAACGGCTATACGAACTTTGAGCCACGTGTATACAATCTTCAATTGACTCAACT  
GGAAATTACGATAATAACGAACTAATTGTCACAATTCGATTTTCAATTATCGATAATCCA  
GCAGTAATAGACGAAATAAAAATGAACTTTCAAATTAATTTAGCCCTCTTCGGAGGGCT  
TTTTTGTACGAAAATGCAAGAAAAACGTCACCTGGGAAACAGCATAAATAAAGTCAGT  
TGAATTGCTGAAAAGAATAAGATACTCCAGGAAACGGGATGTAAAATCAATACTGGAGC  
CCATGGCTCCAACGAGCTTGCTCGTTAATTTTTATCCTTTTAGTTATAATATCTATTAAG  
CCATAAAGGATAAGTTTTGGCAAGGCCAAAACCTGGAAGCCAGATTTTACTGTTCAACTA  
TCGATTTATAGTGTTATACTGGCCTCAACACTAAAGGAGAGTAAAACATGATCATGAATA  
AAATTCAAGAAGTTCGTATGTCTTTTCGCAAGCTTGGCTCTGATGGCGCTAAAGCTGCAA  
ATCTTCTCGGTCTAGTAATTGGCCAGGTCCAGCAAACCTCGAGATAATTCCGACGCTGCAG  
TTATCAAAGTAATCAATTCCCTTTTGAAGGGAATTCGCGAGCGTATTGCTCCAAAACACA  
ATCAGCACGACCTCGGCAATGCATATCGAGAAGAAGCACTTCTTCTCAGTTTATTCTC  
AAGCCATTA CTGACGAACAATAA ACTCGGTCGTC AATGGTAAAGCTGTGCTAGACCTTT  
ATCGGGTGCATGGCCAAATACCAATCTTATCACTGGAAAACCTTATGGCACAGCTGTGAG  
CCGGTGTGAAAGATGGA AATTGGTCTATCCCTGACGCTGCTTCGTTGAAAAAACAGATCG  
AAGTATACATCCTTATCGCTTTGGACGTAATTGGAGAATAAAAATGAACGATGAAATTTGC

GTAGTATGTAAACAGTTAGTTCCTAAAGCACTTGCTGTTTACACATCTTTTGGACCAGCG  
CATCCTGGTCCATGTGCCATTATGTTGAACTTTACCTCTTTCAGAATCTACCGGAATT  
CTTGAAGAGACCGAACTTCTGGTGTAAAATAAAAAGGCCTGCATACGCAGGCCTTTGTT  
TATCAGAAGTCTTCAGGCGGTTTCGCTTTCTTCTCTGGCATTTCGAATTCACCTTCTACGG  
CCAGCGATCGCATCTCGCACCGAAATATCATCGGTGGGTGTCAATTCAACTTCTTTAACT  
CGTTGTTGTAATATTTTTCTAGCTCATCTAGTCCTTCTGCTGTTTGACACGCGGCAATT  
TTAGACATAAATGAATCCACTGTTGATTCTGCTATAAATTGCTGAAACATTCCCATTGCA  
TCCCTCCTATAACGAAATTTTATGCAATGTGTAATTGCATTTTTTCTGACACATATCTTTC  
AATACGTTCTATTGCGTGTGTCAGGGCGTAATTTTTCTTTGTGTATCTCCCATGAACATT  
GATTATCCCAATATCGTCAATAATGTCCATACTGTAGCAATACTCTTGGACGAGTGCTT  
TCTCAAACTCGCCCAATAGTTTGGAGAACAGTTACCTTTGATTTAACAGGCTGTGCAAA  
AATGATATGATGCAAATTTTTGATTGACACACCAGTAGAGAAAACACCATATGATGCTAC  
GAAAACATGACCAGTTCCACCTTCGGCGATGATTTTCACTTGATCACGGATTTTCGGTGT  
TGTATCTCCAGATATAAAATGAACTTTACCTGGGTCATGAATCTTTCTAAGCGTATTGTA  
CAAAGCCATAACCATGCGCTTTCAGGGCGAAACATAACAAATGCATTTTTCATTTTTGTCTGC  
GATTTTTTTAGCCATCGAACAAACAACCTTTATTTCTTTTCGTATGATTTCGTGATAAATTT  
TATTTCTTCATCAGAAGAAAATTTTCTGGCAGAAGTTCGATCTTCGCTCGAATAACCAAG  
CTGAATTGCTTTAACTTGCAAATCACATACTTGGCCCTCTTCCATTAGCTGTTTTGTTGT  
TACTGGTCTAAATATATCCCCAAACATGCCAACATATTGCAAAATGTTTGCTTTTCCATC  
TCGCAGAGAACCAGACAAAGCGTATTAACCGGTATATGATCGACGGGTTTCGATGAGTTT  
CTTTATTGATGTCCAGTTGATAGATGACACTCGTCGTTTCATAACACAACCGAATTGGTC  
AAACCATTCTTTTTTCTGCTTAATGGCAGATTGCCAAGTAGAAACATATATCAAAGCATT  
CGACTCTTTTACGGTCCCCTTTTATCCCAAGCATAGCTTCTCGAGGGAAAAGACGGTA  
ATCGACAAAGTCATCAATCATTGTTGACAAGACATGTCGTTGGAACATTGACAAGAAC  
TTTGCCTTTGTAAATTTTCCAAATACGACAGAGACAGCAATGCTAGAATCAGCGATTTACC  
AGCAGATGTAGGCAAATTTAGCAATTTTCTTTTTGCGCATATCCCTTCATACACAGCATC  
AGCTGATACCAGTGAGGAGTGATTTTGTGTTACCAGAATAAATATCTTTGCTGTTTAC  
CCATGCATCAAATTCGGAACGTGAAATATTTTGTCTTTCCGTGATCAACGGGTCAACAAC  
TATTTTATAATCGTTCTGCTCGGCAAACCTTATTGCTTGAGTGAAGTCCATAAAGGAAG  
CAAATGATCATATCCTAGCAGGAATATGTCACCAGACCAACCTCCACACTTGAAACGCGG  
AGAAAATTCATAGCCATCTGCTTTAAATGAAAATACTCCCGCATTTTCATAGAAGATCGA  
GTCTTCGCAAACAACCCTGGCAAACCTGTAGTTTTCTAATACAATATTTATCAGTAAACG  
TCTCTTAAATAAGTCATATAGTTTTATTTATACAAAGGAATCACCATGAAACAGAACTT  
TTAGTCGCTCTGATATCGGATCTCAGTTTTGTTCTCTTTCTGCCGAGAAGGCAAGAAA  
AAACTAGCAGATTATGCTCACAGAATTACGACATTAGACTCGTCAGAAACAAGTCGTTT  
GAAAATATGATGAACGATTTTGAATCTGCTGTCATTACCAAATTCGAGGCCGCTCGTGCG  
GAAGCTGGAGATGCTGAAGAACTATCGATATGGGAGAACGTGTTGACCTATCAAAGGGG  
ATTGAGCTTGACCCTGATAAAATGGATATTGAAGATGAAATATCTGAAACAACAGAGCAG  
CCTGTTGTTGCTGAACCATCGGTCGAGATTGTCGATCAAGACCAAGTAGAAGAAAAACCG  
GCCATCCCATTTTCTGAGGTGAAAATTGAAGCCCCTACAGCAACTGAGACAACCTACCCAA  
GTAGAAGAAAAACCGGTTTCTGATTTTGTGTTTGTGTCATTCCCTGAAGACTATGCGCCAAA  
TATCGGCTGGTCGGACCAGAAGGCCGAGCATTATTAATGTTCCGTATTGGATACACGAT  
TGGATGCAGGGAAGAAATTGGAAAATTGAAATTGCAGAATGTCCATATGACAAAGAGCTG  
TTGAAGTCATTGGCATTTTACATTGAGCGAGATGGTTCTGTTGCTATTCGCGAATCACGA  
AATAGCAAATTCATCGTTATTTTCATAAACCAGGGGTCTATGACCCCTTCATTTGTTTAAAG  
AAAAACAATATGGCAATTAAGTCTTCTCTCCACTTGATCCATCCGTTTCGGAAGG  
TAGTATTGTTGACTTTACCGTTACTTTTACGCGGGATGAGACGGTTAAGGAAGTTGTTGG  
TTACGAATGGCTTGTGACGGCGTTGCTCAAAGCGGAGAAACATCAACTACTTTTAGCAA  
AACCTTTGATTCGGCCGTTTCGTTTACTGTAAAATGCAATGTGACATATGCTCTTGTGTC  
TGACGACGGTGTGAGCCAGTTGTTCTTGCAGCCGAGAGTGCTGTGACCGTTCGAAGAAGT  
ACCCGCACTTGATGGAAAGCATTGGTTCGTTACCCCTTGGCTTTCAAAAACCTCGAGTTT  
CTCGTGGGTTCCGTACTGGGTGCACGACTGGATGGTAGCGAATCCAACATGGCGTCCAAC  
ACCGGCAGAAAGTCCCTTGGCCAATCATTACTTTTCGCGATTGACCAAGCGGTGGAGGAATA  
CAGCGAATGCTTATGCAAGAATCCCGTAATGGGTACATTTACAAAGCATCTGCTTATAC  
CAAGTAAAAGGAGCCTTCGGGCTCCTTTTTTGTGTTTACATTTCTAGAAAACGAATTATGA  
TGGCTTTGCCAACTTTGGGCAATTCACAAGGTTCCGAATAATTAAGGAATCTTCCTAATC  
GAAAGTGAGTAAATTATGCTGAAATCGGCATTAGAAAATGTGATTTTGGAAAATAGTCAA

GCCATCGAAGGCAAAGTGCTTGTACCCGATGCCAAGAAAATGTTCACTGACCCGAATTCC  
CCAATTCATCACAGAGCCAAGAACCGTGATGAGCGGTTTCAAATCCAATTCGGTGATTG  
ATGTACTGCAACAACCTTATCCAGTTGCAATTGACGGCCCGATATGGGAATCGTCGTAT  
TCCCTGATGTATCCGATGATTCTGCGTAACCGTTTTGGTGATTTTAACTCAATGGCCAT  
AATTTACGTGACGTTATTGATACTCTGCTTGAACCTCAGGCGTGAATTCAAAAAGAAAATG  
GCTCTTGCGCATCTTGCAAACTGCGTGACTGTCCAGATGACGGTGTGCGATTACTACAAA  
GCACAGTGGTACACTAAAGCTATTTTATGTTTGATGTATGCTCGATTTGCTGATGATCGA  
GAATTCGACATCGAAAAAGTTGTA AAAAATTGCAAAAAGCGAATACGTTTCGAGCCGCAATT  
TCCATAATCTCATCCGGTGGGATTTTGTCTCAATGCCTCAGTCGATTTCATATGTTTATGCT  
TCAGCATTACCGATTACTTTTTCTGAGACACAACATAACGACAAAATATTCAAAGATAGTG  
ATTTTTGAACACGGATACGTCGCTGACCCGGGCAAATGCATCGAGTTCGTCTGCTTACA  
GAAACAATCAAAGATCGGCTGATCAAAAACCGCGTCAACAATTCATGAAATAGTTGTAC  
AGTGATGGGCTATGTGTAATGATAGTCCCATCAAATCTACCAAGGAGCATATCATGAGAA  
CAATCCACTGCAAAGACGACTATGTGCGAGTTTTATCATGGCTCTTGTACTCAGGCTTA  
AAGGTGATATGCTTCTTCCGCTGAAGCAACAGACACGATTTCCGAAAAGGGCCGGATAA  
AGA ACTTGACCGTGTGTTTTTACC AAAGACCGCGGTCTAGCCAAGGTTTATGCTAGAC  
GTGCTGCTTTTTCTATTGGCGGGCAGCCAACTCTATTTTCGAGTTACTGCACCGGTTGACA  
CGGTCTTTATGTCTGAAACGCCGGGCGCGACGGTTTACCATGCTGCCTGGGCTTTTTGTTG  
AACAGATTCCATTTGGTAAATTGAGCGACTAGAAAGATGAAATTCACGACAACTTACTTC  
AATTTCAAACAACCGTCCGGACCATATCATCAGCGGTGCGATAGTGCCAAAGACAAAA  
GAAGAAATTATCGAAGGCATCAAAGCTTACGTTGATTCTATTTGTCCGTTAGAAGATCGA  
ACCGATGAAAACGGAAATGACACTCTCAAATCGAAGAGGGTGCCCGACTCCCAGAGTCCG  
ATGCGTTCGCGGCCAATTCAAGTCACTATGAGGTAATCGTAATGAGATATACTCAAAGG  
ATCTCGCAGATGCCATTAGCTTTGCTGTGGGCGTTCACATTGATCAATTTGACAAAGGCG  
GAAATCCGTATATTTTGCACCCATTGAAATTGCTGCATTGGGCCAGACATGCCAATGAAG  
ACGTTGATGTTCAAATTCTGTGCATGCTTCATGATTGTGCAGAGGATAGTTTCGCTGGGTG  
TTGCAGAGACACTGGATTTGATCGAGATCACTTTTGGCACCGAAATGCGTCAACTCGTGG  
ATAATCTGACGAAGCGTGATGGTGAAAAATATCAGGAATATCTTGATCGAATCAAATTGA  
ACGTCAGATCCGCGAAAGTGAAGTGCTTTGATCTTAGACACAATTCTGATCTGCGCCGAC  
TGAAATGTATTACAGTCAAAGATCAAGAACGTACCTTGAAATACCAAGTCGCTTATGCCA  
AACTGAATATTTGGATTCAAGAGCTAAAGGAAGAAGAAAATGCGTAATATTTCTGAGCTT  
TCGTCACCCGAAAAGGTACAAGTGCATTTTCATGTTTCGTGAAATGAAGCATGGATTTCGTA  
CAAATCGCCAAAATGTATGACATTCGCGCGACAAATGTCATCGATGTCGTCAAAGAAGTT  
GATGACATGCGCGACAATCATCTGGAAGCTCTTACCCGAGAGCCGGTAGTGTATCGGAAG  
CACTTTGTGAATCCCAAACGGCATCAAATGATGGTCGCTTCAAAGCTCGGAAGCGCGCT  
AAAGGCGAACTTTTGGACTTTGCCATCAACATTGACTCCCGAGAAATCGCTTGAGATT  
TCTCAAGCCTCGGCCAACATGCCCGTCAGGCCAACAAAGAGAAGAGCTTGAAGCTTTGTTG  
AACAAATTC AACACAAACTGATGTACATTCTCCGCGATTTTGGTTAAA ACTCTCCCATAA  
TGAAAACCGAAATCACGGAGTATTA AAATGTCATCTAGAATGGATATGCTTATACGCTA  
CAATGCCATTGCTTCGGCCTCAGTCAAAGTTCCTGAACCTGTCAAAAAGCATCATTTTGA  
AATTTCTCGAGAGAAGCGCAGCACCGAAATTGAAGAAAAAATTCAAAGCTGAGCGAGATGA  
AGTTGCTCGTCAAATTGAATACATGGCTTTATTCAGCGCAAATAAGCGTACTTGC AACCC  
GTATCAAGTTAAAGTAAAAGCTGCGAAGAGCGCGGCTTAGAGTGGCGTATAACTTTTCA  
ACAATTTGTTGAATTGATGAAAGTCGAAAAATGTGCATACACTGGTACTGTTTTCCCGAA  
AGACCATGGCCGTTCTATTGAGCGCATAAACCCCAAAGTCGGATACACGATGGAAAACGT  
GGTAATCGTCACTGCTCGTGCAAACAGCCAAAAGGCTCATCTTGACCAATTTGTTACCGA  
AGAGCATATCCCCGCTGATATGAAAGTCAAACTTTTTGGCGAAAGCAATTTATCAATTGG  
AGAAAAATACAAAATGAATTGGATTAACTTTTTGAAAATGCTATAGTACATGACGAGTA  
TATGGTATTTTCCGAGAACTGGACAAATCAAAGTGATTTTGTGCCAAAATCATCGAATT  
GTTCAATGAAAATACTAAACATGGTGGATCCGCTCCAACAGTTGTGCCAATGGGAAATTG  
GCCATCTAAGAGCTATCTTAGCAACATGCCTCGTTTGTATGTTGAAACGCTATGGATG  
GGA ACTGGCGCACGATTATCGTCAATGGTGCAAAGATAATCCTGGCAAATTTGGACTGT  
CGAAGTATTCGGCAGCCCTGAAGCGAAATATCCTACATCATTTATGATGAAATACGAAAA  
AGGATTTAAATTCAAATTGTTTTGATAAAAGAAAAGCCCCGACGAGTCGGGGCTTTGTTG  
TATTTGCAATTTGTA AATTGATCCGATTACACCGGAATGATTCTGGGTAATTTACACCT  
AACATATATGACATATCAGATTGACCTACCAAGTTATCCAATCATCACCTGTTACATTA  
CGTCCACCGGATTGACCCATACGTGTAGTGTACTGGTTAATGGAGAAACCATAACCGAAGC

ATAATGCCAAAAGATGGTTGCAGTGATGTTGAGTCATTGATAATTTTTATAAGCACCCAAA  
TCATCTGCTTCAATATACGGTGAATAGAACAACGAACCTACGTGTTCAATATCATTGACG  
TAATGCTTACAGCCAGTGATCAGATAGTCAAATGACGATACCGTATCAACATACACTTTC  
AGTCCGTTGCGCAGAGTTCCTGCTGAAAGAGGATCTTCGTTGCGATACATTCATCCGGAT  
GCTTCAAGCATAGCAGAAACGCGAGTTGTACAGAGAACATAGGTCGCTTCATATGATGTG  
TTTCTCAGCATCTAATTTTTTCAGATCGCATGCTTGTGATACAGAGTTCTTCCAATAGCC  
GGGGCGTCAGTGCTAGCGGTTAAATCCAGAATCCCATTTGGCGAAATATATTCTACCTTA  
TAGCGGCGCGAAACAGTTATAAGAGTCTGAATAATGTCTTTGTTAATATCATCAGATATC  
ATAGTTGACAGGGCATCATCGACTACGCCAACCCATCCATTTTATTTGCTTCCAAATCC  
TACATCAACTCAACACTTATATTTGTCTTAAGTTTGGGTGTGCGAACTGGAAGTGTCCAC  
CGATCAAACCTTCAAATCAGTTTCGACAAATGATGATGCACCTTCAAATCTTCTGCTAAT  
GCTGCTTCAGACTTGATTCTCAGGTTGCCGAGCATTACAGCATCACCGATTGCATCGGCA  
ATGTTTCCAGTTGACGATGTCAAAGTCAGTGGGTTTGTGGCAGTGTAAGCCACATCATT  
GAATCTTTGAAAACATACCCCTTAGCCATGGGAGTGTCTAGTTGCGCAAGAGGAATCGAA  
TCCCGATATCCGACTGACCCCATGTAAGTTGCAGCGCTGGAGAATGATTGATTACCGGCA  
GGGTTTCATATATTTACACCGTACAGTGTGGAGGTTGGCATGTTAGTTTCTTGAATTGCT  
ACCATATCGGTA AAAATCAAGTTGTTTGGCGCCCGGGTCAAGCCGACAAGAGCAGGACGG  
CTCGGACTATTTGCCCCGGTAGTTGTTGCTTCAGAAATCAGATCGTTAATGCTGCTCATA  
TTTTTCTCTCATTGTTCTGCGATTATACGAACTCGTGTAATCGTGAAGTTTGACGTAGAT  
GAAACCAATTCCAAAGCACCACCATTTCGTGGCAAAATTTCCGTTTTTATCAACACTTATG  
AATGAGTTGCAGTTTATTGTCTGCGAAGCCTGCCAGATATTCTGACGACAGTCATTGTA  
TCAATATTTACGCCTGCATTAACGGTGAGTTCCAACGAGTTTGCAGGTTCTGCATCACCA  
AATGAGCCAGTGATTGATATTTTATATTTAAGTGACCTGACGCGCCATTTGCAGCTATTT  
GGCATGTCACTGATTCCATTTTGGAAAGATTCATGCGTAGAGGACATAACTGGAATATTTG  
ATTTTATTAGCAGCATATATTTTTCCTTATGCAAAAAGGGTGCCCGAAGCCTCCCTTAA  
CCATTCCTTGGTTGTGGAACCAAGTCCTTTTGAATTACAGACCTTTAACCCATACACGGC  
GGAAGTAGGCATTCTTACCAACGCTGTGAGCACCAGGCATACCATTGCTGATTCGACTGG  
TAGGAGATTGGGTGCGGGATTCAGCGAACGGGTTAACACCGATGGCGTAACGAGTCTTGA  
AGCCCATGACCGGTTGGAAGTTCTTCGGATCAGAACCACGACGCGGGTCAAGTCAAAGT  
ATGGGCAGTAGTAGATACCGGCATCCAGGTAGTTGGCACCGCGGTAACCCATGGTGAAGT  
AATCTTGACGGGCGTATTGGTCTGTGTAGA ACTTGTAAACGACCACCAGAACACCAGCGA  
ACACACCATTGGTAGTATCACCGTTCAGGCCAGAAAGCCATACCTTGAGCAGCTCGGGTGA  
TACCAGTATCAACCAGAGCCAGGGCAGAAACTACGTTACGAGAAGCGATGATGAAGTTAC  
CTGCACCACGACCAGTTTGACGAGCAATTTTCGTTAGCTTCCTTGTGCGATTTGGATCAGCA  
GAGCTTTGTAGCTTTCACCAGCCCAACGAGCACCACGGACATCGATCGGGTCTTGGAAAGT  
CAAACACACCGGCAGCAGAACCTACAGTTTGAGTCCAGCCAGATTTACCAACTTGAGCGG  
TGTAGTTAATCTAATCGATAACTTCACGGTTGATTTCCAGCATAACTTCGTTAGCCAGGA  
TTCCGTTCAAGCTCGCTGTCAGCATCCATACCATGAACAGCGCGCAGGTCTTGGGCCAGTT  
CGATAGAGTATTGAGCTCTCAGTTGACGAGATTTTCGCTTCGACGGTTTGCTTGTGATAC  
GGACGCTCATTTTCGTTCCAAGGGTTATCGGTGGTTCCGTTAAATCCTTGACGAAGTTCCG  
CGATAGAGGTAGCCATACCTTCAGCAATTTTCAGCCAGTTTCGGCAGCAGCAATCTTGGCAG  
TAACCAGGGCATCCAGAGCAGCACCAGTTTCGTTGGTACCGACAGTCACGCTTCCGCCAG  
TCACCTTCTGCAGATAAGCTGAACCAGACTCGTAGAAGAAGTGATAAACGATATCACCGG  
TAGCAACAGCTTGACCAGCAGTCAGCGTAGCAAACGGAGTGCCATCGTCTGCACTGCTAG  
CACCTTGGCACCCAGACCTGAATGCCAAGCATCAGGAGCATAACATCGGGTGGAAAGCCT  
CCTTACCACCAGAAGCCAGAGCGTCTTTGCCGTAAACAGAACGCAGGGCAAATACTTGGC  
CAGTAGGACCAGTCATCGGCTAAACACCAGCGATATCGAAGGCGATCAGGGATGGAATTG  
CGCGTCGTACCATGCCGATAACAGCAGGGCCGATGTTTGTAAATTGCTCCTGAACTGTGGC  
CAGCAGCAATATTGGTAGGATAGTAACCGTGATCACCAGCAACTTCGGCTTCCATCAGAG  
ACTGACCGAATGCTTCAATCAGTTTGTTCATCGCGATAACCCGGATCGGTTTTTGGAACTT  
TTTCTGAGCTTCGAGAACTTGGGCTACAAGAGCTTGTCTGTTTTTACCAGCAATTTTCAG  
GCAGACCTTACCTTCCAGCAGCGGAGTCCATTTGTTTCCAGAAATTTCTTTGGTTTTTCAGAG  
ATATTGTTATAACCTTTATTTAATTAAGAAGACATACGGGAAGCAGCGGCCAGATAGGCG  
GCCCTGGAATTATTTGCCTGCTTGTATCATTTTGTCTCAACAATCACTTCGGGTTTCGAAG  
TTTACCAGCTGCAGATTCATCAATATTTAATGCTTGTTCCTGGATCGGTTTTTGTTC  
TTTCGACCAGAATTAGCAACCATTTTCGACAATCGCAGACAGTTTTTGGTGATTA ACTATCA  
CCATATTCCAGGCCTTCAACAAGACTCAGAACTTTTTCTTCTGTGACTCGGTCAAACCT

GCAGTAGCTTCTGAAATAGCTTTTTCTTTCTTTCAGTGAAGAAATTTGCTCTTCCAGAGCC  
AAATTTTATCAACAGCGATTTAATTTTCAGCTGTAGATTCATCCAGCTCAGCATTTCAGTTC  
GTCAATAACATATACTTGTCTTTCTGGTACAGAGACGTTATTTTCAATGAACAGTTCTGT  
GAGACCGGTTGCAAAGGATTCGAACAGCTCAGACTTGATGTTTGTCTTCACTTGCAGCGC  
ATTTTCTTTTCAGCTATTCTTTGCCAGATGAGTTAAAAATTTATCAGCATCTTTCGTAAG  
TTTTGTTTCAACTTCTTTCACGGGCTGCTTCAATTCCTTTCGGCCAGTTGAGTTTTCGGCTGA  
AGAAGCAATATCGGCAATGTGAGATTCAGCAAGCGGGATTACAGCCGATCGTACAGCTTG  
CTCAAACGCAGTACTGACATTTTCTTTTACGGCTTCGTCCAGCTGAACAGACTCGAAAAT  
ACTGTCCAGTTCAACGGCTACCGCGCCCAGTTTCTCGCTGGATTCAGCCAGCAGTTTATC  
TTAAGGGACATTTGGTTTTTCTTTAGTTCAACATTGAAGCCTATGTTTTTAGCCGATT  
GGCTGAACGCTTCATTAAGTGTACTTACATTGTTATTTATAGCATCTGTATGAGCTTCAG  
ATTCTTGTCTTTGCTCTCTTCTTAGTGGTTAACGTACGCTTGTGGAGCAGATGGCCCC  
AAACAACATCAACCGCTACAGTGAGGCGATAACCTCCTGAACAAAGCAACCTTTAACTT  
GCCCCGAGACCACGTACTGATACTCCCAGGAATCCAACCAGCTCGTATATTGGCGGCAAGTT  
TATCACCTGGACCAAATCACCTTCAATTACCCTGGCAGGACCCATTACATTATCGCCTT  
CCCACCATAGTTTTTCTACTATGATTGAAGACAAATTGGGGGCAGGCATCGGCCTTGCAG  
GATGATTAGTTTCGCCGAGTGATTGTTTAGAATTTATTTGGGTAGCAATATAATCGTCGA  
CAGCTTTGGCAAGAACAGCTTTAGGATAAATTCTCCCGTTTCTATTCTTAACGTTAGCTT  
GCATAAAGATGCCTTCAATATACAAAGCACCTTTACCATCATCCACTGATTCGACTACAA  
GTTTACAGAACAGGTGCCCGCGGAAGTCCGCATACTACAATTAGCAGCTCGTCTTCCATCT  
TATAACCCCAAAGCTTTACGGCGTTTCAAGGCACGTTTGTTTTGGCGCTGCGCCTTTATCC  
CAATGATTGGTTGAGAGCGCTTAGTTTTTCGCCGCCTTACGAGCAATTTGTCTACAAGTA  
GCAGCAGTTAGCCAGTAGTTTTAAATGCATTGCGCTTCCGTGTTTCTCGATCTTTGGTA  
CGAGTTACTTCACCTTTCGGATTAACATGTTTGACAATTGCTTCTGAAATGGAAATATTT  
TCAACTGCAGCAATCATTGCCAATGACATCTCTGTTTTCGTCAAGTGAATGTTTGGAAATA  
ACACCGATAATTCATCGGTGCTAAATCCGGCTTCTACGAAGGATTTAACACGAATCACT  
GCTTGCGCAAACCTGAGATTCAATGACTTGTGATTGCTGAATAGCCGGATGGAATAAGC  
ATTTATTCCTCCTTTCATCTTCATCATCTTCGTCGTCATTCTCATCATCTTCGTCGTC  
TCGGGTTTTTACCTTCGGTAACAACCTGCGCGAGCAATGGCCTGTTTTTCTTCGGCGTAT  
ACTGACTCTTTCACAAGTGCCATTTTCGCATTAATTCACGTTTTGCTTCATTCAAATCA  
CCTGATTTGATAGCATCGATCAATTTTTCCATTTAGAAATCATCCTCGTTTTTCAGGGTTC  
TGGAATCGTTTACATTGGCCTCTTTTTCTATTTGCTTTTTCTTCTTGAGCAATTTGCTCA  
TCAGTCATCTGCAAAATGTTTTTTCATGACATAATCATGCGAGACATATTTACCTACATAC  
GGCTCGATTTGCGAAAGAGCGTCAACTCGTTGTTGAAGAGTTTCAATATCTTTCAATTCG  
GTATAATAGGAATCTTGATGGAAATTAACCTTTATGTTATTTATTTGCTCTTCCCATTTCG  
CTTTCTAACATGATTTTTCTTGTAATCAAATTTGGTTTTGAGCGGGTCAAGGAAAATTTCT  
TCAAAATTTGTTGAAGCTGAACAATAAATTTTCTGAAATCTAATTCATCGCGGGTGATA  
GCCATATCTTGGCCACCAATCACCATTCCGCCATCGTCGCGAGGCATCCGGGACAAAGGA  
ATTCTCAGAGCTTCACAGAGCTTTTTATTGAACCAGCGAACATGATCCATTTACCCATT  
GTTTGGGCGCCTGGAAGAGAAGTAACTTCGGTAACAGATTTACCATCTCTCCGCATCAAC  
CAATAATCTTCAGTCATTGAAAGATTGCGTTTTTGTATTTTTCACAGTACCTGTATTCGAA  
TCGTATAACAACGATTTTTTCAGGCTCTGCATGATGCCATTCACGTATTCAGTTGCTTTG  
CGATTAGGCATATTTCTACGTCAATGTAGAAAACACGTCTTTCCGGAGCACGCGTAATA  
CGATATATTACCAAAGCATCTTCTAAGAGTTTTAATTGGTTTTGCAGGCTTAACAGCATT  
TGCAAATAACCGACAATCCCACGATCAGAACAATCCTGAAGGCCTGAATGCGCATATACA  
ATGGCACTTCTCGGAATTTAATGCGTGTGTTTCGGTTTCAGACAGTCTGCCGTTATAAGCA  
TAACCTTCGCTGCCGGCGGTATAAACAATAAATTCGCGATAGCCTTTTACTATAGAAGTA  
CCACCGACGTCAGCCGTAACGATTTTCAGATAATATTCGACATGACGTGGGTCTAACCTG  
CGTAATTCAACAATGCCTTCTTTAGGATTAGGCATTATTTTATGCAAGAATATGCGGGAG  
TCAACATAACCATCTGCAGAACAACGTGTCGGGTTTTCGAGATAACATTTAGCAATCTGCAA  
ATTTTCATCAAACCTTCTAAAATTTTGTCTTTGATAGATGAACTAAATTCAGTATCATCC  
AAATCAAGCGATACTACTTTCTGACCCTTTTCATAAACAACAGCTTCATTTCCGATATTT  
GCTACAGCTCGCTCAACTTCAGGATTAATTCATGAGTTGGCGATATGTGTTTATGAGGTT  
TTGGTACCGGAAATGTTGTTATCGATATCAAAAAATTTGTTGCATTAGAGCGTTATATGAT  
GATTCTCCGTCGCGAGCTTCAATCTCGGTGGCACCATCATCTTCTTTAGGAGCCGCAATC  
GATTCGTGGCCTTGTCTGAGCCGCTCGTCATATTCTTTGATCGACACGAGCCCAAAT  
TTAAACAAATCTAAAACCTTCATACAAACTCCTAATCAGGGAGCATTACTGCTGCCTGTA

TTTATTATTCCCACCAGTCGAGTGCAAACGTAGTTTCAAATGTAGAAACTGTGTTGTTAT  
CATCCCAGTCGAGAGTAACCTCACCAACGTTAGTTGGGAAAAGACCGACAATGGTATATT  
CCTTAGTTGTATTTCCAGTACGATCTTTTTGACGAACAATGCCAGGCCTTTTATATGCTT  
CTAGAATATCGCCAGTGATTTCAATTACCCATTCCATGAGTCAAGGCATTCCAATCGACAA  
TTGCCTGTGCGAGTGTTATGGGCCGAATCGTTATAAATCGTAATCGTCCAGTCGTCAAAAA  
TACGGTCACCTGCAACATTAAGTTTGCGGTTCATGTATCCAACCGGGATTTTTTCAACAG  
TGGCTGCCGGCATTGTACCTGCTTTAGCTTTAAATTTGGAATTTTGGCCAGGTATGGGA  
TTTCAATTTCAAACAAGTTAGGGCGGGCGAAATCACCGGACTCAAAGCCCTGAGGAGAT  
CAGTTACGTGATTATCAACCTCTATGTTTATTTATGCGCCCATATTTGGGCCCAACGCT  
GAATTATGCTAATTGGGCATGGCCAATTAACCTCGTCAAAGTTAGCACCAGTTGATGTGCG  
TACAAAGTTCAGAGTGATGTAGTTAATTGAACGAGGAGCTTTGATATAAATCGTAGCTAC  
AAATTTATTACTGTGATAACTTGC GGAGTGTTGTGTGTTGTATCACAGACAACGCGGAA  
GTCATAAACACCACCAGTGACCTGATGTTGTCGAGATATTGCGAAACTTCCATACGGAA  
CTCTGACGAGTAAATGCATCGTTATTTCAAACAATTCGTATTTAGAAGTATCACCAATAT  
TTTTCTTCAACATGTTGAAGAGGCGACGAACGTTAATTCGGTCAAATGGAGATGGAACCT  
GAGTTGCCATTTTGTCTCCAAAGAGAACAAATCCGTCACCGCCGGCAAACCTGTAACCG  
GGTTAATTGACACTTGTTACATGGTATCACGCAGCGATTGCTTAGGTTCAATTGCCAGTT  
TGATGGTGTGCGAAGTTGGCCGCGACGATATCCAGCAGGGGACATCCATGGATGTCCTA  
CTTGATCGGTGTAGGCACACAATCCGGCAATATCGGCAGAAAGAGGAACCCGCCGGTTAA  
TATCATTGTATTTGTCATACTGATATTTATAGTTGCCTGAAATAAAAGCATATGTTGAGC  
TAATATTCATGTTATTGTCGACAACCTTACCACCAAATGTCACACCATTTCGCCATTCTGA  
CAATATTCTTAACCGCTTGAGTGGTAGGAACACCAACAAGTAATTCTGACGGAGGATTGA  
CGCATGCTACACAGTCTTGGCGGTCATCTGCGAGAGCAACGACATGTTTCTGGACAGTAG  
ATGCAACAGCAGCACCGTCAGATGCACATGCTCCAGCAATCATCAGGTTGAAATGCAGAG  
CTTCTCTGTCGGCGAACAGATCCCAACCAGCAATCAATTCATCTGAACCAACAGCATCAT  
TTGCCGAAGCGCCTCCACCGAGCCGGATGAGACCGGCAAAGCCAGCATGCCAATTTACAC  
TAGAAGCATAAATGAAATTAAGTGAACCATTACGGAAATAGTCGTCCATGAAATGTATTT  
CCATAAACATCTCGGTCTCCGCGACGAGTGGACAACACAGTAGATTCGACTACGATGCCG  
TCTCGACGAACAATAATAGCAAATTGGTCATGAGTCATCGGGCCGTATTGAATGACGCTT  
GCGCTTTGCTAGTGCGAGTACCACCAAACAGGTAATTTGGCTGGGCTGCACCACCTTTGGA  
ATGCGGCCTTAGAAATTAATTTCAACTTCGACAGTTGAACCGATTTCCCCGGGATAGACGG  
CTGAAATCAGAGGCATTCCATATTTGGCAAATTAGCCAGCACTTTGGTAGAAGTCATAA  
CATCTGGAGCTTCTTCCGAATTACCAAAAAGTAACTCCAGAATCAACTACGATATTACCCA  
AGGTTAAAGCAGCAGCAGAACCGCCAGATGCGCCCGATACTTCTGCGCGCCAGTTATTTCT  
CTAAGACAGGATATGTTCCCAGCTGTTTGGCTTTTGAATTACTGCAGCTGAAGGAACAA  
GCAAAGCCTTAATTTTACCGTCAGCCACAACCTTTAGTTACTTTTCTTCTTCTGTAACAG  
TTGTGGTGTATGCTTAATAGAAACGGTATCACCTACGGTATAACCTTGTCTTCCGGTAG  
TAATTGTTACTTCGATTTGGTTAAACAATGGAGATGCGTTTTTAGCTTGCTCCATGTCAA  
TTACGCGCACGAGACGAAGATCATTACCATACTGCAAGAAGTTCATAGCACTCATGAAAT  
ACGGAGCAGTGTATTGTCTGGGCTACCAAACATATCAACCAATTCGACTCCATTTGTTA  
CTTGACGAATTTTCATAGGCAGGACCCCATGCGAATTTGCCGACTAATGCGGCACGGCCAA  
GAGCTGACCGAACGACAGTTGAATTGATGGAAGTTTCCTTCATTTCAATGCCGGGGCTCA  
GAAGTTCCATATTTTGGTTCCTTGGAAAGTTAGTTTAAACACATGTTTATTTATTGCTTTAT  
ATTTACACGAACGACATAACCATTACTGGCAACTTCGAAAGTTTCTTCTCCGCTGTCAACT  
ATAACGACAGTCGTATAGTCGTATATAAATTTTCCATTTCTGACGAAATATTTCAATTT  
GCCAATCGCATGTCATCTCTCGGTAAAATCAGAAAATCTCGGTTGGGTAGTAAGCCAA  
GCAAATATTACCAATGATATCACCAAGTCATCATGGAACCGTCTTCCGGCTGCGCATGAA  
ACACCTTTTTCTGAAAATGTTCTCAGTTCCATTATCGTGCTTTTTATGGTAAAGCACTAAT  
TTTTCTTTTTTCGATTAATCCTTGAGAGTAGAACAACCTAGGGCTTTTGACCGTTTAGTT  
TGCTTCATCCCGAGGTCGTTGTACGAGTCACATATAATGTTTTCGTATTCCAGTCCGGAA  
TACAACGACTTAGCTATGGATAACCCGTTGCATTCAGCTCAATATAGATGTATGGCTGA  
TAATACATATTTAAGTACTTGAGCAACACATCAGGGAGTATCAGGTGTGACGTGGTGTG  
CTGTGATATACTGCGACCTGTTCTGACGGGAATTCTGTTATGTGCTATATGTGCATAGCA  
TGAGAATCTTGCCACGACCATCAGCAGAGTCTAGTGTGCGATATATTTATGACCTTCA  
ATTGGTTCCTTAAACATCGTGAAATTGTCTGATGCTGGAACCTTCTTCCACGTCATTTTT  
GACAGTTTGAACCGTTGATCAACGTTCCAGATGTTCCCTGGAAAGCAGTATTAAGCTCC  
TGTTGAAATGCCTCAAGGCTAGAACC GGCGATTGTCTTGGCTGACCAAGAATATCCGTCG

TTAAATATGAATCGATGCCATCTGTTTTAGAACCATCCGAATACATGCGCTCTTTTACG  
GACGACCATGTTGCGGTATACGGAACAAAACCAGATTTGCTTCCACTTCCATCCGAATTA  
GGGGTAATTGCAGCAGTCCAGATATCGTACCAATGATTAAGCCCATTTCGGCGTTGTTGTC  
ATCAAAATCTTCGAATGACGACCTGATGATATAACTGGCTGGATTGCTAACCACGCGTCG  
TTGAAGTTGGGAATAAAAGCAACTTCGTCGATGTAATCAGCGCAAACGAGTTACTCCGC  
ACAGCATCAGGGGAACCGGAAAATGCACCAATCGCACAACCATTTCCAAAAGTGATAGAC  
CCTTTATTCCATTCAACTATAACCAGGCTGCAGAAAATCTGGCAATAGCTCCAATGCCTGC  
TTTGTCTATGAAGA ACTTCCGCTGACATGGATGCTTTATGCACAAGGATACCAACGTTT  
TTAGCCGAATTGAAGCAAACAAAATGTGCCAAGAAAATAGCTACTACTGTCGTTTTTCCG  
AGCTGACGAGACAAATTTGCTGCCATCAGACGATTGCCAGCCATTATTCTAAGCATATCT  
TTTTGGTAGTCACGCAATTGGACCCGGATAATGCCATAGTCAATATGCTCAATGCAGCAA  
TAGTTTTTCGGCGAAATAAACGATATCTTCTTTGCATCTCTTTTCGCTCGGCTAACATCTCC  
TTTGTACATTTTATTTAATGTTAGCACGCTTTAGATTTCGGCAAACATTATATCTAGAA  
CGTTGTTTGTTTTATCTTTAAACGTTCTAAACATTGACGGGTCGTCTGCTTGGATTTTT  
ACCCTCTTACTCCCTGTGATTTTCAGATATCTATCAAATGTCGAGGGATACCACTTATCA  
TCGTGATTTGATAAAAATCCATTCCCCATCTTCGCGCATTCTCTCTTTAACGTGGATGGA  
TAGGTCATTTGCAATGGGTAATCACTTTCGAAAATATTCATACTTCATCACCCAATTCCA  
GTTCAAGCAATTCATCAGGAGAACCTTCGAATTCTATAATTTCTCCGCTTGCATCATT  
GAACTGTGCCGAGTATGGATGGTTCTGACGATGTTAGTTCTTTCATTTCCCTTGTGCATAT  
TAATGATTTCTTTATTGGTTGAAGTCATTTGACCCATTAGCTGAGAAAATACTTCAACCA  
TACGTGGACTATCGGCATTTTGGCATTTTCCAATGCTATCTTTGCCATGTCCATCATCA  
TTTGAGTTTGAAAATGCATGTTGCGTCTAACAAAGCGTATAGTCATCTTCTGGTCAATTT  
TTCTATTGTTTGGATTTGATGTCGGTTCTTGTAAGACCAACGGGGCGTATACCTGCACGT  
CTTCCCCGTTGAGTCTTCGATACCAGACAAATCCTTGAGACTAGTGAAGTCTAAAAGAT  
CATTTATAGAGTATTTCCCTATTGTGGTTCGAGGCGGTGATTCTGATCGGTATTGTTTGT  
CATACTTCCATCGAACTCCCGTCCCAATCTTGAGCTGGCACTGTTTTTGGATCAACTGG  
TGATCAACTGATTCAAATGAGTATCTTTGTTTATTTCTCTTTCATTGCCAAAGAAATCA  
AGATAAATCGTTCTAATTTACCTGCAATATTTTTGGTGGTTGGATATAACCAACCAGTG  
AACTAAACATGATTGACCATTCAATACGGCGTCGTTGTTTCGCCAGGGCCATCTAGCTGC  
TCATCAGGCGTTATGGATGTGATAGTTATATTGATAACCCGCCCTTTAATAATTATTTTCG  
TTGTCATACAGCTCGGTTATTGTGCATGAAAAATGTGGTCGAAAGTATGGTAAAATTTGT  
TCAACTATTTGAAATGCATCATCTTCATGTTCGGGTCCATATTCTAGTTCAAACATGAAT  
GTGTATGACACAGGGTTAGATTGCGCCAACGCTTTCCCATTTGGGTTTATTTATCCATTTA  
TTTTGAGTATTTCCAGTTTTTACCATTGAGTTATAATGCATATCGATCAAATGCAAATTC  
ATTCTAGGAAGAATTGCTTCGACTTTTGCAATGTTGAATTCGGAAGTTGGCATCGTAATA  
TCATCAATAGACATTACCAATTTTTCTTTACTTTCGCTAGGTGATAGGAACATCTTGAAAA  
TAATGCTGGCCATCTCGAAAACGAGAACTTGAATATGACCAAAAAGTTCCATTAGCATC  
AATACATATCGGTGTATTGAGCTGTTATAAAAATGATTGCCAAACATTACTGTCCCTCAT  
GCCGCCAAATGGACTATTAAGCTGTTCACTGGGTTTGTACCAATTGGATCAAATGGCT  
CAACAAATGGTCTAGCTTCATATTGCCCTGAACACTCTCACCAAACTGAGCGATTTTTT  
GATCAATTAACCATCTAAATTCAATATTGGCTCCAGGTCTAAACCATTATACGGATCT  
TCAATTTAGGTTTTTCTGGAAGTGGAGGCAATTTTTTCCAGAGTATATGAATTT  
CTGGGCAACAATTACCCTGATTGGATTTTTTCCCATCTGATAAAACGGCGTGTAAGGTT  
TACCCATGTTATCTAAAACAGGCTGTTATCCATTGGCAAATAAATCAGATCACCTAGTTT  
AGGTTCTTTCCATTTACTTGATGCTTGAAAAGGCCTGGGTTGATATAAATTCTGACTTC  
GTCATTTTGTGATGGCCAAATTTAGAAAAGAACTCTGTTGTCCCTCATTTGACTCGAA  
GCTATTGAGCCATGCCGCAAATTTCCATGCTTTTTCAAATCTGCTATTTGGGTCTTCTCC  
AAACACAACGTCCAAATTTGTATATTCTCTTTTCGAGATAATAAAAATTCCAAGCCTCTCAT  
TTGAATAGATTCTGCAACTAGAGTGTGCTGGAGGGCCTGAGAGCACTCATACCGATTGAA  
TTTGACATACGGGTTAAGAATATTTTGTCTATTCATTTGTTGATATCCGCTTCTATATTC  
TTAAGTAGCGAATAGTGACTTATCCATCATAATTTACCCCATGATAATAGGAGGAGGCC  
ATCCAGCAATTCGAGTTCTTGTCTAAGCTTATCGATATCTATTCTAGCTTCTTCAATTAG  
GCGTATTCATCGAGTGTACACCACCTGGAAGCTGCATACCTCGATGTTTCGCTAAAAC  
TTGGCCGTTAGTTCTTTCATTTTGTCTTTTGCCATGTCTTTTACCCAGCGATTATTGT  
ATGACTTATCTTTTGTACATACCATTGGGTTGGCCTGCATAATTTTGGCCATGTGACATAT  
TAGGATATGCGTATTTTTGCGCCACTGACGGCACACTATCGTCATCTGACATGGCAAACC  
CATATCCAGCCGAAGTGCCTGAAAGCATTGAGTCAACATTCGCATACGATTTGCAGTAAA



CCTCAAATACCAGCAAATCTCCTTTTTGCAATTTGCCAGCAACTCTCATCATTTTCGGTAG  
TACTGTTGAAAAAGAAATCAGGCAAAGAAGAAAGCATGTCTCCCATCATGTCTCGATATG  
ACATCAATTGAGTGAAATATCCGAGATCTGCGCCAAAAGCATTAGGCCCATACCATCGGC  
ATTGGCCGCCAATTGAAGCTCCAGTCATACCATAACAAAAACAGTAAACCACGGATAAA  
CAGCCGTGCCGTCCATGGTTATAATTGACCCAATATTGGTTCGAATTACCTGAGTAACTG  
CTAATCATTGCCACCTGCAAACTAATTACACCAGTTTTAGCTTGTCTTTCGGTTAATA  
CTAATGTTGCATATGTTTTGTGAAATCCATCGTAGTGATATTCATCGTACAATTCAAGAG  
CTCTAGATATGCAATCAAATACTTGTGCTCTGTTACTTCGACGTGCACGATAGGTGCAC  
CTAGACGTCTAAGTATAGCGTCCTTTAATTCTAACGGGTTATTAGTGGTATATGACATAA  
GTGTCTCCTTTATGCTTTTTAAGCAAATTATGGCGGAGCCTTTCGAGCTAGCTCGAAAAT  
GCTATCCTTTTAGTTCTAATATCTATTAAGCCATAAAGGATAAGTTGTATTTACAATAAA  
GGCTCCCGAAGGAGCCTTGAGATTATGCTGGGACAATAACAGCAGACATTTTGCCGATAG  
TTATCGATTTAGCTGAACTTGAGTCAAGTGCTTTGACATAAATTGCGATAGTATCATCCA  
AAATTACATTGTACAGCCAGTTGTGTGCGTAGAGTCTACCGTTTGATCTCAGGGTAAATT  
CTTGCAAATTGGTGTATGATGTAAGTCCGCCGCTTGTATGAGCTATTGAGATATCCAGAT  
CATCTGTTTCTAACAAACCAGATGTTTCAATTTTCGATGCTTGCATTAATAACTAAACCGCCAT  
CAGTGAATTTGATTTGTCCGGATTCAAATATGCAACCGTTTGCTACGGTCTGATCAAAAT  
CAACAAATGGAATAATCTTCGACGTTTCAGCTGTAGTTATTTGAAAATCTTTCTTTTCAA  
CAGCAACCATGATGTTAGTTGCTTTAACCCAAACACCGTTTTTCGCAATACCAGCGTCCTA  
CTGCAAGTGGCTTATCTAACTTAAGTTGAAGAGTTTCGCTGCTTTCTTTGACAGTTTTCT  
TAATACCATCTCTTTCAAGTTGTGTAATTCGCGCCGATTTCCATACAAGTCGGTTGACA  
TCAGAAATGTTGCAGAAACAAGACCTGAATTTTCATCACCCACACGTGAAATAACGTCAT  
TCAACGATAAAGACATTTGGTGTGATTTGTCTGTAAAATGTACAGTCGTCCATTTATAG  
GTGATGGTGTCCGATAGAGCCAATAGCGGCATTGAGATCTGAAATATCCCCCTGAATTC  
CACTGGAAGTGTTCGCCCTAAAATCTGCGTAATTGTTGCAATATTAGAGGTATTTTCGAT  
TGATGTGCTGCAAAATTGTATTTTGCCTATTAACATCACCGATTTTCTGCTCTACCGCTC  
CAAGACGAGATAACGCACCTGTCACAGGGGTATTCATCGTGTTCGCGATAGAACTCAACG  
CACTTTCAATCAACTCCACCCTTGACGCTATCGACACAGGGTTGGAAAAATCGATTTTAA  
TCTTGATTTGATCAACGTCATCATTACCACCACCTAAAGTATTTTCGATAGCGGTCAATC  
TGGTATCAATCGGAATTCCTGTACCAAGCTTAGTATTGCCGACTTCCATCCTCAAATCAT  
ATAAATCAGACGTCAATTGACCTACATCTGACTGCGCCCATGAATTTTCAAGCGCGGGTA  
TGCGCTGGGTGTTTCAGAGACACGGTTTGGTTTACTTGACTAAACCGATACTTTAATCCCG  
AACCTATCGAAGAAGGAACAGAATTACCGTTTATGTCGAAGCCTGGATATGCACCTAATT  
CGTTTTTTACCCATTACAAATCACCATATACAGATCGAGTTGTGTGCTCTTTGAGATATC  
GATGGCCAAGCTTTTCCGAAGTTGATTCTGAAAGAGAAAGAACACCTGCTAAATTAGTTT  
CAACCTCGCTAATATCTTGCTTGATAGCTAAAATATCATTAGAATTAGCATTGATTTGGT  
CAATTACCGTATTATCACCGATTACACCCAAGTTATCTTGGATAATATTTACCGCATCGA  
CAATCTCATTGATTTTLAGGAATGACTGGGCTTGGTCTTCGTCTAGCTGAACAACGTTCT  
GTTGAATATTAAGTGGAGCCCTGTTGTAACACCGTCGCTGGCTGTTTGGGTGGAAGCGG  
CCGAAAGCCGCTCTCCGTTTTTAATCCAACCAATTCGAAGTTGACCATCACCTGGAGTAG  
TATCAACATAAGGAATAACTCCTTTTCGTGATTTTGTCTATCATATTTTTTTCCTCGAGTTT  
TTCTAATCTGGATTTAAGCTCTTTATTAGCCTCAATCAGTAATGCAATGAGAGACATTGG  
AGAAACAGTAAGAGTTCGTCGTCAAGTGTTTTTACGCCTTCTGGTAAAACCTTTTTGCAA  
TTGCTGTGCAAAAATACCTGCCTCTTTGCCTATCACGATTTTGTGAGTCAAAGATTTATG  
TTTTGTGTAATCCAGCGTCAAGGCTATCTATTTTTACGAGTGCATCTTTGATAGGCTG  
AATATCAGTTTTTAACCTGGTATCGCAACGAACATACATATCGTTAATGTGATGTTTCC  
GGCTAGCCATAAATGACCACCTGGCCTAAGCGTAGCAATTGTGGTATCTACGTCATTGGT  
GCGAGTTGTCCTTCTAAAATACTCGTTGTTATTGTCTCCAACAGCAAACAGCAAATACGA  
ATTCGTGTCAACGTCATCTCGTTTTTGAATGTTATAGCAGCCAAATCGGTATTTCTATT  
CCACAAAATTCCTTGATTGTTTTCTGTGAAATTGATATTACCAGTCATTGTGCCACCTGA  
GCGATAACAACCTGGGCATTAGCAGAAAGAGCCGTATTTCGCTGTGAGCTTTCAGTATT  
AAGAAGGCGAACTAATCCTTTTTGAGTGCTAGTAGCATTCAATATGGAAAGTTTAGCTGG  
ATTAATAACGACAGTGTTATCAGCTAATGCTAATGTTTGCGAATTTGTTGCTACTTTAAG  
CAATCCAGCTGAGCTTTCGTCCTGCCATTCTTGATAAAGTATATGGACTAACAGCATA  
GCCATCTCTAAGAAGTCTGCTAAAGCTTGAGCCAATGTGGCCAAACGGACAACCTCCGTC  
TGAGCTTTCTGTTGAGTTGCCCATGATTCTGAGAAATGCGCAATTGCCTGCCTGGTCTT  
AAGAGGAGTCATAGCAGTGGTATCGTCCGGTGCCAGATATTGCCTGGGCAGCAGTCGATAT



ATTTATAAAGATGCAACCTTCCCCAAACTTTGCATTTGGTAGAGTCATGGTCAACGCGCC  
GCCTGACGTGTCTGCGTCATGCATAGAACCAATATCTATCGCATTCCCGGCATAATATTG  
TCGCGATAATTTCTGGTAATATCCAGTGTCTGTAAGAATTTGAGAGTCAGCTCCTTCAGA  
AGCTGACGAATAAAGTCTATAATCACCAAATGTGTTATAAAGCGCATCAATAATTTGGTT  
GAGTTTGACACCACGTCATAGAGTATATCACCAAGTTGAAGGATTACCTATAACGCCTAC  
ATCAATTCTCTTTTTTGGTAGATTGTAACATTTGTATTCTTAAAATGAGAAAATGATAT  
TGATTTCTTCTGTCTGATCGAGAGCTCGAGTGATAGGCTGTCTATTTTCCATGTATATCA  
TTTCTCCTGAATATTTTTCCAATTCTTCAGGTTTACATGCTATCAGGGTCGCTTTAACAT  
CTGGATCGGACGGCAATGATTTTTTAACTAACGGGTTGATGATTACGCTCATCTGGCGAA  
AACCAGTGTTCCTGGGAGTGATGCCTCAGGGAAGTATATTGAGTCCATATACGCTCTGA  
ACCGGAGTGTGTCTACTTTAATCCGGTAAATGAGGTCTAACTTATCCGGATACCATGGAA  
TAGCATTTCATACCCCGATCTGGCAGGATCGTCAGAAAGTTCATCCAGGAAAGGGACAA  
CAATATGTTCAATTTGTGCATCTGTTTATTGATACATCGGGCGGAATAGTGTACAGATAGT  
CCCACACACAGCCATCACTCATGTCTGATTGCCATAGCAGTCCCGCGAGGTGGTTCAACTG  
TTTCATGAGTTGCAGTCCATTTTCCACCTATAGTGATACACTCTATGTTGTCATCTATTC  
CCGAGATAGAACACGAACCAATAGAAGGAACATCAACACAGCGGTAAATCATCCAACCAA  
CCGAAGTGTGGTACGATTGTAGGTAGCCGAGTTGACTACGACGATATCGTCGATAAAAA  
CTGTCTTTGGATTGTCATATCTGATATCTCCCCAATCTTTACGCGGAATTATTGCGTCCA  
GTAGAGATTTATTAATTTTTACTGCACCTAGCATGTTTGTCCACAGGCCAACAACGCCAT  
CAACCGAATCATTTGGATATGGAGGTGCAAAGCCGACATCGGTTTCATTCGTTGACCACG  
GAGTATCACGTCCAAATGTGGCGTATATTGTGTTTTTGGTGGGCTCGTCGCCACCATGT  
CGTAAAAGTTTAGCAAATTTTTTGTCTAAATTTACTACTAACAATAGCACGATAGAAAT  
TACTCATCTATTTTACCTGTGTTGGGTTTTGTGGATCACGAGGATTTCCAACGTCATCT  
TTCAGTCGTTTTTCAACTAGTCGTCTAAATTGTGAAAACGTCGCAGCTGACTGATCAAAC  
AAAGGACTCATTGCAAATCTTCGTTCTGATGGAAGTTTTCTAACCATGATTCTTCTTCA  
GTGTCATATTCAGGAGGAGGAACAAATGGTTCGCCAGCATTGGCCCAACCAAGTATAAA  
GCTTCTCCGGTGGCAGAGTCATGCTCAATATTTCCGTCAACGTCTAATTTGGCTACACGA  
TCGTATTGCTCAGTTGGGTAACCAGCATCCCATCGATACGTTTTCTAAATTATCGATGAT  
AGTTTCTACTTGTTCATCGATAAACAGAAATTGATGAACATCGTGAGAAGTGTTATTCC  
AACAAATCCAAAACCAACTGGATGAACAAAACGGAGAACATCTTGCGCATATCTAGACGC  
CGGAAGAGTTGACTTTATAGTCATGGTGAATATGATCTACTTCGATTGATATAGTCAAT  
CGAATCGCTCATAAGCTCCTTTCTCTAACCCTACCAATATTTACCTACGAACGAACT  
AGTTTCGGATTTTATTTGCTGGCCTTCAAAGCATTACGAATCGTATTGTGAATGGTTAT  
TCTCCACTTCAATTGGCCTTCAACATACTCACGATCCACGTATGAGACGTTTGCACGTCC  
TGTAGGAGTATATATGGTCTTCCAACAATGTCTTGGCTTATGTTGGTTGAATAAACTAC  
GATGTTATATTCTATTCATGCTTTGACTCGATGTCGATTTCAACATCTTCGTTATAAAG  
CAATTTGAAAAGGAATTTATATGATTGTTCAACCCCTTTCGTGGAATTAATAATGGTAGGC  
CCGAGATTCAAAAAATCTTGCGACAGAATCTCGCTTAGCTTCATCCAAATAGATGTTTCT  
TTTTAAAACCTTCTGACCAAAGATATTCATACGCATATTGCTCGCGAGGGTATTTGTTTTT  
TATCAAATTTGAGCAATTTGTTGTAATACGTCCCGTTTTCTGTCCGACAAGAATTGCAGATA  
ATATTTTCGCAAATGCACCAAATTTGGTATCTTCGTCCAAACAACTTTCAGGCATCATTTT  
AGTAACAAGTGGCTGAAGGTCAGGATCCTTTAATCCAACAAATGGAGCAGGTGTCCACGG  
AACTTCACGCTCTTGATTGCGCAGCTCAGCTACCATCATGACGTTGGCCGGCTTCCAGAA  
AATGTATATAGTATTTCTTACCCGATATGGGAATTCATAATACCAATTATTTTCGCCAGT  
ATTTTTATGGAAAAGTACCCCATTTGGCATATTGTTTGAAGTGGTAAAGTATACGTTATT  
TGCATACAGTGTTACAACGCCTTTGTTGTAAGTTTCTCTGTTTACCCTTTTATCACTTTC  
TGTTCCCTTCGTCTGTCGATTGAGAACGAATATTCGATTTTTTGGGTAAACAACAAGAGCTCT  
GTCGTTGTGTGTTATCCAACACCTTGTGCTAGAACGAGCCATCCATGTGAACGCTGCTTC  
GTTATAGTATTGCTGAGGGCCAAGTTTCCACTCTGAATCATCGGCATTGATTCTGAATGT  
TCCCATATGAATTGGGATATCGGAATTATAACCTGGAGTCAATTCGTATTTTACTGCTTC  
AAATACGTTGTCATATTTGTTTGGTAAATCTAGATCTGGCAAAGTACCTGGATATTTGAA  
GTTTATCTGAGAAACAAATATCTCTTCTCCATTTGTTGACATATTGCTATATTCATGCGA  
TATAAAAGTATGGTCTTCGCCAATACCAAAAACTTTTTCGCCAAGAAGTACCATCGAACTC  
ATAAACTCCAGCAATTGGGTCATGGACAACATTTTTGGGGATTGTTGGGTCTAGACCTGC  
CTCAGTAACTACGCCAGTAATCAAAGCATAAAGCTTGCCGTTGAATGTATCAAGCTTTTT  
CGTAACAGCCCGTTCGTTTTGCTGTTATATTGAAAGAGGTTGGGTACAAAGTTTCTCACC  
AAATGTTCGGACTACCTGGATCAGTATCAATCGGGGCATTAGATGTTTTGATTCTGCGCAA

CTTATTTCTAGCTGCTACATATACCCAATCGTCATCGGCAGCATTATTTTTCTCCCTTCC  
TAAAAATATCACCCGGAAGCCGAGCGTATGAGTTGAATAATTCAACATCAAACCAAGAT  
TCAGTTCATCGCCAGTTTTTGGAGAATGTCAAACATCTGAGCTAAATCTGACGTCATCAG  
CTGACCATCTGACATCATTTGCCCGACGACCGTAATAGATGTTTTAATATCCAAGAAGAT  
ATGTAGTAGTGCTAGTTTTGAGATGTTACTGTTCTACTAACTGGGTTGCCGACACGCCCGT  
TGAAAGCTTTGTAATATTTCCAGTTTTGCCCTTTGTCATTCGACACTTTGGCCATTGGCT  
GAAAACGCTAAAACAGATACAACACGTCGTCATTTTCAGCTAGCATTGTTCTATTTTTGT  
CAACACACACTTGCTCAATAAAGCCTTGTATTTTCGTGATGGTTTTTCATCTGAAACTATTT  
TGTCATAAAGATTCGTCGCATCAGTAATTTGATTGCTGAACACGAAATCTTCGCTCATT  
GCGAAGCCATAATTACATCAGTATTGAAATTGACGTAATTTCCGTTCTTTTTAGAGAACT  
TTTCTCTCAAAAAGGAAGCGGCAGGTGTGAATTCTTTCATGGCAGAAATGTAGTAGGCAT  
TTTCCGAAAAGGTTTTGAAACTCCTCAGTTTTCTACCCAATCAGACATCTCAAATCCGTTTC  
CAGAAACGCGAACTCGCATTTTTGTAATATGTGCCTGCTTGTATAGATGTGTCTTCAAACC  
ATTCTTCGACCGATGTTACACCTAATTGACCCCAACTGCTTCCGGACCCTGCTCTAGTCT  
GAAGAAGTTCGGCAATATAGTAAAAATTTGAACCTACATCGTCCCAAGTCAAATATACTT  
GATTCGCCGATAAAAATTTTGATTTTAAGGCTCGTTACGGCCGGTGCTTTTTATGATCATAA  
AATCTCAAAGGGCCGTTAGGCCCTTATTGTGAAATTGCTTCAAGAGTAATAGCAGTGTA  
CTGTTGACGTAAATCATTCTCAAATACGATAGGAGTTCATCTTTCGCACAGATAGTGTC  
ATCAACTGGTAATGCTTCTATTACTATATATGCTCCAGCAAATGATTCTGCCGGTACAGG  
TAAAATACCAAGGTCAAAGTTTATAACACTGAGAGCATAGTCAAAGTTCATAACTTCATA  
TACTTGTTCCTCCACCCACTGTTGTTTTTTGTGAAATCATTACAAGAGGACTCTGATGC  
AGGAATATCGCCATCAGCAAATGGCCCAATCAAATTTTACCAGTTTGTGACGTAGAAAC  
GTAATTAACCTTCATACGTTACGTTATTCTTGGTGAATTTGATTGTAGAACTATTGACTGA  
CCCCTTTTTTATTAGCATTATGGAAAGATATTCCAGCCATCGGAGTTTTGAAGAAATTAT  
CTGCTTCCCTGACAAGAGATATTTTCAGCAGAAGAGCCGATAATAGAATCATCCGACGAAT  
CTACACGTGTCAACATCTTAGATTTAGAGAAGTTTTTGTGAAAATTTCAACTTCATCAG  
TGTAATAGCGGTCAATAGAATCAATTATTTGCCCGCGAAGCAATTCTTCAGAGTTATACA  
ATTCTGAAAGGTTATATGTCACTTCGATTTTTGACTTGATGTACATGTAATTTGGGTCTA  
TACTGCAGGGGTAATAGGGCGCGAGATTATATTGTGACAAATAATTTTCAATGTCTTCT  
TTTTGAACAGTTGTTAATCTAAGCCCTTGTTTTGGCTTAATAGCGATGAACGCGTATCCT  
CTTTTCTCACTGTCAGTGAAGCACTGAACGGCTTGAACAACTGAACCAAATTTGTGAGAG  
ACAAATGACTCGTAGTCGGTTGTAGTAACACATCTGCGCTGAGATTCTCTCATAACCGGG  
GAACAGTTCGCGGATTCTTTCGATGTCTTCGGGATCACCACCACCCTGAGTACCCACATA  
ATCGGCGTCATCAGTCGGATTCTCAATCAGATCAGTTATGACGATATTTTGAAGAGTATC  
GGTGTATGCGAAATCTCTTGACCCATTTGCTGGCTCACCACGAGTGCTCAAATATTCGAT  
CACGATTGTTGACCCGATATTCGGTTTTGAGCCCGCCAATGTAATTTGCTACAAGAGCCCC  
GCCAGCGATTTTCGGTGCTAGCTTCACCTTCGCCAAAGAATATCTCAGTCGTCTGGTCAAC  
GGTCTCACGCATATAAAATACGTTAGAAGCACCCGAAATATCAACCATCGGATTATTGGT  
CCAATCGACGCAAGGTGAACCATCTACCCATACACGAACTTTAGATCTGTGATATTGGG  
GTCACGAATCAAATTTGACTAATTCCATCAAATTTCAACTCAGTTCGAACTATTTCGTCC  
TTGATACACGTTTACAAGGGATTCTGATAGGTTATTCTGACCACGAATTATTGTAACATC  
GTCAAGAGTAACGAATGGGTAGTAATCAGTACGTTCCACCGTACCAACGAATTTAGTTCC  
TCTCGGAATACGAATGCTGGTAGGATTCAACGGGTTTGTGCTTTGAGCAGTAAAGTCGT  
ACTAGAAGCAGTACGAAAATCTGGCATATATCCCATGTCCTGAGCATGTTGAACAACTGA  
ACTTCTTAATACAGCGGTTTCGGATAAAACTCTCGAATAATGCTGAATTTGAAAATTGCTG  
AATATAGAGTGTGCAATATGCCAGAAAATCGGTTAAACGTTAATCTTGAACCAGTAAA  
GTCATAATCTTTAAATTCATCCTGGTTACCTAACCAGTCAATTAAGTCGCTTTTTGATTT  
GTCAGAGGTAGCGCCTTTAAAAAATATCTGGGATATTTGTTTTCAATTTTCATCGTATAAA  
CACCTTACTAGATGATTGCGCAATTGTGTCTCCGCAAGCTATTGGATCACCAATTGATAG  
TGCGGGTTTTCCACCAACAAAACCTTCGCCGTAGTGGGAATAACGTAGCCGTCATGAAC  
ATCATAAGGCTCAACAGTGTTCGATGAGGTATTATTCTGTGCGCTTCAACGACGACCTT  
TATACCGTCAACAAAACCTTTTCCCTGCGTGGCTTGTATTTGTGTAGGAGGATATGTGTC  
ATGGCCAGTTGTCCAAGCCATATCGTATGTCAATGCAGGCATAAAAGGCCCTCTTATGTG  
ATTCTATTTAAGAGCTCCCGGGAGGCATTAATAAAATAATCAGGAGTGAAACTATATGA  
TTTTTTCATTTTTTTGTACCCAATAGATTATCAGGGTAAATCTACTACTGATATTTTTAAG  
AATTACAGAGCGTATTTTTAAACGTGTTATCGTAAAATACAAGCCTGAAGTGTATTGGATA  
AATGGTGCAACAAGACCTGAAATGTTGGCACATGAGCTTTATGGCAATCAACAGCTATAT

TGGGTTTTGCTAATGCTAAACGATGTATATGACCCTTTTTGCGGATGGATAACAACACAA  
GATGCTGCATATGATTACGCGCAGCAACAATATCCAGAAAATAAGGTCGTATATCATGTT  
GATGCCATTGGTGAAAAGTATTGGAATTTGGTAGAAGACCCAGATTTCCCGAAACATTGG  
TATGATGCTGGAGATACATCTAGATCACATATCAATATGTTGGAGCACTTCGGGCCGTT  
GATCCCTTGAAGCTCAATCTGCTGTCAATGAGCAGAAAACGAAAAATTCTGATATTTAGC  
GAAGCTGATATCAACTCGTTCCTAAACGACATGATACGTGAAATGGAAAAGGTTTAAGGT  
GCATAATATTAAGGTTATTGATAGATTTTTACTGGCGTCGTAGAAGATCGTCAGGATC  
CGTACATGTTAGGAAGGGTGAGAGTGCGTGTCCACGGTATTCACCCAGAACAAAAGGTTA  
GAGCAGACAACACTATGGTTTAGCAACCGAGGATTTGCTGTGGATGTCAGTAACCATGCCTG  
TTACATCAGCGTCAGTTTCGGGTGTAGGCCAGGCTCCAGTAGGCATCGTGACCGGTA  
ACTC  
ACGTATACGGAATTTTCTTGGATGAATTTTATCAAAATGGCCTAGTTCTCGGGACATATC  
CAGGCATATATCCAATGATGCCTGTTTTCAATAAAGGTTTTTCTGACCCATCAAGAGAAT  
ATCCTCGGTACGTCGGTTCAGATGTGAATTTTTGGCTAGAGGTGGAAAAGAAATACAAA  
TTTCACCAGGCCAAATTGTAAAAGACAACCAAATTTGTTCCAGTTGTCGTAGAAGATCAA  
AAATCTCAAGCGAGATGTGCGACAAGGTGCAGATAGAACACCAAATGACGAAATACACCAA  
ATCCAGATCCAGACGCAACAATAGAGGATATGTTACGTTATGACGAAGTTATTCGTGTAT  
CGTTTTATTGGGACAGTGAAGGATATCCAACCTGTTGGAATAGGTCATTTGATAGTTCCCG  
AAAAACTAGAAATATGACAAGAATAAACCAAATGCTCAGTCAACAAGTAGGCAGGCAGG  
TTAATGGGAGAATAACCGAAGAAGAATGCTCTATGCTGTTGCGAACGCCATCTTTCCAGCG  
TCTATTCTAGCGTATCAAGCAATTACAAGGTGCGCCCGGTATATTCGATGCTAGACGTTA  
CTCGTAAAATGGCTATCGTCAATATGACGTTCCAAATGGGTGTTGGTGGCGTAGCAAATT  
TCAATATGATGCTTGGATACTTGGCACTAGGCCAATACGATAATGCGGCTGATGCTGCTC  
TCGATTCTTTATGGGCTAGACAACTCCATCACGAGCTCGTCGTGAGTCAGAAGTCATAA  
GAAATGGAACTTGGTGCCATACGGTGGGTCACAAGGATCTGCGCCTTCATTGCGGACGA  
TGAGAATGTTCAAACCGCAAGTGTATCATCAACCGCCCAAGCTCCCTCGTTCACCGAGC  
CTGAATCACCTTACTCGGCTGTATATCCATATAACAAAGTGTATGAAAGTGAGTCTGGTC  
AAATCCAGGAATTTGATGATACACCCGGGCATGAACGCATAAGAACATATCATCGGACGG  
GTACGTTAGAAGAAATATAACCTGATGGAACAAAAGTACGAAAATTAATGGCGTTGATT  
TCTACATTGTCAAGAACGATGGGAATGTTTCATATCGGCGGAAAACCTTAGATCGTTGTCG  
ACGGGGATGCTGATATTTTTGTTCTAGGCGATTCTAATAGCACAATATCTGGAAATGCTA  
CCCAATTCGTTTCGTGGTAATGTTGACGAGCGAGTAGAAGGTAATGTCAATCAGTATGTCA  
CTGGAAATTCATCGGCGTTAGTAAATGGAATCTAAATGCAGATGTTGATGGAAACGCCG  
ATATTAAGTTATGGGTGACTGTTTTAACACGATTGATGGAAAGTACACTCTAAAAATTG  
GAGGAAATTTTTCTACCGAAGTTGGAGGAAGTAGGACAGATGATGTTTCTGGTAATTGGA  
ATAGACAATCGGCCCAAGTATCCGATGTTGCACAAGGAACATTCTCAATTGATGGTTCTA  
GAGTAACTTGGGGTAATTCATGTCAAATATATTACCAGCATCAGCCGTTTTGCCTGTTA  
AAAGGGAAAACGAAATAGTATCGCAGACATTTAGCGCAAACCTAACTCAATCACGGGCAA  
CCCTGGTTTCTTTGGAAATTAGTGCTATAGATCAAAATCAAGGAATAGTTATTGTCAACA  
ATGGATTTTCAGGACAATATACTGGAGTTTTTACCCTTGACGGTGGTTTATCATATCGTT  
TAAAAACCGGAGAAAGTGAAACAGCAAATAGATGGGACGATTTGCCTGATCCACAAACAA  
CGGATTTGTATTCTTTTCTTGCGCCAAGAGTAATGGAAAAAGAATATTCATACCTTGTTG  
TTTTAACATACGACGTTGTTACGCCAACTAGAGCCAGGTAATCCTCCAAGACTAACCAAGT  
TAGATATGTGATAAGCAAGACGTATACACAAAAAGTAGTTGGTGACTGGAACACATGGGC  
TAACAATATGCGAGATTATGTATATAGGGGTAGATAATGGCATATTTTGGAAATTTAGGC  
CAAAAACATCGAAAAATACAAGGGCAATGCAGATAAAATCACGTATAGGTCCAGTTGGGG  
AGCGTGGGTCATGAAATTTTGCATCAGTCGCCTTCAGTTTTAGCATGGAATTCTGAAGA  
AGGAATAATCCCGTGCTTTTCGAATGCTGACGGAAAAAGACGAAGATATTTTCATGGATTT  
TTGGGTCAAATGTCAAACGGCCAAGTATTCCTGTTGCAAGTAAAACCCGAAAAGGAATG  
CAGACCTCCCCAGATGAAGTCTACGAATACTGCGAAAGCCAAAAAGCAATTTATGGCAGA  
AATGTACACATGGCAAGTGAATACAGATAAGTGGAAGCTGCTAATGCCTTGTGTATGGA  
AAAAGGTTGGATTTTCAAGATAATAACTGAAAATTCTCTTAGAACTCATTTTGGATGGAG  
AGGATAATGATTTTTGACTATATCAATGAAGCTCCACAGAAAAAGTCAAGAAACCAATGG  
GTAACATTTGGGAATAGAATGGAGAGAAGCAAAATCCAAAGGTGTATCGGGAAAGGATTTT  
GCAAAATCAAAGCGTCTAAATTATGACACGTTTAGACGGACTATGCTTAAATTCGCAAAG  
CAAGTTGATATTGCCATAGAAGTCGAAGGTCTAAAAAATAAAGCAAATTAATGCACGC  
GAAAAAGCATTAGTCATGATAAATGACTTTAGAAGTCAATTACGTTCTAGAGCAGCTGAC  
ACTGGAGCAGCAAACACTAATAAATCTCTAAAATGGTTCAATGATACTGTCAAAAAATCA

ATTCGTGGTCACATGGTATCAAACCCGAAACCAGGGAGAATTTACACTTTTGCATATGAT  
GCAAAGCACAAAGATACTCTCGAATATTGGGATAGATTCCCGCTAATTTTCTTTTTGGGA  
ATAGGCACATCTTCATCAGGCCCTTAATGTATGGCTTAAACTTGCATTATATTCCTCCAA  
AAGCTAGACAAAGCTTTTTAGAGAATTGCTAAAAAATTATGCAAGCACCGAACGACTAT  
CCAATAAAACGACTCTGAAAATAAATTGGTCAAATGTTAAAGTAATGAATGGTTCGGACG  
TCATGATAAAAGCATACTACCAGCTCATTTAAAAGGTTCAATGCTAGAAGTGAACTTA  
GCGACTGGGTGAAGCTCATTTACATGCCGCTGCAGCAGTTTACGTCGAAAGGTAAACGAT  
ACTCTGCCAAAAAGGTATGGGCACGTGCTTAATGGTAATGGCCTGGACTTCGTCTGGGCC  
ATTTTATTTTATAGATTAATAAACCATATATCTCGACGTAATGAGTTTAGCAGGGTGATC  
CCGGTAAACCCTGTATGCATCCAGTTATATAAAGGTTACTGGCTTGCCAGATTCAAGCT  
TGCTTGAATCATTCAATTATTATCCTTTCTGGCTTAATAGATATTATAACTAAAAGGATAA  
AAAGATAAGTTTGAGCAAGTTCAAACCTGTAAACAGGTTTTAATTTTTATGGAGTTTTAC  
AATGGCTTTAAAAAATCAATCGAATATTAATAACTTTACGCTTGATATACCGTCATCTGC  
TGGTATTAAGACCATGCTCATGAACGTGCAATCAGCATCAATACCAGGTTTTTCGTATACC  
TCCGACAGAAATGCCATTAATTTCTCAGGGAAGTCTAGACAAAACGTGCCCAGTACAAC  
AACCGAATTTGATCCGTTGATTGTTTCGAGTGTTGCTTGATGAGGATTTTGAAGCATATAA  
CGAAATGTACAGATGGATGCTTTCATTGAATGACTATGCTCGGCAAACCTCCACTAAGTG  
GGAAACGGTTAATCAACCGCCAGCAATAACGCTTCATGTTTCGTAATAACTCTAAGCGTGA  
TATAATTGCCTCATTCAATTATCATGGTGCTTGGCCATCTGAAATCGGTGAAATAGAGTA  
TTCTTACCCTGAAGATGGTGATGTTTCTGTGACATTTACAATTACCTTTTTCTTCAAATA  
TTTTGAAATTGAAAAAGATGGTGAATTAATACGACCTTTGAGAGTATAACAATGATAATT  
GCGTTATCGGGCAAAAAGAGATGTGAAAAGACACAGTAGGCGATCTATTGGAAAAAGAA  
GGTTTTTCATAAGTACGCTTTAGCAAAACCTATCAAGATTTTCCTGTACCGTGCAATCCGA  
GATGACAATCGGTTGCCAATGTTTGTCCAATATTTTGATATGAATGATTTTAAACGGTCTT  
GGTTATGACCGTGAAGAATATTTGCCCATTTCTAATTCGGATGTTTTTLAGAATTATGCGA  
TCTGCATGGATGCTTGTGTGTGATGACCAACAAATCGATTACACGTATGCGCATACCGGA  
ATAATTTCAGAAGCAGTTCATGGCAATAAGAAAGCATGGTCAATTCGTCGACTGATGCAA  
ACATTTGGAAGTATATTGGTTGCGCAATAAATAAACGTATATGGTTGCAATATCTAGAA  
AATTTCCATTGAATCACGAAAATGTCGTTGTTGCTGACTGTCGGCAAGACCATGAAATG  
TCAGAAATGCGAGAAATGGGAGCAGTCGTTGCTCATATTATTCGTCGTAATGATAAT  
GATACTCATTCCACCGAAGCAGGTCTTCTATCCGGTCTGGTGATCATATAAATGATAAT  
ACTGGAACGCTTGAAGATTTGCATGAATGCGTTAACAATTTTCGTA AAAAACAATAACCCT  
AAGGATATAAAATGAACGCAGAAGAACAACCATCGCTTACCTGAAAATTCGAGTTTTTG  
ATCTGATCGAGCAACGTGTTACTACTCAACAACAAGCAGAAGAATTTTTAGATGCGCTCA  
CCAAAATCGTCCACCTTTTGGGTGTGACCCCGCCGATGGTGAAGATAGCATTGCCCTTT  
CTTCTATTGTAGAAGCAGTAGAAGCTCTGGTTCCTTCTCAAGAAGTTGAAGTGGTAGAAG  
ATAATGTTTACAGACAGCTTCGTAGGAACATACGTTGCTTGTAATTTAGTGATGAAAC  
GCTGGATTTTATCCAGCGTATTCAAGAAGAAGTATTGATGCAAAATCCTGTTCCCTCGAGA  
CGAACGTCATTCTACTATCGTTTATAGCAGAGTATATGTTCCATTTATCCCAGACGATTC  
GCCTGAACATTTGGCCGATAGTTGCTATCTGAGAATTTTTGAAACTCCAGAAAAGAATTT  
TCTTGTCTGGCGTATGATTCTCCGTACATGCAAAAACGACATGCGTACGGCCAGGTCCT  
TGGCTCGTCAGCTCATGATTTTGACGAATACAATCCTCACATCACGATTGCAAAAAGACAT  
TGGTCCCTCTTAAGTATGAAGGATCATACTGACTTCCCTATCGTAACAACACACGAATATGT  
GGAAGAATTACGTGAAGATTAAGCAAAAAGCAGTTAATGTTCAAAGCTGCGAAAATTGA  
TGTAATGAAATTCATGAACAAAACATTTGTTTCAAGAAATGAAAATAAGCAACCTTAAGG  
AAAATAAAATGCAAAAGCAAGTAATTTCTGTCCACTGGTTCTACCCTGACTGTATCCGGCC  
GTGCTGTTTCTGTTGAAGTAGGCCCTGTTTTTACTGCCCTTGTCAAAGGTGAAGGTGAAA  
AACCGTAGTAGTTGCTGAAGTTCGCAGTGAAGTGGCTGATGTTATTGTTTATGAACCTC  
GCCGCTGGGTGAAGCTTTAGAAAGCTGCTGAATAATTTTCAAATGCCCTCTTCGGAGGGC  
ATTTTTGTAAGTATAGGAGAAGTTATGGAAATCTTTTTGTTTTATTTTGTGATCACATAT  
TTGGCAGCATGTACAGTTTTGGCTATTAACGTGATAAAGTATAACAACATCAACATTCAGA  
TGGAATTTTGTCTGGACAAGTGGCCAAAATGCGGAGTTGTATTGACAACACTGCACTATGC  
AGCTACATTATCCGTTTCGCGTTTATGCAGATACAATTGGAAAAATAAATGACAGATCA  
GCAAGAAGAATTTTACATACGAAAACATCCGAATTAGTTAAAGTCTGGTGTGAATATGA  
CATAAATGGCAGTTTTTGGAGGTAACAACAACGAAGAAGTTTGTGCTATCATGTTTCCATC  
AGATATGCCGCCAGATGATTATTCTGCTCATATTAGCATCATGGTTATGAAACATATGAA  
AGAGCAATCTGGCTTAGATGAAGACGATCTTGATGGTCCATTGGATGGGACTACTTTAT

GCCTTTGGAATTGTGATGGAAAACGTTGGCATTGCAAGAGTTGTCAGAACAATTGAGTTC  
GATTAAGATAAAGCATAGACTTGAGGTATAGAAAATGAAATTTGCACCCGGAAGTGTAA  
TCCAGAAGGATAGGTCATTAATAATCACTTCCTGGGAAAATGATGGTGAAGATTACGATCA  
TGTCATTCATACCGGCAGGCCAATGAAAGATATCGAATTCCTTTGAGAAAATCAAACCGAT  
TTTCAGTTCATACCACGACGAAACAAATAAAGGCTATGGCAACAAAGATTATAATCCTGG  
GATGGCCCGCGATTTGTTTTGAGATTTTTGTAGAAAATAGGCATTTGTCTTTGCAATTC  
ACGCTATCTAGGGTTGACACCAGATATGTATGATCCACTTGATGGCGATTTATACAAATT  
CATTCTGCCATGACAATTTCTGCAAAAATGCTGAAAGAACACATCACCGGTTATGCCAAAC  
AGTATTACTTCGATTTAATTTGTGTGGTCGAGTCGATTGAAATCGAGTATAACCAGTCTG  
AATACGTTTTTTCCAAAAATTACACCTCGTTAAAATTAAGGTAATCTAATGCAATTTTTAT  
TTGAATTATTTGCAGCTAGCGTTCAATACACTGCTGTTGCACTGATTGTATATGTTTTGC  
TACATGGTTATGAATTCCTTTGACGAATGGCGGAAAGGAAAGCCCGACTCAAAGTTTCCAG  
CAAAAAGCCTATCAACCAGGCAGATTTATGGAGCCATTGCAGCAGCATGGCTACCTGTAG  
CTCTTTTCTTGCTATGGAAGCTAATTGAATTCATTTACGTCAAAGTAGTAGTCGATAAAA  
TTTACAAAAAGTAGTTTACATTGATGGGACTATGTTTTATGATAGTCCCATCAAATCAAC  
ACGGAGTAATTTAAATGAAAATCTATCACACGCAACATATCGCGAAAGTTAACGGTATTA  
CAAAGGATGACATGATTCGCGGCCATAAACTCAAGGATTTTCATTGCTATATCATGTTTA  
AAGATGGCAAGGTCATTGATTGCACCTTCAAAAATGTCACGGCACAATTCCGCAATATTG  
AAACGATTGCTCGTGAAGTAGCAGCAGAACATCAATACACTCTGTGAGAAACAACACAGT  
TCTGACAATGGGTTGACTATAATACCCATCGAAATTGGCCGTGGAGGGAATCAATAACGC  
GTGCTGAAATACTAATACCGAAGGAGGTAATAATGAAAAAAATGTTTTGGTTTTGGCTCT  
GATTTTTCATCTTCTTATGCGAGCGCAGATTCACCAATTTGATAATTGGTGGTTTTTTC  
AAAACATTACGAAAATGATGAAATGAATGAAAAACATCCGGCGATAGGGGTCGAAATTGA  
CAACTTTTCAATAGTATATACGTCGAAAAACTCGATTAATAAACCTTCGGTTCAGTTGGC  
TTATTCTGACACATTTTACACTTATGGAATTTTTGATATTGGTTAGCGCGTTGGTTTTAT  
GACCGTTATCGATATGAAACAAAATATGCCAATATCCGATGGTATAATGGTGTGATT  
GGGTGCCGGGGTAGCCCCGCTCACCGCCAATGATATTTTCGGTAGATACCCCTATTCCGAG  
ACTCAAATTTGTTACAAGCGTAACACCAGTTGTTACGATGTTTCGGATTAAGATTGAACT  
TTGGTAAATTTGAGAACGCAAAAATGAAACTATTTACCCGACTGGTAAAGAAAAAACTTTC  
AAATCGTGGAAAAGCCTGAAAGAGTGGCTGTACGCTAATTGTGATTCGTGGGATGCTGAT  
ATATTAGATATTCCATTTAACTCGACAGTACATTGGGGTCTGTGCCCATTTGATCAAGAT  
ATCTACAATGGAAAAGAAACGTTTGTGTTGGAATTTCTGCAAAAACCTTTTAGAAAAGGAA  
CTCGAGAGCCGAGCTGAGGAGATTTGAATTGGAACCTTCGTTGTAAAACCTGCCCGCTCA  
TCTAAAAGAATGGTTCATTTCTTATATGTGCGATTCGGGTGAACAGCATCTCATGGAAGC  
ATGGCATGATGAAGGCATCGAAGGCGATCGCGTCGATTTACAGATATCCATATTATTCTCG  
AATGCGTGGCGAAGAAGTTGACGAGACCGCTGATATCGTAGTTACTGAGTATAAGTGAAT  
TATTGCGAAACGTTTTTAAAGTTATCGCTGAAATCGAGCAAAAATTCACATACCAGGCACC  
CATAAATAGATATACCAAATAACAAAAGGTCGAGCGCGATGCGGTAAGGAAGCGAAGCGG  
TTACATCCTTAATACTGAACCGATTAAGTTACGGCGGATGGACTGGGCTATCGGTAAACG  
GGGGAGCATAGACCCGAGCACCTGGCGTTATTATGCAAGTATGGTGGAAATTGGTATACAC  
TGGAGGCTTAAAACCTCCCCTTCGAGATTGTGGGCTCGAGTTCCACTACTTGCACCAA  
ATTCAAATTTCTAAAGCATATTGTTTACACGCTTTGGAAATAAGATATGATTAACCTTATC  
GAATCAAACACGCATTCAGTCTTGAATGGGATAAATTGTGAAAAGCCATGGTTTTCTCTG  
GAGCAAGCCTTAAGTGGACAGA ACTCTCATCCTAGTGACGCAGGAAGTGTGTTTTGTTTTGA  
AAAGAATTCTGGAAGATTGGCCCGAGTTGGTTAAGGCACCGGTCTTGAAAACCGGCGAT  
CGTAGGAATACGGTCTATCCGTTTGAATCGGATATCTTCCTCCAAATTGAGGTGCTGTGA  
GCCGAGCGGCTTAAGGCGGTCTAATGCAGGACATACGAAAGCGTATCGTAGGTTTCGAAT  
CCTACCAGCACCCATTAATTCTGAAGCATATTGTTTACAGAGTTGCTGGAAATGAGATATTA  
TTGTCTCTTCGATTA AAAACAAGTTTATTTTTGGGGTGTAGTAGCATAACGGTCATGCGGCC  
GGCTGTTAACCAGGTGAGGAACTCTACGTTGGTTTCGACTCCAACCATCACCGCCAAAATC  
AATTTTCATGGAACGTTTCGGGTAACGGGATCCCAAGCGGCTGTAACCCGCTCGCCTCTGCC  
ATTCTTGGTTCGAGTCCAAGGCGTTCCACCAATTTAACATGAGAAATATATTTTATGAAG  
CAAGATCTATTTGATAGATACGGATCCTTCTGATTGAAAGAAGGAATACACGGTGAATTT  
GAAATAACTGATGATTTAGTTCATTCGATATTTTTCAATCATATCTATCAGACGACCAA  
TTGCCATTTATATGAAAACGGCAGCTGGGTTAAGAGCATTGCGCCAGATGAATTACG  
TTAGAGTATCTTCTCAATTTGAAATATTATCGATCTGGAAAAGCGTCGGGAATAAATG  
AAGGTTTTGTTTTATCTGATAACAAATCCAGCTTGGCCACATCATTTTAAAATTGGAAGTA

AAATATCAATACAATCTCGATTATCATTGTACCATAGTTATTCACCGAATCGCGATTTTG  
ATATCGTCTCTTATTTCTTCTCTAAATTTTCGTTTTGCGGATGAAAAAGCTTTACACAATT  
TGTTTGAAGCTGATGACGAGTGGATTTATGACAAAACGGGAGATAAATTGAAAGAAGCTC  
TGCAATTCCTCAATCATAAGCGCAAAATAGATAAACAAGTTTTACGAGCATCTCTAACTC  
AATTGGTAGAGTAGCGGACCTCTAATCCGTCAAGTCTGAGTTCGAGTCTCAGGGGATGCA  
CAAATAACGGAGAGGTATTGCGGTAAGAGCCGTCCAGGCATGTAACCGGTACGTTA  
CGAGTCTTGTGGAATCGAAACCAACCCTCTCCACCAGTTTTGCAGTAAAGAAGTTGTAA  
TGCGTTGTCATCAGGCACCTTATGCGGAGTAACGTTTCGAACCATAACGGAATGAGTCCAGG  
GTGCTACAATTTGAGCGGCGAGTGTATGGCCGAGCACACCACCTTTTAGGCGCCGGAAGA  
CGGGTTCGAGTCCCGTACCGCTCACTGTAATTAATTTCAAGTAATCATTGGTGTGAACTT  
AGTAGTAATGGTAGCTATCCTGGATGTGACCCAGGGAGTACGGGTTTCGAACCCCGTAGGT  
CACCCCAATGATTATTTTCGCGGGTAAGGTGTTTATGGATACATGCTAGCCTTCCAAGCT  
TGAGTAGACCGGTTTCGATACCGGCTACCCGCTCCAAACACAAGTCACAGGGCTCTAGATT  
CCTAGTCAGTTTCCCACCCCTGGTTGATGCACTGTCCATTATTGCGCCGTGACTGGAGCC  
GGCGAGTTGGACAACCGTATTGTCTCCGGCACTTAGATGACCGGCTTTAACAAGATAAAT  
CGGGAGACGTCCCGTAAAATCCTCGGACAAAACCTCAGTAGTCACTCCCGTCATTTTTCG  
CGGTGAAACGAGGAAGTATAGACGGGTAACGAATTCATCTCAGCGTAGGCAAGTGGTGT  
GTCGTTCCGTTTGGGACGGAATTTTCGGGTGTTTCGATTCACCCCGCTGAGACCAATTAC  
GTAAGCGGATACTTGGTTGCAAACAAGTCCGTAAAGTCGTCGAATGTGGTAACATCCTCT  
CCTGGCACTATCCCAGTGATGCGGTTATCCAGAACGGCGCAAACCTGAAGACTTGAGTCAG  
ATCCGTAAGGCCCTGACTCCAATTCCTCAAACACTCTTGTTTATGTGGCGGTTCGAGACAT  
CCCACGTTCAAACCTGAAATCTCGATGTCCCGAGCTGCAGCGTTAGGGAAGAGTGTGTTG  
AAGAATTGAACTAACTCTGAGGAACATGTTATGAATGTTGTCAAATTACAACCACGCGC  
GATGTCTGTTGTGATCAAACCAATTCATTGGTTCACATGTATTCTGCTATGGCCCATGT  
GATGCTGGTGTGATTGGATTGCTAAATGTGCGGTTTGTCAAAGAATGGGAAATCGAT  
AGGAGCTGTATTACCTACGTCGTTAAGACTTAGCGTGAAATTGAAGTTGACACAAACAAA  
ATTTTCGCGTGACCTGACCGTTGGTGATTTGGTTCACATTTTAAGCAGATTTGATTTCCAT  
ACTCCAATTGTTAGCATTTCGATTGAAAAGTTCATCTAATCTTGTATTTGCTTCATCCAAC  
GGAGATGGCGTAAATATACATGATTAATTGCCGGTTTAGCTCATCTGGTAGAGCACAGCC  
TTTGTAACGCTGGGGTGGTCCGTTTCGAGTCGGACAATCGGCACCGAATTTTAAATGAGG  
AAAATATTATGTTATTTGCTTATCAAGTTATTGCTGTTATCTTCTTTATTTGCTCTTTCT  
TGGGCGATTATAAGCGATATTCGGATTCCCCTTCGAAATTGCGGGTAATTTGATTGGCT  
CTGCTTTTGCAGGTGGTTTGTGGTCAATTGACGGTACTTATCCATATTTTTTGCATCGCAA  
ACCGCAATCGCTAAATAAATACAAAGGAACGGACTTCTTCGGACCCGTTTCGTTAAGTAAA  
AGGGAAGACCATCTGGATATCACGAGGGCGTCGGCCTGTATCATATCTTGCTGGCCCTTG  
GCCTCCGACGAGGTTTTGTCTGGAAATGGTGCGCCAGCTCGTTTCAATATGACATTGGT  
GTTAGCGGTAGCATGCCGGTCTCCAAAACAGTGCGGCCAGGGTTCGAATCCTTGATGTCA  
TGCCAATAGTGGATTAGCTCAGTAGGTAGAGCACTCGACCGATAATCGAGAGCGCATTGG  
TTCGATCCCAATATCCACTACCAAATTTTTAGGAGAAGTGGATGAGCGGCTGGAATCGCT  
TCCCTGCTAAGGAAGTAAACCGAAAGGTTTCGAGAGTTCAAATCTCTCCTTCTCCGCCAA  
ATGTATCCTGAAGCATATTGTTTCAAATTTCTCAATGAGTGATATTATTAACCTACATCA  
AAACAGAGTTTAGATCGGAGCCATAGTTTATTTGGTTAAAATAGTCCCCTGTCACGGGAC  
ACCACCGAGTTCGATCCTCGGTGGCTCCGCTCTAACTTTTGATGCGATGTAGAGGAGAGG  
TCGTCTCGTCGGGCTCATATCCCGAAAATCAGCGGATCGAATCCGCTCATCGCTTCCAA  
CTTCAATCGCTTGTGAAACGTGGGAAAATAGCAAAATCTGGGAAAGGGTCGCGAACCAGGA  
ACCTTAAAGTAGCTTTCTAAGTACTTGTGTCTGGCAGTTCACACATACCTATATTTGTG  
ATGGGTTTCGAGACCCTAACAAGCGCCCGAATAACAACGCCGCGACCAATCGAATGATCG  
TTATCGGCTTTTTTCATCTGACGGCCCTGTAGCTAGACGGTTCAGCAGGGCGGCTCATAAC  
CGCTCGTAGTACGTTTCGATTCTACCAGGGTACCAATTTGGGTTCTTCGTTAATGGGA  
AGACCGTAGGTTGCTTTGCATCTTGATGATGCTATTTTCGATACTAGCAGAACCACCAAT  
TTGAGGAAAATACTATGGATATCGGATCCGGCTCGCCTTGCCATCGTGTGCATTGAGTA  
ATTTTGCTCCGCATGAATTCGTTATCGATGGGATTAATGTTCTTCAATGGAAGGATTCC  
TTCAGTCTCTCAAATTCAAATCGCCTGAAATGCAAGAACACGTTTGCAGTCTGGTTGGTA  
AAGCCGCCAAATTAAGGACAAAGAAAAACTGGTGGAGAGCTCAAACCTGTACTGGA  
AAGGTAAACCGATGCGGCGGCAAAGCGATGCTTATTCTGATTTAATCTACCGTGCGTACG  
ACCAAATTGCGAAGAATTCCGGATTTCAACGAGCAATCCTAGCCACCCGGAATTCTTCGT  
TAACCCATTCAATGGGTAAAAGTAAACAGAATGAAACATTGTTAACTGAACAAGAATTTT



GTTCAAATCTGTATCGTATTCGAGATAAACTCCAAGCCGCTTGATTGCGGGCTTTTTAGTC  
ATATGGTCTCTTAGCTCAGTTGGATAGAGCAGCGGCCTTCTAAGCTGCGGGTCATTGGTT  
CAAATCCAATAGGGACTGCCAAATTAAGGTGATGTCATGGCGATGATGCACTAAAAATC  
TCATGCCCGAGAGGGAAGGGGCAGTGGAAATGCACGAAGCGAGAATTGGTATAATTCTCC  
ATTGTGGAAAAACACCGGCCCAAATAGAAATCCCGGAGTAGTAAAAGTACAAATTCAGA  
AGATCAATTAAGTATGAACAGAAGCTTCGCAGGCGTCAACAGGAATTGCTCAGATCAAT  
TTATTAAGGTAATTAATATGTCTCATTTACAACGTATGAAAGATGAGCTGAGTGAGTTGG  
GTGTTGACTGAATAAGCTCAACGATTTTATTATCACGTCTGATATTTACAAGACTCTTG  
ATCCTGATGAGAAGTTTCTCATGGAACAACAGTATATCGCGATGGACAGGTATTACGATA  
TGCTAAAACGGCGAATTAAGCGTCAATCATAATTAGGGCTCCTACGGGAGCCCTTTTCGT  
ATTCTCTCGACGAGGTTTCAACATGAACAACACTATTTTCGATTATAACTCTTTCTTCGTAAA  
TGCAATGCGTGTTGGTTCGGTCAATTACCCACCGGGGTGCGAGATGGAGGTATTGAAAGA  
TCGATCAGATTTTTTAGAATCCAATAGAACAATATCCATAAATGTTGGTTCGGCAAACCGG  
TAAAACAACCTTCATTTATCAGGCTTGGTAACGAATTAAGCAATCATGCCAAAGTTCGCAAT  
GGTAGTCATGAACACCCAAAATAAGAAAATGACCAAAAAGTATGGGAGCTAAATTCGATAT  
TCTGACTTTTTAATGATATTAAGAGACAATTGCAGATTCTGGATTTAGAAAAAATTCAAT  
TCATCATGGTTGACGAGAGCGAATTTATTCTCTTTGATGAGAACACGGTGCACGATTTTT  
ACAAATGGGCAAATTAAGTAAAGGCCGAATTTGTACTAAAAACTTGATGCAGTCTGTAA  
ATTATTCAAGCCTAGTGGTATTATTGCCATATCAACTAAACACACATTACAAGTATTTAAA  
AATGTCTAAAGCTACTCACACTATCGATTTTCGGTTTTGGTAAAATCGTTGCTCAGAAATC  
TGGTCATTATTTCAATGTTATTGAGAGTCATGACCCAATGATTCCCACAAATACCAAATT  
TCCAGTCAATGACACTTTGGTTCTGGAAGCAAAGTAATCGAATTGGAGTAATCGGCCTT  
AACGCTTATTTTTCACTATTCTAAAAGACATAATGAGTGAGCACTACAATCGCGATAGTG  
CAGATGACCCAATCAAAGTTGTTAAAACATCGGGCGTAATTTATACGGCCAGTTTGATGC  
ATAAATTATCTTACGATCAACTACCTGGAGGAGCGCTGATCGTAGCAGACAGAGATATTG  
CAAATGACATATGGCATGCATGTGATAAACCAGAAAATGTTAGATACTTTGTTCGTTTTGCA  
AAGATAAAATGCATTTTGAGCTTTTGCATAGGCCTCCAGTAATCATATTTGTAACCTCTG  
CCAATGTAGAGAGCATAACGCACTGCTTTATTTCAAAGACTGGGTTTTCAAATCTACTG  
AATTTACGGCGTATTACCTCGAACAATGCGACGGTTATCTCCAAAATGAGAAATCTTA  
TAGGATTTTAAATGTACTAACTTTACAAAACCCTTCCGATATATCAAAGCCAAGAAGGTT  
GGATTATCAAATACCCTTAGTTTGCCAAATTGGCAGTTGAGCAAATGCATGCTTTTTGGC  
CATGGGATGAACCAGTTGTTGATAATGATGCTCAAGATCTGCGCACCAAATTGACACCTG  
GCGAGTTGAACGGTATTACGACCGTTCTTAAACTGTTTGCAATTTACGAGCGCAAAGTCG  
GTGAAGATTATTGGTCAGCACGAATCGCTCGAACATTCGGTTCGCCCTGAAATCAAACGCA  
TGGCAACTCTATTTGCCGCCGAGAAAGGTAACCTCGCATGCACCTTTTTACAATAAAGTTA  
ATGAAGTTCTTTATCTGGATTACGAAGCTTTCTACACTTCTTGAAAGAAAGCGACGAAT  
TATCTCGTCGATTCAGTTTGTTCGGTAAATCGGTATCAGACCCCGATGATGCCAAATCTT  
TTGCAGCTTTCACTTTCATTGAAGGTGCCGTACTTTATTCCAGCTTTGCATTCCTCAAAC  
ACTTCCAAGCCCAGGAATGTGGCAAAGACTTGATGCGAAATATTTGCCGTGGTGTGACC  
TTTCAGTTGCAGATGAACATCACCGCTCAATTGGTGGAGCAATGTTGTTCCAAACACTTT  
GCCGTGAAATGAAAGAAAAATATGGTGAAGATGTCCGGGCAAACACTGAAAAATGACATTA  
TCAACATGGCATATCAAGTGTTTGATCACGAGTCTGGCATCATCGATCTCGTTTTCGCTG  
AACCAATTGATGGTATAACTGCTGACGAGCTACGAGTTTTTGTTCATATCTCGAATTAATC  
TTTGCCGTGAAAATCTTGGTTATGAGCCATTTTCGAAATCGAAAATAACCCTATCGCTG  
ATTGGTTCTATCGCACCATTAATGCCAAGAAATTCATGTTTTCTTCACTGGCTCAGGTT  
CGGAATACAACATCAATTGGAACCGAGAAGGTTTCTCTGATTGCTGGTAAAATAATTCTG  
CCCTGGTAAACCAGGGCAATCTTTTTAAAATCATGGTGCTTTAATGTCTAAAATTTCAA  
ATTGCAATCTTTGTCAGCCGAACGCAAACATATGCACTCAATTGGCGAAATGCCAGAGTG  
GTTTACAACGCAGGGCTATTCGATGTTCCGGAAAAAATTATCAGTACAAAGGAGAAACCGT  
TCGTGGTGCATTCGGGCGAGTCGCCTCAACACTTGCAAAGCATGATATACGGCCAGAAGC  
TGAAGAGCGCTATTTGACCTTCTCTGGTCCGGTAAGCTGGCGATGGCTACCCAGTTTT  
CTGTAACACCGGCACAGATCGTGGAATGCCTGTTTCTGCGCAGGAAGTTATGTTGGGGA  
CAGTGTCTTACTTCTACGAAGGCCAAACGGAAGTCGCAATGCTCGCTAAAAACGGTTT  
CGAACTGCGTCATATCTTGGAGACATCCGACCTCGTGGGTCCGATATCTCGACCAGCCA  
CAACACAGCAGACGGACTCGTTCCTGTATTTGACAACCTTCGTTAACACCAAACAAAGGT  
TGCAGCTGCTGGCCGACGTGGTGAATGGGCCGGTTACGTTGACTTCTCGCATGGTGATTT  
CTGGAACTTTAGGGGTATGTGTTGAAAAACCCGGCTACTGCACACGTTGGTTGGGTATT

TGAGAAAGAAGATTACGAAAAGCTTCTGGCTCGCGATCCTGAATATATGGCACGCTGGAA  
TGAAGTCTTTAGATGCGCGCTCGTACTGGTAAGGGCTATATGTGGAAGAAGTGGATCGC  
TAACGATCTTGCTCCACAAGCAATCAAAAATTCAGGTATCCGTATTCGTTCAAGCCAGCT  
GTGCACCGAAATCGCATTGCCATCTGACAATATGCATACTTTTACCTGTATCCTGAGCTC  
ATTGAATTTGTCTCGTTGGGATGAAATTAGTGCTGAAGATATCAAATGGGGCTGTTCGTTT  
CCTTGATTCGGTATGCTCAGAATTCTTGGA AAAAGCGAAAAAACTCCCCTATGACACTCT  
TCATGAAGCTATCAGATTTACCGAAAAAGCACGTGCGCTCGGTCTTGGTACTTTGGGTTT  
CCATACCTATCTCCAGATGAATGATACCGCGTTCGAATCTGGCGCCGCCCCATTCTGAA  
CAATAGCAATTATTCGCAAATCAAGGTTTATGCAGAAGCTGCTTCTCGGGAATTAGCAGA  
AGAGCATGGTGAACCAGAATGGTGTGTTGGAACAGGTATCCGTAATGCTACATTGATCAC  
TATTGCTCCAAATATGAGTTCTGCTCTATTGGCTGGTGGTGTATCTCAGGGTGTGAGCC  
TCTCGCATGTAACAGCTTCATCCAACAGTCAAATGCTGGTGATTTTGTTCGCTCGAACCC  
GGTATTGGCTAAAGTATTGTCCACCGTCTTTCTGATTAAGAAATCAAAGACCCCATGGA  
AAATATTGCCACCTATCATAATGGTTCTGTTCAACATCTGGATATTTTGACAGACAATGA  
GAAAATGGTGTTCAAAACAGCTTATGAGATTGACCAACATGCAATCATACTGCTTGTTC  
AGCTCGTCAACGGCACATTGACCAAGCGCAATCAATCAATTTGTTCTTCGCTGCTGATGA  
AAAACAATCAGTCGTTGCGTCCGTTTATAGAGCGTTTATGGATGACCCCTGCTGAAATC  
TCTTTATTATTGCGTTCCGAGCGTGGAGTAAAAGCTTCAACTGGTGAGGCGGAGTGTCT  
AGGATGCCAGGGCTAACTGCAAGGGGCGAAAGCCCCTTTTATAGAACATATGTGACAAAA  
TTTGAAACATCATCAGGTGAGAAAATTTATTGTGGTAAGCATAAAAAGTACGCATGCTAAT  
CCTTTATCGGACCCCTATTGTGGGTCTGGACTAAGTTTAAAGAAATGCCATATCAAATAAC  
GGTGTTCCTTGTATAAAATCGGTTGAATGGTTTGAACATTCAACCGAAGAAGAGATGATT  
GAAGCGGAAATTTTATTAATTTCAAGTATGGTTGATAACCCGAATTGTATCAATATCGCA  
TACGGTGGTTTTTGGTGGAAATGCTTTACGGTATGCTTCCGATGAGAGAAAAGAAGCATT  
CGCGAAACATCACGCCAGAAAATGATCAAGCGATATAAAGACAGTGATGAAATTA AAAAG  
CACAGCAACCGCGTGCAGATTGCATGTAATCGACCGGAAGAACGGCAAATACGAGCTGAG  
CGACATGCTGAACTTTATAGCCGCCCTGGTTATTCTAGCGTATGTTCGGCAATACAAAA  
GAAACGCAAAGCCGCCCTGACGTCAAGGCCAAAAATGCTGAAGGTGTAAGAGCGGCGAGA  
AAGGCAATAAAATTTCTTAAACAATAATATGTTCGGACGTAATAACTATTATAGATGGG  
CGATTTGTTGATAAATTA AAAACTCGCGGATGAGTTGTCAACAAAATATGATATCAGATAA  
ACCAAATATTTTGAGAATTATCGACCTGATATTAATTCATTGCTGGGATAAATGTGGCT  
CTACGAATTTTATGCGCAATTTTGTCTATGCCAATCCGCTTTTTTGGATTTGGGTATATA  
ATTCACGTATTACTTTCAACTGTGATTTCTTTCTTTGTTTTGGAAGGAATTACTGCAATA  
GCTTATTATACAGGAAAAATAAATGATTTATCTTTTCGGCGCTGACTGGTGTGCAA ACTG  
CAAACACGTAAAACCTATGCTTGCCAATGTTGACTATAAATATATTGATGTCGATTCTGA  
TGAAGGCATAGCTCTAACAGCAAAATACGCAATTCGAGGTTTGCCTACAAAGATTAATGT  
AGAAACAACCGATCGTTTTACGGGAGTTCCGAAAAACGTTGCGGAATTGAAGCAAAAAAT  
GGGAATTTAACAATGGGCTCTTCGGAGCCCATTTTCATTTTCATTTTATGGTTACATCG  
CGAAAAATCCATGTTAGAAATAAGTTTGAATCAATAACATATGGAGTATTATCATGAATCG  
CTACAAACTTCGGACAATCCTCGAAGCAGAGTTTAAAGAAATCAACAGAAAAATCGAAGA  
AGCTAGGTTGGCTTCTGGTCATGGCCACCGTTTTTCATCTGGAATACACTTATCATTTTCAT  
AGATGACCTGTTGCTTCGCAATATCAATATCGATGATACGCTGAGCTTGATCAAAGGTTT  
GAAGGAAAAAATACACGAAGTTGACGCATACATGTCTCTTCCGTATCCTCCGCATCTTGA  
CGAAAAACGAGTCGAAGGTGTAGAATATCGACCAACTCTCTTAGAAATCACTAATGGATC  
ACTTTGGAGTGGAATTACTCCTTCCAAAATTCGCCATCATCAGAATACAGTTCTTCTTT  
GACATGTCGAATGGCAATAGTCAATTCACGACGTTTAACTTCAAACGTA ACTACAAAAGT  
AATTA AAATGGAGGGGTTATGAGGCTATTGATGATTCTGATGATCGTATTTGCCACACAT  
GTTTATGCCGGTCCGTCGGTAACAGATTTTACGGGACTCAAAGTACAATTTGTCGTAT  
GCTTACTACTATGGAAAAGCTTATGACTTGACGGGAGAATTGCGAGATGTCAATAATCCG  
AATTACTGGAACGATCGTCATCTTGGCACATTATTCGCTGCTATCGCATGGGAAGAATCC  
TCAGCTGGAATAAACA CTGGTAGATATAAAACGGGTCATCATGCGTATGGGATGTTTCAA  
AATCTTTACACAACGGTTACATCTAAACTCGACAATAGAGGAATTCCGTACAGACATTGG  
TATCTGAAAAGGGATTTGGAGCGTCAAAGTTCTTCTGCCGAATGGGCTATGGATGAACTC  
TCATACTGGCTCAAGGTTTCGAAAAGGTAACATTCGAATTGCTCTGGCTTCATAACAACGCA  
GGTTGGAATTACCATGCTGGTTTGAAGCTATGCCAATCGTGTTTTGGCAAAAAATCAAGAG  
CTCAAACAATCGGACTTTATTTACAAATAAATGTTTACATTTTGGAGTTATGGGATACT  
ATAACCTCAGTTAAACAACCAATCAAATGTGGAGTAAGTTATGGACTTCATCATCAATA

AGTTCTGTATCGCGTTTATTGTGGCTGTTGAAGTTGATCGCGCTAAATTGGAAGGTTGCC  
GATTTTTCAATTCACTTTACGATATGAACGTAGCTATGCCAGAAGAATCTATCGGATACG  
AGTTTTTGATTACTCGCGATTCCCACGATTCCCAAATTCTGATTCACACCGATTCCCGAA  
TTATGATTCACACCGATTTAACTCGTCTGAAGTCCGCATAGAAACTGAAAGATTCATTC  
GGGAATACTGTTTGTGAGGTAAGCGCAATATCATCTTTTGTATTGCTGGGCGTCCATA  
CGTGGACGCCGTAGATATCGAATTC AATCGTATCCATTACAGCAATGGAAATGACCGTTA  
TGGCTTGGCTCATTCCGGGTGGAGTCGGCTTCCAGAGTTATGATTTCAATGATGTTCTCGC  
ACACGAGGGTGAAATATGAAAAAGTCAATAGCAGCTGTTTTAGCACTGTCAATTTATGGT  
TGCGGCGCGGCCGCTCCTGCAGTAGCAAACATGAACGAGACGTTCTGGTTTCTGAAAAA  
TCTGGAGTAATCAAAGACTTCACCGATGAAAATGGCACGTATGAATCTGCTCTGTCCGTT  
TCATGTGATATGCAATACGCACAGAAACGTGACGATTGCCTTGGGATTATTTTCAATAGT  
GTTTATTGGATAATTGACTCTGCACGATCTGACGACAGTATTTTATCTGGGCTGAGCGA  
GTTATGATTAGCTTCTACGGAGTTGTTCAAATCGTTGACTATGTTTCGGACTGGGTCCGCT  
ATCGTTATTTGGCGTAAAGATAATCCCGATTTCAACCCGATAGGCAAAGTAATGTCAATT  
ACTACACCTTCCGGCAAACGAGAGTTCACATTATGATCGTTAACACAGTCAAAGGTAATG  
CAATCAGTCTGTTTCTGAACGGCGAATATGACATGTTTGCGCATGGTTGTGACATTTTAA  
ACCGAATGGGTTCTGGCATTGCTAAAGAAGTTCGTGAACGCCCTCCCTGAGCTTTGGGAAC  
TCGATCAAAGACAGTCGAAGGTGATCGTTCCAAGCTTGGAACGATCTCGGCCACAAGTT  
ACCCCTATGCTGGCCTTGCCTTCAACTTCTATACTCCGGCGACTTACTGGGACCCTAGCG  
ATATGTTGTCCTAAGATGCGGCCCGTTCATGCTTTGAAACCTTGAACACTATGTGTGAAG  
AAACTGTAGATTTTGGCCTCGGTAAGCCGACTATGTGTATTCCTAAAATAGGTGCTGGTC  
TTGCCCGAGGTTATTGGGGCAAATTTGAAGCAATCATCAACGAAGTAACTCCAAATATTG  
ATATTACAGTGGTGGAAATTCGATGGCAGTCGGTAAATGGCAACAGTGTGGTCCGGTGATG  
AACCGTATCTTCGAATGTGCAATAGTCGAATGACTTGGCGAAGAATGTAAAGGTATTATA  
TTCCACTCATATCGTGACGCCGGCGATGTAGTTCTCGTTAATTACGAGTTGATGTACCAC  
GGCCGAGTGTATTATTGGTCAAACCTCAATGGTGCCGTAATGAAATTTCCAAAAGAATTTT  
TGATTGAACTCATTGGCGAATCGCTGGAAATCATCCCAGGAGAAGGTCTTCCATCAGAAC  
TGTGTGGCAAATATGAACTTTAGTAAACGAAGTTGTCGACCGCGGGCGCTGGACTGTTT  
ATTACGACTTTGTTTTCTCCTTTGAAAAGGATGGAGTAAAGCGCTATTTCCGCGAACCAT  
ATGAAGTCGGTGCAACAGAAGAGCAGGACAGCCCGATTTGGGAAAATGAACCTGATCTGA  
TGGATGTCAGTGAAGCCGAACCGTATGAAGTGACTACAATTGCATACAAGTGGAAGAACA  
ATGGCTAAAGAAATAGAACGTAAATGGCTTGTTAAATTTGTTCCATAACAAGAATTTGGAG  
CAGTTTCCTCATAAGCAAATTGCACAATTCTACTTTGATGGTAAACGCTATCGAAGTGTG  
ATGGAACTGGCGTTCGTTAAAAATTCATAGAAACAGTGAAAACCTGGCGCCGGTTTGGTT  
CGCGAAGAGGTCGAAAACGAAATCGACTAGAATACTGCATGGGAAGCCCATGATGCTGCC  
GGTTTACCAACTTGTGTTGTTAAAACTCGGTACGAAATCCCGCATGGTCATGGATTAAC  
GATCGAACTCGATATGTTTGCTTGTGGGGAACAGTATATCGAGATCGAATTTGATAACGT  
CGAAGATGTCAATGCATTCATTCCACCGTGCTGGTTCGGCGAAGAAGTTACCAATGATGA  
ATATCACACCAACTATGCGCTTTTCAAGCGGCCCAACGAGGTCTAAATGGCAAGTCTTCA  
TTTTCACTGTGCTGCAATGAATTTGGCAAAGCACACATTTGCTTCAAGTAGCACACAA  
TTACGAAGAACGTGACATGCGTTCTATTATCATAAACCCCTGCGATTGATACGCGTGATGG  
TTCAACCGTATCCTCAAGAATTGGTATATCGCGGCCTGCTATTATGGTGAGGCAAAGCGA  
TAGTTTGACCGCCTTAATCAGCAAAGAGCATAATGGGCAGCACATTAGTTGTGTTTTGGT  
AGATGAAGCGCAATTTCTGCTTCCAGAACAAGTCAGCCAGCTTGCGCCTGTTGTAGACGA  
ACTGGACATTCCAGTAATGTGCTATGGATTGTTGTCTGATTCAAATGGTAACATATTTCC  
GGCAGCAGAACGACTGATGGTTTTGGCAGAAGAAAAGGTTGAGCACAAAACCATATGTTG  
GTGTGGCACCAAAGCTACAATGAACATGAGAATCGATGAGAATGGCAAGAAAGTCTGGGG  
GCCAATTGTTTCGATAGGTGGCAATGATCGCTATATTTTCAAGTATGTCGTAAACACTGGAC  
ATTGGGGAAATCTTCAAAAATAATTTCAAAAAGATGTTTACAACAAGGTTGTTTTGTATAG  
AATATCCTCAAGTTAAACGAAATGAGAAACACATTATGAAAAGTTCTGATGTTTTTTGCC  
AAGTTCAACTTGCTCAAGCTTTTGAACCTGAAGAGTTGAAACGCAGATTAGCTCCGGTTG  
GAAAATTCGTTGCCGACGAAATGATTTCAAAAACGAGTCTTTACAATCACCTTCGCGGGCG  
ATAAATTCCTGGAATTTACACCAGAGATATCGTCGACTATCTAAGAACTCTTGGATTTG  
AGATTCGCACCGAATCTCATCGTAATGAAAGCTATATCATCGTAACTGCAAACCCTAAT  
TCAATCAAAGGAAATATAATGCGTACTATGTCCAAAACCCCGAAAATTACCAAGAAAAT  
GGGCCTTTCTATCGCAGCCGGTCTGCTGACCGCAATTACTGCCCTGAATATCTTTACTGT  
GGTCCGGTGATGGTTCGGTTGCAACCACCACTTTCCTGGGTAAAGTTAGCCCGAATATCAT

GCAGCCCGGTCTGAATATCATCAACCCGCGGGCATCAGTTGATACCTATTCAACTCGTGA  
TCTGAAGATGGAATTCTCAAACGTACAAGTTCCTTCTCAAGATAAACTGAAAACCTTCTGT  
CGATATCACTCTGATGCTGCGATTTCGACGGTGATAAAGCCCAGATGGTTCGCATCAACGG  
CGGTACCGAACGTCAGGCCATTGATAAGTGC GTTGC GAAGAAATTCGAGAGTACTGTTCCG  
TGAATCCGGCAAAAACATCAAGAAAGCGCAAGATCTGTTTGGCGACGCTACCACTCAGTC  
CATGCTGCAAGACATGATCAAACTGAAGTCAACGACTATTCCAAGCCGTTTGGTTATGA  
GGTAACCGAAGTGTTCCTGCAAGAGATTACTCTGCCGAAGCTGATTCAAGACCAGGTTGA  
GCAAACCAAAATTCGTGAAGAAGCCGTAAACCAAGCCCAAGCGGATCTGGATAAAGCCGA  
AAAAGTGGCACAACAACAGGTTAAGACCGCCGAAGCTGCGCCTGAAGCTCGTGAACAAAA  
CGCGGTTGCTAACGAGCGTGATGCTGATGCTAAACTGTACGCCGCAGGTAAGAAGCTGA  
AGCTAACGCTCTGCTGCAGAAAACCATTACTCCTGAAATGATCAAATGGCGCCAGCTGGA  
AGTCGAAATGATTCATACCAACAAATATCAAGGTGGTGTACCGCAGACTGTGGTCCGGCGC  
TGGTTATGATGGCCAAATGCTGATGGACATGCGTTCCAAGTAATTTAACTCGGGCTCCTT  
CGGGAGCCCATTTTGATAAAGATAACTTGTAAATTGGAATATAATATGTTTAGCCGTGGT  
TTTACTTTAATCGAATTGCTGGTATTAGTGGCGATTGTTATCATTCTGTTAGCCATAGCA  
ATACCGGCTTTTTTCGGATAACGAAATTTATAATCCGATCAATTCAGTATGCCCTCATGGG  
TTAACAACCGCAATTACGCCAAATGGCGAAGAAATCTTGTTTGCCGAAAAAATCAAGTG  
ATCAATAAACAAACACTAACAAATCGGAGAATAAATGCAATAGCAACTCAAATGGGCATC  
ATGGCGGCATTCGTAGCAGCAGCACTTTCTGGTTGTGGCGAGCAACAGTCTGATACATTT  
TCTTATGATGGTCTCGGTGGAGAACCTAGGCATACCGTACACCGACTTCGGCAGAGCAA  
TGTCAGAAGTGGGTGGTGGTTCGACGGAACAATGCCAACTAGCATTAAAGCAAGCGAGG  
GATGCACACACCTCAGCTGCACCGAAGTTCAATGACCAAACATCATGTGAATCTGGCACA  
GGTGCTGTATGCACCCAAACACAAATTCAGAATTCGATGGTAGTTTCAGCGACGTGTTT  
GTTCCAGCTACGGCTGGTATGATTGTTGGCCAATTGATGTCAAGCAATGCTCGCCCGATG  
CCAGTATATGCGCCAAGTCGACCCGAAGATCGTCGAAATGGCTTCGTCACTGCGAAGGGT  
TCCTACGTTCCCTCGGAAAAGGTTCTATCGGTGCAAACATTTTCAATACTTCCTTTGGC  
AAGGGAAGTTTTGCCAAACCGGTAGCATCTTCAAACCTGTTGTGAGAATGTCATCAGGC  
GGTTTCTGAAAATCCGGTGGCTTCGGCTCTTCAGGTGGTTAATTTCAAAAAGCGGTTTAC  
AGTGATGGGAGTATGATTTACTATAGTCCCATCAAATCATTAAAGGAGTACATCATGATTT  
ATGCTGGCCAAAATATAGAATCACCAGACCTGTAAGCGAACAGCACATTGTTGGTGTG  
GTGATATTATAACAATCTCCCAAATCACTAGAAAAAGGCATTTCGTTCTATGGATATTTCT  
GTTGACGATGATGGAATTCATATGAACGAATTCTAATGTTTGAAGGCCCGTACAATATC  
CAGGAGTACTGGGAAAAAGTCGAAATGTGCATGGAGGCCGTTTAAATGATTGACGGAATT  
TATCGGATTATTGGCGAAATCTCTATGAATCATCGTTGCATTAGCCAAGGTGACGAAATT  
TATTTGAAAGAAGATGAATACGGAAATATCCGCGGTCCATCAGTTGACTGGGACGGGCAT  
GAAACTGAAATTGGTTACATTTTGTGCCAGACGCAGTGGAAGAAATCCCAGCAAACT  
TACAACGAAGCTTACCGAATTTGGATTGACACTGTTTTGGAGAAAGTAGAATGAAACGCG  
TATCTATTGAAGCTCGTAAAGATTGGTTGCCACAGTTGACTTCTGAAGGTGTTTTGTGGA  
CCACTACTGACGAAGGTCCTTATTGGGCCGAAGCAATGGTTCAGCCCAAGTATAACTCCT  
TCACTCGCAAAGAGCAAGAGCAACTCGAGAAAGCCGCAAACAAAATCCATGAAATGTGTC  
TTGAGACAATGGAATGGCTGTTTACTAGCGACGCCAAAAAGCAAAACGAAATTTTCAACA  
TGTTCAATATCCCATACGATTCTCGTGATCAAATCATATGCAGTTGGGAAGATGAAGAAT  
TGGGCCTTTATGGACGGTTTGATTTCTCATGACCGAATACGGACCCAAGCTTCTCGAAT  
ATAATGCCGATACCCCCACCATTCTCATTGAATCTGCAATTTCTCAATGTAATTGGTTCA  
ACGATCAACGCGAAAAATTCATCAAGAAGCTTTTCAATTTAACGAAATTCATGAAGCAT  
TGGTTAATCACTGGCGTGACATGAGCACTTATAACGCAATTGGCGATAAAATCAGCTTTG  
TAGCTACTACGCAAGTTGAAGATTTTGCTACAATCTCATAACATGGCTGAAACTGCTTCAG  
AAGCTGGACTGAATGTAAAACCTGTTTCGATATCGCCGAAATTCAGCTAGGTGATGACGGAA  
ATTTTTATGACATTGAAGGCCAGCATATCGACACTTGCTTCAAACCTGTATCCATGGGAAT  
GGCTGTATGAAGACGATTTTGGCAAAGCCATCGATGGTTGCAACACTCGGTTTATTGAAC  
CAACCTGGAAAATGCTGCTTTCCAACAAGCACTTTTGGTTCTTCTTTATGAGCGTTATC  
CTGATTGCGAGTGGTTGGTCCCAGCGTATAACAGAATATGATTTTGACCGATTGACTCTGT  
TCACATATGAAAATCCGAAATGGGTGTCAAAGCCTATTGTTTCTCGCGAAGGATGTAATG  
TTCATATTTTGAATATGGCGGAGAAAGTGAATTCACCGATGGTAATTACGCAGAAGAAC  
CGCGTATCGTCCAGCAATATATCGAATGGAAAGATTTTCGATGGCTGCTACCCAATGCTTG  
GTGTATGGATGGTAGGTAGCGATGCCGTGGGTTTGGGTATCAGAGAAGATGATAGCAGAA  
TTACCGGTAATAACAGCCGACTTATTCCGCACGTCTAGAAAATTGACAAACAGCAGATG

ATTTAAACCCTCTGTAAGGCGATAAATATGATAGGAGTATAAAGCCATGGATTGGCCAGA  
TGCCTTGTCATATTGGTTAAACCAGTATGCGGTAAGACAAAGGCATCAAATAGGCTTTG  
CCTTTGTTAATAACCATCAAGGAGGGGCAATGGCCATTTGTCGTATGTTAAAAACATT  
ATCAATAATCACATCGGTTTTAGCTTCAATGCACTTCGTAGAGGCGGACCCTGAAAATGG  
GTCTTATGATGAGTACATGCGTGGCGGTTAATAGTGTATAGCAACGAAATAGGGCCATC  
TCTAGATAATTCGGTTGAATTTCTTAAGCATTGTAACGATAAATGGAAATCTGCTAAATG  
CTCTTCGAGTTGTTATCAAACCTGGATATCTTGAAGCAAAGACATTCATAGCAGAAAGAGA  
AGGTCATGGAAGTAAGATTTCGGTGATGTTGTAACCGAGAAAACAAGCATTTTTGATGAGT  
TTATTGGTGCGTGTTTAATGTCAAGCACATATGCGCATTCCGCGCACTTTTATGACAAAG  
TCGTATGAAACGCATATAGCATAACGAATATTTCTATGACAATATGCCAGGGCTGATTGAT  
ATTTTCGCTGAAGCGTATATGGGTTTCAGGATTTACATATCGGCCGCGACTGTCCATTTAT  
AATGGAACCTTTGAGTCATTTGTCAAGCAACTTGCCAGATGGCGGAAAAGGTATCTGCC  
AGTGCACCTAATACGGTTCTCAAAAACACCTCAGATGATATCCAAGAGCTTTGTTCGTATG  
ACAATGTATAAACTATCATTGCACTAATTCAAATGCCCTGGTGTGAACCAGGGCATTTTT  
GTATCCGTTTGAATAAAAATTCAAATGGTTGTACTCCTACGTTAAACGAGTTTCGAATG  
TTATCATAATCAACCAACGGAGACAACCGATGAAACGTGTTAATGAAATGCCCAAAAATG  
GTCAGTTTGTAGTTGTCTGGGTATATGACGGCAAACCTCTGGTCTGAAACCTGGCGCTTGA  
ACAACGGGGTGGTTGAAATCCTCATGGATGATGACACTGCTGATGAATGGCGTACAAACG  
ACTGTTATTACGATGATGGTTATGAAGATCTCGAACTCAACTATATTGTGATTTAAAAAT  
GTCTATACTTCAGGAAATCGACAGGCTGTGCAAAACAATAGGTGTGGAAGCATCAGAATT  
CAAGATTTTCGCCTTTCTGGAAAATTGTGCGCAAACCTGAGTGCTCCTATGGGCTTTTATT  
TGAGCGCAATTCACTGTTTACGAACATAAAGAAACGGGCTATACTATCGCAGTTCATTC  
TGAGCGGCATAGAGCTCAATTTGTCAACGAAAACAACGAAGAGGCTATGGGTTTCGCTGA  
AATGATCGTTTCGGTGAGCGAAGTAGAACCTCACAAAAGCAAACATGGCACACGTTGGCA  
ATTTGTGTAACGCTTTAGTCATTTTAGTGTATATTACCAGTACAATGGTTTAGACTAAAA  
AGACTGGAAATAAAAACCTCGAGCGAAGCTCGAACGCGAAGCGATAACTAATTGGTGATAA  
TATGCAAATTATCCTTCAGCCTGCAGGCGAAGGTAACCAGCCGAAACAATCAAATCTGC  
CTATATGGCAGCAATGAATCACCTGTTCTTATCGTTTGTCTGTAGAGTATCCAGCTGT  
ACTGGAGCATCGAGTTAACATGTTTCAGTATTCAGAATCCTGCTATCAAAAACCGCTATGA  
CATCGTTACTTGTGTTGGAACCTGCAACTCCCGAAATGTTCAAAGATCTTGGCTATTTTGA  
CCGTTTTGGCACCATTATTCTGGATGTCAGCTTCGCAATGAGTCGCGGCCCTTGGATTAC  
AGTGTGTGCCGAACCTCGAAGCATATGGTTATGAAGTAATTGCTACTCAAGAACTTGTTAA  
ACCTGCGCAAAAATCGCACAAAGTGTATCACTGATATGATCGTGGCCCCTTAAATGGGGC  
CATTTGGAGGAATCATGAAAAGATATCGTTTTAAATCTGATGAAGCTCGACATGAATTTG  
CTGCCATAAGCGACATCAATGCTGCTATTGCTAATAGCGTATGCGATCGTGTGTTTTACG  
AAGCTATGCCACGAAATACTATCGATGAGATTTTTTTTCGAAATCGACGGTATTACTTTGT  
TTCCCGAGTATTTTCTGTTTTCTTAGCTAACGAAGTAAAAGAATATTTTGAAGAAGTAA  
GCGCTGGGGATGTTGCTCACGAGATATCCAGAAAGATATTGGAAAATAACGATGTTGAGC  
AATTGCTTGCAAAAACGCGGCCCTGCGGGAACGCATGTCTAAACTTGAAAATCGTCTTG  
AACGTCTTGAACGGTTGGTATAAATGAAATCTACAGCTTTAGCGTATGTTCTTTGGTTTT  
TTCTGGGTGGGTTTGGTAGTCACCGTTTCTACACCAGAAATTATGTCACCGGAGTTATTT  
GGTTTTTTACTTGCGGTCTGTTTGGTCTTGGCTGGTTTGTGCGACTTTTTTATCACTGCAG  
GATTAGTTCGACGCGCCAACATTGAATGGCGCCAAAATCAGATAGAAATTAATACAATGA  
TTCGTCGAGGTTATTGACATGGTTTATAATTATGATCGTGCTGTTGTTATTGGCCGCTTT  
TTCCAGCTTTTTCCACCGTGTACATGAAATGCTGATTTACAAAGCGCTTCAAACCTGCTGA  
AACTGTTGCTGTTGTCTTCGGGTCATCCATTGTAATCCAAACACAGTCAACCCACTTCC  
AACACTGGTTCGAATCAGAATGTTCAAAGAATGGGTGAGTAACAATCTCACTCCTAGCGA  
ACAGGCCAGAATTGTTTTTCGGTAATGTTTCTGACTACCGCTATAACGAAGATCGCTGGTA  
AACAGAAGTTCGTGAGGCCGCGCAAGAGCAACCGGGCGAGCGTGTGCGATGATTGCATA  
CGATAAGGATGAAGAATCTTATTGGATCAAAACCTTTGGATGGGACCATATTCAATGCAT  
GGGCGTTCAGAATCACGGGAAAGACATCTCAAATACCCCAATGCGCGATGAATATCTTCG  
AACCGGTTCTATCCACGACGATTTCCCTATCAATCCGTCAGTGCGGTCATTTCTTTTGA  
ATTTTGGAACTACTGAAGGTTCCGAAATACGCAGCCGGTTGACGGAAGAACGTGCGATGTG  
GGACAATGAACATGCAAAGGTTAAAGATAATCCATACGCTGATGCTCTCAGCTGCAATAC  
TGCTGATGCCGTAGTAACGTGCAACAACCATATTCTGGTTATTAGCCGCAAACATGCACC  
AGGCAAAGGTGCTCTTGCTCTTCCAGGTGGTCACAAGAATTCCAATGAGACCTTCCGCGA  
TTGTGCAATTCGCGAATTGTATGAAGAAGTTCGGATTGATGTCGATCGTCAAAAAATCAT

TGGGTCTATAAAAGCACACGAAGTATTTGATCACCCAAAGAGAACGGCAGAGTTCTGCAA  
ACCGACGGTTGCTTATTATATCGTACTTCAACCCAAAGACGACGGTAGTTTGCCTGAAGT  
TCGTGCTGATGATGATGCAAAAAGCAGCATTGTTGGATGCCAATGCATGAATACAAGAGAAA  
TCGGGCACGTATGTTTGACGATCATGCTGAAATCATTTCACGCTTACCCGGTATGTAGGA  
TACAATTACGGAAAATGATGTAACATCACTAAAGGAGAATAAAAATGAAAGCAATCTGCA  
TTCGCAAGAAAATCAAAAAGCAAAAATTTGAGCGCCCTACACCCGGTATGACGTGCGAT  
ACCAAAATGCTCGTTGGGAAGTTGCAACACTTTGTTGCATCACTGAAAATCCAATGATTA  
TTTCACGCAAAAAGATGAGTCGAATTCATGTTATTATCGAACTTGCCACTGACTGCAGCG  
AAATGTTTTCCAGTTTAAAGAAATTTCTCCCGAAGGTATTACCAGCTGGGGTGAAACGT  
CTGAAACTTCCGAAATCAAATTCGTGAGTGGTCATTTCCGGCGTGATGAAAGAAAACGAAG  
AAACTGTTTACACCCCGATTCAAGTCGGCGACGAATTCATCCATCGTAATCATGATAAAC  
GATACGTGGTTAAATTCATCGCAGAAGACGGTTCTCTAATTTCTTGGGATTCTGATTATC  
ATAGGTCAGTTTTCTTTAACCGCAACGATCGTGATCAACTTAAAGCATATGACATGAAAT  
TATCTTAAGGTGGAAATTATGTA AAAACTAGTTTTTTGAGGGCCTTCACGGCTCTCATCTT  
TACGGTCTCAATACTCCTGAATCTGGCCTGGATATGAAAGGCATTTTCATCCCCGATCCC  
AAAGATATTCTGCTTGGCCGAGCCAAAAGAAGCTATTCCATCACAACCTGGCAACGACAAG  
TCCAAGAACAGCAAGGATGATGTTGATATCGAAATGTTTTCGCTCCAGCAATTCATCCTG  
GATGCGGCCAAGGGTGAAACCTATGCGCTGGATATGCTGCATTCTCCAAAAGACAAAATC  
ATCACCGACTCGTCTGTTTGGCAATATATCCATCAAACCCGGTCTGCTTTCTACACGACC  
AATATGACTTCTATATGGGTTATGTTATGAAGCAAGCGGCAAAAATATGGTGTAAAGGT  
TCTCGTTTAGCCGCATTACGAGAAGTAAAACAGTTCATGGATGCTCTTCAGATTCACGAA  
AACCCAAGACTGCGAGACCTAAAAGATCATCTGCCACAAAACGAGTTCTGCTTCTGGACT  
CACGTTGAAGAAAATCCCGACACCATGTCGTATTACACCATGATGGGCCGTAGGTACATT  
GCTGGTGTAAAGATTGCTGAATTCTGCGGGGCAGTTGACAAGCTCTGGGCCGAATATGGC  
GATCGAGCTCGCAAAGCCGAAGCAAATGAAGGTATCGACTGGAAAGCTCTAAGCCATGCG  
TTGCGAGGCGGTCTTCAATTGCTTGAAATTTACAAAACCTGGCGGTTTGAAGTATCCATTG  
GCCGATGCTGAAGAAATCAAACCTGGTTAAAGCTGGCAAACCTGTCTTTAGCTGTAGTTCAA  
GAACGACTGGAAGAAATCGTTGAAGCTGTTGATACGGCCGCAAAAAGAGGCATCTAAGAAC  
GGAATGCCCGATAAAGTGGACATTGGACCATGGGAAGCGTTTGTGCAACAGGTTTACGCT  
GAAGCAATGAAAGAATATCTGGAGAGCAAATAATGAAATTGATTCGCTTTAAATTCAAA  
GTAAGGAAATGCTGACCGAGTATACTACTCGGTTTCAGACGCCATATTTGGGCAGTAGGTT  
TCAGCGCAAACACAGTTTTTTATTGCCAGAATCAACAAACGTGGCCAAGTCAAAGTATTT  
TTGATGGTAAAACTCTTAAAGAAATTTGTTTCTTCGAAAGAAGGTTGGCTTCTTTTGCCT  
CCTTTGAGTTTGAAAAGTTTTGTGAAAAAGTAAGCTAAACGGTTTACATTGATGGGGCTA  
TGATTTACTATAGTCCCATCAAATCAACAAGGAGTATGTCATGAAAATCACTAAATCAAC  
TAACCTGCAATCCATGGATTTTCGTTGGCCGTGTCGTTAAGGCAGCGACAGAAACCAAAGA  
GGTTAAAAATTTACCCCGATTTCGAAACCATGCTGCCGGTATTACCGTAGGAATCGTTGG  
CGTTGGGCTGCAATGTGCTTTATTGGCGATATCGATATGGCTCGTAAAATCTTCATTGC  
TGGTATTATCGCTGGCGCAACTTTCCTCGTTATGAAAAGGGACTGATGAAGTGATTAAA  
GCTGCTGAAATGGCAAAAATGGTTGCACAGAACTCCGCAGAAATCGTCAATTCCGTATCT  
GTGCATTTTGATGATTTCTTCAATGATAATATGAAAGACACAATGATTGTCAAAGGCGGC  
TATATGTGTGTTGACGCGGGCCAATTCTTGCGTTACCTACGTGAAAAGCAGCCTTTTACT  
CATTTGTATAATGATGACATTATCAAACGTTTTATTGCAGAACTGCGGGGATTGGGCTAT  
AAAGCAGAACTTGTGTTGTCACCTATGAGCCCTGATTACATTTTCAGTAGCGTTGGTAACA  
AAATGATCGTTTAGGGGCATTAATGGAGCTGAACATCGTTAAAGTATACTTGGAAAGCA  
CACTCCAAGTTGAATCGCTCATCGGTAATAAAGTCGGTGAACCTGAGATTTTCACTAAAG  
AATATTGGCTGGTGAAAGACGGATTTATCTTTCAGCATGACGGGCCAGGTATTTCCAAA  
ATGATTGTTTCGCTCTGTTATGAAATTTCTCCGGAAATGTCACTTTTCTGTTGAAATCACGG  
TGTTTATGGTAGACGACTATGTTTCCAAAAGCGCCAAGGCTATTGTAGTTATTACTGATA  
AGGAAGACAAATCATGAGTGGATAAATCTACCCTTCGTTCTCAACGTAAACACCAGCGCT  
GACGTCACAACGACAGTGCTCATGTTTCGCAATTTTTTTGAACACCTTACAATCCGAGCAGC  
ATGATCGCGATTGGCTCAATCTGTTTTGCGAAATGTTCAATGTTAAACAATGGTGAAAT  
GGGATAATACGTATCAAAAACAGCCAGGATTCGGCGTGGTTTTGGTACAAAATTGACC  
GAATTATGAGAGAAAACCATATTCCATGGTGTAAAGCCAACACTGGTATAGCCATATA  
TGCATGAGAGAGGCGTCTCGCGAGTTGGCGAGTTGGCGTTTTCTACCGACAAAGGCGTAT  
TGATGATCGCACGGCTTCTTGAATTTGAAGTTCATTCCTCTGGTATGAATTTAGTTTTGC  
CGGTGTTGAATCGCTATCGGAACCGTCGGAATACCGAACTTCGCACGAAAATGGTTCATC

CTAAGCCTGAAAACATTCATTATGCGACTACCGAAGAGATTGATAGCATGAGAGATACTA  
TTAGCATTGATAAAAATGTTAAAAGAAATCCCAGCAATCGAGTCACGAATCAGCGCTCTTG  
CTCGGAACTTGCCCAATTGCAAGATAAACTCCAAAATACACGACAAGATGTCCGCGATT  
ATCTTTCGAAAAAGTATGGTATTTGATTGAAAAGTTAGTGTACAGTGATGGGAACCTTGG  
TTATAATGTTCCCATCAATAAACGAACGGAGTAATTTAAATGTCCATCAAAAAGTCTGCA  
ATCAACATTGGGTACATAGCGTCACTTGCATTGTTTTATTTCGATGTATATCGGAAATGCT  
TATGCCGTTCTCGGATGTGCAAGGGCAGATATCGGTTCAACCATTATTGTGAGAATTTGC  
GAATGAATTATTATGCGACAGTTAATAACTTTTTGGAAAATCGTCGGGATACTTCCAATA  
ATCACTTTAAAACCTATAAGCCTGTAGCTGAACGGTTGGCAAATTATCACCTCTTCATGA  
AGTTGGTAAATGATATTTTGCCGAATCTGATGCCCGCATCGCCTCTCGGTAAACACAATG  
GCATCTCCAAAATCAAGCCAACTACTTTAATGTTGATGCCGAAAACAACGTCACGGTTA  
AAGGAATTATTTGGCTCAACACAGCGGTTGAAGCAGATTGTTTTGCAGCGAGACTGGAAC  
TGCTTAGGCATTATGGGGCTGCCGTA AAAAATTGATATTTCTGAAAATGGCAGAAATCAAA  
TAGTTAGATTTAGCATCATCTTGAGCGAAATTAACCGTGTCAAGACTGTTGCTGAAGATG  
CAAACATTGTGCAAGAGGCACGATCGGCAGAACCTGTTAATCGCGAAAAGTGA AAAAAGAAA  
TTTGGCAAAGCATCTTCTTTTCTGAAGCGATCGGAAAAGCTATCAACACTGTTTCGAGGTG  
CACTCCACTTTGGCTCTAAACGGTTGAACGAAATTGACAGTGAAGTCGCCAAGTTGCAAG  
CACTACGTAAAGAAATCGAAGACAACATGAAAATCATCAAAAAGTCAATTGGGGCTTAAT  
TAAGAATATGATCCGTCCACACATCGGCGTGAAAGGTATCCCTCTGATCGCAATGACTGA  
TTATTACAAAATCACCCATTGGAACCAAGATGCCTGAAGGTACCGAAGAAGCAGTTTTCTA  
CGTCGAAGCTCGTGGTGGCAAATTCGATGAAATCGTTATCGGTGGCGTGGAATATCTGCT  
GACCAAGTTTGCAGAAATCATCACCAAGATGATATTGACGAAATGGATGCCATGAGAAA  
GGCTCACTTTGGCCAAGACGTATTCAACCGTGAAGGTTGGGAAGCAGTCCGCTAATATCA  
AGAACAGCATGGCTGTCTGCCCATCCAAATCGATGCTGTTCTGGATGGGACTGTTGTCCC  
AGTCAAGCATGTTGTGCTGACTGTTCTGTGCAAAAGCACCATTCTGTTTGGCTGGCGGGTTG  
GTTTGACCAATCATTTTGGAGAGCTGTCTGGTACACTTCTACTGTTGCCACGCTGAGCCG  
CGAATGTATCAAATCTATTCGCCGCCACCTGATTGAAACTTCTGACCTGGAAGTAGGCAG  
TCCTGATTTCAACTTTGTGCTGATGACCCGACTACATGATTGTGGTTCTCGCGGCGTTAG  
TTCTGGTGAATCTGCTGCAATCGGCGGTTCTGCTCATCTGTACAACCTCCATGGGTACTGA  
CACTGTGAGTCGCTGTATTTTCGAAAACAGATGTTTGGCGCTGGAATGGCAGGCATCTC  
TGTACCAGCTCGTGAGCACTCCACCGTAACGTCTTGGGGTGCCGATCGCGAAAAGACGC  
CTACCTCAACTCGGTTGAACTCTTCGGTGCGGGTGCATATTCCATTGTGTATGACTCTAC  
CGATTTTCATGAAGGCAAACCGTGAATTCGAGAGCTATAAGGACAAAGTTATCGCCGAGGG  
TGGTACTCTGATCGCTCGACCTGACAGTGGTGTATGATCGACAATATCAGTTTTGCTCT  
GGAAACTCTGGGCGAAATCTTCGGTTATGAAACCAACAGCAAGGGCTACAAGGTTCTGAA  
TAAGCATTGTCGTATTATTCAAGGTGATGGCATCGACGGTCCCGAAGTTATCAACCGCGA  
TCTGACTGTTATGAAAGCTCGCGGTTGGGCTGCAGAGAATATTGCGTTCGGTATGGGTGG  
CGGTCTTCTGCAAATGGTAAATCGTGACACCTGCAAGTGGGCCATGAGAATGTCTGCCAT  
CAAAATCAACGGTGTATGGAAAGACGTATTCAAATGCCAAAAGGCGCTGAATGGAAAGC  
TTCCAAGAACGGTCAGCTTAAGCTGCGAATCATGGATGACGGCCGCTATTACACAGAAGG  
AACTATTGAAGGTGGTCAAATGCTGTACGGCGTAAGCACCAAAGACGGTTTTTGTGAACT  
TATGTCGAAAGATGCATTCGTCCGGTATTATGACGCTGAAAAGGGTCAAAAATTCTAGAG  
CAATCTGGCTGAAATCCGCCAGCGTACTGCAATTAATAATCATTCAAATGCCCTCCGAA  
GAGGGCATTGTGATTGGAGAAATCAGGATCAACAAAATTATCAAGTGGTATGAGCAAGA  
ATGGCTGTACAAAAGAAAATAATCTATGAATGGGAAAATTGATACCTGGTAAAATATTT  
TTCGATTGACGGAGAATTCGGACATATTCCATCATATTGGGGCCAAATGTATGACGGATA  
TAAGTTAAATCGTTTACGACTCTTTATTGTTTCTATTGAATGGGGTCATATTGTTATGTC  
AAAAGGGGAGTGGGAAAGTAATGCAAATCAAAGTACAAGAAATGAATTCAAAAAGCTC  
TAGAAAATAATGACCAATACGAATATCCTCTGCACAATGAAACAATCAACCAATTGCGTT  
CAGATTTTTCTGTCCACAAGTTGAATATGTTTATTTGTGATTTCAGAATATCAATCCA  
TTTTACCCATAATCCCTCATGACGCGAGTATGTATGCGCATAACATAATCATGCCAAAGAA  
TTCACCAGGGTGATCGGTCGCAATATCAGAGTTAATCTTTTGTGACAGATCATGAACAA  
ATCAAAAACACGATATATTGGGCATTTCTGATATAGAAGAAGTTGAAATTGGAAATTCG  
AAATATTTTGGCCAAAGACGGTAAAATATATAACGCAACAATAGACTACAACACCAAACAG  
GTTATAATGGTGGCAAATGACCCTCAAGTTTAGAAAATTCAAAGCAAAGACGAACGTA  
ATATGTTTAAAGTTACCACCAACTTCAGCGATAAGTTTGTGATAAAAACGATTTCATTGGG  
AACTGCCAGCTGTTAATTTAAACGAATCTTCTATTGAAATTGAGCGTCTTGCCATTTTCC

TGGA AAAATGCA AAAATCGATACCCAAACGGTAAGGGTGGTCTGGACGATTTACCCGACA  
TTCCCGCCTACTATCGCTATTTCTGCGAAGAGGAAGAAAGCATAGAAATCTGGGAAAAAT  
ACGGTGTTGAAACGCTATGGTGGCCACGCCATGATGGTGAATATCCAAAAACCTTGCCA  
GCTATGAAATCGTATATACTGATAACGATAACGTGAAGTACAGTGTAACCGTGTAATTA  
ATAAGAGCATATGGAGGAACTTTATGCTCTTAAATTC AAGTCTGCTGATGAATTA AAA  
CAGAAATTGTTTGAAGAACAAAATAAGTGTGTA AATTGTCTGGAAACGAGTTTGACGGT  
CCATACAATAAACAGCAATTGGATCACGATCACGTATTGCAAGGCCCGAATGCCGGAAAG  
ATTCGAGGTCTACTTTGCAGTAGATGCAATCTACTTGAAGGCATAATGAAACACAAATTT  
ATACGGTCAGGATTAAGGCCAAAGGATGTTGATTACATCCAATGGATGAGATCGCTATTA  
CAATATGTAGATTCAGATCATTCAAAAAATCCAATACACCCGAATTACGTTTCCGACATG  
ACCAAAAATTTCTCGCGGAAAACTTGAGTGAAATGAAGGCCGA ACTACGCTAACGAGGA  
TCTGACTTTGATGAAAAAGATCAAAAAGCTGTTTTAGTCAAAAAATGCAGAAAGCAATTT  
AAGAAGGCCATTCAATGACTACCCGATCACTTGTA AAGCAATTAGTAGAAGGCCAATCTG  
GCCTGCACCACGAAAATGCGAATAAAAACGCTGACTTTATCCCGACCATGCGAGATATGA  
TGGCATCTATCTCCTTATAGGATTACGCTAAAAGCATT TTTGCCATCTCATTTAATCGAAG  
CACATTATAGTGGAGATATTCATATTCACGATCTAGATTATGCTTTTACTCTTTCAATGA  
CAAATTGTTGCTTGGTTAATCTCAAAGAAATGTTTAAAAATGGCTTCAACATGGGTGATG  
CCCAAATTGAAGAGCCTAAATCCTTTGGTGTAGCTTCAGCCATTATGGCTCAAATTACCG  
CACAAGTTTCTTCCCACCAATATGGCGGGACTACTCTTGCCAACGTTGACCAAGTCCTTG  
CGCCATACGCCATAATGTCATGGAATAAGCATT TATCTGTGCTGACTGCAGCTTCATCAGCG  
ACAATGATAAAAATTGAAAAATATGCATACGAGATGACTGCTAAAGAAATCTATGACGGTA  
TGCAAGCTTTCGAATACGAAGTCAACACGATGTTTACCACAAATGGCCAAACACCGTTTCG  
TGACAATTACATTTGGGATGGGA ACTA ACTGGTTCGAAAAAGAAATTCAAAAAGCTATTT  
TGAAAGTACGAATCAAGGGTCTTGGAAAGAATGGCATCACACCAGTATTTCCAAAAACTC  
GTTATGTTTCATGGAAGCTGGTATAAACTTAAATCCTGGAGATCCAGACTATGAAATTA  
CACCTTGCTCTGGAATGTT CAGCCAAGCGAATGTACCCTGACATTATCAGCGCGAAAAAC  
AACCGATCCATCACTGGTAGTAAGACTCCCGTTAGTCCAATGGGTTGCCGGTCTTTCTG  
GCTGGTATAAAGTCTGGCGAACTAGATGGCAGAAACAATTTAGGTGTTGTCTCTGTCAAT  
ATTCCCGGATTGCTATCGAAGCAAACGGATCACAAGAATCGTTCTTTAACTACTTCAA  
GAAGGTTTTGAATTGTCAGTTGAAGCATCTTTGAACGAATTAACACCTAGAAGGTGCT  
AAGACAAAAGACCGCCCCAATTCTCTACACTGAAGGGGCC TTTGGTCTATATCTTAATCC  
GGAAGAAGAGTTTTTTTGCCGCATTTGAAAGAACGA ACTTCGATTTCAATTGGTTATATTG  
GCCTTTATGAAGCTGCTCTGATTATGACTGGCAAATCAACAGCCAATGATCTAGAAGCAC  
GCAATTTTGCGCTTTCGATTGCAACATATCTCAATTTTTCATGCGCAAAAGCAAAACTCA  
ACACCGGATGGAAC TTTAGTCTTTATTCTACTCCGTCTGAATCTCTGTGCGATAGATTCT  
GCCAGCTGGATCGCAAGAAATATGGTGT TATCGAAGGAATTACGGACAAAGATTGGTATA  
CGAATAGCTTCCATATTCCTGTTGATGCCAGTTGAACCCGTATGACAAAATAGATGCCG  
AAAAAGAATTCATTGGATTGCATCGGGTGGACATATCAGCTATGTCGAGCTACCCAATA  
TGCGAAACAATCTCGAGGCCCTTGAGCAAATTTGGGATTACGCGATGGAAAATCTTTTCC  
TATTTTTGGAACAAACACACCTGTTGATAAATGCTACGAATGCGGTTTTGATGGTGAATT  
CAAATGCACCTCGAAAGGATTTAGTTGCCCGAGCTGCGGTAACCACGAGTCGGCAAAGAT  
GTCAGTTATCCGAAGAGTTTGTGGGTATCCTGGTGTCTCCGTTGGCGAGAGGATTCTATA  
AAGCAAACAAGCCGAGTTTCATCACGTGTCAAGCATGTGAAATAATTTTTAAAACTTG  
TTTACATTTGTGCAGATGTGTGTTAATATACATCTGCACAACTAAACAGCCCAAATAAG  
GTTATTATGTCTGATATTAAGCAAAGTATTGAAACCTTTGAAAAGAAATTCAGGATATT  
AAGTCCATCCTGGAAACCCCAATGGATAAAGATGAAGCTCAACAAGCAATCCACAAACTG  
AATTGTATGTCTGAGGAACTTGAATCAATCGCTCAAGCTGTTGCTGATCGATTCTGCATT  
TCCTTCTCGACTGGTGATTATGGATATGGCCGTACCTATTATCCTAAAGGTAACCGTTTT  
TGGTCAGAAAGCAACGCCGAAGAGTATGGCCAAGGAACCGAGAATGGCTACTGGCTCAGT  
TCCTCTGATATGTGTTAAGGAGAAAAGAAATGGCTCGTTCTAATGAATTGGTAGAAAAGG  
CAGTTCAACTTCAAAA ACTTCTTGTGTTGAAGTTGAAGCACTGGCAACAGAACATGCTTACG  
GCATGGAAATCAATGGCAATGAAGTTGATTTGACGACTAGCTGTCAAGCAGTTGTTATG  
GCGAAGGTTCTGAAGCATTGTCATTAAATGCAGATGGCTCCGTGTGGATGGAAAGTAGTT  
GCTAATTAAGGGGCTTTCGGAGCCCAATTTGAGGGTTTTGTTACGATTATTGTTGGCT  
CTCGTGCTTTTTCGATCTAGGCTAACTCCGTTTGTGCTCCTACAGTAAATATGGACCATG  
ACTTCATTGCATACGAAGAAGAATGGAACGAATATCAAGTCAGAATGCAAGGTCGGACTA  
TTGAAGTAAAAAGCCCGAATGTTTCGAGCTTTCGTGCTCGGTGATGGTAAATCTCGTTGCT



GTTATCACGAAGCATATATCGTTCAACCTGGCTCGTCCGATGAAATGATTTACAAACTCA  
TGGATGCTGTTCCCGGTAAAGACGTATATGCCACTCCCGAAATTCTTCTCGCCATGAAAA  
TGGCTCATCGGTTCAAAAAGAACACTCGCAATTTTCATCAAAAACCATGATGCACATTCGTG  
AATTGCGTGAATTTGGTATAGTCATGGGGCCTGAAGACTTGGAAATTTTCAAAAAGCGTG  
ACAAGAATCTTTGAATTATAGCCACCCGAAGCTTAACGTCTGTAAAGGCGCATTTTTCA  
AAGACGACATCTACACCTATGATCATGACACAATTCACGAAGCAGTGGCGGTTGAAGGTC  
TTCTAGCATATCGATCATAACATGGTTGATGGCGCTGAAGTAATGACGTCAAAAGAAAAAT  
TCTTTAATTGCTCTCGTCTGATTTCAGTTGATGGGTGTTTATGAAGAATCTTGTGTTTTGG  
CTCTGGAACGTTGTCTTATTCCTTTCCAGGAAAAGTTCAACCCTATAAAGCTTTTTCAA  
TGGCCCTTGAGAAAGTATGCACTTCTATTACATCTGGCTGGTTCCGTGAATTTGCGTGGG  
AAAATTATTGTGACGTTATGAAAATTTACGCCGATCAAGTCAGGGCTGGCGACTCATAACG  
ACGAATTGTTCAAACGAGACCAGCATCTCCTGAAAATTCACAGTAAATAAATATGGATTT  
TCACATAGGAGGTATACTGTGGAAGGACACATAGTCCAACAAAAGTTTCGTGAGAACTGAC  
ATCCCGGAACCAGAACCAGGAAAAGAGGATGAATCCGAAAATCCTAAAACAGACGAATAG  
AAGCTGTTAATAGTTTATGCCAGGTGTTATAATGACCCTGGGCATTTTTTGTAAATTGGAG  
AATGTAGTTGATATTGAAATGCATATTGAAGCACAAAAACAGATTCGAGAAGCTGAATGG  
TCTGTTTCGCACAGCAAAACACGCTCGAATGCGCGAACTGCGAAACGCATATGGAGAAGAA  
AAAGAAGCTGGCCGAGTGAATCTGAACTTATTTTCAGAAGATCATGTTGCTAAAGCTATT  
TCGAGTTATTTGAAGTCGAATGAATATGACGTAATGCTTGACCGTAGAAAAGAAGTCGCA  
AAACAAAATTTTCGTTGTCCATGTTGCGATACCGCTCAAATCCAACCTTGTTTCATGGGTT  
AATAAAGTAGTTGATCTTCGATGACGCAAGTGCAACCGGAAATTTATTTGAGAGTCTCCG  
ATATGATGTTTGGAGAAGCTAAAGAGTTAATAAAAACGCCCTCCTAAACTTTTCTTTGGTA  
AAGAATATGATGGGACTCATGTAGGCAGTATTTTGGAAAAAATACAGCAATACAATGGTC  
CAGGAGATGCTTATCGAGTGGAGTATCGGGTACTGCTAGACGGCGGTGATGTCGTAAC TG  
GAGTAGGAACAGCCAATTATAACTGGATAACAAAAGTTGGCTACAGGCCTGATGTTGAAA  
TAACAAGAATCAAACCCACAGAGGCGACGTTAGACCGATGGAGCTGTATCTATTCGGAGA  
AATGGCATGATTGAAATATACGGAATTGTTTCAGAATCGCACAAATTCGCGCATGCGAC  
TTTATTGTCAAACGTCTTGAAGAAGATGGCATAGAATATTCCATAAAAAACTGTTTAGCG  
GGATGCTAAAACCTGATCTCGGGTTTGGAGTACCAGCGAGACGTCATCGATGAGCTCAGGCG  
TCGTATAGGGCAACCCCAAGGTTCCCTGGAGCTTCCAAGGTTTTGGTTAATGGGATATA  
CATCGGCGGTCCCAAGCTCTCCTGGATTATCTGGATTCATAGGCCTCTTCGGAGGCCTT  
TTTCGTAAAAGTAATGTACAAGGTGTTTTTTCGATGATAAGATAAGTCACAAGTCAAGTG  
AATGAGATTTACATTATGATCGATATACCGAATATTATTGAAAATATGAACAAAATGTTT  
GCGATTCTTGGGTATAAGCCCAATAACGGCAAAGCGTGGACAGGCTATGTTGACGCAGAA  
GGCAAAGGCCGCAACCAATCAATTGGCAAACCTGCTAAAATGGTAGGCTTGAACATCTGG  
TCGCCGCTGTGCCAGCACGAGAACTGTTTGGAACTACTGCAACTCCGCAGCAACTTGAC  
GAAGTTCGCAAGTTTGCAAAAAGACAACCAACGAACAATTGGTTGGTCAAATATGCTGGTG  
TATGACAAAAGAACAACACTAAATAGAGCAATGTGTTTGATTGCTAATCCTATGTCAACT  
ATGTGAGAAAATACTTTGTCTATGAAAATATTGCCGAATTTATTCGTACAAAATCAAC  
TCGTTTGTCCAGAAAAATACTTCTGTGCAAGACCAATATGCGAAAGCAGCAGAACAAAGTG  
ATTAGCCAAATCACCAGGCTGGAAACGGCACATGTGAAATCCGTTTCAGAAGAAAAACGG  
TTGAGTCAATATGCAAAAAGATAAGCAAGTTGAGGGGCGGCGAAAAGATAATGAAATTCGT  
ATGCTCATGGATTAATAATGTTCCCGTCGAAACTCATGTTAAACTTGCTCTTCTGTACCGT  
CGTACGGCAGATGCGCTGAATGCCAAAGCTGATGATTTGGAAAAAATGCGGGACGAGATT  
AAGCTGGCGGTTGTTGAACTCGACAATTCTCGTTTAGACTTGGCTGCCAAACTTGAGTTT  
ATCCGCGAAACTCGCAATGCAGAAGCGCTTGGTATTTCTTGTTCGAAGATGTCATCGAA  
CTGGCTGGTCTACCAAAGTCGATGTCAACGATGTTATGATGCGTATCGAAACCTTCAAC  
GGCGATTAACAAACAGCTGTAACAATTAGCGAAATTGAAAATTATATCAATGGTCTGAAG  
TAATTA AAAAGGGCCTCCTTGGAGGCCCTTTGAAAATGGAGTATGTTAATGATTTGCTCA  
ACATTAGTAACTCTAGTCGATCCAAATGGAATTCGAACTAACTATCGGTATAATCCGGTG  
ACAATGGTATATACCAACACGAAAGGCGAATCTATTGACGCATACACCGCAGATTCTATG  
GGATATACTATCAGCCGAACCGAAGAAGCCAAAGAAACGATCGATTCTGTTTCTCAAAC TG  
TCTAATGCCGAAATGAAAAGAATTATCGCGAAATGATAGGTAAAGATCGTCAGATTGAA  
CGAGAAGAGCATGATGGCAGTGCTAAAATGGATTACGAAACTTTGGCTAGAGCCACTGAA  
ACTGCTGATAGTCTTATACTCAATAAGATTA AAAACGAGTGATCTTTTGAATTTGAAGGCG  
CAGTATATTTTCATCTGTTTCTGGTATGTGCGGCTGCTGCGGCTGCCGTTGAACAAATCTCC  
GGTGGTATTCAAATTGGAGTAGAGCGGCGATGGAAGCGGACTTCGGAAGCCAGCCACGGT

GAAAAGTATATCGCGCATTATAGCATTGCTGTAGCAGATTCAGAGCCGTTGGTGAC  
GCAATCAAATTCGTCAAACCTCTGCGGTCTGCACATCCTCAGTTGTCACATATCGGTTTT  
ACAAAATTGGCTTACACTAAACTGGCTTTAAACAACCGCGAAAGTGAAGTAAAATTTGTC  
AAAGAATGGATTAGCCATTTACCGAGGACGTGCTTATCAATATCATGCTGGAAAAAGGC  
TATAACATGTCGATCAGCTGCCCAAATCAAATATTGCTGTTGGGTGAGTTTTCGAATTAT  
TCCATTCTGAAATTGCGCGAATTGAAATGTTTGTAGACTATTGCCGCCGAAGTCTCCG  
AAGAGAGACTGAAACAGTCTACAATGACCGTCAATCGTGATAAGATAATATAGTTGAAAC  
AAGCATTCAAATTTTCGAGAGGAATTCAAATATGTCTAATGCATTCATTGCGGTTTCGTAA  
CTTTGCTGTACACACTGCTGCCGCCGAATTCACCGCTGACAATATTCTTGGTTCGTGAAAT  
CACCGAGCAAAGATCGACAAAGTTGAAAACACAGTATGGGATGCTCTGATGGAAGCGGG  
TGTTACCGGCATTGGACGCCGAGCGATTTCGCAGTCTTATTGTGCAATATATCGCGGATGA  
ATTCGGTACCCAGCCGCTTGCCACACTCCTACACACGCAGGTTACAAGCAAGTCGCCGA  
AGACGCGTACAAGAAATATCAAGGAAAAGCTCGCAAAATCCGCCAAGAAATGTACGGCAG  
CAAGCGATAATTTTCTTAGCTCCAAATAAAGTATCTGAAGGCTTTTCGCAGTCTCCGAA  
ATAGGAATATCACAATGGAATTCAAATTTATTGTTTCAAGCCGTCATGCTGGTCCGATTG  
ATCGCTATATTATAGATTTGAAAAATATCGACCGCGTTTCTCCGGGTGGTTGCGAAATGC  
ATATTTTACGTACTACTTCTGGTGCTGATAACATTTTCCATGTTGACGCTTATGACCCCG  
AATTTTCCAACGAAGTTCACCGGCACGTTTATTACATTCTGAATGCCATTCGTGTGCCGG  
CTGGTGCACACGTAGTCGGAGTTATATAACGAGAAATTATAGCCGCCAGGCCGAGAAAGC  
TGTTAGCGAATTTATCTACATGGAATAATTAATAAATGAATTTCAAGGGCTTTTATGCTGGT  
GTAGGGAGTCGCGAGACTCCCGAACATATTTGTCGTTTGTATGAAAGATATCGCGGAGGTT  
GCTGCGATCATAGGATATACCGGACGTACTGGTGGTGCCGATAAAGCAGATGACGCATTT  
GAAACTGAATTTTTGGCAGTTGCTGATAGTTTAGTCATCGACAATATGGCTGAATTTGAT  
GTTTATCTGCCATGGTAACGATTCAATGGCCGTTTTGCACCAAACATGCTCGTCACAAC  
CTCATTTTACCAAGCGCCAATGAGTGGGACGCCGAGCAAATCATGAAAACGGTCCACCCA  
ATTTACTCCAAAGGAGGTAATTTGACTGGTGGTGCTCTTGCCTTACTACTCGAAATGTG  
AATCAAGTTCTAGGTTATAATCTGAAAACACCTTCAGAATTCTTGGTGTGTTATTCGGTT  
CCAACGGATAACGGAGTTTCTGGAGGAACAAATACTGTGTGGCAGCTTGCAATGTGTCAT  
GGTGTAGAGTGTATAATCTTTACAACCAGTTTACATGAGCGGCTTAAGGAATTTTTG  
GATCTGTGAAACTTTACTCTCTCCGCTAAACCAGCTGCAGGAAAAACTGCAGCTATTA  
TAAATCATATTGTTGAAAATAACGAAAAGGCAAGTATAGCCAGCATATCTAGACAATTGT  
CGAAGCAATCTTTTGAATACTTTGTGCGTCTGGGCGGAGAAGGCGACTTAGTTGACACCG  
ATAACCGTCAAGGCCAAAAGTCGGTACACGAAGCAGTTATCAAAGCATCCGAAGAATTTG  
ATGTGATTTTTATAACGCACGCGGCTTTAATGGGTCTTCGAGATATTGATGCTTTAAAAG  
ATTTAATCTGTATATCGATGAGGTTCCAGAATTAACAAGCTTCGAGCGATTTACTTTCA  
CAACATCAGTCCAAAGTCATATACTCGAATTGTGCAAAATAGATGAAACTGGACTATTAG  
AGCTGCGAGATGAGCATCGAAAAACATTTCCAAAAAATGGCAATAGATGGCTTTAGTGAA  
ATGATGACATTTATTCAACTCTTTTTCCGTTGTATAAAGCACTCCTGACAGGTGTCCCTG  
TCAGGCTGTCAGTAGAGGGAGGTGTGACGCAATGTTATTAAGTGAATGACGCGTCAAATG  
ATGATTGGGCAAAATTCAAGTTAATAACTGTCTGTTCTGCAAAATTTTGAGCAGACTTTTA  
CTGGCATGATTATGAAGCATTTTAACGGATGGGAATTTGAAGAGTCTCCGCTAGTTGAGC  
GGTTAGCTTTCCGAGATTATCCTAAACTGCTCGCGTAAAAATTCATGTAATGTTTGATG  
ATGATTGGTCTCGTTACACAGCCGACAAGGAAGTTGATGGGATTTTCAATTACTCTCGCA  
TCGAAAATACTCTCGACACAATCATAAATGGCGATTTTCAATTTACAATCGAAATTTTATC  
GGCCAAGAATGCCAAAGGGGACGGAAAGTTCTGATAACCCGCACGGTCTAAACAAATATT  
CGGATTTTACCAATGTGGTTGTGATGTTTTTCGTATAATCCGGCGCCTTGGCAAGTTCCAC  
TTTTGAAAGAACTCGCAAAGTCGGTAGGCTTAGATGAAAGTGAATGGTTGACGCGTACA  
TAGTTTCAAAGTATCTTGAACCCGCATTTCAACTTTGCACAAGATGTGATATCCGAAATG  
AACATTCGCTAAAACCCATCAACCTGTATGTTCTGATATGAAATTAGCTCAATATATGT  
TGAGATATTTGCCGCACGCTGAGATATGTGACGGTAATTCAATCGAAAATCACAACAGG  
TAAAAAGAAATCGAGAATCGCATCAAGCGCTATACCAAATGACCGAGAAAGAAAGTTCA  
AATACAAGTATCCGCTAAGAAAACCTGGGCGAATACTCGATATCAATTCTGCTAAAGACC  
AGGAAATTATCCAGGACTGGATAATCACAACGCGAGAAAAAGCCAAAAAGAAGGCCTCTA  
CATCAGGCCTTTGTCGATGCACATGATAACATAGGGATCACTCTGGGGTTATCAGGAAT  
TTTTGATGATAGGTTATTAGTCTAATGACCTTGTTTAAACCTGGTTGATTATAGAAATCC  
TGGCTCCAGGTTCAAGCTTGCTTGAACCTTATCTTTTTTATCCTTTTAGTTATAATATCTA  
TTAAGCCATAAAGGATAAGTTTTGGCAGGGCCAAAACCTGCAGGCAGTAAAGTTAAATAA

GTTTAGCAAGCTTATTAGTATGATATACTCAATCATAGGAGGAATTGCCCTATGAAATAT  
GTTGACAATGAAGTTCTATACCTGAATATTTGCAAATGGAAACAAGATATGCGTGATGCA  
GGGCTTCACATCAAGATGCCAGATGCAATTGGTATAGACATTATGAAGATTGCAAAAAGGT  
TTTTCCGGATATTACAAATTTGCTGGATATACGCAAAATTGGAAAGACGGAATGAGATCT  
GATGCAGTCTAAGCTGTTGTAAGGGATCAGTAAATTCGGATGAAGAAAACACTACAAAAAC  
CCCCATGCTTATATCACACAGGCTAGTTAGCGCGCCTTTATTGGACGCATCAAGTACGAA  
AACACGAAATGGCTATCAAATACCGGTATTTTTTTGACCAACGTGTATGACGAGCATGAT  
GAGGATATGTCACGATTGGTTGATGAAAATTTTCATCCAAGACATCCATGGCAAACACTAGTA  
GCCTATGAATCATCCCTTAAATCTAAAAAGAAAGATAAAGAGGATGTTCCCTAATTTGGAT  
TCATTCTATGAAGACGACCCTGAAGATTAATCTTTTACCCATCATTGATTCAACATGCGG  
AGAAATAGAATTATTAAGCGTATTTTCGTAAAACCTCCAATTATTGGATTATAATATTCCTG  
TAGTTTTAAAATCCTGCCAATATTTTCATGGCAGCCGTTTCGAAGTAGAAACTAGGCCAACT  
CGATTGGCATATTGATGTAGACACAATGACAATGGAGATTTTCGTATGTCGCCTGATTACG  
ATGTTGACCTTAGCACTGGTGCAGAAGCTCTGAGTGAAGTTTATGACCATAATCTCATGG  
ATTTACAAGAAGATCTACGAAAAACAAGCTGAAGAAAAAAGCCGCAAAGCATCTTAAAAC  
TCATGGGAGAGAAATTAAGCGGCTGAAGAAACATGCTGAACGAGCTCTATTCGCAAACAA  
TAAAGAACAGTATGCGTATGCTATCAGTAACTTCGTACCCTGTACAAGCAAAGCAACT  
TCCGCATTCTGCAATGATCACTATGTTTGAAACTAGTCGTCAACAAATTGTTGACATGGC  
TAAAGCATATGCTACTGCCATCCAACCGGCAGAAAAATAATCAAGCAAATCGCAAACCTG  
TTCCAGTTTGTCTATTTGATCTATTATAGGCTCCACGGAGCCTATTTTTGTATTAGGAT  
TTAAACATGAAACTTTTGCATCTCGGTGATATGCACAATGGCGTAAAAGATGATGACCCT  
TGGCATGAAAACATCGCTGAACACATAATTGACCAGGCTGTTGAATATCCTAAAGCAAAT  
GGGATAACTCAATGGCTTCAGAGTGACGACTTTTTTTGACGTTAGAAAGGCTGTAACACAA  
CGTACAATGGAATTCGTCAGGACTCGAATTACGCCCAAATTGAAAGAAGCTGGTATTATA  
TGCTATGTGATCTTGGGAAATCACGCCATGAATAAGAAGGATAAAAATACATCCAAATAGC  
GTAACCGAAACTCTGGGTAAAGATGAAACGTATGTCGTGATTGATAAACCGACGACGGTC  
AATTTTCGAAGGTCTTGATTACGACCTTATTCCTGGTTGTGTAAAGAAAATGGATCAGAC  
ATTTTCGAGTTTGTCAAAAAGTCAGAATCCGCATCGTGTCTTGGTCATTGGGAACTAAGC  
GGATTCTATTTCTACAAAATATTCAGGTTTCGGGATACAGTGGAGATTTTTTTGAAAAAG  
TATGAAAAAGTTGTCTCTGGACATTTTCATACTCAATCAGACGGTGAAAATATTCCTACTAC  
ATCGGCACTACTTATACGATTACAGCCGGTGTGATGAAGATGACCCTCGCGGTTTCTGGGTT  
CTTGACACAGAAACCCGTGAATTTGAATTTATTCGATTTCCAAAACATGGCACAACGA  
CTGACTTATCCTGGTGTACAATAGAAGAAATTCGAGAGTGCTCCGGTTGTTCTGTCCGT  
TTGATTACTAATGAAGTTGATGAAGGCTTGACAAAAGTTGAATGTCTTCTGGCTAAAATT  
GTTTCATGATCTGAGAACCATCAACAAATCTGCCAAAATTGAAGTTGATTCTTCATCTGAT  
ATAACCGATGACGGCGAAACTCTTACTGTTTCATCTATGGATACTTCTGGTAGTTTCGATG  
ACCATAATGGGTTTATTCGCTGAAAGTGTGCGCAAATTCCAGCATCGGTGCGGAACATAAA  
GAAGCAATCGTAATTATGGCAAATGAACTTTATGCTGAGGCTATTGCATCATGATTGAAA  
TTAAAAGAAGCAGCTTGGATTTATTCGAGTTCGCTACAAAACATCATGTCCGTAGGCG  
ATGATCCTATCGCTATGTCGCTTAACAAATATGCTAAAACATGGTGCCTGGCAAATAATG  
GTGCCGGAAAATCGACAATGTTGGAGGCAATTTATTTTGCCTATACGATAAACCTTTTC  
GAGATATTACAAAAACCAACTGCTGAATGAAAACACTGGCAAATAATTTGTTAGTGGAAC  
TTTGGTTGGAATACGAAGAAAAGGTTTTTCACATTACACGTGGAATTATGCCTAATAAGT  
TCTCGATAACTTGTGACGGCGTGGCTATAGATGCTGCAGCATCAGTTAAAGATTTTCAGT  
CATATTTCAAGAAATGATTGGAATGAATTCTACCAGTTTTAAACAGATAGTTGTTTTGG  
GCACTGCTGAATATACGCCGTTTATGCAACTAAAAAGCGCCGGAAAGGCGCAAACCTGGTG  
GAAGATTTGCTGGAAGTATCCGTCTTAGCTCAAATGGATAAAAATCAATAAAAAGCCACGGA  
TTAAAGAGTTAAACCAGGATATCGCTTCAGTTGATATGGAAATAAACCATATAAACTCAC  
AGCTGAAAACATAACCAGGATCACCAGAATAACTCTAATGCATCCAATGCTGCTGCCATAT  
CCGACCATCAGGCATTATATGACACTGCTCGCGAAAAAGCAAAGAAATCAAGTCGGCTA  
TTGATTTGCTCACAACGCAAATTACAGAATTCGTGATGACTGAATCCCCTGCATCCGATC  
TTGGCAAGTTTACAATGGCTAGAGCAAAGCCGCGAGCGCAACATGAACAATTTTCCGGTA  
TTGCTCATATGCATGAAGATGGTGGAAACGTGCCCAACATGCATGCAGCAATTTGACGATC  
CTGAACTGCTAGTGCAATTCGTGATAAAAATGTCGCGAGATCCAAGGTCAACTTGACACAG  
CCGATATTCGCATAAATGAACTCAACCAAAAAATGATAGAGTTCAATGAAGCAGCTGTTA  
ATTTCCGTGATCTTCAGAATAAGTTAAACAACGAAAAACAGTCTAATGATCTTTATGTTA  
ACCAAGCTAAAGCTGCAAAGCTGCAATCGAGCGTCTGCAAGATGAAAGAACAGATTACA

CATCGGAAATCGACCAACTCGGGAATAACCTACGTCTAAAAATTAGTGCTAAGTCTGATT  
TAGAAAAAGAGAAGCACCGTAGGTCTTTGATAGCTGATCTTTTGAAGGATTTCGGGAATTA  
AAGCCGTCATCATGGCCCGCTATATTCCGTATTTCAATAATCGCATCTCTCATTATCTTG  
ATATAATGGATGCAGATTTTGGATTTACTCTTGATTCCGAATTTAAAGAAGTAATAAAAT  
CTTCAGGAAGAAGCACATTCAGTTATAACAGTTTTTCTCAAGGCGAAAAAGCTCGTATTG  
AGATGGCTGTCATGTTTGGCTTGGCGTGATTTAGCATCTGAAGTTTCTGGTGTAGATGTTA  
ATGCGCTGTTTATGGATGAAGTATTTGACGGTCCTTATGATGATGATGCACAACGCTCAG  
TGTTTTCAATCATAGAAAACATGAAAGCCAACGTGTTTATCATTTCGCATGGAGAACACG  
ATCCTCAGAAATTTGACAGACACATTGTAATGTCAAAGCTAGGGAGAAGTACGCTAATGA  
ATGAGGTAATTTTTGATGTTTATAATCTTCCAACAACCTGCTCCTGAAATAAGAAGTTAT  
AATTTAACTGATGAAAATGGTCATGTTAATTTGATTGTCACTGATGAAGACCGGAAACAG  
GTCTTCAGCGAAGAAGATATCCGCAAGTTTAAATCAAATCGCCATGCTTATTACAATTTA  
GTTGAAATTTTCGACTAATGATTTGCGTGAATAGAAATTATATTAGAATGTTTCGTTATAA  
ACACACTGAGGAATATGTATGCGTAATCAAGCCGTTCTTTTTGTACCAGCCGATATCCGC  
CCAATGAGCGATAACGTGTTTAAAATTCAGTTAAAATCCGAAAAGCTTGGGTATCATT  
ATCAGTGATATTCGTGCAAACCAATTGCAAGCTCTTGAGCAGAAAATTCGGTTCGAACTA  
TATGCCGAAATTGATAAAATGGTTCGAGACATGTATATCGAATTGCTCGTACGCCGCCGA  
GAAAACATTCTGGCCAATGGCGGATATCATGTTAAAGGAATGAACGACAAAAAAGTACTG  
GCCAAACAATTCCAATACGACACTGACGAACTAATTATTCAAGCTGCTCAGACTGTCATG  
GCAGATTACTAATAAGCTATATCGTAGTTGTGTTATAATTTCAAATACTGAAAGGAAT  
ATGAAATGAACTTTCAAAGAAACACTGTCCGTAATGAAGAATTTTGCAGCTATCAATC  
CATCTCTGCGACTTACCCCTGGCAATTCATCATGACCAAGTCGGTAAATGGTGTTCAT  
ACGCTGAAGCTACAATCGCTGATGAAATTGATTCCGAGCGGAACATTTATGACCTGCCTA  
ACTTCCTGTCAATTTCTTGATCAACTGGGTGAAGGTTCTGAAATCAATCTCTCAAACGGGG  
AAATTGTCATCCAGAATGGTCGTGCAAAGTAAATCTGCCTGATGCTGAATCTTTAGTCA  
TCGTGGTTCGGAAGCAACGGCTGCGTATGCCACCGGCTGATGTAGAGTTTACCTGAAAG  
CTGAAGATTTAGCAGAAATTCTCAAATCTCTCGAGCAGTTGGTGCAGACCGCATCGCGA  
TTACTAATCGCAATGATCATATCGTTATTGATGCGTTTGGCGTCGAAGACGGCGATAATG  
CACGAACGCGATATTTGACCGTCTGTCTTACGAAGGCACCAACAACCTTCAGTTTCG  
TTATCAACCTTGAAAACGTCAGTGTGCTCGTTGCCGATTACAAAATCAATATTTCTTCCA  
AGGGCGCTGCTCAATTCCAGGGAATTAATACCGCATATGTATTTGTCCTTGAAACATCTT  
AAAAGCAGACTTCTAATAAATCCTGGTGTGATATCATGCGGGCGTAAAGGCCCGCTTTC  
TTTTGAGAGGAATTTAATATGTTGACAGTTAATGCCGGCGAATTCATGTTTGA AAAACA  
ATATCGCCCAGGAACAATCGATGAATGCATTTTGCCAGAATATGACAAAAAGATTTTCAA  
ATCTATCGTTAAATCTGGTCGTATCCCCAACATTATTCTTCATTCTCCTTCCCCAGGGAC  
AGGTAAAACACTACCGTCGCCAAAGCTCTGGTATCAGAAGTTGAAGCCGAGTTTCTGTTTCG  
TAACGGCGCAGACGCAAAAATTGACTTTGTTTCGCGATGTTATGACTCCATTTGCAAGCTC  
TAAAACATATGGCAGCAGGTGCAAAAAGTAATTATCATCGATGAATTTGATCGAGCAGGTCT  
TGCAGATTCTCAGCGTCATCTTCGCTCATTTCATGGAAGCTCATTCCAAAATTGCACATA  
TATCATTACTGCGAATGATTTGGGTGGAATTAATCCAGCACTTCAATCACGGTGTGCTGT  
TATTCAATTTGGTAAAGCCGATCAATCTGATAAAGTCAATATAATGAAACAGATGATTGT  
TCGTGCCGAAGCAATTTGTGATGCTGAAAATATCGAAGTTGAAGATCGCAAAGTTATTGC  
CGTTTGGTTAAAAGAAGTTCCTGATTTCCGTAAAACCTCTCAACGAGATGGATTTGTA  
TGCATCCGAAGGTAAAATTGACAGCGGTATTCTGCGTCTGGTTCTCAATACCCGCAACGA  
TATCGAACAAGTCATTGATGCACTTAAAGCTAAAGATTTGAAATCGCTTCGTGCAATGGC  
TGGTCAATACACGACTGATTACGCTGGTTTTGTTGAACGTCTATGTAATGCACTGTACCC  
GCTCGTTAATGGTCCGGCAAAAATTTCGCATGTACGAAATTATCGGTGAAAACAACCAACT  
GTTTGGCAAAGCCGCAAATATCGAGTTTCATGTTCAATATATGTTTCGTTTCAGCTTGCCGT  
AGAATTCCATGGTAACTGGCTGTAAGGAGTTCGATATGAATTTGAATTTCTTATGGGTG  
ATGATGAGCAACTCAATGAGCACGAAATTGCTTGGAAATCGAAAGATTGGGATGCCGTAT  
CAGCATTAGCTGATTCGTTCAAAGAACCTTCCGAAAACAATGCATTCGCATTCTTGGATG  
ATATCACTTAAACCAAAAACGGAAAGATGTGTATCAAATAGTGATTATCCGGCATGGTTA  
TCAATAATGCTCTTTCGATGCATGCCGAAACACTGTATTCGGCCTACGTCATGAATCTTC  
TGTCAGCATTGCCGGCCCAAGCGCAATAACAATTACCTGGTGTCATCTGTAAGAAAAGGCA  
AGATTTACGGCAAATGGCCTAAACTAGATGAATCAATCATCGAAAAGCTGTATATTGCCG  
TTATAACAAGCAGCGAATAACGTTGATTTGCATACCGCAAAGATGTATATGCAAATCATGC  
AAAGGCGAAACACTTTGCATGATTTTCTGAAAAATCACAAATTTATTGTAACCTCCAGCAT

TTGTTAAAACTGTTGCGAAAACAGCAAAAGATCAAACGCAGATGCTTAAGTTGGCTAAAA  
AATTCTAAGGTTTTCTTATGATCCAAATCGATATCAATCATCCTGATGATTTTCTGAAAA  
TTGCTGAAACACTTACACGAATTGGCATTGCATCTAATAAAGAAAAGAACTTTATCAAA  
GCTGCCATATTCTTCAAAAGCAAGGCAAATATTTTCATCGTTCATTTCAAGGAAATGCTGA  
AACTAGATGGTCTACCAGTATCAGTTTCCGAAGAAGATATTTCTAGACGAAATAACATTC  
CTTCATTGCTTCAGTCATGGAATTTGTGTAATAACTAACTCCTATTGAATTGTCATCTC  
ACAATAATTTTAGAGTTATTAGCCACAAGCAGAAGGGCGAATGGCAACTATTCGCGAAGT  
ATCAATGTGGTTAATGAAATGGCCTCAACAGAGGCCATTTAGAAGGACATATTATGCAGC  
ATTACACGAACATCGAAGTTATTGGAAATACCATTTTTGAGCGTTACATTAAGACGGTG  
TAAGACTATCGCGAAAAACAAATTCTCAGCCAACACTCTTTCATCATGCCGCCCCAGGTG  
TAGAGACGAAGCACAAAGACATCTATGGGCGTTTTTGCTACCAAAGAAGCATGAAAATA  
TTTGGGAAGCAAAGCAATGGCAAAAACGAATGGCCGAAATTGGCCAAGATGCCATGGGTA  
TGGACGACTATTGTATTTCCCTACATCTCCGATAATTATCGCGGAGTTATTGATTTTGATC  
GTGACAATCTCATTATCGTTGTAGTCGATATCGAAGTAACAGCTCCAGAATTCCTGATC  
CCAAATTTGCAAAATATGAAATTGATATGATTTCCCATGTGCGTTCGACGAGGGCAAAA  
AGACATATTACATTTTTGACCTTGTTAAAGATGTAGGCCATTGGGACCCATCTAAGTCTG  
TTCTAGACAGATATAATTCTTGACAATGTCGTTTACATGCCATTCGACACTGAAATTGATC  
TTCTTCTCAACTATATTCAACTATGGAAATCATCTACCCCTGATTTGGTGTGGTTGGA  
ACAGCGAAGGTTTCGATATTCCGTACATTATCACTCGAATTATCAACATCTTGGGTGAAA  
GTGCGGTTAACCAAATAAGTCCGTACGGCAAGATCGGCTCAATAACAATTACAAACATGT  
ACGGTGAAAAAACGATCTATCGTATCCATGGTGTGCACTGATGGATTATATGGATGTTT  
TCAAAAAGTTCATTTTCACTGTTATGCCTGACTACAAGCTAGGTAACGTTGGATATCGCG  
AAGTTAAAGCAGACAAATTGGAATAAGACGGCCCAAGTAATAAGTTCCGAGCAGCAGATC  
ACCAACGATATGTCGATTACTGTGTGCGAGATACGGATATTATCCTGTTGATCGATGGCC  
GTCGATGCTTTATTGATCTTATTCTGTCTCTTTGATATTACGCGAAAATTCGTTTCGAGG  
ACGTATTACGAACACTATTACAGTTTGGGATTCTATCATTTTCAATTGGCTTGTGAGAAAA  
ATGTAGTTATTCCGATGATGAAAGCTAGCCCAAAGCAAAGTTTCCCTGGGGCATAACGTAA  
AAGAACCTGTTCCCTGGTGCATCGATATGCCATGAGCTTTTACTTAACATCTCTGTATC  
CGAGTATTCTACGTCTTCTCAATATCAGCCCAGAGATGATTGCCGGAATGTTTGCACCTG  
CACATCTTGACGACTATATCAATAAGACTGCTCCTAAACCATCTGAAGTTTATTGTTGTG  
CCCCAAATGGCATGATGTACAAACGGGGTGAAGTTGATGTACTGCCAGCTGAAACTGAGA  
AAGTATTCTTGCAACGTAAAGCCGAAAAGAAAATGATGCTTGCTGCTATACTCAATCAGG  
AAGCAATTAAGAAAAATTCTGGCTTCCAGGGGCGAAAAGGTAGACCACTAATGTTCCGCT  
TTCGTATGGGTGTTATATTATGCACCCATCTTGGAGGAATTACATTATGTGGTATATTTA  
CAAATAACGAATGAGCTAAACGGCAAAATTTACGTCCGGGTTCACAAATCCGCAGACAT  
GAAAAACGACCCTTACATGGGTTACGGCGTAGGTGTTAAACGAGCAATCGCCAAATATGG  
TGTTGAAAATTTCACTCGGACGACGTTGTACGAATTTGCGACAGCCGAAGAAGCTTACAA  
TATGGAAGCCGCCATAGTGAAGAGTTTTTCAGCCGTCCAGACGTCTACAACGCAAT  
GGTCCGGCGTAAAGGTGGTTGGGCCCATATCACAAGCCCGGGCAGCATATGAAAGACC  
CGTCATGGCTGCTTACATTGGGTCTTGCCTTCGCCGCGCATATGAGCAAGACCCGAATAA  
AAAGCTTATTAGCATCGCCAATTTCAAAAAAGCGTTCGAAAGGGACCGTGGCAAGAAACA  
TTCAGAGGAGACTCGCCAAAAGCGGTCCGACTCGCTAAACGATTTCTACGCGAATAACAC  
ATCTGTTTTCACTGGTATCCCAAAGTCAGCTCAGCATCGCAACAAAATGAAAGCCGCTG  
GACTGAAGAACGCCGCGCAAGCCAAGCAGAGCGTCGAAAGGCCCTAGTAGCCTCAGGTAA  
TGACGCATTTCGCTAAAAACAGGCTGGGCAAACTAATAGCGAAGAAACGAAGGCTAAGAT  
GTCCGAAGCGAAGAAAAAATACTGGGCTGAAAAGCCAAAAGTTATTGTAAAATGTCCACA  
CTGCGGAAAAGAAGGCATCAAACATGCCATGCTCAGATGGCATTTCGACAATTGCAAACA  
CAAAGAGGCATAATTATGGAACCTCGAATTATTCTGCGACTTCAATGAAGATGAACTCGCG  
TATTTGAATACTCTTTCAACCGATGAACTTCATACCATGATCGGTCGTTGTGAAAAAGAA  
GAACAAAACGCAACACCAACCAATTGAACCGCAAAATTTTGATCAACTCGCTTTACGGA  
GCTTTTTAACACTTCATTAACCTGGAGCTCCTTAAACCCGGTGAACCTCAGGGAACCTCTC  
AATGAGACAATCCTGAGCCAAGTCTCGAAAGAGAAAGGTGCATCGACTATCGAACGGCGG  
GTAATACCGAACCGAGTAGAGTACACCCAAGTGGGTGGAAGCGCCGGGGGTGCAGCAATG  
CATATGATATAGTCTGCTCTGCATAGCGATATGCAGCTGTGAGTAAAGGTCCGCGACGACA  
TATCCACGGTCTTGGATTAACGACCCAAGGCGAACACCTGGTAGGTAACAACCTCTTCC  
GATTCTACGATTTGCGAAATGCTGAAGCTATTACAACCTACGGTCAATTGGCTATTCCGT  
GGATTGAGCGTAAACTGAACGAATGTATCAACAATCTTGTCAAACCAACTAATGTTGATT

ATGTGTGTTATATTGATACTGACTCGGTGTATCTCAACATGGAAGCAGTGGTTAATAAAG  
TAGGGATTGACAAATTCCGGGACACCAACCATCTGATCGATTTCCCTTGATAATCTCGGAC  
ATAAAAAGCTCGAGCCATTTATCGACGAGTCATACAAAGAACACGAGGAGTATATGAACA  
ATGAGCACCATCCCTTGCTCATGGACCGCGAAGCCATTTTTGGAGCTCCATTGGGTTCTG  
ACGGAATTGGTGGTTTCTGGACAGGTAAAAAGCGATACGCTTTGAACGTTTACGATATGG  
AAGGCACTCGATATGCTGAACCGCATCTGAAAATCATGGGTCTAGAACTCAACGATCAT  
CCACACCTTTGGCTTGTCAAAAATCGTTAAAAGAGTCAATTCGTTCGGTTGTTGCAAGAAG  
GTGAATCTTCTTTGCAAAATTATTTCAATTCATTCAAGAAATCAATTCAAAACAATCGATT  
ATCAAGAGATTGCCGCAGTGTCTTCTGCGAATAATATCGCCAAAAACGCGGATTTCGGCAG  
GATATCCAATAAAAGAGCTCCGTATCATGTGAAAGGAGCCCTTGCATATAACCGGATTG  
CAAAAAGTACCAAGCAATTCCAGAGATTGTTGAAGGCGAAAAGGTAATGGTTATTCCTC  
TTCGTGATCGCAATCCATTCAATGAATCGTGTTCGTTGGCCGTCGGGAACACAAATTC  
CACCTGTCGTAGAAGCCGATGTTTTGAAGTTTATAGATATAAATAAGCTTTTTTGATAAAA  
CATTCGTTAAACCACTCGCTTCAATTTGCGAAGCTACGAAAACAGATTATGAATTTAGGA  
ATAATTTGTTTGACATGTTTGATATTTGAGGAAATAGTATGTGTTATATGACAGTTCAAG  
ATTTTCGTGACATCATGGTGTCAAAATACAAATCAAATGAATTTGTTACTGACAAATCCG  
GGGTTAAAAGTGTGCAAAATTGCCCCAGTTATGTTTAAAGGCCGATGAAGATCTAATTTTCG  
GTAAACTTAATCACGATTATATTGAGCGAGAGTTGTCTTGGTATTTGAGTCAATCTCGTT  
ATGTTGCTGATATTCCAGGTAAAACCCAGCAATTTGGGAAGCTGTTGCAGATTGTAACG  
GTATGATCAACTCTAATTATGGCTGCGCTATTTTCAGCGAAGAAAATGGAAATCAGTTTG  
CAAATGTTGTCAAACATCGAATTGAAAATCCATACACTCGTTCGTGCCAACATGATTTATA  
CTCGACCGTCTATGCATACTGATTACGATGCAAATGGTATGTCCGATTCATGTGCACCA  
ATAACGTCCAATACCAGATTCGGGATGGAAAAGTGAATGCAGTCGTTTCATATGAGGTCAA  
ATGACGCTATTTTCGGTTATCGGAATGATTGGGCGTGGCAGGATTATGTTTTGTCTTGAC  
TGGTTGATACTCTTCAATCCCATGAAATCATGGTAGAAAAGGGTGATATCTACTGGTGTG  
CTGATTCACTCCATGTGTATGAAAGACATTTTGGCCTGATTGAACAATATATTGCTCAAT  
AATTCTCAATTTAGCATAGCGAGCATAAGATTGCTCGCTATGTTTAGAATCTTTATAGG  
GTTGGTATAATGTCACCACACAAAAGGGAACATTTATGGCATGTACCACTGAAGATGAAAC  
TCCCAAAAAGTAAATGACGCTCATGCTCTTATACAGCATGCTATGGAAAACGTTAAACA  
AGAGCTGCTGATAATCGATAAATCAGGCAAATCACACCCTGTTATATTTTTGATGCTCAT  
ATACATGATGGAAAAGTGCATGTAGATTACAAAGCAGTTAATGAAAATGATGAAATTCAT  
CAACTTGTTTCATGCAGCTATGAATGCACAAGTCAAACAAATTATGAAAGATAAAGAGGCA  
CAAATTTGGTTGAAACAATCCTTGAAAACCTTCCTCTTCAACAATACGTACTTTATTTTCG  
GCGTACCCGTACATAAAAGAAGATTATTTTCGACCGTGGGCCTTACC GCGAGATTTTTAAA  
CTCATCCAAAACACGTGAATGAGTACAATACAATCCCAACCAAAAAGTGCACCTTGCAATC  
GCACTTGACAAAAGTCTATCGATCAAGTAACTCATGACGGTGTGAAGGACGTTTTGGCT  
CTTCTGTCTTCTAAACCAGAAGATCATGCCTGGTTAATTAAGAAAGTGAATCTTACTGC  
AAAGACCAAGCGATGTATAACGCGTTGTCTAGGGCAATCGAGATACAGGAAAATGCGGCC  
AAACCATTTGAAGAAGGACATAAGAAATTGCCGGATGTTGGCGCAATCGAAGATTTGATG  
AAAGAATCATTGGCTATTTTCGTTTGATGGCTCAGTCGGCCATGATTGGTTTGAAGATTAT  
GAACGACGTTATATGCTCTATCAATCCAAAGCTAATAAAGTCCCGTTCATCTCAAACGTT  
CTGAATAAAATAACCAAGGGTGGTGCAGAACTTGGCACGCTAAATGTTATCATGGCGGGT  
GTCAACGTTGGTAAATTTCTTGGTCTTTGCTCTTTGGCCGAGATTATCTCCAAACTGGC  
AAAACGTCGTTTATTTCTCGATGGAGATGGCTGAACATGTTGTTGCGAAACGTATAGAT  
GCCAACTTGCTTGATGTCACGCTTGACGAAATAGATGATGGCAACATGAGCTTGGCTGAG  
TATAAAGCTCGGATGGAGCGTCTGAAATCCAGAAATATGGGTTCGTTTGATTATCAAGCAA  
TACCAACTTCTGGTGCAAATGCTAATCATTTCACGCGTTTTTTGAACGAGCTGAAGCTG  
AAGAAAAACTTCAAAGCAGACGGTGTATTGTGGACTATCTGGGTATCTGTGCATCCACA  
CGAATTCGTGGAGGTTATGAGAACTCGTATACTTTGGTAAAAGCTATTGCCGAAGAATTA  
CGTGGCCTGGCTGTCCAACATCAAGTTGTTCTATGGACTGGTGTCAAACCACTCGATCT  
GCATGGGATTTCGACCGACATCGACATGTCAGATGTAGCCGAATCTGCTGGCTTACCAGCA  
ACTGCTGATTTTATGCTTGCAGTGATGGAACTGAAGAGTTAGCTCAAATGGGTCTCCAA  
CTGATGAAGCAAATAAAATCGCGGTATGGAGATAAAAATTGGATTAACAAATTCAAAATA  
GGGCGTTAACAAGGGCAACCAGAGATGGTACGATGTAGAAGAAGAACAATCAAGGCCAGG  
AACGCCAAACACACCTTCTCCAAGACAAGCTGACAATACGAAGGGCAATAACTCAAGACA  
GCATCTTGACGAACTTGCCGCGACAATGCATTTCTGATGGCCTAACGGCCATCTACATAG  
GAAACTGATGATGAAAACATTTCTAGAGTGTCTGGTAAACAGAAAGATCATGTCAATAT

GGATATACCGGTTGTGCGAAGACGTTGTGGCTGGTGATTCTGCAGGAGACCCCGTCAACAT  
CGCAGCTGGTAAAACGTCTGGCGCAGTCATTTCCCCTGGGCCTAAACTCCTTCCTAAGAA  
GGAAAAGAAGAAGAAATGATTACGTTTCGAAGCCGCACAAGAAGCGTGCGAGGCTTTAGGT  
CATGTAGCCTTAAAGAATCTTAGAAATCAACCTCATCTTGATATTCTGAAAACAATCTAC  
ACGAATTCCTTTCCAAGCATGATGAAGGATGTCGTGTATGAGATGGCTGTTAATGCTGCA  
GAAATTGATTCTGACTTGGTTACGCAAGGAAAGCCATTGTCTCGTTTAGAATATGCTCAA  
CACCGTGAAATTCTGTTGGAAGCATGTCGGCAATTGGATGCTAATGGATTTTTGTCGTAG  
TATAATGGGGCCAAGAGCCCCATTTGGAGTTATTATGTTTGCTGATTTTTTTGTTTGCCGA  
ACGAGCAATGATGCATTTGCCAAAATTCAAACGAAAGAAGGGCAAGTTCAATTCAAGATG  
TCCAATATGCGGTGATTCCATGACGGACATGAACAAAGACCGCTTTTGGATGTATGAGAA  
GAAGGGCGAGTGGCAAGTTCATTGCTTTAACTGTGGTTATCATAGCAATTTGGGCGGGTA  
TTTAAAGGAGCGAGAAGAAGTACTTTATCGTGGATGGCTATTAGAAAGAAGGAAAGAAAG  
CACTGTCTTCAAGGCAGAAGCAAACCAGTAGAAAATCTCTTCACCAAAAAGATGCCGGT  
GATTGAAAAGTTAAATTTTTGTGATCGTCTAGAATTGCTACCAGCGAACCACCCTATAGA  
AAAATATGTGCGAAAAAGAAAAATACCAGAATCAGCATATAAGCGGTTATGGTTTACTCG  
CGAATGGCAGAAATTAGTAAATTCTATTTACCAGATACGTATACGCGCGAATCACGGGA  
AATAGATTGGTTCTACCGATATTTGACAAAAACGGTGAAATCCAGTCTTTTCAGGGAAG  
AGCTCTATCAGCTAGTCCAACAATAACATCACCATAAAGGCTCATGAAGATGCATCAA  
AATTTCCGAATGGATACAATTGATGGGAACCGAACTGTATGGTTTATGGAAGGACCGATT  
GAGTCCCTTTTCATTCCGAATTCTGGAGCTATCACTGGCGGTAGTCTCGCATTAAAGTGAA  
GTTCCATTCAAAGCACTCGAGTATGGGTTCTTGATAATGAACCATTTTCATCCTGATACG  
TGCAAGCGACTGTCTAGACTAATTGATGCAGGTGAACGAGTTGTGATGTGGGACAGGTGT  
GCTTGGGCGTCCAAGATGTAAACGATATGATAATGAATGAAAATGCAACTGCCGAAGAT  
ATTGTCCAGTATTGCAAGGACAACGTCGTGTGCGGGTTTGCAAGCAAACTGCGATGTGGC  
AAATGGAAGCGTTGCTAAGGCCTCTTCGGAGGCCTTAATTGTTTTTTATTGAACGATGACG  
AACAAAACAGTGTACTATCTCTAAAGATGATACTATATCATCATACCAAACAACACTGA  
TTAAAACAACGGAGTATATCATGACAAGTATAAATCTCGAACATCCTTCTCTATTGTGCA  
ATGCTCACCTCATAGGCGAATGGTATGAGAATCCTCGGGTTGCGAGCATTTTGATCAAGA  
AAAACGGAAAGACTGGTAAAATTCCATCAAATTTACCGTTCGCACAAATAAAAACCCTC  
TCGGCGGTCGAGGGCATGTAGCTTTCTTTTACAACAAATTGGCTTGGGTACGCGATCGAT  
ATCTGATGCTAATGGAAGAAATGACAAAACGCGGCTATTCGGCGACTGACAATTGGAAAG  
TTGCAATTTTCTTCCCTGAATACGCCCATTTGTTTGGTGAATGGGAACCGTCAGACGATG  
ACATCTTGCTGAGTCGCACAAGAATTTCTGAGATGATTCCCGAAAAGCACAAGCTAACTG  
AAATGCAAATTCACAACCTTAAGCAGATTGACGAATATAAGGAAAAAATGAACGAAATCT  
GAGCTTTATAAACGTGGATACAAGTGGGCTTTTGACTTTAATGAATTTGATCGCGGCGCA  
TTGGAGGCTGTCCGCGATATGCAAAATACGGAGAACAAAACATGAAAGCTCTGACTATTG  
CTCTATTATTGCTGCTTCTACAGCTTCTGCTGCTAGCTTCGATTGTCAAGTAAAAAATG  
TGAATGCCATCGAGAAAGCTATTTGCGCTGTTCCAGAAACTTCTTTGCTGGATGATCAAG  
TGGCAGAAGCATTAAAGGCAGTATCCCATATTCCTGAAGTTAAGGCTGACCAAAGAGCTT  
ACTTCAAAGAGCGCAACGCATCAACGTCTTTGTCTTCGCTTAAAGACAATATGACTGACC  
GCATCATTGAGTTGCAGATTATTGCCGAATTGGAAGGTGTTTCAGAAAAAACCGCATTCTG  
AAATTGTCCGAACCGATTCTGCTAAAGCTACAAGTAATCGACCCGTCGAAAAAGACACGG  
TGGCAGATCTCACTTGGCAAGCAAAGCAAGGGGATGAACTTAGCTTTCGTGGAAAAAACG  
AGCTACACAGATTACCGTGACAAAAATGCTCCAATTTGGATGCGCGACTGTGCGTACAGG  
ATAGTTCGCAACGATGTGATGGGCAGATGGGTAGCTCAAGCTCGTTCTGCTGGTCTAATT  
AATGAATTCAAATCTGTAGAGTATAAAATCGAAACCGGTTTTTTCAATATGACTATTGAT  
AATTTGAAAATGAATATTCAGCAGGGTCGTCAAGTGTGCGAACCTATGGCAATAGGACCA  
ATGAGGTAATACAAAATGTGGATTCTTATTCTCACCATAGTTGGAACAGGGATGTCTTCT  
GTTCAATCTATCCCGTTTAAACACGTATGATTCTTGTGAAAAAGCTCGAATTGTGTGAATG  
AAAATACTCCTGATTCTAGGAAATATACTGCTGTCTGTGTCGAAAAGTGATATAATGACT  
ACAACATAACATAGCAGAACAAAATGACACCCCAATTTAATGAATGCGCACAACCTAACTGA  
TAATATGGATAAGGCAGTAAATGCACTGTATGATTGCCTTATTGCCAACGATAATCCTCT  
CAATCGAATGATTGACATGCAACGTCAACTTCAAATTTGAGCTCGCACAAACGGCATCCAAA  
ATACAATCGCGACCCACGAGAGCTTAAACTTTGTGGCGAAATTTCTTGACTGGTGTCAAGC  
TCAGGACGATTATATTGCCGACGAAATTCGCGAGCATTATACTGCTCTAGGTGGAATGAG  
TAACCCCAAGCCGAATGCGATCTGGAACCATGGCGCGCTGAACATGCCGAATATCGCAA  
TCGACTATTTTCTGAATTGTGCGCTGAAGACCAACTCGAAGCAAATTCGAGTTGATTGA

CCAAATTCAC TTTGTTCTTAACAAGATCATTGCGATGGGCATGGATGGCGATGAAATCTT  
CAA ACTCTATTATTTGAAAAATGCCGAAA ACTTTGCACGGAAGGAGAATGGATACTAATG  
CTTGAACAAGATGAAATTGATGAAATCAATCGCTTGC GCAA ACTAGATGTTGAAGAAGGT  
AGGGCGGATATTTACGCCCATATATTCAATTTCAAACAATAAAAATATGAGGATTTTTAT  
TATGTATGAAGTCAAATGGATTGAAATTAACAGAGACAATCATGGCGTAACATTTGCTAT  
GAATACACCCGACGGCGTTCTAATCGGTGTTAATTACACTTTTAAAGCGGAAAAGTTTGA  
TATGACATTCATTCTGATATAAAAAGTTGTCAATAATCCCAATGGAAATGGATATATTTT  
CTGCCACGGGTGATTCATGAAAAAATATGTAATCCAATGGAAAGACGTGCAAGGATTCTG  
TCATTTTCTGGATGGCAATTTGTATGGCTCATCTAGTGGTGTCTGATTCCATAATTCATG  
GGAAGATGCCAAA ACTAATATGCAGAAAGCGAAAGAAGCCATAACAGAGTATTTGAAAGG  
AACAAAAGTCGTCAAAAAACGACTATTTGGGCCTCCAACGATAGTCACAATCAACAAGCC  
GTCGGAATATTTGGCCAATGCGCATAAACGAATGTGTGATACAATGCATATCGTTGATAT  
TAATGTGATGCCAAAACAAATGAGGTA AAAATGGTAACATATGATGATTTGACTGTTGGC  
CAAAAAGATGCTATTGAAAAAGCACTCCAAGAAATGAGA ACTAAACGTCATATTACCATT  
CGAGGGCCTGCGGGCTCTGGTAAAACTACTATGACCCGTTTTCTGCTTGAGCGTCTTTTC  
CAGACGGGCCAACAAGGTATTGTTCTCACAGCACCTACGCACCAAGCAAAGAAAGAATTG  
TCCAAACATGCCTTGC GCAAGTCATATACAATTCAGTCAGTCTTGAAGATTAACCCAAGC  
ACTCTCGAAGAAAATCAAATTTTTGAGCAGAAAGGTACTCCTGACTTCTCCAAAACACGT  
GTGCTTATCTGCGACGAAGTATCGTTTTATACCCGCAAATTGTTTGACATTCTGATGCGA  
AATGTTCCATCTCATTGTGTTGTTATCGGCATTGGAGAGAAGGAGCAAATTCGGGGAGTA  
TCAGAAGATGATACGCATGAACTCAGTCCATTCTTCACAGACAAGCGAGTTGAACAAGTT  
GAATTGACGGAAGTAGAACGTCACCAAGGTCCAATCATTGAAGTTGCAACAGATATCCGA  
AATGGCAAATGGATTTATGAAAAGCTTGACGATTCTGTTAATGGCGTATAGCAATTTTCAT  
ACGGTCAAAGATTTTTCTTTCAA AATATTTTCGAAAGAACAAAACGCCCAATGACCTACTT  
GAAAATCGCATAATGGCTTACACAAACAATTCTGATGATAAGCTAAATTCCGTTATCCGC  
AAACAGCTATATGGAGGAAACGCTGCGCCATTCCCTGCCGGATGAAATATTGGTCATGCAA  
GAACCGCTCATGTTTGACATAGACGTTGGTGGCCAAACTCTAAAAGAAGTCATTTTCAAC  
AATGGGCAAACGTAACGAGGTATAAACGTTAAACCTTCTCGCAAACGCTTAAAGCAAAA  
GGTGTGCGGCGAAATTGAAGTCGAATGCACAATGCTCGAGTGTGAATCTTATGTAGAAGAT  
GAAGATGACTATAGACGAGCGTGGTTTACGGTTGTTTCATGACCAA AATACTCAATATGCA  
ATAAACGAATTTTTGTCTATTATTGCTGAAAAATATAGAAGTCGTGAAGTTTTCCCAAC  
TGAAAGACTTCTGAGCAATACGCAATACTTTACCAAAGTTTCGACCCTTGGGTGCAATG  
ACATTTCATAAATCACAGGGTTCAACATTCGATAATGCATATCTTTTTACTCCGTGTTTG  
CATCAATATTGCAGAGACCCGGATGTTGCACAGGAATTGATTTATGTGCGGAAATACTCGT  
GCCCCGAAA AATGTCTGTTTCGTATAAGTATCCTGAAA AAGCGATTTATAGACCAGGTCA  
ACTGGTCTATTTTATCAAAAACGGGTATCGCTATAGCGGAACCGTATTACAATACAAAT  
TCGGAGGTTATCGCATATTGAGTGATGCTTTTGATATGGTATTGCACATTAACCAAACC  
AAGTGGAGAGTAGATTATTATGAGCAAAGTGACAGCTTTTATTATTGACTGGGAAACAAT  
GGTCAATGCTCCTGATGGTGCAGTAGTTGACCTTGCTGTTTTGGTGTGTTGAGCATGACCC  
GTACAAACTGCCTACGTTTGAAGATCTGTGTAAACGCGGGCGTCGATTCAAATTCAATCT  
CCAAGAACA AAAAAGGCATGAGATTCTTTGACCAAGGAACAATCGATTGGTGGAAAAACA  
AGATGTGCAAGCTCAAATGCATCTTAAACCATCGAGCGAAGATGTCAGCGTCATGGAATT  
TTATGAAAGCTTCTTGGATTTTCTTGCAGCACAAGGGTTTGACAAGAAAACAGGTCATGG  
CTGGTGTGCGGGTCAAAGCTTCGATTTTCTATCATGATCGATGTTATCCGCAA AATTTA  
CAACACTCGTGAAACATTCAAATACGAACCATGTTTCTTCTGGCAGCAACGTGATGTTTCG  
TACTACTGTAGAAGCTACTCTGCTGATGCGTGATATGACCATGTGTCTATGCCGAAGGG  
TGTTTTGGATGGATTTGTTGCTCATAACGCAATTCACGATTGTGCCAAGGCTGCGCTAGA  
ATTGCTTTATTCCAAGCGATATGCTCTCGGTCTCGACGATATTCCCACCGGTGATGATGT  
TGACCCGCGGAGTGTCCGCAAATGATAGTTGCTTTTGGAGAGGGGTTGAAAAAACCCCTT  
CTTTTATCGCACATCACCTGGCGAGATGACAAAATTCAAAGTGCTTAGGTTATTAACGGG  
GCATGGGAATTTAACAGGGTTAATGGAGTTTTGTGTGTGCAAGGTGATGTTAATTCTCCA  
ATGGAAGAATTACAAATTGCAATAGATGTTCTCAGGCGTTTGTTAGTGGTGATTACAAT  
GTAATCATCGAATGGGCTAAA AATGAGGTATCAGAATGATTTACTAGCATTACAACGCAG  
ATAGCTTCTGGGGTACTACGATCCAAACAGCAATGGAAATCCGAAATCGGTTGAATTCAA  
CGATGTTTCTGCGGTTTGTCAAACGAAAAGATTATAATGCGCGATATGAAGCGTTGATTA  
AATCTATCGGTGAAATGCTTGGGCAA AAGCATCCGACGGCCAAA ACTTGGGTAGCAA AAC  
CAAATCCTTT CAGGGATGGTGTACTAGTGGAGATTCGAGAGTGAAACAAAATTACGCTTG



GCTAGCATATCACTTCGGCTTGGTTCAGCAAATGCTTGCAAATATGGCACTCGCGGATG  
TACGTTTGCTAACAAATAACCCGCACTTTGCATAATTCATTTCAACTGAAGATTTTTGTGC  
TATTTTGCAGTTCGCACGACACTGCTTCCTTAAGGGCCGCGAAGTTGCCGTTTCATGATCA  
TGACAGATTGATTTACGGCTGCTTGTCTGGGGCGGATGAGCGTTTTATCAAAAGTCGAGA  
CACTCGAAAGCTGAACTTTTCAGTTTTGGGTATCAAAATCAGCGACTCATCATGTTGTGAA  
CCGTGTCATCAACACTGATTTCCGATGGATTCAACGAACCAATGAGGCCCGAAATGGAT  
CAGCAAGTAAATGAAGAAGTAGTTGTTTCTCTGGATATTGACGGTGTTCCTCAATACGCAG  
GATGATCACATGGAATGGAGAACTGACAAGAACAGTCACCTGTGTCTGTTTCGCCATAC  
AATCGTGGCGATATTGTCAGCAACCATAGACTCAGTTTGCTGAGGGAATGGCTAAAGAAA  
CATGATGCTAAAGTGGTTGTAATTAGCTCGTGGGTCTTTTTGCGTGATACTGGAAAAATG  
ATATGTGATTTTCTCGAACTTCCGTATCATTCCGAAGCATACTGACTGGCGGTGGAAAA  
TCTCGTGGCACTGGTGTCTTCGTTCATGTAGCCGATCATAATATCCATAGATGGGTGGTC  
TTGGATGACGCCAAGTGCATGCATGATCAGGATGAGGTCCTACTTAGGCACCTGGTTCAT  
ATCAAAGGTGGTCTCAATGAATCATACTTGGAAGAGGCCGACTTCATTCCGTGACACCTG  
GTGGTCCCGCACCGAGAGTCGCTGGGAAACAGCATAAATAAAAAGTCAGTTGAATTGAT  
AAAACAACACTGAGTGACTAACTGGAATAAAAAGAACCGGGCTTCGCCCGTCGTGCTTGCAC  
GAATCCAGTTTGTCTTTTCATCTGATTTATATAGGGGCTCTTCGGAGCCCCTTTTTTGTT  
TTCAAACACTAGTGTACAAGATAGTGCTTCATGATAAAATGACTTCAGGTTGAACAACAAG  
GAGTACTCTTATGATTTACGCGATTAACAAATTCGGTGTAGCATTGCGATAGAAGCCAA  
CATTTGTGCTTATTCGATTGCTTCTAGAGGCTGCCAAGTTTTCTCGTGTGCTGACGATAT  
GTATGCTGCCATAGATCCTCAGGCTGTCGGTTACGAGTATCACGTCAAGCAAGATGGCGA  
TGCTATCATTTGCGAACTCGAACAGACCAACGTTTCGCGTAGAAAAAGATTTTGCTGAATT  
TATCTCTGAGTACGAAGTTTAAAGTGTACAACACTGATGTGGCTGTTTCATAAATGCCACATC  
AAACAACATGGAGTAATGAAAATGCGTATTTCCAAAGATTTCTTCCTCGACGTAATGTT  
TTAAAACAAGGATTCTGTTGTTGAGAAATCCCTCGAAGAGCATCTCTGCTATACCACTGT  
TCTGTATGTTTTCGAAGGCAATACTCGAATTGCTGTTCTCGAACGTGTTATCACCGCAGA  
AGGTACCAATTGGGTTCTGAAAGAAGGTATCTACGAAGAGCTGAAGGGTAAAATCTGATG  
GGAGCTCCGAATCATAGATTGCTCCTATGCGAAGAAAAAGTCATGGAGTTGAAAAGGAA  
TTGTATGACCTTTTCTTCGAAATGAACTCTATTGGTGCACAACATCAAGACACTTGGGGC  
AAACTCTTAAGACTAAGGCATACAATGAGTCTCGAGCTCAAATGGCCGAGTATAAAGAG  
AAAATTCGCAAAATCATTGCGACTAATTTTCAGCAATCTGTACGTACGCGTACGAGCTG  
ATTGGTTTGGAGGGAATTGTGGATGTTTCCATGAAACGTGGCCAATGAATTTTGTGAAA  
CTTCAATACGAGTAATAAAAATGAGAATTCGTCTTGTGATAAGAAAGGTTTCATAGATG  
CAAACCGCCAAGACAGTCAATCCTACAGATTGGCAAGGACCATTGTTGAATTTGCAGAAT  
GGAGGCAACTCTGTGTTATAGGCAATGATGGTCCCGAATGGCTTCTCAATGTCTACGGTC  
CATGCTGGCGCGGTAGAATTTCTGCAAACTACAAGCAATATTTTCGAGGTTCAAATGAAA  
CCTAAATTGAAAATCCCTCTCTCCGAATATCAACAACGTTTTTTGCAAAACGGAACGGCAG  
AGTTGTGGGCAAGTACGCTTTAACAGAAATCCAAATCTGGAGAACTTGAAGTTCTCGAA  
ACAATGCCGGACGGGACATTGAGAACAATGCTACTTTCCTTGGATACCACATTGGAATT  
CCACTCGAAGAACAACGATATTTTGAATTTGAGGAGCAAAAATGATTGATGACGTTAAAA  
TCGATATGACTAGCAGCTTTAACGCTAGCATGGCTGTTCTTCCAAGATCAATGGGTTTTG  
TGCTGGCCAAGCTGATGGAAGAAGTAGGTGAATTTGCAAAGTCGCTGAACCAGCCAGAAC  
GTTGCGATGAACGCC

>NewGenomeName\_25

CTCTATCGCGTCTTAATACACTATTCAAATCAAATGCCTGTTAAATGGGTTTTACGTTTC  
AATAAAATAGCTAATTCCTATCAATGGAGGACACTGTGGATGATGTAGTACGAATAGTGT  
GAGGGCTTTTACTCGGTGGTTTTGTCTATCTGGATTTTGAGAGGTCATAACAATGGCAAAC  
AATAAATACGATGTACTAATCCAAGACAACACTACTTGGAAAGGTATTACGGTCACAACCGAC  
GTGCACAGCGCTTAGGTAGCGTTTGTGTTTCGTAATCGTGCATTACAACATTTGATTAAG  
AAAGCTCTAATGGTAGAAAATCGCGGGCACAAAGAGGTGGTTGAGGACTGCCAAGACATT  
ATTGATTCGACTGTACGAGCCAAGAAGACTAGATGCCAGCTGCAATACATTGAATGGGCA  
CATGCACGAGATAAGGAACTAAACATGGAGGCTATCCCAATGGGTGATAACCTAGCAGC  
TGTGTGGATTATGATTATGTTTCTGTTTATCATAAAAAAGACTGGTCCGATTAAGGCCCT  
TAACTTATTCTCGTTTACACCACTTCGGAAGCGGTATTAGCCAGCGCAATACGGCTACTG  
CTGTTATCAAAAAGAAGCGTAAGACTCCCACAATGAACCACGATGTTGGAACATTGGTCT  
GGTTGATTAGTTGGGCTTTATTACGAACGTTATCCCTACCTACTACATTCTCAACATTTT  
CCGCTTTCACCTCAAGATTAGAACCCATAGCGTACTCTTTATCTCCTATCTGAGTATCTA

CTTGTTAAGCAGCATTCTGGTCAGGAAGTAAAACACCCTTAGCAATCTCTACTGGAGACA  
GAGAACTACACCCATTAATAGATAGGACCAGCAGTAAACCTGTTCGAGACGAGTAGGGATT  
TCATCCTACTTTTTACGTAGCTCCTCAATAACCCTCCGGTGATATCTCATCTCAGTCTGG  
ATAATTACTAAGTTCTCATTCCGGTGTTCGAAGTTCGTTAACTAACGCCCTGTTCTCTGAT  
TGTTGGCTTTGCAACTGACGGACCCCTGTTTGAAGCTGACCAACCTTATAAGATCAAGAT  
AGAGTAGCACCACCAATAGCCACTCCAACAGAGAGGAACGTATTGATTATAGGAGACTTC  
CAGTCGTTTtagcataactacctcccataaccgtccaaatATGCTGCAACAATATTTAGGCG  
CATAGCGTAAGTATAGGAATTATCTACAATGCCTGAGCTATCGTAGACCTGGAGAATACG  
ATCTCGCGGTATCCCTTTATATTCAAGAGAAAAGATAGAAGTGTAGACCTTGTGGTCATA  
ACAGCGGATAAGAGAGAGGCCCAAGGTAGGGCCATCTCTAATCTGGAACGGTGCTAGTAA  
GAACAGAAACATCACCAAGAGTAATATAGCACGTTTCATACTTAACTCTATAGTATTGT  
TCATACTTACCTCGCAGATCCGAAGGGTCCATTAATCTGGAGCACCTTCGTCTATCTTA  
CCAGATTGCTGATCGTTGTATCGAAGTCCTGCAAAGACGGTTTTCAACGCGTCTGGAGTA  
ATAACTCGTTGTCTAAATGCCTCGAAGGCTTTATCTTCTTCCTTTGACAGCATCATGGTC  
CTTATTGGTGCACCACCTCGTACTGGAGCATTCTCTAGAGCGTCTGCCTTCTGGCGTTTG  
ACCTCAAGAGGTTGTTTCCAGTCGATAGGACCTTTGATTAACAGTTCTAAGTACTGCTCT  
GGAGAAGCAGCAAAGTTCTGCCAAATATCAGCATTTCCTTTCAATACGTTGTACGTATCA  
ATCAATCGAGACTTACCATAAGTATCCTCCAACCATTAATAACCACTTTCTCTTTACCA  
GCAGAGCGAGTGTACATAACCACCACGGGCTCGCTCGGGGCGGTATTGTGAACCATAGTCG  
AGCTTATCGGGCTCAGTATTCACTAGAATCTTAATGTATCTAGTTTGTCCATTGTTGCT  
TCCATACGTCCACGTAACGCACTGGCAACTGCATATAGCGCGTGGTCGATAGTGGTTTCC  
ATCCACTCTTTATCTCGTGCAAAGGTAGCTTTGTACTGAGGAGTTAACCGTCGAGTCATG  
TTCTCTAGTAAAGACCGCAAAGCTCTGTTCGATAACAGGTTGCGCAGTAGCAATATTATTA  
CGAATCATATCTGGGTTATATACCGCCCACCTTGCTTGTGTTTGTAGAGCTAGGGTAGTA  
GGAACAACCTTTCTCAGTCTCTCCACCTTTTCACTCTCTTTTCGCTTCTTCAGGGTTGGCA  
GTAATACCCACCATTTCGTTAGTAACCGCACCATTAAGCCCGCTGTAAGCTTTATCCCAAG  
TTCTGAGATTTAGTCATTAGGTCTGAGAGGGATGCGTTGCTCTTAATCAGTGCCTTAGCA  
CGTTCAACACCAGCCATAGACCGGAAGATGGACTGTTTCATTGAGTCAGGAATAGGGTTG  
TTCTTGGCTAAGTAAGTTAGGACACCATAGTTCTGGTTGCCCTCTGTATAATCATTTC  
GCAGGCAAATCATTCTTAGCTTTAACGCATTTAATTGCTGTCAGGTCACTAACCATCGTC  
TTCATGTTTTGTTTGAAGTGTAACTCGTAATTCATTAGTTTCAATCGTGTCCCTTAGTA  
ATCGCACCGGGTTAGTAGCAGTCTGCATTTATGTTTTCTGTAACAGGACAGCACTCAGT  
TCTAGTCCAATCTCTAGGGCACGTTGTTGTTCCAATCCAAATGTAGCAGCTGGAGAGTTG  
AACATGGTTCCGAAAATATCATCTTGAGCACGAAAAGTCGCGTCATTAACCGCGCCATAA  
ATATCATCTGTGTAGTTCTCAGCATTGAGTTTACGAATCTCACTCTGACGCTGTGATGGA  
ATCAAGCTGATTGCAGTTTGTGAGATAACCGAACTCTAACTGAGTCAGTGTACCCTC  
TCACGATATTCATTACAGGGCTTTCTCTTCTGTAGATAGTTCCATAACTACCTTACGCAA  
CTCGAACTAGATGAACCGATGCCAAACAAAGTAGCACCACGTTACGAGTTGGCATTGCGA  
AGGAATGGATATGAGTTGATAGCTTCTGTATGATGGCACGGGCTGTAACCTGTACCTCA  
CGGCGTTGCATAACCAGCTTTAACCTTATCTGCTAATCCACCTATACGCCCTAGGTACGGT  
TGAATCTCAGTAGGGATTCTATATCTAGTGGGTTATCTAGAAAGCTTCGAGTATCGTTA  
ACAACACTCTGAGAACTACATCACCACCAATCTTGTGCCCAAGGCTCCCGACCGCCTGA  
ACGAGTCGTGCTAGACTATCATCATGAATACCAGCTTGTATTGGAGTTTGATTAGAAGCT  
ACTGCTTGGATAGAGTCGCTTGTGTTAAAGATAATAGTTCCCGTATAACTTTATTCTCCT  
TGTAGTGTATCAATTCCATCTACATTCTAACGGTTTGATGAACTGTGGAAGGAATAACCT  
GAGCGAACCTGTTAATAATCATGTTGCGACTGAACTCTCCTTTCGGTTTCGCTACCCTT  
AGCAGCTAATCAACTGCAGCTTGACGTAATTGGTATAATCCTGCGGGGCCATCTGCAAGT  
GAGCTATCAATCGAGTTCATAATTAACCAGTTGCTCTCACTCCAGCCACGTCGTTAATA  
TCCCACCCCATGCCACTTTTTTAATAAGCTTCACAGACAACCTGCACGTCCGTACGTTTT  
AGGACGCTACGTGCTATACCGAATATTGTGCCTCATAGTCTTACCCACACACTGTGGA  
TTAAAGCCCAATGCCTTTGTTAAGGCTTGAGCCACACTAATTCTTGCGGCCACAATGGT  
TGTCGGTTAGCTTTGAAGATTGCTTGTCCGTTATACATCACACACGCACCGATTAAGTTA  
CGAGTTGATGTAGGAATCTCTAGCAATGATTGCCCCCTAAATTGCACCATGTTAACGGCA  
ACTGTCAGTGATAGATCATCCGCAGATAACGCCACTTTGCCATAAACATCAAGTTCTGC  
TAGAACCAATCTGGTGACTACCGGGGCCAAAGACACGTCCGTACACACGGCCTGCAGCA  
CATGCCGCTAATTCTATTAGTGAGTAATCCCCACTAATGTATCTAGTTACACTCTCCTCT  
ACAGCATTCAAGTTTCCGAAGCGAGTATCCACGTCTGCATCCACAACAAGCCTCTTATA

GCTAATCCAGTGGAGCCTCCTTTCAAAGACACTATCACGATTGGGTTTAGGTCTCGTGGC  
TCTATACCTGCCACGATAAAGCAGAATCAACTAACAAGTTACCGTAAGGAATACCACTA  
GGTCCGAAGAGCATTAGCTGGCTTGTCACTAGGTTAATTTTGTCTTGGGTGGATAGGGTA  
GTGCCTAACTTAGCCTCGATACATTTAGTAGCAACCTGTTGGAAATGGAACGGAATTGAT  
TGCCAACCTTTCTGGAACCACGCACGGTTAGATTGTGACATATTCAAACGGAATGCTTCG  
GTACGAGCAACCACTTGTTCATATCGTCAAACCTAGCTCCCTTGATACCTGCC  
GTACAGTCGTCCTAAGCGATAACAAGCGAGATACGAGAAGTAACCAACTCACCTTGTTC  
AAGACGAATCGCCCTTTCTCTATGAATCGGCTCAACATGGATTGTGTTACTGGAATGCAA  
CTAGCCGCAATACGGTAGTCACCTTGACCAGTAACAGCAGAATCGTATAAGCCTGCCTTC  
TTCCATCCTTCGTAGAATTCACGAATATCCGGTAAATTATTGTCACTACCTTGTAAGTGA  
CTCTCAACGATACCTGGATCTTTCGCTAAGTCTAAGAAGTGTCACTTAGTCATGCGATCA  
AACGCTCTCAGTGC GGATTGATTACTGATTCCAGCTGCTAGAGTAGAACCCATAGCGTGT  
ACCAAGAAGTGAGCAGGAGACAACAAACCTAGCAGTAAGATAAACGCAGCTCCTTTGAGA  
TTCTGAACTGGGTCCGATTGGTTCATACGATATAAACCTTCTGCCATTCCAGGCTTGTCC  
TTGCGGTCTAGATACTCTGCTAGAGAATTAGCCATGTTTGACATATCACTTTGTTTCTTA  
CTCATAATACTCATCATCTGAGTTACTTGTTCATGAGAAATCAATAGTTTGTACGAACT  
AGGGCATCTTCTAGTTTTTCAGCGTCAATACGGCGAGAAGCTTGGAAATTCTGGGTACCA  
ATATCTTTTCTTTGATGTTTACTAGCTTGGTTCATCCAACCGTCGTGTAGCGCCTGTTTC  
AATTGGCTAATCGGGTAACGAGTTGAGATGTTACCGAAGTATTGGCCTCACGCTTCGATT  
GGAGAAATGAACTCAGCCTCTATGCTTTCTGGACTAACCTGATACGTTCCACAGCACCA  
GCACTACGGAACCTACCTCCGTACACGTTGATAATATCTGTATCACGTTCCAGCAGCATCC  
ATCTCAGGGTCACGTAGAACATTGTTATTCTTGTACGGGTTACGTGCTTTAAGATTCTCA  
GCATATCGTTCAGCATCCACTACATTATCAAAGTAACAGCTTGTCTTGTATATGCCCGA  
CTCTTACCATCTAGATTGATTGGAACCTTCTCTTTAACAAAGTGGTAAGCCTCCTTGTAC  
ATAAGAGGCATATAGCCCTTACGACTATTTAGAACCAGTGGGTCAAGGTCACGGATATAT  
TCACGTCTAACGATAGCGAATGTCCAACCCTGAATACCTTTCATCCAGAACTCGTTTGGG  
GTATCTAGATAAGTCAGTTGATAACGTGTCTGATAGAAATCTTCCACATTTACCTGTC  
ATGACAGTGATGATTCCGGGCATTAGGGGGGTCATACACACAGATCTCTTACGAGCTTGG  
AAACATTGTCTAGCACTGGTAGCGACTTCTTAGCTTTAGAATACGCAGACTGTTACCA  
ATCTGTTCAGTTTTGTTCCCATAGCACTGAAGCTGTCTATATAAGGCGTCATTCTATACC  
GGCCACCCTTGGTCAGCAGTTTGCCGCATTGTGTGCTATGCTTTGAACTCAGAATCATGA  
AGTTGAGGTAAATCAGGTCTGACACCTTTCACCATATCACGGTATGAATATACCTCATCA  
ATCAGTGTGCCTTTCTTTAGAATCAGATCTAGCTTTTGTAAATCCCTCAGTATTAACACCT  
ATCCAACCTTCATTCATAGCTTTTTTGGAAATCCACTACGAATCATAGCACGTTACCCCGAT  
ACACGAGTGAATGTACCCACAAGAATGCACGGTCACGGTCTAGGGAAGTGTTTGGACTC  
ACTACCTTAGCCTTGGTCCTAGCCATTATGCTAATCTTGTCTGTGTAGCAGCCACCACGT  
AATGCATCTTGGTTGTA CTGATTATCACTATAGTTACGTTACGTA CTGTTGTCACCA  
GTCATAGGGCTAACAAATGTCACACTTGAACCTCACACCCTTGTCCCTAGTTTCCAATGTC  
AGTTAGATACTTCGTGTGCTCCCAATACGCGCAGCAATATTCTCAGCAAATGCTTGT  
TGCTCTTGTGGAGTCAGTGGAACACATTCACGGGCCACGTCCTTAGTTTTCAGCAAAGATA  
CCATGAACAGTTGACCAACGTTTCTGAACTTCTGTGTTCAATCTCTGGAGCAGCACCTTCT  
AGGATAACTTCCATATCTTGAATAGGAGCAGCAGTCCTAGCTGCATCTAAACGAGACATT  
GATACCGCACAAGCGGCATCCTCCGAACGCGAGGCAACGTCTACAACGGTAGCGGCCACA  
TCTTGATCGTGGACTACATTTTCGAGCAGTAGACGATAGACGTTTTAAAGACGCCACCGCC  
TTGATACCAGTTAATCCTAGAATAAATTTATCTACCTTATCTAGAATAGAAGCTAGTTGA  
GTGTTGGATT CAGTCTCTACGGCAGTAGCAGAAATTAGGAATACCTTCTGTAGGAACTCT  
TTATCTTCTGCTTCTTGTGAAGCTTCTCGCAACTCTTTAAATTCACCAACACGTTCTTTA  
GGAGGCGATCCATAAATCGTTTTCTAGGTCTGCTCGGCCACCACCGGAAGTCATAACC  
TCAGTGAACCAGTTAACGGCTTCTGGAGTGACTACCTGTAGGGAATCCGCAGATGGAGCA  
CTGTGTCAACCCGGTAAGAACATAGCAGTTAGGGCATCTATAGAAGTCATCGTTCCCTCAC  
ACCCGTT CATCCCGCACCCACC GATTTGCCGGAGAACCATAATTAAGTTGCAGCATCT  
TCCCGTTCTTCTGGAGTTAGATAAGTGTTCAATGAGTCTACGTAGGCCAGTTCAGCACCT  
AGCTCACGGGCATAATCTACATACGCCTCGTTCTCACTCTTAGTCAGTTCTGCAGCAGAG  
TTAGCTAATACTTGTGCATTATCTCCCGCAAGCTCATCAATAGCCATTGCTGTACCAGTT  
ATAGCCGCTTCCATAGCTTATTTTTGAGAGTTAGATAGACGTACAATTGGGTCAGCATTG  
TACGCTTCCATATAAGTTTTATAAGGTCGTGATCACCAGTACGGAACCTACTAGTGGAT  
TCACGAATAGCTACCTCTTTCTTAGATCAAATGCGTACAAATTGTTGCTCTTGTCCATT

TCTAGTGGATTGGAATAGACAATTCCTTATCCAATTGGCATCGCTTATCTCCTTATATAA  
TTCTTTAACGAACTGACCAAAGTGAGCATCTTGCATTCCAATGTTAGCAATAGCTCCAGC  
AGTATTAGCGCGGCTAGAAGCATTAGCAGCGGTTTGAGAATAACCACTAGCTTCTTTACA  
TATCTGACGGGTTTGGGCTCAGAACTCAGGTTTCGCATTAGTGTGTGAGCTAATGGACGC  
TACCGCACGTGCTTCACAGGAGCTACCGGACGTACCGGTTTGAGCAGCATTATTCTCAAT  
TCTTGCTCGTTGGATTCTGGGCTTGTGTAAGCAAGGTCCCCTTTCGGGTTTGCTCAAC  
ATCTGCAATCCGAGATTGGACATCTTGTCTGATTTCGTTGCTCTTGAGATGCCTTGCTAGA  
TTGGGCAATGAATACGGCTGTAATAGCGACATCTGCACCAGCAGCAACAACCTGAGCAGC  
AGCTGCACCAGCGGCAGTTGCCATATCACACCTCCAATAGTTTACTGTAAACGATGATAT  
CTACGTGATACCCAATCGCTCCATAGAGGAGGTAGTGGGAGTGAAGCCAATGTGGAGAA  
CTGTTGCCCTGTACCGGTGTGCGGAACTCTCAGCAACATCGAACATTCTCTTGAACCCCA  
TGCCCCCGCGATAATCTGGTTTTAGGTACAAACAAATAGTAGATGCGACACATCCTTTGC  
TGAATACGGCTTTAGGAAGTACATTGTAATCACGTATCCAATTGGAGTTTCCTCGTCTC  
TGCGCACAAATGATTTTGATCATACCCGCCGCAAGGAGATTATATCAGCTTTCTAGATTCA  
ACTCGAAGAGTGATTTAGTTGAACGAGCGTCTGCCTCAAGAAAATTATCCTCAAACAGAC  
CACTAATATACAATTCCTCACGAATTTCCGGTTTACTTTCCATGTAAATGTTTAAACAGAC  
CTTAGTACCACCCCTGACGGTACTGCCAACATTACAACCTTACAATCCTTGCTTGGCTT  
TGTTCTGAACACAACTGGAATGCCGTTCCCTGAGCCTCTAAGTCGCGCTGTGGCCGTGTT  
TACTTCATAAGGGTACACATTGACACCCAGTTTGAGATTCATCGCTCTACGGCAACGCTA  
GCACTGACTGTGACGAGTAGTCTCAGTGCATTCTTGCCCGTAGGATAGTCGGTAACGCC  
CCAACGAATACGTAACAACATGCTAGATTTCGTTTTCTCTCATAGCTTCTCCATCCACATC  
TTTGCTCCAAGTATCAGTTCCCATCATGTGAGTTGCTGGGCTTGTATTTTATGCACGGGC  
TTGAGTATCGTGTGATTTCTGTGGAGCACTTAACAGGTAAGCCTATGCATGCACTAGGCA  
GAAATCTTTAAAGTAATCTTGGTTAAACGAATAGAATCCAAACGAAACATCATACTTTT  
GATTGTTAGATACTTAGTATCTCTCAACTCTTCATCCCCGATTCTACGTCCCAATGGGAA  
TGTAACATCAGAAGACTCTAGTTTAACTCTATCTATACCAGCAAAGGTACAGTAATCACT  
AACTACCTTGTTACCAATAACGTTACGCTCCGGAACATATCCGGTAACTCTTTACGCCAT  
GGTAATGTCACCTTTGAACCGGTTAATGAATAATGCAACATAACGTACGCTTAAAGGTAAT  
CTCTAGGTCAAAGTTACTTGTATTGGCAATTTCACTAAGTCCAGCGAACATATTTACC  
TGTACGTTTTACAGTAGCTATCGACTTAACCTTACTGGTAATAGTTATCTCATTATATAA  
CGATTGAATCGTTAGATCTGTTAGTTTCGGTGCAGAGTGTTATCCAGTTGTTTGGTCTGG  
AGATAGGACAATGATTCCTTCCCTCTGCCACTAGAAAACGGTATAACCATATGCAACAAC  
AGAACATGGTGACACACCACCGTAGACAGTAACTTGTCTACGTGATAACCAGTAGCGGA  
GAACAGACCATCTGACGTACCACCCAACAACCACACTCCATTTTCAGCAATGATAAACAG  
ACCGCTGGAAACGTCTTCCAGTCCAACAATCTTGCAGGTTGCGTTAATTGTGATGAAAAC  
ACCGTCTGTATCAACAAGATTACTGTCCACTTCACTTGTGGGGTCAGCTAACTGATAACA  
CTTGTTAATCTCTGCGTTAGATTTAACTAAGTGAAGAAATACGTGGTTACGGAAATC  
AGGACGTACATCAATTTTCTTGGGGTTGCTTGGAAACCCTCCATAGAATACTCGACC  
TGCCAATGTTTGAATGCAAGAAAGTTTACCACTAGCTAACAGTTGTAATGACGCTACCGT  
CGAACCACGAGTTGCAGGAGTGTTTTGACGTTCCCTACCGATACCGGTAGTTGTGCTGAC  
TTTCATCCGAATTGGAGTAACTTTCCGATTGCGTTTGCCTGTACCAGCAGTTGTTTT  
AAATAACCACCAAATCTCGTAGCCACTTGGATAAGCACCGATTGTCGAAAAGTTGAGTT  
AATCTTTTTACTATCCCCACCTTGGTTAATTAGCTCGGACCGATAATCTGTGATAGGGT  
TTTTGGCCGTTCTCTACTTGGAGCCGAATTTCCCCCACATCACGAGTTTCAACGAACAC  
AACCTTTCTACCTACTACGATTTAACGACGTGCAGTGATAGAGTCTGTTTGGAGTATCCAT  
AATCTGGAGTGATATAGGGTCTGCATCCTGAGTTGCAAATACACTGATACCCTCTACCGA  
AGCGCCACTCATAAGATCCTCTGTAGTACCTTCTGTGGATAAAAATTTATTGGTTGTTTAT  
TTACAATTTCCCGTTAGATAATGGGTCAACAGAAGTATCAACGAATTTTAAATTTATCACC  
GAGCTGTACTACTAGAATTTCTGGAATGGCGACATAGTACGTTTGGCATAACGTTAACT  
AGATACTAAAATTTGGTCTGAGAAGTCTACGTAGGTAGGATACAAAGTACCTTAACTTC  
CAAATCCAACCATAGCGTCTTGCCCAAGCGTTAGCTTTTGGAGAGGATGATGTTCTCACC  
CTCTCTGACAGAATCCATAGGCATATTTAGAATGTTCCCTCCTGTCATTAGACCAGACTG  
AACTGATTGTATTCTAGATTAGCCTGTCATCTTGCCAGTTGCTTTTGGCTCCTCGTATTT  
CAGTAGCTAGGTATTGTTTGTGATGCGTTGCCAGGCGAACGCTCTTGAGGGGTATTGCCCTT  
TAAGAACTCTGGTACTTGACCACCGCGTCTAACTAAATCTCGTATACAGTACCTTCGT  
TATCTGTAATCTCTACTTTAAAAGCCTTTGTTACTGCCATTAATAATCTCCTTGATAAGAT  
GTTTCGAAATATGGACTACGACGATTTGGGCAAGTTGAAGATGTTGGTCCGCCATAGTTG

GGGAATCGAATACCACCTTTGGCTTGCCAACTCTTGCGGCTCATATGATGACGATGGATT  
GTAGCCCATTGTTCTGCTTTAGCTGCGTGCATTTGTCTAATCTTGGCACTGAATGCTGGC  
TTTGCTTCACTGATTAGGTATGGGAGCATGGGAGCTGGTAAATCAATAATCCAAGCATT  
TCCAGCACAACTTAGGACTAATAAAGCGATGCCTTGAATTTTATCTTTGTGGATTGTA  
GATTCTACGTCTGTGTTGTAGCTATCGTATAACAAGCTACTCATCATCGAATGAAGTCCAG  
AATTGTGGAGCTTAATCGTGTGGATGAAGTACACAATGCCGTTGTCATCACGGACCTTC  
TGTACGTTGGACTGACCTGAGTTGATAGTAGCTAGTCGAGCTTCGAACTCATCTGGATAC  
ACGTACTTTAACTCAGTGTAAGATACTGGACGCTCTTTCATTGAGGTATCTTATGGCAAG  
TACGTCATCTCTTGAATGTTCTCAGGTAGATTTAAGTAGTTTGGTTTATCCACATCACTT  
ACTCCATCAAACCTGTACTCCACGGCGAAAGTAATCAATCGTTGAGTTGGTGATTAGGTTG  
TCATACGAAGAACGCAGGATGTACGCCGCTGTATCGACTCAGTGGTATCATCAATAGAG  
TTGACGTTACCACCATCCGAATCACTCAGCATGTCTTGAACAAGATGAATAACAGTATAT  
TTCATTATCGTTTACTATATCTACCACCACGAGCCTTTCAGCTCTGTCACCATATTTAC  
CACCATCGGAACGGTTGGCACTTCGAGAACGTACTCGTAAATTACCATCTCCATTACCGC  
CACCGTGTTCCAAAGTTCTTTTGTGATCTACGTCTTCCCGTAGCCCTTTCGAACTTTTC  
CCTCACGTCCCATCTTCCGACGAACCGCATTCCCTTTTGGCGGATTCTTCTTTTGTCTG  
GAGTACCCTGGTACTTGTGCTACTCCTGTCGGTCAGTACGCTTCATTGCCATTACTGAAT  
CTACGAGATTTAAAGAATTAGCGTTTCATCTTGACTAACAACGCTGAATTGACCGGCTAC  
ATATTTCAATTTTACCACGAACGGACAACATATAGTCAGTACCGACAGGAATGATTGAGCC  
ACGGAAATCCATGATATCATTCTGGTATTCAGACGGCCACCTACTGAGGATTTGAACAG  
AGTGAAGATGATTTACTACCTCCGATTGGCGTATATACAGCAGATTTGCCATAAGGGTC  
AATCGAAATTCCTGTTGGAGTCGCAAATGACTCATTGTTGAGTGGGACAAGCACAGTAGT  
GCCATCACCTTTGGCACGTAAGAATGTGGTAATTGGAGCATTAAACAGCTCCTTATACTAC  
ACGTAAGTATTCATCTGGAATATCCTGATGTTGTATATCAGCCACTGGAATGACTCCTTG  
TTACGAGATACTGATGTAATTAAGTAGAATTCCTTAATGTATCGTGTATCCATTCCCTGA  
ATTAACATACTCGTCTTCGCCACTACCTGTCAAGTCACCCTAGACCAATTAGTTTTGAAG  
CAAAGTGTACACGAAAATATGCAGGTAAGAAAGAAAGCCCTCCGCCGAGGGCCTTGAGATTA  
GTGTTGCAATCGGGATCCGCCTAAAGTGACACCAGCATTTGTTGGGATTCTAGCAATACT  
ATGAGGACTACTGATAATTCCAATCTTTTGGACCTGTCGGATGTGTACTCTTTGAATCG  
TACTATCTCACCAGCTACGACACTTATGGGAACAGTGAATGAATGAGTTAACATCACC  
GGAATCACCACCAGCCAGTATCAGCAATCTAGTAGTTCCACAGACAGGACTCCATGAGAT  
ACCATCCATTGATGCTTCTCCATACATTCCCCACAATACCTCTCCAGCACCTACGGTTTC  
TCTAATGACCTGTACTGACATATTGGACATTGCTTTCGCACCATCGGGCGAAAGTTAGTAC  
TCAAGATGTTAGGTCTGTTTGTACAAAATCACTGGCAATCTATGTAACGTTGAAAGTAAT  
TAGAGAACCAATGATTGATGTTCTCAACAGTTGTTTAACCGGTAAGGACTTAGGAGTAGT  
GTAGCTGATTCTTATAATGTGCTCTTAACTCCGGTAAGGCTTGGTTTTCCACCGAGT  
TTCTGTGAGGTTATAAATCAACACTTCACCATCCGTTTGGATCGAACAAACCATTAGCAC  
AATAACTATTGACTCTATAGTGTCTGGAATAAACTCTAAAGCACTCTCAGATTGTTACC  
CGCCACTAGTTGGTTACCCTGCCCTACGTAAGTGTGTTGGCCAATCTAACAACCTCGAGGAA  
AGTCTGTTTACCTTGAGGCTGTCCATCAACATACTCAACAGTTGCTAGTTCTTATCTAA  
CCAAGGACGCATTTCATAGAGAGTAGGCTGGGACACCATCACTGCTGCCTTTAACGTACAA  
GTCTGGTCCGATTCCGTAAGCTATTGCAACTAGAAGTGCACCTTGTCGTAAGTTAATAGG  
CGTCGGTAGAGTGAAGGTAGTTATTACTACAGATTGGCTGCTACCCATATCTCCATCAA  
CACGATAGAGTTGTTGTAAGTTAGTCTGAAATGTAAGTGAGGAACCTCGTTAGTGCAATA  
CAATACACTTTTAAACACAGTCTCACTGTATGGAACAGTTACGATAAATTCACGGTTGAT  
TACAACCTCAGATACGTTTGTAGTTCTAACCACGTATTCGAGAGGGCCATGCACTCGTCT  
AACAGCGGTAAGTATCACTGTCAGAAATACCCACACCCTGCCAGATGGGAAATAAGA  
TTTTCTGTGGCCTTGTTAAGAACCCTACTTTCTCTCCGAAACTACCGATTTTATGTAC  
ACCCTCTGACACTGAGTTAGATGAAACATCGAGTTCACCCTCGGAATTGGAGAATACAG  
AGTGTCCACGAATTCGAGGTATCCACATCCCCTTAATCATGTGATTGTAAGAACTCC  
TCCATCAATTACAGATTCTATATTATTGTCTATGCTATCAGCAATAACACACTTCGCCTT  
GATAACACCAGCATTGATACTATCATTGAGTTCATATCTAGGTCACTTTCAATTTGGTT  
TGGTTAACCTTCCGGGTTGTCCCTGAATGGAGCCACATTATTGTGTATGTCCTTAATCTT  
CTGGAAATTACGATTAATTGGCACAGAAGTAGCGGAGGTAACATCACTCAGAACATTCTT  
AGCCATACTATCTCCTTAGTAGTATAATTTTTGATCTATAAAACAAAAGGGAGAGCCT  
AAGCCCTCCCTTGCATTTCGTTCCACCTATCTTAGATTGAACCTTGACCTTTTGCACCAGC  
AGCGGCATCAGGATTCCTACCTCCTTTCACATAACGACCAGTTAGACGAACTTTACCTTC

ATCAGTCACAGTTTGGCGAAGTACCAGCGGCTTTGGAGGTAACCTTCGCTATCAGTAGTTAA  
AGCACATGCCCAAGTACTTTCTGGAGTTGGTTAACTACGCCACTCCTTCCTCTTGTGC  
TTCTAGCGGTGGAACACCGTTGGTACCTTCTGAGCCTTTAGGACCTACTGCAATAACAGG  
GTCAGTACCACCAAGAGAAAACACCTCGGATACGTGAGCAGAAGCATCAACAACCTGAAGC  
ACCTTTAGGCAGAAGTACTTTGTTGTATTTAGAATAGTCTTTCTAGAAAGAAGATCCCCA  
AATATCAAAGGTCATTTCCATAATGGAACGTTCTGTCTTAATGCCGCTTGTGGTGACCG  
TGTACCACGCGCTCCATATAAGTCGTGAGTACCAAGACCAGCATAACTTTCAAACCCAT  
AATAAGCTCCTAAGATTAATCTAGCAATGAACCGGAGGAGGGGCACTCCCTCGCTCGGG  
TCATTTTACTTACTTGTGTCAGCAGTCTCAGAAGCGAGCAATGCAAACAGAGTGTGCTTACG  
TTGGATAACAAGACCATAACGCCGACGAGCAACGAACTCATTACGGGCAAGGTCTTTGTA  
ACGTTTCAGACTCAACACGAGGAGCCTGACGTTCTGCGTACATTATAGGTTTGGAGTTGTA  
ATCTGCGACACACATACCGCTACACGCAACACCGTTGGTGATTGTCACACCACCAACCTG  
TTCCCTCACGATACGTGGTAGACGGTTAGAAGTTATCAAGTGCCAGCCGTACAAGTTGGA  
AATGAACTTCTGCTCATGAGCACGACCGCCTTTCTACACATCCATCGAGAATGGGTTAGA  
GTCGATAGCACTTGCAGCGATTTGGAACCTGGTATTCAGAGTTTCCTCAATGAATGGGTC  
AACAACTCTGAATACCACCACCTAGTGGAAGTTTCGCCTTGTGAGCAGCAAGTTTCAGGTA  
AATCAAGTCTTGTGCTTCGATGGTCTTGTAGTACCTGTATCGATACGCTTGTGAGCTAA  
GCCGTTAATCTCGGTAGCCTCAGCAGCACTTAGACCTGCGTAAGCTACTTGCAGATAGCG  
GGTTTCAAAGTCTTCTTGCATCGTACGAGAAGACTCTTAAGCACGCATTGCCATCTGAGT  
TTCGCTTTGAGCACCGTCTTACGTAATTTGTCAGTAACAGACCAATCATCGCCGTTGCA  
GTTAGTAAAACGCCTCTTAGGTTCCAGTCACGCTTAGTTTGTAGAGCAGTGGAGTTGC  
TACTTCCACATCCTGAATAGTTACCGTATCCACAGTTTTAATGTTTAGCACTTCACCCGC  
GAGAAAATCTAAGACGTTACGATACATCATTGCTGGCAAGGAACCATCGTGTAGGTTTTTC  
CACAATGAATTTTGGATATTGTTGAGCCTCAATAAAATGGCGTGAGTTGCCAGTATTTTG  
TGAACCAGTAGCACCAGAAATATGTAATCTCCTTAAAAGTTAGTAAGCTTGTGAAACTT  
CTTACCACCTTTGACCGCGAAACCACATGCACGGAAGGCAGCGACTAAGTCAGAAGTAG  
AACCTGTTGAACCCATTTTGAAGTTGAGTTGTGGCTCTGGCGGGCTCTGAAATTACGCCG  
TGGTATGGGTACCTTTTGAAGTAACAGTCGAAGTAGTTGGTTTAGATTCGACATTAATAA  
AACTTGGAACTGGTTTAGGTTGATTTGGCAGCGAGGTCTTTCAAAAAATAGAAACCTACTC  
CTAATCTAGGACCCTTGGACTCGAGAGCCTTGGTTCGCCCTATTGCTAGCGCCAAATTCAC  
CAATCAGGGCATTAGTTACCGCTACTTGGTTAGCTTGTGCTTGTGCTCGGGCATTACGTT  
TGTTAAGTAATTCCAACACCGCCTGTTTCTAGACCTGCTTGCATTGTGGTGCAGTTG  
GGAGGTGACTTACAGCAAGAGACGCTACTACGTCCTCCAGATTGTTAGCGTTCCGCCAGGT  
CAGCCTTCAATGTCTCATTCTTCTTGTCTTATACGTTGGTTTTTCAGCTTCGAGATTAGCAA  
GGAGCGATTGAGCGTGTGGAACACTAGCTAAAGCTGCTTGAAGGTCTGCGTATGTACGAC  
CTTCACCCACATAAGCCGCAAGTTCTTGGAGCAGTTGAGGAGCCGCAGGCGCAGGTCGTT  
GTACGGGTTGCTATGGTTCTGGAGCCTTGTGTTTCTTGGAGCCTGTGCGAATAAATATGATT  
GGTCAGCCATATAATTCTCCCTATTCAAATTCCTAAACGTGATTACGAAATAATTCTAAT  
AACTTAAGGTTACAAGTCAATAACTTCTAGTCAAGTTTTTTCTTACTATTTTATGCAGC  
CTGTTTGAAGCCCCAATTAGGACAGTCGAAACCATCCAGTTTGATTTGTTATTCTCGATT  
CTCAGCGATACGCTGTCTTAGAATTTCCACCAGTCTTTCCCTGACTATCTGACTTCCAGC  
GAAATCGTTGGCGAACTGTACCTTTTGTTCACCTTTCATTCCCTTGCCTACAGACAGTTTT  
TATCCTTATCTCCTTATCCTAACGGTACTTGTGCTCCTTCTTCGATTTGTGCTTGTGATT  
GGTTAACAAGTGCAGGGGTTGTCTGTGCTCCATAACTGCTACGTTAGGTTTGAATAAT  
CCCATCCACCTAAGCTTAAGGTGTGTTCCAACATTTTAGCCAAGTTCTCAGTAGACACAT  
GAGGTTTAATCTCTTGCCAAATTGGAGTATTAGCAAAGCCCATTAGGCTTTGTACAACCT  
GCGCTTGTCTGCAAAGTGTGAGCGCCTCCAGGACGTAGACGACATTTTGTGTTGGGATAC  
CGTCTTTGTTAACGTTTCTAGTGTGCTCCATAACTGCTACGTTAGGTTTGAATAAT  
CATAAGCTACATCTAAATTACGACGAGAAATCTCTAGCATCGCATTGAGAACCTTAGCCA  
CCAACATTAGTTCAAAGTTCATAATCTTCTTGGAAACATACGCCAGCGGGCGGTTTGA  
GCTGTTGGGCTCGAAAGGTGTGTACTCACGGGGAGCACGAATACCATACTTAAACGAG  
GAACTCCTGCAAACCTTGCATCTTAGCTTCAAGAATCTGAATCTGAATATCTGCTTGT  
GAGCTTGGGTATAGGGAGCCATCATCTATACATCACCATCACCATTGATGTAATCTGTT  
CTATAGGTCCCAAACAACTGCTCAACATCTCCTATAACATTCATTGAAGGAAATGCGA  
TTAGGTCAACCACGGCAGCTTCAAGTTCTCAAGGTGGTCGATACTATATTGCATACCTA  
CTAGGTTATCTAGTGGTCCATACAGTACAGGTTATGTTGACGAATACGCCAACAACAA  
GGAAGATTGGAGCTTGTGCAAAGCATGATAGATTCTCTTTATCCTCGATTACAACATGC

GGTCAATGATTGTGACTTTCATATTACGCTTAAATGTACCTGACTGAGTATCGTGGTAGC  
CACCATAGAATGTCAGCACCTCAATTTAAAGACTTTGGGAGTAGTCGTAAAGGATGCCAA  
ATCCGTCCATCGAGCCGCCTACAGCCTTTTCAGAGTCTTCCCTAGTGTAAGTGTCTAGCC  
CACGACTCATCTCTCGTCTACGAGCGACTGAGGAAGCGGGAGAGTCGTTCTCTGGCTGGT  
CTAGTTCCATTTGTGGTTACCCTCCCTCATCAACACCGTACGGATGATTTTTGGAGAGT  
GAGCAAAGTCTACAGCGACGGGATTAACACACTATCTTTTGGGTTCGTTGAGAACTGCAC  
GAGGACCAAAAATACGTATCAAGTGTAGCGCCAGATTCCCTCATCCTAAGTGGTTTCCTTCT  
CATACTGGACGGTGGCAAAAACAGTTGCCGTAATAAATGTACTCGAATAGGAGTTGACTGA  
TGATTGTGCCGAAGTCCGATTCCCTAACCTTGTTATCCATGTATTGCTGAATAGCGTCCC  
GTTTGGCCTCATCGTGAAGGCTCTTACCTTCCCGCATCAACCACTGTTTCATTAGGAAGCA  
GTGCACTAATGTAGCTGCAGTGAAAGCAATCTCGAATCTGACACAACCTTAGGTAAAGTAG  
TTTTGTTCTTCCACAGTAACGTGCGGTTAGTCGTCTTACAGGTATCAGTAGCAGAGATGT  
AGTTACGTAGTTCACTCTTTTGAGATAACTACTCATGCCGCTGACTGTTCCAGTTCTGCC  
AAGTATCAGCAATCTGTTTAGCCAGATCATCACGAGTGTCCGGTGGGCATCTGTTGTAGTT  
ATAGAACCTTCCCTTTTATTAATTAATTACTCCAAATCTAGGGATAAATTGAATGACGTT  
GCTTTCTCGTTTAGCGCTTGCAGAAAGTTGCAGTGGTTTTACCAGCAATCTCTACAGCATA  
AGCTAGAGGGTCTTTCAAGTCATCATGAGGTGGACGAGCCATCACAAGTTCTTCCCTTAG  
CATTGGAGTGTATCCACCTTTTCTATGCCACATAATACCTTGCTCATCCCGTGGTTCCAA  
TACAGCAACCGTACGCTCTTCCCTTAGAACCAAGCGCGTTAGTTGGTCGAAACCCGTCGAT  
ACTAATAGTCATGCCTACCTTGCAGAACTTCTCTTTAGTATCGTTTACAATGATTTGCTG  
TGCCACAGTACCCTCAGCACGAAGTTTCTATATCCCACTTACTATGCAAAGCAGAGCT  
AGGGTCATTGTAATCGTTAATCTTATCTGTTTTGAATCGGTCAATATCCGAAACGTAGAT  
GTAACCCTGTGAATCAATCCCAATAACAACGATTGATGTAAGGTTGCCAATCTTAGAGAA  
ACTAACTGCAAAGTCCACAGCAGCTCAGATATTCAAAGGTCTGTCCTTAAATCAGTGTCT  
ACCTTCCCGATAGGTAGCGAATATCTTATAGTAGTATTGGAAAGTGCTATAGTTCATACG  
TGCTGCTTCCGGGTCGTTTGGGACATTGTAGTACTGAGCAAAGAAGTGAACACGATCAAC  
GTATTTAGCCTTCTTCTTAGCCAGAACACGGTTCTCAAATCCAAACTCCTTACCATCAGG  
ACCACGATGAGTACCAGGCAACAAGCATAACCCATCTTCTTCTACTACACGCTGAAAAAT  
ATCCCAAACAGGCCTTTCCTCTCCAGTCTTCTTCCATATTCGTCGAATACGGGTTGATG  
CTGATTCTTCCATGTGTCGTAATATCAGCAGGAAGATACCGAGTACCACAAGTTTTAAC  
GATACCATCAGCGTTCAGGATAGATTCCATCTGAGAGTTAGCAGCAGCTACCTTGGGTCT  
ACCATCCTCCAGATATTCGTTATCTGGAACACTACAACCTTCAATTAGAAGTAATAACGTCAGC  
GTGCCGACCAGGGGTGTTAGGGGTGAGGCCAGCAGTCTGAATAGTAAAGTCCCGGATGCC  
ATCCATCTCACGTTTTTGGCTGGTCAACTGCGATTACACTGTCAGTACATTTCTCACGTTT  
ACCCTCCTCCTCATTATCATATCCGACCAGTCCCGCGGATAGATTTTGGAAAGTCATGAT  
GTTCTTACTATCCTATAACTGCATTTACAGCAAGTTCCTGTTAGCAGAGATATACAGAGT  
GGTTGGCTCGGGATGATTAGTCACACACCAAGTTACCCCAAGAGCCATCATGTGAGGTTT  
TATGTGACCACGAGGTGACAGTAGAAGTTGGTTCGTAATTAATCTCCATCCACTTTGC  
CACTTCTTGTGGACCGCACCGTAAACGTATTGTGGATTAAGCAATCGTCAAACATCCA  
GAAGTGAGATTCAGCAGCTTCTCTCATTTTCGTCAATCTTACACACTCAAACCTCGTAATG  
GTCGTTATAGTCTTCTCTAATGCATTCTTAACCCGTGATGCAATCCATGACTCACGAA  
CTATTTCTTCTTGGCTTGGGCGTCTGCCCCACGTTTCGTCCTATCCTACTTCGGCAAGCC  
ATTTGGCAGCTGCAAAGACTTACCATCTCGTGCCATTTCCATTGCACTGAGTACACCGA  
TAGAGCGATCTTGAATCTCGGCTTCTTCCATGCCATTCCTCGAACACAGCGTAAAATTCTT  
GGTTAGCCTTAATCTTCTTCCAGTGTGTCACCCACCTAAGCATTCCCTCGCATATTTAA  
TCTCATTTGGGTCTTCGATGTACGTCTCGACAAACAGCCGTTTAAATGCTTAGGTACTTTT  
CACCTTTGAACATACGGTCTTTCATCCGATATCGTGTAATTCAGCTTGGCTTGAATCCCT  
TCCGTAAAATAAACCCTGAGTAATCCATCTACCCATAACAGGCCTTCAATTCCTTCTTCA  
TTCGACCCCTTAGTATGGCTTATTATAGGGGTAAATAAAGTAAATACTTTACTACTCC  
AAAGGGTATTTAATTAATTGGCCTTAACAGCAGCCCATCAAGCCATCTAGGCTTGGCGA  
GCCATGTCAATCTGCCACCCCATAAATAATGGGTCACTAACTACTCGATATGCCGCTTGT  
ATACGTATTAGATTATCTTCAATTTATATCTACTGGAAGAATTTCTAATGTGTTTCCAAGT  
AGTTCTTCTTAATTCACAAATGTAGAACAAGCTTCATCCCATACCCATTTACCGGAGGCA  
AGTTCCCTCCGGTGTAAATCTTAGTTTACTCTTAGAATTTCTTTGTTGATTCGACATCCT  
AACAGTATAACCACTATTTACAGAGTTAACGTTAGACGTACCATCAACGGCAGCCCCAGCA  
GCACCTCCTGCCTGCCACCGAGTCCAGGAGTCTGCATTCCTGATGCACCGGTGGCTCCA  
CTTACACCTGCGACACCAAACCTTACCACCATTACCTCCGTTACCACCTCGACCTTCGTCA

GTCCACCGTTAACACCTGCAAGACCGTTTGTGCTGCTTGGCGAGACTCCTTGACCTTTT  
CCGCCATTACCAGCGGAACCACCGGTAGTGTATGTAGTATTGGGCACTGTTATAGTTCCC  
TACATTGCGTAAGCCTTCAAACACCCACAGCTTCACCGTCGAATTTGGATGCCTAGTAC  
GTCCACCCTCCCACGGCTATAGTGATACCGTAGGTAACACCAGTGCCAAAGTCTGGACCA  
GACCAACGATATATCTCGGAGTGACACATACGGAGGAGACAGTTACGAGCACGAAATTCG  
CTTTGGTTCCCTGTAGCGTATGTCCGAGCTCCAGATGATGGGTACCGGAGTGTAGATTCA  
GTAGTAAAGAAACCGTTACCACCTTGTCTCCTTTACGACCACCACAGCCTCCACCTGCG  
ATTGTGCCGTTGTTGGTTAAGTTAATGTTTTGTGAAGTCTGTATTTCGTAAGGCAGGGCCA  
CCAGCTTGCCCTACTCCAGTTCTCCAACACCAATTTGTCCCTAGATATTACCATTCTTG  
ATGATGTTCAATTGTCTTGACTACAAAGACGTCTGGAAACACAATTGCTGGAGTGCTGACG  
TTGGTTGAGTACACGCTCACACCGGAGTTAATCACTAGATTATTGATAACCTCTTCTCTA  
CTACTTAACGCCGTAGCTAGGTTGAAACTTGCATTACTCTGACTGCTTGTGTAAGCAAAG  
TCGGGGTTTTTGAATTTCTTCCATTCCCCGTTGTCACGAACCAAACCAAGCGGATATTT  
AAAGCTCCACCGGCATTAACCTTTCATTGTAGCCTGTCTGTAAGTACCAGAAACATTTACT  
CCAACCTGGCATGGTCCCTGCTTATACGGACCGTAGCCAATCTCCATCGGCACCACCA  
TAAGGTGCGCTAGAAGATACAGTAATCTGTGCTTTCTATCTGCGGCTACATGAGGAGAA  
GAACGGGCATCAGTTGCATCATCATATGCGGCTTTTACACCGGCAGTTGCAGCATAAGTA  
GTGGTACTTGTGTGTTAGTAGGACTAGATGCTCCCCCATCGTTTACGTTGCTTAAACTA  
ACCTCAGCTGTAGTAGTCCAACCATTTGCGAACTCCGGAGTGCCTGTAATCCCCGACCAT  
GCTGGAACCTAACCAATAGGTTGGTATGTGCGCCCACTCTCACCTTTAGAATAGGCAGTA  
CCTGCTAACTCCAATCCAGATCTAGCAACTGGAATAACTTGGACCTTAGTCCTTCCTTCC  
AACTCCTCTGAACGTACGGCCGTAGGGGTAGCACCCAGAGCACCTCTATCCGTTGGGGTG  
GGTTTAAACCCTGTGTGGTAGATTTTACGCCATGGGCGAGATTCCAATTTGTCCTATGA  
CCTGATTTGAAATATAAAATCTCACTATTAATTCCATACCCAGTTAATAAATTGGAATGCC  
CTATCTGCTGGAGGTGATAAAAATGACCCTAAGTTACCGTAATTAGTTCCCTCTTGCATA  
TTTGGACTGTTGTTACCCAGGCGAACAACACCAGTTAGATGTGGATACTGAGTCAAATCG  
AGAGTCTTAGACGCCGAGCTAACATCACACGGTTTCCCACATCAACAGACGGAACAGCT  
CCAACAACCTGAGGCAGTGGGTGTATAACTTGGAGAGTATTCCCTAACCTACCCTCATAT  
AGTGAGGTAGATGACACCACTTATCTCGCAGTATTGTTACTGATGAGGTTGCAGCCTCA  
TGTATTCTTCCAGTTCAAACAACCTACCTTATGATCTATACCCTGACCAGCATTGTTAATA  
TACACACTGCCTCTATTATCCATCACTCTGTACCCATCGAACTTTGCAACGCCTTGGGTT  
GGAGTGGTATTTACAGAATCGGAGTCGATGAGCAGCTCAGCAGTCATTGTAGCTCCAGCT  
ATATTTACGGCTCCTAACTTTGCGTGAGTTGGTTTGTTCGTATCCGAGTAGAACTTAATA  
TCCGCGTCTGATTTAGAGTACACAGTGTGGCTTCCGGCTAGGCCGGTGACGATACCTACT  
CGACCATTAACGGACTGTACTCGAGTACCACTCTCTACAATACCCAAGAGGAACCAAGTC  
CAAACAATCTGGTCACTGTCGTTCACTGTTAGTGTTCAGCTGGGATTTGTGTAGACACG  
CCATTTGGGTTGTTAGTAACTTCAACATAGGCTGCACCTTCTGGTGCTGGGTGAGTTGGA  
GACATACCTTGGTTGATTGTTGGGTGCTCTGGGTCTCCCATCACAAAGATGCTTGTGGA  
GTGGTAAATACATTGTCCACTTGTGCCTCACCTTAATACTGATAGAACCGGCACTACCG  
GCCAGCAAGTCACTTACCAGCAGTTTCTCTAACTCTTTTGACGAGTCATTTTGAATCATG  
AGGTATTCAAAGTTACTGATAGTCCCCTTTGCAGGGGCCGAATCCGCGTCGATTACTTTG  
GTTTGAATCTTGTATCCATCGAAATCTCCTCAGGCAATCACAGATACTCCCCTAAATTG  
AGAACCAGTAGTGGTACTCTGCTTAGTTTACGTTAATTACCGGAGAAGTTACGTATCC  
ATTGAGGATAAGTTCTATAGTGTCCACTCTCTAGGAGAAGGAATAGTAAACGACCAAGT  
GACTCCAGAAAATCCATAACAAGTTTTGTTATTTGCGCTAACATAGGCACGTCTGGAAGA  
CTCATACACTACGGAACCGTTTACTCGAATACTCCAAGTGATTTGAACATCTGCCAAGAA  
TGATGGACTGAACGAGGACAACAAGACTAGTAAATCCTCCAAACTCGCCATTGCAGCAGC  
CGCAAACGGGGTACTAATCACTCTGAGACGAAGACTTAATGAACGTGCGTGGTTAAGTGG  
AGTATCCATTCCAACGAACGTTGTAAGTACTGACAGTGCAGTAGCTGACCCATTGTTAACTT  
GGTACCCTTACACCATTCACTTTGATTGTGAAACCTTGAACGAATTCACCTGTTT  
CCACTCTCCAGAACCACGATACACGCGAGATTCTGAATACCCTTGGAGTTTGTGACTG  
GATACCAGCATCAGATACAACAGGGTTTGGGTTAATAGCGTTAATCAATGTTTAGCTCCC  
CCTGGTGCCTGTGGCTTCAATATACCACTCGAGAGAACCACGTTACCCCTGGTCCCCTTG  
TGGAACATTGTCACCTGTTTCGAGCCTGTGGTCCCATTGGACCTCGTGCGCCTTCAGGCC  
TTGTGGCCCCTAGGGCATTGAGCACCTGTTAGTCTACTGGACCTGGCGGACCAATAAT  
ACCTTGGAGACTCCGGACCCCTTGTGGGCCTGTTAAACCCCTATCCCCTTGAAGGCCTTT  
CTAACCTGTGGGCCACGTTCCCTTGGGGACCTTGGATACCTTGGAGGCCATCGGTGCGC



TTGCACTCCCCTCGCCTTGCGGACCCCGAGCACCTTGTGGACCTGTAGAGCCGATGGG  
TCCTTGCTTACCTTGAGGTCCTTGTGGACCTAGACCAAACGGAATTGCTGGAGACCAATC  
ACCAGACGCTGCGATCGACTTTCTGAAGATCGCACCCCTTAGTCACAAATGGAGACTGGAG  
ACGTACTGTGAAGCGGACTCCAGTTTTAGGAGCTTCACCACACGTTAGAACGTTACCCGC  
TCTCTAAAAAGTATCTAGGGACTGGTATGAGTATCCTTGCCAAACATATCGGTTACTCTT  
CAAGTTTGGAGTGAACAACAAAGTGAAACTCTTAGTAGACGCATCTCCAACAAATTCCTG  
TTCTTGAAATGTAGAATCAAATGAATAGTCTGTTGCAAAGTAGATAAATGGTGGACCTTC  
ATCATCGTATGCACACAAACCACTAAACAAACCTTGAGCATCGAAGAACAGAGAGTCGCC  
CTTATCACCTTTTCGGCCAACTGGACGAGCAGCACC GGATGGCCTGGGTGACCCGTTAG  
GTCCTTCGTAGTTACCCTCCGTCAGGGTTGCGGAATCGTAGGTTCCGACCATCCCA  
GTCATGCTCTGGAGATAAACCTTGTGGGCCTGCAAGAACAACAACGACCTGCGGACCTTG  
AATGTTTACCCAAGGACCCCTCAATAACTACACCAGTAACTGGGTCAATCTTGTGTC  
GAATCGAATTGATGTGGTAGATTGAGTAATGCTGTCACCAAATTGGTGGATTGGAGTACG  
ACCTACTACGCCTTGTGGTCCCTGCGGACCCAGAATATCTTGTGACATTGAATACGCTG  
TGGACATTGTTATCCAGTAGGGCCTCGCGGACCCTCTCGCCAGCCGGGGCAGGCGGACC  
AAATACTTCAAGTGAAGCATATGAGTAAATGTCCACCTTGTCTGTAGACGTTGCGACGTA  
GTTAATGAATTGTACCTGTGTGCCACTGTAGTGTATTCCACTTCTGGAAATAGACGGAT  
ACCGTTTTTATACACTTTGGTAGAGAAAGGACCTGCCTCTACCTTAGTACCGCTGTGAC  
GTCAAAGAAAATCCATTACCAGTATGTCGCATCACCGTTGGAACAGTACCAGATACATC  
ACCTTCTAAGGTTTCAAGGTCTTCCACTCGAAGAGGTTAGGTAGGGTTAATTCGAGCAGG  
TCGGTTAATTAGACGGTTGGATTTAACAACAAACTGATGTTCCAGTTGTTTGAACCATT  
CTTAACTGAGATAAGATTGGAGTTTAGAGCCTCTCCAAACTTATCAAACCTTGGAGTTTAT  
TGAGGGGGTGTAAAGCCTCCTCTTACTTCAGTAAGAGTAATAGTCATAGTTATTTAAGT  
TCCATAAGATTTTTAGAAATAGTTAATATGTCAAGTATCTAGACTATAATAATGATTATG  
TATTAATACATTCCGATATAGAAACATATCAATACTTAAAAATACCCCGTAGGTTACGC  
AACTACGTTGACCGGGTAGATGCTATTCCTTTCATTAAGTCTCCGCTGGCATCAACT  
ACGCAAGTATTCAACATACCCAACCTCTTAGTGGCTACTCATTGAAAGATACAATAC  
CAACAATCTATCGGGCTGTGGTGGGGCCGCGACTTGTTTACTATAGTGTATCGCCCCGTA  
GAGTGAAGCCGTATAGACGTCTAGAGCACAAATATTATCAAATTTGCTAGCTCTTATAAA  
TGACAAATAAGAAATCTGGAACGCCATGATTTCTGTGGGAAATTTTTATGTTGCTGTGCT  
AACCAAAATAGCACGCCTCGTGTCCCCCTTACCCATCTCCGAGGATGTGCATGTACTCC  
TTTTTATCTTTATGTGCGCATTTAGCCGTACGGAGACATTGTTGATGGCTTGGATGGTTG  
AGCATTAACGTTTACGAATTTTCTCTACAATTAGCAATCTCCCGACACTTGCACGATTAA  
GTGTCCGCACAGCGATTCCGGTGCCTAACATATTGAATTATCTATTATTGGGATGAGCTG  
AGTGTCTGTATATAGCTGTACATGATACTGAACGCTAGCTATCTACCAACTAGGTGATA  
ATAGGTTGTTTATTTGTACCTGATACACGTATATACTGAGCGTATTCCCGATTCATATCC  
ATGTTGAAAAATGTGATGTATGGCACTTTTAGTCCAGTTAGGCTTGGTGTAAATTTTAC  
CCCGTCCGTAAGGCAACAGACTAACGATATAGAGATAGATAGTTACAGTGTTTATCCCTG  
CTCTTTAAAAATGTGGTTGACAATGATTACTCATTTAAGGTAATCTTCACACCGTCAAAT  
GTTTACGGTGATACGTAGTCCTGTGTTGCTCTGGGTTGATTGAGGTAAGCGGCGTTACCG  
ACTACTATCAAATACCGTTCTAGATGTACCGAACAGGAAGCTAGCCAACAACGCTTGACG  
TGGGGAGGATGATTCAGTTAACATGGTACCACGCTCTGAGTAGCATTTCGAGTTAACCGA  
ACGGTGCTCTAACGTTCTCTAGTAATTCGGATATTGACACTGATTTAACATCGGTAATT  
AGGTTGATGATGCGAAGTCTGGCGTAGCTGTGAGGAGTTAGACTCTGAAGGGTATAGAGC  
TACGGTGCCTCGGTTCCGAGTCTGTAACGCTTTATCTATAAATCGTCCAGCTAAACTAA  
CGGTTATGTATATAACTACAGTGCGGTTGACGTTGATATGGTTGAATTTTGAATGCTGAG  
TGTTGATAAGCCGAGACGAAATGCGTGTCCACCGTGAAACCAAAAGGTATGCGTCAGATC  
TAATCAGCACGCCAAGCAGTCCGCCGTGATTAATTGTAATAGGACTGTATCTTTAATGGC  
ATGAGATACCTAATTAATATCAATCTATGAGTTAATTAGTAATATCTGGTAGAGCTAAAG  
GTTGTTTAGTGTCTAAAAAATTTATGGTGAGGGGTTAAGTAATCTAATGTGTATAAAGG  
ATTAATACTGCTACCCAATGTGATTGAGTTCTATGTGCTCCGTGTTCAATGTTTACTCAC  
CAGAGGGCTCGTTAAATGTTGACTAGCCTTTATTGTATTCACTAACACGCGAGGGGTAAC  
AATGCCAACTTGAATTACAATAACGTTTTACCAGACAAGGTAAACCGAATCAATAGCCT  
GTTAGGTATTGGAATTACTGCGGTAGGTCAGTCTGAAGTGGAAAGCGAACCAACAAGGTTA  
TAAATTGGTTCAAGTTATGTGTGAAGCATTCTCTATTATTCCACTCTCTGACTCCCTTAC  
CAGTAAAGAATTAACCTTGTTCCTGACTAGACTAATCACTCGTCTAACTCTACCATCCAA  
CTAATCTCATGGGTGATTAGCATGGCCCTACAATACTGAATCTAACTTCAAAGCTAAA

CTTAACAATTGGGTA AAAAGGCAGCGAGTCTAAGCGTGATGAACTGCAAGAATTTATTGTG  
TTCGGTGTACTACATAACCCACAAAACGACAAGGCCTTTACCAAAGTGTCTGAAGTAATG  
TTTGCTTGTGAAGATGCGAAGGCATTCCTAACCAGAATGTATCTGACTACAGCAAGAAA  
GTAATGAACGCTGTAGTATTGAATGTTAAGGGTAAAGTGTTCAAGAAAGCTAACAAGAAA  
GCGTCTATTGAATATAACATTGGCTACCTAGAATCTGAGGCCTTCTACGGGTTTAGCAAG  
GCCACGAAAGCAGCACAAGTAATGGATATTATCAATGCGGATGCACGTTGGGCTAAACAA  
CTGCGTGAGAACACTGATAAAGGTTTCGTTTGAAGACGGTCTACCAGATAACGCCGAAGAC  
CTACTGAATACTGCGTCAGTTTGTAGGGTAGTAACTAGCAGCCTTTCCAAATGAGAG  
GCTGTTATCGTTATTGTCCATATACTTGATGAACGAGACTATTCTGTCTATTAAGATGCG  
TCCATGTGCTTTGTCCCTCATTTC AATTTACTGATCCTCCGTTTGCTGGATACGTGGGTGC  
TCACAAGTACATTAAGACTGAGGATAAATGGATTGTGACTGCGATGGTTCTGTGACTCTT  
AGAGGCGGTACTGTGGGTAAATTGTACTGCGAATGACGCTAACGGTGTTAAATGGTCA  
TTTGTGCTGTTCAACTATAACGTTGAAACATACGTAACCGGTGGGCTAGATTGGTTTGCT  
CGTGAGTTCGAGCAGTCCGATTTTGAAAACCTTGTGTGACCCAACACCCACCATCGACAAT  
ACTCCGGCCAACTAGCTGAAAGCTTCCAGCATTGCTATGACTGAGTGATTTACTAA  
AGGCTATCTGATTAGGTAGCCTTTGTTAGTTTATTTACGCAACCATTGGTGAATATAAT  
GCGTATTTTAAATATTGTCAGCAACGCCGTAGTA ACTAACGCAGACGAAGTAGCACAGGA  
AGATAGCGTATAGATCAAAGGTA CTACCTATGTTCCATGTTTGATTCTGGGTCATTGGGT  
TATTGTTTCGTAGCGATAAGGTGGTTGATGCGAAGACAGCAGACGTGCCAACAACCTTCGG  
GATGTTAGCTCTGATTGTCTAAATGCTAGGTCGAAAAGTACTATCATCATCATTCCCTCA  
GCGATATGGAGACAGCAACATGAAACAACCCAATCCAACTGGGCCCATAGTCCAGTGTG  
TTTGTGTTACACAAGCAAATAGCAGACGTTGGACTAATCAAAGTGGACAATATAATCTC  
TCGTGCAATTGGTGGTGC GGTGAATGGTGGTCGCCTTGGTTTTATCTGTGCGGTTATTAA  
ACAGGCCGGTGCAAACAACCGTAGTCTGTCAACGTGGGAAGCATAAAGGTCAAGTGTATGA  
CTTATTAACCACATTGGCTCTTGTCCACTAACTGATTAGGTATCCAATCATGTTCCATAC  
AATTACTCTGAGTGTAGCCGAGCTGGTTATGGGATTGGCCATTCTCTTAAATAGTCAAGT  
GCTAATCCGCTCTATCTTAAAGCCCAAGTCACTAGGCCAATATGTACAGATTATTACT  
AATGATTGACATTTCCACGATTGTGGCGTGGTTCTTTAAGATGCCACTCGGAGCATGATT  
GATGCTTTTCGGTAAATTTGTGAAC TTAATCCTGCTTATTTACCTACTTTTACGGAGAAA  
ATACACTATTTGTAGTCTAGTTCCTGGTCGTATGGATGCGCAAGAACGTTTACAAAAGGC  
TTACGTTGGTGGTACATCTCGTAGCGCTGTTATCTTCCCGAAGAAACGTA ACTGGATGGG  
TACAACGCCCGTGTAAAGTCTGGAAGTACTAAGACTTATCGAACAGCGACACCTCCTCG  
TGGCTTTAAGCACTTAAACTGAATAAATATTAGGAGTCCATTATGGTACGTACGATCGCA  
TCAGGCGCTTTTTCTTTCGTTGCTACTCATCGTGAAGATGATCTATCCGTATCAAATATC  
TTTGATGGTTCGTGAACCAGACGCGACTCAGTTGAATCCAAAGCGTGTCGAGCCTATTGCA  
GACCTTTTGGCTAGTCAAATTCGTGAAGAAGAGTCATTTTTGGCAGCAAAAACCTGCGT  
GAAACAGAATTTATGGTCTGTATCTGTGCAGTAGTATTGGATGAACCAGTACGTGACGCC  
TTCTTTGAAGCGGCAGAGGAAGCAGTTCGAGCAATTGATTGTGCAAGGTGAATCACTCCAA  
GCAACTAAACATTAATCCCCTAACCAGAAAGAACTACCATCACGTTCCCAATAGAAGGA  
ATCATAATTATGTCTATGATCTCTAAAAC TTTCCAGTATTTGGCTCAACTGTGGTTCAC  
CTAATGAATACTCAAACCTCTTTGGCTTTACCAATTGTAGACGGTGAAGAAATGGTTCGAA  
GGTACTTTGAAAGACCCACTCTTGGAAAGGGGCAATGGCTGCATTCGAGGACTTCAGCGAA  
AACCACGCAAAGCTGCGGCTCTACTATTCAAAGAAGCTAAGTTCTTCCACCAGAAAATG  
ACCACCAAGATATCATCGGACTGCTTGGGCGGTAACATGAACGTTGCAATGGTTGCTCCA  
TGTGAATCAAGCCGTGAGGTAGGTTACGTTGTCTCCAAGACTCGTGACGAGGATGGTCAT  
TGGGAAGTTGTTACCATGAAATGCTCAACCTAGCAGACGATAGCAGTGTTCAGACATG  
GTGCACAGCTGGAACCACGGTGCCGCGGAACATTTAGCAGTGTCTCTAATGCTGACTTGT  
TCGCTAGGCTTAACTAGGTCTCAACAATCAAATCGGTCCCCTACTGTGGTGGTGGGAGCC  
CATCCACCCTCAACTTGAAAGAGAGAAATACCATGAAAGGCATTCGTTTAAATCAACA  
AATCCGTTCTGGAAGCGTAAGAAACGTGCTCTAAGCTTGGGCTATTGAGAACCCAAAACC  
TGAGTGTGTGGGTAAACCAAGCAAAAACACTTTGTTAGATGCCGCATACGCCCCATGTTA  
GAAAGGCTTCCA ACTGGATATTCAATTTGGTTGTGGTTTGAAGACGAAATACTAAACAA  
AGAGTGCTACGTAGCTCTTCGTGTCGATGGTGAAC TCGGCACTGAAATCATCTACGAAGG  
TATGTA CTCAAAAATGCAGGAGGTAAGAAAGAGCGCCGACCCTTCCCTACCAACTTGTGC  
TCTACACTTAACTACCTCTTCAACCGGTGGACATCGCATGGAAGAAGCAACATGATGAGTT  
CACTCTTCAACATGAGCAAATGAAGAAGTGCAAACAAGCTCGTGCTGACAGAGCCACTGC  
AATCCGTGCTGTGCTACACAGTGTGAACACCACCAAGCAATTGCTTGAAGCATGGGCAGA

GCTTGAACGCTTTATGCCGAGTGGTTATGTTGACCCAAGCAAAGTACAACCTACCAGCAAT  
CCTTCCAACCTTACCAACTGGAGAGTTAAATATGAATTCCTTTCTACTGAGTGTATTCTT  
GATTCTAACTTTGTGCGTATCGCTTCCCTCAGAAGCGGAACCAAGTTCTAATGTTACAAG  
AGCCACGTTTGTAGAATAACAATTGCAGTTGTATCACTGATGGATACATTGCAGCGGCTAC  
GCTTAACGGTAAATTCTGTGTAGACTTCATCTTAGCAACTAAGAAGTCACAGAATTATTA  
CGATAGACTCGACCGCGCAGAAAAACGATTGATTTTCAGTTTATCTCTGGGAATGAAAATC  
TAAATAGATTCGTGAAAAAGGTTGCAGACTAGCTCTAGATGCCATGCAATAAAGGCTCAGA  
TGAAATGGCTGCCGCTTTGGTTTATGTAGTAGGTTTGTAGTGAATAAGTCAAGGGTATCT  
AATTGGATGCCCTTTATCGTGTTCCCTCAATCAGTTGGCAACTGTTATGAAATACTATATT  
GAATCCCGTTTAAACCCACTATCTTAGTATCTTTCCCTAATGTGGTTGCCGTAGTAGAACCT  
TTGTTGGCCGTTCTGGGTAAAGGTGAGGATATGTACAACAAAGGATGCATCCGGGGCAAT  
TAGCAATATGGGGAACCGTATAACTTTGGTGAGCCTGTCCCCTTCACTCATATCTATTCA  
TGGTCAACTATAGACGACGTTCAACCCTTTCGTAAGTTTACTGGAAGCTGTGATGTTGGC  
TTTAAAGACGCTGCCCAATACTTCCCTGCCTTGTTTAAAGGTTCTCTGCAGACTAGATTGAA  
GGTCTCAAGCCTTGAAAAGATAATCTTGATGTTGTCAAAGTGATCTACTCAATACGCTA  
ACAATGACTGACGAGTATGAATCTCCCGATGATACCGATAAATTCTTAAACCAAGTTAGAT  
GGAGCCAAGATTACTAAAGAGCATGGCCGATGTGACTGAACAAAAATGCAACCAAAATTC  
GTTAGAAAAGTGTGGTCCCTGGATCTTCAATGGTCAGGGTGCCCTGAGCTTGCAGAGAAA  
GAAGTGCGTGAAAGTTGGTTTGGGTTTAGCCTAGGTAATGATCACTACTTCTGTAAAACA  
GAGGTAGATGATGATCTATTCGACCGTTACCTAAATATTTACTTATGGTTGAAACACAAA  
GGCGTAAACGGAGGGTGAACAGTTTCTAGTTCATTGGTGAAGGTAATTTTACTGGATAAGT  
AGACAGCAGTTTCTAGTGCTTCAATCATGTTCATTGACTTATTAGGAGAAAATATCATG  
AAACGTATTGCTATTGCTTACAGTGCACAAGAAGGCGGTAACACTAAAGTTAAAGTTTTC  
TGGTCAACGCAGAAAGACAAAGAGATTGCTATGTTCAATTTCTAATAATACCGCGATGCG  
CAAACCGACCAACAGACCACCAATTGGTACTAGATGCACCAATTCACTAACTAACACCGG  
TACTATCATCATGAGCACACTTCATAGAAGGCTAACACTGGAAAACAAAACCGATGCTCC  
CAACGGACAAAGAGTCAAAGTATTGACCCACAACAATAAGGATTATGATGTAGAGCTGTT  
ACCTAACGAATCAGATAGTTTTGGCTCTTAAAGCAATCAGTAGACAGATTGAAGACGAATC  
AACTTGTGTTTTGTAGTCACCCACTCTAGTTCGAGTACGTGTGCTTATGTGAGGTTTCAG  
TAAACGGGAGCTATTCAGTTTGCTTGAAAAATGTTTAACTAATACTGGTAAATAACATGC  
ACCTTGAAATAGATGCAGGGCGATTACTTGCCCGTGTTATTGCTGGAGATTTTGGCATCA  
AGCTAGTCATGCGAGAGGACTCTACGGTTCCAATGACTGACGGTAAGACAATCACAATGC  
CAGTGCTAGGTCCCGATTGGGATGTTACAGTGCCAAGGTGCAGCGTTGGTGTGCAGGAC  
TTATTCACGAGTGTTATCACCCATAACGGAACCTATCGCTTTTGATTTTAAAGTACTGCGTG  
AATTGATAATCGACTCCAACAAATTCTTTGGTATGGTACTCAACATGGTTGTTGACCATA  
ACATTGAATACAAAGAGTATGGGAACTCGCGGGTGCTGATGAATGGATGGATGCTTTCT  
ATTCTAAAAGTTACATGAAAATCAGCGGTAAGTTTGGTAGTAATCCAGAAGAATTTAAGG  
AAGCGTGTGCATTAAGCCCTTGTTGCCTTTGACCACACAATGCGCTCTCAATGGAGTG  
GCATTGTTAATCTTCACTTAGCGGAGGGACTCACTACTGAACTTGCCCGCACTATGTTCC  
AACTATGATGGACGAAGCCCAAGACCTAGACTTAAACCAAAAGTGTTGGTGGTTTGCCTA  
GCCTACCAGTCTGCAACCTGTTGATGGACTTGTAGACCTGAAAGAAGAAAAAGGTGGAG  
CCGAGTCTAAACCAGAGGGTTCATCCGACTCTAAATCAGTACAAGGTGAATGTAAGCCCA  
GCGTCGGCGAAGGCGAAGTTGACGAGGGAGAAGGCGCAGGAAGTGACTCAGGACCACCTA  
GAGAGGGGGAAGGTGAAGCAGGTGAAGGGGAAGTACCTCAAGAACTAATTGAGATGGTCT  
ACGGGGATTCTGGGCGTACTCCCGACGATTGTAAGCGTGCTCCTGGTACTAACGTTAAGC  
TAACTTACGATTGGGACGAACGAGATACGTCTGGCTATTGTGTGGTAACTGCTGCAGAGT  
TACGACCTAAACCCGTTGCAGGCCGCCGCGGTAATATTTGCGTAGATAATGTGCTGTCTC  
ACTTCCATTTTACTCTGAGTGATAAGGTCAGTAACATCCTCAAAGTTATGTCCCGAGTCA  
AAAGGCAGCGTGACACAAGCGAGGCAAGTTACATAGCAAAGCTGTGGCTAAATTAACGA  
CTGGCAGTGTTGTTATATGCCCTCAAAGGAACCGAAGGTTGTATTAGATACGCCTGTAA  
CTGCTCTGTTAGATAGCTCAGGCTCTATGTCTGGACGTAGCTAGTACTTCCACGGTCTGT  
TGGCGTGTGTGTGTTGAATGATTCTTGAACAAAGTCGGCATGCGGATTGAAGTTCGAG  
GCTTACTCAAACCTTACGAAGGCGGCAATTCGTACAACCAGCTTCTCATTACAGACACCGT  
ACGGTCGTCGTGATACGGCTCGTGACTTGTGAGAGTCAATGGATGGAGTTGAATTAGCCA  
ACAATGAGGATTGTGCTGCTATTATGTGGGTACACTCTCGTCTAATTCGCCACAAAGCTG  
CACACAGAGTCTTATTGTGTTAAGTGATGGTAGCCCTGCATGTTTGCAAGATAACTCGT  
ACGCATTAATAAGCAAGGGGTCGAGGAGATTGAAAAGGAATCTCCAGTAGAAGTTTACG

GCATCGGCATCATGGACGATACATTTAAACGCATCTACACACAAAGCGAAGTTATCAGAC  
GACCAGAGCAACTAGAATAAGCTCTACTTAATGTCGTTAAATCTATAGTTCTCGGTTAAA  
ACGGAAAACATATCATGGCAACAAGGACAACAGCAACATCAGAAGCTCTACGTTCTCGTG  
TACCGGAGGCACTGGCAGCAGGTATGGGACGTGAGGCTCGTAAAGATGAGTACGTGACTA  
CGGCTACACAACCAGAACCTCCAAGAAACCTACTCTCTTTCAAGATGAGTTCCACAAC  
CATCAGGTGATGGTGTGAAAGAGTATGCTGAAATCATTGGGCATCCTCATCCAAACGGTG  
AGTTTTATATCCACACCTGCAGGAAGGAAGATTGGACGGAAGAACTACAATCTCTGATTC  
CAGAAATTGATACCAACATGGAGTTTGATGATGACCTCGCTCTTGCTATTCTTATGGGGA  
TTGAATACGACAAACCTGTATTCGCTTATAGCGCACCCGGAGCTGGTAAGTCAGTGACTC  
CAGAACAATCTGTGCTCGTATCGGGTATCCTGTTCATGTTCTGTGCTGGTATGGGTGGTA  
CCGAGCCTAGCGACTACGTGGGTTCTCCTTGGGAAAGTGACGGCAGTATGGAAGGGAAAG  
ACGGCCCGATGTCTTACCCTGTACGTAAATGTGTATTCTTCTGTACGATGAGCCAGTCA  
ACGCGTCTGCACAACTAACATGTGTATCCAATCACTGCTAGGTAAGTCTCGTACTCTGA  
AATTGTACGGTCATCCTCACCTGTTAATGGTAACTTACGTGCTAATGGTAGTTTTCTGTA  
TCATGCGTGCTGGTAACGTCCGTGGTTCTGGCGACCAGATGGATTAGATTGCGGCAGAGA  
ATCAAGACCAATCTACTCTGAACCGTATGGAGTACAAAATTCATGTGCCATACCCAACCTG  
AGAAGGCTGATAAAGAAATTCTACGCCGTAAGATCCCACAACCTAACTGAGCGTTTGGCTA  
TTAAGATTGTTTCTTAGCTAAAATGAGTCGTAAGGATGGTAGCGAGGGACTATCAACA  
TGCCTTACTCTGTACGTGATTCCCAAGATATGGCTAAACAATCACTGCGTTTACGTAACC  
CTGAGTAGGCTTTCAAATTACCTACTTCGATTCTGTCAATGCCGAAGTTGAGAAGAAAG  
AGCTTGAGAAAATGTGGAACCTGGTTAAGTTCGTCGAGTACAACTCGAAGGAGTTATCA  
TGGCCTATTATGGTCGTCCGGTCTTTGTGTTTAGCACAGACCCCACTAACTAGCCTATC  
CTCGTGATTCTGTTGAGGAAGAGTATGACCTCAAACACGTCGAAAGAGCTAGTGATTCAA  
CTAACTTCGTCATAGGCGGTAGAAAATGTTTGAGAGACACCCTATCCGACGGCCACGAGA  
GGGAAGCAAGTGATGCTCTAGTGTGGATGTTTAAATCAGACTTGTTAAAGGGCTGTGGGT  
AAGTTTATCCACTATTCATCAACTTAGATGAGGAGGTTAGCGATGGGTACTACTTTGTGA  
AGTGGTCGTGGACTAGCACAAATATCCACTCTAATCGTTGATGTGTGGCACCTGTCTGAA  
CAAGTTAAAGAAGAGGCTATTAAGGCTATTCTTGAAGAGTTTGGAAATCAAGACACCTCGT  
ACATACAGCTTCACAAAAGATAGCTGTGGATATCGGATCTTACGAGACATTAATCCATCT  
CACCACCAGTTAACTCAAACCTGCAATGACAGAGATGGCTGAGTGGAGGAATCATAGAATA  
TGTTGATTCCAAACCACGAACCAGAGACTACATTCTCGTTAAGATAGAGGAGTTATTAGT  
ATGATTGATTCTCCTTGGTTACGCTGTAAAGCCTGTGATGAAGAAATTCAACCACATAAT  
TTTCGTGTTCTCTGTGAGCATGATGAAATTTAGAGGTGTGGGAAAACCTGTGTCTCTGAG  
TGTCGTGCTAAAGTCTCACATTGGAACCTCTGGCACTGAACAATGGAACAATGATTCAACA  
GGGATTTCGATTACTAACCCAGTATGGGAGATTCACTTGGTGAGTTGATGCACTCATT  
CATAACGGAGCTTCTTCTGGTGGCAGTTTTTCATTCCGAATACCGAGATTAAGCCGTCGC  
AGACGACAACCCAGAGTGGGATATCGGTGAAACGAAACATTTCTTTAACTGTAACGAAGG  
CCACAACAACAACCGATTCTATGTGACCCACGTAGAGAACGGTGTTTACCTTGGCTACTG  
TCATGCTTGCAGTGGTTAGGGTATCTATCGTGAGAAGGATGCCCTGTTTAAAATAAATT  
AGCAGGTAGTAGTCTAAGGAAATCCACCGTGATTATAATCTTCCAAGGACTATTACCAC  
TAACATGTCAGAGTGGTCGTCAAAGGCTAAAGTGTGGATGTGAAAAGCCATGCCACGGA  
TGATGAAATTAAGATAGAGGTTTCTGTTACGCTACCGAATCAGGTCGTGTGTTACTTCC  
TACGTATTTTGTGAGTATCAGGGATACCTCTCTCGAAGAGTGGAGGATCACGATGA  
AGCGAAATACTTGGCAATGTCTAAATACCGAGAAAAGTTCGCGCTGTATTCTGAACCAAGG  
CACTAGCGACTGTATTGTGGTGGAAAGATGCTCTATCTTTTATCCCATCAGTAGACACAC  
CAGTTGCGTCTGACTTTTTGGAACATCTATATCAGACAATGTTCTAAATCTTATACGCGG  
TAATCACAATAAGTACAACATCTGGTTTGATAATGAAAACCGACAGGTCAAATCAAGCT  
GCTCGAGCTTAAAGCTAAGTTGGAGTGGTTTGGTTCCGTCCGAATGATTAACAGAGACAA  
AGACCCTAAAGAACATTCTGACCCTGAACTCAAGGAGGTACAATGCCTTTAAAATTTACA  
TTCGGGTATACGGTTAAAGGTGTAGATAACGTTCCGATCTACACATCACATTCTATGGAT  
GGTGCAAGATACCCTGCGTGGGTGAATGGCTCTAGTCCGAGACGCCTCACTAAATACGAA  
ATCATTAGAGTGCATCAAGATGCAACTACAAGAATTGGTGTTTATAATATCTACGCGGT  
CAAATGCGAGTGGTCAAGTGTACCTATGCGGTGAGCGAGGTCTGGAACCTAGATACACCT  
ATTATCAGTGCTCCAGTATCTGCAATCGCACCAACACCGGTTTCGTCTGTTTCAGAGTCA  
TGGATGCGTAATGATGGGTATGAACACGATACAATGCGTGGCCGTGTAGTCGATGCTCGG  
AAGATAGGCAACAGCATTAAAGGGAGCGTGATGGCATGTGGGTGATGACCACCGTGACGGT  
TTGGGGGGGACCTGAAATGAAGCATTCCGCAAGTTAGACCCGTTAGATGCGGCAGCAATG

TCACTCAACTTATCAGACATTACATCTGGAGTGTAAATCATGGGTGAAGAGATTAATGTTG  
GTTCTTGGGTTTCGCTATGTTACTTCTGGTGGGCTGACTTAACTGACAACAAAGTGTACC  
TAATTATTCAGGTCTACAGGTCTGATGCAACTTACGGAAGGATTCGGCTTTTGCATGATG  
TGGGTGATGTTACGACTTGAAGGAATATGAGTATGAGTGGTTAGATACTCGTAATCCTG  
ACTGGATTCTGGTGTTCAGAAAGGTGATAGTACTCCAACTGAGGAGAGTGGTCAAGCC  
TCACAGTCTTCGACGATGAAGGCCAATGGTACTATATCCGAACTATTTAAGGGGAGCGAA  
GGTTGTGAGTGACTCAACTGCTACAAAAGATCCGTTAGAAGCAGCTCGTGCCGCGGCAC  
AGTTATTAGTCTTTGCTGATGAGGAGGATAAATTGTGAGTTTAGACTTACTGAAAACAT  
GGAGAGCCGTGAGAAGTACGAAAGTTACTCTCCATTAGTTCGTGAACATACGGTAGTCCC  
TTCCGTCTGGAAGGGAATCCAAGCGATTAAACTTGGTTTAAAGAGTCTGAAGAACGTGA  
AGACATTGATGCGGGTTCTTTCTCGACGTGGTTCTGTGCTATTAATTATGGTCATTTATC  
TAGTGACAAGCTTGATATATATCGTGCTATCTTTGATAAATTACCGGCTCATGTTGTTGA  
TGCTACCTTGGAACGCAGTATCGGTGAGAACTTTATCACTCGCGGTTACTGTACTGCATT  
GTTGGATAAAGCTCTCCGAGGTGCGGAAGGTGAGCCGGTCACGCTTTATGACCTTCAAAA  
AATCGTAGATGATTTGACCAACGTGTTAGCTTGAGTTGATGTACTTGATTTGTTTGCTCT  
CGAAGACTCTATCGAGGATATAGTTAAGCGTATCACCACCGGTGGCTACGATTGGCGTAT  
ACAATTCATAAACAAGTCAGTTGGTCGTCTGGCAGAGAAAGGTAAGCTGGTTGTGATTGT  
AGTTCGTCTAACACTGGTAAAACAACGCGCATGGCTTATAACGCTTCTGGTTTTCTTTC  
TAGAATGGCAGAAGATAAAGTTGTGTTGCGGTTCAAGAACGAGCAAGATGGCGGTCAGGT  
CATTTTACGTA CTCTCCAAGCTGCTATCAACTGGGCAAGTGCTGACATTGAGCTTGCTCC  
GTCTCGTGCATTGTCCGTTTATGTGGATTATGTTGGTAACAAAGATAAGATTAAGATTAT  
CGACAAGGCTGACACTAGTGTGACGATGTAGAACAATACATTGAGAAGTACAATGTAGG  
CTTAATTGTTATTGACCAGTTGTGGAAACACCACTGGTTTGAACGTGAGACAGCGATCGA  
AGTAGCTCGTCAA ACTAAAATCTTTAACTGGGCGCGTGAGAGTCCAAAGAAATATGCCAG  
TGTTATGGGTACTCTACCAGCTGATGCGCAAGCGCAAGGTCAGAAATGGTTGGATACGTC  
CATGATGTACCGCAGGAAA ACTGCTTCACAACGTGTGGCAGACACAAGCATCATGATGGG  
ACGTA CTGATGAGGAGTGTGAGAAAGCCGTTTCGATTCTCACCATTGCTAAAAACATGAA  
TGCGGTAAGACGTGAAGTAGACCCTGACTACTTGAAGGCCGTGCCGAGTTACGTATCGT  
TCGAGATACTGCTAAATCTAAGGAGATCTAAATGTGGTTAGACCATGGCCATGACCCTAC  
TGAGATTTTTGCTACACCGGTGTCATTTCGACTGTGAAACAACCATACTAGTCAGGGTAT  
TGGGAAGTCACAAGCTTCTCCTTACCATCCTGCAAAGAAGATGTTGTGCTTTGGTTGCAA  
AACGCTAGACGCTGAACCTGTAGTACTTCGTCCATAACATGCTGACTTCCCAACAATCAC  
TCGTGAGAATGATGTGTTTTTTTTGGTAGGCCACAACATTAAGTTCGACTTGCTGTGGAT  
GATGCGAACGTATCCTGTTTTCTGTGATATGTTACCTAACCTATGTAATTCGGATACCCA  
ACTTGCTGAGTACTTGTAACTGGACAAGACCACAAGATGGCGTCTCTTAACGGGTTGGC  
TATGGAGTATGGAGGTACATAAAAAGATGACCGTATCGCCGAATTTTGGAAAGCTGGAGT  
TGATGCTTCTGACATTGCTTTCCCGATGCTCAAAGAGTATCGGACACAAGACGTAATCAA  
CACTCAGATACTTTTCTAGATAAAGTGGACCAAATCATGAAGGCAGGTCTTCTTAATCT  
TACTATGCCTCAGATGTACGCTATAATGGCTACCACTGAGATGCTATGGCATGTTATGAA  
GGTCGACAAAGA ACTTGGCTTGGATTTAGATAAACCTCTCCAAGCTGAGACAGGAGATAT  
TAAGGGTGCTGTATCTTCTGTGCTGGAAGCTGTAGGTTTTCTTAAAGATTCAATCAACGT  
GAGCAGTAACTCACAGATTAGTGCTCTTATCTTTGGGGGTGTTGACAAGTACAAACAGAA  
AAATTACTTCGACAACGACGATGGTGCGTTTGCTACATTCAAAGGGGGTGCTCGTGCTGG  
CCAACCTCAGACCAAATCTTTGAACGCTCCAAGCCTCTGGAAGGTATGTGTTAACCAAT  
CAATCCGAAAGGTAAGAACGGTTCGTTCCAGTAGGTGACGACTCTCTATCCAAAGTCAA  
AGACAAATACAAAGGGGACGCTGTTGTTGAACAGTTATTCGGTGACATTCTTAAATTCCG  
CCAATTGGAAAAGGATGTTAACACTTACTATACTGGCTACGCTTCTCAATTGTTCCCTGA  
TGGTTGCCTACATGGTAACTATAACCAA ACTAAAACGGCTAATGGTCGATTGTCTTCTAT  
TTCGCCAAATATCCAAAAGATCAGCAACTAATGTTTTGTAAGTTATATGGTTCGTGGTAT  
ATTCGGTGTAAGCCTCTACGAGGTACGTTGTGGGTAATTGTGTTGACAATAGATTACAT  
CGAATATACTGGGCGATGAAGGGCCGTTGTGAGTATCCTAAGAATGTCCGCTACTCTCGA  
TATGGTGGGAGAGAGATTTCAGTAGAGTTCCAATGAAATCCAGAGTTCAGAGAGTGGGCA  
TACCAAATGGGGACTCGCCGACATTAACAAAAGATAGAATAGACAAGGACAAGAGCTCC  
AGTCCCGAAAATTGTAGCTGGATAAGTCACTATGATAAGACGCAACTTGGTTCCTTGAAG  
TATTGGAATCACATTGAAAGGGTAGATGGCTCTATAGGGTATGTA ACTAACAAATCCTACA  
GAATTCTGTAGGGAGCATTCTGAACTTAGAGTTCTTAAAGTAGAGTGGGAAAGACCTAC  
AGAGGAAAAACAACAAAACAATACAAAGGTTTCAGATGTCAGATACCAAGCGATGTCTAA

TCTCCCGATTTCCCAATGGAAAATTCATGGATTGTGATTTCTCTCAACTTGAGGTAGTTG  
GTGGTGCGGTGTTCACCTGGCGACCCAATGATAATGAAAGATATTATTGAGGGTGTGATA  
CTCACTCTATGTCTGCTTCTTGGGCAAATCCAAAATACTCGTCTGAGGCAATCTTCGCAG  
GGTACAAGGCAGAAGACCTTTCTTCACCGAACGAAGTTAGAATGCCATGCCTGTTTACT  
TTGCTTTGCAATACGGTGCTGGTGCTGAGGCTGCTGTGGAGAACGCAGGTATCGAAGGAG  
AACAAAGCTCAAGCAATCATTGATAACTACTACAATCGTTATTGCGTGTGGAAGCAGTTCC  
ATGATGATATAATCGAGCAAGTTAACAAGAGTCGTCAACCCTCTAGTCGTCGTAAGTAAA  
TCTGTATGCCTGTTGGTTCGTGGTGAGTACCGTAATCCATCAGGACGAATGTTTACTTTCT  
ATGCTTACGATTCTCCTGAGTCGCTTCGTCGTCGTCGTACAGATGAACTCATTCTCCCCCA  
CACAATGTAAGAATGACCCGAGCCAATCTTTTGCACATGGTGATATTGTTCCCTATGATGG  
TGGGACAGATCTACAACTACTGATGACAGACAAAACGTACGGGATAAGTGCCTCCTAA  
TTGGTACAGTACATGATTCTGTAGTGTGGATGTTTCATCCCGACATTCTGTATTATGCAG  
CAAAGGCCGTTTCGTGGGTGTTGTTACGTACGCCTGCATATGTGGAACGTTACCTTAAAG  
TTCCATTTGATGTCCCTTTGGCTTGTGACGTTGACATCGGGCAGGGGCGCATGGTTCAATA  
TGCATGGATACAAGCGTTAGGAGGTTCCATGCAAACAGTATCACGGAAAAGATGGTAAGG  
CGAAAACGAAGAGCACCACCGTGATAAGGGAAGAAAGTGGCTATGGAACTCCAGAGTAC  
GCTTCTCTAATTAAGCTACGCCACAGATTAAGGAAGAACTCCGGCATGACACTAGAGGAA  
TACAACCGTATGGTTGAATGCTGTAATAACCAATGCCAAATTTGTCTGCAGACTCCTGAT  
GGTAGTAAGTAAGACACTCTTCTTTGTATAGACGACAACCATGAACTGGAGAACTACGA  
GTATTGATTTGTTGACGATGTAACCTAATGTTAGGCTATACTATAGATGATCCAGAGATA  
CAAACCAATGCAAGTAAATACCTGCTAAAATAACTTAGCAAACCTCCGTAATCATAATA  
ACAATAGGAGATATTTCTATGACGACTATGACTGGTACAATCACTCCTAAAGCTCGCACG  
GGTAAATCTATTAACCTAGGTGACGGTAACTGGTACTCAGCATTTCGCTGCTTGGCAGTTA  
CCGGCTAAACTTAAAGCAGGTGTCTCAGTAACTTTTGAATATAAAGAGAATGGCCGTTAC  
CGTAACATTCAAGGTGACCTTAAAGAAAGCAGGTGGTTCTGCTCTTGCTGCGAGAGGAGGT  
AAAAGTGCTCCAGCTTCCGTTGGTTCGCGGTTATCGTGCTAACGGTCAAGAAGGTGGTTTC  
CCAATCCATCCACTAGCGTATGATCGTGCTCATGACCTCCGTAACGCAATCGCTGCGGCA  
AGTACTATCATTGCTTGTGACGATTGCACATGGCACTGAGTTTGAAGATATTGCCGATGCT  
ACACTCTAACTAGCAATAACCTTCGAGGGCAAATCAGCTGCTGATATGGGACGTGTGGCT  
ATGGCTGATATCACTTCTGGCGACTCTGAAGAAGTTTATTGTTGAAAATCCTTTGGCTCCT  
TCGGGCGCCTTACAATCTTTGGAGGCAAATGTTAGAGAAACATGCTCGGTTACTTCGT  
ATGCTTCTTGGTTGTGTTACTCTGGCTTATGTTGACCTCTTCTTTGACAAGACCAGACAA  
CAATACGTTAAGGTTCCACGGAAAGTTTTGAAGGATTAGAACAACGAAGATGAGTTGAGT  
CGCCAAGCTCGAGAACGTCAGAAACGTGGAGAAGAACGTCAACGTTTGGCAGAGAACCGC  
ATCGCTAGAATCAACGACCTGTTAGAGGAATAATGATGAGTTTATGATGAACTATTATATA  
AGTTTGTAGTCGAGAATGCTGAGAAAACAATCCAGTTGGCTGGACCAAATTCACCGATG  
TAGGGAAGTTAGAAGCCTATCGCAGTGTTTTAGGGTCCATCGAACAAGGATGCAGTCTAG  
AACACCTAGCTCAGAATCTTCATAAGGGTATCGACAGGGTGGAACTCGGTTAGGGGCTAC  
ACAATGAAGATTGAGACAACCTCTCCACCTCCTGAAGTGGCTCCTTGGTACAAATGCAGT  
AAGGAACAATGCACCAACTTATGGCAACCCTATCAAGGTAACGTCGGCTGCCTATGTTCT  
GAGTGCAGGATTAACCCCTGACTATGTAACACACACGATTTTGGAGACAAGAATCATG  
GCTACAATCAAATTATCTAAAGATGTAACCGCTGAAATCGTTTTTATGTAACACTGTTAAA  
GTTACAACCCACCAACGTGTTTCGCGGTGGTGGTTCTTGTAACTCATCTGTTGGGCATTA  
ACTGCTTCTAAGTTGGATATCATAACTCTTCTGATTGAGATTAACCCACTCGCTTCTTGT  
GATGTTGCAGAAGATATTCGTAAGCAATACGTAATGACAATCCAATGATTCATCACCTA  
GGTTTAGAGGTACATCAGGCTTAATATGACGACAGTTGCAGTAATTGGTGAAGACACTCC  
AACGTTTCGCTCCGGCAATTAGCTTTGAAGATTTTCACTATAAAACACCGGAGGGTGATTG  
CTATCAACGAAAGAGTGATGCTCCTAAGTCGCTACAAGACTCTCTAATTAAGATATGGGA  
GGCCACAGCGCCTCGACGATTTGCTGTATCTCGTTTTGAGAAATTCATCCAAGATATGCT  
AGATGATGGTCAGTGCAGGATTATGTGTTGTTTATTGGTGGCGGGAATAAATACCGATA  
AGATTTTCCACATCCTAAAGGATACCCTTACAAGGGCAATCGCACCAACATGCACAAACC  
TTTCTATCTTGTGATGAGTGCAAAAACCTTCTAATGGAGTGCCTTCCAACGATTGTTTTCGA  
AGGCTACGAAGCTGACGATGGTTGCGGCATTTTGTATGAGTGGAGGTATGGAAGGTTACGA  
TGAACCTCCGTTATGTCATATTGATAAAGATATGGATATGATTGAAGGTAATCACATGCG  
TTGGAGGCGTAACATCAATGGAAAAGACTTCCCAGCTAAGTTCTACACGGTGAACAAAGT  
AGCAGCTCTACGACACCTCTATCTCAACCGCTTTCTGGTGACCCGACTGATAATATTCT  
GGTCTATTATTAATCACTGGTAAGAAATTAGTTGCTGGGATCAAGTCTGGATTGCAAAC

GCTGTCTACTGAATTAGATATGTGGTCTCCCGTTCGCCAAGTCTATGCTAAAGCAGGTAT  
GCGTGACGAGAACATCCTTATCGAAATTGGTCGCTTGCTTTGGATTCAACGTAAAGAAGG  
TGAAATGTGGAACACTCCTACGAACGTTTTACGGTACTAGCACTACCTGCCGAATAGCAA  
CAGTACACTATAACCTATAAATTTGTAGCTCATATTATTGTCACACTAACCCACAATGAT  
AGGTATGCTGTAGCTCATGTACCTACAGCCCTATTTGAGTCTCTTGAATATGAAGACTTG  
GCAGCATATATCGCTGATAATCCGTGTACAGACCTTAAAGCAGGTTACGGAGTATTTAAA  
GATGCGTAACATTGAACACAATAATCGTCAAAGCACAAGCAACTGTGCTAGAAAAAGC  
TCGTGACGCCAACGTGCTAAGTACCATCGTCGCAAAGAGGAGGACAACTGCGGGAAGA  
TTACGACGCGGAAGTGTGCTGTGTCTAAACGTTACGAGACCCGCAAGTCGGGCTTCCGTA  
GCGGATTCAAGCATAACTTTGCTAAAAACTGTCCAGTACCTTATGAGTATGAGACAGAGT  
AATTACCATATCCAGTTACGTTAACTAAGCATTAAATGCCTGCTTTTGTCTTGATTAAGA  
CAGACGGAAGTAAGCTGTATCTGGAATTGAAGGGTTCGGTGTACTGCTTCAGGCCGTGTTA  
AAATGAAGCGAATCAAGAATTGTTGCCCGACTTTAGAAATTAATATGGCGTTCAGATGG  
GCACTAACCGGATTACTAAAGTTGCCAAAACAACCTTGTATCCAATGGTGTGCTAAAGAAG  
GTATCCTTGCATAGGATTGAAAGGGTAAACCAGCACACATTCCAACCTGAGTGGTTAGAGG  
AGTTGAGTTGAGCTAGTATACTGAGCCACATCCAGTACCTTGGACTGGTAAAGACCTTAA  
AGCTGCTTGGCAATTCACAATCAGAGTTAATTGTGTCCGTATGCTCCGCGATGAAGCAGG  
AAACCTAATGTGACGTAAAGGTAAGCCGTTAGATAACTTAAAAAATGTAGGGGAGGAAAT  
CTCCGATGCATAAATTTAATGTGGGAGTTGGGAAGCGTCTATATCTCACTGTTGTTCTG  
TGGCACTTCAGTTGGCTCCGTTGATGCTGCGAATGTTTATTCTCTTTTTCCCGTTGTTGT  
TAAACGTATAGATTTAGGTGTCGATATCAATCCAACCTTCAGAGGATATTAATACTTCATT  
GAGTCTTGTTTTAGCTGAGGTACACGAGGGTTGAGTTCCTCCGTAAGAAATTAATGGCAAAGG  
TTAACTCTACAAAGTGAAACCTAACGAGACTTACGATGTTCAAGTCATTGGTAGGGTAGA  
GGGTACTGGTAAACATAAAGGGCGGATTGGAGCACTACTTACTCCAATGGGTAATATTGG  
TACTGGATTCAGTATAAAGAACGTGCGTTCGTGGTGGTGCACAATACCCAGGTTTGAAAG  
TACACCACGTAAAATTATTGAAGTTGAATGTTGGGAATTGACTAAATCTGGTCAGTTCCG  
TCACCCTCGCAATATTCGTTTACGGGAGGATAAATAATTGCCTTTGGACCTAAAGGAGTG  
GCTCCGGCGTACATAGCAATGAATGAGATAAAATAGTACACACTTGGTGTATGCTAGTGCT  
GCATTTGAACAGAATAAGTCCACCATGTACAGTGTTCCTCTTGATGATATATTAGTATTA  
CATAGCCTATCACACGCGACTTGTATGAAACCAAGAGATTTTATCGGAGTACTAGAAGAA  
GCAATTCTTCCAATGTTGGAGTCGAGCACACAATTATGATTAATACAACAAGCAAAAATG  
ATTACTTACCTTCAACTGTTCAAACATTACGTTATGTCATTATGAAAAAGATTTTGTTC  
ACAACGGTGATGAGAACGTCCAGCTTACGAAGCTGGAAGAGGAGTTGTGAGAGGTTCTCG  
AAGTGTCTGTGAGGGTCACAGTCACGAACACTGTAAGGAAGAAATCCGGTGATAGGATTG  
TGGTCTTAATCAACCTGTGTGAACGCGGTGGTTACAACCTTGCTGAATGTGCTAACACTG  
CATTCCAGAAGATTAACAAGCGCAAGGGTAAGAGCATTAAATGTTGGTTTTTTTTAAGTATG  
AGGATTTGAAGTAATGGGTAGTTCGTACTIONACTAGAACCGGAAATTAACCTGGATGGTAC  
AAACATCATCCTAACTACTGGAGTCTGGGAGCCGGTAAAACGGCTGCCCTAATTAACGC  
AGTAGAACAAATCGGAAAAGAAAGGTCCGGCTAACTGTTTGATTATTAACCAGAGGTGTA  
TGCTCGTGATGAAGGTGTAGGTGCACGGGATCGACGCACTCGACCGTATACCCCAATTGG  
AACCGGAGAATAAGTTGTTCCGGTAAGTTCTTTGTCTGGCAGAATAGTTTTTTTTGCTCGT  
TGATGAGGCACAATTTTAGTCCCGAGTTCATTAAGCCAATCTGCCCTGCAGTAAATCT  
CGACAACATCCCAACGTAGCATTCTACAGTTTAAAGACTGATTATCTCGATAATACGTT  
TGAGTAATGTAAAGAGATTGCCAAGTACGTAAACCGGATGTGTGAGTTACAACACACTTG  
TGAAATGAGTGGTAATCAAATCCGGTACACAAAATGCGTATTTCTGGTGGTATTCTTT  
GATTGAAGTTGGTACTGACAATTATCGAGCTGTTTGTCTGTATGTTGGAGTAAGAAGAA  
ACGAGTAAGATGTTCAAATGTGAACACTGTGCTGCGGAGCCTGAAGGTATTAATAATCGTA  
GACAGCCGAACCTAAGTTTGAAGTTAGGTGATGACTATCTCATGCAAATCAAACGTTGTTCT  
GAATGCGGTGGTTGCTCCAAGTCTATCAGAGTAGATGAGGGTAGTTGCGATTATTTTCGA  
GAAGATCCTGACTGTGCACGCGCGCTTGCAAATCTGAGATTAGTCCCTGCTGTCCAAC  
CCTGTGCGATAAGCGCGGGGTAAATGATTACATCACCCACCTTGAGAATGTCTTTAAAAA  
TCAACGAGAAGAAATTGAGATGCTTAGGGCGAGGATTAATGAGTACAGTAGTGAGTGACT  
GTTACAGCAGTTATTGGTAGTAAAGCTGTCTTAACCTACTACGTAACAACGGTAATAATC  
ATGCCAACTGTATACACGTTATGCAGAAGTTACACACATTTCCGGGTAAGCAAGAGGAATT  
ACTTCACCCTCACATTGATGTATTGTGCACTCTTTCCCAAACGATCTGTCTTGCTGCTGTTG  
TGGTACTCACTGTGTAATCGATTATTCTCATGCCTGTAACCTCTCATATCGATGCAGTAGC  
AACTGACCAAGGCTTTACTTGTCTAACTGTGGCTGTCTCGATAGCCGGAGGATGTTGAC

TAAGCGAATCTGTTGTTATCGAGGTAATCCAACAGGACGCGGGTTCGATAATGGGAGGCA  
GGATGAGTTGATTCGGGGAGTTAAACCTTGTTGATTGGATTACGGAGGAGCTCGTCTTA  
TGGCCTCTGTGCTTGCTTTTTGCGCTGATGACATGGAAGAAGTAGACCATGATGCTTTCG  
TAGAAACTATGAAGGAGTTAGATAATGAGTGATGTAATTGGTATCGGAAACGCTGCGGTC  
AATCCGGATAACGAGTTGGGGATTGACAATGGTAATTATGAATCGGTAATTGTTCTTGGT  
TCCTAGAAAGATGGCTACTTAGGTGGTCGGCCAGTACTAACCTAACACGCGAGAAAATC  
TTATGGTTGCGTGAGCAATCAATCACAAATACGTACTTAGTAGGTCGAACGAGGTGGTG  
TGATGGGAGAGAAATTAAGGGGAGTAGCTTCCGAGTTAGGCCAGACTTCTCAGTAGCTC  
TTGCTCTAGATATTCTGGCTTATGCCGCAGGTGTAGCTATGGCCAGTCCTACAGTCACCT  
CTGTCGGATTTACCTGACAGACTTTTATCAAGGGGTGGGGTTACAGTGAGGATTACTATC  
TCATATAACAACGCTAAAGAAGATGGTTGGTATATGAAGCACAGAGTAGCAGTTGACATAA  
TGGGTTTAGATGTGATTGATGTGGAAGCTATGGAAAACACCACAAAAGAAGAACAGTTT  
GGAGTTATCTATGATTGTTTTCTTGGAAATGAAGTACAGGCTGGAGATGAGGTAGTTGC  
TATGGAGCGTCCTGGCGAACGTTCCCTAGGAACTAATCAGAGGATTTCGTTATTAAGATTAC  
TCCTAAGAGAGTTGAGTTATATCAACTGGGTATCGGAGAAAGCGTCATTGATATTAGTAC  
AATCAATAGTGTGAAAGTAAAGCAAGTAGAACATGAAAAAGTTGTTGAAGTGACTACAGA  
TAAAATTGAATTTGTGTGATTA ACTCTCTCTATCTACTTAATATTCTATTACAAT

>NewGenomeName\_26

ATGAATCTATCACTCAAACAACACTTCACTAAACCAGATTACGATTACTACAAATATAAC  
GGAAAGGTACCTGCGAACCAAAAAGTCATTTGAGCAATGGAAAGACCGTTATTTTTTTAAA  
AACGTAGCGACAAAACATACAGGAGATAAACTCTTAAATTATTTTGTGCGCTAATTTTGTA  
GACAATCCTAAAGGATATCTCAGATCATTTAGTGAGGATACCTATAATAAATGGTGAATA  
CATCAAGAGTCTTTCACTTATAAATTTAAACAAGATGTAATCTTTTACTCGATGATTAT  
GAGTATCCATATCAGGAAGCATTTGATAGAATGTTTCATAGTCACTTCTGGTCAGCATCCA  
AAAATCATGAGACACTATCTATCTGGAGAGATCTCATTAGAAACATTGGTTGTATTAGAA  
ACATGTTTAGGGTTCGTTGAAAATTTTGATAAACTTTGTCAGATCCTATCTGGAAAGAT  
ACCCGAATGAAGGTTATGGAGTATAAACCATTCTAAAATTAATTTGTCAAGATTATAAG  
TCGGTAATCTTAGATACTATTA AAAACAAGTTATGAGTAATTTTTTCGAGTCCCAACAAG  
TCCAAGAAGATCTACAATCAATCTTAAATTTTTATAAAAAAATTTTCAGCAGAGACAGTAC  
CTTTAGGAATCATGGATAAAGAAGAGAACTAGAACACATTGAAGATTGTAAAGCACATT  
TTGCTAAACAAAAGACTTGCTATAACAAGTTGTGTCTAGCATCGAAAGAAGATAAAGAAG  
CAGCAGATATGAAGAACAGAGTCAATGATTTAGCTTGTGCGTTTGGATATTAGGACCTAA  
TCGAGTGTATGAATGCAATGGTTGTTACACTAGAGGAAGCAGCAAAGAGGGATGATCTAT  
GAAAATTAATATGATATCTGATGCACTCAAGATAGAATTA AAAAGATCGTATCAATGAGGT  
TTTAGATAAGAGAGAACTTCAGAAAAAACTAGACGGTCCTTGTGACTTTCCAGAAGATAC  
TGATTGGCAACCAGATGATGATGGTCTTGATTATGAAGTAAATTACTATGGATAAGAAGT  
TTAAAGATTTTATAGAGAAATGGAAGAAGCGTTTACGTTTCCCAAAAATGCCACCACCTC  
GAAGTTGCCCCGCTTGACAACACCTATATACTATGCTACGATTACACACTAGTATACAAA  
CAACTTACACACTAAAACGGAGAATACGATTATGTCTTTCGCAGCACCTAAGAAAGCATC  
TAGCACGGGAAATACTTTTGCTAGATTGACTAAGGAGATCGAGAACTAAACCAACCTGC  
TCAAGGTAACAGTGGCGCAGACGACCGTCTTTGGAAACCAGAATTGGACAAGAACGGTAA  
CGGTTATCCTGTTATGAGATTCTTGCCCGCACCTGATGGAGAGGAACTTCCTTTCGCTAA  
GATCTGGTCGCATGCCTTCAAAGGTCCTGGTGGTCAATGGTATATTGAAAACCTCATTGTC  
AACTCTTGGTAAACAAGACCCTGTTTCAGCATAACAATACTGAACTCTGGAACGCTGCAGG  
TGAGGGTTCTTCTGAACGTGCACAAGCACGAGCACAGAAGAGAAAACCTTCTTACTACTC  
TAACATTTACGTTGTGAGTGATCCTGCACACCCTGAGAATGAGGGTAAGGTCTTCCTATA  
CAAATACGCTAAAAGATTTTTGATACTCGTTGAAGGAATGCAACCTGCATTTGCAGA  
CGAGACTCCAATCGATCCTTTCAATTTCTGGAAGGGTGCTAACTTCCAATTGAAGATCCG  
CAAGGTTCGATGGTTACTGGAACCTATGATAAGCCTGAATTTGCCCCACCTAATACACTAGG  
TGATTATGATGACAAACGTCTAGAACAAATTTGGAAAGAGGCATACTCTCTTGCTGAGTT  
TGAAGACCCTAAGA ACTTTAAGTCTTATGACCAACTTAAGGGACGTCTTAGTTTAATCTT  
GGGTAACACTACTCCAGTAGCACGTCTTGATGAATCTTGTGAAGATGTTAAACCACAGAC  
TCCAGATTGGGGATCAGAAGTTACAGATTTTCGAGAGAAAGAAGTTGCCTCTGTTCTCTGC  
CGAGGATGACGTAGA ACTTTCCTACTTTGCAAACTTGCTGAAGAGGACTGATTATAAAC  
TGGCACAAGGAGGGTTGTAATGACCCTCCTTTTCTAGTATAATTA AAAACATACACAAGCA  
ATACAATGAAA ACTGGCCTCGCTGCAATCATGTTACTTGCATCTGTACCTGTAATGCTG  
AAAGCATTGGAGACAGGAGTAATCGTCAAGCGTATGACTCCTCTGGAGGATATGCATACG



AACAAAATTGCTATCGTTATGAATATCGGGAAGAGTACGTTCCCTGGCACTTCTAGATCGC  
CTGGTTACGTCAGATCTAACCGAGAAAACATTGCAACACCATGTTTCTATGGTGATCATA  
GCAGATCTTCAACTGCCCGTTCAAGAGTTTACAGAACTCCATCACCTGATGGTAATGAGT  
GTAGCGAAGGAGCAATTCTTGGAGGAATCTTAGGAGGAGGTGCAGGTGCAGCATTATCAC  
ACGGAGATGGTCGTTGGTGGGCAATACCTTTGGGAATTGTCGGTGGATCTATGATCGGTT  
GTGATATTGATGGAGGTTAGTGATGTCAAAAACATAAACTCCTATAAGCAAAGAAGAAGT  
CGAAGATATGATTGAGTTTGTATCAACAGAAAACAATCGTAATGCAGGACTCATCAGTAT  
GGTTTTAGGATTTCTATTCATCGCACTCTTTGCAGACGGATTATCTAGAGTTATCGGAGA  
GATACCTCCATTTATGGGTATCGATGTTGATATACTCAAAGAGATAGTGGAAGAACA  
AGATGAAATATTAAGCACTTTCAAGATCATGAACAACATAGGATTAGAAGTTGTCTTC  
TGGACAATATTGTCAGTTTATTTACTAGCAAAAATCGGAGTCTTTCAAAGATATGAATG  
ATGTCGCACTAGTAATACTTGATTCTATTTGTTATGTTATTCGCAGCAACCGTTGCAT  
ACATGTTTAGGTTGATGGGCTCTACGTTGGATTCTTTTAAACAAGGCATCAATTGGACAGC  
CTGAGTTGCGAGGGGTTAGAGAAGGCGAACAGTTGTTAGGAGTTACTTTCAAGGGATATG  
AAGAACTATCACTAGATGAAGTAGAAAAATATCCAGTAAGTGCACAAAGAGACCATGAGC  
CCATTGAACTCTTTCGCGATTTACAAGATCGTATTGATGAACTTGATGATGAAGACGATG  
ATGATGATGACGATGGTGATATCCCTGCTAAACCGTACGTCGGTTCTGGAATCTGAAATT  
GACTTTTAGTTCCCAAGAAACCGCAAGAAAATTTCCACCAAAAATTTGACCCCTAGAGAT  
TTTGATGAGTGACATACATTTTAAAAAACACCGAGTGTTCGAGATACAGACGGTGTTAT  
TTTTTATGACATACCAGTAGAGGAATCTAACGCTTCTGACTTAGTTGTTTCATGAAGGTCC  
TGCTGAATCTCCTCCACCTGATTGTGTAGGAGGGAAACAATTCTATATACATTGCTTTCT  
AGATGATTACAACAGAGTTGTATCAGGCACAAGAATGTTTGAATTAGTTAATTATGATTG  
GAGATTCCCATGTATATAGTGCACCTTGATGTGCATAGTGGTGCATTAATTATTCCTCG  
TGGAACATTTTCATAGATCTCAATCAGGAGAACATGGATCTATTGTAATCAATCAAGCAA  
GAGATACGATTGATTTGATGCTAGTCCAGAGTTTTACCCTGTATCTGGTGCAGAGAACGT  
TCAACTATATAATGTATTAAGAATGAGAAACCAGTAATTCATCGCTTAGGAGAATGACT  
CAAAGTTATCACATTTATTTTCAAGAAAAAGTCCTCTTTAAAAATTTGACAATAGAGGCA  
TTTACTTTAATATGGGACAAACGCTATACTTCCTATTGGAAAGATGACATAACGTATTCT  
ATATGTTATGATGAAGCATGTGAACTAGAACCCTCTTTTTAATTATGATTCCATTTTAC  
TTACTAGTGCAGCATTTCTTAACTTTGCATTTTATATCTATGCAATTGGATTTGTAATTG  
CACTCGCCTTAGAGCAGTATCTCAAGGCCAGACCCCTGTCTGCTGACTCATCGATGAATG  
AGAGAAATAATTATATTGTGCAGACTAATAGAAAATATTGTTGGCAACAGGAATGGGTAG  
TAAATCTTTTTTGGTTCCTATGTAATATAGGATTGTTTGTTTTATCAAGGAACATGCAA  
CACCTCAAGATACTTTCTGGAACGGAATATGAAGAAGGAATCAAAGAAAGAGAGTATGC  
TTAGGATAGAATGGAATACTTCAGAGAGTTCCATCGAGTCATTGCACCAGTAGTTGTAAT  
GAAAGTGGAGGGTAAAGATGAATAAAATTTATGCAACTTGTCTTATTGGTGCAGTAGCAT  
GGTGCAGTGCAGCACAAGCTTGTAGTCCTCGTTTGGATGGGGGAGAACTTATTGGCCTC  
CAATTGATGATGTATTCTTACCAAAGAAGAGATGAAGGGTAAAATGATGTTCCGATC  
TTAATCACTGGGCAGCTATAACAAGGTATGTTTATCAGAAACCAAAGACGAGAACAGATAG  
AAGAAAATGCGACTCATCCTACTGACGCAATAGATAAGGCATTACTTGATTTTTGGAATG  
ATGACAGAGTATGAAAGACGAGCAGAAGATCCCTGTTGGCAGCATAAACAAGTGTATC  
GCAATGTTACCCTCGATTCACACAACACTAGCTACATATATCGTAGAGAAGATGGAACA  
TATTACTGGCAGCATCGTAGAAAGGAAGCGGAAGACGACCTCTTCGTCGATGCTGATGGG  
TTGCAACTAGAACTTCTAGGTGACCCTGTGCTATCTAAAGAATTTATTTTTAAAGCAATA  
TTTTACTAATATCCGCCACCATATCCAGATCCAGAAGAGCCGCTAGAACTTGGACTAGAA  
CTGCTAGAACTAGAGGAGGAAGTAAAGAAAGAACTACTACTGGAACCTCGAACTGGTTGAA  
CCGGTCGAACTGGTTGATGAGTATGCTTGTGGTTACTGACATCGCCTACGTTGCTAGTG  
GTGGTTGTGCTAGTTATTGCTGCTGTTGTCGAATTTATTACACCTGTGGTTGCACTGGTT  
GCAGAAGGTCCGTTATCAAATGATCTCACAGCAGTATTAAGTGAAGATTAAGAAGCACTA  
CCAATAACATAACCAACAGCATCAAAGAATGTAGAAGCAATACTGAGAGGTGACTTCTTA  
TTATTTACATCATCTAATTCTGAATGAGGAGCGTACGCAACGAGAGTTTCAAACCTTGA  
ATCATTCTATCTACAATTCCTCTATTGGGAACTTTAATTATTCTTTTTAATTTATTTAAG  
TAATATTCATGCTCATAATTAGATACTGGATATATTGAATCACTCTTACCTTTTGTAGTT  
CCGTCAGGTAAGTCTGTTCTGTAAGTTGAATTTACTTGAATTCCTTCTTTGACTAAAAC  
ATTCCATTCTATAAAACCTCGTTTGTTCATAGTGATGCGCAACTTCTGGATCGCGATAC  
TTTTTAAACAACCATATCTTGTAGATCTGCTTCACTTCTTGGCCACTGCTCATAAAAATCA  
GTAATATTGTTTAAACATTAATAACAACCCATTCTAAAAATGGATCTCCTGATGCTACTTCG

GCAATCATTGAGGGAGTTTCGCCTTCTGCTAACGAATATGATGCAAAGAAGATTGTATAT  
TTTTCTAGGTCTTCTCTTACTATAATTCTACGAGATATATTTATTGCTAAACGATATTTG  
AAGGGTTCGTATTCTTGACACCCTCGCCAACATATACGTTTGGTAGAAAATTTAAATAT  
GCCATTAGTATCCGTTTATGATGTCTGATTGACTGAGGAGACGAACCTCAGTAAATTGTA  
CTTGTAGTTCAACAGCAGGAACCTGAATCATGCTCCCGTCAATTCTTTTTATTGAAGTAT  
ACTGATTGTCTAGTGTGTAATTAACAGATAACCCAGAACTTACACATGTATCCATTTTAA  
AATGTAAACTGATGTTAGTTTCATGTTTCAGCAGTGCTTGAAGTGCCTAATGGATCACTAA  
ATTCACCTGACTTTGGAGTCATTCTCATAAATGCCAGTTCATATTAATCAGGAATACCAA  
AAAATCTATACCCTGACATCAGACCACCATTATCTCTGACAAATTTTTTAAACATTATATG  
CCGTTTGATCCTTGTACCTGTAGTATTTTCAAGTTTTTTAGAATCTTTTTATATCTGTTA  
AATTTAATAAATCACTTTCTTGACTTACATTGGCACCTTCATTAGGGTGAGCACCAACTT  
TTACATATTGAATTATTTTTCTGATTTCTTGTGCTTCTTTATCGTTTCTTGCAAACATTT  
TAAAAGCGAATGAAAGATTTCCAAGATTCATTTGACTAAATATCTGCTCAACATAAGGAT  
TGAATACATTTCCCTTCTGTAAACCTGCTAGAGAGTTCATCTTTAAATTCCCTCGTACGC  
CTAGGAAACCAGATAAAGCATTAGCACCTGATGCAATAGTAGAAGCAAAAAACTCTGGAA  
GCACAGCTCTTGCAGGGTCTTGAAGTGTACCTGCTACGTTTTCAAAGATGTTCCCTCTTT  
GAATTGCATTGATCGCAGCCGCACCTCCAATACCAAATTTGTTTGATTATATACTGGTG  
AAGACTGAGCATTAAACCACCAGGAATCGCAAGATATGCTATTGAAGAATGAAAATTTG  
TTCTACCCAAGTTTCTAGGATAATTATTCTGCCCGTAATAATCTTTTCCCTCCATCATGAT  
ATTCAGTTTTCTTTCTACGTATTCTTAGGTAATCTGTCTTTCCAGTAAGACCATCAACTG  
AATCTCCATTAAAGTCTGAGTCCACTACAGGGGGTTGCAACGGATAACGTAGGGTTGATT  
TACCGTAATCTCCGTCGTCTAAAAATTCAGTTGCCAAGATTTCTTCCTAAATACTAACAT  
GGTCTTTATGTATTTATGAGGTATCAAGGAATATATCGACCAAACGTTCCAAGAAAGTAT  
AAAGGTGACCCCAATAACGTTATTTATAGATCGTCTTGGGAGTATAAGTTCATGAAATGG  
CCTGATATAACCTCCACGATTCAAGAATGGGGTAGTGAAGAGATTATTATCCCTATATT  
TCGCCTGTTGATGGTAAGAGGCACAGATACTTCCCAGATTTCTTTGTAAAGATAGAAGGT  
AGAAGGTATTTGGTTGAAGTTAAACGATTGAAACAAACAAGAACCTAAAACCTCAGAAA  
CGAATGACAAAACGTTATATTAATGAAGTCGTGACTTGGAGTGTCAAGCAAGCAAATGG  
AAAGCAGCACCTGAGTTTTGTAAAGATCACCCTGGGAATTCAGTTGATCACCGAAAAG  
GAACTTAAAGTATAATGGCAATCATTAAACACAGAACAAGCACAGTATCCTTCATATCAAG  
AGTTCCTAGCGTTCTCGAGGAAAGAAGATCATCATCCTAGTTTTACTAACCTGTTACCGG  
TGCAGTTTGCTGCGCCTAGATTATTACAAAGTAATTTGGGACCTTCAGTAGGAGGAAGTA  
GAACAAAAGATTACATCCAGAGACTCCTCAACTCCGCACTCTCTTAAATTACTATGCTA  
ATTCTATAAACCTTCCCAGTAAACAGATGACTACTGGTTCTTTCCCTAAGTGTAGGAACAG  
CAATTAAGTATGCGACTAACCAAGCGTACAGTCAGATGAATATATCTTTCATTATGCCAC  
GTTACAGTATACTAGAGTATTTTTTGAAGAGTGGGCTACAACCATTTCCGCTGATTCAA  
ATCAATATGTAGAATTTTATGATGATTATGTTTGTTCATCACTTAGAGTATATAAATGGG  
AGAGAGGTGGAGGAAAAGATGTAGTGAAGATGAGAAAATGATCAAAGCATTGAAGGATG  
CAGGTGAACCTTATCTAATTGCGAAACAATATAGAGTAACTGCGGTATGGGGGATCCGAA  
ATGTATTTCCCTTTAATATTGGATCAATTCAATTAACAATGACACCTCTAGAGCAATGA  
CTCTGACAGTAGGACTCTTATTTGAACGCTATCGTCTTACAGTTGCGTATGACTTCCGTG  
ATCCTGGCACATATCAGTTTCCCTGGTGATAGTAATCCATTTACATCAAACATGCCTCAAC  
TTGATAGATATAAATAGTGGAGTCTTCTAAAACCAAATCGATTTTCAGCTCCCAGATAAC  
CGCAAAAAAATCCCGCCAAAATTCGACCCTAGCGTTTTTACTAAATAACTATACTG  
AATTGAACTTCTACGGCATTACCTAAGTTAAATGTACCAAAGTACAAAATGAAACTACCG  
TCAGATGGTAGAACGGTGAATTATAGACCATTCCGCGTTAAAGAAGAGAACTTTTACTT  
CTCGCAACTCAATCTCAAGACCAAGAACAGTTAATCGTTGCTATTAAGATATCATGGCT  
GCTTGCACAGATATCAAGGATATTGATAAATTGGCAACTTTTGACATTGAATACCTTTTC  
TTACATATTAGTACTAAATCTGTTGGTGAAACTGTAAAGGTCTCTTTGACCTGCCCTGAT  
GATGGTGAAACTACTGTTGGAGTAGATATTCCTCTTGATGAAATCAAAGTCAAAAAGACT  
AGAGGTCACAAAACCTGATCTTAAAATTACTGATGAATTCACGGTACTATGGGGTATCCA  
AGTTTAGATACTTTTGTAGTATGAACTTTGTTGGTGATGGTTCTGAAGTCGGTGTTGAT  
CAAGTCTTTGAAATGGCAGGAAGTTGTATGAAGACAATTTCTGATCGAGAACAAGTTTAT  
GACTGTCAGGACGTACCTAAAAAAGAAATTCAGACTTCTTTGAAGGTATGAACACTAAA  
CAGTTTCAAATGGTTCAAGCCTTTTTTGAAACTATGCCGAAACTAACTCACACAGTTAAA  
GTTACGAATCCAAACACAGGTGTTGAGAGTGATGTAATTCTGGAGGGATTTGCAAGTTTT  
TTCGGCTAGCCCTAATGCACATGGACTTGAAGACATATTATAAGAGCAATTTTGCTTTAA

TTCACCATCACAAAGTGGAAAGATTGAATATATTGACAATCTCATGCCATGGGAAAAGGAAA  
TCTATATTAATCTTCAAATTAACCTTCTTAAAAGAAGAAGAAAACTTATGAAGGAGCAAA  
AAGCACAAGGTGGCTAAGATACAAGCCTACAAGCTTATAAATCCTGGAGTGGCGACTATC  
AAAACCTCCATCGTTTGTTCCTGCGAGACAGACAATACCTGCTCAAAATAGACTTGGTAAG  
ACATTCGAGGGCGTTGGACAAACAGTCCTTGACTTAGAAAAAATCACCAACTTACGTCTA  
GGAATACAAAAGAAAGCGGATGAAGCGGAAAGAAGCCAGGACCAGAGAGAAAGAGATGCT  
GAAGCTGAAGAGTTAGCAGAGAAAGGTTTATCAAAATATTTCAATAAAGAGGGGAAAAGAG  
GCAAAAAAATTTAAACCAGATAATAAACTAAAGAGTGCATTTAGTAAAATGTTTGGATGG  
GTAGGTCTCTCCTATCTCCATTTGTAGACCTAGCAAGAAAACGATTTGGTTTATTTCTA  
ATTAAGAATTATTAGAGTATACTGCAGATGAAGAAAACCTTAAAAAAAATAGAGACCTTC  
CTAATGAAGACAGATTTTGTCTTTAGGAAGATATATGGTTTTGGTAAATCGTTAATTAAG  
GATAATATGGTAGATCGTATTGAGCAATTATTTGGTGATGATACAACATTATTAGGTAGA  
CTTGGTGGTCTCGGTAAGTTGATGACAGGTATCATTGGGTTGAAATACCTCATGAACGCA  
TTCAGTATTACTGATATTATCTTTCTAGCAGATCTTATTAGTGCAACTAGTTTCATT  
CCAGGAAATGGTAGATGTTTACCGAATATTA AAAAATCCAAATCTAATTTAAAAAATAAT  
AAGGTAAACTTGAGAAGGACACTAAGCGGTGGGAAACAGATGAATCCTGGTCTCTCAGT  
GGAGTAAGAGAGTGGCTTAGAAAATTTAGAACGACTGCAGGTAATAAAATTACTCAAAGC  
ACTACGACACGTGAAAACCTTCTTCAAAGACTTACCGATAGTGTAAGAAAGCTGTTACA  
CCAAGCAAAGTTACTCAATCAGGCACTGGTAATATTTTTACTAGAGCACTTGATGGCATA  
AAGAGTAAATTTACAAAACCTAAGGTTTCAGGTAATGTAAAACCCAATCTCAATTTAACG  
GTATAACCAAACAATATTATATAACCCAAAAATATCAAGGTAAAACCTAAAGCGGGTGA  
GGACCACTGGGCACCCTGTCAGCGATTGCTCTTGATATAGGAATTC AAGCGGGATTTGGT  
TCTATAGAACAGAAAAAATTTGAAAATTACCTCATAAAGTTTGAGGCAATGAGGAAGGTG  
GAACAATTAAGAAATTC AAGGAGAATAAAATTAAGAGATTATGCTAAATCAAAAACCT  
TCTGGTGCTTACGGTGTTTTTCAAGAAATTACTGGAGGTGGATCGTTAGGAACGAAT  
TATGATAAACAAACGTTGGAGAGGGAGACTAATTATCTGGAGGCAATGCATCAGATAATG  
GGAAGTGTGACAGTTCTGCTATGAATGATAATGAGTATAAGCAGTTCTATGAGAACATA  
AAACCTGAGAACAAGGATACGAGTAAATTTGATGATCTGAATCCTAAAAATGATAAAAA  
TGGTGAACCCAACAACATGGTTTAAAGCAGATGGTGGTAAGTTACCAGAGTTCCTTATC  
GGTGGTTTATTTAAATCAGGTAAAACGTAGTTAGTGGTGTAGTTAACACTGTTACTAAC  
GTTGCAAAGACTGTATGGAATGGAGTGGGTAAGGTTGCTTCAAACCCACTCGGATTTACT  
GTAGCGTCATTTATTCCTGGTGCTAATATTAACGTACCTGCTATCAAGGCAGTAAATGCA  
CTTAGTTCTGGTGATATCATGGGTGCTGCAATGAATGCACTTGATGGTATCAGTAATTTA  
GCTAATTTCAATACAGTTAATGCTATTAATCAACCTACAGGGATGCAAAAACCTGAGATTT  
AGTAAGTTTGGACAAGGTGTCTCAAACATGTATCATGGTGCCTCAAGGCAGTATCTAAT  
ATTAGTAGTAGAGTTAATGGTTTCTTTGATATGGCAAGAAATAGGACTATTGGTAAGATT  
GGGATGAAAGTTTTTAAATGGTAATATTGGTGGTGCTATTGGAACCTTAGTAGGCCAAATG  
CCTGGTTTCTCAGGAGGTATTGAGAATTTGGTAATTGGTTGAAGAAAAATAAATTAGAG  
GGTATCTTAGGAGCGGTTCCCTGGTCTTGAGGTTTAGCAAGTAAAGTTCCTAATATATTG  
TCAATTCCAGGCATGGAATCTATCCTAGGTATAACCAGGCGAGGGTTTTAGTGCCTTAGGT  
GCTATTGGTAATATTGCTGACAAAGTAGGTATGAAAGGTGTATATCCAGCTATCATGAGT  
GGTGTCAATCTGGAAAGTTTATTGAAGGATTACCAGA ACTTGCTGCAGAAATAGGTGTT  
GATCCGAGAGTTTTAGGTGTTCTCGACAGAGGACGGGATTTATTACAGAATAATCAGTTC  
AAAGCAGAGTATGCAAAGCAGACTGCTATTGAATCTTTACCTGTTCCGTTGACCGTAGAA  
AAAATCGTTGCATCACCTACCCCTGTGCCAATAAATAGCGTTGATACCTACTTAGTAGCA  
CCATCCTCTACA ACTAACAGATAATGGCAACAGTAAACAAAGGTGCGAAACTAGATTTTT  
ATAAGTTTGTACCCTAATGCGGGAGCAAGCACTACTTCTAGAGCTAATGCAAAGGAG  
GGAATAGAGAATTA ACTACTGTTATAAAGCAAAAATACAAGAGCAATTAATAGTATGGGTA  
GAGTTGTCAATACTATTGGCAGCACTATAGTGTCTATAAAAGACGTGCAGATGAGGTTTT  
TGAAGATAGATGAAGAGAGATTAAAGAAACCATTCATTCGTACCCCAATATACTAAATAAC  
AACCTCCTCGTAAAATGAAAGCATTGATAGTTTATTCAAGGGGAAAATACCAGGTTTCT  
TTGAATCACTTGCAA AATTAGCAAGAGCGTTGATAAAGTTTTTCTCAGTTCTTCCTGCTC  
TTAAATGGTTATCTAATCCTGAGTAGCAAGATAAGGTTGTTAAAGGACTTGAAGTTCTTG  
CGAAAGTTTTTAAATTTATTGCATCTGTTGCTAATTTG CCTGTGTTAATACTATAGACG  
GACTGTACGATCTTTTAAAAGAAGATGCTACATGGATGGAAAGAATAAGTGGTTTTACGA  
GAGCACTTG CAGGATTGGGAACCGCATTCTTAGCATTAAATTTTCTTACAAATCCAATGG  
GGTTATCAAACCTTCTCAAGTGTGCTATTATTCTTTCTCAAGGGTCTCCTTGCTGCCT

TTGCCATACTAGCTACCCATCCTTTGATTGCAGGTGCAGCACTGTTTCTTCTTCCAAAAT  
ATCCTGATCAAATTCCTGGTTTAGTCAGTAAAAATGAGGGAGCGTTTGCAGAGGCTTTAG  
AAACAACAACAAATGAATCTGGTGATACTATCATTGCAGAATCTGATGAAAAAGCACAAA  
GAATCGCAGATCTTAAAAAACA AAAAAGAAGATCTTCCCTTCTTGATAGGTTGTTTGGAA  
AAGGTAAAGAAATTC AAGAGTTAATTTACTTAGAACTGGTAAACTAAAAGTTATG  
GATTATTTGAACATGGAGGTTATCTAGATGGTTATCCTAAGGGTGGTTGGATTCTGCTC  
ATCAGTCAGGGTATTCCGTGTCAGTACTAGATGGTAATAAACCTGATTTTATTGGACATGGAA  
CTGAATATGTTGCACAGAAGTCGGATGGTGGTGCATTTATTGTTCCGTTTGATACTCCTG  
CAACTAAAAGGATCCTGATCGAACATCTCGAAGAATGACTGAAGCAAGACTTCTAGGAT  
TTTTTGAAGAAGGTGGTGGGTACGATACGTTTGCTAAGAGAGTGTTTAAGATTCATGAGG  
GTTTAAGTCCAACAGCAATACCTGAACCTAATGGTGGAAATGTCTATTGGATTGGTTCATT  
ATATTAACCTTCTGATAATTTCCCTCCCCTACTATTAGTCGGGCGTTTGCAAATCAACTGT  
TCAAAC TAGATTATAACGATCATAAAAACGCTGCTATGAAAAACCTGGATTCCGGTAAAT  
CTAGTCATCAACAAAAGCAGCATTGGTAGCTCTAACCTTTAATCAAGGTGCAGGTTGGC  
ATACAGGATTCCCCAAGTTCATGGCAGCGTTCATCAAAGGTCATTATGAAATCGCAGGAG  
ATGAACTAAAAGATAGTCTTTGGTTAATCAAGTTGGACGTAGATGACCTACTATTGTCA  
ATTTGATGAAGAATAAAGGTTTGGGAGACGGTATTGGACAATACCTTTTAGATAGAGGTT  
TAGTAGTCCCTATGGACGAGTCGAAATCAAGTAAAGGATATGATTGGACATTTGGATTAG  
CACAAATTTTTTGCTGGAGCACCTGCTGCAGCTGCAACATTAGATTCTAATATCAATGAGA  
ATAGACTTGATGGTATGGAGACTAATACTAAAAGGGATT CATATAGAGTCGTTCCCTACTT  
CACATGCAGATACAGGTTCTGGACGGGGTATTGAGGGAGTTACCGATAAATTTGGTCGCC  
CTTTGGAATCTCTCAACCTGCTGCTCAAATGTTTGCTAAGATGATGCAAGCATCAAATG  
GAATGGTAAAAGGATCTGATGTTGCAAGCAGTGGTAGATCACCATCAAAAAATAAAGAAG  
TTGACGGTCACAAAACACTCAGTTCATTTATATGGAGAAGGTATAGACATCTCTGGGTCTT  
CAAATGCATGGATGAAAAACAATGCTTCTAGATTTGGTTGGAATTATGGATACAGTGACG  
GACCTGGTAGTGGTCATTATGATTATGAGGGTGGAGGTGCAGGTAAGACTCCTATCTTAG  
GATAAGCTGGATCTCCTTCATATTCGTTTCATGGATTTACAGAAAGAAAACGCATGAAGAA  
AATTACTTGCTTCAAGTAGTCTATCTGGATTAAGTTTATTTGGTAATAATAATGATCAAC  
CAGGTTCTGGATGACCTTTTACTGACATGTTCTCGGAGTGAACATTTGGTAACATGGGAG  
ATTTCTTCAACAACCAAGGGTATCAACCAAACATATTTAATTCTCAGAATAGAACGAGGT  
TTGCTCAAAATAATAGTGAACAAATCAGAGTTAAGAAAGTAACAGAACAAAGAAACCAAG  
CAAGAACAGAAGTCAATGCAAAGACTTCGGAGATTGTGCAGATGGCGTTGGCTGCTGTTG  
AAGCGCAAAGTGGTTCCAATAGGCAATTCATTTTCGACGGCTGAGTCGGCAATTAGGAGTT  
TATTAGGAGCTCAACAAGGTGGAGGTACGTTTCGTTAATGTTGGTGGAAACAACAGGAACAG  
TATTACGAACTGCTGTTGCTGTCTTAAATTCATTTAATAATCCTTTAAGAGGTATTTTCC  
GATGAGTAAAAATTCTTCTAAAGAAGGGTCATTAGTTAGAGAACAGGCAGGTCAGAGAGA  
GGTAACTCTATCCATTTACAGAAATGGAAAAAGTGTGGAACTCCAGATGGAGCATATGA  
TTTAGTTACATTTTAAAGAGGATTTGAAATTTATGAAAGTATTGCAAATCCCTGCATGGA  
GTGTCGCATTATTTTAGAAGATGCAGGAGGACTTATAGGATCTTTAACAGGAAATGAGGC  
ATTTACTATTCAAGTTAGAACCTCTATCAAAGATAGAATTTACAATTTTCAGATCCAATCA  
AATTCAATCAAGAATTAGGACTAGACAACTAATGACACATTTT TAGTTAACTGTGTTTC  
TGATGAATATCTAATCAACGAACTACAAATGTATTTGGTAATTCTGAAGTCATTTTCAA  
GAATGAAACAGAAGCTGGTGCTATCGTGAAAAAATTATTAGGCAAAGAATATATAAAATC  
TGAGAAAAAATTATATATTGAAAATACTGTTAACAAACAATCTGTTATATCACCAAACCTG  
GCGAGTATTTGATTTAATTTCTTGGATGTCACAAAGAAGTATTCGTAAATCGAGTAAAAA  
GGGTGTTATGCCAAATGGGTTTGCTTTTTATGAAAATGCACTTGGATTCAATTTTAAATC  
AATTGAGTCTATGATTGAGGATATTGGTAATCAAGGAGAAACATCTGAGACAGATATAGC  
ATCTGGTAAACCAGA ACTATAACACATATCATTACACACCCAAAAGAATCGGTGAAGCAGC  
TGATGTTCAATTTAATATAGATCGTATTGCATTTCTGATGAGAAAAACTTTTTGATGGG  
TCTAAGACATGGTTCTTGGTCAGGATATAGTGTCCGTTTGGATTCTGTATTCATCACCAG  
ATCTAGAATGGGAACTAGCACAGATTTATCTGCAGACGCTTATCGCTATTTCGTACGCTGA  
ATTATGGAAAAGAATGGCAAATCTGGATGGTGGTAATGCTGTTAATCCTCAACAGAAAAT  
GGATAATTTTTCTAAAAATGCTGGTAATTTTCCTAATCGAGTTAGATACTCAATGATTCC  
TAATCAAATTTTTGATGCTAAGTTTCAAACAACCTCAAAGAAATTATCAACAGCTCGT  
TGAATTACAAGCATATCAATGGATGCGTATTGAATCATTAAAACA AAAATCAACTGACTAT  
CATCATGCCTGGCAATTTAGATTTATATGCGGGTTCGGGGGTTAACTTAAATATCCCATC  
GACTCATATAGAGGGTGACACACCTGAAAGAGATCCTAAGTAGAGTGGTGGATGGTTGAT

TGCTGCAGTAGCACATAAGGCAGTAGGTTTAAACTTACAAACAGAAGCTTGCTCGAATGAA  
AGTCTCGGATATCCCGAATCTCTCACAAAACCGAGAGGTAGGCATACCATAACTTGACAT  
CCACACTCACATTTTTTATAATATAAGTATAAATAATTATGTATCAACGAGGTACACAAA  
TGGACACTATAGAACAACACATTCAAAAAGATAAAGATCTAATCGAAAATCCTCTCACAT  
CACCTTCTGCTCGTAGACACTTTAAACAAGAAGCTACAAGAAGTATAAGAGTATGTAGAGC  
ATCACAAAAGTAAATTAAGCAGGAGATCATCACGATCCAAACGCACTTGAAGTATTTT  
GTGATCAAAAACCCAGAGGAACCGAATGCCTAGTTTATGACGATTAATTATGACAGCTAA  
TATACAGGACTTTGTGACTTTTCCTTATAGTGATTTGAAATTAAGATTTTCATTGGTAG  
ATGGGAGAAGAAAGTTCCAGATGAATTATGTGATAGAACCGTAGATTAGATTGAGTCTCA  
ACCACTTGATAAAAATATTGGTAATGATAACGCAGTGAGAGAGGATCGAAATACGTTTCT  
TATCGAAACTAAACCAGAGCATAAAGAATGGTTTAGAGAACTTGACGATTACCTAACCCC  
TACAGCAACAGAATATGCAAATACATGGGGTGCCTTAAAGGGTGCCTTTTAAACGAACAG  
TGAGATTAATTACAAAAACATTGCCTTGTGAGGGTATCATGTTTGGCATTGTGAAAG  
AAATGCAATGCAATTTGTAATGAGAGAATTGGTATGGTCTATCTACTTAAATGATATGCC  
TGAGGGAGAAGGAGAAACAGAATTTTTATTTCAAAAATATAGATATCAACCACAGAAAGG  
GGACATCCTAATCTTCCCTGCATCTTTACTCATACTCATAGAGGTAATCCTCCATATAC  
AAGAACGAAATATATTGCAACTGGTTGGTATCTTTATACACCACCTGGTGGTATTCATAT  
GCAAGAACTGCAGAGACAGCGGGTATACCAGTTACTACACTTATTGATCGAGATTGCTA  
TACTACACCTGGTGGTGTATACAAGAAAAAGACGTATAAATACTTTCAAAGTCTAGAAT  
ATTCTCATGTCAACGATTAATGTAGGATCCGTTCAACGTAGTCCAACGGTAACAGGTGAT  
TTAACTGTCAGTGGAACAATTAGATCGTCTGGCGTACGACACCCATCTGCTAACACAGAT  
GCAATTTCTGCTGCTGCGGACGGAACGGAGACTGTGGCAGGTGTTGTTAAGACAGCTGCA  
ATTCAAGATTTATCAGCTAATACGCTTGGTGGTGGTCAAGTTTTACAAGTTGTTCAAAGG  
GTTAGTAACTCATATGGTGAGTTTGGTAACTCACTTATCAGAACAACATTAATAACTTA  
ACTGCTATTGGTGATTGGTATATTGACAGTACGACTACAAAAGCAAATTCTAGGATTTTG  
TGTCAGTGGAAGAACTAAGATGTATGGTCCTAACACTCAGCACCAATGCGTTGACTTAAGA  
AGAAGAATCGGTAGTGGTGGTTTTACTTCATTAGTTGAAGCTTATAGATCAAAGAGCACT  
ATTCATACATTTGCAGGAATTCAGTGGCAAAATGGTAACGGTGCCTTTTGAAGGAGACTAC  
TTCTCAGCATTGTTACACCAACCAACCTGCAGGTACGTCACCTTCGTTACCAACAA  
CACCTTGGAGGTTGGGCAGGAGGAAGTATCGACTTCGGTGGTGGGATGCTAACAACAAC  
CAGAACGCTCGTGGTATGATTGTTATGATGTGCTATGAACTTGCACCTTAATTTTTAATT  
ACAATGACACTTCCAGTTCAAACGTTAAACTCCATCTTACGGTTCTGCAATTTCTAAG  
ATAAGACCTGATTGTGTATGGATTATCTATGAAAATGATCTGTCAACTCTTGAGTGGTCT  
TCTGAAAATACATTGCCTAGACCTAATGATGCTGAAATCATTGCCGAAGTTGACAGTCAA  
ATGACTGCTTTCAATGCTAAACAATTTCAACGTGATAGACAACCTGAGTATCCAGATTTG  
AAATCACAGTTAGACATGTTGTATCATGGCATCAAGGACGGTAAGTTAGATAGAGGCACA  
TGGATTGCAGCAGTTGAAGCAGTAAAAGCAAACATCCTAAACCTTGATGATTGACGATT  
TTATTATAGGACACTGGACAAATAGATATCAAGCACAAATCAGCACCTCACCATTTCTCTA  
CTGTTGAATCTATATGGGAAAAGGTAGAGGGTGGTTATCATTGAGAGAATTTTTATAGAA  
GCGACGGTGTAAATAACCGTATAGAGAAAGATATCACAAAGGTTAATGCAATATCCTTTG  
ATAAATTACTTTTTGAAAATTATAACTTACACTGGACAAGATCAGAGAATTGTGATATGA  
TATTCACATTCGATGGTGAAGCATCGCATGGACACCTAGTAGGGGATAAATGCGCTGGTG  
ACAAAGGATATATGATTGTATCTGAGATCACTCTTACGGGAATCGACTGCATAGTATGG  
ATCAAGGATATGATGATAAAGGTAACATGGTATGGGGTAGTGAGGGCATTATAAATTCA  
CTTGCTGTATCGACCCTAAATAAAGTTGTAGCAATCTCAAAAATATGCAGACCATTGATG  
GTATTGTAAATGAACCTACGGTCAATTTTGTCCGAAAAGATGGATTTTTCTGGTGGGTTG  
GTGAAGTAGAAGATAACGAAGATCCTATGGAATTAGGTAGGGTCAAAGTTCGTGAGCTTG  
GATATCATACTAACGTACGAGGCGGAACAAGTACAGCACTTCTACAGTAAATCTACCGT  
GGGCGACAAGTTTGCAACATACTGGCCAAGGAGGTAATGACGGACAAAGTGTAAGTTCTG  
GACAAGTCAACCTGGTGAATCGTCATGGGATTTCTTATGGATGGCGATCAGGCACAGA  
TGCCTATTGTCATGGGAGTTCTTCGTGTTTCAGAAATCAAACGCTACAAAATAACAACAAC  
CATTTGCTTTTTCTGGTGAAGCAATGGAGCCAGGTCTTAGTGTTAATGCATCTGCATTAC  
ACCCCGCAAAACCAACTCTAGATTGGCAGGAACTAAAGAAGAGAGTTTCTGAGACAGG  
GTGCACATAACAGTTTGCCTTCTGGCATGAAAACATGTGAGGAAGGAGGTCTGGTT  
CTCCTAAGAAACTTGGAAATGATGTAGGTATTATTGGTAGTAAACGTAATACTGTAAAC  
CTAGAGATCCAGAAAACCAATACACACTGCTAATGGTGTGGTGGTCCCTGGAGATCAC  
TCGTCTATAAACTTTTCATATTTGATTGCAAATATTGCTGATCATGCAGGAAGTCTCGTAA

AAAAGAAGACGGGGACTTCCTCGATTTAATGACAGGAAAAATTGTAACCGCAAAGAGT  
TAACTGCTAAGGTGGAAAATTTCTTGAGTGCTATATTTATTCAAGTCGTAAGTGCTATCA  
AGCAATCTTTGGCAAACCTTGCAGAACAATTAATGTTATAACTTAGCTTGCAGGTGCAA  
CTGGTATTCCATTTGTCACCTTTACTGCTGTTACTGCTGCAGTTCAAAGATTTTGAGTG  
CTCTTTGTATTGTTGATAAAGATCTTTAAGTCTCATTCAATCTCCTATTGATATTCTTC  
TTAGCATTGTTGAAAACCTTCCTTGAGGGTATCATCTCTCAAGCACAAATGTTTCATGAACA  
GTGTTTCAGAAAGTCATTGATGATATTGTTTGCTCTATTCAAACGATTCTTAATAAAGCAC  
TCGGCATTGTAAATGATGTAAAATCTATTGTCTCTGGAATCGAAAAGGCACAAGAGCTCA  
TTAAACATGGGAACAAGGAACACAAATTTTCAACTATCTTCAAAGTTTCTTTAAAAATG  
GCATAACCAACTTAACTGGATTGATGGCATTATTTCTTAAGTTTGCAGGAAGTAACTTTA  
ATCGTAAACTTTCTGGTGCTGAAAATGATAATGGTTGGTATCCTATATTCAGTACAATA  
ATTGCATACCTGAGGAACCTCTAATAACAATAGCATTTCGAGGAAGAAATTGAGGTGGTT  
GTGGCGAAAATGATAAAGGTGGCGGATTACTTGATAATATTCTTTTCGCAAGCAGACCCTT  
ATTTGTCTGCTGCTAAAACCTTTGTAAATGGTGCATCTGAATTATATCTTGGCACACCTG  
GTCGTTTAGCAACCATTATTCGTAAAGAAAATGGAACAACACTTACATCAGTTAAAATAA  
GTCAAACATCGTACGCTGAATATACTTTCAAGAAAGCATAGCGTAAGGAAAAACCAGATA  
TATCTGATGATGAAATAGAAAAACAATTAGTTGTTTTTCAGAAAGAGACAAAAAGAAAAGA  
AAGATGATGTTCTGGTTGCAGATCACGCAACGTACGTTGGTAATAGCACTAAAGAAGTTC  
ATGGTGATCAATCTGAAGCAATTGATGGTTCACAGGTTACTAATATTGAAGGTGACTATC  
ATTTAGACACTACAGGTGATTGTCATATTTCTGTTGCTGGATGCTTTATGCTTAATGCTC  
AAGGTGCACCTAAACAGGTAAAACCAGATTGAACTCCATCTGATGAAAAAGACATTAATA  
AACATTCATTAACATATGGTTCTGATGTTGATATGAATATCTCAGGTGCTGCATTTACTT  
TTGACGGTTCAGAATTTAGTATGGGTGCGGTCCTACAAAAATTACTGGATCTAACTGTG  
AAATTTTCATCTACAACAACACTAGCATTGCTAGTGGTGAAATTTTATTGACTGCAGAAA  
ACTCAGTTGATATTACTACACCATCTTTAGTAGAATTAATTAACCTCCCTCCTTACCCATA  
CTAAGGTTAAAACCTGGTATTCTTAGAAAGGTTGGTGGTTCTATGGAAACATATATGACAC  
CGGGTCTAGCTTCAGCAGATGCTATTCGTAGACATATCGTTGCAAACCCTGGAGGATATG  
CTTTTCATCAAAATGGTTTGGCATACTAACTTAGTTATGACAGGACCATGGCTCGCAA  
CTGCTACAGCAGGTCTTGCTAGTTAACAGCAGGTGCAGTAGTAAATATCACTGCAGGTT  
CTGCCATGAACATCACTGCAACAGCATCAGTAAACGTAAAAGGGTTGACGATTTTCCTAA  
AATAGTGCTATACTATGAGTGTATCCGCGGATGCCCCACTTGGTTTGGTGCACAACACCT  
CCGCAGAATGACAGGAGACCCCATGCAATACACTCAAGTTGAGCAAATTTTTGTAAATTT  
CTCTAGGAGATCTCTAAAAATCCTAGATATTGAAGGGTACCACAAAACAATAGAATGGGA  
ATGGAATGAAGAGGGAGCGGAAGGTTTCTCAGTAACTATTTCTCACCTTTGTGATGTCTT  
TGACACTGACCTTATTACCTATTGTTTTGCAGAAACAGAATGATTATTCCACATTTCAAT  
TTTGATCCCAACATTACATTTCCGATTTCAATTGCAGTAGTTACTGTATTGTTTATCTTC  
TATGGTATCTACAGAGGTTTCTTTGCAAATGAAGGATTGACAGACCCATTTGACTACCAC  
GACGAGTAAAACCTATGATTGGACCTATTGGCAGTACATTAGATCAAGCAGGTGAAAACCT  
TCATTTTCATGATGGATCTAACAGCAAACCAAAGACTTTGCTGGAAAATTTCAACACCTAA  
GGGATCTGTTATGTTAGTTCCTGTAAATGAAATTGCTCCAGTATCTGATGAAATTCAGA  
TCAAGTAGAGGAGTTTCGGAAAAGTTTTATGGAGAAAGATGCGGCCTGAAACTAGACATG  
CCATGGAAATGCTTTTTTCATTCAAATGGAACCTGCCAAAAGCAGCAAACATGCTAATC  
TAACTAATAAGGAAATGAAGATTACTTTTGAAGAATACTGTAATTTCCATGAAACTTCCG  
AACTGGCAACACCCTCAAAAAAGGAGAAAAAGAGACATCTTAAACCTGAAGCACTTCGT  
GCTGCTAAAAAAAGATTACAAGCATTAAAGAAAACAGTGGGAGTGTGGCGGAATCGGTAG  
ACGCACCAGACTTAAAATCTGTTGGGCATGTGCCCCGTGAGAGTTCAAGTCTCTACTCC  
TACTGTCCGGGGGAATACAAAAGATCTCTATCTAGAAAGAGTGCCCCCCTTCAAACATAC  
TAAAATAACATGACAGTATTAATCATCATAGTTGTGCTCATTGTAGTAGCAGGAGCACTT  
ATAAGGTACTACGATCCTCATTAACCTGAAAGTTGACTCTAATACGGAACCCTTTCCCTTT  
TTGTTTATTGAGGATTTGTATACAGAGGAAGAATTGCGTCTAATATGGTGTGAGTTAGAT  
TATTATCAATCTAATAAGTATATACTAGATGCAAATACTAATCCTTCTGTAACAGATGAT  
GGAAAACCAAGAACTAGAAAACAAGGAAACTTCGTTGATAATGTTTTCCAATTGAGAGAG  
TATTCTAATATTTTAAATCTTTCTAGAAAAGTATTAGAACCTGGTTTGATATGTCGTCGT  
GACCATCTTATTCAGTGGAAATATTTCCAACCTGATGTAGATCACTCTTTACTTTTCATAT  
TATGATGATGGTGGATCTTATCTACCTCACCACGATAACACCTTAGTTAGTGTGATATCA  
TGGTTATGGAAAGAACCTAAATGTTTTGAAGGCGGGGATTTTGTATTTGAATAATATAGA  
ATTACTGTTAAATTTACAAACAAGAGTGCAGTTGCATTTCTGGCACTATCAGACATGGA

GTCACTCCTATCAAAATGGAAGATCAACATAAAGATCTAGGTTTAGGTAGGTATTCTTTA  
TCACATTTTTTTGAATTTTAGCTAATGGGGTACTTAGTTCATCCTTTACCACCTAGAAAAG  
TTTGGGTCAAAAAAGAATATCTTTATGATGTAGAAAAAGGTCATGGAGAACTTACACCTG  
GCACTTGGATCTCAGTAAGGAGTATCCAAGCAAAGGCATTATATTTTGAGACATTGCTAG  
CAGATTATGGTGCACCTTTGATATGTTACCACTCAGTGCATTTGTATGGAAACCAGATA  
TTGATTGGGATGATCAGTTGCCATTAGATGTATTAGAAGTGTGGGATTGTTTTGCTTATA  
TTAGTACAGTTGTAGAAAAAACTATACTAGGTAGATGTCAGTTCCTTTGGTAAGGACAAGA  
AGACGCACGCAGGAGAGTATGAGTTTACTATTGATACTTCACACCCTGACTTATCTGTAT  
TAGATGTAAACTTTTTAGAGCATGATCCAGAACATAAGACCTGTAACATCATTGCACTAG  
ACAATGGACAGTTTGCAGCACAACCAATAACAGATGTCAGTTCCTCGATAAATAGTTTGG  
TAGATAATGATAATCTCAAGAACCCTGACTTCAAAGTATGCACACAAAACCTATGCTGTAG  
AAACCCTACCTAAGTGGTGGTCTGTGGGTACACAGCTGAGTGGGCATATAAGACAGGGG  
AAGAAGAGGAAGAAGAAATAGACCGAACAGGCGGTGACTTTCTTTATAAATAGACCTGT  
AGCAAATAGTGTGGTTATCTGTGGGAACCCGTAAAATATCTTAGATGGATAACAATATCAG  
ATGCTAACCTAACGGGTGAAGCAATTCTCCCCGTGGTTCGTGTCTGACCCATTGATTCCTA  
ACGGAAAAGCAAAAGTAAATCAACTCTTCCGTGGAGTTTCACAAGGAACTAAGGCATCGC  
CTGGTCTTTGTTTTGATTTAGACAGAGACAGTGGACTATAACCAATCAGCGTACGATCAA  
TCGGTGTTCATTTGGTGATGGTAGTTTATATTTTAGTAGAGTCAGCAATACTGTAACTA  
GTTCTTCGCTATTTGTAAGTCTGTTGATGATACTGCTACTAATACGGACATTGTTTTCG  
CACCGAAAGGAACGGGAACTGTCAGAGTTACCGGTCTATTTACTATTGATGACGGTTCTG  
TGATCTTAGAAGATGCACAAGCACCTAAGGCAAGATTTGAGGTAAGTAATGTTGAAACGG  
GAACTAATACTCGCATCTTTACGCTACCTGCCATTACATCTGGTAATGGAAGAGTCTTGA  
TTGGTGATGATACACAGCAAACACTAAGAAATAAAACCATTCTTATTGGCGAGGATAATC  
TCTTTATTACTGATGGCACTGAAGAAGCAATATAACAAATTAAGTGGGTTGATACATCAA  
ACGCTAGAAGATCATATTTTCTTCCCTGGTGCGGGAACTGTAACAAATACAGTAGAACCAA  
CTGCGACTACAACACTACATTGTTAGATACAAAGGCAGAACAAACAGCATTTAGTAAGACTC  
TTGTTAATCTTAAATTAGCAAAAAGACGCTGAAGTTGCAACCCATCGGGCACAGTTCAACA  
CTAATGCTCTATCTGCTAATAGAAGTCTAACTGTTCCCTGATTTATCAGGTAATCTTGCTT  
TCACTGATGCTACTCAAGTATTACAGAACAAAACCTGTTGAAAATTTAATTCTTCAAGGTC  
CAACGGATACTTCAAAGGAGATTACATTTTCAGTTGCTAACTCAAATACTTTTACCAACG  
TGACTGTTCAAATACCTCCTACTGCAAACCTAAATAACACAGGAGTTCCTAATACACTTG  
CTACAGAGGCTGTTACACAGGAGCTGTCAAATAAATCATTGACTAACCCCTGTGCTGAAGG  
GTGCAGGATCAAAAACCTGTAGGTACTGTTACTCTTTCTATAGATAATATGACAGCTAACA  
GAACTATCAGATTCCCTGGTTTTGATGCAACTCTGTTATCTACTGAAAACGTTACATTTG  
ATGACGTTACATTTGGTGCAGGTATTAGTGCAGCAAACCTTAACGGGTGCAACAAGACAAC  
AACAAATTTTTCTACGCAGGATTTTAATTA AAAATGGCTAATCAAGGTTTACTTGCACAAC  
ACAAACCCGCAGCGAACACGAATACGTTGTTCTATTCTGCTCATGTTGATAAATCTGCAA  
GCACGATGATCAACGTCGCTAATGACGGAAAAGCATCAGACTACTCTGTTGCTCTTAAGA  
ATTTTGGTCAGAAGTTAGTAGTAAATGGTTCTGCAAACGCATACAAATTACATGAGTATG  
ACGTCATCACTGCATATAAGATGACAGTTGACACTGCCTTTGACCCTGCAGCACAGGGTT  
TACTGGCGGTCTTCAAGTTACGAGTGCTGATAATGAATCAAAGTTTGGATATGAATCTG  
CCATTATTCCTAATTATGTAGAACTTTTTGTAAAACTTTTGCTATCAGACAGATCACGA  
TTCAAAGTGTTACTGGTACGTTCTCTGTTGGTAATACTATTACCAAAGGTTCTGGTAGTG  
ATGCAACTACTGCAGTAATCTATGGTAATAATGGAAGTATTCTTCATGTAGGTCCTTCTA  
CTATTAACGGATCTGGTGCAGAATTTGCTGCAGGTGACAGTATTTCAAACGGTGCGGGTG  
CATCAGCTACAGTTGCAACTGGTGGTGTAGGATCTGCATCTAATAAATTTGTATTCTCTA  
GCACATCAGGCGGAGCTTATGACCTTCGTTTGATTTCTGCAGGAAACGGTTTTGAACTAT  
TCAACGATAGATCATAACAGATTTAATCTTGCTGACTCTACTAACTCAGGTCACGTTTTTC  
CATTATCAACAACCTATTAATGGTGAAGTGGGGTTCTGACGGAAACAACAGGTAAGTCTGATG  
ATGGAAGTGAATATACTACTGGTAAAACCTAATGGCACCATTGGTTCTAGTGGTGCAT  
ACATCCAATATGCTTTTACTAGCACTTCACCTACTTTGTTATCCTGGTATAACTCTGTTA  
CTGGAACAGCTGCTAACAGTAGTTTTGGTGGATCAGAGGCATATCTTACAACAACCTTCTA  
CATCTACATTCAATGTATTTTACATCTATGATGTAGAGTGATCTTGGACTAACTCTACAT  
CTACCTTTGTTTCAAGACAGTATCACATATACTGTTACTACTCAAACCTTCTGCAGCGTACG  
GTTATTTTCGTACTTACAGTGGTAATAACTTATATGTTATTAAGGACTTAATTCAGCAG  
ACTTTGCAGGTTCAAGATACTTTCTTATATAACCCCAAGTTATCTACTGCAACAAGATCTA  
CTGTGACTGTAAATAGTGTGCTGTTGTAAGTACTGCTGTGGAAAATAATTACATTATTC

AAGGTGCAACTAACGCTGGTCATGCAGTCGCAAAGAATTCTTCTATTGTTGTTGGACATG  
GTGAAAGATTGATTATCAACAGCACTACACAAAACAACGCCTCCTCCCTTATTGGGTTTG  
AAGATTCCTCAAGTGCCTTCACTCCCCGAACATTCGGCAGTTGAATAAATACAAACAAAG  
CGGATAGGTAATGTCACTAACTAGACTAAAGAATATTATTACGTCCAGTATTGGACGTAT  
CATATATGTAAACCCTGACGATTTCTATGCATCAGATGCTATTGATAACAGGGGAAACTC  
TGCTTTGCATCCTTTTAAAAGTTTGCAAAGAGCATTCTTAGAAGTAGCAAGATTTTCATA  
TAGAGTTGGTTTGAGTAATGACGAGTTTGATGCTTTTAGTATCATGCACCACCCTGTTGA  
ATATTTTGTAGACAATAGACCAGGTGATGTTTTATACACGAACGTTGCACCTATTGATGC  
AAACTCAGACTTAGACTTACCTTCTCCTGACCATGTTCTATACAAAGATAGTTCAGTAGA  
AGGTGGTATTAGCGTTCCTAGAGGTTGTTCTTTAGTTGGAAGTACCTTCGTCGTACAAA  
AATTATTCCAAAATATGTTCCATATCCTACAACGTATGCTGCAAAGGTATTAACACAGA  
GGATCAAGTTCCTCCAAGAACAGCAATCTTCAAAGTTACTGGTGGTACTTATTTCTGACA  
ATTCTCTTTCTTCGACGGTGTGAAGAGGGTGTATACTTCGAACCTGATTCCACTGAAAC  
ATTAGCACCTAAGTTTTACATCATAGACTGACTTGTTTTGAGTTTGCTGATGGTCTTAA  
TCCATTATCAACTCTTATTTACAAGGAACCGTTCCCTCTGCTGATTACTCTGCTGTATC  
TAATATCCTGCAGAGAAATGATTTAGAGATGTATTATCAGAAAGTGTGCGTAAGCTTTTCG  
AACTATCCCAGATACATCTGGGGATCCTGCACCTGACCAGATTCAAGCAAGGGTAGAAGA  
AAACCGTATTGTAGGTCCTATCTCCGATGAATACCGAGTCTTCAGATCACAAACAATGT  
ACAGACAGCTACGGCTGTCACCGTTGACGAGTTTGATAACCCCAGAGACCACGGATTTTC  
TGTGGGTGTTAACATCGACGTTAGTGGTGTACAGGATCAACTGGATCGCAATCCGATCT  
TGAAGCAGGAGTTTATAACGGGTCTTTCTCCGTCACTTCGGCCTCGGGTAACGTCTTCAC  
TTACCAGATGCAATCAGTCCCCTCAGGAAACGGAGCCGGATCAAACATAACTGTTAAGAC  
TGAGACTGATACTGTTGACTCAGCATCACCGTATGCATTTAACCTATCACTTAGAACAGT  
GTGGGGTAATAATGGTATGCACGCAAACGGTGCAAAGCAACTGTTTTCAAATCAATGGT  
TGTGGCACCGTTTACTGGACTGTCACAACAGAAAGACGATAGAGCATTGTGAAGATATAA  
CGCATCAACAGGTAACCTATGATGTAGCAACAGCAGGTGATGGTGCACATATAGATGGTT  
CGCTGAATATAGAAATGGATGGCGTCATGAACACATCAAGTGTAGTAGCGACTCATTAT  
ACAGGCAGTTTCCGTGTTTCGCTGTGGGATACCAAGTTCACTTAACTGACTAAGCGGTGG  
TGTCATGTCCATCACCAACTCTAACTCTAACTTTGGTAACACTGCTCTCAGATCAGCAGT  
ATTCAAAGCAAAAGCATTTTTAAAAGATAAAGCGGGTATGATTACACATATCTTTCCCC  
AAAAGCACTCAATACAATTTCAACAACCTGCAAGAGGAACTAATGGTCTTTAAATATTAC  
TCTTGCTAATGATGGATCAGTGAATGGTCTGATTCAAGGTATGACTGTATCTGGAACAAA  
TATTGCTACTGGTGAATCGTTAGTTCAATTAACACAAATACTAGAGTAATCACACTTTC  
TGCTGCAGATACGGGAACTGTTACCGGGCACGTAATCTTTGGTGAAGAGACATCTGTTAA  
CTGGGTAAACATTGATACTCAAAGAACTAAAGTAATTAATACTGCACTTTCTGGACAAGG  
TGGAACACCAGGCACAAGACTATACTTATATGGTTATACTGTTGAAGCGTATCCTCCAAC  
TAGTAGAGTTCAAGGTTTTACAGTCGGTGCAAGACAAGACTGAACTGGTAATAGTGCTAT  
AGCAGATAAAATTAAGTCTTGGTGTAGGTGCTCAAGCTGCATCTTCTGCAACTGTACAGTC  
AGCAAGCATATCACCTTATGGTCTAGTGTATCTGGTCTTACAGCTGGTGTAAATTGGATA  
TCCATTACAATATGATAGTAATACATATACTATCAATGGTGTGTCAGGTTTCAAGTGGTGG  
TTGGTATCTAAGTGTCTTCTACTTATAACAGTATTTACGAAGCGTTAGCAAATAATAC  
ACAATACAATACAGTCAGTTTTACTCCTACTACATTCCTCAAGAGAATCCCTGATTCAAG  
AGACTTAGAAGATAGAACATATCGTGTACGTTATGTAAATGATACGGATAAGACTAATCC  
ACTACCTAGAGATCCTATCTCTGTTTTCGTATTACAACCTCATAACAGTGATACGACAAC  
ATATAACTTTCAACGTGCATTTTATTTACGATATCGAGACTGTTCAAAGTTTGTAAG  
AGGTGTTAGTGATGGAATATATTATATAACATTACTATGCGGTTCTATTGCACCTACTAC  
ATGTAACCTTTGATGATAGGAAGTTCTCACAGAACGTTAACGAAGTTTATCCTACATTCTGA  
CAGAGATAATCCAGTTGCTGATCCTCCTGCTGCAGTCACTGAAGCTTCCAATGTTACCCT  
AGGTCTTGTTATTTCTACTGATGGTGAACCTCCAAGTCTGCACTTGACCCCCAGAGAAT  
TATTACTAAAGAAGCAATTATATTCTTACTGCCTGATACTGGTTGGCAGAATCCAGGTTT  
AACTCCTGCGTACGATTCAGTTAACGGACGTCTTGCAGGTATTGAACTGATTGCACGGGC  
AGGAGACGAAGAAACCAGTAAGATTAATATTAGTCAAGATAACTCTGGAGTGGTTGCACC  
AATCAACGTAGAGTTTAGACGATACTCAATCATGCGTTCTGGTAACCATACGTTTGAATA  
TCTTGGTTTTGGTCCAGGTAACACTCAACTGCGTTCCCTCAAACCTCAGGGAGAAACATT  
ATCACCTGAGCAGATCAGATTCTCACAGTCTATTAAAGAAGAAGGAGGAGTTGCATTTA  
CTCTGGTTTAAACAGTAATGGTGTATTAATCATTGGTAACCAGGTGATTAACCCTGTTAT  
GGGTCAGATCACTATCGAAGATATTGCACAGTTGAATGTTTTTGGTGAAGAGAAAACAAC



CATTGAAACGTTCTTTGAACTAGTATTGACTGATAAACTGACTGTTATTTGTGGTGCATC  
TAACGCACTTGAATCAATCTTTGCAGGTCCTGTCACATTCCAAGGTCAATCTACATATAC  
AAACAACATAACCGCTAAGAAATTTACCTATAATAACCAAGATGGTACAGTTATTAACA  
AACCTTACTAGCACCAAGAAATGCGAGTGGACTCCCCGATTTTAGTAATATTACAGGATA  
CGATACGCCTGGTGTGGTGTATTTGTTTACAACATCAATTGGTACCTGGTAAGTCTCT  
TGGTTGGATTTTTTACGGAGCTGCGTCGTATGAGTTTGGTATCACGGATACTGGTCAAAT  
CAATGTTATTATAGACTCTGGTGTACGAGGATTGGTCTTGGTGTGCTCCTACGTCTCC  
TTACAGGGCAAACATCAACGGTTCACCTAACGATTGATGGAGACTTAGTTGTTACTGGAAC  
AGGTGGTGTAAACAGCTGCCAAATATAAAAAGAATCAATACAAAGGAGACGGTAACCAATT  
AACTTTCGCTGTTAGCACATAGACTGGTGGCAGTCAACACACTGAGAACTCTTTAATAGT  
ATTCTTAAATGGTGTGTCACAAATTCCAGGCACTAACTACACTGTTGATTCAAATGGTGC  
AAACGTGGTGTTCAGTGGTGGAGACGCACCTCTTCAACAGATATTGTGCATATTCTCGA  
ATTACCTATCTAAATAACAAGGAGGGTCGCAACAGAACATGGCGATTACAAGAATTAGTG  
GAAATCAAATTTCCGACAGCACAAGTGCAATCATCACTACATTAAGTTTCTTAAGCACTA  
ACTCAGTGTTTAGATTACCTGCAGGTTCCACAGCAAACAGACCTACAGGTGTATCTGTTG  
GAACTTTACGTTTTAATACTTCATAAGATTCTGCAGAAATTTATAAGGATGATGATCGAA  
CTGGATCCGCAGGGTGGTTACCTGTTGCAGGTGGTGGTCTTCTCTCGGAACGGACAGTA  
TTTTCAGAACTAACCTACAACCTATTCCAGAAGTTATTACAGTTCGGACCTTCAGCAGGAA  
ATGAGTTTGCAAACGGAATGAGTGCAGGACCAATAACAATAGGAAATGGTTCTACAGTGA  
CAGTAGAGTCAGGGGGGTGATGGAGTGTAGTATAAATGAACTCAACGTTGGGGAAATAA  
GAGGATTACTAGCAAACAGTGCTAATAACTGTTTCTACAGAGACTTCAATTGGTTTTG  
AACTGCAGCTCAATTAACGCATACTACTTTAGGAACCAGTCCACATGGTAGTTACTTATG  
GCACTACTACAGAGTGGGATAATCAAGTAAGAGTTCATCAAAAAGATTTTTTGAATGGAC  
AAATGCGATGGAATACAACAGACCAACAACCTCCAATTTTTATTACAATGGTTGGATGAAAA  
TGGTGTCTGGTATTGCTGTAGGAGATATCGGAAGTCAAACAACCCTGCAGTAGATGGAA  
ATGCAATATATAGAGCAGGTAATCAAGTGGTATATATTGGATTCAACCAGAAGGGCAGT  
CATCATATCAAATGTATGTTAATAATGATGATAATGGAGGTGGTTGGGTATTATGTGTTT  
ATGCAAGGACATCAACCTGTCAAGATCATATGACTACAGGATCAGTCAGAATTAGCGGTA  
CTACAGGTCTAGAACAAATAACATCTACAACCTAAGATGGCGGACAGTTGGATTCAAG  
CATTACGCAATAGTTCCAGTTATACTGGCACTACTGGATATTGGATGCACGCATTAGATT  
TCGGTCTAAGAACGATTTTATTTCAAGTGCAGCAACTGTAAATTTGAATAATTGTGATT  
CTGAAGAGAATCCTAGAGCTAGAATCTCTACTACATATCAAGGGGGTCTCTCTGACAGAG  
GTCCTAATACAGGAACTAAAGGTTAAGGAGATCACCATACTTCTGGTGGAACATATTTTG  
CATACGGTAGACACCCTGAGTCAGGTAACAACCTGTGGATTTCAGAGAAGATACTAACGGTG  
CATCAAACGGATACTTATGGGTAAAGTAAAATGAGTAAAGTAACTCTTGTAGCATTAGGT  
GGTATTTTAAACACTATTGGACAGGTAACCTGTACCTGCAGGAAATACTTTGACAGTTGAA  
GGAGACATATATGATCATCAAAATACTGGTGCATTGAAAGTGCCTACAGGTGCGACTGCA  
CAGAGACCAAATAGTCCAGCTGCAGGTGTAGTGAGATTTAATACTGGTGAAAATTACTTA  
GAGGTTTAGACTGGTAGTGCACGGAATAATGTCATTGGTCTCTGATGCTGCTGCAACTTCT  
AATTTAGGAACTGAATCAAACCCTGCTGTTAGTGGTATGGCACTCAAGGCAGAGGTATTA  
CCTTCTGGTCTTTATTGGATTAAACCTAATGGAAGTGAACCTAATTATAAAATGTATGTT  
GATAATGATCGTAATGGTGGTAGTTGGGTTTTAGTTGCACATGTTAGGATATCAACCTGT  
CAAGATCACATGACTAATAGTGTCTGTTTCGTATTAGTAATAGTATAGGTCCTAGATTTGGT  
AACACAAGAACAACCTAAAGTTGAAGACTCATGGATGAACGCCATGAGAACTGCATCAACA  
TACTCTGGTAGCACTCGATGGTTGTTGGAAGCACATGATTTTGGTACCCCTGGTAAGAAT  
ATGATTTTTGATAGTGCTACTACTGCAGATTTACCATCAAGTGCTAGTAATCAGAACGCA  
AGATAACGAGTCTCTACTACCTATGAAGGTAGTATCTCTGACAGAGGACCTAACACAGGA  
ACTAGAGGTTTAGGTGATCATCACTTCTGGGGGTACCTATATTGCTTATGGTAGACAC  
CCAGAACAAGGTAACAACCTGCGGGTTTAGGTCTGACAATTCGGGTGCATCACACGGATAC  
TTATGGTTAAAATATAATGAGCATTTTAAACGTCGGCGAATTAATGGATCTACGGAGAA  
CAACCGACAGATTATAATGGAGACCAGTAACAATCTTGTATCACTGGAACCTTACTCA  
AAATCGTTTAAAGTAGATTTACATTTCTATTGGAACGACTGCAGAAAGAACAAGTAGTCC  
AGCGGCCGGTTCATGTGAGGTATAGCACAACCTTAGGGTATGCTGAGGTTTATAATGGTAG  
TGCATGGTATAGAGCAAGTTCTGGTATTCTCGGAACTGTAGGAACTGAGGGAAAGTCCCGC  
AACAAATCTCCACAACCTCGCAGGACTACCTTCTGGTGTCTATTGGTTCCAACCAAGTAG  
TCAAACAAAATATCAAATGTATGTTGATAACAGTAGACTTGGTGGAGGTTGGGTCTTGAT  
GGCAAGTGTTAGAACATCTACATGTCAAGAGCATATGGATCAAGGTGCTGTTTCGTATTAG

TGGTACGACTGGTCCTAGACTAGATGATACATCAACATCTAAGATGGCAGACGCATGGAT  
CAATGGTTTTGTATCTCGTTCTAACTATACTGGTTCTACTAGATATTGGATGGAATCAAC  
TGGATTCAATAAAAAATGTGTTCAATGATTCTAATGCTACTGTAGATTTACTCAGTTCTGC  
AAGTAATCAGAACGCAAGAACAAGAATATCTAACTCCTATGAAGGAGGTTTAGATGATAG  
AGGTCCTAATACAGTAACTAGAGGTTTTGGAGATCACCATACTCTGCCGTACCGTACTT  
CGTTATGTTAGACACCCTGAATCAGGTAACAACCTGCGGAGTTAGAGCAGACTCTCTATG  
TGCACCTAATGGTTACCTATGGGTAAGATGATAAATAGAAACATACAGAATTTTTTCAGAC  
ATGTCGGATATTAAGTAGATAAAGTTAAAGGTAGACAGGCACCCGCAAGTCGTCCTGAC  
GACACCTTTGATTCGTCTGGAAACATATCTTTTGCAGGTAATATTTTCATCTATTGGTGAT  
GTCCTGCTGATGATGTTACAGTCAACTTCTGACTTCTTATTCCCAGATATGCAACGAGT  
GCTTTACCTAGTAGTGCAACTACAGGAAGTATTGCATGGGATACAGATGATGAAGTAATT  
AAAGCTTGGGACGGAACGGAATGGAGAAATGTTGGAAAGGGAGCAGGAATATCAGGTAGT  
GGTGGGTCAGTTTCAACTGCAGGTGGATATACTATCCATACATTTCCAAGTGGTGGAGCA  
TTAACTATTGATGGAGAAGGAAGTGTGATGTACTTTTAGTTGGTCGTGGTGCAGGTGGT  
GGAACCTCGTAATGCTGGTCCTAACTCAGGAGGAAGTACGCGGAGGTTCTGGTGGAGGAGCA  
GGTGGTTGGGTTCAAGTAGCAGGTATCCCTCTCACATCTGGAAGTTATCCTGTTAGTGTT  
GGTGGCGGTGGTAATGGTTATCAGTCTGGACAAAATCCTGGTCAAATGGTTCGCCCTCT  
ACATTC AATGGTCTTGTAGCATAACGGTGGAGGATACGGTGCCTCAGGTCTGGTAATAGG  
CCAAGTGGTACTGGTGGATCTGGCGGAGGAGCAGGAGGAGGTGGAGGTTACCTGGTCAA  
GGTGGTTCTGCGCTACAACCTCGTGCACCTGGTCAGTCTGGTTCTAATGGGCATGGAAAT  
CCTGGTGGTCTAATCCTACCCAAGCATGTTACTCTGGTACTGCTGGAGGAGGAGCAGGA  
GGATCTGGTTCGACTGGTGGAAATGGTCGTGAGGCACCTGTTGGAGATGGAAGATCAAGT  
GTATAGTCTGGAAGTAAGACAACCTACGCAGGTGGCGGAGGAGGTGGCGGTAGTCATCCA  
GGTTCCTGTGGTGGAGGTAACGGAGGTTCTGGTGGCGGTGGTCACGGTGGTGTGCTCCT  
AACCGTCAGAATAATGGTTATGGAGGTGCAGGTTACCTGGTCAAAGGCGGCGGTGCGGGA  
GGAGGTGCAGGAAATCCTTGGCCAAATGGGTCAGGTGGTAATGGTGGTAGTGGTGTGTT  
ATTGTTAGATACCAGACACCCTAATTCTGCAAAGTATATCGCCTCAATCTTAGATCGCTT  
CATAGTTTCAATAGCATCAACAGGAGTTTCAACAATACATTCACCCGCAAGGTTAAAAGA  
TGTATTGAACAAGATAGGAACTCCTGTTTTTTTCATGGAAACATGTAATTAGTTGATAGTA  
ATGATAATTTTGATTGTCAGTCACCGTCTGAACTCTACAAGTGTAGTCAACATGAGTGAC  
ACCAGGTATAGTATCTGATGTAACATTTACCGCATAACATCATATAAGGACTCTCATCTAA  
TCCTCTCATATCAAAGTAATCATTAGCACGTTCTTTTCATAACTGTTGCAGCGAAAGGTCT  
AAACCCTTACAGTCTCTTGACTCGATTGACTATTTCTTTTGTGCTGCACCGTTACGAGGATC  
AAACAAGATGGATCAATTTCTAATGCTCTAGGTCCTGCTTCGGATCTACCTTGATAGAT  
TGCTATTATTTTTACGTCAGCGATCATATCTGCTACTTCAAATGGTGTGTTAGGTCTAGT  
GCTTTCCATATAACAACCGAGTAACGTTATCGTGGACAGGTCCGAGATATAAACTATTCAA  
TGGTCGTTTTGTTTTCATCACCAGTAAGTTCATGGTGAATAAGTTTTGCTGCTCCAATAGA  
CGTACCTGCATCACTTGATACAGGTTCAATGTATAAGTTTACATCACTAGGTAACACACT  
CAAATAGTAAGAGTTTGCAACGCAATTCAGAAAAAATCCCCAGATAAACAACGTTCTT  
ACACCCAGTTTGGTCAATTAGATTGAGAATATCTTGTGCAACGTGTTCTTGTGTTTTGTTT  
TTGTAAGGTGAAAGCAAAATCCGCTTTTGAATTAATAAATCACCAAGCAAAAAATTTAATCC  
AGTATCATGTAAATCTTTACCGATATAAAATAATTGTTTGTCAATTAATCCATTATCATA  
TATTGATAAGGGTAGTTCCTCTCCATAAAGATGCTATCCCATAACTTTACCTGCATCTAG  
TTCATGAAACCCAAATCGCATTGATGTCTATTGAAATGCCATACCCTCACCAAGGTTGTT  
AGAGATATGAGCCACACCAAATTTATGATTAGATTCAAAGGGGACAGCAACGTGTCTATC  
TCCAACGGTAAAACCGAAGGATCTGTTGCCAAAAGGTTCGTAGATAATTCTCTACCATA  
GGTGCCTGATTGAAACATATCTCCTACTAGAGGTACGTCCGGATCCCATCCCGTCTTTTAC  
AATACAGATTGCTTCATCAAATCCTGAGTTGTAAAAAGCGTGTGCTGCATGAAGTTTATG  
ATCTGATAGTGATAGGTCATGAACCTCAGTGTACATACTTATTTTCTTTTCGTCTTTACATA  
TAACCTATCTGGGTCATCATCAATAAAACAGTCAGCAGATGTCAATTTGCCCTACACCTGC  
AATACAAATATTACCAAGGTTTAAAGGTGTCAAGGTGAGTCAAACATTGAAATGGAAAGGC  
ATCAGACGTTCTATTAGATAATCTTTCACTTCTCAAGGTGGTAGACAATTCCGCCATTTTG  
TAGTAAAGTAGTATAGGAATTATTAACCTACTGATACCTAAATTTCTCATAGGATTTCT  
TGATTCCTGATACATATATTATAACATGATTTTTAAATTATGACATTTAAAACAATGTGG  
TATGAGACCGATATTCCATGGGAATTTGTAAGTCTCATAGAGAGAGAATGCACACCGTAT  
GATGATATAGTTAAGGCAGCGAGTGTAAGAGAAGGAGAGATATTTGCTACAAGAGATAGT  
GAAACATCTTGGATTCTGCAGATAATTGGGTCGGAGGATTCTGTATGTCTTCTGTATTG

AAGTCAAACAGAGATAACTTTATGTATGATATAGAGGGTATTGATGGCAATGAAATTCAA  
TATACAGTATATGAGCAAGGTCAGTTTTATAATTGGCATCAAGATGCAGATCATACTGCT  
GCAGACGAAAATGGTAAGTTGAGAAAACACTGTCATTTAATTTACAACCTCTCGTCTCCTGAT  
GACTATCAAGGTGGTAATATTGAAATGAAAAACACTGATGATGATGTATATCTAGTGCCT  
AGACGTAGGGGTACATTTATTGTGTTGATAGTATAACTGCTCATAGAGTCCAGAGGTT  
ACTGGTGGTATTTCGTAAGACTCTGGTAGGGTGGGTAATTGGACCGATGTGACGATGATTC  
ATTACAAAGATTGGAGTCTTATTCAACTCAAGCATTGCGGACTGCTCCCCCGTTAGTTG  
AAGAACCCCTCTTGAACGAGGAAATTTTGGATATGATAAAAATGGCAGAATGGAAAATA  
TGTCTGAAGAAGGACAAGTTCCAATAGTCTTGCAAGATATAATCACCCCTAAGTATAAAC  
AATTATACAAAGGTGTTCAATCAAAAATTGAACTATCTTAGGGGAAACGTTATATCCAA  
CATATTACTTTGATAGATTTTATTTCAGGGTCTAGAATTAAGAAAGATCATGATAGAC  
CTGCATGTGAAATCAGTGTACCAACGAATATCACCACTAACGCAACTACCCATGGCCAA  
TATATTTTGAACCTCCTAACGGAGATGTTAAGGAGCTTTACACAAATCATGGTGTGCTG  
TATTATATAAGGGTATGGAGTTAGAACATTGGCGAAAATGATTAGAAGGTACGCCAAAAG  
TTTACTATACCAAATTTTCATGCACCTTTGTAAGGGCAGACGGATATCACGTGCAATATG  
CTTATGACACCAAGTGCTAAATAACTAAAGCACAACCTAACTGATTAAGATGGATGGCAC  
ATTACGCTAATATAAATGATGATAATGTTGTGCGAGAGAGTCGAAAAACTTGACGACTTTT  
ATGAATGGACGGACACAGGTGAACTCGATGAACAACGTGCGATCACCACTATGAGTAAGT  
TTTTTGGAGCAACAACCTGATTGGGTGACGACCTCATCCAATGCCAAGATTCGTGGTATGT  
TTGCAGGTGTTGGAGATATATCTCGTCCCGATTTACATAAGTTTGTATCTGCAAAACCGG  
CAGGTATGGACTCATGGGTTTTAAATGAGGAAACCTACAGTGGGAACCCCTCAATACCAA  
TGTCCCCTGCTAACGAAGATCGTACTTGGGAGTGAATGAAACAACCTAAAGCATGGGACG  
AAGAAAACATTGAAAAAATTTTATGAATTGGTCTCTTTTGTATGTAGCAATTAATTTATT  
GAGACCTCGTGATAAATGGACTCTAGATCATGGCAAGTTTAATTGGAAAGACCCTAGACC  
TTGCCCAACTATGGAAGAAGTTGAAGATTGTCTAAACAAAATAAAAGAAGTTGAAGAGAG  
TCTTCCTTATATTCTTTAAACAGAACAACAAGAAGCATAAGCAGATACATGTCAAGATCC  
CGAATTTATCGCTTGCAATTATAAGCACGATCTTGAAGAGAGAGGTGTACATGTAGGAGG  
AGGAAATGAGCAAGGAGAAGGGATAGGTGGTAAAGGTGGTGTAGCTCCAGACTAATTTAT  
GAGTGATTATTTTTATCATTACAGATTGAATGACATACAAAATTCAAATCTGATGTTGA  
CAATGCAGTTAATGATTGTGGGTTAGATTGCCTCAACACTCATATGTTTGATATATCTAC  
CAGTTTACAAGGTAGGCAGTATCATTGATGGAAGAGAGAACACTTCCATATCTTAAAGG  
CATCATAGATCAAGTTAAAGAAATGATAGTAGATGCTGTAGATGCAAAAAATCTCAAGTT  
AGCATCTGCATGGACAGTATATGGGGAAGAAGGAACATATCATACAATGCATCAACACAA  
CACTAACAAATGATAATTGTAGTGTGATATACTTAGATGTAGAGGAAGAAATTTTCCCTGC  
AAAAAATGGATCTTTTTATTATTTCTTGGACGGAGTAAACTAGTTCCGCCAGGTGTAGG  
AGACGTTTTGATATTTCTGCAACTCTTTGGCATGGTGCATACCCTCAGAAAACCTAAAAT  
GTGACATGTATTAATCTTGATTTTACACATGAAACAAATTTTTAGTAATCAATTCCATT  
ATCAATATAGAATGCCTGGCTTTGATATTCTTAAAGAAAGGTTAGATACAGTTGAAAAAT  
TTGATGATTGAGATTTACATGGGGAGACCTATGTAAGATTGAACGTGACTCATACAATG  
TAAATGATTTCTTTGATATTCTAGTCAAACCTCTTGGTTTGTATGTCTGGTGTATCTTAATG  
TTAAATTCAATGCTAAGATTTTAAATCCTTGGTTGAACAGATATAATCGTAGTGGATTTT  
AAGAGATACATTATCACGATGATTGAGACATTGCAGGTGTGGTATTTTTAAATGATGGTG  
AAGATTTCTCAAAATTTTATTCTGGGACGCTCACCATACATCATTTACTAAACCTTGGG  
TTAAGATACTCACTCAGATGAAGTTGTCTAACATATATTATCCAGAGGTGAAAGCGGGTG  
ATGTTTTGTTATTTCCCTCACACATGTTACATGGTGTTCCTCATAATTCTGATACAA  
TTAGAGAGACATTTTCTTTAATGTCGTAGTGACAAATGTTGAATGAAGTGTATCTAACT  
GATAATTTTTTGGAGTGTGACATATGTAATTGGTTCATGTCATTTTCATCAAACTATGTTT  
CCTTTATATGGATAAGAGTTTGGAGAATAGAAGAATTATTAATTTAACAGAACTAAATCAT  
GTTCTCTTTAATAATAATGGACCTTATGAGGTAAGAGATTATCTAAAAATAGTCCAAGCA  
AACTTGACTACAGAGGTTAGGAAGTACGACCCTAAAGCATTTCCTAATTATATTCATTGC  
ACAGTGTGTACAGCACCACACTATCAACCAATACACACAGATTTTGTGTAACACGTTTGG  
ACATCTATTCTATACTTGAATGATAACTTCACAGGTGGTAATACTATTATTGAAGGTGAA  
AAGCTACCGCCAAAAAAGGAACTTGTAGCACCTTTAAAGGAGAGTTAAACATGGAGTT  
GAAGAAGTGACAAAGGGTAATCGTTATACTATTTTCGATATGGTATAAAAATCACGTAGGA  
GTAAACAAATACAGATGATAATAGATTTAATCCCAACATCAATTTACATGGATAGTTTTG  
AATTATCCCCGAAGATCATGCAATTTATCTCAAGTAAACTTACTAGAAACAGAGATC  
AATGTGCATGGGTGAGTTCACCTATACATTTACTTGTATTGGTATCAAAGTATTGAAGTTA

AAGTTAGAAAGCACGTTGAACAGTAAGTTTAGAATGACATTGGTTTGAGTAGAGGATACA  
ATTTGCAAGGTCATGGTGCATGGTTGAACAGACATGATGAAGGAGATTACACAGAGATAC  
ATCATCATTCTAATTCACCTTCTAAGTGGTGTATATTATTTGTCGGTCAATGACCAACAAG  
GACGTATAACAATTCTATGATGATAAAGATGGATTGTTTCGTAGATATTTACAGTATTAA  
ATTACACTGAACCTAACAAATAGAAATTCTCATAGAGCAAACGTAGAATGTAAGAATGGAA  
CGAATGTGTCATTTCCCTCACGTCTGAAGCATAACCGTTGCACCCAATCTATTTCGAAGAAC  
CTAGATTCTCACTAGCATTGACTACACGTGAGAAGGTGTATGTGATGCAATGGTGATCA  
AGGTGAACTATGTGCCAGTTAAATGAACTGTCCACAGGCTCGCCATTTCAAAAAAATTGT  
GTTATACTAATAGGGTAACGCAAACAGAACAAATGCCCACTTCACTCTCATCTGCACAGA  
CGAAGATGAGACCCTCACAAAAAAGAGCTTGATGCCGACATTCTTGATGATGTTGTCGA  
TAAAACTGCCGACTTCTACATGGAGTAGGTTATTGTTTCCAGGATCTTTCAACGCAAGT  
GTATCCAACCTCAGGAAACCTGATACATACTACAAGTAGTTTACAATTTTACACACTCAA  
ATGGGTGAGACATTTTCGGCGAGGTGGTAGCGATCAAGGTTACTACTCTTATGGTAAAGCA  
ATCCGGGACAAGCGACAAACAAAAATGGTAATTAAGAAAATCGAACATGAAAACAAAAGG  
GAATTAAAAAATGAAAGATCAAAACCCAATACGTCTGAATGAAAGTTCTGATGTAAAATA  
TCAGAGAGCATTAGACCTTTTTACCGAGTCAGTTATGAAACCAGACCCAGATTCGCGTGG  
GTGTGCCATAATCAGGATTGTTTCACTGAACTGATGGAGATAGGAGAACACGCTTTGAA  
ATATCTTTCAACGTTGAAATCAACACAAAACCTTTGAAAACCCAGATGAATCCGATACAAT  
AGAACAAGAGGCCTTGGAACACACTTCCCCTTTATCTAAATGGAGATAAATGTATCTTAA  
ATCTGCTATATTAATAAATGCAAAAAGAACTATTGAAAGATGCTCTGTTGGCATAACGT  
TTCAAATTTAAAGAAACGATACTATGGGGATAAAATTATTGATGAATCTTTTTATCTAAG  
TAAGATGAAAGAAATTCAGAATATTGTTGATGAACTACATGTACAGGAGTTATACACATA  
ATGTTTTCGTAAAGAAATTAACCTATTGAAGCACGCTATCATGAAAGGTCAGGAAGACCCA  
TTTCTATACTGCGAAGAGGAGTTTCATAAACTCAAGAAGAACTTAGGCAATTCAGGGAG  
TGGAAGAAATCGACTATTATAGCACAGAAGGGTGGATTTGGATACGAAGTGTGACAGCTA  
AGTTTGTGTCACAACCCTATTGACACTTGTAAATATCGTTTATATTAAGAATGTCGAA  
ACAAACAAACGTAAAACCTTTCAAGGTAACGTATACCCAGAGGAATACGTTTTTAAGACGA  
ACTTAAGTAGTTGAGTTTTGTTTCGACCCACCTATTATTTCTTGACATGGAAGTCCAAGC  
ACATGGTAACAAATTTGAAGACATTGTAACCTCGTGTGAGAACTGGGCTATCAAAGAAAGA  
ATATGATGCTCTAAAGAAGAATGGTTATGCCTCATCATTTGATTTACCAAAGGTCTTAA  
GGTAGAGTATGATGCTAGTATTAAAACTACTGGCAACAATACTATTTTCTGCTCTGATAT  
TCTCAGAATGATGAGACATAATGATTATAGACTAATTGTTGGGTGCTACGATCAAGTAGG  
AGATCAAAAAATATTTACGCACAATATGAGTTTTCTATCCAACCAAAGACTATCTAAC  
TTTATGGGTAGACATGGATTTTCATAGAGTACAATTCTTTCTAAACTATGATAAGAGTAT  
TCCAGTGGGAGCAAAGCAAGAGACGATTCTAAATTAGTGAGAGATAATTTGCAAGAAAG  
TGTATCATGCGATAAAGCATTATACACTATCAATCCAAAGGTAGATAGTAAGAAACAAAG  
AAGAGTTCAATGTTCAATTAACCTTGACGAACTAATTCCAATTGGTGTAGAATATGAAA  
GAAAGATATATCTTTAATCCTAGAATCTAAAAACGTACGTTTAATAAATGAGAGCATT  
TGGCCACCAACAAATATACCTGAGAAAGATATAGTGATGACCCAGAGTATCTTGCTAAG  
GAGATCATTAAATCATTTCATCCTACTGGTAGAATTCTTGACCCTAGTAGAGGAGAAGGT  
GCATTTTATCATAATTATGATACGGACAATAAAGATTGGTGTGAACTAGTAGAGGGAAGC  
GATTTTTTACAATATCAAAGAAAGTTGATTGGATTACTAATCCGCCTTGGTCTATG  
ATGCAACAATTTCTAGTGCATGGCATGGAAGTGGCGGACAATATTGTTCAATTAACAACG  
ATCAATCATTATACTACTAAACGTAGAATAAGAGATATGAGAGAATATAACTTTGCAATT  
AAAGAGATATATAATGTTCCACACCTACAAAACCTTGGCCACAACCTAGGGTTTCAACTA  
GCTGCTGTTACATACAGAGAGATTATAAAGGAAATATTAAGTTTTCTTATTTCCCTGAT  
CGTTCCAGATATAATATGACTACATACTGGTGTCAATCCTACGATTGATATTTACCGCCT  
AATTAGGACGTTACAGATTAACCTATTATGAATAGAAACCACAGACGTAAGCAACGTGTAA  
ATGTTGCTGATTTATTTGATCTTGAGAAAATTATTTCAATAGAAGACTGGAATGACGAGT  
GGGAAGTGTGCTCAATACAAAGAGACCACGAAGAGAGAGCAAGAAAACCTAAGCACAGAA  
ATAAGTTATCTACACTAGTATCATCACACTTATAAGTAGATGGTGCAGTATTAACAAAAG  
ATTGTTACGACCCAGAGACGAAAAACACATACAAAGCAGGAACTAGATTTAAAACCTAACG  
GACATACTAGAGACGCACACTGGTGGTCAGATGATGCTGACGATTGGCAACCCTCACACG  
TTCGTGAAAAGTATAAAGAACACGAAAATATTAATTCATATAAAAAGAATACTTAATGC  
ACGACAACCTAGATGACGCAGAGATTGCATCTGATAGGGTAGATGGTGGTATCGTGCTG  
TATTTGGAGAGAGGTATATTGTAATTAAGATGGTACGTTGCGTAATGTTGAACCATTAC  
AACACGCAGCTTTACTATGTTTTTCTAACAAGTATAACGTCAAGATGAAAACAAATACTG

TTAACATCAAGATGTGGGTTAGTGATATTGAGGATGCTGTTTTATTGGTTCGTAAGTAT  
ATCTTGATTCTGAATTTAATAGTTGAAAGCAAAAACTCTGCCACACTATAACCGATTTA  
CTTGGGCATATCTTGTTTCTTATATGAAGTCTAAGGAAGTTCCAGAAGCACTAGAAAAAC  
TAAAGGAATTGATACAGAGCATCTAATTATGAAGTGGTAGTTGACCCCTCAAATGGAC  
GTGAAGATAGATTTAGTCTCTAAATGTATTATTGAGAGAGTGGTAACAACCTCAAAGCAG  
GTACGTCAAGGTATGTTTCAGACCTCAGCAATGAACGGAAGTTATCCCTCTAACAATATGA  
AATCATTTACACTATTGTGTATTGATAAATTTATTGAAGGTAAGTATCTTAGTAAAGATG  
GTAGCATGAGAGGTGTTGACTGGAAAGCATACTTAGAAGAGTGGGAACTTGCTTGGAAG  
TAGCACATGGTATGACAGCACCTCACGTTGAGTATGGGACATTACCACTAGAGATGTTCC  
CCGAAGACGAAGACTATAACCAGTTAGGATAGTGTCACAACCCCTCGACAAAGGGGTTTTT  
TTATGCTATACTGATTGTATCGAAAGGTTATTATCCAACACTACGTCCACACCAAACAAGAG  
CATTCAACTCTATGCAAGAGAGTAACAAGGGTCAAATCATTGTTCCCTACTGGTGGTGGT  
AAACATACATCATGATTGCTGATACTCTTAAGAGATTCAAGTTACCAGTTGCACAGACTA  
CAGTTGTAGTTGCACCTCGTATCTTACTTGCTAATCAATTGTGTGCCGAGTTCCTAGAGC  
ATAATCTAGATGGATATTACAATCAAGGTGTTGATGTTGCTCATGTTCACTCAGGAGAGA  
CTCATCACTTCAGCACAAACAATCAATTTGAATTAATACTTGGGTCAACAACAGCAAAA  
AGCACATTTTGATATTGACCACATATCATTCACTTAAAAAGGTGGTCAATGCAGTTGATG  
TAGAAGTTGATACTATTTACTTTGATGAAGCACATAATGGTTGTGGTAAGCACTCCCATA  
TTGCTCTATCTCTAATAGTCCAGTATGCAAAACGGAGTGACTTCTTTACAGCATCACGTC  
GCATGGGTCGTGGTGTATCACTTGACACAGGTATGAACAACCTCCTCAGTATATGGTGGTG  
TATTGGAGAGTGTCTCGCACAGGAAGTCAAGTCAGGTGCTATTGTTCCCCCTAAGA  
TTGTTCCCTTTGAGACTCGTAACTCAACCCCTCGTGACAAGTATAATGCTCATGAGATTG  
ATGCTGATAACCTCAGAGATATTATCGATACATTTGATGATAGTCAGAACAACAAGATTC  
TAGTTGCAGCACCTAGTTCAAGAGTCTTGGGGAATACGCTCGGACATACTACCATTGTTA  
AGTATTTCAAGCACAAATGGATATGACGTTATGCACATCACATCAAAGTTTGGTACTATCC  
TCAATGGCACAAAAGTTGGTAGAGAAGAGTTTTTTGACACACTCACAAAGTGGGGTCAGG  
ACGATAGTGAAAGATTTGTTATTTTCCACTATTCAATATTGTCTGAATGTATCAATGTTT  
CAGGTTTGACTCATAACAGTTTTGTTGAGAAACCTACCTATCACTGAAATGGCACAAACTA  
CTGGTTCGTGTCATTCGAGTTCATTCTGATGATCGTAAATCAGTTGCTGATGGTCTCATT  
CTGCAGGTGCATTTCACTTATACAAAAAACAATTTGGACAAGTAAGTGTTCCTACTGGAC  
AAAAACGTGGAGACGCAATTGGTAAAAGATTGCAGAATGTAGTCAACCAAATTTTTGTTG  
ATGGTGTTCCTTATCGCTTATTGCCAATGTAATTAAGACCTCAAAAAGATACAATTCT  
ATATGGGGATTGTAGGAATACAATTCCCACTATACATGAGAGAGTCCAGATGTGTGTAAC  
TTCCACCTTATTATGGACTAAGGGATTATGGTGGATAGTCATCACAAATAGGACAAGA  
ACAAACGCCCAGAAGAATATATTGAAGAAGTTGTAATGTATTCCGAGAAGTTAAGAATGT  
TTTAGCAGATCATGGCACTCTATGGTTCAACATAGGGGATAGTTGTTATAACCATAGACC  
TGGTAAAGGTCAATCATATCCTAAACAAACAGTATCTAAACTAAACAAGATTTAGCTGA  
TAAATGTAAGAAACGAGGTAACAAATTAGAAGGATTAAGAGAGAAAAACCTTATTGGTAT  
TCCTTGGTTGTTAGCGTTTGCCTTCCGCAAAGATGGGTGTTATCTTAGGCAAGATATTAT  
TTGGCATAAACCTAATCCAATGCCAGAAAGTGTAAGATAGATGCACAAAAGCACATGA  
ATATATTTTCTTATTCTCTAAGAACAAGAAATATTATTATGACAATAAAGAAATTAAGA  
ACCTGCACAACATTGGGGAAGTACTAGAGATAGAACTAAAGGAATGTATCACAAATAAGGAAC  
TAGATTAAGTCCTCATACTGGACTCAATAAGAGTTATCCTACAAAGAATAAAGATCATT  
ATGGTCAGTAACTAATAAATCATATAAGGGAATTAAGTACTAGCAGTATTTCCCCCTGACTT  
AATTGAACTTTGTATCCTAGCAGCGAGTAAGAAAGGAGAATTAATTCTTGACCCATTTAT  
GGGTAGTGGCACAAACAGCAATGGTATCTAAACAATTAGACAGGCATTATATTGGTTGTGA  
ATTGCATGAAGAATATAAATCACTGATTGATTCAAGATTACCAAACACAGCACTTACTGA  
CTTGTGTAGTGTGACAGTTAACGTACTGCACACTATCGGTTGCATATGACCCCTATAGTC  
ACTTATAGTATATTCATACAACAGATTGTTATTATGTCAACAATGCAAGAAGCGCACTC  
AACTTTCCGATAAAACTTTTTGTTTCAGTTAATCATCATTGGGACGGTTATCTTGAGTGG  
TTGGGTGTAGTCTAACTGAACAGTATAACAAACTAGAGTCTTTTATTGAACTTTTCTCA  
GGTGGAGACATAAGTTCATGTTGGTCAGATAATGAGTATGATTTTCGAGAAAAAGGAATTG  
GTAACGTTACCCAAAACCTACTTACTACTCAGAGAGAGGAGAGACAGCACCCCTAGA  
ATCGCACACTCAATTACAGAGTTCCTAGATCATTGTGACCAGTGTGGTGGAGAATTTGGT  
TATGTCTATGATAAGGGAGAGTGGTTCGCTTATGAGACTACAGACCCGCACTTTAGTTGAC  
ATTCCAGAGGAGATAGCAGAATGAAATTTATAGTAAAAGACATTGAACTCTAGTTAAGTG  
ATGTTTCGAGAGGGAGACCCCGATTTACAATTCACAGATCGAGAAGAGAATGTAATGCACC

AAAGATGTCTAGGTTGATGGACAGCAAGAAATGAAAAACATTA AAAAAGAAAGGATTTTTG  
ATTCATAGGTTATCATGTAGAGTTTGTGACTACGAGGTA AAAGCATGAACACCTACCC  
ACTTCCGAAGGTGCTACAAAGACATGGTATTGAAGTTATGCTGATGAATGAACATCAAAG  
AAGAATCTGGATAGAGGACGTTAAAAAGATACACCCAGATTTCCCGTTTGACAGCATGGT  
GTATGACACTCACACTAGTGGCACATAGTCCCCCATTCCCCTCTATCATACCCTATACT  
AAAAATATTTCCAGAAAGAAATGCAAAACATTCCATTCTACC ACTTCCCCAAATCCCCTA  
TTCTCATCCTAGGGTTATTTGGAATTGTAGTCGCACTCGTCACACTTGACGTTGTTAATG  
TAAAGTATTTCAATAGTCCATTCAACGAGGATAACA ACTAATGCTAGATTTTTTATCAGA  
TGTCTTAGAGGATTTTTGCTCTAAGTATAATCTACC ACTCATGAGTGCAGATGACCTATT  
ATATGCACCTGCATGGTCAGAAATCAATCTTTCACAACCTCAAAAAATTTGGTTAACCAA  
TTATATGGAAGTCTGGGATATTATCCAAGAAAATTCTTAAGGAGAACTTTATCATGACAA  
CTCAAGAACGTGACAATGCAATTACTCAAATGTCTAAGCACTTGTTTAGCGTGATGCAGA  
CCAGAGTCAAAGAGGACAGGCATCTAGATGCCCTATCAATTTGCGGAGAAGTGGGTAGTAA  
ATGGCAAAGACCCTCAGGACGAGGATACAGAGTTCATTTTTATTCCTAACACA ACTTTTTG  
GCGATTGGACATGGGAGGTGTGACAGTACATTTAGCGTCACATACTTTCCCTATTCATAT  
CCATTACTCACTATAATAAAGATATGAACAAAACAAAACCAAAGATAAAACCATTACCA  
AACTTATGGAAATGGTTATTGACACACTTAAGTATTGTGATGATCTTGATGACCCTGCAT  
TTGCAATGTATTATGTCATGAGAGACGCAGTTGAAATAGAAGTTCGCTATCCTATGGAGT  
TTTAACTAATGAATCAAAACGACAAGAACGAACTTGAAA ACTCTGGTATGACTCAAATG  
AGTTGTATGAACTAAGATAACCATTATGTTGACAGATATGTTGAAAATATGTCAACTAAGG  
ATTTAGTCCAGTATGTCTTTGCTGATTTGCTCAATTATGTT CATAATCAACCAGATGCAG  
AATTTGTTGATGAAGCACAAA ACTATTGGGAAGATCTCTATGATGATGTTGTTACTGACA  
GCAAAGAGTATGCAAACAGCGATTTTAATAAGCCCTTAGAGGAGAGCAGAAATAATGACT  
AGATCAGAACTAGAAAACAAAATTATCAATTTTGT TTTTAGAGAATAAGCTTGATGCTTCA  
TTTGTGCAACAAAAGAGGGATTA ACTTATGTTTCGCTTCGCAGTAGAAGAGGATTTTGAA  
GAATGATAAAAATTGAACTAACAAAAGGACAATTTCAAGAAATCTATGATGCAGTTAGGG  
ATTTACCTGACGAGATCAGAGAAGACTTAACACTTGATGGGGAAGAACCTGATACAGCAC  
ATTTAGATTTGTTTAGTGACGTTGATGAACTCGCAAGAATTGATAAGAGACTCAACAAAC  
AATTTAAGCAAGTAAA ACTCAATTCGCCAGATTTGGAGTGACAGTTAATTATGTATCACA  
CACTACCACGCATAGGTTACAAAATACCCTATAATACGAATAAGCGAACAAAGAACAAAA  
AATGATTCCAGAAACATTGCCAGTTC ACTTGAGTGGAGATCAACTCTACAATATGGTAAA  
ACTCTAGGATCAACTCAGTGACATGAGTTTTGAACTCATA CCCGAACAGATCGAAGTGTT  
CGAGAATATTCAAGATGCAGAAGTCAACGGAGGATTTTTCTAATGAAATCATTTCATCA  
AAAGTTACGATCGTTTTTGATATTAATAATCCTGAAGCGAACTCTAAAGAAGAGTATATC  
CAAAGTTAAAAGATCAGTATGAAGAATGTTATGGAATTTACCTACACGATCATGAGATC  
ACAATGATCGAAGAGGAAGAACCAATTAATCTTTATCAGGGAGCATAATGGAAAGTTACT  
TAAATCTATTTGAGCATATCCCAGAGGACGAGATTCACATATTTCTAACAAAGATATGGG  
AAGCACTTGATCGGGCAGGGATTGAACTAAGACAAGATGCAGAATTATCAATCCGCATTT  
ATGATGACA ACTATGAAGGAGAATATGATGGGGAAGAGTATGACATTTAAACAAGTGTCA  
CGTACGTTTACCATTCCACTCTATTATCCTTTATAATAATTGTAATTAACATTTTTTATT  
ATGATACAGTATTTTTATTGAAATCCCAAATACACCGATCAGAGAACCAGTGACCGGTTTT  
TGTTATGACATACTATATGATATGGCACAAACAGTATGTT CATGCAGAATAAGTATGGTCT  
GCTAATTATGGCACTAGAATGATACAGGGCATCTATACAGATAAAGAGTAATCAATTCAT  
TCAAAGGAGATTTTTAAAATGGGTGCTACACGTGACGTGTGTGCTAATTTTGATGAGACT  
TATAGGCAAGAAATGGAGGTCCCTAAAGATTCGCATTC AAGATTATCAACCC  
GATCTTAATTACTACTGGGATAGTCCAATAGAAGAGGATTATAATTGGAGAGACGAATTT  
CCTCATGCTGATTGTATGTGAGAAATCTGTTTTGATATAGCAAACCCAGAAAAGAAAATC  
AAATGGAATTGTGCCAGATGTTAAAGTGTACACAGTTTCCCTATTCCCTATACATTTACC  
TTTATAATATTAGTATATTCAACAAACATCATGCAGA ACTTTAAAGAATTTCAAGACTAT  
TGTGAATCATTCTACGACCATCACACCCAGATGTTTTATATCCTATTGATGGATTA ACT  
CGCGAAGAGTTAGCACTTGCTACACTCACATACCTAGACTTATGTGCATCATCTGATGGT  
CAAGTAAACTGGGGAGACGGAGTTAGTTTAGATCGTGAGAGAGTCAGAGATTTTGTTTAC  
GCAAGGAGGTGAGTAGCATGAGGAAATTTATAATTCTAGAGAGATTTGTTGGTTATAATG  
AAATAACGATCGAAGCGAATACCGAAGAGGAAGCGATCGAACTTTATAATCGTGGACATT  
TTCCCGATAGTGCGGTAGATCAAGATGATACGTTTTTACGATTTTGAATTTAGAGATATAT  
GTCCAGAATGATGGAAGAATTAACAGAAAAACAAAAGTTGCTCATTCACTTGAATGAAGT  
TAAAAACATATTGAACAATTGCACATCACTTGATGATGAACTAATTGGATTATACCAGAA

TTTTAACACGATCACAGACGTGGACATTTTTAAACCATTAATGGACAGTTCAAATACTGT  
CACATAGTTTGACCATTCACACTATTATGGACTATAATAGTAGTATAAACAAAGAGGATT  
TATGAACAACACTTATCTATTCCTGATGCACAGATGAGAGTCATCAATGTAATGCTCAC  
ATATGTTGACGAGTTGGGAATCAATGCAAAAATACAAAACCGATTTTGAAAGTCTTTATGA  
CTATATCCAACAGGCTGAGAACTATTCTTAGGAGAGTAAAATGTCAGTATCACATCACG  
AGAGCATTCTCGAAACTTGCTATGATGAAGCATGAATAGACTACGCAAAGAGCATGGTC  
TAACATACGATCAACTTACAACACTTGAGCAAAATTCTGACTACGGTATTCTACCAGGGA  
TCGAAGCAGAAGCAAGAAACAGATTTGAGGACTTGTGCCAGTAGGAATACTTTCACCTAG  
TTCCCCATTCAACCCACCTATCCTTTATAATAAGAGTAAACAACAACAATCTATGAGG  
ATGACTAATAAGCAAGCAGTTCAGCAATTTAGATGGGATTGGTCAGACTTCCTAAAATCT  
AACCCAGTGGGAGGGGAGACAAAATTGCAAAGAGGTATGCTTTTAATGATTTTGTTGAT  
GCTCTCAATAAAGATGGTCTAGTCTCACATTATCAAGCATATAACTGGTCAAACCCATTC  
TAAGGACATTTTTAAAAATGACAACACTATTGTACTTTTAGAAGAGTCACTCAAGCAGTTAA  
AGATTATTCAACTTGAGAATTTGAAGAGAGAACCGAACCCAGAAACAATTTGACT  
AAACCGTTGTAGTTCCAGATACTGATCTAGGTTATCATGAACACTATACAATGGATTTAG  
AAGTTGCAAAGAAAAGTGAAATTGAGTGGGCAAGAGACTACGGTCGGGGATCTGTAGAAG  
ATCGTAACCTAAAAACAGTATTCGCAGTGCGGTAGTGTGACAGTTAGATTTCGTGGCACAT  
GGTAACCCCGTTGTCAGTATTACCTTTATAGTAATCGTATAAGAAACAACACTTCTAAA  
AAACATGACAATCTCAGAATACAAAAAACTTCAAAAAAACGACACTCTAATGATCGGTCT  
TGATGTATCTGAAGAGAAAACAACAGAGTAATCAACAGAATCCTCGAAGTTGACAATTT  
TCAAAATGTTGCTTGTATTGTGCAGACTTCTCAGAATTTGTGGAAGCCTTGGCAGAGTG  
GGGTGTTGATGGGTGTTCTAAGGTCGATTTTGATGACCCTGATCTAGACATTGCTAAACT  
AGACAGATTTATCAAATCTGAAAACGGAAACATTAGGGGAGAGTAATGGAACCTAACCCCT  
AAACAACCTAGAGTATGTCCTCGAATGTCTCAATTTTCAGTACGCAGAGAATGAGCATATT  
AAAAGGACATTATCGAACTTAATGCTAGTATATGCAGACTAGTAGCAAACCAACTACAG  
GAGATTTACAGAAATGACTAGAGCAGAATACGAGTTAGTTTTTCAAGCATTAAAAACTA  
TCGTCTTTATATGACAGATGAGCAAGAAGTTTTAAGCGAGAAAATTCTAGACGATCTTTT  
TTACCCCGAATTCGATAAACTAAAAGGAACCGAAGAGACCGCAGGAGATTTACCAGTTTT  
AGAAATTCCCGAACATCTCGGAGAGGACACATCAGAAATTAATCACTTAATTTTCGATA  
AGTCAACGAACCTTGTGACACTTTGATTAATGGCATAGGGTTTCCCATTTGCGGGTCGC  
CCGCCCTGTAATTATAGTATAACATACAAAGAAACCTTTTTATTATGAGAAAAGTCGAAG  
CAACAAAGAACTCAATGATTCGCAACGGTGTAGCATGGTCAGATGGTAATACTGCCACTA  
CTTACGATCATGATGGAAATTGCCTAGTTTCCCTACACGGCAATGATATCGCAACTGTTG  
GCGACTCATTCATGGCATTCTTTGACGGTGGTTATCAATCTAACACAAGTAAGTCTAGAC  
TCAACGCATTGCGACAAGAATTCAGACCACACACAAAAGTGTTTCGCTAAAAACTTGCAAT  
GGTTTATCAAAGCACATAATACAGTAGTTCCATTTATCTCAGGGAGTCTAGTATAATGAC  
AGTATTGAATGAATATGAAAAAATGTTTAATACCGTCCAGTCTCTACACTTTGGGAGAAC  
ATTCTGGATAGATGACGAAAATAACCTATGTTTCAGCACCAACTTATAAAGATGGTTCTCC  
ACAATGGGAACAATGGGATTATGTTAGGGTGTGGACAGACTTAGAAGGGGTTAACCTCGT  
TAAATGACTTGATGTTTCGTA AAACTTGTCTAGAGTAAAAAACTATGGTGCGGAGGATTT  
TACCTAGTGCATCATGTTCTTTACGACTGGTCGGAATTAGGAGAAATTGATAAGCACGTT  
ACCCAATTAGAAAAGGGAATCGAAGCAATCAATCAAGCAATTAATCATGTAACCTAACA  
GAGAACAAGATTATAAAGAACCACTATATAGAGTTAGATCGGAATTGAATAAACAACCTC  
AATGACATTCTAGCACATTTCCAGATTATTCAAAAACAATGCAAATAGGGGATATAATCA  
GATTTAAAGGAGTGCAGGGTTTTATCACTTTTAAATGTAAGGATTATATTACCTATTGCA  
TTCACCAGTATAAAAAAACAGATGAAGAAAGAAAACACGCCCGAAGAGAATACACACAGG  
TCAATGTTCTCATCTACCGACATGAGTGGGGTATCATTAAAGCAACAGTTGAAGTATGTA  
AGGATAACGAGAAGAGAATTGACGTTAATGTTATGGGATAATTATCGGAAGTATTAGCTA  
AAACAGCGAAGAGACAGAAATGCTGCAAATAAATAAATATTGAAATAAATCTAAGTGTGT  
GTTTTATCTCTCGGTAAAACCTCTCAGAGTAATGCACCCTTAGCACGCATCTCAACAGTTG  
TCAAGTCACTCGAGGATATGCACACATTTCCAGTAAGGGCTTGACATTATTGGGAGATAT  
GCCTTATAATAACACTGTAAGGGTTTAAGAAAACAACCTGTATGCTTTCAACTAAGTCTAA  
AATGATCTACTACTCTATAACGAAGAGGATGAATTA TAGGACAGTTCTCTAGTATATA  
CGCAATGCAGATATATGATCATGTTCTCAGAGTTGAGAGAGACGAATGGAGGGTACCGAA  
GAACCAGGATATAAGCGTATTTGATTATATCAAATCAATCGGTTATACTTGGGATTGTGT  
CCCTAGTTCTCAGGTAGGAGAGAGTTGACAATGTAATTACCCTATGCTATAATATGAGTA  
AATCGGAGGTTATCCAATTGTAACACTGAGAACAGTTACTGATTAATTAGAAGGCAATCT

TATAAGCCCCCTTAATGTAAAAATCGGCCACTACCCTAAGCTACAAAGGTTCCCCAGAGC  
ACTTGATATATTATTCATAATTTTCATTTACATCAGTATTAAAAAAATTTTGGAGAACAAA  
AATGCCCCAGAGGACGATCTAAAAACAAACAAAGAATTTAGTGGTAGACAAGAGCGAAG  
AGTATGGGCGATTGAACAATACTAGACTGGAAGGGTGTTTAGATAACAGAATGTATGA  
AGGTGCAGATCATGCTGATTCTATCTACAATGTAAAGAATAAGGATTCCTATATACACT  
ATGGACGGATTGGAAAAGGAATCATCCACTACATATCCACCTAATAACAGACTATAGAT  
GAAGATTTATGTCCCACAGAATTACACAAATACTAGAGGAAGATGATTATGGGAGACTTAC  
TACTCACTATCCCCTATGAATTGTGTCAAGAGATGGTTTGGAACGGAGGAAGTGAAGTAC  
AGTATGAAGTCAATGATGATGGAACAGGTTTTATTTTAAAGAAAGTGAATGACTGAAAAA  
GATCAAGACGAAATTTCTACAGCATTGAATGCTATTAATGAATGTTTACTTGCTCTTAAT  
ACACGATTAGAGGCATTAGAGAAGCATGTTTCCGAACTACCAACACCAGACAAAACATAT  
TTCAAACAGAAAGGTGAAGAACACTACCTAAATATCAAAGGTAAGTATGACCTGATATAT  
AAACGTCTTAAGAACTAGAACATGGGATGTAAAATCACTGCGAGAGGACAGAACCCTAT  
CTTTAACTCTAATTCCCTTAACGATAATCACTGTTATGCGTACGATCCTGAGGCAACAGG  
GCCGGTATCGATCACTTACAGTGAATATCCTACTGCAACAATTCGAGATTATACCCAATA  
TTACATAACCAGCAAGAGAACATAACTTCGTCAATGTATAATGCTTCGGAAGTATGTCGTAA  
CACTTGTCAATCATATTTTCAAACAGCAGGTGCATGTGGTAAGATATTTAAGGATAATAA  
TTGTGTCAATAATAAACTTGTCTATTAACCTTTGATTATACCCCTTTAGAAGTCTTGT  
TGACTTTGCATACTCTGACGTATGGTTCTCATACTTATATGATACGTCTGTTAAAGCGGG  
TCATGTAGGAACTCCTGCGTATTATACTGAAGATGAGATCAAACTACGAGTGGAGGAAC  
TGGTCTGGGTATGGTCGTGATAATCAAAACACTTCATCCAATCGTTTCCCTTGCACGAG  
TCAATTTACCTGCACCGCAGCGACCACAGACCTTAAGTATACCGCTCCACAGATTATAC  
AGGCGACCCCGACTGCCCTCACCCCACTCTATTCGGGTTTGGAAACCACATCTAACAAGAT  
CGTTTCAAGTATGATGCGCTATCCACACAGATACCAAATGGGACGGTGGACTTTGAGGT  
GGCAGAAATGGGTTCATCTACCTTTACTGATATATGGAATGAGAACCAACTACAAGGTAC  
GCCATTCCCTTCCACTGCAATAACAACACTGGGTAGTTGATGGTGAAGCAGGTTTTCGAGGA  
TTTTTAGAAATATGACCTTAACGGAGCACAGATGACCTCTGGTTCTCCTAACTATAACGA  
TAATGCAACTACAGGAGTTAGGTTAAAGTTTCGTATTGAACCTAATCTTCTTGCTAATGG  
CACCATTAACGGAATAATTGGGAACTAGCGGAGCTTATGAGCAATGGATCAGGATATTC  
AGTAGGTGATACATTCGTGATATCCTATGCCAATACTCATACTAACGGAAGCACAACACTAC  
ATTTCAATTAAGGTTAGGGTAAAACTGTAGGACAAATCAATTCATAGGTAGTTCATC  
AGGTTTTGACCTACTGAGATCGAATGATACTATCAATGGACATAACCATTACCCGCGTTTT  
CCACACAGATCAAGAAAACCTTCGAGTATCATGTGCGATACTTAGACGTAAACGGTAATAA  
TTTTGCAAAAGTTAGTCAATATACATCAAATAGGGCGCACCAAATCACCACAATAGCAGG  
AAAAGGCATTCCCGACCGCGCAATCTTGATTGGAAAGTATGAATTTATCGATAAATCTGT  
GCAATTTGTCACCGCAGACGTAGATTTGGACGCACCAGACATTTATAACTCCATAAAACA  
ACCAGATGTAACACTTACAATCACAAATGGGCGCGTAACAGGCACTACAATTGTGGATGG  
AGGGACTGGTTGGAAACCAATTGAAGGAAGTACCTGACCTTGTGTCACTGCACCACTCAT  
TGAGAGTGGAAAAACGCGGAATTGAAGGGTACGTTCTCTAATGGAGTGCTCACGGCGGT  
AGAAATTACAAATGCAGGTAGCGGATATGACGCAGATAATGCTCCAAGGCATGGATTTCG  
CAATATTTACAAGGAAGTTACCACAACCTCAAGAGAATTTTCCCGATGATGACTATACTCC  
CAACACTTCTAAGCAAAAAGTTATCCAACTCTGAATAATTTACCTAAAGCGGGGGTAGT  
TCCAGTCCATGTAGACTCATTGCGACTGATCAACCCGAACTTACCAAAGTTTGATTCA  
ATTAGGTCTTACTGATAGTGAAATTAGAGCAGTTCTTACTGAAAATGAGGTAAAACGTTT  
ACAAATTGACCCTTCTACGTCTCCAAAAGGGACACAAACCGAATTTGCGTCTCTAGACGC  
GATTTTTGTCTTCGAAGAAAGGCAAAATTTTACTGAAAAACAACCTCATATCAATATTAA  
GTCAGATCCTGACCGTAGAAGAGTTCAAAAACCTAGGACAAAGAGGGTATTCCGCTAGTTC  
TTTGGATACTCTTCGTGATGCTACACAAACTGATCAGTATAGTTTGAAGTCTTTGGACCA  
TTCTGAAGTTCCTGACAAGGTAAAAACGTTTTTTGAAAGATGATAAAGAGCAAAGGCTTGC  
AAATAGAGATGCGGTTCTTGATGAAATGACACAAAAAGTGAATCCTGAGTATACAAACCTA  
TATAGAAAACCTTAGTTGAGACTGTTCAAGGTCCGTTAGTCAATCTTCCAGAGGCATCCAC  
GGGACTAAATATATGATGACACAGTATCGTGCGGATCCTACGTCAAAGTGAAGTAAA  
TGTTACAGTTTCTATGACACTAGTAAATTCGGGGAATTCACATTTTACTTGTAACCCTCC  
TACACCTTCAACAGGTGGAACAGTCACAGGCGGAAATGGGGAAACGATTGTAAGTCTTAA  
TCAAATTTCTAGTTTACTCGGACCTGTTTCTCAAGCGTGGAGTTGTAGCGGAACATTATC  
TGTTTACCATGAACTTGGTCGAGCAGCAGATAATGCTGCCCGCGCAGGTGCAGCGTACGG  
AAATCCTTTCACAATAACCTAATGGCATTCAATCCAACAGCATCAGGAGCACTTGGTTCT



GCATTATTCATGGGAACATGTACTGGACACGGAGCGTGAACAGGATATCCACATCATCCT  
GGTCTTGGTGGAGGAGTATTGAAAGGTTCTTCTTGTCCACACGCACCTCTTGCTCCAAGA  
GTTTCTCCCAGACCAGTAGATGCGATGGATGTTACAACCATATGGCCTCCGCATCCGCAA  
TTACCTTTTGTCTGCATTATTGCGGAATGTGATTGTTAATGGTATAATGCCTCTTATCGAT  
TTCGTTCTTCTTATTACTCACCTACTCCAACCTCTCATCCTCACACAGTTGTTACACCG  
CTTCCAAATGGTGTATGTGTTTACTACTACATCTTCTCCTGCGTGGCACTGTACAGTAGGA  
ACTGCGGGTGGTAGACAAGCAGCACCAGGTCATGCTAGAAAATTACTCACTACTAGTAAG  
AACGTATTCATCAATGGTTCGACGAGCAGGAATGTTTGGTGTATCCTCTAGGTGATGGTACC  
GTAGCGTTTCCGTCTAACTCGCGTGTGCGGGTGGAGACCAAATGTATTTCATAGGAGCT  
TAATTATGGCAATGAGATTTCACTTGGGTAACACCATTGAGACAACCCCAAAGAAAACAA  
GACAAGGTAGAGGACAGCATACTAAGTATAGTGCTACCTCTCGTAACACAGCAAAAAAGA  
GGTATCGTCGTCTAGGCAAATAGAATTGTAGACGGTAAACGTAATGCTAGCATTCTGTGA  
GACATGTCAGATCATTTTTATGATCATGGAAATGAATATTGTCGTTATTGAATTACTGAT  
CCACGTTCTGATAGATCAATTAGGAAAAAATCTGAAAAAGACGCTAAATAATACTGGCAC  
TTCTCGTATTAGATGGCGTTAAAGAAAATATCAGGTAAAGATCAAACAGATCACGTTCA  
TTTACGGATCTCTCATTGTTGATGGTGA AAAATGCGAATACACAGGATGATGCTGTCGGG  
AAAAATGACAATGCAATCAGACAGGCGATCAAAAATCTAATTATGTCCACGCCTGGTGAA  
AAACCATTTCAACCTCTAGTAGGATCTAATATATCAA AATTCTTATTTGAACCTCGAGAC  
GATTTTACAAGTGATGCTATCAAACAAGAGATCATAAATACGATTAATCGGTTTGAACCT  
CGCGTACGTATGACAGGAGTTAGAGTACAACCTCGTTATGATAGAAATACATTCAATGTA  
ACGATGGTGTATAAAATAGCTGGAATCCCAATCAACGAAACTATCGAGTTCGTGTTACAG  
AGACCTGCATAATGCAACCAAATAACCTCACAGAATTAGACTTAGAACATATCAAAGCAT  
CGATCAAATCCTATCTAAGAAGTCGGAACGAATTTACGGATTATGACTTTGAAGGATCTT  
CTTTATCGTATCTTATCGACACATTAGCGTATAATTTCATATTATACTGCATTTAATGCTA  
ATATGGCGATGAACGAGGCATTTTTGCCTTCTGCTACTATTTGAGATAATGTCGTTAACG  
TTGCAAACTTTTAAAATACGTTCCACGTTCAATTACTTTCATCTAGAGCATGCTTATAAC  
TAGATGTACAAACAACACAGACTGCAGGGGCATATCCTAGCAGTATAACATTA AAAAAAG  
GTGCTATTGCATCTGGTGGAAATCATGTTTTTAAACATTTTAGAAGATATTACAAGTACGG  
TCAGTTCTACCACAGGTGTTGGCACTTTTGACAAAGTAATGATCATGGAAGGTAGTATAG  
TTACCTTCCAATACATTGTTAATACCTTTGCAACTCAGGTTTATAAAGTCCCTTCCGAAG  
ATGCAGACATTTCTACTCTTAGTGTAAGAGTAAAACCTAACGAATCCTCTACAACATCAG  
ACTTATACAGTTTGACTGATACAATCACTGATTTGACCGCAACTACTCGTGCATACTTGC  
TCAGTGAAGGTGAAGATATGCGTATGAGGTAAAATCTGGTGATGATACTGCAGGTAGAG  
CGTGAAAAGATGTAGAAGTCGTA CTTTTGAGTATTTGGTTACTTCTGGAACAGAAGCAA  
ATGAAATTACAACATTTATGTTTCATAGGACAGATTACAGACAATATTGGAGGTGCCTATA  
GTGGCACATCAGTCACTTTGAGCATGAAAGAGAAGTCACAACCTCGGTGCTGCAGCAGAAA  
CTTTAGAATCTATTAATAATAATGCACCAAGATACTACTCTGCACAATACAGAGCAGTAA  
CAGCACAAGATTATGCATTAATTGCGAAAAAAGTGTATTCTAACGCCGATTCTGTTGTTG  
CATATGGTGGGACTCTTTAAATCCCCAATTTACGGAAAAGTCTTTATTGTAATCAAAA  
CCAAAACCTGGTTCTTTACTTAGCCACGCAACTAAAAGTCAATTTCTGCAGATTTAAGAA  
AATATGCTATGGCATCAATTGATCCTGTAGTTATTGACCCAGAACAGATGTATTTGTATT  
TGAAAGACTTTGCACAATACGATCCTGGCACTGCATCTAATACTTCCGATATCAAACTA  
ATATTCAGAACGGAATTAGCGATTGGGCAACACAAACTCAGATTAATAACTTTAATGCTA  
CATTACAGAGCACAAGCATTGAAAAAGCGGTGACTTTATCCGATAATAGGTTGAGTGATG  
TGTCTTTACAACATCTATATTAATAATACATCTATCCAAACACAAATCAGACTAATACTT  
ACTGTATTGCTACTGGTGC GGATCTATATGATAGTGGTCCAAGCAATCCGATGGAAC TA  
CTTGTAGAAAGGAACCTAGATTGCTTTCAGGACCTTTTAGAACAGCAGATAGACCAGGAA  
TTGATCAACAGTTTGAAGATGATGGTTTTGGCAACTTAAAGAACATTTTATAACACTGGTA  
ATAAGAAAGTATATACAAATAATGCTGCAGGACCTGTAAATTATGCTACAGGTCAAATTT  
GTTTTGGTCTGTTAATATAATTGGTTCAGGTGTCAATACACCTCTAACTGGATCTATAA  
CAATTACAGATTCAACAACCTGGTGCAGGTTCCGTAACAAATGCAGATGTACTTCTACAG  
GTCTTCAGATTCCTGTTCTGTTTATACCTGCAAACGTTGCATCTATTAATGCTGCAACAC  
CAGGAACTATTAACAATATTATAAACCCAGAGGTTACAGTTGTCCAGTAGGTACGATTC  
CTCCTCCAACAATACCTCTAAATAGTTTGACGCCATCAGTGTTTAAATACGGTTCCCAAA  
CTATTACTGTTGCTGAAATCTCAAACGCAGGTGATCTAACATCCTCTTCTTCTGCTTCTAGG  
TG TAGATGAACATTAATAAGGTCTCTCAGTCAGTTGTTTCACAGACTCCAGATTTTATTG  
GAAACGATCATCCATTATTCAATAAATTTATTGAATATTACTATCGTTCTCAAGAAAAAA

CGGGTTTAGGGCAGAATATTGTCAATGAGTTTTTACAATATCTTGATATTGATAAACTTA  
ACATCGATATTCTTGATGGTGTACAAAGTTGGTTAATCGACAACACTACAACCTGCTGATG  
AGATACTAGTTGAAAGTATTGACAGTTATTTAACTTAAGATGTTTCTGTTTAAATTGGTA  
ATGAAGGAGTATACTTTGAATCTACTACAGCATCACCAAACATTGCTCTCAGTCCTGGTA  
TTTCTTACGAGCACCTAAAATTAAGTAGACAACCTTTGCAAGTCTTCTAGATTCCTTTG  
ATGGCACTACAGTTAGCTTTAATTTAGCATCTCAGGATAGTCCAGTAGTAGCACCTTCGG  
CACAACTTAATTGTTTCTATTTTCGGAAAAATATTAACACCTGGTATTGATTACACAG  
TTGATGGCACTGCTATTGTCTTTACTACTGCTACTAGGAGAAGAATTCCTGCAGATGACT  
CAACTTCAACTTATATTAATATCAATGTGGATTTGTTGATAATACAATTGTTGAAATAG  
ATAATTTATCTAGTTCTTTAGGTGAAGGTAAGAGACAGTTTACCATGACAAGAAATGGTT  
CTCCTTAAGAACCTGTTGTAGGTGAATATATCTTAGCAATTTACGATCAACGTCCATTAG  
TTTCTAAAGTAGACTTCTTTTATGATAAAGAACCGTTTATTTTTCTTACAGCACCTCTCA  
ATGGAAGATTTCTCTCACTATGCTCAATTGAAGCACCTATTCATTCATTTGGATCTGGTG  
CTCTGGGGTACTCTCGTCTTGACGATAAAGGAATTTTAACTAGCGTTTCTGTAAAAGAAA  
ATGGTAGTAATTATCGTTTTGAATACCCTCCTAAAGTCACTATCAACTGTGCTGAAGGTA  
GCGGTGCTTCTGTAACCTGCACTTGTAAATGGTATTAAGACTCTATGACTCTTAGAAGGTG  
GTAAAGGATACAGCGATACTAACCCTCCTGTAGTTCAAATTCATCAGCATCAAAACCTG  
GTTCTGTAGCAGCAACTCTTAAAGCAACTGTAACCTAACGGTAGTGTTTCTGGGATAGAAG  
TTATTAGTTCTGGTAGTGGATATACATTTACACCTAGAATCACCTTCAAGCAACCTGGCG  
GTGCTATACTAGGCACCTGTCTATTGTAGGGGGTCAGGTATCTGGAACCTATTCCTATTA  
CTGATAGTGGTTTTGGATATACTACAGTCCCCACAATTTACATTGATGAACCAACGGGAA  
CTAATCCTATTAGAGCAACTCTAACTCCTGTATTGACTGATGGCGTAATAATTTCTATTA  
CAATTACTAATGCAGGTCAAGGATATATCACTACTCCTAGAATATCTGTAGTTGATCCAG  
TTGGTGCACAGGTCTTGTCTACAACCTGTTGATTCAAATGGGCTTCTTGTAGGAATTGAAT  
TATTAGATGGTGGTAGCGGATATGATGACGTACCTTCTGTTTATGTTCGTAGATAATAGAG  
TAGATGCGACAGGAGCTTAAAGCGGGCGGAACCTGGTGTACTGCAACTGCTGCTATATTCA  
ACGGTAGAATTACTGATATTAATATTACTGCTTTTGGTTCTGGTTCTATTGCTGCAAATC  
CTCCTGAGATAGTAATTCAAGCACCTACTCAGGCAAAAGCATCTGCAACAGTTGGTCTTA  
ATGCAGTTACTGGATTTAAAGTAAATCAGTCAGGTAAAGGAGATTCAAAATCAAAACTAC  
TTGGTTGTGCAAGAGCAGCAAGTGGTATTACTTCTTATACTGAAGATGGTAACGCTGTAT  
TTACAAATAACACTACAGCAGCAGCACATACGATTAATTCTGATGTAAAATGTCTAGATG  
CTTTATTTGTAACCGTTTACTAGACAAATACACTGAACAGTTTTTACCTGATGTTCAAG  
AACTACATTATAAAAAAATTGATGTTAGAACAGCAATCAAGACAATTAAGATTTTTTATA  
CTGCAAAAGGAACATCTTTCAGTATTAGTTACCTCTTTAAACTGCTATATGGTTAACAGG  
TAAGTATTAATTATCCAAAAGATCAAATTATCAAACCCTCTGCAGCAACATGGTCTATTG  
ACACTATTTTGCCTGCAACTTTGGTAAGTGGAGATCCTACCAATATTAGAGACGGTTTAT  
TAACTCAGGGTGTGATATTGCTGATGTTAACGTGGCAGCAGCGAGTGCTTTGATTGAAA  
GCTATATTTCTATTAACAACTTCTGACGTAGAAATTTTTGAACTTGTCTTTTCGGAAGAAA  
CTATTACAGGTCTTTTTGCAGTTCCTTATAAAACAAAACCTTGTCTGAACCTTTAGGCACTG  
AAGACAGTATTATCACTGTTGACTCTACAATTGGTTGGCCAGAGAGAAACGGTGAGTTTG  
TAATCGGATATAGTGAAATTGTAAGATATAAAGACAAATCACTCAACCAGTTTATTGAGT  
GTACACGTTCTGTTAATAAGATTGTTGAAGCTTGGGATTCTGCTACCGAGGTTGATTCTA  
ACTTCTCAGTTTTTCGTTAACAAAGGCACTCCTCTGGAAGTTCTCATGAAAATTGTTGGTA  
TTGTTGATGCTCAACAAACAACTCTTACTGATACTGGTTCATATTACTTAGCTGGTGATA  
AATTAACAGTGTCTGAGTTGGGTGGGACAGGACCTAATGCTGAACTTACAACCTGTTTGT  
ATAACGTTAAAAAATTAATTAATATCAGTAGTATTACGTTTGGTGGTGTGAAAATCAGT  
CCGCAACTGTAACCTTGTGCTAATAATCATGGTCTCTTAATTGGAGATCAGGTTACAATCT  
ATGGTGTTAACCCAATCATCTATAATGGAACCTTCTTAGTTACATCTAGAGATAGTAATA  
CAGTGTTCCAATATCAATTACCACTACCTCCTACAGTCGTACCTCAAGGTAATATTCGTG  
TATCTGTTGACCTCAATAAAGGTAAGACTGCTGATACAGCTGTTTTCAATTCTATCGGAC  
CTTACACAACCTAATATTCAAACTCATTCTTCAATAAAAACGACGTTTACGTTGCTTCTA  
CAGGTATAACCAACTATAAGATCGGTCTGTTTCCTGGTTCTGCTCTTTTGGCAGATAACC  
AACGTAAATTGAAGCGTTTCCCATTAGCGGGAACCTACAATTTCTACAAAGAATAATATTT  
CACCTGGTCCGATTGGAACATGGGTAAATGGTGTCTTATCTGGTCTTATAAGTCTACAA  
TCAAGAAAACCTTTGGTGCTGTTACTGATATCACTATTTCTAACGCAGGTTCTGGATATG  
ATGCTGCTTCTCCTCCAAATATCACAATTTCTGGTGGTGGAGGAACTGGTGCCACATCTA  
GCGTAACTGTTAATGGATCTGTTAATGAAATTACTGTAACCTGCAGGTGGATCTGGATATA

CTTCGTTTCCTCTAGTTTCTATCGCAGGTGGAGGTGGATCAGGTGCTTCTGCAACTGCAA  
TCATCACTAAAGGTGTTGTATCTAGAGTTTTGATTAAGGATGGTGGAACAGGATATACAT  
CTCAACCTACTATTACTATTGTTGGTGGTGGAGTAACTGGTGTACTGGAAGTGCATCTA  
TTCGAGGTCCATTCAAGCTGTAAGTGTATCCAATGGTGTGCGTGTTATACTTCAAATC  
CTACTGTCACACTAAGTTCTGGTAGCGGTGCTGTTGCTCAAGCAATCGTTCAGAATGGTC  
GTATTATCTCTATCGCTAATATTTCCGGCAGGTTCTGGATATACTACTGCTCCTACAATTG  
ATATTCAAGGAGTAGGTTTCCGGTACTGTTGCTCGTGCAACGCTTGATGTTGATGGTGATA  
TTGCAGGTAGAGTTACTGGTATCGAAATTGTCAATAGAGGTATTGGATATATTCAAGGTA  
CGACTTTAATTAATTTAAACTCTGTTGGTCTGGTGCAACATTTACAGCAATCGTATTCC  
CATGGACTTATAACTTACAAGAAACATCTACTCTTGATGTTGCAAAGGGCGGAGTATTTG  
AAGGATTTAATAATCAATATGGTGGTGAATATGCTGACGTATCAAACCCACAAAGATTAA  
GATATCTTCTTGGTGCTAATTTATATGAAAATAATGCAGGATTAGTCAAAGAGCAAGCAA  
CTCCATTAGCACACTCACCGATTATTGGTTGGGCATTTGATGGTAACCCATTTTATGGTC  
CATATGGTCACTCAGATCGTACTGATCAGTACTCTGCTATTGCTAAATTAACACATCTT  
ACCAACTTAAAGCAGAAGTGTATATAATACTGTCACAAACCAAATCCTGTTAGAACAC  
CAGGACCTCGTCTTTCTGAAGAATCTGCAGGTAGGTTTGTGAAAGCTTATCAAGATGTTT  
TTGGTCGGGGTGATTTAGATCAATATAATGGTCGTTTCCGTAAGACACCTGATTATCCTG  
TTGGTAGATATTGCTATTTTGTACTATTGATTCTTCTAAAGATGGTAATCCTCTATTCC  
CATATGTTCTTGGTCCGAGTTTCAACTCTGTCGTAGATACTTGGATTTTAAGTGCTGGTG  
CTGTTCAACAAAATATCCTACTGGTGTGTTAGATAACGTGCTCCATATGATACCGTTG  
ATATTGACGTTGAGAGGGCAGCAAATGCCTCTACAAACGCTATAACCCTAGAGAATGGTG  
ATATACTACTATTTGTAGTGGAAGACGAAGATATAAGTGGTATTATTGCTCAGGATGAAA  
CTGATGATCTAGATCAGGTTTTTGAAGAATCTCCATTACAATTATTTGATTATTTCCCTA  
AAGTATAACTTGATTCTAAAGTTGACACTGAAGTTGAGACAATTTCTAAATTTGAAGATG  
CATCTGTAACAGGATTCACTATTGAAAATGCAGGTGTTAGTTATTAGGTAATGATAGAT  
TAGTATTTGATAATACTGATACAGATGGTCTGGAGTTTCTGCTCGTGTTTCTAGAATCA  
AAGGTGAATCAGTATTAACTTATGGTTTTGAGAGTACTAGTGGTATAAATTATGGTCTTC  
TTAAAACACAAAACCTCATAATTTAGTTGCAGGTGATAGAGTATTTGTTGAGTATTCTC  
CTGTAACGGACAATACTAATAAGTCTTATATCGTACGTCAATATAAAGGTATTGAGGAGA  
TTCAAATTGATCTTACTGGATCTGGTTACAACACAGATATTTCCCAACAATTATTATTG  
ATGGTAATGGATCTGACGGTAGTCTTGAAGCAGTTGTTACTAGTGTAGGTTCTATTGACA  
CTGATAATATTCTTAATTCTGGTCTGGATATACTTCCAATCCTAGAGTTATCTTATCTC  
ACCCACAGGTATTCAAAAAAGCAGATTACTATGTTTCATTGATTGAAAATCAAATTTATG  
CATCTGTAGATGATGTATATGTGAATGATAATAAGGAAGTCTACATTTGTGGTAAAACAC  
ACGACATATATGATAATCTTTTTGCTTTTTGTAGCAAACTTTCTGCAACTGGTATCAAGG  
AATGGGAAGCAACTTTAGAATACTGGTGGTATAGATGATGCAGAATTCCAAAAGTTAT  
ATGTTGATGGTAAGGATATTAGGGTTGCAGGAAGAACTATCCTAACTCTTCTCTATTAA  
ATGCATACAATCCAGATATTATCTTAGTTAAGTATGTTGAGGCAGAAAATGGTCTTAGTG  
CAAACTGAATTTGAAAGAGCATATGCAGGTATTTCTGGATCTACTCGTTCAGATGGAA  
TTACTGCACTTAAAAAATTCTCTGATTCTGGATTTGTTATTGGTGGATATACATATACTC  
ACTCTGCTAATCATTACGACGCTTTTGTGCTCTAGTTGATACTACTGGAAGTCTTTGCTA  
TTAAGAGAGAAGTACATCAGCAAATAGTTCTGAAAAGATTACTGATATTGTAGTTAATG  
GAAGTGATGTATATTCATCTATGGAGATTGCATCTAGTGTTTCTGCAACTGCAGTTGATG  
TTGGTTATGGTAAAGCAACTATTGGAAGTGTGCAATTTCAATTCCTTATATCAAACAGA  
TTAGTAATACAGTGTATTCTTTCTGGAATACTAGTATTGCAATGGATGAATTTGATGAGG  
CATATATTAGTGCTACAAGTACGCAAACTGATAATACAACTAAAAGTGGTTTCTGGG  
TAGGTAATTTAATACAACTGGCGATGTAATTTACATTAGGAGATATGCTGTTGCAGGTG  
GATCTATTACTGCAGCAAGTAAGTGTGTTATTGATATATTTGGTGTCTTAAACGTAGCAG  
TTAGTAAAATTGCTACAAGTATTAGTGCAGACTGCAGAGTGTATTAATAATCGGAAGTAA  
ATGGTATAATTAAGAGTCATACAACTCAACAGTTTAATCTCAATAATATTGAAGGTATTA  
CTGCAAATTTCTTCTGTTGATAACTCTGGAGATGTTTCTATCTATTGGTCTGAACTTCTT  
GGAATAGGAATGAATTTATTTACCCATTGACATCTGGATCTAACGCTGATACAAGTGGTC  
ATTATACTTTACATCTACATCAACTAATAACTCTATCACTTATGCTGATAATGTTGCTA  
AGATTTATGGTTACACCCCTGCAGGATCTAACTCTACTTGGGTAAATTCACAAGTAAAA  
TTACTTCCGGCTCAGTTAGGAACAAAATTAATGAGAATTGGACTATTGAATTTGGACTTT  
ATAAAGACGCAAGTTCTTCTCAAACATTATCTCAAACACAACAACATTAGTTTCTATTG  
GTGATGCTGAAGACGCTACAGGTGGTCTTTGGTTATACTATGATGTTTCTAGTGGAAC

TAGAATTAGTAGTTACAAATAATACTACTAGATTA AATTCTGCAGGATCTGCACTTCAGT  
CTACATTA ACTACATTGTTTGGCTGATAATACATGGCAAACATTGGACTTAAGAAAGAAG  
GTAATCAGTTTACTGCATATGTAAATGGAATTCAAGCATTACAGGAAGGGTTTCTAATA  
CAGCATTAAACGGTAAAGATCTTCTCTTTGGTCAAATTACTGGTAGAGATGGAAGTGCAG  
GAACTATTCGTAAGAATGAGCAAGGTCAATACTTTATTGATCATCTCAGACTTAGAATTA  
GAGCAATCACTCCTAGCGTACCTAGTGATGTTACTGCATTCCCAACTACAGGTGCTTCTG  
CCTTTGCATATACTTGGGTTGATAGTGGATGGTTTAATACTAACCTTTCTAAGTCTGATT  
ATATTGATTACATTGGTTGGGGTCTTAAGATGGATAGAAATGCTGAAGCTGCAAGAATTG  
GAACTCTAACTGTTCAAACGAATACTCATGTTGGATTTGTTAGAACAAGTGTAAGTGCTG  
TAACAGGTGTAGATCTTACTGTCACTAATACTGGTTTTGCTTTAGGTGATGCAGGATTCC  
AAAATCTAGACTTTGATGATTCAGCAGCCACTATGAATGCAGGCACTGAGTCACTTACTT  
ATAAGCAGGATATCTGGAGTTCTAGA ACTGCAACTGTTCCCTTCAACAGGTTCTAGAAAAC  
TTAAGGTTACTGCTATTGTTAGAGACAGATATTACTTTAAAGTAACTCCAAAATCTAAGA  
TTGATAATATTCAAGAACTTACCAATAATCAATCATTAACTTTACTGTAGGTACAAAAT  
TAACTTAGTAAATGCTACTTCTGGGGCATTATTAATAGTGGTTACATTATTTCTACTG  
AAAATGTTAATAATAAAAATATTCCTTTCTGTTAATAATAATGGTTGGTCTGATGATTTGA  
ATCAGGGTCAATTAGTCACAGAGCAATTTAGTGAACAGTCTACTTATAGCATTGTAGGTC  
CTATTCCTGCAGATGTTAATGAAATTGAAGGATATAATTTTGCACAAGTAAATAACACAA  
CACCAGGCACATTTGATATTGATCTTGACAAGGATAATTTAGATGGAATTTATAATGCTG  
CAGGTGGACAGAATTTAGATAGTTTTGCAAAATTCAAACCACGTAGTGATATTGCTTATG  
CGATTAGAATTGATGAATTTTCTCCATCCGGATCTCCGTTTATTGTTGGATCTGTAGTCA  
CAATCACTTCCTCAGATATTAGTTTTAATACTGCATACTCTACAGCACAAGTTACCAACC  
TAACTGGTGTTTTAAAGATCACTGTGATTGCAA ACTGCACTAAGATTGTACAAGTTACTG  
CAGTTACAAATACTGATCAAGTTTATGTAATTACACGA ACTAATCATTACCTATCTACTG  
GATCAATGATTTATGTTGATGGTAATCCTACTCAA ACTATTGGTTCTACCACATATGATG  
AATATGATGGATCCTTTGCAGTTTCTCCAATTGTTAGTGCCAGAGAATTTGTATAAAAAC  
TTCCTAGTGCTGCATTA ACTTCACCTGCTACCACAGCAGCAAATGTTAGCATCTACGTTA  
AGTCTCCCGTTCTTAAAATGTATTATGGGCATCAATCCTCGTTTGATGTCAGTCATTCT  
CAATGAGCGGTGGTAACTTATCTATATCTAAAGATCCTTTAAACAAATGAGAATATTCCT  
TCAACTCTATTGAACGTGTTGGAACACCTGGTCTTACAGGAGCAGGAAATCCTACTCCTA  
CTGTAAA ACTTAAAGTTGATTACGGTATTATTACAAATATTTCTTATTACTTTGATCCCT  
CTAGA ACTGGTGCTGATTCTCCTGTTTCAGATGTAAGTTATCGTGATGTTACTGACTCTC  
CTTACAAGGGGTCGTTCTCAGTTCAGTCTGTTCAAAGGTGCTACTATTACTCGTGGTGCTG  
ATATTAGTAGATTTCTCATCTCAACGAACCAGAAGCAGCTGCTGATGTAAACCAAGCAT  
CTTATTCAACAAGTTCTCTTAAGGCAGTTGGATCTATTGGTGCTATTCGTATTGTTAATC  
CAGGTGGTTTCTATACAAGATTACCTGTTGTTACTGGAATTC AATCTACTAGACAAATTG  
AAAGAGTTCTATTAACGCACCAGGCACAGAATATGCTGTAGGAACTTATACTGGTGTTT  
CTATTGGTGGTGATGGTGAAGGTGGATTTGTAGAAATTACTGTTGCTGACGGAGCTTAGG  
CTAACGGAGTAACTATTCCTGGTCAAATTCAATCAGTTGTTGTTACATCACCTGGTAAAA  
ATTATACTTCAGCACCTATTGATGTTGAGGCAATTACTGGTATTCTAGGATCTGGTGTA  
CTGGTTCAGGTGCAGATCTAGAAGTTGTTATTCCTGCTTCTGGA ACTGGTGCATCTATTT  
TCACTCAAGGTGATAAAGTTGGTAAGATTAAGGAGCTTAAAGAACAATAAGTTTGGTTATG  
ATTATCCTCATGACTATACTACCTGAGATTACATTCCCAATAAATGTTTCAGCTAA  
CATCTACCTGTATCCTAGACAGTATTACAGTTACCGGTCCAGGTTCTGGATATACACAGG  
CACCTGCATTGGTAATTACTGGTGGTGGCGGAACAGGTGCTGTTGGCGAAGCAACAATTA  
AGAATGGTCGTTTAGATTTAATTATTGTTTAAAGATCCAGGCGCAGGTTATTCTTCTACTC  
CTGCAGTTGCTCTTAGATCTTCTTTCAATTATGTTGTAGATCTTGACTTAGGTCTTTTAC  
AGTTTGCATTCCTCATGATATTGCTAACGGTTCTGCGGTTAACTTAAATGTTGTTGATA  
CTGGTGAAGGTGCAGACTTCCCGCTTGCTGCAGGTGCGATCGATCGTTTGAAAGGAACTA  
CAACTTATTACGCAATTACTGGTTCTGCAA ACTCTCTTGAACCAGATCAATTA AAACTTG  
CTATTACTGCATCAAACGCAA ACTTAGGTGATGCTATTTCCCTATGTCAATGCAGGATCAG  
GTCGTCAACAATTAGTCACAGAATCTTTCCGGTGGTGCTGCTAAAGCAAACGTTATTTTCT  
CTACCTTCTTAGAAGGAGA ACTTGTATCAAAAGTGATTCTTTAGACA ACTCAACTGCTC  
AAGGTTATGTTTCTACAAATAATGGTTGGCAGATAGGACCTAGAATTCTTAAAGATTGTAG  
ATTATACTGGTGACTTTATTGAAGGACAAAGAGTAACTGGTGTATATCCAAATCTTCGG  
GTACGATCAGTGACCTGAATATTGCTAAAGGTGTTCTTGAGATTGGTTCTTACCAAGA  
CTACAGGTCAGTTTATTGATGATGTTGGTAAACCTTCTGAAATTATCGAAAAGATTCAAG

ACTCTTACTATTATCAAGATTTCTCTTATACTATTAAGTCTGCTGTTTCTATCGGTGAGT  
GGAAAGACATTCTTATCAAAAACGTTACCATTGCACCATTCAAGGTATTTGGTGAATTA  
TTCTTTGTGATTACGGATTTGTTCCCTAACAAAGAGAATGATTTCCAACCTACTAAATCTG  
TTGAACTTGCTAGAGATGCGATTGTTCCATAATATTGAAAGTTTTGCTTTAGTAGAACCAG  
TTTATTCAGAATTCAATAATACAGAAATACTTTTCCGTCAGAAGAGACTTACATCTTCAG  
AAAAAATTCTGACTTCTGTTGTTCAACGTATTGATGATATTTCTACTTTATCTGATGGTG  
AAAGGATTGCATTCCCCTGACAGTTGGTGGAACTAATATTGTTGCTAATGCTAATCAAT  
TGATGATTGTTTTAAATGGTGTGTTGTTCCAGAATTCTGGCACATCTTTCAATCTTCAAGGAG  
ATTCGATTGTATTCAACGTACCACCACAACCTCCTGCAAGTATCAAATACGTTATCGTTA  
CTATTCAAAATATTCTACTAAGAAAATTTCAATTTGATGATATCGGTGGTATTTTCCCAA  
ATCCTGGTAATGAACTGGTTGGAATAGCATCAGGAAATCGTCTGACTGTTACCAGTGTTG  
TAGGTAATGATGATTTGGTTTCTTCACTCATGGAAGTGCATTTACTCCTAGTGAAGTTG  
TTACAGTTGGTGCAACAGGCTTTGCTTCTAATGTTGCTGCAAGTAATGGTGTAACTGATG  
TTCAGAATATCGGTCTATTTACTTTTGGTGAGAAAGTTACTGACTTCCAAGGTCATACTG  
CTAGAGTTGAATCAATCAACGTACACAAAGGTCGAGAAACACCTGTAGCACAATTAAGAT  
ATACTATCGGTCCTTCTACTACCTCATTTGAAGTAGTTGCATATAAGACTGATAATAGTG  
TTGCTGATGCACCTGTTGCTGACGGAACATTTACTACTGGTCAAAACTATCAGTTTGGCT  
CTGAAATTTTCTTGCTTAATAGTATTACACAGGATTCTCAATCTACAACCTTTTGGAGTTA  
CAAGAGCAGAGTCTTGAACCACGGCTGTATCACAGCAAGAAGATAATCCTGTTTATGGAA  
CTCAAATTTCTGTCAATAATCAACTAACTTTAAGTAAAACAACCTGGAACATATCAATCTA  
CACCTGGTCTTTACTACATTCAAATTAATGAAGTTATTATTGGTGCAGCAATCTGGTGTAG  
ATGCTCGTGTTACTGCAACTTCTACATATCAAGATCCTGTAAGTCAAGAATTTATTAGTC  
AGGTTAATATCTCTGAAGGTTCTTCTTTCTTTGGTCTATTATTCAACAGGATTACTTCTC  
AGACTTCTCAAACGTTGTTCTTGATGAGATTTCTAAATCTCACGTAAGAATTGTTGATT  
TTACAGATAATCAAACAGATTACAATACTAAATTCCTTCTAATGAAGCACTTAACAATT  
ATGTTATTCCTTACGATAATGCTTTCGGGCACTCTACAAAATGAGACTATCCGTAAGTACA  
AATTAGAGTATGGTAATAATGATGGTGAATTTGCTACTGGTGAAGGTGCTGTAGTTCGTA  
AATTAAGTATAGAGATACAGTTGGAATTGGTTTATTCGTTCTGGTCAAATATCAGAA  
CTCGTGATACGAAGGCAGAAGTTATTGGTGCAAACCAAGCAAGAAAAACTGTATACGTTG  
GTAAGGTTGGTAGATGTCTAAGAAACGGTGGAGATTATCATACATTCACATTTAATAATG  
CATATCTCAACGCAACCAATCAGAAGTTAGGTGATGCTTGTTTAGGTCTTTCACCGGGAA  
CCGAAGCACATACTTTTGTAAGTGGTGTGCTGTTCAATCACTGCAGGTGGCGGTGCAA  
CAGGTACGTTTACTGCTGCAACAGGTAAGTACTACCTATAATGGATTGACAGGTGATCTAGTAA  
TTGAAATTGGAAATCACTCTTTAGCAACAAGTAACAAAGTTCTTATCGCTGATAACAGTG  
TTGGATTTATTTGTGCACAAGATGGTAATACCTCTACTAAAGCATATCCTCGTAGCACTG  
ACCCTGCATCAGGATCTGCTCGTAATATAGCTGCAGGTACATCAACTACGATAACAGTTA  
ACGTGCGTGCAGTTGCAATTGATGACAGTTCTGCAGTCGCGGCTTTTGACGAATTTGGGT  
TTGGCACTGCAGCGTTTACAATCGAGTGTGGATTAGACCAATTTCTGTTGGTGCAGGAA  
CAAGATCTATCTTTGATTTTCAAGAACTGCTGCAACTGAAGTTGCTCCTTACTTATATCTTG  
ATGGTGCAAATCTAGACTATTATGTTAATGGTTCCCTAGTAATTCAAGGAACAGTAAAAA  
TATTTGCAAATCAATGGACACACGTTGCTATTAGTAAATCAGGTTCTGTAGCTAGACTGT  
TTGTTAATGGTGTTCAGATGGTAGTAATTACAGCGATACCAATCACTACGGAACAAACA  
AACCAATTAGAATTGGTGAGGATACTGCAGGTAATGATCACTTTATTGGATATATTGATG  
AGTTAAGAGTTTCTACAACCTGGAGGTTATACCGCAACACTTACTGGAGCTACAGGTATCT  
TCCAACGTGATTCAAACACTGTATTACTCATTCTTTGATGGTGTGGAAGGACAACAGC  
ATACAGATGATTGGTCTGGAAGTGTATCATTACTAAGGATGAATATTTTCAAGTAATGATG  
CAATTCTAGAAACGTCTAGAAAGACTGGTGCACCTGCAGGATTTGCGGGTAGATCCCACA  
GATACTATAACGCTGCAGATGATATCGGAGGTAACATCGACTTTATCAAGAAAGAGGTTG  
TATATCAAATGAGACAGAGATATCCAGAAGTGTATTCTAGTAACTCGTTTCACTCCAA  
CTAATGCAACATATGATGCTGTAAGTGGTCTATTGTCAATGACAGTACTGGAAACACAT  
TTACTAATGGTGGACAATTTACACCTCAGTCTGCATCATAACAATCCTTCGACTGGTATAT  
TGACTATAACTAAGATTAATTACGGTGTAAACAATGGTAAGAGAATCAATATTAAGTTG  
GTGGTATCACATTTACATGTGCAGAAGATATTAACGCTCCAAGTCATCCATATCCTCGTT  
CTACAGATCTTGTGTCAGGTAAGTGGTTGACAGTATCTAATGCGACTGCAGATACATTA  
CAGTTGATGTTGGAACCTCATCTAATACTACAACCTCATACTTTTCGTAAGTGCCTTAAGTA  
ATGCAATTACTGTTGAGAAAGATAGACTTAAGATTTTAGATAATTCCTTGCCATTCACTT  
GTGCGATGGATGGTAATACTGCTAATAAACTTATCCTCGTCCAACAGTTTCTGCATCTA

AAGATGTTGCTCTTCCAATCGTAGCTTCCAGTTCTACCAATTTAACAGTTAATGTAGGAC  
CTTACCTTTAGTTAATTTCCAACCAACTAACGCAACGTACGATCCTGCAACTGGTGCAT  
TCGTCATGACGATTGCTGATTATACAATCAATGTTGGAACACAAATTAGATTAAGTCAA  
ATTCATTTACATTTACTTGCACACAAGATGGTAACAGTGCACAGAAAATTATCCTCGTG  
CAACTGCGGGCGATGGTCAACCTGATCCTGCATATAATACTGCTCTAGATGTAACAGCAG  
TCGGAACAACTACACAATATATTAGTAGTGCAGCGTATGTTTCTACAATAGGTATTTTAA  
CGGTCAATACAAGTGGTAACCATGGATTATCTACTGGCAATAGAATTCAAATTGATGATC  
ATTCCTTAACATTCACATGTGCTTATGATAGTAATGCTCCAAACCACACGTATCCAAGAC  
AGACTGATCCTATCAGAGGTGAGTGGGTGAAAGTAACCGTTTTTGGATGCTGATACATTA  
CTAATGATATTGGAACATCTAGTGATACTTCTGCACATTCATTTGTTTCTGCGACTGCAG  
GTGCACTAATTAACAACAACTGGAAGTGAAGTGTTCACGTTGGTGTCTGCTCAGGCAG  
ATCAATATGCTCATACTTTTGTATCTGCTGCAACAAACGCAGTTGTTACAGGTGGTAATT  
ACTTACATACATTTGTTTCTGCTACAAATAATGCAGTCATTATTGACGAAGGAATTAATT  
GTGAAGATGATATTCGTGATACATTGCATGCGATCATTCAAGATCTTCGTAATGGTTCTA  
ACAATCATGTTTGCATGCTGCATCTTACTATGTTAATAGAAGTGTAAACCCAGTTGAGA  
TTGCACAGATTGAACCTGCTGTTAAAGAAACATTATTTGCTTATGGAAAAGTTGATGATG  
TGCTTCAGTATGTCATTAATAATGCTCTTTGGCCAGTTCAAGGTGATGATGGTTTAACTC  
AATTTACTGACGTTTCAATTACTGATTCTTCTTACACTACATTGAATCAGTTTACACCTA  
CTAATGTAAGTATAATCCTGCTACTGGTGATATTGTATTGACTCTTGAATCTCATTCAA  
TGACCACATCATCAATAGGTAAAATTGCAGTCGGTGGAAATCACATTTACTTGTACAAAG  
ATGGCAATGATCGTCTACTGCATATCCACGGAAGACTCTTCCTGCTGCTAAGGCAGTTC  
TAGCTGTCACTGCTGTCGGTGGTGGTAACACAACACTATCACAATTAACGTAGGTAAATCAT  
CGGCAAGAGATCAATATACTCATACTTTGTATCTGCAGTAACTAATTGTGTCACTGAAT  
TAAATTATACTACTGGTACTGTGCTGATGTCTATGCAACTGTTGGTAACTTAATTAACA  
TCATTACAGATACAATTACAAATGCTTCTGCATCATCACCTGTTGATCATTGGCAAGTG  
TTACTAAAGTTGAACCTGCATATGAGTTCGTTGGTGGAAACAGTTGACTGATATCTAGAAA  
CAACTTTAGCAGTTGATTATCCTAATGCAGGAACTGATTTATCATATACAAATCAGATTG  
GTCGTGATACGCAATATCGTTTCAGACATGCTGCAAACTAATCAGACTTAATCGCACAG  
CAATCGTTGATAAAGCAGCGTACGATATGTTACAACGTTATCCTACTTTGGCACAACAA  
TGCCTAGAAACCAAGGTGGTGGCAAGCACTGACGGAAGTATTGGTTGTAAGACTGACTTAG  
GTAATTTCTTAGATGCTATCGCAAATGATTTACAAGAAGGTGGTAATCTTGAAACTACAA  
CAGGAACTGGATTCTATCTTCCAAAATGGAGGACTACGTTATATTCGTCTTCAAGTAT  
TGCAGTCAGTATATGCTCATGGAAGACTTGCTGCGTATATGAAACAAGCAGTTTATAGGAA  
CCTTAACTGACGCCAATACTAACAGTATTGTTGTTGGGGACTGGGGAGTTACTGGTTCAG  
GTGTTCTGGTTACTTTAATGCTGTCACTGCTAGAATTGATGAACTCATTGCAACTATTA  
ATAATTTTATTGCTCCAACAGGTTTCAAGTCTTGAAGTCTGCTGCTGATAGATTATTCTTTA  
ACAAGCAATTTATAAAGGTAGAAATTAACGCTCTTGTCTACAGTTTCTTTTCAAGTGTCT  
TAAACGGTGTACCTATAATGCAGGTGCTTGGAAATGATGTATTAGATGTTGAAGATTTAA  
TTGTTGATCTTATTTCTGATTTACAAGCGGGTGAACAGATAGCACAATTCAGAAGCAA  
GCACTTATCTAAATCCTGCTCTTAATATTCAAACCTTGGACAATGTTCTCCCTGCAGCAT  
TATATGCTATTGAACAAGTTGGAATCCTTGGTGCATGCGATTGAAAATGGATTATTTG  
CTCAAGCAGAAGCCGGAAGTGCAAACAGTTCTACTCACTATGAAGCGCAATATACTGATG  
AATCAGGATATAGAAATTCTATTTCAAATTCAGCAATCAATGGTGTGTTGATATGTATGGC  
GAGACTTAATTGAGATTGTTAAGGATATATTCTCACCTGGCGGAAAAGAAGCAAGATCTG  
CTGCTAAACAATTAGAGTATAATGAAAATTATTACACTAATGAATTAATAACGCAGTTA  
CCAATCAATTTGGATCTGGTGCATGGTCTACTGATCAGGAAAACCTTTATAGAAGGTATTG  
TTGGAGACATTGTTTATGATTATGACAACACTGATACTTACGATAAATCCACAGCATATA  
CAATTACATTAAGTGAATTTTCGGGTACGTTTGGTGTGGGAGAACTTGTACTGCCAGTA  
ATGGTGGTGAAGCAACTGTTCTTGAATACGACGATGTAATAAAATCCTTTATGTCGGTG  
CATTTGGTGGAAAGTGCATGGGTGGCAACTAATACATTATCTGCTCCTAGCGGTGCTACAG  
GAACCATTGCATCTGGTGGCGTAAGTTCTGCATACAATTGGTATAATAATCCAACCTAACG  
TTAAGATTATTGATAGAGCAAGAATCCTTACATCTAATATTAAAGGTCTTGTCTTCAACTA  
CAAATATTTTCCCTGATCCCGAAAATCTTAATGCTACAGGTTGGACTGCATCAGAAACAA  
CAACATCAGTAGATGTTACTGCTGCTCCTGACGACACTCAAACCTGCTGATAAGTTAATTG  
CTACAACAATAATACTGAGCCCAGCAAGTATAAGAATTTCACTCTAAATTCCTTTGAGT  
CATTTGATAGTATAGTAAATTTGACTCTACTACTTAAACATTCGATACTGGTTCTG  
CAGGTGATGCAACTACTCAAACATTTACATATTCAATCTTTGTTAAGGCAGCTGAGTATA

CTAAGACTCGTATATACCTAGCACTTGATGACTCTCTTGCAACACGTCAAAGAGCATTCT  
TTGATCTTGATTTATCAAATGGAAGTAAAGGTTCTATCTTTCTACCTGATGTTGCTAAAA  
CTGTAGATGCCTTTGGAGTAATTCCTCATGGTAATGGATGGTATCGTGCTTATATTGCAG  
CAACATTTGGATTTGGATTCTCTCAACTTCGCACACAAGTTTATACTCGAGGTTCTAACG  
GAGCACTCGTCCATACAGGTAATGGATCTGATGGATTATTTGTTTGGGGTCATAAACTCA  
ATAGTGGTGCCCTTGATCTTTATACTGCAGCATCTGGTACATTATTCTATTCAAACACTG  
TTTATAATGTCAAGACATTTGCTTTGGATAATCTTGAAGACTTTATGGGTAAGGCACTTG  
ACAATACTTAAACATCTCCTTCACCTTTTGCATCTTTCTAAAAGTTCTATGATGCTTCTC  
TTGCATCAGATTACAACAAATCTACTATTCAAAGGTTTATTCGTTATCATCTAAATGTTA  
TTAGAAATCAGTTAGCACAGTCAACTTATTATACAACCTTACTAACAACAATGCGATCA  
CTGCTCCTACAATCAAATATGGTAATCCTGAGGTTCCAATTGGACTTAGTGGTGGTGTTA  
AACCTGCTGATTACTTCTATGGTTTACTTAGTTACGCATCAGCCGAAGTTGAAACTGTTA  
CACAGAATACTGGTGAAGTAGTTCAAGTTTATAATAGAATTAGAATTGACGGTAACATAA  
CTGATTTTTCCTTTCACAATGGGTGAAACTGTTGCTAAAAAGGGTGCAGGTGGTGTTACAG  
GAGTTGTATACGGTTTCTACGAAGATGCAAACATAAGTATCTTGATGTTCCGGGTAACCG  
CAGGGGTTTGGGCAGTTACTGACAATATTGTAGGTGTAGCAAACCTCTACCTCTGCTCAA  
TTAGTGCTATTGAAGATCGTCTTCATATTATCGATCTTCAAGGATTGTTTGAGAATGATA  
TCCCATTCAAAGGATATACATCTGGTCAGACAGCACAAACCAACAGGATTCTATCAAATA  
ATGCAGCGATTACAGATAACACTGGAGGTACTTTAACAGTTGATAGTGCAAGTCTAACTG  
GAACATGTGAAACCACTGCAGTGGTATATCCTCAGACCTCTAGGAAGTTTATTGATGTCA  
AGAAGATTGATGGTTTAGATGTTAAGGTTGGTGTAGTGTAGTCGCTTACACAGGTAATATTC  
GTCTTGCTATTAATATCCTTAATAACTTGAATGTATTTACCGAAGGTAATAGACTGTGTT  
CAATAGTTGCAGGTCAGCAGCAAACCAATATGTAGTTATTTCTGGGATAGATCTTGCTA  
ATAATTACCTATACGTCCTCTGTTGGCGGATTTACACCTTCAATTGGTGGTGTCTTG  
GTGATTATGGAACAGGAACTGCATTATCTGTGGGACAAATTCAGCTTACAACCTGTTGTTA  
CCAATCCAGGTCAGGGTTCTGCTAGAGTTCAAGATATTGAAAATATTGGTTCGAATAAGA  
GATTATCTCTCTCTTCTGTTGTTGGTTCATTTACTTACAATTATGGTATTAAGGTCCTG  
ATAATTATGCTTCAGCGATTCTTAATGTTGAAGATGTTAAAGCTCGTGTAACCGTTCCT  
TCAGAGGATTTGATGGAACACAAACATCATTCAAACCTCACTACAGATAATGGAACCTCAAT  
ATCTGCCTGACCCTGCAGGACACATGCTCATCTTTGTTGATGGTATCCTACAACCACCTG  
GTGCAACTAATGCATACACAGCGTTCTCTGGTACTATTCAGTTCCTGAAGCACCTGATT  
TGGGAGCATCCTTTACAGGATTCTACGTTGGTAAACTAAGACAACCTTGATGATATTAATA  
TCGAGTGTGATTCAATTAAGTCAATCATTCAATTTGAAACGTAATGATGTGTTCTATTCAT  
TGACTCTAACTGATGGTGTGCAGTCAAGCACAAATTAGACCCGAAAACAATATTATCGTTT  
CAGTTAATGGTATGATTCACGAACCTGGTATTGGTTTTGAGATAGTTTGTCTAGAATCA  
TCTTTACTGAAGTTCCTAGATTTGGTTCTACATTCGTGGCATTCTCTTATGTTGGTTCTG  
AGGCAGACGTTGATGCTGCTGAGGTTGTTCCCTCCAATTGAACCAGGTGACTTTATTGACA  
TTCAAGGTGAGACTGCAGATAGAGAAGTTGCTGTTATTGAATCATCAAACCTCTCTAATTA  
CATTTGATTATCTTGGATCTGTATTCGAACAGAAAGCTGTTCGGAACCTGCAGCTCTAACAA  
CTGGATTTATTAAGAATGTTTCAGGTAACCTGGTGGTGGTTCAGGATACACTTCCACACCTA  
CTGTTTCGTGTTGATTCAATCGCAGGTTTTGAGGGTAATATCCGTGCACTAGTTGGTGTG  
CGGGTGTGAACTCAGTGCAACTGGTTCTGGATATCAAATCCATCAGTTGCAGTTGAGA  
CCACTGTCCCTGATGATTATGTCGCACCTAATCTTGCAGATTATGGTGAAGAACTAATTG  
ATCCAGAGATCCATAAATAACTAAAAATCGTAGCGAGTAATGGCTAAACAAGCACTAGG  
TCTAGGTTAAGCAGCAAATGATAACTCAGGGGATACCCCGAGCGCTGGTGGTGACAAGAT  
CAATGACAACCTTACTGAAATATACGGTGCCATTGTTAATGGAACCTCACTGACTGTTAG  
TGTTACAAACCCTGCTGTTGGTTCAGGTTCTTAGATATAACGGAAGTACATTTTTGACTTC  
TGACTATACTCAACTTACTTCAGCATTAGATGTAATGGTATCAATATTGTATCCTCTTC  
TAACGGTAATATCGTTATTGATCATAACGGAACCTGGCAACGTAACCTATTTCTAATGGAAG  
TGTCACAAACACTTTAATGGAACCTACTGCAATAGTAGACTTTCCTACAAAAATTCAGTA  
TAAGAATGAGTTTACATCTCTTGGTGCTGCTCCTGCTGCAGCAACATATACTGGTTATTT  
CTTCTCTGTAGATGGTAATGATAATACATCTGTGAACATTAATATAACAGCAGGTGGAGC  
GGGCGTAATAAGAGCAAAGCTTGTAACTGAATATTTGAGTATTGGATTACTTTCAGATGT  
TGATATTACTACTGCAGCACCAACTAATAACCAAGTCTTAAAATGGAATGGAACCTAAGTT  
CGTCCGGCTGATAATATTCAGGGTACTTCAGGAGGTGCCACTCAAACCCTCTTCGCTAC  
TATCTTTGGTGACAGTGGCAGCACTACAGCGAATACAACAACAGATTCTTTAACAATTGC  
AGGTGGAACCTAACATCACTACTGCAGTTGTTGGTGACACTTTAACAGTGAACCTTCTGTGG

AACGTTGACAAGCACCATATCAGCGTAACTGACACTGATATGTCAGGACTTACTCAAGG  
TGATTCATTATTCTATAATGGAACATAATTGGGCTCCTACTAGATCACCTATCACATGGTG  
GGAACCTGGTGCCACTGGTAATGCACAGAACTTTACGTTCAATGGTCATGGTTTCTCTGC  
AGCAACAAATGATCCTCAGATCTATGTTCAAAGAGGAGCAACGTATGCTTTTGATAACTC  
TACTAATGGTGGTGCACATCCATTTAGAATTCTGAGTTCAGCAGGTTTAAGTGGCACTCC  
ATACACCACTGGTCAAAGTGGTAGTGGAAGTGCAGTTCCTTTATTGGACCGATCCTATGGA  
TGCGCCTGGCACAATTTATTATGAATGCACAATCCATTCACATGTGAATGGGACTATCAC  
CGTTGTAAGTTAATAAATGACAAGAACTGTTCTGGAAGTGGAGCTGTAATCGAACCAAT  
ATATGATGGAATATTTGGTGTTCGTGCAGTAAAAGTATTAATGGAGGATCTGGATTTCGT  
TCCTAAGGATCTCCACGGCTTACTGTGAGTGGTTGCGGAACTCCTGATGAAGCAGCGTT  
ATTATATCCAATCATTGATGCTCATTCTGGAAGAATCACTGATGTAAGAGTATTGAATAG  
AGGAAAGGGACATGATCCTCTAAGATTGCAAATTATCCTGAGCAGGATACACTAAACGT  
CGTTACTTCATTTGATGTCAATAGAGTTTGCCAAAGTCATCCTAACTCTCCTACAACAGG  
TACCTTTACATCTGTTAGACTAAGATTAGTTAGTGATAATCACCTAAACCAACTCAGCA  
TTTCTTAACTGAAAGACAACCTGGCGGTTCTACAGTTGTCGTTGATAGAAGTTGTGATGA  
TACGATAATCTACCGTGGTGGAAAGGATGTTCTTATGTTGGTCAAAGAGATTTTCAGAA  
AAACAAAGCACTTGGCATGATGGCCAATGGTGTCTTACTTCATACTCCAGAATGGGGAAC  
ATCAGCAGGAACTCCTACAAACTTCTCTGCTGATACTGCAAATACGGTTATGTAAAAA  
TACTAATACTTATGATGCCGTAAATGATAGTGGCGTTTATTATTATCAATCAAGTAAAAT  
TGTAATGAGTATGCTCCTGATAATGGTGTATTTGATTGGGGTGATATACTACTTACAC  
TTGGAATATTTAAGTAGAAACAGGAAACCTTGTGTTGGCGTATCTAACTTAGATGAAAC  
ACTTGGGTCTATTGAAGTTGGTAGAATTGTAGATGAAGTCTCAGGAACTGGTAGAGGTGA  
AATTGCTAAGATTGTTAGAGATAATCAGAATAATGTTACTAGAGTTTAAATTAGAGCATT  
AACAGGTGATGCTTTCCAAGACAATGATCTTTTGTAGGTTCTAATGGATTTGAATTTAG  
ACTCAGTGTGATCCAATATCAATCAATCCTTATTATATTGATTTTGGATCTGACGCAGC  
AAAGTTCGGTCCTTTCACACCTGGCCAATTTTATATCGCTCCCAGGATATTCAAGTAAG  
AGCAAATTATTTAATTAATTTAATCAATCTGACGCATCTAATCAGGCAGGTACAGGACA  
TCCTATCAGATTTAGCGCAACTCCTGAGTGTACGTTGAATAACGGAACATTATACTACAA  
TAGCACTGGTGTATCTCAAGCAACTGCTACAGATTATGAATCAATTTATGCTCCATTATT  
CTTGATGAATAGTGATGAACAAACAAGGATTTACTTCCATTGTGCTTATTACAGATATAT  
GGGAGGATATGCAGGTGATGAAGGTTACATGACCCTCAATTCATCTGCAGAAACATATAC  
TCCTACTAACAAATTATTATGCTAGGGACTTTTATCAAAGTAATAGCAGTGATCCCAACAC  
TATAGATAAGTCTAGATATATTGATGGACACTCAAAAATTCTTGGTGTCTTTTGTGATGG  
TTATGCAATTTACGGACCTTGGGGATATAATTCTAGTGGTGCAGTAGCAAGAGAAACCTC  
TTCTTATAGACTTAGAACCCTGCTGAATTAGCGGGTGCTCGTCCTCAGGTAAATACAGT  
ATCAACGGTAACATATGCTGTTACCATTTGTAATGTACAGTTCCTTTTGGAGGTTCTCG  
CCCAAACTTTTAGAAATTGGGTGCGGGTAAAACCTTACAATTTCAATCAAATGACGCATC  
TAATGACAGTCAACACTTACTAATCTCAACTGCGGACGATGGATGGCATGGGCAAATCC  
TGTTATCATTGGGAATACTGCAAATTTGTATTCAGGCAATGGAATTAATATTATATTGA  
CGGGAGCGAAGTAACCTATCAAGCATATTTGTCAGGTTTTAAATTGGCAACATCTCGTGA  
GGAACATTTACAGTTCCTGTGAATGCACCTACTGCGTTATATTTGTTTGCATATAACCAC  
TGCAGGTCATGGAATTAGAAGTGTCAAGAAGGATATGTTCTAGGAGATTTGGTAGAAGA  
TTGTATTTACGATTCTTCTGTAGGAACTCTTGATGAATTTAACTGTAATTTGCTGTTAC  
ACCACAGTATCCTAACGGAACCTATGCATACTTCATGAGTGAAGATAGTAGTGGTAATCC  
TGCATATCCATATGCTGTGCGTCCTAAGTTTTACGGAACACCATTATTTGAAGGAGATAT  
TCCACCCGCGAAACCAACTGTATCCCAACAGATGCAGAAGGTGATGTAGTTCTTGCTGA  
GGATGGTAGTGTATTATTATATCAAGATGACGAAGAAAGGTGATAATTTCTTCCGACCTGC  
AAAAGCCAAAATTCTTTGTGGGGAAGGAACTGGTGCAGTTGGAAGTCTACTGTTCAAAT  
TGTTACTGGTCTAGCACTACTCGATGGTGGTAGAAGTTATGCTACTCCTCCAACACTTAT  
TTTTGAAGGTGTTGGTGGACAAGGTGCAGAAGGTGAGCCTGAAATTGATACTCTAGGTAA  
AGTTACATCTATTGCAATTACAAATCCAGGTGAATTCTACCAAGAACCTCAATTTATTTT  
AATCACAGGTGGTGGCGATATTGGTGCCAAGGCGGAAGCAACTATCGATCAAGGTGTTAT  
AACAGCAATTAATATTACAGATCCTGGTAATGGATATACTTCAATTCCAAACGTTATCTT  
TACAAAATTAGTAACACTTAAGAGAAAACTAGAGCACGTGAGGCATTTAACTAATCAA  
CATTTATTTGACTGGTCTTGTTAACAATGTTACGTCGAATGATACAGAAATATATGTTAA  
TTCTACAGATGCATTTCTGCTCTGGTCAAATCATCCTTAATTATGAAACAATCTCTTA  
TACCTCTAAATCAGCAGGTAAGTTTGGTGGTCTGACAAGAGGTGTAACCTTTAATTATGA



TCAACGGGTTATTCATAACGCAGGTCAAATGATTCAAATGGTGTTC AACCTATAAGTT  
TAAGGTTGGTTATAGAGTTATTCGTA AATTTGAAAATGCTAATAACAAAGTTGCAAAGT  
ATATGACTGGAATCCTGTTACCAGAGA AACTTCTAGTTGCTTTTCTAGTTGATGAATTAGC  
ATTTATTGACGGTGGGATTCCTTCTACTGAAGATCCTATCGTACAGTTTGATGCAGGAGT  
TGCTTCTAGTGCACCTTTTGGATTCCAACCTCATACTGTTCTTACA ACTACTGGATATAA  
TATTTTCTTATTGACAGATCCTCCTTCTCTTTTGGCAGACAGATCTTTCCAAGATATTCT  
ACCAACAGCAGCAGGTGATGGAATTGCTGACCTAGATAAGACTGGCACTGATTATGCTAA  
TCAAATTAGTCTTGATGGTGGTATCTATCAGTCTTTATATGGTATAGAAGAACTCAAGG  
TGGAACAAATACAAGACTATTCCAACCTGGTGATAATGTAAAAGATGGA ACTATTCCATT  
GAAGTATGCAACAATTATGACTGTAGGTGCTTTGAGTGATGGTGTG AACACACTGCCT  
TCTAACTATTAACTTGATGCAGCAAATGGTAATGGTATAAATCATAGCGTTAATGAAGT  
TGTTACAGGAGCAACTTCTGGAGTGATTGTA ACTGTTGTTTCTTATGATCCAACAACGAC  
AACAGTAGTTGTAGGTGCGCATTGTCCCATTTAATACTGGTTATATCAATGTTGGTGTGG  
TGGATATCTTTATGAGTTCTCTGATAGTGGA ACTGTAGTTGATGTTATAAATCAA AATCC  
TGGCAGAACTATACTGCTGCACCAACAGTAA CGTTGGAAAATATTGGTGCCATTCAAGC  
GACAGGAACTGCTGTTCTCACAGCTGCAGGAGACAAAGTTGCATCTATTACTATCAATAT  
TGGTGGATATGGTATTCAACAATCTGTTGATAACACATATAACCTACACCC CACAGTAAC  
ATTCACTAATGCAACTGGTGATACC ACTGGTGCGGGTGCAGTTGCACAAGCAATTCGAGG  
AGGTGAGGAGCTCGTTGTGAACGGTGGTGCACGATATAGAATCAATAGTATAGAATATCA  
AGCAACTGTTTCGCTCCGCACCCTCATAAATAA ACCGGAGAACAATAGTATCCCAA AATGG  
CAGCCCTATTA ACTGATCAATTTAGAATATTTTCTGCTAAGAAATTTATAAAAAGCACTGG  
AAGGTCCTGACGCAACTCAGAGTGACGATGCAGCGGGA ACTTCCCGTGATCGTTTGTATG  
TTTTCAGTGGTAGACCCCAA ACTTGGGATAATGAAACCTCGCCCCACAGGCAGTAGACT  
TATTCTCAGAATTTTCTGGATCGTACGATGAAATGATGTCGATGAAGAGAGT CCTCGCTT  
CTGACACGATT CAGGTGCTTCGCAGAATTGACTGGGTTTCCCCAGAACAACTACAGGTG  
GACTAGGTTTTACCTATGACATGTATAGACTTGACTATTCTCCTACCAA AACTGCTGATT  
CAGGTGCTAGCAAATTATATGACTCAGACTTTTATGTTGTGAATTCACAATATCAATGTT  
ATAAAGTCATCTATAATGGA ACTTCTCCTTCAGACCCAAATGGAAAACCTTCTACAGTTG  
AACCTACAGGTA CTTCTACTTCAATTATCACTACTGGTGATGGTTATCTTTGGAAATACA  
TGTATACCATCCCCGTAGCATCGGGTCTTAAATTTTTTTCAAATGACTACATCCCTGTCT  
CCACCAATACATCGGTAAAGACAAATGCAGTTGTAGGTGAAATTGATACAGTTGTTATCA  
ACTCTGCAGGTTCTGGTTACAACAACGGA ACTTATGCTAATGTTGCAATTAATGGTGATG  
GAACTGGTGGTCTGTTTCTATCGTTGTAGACGGTGGTAAGATTATTTCTGCTACTGATA  
CTTCTGGGGGACCAGGATATACATTTGGTAAAATAAGCGTTAACAACATCACTGGTATTC  
GAACAGGAACTTGTGTCATAGTTGCTGTTATCATTCCCTCCTCCAGGCGGACATGGATCAG  
ACGCAGTTGTTGAACTGGGTGCTTTCCGTGTAACGATCAACGCGAAACTATCATGTGATG  
AAGGTGCAGGTGACTTCCCAATCGATACCGATTATCGTGGTATTGGTCTTGT TACTAATC  
CTTTAAATTTTGGAACTTCTGAATTGATTTCTGATTTGACGGTTTCTGCTACGAAGGCAG  
CAATCTTCTCCCCTACATTCCAAGGCAACTATGTGGCTGATGAAATTATTACTCAAACAC  
GAGTTGTTGGTGGAACCAGCGTTACTGCTCGTGGTCTGTTATTTCTTGGAATGCCACAA  
CTAAAGTTTAGAAATATTATCAGAACGCTATTGATGGAATCTTCCCCGAAGTTACAGGGG  
CACAAAATGAGTTTGACGGATCTAACGTCATCAATGGTGCAACTTCTCGTGCAGCTGGTC  
ATGGTCAGCCAGATGTTAATTTCCCTGCTGTTCCCAACTCTTCTTCTAGAACAAATCAACA  
ACACAGAATATGATTTGGGTATGTAGTTTAA CAATGGTTATTCCCAACCAGAGTTAGCGT  
CAAATAGCGGTCAGGTAGTTTATATAGATAATAGATGAGCAATCAGTCGTGCTAACGACC  
AAGTAGATGACATCAA AATCGCAATCGAACTCTAATGGCACAAAATACCAACCGAAACGT  
CACA ACTTATTACGACGACTTTGATACGAGCAAAA ACTTCTAACGAATTTTGT TACGTCC  
TGGTTTCCCTATTCAAGCGAGGGA ACTTACAACGATGCAAAGCATCATGCAA AACCGAGT  
GGAGAATGGTGGTGCTCACTTGT TTAAGATGGTGCGATGGTTATTCCAGGTCAAGTTGG  
TTATGACCTGACTGTTGATTGCATCATGCTCCAAGAATCTTTCTTAGGTGCTGATGTTGA  
ACTTTATAGA ACTCAATTAATGACAAGGTCTGCTACTGGTCTTACTACAGGTGCAAAGGC  
AAAAGTTCTTTACAGTATTTCTTCTACAGAATCAGATAAAGGTTATATCACTCTATATGT  
AAAGTAGATTGAGTCTGGTGGAGCTAACAGCACTCAAGCAACTTTTCGCAAATAATGAACA  
ATTAATTACAGATACTGAAATCACTTTTCGGAACCACTTTGATTGAAGTTGGTTCTCCTTT  
CGCACTATTACTTCTACTGGTGCTCTTCAAACAGGTTCTGTTGCTTATGTACAATCTGG  
TGTATATTT CATCAGAGGATTCTTTGTTGATGTCCCATACCAATACATGCTTTT TAGATCA  
ATATCGAAGCAACCCCTCCTATCGTATCAGACTTGATATTCAAGAATCAATCGTTACCCC

AGAAGATGACCTTAGCCTCAACGATAATGCTGCAGGAACATCTAACTATGCAGCTCCTGG  
TTCTCATAGATCTGGAATCACCACAACTTAATTAAGAAAATTCTTACTGATGATGCCGA  
TAAAACTTTATCGAACTTCTTCGTATCAATGCATCAAAGGTAGAGAACTTCTTGATAG  
AACTGCGTATGATGAATTAGAGAAGAGTATTGCACTTAGAACTTTTGAGGAGTCTGGAGA  
TTTCGTTGTTAAAGACTTTGAGGTCAGTGTAGAGAAAACCTTGATGATGGTTTTAACAA  
TCGTGTATATGCTGCGGGTGCTACACCTTCATCTGGTGCAGTTTCTGCAGGATCAAATA  
CTCTGTTGAATTGGGTGCAGGTGTAGCGTACGTTAGAGGATATAGAATTAAGAGATTAGC  
ACCAACCTACGTTGAGTTAGACAAACCTCGTGAAGTTAAGGCAGCACAGAACACGATTGT  
TCCGTTTGAAACGGGCAACTTTACATCTGTAAAAAATGTTTATGGATTCCCTAATGTTGC  
AGTTTCTACAATCACTAATGCATATCAAACCTGTCGAATTAAGACATGCATTTAGAACTAC  
ACCAGGTGATGCAAATGGTGTGTTATTGGGTTTGCTCGTGTTCCTCTATGGAGCATGT  
TGGTGATCCTGATAATACTTTTGAAATGCTGATGATCAATATAAGTTGAATATCTTCGA  
TGTTCAAATGTTACAGTTTTAGAACTCGCAACTGCTCAAACCTATTGCAGCAGCTTCACT  
AGTTATTGGTGC AACCTCAGGTTATAGAGCATATTTAGTCAATGCTATTTCTAGTGATGG  
TACTATCATTGTATATCAAGTAGAAGGTACTTTTTGTAGAAGGTGAGATGGTCACCGTTGA  
TGGAGAAGGAGTTGATACTATCTCTGCATTACATAGTTACACATATTCTGAGACTCGTCA  
GTATGTCTCCAGAAATGAAAGCACAAATGCTGTTGAATTAAGTGCAGATGCAATCTTAAA  
AGATGTTTTACCGGTTGAGGGTGAAACCTTTACATACAGCACTACTGCAGGTAATGTTTT  
AACTACAGATACTGTCAGTGCTGCTGATGGGTCTAGAACTGCAGGAACTTATATCGTAGG  
TGCATCTGACTACACTACTGATGCAAATGGAACAGGAGCAACAATCTCTATCGAAATTGA  
CGGTTCTGGTGCTGCAACAGTTACTATTCTTAAGGGAGGTTTTGGGCACGTTGTAGATGC  
AACATTTACTATAGCAGATGCTAAACTTGGAGGAGGCGGTGGTGCTGCACTCACATTGGA  
TGTTGCTACAGTTGGTCCTTCTATTGAGGGTTTACAATCAAACCTTTGCTTTAGATCTAAG  
ACCTGGTGATCAAGTATATATGAGTTCTACAGAATTTGTTACTGTTGACACTGTAECTCA  
AACAGCAATCGCTACTACTAATACATCAAACATCTTTAATTATGGAAGACAACCTTGTA  
TGTAACAGCTGGTTCTGCTGCTCCTTCTGCAGACACTTATAATGCTGCAGTTAGATTAAG  
AACTAAATTGAATGGCATCAATAATGCTTATCTTCTTAGCGAAATGCCTAAGGAATACGT  
TAAGAGTATTCCTGATGAATCAATGATGGTTAGAAGA ACTTTTGATGCTCAGACTGTTGC  
TTCTAACTCTATCTCTATTACTTTACCTGAGAACGAACAGTTCCAATCAATTAGTGATGA  
GAACTATACATTTACAGTTCTTGCAGGATCTAACTCTACTAACCAGTTGGTGATCAGAT  
CACTATCAATACTACTAACTCAAGTGCTGTTTGATATACCACATTCTCAACTTCTGAAAG  
AACGACTTTACAGATTCCTAACTTAACAAATATTACTTCTATTAAAGTAACATCGTCTAT  
TTCTAAGAACGTTACTACTAGAAAAACAAATCTGGTAATCATATGTTTGTCTTAAAGT  
TAATTAACAACCTTAAAATCTTGATAAGCTAAATTATAATTTAACATATTCAAATCTATA  
CGGAACAAGTATACAAGATAGAGACATCTCTCTTGGTTTAGTCGACTGCTATCGTCATCA  
TGCTGTACATGAATCTCTAGATGATAATGATCCTGTTATTCCATCTGTAACCTTTACTCGA  
ACCTACTTTCTTTGCTACTGGA ACTATCGTAACTGGTAGAACTTCAAAGCAAGGGCAA  
AGTTGTTGCTTTCTCTTCAGGAACCCTAAA ACTTAATGTTGTTTATCTATCTGGTATATT  
CCAACCAGGTGAAATCTTGATGGTTTTGACAGTAATAGTACTGCAATCAATGCAATTAT  
TAATGATAGTGCAGGATCTGTTATTGTTGGCTCAAAGTTGTA ACTGATAGTTACTGCAT  
GGAATCAAATCAAACAGGTTTTTTGTATGATCTTTCTAAAATTGTTTCGTAAGAAAGGTAT  
CGTTGCTCCTGTTAGAAAATTA AAAACTATTATTGACTACTACAGTCATTCTGCAACTGG  
AGATTATTTTGGTGGTCAATCTTATCTCGATACATCATAACAGCGATATTGCGTTCTTTAA  
GGTTAAATTCCTTGCTGATTACCTAGACTTTAGACCAGGTGCAAAGA ACTTGTTTAGTGG  
ACCAGGTACGGTAGCATCTCCTGCATTTGTA AATTGTTCTACATTTGACTTTAAGTCAAG  
AGTGTTTATTGTATCTGGAACACCTAATGCTACAGTCTTTGATATTCCAAAATTATATAG  
TAATTTCCGTTGTGATTTTGATTGGTATCTACCTAGAGTTGATAAATGTTTTGCTACTCC  
TGATGGTGAGTTCAAATTATTA AAGGTAAATCTTCTGAAAGACCAAAGA ACTGATTC  
TCTAAAAGATGGTATGCTTATAGCAACCATATCACATAA ACCATATGGTTTCGATCCACT  
TGCAGATGTAGTAATTAACGTTCTGATAAGAAACGTTATAACCATGCGTGATATCGGTGG  
TTTAGAACGTAGATTAGATCAGGTTTAATATTATACATCACTCAACATGCTTGAGACTGA  
TACAGTCAATAATCAAACCTTGTATGCTAGTGGTAAGAATCGTTTGAAGAATGCATTTAT  
TGTTGATGATTTTGGTGATCATAGTAAGTCTGATGTTGGACGTGAAGATTTTCTGCATC  
GCTTGACTTTAGACAAGGGTATGCTCGTCCCTCTCATTACACA ACTAACGTTCCCTATAGT  
AATTAATACA ACTTTATCCACTAATATTCAACAAACTGGTCCCTCTAATTACGTTACCATA  
TACTGAAGAGGCTATTGTTAATCAACCATATGCTTCTCGTGTGAGAATATTAACCGATT  
TAACGTCTCTACCTATATCGGTGCTATTACTTTAACACCTGGTTCTGATGATAGGTTGTA

TACTAATAGACTTCCTGCATCAGTTCAACAGATTGAAGGTGATTTCTTACAAGTTTCTTC  
TGAATGAAATGTTGATCAGAATGGTTTTGCTCCAATTGAATGGGGAGCATGGGAAACTAC  
ATGGACAGGTGAAGAAGTTAGATCATCTGAGGTAAGTACTAGACACTCTCATTGGTTAGAAGA  
AGATATCGGTAGATCACCTAGACCTGATGTTTGGGATGGTCGTGGTATGCGTCGTGGTAA  
TCAGACTGAGACAATCGAAGTTACTGAAGATCAAGTAAGATCTGGTGTGGAACTCAAGT  
TATTCCTAGAATTGATTGTCAATCTTTGGGTGATGCTATTCTTTCTAGCACATCTATTCC  
TTGGATTCTGTTCTAGAAACGTTGAAGTAGATGATGCACGTCTAAAAGCAAGAACTCGTTT  
CTATTCATTCTTTGATGGAAAGGCAACTATTGATTATCAGATTCCAAAGATTATTGAAAT  
TATTAAGATCCTACGGTTGATAGTAGAACAACACTCTACTCCCTTTGTTATTGGTGAAAC  
CGTAACAGGTGAGATTAGTGGTTGTAAGTTAAGGATGCTGCACCTGATGATTTTTATAA  
GTTCAATCCTTATGATAATACAGCACTTCCTACTTCATATGCATCTACAACACTGCATTCTT  
GAACATTGATACTACTGAACTTTCTAAGCAAGCAATCGGTGCCTTCTATGGTAATATGCA  
GGTTCAAGAAGTATTAGTTGGAACCTTCTGGTGCTCGTGCTGTTGTTAAAGACCGTCGTAT  
AATTTCCGATCGTTTTGGTAAATTAAGCATCATTCTTTATTCCCTAATCCTGGTGTAGG  
TTCAAACCCAAGATGGGCAACAGGAAGTAACTTTAAGACTTTCTACATCTGATGTTGA  
TTCACGTCTTTCTGGTGCAGTTGCATCTTCCGCTCAAACCTTCATATGAAGCAAGAGATAC  
GTTAAACACAGTTCAAGAAAGTATGTTGGCATTTCGTAACGCAGAAATAGTTACTGATAC  
TGTAACCTCAAGAACAACAATTCAGACAAGTAACTGAGAGTAGACAGATTGGTTGGTA  
TGACCCTCTCGCACAATCATTGTTGATGAAGTCGGTGGTTCCTTACTTCAGT  
TGATGTTTACTTCTCTAAAAGGATGCAAAACATTCCAGTATCTATGCAAAATCAGAAACAT  
GGAAACTGGTAATCCTACAACAACCTTCTACCTTTCTCTGATGTTACTCTAGAACCCTGA  
TCAGGTTTCAAGTATCAGAATCTGCTGCAGTTGCAACTAGATTACATTTGATGCCCTGT  
ATACATTCCTCAATCACAAGAACATTGTTTTGTTCTCCCATGTGACTCTAACTCATATCA  
GATTTGGATTTCTAGAATGGGTGAGATTGATATCTCTGGTGACAGAACAAATTTCCGAACA  
ACCTTATGCAGTTGTTCTATTCAAATCTCAGAACGCTACTACATGGACTACAGATCAAAA  
TGAAGATCTTAAGTTTATTATCAACGCTGCATCATTTAGTAATACTGGACAACTTAACT  
TGTATTGAATAATGCTGAACTCGGTAGAGGAAATGGTGGTAAGTTAAATCTTCGTTCTGA  
TGCTATACAAACATTCCAACCAGAAATTAGTTCTTTCACTTAATTCCACAACCTTACCTTA  
CACAGTTGGTTCTCGTATCTATCAACAGACTACTTTGGCAGAGGGTACGATTACTGCAAG  
AACTGTAACAGCAGGTGGTGTTCATTAACCTATTAATGATATTAGTGGTAACTGGGCAGC  
AGGATCTAATACTGGTAGAGTAATTGCTAACCCTGTTGTTTCTTCTAAGACATTAGCAAC  
TATGGTTGTTAGTGGTGCTTCTGGTGACTTTACAGTCGGTGACACAATTACAGGTAACCTC  
CTCTACTGCTCCTACTGCAGAAGTTGTAAGTTGGACTACTGCAACAAATACACTGCACT  
TGAATATGTGTCTTCTGCGTTTGCTCCATCATCAGAACTATTACTGGTGGAACTTCAAC  
TAAAACCTGCAACAGCCAGCAGTATTACTTACTCTGGAGACCCTGTTGAGTCTGCTGTAAT  
CCAACCTTCTTCCCAACAGGAACACCAACCTATTATACAAATCAAAGAAAGATTCGTGT  
TTATCATAGTAATCACTGTATGCACAGTGCATCTAACAATGTGATTATTGAAGGTGCTAA  
ATCTGAGGTTTCTGATACTGCTTTGACTGCAGCTATATCTGCTACAGATATTAGTATTGC  
TGTAGGAGACGCTACTGCATTCCACAAGATTATTAACGGTGCTGCTATTGGTACAAGTAA  
CGTTGGTTACATTAAGATTAATGATGAAATTTCTTATAGTGCAATCTCTAGTGATAA  
CAAACCTATTACTGCTCATGAGCGTGGTCTTGGAGGAACAACCGCAGCATCACATACAGA  
TGAGTCTGTAGTTGAGTATTATAACTTATATGGTATTCCTCTAATCGAAATTAATAAACC  
TCATGCAGGAATTGGAGATGTTACTTTTGATTACTATGAAATTTCCACATCATCAATTGC  
TAGATTAGGAATCTTGGTGGTGGAGCAGGTATCATAACCATAACAAAATATTGAATACAG  
CACTCTTGTTCCTCATATTCAGAAGATGTTGCTTCCCTAAGACTTACATTACTGCTAGAAT  
TAACACTATTAGTTGTACGTCTATCAATGATGGATCTACTTTATCGGAAGCATCATTCTC  
AAATGATGGAGTATTCTCTGATATTATTTAAGTCAGGATAATGATTTGATGACACCACA  
ATTAGTTTGTCTGCAATCTATGAATCTTCTGAACTTAGCGGTGCTAAGTCATTGAGAAAT  
GGATCTTACAATGACTACTGATAAGACTACAATTTCTCCTGTTATTGATACAGATAGAAT  
GTCTCTCACTTTGGTCTCTAACCCTATCAATAGACCTTCAGATCCTAATACTGCAAACT  
ATCAGTTGGTGTGATGGACATGATGCAGTTTATATTAAGACTGCAACTCTAACTAATCC  
TTCTGGTTCTATCAAAGTTTATTTTGCAGGATATCGCCGACCCAACAGTGAGATTAAGGT  
GCTATATAGAGTGCGTCCTGTTGGATCTTCTGTTCTATAGAACAACTGGGATTTTCTT  
ATTCCCAGCTGCAGTTTCTAAGGTTCCAGCAACTACAGAAAGAGAAATATATTCATCATA  
TGAATATGAAGTATCTGGCTTGAGTTTTGATCAATATCAAATCAAAGTAGTGTGTTGTTT  
TCCTAATCAGGCATTAGTGCCGATTATCAAAGATCTAACAGCAATCGCTCTTGTGTATA  
ATGCAAAATTCCTGTAAAAGACAATGCGAATTGGTTCAGGGACTCCTATGCGGGTTCGTC

CAGTGTGCTGATAAATCTCTGAATGAGAAATATATGGCAGCAGATAAAGCCCGACAAGTC  
AAGAAAAAGGAATTGACTACTTTACAAAATGAAGTTTCTGAGTTAACATCAGATATGAGT  
GAAATTAATCACTCCTACTAACGTTAGTCCAAAACAAAACATCATAATGACTGTTGAAA  
AAGTATCACAAGAAGAGATGCATTCTCAATTCAAGGAGAGATATGCAAAGTTGATTGAAG  
AAAATCAACACTTGTCTGCGAAAATTAAGAAAATGAGGGTACTGCTCTTAAATTATTGG  
GTGCTATTGAAACACTAGAATATTATACATAGGAAGAGGAAGAGACCGCTTCTACTCCTC  
CTGATTCACTCCATCAGAATAATTTGAAGGGGGCACAGTCCCCCTCTTTTTTTAGCATA  
AATAATAAATGAAGCATAATCTAATCGAGTTGTCGTAACAAATGGCAAATAGATTTCAAT  
TAAGAAGAGGTGGCGAACAGGAATGGGCGAACTCTAACCCGACTCTTGCAACAAGGTGAAT  
TTGGTATCGAACTTGACACGGGTCGTTTTAAGATCGGTGATGCTGTATCTGCATGGAACA  
CCTTAAGGTACGAACGTCCTGTAGAGTCTACACCTAATACTGCAAATACTTTAGTCCAAC  
GGGATGCTGATGGTAACTTCTCTGCAGGTGCCATTACTTCTACTGTTATTGGTAGCTCGT  
CTACTGCGTCTAGACTTGCTTCACTAGACAAATCCAACCTCTCTAATGAGGTTACTGCTT  
CTGGTGTTTTTGATGGTTCTCAAACTAAAATCTATCTGCTGAATTAGCACTTGTCTCTA  
CTTTACCACATTACGATGGTACATCATCTCCCTCAGCAACTTACAATAAGGTAAGTGTG  
ATGCTAAAGTTAGAGTAACAAACGCACAAGATTTTACTGCTTCTAACAACGGTACTCTTG  
CTGATTATGGTCTTGATGGAACCAATGAAGGAACATCTGCACAACCATAACGATTTAGACT  
TAGTTGCTTTAGCAGGTTTGACCACTACTGGTATGATCTCTAGAAGTCTTCTAATACTG  
TAGCAACTAGAGCAATTACTGGAAGTCCACAAGAATCTCTGTAAGTGAGCGTGCAGGTA  
TTTCTGGTAACCAACTATTGATATGATTACCACTGCTGTTACAGCAGGTAAGTATAATA  
CGGAATCCCTGACATCTGTATCTGGTGCAGGTGGAATGGCGGACCCCTTTGGTACCGCTA  
CAGTTAACGCTACTCAGTTTACTGTTGATGCCTATGGTAGATTGACAAGTGCAACAAATG  
TGCCTTTCTCTACTGCTGAAGAAGGTAGTCAGTATGCTAGCTATAATGCAGGTAGTACTT  
ACGTTAGATATGACATCATTGCTAACGCATCTAAAGTTTACCAAGCCATCACTGGCATTG  
CTGCAGGTGCAGGTGCACCTACTCATAGTAGCGGTGACTCTGGCGGGTGGAGATAACTCG  
CTGCCGAAGCAACAGAGCAGAAGGGATTGGCTAGTTTTGCACAAGAAGATTTGACGTTG  
ACGCGAACGCGCACGTCACGATCGCCACCGCAGGAATAGATAATACACAACACTACAACATA  
ATAAACTTATTTTACAGATGGAAATGCTGTTGAAAATTTTGAATTAGATAACGAACTTA  
CAACTGCTACCGCCTACACTGGTTTTAATGAATTAAACTTTATTAATAATAACTT  
CTGGCGGTTTATTATTCGGTGCTAATAATACTGGTGATAGTGGTGCAGGTGAGATCGATG  
TAAACGTACGTTCTTACTTTAGCGATCCTGATATTACTTTAGATGGTTTAGTTGCACAAA  
CTCTAAACAAAACCTGGTGATGGTAATCTTACTTTACAACACTACTCAAACTCATCATCTC  
CAAGATCTTTAGCAGTTTACAGCATCAAACCTCTGGTTCTGGAAGTACTAGGACAGTTACAATTA  
CTGCAGAAGATGTAGTTGATATTGATGCCTCAGATTCGAACGGAAAAGCTCATGTCGAAG  
ATTCTAAATTCCAAGATAACTACATTGCTACGTCTAATGCCACTATGCACCTTGATCCTG  
GTGATGATCGTGCTACTAGTGGGTTAGTTCTGTTGTTGATGGAGATTTACAGGTAGATGGTA  
CCACTACGACAATTAATTCAACAGTTACACCAATTGATGATCCCCTATTACTCTTGGTG  
GCGATACTGCTCCAGGTAGTGATGACAATAAAGATCGTGGAGTTGAATTCAGATACTACG  
ACAATCAAGCAAGAATTCGCTTCTTTGGTTACGATGATTCTTACACTGACCGCGGGGGAC  
ACGTCGGAGGATATACATTTTACACAACGCCACAATAACATTAGAGGTCTTTAGTGGAA  
CTGCCTCAGGTATAGCTGCAGGTAATTTAAAACCTTACAACAATACTAACTTAACATCTA  
ATACTGCAGGAGACTTAGTAGTTGCAGGTGGTGTGGTACTGGAGATGATGTTAATATTG  
GTGGATTGCTAGATGTCGATGGCACATACCGTGCTAATAGCACATCTAGATTTGATGGTA  
ACATTGTATTCCAAGGTGCTTCTAAGACATTATCATTGAATAATGGTAGTGGCACAACCTA  
AAATAGAACCTTCACTACTACAGGTAATGTAGAAATTTGTGGTATCATAACAAATACTG  
GTGCTATTGATGCAAACAGCACTTTAAATGTTGCATCCACAGTACGTTTTGAAGACACAG  
AAGAGCCAACCTGTAGCACAGAATGGTGGAACTGGTATTTATGAATTTCAATCAAAGATG  
ATGGTGCATTCAAATTTGATGGTGGTGGATATGTTGAAGGTGATACAGTATTCAATAGTG  
ATGTTTTTATTAACGGTGTTCAAAACCAAGAGACAGTGCTACAGAATCATTCCGGTAAAA  
GAACTATCTAAACATCACATATAAATTACGTTCTGGTTCAAGTGCAGCGTATACTCCTT  
CATATGCATCTGATAAATACTTCTAACTTAAGAATTTTTGGTGGTGCAGATATTCAAACCTG  
ACCTCCATATTGGTGATGATCTTTATATTGGTTAATTAAACTCTGGTGACAGTGTTTTAT  
TCCAAGTATTAGGAGAGTCAGGTAATAAACTACTCAAGGAACATTAACAGTAGAAGGTC  
AAACAAATATTAATGACTCCCTAATTGGTAATGCTTCTAACGAAAACCTTTAAGATTCAA  
ATGGACCTGCTGCAGATAAATTTACAGTTGATACTGATAATGGTAATACATTAATTGAAG  
GAACACTTAATGTAAACGGTGTAACTGATATTGACGCAGACTTCGCAGTTAGAAACGGAA  
CGACTGATAAATGTTTTGTCGCATCTGCCTCAGGTAATACCCAAATTAAGGCAATCTGA

CTGCTGATGGTCATACTGAATTA AATTCAACACTTAATGTTGACAGATCTACAACACTTG  
GTGCACA ACTTACAGTAACTGGTAACTCAGAGTTCAACGGA ACTCTAGATGTTGATGCAA  
ACTTTGCAGTCAGATCAGGAACTACTGATAAGATGACTGTTGCATCTTCTACAGATAACA  
TAGCAACTGATGGA ACTCTAGTTGTTGCAGGTCAAACA ACTATTAATGATTCTCTAATTG  
TTCAAAGTGATAACGAAGTAGTTAATATAAAAAATGGTTCTGGCACA ACTAAGTTCAGCA  
TTGATACTGATAACGGTAATACAAATATTATCCGAACATTGACAGTTGCAGATGCTACTC  
AAATTAATAACTCTTGGTGTCTTCTAACGTTGTAACCTTAACAAGAAACTCAGCATA  
CTCTGACTGGATCTTATTCTGCTGATGGTGCATTCAA ACTAACTGGTGTGTCAGGTATCG  
GTAAAAACCTTGGTGTGGTGAAGGTCTAAGAGTATATGGAGGCACTGAACTTACTGGTG  
CCCTTCAGCTTAATAATAGTGCTGATATATCTGGTGCTTTAGTAACTCATTATGATGTTA  
CTCTCACTGCAGATAATAAGATGTTCAAGGTGCAGAATGCTTCTGCAGCGAACAAGTTTA  
CAGTCGACACCGATAATGGTAACTGATATTCAAGGAACATTGGATGTTCCAGGTGATG  
TAACTGCATCATCTGACCTTACAGTCACAGGAAATCTTACAGTCAATGGAACGACAACGA  
CTGTCTATTATAAGGTCACAACAATCGATGACCCTGTTATTACTGTTGGTGGTGATACAG  
TACCCGCGTCTAGTGATGGAAAGGATCGTGGTATTGAATTTCTGTTATTATGATGGTTCTG  
CTAAAATCGGTTTCTTCGGTTTTGATAGATCATCCTCCCAATTCCAATTCTTAACAAGTG  
CAACAAATACTTCTTAAGTTCTCTCAGGAACAGATGGTGCTCTAAGAGCAGGTAGCTTAA  
ATCTTACTGGTGCGGGCACATCTCTTGATGTTGATGCTAATGCAAACATTGATGGCACAC  
TGACTGTAGATGGTCAGATTATTTACAAGTATCTTCACGTCCTGCTCTTGTACCCCAA  
CAACAGACAAGATTAATAATCATTACGCAGACTTACTAGATGGTGCTACAACCGCAACTG  
CTGCAACCGCATCCACAGTTGTTCTTCGTGATTCATCTGGTGATTTTGTCTGCCAATCGAA  
TCACTGCTGCTAGTGCTGCAGGATCCGGTGCAGGTTTCTTAGTAAACGCATCCACTGCTG  
ACGCATGGAAGAGTGCTAGAACACTCACCATTAGCGGTGTTGTATCTGGTTTTGTAGTCA  
TCGATGGAAGTGAAAATGAAACACTTACAACA ACTTATGTTGATGCAGACATCACTGCTC  
TAGCAGCGATGAGTGGAACGGGTTATGTCGTACGAACTGCTGCTAACACTTTTGCCCAA  
AAACCCTCCAAGTCACCGCATCGTCTGGAATCACTCTTACTAAAGCTGATGGCGTTTCTG  
GTAATACTACAATTAACGTTGCTAGTGCATCTTCTAATTCTGCAAACAACCTCGTCCTAA  
GAGACGGATCTGGTAACTATGTTGCAGGAACTATTACTGCTGCCTTAACTGGTAATGGCA  
CAGGCAGTGTA ACTGGTAATGTA ACTGGTCACGTATCTGATATCTCAAACCATGATTCTG  
GTGATCTTACTGAGGGCACTAACCTCTACTACACTAATGAAAGAGTTGACGATCGAGTCA  
TTGCTCTTATTAATGCAGGAACTGGTATTAGTAAGGTTTACGATGCCGCTGCAAATACAT  
ATACACTGACTGTA ACTCAGTCAGATATCAAACTGATAATGTAACAGAGGGATCAACAG  
ATCTATTCACA ACTGCTGCTAGA ACTAGA ACTCATTTACATATGGA ACTGGTATCACAC  
ACAGTTCTGGA ACTTTATCAGTTACTCAGTCTGATATTAATACTGACAACGTA ACTGAAG  
GGTCAACTAACCTATTTACTACTGCTGCTAGAACATGAACACACTTTACATACGGA ACTG  
GTATTACACACAGTTCTGGA ACTTTATCAGTTACACAATAAGATATCAACACTGATAATA  
TACTGAAGGTTCTACAAACCTATTCATTACTAATGAACGTGTTGATGATAGAGTCAACG  
CTGTA ACTGTTGCAGGAACTGGTGTAAAGTAAGACATATGATGACGCTACGGGAACTCTAA  
CTTTAGCAGTTGACTTTAGTGAGTTAATACAGGCAATATTACGGAGGGTTCTAACCTTT  
ACATTACAAACTCGTGCTGATGCAAGGGCAGACTTGAAAGTTGCTGCTGCAACTGGTT  
CAAACCTTGATCTTTCTTCTAAGTCTACGTCCGCTCTTTCTGAAGGAACTAATCAATACT  
ATACAGAAGCAAGAGTTCGAGCAA ACTTGACAATGGTTATGAGCAACTAAGAGCAATGT  
TAACTAACCTTGCAACTAGCACC ACTCTAAATCTTAACTTGTCTGGTGAGCCTACACCTG  
GCGCAGTTGGTATCACTGGTGTGGTGGTGGTGGCGGTGGATTTACTGCAGGAAACAG  
CGATTGCTACATTTGGTTCAGCAACTGGATCTGGATTGACTGTTGATACTACGGTTGAGA  
GCGATGGAACATCACTGCTGCTGCGGTAATGCAGGTGGTTCTGGATTTCTAATTACTG  
ATACTGTCACAGTCACTAACCCCAACGCAGGTAAGATTCTTACATTGAACTTGGCAACAT  
TATCAGGTGGAACAGGTTATTCATCTGCTACTTGGATTGCAATCAATGGGGGTGACGGTT  
CTTCTGCGACTGTTGACATTACTGCATCTGCAGGTGCTATCACTAACGTAACAGTTAATA  
ACGGTGGAACAGGATTCGCTGCGGGTAATACTATAAATATTGCGAATGCTAATGCTACTG  
AAGGTAAGAATCTTGGATCTATTACTCCTGCAGGAGCTGGATATTCAACAGGAACTGCCA  
TTGCAACATCAGCGTCCGCATCTGGATCTGGAGCAACATTA AATATCACTTCGGTCAATG  
CTAGTGGTGGTATCACTGGTGTGCAATCAACGATGATGGATCTGGTTACGCTGCATCTG  
AAGTCTTGACAATTACTAATGCTAACGCATCTGGTATCCCAACGGTAGGAAACATTGGTG  
CTGCTGATGCATCAAGAACTGCAGGAACTATAACTTAGGCACATCTGATTATGGA ACTG  
AAGCATCTGGTGCCAACGCAACATTCACTGTTGTTGTTGCTTCAAATGGTGCTGCTTCTA  
TTACCGTAACAGATGATGGTAGCGGATTTATCGCCAATGAACTATCACAGTTGCTGATG

CTCAACTTGGTGGTCGCGGTGGTGGCTGCTCTTACATTCGATGTAACAGCAATCCATGGTA  
GCACTGCTACAGTTCAGTATCTGCGATTCATGGAAACGGTACAAGAGTTAATGTGCGTA  
CCGTTGCAACAACCTGCAACTCTAACTCTAACTGACATCACACCGATGGAAGTTGGAGCAA  
CAGTTACAGGTGCTACTCCTGGCACCACAGGTGTCATCACTGCTCTGGGAACTAACCAGA  
TCACTGTCAATACCGTTGACGGATTCTTCAAGAAAGGAGGAGTCGTCAGTTCTAATGATG  
TACTACTTACTATCTCCTCATTAAATTAATAAGTTATGTCTGCCACCAGACCCGTA  
ATAAAAGTGAACACTACGAGACTATGCTCTCCGTCGTTAGGATTCCTACTATAGACATCA  
ACGTTCCCTACTGAGCACTTAGATGATTTGATAGAAGAAGCGATTGATTTCTATCAAGAGT  
TTCATATGAAGGTAGTTACAAATCCTTCATGTTTATTGAAGTTGCAGATGCTATTA  
CAGCAGCAAAAAGTTCAACTCAACAAGGATGTACCAATTGGTATGAGAACAATAACTATG  
TTTCATTACCACCTAACATCTTAGGAGTCAATCAGTTATATACACAGCTTGGTGCTTATG  
GTATTGTGCCTGGGAACACGTTCAATATTAAGTATCAAATCTTTTTAAATGATATATACG  
CTATGACCCATGGTCATATTCTTCATTACTTTATGACATCTCAATATCTTGAGACACCTG  
CTTTTGTAAACAGACTCTAGTAGGAGTAGAAGAGTAAAATATAACGAGAAACAAGGTTCGAT  
TGTATCTCGATATGGATCGGGATTCATTGGGAACAGGAGATAAGATTTTAGTCGAAGTTC  
TCGTACGTCAAGATCCAGAACTTATACAGCAATGTATAATGATAACTGGTTAAAAGGTT  
ATGTTGAAGCATTATTTCAACAACAATGGGGAAGAACCCTAAGTAAGTATGATGGCATT  
AAATGTTAGGTGACATCACACTTCATGGTCGTCAAATTCCTGAGGACACAAGTCGATTCA  
AGAAAGACCTTGAAGATAAAATTCGTGATACATATGAACTTCCTCCTTTAGACTTAGTGG  
GGTAAATCTCTAATGGTCCTTCGCAACTCTCCTGCACAAGATTATGTTCAACCGGATTTTT  
CTAACGCAGGACGCTTCAAAGCAAATGGTTCTACACAGGAACAAAAATTTATTGAAAATC  
TATTAGTTGAAAGCATTGAAATCTATGGGCAAGATATTTACTACGTTCCGAGAACGATTG  
TCAACACAGATACGGTCTTTGGAGAGGACTCGGATTCGCGATTCGATACTGCGAAACCGA  
TTAGAGCATATGTCAATAGTGCTGAAGGATGGGAAGGACAAGGTGAGTACTTAGCAAAT  
TTGGAGTCCGTATCGAAGTCAAGACAATTTTTATATTCTCCCGTGAGAAATTTGAAGAGC  
ATGTGGACGATGGTGTGACGCTTAACGTCGAAGGGTGACCAAACGAAGGGGACTTAATCT  
GGTTTCCAACAGCAAAGCATGTATTTGAAATACAATTCGTAGAAGCAGAAAAACCATTTT  
ATCAATTAGGAAAAGGATATGTTTGGGAATGTCAGTGTGAACTCTTTGAATACAGTGACG  
AAGATCTTGACACAGGAATCGCAGAGATCGATGCAATCGAAGCTGGCTTTGCTAATGCTA  
TTACAGTTAACTTTGCTACTGGAAGGTCTAGCGATTTACAGTTGGTGAAATTTGTTGCAG  
GAGGTACATCTAAGGTGACTGCTGAGGTTCAAGCATGGGATTCTACAACCTAGACAGTTAC  
AGGTCTTTAATCGTTCAGGTGTCTTTACGATACCTGAAACGGTTACAGGACAGACCTCAG  
GTGCTGCTTGGACAACCTGCATCATAACAACACTAAATAATGTTAATACCGCTAACTCTA  
TTGATCGAAACAACGACTTTGAAACTTTGGATAACGATATTATTGACTGTACCGAAACTA  
ATCCATTCGGTTCAATTGGTTCATTACTGACGCTACAAGCTAATGTTAGGCACTTATTC  
ATATCACGAAATTTTTAGGAAGACTATCGTTGCTTTTGGAACGTTATTCAAGAATATTGA  
ATTACGTCGTAATGATGAAGTTATGACAGTACCTTTAGCGTACGGTCTAAACAAAAATT  
CTTAGCAAGGTTAGATCAAGTTCCTGATCCAACCAACAAAAGAGTTGAACTTACTCTACC  
CAGAATCTCTTTTTAAATTAACGGGGTATCATATGATAGTGCAAGAAAACCTTGCACCCAC  
ACAAATGATCAAGATGGCAAGCAGTTCAACTACAAATAAGAACGTTTTTATGCCTGTTCC  
TTATAATCTTCGTTTTGAACTAGCAATCATCTCTAAAAATCAAGAAGATGGTTCACAAAT  
TTTGAACATATTCTACCAATATTCCAACCTCATTTCAATATGGCAGTAAAACCTATTGCC  
TGAGATGACTGAGATTAGAGACATTCCCGTAGTCCTCAATGACGTCGAATATGAAGATGA  
CTATGAGGGTAACTTTACTACAAGAAGAGCGATCATTTATACCTTACAATTTACTGCAAA  
AACTCATCTATACGGTCTGTATCGGAACCAAAAGTTATCAAAAAGGCAATTACAGATTA  
CTATACAGATACCAATACTACATCTGCACCAAGAGAAGTACGGTATACTGTTGTTCTTAA  
TCCTCTCACAGCAGATGCTGATGATGATTTCCGGATTCGGAGAGACTACTGCAGTCTTTAC  
AGATGACAAGAAACGTAATCCTACTAGTGGTGCTGACGAGGCAATTTAATCATGTCAAAT  
CCTTTCGATGGTCTCAACGATGCTTTTGGAACTGAACCTACAGAACTTCAAAAGCATGTT  
GAAAAAATAAAACCTACTCTGAAAAAAACAGAGACTGAAGATGTGAAGCAAGACTACACG  
ATATCTCGTGCTGCGTTACATAGTTTAGTGATGAAAGGACAAAAAGCAGTGGATGGTATA  
TTGGAAGTAGCACAAGCATCAGATCATCCTCGTGCCTATGAAGTTGCTGCAACAACGATT  
AGGAACGTAGCAGATACTGCTGATAAACTAATTGATCTTCAGAAGAAGATGAAAGAGTTT  
GATGCTGAGGATATAAAGAATGCACCTACTACAGTAAAGAATACTATGTTTGGTGGTAGC  
ATTGCAGAGTTACAGAAAATGTTAAAGCAGCAAAAAGAGATAAATAAAAAGGACGAGAAA  
TAACAACACACGACATGTCAGTATTAATGTTCTTAGCACTAATACAGTTGCTGCAGGTG  
CAACTGAATATCAAGTAATTCAAACAGGTTATAACAGAATTCGATCTACTTCAGGTGCAG

CAACAGTATCACTTAATGGTGGTCTGCAATCACACTTGTTCAGAATGAATTCATTCTTC  
TCAAAGGTGGTAAACCTGGTCTAGCACGAATTGTAAAAGCAGTATCTGATTCTACGGGTG  
ACTATATCCTAGGTCAGTATATTCATTCTACAGGTGATGCACATCCATACACATCTGGTC  
CTTTTATCGCAGTTGAAGATGATAGCACATCTCCTGCTATTGATAGTAACTTCCTTTCTG  
CAGGAAGTGCAGGTA AAAAGATTACTGCTGTCACAGGAAAGACAATCGCTACTGATATTG  
ATTCAGCAGGTGCATCAGCAGATTACACTTTTGCCTTCTCAGGTCCTCAAGCAGTTGTTA  
AAAGATGCATTA AAAATCGTTGCTGCTACAAGTGCAGTAATCATATAAGAACTTCAAGTGG  
ATGGTGGTTAAGATGCCCGCTGTAAATCAAGAGGCAGAGAGAATAGTTAAAGGGGATGAAG  
AAGAATCATCATCGCTTTAAGAACTCTATGGAGATCGAGAGAAAGAAGTTATGTACGCT  
ACTGCTAATTAGTTAACACAAAAAGAACAATTGAAAGATATGTAATATCAAGATGTCATT  
AACTCGTCGAAGGTAATCCTACTCCAAGGATGCTATCGAAAGCCAAGTCATAGACTACT  
GGAAACATTTCTGCTGATCATGGAAGTGCAGAAAAGAAGAATAGAGTAATTAGAAAGTCT  
CTAGAAAAAGATCTTGAGAAGAAAGGTATAGGTTATAAAAAAGGTGTAGGGGAGTATAAA  
TATTCCTCAGGAGAGGGAACAGGACGTGAGGTTTCATACCAAACAAGTCTTGGCAAAGTA  
ATGTCTAAGAGACGTTTTGGTAAGGTCATGCGTCGTCTAGGACGAAGGCATGGTCAAGAA  
TCAGTTATCACTACCAAGTCAGGTA AACCTGCTACACTACATGATACTGAGTCTAAAAAA  
CCATCTAAGTCTTTGAACTTAGGTAAAGCAAAACCAGGAAAAAATCCTGGTGGTTTCGGA  
GAAACTTCTGGTACTAAAGTCAGAAAAGGTA AATTAGGTAAA ACTAACA AACCCGCGATG  
CACTATGGCTACTAATGAAATTATCGAAAAGAACAAAAGGGGTGACAGTTCTTTGCACGA  
CTGGTTTTGTAAAGAGTAAGTCTTCTGATGGGAAGCCTGGTTGGGTT CAGCTCGGTGGTAA  
ATACGCAGGTAATCCCTGTGCCAAACAACCTGGACAAACATCCAAACCCGAGTGCGGTTC  
CAGTAAGATGAAAAGAAACCTAAATAAAAAAGAGGAAGATGCTGCCTTTCGACGCAAAAA  
CAAGCAAGATCCTAATCCAACAGAAAAGGAAAAGCAATCAACGTGAAAACAGAATCTAC  
ACAAATACACGAAGGCGAAAAAGATGCATGTTACCATAAGGTAAAATCTCGCTATTCAGT  
TTGGCCAAGTCCTTATGCAAGCGGTGCACTTGTCAAGTGCCGAAAAGTTTGTGCAACAAA  
TTGGGGGAACAAAAGTAAGAAAAACGAATTTGATATGAAGGTAAAAGGATTCCAAAGTTT  
TCAATCAGAGTGTTGGAAGACTCATAAAAAAGTTGGTATGAAAATGAAGGGTGGTAAGTT  
AGTAAACGATTGTCGTCCAAGAACGAAGCAAAGGAATACACAGGACCTGACAAAGCGGA  
CAGAAA ACTTATCAACAAAATGGATAACCCTATTTATGCTTAAAAGTTAGCAGACTATGA  
AAAGAACATGGATCATAAGAAGCGTCAAGCACTTAAGGATAAAGCGACTAAGGGTATGAA  
GTTTACTCATGAAGAACTACCAACGAAGCTAAGAAATGTTGGCCAGGTTATGAGAAAAA  
AGGAACCCAAAAACTAGTCGGCAAAACGTACAACCGCTGTGTAAAAAAGGAAGACTTGG  
GTATGTCAGAGAAAAAGCAGCAGCATGGACTAGGAAACCAGGAAAAA ACCAATCAGGCGG  
ACTTAACGAAAAAGGCAGAAAAAGTTTCGAACGCGAAAAATCCTGGATCTGACCTTAAAGC  
ACCTAGCAAAAAAGTTGGAAACCCCGCAGGGCATCCTTCTGCGCTAGAATGAAAGGAAT  
GAAAAAGAAATTA ACTTCAAAGAAAACAGCCAGCGATCCTGATTCAAGTATTAACAAAAG  
CTTGC GTGCTTGGAAATTGTTGATATATAATAGACGGTAGTCTGTACAATTA AAAATGAAA  
TCTGTCCGAAGTGTAGTGCTACATGGATCGGGGAACAGTTATATTGGTCTACAGAAAAAG  
AGGGTTGCCCTCATGATCTTGCAGGACTACTATGTAATAATCATGGAGATGAAACTTGTA  
TTAATCCATGTAAAGGATCCACTAGTGGTCAAACATGGGAATATCGTCGTGGAATGATTG  
ATGGTTTGACGGAGGGGTATGGTAAAGATAGTTCGTAATGTATGTCATCAATCTTTAATA  
GAGTTTATATTTGAAACAGCAGAAAGAAGAGAAGCGTGGCATTGGA ACTTCCCTATGGGA  
GCAGCGTTCGATAAGACGCATGCAAAATTAGACATTGTATAAGATGGTAAGATCAAAGAT  
GCTTTTCTAGCAGGTCTTGCATCTTCTGTTTTGTTGCAAGTATGGGAAGCAAGTAATAGA  
GAACTATTCATACCTGAGATATTTTATGCGGGTGTGGCAATAAAAAGATAAGCATAGAAAA  
GATAACGTACCTGTAGATGACGCTAACAGAAATGATAACCATTA AAAATTTGGGTATCTTG  
AATAGTGACTGGGATCCGAACACGATGGGTGGTGGATTTATGCATGGTTGTGTCATACAT  
AAATTGAACCCTACCGACTTTTGTATTTTCGATCCAAGGACTCCTCATGCAGCAGAGGCT  
GTAATCTGTGATCACAAAAGATTTGCCATGGATTTCTCTGTAAAGAAAACGTAACCAGCA  
TGCAACTTTAAAATCTATCAACTATAATATAGTGTAGACTTTAAAAGGAGAACGATGTTT  
TTTGCATCACACCCGTCTGTTTATACTTTACCTGGCACATGGGGACCCCAACCAGTTATA  
TTGTATAACCCGACACTTCTTATTTCTCTTTAATCAACAGCATTGCTATTGGTGGGATT  
GTATCGATTTTAGCGGTTAGGAGAAAGAGAAAACGCATCTAATAAATGACTGACCTAAAC  
ACAATTATGTTAAACACAACCGTTGCCATTATTGATTTTTGTATAAAGATAGAGACTTC  
CAAAGATTTTGGGTGCTTGAGGAGATAGCTCGAGCACCTATTTTGCTTTTATGAGTGTC  
CTACATTTCTGAGAATCAATGGGGTTACGAGGACCAGAACACATTTATCTAATGGAGGAG  
CATTTTGGTCAAACGCTTAACGAAACAGAACATCTTGAATATCTTGAAGTCCGGGGTGGT

AACGCTTATTGGATTGAACGTGCTTTTCGCCAAACACCTCGTCCTTATCTCCTATTGGTTC  
ATGGTGGTTTATTATGTGTTATTTCCCTGTATCTGCATACGACCTAAATGAAAAAGTAGAG  
TGGCATGCTGCACATACATATGAAGAATACCTAACACGTTTTCCAGATGACGAGGACATC  
ACTCGAATCAAAGATGATAAAATTAACATGCAAATGAATTATCCAAAGCAATAGAGTTA  
ATTAAATGAGAACCCTACCCAATAACGAGTATAAACTAGTATTCGATGCTCTTTGGAAAC  
GTCAGCGATGCTTTAGTGCAGGTCATAGAATGTTCAAAGAATACGAGAACTTATTGAGG  
AGTTTGAAAAATGCCAGTCTATCGTGACAATGAGATTAGACTTAATCTCAATGAATTAATT  
GAACAAAGGATTCCAACCTATGACTTGCTGCATCCAGACCACTGCTTATCTGAAGCACAA  
GTGGCACAGCTAGCACATGATATTAATATGGATTTAGCCTTGCACCCAATGTATCACCAG  
ATTGATGATCATATCATGAGATAAGTAAAGGCAGCAGGTATTGATAACTCAGAGCAATGG  
GTTGAGAAAAAACTAAATGATTTAGATTTCTGAAAAGAATGAAAAATACAGAATCTTCTG  
AACTTATTCAACGTTTTACCAAACGTACGATGCAGTTGACAGCAAGGAAACAAGAAC  
TTCGATCTGCATATGATGACTATGTAATAATTAGAAAGAGATCTGACTAGACTTGATGGT  
CTGTGCAAGCAATTGAATGTGTTGCTTTCCGGCAAATTACCAGGACATGGTAACCATACTG  
GTATGAAAGATCACTCTCCCAACTAAATAAGGGTGGCGAGGATCGATCTCGACTTAGCCG  
ATTTATGAGTTCGGTGCATTCACCAGATTGCTACACCCTCAATGGAGTTGAACTATCAT  
GTCCCATTAACCTGTAGGTTATCACGATAAGCAAATCAACATTATGAAATATGTGAGTC  
TGCTGAAGATGTTTATCATGATATCAAACAAGCATGCGAAGATTTAGAAGGATTTAATAA  
TCCACACGCAGCAGAATATTGTATCAAAGAAAATTAATGGTTGTCAGGGGTGTCATATG  
GATGGTCTTTATACTCGTTGTAATCGTCTCTTGGTATATCTACTATATACTTAGAATGGC  
CTACAAGGAGATGGACGATGGCAGCGATGCAACCACCGAGCAGGAAAAGCTGCTATAACT  
TTAGAGTAACGGAGATTAATCGTGTGTTGACGGGGATACTATTGATGTCACCATTGATT  
TGGGGTTTTATCTATACAAGAAAGAAAGAGTTAGAATTGCAGGAGTTGATACGCCAGAGA  
AAAGAACCAGAGATCTGGATGAGAAGGCATTGGGAATAGATGCTACAACTGGATGAAAA  
AAAATTTAGAGGATGCTATTAATGGAGATGATGAGCTCACTATACGAACTGAACTTAAAG  
GTGGGGTTGGCAAGTATGGTAGGTTGCTTGTGTTGGTTATACGATGCCGATGATGATGAT  
CACTCTACGAAAAAATGATTGTGCAAGGATATGCATGGTCGTACGACGGTGGAAACAAAAC  
AAAAAACTTCGATGAACTCCGTGAAATTAGACGAAGCTTCGGAACTTTGCTCTAGTCTA  
GCATCGCTGATTAGAATAAGATTTCAAGGTTATCACATTTTGAAGA ACTTGCTTCAGAT  
TATGATGAGGTGCATACAGGTGATGTATCCATCTATAGTTGCATGTGGACTTCTAAGGGC  
TTAAGAAAGTGACATATAGAAAGAGCACTTACAAATAAAGGGATAGAGATACTACTACTGT  
GTATTATTTCCAGATCCAGAGTTGCCTATTCCTAACTTTGGATGTGATATCGTAGAGGCA  
GGTGGTAAAGTAACTGCTGCTATAGTTGATGTGTCACCAGTGCATAAGGTAGATTAAGT  
TTACGTAATATAACATATAATTTTAAAAAGAATAGGCATCTACCAGAGTGGGGTGAGATA  
TTTTACCATGGTGTAAAGTTTGTAAAGATTAGAAAAGGATGAGTATGATGACTTTTTATTA  
TTGTGTAGTGAATACTTAGAGGTATTCTGTACATAGTAAGAACAGCAGAAAGAGAAACA  
GACTGGAGAAATACTATGAGGAGATATGACGATCAGTTATGCTATTGCACATCGCAGATG  
AAGAACAAGAAA ACTGAGGCGGTGCTATCCCCATGGTTCGATAATCCCTGGGCATCTATA  
TATCTACAGAACATACTATTTGACAAACCCAACTATGAGAAGAGAAAAGTTGGAAGCTC  
TGAAGGCACCTGCCATTGGCAACATCAAGAAAGCAAAGATGAACGTTTAGGTTTACCTTA  
AGAATCCTGTTGGAATTGGTTAACACCCAGATGTTCTTGGTGCTATTCAAGAACA AATTG  
ATTTGATTGCGAAAGAAGAGGAACGTTTGGAAAGTAATCGAAGAGTATTTTGAAGTAGGAA  
TGGATCTTTATGGTGGAACTGAATGAGTGATCAGTATCTCGGCAACCCAATCTAAAAAA  
AGTTAACACATCAATTGACTTCAAACCAGAAGAAGTTGCTGAGGTATTGAAGTGCCAAGA  
GGATCCCATATACTTTATGAAAAATTATATCAAGATCGTTTCTCTAGATGACGGTCTAGT  
TCCATTTAACATGTATCATTCCAAGAGGAAATGGTATCTAAGTTTCATGATCATAGATT  
CAATATCGCTAAACTACCACGAGAGAGTGGTCAGTCTACCATTGTTACTGCATACTTACT  
TTGGTATGTGTTATTCAATGCAAATGTCAACGTAGCAATCCTTGGAAACAAATCAGCAAC  
TGCTAGGGAGATGCTTCAAAGATTACAATTAAGTTATGAAAAACTCCCAA ACTGGATGCA  
ACAAGGAATCTTCCAATGGAACAGCGGTTCTCTGGA ACTTGAAAACGGCAGTAAAATCAT  
GGCTGCTTCTACTTCCGCTTGTGCTGTCAGGGGTATGTCATTTAACGTTATATTTCTGGA  
TGAATTCGCGTTCATTCCGAATCATATCGCTGATCAGTTTTATAGTTCTGTTTATCCAAC  
TATCTCTTAAGGTAAGTCTACGAAAGTTATTATCATATCTACTCCTCACGGAATGAATAT  
GTTCTACAACTCTGGCATGATGGAGAGCCTGGAACGAATGAATTTGTGCCTACGGAAGT  
ACACTGGTCAGAAGTGCCAGGTAGAGATGATGTATGGAAAGAGCAA ACTATTAAGAACAC  
ATCAGAATCTCAGTTTCGTGTTGAGATTGAGTGTGAGTTCTTAGGATCTGTTGATACATT  
GATTGCTCCTAGTAAGTTGAGAATCATGCCATATCATGATCCAATTACATCTAATCGTGG



ACTTGCAGTATCTGAACAAGTAGTTCCAGAACATAATAATATTATCACTGTTGACGTATC  
AACAGGTGTTGGTAATGATTACTCAGCATTGTTGTGTAATAGATAACCACAACCTATTCCTTA  
TAAGATGGTTACCAGATATAAGAACAATGAAATTAACCCATCGTTCTACCAAATATTAT  
CGTAGACATTGCAAAGAATTATAATAAAGCATACATCTTATGTGAAGTAAATGATATTGG  
TGGACAGGTAGCAGATATTATCCGTTAGATTTGGAGTATGAGAAGTTGTTGATGGCTGT  
AATGAGAGGTTCGTGCAGGTCAACAACCTAGGTCAAGGTTTTTCTGGTAAGAAAACACAAC  
TGGTGTAAAGATGTCCACAGCAACAAAACAAGTTGGATGTTCTAGCCTTAAAGCATTAAAT  
TGAAGTAGATAAATTGCTTATAAATGATTATGACACGATTGCGGAAGTAACAACGTTTCAT  
TGCGAAAGGTCAAAGATTCCAAGCGGAAGAAGGTGGTAATGACGACCTTGCTATGTGTTT  
AGTGATAATTGGTTGGATGGCAATGCAACCATACTTTAAAGAGATGCCCGATAACGACGT  
ACGTCAACGCATCCATGAACAACAGAACGATATGATTGAACAAGACATGGCACCATTTGG  
TTTTGTAACCTGACGGAATGGAAGATGATTATTTTGCAGACGTTTCAGGGCGATGTGTGGAA  
ACTCGCGGAATACGGGGTTAAATCCTACATGTGGGAGTTTCAGTAAGGTTTTCAAAAATAT  
GAATAATTCTAGACATCTGATGTTGGAATTACCCTAGGAGAAAATTAACCATGGCAGCCA  
ATCAATTATCGCCAGGTGTAGTGGTGCAGGAGAGAGACCTTACTACTATTACCACATTAT  
CGACCGCTAACGTTGGTGTGCTCGCTGCACCTTTTGAGCTCGGTCCGGTTGAAGAAGTCG  
TCGAAATCTCCAGTGAAAGGGATCTTGCAGAGCAATTTGGAAAACCGAATGAGTATAACT  
ACGAGTATTGGTATACTGCAGCACAATTTCTTTCCTATGGCGGACTACTAAAACAGTTC  
GTGTTGACTCGACATGTCTCAAAAACGCAGTTAGTAATGGAACTGCAGTTAAAGTCAAGA  
ATTTAAGTGAGTATGAAACCACTTACGTAGGTGCTACTAACACACGGAAGGGGGCAGCAA  
GAACTTCTGGAACCTACAGGAAACACTATCGGTGTATTTGTAACCTGACGCAGGTGCAGATC  
GAATCGCTGTTGTTCCCTGCTCCTGGCTCAGGTGACGATCATGAATTCGTTGCTGATGAAG  
CACTTTCGCAACTTCTGGTGTGCAGGTAAAGTATTCAAATACAGCCTAGTATTAACAG  
TCACAACCTGTTGTTGGCGACTTCGTTCCCTAGCACTACTACAACCTGTTTCAATCTCTGGTA  
CTAACAGACAGTTACAGTGCTTGCTTGGGATCCTAGTAACAAGAACTTGAAATCGGTC  
TTCCTTCTGGTGGTATCACTGGTATCCTTGCTGATGGTCAGACTGTAACCTCAAGGATCTA  
ATAATTGTGTGATTCCATCATCCGGTATTGAAAGAAGAGTTAATATTGGATTAACAAG  
GTAGCATTGAATTCGCTGCTGCTGAGAGTATCGCTGATACTAACTCAACTGCTGTTTCAA  
TCAGTTCTGTTTCGTTCTGAGTATGCAGAGCGTGAGTATCTACCTGGTGCAAAATGGATTA  
ACGTTGCTGCTCGTCCTTCTACGTCACTCTTTACAAATAATGCAGGTGGATCTAGAGATG  
TACTTCACGTTCTAGTTATTTATATCGATGGTGGTAACACTGGAACAACCTGGTGTCTGTT  
TTGAGCGTTTCATTGGTCTTTCAAAAGCATCGGACGCTAAGACATCTGTTGGTGAAGCAA  
ACTACAACAAAGAAGTAATCAAGCAAAAGTCTGTATATATCTACTGGGGTTTACATGAAG  
AAGGAGTATTCAATGCAACTGCTTCTGCTGCTGCAGGAACTGGGGTTTAGCTGCTGCTT  
CTAGACAGTTAACTTACTACGTTCTGCAGATGGTTCTACTGGTTATCCTGAGGGCCGCG  
CAACTGTAGGGTATAAGAACAATGCAACATACTACTACAGATTAACCTGGGGGTGTTGACT  
ACGGTATTTCTGGTGGACTTTACAGTGTAACAAACACATCTCTTGCAACTGCATATTGTC  
TTGCAGAAGTTCCTGAGTCACAAACAATTGACTTCATTCTTACTGGTCCTTCTGGTGCAG  
AGGATGCTTCTGCAATCGCTAAAGCAACTTCTCTAGTTTACATTGCTGAAGAGAGAAGAG  
ATTGCTTAGTATTCGTTTCACCTGGTAGAGGAAACGTAATTGGAGTTACTAACTCTACTA  
CTGCAACTGATCATATCGTTAACTTCTTCGATCTATTACCGAGTTCTTCTTACATGGTAT  
CTGATTCTGGATACAAGTATACGTACGATAAGTATAACGATTTATACAGATACGTTCCAA  
CCAACGGTGACATCGCAGGTTTATGTTTACAGACAACCTAAGGTTGCAGAACCATGGTTCT  
CACCTGCAGGTTTCCAACGTGGTGTTTAAGAAATGCTATCAAACCTAGCATAACACACCAA  
CTAAGACACAAAGAGATCGCTTGATGCAAACAGAATGAACCCTGTCGTATCATTCCCTG  
GTCAAGGCGTCGTCCTCTTTGGTGACAAGACTGAACTCGGATTTGCATCCGCGTTTGATA  
GAATCAACGTACGTCTATTCTCACCATCGAACGTGTTATCTCAGGTGCTGCTAAGG  
CACAACCTTTTGGACAAAACGATGAAGCACAGAGATCACTCTTCTTGAATATCATCGAAC  
CTTATCTAAGGGATGTTCAAGGTCGTCGTGGTGTAACTGACTTCTTAGTTAAGTGTGATT  
CATATAACAACCCACCAGAGGCAGTTGATCGTGGAGAGTTCTACGCGGAGATTTTCGTGA  
AACCAACACGCACAATCAACTACATTACCTTGACACTTGTAGCAAATAGAAGTGGTGTG  
CCTTCAGCGAAGTAGCAAATTAATTAATTCATACTTTTTTTCAGACGGTTTCCGCATCG  
GTACCCTCTGAAAACCTTTTATTCGTCCAAATATAACTGACTGAGACACCTAGAAAAATGG  
CAAAAAGAGGAACGATTGACGATTTTAAGGCAAATGTAGCATCAGACTTTGCTCGTCCTA  
ACCTATTCCAAGTTGATTTAGCATTTCACTCTGGAATCATTAAATAATTCTAATTTGGTAA  
ACCTTGCTAAGTTCACTGTTTCGTGCAGCGAATCTTCCCTTCTCCAGATTGGTGTAAATTG  
AAGATCTTTTCAGAGGACGTACGCTAAAGATCGCAGGAGACAGAACGTTTGAACCTTGGAA

CAATCACTGTTATGAATGACAGTAAGTTTGTCTAAGATCCGCATTTGAATTGTGGGCAT  
CAAGCATTCAAGCATAACAACGAAAACCTTCACTTCCGCAGCAGGTCGTGGAGACACAGATG  
ATGCAACTGGATAATTTGCTGATATGAAGGTACATCAATGAGCAAGAGATATTAGATCAG  
GAGAGAAACAAAAGGTCTCAAATCATATAAGTTCTATAACTTCTTCCCTAGTGCAATCG  
CAACGATTGATCTAGATTACGGAAACAACGATGCAATCGAAGAATTCACCGTTGAGATGC  
AGGTTTCAGTATTGGACTCCTCTAGCAGACGCCATCGACTAACCCGCTAAATAGAACAGGA  
CCAATAATTAACATTTAATAATGGCAAATCAGCTCTTCGGTTTTTCGCTTGAGAGAGC  
GAAGAATGTGCCTAAGGGACCTTCTTTTGTTCAAAAGGATAGTATGGATGGATCGAAACC  
TATTGTAGGGGGCGGTTACTATGGATATTCCCTCGATTTTGATGGCACGGTTCGCAATGA  
GTATGAACTAATCACTCGTTACAGAGAGATGTTTCTACAACCAGAGTGCGATAGTGCGGT  
TGATGACATCGTGAATGAAACTATTTGTGGCAACTTTGACGACGTTCCCGTCGAGGTCAA  
GTTGTCTAACTTGCAACAATCCGACAAAATTAATAAATTAATCAGGGAAGAGTTCCAAAC  
AATTCCTTCGCTTGCTTGATTTCCGGTAATAGATCGTACGAAATTTCCGTCGCTGGTATGT  
CGATACAAGATTATTTATCATAAGGTTATCGATCCAGATAACCCTAGAAATGGTCTTGC  
TGAGTTACGTTATATTGACGCTCGTAAGATTTCGTAAGGTTACAGAGTATGACCAGAAACG  
TCCAAACGAACTTCGTGGACTAGATCTGAATGCTCAACTTACACAAAATATGCAGATTA  
TTATCTATATAATCCTAAGGGTTTGAAGAACTCTGGATATAAGCAAGGAATTAATAATTGC  
TGCGGATTCAATCACTTATTGCCATTCTGGTATACTGGATCTCAATAAGAATATGACATT  
AAGGCATCTACATAAAGCAATCAAAGCGGTTAACCAACTCCGTCTGATTGAAGACTCATT  
GGAAATCTATAGATCATCAAGAGCACCAAGAAAGAAGATTTTCTACATCCATGTTGGTAA  
CCTTCCTAAGAACAAGCGGAACAATACGTCCGCAAAGTTATAGGAAGGTATCGTAATAA  
ATTGGTTTTATGATGCAAACACTGGTGAGATTAAGATGACAAGAAGTTCATGTCCATGTT  
GGAAGACTTCTGGTCACCGTGTTCGTGAAGGCGGTAGAGGAACTGGGATATCCACTCTTCC  
TGCGCGACAAAACCTTGGTGAAGTAGAAGAGGTTAAGTCTTCCAGAAAAAGTTATACAA  
AGCGTTGAACGTACCGTCATCAAGACTTGAGACTGAGCCTACCTTTAACATAGGTCTGTC  
TGCTGAAATTACTAGGGACGAAGTAAAGTTCCATAAATTTATTGCACGTCTCCGCAAGAG  
ATTCTCAGAAGTGTATGGATCTCCTTAAACTCAACTCGTTCTGAAGGGCACAATGAC  
TCTGGAGAATTGGGATGATATCAAAGAACACATTCAATTTGACTTTATTGCTGACGACTA  
CTTCACTGAACTAAAGGAAATTGAAGTACGCAATGAGCGTATGAATCAAGTGAACACAAT  
GGATCCTTACGTTGGTACATACTTCTCTATTGAGTATATGCGTTCGTCAGGTTCTAAAACA  
AACTGAACAGCAGATTAAGGAAATTGACAAACAATGGATTCTGAACGAGAAGCAGGTCT  
TATACTCGATCCAGAGCAAGCAATGCATCCCGCTACGGATCCTGGCGCTGCCCAAATGG  
GGAAGTAGCTCCACAAGAACTCCTCAAGTAGACGCGGGTGACACGAAACGGGGAGAAAT  
CTGAACTATAAATAATAAATGTGAAAGGAAAATTATGCCTACTGAAATTGCAAACCAAAT  
AGTTCAACAAATCTTCGGAGACGATAAATCGAAAGCAGTTGGCTCAGTGAATGATGCATT  
GGCTGCAACTGCATATGATGCCATTCAAGCAAGAAAGGTTGAGTTCGATCAAAGTATGGA  
GTTTGAAGTAGATGATACCGCACAGGATGCTGCAGATGAAATTACAGATAACCTACCTGA  
CGGAACTGACGAACCTGAAACTGTTGAAGTTGATGGTCGCAAACCTGAAGATCCACCAGA  
AGCACCAGAAGGACCCGTTGCTGACGGAACACCTTTTTCTGTAGAAGAACCAATCGAGGA  
ACCAACCAATGAACTAATAGCTGAAGAAATTACAAACGTTGATTCTATCTGCGAAGAAA  
AAGAAGGCAAGAAAACCTTACCTCATTGAAGGTGTCTTTCTACAAGCGGAATTAATAAAC  
GCAACAATAGAATGTATCCCTTGAAGACTTTCTCCAAGAAGTCGCTAAATATGATGAGA  
ACTACATTCAACAAGGGCGTGCCCTTGGAGAATTAGGTCACCCTGATGGTCCGTCAATTA  
ACCTTGACCGGTTTTCCATAAGATTCGTTCTCTAAAGGAAGATGGAAACAACCTTCATAG  
GTAGAGCAAAACGGCTCGACACACCTATGGGTGGAATCGTAAAGAACCTCTTAGATGAGG  
GTGTCAAACTAGGTGTTTCATCTAGAGGCATGGGTTCAATTCGTAAGAAGAGAACTGTA  
ATGTTGTTATGGACGACTTTATGCTCGCAACTGCAGCAGAAATAGACGCCGATCCTTCCG  
CTCCTGATGCTTTTGTCAATGGAATTATGGAAGGAAAGGAGTGGGTTTGGGACAATGGAG  
TCCTAAAAGAAGCTGATGTGGCAGAAATTAACAAGAAATTGATCAAGCAACTCTAATTA  
ATCTCCAAGAACGTAAGGTTTCCGCGTTTGGAGGCGTTTTTAAAGAGTTTGTGATTTATAA  
ATAAATACAGACAACGCTAATGCATAACGGAGTTTAAACAATGGCTGAGACCCACGATA  
AAGAGCTAGATAACATGGAGCAAGTGGACGAAGGCGCTGATCCTATCACCAAGAACGCAA  
AACCTGGTGAGAAGATGCACACTTCAAAGCAGGAAGTCCAAAAAATGTCGTGAACGTAG  
AAGGACCTGTAGGTGCTTCAATGGAAGGCGCAAAGGAACTAAGAACGCAGGTAGTTCTG  
CTGCAGGTGCAGTGAAGTATGAAGTTCTAAGTCTCTGAGCACAAAACCAAGTGCTGCAT  
CCGCAAACAAGAGGAGGTAGACACGGGAGATGGCGAAAAAGAAGAAATCGCTGAAACCA  
AGTACGAATTTACTCAGGATGTTGACGCTCTTGTTCGACGGTGAAGAAGTATCAGAAGAGT

TCCGAGTAAAAGCAGCTACTATTTTTGAAGCAACTGTTACTGCCAAAGTTAACGACGAAG  
TTAAAGCGTTGCAAGAAGCGTTTGAAGACTACGCCGACTGAAGAAGTCGAAAAAGTTCAA  
CAGAATTGGCCGAGAAGGTTGACGATTAATTCTCTTATGCTGCCGAGCAATGGATGAAAG  
AAAACCTCATTGCGAATCGAGCATGGCATCAAGACAGAGATGGCAGAATCGTTCTTCAAAG  
GTCTAAAAGGTCTCTTCTTAGAGCACAACCTTACCGTGGCTGAGGAGAAGTTCAACCTGC  
TAGATGGAATGGCAGGAGAAGTGTGATATGGAAGCTAAACTCAACGAGCAAATCGACA  
CTAATGTTGCTTTGAACAAGCGCATTGGTGAGTTTGTAAAAATGGAAATTGTGAACGACG  
CAGCTACTGGACTAGCAGATACCCAAAAGGAGAAGTTACCATCATTAGCAGAAGGTGTTG  
AGTTTGAAGATGAAGAAGATTTTCGCAAGAAGGTCCAAACTATCAAGGAATCCTACTTTA  
CTAAAAGGCTGAAGTCGCTACAAAAGCAACTGAACCCACTGAAGAAAGTTCCGCTCCTT  
TGGTAGAAGATACTAACAGCAGCACAATGTCGAAGTACGTTGATGCACTCGCTCGTTGGT  
CCAAATAATTAACCTACTAATCCCAAGAGGTAATTTAAAATGTCTTTAAATCAACTTCAG  
GAGAAGTGGGCACCCGTTCTAAATCACGAATCTCTACCTGAGATTGATGATGCACATAAG  
CGTGGCGTCTGATGACAACCTCCTAGAGAACCAAGAAAAAGCATTAGTCGAAGAAGGACAA  
ATCCTTACAGAGACTCTACAAACCGCAGGTACAGGTGGTTTTCGGTGGCGGTGCCACTGCA  
ACTGGTCTGTGGCAGGTTTTGACCCAGTATTGATCAGTCTTATCAGACGTTCAATGCCA  
CAATTAATTGCATATGATATTGCAGGTGTCCAGCCAACGAATGGTCTTACAGGTCTTATC  
TTTGCAATGAGAACACAGTACGGTACTGAAAGAGATCCTTCCAGTGGCGATTACGGAGAA  
GCATTCTTCAATGAGCCTAACGCATGTTTCTCTGGTGCTAATGGGAACCGTCTTGCTGAC  
AACGATCCAACCTGCATCTGGGAGTTCTGCCATGAACGATGCTGAAGGTGCTAACCCAGGT  
CTTCTTAATGATTCCCCTGCAGGAACATATGAGTTGACAGGTGACGCTCAAGGAATGAAC  
ACCACTGCTCTTGAAGCAATTACAGATGCTGCTGCAGCAACTGCCTTCATAGAAATGGGT  
TTCTCAAGCGAGCAAGTTACTGTTACTGCTAAAGCTCGCGCTTTAAAGGCAGAGTACAGT  
ATTGAGCTTGCTGAAGACTTGAAAGCAATTCATGGTCTTGATGCCGAGCAGGAGGTAGCA  
AACATTCTTTCAACCGAAATCCTTGCTGAAATCAACAGGGAAGTTGTTAGAACAATCGAT  
GTTAACGCTGTTGCAGGTGCTCAAACAACACTGCTAACGCAGGTATCTTCTACCTTGAC  
GTTGACTCAAATGGTAGATGGTCTGTTGAGAAATTCAAAGGACTTCTGTTCCAGATTGAA  
AGCGACGCAAACGCAATCGGTCATCAGACACGTCGCGGAAAGGGTAATATCATCATCGCA  
TCTGCTGATGTTGTATCTGCTCTTGGTATGGCTGGCGTGCTTGATTACGCTCCTGGTCTT  
CAAGGTAACAATGGTCTTGTTCCTGATGACACATCTTCAAGTCTTGTGGAACCTTAAAC  
GGAAGAATCAAGGTTTACGTTGACCCATATTCAGCAAACCTAAGTGACAAGCACTACTAC  
GTTGCAGGCTACAAAGGAACTTCTCCTTATGACGCCGATTATTCTACTGCCCATATGCA  
CCTTTACAGCAAGTCAGAGCAAGCAACCCTGACACTCTCCAGCCAAAAATTGGATTTAAG  
ACTAGACAAGGTATGGTTTCTAACCCATTCGCTAAAGGTCATACCCAAGGTTCTGGAGCA  
CTTGCTGCTAATACTAAGTATTACAGAAGAGTTCAGGTTGCTAACTTAATGTAATAA  
GTAGTCTTACTTAACTTTCTAGAGGGTGCTTGACACCCTCTTTTTTTATGCTATAGTATA  
TTTGTGGACGCAACACTGGGAGTGAATAAACTTGCTGGCATATAGCTGGTTAAGG  
TGATGCGACAGAGGTGGTCTCGCTGTCAGGAATGGCAGAACTACAAACCAAGTAGGTCG  
TAGGCAGAGTGGTAATTCTAAACTGTAGAAATGCCCTGCTCTTGTGGTATACAGGAATC  
CAACCTCCCCATTAATTTTTTAGTAGAAGGGTAAAGTACCTAGTGAAATTGTCAGGTTT  
GCATTATAAGTAGTAATAGAATTAGGGTTAACAAGATGCACTAAACTTTCCTTGTTAATC  
ACTTCAGAAATGGAGAGAGATTGATGCACAACCTAGTATCATATAATCAATTAACAGGTT  
CTTACTAGGAAGAACACGACACACGGCTAACAGAATACTACGAATGTTAATCGAATGTG  
ACGACCAACAACAGATCTGTAAGAATTTGCAGAGAGGTTCTTATGTAACACATATTCG  
GGAAGACTTAGAAAGGGGGCAGAGATGCTCCCTTTTTTATGTGCTAAATAGCTCTATCAA  
AATGGAATTATATTATGGATTATAATCCTTATTCTCTGAGTGGCAGCGAAAAACGTATC  
TATAGGAAGCACTCTTTAAATTCCTTGTGACTACGTTGAGAACGATATCATTAGAAATG  
ATTTCAAAGTTATCCTGCCAGTAGATCTGATGAAGCGTACAAAGAGTATACTAAACTCA  
ATCAACTATCCGCCAAACGCAGTAAAGAATAACAAATGCTTTCAACCAATACCGACTCC  
GACTGGAGTCTATCTGTAAACAGATCGTAGATGGTGAAAATGTCAAACCTAGAAGACATGA  
TTTGGGCGCAAAAACCTAGCAAAAAGAAATACCACTGCTGCTACTTGGATGCGACAAGCAC  
GACAGAAAGCAGCAAATCCTGACATGAAAAATGGAGGGACGGACGATTTTCTGAACAAAA  
TGGGGTTAGGAGAACCCGACCCATCGGATTATAGAAGCGGGTTCAATAGTGCACATGACA  
TTGGTGTATGGTTTAAACAGAGAGAACTGACGACTGGAGACAACGAGACTAATGGCAAT  
CTGGTTCCAAGACCAACTAACAAATAGAACTTTCTTTCCCCTATAGGATATCTTTTCT  
GTTAGATCAGGCAAAGAAGGTGTCTTTTTTATGTCAACAAGGAGAGATTCCATCAATAAA  
TTTAGGTGAAGTTCTTATTCTACTGCAGGTTTAGTCCCTTTATCGAGAGAAGGAAACAT

ACGCTATGGTGATTTGACCGTTGAGTTTATGGTAGATGAAGATCAAAGAACTACATGGA  
AATCCACAACCTGGATGAGTGCTTTAGGAACTCCACAATATTATGATGAGGGTGTTCATG  
GGAAACCAAGTATCAAGACGCACCATCACAAGACGTACGTTTCTCAGACGCTACTCTTCA  
AGTATTAACAAGAATAACTTAGCAAACCTGTGAAGTAGTCTTAAAAGATTTGTTTCCTAC  
AGA ACTATCAACACTATCATTGATGTTTCACAAGGTGAAAATTCATTCATGACTGCACA  
GGCAACTTTTAAACATTCTCGATACGAAATCAGAAACGTAAATTCGAGA ACTAGACGATG  
AAGAAGTTCACTCTATTCAAGTTTGAGCATA CATGTCGTGGTAAAGAGAACTGGTATACT  
AAATCCACTAGGTGGGCGGAGAAGCAACCCTTCCCTTTAAACCATTTAATTAAGGTTGT  
ATCGAATGGTTGCATATTCAGTGGAAATGATGGTATAATTAATATGGCTATGGACGACGTT  
GATCGTCAGGTAGATAAAAATCCAATCCCAGTGGGAGGAAAATGAGCAACCAACAAGACAC  
ACAATCGTGGAGACAGGAGTATTTGGAGATGAAGGCTGGTCTCTCGAAATTACAAATCCG  
ATTGTTGAAAGAGGGTCCCTCATCAACTAGAACAGGCATGGTTACTCCAAGCGATGCACAA  
CGACTACAAGAAGATGAAGGGGATCAAGGAACCACCTAGTCGTGAGTCTGGATATCAGAT  
ATCAATGTAGGAGTGGTTTCAACGTGAAAAGGATCAGGGTGTATGAATCTTGAGCAATTT  
CAAGAGATGTGGGAAAAGGATAGTGTAATTTACGGAGATTTTGACTGCGAAGAATCTACA  
AAAATGCCACAACCTTCATATGAAATATATGGAGTATCACAATACTTTCTCTCTTATGAAA  
AAAGAAAGAGAGTTAGGAATGAAACGTCTCATAAGAGAAAAATGGTTAAACTATGTAGGT  
AAAGCACCTCTTCAGTATACAAATAAACACCATTTGATTTTAAACTTACTACATAAGAA  
GAGATCAATATGTTTATTGAAGCAGATGATGCTATCTGGAAACTACAATTTAAGATAGAC  
TACATAGAACAAGTTCTACTGTATCTTGATAGTATCTTACGAATGATAACAATCGTATT  
TGTCAAATTAAGGATGCAATTGAATGGGAAAAATTTAAGAATGGTTTTTAATGAATTACG  
GATTGCCCTACAAAGAAGTTATCTTCAATACAAAGGCACAGGATATAGTCAACAAGGTAA  
TTTCGTATAGACATAAATTGGACTTGAGGACAAATTCGTAGGGAAGTTCAATCAAATAGAA  
GTTCCGAGATAGCATGGTTAGGAGATAGAGAACTCCTGTCCATGATTCTTCGTATGATTA  
AGAAAATAAATGAAGATGCTCGTTGCAATCTAAAGATTACAGGTGTCGAACCAGTTCAGT  
ATGGTAGATATGGTGAAGATGATTTTTATGATTGGCACATAGATCAACACCCTCAACCAG  
TAAAGGGATTAGTAAGAAGGGTTAGTATGACACTCTTTCTAAATGAAGATTACGAAGGAG  
GCGAGTTTGATTTGGAGATATATAAACAGAGACAGATCCCAGAAATAAAACTTTCAAGT  
TAAATGCAGGATCTGCTATATTTTTCCAAAGTGATCGATGGCACAGGGTACGTCCTAGCA  
CATCTGGAACCTCGTCAATCTTTAGTAGCATGGTTTTATGGACCTCCTTATTCGTAAAAAG  
AATGAAGTCTATCTTAAGGTTGAAGCGCAACCTCACATTAATTATGAGTTAGCAGCTTTC  
TTTACCTTCGAGGTAGAGTCTGCAAAATTTATGCAGAAGACTAGAAGGTATACAGGATGG  
GATTGTAAGATTAGATTGTTTTCTCCTGCAACAGGAGAGATATATCGTGGTCTTGATAGAT  
TACTTAACAGACTGGGCGGAAGAAAAGGTATTTGAATATCAAATAGAAGATGATGAATAC  
TTTGGTCATCCTATCACAGAGAATGAACTTATCACTCCCAAGTCGGTTGTAGGGTTTGTA  
AAATCACTGCGTCTGCCCCGACTCTACAGGTAAGGGATTATCAGTATATGGCAATTTAC  
GAAGCACTAAAATACAACAGACGACTGTTGCTGTCCCCCACAGCGTCAGGATAAGCTTTG  
ATGATTTATGCATTGGTTAGATTTTCGGTTAAACGTTAGTCGTAATGTTTTAATTGTAGTC  
CCCCTACTCTCTTGTGCAACAAATGTATAAGGACATTGAAACATATGGTTGGATGGCA  
AAGAAAGATTGCCATAAGATATATGCAGGGCAAGACAAACATACAGATCACAATGTAATA  
ATCAGACTTGGCAGTCAGTATATAAAGAACC AAAGAAATCGTTTGATAGATTCGACTGC  
GTGATTGGTGATGAAGCACATCAGTTCAAAGTAAAATCTCTAAGTACATTGATGGGTAAG  
TTGCATGATTGTAATAACCGTATTGGTTTTACAGGAACACTAGATGGTGCCAATGTCAAT  
CAACTTGATTAGAAGGTTTGGTTTGGTAGATGTTCTCAAGTTACTAGAACTAATCAATTC  
ATGAAGGCAGGGCACATTGCTAAATTAAGGTC AAGGTAGTGTTTTTAAAACATGAAAAA  
AAACTATTTGAAGGATATCAAGAGGAAATTGATTATCTAGTTGAACACGAAGGAAGGAAT  
AAATTTATCCGTAATCTTGCGTGTGATCTCAAAGGAACTACCCTTGTGCTTTTCAATTAT  
GTAGAACGACATGGTAAATCTCTTTACACATTGATAAATAGTTACACAGACAGACCCGTG  
TTCTTTGTTTCATGGGGGTGTAGATGTCGATGATAGCGAAGAAATTCGCATGCTAACAGAG  
GCATCAGACAAGGCAATCATTATTGCATCGTATGGTACGTTCTCTAATGCCATTAATATT  
AAAACTTACATAATGATATTTTCGCTTCTCCTTCTAGATCTCGGATTCGTAATTTACAG  
TCTATTGGACGAGTATTGCGGAAAGGAGACAATAAATCAAAGCCACTTTATATGATATT  
GCTGATGATATTACAACAGACAGGGGCAATAACTACACGTGGAATAACCTGATGGAGAGA  
GTCAAGATT CATAATGAAGAGAAATTT CAGTATGGGATCATAGATGTAAAAGTAAAGGCT  
TATGATTA ACTACGAAAACACGACGAAGAATTT CACGGTATATTCAA ACTGGTTAGTGG  
GTAGGAAATCCTTGCTAAGGCAGTTATGACAGAAGACCGTGGAGAGAGTTTAATGTTTCAT  
GTCTGATCATGTTAGCGCATTGGCAATCACTAAGGACGTCGGCGAGCAAAAAATATTAAG

AGGTATGGGTTTCAGTAAATGGATTGCAATGTCTGACGAAGATTTTTTTTATTTTAAGCGA  
GAAGGATATCATGACCATGGCAACAATGAGTAGACCTGTCAAACCTCATGTACGATGCATA  
CATCATCGGCGAAGATGCACATGGAAAGCAAATGAAAGAACGTCAAGTTCCGCTCTCGAT  
TGCCGAAGGATATCTAGGAAACACAAAAGACATCCGTGCCTTGCTACAAAAATTGTA  
AAAGTAAGTTATATTTCTCTGACCCCTTACAGTGTTAGTAGACTTGTCCCTTGACAGGTT  
TGTC AAGTGTTGTTATAATTA AAAACAAAGAAAAATTTGTATGAAGATATCTTCCCCAAA  
AAGCGACAGCATTATGTAGATAATCAAGAGTTTCTTGCGGCTATTATCAAGTATAAAGTG  
AAAGTAGACCATGCAAAAAGAAAAGGGTCTACCAAAACCTCGTGTCAATAATTACATTGGT  
GGTTGCTTTTTAAAGATTGCTACTCATCTATCATATAGATCAAACCTTTATTAATTACATG  
TATAAAGATGATATGGTATGTGATGGTATCGAGAATTGTATACAGTATATTGATAACTTT  
GATCCTGCTAAGAGTAGAACCCCTTTGCCTATTTCACTCAAATCGTATACTTTGCTTTC  
CTAAGAAGTATGGCTAAAGAGAAAAGACAAATGGATATTAAGAAAGAATTATAAAAAAA  
TCTGTATACGATCATGTGTTACAGTTGACGGAGACGCAAGTTCAGAGTATAATCAAATT  
AAGTCCCGTGTGCGAAATGAATTCTAAACGATGAAGATTCTCTTAACAATAGATCAACACT  
TTGGCGTTCGAAATGACAACCAACATTTTATCCATCATTACAAACAGTTTTACAATAATA  
TTATAATTCCTTTTATAAAAGCATCTGGCATTAAACAGGTCATTGCTCTTGGTGATACCT  
TTGATCGCCGTAGGTTCACTTTATGTCTCTATCCGAATCAAAGATATGTGGTTTG  
ATCCATTGAGAGATATGGGTATCCCAATGACCATGCTTGTGTTGCAACCATGACATATACT  
AAAAAAATACTCTTCGAGTTAATGCCCAAATGAATTACTCAGAGGGTACGACAACATCA  
CAATCATTGATGACCACGATACTGTAACCTTTGATGGTCTACCTATTCTTCTCCTTTCTT  
GGATTTGTGATGACAATCGCGAACGATTTCTCAAAGTTGTCGAAGGATCTGATGCCCTG  
TCGGTATGGGTCATTTAGAGCTTAACGGTTTTGAGGCTCATCCAGGTCATGTGATGGAAG  
GTGGGATGGATCCCAATGTCTTTAGTAAATTTGAAAGAGTATTCTCTGGACACTATCATC  
AGAAATCTACTAGAGGTA AAAATCAGATACTTAGGTAATCCTTATGAAGTTTATTGGAATG  
ACTACGGAGAGAAAAGAGGTTTTACGCTCTTTGATACAGGCACTCTTAAACTACTTTTT  
ATATGAATCCCTTTGATGTTGTTTATAAACTGTATTATAATTCTGGAGTGTTTCACCCAG  
ACGAATCAGAAATGAGAGGATCATTCTGTCAAATTAATTGTAGAAGATAAAGGAGACTATC  
AGAAGTTCGACTACAATGTAAAACGCATACAGGATATGGGTTGTGCAGATCTTAAGATTG  
TTGAAGATCTTAGTGTGGAACCTGGAGAATGGAAGTGAAGTGCTAGAAACCGAAGACACAA  
TGATGTTGTTAGACAAATATATAGATGAGATAGATTTAAGAGTCATTAGACCTAATGTTA  
AGTCTGTCATGCGATCACTATGTGTAGAGGAATCAGAACTATAATGTTGGTTCTTACTGA  
TAAAAAAATTGGTGGTGTGTTTATGCTAACTCTAAGTCAGGCGACGAACAGGGTAAGAAGAA  
CGTGCTTGTTTTGTCAGAGAAAGACGATGCAGAAAGATATATCGTACTTCTAGAGGCAGA  
TGATTTTAATCAGGAACTTGACATTCTGGAAGTAGATGCAGAAATTGTTGCCATGAATTG  
TGTAATTATGGGTATTCTTATGCTATAATAGAACCTACTGACTTACTCATACCAAAAAT  
CAAATTTGATAAATGATTGTTTTTGAATATATCAAGTGGAAGAATTTTCTTTCCAGTGGT  
GATCAATGGACAGAAATTAGTTTGAATGACTCTCCATCAACTCTTATTGTTGGTGCAAAC  
GGTGCAGGTAATCTACTCTCTTAGATGCATTGTGTTTTGTTTTATTCAATAAACCTTTG  
AGAAACATTAGTAGAGGACAGTTAGTAAATAGTATCAATGAAAAGGTCTTAAGGTTGAA  
GTATTATTCTCTATTGGTGTGATGAGTATCGCGTCTTTTCGTGGAGCGTAACCTAATATA  
TTCGAGGTCTACAAAAACAATAAAATGGTGGACCAAGATGCTGCTGCCAAAGACACGCAG  
AAGTATCTCGAACAATCCGTTCTCAAACCTCAACTTTAAATCCTTTACACAGGTCGTCATC  
GTGGGTTTATCCACCTTTGTCCCTTCAGGCAACTCAACGCACCTGTCAGGCGAGAAGTT  
ATTGAAGATTTACTTGACATCAACATCTTCTCCCAAATGAAGACGATCCTAAAAGATCGT  
GTTAGACATGCAATGTCACAACAACGTGATTGTGACCTTCGCCTTCATATCGCAGGGGAA  
CGTGTAACAATCAAGAAGGATTTATTAGCCCTCTTGCTGATGTGAGTGCAACTCGTCAG  
AAAGATAAGAAAAGTAAAATTA AAAACAATAATGAGAAAATTAATCAGAAGAAAAGCAA  
CGTGATCTACCGAAAGAAGAAGTAGAACTCTTACTATAGGTTTGAAGAATGTTGATAAT  
CATAAAGCAGTATTAGATGACCTTCGTCAAGAACAATCTGATATCAATTCAGAGTTAAAA  
TCTGCTGCCAAACAATAAAGTTTTTTTAAATCACATGATGAATGTCTACCTGTTCTCAT  
CAGATTGATAAGGAATTCAAGACAGCAGTGATTGGTAATTTAGAACTAAAGGTCAGAAT  
CTTACAAAAGATTTTAAAGGTTTGACTAATAAAAATTGCTGATGCTGTTAGTGTGTTAGAG  
AAAATGGAGATTTCTTCTAGAAATATCATGGAACTCGAAGTAATGTATCCTCTGCAGAA  
AGAGAGATCGTACGTTTAAAGACAGAGAACCTTAAAATAAATGAAGAGATATTAGAATA  
CAAACAACACTCCTAAAATTAGAGAAGAAAACTATCGTTAGTTAAGTTTCAAAAAGAA  
TTAGAAGAAACACAAAAGATTGTGGAAAGAGTCATCAGACTCTTGATGAATTTAAAGTC  
ATAGGTAATTTGTTAAAGGACTCTGGTATTAAGAGTCAAATAATTAAGGAGTATGTTCT

ATTTTAAATAATAATCAATAAAATAGCTGCACAGCATGGACTTCTTTGATAAACTTCACA  
CTTGATGAAGAATTTAAAGAAGTAATTAAGTAGATTTAGAGATGAATTTTCATATCCA  
TCTTTTTCTGAAGGAGAAAAAGCAAAAATTGATTTAGCATTGCTATTTACATGGAGAGAC  
GTTGCTCGTATGAAAAATAGTGTTGCTACTAATTTAATCATACTTGATGAAGTATTCGAT  
AGTTCTCTGGACGCAGAAGGAATAAATGAACTCTTGAAGATTCTTCATGCTTTGGGTATT  
TCAAGTAACATATTTGTTATCTCACACAAGGGTGATGTCTTATTAGACAAATTCCTAAGG  
ACACTTAGATTTTAAAGATTAATGATTTCTCGCGGATGTCAGACGACTCGTAAATTTTG  
GAGAGTATGGGCAAAGCACTTGGAGACAAGTCTGGAACTCAGATAAAGAAGCGGATTG  
GATTGCTTTAATCCGAACATTTATTTTCAGTCGGTGAGTAGTACTAACTGTTTTATCGT  
AGCAGGTAACATAAGACACTGGAACGATCATCACGTTCCGCCATCATATCAGCGTGTGCC  
AATTAAGGAGTGGCACAATAGCTAGCGCATTCTTTATTGGTCTGCTATAATAGGTATAT  
ACGAAACACAGACACATGATCAATCAAGAAGTAAAAGGAACACTTGCTAAACTACTAGCA  
ACAGAAAACCTCACAGTTGAGCACCGTCAGGTTACAACCTGCATACTTCGATGTTGAGAAT  
CGTGTTCTTTGCCTCCCGATCTGGAAGTCTGCCTCAAACACTGTTTACGATCTACTTGTA  
GGTCACGAGCTAGGACATACTTTTATACTCCTGCAGATGATTGGGATAAAAGTGTTCCCT  
ATAGCATTCAATGTTCTCGAAGATGCTCGTATTGAAAACTAATGAAGCGTACCTAT  
CCTGGTCTTCGTAAGTCTTTCTTTGACGGATACAAAGAACTATGGAATCAAGATTTCTTC  
GGAGTCAAACATGAGGATCATGAGATTCTATCACTGATTGATCGCATCAATCTTTACTTC  
AAAGGTAATCTATATCTTCTTTCTCAGATGAAGAGAAAGCATGGGTAAACAGAACTGGA  
AAAAGTGAACAATTCAAGAGGTAGTAGACCTTGCCAGAGATCTATACGGTTGGGCAAAA  
GAAAAGCAAGCAGAGAACGAGCAAGAATATATGGAACTGATACTGAGATTGGTAATGGC  
GATGGTAATATGAGTGGTGGAGTTTCTGCTACAGATATCGAAGTCAAAGAGAAAGATTAT  
TCTGAAGGAGAAAAATCTGCACCTGCGATTGATCCTAATCAACCATGGGATAGTTCAGAG  
AATCCTCTTGAGGATCTATCAGAAGGTCTCAATAAAATACTCAGCACCTATCGGTGGCGAT  
GGATCTGATCTATCAATGACTTTGATCAAGTAGAAGAACTGAGAGTATTACAGATAAA  
GCATTAGAAGAATCACTAGAAGACTTTGTTGATGATGATGCTAAGGAGTGTGTTTGCCTT  
GGTCTTCTAAAGTAGAAATTGACAAACTTCTAGTTTCTCACTCTACATTTCAAAGTGAT  
CTTGAAGGATACTTCTCTTTTACAAAAATGGTGACGAAGATGCAGAAAACCTATAAGAGA  
GAGTGTCTTCAAGTATGCAGATGATCATTACAACAATTCCAGAACGATGCACAGAAATCT  
GTAACAATCTTGTCAAACATTTTGAAGTGAAGAAAGTCTGCTGATGAAAACAAACGTGCA  
GCAGTATCAAAGTCAGGTGTTATCAACACTAATACTCTTTACAAATACAACTAACTGAT  
GACATCTTCATGAAAGTTTCAACTGTTCTGAGGGTAAGAATCGTGGTCTTATACTACAT  
CTTGATTGGTCTGGTTCATGCAGTATCAACTCTTGGATACTGTAACGGAAGTTTTC AAC  
TTGGTATGGTCTGTGCTAAAGCAGGTATTCCTTTCCGTGTCAACGCATTCCAGAGATCA  
TACTATAGTTGTGATCATAGTAATTGCAAACAATGGAATCCTGGTGTGGACCTAAGGAA  
GGTAATCTTGGTATTGCCGATGATTTCAAGACTTCTTGAATTACTATCTTCTAAGCAAAAT  
GCTAAGTCACTTGAGAATTCCTCAGACAAATTTACAGACAAGTATTTGCTATCGGTGGA  
TACCGTATGTCTGCTATGCCCACATACTCTTGGTGGAACCTCCACTTGCTGAAGCAGTT  
TTCTGCACTCGTCAGATGGTAAAAGATCTCAAGAAGGTAGAAAATGTTCAAGAAAGTAAAT  
GTTGTATGCTTAACTGATGGCGAAGCAAATCCAATGTCATACTGGGCAATAAGTCCTTAT  
AGCACTTACATGCAGGAGATGCGTGAGGAAAAATTCAGACTTGCTCAAATGTGTCACTCA  
AGAAATAGAGTATTCATTCCTCGTGATTCTCACACTGGTTATCAACGCAAACCTTAATGGT  
AGTCCATATGAAACTACAAAAGAGATCGGAAGTTACATGATAGATGTTACTGATTACAAC  
TGGATTGGTATCAGACTCTGCAGTAAAGGCGAGGTATCAGGATTGATTTCGTATCCTTGGT  
ATGGACATACGACGTCAAGACAACTTGACAAGGAATGGAAGATAGAAAGATTTGCTTCT  
ATCAAAGATGAAGTTGGATTCTCTCAATCTATCTATATGCCTGACAGGGGCAATGGTGAA  
GGAACCTCAAGACCTGACTGTAACAGAAAGGCGAGGTTGCTACCAAAGCAGAACTACAA  
CGTGCTTTCAAAGCACATGGGTTCTAAGGCCACACACTAACTCTCCTCAACGCATTC  
ATTGAACAATCACATGAAGTGTAAGTAACTCTATTTAAAGCGGGAACAATCTTTGAAG  
AACTGTTATCACTGTGAATTATGATGATTCAAAAAAGTTGCATTAGCAAGAAATCCTA  
ATTCTACCGTAATGAGTGTGACAGCAGTGTTCGGATAAATAACTGTCCACATGCGGTAGC  
ACTCAGCAGATATACCTGCTATAATAAATGTATAAACACACAAAGACTATAACTTTTGAA  
CCAAACCCTGTGACAACCTGAACAACCTTGTTC AACACCTTACTGATAATGTTGTAACCTGAA  
GTCGGATGCAAAGACATTCGTGAGTCAGCAAAGATACTTAACTATCTTTCACAACCTGCA  
AGTAAAAGACATAAGTCTTATAAATCAGGTATAGGCAAGTGGAATCTAACCATTCAAGAA  
ATTCAACGTGCGTAGGAAGCACCTGCTGCTAAGAAAAAAGCAAACCTATGTTCTGATAAA  
GATAAGACCTATGTTCTTTTGGTAACTTCACTTCTGTAAAGAAAGTTATCTCATCGAAG

AAGTTCAATCCTCTATTACATTACAGTTCTATCTGGAACGGTAAGACTCGATCAGTTGAA  
CAGGCGTGTGCTGCAACTAATAGGGAGTTAATCCGGGTCAACATCACAAATCGAAACTGAC  
GAGGACGATCTTATTGGTGGGTTTCGTCTTGTTAATGGCGACACTGTTTGGCACAACGGA  
CCTGCGGTTGAGGCTTTGGAAAGGGTAGCAGTATTACTTCTAGATGAGATCGACCTAGCA  
TCTAACAAAATTCTTTGTTTGCAGTCTGTCCTTGAAGGCAAAGGTGTATTCCTTAAGAAG  
ATTGGTAGGTATGTAAAACCTGCTCAAGGATTTACTTTTAGCGCTACTGCTAACACTAAA  
CGTAAAGGATCTGATGATGGTAGATTCGTAGGAACATATATTGTGCGACGAAGCCTTCTTT  
GAGAGATTCCCAATCACATTTGAGCAAGAGTATCCTTCTGCTACTATCGAGACTAAGATC  
TTGATCAATCAGGGATGTGACAAAGACTTTGCAGAGAACCTAATCAAGTGGGCAGGTGTA  
ATCCGTAAGACATTCTTTGATGGTGGTGGTGGTGAAGTTATCACAACCTCGTCGTTTGGTT  
CACATTGTTTCAGCATATCAGATCTTTGGAGATAAGTTGACAGCAATCAGATATTGTGTA  
AACCGTTTTGACGATGATACAAAATCATCTTTCCTAGATCTTAATACAAAAGTTGACGCA  
GGAGAAGATTCAGAGTATACTGATAATAACGAAGTTCAATCATTTCAGTTAATTATGAAGT  
ATCGTGAAGAGGAGTTCCTACAGTAACTCCGACATTACATCGAGAGCACTTACTCTCAAC  
ACTATGCTAGTGATAAGATTCAGACTCTTGATGTAATCGATGAGTGTGCGGATGCTACAG  
CATTTTGTAGAAGTAACATTTTAAAGTACGCTTCTCGCTTCGATAGAAAAGGTAGTGCTA  
GACAAGATCTCTTAAAGGTGCTACACTACGGAGTGTTACTCATGCACTTTTATAACAAGAG  
ATCAAGCAAACCTACGCAGCAGCAACTTTTGCAGCACAAGAAGACTAATTCATTATGACAG  
TAATTTCCAAACCCACCATTGAAGTCCTTAAAACTTCTGTTCAATCAACAAGTCTATTG  
TTATTAACCTGGCAATAAGATTTCTACGCTCAGTATTAATAAGAATATTCTCGCTATTG  
CCGAAGTCGAAGAACAATTTGATTCGCAAATTTCTATCTATGATTTGGGAGTTTTCCAGG  
GAGGGTTGTCTCTGTTGACTCACCAAAAATCGATACTACTGATACCTACTACGTCACAG  
TAAGTGACCTACAAGGTAAATCATAGACACGTTATTTCTATGCTGATCCTGATATCATT  
CTCAGTCACCAGAAAAGAAATCAACTTGCCATCAGAGGATGTTGAATTTAAACTTGAAT  
CTAAGATTCTGATGCAATTACAACGTGCTGCTATGGTATCTCAACTCCCTGTTCTTTTTT  
GGTATGGGGATGGAGAACTATGCAGTTATGTGGGACAGATAAAAAGAATGATACTTCCA  
ATAATTATTCAGTAGTAGTTGGAACACTACTACAGATGAGTGTGTTTTTTGTTTCAAAGTTG  
AAAACCTTAAACTTTTTATCTGGGGATTATGATGTAGTATTGAGTAAGACAAATGTTGCTT  
TGTTCAAAGGTGACGGAATCAAATACTACATTGCTCTAGAACCTAACACATGAGACGTTG  
GCATTCTGACACCGAACTAATCTGGGTAGGTGACAAGGATGGTCCTTATGCAGAGGAGTA  
TAGTTTCGTAACATACTCCACTGCCCTAAGTGCGATTCTTACGTTGAAGTTTATTATCC  
TAAAAAAGATGAAAGAATTTGATTATGAACTCGATTATGAGAGACTTGACTTTACAGACG  
AGGAGACTCGTAAACTATATCGCATTTGGAAGAGGGGACCAAGGGGTTCTACTGGTTCGCC  
CTTATACTAACGATATATGTGCTCATTAGAGATTCAAAACTCCCCTGAGGCAGTAAAAT  
CTTCCAACCATATCTTTGGTATGGATCTTGATTAACGTGATGAAATAGATTTTCATCGGTA  
TGGATATGTGTCGTAAGTTTCTTGAATGGGTTTTACCAGATCGAGGAGATATGCCATTT  
ATAGAGATGGTAAAAAGTATGATAAAGAAGGTAATGTCATACCCCAAGAACCAGATCAGG  
CTACCTGTCATTTTGCTGAGTCTACTAAAATTTTTAAGAAGGTTTCGAGATATTGTTGCGA  
AGAATAAAACATATGTTACACTGAGGAAAGAATGGAGGGCATCTGCATGAACATTTTTGT  
AACTGATCCTTCCCAACTAAGTCTGCTCAGGTATTACCTGACAAGCACATCGTCAAGAT  
GCCACTAGAGACCTGTCAAATGCTTTCTATTGTTGCATCTGATAAATGGGGTCACGGTTC  
TGGTTCTCTACCTAACTAGATGGCACACCATACAAAACAATAAGGGTGCCTTTTTGTAA  
TCATCCCTGCACTGTATGGGCACAGGATAATTGGACATGCTGGATCGTGCATGATCTTGC  
CTTATGCTTTGAATATACTCTTAGATACGGTAAGATACATAGTTGTCAATCGACTATCGA  
ACATTCTGAAAAAATATTTCCCTCCTCAGGATACTGATCCAACACATTTTGTTCGAGG  
TCCTGATCAGTTAAGCATGATAAGACTATTGACATTTTACTGCATACAAGTATTATAT  
CAATAGTAAACCAAGGGTATCAGATAATTATCTAAGGTTACCTGATAAAAAACCTAACTG  
GGTTAATTAATTATTATGAATGATTTTTTTGTGGGTCGAGAAGAATCGTCCTAAAAACGTA  
GAACAATGCATCTTGCCGAATCTTTGAAGACTACCTTCAAGAGTTTTATACAGCAGGGT  
GAGATTCCTATTCTCCTTCTATCTGGGACAGCGGGGGTAGGTAAAAACAACCTATTGCTAAA  
GCACTTTGTCATGAACTAGGAGCCGACTATTATGTTATCATTGGATCCGATTAAGGACGA  
TTCTCGACACCGTACGAACTAAGCAAAGAACTTTGCTGCAACTATATCAATTACAGCA  
GAAGCAAAGCACGAAGTTCTTATCGTTCGACGAAGCAGACAACACTATACCAGATGTTCAA  
CTCTTACTTCGTGCATCGATAGAAGAATTTCAAAAAGAAATTGTAGATTTATATTTACCTGT  
CATTTTAAAAACAATAATTATTGAACCTCTACACAGTAGAACAACCTGTCGTAGAATTC AAC  
GATCGTGGGAAAACCTAAACAACAACCTTGCTGCAGAATTTCTTTGCTAGATGTAAAGGTATT  
CTGATTGCTGAGGAAGTTACCTTCTCAGAAAAAGTTGTAGCAGACGTTGTTCAGAAGTAT

TTTCCAGACTTCCGAAGGACTCTTAATGAGTTGCAACGATATGCAAGCACAGGAACTTTT  
GATACTGTAATCCTAGCAGCACTAGGAGACGCAAATATCGATACTCTAGTCGAATCATTG  
ATAGCAAAACGATTCAATGATGTAAAGAAATGGGTTACACAAAACCTAGATTCTGATTCT  
GTCTCTATCATGAGGAACTCAATGATAATGCTTATAATGTAATGACAGGTCCTAGTATT  
GCAGCAGCAGTTTTAATCATTGCTGAATATCAATACAAGTCTGCATTTCGTTCTAGATCAG  
GAGATCAATCTCCTTGCATGCTTAACTCAATTGATGCTTGGATGCGAATTCAAGTAACAC  
CCAGTGACCTTTACAAAGAAGTAAAGGAACTTGTCTTAAAGTCCTGATTTTCCTTGGCATT  
GGCATGACAAAGCATAACAATGATGATGAGGTTACTGAAGGTAGAACTAACTTTGGTTACT  
TGTCACATGTAGTCTTAGAGAGACCTGGTTATACATACCTAACTCCTAAGATAAATCCTG  
ATCACTTTCCATTGTTTCATGATTTATTTGTTGAGATCTGTTGAGACAATAACATTGACC  
CTAAAGTAATTTACAGGATCAATGCTAACCTGACTACTGAATCACACCATAACAAATATG  
GTCCTGACCACACAGACCATGACTATCCTCATAAGAATATGTTAATATACTTAAACAGGAA  
CTCATGGAGGTCTTACTAAAGTTGGAAACACCAACTACTCTTGTATGCTTAATGAAGCAA  
TTGTTTTTTGAAGGTGTTACGACACACATAGAACCTACGTTTGGAAAGACGAGTAGTTCTAG  
TTTACACATTTTTATGATTATGACTATCAAATTTATTACAAAACGTGAATAGGTTAAAGC  
ACAGGTAAAGTCCAGATTCTACTACTGGTTCTGGGGTGCTATGGCAGGTGCTGTTGTAGG  
TGGTCAACTATATGTTGGATCTTCATACAGACAAATGGCAAGATCAATGGACAGATGGTT  
TGAAGAGACCTTTGAGGTGATACAAATTCCTACTAAAACCTCCAACGGGACGCATGATGCC  
TGTTCCAATGCCTAATCCAGATTTCTATGACGATCCTATGATTATCAGATGACACCGTTA  
AAAACACCACTAAGATATCCTGGCGGTAAGTCTCGTGCTACTAAAAAAATGGCACAATAT  
TTTCCAGACTTAAGAGACTATCCTGAATCCCGTGAACCTTTTCATGGAGGTGGATCTGTA  
GCGTTATACGTTACACAGATGTATCCTCATTGGAAATCTGGGTCAATGATCTATACGAA  
CCTCTTTATACATTTTGGACACAACCTGTAAAATCATAGTGAAGAACTTAGGAACCAACTT  
GTTCAACTCAAGCAAAAATATCCTGATCCGTCTTCGGCAAAAATCTTTTCTTATAATCC  
AAAAGTATCCTACTAGACACCTAAGAGATTGCGATGTTAAGGCTCGTGCTGTCGCTTTC  
TATGTTGTTAACAAGTGCTCATTATCTGGTCTCACTGCGTCCTCATCGTTCAGCTAACAA  
GCGTCTGATTCAAACCTTTTCAATGCGAGGAATTGAAAAACTACCATACTACGGAAGACTT  
ATCAAAGGTGGGAAATCACTAATCTGCCATACGAAAAATTATTAACAGATGATACTAAT  
GCATTCCTATACTTAGATCCTCCGTACGATATCAAGGCAAACCTTGTAAGGAAAGAGAGGA  
ACAATGCATATTGGATTCGACCATGATCCTTTTGCAAGAAGGTGTGATAGAGTCGAGTGT  
GATCAAATGAAATCTTAAAATCTTCTAATTTAGTAAAGCAAATATTCCAAGGTTGGAGA  
GCACAAGAATACGATCATACTTATACTATGAGATCTGTTCGGTGACTACATGTAAGATCAA  
GAACAACGCAAAGGACTTCTCCTTTTAAATTATGGCATATGATGAAAGATAACCTCTAAA  
GGATTATCTAACTTAAGCAACTTCAGTAAAGATTATTTGATGGATGAGGATCCTGCATG  
GGAGAAAAACTATCCTTCCTATGTAATCAATAAATACATGTCTCAACATTTGGATACGAT  
CATGTATGCTAATGAAATGAACATACATTCTCATATAGAGAAACGTTTGCAATATGCTTT  
CTTTATAAATATCGTGAGACCCCGAAAGAGATTTACTCCCTGGGGTAACAAACAGAAAGT  
GAAAGATCTTGACCTTGTTACAAAATACTATGGTTATAGTATTTATAAAGCATATCAAGA  
CTTAGAGATCTTAACTCCATCCCAACTTAATTACATTAAGGATCAACTGAACAAATGAGG  
TAAGACCAGATGAATGAAGTTAAAGAAGTCAAGTGGACTAAGAATGATATGGTTGAAGTG  
AATTTAAAAGAACCAGACGATTTTCTAACGGTTCGTGAAACACTTACTCGTATCGGTGTA  
GCATCTCGTAAAGAGAAAAAGTTATACCAGTCTGTCATATTCTACTTAAGAAAGGACAA  
TAGTAAATCGTGCATCTCATAGAATTATTTGCTCTTGATGGTAAGAAAGCATATCTATCT  
GAGATTGATGTGCAACGTAGAAACAGAATTATTACTTACTATCTGACTGGGGACTAGTT  
GAAATTGTAAGTGTATCAGCAATCTCAGACGCTGCTCCATTAAGTCAAATTAAGTAATT  
GCATACAAAGAGAAAGGAGTTTGGACGCTTGAGTCCAAGTATAAAAATCGGGAAAAACGT  
CAAGTCACAGAATGATATATAGTTTAGTGTTATCATACCAGCATAACGGCAGCCGCAAAG  
ACAGTCGAGGATAAACCAAATGGTCCTCTTGGAAAAATCAAAGAGTTCAATGAAGATAAA  
GAAGAACAACCTTGCTCTCCTAAGTACATTCGTACGTGTGGGAATTTTGATTTGGAGTGGT  
GGTATCTTAACTTTAAATTACGTTACGATACCTGGTTGAGAACTAGATAAAAATCGATCCA  
ACTTTTATAGCGTCGGTCTTCACAGGAGTCACAGCTACTGTCGGCCATCAAGCGGGAGGT  
AAGAAAACGAATGGAGACAGTGGTGGTGGTGCAAACATCTCTAAGAAAGACATGGAGATG  
CTTATAGAAAAAGCAACACAGGCAGCACCAACTCAAATTAACTTAGAAGTTCCTACA  
GTTAAAATTAAGTAAATCATGCAAAAATTAATCAACGGAATCGCTATCTTCTCAGG  
TGTTGTGCCACTTGGTGTAGTAGGACTAGGTGGATATGAATACTTCCGTAAGGATGCTAT  
CATTGAAGACATCAAAGAGAAAGCAATCAATGCAGCACCTGGAGGAGTAAGTACTCTCG  
ACCTGACATGGTAGATACACAACCTCCTGTAAATGGTGCACCAGTTCCTTATCTAC



ATTACCATGAACCTTTAAATGGATATCAATCGGTGTAGTTGGTAGTATATTCGCAGTATCT  
CATCTGGGTATGATAGGTTATATTGCCAGTCGGAAAACCGAGAGTCAATTACCTAGGATA  
GATGTTCTGTAGGTGACTATACTTCATATGCCATCTCAGCTGATAAGGATGGATATAGA  
ATTAGTTACTCAGCAAACGATCCTAAGACAGCATTTATTACTAAGGACATCAAAGAGAAA  
GGTGGTTTCTTAGGACTAGCAAATGAAACTACTAAGATCACTGAAGAATACTGCTTAGAT  
GGTAAGACTAATCAAGGCGGTGCTGTATCTAACAAGAGATCTTGGCTTGATCAACCACCT  
GGTGTGACTGCAGAGCAATCAGCAGAAATAGTCGCTGCTCGAAAAAGTGAAGCCTGTATC  
AAAGCAATCGGATCAGCAGAGGGTACAGGACGTCTCGTTGGCACATCAATTGGTGCTGCG  
GCTGCTCCTTCTCTCAGTAGAATCCCCTTTGTAGGTTGGGTCGCTGCTGGCTGGGTGGCA  
ATGTTTGGTGGCAATCAGGGTGCTGATATAGGTGGAATTATGGCAGAGGATATGAGTAAG  
GGTTGTTAATTCATTTTCTTCTTAGGACGTTTGAATGGAGGTAATCCTTTCTTCTCACGA  
TACTTATTACACTGTAACCTCATTACGACTTAACTTAGGTGGTTCTTCATCGGGCTTCTTT  
TGCATGATCGTAGTGAGTTTTTAAATGAGTGCTTTTATAACTCTCAACAGTAATGGTGTT  
GCAGCAGCAGATGCTGTAGCTACCACTGCGATAGATGCTGATACGCTGACTTGATTTGTG  
CTTGGTAGAAATCTTTGAATTTCTGTAGTATCTTCATAACAACACTACACATTGACCAGCT  
CTAACTTCATGACCTGTAACCTCTTTCTTACCATTCTGAGTTAGATCACCTACTCTAGGT  
TGATTAGGTGCAGGACACTCAATCTCTTTATCAGTTTTTGGTATCCGTGGAACCTCTGTT  
GTATCTACTTCTGGTGTAGGTGGTGGTTCAACGACAGGAGGTGGTGGTGCCTCTATGACC  
ATCTGTAATTGATCAGGTTGATAATCCATCGCATCATATGATGGCACACCTGCATCACAG  
AACTACTAGTACTTTATCTTCATCGTCTTCAATTATTTTATTATTCTTGTCACTCTGCTCG  
TGTGCTTCCACACAACCAGGCATCTGAATGATGGGTTAACCTATGTTTACAGTAGCAGGA  
GGTACGAAAGGTATTGAGTGAACCTGGTTGTTTAGTTAACCAATCTGGGATATCACTAACA  
AATATTCTCGTTCTTCCTATGTCTCGAACACTTGCCTTATTGACTTCTATCTTTGGTATA  
TCCATACATCATGGGTTTCTTATTGATATATCTTCAATGTTACTTGCATTTGTGCTAGGA  
ATCTCATGAGCAAGAGGAGCAATGATATTAACATTCTGCGCAACAACGTCTGCACGTATA  
CTATAGTATGGTGACTTAGGATGGTATGAAATCCGTCTTTTATCAAATTTCCCCATTTT  
TTCAAACGAGCTATCTCAAAGTCAAGTCTCTTATTCGCTACGGTTTGATTCATTAATGCG  
CTATTTGCTGCTGCTGCCTCTTTACATTGCACTTGAAGTTTCTTATCTAATGGTCTAGAC  
CATGCTGCAGATACCAACTGAGAAATTATAATCTTCTTTCTGTGCTGTTCTTGTAGGA  
ACATGGTATTAATATTACCTGGATTATCTAATACACCGTCATCATTCAAATCTGACATA  
TCATACATAGGATCCATATAGTATGGTTCGTACGGTTTTTGTGCTGAAGCCGTCCCTGTG  
ATGTACGGAGTAATATTCTTGGGAGCACCTTGACATAGAATGCCATTACCATATGTGTTT  
GTTATATACGGACCTTGTAACACTTGTATTGCCTGGTTCGTCACTGAGCCTGAAGAGGTG  
GTGATTAGACTTGCAGCCGGACTGACACCACCAACTGTCTCTGCGTTAACAATAGGAACA  
ATGGGCATGAATCCAGTAATGGAAAGTAATGCTATTGACTGAAGATACTTGTGTATCTG  
TTACCGACGTTACGGTTGTTTCTCTTTGTATTACCGTGTGGTTTGAAAGACCTGGTCCCA  
TGTAGGTTTCTGTGATTGAAACGCTGCACCTGGCGTCTGTATTGTGAAGTTGGGTTTGT  
CGTTATACCCGTCCATGTCGAATTCAATCCTTCAATAGTATTAACCTGGGTTGCATTAG  
TGGCTGATAAATTATCATCTGTAGTTACAACGTGCCACTGACCGACCATTGATAGCCTG  
TGTTATAGTCCATCGAAGGTATGGTCTCCACCACAGTGGAAGTCGTTTCCGTGTGGGTGC  
TCATCGAGCCCTGTTGGAAATTTGGCACCACAGGCACGGCTATGACTGGGTTTATAGCAC  
CTCCCATAGCTATTAGTAGGAATAACTTATATGTATTCCCTCATGACTATTAGTCAAAAAT  
AGTAATTTTCGCTAACAACCGACCTGTCAATGAATTACCTGCACCGAGAGATCCTGCTGA  
ACTTGTGCCCTGATTAATCGTGATAGTCTGACCATTTGTGATTGTTCTTGGTGCACCTGT  
TCTGTGCTGTTCTGCACTTTGTGTGGTGATATCAACCCAACTAGCAGCTGCTGCAGAAGA  
ATTGTCACACTGTTGCCATGTTTGGGCTAAGGAGAACGATCCTGCAAATGCTAGGTCATC  
ATCTGCAGATGATCCTGTGCATCCATTTTGACCACCAGTAATTGTTCCAACCTGTTCCAAC  
ACCTGTAGTAGCACTATAAGTGATAAATACCGATACCACCATCTACAGCACTACCATTGGC  
AGGTGTATGTGTTGTGATCACGTTATTTCCAGAGATCAAATAGCTATTCCCAATTCGTGT  
CTGAGTCACGATTTGAGGTTCAACAGTTAGTTGTAAACTAGATTGGTGTCTAGTCGATAG  
TCCGCCCGCATCTGCTGCTGTGCCGAACGTCAAAGCATAATGATAGGAATCAATTTCTT  
CATTATTTTACTCATAGGGAATCCTGCACTATATAGGTGTGCAAACCTTACACATGTGT  
TCGGCATGTACCAATTCCTGACATCTCAGTCTATGGTTAAATAGTAGTGTGCGCTTCGGG  
GACATAAACTAACACTCGCTTATTTAAGGAGCAACATGACTAACTTATCAAAGTGGAAAT  
CGAAGGATGTGATGCAATTTTAAACGCTGCAAATCGTTACAGCGTAGGATTCGATGATC  
TGTTTCGACAGACTACACGCATACGGAACAGGATCACCTACTGGACAATACCCTCCATATA  
ATATTGTCAAAGAATCCGGAGACAAATGGAGACTAGAATACTAGCACTCGCAGGATGGACAG

CAGACCAAGTAGAAGTATCTACAGAGCAGAACGTACTACTAGTCAAATCAAACAGCAAG  
ATCCAAATACGAAAGAAGTACAATACGTTTCATAGAGGTGTAGCATCCAGAACATTTGCTA  
GGGGATTTAATCTATCAGATGACGTAGAACTTTGCAAAGTATCCTTTGTTAATGGAATGC  
TAACAATTGAGTTACAAAAGGTAATTCCAGAACATCAGAAAAGACGAGTCTATGAAATAG  
GTTAACTAACACTTTTCGCAGTTCTTAACCTGTAGTTAAAGATACAAAACACTCACTTATG  
CTATAATAAGTGGGTGTTATTTTTTTTTAAACAAATGAAAGCATTAGCAATTGCATTGCTT  
CCTTTACTATGCACAAGTGGATGTGCAAATTCAGAACAAGGTTGAGTGGTGCAGGTGCA  
TCATGCCCATCTAAAATGTATACTCGTTGGTTCTCAGACGTAGCAAATCTGGTGGAGCA  
AAAGTAACTATCAGGCAGTTGGTTCTGGTAGTGGAAAGAAAAGCATTTATTGACGAGACC  
GTAAACTTCGGTGCCTCTGACGATCCTATGAAACAAAAGGATATAGACAAAGTAACAAGA  
GGCTTAGTTTAGATACCTATGACAAGTGGAACTATTGCATTTGGATATAACAATCCTGAT  
TGTGATCTAAAACCTACACAACAACAGCCAGGTGAAGTTGCTATGGGTATCATCACTAAC  
TGGAAAGAAGTTGGATGTGATGATCAGAGGATGACTTCGGCACATCGGTGAGTGGGTACT  
GGAACAACCAAGGCATTTACAAGTAGCATGCAAGCATTCTCTCCTACATGGACACTTGGC  
ACAGGGAAATCTGTAGCGTGGCCAACAGGTGTGGGTGGTAAAGGTAACGCAGGAGTGC  
GGAGTAATTAATAACACCTGGTTCAATAGGATATGTGAATCAATCTTACATTGATGAT  
GTTGTAAGACCCGCAGCATTACAAAACAAGTGGGGTGACTTTGTAAAACCATCAGTTGAC  
GCAGGATCAAAGGCCTTAACGGTATCACTCCTGATGAGAACCTTGCAGGAACAAATACA  
GATCCAGCAGCCGAAGGAGCGTATCCGATTGCCACTATGACTTGGATACTTGCATATGAA  
ACAGGTAACGGTAAGAATACAGATGCAATCAAGACAACATTATCAAATCTCTTGAGTGAT  
GAGTATCAAGATAAAGCAGGTAAGTTAGGATTCGTTCTCTTAAAGGTGACATTCTTGAG  
AAGGCAAGAGCAGCAGTTGACAAGATCGGTAAGTGTATATAATAAACGTATCGTAA  
TTATTTTATGAGTGTAAGAATCGTACGAACCAGAAACGGTGACGATGTTTTCTGTGATCT  
TTATGAGGTCACAATAACGAAGATCCAAGTAAAGCAGGAGCCTTTCACCTTAACAATCC  
ATATATTATATGGTTGCAAGGAAAGAAAACCTGAAGAACCTAAAATTCTTGTTGAAGTTGA  
TGCAGGTGACATTGTAAGTAAAATCAAAGATCCCGATATCTACTTCCAACCTTGGATTCC  
TCTGTCTTCTAACAAACAATTTCTTTTGAAGTTAGAGGAAGTGGTAACCGCATATGAGAC  
CTATCCAGAGGTCATCACTAAATACAACACATTAATCGAGGCAGATGGAGGAAAACCAA  
TCAAACCCCTGTTGATGAATCAATGGAGTGAATACCTTATTGGAAAGGTAAAAGAGTTAG  
ATGAGGAACCTAGTATCCTTATCGAAAAATGCTATGAAGAGACGGGCGAGGATAGGATGA  
TCCCGTTTCCAAAATACAGTTCACAACGTGATGTCTTCTTGACATCTGAAAACATCTTGA  
GTATACTAGATCCGACACCAAACTGTTGGAAAGCGACAATAAATTATGAGTTCCTTCTA  
CACCAACATTCAACTAGCTGGTGACACTATACTTTACAGAGGGTATGAGAATGGAGAAGC  
GGTTCAATATCGCACATCCTTTTCTCCTACCCTTTATGTTTTGTCTAAGAAAAAAGAAA  
GTTTACAACACTAGATGGGAGATATGTGTCTCCTGTCAACTTTCATAATGCAAGAGAAGC  
CAGAGAGTTTATCAAACAGTATGAACATGTAGAGAATTTTGAAGTTCATGGTTACGAAAG  
ATTTGTTTATCAATTCATTCGTCAGCAGTATCCAGATGATGTTGACTACCACATTGATCA  
GATGAAAATCTATGCATTGGACATCGAGGTTCAATGTGAAAATGGATTCCCCGATGCAGA  
AGCAGCAGCAGAAGAAATGCTATCAATCACCATTAACGATATGGTGACTAAAAAATATTA  
CAGGTCGACAACACTAGAGAGTTTGTATGCACCAGATAATCAGGAGTTGAATGTCTCTTGGAC  
AGAACAAGAGATACTTACAACTTTATTACCTGGTGGGCACAAAACACTCCAGACATTCT  
AACTAGTTGGAACGTTAACTTGTATTACGTCCCTTACATTGCTCGTTCGAGTCAATCGTAT  
TCTCGGTGAGAAATGGATGAAGAGTTTATCCCCATGGAATCGTGCAAATGCAAGAGAAGT  
ATACGTCCAAGGTAGGGGGAATTACGCTTATGATATCTCTGGTGTTAATATCCTTGATTA  
CCTCGACCTATATCGTAAGTTTACATACTCAAATCAGGAGTCTTATAGACTCGATCACAT  
TGCCTTTGTGCAACTCGGACAAAGAAAAATAAATCATGATGAGTATGAAAACGTCAAAGA  
CTTCTATACATCTGATTGGCAGAAGTTTATGGAATACAACATTCATGACGTTGAGTTGAT  
TGACCGTCTTGAAGATAAGATGAAGTTGCTAGAACTAGCAATTCCTATGTCTTATGATGC  
CAAAGCAAACCTTTGAAGATGTGTATAGTCAGGTGCGCATGTGGGATACGATGATATATAA  
GTATCTTACAGATAGAAACGTTGTTGTTCCCCCTCGAAAAGGAGCGAAGAAAGATGAAGA  
ACACGCAGGAGCGTATGTCAAAGAACCGAAACCAGGATGCTATGATTGGGTGTCAGTTT  
TGACCTCAATAGCCTGTATCCTCATCTTATTATGCAATACAATATCTCGCCCGAAACACT  
CAGGGAGACTAGACATCACAGTGCAAGCGTTGAGAGAATCCTCAATCAGGAGTTGGAGAT  
AAAGGAAGACTATTGTGTATGTGCAAACGGTGCCATGTACCGAAAAGATATTCATTGTT  
CCTGCCAGAGATGATGCAGAAGATCTACGATGAACGTACAATCTACAAAAGAAAATGCT  
TGCTGCAAACAGCAACACGAAAACCTACCATCTAACAAACTAGTTGCTGACATTTCAA  
GTTCAACAACATTCAAATGGCAAGAAAGATTCAACTTAACTCTGCCTATGGTGCTATCGG

CAATCAATACTTCCGTTACTACAATCTGGCAAATGATGAGGCAATTACTGTGTCATGGCA  
ACTTTC AATCCGTTGGACCGGAAACAAAATGAACGAGTATCTCAACAAGATACTCAAAC  
TACAGGAGAAGATTATGTTATTGCTCATGATACTGATAGTATCTACCTCAATTTGGGTCC  
TCTGGTTCGAGGCTGTATAACAAGGGGAGAGAGGCAACTGATTCGAGCATCGCCTCTTTCT  
CAATAGTGTGTGTGAGGTGGAACCTGAAAAATATACTACTAGTTCTTATGAACCGTTGGC  
CACACATGTAAACGCATACGAACAGAAGATGGTTCATGAAGCGTGAGATTATTGCCAACAA  
AGGTATCTGGACTGCCAAGAAAAGATATATTCTCAACGTTTGGGATAGTGAGGGTGTTCG  
CTATGAGAGACCTAACGTAAGTTCATGGGTATCGAAGAAATTAATCTTCTACACCTGC  
AGCATGTCGAACATCTATTCGTGATTGCCTAACAGTTATCAGGAATGAAGATGATTAGTC  
TGCACAGGGGTTTATTGCTGACTTCAAAAATCATTTTTCTTCTTACCTATTGAAGACAT  
CTCATTTCTAGAGGTTGTAACAATCTAAATAAGTGGTTCGAACCCTACAACGATCTATAG  
CAAAGGGACACCCATACATGTGAGAGGGGCACTGTTATATAACTTTTATAATAAGAAAA  
CAAACCTACTCACAAGTAGCCCTTAATTCAAGATGGAGAGACGATCATGTTTCGTCTATTT  
GAAGACTCAAACAAAATCAACGAGAACATTATCAGTTATCTTAATACGTTCCCGAAAGA  
GTTAGGACTTGACCAACAGGTGGATTATGATCTACAATTTGGGAAGAGTTGCTTAGAACCC  
CATCAAAGTGATTATGGACGTCATTGGTTGGCAACCAGAAAAAATCGCATCATTGGAGTT  
TCTATTTTCATGAAATTTGTTGTTGTATAACCAAAAACATTTGGTATCCAGACAAAAGA  
GAACAAGTATTTGACGATGAGTCAGAAGCAAAAATGGTTTGAACGTGCTATGAAACGTACG  
AACTTTATTACTAAAATTACGGAGGTTGACGAGTGAGTTTTCTGAAGACAGTTGTATCAG  
AAATCGGAAATGAATATGCAGGACTAGTATCAGACGGAGTTTATGCAGGTGATACAAAAT  
ATTATATTGATACTGGTTCTTATGTCTTTAATGCCTTAGTTTCAGGAACAATTTATGGCG  
GTGTGCCAAGCAATAAAAATCACAGCGATTGCAGGTGAATCATCAACTGGTAAAACTTTCT  
TTTGCCTTGGTATTGGGCAACACTTTCCAGATTCTGATCCTGATGCAGGTGTAATTTATT  
TTGAATCTGAGTCTGCTATTAGCAAACAAATGATTGTTGATAGAGGTATTGATGCAGATA  
GAATGATGATCGTTCCTGTGTCTACTATCGTAGAGTTTAGAACTCAATCCTGCAGGATTC  
TTGACAAATATATGGAACAGAATGAGTCTGATCGCAAACCTACGATGTTTGTATTAGATT  
CTCTTGGTATGCTTGCGAGTAATAAAGAAGTTGAAGACGTTGCTAATGATAAGAATGTCA  
GGGATATGACAAGAACTCAACTAATTAAGGTGCGTTTCGTGTTCTTGCCTAAAATTAG  
GTAAAGCAAACGTTCCCTATGCTCGTAAGGAATCATACATATGATGTTATAGGAAGTCATA  
TTCCAACGAAAGAAATGGGAGGTGGAAGTGGACTCAAATACGCTTCATCAACAATTGTAT  
ATCTATCAAAGAAGAAGGAAAAAGATGGTACGGAGGTTGTTGGAAAAATTATCAAATGTA  
AAGCCCAAAAACCCCGGCTAACAAAAGCGAATTCTATTGTAGAGACACGGTTATATTATG  
ATCGTGGACTTGATAGGTATTATGGATTACTAGAATTAGGTGAAAAGCATGGAGTATTCA  
CACGCAAAGGTAATCGTATTATGGTTGGTGAACTTCTGTATATCCTATATCCATTCTTG  
CAGATCCCTAAAAGTATTTTACTGATGAAGTAATGGAAGCATTAGACGAGGCAGCAAAGA  
AGGAGTTTCAATATGGTCAGTAATCTTACTGACTACATTAATTTCTATGATCATATGTTT  
GAAGAGGATTTTTGTAAATCTGTAATTCAAACATTCCTGAATCATAAAGAGATGTTACT  
CGTATAGATAGAGAACAAGACCAACCTTTAATGAGTTGAATATCTCACAAAGGTTTATG  
GCAAAGATCCTGCATGGTTGAGTACTCAGAAACATATACAGACAGTCTTTATTGATATT  
GTCAAAGTTTATATGAATGCTTTACAGTGTGACCCAGATTTTCTGCAAAAATATCCTTTG  
GAAGAGGTTAGAATTAACAATATAATAATGATGGAATAGATCAATTTAAAGATCATGTA  
GATGTAGGAGACTATAATTCTGCTCGTAGATTTTTAGTGATGTTTTTATATTTGAAGGAC  
TTTGATGATGGTGGACAACTAATTTTCTAGATTGAACCATGCAGTTTCACCTAAACGT  
GGTAGAATATTATTCCCTGCCACATGGCAGTATCGTCACTCAGGATTGCCACCTGAG  
TCTGACAAAAGTACATTGTTGGAACCTAATTACACTACCTATGATTCTCGAAGTCACGA  
TTGTATGTGATCTCTTGATAACGAGAAGTATGCAATGAAGGTTCTTCCTTTCTTGTAGG  
TAGATTATTTTACCGTACGTTCTTACAAGATTATTATTCTTGAACCTACATGAAAACATTA  
GTAAGTATGATGCATTGCCATCTCTGAGCGCACTTAGTATAGAATGTCAAGAAAGAAATG  
ATCTTACAGAAGAACAATTTAAAGAAATTGTTGAGCTTTTAAATGTCCTTTCCGATGATC  
CCAAAGACCAGACTGGCTCGTGGATTCTACAGAAAAGTGGTGTCAAGAGCGTGCGATCT  
ACTTATCGCTTATGGAATCTGTTAAGATTGCTGACGGTCAAGATACCAAACGCGATAAGG  
GTGCTATTCCGCAGATTCTTTCAGAAGCATTAGGAGTATCATTGATCAACATGTCGGTC  
ACGATTATGTTGAGATCGCTACTGATCGTTTTGAATGTTATCATAGAAAGGAAGACAAGA  
TTCCTTTAGATCTGGAGTTTTTTAATAAGACCACAAAGGGTGGTTTAGTAAAAAAATCAC  
TAAACATCCTTCTTGCAGGAACAGGTGTTGGTAAATCTTTGGTTCATGTGTCACTTTGCTG  
CATCAACTTTATTGCAAGGTAAGAATGTTTTTTACATTACTTGTGAAATGGCAGAAGTAA  
AGATTGCAGAACCTATTGATGCAAACCTTTTAAATGTTCTTACTACTAACTCGCTGATC

TACCACATCCAATCTTTGAAAGGATGATTAAAACACTAGCAAAGAAAACCTCAGGGTAAAC  
TTATGATCAAAGACTATCCTACAGCGTCAGCACATGTAGGTCATTTTAAATCTCTTATCA  
ATGATCTTGCATTGAAGAGAAGTATTAGACCTGATATTATCTTTGTAGATTATCTAAACA  
TCTGTGCTTCCCAGATATACAAAGGAATTATTGTTAATTCTTATACCTATGTTAAAGCAA  
CTGCTGAAGAACATAGAGGACTTGCGGTGGAATGTAACGTCCCGATTGTCTCCGCGACAA  
AAACGACACGCTCTGGTTTTGGGTCTACTGAAATTGATCTCACTGATACGATTGAATACT  
TTGGTCTCCCTGCTACTGCTGACCTCATGTCTGCTCTTATCTCGACTGAGGAACTTGAGG  
GGATGAATCAAATTATGGTCAAACAAATTAAGAATCGCTATGATGATCCTACTATGAATA  
AAAGATTTTGTGTCGGTATTGACCGAGCGAAGATGAGGTTGGATGATGTAGAGGAGTCTG  
CTCAATATGACCTTGTGATTCTGGTCAAGAAGAAGAGAAGGTTGATCTTGTTCAGACGAT  
TTACATCAAAGAAAACCTTTTAGTTAACTAAAGTATGATTGACTTTAAGAAGTATACTGAA  
TTTGTAGATGCTGTTACATCTGAATAGAGTAAGCATAGTGGTCATTTCCAAGATCGTTTA  
AGAGAATTAGATTATAAAGACTTCTCTTCACATAGAGCATTAACTGCTGCACTCGGGCTA  
TGTGCTGAGTCAGGAGAATTTACTGAGATAGTAAAGAAGATATTATTTGAAGGTAAACCA  
GTTACTGAAGAGAATCTATTTAATATGAAACGTGAGCTAGGTTGATATCATGTGGTATTTT  
ATACAGGCTTGTATAGTATTAGATGTATCACCAGAAGAGGTTATAGAAATGAATGTAGAT  
AAGTTGAAGAGCATATATCCTGGTGGAGAGTTTGATCCCCACTATTCTGTAAATCGTAAA  
CAAGTAGATGTATAATGGTAGGACCTGGTGAATACATGGTAGTTGTTAGTGATCTTGCTA  
ACGCATACAATACTATTGAATGGAAAGATGCTATTCCATATTTGATTTGTATTATTGGAC  
TTTATTGGATTAAGTTAAAATCGATACAAGTTTAGGACTTGGTAAAAGCAATCAAGAG  
AACTAAAAAAATTATTGTTGATGCAATAGTTGAAGGTCCTCAGAAAGCACATAGATCCT  
GAAGTTAGGTAAACTTGATCCAGAAGAAAGGGTTCTATCTGAAAAAAGATAGAACCTAT  
CCAATTGACAGCAGAGTTAATTGCTGAGATTAATTGTGCTATGGCACATACAAAGAAAGA  
TGGCACATATAATTGGTTGCCTACTGATGAGTATGAAGTTCAAATAGCAGGTCCGTTTGC  
TGCCGATAGATTTATTGTTATGAAAAACACAACAAAGAATCCAGTAGTCTATGCTGAACC  
TCATCCTTACTTTGACTATGAGAAAAAAGTCTTTACCAAAGATGGTAGAAAGGAGTATAT  
GAAAGAGTTTAAAATAAATAAAGATAAAGATAAAAAAGAAGATGGAGACAAACGCTAGAG  
AACTGCTAAACAAGAGAATGGTTCTAGAGTTTTTTTCAAGTCTGTAATCGAAAGAAACA  
AAGAACCATCCTTAAAAGAAATGGTAAAAGTCTATGAAGGATACGGTCCTGAATGGAGAT  
CAACATATCTTAAACAAACTGCAGCATTAAAGAAAGTTTATAGGATCTAATAAAGGGTTG  
AATATTCCAGAGATAAAGGAATCATGCCTTACATTAATCACATTGCTAAGAAAGAGTGTG  
GTGTACCAGTAAATGATCGTTGGAATCCTATGGATATTGTATTGGTTAAGAAGAGTGCAA  
AGAGAGTTGTAGAAGGAACTATAAAAGAAATTACTAACATTGATGGAAGGAGTAAAGATG  
CAAACTTACTCTACTCAAGGCGTATATGCGCGAAGCATTGAAGTCTAAAATTTTAATTG  
GTGTATCACTTAATGCAATTGCAGCAAAGAAAAACACTGCTAACGCAGAGCTTGCAAATG  
CAGGTAGAACAACTGGTTAACCTACCATGGTTAACATGGTTCCCTAAATATTTGAAGTGTA  
CGTTAACTTTAGGAAAGAAAAAGAATTACCTATTTGATACTTGTGAACTTGGTTTTGATA  
TAGTTACAGTGAAAGGTGGTAAAATACGTGGTCAATCAAGAAGTCTTCAATATTCTAAGG  
AAAGAAATTTTGTTCAAACAGAGCTCACTCCCAAAGGTAAAGTCGCAGGAGGAAAACCTG  
GTAAAGTTTCTAGTGTTCATTAGATAAATTTCTAGGAGATTTAAGATTAACCTCGTCCAA  
CTTCTACAGCAAAACATAATCATATTCCTAGAGTTGGTGGTTGGACAGATAGAGATAAAA  
AATACTGGATTGACTTGTATAAAAAATTAGTTACATCTCGTATGATTGATTTTGGTGAAG  
TTGCTGTGTGTGAAAATAACCAAAGGTCGCTGAAGCTATCGAAGCAGTTATAGACTATG  
CAATTTACATACGAAACTCGTCAGGCAGATAGAAGTTCTGCAGGTAGATTCTCTTCTAAGT  
TGATTGCTATGGAATGGGCACATACTTGGAGGCAGATTGCTAAGATGAAGAAAATGCAAC  
AGTGGTGCACAGCGCGATACTTTGGTAGAAAAGAAGAAGTCGGTGATTCTAACGGTCCGT  
TCCTAAAGATATACTAGTCCAGCTTATAGAGTGTCCACTATCACTCGCATTTACCCCTCA  
GCGTGCTATAATATTAGTATACAGACAGAGGACTCCTTGCCTAACCAACACCTTCAACAC  
CTTGAGGATCTGATCTTTTCTGGTCGTAAGGAAGCGTTGGATGCAGTATGGTCTGCACTT  
AACAAACCAGAACTGAGTGTTAAGTGGGATGGTGCTCCTGCTATCATCTTTGGCACAAAC  
CCTGCAAATGGCAAATTCTTCGATGGACCAAATTCGTTTTTAACAAACACAAGATCAAG  
ATCTGTTATGATCAAACAGATATTGACGAACTTTACTCTGGCATCCTTGCAGGACATTCTG  
CGTTATGTCTTTGGAAGCTTCCCTCGTATCAGTGGAATTGTCCAGGCTGATTTTCATCGGT  
GTCGGAGGGGGCCGTGTTTATCGCCCTAATACTTTTGAAGTATCGTCTTCCCTCTCTGATC  
CTTAGCGATATTATCCGTGCTCCACATACTTCTTATACCGAAGTTTCTTCAAATGCTGTT  
GGCAGCATTTCGCCACGATCTACCTTCTACATTATCTACTTCTTACTTTATAGTTAAGAAA  
GAGGCCGATGCATCTCTTGCTAAGACTCCTTTCTTCAATTGGGTCAAGTTTCTCAGCAGG

TTGCCTTGATGTAAAGTGCCTAGCGAGAAGGTACGTCCACATATTCAGAAACATATCAAC  
AGGTTTTTCCGTTGTGATTTACCAATTCCTTGAGCAGAATTTTTGTATATTACTTTACCT  
GATAAATAGAAGTATGAAGTTAATGTTACCACATTCAAAGTGTGGCATATGTTATTTCAA  
TTGAACCATAGTTTATTGAAAAACATCGTTGTCGTTGGAACGTGAAATGCTACATAGAT  
GGCCAACCTTCAGAACATGAGGGTTTTGTCACTGTTTCAGATTCTCCCTACAAAATTGTA  
GAGAGATTGACTTTGAGCAAAGCGAGCTTGAACCTTAGTAAAAATTGGACGAATGAAAA  
ATTTAATGCTTTTCTAATAGAAGCACAGAGATCGTTTGCTGCGAAAGCAGCGGAAAAATT  
AAATCTTAACCATGTAGGTTACGGTAAATACGCAGACCCATCTGGGAATGTGACTCACAT  
GTCTAAGGATGGTAAGCTTGTA AAAATTACAGCAAAGATGCAGCGAGGACACAACAAAA  
TGGAGGAGATGAAACGGAATGTGGCGAAGGTCTGGTCGATCAAGGCGTAATCTCTATTAC  
ATTTGGAAGATTTTCATCCACCGACTATTGGGCACGAGAACTTCTTAAGAAAGTAGAACA  
AGAAGCAAAGTGTGGTGGAGGAGAGTATAGAATATATCCTTCAAGAACTGAAGATCCTTA  
GAAGAATCCTCTTGATTCTGGA ACTAAGATCAGGTTTATGAGACAAGCATATCCAGACCA  
TGTAATGCGATCATTGATAATGAGGACATGAGAACTATCTTTGATGTTCTTACTGCTCT  
TGACAATGATGGGTATAGTTCAGATAATATTGTAGTGGGTGGTGATAGAGTATGTGAATT  
TAATTCATTCGCAACGAAGTATAACGGTGACTTATATACATTTGATGAGATTAAGGCAAC  
ATCAGCAGGAGGAAGAGACCCTGACTCTGTAGGTGTAGAGGGTATGTCAGGATCTAAGAT  
GAGAAAGGCTGCGATGGAAGGTGGTCAAGATTCTTTCAATAAAGGTATACCTAAAGCGAT  
GTATAAGAAAGATAAAGAAGCGATGTATCTAGCACTCAGACAATCAATGAATGTGCAGGA  
AACATTTGTTGACTTCGCTGAAGCATCATATCATCATTATGAGATCCCTCCTAAGTTAGA  
TCCTCAAGGTTTAAGGGAAGCATACTATGATACTGGAATGTTTGAAGTACGTACTTTTGT  
TGAAAATATAAACACAGGTATTGCAGGTAAGGTCTAGTCGTGGTAGTA ACTACATCAT  
TTACATTGATGAGCATGATAATATCTTCCGCTCATGGTTGAAAGACCTTGTTGAGACTAA  
GAGTTCTGATTATGGATTTCGAGTTTACACCTGCAGGTGAGATAGGAACCCACGAATTAGC  
TGCATATTATCGTAGAATGACGCCTGGTGTGTTTCATAAAGAAGATAAATAAAAAAGTAAA  
GGTGACTTAGTAAGATGGATTTAAAGA ACTTACCTGACATGATTGCTGCATACCAAGAGG  
TGCAGGAAAAGCAAAGAAGCTAGATCCCGTTGGAAAAGAAGGCGGTGATATAGATAATC  
ACGGTGATAAAGATTCATCTGATAAGTATCTTATGAAGCGTCGTAAGGCAATTTCCAAAG  
CAATGAAGGTCTAACATCATCAAAAAGATGAGAATCGTAAAGTCATCGAGCATGATGTTG  
AAGAGGACGAAGTAAAAGAAGCATGCACAGTAACGAATGCTGATAAGAAAGGTCACACCA  
AAGTATATCAGAACTTTAAAGCAGGTATGAAGGGTAAAGATGGTAAACCTTTATACAAAG  
CAGCAGATCACATGAAAGAGAATCAAGATATTCATCCTGATGACAACGTTTTTATCAACAG  
AAGA ACTAGAGAAAGTAGCAGAACTCACTAGACAGTGGGATGCTAAGCTGGAAGAAGGTA  
ATGGTATGATGAAAGGGTATCCTAAAGGTGGAGAGGTAAAGGCACCAAGAATGCAGAAAG  
GTGCTATGGCATATGATGGTCCTAACACGGCAGCAAGTGAAGCAAAGGATAGAATCCTTG  
CTAAA ACTAAGGAGAAACGCGAAGAAATGAAAAAGTAAAGGTTATCTTTCAAACACCTATC  
TGAAAAAAA ACTAAAATTA ACTAAATCCTAAGAAGGAGGATGTCCTGGAGGGAGATAA  
AACTCTCAACCATGGCGAAGATTGCGGGTGCATGAAATGCGACAAAAAACGTCGCAAGGG  
TGA ACTTGCGATGAAAAATCCGTATCTACCGAAGAAAAAATTTAAGACAGTAACGAATA  
AGTCTCAGAAGAAAGCACAGAAAGCAATGCTCAAAGCGATAACTATGAAACGAACTTGTT  
AACCTTCAATCAATTTTCATGAAGGATCATCTTATGGCTTATATAAAGGATCAGGTA AAGC  
ATCGGGTCCTATGGCTCCCTTTGCCAAACCAACTAAACCTAACCTAAAGCAAAAAACAAA  
GAGAGTGAAGTATGTAGGTGTAGGTGAAGAGACTAAGTATGAAGTCATGAGTAAAGAAAA  
GTATAAGAATACTCATAAAGACTTCAAGGGTAGCACTAAGAAAGAACCTAGGGTATCAGT  
TTACGATCCCGGAAAGAAAGCAACAGTATCAAGATTGGTTAAATTCTCTGAAGCAAAGTA  
TGAGAGAGGTGCGTCAA ACTATGGTAAGATGTCTATCAGAAATAAAGAGCAGTAGGTTA  
CGGTGTCAACGCAGCACCTCCAGAGGAGAGTAGGAAGGCACATGATGAGAGAATGAAGAA  
GCATAAAGCATCTCAAATGAAAGAAGAAAAGCATAGAGATGCCGCACTTGATACTGTAGA  
GAAATCAAACATTGCCCAGTATGGTAAAGGTGCTATCATGAGAAAGGGTAGCGATCAACA  
GAACAAAGTCCGAGGTGCTAAGTCTATTGCAGGAACTGGTAAGTATTAGAAGGTGGCAGA  
TCAGAAAAAGCAA ACTGCTTCAGACGCGAAGAAGCGTGGGTTTTAAGTCTGTT CAGAACTA  
CACTGATGCTATGGCACGTTATGGTGATAGAGATAATTACGACAAGGGTAGAGGATTAGG  
GTCATGAGCACACCTCTTGACCTATCTCATTGTCCCGATGGTCAGTATTATTGCTTTGAT  
GATAGAAAATGCAAACCAATACCCAAAGGTATGTCAGTAGGAAAGAATGGTATGTTGGTC  
AAAGAAACGACAGAGTTAAAAAACGAAATAATTGCGAAGGCACAGAAAAAACATACTATG  
GCAGAGTCAAAAAAATTCAAGGATGTCATGGCAAAGGAAAAGAAGCAAAAGATAAGTTA  
TATAAGACTACTAGAGAAAAAGGCGTACGTTTCTATGACAAGAAAGGTTCTGGTTACATG

AAGGACGGTAAGAAAAAATACGATTGATAGCCTATATATTGTGTAATTACATATTAAGAT  
CATGATTGGTAATTTTTTAATGCCACTGGCATAACAAGGTAATCTATTCTGCTGTCAAAA  
AATCCCTGATGATGCAGAACTCGGAGAGAACTAATCGATATTTGTTAATTGATTATTGG  
CAAGGCAGTGAACTCACTAAGACGACCGCTGACGACGCTCTATTTGAAAAAGTAAAGGA  
AGCACTTGCTGCTAAATAAGTAGCGTTTGGCACCCTTTTAGAGGGGTCTCAGAGACCCCT  
TTTTTTATAAATAACTACAGGAAAAAACAGAATTTTAGGAGCATAACCATGGCACTTTAC  
GGTGTAACTGATGCAGACGAATCTATGCCAAAGTGGGCTGTGAGAGGGAGCGCTGTAGAC  
CCCCAAAATATTTTTGCAACCACTGATTGTTGGGTTCTTTGTCAATTACAAGAATGCCGCG  
AAGACAAAGTTTTGGGATGAAATCTTAGTCTCAGTTGATGGTCTAGTAGGTGCAGGTTCT  
CGTGGAACCAATACCTTTGGTGGTGCAGATATTGCTGCAGTATTCTTTGAAGAGACAGGT  
TATGCAGGTGGAGCAACAGGTTGTGTTGTTGTCAGATATAACGAACAGGTTGACCTCACA  
AACGGTGCAACTTTAGTCGTTAGAAATACTACTAACAGTGCCAAAATCACTGCAATTGCT  
GCAGCACAACGGGTGTAAACCGTGTGAGTTTACATTCCTGCGGCTGCAACTGGTAAA  
GCACATGCTATCAAAGCACAAACAATCTCTGGAACAATCGTTGACTCCAGTGGTGGTGCA  
GCATCCGATAAGGTATTTGTTTTCTGGTGGTGTAGTTGGTGCAGATGGAAGTGGTTCTACC  
GCAACATTTACTGCAAGTTAACTAACATATGAAATTTGACGAACTAAATGAGGATACATG  
CCGCGTGTTCGCCATTGAGCATTATGAAAATCCTCACTGTGTGACTAGAGAGGATTTTGT  
TGAAGATTTAAAAGGCTTCAAGTATCTTAAAAGACTCATGAAGCGTTATGTGAGAAGAGG  
TCCGTTAAGGATTCATCTCGTCATCAATCATATAATCATCTTATATAAAGATTTTGGTGA  
AGCAGCAACTCCTCTTCTTCTTTAAATTAGAAAGAGAATATTGGAGTTTAAATAAAGAC  
TCTACTGATCTATTTGAGTAAATATCCAGTAGGGAAGCTTCCAGACTTGGAAATGATACCC  
CGATTTAGAAGAAGAAGCTTAAAAGGTATAGGATATGTTGACAGCAGGAACAGGCGGATT  
TAGTGGTAGCGTAGCTGCCAAAGGTCCTGTTGCGGTTTTTGTATCCTGTCATGAAGATGAG  
AGGTAAACTTAAACAAATTAAGGCACAACAATCTAGTTGCTGTGAAGAAACAGATAGCGT  
AAACCCTCAAGGTCCTTCTAGATTATTCCAATACAAAATTAACGTACCTGAGGTTGGTGA  
ACAATCGTGTGTTGCTAATAGTCCTGCTGAACTCAGGATGAAATTAAGGATGGCAATCAT  
GCCTAAGTATAAGTCTGGTATTAATATTGAAAGAATAATGCCTGGTGGTGTGCTGCTAAATT  
CTGCATGGACAAGAGAATGAAGCACATGAAGAATGTGTAGGAAGAGTCTGAACTAAAGAA  
AGCAAATATAAACTATAAGACTACGAAGAGCGGTGGTAAGAAAACCTCGTCATGTCAATAA  
GAATGACGTGGCAGATGCACAAGCAGCGATGAAGAATGATCCAAAATACATTCTTGGTAA  
GACTAGAGTAAAACCTGTTAAAGAAGCTGCAGGGGATTAGCAGATGTACAATCAAATGAA  
TCAGCAAAAGATTCAGAACCAGAAGAAGAAAGTCATGTTAAAAAAGCAAGAATTACAAA  
ACAATTACAATAAAAACACAACAATTAAAAAACAAGCAAGGACTGGAGTAGAACAAGA  
CGCAACAAGGTAATGTCTGACCTTAACACCGCTATAATAGAGACTCGAAAAACTAGTT  
GATTCATTGCAGGAGTATTCTGTAAAAATGGGTCAATTTCTGTGCTGTGCATAATGAGAAG  
TTAGATAAACAAGACAAGATCGATCGAGTTTTGTTTAAAAGGTTGATAGATTGCATGGA  
GATATTAATAGAGAGACAGAACAGATAAAGAAAGGTTGTGAAAGAGACATCCGTAAGATA  
GATGATCGTCTAAGGTTGATGGAAAAGAAAATGTGGACTATATTTGGAGCAGTTTCAATC  
GTAACGTTCCCTGTTTCAGCACCAGGAGAGGCAGTTTTGAAGAAGTTGACAAACAATCAA  
AATACTAGTATTATAACGACAGAGATTATTAGGTCTACTTGATTGACAATTTTTATGCGA  
ACCTACTCTCTGCTCGTCTTGACAGATTTAAGCAGGTCAAGAACGGGACGTACAACCTTA  
GGTGTCCCTATTGCGGTGACTCCCAAAAACGTAAGAATAAAGCAAGAGGTTACTTCTTCA  
CTAAGAAGAGTGGTCTCGTTTTTAAGTGCCATAACTGCGGTGTAGCCAGATCGTTTGGTA  
ACTTTCTAAAGGAACAAGCGAGTGACCTTCATGATGAATACATCATCGAGAGATAACAAG  
CAGGTCTTACTGGAAAAGGTACGAATGTAGCAGACCCTGAGTTTAAATTATGAAAAACCAA  
TATTCAAAAGAAGGGAGAAGTACAAAGTATTTAGAGCTAAATAGTTTCGCACTCAGCAT  
TAGCATACTTAACCAAACGTGGTATACCGAGGAAACATTTCTCGAATTTTTACTATGTCG  
ATGAGTTTTGCACATGGGTAAACACACAGAAACCTACCTCCGAAATGTCACCAAGGATC  
ACCAAGGATTATTATTCCTTTTATTGATGAAAACGGAGAATGGTTTGGATTTCAAGGGA  
GGTCTCTGAATCCAACGACAACTTAGGTATATAACTATCATGTTGGATGAAGATCGAA  
TTAAGGTTTATGGTGTGATCGTGTCAACTTCAACAAGACCGTGTATATTACTGAAGGTC  
TTATCGATAGTCTTTTTATCGACAATGCAATTGCTACAGCAGGTGCTGATGTTGATTGGA  
AACTAATAGATCGAAAAGAGGCAGTCTTTGTTTACGATAATGAAAACGTAGTAAGGAAA  
TTGTTAACCGTTCTGAAAAGCAATTGATAAAGGATATGAAGTAGTAATCTGGCCTAGTA  
GCCTACAAGAGAAAGATCTAAATGACATGTTCTTCTTGGACACGACGTGCAATCTATTG  
TAGAATTTGATACTTACCAAGGATTAGAAACAACAATTAATTAACCGAATGGAAAAGG  
TCTGATTAGTCCAAGGACACCCAAACCAATCAACGTCACAAAAAGAGAAGGAGAGAAGAC

ACCCTTAGACCTTAATAAGGTTTCATAAGATGGTAGAACTTGCCTGTGTAGGTCTTGCAGG  
GGTCTCTGAATCTGCTGTAGAGATTAACAGTGGTCTTCAATTTTTTGACCGAATTAAGAC  
AGCAGACATTCAAGAAATTCTTATTCGTTTCAGCGAATGATCTGATCTCTCTTGATCATCC  
TAACTATCAGTATCTTGCTGCATGATTGCTGCTGTACGGTCTTAGAAAGGCAGTATATAA  
CGGTCACCCTGAAGGTCATCCTCCTTTACTTCAGCATGTCAAGAAGTGTATAGACAAAGG  
TGTGCATGATAGCAGTATTGTTTCCAAATATACTGAAGAAGAATGGGAAAAACTGACTAG  
TTATATTGATCACGATAGAGATTATTTGTTTACATATGCAGGTATTCGTCAAGCAGTCGC  
TAAATATCTCGTACAAGATCGTACATCAGGAGAAGTATACGAAACTTCACAGTTCATGTA  
TATGATGGTGGCGATTACTCTCTTGCAAGACGATGAAAAATTTTATCACTTGGAGTATGT  
AAGAAAATACTATGACGCAATCTCAAAACACAGACTCAACATTCCAACGGCGATTATGGG  
AGGAGTGCGTACGCCACTTAGACAATTTGCAAGCTGTGTTCTGGTTGAGGTTGATGACAC  
CCGCGATAGCATTTTTAGCAGTGACATGGCTATTGGCTAGTATGTTGCACAAAGGCCGGG  
TATCGGTAACAACGCGGGTAGAATCCGTGGCATCAACAGCAAAATCCGTAGCGCAGAAGT  
ACAACACACAGGTGTTGTACCTTTCCTCAAAAAGTCTGAAAGTACTGTCAGATGCTGCAC  
TCAGAATGGCATTATAGGGGGATCAGCAACTTTCCTACTTCCCAATCTGGCACCAAGAACG  
AGAAGATATTATTGTTCTAACAATAATAAAGGAACAGCAGACAACAGAGTAAGGTAAGT  
AGACTATAGTATCCAGATTAGTCAGTTCCTTTATCGAAGATTCATTGATGGTTCGCAGCAT  
CTCTTTGTTTAGTCCACATGATGTGCCAGGTTTATACGAAGCATTGGAACTCCTGAGTT  
TGATGATCTATATGTAGAGTATGAAAATGATCCTGCTATTCTAGAAAGACTATGAAGGC  
ACAGACACTCATCCTTGATCTATTGAAGGAGAGTGCAGAAACAGGTCGTCTTTATATAAT  
GAACATTGATCACTGTAATAGTCACAGTTCATTCAAAGTTCAAGAAAACATGAGGAACCT  
CTGTCAGGAGATTACTCTTCCAACAGCTCCTATTCAACATATAGATGGATCAGGTGAGAT  
TGCTTTGTGTATCCTATCTGCTATCAACGTAGGTAAGTTAAAGAACCTTGAAGGACTTGA  
TGAAGTATGTGAACTTGCTGTTTCGTGGTCTTGATGCATTGATTGATTATCAACAGTATCC  
TGTC AATGCTGCAAGGCAAAGCACATTGAATAGTAGATCACTTGATTTTGGTTACATTGG  
ACTAGCACATTATACTGCTAAGAATGGTCCTAAGTAGGATTGTCAGAAAGCATTGATTT  
AGTTCAGAACTTACTGAAAGATTCCAGTATGCTCTTCTAACAGCATCGAATCGTATGGC  
AATGGAGAAAGGTCCTTGC GGTTATTTTCGGTAAGACAAAGTATGCTGAGGGAATTCTTCC  
TATCGATACATATAAGAGTGAAGTAGATGAGATTTTCCGCATGACCTATCATGTGATTG  
GGAGTTTCTCAGGGCCAGGGTCAAGGAGTATGGACTCAGGCACAGCAGTTTGTCCGCACA  
GATGCCTTCTGAGAGCAGTTCGGTTGTGTCAAATGCCACAAACGGAATCGAACCTCCTAG  
AGACTACCTGTCCGTTAAGAAACCAAAGAAAGGACCTCTTAAGCAGATTGTTCCGTCTTA  
TAACTATCTAAAAGCAAACCTATACCCTGCTATGGGATATGCATAATAATGATGGTTACAT  
CAAAGTAACTGCAGTTATGCAGAAATTCTACGATCAGGCAACGAGTGGTAACTGGAGTTA  
CAATCCAGAGAATTATCCTGACAATGAAGTGCCTGTATCTGTGATGGCAAAGATCTTTT  
GACCACATACAAATATGGTTGGAAGACTTCATATTAACAAAACACTTATGATGCTAAAAA  
AGATGGTGACGACGAAACAAACGTCGATAAATTAATCAACGACATACTCACCTCGGAGGA  
AGAAGACGGTGACAGTTGCAAGGTCTTATGCAGAAGTAAAATGAATGACAGTATTTAACA  
ATAACAAAGTAAACACAAAGAAACAACCAATGTTTTTTGGACAACCATTAGGAGTCCACA  
GATATGATGAATATAAGTATCCAGTATTTGATAGACTTACACAATCACAACACTAGTATATT  
TCTGGAGACCGGAAGAGGTGTCTCTACAGAAAGATAGATCAGACTATCAAACCTATTACAC  
CAGAACAGAAGCACATCTTTACTTCTAACTTGAAGTATCAGATCATGCTTGACTCAGTTC  
AAGGTAGAGGACCAGGTATGGCATTCAATCCCTACTGCTCTCTTCTTCTAGTTGGAAGCAT  
GCATGACGGTATGGGACATTATGGAAATGATCCATAGTCGTTCTTATACATACATCATCA  
AGAATGTATATCCAGATCCTTCAGAGGCATTTGATACTATCTTAGATGATGAGAATGTAA  
TGTCTCATGCATCATCTGTGACTAAACCGTACGATGAATTTATTAATTCAGCACACGAGT  
TTGATAATTGTCAAACATGGGATCTGGCAAGACAAGGACATTTAACTGGAACCTATGAAA  
GAAAAGA ACTCAAGAGAAA ACTCTATAGGGCAATTGTAAACGTTAACATTCTTGAAGGAA  
TTCGTTTCTATGTCTCCTTTGCGTGTTCGTTTGCTTTTGGCGAAAATAAACTTATGGGAG  
GCTCAGCTAAGATTCTCTCTTATCGCTAGAGATGAAAGTCAACACTTGGTTATCACAT  
AAAATATCCTCCAGAACTGGGCAAAAGGTGACGACTCCGAAATGGCAGAAATCGCAAACG  
AAGAAAAACCATTCGACGTAGATATGTTCAAGAGA ACTGTTGAAGAGGAGATGACTTGGG  
CAATCTATTTGTTTAGAGAAGGTAGTATGATTGGATTGAATGATCGCTTACTACATAATT  
ATGTTGAGTGGATTGCCAATCGTAGAATGAAAGCAATCGGATTAGATCCTGTGTTGATC  
AAGTTGCTAGAAACAATCCTTTGCCATGGACTCAACACTGGTTAAATAGTAAGGGTCAAC  
AGAACGCACCACAAGAAAGGGGATTGAAAGTTATGTGCTCGGAGGAATCAAACAAGACG  
TCAAAGGAGACTCCTTTGCAGGATTCTCTCTTAGCACAGAGTGGTTAGATAAAACTTAT

AATGATCTAGTGGAGGCAGGAAATGACTACGGTCCAGACATTACTGACATGATCTGGACT  
GCTGCTATGAAAGAAGCAACTAAGAGGTTGCAGGAAGACTTAAGCAAAGCTAAAGATAAG  
GATAAAGTGTGTAAAAGTGTATCATAGTGACCTACCAATGTCAGGAATCTATGATATAAA  
TATAATGTACAGGTAACAGTTGTTACCAAACGTTCCATCCAATGTACGGACTCGCACTACT  
GTTGTTGATGTTTGCAGAACACGATGGTTCCTACTGGGAAGTATCATGTAACGAATGGAA  
TCAATCAAGGATTGAGATACTCAGCGATGAGAATCTTAGTTCAGATGCTCATGAGTATCT  
TATAGATTACTTCTATACCAAAGTATCAGAACCAAATTGCGAAGCTTGCCAACCTAGACG  
CAAGTAATTGGCGGAAAGGAGCGTTCATCCCATGATCCCTATTTTAATTGCTACTGCAGT  
GACATGTGCTGATATTCAACCATTAATCGAGCGTGCTCGAATTTATGAGGGAATTGATGA  
ACAATCAAGGCAAGAGATCATTGAAATTTATCAAGTAGATTTTACCAATGCTGTAGGACT  
TGAGTGTGATTGGGACGCAAACGAATAAAGGAACGGACCTTAAACAAGTCACTAACTTTA  
GGAGTAAAATCATGACTACAATTATTTACAGAGGCGTCAAGTATGACGCTGAAGCATAACA  
AAGCAAAGGTTCTTGCAGAGCAAGCAAGTAACAACCGTCACGATCTGATGTATCGTGGAC  
TGAAGGTCGAGCGTAACTTCGCATCCAGTCTTAATCGTGACAGAACTACAACCCATTGG  
GATGGTATCCCTAGGGTCTGTTGTTTTTCATGATTATGATCTATCTGGAACCTGCGTCTTTT  
GCCTCTAAAGAGACCAACAGTTGCTAAAGATTAATCTTGAGTGGGATTATGGTCTTCCCG  
AATATGATGCCACTAAACACGATCCAGTCAAGACCTTCGCTTTTTTTAACTTATCGTGGAG  
TACACTATCCTAAGTGGGTTTACCTCAAGGTAGACTTCGGTGGTGCACAACCGTGGAAACA  
TAACATCTAAATTATGTTAAGATAAACACTTTAACCCTAGTCCTTTACGACTGTGGTTTT  
TTATGTTACAATAAATATTATGAATTATGCGAAGGAGCACCACGAAAATTTGTCTGGATA  
GTTCTAATGCCGAAACGATCTCTAATGCTTTTGAGAACGATTTAATTGACGGTGTAACTA  
CCAACCCATCTCTTATGTTAAAAGCAGGACAAGATGCTATGGAAGTCATAACGGAAATTT  
CAAATGTATTTCTTTTCCATGCTTCAATCTCTGCCGAAGTGGTAGGTGATACTGCCACTG  
AAATGTTAGATATGGCAGAGAAGTATAGCGAGTTTGGACCAAACATCACAATTACAGTTC  
CATGCACACCAGAAGCTCTTAAGTCATGCAGAGTCTCACTAACGATGAAGTTAGTGTA  
ATATCACATTAGTATTCTCAACAGCACAAGCAATTCTAGCATCTAAAGCAGGTGCAACGT  
ACGTTTCTCCTTTTCTAGGAAGAGTATACGATAACTCTTTGGATGGAATCCACTTGAGTG  
AGGAGATTGCAGACGTATTTGCAACTCATGGACGAGACACAAAGGTTCTCGCTGCTTCAG  
TTAGGGAAGTTCAACAGGTATCATCTGCCTTTAGAGTAGGAGCAGAAATATGCACCCTCC  
CTGTTCCCTGTTTTCAATAAGATGTATAAACACATTCTTACAGATAAAGGATTAGAAGTGT  
TTGATAAAGACTGGCAGGAATTGCAAAGATGTCTGAAGAAATATATCGTAGATATCCTCC  
CTCTGGGAGAGGTCATATGAGAAAGATTGATATCGCACCCAGAATGTTTAGACTCATAACA  
CGAACTCTATAATGAACATGGAGGTGCAAGTAATGACTGGAAAGCAGGTGCACACTATTC  
CCTCGATAGAGTTCTACAAATCCTACAAGAATATTACTCATGAAGAAAAGAAATTTAAAA  
ACGTTGATACATGACCTTGAGGTTGCAGTAGCAGAGTTAAAATCTGAGGTCTATTCAGAC  
ACTGGAGCATATCGTATAAGTAGTGATACTGACAAGCACCCCTACTTATCGTGACAGCAAC  
GACGAAGTCGGACTCTGCGATTGATTATGAAAATCCCCGGCTATATGAAGGTTCAACTTT  
CACTTCTAACGATATTGGCGATTTCTTCGGTTTCGTCTACCGTGTTACACATAAGGTTAA  
TGGGCGAATCTACATCGGGAGAAAGTATTTTTATGCCTTTAGAACACCAAAGGAAAGAA  
AAGAAAACGAAAACAAGAATCCGACTGGAAGAAGTATTATGGATCTTGTCCAGAATTTAAA  
AGAAGATATATAATTGTATGGAAAGGAACAGTGTAACGAGCGATTATAAGCCTACATAA  
CCCGAAGGGTCAATGCACTTATGAGGAGACCCGACAACCTGTTTTTCAATAATGTACTTAC  
GGAGGCAACAAAAGAGGGAACCCCTGCATTTTACAACCTCGAACATACTTGGTAGGTACAT  
GCGTAAAGATTATTTCAATCCTTGACAACCTGCTGATAACTCTTCTATAATGTCAAGGTAG  
TCAAGGGGGTTCTCTTATGAACGAAGAATTCAACATTTTACGATGCGATGATCGACATCAT  
GATCGATCAGTTGCATAAATGTGCTGAGCTCGAAGAGGAGGAACTTGAAAACCACTGGGA  
CAGTAGCTCAGCGGAAAGAGCAACTGCCTTCTAAGCAGTTCGGTTCGTAGGTTC AATTCCTA  
GCTGTCTCGTTGCCTTCGGGCAAATCGGTCAATACAGGTTAAAAAAATGACTACAGCACA  
ACGTTTCTCGTCTTGTCTCGATATCCTTACCGATGCAGTTGACAGACAGATTATACTTGA  
CACCGAACATCCTATCATATATAATGAACTAGTAAAACACTACGAGGATAAAGGTGTTCA  
ACTCTACGGTGATGTAGATGAGGAGTACGAAATCCATTTATCCAAACTTGAATCGATCT  
TTATTATGAAACTTGAACCATTTTAGAACGGTATCCATACAGTTATGTGTCGGTTGGAA  
CTCTTCCAAACGGTCATCCAGACTATCGTATCCAGAAGTTTCACGAATGAACACAACGCT  
ACAGAGTCATGTATCTACTTGACAATTCAGGTCAACTGGATTATGTTATTGAAGACTTTG  
AATACACAAAATGGTTAGACCCTGATCCTGAGGTCACTGCGTAAGGCAGAAAACGGGATG  
TAGTTTCCGCATCTAATTAATGAGTTCCGAATTGTTATTGAGGATCTACAGAGCAGTGAC  
TAAAAAACCTGTCTCTTCTTACGAAAACATTATAATATCCTAACATACGGATAAATCCC



GTCTTTGCCAATAGACGTTAAACTAGATGGTTTTTAGGCGCGAAAGCAACTCATAGTCCTA  
GTCCTAATCAGCACCCCTTCGGGGTGCTTTTTAATTTTCTTATATGTTGAATCAGAAATCTT  
AATATTTCAAACGCTTGACAAATGTTAAAACATTATAAATAATTGTAACAGTTCTTAATA  
ATACTACACAAAATGACAACAACAACTGAATCAGGCGGAAGACAATATATGTTTCCAAC  
GAAACTCGTCCTTACCTTGAGGAGAACTATCAATAATACGGAAAGAACGCTGAACTACTC  
ATTGGTGGCTTGGCGATGCTTGGTTTAGTTGCGGGTCTCGTCTCTTACGTTACCACAGGT  
AACTTCTTCTTCGGTGGTCTTCTTTGTTTCTAACCATGGAACCTTATCGAATCAATTATAT  
ACACACAATCAACACGCAACAGGAACACCATCATGACTCCAGAAGTAGAAAGATTTAATG  
GATGGGCAGCATTGCTCGGTTTCGTAGCAGCAGTTGGTGCTTACGTTACAACCTGGTCAA  
TCATTCCAGGTATTTTCTAATGTATCCATCAAATACAAAAGAAGTAGAAGCACAGAAAGT  
AGTTGCTGAGAAAGTTAACGGTAGATTAGCCATGCTTGGTATCATCGCAGGAATCGGTGC  
TACTTAAACAACAGGTCAACTCATTCCAGGTTTCGTATAATGAAACATTGGATTTTTGCA  
GAGGAATTAACGGTAGACTAGCGATGATTGGTCTACTCGCAGCAGTAGTGAACCTATGGT  
TTCGCAGGTTGGATTGCACCAGGTATTTTCTAATGAACAATCACGACGTCATGGAAGCGT  
ATAAGAGACCTATGTCTGTACGTTACATTCCATTCTTCTACTGTATTATCGCCACAGGTT  
TAAGAGCAACTGTTGGATTACCTGTATACGCTCACGGATTAATCTAATGTATATTGATCA  
ACAAACGTAGATTCATAACAATGTTGTTTCCGTTTATGCCTGTCATAACGCTCTTCATTGT  
TTGTTTTGTCATGCTAGGTGATCTTCCCTGGGACGATGATGACGATGATGATGATGGTGG  
CGGGGGCGTAATGACTCCAGTTTATAACCATAACCTCAAGGAGCATAAATAAATTATAT  
TATTAGCATCAGGTGTTGACGATGCCAAATCCTAAAGCACTCTATGAAGATATGGAGACC  
CTTAACATGCTCTATGAAGAGTTACTATGGGATCCTGATGCAGAGTTAGATTTTAAAGCA  
GATTACAGTAACAACAGAATAGTTATAACAACCTAAAGAGGACGCTTGACTTCCTCTTTTT  
TTATAAATAATCTTATGATAACTTGTAAATTAATCATGGCAGCAGATCCACACAACACTTC  
CGTATGGGTAGCAACCCGAAGGATTGACGATAAAGTAATGGAATTCTTAGTTTCACATAC  
TGCATGGAACCCCGACAAGAGATTCGCAAAAATTTTTGACACTCAAGCAGGTGCCAGAAA  
GTTACTTAAAGAAGGGGGTATGAAAGGTACCGTACGAAAACATTCATGACAATTCCCGCA  
TCAGATAAATTACCGTATGTTGGATGGTTTGTGACAACCTTTTTAAAAGGAACAAAATAC  
ATAGACAAACCTGTCTACGCATCATGTGATATTTCTATACACCAACAGATGTATGACATG  
TGCACAAGACATCTGAGTAGAATAGGTGGATCAGAAAATTAGTATTAATACTCATCGTTT  
TCACTTGACTTAGTCGTAAGATATATTACTATAAATAAATCAACTGGGTGAGGAAATCC  
TCACCTTTTCTATGTGCACCCGTTTAACCGAGACCTATGGGTGGGTAAATTACGTCTCTC  
ATATCCATCAGTGAAGGGATTGATGGAAATATAGTATCGCTGTACCCTTTGAGCCCTACT  
TAACAACGTCCTAATGATAACTCTTTCAAGACAAGGCAGACAAGGTGGACTCCTACAAGG  
ATGGCCAGAGTTCTGCGAATGGGTAACAAGCACTAACAACAGACTTTATGTTGGTTGGTT  
CGGTGTCTTAATGATCCCATGTTTATTAACAGCAGCAGCATGTTTCATTGTTGCATTTAT  
TGCTGCACCACCTGTGATATCGACGGAATCAGAGAACCTGTAGCAGGTGCTCTAATGTA  
TGGAACAACATCATCTCAGGTGCAGTTGTTCCATCTTCAAACGCAATCGGTCTTCACTT  
CTACCCAATTTGGGAAGCAGCTACAATCGATGAGTGGTTATATAATGGTGGTCCCTACCA  
GTTGGTATTCTTCCATTTCCCTAATCGGAGTCTCTGCCTACATGGGTAGACAGTGGGAATT  
ATCATAACAGACTAGGTATGAGACCTTGGATCTGTGTTGCTTATACAGCACCAGTATCTGC  
AGCATTGTCAGTATTCCTTGTATACCCATTTGGTTCAGGGTTGTTTCTCTGATGGTATGCC  
TCTAGGAATTTCTGGGACATTCAACTTCATGTTTCGTATTCCAAGCAGAGCACAGCATTCT  
TATGCATCCCTTCCAGATGGAAGGAGTAGCCGGTATGTTTCGGTGGATCTATATTCTCCGC  
TATGCATGGTTCACTTGTAACATCTTCTAATCAGAGAGACTACTGAGGAAGAATCTCA  
GAACTATGGTTACAAGTTCGGTCAAGAAGAAGAAACCTATAAATATTGTTGCAGCACATGG  
TACTTCGGTAGGTTAATCTTCCAGTATGCAAGTTTCAGCAACTCAAGAAGTCTTCACTT  
CTTCCTAGCAGTGTTCAGTTGTATGTGTATGGTTAACCTCTATGGGTATTTGTACAAT  
GCCAATCAACTTGAACGGAATTAACCTTTAACCAATCAGTTGTAGATGTTAACGGTAAGAT  
CATTCTACATGGGGTGACGTAACAGAGCAAACCTTGGTATGGAAGTAATGCATGA  
GCGTAACGCTCACAACCTCCCACTAAACTTAGCATCTGCTGAAACTACAGAGGTTGCTTT  
AACTGCACCAACAATCGGATAAATTAATGCTGAGGAGCACAAGCACAAATGACTCAATTT  
CTCGTAAAATACGGAGGATACTTTTCAATATTTGAATTCATATTCTTTATGGCAATAGGT  
ATCACGTTACAACCTGACCTAACCTAATCGAAATAGAGGGGTAAGACCCCTCTATTTTTA  
TGGCATGTTATTATCCAGACGGTAGTTTTGGTACTGTATGTGATCTACCTCCCACTGATG  
CTGAGATAGCACAGAGGCCACGATTTGCTGTGTCTGATACTTCGCGTTTAGGAGTAGACT  
CTGAACGTGTTGTTACTCTTGATTTGACAGGTTAATAAGATAGTATGCAAGAAGTTATTG  
GAGAAGTGACCTCCTTCTTAAAGCGTCAAAGATGTAAACAAAGAACGTTACCTGATGGCA

CTATAGAAAATTACGATTGTGTATGGGAATATCAAGGTGACCTTGGAGAGAATTATGATA  
GTGGTTGGAATTATGCCGAGGCAAATAATGAAGTTAGTTTAGGTAATTCTTTTCCTCAAC  
CAACATTATCTCCAGCAAGATGTTTACAATATCAACCAGACATTAATATTAGACCTCTAA  
CTTTCTTCAATGCTAAATGAACTTTAGGTATAAAAAGTCTAATGAAGGATCTTCACCTG  
TAACATTTCCAGTTGAATCTGAGTATCTATGGTCCTCTGAAGCAAATGAATATGGTGTAT  
GGACTAACGCAGGAGAGTGTACGTTACCACTCGCACCTCAATCAGTAACATATAAAATTA  
ATATCACAGTAGCAGGAACTTAGGGATTTACTTTTGCTGCTGACGATACTGGATCTGTTA  
CTATTGGATCAGAGACTAGTGC GTTCTTACAAATAGTGGTGGTAGGACAACCACTGGAA  
CTCCCACTACTGCTACAAGATCATTGTCAGTAGGTGTTTTATTTGTGACAGTTATATA  
GGAATGAAGTCGCTAATCCCCCAACGATAACTGATGATGAATATCTTTGGGGAAATAATC  
CTCGTGGATGGTATCTCAAGATATGTAAGGGTGGAGCATGTGGAAGTGCAACTAGTATGT  
CTTGGGTAACCTCAGGTCTCATCTCTATGGTCAGCATTTCATGAATACTTACGCAGTAT  
TCCCAAGTGATAATGATCCTTTACTAGAGGCTGGTCAAACAGCAACGTATAATATAAATA  
TTCCTACAGCAGGTAATTATGATTTTGAATGTCAGGCAGATAACACTGCTACATTCACAC  
TTGATGGAACACAGATTGCGACGTCCAGTTCCTATAACAAGTAGCACTGCTACACTTT  
CTAACTTGAGTGCAGGAATGCATACTTGAGTTGTCTCAGTTACTAACACTACTACATCTG  
GTAACGTCGCTAAAAGTTGGACAGATAATCCTGGTGGTGCGGCATGGACAATTTCTCAAT  
CTGGTGTATAAATACCTTCATCATTACATCTTTCTACATCTGGTGACGGAAATCTTTTCT  
GGCACACTAGAAAGGCAACAGGATATACATACTCAATCACATAATGGAACCTCCCCAAAAT  
CCCAAACAATCAACTACGTAAAGAGATAAAAAGAAATTGTAGGTGATGCTGATGCACACTT  
TGATTTGGTTGTAGATCCTACGGAAATCATAGACGTACCCTTAGACACAGATGAATACTT  
TGAAGGGAAATATCAAGTGCAAAAATGTTAATTA AAAACCGTAAACGAACACACGAATA  
GCATGAATCCAAAAGAAACAATCAAAGCAGCAAAAAGAATCATTAAAGGAACGCAAGATTA  
ATAAAAAATTGTGCACTAAAGAAGATGCTCTTTGCCAAATTAAGCAAAAAGAAGAGCAA  
AGAAAAAATTGGCAGAAGAAGACACTGGACAGATCCCAAAGAAAGTGTTAGTATAAATAC  
CCGAAGCGAAGGACGCTTCGCGAACAAAGATTTCCGAATGGTTCAATTACTCCCGCTAGG  
TCTCTACAGTTCAAATCCTAACGAGAACACGTCGAGTTCTCTAACATCTGCAGGTATAAC  
TCTGCAAGAAAATAAGAAAAACAATGATTAATCAACAATCGCTGCAGTCGCTGCAGCC  
CCTCTTCTAGTTTGGGGTGCAGCTTTAGCTGGTCCATATGTTAACTTAGAAGCAACTGGA  
TCATATTCTGATGGAACATACAGATCTGGTGGATGAGAAGCAGTTGTAGGATACGAAGGA  
GAAACACCAGGTAGTATCGGTTGGTAAGTATCTGGTGGTCTACTGTAACCTACACAGAA  
TCAACTGATGAGTTCGGAGACGTTGAATTGGGAGGATACCTTGGTGGATCTTACGATAAG  
TTCTACGGAGAAATCTCTGGTGTAACTACATCTGATGACGACATTGACTTCCCTGCTAAG  
GCAGGTGTTAAGTTCGATTTCTAAACGCATCTATATAGGATGAATCCCAGGGACTCTATG  
AGTCCCTTTTTTATTCAACTAACTATTATGAATTTTACTGTTTACACACGAGACGGTTG  
TCCTTACTGCACTCAAATCAAACAAGTATTAGAAGGAAAACAATATAATTATCGGAAATA  
CAGATTAGGGGTTGACTTTCAAGGAGAAGCATTCTATAATCAATTTGGAGAGGGATCAAC  
TTCCCTCCAGTTGTATTAGGTGGCACCAAGCTTGGTGGTTGCACTGATACAGTTCCATA  
CCTTCGGGAAAACAACCTTATCTGATGGTAGAATTTTACGGTCTTGTGTAATCTGCTATT  
GATGCTGCGTTGGAAAAGAATATGTTTCTTCAAACCGTATAATTAATTTGACTCACAGC  
AAGATTAATCGTAAAGAAATACAAGAGTTCATTGATAGCACAACTGCTAAGGAATTAGCA  
TTGACTATTTCTGGTCTCGATGCTTATGTCAAGGGTGGATCTGACTCTTTTCATCAGTTA  
CTTCGTGAAGCATATGGGCATCTTGGTAAACCAAAGCAAGGATAATCTCAAAGTACTTG  
TCACAGATTTTGTTACATGCTCGGCAATACGAATGGTATAAGAGACCAGGTTCGTAGTAAA  
ACCTCTAAATAAAAATAGCTAAGGAGAGTCCATGGAAATTGCACTTGTAGTATTAACAA  
CAATCGGTGCTTTTATTCTTGGTATAACCGTCTCTTGGTTAGCGACAGGGTACGTTGAAG  
ATTACATCGAAAACGCTGCCTATGCAAAAATCGGTACACATCCTTAGATGTTTGATGAAG  
ACGGTGACATGATTCATGATGAACTAATCTATATTCGACCAGACTCTAGGTTCTTACAAC  
ATCAAGATGACGATGACGATGATGATTAACAAATTATGCCTACACGATCAATTGAAAACA  
CTAACTCTAGGTTACTAATTAGTGAGATCCTAAGAAAGGTCTCAGATGCTAAAAGTAAAA  
AAGAAAAATTTGACTTACTGATGAAACACAACACTCCCGCACTACGTCAACTAATGATCA  
TCAACTTTGATGAGAGTATTGTATCAGAACTCCCCGTAGGTGAGTTTCCATACACTCCTA  
ACGATACCCCTGTAGGGACAGATCATACTAGACTTGAACAAGAATACAGAGTACTATACA  
GAGTCTTCAAAGGAGGAGACAATCGTCTCACGTCTTTGAAGAGAGAGTCCATGTTTGTGC  
AACTTCTAGAAGGATTGTCTGCTGAGGAAGCAGAACTTTTGGTTCTATGTAAGGACGGAA  
AGATGGTAGATAAGTATAGGAGATTCATAAGGCAGTAGTTTCTGAAGCATTTCATCTA  
TTGAATGGGGAGGCAGAAGTTCAAAGGAGTTCGAGTTTTCAAAGAAAAATGCACTCCCGA

TGATGCAAAAAGATAAATCATTACCTTACACCGCCTATTTGGTTGAGTATAACGTAGATGA  
TAAACCTGCGTTTGATATTGCAATCGCAAGTAAAGCAGTAGATCTTTTTGATTACTA  
TGATCTTTATAAAAAGCACTTTGTAAAGTTTACACAATCAGAAGGTAGAATTAACCCTAA  
ATTATGGAACGATCCAACACAGAAGAAAGGCAAGCGAGACAAAAGATGAGCGTCTACTTT  
GACCGTAGAAAAGCACTCGATGCGGAGGAAAATAAAAAGAATGAAGAAGCAGCAAAAAGCA  
GTTGCTAGAGTAGTTCAATTCTTTGTTCAACCTGCGATTGTTATGTTACTATGGAAGTGG  
TTGATGCCAGGTTTGGTTTGGTCTTGCCACTATTGGATATCTAAAAGCGTTGGGTTTGTCT  
CTGATGTCGAAAATTTTATTTGGAAAGTATGAGTAAAGTATTTTTGATATCTGTAECTC  
TGATGCAGAAAAACTATCGGGTATGTTGCTAGGGTGAGTAATCCTAAAAACAAGAGAA  
CCCTGACGTCGGGGGTTTACTTAAGTATTGTATTAAGCATGGTCATTGGAGTGTCTTTGA  
ACAAGCGTTCATGACTCTAGAGATTAACACGACTCGTGCTATTGCTGCTCAAGTCCTAAG  
GCATCGGTCGTACACATATCAAGAATTTTCACAGTGGTACGCTGACTCTTCTCTACTTGC  
AGATAGCATCCCTCTTCCAGAACTACGTCGTCAAGACGATAAGATTAGACAGAATTGTAT  
TGATTATGTAGATCCATTTATCAAACAGGATTACGAGTTAAGAATGTAAAGGCATTTTGT  
AGATGCAATGAACTCTATAAAGAAATGCTTCACTCAGGTATTGCAAAGGATCTGCTAG  
CATGGTATTGCCTCTAGCAACACCAACTAAAATGTATATGAGTCGATCACTTCGCTCATG  
GATTCATTACATTGACCTGCGTTCTGCTAATGGAACACAGAAAGAACATATGAAAATTGC  
AGAAGCAGGCAAACAACATTTTATATGTCAGTTCCCAATCATCTACAAGGCACTAGATTG  
GTGTCCTGATGATGATTGTAATGTTCTGATGAAGACTACTACAATGACCTACAGCCCTG  
TTTGAGGATAGATTAATGCCTAGTTACCCAGTGATAAAACAAAAAACTGAAGAGAAAAAA  
GAGCTCCACATGACCATGAAAGAATATGATCAGTGGAGAAAAGATAGTCCCGATTGGGAT  
AAAGACTGGCAAGCAGGTGTTGGAGGTATGACCTATGGTCACCCTAAGATGGCGGACGGA  
TTCAAAGAAGTCATGTCCAAGTCCAATCAGCACATCCTAAAGCGAATCTATCTCGTTTC  
ACATAATGGAAAAAGCAAGAAAAAGAACTAACTCTCCTAAAACCTTTCCCAATTGTATGT  
CGAGGAAACACATGAAACGTAAGAAACCTATCGACTCATCATACATGACAGAGGATAAAC  
CTCTGACAGATAATCAGTCACTAGCATTGCTCAGTATGCTGAAGGTAAGAACTTGTAC  
TGCATGGTGTTCAGGAACAGGTA AAACTTTTATTACTTTATATATTGCTTTGCAAGAAG  
TGCTTGACGAAAACACAGCGTATCATAAAATATACATTGTAAGGTCTCTACTTCCTACTA  
GAGAGATTGGTTTCCTACCAGGTGACCATGAAGATAAATCTGCACTAAATCAGATTCCAT  
ACAAAAATATGGTAAGGTATATGTTTAGTATGCCTGATGACAACGCCTTTGAAATGTTAT  
ATGATAAATTGCGAGCACAAAGGA ACTATTTCTTTTGTATCTACTTCTTTTATTCTTGGAG  
TCACTCTTGATAATGCTATTGTTATGGACGATGAGTTCAGTAACTTAACTTTTCATGAGT  
TGGATTCTATGATTACTCGCATAGGTGAAGACAGTAAGATTATGTTGTGTGGTGACATTA  
CCCAGTCTGATCTTACACGAGAGAATGATAAGTCTGGTATCTCAGACTTTATAAAAATTC  
TGCAGGAGATGAATGAGTTTTGATGCATTGAGTTTGTATATCAATGATCTCGTTCGCTCAG  
GACTTCTTAAGTCTTATCTCTTGTCAAATATAATCTTGGTCTCTAATGTTTAAATTCGT  
TGATGTTGGTAATATTTTCAGTTGAAGTAGAACCAGTAAGTAAAGATGGAGTACGTTTCTA  
GCCTATTCCTGGTGCAGGATAAGTATTATCCAAGCGTAACCTCAATCACATCGTTTAAAGAA  
CGCACAGTTTTTCAAAGAGTGGAGAACCCGAATAGGTGAGGACGAGGCGAATCGCATTAC  
TGCTAGATCAACTCAACGAGGAACAGCAGTTCATAACATTGCGGAAGATTATTTCAAAGG  
TGAATTAACCTTGACAGATACTTGGAAAATACTCCATTGCCTGTTAGAATGTTTCAATC  
TGCAAAGTCCACACTAAACCGGATCAATAACATTCAATTGTCTAGAGACATTTATCTATTC  
ACACTATCTTGGTTTAGCAGGTGAGTAGATTGCATTGCTGAGTTCGATGGCGAGTAGGC  
ACTGATCGATTTCAAACGTCTACTAAAGAAAAAAAGGATGATCATATCGAGAACTATTT  
TGTTCAAGAACTGCATACGCATCGATGTTCTTAGAACGTTTCAGGAATTGAGGTCAAGAA  
AATTGTCACACTTACCGCCACTGAAGAAGGATCTATTCAAGTATTTGAGAAGTACAATCT  
TGATGACTATTTACAGTTGCTGAAA ACTTACATCGAAGAATTTGTTAGGGGAAGACATGC  
CTAAAGAAAAACTTGAGGATAAATTTTTTAACAGCTACCAAATGCTCACAAGAGATTGTAA  
GGTTAGTTAAGAAAAGTAATGGTCTCATTACATATATTGTAGCAGTACTTACATACTGCC  
AAGAGAATGAGATCGAGGTAGAGACAGTTCCAA ACTGATTTCTAAACCGTTGAAAGAAC  
GTTTGCGTACGAAGCACAACTTTGAATTATATGAAAGCATCTTCTAAAGGAGTATTAC  
CACTGTGACAGGGTTTGAAGTGTATAAG

>NewGenomeName\_27

ACCGGGGCTTGTACTCAAGACTCCGCGGCCAACGGAATAGTAACTCCAATGGCGAAGAGC  
CGAACTACTTATACAAGAGGTGAATCTTACCCGTAATAACCCACCTTTGAAGACTTT  
GTTTATGTGCTAGATTTTTGCGCGCTCGACAATTGCAAGTTTACTATCGCCGGCGAGGCG  
AACCTCGTGAATGCTACGCCTCACGTTCTGTGATTCTGCACCTGCGAAGTAATGCTCGA

GCTGCTGCACTGGAGGAGTCGCTTGGAGGAAGAGCCTGGCTCTCTCGTGCCCGGGGATCT  
GTTGAAGATGATGAAGAGTATTGCGCAAAGGAGTCGACATACCTTCAAGTTGGTGAGCCA  
TTCTCTGAGGGTCGATCCTCTGATCTAGCCGAAGCGACATTCCTGTGATGGCTGGCGTA  
CCGATGACTGAGGTGGCCAGGAAGTTGCCACTACTCATGTTCGTTTCGGCGTGGCCTG  
GAACGCTCCGGCACCTGTTCTGTCCTGACGCAACGTGATTGGAAGTCCGAAGTTATCGTG  
CTGATTGGTCCCTCCTGTCAGTGAAAAGAGCCGTTATGCATTTGATTTTCCCGCCGAAAGC  
AAGTATTACCAGCCTCGCGGGAAGTGGTGGCACGGTCACTCGGTAATGACGTACTCGTC  
ATGGACGACTTGTACTGTTCTTTTCCGTATGCTGCTTCGTTGAGAATTACCAACTTTTAC  
CCGTTACGGGTTGAATTCAAAGTCGGTATGACTCATTGTTGTTGGCTAAGACTCTGATCATT  
GCAAGCAACCGCGAGCCTCGTGATTGGTACAAGAGCGAGTTTGGAGCTTTCAGATCTGTAG  
CGCAGAATTTGCAGGTATCTTGTGTATAACACTAACAAGTATGAACCCGCCAGTCATGT  
ACCCTCCCGTTCCCAATAAACTACTGAGACGAATTTGCCGTGAGTCGTTTATTAAGGTAA  
ACATTTGGCAGCGATTAAGCAGTTGGGGAGATCGGTTAAGGTTAGGCACTTGGCAGGGAG  
TAAACTTGGGCAGCTCGGTTAAGTTAAGGCACTTGGGACGTATTAACACTTGTGCAC  
CTCGGTTAAGGAAAGGAACGTGATACGGTTTAAACTTGGGCACCTCGGTTAAGGTTAA  
AACGAGATCTCGTTTTTGCCTAGATGCCCGTGATGTGTCCAGATTTAATGTCGAATGTGT  
ATTGCGCCTGTATGTCGTAAGTGCCTGCTTTCGTTGTTGTTGTTGTTGTTGTTGTTGTTG  
TCATGCCCATGCCGTAACGCCCACTTAGTCTTCAGTGCAGTTGATCCGTGTAAAGTTAC  
GTCCCCCGAGGAAGAAGGTGGAGTATTTTCGTCGATTGGCACGCCCTTGTACGAGGGGCT  
TAGGTACGAAGTAGCTTCTGTCTACTCTGGAGGGTTCCCAAGTTCTCGTGGGGCTCGTTG  
AGCCGTAAGGGTCTATAGACCATCCGGTGGTTGCCGTTTAACTGTCTGCCCGTATTTGT  
CTATCACGGCTGTTCTCTGTGTCTTGTCTGTCTGATATATGTTGTACGCTGGTCTGAGAG  
TGATAGCTAGACCCATGATCATGTATTAATCGTATGGGTAGTGGTAGTTAAGAATTGAGC  
GCTCCATGTAGCTGTTTCGCGTCTCCGAACTTCGCACATCTCATGTGTAAGCCGCATATAT  
TGTTGCCACGGGCCGGTGGTTCTGAGTACTTCGCGCACTCTTCTAAGCTTAAGCTCTGCC  
ATTTGCCAGCCGCTGTCGGCGCTATTTGTGAGCCGAAAAGGCCGAATTCGGTGTTCCTTG  
TGACCCAATATGTCACTACGGAAACCCGTCGTCGGGGGCTTTCGATTATTAGCCTTCGTC  
TTCTGAATCTCCTGAGTAGACCCCGCCTTACCTCCGACCACGAGATGCACGCCGTCAGG  
AGCGAGCCCGCATTGGCACCCGGCGGCACTGACTTCTGTGAGTTATAAACGACCCGCACAG  
GCGCCGTTATATTATT

>NewGenomeName\_28

ATGATAATCCAACGTGCCGAAGAGAAGCTCCCAGTATCCGGTAGTGTACAGCGCTATCAG  
ACTGGGATCGCGATTAATGCTGAGACTTGCAGTATTCTTATCGACGGTATTTATAACGAC  
AAAGTTCTGGAGGCGGTGCGTGAAACGCTGTTCAACGCTGTTGACTCACACACGGAACT  
GGTTGCCGTGATAAGCCGATTATCATCCACACCCCAACCGGCCTGGAGCCTTGGTGCTAC  
GTAAGGGATGGTGGTTTAGGTATGGACTTCGACATGGTTACACAGACCTTCGTGATGTTG  
GGGACCTCCACTAAGCGTGGCTCCAATGAATTGATTGGGGCCAAAGGCATCGGCTCAAAG  
GCTCCGTTACAGTGACCGGCTTGTTTACGGTCACCTCCGTCAAAAACGGTATGAAAAC  
GTTTACTCGGTGCATAAGAATGAGGGTATTCAGAGGTTGTTTCTCTGCGCGAGTCGAAG  
ACTACAGAGGAACTGGCGTTGAAATCAAATTCAACGTAGATCATTCTGAGACTTCCAAA  
TATCGCCAGGCCATCGTGAAGTGCCTGCGGTTTGCAAAATTCCCGTATGAGATCAATGAA  
CCGTTTTCGACCTCTGAGATCTATGACCGAACCTACCCGGTTCAGTATCGTTATGAGGAC  
AAAGAAACAGGTTGGATGCTGGAAATGTACGGTTCGGTATCCCGCAATGCAGACAGCGTG  
GTTGTGATGGTCCAGCAACCTTATCTGTGCAACTATCTGTCCAGTAATAAGAAGTGGCCT  
ATGATGATGGTTTCTATTCTATCGGGGATTGTGATGTGAACCCTGGTCGTGAATGGACC  
GTCGAAGGTAAGAATGACCGTGGTTTCCGTGATCGCCTCGAAAAGTTTGTACTGGGGCT  
ATTGAAAACGTGGTCAGGAAGTTCGTGGAAGCGCTTAAGCAGCTACCTACACTGAAAGAA  
GTGCTGGAGTATATGAAGCGTGTTCGGTGCCTGCTTCTCAACCCGTTACGGGTCGGGGTTT  
ATCGCAGACAAGTTCCATGACCACTTTGGGACTTTCAGTATTGACAAGTGCATAACTTAT  
GGTGAGAAGGGTACTCGCCGTGAAACTGACAAGACTTACGGTATGCTGACCTTATGAAC  
GGTTCGCCACTGGTTTACAACGATGACGGTAAGTGCATCCGCACCACATGTAAGTGGCTG  
TCTGAGAACTGCTTCAAACGTGTCTACGTTACGGAACGTATTGAGGCGCTGGAGATCCTG  
AAAGACCCGTTCTTCGTTGGAATGGTGCATAAACTTTCCGACCTTGAGAAGCGTCCTGTC  
GTGAAGGGTGAGAAGAAGTACGGTTCGTTATGGCTTGTACGAACCTGGTCACAAAGTGTGG  
GTTATCGACCAAGATGGTTCTATCAAGAGCGACCGTATTTCTCGCGCCGACTTTGATGAT  
ATCGAAGCCGCCAGGATCTACAGTGTGAGAGGTGACTGGTAATTGTGATCTTGGTGCT  
GTTAAGTATCTGCACCGTACACAACAGCCAGAGACTTTCTGAAAGGACTTGGGGGTCGAG

GGCAAGATGTATATTGTGCCTCTTAATCGCAGTTGCTGGTTACCTGATGAAACAAGGATC  
GTTACCAAAGATGACCCTTATGAGCTTGCGAAACAGAATCTCATGGAGTATCATCTGAAC  
CAGCGAACCCTTGCTCATCACTTATCGCCAGTTGGTGAAGGAGCTTGGTATTTTTGGG  
GTTTAAAGTTGAATCCGACCCTGAGTATAAGCCTAAAGCGAACATGTCTTATTCGCTTTCG  
AACATCAAGGGATATTACGCTCTGGAGAAAAACGCTGAAAGGATTGTCGATGCACGTATG  
CGTATTGGTAAAAAGCTTTAGGAAAGTTAAAAAATCTCGATACCCGCTGCTTAAGTATGTT  
GACCTGAAGCACTTCAACACACCAGAGATGATTGAGTATCGACAACCTTATTGATAGCAA  
GGAGGAACTAAATGAGTCAGTTATTTGTATCCCGTAGCGCAGCGCGTAAGTTTGCAGCAG  
ACAACGGCATGAAGGTCGTGGACCGTGGTTTGTCTCCGGCTGTACTCGCAACCGGGCGCT  
GGATGGTTGTACCAAAGACAGCCAAGGGGCATCTAAGCCCCAGAGGTAGAAATGAGTT  
TCACCTCGGAAGCCAATCCTGCTCAGGTTTCACAGTTCTTCGCAAGCCGTGGTGATGCCC  
GTGATTTTGC AAATGGGAAAAAGAATGAGAAGATCATTGATCATGCGAAAAACATCCGATG  
GTCGTGATAATCAAGAGGGTGTGGTTAAAGACCTCGGTCAGCAGGGTAAGAGCTGAGAAG  
TCGTCTTTGACGTTACCGATCTGCATATCGAGGCCACTGTAACCCTGTTGCCTGAACCAC  
ACAAGGTTCTGTGACTGTGGTTGTTGAAGAGTCCGAGCCGAAGTCGTACTTCGACGAAG  
AGACTCTTGAGAAGAAAGACCCTGTGGTCATCATGACTCCCGGCAATGTTTGCATCTCGA  
TGCCTGATGGTACTCAGCACACCATCAACCGTGACAACGATATCTTCCCTGATGTGGCTC  
TACTGCTGATTGAGGGTGTATGTCGAAGGGGCTATCGCGCTGATCGAAGCAGGTAAATAAG  
CCAAGGCTGAAAAGTTTGTGATCTCGGCCCTGACCTTAAATTGCTGGATGGCGTTCTGT  
ACTGGCACGGTCAGAAACAGGAAAGCACCCTGGCTGATCGCATTCTTAACGACATTAAGA  
ATGATACGTTTCGATGACCGTTATGTAAAGTTCATGCAGAAGCTAATGCCCAACCCGTT  
ATGCATCTGTGAAAATGCTGTATGACTTGATTCAGCACACGATCTTGAGATTCTTGAGA  
ACGGTGATGTGAACGCATATAAATAGATCACCATGATTACCGATGGACCTCGCGATAGCT  
ACACAAGAAAGGTTCCCTAACTATGAAGGGCAAATCATTTCATGCCTCGAAACATGGTGG  
AAGAAAACCCTTACCAAACCTTGTAGCCAGGGTCTGCATATCGCCTCTCTAGAGTATGCGG  
GTCGGTTCGGTGGCAACGGACTGATTGAGGTTGCGGTTAACCCCTGCTGATGTGGTCAGTG  
TACCTTACGACTACAAGCACCAGAAGTGTGGTTGCTGCCGTTATGAAGTCCTGACAGGTG  
CAGAAAAACCCGTTTCGTGCGCCGGATGTGCTGGTTATCAGGACGATGGGGGAAATTCTGG  
AAGAAATTTACCTGGAAGAAGAACTAAGGAGGATTGATGTCACATTTTGGTGTGGGCGT  
TGAAGCTGCCCTTGGTGTGTCATGTCGGGGGATAACGTATTCGTTACGGGACCCGGTGG  
TAGCGGCAAAACTTACACCATAAAGACCATCCAATCGCTCTACGCAGGTTCTGTCCCTCAC  
AGTAGCCCTACGGGGGCTGCTGCCATTAACGTCAATCAGATGACTGCACACCGTGCATT  
TGGGCTTACAATGGGGGTTGCTACCAA AAAAGGATACTGAAGAGATTAAGCCGAAAGTGAA  
ACGGCTATTGAAGTGTAAGCGCTAAAGATCATCATCATTGATGAGATCAGTATGTTTCAG  
GGCTGATAAGTTGTGGGAAATGGATATGAAATGCCGACTCGCAAGAAAGCAACCAAATAA  
GCCGTTTGGTGGTTTCCAGATCTGCATGTTTGGTGACTTCTTCCAGAACCCGCCGTCCT  
TACCGATACAGAAAAGGAGACGTATTTCCAGTTCAATTACACAGAATTGGCTTGTTTCTC  
AGATACTTGAAGGAACTGAATCCTTATCCAATACTACTTGAAAAAGTTTATCGCCAGAG  
CAGTGTCATTTCTCAACGATGCTTAATTGTCTGCGTTGTGGACAGCGGATTCCAGAAAT  
TGTTAAATTCAAGAACACGCATTGTTATGATCATGGCAAGACTCTTGATGCCATAACGAT  
CACATCTACACATGCTGCTGCCGATAAAGTAAACAAGAAGCGTTTTTGATGAGGTCCCTGG  
GTTGCCCTACGTTGTACTGCGAAGAAATCTGGTGAGTTTACTCACAAACCTGGGCCTGA  
AGAGCTTTACCTGAAGGAAGGAGCACAGGTAATGATTACAGTAAACGACCCTAAAGGCTT  
TGATGAGCTAGAGTATGTCAATGGTTCCCGTGGAGAGATATTCGAACTCGGTAAGGATAC  
TGTGAAGGTTTCGTTTGGACTGTGGGAAAGTCGTTGATGTAGATGCCTATGTGTGGGAGAA  
TGTGGAATATAACCCAGTCAAGAGCAGGAATTCTGATGGTACAACAACCGAAGAGATTGA  
GAAGATCACTATCGGTGACTACCGTGCTCTCCCTATCCGTTTGGGCTGTGCTGTAACAAT  
TCATAAAGCGCAGCGCTTGACTTTACCTGAACTTAAATATAGACTTTGGTTATGGCGCTTT  
TGCACCCGGTATGGCTTATGTTGCTTTCAACAGGCCTACATCAGCTAAAGGATTAAGACT  
ATTCAAAAAGGTCAAAGAAAAGAATATTATTATTGACCCACGTATAGTAAGATTTTATGA  
AGAGACTTTCCAGGTAAATAGGAGATAAAATTACGGCATCATACTCTCGAAAGCAGGTA  
GTCAAGAAGTTCCAAAAGGAACTTGAAGATTGGAACAACGCCCCAGCCGCAAATGCGTTG  
AAGCCACCGAAGCATACTACAAATATCCAAATGGACTCTCTTGATGAGATGATGTCACCA  
TACGGCTACGTTTCATCGTCGTGTTCCACCATATCCGAACATTACAGATGGTCGTTTTGGT  
TACCAGTCCCTTTCTGGTAATGATTTTATCTCCCTGGAAGATGCGGTGTCATAACCACAAT  
AATGCGATGTTCCGTGGTAACCCTTTCAGAAAGATTCCTGATCGTTTAAAGCTTCGCTCTT  
CAAAACCGTATTGTGGAGCAGGGGTCTGTACAGCGTGATAAATCCCGCTATGCAGGTGGT

TCAGGTATTAATCTCACAAATTATGGATGAAATTTGATGACATTTGAAGTAGAACATTT  
TTCTGATCTGAAGAAAGTTTCAACAGAAAACTGTTGAAACTTCGAGATGTGGCTAATGA  
TAATTATAACGAGGCGCATCGTCACATGACAAAAGCCTTGTTGCATTTGTGGTCAATTAA  
AGACGAACTGCAGTTGCGTAAAAATGCTGAAAAAACTATTTAACTGGCTGTTTGCCAAGA  
AGGAAGAACCTGAGCGTGAAGTTAATGTGTTTGATTTACAAAACGTGGAGCAGGGCATG  
ATATTACTCTTCGCATGATTGATGATGGGGAGTATGCAGAGGCAATGGTTTTCCCTTGCTT  
TTGATCAACAGGCACCGGAGGTTGGCGACTTTATTGTTGCCAATCTTGAACAATCATCTA  
TGCAGGGAGAGGTGGATTACCACATGACTTTTGTGGTTGAATATGTGACTTGTATTGCAC  
TGGGTATTTCCCAGCTAACCTAACCCGCTACGAAGGTGCAGAAGATGAGTAAGTCCCCT  
AAAGTCGAGATTGAATTTGAGTACGGGCGCCCAACCGAAGGTGTGGTTGCAGTAGAAGCA  
CTTTATACTGTTTCAAGCCGGACTTTTACAGCAAAGAGAGCGATTGGGATTACAATGGT  
TTTCAGGACTTAGAACATTATGCTGTATTCAAAAACGGCACCCAGATCCTCGTTGACATT  
CCATATGATGTCATGTACCATCACCTACGTGAACATCTGCGTAATGCAGAGATCGATGGT  
TGTTTTCCATCGTGAGGAGGAATTGTAATGGCAAAAAGAGAAGTTAAACTGGTTGAATTCA  
ATATGAAGCAGACCAAGAAAGAAGAGGCTGAAGAAATTCTGGCAGGTCTTATTGATGAAG  
ATTTTGTCTCATGGGGCAGCACGAAGCCGAAAGTTGGATGAATTTTACAATGGTAAAAT  
CCGATAATTCATAAACGTTGTCCATAATACGGATTGCGGCCTTACACCTGCTCTCCAGT  
TCCAGGTGGTCAATGGTGCAGCAGAGCGAGGTGTTTATTGAGGTCCGTATGAATAAAGTG  
GTGTGGAGCCTTTTCGATCGCCCCGGCATCATGGGGTGGGAGTATTCTAAAAATGGTTAT  
AAGGTGTACTGCTTCAACTTTGATGCTGGGGGTCATGGTGGCTATGAGTTGGTAAGGGTT  
AAGCATCCTAATATTCAGTATGTCAATTCTTGGATCTATGAGGGTTTTGATCCAGAGAAA  
GATGGGATTCCTAAGCCAGATATTATCGTTGCATTTCCGCCATGTACCGATATGGCAGTT  
AGCGGTGCTGCTCATTTTGCCTCAAAGCAGCCAAAGACCCTCTTCTTCAGTACAAAGCC  
GTGAATACAGCTAAGGTTGCAGCAATGTTAGGAGATAAGTACGGGTGTCCATACATGATA  
GAGGACCCTGTGAGTGTTCTGTCTCCAAGAGGAGGAGACCGAACCACATGTTCCATCCG  
TATGAATATGGGGGTTATGTACCCCATGATGATGTTTATCCGTTCTTCCCTGAGTATATT  
AATCCGCGGGACTCATACCCTAAAAGACGTGTCTTTGGACGGGTAATGGTTTTAAAATC  
GCACCCGCAAAGCCCGTTGCGGTAGCGAAGGGTACTCAGAACAGCATAAAAAGCTGGGA  
GGAAAGTCTGCCAAAACAAAACGGATCCGTTCTTTAACACCCCGTGGTTTTGCTGCTGCG  
GTTTTTTATTCCAACCAGGAAGTGAGGCTAAGTGAAAGAGTTATTATTAGCTGGTGGTCG  
AGCAGGGCCATCAGATGGAGATACACATATGCTGCTACAGGCTGACAAAGTGAGTGGCAT  
CTACCCCATAGATCAAGCAAACCCGTCGCGAGCATTCACTTACGGGACCCCTGCTGG  
ACAAAGTACAGTGCAGGCTAAGTTTGGTCAATATTCGTTTACTGCCGCAATGGTGGTTT  
TCAAATGTCTGGAACAGTAAAACCTGATCTTGCATTTGCAAGAGGTGATCCATTCACGAT  
TGAGTTTTGGTCGTACAACACGGCAGTCGATAGTGCAACCTGGTAGATGTACTTTAACAT  
AGGAACCTCTTCTGTTTTAAAACCTATCAGTCAACTAGTTATTTGCAAGATAACTCTGC  
TTCTGTACAGGTTGGTCCACTGTCTCGCCTACCGACGAACCAGTGGAACCACATTGCGAT  
TGTTTACGATGGGACAAATCTCCAGTTCTATGTGAACGGAAACCGCATTGTATCGCAAGC  
ATCTGCTGGCGGCTGGAGTACAGCTTCATCATTGCAAGGGTGATGGGTGGTGAGGGAAC  
AGCGAAGTGTTTCATGGATCAGTTTCGAATTTCCGGTGTGCGAGGTATTCAGGTACTTC  
ATTCAGTGTACCCACAGCACCTTTTGGAGATGGATTAGGAGGTAAGTTGAAAGATGTGGTG  
ATCGCAAAGCTTCAACCCTACAAAAGTTGGAGGATAATTTGAATTTCTTTTTTGAGAAG  
GGTATCTCATCCAGGTGGTATTTCTTCCAGGATGGATTTTATATTGCTGTTGTTGTT  
AGGCCGTTTTAAGGAGCGATGATGGGGAATGGTCCGGATTGGGGCAGCATTGTGGAGTAC  
CGAGACGGAAAGCTGTACTGGAAAGTAAACACCTTCTCAGGTAGACACCACAATCATCCA  
GCGGCAGTTATTGGCAAGGAAGCTGGATCAATATCTGGAAAGGGATATTGCGCTATACGC  
TTTCAAGGGGACAGGTGTTATAGGCATGTTATCGTGTGGGGGCTTACCACGGACCAATC  
CCAAAAGGATTGCAGGTTGACCATATCAAATCGTTAAGGGAGACAGGCGGTGTTGCCGAT  
GACCGAATAACTAATTTACAACCTTACAAGAGGTACAAATACTCGTAAAGGTGGTGGT  
AACATGCCTAATTCTTCCAACAAGTCTTCTGCAAGAAGAGGGGTTTCTTGGGATAGAGGT  
TATCCATCAATGCCTTGGAGGGCAAGGAAGACCGTAGACGGAAAAGTTCTCCTTAAAATT  
TTTGCAGTTTTAATGACGCCTCTCAGCAAAGACAGTTGTTGGAAAAAGAGTATTGCTAT  
GGAGGACTATGAGTAATTTTGAATTTTTCGGGTTATTGACAAGGTGGACAGGAAAACCCGA  
AAGCACAAAGATTTGGCAATAACGGTAATCGTGGAGGAAGAGTGAGTTATCAGCAGCGCG  
AAGAAGAGACCCTGGAATCTGTAGTCAATGGCACCCGTATTCTGGCAGTTCCTGAAATGA  
GTCTCTCGCTTGATTCAGCGAAGTATTTTAAAATCCGGTCTCCTGTTTTCAGCAAGCGACG  
GTGTAACCATTACAGAAAACCTACTTGCCATATTATGAAAAGTACGGGAAGCTTACTGGTT

ATAACAAACGTGACTGGACACTACCAAAACAGAAGAAGGGTCACTTCTCTGTGGTTCGGCA  
CTGTAAAGGCAGCATCTTAGTCTTTGGTCAGCATGAAGCTGCTATGGGCGCTGCGCGTA  
AACAGATTTTTGTTGTTGAGGGTGAAGGTGATGTGACTGCTGGGTGGCAGGCGGGTTTTG  
ATTTTGTCAAAGCTTTAGCTTGCAGCCCCAATGCCCCGAAAGGGGTGAAGGATTGGGCGG  
CAAGTGTCTGGAAGGTATCAGTGCCATTCAGAAAGGTGAGGAAGTTGCAGGTATCCGT  
CACTGCCTGTTGTCGGATTAACTGTGGCACAGTTAACGCAGTTGATACCTTCGCTAACA  
ATGAGAAGTTTATCCTTGGTTACGAAAATGTAGTTCTTGGTTTTGATAACCATGAAGCAA  
CAGCGCTGGAAGGAACGTAAAATCAAGAAAGGTAAGGAAGCGACAGATTATGTTCCAG  
CATTCTTGGTGTGACACAATATCTGTGTAGCTCGTTACCCTAATGTACGTAACGATCCGG  
CTGGTGTAAAGATATTCGAGATATGTACGATGCTGGGAAGGGTCTGAAATCTGGAACA  
CGTTTTCCAAGGCAGAAGTCAGGTATGTGCCTTACAACTGATCAGTCTGAGCAATATCA  
CTATTGAGAACCTTCGTAAGAAGAAGAAAGATGGTGTTCATTACCAGGTATGCCTCGAC  
TTTATGAGTTGACAAAAGGCCACGTAAGGAGCCTTGGACTGACTGGACCAAGTG  
GCGGGGGTTGACAATCTAGCGCCTTCATGCAGTAATGTATGAAGAAAACCTTGTGAATC  
GGTGAAGAACCTAACGAGAAGACGAGGGCAATACCGAGCGAAGCCGAAGAGTCTCTCCTT  
TTATAAGGAGGGATTATGTGGAAAAGTATAGAAAATTTTGTATGGATACGAAGTTTCTGAC  
AAAGGTGAAGTAGGAGGGAAGAGAGGCTCGAATATAAAACGTGATACCAGTGGCAGAAAC  
TCCCGTGTAGCCTGTGCGGAGAAGCGATAGTTACTCGGTGGATGGTTCACCGTCTTGTA  
GCTTTTGCATTTTTGGACCCCATAGAGGGTAAACCTTATGTGAATCACAAAACGTTAAT  
AAAACGGATAACTCAGTTGACAATCTTGAATGGGTAAACCAACGGGAAAATCAAGACCAT  
GCTGTTTTAACAAGCTTGTGTCTCGTGGGGAGGAAATATGGACATCTAAAGTCACAGAG  
AGTGTAGTTCTTCAGATATCGGAAACTTTGCAACTTGGACTTCCAGTATCAGAAGTGGCG  
AGAAGATTCTCCGTTCCTTTTCGGAATGTAAAAAGAATTAATACAGAGAACTTAGGAA  
TGGTTAACATCTGAATACGAGTTCTTTTTAGGAAGACCCAACTAACCTGCTTTCGGGA  
GAGCGGCAACAGATATACGACCTGTTGAAGTATGGCTTCCCAGCAGAGAGGTTGCCAAG  
ATGTTTGGTGATTCTAAAACGACTGTATTAACATCAAGAGAGACTTTTCGGAACGTGTA  
ACGACTAGCCGTGATGAGTGTAACGGTGTACATCCAAGTGGGCGGAAGCGCAAGGCATCC  
TGAATGGATGATGATATAGCCTGCTCTGCATGGAAACATGCAGCAGACCCCGATACGAGA  
TAGGTGTGCGGCAAGGAATAACGAACCTTGGCTGAACTTAAGGAAAAGTACCATTGCTCGC  
AAGATCGAGTATGCAATTGTGGATTATCTTCGCAATATGGATATCCCTCGTCTTGACGGC  
TGGACGGAGCACGAGGAGGTTGCAATCATCCGTCTTGAAGAGGATCAGGAGGAGTCAGTA  
AACAGCCTGTACGCTGAAGAGTTGAAGGTTGACCCTAAAGCATTGCTGCAGATCCTAAG  
CAGTTCCTAACTGAGGAAGAGCACCTTGCCATTCACCAACGGTGGATTTCTGAGGACAAG  
ATTAAGATCTTTGACCACTTCGGTTCTATCCCGACAGATCAGTTGATTCAGAAGCTGAAA  
CAGATGGTGTTCCTTGATGGTTGTATGTGGATTATCCTTGACCACCTGTCGATGGTGATC  
TCCGGTCTTAAGTCAAACAATGAACGCCGAGATTTGGATAATATCATGACCGAGCTTGCG  
GCATTCTGTAAGCAGTATGAGGTGTTCACTCTCAGTATTAGCCACATGAATCGTAAGGCG  
CTTCAGTTATCGTAGGATAAAGACGGTAATATGTTGCCATCTGGTATCCTGTACGTAAA  
GAAGACCTGCGTGGTTCTGCTGCACTGGAACAGCTTTCCTGGATTGTCTGGGTGTTGAG  
CCAGAAGAACTACCAGACCGCTCTCGTGGTCGTGTGCGTGTGGTTGTCATGAAGAACCGC  
CCAGACAAAAAACTCGGTGTCGCAGACCCCATGATCATGGACGAAAACGGACAATTCACG  
GATGCGTCTGGTTGGGTAAGGGAAGATGGGATGTTCAAGCTGGACGGGGAAGTCATGCTT  
CGCCCTGAAGGTATGGTTCAGACCCTACGACTGGAGACTCCGGTGGGTAAGGTCAATGTA  
CCAGCACCTGTCGTGGAGAATCCGGTGCAACTCCCATCGCCAGCAGACATAGATGAGGAT  
ACGCCGTTTTGATGATATATTAACCAAATGAGAGGTGGGTGTCGATCCAGACCAACCCAC  
CTTGCAATAGGAGGAGCATGAAAGGTTTGTATAAAGGGACAACGAAGCTGTTGGTCTGTT  
AGAGGAAGTAACTAAGTACCCTGTACCCTTCTGAAGGAATACGGTGTAAACAACTGGAA  
TCTGTTTTTAGATCCTGCACACCCACAGTATGAGAGCGCCGTAACATATGCTCGCAGCAA  
GACAGAAGCCAATCTCACGATCCGCTCATATGACGAGCTTGAGGCTTTCCTGAAAACCTTG  
CCGTGGTATTGCGTGTACAAACCTTTTTGGTTATGATCTACGCCTCTGGAAGAATCTGTC  
AGGCATTGAGTACGACATGTTCAAAGACCCTAAGTGTCTGGGGACGATTGGGGACACCCA  
AGTCAACCTGTACGATACTCTGTCTATGAGCCGTGTACTTTTTCTGACCGACCAGTACC  
AAATGGCTGTCCTGCTGCAGTTTTGAACCCGGTAACCCGGAACGTGACCGTGTGGTCC  
ACATGGCCTTATGGCTTGGGGCTATCATGTCGCGAAGAAGAAAGTTCAGATTGATGACTG  
GCGTAACCAGCCGCTCTGGGAGTACGTTAACCGTGTGTGGGAAGACGTTCTGATCGACGA  
ACTGACGTGGAAAGCATTGATTGATGAATCCACTGGTGCTCGTTGGCCCGATGACAAGCA  
GTTTCATGTACACGGATAAACCCGAAGGTATTCGCCAGATTAACCTGGAAAACGCTCTTCG

TCGCCGTATGCTGACGGATTACCTGATGATTGAGCAAGAGATTCAGGGTGTTCGGTTCAT  
CAAGCATGAGGCGGAAAACTTCGAGATCGCCTTGATGTTATGATGAAAGAGATCGAAGA  
AGAGGTTGAACTGTTACTTCCTATGAAGGAGATGACAAAATCTCAACAACCTAAGTTCCC  
AGCTAACCCGTTTAAATGGTGTGTTAATATCTCCACCACGGATGGAAGTGGTTACAGTA  
CCAGTTTCGGTATCCGGGTAACCGCGAGGGGCTGGAGTTTAAGGGTTCACCAAAAATCCGC  
TTTCAAAGGTTATGGTGAGGTCAGTGCGGCAGGGGAAAGATACTCTCTCCAGAACGGTGT  
TGAAGACCCTATGCACTTCGGGGATTTTATCCGGGAACAAAGGAATAAAGAGAATACCCT  
GGTGCCTCTGCCATCTGACCTGATGGAGAAGGCCAAAGAGGATTTGCGGAATGGTAAGAT  
GCCTGACCTGATGGTCCCGATGAAGATCTCGAACCCAGGACGACATCAAGAAGTACCCGAT  
CCGCGATGCTGACTGGAAGCCTAGCCTGTGGCGTGTA AAAAGATGTGACCAAAGATCAGCT  
CAAGAGGGCCAGAAGTACCCAGAGATTGACGAATTAGTCAGAAAGTACATTGAGGAGGT  
TGGTGAATCAGAGTATAAGTCTTTGATTATTGAGCACTTAAATAACACAGACGACAAATT  
CAACACCTCAGAGCGCAAGTTTGATCATCGTTATGCGTCTGACAAGGCGTATGCGGAAAT  
ATTCAAGAAGTTCGGGCGCAAAGCTCGTCAGTTACCAACTTCACCACAGGTGAAGGATAA  
CTTCGGCAAGCTATGTCCGAACCTCGAACGTATTGATGTTCACTTGGCAAACAGATCGT  
TAAGTGGTTGTCACTGCGTAACCGTTCGCTCAGTCCCTCGACCCGATTGATGAGGATAAGAA  
TGACACAGGTTTGCTCAACCACCCTCGCCTGTCGATTGATGGGAAGCTTCCCTGCCCGTTT  
TTCTGGAATCACCAACACCGGGCGTTGCAAGGCACACCATTTGTGCAAACATGCGTAAGCC  
AGATCCGAAGGTGTTGCTCGGAGAAGAAATGCATGGATTGTGGGGTGTACTGACGGGTA  
TTATCATGTCCGGTATCGACGGCTCCAACTAGAGGGCATGATCGCCGCATGGGGTTCATA  
CCAGTTCGATGGGGGTGAAAAGTTCGGGCTAATGGACAGCGGAGACGCTCACGCACGAAA  
CGCAGAAGCGTACACCAAAGCTTCAGGAACCCTCGTTACACGTTAGCGGCGGTAAAGGTGT  
AACCTACGGTATCGTGTACGGTGTCTCAGGCGGCGCAGATTGCAGGGATTTTGAACATCTC  
CCTTGACAAAGCTCAGGCGGTAATTGATGCTTTCTGGGATAGGAACTTCGGTTTGAAAGG  
TCGTAGAGAATGGCTGGAAAAGTTCGGGAAGCCACAGGGAAGCGTTATATTCCTGGATT  
GGATGGTTCGTAAGATTTGGACCCGTTCTAAGCACTCGTTACTGAATGCTTACCAGCAGAA  
CGGTGGTGCATCACTGTTTGACCTTGGTGGCATCCTGCTACACTGGGAAATGGTGAAGCT  
TGGGTGGTATGATGACGATGTACGTCGCTGATCTACTACCATAAGTAACATAGTGGCTT  
TGTGAGGTGACTCACATCGAATAACTCTTTTAATTGTTCGGGAAGGCTAAGGTTGGCAGTT  
TTGGTAGACTGTTATACTATGCTAATCCGCAGCGAAGCTTGTCAAGAATTTTAGAGACAA  
GAACGTTACAGAGACTAATTCAATTAATAACTCCAGCTAAATGCGAGGAGATACATGAAA  
ACTACCAAAAAGGATCGAGACATGCTGATTGCCATTACACTTGGCGATGGATGGTTATCC  
AAGCATGGGCATCTCGAAGTGTGGCACTCTATCCACCAGAAAGAGTACACATTGATGAAA  
TATGAGAAGATTAAGAAATTTTGTCCAATTGTTATTTTATACCGGAAAAACAGCTTGGGT  
AAGGAACAGGTGGGTTTTAGAACTAAAAGATTACCTTTCCTAAAATTACTTCGTTCGTATA  
TTGTATCCTGAAGGTAAAAAAGTTTTTCAGTGGTAGATTACTAAATAGACTTGGACCAGAG  
CACTTGGCGATAATTGTGGATGGACGATGGAAGTTTAACGACCCTGAAGAATAAGAAGGGT  
GTTAAGTCATCCTCCAGATATACGTTAAGTCTTTGTACCAGCAGAGAGCAATGTTTGCTA  
GTTGCTGACTCGATAAAATCTCTTACTGGCGTATGCCCTTGGATAAGAAGTGTGAGGGGT  
GGTAAATATTTTTCTCTTTGTTTTACAACAGGGGAGGGGAGGATTTTTAGCCAAGTAATA  
CGACCATTGATGTGTA AAAAGCATGATGTAGAAGGTGAGCCAAGATTAATTCGTGGGGAAG  
CGACCAAGTGGCGTTGCAAAGAGAGCATCCCTTGTGGATGGTTAGAAAGTCGGATCCTA  
CGCGAAAACGTATGGCAACACGCAATGGTGTGCGGCGACATTAACGACATCGCTAAACTTC  
TGGATGAATACCAGCTCCAGGTTCCCTAAGAAATACTTGAGGAAGTGGGAGTTTGATACCC  
TGCAAGATGCAAAAAGCTTTTCGTAAAAGAGTGGGAAACAAAAGGCCGCGTATTGGACGGGC  
ATGAGTGGAGAAAGGCTGTAATAGACGAGAATGGTGAAAAGTCAAGGATGCCGAAGGTA  
ATACGGTGTATTAGGGCGTCTTTGGTGAAGTTAGGAAGATACACATCCGATATTGCCCTG  
TTGGTGAGATGGTGGTGA AATGTGTTGAGAAAGCGGCTCGTATGATGGGTTCTCCGGTGC  
ATATCACAGGTGCCTACTTAACGGGTAAAAACTGGGCTGAGTGTCACTAAATTTAAAGGG  
GCAGACGCCCTGTTCTTGGAGACTATAAATGTTTGAGATGATGCTTGCTACAAGTGA  
CAAAGAAATCGATTCTGTTAGTAATGTGGAATTTACCAACATATCTTCCCTCCCAAT  
CATGGACTGTCCCTGCCAATGTGCGAGTAGGTCAGTGTACTTTGTGTTGGTCAAGGAGGGG  
CCGCACCAACTAATCCACTTCCAAGACGTGGAGGTGCGGGTGGAGACTTGGTGTGGAGAA  
ACACCATCCCAGTTTTTCGTGGAGAGATTTTAGAAGTGTTTACACAAAATAATGCAGATG  
GGACGACGCTTGTAGATTTGTTTCGTGGTTCTGTACCCTGGTACTGCTGGTTTCGGGT  
CAGGACCTGAACCGTACACGGGGCAATACCCAGATATGGGTGATGCAGTGATAAATAAAG  
GCGGCGCGGGTGGGAATAATACCTCAGCCCATGATATAAAAACGTTGCAGTGGCGCAGGTG



GTGCCGCAGGGTATATTGGGAAAGGTGGTGTATGGCGGTTATGCATACCCAGCATCAACAA  
TGTACTCTCAAGGCAAGGATGGTCAGGGAGGCGGTGGCGGTGGCTCATGTGGTTATTACT  
TCTCTGGTTCCACATCTGGGGAGAACTCCGGTGGCGGTGGCGCTGTCAAAATCTATGCCG  
TTGGGCTCAATGGTCATGGAGGTAGAGGTGGATATTCACCAACAATAGCAAGAGGCGGGT  
CGGGTGGGGCAGACCCTACTGGTCGCCAGGGTGGTAAATTTGGGGGTGGGGATGAACACG  
GATCTTCAAGCTCACCTGGTTCTTCAGCGGTGCGGATAATCTGGGGAAATACAGAAAAGA  
GAGAGTTCCCAAACAATGCCCGAACGGTATAAATAAATAAGAGGAGGATGTATGATTAAA  
GAAGGTCAGTTGGTTAGATTGAAATCAGGTGGCCGTGGCATGGTTGTTGAGCGTATCGTT  
GAAAGACCGCTGACCTCCAACGGGGTAATCAGTATCGTTAAATATGCTGCCTGCTCATGG  
ATGAATGAAAGCAATGTGAAACAGGTGGAAGACTGTGCTTTTCTCCTGCACTTCAAATTATC  
GGAGAGTGATATGAAAGTAAAAGGCACACAAACCACGGTGCAAACCGTGGCTGTGGAAC  
AAGCGATGACGCCATCAAGTTGGTTGTTTATGGTCAGACGATTGATTATCTTGCACATGC  
TGTGGAGGAAAACTTTTGTACGGCTACCTCCACAGCTTGCCACCGGAGTTAAACGGTAA  
AAGGACGATCAGGGAAAGTTACCGATCTGGGAATAAAGGTAAACTAGCGCTGGTGCATGT  
GGATGCTGCCTGGAATTACCACAACAATGTTGGAGAGGACAATGAAGTTCGTTTATTGAC  
GGAAGAGGAATGGGAAGGTTACAAGGAGCTTTGTAATATCTCCAAGGTAATTAAGACTT  
GCCAAAACACCGTAAAAGCCCTTCACTTCATGGTTGAGGGGCTTTATTTTTAGGGGAGT  
TAAATAACATGGAGGGTGGTGTATGTTAGAGGCAATCGATGATTTCTTTTTAGTGCTGGC  
GGCAGTGACATGTGTGTGGTGTGGCTTTGGCGCTGTCTTTCCAAAAAATGAAACACACCG  
TGCGGTGTACGTGGTTTGTGCAGTAATCTATGCTTCTTTAGGGTGCATGTCTGGAGTAT  
CGCCTTATAAAAGGTCACATGCCTTGGATTAAACCCTTGGTGATTGTCGGAATAATTGTT  
ATTGCGGTGTTTATTGTTGTTGACATCGCAGATACCGTCACCCTTAATTGTAAGCCTAAC  
GGTGAACAACGCCTCGCAAACAGTGCTGATGGAGTTGTCGTTGAGAACAACACTGATCTGC  
GACAGTGGTGGCGTGAAGTGGTCTCGTTACTAACCTTGAATAAATAATATCAAGAGGAGA  
TTCGAATGAAAAAATTAACGATTGCTCTGCTGGCTATGGCTTTTGTGTCACCCGCCCATG  
CGGAAGAAGATGATGATTTCCAGACCGAACCTATGAGAAAGGTTGCGGTGTGCAACAAGA  
TCGAGCGTTTCTCTGTGAGCATTGTTGCTCATAGGAAGGATAGTATGGGAGAGACCTGTA  
TCGACACGGTATCCCTAAAAAGCATGCTCAGGTGGGGAATGTTCTGAGCGAAGAGTCGC  
GCTGGTATCAGGGGTCATCTATCAACCCAACCAAAAAATCTGTGACCCGTGTGTCACAAG  
TCTACCAATGACAGAAGGGGTGATCATGAAAAGATTATCCTTGCCACCCTGCTCGCGCT  
TTCTTGCTCTGTACAAGCAACAGAGTTCTATAACCGATACCTTGGCAAAAAGGATCACAGA  
TGCAGGCTATGCTGATATGCAGGATTCTTGCAAACAGGGTCTGAAAAGAGCAAAGGCTAA  
AAAAGATGGGGCAGAAATTGAAGTAAAAATTGCAGAAGTGCAAGTGGCAGGTTCCAAAAT  
GGAAAAGCAGATGATTATCCTCACAAACGCTGTTGAAGAAATGGAGAAAAGCAAATTACT  
ATGACTCGTGGCCTTATCTTCCGAAAATTTGCACCGCTGACCAACGGGCATGTGGCATT  
ATTCGCCAGGCGGCTTCGCAGGTGAGTTGCCTGTATCTGTTCTGTGTCATGACCATAAA  
TTTGTGACGCACAACGAGAGTGGATTCGTCCAAAGTTGGGTCTTGCTGATCGCTATCGT  
TACTTGCTGGATGTTATTGCCGATGAGGGTCTGGATAACGTGAAGGTTGACTACGTTGAT  
GAGTCGAATATACGCGGATACCTGAAGCAGGTGCTGCTTATGCAAAACTGATCCGTGTA  
AAGCAACCTTTCGTTAAATACGACTTTGCTTTCTGTTCTGAGCCGGAGTACGAGTCTTAC  
TCCAGTGAGTTCTTCCCTGAAGCGAAGCATGTTGTTATCGACGCAGAATGTAAAGCTGTT  
CCTATATCTGCAACGATGATTCGTAACGACCCTTACAACAATTTCTATAACCTGGCATGG  
CCTGCACGTAACGCTTCATGAAAAGGTGCCATTGTTGGTGTGAGAGCACTGGTAAA  
ACGACCCTGACACAACACTTGGCACACACATTCTGTGCAGCTTGGATTCTGAAATTGGA  
AGACTGATCTGTGAGCGTGAGTATCACTCCAGTGAGCTTGGCAGTGAATCGTGAGGATTAC  
CTGCGTGTGCAATGGAGCATCGCCTGAAGGAGATGCAGGTGGCTGGTTGGGGTGACCGT  
GGGGTAATGTTCTCCGACACCACAACCTCTGATCACACACTTCTCTGGTGTGTTGTGCAGAT  
AAGATCGACTACTCCGACCTGTTGTTCCGGACACTGAGCCGTGAAGAGAGCTACAACCTC  
TACGATCTGTTCTGTTCTCACACCCGAGGTTCCGTGGGTTGCTGATCCTCTTCGTTTG  
CAGGATACACCAGAAAAGCGTAAAGAAACGCATTCTTTGCTTGACACAATGATCAGGGCA  
TCTTATGATACAAGCAAGGTGGGGGTCATCTCCGGCAATGATTAAGAAGAGCGTACTGAA  
AAACCCGAAGAAGCTGTCCGTAAATTGCTGAAGATCAAAGGAGAATAAGATGAACGTAAC  
TAATTCAACCATGAAGCAGGCTTTTGGTGTCTGAACGTTATTTTGGAAAAGGCCCTGA  
GTTAGCTGAAGGTCTTCAGGCTTATGCTAACTCTCGTGAGCAAGGCTTCTCTATAACCAA  
GTAGAATCACAAAGTGTGATAATGACTTTTCGAGGCAAGTTTCTTTCTCCGAGTGTCTGTA  
CAGTGATCAGATCAATGTGTACTGGGGCCGACCAGGAACTTCAATTACCAGACGAATGT  
GCCTGACGACGCCGTATTTTTCTCGTCGCAAATACTTTGGTTACGAGGAGTATGAAGA

CGCGGCAGACTGGAGCATCGCGTACCTGAAAGGTGACTTAGATGGATCAAAATAATCAGG  
TTTTGGTCTGGAAAACCCAAGAAGGTAATCTTGACCGGATCACCCATATGTCTGACGAGC  
ATTTACGTAATGCAATCATCTGGCTACTGACAGACTCTTGTCTTGATGACAAGACGGAAG  
GTGTGCCGATAACGTCGTGGGTAGAAGCAATGGCAGTAGAGTTAAACAGCCGGATGGTTG  
GTAATGTCTAAGGTTCTTAACATTTACCATATTGGTAAGGTTATCCCTGAAGGTGCCGTC  
TACATGGGCCGCACCATGAAGAAATTTAACCTGGTGCCTCATAAGCTAGCCAACCCATTC  
CCTCTTGAGAAAGGTGGTGGGAATCGTGATGAGGTCATAGAAACCTACCATGGGTGGTTG  
TGGGAGAAGATCCAGAAAGGTGACATTACTTTGCAAGATCTTCTTGGCTTGGACAGGAAA  
GTCCTTGTATGCTTTTGTTCACCGAAGAGATGTCACTGTGATGTAAACATGGCGGCAATA  
GAATGGGCCAAGGGGAGGGTTACAAAATGAGTTTCAAAAAGATCACACTTATAGCGAGT  
TATATAAGAACATCGCTGGAGGTCCTCCCTTGTGCTCTCTGAGGATGCCGGAGGTTATC  
GTCTGGCAGGTACAAAGATAACTGGTCAACCACTAGCGCGTTTTGAAATTTCTGTTGTAG  
AACTGATGATCGCAGTAAATAATCACCAAGGAGAATAACATGGTTTATGGTAGGGGTATA  
AACGACTCAGATTCTCCCTGTCAGATCTTCAAGTGGGTAGATGGTAGACAGGTTTTGGAA  
TGGAGATGCCCTTACTATGAACTTTGGATAGGGAACCTTGTACAGATGTTATTCACAGCAG  
TTCCACAAAAGACAACCTACCTATGCCGGATGCCAAGTGGCGGATGACTGGTTAAGGTTT  
TCTGTCTGCAAAGAGTGGGTTTCTCAACAACCCCTGCACGCACAGTGGTTGAATAAGGAA  
GGTGATCTTCAATTTGACAAAGACATTCTTTTGGAGGGGAACAAAATTACACTCCTGAA  
GCATGTGCGTTCGTTCCAAGATACTTAAACACCGCATTAGACTATAGTAAGAATAGCGGC  
CTACCTATGGGTGTAAACAAAAAAGAAAACAGGAAGGTCTAAGCGGCGGGGTGCAGGGTG  
GACGGGAAAAGAAAATACTTGGGCGTGCGAGCAACCCCTTGCTGCTCATGCATTATGG  
CAAAGCAAAGGCTGAAAATCTTCCATCTGTGATCGAGGTATACACCCCATCTGACTTT  
TATAATGAGCTTATTGCGAAAGCCCTGCACAAAAGAGTTGACAGAATACTAAATGACCTC  
CAAATGGAGAGGAAACAACCTACTTATGAGGAGAAAAGATTACATGATGAATCTAGACG  
TAAAAGCAACCTGGACCGCTTTTATGGTTGGTCGAAACTTGAATATCTGTGGCTGTTCA  
TCTGTTACGCCTCCATCGCTCTCGTGTGATCATCTTGGGCGGTCGGGTTATTGAATTA  
TCTTCTCTGTGACAGGTAGTATCTGAGCGATCCTTGTGCAAAGGTAAACTTTCCAGTT  
ATTATTGGGGCTTTGTGGCGACAGTGTGACTCATAACATCTCCTTCACGTACAAATTGT  
ACGGTGAGACGATTATGTACCCTCTGCTATTTACTCTGATGCACGTGATAGGTGTGATTA  
TCTGGGCGAAAAGCTGACTGTCTCTGAAGACGGTGAACGTGCGGATGTTATCAAAAAGT  
ACCTCACCACAAAGCAGCGGTGGTTCGGTTGGGATTGGAACGTTGGTTGTGATCGCCTTGC  
ATGCAGAATTTGTAAGCCCTCTGAAAGGAAGTATGCCTGGACTGGATTCCGCAACAGCGA  
TCCTCTCTGTTCTGGCAACCTATCTGATGATGGTACGTTATGCAGTACAGTGGTACGTGT  
GGATCATTGTGAACTTAGTCGCAGTACCTTTGTGGATTCAGACAGCGCTCCACCTTGAAA  
CTCAGGGGTGGGCGGTACTTGCAATGTGGATCACTTTCCTGTTAAACTCTATTTCATGGTG  
CCTACAAGTGGCGTAAAACGAAGTAGCTATGTAATGATTGGATTTTGGGAATGGTTGAC  
GATGCACAATAACTGGGTGCCAGGTACCGCCCTTTATATTACGATTTTTGTTTGGGCCAC  
TGTCTTATCTTTCAGGGAAACACGGAAGTATAAAGTTATGGCATAATTAATGCTGGTTGT  
GGTAGTTGGTACGCTATTTAATGCCTTGTGAACTGATAGTGATGGTTATCGCATGTATAA  
AAATCACTGGACCAGTGGTGCAAAACCTGAAGCTGTGGCATCATTCTATGTGTTTCGATGC  
ACAGAAAGAACGGTGCTTTAAACCAGTAGTGGGGTTTGCACAAGTTGATGATATGCAGGT  
GAAGACCCTAACACCAAACAGATGGAGACAGGCGAATGGTTATGAAATCTGAGCGAACA  
GGTCAAAAATTTGTA AAAATGAACGAAGCCAGTTTAGGTGAGAATACAAATCTGGAAGAG  
CAGTTGGTGCTGGAATACTTCAAGAAGAATGTTGAATATCTTCTGTAGATTATGATAAT  
CCAACCAGTTGCCGTAAAGCCTTCCGTCAGGTCGATTTCTGCAAGAAGGGTTATCAAGAT  
ATGGTGATCTGTAGCCTAATATCGGGTGGTGAATTGAACACAATCTGGTCTGTACTGGAG  
GAGTTTTATGCGTAAATTCTTTAAGTGGCTACTGAGCCTGGTTAGTTCAAACCTCTGTAGG  
GACCATTGGCAGTGGTAACACCACCACAGTGACGCAGACCTCAACTGTGCATGTTCTGAA  
GGGACGTGACCCAGAGGGGGATTAGAAGTACAAGCTTAAACCCCTGACTGAAAATGAGAT  
CAGGGATATTGCTAAAAGGCAGTGGCAGATGTAGCAGCTAAAAGCTGGTAACAGAGGG  
CCGAGAAGAGCGGCTGAAAGAGATAATGGAAGAGTTGGATTGCCAGCGTAGGAACCGTCG  
CCCACCACCGCCTCCTTACCCCCACGTCGCCGTGTGGTTGTGGATGATGATTCTCTCGC  
ACGATAGAGACGCAGTGAAACGAGTTACAGTCGTAACGATGACGATAGCATTGTAACCAG  
AGCTTTTGTGCTCTGCTGTTTATCACTCGTCAAGTAGTGACGATGGTGGAAAGTTATAG  
CAGTGGCCGTTGTGACTCCGGCAGTTCTTCAGGAGGATGTGATTGAAACTAACGAAAACG  
TTAGTTTGTCCAAACGGTCATTCCACTACCTCAGTCGTAGAGCACTTTGTATCCACGATT  
GACTGTGCCAAATGTGGTGTA AAAAGCCACATATGTAATGGCACTGGAGGATGGTAATATG

GTCGCAGGAACAACATCTTGTAGCTTCCCATCGTGCCTGGATGATCCGTTTATTA AACCT  
ATGAATGTAAACAAGGAGTTTATGTAATGAAATTTTCATCTGCACTGGCGCTTTTATTCA  
TCGCCTTGAAACTGTGCGGTGTTATTGCATGGTCATGGTGGTGGGTCTTGGCACC ACTCT  
TCTTCCCCTCGCGATTTTTGTGGGGATCATAATTTTGTTTTTTCGCCAGTGTCTTTGGTG  
TTGCAGGGGCGGCTGCTCTTCTGGACAAAATCAAATTAAGTAAGGAAAGATCTCGATAAC  
TATTGACATACAGAGTTGAAAGGGGTAATATACCCCTTCACTAACAAACGGAGGATTGAT  
GATTTAGGCAGTAACCCCTATCGAAACCCAATCAGAAAAAGAAAAACTGGTCTTCCCTCGA  
ACTCTACGTAGGTCAGTTTGGAACAGTTGTTCTTCTTCCAGTGCCGGAGCACAGATGAA  
TCAGTTCATCGGCTCAGAGCCTATGCGTGATGAGATGCTGAAGGTTATCCAAAGCGGCAA  
CATCACTACTGTGGAAGAAGCTCTTGCATGGGTGCGTGGACACCGCAGTAACCTTCTGCA  
ATTAATGGTGCATCGTCTTTTGCCTGAATCTACTGAGTCAGGTTGAAGATCTGGTGAT  
CGATAGACTTTTGGGCGTTAACAGTGATACCCAACAAGAAGAACTAAGTGATAGGAGAG  
AGAATGAGCGTAATTAACGAATACAAAGATCCGATCTCCGGCACGTTAAACC ACTTCTCA  
AAGGGCAGCATCAAATTCATCAGCATCATACCTGTTAAGAATGGAGATCCTGATGGTGTG  
TAACGTACCCATATCCAGCGCGAAATGGTGAGCCTGCAAAGGTTTTTCGAATCAACACAT  
ACCATAAGCTTCTTGATGCAAGGGGTGGACGACAATAACAACGTTATTGATCCTCAAAGC  
CAGGGTGAGTGGGTGCGCATGGGGGAGAAGAAGCTACATGCCAGCCACACCGACAAAGTG  
CAGGTTAAGCTGGACTCTGGTTACAAAGACATTCTGCCTGGTATGGTTGCATCTTTCCC  
CTAAAAGTGAGCACGAACGGCGATGAGACCTATGTCAACGGCTCTCTGAGTGGCAAGACT  
TTCAACATTCTGGACGAAAGCAAAGCAGGTCAACCTGCACCACGTCAGCAGCCGCAGCAA  
AGTGCTCAAGGTCAACAGTCTGGTGGTGGGGTGAAAGTTTACGGCGAGATAACCGCTATT  
GCAGGGAATCTGGCGACTGTAAATGATGAGAAGAACGGCCCTGATAATGTTGTTCTGTCT  
GATGAGCAACTGGCACAGGTACAGGTTGGTGGTGCCTGACAGCTTTTGTAAATCTTGCT  
GATGGCACAAATCCTGAACGGCTTTAAAGCTTACGGCCCAGTAGGTCAATGAACTGGCTCA  
CGTGGTAAGAAGTCTGGTGGGAATTATGACCCTATTGGTGTAGCTTGTGGTCACGGTATC  
AACGGCCTTAAGGAATTGATGGGTGCAGGTTACAAAGTGAAGGATGAACTGGAACAGTA  
AAAGCCATTCACCGTGCAACTGTAGACATGAAGGCTTTCGTTGCGGAGCGTACTGGTAAG  
GATGTTGAATCAAACGCTGTTGGAGCAATTGCAGGTAATGCAATCCTTGTTCATGTAGC  
CGATTCAATGCCAAATCGGAAGTAACTGAGTCAACGATCCTGGAAAGCGCCAAGAACGTG  
TATGTTACGCTCTCTGAGCCGTTTTATGAGTCTTGACTAACGATGGTAAGCCTGCGAAT  
CAAAGGCAACCACAGAGTTCTCAGGAGCCTCTTAGCGGCACTGTTGATGTACCACCTATG  
GATGCTTATGAGCCTCCGATGGACTTTGCCGACGATATGCACTTTGCCCAATCAGTCTG  
CAATATGGTAGCAACTTCATCCATTGCATTTAATAAAAAGAAAAGGAGCCTTTCGGCTCC  
TTTTTGTTTTATTGCGGTTGAGAGGGTACGCCTGGTTCGCCGGGATCCACAGGATCTGGT  
GGGGCTGTTAAGTCGGAAACACTGACATACGAATGATCAAATGCCTCAACCTGACCTTCC  
CTGTAAATAAGACGAACACCACAACGAGCATCACCAACTGCAATACAGGAAAGGAATCCA  
CCTTCATCAATCATCACCATCTGGATTTGTAGTTGTTAATTCTCCGTCTATGAAGTTA  
GTATCAACATTGGCTGGAGAAATTTCAATTCGACAACGTTCCGGACCTGGTGTATAGTCA  
TGACTGTTTTTATCCATGAACACGAACACATCACCAACTTCTTTTGTGGGATGGAATCG  
GTAGTCACAGAGAAGATGGAACATAACCGCCAGAAGTATCTGTGTGTGTTTTAGCATCC  
GCGCCATACCCTCTTTTAGCAGTCATTGTGATGTCAAATCCACCCTCTTCAAGGAAGGTC  
ATAATACCATTTGAGTCTACAGTTGCGATATTAGGAGCACTCGATGTGAACGAATTATCA  
GAAATCTCAGCATCTGCTGGCTCAACAGTCCACGTAAGTTGACTTCTCGTCCCTTTGATA  
GCGTATGGGATAGACCCTGTGGTGATAGCATCCGCAGTTGTCCCCCAAAGGATGCTTCT  
GGGATGTTTGTGAACTCACCAGTGCTATCGGTTGACCCAAATAAACCATAAAGGTTACCA  
GCGTAGTAAAGGTTCCCGTCATACACCATCCAATGGCTGATAGAGTTCCCTGGTTAAGG  
ACATCTGTCTTCATTTCTACAATGTATGTCAGCTTCGAAAGATCCCAATCTCTTCCCTGTA  
GGA ACTGGAACAAGGGTTCGTTCTATCACCATTTGTTGATGGTGTGCCAAGACCAAGTTGA  
GCAGTTAGGTCACCAAGACCGTAAAGCTTGTATCAGCAAGCAGAAAATGAGACTGACCA  
CCGTCGATAACCCTGAATGTCTCGTAAGGACCAATACCCTCCTTCTTAGAGTATTGGGCT  
GTCCCGATGCCCTCGTATATAAATAATGCTCTGTATCATCAACACCTGTAAAGGCGATA  
GCCATTAAGTTTGTTCGTTTCGCTAACC ACTCTTTAACATAGACGGTTTCAGCCACAGAG  
GCAAACTAACATCGATAAAGTTTTGTGTTTGTGTTGTGGAAGTACAGTCTATTTGATGG  
GTGGCCCCACAATCACGGGGAAGTCCAATATTGTT CAGGTATGTCACGCCAGCATTGAG  
CTGTAAGCTATCACAGAGGATGCACTAATACTTCTTGGGATCGATATTACGGTAGTATTA  
CCAGAGCCAAGGCATCCATTTGTGTTTGACCCGCTTCCATAAAGTCTTCCCTCTACCATC  
TGCAATAGTGTGTTACCGAGAGCACAAGAACA ACTTTGTAAATTTGGGATTGGTACTGTG

CCTGTTATTGATAAAGGGGAGCTTGTCCAAGAATAATAGATAGACCCACTACCAGTGAAT  
TGACAGGTGTCCCCACAATACTGCCAGGCACCATTGTTGTATTTGACAATAAAGGCTCTA  
CCACCACCAAAAACATCAGCTACACCATGAGCCGCCAAGTGCCAATGATCCTTAAACGGG  
CTTATGTTCCCGTTTGCGCATTCAGACCACGAATTATCCCCTTGGGTATAGAGTCTCCCA  
TCAATCAGGAGGTTTCGCCATTGACCTTTTGGTAGCACCACCAACCAGACCACGGGTAAAG  
GCCACCTTCTTAAGACTACCTGGTGGTAGTTGTTCTGTTCCCTCCTCCAGATAATGTCAAG  
AAGAGACATGGAATAGGATACATTA AAAACGTCCTAAAAGAACGACTGTCAGAAGACAGCC  
TTGAATCATTACGGACGACGAACAATTACAGTGTGATAACACCGCCTTCAACACCATTA  
TAGGTTAATTGAAGAATAGCCACCGAACAGCCGTCGTTAATTGTATCGCTGTTTAAA  
ACCAAGTATTTAGGATCCAAAGTACAGTGTGACCGCCAGTACCATCTTGAGTCAGGTAT  
ATGACAGCAGAAAAAGCATCTGTTCGGTTCAGGCCAAGCACCAATTGTTAAATCCGCCTCC  
ACTGTTACGTTGTAGATGTTGGAATCTCCACTTGGGGACGATGCCGCTATAGAGCTATCA  
ATATCCACAGCAATAAGTGTCAGGAATTCAACACTTGCCTTGGTTAAGATTGCCGAATCC  
TGTACCGTAAGGCTATTGGCAGTTACTGCACCAGTAGAGGAAAGAGATCCTACGGTGATG  
TTCTGACCTGTCAAGTCAACAGAAAGACCTGTAACCGTACCCTGAATAACAAGGTTGTTA  
ACAGTCGTTGTTCCCTGTTGCGTTGTTAAGGTTGACATCAACGTTTGCGGTCAGGTTATCC  
TGGACTGTAACATCGGCAAGTACGCTAAGATCCTCAATAAACTCAGACGTTCCGTGTAACA  
GAGAGTTTTCCGCCAATTGTACCATCTGCTGTTCCGGTTGTAAATCCACCATTGAGACTG  
GTTAACCACCCACTGTGAATGGACCAGTGGTGTTCCTGTTACCCGCAGAGAAATCTTCG  
AGTGTGATTACCGTTTACGGTAAGATCACTTGTAAATATCAAGGCCACCGCTTGTGCG  
TTTCCAAGGTTGGTAACACCACTGACCTGTAAGTCACCACCTACAGTTTACCCGCTGCG  
GTTGTAACAGAGTTTAGTGAAATATCAAGTCCGTTGACACTGAAGGTGATACCTGTTACG  
TTACCTGTAATATTCAGGTTTTCTACCTCAGTTATACATGAGACCTTTAATCTCGGTGCT  
GGAGGATCTTTACTTGCCTTACCGCGGATATACACATAATCGAAAACGTTATTACCCACA  
TCTGTCAGAGACATGGCTGTATCATCTTCAGCCACTGTTCCGTTGTCAATAATGTCCGTC  
TGGATGCTGTGGGTTTTGGATCGCATATGGGTCAAGGCGCGTCTTAAAGAATGTCGGATTA  
TCTGCGTCTGTAAATACGAAGGTAAGACTTGACAACTCTTGGTCAGGATCAGGTTCTGG  
AAACGACCTGTTGAGTTATCTGCGTTTACAGGGCCATTAAGCTGGATTGTCCCACCAACC  
ACCAAATATTGAGTGTTGTAGCACATGTTACAGACAGGTTTGCAAAGGTAACACTACCA  
CCTGAGATGCTTGACAAGGCGCTTGCTATAGCGGTTGTAACAAAGGCAGTTGTGGCAATT  
GTTGTAAGTGTGCTGTTAGCCGCAGGGGTTGGAGCCAGTGGGTTTACTGTCAGGATCGGG  
CTGTTGATTGGTGCATAGATAGATGCCAGCGCCGCTGCGTCGTTGTACAATCTCCAGTTA  
ACACTGTTAGGCGGGTTTTGTGGTAAAACGACAGGGGCGCTTGGCGTTGCGGTTGGTGCA  
TACCACCATTGAACCCCATTTGTGCCATTA AACGCATAAAGCTGGTTGAATACTGTGGTC  
TGAGTACCCGCGATCCAAGGCATAGGCGGTGTTTTAAAGAACAGGTTGTCAAGAAGAGCT  
TTACGCACCGTTGGAATGGTGCTACCATCTTCAGTAACAACAGTTTCCGGATGCCGTTCCG  
TTGACAACCTTGTGGAGGCGTTCAGAGTCTTCAACAACCTGATCGACAGCCTGTTCAAAT  
TGAGTCATGTCTGCCACAAGAGTCTTCTTATTGGTCTGACTTTGGTTCTGTACGTTGGGC  
TTCTGTTACTCCCAGCGTAGAGATATAAGCTTACTGATTAGTTGAGGTGCAGCAACTGT  
GGGTGCATAAATCAACATGTACCACTCGGTCAACGTTCCATTGAATCCCCAGTAAAGGAA  
ATCTGCGGTCAATTGAAGCCAAGCCGATATTGCTCCAAAATTTTGTGTGAGAAACCCTCTC  
AGGGTCTACAGGTGATCTCACAGATCTTTAATAAACTTCACTAGTGATTTTAAACATATT  
TCCTCAAGATTCTCAATGAACATAACATGGGTAGGAACCTTGCAAGAACCACGAGGCTTAC  
CACAGTAGCCGTTTTTAGCCACTCTTTAACCGTATTGTATTTAAATGATGCACAGAGGAT  
CAATACTTCATAACGGTCTGATATGAAGATTTGATGACAAAACCTCAATGCAAGTGGCAA  
AAGATATGAAAATTGCATGACTATTATCTGGCAGAAGAGTACAGGCACTGATACGGAAAT  
GATCAGCTTCTTCTTCCATCCCAGACAATACACACGCTGTGGCTAACAGGAGGGTTATGTC  
GAGCAACCAACATAATGACATATATAGAGACAGGTCAAAGAACTGGATATGAACAGAAAA  
CCACGAGTACAGAATGTTCTCCAGAAGGATATGGATCATAACCACAAATAGACATGATCCT  
TATACCCTTGTCTCCATTAAGCAGCAGCACTGCAAAGCATAAGAAATACAGTGCTGAACT  
TATCATCGACGTTGATTCTCCATGAGTAGCTTGAACCTGATTGCTGAGGTCAGCACGAAGA  
TCGCCCACGTCTTCTTTAATGTCCTTACGCAAGTCTGAAACGTCATCACGAACCGTTTTG  
AGTTTCTTATCCAGAATCTCGTCAAGTTTTTCTTAGTGATCATCTCTGCCTTAATCCTT  
ATGATGTCTCTATCAAGTTCATCAAGGCGCTCTTGCGTTTTGTTGTAATCTGAGTTTGTG  
ATTCTCAGGACACCAATTA AAAACAATCGTGATAACGCCCAAACAGCTTTGAGGATAGCA  
AATAAGTCAATAGACATTATAGAATACTTTTGTCTTGGCTGGTCTTTCAGGCCAATTGA  
TATTAGGAGCATCCTCCGGGTATATTGCTAAAAGATCAATACGGTACGTCTTTAGCTTTT

CGAGATACGCTTTCTGGGAATCCAAAGTAGGTCCTCTGGAAATCAAACCTTCAAGGGCTA  
AAATCTGGTTTGTAGCCCAAGACATTTCACTGTCCAGAAGAACTTCGGCCTGTGCAATAG  
CCTCTTTATTGTAAGCTTTAAACTCCCCAGAGATGAATTGCACCGCCCCTAAACGGGATT  
GAATACCATCAGGTACTTCATCAATAACAGCAACCTTCATTTGGTCTGGGAAGTATGCTG  
ATGGATCAGAAGACACACAACACGACATCACCGGAAGACAGAAGAAGGAACCTTGGTCC  
CCTCTTTCAATTTTGTCAACTCTTTCCTACTATGACGTACCAATCTTCCCCGTCTTTATCTT  
TCAGTAAAACCTGCACCTGACTCCAGGAATGTGGCGTTCTCGTCCGTCTTTGTTGGGGTGT  
ATAATGAAAATTCACCATATACCTTTGTCATAAATCCTCCTTAGTCCAGGTTGGAAACAG  
TTACCCATTGTCCGTTAATGAGATACTGTAGTGGTGCAGTGTAGTAAGTTGCGCCCCTCA  
ATCCTTTCTTGTACCGAAAGCCCCGGTTCATGACCTGACCTGCATAAAATCTGGATT  
CACTCACACCTGTGTCAAACCTATTACCTAAACGGATCTGCTGAACAAGTCCAGACAGGT  
TTAGTGTGACGTTACCGTTGCCGTCTGCCGTGCACCATTGATTGCTCTCACAACGTTTC  
GTCCACCAACTGTAGCGGAGTTGTTGTTGACAACAAGGGAGTTAACGTTACACTGTCCGT  
TTGCGCTGGCTTATGGGGTTGTTAAAGACCTTCTTGCGACAACGGTGAACCCTTGAACGT  
TTCCTGTTGCCGTAAAGGTCCCTGTCCTGCTTGTGTTGGACTGAATAGTTAGAGCATTCT  
GCGTACCGCTTAAGGTAGTGTGTTGTAAGTTTGCAGTGGTTGCAGTGACGCTTGCCCCGC  
TTATACTCCGTTTGCGATAATGTTTCCAGTTCACCTACACAGTACAGCAGTGCCACTGA  
TCGCATTCAACTCCATCATTGTGAATTTTGGAGCCACCAGAAGGGACGAAGCGGAAACGCA  
CACTATCGATGCTCGACGTACCTGGGGCATTACCGATATTATCACCAACTACAAAATCAA  
ACAATGTGGTGTCTGCTGCTGGGTTTGTGTCGTGCTGTATGCGTAATCTGATTCGGCTG  
GTTGGAGGCTCAGGCGTCGAACAGATAATGCACCAGTCATGGTGTGCCTGAAGTGTTC  
CACATCTGGTATCAGACTCTGTTTACTCCAAACATCGAGGTTTGTCTGGCTGCGGCCCT  
TGTCTGCAAGGTCTGCAAGGGTCTGATTCACACGTAAGAAACGACTGTGCGAGACCAGGGA  
TCTGCTCACCAGTGATATACTTGGCCCATGCAGTCAGCATATTTAAAACGGAGTTAAATT  
CTTCGACTGTTGGCTTTTACCAGGGTCCCAACCTTTGTTCCACAGGTCATCGATAGGAC  
GTCCTTTGTTAATTCCTGGGTGTTAGGAAGAACAATATCTCCATAAGCCCAAATCTCAA  
TGGGTACTGTTGGCGCTGCCATTGTAATCTCCCTTAAATCAAGGTATTCTCTTCATCAGA  
CACATACGTCAGGTGAGCAAGACCACCTCTCCTTTTCGGCTTCCCTGAGTGGATAGAACC  
GAATCCGAGTGCATGTTTATCGCCTGCGAGTCCAAAAGCCGTACCATTTGCCTCTGTTAG  
TCTCAGGTGTGTTGGCATTGGCAACATGACTTGAATCTCCTGGAGAGCAGTCTCCAATTC  
GAAACATGTTTTGGAAATGTTAATATCGAAACGGTAGTTATCACCCGTGTATGTGGTAAA  
GTTACCTTCCCCGAACAACCTGGTTAAGGGTATCGATAACTTCAGGTCTTGTCCCGTGCTT  
CGCAGCACTTGCCAAAAGGATGATAATGATGGCACGATAGTTCATATCGCTCACGACATC  
ACGCTCAATCCCGACCTACTTCCCTATCTCATCAAGGCTGACACCTGTGCGATTTTTTCAG  
TAATCTGCCCTCAGACATGTTGACCCACATTTTCATCAAGCTTTTTGAGGCGTTCCAGATA  
AACCGTCATAAATTTGACAAGGTTTTCTTTCTTTTCAGAAAATCGCCAGGGAGATATTC  
AATACCTCCCTCAATGAAATCTGGCAGAGTATGGATGTGGTTAACATCCTTTAAATAGTC  
TGCCATACTTACCTCATTAGATGATTTGCTGTAATGTACTGTGCTGTATCTAAAGCAA  
AGACTTCTGTCATAGCTGCAACAACCTTCGCTGTTAGAATAAGCACTGTCAGGTTGGTTCAG  
TGTTCTTAACATCCACCAACAATTGCGTGAAGCGCCCGGGTGAATAGAGGAACCAACTG  
CGGATAACCAGCTGGATGTTCTAAAGTGTATCTGCAATGTCGAGAGGATCAACAACGGCTT  
TCAATGCATCTTTGATTGTGTTTTGCTCTGTCACGGACAGGAGCTTTCCTTTATAACGAA  
CACGGACTGCAAGCTCACGAGCCTGTGCTTTGCTGTGATAGATACGTTCCGTCTGATCAT  
CCTCTGTGGTAACATCATAAAAAACATTACAATAGGTGGCGTTGTACAATGCGATTGTGT  
TATAAAGTGCTTCACTGATTTCTTCTGTGGAACCACCATAAACTACAGTCTCAAGCTTAT  
ATGACGGAAGACCAAACCTGGTCTGTTTCCCCTGTGTTGTTTGGAGAATACACGAACCTTGC  
TTACGCCTTCGACGATTACAACGGCAGAAATAACGGCAGGTTTAGTGGCTGCAGCACCTC  
CTGCGGTGCTTTGTGAAGCACGAACCTCGTAATCAGTGTCTGTCTCAACATCGGAACCGT  
CATTAAAGGCGGTTCATGTTGGTTCATGCTGAGAAAACCGCTTGGTGTGCGGTGTGAAATTCG  
TTTCAGTATTTGCTTCACGAGAAATAGGCCCTGCTTCAGCAGCAATTAAGTCAATGCTAA  
TTGTTCTCTGGCCCACTACGGGTGAGGAACGGAAATCAACACGACTGTTTCAAGTCCGATCA  
TTTTCTTGTAGCATCAGACCCGATATACATCGCGCCACCCGCACAGTCAATGAAGATCC  
TGTCTTCGTTTAACTGTGTGGAGTTGTCAACAATGAAATCCTTAGTTCGATGACATGAACG  
CATTTAACTGAGGGCTGTTAGGCACCTTATTACTTAGCGTCAAGTTCATTGATTTTGTG  
AACCATCGTTCTGATTAATCATCTGGAACGTTTGTAGTTACCAAGAACCAATCTTGGTTAA  
GGATTTGTTGCGCCAGGATATTCCCTGCGACAGGTGTGTCCTGCGTGAGTACGAAGTTAC  
CACTGTCAATGCTATATGTTGAAGAAGTGTAAATCATGTTGTACGGGACGGTGTATTAA

CAACCATCTGGATAGTACCTGATCCTCTGGTTTTACCACGACGATAAATACCACAACGAC  
CAAGCAGGTCATCATGATAAATACCTTCTGCCCTGCAAGTGTCTGTGCAGAATACACAG  
CCGCAGCCAGAAGGATCAACTGATATTCTCTTTCATTCAAATTGTGGTAAGTTTGTCAA  
CAACAGTGTAGCCTGAGTGTGAAGTTTTACCCGAAAGTTCGGATCAGCGACTGCTTGG  
TAACCGCGATTAAATCATCGAGGGATGGGATCGCGAAGCCGTAGTCATTTAATCCATATG  
GAGCAGCCACGAACGCCTCCTCTTGCTTGATTTTTGCTCTAAGATGTTGCTATTTTATCA  
TATTGTGATTTGATTATAAAGGCTTATAGTAAGAAAAGGGGCTGAAGCCCCTTGTTATTT  
AAGTCTTTTCGCGGTATACTACGGGATTTGTGCGAAACAAGAGCCGTGTTATCAGGTGTGG  
CTGTCTGGATTGGATCTGCAATGTCCTGATATAACGGTGTGATCCAAGCACCTTTTTGT  
ATGGCGCTCTTATAACCGTTGTCAGGAGATCCGCACCACGGGGCCTGCGCCTGGGATGG  
TGAGTTGCAACCAAGCAGATTTAAATGCACGAGTAGCCCAAGGTTGTCGGATACTTGAAT  
CTGGTGACACTCAATCGTATTTGAGCCAACCACAGTTGCCTTGATGAAATCATTAGGTT  
CAATGTAAGAACCCCTGTTTCAACAGCAAACATAACCACCTGTCTTCTCAGAATGATGT  
CCCCTTTAACGAATTCCTTTCCTTGAGGAAAATCATCATTATCAGAGATATAGATGTTAC  
CAGCATTAAAGCAGTATGACACCTCTGTTTCCGCTTGCTTTAAGTGCTCAACCAAATGGA  
AGTTACAACCGTATTTTGTAAAGTGGTCAAAGCCTACCTGACCGAACTTACCGTTAGCGA  
CACCATTATCATCAAGGCTATTGATATTACTGATCTCAGCAGAACACCAAGCCCAACGCT  
TCATCGCACCGCCTGCCTCACCTGTACAGCTTCATAGTCGCCAATACCATCAAACCTGTT  
TACAGCGGATGACAGCAAGACGAAGTTTTAAGACAAGACCGCGATATTTGAAAGTGTGGC  
ACTCAATGTCTCAACCTTCACATCGTTGGTCCAGTCATCCATAGCACTAACTGGAATAG  
CTACCAGTCCCGTATGAGTACGTACATTTGCGAGTGTAAAGTCACGGCACGGAGCGGCAA  
AGTTCCCTTGGTTAACACCCCAACCAAATAAAAGAATCGAGTAGCACCGTTGACCATTT  
CGCCACGAACACCATCAATGATATAGTCTTTGTAACCATAACATACGACACCACCGGATG  
CCAGCAGTGTTCGTTAGAAACGGATGCATCAGGATAAACCTCAACGTTCTCGACCTTAA  
AGTCACGGCACAGCTCGAAGTGGATAACATTGACGAACTCGACGCATCTTAACGTTACGAA  
TGATGACCCCACTAACATATTGGTCATCAGAGGCGTTAGCACCATACGGTCCCTGGCCCG  
CAACACCGATACCAATACCCAGTTAGTAGAGTTATCTGTATTGTTGAAGTTGTCGATGT  
CAATATCTTCGATTGTCAAACACCCGCTTTATAGTGTCTCTGTACCACGTTACACTCAA  
TAGCATCGCCTGTCAAATCGTTAAAGTTGAGACGGGCAAACGTGCGCGAGTAACAAGAG  
CGCCTGTACCTTGCTGAAGGATACCATATTTACAACCTCTGAACTCACTATCCAGGATGT  
CAATTGTAGCTTCTATAGGGAGGGCTTGTAGTAACCTCGCTGCGGTGTTGGTATTGTTAA  
CCCATGAGGAGTCTGTAATGATCAGACGCCACCATGATGGCGAGTACAAACACCTGTGA  
AGCTCACCCAGCGGAATGTGCTGTTTGTAAATACATGTATCTGTTGCCGCCAGTCTGGT  
TAAAGCTTCCACCATAACCATTCAACACCGTCGATATACACACTTGTCTCAAGAACAAGGT  
TCCATCCCATGCAAGATCAGCTTTTTTGTCTCTTTTGCATATGCAGCTAACGCTGTTA  
CAGCCTCTGTGCTTGGTATTTGCCATGAATTCTGCAGGGGTAACAAAACCATCGA  
GGGATTGAGCCACTGTTCCCGCTGGTCCACCGATAAAGGTTGAGCCATTAGCACCTGCAA  
GGTCTGCACGTAGAGATGGGTCGTTAGCTGACCACGCCCTTCACCAACACCACCTGTAG  
TCTCCGGTGTGGAGTCGGCAGGAACAAGTTTCGGGTATGCCCGGTCCATTGATAGATCC  
TGTTGGTTGATCTGTGATCACCTGATCTTTGGGGGAGACAAGCGTCCCCCTTCTTGGGA  
AGGAAAACAGGCGTATCAACCCGAAACTGGAGAACATATCTGACCATGTTGATTTACGGG  
TTGCATCCGCCTGTTTAAACAACCAGGTAGTCTCCCTCGAAAGATCCCGTCGCAGTCGGTA  
AGTCTGAGACCTTGACGGTAGGTAATAGATCTGCCATTCAATCCTCTTATCTGGTAATGT  
TTGTGTACATAACCATAACAGACCAAATCCTCTTAAACAATCCCCGGCGTGAAAGCCGAAGA  
ACATCCCATTGTGAGTATCTGCACGAGGAGCAACAGGCCAACACTCATTATCGGAGGAT  
TCGGAGTCTGAATGATGGAGTTATCGTGGATAAGACCGAAACAACGTTCTGCTAGCAAGT  
CGATGTTAGGGATACGATCACGAATTCCTGCCATCCCTAGCATAGAACACCCACCCATGA  
ACAAGCCTGACATGTGGCTGGTAAAGTCATCTTCAGGTGCAAGCACCGTTACATCAGGAT  
TAAAGATGGTAGGAGTTCTTCCCTCGTTGTTGTCTTGGAAACATTTGAGATAATCAACAC  
AGTTCTTCGCAACAGTGAATAGCTTACTTGGAAACAGCTTCTCGACGCTGAGACAATTCAT  
AAACGCAACGAAATACACAGAAGAATGCACGGGCTTCATATACATCCCAAGCCGTTTCGT  
TCCAGTGCTTCATTGTGAAAGCGTTTGGCTCACCGTACTTCTTCGCATCCCAACGATCCC  
ATACAAATTCCTGCGCCATTGGTCCAGGCATGACAGGATTGAAAGAGTTATAAAACCAGA  
TCTGCAAATCATAAAGGAAGTCAATGGTGTTATTCAATCTTGTCCAGTTGATGTGATGAC  
CTTTGAAACAATACAGCGTAGGGTACTGATACCCAGGGTACGGAAGGCCACGCCAACCAT  
CGTACAGCGCCGTGTTCCGGTCACTGATGTTGGAGAACGGGATGAGTCTGGGGTATAGT  
GTAGGCTGTTTGTCTTATAATCAATGATCGTACAGTCGCCAAGCTTCGCACTGTATGGGT

TGTCTCCGGACACAGTGATACTGAAATACCTAGTATAAATCGTCACCACCTGTGGAAGTGT  
ACAACCTCAGGACCAGCATTACACAGTACCAATCGATCCGTGCGCTGACACGATCAACAG  
GGTCGGTGTGAGGTGCCAAGTTAATCTGCTTCAGATTATGGAGATCGATTTGGTTTGGTC  
GTCGATCAGTTTCCGGATGATCTGGTTGATAACTACTTCGTACAAACCTGGTTGTCGTAA  
TCTGAAGTGTAGTCCAATCACCGTTTGTGCGGGGATCATGGCCCACCATCTCCAGTTGT  
TTACATCCGTAATCGTAATGTTAAGTTATCAGCGTAAGAGCGATATGTAAACGCAGAAA  
GCTCTGCTGTTTTGTTATCTATCAGCCAGAAACCAGTCGTACAACCACCATCCGCATCTG  
TGATGAGGGTGCAAGCTTGGTCATTAATCCTTCCAAGAATACCAGTCTGGTACTCAAAGT  
CAACAACCTGTGTTGTCACCTCAATCCACAACCTATACGAGGGTCTGCAACAATGGAGTTAC  
CACCACCCGGAGGTGTTAAACGAACAAAGTTTGACAGGGGGATGTCCATTGATACAATCG  
AGTCAGTACCGCGAGGAAGATCACAACGGTATGTCACCCGGCCTGTTTCAGACTTCGTTT  
TATTGAGGTCTAGTTCAGGTCTGAACAATAGCCAATTGCCAAGGTCGTCCTTACCTCAA  
ACTGAACACGCAACTTGGAGTTACCGTCTACACGGAATCAGATCGGCTGCTCTTCAAGGG  
TTGTTTGAGCAGATACTGCCTGACGAATACCAATATACCTTCCGGGTCACGACTATACT  
CAGGGCCCGCTGTTGAGGGGTAAGGGTAACGCTAGCTGATCCCGTCAGTGAACGGAATGA  
TGAAAAGGTGCGATTTGCGGAAAAAATTATCGAAACGGTCAATGTCAGTATAATTGACAC  
AAACGAGCAAAGACGACAGCCAGCAAAGCCAGTATTTTCTTTCTCCGGTGATCTGATACA  
TAACATAGTAGGCATCACACCACCAAGTTTCAGCATAAGAGGGCGTTGTCCTGAAATCCCA  
TCTCAATAGGTACGTTGACTGGTCGGTTATGCCACATCGTGTTCCGATCCATCCAGTACC  
CACCATGCTCTACAGGGTTGCAAGTTGCATAGTTGAATTTGAAATTTCTGTTACCGTGG  
TATCTTTGAGTTGAACAGTCCCCACTCCGCCTCTGGGAAACCCTCTTCAAGAATATTAC  
CGTCCCAATCAACTTTTCTGCCGAGTCTGTGAATGATCCAATCGACATCGCACTGAGACC  
CATACTGATCCCAATTTGTCGTACCATCTGCGTTAGCAGCATATACTGTGGCGTTAACGG  
TATTCCACCAAGATTACCATCAAAGGCGAATCAAGCCTTGTCAAGGTATTCTCCCAAT  
GTGGAGCACCTTGAGGAATTAACGTCTTACCATTTGTCCATTACATAACGCTACCCTTAT  
ACCCACCCTGGGTTGGGTATCCATCGTCTGTCCGGTGGGTAATGTGCAAGCCTTGGCTCTT  
TCACGTCAATGATCCAGTTCGGGCGATACACTGCCGGAGGATCTGAGATTGGCTGACCCG  
CGAAGAACCAGTCGATATATGCTTGCCAAAAATCTTCTGCAATTTCCAGATATTTAGGGT  
CGTTGGTTGCAAGATATACATATGCGCAACCGAGGATCAAGACAGACTGACCCTCGGTAG  
TTGCATCACCGTTAGGCTCGGCTTCTTGAGCCGTCCAGTTGATAAAGATGCGGTTGCTAG  
CCAAAATTTCTGTAAGTTCAGGATGTAGTGCTGAACTGTCGGGTCAACGGTCTCTCCCT  
TGTTTCTTTCAAGGAAGTGTATGTGACCATCGATCAATTGAAAAACATTATGAATACTGT  
GGCGTAAGTGTGCCATTACTCAACTCCTGCCATAATAAGGGAGCCGAACCAACAATTCCC  
ACCATCATAAGTGACGAACCGAAAGATGTCTCGGACCCCGGTGTTATAAGAAAGAACTGG  
AACACGCCCATAAATTCATTTAATATTACTGGGCCATGAAACCAAAATTCGCCCTATAACC  
CTGTGTTAAGGATAAGGTAACGACTGAGATTCATCCTGATCCGTTGATGGATTGGTAAT  
TACGACAACGCACTGACCACCTGTCAAGTTGGCAACAAAAGAAACACCCCTGTTAAGGTT  
ACATGTTGCTGTCCATTGCACATTGCCAAGATTGACAACCTTACCTGTTGAACCGCCGCC  
ACCACTGGCACCGAACACTTGCCAGGCGTTCTCACTGATGCCGCTGTGGTTGACGGGGA  
AGATGACGTTGGAATTGTTTTCGGGTAAACACCATTCCATGTGTAGTACTTACCATTCTG  
ATCAAAGAATGCAAGGTCTTTCTTGGATTCAAGGAACCCACCCTCAGAAAAGAAGACAAC  
GTTTCGTAATACCATAACGAGTCATGATGGTGTCAAGAGAAGCCTTCCCTGGTTGTGTCTGC  
CTGATCCATAACTACATAGTCACCACCAGATACGGTAACGGCGGAAGGAAGGTCAGAGAC  
CTTACCGTTTGAAAAGAAACATCTGCCATTATCACCCCTTAGTGGCTACGTTTGATGG  
ACTTGCCATCCTCTGTGGTGATAATCTTATTCTTATCATCAAGTAAACTACCAACCGGAA  
TAGGGTTATCCATATCAGCACCAGACCAAGTATCCACCATGTAGCATCGCCAGTGGCAG  
GAAGACGGAAGTTGATCAAGTAATAAAGTTTGTAGCCCAGGTGATCCAACCATCGTCAT  
CACAAAGAACGGTTGCACCTTCATCAGGGGTTGGGTAATAATACTCGTCTTGACCTACAA  
AAGCGAGTCTTACCACTTCCCTGTTCTTTGGTGGTGACTTCATAAAAGGCTTGATAACTAT  
GGGTTGTTCTATCCATAGTTGAATAGCAAGAGTTGATTTCAAGAACGTCAGGTTCAAGAC  
GTGTTACCTCCTTGATCTTATTGTCAAGGACAGTCTTCATTACTTTTTTGTCTTAAATATG  
CTCGGTATGGGAAACCAAATGTCTCATCGAAATACCAGTTACAAGCCCAAATGTTGAATC  
TTAGCCACAGGCAGTAACGAAGGCTGGTCTGGTTTACTCGATAAGCTTAAAGCCCGAGG  
AGACATCAAGGTTTCCGTAACTGGGTCCATAAGGAGATCTAAGTAAAGAGTTGCCATTT  
AAAACCTTATTGTTGGGTGGGTTGGTATTACCAGAACCACCATCATCTGTCCATGTGT  
AGAAGTGATTATGACTGACAAACCAATCATAGAAATCATTATTCACACCACGGGCTG  
TAATAAAGTTGCCATCTGGTGTGACTGTTGCCCGTTCAATTTCAATATTCCCATCCAGCT

TTGCAGTCAGTGTGCTGCACCATTTGGTGAAGGACATTTGACCAGTTTTATCAACAATGA  
ACGTTCCACCCGGACCAGTTAATGAGAAATCCCCTTCAGGCGTCATGGAGAAGTGAACCT  
GGTCGTTCCACAACACTCAACATTGTTTGGGTCTATAGTCACGGCGTTGCCATCACTATGAA  
GACCGATAATGGACCACCCGGGAAAAAGTCCGTGGGTGGTCGTATCATTAGCGTGACCTT  
CATTGCGCTCAGAGAAGGAGAGACCAACAACGTCACCAGGCTTCACAGGAGGCGTCAGGC  
GAGCTTTTCCCTCATTAGCTGAAGGCATGGATAGCGGGACATCGAAAACCGCAGGATATG  
CGTCTACGGTGCCATCGTTCGAAGTTTGTGAGGCTAAGGGTTGGACAGTGGCAGAAGGGA  
TTGCGTAATCCACATCAACCACTCTTGCCCTTAGTCTGTGTGGATGTCGCGAGCTTGCC  
TTGCGAAGCATTGGTTAAACGCAGCATAACATACGTTGAATTGATGCCATTATACCTCCAC  
TACTCCACCACGGGTCTCTGCAAGACCGATCTCAGACACCCATTAACCACCCTCAAGTTG  
CCCTTTGTGGGCCAGGTACACAACCTTTATAAAAACCCTGTGTATTTCTGACTTTTCACGTA  
AATCGTGCTTTCAGGAATGATCGCACCATTAAGCTCTGTCACCACAACAAGACCTGCGTC  
TTCTCTGATCTCGGCACGACTTGGACCTTTGTTGGTTTTTCGTTTTCTTTTTGGATTTACT  
TTTTATTCCAGATTACGCTTTGCTGGTTCAGGGTTTTGCGGGGTTGGTCAATCAGGCAT  
ACCTGACTCTGCACTGATCTCAAAAACAGCCGTCTTAAACCTCTTGCCTTGTGTTGTCCA  
GTAAACTGCACCATCTTGAACACTGAATGTTGATCCAGTATTCTTCGCCACCCTTTCAAG  
ATTGTTTCGAGCGTTACCTGTGAAAGCAATTGACTGCTGGAGAGTCTGACCACGGAACCT  
AACAACTGCGCAATTGGTAATTTCAAGTCTGAGATACGGTCGTTAAGAACTGTATCAAG  
AAGAGTCCCCTTCTTATAAGACCTAGCGGTCTTTGCAGTCATAATGTTGGTCGTTCCATC  
ACCCAGGATCATCTTTGGTTGTCTGGTGTGTCCATCCCATTTATCCTGGACAAACTCAAC  
AGTCCCTGAAAAAATCATCTGGTTTTCCACCATCAAACCCCGCCTCAAGAACAATGGCAAT  
AGACTCTCTCAGGTTAGCATCAAGATAACTAACTGTTGCGTCACTCAGGTTATATAGCGT  
GACATAACCTTTATTCGGGTCTTTGGAGTTATCCTTCTTCACCTCAAACCTCGATGTTTGC  
AGCGCCTGTTTCGTTACTAACAACATACGTGTTTTTTGTATCTTGGGTGGTATAATCAGA  
GATGTTTCGTTGGTTTTCTGTCCAATATCAACAGGTTTGCCAATGGTGAGTCTGAATCTACG  
TGTTCTGTAAGTCCGCATCTGTTAATCCTCGTCTTCAGTGACCTCGTCGTCAGGAGACGA  
ATAAAGGAGTTGCAAGTCAGACAAGAACCCGATATTGTATCTCCCCACACGTTTGGTTGA  
CTGGGTGAATGAAAAGACACGCAGTTGCCCTGAAGGAATGTTTTCCAAATATTTAAAAGG  
GTCACAGATGTCGAAAATTGTTGTTTCATCTGAAAGAGATGGTTGGATCAGAGCCAACATC  
CCAAATGAAACGAGCCAAGATTCATCTCTCCTTCCACTGGAATCTCATCTCGTATGT  
TTGACTGTCCAATACCACACGCATAGTTTGGTCAGCAAAACCATCAATATCCCATAAGAA  
TGTGATCTTTGACAATATTTACCTACCGCCTCATCGTAATCAATAATGGAGCCTTCTTGA  
GTCCTAATCTTACCAACTGGGGTCATCACACCAACAACCTTGGTCTTGCTTGGTAAGGTTT  
CCAGTATCCATTGAAGCAGCAATTGCTTGCCATCCATCTTTGTTTGGGCCAGCAAATTTG  
GTTTCGACGAGCAGTGACTTCAACCTCATTGTTCGGTAGCTGAAAACCTGCACAGACCCTTTC  
TGCTTGGTTTAAACCACCAGACTTTTTAGGGTCCGAATAGATTGTCGCCATCGCAGTTTTG  
CCAAGGATGAAGGTGCGGAACTCCGTGAACTCAAGCTGGAAAACCAATGCAGCGCCGTC  
GAGTTGCTACGAGAAGCCTCCATCGAGTTTAAAATGTAATTCTCGATGATCTTATCTTCA  
GTCACCAAGGTAACGATCTGACGATCAGTGATAAGTCTTTCGAGGACCTCAAGTGCCTTT  
TCTGGGCGGCGTGAGGCAACCGGGTTTTGCTTGTCTGTATCTGTATCAATGTAGTTGTTT  
TGGATAATATAAACAGGAAACGAGTTCACCCTTGCACTGAAAGAAAATTTCCCATCTTCG  
ATGACACCGTGGTCACTGAACTTTACCTTTTCTTCAACAGCGTAGGCTGTCTTATCCACC  
GTCCTTGTGTAAGAGCGTTTTTCAACAACGTCGAAAATGATCGCGAGGTCGTTGGTGTAG  
TTCTTGTCTTGTAGTTCTACGTGTCTACCGCCGTAGTTCAAACCACTGGCGAAGAGCGTA  
TATTGCACCTCAGCGCTGGCTTCTTGGGCTGTGTTGACCTTTATCTCTACGTTAGCCGTG  
GCCTTACCCTGTTGCGGTTTGGACTGGTTGTTGGTTAAAAATGCCATGAGTCTCCAATT  
ATACATGTTACGATTGTATCATAAATCTTGAGATAAAAACAATAAAAAAGGGGCCGAAGCC  
CCTTTAAATTATTGCGGGACACCAAGGATTAAGTTGATGTTCCCATGTTTGCAGCTTCG  
ATCTGCTGGTCGATCATGTTCTTCATCTCACCTGTATCAATCTTGATTGTGATCTCGCCA  
TTGACAGGTTTCGGTTGGAATGACCATAGGAGCATTTCCTGTTCGGGCCAGCCCCAGGCATC  
ATCGAGTCTGTTTCAGGTAGTTGAGTCTATACTGATCAGTCATTGCCCTCTGACCAGTA  
GTAAAGTCCCAAGTTTTACCCATCCACGAGTTCTTGTAAGGTTACCACCTGCGGTTGTA  
TCTGTGCCGTATGATGATTCATGTAATCTTGAGCTTGGTTCGAAGACATCATCCCCGGGA  
AGCATACTTTCTCCAGCAATCAACCCATACAGACCAAGCCAACGTGCAGCTTTACCCATC  
TTACCGAAGCTTGGACATTTCTTTTCTTACCAGCCGCCCTCGCCACCTTCATCATCC  
CCACCGCCGAAGATCGTTGTTAGGAATTTTAAAGCTCCGGAGAGTCCAGCAATCTTCTAA  
AGAATACCGAACACACGGATCAGAGCAGAAGCAAAGAACAGAGCACCAACACCCACCCT



ACCCATTTCCATGCAGGGGATAACTCCTCGCCATTTTTACGGAAGATTGGAATGTAACGT  
TCCATGATGCCTTGGATCAGCACAAAGGTATTGTAAACGGTATAGACCATCTCCATGAAC  
CCGGCACTGAACCCAGCAATGAATTGACCCAGATTTTGAGCCAACTCCCCGTTGTAGTCA  
AGGATTTTTGCAAGTTCGTTGAACGCGCTTGTTAACTCATCCCCAAATCCGCTCTGGAAA  
ACCTTGTTCTGAAAGTCCATCCAGGTTAAGGTCAGTCTCTGCATCGCAACACGGTTGCC  
TGCAATGCCTTTTGAATGCACCCCTTTATTTGCAGACTCGGAGTAATACTTGGCTACA  
AAAGGTATGACCTTCTCAGCTATCAACTCGCCCTTCTGCAACATATTGTGCATCTTGGTT  
ACGTCGATGGTGAATCATTGAAAGCCTCTTTGGAAGCCTTGATGAACAACTGTAAAGAT  
CCCGGAATACCTTCAGCAAGTTGCTGCTTCAGTTCTTCCGCCATGATCTGTCCTTTACCC  
ATCATCTGCTGGATTGCGGTAATACCAAGTTGGTATTTGACCCGGATCAACCTGTAAGGCA  
GTAGAGTATTCAGAGAACGCCTTGAAAAGTTCATCGTTCTGTGATTTACTAAGAGCACGA  
TCCGCTGCGATTGCCATTTGGGTGTAACCCTGCGTTGTAATCTTGAGGACAACACCCAAG  
CGGTAAGACTGGTCACCAACAACTTCATGCGTTTCCCAGCTTCTTCGGAGCTATCAGAA  
ACCATTAGCATGGTGGCTTCTATGCCCTGGAAGAACTGACCAGCTTTAACAACGCTTTCA  
GCTGCATTGAATGCACCGTATGCTGTGCTAACGCTGATTAAGTGCTACGAAGGTTTTTC  
AACCCGTCTGTCAGGGTAAGAGTACTCGCATTTGCCTTCTTGAGTCCAGTCTCCATTGCT  
GCAAGTTCAGCACGGTAATTTGAAGACTTCATGGTATTACTGTCAAGGAAGCGGTCTTTC  
CGAAATCGTAACCTTTCAATTTTGAAGCATAATCGTCACCATATTTAGCAAGGAGACGA  
ACACCTGCGTTTGCAGCCGTAGATTCTTACCTGCAAGATAACGGGAATAACGCTGATCC  
TCAGCTTCCATTTTCTTACGGGCGTGCTCACGGACGCGGAGTTGCTCTTTGGTGACTTCC  
TTTGCAACTCTTGTTAACGTTGGATCTGACGCACCTGTGCAGCGTGTAGTTCTGGGTGC  
TAAGCTTTGTTTGAAGTACCAACCATGCCTGTAGCATTTTTCGGCGTTCGAACGTTTTGAT  
AGTTGCTCTTGGAGAGCGGCTTGACGTGCAGCGGAAATTGCTGGATTTGTGCCGTAACCA  
CCACCTGTCTTTTCCATCTCACGGAGACGAGCCTTTAGGCCATTGTCATCCGCTTGAGAT  
TCTGGAGATCTTTTTCGCGTTCAGTTGACCAACAGCCTGCTTTCTACGGGCGGCTTGAATT  
TTGCCGATTGCTTCACGGGCGAGAGCTTCCCTTCTTAGCCATTGCAATAGCATGGGCTGTA  
GTTTTCGCTTGTCTGCACGTTCCGTTTGTTTAATCTTTTGTAGACAGGACGTGCCTGC  
ATTGCAGATCGGCTTAATGTGGCTGCTGGATCAGTCTTACTGGAAGAGAACGCCCTGCCA  
GCTTGTTCCTTCACTCTTCAAAGACTTCACAGCTTTCATGGCATGGCCGAAAGAAGTC  
CTGTCCACGTCCCATGTCACTTTGTTGACTGTCTGGGTTACGATAAATATTCGCCATTGAT  
TCCCTCTCAATAAAAATCTCAGGCTCCCGAAAAGGAACCCGGCTTGAGATTAACCTACTC  
TACCACGGCGCGGCCAGTTTGCAGCTTGTTTAGCCCTTGCTTTACTTTCTTCTCCTT  
CTTGGCCATCAGAAACGTAGTCTTACATATCGAGGTATTCGTTTCGGCTTGAGCAGATAGG  
CCATATCAGCAGATTCAAGGGAGCTATAGGATTCCCCCTTGAAGTTTTTCAGAGCACTAC  
AACATAAGTAATCGAACTATGTCAGTGAGCTATTTTTCTTTCGATAATCCATAGCTCTCA  
GGACGTCTTTCGAAATTTTGGACGGTGTTACTCCGCTGCCACTTCAATTGCCTGATCCAC  
CGAGTTCATTGATGGGTCTGTCCCAGCGCTCCAGAAAGTCCCTGAAGGTCTACGAAACC  
GTCCTTTCGTGAAAAACAGCCGTGGTTAATCTCCAGAACTTTAGCAACCAGCTTGATGAG  
GTCTAACATTTTGTCTTGGAACAGAGCGTCAATATCTACTTTACCCGCCATAACCATAAAC  
GGTTACATCGTCAAGAATCAATGCGCAAAGTTTTTCGAGATCAGCTTGCTCCATCTGTTC  
AAAGAGGTATAGAATAGCTGTAGGGAGGGCATCAGAAAGGTTCTGGCCTCCAGTCATCAT  
GGAACCAGGAATAGTTGCCATTGGGACTGCTACATAACGTCCGATCTTCGGAAGGTTTTT  
CATGACCTTCGTTGGAGACCAGTGCCTGATAATGAAGTTGTGACCTGCGAGGTGATTC  
AGTTGTCCGCTGATATTCATGTACGCACCTGCGTCTTCGTGGTTGAGTTATCCATGCGT  
GTATAAAGGCCACGTCCATTTGGCAAACGAAACACTTAAACGATACCAGTCAGGCCAGCA  
AGACCGAAGCCTGCGCAAGACAGAGTATCTGGGCTTAAACCAAGCATCAAGGATGCCGATT  
GCCAGTCCAACCTGGCCACTTCTGTTCCGTAGGTCGGGTCTGGTTGTTTCTGAATCCAA  
GAGATGGTGCTGAGTCCATAACCCTGAGAACCCTCAAGAAGGACAGGGAAGAAAATCAGT  
CCGGTGATAGAGGCTTGTCTGCCAGTTTGCAAAGTTTCCGTTCCAAGAAGCGGTGTTTC  
TGAAGGGAAACCGTCATGACACCAGATTGGTTACGTGACAGTGCGGCGGATAACTACCA  
TCGACCCCATGTGGGGGATGATGTTATCTTCGTTACGGGCAACGACGATTTTAGTATCT  
GCGGCGAAACCAGACACACGCTGGGTCATCAGGTACAGTTTACTATTTTAGGGTCATAC  
GCATACGGCGTTAGGATAGCCGTATCCATTTATTACAGTCGTGCTGGTACAGTCTGACCG  
TTTCCGGAATTAGACCCTGTTTTATCTAACAGAACGGTCATGGGGTTCTTAAACGAAGTGC  
AGTGGCGTGTGTACACAAGCTCCACTTTCACGTTGTTTACAGAGTACGAGCAGCCAGATCG  
TTAGTCGGGATGGTCGCACGAAGCGGGATTGTGATCACCAGATCGTAGAACACTTTGTTA  
ACGTCATCGTATCCAGTAAGGATGGACCCGTTTCGAAATACCAACGTTGACCCGGTTGTTTC

ATCATGACAGATTTACGTTAGGAAGATCGTCATCACTCATCTTCTTGGAGAGACCCAGG  
TTAGAACGGCGAGACATGTATCCAAACACACTTTCTTCTGTACGGAATTAAGCCAGTGA  
CCGAAACGAACAACGTCAACGTAGTTACCAGAAGCACACTTACCTTCGTCTGAAGGAAACG  
ACACCGGTAATCAGACGGTAGAAGTTACAGATTCTGGTCCCAATTGGTTCATGCGATCACTC  
ACACTCAGAGTTGGAGCGATAACACCTTCCACCGTCTTCAGGTGGATTGAGTCACCATAA  
GAAGGGTTCGTTGGAAGCCATTGGACCGATAATTCCACCCTCTGGGAATGCGGTATCAGCA  
AGAGGATCGTACATGCCGATGGTTGTATCGTACTGGAGTGCTTTCAGTTGGTTAGCAATG  
GAGTTGCTACTAGCACTCTTAGCCAGTTCGTCAGCAGTTGAATAAACGTGCAGCTTGTAG  
TTTGCAGCAGCGAAAGCAGCAGCACCAAGGATTGAAGCGTTGGTGTGAGATTGAGTGCTC  
AGGAAGTACCAGTTCTCAGTTGCAGTCAGGACTTGTGGCAGAACAGACGACACATGTTCA  
CTTGAGGAGGTTGTGATTGTCATGTTACCGCTGTCACGACCAATCCTGAAAGTACCATCA  
ACTTTTGGAGCGATGGTTACAACGCCTGCGCTTGCCGTACCAGTCAGAACAGTTGTCAGA  
GTTGCATCACCATTAAGGGCTGCTGCCAGGGCAGTTGCCAGAGAGCTTGGGGTAGCTGCA  
CCAGTCACTGAAAGAATAACGCTGGTCTGATAAGCTCCGGAAACTACGTTTCAGAGCCACC  
GGGTTTTTCGGTTTTCAGTGTTTTGTTTGTCTGTGAAGTCCACGATGGTAGTGGTAAACGCT  
TGACGACCAATCATCAAGTACTGAGGACGGAATGTACCAGCAAACGCTTTTTGTTGCACAG  
GTGTAAGCTGGGGAACCTGGCGCGAATCCATCATCTACAAGCTGATCGAGTTCGGTATAA  
GCGCGAAAACGTTTCAGGGATGACGTTGTGGATAGCCAGGAACAGCGGGGTTTTCAAACCT  
TTGATGTCGATTGGTTGAGTACCAAGCGTGACTGTAACGTCAACCACCTTGTCAATTATAA  
GCCATCGTTTTCTTCTTTATTTCTGTAAATACAGTTATTGACCAGCACCTCTTTGTG  
CTGTATTCTGGGGGCTTGCGCCCTATAACGATCACTAATAAGCCAGTGCTTAACAATAA  
CCGAGTGGTTTTCTTTAGCCATCTGCTGGGTAGTGATAAACCAGTTGAGCGTTGATCTTC  
TCCAGTTCTTCAAAGCTCCGGTCTTTGTTTCGATGAAGCACACGTTAAATGTGATCAAG  
ACAACATCACGGGTTTTCAAACCTTCTGCATATTCAATGGAACCTTAAACGAGAAATTGTC  
GAAGAGGACGAGTATGCAAAGGAGAGTTGGTTGGGAAATATTTGTCATAATTGAACGGT  
AGTTTCATTGCTTGCAATACCCTGCTTAAGGCGTTGGGAGCTTTACCCTGTAGGCTGTG  
ACGGCGTAAACAACCTCCTAATTATGCACCGTCATGGCAGTGCCTTGAGTATCAACACCT  
TCGTCAGACTGCCCGTCAATCTGGTCAACTGCCGTACAGGTCAACAAGAATGAATTCACCA  
TCCACCTTGGGAATGTCATCTTCACCTGCCAATAAACTATTCTTCTGTGGTTTTCTTTA  
CAGAATGCTCCCCTGTATTGGTAAGGGCGTCAAAGAATTCGTCCGAAATGGTGAATCCA  
GCTTTTAAATTCCTCCGTTTCGTCCCTTCAGGGACGGATACTACGTAAGCTCTGAAACGGG  
CGACACCTGGAGTCTGATAAGCATCAGATTTAAACACAGTGAACCACATCATTTCCCAC  
GGGAATTCATCAGCTTGATTTGGCCAGCAAGCTCGTTTGAGCCTTCAACAGGACCTTTGA  
GCATCACAGAGGAATAAACGGTGAAGGGGTCATACTGACTACCACCTTCTGCATCAATT  
GTGATGTATAATCTCTTGCAGCCTTACCTGTTGATGGTTGGACAACCTACTCAAGAACAT  
CAAACCTTTCATACTCAACTTCAACACCTTGGTTTTTCGTATCCATTGCTTGCCTCAACTT  
TTGAATATTGACTGCGACGCCTTGTAAGGTTGGGCGAGGTATTAATCTATTTTTTCCAA  
TAAGTCTGTAACCAGCCATTATGCCCTCGACCCTCTGCTGTTGGATACTCTGAATGTTGT  
GGACTCTTTAAGGTCACCATAGTGGTACATCGCCTCACTGAATCCCTTGGCATCGGCCCA  
CGCATCGGATACTCTGTTATGAGGAAACAGACCGGAGTCGATAACGAACTTTATCTTTCT  
TGCACCTGCTTTGCCGATCGTGTTTAGCATCGGTGTGCGATTACGACCGCCTGAAGCAAG  
GGATCCGAAAAGTTCCTTCTGGAGTTTTTCCAGTTCCTTATTGAATGCAACTGCTGCGCT  
TGTCATAAAGGTACGGGCAGGAAGACCATTCCAACCTTCTTGATGGATTGCAGCGAGCGC  
TGCAGTATTAAGATCTGAGTAGTGAGGGTCGTCATAATAACCATATGAAACCTGACGCGA  
ATTAAGTTGTTGGGTTGCTCTGAAAAAGTTCTCAAACCTGGCTCAGATCTTGCTTACTCGT  
GAAGTTTGGTCTCATAGCCACATCCGTTTAGGTAATTGACCACATTATCTTAGCAAATC  
AACGACCAAGCGAAGGATAATTAACGAGGCCGGCGGTGAGGGTATCTGCGAGGAATTCCT  
GGTACACCTGTCTGGGGTACAAAACCTGCAACCTTGAAGGGATCTCTTGAGTTCGGGTTT  
CCTTTCACACGCCAGTGTTTCATCTTGTGCGACACCACCAATGATGAATAAACTGGAAACC  
GCGCTGAGACAACCGTCCACATAATCAGGATTGGCCTGTAACCAGGTCAGGAAATCTCAC  
CAGTTCTGGTATGTAGAACCACCTTTCACCTGGACTGTTTTCGTCACCGATCTTTTTCCAAG  
CGTTCTGTGATAGATGCCTCTCCAGAGTTTACTTCTCGAAGAATCAACCAACGTACCACA  
TCAACGAGCGTGTATAAACAACCTCGCCACATGTCGACGCTTGTGATTGAGGGTTGGGC  
CAGTTTGCCTTAACCTTCTCAATAGCAAAGAAATGCCAGAATCTTTTCGTCTGGTGAACC  
TCTGGGGGAATGGACCCAAGGAGCAGTCGAATACATGCAATAATATCTTGGTCTTTCATT  
TTCGCTCCTGTTGGATTGCTCTTCTATTAATCAATATTTTATCACAAAATATTCTATTTG  
TCATTAAGCACTTGAACGACGTTAAGTTCTGTTATCTTTAAGTCATCAAACAAAAC

GGAGAACATTTTATGAAACATTCTAGGGCCGTTATCATTGGAATTATCGCTGGAGCACTT  
ACCGGGGCGGGAGCTTTTACGTATGTAATGAAGCATCCTGATGTTAATAACATAAAAGCA  
ATTGAATCACGTTGGTTGTCACCTGAAGAGAAAACCTGCCAGCGTCCATCGACTTGTTTCGT  
CTCGGTTGCGACCAACGCTTCAGGAAAGCATTCAAACCTGGCGTCTCAGTTGTTTCAGACA  
GGTGAGATGGATGAGATAACAGAACAGGCTGAAGCATAACCAGTTTTTGAATGATGTTGCG  
ATCCTTTATGGAACCTGAAGGATTCAAAGGGGCGTACATCTGCACCTATTATAAAGATGGA  
AAAGACCCCGCGGTCAATGTGAATATGGAAGCAGGTCTACGTAAGCTTCTAAAAAAAAG  
GCCCGAATGGCCTTTTGTACACCATAATCCCAGCGGATTTAAGCTTCGCAAGCAGTCC  
GTAAAGTCTGCTACCAGAGTTTCAACAACGGTTGCTACAGAATCTGCCTGTCCTGAAGC  
TTTCATAACACCACCGAGCGTGGTAGTTGTTGCTGCTGGAAGTGTGTAACCTGCACCACC  
TTCTACGAGGTCAGCAACAAAGATTGATTGACCAGTACCAACAGCGATAAGTTTGGTTGC  
ATAAACAAAGACCAGCTACACCAGAAGTTGCCATATTTTATTTCTCCTTATAGGCATGAGG  
AAGGTAATTGCGGAATATTTCAACAGAGGTTGCCTGATCCACACTATCAATGTAAGTCC  
AGTAAGACTTCATCTACTCCTAATGAGATCTGGATACGCTGTTGATTAAAGCTGCCATTT  
CTCTATGGGTGAGATCAGCCTTGTAACCATGGAGGAACTGGAATGGTTAGACATTTGTGG  
TTTCAGAACCATCTTCAACCAAAACATTCTTGATGGTTAATAAAGTTGCAAGATCAAAC  
TCTTGACGCGAACTTGGTACTCCCTCTCATCGTAAGGATAAGGGATAACCGATGTTAATGT  
CCCCGCTAAGAACAGTTTGTGCATCAGCCTTTCTCTGATCTTTTGCAGAGACAAGGTTGG  
CCGAAATTTCTTCTCAGTGAAATCTCGTACATCCCAACTTTGTTCCCATTTCTGGGTTT  
GGTCATTGAAATGTGGAGCGCCTTCAGTGAACACATCCCGTTCAGGCATTTCTTTCGGAA  
TTACCGGGAAGTAACCTAACTCGACAAGGTTTTTCAGACTAGATCCAAGAACCGGCGCTCA  
CGTTCGGATTATCCGCTCTGAAGTCAGAAAGATATACCGGATATTTCCCATCAGACGTTT  
TGATAAGAGGTGTATATGCGTAAACTACCATTTACTCTCCTTGAGAAGAGCGCCGAAGCC  
CCTTTATTAATCGACAGTCAAAGACTTTGTACCTGTCAGGTTTGTCCCGTCCCAGAGTAT  
AGTAACAACCGTGCGGGTAGTTCCAGAGTAACCGCTGTGCCGTTTGACCATGCTAGGTT  
GCCGGGCCACGTCAGTGACCCACCGAACCAGAGAACACGGTAACGATTGTCATTGCTCT  
GTTTGCAGGTAGGTTAGTGAAGCTCATGGTTTTGTTTGTGCTGTACCGTCAACCTGAAGAC  
TTGAGACACGCCAACATGCATAGCCCCGTTGTAGAAGTAACCAGAAGATCCTAACGATC  
AAGTTTCTTCCACGCATAGTCTACACTGACATAAGAGCCTGTATCTGCTGGTGCTTCAAG  
TACCGGAACATCAACCCACCCAGCATTGTTTCGAGCTTGCGGAATGGTAGAGGCTGAATC  
ATGAACGATTCTCCACCCATGTACCCAGAGAAGCCCATGCGTTAGCAGATGTTTTCTT  
GACGGATTCCAATGTGGATTTATTGATGAAGTAATCACCAATTCGCTCATCAGCAGGACC  
TGGGTTACGGGAGAATTTTCACCAAAGTGTTCCCTTGGTCTCCTTTAATTCCCTGGATAACC  
CTGAATACCTTGTGGACCCTGTGGACCTTGTGGTCCAACATCAGCTTGAGGCCCTTGGAT  
AGGTCCCAAGTTCTCATAAGTGGTTCAGTCCATCCCCAGAAATCTCCCTCAAGCAAGAA  
TCCCTGACCAAGCTCTCCAGTAGAAGGAAGTTTCAAGTGGTATTGTGCGAGTTTGCCAAGGAT  
TTCTACCCAGCACCCACCTGACCCTCTGGTCTTGTGGTCTTGTAGGGCCTTCTGGACC  
TGTCAGTACCCATCCGTTCCCATGCGGTCCCGCTGTAAACATAAGGGTAACCTTTGTT  
CCCACCGGAAGTTACTGAATACATCCAGCATTGTTCTGGGTTTTGAACATCAAGCAGGTC  
CTCATAAGTCGCAATAACACCTTTAGCTACGCTACTTGCACCCTTCGGTCTTGGTCAAC  
TTGGATAACCAGGATCACCTGTGGGGCACGCATGACTCCAAGATTTACCCAGTTAGTACC  
ATCGAAAGCAAAGCTTCTCCAGTGCCTCTGTGGTGAAGGATCTCCAGTTGCTGCGCC  
GGACGGCAAAGCTGCTTGATTGGCTACTGTACCTCTGGCAGACAGTGAACGCCAATTGG  
ACCCTGTGGTCTGTAGCACCTGCGGGACCTTGAGGTCCTGCATCAGCCTGATCGCCTTT  
AGGCCCTGTGGGCCATAAGCCCCAGTATCACCTTTAGGACCGACATCCCCTGTGCGCCC  
GGTGTACCCCTTGTGCGCCTTTTGGACCAACGTAAGGCCCTACGTTTATCCATTGAGCATC  
AGCCTGATTCCAGACGTAAAGGTTTGAAGTATAATCCAAGCATCGCCTGGTGTTCCTGT  
TGCAGCAAGATCTGAAACAGCGCCTTTTTTCCCAAGAACACGAGCACCATAACCAGTTTC  
ACCACGATCACCTTCGGACCTTGAGGTCCTTGTGGACCGACAGGGCCAGTTAAACCAGT  
ATCGCCCTTATCTCCCTTTGTACCGATAGGCCCTTGAATACCTGTGGACCTTCTGCTCC  
AGCAGGACCCTCAGCCCTCGCAGGACCTTCTGGGCCTTGGTTCGCCCTTTCGTCCTAGGGG  
CCCTTGTGGGCCGACATCAACTTGCTCGCCTTCAGGTCCTTGAAGTGGACCAATATCTTC  
CCAAGTGTGTCAGATGTCCAAACCCAAACGTGTTTGTCCGTTTACTAGCCCATGCATC  
AGCCACAGCATTACCAAAATCAGGCAATTCGTCATCTGTTGCTTTTGTTCCTTCAGTTT  
TACAATTGCGGCATCGTTACCTTTATCGCCCTTGTACCTTTAGGTCCTTGAGGCCCTGT  
TAAGCCCTGAATCCCTTGAATACCTTGGTACCTTTCTCTCCACGTTACCTTTATCGCC  
TTTAGGCCCTGCGGTCTGTGGGACCAGTAGCCCCGTGTGGACCAGCAGGCCCTACTTG

CCCTACAGGTTGCCATCCGTCTGCATCGCCAGTCCAAACCCACATCTGGTCTTGGATGAT  
GTAGGTAACGCCTTCCGTATTTCTTGTAGTCGGAAGGAGAGATGTGTTCAGAAAATGCACC  
CCTGATCACCCATCCTATACCATCTTGCCCTTGAGGTCCAGCGAAATCGCCAAGATCAGC  
CCAAGTGCCTTTCACTGTCCAGTAGTGAGTTCCAATTACGTAAGTATCTCCCTCTTG  
CATGGTTTCATCAGGAGGAAGTCGGGATGGGTCTCCAACAATTCCTTGGATGTAATAAC  
AACACCCGGATCACCTTGATCACCTTGTCGCCCTTATCGCCTTTTTCTCCGGGAGGGAC  
AGAAAGACCTCCTTCACCAGGGTCGGTCACTTCAACAAGAACGTTTCCGGTCTTGGTTGA  
AATAGGCACAACGATCTGAGGAGGAGCAACATACAGCGTTCCTCCTGCCAATAACAAGCAG  
GTTATCAGTGAGAGGGCTAACCCCGACAGAAAGTCCGTCAGGGCCAGCTACAAGTGCGTT  
ACCCGAAGCAGGATCTACAACAACAGCGGCCTTCAGCGGAGTATCGGAGTTACCATTACC  
GAGAAGTGTTACTGTGGTCGTATCTTCTGTGTGGAATTGTCCATCGTCCACAGCGGTTCC  
ACCGCCAGCACCTTCCGGAGGGATAGGTTACAGCGTTGACGACCGTATCATTGTAATCTGC  
CATTTTTACCCCTTATTTACAGGCTCTAATTCTTCAATCGCAGCCTTGTAGTCAGCCAT  
CATGTTTTCGAAAGACTTGTTTTTGGCAAGGGTAATGCCTTTGGTTGCAGCGAGGTCAGC  
AAGTTTAGCTTTGCTCCCTTTGTTGTCAGCTTCGTCGTTACAGTGTCTTCTGCTTCAGCCAG  
AATTGCTTCGTAACCAGCAGACTTCACTTTCACCTCTTCAGTCTTGACTTCTTCACCTTT  
AGGGCCTACAATTGCCTCCACTGCCTTACCGCGACAATTCGGGGTTGGAAGAGGACTGTT  
GAAGAATACGATGTATGTACCCATGCGGAGGGTAGAGTGTCTGCATCCACATCAAGTCC  
AGAGATCTCGGCAAGCGCCTTGAAGAACTCAACAGAGTTGCGGAAAGCCCTTTGTTCAAGT  
ACCGACACAAAAGCCGTTTCAGAGGAAGACGGGCAGAACTACCAACATTCAGATCCGCTGC  
GTAAGTACCGAAGAAATTGAACAATTCCACCTTGTTAGGGAAAATACGATAGTTTTGATT  
AGCCATAAAATCTCCATTTGGTTACCTTAGTAAAAGCCACTTGACAGCGTTGATGAAGTG  
GCTATTATTAAGGCAGAAAATAAAAAGGGAGAGGTGAAGAATCACCTCCCCCTCTTAGA  
GGTAGCAGTTACGCTATCTTATGCGAAAGTACCAATAGAGCGAACTACCTGTTCCGGACG  
GATGTTAACAGTCGGGAAGGAAGTTTCGGACTCACTTTTTATTACGCAGGTATGCAGA  
AGATTGGTACCACAGGTACAGTTCCTGTGCAGGAGTGTTCGCTTCACGAACGTCATCTGC  
TGGCGCATAGTGAATCTGGAACCTGTCGTCGATTCTTTCGCGGAAGAATGTAAGCTTCACC  
ATCAGGGATGTAGTTGGAGATATCCTCGATGTAAGTACGTTCTTGTGAACGAACATACG  
GTTGTTGGCGTTCTCTGCTCCCTGACCCAGACGACAACGAAGCGGCTCTTGAGTAGAAGA  
GTAGTATTGATAAGCGTTCATTACCAGCGGATGAGCGATCGGCGCTGAGAACCACTTACG  
AGAAGCCAGAACTACGATACCGTAGTTGTTGCCATTGTACCCCGCATTGTTCGATGATGTA  
AGCACGAGCTTCAGCTTCGTGAACGTCGGTCGGGTCGATTGCAACATTGGTGAAGTCAAT  
GTTTGCAGTGTGCTGAGTAACACGCTACTCGTTGAAGTAGTTGTACTGAGCAGTCGGGTG  
TTGTGGTGCCCAAGATTTACCCATGATCGCCTGAAGCATTGCTTTTTGTTTCAGTTGTAC  
ATGAGAGATGCGGATACGACGAACCACCCGAGCAACAACATCTTCTACAGTCTTCGGAGC  
ATCAGTAGTGAAATACTTACTGAAGTTCTGTACGTCTGCCGGAGTGATCTGACGATCAAG  
TGGGAAGAACGGGATGTTGATGTTTTTCAGTTGGGCCTTTTCAGTACCAACGTAGTTACG  
TTCACCCAGACGACGACGAGCCGGGAATTCGGTTACAACCTCGTCAACACGTTCAATCTG  
AGCGACAGTCGAAACACCGTGGTACGCTGTGAACAGGTCCATGTAGGTGATAAGACGGTA  
CTGACGTGGGACGATTTCCAGAGTTGCGCCAAGATCGACGATCGGGAAGTTATTAGAGCG  
TACTACTGCCATTGTTATTCTCCTTGGTGTAGATTAGATAGCCGTTACTGGGATCTCAAC  
AGTGCCGTCGTAATATTTATCGGTGATCTTCAGACCTTTGGCCTCAAGAGCAGCGATAGC  
GACAGACTTGATTGCAGTAGTACCGTCAGCAAAAAACAGTTTGAATTTGTTTCAGGGTCAG  
ACCACGAACCGCCACAACGAAGTTGTAAGTAGTACCAACCACGAAGTCACGAGGAGCATC  
GTAAGCAGGAACCAGATCCCGGTACGTGATTACACCGAATGCGTCAGCAGCAGCGGAAGC  
GGCAATTGGTGCGCCAGCGGCGTTCACAATCATACTTCTTTCAGACCAGCTACGAACTC  
AATCGGCATTTCCACTAAGCTGTAGCCCTGGTCAGAAGAGTCCACTTTACCCAGAACGAT  
GTCAGAGTAGTACCCCTGGATTAGATTAGCCATTTATTTAAATCTCCTCGATTAGCCGTC  
TAGTGCAGCAGCTTCACGAGCGCAGCTTTCCCTTTCTCGATGTGAGCCTGAAGGATGTC  
TTCGGCAGACTGGTTGATGTCATCAACAGTTGCTTCACCGTCTTTTCCGTGTTACGACGT  
GCCGACCTCTTTCTTCACGGTTTCAACTTCTGTTTCCAGTTTCGCTGATACGAGATTGGGC  
TTTTTCCAGAAGAGCTACTACCGGAGCGTTAGCTTTTTTCGATGATGAAATCTGCCACAGA  
AGCGTGGTCAGCTTCAGCAGCAAAGGTGAAACCTTGTGCGCTAGTCAGAGCGGCTTTCTT  
TTCTACTTCAACAGCGGCTTTGATGATTTTCATAAGCAGCAGCATCTTTAGCTTTGGCATC  
TTCCAGTTGCCTCACCAGGTACAGGGTATTTCTGAGACTTGGTTACATCAGTAACATTATC  
GGACACTGAGGTCTCCTTATTTTCTTTGGATGTATCAATTACGGGGTCAGTACCTGCTTC  
TTTGACGACCCAGTCGCTGGAAATCTTCGGACTCACCTTCGGAGAAGGTCAGGGCTAA

TTCGCTAACTCCCTTTTCAATCAGTTGCTGAAGCTTCAGAAGTTCATACTGTTTAAACAAG  
GTCGATTTCTTCACCGCTGTGCGCTGCCTTGGCGATAGAGATTCACTCCATACGCCCTTC  
CAGCCATTCTGGTGCTGTGCGTTCCAAGCTTGGACCCACTCATGATCTGGGTTTTTCAGC  
GGCCTCATTTTCAAGTTCAGTTTCAAAGCCCAGCAGTTTGACAAGCAGTTCTGCATCGTC  
GCTCCACATATAGAAGAACTTACCCAGGAACTCTTCGAAACTCATGGAAACGGTAACCTG  
TTGCAGCGCCTTGATATCGTCTTCGGTAATCTTTTCCGGTTTCAGGTCAGACTTCATCAG  
AAGTGATACTGGACGGAGGTTTGCAGAAAACCTTGACTCTCATGGCAGAGTGCAGATACC  
TTTTTCTTAATGGCCTTGGCTTTTGAATTGTCATTCGCCATCGTCCTCAACATACTCG  
ACACCGAAATCAGCGTTGGTGATTACTCCTGTTGCTTTGTGCGATTGATCCGGAACACTGA  
ATGCTCAGGCCACTAACAACGTTGGACTTTTTAAGGTCCCACAGCACAGGGTCGTTATAT  
TTAACTTTAGCTACCCAGGTGCCAGCCTTGATTACTTGCTCGGTCCCGATAACCACCACA  
TCAAATTTCTTCTGAATCCAAGTCTTCGCGATTGTGAACGAGTCAATCTCAATCATGTGG  
AAGAGGTTCTCTTTAACAATGCCAGCTACGTTTGCCTTATCAAAAGACTCCTTGGCCTTA  
GCGATTGTCTCAGCAGACATCCATTTCGCCGTGAACGTCCTTGGCATCTGGTTCGTAGATA  
ACTTCGTAAGAAATCATCTGCTCATCAGCATCTTTCTGGATGCTCACAAACAGAGGTTGAC  
TTGTTGATTTTCAGTCTTAAACATTCATTTTGAAGAATGTCTTTGGAAGCCTTCTCGATAGCG  
GCTTCAGGAGATTGGCCTGAAGCAATCAGGCCATTTGCAATACTCAGTACCTTGCTCTTC  
TGAACGAGTGACAGATCAGATTCCGATGCAGGAAGGTCAGCAATACTTGTGTATTTTCATC  
ATTTTCCCGATGATAGTTATTTTATCACCGTTCATTTTCTTTTGAAGCTATTTTCAGTA  
AGTTGAAATTAATTATCCATATTGGATACGGAATTGTGCGTTGTGGAAGAGATTTTCTCT  
GTTCCATTACCGTTAGAGCCTGCTGTCATACCATCACCGGAGCGACTGGTATCCTGACCA  
ACGAGTTTCAGAAGTTCATCAGTTGATATGACTTCCGGGATCTCTTCATCAAAGCCACCA  
ACTTCAAGGATCTTGTGATAACTGTAGGAGTTTTAGGAAGATACCCAACACCACCGATA  
CGCTGAACGAACCTTGGAGAAGTCTTCCATTTTCGACTTCTTGGATAAAGGCCTGGTTTCAGT  
TTTGGCAGGTCTTCGTCTGAAAGACGGATGTCATTCAGTTCCAGAAGCTGATGGATCAGG  
TTCTTGTGCAAGCCTCAACAAGGATGTGCGATGTCACGCTGAACGAAATGCCCGTGGATG  
GACTGCTTCGATTTCGGATAAGTTGTAAGACCCCTGACCATCGTTACCAAGGTTGATGAAT  
CCAGCGCCAAATCTGTGCGAGGATTGCCTTCTTACGAGAGTTCACCAGTTCCTCTGTACTG  
TACTGCTTACCTGCACCGTCAATCCCTCTATGAGACATCTTGTACTGTTACACCACCTGA  
GCGTTCATATCTGAAGGAAGGACGAAGTAGCCTTGCTCGCCTCCGTGGGCGTTTGCAGCA  
TCCGCCATCAATCCTTGAACCATTTCTGATTCTGGTGATTTTCGGGTCAATCGCTGCCTTG  
TTCAAGATCTGAGAAGGGATCTTGAGATCGATGATACCACCAAGATCTTTGGAAGCACCA  
ATTGTTTCGAGGTTCTCAATCAGAATCTTTTTCACGGAAAGCACGGTAACACCCAACAAGA  
GGAGAAACACCAGCAGGGTTTACTCTGTACCACCAAGACTCATCACCATAAGTTTACTG  
ATAGGAATGAACACTTCATCCGCAGAGGAGGTCAGATTAGTAACCAGGCTCATAGCACTG  
GAGATTTGCGTCAGACCGTTCTGGAAGTTGGCAAAGGCCATCTTACTCTGGTAACTCCCT  
TTCAGGGTGCGCCATCCTCATCAAAAACCCAAGTTTTGAGCGAGAAAGACTCGATTGT  
GGCCTAAAGCCAATCTTATCAATGGTGATGTACCAGCATATTTAGATGGGGCAGAGTCA  
GTACGGTACACCTTCTCATAGATGGAGAATCCATACTCATTAAAGGTTGCGGCACTACGT  
GCAATATCGCGAGGAGTTTGTGTTGGCAAGGTTCTTACCAGCGTATTCTACAAACTCG  
GCTGCATCTTTGGATGCCTTACTGTCACGATTATACAGGACTTTGAAATCATTGAAAGCT  
TTCGTTACGAAAACATACTTCGTATCAAGCGCCGTGGAGAGAGTATCGTCTTGCTTCATA  
TCCTCGACGGTTGCCAGAAAACAAGGCCAGCGTAACTCTTCCACCTTCATAACTTCGGAT  
TCTGCACGAAGCTGTGAAAGATCACCAGAACCTAGTTCCTCCGGTACGGAGACGACTAACA  
GCCAGATATTCGTTCCCGGCTTTAACCACCTCCGATGGTTGTGCAAATCTTGTGACACG  
AGTTATCCCCTCTGTTATATTCTTGTATAAGGTCGAAGCGACAATTGTCGGGATAACA  
ACAGGTCTGGCGATCTCGTTCCTTCTCCAAGTAATTAATACTGGAGGCAACGGCATCCGCC  
CAGTCATCCTTACGATTGTTGTGCTTCGCTCACCATTAAACTTTTCAAGTGCAGTCATT  
AAGGCTTCATATGTCTTAGCATCGAAACTGCTTCTGACAATCCTCACCATTCTGACTGA  
GCAAGTTTTGCAAAGGAGTGAAGCGTGTAAGTTTTGATTTATTCCCTCGCGTCCGGTCT  
CTCTCAACCACAAACCCTTACGCCAGAAGCTCACGAGAGCTGGTTGTGAACTCCCTAATG  
CCTGCTTGACCGGGGTCAACCCTGAAGATGATAACAACATCATCCCCATGGTAATGGGCT  
AGCTCTTTAATGATCACATCACGTTACCAGCTTTCTTACAGAAACGGCCTAGCGTTTGA  
GTGGAGTATTGACCATCATCAACAACTCAGGGCAATAATCTCCTGAAAGATAATAAAAC  
CCATCAGGGTCTTTACTTACCTTACAGATGCAGTAAAGTCAGAGTATCTGGTACCAGAT  
GTTCTGTTCTTACCTGCCTTGTGCGATGGTCTAACCGACGTAACGCCAGTGGTAGGCTA  
GGAACCTCCTTGCAGATAGGATCGCGGGACATAGTTCGCACCTACTGGACGAACTTTCCAG

TTTCCGTGGAGTAGCTGTGCCTTTTCAATTTCCGGAAGACCCTCAAGGAAAGGAAGATAA  
TCTGGGTTGTTGTCAAGCATCGGTGGGTTATCGAAGATAGTTCGCACTGATGAATGAGAAG  
GAAAGTGGTTTTGGCTTCTTACGAATGTCCACACCGTCCCAATACTGCTCAATAAGTTCC  
TCTGCTGTATCTCCCCAGATGAACACACCGTACGACGAATGAACCAACGGATAATCCCG  
TCTCGCTCCGCAATGGGGAAACCATCATCGTCTAGATAACCACTCAATCAACCCTTTAATC  
TTGTGGTCCGGGTCCGGGTTACATGAGATGACCATACGGCTCGGGTATTTGGATTCAGAT  
CGAAGACGAGACATGAGGTATTGATCTAAGACCATTCAAACCTGTGTTCTTCGTCAAAA  
CCAACAAGGGTGTACTGTAGACCCTGGTGAGAATACTTATCTTTCTCGTATTCCTTATGG  
GACCATTTTACTTTAGCACCAGAAGGGAAAATTGCTTCCAGGTCTTTCTCCCTGAAGCGT  
GGTTTCCATTCCGGATCAAGCTGTGTATAAATGCCTCGTGTGTATCATACAAACCACCA  
CCACCCTTCCACTGAGGGGTGTTTCTACGGTACATGATGCAGGTGTTTCGTGGATCGTCG  
ATGATATTTAACGGCATTAAATTGAAGCAGGTAGGATTTACCTGACCCCGCCGACCCCCA  
ATGATGAGGATTTGTGCTTTGTTTTCCAGTATCATTTTCTGCTTAGGGCTGGCAGGTCCG  
AACGTTTTACTCAAAGACCTCCATATTAAGGGGTAATTTGGCCTATAGGAGGTAGTTT  
ACCACGAAACTTGATAAAAATAAAGCCCTTATCCCGAATTAAGGGCCTTGTCAATCACTT  
TTGCGGATTA AAAATGTTACGCACGGATTGTTGCAGAGTCCTTAACTTGCTGCGGTGTT  
GGCAGCCTT CAGGTTGTTGGTCTTCATGATCGCGTTGTTCTCTGAGTTTGAAGAACCATA  
CTTCAGGGCAGCTGGCTCCACAGGATCAACCATGGTAGCAGCACGTGGTTGTGCAAGAAC  
CTTTGCAGGATCAAACCTTCTCAACTACCGGAACAACCTCCGGCTTCGCCTGACAACCGAC  
CAGTAGGGTTACTGCCATCAGCACTGCCATTAATGCTTTATTCAATTCACCCCAAGCTT  
TGGTTGTAGATGTCAAACAACCTGGTTGTCAAGCCCTAGCTTCTTGCTGCATCAGACCTG  
CTGTAAGCGTCTTACTTTGCGTTAAGCTGTGCCTGCAATTCTGCATTTTTTGCCTGCTCT  
TCTGCCAGTTCCTTTCAAGGATATCGCTTGCATCTGTTGTTTCATCCGTGTAAGACTGA  
TTCTCATCCTTGTTTTTCTGTTGCAGATCCTTCCATTTTCGATCTGTATCACTACCCCT  
GAATTGTAGGACTGCCTGATCTGCCCGTTATAACCAGTGCTTTGCATACAATCCCCGCCA  
ACGAGGACAGCAAGCAGGATGAGCACTGCGATTACCTTTAGATTGCTTTTCAGAACTTC  
AGAGCCATTTCAATTTGTATCATGAGATTTCCCATTTGGTATCAATTACCCGCTCGATTT  
TGAGCAGAGTTGTATCTTAATCTTCGATCTCTATTGCAGCATCATTGTAGGCAATCTTGG  
TAGGGTCGCTCACAGACACCTCAAGAAGGACAGCGCCAGGTAAAGAGGATTTTTCTCCCC  
ATCTACCAGTTCGCTTTCTCACCCCAACTCTTGTATACGTTCAAGGCTTCCTGCTCGT  
CTACATAAAGGTTTCATCACATCAAGGAAATTTTGTGCTGGTTTCTCCTCCAGAAGACCAA  
CTTTGTGCCTTTGATCTACAGCTTGCATCAGGTAGAAGTTGTCAGAAGGACAAACTCCCC  
ACAGAGTTTTAAATATGGCCTTCCAGTATTCTTTCCGGAGGCGTTGGTACATGGTAAAGA  
TATTTCTCTTTAAGACCTGCCCAACCACCTTTACCACCCTTCTCAGAGTCAGTTGCAA  
TAGCGCTGATGATTTTATCTCCAGCACTATCCATTTTATCAAATAATAGCTCAAATGAAA  
ATGGCCTTTCTTCATCGAAAAGCTCTTCAACCTTCGTACCATAACATAACCACTCAGGTGGG  
CCTAGGCATATTCCCAAGTATCAATGCTCAAACCTAGAAGCTACAATGCCAAGCTTCATGG  
TCTCCCGGCGAGAGATTGTATATCCGCGAGCGCGGTACTTATCAGCACGAAGCATACTAA  
TAATCGGGTAATCTGTCTTGGGATTCAATACCAAACCTTCTGAGCGATGTGCTTCATGA  
ACTTTTTGACAAACGCCGACTGCTCTTTTGCAAACCTGAATGACCCCATCTTAATCGTAA  
AGTCAAACCTTATCAAATATCTTCTGTGCATCAGGGAAAACATCAAATCGATACATTGCA  
GAACCGGGAGCTTTTTTATTGGTAAACATGACACTTTTATCGGTCATACAGATATTGTCA  
ATGTTGTCAATCTTACTCTCTTTAACCCTTGGGTGAATGCCTTAAATCCTCAGCAGAC  
ATATCTTTCCAGATTTTTGCCAAGGCAACAACCTCACAGGCGTGTATCGGTTTATCTTCA  
GATTTGATCACCAGGGTATGGACATAATCTTTAATGCTTCCCGGATTGTCAAGTTCCCTG  
AAATATTTGAATGACCGTTTTGAATTGCCCAATGATTAGTCGCCTCTTTCAGGTCTGAT  
TGACCTTTCAAGAGGCTACGATCAGTCATGTACGCAAGGAAAACCTTCCAGGTTCTCCCAT  
GAAGGGAAGTAAAGGTCTATGTGCTTTACTTCTCGGTTGGAGAATAAGGATGTCAGTGTA  
CCACCCGCGACACGGACTTCGAGGCGTTTAAGGATCTCCATCAACCCGTTTGGGAATAAGG  
CTACGGAGGATCAGGTATTCACGGTGGTATTCTTCTTTTGGAAAGATATGAAGCATGGTT  
TTCTCCTTTAGTAATTAACCATTGGAGTGTTCCAGAAAAGAAAAGCCCCGCAATAGCG  
GGGCGAGGCAAAGGAGAGGAGATTGAATATTTATTATTATTAGAATAAGAAAAGTGGCGT  
AGGAACCTTTACTCGTCGAGGGTGTCTTACCGTTTCCACAGCCGACACCTTCTTAGTGT  
CCACTTAGTAAGTTGGATGCGTGAGCGGGAGTCGAACCCGCAATCTTCGGCTTATGAGGC  
CAACATGATCTATATATCCGTTTCACTACCACGCAATTGTTTGGTGGGGCCGGGTGGACT  
CGAACCACCGACCATCTGCTCTT CAGGCAGGCCCTTACCAACTGAGTTACAACCCCAAG  
TAATTGGTACTTCTGATGGTATGGAACCCCGACGCTTGCCGTGTAAGACAACGTTCT

ACCCTTGAAC TAAGGAAGCATCAAAGTGGTGGGCGACAGGGGACTCGAACCCCAAAATC  
CTACTTCTAAGTACGGCACTTATACCAATTCCATCAATCGCCCAAATAGGTGGAAGCCCT  
ACTGTCTTCCTGATCAGCCAGAATCCTTATCCAGCATTGTCATCGGCCCTGTAGATCCTA  
TCATGAACCAGGGAGTCGATGCCTTTATTTGGTGGAGAATAAGAGATTCGAACTCTTCTG  
ATATCCTCGGTGCAAGCGAGGTGTCCACTCCAAGCAGACCCATTCCCAATTGGTGCAAG  
TACAGGGATTTCGAAGCCCGATTCTCAGCTTCGTAGGATGATGCTCTGTCCAGTTGAACTA  
TACCTGCATTAATAATAATATAATGTTCTCAACCCTTCAATGAAGCCAAGAACCCATGCCCTC  
TTTTGCTGCCACTCAAAGTCTGAGTAAGTACAGTCGTGATGGTCATGCGACCTGACATT  
GCGGCATCATAACCACGACAATAGATTTGATCAAGTGTCTGATTTGTAGTCTTCCAATA  
TCAGATATTTAAAATGGTCATCCAGGCAGGACTCGAACCTGCGACCCGAAGCATCCAAGG  
CTCCACGCTACCAACTGCGCTACGTACTGATTGTGTAAGTTTTACTTGCCCCAGAATCT  
TACAACTGGTATCGCTGGCTAGGTAATAAGTTCTCCAAGCAAAGGTTTAATTTGCAAGGA  
GGATGTTTGGCGAGGTTCGAAGGGGATCGAACCCCTCATTTCGCGATAGACAGTGCGGCAC  
CATTACCTTGTGAGCCACGGCCCCATAAATTTGGCGACGAGTGAAGGATTTGAACCTTCC  
TTGAGTTTTACTCACGGCTTAACAGGCCGTCGCCCAACCACTAGGCCAACTCGTCATTT  
AACTACTTTATCAGCCAAAAAACC GTTTGCAAGAATTATTTTACTAATTTAAAAATGG  
TGGGTCTGGAGGGATTTCGAACCCCGATCCTCCGATTA AAAAGTCGGATGCCTTCGACTTG  
CGTCACC ACTTGGCTACAGACCCGGTATTTGGAGGAGAGTGGAGGAATCGAACCCCTACC  
GTTTCCAGCACCACAAGGTTCAAACCTGCTTGTCCATTGTTGGACGGCAATCTCCTTGGA  
GGAAGATGTCAGACTTGA ACTGACACACCCCTTTTGGGGCTACTGTCTCTTTAGCACAGA  
GATCCCTTACCTGATTTGGGTTAATCTTCCAGATGTGGCGGAGAAAGAGGGGAATCGAACT  
CTCAAGCCGTTTTACCAGTCAGCACCTTACCAAGGTGTTTTCGTACCTGTGATTTGCT  
TCTCCAATTTGGGGTGACCTGTGGGTATCGCGCCCACTTGCTCAACGTCACAGGTTGAAC  
ATCGTCTCATAAATGCTTAGGCCACACATGAGCAGTCTCAA AAGAAAATGTTCAAATTTG  
GCAGGGGGTGGAGGATTTCGAACCTCCGATGTCGAGTTCAAAGCCCGATGCATTAGGCCAG  
CCATGCTAACCCCTATTGGCGTGAAGGTGAGGAATCGAACCCCTTACGACTGGTTTTGG  
AGGCCAGCTTGCAGCCACTGCAAGTATGTTACCCGCACAATGTTTGGCGTCCTGTGCGGG  
GATCGAACCCGCAAAACCCACCTTGAAAGGGTGGTGACTTTACCAGTTTGTCTAACAGGA  
CATAGTTAAGCGTCATATCGGATTCGAACCCGGTGCCACCGACTTGGAAGGACGGGATGCT  
GGACCCCAACACTAATGACGCATAATTTTGGTGGGAGTAGCAGGCTTTGCTCCTGCGAC  
CTCTCGATTATCGGTGAGCGCTCTACTA ACTGAGCTATACTCCCTTTGTTTTGGTGGCC  
CACCTGGATTTCGAACCTGGAACCCCGAAGGGCACGGAATTAGAATCCGCTGCAATAACC  
GTTCTGCCAATTAGCCAAAATCTTTATAGCGGTGGACGACGATCTGCAAAGAAGCTGATG  
ATCCAAACCACCATCGCTACGATAAATACTTCTGCAAGCCCAAGCTGCTGTTCTCCTGCC  
ATTGCCCAAATCCCTGAAATGCCGCGATTAATGCGATAACAAGAAACATCAAACCCCAA  
TTCAACATATTAGTATCCTCATATTAAGATATTTTGGTTAACCATTTTGTGTTGAAAGGAA  
CGATGTCGGTAGTGCAAGGTTTTGATGGAGCCTTCTCCGGAACCTTATTACCGTCATCAA  
CGTTTTTAGTTTCTTCGTCACTTTCCTTTTCTTCATCGAAGTAATCAGGCATCATTACTT  
CGCCTTTATCGATGACGAAACGTTCAATGTTCTCTCTGATGTTGTCCTTGGTGCTGGAAT  
TCATCATCAGGTCACGTA AAACCTGGTGTGCGTTGGGAATTATGGCGATCATCTTTGTCT  
TCAGGTCAAGAAGATTCTTCTCAAGCTGAATTGCATTTGACTCCTCTTTTAAAGGACGCC  
CCTTTCCACGACGACGCTTTGTAAGCTGTTGGTTTTCTGCCATAATTAACCCCACTCATT  
CATATTATCAGAGATGTTTTTCTCTGTCAAGGTTATTTTAAACATATTTTACTTTAAATT  
TAAAGCTTTGGAGCACTGTGAGGGAATCGAACCCACGACATTGGTTTTGCAGACGAAGCT  
CTTACC ACTCCAGCAACAGTGCTTGGTTCGAGGCAGCAGGATTCGAACCCGCGTAAAGCAG  
TTTTGAAGACTCCAGCCTATCCGCTAGACTATGCCCCGTAATTTCTGGTGAAGGTGACGA  
GACTCGAACTCGTAATCATTGAAGCGGGAGATTTTAAGTCTCCTGTGTATCTCCATTTCA  
ACCACACCTGCAATCATCGTTCCCTGAAATATGACACAACAAAACCTTTTCCAAGAGCAGG  
TCCACCGCTTTGTATATGCTTACCATATTGCCCTGAGCAAGACCTCGAACAAAAGGGCC  
AGATTTTTTATCAGATCTGTTCTTCTTTGTGATTTTGCCAATTTAAATGTATTACCACA  
CCAAAGACAGTTGCAATATATTTTCTTTGCTCGTAGAGCGCTCTTATCTGCGTTAGCCAT  
TCTTGTTAAGTCTTGCAGATTAGAGATGTTGTTGTTATTCACATCCCTGTCTATATGGTC  
AACTGTTTCTAAATCTGGATCAAGCTCTCTTCCAAGATGCATCTCCATAAGATAGTTTGG  
GTCGCTTCCTTTCATTTGCATACCGTCATAAAGATAGATGATCACATGTTGCCTGCCATC  
ATCCCTAACATAACGGACCTAAAACCTTTTCTAATCTTATCGAGATACATATGCCTCTACCA  
GATTGGACCAAGGACGCAAAACATATTTTTCAGCTGCATGGTGACTCCACCGACCTCCGTT  
CTCCGCGAAGGGCGCTCTACGACCCTGAGACTTCTGTTCCAACAACGTGGCCTTTGTGCG

TGGA ACTCCATTTCGT TAAAGCTCATTCTCCGAACAGATGATCAGTCTTTGAATCAAATAA  
TCTGAGCTAACGC ACTCTAAAACACGCTAAACATCTTATGTACGGGCTGAAGTCCTGAAT  
ATCGCCATATTCCCCACACAAGTACCAAGCGTCTGCGAGACACTCCGCCTGTACCATTCT  
GTAATAATCGGTTCTCGTGATAACCAATCTACGGAATCACACCCCAGTCGGTGCAGCAAG  
GTTTTAAGATTCTCAAACCCGTACATAAGATGTTTGGAGCCGGGTGACGGAATCGAACCG  
CATATGTATTCTCCTCCCACACCACGCTGGAGGGTATTTTCAGGCCTGGATGGACCTCGA  
CCTTCCCAAAGGTCTGACCCGGCATTGGCTCCTCGTACAGGAATCGAACCTGTGCTTATC  
CCGAATCTTGGGACTGCTCTACCAACGTGAGCTAACTAGGAATTGTTTGGTGTGCTGCCAGT  
AGGAATCGAACCCACTTCTTCGGCTTACAAGGCCGCTGCATCGCCACTTATGCTTTAGGA  
GCAAGAATGCTGTTTCCGATTA ACTGCCCGGAGGTGTGGTTAGCCATATCTTGTGAGCTA  
ATTACCTTTGACCCACGATTTCAATAATCAACGAAATTTTATCTTTGTGTTTTGAAAGTT  
TCAAGTTTAAACGTTGACCTTTGAACTTTAATCTTTGAGTTTTGAACTTTGAACTATTCG  
ATCTCGCGATTTCGAAGTTTGTTCGTTCCGGAGTTGTAGTCCGAAGAACATACGTCGAGGT  
ATCATCCTTTATGATTAAGTTCGAGGCAGTTTAACCTCCGGCCTCGGTAGAGGCAAGATT  
TTTCCA ACTTCGCTAACCAAAAACAGCATTAAACACTTTACCAGTTAAAAACAGGAATT  
ACAAGA ACTTTTTTCATAATTCCC GCAATTAATTTTAGAGTGATCCCTCAATCTCTACTTC  
AGTCTTCGCATTGATCTCTGACAGTGCAAAGTAAACGTTGGAAGTGAAGTCTTCGATCTC  
TGCTTCCATAGAGCGGATGGTGTCTGACAGACCCAGAGGGTCAACGATAGACGGGGTGCT  
GATCATGCGGGTCGGACCTTCTACGACCTTCAGCTGTTAAGCACCCGGAGACTTCTCACG  
ACCGATGTACGATGCGCGATTCTGTTCCAGTTTTGCTTCGAACCCCATAGTCTCCTTGT  
CAGGCGAGCCTGAGCAAGGTTGTACTGGGCTTTCAGCTTGGCAAGCAGAAGCTCTTTGTA  
CTGAATGGTGC GGTTGCGTTCAATTGCCTGAGCAACTGTCATCTCCTGGTCACCAACGGT  
AACCTTGGTGGTTGCGTTGCACTGCACAACGGCAGCTTTCAGTTCGTCACGAACTTTCAG  
GAGGTCTTGCAGGCCCTGATAGTCTGCTTTCGCAGCTTCTCAAAGGCATCAAAACTGAT  
CAGTGAACCAGGGATCTGACGGTTACCGTCAATACCTTTTGCAATGTGAACAGTGTTAAG  
CTGGTCAACACGTTTCTCGATTTTACCCTCGATCTTGGTTCAGAGTAGCCAAGGCGCGGGT  
TACAGAAATCTTAGTAGATATATTATTCTCCTCTCATTTAATTTTGAATTTTAAAGTCAC  
TGCAAATTATTAGCCGACTTCTTGTCCGGCACAGCATATTAGTTTCTGCCAGTGTTGACT  
ACAACGCCTTGGCGACCAGCATCTGCCTGAGCAATAGCGAGACGGGTTTCACGGGCAGCT  
TTCAGGTCAGCACGAGCAGCTTCAAGCTGTTTCAGTAAGCATTGCGATACGGTCATCTTTC  
GTTTTACTATTAGCAGTCAGTTCGCGATTCAACTTTGTGTGCAGATTCCAGGTTGGAC  
TTCGCTGCGTTCTGTTTCGATTGCAGCACTGCGCTTAACATCAGCAACAGCGGCATTGATC  
GCGTCTTCGTTATTGTCTGTGCAACAGCCAGTTCATTACGCAGTTCCTTCAACAACAGAA  
GGATCGATTGCAACCAGACCGCGAGATTTTCAGCAGGTTTGACAGAACGCCTTCTTCGTTT  
TCCAGAGCCTTGATCTTCAGCTTGGATTTTTCTTCAGCCAGCTTTTTGTTAAACTGAACT  
TCAATCTGTCCCAGTTCCTGTTGTTTGA ACTGAATCTCCTGACTGATCTGCTCAGAGCCT  
TCCGCCAGGGTTTGAAGATCGGCAACTGCCTTGCAAAGGTTGGTTGCAGCAGCGGTTACA  
GCTTTGGTGGCACGTTTCAGTTACGGAAAGTACAGTTTTAGAATCAGACATTAAGTGCTCC  
TTTGAGTTAAATTAGGTTTTAAATACTACTACTTACAGATTGTGTTTGTCAAGCGAATCTT  
TGATCATTTCTTCGGTTGTCGGGTTGTTTTCGAACCCACGACCAGTAATCCCAAAGAATGA  
TAATCGCACAAATGACAAGCATTGCCAGAAAAATCATGCCGCGGCTCGTCGTACAACGCC  
GTTAATAGAATCACA AACTTCACCAACAACGTCTGCGGTCGGAGATACGATCATCTCATC  
GGCAGGGTGAACATCCTCTACTGCGACATCCACAAAAGGTTCTGCAACAGTTGCAGTAAC  
AGCAGCAGCAGTACCAACAACATCACCAGCCATGCTTAAACAGAGATCCGAACATTTATTT  
GCTCCTTTATAAAGTTGGTGGGGCATGAAGGATTCGAACCTTCGACCTTCGGCTTAAGAG  
GCCGCTACACTAAACGCTGTGTTAATACCCCGAATCTGGCCCGTGTTTTTCAAGACGTTG  
CACGGGATCGTCACGGTTGCCACGGCCCTTTATTTAAGACGCATCGCCGCAGCCAGCTT  
CGTATATCCCATGCCGGAGGAATTGCTTCCTCTTAGCTTTCGGCGCTACGGCTTCAGCA  
ACCTTAGCGTCTTTAGCTTAAACCAGCGCTTACGCTTGGTCTTGCCAGTGCGAACACGA  
TGTGAGGCAGAAATGACCTGACCACCTTCAACGCGGGAAACTGATTCCCAGATTGTTACA  
ACGTTGCCATCTTCATCACGACGCTTCTTACGAATAGAAACCGTCTCTGTTACACCCGCC  
AGACGAACATCAAGAGGGGCAGAGTGGGTCTGCGTAGACTTGGACTCAA ACTGGAACGGC  
TGCTTGATTGCGTCGGTTGCAGAACTTTCTTTTTTTCGTTTTGCTTAGCCATGTTTTAT  
TTCGCTCTATTTGCTAATGTCTCGTTGACGTTGGTAATACTAAACTCTCTCACTTCTT  
TGACAATCGTCTTTTTAAATCTTTTTTCACTTCTTGATGAAGACCGAGTGAGAGGTCATAA  
CGATCATATGTATGAACCGAGGATGCCTTGATAGAATCAAATCGGCTTTTCAATGATTCT  
GACATACGTGATTTTTCAATGATACCAAAAACACTAATATACAGTTTTATTGCATCTCCG



GTTTGTAGTTCTGGCAGGAATTGAACCTGCGACCTCTTCCTTATGAGGGAAGCGCTCTA  
ACCAACTAAGCTACAGAACCATTCCGTCTTGGTGAGATGAATACTAATGGTTAAAGAAAC  
CATTGTCAACACCTAAAATGAAAAAAGCCAGTATTTTTCTGTCCGGTGCTTCTGGTAT  
GACTTGCGATATGAAGTCGCCTGGTTGTCAAGACGCTGGTAACTCGTGCAGCGTCACCG  
CGAACAAACAGAACATCCTGCTTCATGACATCAACGTCAGATTGCAGTTGATCAACTTTC  
TGGTTGAGAGATGCAACATCGCCTGACAGTTTTTCAAGACGCTCAATTTTGTGGCTGGTG  
CAACCAGTTACTGCCAGTGTCCCTATTTGAACCGCGCCAAGAATAGCCTTTTTAAACATT  
TTATTTCTCCTGGGATATGTGCAGCAGTAGTATCTGCATGATCTATTTTACTGCAAAAGG  
TCCCAATTTACTTCAGGAAATGTCCGAAAGAGAAACATTCTGTTTACAAGCATTGCAGGT  
GGTTACCTTCTTTGGACTCATGAACGGAAGGCCGCACACATCCCATTCAGTGTGGTAATA  
AAAATTACGGAATGTTTCAGTGGGCCAGTCTCTGTGCTCAATTCAAAGATTGAGTCAA  
GGTTTGGTCTTTCATCAGAACAAATACCCTCTCCGAAACCTACGAAAATATCTACGTCTT  
CAGCCTGGCGAATGCCTTACCCTGTAACCAATAAATCCGTCAAATTCGTCTTTCATCTTTT  
TACTCCTTTTCGCTTTGAACGTGTAATCACCGCTTCAGCACGGCGCTGCTTCCGGTTTTT  
ATACTGTCCGGAAGATTCGGAGAGCGTACTTGATTATAGAATCACCGTCAACGGGTTAGA  
AATAGTATAAGCCGCCTTCTTCTCCGAAGGATGCAACGTATTGCCATGCCTCTATGCCAA  
AGCAAGCCGTAGAAAAAGCGATGTCATTAGCTTCTTCAGTCGCTGCGTTAAGGGTTGGGT  
GGTGTGATTTCGTGCTCAATGTGCTCTCCATTATCTGATTTATGTACAAGCTTTAATTTAA  
ACATTATGACCTAGCGTTAAGGTGTTAAGAATTTTCGAGTTGATTTCGATAGTTTAGAACTT  
ATCAGTGGTCACTCTTTTTGTCAATCAAACAATCCCTGATGCCTTGACACCACGACGATA  
TACTGCTAGTGCTAACGTCTTGGGGTGAAGCTCTTCCCTCATCTTCCCTTCGGATTATCAAT  
CTCGAGGAAATGTTCCCTCCAGACCAACAAGGATCTCCGGCTCCCACGCCTACTTCTGGTC  
TGTGTGTACAGATGCACGATTGAAATCATGACGACTAACTGCATTTTCGCACTCAATATCT  
CCTTTTCTCTATCTCGTCAAATATTGCATCATCAAGGTTCTGAATGTTTTATTTTCGTT  
TTTCAGTTCCCATTTTTATTGTCACAACATAATGATTTTCGTTTTTCAACCCACGTTATCT  
TAACATGTCCAGTGTTTGAAGATGCAGTGACATTCCTATTATTCATGTCGCGTGTTGCTT  
TCTTCAGGTTTGCCACGCATTGTTGGTCCTTATCCTCTCATCATGGTCAGCGAATTCAG  
GCATTTATCCAGTCATATAGAGATATGCAAGTCTATGAGCCAAGTATAGTTTCCATCAA  
TACGTATTACAACATAACCGTGCTTCCAACGCAAGAACACTCTGTTCCACCAAGGCGGG  
TAGCGTCTTCTTCTTGAAGAACCCTCTTTAACCATGTGAAAATGCCTGTCTGCGGAT  
CGTAATGCAAACGGGTTTTGAGATACTCTTGCCTTAGACTACGCACAGGATTCCTCTTCC  
AAATCAATTTTTCTGTTTTAGTGTTTACCCACACTGTTTTATCCTTGCTGACGTTTCATC  
TGATGACGGCAGCCTAAGGACACGATGCAAACGCCTGGGCCGTGGGCCTCAAGATTAGCT  
TCAAATTCCTATTTACAGACTTTGCACTCCATCATTACTGGTCCAAACATCTTAGGCTCC  
TCAATAAAATACGGGTTTCGTTGGTGTGTTATTACACGTAAGGCAATCTCGTACTGGGACT  
TCATGCCACTTGATGGATTTTCCATAGCCTACCTATCAGAAAAGCCCCGAAGGGGCTG  
ATAATTTAAAGCTGAGAGGCTGCCCGACCACGAATCTGTGTCAGGTCTTCGTCAATCATC  
AACTGACCGTCTCGGAGGACACAACCGAGTTCGTTATCACGAGACTGTACCTCATGCACC  
TCCAGATTGTCAACCAGTTTTAACTGATTGTCTTCATCACGAATAACCTTCAGGAAACCT  
TTTGCAGATTTCTTAGCGAGGTCAGTCTTCGGGTCTTTGACAACCATGATCTGCTTGCCG  
TCGATAACTGCACCCGTTGCTTTCACAGCCATACCCAGTGAATCACGAGTTGTGTACTGG  
GCTGTGTAAGAACCAACACCGTACACGATGTTACTCGATGCAAGGCCACGATCTTTCAGT  
CGTTCAAAGATATCTTTTGCACGAGCAACAGTGATATAGTCACCGTAGATCAGGCCGACA  
TGACTATCAAGAACTTTGTACCATCTGGAGTTAACTTCTCCACCAAAGATTTCCACAAA  
CATTCTACTGCACCTTTTACCTCATTATCTTCAAGACCTGACGCTTGGAATCAAAGAAT  
GCATTATCTTCATCATCTACCAGAATGCGATAATATTTACCCTCAATCTTAGCAACTTCA  
GAGTTTGAATTATCCTGTAATGCTGTGTCCGCATCTGACCAGTCATGGAACCTCACCCAAG  
CAGCGATACCCGGCAAAAATATGCTCAGGCATACCTGAGTCAGGACGAAATACAACACGA  
CCTTCACGAGAAAGAGTTTCATGTTTCAAGATTGCTGCTGCTTTCGTGATAATCGCCAAG  
AGGCCATAGCTATCTGCAACGTAGGAAACAAAACCTTTCGGAAAAATTTCCGTGATGTAG  
CGCTTCAGGAACTCGACTTCTGCAAGATAACGTTTTAAGATCAAGGCTCACGAATTCTTGA  
TTTGCTGTGTTTTCTTCCATCTCATTAAACGATGAAACCGATATTGGTTGTTGCAACATTG  
TGTTTCAGATGCAGGGACAGACCCAGAAAGGAACATACATTTTCATGTTGTAATAACGATTT  
GCATACACAATCGCGGGAATGGTATCAGTACCCATAGAACTGATCAGTTGTCCAAATCCA  
CTCTGTGCTGCGTCATGAGTCGCACCTTACCACGATATGCAAAACAGTGGTTCTGGAAG  
GGAACATGCAGATTATTATCACATGTTTCAGCAGCCCATTTCTGAGACAGTTTACGATAT  
TGCCAGAATGTTGTTGCAGTTGTGACTGTTTTCCAGGTTGCTGCTGACATCACAGTTTAC

AGGAAGTTCGGTAACCAGTAAAAATCCGGATGGGTATTCTGGATAGTGAACATTGGAACC  
TGCACCGGAGCCAGAGTGCCTTCTGGTAAAGCACGGATTTCCAGAGGTAGATAACCAAGG  
TCGTGTAGCTTCTCAAACCCACATTTCCACCATACCCGGTCCAATACTCAGGTCGCAA  
ATTGCTTTGTAATCTGAAATCGCTTCTTCCTTTGAGCGTTTGAAAAAGTTTTAAGTAAAC  
ATATCGATCAGGAACCACTTGATGAATCCCTGAATACCAGCAAACATCACACGGTGGTCA  
TTGTCTGCGAAGTGGATAAAGTGCTTTGCGTTACGGGCGTTCATATTGGCCTGAACAATG  
TCAGAACGTTTGTACATCGAGATGTGACTCGGTTTGTAAAAATCAGTGAAAGTAATC  
GGGCTTTCTTTATGCAGCATGTGTGTCTCTCCTCTGTGAATTTTGTGGGAGCATTCTTGG  
ACCCGTTTTATACTATGTCAAGAAATTTTAGAAGTTTTCTATCCAGTCGTGATATGCATA  
AATTTTCATCTACACCATCATCAAGAATGACCTGCTTGCCGAATGAGAAAATACCCGTGTGT  
GACATAAAGGATAACACGTTTTGCACCCTTCTCCATCAACGCTTGTGCAAGGGCCATCAA  
TGTGCGACCACCATCACAAATGTCATCAACGATGACACATTACGACCAGTAACATCCTC  
GAAGACAGCAGTACCTGTGATCTCGTGAGTTTTTACATCACGGACCTTACCTGCTTCAAC  
AAGCGGAAGGCGGAGATGTTTCAGAAACCTTCTGCGCTTTTTTACGTGCTCCGGCATCTGG  
GGCGATAATCGTAACATCCCTACCAGCAAGTACATCACTATAGGATGCTGCGAGTTCATG  
TTGGTGCCGAATACGAACATTGTTTCAGAAGTGCAGCAGAAACATCACTGTGCGGGTCATC  
TACGATAACCTTATCAAACCCAAGTGACTTAACGATGTGTGCAAAAACCTTGATGGACAA  
TGCCTCGCCAGGCTGCTTAACACGAGCTTGACGCGCATGGGGGATGTACGGCAGGTGAAG  
GAGATACTGTGCTTGAATATCAATGTTATCAAGTCGAGAGCAAGCATCTGCAAGCAGAGC  
AAGAGCCATAACATCCGCAGATGTCTTGATTTTTGCTGTGATGTCAACCAAACCAATGTG  
ACTTTTTGGTGCATAAATTTAATCGATCTTAACCTGTTCTTACCACCCTTGAATGTAAG  
GCGATCAACAGGGCCTATCAGGTTGTTTCAGACGAAGTTTTAAACTCATTTTATTTCTCCT  
CAATTATTTGATTAGTCTTTAAAATATCTTGCTTGTGGATTGTCTCTGTGAAGCCGTCAG  
GTAACCAAGCTTTTTTACAAACAAATTGTGGGATCGGACGCAACACAATCTGCTCAACTT  
TGGCAGCTTACCATAACTTTTGAACAGCATGGAGTACATCAGTTTGTGCTGAAACAAAC  
TTTTCTTTGAATGTTGGCGCATTCTTTGAAAACATAAAATGCTATACCAACGTTTCCGA  
TTGTTAAGCCTGGGCTGCAAGCTTTGAACATAAATGTAGCAGGTTCTTTCTAATTTTG  
GATTTGTAGAATCGCCAAACGAAATACTGTACTGACTACTCTCCGTTCCACTGTCAGAGA  
TGGCGTTTTTCTTCTCGATCCAACCTTTTCATACAGAGAAGAGAGTGACCTACCAACAC  
TGGCTCTACTCAACCTGTGGCGTTTATGAAAACCTGGTAAGTATAAACCCCAATACCAT  
TCAACCCCATAAACATCAAAGAACCTTTTCAGAAGCACTTATTTCTTTCGATTTTATAA  
CTTCATGCATAACATCCACTATCTCTTAACAATTACGTAATGCCTCGGTTTTGCATTCCC  
TTTAGAATCTTGAACACCAGAGCGTATGCGGCGCACGTATCCAAGATACTCTATCTTTGT  
CAAGAACTCTGATACTTTCGGTTGTCACTTCTCACTCAACCCAAAAGATGACACAAAGA  
TTTTTGGGATGGAAAGAATATCTCATCACCACCATCAGGGATTAAACTCTTGAAGTAATC  
ATACCTCCACCACAATTGTATCAACCTTTGCAAATCTTGTGGTGAGAGACGGTCATCAA  
AAGCCAGTGTGTGCGGATAGTGACGTAAGAGCCATCCCTTATGTTGACAGCGTTATCACC  
AATCTTTATCTCCACCACCATCTCCTATTTATTCCAGAACAGATATAATTAGAATGTACA  
CCAACGTAACGCAGATGTCAACATAATTATCCCAATCGGGAATGTCTAATTATCCCAA  
AAAGGAATCCAATACTAACCTATCAATTAACCTAACTTATGATCTTTTAAAATCAAACA  
ATAAAACATAAGATCTATATAAAAGATCTTTAAGTATGATCTATAGATTCTACAGTCATA  
GAGCCAGTGGCTCAGTTGGGTCAGTTGGGTCAGTATGGATGAACAAAATCTGTTGTCAA  
GAGTTGACTTCTCGTTTTGTTTCATGTACAAAGCTTCTATCGTTTTAGAGAAGAGTGTGAA  
TGTTGTCAAGTAAACAAGCTAAAGCTGTTGGAGATATGGTGTGTGGTAAGAGTCGTCGTA  
AGGCGATGCCTACAGATGAAGAAACCACACGATGGATGATGGTATGTGAAGTCTTTCATG  
AATGCAATAAGGAACAGAAAGATTGTGTGGTGTACCAGATGGTCAATCTGCACATGAGG  
TGTTTGGAAATTACGACGACTTTGTTTCGTGGTCTACGCAGACCAAATGTGGTGGTGA  
CTCAGATGAAAGACTTGACAGTGGAGCACATCGAAGGTAATAATTGTGTGGTGGATCTGA  
GTGAGATTCTCATAACGCTCTGAGAGCCTCTCTGAGACGTTTTGCTGGTGTGGTGGTACA  
CTTGGGTTCCCTCACACCATTTTAATTCAATACAGGGCCGCTCAGAGGCTCTGAGGGCTAT  
TGTGGAAGATTATTTTCAAGCTTAGTCACATATCTGGTGAAAAATCTGTATGCAGAGAGG  
CTTTTATGGCTCTTTGAACATCATGGCTTTCGCTGAAAAGCGGTTCAATACAAAACCTGT  
ATCTCGACAGCCGTGTGGATATTGGTAAGTCGTGGTTGGAGTCATTTGTGTACATTCATG  
GTGATCGAAATGTCGTCAACTTGGTGTGCTTGAAGCTTATTACTTCGCAGCACAAACATC  
TGCCCCGTGGAACCAATACCTTCTTTACGCATACCCTCCGGAGGACATGGACAAATGAA  
AAAAGACATCAAGAAACCTGTAATGGAAAAATTTCGATACAACAGCTTTTGTTTTCAATAC  
AAAGGTAGAGATCATCAAAGAAGCCATTCAACGCTTGCACGATCAAGAGGCAGATCCTAG

CGCAGAACCCTTACAAAAGATGAAATTTTCGTGGCTGGGGTGGTGGGAACCTAAACATGCC  
AGAAGTGGAAAGGTGTGGACTCACAGAGGTTATGACGTGCGCCCAAGAGAACGCCGCTTT  
AGGGCTGTATAAGAAAACAACGAAAAGGCAGAAAAAGAAATGACCAATATCGATCATGTA  
ACATCAGATACAAATTGGTGGCATAACCAATATTCTTGGTTTCCCATCCTTTGATAACTTC  
CTTAAAAACCTGTACGGACCGAAAGAAGATTCAGCGAGGGTGGCAAGATGAATGACGAC  
ATGGTTAAAACATGGAACAAACATGTGAAACCTGATGATGTTGTTGCACATTTAGGTGAT  
TTTGTGATCGCGTATGGTAAGCATATGGAGCCGAAGGTTCTGTGACATTCTTAGCCGAATC  
AACGGAAAGATCATTTTGGTTGGTGGCAACCACGACAACCACACTACAAAGCGGGTATTT  
CGCGAGTTTGGTCACGAAGTTGTTGACTATAAAGAATTTGATTTTCAGCACAGGAAAAGAA  
AAAGTTCGGGTGTGTATGTTCGCACTGCCCGTTTGCATCTTGAATAAAGCACACCACGGA  
TCAGTCATGCTCCACGGACATAGGCACGGCTCATATAAGGCACCTGGTGGACGAATCCTT  
GATGTGGGTTCGGGACGTCCACGGTCGACCTTTGACGATGCTTGAGGCCGTTTCTGAGGGA  
CTTAAAAAGCCTATTTACGATATTCCTCACTGAGGAGATGGTGTGCACAACCAAAAACGC  
AATTTCTTGCCTAAGAAAACATCAAAATCTTTTTACGCCACAATACATATTGCTGGCAGT  
TACAACCAGGCGGAAAATCTTTGCCGACACTGGGTGAGGAGGGGAGCATGTGTGCAGATT  
TCCCCTTGTACTTCTGTTTATACTGGTGGTGTGGAAGACGGTATGACTGTGCGTATCATG  
CAGTATCCTCGTTTTGAGCGACCAGGACATGAAATTCTTGACATGGCTGTTGAACTTGGG  
ACATCCTTGGCTCAGGAATTATGCCAGGTAAGCTTCAGTGTGATACACCGTATAATAAAA  
ACGTATTATCAGGCAGATTGTTATGAAAAAAGATCTTAGGTCCCCTCTTGGTATCAATGA  
CTCTGAGATAATTACACAGAGTGTGTTGATGGAAAAAGGATTTTCCATCCTGTATATCT  
TAAGTGGCGAAATATGTTGCGAAGATGTCTTGTAAGCACAATAAACACCAATATTATGA  
AAGAGTATCAGTATGCGATGAATGGTATTACCTTCCAATTTCAATTCGTGGGTTGGTGA  
TACGGATGTTGCTGGCCTCTACTTGGATAAGGATATCCTCGGTGACGGAAAAATATACTC  
ACAAGAGTCTTGTGCATTTCGTAACACAATAATGTAATCAATTCTTTTCATCTGTGAAGAA  
AAATGGCAAGTATATGATAGGGGTTTCCAAAGGAACCCGCCTTGCGGACACATTATACTG  
CCACTACAAAGGTAGGTATATTGGTAGTTTTAGAACAGAAACCGATGCTCATAAAGCTTG  
GCACATTGAAAAGAGAAAATCATGCAAAATCTCTTGAATCTCAGAACAGGATGTTAGAAT  
AAGACAAAAGCTGCAAGATATTAGTGCAAAAATTGAATATGACATCCTAATGGGATAAGA  
AACATGCTCTTTAACGTAGACGATCTGGTCGCTAAATAGCTGGTCACCAAGAAGACTGAC  
ACTGATAGCCCCTTCGCTGGCCTATCAGTTCTGAAGTACAAGAACAATGTCTTCTGGGAT  
AATCTGTGGAACACAGATCCACGTCTCTTGGAAATGCCGTGGCATGGAGGTTGATTCGGAT  
GACAATGTGGTTATCTGGCCTTTCACCAAGATTTTCAATCACTTCGAAAGTGGCACAGAC  
TTTCCGGCAGACAAGGTGGTTGATGCAGTTCGTAAGTTAAGGGATTTATGGCATCCGCT  
GGTGTGTATAAGGGCCAGCTTGTGGTGTCAACTACAGGAACTCTGGAATCAGACTTTGCT  
GTTCTGGCGAAGACTCACATCATTGCTGAATGCAATGACATTGAGCACGTCATTAAGTGG  
ACCTAAAGTGCAAAGGCGACATTCATCTTCGATATCTGTGATTCATGTGATCCGCATATT  
GGTGATGATGAGCGTGGGGCGTACCTGATTGGTGTTCGAATCCAGATCCGTGATGGCACA  
AGTTTTATGCTGCCTGAAGGTGACCTTGACGGAATCGCGAATGTTACTAAATTCACGAAT  
CCTGAAGTCCACCAGATGGTTAAATTTTCAGTTGTTGTTGAAATGTCAAACATTGCAAC  
CACGAAGGTTATGTTGTGCGTGTGCCAACTATCCGTTACGCTTACTGTAGAAAATCAA  
TCCCCTCATTATCTGGCGAAGAAGTTCTTGATGCGTGGTGGTGAACATGTGGGATATG  
ATCTGGGATCATCCAGACAACGCAAAGCAGCGTATTGATGAAGAGTATTACGAATTGCTT  
GATCATATTCCTGAATACTACACCAAGATGCTTGGTCAGCTATGGATTCACAGCAGCAT  
CGTAAGATAGTTGAAGATTATTTTACGATAGAAGATCTCTTTAACCGTGGGAGTCGTTTT  
TATGTTGGTGTGGCTCGATGACTTAAGGGACCCCGTTAATTACGGGTATCCAGATGCCTT  
GTGGATAAAAAATTCGCAGGATTTTACTCAGTTTCTCGAAAATCCGTCAAACCATATCG  
TCGTGTCACGGAGTGGCACTTCGATAATGATCTTGGAGAAGATTCTGATCATGATGGGTA  
TTGGCGTTTCTGGCGCTTGAGGAAAAGATTGTCGTCGTAAGATGCTGTTTGGCCCAGT  
TAAGCTGTTTCGTTACACATCGGACCCTTCACCAGGGCATAAGTTTATGCTTTCAAAGA  
TAGTTTGGCACGGTCTCGTGTAACCATTTCTGAGAAAACAATTACTGAGGAGAGGGTATGGA  
AATGACATTAATCATCATTTCGTGGGGTTGCTGGTGCGGGTAATCAACCGTTGCAGA  
ACTCCTGAAGAATGACAGCAATGTTGCACATTACGACGCGGATATGTTTCGACTATGTTGATGG  
TGAGGACCGGTGGAAGCAGGAAAACCAGCACAAGGCGGACGAGTGGTGCCAGAAAAACGT  
TCGCCTGGCAATGGATATCGGTTATGATCGCGTGTCTCGTTTCAAATACCTCAACCAGCGA  
GAAAGAAATTAACCGTAGCTTGACTTGGCTAATGATTATGGATATCAACTAGTTTGGCTT  
GGTGGTTGAAAACCGTCATGGTAACGATGCTATTACAGCGTTCGCAAGAAACACGAGA  
TGCTCAAGAGCGTCTGCTGCTGTAACCTCGTTGAAATTACAATAGGAGAAATAAGTGAGACG

TTTGATTGTTATTTCTGGTGCTGGTTTCTCTGCTGGGAGTGGTGTTCGAACCTTTCCGTAC  
TGATGAGTCAACAGGTAAGGCGTTGTGGGATGAATACGATCTGGAAGAGGTTTGCAATAT  
CCACGCATTCCGTGGAACTTCTACGATAAAAACCCACATGTTTTACAATAAGCGTCGTGC  
TGAATTGCTGACTGTACATCCGAACCTGGCTCACCTTCACGTTGCAGAGCGGTTCCAGCG  
TTATCCAGGGCAGGTTGTTAAATTGACCACCAACGTTGATGATCTTTTGGAACGTGATGG  
TGTGACGAAAGAGGATACGGTCTACATTCATGGATACCTGACGGAAATCATTGTCAAGGA  
CAACCCGAAAGGAAAGCCGAAGATTATGGATGTAGGCTATAACGAGGTTGATCCTGTTCA  
GTATAAATGGTGTAAAGCCCAATGTTGTGTTCTTTGGTGAATTTGCACCAGAATACAGCAG  
GATGTATGACATCCTTGACGCCCTTACCAATGACGATATGGTGATCGTTGTGCGGTTGCTC  
AAATACAGGCATCAACTTCAACTGGGAGTTGTTTCCCTGCTCTCCGTAGAGAAACAAAGGT  
GCTTGTGGTAAACCCACGTATCAACTATCTTGAGCATGAGCAGTATGATGCTCATGGTGT  
TATGCAATTCCGTTGTGGTGTGTAGAGGCTTCAGCAACAACAATTTTCATCAAGATTGT  
GGGAGATCATCTTGAATGTAAAACAGCATTACAAGGTAAGGAGAAATAATGTGGATTGCT  
TACTTATCCCAACACTGTACGCCATTAACAAGGACGGATCTTATCAGGACTGGAATGTT  
AGAACAGAGGGCGATGAGGTAGTTGTTGAGTCTGGTACACAAAATGGAAAGGTACAGCAA  
AAACGTACCAATGTGAAATGAAAAATCGTGGTTCGTGCTAATCAAACAACCTGCTGCATTT  
CAGGCTGTGCTTGAAGCGCGATCAATATGGGAGAAGCAAGTACGCCCTGGTTATCGTGAG  
ACAAAAGAGGGCGTTACAGACTGAGGAGAACTTCTCTCCCATGCTCGCACACGATGCAATT  
AAACGTTCAAAGCATTAGTTTACCCTGCATATGAGCAGCCTAAGCTTGATGGGGTACGC  
GCCCTTGTAACCTTGACAAAGATGTTATCCAGTATTTAATAGTCGCGGAAACAAGACG  
TACCCTGTTCAAGGTGCATTGTTGCAGCAGACTTCAGAACTTGCAGAGCATACTGGGTTT  
GACAAATTTGATGGTGAACCTATATATTCATGGTCTGAGCTTACAGAAGATTGTTGCTCTG  
GCTAAGAAGTGGCGTAAACTGAGCAGATCGAGGTTGAGATTGACAAGGATTACCAATCA  
GATCTGAAACGCTATCAGAAAGCTATTGACAACGGTGAGCAGGTATGGAAAGATTTTGAT  
GGTGATGAATACGACGTAAGTATTGAACCGGTTAAGGATGTTGACCGATATGGCGGTTCC  
ACAAGTTTGGACCTTGAATATCACATTTTCGATATTCCTGTAAACGCAAACAGCCCGTGG  
CATTACAGAGAGCCATGATAAAAACCGACTATCTGATCTTGTTACCGTGATGTATTCACTT  
GATAGTGAGGTCAGTGCACCAAAAATAAATGTTGTTTCGTGGTGAGTTTGTCTGAATGAA  
GATGCGGTTAAGCGGTTCAATTGGGCGATACATGCAAGAGGGTTATGAAGGTGTTATTATC  
CGCAACTCCAAAGGCGTGTATGAATTCGGTCCGCGATCTTCCGACCTTCAGAAATGGAAG  
CTGTTCCAGGATGGTGAAGCGAAGGTGTTGGACTCTGTGGAGCGCACAGACGGTGAGCGC  
GTTCTCCTCTGCGAAGAAAAAGACGTAACCAGATTTACCCGTAAGATGAAGGGGACGCGT  
GAAGAACGTTCTCAAGCGAGAAAGTTACTTCTGGTTCGGTAAGTTCATCAACTTCACATTC  
CAAGCAAGGACTGAGGACGGGGTTCCTCGGTTCCCTGTAGGGCCGCGTGTACGAGTAGTT  
GATTCATTAACATGGGAGCCTGTATACTGATGGCATTTTATAAGAGAAAATATCAAGAAG  
TGGAAGCGCATGTGTTCAATGGTTCAAGCACAGGTGTTGGTCAAGTGATAAAGTGGATGG  
AGACTGGTGTCTGGAAAGATTACAGAGATTCACACACGAGACATCCATAACACGGATGTGA  
ATGGGACCCAAGCTTTTCCCTGGTGATTATATCGTTAAGGTTGGCGACCAATTCGTTGCAA  
TGTCACCACAGGATTTTAGCGACCTGTATGAGCCTGTGACCGATGATGATCGTCTACATG  
GTGATGACAAGGCTAAGAACGTGGTGATGGGTGATAAGGTTGAGATGTGGGGCAAAGAAT  
ATCTCGTCGAAGGGGTCAAGGTAAGTGGTGATGACACCATGCTTGGACTCGACGATGGGT  
CTAATGTCCAGATCCGTGGTTAAACTGCTGTAAAAGTCACTGAGGTACGTGCATAATGAT  
CTGGTATGGACTGGCGTTGCTTGGTGCAACAATACTCACTGATGGCGGGATTTATCTCGC  
CTACCGATTCCGTAAGATAAGCTCGATGTTTTTATCGACTGGACTCAGGGAAAGATTAA  
GCGTTTACTGATTGTCTGGTTCGGTTGTATTGGGTCTTGTGACGGTGGCCCTTATCAAACC  
GTTGTGGAACACAATGACATGCCAGATTGATGGCATGGCATAAAGGTTAATACCTCCTA  
TTCGTGGTATAAGAACGGGAGTTATGGCGATAAGTGTCTTTTCGTTACAAAGAACGGAGC  
GCTGCTTCCATTAAGAATTATTCGTGATCAGCCTGATGGTGATCATGCTTCAGCTGTTGT  
TAATTAAGGAGAATAAATCAACTTCGGTGTAACTTATGAAACGCTACTGTCAATAACCAA  
ACCGAAAGATATGGTTGAGTATGGTTCGCCATGTAGCTCAATGGAACCACATAGCGCGTGT  
TGCTCGTGGCGGGAAGGCAACTCCGGTTGATCTGCAATTCTCTTCTGTTGTTGAAGAGTT  
CTAAGAGCTTATGAAGGCTCTCAGCGAAGGTGACCGAGTTGAGGGTGTGATGGGGCCTC  
TGATCTGTTTCGTGGTCTCATCCTATGCTTTGTGGCTGCTTGAATCTTCTGGTGTTCGCTG  
GGAGAAGTGTCTGAAGCCAGCAGAGGGTGCTCAGTTCAACAACGGTGAGATTGTAGAGCT  
TATTTTCAACACCCCTTGTCTGTGGAATCAGTTGCTGATATCTTGCAGCAGTCGGTGGC  
ATTATGTTTCCGCTTAGATATCAACTTGGATTACAACATGCGTCAGGTGGTATCCTCTAA  
TGACTCTAAGTATCCGACGATGACACAACCTAAGAGAGGCTCACCTACTCTGAGCTTATA

TAGTGACGATGAGTTGCTTATTGCCGAATGCAAAGCTATTGAGAAACGATCCAACGGTCTG  
CTACTCTTCTGTGAACGCTGTACGTAGTGGTGAAAACATCGTGTCTTCGATGGAAAGGG  
TAAGATCATGAAGCCGAGCACTTTCGTAGAACCGAAAATTATTGCTAGACAATAAAGAAG  
GGGTCTGTATAATGGACCCCATCAAGACAGAGAGGAGAAATAAATTGGAAAAAGATTTTG  
ACGAAGTTTGCAGGGAAGTGTAGAATTGTCAAAACGTCTTAATGTTCAAATCGTTATCG  
GCAACAGGCCGACATTCAGGCCGAAGCAACATATGATCCGCTTCACAATGAAGCGTCTGTT  
GGGGCGGTCTCAAGAAGTACGCTTATGAATGCACTCTCGAATATCTGAAGACGTATGTAG  
AGCAAATCGACAAAGCTGGCGGAAAGATTATCGATATCGAATATAAGTGTGGACAAAAA  
GATTTAAATAGCTATACTGAACTCACTAAACAAACAGAGGAGAAACAAATCTATGCCACG  
TATGCCTAATATCAAAGTAGAACTGACAAACACCCTGCCTTCAGACGCTGTAGAGCGTGA  
GCGCCTGAAAAAAGTTGTTTCAGGAAGGTTTTGATGCGAAGATCGCCAAAAAGATGCGGC  
GAGCCAGTTCAAAGACATCGTTGCGGTTGATAATGACAGCCATAACTACGACCCGAAGTT  
CATCAAGACCCTGATCAATGCTGAATTTGACCCGAGTATCAGGCAGGTAAAAAACGTAA  
AGATCTCGAAGAGCAAGTTGAGCAGATGACCGAAGCTAATATTCTGTTTGGTTCGCGTGAG  
CAACTAATGAAATGTTACCTGCATGGTGTGGACTTTTTGTTTTCTTGTGCTTCATCTTC  
GGGTTTCGCAGTACCGACTCTGGTTTCAGCAAAGAATACACTTTTAGTCATGGGTGGTTTC  
GCCCTTGTATTCTCCGCCCCAGTTGTTGTATGGTACTGGCTCCGAAAGGTGTTTATTA  
CGTGGAGGGGTAAATGCTGCTAAATCTTAAAGCGTCTACGTGGGAAAAGTTGCAGGCTCT  
GGCCCGTTCCAAGAATAACTCTGCTGCTTCTTACCTAACAAAGATTGTTGATTAGTACGT  
TGACGAAAACGTAAAAACTGAATACAAAATCAAAGAGGAGAACGAAACTAATACTTAAGA  
ATATCAAACGTGTACTGTTGCTGGCCTGATCGCTTTGGGGGCAATTAGCCTGACTGGTT  
GCGAACGTGCCACCGTGCCTGCGGGTTACGTTGGCGTAAAGGTTGACCTGTACGGTGACG  
ACAATGGTGTCTAGCAGCAAGAAGTTGGTGTGGTAAGTATTGGTTGACCTGGAACGGAG  
AGATTTATCAGTTCCCGACATTCAACCAGTTGAATAACTACGAGCAGCCGTTCAACTTCC  
AGACCAAGGATTCGATGACGGTATCCGCTAAAATCGGTGTTGAATACTTTGTTGATCGCT  
CAGAGGCCACGAAGATTTTCCAGACCTACCGCAAAGTGTTTCAGGAAATCACTGATGTAA  
ACCTTCGACAGAATATCTCGGATGCCTTGATCAAAGAAGCTGGCTCAATGGACATTGGTA  
CGCTGCCTGGTGATTGTAACAGTCAGTTGCTTGAACGTGTTACCAAGCAGCTTAAGTCCA  
GGCTTGATCCGATTGGTATTGTGATTGTA AAAACTGTCATATACCGATGAGCTGATTTACC  
CCCCGCAGGTAACAGCGTCAATCAACGCGAAGATCGAAGCAACTCAGAAATCTCTGCTGC  
GTGAGAACGAAATCCAGCAGTCCAAGGCTGAAGCTCAGAAACAGATCGAAGCCGCTCGCG  
GCGAAGCTGAATCTAAGCGTCTGCAAGCTCAGGGCGAGTCCGATGCTAAAGTGGCACTGG  
CAAAGGTGAAGCAGAATCCATTTCAGATGCGTGGTGTGCTCTCCGTAAAAACCCGGGGA  
TCATGCAACTGGAAGCCATTAACAAGTGGAAATGGCGTTACCCCGGTATATATGACCAGTG  
GAGCACAAGCCCCGTTTCGTTACTCTGCCAGCAGGAAAGTAACAGTTGACAAAGGGCCCGG  
TGATGATTATCATCGGGTCTCAACATATAAAAAGGAGATACAAAATGATCCGAGTAAAAT  
TCTTCATAGCAGTATTACTGCTCTCTTCCCCGGCATGCGCCACAGTCAACACCCTCACCT  
TGGTGGACGAATACACCGATGGAAGCTCCAAAGTCTGCATTTACAGTGATGGTAATCGCA  
CAGAATCCTGTGTTAAGGATGGCCCTAGTTCTTGTCTTCCAAAAAGACATTCCACTGAG  
GTGATTTTATGAAAAAGTTCTTTGGTCTGCTTCTGTTTTATCCTTTGACGATCTTGTGG  
GGTGGTATACTGGCACCCCTCCTGTTTCGATTTTTTCACATGGACGGCCCCGGTGTGGAAC  
TCCCCGGATGGGCTGTAAGGGTTAGATTCTTATGGGTTCTCGGTATAACCGGGTTCATGA  
CATGGAGGGGCAGAAATGAGAGTAACGGATAAGTTTGTATCTTTTTTACCCAAGACGAT  
ATCTTCAGTAACCATTATCGCTGTGCCAATCCTCTCTGGATTCCAAAGCACCAAGCGGTT  
CGTGCAAAGTTCTCGACTGTAGATCACTTCATGATGTATGAAAAGGCTATGCTGTTTGGC  
GATACAAATATCGCGGTTGAAATTTCTAATGTTTATCACCCACAACAGGCTAAGAAACCC  
AGTCGGCGGGTGAAGA ACTTCGACAACAGCAAATGGGTAGCGTTTCGTGAAAATATCGTT  
GTGAATGGTCTTTATGCCAAGATGATGACTAATCCACCTTTAAGGCTGCGGCTATCAAC  
CTTCGTAAAGAAGGCAGGGTCTTTGTTGAGGCATCTCCCTACGATGCAATCTGGGTAAATC  
AAGATGGCTGAGAACGACTCAGGAGTAGAGGACCCAACTAACTGGAAAGGTCTTAACCTT  
CTCGGAAATTTCCGGGCACAAAGCGATTGACCGATTAATTGACACTCTTGAGTTGCATTGA  
AATTAGAGATCGAACTGGTTCCTAAAACAGCTTGGTTCACTAACTTACGTTCTCACCTCT  
CTAAGTCCAATTGGGATGTTGTAAGGAAGAGATGTTATGCAAAGCCAATTATATATGTG  
AGATTTGCGGGGGAAAAGGAACCAACACCCCGTAGAGAGTCACGAAATCTGGGACTTTG  
GCAATGCCAAGATCACGCTAAAAGGTCTGATCGCACTTTGTCTTCTGCCACGAAGTCA  
AACATATTGGATTGGCGGGTATTCGTGGTAGGGGGGAAATCGCTCTTCGTCACTTCATGA  
AGGTCAATGGTGTCTCCAGACAAATTGCAGACCAGTACGTGAAAGTGGCTTTCGCTTTAT

ATCACGAACTCAGTAAACAGGAAAAATGGGAAATGGATGTGCGGTATTTGGACGAGTATT  
TGTGTAACGATTGAGAGGGCTAGTGGGATACCCGTATGATAAAGATTGGAAAAATAAAGT  
CACGGATGACTGTGTGATCGCTTTAGACCTTGACCAGACTTGCTTTGTGTCTGCCGCTGG  
CGCTGAGAACCGTACAATAAAGGCAAGTGACATCGCTTCTGGTCGGTCAAAGATCATTA  
AACAGAACAGAGTTCTGGGGCTCCACCAAGAAGGTGCTTGGCGGATGGTTGAAGGACCA  
GAACGCCATTATGGAAGTGAAGGCGATAGCTGAAGACCGTGAGTTCCTTGGGGAAG  
AGATGACTTCTTAATCGAAGATATTCAAACCCCTGAACCAGAGGAACACTGCCTGCATAT  
ACTGAAGACAAAGATTAAGGCTATCTTTGAAGATTTGGGAATGGACGGCAGCAATGGCCT  
TGGTGTGCTCGGCGGGGACAACAGCTTCCGTCTGTTGTTACCAGCACCGGAACGTTACAA  
AGGAAACCGTGAAGACACCTTTCGTCCTTTGCTGTTGAAGGAAACCCGCGAGTATGGCAA  
GAAGAAGTATAATGCCAAGGTCATTGATGGTGTGAGGCAGATGATTACCCGTCTGTTCT  
GATGTATACCGGATGGGAACACTTCCAGGCGACTGGTAAGTTCAACTACATGGTTGCGTC  
GTTTCGACAAGGACCAGAAAGGAACACCGGGTTTACTTCTTGATACGATGCGTGATAGCGA  
GGAGAAAACTGGAAACACCCGATCCCGATGATTATCGACGATTCTATGGGTGAGATCTG  
GATGGAAGGAAACAAGGTCAAGGGATGGGGACGTAAGTTCCTTTGGCTATCAGATGCTTTG  
CGGTGATAGTTCAGACAATATCAAGCCTTAGCAATGCTTCGATATCTTTGGGCGTTTTGG  
AGATAATGCTGCATTCAACCTGATCCGGCATCTTCAGAACGAGAAGGAAATGTGGACGGC  
AACCGTTGACCAGTACAAGACTTGGTTCCTAATGGGGTTGAGTTCACCTCTTGGGATGG  
TTTACAGCGCAAGATGACCGCAGGGCAATGGGCTTCAATCATCATCCAGATGGTTTACAT  
GAAGCGAACTGCCAACGACCATACTACGCTCACAACCTGAACATCGTCGCGTGGGGGTTAT  
ATGATTGATAAGATGATCATGGATGCTGTAATGAGGGACACCCAGGCCCTCTCGGTGTCC  
TCTCTGTAGCCAAAATTCATGGTTCGAACAGGGCTGTGGAGAATGCTGGAAACAGATTAT  
GGGACTATGTTGTCTTACGGATGACTTCCTTGAGCCTGATAAAGGCATTCCTGTACTT  
CTTCTGGAGGATTGTGAGCTTGTGGGGGGGGAGAGATTAGTTCTCCTGACAAGCGTGGCT  
TACGGAGACCTTGAGTGTCTCTGGTGTGTTCAAGGACCAAGCTGTAGGAGACTCCGAT  
GATGTTGATGTTGGTTGACCAAAGCCTAAGTCACTGTGCTGTCGTAATATGGGAACATGG  
TGATCCCGTTTACAGGGAAATGATCAGGACAGGCTCAACACACAGTAAAGGGAAGAGGCA  
GAAGGATGTTGTTATTTTGACAACGTTTATGTGCAAATCCGTTATATTGTGAACAAGAT  
ACAACCTTGGCAGAGGAGCACAGAATTGCCCACTACGTCAATGGAAGCCCTCAGTCTTGG  
TTCTATCGGTAGTGCAACTCGTCATTTGGCTGGCCTTTTTTACTGCGTTGTGTACGCATT  
GTACCAGTTTGGTATTTTAGGGTATGGTTCATCCACACTGTTGCACCAACATCTGTGAA  
ATCTTTTTTCGAGAGGTCTTTTACCGGAACAAGAGCGCACTTTTGTGAAAGTAAATGTTGA  
CACAAAGCCAGGTAAGAAGGTATACTCAACGGGCCAAGTGAAGATGGAAAAATCGCATAT  
GGTCAAGGCTGTTGAGAGCGACATGCCTGGCTGGTTAGACGGTCTTACGCTCGCGGCTGG  
TAAGGCGGATTATGCGGATGCGTATTTGATCGGGAAGAAGTTCATGGAGGGAGTATCCGT  
TGAAAAAGGATAAGGAGTCTGCATCAAAGCCCAAGGCAAGGAAGAAACCTGTGCTAGTG  
CCATTGACGCCAGGACTTTGGGTAAAAGATGCAAGACAAATCGCTGCATTCAGGGAGAAA  
TTAATCCTTGAGCAGGGGGGTCTTGATCCTGTGCTTGGGGAGCCACTTCACAAACCTTGC  
TTGGACCATGACGACTTCGATGGTAAATGTCGTGGAGTCTTGAGTCAGTGAGTGAACACC  
TTCGAATGATATGTGCTGAAGGCATGGATGAAGTACGTGTCTGCGTACACAGATACGTCT  
TTGTCCACAGCGCTCCGAAATCTTGCTGACTATTTGGAACAGGATTTTAGCGGGTTCCCT  
ATCCATGCAGCGCACAAAGACGATATCCAGAAGTTCCTGAGGAGGTGTACCAATGACTAC  
ATCATTGAAAGGGCGGAGACTGACCTCGGCCTGATCATCCCCAAAGGTACTCAGCAGCAT  
GATAGCAAAACGCTTTACCATAACAGAGTTTGTACGCTAACGGAGGATAGATTTGCTGGA  
CAATTTGAGCAAGCACCTGAAGTCTATTACAAGAACTGGCGGGGGGAATACGGTTATCG  
AACCGGGATGGACCCGATTATGTGGTTCGGTTCACAGAGTATCACAAAGAGCCGCAGTG  
GATGATCAAAGCATAACGATGTTGAGAAAGATGCCATCCGTGACTTTGCTGTGAATGACAT  
TGTTGAATTTATACGAGAGGTGTAATGCTGAGTGCAGAAGAAATCCTTGAATTAAGGCG  
AAAGGTATGAACAACCGTGAAGTTGCTCGTCTGTTATCTGGGGATGGAGAGTAAGGAATCT  
CATATCCGTCTGATCCTGAAGGCGCACCAAGTATGATGCAGAGGCTGCTCAGGTGATCACC  
GAGACAGTTGTTTCGCAATCCGGGGGCGAAGATCTTCCCTTGGTTACGTAGAGGTATACCA  
ACGCTCGCTTGGGTCTCTAACCGATTCAAGGCGTTTGTAAACACCTTCCCACGTAGAACAT  
TAGCCTTATATGTACACATGGGCGGGTAAAGTGGTTGGATAACCCTGCGATTATCAGTCGC  
AAGCTGCCGATTATGAGACGTTCAAACCGATATCCACGACGACCGTGAACCTGGTTGAA  
GAACTGTGGCATAGCCTTATGATGAGTGTGATATTTTCAGTGCACACAACGCACGTTTCGAC  
AAAGGATGGGCTAACTAACGGTTTGTCTTCCACGGTGTGAAACCGCCGTCACCGTACATC  
GTGATCGATACACTTGCAGAACTGAAGTCGGCTTTCTCCCTGCCGTCCAACGCTCTGGAT

GCCGCTTGTGATTACTTCCAGCTTGATGCCCGTAAGCGCCATCACGAAGGGATCACCTTG  
TGGATTTCGTTGCTTCCACGGTGAGGTTGCAGCATTTCGAAGAAATGGAGTTTTACAACATC  
GGGGATATTCCGACGCTTGAAGGTATCTACTTGAAAGTTAGACCTTTCATGAAGAACCAC  
CCGAACGTGAAGCTTATAGCGAAGAAGACGACACCACTGTCCTTCGCTGCGTTTCGTTGT  
AACTCTGATAAGGTACTGCCTATGGAAGGTAAGGTGGGGACAACCTACCTGTCAAATTC  
CAGGCATATCGCTGTGAATGCTGTGGTTCTGTTATGCGTGACCGTCGCAACATCCGTACC  
AAGGAAGAGATGGCTAACACGCTTGTGAATATCATTTGAGGGCTTCGGCCCTTTTGCAA  
GGAGAGATGAATGAGTAGAGTTATCAGCTTCAAAGTCCCTGACTCGTTTGATAATGACTG  
GTGGATAAAGCAGCTTCGTGATCTTGACATGCGTCTGGAGGATTTGGTGGAAATCGGAATC  
TGATGAAGAGCGCTTGAATAAGATCGGGGCTGTCTGGACATCGTTAACGCTATGCAAGA  
ATATGCGGGGTACTGATGGATACTATCCTTCTGAACGCACCGCCGTTGAGCGGTAAAGAT  
GACATCTCCACCTATCTGTGCGATGGTCACCCAAACCTGCACCACGAGGCAGTTAAGGAA  
GTTCTGTTTGAAATGGCTGTAAGGACTGCTGGCATCTCTCGCGACCTGTGGGATGCTATG  
TACACTCGTCGTTACAAGGATGTCCCCAGTCCCTACCTGATGATTGAGGGTGTGAATGTA  
TCTCCTCGTCAGTGGATGATTCAGTCTCTGAGAAGGTGATCAAACCACTCTTCGGCAAG  
TCTGCGTTTGGCAAGGCAGCGGTTGAAAATCTGAAGCAGAATTATGCGAACGATGAGGTT  
ATTGTTTTTCTGATGGTGTATCCCGGAAGAATCCGAGAGCTTCTGATCACGCTTAT  
GCAACTGGTGGGGAGTTTTTCCTTGCACGTATTCACCGGAAAGGCTATGATCGGGGTAAAC  
GACAGCAGAAACTGGTTATACCTTGACGGTATTCGAGGTCATGAAAAAGACTTCGATAAC  
AAAGAGGGGAAGTTGACTGACTGCGCCGAATCTGTCCTTACTGAGGCGAGATCATTACAG  
TATGGAGAAGAGAATGCGTAAGCCACTTAACATCGGTATTGATGTAGACCTAACGTTTCGT  
AGATTCATGCACACCCTGGCTTCAATGGATGGAGCAGGTATACGGTGTAAAGGCAGATTA  
TAACCTGTCGCATATAAACCCGCAGGGGATGGATTATTATAATCTGTCAAACACTTCCC  
TCCTGCGAAGGTAAATCAGTTACCTCCGTATGAGTTTTGGGAAGATCCGTACCTGTACGA  
CAAACCTGCGTCCCCGCGCCGGGGCTGCTGATGCACTTGCAGGTTGGGCGGCTGCTGGACA  
CTTCAACCATTTTCGTGTCTTACTGCAAGAAAGGCCATTTCTCGTCCAAGGTAAGATCCCT  
GAAACGAGTGACAGAGGAGTTTTTCAGCATTGAACCTGGAAGTGGTCACGGTTTTTATGC  
AACAAAAACAAAGCTGGTATTAAGATTGATGTCATCATTGATGACCGTAATGAGTTCCT  
GAACCAGTTTGGGCCAGAGGTGATTAAGATCAAGTTCAAGACACCTTATGACCAATCTGA  
AGAACTTCGCGTCTCTCTCGATCTTGAGAGCGATGACTGGAACGTCATCAAAGACTTCAT  
GCTGAATATTGCTTAATGAAGAGATGCCCCACAGGAGACTTCGTTGTCCACTAGGAGGAT  
TGTGTGGAGGTATTCACCGAGGACGGAACCTTCCCTCATATCCTTCAAAGCAACAAGTGAC  
ATGTGTCAGTACATACTGACACGATATCTGGTGTTTAGACCCGGGATGGACCCGGAAACA  
CCTGGCCGAATCAAGAGGAGAGGCCAATGAGTCTTAAACCAGAATCTTTCGACATCATCA  
AAAACGAACTTCTGCGTCGTGCTGAAAAAATCCACAAGTGCTCGGCCTTGATGCTATAG  
GGACCAATGCAGCAGACCTTGGGATCACCGAAGATTTTCGTTTCCCGTCTGATCACTGAGG  
CATACTTGGAAATTTACGACCGACGAGGTTGAGGAAATGGTAGCCTTCCAGCAAAAAT  
TCGCAGATCGCAATCTCATTCTTGAGAAAGTTATTGAGCAAGCATCTGCTAAAGTTTTAA  
AAGAACACAAAGAGTCGCTGTATAAGAACTGGAAGGAGCACATAATGAAAAACGCTGT  
AGTTGCCCGTGTGTGTCGCGGATAGTATTACACCGAAGGGTCCCGTATTACAACTTTTGA  
GCTTGAGTACCCTCGTATCATTACAGCGAACTGATGACTCACCGTCTGTTTTCAGTCGGAA  
CGCTAAGAGCAGCGGTGCAATCCCGGTCAAAGATGATCTAGCAGGTTTCAGACAGACCC  
TGCAATGCCAGTTAAGTTTGGAAAGAATCAACCCGGAATTCAGGATGCTTGTGACCATGA  
CGCACAGCTTGGTGTATGGGAATTCGGCTGAAGATTGGTGGAAACTCGCAGGATTAAGTGC  
GGCACGCTTTGCAGCAGAATTCGCAGATGCTGGTACCACAAACAGATCGCGAACCGCCT  
GCTTGAGCCTTCCAGCGAATGAAATCGGTCTTGACAGCAAGTACTTTGAGAAATTCTG  
GTGGTTCAGGGTACCTAAGGATGCCGATAAAACCATCTACGCTTTAGCAGAGGCCATGAA  
AAAGGAATTTGACGCATCAGTACCTGAATATCTGAAGCCAGGGCAATGGCACACCCCTTA  
TGTTGATCACCTATACTCTGCAGGAGAGCAGGCAAGTGAAGACACATTTGATTACTGTGT  
TCTTGACGAGAACAACAACCAAGTATCTTGACAGTGGATGAAACTAAGGCTATTTCTGC  
ATCTTGTGTGCTCAGGTGTCTTATCGTGTGCTTAAACAACACGAAAGAGAAAGCTTTAGA  
CATTTATGGGAAACTTTTAAGCGGCAATAAGGTACACGCTTCTCCTTTTGAACATGTTGC  
AACCCCGATGAGAGGTGAGTTCAGCCAGTACGGTTATGACACAAGCATCAATTTGTCGGA  
ATACCCAGTATCTTGGGAAGAAGGCATTACCCATGTTGATCGCAAAGGTCGACTATGGAG  
TGGGAGCTATCGAGGCTGTATTGAGTTGCGTCTATTACTGCCTAATAACTATGTTGAAGG  
TTGATGTAGCTGGATATGAAGGGATTTATCAGGTAGATACTGATGGTAATGTTTGGTCTC  
TTGAAAGGTGGGTTGAGAAAACCTCGCCACGGAAAAAGAACAGCGCCACAGTTGGTCCCTG

CAAAGAAAAGAAAGTGTCTGAGCATGTCACAGTCTATCTGCCTGTTAGATTGGCAAACA  
ACGGTGTGTA AAAACTTT CAGGGTGCATAGGTTGACTGCTGAGGCTCTCCTACCTAACC  
CACACAACAAGCCATATGTGAATCATAAAGATGGTGATAAGAGAAACAACAAGGTCTCAA  
ATCTTGCATGGGTAACCGAGAAAGAGAACTGAACATGCTATAGAAACAGGGGCTGAAGC  
CTGAAAATCTGAGAGATCGCATGACTGGGCGTTACGTGAGCGAACTGGAAATAACGT  
AGTTTCTGGTTGACAAAGTCTCCAGTAAAACGTATCTTGGATGTATGAATTGCGGGGAGA  
AAATACTCCCCGATTATAGGCAGAATGGAGGTTACAAGATTA AAAACA AAAACGCAAACCAA  
CCCAACATATTTTCGGTCACTTTGGACTTTCTGAGAACCGTACCCGGATTTCGATGTAACCC  
AAGATAGTGGACTCCGTGCTGCCCTTTATGCAGTAGGCTTCCAAGTCACCGATAGTGAGG  
GGAATCCTAAGCAAGTAACAATGCTTAACATGAAAAATGTACGATGTGCCAATTTGCCCT  
ATACGTACCGTAAAACAACAATCTTTGTTGGTGACATGCGTCCGGATTATCCGTATGCAA  
AAATTTATAACGGTGTGATATTCTCGACGTAGGGATTTACTCCGAGCGCGACATGGAGT  
TCGTTCTTGATCTCCCATACGATATTCCAGTGAATGAGAAGGTTAATACCCGTAAGTACA  
CCAAACGTGGAGATCGTCCAGATTGGTTTGATATTACGTTTCGATAGTGAAGATGAAGCAC  
GTCTCAGTGACGCATTTGGTCTGGGGGAATAATGAGTAAAGAGAAGACCAAGTAGAAAGA  
CCGTGACTTCGATGAAAAGCAATACTACGCCGGGTGGCTCTACTTCAATGATTTAACCGA  
TGACAGCAAGATGTACGACGATGTTTACTATGATGAGTATTCTGGTCAAATAGTGAACGT  
CACTAGGCCGAGTCAGGATGATAAACCAGACGAAGACGTTGACGAAGCTGATAAGTATCT  
TGCTCAATTCGAAGAAAAATAAGGAGCAAGTTTGATCAATACATTTGTAAAGAGTGATGG  
AACCAAGGTGCCGTTTGAACCAGAACGCCTTAACAAGGCAGCGATCTTTTGTGATGACGG  
TAATGGTAACTGGTCACATATCTCTATGGACGCCTACAAGCGCCTGTATGATGGTTGCAC  
CACTCGAGAAGTTAACCAAGCATTGATCGATGCCTGCGTGAGCCCGAGAGACGAAGCCCA  
TTCAAGGATGGCTGGGCGAGTTCTGATCGGGCAGATCTATAAAGAAGCTTATGGCGGTTT  
CAGCAAGATCACTGCTCGTTATAATTTCTATCACGAGATGATTGAGAAGGGTTACTGGGA  
AGACACGGGTTACGGTCAGATGGAGTTCGTGGA ACTTGAGAGTGTCAATTAATCATTCCAA  
GGACCTTGACTACGGCTACGCCGTCTGAAGCAATTCCGTGACAAGTACAGTATCAAAGA  
CAACATCGACGATGTTCTTTTTGAGTCACCGCAGATGATGTTTATGGGTATTGCGATGGC  
GGTAATGACCGGTATGCCTCGTCATCGTCGTATCAAGGATGTCATTAAGCTTTATACGTA  
TCTGTGCGATCTGAAGATCAATGCTCCGACACCGTATCTGAACGGTCTCCGTACCGGACG  
AACTGGATATGCGTCTGCTGCATTATTAAGGCTGACGATACAGCGAAAAGCATTAGTGT  
TGCTCGTGAAGTTACGTATACGATGACAGTTGCACAGGCAGATATTAGCTACTACCTCTC  
CTCCCGCTCAATTGGTGACTGCGTTCGCGGAATAACGATCAAACACATGGGTAAACTTCC  
ATATTACCGTGGGATTGATGCCGGGGTGAAGAAAACCGTCAGTCCACCCGTGGTGGTTC  
TGCTACTATCGCTTTCCTGGCCCTTGACCCGCAGATCGAAGTACTGTTGCGCCTTAAGTA  
CCCGCAAACAGTTTCTTCAAACGTAATTAACAAAATGGATTACTCCATTGGTATTAACCA  
GTCGTTTATGAACCGGGTGGCGAAGAACCTTGACTGGAGGCTGGTATCTTACAAGGACGC  
ACCTCAACTACACGAAGGTATGGTCAAGATGACCATGCAGGAATTTGATGCAGATGTTGC  
TCGTGTGGCAGCGGATACTAAGATCCCTAAAACCTGGGTGGAGGCTCGCGATCTGGCACT  
AGAGATCCTTACCCAACGAGCAGAAACAGGTCGCCCCGCACGTTTACTGGCCTGACGAGAT  
GAACCGGCACACGCCTTTCCTGGAGACGATTTATTCCTCCAACCTGTGCCAAGAAATCTG  
TCTGCCTACCAAGGGATACAAAGATATGCGTAAACATCTTTGCTACCTTTTCAGACGATGG  
TGAGGTGCTCTTTGCTTCTGTCATCTCTGGATGCCGGGCGTGTTTCTCCGGAAGAGTA  
CGAGGATGTTGCTTACTACACCGTCTTATGATCGACAACGTTATGGATATCATGGATTA  
TCCGTATGAGAATATGGAACACACCGCCAATTCTGGTCGTTCAACCGGTGTTGGTGTGAC  
AAACCTTGCTCATTACATTGCGAAACACAAGGTTGCTTACGGCTCTGCTGAGAGCAAGCA  
GTTGTTTTCATGACCTGGCAGA ACTGCACAGCTTACAGTTACATAAGGCAAGCCTGGGTCT  
TGCAAAAGAGCGTGGTGTAGCTCCGTGGATGGACAAGACCAAGTACCCACACGGGTGGTT  
GCCAATAGACACCTACAACAAGGCAGTTGATGGAGTTGTTAAGAATCCAAGTCTCAAGCA  
GTATTGGGAAACTTTACGACAAGTGAATATCGAGGTTGCTGGTATCCACAATAGTGTGTT  
GGAAGCTTATATGCTGAACGAAATTTCTTCTCTGGCGTCGAAAACCTACTAACGGGCTTTA  
CCCGGTGCGAGATCACATTATCTTCAAGAAATCACCGCAACGGTCTGTGCTGTTTATCGT  
GCCTGAGTATGAAGAACTGAAGGATTACTACACCTCTTCGTGGGATATTAACACCAACGA  
CCTTATTGACATTTACGCCGTCAATTCAGAAGTTCGCAGGGCAGGCGATTAGTGTGACCT  
CTACATCGACTATACCCAGTTGAAAGACGGAAAGGTCTCGATGAAGGACCAGATCGGTTA  
CCTGATCCGTGCAACGAAGATGGGGATGAAGACTTGGTACTACTTGGACTCGAAGGTTGG  
TGATGGCGACTCCCTCACCGCAGAACTTCAGGCGAAGAAGCAAGCAGAGGAAGAGACCCG  
CAAGGATTATCCACTGTTTGCCGACACCTTCGTTGAAGACCCGTAATGTGAAGGTTGTGC



ATTGTAATCCTTATGGGGCTTCGGCCCTATTTTTCCGGAGGCGAATTAGTGGCAGTATT  
CAACGGTGAGAACACCGCTCATAAACTGGTGATTATCCGCTGTTCCCTCGGACAGCAAAT  
GGGTCTGTATGACTCTATCTACAAAAAATACCCAGCCTTGTTTGACCTGTACAAGGCTCA  
AAAGGAACAGGATTGGTCTGAAGACGAAGTTGAGCTAAATCAGTCAATCACTGACTTTGC  
AACCTGTAGCACATCCACGTATGATGTCCTGGTTCAGACCCTGATGTGGCTGTGTGAGGC  
AGATAGTGCTGCAGCACAGGCGATCATCTGTCTGTTTGCACCTTTCATCACAAACAGTGA  
ACTTTTCGCCATGTTGATGCAGCAATCATAGATCGAAGTTCTCCACGCCCTGACTTATTC  
TGATATCGTCCGTCAGTGTGGCCAACTCTCGGCAAATTAATGAAGATATTCAAAAACA  
TCAGGCAGTTCTCGAACGTTCTGGTGTGATCGTCAAATACATGCGTGAACCTTGAAGTTCT  
TGGAGCACATTATCGTCTCGATCGTGAGTCTGTAGACAAAGAACAGGTTTCGACGTTGAAT  
CCTACGTGCATTGTTTCGCGCTGATCGGTCTGGAAGGGATTGAATTTATCTCCAGCTTCGC  
GTGCACCTTTGCCTTGGCAGAACAGGGTGTGTTTGTTCAGGTCGGTCAGCTTGTCCAGAA  
AATCATGCTGGATGAAATGCTGCACACCAAGATGGATTTCGAGATTATTGATATCCTTCT  
GAAAGGCCCGGTGTGGAAGTCTAGTTTTAATGCCATTAAGCACGAGATCAAGGAAATCCT  
TGACGAAGTTCGAACAACAGAGTATGGTTGGGGTCATTACCTGTTTCAGTGATGGTCTGTC  
AATCATCGGATTGAATGCGCCGCTCCTGAAAGACTGGACTGACTGGAACGTGTGCTCCGAT  
TTATGACTACTACGGTATTCCAAAAGATTTTCGAAGCTCCTAAGCGCGATCCTCTGCCGTT  
TATGGATATCTGGATGAATCCAAGCCGTCAGCAGAATGCAAACACTAGGAGCAGATAAACAC  
GGTTTATCGTTTAAATGCGGCAGTCAACGATACAGACCGTGAAGTCTGGGACTTTTGAGG  
AGTAACATTGGACAATTCGATTTTTGAGTTCGGGGTTGCTTACGACCCCGCCTAGATTCA  
TGTCACCTTCGATGGTGAGCGTATTATGGGCCTGGATGGTGATGTCAAGGTTTCATGCTC  
TCGCGGTCTGAATGGTGTGGCCTGTGCAAAGGTCTTTATTCAAGGTCAAAGCCCTTGGGT  
TATCCGACTGAAAAAGCTTCTGGGTGAGCAAGGGCGATTGCAACTTGATTACACCGGAAG  
TGGACCATTCCACGACAGTTGTAACCTTTGTGGCTGATATGGTTGTGAAAGGTTATGACGT  
TGATTATACTGGCAACATCCCAGTTTTTGTTTTTACCTTGGAACCGGAGAGATCATGAGT  
ATCAAAGACAACATTTTCATTATCTACGGGAAGGACAATTTCTTACACTGCGTCCGGGCA  
AAAGAGTTCGCTAAATACAAAGGTCAGGAGTTTATGTATCTGACCCTGGAAAAAACTAG  
ACCAAAGAGGAACTGGTGGCAAAATGCTCTCCAGTGATCCCGACAACCGTACCCCGTATC  
TTTATGGATGATGAAACCAGCACCCGGTACATCGGAACAGGCGATGAGTTCATTGCATAC  
GTC AATGCAAACATCTGAGGGGGTAGAGGAGAGAAAGTAGTAAAACGCGATGTGAGTGT  
GAAGACTTCTCTCTGGAAAAAGTTAAACGAGCGGTTGAGGCCGCTCTGTTAGCAAAAGGT  
ATGGACCCAGAAGCAGCGCATCACACTGCGGTCCGTATCGGTTCAGAGGACTTTC AAGCTA  
TTCATGACGACACCTGTGAGACATGTTGAAGATTTCCATCGTGAAGTGGAAAATCTGTTG  
ATGGAAGAACCGCTACTCCGTGATGCTTCTCGCGCCTATATTGAGTATCGCCATGATCAT  
GACAAAGCGAGTGAAGGAAAGGGAAAACCTTATGCAGATATCACCGGATTCGGGGACCAA  
TCCACAGAAGAGTTCACCCGTGAGAATGCAAACATACCAAGCACGGTCGTAAACAGGCAC  
AGGGACCTCTTAGCCGGGATTTTCGAGTAAACATGTGGCGTTGACCCAGATACTGCCTAAA  
AACCTCGCAGAATGGCATAACAGAGGGTTTTGGACATATTCACGACCTTGATTACCTGGTA  
AGCTCTCTGACAAAATGTTGCTTGGTAAATTTTCGGGACATGCTTGAAAATGGTTTCAAG  
ATCGGCAATGCTAAGATTTAGAAGCCGAAATCAATTGGTGTGGCAACCACTGTATTGACA  
CAAATCATCCACGCTGTAGCGTCAAGCCAGTATGGTGGACAGACTTGTGCTAACATCGAT  
GAAGGTCTGAAGCAATACGTTGAAATGAGCTTCATGAAGAATGTGAAGCAGTCCATGAGC  
CACAGGAACGCCGTTGGGCCGACCAACAAAATGGTTTATGATGCAATGCAGACACTGCTT  
TATCAGGTCAATACCCAGATGAGCGTAAATGGTCAGACTCCGTTTATTACGATCAGCCTT  
GGTTTGGATACATCCCTGTTTCGGTAGGATGATAAGTTATAATTA ACTAAAGGTCCACAAA  
GAGGGCCTCGGCGCTGATAAGGTGAGACCAGTGTCCCGAAAGTTGTGTTCTTCTGAAG  
GAAGGTGTAACATGAATCCTGGCGATCCGATTTATGATCTGAAGTTGCTGGCTATGGAG  
TGTTGTGCTGAGAGAATTTACCCCGACTTCGTCTCAGTACCGTTGAACGTGCAAGTGACC  
GGATCTTCGGACGGCAAGGTGCCGAGCATGGGTTGTCGAAGCTTTTTTATCTCACTTTGCA  
ATCAAAAATGGAGAAAAGTACGATGGGCGTATCAATCTTGGCGTGGTATCATTAAACTTA  
CCCATGATTGCAGCCGAAGCAAAAAGCCGGAAGGTTTCTTACAGACCTGCTTGAGAAA  
CATATGGAAATGGCTTATGAGGCACACATGCTTCGTGTTGGCCGTCTGATGGATGTTACG  
GCATCACAGAACCCGACATTGGTCATGGAATGTGCTCTGGCAAGGCTCGGGCCTGATGAG  
AAGATCAGTAACTCTTCTATGACGGGTACGGCTCCATTAGTATCGGGTTTGTCTACCTT  
TATGAGGCTGTGGATATCCCTTATGATGAGCCAGTACGCAAAGAGATGGCGATGAATATC  
CTGAAGTACATGAAGGATATCTGTGCACAGTTCAAGGAGCGCAGTGGGTTAGGTTTCAGC  
CTGTATGGAACACCTGCGGAAAGCCTGTGTTATCGCTTTGCAAGCAAGTTACAGGAGAAA

CCTCCTGGTTTACTGAAAGAGATTACCTGACAAACCCTTTCTACCAACCTGTGTGGCTC  
AACAGCGACCCATTCAGTAAGTGGGAGTACGAATCAGGTTTCGCAGAGATCTGTAACGGC  
GGTAATATCGGATACGTGGAAACCCCGAACCTGAAGCATAATATGCAGGCTCTTGAAGCG  
CTTATTAACATATGGGTACGAGAACATTCATTATTTCCGGTATAAATCAGCCAGTGGATCAG  
TGCTTTAAATGCGGATTCAGCGGGCAGTTCAAGGCGACTGCAAAAGGATTCGAATGTCCT  
TCTTGCGGGAACCATGAAGAAGGAACGATTTGTGTGATTTCGTCGAGTTTCCGGATATCTG  
TCAGCACCAAACCTCACGACCCTACAACAAGGGTAAGATGGAAGAGGGTGTGTAAAGCGTG  
AAACACGTATGAATATCTGTGGTTATGAACCAACAGACCTCGTGAACGGAGAGGGGGTCA  
GGTGCTCCCTTTGGGTTAGCGGTTGCAGTCACGGATGTCGTGGCTGCTTTAACCAAAAAG  
CATGGTTCGAATAACTACGGTCAGCCTTTCACCAATGCGGATGTTCTCAGGATCATCAAAG  
ATATGGGAAGGCCATTTATCAAGGGCTTGTGATACTCGGAGGTGAACCACTTGACCCGC  
AAAATGTTGATGAGGTCGTAAGGTTATCCTGCGTGGCCTTGCAGTATTCGGAGATAGCA  
GGGATATCATGGTTCGGACTGGATCCACCTTCGAAGAAGTCCCTGAAAGGGTTCAAAAAC  
TTGTTGACATTATAATGGACGGCAAGTATGATGAGTGAATCCTACAACCAAAAAGGTTCA  
GAGGTTCTGACAACCAGAGGATGTGGGTAGAAATATACGGTTTATGGATAGAGGCGAAGT  
AGATGAGTAAGAAGATGATGCGTAAGGCATACCAGAAAGAACTGGCACTGGAACCTCCGTG  
GCAAAAAGCGTAAGAACAAGCGCACCACTGAAGACGAACCTGATGCAACTGGTAGCTGACG  
CTGCTGTCCGTGGCAACTACTGAGTTACTCCATGACTGACGTTGTCAACGAAGAACAGAC  
CTTTGTGCCACAATCGCAACTGGAAACGCTGCTACTCGCAGATTCGGAGGAACTGGCCCG  
TGAGTTTGTGGGCCTTGTTTTCCCAAGACTGATCAATCAGTTTACGGAACAACTCAGTA  
TCAAATTGAAGCCCTAAAGCAAATGAAGGCTGACGCACGTAAGGCCAGGATGCTGCGAT  
GGAGAAAGAGCTTAATGCTGCTCTGGTTAAGCTGAAGAAAGCTCTTTCTGAAGAGGTTAT  
GCAGAAGGTGATGGATACGATGGTTGACCTTCTGAAAGAAGCGCCGACACCGCACGAGCT  
TGCTTACGCGAACTACCAAGAACGTATCACCATCAAGATTTCTGGGACTGCCGCCCGACT  
TGAACCGGCTTTTGAAGAGGGCGCTCGGAGAGGGCTAATCCGAAAGGAGGTCTTCAATGAA  
TGCTGCAATTGCGGAGATTCAGCGTATGCTGATCGAAGGTGGGTTTAGCGTCCGGCAAGTC  
TGGTGCTGATGGATTGTACGGACCCGCTACAAAAGCCGGACTGCAAAAGTGCATTGCACA  
GGCTACCAGTGGAACAATAAAGGAGGTACTTTGAAACTCACCAAGCACAACTGGACAA  
AATCTTCCCCGTTGGTGCCAGTTCTGGGAGGAATGGAAAATTCCTGATGCCGCTCAATGA  
CATGTTTGAAGACAGAGATTAATACTGTAAATCGGGTTGCAGGATTCCTGTCTCAGAT  
TGGTGTGGAGTAGGCGGAGTTCGGTATGTACGTGAACCTCGGGAACGATGCCTACTTTGA  
CAAGTACGACACTGGTCTATTGCAGAATGACTTGGA AAAACACCCCGAAAGATGGGGA  
TGGTGCCAAGTACAAGCGGAGAGGTCTGATTCAGGTGACCGGACGCGCAAACCTACAAGGC  
TTGCGCTAAAGCACTCGGTCTAGACCTCGTTAACCACCCTGAGTTGCTTGAACAGCCTGA  
GTATGCAGTTGCCAGCGTTCGTTGGTATTGGGACACGAGAAACATCAACGCCGCTTGCGA  
TGCTGATGATATCGTGTAATTACCAAGCTGGTAAACGGTGGTACAAATCACCTTGCCGA  
ACGCACAGCCTGTTACAAAAAAGCAAAATCTGTTCTAACCTCGTAAGGAGAACCAATATG  
GGAAGAAGCAAAGCCGCTCGTGCATTAAACTTTCGGCTCGTCACCAACAAGGTGCAGAA  
AGACAAGCAAAGCACCAACCCGAAATTCGATGAGGAACGTAACAGCGTCCCGGCTCTGGTT  
ACTCTGAATGAAAAGCAGCAGGATTACCTTCACAAATTGCAAACCTTGCAATATCATCATT  
GCGAAAGGTATCTTCGGGACAGGTAAAACCTACCTGGCATCCGCCACGCTGCCGACTTG  
CTACGTAGAAACGAACCTCGACAAGATCATTGTGCTCGGCCAGGCGTGCAGACGGGTACA  
AGCTCCGGCTTCAAACCGGGTACTTCACTGGA AAAAGCTGTTCCCCTATGTTCTGTAACATG  
TTGGATAGCATCCGCAAACGCATGGGCGACGGGGCATATTACAATGCTCTGAAAGAGGGT  
TTAAATGGGCGTATCGAAGTTCAGGAATTGGAAAGCATCCGTGGTTCGATCATTGACGAA  
AAGGGCTTCTGCTGATCAACGAAGCCCAGCAGAGTACCCAGAAAGAAATGCTGAGTATC  
ATTACTCGTATTTCCGATACCTGTACACTCGTTGTGATGGGGGATGCCAGTCAGAAAGAC  
ATTTATGATCAGTCTGGCCTGGAGTTACTGATTGAGTTTACCCAGCGACACAACCTTGCA  
GGTGTGGGTA CTGTGTCATTTGATGACCCGAATGAGGATATCGTTCGTGGTGGTATGGTT  
CGTGAGATCGCTCTTGGCCTGATGGCTGACCGTGAGGCAAACTGTACACGCCGCTGGCT  
TCTTAACAGGAGGAAAATGGCATATTATACTGGGGTAGGATCACGCGAAACACCCCCAGA  
GGTTATCAGCGTGATGGAAGACGCAGCTTTGCGTCTCGCCAGGCTCGGATTCACTCTTCG  
AAGTGGGAAAGCTGGAGGAGCGGATGCTACATCTCAGAGAGTGATGTAAAAAAATGACGA  
AACTCTTCACAATGGAAGAAGAAAGAGTATCGTACACGCTTGGCAGAGATTTACATGCC  
TTGGGACGGCTTTGCTTCAGACAATGAAGACCTTTGGGACTGCTGGGTTTATCCCTTGAG  
TTACCTTGATAATCTCATGACTGAACAAAAGCATAAAAGGGATCGGTTGGTTGAGGAAAT  
CCATCCGAATTATGAGGCTCAGAAAAGGAAAAGAGGTGCTTTTGC ACTCCATTCCTCGTAA

TGTGCATCAAGTTCTTGGAGCAAACATGCTTGATCCAAAGCCCTCTGCCTTCTGCCTTTA  
CTATCCTTCGGAAGATAAGCATGGCAACCCAAAAGGCGGAAGTGTAAACGGCTGTCAATGT  
CGCCAAAAGGATGGCGTGAGGACGCTTAACCTAAACACTCCGGAGCGCTTGGCCTTGCA  
TGAGCAGTTCTGACCAGTCTTGAGAGGAACTAGGTGTCCAAGTTTAGAGAGAAGCTGA  
ATCAGTCTTCTGCCTTGTGAAGGTTGAAAGAAAGGGCTGGGTTCTGGATAAAAAGAGAG  
GAAAACGGATTTATGTTACCGAAGCAGGTGCGGAGATTTCGTTATGTTTGCACCACAGATG  
ACACGAATCAGTTCAAACATCTGACTGAATCTCTAGAGTACGAGTCCAAGAAAACCTTTT  
TGGTCGGAGATACAGTAAAGCTGGACAATTTTCGGGCTGTTTTACATTGTGGATGCAGGAT  
ACCGTGGAGATGACGGTGAAGTTAAGTACCTGATCGCTCGATAGGAGGAGTATGACAGTT  
AGTATTCATGGGGTTGTTTCCCATCGAAAACCTTATGGAAGTGAATAATTGTGGAGTTGTC  
GAGCCTGAATTTTCCGAGGAAGAAGTAACGAAGCGTTTGACCTTTTACCGTAAGGTAATA  
TCACAGAGTTTGTACGAGATGAATGATGGGTTTCTTACTCGTATGATCTACAGCGAAAAG  
GTGGCTGAACGTGATGCTCGTTGGATGTTTCCGGACAGACGTGATCTACTTAATCATCTG  
ATTTATCTGGATCATCAGGGTTCGTGAATCGAGTTATGTGAATATCAGTCCGAAGGAACTG  
AATGAGTGCACATTGCAGCACACAGCAGCGTTAGCCTCTGAGAGGGCAAGAAAAGTTCTC  
GTGACATTCAAGTACAGCGATCAAGTGCTTGTGGAGGACGAGACAGGGTACTACATTGAC  
TGGCTGATGAAGCATGCTTACATTCTGAAAGGCTACATTGCAAACGCTCGCGAGGAGGAT  
TAACATGGAACAGAACAAAACCTTTGTCGGTATGCTGCCGTGGATGAGTGGGAACATTTA  
TAGCTACCCGGTCCACTCTCACGATCACGTCATCTACATTGATGATCTGTCATGGCTGGA  
AGCCATCAGGATCGTCTGCAAGTTATCCGCCAGGCAAGCCCTGATGCCACGATCCGGGT  
GGTGAATTAACCTCCTAGTGGGGTAGTTTCTATCGCTATGGCGTATGTCAGTGGCATCCG  
TGAGAGTCAGGCCCAGATCGACACCCATGCCGAAGGCAACGTTTGTCTGCCGGGACAGT  
TTTGTGGCTGGCCTGTAAGTATCGCACAGTGTCAACTGACAGAGTTCGGGTTTCGATAA  
TTCGCAGGGCGGGACTTTTCGGTGTGGTGCAAACATGCACGCTCAGATTGCATTTCGAGAA  
GCATTAATTTGATCGTCTGATTGCCACCTTCTACACCGGGGTTCTGACCGATACTGAGAT  
TGCAACCATCAAAGGTGGTGGTCAGGTGTGGATGGATGAGATCGAGATCGTTAAGCGTAC  
CACTGCCGTGCTGTTGGATGAGAAAAACATCAAACGTACGCAGCAAGGTCAGAACCCAAT  
CATTTCCGGGGAGAAGAAGGCTAAAGAGGAGAAAAAGGTCGTTGAGAATGTTGACCTGAA  
CAACCTGCCAGAAGGTGAGCCTGAGAGCGTGTTCCTGAAGATTGATGTTGACCGGGAAAT  
GTTCAAGTTCGATGTATCCACGCTGAGTGCAAAGATTTTGTATGCCTTCAATGTGGAAGA  
ACTGCAATCCATCCTGTCTCAGATCGGTGCGCTGGCAGCAGGCTCTGAAGAAGTCTGAA  
GGTTACCACTCGAGATCGCCAGGAACTGAACGGTGAATCCTCAAAGCCTCTGAGGAAAT  
CGTTGCAAGTATTCTGGAGCAAATGGCGAGCTGATGTCTGCACCTTTAAAAAAGAAGGAA  
GAGCGCAGGGCATAACGATGTCTACGAAACCCCGACTTGGGCTGTTGAGGCCCTCTTAAAG  
GTGAGCCCGATTGATTACACCAAACTTACTTGGAGCCTTGCAGAGGCTCCGGTCCGATC  
TACAAATTCCTGCCTTTGGGAAGCGCGTGGGGTGAAATCCGTCAGGGCGTAGATTCTCTT  
AACTCCGAGTACAACCACGTTGATATGGTTGTGACCAACCCACCACTCTTTGGCGCAA  
GAGTTCGTCACCAAGGCACTTGGATAGGCGGATGTTGTGATCATGTTGTTGAGCATAGGA  
TTCCTTGAGAGCATGCAGCGTTGGGAGTGGTGGCAGGAGAACCAATCAGTTCTCTTTTG  
GTTCTTTCTCAAAGGCCATCATTTACAGACGATGGAAAAACCGATGGCAGTGGTTATGCC  
TGGTTTGTGGGACAAGAAAAACAAGCTCGGGCTGAAGCCATTTTATTTCTGGAGGGA  
CAGAGTGACGTATGTCGCAAACATGATGCGAGAGATCGCAAACAAAGGAGAAAAGCAAAC  
CCCGAGTCACTGAAGGAACTGTACGATCAGATAGTGGACGGGATAGCGCAGTGTGCGAG  
GAAGGGGATGTAGGGGATGGGACTTTCTCTCCAGTTCCCGGAGGAGATGAATGATTATCT  
GCCCCATATTGTTGGCGATCTTCGTGGTGGCGGGTTCACAGTCGATATCATCAGCTACCA  
ACCAACAAAACAAGGCACTGCAATAAACTTTTTCGTAACATGGTAAATAAACCCGCTTCG  
GCGGATTTTTTTCGTTTTTGTACTTGACAAGGAGTAAATAAACACTTAAGCTGTTATCCAA  
CAGAGGAGAACAACATGCGATTTTACATTTACTACCGTCCTTTAGAGACCATCCGCTTCG  
GAGAATACATGGGTGACCTTATCCATATCTCGACAGAAGAGAAGGATTACTGCCCTGACC  
GGAAGATTTGGAAAGTTAAACGTTGCAATCGCCCTGAGAGTGTGTATACTCGATTAATCA  
AGATATTGAAACACGGCGGGATGGAGGACAATATGGTTTCTCCACTCGACGGAAATAGAT  
CACTAAAAGATCTGGTCAAATAGATGACCCAATGGGAGAACAACAATGAAACAAAGTCT  
TACCAAAGAACAGGCCCTGATCATCACCGGGTTCACAGGAATCCTTTGCTGTCCGTTCAA  
CCTGTTTACGACGATGTGAAAAGCGCCTGGGCCGATCCTTGTAGACGCACGAGTTGGG  
CAGTAAAGAGTTCTCCGCAGAACTGAAGGTTGTTTATCGTGGAGACTTCATGGCGATGAT  
TTACAAAGGGGAATGATGATGACCGAACTCAATGCCCGTGAAAAGCTTTTGGCGATAGCT  
GATTGGCTGGGATGGCAAACGAAAACCTTTCATTTGGCTTGAAATCCCCAGACGACGCT

GTAAAGCTGTACA ACTACTGGCAGGAACATGCAGACAGTCTCCCGGAAATGGCAGACGAC  
GAGCAGGACGATGAGGGACGCTGGTTGTTTATTTTCCGTAAGGCAGCACTGGGATATGAC  
CCGATGGGCCACGACGCTTCTATTTTGGAAAGCCCTTGGGGAAGAAAAGTACGACGCTGAA  
AATAAAGACACCGACATCGGCTTTTACGACATCCGACAAAACAGTGCATATAATGGACATC  
ATCGATGCAGAAATGGAAGTTACAAAAGCAGTACGGCCTTGTCTAAACTGAAACAAAACAG  
GAGAAAATAAATGATTAATAAAACATAAACCGTTGTTAAAGACCTGTGCAATGAGAACAT  
GGGGACACCCTCCACAGTGGGTGAGGTGTAACCACAATTGTGGAAGTTCCTGCCGATAC  
CGCTGTAGTTGTGTTTCGACCAAGAAGGCCAGTTTTGTTTCACCTCTACAGTCCGTAGCGA  
TGTATTTCTTACCAAACGTGGAAAATCCAGAAGCAGAGGTGGGTTTGGTGGTGGAAATCCT  
AAACCGAATTAATGCTTTCCGTATCAACGGTGTGTTGGTATGAAGGCAACGATGTGTACTC  
CGCAGAAGAACGGGGGATCACCGAATGAATCTCTATGCAAAAATTGACTGACCCCCAGAAT  
GGTTGGAATGACGACATGGAAAAGGCCCGTGAATTTTTTAAAAACTCACGATCAGGAGGAA  
ATTCTTCTTGTTACTGAAGTTGCTATTGACAGGTGCGAGCACCGAAGTGGTATTGTCTAAT  
CACGGGCATGGTTGGAACAGTGTACAATTTACCTTCTTCATTGAGGGTGAGATCGGTCTT  
GAAGAGTATGACATCTTCAGCAACAAGAAATCATTAAATACAAATTTATAAAAACATATATT  
CACGAAGATTTCTAAGGTGAAAAGATGAAGGTATATTTGGTAGGTGGCGCAGTACGTGAC  
GGTTTGCTGGGCCGTGAAGTCCACGACTGTGACTCCGTGGTTGTGGGTGCAACACACGAA  
CAAATGATTGAAAACGGGTTTCATCCATGTGGGGCGCTTCCCTCCCGGTATACCTCCGACCG  
GAGACCAAGGAAGAATACGCGCTCGCTCGAACTGAACGTAAGGTTGGAAGCGGTCACAAA  
GGTTTTGAGACCTTTCTCAGCCCTGATGTAACACTGGCAGAAGACCTGTCTCGTCAGGAT  
CTGACTATTAATGCGATGGCTCAGGATCTGGATACCGGAGAAATCATTACCCGTTCCGGT  
GGTCAATATGATATCGAAAAGAAGGTCTGCGACACACAACGTTGGCGTTTTCTTGATGAT  
CTTCTGCGTATTCTGAGAGCTTACAGATTCAAAGCGCAGTTGGGTAAGGAACGGGATCTC  
CATCGGGAGACTAAATCTCTTTGTTACCAGAACCGTCACGAACTTGAAAGTATCAGTGGC  
GAGCGTAAGTGGAAGAGATGGAAAAGGCCCTAGGGTCTGATAACTTCCGTTTCATATGCT  
GAAGCAATGGCAGAATTGGGCGAGTTGGGAGAACTGGAATCGCTGCGTGGTGTAGAGCAA  
CCTCCGGAACACCATCCGGAAGGTGACGCATTCATACACACAGTGCTGTGCCTAGATATC  
GCATACCAGTACGAGGCAAACCCATACACGAAGTTTGCAGTCCTGTGTAACGACTTTGGC  
AAGGCCGTGACATTCTCCAAGTATGGGAACCTGCTCGGTCATGAAGAGGCAGGGCTTGGT  
CCGGTTGATGCACTGTGTGAACGTATTCGTGTGCCAAACGATTTCCGTGACGTTGCTCGC  
TACGTGACTGAGCACCATAACGCGTGTTCATTGCATCGCCCCCTCGGGGTGGAACAAGGGT  
GCAAAACCGCGATCACTAATGAAGCTTTTTCGAAGCTGCTGGTAACGTAAGCGCATCATG  
ACAGCTATGAAGGTCAGCGCCCTGGCTGACGCATGTTTCTGTGATGCAAAAGGCCGTGGC  
CCGACAAAAGCAGCAGAACCTTACCCACAGGGCTACGTTGTGATGGATGCTTTCCGGTGC  
ATGGTGGCGGTAGATACCAAAGTAATCTCCGCTGAGAGTTTGAGCAAGGGCAAACCGGG  
ATTGAGATCGGGGAAATGATTAGGGTGGCACGTATCGACGCAATCCGCAGCGTCACACCG  
CATCAAATTCCTGGTAAGGCGTTCTGTATGATGAAATCGGATAAGGAAGAGTACACAGA  
CGAGAAACCTCACTTTAACGCTGACAAACACGCAGGGAAGCAGGTTTGTGCATGATGCGG  
CCTCGTGGCCTTAAGGAACAAGGCAATCGACTGGTGCCTGGATAAGGGATGCAATTACGC  
ATTGCATCCATCGTACAGAAGCGCCATGTTTAAAGTTCACACAGTTTTTCAAATAGGGGAA  
AGATAATACCTATTGAGCTTGTCAATTTATTTGTGCATTGGTATACTAGCTATGTTGACGA  
TTCTGACGTTGGTTTTGGTTTTGTATGGATACGATAATTTTCATCATCCATCGGCATCGGGC  
TGCTGATGATCGTCTTTTGGCCTCTCGGACTTTACTGTTTGGTGGGTGGCACCATTGCCG  
CCATTTTTGAAGAAGATTTTGTATTGCAAGGAGAAAGAAATGAAGACACGTATGTACTG  
CGCGGTAAATCAATACATTCCCTGGCATTACGCAGGTATCCAGTCAGCACACGCGATGTC  
TGAGATGTTCTTGGAATTACTCTCAACGCCGGAACAATGCCGGAACCTGTTGTGGGATAG  
GGCTGACCGCGTTAAGGCCGTGATCGTCCCTCAATGGTGGATAACCAGTCGTCATTGCAAGA  
ACTGTGTGAGAAGTTGAAACCTCTGAGCAGCACTTATCCGTGGGCCTCTTTCTGTGAAGA  
ACAGGATGCACTGAACGGCGCTATGAAAGCAGTAGCTGTGGTATTGCCACAGTAAATGTA  
TGACCCCCAGTATTCAGATGTGGTCAATCTGTACTAACCCGGTAAGCACATCGCCTCTGT  
GGTAGCCAAACAGTACCGCGATGAAATGGGAAATGTGGTGCATAAGTACACACAACCTGC  
AAAAGACCTGATCACAATGATCAAATCATTCCGACTGAAAGGAGAATAAGATGAAAGTAA  
GTGAACTTGACCGAAGTGTGATTATCGAGATGATCCGTTACGCTACGCTGATCGCTACTA  
CTGAGATCCGAACTATCGGGTCAGATTACAAAAGAATAACGAATTTCTTTGACCTCGACC  
TGCGGGATGTGGTAAAAGGTGTCGAACAACAACCTGTTAAAGGACGCGGAATAATGATCTA  
CACAAATTTATACCCTATTCACCCTGCTTGGTGTGGTATTGCTGACCCGTCACTGGATGAT  
CGGGGAAGATTTCAAGATGGAGGCAAGAAGTTTTCCCATGTTTCGTCTGCCTTGCAGTTAT

GGAGGGCTTGATGATGGTAACAACCCTGATCCCACCTTCTGCTGGGCTGTTTCGCAGGAAT  
CTTGTTTGGGCTTTGGATGTGGAGACATATTTTGTCTGCCCGTGCAATCTTGCAGGAGAA  
AGTAATCAAGAACGAAAAGATGCTGGTATCCATCGTCCTGAATGTTCTTTTCTTTGTGCT  
TGTATCGGTGAGCTACTTGAGGTGAGGTGGATAAATGACAGACGTTCTGTTGGAGAGGACTT  
GAAGATTGGTGATGAGGTTTATATCTACTGGGGAGGCAATGAATTGCGCCCTGGTAAGGT  
AAACCAAATCAAGGGAAATAAGGCCAAGATCCTTGTTGATTCTTGGCCTAATCACCCAGA  
TCCAGCACACCGTTATTCCATGTCTGAAATGGAAGTCGGGCGAGTGCATGATCAAGGCAGA  
AGAGCCAACAGGCTGGTAGCCGGACGAGGTAGTTTTCTTGAATCAGGAGATCATTGCTTT  
GAGAGACGAGGCGAAATTCTTGGAGGAGAAGACCAAGTACCAAGATCTCTTGAATTTCTG  
GGATAAAAACCGACCATCCAATCTTGTGTTGCTCTTAAGGAGAAATATGAAAACCTGTAGAC  
TTGTTGCGTTGCTACTCTGGCAGCATCGCTTATGGGACTAACCTCCCAACATCGGATACC  
GATATCCGAGGGCTTTTCTGTGCAGAACCGAAGTTCATCCGCACACCATTCATCAATATC  
AAGGAGCAAACCCTTGCTGACAGAGAAGATGGGAAGATTTATGAACTGACAACTTCATG  
AAGCTTTTCGTGGAGATGAACCCCAACATCATCGAGCTTATGTTTCGTGAATGAGAAGGAT  
ATTCTGCAAAGCTCTGATGCGTATGACTATCAACGTACAATGGCACCAGAACTGCTATCG  
AGCAAGGTGGCCTTTAGCTTCTCAGGCTATGCAATAGCACAGCTTAAGCGTATTCGTGGT  
CACGATAAGTGGATCAGCAATCCACAACCTGAAGCAAAGCCAATCCAGAAGGAGTTTTTC  
CGTTGGTGCATAACTACACCGAGCACCCGTCACTGAAACATGAGGATTTTCATGCAGGCA  
CTGGACGGCCTGAACATCTTCTGCATCCTCGTACCTTACGGTGACAACGTTTACGGTGTG  
ATGGAGAACTTTAATAGTTCTGGCCGATTCAATGCTGACGGATCGAGTCGTAATGTCGAT  
TACCAGCAACTGACCGATAACGGATAAAAAGGGTAAGCCTTCGTTTATCGTAAAATATCTG  
GCAGAAGAGCACAAGCTGGCGAAAGAGAAGCATCGGAACACTGGACGTGGAAGGACTAT  
CGCAATGAGGCTCGTCATGAACTCGACGTCCAGTTCGGATACGATACCAAACATGCGCTG  
CACCTCGTGCGCCTGATGCGTATGGCGGAAGAGATTCTTACTGACGGTAAAGTTCTGGTT  
AAGCGGCCTTACGCTCAGGAAGTCTTACATCCGTGGTGGCAAGTGGACCTTTGAAGAG  
CTTCTTGCTTGGGCTGACGAGAAAGATCGTTATATCCGAGAAGACCTGTACAAAAGACA  
GATCTCCGAAAACAACCGATCTTGAACCTCGCCGCTCGTGTACTTAGTACCGCTCAAGAT  
ATCTGCTGGGCCAAGATCGATGCTTGAAGCAGTAATCGGTATACTTGGGGTTGCATATGC  
TGTTATTGCTGTGGTATGCTCCATAAAGATGGAGAACGATAAAGTTCTCCGTCAGATTTA  
CAAGGCCAAGACAGACCATGATTGGTCTGAGATCTGCTTCGCAGTCCGGGTTCCGCTGGCC  
GCTTGGGGGACTGGTCCATTATGTTATGAGGAGAAGAAATGAGACAGCTTGAATTTATGG  
GAAGAATGTTTCGAGTTGGTTGCGAAACGGCAAAGTGAATACAAAATGCACCGTAACATCT  
TTGATGAACCAGAAAACCTGTCCCGATATTCGAGACCAGGAGGACTGGCTTGGTGATTTTT  
TTGTGTGGTTCCAGTGTAAGGGGTACACATTATGAGTTAAGGTTTGTAAACGCCAGAGCA  
GGCGAAGATCTTACGTAAGCGTTTCTCTTGCAAGAAGCAACAGGCAACGACCTCAAGGA  
TATTGCAAAGAACGGTGGTGTGTTGGTTGTATGAACGATGCCTGCCCGAATTGCGGTGGCAC  
AGGTATTCGTAAAGGTGGCCTGGGTATGTGTGTTACGGCATCTCCTGCCCTGCCCGAA  
GTGTTCTTTCACATGTTGATAGGCTGTAATTGCAATCACTTAGGATTTTGAACCTTTGTG  
CGATTGAGCCTTCCCTCCATATAAAAATTTGCCACAACCATTATAAAAATGGAGGTTAATAT  
TATGATAGGAGGTAGTATGTTTTAGAAAATTTGGTTTCGTGAACACCCTACCCTACAAGAACA  
CTGGCAAACCCTGCTGGAAAAGAGTTTTAATCATCAGGGATGTTAAAATAGCATCCTTT  
ACACCAATCGTGTAGGGCGATTGGAGGTAACCTCGTGGTGTGACACTCGAAACCCAATGA  
CATGCACGTTCCGTGTTGGAGATATGGGTAAGCTCGATCCTGATGACTTGGAAAGAGGCTT  
TCGACCAGTACGAGGGTTTTGAGACGGCGATCCGGGACATGTATAGAACAATCGACATCA  
TCATCAATGAGCACAAGAAGTCTCTGGGATGGGGATAGAGAATCAAAGACTGGTTCAGGA  
ACCCTCCTAACAAGGTTTTCTTTGTCGTTTTCAATTATCTACGCAATAATTAGCGTGGTTG  
TGTATTTTTATCCATTATTTTGGAGGAGATTGCATGAGGGACAGAGGAGATTATAACAAC  
AGTATGCCGCGCGGAGGCGTGAGATAGACCGTCAGCGTCGATCCACACCAGAAGGAAAAG  
CAACACAATTGGAAATCCGCCTTGACAGAATTGAGGCGGAGAAACGTGCAACACTCAATA  
GTGAGTGGGACATCTTCGTTTCGTGAAGAGGCCAACCTTCTTTGCAACGAGAGGATGCGTG  
GCACAGGCATTCCCTGGGAGTCTGACCACATGCTGCCCTCCGTGCGAAGATTGTATCTG  
GCCTAAACTGTGGTGATAATATCCAATTTATCCCCGCAAAAATGAACCGTAGTAAGAACA  
AATACATGATCTACACCAACCGACTGGATTCGATTAAGGATTTGGAGACCCTATGCAGGA  
CGAATTAATAAAGCTTTTTGTAAAGGATACAAATCACAGCGTGATCAGTAAACTGCCGGT  
AATATCCGGAGCAGTGGCAAAGTCAAATCCGGATCAGAATGGTCAATCGTTTTCTGTTGT  
GAAGGCTAAACACAATGCCTATTCTGATGGAGTGCTTTATCCAAAGCTTACAATAAAGAA  
GAGCGCAGGAAAAACGAGCATATCTTTTTGATAACAACGAACAAGGATGAGGGAAATCTG

GATTTATCCTGATCGTGTGAGCATCGGTGAGGGCGAGGTATACAACCGAGAAATGTTTT  
AGACTCATCATCCCCAACAGATGAAGAAGCCCAAATGCTAAGAATGAGCAAGGGTGCGTA  
TCTTGATATCCTTATGCAGAAATTCGGAAGAGTACCCGAAAGTATCTTGAAAGGGTGAT  
GTCTGGAATGTTTGTGTGGAGTATGTCTCGGAAAGCAAAGAAAGAGTGATTGTTTTAAT  
AAGTTAAACGGCCATTGGCGGGTTTTCTTTCATCAATCCTTTGTCATCCTTTCAATGACC  
AAACTGTCCGAATCATCAAGAACTGACAGGTGCTCAATAGGAATGTTTCATCGTAGTAGGC  
ATCTCCCGTTCATGACATTCGAACCAAATATCGTCCACCGGGTAAGGCATTCGGTTTTGGA  
CCAATCTTGGATCGTCCAAGAACAACACACCCAGCCGTTTAGCTGGAATGTGAGCGGG  
TTCTTGGGGCTGAATCCGTATAAAAAGGCAGATTGTATCCGGGGCGCACACGTTGGTCTGGC  
TCATTACGGTCCGGGGCGACCGCCCTTATCTTCTAACAGCAGCATGGTGTCTCCTTATTGG  
GTTGTTTAAGACATCATATTTGATAATTGTGCGTTAGTCGATGGTTGACAAAATATTTAT  
TTCTGCCATAATGGGGAATAACTTCGGATAGGAGATTGATATGTGTGAAAAGTATGGTGA  
TGCAAGGGTAGAACTTGGGAGAATGATCGAAAGGAAGGAGATTCTTTAAGAAATCCTGAG  
TGATATCGACCTGTGTATCCAAATCAGGAATGGTGCTGAGAAAGGCTCCAGGAAAGGGC  
AAACTGCTCGCTTCTTATCGACGCATTAATACACACTGCACAGAAGATCCAGAAAAGAGG  
TCTTCAATGACGTACAGTATCTACGGCAGAATGCCTATGGCCCCATGCTCCCGCGAGGGA  
GCGTGGTACTGCCTGAAAAGTAAAGTACCGTTTGACAAGACGGTAGAAGTAATGCAACAT  
TACAGAAAACTTGGCGATAAGTTCAGAGGAGACTTGAATGTTTGGATGGTGGAAAAGGC  
GCAAGCTTAACCTGATCGGAACCTCCACTTGGACGGTCAACTGGACCGACACTGGAGAAA  
GAGATCGTGAACAATGGTTGTTCTATGAGTCTGAGAGTGGTCGCAGGTACTTCGAAAGTA  
CTCATGTACCGTGGTTACTGAGTAAAGAAAACCGACTTCCCGGTTACGCCGGGTGCAAGG  
CGTGGGCCAGTGGTGGGCGACTTCCAGATACTTTCACACCAGTGAAGGTGATTGAATGAT  
CGACCGAATCGTAAATAATGTGATCCATGCACCTGCGTTTTGCGTAGTGATGTTCCGGTT  
ATATGCTGGGCTGGATATGAAGATTTATCCGGTCATGTACGCATGTGCTGCGTGTGCGTT  
GGTTGCAGGCTGGCTTCTAACTAAGCACATCATGGGAGATGAAAGATTCTCAGAAATGCT  
TTCCGTTTTTTCACACCTCATCTGGAGGACATAATGCAAAGCATACACTACGAGCAGCTT  
CTACGAGAGATCCACAAAGATTCAATTGATCAGTGGTTCATTCTGAAGAGGAACACCAA  
CAACACGAGGAGAAAGAGATGGGCGGGGATACAATTTTTGATTTTCATCAAGCGGGAAGTG  
TGGCGGGATAGCGATACAGGAAAGTGGCGCTTCAAGAACAAGGAGTTCAAGCGAGAGGGG  
CAAGCAGAAAAGGCCGCTGTGCAGTATTTCAAGAAGAAAACTTTTGATTTTATGGGAAA  
CTAGAGTTTTACCCAAGAGAAGACAATATGTTTGAATGCTCTTGGGCGGTAAAGCCCC  
CATCTCCGCCGGAAGCATCAGAAAGGCAATGGCTGGGGGTGCGGATCTACTTGCTCTATC  
TGAAAGCGATAAGCTGTACGGTATTTGTGCGGACGTACCTAAGCGGCACTGGTGTGCCAC  
AACGACTTGGGCGAAGATTCTCGATGATGTTTAGGATTTTTGGTTCATGATTCAGGCAATG  
CCTTGCAAAAATGAAAGATGCGAGATGGTTATTTGGGGGCCAAACTCCGTGGGAGCGAT  
CCTTATTGTACGGGCTGGAATGCAGCCGTCGAGTTTATCCTGAAACAGGACAACCACAAA  
GATTCACCCACACTAATTGGTAATACGGGCGGTATATGCTGTTGTTGCCATCATGCTGC  
TTCTCACTCTGTAACCGACCTTTACCTGAAGTGACCCACCACACAAGGGGAGCCTGAATT  
GGCTCCTCTAGTCCTGCCTGAAGAGTCCCACCAAGTTTGTTTAAAGAGGCACATCAATTT  
CCTCTTGACGTAAACTGTCAGCCCTGCTACTATTACCTAAAGAGTCACAGGTGCTGAAGG  
TCTGCACGAAACAACACCACGGGTGCCTTGCACCTGAGAATTGAATAATTCTCATTCAA  
CAATCTTTACGGACGTTGGATGTCTGATTGTTGAACTGTACCACCGCTCCCGCGTGAAA  
GGTTGTACAGTTCATTGACACACAATGCCCGTTGCACGGGTGAACACGTTTCATTGCTCTG  
CAAGACAACATGTTTAATGAATTGCATATCTTCGACACATGTAGCCTGAAGTGTGCGATAC  
TGTAACATGTCACAGGGCGATTAGCCACAGGCTAAACCGTATACGGGTAAGCATATCAA  
AACCCACCCCTCCCCCGCCCGGAGGGAAATAAAAGAGGCCCTGTCTTGTATGTCTTGGGG  
ACGAAAAATATCCGTTGGCTCTATGTCTGATGTGATAGAAGGACAATCACAGCCCCCGAA  
GGTTGTCAAGGATCTTTACAAAATATCTGAGTGGTCCGATGTCGAGACCCTTGCAGTTTT  
TTGGCACGATGATTGCATGATGATTACTTGTGTGACTAATGATTGCCTAATGAATCTATG  
ATGATTTGCTTGATCAGTCAGCTTACAGAACGATTTGCCCTTGACTTGCTTACTTTTTGTG  
TGGGTTGGTCTATTTAACATAACACACGTTATACGCACCACAGATCGGTCTGTTGCATGG  
GTGATAGTTGCACTATGTTACCATTGCATCAATGAACCATTACTATGACGATGATTAGCC  
TGCTATATGTTATCACTGTGACAGTTTACACCTGTTATTATTTCATTATGTGGGGTGTATT  
GTAGATGATAATGCTTTTTATAATCATTATGATTTTCGATTTTTCATTTCAATTTCTAAATG  
AAAATCATTCCGCAAATAAAAATATTTTGTAAATTTTCGCACAAAACACTTGACAGGGAGG  
GAAAATTGTGTTTAGCAATACTCTGCTTTTGTGAGCATTTTGGCCACATGATAACAATTCTCG  
TTTAGCACTGTGATGGACCGGATACCCGGGAATGCTAATGCATTGAAATAGTTACTTATT

GTA ACTATTG TCTGTATTGCTACACAAGGGATTAACAGACTTTGCCTATCAAGAAAAAGC  
TTGACACTTGAGGCATCTTTTATGCTCAAAAACAAGCCTTTCAGCAGGCCAGCGGCCTGA  
TTTACAGATCGATTAATCATGGTGTGTCAACCATTGACGGCGATTTATTGCTAATAAAAA  
CATCTTGACTTTTATCACCTCGCGAGACTATAACACAAAGCGCTTACGGGTTGTTTTCGC  
CACGGAAAACAATGTCCAGATTGACCAAAGGGGTTTTGTGAATCCCCTTTATCTGGACAC  
TATAACACGAGAGCTATCAACGTTAGTTGATCGGTGTTATCGTGGCGAGTGTGATAATTT  
CATTGTGTA ACTATTCACTGTAAATGAATAATAATGTAAATGATTAGCCGTTGCTTAATC  
ACGTATGTGATTATATCGTAGCGTCTACGAGCCACGCTAACGCGAACGAAAATGATAAGT  
ATTATCATTGAGTTACTCTCGTGTTATAGTGTGCTCGCTACGCTCGCGCCACTCACCA  
CGATCACGCGAACGATTATTTTATTTGACAAGCTTTTATTTTTATGCTCAAAAAGACAG  
TACACACAATGGCTAAGATGAGAAAAGTTATCAAATGAGAGTTATTATCACGTATTCACA  
TGAAACGCTTAAACATGCGTGTTTTATTCACTTGATAGCATGCGTTAGCAATTTTGGGGT  
GTTAGTTGGTCAAAGGCGATAAGCAATACCCTTTTAAACGCAATATAACGAGTTTTGAGC  
GTCTTTTCTCGTGAGCCTTGTCGTTATATTCCTGTCCCTGGGATCTCTTTAATTTCACTTT  
TTTGATAAATTGCCAAAGGGGTTGGTGAGAATAATTCTCAGTTGCGATATTGCAACCAGC  
GTTAAAGCGGGTAAAGATTTGGTGTGTTGTTGGGGTGTGTTGAGTGATATGCAAAAGCCG  
GGACAATTCCCGGCCTTACTTACAACGTGACAGCCAGTGATCCGGCAATGATGAACGGTA  
GATCATAACGGTTCGAACCGTTTAAATCTGTGATATTTACCACACAATAAAACGCCAATT  
GCAAGCCGTCGATCATGGTGTAACTGTCTGGGCCGCTGCGTCACTGAGTACAGGGCAGG  
CAATCCAGCCATCAAAAACACTTGACAAAACAGCCATAAAGCAAGCCCTGGTTTTATAAA  
GATTTTGGCCTTATCGGTAACGGTGCATTGATTGACTGTAAACCGATCCGCCGTCGAAAC  
TTCCGCCTTCTCAATGCGTCCACCATTTCCGCACATTTTGCGAAACACATAAGCACAAAT  
GATCGTTAAAGTCAAGCGCTTTTCTAATTATCTCTTCTTTTGTCTCCCCGAAGATAAAGA  
CCAGGTGATCAAGGGTGTGTAGTGATTGAACCACGCTCTCACCTGCTCACATTCCATGG  
GGCGATCCCTCTCGCTCAA ACTTGACAGGCCGAAAGATTCAAACGTGGTTACATTGTCCA  
TCAATTCAGTGTAGGCGGTGTCCAGCCACTAGCCCAGAACTCTACAGGATCGGTGTGAA  
AATCAGGATCGTCCGGATGAATAAAGCAGATAGAAAACAGTTGCTGATTTTCACGCTTTG  
TAAGGGTGTATCGTGCCTATCCAGGCCGCGCCCTAACATATCTTTCCGGGGTATTTTCAT  
ATTTTCATGATCATTAGTCCCTGGTGTGTGGGTATGCGCCGTAAAGTCCATCACTATTA  
ATCATCGTCAAAATCGGCCAGGTATTCGAAAATTCAAATTCATAGCTACAACATGCTT  
GACAAGCTCACTATTTTTATACTCTTCAGGAGACAGGGCGGATCGGGCGCTCACTATACAG  
ATCCGTTAGTTCGATATACTCCCCGACCTTTAGAGCGGTAAACGGTGTTTTTCTTGTGTC  
AAAATTTACTTTTTCCATGATATGCGCTCGACAATAATGATCGCTTGTGGGATAGAATCC  
GGGGCAACTAACAGGGGTTTTGATTGGCGGATCTTAAAGCCTAATTTCTCTTTGCAAACG  
GTGGCGGTCATTTTCCGCACTTCCGGATCGACGTTTTGATCCTTACAATACCACACAGAT  
TTTTCATCTGCAATAAGGTTGGGTAAAATTCAGTTTGACCAGTTGCATTTTTAATCATT  
TTAATTTACCTTTCAGATTATGCCGGGGATGTCCCCGGCCTTGTTTTGTTTAGTATTCGC  
TAGCATA CATTGCTAACGGGTCATCAAAGGCGCTTTGAGCATCAGCACGATCCCAGAATA  
AGTCTTGATCTTGCTGCTCTCCAATGTCTAACTGATTATACGCCGCTTGCGCTTGATATT  
CCATAGCCAAAGATAAACGGCTATCAAATTCATTAATAACGCTTTGAGATAAACATAATT  
GCATACTATCCTTTAACATTTTCGAGCATGTACGCCGCCGTGCTTTCCTCCTGGTCGTGGC  
AATATGCAGACCAGATAGCGGGCTTAAACATTTTTCAAATGTGCATAAAGATCTTTATCGA  
TAAACGGCGAAACATCGTTTAAAGATACAGATCAAAGATTGCGGTTTGTGATTATTGCTGA  
TAGTGATGAAATTTTGCATTTTCGTTTACCTTTCCGGCTTGCCGGGGAACCATAACCCCGG  
CCTCAAACGATATTACCCGATCCGCGCCTGGCTTGCAAGCTTTTTTTTTTATTCATCCTC  
ACCGTAATCATCGCCAACGTTGAACATGTCGAGCATATCACCAGCGGCCGATCCATAGCAG  
GTACATTTCCAGGGTGTGCCGATCCATATTGTCGATCCCGTCTACCTCTTCACGCTCGAT  
CCCTGTCTCGGCCAGGTAATCGCGGATCATTGTTGTCGCTGTATGCGCTAAACTGTAAGCC  
GTCCCGGAAATAAGGCAGGGCCTCCACCGTTGACGCTTCACAGTCCCAGAGTGGGCGAT  
CTCTTCTACCTGCTCACGGTCCCGAAAGATGAGACAAAGGCGACCGCATGAGGAGGACCA  
ATAACATATTTATTTTTCATAAATCTTTACCTTCCCATTATGACCGGGGGCGATCCCCG  
ACCTTTAAGAATACTTTAGCCGATCTGGTTTTTCAGAGTCAACCGAAAAACAGCATTAC  
AATCGCAACAACCAAGGCGAACACGTCCACAGATTGACGGATCGGCAAACGTGTCAGCCTG  
CTTTACGTAGCCTTTCGCGCCTTCAATCTGATAAGACACGTGATGATCTTTTACTGCCTG  
TCGTGATGCGTGATCAATGGTTGTTCCGTCCGGATCATAATGTCCAGACGATCCCCGT  
CAGAGCGTCATTAACATGGCAAAAACGCATTACGGTTTTATCATCGAAACGACGAAAATC  
ACATTTTGCATTATCGGAAACGCCAGCCAGGAAAAAGAATTTATTTGCAATTTCCATTT

TAGAACCTCGTTTTAGATGAAAGATAATAACAGCAGGAAGATCACGAAAGACCACACCAG  
GCGACACATAAAACGCGCCTCAATGTAAAACGTGTTTTCTGTAGTGTATTCTGCTTTGTA  
ACCGTTCATGATTCACCTCTACCAGGTGACCGGGTACAGCTCCCGGCCTTGTCTGGTAAT  
TATTGATCAACGGATCGCCGTTGTCAAATGTTTTATGGCCTTGGTTCACCTTCTGGCGA  
AGGAATACAGGTCGGATTGATATAATCAGGATCACGGCGTAAACCACTAGCGGCGATCTC  
GCAAGATAGCGGATGATCGTATAATTCAATAACAAAATCATCACATTGCATCATCATAGA  
TGCGCCATAAAAACAGATACCCGCGAAAACCTCAAACATTTGATTAACCTTATTTTTTCA  
GGTAAAGAATTTGGGTTTTGTGCGCTTTTTTAGCGCCATCTTCAACTCCTCACAAAGGC  
CGAATTGCTCGCCTTTCAGAAGATTATAGCTGTTTGCGTACACGTTGCAAGCCTTTTCTT  
CTGTAAAAGTTTTCTTTACAATCCAATTAAACTCTAATTTTCATGGACGTAAGGGAAATGT  
GAAAAGCCATTACTATAAATCCGAACATGATCAATTATCCTCTAAAATTATATAGAAAGC  
AACAAACGGCAAGCATTGCGACCAAAGAAGATACCTGCGCCACCACACACCAAGAATTAGT  
ATACTCTAATATTTTGCTTACCCTCGTTTGTGGTGGCACCGTTGCCGCCTATGTAGAATC  
ATAGCATAAGCGGCGCGGGTGTCAAGCGTTAATTCTTGATCTGGTTTGTGAGGTTGTAAT  
CCTCATAACGTACACGGGAAACCGTGACCGATTGAAGCAAGAGGCAACGAACACGATCCG  
CCCGGTTGTCATATTTTTGATATGCTCAGGGGTAATGTGGCGGGTAAACTTAACACGCA  
AACGTAATTTAAGCGGATCACGGTCATCAATGCCAGTAACCACACCGAAACCGATTTGCC  
CGTAATTGTGGTAAACCATTTTACCAGGAATTGAGATTCAAGCGCCGCGATCTGAGATT  
TTACGTTTGGCATTTTATTTACCTTTGGTTTGTGTGGTTGGCACCATTTGCCGCCCTACGC  
ATTAAGATAACATAACCACAGCAGGACGCAAGCACTATTTTAAATTATTTTTGTTGAGA  
ATTGTTCTCATCTGCAGCGATTTTGCATGAACAGCGACAATTATGCAGATAGATTCACTG  
CGTACTAAATTTAAGGGCCTTTGAGCGTGGCGGGGTTATGTCATACCCTGCAAAAAGCT  
CTAAAACGCTTTCTAAGCGCTTCCAGGCTTGACCCTGGCAAGTGCTTCACCTCGCGGAGA  
TCTCCTTAAATTCACTTTTCTGCATAGAAAAAGCCGGGAATTATCCCGGCCTTTCGTTTA  
ATAATCTGGTACGGCTTGCCACTGTAAAGCGAGCTTTCTTTTCGGCTAACCGCTTGTTAAG  
ATTTGGATCGTAGCGGTCCGGCGTCCAGGTTTTGGCGATGCTCTCCGGCTTGTGTAGTTT  
GTCGTTTCGCTGGCGTCGCTCGTTTACTTCCCATATGCCAGGCGATCACGCTTGCTTGT  
CATTTTTCAATGTTGCGCAGATTTTAAACCTCGTTTTATTTTCGGTTGTTGTTTGCAT  
GTTCAAAGATCCGGTCTTGTTCCTCGGCTAATTCATTAGCTCGCCATTCGATGATCTCCG  
CGATCTGCTCCTTTGTGCCTTCTTTGTGATACGTGACTACTCCGCCCCGCTTTTTCACTT  
CACACAATAAGCCGTTACCCTCAAGATCATTTAACGGACCAGATCGCCGGGTGTGGTAGT  
GGTTCCTGTGAAATCTTTATTCAAATAATGGTACACTTTGCCCATCCTGTATTCAATAAT  
ATACCACAGCAGGCCCCCGCCATAACCTGGCGGGGATCTTCCAGTAGACAGCAGCAGCAG  
CCACCAAAAATAGGGTTTTAAACACTGTTAAAAATCCTCTAACATCTCGCGGAGTGTCTC  
CAGGTCTTACCTGTAAACACTTTGCCGAGTTCCTCGCCCGTCTTCTGACAAGCAAGATA  
AATCTCTAAACCTTTGCGGCTATCCTCATCATAGCCCATATTAGCGCAAGAACCAGCATG  
AGATTCAGATCCCAGATCAATATCTGACAGCAGGCAGCAATGCACGTTTGCGTGCGTAGG  
TGTCGCAACATAAACACAGTTACCGAAAGACATTGCTTTATTGTGCTTGCCTTGTAAATC  
GTCGCGTGTCCAGTTATTTGATCACCGATGGAAACCGTAGCATCATCTTTAACTAATTC  
TCTTGCCTCGGTTGGGGTTAAGCCAGTGTGACGGCCTACACGGTGACCCGTTCCCGTTTT  
AAATTCAGAGCGGGAAATCTACCCGCCTTTTTCGAAACTCACGAAAAACAAATCAGCTTG  
CCATTCTGGATCGTTGTTAACGCCACCATATAACCGCTTTAAATCAATCCCTTTTTCTTT  
CAGGAAGTTGAAAACGGCAACATCTTGATCGTTGAAAGTGATTTTGTATTTCATGATGAT  
TTACCTTTTTGTTGGTTTGGTATTATTGCCGGGTTATTTCCGTTACTTGGTCGGGCTTAT  
CTTAAAGCCCCACCTATTAAGAGTCAACAATTATTTAATGATTCCTTTCCCGAAATAATC  
GAAAGCGGCGATCACTTTCAAGGTATCATCTAACAGCTTACCGGGGATCTTTAGATTGTC  
GATCCGTTGGCTTGCCTCTTGCTTTACGTCCTGAATTGTGCGGTTTGCAGGATTAAGAT  
CGTTAAAACCTTGACCGTTAGCCATGCTCACGACCTTTTACACCCGCTTTAAATAAATTGT  
TAGTAACCCGTTACACATGGCGTTAAGCGCGCTTTTTAGTGTGGGGCGCTTGGGTCATTG  
ATTCATAAGCCAGATCATAACCGATTTTTTCAAGCCGGTAAAGCGCTGCGCTTTTCCCTT  
CGTTGTGTGATTGTTCCCGGCGACGGGGCGACTCCAGGACCAGCACACCGAAACAGTGT  
AACCATTTTGCACGGATACCAGATCCCCACGGTGAAGCGTGGCGCGGTATTTGTTGATCG  
TGTTTCCGTTAACATCGCGACAAAAATCAAAGGAATCAACAACAACGAAAAAATCCCCGG  
TTTGGTTCGTGCGTGACAATGAGGCCGGGGCGTTTAGAGCGTCATACACATTGATAGATG  
TTTTAAACTTTGCCACTTTCTTTACCTTTTCAGTCTGGCGGGAACCTCTCCTGCCTTGAT  
TAATAATGTAACCGATCCGCCGATGGTTTGAAGCTATGCGATGAAGTTTTTTAAATCTT  
TTTTGCGCTTGTCTGTTTCTTGGGTGACGTTGATTTTTAGCCGTTCTCACTAGCCCACC



GATCCAGGTGGCCCGATACTGATTTTATCCCGGTCATAGTGGAAAGATCTTTCATTGCAA  
CTTGTAAGCGTGGGAACCGTAACCATAACGCAGATCCC CGGACGTGTACAGCGTCGGCC  
AGGTGTTCGATCTCCGGGGTAGTGAACGAAAGCTCATAAACAAAATATGTATTACCGTACA  
TATCTGTAAAGTCAAGAGAATGAAAATTTAAAGTTGCGGTTTTGTTTTCTAATGCTTTTT  
TGAAAATCTCGATCATGTTTTCCATTTTCGTTTACCTGCTTTCTTTTGGTCTGGGTATTAT  
GCGCCAGTCTCCCGGCGCTTGTCAAATTACTTTTTATCGGGCCATATGCGCCGCAAACG  
TGCGGCGATCTGGGATCGCTGATGGGTTACCGGGATCGGCTTGCCGTTTGCCTCGTGTAC  
ATAGGAGACCCGCGCCGCTGGCGGTTACGGTAACCCGCTTAAATTTCCAGAGTAACAAC  
CAGGGCCGGGGCGCTTTCCATTGCAGCAGGTAGATCGGCGGTGTCCTGGATCGCTTCCAC  
CATAACGTCGGGGATGACCTGCCAGCGTTACCAGCAGGCGCGGCGGTGCCGTTGTCGAT  
CACTTTTCCGCGTGGCTTTTGCAGCAGTACGGGCAAGGGCGCGAGAATTGAAATATTT  
TTTCATGGTGTAACTCGTTTTGTGTGGTTGATTTGTTTCGCTTGTCAATGTGTGGAGATT  
ATAACCCACACATTAGCCAGCGTCAACAATTATCTTACAGTTATTTTTTGACCTTTCAC  
AATTAGATAAGTGTGTCCGGCGTTACTATATTGATCAACGTATACCCGACGATCACGCC  
CTGGTAATTAACCTTCCATTGTGTAGGGATCTTGGTCCCATACCCGGATCGGGATTTAGT  
TAGCCCCTTTTGTGTCACCACAAAGGCGCGTCAATCGCCGTAACCTCCGCCAACAACGA  
CCCGTCATTGTCAATCAATAATGTTTCCATTTTGTTTACCTCTCGTTAGTGCCGGGGCGC  
GTCCCGGCTTGTAGTAAGATAACCGATCCGGACTTGGTGATCAAGCTTTTTTCGAAAAT  
ATTTTTCAGGCCGTCAAAGTTTGCATGATCTCCGCGCCTGCCTTTTTTGCAGCGTCCAG  
CGCTTACCCTTGATCCCGTTGCCGTTGTAACTTCTTTTGCCTTCGGTCAACAAATCGCT  
TTCGTCCTGGTATGAATAGGTAAACTATAACCAATAATCTCATTATCCAGGAGGGTGAT  
CCCGTTCGCGGCGGCCGTCACATTGAAACCATAATGACTGGCGTTTAAATCGCGCTCCAA  
AGCGTCCTGTGCGGCCTCGTAAGCGTGGCGCGATGTGTTATCATCACCACGGGCGATGAG  
GTCTGCGATCCGCTCTTTCAGGCTGTATTGTAACGGGATAGCATACTTATAACTAGTGCG  
ATCCGCGTTAGGATTCTTACAGTAACCCCGCCCTGGTGATCGTCGGTCAATGCCCACTC  
ATCGCCAAATGTATCATTGTATTATAGCATAACAACGTCAACGCTAAAATCAATGCCGTT  
TTCGGAATAATTGAAAGTTTCGATGGTGTCCATTTGCTTTACCTTTTCAGTGTGGGGCGT  
CGGTGTGTCGCCCTGATGTGATACATAGTAAACGGCTTACTAACTCCCTTTAATACCCCA  
GGACATAAATTTTTAAAAAAGTTTTTCCCTTATACTTGTTCATCCTGGCGGTGATCGTG  
TACTATATAGGGACTGAGACAACAACGGCGGGTAAAGAAAATGGATAACGTAAACGTAGT  
AACAAAGCGAAACAATGGTTACCCTTTTACCTGGGAAACATCAGCAAATCATTGTGATC  
TAGGTCGTTGCCGTTGCCTCATGCCTTGCATGCTTAAACGGCGGATTCTACCGGGCGAA  
AGGGGTAGCGGAAGACCTGGAAGTTTTAGCGAATACCCTGTAAAAAATATTTGGTCTG  
GGCTTGCAATCGGCGCGGCCCTGGGTTATAGTTAGTTCTAAGAAGAGTAAACGCCACCC  
ACTGCGACAAGGCCGGGCTAACGTACCGGGCGCGGGTGCCAGGTCGGAAGGTGGATCGCC  
GGTAGTTCGACCTGATGTCATTTGTAAAGATTTGTAAAGTAGCTTGATCCGTGGAGTGGT  
TATGCTATTATTTACACATGGCGAGGGGTAACGGGAATCGCGAGACAAACACCGAAGCTG  
ACCGCTATTCTGCAAATCAGAATGATTCTCATTCAACAAAAAATTTCTCTTGACATCGCG  
TGAGCGTGTGTGAGAAAATTACCGATCCCTAAATAATTTTTTCGCTCTATAGAAAAAATA  
CGTTTTCATAACTGAAAACCTCGATCGAGAACC GCGCGGAAAAACTTTTTGCGATAGACAGA  
AAAAATACGTTTTCGGTTTTGAAAAACCGACCGAGTACCAGTGTTATCCAGAAAAACTT  
TTTCAGCGATAAATAAAAAATACGATTTTGAAATCGAAAACCTTGATCGAGTACGCGGACT  
TAAAACCAACAAAAGGGATATAACATTTCTTGAATTTTGCCACAATTATCGTACCGGGG  
CATGGAAATTCCATTAGTAATCATTATGTTGCATGGGTGGGGTTTAGGATAAGTTGCTGT  
ACTTTCAAATCTTAAATCACAATAAAATGGATTTACAACCCGGCTATGAGGGAAAACC  
ATTTCAAACCAATTTCAATTTGATTTCCAGTTCAAATTTCCCGACCAATAT  
CAAGGGCAAACAATATCATTTTGAAAAACCGTACCCTTTCAAACAAGTTTCTGAAGAG  
AAATAGCAAGTGATTTTCAGGTCGTTATCAAATATATTCTCAGATTCCCATGCAGCATGTG  
CCTCTTGCTCTGTGTCAAATATCCTATATACCTTCCCCTTGGGTCATTTTTAGATCTCT  
GTGCGTTGAACTTACCAAGTTTTTTGTCAAATGTTACACCTCGTGCCTGTTTTCCATTT  
GAGAAATATAACTGTTCAACCACACAGGGATGTAATACAAGTATCAGGGCCGTAAGCCC  
TGTTCTTTCTACCAGCAAACTTTGTCAAGTGCATATCCTTGTTGATAATTGTTGCACC  
ACCATGTATGAAAGTTCATAAAATAATGCCACTTATCGACCACAACAACCCCAAGATAAG  
AGGGGTATTTACCGCTGTAGCTTCTGATTATCATATTGTGCCAATCCTTGTAGGCCGTAT  
GGTGATGGAGTTTTCCATCTTTCCGCATACTCGTGATAAACGGTGCATCCTTTATGCCAA  
CACCACATACTAAACTACGATGTTTTGTAGATGGTTTCGATTCCATTTCAAATCTAAAC  
TCATACCTTCTCCTAAATATCACACGGTTTTTCATTTTGGTTTCTTTCCGAAAGTCTCTC

TCCACCCACAAATATCGTACTCTGCATGGTGCGACATTTTATAACATCAGGATTTTATCAT  
CAGTTGGATTCATCCCGTCCATGAAAAGATCCTTCATCTCTGAGAGCCTGAAGCGATAGA  
CCTTTTTATCCTTCGTCAAGATAATATCAATGCTCCCATTGACAGCATCTATTCTTAAGG  
TATCATCACCTTCACATAAACACAGTGTCTTACCGCAAAGAGTGATCCAGTCCTGAACAC  
CAACAACCATATTGCTTGCAGTGTCCCATGCAGCATAAGCTCAACAACAATAGAACCTG  
CGTAACCAGTTCGCTCTTCCTGAATGATGTTGAAAACAAAACCACGCTGAAAAATATTGC  
AACCGCGAGACTCAAGAGCGCTGTAAAGGCTGGAGTCTTTGTTAAATTCCCTTACCGCTT  
CTCCCGACAGATACAAAAACCTCATCCGAGATTTATGCACGACCCATCTTGTTATCAACAG  
AGAAAATATCTTTACTCAGGGTATCTTCCCGTTCGCCAACAGAGATCAGGGAGTCTGTGA  
GAGTAACGACAAGCGCTTCCAGTTGGGTGACATAATTCTTATAGTCATTAAGCTCTGAAC  
CCTTCGCTATACCCTTCCGTTCAGAAAGCTCAGACTCTACATTCCCGTGTCTGTTTGTAA  
ACTCTGCCTCATCATCTTCATCAGGTGAAAATTCAAGGTAAAATAGCTCGTGTCTGTGC  
GCTCAAATATCTTGAGTAACTCGGATTCAGATCCGGGTGAGGGTATTCGTTCTGTGTAT  
GATCGAGAATCTCTGTGGTGTGAAAACGGTGTGCATCTTAAACTCTCATCTATCGCTTT  
GTGAGGCGTTTTAATAAATAGCTGTACGTTTCGCCTAACCTGTATGGTAAAACCCCCCAG  
AAGCGTTTCTACGCAACATACGGGGCATTGTGGTGACATATCTTACTGACCGTGCTTCTC  
GCTCATCTGATACTTCATGTATGCCATGTTTCAATTTATGCTTTACATCATAGGGGATTGG  
TAAGTTTCCGAACATGAAGTCGCTCAGCTCATAACATCTTCTCCAGAACTTGAAGGTGTA  
GTAAGGGATCTTCATCAACGCACCTCCACAGGCTCAATGAAGTAGTTCTGGCCATGCTTC  
GTCTGACAGAAAGATCCTGTGTACCAAACCCACGCCCAACTAGGCTTGTCTTACGCATG  
AGGTCGAAGTTGGTCAACTTTTCTTCACGCAGTAGGGCTCCTGATGCATCGACCAGTTTC  
ATTAGTAAGTCGAAACCACACATCGAGATGATCTACTTGTGTCATCGCTGTCAACAATG  
TCAATGTTTGCAGCAGACCGCCACGGCTGAATCCGGTATACCGGATTTCAAGGTGACGG  
ATCTGGTGATGTTCTGATCTTTCGACTTTTCGTTCAATACCGTAATCGTTCTCATAACCT  
GTATACCATGCCCGGTGTCTTTGTTATAACAGCGCGGGGTATTTCTCTTTCCGAGCATC  
GCCGTTCAATTTCTCCTCATTTTTCTCTATCCAAAGGATCATAACCTGGAGTTGTTGTTT  
CATGGGGATCAATACAGGGAAATCATCGATCCAGATATCCGGTATCCACCCCAGCTTTGC  
ACAGACAGCGGGCTTTTGCCTCCGCGCAGTAAATGATGCCTATTCCAAGTTCTTCAGC  
CCAGTATTTGATATCATCGTTCCCTGTCAGTTTCGAATCGGAATGTCACGAACTTGACAGT  
GCAGTCTGAATCTCTTGAACAGAAGAGGTGGACGAACTGCGACCACCTTTCCGGATCAAG  
AGTGAATGTGTCATCGAAATCAAGCGCTATACGCTTTTTCTCAAATGATTTCACTCAGCC  
CCCATCTTCTCTACGATACTGTCCCACTTATTGCACTGCTTGTGCATCATAATGTTCAAGA  
CGTCGCTGGACGGTTTCTGCGATCTCTTCCGATCAGAATCGCGAGGGTTTATAACAGTCC  
TGAAGCTCAAGCATGTAAGCGAGGTCGTTTGCACAGTTGATCACATCGGCAATCTCTGCG  
ATTGCAGGTTTCATCACAACGATGAGGGCGATTTCAGTGCTGGTGCCAGTTCTCCAACCTCC  
TCTGCCAGATACATCATGACAGAAACAGTAGACCGGGCTTGCGCCCGGACCGAGGACTGG  
AGTACGCGTTCAGCCATCCCGGTCATTTAGACTCCTTCTCTTTTGCCTTCTAAGCTTCAG  
CGGCTTTTGCAGCAGAATCCAGGTCTTCGGTGTACTTCTGAATCTGCGCATCAAGGTA  
TTATGGTGCTGTCAGCCAGTTGCTGAGTACGTGGTGATTCTACCACATTCTGACCGACAT  
ACGCCGCCAGCATTTTGTAAAGCTGTTTCTTTCTGAGGCATGAAGTTTGCATATAACAATCC  
CCAGGAAACATAACCACATAACGAACACAGCAATCTTACGAGGCCCTTTTGTGAGGTGCG  
GCTTAGGCACAGGTTGGCGCTCTGCTTACGTTTACGAGGTGCTGTTACCTCCCCAAA  
CTTCGAATCGCAGCCAACAGAAATCACCATTATGATAAGGTACCATCATTGTACCAT  
CATTATCAATCCTGGTGACAACATAACATCTCCGGAATTATAATTGGACCAGTCCTAAG  
CTAGGACAAGGTTCTGCCCCAGAAAGAATCCAAACCGTTCTTCTTACCATCCGTCTCTT  
CGTAAGTCTTCTGAATTGCATACATGATAACATATGCAACCGCTGAAATGAAGAGCAGGA  
AGCCCCAACCGCCGTAAGTACCATCAGGAGTGAGTCCATCGATGAGGTAAATCAGAAAAG  
GCCATGACATCAGTTATTCTCCTATTTATAAAAAATTTGGCTCAATTACAGAACGACCATC  
TTTACAATGAACACTTGAGGACAGTGCCTCAAAGCCATGAAGGAATCAATCTGGGTCTT  
ACCACCAGAGAACTCTATCGCCCAGTCATATTCTTTGGCGTTATCCCTTTTCTCTGGCAG  
ATAACACCCCGTAAAAGAATGGATAACAAAAGTGGTATGAAGACTTTTTTTCATTTCTCA  
TTAAGCTCCGCAATCAGTGCGTCAGCACGTTTGTGTTTCATGCCATTGATATTAGCAGGT  
TGGCCTGCCATGTCAAGACGATTTTCGCAAAGTTTCTCCTGAATCGTCTTACCCATCGCC  
CAGAATGGCTCCAGACCAAGGAAAGAACGCCAGTATGCTTTTCCCACGAGTCCACCGCT  
TTAGGGCACCTATCGTCTGTGTAGGTCCAGTGTGCAGCGCCGTAACCTGTCAGGCCATCC  
ACAGTCAAGTACAGGCTTGGCATAACAATCGCAACTGTCATCAACATGACAAGAGCAACTT  
GAGCTACTGGTAATCACAAGGTAATTCGGAACCAGACGTTGAATAGAACGTTGAATATTA

ACCATTTTTTCGGCCTCCGCGCCGCCCGGAGTAGATCGGGTAAACAAGTTTGCCCCTGTC  
GCCAATCTGCTCCGTTAACATTGAACTTCCACACACATCTGAAGTGCTTCGCTATCGCTC  
CATCTCTTCTCTTGAAACCAACTATACACAAACAAAAGCATAAATCAAGTCTTTTAGAA  
AAGATCTTTTGTTTTTTGTTTTTAAAGACCTTATGTGTATTAATTTATATATGTCTTCT  
GTGCAAATTTGCAGGACACAAGGTGCAAATTTGCATAACAGCGAGGTGTATTCGTATG  
TGCTCATGCCTCTCCTTTCCACAGATAAGTAGCCGTTTGTGACCAAGTTCTTCATAGAGG  
TACTGATGGACCTTTCAGAAACACCAGTGGCCTCGCTTATCGTCTTGTAAGTTGCGAAAT  
ATTGCTTTGTTTTTGTCTCTAAGTATCCGGCTTTGTATTTTATATGCAGCAGGACACGAA  
GATCTGTACAGGACAAATTCTTGTTCATGTAAGTCTTCTCATCACAAGGTACCCACCTCT  
CGCTCTTTCTGGACAAGTGTAACTTCTCCACTATAGACAGATGGTAAAAATCCTTCGACA  
ATACCTACAGCCTTTTCAAATACTTGTCTTCAAACACTCTGTGCCACCAGGTATCCTC  
AAATCCATCATTGGAATCTGCCACTTTATCATCCTTTCTAAATGCCCTGCCAGGCCCCCA  
TTCTCAAAGTATACACAAATTCCATTGTGGAAACACTACCATATTGAGAAAGTTACTGT  
TCCCGTTTATTAGGGTTTTGCGTAATACCTACTGTACGAACACCATCACAAAACCTGCCA  
ATATACAAAGACTTATTTTTACCACCAGGGCTATATAAGTAAGCATAATCTGCCATAGTA  
ACTGTTTTATTTTCTCGATCCAAAAGCAAGAAAAGTCTGTTCTCCACATTTCTCAGGCAT  
TGACTCAGCAACCCCATTCATGTTAGTATCTAAGAAAAGAAGTTCTACAGGGTAATTT  
TTAATATCTTTCCGAGAATCGAAGCATCTTTTGACCTTGAATAGCAAAGCACATCATCC  
CCAGTCAATTTGTCAACCTGAGTCAAGCGATCAGGTGTACACATTTGCTATGACTTTAAC  
ATTTTCATTCTCACCCTCCATATAACCTCTTAAGAATTCAATAACATACTCCTTCGCAT  
ATTCTTCATCAGCATCATTATGCCACATGCGGGTAATTACACCCGCCATAGTGTACAAAG  
ACCTCTCAAATGGTGAAAGTCCAGGTAAAATACTAACCATAAACTCCTCCTCTGTGGTGA  
TCTCCAGAGGATTTACCGTGTAATCTGGTGGGATAATCTTCTCCACTCTCCTCCCTTGA  
AGTTCTTAAGGGTCAAGGTCTCATGTTGGAAGTTGTGAGGTACTCACAATACTCACAAC  
CATCCTTTTTGAAGATTATTCGCACAATTGCCCGGTGTACATGAAATCCACATCCAGAC  
CGGGACCAACGGCGACGATTTTATTTGAGTGCTCATCTATATCTACCGCCCTTCCGAAA  
GGTGGATTAAGTTCGCACGGTTTCTACCGCAAAGGACCCTCAGTGTTTCCATTTACGA  
CCCCAGTCTTTTTTCCGATCACTGAGATCCTCAATATATCCATCAGTGAAGATTACT  
TCTGTTGCCCTTCGGAATGTTACCTTCGATTTACTGGAAAGCCACACCTGCCATAGTACCG  
CCTGTGGAGGTTACATTGTAGTCCGGCATCTCTTTAATGTTCTCATGTGTGTACACTATC  
ACATCACCAACCTTCGTTGACCAGCAAATAAATGTCACACGGAATGTTTTATAAAGCAGA  
CACAAACGAATAATCTCGTTGAAGATCTTGGTGAGCGTCTGCTGACATGTAGAACCTGAC  
ACATCAAACCGATAACGATGTCGATTGTATCCTGTTGCTTCTCCTGGAAGATGATA  
CTTGGCTTGTGGTGATAGCAACGTAGTTTCTTAACACTTTCGTAACAGACCCCGATCTA  
CGAGCAGGTTTGCAGAACGAAAGATGCGATCTCACACGAGAAATCATTTCGTTGTTTGACG  
ATCTGCATGTAATCGATAGGTGGTTTACGCATTCTGGCTACCAGTTCTCGTGCCCTTTTT  
GGTCTTACCACCCGCAGCCTTTAATGCAGCCGCAATAAGACCCGCTGACCATGCAAAG  
TTCTCATCTTTTGCTACCGGACCTTGACACGGGTGTGGATCAGTGTACCCAAGAATGTCA  
CGATCTGGGTCATAATCCCCGATATGAGTACCCATTCGGTGACCTGAGACATCCTTCCCT  
TTGTGAATGGCGCTGTAATTTCTTCCGCGTCATCCCGTGAAAGAGAAATCACAGTAA  
CAGTATGCCATAAATCCGAATTCTTTATTTTTATCAAAGACTGTTTGCGCCCCACCAGGG  
AAAATCGCATAACCTGAGAACGTGGTCCAAGATCGCTTATCACAATATCTGTGTTGATA  
TACTGCTCCGCAGCAATATTGTACAGTTTTGAATCGAAGAAGTACCACGAGCCATATGA  
TCATTGGTTATATGACATGCCTCATGGATGAGAATAACCACCACTTCCCTTGGTGTCTTT  
TTACGATAGAATACATTGATATATTCTTCGTAGTCATCCTTCTGTTCTGAGTCATGTGG  
GGGTGTTTATCAATCCGAGAAAACACCTTCTTCTCCGCTCTTCCGGCATAACCATGATG  
AACTCAGGGTTATAATACAGGTTGCGCTGGTCAGTCCCGCAGTAGGCAACCAACGCCAA  
TCTGCGATGATCGGCAAAGAACTCAGCAAAGTCCCGTAAAATGGGCGCTGTTGTAACAAT  
GCAATACGTGCAGATTGAATGACCTTCAGAGCATCTTTCTGAAGCTTTTCAATCATTTCG  
CTTTCGTATTTATACATATCTCTCTCAAATAAAAAAGGCCATCAATCAAGATGGCCTCA  
GTGTATCTCATTTTTGAAATGCGGATCAACTCTTTTTCTTCAACGGAATATTCTCTTCTT  
CCACCCTTAATCCCCATGCCAGTTTTGGCTTTGGCTCATAACGGGGTTGGAGGAACAGCAA  
ACAGTACAATTGCCTCCACGTTTCCAGAATGGGCTTCGTCGATAATCATAACCCCTCAC  
CAACTGCAATCGCAGGCTTGAAACCATGATCCAGCATCTTTTGTTCAGGGGCCGTTGCTG  
GTCGGCCAAGATGTGTTTCGTACATTATACCACGTTATTACGCATCGCGTTGATCTTCGG  
CAGACTGAGACCTGTATGGATCATCAATTGGGTCATTGCTGTTTCCATTTTCTTGGATAG  
AATGATGAAATTATCTTTCGCAAAGCGAAGTTTAAGGTTCGAGGTTCCGGAGTGACTTGGG

TTCACCTGTCAACTTCTCCCCTGTCAACGAGCAGGTGTGACGGACATATTTTGCCTTGAA  
CTGTGCATATGTCACACTTACATTTCATCCCTACAGCAGAGAAGGTTTTGCAGTAGTTTGC  
ACACGCCAGACCTACCGCTATGTCATCCGGCAGTTTTGCTGGCTCCGGTGCTTTTTTCTAC  
GACCTCTTCCACAGCCTTGGTTACTTCCCTCAGTAACTTCTCCCATGTGCATATGCTTTTC  
TGCTTCCCTGGTTCAGTTTCGCTTCGATAGCAATCATCTAGTTCTCCTGTTGTGGGATATA  
TTTAGTTTTTCAGCATTTCATGTGGTCTTCTGACATGGTCAGCATCATTGCCTGAACAAT  
CTCGCGATCAAGCGGTTCAATTATAGTGATTGCGGTCTTCTTGGCAACCAACAATCTTT  
CAATTCGTTGGCACGACGATTACAACACTGACGTTGCCACGCACATTACCTTTTTTATC  
GTCGATACGTTCAACTGAAGGGTATTTTGGGTTATAACCCGCCACGGTTCATAGGAAA  
CGGCATGTTGGTGTAGTCGCAAGTACCCATAACCGAGTAACTTCTTACCGATCATGAACCA  
ATCATCGAGGGTGAGTGAGAACTCGTTACCACGTTTTCTTGTACACTCAATCTTTGTGTG  
GTAACGCTCTTCGAGATTTTTCATCTCGTTTTGTGTGAATTCTTTTTTCCAGTCAATCAT  
GTTCTATTCCCTGGGTTGTTCCCGTCTTGTGGGGTGAATTATCTGGCATTCAATCCGCGC  
TGTC AACACTTGATTTCAAATTCTTTACAGTGTTTGTCTTGTGTACTTTTGTGTTGAAGGA  
AGGATAAAAATGACGAAATTCAACGTTGATGTTACACAAGTAAATGCCCCCAAGGTTACA  
GCAGATATCGACTGGAGCTTATTA AAAAGTTGACCAGACCACTCGCGCCCTGATCGAGCAC  
GGGCAAAGAGAGCACGAGTATCGTCAAATCGCAATAATGGGTGTCTGGGATACGCCAAGA  
ATGAATACCGATGATTTTCTTTCAGGGGTGAACCCAAGGGTGTATGGAAGACCATCACCTG  
GCTGAACGACTCAATGGCCTGCATGAAAGGGTGGATAGGGGAGAAGGACCATTTTCTTCG  
TTCTGGGGTTATGACTGGGATGGTTATCTGCGGGAGAGCCTTGATAAGAGGTTTTTGGCC  
CGACTAGAGGTAGATGTCAGAGACAGGGCCTTAACTCAAGCCGTTTCGAGCGGGAAGGG  
GTCTCAAGAGGGAATGTCTCTGCAAATATCCGGGGGCATGGGGATGGGGATGCCTTTACA  
AAGAGTTCTGCTTGGAGGTTTTCAATTTCGTACAAGGGAGTTTCTCAGTTTGTTC AAGCCC  
CTGATCAGACAAATGGGGCGTTGTGAACCAGACCTTGTAATCAATGCAGAGTTCGCGAGA  
TACGGCTTTGGTTCAA AATTCACGCAGAGGTCAAGAAACGTTATTGATATTATTGGGATC  
TCCTTGTCTATCGGAGATCTTCTTATATTTTGC GACTTCAAGGACAGGGATAACTTCGAT  
GTGCAGTGCAACCACATTGGTCACAGCGTCTTCCACTTGGGTGATCGCGGCGTTAAGATC  
AAGAATGCCCGTGAAGGGTTGTTGACTTGCAATAAGAATGAGACATTATTCACCTCCGT  
TGGGAAGCAAGAATCAAAAATATGATGGCAGGGGAAACACCCGGCCCGGAAGAGTAAATG  
ATGATGGAAATGGCTGGATATAAAGATGAGTTCTGGCTTGACAACATTGATGGTTTTGAT  
ACACTCAAGATCAAACATTTTAATTTGATGGAGCAACAAAGATGGTACGAACTTTCAATT  
CCACGATTCAGTTTTTAACCCCGGCGCAAGA ACTTGCTCTGGCTATCAAGATCGCAGCAG  
AGGACCACCTGAATCAGAGAGACAAGGGCGGCAATCCTTATATCCTTCATCCCCTGAAGG  
AAATGC ACTACCTGAAGACTGATGATTTTCAACTCATGCCGATTGCAGTCTGCACGCTG  
TTTTGGAAGATACCGATGTAACGGCTGCTGATCTGGTCATTCTGGGCTTCTCCAACCGTG  
TGGAAGATGCTGTGGTTCTTCTGACAAAGACCCCAATCAAACACCGGAGGAAAATGTCC  
AGGGGATTGCAAGCAACTATGATGCTGTTCGTGTGAACTTGCAGACCTACGCCATAACT  
CTGATGTTTCGTCGCCTGAAAGGTCTTACAGATAAGGATTTGTTGCGTGTCCGTAAATACC  
ACGGCATGTATCTTCGTCTGACAAAGATGAAAGAACATCATGAAGCAATTAACCTGTTGT  
CACAATTATGAATCTCTTGACAGTGCTTCGCACAAACAAGTATACTCAGAAACAGATGTG  
CTACCTGCTGGGGATGCCCTCGTGGAGAGTGAGTAAGCTCGTTCTCAAGTTGGAGAAACG  
TGGTTACATTCAGGTAAGTCGCAGATACAAATTGAGCGGGCCGGTGTCAAGACCCTTTTG  
TGTTTACGATCTAAATCTTTACAAAGTGACTCTATCCACGAGCAAAGAATGTCCAGAAAT  
CAAGGCTACACCCCAAGGCACAATCAAAAACCCCGCCGCGGCTGGGCGTGGACTGAG  
AAAGTTCGCGAAACATCTCGTTACTGGATGTCTTACCAGCATT CAGTAACAGGAAAAGCC  
GTGAAGTATCGTAAACTGACGGGAAACTGGTGGGTGGGGGTGACTACCTTGACCTTGAA  
TCCATTAAGGAGCTTTCATATGAACAAATCTTTACAAGAGGCTATCGAGATAAGGCGTAG  
TAAAGGGCAGAGCGATGCGGAAATTGTGGACTACCTCTTGAGGCGCTCTGATCGCAAAGA  
AGAACACCTTACCTACTATAAAAATCGTGCCTCTGAACTGAAATCAGCTTTGATTCCGGC  
ACAGTTTTAAAGTGGCCGTCGGGTAAAAGTACGGTTGACAACATCATCAGAACATGTTG  
GGGAAATTACGTGTATCATAAAAACACGCGTTACGTTT AGGATGGTAAGTTGAAGGCATG  
GGTTAAAGACCCTAGCAAAAACAGTTTGTAAAGCACAATATCAAACACCTGCCAGGCAA  
ACTTCATGTGGAGGTTATTCTTCTGACGAAGAAATGCCCCGGAATGGGAGGGGGTTGC  
TGTTGGTAATCTGTTTGGTAAACGCCTGCTTG CAGTAGAAAAGACGGGATGTGGATCAA  
CTCTGATGATACATT CATTATCACTAAGAAGGAGAAGAACAATGCATAACTGGAGAACCC  
GGTTTGATTTGCGTGATGTGTGGGGTCAACGTA CTGGTGAGTGCAGTCCAGAAGAGTGGA  
CAGATAAGACTGTT CATGAACTAGCAAAAAGAGATCGCACGTCGAATAAAAACGTAAGTTTC

CACAACACATGATTGATGGACACGACTGGGACCCTCGTTTGACAGAGATTCAAGACATGT  
TCGAATCAGTACCGACTCTTAAAGAGCCCCGTGACATGCTGGCCCGTCTCATTGCAAACG  
AAAATGTTTGCATGATGAGACCTGCGAAATATCCAAAGATACCCCGATGGCGCAGTTCT  
ACGAGGCGATGTACCTGTTTTATGATAGGTGTGATAGTAGTTCTGTGTGGGAGGATAAGT  
GAGAGCTTAAGATTTTTTCATGTGCCGAGTCATGCTGCTTCCTGGTCACCGCTTGACTCG  
TGGTGCATGGTATGCAGTCCTTGGTGCCCAAAGCCTTGAGCCAGATGAAAAAATGTTCTC  
TGAGGATCTTGCAACGAGGATTACATACCCTATACAATGATATTGCCCTGAAGAAATTGA  
GGGAGTAATTGCAAATTATCTTGAAGAAAGGAGACACACGAATGACGAGTCGTAATATTT  
TTGATGATAACCGGATCACCTGCGTGACATCCCGGATTTAATGCGCTTCTGTCAGCTCC  
GCGGGCGCTCGCTGATGATGTTTCGGTGGTGTGCTGGCCTAGGGAAACGTCAGGCAATGAAGC  
AGGTCGCAAAGATGCTGTTTGGCGAACATGACGCCAACCTGATCGATTTCCGTCTTGCGG  
ATAAAGAGCCGTCAGATGTTGTGGGCGTACAGATCCCGGTACAGACGACAAGTGTGTTA  
CCCGGACCGGTTGTGCGATCCCTAACTTCTGGCCTGAAGATCCTAACTGGAAAGGTATCC  
TGTTCCCTGGATGAGCTTCTTCATGCGGAGCCTTACCTTCAGAAGGTTGCATACCAGATCA  
TGCTGGATCACCGTAATGGCACCTACATGTTCCCGAAAGGAGCGGTGTTTGCAGGTGCTG  
GCAACCGTCCCGGCGATGGTACTGCGGTAAGTATGCTGGAAGCACCTCTGGCTAACCGTA  
TGATCCTGGTCAACTCGATTACGGCCCGACTGTTTGGCTGCATGATTATGCTATGCACA  
ACGATGTTACCCACAACGTTGTTGCGTTTATCGATGCAAACCCAGGTAAACTGGAAAAC  
ATGAGGAGATGTTGGAAATCAACTCCCCTTCATACGCCACACCCCGTACTTGGGTTATCG  
CCAGCGATATCCTGTACGATTATGATGCAGGTATCTTGTCCACCCGCCTGGCACGAGCCG  
CTCTACAAGGATCTATCGGCAAAGCATTGACCGATGAGTTGTGGTATTATCACACCCGTA  
TTGCAAATATGGTTCCTTTTCGAGGGGGTTATGGACGGATCGATCAAGAAGAACACCGGGT  
CAGACACCTCAGATGTGTTATGGACCCTAGGCTCTCAGGGTTCAATCTGGTTGCGTAAGC  
CAATTCAGAACAAGAGTACACAGATGATCAGGTTATTGACTTTGCTGCGAGCTTCTTGC  
AATACATGTATGATAATTTTGGTCAGCATGATACGTCATCGAACCGTGATTTTCGTGAGTT  
CTGTGTTGATGTCCTTCATCCAAGAGAACTCTTTTGCAAAAGCAATCCTGTTGTCGGGTG  
ATCGTGAGCGCTTACCTGCCACATTGTTGGGTACATACCCGGTAGTAATGGAGAGCATCA  
CCGAATACCGCAAGAAATTTGCTGAAGGTGTTGATTCAATCGTAAATTAATCGTTGACAG  
CCCCAAGTGGGGCTGTTATTCTTTGCTCACACAAAACAAAAGCGAGGACAAACCCAATGAC  
TAAGTTAAACTGGAAAGAAGCACAGCAGGCTATGAGTGAAGGTAACAAGGTACGCAACCA  
ATACTTTACTCCAGAGGAGTTCTTCGAGATGAAGAACGGGCAAATCGTGTGCGAAATGGG  
ATACAACATGGCTGGTTGGTATCTTGGCGAGGCATGGCAGGATGAGGGATGGAGCGTGAT  
TGATGCGTAGACCTAGCTTCGGGTATATTTATATCCTTGATAAAGGTTGTGATGCACGTT  
TTGTTTGTGAGGCTCTCTTGACATAGAATATGTGAAGGATCACTACGGCCAGACGCAA  
AGAAGTCCACTTCCGTGAAGACAATGGTTTTTGTCAATCTTCTGGATGGCTGGAGAGA  
GTGCTGGGGTTATACTAGCCAAGATAGCGGAGCACGACAGAGAATATTTTCACTTTGTCA  
GGGATTTTCGCACAACAGAACAGAATTGTTCTCATGAAGGGGGAACACTATGGTAAAAGAGTA  
ACTTCGTCCAATTCCTAATTATGGCGATGTGATGGATGTACATTCATGGGATTGCCGTGT  
AAAATGCGGTGCCTTCATTCTGATGGTGGAAATGGGTACTGGTGTCTGATGAAAATTA  
TGAGTCCGACATCAGTCGCTGGAGTCCACGTCCTGAATGGGCGACCCACGTAGCGTGGTA  
CAATCGCTATTGGCAACGTTCAAATTTCCGCTGAAAGAGATCAACGAGGTTTGGTGGATT  
GATCGCTTTGACATGGTGTGATGGCTGGTTACACATAACCAGCGTCAGCGTATTTTTGTTGTC  
TGTGCTAATACGAAGGGTGAAGCTCGTGAAGCATGGACGCTTTTAAAGTGAGGAATTGT  
GCATGAAAGTAAAAATGAACTGCAACTACAGCGACCGCTTAGACCATCCCCGTGCTGGAG  
ATGTCCTCGATGTTTTGGAAGAGTTTTATAACGGGACTTTCATTGAATATTATCGTTGTG  
AATGGAAAGGTGGTGACCTTGACGTTTACCATAACGAGTGTGGTGAGGTGAAGAAATAAC  
ATGAAGGAGAGTGAAGAGGAATTGCAGGCGCTTAAATCTTCTCCTTCTCATATGACCCTGAG  
ACAGGTTTGTTCACGTGTTTAAACCCTATCGCTCGTCGTCATTTTGGAAAGGTTGCTGGT  
ACAAAAAGAAAAGACGGTTACGTAGCGCTTGGTGTAAAATTGAAGGTAAAGGTTTTTAC  
TTCTTGGCACACAGGGTTGCTTGGGCTTTTTATTACGGGGTATGGCCACTTACTTTATT  
GACCACAAGGATCGACAAAACATAACAACCGCATTACAAACCTAAGAGATGTTTCAGAAA  
TTTGTAACGTTTATAATTATAGCAGGGGTAAAAAGAACCACAGGTTTCCGTGGTATA  
TTCGTAGATAAAAGGTGGACAAGACTCAGATTCCATGCCGTGTATAGCAAAACCAACTT  
GGAACATTCGACTCTGCGGAGGAAGCCAGTGAATGATATCAAGCATAACGTTAAAACGATT  
CATGACATTGTAGTGGAGGCCTGACGCTTAAGTATAAAGTAGGTGACCTGATTGAGGCTG  
TGAAATCTGGGGAGGTCAATGTATTTCGCGCATGGCTGCAATTGTTATTGCACGATGGGAA  
GCGGGATCGCTCCTCTAATCAAAGAGGCGTTCCTAAAATGTTTCGCTGCCGACCTGAAAA

CTGAGAAGGGCGACAAGACCAAGCTGGGAACCTGCACAGTGGCCTTTTATAATGATGGGT  
CTCTCGCAGGATTTAATCTTTACTTACAATACTGCTATAATCGTCGTAAACAGGGTCTCA  
GGCACCTCGATTACAATGCCCTGTACGATTCGATGGTTGAAATCAAAAAGCTCTTACAGA  
GCTATACAGACGGCCCTAGGGACCTCTATCGAATCACGTTCCCTAAACTAGGTGCTGGGC  
TTGCAGGGGGTGACTGGAATGTCATCGAAGCAATGATCAAATCAATCTTCCACGATTGTG  
ATGTAACAGTGTATATTTTACCGGAGAAAAAATGAGGGTGGAAATTATCTATCTTTTGTG  
AGCATTCTTTGGATTCTACATCTTCATTAAGAGGACGCAGAAAGATTTCCGGGAGAGTCGT  
TAGTGTAGATGTCTTTGCTGCTATATGCATGGGCTTGCTCGGACCTGTGTACTTCACTAA  
TCTTGTGGTGCTGCGAATTATCAACGGAGACTGGAATGATTGAACTATTTCCCTGGAATG  
AAGGTCCATGCTAAAATTGTGGATGTATATGCAACAGATCGAACTGTATTTACATAGAGT  
GCTCCTCGTGGCAAAAAAATATGCCCTCATCTTGATGACAGATGAAGATCCCAGAGATGA  
TGTTGACAATCTCTTAAAGGCTTATGAGTGGATTGAATTCCTTGGGTGGAAACACGAGGG  
GGATGACAGATCGAAGAAATTTACGTTATCATTGATACCCACAATGCAACCTTCTGGAAG  
TCTGCTAACGACAAGACATTATGGCCTTCTGCGCGGACAGCGAAGTCTGCTTTTGGTTCA  
AGTCGATACAGTCCGCTGCTTTGTCTGTACTCCCAGCAGGACCTATTTAAGATTGCGAAG  
GTAACCACCGCAGGGGTGATTTATGAGTAAGGACAGAGTTTACGTCATCTATGATAAAGA  
GGATGACTGCCTGTGGCACCATATAGCAAAGATCGGTTGGATAAGTTCCGGCGCTGCAAA  
AAACGCCTGGAACCTTGGCAAGAAAATAAAATTTGACAACCAGAATCGTTAAGTTGTCGT  
CTGTGTTAACGAACTGCTGGTTAAGTCTTTAATTGAGCAGAAGAGAAATGACAATGAGTA  
AATCTGTATCAGGTATCGGTCAGACCGAACAGGAAGCGGTATACATCGGTGGTAAGCGAT  
TTGCTGGCGCACTTACCAATGCCCGTCTTTTTACGGCTTTGGTGACACGAAGGATGTT  
GGTGCATCAAAGGCTTTTGTATCGTGATCTGAAAAATCGCAGCTTCGACAATGGCGATA  
TCCGAACCTCTGTTGTAAAAGAAGTATCATTGAGCGTGACATCTACGCCATCACGA  
TGAACAGTGCTTATCGACTGGACAACGTGTGCCTGTTGGCATTTCGTTGCTTCCGGTGTGG  
CGTGATGACGTCCTTAAACTGCTGGCAGATGCAACGAAAGATGCTTATCCGGAAGAAGGG  
GTTCTGTCCGTAGAGGCTAATCTGACCTATCGTGTGACCCAGAAATATTTCCAGGAGGCC  
ACAAAACGTTTATCAGCCGGCGAATGGGTTGTCACCCAAGCAGATTCTGTGAAGCGCACC  
CTGAAAGTCGGTAACGAAGTGTATGTGGAGGAGAAATGATTGACTAAAGCTATCAAATAC  
CCAAGCACTAACAGTTCCGTCAGGTGATCCGTTCTGTCCACGACCGTCTTACCTTGGAC  
GGGATTGATGAAAACGGCTGCGTAAAACGCAAGGTTGTTAACCCGACTGAGTTTCTCCTG  
CCCTACGTGGGGCCTGTGAAGATCCACGGGACCAACGGGAGCATTGTGTTCTACTCCGAA  
GATGAAGTTGTGTTTTCAGTCCAAGCACGTGTTCTGTCTCTTGAGCACGATAACAGCGGC  
TTCATGGCGTTCATGTTGCGTAAAGATACTGGAGCACTGCTGGACCAGGTAAAACGCATC  
TGCGAAATCAACGAAGTCCCGTTCGAGTTCCCGGTTGAAATCGCTGGTGAATGTGCTGGT  
CGCGGTCTTCAGAAAGGTGTCGCAGTCAGTGAGGTTGAGCAGTTCTTTGCCATCTTCCGT  
GTTGCAATCGGTCAGAAAGAAACCTCACTGAAATGGTTGCCACCAAGCGCAATCTTCGGC  
ATGGGCCTCCCGAACAGCGGATCTTCAACGTGCTGGGTTTCCGGTACTGGTACGTGCAT  
ATCCCGTTCAACGAACCGGAAATGGTACAGAACGATCTGACAACGCTGACCTTGCAGGTG  
TAAGCTCAATGCCCTGCTGGTAAGTGCTTCGGTGTGAGGGTGTCCGGTGAAGGGATCGTG  
TGGTCTCTAAAGAGCACTGAACTGGCACAAGTTTCCGGTCTGTGGTTCAAAGTGAAAAGC  
GAGAAACATTCTGTCTCCAAGGTCAAGACCCTGGTAGAAGTTGATCCGGTACGCCTACCG  
AATATCCGTGAGTTTGTGAGTATGAGGTCCTGAAAACCGTCTGTAGCAGGGTCTGGGT  
GAAGTGGGTCTCGACCAGACCCAGATCGGGGAGTTCAACGGTTGGGTTAGCCGTGACATC  
AACAAAGGAAGAAGGTGATGTTCTGGAAGCGAATGCCCTAACCATGAAGGATGTTGCGGAA  
TTTATCAGCAACAAATCTAGTGGTTGGTATATGTAAAAACTGAAAGAGTGGCTGTAATGG  
CCTTATCGTATCCACAACCCGTGAGGTTAAAGACAAGCCTTTGAAGGCGAAGTGTGAAA  
CTTTAATCTTCGAGGATGAAGAACAGGGTAGACAATATGTGGAAGAACATGCTACCTTTG  
TCTTCTCAGTTCAAAAAGCGAGGATTGTGAAGAATCGAAAAACCGAAACCCAAGTTTGA  
GTGGGACAGAAAGGAAAGGATCTTCTTAGCGGCAGGATACTACGCATACCTGGTCCGCTGT  
TACTTTAGTGGTTGGGTATACTCTTTCGGTCTGTGGGTATGTATTTGTACCCAGAGCAA  
GATCTGGAGGCTGTAAATGGAACCTGAGTGAGTGGTTAAATGTGAAGAGCAGACAAATGGA  
GGATAACGTGGTAAACTCTATAAGTATCAATGGCAATACCATCATCAATGGTAACGTTGT  
TGGTGGTGTATGAACATTACTTCCCGTGGTGATAACATTTACATCAACGGCGAGTTAGT  
TCACACCACGCAAGAGAAGAACATCACTGCGGTTATTCATGGTGACACCAAGGGTTTTTC  
CACTGTTGCTGGTGTATGTCAATGTTTACGGCGTAAATGCTGGCAATATCAAGACAACCTC  
TGGTGTATGTTTATGTTGAGCACGGCGCACTGGGGGACGTAACCACAGTGTCCGGGGATGT  
TTATGCAGAAAAGATCGAAGGTAATGTGAAAACCTGTCTCAGGGGACATCTCCCGCCGTTA

ATTGATAGCCCCTTTCTTGGGGCTTTTTAATTTGGAGCAAGATTTGAAAATAAAAAGCAAT  
AATCCTGGCAACCGCCTGTGCATTTTCTCTGACTACCACACCAGTCTTAGCCAAAGAAAA  
CGCAAAGAAGCCCAAGGTGATTCATCTTTGTAAAAAAGATGATACAGCGGTAAACATCTT  
GGCATGTAATATGTATCGTGAAGCCCGTGGTGAAAGCGATCATTGTCTCATGTCAAAGC  
TTTTGTGACGCTTAACCGAAAAGACAATGATAAGTCTCCTCGGACGGTGAAGAAGATTGT  
CTACCAACCGGGGACAGTTTTCTGGACATCCTACAGTACATGCTTCAAAGTGTATTAGAA  
AGATCGTTGGGAAACGGCCAAGGAGTTCGCAGAGGTATTGACCAAGATCCACAACACTAA  
CAAAGTTGTTTATGTTGCCATTGACATCACCAAGGGACCTACGTATTATCATTCAAAGAA  
GGTTGAGCCTTACTGGACCAAGGCGATGATCCGCACGGTCAGTATTGATAACCACATCTC  
CTACAAAGAAAAGCCGGACCCCCAGGGAGCCTGAACTTATGAAGAATTTTTTTGCTGCTT  
TGTGTTTGCATTATCCCGTATCTTGTGATACTGTCTATTACTCAATGGATGGTCTGGGAA  
CAAGTGTACAGGAGCGTATCTTCTTGGATTACTGGCAGGCATCTACCTAGTGCGGAAAGCT  
CGCAAAGGAACCCCATAAATAACTGCGAATAGAGGAGAGAAGG

>NewGenomeName\_29

AGGACACGTTTCATTCGATCGGCTCGTACTCGCGATTGATGTCGTCGGCGGTCCAGTCGAC  
TCCGACGTTCTTCCACACGGTGATGATGACGTTGTGCGCCAGCGAGGTGACTGGTGC GCGG  
TTCCAGGTCTTCGACGATGCGCCGGACGGTGACGAGCGGGTAGTCCGCCAGATCCTCCGG  
GAACTGCAGTCGGGCAATGCAGTACGCGAGATCCATCGTCATGACATCGACCCGGTCTCTC  
GTAGTGGTGTCTGACGGCAGCCGCGTCTGACACCGTGGGCAGGCGGGCGGCGTTCTGCTT  
GGGGCTGATCACGCTACCGTCGAGAACGGCATGGATGTCATCCACAGTGACGGTGAAGCC  
CTTCTCGGACATGGGCAATGACCTTTCAGAGGGCGCTGGTGATGATGGCGAAGACGAACA  
TGAACAGGAACAGGCCGACCATCTTGACCAGCCCCAGCCGACGAGGCGGCGGAGGACCA  
TCCACGGTGACGGGATCGGCTCCCGGCGTGGAGTGTAGGCGTTGTGGATTCCCATGGCTG  
GGGTCTACTCTCAGAACGGCGGTTTCGTCGGGGATCTCGTAGACGACCGGCTGGGTTTGCG  
GGTGCGGCGGCGGATCGGCTGCGTCGCAACGATGCTCGCGGATGATGTACCCAGCTTGG  
GCACCGGCTCCCGGCGGTTTCATGGAGGTGGCGCGGTGCGCGAAGCTGGGGTGGTGAGCGT  
AGAAGGTGCGCAGGCCCTGCAGTAGGGCGTCTACTTCGCCGACCTGACTGAGCTGGTACG  
GGTTCGAACTTGGTGTTCGATGCCGTGGACCGCGCCCAGCACGACACTCCCGCACCGAC  
CGCATTTGCCCTGTTCGCGGGTAGTTCGGTGGTGAGGTGAGAGTTGTGCAGACGCTGCCACT  
TCTGGGCCTTCTTGC GCGGGCGGCACGGCTACGCCTCTTCGAGCATGCCGACGTTCTTGCA  
GTAGGTACCTAGCGGCGGTGGTTCGACGTGGAACGAGGTGCGCGGTTCCAGGTCCGGTGT  
GATCTGCTGGAGGTTCGTAGAAGATGGTGCCTTCCGGACCTAGGTCCCGACGTCGCCCTT  
GTACAGGGACGTCGCCAGCTCGTACGTCAGCAGCTCAGGCCGGACCTCGCTGCTGTGCAG  
CAGGCCGACGTAGCCGCCGTCGTA CTGCAGCGGCTGCGGCTCACCCAGCTCGAACTCGGC  
CACGATCGCCAGCAGGTCCCCGGCTTTTACGTAGACGTCGTATCCATTCATGGTGTTC  
CCTTTTCTCAGTCCACAATCTCTCTCAACGCCCTCTCGGCGTCTGGCTCGTACTGCTC  
CTTGCCGACTACTTCGCGGGTCTGCTGGTTCACGATGGTCCAGCCGATCCCGGAGATGTA  
GAGGGCGGTAGCGATGTGCGCCCCGGTGGAAATCAAAGGCCCTTGATGGTCCACTTCTCGGG  
GCGCAGGACCATAGGTTCCCCGATTCCCGTGGGGCCTAGTGCGAATACTCGCTTGTCCAT  
TCGGTACACCTCCTGCCCTCCTTCATCCTCGATCAGCGGGCGGAGCTTGTGACCCAGC  
CGTTGAGTGTCTCCACGAAGCCTGGTGTAGGGCAGCGGGTGACGCCCTCATCGTCGGCAC  
CGGCCGTGAAGACGACGTGGCCGTACCGCTCCTGTCCGAGGACGCTCTGGGTGACGGCGT  
GGACGATCGCCCCGGCGTACCGGTTTCGCGCCGCGCTCGCCGACCTGGACCTGGCCGTCGT  
CGTCGACCGTGAACCTCCTGCGACAGCAGGGCCTCGTCGTCGACCCACAGGGTCAGGTTCCG  
GTGCGAGCTTGATCGCGTTCACGGCCGAGCAGCCGATCGCGTCGTACAGCGCCCCGAGTG  
CAGCCTGGTTCGGAGCCTCCGAGGTCGATGCGCTCGGTGCTGCCATCGGTCTTCAGCAGGT  
CGGCCAGTCGTGTATGAATCTCTCCTCCGTGAGTGCATCGTCTTAGTTCGCGTGAGTGT  
ATCTACGGGGTTCGACTACCCCTGGCTTTGACGCTGGCGGCCTCATCCTGGTCCGGCAG  
GGTGCAGAGGCCAGCTTCGACCAGGCGGACGCCAGAACGGCCGTAGGCCCCCTGTAAGTG  
CCACACCAGGCGGGTGTGATCAATTCCTGGAAGGGCGAGGTGGTCTGCTCGTCGTCCAG  
TTCGTCCTGTTTCGAAGGCGATGATGCGGTCGATCACGTCACTCATCGGTCTATCCTCTCC  
TTGTGCGGGTCTTCTTCAGTAGTTCGATCCCCGCCAGCGCCGGCAGCCTGGTGTGGCGA  
CCGGAGTGTGGGGGTGTGGTGCGCCCGAACAGGGCCTCGGCCTCGTCTGCGCCTTCT  
CGTGGACGACGATGTGCTGGGCTGCGTCCACCGCGGCCTTGTCTCGGCCGGGGCCGGTGG  
CCTTGCGGTAGCCCCGAGTGCGGGGTCTGTTGGGCCAGGTACCGGCGGGCGGATGTAGTCGG  
CCTTCTCGAGCACCTCCTTCGGGTACCGCTTCGCTGGCGGGGCGGGATCTCGTACTCGA  
CCTCGGTGCCCTTGGTGACGTCCACGACGACCGGGTGGCGGTTGGGATGACGCAGGACCC

TGACGGTGCCGTGCAGCGGACCGGGGGACCATACTCGGCTTCCTCCATGTGGCCGCTGA  
GCGCGACGTA CTCCCTACCCACCTCCGCGTACAGGTTCGATGGCGGCCTCGCTGGCGAC  
GATCTCCTCGAGCATCTGCCGGTGGCTGTGCGGCACGACGGGGATGTCGCCCGGGACGAT  
CCAGCCGCCCGCGAACGTGCGCCAGGCGATCGGGATGCTGGACGTGCGGATGACGTAGGT  
GAGCGTGTGCGGGTGTGCGGCATGGAAGTCGGCGTGGTGAGACTCCGGCAGGTGCGCCGAA  
TCTCGCCTCACCGATGGCGTAGCCACCCTGCAGGCGGCCGGTCCGGA ACTCCTCGCGGCG  
CTCGATGGCCGCTGGCACCTCCTCGGCGCGGAGGCGGCTCTGGCGAACTCTCATTAGGTC  
ACCCCCACAGGTTCGATTTAGGCGATGGTGAGGCCGACGGCATCCGGCCGGACGGTGATCT  
TCGTCCGCTCGGTGATGTATGCCGTCTCGCCGTAGCAGGACAGGTGATCGGCCAGCAGG  
TGAGGACCGAGTAGAAGCCCTCGCCGGTCCGGCGTCCGGGTGTACGTGCCGGGGCGCGATGT  
CGGCGGGGACGCGCAGGGTGCCGGTGTGCGCCGTGCGACATCCCGGGCGGGGTGTGCGCGT  
CGGGGGTGTGCTGCGACGTGCTGAACGGGTGCAAGGGCGGGGTGTGACGGTGCTCTTTC  
CGCCGTCCCCGACCGACAGGGCCGCGCACCCGGAGAAGGCGAGCGTTCCGGCGGGCGGCGA  
CCGCGACGAGGGTGTAGGGCCAGAGCCGCTGGGGGGACATTGTGAATCTCCTTGGGACTG  
TTCAGGAATTGGCGTAGAAGTAGCCCGCGCAGAAGCCGGTGTAGCACTTCTGATCGGGGT  
CAAATCGGTTCGCTCCCCAGATGGCTCCGAGGGTTCGTGCCGAGGGAGGACGGGGTGTGCG  
GATCGAAGCGAGAGAACTCCTCCTGCGTATATCGGTGCAAGATGACGACGTGCCCGTCGA  
TCTGCTGGATGAGCAGGGTGCCGTCCGGCGGTAGCTGTGCCACTGGTCTCTCCTCTCAGC  
GGAACCAGAAGTCGCGGGGGTCTCGGTAACCTCCGCGCTGGCGCTTAGCGATGGCGGCCT  
CGCGCTCGCGGGCGTAGTGCCGCTTGATGCGCGCCTTGAGGGACTTCGGGTGCGGGCCAC  
TCTTGCCTCCGTGGAAGATGTATCCGGCGGCCAGGCTGCTCAGGAATCCAATCATCAGAT  
CCCCCTCTCGTCCGCTTCTGCTTTGTGATCAGCAGGTTCGATGTGGACGATCAGCTCGCG  
TCGGATGTGCGAGGCGGAGTAGGTTCGTTCCGGGGTGGCCAGGTCTAGGTTCGTCGTAAGTA  
GGCGCGGGCGGGTGTGCGACAAGCGGGCAGCCTCGGCGAGGATGTGCGACCGGAGCTGGTC  
GTAGGTGTGCGGCCATCGGAATCACTTCCAGTTGGTGGTTCGGATTGTGCGACAGGATCAGG  
CGGCAGGTGCTGCAGGAGACCGCCTTGAGAGACTTGCTGGCGAGGGCTTCTCGACGTGC  
GGGAGCGGTTTTCCGCAGACGCTGCGGGGTCTCGGAAGGCGTGGCGGACGGGGTGGCGG  
TCGTGCGGCTTGGCGACGCGGATCGGCTGGCTCATGGGTTCCGGTCTCTGCAGGTAGTGGT  
CGATGGCGCCGTA CTGGACGCGCCGGTTCGAAGATGGTGGCCATCAGGGCGGCGAGGGCCT  
CGGGGTCAACGGTGTGATGCGCCTCGGCCGCCAGGTTCGACAGCTGAGGCGATCATCAGGT  
CACGGGTGAACTGGCGGCTGAGCATTGATCAGATCCTTTGCGGCACAACGTAGAGGGT  
AGTCAGGCAGGCGGTGCAGAATGCCGAGCCGGTGTGAGCGAGGGGTAGCCCTTCCCGCAGGC  
CTTGCAAGTGGTGGCGGCGCTCGGCCAGCATGGTGTCTTTGGGAAGTCGACGAGGGTGGC  
GGGGTCAACGATCGGTGCGGCCAGGGCAATCACGTCCAAGATGGAGTTGGAGTAGTTCTC  
GGTGACCCAGACTGCGAGCCTGCGCATCTCGGGTGTATCGGCGACCCAGCTCGCTGTGCG  
GCCTTGGAGTCATACTTCACTCGCCGGTACGGGGTAGGCTAGGGTGTGACCCAGCTCA  
CCGATCAGGGCCGCGATGTGCCGGACGGGTACCTCGGCGATGGTCTCGACCCGCCGCTCG  
CCCTGCGACCACTGGACGGATCCGGCCTTGGTGGCCAGGTAGACGACGGTGACGCGCTTG  
AAGTCGACGACCTCGTAGTGCTCGGGGTTCGAGGAACCTTGGCTGGACGCCGAAGCTGGTT  
TCGGTGGGGTAGCCATGACGGCCTCCTTCGGTCTGTGGCGGTGGTTTTCGGTGGTGCCC  
TGCCCCGACTCGGAACCGGGGGCGTGACCGTTCTGCAGGGCTGTGGAGCATCAGGCCAG  
CACCTCCCGGAGGACGGTGTGGACCTTGTGTCGACGGCCGTGAACTGGCCGGTGTATGGC  
ACCCTCTGCGTTGCGCTCGGCGCGGGTAGCGCCCTTACGGTGGACTGGTGATGTGCCCA  
GGTGTGACGGCCTGGATGACGCCGAACGCGGTGCCGTTCCAGGTGTTGGCTCGGGCGTC  
GTGCCGGTACATCGTCGTCAGCTCGTCGCGCTGGCGGGTGGCGATGTCCGGCGCCCGGCC  
CTTCTCCTCCGGCACCGGCGGCCAGGCGGCCAGGA ACTGAAACCACTGCCGGTCCGGTAC  
CGTTCGTCTGGACCACTCGTGGAGGGTGTGCGGTGAACTGGTCCGCCGTCTGCTCGATCAG  
CTTGAGCGCGGAGCGGGACTCGTCGATGCGGAGGTTTCGAGGACCGGCTGTGGCGGATCTT  
GACCTGTGACGCTTGGCCTGCCCGAGAGCGATGGCCATCGTGTGTCGACAGCCGTGGC  
GGTGATCGTCCGGCCGTACGTGGTTCGAGAGGCTGCCGTGAGCGAGGTGGCGGGCCAGCAG  
GTTGGGCCGGTAGGGCAAGCCGGCGACCTCGGCGTGGAGCGTCTCAGGGACGGACACCTC  
GACCCAGCGCTGGCCGACCTGCCGGAGGAGACCGGCGCTGGTGATCTTCCAGGCTGTGCGC  
GAGGATGTTGCTGACCGCTCCGAGCAGCCACTCGCGGTACTGGTGCGGCTCGTACCCGTC  
GGTGAAGAGCTTGAAGACGTGGTGGTTGCCGGAGCGGGCGATGGCGGGCAGTCCGGGGAC  
CGGCCGGGCGGCGACGGGGATGCCGTGAGCGTTGAGGCCAGTGGCCTCGGTGAGGTCCGC  
GGGGA ACTCAGCGAGGACGGGGACCTTACGGCCTCCAGTCGTAGAGGCGCTCATCGAC  
GTC ACTGACCGTGTATGGCCCCCTCGTAGTGGTTCGAGCGTGCGGCCTGGTCTCTGCGCG



GTAGTGCCAGGCGTGGCCCCGGTTGGCGGTCATGCCGATCAGGGTGTGGTGTTCAGCCA  
AAGAGAGGTTTCAGCGGACATTGTTCTCTATCTTTCCGGTTTCAGACTTCGATGAGTTCGA  
GTACGCGGGTGAGCTTGTGGCCGGTGGTGTTCACCCCCGACGATGACCCCGGTGCCGT  
TCGTTGCGGTGAAGCGGGCGACGGAGCCGGTGCGGGTGAACCAGACGCTGAGCTGCTCGA  
CGTCGCGCTCGAAGCGGACGAGGCTACTGGTCTCGCTCGGGGGGTGGAGCTAGGACCAGC  
CGTGCTTGGTGGCGGCGGTTCGCGACCTGCTGTCTGCGGTCATGGCGGGGACTCCCTAGT  
AGTCGAATCGCTGTGCGAGGCGGGCGTCTGGGCTTCCACCTCGAGGTTGGAGCCGTCGG  
TGTCGATGGAGCGCTCGGCCTGGCGGAGGATCCAGGCGATCTCGCGGGTGACGTAATCCC  
GTCGGCGGAAGGCCCCCCAGGTGGCGAGGCCGTGCCCGCAGACCCAGGTCCAGGGGTGGT  
GCCCTCTATCGCGCCGAGGTCGTTGACGTAAGTCGTTGGCGAAGCCGCTGGCCCCGTGGG  
CAAAGGTGAGTGCAGCCGCTCCTCGATGTCCGTGGGGTAAACGTTTCAGGACGGAGAAGG  
CGGCGCGGGTGGCGGTGGTTCATGGCCGGTGCCTTTTCAGATGTCTGATGGTGGCGGTGAGG  
GGACCCGGCGTCCCTTGACGTAAGCCGAGGATCAGGATGGCCTCGGTGCCGTTCTTGTGCT  
CGGTGCCGCTTCCAGTAGCTTACGTCCATGGACTGGCGGACGATGTTCGAACCTCGGTCCAGG  
TGGTCTTGGTGGCTCGCTTGGCGAAGTAGGAGATCAGCGGGTGTTCATCGTGAACGCTC  
CTTATCGGGGTTCTGGATGCCTCGCTCCGCTCAGCCCCAGGGATCGTTGATGTCCGGTGC  
GGCATTGGGGATTGAGATCGGGGTGCGGGTGGCTGGTGGTCCCGCCATCCACGGCATCC  
GTAGTCGTGGCGGTTTTCCCAAGTGCCGCAGTCGCAAAACATTCATTGCCTGTTCTTTGC  
GCTGCAGTAGAAGTGGGTGGCGGGCCGGCCAGCGGAGGCTGGTCTCGCCGGTCCGGCCGT  
CTCGTGTCCGCGAGAGCTTGCATCTGTGCCGCCCTGGTGAATGGGCGATGCCGGGAC  
CTACTAGTTGGTCACTCTGTGGAGTTCTCTGACTTCTTATCCGGAGCCGGGTCCGGCCG  
ATGATCCGTGCCGTGGTGTCCGCGTCTACCCGCTCTCGCTGGCGGGTCTCCTGGTCCGCG  
ACCCTTTCGGGGCAGGATTGGCGCTCTGTGATTCTCTCGGTGGGTGTGGGGGCTTTCG  
GTGTTGCTGTTGTGATGACCACCTTGACCCTGGACCCAGAAAGTAGGCTAGGGGTTTGAG  
GACGTTCTGTTATCAATCCGTTATAGGGTGGTCTGTCGAGTCCCTTGATCAACAGGCCTT  
TGGGCAGGTCAGGCTGTACTTCCGGCGTCCGGGAGACCTTGTGTCCATTCGGGCAGGTTT  
TGGGAAAGTGACCGTGAATCTCCGTACCAACTTCTGGCGGTCTGACGCTGGTCCGTCATG  
AGTAGCCGTTATGAGGGCCCGGGCGGTTCATCTACACCCGAGTGTTCGAAGGACCGCGCT  
GGCGGCCGTTTGTGGCCGAGCAGGAGTCCGAGTGCAGGATCGTCTGCCAGCGTGAGGGC  
TGGTCCGGGGCCGACGTGCTGTCCGACAACGACGGGGGCGCGTTCGCTGGTTCGAAGGGG  
GACCGGCCGATCTACGACCGGCTGAGCCGATCCTGCAGCCCGGCGACGTCCTGGTCCACC  
TGGGAGGGCTCCCGAGCGCAGCGCACCTCGCGGCCTACAACGACCTGCGCCACCTCTGC  
ACCGAGCGCGACGTCCTGTGGTGTACTCCGACCGCGTCTTCGACCTCACGCGCTCCGAC  
GACCGGTTACGACGCTGCTCAACATCGGCCTGGCCGACAAGGAGGTCGACGTCACCCGC  
GAGCGGATCATGCGGACCCTGCGGGCGAACCTGCAGGCCGGGAAGCCCCACGGGATCCGG  
CCGTACGGGTACCGATCCATCCGCGACCCGGACACCGGCAAGCCGATGGGCCGGGAGCCG  
GACCCTGTCCGAGGGGCCGATCGTGCAGCGGCATCGTGGACCGCTTCCGTGACGGTGTACCG  
TTGCGGCGAATCGCAATTGACCTGAACGCGTACGGCGTCAAGCCGACGCGGGCCGAGGAA  
TGGACGGCCAGCCTGCTCGGGAAGATGCTGCAGAAGCGCGCGTACGCCGGTCTGCTGACG  
CACCACGGGGAGATCGTCCGCCCCGGCACCTGGCCAGCGATCATCACCAGGACGAGCAC  
TACCGGATCATGGCGATCCTGACGGACCCGGCCCCGGACGCGAGCGCGGCACCTCGCCG  
AAGTCCCTCGTACGAACATCGCGTCTGCGGGAAAGTGCAGGACGACGGTGCAGCCGGAAC  
ACGAAGGCCGGGCGGACCTTGAACGACTGCCGGGACATCGGCTGCGTGACCATGACGGCG  
TCCGACGTGGACGAGTACGTCGAGGAGTGGATGTTCAAGCTGCTGTCCGACCCGCGCGTA  
CACAGGCGCGTACGCCAGCAGGGCGACAGCAAGGCCTCGGCGGACGCCCTGGCCAAGATC  
GACGAGATCCGCGCCCCGAGGGACGAGTACCCCGTAGAGGGCCCAAGGGGGACATCAGC  
CCGCGAGCCTTCGCTCTCATGGAGAAGCAGTGGCTGACCGAGATCGCGGAGCTGGATCAG  
GTGGCGAACAGGCCCTGATCCACCCGAGACTGGCCGACCTCACCGGCCCGTACGTCGAG  
GCGCTCTGGCCGGACATGGACCTGGACCTGCAGCCCGACATCTTGGCGTCCATCCTGGAA  
GTCACCCTATACCCGACAGAAGCTGCAACGCGAGCAAGACAAGCCGCCGATCGAAGTCCTT  
TGGCGCACATAGCAAAAGCCCCTGCCTGGAGTGGATGCCGGTCCGGGAGCTTTGCTTTTCG  
AGCTAGACGACGGCTGAGAGCGTGATCTCGTAGGCGAGCCTGTTTCAGCGCAGTGAGCTCG  
TCCAGCAGGTCCTTCGGGTCTCGGTCTGTGCTGCGCTGGCGAGCAGGCCCGTGTCTAGG  
TTCACGAGCTGGCGAAAGGTGATCGCGGTTCGACGCTGACGTGCGATGGGGTGGCGATGCG  
GGGCGGCGTCCGGTGTGCTGTTGCTGGACCGGCTGCGGGGTGGGTGCGAGCGGTTCAAG  
GGCGGTGGGTCCGGCTTGGCATCCTCATCGACGACCGGGTCCGCTCCCGAGGTCAATGT  
GGCCTTCGAACCTACCGAGGCACCACCAAGCGGGGCGTCCGATCGACTCGAGGAAGCGCTC

CGTCGGCCGGTACCTCCGCGCCCAACTTCGTA CTGTCGCAAGGTTTCCGAAGATCTGCC  
GCCGAGCTGCGCGAGTGCTTCCTGGGTTAGATCCAGCTCGGCGCGGGGTTGCTGGATGGC  
CTCGCCGAGGAGGCGCTTGCCTTGGTGACCGTATCCGGGTCGAGGTTCTTGTAACGGT  
CATGTTGATCATCCTTTCATGTTTGGCCAACATCTTGGTTCGGTTTCTTCGCACCTTCAA  
CTTGCCGGGTGTAACGCCCTGAGTTGTCTCGCGATGCTGCTATTGTGCCCCGCCAAACA  
TGGGTGTAGAGAGAAGGGCCAAAGAATCATGCCCGGTCTGTATACATACGGTAACAGAC  
ACATCAATTTATGCTCTGACCTGCGGGTATGCCACTGGGGACAATTTGCGATGTGTTTGC  
AATGGCCAAGGGCTTGCCCAAACTTTTGGGGTTGGTATTTATTGGGTTCCAGTAAGCCAG  
CCGGTGATCATCACCACCGACGTCCAGCAGGAACCGACCGCATAAGTGAGCAAGATCACC  
GGACGGACGTCCAACACGCCCGACATGAAAGTGATCTTGGTACACAAAAAGACCACCGG  
TTCTTACTGCAGTCCCAGAAGTTGCACCAAGTCCTTCGTCTGGAGGCAGCTTCGCACCAC  
CAGCGAGGCGCAGAGCGAATAGGAGACCTCTGCGATCTCCACCGCCGAGCAAACCCATCG  
CCGCACCTACCTCACCCCGAGGAGTGCGCGGGCGGAGAACGAGAAGGGTTTCGTCCACCT  
GTGCCGCGAGGTCAGGCGGATGGCCCCGCCATGGAACATTACCGTACCTCGAACGTGGC  
CAAGCTGGTTCGCCCGACCGTCTTCGTCCAGCGCCAGCTCGTAGCCGACGGGGAGGCCGG  
AGCCAGCCTGGCGCACTCGGACGTGACCGGCGAGCTGGCCGTCTACCGGCAACTGCAGGT  
CATCGCGACCGAGCACCGGTCCTAAAGCTCCACCCCAAACCACCGGCAGCCAGCCAC  
CACCTATCCCAGGGTCAACCAGTCCGATACCGCCCTCACCCCGGCCGGGCTGCCGGGTT  
TTTCGCACCCACCCACCCCGCTTCAACAGGCGGGGGGCACTTCGTTCATGTCCGCATA  
CAGGCAGGACTACCCGCTCGAGCCGTTTACGGCGACGAGCTCGACGACATCGTCAACTG  
GAACTCGCCGGAGGAGGACAGAAACGTGGCATCTACGGCGACCATGCGCGGCCGGAAGT  
CTGCAGCAACCCCAAGCACCCGCACGCACGCTTGACGGCGGCCTGGAGGACATCCGCAG  
CCGGGTCAACGGGCACGTGGAAGACCAGTGACCGTATCCTGGCACTTCCGCCAAGGCGG  
TAAGCGTCTAAATACCTGACCCACCACAGGAAGTCTTCGACCGCCTGTTCCGAAACCTCT  
CAGCGGCCACCACCGCCGCAATTCTCCCGAGGAGCTTGATCATCATGGCGCAGTACACCTT  
CAACAACCCCGACTTCCCGAACGAGAACC GCGACGCCCTCGGTTTCGATCCTGATCGGGGC  
CATGGGCTTTAACCTCGAGTTCGCTGAGGCGAGCGGCAAGCCGACCTCCGCCAGCATGT  
CGCGAAGGACGTTCGCTGGGTCGCTGAGCACGTTCGGTGGCACCGCGATCCCAGAAAGGC  
CACCCGCACGTTCAACGTGGAAGACTGCACCTGCGGGCAAGACCACGACGGCATCGAACA  
CCTGGTGAAGGGTACGCTGCTGGCGTACGACATCGGCGCGATCCAGACCGCCGACCAGCT  
CACCCGGATGTTTCGAGCGGGTCGCCTCCGAGACCGGGTGGGTGATGGCATGAGCACCGAT  
GAGACCGGCCCATCCTGCGCGAGGCCCGCCGCTCCTGATCCAGACCAAGGGCTGGGCACGG  
TTCTCTTCGCCAGCACCCACGGCGAGCACTGCGCGCTCGGAGCGATCCGGGAGGCCGCC  
GACGGCAGCATCTTCGAGACCGACAAGTCCAGGGCAGCAACCGCACGACTCGCCAGACC  
CTGCGCGATCGGGGCGTCGAGGGCGACCCGGAGAGCGACTCCTCCTGGCTCGGCGACAGC  
GCCTACCGCAAGGAGTCCGAGA ACTTCGTCTTGGTGACCGACCGGAACGACGCCGACGAC  
CGCACAGCGGCCGAGGTGATCCAGGCCCTCCGAGAGGCAAGCCACGGATGACCGGCATCA  
GGCTCTATGGGATCAGCATCCCAACCGTCCACGACCAGCCCTGGCGGCAGAAGGCGAACT  
GTCTCGGCCAGA ACTGGAAGGAGTACGTGGTTCGAGGAGATGCTGAAGGGCCGCAACGCTC  
CCGAGACCAGAGCCATTCTCGCCAGGCGAAGTGCTCCTGCTGCCCGGTCAAGCGTTAGT  
GCGCAGGGGATGCCCTCGACAACCACGACATGGGCGTCATCCGGGCCGGTGTGGCCGTCC  
CCTGAACGAACGGATCCGAGGAGTACCGGCAGGCCGTCCGCAAGCTCGAGACGGCAGCGG  
GCCGGGTGCACCGCAAGACCAGGCGCAAGACGGTATGGCCCAGACAGTTCGAGAGATGCG  
CCTGGACGATGCGGCCACGCCGAACCACCTCGACGAATTCCCCGGCACGATCACCCACG  
GGGCCGAAAGCTATGCGGCACATGCCAGATGCGGCAGTGGCGCGCAGACAAGGAGACCA  
AGGAATCATGAGCGACA ACTCCGAGAAGGTCCGCCCCGAAGGTCGACCTGGAGGCGTACCG  
CCACTCGATCAACATCCTGCAGTTCGTTCGAACAGGAGCGCGCGAAGATCAACGCCAGCT  
CGAGGAGCTGAAGGAGGTTCGAGGACGAGTCCCTCGCGATGATCCGGGAGGCCCTGGGCAA  
GTCCGGCGAGATCGGCCTGCTCGACAACAAGCCGGTTCGTACCTGCCACAAGTCGTACCA  
GAAGCGACTGGACCAGCAGGTGCTCAAGCAGCGGTACCCGAAGATTACGAGGAGTGCAA  
GACCGAGCTGGAGATCCGCACCCCTCAAGGTGGTGGTGTGACCCGGACGCAGCCCTGCGCC  
GACTATATCGAGATCGACGACCATCACATGGGCCGGATGAGTATCGAGTGCTACCGGCGC  
AGGGGACACAAGAAGTCGCACAAGGGATTCTGTGGGGGCTGTGGGACCGATGGTGAATC  
CCTGCGTCTGACTGCAACGAGCGGCCCGGTACGGCAAGCTGACCCGCTGCAAGGAGTGCA  
TGGAGGCACGCCGGGAGGCGAGGAGCGGACCCTGCACCATGTGCGGGCGGCCCTGGATAAT  
GCCGGGGCCTGTGCATCGCCTGCTACAACC GCGAGATGACCAGCGGTTCGGCTCAAGCGCC  
TACGGGACGAGCCGAAGGACGAGTACTGCAACCGTGGCGACGAATGCCGCAGCAAGAACA

AGCCGAGAGAGAAGCAGCGCACGTTCCGGGGCAACGTGTGCCGGAGCTGCTACACCCGCG  
ACGAGTACCTGCGCATGACGCCGGAGAAGCGGGAAGCCAGACGCGAGGCCAATCGCAGGC  
TCCGCGCCAGAGCCAAGGCAGATGCCGAGGCGACAATAACAATCGAGCAAGAGGAGGAGG  
TGGGGAACCATGTTGAGCCAGGTGCAGCGGCAGGAGTTGCGGACCATCTGGGCCAACTTG  
GACCTTGGGCCGAGGTGGAAGAAGTGGGAGCCGGTGGACCGAGCAGCGCAGCAGCTGACG  
GAGTTCCTCATTGACGTGCCAGTGGGTGCGGCATGAAGCGCCTCGTACCGGCCGTGCAAG  
AGATCACCGCCGTCCAGTGGGGTCTGACTGGGAGTCAATGCTTCAGAGCGCAGAACAGC  
TCGGCGAGCGGGGGATGCTGTTGACATCCGCTTCGCCACCGAGGAAGCCCGTCGGCGCG  
GCGCCGACATCTTCCCCGAGCGTCACATCATGGATAACCGTTTCCGCACACACGTTGTGA  
CGCACGGACTCTGGGTGCTCATCTATCCCGGCTACCGGCAGTTCGGGATCCTCTCCACCG  
AGGAGCTGGACGCCAGTACAAGGAGAAGAAGAAGTGACCAGCACCCCGCACGGCAAGCT  
GATCGCCACCACCGGCGACGGCACCCACCCCAAGTTCGAGACCGAGAACTTCCCGATCGA  
CGACCCGGTCTGGGTGCTCGCGTTCACCGAGGCCGGTTCGGCCGTTTCGATGTTCAAGGA  
GTCGCGCTCGTACGAATGGGCGCTCTCCGCTCTCCTCCGGATCGAGGGAGTCTCATGCG  
GCAGACCGGATGGTTCGACCGCCTGGACCTCGACACACCCGACGACAAAGTCGGTGACTG  
ATGTTACACCCCGAAACACTAAAGAAGCTCATTCCCAAGCGATTCCACGAGTTCGTAGGC  
CTCCTCTGCCTCGCGTGGGCGCTCTTCTGGTGAAAGGAACACCACCTCATGCGCAACTCC  
ACCGCTCCTGACCGCAAGCCGAAGTTGTGCCAGTTCGCCAACTACACGCCGGGCAAGGGC  
GCTGTCCGGCTGCACGTTCCGCAACGAGCACCCACGGCAAGCACTCGTACGAGGTCGCCGAG  
ACCGTCGAGCAGGGCGACATGCGGAGCTGCGACGGGTCCGACATCTGGAAGGCCGACTTC  
CATCACACGCCTGCAGGGGTTACCAGCGTGAGCAGATCCATTCCGGGCCATAACCACGCC  
CACGTGGATCGGGAACGCGACCTGCGGGACGTCCAGCGGGCCGGAAGCCGCATCGCGGCG  
CACTACAGCCCCGACAGCCGGGAGCTGGCCGTCTTCGCGCCTGAGACACTGCAGTACGTC  
TTCGGGCTGTTTCGACGAGCGGGGGATCTTCAGGACCCGCACCGTCTCGAAGATCGTTCCG  
GACGGCTTCCGGCCGCTGCACTGGTTCGCCGGAGAGCATGTTTCGTCTGCACACCCAGGAG  
GAGCGCGAGCCGCTGACGAACGAGTAGGCGGGCCGAGGAGCTGGTCTCGAAGCTGCGGGCG  
GTGCCGGATCCGGTCGACGAGGACGAGGACATGCTCACCGTCGACCACGACGCCGTCCAC  
CACCCGAGCGACTACCGGACGATCACCGTGACGATCAAGCACCCGAACGGGATCGAGGCG  
ATCGACGTCACCCGGTGGTTCCTCGTTCGCCGAGGACAACGTCTGAAGTACCTGCTCCGC  
GCGGGCCATAAGGGCGACCGGCTGGAAGACCTGCGCAAGGCCAGGCAGTACCTGGACTTC  
GCGATCGAGTTCGAAGAAGAAGCACGAACCAACAAGGGATAGAACGATGTCTCACAACCA  
GGCCTTCTTCAAGGAGATGCAGGGCGGCAAGGAAGCACCCCGCTGGCCGACGTGATCCG  
CGACGAGTTCGCCGACGTCCCGGACGACCAGACCATGTTTCGAGTCCATCTCCGACACGCT  
CACGGTCTCCGTGGAGCTGGGTATGAGCGTGGACTTCGCCGCTGCAGCAATCGCCAACGG  
CCTGCTGGATCTGGGGTTCAAGAGGTGATCACGGGGGACGGCCTCCGGCAAGGAGGTGATC  
GAAGCCCTGGCGCGGACGGATGTGACGAAGTACGGGTTCTCCGGCCTGTGCCCCGCCCTG  
CCGCTGATCGCGGGGTGAACGCCCGAGTAGGTTCGAGATCCAGGACCGCCTGGCCCCGATG  
ATCTTCTCGTCCGTGCTCGGCGCGCTGAGCAACCCGAAGGTGGTTCGGGGGAGGGTTCGATC  
GTCTTCGGAACGCGATCGGCAACACCGTGTGCTCGTCTGGCCGAGAACGGCTGGATC  
GACGACGGAGCAAAGAACAAGATCGAGGTGAAACGGAGTGCTGGGTAACAACATCGGAGC  
AGCTTTCGTGCAGCCCGCGCAGCAGATGGCCAAGGCCCTTCTAGGTATGGCGCGGAGCCT  
CGACGATATAGGGAGGCAGATGCACACCGCCAATCAGCTCAAGTGGCTGGAGATGCGCAG  
CAGCGAGAAGGGCTTCGAGTACAGCGACGGCGAACTTCTCACCCAGGTCCGGCCGCTAGGT  
CGGTACCAAGGGTGACCAGCGAGGCTGACAGCTTCTCGACGTAGGCAGTGTGTTCCGGG  
ACCAGCTCCGGCAGATCCTGATTGACGCCGTAATCGCCTGGGTGCGTGCGAGGCCGCGCT  
CTCAGCAGAAGGAGATCGGGCCGTCGCAGGCCGGTGAGGTGTGTGCCCGCCGGTTGGCGT  
GGTTCGATGACCTCCACTCCACCTCGAACTAGAAGGGGGATCCGCTTCCGTTCGATAGTCG  
GCACGTTCGATGCACGGTACGATGGAAGAGGTTCATGGCGCTCGCCAACGAGGCCCTCGGCC  
GGGAGCGATCGCTCACGGAGTCCAGGGTCTTCGATCCGATCGCCGGTACCTGCGACCTCT  
ACGACAAAGACACCCGGTCCGGTATCGACTGGAAGTTCCCCGGACACAGTGCATTCAAGA  
AGGACAGCACCAAGGGACCAAGCCCGGGGTACCGCAGCCAGGTGCACACCTAAGGCCCTCG  
GCTACCGGAACCTGGGCAACGAGGTTCGACAAGGTTCGACATCATGTTTCATCGCGCGCGCCG  
GTCGCTCAGCCGGTCCCACCTGTGGATCGAGGACTACGACCAGCAGCTGGCACTCGACA  
CGGCCGAGCGGCTGAAGAACATCCGCAAGGTTCGTCGAAAGCCTCGAGACCGACAGGTATC  
CCGAACGGGCACAGCATGTTCCGGTACACCGTCCGACTAGTGCATGTTCTGCCCGTGGT  
GGAACCCGAACCCCGAGGCAACCGTGAATGCCCGGCACAGCGGGTTCGGAACGGGT  
TCCTGCTCCACACCGGGGGTGCCTGATGCCGGTTCAGCCCCGACGACGCCTACATGGTGGT

CACGGTCAACGGCACTACCGGCTGTACCGGTACCGGAAGGGCGGACGCCCCGACCAGTC  
GCTGGAGTTCCTCGCCTCGGTGCCCCGACCTCGTGGGCGTCTACCGACTTAACCCGGAGTG  
ACCATGATGCTCACCTTCTCATTCTACCCGCCCTCGCCTTCGCGGCCATCTACGTCCTG  
CTGGACCGGTGATGGCAATGGGCACAGCGGAATCGATCGTACTGATCCACTGCATCACGC  
TCGTCGTA CTG CAGCCATCGGCGTCTACGGCTCGCGTAAGTAGCTCCACCCCGAGCTCT  
TCCCCCGACCCTGCGGGGTACCAACCGATCAGAAAGGCTACCAACATGAGCAGCTTCC  
ACGCCAACAACTTCTCATGGGTTTCGGCCAACTCGGCGTCTGTTTCTGACCCCCGGCACCA  
CGGTGATGGGCGTCATCAAGCAGGAGCTGGAGGTCACGCAGCAGCGGACTTCGACCCCCG  
GCGAGCCTGACTTCTGGGACAAGGACAAGACCGACTCGAAGATGCAGCTCGTCATCACCC  
TGCTACCCAGGAGCGCGACGTCAACTACCCGCACGACGATGGCGAGCGCAAGCTCTACG  
TCGCCAGCCCAATCATGCGGAAGGCAATCGCGGCGGCTGTCAGTGCGGCCGGTTCGCAACG  
GCCTGGCCGTTCGGCGGTGCACTCGCGGTGACCTACACCCAGAACGGCGTCAAGACCGGCA  
AGGGCAACCAGCCGAAGGAGTACTCGGCCAGTACGTCCCAGCGACCCGGTGAGGTCAACG  
TCGAGACCCGGCGCGGCCGTCCCAGCGGCTGCTCCCCTCCGGCACCCGGTCTCTCCCCCGG  
CACCCGGTCCCCTCCCCTCCGGCACCCGAGCCGGTTCGTCATCAGGCACCCCCGGTTCG  
CTGCTCCGGCAGCGGCCGGCCGGTGGCCTCACCCCCGAGGCGCTGGCGGCACTCAACGCC  
TGTCGGGCAACCAGGGCTGATCTAGCCACCTGAGGGGCGGGTTCGGGATTCTTCGGAGTC  
CTGGCCCCGCCCTTTGTTGTACCCACAGACAGGAGAGATCCATGGCAGGCAGGGTAATCC  
GTCGGCTCGGCGTAGAGATCGACGAAGAGGCGAACGTCACGATCGACGGCTACGGGTGGG  
CGACCGTGGACCCCGGCGAGAACGAGGGCGAACGACGCTCTGGCTCGGCGGCGACGTCC  
CGACGATCGTCATCCTCGCCCGGCAGGACCAGCTCGACGCGCCGCAGGTTCGTCGCCGTTCG  
AGGTCTGGTTCGCTCGAGCGGCTGCAGCAGATCCTGATGACCACCGCGCATCTCGCCCCGAC  
GCGTCGCAATCGACCCGTCCGAGCTGGACGAGGGTGACGAGTACGCATACGGCGACGAGG  
ACTAGACATGCCGCACACGCTGAAGGTCACCGACCACGAAGTTCGTCGCTGGTGGCCGAGT  
CGAGTGCCAGCTCTGTGGATCGAAACACACTCTCCACCAATGGACATTGAAGCAGGACAT  
GGGTGAGGCCGCGTTCTCGAAGGACATCTGCGTGCCCCCGCCGGAGGTGTCGACCCGAGGA  
GGAGGGGTCAACTTTCGTAGAAAGACAGGCGGACTACCAGATCCGGAAGAACCAGCGCACCC  
GGGTCTGGACCGTGCAGTGGCGCAACAACGGGCCGATCCCCTACTACTCGTTCGACGAC  
GCGCGGCTGACGCTGATCAACATGCTGCGCCTCGAAATCATCTGGAACACGAATTCACGT  
GGGAATAGGAGGGATTGAGATGGCGACACCCGGCACATGCCCTCCGCAAGGCGATCGTACT  
GCTCAAGGAGGACGGCTGGATTTCAGGGAGCGATGCACACGCCCAGCGGGTACTGCTCGAT  
CGGAGCGATCCGGCAAGTCGCTCTGCACGCTCTAGGCGAGGACGACGTCGAGCGCAATCA  
CCAGGAGTTCATGGACGAGCTGTCCCTGCAGCGCGAGGAGACGCACCCGACTCGTCCGGGG  
CGTGATCCGCGACCCGCTACAACCGCTCCAGCATCGTCCACTGGAACGACGACGGGCGGGCG  
AATGGTGTCCGAGGTGCTCGACGCTTTCGAGACCGCACTGCAGCAGGCCGACCCGATGAGA  
GGGTCGCTGCTGATGTCGGCCGCGGGTCCACCACTCTGCGCCCCTATGATCGCGGTC  
GGCTACGTCACCGCTGTCGTCGAGAACGAGGGGGTGCCGTA CTGTTTCGCGATCCTGTT  
GCCCTGCTGATCGTGAGCTGGCAGGCGGAGCGGTGGTCACTGAACGGCTGCCGCGAGTAC  
CAGAACAGCCGGGGCAAGGGCTGAGCGGCCGGAGCTGGAGGTTCGGCGAGTCCGGCCACTT  
CCTGTTCTTCCACTTCGAGGACCGCTATTGCGACGGCCTTAAGAAGGCCACCGTCTGGCT  
GCAGGGGTTCGATCAGTCCCTACGGAATCCCGTGCAGAGTGCACACAAATCGTGGAGAGAGA  
CGATGGGTGATTACACCCACAGCACGGCACCGTCCGTGACTTCGAGGAGATCCAGCCGC  
ACGGCGACGGCGCACCCGGCCGAGATCGACGACCACGTGCGGATCCCTGGCAGCAACACCG  
AGTGGGTTCGTGACCGACGTTGTTCGGCGACTTCGCCCCGGTTCGTGTCCAGCGACGGCAGCC  
GGACGTTTCGCGTACCGGCGCACGCTCCTGGAGCCGGTCCCATGAGGCTGTCGCTCAACAT  
ATTCGGCAAGGAGTTCGGGGTTCGTTGTCGGGGAGTACCCGGCACCCGGCCGCGAGGGTCA  
CCTCACCGAGATCTACCAGAAGTTCGAGCACATCGCCCTCGAGCTGCACGAGGGCGAGCG  
GTGGGAGACCTGGCAGCGCCAGCGCAGCGCATCCGGCGGGCAGTTCGGCTTCGCGGCCAA  
CTCCCGGCCGATCCAGAAATCACACACACGATGGGAACCGAGATGACACAGCCGTTTCGGA  
GAGTCGGTGAAGAAGACGCCGGAGCAGCGATGGTTCGACATGATCCGCAACCTGCACTTC  
TGGGATGGCTTCGTCCAGGCGCGCGAGGAGAAGGACGCCCGGAGCCACGAGGAGGACTAC  
GAGAGCAGCGAGCACCTGTCGCCGGTCTCCGACCCCCCTAACGCCGAGATCGTCAGTAGG  
GCAGTCAAGCCCACCGGCCTGCCGGGGTTCCTTCCAGCAGACCCGGTGGCTACGGGACCAAG  
CACAAGCTGATCGTCGACATCGACTACCCGGTTCGTCGCGATCGAGTCATCCACGCCGGGC  
CACAGCCCCCTGTACATCGACAAAATGAGCTGACCTGGGCCTACACGCTCCGGGGTTCGTCG  
GGGTGCTGGCCTCGGTTCGGCATCGTCGAGCCGGGCTACGTGGACGCCAGCGAGCGGCTCG  
GCTGCACACACCTGCGGGTTCGGTGGCTGAAGAATAAGTACCGCGCACCCGCTCACGCCGT

ACGAGACGCACTGATGGCCGTGAAGCTGGCCGCCGGGGTGCGGTGGGTCGACGAGGGCGA  
GGCCGGTGAACCGGCGGCCCGGCTGCTGTTCTGAACGAGACCACCGTGAACGGCTGGGT  
CGAGCACGTGCACGTAGACCTGGGGACGGACGAGGCCGAGGCGCTCGGGTGGTCGCTGAG  
CAAGAATTCATGCAACTCAAGGAGATTCGGGAGACGAGATGAACGCGCTGCCCTAGCG  
CCCTGGGAGAAATCTGGGTGGAGCACGAGTGGTCGGAGTTCAGCAAGAGATCGTGGGC  
CTCGCCCGGCGCAAGGGGCTGCGGGTCTTGAGATCCACGTCGCCGTGCGGCGAGCGGCTG  
GAGATCGTCACGGTCCCGGCCGACGGCAAGGACATCGTCTTCGAGAACGGCGAAATCACA  
AGAACGACATAACCACTGCCGATCTGGGCGTAACGGAGGTGAGAGATGAAGGTCACCGGG  
AAGACGGTCAAGCTGACGACCCACGCGCGACGGCGAATGGCCGAGATGGGTGTCGACGAG  
CACGAGGTGCAGTTGGCGCTGAAGTACCCGGAGACCGTCGTCTGGTCCGGCAAGTACCC  
GGCTGCCAGAAGTACCGGCGCGTCCGGATCAACGTCGGTGCGAAGACCGAGGGCGACGAG  
CTGGTGGGCATCACGGTCGTCTGGCCGAGCCACGAACTGTGGCAGCAGCACATCGAGAAG  
ACCGGCGGGCGGTACCGACGAAAGCTGAAGCCGTGGCTGAACCACTGATGTGGAGCCTGG  
CCCCGGCCCCTGCGTTCGTCTGTCGAGTGGTCCGGCCGAGGACGGCGAGTGGGTGGGCCTGT  
GCCCGTCTGCTCTTCCCCTCGCTGTCTGGCTCGCCGAGACCCCGGCCCGCCGCACTACCAG  
GCATACGAGACACGGTCTGGGTGCAACTGGGCCACACATTCGAAGGAGCGCATCATGTCT  
GACAGTGGGATCACCCAAGACGTCTGTTACGCGGGCACCGTTCGCGTACAGTCCGGATCC  
ATCCTGGGCTTCGCCGAGAACCTGAAGGTCCGGCCTCGCGACGTGCGCGTCCGACCAGTG  
AAGATGGGCGCACTTAGCGCGTCATACCTGCGCCACCGCCGACCGGCCACCGAGCTGATG  
CCGACGTCCGTACGGCCGAGCGTCGACCCGAGGGACGTCCACAAGCGGCACGTACGCCTG  
GTCGCCATCGAGGCGTCCGGTGGCCCCGAGGGTCACGACGTCCTCGGCGTCTTACG  
ACCGAGCAGGCGATGCACGGCTGGGCCGACTACGAGATCCGTGCACTGGCCGAGCATGGC  
GGCACCGGCCTCTGCGTCAACCAGGGCACCCCGCGCTACTGGACCGTGGTGTTCACCGAC  
CCGGTGTACTGGAGGCGACCGGCATGGCCGCGTTCGTCTGTCGCCGGAGCTACCCACGTG  
GGCAATACGACAAGGTGCTACCGATGCCCGAGTGCCAGCCTGCCGTGAGCCGGTCTCT  
GTTCCGCGCTGAACGGTAACGGTAACGCGATCGTGCTCGACACGGCCCCGGACCCCGAGCG  
TGGACAGGTGCTCTTCAACGATGGGCGCTCCGTCTTCGTACCCAGCCCGAGCAGTGGGC  
CGTGGTGAAGCAACAACCTGCCGGTGTACCGGCGACACAACACGCACTGCCGCGAGTT  
CTGGTCTACAAAGTCCACCCAGCCAGCTCGCGGAGCATAACCCGAGAGGTGAATTGACA  
TGCCCGAGAACAAGATCCAGGCGATCCTGGCGGCCCTGCGTGAGACCGGCATCCCGGCCG  
ACGAGAACGACGTGCAAGAGTTCCTCGAGCACATGGATGACGAGGGCTTCTACGTGTCCC  
GGACGGGGGAGTAGTCATGAGCGACTTCATCGAATGGCTGGACAATCTCAGCCTGTTCCA  
GTGGTACGTGCTATTCTGTTCTAATGGAGCTAGTATTCGGCCCCACAGACATGTTCTGTC  
GGACAAGGGGTCCGAGTACCGCGCCCTGAAGGACGACGCGCCCCGGTGGGCACCCGAGTG  
GGCCATCCGGGTGCTCGCGCTGCTGTCCATAGTCTCTGTCGCCGTGCTCTGGCCGGTCTGT  
CACCGTCATCACGCTCTACAAGCTGACCGAGCGCGTAATCGTGTGGGGCGCAGACAAGTA  
CCTGAACTGGGCGACGCGCCGGTTCCTGCGGAAGGTCGGGATCACCGACGAGGATCTCGG  
CGGCAGCGTCTACGGACCCGCCACGACGACGACTCGATCACTGTATGTTCCGACCCCGA  
AGGCAATGTGGTTCAGCCTGACGGGAAGTGGAGCCAAGAGTAAGCGCAGCAAGAACCAGA  
AGGAGGCGCACCTGGGCAACTCGGTGCCCGAGACGACGTCGTACGTCTTCCATGACGCCG  
AGCGGCAGATCTCAAGCTCCATGAGTTCGTGCGAGCGACGACGCGGTTCAACCAGGACC  
TGCCCGCGTTCAGCCCGCTCGAACAGCATGAGCTGGTCCCGTACGACGCCACGAGCAGC  
ACCTGCTACCCGGCGGATCTCGAACCAGCGCCGGGAGCTGCGGCACCTGAACCGCGCAT  
ACCGTCGGCGCAGCGACGAGCTGGGCGCGAAGGTCACGCTGCTCAAGGACCAGCTCAAGG  
TCTCGATCAAGGCGACACAGGCCCGCAACCTGAAGATCACGCTGCAGCAGGAGGAGATCG  
ACCAACTGGGCGGACAGCTCGCCACTGCGACCGACGGCGGCCGACGAAAGAGAGCATTCC  
GATGGGTCCGAAAGTGAAGCGGGGCGCCAGCCGTACCTCGCGCCCCTCACGACAGGGGA  
CCTGCGCCGCGACCGGGTATGGACCGAGGATCAGCTCGACGAGTTCCTCGGAAGGTCCG  
CATCCAACCTCGCACCGTGGCAGCGGGATGCGTTCGCTCCGGTTCGGGAATCGGCGCACGGT  
CGGGGTCCACAACGGCGAGCAGAACCTGCACCACAGCGGCTGATCCGCCGGGTAGAACAC  
GGTGCATCGCCTAATTAAGGAACTGGCACTCGCCCTCGGCCATGAGGTGAAGCCCACCGT  
GAACGGGTTCGAGGACAGCATGGCGTTCGGGACGAGGTGCGGCTGTGAAGCTGGTCCGG  
TTCACCAGGGTCAACGGCAACGAGGTTCGTCTCAACCCGGAGCACGTCTCGCCGTCCAC  
CGCTACGGCCTGGACCACAGCGAGATCAACCTGATCAACGGGATCGACGTGCAGGTCAAG  
AACCTCAGCCCCATGCAGGTTCGGCCACCTCCTCGCCGAGGGGAGGCTGCCGAGAAACCC  
GTGTGACGAGGCGAAGCACGCCTGCTGGAGTAACCCAGGCGATGGAAGGTGCATTACC  
TGGGCCGGGAGTACGTCTACTGGTCTGGTACTGGGCCATGCGGGCGGCGAACACCCCTGG

CCACCCTCGGAGGGGCGCATCCCGGTCCGGGGCCTGCTCTCGGTTCAACACATTTAATGAG  
TGAGGAAGTGACCATGTTCGGAGAACGAGATTCGCGGATACGCCGACGCGTTCGACGAGTA  
CTGGAACAAGGGCTGGAAGTCTGTCTATGGCTGCCGAAGGGGAAGAAGTTCCCGACGTC  
GTCCGTGTACACCGGTACGACGCGGCGATCCCCAGCTCCCCGACGTCATGGCGTGGGC  
CGAGGACCATCCGGACACCTACCTGGGACTGCGGTTCCAGGCCGAGATCGTGGGCCTGGC  
CGTGGACGCGTACGGCGAGAAGACCGGGGCGTCGACCATCGCGGAGGCCATGAAGCGGTA  
CGGCCTGCTCCCGCCGACGGTCCGCTCCACCTCGCGGACGGACTCGACATCGGGTATCCG  
CCTGTACCGCAAGCCCGCCGACATCCCACTGCACACGCAGATCAAGTTCCCGGACTGTC  
GATCGGCAACGTCGAGGTCGTCCAGGACCACACCGGTAAGTTCGCGTGTCTGGCCGTCCAT  
TCAACCCGAGGGGCGGATGTACGAGTGGCGGGACGAGAAGGGCAACGTGGTGCCGGGCTC  
ATCGATCGACGACCTGCCCGAGCTACCGCGCCCGTGGATCGAGGGACTGCGCAAGGAATC  
TCACGCCGAGATCACCGCGCACCGCGATCCATTCGAGGGCGCTCCGGCAGCTCCCGCAGGG  
GAAGATGAGCGAGAAGGTCGGCGAGGCGCTGCGGCGCGCGAAGACCGAACTCGACTGCGC  
GCCGGGGTACGTCACGACGTCGCGAACGTCGACGTCCTGCGGCTGCTCCGTCTGGCGGA  
GAAGGGGGAGCGGGGCGTCACCGAGGCGCCCGAGTCCCTGCGGTCCCAGTTCGTCGAGAT  
GACGCGGGACCGGAACACCGAGCTCGAGGCCAACGCCGAGTTCGACCGGATGCTGTACGG  
CGAGCGCGGGCACGACCTACTCGCCAGCACGCCATCGAATGAGAACGACTACGCGGTCTC  
CGGCGTCGCCGATTACGTCCGGCAGTCCGAGACCCTGGCGAAGCAGCGCGCGCAGGCCCA  
GCAGGACCCGGTCGTCGAGTGGCAGCCGCGGCGTCGGATCCGGCCGACTCGGTGCGGGC  
GTTCTGTTCAGGAGGAGCGGATGACCGGTCAACCGAGTCAACCTGCTGCCGGGCTGTC  
GGCCGCCGACGCGTTCCTGTTCCGGCATGGCACCGGGCCCGGTGCGCCACGTGAGCAGAT  
GACCGGAGCGGCGGCGGTCGCGGAGATCGAGTCCAGCGGCGAGGCCACGATGCGGAGCAA  
GCTGCTACCGTTCGCGGGCCTGGCTTACGTGCCGCCGTCGGAGCCGCTGCTCGACGGGCT  
GCTCTACCGGGGCACCCTCGCACAGCTCTCCGGCCCGCGGGGATCCGGCAAGACGTTTCGT  
CGCGCTCGGCATGGCCTGCGCGCTGGCGTCGAACCGAACCGACTGGAACGGACAGGACAT  
CCCGTGGAAGCGCAACGTCAACAGCGGATCCGTCTGTACGTGCGGGCCGAGGGGGTCTC  
GGGTCTGTACGCGCGGATCTATGCGTGGTGTCTACTGCAGGGGACCGGCATCGACCCGCG  
CAGCCTCCAGCTCTACGTCTACCCGGGGGCGGTACAGCTCGGTTTCGTACACGCAGATGGA  
GGAGCTGACCGAACTCGCTCGCTCGCTCGACTGCGTGTACGGAAAGCTGAGCTGCCAGC  
TCTACCAGCGTAGCGCGGACGTATTCTCGGCGTGCCGTTCAATATCGCGAGCTACGCGC  
TGCTGACCCATTTCTTCGCGGACCAGCTCGGACTGAAGGTCTGCGAATTCATCTGGACCG  
GCGGCGACGTCCACCTGTATTTCGAACCACGTCCAGCAGGCGACCGAACAACTGTCGCGCA  
CGCACACGGGCTATCCGTAGCTGGCGCTGAATCACCGCGACTCGATCTTGAGTACTCCG  
CCGATGACGTCATATTCCTGGGCTACCGGCCGACACAGGTCATCAAGGCCCCCGTTGCCG  
TGTAAGGAGGTACGGCTGTGGCCGACGACTGGACAAAAGACCCTGACGCCACGCTCGAC  
TGGCATTTCGACTGGATCAACTGGCTCGAGCAGGGCGAGACGATCACCACTTCGACCTTC  
GACGTGACCGCCGGAATCGCGGTTCGGCTCGACGGCGAATAGGACGACGAATACGACTGTC  
TGGCTTTCGGCGGACGCCCCGGCCAGAACTACCGCGTCACGAATCGAGTCATCACATCA  
GCCGGTTCGACTGACGAACGGTCCATCACTATCCGCGTCCGAGACCGGTAATTGAAGGAG  
CTTCAATGGCTAACGACAACGTGCTCGGGCACCCAGTATCACCGTGAACAAGTACAACC  
CGGAGACGGTCACGGACATCACCCGACGCTCGGCCGCGCGCCGACGATGGAGGACTACG  
CCAACATCACACCGGACGACTTCGTCACCGTGGAGGGCATTGGCCTCGAGAACGCTGGTC  
TCCAGCGCCTGGCCGACCTGATCATCGGCAACGGCAGCGTGACGGCGGTACCGCGATCA  
AGGGCCTCATCGGCGTCGGCAACAGCAACACTGCCTTCAGCCCGGACAGAGCGACCTGC  
AGGGCGCGTCGAAGCTGTTACCCCGGTGGCCAGCGCGCCGACGGCGTCCGGCGGTGTCA  
TCTCGGCCTCGGCCAGTTCGCCTCCGCCGACGCCAACTTCGCCTGGGCGGGCGTGGTGCT  
TCGCGATCGGCTCCGCCACGACCGTGAAGAACGCCGCTCTGGCGACCGATGGTGGTGGGT  
CGGCAGTGATGCTGAACCGCAAGGTCCAGTCGCTCCGCACGAAGGCCTCCGGCGCTGACT  
GGACGCTCTCCGCGACGGTACCCCTGTCCTGATCCAAAACCCAAAGGCACCTGACTTGAT  
AGGCGCCTATCAAGTTGGGTGCCTGGATAGTTCGGCTTACTGACCCGCGCATGCAGAAGC  
AACAAACGACCGTAAGTAGGGGTGCCTGCCATGGGCCACAAGGGAAAGCATCGCAAGCAA  
ACCAACTCCAACGCAAAGCGTTTCGTAGCGACAGCAACCGGCGTCGGGGCACTCGGCCTC  
GTCTCCGCTGTGCGAGGCACTCCGGCCGCGTCGGCGCACAACTGGTCCGGAGTCGCCAC  
TGCGAGTCGTCCGGAAACTGCAGCACCAACACCGGCAACGGTTCCTACGGCGGCCTGCAG  
TTCACGCACTCCACCTGGGACGCGTTCAGCCTGAAGGCGCAGCCTGGCGCGCTGATCTG  
GCCACGATGGCGGATCAGATCGCGGCAGCGGAAGCAACCTGAAGGTGCAGTGCATCGGC  
GCGTGGCCGGTGTGTGGGGCGTACCTCGGCTGGCGTGGAGTCACTGCCGGCGTCGGGACC

GCGCCCTCCGCGCCGTCGTACGTCGAGCCTGCCCCCGCCCCGACCCGCCGCATCGTGG  
GTGCAGCCGGTCACCGGCACGAAGTCGCAGGGCTTCCACGGCGGCCACAACGGCGTGCAC  
ATCGCTGCCCCGATCGGCACCCCGATCTACGCAGCGGCGTCCGGCTCCATCGACCTCGCT  
GAGTTCAACAACGACCCCGGGCGGCTACGGCAACTACACCCAGCAGACCGCCGACAACGGC  
GCGAAGATCCAGTACGGCCCCATCTCCGAGGTCTACGTCAGCGCAGGGCGACTACGTCACC  
GCTGGCACCCCTGATCTCGGCGGACGGCAACGCTGGCACCTCGACCCGGTGCTCACCTGCAT  
CTGCGGATCAACGCCGAGGATCCGGAGGGCGTACCTGATCAACCAGGGGCGTCGCGCTGGAC  
TGGTCCGGCCCCAGCCGCTGCCGTCCTCCGGCACCCGGCACCTGTGTCCGCCCTGGG  
GAAGAGGTGGCGGTTCGAGGACGTTCCGGTCTATCTGGCGCCGGCTCCCGAGGGAGTCGAG  
ACGGTGACCGTCGTTCCGGGAGACACGCTTTCGCACATCGCTGAGGTGTTCCGGGATCGAC  
TCCTGGGAGACCCTCTTGAACCTGAACAAGGATGTGGTTCGAGAACCCGCATCTGATCTAC  
CCCGGCCAGGTACTCCCCCTGGCCTGAGAGAACGGAAGTCAGCGGCATGGGTAGCCGAAA  
CAAGCTGTACTGCAGCACATCTCGGCCCTGGGCCACTGACTACCGGCGAGAGGAGGGCTG  
GGCACGGCGGTTGACGAGGAAGCTCGGACGCCGCCGTGCTCAGCGTTTACTGCGCGTCCGG  
GCGATACGACCTGGCCTACACCCGCCAGACCAAGGATACTCAGGGATGGATGACCCACTA  
GGGGGTTCGACGTGCCGACTGATGTCTACACGTCGACCAGTACCTGGACCTGCCCGGCTAG  
CGTTCTCTCCGTTGATGTATGGGTCTGGGGCGGCGGGCTCCGGCGCGGGTGAACATC  
GTTCTCCGACAACGGCGGCAAGGGATCGGGCGGTGCCTTTCGCCTTCAAGACGGTCCGCCGT  
CACCCCGGAAACGTCTACACCGTCACCGTCGCCACTGGCGGCACCCGGACAGGGCACAAA  
CGCTGGAGTGGGCGGCGGCGCATCCTGGTTCGGTAGCACTGGCACCGTCTACGCCCCCGG  
CGGCAACGGCGGATCGAAGGGCCAGTCCGCCGCGGTTCGGTGGGGCGGTACCTCTGGCGC  
GATCGGCACCTCGGTCTTCTACGGCGGCGCAGGGTTCGGCCGGTAACCAGTCCGGCACCCG  
GTCCGGCTCCGGCGGCGGCGGCGCATGCGCGAACGGCACAGGCGGCCCCCGGCGGCACGCT  
CTCAGGCGGCGCTGGCGGTAACGGGTCCGGCGGCCAGTTCGGCGGCAACGGCGGCGCGGG  
CGTCAACACCGACGCGGACGGCAACCCCGGCGGCATAACCCGGCGGCGGCGGCGCTGGTGG  
TCGACGACTTAGCACGAACTCAAACGGCGGTGACGGCGGTTCGACGCGAGGTGTGGATCAC  
CTACGTCACCGACATCACGATCAACCAGTCCGTCGCGTCCGGCACGACGGCGGACGCGGC  
GACCGGCATCGCGCTGGCCACCCCGACCGAGACCCTGTGGTTCGACGAACTCACCCCGAG  
GGTCTCGCAGTCGGCAACGACAGATAACGGCGGCGTTCGGCAACGAATCCGCCAAGCCGAC  
AGCGACCGTCAACCAGGCGGACACCCGGCTCCGGCACTGACCTGGCCAGCCCGGTTCAGCGC  
GCTTATCAAGCCTGCTGACAGAGGCCAGGCCGACGATCTGGCCTTCGGTTCAGCATCACGGT  
CGTCCGGCGACACCCGGACAGGGCACGGAGTCGACCAGCTATAACGGCCAACACCCCGACGGC  
GAACGACACCCGGTCCGGCACCGATGCCAGCACGCTGACCGCGCAGGTCACTGCAGCGAC  
GGGACACCGGACCCGCCGACGACAACGGACACGCCAGCAACAGCGTGGTTCGACGGCGACAC  
CGGCCAACGGCCGACGGCACCCGCGACGCTGCGAACGGACTCTGGAGACGCAGCCAGCGG  
GTCGGACGCGGCATCCACGACGGCGACCGTACCCAGGGCGATAACCGGATCGGCGGCCGA  
CACGGTACCCGGCATCCGGCAGCTGTCCGGCGGACGCCGCGCACGGCGACGATGCCAGCAC  
AATGCGGATCAGCCCGGTTCGGCGAAACCCGGCATCGGCACCCGACTCTGCGCAGATCCACGT  
CACCGTCTACGGCAGTGACACCCGGCAGCGGGGACAGACCTCGCGGGCGGCGGGTGTATC  
GCCCCGACGACCGCGCGACCCGGTTGGAACGAGAACTCATAAAGGCCGTCAGCGGTATCCT  
CGACGCGCCCCGCTGCTACCATCCACCCGGACAAGCGGACGGTGAAGATCGAGCGTGA  
GCGGGCAACTCGCGTGGTGGACAGGGAAGTCCGGCTCGTCATCCTCGGCAAAGATCGGAC  
GCCGCGCACGACCATGCCGCACCGCAACTGCCGCTCGCTCGGCGTCCAGCCAGAGAGCCG  
CAAGTACATCGTGAAGCGAGAGGAGTAACCAGTGTCCGACGAGATGACCGTCGAGCAGAG  
CGCGCTCGTCCGCGAGGTCCAGTCCGGCGACATGCGTCCGGCGCTGACCCGCGATCCGTGG  
CTACGTGGTTCGACGAGCTGGACGGCACCCGGCGCCCCGAAGTGCGCCATGTCCCAGCTCGA  
GACCGGCGACACGCCCTCTCTCGTCTGCGGCTGCAGAAGATCCTCGAAGAGATCGCAGC  
CCTGCCGGAAGAGAAGAGGCCCGGCGAGGACGACGCACCGAAGACCAGCACCCCGCGGAT  
CCGCGCCCTACGCGCCGTCGGCGACGACGAACCCATGGGCAGCAAGGCATCCCCCGCAC  
GCAAGGGGGTCCACGTTCGGAGAAGCTAAGGAGGTAACCAGTGGCAGTCTTCTCGGAGAA  
CAGAATCCACGGATCGCTCATGAGCCGACATCCGTGGGTGGAGTCACATCGGCGGGCCGC  
GAGGCAATCGAACTCGCCGCCGAGGCTGGCCTGACCGTCGATCCCTGGCAGCAGAACGTG  
CTGCACGGCGCTCTCGCCAAGCGCGAGGACACCGTCTACAACCCATAACGGATCAGCTC  
GAATACAAATGGGCCGCACGCGAAGTCCGGCCTGATGATCTCCCGCCAGAACGGTTAGGGG  
TCTCTCCTGGAGGCCCGCGAGCGGGCTGGCCTGTTCTTCTCGGCGAGCGCCTGATCATC  
CACTCGGCGCACCAAGTTCGATACTCCAATGAGGCCTTCGAGCGAATCCTTTTCTGATC  
GAGAACAACCCGGACTTCGAGCAAGAGGTCATGCGGGTCGACCCGGTACACGGTGAAGAG

GACATCGTGATGAAGAAGCCGAAGGGGTCCAACCTTCCACCGCAACGACTTCGGTTCCGT  
ACACGGACCAAGGGCGGCGGCCGAGGCTTACGGGTGACACCCTGATCCTCGACGAGGCC  
ATGATCCTCGACGCCGACATGGTCAAGGCGCTGATGCCAACCCGGACGGCCCGACCGAAC  
GTGCAGATCTGGTACACCGGCTCGGCCGTACCCGGAAGTCGACGCAGTTCGGCCGCGTC  
CGTCCC CGCCCTCGCTGGCGGGCACC CGCTGCTCTGGTACGTTCGAGTGGTTCGGCGGAT  
CTGTCCACCCCGCTCTGCCCGTCCGACTGCGACGAGCAGACAAGCCCGGGCACC CGCGT  
ACGTGTGCAAGGGCGAACGCCGCCTTCGGGATCCGCATCCAGGAGGAGGGCATCGAGGCG  
AACTTCCGCTGAATGGACCTCGACTCGTTCGCGATCGAGCACCTCGGCGTCGGCGACAGG  
CCCACCGAGGGGCAACCCTGGATCGTCATCGCCTAGCCGTACTGTAACAGCCGCTTCGAC  
GCCAACTCGCAGCTCGGCAACA AACTTCGTCTCGGTGTGACTTCGCGCCGGACCCGACC  
AAGGCGACGATCCTGGCCGCCGGTCCGAACCAGCACGGCGACGTCCATCTGGAGATCACC  
GGCAACGAGGACATCGGCTTCGACAACC GGGTCGGCGTCCAGTGGGTGCTCGAGCGTGT  
CTGCACATCTGGCGTACCCAGCGACCGAAGGCGGTAGCGGTCGACCCCGCCAGCGAGGCC  
GGTGGCGCTGATCGAGCCGCTGCAGGACGCGCAGGTCAACGTTCATGACCCCGACCTCGCGC  
GAGTACGGCGTCGCCTGCGGTGAGTTCGCTCCGGGATCGTGCCGCGCAAGGGTGAGAAG  
GGCTACATCACGCACATCAGCCAGG CAGTCTCACCGAGACGATCGCGGTCTCCGACATG  
CGGACCTCCGGTGACCTGTGGATGTGGAGCAAGTCGCTCTCGACGGCCGACATCACC CG  
ATCGTCGCGGCCACGCTCGCAGCCTGGGGCTCGAAGAAGATGGGCTATACGAAATCCGAA  
ACCGTCGCTACCCCATGGGTATTCAGACGATGAGAGGCAGGACCGAATGAGGCTTATCGA  
GCTACTGGCCGTGATCCTGGTTCGCGATTGCGCTGGGCGTCACCGGCACGGTGGCCACCTT  
CGGAGTCTGGACCCTGATGGCCTGGGCGGCAGCGATTCTAGTCGCGGTGTTCTCCGTGGA  
GGTGACAGACTGATGGCTAAACTGTGGCACCACCTACGCGGCCGAGGTCACCCCGCCGAG  
CGGCGGTTTCGGACTCGACGACCTCGCCAGTGGTACCGGCAGTACAACCTGCTCCCGTGG  
GCACGGCGTCAGGGGTACAGCAACACCGAGACGAACGACAACGACTTCGAGGGCTACGTG  
CGTGGGTCGTACAAGGCCAACGGCGCGGTATTTCGGGGTGGCGCTGGCCAGATGTTGGTC  
TTCACCGAGGTGCGCTTCTCGTACCAGCGGTACACCGAGGACGGCCCGCCCGGGCACCCTA  
TACCGGCGGCCGAGCCTGAAGATCCTCGACAAGCCCTGGCCGAACGGTGCACCCGGCGAC  
CTGCTGGCCCGAGCGATCCAGGACACCGACCTGGCGGGCAACCACTACGTCGTCCGCGAG  
GGCAGTGGCCCGAACGCGCGCCTGCGCCGCCTGCGGCCGGACTGGGTGAGCATCATCCTC  
ACCTCGCCCGCCGAGAAGGCAGTGCAGTCCGACGTCGTCGGGTACCTGTACAAGCCCGGA  
GGCACCGACAACAAGGA AACTCTGGAAGCTGTACCCGGTCGATGGATCGAACGGTGCCATC  
GCGCACTGGACCCCGATCCCCGACCCGGAGGCGGCCCTACCGTGAAAGGAGCTGGCTGACA  
CCGGTTCTGCGCGAGATCATGCACGACAACGCAGCGACGAAGCACAAGCTGAAGTTCTTC  
GAGAACGCAGCCACGCCGAACCTCGCGGTGTCGTTCAAGGAGACGGTGACGGCTGAGCAG  
TTCAAGGAGTTCATGGAGCAGCTCGACGACAACCACGGCGGGCGGAGACAACGCCTACAAG  
ACGCTGCACCTCGGCGGCGGCGCGCACGTGCTCGTGATCGGCTCCAAGATGGAGGAGATC  
ATCTTCATGTCCACGCAGGGTCTGTCCGAGTCGCGCATCGCTGCGGCCGGTTCGGAGCCAC  
CCCGCGCTCGTCGGTCTTTCCGAAGGGCTGCCAGGTAGTTCGCTGAACGAGGGCAACTAC  
AAGGCGGCGCGCAACA AACTTCGCCGACGCGACGATGCGGCCCTCTGGCGCTCGCTGTGT  
GCGGCGTACTCGGTGGTGGTCGAGGAGTTCGACGACTCGCGACTCTGGTACGACGCTCGC  
GACGTCGAGTTCCTCCGACAGGACCAGAAAGAGCTGGCCTAGCTCACCGCGCAGCACGCG  
TCCACGATCTCGAAGCTCGTGTGTCAGGGCTACACGCCGGAGTCTGTCACCGAGGGCGATC  
GTCAAGGCAGACCTCAGGCTGCTCAAGCACACCGTCCCTCTACTCCGTCCAGCTCCAGCCC  
CCCGGAACCATCGGCAAGGGCGCACTGACCCGACAGACGCCAGCTACCCAGACGGACGAC  
GTCAAGAAGGTCTGAATCAGGTCAAGAAGGACCCGAAGCCAGTGGTCGACGTCAAGAAC  
CCGAAACAGCCAACAGTCCGTCAGGACAAGGCGAAATGACCCGCGCACCCAAGGAAAGGAG  
TGATCGAGACTGGATTTGTGTAGTCGCTCGGTAAAGTTCCGAGCCAACACGGCCCGCTGGA  
GACGGCGACGGCCGGACCCTGGAAGGGTACGCGGCAGTCTTCGACCAGCACACCGAGATC  
AACTCGTGGGAAGGGCGCTTACCCGAACGAATCGCCAAGGGCGCGTTC AAGAAGACCCTC  
CGCGAGCGCAAGCCGATCATGCAGTACGACCACGGCCGGGACTCCC CGCTCGGGCCGGTG  
CCGATCGGCGTGTACGAGCACATCCGCGAGGACGAGCACGGCCTGTTCTGTGTCGGCCGC  
GTGTTGACAACCCCGTCGTCGAGCCGATCCGGCAGGCGATCGAGGGCGGTGCCGTCACC  
CGCATGTGTTCAAGTTCGTTGTCACCTGAGACCAGTGGACGGACAAGAACGGCAAGCGA  
GTTTCGCGGCGACGAGATCAGCAAGCTGCTCTAGGAGCCGGGCGACCCGGGGTCCGCTGGCG  
CGCAGGATCCGGGAGGTCTCGCTCTTCGAGGCTGGACCCGTGTCGACTCCC CGGTACGCA  
GGAACCTCCGTCGGCGTCCGGATGACCCGAGCAGGATCGCGAGGCTCCCGTCGCCGAGTAC  
CGGCGCACCATGGCCGAGACGGAGGCCGAGCAGGACGTCGTTTCGATGGCTCGAGGGTGAG



GCCCATTACGAGA ACTATGTTTCGGACATGGCTCTACGCTGAAACCGAGGACCGTAAGGCT  
GTATCCCTCTGGCTCGCAGCCGAATCCGAATACAAGACTTCGATTGAGACCGACGCCGCC  
CGGACGGGCACCTCGGCTCCCATCGAGACCCCGAAGCAGACGCCGCCCGCACCCGGGGC  
ACCTCCAATCGGGAAGACACCAACACCCCATCCTCAAAAGGTGCATCCCATGACCTTC  
GAAGAACTGCGGGCACGTCTCGCCGAGATCGCCGTCGCCCTCCGACATCGGTGCCGAG  
TACCGCGACGCCGA ACTCTCCGAAGCCGAGCAGGCCGAGTGGGACGGCCTGGACGCCGAG  
CGCGCCAAGGTCGCCAGCTCGATCGAGCGCATCGAAGCCCGCATCAAGCGAATGGGTGAG  
CTGGTCGACACCGGCAGCACCAGCGCGCCACCGACACCGGCACCCCGGCGTTCCACGCC  
CGCCGCGACATGCACGACATCGACGCCGTCGCCCGCGCGGCTCGCAGCGAAGAGGACTTC  
GTCGAGCGCTCCAGGACAACGCCCGCCGGGCCACGGGGAAGATGTACTTCTCGCCGAG  
GTCTCGCGGACGCCGCCAGGAGCGCATCGAGCGCCTGCTCGTCAACGTCGACTCGAAG  
GGTGACCTCGCCAAGCGGATCCTGGCCACCGGCACCGCGACGTACAAGCGCGTGTTCGGC  
AAGGATGCTCTCTCGCAGAGCCTGCAGGATCTGACGGCCGAGGAGGCCCGCGCCCTCTCA  
CTCGGTGCCGACGTCGCGTCCGCCAGCAACGGTGGCTTCGCGGTCCCCGTTACGCTCGAC  
CCGACGGTGATCCACACCAGCGCGATCGACATCAACCCGCTGCGTGGCCTGGCGCGTGT  
GTCCAGATGACCGGCAAGGAGTGGCAGGGCGTCACCTCCGCGAACGGCATCGTAGTCTCG  
CGTGGCACTGAGGCCTCCACGACCGAGGCTCCAGCCAGACCCTCGCACAGCCCAAGGTC  
CGTGCCAAGCGTGTCTCCGCGTTCGTCCCGTACTCTTTCGAGATCGAGCACGACTCGTCG  
GCGATGCATCAGGAGATCACCTGATGCTCGGCGAGGCCGAAGGAAGCGGAGGAGGCCGGT  
TCGTTCTGACCGGCGGCCAGGGCGTCAACCCGCGAGGGCCTGCTCACGGGCGCCGGT  
GCCGGTCAGGACGTCGCTGGCAGCATCTCGCCCGCCCTCACCTCCGGTGACATCTACGCC  
CTGGAGGAGGCGCTGCCGAACCCCTACCGCGCGAACGCTCGCTTCCAGGGCGCGAAGGCC  
CCCTACAACCGCATCCGCCAGAGCGACACGGCCGGTGGCGCGGACCTGCGGGAGCGGCTC  
GGTGCCGGACTGCCCTCGCAGCTCATCGGCTACCCGCTGCATGACGCGAGCATCATGGAC  
GGTACCCGAAAACGGCCCGCCGCAAGCGCGTCTGGTCTCGGCGACTTCCGCAACTTC  
CTCATCGTCGATAGCATCGGCACGAGCATCGAGCTGGTCCCGCACGTCTTCGCGACCTCG  
GGTGGCGCGATCGTGCCGACCGGCCAGCGCGGCCACTTCGCCGTCTGGCGCAACA ACTCC  
AAGGTTCTGGTGCCGGACGCCTTCCGCGTCTCAAGACCAAGGCATCCTGATCCACTGAC  
TCCCCCGAAGTGCCGTAGCACTGTCAAAGGTGTTGTGGCCCTTCGGCCGTCGGGAGGGCG  
GTAGCAATGGCACTCGGTGATCCATACATACCAAGGACGAGCTGCGCGACTACCCGCGAG  
ATCCGGTCGGACGTGATCCAGTTCGACCAGAAGCTGACCGACGCCTGCTCCTCCGCCTCT  
CGCGAGGTCGACCAGCACTGCGGCGGTGAGTTCAACAAGTCGGCCACGGCCACCCCGCG  
ATCTTCCAGATCGAGCGGCGGCGCAAGGTCACGGTTGACGACTTCCACACCAGCGCAGGC  
CTTGTAATCGAACAGGGTGACGGGCTGGGCAACTGGGAGCCGGTCGATACCGCGTCTTCG  
CTTCTGGCCCCGTACGACGCGATCGTGGACGGCCTGCCGTGGCCCTACTACCGGCTCGAG  
TTCCCCGGCTGCGGCCTGGTTCCCTCGGATCGGTATCAGGCCCGGTTCTCCGCGTGACC  
TCGCAGTGGGGCTGGCCGAGCGTTCAGCGACGGTCAAGCAGGCCGCGTTCATATCGCC  
GCGCAGACGTACCGCCTCGCCGACGCGCCCTCGGGGTGACCGGCAACACGCTGTACGGC  
GGCGTCGTCCGCGTGCAGGATCTGCCGGGCGTCGCGACGAAGCTCTGCCGGTTCGTAGTC  
AATCCGATCCTGGTGGGGTGACATGACGACGCTCAGTGAGCGCCGCGACGCGCTCGCGAA  
AACGATCAAAGCGGGCGTCGACAAGCCGCTGCACGCGTACGAGACGGTCGAGGAGATCGT  
CAACGTGCCGTGCATCATGATCGAGCCGTTCAACGCCAACTTCGAGAGTGC GTTCCAGCC  
CTGGATTCACACCTGGGAGTTCTACGTCTTCGTGCTCGCTTCTCGTTCAGCAAGTTCCGC  
GACGGGCCAGAAGCTGGTCGACCAGATGGTCTCCGGCACCGGCCCGAACAGCGTGGCTCA  
GATCCTGAACGAGAACTACACGCTCGGCCTGAACGGCGTCGAGGCACAGTGCTTCGGCAT  
GAAGGGCTACGGCGGCTCGTTCGACTGCGGCAAGGTCGCGCACGTTCGGCGCAATCCTGCA  
GGTCCGAGTAACAGTCGATCCACACGCATAAGGAGGTGGCGGCAGCATGACCGCTCTCAC  
AACCAAGGTTCTGTCCGACGATGGGAGCGCGCCTACACTCGTACTCACAGCGCCTCGGT  
TACCGCCCAGGTTCGGCAACGGCCACAACACATTCCTGTACGTCAGCAACACCGGCGGCTC  
GGCTGCCAGTGCAGCATACCCCGCCCGGCACGACCAGCTACGGCGTTGCCCTCCAGC  
CAAGACGGTCTCCGTCCCCGGCGGGCGAGGCGAAGTACATCCCGCTCCGGCGCGAGTACGC  
CGACGAGTCCGGCCGGGCGACGATCGCGTTCACCGGCACCCCTCGCGGACCTGAAGGTCGC  
CGTCATCCGCGTCGCTGACGGCCAGCGCGAACTTCCACAGGCTGCGCTAAGAGCAGGCC  
GAGGAGGCAGCACTCCGCGCCAGCGAGACCGGCTTCTACCAGGTA CTGGGCAAGAGCGCC  
AGCCTCGGCGTGAAGCCCGGCAAGGTCGTCTGGATGTCGGTTCGAGCACCCAGCGCGGCTG  
CTGTCTCCGGCAACGTCGAAGAGATCAACCTGCGGAGCAATACCGGTGACGAAACGGGC  
CACGAAAGCCCGGACAGCACAAAGGAGTAAGGGCAATGGCAACGATCGTTCTCCGGGACT

GCTTCATCGAGGTCGATGGGGTGGACTTCTCGGATCACGTTTCGTCCGTGGAGGTTTCGC  
TCAAGCAGGCGGGCGTCCCAACACGGACTTCAGCGGGCGGCAAGGAGCAGGACGCCG  
GTCTGAAGGATGACGAGTTCACCGTGAAC TTCAGCAGGACTTCGACGCGCCTCGGTTCG  
ACGCTAAGCTCTACCCGCTGTACGACCTGGAAGACGAGTTTGTCGTGAAGGTGCGCCCCG  
GCGCCGGAGCGGCCTCGGCTACCAACCCCGAATACAGCGCTACCTGCATCCTGCTCGAGT  
ACCAGCCCCTCGCGGTTCGAGGTCGGCGACCTCTCCGCGACCAGGGTGAAGTTCCCGACCC  
AGCGCAGCGGCATCTCGCGCTCGGTTCATCTGATCGGGTAGCGCCGCATGGCGATCGAACG  
GTACCGGCACACCCTCTCGTTCGATGTCATCGGCGAGCGCCAGTTCCGCGAGGTCCAGAA  
GGCGCTCACAGCGGCAACCCGACGCTCCCGCGCGACTTCAAGAACAGCGTCAACGAGGT  
CGCACGCGGGCTGCGCGACGAGGCTCGGTATCAGGCTCTTCAGAAGTTCACTTCGAAGAA  
GGGCCACACCGGGCTTCGTTCGCAAGGCCGCCGCTGGCGCGCAGATCATCCAGATCGACAA  
CGGCGTCAAGGTCATCACCTCGATGCCGGAATCCGACGAGGCGATCATCCCTCGCGGCCT  
CGACGGCGTGAAGAGCTGGCGGCACCCCGTGTTCGGCAACAAGGAACGGTGGGTGCTGCA  
GCGTCAAGGCTCCGACTCCTGGTTCCTCGAGACCATAACGGAAGGGCCACGAGCCGCTGCG  
CAACCGCCGGGTGCGCAACATCAACGACACGATCGAGAAGATCGACGACGCCAGCCACAC  
CGGCTGACGCAAAGACCAATGCTGGGGCCAGGTGTTTCTGTTCGCGGGTCTGCCTGGCCCC  
AGCTCCCATTCTCGCTGACCCGCGAAATCCACTGCACCACACACCAAAAAGGAACCGCGA  
CATCATGGCACTTCTCTCGAAGACCGACATCCTCTCCGTCGACGACCCGCATGACCGTCCG  
CGTCTCCGTCCCCGAGTGGGGTGGCGAGGTTCTGGTCCGCACCCTGCCCGCCGTGAGCG  
GGACGAGTTCGAGGCTTCGACCGTCAAGACGAACAAGGGCAAGCATGAGGAGAACTGCGA  
GAACTTCCGCGCCCCTTCGACGCCCTGTGCGTCGTGGACGAGAAGGGTGAGCGCCTGTT  
CGCCACTGGCGCTGAGGTTTCGATGCTCGGCAGCAAGTCCGTCGCCGCCCTGCAGCGCGT  
CTTCAACGAGGCGCAGAAGCTCAACGGCATGACCGAGGCTGACGTCGAGGAGCTGACCGA  
ATCTTTCGAGCAGAATCCCGACGAGGCTTCTACTTCCGCCTAGCCGAGACGCTGGGGATG  
ACCGTCGAGCAGATGCTGGCGGTAGTCTCCAGTACGGAGCTGGCGGAGTGGGAGGCGTAT  
GAAGGCGCCTTCGGTCCGATCGGGAAGAGCTACGGAGAGCAGGCCCTCGCCAGCATCTCC  
GACACGCTCGCTATCCTGCTGCGTCCGTACGGCGAGCAGTTCGACGACAACCCCGTCCA  
GTGCCAGCAAGTACCCCGCCCGTTCGGAGTGGTACAGGCCAGAGGCCGTGGCGGACTCG  
GTAGATCAGGCCGAGTTCGACAGCAACTTCCGAGAATGACCGATCACCAAAGGCCCGTCCG  
GCCGTTTGCCCATTGCCGCAGCCGGTTCGGCGGGCTTTTTTTGTACACCAGGATGGAGGTTT  
CGCATGGCAACGATGACCTCGCTCAACTTCGCGATCAGGAGTAGTTGTGACGGGACTGCG  
TTGAACAAGGCGCGTGTGACCTAATGGCTCTGCAGGCTCAGATGCGGACGATATCGTGT  
GCCTCGCTGCACTTCACGGTGGACGCCGACAGCGAAGAGGGCGAAAGCCAAGATCGCGGAG  
CTGCGCGCGCAGGCGCGGGACATCCAGATGGGCATCGACCTGAACGACGGCCAACTCGCT  
ACGGCGCAGGCCAAACTCGACATCCTGGCTCGCGATCGAGAAGTCGACGTGAGGGTGAAC  
GACCATGAGATCGCGAACAAGATGGACCGGATCTCGGACTCCTTCGAGAACGCGTCCGGTC  
AGCGCTGTGGACTTCGGCACCTCGTTCGAACCGTTCGGGGCTTCATGGCCAAGGTTCGGCATC  
GCGGGCTTCGCCGCCGGTCTCGTTCGTTCTGCCCGGACTGATCAACCTCGTCCGGTGCATCG  
CTGACCGGCGCGATGGGTGGCAGCATCATCGCTGTTCGGCGCGCTGGCGCTTAAGGAGAAC  
GAGCAGATGAAGGCGGGCTGGGAGGCCCTGTGGACCGAGATGAAGTCCACGGCCAGTCT  
GCCGCCAGCCGATGCTGCAGCCGTTCTGGACACCATGTCGATGGCCAAGACGCGGATC  
GCGGAACTCAAGCCGGAGCTGACAGACCTTTCGCGAGTGCAGCCCAGGCGATCCAGCCG  
CTCACGTCCGGCCTGATGGATCTCGTCACTAACGCGAGGCCCGGCCTCACGACGGCGCTC  
GAGCAGTCCGGCCCGATGGTCCAAGGGTTCGCGGATGGCCGCGGTTTCGCTCGGCACGCAC  
GTCTCGAACTTGTTCGCCGGGATGGCAGGCGGCGCAGCGGGATTCGGTTCGACTGTGGAAG  
ATCACGTTTCGATCAGGTCGGCCTGATGATCGAGCAGTTCGGCGTTCGCTGCCGGGAAGATG  
GCCGAGACGGACACCAACCCCTGGGATCGACTGCAGCCC GGCTTCAACCAGTTCATCGGT  
GGCTTCTCGACGGCCTCGTTCGAATTCACGGCCGCCGTCGACAACGGGGTTCGGTTACGCG  
CTCTCGCTTTCGGTCTGCTCGGCGCCGGCATGCGCGGCACGCTCGGACAGCTCGGCGAG  
CTGGTGGCCGCGATCTCGAACGCCCTCATGCCCGTCTTCGACGGCACCGTGCAGGCGCTC  
ACCCTCGTCATCGGCGCACTGATGTCCGGCCTCGCTCCGGCGATCAACTCTCTCGTCCCG  
CTCAGCAATGCGCTGCAGCCGTTGCTCGTCATGGTTCGGCCAGTCGCTGACCCAGGCGATC  
AACCATCTCGCACCGCTCCTGCCCCGAACGTGGACGCGCTCGTCTCCGGGCTCATCCCC  
GCGTTCAGGCGCTCATTCCCGCACTCGTTCGGGTGATCGAGCAGATCGCAGTAGGCCTC  
ACGCCGCTGCTGGAGATGCTGCCCGTTCGTGATCAACACGCTCAGACCGATCGTTCGTCGGC  
CTGGCCATCGCGTTCGGCCAGTTCACCCAGTGGCTGTCCCGCTGATCCCGCACCTCATG  
CAGATGTACATCGCGTAGAAGCTGATCTCGACGGCCATGGCTATCGGGCGCGGCATCATG

ATCGCGTACACGGCAGTCCGCACGGCCCTCACGGTGACGACCATCGCTCACACGGCGGCC  
GTCTGGGCGAACAAACATCGCGGTGAGCGCCAACCCGATCGGCCTGATCATCATCGACATC  
GGCGCTCTGGTGGCAGCGATCGTATGGCTCGCGACCCAGACTCAGTTCTGCCAGACGGTC  
TGGGAGGCACTGAAGGTCGCGATGGCGGATGTGTGGAAGTGGATGAAGTATGCGTGGGAT  
GCCACGGTCTGATTCCTGGCCATGCGGTGGGAGCAGTTCTCCGGCACGATCGTCAACGCA  
TGGAACGCCACGTGGAACCTGATCAAGGTAGCGGCACAGGCTGTCTGGGGATTCTCACC  
AACGCCTGGAACCAGTTCCTCACGGTCCTCAAGGTCACCTGGGAGGTCGTCTCCGGCGTC  
ATCAAGGCGGCCTGGGACGTCTGGTGGTTCGCCATCCGCGCGAGTGTGCGGATCATCTGG  
GCGTGGCTCGAAGTCGCCTGGGGTGCCTGTGGGGCACTGTCAGGCGAGTCTGGGATAGC  
TTCGTAGCGCTCTCCAGCCGCGGTGGGATGGACTCTGGAACGGCGTCAAGGTCTTCGCC  
GAGGGCGTCTGGGGTGAATCCAGATCCTCTGGAACGGACTGTGGAAGGCCGTGACGGCA  
GGCTGGAACGCCTTCATGGGCTGGCTGCGTCCGATCTGGGAGTCTTCTGGAACACCGTG  
AAGCAGGTCGGTGAATCCATCTGGAACGCCGTCAAGCTCGCCTGGGAGTTCCTGTGGGAT  
CAGGTCAAGCAGAAGTGGGGCTGGTGGGTCAACCTGTTCTACTCTGTCTGGCAGCCGTTT  
TGGAACGGGATCAAGGCTGCAGTCGAGACCGTCTGGAACGGAATCACTCCCGCGTGGAAC  
GCCTACTGGAACGGCATCAAGGCGATGTGGGAGAACTTCTCCAGCGCCATCCGTGCCGGG  
TGGGAAGCCTTCTGGAACCTGGGGGCGTGACTTCGCATCTGGCGTCTGGGATGCGATCACC  
AGCAAGTGGGGCGAGTTCAAGCAGAAGTTCGAAGAAGTCTTCAGCACGATGGTCCACAAG  
GCCCCGAGATCTGGGACAAGATCCGAGAAGTCTTCGCGAAGCCGATCAACTTCGTCATC  
CGCATCTGGAACGACCACGTCGCCGGTAAGTTCGGTCTCCCGGCACTCGACGAGATCGGC  
GGTTCGCTACCGGTGGTCGGGTCGACGGCAAGGGCACGGGAACGTCCGACGACATCCCC  
GCCCCGCTCTCGCGCGGTGAGCACGTCTGGACCGCACAGGAAGTCGATGCGGCTGGCGGA  
CACGGCAACGTCGAGGCCATGCGCCGCAACACGCTAACGGTGTGCGGCACTAGGCCTCC  
AGCGGTCAGGTCGAGTGGATGATCGGCCAGCAGGAGAAGTTCGCGCCTGCCCTGCAGGTC  
ACTTCGGCTCAGCGGGACTTGAACGACTACCACGGCCAGGGCAAGGCGGTGGACTTCTCG  
AACGGCGGGCAGCCGGTACACCGGAAGTGATGGCCTTCGCGAACTGGATCGCGGACACC  
TTGGGTGCTAACACGCTCGAGCTGATCCACAGCCCGTTCGGACGGAACATCAAGGACGGC  
AACAGCGTCGGCGACGGCATGGGGTTCTACGGGGCAGGCACGATGGCCCAGCACAGGAAC  
CATGTCCACTGGGCAGTCGACCCGCCCTCAACGAGGACGAGGGCGGCCAGAGCCTGTG  
GGCAAGATCTGGGGCCGCGTCCGCAAGGGCATCGCCTGGACCGTCGAGAAGTTGACCAAC  
CCGATCCTCGGACCCATCCCGGATCCGTTCCCTCCCGGTGTGCGTTCGCCGTTCCGCCGA  
TTCCCGAAGGCAGCGGCAACGAAGCTCCGAGACGCGTTCCTCAACAAGGTGCGCGGCGCT  
GAGGGTGCATCCGGCGGCACTGCCAGTGGAGACATCGGCGGCGTCATCCCCGACGGGGAC  
CGGCTCGGCATCATCAACGAGGCCCTGCGGATCACGAACAGCCCGCCTCCCTCGTCGATC  
GAAGCATGGCAGCGCGGCATGAACACGCTGATCACGCGAGAGTCGGGTTGGAACGCGGGC  
GCGATCAACAACCTGGGACTCGAACGCAGCGGCGGGTAACGCTTCTCGCGATCTGGCCCAG  
GTGATCCCGACGACTTTCGAGGCTACAAGGCACCGGGCTACAACAACATCGACGCGCCG  
GTCGACCACGTCGCGGCCTCGATCAACTACATCAAGTTTCGCTACGGCACCATCGAGAAC  
GTCCCGCAGGCGAACGCCAACATGGCCCCTCAGGGCTACCGCACGGGTACCAACTCGGCT  
GCGGCAGGGTGGCACCTCGTCGGCGAAGACGGACCCGAGATGGTGAACCTCCGTGGCGGC  
GAGCAGGTCAAGACGTTTCGACGAGCTCATCCGCGCCCTGAAGGACTCCACGTCAGGACAG  
AGCATGGAGCTGGAGTCGAAGCTGACGGCCGAAATTCGCACGCTGGTGGAGAAGATCGGG  
ACCGAGGTCAACACCTCCGGAGGGGCGGTTTCGCGCAGTCTGTGCGAGCAGGCTATAGAGCGA  
GTGCTTGCCACGGCCGGTATGCAGCTCAACCTCTCGATGCCGGTACCGCAGAATGCAGCC  
GACGCAGCAGCGTACGCGCAGGAAGTCGCGAATCAGCTTCGCCCGCAACTGGAGATGATG  
ATCGGGCAGCGTATCGGCACATGGTAATACAAGGGGCGGGCTGGGGTTCACTACGAATC  
CCGGTCTGCCCCCTTCACGTGTAGGGAGACACAATGGTTCTGTTCAACTTTCAGCCGAGC  
GGCGACTGGTTGAACGACGGATGGAAGATCATCGGCGGCGTCACCGCGCTCTGGCAGGGC  
CTACCCATCTCAGCATTGCGAAGTGCATTTCAGTGCCCGGCGACAACGGCAGGCGCAGCC  
GTGTCTTCCCCGTCGACACCACGAGTCCCGGACGGCGCGATCATCACTCGGTGACG  
GTGAAGATGCGGGTTCGACTCGGAGCTGGCGCTGCACCGTCCGGCACGGCCCCCTCGATC  
ACGGTCGCGGTCGTCGCCAGGACAACACCTAGCGCAACCTGACGCGCACCATCTACCCG  
ACGAGCACCCCCACCGACTACGAGATCGCCACCTACCAGCGCGACGCGCTCGGCCTGGGG  
TGGGATGTGCAGCGGCTCAACAACCTTCTGTGCCGGATCTTCTCGTACGTCCGCATCTTC  
CACCTGATCCGCTGCTACCGGCTCTGGTGTGAGATCAAGCACCGGCTCCGGCCGACCGTC  
GCGATCACCGCCTCGTCGGGCACCGTGACCACGCCGTCGCCGACCATCTCGTGGACGTAC  
ACGCAGACCGACGGCGATCCGCAGAAGACCGTGGAGTACAAGATCTTCACGGCCGAGCAG

GTGGCCAAGGTGTCCTTCAACCCGGACACGGCGACGCCCTCTTCCAGGACACGCTGCAG  
GGCGACGTGACGAGCGTGCTGCTGCCGACGTCTCAACTCGAACAACTACTGGGTCTAC  
ATGCGAGTCACGTCTGTCATTCGGCGCGCGCTCGATGTGGGTTCGGCCGTACGTTACGGTG  
TCCGGCCAGTCGCCCCGCGATCCCCGGTGTGACGACCCGACGGACGCACTCGGCAGTGCA  
GTGATCACCGTGGTGCCGGACAGCGAGTCGGGCAGCGGGTGGCTCCACATGCGGAACACC  
TCGAACATGCTCAGCGCGCAGGAGGCGGTTCGCGGAGTCGCCGACCGACGGCCACACGTGC  
TCCGCCACCAACGCCACGATACCCGCGCGTCCGCCGTCTCCTTCCCTGGCGGCACGTCC  
TCGTGGAAGGTCACGGCGACAGCCGGGGGAGCGGCACAGGTCTCTACGGACTTCGTGCGG  
ATTGAGGAGTCCCTGCCGATGACCTCGCGCGCTCAGTTCCGAGCGGCGGTACCCGGGCGC  
TCCTGCCGGGTGGTGTGATGCGGTTCTACGACGACGGCTACGCCGAGATCGCGGGATCCGCC  
CTGACCGGCAGCTCGGTGACCGACTCGACGAGCACCCGGACCGCGGCACCGGTGTACGGC  
AACGCTCCGGCGAACACGGTCTACACGCGTGTACCTTCGAGGTTCTGTGCGGCGGCGGCC  
AGCGCCGTGCACAACCTGGACCACCTCGGCGTACAGGTACGGCCTGAACACCCCGTGGGCC  
GACGGCAGCCACGCCAGCCGCAACCTGCTCTCGGCGTACATCTCGACGGCAGAGGGCAGC  
CAGATCGGCGGCGAGTTCTGTACGCCGACGCGGCTTCGACGGCGGTCACTGCGGCAGCC  
ACCCGCACCGGGTCTTCTAGTTCGAACTGCTTCAAGATGACGTACGACGGCCTGTCTCCG  
TCGATCGGGTTCGAGGTGTGCGCACGGCGTTCACGTGCCAGGTCCGGCGCCGACTTG  
AAGCTGAACAAGCCTGCGGGCACGGCGACCCGGCGACCTCATGCTGGCCTTCGTACGACG  
TCGGAGTTCTGCACGATCACGCCTCCGGCTGGCTGGACCCTGGTGAACCTGGGCGAAGGTC  
GACGACGGCACCCACGGACACCGCGATGTTTCGTCTCAAGCGCACCCGCCACGGCGTCCGAA  
CCGGCCTCGTGGACCGATGGCTTCCCTGTGACCAACTCGCTCCGGCGGTCCGGCCGTCACG  
GTGGCGTACAGCGGCGCACCCGGACGTTCTGACGGACACACAGGCCGCCTCGGGTAACAAC  
ACCCCGCTCGGCATGGAGACGCCGTCTCTGCACAACACGGACCCGAACGGCTGGCGCGTG  
TGTGCCCTTCGCGGTGTGCGACAACGCCTGCGGCGGAACTCTGACGGCGAACCCGGCAGTCC  
CCGTTACGATCCCGCAGATCAGTTTCGTAGGCTCGGCGTCCCGTGGCTCACGGCGAAC  
ACCGCTGGCTCGTACACGATCAACAAGCCGTCGGGCACCCAGTCCGGTGTGCGCGATGGTC  
GCGACGATCGGCTACCTCGGCAACGGCGCAACAGTGAACCCGCCTGCGGGCTGGACCCTG  
CGGAACCACACGACGGCGAACACAGAGCGCCGTTCCCTACAGCCTCGCGGTGTTCTAC  
CGGGTCGCTGGCGGGTTCGGAGCCGGCTTACTGGTCCGGCACGATCACGGCGGCTCGCAG  
TACCGCACGACGACGACGAGTGTCTCGCGTACCGCAACGTCGACAACGCATCCCCGTTT  
ATCTCCTCGAACATCACCGGTACCCTCAACTCGAGCGCGCTGGTGACCGTGCAGGCGGCG  
AACACGAACGCGCTGGCGTGGCGTGTGTCGCCCTTCGGTGGTCTATCGGAGGCGGCCAAC  
AGCTTCGGCAGCACGAACGAGGTGTCGAGAGCGTGGACAACACTACGTGCAGTACTCGATC  
CTGTTCCGGTAGCCGCGCTTGCAACGCGGTGATGATGGCCGAATCGAACGGCGCTGTGTGCG  
ACGGCAACGTATGAGCGGTACGCGTACTCGAACAACTCGCTCTACGCGGGCGTCCGGCTTC  
ATCGGCTTCCCTGCGTCCGCTCGGTACGCCTCCGACCCCGGTGGCCGACGAGACGGCACGC  
ATAGCAGCCGGGCCGGTGGGTTCCGGCCAACACGTGGGTCTTCGCGAGGGTCTTCGACGCG  
AACGGTGTACGCCGACGGGCAGCCAGTCGATCACCCGCATCTGGACCCCCGATCCCCG  
ACCGACAAGAACTCGATGGCTGGCTGGTTCGGCATCCTGAAGCCTGCCAGGCGCAGAAG  
GTCGGGTACGCGACGGCCACGATGAACCGCACGGTGGACGTCTCGTGGTCAAGACCGAC  
CAGATCCCGGATGCCGACTTCGTGCCGGCGACAGCATCGTTCACCCGGATCGACTGCGGGC  
ACGCCCTACCTGACGGTGAACCTTCTACCCGCGCCAACACGCTGCTCGGCAGCCAGATCGGC  
GATGGCACGGCGTTCGCGACCCGGCGGGTGGACCAAGTCGTCGGCGACGTTCCGCATCCCG  
AGCGACACCACGCGCATGTCCGGTCCGGCTCTCGGTCTCGGGTCGCAACGTCCGGCAACAAC  
GTCTACTGGGACCACGTCTCGTGGCGTACGGCGTCGATGCGACCTACCCGGCCGAGCACC  
TCGCGTCCGGAGCACCCGGTCTGGTTCGCTGCCGAGATCCAGTACGCGGACGACGACGGC  
ACCGGCTACTCGGACTGGGCGCACCTGCCCGGCCTGAAGTCCAACCCGCCTGCGTTCGAG  
CCGCACTCCGGCACGGCGTCTACACCGACCACGCGCCGATCCCGCTGACCAACAGGAAG  
GACCTCGCTCGCACGGTGTCTCTCGGCCTCGGTGGCGACCTGTTTCGTGTGCGGAGTGGGGG  
CCGGACAGCCCCGAGTTCACGTACCAGGCGGAGAATTACTGGCACAAAGACATCTCGAAC  
CCGAACAACAACCTTCGGCTCAAGGTGGCCTGGGACAAGACGCAGGCGGCTAAGACGAAC  
AGCGCCACAGTGTTCAGCCTCTCGGCTCCGAACTCCCCGTGGTGCTCAGCGAGGGCTAC  
ACGGGCGACAGTTCACCTCAAGCTCACGCCGGTCAACCACGAGGAGCGCGCCGAGCTG  
CGGACGATGCTCACGTCCGGCCGGACCCTGTTCTGACGTCGGACATCGACGACGCCTGG  
TGGGTGCGCCCGGTTCGGGGACCTGATCGAGGACGTGCTCCCGACCGACAAACCGCAGTCC  
AATCCGCGGCGCGAGATCACCTGCCAGTTCGTGCAGGTAGCGCCAGCAGAGTGACAAGTA  
GATCCAAATGGCCCCGCGCACACAACGATTCCTGGACGAGATCCGAGGCAGTCACACCGT

CTATAGCTCCGTGGACGTGATCGCTCCGGACCAGGAAACCCGGGCGGCTGGTTCGTGATCGA  
CGGCGAGATCAACGTGACCCGGACAGCCCAGTACCGTTCGCGCGGGTTCGGATCGACTGCGT  
AGACCTGAACGGCAGCTTCGTGCCCTTCGGCAACCAGGGCATCCTGACGCCGTTTCGGCAC  
CGAGATCCGGCCGTACCCGGGGCGTGAAGTACGCGGACGGCACCCGTGGAGGTCTACCCGCT  
GGGCGTGTTCGGCAGGGCGGGTAGCTCCTTCCACGAGTCGTTCGAGCCGGGGCGGCAACGC  
GGGAAGCCGCATCTCGCTCCGCATGTTTCGACCCGATCCCCTGTGTGGTGGCGCGGACAAGTT  
CACGAACACGTACACGATCAACGGCGGCTCGAACATAATCACCCGCGATCAAGCTGATCGT  
CGGCCGGACGTTCCCGACTTCGAGTACGACGCGGTGTTCGACGACGCTCAGGACGCCAG  
CCCGAAGGTCTACACCCCGCAGGACGACCCGTGGGTGGACGCTTCGGACCTCGCGAAGTC  
GATCGGCTGCGAGCTGTACTTCGACGTCAACGGCTGGGTGGTTCATCGCCCCGACGACCGA  
CATCGACGCGCTGCCGAACCCCGACTTCACGTACATCGAGGGGCGGGGCTGCACGACGCT  
CGACCTGGCCGCCGAGTACAAGGACGAGCCGGGCTACAACGGCGTTCATCGACGAGGGCGG  
GGCCACGGGCGACGAGCTGCCCCCGGTGCGCGCGGAGTCGTGGGACTACGAACCCAGCTC  
TCCGACGTACCCGTTTCGGCCCGTACGGCGAGGTGCCGAGTTCGTGCAGGACACCAACGT  
GAAGTTCAGGCCGACGCGCAGAAGATGGCCGATGCGCAGCTCAAGGGCTACATCGCCTT  
CTCGGCCGCGCTGTCGATCAGTCTTGGACGAACCCAGCGATGGAGGCCGGGGCGTTCAT  
CCAGGTTCGATCGTACTCCATGAACATCACCCGCTTCGACACGGTTCGACTCGTTCAACAT  
CCGGCTCAAGAAGGACTGCGTCCAGAACCTCAAGCTCCCAACACGACGGGTTGCATCGTG  
ATTCGAACCTACGGGCAACCCCGGCGACCGTCTGACCCGTGTAAACGTTACTCGCACA  
AGCACTCTCGGAGGTGAACGATGAGCGGGGTACCGACACCTGCGCCGGACACCCCCAGG  
GGGACATGACCCCGGCTGAGCAGACAGCAGCGGCCATCGCCGCCAGGCCCTGCAGCGCC  
AGCAGATCAACTCGCTGGCAGACGCGCTCACCCCGCCGACGCAGATCTCCGCGCTCGTCT  
CGAAGGCGACCATCGTACCGTTCGAGTGGGGTACCCGCCAACCGTGACAATCCAGCTCG  
GCGGCGACACCACGGCCTCGATCGCGGGCGGTCTGCTTCTGGACAGCTAAGTGCCGACGG  
CCGGGGACACGGTTCGATCGTCAAGCAGGGGAGCGAGCTGTTTCGTCCTCGGCCAGATGA  
TGGACAACCTCGCGGCCGGGGCGATCGGCTGGCAGGCTCCGACGCTGACGACGACGTGGA  
AGGCGAACCCGACGTTTCATGCCGATCCTGTACCGGATGGTCTAAGACAATCGCGCGCGGA  
AGATCCAGTTCAGGGCCGCGTCTGGTGGAACGGCTTCAACACCGGCACGACACTGTTCA  
CGTCCCGGCCGACTACCGGCCCGGCGTGCAGCGCGCCTTCAATGTCACCCGAGAGAACC  
TGACCGGCGGCGCGAACGCGCTGCAGCTCCAGGCGAACAAAGGACGGCACGGTGACCATCT  
CCGGCCACCAGCTCGAGACCGTGGGCATGACCAGCTCGGGCGGCGGCACGACCCGGCACGA  
CGGACACCAACCACAAGCAAAAGACGTTCGGACATCGGCAACACTGGTGACCCGGTGCTCG  
TCGGCTGGTGGACGGACTGGGTTCGTGGGGTTCGGCTGTGGGAACGAACAGCGTACGCACA  
ACCACAGCACCCCGAATCACACGCACACGATGACGAACGCGTTCCTTCCCTGGATGGATCT  
CGCTCGACGGCGTGGAGTTCTTCTCTGACTAAGAGGTGCGGACGGTGCGGCGACGCAAA  
GGATCTCGACGAGTTCAGCGTTCGCCGCGCCGGGTCCGAACAACGACAGTTCGACTGCAG  
GCTCTGTACGGCCGAGACGGCCGAGGAGAACAGACTGCGGGTGTTCGTACGGAAATCACGAC  
GCGCCACTACAACGCGATGCTCGAGATGCAGGGCGGCGTTCGCGCCATCTGCTCCGAGCC  
ACCGCCTCCGGGGGGAGTGCTGGCCGTCGACCACAACCACAACAGCTGTCCAGGCAAGAA  
GAGGTGCGGCATGTGCCTGCGAGGCCCTTCTTCCACGAATGCAACATGGCGCTCGGCAA  
GGTCCGAGACTCCAACCAGTTGGTGCACAAAGCGAGCGGGTACCTCGACGGCGGTACCT  
CGATCTGTACTACTGCTCGGTGAGGATCGGTAGTGCATTAGATAGTCCAGACCAATATC  
AGCAAGAACAGCAGCGGGCCATAGGGCGGGCCGATCCGGCTGTTTCGTCATCCACACCCAG  
GAGGGCAACGGCACAGCGCGCTCGCTGGCGGGGTACCTGCAGAACCCTCGTCCGGTGAC  
AGTACCACTACTCGATCGACAACCCGAGTGCATCGCGGTGGTTCGACACGGACCCGTTCC  
GCGTGGGCAGTGCTCGATGCGAACGGCTACACGATCAACCTGTGCTACGCCGGTAGCCCG  
GCCTCTATGTCACGTGACGAATGGATCGCCAAGTACAGCAACGCGATCGACTTCACCGGC  
TGGCTGATCGCACGCGATGCGAAGCAGAACGGCTTCACGCCCTACGTCATCGGGCACCCG  
GAGAGCCGCGCGGGCAAGCAGGGCACGACCGACCACTACGGCATACCAAGGGCCTGGGG  
ATCGGCGACCACACCGACGTCGGCGGGCCGCGACCCGTGGGACCTGCTGCGCAAGGCGATC  
GACAAGTACATGGGTAAACACGGCCCCGCTGCCGCCCGCCCCGCTGCCGATCCTCAACCCG  
ATCGACGAGTGCCGGAAGACGAACGACTGGCTCGGCGACGCGCTCGATGGCCAGAAGCCC  
TGCCCGGACAAGAAGGGCCAGTTCCGGTACTTCAAGAACGGCGCGGTCTACTGGACCCCG  
GAGACCGGCGCGCGGGCGATCCCGTTCGGAGCTGCTCAAGCAGTTCGCCGACCTGAAGTGG  
GAGACCGGCCCGCTCGGCGACCCGACGCACGACCCGACCATCCTCACCGGGCCGAACGGC  
CGTCCGTGGGGCGTTCGTGCAGGGATTCAACGGCGGCAACCTGCACCGCAAGTACGGCACC  
GACGAGGCCTTCTGGACGCACGGCGAGATCGGCAACCCGCTGGGCGCGTAGCGGATTCGAG

AACGGTCCGCTCGGCTGGCCGACGAGCTGCCGTTTCGACGGCGGAGTCGTCCAG  
TACTTCGAGAACGGCCAGATCCACTGGCCCCGCAAGCTCAAGACCATCGCGCTCCTGAAC  
AAGGACGGCGCGGATACACCCCTGGCTGACCAGGGTAAGTCAGAGAAGGAGATCGCAATG  
ACTCTGCGAGAGAAGACCGCTCACTACCGCAAGGCCGACGAGGCTGGCATCGGCTCCGTG  
CTGATGATCCTGACCTCGCTTCTCGCGCTGGGCGATGTCTGCCCGCTGGCACGGCTGTC  
GTCGTCACGACCACGATCCCCGTCTTGACCACGGCTCGCGTGTGGCTGGCGAAGAACGCC  
GACCTGATCGACAACGCGGCCGACTCGATCGACGGAATGCAGCGCGACGTCCGGGGCCGAC  
GTGCCTACACGCGGGAAGCACGCTCGGCAGTGAGCGCCGAGTACCTGGCACTGGTTCGTC  
CCATGGTTCGGTCTGCTGATCGGCTCGAACGGCATCACGATGTGGCGCACCCAGCGGATCT  
TCAAGACCAGCCAGTCGGAGCAGGGCGAAGGCCATGGCAGTCCAGGCAATAGCGACGGCAC  
ACAGCGAGCACATCGACGCGGCAGCTCAGCTTTCCAGACAGTGCTCGGCCTGCTGGCCC  
CACTGCAGTCGCAGATCAACGACTACGAGGTGAAGCTCCGCGACGCGGTGACGTACATCG  
CCGACCTGCGCTCCGAGATGACCCGATCCGGGGGGACGGCACGACCGCTCCCCGAGTCCC  
TGCAGGCGATTGTGACTGATCCAGCCGCTGACGGTAGAAAGCACAAAGGCCCCCCAGCC  
AAAGTCGCGCAGCGGCTCGGCTGGGGGGCCTTTTCTGCGTTC

>NewGenomeName\_30

CTCCGGGCCAGTACCCACTCGTCGCATCCGTTACCAACGGCCAGAAAGTTTCCCCTGGGG  
GCGTTACCTACGAACGACTGACCGTGGCTGACGGCCACCTGACCGCCATCACCGAAGTCGCTG  
CTCCATAAGAGGTGTGTTATGCCTAAGTTCCACAAAGTAGGGCGCCTTTCGCGCTCTGCT  
GCGGCTGTCCTTAGTATCTCCGCAGCAGGCTTAGGCTTTATCCAACACGAAGAAGGAACC  
GTTAATCAGGCATACCTTGATTCGATTGGAAAGCCTACCATCTGCACCGGGCACACTGGC  
CCCGAGGTACGCGTAGGGTTAGTCTACAGCGACGCACAATTCGCTGAGCTGCTTCACACG  
GACGCCAACTCGGCTGCCGCTGCTGTTAAGCGCACGATCAAAGTCCCGCTGTACCAGTAC  
GAGTTCGACGCGCTCGTCTCGTTCGTTCAACTTCGGGAACACGAACTGGACCACAAGC  
ACTATGTTCAAGCTGATCAACCAAGGTCGGTACGACGAGGCTGGGCGCAACTCCTTCGC  
TGGCGTTATGCTGGTGGGAAGAACTGCTCCGTCCGGGCCAACAACTGCTACGGCGTTTAC  
ACCCGCCGTCACAACGAGTAAGCACTATGGCAAGGACAATACTGCTCCGCGTACTGCTCC  
CGCTTGCCCTTCTCGGGCTGGCTGTGGGCCTCTACGCGACGCACACGTCTCTCACTGAGG  
CAAGGACAAAGCTCGATGAATAAACTCGCTATACGCGACCTCCGGGCCTCTCAGGCTC  
GCATACAGGCTGCTGTCACGGCTGTGCAGAGGCTTAGCTCGCAGACTAAAGCGCTCGTCA  
GCGATGCCCTCGACAAGGAACCTGTTTACCGGGATACTCCTGTGCCTGCTGGCGTTTCTG  
ACAGCCTGTGCAAGCGACTCCGCTGCAAGGATTGACCCTGACGTACCGTCCCCGCATCCA  
ATCGTCTCTACGGCGACCACAGGCGGGCTGGTGAAGGGGCTGGTGGACTACGCAGACGCG  
CTGGATTACTGCAACGCTTTCGGGGGATTCGGGCCAGAAGCTCAGACCCAAAAATGATGC  
GCACATGCGCCCGCTCTCCAGGACATAAAGAGCGCGAGGTTCCCCCATGTGCCCTGCGCA  
GAATGTGCGGGCGCGCTGATTAGGGATGGCTGGTCATGGCGGTCTCTCGCTGCTACTGTCG  
ATGTTGACGGGGCCAGTATGGGGCCGCTGAGCCGGGCTGACAAGCGATTTGTTACGATGG  
CCGCGACAAAGGTACAGGGCACGGCAATACAGGCTATGAGGGCGCTGAGAACGCGCACAGC  
ACGGCATTAGGACAAGGGCGGGCAGGCAGAAGGGCACACTGTCTTCTTTTGGCTGCGCGG  
GATTGTGAGAGCTGAGAGCGGTTTTCTAATTGGGCCACTATTGCGAAGGGAAACGCGATA  
CCCTGCGAATGCTTAGGAGACTTGACACGAACGGTCATATCTGTCTAAGCCGGAGCAACA  
GCACAGCCCAACCACACACCAGACCACGATGTCAAGACCAAACCTACCAGACCGAATGACA  
GACCTTGATAACAGACCGGGCACACGGTATACGCGCATGCAGGACAGCAGCTTAATGACC  
ACGCGACGCACGGGAGTAACATAGTGACATCCATAATACAAGACTAGACAGACAGGAATC  
ACAGTGTACTATGGGCACCACTGAGACGCCAGACAGCAACACAGCCGGACAGGATGAAAT  
AAGCGGTTGACGGAGACGAGAAACACTGTACACTGCGCAACATGTTCAACGAGACGGACT  
AACTGCTAAGGCAACACACTGCTAAGGCACTGGAACTCTCTAAGCTAAGTAGCTAGCTG  
GTAAGACCGACAGCCACAGAAAGTGAACAAAGCAGGTTGACAAGCGACACGCTTCACGGT  
AACATCCGCAGCACAGCAACATGCTACACCGGCTTCAACGTAACGCTCGCTCAGCAAC  
TTGAATGTGAGCTTGACACGAACGAAGCCACGCAGTAAGATTGACGGCAACAAAGCAACA  
CGGAAAATTACAGCCGGGTAGTACGGGAAGCGTCTAGCATTAGCTGGTAGCGTATTGGAA  
TCTAAGTAACGACGGGATCAGCGGAACTGATCGACGCTCCTAAAGGCACGGCGTCCAATC  
CTTAGCTTCACGGCTGGTAGTGCAAGAGACTCGAATGCAACCGAGTACCCATGGAAATAA  
CTGGGGCCGGCTTAGGCTCAGAGCTGGTTCGGATACGATTACAGCAATACTGACTGTCGGG  
ATGATAGTCAACTGGATCAGGTGCATAGGCGGGAGTGACTGCCGATGACTGTAGCCTGAT  
AGGAACCTGCCAATACCACGGTGGTTCCTAAAGCCCTCTTATGTTCTTACTGACTGGATG  
CTCTGTTGCACAGGTTACTTAGACGAGTTCGGCTTTAGAACTACCGAGGTGCAATTCATG

GCTAAGCATGCATCCATCAGTAAGGTGGAACGACAGCAGCAACGTGACTACCAGAACTTC  
GGCAAGGAACTTCGCAAGCATGTTCGGTGACAACAAGTCTCTGCGTTCAAGACTACCGAT  
CGTCTGTTGGCTGAGGCGGAAGGTTACTTCAAGATGGTGGCTGAGTTGTCCGCTGTAAA  
GGCGAAGGCGCAGTGACTGCAAGGCGCAAGATCCGCGAAATGCGGGACGTGCGGAGAATTC  
ACTGATCCTCAACCAACGAGCAAGAACGCATGGGATACTAAGCAGACCAAGGCTAAGCCG  
GGAGAGTCTAGGCCGGTGCCTGGTAGTACCGCGACACATCAACGCATTATGAATGGGCAG  
TCCGCCCGCAACTCACAAGGTATGGGAATCTAATCATGATTAAGCAAACCTCTGATCGTCG  
GCACCGCAAACATCATCAAGGCTGTTGCCTCGATCGCCAAGCGCGGGCGCTAAGCTGGACG  
CTGACATCCAGTTGGCCGGTGTGTCGAACCACGCTCACATCAATGAGCACAACAACGTGA  
CCCTGTTTAATGATCTGTACCATTTCGCTGCCGAAGGGTACCCGCAAGAATGCCTTGGCTG  
AGTGGGCCATCGCTAACGGTAAGGTGAACATCAACGAAGGCCCGAACCCTAAGGACATCC  
CTTTCTTGTTCGCTAAGGACAAGGTAACGAACATCGGCTTGGCGTGGCAGAAGCCTTGGT  
ACGAATTCGCACCGACGCCTGACCTGATCCAAGTGTTCGACGTGCTAGCGGCCATCGCCA  
AGATTCTCAAGCAAGCGGCCAAGGCGCGCAAGGATAACCATGACGTGGAAGTCAAGGGTG  
AAGGCCTGCTGGAACAACCTGGCTGGCATGACCACTGCGGCATAACGCCGGCACTCCCGAC  
CCAAATATGGGCGCCGCAATTCCGCTGGTGGCCGAACCTCTGAGGTGCATATGCAACTCC  
CAAACAACGCTATGGCCCTTGTTCGCTGTGCTGGCGCTCGCTGGCTGCTCTATCAATGTCG  
TAGTGGCACCGCACGCCGTGTTTCGCCGTAGACAGCGCGATGGACAGCCCTGTGGACGCAT  
CCGAAGGCATGAACAACGGCCACATGGGTGACAAACAATGAGCCGGGCGCTCAAGGCTGC  
TGATCTGGTGCGGGTGAGCCTGCCGTCCGCGCGCAGTGCGAATGCCCGTGGGCTGCCGTT  
CGGTGCCGTTCGTGGAAGTGGAAAGGCGAGCAGGTGCTATACGGTGAGCTGCACGGCCCGT  
GTTCCGCATCAAGGCTCAAGGGAACATCCCGGCGTACCTCTTGCCAGTGTATGGTTTGAA  
GCACGCCAAACAAGCAATGCGTAAGCGTGCAGGCTACGCCAACCGCCGAGGTTAATGATG  
GACAACCTTACGATGCACGCCGCCGAGCCATGCTGGTGGACGCCTTCAAGGCCGTGACT  
CCTGAGTACCTGAGCAGGCTGGAGGTGCAGCCTGACATCCGTAACGACGACGACACGCAT  
TGGGTGGCGCCGGAAGACTACGAGACCCTGTGCGACGACTGGGCTGTTGGTCTGCTGATC  
ATCAGCAACCAGCACATCGACACGTCGAGCTATGGCGCGGCTGGCAACATCGCCTTCCGT  
ACCATGCACGACCTCGGGCATCTGGTGCATGGCCTGACGTTCTCGCTGGGTTCATGAAGTC  
TCGAGGTCCATGGTGCAGTGTCCGGGGATCCGCAAGCACATTACAAGACGGAGTTCAGT  
GAGGTGTGCCGCGATCTGTTCCCTGGCCGAAACGGTGTATGATGTCGCTGTACAACGAGCGG  
TATGGTGCCTTCCCTTGGGACCAGACCGAGTTTGTGATGCGCTGTTGCGCTGAGCAGTGA  
CGAAGTAATGCACATCTGCGGGTGTGCATTGCTGGTTTACTCCTCCAGGCATGGTCGGAA  
CTGATAGAAGCTATGACAATAACAAGTGCCACGACTGGAACACCTGAGCGATGGCCTCGGC  
CCTTACCGCTGGCTGCATGGTGGCCGAGGTGGGCAGCTTGACTGGGCACAGCGCGATGCT  
CTGAGCATCACGGCTAATACTGGTAGCTCGCCGATGATTGGCGTTGACTACCCTTCACAC  
TTCAAGTTCGGCTTTGCCAATCGTCGGCAGGCTGAGAGCTGGTGGTGTGAGAACGCACGG  
CGTGAAGCGGCTGCCAAGGCTACGCTCTAGCTGTGTACGAAGTGCCCGGCGCTGCTGTG  
ATTCACGGTAACGCGCAGGTGGCATTCCGGTCCAGAGGTCCGCAAGCTGTTGGCTCATATC  
CCTGCATCCGAGTGGGTGACAGGCAACCTCAATATTCCCTTGGCTGCGGAGGCCGAGCAA  
TGCGTACAGCAAACGGCGGGCTCGCCGAGTCCGGAACAGAACTTTGCACACGAACCACAA  
CCAAAGCCGAGCGGGATGCCATCCTACTTTCGTGAGTCAAGGCTCATTGCGTGGCGTAAGT  
CGCTGCCAAGGAAACGTAAGCCAGATTCCCAAAGACCCGGCCCGGTTACGTGGATTTCAGT  
TTTGATGCTGTAGTGTTCATGGGAGACACGTTTCGATCTGGACGTGGAACCTGCCAGAAA  
TCCTTCAACGAACTCAGGAGTTTGTATGGTGGAAAGACTAACTCGCTTCGATTGTGACGA  
TGCAGCAATGGCCTAGGCTTGTGCCTTTGCCTGCGATGCACTGGCACACGCTGATCCTCT  
GGACGTAGTGTGAGCCTACGCCGGAAGACCTGCTGTAACGCGAAGGCTTCGATGCCTA  
CACTGGTGTGGATACTCTCTGTCTGATGCCACGAATCCGTCATGCTTGAGTATGGCTT  
TGCTCTGTTGGAGGACGAGGACGCATAAGGGCCTCACTCACGACCCAAATAAGGACGCCG  
CAATTATGGCAACGCTCAATGAATTCCGTAGCATGACTGGCCGCCAGGTAATGCACTCTC  
GCCGTGGTAGCGCGGTGGGTGTAGTAGTTGGCATCGAAGCTAACTTCGTGATCGTGATCT  
GGGACGGCCAGACCTTCCGCACCCGCAACAACCCTGTGTACCTGACCATTCTGCCCGAGG  
ACAAGACTGTGAAAGCTGCTGACATCAACGACGTGAACAACGTGCAAAAGAACATCCTGT  
CCGACCTGCTGCGCCAAGTGCAGGACTCCAGTAGGCCAGACCGTTGCCGGCCGTGGCA  
CCGACGCCGCCGCCCGCACCATCGGCGTAGCCAACAACGTGTACAGCTTCGATGCGCTGG  
CCTTGCCTGAAGCTGGCCTGATCGTTTCACAGAAGGACAATAAGGAATTCGCCTAGTGGT  
TCCTGACCAGCATCGGGCACGCCAAGGCAGTCGAGCTGACCAACGTGCGCAGCAAGCCCG  
AGAAGTGGCTGGTCTGGTGGCCGACTTCTGCCAAGACTCCGCAGGTTGTTCACTCCTGTG

AGCAAGAAGCGAGGGCCGTTGCTGAGAGCATGGCGCGCAACTATCCGGGCCAGTTGATCC  
ACGCTGTGCAGGTACATGCGGGCTTCAAGCTCAAGGCCGAGAAGGTGGAAGTGAAGAAGA  
TCGAAACCAAGCACACCATGGTGCAGGTGTAACATGGCGCGCATCACTCTGATCATGAGC  
CAGCCTTCCCGTGGTGATACTGCGGGCGCTCACGAAACAAGGCAAGCTTCCCGGGCGCC  
GACTTTGTTGGCCGACGTTTGAAGATGTTAAGCTCGTCATCAAGGGCGGGTTCGCTCAT  
ATCACTGGGGACAAGGTAGCGTACAGCTAACCGGCCACGTAATCAACCGTGTCAAATTC  
GAGGCTTAACCCATTCTGATCAAGAACGCCGCTTACCTGATTGGTCCGTCCAAGTACATC  
GCCGACGAGGCTGCTGAGCTGCACGCTTCGGCCCGTGAGTAGGTGCTGTCCCTGCATGGC  
CGCGACATCGACAAGGCGCGCAGCCAGTACAACGCCAAGGTGCGGAAGGTGCATGGCAA  
CTCAAGGGCCGACGCGAGCGTGCCGTGGTTCTGTTACCCGCCAGCAGGCCGCCGAGCAG  
CGCCGCGTAAAGGCTGCCAAGTTGCTGGACGCGCTCAAGTGATCCGCACCGTGACCGGGC  
GCATGCCAAGCGAGCCTGAGCTGCCTCGGTTGCGGGGCCGAGCATCGACTGGATCGTCA  
CTGACGACATGATCAACGTGGACTTCGCGGAGCTTGAGCGCCGCGTTGCCGCCTCTCCCT  
ACTTCGCCCATCCATACGGAAGCAAACCTATGAACCGCCAGAACGTAATCGACCTGAACA  
AACGCTCCGCTGTAACCGGCGACATCCTGTCCCTTCTGCGCCGTGCGCCGGGCTCGACC  
TACTGGACTACAACGAAGGTCTGGATCAAGACAAGCGCACCGTGCCAGCGGGTAGCGATG  
GTCAAGAGCTGGGCCGACTGGTAAGCGATGGCTTCCAGTTCAGTGGCTTCAGTATCAACG  
CCGAGCTGTTTATGACCAAGCTGCGCGGGCGTCTTCTACCCGGTGCCGAGTTATAGTGGCT  
AAGGTCTTACGATATGCATGGCTGGCAACCGTGCATACATCAGCAACGAAGACCATAGC  
CAGCTACGCTTTAAGCGCAAGCACGCCAAGGCTATGCGCAAGATGTTGAAGCACTGGCTT  
CGATGACACTGAGTTCGTAATGCACATCTGCGGGGTGTGCATTGCGGGCAATTGTGCCCA  
TCCTAAATCCCTGTTGGAGATACACCATGTCCAACGTACAAGCACTGATCACCGTAACCA  
ACGGTAACGACGCCAAGAAGACAAGCTGGTTGAGAAGGTGAACAACCAGATCGGCAAGG  
CCACCGAAGCAACCGTGTGCGTGGACAAGTACCTGCAAGAGCGCGCCGCCGAAGCTGCGC  
GCCTGAACATCGAAGGCGGCACCGAAGGTTGCTGCGTGTTCGGTTCGTGCTGCCACTGCGC  
AAGAGCTGACCGGCAAGGTCATCGCCGTGGTGAAGTGAATGCGTCCGCAAGCTGTTGA  
AAGTCATGGCCGGTGCAGGCGCAGCGTTGAAGATTTACGACGTTGCACCGAACAAGTTCA  
ACCCTGTGCGCGAGCAGGTGCGAGGGCACTCCAGACCCAATTCAAGGCTCCGAAGTTCCG  
ACGCTCCGGTTGGCGAAGTCGTGGACTTGCCGTTGATGTTAACAGCATCTCCGGCGGCT  
CCGACGCTCACGCCGAGTCGCTGGCCTGTAATGCTTGACCCTCGGCTGTTTGTGCCGAC  
CGATGACCTCTTGCATGCGGACTTGATAACGCATCTTGAGGCGTTGCGGACAATGGATGA  
TGGTGCAGCACGGCGAGGCGGTGTTGACTTCCGGGACTTCCACGATATGGATTCCCGGTT  
CAAGGCCGAGCCGATCTGATCTGGCGTGACAGCGACAGCGTGTTCGCGATGCCGTTCT  
GTCTCCCGAGACTTGCAGGGCGTTGGTTGCTGCGTCTGCTGTTCTGTTACGAGAAGAA  
GGCCAGCGAAGAACCAGACTTCCAAATCCCCGAGGTAGTTCTAAAGCATGAATGCTTAGG  
GCGGCACGCTCGTTGGCGGTTCTGTTTGATCAGGTGATGATTCCGGTTGCCGAGCTGCT  
GTATGGCATCGAGCCGGAGGTTACGCGGAGCATCCAGCTTGACAATATCGACCAACTGA  
AACAGGCTATGGTAACTGGCATGTGATCTGGACTCTGACTTTACTGTGGTTGTGGCCCT  
TAGCAATGAGCATGCTGGAGGCGGCACAGAGGTTAAGGCACACGGCTTCTCGGAGGCTTT  
CGAGGTTCCCTCAGTTGCCTACCGGATCGGCTATGATCTTCCGGGTCAGCTGTACCTTCA  
CCGAGGCATGCCGGTACTGAGGGCGTGCGCAACTTGCTTGTGTTCTGGACTGAAGGGAA  
ATGAGCAATGAGTGGTTGGCCTTAGCGCAGCATTGCGCGGTGGGTGGTAACGCCAAGCAT  
CCGATTACTGTGGTGTGATGGCGGACCGCTGGTTGTGTTCCACAACGATACGAAATGGTCG  
GCGTACTGCCACCGATGAGGGAACCTCGCGCCAGTATTCAAACCATTGCCGACGTTGCAG  
GAACGCTTGGCGGCAGTTGAACGACAGCGGCTTCAAGAGGAAGCTGTTGCAACTGACTCC  
CGGCCACCGATGCCAGCGGTGTATGACATGGCCGCGTGACCGCTGGAGGCACGGGTATGG  
TTATTCAAGGCTGGGTTATCCCACGCCGAGGTATCGCAGAGTGGCGCCTACTATCATCCG  
CCGACCCGCGGTGTGGTGTTCGCGGATTGGAAGATGGGCGCTTGACTTTCTGGCATGCC  
CGCCGCATACTCGGCACGACGGCAGCAAAGTATCTCAGCCAGCCGGGCGGGCGCGAGTGT  
ACACTCCCGCTGTTCCGGCGGTGGATATGTGATTGCCTTAGTCGAGGCCTTGCTGTCTGCG  
TACAAGATCGGACCGGCGGGTTGCAAATCTTTGTGCCTTATGGGTGGGAAACTGCTGCCG  
ATAGCCCGGGCGTGGTTGATAGTTAACCCGCAGTACACGGTAGCGATCTGGCTTGACCCT  
GACGGGCCGGGCCGAGTTCTGCAGCTGAAATCAAGAACCAACTATTGATGTTCCGGGATT  
GAATCCCAAGACATCCTAACGGAACGAGACCCTAAGTTCCACAGCAAGCAGGAGATTCGA  
AATGTCTTTGGACATATGACTATTACAAATGATGCGAAGTTCGAAAGGATTACGACAAGCT  
GCACCGGGTAATGAACTCGCGTGCATTGGATCAACTGACCGCCACGATCATCACTGACTT  
CGGCAGTTACTTCAAGGAGGTTCCCGAGTGTGATCTGATCCCGGTTAGCCGGGAGTTCCA



CACGTTCTTCCACACGATCTGTCACCCGCGAGTTAAGCCCGGAGCAGGGCGGCGGTACCG  
CCCTGTGTTCCAGCAGATCGAGAAGCCAATCGACGACACTGCGAAGTCAATGATCATGGG  
CCGGTTGTTGGAGAACAACCTGGGCGCAGGACTTGCAGGACATCGCCGAGCGCTTTGCCCG  
TGGTGAAGAAATCAACGTGCGCAAGCTGACGGCTAACACGCTGTCGAAGTTTGAGCAGGA  
CATTGAGCGTAAGGTGAAGCTGCCTTTCGTGGCGAGGGACGAGTCGTTGTTTGACGAGGA  
CGTTCGCAACGACGGGTTCAAGTGGCGCTGGACTCGCTTGGCCGAGACGATGCGGCCACT  
GCGCGGCGGCGAGTTCGGCATCTTGGCGGGGCGACCTGACAAGGGCAAGACGACTGCGCT  
CTCTGACCTCTGCACTTACTGGGCACGGCAGTGCAAGCTGGTCTTCCCGGACAACCCGGA  
GAAGCACCAGATTCTGTGGCTCAATAACGAAGGGCCGGGCAAGCGCATCCTCAAGCGGAT  
GATCCAGTCTGCGTTTGGTTGCGGTACGGCTGAGTTGATCAAGAAGCAAACGGCTGGCAC  
GTTGTGGGATGAATACGAGGTAGCGATTGGCGGTGATCGGACTACGATCAAGGTCATCGA  
CATCCACGGATTCAAGGCGTGCCAGGTAGAGGAAATCTTCAAGCAGCATCGACCCGGCTT  
GGTGACCTTCGACATGGTGGACAACGTGAGGTTTCGATGGTGAGCTTGCGAACGGTGGCAC  
GAGAACAGATCAGGTGTTGGAGGCTATGTATCAATGGGCGCGCGACTGCGCTGTGCGATT  
CGATTGCCCGGTACTCGCTACGTCGCAGATCAGTGCAGGACGGTGACGGTGAACCGTATCC  
AACTCTACCGATGCTTAAGGACAGCAAGACTGGCAAACAAGGTGCAGCCGATTTTATTAT  
CACATCCGGAACGTCTAACGATCCTTCGGTGAAGCGTTGCGTTTCATTGGGACGACCAA  
GAACAAGCTACGTCTCGAAGGCCAGCCACAAAGTCCGCGTGCGCAAATGGTGATGGACGC  
AACAGGAGGACGCTATGTCCCGCAATGAATACCATCCGCCGCGCTTCCGTGCAATTGAAC  
AGGCCGTGTTTGAAGAGATTCGCCACGTCTGGCCAGAGGGCGGGTGTGCGTGCCAACGCTG  
ACATGACAAGGCCCGGATGGACTGGCATGCGTGTGCGTGTCTGCATCTTCCGGCACAACA  
ACGAGGTGTTACTGGGAGCGTGTTCCCGGAGGAACAGTTCTCGCCACCTGTCCATGTGG  
TCGCCAGCACGATGCGGCGCTCGTTCACTGACGGCGTACACAAAGCGCGCACGGAATACG  
AAGATGACGTACGCAATCTGCGACTATGAAACGTCGATCAAGTCCAGCTTCAAGCGGAAG  
GCGAATCCCTTCCATGAGAACTGGACGGTGTGGGTAGGTGAACATCAGCACGGCAAAGAG  
CCTGCGTTCATCAAGCACGATGACAAGGATCGCAGCAAGGGATGGCTGGCGCGGTTCTTT  
GAACGCAACCCAGAGTGCAAAGTATTCGTAGGCTTCAACTTCAAGTTCGACGTGCTGCAC  
GTGATCGCCGATGAACCGGCTGGTCTGGATGCGTGGATGGACTTCATCAACCGGGGCGGG  
CAAGTGTGGGACTGTCAGCTCGCCGAGTACATTTTGTCCGGTCAAGACCCGTCGGCTCAC  
ATGCTTTCGCTTGACGAGGTGTGCGTGGGTTACGGCGGGCACACGAAACCCGATGCGGTC  
AAGGACTTGTGGCAGGCGGGCGTTCGAGACAAGCGACATTCCCGATGACCTGATGATGGAG  
TAGCTGCCGGGCGACATCGAGAACACCCGCAAGAAATTCCTCGGCCAAGTGGTCAAGGCT  
CAGCAGCTCGGGCAATCCCGAAGCGTCATGCTGATCCTGGGCGCGCTGGTCTTACGATT  
GAATCCGAACGCAACGGCATGAAGGCCGACTACGAGTTGGGCTTGAAGCTGGCGGCAGAG  
CTGGTAGAAGAACTGGCCGCGTTGATGCTGCGGCTTGACGAGTGCCTGCCGGGCGACCTG  
CCGTTTGAATTCAACTGGGGCATTTCGCATCCAGTTGTGCGCGATTTTGTGGTGGGGCT  
GTTAACTACAAATCCCGCGAGGCGATTCTCGATGAAGACTTCAAGCAGACTTATGCACAG  
AAGACTGAGTCTCACTACCTCACGTGCGGACGGCAGCACTATCGGACAGGACGAATACAAC  
GACGCTCTGCTCAGCGGTAAGCTGTGCCGACACTTGTGTACTTTAGCAGCGGCAAGAAC  
GATGGGGAACCGAAGACGAAACAGGTTAAGGTTAACGACCTGTGAAACAGAAGTCCCGT  
CTTGAAGACCACACGTACATCTTCCCGGCTACACCAAGCCGAGCGACAAGTGGAAGACG  
GCCACTCCGGGAGTGTACCAAACCTGGCTCTGCCATCATCGAATCTCTCGGCAGCCGGGAC  
ATCCCATTCCTCAAGAACTTGGCACGCCGTGCTAAACTCGACAAGGACCTAGGGACGTAC  
TTCATCAAGACGAACGACAAGGGTGAGCAGACAGGCATGCGCACGCTGGTTGATCCTGAT  
GGTCTGATCCACCACTTATCAACATGACCAGCACGTTACCGGGCCGGTTCAGTTCCGGT  
AACCCGAACATGCAGAACTTGCCGAAGGCAGGTGAAGGCAAGTTCGAAGGCCAAGGAAATG  
TTCGTGTCCCGGTTCCGGGCCGGAAGGTGTGATCATTCAAGTCCGACTTCTCGTCTCTGGAA  
ATCTACATCCAAGCGATCCTCACGGGTTCCAAGCAGATGATCACGGACTTGTGGCCGGT  
CTTGACATGCTCGTTGCACGGGTTGCGACGACTGCCGGGATCCACTACGAGGGAGCGTAT  
CGACTGTGCCACACGAAGCTGGCGGGCGGTGCGGCTGAGTTCCTGAGTGGGTAGGCAA  
CGGACGAAGGCTAAGGTCTTCTCGTTCCAGCGTGCTTACGGCGCAGGCCGACGCAAGATC  
AGCGAATCGCCTGGCATCCCAATCGATGAGGTGTACGCACTGATCGAAGCGGAGAACACG  
CGCTGCCCTGAGATTGAACCGTTCTATGCTGACCTGATGGAGAAGGTCACGAACAGCAAG  
CGCGGCTGCCGCAAGGTAGTACCGCACCCGGACTTCCCGGCGAAGCAGGTTGCCTTGGGC  
ACCGGCTCGTATCACACACCAGACGGTAAGCTCTACACGTACCTTGAGCAGTGCCTCCG  
AAGTTCGTGGTGGAGAAGACTGGTCAAGTGGTTCGTCGTTCTCGCCAACGGAAATTAAGAAC  
TACATCGTGACGGGCACCGGCGCTGAGTGGGCGAAGGCAGCATGCTGGTTGTTGGTTCGC

ATGTTCTACCCCCGCAAGAACTGGGGCGGGCTGGGCCTTCTGATCAATCAGGCACACGAC  
GCCGCTTATGGTGACACGCATCCGACTGTCAAGAAGGAAGTGGCTGCTGTGATCCATGCT  
TGCATGGAAGGTGCATCGCCATTCATGGCGGCGTACTTCAATTGGGACATCCCCTGCCA  
GTACCAAGCGACACAATGTGGGGCGCGAGCATGGCAGAAGACAACGCCGTGGAAGGCATC  
GACGAGCTGGCTCAACCGTTCCGCGAAGAAATCAAATCGCAATACATCAACCAATATCTC  
TGAGAGGTTACACCATGTCCGAAGCAATCTTTGACCAAGCAGCAATCGCAGCAGCCATCG  
CAGCAGCAGCGGCGCAAGAACCTGACATGAAGGAATCGCAGAAAGGCGGCGGGCTGGG  
TTCCACCAGCAGCTGGCGGCTGCATCGTAATGCTGGTCCGCTACATCGAAACCGGCATCC  
AGATCGCGCCCCGAGCAACGTCGATCCGGTCAAGTTCCCCGGTGGCCCCGGAAGAACAAG  
TCGATTTGATCTTCGAAATCAGCGGCAAGGGACACGAACCGAAGGAGCTGGAGATCGGCA  
CCAAGGTTCTGAGCGCTTGACCGTAACGCGCAAGAAGTAGTTGAACGAGAAGGTGTGGT  
ACTACAAAATCTTCAACACGCTGTACTATGACAAGACCGCGACGCACTTCGCCAACTGC  
TGGGCAAGCACTTCATCGCCACCATCATCCACACGCCGAACAAGAAGAACCTGCAGTCGC  
CGTATGCTGGCTTCAAGTGCAAGACTGATGGCTACACCTTCAAGGCTCCGACCTACAACC  
CGAACCCGATGGACATGACCGAGATTGCCATCGTACCGAAACCGGCGGTGCTGACTCTGC  
TCAAGCTGTTCTGTGGACTCACCCGTCCAAGCCGATGAGGGACTCGCTGTTTCATCGAAG  
GCAAGTACGACGACCGCGAGGACGAGAAGACTGGCGTGGTTACTCCGGGCCGAGCAAGA  
ACGTGGTGCAGAACAAGATTCGCGGCGCCAAGAACTTTGTAGGCTCGCCGATCTTCGACA  
TCGTTAGCGGTCTGGACATCGCCGAAATCGAAGTGGCGGTGGTAGACAATACCCCGGCGC  
CGGAGTCGGCTGCTGTTCCGTCTGACGACGCTGCCGCTGCTGCGCTGGCGGCGCTCTAAT  
GGATGGGCTTGAAGCCGCAATAGCTGCTGCTGGCGACGAGCCTATGCCATGCTCGGTGAT  
CCCGGACGTTGTGCCGGGATGCCTTGTGCAGATTGACGGCCACTACGCTGCGTACTTCAT  
GGCGGGCCACGACGATACAGATAGCGGTACGGCGCCGCTAACCTGATGCAGCGTTTAAG  
CACCATCAAGGAAATGACCGGGGCGAGCGGAGTGGTTGTCCACCTGTCTGCCGACGGTTG  
TACCAAGGCCGACCGCTTCTGATTGCCACCGTGCAGCCGTATCAGGAACAGCGGGCTGG  
CTCTGCCCGTCTTAAGAACTCGCGCAGCTTGCGCGAGTTCATGGAGAGCTAGAAAGGCC  
GGCGTTCACTCCGAAGATTTGGGGCGACCGCGAGGCCGATGACGGCATGGCTTACATGCA  
GCAGAAGTGGGTAGCTGAAGGCAAAGGCGAGCTGATAGTGACAGCTACCCGTGACAAGGA  
CATGCGACAGTATCCCGGCTGGCACATGGACTGGATGACTTACCAACTCACCTACGGTCC  
CCAAGGGGCTTACGAGGTGATCGGCGCGAACGACTTGATCTATGGGCACAAGTGGCTGTG  
GCTGCAAACCCTGCAAGGCGACAACGCGGATCACATCAAGGGATTGCCGTTTACCTCAA  
GCCTAACGGCAAGTGGGAATCGGTGCGCGCCGCGCGAGCGTTGGTGGACTGGCGGGTAT  
CGACTACGACGCCGATGTGTTTCGATGAAGTGGTGCGGTTATACGACACGCACTACACACC  
GACGGCGGGGCTGTTGCGACTGGCTGAGACGTTGCTGCTGGTATGGCTGCGGGCGTGATCA  
GAAGGCCACGTTACCGACATGGCGAGCTGGTTGCAACTACGGGATGACCAGAAGGCTCG  
CTTGACGGCTGCGCTGCTGGAACATCAGACACGGATGCAGGATATGAAAGCGGAGGTTAC  
GCGAATTGAAGCTAACCAACAGTCAAATTAACAGTGCGGGACAAGATTCGTGCAGACC  
AGAAAGGCTGATCTGCGCTATGCAATCTGCCTGTTATAGTTGCTGATGCTGTCCTCGATC  
ATTGCCACTCTCACGGCTTTATTCGTGGTACGCTGCTTCGAAGTTGTATTAGCCTTCTTG  
GAGTGCTTGAGAACAATCGCAAGCGCTTTGGGTTAGGCGACGACGACGATTCGCAGGCT  
TCATGCAAGGCGCGCTGGCGTACATCCAGAAGCACGACACACCACAAACCCGGATGTTCC  
ATCCGTCAATCAAGACCGAAGACGAGTAGCGCGTAGCGCGAAACCCCAAGGCCCGTAAGG  
CACGCGCAATGCGAGCAAGCAGAAGAAATAATGCGCGGTTCCCTGATGCGATTGTTTCAG  
CAAGAACAAGCACACCGAAATTCGCGAGCCTTTGGTTGCAACGTGGGCGCGGCTGGCTA  
GCACAACCGCGTGCTGGGGCCAGACAGGCCGTACAAGGTGACTCGTCAGAACGTCACATA  
CTGGCGTGCGATGTTTCATCGACAACAGCGACAACATGGCGAAGACCGTCCGCGAGCTGCG  
CGAGAAGCGTGTGCGTCGCAAGCCGATCCGCTGTACGCTGATCAAGTCTTCGACAGCAA  
GCTCGTGTACAAGTCGATTCTGGTTATCCCGGATCAGCATGGGCCGTACCATCACCGAGA  
TGCGCTGGCGTTCATGCAAGCCTTGCCGATAAGTTCCAGCCGGAACCTGACCGTCAACCT  
CGGCGACGAGCTGGACTATCATGCGATGACGTTCCACGACAGTGACCCAAATCTGGACTG  
CGCAGGCGTTGAACTGGAGAAGGGCAAGAAGTGGTTGCGTAAGCTGGCGAAGCTGTTCCC  
GGCCAACTGGTTGGCGATTCCAACCACGGTTCATGGCGTTCGTAAGACCAAGCACCA  
CGGCTGCCGGTGCAGTTGATTTCGTAGCTACCGGGAACCTGTGTTCCCGAACGGCGCCGG  
TGACGACTGGCACTGCGCCGAGAGCTGGCGCGTCAAGACTCCGCTGGGCGACGTGATGTT  
CAAGCATCAACCAAGCGGCAGCATTTTGGTAGACGCGGCGCACAACTCCTTCAACTTGGT  
GGTGGGCCACCACCACGGTAACTACTTGGACGAGTACACGGCAAGCTGCACGCACCTCTA  
CTACGGGATGTACAGCGGTTGCCTGATCGACAAGGTCGCCTATGCTTTCGCCTACGGCAA

ACACTCGCTGCGCAAAACTGTTATTGGGTGCGAGCGTTATCATTGATGGTCGCCCCACTTT  
GGTTCCGATGGTTCTCAACAAGAAGGGCCGCTGGAACGGGAGCTTGTAAATATGAGCCTTT  
CTGATATGGCAACTGACTACCCTTGAGCAATCTGCCTCGGCCCGTGTAACGGACACACCG  
TCACTGCCGACCCAAAAACAGTCGCCGTAATGAGCGCGGTGCCGGGTTGAAATACGACG  
GTGGCAAAGGGCGCTGGTCGCTGTTGATGGGTGCGATGTCGAAGGCGCTGGCCGGTGCGG  
TTGCCGTGCGAGACCTTCGGCGCCAAGAAGTACGCCGCGCAAAGTTGGGAGCAGGTGGAGA  
ACAACAAGGAACGCTACCGCGACGCCTTGTATCGCCACCTAAACGCCATCGAAGCCGGTG  
AGGTACGTGACCCGGAGAGCGGCCTGCCGCACTGGGATCACGTAGCCTTCAACCCACTAT  
TCCTGTCCGAACCTGGAGAAAGCTCAATGAGCAATCCGCACAGCGTAACTGAAATGGTGTT  
CAACGGCTTTAGCGACAATCTGCAAGCAGCCATCGACACCCGGCAAACGAGCCGTGGGCACG  
GGTGATCCTCCGTGCCGCTGTTGACAGCACCATCACCAAGGTTCACTACGCAGAACTGCG  
TCAGGACTTTGAAACCGCATTTCGGCGATCTGGAGGACGAATAACATGGGTATGCCTGACC  
GCAAGATTCTCGTACAGAAGCCGAAAGAAACCCGCGACCTTAGCGCTAAGGCGCTGGACG  
CGCTGCCGGAATTCGACTCCGGCAAAGTGGGTTTTCCAGCCGAAGTTCGACGGTTCCTCGC  
TGATCATCATGGTCGGCATCAACGTGGTGCGCATCTTCTCCCGTGAGGGCAAGGAATGCG  
TGAGCATGCCGCCATCGCCGAACACTTCCGCATCAACTCGGTGCCGAACATGGTTTACT  
TCGGCGAGGCGTATCACCCGAACATCCTGTTCAAGGATATTTCCGGCATGTTCCGTCCGGC  
AGTCACCGCGGTACGAGCAGGAAGCGTGGATTTTCGATGCGAGTGACCCTGCAAGAGTTC  
GCACCGGCGAGGCCAAGCGCCCGTATGCAATGCGTATGAAAGCGTTGTCGCATGTGGCGA  
ACCACGAGTACGGCGTTATCCCGCCGATCACCCGTGGCAGCGTGGTCGAAGTGCAGGCCG  
ACATCGACAGCATCCGCGAGTACGGCTACAAGCTGGAGCTGGACGGCTTCATGGCGAAGC  
AAGCGGACGGCGAGTGGACTGCCGGTGATGACCCGCAAGGCCGCACCATCAAGCTGAAAG  
AGCACAACAGCGTTGACCTTGAAGTCGTCGGCATCATTGAAGGCCAAGGCAAGTTCAAGG  
ACATGGTGGGGGCCATCGAAGTCCTGTGGCGCGGCAAACATGAAGTGGTCAGCAGTGGCC  
GAGTGACGAACCCCGAGCGATTGGAGTTCTTCAACGAGCCGGGCAAGCTGATCGCCAAGA  
TCGTGGAAGTACATGCGTTGGGCATTACGCCTGACGGTAAACTGCGGGAACCCGCGCTACC  
AGCGCATCCGCGATGACAAGACAGAACCGAGCGAGTAATGAATCAGGCGGACTTAGTACC  
GGAAATGGCAGACGGTGGGCGTCGGGCGCGGATAGCGAGGTTTCAAATCGCCGAGGCGGC  
GAATGACGCAGCGAGCAATCCGTATGCCGCCGCGATATTCCGCCGCTTCATCAAACCTCT  
GTCAGAAGGTCTGGACATTTATCTGCACAAGGCTGTGCGAGGAGTGGCAGCAAAGTCGAA  
AGTGCTGCTGCGCGGTACAGGATACGCTGGCGTTGGCGTACATCACGATCCGTGGTGTGAT  
CAACGCAAGCCTCTCCGAAGGGGAGGCCGTATGTGCTGGTGTGGCTATGGGCATTGGCCG  
CACCGTTTACAGCGAGGTTGCACTCAGGCAATTTGAAGACCTGAACCCCGAGCTGTATTA  
CACGTTGGTGCAAGACCTTCACCGCCGATGACCAAGACCGAGCGACACAGGTTCAACGT  
GATGCGATCCAGTGCCGAGAAGGACGGGACGCCCTACCGATTTGGGAGCCTGCGTAGAA  
GACGGACGTGGGCACCTTGTGCTGGGCGCGTCTCTGGACATCGGGCTGATCGAGACATT  
CGATCTAAGGTTGAAAGGGAAGACGACAAAGCACCTCCGGCTGCATCCTGACCTGCTGGC  
GCTGGTTCGAGCAGATCAAGGGATTCGTGGCTGGGGCGTCGCCGTTCAACCTGCCATGCGT  
GGAGCCGCCGAAACCATGGTTGACACCGACCGATGGCGGCTGGCACACGATGGCGATGCG  
CCGAACCTTGCCGTGCTTGGTGCGAGGGCAAGCAACAGCGACCATCGAGGACGTTGGGCC  
GCGAGTGCTTAAAGCGCTGAACAAGGTGCAGAGCGTGGCGTGGGAAGTTAACGGGCGGAT  
TCTGGAGGTTGCAGAGTTCGCAAGGGAGCATTTCGACGTACAGGATGTGCTGGTTAGCGA  
TAAGCGCGTCCGCACGCCGACAAGCCTCTGTTTATGCAGGCTGATCCTGTCCTCAAAT  
CGTTGACATTAACGAGTTTGAGCTTGCACAAATCACCGAGTTGCGACAGGAGTAACGGGA  
ATGGCACACACAACAGAAGGTGCAGGGAGCGCATGCGGGCAGCACGAACGAAGCTATCGG  
TGTGGCGAACAAGTACAAGGGGAAGCCCTCCGGTTTGTCTACTCTGTGGACTATCGGAG  
CCGATTCTATGCCTCTGGACAGGGGCCCTCCCCACAAGGTAACGACCTTTCAGAAGCGCT  
AATCCACTTTGCAAGGTCTGCACCTATCAGAACTTCCGCTGGCCTATTCTGGTTCCGGGT  
AGGCGGGGCGAACAAGTGGGCGGGTAACAACTCGATAAGCAGCCGCTCGATGTCCGGGC  
GCAATGGGTGATAGACAATGCCGATTTTATCTGCCGCATCGCAGAAGACCCGATCAGCCA  
CCGAGAATGGACAGACGCTCATGTACCTTCCAGTTCCTTGCCTGGTGGCTTTGAGTACGC  
GGCTTGGGTGCGGAATCCTGGATCGTTTCGCACTCGAATCCCACTTGGACAAGACGCCGC  
TTGTAATGGTCTTCAACTCTTCTCAGCGATGCTACGAGATAGGGTGGGTGGGCGAGCAAC  
GAACCTCATTCCCGACCGAGTGCAGCACGATATTTATGGACTCGTTGCCACCGCAACTGC  
TGAATCGTGCAGTCAGATATTGACGAATGCGAGATTGCCAAGCGCTGGAAGTCACATGA  
AATTTTCATGGTCGCTGGTCAAACGTAGTGTTATGACCCTGCCCTACAGCTCCACACGGCA  
CTCCTGCCGGGACTTCATCATGAAGGAGTACATGGACAAGGGCAGCGCGCCAGAGTTCGA

CAAGCGGAGAATGAGCCTGCTGCGCGGTGGCTCTCGTACCGGGTGTGGGATGGCATCTG  
GAAGGTGGTCGTC AAGGGACGGCAGGCGATGGAGTGGTTACAGGCAGCATCGGCCATTAT  
GTGCGCCGGGAACGCCCCACAAATCGAATGGAGGACCCCTGCTGGCTTCCTTGTACGTCA  
GCGCTACCACGCTCGGGAAATGCTCAGGGTGAGCTGTACAGCCTCTCAGGCAAACGTAT  
CCCCATCAACGTCTAGACCTTCAAGGACGAGGGAGATCCACGGCGACACCGGAACGGCAT  
CGCGCCGAACCTTCGTGCATAGCTGCGACGCGGCGCACCTCACGTTCTTCACGAATGACTG  
GGAGGACGAGGATGGTGGCGATCTGGCATTAGTCCACGACGACTATGGAGCCTTGGCCGA  
TAAGATGCCCAAACCTGCTCAGAATCCTGCGTAGGTGCTTTGTCGCCATGTACCTGTACCA  
TGACCCTCTGAAAGCGCTGGCTGCGCAGGTGGAGGGGTTGCCGGAGCTTCCAGAGGCCGG  
TACTTGAACCTGGAGGACGTAACCCGGTTCGGTTTACTTCTTCTGCTAATTGGGCCACTA  
TAGCAACAGGAAACCTTTATGATCCAAAAAGCATTGCTACGATTCGCCCGATTCATTTTG  
GGCACCAAACCTCGCGGTTGTCAAGAACACGATTCGCCAGCAAGAACAAGTGATAGAGTCC  
ACCACACAAGAACTGGCGGCCTCTCTATCTCGACCACCGGATGTCAAATACATGGTATCC  
AGACAGGTATTCAATAAGCATGTTAAAGGCAAGCTGGAACAACCACTATTAGTTAGTACC  
AGCAGCTCTGAATATGCTGCTTACTGTTTGGGTATTCAAAGAGCATGCTCTGTTATGGAG  
AAGGAGTTGGTGAATGATTAAGATCAAACATTGGCTTAACGGCAAGCCGTACGATGATGT  
CAGTGATGATCCCCGTGATTATTACGACAGCATGTACTGCGCTGTTAACTTCTGCCGACA  
GAGCTACGTTGAAGCCGGGCAAGAGCCAATCAGCACATCCGAGGGTGTAGTTCGATTGAT  
AGCCTCTGTCTGATCATGCTGCTGGGCGAGACGTTTCGTCGCGTTCTTCGATGTTGCTGA  
GTCGTGGTTTCGTGCGCGACAAGTACCTGAGCGAAGAAGTGTTCGGCCCGCAGCCGGGCAA  
GACGGTTGACCTCAAAGACTTCATTGCGGCCGGCGAAGCTGTTGGCCGCAAAGAGGACTG  
CCGGTATTTTGAGTTCGGAACGGGAGCCAATCCCCGGCAGCAAGCACTGGCCCGAATGTG  
TCGTCAATTCGATTTCCGGCTGGCCGCAATCACACTACAGAAGGATATGTGACATGGTTT  
CTGGTAAAGCACTAGGCAAGATCGGCAAGATCATCAAGAAGGTTGACCCGCTGCGCGGGCG  
GTGACGCCATTCTGGAATCGGTGGGCTTGCCCACGCTGACCGGCCAAGGCGACCAGAACA  
TTTGGGACATGGGCCAGACTGCCGCCAAGAACGCCGCGAAGCAACAAGCCGAGCAGGCAC  
GACAACAGGCCGACGCACAACATCTCGCCGCGAGCAACAAGCGGAAGCTGTTCCGCCAGC  
AAACCGCAGCAGATCAACAGTCAGCGAATCAGCAGATGCAATTCCAGATGCAGCAGCAGA  
ACGATCAGGCCGCACAGTCCGCTCGTAACGCCGCGCTACAAGCGAGCCGCGATTCTGGCC  
AGCCAATCGGCAGCCGAGGCCGCGAGCCGAGGAAAGTACGCCGAGCGTGACCACTGCCACC  
TGCAGGGACAGCGCATTGACCCGCGTAAGAACAGCGCCAACGCAGCTGACTCTGCCAAG  
ATCCCGAGCATCCGCATGTGAGTCTTGGGTTTCGCACAGCCGAATCCGAATGGCGGAACC  
TGCACACCAAGCGGAGCGGCTTGCTGGACAGGGCTGAGCGGCTAGCAGAAATCACCATTC  
CGAGCGTGTGCCCGGATGACCAGTACGACAGTGGGCGCGATGCGCTACTAACGGCGTGA  
CGTCACTGGGCGCGCAATGTGTCTCTAACCTGACCAACAACCTTATGCTGGCGATGTTCC  
CGGCATCCAGCACGTTCTTCCGGCTGGCGATGTCTGAATCGGATGCGCAAGCATTCTGTGG  
CCGAGAACGACCTCACGATGGACTTGCTCACGGAAGTGCTGTGCGCAGGGTGAGCGCGATG  
CTTTGCTGCAACTGGAAATGACCGGTGGCCGCGAAGGTCTGTATGAGGACATGACGCTCT  
TGCCGATTGTGCGTAACGTGCTGATGGTCAATCGCAGCAAGGACAAGCTGGAGTTCATCC  
CGCTCAAGGAGTACGTGGTACGCCGGGCGCGCAACGCTGACGTGTTGACCGTGGTTCATCA  
AGCAAGAGCTGGCGCACTGCGAGCTGAGCGAAGACGTTCTCGATCGCATGGACCCATGGC  
GCGAAGCCGATCCCGATCTCACTCGCCAGCTCTATACTGTTGCCGCGCATTAAAGGGCA  
AGTTCCGCATCACAATGCACGTTGACCAGATTGAACTGCCGTACAGCACGTTCCGGTTCGA  
CCTACGCTCTGGACGACTGCCCGCTGCACCCGCTGACTTGGCGACTCCCGCTCGGCCAGC  
ATTACGGTGTGGGCCGAGTCGAGGATTACTTCTCGGACTTCGGTACGCATGAAGTGGTCA  
GCGAGTCCATGAGCGATGGCGCGATCATGGCTTCGCAATTCGGCTGGCTCCAGAACCCTT  
CCGGTATCACCCGGCCCCAGGACTTCCAGAACAGCAAGAACGGCGACGTTATCGCCGGCG  
CAGCGAACGACCTGCAACTGATCTTCGCCAACGTGGGCCAGCAACTGAACACCGTGCTGG  
CAATTAGCAGCACATTCCAGCAGCGACTGGGCCAAGGCTTCCTGCTCATCTCCGCTGTGA  
CGCGGCAAGCTGAGCGTGTGACCGCCGAGGAAATCCGGCTGCAAGCGATTGAACTGGAAT  
CGACGTTGGGCGGGTTTTACTTCCGAGTTGCCCGCGACATCCAAATCCCTCTAGCTAATT  
GGCTGATGAAGAAAGCCAGCTTTAACATCAAGGGCACGAAACTGCGCCCGGTGGTGATCA  
CTGGTCTGGACGCATTTACCCGTAACGCAGATCTGGAACGCTTGATGAACTTCTTGGCA  
ACGTGACTCAGTTGGATCACATCCAGCCGCGACTCGCATGAAGCTACAAGACTCCAACA  
TCATCGCCGACATCGCGGCCGCACTTGGCGTACGCAAGAAACGGTACGTTGCATCGGACG  
ATGAAATCCAGCAACGCATGCAACAACCTGCAAGCGCAACAAGCACAAAGCGGGGATGGCG  
CCGCTGATGATACTGCACAGGAATACGCACAATGATCTTCAATCTCTTTGGCCGTCC

CTACATGGAAGAAGCTGGCGCAGAAGGCGCACCGGCTGGTGGCGCAGTATCCGCCCCGGC  
AGCGGCCCGGCGAACGCAAGCACTCCAGACCCAAAACAGGCTGCTGCACCCGCGACCGA  
ACCAGCCGCGCAGCGATCGCCTACGAGTCCACCGGCAACAGCTACGCTGACTACGCTTT  
GGGCGAGATCGCCGCGGCGGGTATCGGCCCGGATCCCCCTGCCGCGCTGGCCGCGCTGGA  
AGGCAACTTACCCGTGCTGAAAAACGCACTGGCTGCCAAGGGCGTGCATGGCAGCGATCA  
ACTGGTGGATATGCTGACCCGAGCTGCAACCGAGGCCGCTGACGCCGAGGAAGCGCTCAA  
CCAGCAAGTGACCGCCTACGTTTATGCGCTGGCCGGTTCCAAAGAGCAGTGGGACACCGT  
GATGGAGTGGGGCTGCGCCAACGCTGACGAGGCCGAGAAGGAAGCGCTGAACGATCTGTT  
CGGTGATCCGAAGACCCACAAGATCGCGGCGACCTACCTGCTGTCCATGTACGACCCGCG  
AGGCGGTGTGCGTGAACCCGCTGCTGGTGTGATCAACCCGGATGGCGCTTCGGCCCCGTGC  
CGCTGGCCGTGCTGTAGAAACCCCGCTGAACCGCGTACAGTTCGCCGCCGAGGCGAAAGC  
ACTGCGCGGAAGCTGGGCGATGCCTACGTGACCTCGGCTGAGTACCAAGCACTGGGCCG  
TCGCCTCGTTCGTTAATGCTAAGCGGCCCGATTCTAATTGGGCCACTATAGCAACATGGA  
ACCCAACAACCTATGTCAAAGGCTGACTCTATGTCTCTGGATAGCTTTAACGCAGTCCG  
CCCCAACGCTAAACTGGGCGGCGCTGACCCGCTGGAAGTATCATAGAAGAATTCGGTGG  
TATGGTTCGAAGGCACTCTGCAACGTCGTTCCGTCACCGACGGCATGATCAACGTCAAGCA  
GATCAACGGCACTGCGACCGTCTCCAACCACGCCATCGGCGCGACCCAAGTCAAAACCAT  
TCAACCGGGCAAGACCCCGAATGGTACTGCCGGGCAGTTCTCGAAGAACAGCGTGACCGT  
TGACCGCACCATTTCTGGCCCGCGCCATCCTGCCATTGCTGTATGTGTTCCAAACCCAGTA  
CGATGCCCGTAAGGAAATCGCTCTGGAGCACGGCAAGCGCCTTGCCAAGTTCAAAGACCA  
AGCGTCCCCGATCCAAGCGATCAAGACCGCCCGACTCACCGTGAACCCATAACGGCAACCT  
GCCGGGCCACGCTGCTGGCACCGTAGTACCCCTGGCCGCTGCCTGTGATCCTACCGACCC  
AGCGAAGCTGTACCACGCCTTCGGTCTGCTGTTTCGCGCAGATGATGGAGAATGACGTTGA  
CCCAACCGGCGATGACGTGTGGGTATTGGTTCGTCCAACCACTATCTACGCAATGCAGGA  
AGCGGAACAGGTCATCAACGGTGAGTACATCACTTCCGATGGCACCAAGATCAAGGCACA  
CATCTTACCCGCGTGGGGCGTTCCAGTCGTACCAACTCCGAACCTGCCGATCTGGGTTGA  
AGGTGCAACCGAGCTGCCTGACGGCGTTGCTGCTCACATGGGCGATGACTACGCTGGCGA  
CTTACCAAAGTCGTTGCTGTAGCGTTCTCGACCCGCGCCATGTTGGCCGGTTCGACCAT  
CGACCTTGATCGATGGTCTTCTTCGACGACGTGACCAAGCACTGGTACGTGGATAGCTG  
GTTGGCATTTCGCTTGGCTCCAAACCGTGCCGAGTTCGCTGGCATCATCGTTACTCAGTA  
ACACCACTCTGGCCCGCAACGGGTTCCCTTAATCGGGAGCCTGTTGTGGGCCATTTTCGT  
AGGTACGCGCGAATGAGTTTTATCCCTGAGCTTGATGTGGAAAACCGTTGCCTTGCCACG  
ATGGGTGAGCTGCCGATCAACTCGCTTGAGAGCAGCCGCAACCCAATTGTGACTAACGCA  
CGGTCAGCATTCAAAGACGTACCGATTGAAGAACAGGCCGTAGGCTGGTGGTTCAACATC  
GAAGTCGTCAAGCTGCAACCACAAGGAGCAATGCCCGGAGAGGGCGGCTTCTACCGACCA  
CCTACCGATTGCCTCTCGCTCTCGACGGAGGATGATTACAACCCGGCATGGCTTAGCATC  
CGTGACCGCAAACCTGTACGACAACGGGCGTGCCGAAGATCACCTCGGTCACGATCCGATG  
CAAGTCAAGATCATCCGGCTCGTTCCGTTTGACGACCTGCCGTCCAACGCTCAACGGTTA  
ATCCGTGACAGCGCCGTGTTCAAGTTCAGATGGACTACGACGGCGACGAGCTAAAGATG  
CAACAGGCAGAGAATTCCTACTACTGAAGCCTATGCGATCTGCATGGCTGACCACATCCGG  
TCGGTCAAAGCCAACCTGCTTTATAAAGGCTCGGCTGGTTCGCGGTTGTTACGCTCTCGC  
ATCCCTTACGGTTCGACTGGCCGTTGGAGGTAATATCAGCAAAGTACAGGCTCTTACGA  
GTCGTTGACCAAGGGCGTATCCGAGCAGGTCGCCCACCAGCGTTATCCCGGACAGAAGT  
GGAGCAAGTCAACATGGTTTCTGACCCGGTACGCGGCCTTGCCCGTCGCCGGGGTTCCGT  
GATGATGTCGGAACAGCACCGCCCGGAAATCGCGTTCGACACTCCGTCCCGCGATAACGG  
CAAGTCGTCCGGCGAGCAGTCCCTGTACCTCGGCGTTAACGAGTACAGCATCATGCACCG  
CAAGCGCGCAGCAGCAGGCTCGACCATGCCGATTCTGGTGTGCTGAAGAAGACAACCGG  
GAACTTCCTGCCAGTAGTCGCCCATGGCAATCTGGCGGGTACTCGAAAACGGATTCAA  
CAGCATCACCGCAGTCGGCAATCTGGTACTGCTGGCGACCAAGGGCGTAGCATCACGGTA  
CACCGCAGTCGATCAAGTACCAACAGCCCAGCCGCTAACTCGGTGGCCGCTTGGGTGAA  
GGGCGGTTTCGTATTCCCGCACCTACACGCTGTCAGTTAAGCGAGCCAGCGATCAGCAGGT  
TATCACGGTGCAGTACACCACGCCGACCTCGTGCTACCCGGGCATGCTGGACACCTCGGA  
CAGCCCCGAGTCATCCCCGACCCGGAGAAGCCCGGCCAGACCAAGCCAAACCCGGACTA  
CCAGAAGCTGGTGCACGACCGTGTGTACGCTTGCTGAAAGACGTGAACCAAGTGGATCCG  
TACAGCGGCGGCGGCGATTACGCCAGCGGCCCTTGCTACTAAGCTCCAAGAGTTGATCAG  
CCCGAGCTTCCCGGTAGTTCGGGCCTGAACGGTTCACCATCATCATCGACGGTGGGCA  
GAGCGTGAGCTGCGATGACGGCGGTAGCGGCGAGCAGTTCATCGGCGTGGCGCGCACACT

GAAAGCTGCGGGCGGATTTGACCACGGTTCACCGGTCGGGGCAAGGTCGTTAAGATCAAGCC  
AACGAGCGGGAACTCGTACTACGTCAAGGCCAACGTCAAGGACGGCACCACCGATGGATG  
GACGCAGGTGATTTGGGATGAATGCCCGGTGTTCTGATCACGCCAACCGCAGTCACCGC  
AATCGGTGCGGTACACAACGGAACGTTCTACGTTGCACCGTCGCCAGCGGAACCTCGCTGC  
GCTAGCCGGTATCAACGTGCCGCCATGGGAGCCATCGTCGTCGTGCGCCCTCGACAGCCA  
ATCCCTGCCAGCGTTCCTTGACAGGGAAATCAACTAAATCCGCATGTTGCAAGACCGGCT  
GATCATCATCGCCGGGGCTACCGTGTTTCATGTCTCGCTCTGGTGATTACTTCAACTTCTT  
CCGCACGTGCGGCCCTGAACACTCAGCATAACGACCCGATTGAAGTATACGCACTGGGCAG  
CGAAGACGATGTGATCACGTCAGGCACTTTGCTTGCCCGCAACCTGATCTTGTTTCGGGAA  
GGAGTGGCAATACGCAGTGCCGGGACGTGACGCGATTACTCGGCAGAATGCGTACGTTGC  
TGTGCAGTCGGGCTACCGGGACAGCAAAACCTACCCACCGGAGTCCAGCGGCAACCTGAT  
CTTCTTCGGCCAGAAGCGCGAGGGCAAGCTGACGATTCAACAAATGCAGACCGGGCGCTTA  
CGCTGACACTCTGGATGCGTTTGAAATCACACAGCAGCTCAACAAATACCTGATCGGTGA  
CCCGGTGCAGATTGAGGGCGGTAACGTACCCATCCGCGCTGTTTGTTCGCACGACAGCCGA  
CGCCACCGGCGTTCGGGTATACAGCTACCTCGGCTCGCAGAACAACGCGTAGGTGCTGTT  
CGATAGCTGGAGCAAGTGGACGTTTAGCAAGACGCTGGGCGATATGATCGGCATCACGAC  
GAGAGACGGCGACCTGTAGGTGACAACGCTTCGGCATCACCTCAATGGTTCGTGGTTCGT  
TACGGATCGGTTACGATGAACACGGATGTTTCCTGACTGTCACCTCGACACCCAGCGCCG  
TTACATCGCTGCCGTTTCCAAGACCATCGGCAACAACGACTATCCCGAGCTGCTGAGCGG  
GGCCTACAACCTCAACCGCATCCCGGTACTGGTTGCAGGATGATACCTTCGGCGAGCGATT  
GGAAGCGTTGCGGGAACAGATCGGGCCACCCAACGATCCAACCTGCTGATCGGTGCGGA  
CTTCGAGAGTTACGTTGCGCTGACCAACCCGTACATCCGGGACAAGGACGGCAAGGCAAT  
TCTGGACGGGCGCCTGACGCTGGGCAACATGAACGTGAACGTCTTCGAATCTTCCGCGAT  
GGTCGTGAGCATCTGCGACTTGGTTAACGCTGACAGCAACGCATACGCGGAAACACTGCG  
CTGGGTTCCGCGGAATGCTAACGACTGGGTACTCAACACACAGCAAGTGGCCGACACCGC  
CTCGGTTGTTGTAGGCGTGTACAAAGAAGTGCGGGACTGCAAGGACAAGCTGGCTGGACG  
TAGTTGGCTTCCGCTGACACTCTCGGCCATCGAATGGCAAGGGCAGTTCTACACAACACG  
GAGACAGTAAATGTTTCGGCATTCCCATCATGATGGCCGCTTCGGTGGTCTTGCAGAAGGA  
TAAGCAGAACTCAGACATCAAGAACCTGAACCGCATCAACAAGGGCAACACCTACGAAGC  
GAACCAGCAGCAACAAGGCAACGGCATTACAGGCGTCTGCGAAGGGTGCGCTTAACCGCAT  
GAACCAATCCATCCAACGCGAGTCGCGCTGACGGCCTTCGGGCAGCAGCACAACCTCGCT  
GGAAGCACAGCGCGCCAACTCGGCAAGCAGATGACCACGGGCAGCTTTGCTAACCGTGT  
ACACGCTGCCGAGCAGCAGGGCATGCTGGTGGCGCGGTCGAGTGCGGGCGGGCGTTGGCGG  
TTCTACGTCTTCCAGGCTTGAGGCAACGATGAGCGTGCGGGCCGATATGCAGCAGCAGGA  
AATGCAGCAGATGTATTCCGATAAGCTGTGGGCAATCGATGACGCAGAGTAGAACAACCT  
GTAAGAGCAGTATGGGATTTCCCAACAACAGAACGTGTTTATTGACGACGTGGCACCGAC  
AGAGATTTATGGCCCGCCGAAGATTCCAACCTAACTCCGTTGGTGACATGGCGATTGCCGG  
TGCGATGGCATTTCATGCAGGCTTGTAACAGCATGGGCATGTTTCAGCAAGGGCGGGCGGAT  
GGATGCGACTGGCGTGGGCGGTAAGCTCAAGTCGTGGTTCAGTCCACAAGGTGGCAGGAG  
TTCGCCGGGCACCGGCGCTAACTCGTTCTTCCAACCTCGGAGGCAGGACGTAATAGCAAGA  
CAATTGGGCCAAGTAATTGGCGGGCGGGCAGCAACGATATCAAGCCGCGTATGCGCCCGCA  
CCGCAGAAGGATAGCACAAGCGAGCTTCTGTTCAAGATGACCCAACCCATCTTGCAGAAG  
AAACTGGAAGAAGTGCAGCAGTCGAAGTTCGTGGAGGGCATGCAACGTGTGGCCACGGGA  
GGGGCTTATCAGGACTTCAAGAAGGAAGACTCGGTACTGTCCAACATCTTCGGGCCATCC  
GCGTCCGTAGCTGGCGCAGCCGCAATGGCTAAGGTCAAGGGCGTTGAAGACTTCAACACT  
CAGTTGTATCAGGACATGCAGGATATGGCGAGCAAGTCGCCAGACGAGTTCCGCAAGCAC  
GCTGTGCAGGGAATGCAGCAGCACTTGCCGGGCGATCCCGATGTCGATAACGTGTTGCAG  
GCCAAGATGGTCGAAAGCCTCGGGCCGCTGACGAAGACGCAAGCCAAGGCGAACTACGCT  
TGGCAGCTGCAGCAAACCACGATCAGCTTCAACGGTATGCTTCAATCTGCCGGTGACAAG  
TTCCACGGCATTGCGCATCTGTTTCGCACAGGGCATCGTGAGCAAGGACGACTTCGACTTG  
GCGAAGGCCAATCTGCTGCAATCCAGCCTGCCTATCGCCGGGATGAATCCCCAGACGTAC  
AAGAAGGCGATCATGGACAGCGCCGAGCTAGCTATGGACAAGGGCAACGCGTGGGTAGAC  
CGTGTGTTCCAGCAGACCGGGATGTACGACGGGCTTGAAGCTGGTGACCAGACCAAAATG  
TTCAAGGTGCGCGATGCAGCGGCCTCAAAGATCAAGAACGAGGACGGTTTTAACAAGTAC  
GGCGCAGCAATCGGCGAGCTGATGGGCGGTGCGGCTGGGCGTAGTCCGGCACAGAACAC  
GAAATGGCTAACAGATCAACCAGCGCTACATGGACGAGACAGGCAGCGAGACGGGCTTG  
CTCAACATGAAGGACGTGATCAGCATGGATCGCAGCACGTACTCCCGCATGTTCAAGATG

CAGGACAAGGTGCAAGAGCTGGCGATCAAAGCGCGCCAGGACGCACAGGCCGAAGGTAA  
CTGGCACAGCAGGCAACCGAGTTGGTTCAGACCGGCAAGGGCAACTACGGTGTGGGCATG  
GGCATAACCGCGCAACAAGGTGGACGTAGCGTTCAACGAGGGCTTCACATCCAAGTTAGCA  
ACCGGTAAGCCGGAAGACACGCTGGATATGGCAAGCCAGAACTACTCCCACGGTAACGCC  
TACGTTAACCCGCAATTCAGGGCATGCTTCTGGAGCCATTCCGCCAGATCAGTGCCGGT  
AGCGTTCCGCAGCCGGAGTTCGACCGCACGGAGCAGTTCGGTGACGCATGTCAACAGCGC  
CCGGAATCCGTTGGTGCGATTGATGTGTACCTCGGTAGCGAGAACGTGGTGAAGCTTCAA  
CGTACCGCGATTTCGCTGGTCACGTTCCGAGGGCGACATGCAACAGGCAGCCAAGGCAGGA  
TGGGGCGCGCCGGTAGTGCCTGGGCCTAAGCTCAGCTCGGTGGACAACAAGCCGCTGATG  
CTGGAGGCCATCCGCACTCAGATCGAAGGCAAGGGCGAAATGAACAAGCTTGATCGCTGG  
TGGAAGAACGTGCCCCGGCATGTCTGATGCTGAGAAAGACGTTGTGTTCAACGCAATCTCC  
GGCGATGCGCAGGTCTATGTGATAACCTCGGCATGGCTCCGCAGGCAGCAATCACTCGC  
GCACTGGAAGGCTGTGGCCGTGCAACCGTTGACACCGTTGGCGCATATGCGATCCCCAAA  
GAACCGAACCCAGCAGCCGCTGGCGGCACTCATTGGCACCGACGATCAGACGGTGGCGCGA  
GTGTTTCCGAAGTTCCTTGACGTCCATGGCTCGTAAGCAAGGCGTGGCCGTCATCTTGGCC  
GGAGCCGGCAGCAGCGTGACCAGCAATAAGGTTGAAGCAACCCCATCGTCTAACGTGACG  
GACCTGACCAACTGGTACGGCGGTGGCGATGCTGACGTGTCCCTGATGCGCAGCAAGGAC  
GTTACGGACAAGGATGGCAAGGTTTACGGAGTCTATTCTGGGCTGCTGTTCCGGGACGAC  
AAGACAGCAACCGTGAATTTACATCCAAGACCTGAAAGAGTTCTACGAGAACACGATC  
AGGAACCGCAACGACATCACTGACAGCCTCCGCAAAGCGGGGCTTTAATAGGAGGCCGCA  
TGGCTAACATTTCTCGATTCAATCGAAACCAGCAAAGTAACAGTTGGCCCTGCGGCAACCT  
CTGGTTCAGGCTCGTTGCCGACGCCGCGCGCACAAAGACTTCGGGCAGGCGAGTACGC  
TCTACCGTCTGACGCCATGGCAATCGCCAAGGGCCAGAAGCCCGCCAAACTCAATGCCT  
TTGAGAAGATGTCTGCGTTCCAGCTGGCAACAGCAGGCGCCGAGCCGCAATTGACGCGG  
GCAAGTCCCGTGAGCAAGGCGCCGAAGCCGAGCCGAGGGCTATCAAGCGGTTGCGAAAG  
ACCCGTTTAAGAATTCCAGCACCAAGAACGTCGGGCACAGCCCCGCGCTGACCGATGTAG  
CAGACCCAGCAACTGACGCACACGTACCGGCAATTCTGGACGAAATCATCAAGAATCAAG  
CCTACAAGCAATCTGTAGGCCCGGTGATCAAGTGGGCGCCGAGTGCTGGAAATGACTG  
GCATCGGCGCGTTGGTACGGATGCTGAGCGCAACTACAACGGTATGCGCGCCTTCAAGG  
ACGACCCGAAGTTCGACAGCCTTGAGGGCCGCGAGGTTTGGAGCAAAGGCTTGAGCCAAG  
AGGGCTTGAGTGGGTGGCTGACGCCCGCAGCGCATAACGAACGGCAGTACAAGCTGGCCC  
GTTTGCAGGAGACACGCGACAACGACAAGAAGATCGGGGCGCGCGGCGATGGCGTCGGCA  
CCGTGGTTCGGGCTGACTCGTGGCGGGCTTGATTCTGCGGGCTGGGCCGAGGTATGGGCG  
TGGGTAAGGTTCGCACAGTTGATCAAGGTAGGCATGGAAATGGGCGCCGTTCCCGCGCGGCC  
TGATAGGTGCTGGTGAGGGTGCCGAGGTAACGTGTTGGTGGAAAGCCAGTATGCAGGCCG  
CTGGCGAGCATGTGACGCCGGGTGACTACTTCTACGCCGCTGGTTTCGGTGCCCTGTTCG  
GGGGCGCCATCATCAGGATGACCCGCCGAGTGTCCGGTGAGCCGTCGGTACCCGAGGCTG  
ATGCCGTCTCTGGCTACACCAAGGACATCGCAGAGTCTACACCGACGGTAGCCTCAAAT  
TCCACGCATGGCTTCTGGAGGAAGCTCAGAACCGGCTTCCCGAGGGTGCAACGCCCGAGC  
AGATCGCCGAGCAGCGCGTGACGTGTTCAACGAGCGCTCCAACGCCTACTGGCAGCAGG  
CCACACGGGCTATGCCATAGAGCGAACGCATCCGGCCTGACGTAGACAGCACCAAGCTGT  
ATGCAGACGGGGGAGACGAGCTGACAGGCACGCTGACGAAGAATCTGGAAGGGCAGTTCA  
GCGACGTTGTGCGCCGGACAGCGGTGGGCGATCAGTGGGGATCCACCCCGGCGACCCTCC  
CGGCAACGCCAAGCGCCTGATCTACACCGAGAAGATGCTGCGCATGGTTCGAGAACCAGC  
CAACCTTCGAGCAAGCCAAGCTGGATACTTGATTGGCAACTGGGTTGCACCGATTGCGG  
ACAGCGCGATGGTGGCAAAGTTCAGCATGCCGCAATTGATCCTGGTTCGAGTGAGCATC  
CGTTCATGAAGTGGCTTGCAGCTAACCTGCAAGAGTCGCCGACGCAAGCCGGTGGCCAC  
GCACTACCGCAGCAGTCGCGCATGCGATCCGCCAACGTCGTGAAAACAGTTTCAATGCC  
GGTACAACGAGGCGTGTGGTGCATGGCGCGATCAGAACGGCGGCTCGTTGGGCAAAGACA  
TCCTGTTCAAGCAGGAGCACTTCGAGGACTTCAACAACTGGTAAGCACTGCACGGGCAA  
TCCGCGCAGCCGGTATCACCGGTGACGAACATCCGAACGTTTCGTGCAGCCGCCGACGTA  
TGGACGAGGGTTTCGCCGCTTTCGAGCCGACCAGCGCACCCGCCAAGACACTCGGTTCCG  
AGTTGCTGCTAGATTTACGATCGGCTACACGCCGAGCATGCTGAACAACAAGTTCATCG  
AAGAAAACCCTATGCACCGTGAGGCGATCCGTGAGGAAATCCGCAGCCAACCTTCATGACG  
CATGGGCAGGCATGCCGCAAGGCGCCAAGATCGCTCAAGACGTAGCGGCCACTTACATCA  
ACCGCGCACGCAATTGAAGGTGCAGGCGGTGCAGTAACGCCGGGGCATATCTCTGACCCGC  
ATGCAGCAAGCAACCTGCGAGACGCTTTGGAGCAACACGCCCTCAGCGAAGCAGACATCG

AACGGTACATTGCCCGCGTTGGCCGTGGTGGCGCACAGCACACCAAAGGTCGCCTTGATC  
TGGACTTGACCAAGCAAATCAAACCTGCACGCTGGCACCGTGTTCACCCCTCGGTGACGCAT  
TCATCAACGACACCTCCGCGCTGTTCCGCCAGCAATCCCGCTACGTTAACGGCTACGTTA  
CGCTGAGCCGCGGTGGCATCATGGGCAAGGAAGGTATCGACCAGCTCTGCGAGATGCTGG  
TGCTGTCCCAGCAAGGGCGCATCCGTCAAGCCCTGGGCCACGAGCTGAACGCCTTCGACC  
AAACCATGTTCGGAATTCATGGGCAAGCCTTACCGCACCGCGCACCGACCGGCTGACACCT  
TCCGCATCCTGACCGGCACCAGCCGACTGGGCCAAGCTGCGATCCCGCAGCTCGCCGAGA  
CTGGGCAGATCGCCGCGCACTTGGGCACAGAGAGCGCAATGCGCTTTGTGAAAGCCCTCC  
CACGCCTTGTGGACGGGGTACGGAAGGGCAAACCAACGACCTCTTGCACCTCGCTGGAGC  
TTCCGGGGCGGCGCCATCGGCGACGAACACCGCACCGATGTGCCTTGGCAGTCGTTTCGATG  
ACATCCAGTTGGCAGGAAAGGACGCTGCTGGTACGGTTGACCGCGCAATCCTTGGCGCTG  
CACAGGCACAGTACACCCTGACCGGGCACCGGTAATTGCAGGCAGCACAGACCCGAGGGC  
TAGCGGAGCAGATTCTGCACAACGTCATGCGGTATGCGACGGACGGCACCAACCATTCTG  
CCCTGCGTAGCATGGGGATGAACGACAAGTTGATCGCCGCCATCAAGAAAGACCTTCGCA  
ACATCGCCGAGTTCGACGACACTTGCGAACCTCAAGGCATTCGACATCCGCCAGACTGACA  
ACCTTGGCGCGATGCAGGAGCTTCGCCAGTTGATCGAGCGTGGTGCCAGCCATATCATCC  
AGTACAACCTTCATCGGCGAGCGCCAAGCGTTCGTGCATGACTCGTTCCTGCGCATCCTGA  
CTCAGTTCCGTTGGTACTCCCTGACCGCATCGTCGAAACAGTGGACTCGTACACGGACTG  
ACCAAGGCACCGCGAAGGCGCTGGGTATGCTGATGTGCCAGATGTCCGGTGGCACTGCCGC  
TGCACCGTGCCCGCGTGATGGCTGTATCGGCTCTGATGTCCGAAGACCGCGCTGCCGACT  
ACCGCGAGAACAACCTACGCCCTGATATGCTGGCCCGCGCCACGCGGAACCTATGCCTCTC  
TGGCTGGTTTCGCTTGGCCATACGGTGGATGCTGGGATGGGTGTGCTGGGCATGCAGATGT  
CCGGCGTCCGCTCCGGCTCTCAGGATGTACTCGGCAACGTCCCGGCACTGGGCTACGTCT  
CCAACACCGCGCAAGCGTGGAAGGATAAAGACGTGTCCGGCATTATCAAGACAATGGCCG  
GCGACAACAGCGTGTCTTGTGCTGCCCGCCGCACACCTCTCGCACTGGATGCAGTAAGAGT  
GATCTAACCGCTAAGTGGCTCAATTCTAATTGGGCCACTATAGCAACACCAAACCAATT  
TCGGAGGCATCATGGCAGACTACTTGTCTATCAACGAGTTCGCCGGCAATGGCTCCATCA  
TGCATATCGAGGTCAGCTTCGCTGGCAACAACCCCGATGTAGGCTCTGGTGTGTTCCGT  
ATTTCAAACCCGCTGACGTGAAGGCTCAGTTCTTCACTCCCGCCACTGACAGGACTCCAC  
AAATCGTGGAAGTCAAGCCGCTGGGTTACGTCCGGCCAAACACCTTCATCACTCTTGAGC  
CTGTGCCAACCAGCAAGATTCTTCGGGTGTACCGCGAGACCGAAGACCGTACTCGCTGG  
TCAACTTCGTAGCGTTGCAGATCGTGACGGAGCGTGACCTTGACGCACTCGCGCGGCAGA  
CCGTCTTCTCGTTGAAGTAGCGAAGGACGCCGCACAGTTCGCAATCGACACCGCCCGCG  
AGGCAATCCGATACGCCACTGCTGCTACCGGCGTGGCGCGTGAAGCTCTCGCACTGGCAA  
CCACGGCTGACCGCAACGCTTCGGCGGCTGTAGTCACGGCCAAAGCTGCTTCTAACGTCC  
CCAACCAAGCGTTGGTCAACGCCAACAAGGCAGCACAGGACGCCGCATCGGCTGAACAGC  
ACGCCACCAACGTGGAGACGCTAGCCGCTGCTGCTCAGACCAAAGCTGGCTCGGCTACCG  
TTACGGCGAACCAGGGCAGACGCTACGGCCAACCGGGCCGAAGGCACCGCCAAAGCAATTG  
ATGGCAAAGCAACCGCTGCTGTGGCAACCGCAAACGCGGCTACCGCCACTGCCAACAGGG  
CTGAGTCCACTGCAAACGCGATTGACGGCAAAGCCACACAGACCATCAACACCGCGAACT  
CCGCAACCACTACCGCGAACCAGCCAAGGCAACCGCCGAGGGTGTGACGCGAAGGCAT  
CGAAGCATTCGCTACGGCCAACGGCGCCGCTGCTGACGTGGCAGGCGCAAACACGAAAG  
CTGATCAGGAAATCCAGACGGCAAACCAAGCAAGGGCAAACGTGGCTGGCTAGGTAATCC  
GCTCCGGTGATCAGATGACCGGGGTTACGGTGGTTCGAGCCGCGTGTGCAGGCTATTGCCA  
AGGCTGACGGCAAGGCGATGTTTGAATGGCACGTTGCTGGGCAGACTGCGGGTATAGCAT  
GGCTCACCTCTGACGGGATACTCCGATTGGGGCAGACTGGTGGTAACGGCTCAGAAGTGA  
ATCAGGCCATGAACATCGGATTACGACGCGGGAACGGTCTGTGAGAGGCGAATGGCGGG  
CAGCTTCGATGGTATCCGTCGATGGCTACCACAAGAACGTCTACCCGCAGCCCGGTGGGG  
ACATCAGCCTTCGGGCTAACGTATCCGTGTTCCGGTAACATGACAGTCACCGCTGCTGTCA  
ACGCCACCACCTACACTGCTACCCAAGGCAGCCTGTACCTACGGCCCGCTACGGCAGTTG  
CAAACACGAACATCTGGTTCAGAACCCGCAAGGCGGCGAGCTTGGTCTGATCTACACCG  
ACCCGTGGTCTCCCATGCACTTCCGCTCAAACGGTGGCGGCGACACCTTGGCGTTCTATG  
CAAACAAGACCGCACGCTTCAACGGTAACATCACTGCCCCATCTGCCGCTATCTCCGGGC  
GCGTCTCTGCTGCTGAGATGCTGTCCGGCGGAACGGTGTGGTCAGGCAACGGCGCTTCGT  
GGCTTGCGAACGACGGCAACGTGTACGGTCCGGTGGGGCGGCTACCTGTCCAACCTGGG  
TGAACCTCAAACCTCGTCACCCGTCCCGAGTTCGGCGGTGCTGTCCGGGCTAACGTCCGAG  
CATTCACCGCTGGGCAAGTCCGGCACTTACGCCATGCTCCAAACTCGCGGTATGGTCAACG



GCGGGCCGGTTGCACTCGTTCGGCGGTGATCAGCTCGGCTGGGCGACTTGTGCGGGCGACT  
TCTCGGAAATCGTTCGGGTCGGGCACTTGGCGTGTAATGGGCGTGTGTCCACGGGTAACA  
AGGTTGTTTCTACCACTATTTGGCTGAGGGTTAGCTAATGCAATTTCCGAAAACCTGTCTG  
GGAAGGGTTCCTGTGTACGGCGTTCGTTCACGGTACGCCTCTGATTCCGGCAAGTT  
CATCACCGCCGAAGTGAAGTGGGGCGATAAATCCGTCCCCTACGCTATCAGCGCTCTCGA  
CCCTGAACCTTGGGGCAAAGATTTGTTTGACCATTGCTTGTCTGCTTGGTGTGACACCCTA  
CACGGGTAAGTCCGACGCCGAGTACGCGGCAGAGGCCAATGCCGCAGCCGACCGGCAAGC  
TCTGGAAGCTGAGCTGGCCGACCTGATGATTGATGTACAACCTTCAACTTGCAGCGCCAGA  
AAAAGTGGCCCGCGCCAAAGAGATCCGACTCAAACCTCAAGGAGTAAAACATGCTCAGCAC  
TGACGCCGCAGACGTGGTATTGCAATACCCCGACTGCGGAAGTTCGGCGGCGCAACATT  
CTACGACTCTTTTGTGTCTGTTCCCAATCACTACGGTTCGCGCAATGGATGGCCGGTATATG  
GATTCTGATTCACGCAGGCTTCTACCTGTACGGCCGTTATCAGAGGAAATGACAACGGCA  
GCTTCTAGTGATCGCCTTGGCAATCTGCACACGATGTTACCGCTTACTGGGAGCATCGG  
TTTGAAGCTCCTGAACTGGGCTTCGAAGATGAAGGCTACATCCCGCTCACGTCCAACGAC  
CTTGGTGTCTCCGGGCGTTCCTGAAAGACAACAACATCACCGCCGAACCCGGTGGCGAC  
AAAGACTTGGCCCGACTGGGCGCACAGCTTGCCGCTGACCTGGAAGGCTCCGTGAACCAA  
GCCGAGCTTGACTGTATCCTCAAAGACGCCGAAGGCTGGATGGGAGTTCAGAAGTATGAG  
AGCACAAGACGCCGCGCCACGCACAGTTGGCGCTGCTGCAACAAACCTTCTGAGCTTCT  
TGACGTTTCTGATTATCGGCATGAAGTTGTTGGGGTTTGCGACAACAGCGATCCAAAAG  
ACATCGGCCTGTACCTTGAGCATGGCCCCAAAGACCTGATGGTTCAGGCACAGCGCTCTC  
AAGCCAAATCCACCATGACCGCATTGTTGGCGGTGTGGACACTGATTCAAGACCCGCGTT  
CCCGTGTGCTGATTATCTCGGCTGGTGGTACGCAGGCAAACGAAATCTCGACGCTGATCG  
TCCGACTCATTATGAGCATGGACATGCAGGCTTGCCTCCGACCTGACCAGCAAGCTGGCG  
ACCGTGTATCCGTGGAGAAGGTCGACGTTCAACAGCCTGAAAGGCGTGGACAAGTCGC  
CCTCCGTAGTTTGCATCGGTCTTGGTGGTAACTTGCAGGGTAAGCGAGCCGTCTTGCTGA  
TTGCGGACGACGTGGAATCCCAACAAGAACTCACGCACCGCGACCAACCGCGAGCTTCTGC  
TGCAACAAATCCGTGACTTCCCGTCCATCGCAGTTGACCGCGTGGGCGCTGGCGGCGTTA  
TAGAACGTCGGGGGCGAGTGATCTCCCTCGGTACTCCGTAGACTGACGCTTCCGTGTACA  
ACACACTCCCGGCAGCTGGCTTTGGCTTGCATCTGGCCCCGGTTCGTTACCCAACGGCCG  
AGGAAGAACCGGCGTATGGCGAGCATCTGGCGCCGTACATCGAACAACGCGTGACCCGTG  
ACCCGTCTCTGCGGGAAGGCGGCGGACCAACCGGACGTTCCGGCCAGCCAATCGATCCTG  
AACTGCTGGGCGAGGCCGCACTGCTCTCCAAGGAGAACAAGCAGGGGCCAGCCTACTTCC  
AGCTCCAGCACATGCTGTGTACGCCCTGAGCGACATGGAGGGCTACATACTCGAGGCC  
AACACATCGTTCGGTATGAACCTCGGCGCGCAACTGCCCATGCACTTCGTGCGTGGCATCA  
GCGCTGAGCATCTGCGACAGTATCAGGTCGGCTCTCTCAAGTTCCACTGCTCGACTCCTG  
TGCACATCGGCAAGGAGTTCGCTGCGCCTGCATCCCGTGTGCTTGCAATCGACCCCGCTG  
GTGGCCGCAAGAACGGTGACGAAACCGGTGTGGCCGTAGTTGACCAGCTCGCTGGTAACA  
TCTTCGTCCGCTCGGTAGAGGGTATCCCCGGCGGCTACTACGCCGACACGCTCAAGAAGC  
TGGTGGCGTACTGCTAGCGCTGGGAGCCGCACCTGATTGTGATCGAGAAGAACATGGGCC  
GTGGTGCCTTTACACAGGTTCTGCTTCTCTGCTACGTGCTGAGGGCGTTACCTGCGCTG  
TGCAATAAGTGTACAACACCGGCTAGAAAGAGCAGCGTATCGCCGACACTCTGGAGCCAA  
TCGCAGCCCGTGGCGCACTCGTCTTCGACGAAAGCGTCATCCCTGACGACTGGGCTTCGA  
CCCTCGGCTAGCCCGCTGACAAGCGCCAGTTGTTACCCCTGATTACCCAGTTCATCAAGC  
TCACACGCGACAGAGGCGCGCTGGTTAAAGACGACCCGGCTCGACGTAATCAGCATCGCCG  
TAGCGCACTTCATCAACGCTCTTGCCCAAGACTCCGCACTGGTTGCGCAATCCGTGCGGG  
ATCAGGAGCTGGTCAAGTTCATGCAAGACCCGCTTAGCCACAACCGCTACACCAACGCTG  
CCCAAACGGGCTACGGGGAATTCGCCAATCCTACTGCAAGGAAGACAAGACGATGAAATT  
CTCCACTCTGCCATCCCCCGGTCAACCCCGCGTTCGGCCAGAAGCTCCGTGAGATCACTAC  
CATTGCAATTTCCGCAGCCGAAATCCGCAAGGGCCAATCCGGTCTTAACTCTCCCGAGCT  
GGTAGCGTTCTTCCCCGCGCTCTGAACGCCACTCCCGGCGCTCCGGGCGAGAACCCACT  
CGTTCGATCCGTTACCAACGGCCCAAAGTTTCCACTGGCGGCGTTACCTACGAACTGAC  
CGTGGCTGACGGCGAACTGGCCGCCATCACCGCAGTCGCTGCTCCATAAGAGGTGAGTTA  
TGCCTACGTTCCCAAGTAGTGCGCCTTGCAGCTCTGCTGTGGCTGTCTTACTATCT  
CCGCAGCAGGCTTAGGCTTTATCCAACACGAAGAAGGAACCGTTAACCGGGCATACTTG  
ATTGATTGGAGAGCCTACAATCAGCACCCGGGCACACTGGCCGCGAGGTACGCTTAGGGG  
TATTCTACAGCGGCGCAAATGCGCTGAGCTGCTTCGCACGGACGCCAACTCGGCTGCCG  
CTGCTTTTTAGCGCACGATCAAAGTCCCGCTGTACCCG

>NewGenomeName\_31

TGGGATGGCTGATGGGACCCGAACCCAAACTATAGGGGATTACAGGGGAATTGCGGGGAC  
TTTTGCCTTTGATTTTGCAGGGTTTTGCGTGTTCCCTTACCCCGGCATCCCCGCATTTG  
TCCCAAGATTTGCCCAAGCTACGGCGTGTCCGCCAGGCTTCCCCGCAGGCGAATGCGTCC  
CGGAGTCGCTGGGCACCGTCACGCTGCCGGGCGACACGGCGAACTGGCGCACCTCGGCAT  
TGCGCGCTGGGTTTCCCCGGGGGTGCCGAACCAGAACGCGAGGGTCTGCTTCAACTCGT  
TGCACCGGTAACCGATGACCGTCTCTACCGTCAGGCTGGCGGTGGCGTCCGCGCAGCAGGC  
CGTCCGCCAGGCCCGATAACACGAAATAGACGATGCCAGGGCGCCCACCAGCAGCCCGG  
CGGTGATCGTCGGCCGTACCCTGTCGTTGGGCTGCTGCGCGGCCAGCTTGAGGGCGCTTT  
CGCGGTCCGATGCCTCCGCAGCATACTGCGCCGCTGCGGCTTGCAGGCGGTTCTGTTCCG  
CCGTCACCGCGAGTTGTTGTAGTTGCTCGCGCAATTGGTTTCCAGTTCCTTGAGTTTCA  
TGGCCGCCTGCGGGTCCGCCAGCAGCGCCGTGGACACGGCGTCCGGCGTCCGAGTCGGTGC  
CCAAGGCTGTAGCCACCAGGCCGCCTACGGCGGCGCCGGCCGGGGCGCCCAAGATAACCGC  
CCAGGATAAGGGCGGCTTTGCCGACAACGCCGGCTAGGTCTTTCCAGTCCATTTAGATGT  
CCTCTGCAGCGTATTTAGGTTTCCGGCGACCCGCCGCGCCAGTCCCTTGCCGAACGTCG  
GCCAAGTGGGCAGGTTGGTGTAGAACTTCATGCGATGTGAGTTGAACAGCGGGGCCAGCA  
TGGTGGGGTTTATCCCGCCCAGCGCATGAGTGTGAGGGGGCCGATCTGTCCGTCCGTCG  
CGGTGCCACGGCAGCTTGCAGCCACTTGGCCGCCTGGCCGGTGTGTGGTTTACCGCAG  
CGTCGAACACCTGGAAGGCCACGGCCCGAGGCAGCCTGTCCCGCGAACCAGCGTCCAGT  
AACGCGCGCGGTAGATTGCCTTGGCCGTCTCGCGTGGCATGTCCGCGCATCGGCCCGGTGT  
AACCGTTAGCTCGCGCTACGGCGGCGGTCACGCCCCACATAGTCTCGCCGCCGGGGTCCG  
CCGGGTTGTTGGAATAACCGCCCTCATGGCCGATGAGGCGGTTCGAAAGCGGTGTCGAAGT  
CCATGTCAGTGGCCCCAAGTTTCGAGGTGATGCCCGCCAGACCGCCGCGCCAGGGCG  
ACGGCCACCAGGCCGACAAGCGCGAGGAAGCCGTGGTCCGGCGCCTTGCGCATCCGACAA  
CCGAAGCACAAGTCCTCGCGGAATTCTTCGACCTGTTCCGGCACGTCCACTTCCACGCC  
AAGATGGCAAACACCTTCTTGGCGGCGCGGTCCGGCGCCCTCCTGGCACGCCGGGGTATCG  
CAGTGCTGGTCAGACATGGCGCTCCCTTATTCGCCGCCAGCAGTTCGGCCTTGGTAAAG  
CCGAACCGCTCGATGGTGTCAAGTCCACGTCCGACACGGGGTCCGATGGTCCGGC  
CCTTCGTAGTCGAGCGTGTGTCGACCCGTCCGGGTAGGTCTGCGCGTCCCTGTTTGC  
ATGCTGCCGCGCAGGTAGTCGAGAAAGTCGCCGTGGGCCGGCGTCCGGCGAGGGCGTCC  
AAGTCCCTCGCGGGTGTAAATGACACGCGATGCCATATTGTTCCCTCCATCTAGGTGAAAAG  
GTTGTGGGTGTCGGCCATTGCGCATGACCCGACCACGAGGCGAGAAACCGCTGCAGAGA  
TTGATCATCGCCGTGCTTGATGAAATTGGCGACCTTGCCTTCGCCCGCTTGACCGAGGA  
CTTGCAGCAGCTTGTGGGTGGGCCATATCCGATAACCCAAGAAGTTGATGCCCCGCGA  
TACTGGCGCCACCTGCCAGTGGCTGATCTTGAGGCCACCGCGCTCGCTGGCGAAGTCGCG  
CAGGCGATAGAACACGGCGCGCAATTCCTCGGGTCCGTCGCCAGCACCACGATGTCGTC  
CATGTAGCGCGCCCAATGCCGCTGCTTCAATTCATCGTGCAGCAGCCGGTCAAGCGCGCC  
GCCGTACACGTTGGCGAACTGTTGCGAGGTGAGGCTACCGATAGGGATGCCGACGCCCTC  
GTCGGGTAGCACACCGCGCAGCAGGCGGGCGGGTGGCCGCGCAATGAATTTCTTGTGAT  
CATCGCGTGCAGTGCCGCGCGGTTCGATGCTGGGGAAGAAGTTGGAAAAATCCGACTTCAA  
GAAGTGCCTGGCGCGGCTCCGCCGCAATTCGGCCTGCACGTGTGACAGCAGCCCGCGTGC  
ACCCTTGTGAGGGCGGCAAGCGTAGGTGTACGGCAGCAGGCCTGCCTCGAAGATCGGCGC  
CACGATGTTGCACAAGGCGTGCCGCACAAGGCGGTCTTTGAATTCGAGCGCCGAGATTAG  
GCGGGGCTTCGGTTCGTAGACCAGGAATTCGCGGTAGGGGGCGCTCTCGTAATTGCCGGC  
TTTGAGTTCAGCTTGCAAGGCCAGCAGGTTGGCGAGGTGCTACTCCTTGAATTCCAGATA  
GCCCCACGTCCGGCGCTTGCCGTGCGAGGTCTTGGCGTACGCATCGAGCAGATTTCCCA  
GGTGGTGTGATCTGGTCGATGAGGTTGCGATGTCGTTTTCCATTGAAGAAGTCGGCCCCGC  
CTTTCCTATTTAGTAATCGACGTTTTTGCCGAACCGTGTAACTGTTCCGCGAAGCAAGA  
CAGAACCAGGCTGACCACCTATTGAGGAAAGGGCAGCCCGCCAAGCCGTAGCGTTGGCAGA  
GCCATGCAAGAAGGTGAGGGGCACAGACGCCGCGCGCCCCGATGTTCCGCTTCGAGTTCCG  
ACGGCCCGTTGTTCCAGTTCGCAGCGCGAGAACCCGAGTTCGACGTGTTGTTCCAGTTGC  
CGCCGAATAGCGCAGCAGCGTTATTTCCAGCCGGCCCTTTCGATTACCGCGGGCAATC  
CAGGAGCCGAGAATGCGCCCCACTTCGGCGATGAGCACTTGTGCTGTCTCGACCTGATGC  
GGCGTCATAGCGTGCGGTTTCGGAATGCCCGCGAGAAAGCGCAACCAAAAATCGCAGGATG  
GCAAGCCCAGCGTCCGCTGCGTAAAGCTTGTACCTGATTGGACTTGGCCGCCACGATG  
AATAATTCGACCTGCCCGAGCAGGCACTTCAGGAACATTTCTGCGCAACGCCGTGCTTC  
CTCGGGATGCTTTGCGCAATGGGAAACAGGTACGAAATAACCCTATCGTACCGTGCCAAA

ATGAGCATTGTTGGTAGTAGCACTTTGGCGCTTCCTCGATGGGTTCCATCGGTTGCCTTGGG  
GGGGCCTTTCGGCCCCGCTACTCAAGAATCTGGTGGTCACAGACGCCGCGCGCCCCGAAG  
AACGCGAACGAGAACGACGGCCCGCTGTACCAGAGCGCAGCGCGAGAACCCGAGAGCGAC  
GTGCCGTTCCGGTCGCCGCCGAATAGCGCAGCAGCGGGCTGGGGGTACACCGATCCGCGG  
CCGCTAGTGTTGGCCGTGTATTCGGATGCGCCATTCACGCCGCCGGTCTCGTTACCCAC  
GTCCACAAGCAACCGGACGCCAGCACAACGCCCCACTTGGACGTGAAGATGTTCCACGCG  
CTCGTGGCGCCCGTGCCGTTTACGCCGGTGGTGGGCACGGCGGTGCCGCGCTGGACGTA  
GCCTCGGTTCGTGCCGAAAGCCAGCGCCTGGAATTCGTTGTAGTTGGGCAGGCGCTTGCCG  
TGGTGAGTCATGACCTCGGCGCAGTTGTACCAGGCCCGCTCGCTCTAGGCCGCGCTGCCG  
TCGCCGCCGAACCTTGGTAGATTTCTTCGGTGGCGCGCTGCCGTCGCCGATGGTCACGTTG  
TAATTGCTGGTGCCATCGGTCAGGTGGTTGACGCCTACCAGATAGATGTCCGCCAAAAC  
GCGCCGGCCACCAGCGTCATGCAGCGCGGGTCGAGCGCAGCCGGGCGGAACTTGAAGTCC  
CACAGGCTGTATTCGTTGCTCTGCGCCGTTGTGTTTCCGCCAGCCTGCGCTGCAGCGTTG  
CTTCCC GGCGCATACTGGAAGCCGACCACCTTGGGCGCCTTGGTTCGAGGTGTAGCAAGTG  
GGCGCCGAAGAGTTGGAATCGGCGCGCACCCGTGCCATCGTTCGACAGCTAGATGGCGTAG  
TCGGTGCCGGCCGTCAGCGCCGGCATGGTGATGGCCGTGTCGACGGTGAACCTGCACCAGC  
TTGCCGTTGACCTCCACGATGGTGCCAGCCTTGATGCTGGCCGTTGCGTTGCCGGTGCGC  
GTGAGGGCGACGGCCGACTTGTTCGGCCTTGATGAAAGCCGTTTTACCAGATCGTGCCGC  
GCCAGGGGAAGCCGCCAGCGGTGGCACCCGTTCATGCACAACGACCCTGTTCTTGTCCGTA  
TCGACGGTAATCTCACGGGCGGCGCCCGTGAAGGTGGCGTGCTGGGCGGTTCGTGCCGCCG  
CGAACTGGACTGCGGTACTCATAACGGTTGGCTCCTAGTTATGCGATGTCGCCCCGGTCA  
GCCAGGCCAATGTTGGCCCGCGCTACCCGAGGGTCGGCAAGATCGGACAGGTTGTGGGGC  
GGCACCAGCGCGCCGGATACCGCGGGCGAGAATGGCCACCAAGTTGTTGGCTGCTTCGCTG  
ATGACCGCGATGTTCTCGGCCACGGCCCGCATGTTCTCGGCGTTCGCCACACTGCGCCC  
AGCACGCCGGCTGGCGCTGCGGGATTGCTGGCCGGCGACTGGTCGCCGTAGTCGATGACC  
ATAGGTTGCCCGGTCAGGTTCGTTGCCAGCTAGGCCGACGGCGGCCCTCGTTTTCCGGCCACG  
GTGAAACGTCGGCAGCGATGCCCGCGACGGTCTGCACGTCTGCGAGGTTATCGACAACA  
GTGTTGACGTTTTCTTCGTTTCGCCGCCACCCGATTGATATTGTTGGCATTATCGACTACT  
GCGTTGATATTCGCTGGTTGGCGACCCGCTGCTTTGATGTTGTTCGGCATTGCCGACCCGT  
GCATTGATGTCCGCTTGGTTAGCAGCGGTCGCATTGATGTTGTCTGCGTAGTCGGCTACG  
ACGTTGATGTTTGCCGCATTGCCTGCCGTCGCCTGCACGTTCGTCGATATTGCCGGCTACC  
GGGCCACGTCGAGGATGTTGGACGCCACGGTGTGACGTTGGCGTTGGCACCCGGCCACT  
TCCTTGATGCTCGCGGGCTTGGCGGCCACGGCGTCGCTATTTTCCAGGTTCGCCGGCCACG  
GATACCACATTGTCGATGTCGTTGGCGACAGCCAACATGCTCGACAGGTTGCGTGCTGACG  
GTGCTCACGTCGCCGATGTTTTAGCAACCGTGTCCACGTTGCCGATACCCGTTTGGCACA  
ATGACGATGTTCCCGCCGGGCGGCGAGGTGTTGCCGATGGGGGGTACGGCAATGCCGCCA  
AAGTCGTAGGACACGCCGGCCGCCAGGTTCCGCCGAGGTAGCCCGCCACGGTATCGACG  
GCGCCAACGCTGGCCGCCACCCGTGTCGATGTCCGCCTCGTAGGTGGCCACGGCGTCGATG  
TTGGCGAGGTGGCCGTACACGGCGGCAACCAGCGGTAGCTGTTACCAAGCTGCACCAA  
ATCTCGCTCGATGACAGACCGCCAGAAATGGGGGCCTGCACGGTTCGGCTAAGGTTGTGCG  
GCGAGTTGCTGGATTTGGATAACCAGCCGGTCAAGCGCGTGCTCGATGACCTTGGGGTGC  
AAGCCGCCCTGGTTCGTTTCAGTGTTTCCGGGCTGGGTATTACGGACTTCGCTGGTCAGCGTG  
ATCTTGTAAACAGTGGCATAAGTTCGCCAGCGTGGTGTGAGTGTGCCGCGGGATTGGAGTCC  
TGTTTCTCATTACGCGCAACGGTGTAGTCCGTACCCAGGGTCAAGGTGGATTCCACACCG  
TCTGCGTCGCTCAAAATGGCGACGATTTCCGCCGGTGTGAAACACCTTGAAGTCGAACGGG  
AATTGTGTGGTCAGGCCATTGCAGGGATACGGCCCCGCGACCCGATCTGTGCTTTGGACG  
GACATGGTAAAAACCCCTGGAGAAGCATCGCAAGGCTACGTCCCCAGGGGTGAGGCACGG  
GCACCCTTAGCGGGCCTCTGGGAACCCGAACCCGATAGCCGCCGGGTTCTGCGTTTTGCC  
TTCGGCCAGGGCCTGCACGCCGGTAACGGTGCGGTTGATCTGCGCGCTGGGCAGGCCGAT  
CAGGTCGCCACGACATTGACGGCAGTTTTCCGGAAAGCGTCGTCGAACTCGCCCTGGTG  
CGTCTGGGTGGCGAACCCGGCCCAAGGGGGCAATCATGCGCTGGCCGGCCGGCCCGGTGTA  
GTCGCGGCCCATGTCGTTGGCGCCTGTCACGGTCTTGGCCGCTTCCCCGAACTCACGCAC  
GACGACCATGCGGCCCAACAGGTAGTCGATATGGTTGGCGAGCAGTTTCTTGGCGAGTTT  
TTCAGGGTTCGTGGTCGCCCGAATCGCCAGGCGTCAGCGCATCCTTGAGGAAGAAGCCAG  
CACGGCCCCGACCACATAGGGCATGGCGTAGTCCGCCGCCAGCTTCGCGCACTTGGCCGG  
AGTGTCCGCGCTCATGGTCTGCGCCACGCCCATGTTTCAGGGCCGTGTTTCATGAACGAATA  
GAACACGGTGAAAAGCCGCTGCGCTGGGCCGCCGCGCTCAATAGCGGAAAGGTCTTTAGT

CTGCCC GCCACTCTGGGCATCTCTGACCGCCTGGTCGGCCAGGGACACGGCGCGGGTTTT  
GTCGTTGCCCTCGGCGACGGCCTTTTCGTAGGCTCCCCACCACGTTCGGCAGGTCCACCAT  
CTGCTGGCATCGCGGCATCAGGAAATAGGCATTGCGGCCGACCCATTCCTTCGTGGCAGA  
ACCATCCTGCACCTGATTGCGCAACTCGTTGAGTTCGCGGAAGCGCGTCCGCGCCCCGATT  
CGCCATGAACGAGGACTTGGCGTTGATCTCGCGCGTAAGACACCCCGGGGCGGTTAGGTA  
CTTCATGACGCCGCGGCCTACCCACGGCGCGCCCACGCGCACGATGGACTGCGTGATGCC  
CAGCGGTTGCATTAGGGCGCTCGTGACGTAGAAGCCAGGCCCGACGCGCTGACGCCCTG  
TCGCAGGCGGGACAGCGCGATGTCCACGGCAGCATCTGCGCCGCGCTCACCTCGGGCAT  
GTCGGCCGCCAGGTCTTGAAGTGTGCTGGGCTCGGGGCCGTAGTGCTCGCGGAAGGC  
GCCGTCGATGGTCTGCGAACGCTGCAGCCGGTTGGCGTCGATCTACCACTCGTGCCACGC  
TAGGTCGTGAATCACATCGTTGACGCCCCGAATACAGACCGGACAGGGTATAGAGCAGCGG  
GCGCCCCGACAATTCCTCGACGCGCGACTTGGTGAAGCTGCGCCGCGTAGTGCGGGTGGT  
ATAGGCCCTTGCTACTGGCGGCGCGCGCTTTCGGTGTCCGAGTGTCTTCCGACGCTG  
GCTCGCGTCCGGGTCGTACTTAATCGGATAGTAGCCGCCGCGTAGGGTTCAGGGTCTGTCC  
GTCTGCCGTGGTGTGTTCAAGGGGCGCGGCTCGACCCACGCCGGCTCCTTGCCGTACAC  
GCGCCGTTCTTTTTCGGCGATCTGCGGCCGGTAGCCCTCGAAGTGGTCCCACCGCCTG  
CACCGCTTGCCATTCCTGCGCAGTCAGCGATTGCAGCACCGGGCGCGATCTGCGCCGGCGT  
CCACCCTTCGCCGCCCGGCAGGCGCTGCATTTTGCCCTCGTTGCCCATGTTTCAGCGCGAA  
GGTGAGGCGGGATTCGCGGTTTCAGGCTTCGGCCGATGGTTCGGGAAATGCTGCCCTTTGCC  
TCCATCTTGCCGAGGGCGAACTCCGGCGCGAGGATTTCCAACAGCTTGCCCGTGGCCTC  
GCCGCGCCTCGTGGTTTCCATGTCGCCGCGCTCGTTTGCCGAACGCACGAAATATTTCCA  
CATAGGGCCGCGTCCCTTGCCGCGTCCATGACGCGCGCCCAGGTCGCTGCCTTGATATG  
GGTGGCCAATAGCGTTTTCAGGCCCCTGCACCGCGCGGCCGGCGTGGTGTGGGCGTGCG  
GGTGTTCGGCGCGGCGTCCCTGCGCGTGCGCCCGGATGCTGTTCGGCGATTTTCATCGCGCAC  
GGCCTCGTAGTCGCGCTGGTGGGCGGCCGTCAGCAGATTGCGCTTCAAGCGGCCAGGTC  
ATCGAGCTGACGCACGCTATCGACAAGGCCGCGGAATTCCTTCAACGGTTCGTGTTCTTGTA  
GGACGTGCGGTACGCCTCGTTTTTCGAGTTCGGCCGGGATGTCCGGCTCGAACCCGGCCTC  
GCGCTGGCTGCGTAGCCAGTCGGCCAGGGCCGTGCGATTGTCTACGGCCTTGAGGCTTTG  
GCCCTTGCGCAGATCGAACCGTTCCAGCAGATTGGCGATCTGGTTCGGCATAAGTCCACGTC  
GATGCCCTTGATGTCGCCGGCAAACCTTGCCAGGATTCGCAGGCCGCGCTCGACCTCATC  
CTGGGCGGCGTAGGCCGTGCGTGCGGCCTCGTGCTGGATAAGGTGGTTACGCTTCTCGGC  
CGCTGCGGTGGCGAGGTCGCCGGCATTTCATCGCGCGGTCGGCATTGCGTGCCACGCGCAC  
CTCGGCGTAGGTGTACTGGCCGGGTCGGATGTGCGCGCACCTTGAGCCGGGACACCAAGGC  
ACGCGCGTATTACGTGCCGCTGCGGGCAGCACGCGGGCGCACGATGGGTTCGGCCGCGCCG  
GTCAGTACCGATCTGCTGGGTTCGGGCCAGCCTCAACGCGGGCCAGCGCGTTGGCCTCGGT  
CGCCAGGAAGCGGGCGCGGGCAGCATTGTGAATGGCGCTATCGGCGGCGCGCTCGATGGC  
TTCCGGCGTGGACAGTTCGCCGAACCTGTTCCAGCATCCGCACGTTCGGTAAGCGCCTAGAT  
TTCTCGCCGCGCGGGAGCGCTTCCAGTAGGGCGGCGCACAGTTCGTCACCTGACGTA  
GCCGAACACTTCGGCCAAGGTATCGGAGTGCATCCCCTCACTGGCCGCGAGGCCCTTCTT  
GCCGGTGGGCGAGGATTCGCCAGATAGCGTTTTTCCCCCTCGCCGTACATTTCTTGAGGGC  
CGGCAGCGACTACTTGGCGCCGTCGACGTTGGCCTACTCGGCGGGCGCGGGCGCCCGTTCTG  
CGGCGCGCCCGGCGGCAGTTCAGTTCACCATGCAGCAGGTAGCGGTTCGGCCCGGTACAC  
CGGCTGCGCATTGAATGCCTCGGAGACGTGGCGGGCGCAGGTCGGCGCGGGCGGGCGGGC  
ATCCTTTGGCAGTTGCTTCATGATGCGGCCGCGTGGATTGCGCAGCCACTGCATGTCGCG  
CAGGCCGCGGTCTTGCAGGTCTTGAATAGCGTCGTCGGTCGCGTCCACGCCGAGGCCCTC  
ATAGGCAGCGAATTCCTTCGGGCGTCATGCCAGTCTGTTCCGCCGTGGCGAACAGTGGCAT  
CATGCTGCGGCCCTGTTTCGGCCAGTGCAGATCTGCGCGCCGGTGGCGAGCATCCGGTTCGAA  
CACGATGCGCACCGCGGGCGTGAGTTCGACGTTTCAGGGCCTCCAAGTCGCGGTACACGTT  
GAGCAGCCACGCGCGGAACCGCTGGAAAAGGCCGTGCATTTCAATGCTGGGTGCCTTGCC  
CTCGAAGAGATACGGCTCGAAGCCGCGGGCGAACTGCTCGTGGTGGGCGCGCATCGCCTC  
GAAGTCCAGATCGTTCCACGCGGCCAGGTCGCGCAGCCCGAACAGTCAAGTAGCGTTTG  
CGCATCACGCTTACCTCGGTTGCGGCGTCGATGAGCTTGGCACCTGCGCGCTGCTTCTC  
GGCCAGGCGCGTGGCGATGTGAGCTGCACATCGAGCAAAAAGTGTCCGGAGTCATGCAG  
GAACGTGGGCAAATCCGCATTATTAAGCAGGGAAAGGGTGGAGCGTGGCGGGGTCAAAGT  
GCCGCGCGCCCGGCCCCCGCCCTGGTAGAACTTGTCTATTTTCTGATCTACACTAGCGTC  
CGAGGCGTCGTCGGGGCGAGCCGTGCCATCCTCGACAAAAGGTCGGTAGTGCTGTCTCCT  
CGTACCGGCCACGCCTCCTTTCTTCGGGAAGGCGGTCAGCAGCCAGTGTTCCTTGATC

GTCCACGTCAAGCGCACGCCGCCGATGGTCGGCGGATTCCAAATTGACCCGGTACTC  
GGTGCGGCTCGTGACCTTCATGGCTGACAGGATGCCCTGTAGGTTCGTCCAGCACCTCGGG  
GTGCCACTTCGCCAGTTTCGCCAGGCCGTAGCCGTCGCTGCGGCGTATGCCTTCTTCTCC  
CCATACCAAGTCGATGTCGCCGATGTCCGGGCGATGCAGCGCGCCGATGGCCTTGCCACT  
TTTCATTTCCAACAGCTTGGAATGGCGCCCTTGGCGTCGCCCTGGAAGTCGCGCAGCAA  
CGCCCCGAACGGGCGCTCCTCTTGATCGAACTGCTGACCGCCGGCCACGCTTTCGCCCGC  
CAAGCGCAACGGGTATTCCTGGGACAGCGCGTCGGGCGTAGTACCCAGGCGCGCAGCCTG  
CACCGCATATAAATTCCCGACCATCGACGAATAGGCGTCATTCACCTGCGGCGTGAAACG  
CGCCGCGTGTCCAATTGCGTCTTGACGGCAGCGCGCACGGCCTCGGACGATTGCTTGAA  
TGCGTCGTCGCCTTGTTGCTCGCCAAGGGCGCGCTCGACTTCGGCCCCGAGTTCTTCGGC  
CTGGGATTGGATCTACTGCTGCGCCTCGGCGCGGCTGAATCCTTCCGGCTCGGTCTTGAG  
GTGGTCGAGCAGGCCCTGCGGGGCTTCGGTCGGCGCGATGCGCGCGGCGTAGTCTCCAC  
CGGAAGCGCGACCTGCCCGCCGGTTTGACAGGGCCTCGGGCAGTTGCGCGGGCGACAGTCGG  
GGACACTGCGGCCACCTGTTCCGGCCAGCCCCGATTGCAAGAGCGTATTGGCGTCGATGAA  
CACCTGCTGCACCGGGCCGTTCTCGGCCGCATTGGCGCCGAACTGCTCGAACGTGTCGGG  
GTCGCGCGCGAGCACCTTGTGCGGCTGCGGCCAATTGTTTCAAACGTGCGAGCAGTTCGGC  
CTGCTGCTGGGCCGCTGCGCACGTTGCGTGCCTGGTCGGCCGTGGTGATGGTGCGGTC  
AATGCCGCGCATGACCGCCACTTTCGCCCCACGCCACTAGCGTGCGGATGAGGGTTTG  
CGCTGCGGCTCTGGGACGCTCGGCCATGTAGGCGGAAAACGGTTTCTCCTTGTTCTCGGG  
CAGAACGGCCATTGGTTCAGGTCTTGACAGTACGGTAGCGACCTCCTCGCCCGGCACCTC  
GGTGGCGACCTGATGGGCCAGGGTCTTGAGCAGCGGCGAGCCGGCGTGACAGGTCGCCGAT  
AAGGCGCGACACCGGCAGCTTTTCAGTGGCGTATTTCGATGGTTCGCCTGCGACACCGCAAG  
GGGCAGCGCCTGCGCTGGCGTGAGGCCCTGCGAGCGGGCATCCTGATAGGACTGCCCGCC  
GGTCTCGAAGCAATGCCGCCAGGGCCGCCGCTGGCCGCCGGGCGAGCAGTGCCATCGG  
AAGCATGAGCACGTTTCGCCGTGAGGGACTGTACGCCGGACGAAACACCACTGCCCAAGGT  
GTCAGACTGCGGCGGACTTAGCTGCTTGGCGAGGTCTTTGGACGGCGCACCCCCATTGTGC  
GAACTGAACGGCGACAGGTTGCAGCGGATTTGCCGGCAGAATGGTGCCGACCAGATTGTT  
GGGCCATTCAAAGACGGACTGGAACAGACCGGCCGCGCCGCGTTTGGCCTGGGCGAACCC  
CGCGCCAATATCGCCAATGAGGGTGTCTTCTGGTTCGGGTGCGCTGACCAGATACTTCAC  
CGCCGTGCCCAGGCTGGACAGTACCGACTCGATGCCGGTTCATGTTGTCGACGTTGTCGTG  
CTCAATCTTGGCCTTTTCCACGTCGGCCAGCAGCGCTGCCGTGGCCGGCGAGGTCTTGCC  
CAGCGTGTGCAAGTCGATGGCGCCGATGGTGTCTGCCGTTGCGCTTCTTCGGCTGGTT  
GAGCACGGTTTCAATTGGCAGGTTGGCGCGACCGGCCACGCGCTGCGCTTCCACGTAGGG  
GTCGGGGTCAGTGTCCGATGCGGAGAACGAAACCGGCCCGCGCTGCCCTGCCCTGGTCGGG  
ACGCGGCAAACCGGCAACAGCGGCATCGAACGGATCGGCGGTAGTGCCCTGGGCGGTTTG  
CTGGCTCAGCGTGCCGCCTACGGCGGGCGTCAATTCGTTGCTCATTACGGGAAACCTTC  
AAATTCAGTACGCATTGAGGTTTTGCGAGTCGGACGGCGAGTCGATGCCTGCGCGCTTG  
TATGCCGCCTTGATGCCGTCCTTGGTGGCGCTGTTCGATGTGCGCCGACCTTCAAGGTCAAG  
ATCGGAACGGACGAATTCGAGAACCCGCCGCGCACAGTGGCGTTTTTCATGGACAGCGCG  
TCGAGGTGCTGCTCGACCTCGGCGTCAGTGAATTTCTTGCCGGCCTCGCGCTGCGCGGGC  
ATGAAATAGCCGTCGATGAATTTGCGAATGGCGCCGACGCGCTCGGCATCGCTGCTGCCG  
TCCTGTGGCGTCGGGTCGACGCCATCATGCGCAGGCGCGTGTGAGTCCCGCCTTGATA  
GCCTGGCTGTTCAAGTCGCCCGGCCCGTTGGTGCTGGGTGCCCGACCCAGACGCTTGGCG  
CGCTCCTGGGAAAATGCTTGAAGTCGGACTCAGACAGGCTGGTGCGTAGTGCGTAGAAC  
TCGTTGTCGGACATGCGCGCCAACCTCGTCCGGGCTGTTGGTTCAGCTTTTTGTAGAGCCAC  
AGTCTCGTGATGTCGTCGCTGTGGCTATGCGCTCGGCCGCGCCATAACGCTAGTCAGC  
TTCGCGGGCGGGATGTTCCGCGGAATGGGCACCGGCAGTTCGAAAACCGCCCCGACGTTCC  
TCGTACAGGCCGCGCAGCGCAGTGGCGACGGCCTCGTCATCGCGTTGCTTGAAGTGCAGCGC  
GTCTGCATGTTGAATTGGCGCTCGGCCTCCACGCGCGCAATCTTGAGCCGTTCCGGGTTG  
CCGGCCAGGCGTGGGTGCTTCTGCAACTGCGCCTCGATGTCGGCCAGTGTGCGGCCGCGCT  
GGGCGCCCTTGGCCGGCGTGTGACGCCTGCATGTTATTAACCACGTAGTCTGCGTTTCC  
TTCGGCAGTAGCGCCAGCCAGTTGCCATCCTTGGCGGCTTTCAGCACCGATTGCAGCGCG  
CCGGGGCCGGCGTTGTAGGCGACGTAGGCTTTCGGCAGGTCGCCGCCGAATCCGCGCGAT  
TGCTTCTGGAAATAGGCCATGCCAGCGCGCGGTTGTAGGCGGCATCGTTGCGGTAACGG  
TTCTCATCCCACGGCAGGCCCGCCAGTTTGGCGGCCTCGGGCGCGGTTGTCGTACATGACC  
TGGGCGATGCCGACCGCGCCTTTGGGCGAGGTAAGCGGTTCTCCGTCCGCGCCGAACTGT  
CGGCCCCCTGACTCGATGCCACGGCGATGTTGAACGCCCGCTAGCCATCGCTCACCTGG

ATGGGAACCTTGCCGACAGCATCGGTAGCGGCAGCAAGTCCGGCGCGGCCGTCCATGTCC  
TTGGTGATATGACCGCGCACCGGTGAGGATGACGTCGGCGTCCATCTGCCCGGAATATTTG  
TTGAGGAAGGCCGAGGCATAGGTTCGGGTTGTTTTGGTCCAGCGTCGACATGTGCGCAATC  
TTGTGCCCGGTGCTGTTTCAGTTTGC GCGCCTGTGCCTCCTGCCACTCGGGCGGATTTGCC  
AGCAATTGCGCCTGCCGGAAGGTTTCGGCCTTTATGCGATCGACAGCCGAATTGATGGCG  
TCGGGGTTGTTCCAGTACAGGGCGATGTGCGCGCAGCGCCGTGGACTGGATGCCCTCGGAC  
GTGGAAGCGCGGAGGTCTTGTAGTCGCTGGCCCCGTGCTGCACAGCTTGACCACGGAAC  
GAGGTCAGGATGTCGTTGGAATGGAGCGCGAAAGCCCCGGCGCTGGGCGTCTTTGCCTAGG  
GTGCCAGAAATTCGTCCAGTTGCTTCTTTAGGTTATCGCCGTA CTGTCGGCCAGCGGC  
TTGCCTTCCGGCCGTTCCAGCGCGTTGATACCCTTGAGGTTTGCGAAGCCGGTGTCTTG  
TCATAGGTCAGGCGCAGCGCGGCTTCCTTGGCGCGGTTAAGTGCGTGCTCCACGCGCAAC  
TGGTTGGCCTGCTGCACCATGCTGTCGGCGATGCGGCCACGTCGTTGCTGAACTGGCGC  
GCGCCTTGGCAGAACTCCC GGGCCTGCTGGTTCGCGGTGTCCTGGAAAGCGGGGGAATCC  
GCGCCGCGGAACGTAGGCGTAGCGAAGCTGGGCGTCGCCAGGCGCGCCTGCGGCACCGTG  
TTGGGCGAAACCTGCGGGGAATCATAAACGGGAACGCGCGGCATGGTTCTTACCCTTTGG  
ACTGAGAATACCGATAACCAGGAATCAGCCACGTCGCCGGCGCCGGACAACAGCGACGAGA  
AACCCGCCCTACC GGGCTGATGCCGGCGGCTGATCCGCTTTTCAGCAGTGCGTCGGCTT  
CCATGCTTCCGGCGCCGGTGC GCGCAGATTGATACCTTGCACCTTGGCCTGGATGCGGGTGT  
TGAGCCCTTGAAGCCCGGCTGCAGTTGCGCCTCCATGCCCTGCGCCCGGTAGCCCCAGG  
CAGTACGCGCAGCATTGGCGCGCAGCGTTTCGGTGTGATCTACTTCACGATGTCGCTGG  
AAACCTGCACCTCGGCGGCGCTGCCTTCGCCCAGGTAGATGCCGTTGGCGGCCAGCGCCG  
CACGCTGGGCGCGTTTAAAGTTGCCCGGCTTTCAGGGTCTGCGCTGCGATCTGCTGCTGGC  
CGGCCTCAAGTGCCGACTGCGCGCTCAACTCGGCGATGCTCGCGTTGAGGTCGCCGGTGC  
CCAGAATGGGGTTCGGCATTGGCGTTGCCAATAGACTCGATGGTGTCCGCGTTGGTGTGG  
CGATACCCGCGTTGATGCGGGCAAGGTTTCGACTGAAATTGAAGGCTGCTTTGCTGCGACC  
GCGCGCCGTA AAAGCTGCCTACCAGGCCCGACCCCATGCTGGCGGCGGATGCGCCCAGGG  
CGACGGCTGATGTTGCTCCTGACATGGCATTTCCTCCTATGCGCCGATGGCGATTTCCGC  
CGACATCGACACGATCATCAACGGCAGAGGGTTCGGCCTGCCGCACAAACAGTTGCCCGCT  
GCCGCCCAATTCGGCGACAGGACGAGCGGAATTCCTCACTCTTGAGTGCAGGCGGTGA  
GCCGTAGGGTTCGGACGTGCGCTGCTTCAGCTCGGTGAGCGCGTCCGCGTGCGGGCCGGC  
GAAGATGCCGGACGACCGATGCACGCGCAACCACAGCTTGTTGATGTTCTTGACGCGCCC  
TTGGCCGAAGCTGCCGTCCAGTTGCATCGCAACCCG CAGGGTTTGCAGTTCTGCGGTGAT  
GGG CAGGCCGATATGCACGGTGC CGGCCTCCACGTCCAGGTCAATGGCGCCGTCAGTTAC  
GACGCGCTGCGGATGCACCGCGCCATCGGCCAGGATGCTGACGGTTTTCCCTTCGAGGTC  
CTCCAGCCCGGTGATATGGCTTACC GGCTCGCCCGACTACGTAAGGCCGCTATCGACGAT  
GAAGGCGTCTCCTGGGCATCGAACTGGCGCGAGGCCATGCGATCGACATACCGCACCTC  
GTTGCCGCAATGGTGC GACGCACGTCGGCAAAGAGCCGGTCTCCTCGTTACCCTCGGCCAC  
CACCGCGCAGGACTCGAACACGCCGTCCGTGTCGTGCTGGTGCCACGCGCCGATCTGTTG  
CTCGGGCACGTAGGTGAGGCCCAGCAGCTTGCCGCTGCTGCTAATGAACCACACGATAGG  
CTGCGGCGCCTTCGCGTAGGCTATGTCCATAATGTCGAGATTGTCGAACAGGTGCGCCGC  
GCGCAGGGACAGGTGCGCCGGTGACGAAACCGTTGGCCTGCCAGTTGTAGGCCAGTTCCGC  
CACGTGGCCGCCCCCGCACGGCGCCGTAGATGGTTCGTGTTGTTGCCACGATCGGCTGCAC  
GTCGGTGGCCCCGACGTAGGACTGCGGCCGCACGCTGATGGTGGTGGGCGTTATCGCGGG  
GGAGTTCACCGACGCCACGCGCCATTCTCCCGAAGACGTGAGCAGCAGCAACTCGGTGAG  
CGGCACGATATGGCGGATGGCGTTGGCCTCGCTCGCGGCCACCCGAAAAGCAACCCGATC  
GTCGTCGCGCACGGGAAGCGAGTACGACATGGCCGATTCGGTGCCACTGCGCGTCATCCA  
AATGTTCTGCGGCTTGTTGGTAGCGCCGGCAAAGCATGGGCGTTGCTCGAAGTAGGACAC  
GGCCGCGGGGTAACCGCCGGCGGTGTTGAACACGGCGTCGTAGATCCGGGGCGTGACGGA  
CAGGACGGGCGCGACATTGTCGTCCACCAGCGAGGTGCCGGTGGTCTGGCTGATATAGCC  
GTACAGGCCGCTTGTCTATTATAGACGTTGTAGCGCGACGCGACGGACGAGGCCGACCA  
CGCGATGGTGTGGCGCCGCCGTTGGTGAAGAGGTTGTTGGTGCAGGTGCCGGCCGACGA  
GGGAGCGGACTCGGTTCTACCCTCGGCATCCAGGCCCGTGACCACGTAGCGGTAGGTGTA  
GTCGGTGCCTTGTGTTTCGACGTGGTGGTCACGCTCGTGGGCGTAGCCACCGGCGACGT  
GAAGGCGATGGTCGCGAGTTGCCAGTTGGTTCGCGCCAGGCGGCGCAGTTCACGCGTCGC  
ATAGTTCGGATGCACGAGCGTGAGCACGTCAGCCGACTGGACAAAGTGGATGTTGAACAG  
GTCGGCTTCGGCGTAGGGATTGGCGATGTCGTAGGGCACGGCGCCGTCCAGCAGCGTGCC  
GCCGTTGGTATGGAAGCGAAAATAACCCGCACCCA ACTCGATCACCATTGTTTGCATGAC

CGAGTAGGTGAACGGGATGAGCCGCACCTTCTTGGCCGAATCCTTCACCTCGCGCACGAA  
GGCGAAGCCGGCGCGGTTATCGGCCTTGCCTTGGGGCTTGACCACGAAGTTGCGGCAGAT  
GGCGAGGCCACTTTGGTACTTCACGTCGTCGATTGCCCCAACATTTCCGGGCTGATTTCC  
GCCGCCGCCAATGAGCGTTGAAGGACGCGGACGTTGGACATCACCCCTCCAACCGTTC  
GGCAAGCCGGGGATATTGCCGTCCACGAAGCCGGGCGCCGCGGGCGCGCATCCATTCCGGC  
ATATGGGCCGGCTTGGTCTTGCCTTGGTGGCATCGGACACCATCGCCTGCGACAGGTAT  
GCCTGCATCGCGCCGACGCACCGCTTCGATGCAGCGGCGTCGACGTCGCCCTTGAGCAGT  
GGCCCCGCCAGCATCGAGGCCAGGTGCCACGCCAGGGCCTGCACGAACAGCGGCGAGAAC  
TAGGTCGTGTCCTTACCAAGCTGACATAGCGCGCCACCGCGTTGACCCGATTGGTCAGA  
ATGATGTCGGCGCCGGTGTGTCGATTTGCGATCTAAACGGCTGCGGGTGTGCGATAACG  
GCCTCGATGTTTGCCGCATCGTGCGGCAGTACGGCCACGATCTTGAAGGCGTCGGCGGGC  
TGGGCGTAGGCGTAGCGCCACTCGGGCCGGGAAATGCACATCGCGGCAAGCTGCGCGCAT  
TTGGCGGCGAAACCCCATTTGTGTCAGTTGAGCAGCGAGTCGCGCGCGAACGGATAGAAG  
CGCGCGCAGTATTCCGCCTGCACGGAACCCTCGGGCGGGTGTGATGCCCGCCACCGTCGCC  
TCGTCGCCAGGTAGGCCAGGGCCAGATTGCTGATGTCAACCTCGGATGCCATCGAAGCG  
CCTCACGAAAAAGCGGGGGCACAAAGCCCCCGTAAGTTCGCGGGTATCACCCACCGAAG  
GAGACTCGTTACACCAAGTCGCCGGCGGACTTGTGTCGTCGAACCTTGCGGGTATTGTCG  
GCGGGCTGCTTGGGGGCCTTACCGGCGCGGGGTGCGTGTGCGGCCGCCGAAGCCGGCGCG  
AACTAGGACGCGTTCGCGCCGTCCGGTACGTCGAACTTGTGCGCCGGCTCGCGCAGCTAG  
CCTAAATAGCCCTGTTTCAGTGCATCACTTCCATGCTGTCACTTCGTTACGCTATGCGC  
GGGCTGTGCGGATAAGCCACGTTCTGTTGGATGCCGGTACGACCTGCGCCGAGAACTTG  
CCGGCCGTGCGGCGGGCCGGTGGCGACGATGTAATAGACACGGCAGTACCGGCGCAGCTTG  
GTGGGCATAGGGATGACCACCTGTTTACCGGCGGGCAGGTTGGCCTTGCCGATGGCGCCG  
GTGGCGGCCACGTATGCGAAGGTGGCGTGTGTCGCCGAGTCTGACCCGAAAACGTGACG  
GTCGCGGCGCCGGCGGCGTCCGCCGATTGTCACCGTGACGACCATCTTGTGCGGTCA  
TCCATGCCGGTGTGGGATTGGCCTGGCCAAAGTCGATCACTTCGGTGGAGGCCGCGCTC  
GCGGTGACGGGCTGGCCGTCCGAGACTTGGAGCAGCTTGTGATAATCATGGCTGGGATT  
CCTTTCTGGATTCGTGATCTGGGGCGGTGCCCCGCCCCGGCCTGTTACACCACGCGGGC  
CTCGGTACGAGCAGCGCATCGGTACGGCGGCCCGGGATGCCGTGAAACGCGACCACTT  
TTGCCGGCGATTTCTTCCATCGTCAGCGTTGAGGCCGCCAACTTGTGGTTATCTGGCG  
GCGCAGGAAGCTGCGAATTATGCGCGGCATGTAGAAGGCCGGGAGGCCCATGTCCACGTT  
CGGGATGGGTTTCGATCGCCTGGGTCATCAGGTCGATGAGGTCGGCGACCGCGCTGGCGTT  
CTTCGTCAGTTCGGACACGTCCACATTGGCGATGCGGACGACGTAACGCCAGTCGCGCAG  
GGTCAGGCCGATGTCCATTTGTAGTGGGTGCGGTAGCCCTGGTAGCGGCCGCCGGCGGC  
GTTGATCAGCGTGCCCTCGCCGAGGTCACTCGATGGCAGGCCGGCCTGCGAACCCTTCGG  
GGAGATGGTATGCAGGGTGTTCGGTCCCCACACCGTCAGCCAGATGGATGCGTTGTGCT  
GCCCGTCCCGCCGGCATCGATGATGGTCTGGCCGTTCTCCGCGGACAGTCTGTTGAAGCT  
CGGCGTCAGGCCCATGAACTTCTCGGCGTCGATGCTGGAATCGCCGTAGAACAGCCTGGT  
CGCCTGGGTCTGGTTCATGCCTTCGATGAAAGCGCGGTCTTCGGACAGGCCAGGCCGGC  
GGAATTGCCGTTGAGGTCGGCCAGGGCCTTGTCCACGTGCGCGTAGGTTTCCAGCATCCC  
CATGCCGTCCTTGACCTGCACGGTGCGGGACTTCTCGGGCTGCACGCCATAGTTCAGCTT  
GCGACAGGTGCCGGCGGGCAGGCCGCTGCGAACCCTGGTCTTGTGGTCGGTGAAAGCGTT  
CGCCTCGATGACGGTCATGGCGTCGAGGATTTGCTTGGTTTCGTTACGATTTTCGACGAT  
CTGCGGGTCGATCTTGCCGTCCGGGGTCATGCGGGTCGCGACATCGGCCAGCGTCGGGTT  
GGTGGTGAAAGAGTAGGCATTTGGAACGCTGCTTTACGGGATCATGTTGGAGGCTGCAT  
AGAGGCGCCGCGCATCGCCCTGCTTGGGCTGGTTGCCGTTGTTGCCGGCCACGAGGCCGT  
CTTACTGATTGCCAGGCCGGCCCGGTAGAACACCCGTTGATTTCCGGGGTGATTGCCCA  
GGCCGTTTTTTGTTACGACGCGTGGTGAGTTCGGGCCTGCCGAAGGCGTCGCGCGCCTTCT  
TGGCCGTGGCATGGTTTTCTTGCAGCTTGTGCGCCGCCGAACCTTGTGCGGCCGTGGACG  
AGGCAACCCAGGTTTCGGGCAGGCCGCCGATGTCCGCGTAGAGCTCGCCAACTTGCTCGG  
CATGGCGCGCCTGCATCACAGGCAGCATCTTGTGCGAGCACCAGTTGCGCCTTGTGATGGG  
GCATGTGGCGTTCCTTGGCGACTTTTGAAGGCGCCAGCACACCGTGGTTCGAATGCCA  
CGCCTTCGGGGGCCTGGAATTCGATTTGCTCGGGTGCGCCTTGCGGCTTCGCCTTGTGCT  
CGCCCTCGGTCTTGGCAGCGCCCGCGGGCGGGTGTGGCCTTGGGTGCCCTGCTCCTGGG  
TCGGCTGTTGCTGCTGTTGGCCGTGCTTGCCTGCACAGTAGCGGGTGTGCTCGGCGGCCG  
GTTGCGATGCGGGCTGGCCTTCACTGGTTCGTTGCGGCTTCCGTCATCAGCGTTTCGGTTG  
TCATGGTTCTGTTCCCTTACCATCACGCCATAGAGTTCAGGGCAGAGCGTGTGGATTTGC

GCCAGTAGCCGCAGGCCCGCGTTCGGTTCATTTCGGCCAAAGGCCATAGCCATCGCGTTG  
GTGTTGAACGAAAGCCGGTACACGCCGGCTCGTTCAGAAACCGCCACACGATGCGGGCGC  
CCCCGCTTGCTGCTCATCAGCCACTTAAAGTCCGCTTCCTCGGTATCCTTCGCCAGGCGG  
CGTCGCAGGTCGGTGTTCGGCCTGCGCTCGTTCCTGTCCCCGAACATCGGTGGGGTTCGTAA  
TTGCTCATGCGCGCGCTCTATGGGCTGGACGAGGAGGCACGGGCACCCCATCAGGCCGAC  
ATGCTGCTGGCGCCGTAGAGGCGCTGCGCCGCACTCGACTCATCGCGCGGCTGCACGTCC  
ATGTCGGTGATCTGCAAATCGACATTGCGTGAGGCCTTTCGTCATCGCGGGATCTGACC  
GACTGCACGACGGCGCGCGCCGTGATTTTCGGACACGGAACCGACTGCCGGCAACGTGTGC  
ATGCCAGCCTTTCGAGAGCTTCGGTGTTCGGGTTGATGCACAGCCCATAACGGGTATTCG  
GGCGTGTGTCCGAGGCCGATTACAGCAAAGCATCGAGCCGGCTTCCATCGGGGTTCATC  
TTCATGTTGGTGAGCGGCATGTCGGCCTCCTATCAGGTGTACCCGCTGAATGCGCGCGTC  
ACCTCAGTGAGCGCGTTTCGCTTGTGGTATCGACGCTGCCAGCTTGGCCGCGCGTGTCC  
GCGCCCTGGTTCACAGCGCGGCCTGATGCGCGGCCTGCTGCTGGTCTGCGTGTGCTTG  
CGGATAAGCGCCACCTGATTGCCCGGCACTATCAACTCGGGGTTCGATGCCAGCATTTCG  
GCGTAAGTGTTCGGCCAGCGGTTCGGCGTCGAACTTGTTCGAGCACTTCGGGCTTGTATGCCG  
GCCACCGCGCCCAGGTTGCCAACGACACTATCAACCGAGTTCGACGCAATGGCGCGATGG  
GCCGGCGCGCACATGGAAATGAACTCCACGTTTCAGGTCAACGCCCTGCATTTCTGCGCC  
GGGGCGGCAGGATGTTGGCCTCGACCATGCGCTGAAACGTCAATTCGATGAGCGGGTTCG  
AGGATTTCTGTTGTGCATCCGTTCAAGCACCGGCCCCAGAATGAGCAGCTTTCTCTCGTTC  
CGCTCGGCAACTTCGGTGGCGGTTCATCTGCGGATTGGTGGCGTTCGGCGAGCATGAGGAAC  
AGGTCGGCGTAGAAACTCGCCTTGTATGCGCTCGGGCACGTCCACGATGTCAGCCAGAAGG  
TGCGACAGGTCGAGTTTGACCTTGAACGCGGTACGGATGCCACCGTTAGGCGCAGCCGCG  
TCCACATAGGACAGGCCCGCCCGCACGGTGTGCTGATGTCCTGGTTCATGGCGGACACCGGC  
TGTTGCAGCGCGGGTTCCTCTTGTAGTCCATGGCCTGCGCCATGCGCAGTTGCTCATGT  
TGTAAGTGGCGCACGTCGCCAAGGCTTCCATTGCGGGGCTGTTGCCGTAGATGTCACCG  
CCGACCAAGGCCAACCGCGGGCACAGTGCAGCGAACGACCGATAGCCTGATTCGCGCAGC  
GTGCGGGTTTCGTCGGCGCCTGGCTCGAAATAGACCGACTTCCACGCCATGTTGCGGTTCG  
TCGCGCTTGTTCGGTTCGCGGTTCGGCGCGCGGCTCGATGGCGTGAATGACCGCAACCCAC  
TGTTCCAGCGCGCGCGGTTCGAAACAGGCTTTGCACGGTGGTGTGCTGCACGTGTCCTTGCCG  
AATTCGCGCACCATCTGCGCGACTGTGATCTGGAATTCTCGATACAGCGTATTGACGCGG  
CCCTGGTTGTTCGGCCGCGATGGCGTATTCGCCCGCCGTCAGCGAATGGTGTATAGACCACG  
GCGTCGAAGTCGGTTCAGCACGATGCTGCTGGCCGTGCCGAACCGCGCCGAGTTCTTCGTAC  
ATGGAGGGCAGCGCGCGATAGGTGTTTCGATTTGGCCAAAATCATCAGCATCAAGTGCCTG  
ACGTTTCGCCAGCCACGCCTTGACGGCGGAGGACTCGTCCAGTTCGGGAATCGAGGTTGTC  
AGGCGGAACAGGGGCGGGCAGGGCTTGTTCATGCCCGCCATCATCCCCGACGCGAGCACG  
CGCAGCGCGCGCGTGCCTGGTGTTCGAGGATGTTGTTGTGCCGCTTCTCGCCGCGGTTG  
CGATCTTGCACGAAGAAGCGCCGCGCGCGCCAGCAGGTAGTCGCTGATTTCTTCCAG  
TGCGACATCCAGCTTTCGCGCTCGGTGCGCAGTTGCCCCAGCGCGAAAGCAGCAGTTG  
CGCTCGGTTTGTTCGGCCACGTTATTGCCCCAGCAGAGTGGACTTGACCAGGGTGTAGGGC  
CGATTTGGTCAACGCCCTGCGGGCCGGTTCAGCATGGTGTGACTGGCCCGACTTTGCCGC  
GCTGCCGACAGCCGACAGCGCGCGCTGCGAATTGGGCTGCTTCTGGTTCGCGCGGTTTAA  
CGACTGCTGCGAGTCGAGCAGTTGCTGCTGCATGATCTTGGCCTGCTGTTGGTAGGCATC  
GGTCTGCTTCTGGTATTCTGCGTTCAGCCGGTTCGGATTTCGGCTTTCGCCTGGTTCGGCCTG  
CTGCTGCGCCTGCTGTTGGGCTTGTGCTGCGCGCTGCGTGTGTCCTTTCTGCTTGT  
CGACATGTACTTGTTCGCCCGACGCCAACGGCGGGCGCCACGGCGACAGCGGTAACGGC  
TCTTGACATGATCTATTTCCCGTGAAGGTGATGGTTTCGGCCCCCTGCTGGTGGGACAG  
CAGTAGGTCGGCATCGTTCGGTGAATTCGGCCTCGGCCTCGGCCAGCGACCGCGCCTCGAT  
GGGGAACAGCATGGTTCAGGTTCGGTGTTCGGCGTTCGCCACGAATGCCTGTTTGGCGCCGGC  
ACTGGCCGGGATGACGTGGTAGCCGCGCAATTTCGACGGCCTCGCCGCCAATGAACACGGT  
GGCGTGCCCGCTGAAAATCAGCTCGGTGGATCCCTTGTATGAGCGCGCCGGTCCGTGTGAC  
GCCAGCTGGGATGCGGATGGGTTCGCGCGTACACGCCGGCGTGGACCAGGTGGGCGGTGGG  
AGTCACGACCTGCGGCAGCTCCGCGAGCGAGCCTTCCAGGAGGCGCACGCTGTCGATGGC  
CTCGGCCGACATCGCCGGCAGGTGCGGGCGGGGGGCGACGATGGCCGTTCATGCGTGCAGC  
CCCCGGTAAACGTGCGGTTGGTTTCGCGGTAGCCGGCGGGCGGGCAGCATCTGCACCAGG  
CGACCCTCGGTTCGGGCCGACAGGTACAGGCCGGTAGCGCCAGGTTCGCGGGCCAGTGCC  
TCGGTGGCGCGCAGCAGCGCCATGCCGGCGCGACCGGGCCGATGCGCCGCGGCTACGAAA  
ATGGAAGTCCGTGGTGGCGATCAACTGGCCTTTGAAGTGGCGCAATGGCGTGACCAGCAGG



CAGGCGAAACGCACCAGTTCCTCGCCCCGGAATACGCCAAGGAAGCGCGCCACGCCCGCG  
GCTTCCATGCCGGCATAGGCGTGATGGTCAGGCGCACGCCCGGCGACGTTCGGCATTGTC  
GATTCATGCGAGTAATCCGCGCACAGACTGGCGAAGGTGGGCGCGTTCGGCCAATTCAGCG  
AAGGCGACGTGACGGACGATTGCGGTTTCCATGCCGTGCACAGTAGCGGCGACCGCGCGG  
GGCACGGGCACCCCGCTACATGCGCGCGTAGGGGTCGTAGTCCAGCCGGCTGCGCGCCTG  
GCCAGCGCCTCGACGGCTGCGCGCTTCGGCGTGTCCATGAGCGCGAGCACGTAGGGCGCT  
GCCAAAGTCCGGCGAGCGGCCGATCTTCTCGATGATGTCTCGCGGCTTGCCACCTTGAG  
CGTGGCGCCGGACAGTGACCACGTGGGGGCGATGAGGTTGGCGAGCAGCCGCGGGTTCAGG  
CGGCAGAGCGATGCCCGTGTGTTGGTTCGGGTCGAGGGCTTCGCGCATTTCGCCACCACAA  
CTCGCTGCGCAAGTTGAAGAAGCGCAGCCGGCCCCACTGGTTCGGTGCCGCGCGCGGCCTT  
GGCGACATTGACGCCGACGACCTGCTGCTTGGCCTGCGCCAGGAAGTCGTAGGGGCTAGC  
GCCTACGCCGATCACGTCCAGGTGGATGACCGCGTGGTTCGCGCAGCGCGGGGATGGCGAG  
GCCGGCCACGGTTCGGGCCGTCCGGCGTGTCTTTGCCGGGGTTCGGTTCAGCGGCACGTGCAA  
ACACATGGCGTGCCGGCGGGACAGGATGGTGTGTCGCGCCCCGCCGCGGGGCCACGTCCAC  
GCCAGGCTGTCCATCGGTGCCAGTTCGGTTCGGGCTGCTTCCACCGGGCCTGCGAGGCCTC  
GACCCATGCTGTGCGAACAACCTGCCACGGGTTCGTGCTCGATGCCCGCGTTCGAAGTCGCC  
GTACAGCATCTGGCTGCGCAATGGCTCGGGCAACTATTGCAGGGGGACGAGATAACCGTT  
ATCGACGTAGTACGTGTTATCGGTCTCGCGCGCCGGAATGAAGGTGCGCGACTTGGGCTG  
GATGATGTCTCGGGGTTGTAGTCCGCGGGGTCGAAGTCGTTCTCGACGCGCCACCAC  
CAGCACAAAGGGTGCCGACGACAGCGGGTTCGCGTCCGAGTCAAACCACGTGTCGCGCGA  
TCCGCTGTTACGGTTCGGGCAGCATCGCCACCAGCGCAGCGCGCCCGGCGCCGTAGGATA  
CAGCGGGTGCTTCTTGTCCAGCCACGGGGCGAAAAAGTCGAGAACCACCGGCCCTCGCT  
AGTAGTCGGCGGGTTGAATGTCATGAGCACGCGCGACCGCTGGCCCCGGCTTGTGTTGTGCG  
GTTCAAGCCCATGACGAAGCGCACCTGTTGCTCGCGCTGCTCGGTCACTTCGTGCAATGC  
CTTGAGGTCGTGCGGCCGGCCCTGCCACCGGCGCTCGTTCGCCGGGATTGTCCAGGCCGGC  
CAGTTCGCATAGCCGGCCACCGGGCAGGCGCCAGAAGCCCTTTTGCAGTTGTAGCCGTC  
CGTGACGTCCATGATTTCCGTCATGCACTGCACGAAGCCCTCGGTCTGTGCTTTGTGCGG  
CCTCACTATGAGGGCGCGCTCGTCCCTGGTTCAGGGTTCAGGCACGCGATGAGGTCGGTTTT  
GCCGACGCCGGCAGCGTCCCCGGCGCCGATGATAACGGCTTCGGAGTTGTACGCCGCGGT  
CTGCGGCCCAAGCAGTGGCCACCACGGCGGGCGTGGTTCGCCAGCAGCGCGTCCACCTCGGC  
GAGTTCGCCCGCGTCATGTACGTGATCAGCCGGCGGATTTTCGGCAACCCTGCACATAACC  
AGCACCGCGGGCGGGTTCGTGCTCCTACCAGGCGGCAGCACGCTGGGCGCGCTGCTGGGCG  
GCGGCAACGATTGCCGCGATGCGCGCGGGCGCGCTCGGTATCGTTGATCTGCACCGGGCCG  
CCGCTGGGGCCGGGCAGTTCATGCTGGTCTTGTGCGCCGTACTTGGTTCGGATGCCACTTT  
GCCAGTAGATTCAGGCGGGTTTTCGACTTGCAGCTTGGGGTGGCCCAGCATGTCGCCGCC  
TTGACCTTGTAGCCGTGGTCCGATTCCTCGGTTTTCTCGCCGGTCTGCGGCGTATGGGCG  
ATTTTCGAGGCTTTCTCGGGCATGGCATCAAAGCCCGCGCGGGCGGGTTCGCTCCATGCGC  
TCGGCGAACTCGGGGCGGGCCTCAATCCAGTGGTACACCGTTCGCCATGCCGGCATGTGT  
TCGTCTAGGCAGCTTTGGCGCAGCGGCTCGCCGTTCGCGATGTGGTTCGAGATTTCCGGT  
CCGATGGCTTCGTTGTAGATCGGGGCGTTTTTTCATGCGCGCAGTTTTTGCGCGCGTCCCG  
AAGGCACGGGCACCCGCCGGCCTGGTTCGGTTCGCGCATCGCGCGCGATGGATGCCATCAA  
CGGACAGGCACGGTCTTGACGCGCACCGCGAACTGGCCGCGCCGCTCGTATGGGCAGATT  
TTTGCAATCGCGCCCTTGGACTGCTCGAACTTCTCGGCCAGCACGGCGTAACTCATGCC  
TCGACCTCGTGCAGTTCCCGGATGCCCTCGACCTCTGCATCCGTCAGTTTGGCATTTCGGG  
AGATCCTCGCCGACTCGCAAGCCGTCATTCACCTCCACGGTTTTCCAGTATGGCACCG  
CCCTCCTTGAACGTGCTATTTTTTGCTTGCCTCGTTTGCCTCGTTTCTCATGCTTTTTTG  
AGTAACTTTCTCAAGTACACGTATGAGAAACTTCTAAAAAATGGGGTAGAAAAGAGGCCA  
AACGAGGCAAACCCAAGTTGCCCGGCGCTTTGAGGACGTAATAAAAATGCGTATTGCAAAG  
CCGGGCCACCGCCAGCGCGCCCGCTGCGATTCTATAAGGCGCAAGAAAATGCGAATAAGT  
AAAAAATTGCTGATTGCCATAGGCGTGCTGTTTTTGGCAGGCTGCGCCGCCCGAGGGAG  
CGGGCGAATTGGGTAATGGTTCGGCGAAAGCAAGGCTGACGGCAGTGCAGCCTTGGGCAAC  
GACGTACCCGCTAAATACGGCGTACGGAAACCCCTGTTCGAGTGGGACATCAACCATGCC  
AACACCGAAGCCGACCGACGCTGCAAGAACTGCTGCTACAGCGGCGCGGATATGTACCGT  
GAAGGACAATTCCCAATCCGGAAAACGTGTCATGCTTAGGGCGTCAGCCCTGCTGGTTCG  
AAAATCTACCGGGTGCAGTACGAGTGCCTTAGCCTGCAAAGCTGACGCCGCGCGCATCAC  
TCGAAGTCCCCACGCGCCGCACGCGGATGCCTCGACGACCTTGCCGCATATTCCTTGC  
GTGCTGTGATAGAAGGAAATCCTTTGCTGTCCAGCCGGCGCCCCAGGCTCTTGGCCGAG

GCAATGAACCGTAGTTCGTTCGCGCGCCTTGGCGAAGGATTCCCACGACGCCACAGGCCG  
GCGTTGCTTTCCACGTAGGCCGGGCGACCTCGCAGCACTCGTCCAGCCATTCGGCCAGC  
AAATCCATGTCGCTCTTGTAGTCGTTCGCGCGCCTGGCGCACCTCGCCCGGCGGCCGAGG  
CCCTGGCGCTGGTATGCCAGCGCGCCGCTCACGCACCACGCGAGGATGCCGGCGGCCTCG  
GCCGCCAGCTTCTCGGCGCGGTTCGGGGTCTTTCGTCAATTTCAAGTCCTGGTTCGAAGTTG  
CGCGTAAAGGGCACCCGGCAGCAGGCGGCGCCAGATGGCGTGGTTCGTTCGCCCTTGACGATG  
GGCCGGTGGTTGGTTCGGCACCAAGCTACCCAGGTGGGCGCCACCTCCACCGTGGTCTTG  
GAATACAGGCCGCGCGCCGGCAGCGGGTTCGCCGCGGTCATGGACTGGATGAGGCCCTCG  
CGAACTCGCTGCCCTCGCCGGCTCGGACACGTACACGAAGCGCGCGCCGCGCAGCCGC  
AGCACGTCCTCGCGCGCTGACCGCGGTGGCGCCGTCCGCGCCGCTTCTCAAGAGCGTG  
CCCGCGCTCGCCATCTTTGCGTGCTCGCCAGCACGTTCGCGGATGGCACCCAGCACAGTG  
GACTTACCGTTGCTGCCCCGACCCGGAGGGGATGGCGAGCACGTCTTCGGAGGGCTGGGCC  
ATCAGGCTTTAGCCGATGAGGCGCTGGAAGAAGCCGATCATGTGGGCGTTCGCCGAAGAAC  
ACGTCGGCGACGGTATGCTCGACCAGCGGGCAGGTGGCCGCGGCGTTCGTATTCCGTAGCG  
GTGATCGTGGTACGCGGTACGCCTGGTTCGGGCGGCAGCAGCTTGCCGGTGTTCAGATCG  
ACCACGCCGTTGCCCGCCAGCAGGTGCGGCGCCTTGTCCAGGTCGGCCACGCCGACG  
ACCACGCGCGGGTTCGGACTGCGCCAGGCTCACCATGTTGCGCACCATGACCGCGCGCTGG  
GACACGGCGCAGAACTTGAAGAAGTTCGGCGCGCTCGGGGTTCGGACTCGATGGCCTTGGCC  
TCGTTCGGGACGCGCGCAGATGGTTCCCTTGGCGAGGTGTTCCAGTTCGACGCCGGCGGCG  
CGGCGCCAGTAGATGCCTGTCCAGGTGAACCAGCCGTCAAGTTCGGCACGTACATGAGG  
CCGTCGCCGTCGTGGCCGAGCATCCTCTCGGCATTGCCGAAGTTCGGTTCATCTGCCGGCGC  
TGCTTGTGGAACGGCACGACCTTGCGGCCCCCGGCCATCGCGGCGCGCACGTCGGCCACG  
GGCAGCGTGGTGACGGTCACTTCCCTTGAACCGGGCGCGGATGAGGCCGGCCAGTTCGCGG  
CGCAGTGCCAGATCGGTGCCCGGGGCTCGCCAGCGCGGCGCGCCACGTCGTTACAAGG  
TCGATGCTGTTCGGCGCACGCGAGGATGAGCGCCTTGGCATCGTCCACCGCGGTGGGCTTA  
TCGGCGCGAACTGCGTTCGCGCTTGCCTGGTTCGCCGATCTTGAGCAGCCAGCGCGCCGTC  
GTCGGGTTCCGGCCGGAATTGCCGAAGCTGTCCAGCACCGCGCCACGTCCTCGCTGCTG  
GCGTAGTTGCTGGCCGTCGCCGACCACATGTCCACAAAGCCAGGGCCTCGCCGCTGCCA  
TCGAACTCATGATGCAGCGACATGCCGACTTTCAGCCAGGTGTCGTAGTCTCGTTATCG  
ACGTAGGCGACCAGGCGCCGCGCTTCGGCCAGGTCGATACCCACCGGCGGCTCGTAGGCC  
AGGAGCGGGTTCATCCTCGGGCGCCGAGGTCAGGCCCGTGCGGAAGTGGTTCGGGTCACG  
CGCGCGAGGCCGCACTTACTCTGCCATCGCCTCGAACACCTGCAAGGCTTCTCGACTTGG  
GCCTCGGTTCATGACCGGCAGGTCGGACGCGCGCATGGCGTCCAGTCCGCCGAAGAAGTCA  
GTCCACTCATTAGGCCGGCCGGTGTTCGGGGTGGACGTAGTAGGTGACGAACTGCTGGCCC  
TTGCCAGCACTTCAAGCCGGTGGCGGTTCGCCGGCCAAGTCTCGAACCCAGCGCCGGTG  
GCCTTGCCCCAGCCCTCGGACTCGGCGCGGTAGGCCAGCAGAATCTTGGGCGCGTTGCC  
ACGCGCTCGCACGTCGCGCCAGGTGCTCCTGGCACAGGCGTCAAGCGCGCGGCCAGT  
TCCGCGGCGGTTCGTGTCACGTCAATGGCGACGACAGGCCGTGCCCCCTGGCCGCAGAGG  
ACACCCACGCCGTGCTCGGGGTATCGCGTCAGGTCGGCCGCGCCAGGCGCGCGGTTTGC  
CAGTTGTCCAGCGCCGGGCGCTTGTGGCCGGGCTTGAAGGGGATGATGAGGTAGCCGTTG  
CGCAGCAGGGCGCGGCTGTGTGTTGAAAATCGGAACTCTAATTGTCGTCCCCCTGGTCA  
GATCAAATCGGCCACGCCGTAGAACTCGGCCTCGGCTGCTGCCAGGCGCGTTCGCGGAGAT  
TTCGTACATACGCTGTTCGCGCGCTCGATGCCGCTGAATCGTCGACCAGAAAGGACTGCAGC  
GACCCCTGTTGTGCCGCTTCTGCGAACGAGTCTGGCACCAACCCCCCGGCATGACAGG  
CAGTACCAGTTCGCGCATCAGTGCCGTGGGCTTGGCACTCAGGTGCCGCTTGTTCGTTCG  
GCGCACGACGGCCTGGATGCAGCCGTGGAACGTGACATCGTGGTCCAAGTGCACGGCCGC  
GCCCTTGGTGGCCACACCACGTATTTCGACCCGTGCCGGAACATCCTTTGTGCGGCGC  
CCGGGCGCCACGGCCCTTGTCCAGGCGATGAGGCCGCTCCAGAACACGCCGCGCCGGCCTG  
CACCGCGTCCGTCATCGGCGCCAGTTGGCGCCTGTCGGTGCAGGCCATGAAGTAGCCGCC  
GGGCTTGAACACGCGCACGCACTCGGCGATCCACAAGGAACACCAAGTCAGATAGCTGCG  
CTGGACGCGCGACTCGCCGAAAACGTTCGGGTAGCGCCCTGCGAGCCGCTTTGCTTGT  
CTTCGCGTTCGGGGTCTTTGGCCTTGTTCGTTCGCGCGCGAACCCGCCGCTGCTGTAGGGTGG  
GTCGGTGTAAACGGCGTCCACGCTTTCGCTCGGCATGGCGATGAGCGCGGGCAGGGCCTC  
GCCCTGAATCAGTTGCCAGGGGGCGCCGGTTCATCGCGTACCTGCTGAAAGTCGTACAGG  
TTGAGCACGAGGTGGCGCAGCTTCTCGACCACGCTGTATCGCGGGTCTTTGTGCCGGCCG  
CTGTAGATGCGGCAGATGGTGGACTGGGATACGTTCGGTGGCATCGGCGATCTGTTCTTGC  
GACCAGCCGGCGCGAATGAGGGCGCAGACCAATTCGTTCGGGCCGCTGGGTGTAGGCCGGCG

GGAATTGTCGGTGTGTGGCGGGCATGGCTTTCTCCATCGGAATGCGTCAACGCATTATA  
TGCCTAGTCGCATAAAATGGAATAGCCTTAAATAAAACCATGCGTTAACGTATATTTCCC  
CGATGACCACGCTTGCGCAAACATCAACTACCTGTTCCGTGTCCGGGGCGAAAACGCGA  
CTTCGATAGCCGAGAAAGTCGGCATATCCTAGCCGACACTGCACCGGATACAGAAGGGCA  
TCAATCAGCGCCCGAGTGGGGAAACGCTACGCAAGCTGGCGGACTACTTCGGCGTGACGG  
TGGACGTTCTGCTCACGCGAGACCTGTCTACGGGCTTGCCGGCCGAGGCAAACGCGCGGG  
CCAACGTGCGCGAAGGCCCGAACATCAGGGGACTGGTGCCGCTGCTCACCTCGGTGCAGG  
CCGGCGAGTGGTGCGAGATAGCGGAGACTATTCAGCGCGACGAAGCTAAGGTATGGTGGC  
CTTGTCGGTGAAGCACGGGCCCGCACGTTCTGCCTGACGGTCGTGGGCGAAAGCATGA  
AGAACCCCGGCGCGCGGCCAGCTACGAGCCTGGCGACGTGATATTCGTTGACCCCGATG  
TGCCAGCGAACCTGGCGACCGCGTGGTGGCCCGGCTGGAATCCCAGGTTGCGGCGACAT  
TCAAGCAGTACCTGGAAGAAGACGGCCGGAAGCTGCTCAAGGCGTTGAACCCCGACTAGC  
AACCGCGCTATATCCCATCAACTGCGACGCCACGATCTGCGGCGTGCTCATCGGAAAGT  
GGGTGCCTGAATGATGATCTACTACCTGACATACCTTGCCGCCGGCGTGCTGCTGGGCCT  
CGCTGTGTTGCCGTGGAAACAGCGCCTCGGTTTCGCGGGAAGCCGTGCTCCTTTGGCTGCT  
CGCCTGGACCTGCTTCTGGCCCTACCTGCTGCTTTACGCAGCGTGGCAGGGCCTCAAGGC  
CTGCCGTGCCGCTTGGTGGGCCTACACCGGCCACAAGCACCAGTAACTGCTGCAGCACCG  
CCTGACCAGCCCGCAGCGCGCGGTCTTTTTACGCTTAAAAATATGCGCTGACGCATTGA  
CATGGGCAAATTCCTTTCCCATAAATGCGCCTACGCATTTAACGAAAGGCGAAGCCCATG  
AACCTGCGCACCTCACCGACCAAGAATTCCTGCGGCACGCCCTCGCCGTGCAATACCC  
CTCACCAGTTCGCCATAGAGGCCGAGTGCCTGCGGGCTTTCGAGGCGCTGCTCGACACG  
CACGACTCCGAAGCCTACGAACCTGGGCACGGAACGCGAACTCGGGCCAGCGTCTGTGC  
GAAACCTCGACACGCTGGACGCCACGACATTGAACCCGGCGCGCTCGGACAACATATGC  
GAGGCCATGCTGATCGGCCCCGCCAACACGGCCGCGTTGCTCAACGCCCTGGCCGCTGCC  
GGCCTCGACGCCCCCAATCCCTCAAGGCCGAACCTCGACCTTGCCAAGCAGTTCGGCGCC  
CTCGTTGAGGACGCGGCGGATGTTTTCTCGCGCCTGTCCGAACCTACCACCACCCCAAAC  
AAGGAGTAATCACCAAGTCCCTCGAAGCAGCAATCCACGAAAACACCAGCGCGTTGCGCG  
ACCTGATCGCCGCCATCAAGGCGGGCGTCCCGACAACCGCCGCCAGGTCGCTGCGGTGCG  
CCGCCGAGGCCCGGCCGCCAGCAGGAAGCCAGGACCGAAAAAAGCCGCGCGCCACGT  
CTGCCAAGACGACGGCAGCGACTGCCCTACCCCCCGTACTGCTGAGGTTGAGGGCGGCCG  
ATGCGCCGAATCCAAGGGCGAGAACTCCGCGCCCGTGCAGGCTGGTGTGATGCCGGCCAGG  
GTGCTGCCGCGGCGACGCCGCTCCGACGTATCAGGACACCGACGACGCTGTGACCAAGC  
TGGCCCGCGTCAAGGGACGCGACGCCGCGGTGCTGTCTGTGGAAGTTCGGCGCCGCGA  
AGCTGCCCGACGTGAAGCCCGAGCAGTTCGCCGACGTGCTCGCCGCATGCAATCAGGCGA  
TGGAGGGCTGACGCCATGACCGCCCCATCAAGAAAACCCCAAGAAGGCGGCGAAGTCC  
GCCCTCTGCACCTTGTGGTGCGGCGCGTCTGCCGGTCGGAACACCAGCCGCAACGGC  
TTCGCTGGCCGACAGCGTCCGGCGCCGAGATTAGCGCGCCCGACTGGAAGGACAACAAG  
AACTGCGGCCACGGCCTGCACGGCTGGCTGTTCCGGCCAGGGCGACCACGGCTGCGTCGAT  
TACTGGCAAGACCCGGACGCCAAGTGGTACGTGCTGGAAGTGCCAGCGACAGCATCGTG  
ATGCTGGGCGGCAAGTGCAAGTTCCCGCGAGCTGTGCTGCGCTTCATCGGGTCGCGCAGC  
GACGCTGCGGGCTACATCCTCGCCCGTGAACCCAAGGCTATGAATGTCGCCGTGATCGGG  
CTTGTCGCGAAGTGGGCGATGGTGGAGTTGCGGAAGTGGGCGCCCTCGGCACGGACACC  
GCAGGCTATCGCGGCACGGCCACCGCTGGCTATCGCGGCACGGCCACCGCTGGCTATCGC  
GGCACGGCCACCGCTGGCTATCGCGGCACGGCCACCGCTGGCTATCGCGGCACGGCCACC  
GCTGGCTATCGCGGCACGGCCACCGCTGGCTATCGCGGCACAGCCACCGCTAGCTATCGC  
GGCACGGCCACCGCTGGCTATCGCGGCACGGCCACCGCTGGCTATCGCGGCACGGCCACC  
GCTGGCGAATCCGGCACGGCCACCGCTGGCTATCGCGGCACGGCCACCGCTGGCAAATTC  
GGCACGGCCTCCGCTGGCGAGAAAGGAGAACTCCGCATCCAGTGGTGGGAAGCCAAGGCC  
GAACGCTACCGCACCGTCTGGGCTACCTCGGCGAGGACGGTATCAAGGCCGACACCAAG  
TACCGCCTCGACGACAACCACAAGTTCGTGGAGGTGTCGGAAGGACCCCGCGCAAATTC  
ATGTTGACGGTAGCTCCCGCGCCCGCGGGCACATCTTCGTGTTCCGGCAGCAATCTGCGCG  
GCACACACCTGGGCGGCGCAGCAGCCGCTGCACACAGAGACTAAGGCGCGGCCTGGGGCG  
TTTCCGAAGGGCGTACGGGCCACGCCATCCCCACGGTCGCCGTGACCGTCGTGT  
CGCGCGAGTCGCTGCCCGCCATCGGCGCGGCTGTCGAGCGTTTCATCGCCTACGCCACGG  
CCCACCCGCATCTGCTTTTCTTCACTCGCGTCGGCTGCGGCATCGCAGGCCACCTCG  
ACGCCGACATCGCGCCGATGTTCCGCGACGTCCCCGCGAACTGCTCGCTGCCCGACACGT  
GGGCGGCGATTCTCGAAGATTAAGCGCGGCGGCGGGTGGTACTGGCATGAGCACGCA

CGCGCAACTTTCCCCGAGCAGCGCGCACCGCTGGTTCGCACTGCCCCGGCAGCGTGGCCCT  
GGAAGCCGAATCCCCGATGATTCCAGCGACTTCGCCGACGAGGGCACGGCCGCGCACGA  
ACTGGCCGCCATGTCGCTGACGAACGGGCTGGACGCCAGCGCCTTCTGGGCCGCATCAT  
CGAGGTGAACGACAAGGGCTGGTAAGTCACCGCCGAAATGGCCGAGCCCGTGCAGAAGTC  
CATCGACTACGTGCGCGTCTTGGGCGGTGAACTGATGGTTCGAGCAGCGGTTGGGCGTCGA  
GGCTGTCACTGGCGAAGCTGGCGCCAAGGGCACGTCCGACGCCGTGGTGGTGTGCCTGA  
CGAACTCATCGTTGCCGACCTGAAATATGGCCGTGGCGTGAAGGCGGACGCCGAGCGCAA  
CAAGCATCTGGCGATCTACGCACGCGCCGCCCTGGACGAGTTCGGGTTCTGGGTGACTG  
CAGGCGCGTGCCTGGTCATCGTGCAGCCGCGCCTCGACCATATCAGCGAGTGGGACAT  
GCCCATCGCCTCGCAGCGCGAAGGGCGGAGCCTGGATTCTTCGTCCCAACAGCAAGCC  
GGCCGCTGAGCGTGCAGCGCAGTTCATCGGCAAGCCGGCCGCGAGGTCAAGCCCGACGA  
CCTGGCCCCCGGTGAGAAGCAATGTTCGATTCTGCAAGGCCAAGGCCTCGTGTCCGCGCT  
GCGCGACCACGTGCTGTCCACCGTCGCCGACGACTTCGTGGACGTGTCCAGGACGGTGGC  
GCCGCGGATCGAGCACGCCGCGGAGCGCACGGTAGACAACGCCATCCTCGGCAACCTGCT  
GGGCGCGGTTCGATCGGGTCGAGTCTTGGTGCAAGGCCATTCGCGCGATGGCCGAAGCCGA  
ACTGCTGGCCGGCCATCCGGTGCCCGGCTTCAAGCTGGTGGAAAGTTCGCCGTGGTGGCCG  
CCGCTGCACGAACGACGCCGAGGTTCGAGGCCGCGCTCAAGGCCATGCGTCTCAAGGTGCA  
GCAAATGTACGACCTGTCCCTCATCAGTCCGACCACCGCCGAGAAGCTGCACAAGGCCGG  
CGACAACGGCCCGTGCCAGTGGCCGAAGTTGGAGGGCTTCATCACGCAGTCCGATGGCAA  
GCCAGCGTGCACCCCGAATCCGACACGCGCCCGGCCCTGGTTCATCCAAGCCGCAGCCGA  
CGACTTAGCGGACGTGAGCGGGGAAACCGTGGAGGACTTGGTGTGAGGAACCGCCCGCCT  
GTTCAAACGACGCTGCCGCCGAGGCCATGCGCCTGCTGCACCAGGCGGCACAAACGCC  
ATCACCCGAGCCGACCCGCTCGCGCGTGTGAATGCCATCGAGAAAGCCACCGAGCGGGTC  
AAGCGTCAATACCCCATTTTTTCAAGGAGTGAACACCATGAAGCTGAAACTCAACAACG  
TGCGCCTCGCTTTCCCCGTTCTGTTCGAGGCCAAGACCGTCAACGGCGGGGGCAAGCCTG  
CTTCTCCGCATCGTTCCTGATCGTCCCCAGCGATGCGCAAGTCAAGGCGCTGAACCAGG  
CCATCGAGCAGGTCCCAAGGAAAAGTGGGGCGCCAAGGCCGACGCCGCGCTCAAGCAGA  
TGCGCGCCAGGATAAGGTGTGCCTGCACGATAGCGTCTCAAGGCCAACTACGACGGCT  
TCCCCGGCAACCTGCACGTGTCCGCGTACCGCGCCACGCGCCCGCTGGTACCGACACAG  
ACCGCAGCCCCCTGGCCTAGGCGGACGGCAAGCCCAACTCGGGCTGCTACGTCAACGCCA  
GCATCGAACTGTGGGCGCAGGACAACAACACTACGGCAAGCGGGTGAATGCGGGCCTGCGCG  
GCGTGCAGTTCGTGCGCGACGGCGACGCCTTCGCGGGCGGTGGTGTGCGGAGCGAGGATG  
AGTTCGACGACATCACCGAGGGCGCCGCGGGCGGCCGACCTGGTGTAAACCAGCGCCCCGG  
CCTTCGGGCCGGGCGCTTTGGCTGAGGCGGACCGAGACGCGTCTTGCACGCACCGGAGAT  
AAGCCCCGGCGCCCCAGCCAAAGCGAACACACCCAGACAACGCCCTGACCTACTTCGACG  
AATACGACTAAGACTACGACCAGGAGCCGCGCGTTCGTCACCTGCAAACGCTGCGGCAAGA  
CCGGCCTGCGCTGGGAAGATGACGGCGGGCGAGTGGGTGCTGATGGAAGGGCACTACAAGA  
TTCACCGTTGCGACATTCGCAAGGCCGCTCTCGACGACTTCGAGGGCGGTGTGATCAGCAC  
CCTATTCTAGACCTAGAAACCTGCTGCCAGGTGCCTATCCAGAACGGCACGCACGCTTA  
CGCCGAGAAGGCAGAGGTGTTGCTGTCTGCTTACGCGCTGGACAATGGCCCCGTGTACGT  
CTGGGATGCCGCCAGCGGGGAAAAGATGCCGGACGATCTGCGGTGGGCGTTGATCGACGC  
GAACGTGCGGCTCTGCGCCCACAATAGCCACTTCGACCCGAGGGTGTGCGGGCACGCCAT  
GCCGACTATCCGCTGGCGCTGCCGCGATGGCGGGACACGATGGTCAAGGCCCTGGCGCA  
CTCGCTGCCCTGCGCGCTGGGGGATCTGTGCGACATCCTCAAGGTGCCGACCGACAAGGC  
CAAGGACAAGGCCGGCAAGCAGCTAATCATGCTGTTCTGCAAACCGCGTCCAGCCACCAG  
CAAGCTGCGCCGCGCCAAGCGCGACACGCACCCCGCCGAGTGGGCCTAATGCGTGGAGTA  
TGCCGGCCTCGACATCGAAGCCATGCGCGTGAATTGACCCGAAGCTGCCGGCCTGGAACCTA  
CCAAGGCACCGAGTTGGCGCTATGGCACCTCCACCAGACCATCAGCGACCGCGGGCGTGAT  
GGTTCGATAACCGACCTCGCAAACGCCGATCCGCGCCGTGGAGCATAACGAGAACGTGCT  
CGCGGCGCGCACCAAGTACATAACCCTGGGCGCGGTGCAGGCGGCCACGCAGCGCGAAGC  
CATGCCGCGCCACGTGCTCGAGGCCTACGGCCTCGACCTGCCAGACATGCAGCAATCGAC  
GCTGGAAGGACGAATTGCCACCCCGACCTGCCGGCCGAACTGCGCGAACTGCTGGGTAT  
CTGTTTGCAGGCCAGCACACCAGCACCAATAAAAACCTCGCAAAGGGCGTGAG  
CAGCGACGGCCGCTGCGCGGCACGTTCCAGTTCAACGGCGCCAGCCGCACCGGACGCTG  
GGCCGGCCGCCAGTTCCAACCGCAAACCTGCCGCGGCCCTGTGCTCAAGCAGGACGCCAT  
CGAGCGGGGCATCGCGGCTCTGAAAGCGGACTGCGCCGACCTGCTGTTCCGCAAACGTCAT  
GGAAGTACCAGCAGCGGATACGCGGCTGCATCGTGGCGCCCGGGGGCAAGAAGCTGGT

CGTCGCCGACCTTTCGAACATCGAAGGACGCATGATTGCGTGGCTCGCCGGCGAGGATTG  
GAAGCTGGCCGCTTTGCGTGAATTCTACGACGGCGCCGCCCGACCTCTACAAGCTGGC  
CTACGCCAAAGCCTTCGCGGTATCGCCTGATTCGGTCGATAAAGAACAGCGCCAGATTGG  
CAAGGTCATGGAAGTATGCTGGGCTACGAGGGCGGCGTTCGGTGCCTTTCTTACCGGGG  
GGCTACCTACGGCATCGACCTTGACGCGATGGCCGACGCAGCGTGGCCTTGGATCGTCG  
CGACATCATCGCCGAGGCCGAGCAGTTCCTCGCCTGGCGCACCGAGCAGCGACTCGGCGA  
CTTCGGCCTCAAGCCCAAGACCTTCGTGGTCTGCGATGCGCTCAAGCGCCTGTGGCGACG  
CGCGCATCCGGCGGTTTCGTCAATTCTGGAAGGAACTGGAAGAAGCCGCACGCCTGGCGGT  
GTTGCGGCCGGGTACGACCTACGACTGCCGCACGCTCAAGGCCCGCCGCGACGGCGCCTA  
GCTGTGCATCCGCCTGCCGTCTGCCGATTTCTCTGCTACCCCAGCCCGGAACTGGATGA  
CGCCGGCAAGTTGTCTACATGGGGGTGAACCAAGTACAGCCGGAAATGGTCACGCCTCAA  
GACCTACGGCGGGAAGCTGGCAGAAAACGTTACGCAAGCCGCAAGCCGCGACGTGCTCGC  
GGCCAACATGCCCGCCATCGAGGGCGACCGGCTACCAGATCGTGTGCTGTCGGTACACGACGA  
AAACAGCACCCGAAGCCGACGACCGCGACGAAGTCAGCGCCGCTCACCTGGCCGGCCTGAT  
GGCTACCAATCCCCCTGTGCCGCTGGCCTGCCGCTCCCCGCGGCCGGCTTTGAAGGCTA  
TCGCTATCGGAAGGACTGACCCATGAAATTCATTCGACTGTATCGCCTCTACCGCGGCTA  
CGTTTTCCGGCCTTCGCTGGCTTTCAAACCTCGCATGGGGGCGCGGCCATGCGTGAAAGCG  
ACATCGAGAAATACCTCGTCGAGCGCGTCACGAAGCTGTGCGGGCGAGGTGCGCAAAGTGC  
GCTGGATTGGTCGCAACGGCGCCCCGACCGCCTGGTCATGCTGCCCCATCGTACCGTGT  
GGGTAGAACTCAAGGCCACGGCGAGAAGTACTCCCTCATCAAATCCGCGAGCATGAGC  
GGAGGGCGCCGATGGGGCAGCGGTCGCCGTGGTGGATTTCGAGGAAGGCGTGGACGAGG  
TGCTGGCGTGAGTAAACGCAAACCTATTACCACCGCCAGCGAAGCAAATGCGCGGTCAA  
GGTTAGGTACGAGACCCGGCGCGTCGCTGAAATTTATGCGGCGCGGTTGGCGGGACTGCG  
CGGTGTGCGGCTGTATGTCTATAAGTGTCCGCACTGCATGAAGTGGCACCAACCAAGAA  
GCAGCCATGGAACAACCCCATCGACGACTTCCCGGTGGTGGCATGACCTACCGCGAGAAA  
GACATCGCCTACGAAAATGGCCGCGTGTGGGTGCTCAGGACATCAGCTAGCTACACGGTT  
TTCGTGTCTGGCGTGACGCATTCCACCAGCGACAGCGCCTACGAATTGAGCGATGCTGAA  
TCCGGCATCGCAAAGGCACGGGCCGACTATCTGGCGCGGAAGCTGAATCCCGCCGGGTGC  
TTAGTATGACGGTCCGCGACAATATGCTTCGTGTTGAAAATGCCCGCGTGCCTGTGCAAG  
AACACCGTATGTGCGCGAGATTGCATGAGGATAGAACGCACTATTTTCGTCGAGTACCCAC  
CGGGGTTTCGATTCGGTAGTTGCCGCGTGTGCAAGGGCATGGGTGAGGCTCGGGCGCTTG  
ACCTGCAGCTGACCAGGATGGAGCAGCACTGGAAGGACGAGCAGCTATGACCCGCCGCGC  
CTTCGTCCCCCGTGAGTATCAGCAACCTGTCATCGATCACGTGCTCGACGTGCCGCGCGA  
CGCGGTGTGGGCCGGCATGGGAATGGGCAAGACGGGTTCCGCGCTCACCGCGCTGGACAT  
CCTCGAACTGGTTCGAACCAGGCCCTCGATGGTGTGCGGCCGCTGCGCGTGGCCGCGAG  
CACCTGGCCCGACGAATCGACGAAGTGGGCGCACCTGCGCAACGTCGAGGTGTCGGCAGT  
GGTCCGACGACCGAGCAGCGCCGCGCCGCGCTCAAGCGTCCGGCCAACGTGTTACCCC  
GAACTACGACAACCTGCCGTGGCTGATCGAACAACCTGGGCGACCGCTGGCCCTTCCGCAA  
AGTGGTGGCTGATGAATCGACGAAGCTAAAGTCGTTCCGGTTGCAAGAGGGCGGCAAGCG  
CGCGCACGCGCTGGTCCGTGTCGCACATGCCAAGGTTGACCGATTCATCGAACTGACCGG  
CACGCCAGCCCAAACGGGTTGCAGGACTTGTGGGGGCGAGGCTTGGTTCTTGACAAAGG  
CGAGCGCCTGGGCCGAGTTTCGGCGCCTTCAAATCGAGGTGGTTCCAGTCCATCCAGGT  
ATGCAGCGACCCCATGCCGTGCGCCTCGAAACGTTGCCGTTTCCCAGCAACAGATCGA  
GGACAGGCTGCGCGATCTGTGCTGTCGCTGGACGCCCAGGACTATTTGACTTCAGCGA  
ACCCATCGTCAACGTGGTGCAGCTCGAACTGCAGGCCAAGGCCCGGGCTTTATACCGCGA  
CATGGAGCGCGAGGCGTTTCTCGCCCTGCAATGCGGTATTGAAATTGAAGCATTCAATGC  
CGCCAGCAAGACCATAAAGTGCTTGAACCTCGCGAACGGCGCAATCTATACCGACGACAC  
GGCGACCACCTGGGCCGATGTCCACGATGTCAAGCTACAGGCCCTTGAATCCATCGTCG  
CGAGGCGGCCGGTATGCCGGTGTGGTGGCGTACCACTTCAAGTCCGACCTCGCGCGCCT  
ACAGCGTGCTTCCCCCAGGGCCGCGCGTTCGACCAGAACCCGCGAGACTATCCGCGACCG  
GAACGCAGGAAAAATCCCGCTGCTGTTCCGCCACCCGGCCAGCGCCGGCCCCGGGCTGAA  
CCTGCAAGACGGCGGCAACATCCTGGCTTTCTTCGGCCACTGGTGGGACTTAGAACAGTA  
CCAGCTAATCATCGAACGTATCGGCCCGACGCGCCAGGCGCAGGCCGACCATGACCGCCC  
GGTGTTCATCTACCACATTGTGCGCCACCGACACGATGGACGAATTGGTCATGGCGCGCCG  
CGAGTCCAAGCGCGAGGTACAAGACCTGCTACTGGAAGCTATGAAAAGAAGAAGAACGTG  
ACCACGCAAACCAACGCACTCGACCACGAGGAAGGCGGGCCACTACAAGGATATGCC  
ATCCAGCCTGTCAAATTCATCCACAAGAACGGCATCGGCTATTTTCGAGCGCAACATCATC

AAGTACGTGAGCCGGGGGCGGAAGAAGAACGGCGTCGAGGACTTGAAAAAGCCCCGCCAC  
TATATCGACCTGCTGATCGAACTTGAAGTGGGCGGCCATGAGTGAAACCGTTGTGCGCGT  
GGCCGCGGCGCCGTATGTCACCATCCCTTTGGCGGCCGTCATGACAGGGCTGACAGAAAA  
AGCCATCAGACGCAAGATCGAGGAAGGGAAGTGGGTCGAGGGCCGGGAATACCGGCGCTC  
GCCGGACGGCGGAATTTTTATATCACTCAAGGGGTATCAGCAATGGGTGCGAAAAGGCGAC  
GGCGTAGAACTCACGGCAGCGCGGTACGGCTGTCTTCACCATCGACGGCGAGCGAACA  
CGGCCGCTGCTCATGATCGACGGCAAGCCTTTGCCGCCTACCGCCGAAACATGAAGTAC  
GTGCGCCGGGTGCAACAGGAAATCCGCGAGCGAATACGCCACGGCACGTTTAGAATGGCC  
GAGTATTTCCCGGCCAGTGGCGCGGGCAGCGGGCTGACGGTGAAGGGCTGGCTCGACACG  
GGCTCGACACGCAGAGCGTGGAGAATTCGACCAAGGCAGGCTACGAAAGCGCGGTCAAC  
CTCTGGAACAACGCGGCAGCCCTCGTCGATAGGGAAACGAAAGCCATACAGGCCACGGTC  
GGCTCGTTGTCTCTGCGCGCGCTCAAGCCCAGTCACCTGCTGACGGCGATTGCGTATCGG  
CCCGATCTGACCGGCGAGACGGTGAACAACCTACGTGTCGGTCATCCGCCAGGCGCTCGAC  
TTGTCCGTGGCCGACAAGATCATCAAGGAAAACCCAGCCAGCGAGGTACCGCGGCAGAAA  
CACCAAAGCCCCCGCCTGACCCGTTGACCCGCGCCGAGGCTGAGGCCATCATCGCCGAC  
ATGGCGAAGCACTACCCCGAGCAGGTCTATAACACGGTCGAGGGCGTGGTTTTTCAGCGGC  
CCGCGCACGTCCGAGGTATTCGGCCAGCGATGGCCCAACGTGGACTTGTTTCAGCCCGAAA  
CCGGCGATTGTGCAAGCGTTGGTGCAGCGGCGAGCAGAAGGACAGCACTAAGACCAACGTG  
GCCCCGACGTGCTGGTAAACAGTCGCGCGCTGGACGCGCTCAATCCGCAGGCCAAGCAC  
ACCCGGATGGTCGGCGATCACGTGTGGAACGACCCCGGTACGGCACGCCCTGGACGGAA  
GAGCCCGCCTTCCGGCGCAGCTACTGGACGCCGTGCCTCAAGCGCCTGGTGATTGCTAC  
CGCCGGCCCTACATGATGCGGCATACCTACGCCACCATGATGCTGATGGCGGGGATGACG  
CCGGCATTGTGCGCGCGGCAGCTTGGGCACTCGATTGAAATGTTGCTGCGCACCTACGCG  
AACTGGTTGGACGGCGCGTAGAACGATCTGGAAATGGCCCGCTTCGAGGCAACCCTAGGT  
GCGGATTTGCCCAAATTCGTCCCAAACCATAAGGCTCAAGCACGTAAGTACTTGAGCCT  
TAAGGAACTTCTT

>NewGenomeName\_32

TGAAGAGAGGTGAGATATTTCCAAGGGAGAACGCGCGACATTTCCGGTATGAGGCGGGAC  
GGAACGGGATCACACGGAACGGCGCTTGCAAACCACTTGCCTAGGTTGAAACAGAAATAT  
ATCTCTCGGGGGCAAGGCCCGCGAGGGCCGCGTCAGGCCGAAGGCAAGGCTCGCGAGGAG  
ACAGTGGTCAACGGTGAACCGCGTAGCGGTTGTCCCGCCCTTGTGGTGGGGGCAACAC  
CGTTGTCCACTGGCGGACGCGGGATCTACGACGACCCCTGCGGACCGATTCTGCGGCATT  
ACATCGACGGCAGCGGAGAAGTCTGAGGGGCGGTTACCTACCTGTCAAGGCAGCCTCCTC  
GGGCTCAATCGGTAGAAGTGGGGCTCGCGAACAGGTGCGGTTGGCGAGCGGGCGATCTCCT  
CGCGCCGGACCGCCTTGATGATCTTGTAATCCACTGGAGTGACACGCCGAACCTTCCGTG  
CCAGCTCGGCATGGTTGTGCGCCGCGGAATTCGTGCGAAAATCTGCCATCTCGCTGGGACA  
GCCGGTACGACACACCACCGGAAAGTAGATGTTCTGTCCGCCCCAGTGGCCGGCCATGC  
GGTCCGCAATCTCGCGCCCGAGCTGGTTGCGCTGGTCCGGCGCCGATGTCCGGCCAGCTCGA  
TCAGTGCCTGGGCGACCTGCAGAGACAAGTCGACCAGAAGCTCCGGCCCTTTGCTTTTGA  
ACGTTTTCGTCTTCATACGGCCTCCGTGCTCCTGTCACGCCATTTTTTTGAGGTGCTCAAT  
CACACGGGATGCCTGGGCGGAACTGAGCCATTTCGAGCGCGTCGACGTGCATCATGCGCTT  
TACGAAAGCGCCAAGCGCTTCCTCAGACCGGTTTTGACGACGCCCCGATCCGCCAGCTC  
AAGCCAGATGCCGCGAATCAACTTCGATTGCTCGTCCGCTGACTGCGCGCGCCCTT  
TTTGGAACGCACTTTAAAGCCGCAACGCTTCAGGTGGTCCAGAACCCTTTCCAGTTCTGG  
AACGGTCAGGTCGGCCGCGGATTCCTTCTTTCCAATCTGCATCAGAACAGCGTGGTAGCA  
GTCATCCGGCATCGCAAGATCACGCTTTGCGACGTGAATCAGGCGGATGAGCTTTTGCCG  
AGCCTGAGGCCCGCGATTAGATTTGAGTACATCGCTGTCGTCCGCTTCGAAGGAAAATT  
CGTCGATTCAACGACTCGCAGGCCGCTCGATCCATATAACGGCGGGAAACCCTCGATGC  
GGCCGGCGTTAAAGGCATCCTGCGGAGAAATCTCCTCAACGGAGGCCGCGAGCAAGCGAG  
CAGCAAACAGCTTCAGAAACGCCTGGAGCGGGCCATGCCGCTCGATGTCTGCATCACCTT  
CAGACCAGAATCGAACAGCTCGCAGAGCTTCTCTTCGGTCAGGATGTTGTGATCGACAT  
CCACCACGATTTTCGTAGCTGAAGTCGTGCGTCAGCACGTATTTTTTTATGTTTCGTCATGT  
CGTCCCTCGCCGTGCGATTGCTTTTCGTGTCCTGGTCGATCGCCGACGGGTCGACGCCCA  
TCGCATCGGGCGTCGCCGCGCAGCTCGACGATTACTTGACGGCGTCCTGCAGCCCTTGC  
CGCCTTGAACCTTCTGGGCTTTTCGACGCTGGAATCTTGATTTCTGCGCCGGTGGCGTGAT  
TCCGTCCGGTACGGGCGGCCCGCGCGCCACGCTGAATACGCCGAATCCCGTCAGCGTCA  
CCATGACGCCCTTGCAGCGACTTCGTGATACCTTCGAGAACGGCTTCCAGCGCAAAGC

CGGAGTCGGTTTTTCGTCATGCCCGTTTTCTGACGCCACGTGATTGATCAGGTCCGATTTGT  
TCATAAATGCTCCGTATGGTGGATAACCGCGAGACGCTCGCGGCCAGCTAAAGTGCTCGAT  
GTCGCAGTTACGCGTTGGCGATGTCGAGCGGAATCTGTACGTATTGGTCCGTGTCGCCGA  
CGCGCTCGTAGACGCGGACGTACGACTTGCTACCGATCACCTGCAGTGCTTCGCCGATGG  
CTCGCATTGCCTCCAGCCAGCGCGGATCGGTGATGTCCAATCGGGCGCAGCGCGAGCACGC  
GGCCTGTGTTGATCTGGCCTTCCCTTGTCGGTTCGCAAACGCCTCCGTGACGATCGCCTGGA  
TATCGGGGCGTGCGTCCGTGGTCCAATCGCGAAGGCACTCGTCGATCATCGACTTCGCGG  
CCTGCATGCGTTCATCGAACGCGATGCGGTCTTGGATGGCACGCTGGATGCGGTAGCGGC  
CGTCGAACGAGTACAGGGTGACGTTGCCGTTCTTGCCGCCAACCTTCGCGCCATACTCCT  
CGGCCGAAAGGTCGATGAAGGCCGAGATATCACCGAAAATTCGGGCTTTCAGCTCGACCA  
GCCCCTTCGATCTCGTTTTGGCTTCGTCCGCCAGCTCGCGAACGAGGCGATCGCGCTCAC  
GGTCGATCGGCTTGATCATGGTTTTCCGGAATCAGGCAGCCTTTCGCGTCTTGCCAGTAAC  
CATTGGAATCTGTTTTCTGTTCCATGTGGTGCTCCTCTCGATGAGGTATTGAAAGCTCGC  
TAGCGGGTCCACCAGCGGCGTATTTCCCTTGCGGCAGAGGCAGACGAGAAAGACGATTCCG  
ATGGCGATAACTACGGCGTCGCTCATATCAATAGGCTTTGCCGCCTTCAGCGAGTCGGTT  
TTCGGGCTTGTGGTCCGGACGCTGCGCATTGAAGGCCAGTTTCTCAACGATCGCGCCAGC  
TTCGTCTTATTGCTTCGCGCCGGCCAGGTCGAATATCCGAATCACCGCGTCCGCGAGTTC  
GACTTCGATCATCGGGCGATGGGGAAGCTTGTGCTCCATCAAACCCTTTCGATGACCTTC  
CATTGCCTCGGCGATTTTCGGAAACGATCAACATCAGCTTCTCTGGTACGTTGTTGCGGGC  
TCGCAGATCGGTGCCGGTCTTCAGGTCCGTCCACCCCCAGACTGAAACGATGCGCCGAA  
GCAGCAATCCGTAAGTGCTGAGCTGCGTGCAAGGTGTTTCGTTACTCGCTTCCATGTT  
GTGCTCCTTGAAAATCGGTGGGTAAGGCATGAGTCGTTGAATCAGGAACCTTCCGAGAAA  
CCGACTTATCAAGCTACCCCCATGTCACTCTGACGCTCATGAAAACGACGTAGGCAAAC  
TGACGATTGCCTTGCCGCTGGACAGTGACGCCGCCCGCACGCTCGCGCAGCACGTCGGCC  
GACTTCGCGAGGTACGGGCCGAGCTGGATCGTCGGCCGGCCGCGCTCGCGCGGGCGAGATC  
TCTTCGGCCAGCACGCGGTAGCCAGGCCGCGCAGCGCCCGCGCGCAAGCGTGCAGGAAC  
GTGAGACGCGAGACGCACTCCGCGTAGAAAACCCGCGTGCCGTCAGGCAGCAGACTTCGC  
GGTGCGGGCAGGTTCAATTTGCACGATGGCGCCCATGTCAGACTCCCTTGATCACGTCGGC  
GGTGATGACCGGCACGCCAGGCCCGCGGCAAGATTCATCGCGGCCGTCAGGAGGTTTCC  
GACCGCGAGCGGGTACAGCAGCGACACCGTTTTCCGGCACGATCGCGTTCGCGTGGTTCAT  
CGTGAGCCGAGTGCGCAGCGCGTGCACGCCGCTTGCCTCGATCACGTCGCCGACCGGCTT  
GTCGAGACGGCCGAACCTTGAATCGGAGGTTTTCGTCCAGGCGCGGGCCGTCGAGCGGGG  
CAGCTCGAGCATTCCGCATCGCTGCACGACTTCCCGAACGTCCTGGTTGCGCTCGGACAG  
CTTGACCTTCAGCTCCGGCTGGCCGATCAGGATGATGGACAGCAGCTTCTTAAATCCCAT  
CTCCAACCTCGAAGAAGCGCTTCAGGTGCTTGAGCGTCGCGATCGGCAGCGCGTGCCTTC  
GTCGATCACGAGGCAATGCTGGTAGCCCGCCGAGTGGCTTTCCTTCAGGGCCTTGTGGAG  
CTGCGCGAAGCGGGCTTCCGGGCTGCTCTTGACCTTCTCCAGCGGGGCCACGGCGGCCAT  
GATTGCTTCCGCGATGTGCGTGCCTTCAGCGTCTTGCTTTATGGTCGTTGTCTCCAT  
CGCCAGCACGTACGGCTTGATGACGATGATCGGATGACTCTCGCGCATCACGCGGTCTTC  
GAGGTCGCGCATCAGCGTCGTCTTGCCGCCGCCGATTCCGCGACGACGGCCAGGAGCCC  
GCCATGCTTCGCAGTCTGGAACATTGCCTCGCGCACGTAGCGAATATCGGGGCTGACGAA  
CATGTCTTCGTGCGACTGGATGTCATCCGCGAAAGGGTACGGAACAGGCCGAAGTCCTT  
ACGGGTGGCTGGTGCAGAACCTGTTTGCAGTAACATGGATTCTCCTTGTGAGATC  
GGTATTGCTGTTCCGGCTGGGAGACCGAGTGGCCCGTCGTATCCGCCAAGACATCGGTCCG  
GCCACCCACCTTTTGCACCTTCATCAAAAACACCTGGGCCTGCGTCCGACACCCCTTTGTT  
TTCCAGGTAGTCGAGAATTCGCTCCCGCAGGTCGAGGTCGTCGAGGCTGCGCGGCCATAC  
GCCGTGATTACGATCTGATCGACCGCCGCCTGCGACAGATTCAGGTGTTCCGCAAGTTC  
GGCCTGCTTGATAGAGGCGCGTTCGAGAACGCTTTTCAGGACCAACATCATTGACCTCCT  
GCCGCTGCGCGAACGAGCGGCAGCGGTTGCTGTTGACCCGCTCGCGGGCCGGTAAGCTCG  
GCGACGATCGCGTCGAGCTGCTCTTGCGGTACGCCGTCGGGATAGCGCTGTTGCAGCCAG  
CGAACCAGTCCGCGCTCCAGTCGACGCCGGCAGCTTCGACCGCGGCCTTGATCTGCTTT  
GCCGCCTCGATCAGCGAGAGCGGCGGAGTTCGACGCGCGGCGCAACGAGGTCGTGTTCC  
GTGCCGCGGCGCGGCAGGTACGTCGGAAGATCGGCTTTGTCGAGGTGCTTGTACGGGTCC  
AGACGGCCGCCGAACGGCAGTGCTTGCCTAGCGAGCTGCTTCAGCGTAGGCAGGAGTC  
GACGTACCTGTCACGAGCTGCTCGATCTCTCGAAGCGCATGCTGCGCTGGCGTATCGGGC  
TGCCGCCGGTAGCTTTCCCGATCACTGCGGCAGTCTCGGCATAGCCGAAATCGCCACGT  
ACGATGAGCGGAACGGCGAAGTACGTCTCGCGCCCGTCTCGCCAGTCAGGACCACCTGG

GCGGCATCGTCACTCCACGGATTGCGCGTGATCATCAGCTTCTCGCCGACCATGACGCC  
GGCACCGACGACACGTCGTATTCTCGCCACGGAACGACATGCGCAGCTTCGGCGTGACC  
TCCCGACTTTCCGGCGAGGCAACCGCCAATTCGCGGCACACATCGATCGACGGCGCCTTG  
ATGAGTTGCTGGGCGGTAATGCGCATCCATGCCTCACTGCGCGTCGCACCATGCCGGCTG  
TGCCTTTCAGTGGCGTTGAAGTGCATACGCCAGCGTTTCGCAAGCGCGTTCAGCTCGTCG  
AGGCTGTTACACGGCTGAACTTGAGGCCCGCTTCGAACTTGCGCTCGATGAGGTTCCCC  
GCGTTCTCAACCTGTCTGGTGGCACGGGCGTTGCCAACCTTGTGGACAATCAGCTCGATT  
CCGAGCGAGCGGCACAGGTTGCGCGTCATGGACGCCGTGTTTCGCCGATCCGGCGTCGAGC  
ATTAGAATGCGTGGCACACCGTGCAGCAGGTCGGCCCCGACGCGCTCCTGCATAGCGTTG  
ATGAGCGTCGAGCAGAGGTTCTCGCCCCGATTCCGCACCCATGACGTACTCGGTGTACATC  
CAGTCGCTCGCGTTGTCGGAGATTTTCGTAGCTCCACACACGATCGGCCGCGATCCGGGCG  
AGGTTCTTTGGCTTGTCTTGTAGAACTCAGCGTGATCCATCACGCGCAGGCCGTTTCGCA  
CGGGCATCGGCTACCGGCTTCAGGTAGTACAGCACGCACAGGCTCGCGTCGATCTGCCAC  
ACGTGATTCGGATGCAGGCGTGCCAGTTCAGTCACTGGGGCCGGTGCAGAGAAGTTGGTTCG  
GGATGGACGCCATACATGCGTAGCGCGCGTTGAATCGCGCTATCGGACAACGGCCGCGAGC  
TCGCCGGTGGACTCGTCGAGAAATTCAGCCCCGATCATGCCATTCGCGCGCAAAATCTCC  
GCCGCGTCACCGACCGTATACAGGCGCTTGCCGTTCTTACGCGTCGACTCCATGAGCGTT  
GCTGAAATCAGCATCGCTTTCGTGCGCGCTCAACGAGCTTTGACCGGCGTCGACACGGCGT  
TTGCGTTGCGTGGTCACGGTGGCTTCTCCAGTTTTCGGGATCAGGGTGGTGAATAACAGG  
CCCAGCTCGCGGCAGGCCGCGTCGTAGATCGCACCTTTTTTGGCGTGGCCGGCCGCGCGC  
GCTGCCTGGGCGACAGCAACAATGCGTTCGTCCAAGACGGCACTCATCGTCGCGAGCCCC  
CGAATCAGTTAGCGGCGCGTGAGAAGTCGGCATCCGCTGACCCGGTTCGACGTATCACGCA  
GCCATTGCGGGACGTCGTCTCCGTACGCAGCGGCCTTGACGCCGAACCTCGTTTCGAAGCT  
GGTTGAGCGACAACCTGGATTTGCCCGAGGACGCCAGCCCTGAAGTCGTTCGTGCGGCGCGC  
CGTGCCTTCGCGCGTGCAGCAAGGTTTCGAAGGCGGCACGCAGGTTGCCGGAATAA  
CCGACTCCGCCTCGAAGGTGATCGCGCTGGTTTCTTTCGGGATTTCCGCTCCTTCTTCGT  
CCGGCGTGACCTTCTTGACGCGCGTCTTCTTCGCGGCCAGCTCGTCGATCTTCGCGTTCT  
TGTCGGACAGCAGACGCGTTTTCGCGCGGCGGCTTGTTTCGCGTGCTTCCCGAAGCCCACCAC  
GCAGTTCTTCACGCTCATGGTGGCGATATCGTCGAGCTTCAGCTCGCCGGTTTGGCCGG  
TCAGCTCCAGCTCTTCGATCTGTTTCGGCGTCGAGGACCAGCATTTCAAAAAGCTTGGTCT  
GATTTCCGGCCGCCTCCAAAAGCGGCGTTAACGCCGCTTTTGAAAACCTTGGTCGCCGACG  
CCATGAACCGTTGAGCTACACGCGGCTCAATCCCCAGAACATCAAGACGCGCACCAAATT  
GGCCGTGCTTATATGCCTCCTTCAGTACTCGAAGGCCACGACCAACCTCGAGGCTCGCTT  
CCACACTACGACGCATGTTTCGCCGCAATGTCGCGTTGAATCAGGTCCAGGTCCGGTGCAAT  
CGGCCGGCAACTGGTACCCGAGCTGTGTAGCGAAAGCTCGGATTGTCGAGTCTCGGTCTT  
GATCAAGCACGGCGAGCTGATTCGCTGCGTCGACCATTCGCGGCATGCCCGGAACATCGG  
CGTCGGTCACGGTCGTCGCGACGTTGTTGGTGTGCTCGGCTTTCGACCTTTCGTTCATGA  
TTTCGCTCTCACAAATCGGTTACTTCGGCGCGGTCCAGAATCTGAACGCGCCAGGTCTCG  
GCGGGCACCGCCTGGAGAGCGCGCAACGATTTCTCTGTGGACTCTTTGGCTGTTGCTACG  
ACTTCGTGCTCGGCGCACTCCAGGCTGGTGAATACCACGCGGTTGAAGGAATCCCCAGGC  
GGGTACACGCAAGCGGTGTACGTGGTGAATTTGGCTGACACGGTTGCTCCTTTACTGATT  
CGTCAGGCGGGTTTGAATGCTGTCGAGGCGCTCGCTGGCGGCCCTCGAGGCTACGGAGGAT  
GGCGACGGCGTGGCGCCCCAGCTTCACGGATGGACGGATGCGGCCCGTTTCGGGAATACG  
CTCCGCGAACCCCATCGCCTCAAGCGTCGCGACATAACCGCGTGATGTTTCGACGGCGAGAG  
GTTTCGTTGCCTTGGTGAATTCGCCGGGCGTCAGGCCATGCGCGAAATGACCGAGCAGAAC  
GTTGAGAACCTCCAGGACCTTCTCAGCGGACTTCGTGGTTGCGTTCGCGGTCATTTCGGCT  
GCTCCAAGGTCGAGTTCGGGCTGTACATGGCGCTCGACGTTGCCGCGATGCCATGCAAGC  
CCTTCCATTGCTTGTGGATCGTCGCGATCGTTTCGTCTGCATTGGCCGAGCCAGTGTAG  
AAGTCGAGCAATTGCCCGACTGCGGCGTTGAGCGTGCCTTGAAGATCTGCATGTCTTCG  
GCCGTCGCGTCGCGGCCGGTTCGCGATGTCGATGATCAGCCGACCGGCGCTTGGCCGCCACC  
CAGCGAGTGACGAAATCGGCACCGCACGCGTCTTCGAACGGCCGGATCAGAGAGATCGGC  
ATACCGCCTGACTGGAACCATTTGTAGAGAGTCCAGTGATCGGCGAGCCCCATGTGTTCC  
GAGATGCGTTCGATGCTGAGATTGCGCCGCTCGCGCGCATGCTCTTTACAGAGTTCAAGC  
GCGTGCCGAAGGCTATGCGGCTGAATACGTTTCCAATTGCGGGCGGCTCATTGGGAAGCCC  
CATTCAAAACGGTTTTTCGGCCGATTCCAACAAGTTCCCATTTTTCGCGCCTATGCAACAAC  
CTTTCGACTCGTAGAATGAAAAGCGGTTACTCCTACGGGGAAAATGTTCCATGACGGATT  
CGGATTTTCAGTGAGTTAGCGGCACGTGTGGACGCTGTCGGGCAAACGATGCTTCGACTTA



TCGGCCACCTGGAGGGACAGGGCTGCATCGACGGCGTTCGCTTTTCGCAGGGCGCTGCGTC  
GTGTCGGCGCTGCTCGTCGCCAACTGCCCGATCCGATAACAGGCACGGGGCGGCGAAGTTG  
TCCTGCAGATGGTGCAGCTGCTTGACGAAGCGAGGTCTCGCCGATGACCGGGCTGTCGAC  
GTGGTGGCCGAAACAGTTGCAGCGCATGAGGTCTTTCACGCTGCGACGCGGTGTCGAGGC  
AATGCGAGCGCTTTTGCCGGGTTCGGCGCAGATTTTCGCCAGCCTTGAGCCCCAGCTTGACG  
GCGATTTTCGTGCGCCTGGCCGCGGACACATTTTTTCCGGCCGCCAGAACCTCGAATACG  
AGATTGGGAGAGAATTTGTTTCGCGATCGCCACTGGGTGATCGAGATACTTTTCGATTGA  
AGCTCCGCGCGGGCTTCAGCGGCGGTACGCAAGTTTCATTGAAGCTCCTGTTAAGGGGCTG  
TCGGCACCGTGGAAGTGCCGACTAGGTTGCCGTTTCGTGGTGGGACGGTGTGAATGAAGT  
ATGGTATGCGTTTGATTACCTGTCAAGCGCCATTTGGGTAAATCGTATGGATTCAATAGGC  
GCGCGCCCGCGCGAGGAGCGTGAGCGGTTGGGGTATATCCAGACGGCATTAGGGGCGCTG  
GCGGAGGTGACCAAGCAATCGCAGATCAAGTACGAGAAAGGCGAGCGTTCGCCGGACGCC  
AGCTACCTCTCGGCAATCATGCGTGTGGGGCGGACGTCCAGTACATCGTCGGGGCGATA  
CGATCGTCGATAGCGTTGGCACCCGATGAACAAGAAGTTCGTTTCGCGGTACCGGTCCGCG  
TCGCTTGAGGTGAAAGCCGCTGCGATTGGCGCGCTGGCGGCCGCAAGCACGACGCGCCAG  
GAGCAGGTCTTGACGGATCCGTAGGACCGGCCATAAAGGTCGAGGAAAACCTCGATCAG  
CAGGGGACTAGTTTTTTCGGTAAAGGCAAGAAAAGAAAATGACCAATGACGCTAACGGGA  
AACAGGAGTTCAACAGGCCGGTTCGGGCAAGCCATACAGGCCGGTGAAGCAAACATCGCTG  
ATCGCTCGGTGAATATCCGGTCCGGCTCAATCGGGAGCGTTGCTGGTTCGCGACATCGTCA  
ACGTCAACCACGGCGTCCCGTTCTCGAACAGCAATGTCGTGAACCTCCAGTTCGGCCCGA  
AGGAGCCCGAAGAAGTCCAGTTCGTGACCAACCATCAGAAGGGTATGATCATGGAGCTGG  
TCGGGCAGATCGCCGGCGCGACGGGAAATGATGTTCTCAAGATTTCCCGGGCCGTATTGG  
CTCGCGCCGGTGCCAAGCGGGTCAAATGGATTTCGACGATAGATACGTTCGATATCGAGC  
AATACCTGTGCTCCTGGCTGAACCGCGTAGCGATCAAGTCCACCGCACCAAGCGCCGCC  
AATCTACGCCCGCTCGGGACAACGTTTGCGAAGACTCACGCCCTGAGCTGACGACGCAAC  
TCCAGCTACCCAGGAGCGGCTCGCATCCACCCGAACGATGCTGAAAGTACGATGTTTCG  
CGCACTCTTGGGCGGCGTCATCCTCGGCTACTACGGCTGGTCCAGTCATCAAACAATCG  
ACCAACTCCAGGCAGCATTTCGGCGGCTGCCAGTATGCGGGGAAAACGTACGCGGTTCGGCA  
GCATCATCGACAACCTCCGAAGCGCCCGATGTTGAGTGTGTTGTGACGTCGGTTCGGCAAGC  
CCGGTGTATGGCGCGATCTCAGCGCACGACGCAAGCACTGACGAGCCGGCCGGCGATTCA  
GTCGCGCAGGCTTGAACGAGCATTAAATTTCTTCCCGTAACGGGAGGCAGCAAATGACCA  
ATCCGAAGAACAATTCGAATTGCGACTCCACCAACAAGGGCGTGCCGACGCGTGTGACGCG  
TCGACTACGGTGAGCGGCGCGACTACAACGATATCAACAAGGGTTTAGAAGTGGTCAACA  
CGCTGCCGCCCGCTCCGCCGCTGCCGACACGGGATAACAGCAATGGGAACGACCAATCTT  
GGCCTGCAGTGGCTCAACCAGCTCTTCGACATTCGCCGCTCGATCCGTTATCACAACCGC  
CGGCGCGGTTCTTCGATCGCCTCGACCAGTTGACTAACATGCTGTCCGTGATCTTCGGG  
TCGACGGCGGTCTACGGGGTGTTGAGCAGCAATAACAAGGCGGTTCGCGCTCGTCGCTGCG  
GGGCTCGTGACGGTGTGTTCCGCGATCAACCTGGTTCGTGGGTTTCGTCGCAGCGCGCGCGG  
GCGCATGCGGATTTTCGCACGCCAGTTCATCGGCTTGAAAAGCGCATGGCACTTTTCGGTG  
CCGGACGAAAGCGTGTGCTGGCGGTGCGCAGCGAACGGCTGACGATCGAGGCCGAGGAA  
CCGCCGGTCTACACGTGCTCAACGTGATGTGCCACAACGAGCAAATGCGGGAGATGGGA  
TACGCGGACGATCAGCTCGCAAAGTTCGGCTTCTGGCAGCGGATGTTCTCCAGCTCTTC  
GATTTTCAGGAGCACGCGCTGCGCTCATCGAAGCCGTAGAATTCGGCTTGCTGTGCGCGG  
TGCCTGTGCCTATGCTGGATGGTTCCCGACTTGGAGTCATCCCATGAACATTCACCCCGT  
CATTGCGTCATTTCGAACATCAGGCCAAGATCCTCGACGTGACTGGCGACCAGGAGAACTC  
CGACGATGCAATCGCGGTGCTCGCTGGTTGGATCGACCTGTGCTCGAACGCCTTAACGA  
ATTTCGATGTCAGTACGCTCGTAAGGATCGGTGGGCTGTTGTATCGCGATGGTCTGAATCG  
GAGGAACGCCGCGCAAGCCGACCGCTTAAGCCGATTAAGAACCTACCCGTACATGCCGT  
CCAAGATGACGGCATATCCACTACGGGAGGTCATATGCCCTTCATCAAGCGCTTCCCGCG  
GCTGACGAGCTGGCTCGTCGCCGCGATCATCCTCGTTGCAGCCATCGCGCTTTTCTCGCT  
GCAGCAACTGCCCGTCGCCCTCTACAAGCTGAGTCTCGTCAGCCTCGCGGCCGTGCTGCG  
GTACTGGTTCGATCGCGGGCTTTTCTCGTACGCGCGGCCGGACATCTATCTCGAAACCGA  
CTGGCGGCATGGACCGGACGGACTGACGCCCGAAGCCGACTATCGAGTCGCCAAGGGCGA  
TGAGCAGGTGTTTCGCCGCGTCCATGCTTCGCCGCGCGGTGATCGTCCCTCGGCGTCGTAGT  
CGGCGTTCGCGCTGGGTCTCTGACCATGCGCGTCTGATCGCCTTTGTCGTGCGGTTGCTC  
GGCGCCCGCGCGCCCGTGGCCGCGCAAGTGCCCGCCGAGGCGCTGCCGTACCGCGCCGAG  
CTGACGCGCAACGCACGTGCCGTCTGGGGCATGGATGCGCCAGTCTCGTCGTTTCGCGGCG

CAAATCCACCAGGAGAGCCGCTGGCGCGCGGACGCCGTCAGCGTCGTTGGTTCGCGCGGG  
ATGTCTCAATTCATGCCCTCGACCGTCGACTAGATCGCGGGCGCCTATCCGGCCGAGCTG  
GGCGAGGAGCAGCCGTTCAACCCGTCCTGGTCGATTCGTGCGCTCGTGCGGTACGACCGG  
CACCTCTGGGAGCGCATCACGGCGGGCCGGTGCATGCGAGCGCATGGCGATGACGCTGTGC  
GCCTATAACGGCGGCCTGGGCTGGGTCTATCGCGCTCAGCGCGTGACGGCTGCCGGCGGC  
GCCGATCGGCAACGCTGGTTCGGACATGTTCGAGCGGTTCAACGCCGGCCGGCACGCGGCC  
GCTTTACGCGAGAACC GCGTCTACCCGCGCGTGATTCTGCGCACGTTTCGAGCCGCGTTAC  
GACAAGGCCGGAGTCGGGCCGGGAGCGTGCTCATGAACTTTCCTGCCCCTGCTTTCGCGCG  
GCCAGTGTGTCGCGGC GGGCGGCCGGCGCTGCGGCGATCGGCGCACTGGCGGCTGGCGCGG  
TCGCTTTCCTTCGGCGGCTATCACGCCGGTGAGCTTGCCGGCGACGCGAAGGTTCGCCAAGC  
TCGAACGCCAAGACGCAGACGGCGCGCGCGATGCCGTCGCACAAGCGCGCATCAAGGAAC  
GCGCGGAGACGCAGCGCGCGGCAGCGCTCGCCGGCGACCTGCTCGCCGAGAAAGCCCCGGC  
ACGCGCTCGAATCCGACGAACTGAAACGGAGAAATTGCCAGTGTACGAGCCAATAACCGCC  
CGGCGCCGGATGCGCCTCTTCAGGATTTGCCTCGCTGCGTGTTCACTGCCGGCTGTGTCC  
GCGTGTGGAACGCCGCCGCGGCCGGTGGTGTGCCCGCGACCAGTGCTGCCGCCGGAG  
CTGTTGCGCCGGCCCCGCGCCGATGACGCCCTTGATTCCGGGGTACGCCAGGACGACATCC  
TCGCCACCACGTCGACGCCAGCCGCCGACCGCGACATCGAATCGCAACTGAACAAGC  
TGATCGACTACATCGAGGGAGAAAAGCAGTGACGTTACAGGTGGAATTCTGGCAATTGGT  
GTCGATGCTCGCGACGTTTCATCGGCCTTCTGATCGGGGCCGGCAAGGTGTTGCTCGTGCA  
GATCGAGCGCCACCAGTCCGACCGCGATCAGAACCAGGAAAAACAGATCAAGGCGGTGCT  
CGAGCAGATCAGCCGGCAGGCGGACAACACGGCGCGCCTGGAGCGCGATTTCTGCGATT  
TCAGGCGGACCTACCGCTGCAGTACCTGCGCCGCGAAGACTACGTGCGCAACCAGACTGT  
CATCGAAGCCAAGCTCGACGCGATCGCGCTCAGATTCGAAAACCTACAACCTCCGGGGAAA  
TCAATGCCGCCCATCAATCCGCTGGGAATCGACCACGCCAAGGTGCGCCGCGAAACGCTG  
CGCTGGTATCTGATTCTGGCCCTGTAGAACGCGCGGCCCGAGGAAGTCGTCGAGGACGTG  
ATGCAGATGACGATGCGCTCCATCTTCGCCGACATCACGGCGCTTGAGGTGCGCAAGGAA  
CTGGACTACCTCGCCGATCGCGTGCTGGTGAAGCTGCGCAAGGAACCGTCCGGCCGCTGG  
TGGGGCGATCTCACGCGCTACGGCGTCGACATCGCCGAGTACACGATCGATTGCGAGCCG  
GGCATCGCGCGGCCGGCAAAGTACTGGAGCCAGTGACATGGGGCGCAGCAACGGCGTGCA  
ACGCCTGCCGAAGCCCCTGCGCGAATGGCTCGAAAGCGCGCTCGTCGAGGGCAACTTCAC  
GGGCTATCAGGAGCTGAAGCAAACGCTTCGCGACAAGGGCTACCAGATCAGCAAGTCGGC  
GATCCATCGGTACGGGCAGCGTATCGAGCGCCGCTTCGCCGCGATCAAGGCGAGCACGGA  
AGCCGCACGCATCCTGACCGAAGGCGCCGCGGACGATCAGGACGCCCGCTCCTAGGCTGT  
GATCGCGCTCGTGACAGCCGAGATGTTTCGAGTCCATCGTCAACCTGCAGGAAGCGACCGA  
CGAAGACGCCGATCCAGGCGAACGTATCGCGCTGCTGTCCAAGGCCGCGAAGAACATCGC  
GACGCTGGCCCGCGCGAGCGTGAACCAGACGAAATTCCGCCTGGAGGTGCAGGCACGCGC  
GGAAGCGGCCGCGCGGCCGTCGACAAGGTTCGTCAGAGCAGCGGCCCTGTCCGATGACGC  
GGCCGACGCGATCCGTCGTCAGATTCTCGGGATTGCAGGATGACGACCGTAGAAACCCGT  
GCGGATCGTGCGCCCGCCGTCCCGCTGCCGTATCAGCAGAAATGGTGCGCCGACACGTCG  
CCCGTCAAGGTCTGCGAGAAGTCGCGCCGCGTTCGGCTTGTCTGGGGCGAAGCAGCCGAT  
TCAGCGTTGCTCGCAGCCAGCCAGCGCGGCATGGACGTTTGGTACGTCGGTTACAACAAA  
GACATGGCGGAGGAGTTCATCCGGGACTGCGCCGACTGGGCCAAGTTCTACAGCCTCGCG  
GCCGACGAGATCGAAGAAACCGACGAGGTCTTTCAGGACAAGGATGGCGACAAGTCGATC  
CTCGCGTTCGTGATCCGCTTCGCGTCGGCCTTTCGCGTCACGGCACTGTGTCGCGCCCCG  
TCCAACCTGCGCGGCAAGCAAGGCCGCGTGATCATCGACGAGGCAGCGTTCCACGAGCAG  
CTCGGCCGAGCTGCTCAAGGCCGCGATGGCGCTGCTGATGTGGGGCGGTCAGGTTACATC  
ATTTGACGCACGACGGCGTCGACAACGCGTTCAATGAGCTGGTCACGGACGTCCGTTCC  
GGCAAGAAGCCCTACAGCCTGCATCGCATCACGATCGCCGACGCAGTCCAGGACGGGCTC  
TACCAGTGCAATTTGCCTGCGCAAGGGCGAAGCCTGGACGGCCGAAGGTGAAGCCAAGTGG  
GTCAAAGATATTCGCGCGTTCGTACGGCGCGGATGCTGAGGAAGAGCTGGACTGCGTGCCG  
AAGAACAGCGGCGGCGCATGGCTGTGCGCGCGCTGAGCGAGTCCC GCATGTGCGGCTGAC  
ACGCCGGTGCTCCGCTGGGCCTGCAAACAGGGTTTCGAGGTGCTTCCCGACCACAGCCGC  
GCAGCCGAATGCCGCGATTGGCTCGAAGTGACGCTCGGCCCGCTGCTCACGGCGCTCCCG  
GTCGACGCCCGCTCGTACAACGGCGAGGACTTCGGACGGACTGGCGACCTGACGGTCCAC  
GTGCCGCTGATCGAACAACAGAACCTGGTTCGCCGCGTGCCGTTTCATCGTCGAGCTGCGC  
AACGTGCCGTTCCGGCAGCAGAAGCAGATCGCCTTCTACCTGCTTGATCGGCTCCCGCGC  
TTCACGGGCGGCGCCTTCGACGCGCGGGGCAACGGCCAATAACCTCGCAGAAGTCGCGATG

CAGCGCTACGGCGCATCGCGCATCCAGCAAGTGATGCTGTCCGAGTCGTGGTATCGCGAG  
CACATGCCGCCCGTGAAGGCGGCGTACGAAGACGGCACGATCGACGGCCTCCCGAAGGAT  
GCCGACGTGCTCGCGGACCTGCGCGCCGTACAGGTCATCAAGGGTGTGCCGCGCATCCCG  
GACGTCCGCGCGACCGGCCAGGACGACGGCAAGCGCCACGGCGACGCCGCCGGAGCGGT  
GCTCTGGCGTATTACGCGAGCCGTGAAGTGAACAAGGGACCGGTGACCGCCAAGTCGCGG  
CGGCGCCGCTCCAGCGTCCAAAGGACAGAGGGTTACGCATGAGCAAGGGTTTGTGGGTCA  
GCCCCACCGAGTTTGTACGTTTCGGCGAGCCGGACAAGTCGCTTTCGTGCGCAGATCGCGA  
CGCGGGCGCGAAGCATTGATTTCTTCGCGCTCGGCATGTACCTGCCGAATCCGGACCCGG  
TGCTCAAGGCACTCGGTAAGGACATCAGCGTCTACCGCGAGCTGCGGGCGGACGCGCACG  
TCGGCGGGTGCCTGCGCCCCCGCAAGGCGGGCCGTGAAAGCGCTCGAATGGCGCCTCGACC  
GTGGCAAGGCGAAGAGTCGTGTCGCGAAGTCGATCGCCGACGTCTTCGCGGACCTCGACC  
TGTCTCGGATCGTGACCGAGATGCTGGACGCCGTCTGTACGGCTATCAGCCGATGGAGA  
TTACCTGGGGCAAGGTCGGCAACTACATCGTGCCGATCGACGTCGTCGGCAAGCCGGCAG  
ACTGGTTCGTGTACGACCCGGAGAACCAGCTCCGCTTTCGCAGCAAGGATCACTGGATGC  
AAGGTGAAGAGCTGTCGGCACGGAAGTTCCTGGTGCCGCGCCAGGAGGCGACGTATCTGA  
ACCCGTACGGCTTTCGGGACCTGTCGATGTGCTTCTGGCCGACGACGTTCAAGAAAGGCG  
GCCTCAAATTCTGGGTGCAGTTCAGCGAGAAGTACGGTTCGCCGATGCTGGTTCGGCAAGC  
ATCCGCGCAGCGCATCCGATGGCGAAAAGAACCCTGCTGCACGACTGCCTTGAGGACATGG  
TGCAGGATGCTGTCGCCGTGGTCCCGGACGATTCTGCATCGTGATTAAGGAAGGAGCCG  
GCAAGACCGGTAGCGCCGACGTCTACGAGCGCCTACTGCACTTCTGTGCGGGCGCGGTAT  
CGATTGCCTTGCTCGGGCAGAACCAACCACCGAGGCGACGTCGACGCGCGCGTCCGCGC  
AGGCCGGGCTTGAGGTGAAGGACGACATTCGCGACGGCGACAAGGCGGTCTCTCCGAAG  
CGATGAACATGCTGATCCGCTGGATTTGCGACCTGAACTTCGACGGCGCCGATCGACCCG  
TCTTCGACATGTGGGAACAGGAACAGGTCGACGAGATCCAGGCCGGCCGCGACCAAAAGC  
TGACGCAAGCCGGCGCGCGTTCACGCCGGCATAATTTCAAGCGTGCGTTCAACCTGCAGG  
ATGGCGACCTGGACGAGCGGCCGCTGCCGGTGTCCGACGTTGATACGGTGGGTGGCGCAT  
CCTTCGCAGAGTTCGAAGCGCCCGAGCAGGACGCGCTCGACGCCCACTGAACACCTTGT  
CCGCGCGCGACCTGAATGCCGACGCGCAGGCGCTGGTTCGCGCCGCTTTTAAAGCGGATTG  
CGAACGGCGCGAGTGCCGACGAGCTGCTCGGCATGCTGGCCGAGCTGTATCCGAGCCTCG  
ACGCGGACGCGCTGCAGGAACGGCTTGCCCGCGCGATCTTCGTCCCGAACCTCTGGGGGC  
GTCTCCATGCCTGAAGCGGTTCGACCTCGGCTACTGCATGAAGCCGCCGCCGAAGAAGGCG  
ATCGAGTACTTGCAGCAAGGGCTACGAGATCACCTGGGATTGGGAGGAGCTTTGGCAG  
GACGCCACGCGAAGGCATTTACGGTTGCCAAGGTCACGCGCCTGGACATCCTGCAGGAC  
ATTCGCAACGCGGTTCGAAACCACAATCAGCGAAGGCAAGACGTTGCGATGGCTCACGAAA  
GAGCTGACGCCCGTACTGCAATCCAAGGGCTCGTGGGGAAAGCAGGATCACGTCGACCCG  
GATACCGGCGAAGTCAACCAGGTTACGCTCGGCAGCCCGTGTGCGCTGCAGACCATCTAC  
CGAACGAACCTGCAGACGGCCTACATGGCGGGCCGCTACGCCGAGCAAATGGCGAACGTC  
GAAGATCGGCCGTAAGTGTGCGTGGCGATCCTCGACAGCCACACGCGCCCGAGCCAT  
CGGGCAATGAACGGAAAGGTGTTCCGTTACGACGATCCGTTCTGGCACTCGTTCTACCCG  
CCGAACGGCTGGGGCTGCCGGTGCCGCGTGGTGGCGCTGTGCGACGACGAGATCATCGTG  
CGAGGCATCAAGGTCGAGGCGGCCGGCGACCCGCTCGGCACGACGCTCAAGCTGGTCAAC  
GAGAAGACCGGCGAGCTGCGCGAGGTCGCGACGTTCCGCACCGTCGACCCAGTCACGCGC  
CGCGAAATCGTCGTGTCGCCGACGTCGGCTGGAGCTACAACCCCGGTGCCGCGGCGTGG  
CAGCCTGACCTGTCTCGAGACACGGTTGATCTCGGCACGATCGCCAGGGGGGAATTGCAG  
TGAGCGATTTCTGTAATTTCCAGATCGACGACTCGGCGCTGCGCACGCGCTTGCTGCAGC  
TCGAACAAGCCGGCCATCAGAAGGCTGGCGCGATGCGCAAGATCGCGCAGCCGCTGGTGC  
TGGTCACCGAGGACAACCTTCGCCGCGCAAGGCCGGCCGCGGCGGCGGCGGCAAGGATTGTCGGAAG  
CGACGATTCACATGCGCGACGGCGGCAAGAAGGCGTACAAGAAAAACGGCGAGCTGACCG  
CGGCCGCGTTCGCGTTCGCAAGGCCGGTCTGATGATCCTGCAGGACAGCGGGCAAATGGCCG  
CGAGCGTCTCGACGGATCACGACGTCATTCGGCCGTCATCGGCAGCAAACAAGGAATACG  
CCGCGATTACCAAGTTCGGCGGGCAAGCCGGTTCGCGGATTGAAGGTCACGATTCCCGCCC  
GTCCATGGTTGCCCGTTACGGCTGATGGCGAGCTGCAACCTGAAGCGGTTCGAGCCGGTGC  
TCAACACGATCCTGCGCCCCTTGATGGACGCCGCGAACCGCCGCTAACCTGTCGACGAGC  
CGATCGCGCTCTGCGCGCCTCCGGACCACCCGAGGCGCGCAACGATAGCCACAGCGCCCT  
GACCCTGCCCCGTAAGTTTTATAAAGGCTTTACGGGTTTGGCTCGAACCTGCTGCGCTC  
CCTGCATCACGCGTATCACGCCGGCGCAATCGTAAAGCCGATTAACAGACCCGTGCCGTT  
CGTCGCCCGATGATGGGCGCCATGAACGCGAAACCAATCCACCTTTTCGGGGCAGGCACG

CAGACCGACATGAACGGTCGCGTGCTTGATTTTCGCCGAAACGGACCTCGCCGCGACGGCT  
GCTGCATACGATCCGAAAGTCCACGAAGCGCCGATCTTCATCGGCCATCCGCGCGACAAC  
GCGCCGTCGTGGGGCTGGGTTCGCTTCTCTCTCGGCGTCGGCCGGCAACCTGCAGGCCGAA  
CCCATCCAGGTCGATCCCGCATTTCGCCGAACCTCGTCGGCGCCGGGGCGCGACAAGAAGATC  
AGCGCCAGCTTCTACCACCCCGATTTCGCCGACAACCCGGTGCCGGGGCGTGTACTACCTC  
CGTCACGTCGGGTTCTCGGTGCGCAGCCGCCGGCCCTCAAGGGCCTGCGCGACGTCAAT  
TTCAGCGACGGCAACGAAGGCGTCGTCGAGTTCAGCGACTGGGGCCAAGCACTCAATGCG  
GGCCTCTGGCGCAGCCTGCGCGAATGGCTGCTGACGCAATTTCGGCCGGGACACGGCTGAT  
CAGGTCATCCCGATTGGCAAATCGAGTCGATCCGCGAAGTCGCGCGACAAGACGATGCG  
CCGACCAGCGCATTTCGCCGAACGCGGGGGCGGCAACCGTACCCACCACCACGAAGCAGGAG  
AAAGACGCAGTGACCCCTGAGAAAAAGGCCGCACTGGAGGCCGAAAACACCCAGCTCAAG  
CAGCAGCTCGCCGACGCGCAGGCGCGTGAGCGCAAGGCGGCGGACGACCCCCGCCACAGC  
GAGCATGTGTCTGATGCCGAGCAGCTCGTCAAGGGCGGCACGCTCGACCCGAAGCACAAG  
GATGCAGTCGTCGATTTCTCGACTTCACGGCACGTGAGCCGTTTCGAGTTCGGCGAAGGC  
GATGCCAAGCAGCCGCTGGCGAGCTCATTCCGTTTCGTTCTCGGCGAGCTGCCGAAGGTC  
GTCGAATTTGGCGAGCACGCCACGCGCGAGCGCGCCGGCGTGACGACGACGGGCGCCGAC  
ACCGTCGAGTACGGCGAGAACGTTCGATCCGAAGCGCGCCGAGCTGGACGGCCGCATTCGT  
GCATACACGCGCGAACACAAGGTTCGATTACGCGGGCGGCCGCGAACGCGGTGATCCGTTAA  
TAACCGGCGCAAGCCACAGATAAGGCCATTGAGCCAGGACAAATGATGGGACGTCTCTCG  
TAACTGCGAATCGTCGATCCGGTGCTGACGAATCTCGCGATCGGTTACACGAACGCCGAA  
TTCATCGGCCAGAGCCTGATGCCGGTCGTCGAAGTGGAAAAGGAAGGCGGCAAGATTCCG  
AAGTTCGGCAGGGAATCGTTCCGCCTCTACAAGACGGAACGCGCGCTGCGCGCCCGGTTCG  
AATCGAATGAACCCTGAAGACCTCGGCAGCATCGACATCGTCCTCGACGAACACGATCTC  
GAGTATCCGATCGACTACCGCGAAGACCAGGAATCGGGCGTTCCCCCGGGAACAAGCCGCC  
TTCCAGACAGCGACCGAAGCGATCCAGTTGCGCCGCGAAAAAATGGTCGCGGACCTCGCG  
CAGAACCCGAACAGCTACGCCGGGGGCAACAAGAAGCAACTCAGCGCGACCGAGAAGTTC  
ACCGCGGCCCGGCAGCGAGCCGGTTCGGCATCATCGAAGACGGCAAGGAAGCGATCCGCACG  
AAGATCGGCCCGCCGGCCGAACACGATGGTGATCGGTGCCTCGGCCTACAAGACGCTGAAG  
GCCACCCGCAGCTCATCGAGAAGATCAAGTACTCGATGAAGGGCATCGTGACCGTCGAC  
CTGCTGAAGGAAATCTTCGAGGTCGAGAACATCGCGGTCGGCGAAGCCATCTATGCCGAC  
GACAAGGACCGCTTCACGGACATCTGGGGCGCCAACATCGTGCTCGCCTACGTTCCGCTG  
CAGCGCGGCGGCCAACAGCGTACGCCGTATGAGCCCTCCTACGGCTACACGCTGCGCAAG  
AAAGGCAATCCGGTCGTCGACACGCGCATCGAAGACGGCAAGCCCGAACTGGTGCGCAGC  
ACGGACATTCTCCGGCCGTACCTGCTCGGGCGGGACGCCGGCTACCTGATCTCGGGC  
AACGGCTGATCGCTCGCGGCATCGTATCCCGTACTGACCACGTCTCGCCTTCGGGGCGAGA  
CCCACCCGAACGGAACATGACTCATGAAAACGCATCAACCGATCCTTACCACGTCCGTTA  
CCGCTGCCGCCGGTCTGAACCGCTTCCAGTTTCGTCGGCTTCGATGGTGCGGTGTGCGCAG  
CCGGCGCGAAGGCGCTCGGCGTTGCCGAAACGACCGCCGATGTCGGCGAGCAAGCGCCGG  
TCAACCTGCTCGGCGTCATCCTGGTTCATGGCCGCCGACCGGCCGACGAGCATGCCGAGG  
TCGAGTCGGACGCGGCCCGGCCAAGCCATTCCGAAGGCAACCGACGAATCGAACGGCTACG  
CACTCGATGCGGGCAGCGGCCGGCCGGCGACGTCATCCGCATCCTGCGGGGTATTTGACGTG  
CGTTATTGCACGTTTCGCCGACCTGAAGCTGGCCGTGCCGGAACGGACGCTCATTGAGCTG  
ACGAACGACACGACCACCGACTACGGCGCACCGGGGGCCGACGACGATCAATACCGACATC  
GTCGAAAGCTCGGTGCGCCAGGCGGAGGAAATCGTCGACGCGCACTTGCAGCGCCGCTAC  
CACCTGCCGCTGTGCGCCGGTTCGACGGTCATCAAGGATGTCACGGTCAATCTGGCCCGG  
CACTGGATGTATGCCCGTCGACCGGAAGGCGCCGCGCTCCCGGACACCGTGTCGACAGACC  
TTCAAGGGGTTCGATGCACATGCTCGAAAAGATCCGCGACAACAAGCTGACGATCGGCGAC  
CCGAGCGGCCCGGCGACGCCCGAGCCGGGCGAAATGAAGGTCCGCGCGCGCCGTCCGGCAG  
TTCGACGCGGACCTGTTGGAGCGCTTCTGATGGCGACGACGCTTGAATGGTTCGATGCCA  
TCGTCGCCCGGCTGCGCGTCAAGCTGCCAGCGCTGGTGACCGAGTACTTCCCGGAGCGCC  
CGGACGAATAACGGCTCAACCATGCGATCGGCGCGTTCGTTGCTGGTTCAGCTATCCGGGCAGCC  
AGTACGACACGACCGTCGACACCGACATGGTTGTTTCAGCCGCGGCGAGTGAAGTTTGCCG  
TCGCGATCGTGCTGCGCCAGCTCAACGGCCGCGGCGGTGCCATCGACGTGCTCGATCAGC  
TTCGCACCGCCCTGGTGGGCTTCCGCCCGCCGACTGCAAAAAGCTCGCGGCGGTCAGCG  
ACAAGTTTCTCGGCGATTTCGGCCGGCCTGTGGCAGTACGTGATCGAGTTTTCGGCGGGCG  
CCGTGATTGTGCAAGACGCGGAGCCGAACGACGGACCGCTGTTGACGCAAGTTACCTACG  
AGGAGGAATCGTGAAATACCAGTACAGCGGACCGACCAGCGGCGTCACGCTGCAGGACGG

CGAAGACGTCCAGGAAGTGATGCTTCATACGGGCGCAGACGTTCGAGCTGCGCGAAGAGCA  
CGAGTACACAGCGACGCTGCTCGCGATGGGCTACCTCAAGCCGGCCGACGCGCCGTTCGAC  
CAAGCCCAGCGCGCCCCAGCGTGCCGGAAGACCAACCGAAGACCTCCGCGAACGCGGTTCG  
CGTGAAGGGAGTCTGAGCGATGGCGGCAAATTTGTCATGGCGACGAGACCATTGAAAG  
GGAAACCGGGTCGCGGCCCGTCAAGGTCGTGAAGTCGGCGGTGATCGGCTTGATCGACAC  
CGCACCGATCGGGCCGGTCAATACGCCGGTGCAGTCGCTGTCCGACGTTCGACGCGGGCGCA  
GTTTCGGCCCCAGATGGCCGGCTTACGATCCCAGCGCTCGACGCGGTCTACGACTA  
CGGCAGCGGGACGGTGCATGATCAACGTGCTCGACCCGGCCGTACACAAGAGCAACGC  
GGCGAACGAGCCCGTACGTTTACGCGGCAACGGGCGGTGCAAACTCGCGCATCCGGC  
CGCGGCGAATCTCGTGCTGAAGAACGACTCGGGCGGCACGACGTACGCCGAAGGCACCGA  
TTACGCTGTTCGACCTGATCAACGGCGTCATCACCCGGATCAAACCGGCACGATTCCGCC  
GGGTGCGACGGCGGCCAAGGCGACCTACGACTACGCGGACCCGACGAAGGTCACGGCCGC  
GGACATCATCGGCGCCGTGAACGCGACCCGGAATGCGCACGGGGATGGAGGCGCTGAAGGA  
CACGTACAACCTGTACGGTACTTCTCGAAGATTCTGATCGCGCCGGCGTACTGCACGCA  
GAACTCGGTCTCGGTTCGAGCTGGAGGCGACGGCCGTCCAGCTCGGGGCGATCGCGTACAT  
CGATGCGCCGATCGGCACGACGCTCGCGCAGGCGCTGGCCGGGCGCGGGCCGGCGGGCAC  
GATCAACTTCAACACGTCCAGCGACCCGCGTACGCCTCTGCTACCCGACGCTGAAGGTCTA  
CGACACCGCGACCAACGCGGAACGCCTGGAGCCGCTCTCATCGCGTTCGGCGGGCCCTTAG  
CGCACGTGTTCGACCTGGACAAGGGCTACTGGTGGTCCAGCTCGAATCAGCAGCTCGTCGG  
CGTACGGGCGTTCGAGCGGCCGCTGGCGGCGATGATCGACGATCCGCAATAGGACGTGAA  
CATGCTCAACGAACAGGGCATCACGACCGTGTTCAGCTCGTACGGCTCGGGCTTGCGCCT  
GTGGGGCAACCGCACGGCGGCATGGCCGACCGTGACGCGACATGCGCAACTTCGAGAACGT  
GCGCCGTACGGGCGACGTCATCAATGAATCGCTGCGCTACTTCAGCCAGCAGTTCGTTCGA  
CGCGCCGATAGACCAAGGGCTGATCGACTCGCTCGTCGAGTCGGTGAACGGGTTTCGGGCG  
CAAGCTGATCGGTGACGGCGCGCTGCTCGGCTTCAAGGCATGGTTCGATCCGGTCCGCAA  
CCCGAAAGAGGTGCTGGCGGCCGGCCACCTGCTCATCAACTACAAGTACACGGTGCCGCC  
ACCGCTCTAACGCCTGACGTACGAGACCGAGATCACCTCGGAGTACTTGCTCACCCCTGAA  
GGGAGGTAACCTGATTATGGCGGGTGGCGTCCAAATCAACCGGATCACGAACGCCAACGTG  
TATCTGAGCAACAATTCCATGCTCGGCAAGACTGAGGAAATCAAGCTGCCGGACATCCAG  
GCGATCATGGCCGAGCAAAAGGCGCTCGGCATGATCGGCAAGGTCGAGCTGCCGGGCGGC  
CTGGACAAGCTCGAAGGCGAGATCGAGTGAACGCGCTCTACGCCGACGTGGCGAAGGCG  
ATGGCGAACCCGTTCAAGGCCGTTCCGCTGCAATGCCGATCGAACATCGAGACGTATGGC  
GCACAAGGCCGCGTTCGGGAAATCAGTCTCTTGACGTACCTGACCGTGATGTTCAAGAAG  
AACCCGCCCCGGTACGTACAAGCAACATGAGAACGCCGATTCAGCTCCGCGTTCGGCGCG  
ACCTAAATCAAGCAGGTCATCGACGGCGAGGAAGTGTGGAGCTGGACTATCTGGCAAAC  
ATCTTCCGCTTCGGCGGCCAAGACATGCTGGCTGACTTCCGCGCCAACACCGGCGGCTAA  
CCCCACACCTGCGCAGTCGTTGTCGTCTTGGCCCCGCTTCGGCGGGCCTTTTTAATCTGC  
ACTGAAAGTGCGAACGCGCGCGCGAATCGACTATGTGTGCTCTACTACCACGGAGCGCGT  
CGTGAAAATCCCCCTCAAATTTCCCGTCAAACCTTGCTACCGGCCAGACGCTCACGGAAC  
GACGTTGCGTCGCGGCAAGCGCAAGGAAATGGCCCTTTCGGGCAAATACAGCGAAGACCC  
GGGCGAACAGGAAGATTTCTGCTCGCCATGCTGACCAACCTGACCGTTCGAAGACATCGG  
CGAACTCGACCTCGCCGACTCGAAGCGGCTCATGGACTCCTTTCGACGATGGTTGAGGT  
ACGGGATACCGCCGGAATGCGGGCGCCCGGCGATCAGCCGCCGAGCAAGGAAACGCAGG  
CGCTGGACTCGGCGCTGCGACCGCTGGATGAGGTGTTGCTACTGGTGCTGAAGATTCAGC  
CGTCCGAGATCGATGAACTGGATATGGACGACTACTGGCACTGGGTCGACGCCGCGGAGC  
GGGAAATCAAGCGGCGCGTCGACGCGCAAAGCAATCCTGATGTCAGGCGGCCCGGCGCC  
CGAGCCGGCCGCAAAGGCCACACGATGGCCTTGATCGCCGCCGCGATGAGGTAGGAGCCGG  
CCACGACGGCCGGCCCGAGGAAGGCGAGGCCGAAAAACGCCACGATGCCGAACACGATCG  
GCACGGACCACCAGGGCAACTCGATGAACAGCCAGACGGCGAGCACGACGCCGGCAATCG  
CGATCACGGTGTAGGTAATGCCTTCGGCGATGGACTGGATGTTTCATGATCGGCCCTCGTCA  
CTTCCGGTAAGGGTATGGCAAGCAAATTTCTATATTGGCGTAAAGATCGGCGCGACGCTA  
CTCGGTAGCTTCGGCGCCGCGCTTTCGGCACGCGCACGACGCTGAATGGCCTCGGCCGC  
GTCGCCGACGAGCTGCGCGCGAGGCATACTGCCTGGGGGACGCGATGGCGCGGGCCGTT  
GCGCATCCGATGCGCATCATCGCCGAGCTGCGCGGCCAGTACGACCCCTCGGCCGACA  
ATCGATCAGGTCCAGGCGAAGCAAGCGGCCCTTTCGACCCGCTTGGCGCGCGGGCGCCGCG  
CTGCGTGAGCAACGCCAGGGGCTCGGCGCCGACATGCTCGGCACATACGCGACGGCGGT  
GCCACGGCCGCGCCCGTAATCGGCGCTGTTTCGGCAGGCCGTCACCTTCGAAGCCGGCCTG

CGCGACATCGCGATTAGCGGCAAACCTGACCCGTGATGAAGAGTTCCGGATCGGGCGAGACG  
ATGCGCCGTGCGGCCCTTGCCACGAGCCAGGGTCACAACCTCCATTCTCGAAGGCGTCGGC  
ACACTGGTCGCTGCCGGCATGGACGCGAAGGAAGCCGGTCAGAAATCGAACCTGCTCGGG  
CGCGTGGCGACGGCCACGAACGCCGACATGAAAGACCTCGCCGGCATGGTGTACTCGTTC  
TCCGAGACGCTCGGGATCAAGGGCGACGCGGGCGCTGAAGGAGGCGTTCAACCGCGCGGCC  
TACGGCGGCAAGCTCGGACGGTTCGAGCTGAAGGATATGGCCAAGGCTCTGCCGAAATG  
ACCGCGGCGTTTTCGGGCAAGGGCATCAAGGGCCAGGACGCGCTGACGCAGATCATCGCC  
AGCCTCGAAGTCGGCCGCGAAGGGCGCCGGCAGTGGCGACGAAGCCGTGACGAATCTGCGC  
AACTGGCTGTCGCACATGAACGCGAAGGGCGACCATCGACGCCTACAAGAAGGCCGGCGTC  
GACTACCAGAAATCGAAGTCCAACCTTGTTCGCCGGCGGCTATTCGAGCTACGAAGGCTCG  
CTGCAGATCGCACAGAAGTTCATCGCTTCGCGCGGCGAGGCGTTCATGAAGCAGTGGAAA  
GCGGCGGGCGCCAAGGGCGATGAGGAAGCACAGCGCAAGCTGATGGAGAGCTTCGGCCTG  
AATGAGGTGTTCCAGGACATCCAGACCATCAACCACCTGCTCGCGATGCGTCAGGGCTGG  
GACAAGTATCAGCAGAACAAGAAAGACATGGGTAGCGCGCAGGCGCTGAATACCATCGAC  
CAGGACTACGTGCGCCGCGCGGAGCTGGCGACCGTTCGCGTGGGCCCCGCTTTCAGACGCAG  
ATTGCGGACCTCGGGATCACGGTTGGCCGCGCGCTGCTGCCGTCGCTGACGGACTTGATG  
AACACGATCACGCCGCTGATCCAGCGCACCGCGCAGTTCGCGGCCGCCCATCCCGGCCTG  
ATCCGCGGCGTGGTTCGGCTTCGCAACGGCCGTGATCGGCATGAAGGTCGCGACGCTCGCG  
GCCGGCTGGGGCCTGAATTTCTTCGTCAAGTCGCCGCTGAACATGGTCAGCACGGCATTG  
ACGACGGTCGGGGCGAAGTGGACGCTGTTTCGCGCGCTCTGGGCCGGTGGCGGCTCCC  
CTGTCCACCGTGTTCAGATTTCTGCATGGGCGCGGGCGCGGCCGGCAAGTTCGCGGCC  
GTGATCGGGCGTGCCGGGAGCCGGTTTATGGGATTCGGGCGCGGCCGCGCTCGTTCGTTGGC  
CGCGCGCTGCTCCCTTTCGGGCAGGGCATGCTGATGACGTTTATCGGCCCGCTGCGGCTG  
CTCGCCCAGGGCGGGATGCTGCTGGCCCGCGTCTTGGGCGGCCAGCTCGTGAACGGCCTG  
ATGCTGGCCGGGCGCGCGGTGCTCTGGCTCGGGCGCGCGCTGATGCTCCATCCGATCGGG  
ATTGCCCTCACCGCGATCGCGGTTCGGCGCGTACCTCATCTACCGCTACTGGACGCCGATC  
AAGCAGTTCTTCGGGGGCATCTGGGCTTCGATTCGTACCGCGTTCGCGGGTGTGCTCGGG  
TGGTTCGGCGCTGGGCTCCCGAAAACCTTCACCGATTCGGCCCCCACCTCATCGACAGT  
CTGGTCAACGGTATTCGCAATCGCTTCACGGCTGCGAAAAACACGCTGATCGAGTTCGGC  
AGCAACGTGAAAGCGTGGTTCGCGAACACGCTGGGGATCAAGTCGCCGTCCCCTGTATTTC  
ATGGGTTTCGGCGACAACATCGCCCAGGGCGCCGCAATCGGCATCGGGCGCTCGTTCGGCG  
GTCGCCGCGCGCGCGGCCGCCGGCATGGCGACGCAGGCCGCGGCCGCGGCGTCCCTGCAG  
CGCATCAACGCAGCTCGGGGCGGATCGCCGGCTGGCGCATCGGTAGCCGGCTCTGGGATC  
ACAGTTCACTTCTCGCCGACGATTACGGTCCAGGGCGGCTCACCGGACGGCGTCAAGGAT  
CAGGTCAAGCAAGGGCTCAACCTGTCGTTGCGCGACCTGGAGCGCATGCTCAAAGACCTG  
CTCGCGAAGTGCAGCGCCGCGCGTACAGGAGCTGACGTGTTTCGCAATTCTTGAGATAT  
CGAATTCGACCAGATCGGATACTTCGACGGGTTTCGATGCGACCTACGGTGCCGACTACGC  
CGAACACGCGCTGCTGCAGAGCAAGCCGCGGCTGCAACGCATGGGCGACAAGCTCGACGA  
GATTCTGATCGCGCTGTCGTTTCACTACTGGTATTGCGATCCGGAAGCCGAGCTGGCGAA  
GCTGCGCGCGGGCGGTGAGCGCAAAACAGGCGATGGCGCTCGTTTTTGGCAACGGCGACTA  
CAAGGGCTGGTTTGTACTGACCGAGGTTTCAGTCGACCAGCAAACAACCGACACGTCGGG  
AACCGTGTGTCCTCGACGCACAGATCACCTGCGCGAGTTCGTCGGAGACAAGAAAA  
CCCCTTCAAGCCGCGGCCGTACAGCCCAAGGTGCCGCCGGCGGCCCTCGCAGGCGGTCTC  
CAGCGTCACATCGGCGGTGGCCACCGCGCGGGGCACGATTCAGCAGGCAGTGACCTGGGC  
CAACCAGGCGCAGTCCGCGAGGCGCGTGGCCGTGACGCGGTCAAGGTCGTCCAGAAGCT  
GAAAGACGATCCGTTTCGACGATGAGTCGCTCGTTCGAGCGTGCTGACCAACATCAAGCA  
AGCCGCTGATCCACTGGCGAAGCTGTCTCCAGCGCTGGCGTCCCTGACCGACCAGATTCC  
CGAGGCGGCCGGCATCCTGCGTGCCAGCAATACTGCGCTGGATGCGGTCCGATCGGGCGCA  
AGGCGGCTTGGCGAACGCGACGATCGGGACGATTACCGGCGCAATCGACCGGGCCGCGGG  
CCAGCTCTCGACGGCGAGCATCGCGCTAAGTTCGCGGGCGCCGAGTCTGAGCAAACCTGGC  
CGCGAAAGTCGCGACGCGGAGGATTTGATGTTTCTGACCCACATCACAACCGAGGGCGAA  
CGGTGGGATCAAATCGCCTACCGGTATTACGGCGACCCGTTTGCCTATGAGCGGATCATT  
GCCGCGAACCCAGCGTGCCGATTACGGCGGTTCTCGCGAGCGGCATTGCGCTGTGATT  
CCGGTGGTTGCGGCCGACGACGTAGCCGATGAGGAGCTTCCGCCGTGGATGCGGTGATCG  
ACACCCCGACGTCGGTTGCCGACGTCCCTGAGCCCGTTTTACGCTCGTGTACGAGCAGA  
AGAACATACCAACGACATCGCGCCCTACGTGCTGCCGGTGGCGTATAACCGACTTCTTGT  
CAGGCCAGTCCGCCGAGTTCGAGGTGCTGCTCGAAGACACGGATGGACGAGGGCTCGATG

CGTGGTATCCGGGCAAAGGCGACGCGCTGACGCTGAAGATCAGCTACGCCGGCGCGCCGT  
TGCTCGCGTGCGACCGCTTCGAGATCGACGAGATTGGCTTCGACGAACAGCCGTGACCG  
TGAGAATCCGCGGACTCGGTACTGGCGTGAAGGCATCGGTCCGAAGCCGCAAGGCCAAAG  
AGTACGAGCACACCACGCTGGCGACGATCGCGGCTCGCGCGGCGAAGCGGAACCACCTGA  
CGTTCACCGGCCGCATTCGGGATACTCGCATCGACCGAGTCACGCAGTATCAGGAGCAGG  
ACGTAGCGTTCCTGACGCGGCTCGCGCGCGAGTACGGCTATGCGTTCAAGATTTCCGGGCA  
GCAAGCTGATCTTCAGCGAACTCGCCGACCTGCGAGGATCGGACGCGGTCCAGCAGTTCA  
AGCGCGCCGACTTGAAGTCGATTCGCCTGCGCGACAAGATCAAAGACGTCTACGCGCAGG  
CCACGGTAGGCTACCACAGCCCGAAAACGAAGAAGCTCGTCGTCTACGGCGTGACGGGTG  
ACTCCGTTGGCGTCGTGCGCCAGTCTGAAGTGGCAGCGGGCAAGCGGAAACAGTCCGGTC  
AGTCGACGAGCGGCGACACGCTGCGGCTTTCCGCACGGGCCGGCTCCAAGGCAACGCTGC  
AGACGAAGTCACGCGCGGCGCTTGACCGGACGAACCTCCAGCAGATTGGCGGCTCGGTGC  
AGATGCGGGGTGACACGAAGCTGGCCGCGGTGCGTCGATAGAGCTGCTCGAACTCGGCA  
AACTGTCCGGCAAATACCTCATCGAGTCGGCGCGACAGCGTCTCGATCGCGGCGGCGGCT  
ACCAAACCGAAGTCGCGCTGAAGCGCTCGGCGCTCGCCGTCCAGGCCGGCAAAGGCGGCG  
GCACCGCGAAAAAGTCAACGAAAGGGCTGCAGGTCTACGGCGTCACCGCGAAAGGCGACG  
TCGGCGTTGTTGGAACCAAGCCCGTAGCGGCGAAAGGCAAGAAAAAATGAGCGAGACCCT  
CGACGAGTTCGGCACGACGATCAAGTTCGGCACGGTCAGTGCCTCGAAGCCCGGCTTCGC  
GCGCGAACGGCTGACCGACCTCGGCAACATGAGGACCATGTGGCTGCCGATCGCGTACCC  
GGAGACCCTGGCCGATCAGGCTTGCTGTACCTACGATAACGGCGAACAGGTCGCGGTGCT  
CCTGGACGGCCGGTGCAGGACGGTGTGATTCTCGGCGCCATCTACTCCGATGCCGATCG  
TCCGCCCGTACGGACCCGAACAAGTTCATCGTCCGCTTCAAGGATGGCGCGGTGCTCGA  
GTACGATCGCGCGACCCACACGCTGACGTGCTCCGGCATGCAGACCGTGATCGTCGATTC  
GAAGTCGGAAATCATGCTGCGCGCGTCCGACAAGGTGACGGTCGACGTGCCGGAGACCGA  
GTTACGCGTAACGTGACAGTCAAGGGCAAGCTGACCTACCAGGGCGGCATGGCCGGATC  
GGGCGGCGATGGCGCTGCGCTGACGGGCAAAGTGAACGTCGACGGCAAACGTGAAGGCGAC  
TGGCACCATCATGGATGCCGGCGGCAACTCGAATCACCCTCCACTGAGCTTTTAGCCG  
GCTTTAATATCCCCCGACTGGACGCGCGGCAACATGGCCGCATGACCCAGCTCTCCGAC  
ATCACCTCCGTTCACTGGCAGCCGGCCCTTAACCGCGAAGGCGTTGTTGAGGGCGTGGAT  
GACATCGATCAGGCGATTCGCCTGATTCTCGGGACGCCCCAGGGCAGCGTTCCGCATCGC  
CCCGAGTTCGGCTCCAAGCTCTATCTGTATCTCGACATGCCGATCGACCGCGCCACGCCG  
CATGTTGTGCGCGAGTCGGTCGACGCGATCCGCCGGTGGGAGCCGCGCTGCGAGGTGCTG  
CGTGTCAATCCGTCGATCGCTGAGTCGCGTGAAACGATCCGCGTGCAGTGGCGCCTTGCT  
GACGGCGTCATTAGTGAGACGGAGGAGCCGCGATGACGCTTGGTGAACCGGATTTTCATCG  
CCCGTGATCCAGACGCCATTACGGCCGGGATCGTGGCCGCCTACGAGGCGCGCACTGGCA  
AGACGCTGTATCCGGCGCAGGTGCAACGCGTCTGGTCGACATCATTGTCTACCGTGAAA  
CCCTCGTACGCGTCGGCATCCAGGAGGCCGCGAAAGAGAACCTTGTCGCGTTCGCCCGCG  
CTCCCATGATCGACTACCTTGGCGAGCTGGTTCGGCGTGACGCGGCTGCCGGCGCAGCCCG  
CGAAGACGACGCTGCGCTTCTCGATCTAAGAAGCGTTGCCGTGCAACCTGCTGATTGCAG  
CCGGCACGCGTGTGCGGACGAGCGAGGGCGCTGTCTCGTTCGCGACCGACACCGACGTGA  
CGCTCGTCGCGGGCCAGTTGTCGATCGACGTGGCCGCGACGTGCGAAACCGCAGGCTCGA  
TCGGGAACGGCTGGCAGCCGGGGCAACTCGGCTCGCTCGTCGACGACCTGGGCGACGTCG  
ACGTGACGGTCGCTAACACCAAGGTCAGCGCGGACGGCTACGAGGAGGAAACGGACGATC  
GTCTGCGTGAGCGTATCCGGCTCGCACCAACAAGCATTCCGGCACGGCGGGCTCCCGGCTCG  
CGTACGTGTTCCACGCCAAGAGCGCGCACCAAGTCGATCGTCGACGTCGGCGTAATCGGTC  
CGGAAATCGAAATGCGCGACGGCCGGCTGGTTTCCGTCAACGGCGTTCAGCCAGGCAGCG  
TCCAGGTCTACCCGCTCGTCGACACGGGGCTGCCTAGCGAAGCGATTCTCCAGCTCGTAC  
GCGACAACCTGACCGACGAGCGTCGGCGGGCCGCTGACCGATTACGTGACGTCGGAACGC  
CGACGCCGGTTCGACTACGCGATCGACGTGCGTTCGACGCTGTACAAGGATGCCGGCGCCG  
ACACAACGATCGCGCAGGCACGTACGGCCGCGAAGCCTACCGAATCGATCGTGCCGCCG  
GCCTGGGGCGCGATATCGTCCCGCGCCAGCTCAGTCGCGCCGTGCAGGTTTCAGGGCGTGT  
ACGACGTTGACCTGCCGGGACTAGCACTGCGCGTGCTGACCGCCAGCGAATGGGCGCGGT  
GTACGGGTGTCAGTGTTCATCCCGATCGGGGTGGCGAATGGCTGATCTGCTGTTGCCGCCA  
GCGCTGGCGAAAGACCTCGTTTCAAGGCCTTCGCCAGTTGGCAGAGCGCCTCGACAAC  
ATCGACATGTGGCCGCTCCAGGTCTACCTGATCGATGGCGTCGACGCATCCGCACTGCCG  
TTCCTTGACAGACAGTTTTTCGGTGATGGGCGAGGACGGCTGGAGTCTCGCCGAGTCGGAT  
GAGGCCAAGCGTGCCTTGATCAAAGGGGCACTCGAGCTGCACCGCTACAAGGGCACGCC

TGGGCGGTCAGAGAAGTGATTCGGTGCCTAGGCTTTGGCGGAGTTGAGCTTGTCGAGGGC  
ATCGGTGGCGCCTACTACAATGGGAAAAGCCGCCATGACAGCGTAATGGTGTATGGCGGC  
AATGGATTGTGGGCGGCCTATCGGGTCATCCTGCTCGATCGCGCGATCACCAACGATCAA  
GCGGCGTTGCTGCGCACGACGTTGGCTGCGTTCGCGCCGGCTCGATGCGTACTCGCGAGT  
CTCGAATACCGTCGTGTGCCGATGCGCTACAACGGCGCCGCCACTATGACGGACAGTAC  
AACCACGGGAGCAGTTAATCGGCAAACTCGTCAATCTTCCCAATGGGAGGAAGATGTTT  
ACCAAATCGAAACCGCCGATCCGGTTCGAAGGTGGCCCGGACGGGGTTTCGAACAAGCAGG  
CGAAGCAGCTCGGCGGCCGCACGCGCTACCTGAAGGCGCAGGTTCGAGCAGTCGCAGACCG  
GGCTTGCAGCAGCATATCGCCGCGCCCGACCCGCATTCGCAGTACGCGACGAAGTCGGACC  
TCGCGGCAAGGCTTGCCGAACCTGGTTCGGCCAAGCGCCCGGCATGCTCGATACATTGAAGG  
AATTGGCGGAGGCGCTCGGAAATGATCCGAATTTTCGCGACGACGATTACAAATCAACTCG  
GGCTGAAGGCGCCCATCAACTCGCCCGTCTTACTGGTACTCCGAAGGCGCCGACGCAAG  
TTCAGGGGGATAACTCGACGGCGCTGGCGACGACTGAATTCGTGAAGCAGTCTGGAGAGT  
CGTATTCCAGCATCCAGGGTATTGCCACGACGGCAACGTTGAACAGCGGACATGTGGGGG  
CGTTTATTTGGGCGTACGGCGTAGGGATCACCTTACGCTGCCACCGGTGGCTGGCGTTA  
CTAATGGTGCAGCATACAATCGGAGCGCCGGTACCGTGACTCTCAAGAGCAATGCAT  
CGGAGAACATCAACAGCCAGTTCGGAGTAACGTTCGAACACGTTTCGCTCTGAATGCGGGCG  
AGCAAGCGCAGTTCATCAGCAACGGTGGCGCGTGGTACTTGTTCGAGCTACACGACGATTC  
TTGGGGTGACGCCGCCGCAATTCGACAACACGACGAACTCGCGACGACCGGGTTTCGTGC  
AGCGAGCAGTCGGTAATTACCGATCCGCCAACGGAAACGTAGGAAGCGCCACTCTCAGCA  
CATCCGACGTTGGCTGCCTTACTTGGGACGGAAACGGCACGTTGACGCTGCCGGATG  
CCACAACCGTGTTCAGGCGGCTCTGCAATCCGCGTGTTCACGTATGCTGGCCCGATTGCTT  
CCGTTCTAGCGGCTAACAAACCTGGGCAATTGAAAGTGCCTGCCAGCGGAGCTGACACTT  
ACACATTCGCTGTTGGTGTCTTTCGGGTTCTTCGAGCTGATTAACGAAAGCGGTATCAAGT  
GGGACGTGGCCGGTGAGTTGTTTAGCCAGTACGGAACGACTGCCGCGCAGTTCGATAACA  
GCTCGAAACTTGCAGCAAGGCGTTCATTCAAGGTGCGCTTGGGAATTTCCGGAATCAGA  
TCGGGCTTAGTGCGGGAACGACGCTGAATGCCAATGCTTGGGGCAACGCGTATACGCTCT  
TCGGAGGTTCCCGTATAACGTGACCTTGCCGTTGCTTTCATCTGGCGTTAATGGTGC GG  
CGATCCGTTTCTCGACCATCGGCTCGACCGCATAACGTTGGTTGGGGCTGGGTCCGATG  
CGATCTTCAACGGCACTACGTCGAACACGCTCGTACTCAATCCGGGAGACACCGTACAT  
TGGTTTCGTCAGGTGTGTGGGTATGTTTGGCGGATCGAGGTCGCTTGCTGCATCGGGCG  
TGATGAGCGGTCTTGATGGAAGACGACGCGCAATTCGACAACAGCACGAAGCTCGAAA  
CGACGGCGTTTGTGCAGCGGGCCGTCGGCTCGGTCGTCGGATCGATGCGCAACGCCAGTA  
TGTCGGTTCCGACGGTGAGCGCATCCGCGACGTTTACCGCAGATGAGATCGTTGTCGAGA  
CGGTGCTCGGCGGTGCCGCGTTCGAATCGCAAACCTTCAATGCAACGATCAATCTCGGGA  
CTACAGGCGCGGGCGGGATGGATACTGGTACTGCACCGGCATCCGGTTTTGTTGCTATCT  
ATGCAATTTACAACCTACGAATGGGACGACGGCTCTTCTTGCCACCAATGCGACTTCAA  
TCGTTGCTCCGAACTTGTACAGCGGCGCCAACATCCCCGCCGGCTATGCGGCCAGTGCGC  
TTGTATCGGTATGGTCAACCTACTCTAGTCGCCAGTTTGGCGTAGGCTTTCAGGTTCGATC  
GGACCGTGAACCTGACTAGCTTTTTCGGTTCTGAGCACAAGTGTCCAGCAGTCTAGTTACG  
CACCGTTCTCGGTGGCAAGCTACATTCCGCCGAACGCGAAGCTTGTATCGGGGTACACGA  
ACTGTGGATCGACCGCCGCATCGATCATAGGTAGCGCTGTCAGTGGATCGTCAACAGGCA  
TCGGATCGGCCGGCACGAATGGGCAGTCGATCCTAACCTTGGCGCACCGTTTAGCGATG  
TGCCGATGGTTACCCCGCAGACGCTGTTCTATGTTTCAACGGCAAGCGCTGTAACGATGA  
CCTTCTCGCGTTTTATATCGAGTTACAAATTCTGAGGAACAGCATGGAGTTGCTAAACGT  
TCAATTCAGTGACGATACTGAAACATCGATTATTCGGTCTTCAACTGTCCACAGGACCC  
GTTGGCGTGGCCCCATCAAGGACAGGTATCACTCGACGATCCTCGATACTCGCGTATTT  
CTCAAGCGTCCCAGGCGCTGCTGGCAGGCCTACCGGAGCCGATCGAAGGGCAATCAGC  
GTAACCTTCGGGGTGTGCTGGTGAATATGTTTCGCCGCGGAGCGCCCGAGATTCACACCGG  
GGCGCTCGACATATCGATGGATGAGCATTTCGAGCAGGGCTGATCCAGGTCTGTCAATGG  
CGCACAGTACGGCACTTCGATAGTGGCCGTTTCAGCTGCAGCAGGCCCGCGTCCGCAATA  
GTGTTGAGCCGAAAGTGCAATGAAGAAGCCGTGAAACAAATATATGCCGTACGATGCAT  
CGGAAAGCGCATATGCCATACGGCTTCCCAGCACTTTGGTTCGCGAACGTTGCCCTAGACG  
AGTCTTCCGTTCCGTGACTGTGAGCACGTACAACATAATGGATAGTATCGGCAACAACC  
ACCATTGCCCGTGGTAAGTCGATTCCGTGTTCAAAGGGAGTGTTGCGGTCAGCGTCGCGA  
TCGCTGCCTTCTGCCGAAAGTCACGCCGAATGGAATCTCAGCGATCAGCATGCCGACCA  
AGAAAAGGGAAAGTTTGTAGTGGCAAGAAACCGGGCTCGGGGAACACGCCGGTGAGTGTGC



GAGCGATCGCGAATGCCGATACGCCTAATAGGATAGCAGTGGTGACGGCGTCCGCTTTCC  
GCATCAGAATATAGAGGAAAGGAAAGGCAAGATAAACTGCATTTTCGAGACTCAAGCTCC  
AGTCATGAAGCATGGTGGAGAACGTATAAAGCGGCAGCAGGCCAAAAGCGAACTTGACGT  
GGGCTGCTAGGTTGCCGTGTAAGTGATAGTCGAAGGATCATAGATCCCACCACTCC  
CCAAAATCCGGGTTCAATAGCTGCAGTACCTTGTAGCCCTTGAGGAACGTTGTGCAAG  
TGACAACCGCGAATACGAGAGAAACGTATTACGCTGGCGCAATACGGAAGTATCGTCGGA  
TATAGAAGCGTAGCCATGAAGACGGTTCGTGTGATCGGCTCGACCGAATCTCGCAGTCTGG  
CGTTGTAAGCCATGAGATAGCCTGAGATCATAATGAACAGATCTACTGCAAGCTTCGGAT  
CAGGTATAGGGGTGAGAGTCCATCCCCCCCAGATCATGCAATCGGCGACCACTACCCAGA  
TCGCGGCGTAAGCGAGCAGACCGTTCAGGTACGGGAAGTCCTTCGTCATCGTCAGCTCAC  
AGTAAATTGAAGGGCGCAGTTTAGCACCCGCAAGTTTTGACCGACCGCCTACTGCCGGCA  
ACAGCTGCAATTTCTTTCTACGTATCGCAAGACATCCGCTCCCGAATTTATCGCGCGTGC  
ACGTGCTGAAATATCGCGCCGCGCTTCA

>NewGenomeName\_33

ACCGGCGCTTATACTCAGTACTCCAGCAATCTACGGCGAGCCCTGGAATGGCTATGAGTC  
GCAACTACTCCTACAAAAGGTGGGTCTTTACAATTAATAACCCTACCTTTGAAGATTATG  
TTCATGTTTTTCGATTTTCAGCACGCTCGACAATTCCAAGTTCGCAATCGTCGGAGAGGAAA  
AGGGCGACAACGGCAAACCTCACCTTCAGGGATTCTGAATCCACGAAGAAATGCGAGAG  
CTGCCGCCCTTGAAGAGTCTCTGGAAGGAAGACCCTGGCTCTCTCGTGGCCGTGGATCGG  
ACGAAGATAACAAAGAATATTGCTCCAAAGCGTCGACTTATCTGAGGTTTGGTAAACCAG  
GCGGTAAGGGTCGATCCTCCCAGCTCTCCGATGCGACATCCGCTGTGCTCGCTGGTCTCC  
CGCTGACTGACGTTGCACGGAAGTATTCGACGACTTATGTTATCTTTGGGCGTGGCCTCG  
AACGTCTTCGTCCCCTGATCGTTGAAACGCAACGTGATTGGAAGATAGAAGTCATGGACT  
TGATTGGTCCGCCAGGGACCGCAAAGAGCCGTTATGCGTTTTGAATTTCCCGCCGAAAACA  
AGTATTACAAACCACGCGGGAAGTGGGGGGACGGTACTCGGGACATGACGTAGTCGTCA  
TGGACGACTTTTTATGGTTGGGTACCTTACGATGATCTGCTTCGGCTAACTGACCGTTATC  
CGTTACGTGATGAGTTTAAAGGTGGCATGACCCAGTGTGTTGCTAAGACGTTGATCACAA  
CTCGCAACAAAGAGCCCCGTAATTGGTATAGAAGGGAGCTCGATCTCTCCGCCTTATATC  
GGCGCATTATAAAGTATCTTGTCTGAAATGTTGACAAGTATGAACCTGCCGCCGCTTGTG  
CCCTCCCCTTTCCAATAAACTACTGATACAAAGTTGGCGTTTTATGTCTTTATTAAGGTG  
AACAAATCGAAAGGGATATCCACTTGGGCAGCTGGTTATGGTGAACACTTGAGAGGGGTAT  
ACACTTAGGCAGCTGGGTAAAGGTGAACACTCGTAAGTGATAAACAGTTGGGCAGCTGGTT  
ATGGAGAACCCTCGAAAGGGATATAGACTTGGGCAGCTGGGTAAAGTTAGGAAAGGACC  
ACTTTTATGTCTAGAACCCTGGTGAATGACCAAACCTTAATGTAAAACCTTAAATTGAGCTA  
CTATATCCTATATCCCCTCGTCGCCGGTCGCGTTATATGGTGTCTGAGGCTCATGCCCA  
TGCCGTAATGTACTACCTGGTCTTGACTGCAATTTATCCAGGTGAATTTTTTACGTCTTA  
GGAACAATGTACTATACTTGGTGCCTTCTCTGCCCTTGAATTGTTGGTTTCGGTACTA  
AGGACCGTCTGTGGACTCTCGATGGGTACCACGGCCGCTGCTGCTGGTTGATACGTATG  
GGTCAATGGCCCATCCTGTAGTTGATGTCCTCAGGATTTGCCCGTCTTTTCAATGATCG  
TTGAGCCTTGTGGTTTGTCTTTTTTGGTAAATGTTGTAGGATGGTCCAGGGTCACAGCAA  
CCCCTTGTATTATGTAATAGTAGTAAGGGTAGTGGTAATCTGGCTAACCCCTTGCATAT  
AGCTATTTGTGTCTCCATACATTGCTCATCTCATGTTTCAATCCACAGATGTTGTTCCGT  
GTGCTGGTGGGTCTGTGTATTGAGCCCCATCTTCTAGACTTAAGCTCTGCCATCTCCCCG  
ATGCCGTTGGTCCAGTTCGGATCCGAAAATCCAAATACGGTAAGTCTGGTGTGCTTGA  
ACGTCACTACTGAAAATCTTCGTATTGGTCGTCCGATACGTAGCCTTCGTCTTCTCAATC  
TCTACGTAGACCCCGCCTCCTCCTCACATCACGATATGCACGCCGATAGGAGCTGAGGC  
GCATCTGCTGTGTGGGCAGTGACTTCCTGTAATGTATAAAAAGACCGCACAAAGCGCCGTT  
ATATTATT

>NewGenomeName\_34

ACCGGCGCTTGTACTCCGTACTCCGGGCCAAGGGGATAGCAACTGCAATGGCGAAGAGCG  
GCAACTACTCATAAAGAGGTGGGTCTTTACCATTAATAACCCTACCTTTGAAGACTATG  
TTCATGTTCTAGAGTTTTGCACGCTCGACAATTGCAAGTTTGCTATCGTCGGCGAGGAGA  
AGGGCGCGAACGGCACGCCTCACCTTCAGGGATTCTGAACCTCCGAAGTAATGCGCGAG  
CTGCCACCCTTGAGGAGTCGCTGGGAGGAAGAGCCTGGCTGTCTCGTGCCCGGGGATCTG  
ACGAAGACAATGAAGAATATTGCGCCAAAGAGTCGACATACCTTCGAGTTGGTGAACCAG  
TCTCCAAGGGTCGATCCTCTGATCTGGCCGAAGCGACATCCGCTGTGATGGCTGGTGTGC  
CGCTAACTGAGGTGGCCCGGAAGTTCCCCACGACTTATGTTATCTTTGGGCGTGGCCTGG

AACGCCTCCGTCACCTGATCGTCGAGACGCAACGTGATTGGAAGACCGAAGTCATCGTTC  
TGATTGGTCCGCCCTGCACCGGAAAGAGCCGTTATGCATTTGAATTTCCCGCCGAAAACA  
AGTATTACAAACCACGCGGGAAGTGGTGGGACGGTACTCGGGAAATGACGTAGTCGTCA  
TGGACGACTTTTATGGTTGGTTGCCGTATGATGATTTGCTGAGAATTACCGACCGTTACC  
CGTTGCGGGTTGAATTTAAAGGCGGTATGACTCAGTTTGTGGCTAAAACATTGATCATAA  
CAAGTAACCGCGAGCCTCGTCATTGGTACAAGAGCGAGTTTGACCATTACAGCTCTGTACC  
GCAGAATTAACAAGTATCTTGTGTATAATATCGACAAGTATGAACCCGCCAGGCATGTA  
CCCTCCCGTTCCCAATAAACTACTGAGACGAAATTGCCGTTAGTCGTTTATTAAGGTAAA  
CACTTGGCAGGGTATTACACTTGGGCAGATCGGTTAAGGTTAGGCACTTGGCAGGGTATT  
ACACTTGGGCAGCTCAGTTAAGGTTAGGCACTTGGCAGGGTATTACACTTGGGCAGCTCG  
GTTAAGGTTAGGCACTTGGCAGGGTATCACACTTCGGCAGCTCGGTTAAGGTTAGAACAA  
GATCTCGTTTATGCCTAGAATCCAGTGAACGTCCAAATTTGATATAAAATGTGAACTGG  
GCCTCTATGTCGTATTGTGCATTCACACCTGTTGTGTTGTCCGGCTTCCGTAGACTCATG  
CCCATGCCGTAATGCACTACTTGATCTTGAGTGGAGTTGATCCAGGTGAAATTTTTGCCT  
CCGAGGAAGAAGGTAGAGTGCTTCGTACCTTCACCCGCTCCTTGTATGATGGGTTTAGGT  
ATGAAGTACCGTCTGTGCACTCTGGAGGGGTCCCACGTTCTCCTGCTGCTGGTTGAGCCG  
TACGGGTCTATTGACCATCCCGTCGTGGATGTCTTCACTATTTGCCCGTCTTGTATATC  
ACCGTTGAGCCTTGACTCTTGTCTTCTGGTAAATGTTGTATGCCGGTCTGAGAGTTATG  
GCTACCCCCTTGATCATGTAGTAATCGTAAGGGTAGTGGTAGAACGGTGTGAGCCGGTC  
ATGTAGCTGTTTCGTGTCCCCGAACATCGCCCATCTCATGTTAAGCCGCATATATTGTTG  
CCACGGGCCGGTGGGTCTGTGTATTGTGCGCCATCTTCTAAGCTTAAGCTTTGCCATTG  
CCTGCTGCAGTCGGTCTGTGGTGGAGCCGAAAAGCCAAATACGGTGTTCCTCGTGACC  
TTATAAGTCACTACGGAAAACCGTCGTCGGGGTCTTGCATTTCGTAGCCTTCGTCTTCTG  
AATCTCCTACGTAGACCCCGCTCTTCTCCGACCACGATATGCACGCCGATAGGTGCGG  
CCGCGCATCGGCAACGTGGGCAGTGACTTCTGTAAAGATATAAAAGACCGCACAAAGCGCC  
GTTATATTATT

>NewGenomeName\_35

ATTTTAACTTGCATGTTCTTTGAGGTTTATATCGCTAGGGTGAATAAGGCATTGGTTTCC  
TTAGTCAATTAAGGAGGATATGCGCTATGCTGGCGATACTAGACTAAAGTCTTGAGTAG  
GCTAAACGTTTCGATAACGTGATGGCCCGCATAGATAATCAATGGCTTTTGATCCCGAA  
TGGAGGAGCTCAGGGAATATGTACGAGGGTGTGTAGGACTTCAACTCCAGTGGTTAAG  
GTCTTTAAAGCACTGGATCCTAAAACAGGTCGTCTTATTTTGATCGGTACGGACTGT  
GGTTCGTGGTGTCTTCGAACATAACGGTCGTGTCAAGACCGCATCCAAGTTTGCTTG  
GCGTATAACGCTGACCCTGCCTTAGACTTTATGTTGGGAGGAAGTCGGCTCTCAATCGCC  
CAATTTAGTCTGATGATTACGGATTATGATATCGAAGAGAACATCGGTATCAGTCTCCGT  
CGCTTGATTCAACAGGTGAACCGGAGCACGCACGATAAGAACAAGGAAGAGAAGATCATA  
AAAACCCCAAAGGGAATACCCCGTCTAAAGTACTGTCAGGGTTCTTTGGTTGGGGGGAG  
TCTGCTTAACACCTGAACGAATGAAACCCAACATCCACAAGGCTGTACTTTCGCACACAT  
GAGGATAGTCCATGAAAACGTTTTTCTGTCTATTTCAACCGGCTTCACTTCTCCTGGTCT  
TGCAACTGGACAATGCGGCGGGTAATGAAGAAATCATGTTCAACTGCACCTTGAAGGACG  
GTGGTGTGGTCAAGCTGACCCAGATTACTCAAGGTGACCTGTGGACCCTTACCATCGGGT  
ACCCGGAAAAGTGCAAGTCAGTTTTACCATGCCTGGGAATGACATGGGTCCGGCAGTTCT  
CATAACCATCGCGATAGCAATCTCGCTACCCGTGAAGTCTTATAACCAACCCGACGGGTA  
ACTGGTTCTATAACCTCGGGGTGGATCATAACGGTAAGGCTAAAAGCGGTTATATCCAAG  
TTATGAACAGCGGAACAGAAACAGCCTACGAACATTGTGTGACAGGAAGCCTTCGTGAGC  
AGTTCGAAAAGAAGGTGCCTTTGTCAACATGACGGTTGTGGATTGAACCTGTTGGGGGA  
GTGAGCGTTTGCTCCCCCTGTTCCAATCTTTATTTTTTTTTTCTAGAAGGGATAACGCCA  
ATGGAAGCCGATGCGAAAACCTTGGAGAAATCAAATTACTGTCTGACATCAAACCTTATC  
CTAAACGGCAGAATTTCCACGGATTTAGTACACAAGGTCTTTAACCCTTGAAGCATAAT  
CATCAGGGTAGGTATAACCACTACTACTTGCTGGATTCCCTCAACGTGCTAAGCGTCTA  
ATAGACCACCAGGATAATCTAACATAACATGATGTTTTGCTTATCTACACTATTATCCTG  
GTACTTGGGACGGGTCGTCCTATTACGAAACGTCATCCCTATGAAGTCTCTCCAGGAGTA  
GGGTGGATGTTTCTTCGGTATTATGCGGACGGGATCTTTACACCTGAGGACGAACGTTTC  
ATTTACATTTCCCGTCGGCCTATCAAAGCAGATACTATTCGAATGTCTTCTACACCTTC  
GTTGAGTTGGTCATTCACACCACTAAGCGCTTAACGGATGTGCTCAATCAGAAGTATCAA  
AAGCTGTACGACGAGTTTGTGTACTCACTGGATTACCCCATTTGTTCTATGAAATTGAAT  
AAGGCCTTTTTGGAGGAATATGGTCCTAAAGGTAATCCATGGGATGGGTTACCACTTCA

ACTAAGGACATTTTCGCTTTAGGAATATCCAACCTTCAAGAAGAAAGTCGGTCCATTTCGTG  
GACGAACTTAACGTTTCGATGAGAGGATAAACCTATGTACAACGTTATAGCAAATGCGGTG  
CTTTTGACCACATATGCTGCAGTCATGCTGCTAGTTGTTTCAGCGCTATCTAGAAGCTATG  
GGTATGCGTTACTCCATTAAGCGGATAGAGAACGGCCGTATTTTATGCTTCTCGTTAGGA  
GTATACGCAGGGAAGATACGGATCCTGCATTCTCCGGACTGTACAGACCCGATCTTCAGA  
CGCCGTTATGATGGATGGGAAGTGACCTTTCCTGAACACTTTACGGAAGAGCAGATGGAC  
CATTACATCATGCACCACGAACCCTTTGGGGAACACAATGCGTCTCATTTCGAAGGATTTT  
GTTGTCTTCAGAGAAGTCATGATTTCGCAAGACCAATGAGGTTTCGTGCGTAGATGGGAAT  
ATCTTCTGCCAAGCGTAATGAACCCATAAAGTACCCTCCCTACCCCGCAAAGGGTAGGGA  
GGGTATGCAGTACACCTTTTTTTGTTAAACCCATGTACAAAGGACCCGGCAGTGCCGTCAC  
TTGGGCTTTCTGTTTCGATCATCCGTTTCGATGGTACCGGATGGCGACGAGGTGACAGCCGC  
AGAACGCTGTTTGAAGCCCGGAGGGGCAGCAATGGCATCCGGGTTGTACAGCGGAAGGAG  
TTTCAACATCTGACGAGCAATCTGTTTCACCGCCAGGGTGTGAATTCCACCAAACCGTT  
GAACACCATGGTGATCTGACGGATTGCGCCTTCTTCGCCCTTGTTACGTTTGATTTCAT  
CGAACAGAGGTACGGGGCATCATACCAACCACCAAGGCAGCGTGAGCAATGTCCTTCAT  
GGTCTGGGTGGGTTCGAAGTAGATGCACGAGACCGATACTTCATCGATCAGCATGTCACC  
TGGATTATCCAGGATGACAATCTTGGCGTTCAGGACTTCCGAATCCATGACCAGCCATTG  
TTGCCAGACCTTGAACATCTTGGTGAACACTTCACCGATGCAATCGTAACCAGTATGAGT  
GACTTGACCCATCGAACGGGTAGCGCCCGACGGAATGGCGAGTACGTGACCCGTCCATTC  
CATTTGGGCGAACTGAACTTCAGTCATGTCACGGAGACCTTCGAACGACTGAGAACGGTT  
TTCAAACCACGCCTTACACAGCGAATGCAACGCAGTGCCACTCGGCAGTCGGGAGAAGGC  
AGCAGGAATCGAGAGGACAATACACCACCCAGTTGACGGACGTGAGGTTGTGCGCTGAC  
ATACTCGTAGACGTTACCAGCCCAACCGTACATACCCCGAATTGGGCGTTAATGACCCG  
ACGGTTTTGCAGGTCCAGAGCCCGTACGAAGGGATCGGACTTCGGGAGTAGGGTTCGTA  
GGACCGAGGAGGGAAGTTCGTTTCATTAGCCATCTTTCATTCCTCAGGCCGCAGTGGTGG  
CCAGATCCTGTTGGTTGTAAGCGGAGAGATCGAATTCCATCATGTACTTGGCTTTGTTAA  
ACCAAGCGTGGAGAATCTCACGCAGTTTCGCACGGGATCCGAGCGTTCCAGTTTGGTGG  
ACGTTTCTGCGACGATGTTGGAGAGTTCACCCCTACTGCGTTACGGCACGCGCTCGCGA  
TCTCGTCTTTCATGATGGAGGCGTAGTTATCTGCGGTGATGGTACGGTCACCACAACCGA  
TGCGCCATTGATCCGCGGAGATCTTCTCCATCGCCACGCACAGGAACGGGTTAGCCAGGT  
CCTTGAGGACCGAGTCGGGGTTCGGGTGAATGGTGGGAGGCCCGGACGGTACGTTTGAA  
CGTCCCAGTCCCAAGGCTTCAGGGAGATATGGCCGTTGCTGAAGTTCTCAGCCGCCACTT  
CATCTTCTTCGAAGACGATGTTGGGGGAGTGCATCAGACGGAGTTAACGGTTATCCGCAT  
GATCCGGTGCCTTCGGAGTGACGATCAAACGGTTCGATGTTACCTGTCCACAGCGCAAAGG  
CATAGGCCAGGTTCGATGTTACCCGAGAAGTACCAGCCGGTTCGGTTCATCGGTGACTTTCG  
CTTCGATGAGGTTACAGCTGCACGGCAGGCTGGGGTACCCACTTCTCAGACTCGACCG  
TCATGCGCAGTCGATTGGTATGATGATGACAGCCGAGAATAGATCTCTTCGAGACTGTTCT  
TCTACCCGGTCTCCAGACACAGGCGTCTGCCACAACCAGAATGTCCTAACGGGCACCCA  
GGAAGTTCGGCTATATCTTTTACTTCTTGGGAATAACCAATATCCAGAAGATCGATT  
GACGGTTACGGGTGGTGTGTTTCAATTTCCACACCATTCACGTAACCTGGTCAGATCCGCCA  
CCATCAGTTTGTAGGTGATGTCCACGCCTGAAGGAGAGTGAGAGGATGCTCGGTGTTAG  
TCAGCAGACCAAAGAGATCGTTGACTGTCGGCTTGGTAACGTAATCCGGTACCTTACCGT  
CCTTATCCAGGAACGGCGAAATACCGCCCGAGGATTTAATAGCGCCGCTCAGGTCCCACT  
TGATAACACCCGAGGTGGTATGGCGTAGTAAGGCGCGCCGTTGTGGTGGGTGCAGGTGA  
ACGGGTTTCATGTGCTTGTAGTACACACCGGGAACCCCGACTTCTACCAGGGTGTCAATTT  
CGGGCTGTTCCACCACATAGATCATGTGACACAGGGTGTGATGTTGTCCTGGTAAACGA  
CCAGGTGCTTTAACGGAGCCGGAACCGGTTACCCGGGGCGTTCTTGTACGACCGGTGA  
AGGAGCCGAAACCCGTTTGCAGGCTGTACTGAACGCCGTTGAGGGACACCGGGAACAGGG  
TGAACCTTGGCACTTTCTGTTGGAGGGTGGTTTTTCGAATACACACGAGTCCCATCAACTC  
AATCGGTGAACTGACGGAGGTCGTAAGGGAAAGTCCCCGTGGACCGAACGAATTCGGAAA  
TGGAACGCCAATTCAGCGCGTCCGCACGGACACCCAGGTTAAGGCCCGACTTGTGTTATT  
CGTCACGGACACCAGCCACCCCTTCGAACAGGAGGAGTACCAGGGTTTCAGGGGTATCAC  
CTCTGGCGGCGATGGCGCGGACTTCGAGCGCGCCGGTTCTTTGCCCGCTGCGGCATCAT  
CGATTTTGATTTTCGATGTTTCAGACCGTTCGGGTAGGTTTTACCCGGGATCGGAATACGCT  
CGCCGTTTTCTGTTATACTTCCAACGGCCGTTGGCAACTCGTTTCGTAGGCCTGACCTTCCA  
CTTTCTGAACAAACGCAGAGAGCGAGGTTTTTCGAGACCACTTCGTTGACCGAGAGGGGGC  
GAATGCCGATGGTATTCTGGCGACCCAGGGCGAACGCCTGGATCAGGACCGACGTTGGGT

CGTAGTAGGGCGACTCCTCGTCGAAAATGTCTCCAAAGATCTTTTTGACGTCTTGGGGGG  
CTACCCATTGGGTGCCTGCTTTAGACGCCAGTTTTCTGTGGGGGAAGATAACCGTGGATAA  
CAGGAAGGTGGAGCGGGGTGGTTGGCGGGGACGTGTCATATTCTGGAATAGAGTTGTCCC  
GAATCCGACTAATGTCCACCTTTCCAGGGACGATTTTGTGAAAACACTCATGGCAACCT  
CGTGGGGGAAAAGTTTGAAGCAATCGTATGAACCCATTCTCAGGGCCGTACAGTGTAATA  
AGGCACTGTCCCATAACATGTTATTTAAGGAATATCTACCATGCTGATCAATGCCTATG  
ACACCACGGTTCGGTAAAATGATCCGGGCGTCTCACCACGCGGACGAAGTCATTAACCC  
TTCATCTGACCACTAATCTGTCTCCCACTAAGAAAGACAAGGTGTACGTTATTACGCACG  
CCACCTGCGTTTCGATTTTCAACCATTGCTTTTCCGATTACCTTACAGACCCATAACCCGCC  
AAACCATTACGGTGTATGACGAACGTCCGTACCGGGATAAACAGAACCGAGTCACGAACC  
AGACTGACCTGACCATTATGGGACTGGCGGCGTTTCTACAGCAGGATGTTGCCGAGTTGA  
ACCTCAGCCCGGTTAAGCTGAGTCGCAATATGGTAACCAAAGGCTTTAGTGACGCGTTAA  
CCCAACGGTAACTATGCGGGGTGGTTTGGATATCGTAGAGTCGTCGACCCTGAAGGTGT  
TGATTGGGTATTATGTGGTTAGTCTTCAAGAGAACCCGAACAATGACCTGGTCTTTGTGG  
TTGAGAATGTCCTTCGTAATGTGTACGGGAGGGAAAAAGACTTTGTATTGGGGGTATTG  
CTGATCTCCCCATCTGAGTACGCTGGAAGACCTCCTCAGTGAGATTTCGTAAGAATCCTG  
TGTTGTATAAACTCAAAGGGATGGGTCTTAAGGACTTCATTGCTGTGGTGGGTGGATTGG  
CCTTACGGGGCTGGGGAAACAGGTCTTTGAAGCTGCGTCTGAAGCACCTTGCTTGTGA  
CGGCCTTTGTCTATGGCGCAGCACGTTTCAGGGCGCTGAATAAAACACCGGTGGGTATGG  
CATTGGATCCTAAATACAACAAGGGATCCTGGATACCTTCTTAAGAACATCGATTACA  
CGTATGATCTCAACGGGTAAACAGTTATGACCATGAAAGGGTTTGATACGGATAACCCATT  
GCTGGCCTACGCGACAGACCACCTGTGGGGTAACCCGGAAGAGAATAACCAGTACTAGGT  
GCGTACAGTACGGCTCAGTGATTACTACGGAGATGTGGCCAACCTTCTCCTTTATGGGCAC  
ATGGCGGAGTTTGCCTAAGCGGGATACGTTTTATTACGTCTTCTCTGTAGGGGGGTGGGA  
TGCAGACTATTGGAACCTCCATAACCACTTACTGAAACGGAATCCCTTAGACCGGTGGAT  
GAACCTGGCCGAGCTGTGTAATCGCCGGGGTGTTCAGCTGGATATCTACAACACCAAAGG  
GTACCAGTACAGCCGGAATAAAGCTTGGGTCATGATGACTTACGATAAGCTTACGTTTAT  
TGCCCTGGAGAAGTATAATACCTACCCTACGCCAACGGGTCAGGAAATGTTCTTTTCGATG  
CTACACCGCTTCCAGTGAGGTGGCGAAGAATGAACAACCGCGAATGCTGCCAGTAACCC  
GTACGTTTATGAAACCATGGTGTACGAGAGTCAGGCTGAACTGGCAGGTCTTTAATAACCG  
GTAAGTACTTAGCCTGTAAAAGCAAACCTGAGTTTACCGGGGTGACGGTGAATGGGGTATATTG  
GCACAGTAATCCAGGGTCGATTCTAAGTGGTCTAGGGGATGTAGTGGAGTTCTTCCA  
TGACACCACTGTGATCCGTACGGAGCTGTACGCGTGCAACACTCTGCAAGACTTCTATTC  
CACCTTGGATAACAAACGGAACCTGATCCTGCATCCTCCTAAACGCCCAGGTGACTTTAC  
CCTTCGGTATTTTGTGATGACAACGATTACTACCTGTTGGGTAAAGGGTTCGACAGGTCTGTA  
TTCCATCGGAATGCGGTGAGTACGATTTCGTACGTTGACCCATGTGGATGTTGCCATTGC  
GGATTACCAGATCCAAGCCGCCAGTAATTACCACAACGACCTCAGTGAGGTGAAGGATAG  
TCGTATCCTGGTATTGGTTCTTAAACGGATTGGGAATACTCTTGGCCGCATGATAATCA  
ACGGATCCGTTACTTCTCCCGCATGACTGATGAAAACATCCTTAAAGCCATGACAGGTGA  
TCGAGCAACGGTGCCGGAGTGGACCGCTCCTAATCTGGAAGCCGGGGTGGTGTGAGTTT  
TACCCGGAGTCAAATGAAAGCGCTGACCGTAGGGGGGGCTCGTAAAGCGGTGGGGTACAA  
TGCGGCAACTCGGGTCTCAGTGAAACCCCGTTAAAGCGGTATACGAGGCGGGTGGTTCG  
AGGGGTTGAGATCCCCAACAGTTACCGAGTCATTTGTACCGCTTGGGAACATGATGAGAA  
CGGGTGCCTGTTGGAATACCACAATGTCAATAATATTCGGTACTACGCACCTCGGAATCC  
GAAGTGTCAACTCGTTGAGTTCACCTGTGGTCAATACGGGGGAACATTGGACTATGTGGT  
AACCAATACCGATTTACCCTTAGACCCCTTAATGGGTTTCAGGGTGTACACTGCTCACTT  
CAACGTGGATCGAGGTGAAATCACCGGTGCGTTAACGGATGTCACTGGGGATAAGAAGAT  
CTACTAGGTGGTTAATGAGGTCTTACTCTGGAAAGGATTGGATCCCGTTAACCAACGTGG  
GGTGGTAGTCTTCAATACCCCGACCTTGACCTATGGGTTTCAACTGGATCACATTGCTCA  
CAGCTTGAGCTTTGCCATTACCCTCATTTATGAACCGGGTGGATTGGCGGTGCCTCTGAT  
TCCTGCTCAAATCGATATTTGGATGAACGGTTCATCCATTGATTGATAATGTCGATTGGAT  
CTTTGACAACGGGTACTGCTACATGATCAACAAACAGTTCATCCGACCGGGTGTCAACA  
GTTTGTGGTACGGTGCCATGACCTGTGGGAGGATAAGGAACGTCCTAAGGTAGAAACCGA  
ACTCGGGTTCGTGGACGGTGGGGTATTGGACGGTTTAAACGGTATAACCTGAGGGGAAGA  
CCGGGTAAACACGTACCGTCAATTGGAGGTCGTTTGGTGGTAACGGACGACGTGCCTACGGC  
CGAGCTGTCTTCTCAAGATAACCTCTGGAATCACCTCAATGGGTTACCGTACATGGTCAA  
ACATGTCTTCCAACCCATAAAGTATGTCGTACCCTATGACAACCTTCCAGGGTGTAAAGA

GAGTCGGGAGATTGATCAACGGGTGAGTGACTACTTGACGGAGTACTGCCCTAAGCCGTT  
GGTGGATCCTGTGATAACCGACCCTTGAGGATAAGTACCGGTTGTTTCAGCCCCTTCCTGAA  
TGTGGTGGTGAATGCGATTAACAACCGGTTGTGGGTGGTTGCGAATCGAGTAGACGGTGA  
AGAGACGTACAGTCCTCAGATCATTGAGGAACAGGTACGTCCTGACAAGTGGTGGTTGAA  
GTATGACTCGGTGACCCGGGACTACGACATCCGCTATTTTGCCGTTATGCCCTACGCGAA  
TGATGAACTGCTCTCGGTAACACCCAACCAGTTTGTGTTCAATTAAGCAAGTGAACGACCT  
TACTTGAAGTCTGTCTGTGTCATTGAAGGCCACTTTGAAGTAAGTAACAGTGACTAAAG  
GGGATATTCATGTTTGACAACAAACCCAGCACGAGTGCTGAGCGAGCGGTGGCGGGTACT  
GATTTGGCTCCTGAGAATGACGGCCAACGGTACAGGATCCATTATCTGCCTGACATCTAT  
GAACCGGACAAGCATCCGCCGGAGGACATTGTTAAGTACGTGGTTCCCGGGAACGGGAA  
ATGGTGATCGATGTTCCCAATAAACAGTTCCTGGAGGGGATTCATCTGGATTACCAGGGG  
AAGACCTTGAAGTCTAACTTGGTTCGGTGGGAACCTCGGACCAGTGAGGACGGTACCACA  
ACTGAACAAGACTGGATCTTCGGTCTATGAGGAGGTCCTCTGTTGGGTGAAGTCTTGCTG  
AGTGTGGACTACAGCCAACGACCTAACGTAGCGCGTGTGACAGCACCATCATGCGACCC  
GGCGCAGCGTACCCTAAACTCTACCTCGGTAACGACGCCAGTGACAACGGTTCGGATCATC  
AGTGCCCAGTACGACAAGTCGGCGAATATGATCAGCAACAAGGTACCTACCAAGTTGGCT  
GAGATCGTAGACCGTACGAACCTGGAGATTATGACCACGGGTCTTTCTGTGTCACGGAG  
AACGAGGAGGCCCTGAAAGACGGTACGCGTGTGACGTTGGTGTCTATGACGAGGGGGGT  
AACTTCATTCCCCGGTTCAACCTCTAATGGTCCAACAGTGTGCATACATGCGGGATCAC  
CAGATCGGTACCAAGTATGTCACGGAGATTGAGCTGCTCACACGGTGGTTTACCAATACA  
GTTAATGCGGAGAAGATTATCATTCCGGTGAACGTATTGGTAACGGCTATTGAGTTCAGG  
GCGGTGATTCATTACTCGGATGGCAATACCAGTGCCGCCATGCCGGTGAACGGTGAACGG  
TTCAACCTGTATGGGTTGAATCAATGGCGCCCCACCTGGCCGGGTCAAGAGGGTGAGATC  
GTAATGACCCTTAAACTGGCAGCGAATGAACAGCTTTACATTGCCAAACCCGGGAGTCCC  
GATCACATCAGTCGAACATATTCGGTAGAAGCCGGTCTGTTAAAGGCGCGTACTCGCCG  
AAGATCTACACCTTCCCGCAATGGGATCCGAGTATTTCCGGGTATCGACTCCAACATTGG  
CGGTTGGATCTGGATCGGAAAACGGCCATTGATGTGACCGCTCAAGTGAAGTTCAATGAG  
AAGAGTGAAGTCTGGCGGCCCTTCTGCCTACGGGGTTGCTCAATCGTTGATCTTTAACTTG  
AACCTGAGGGATGTATCGAGTCAGTACGAGAGTGTGATCTTCCGGCAGTACACCACCATT  
CTGTTGTATAAAGGCATCAATGGGCCGGGTAAACGCTTTGACGTGTCCTTCTGGCAGAAT  
AAACCGTTCGTACGAAGCGAAGTTCATTGTGGCTAAGAAAGCCGGAGCTGCTACCACGGTC  
AATGTGGCCAGCGGGTACGGTAATCAAACGGATTGGGTGAAAGCGTTGTATTGGGGGGTC  
GAACCCAGCTTCAATCGGGTCGATGAAGAGTAAGCTCCTTTACCCACTCATTTCTACCTG  
GTTTCATGAAGACGGGCATTCCTGGCGGTATCCGATCTCGGATTGGAATAAGAACAACGCC  
ATCAACATTGAACTTCAGAAGGGTAAGACCTGTTTCCTTCGTTGGGTGGAACGCCAAACG  
TCTGGTGATCAGAAGCAACTGGCCGTTCTGGTGTAAACGGTTGAATTTCTTAAGGAGGA  
AACGAAATGACCAGTACGGTAAACGTAACCGCTCATTGTACCGAAGATAAGGAAGTAGTG  
GTTCCGGGGTCTGACGCCTGAAGATATCTCGCAAGAGGTTATTCTTCAGAACGGTAAGAAG  
ACGGAAGTGGTGGTGTTCGGCGCTAAGCACGTCATTCACGAACGGACTCGTTTGAA  
CCCGAAGGTTAACGGCGGTTGATCCTATATTTAAAGAGTTACCCTGGGCGGCGCCAGGG  
TACTTGTATTGTTATAGGGTTTTTCGTGGAGTTGATGTATGACAGACGAACAAGACACATC  
CCTTTCCTATGCTAAATGGTTGTTAAGTACCTGAGATGCAACAACCTGCCCAAAGA  
GATAGATGATAAACGCATCCGTATTGTTTGGGAGGCTCGCACAGACGATGAAACCCTTTT  
AGCTCACTTCAATGAAGACAGCTTAAAGTGGTATTAAGACTGTTTCGTTTTCTCAAGGACTT  
TTTCAACTACCAAGCGGGTATGATCGGGAGACCCGGAATGCCAGTTTCCTCAGAACCAC  
CGAAGTGTTCAGGCAACAGGGGATCAATAACTTTTACTTCATCCTCCAACCTGAACAATCC  
CCTGTTGAAAGGGGTGGAACCCTTTGATCCTACCCCCACTCCTGAGCAACAGGTGTGGGT  
CCTGGAGGAGTGTGCGGAGTAACTTTTGGTACTTCTACGGGAAGTTTGCCGGTTAAAGCC  
GAATCAGCCCTTCTTAGCGAACCGGGGGAATATCAGCTTTATTTGGTTCGATTTGAATCA  
CATTACCATCTACAGGATCATGCCGCGGCAACAGGGTAAGCAGCAGCGGAACAGTGCTAA  
GGTTCTTATTGTGCCTAAGGATAACCCTGAAGACTATTCCCCCTCAGGATACTTGGAACG  
GATTGAACACCTACGGGTGGGGGATCAAGTCTTGACCGTTCCGGGAAGCCGTGTCAGGT  
GATTGGCATTATCCCCAGGGTAAACGCCGGTATATCGCGTCTTACCAGTGACGGACG  
AGCCACGGATGTAGGGACTGAACATCTGTGGACCTTGAAGGATTATTTCAACTGCCTCAA  
TGGACGTGCACTCTGGAATGACTATTCGACCGTTGATGTCATTCACCTGTTGAAGAAGAA  
GGTTAAAATTCATTGCCGTTACCGGCTCCGGTACCCGGGAGTGAACAGGACCTACCTAT  
TGACCCGTACGTTCTCGGGTTGATCTATGGCGGACAAGATCAAGACGGTAAGGTTATTAT

CCCCACGCGTACGGATGCGGTTAAACAGTACGTAGTTGATCATCTCCCTCGGGGGGTGAC  
AGTTATTCAGGTAGTGGCTAACAGTTGCTTAGAACGGACTGATAACCAACCTTATTTATT  
CAACAGGGTACACTGTTTACCGGATCAATACCTAGAAGCCCCTTTAAACGCCCGGAGAGA  
CCTCTTACAGGCGTTTTTAAACGTTAGGGGTAAGGTTTCGTAGGGGTAAGGTCTTTATAGC  
CTTAAATCGCGTCCTAGGAGGTCAACTGGCGTATCTAGCCCGTAGTCTAGATGGAACCGG  
TAAAGTCACCAAGAACGGAGTAGAGATTACCCTACCGGAAGAGGTGCCTCCGTTCAAGTT  
CAGGGAAGAGAATGTCGTCTTTGATAATCCGTTGCTGATCGAGCGGGTGACTTTTCGTAGG  
GGATGACGATTGTACCTGTATTGTAGTCGATAACCGTGAACAGTTGTATTTGACCGATGA  
CTTCATTGTGACCCACAACACGGTATCGGTTACGGTGATTGACTTCTGGTTAACGTACAT  
CATGGGCCCGGGGTATACGAGCCACTTGATTACCTTGAAGTCGATTAACCGAGCTCACTT  
CATTGCGGCTATTAAGCAGATACGGAGTTCCATTCCCTCGTATTTGATTAACTCGACCTA  
CAAGGACTAGGATGCTGGTACCAGTCTGACCTACAAGGCCTTTGGGGCAGATAACGTAA  
TACGCTGTACATTAACGTCCCTCAGATCAGTCAGGATGCAGCAGGGGATCTCGGTCGGGG  
GTTACGGGTAGGGACTACCAACTACGATGTGTCCGGGTATATTCGGTTCATCGACACCAT  
CATTGACGGGCGTTCCTCGCTAACGGAAATGGCGTTGTGCGGTGAGCAGGGGTT  
GCCGTATGGGATTACGCACATTACCACCCCAATACCACGCTCCATCCAGCGGGGAGTT  
TATGTTCAATAAACTCATGAGTGCAACGGAGTGGCGGGACAAGTTCTTTGATTGCTTCAG  
TGAGAGTCACTTGAGGCAGATGTTACTCAGGGCTTCCCCTACGAAGACAACCTCTCCGTC  
AGTCTCCATGGTGTACAATTACCTTCAACTGGCTAAGGACAAAGCCTGGGTGCGGGAAAC  
CATTGACCTGCCGGGCTCGAGTTTGGCGAAAGCTAAGATCGACTTATTGCTCATGTGGGT  
GGAAGATGGGGAGAATCGGTTGTTGACGATGTGACCCGGGAAGCCATTAACAACATGAA  
GCGGGACGTGGTGGAGTAAGGAGTATCTGGACTGTAACCTGTACGTGGACTTCTTTGT  
GACCCAACAGGAATTGTTGGAGATGGCAAAGAGGGAGTACAATGACCATTTCTGATTGG  
TGTGGATAAGTCCCTCAGCCATTCACAAGGATGCGTGCACCACTGTGATTCGCAGTATGAA  
GACGGGTAAGGTCATAGGGGTGGGACGATATCCCTAACCTTCTTGGATGATGTCACAGC  
GATTGTTGTTGATTGCTGGCCCTGATTCAGAACC CGCCTTGATCATAGAGCGTAACTA  
CGCACATCACATGATCGACAGTCTGTTGATTATGCTGCCAGCTAAGAGTATGGATCCCTT  
TAAACGGGTCTTTAACCAAATCTACCAAGACACCGTCAATAACGCCAAGGAGTTTGAGGT  
AGTCCAGAACACCAAATTTGCTTACCGGAATAAAGCGTTCTACCTGAAGTATAACAATA  
CTTCGGGCTAGTGACGACCAAGACCACTCGGGACGTCCTGTACGGCCTCGTCCAAGAGGC  
GGTTGGGAATACCGGGTACGGCCTCTGTTGTGCGAAGCCC GCGGATGAATTGATCAACCT  
GAACTTAAAGGGGATCGAATCGACCACGATGGGAAGCAGCACGATGACTTGGTCATTGC  
GTGGCTACTGAGCTACTGGTTCATTAAGCTCGGGGAGAACAAGTCCTTGTACGTGATCCC  
TCCGGGGATTGCCTTAACGGACACCCGTAACCTACTGAACTCTGCTCAGAACCAAGGACG  
AACGGAGTATGAGCCGTACGTTGTTCAACTCATCGATAAAGTCCGGAGTAAGGTTACAG  
CCTAACTGAAGA ACTGATGAGCACCCAGGACAATATGTTAGCACTTCGTCTAGAGGTGGA  
GATTCGGAAGTTAGCCAAGATGTTGCCTCCGGAACAGAATCGCATGATGACCATTGACGT  
GCTGTTGGAGAACGCTAAAGTGGAACGCAACAAACGCCTACTGCAACAACGCAGAACAGC  
ATAAGACCTGACCCTCCTGGAGCCCGTGTGGGGCTCCAGGAGGTATCGGGTTATTTCTGC  
TTCAGAAAGGGCGGTATAACCCACTTAGTTACAAGGGTTACGCTACAGCAAGCAGTGCAT  
GTTCCAGTTCTTGCAGAGTGTGACCTTTAGCCGGCTTGCCGTTGGCCAATAGGTTGAAGG  
CTTCAGAGGCGGTGGTATGATCCAGATACCAACGGTAGTTCGGCGAGCTTTTCGTGCAACA  
TCGGCGAGCGGGAGGGTTCACCTGGTGGTGTAGGGATCCAAGGGAAGATCATGAACGCAC  
GGATTGACGCTGAACCACTTTCCACCATCACACTAACCATGGTGGGCGTATGGCACGAAC  
AGAGAAGCTTTTGGGTCAAGGGCAGTGC GTGATAGTGTCTGCTCCTACGCAGTCTGCAT  
GAAAAAATTCCTTGTA ACTGGTTATTCGAAATAATCCTTGGACAGTACGCGCAGTACAAT  
GAACAAGCACAACGCCGTACGAGTGGTTAATACCCACTGAGGGGTTTTACGTCCGGTAAT  
GGCAATCACAATCTGGTCACCTAATTCCCGAATCGTCTTAACCATGTCATTCCGACTCCG  
ACTCGCCCCGTAAGCACCGCGCATCTTGATCAACACGTTGTAGACTTTACTGCGTTTGAT  
GTTGTTGGCGTGGAGGTAATCAAACAGGTGCAATACGACCGTTTCAGCAA ACTGTTTGTA  
CTCAGGGGTTTTGGGGTTGTGGTACCGCTTAGGGAACTCTTGCAGGGTATACGTCAGCAT  
GTCCATCCGAACATCCTCCAGTAAACTGGCTGCATAGTTCATTA ACTCTTCCTTG TAGAA  
CGAGGTTTCTCTGT CAGGATACGGCCCAGGTA CTGAACGTGTTGATTACGTCCTTCGC  
TACCGACTTAATGGT CAGTTCATCTCCGAGGTTAACCTTAGAGTTCTCCAGTTTAACGAT  
GTTGGTCTTGTGCTTGACATCGTGG AAGACTTTGTTAATGTCCTTAATCACCTTCTAAG  
CCTGTTCTGAATATCTCCTACCATGTAAACGATTTTCTTATCATCGTTCATCTGGGTA AA  
GGCTTCGTAGGGGATAACGGTCTTAGGTTTCAGGATAAGCTCCGCCCGAGCCTCAATCAA

CGACCTCCAGCTTCCATACCGTTTAAATGTCATACTTCAAGCTCAACCGGTTACAGGTCTC  
CAAGACCACCTCTTTACGGGCGGTAAGGTGGTAATCGTTGTGAATGATCGAAGTGAGGCA  
TTTGTAGTGGTACATGCACACCACATCTTTCATGGCTTGATGTTAACTTTCTCCGGTAA  
CTTCGAATGATGAATCCGGTACAGCAAGTAAGCAATGGTCATATTGAAAGCATCCCCTAC  
GACCGCCACTCTCTCTTGATGGCTGCCACGTTGTGGGGGTTCTCTTTGAGTTCCTCTTC  
ATCCAGGTCAATGATGTCATTGAACCATTGGTTACGGTCTGCGGTGGTAAAGGTGATCTT  
CTGCAACCCTAGGTACGGGCTCCCAAAGAACTCCATGTGGTTCACCACACCCATTCGGCG  
GGTAATGACCGCATAACGTAATTCTGAAGATCACTCGCCACCGAGGGGTAATCTCCAA  
GTACGTGCCAGTCGGGGAAAGATCTCCTGAATGGCATGGTACTCTGGAATTCACCCC  
TGACAGTAAAGCTTCATTCCCTTCCACGACTCAGAGGTCACTATCAGGAGTCTTTGCCTC  
TTCAAAGGGACTAAAGATATCCTGGTCCCCTACGAGGTCTTCCGTTCCGTCTAATACTAA  
CATTGAAAACCCCTCTTGGTTAATTCGACGTGGTGTGGCCCTCCGTATTTCTTCAATAC  
GGGCTTGTATCCGACCACGTCATGCAGTTGATCCATCTGTTCTTGAAATACTCTTTGC  
ATTGGGTCCACGCGTCACTGTAGGCCTGTATATCGTCCCCTATGGCGTCCAGGGGAACGC  
CTGAGCGATAAACCCTCTTGGGTAGGTGCGCTACCGGTTTTGTAAATATACGCCTTAA  
CGGCAATTCAACGAGCTCTGCGAACTGCCGGTAATGACGAGGGTGAATACTGCTCATCC  
CTTCATCGTATTCCAAGATTACTTTAGCACTCATGGAATACGTTCCCGCATTTAACCCAA  
AGATCACAAGCAGTTATTACCGGTCATATGGACATTGGTGAACGGGACTGGCATACTTC  
GGTTATAACTCAATCCCCCAGTAAGCCATCCATCATGTCATTCACTACTCCGGACCCAC  
ACATCGTGTCTCATTACCCGGGCTCCTAACTGACCAACTGCGGAACTCATACTCCCA  
GGGAGACTTCTGTACACTGATGATTTTACCACCCCGAGTCGTCGCTTCCGGTATATTCA  
CCTCTACACACCCATTCCCCCGATCACGAATCATGGAACCTCCCAGATCCAACAACCTCCG  
TCTTCCACCCCTACGTTACACTCCGGTAGAACAAATACGGTGAATCACTTTCTCCCGTA  
TACCCTGTTCCACGGTTGCCTGGTTAACCAGGTTATACCAATTCCCCGCATAGTTCGCAT  
TGGGGGTTTTCAAAGCGAGCTTCAACAAGTACTCATCGATATCAGTGCCACTTACGACAC  
GATTTATAGCATGGTCTACTGGATTCAAGGTGACCTCGTCTAACAAACCTTAACGG  
GTTTATATAAACCCGTTAACTAGGATTAGGGAATAATAACATCTTCCAGTAATTCATTAT  
TCGGTTTCCATTATATGTTCCACTTACCCAATTCTCATTTTGGAGGAGGGGGTAAGATTC  
TTAGGACTGAGCGACATGAGCCTACGGCGAGTGGAGTGAAGGAGTAAAGAATCTTGGGG  
GAGGAGGCCCTACCGAAGGTAGAGTCCAGAGAAGAGAAAAGAGAAAATCCGAAGGAAAAA  
CCTATTACTCCGTAATAGCTTTTGTCTTTTATATAAGCCGCGGAGGGCCTTATAAGGCAA  
TAAAATTTAACTTTAGTATTTATTATTATTATAGGAAATTGCTTTTTTTATTTAAAAAAGG  
AAAAATGAAGAGGAAATGAAAATGGGAAAAATACCTTTTAAATATTCCCTAAATTTTATT  
TGCTATTAAAGAAGTACCCCTTCAAAGTCAATTACCCCGACCGGCAGTCCCGAACAGGG  
AAGCCGCGTACAGGGTTTATAATGCAATACTGAAATAGGGTTAATGGATTTTCACTTCTA  
CATTATCATTGGGTAATAAAAGAATACAGTTATTCGTATTGATGTGTTTTGATAAACCA  
GAAGAGGAAGAGTGTGTAATGACAACGATTGCTTATCGTGACGGTGAATGGCGGCGGAT  
ACTCGTGTGGTCAACGGGGCCGATATGATCAACCTCGGAGAGCAACGTAAGATCCACGAA  
CCGGGGGAAGGACAGTACTGGAGTGTCAATGGTAACCATATTATCTGTTTTGGTTTTGTCG  
GGGAGTCTATCGCATCTGTTTGCCTTGAAGAAGTGTGAGTGAAGGGATTACCTTTAAG  
ACCAAAGCACCTGACCACCTCCTTGGGGACTCGAATATGCTCTGCGTGGGAGAACAGGGT  
AATGTTTGGCTGGTTTCAGCATTAAACAACGAGACGGGAGTATGGTGTTCAGGAGTCA  
TGCGTACAACCCCGTTTTGCAATTGGATCGGGGGGTGTTTACGCCAGTTCGGTGATGGTG  
GTCGGTAAAAGTGCGGTGGATGCAGTTAAAGTGGCGTGTAAGTTGGATATCTTTTCTGGC  
GGTCGTATTGATACCTGGGAACTCCCCCTATTCCAGAAACCCCGAGTAAGCGCCCTGAC  
CTGGCCCGCGATAAGACGGCAAATAATCCCGAGGGGGTAAGACCCTCAGAATGTAGGCG  
GTGGAAACTAGAGTGTGTAGGTATTTTATGCCGATGACCTGCATTCCTCATCGCCGGA  
CGTGGTGGGAAGGTTAGGAGTGTAGACACCCACCACCCTCCACTGCCCGAGCCTATTC  
TGTCAGGCTTGAGAGGGTTGCCTACAAAACGCTCCGCGCCTCCAGCTCTATGTCATATG  
ATGTAGAGCTGGAGGTCTTACTTCTTTTGTTTTTTATTTACCCATGAGGGTATATCTTAT  
ACCGTTAAAGTGACCTGTTTCCACGCCATGGTTCTCTAGGTCACTGTAAGGGTACAACGT  
TATTGATCCTCTTGGATGCGCTAACGGGTGGTGTATGGTCATATCGGCGGGTGCCACC  
CGTTAGTCTTTTTTTTCGATTACGCTAGATAATTTGAAACCTAAATTATTAGCAGGCTATT  
GGAGACTAGTCTTTTTAATGACTTCCCTGTAAACCAAAGAGAGCGATTCGATATGTCTC  
GGATTCAATACTACCTCATGGGCGGCGGGGTATCAACATTGGTGCGGGTTTGAAGAAT  
ATTCCCGTACGCGTGTGAACAGTGATCCGGGGATGGTAGGTTTCGATACCAGTGATAAGA  
ACTTCACGGCCGCGTTCCCCATTGAGCAACTCGAAGGGGTGAACGGGAGTAGTAAGGATT

CCACCAAGCACTATGACAAACTCCTCCCCTTCGTAGCGGCTAACCTGATGAAACACCGTC  
CCGGTGTTCAACAACATCATCGTAGCCAGTACCGCTGGTGGTACTGGGCGTGTTATGGCGT  
TGATTGCGTTGCGCCTGCTGGTCGAGTCGGGTAAAAACGTCATTCTCTGCCTGATCTCGG  
AACACACTTCCCTGGTGGATAAAGCAAACGCAGTCAATGCCGTCCGTTCCCTTTGCTAAC  
AGTGCCAACCCAATCAGCTGAACCGTCCGGTGTGCTACATGGAGTTCCTCAATACGCCGA  
ACCTGACCCGTAAGGAAGTACACCCTTCAGGCGATTGATTCACTGAATCTCCTGAGTCTCC  
TCTTTGATCCCGGTAATACGAAAATCGATGAGGAAGACATTAACGCTTCTTCAATTACT  
CGGCGGGGGTAAAACCAGGCCGGCGTAGAGTAGTATTCATTTCTACGAACAGAATGGTG  
CAGCGGACTATACCGGTAAGGTACCGGTCTCGGTCGCCAGCCTGTACCCGAACAACGATG  
ACGTGGTTCCTCGGTTTATGGGATCGGTTTACCGGACGACGGGTATTGTCTCCGCCAACA  
GTGATCGTCCGGAGGACATCAAAGAGCTGCACGTGACCCTCGATCACGGTGAAGCCCTGG  
AAGAAGTGGAGAAAGAGATCGAAGGGCTGGAACGGTTCAAGCTCAAGCTGCCGTTGACT  
TCTCTCAACAGAACGACATTTCCGGAAGGATCGAAAGATCTGGGCTTCACGCTGTAAGACA  
GACAGTGAATCGCTAAGGTAGGGAGCTCACGCTCCCTACCTTAGCCTTTATTACGCTTTG  
GGGTATTTTTTATAATTAGTTTTTACTAAAATGGGCATTATTATACAGGCCTAATTAAT  
ATAGGGGTTAGAAGGTGTCTATAAGCTTCTCTGTTGATTTATCGAGGGGTTACCTATACC  
GATCTACCGGTTACAGGTAAAAACGTCGTGTTAAGGAAAATAGACCAGTTTGACGTGGTAC  
ACTGTTTACAGGCATTAGGCTACCACAACCTGAACGAACGCAGTCTGAATCGTCGAGCTA  
TGGTCTTTATTCCGTCTCTGGAGGATGACATCACGAACTTTACGATCGGTGTACCGAGTG  
ATGCACAGGTTTCGTATTCGTGGGATTGGGAAGTGCTCCCAACGGTTATTGATTACATTTG  
TTAATTAAGGAGACCTTGTCCCATGGTACTGTTCAATGTGAAGGAGATGGCGAATGGTAT  
CCTCATGCCATCTGAATTGTCTCGGGTAGAACGGGAGACCATTATTAAGGACTTGATTGA  
AACGGCCTTGAATATCTTCAATAACCCTTCTTTGTGCGACGGGATCCTGGATGACCTGTT  
GGAGCATTATGAGTTTAAACGTAGGGATACTGAATACCGACCGTATCGTTCTGGATCTCGT  
AAAGGTCATTAAACACACCCGCCGTAAGCTGGAGTGGGACAGTCGTTTGAAGGCGAAGGT  
GGAGTTCAAGCAGGTCGGGAGTGGGTATCATAAAGCACGTATTGTAATGGATTTGGATGA  
AACCTCCAAGCGTTGTCTTCGAATGTAACAGAACCGGTTTCGCCTCAACGACGTTATTAG  
TGACCATCCAGAAGTGGAGATGCTCAATGAAATCATTTCACTACGATCTAGCATAGCCCC  
AAGGAGAGTTCCGGTACTACCAGATCGACGTCCAGTGGTTGTTAAAGGAAATCAGGAGTC  
TGGTTGGGTACCTGGTTACCGGGAGCATTACCGGAAAATCGGTTACTGAACATTACGACG  
AAGTAGCCTTAGGGGTCCTACAGAAAGCCCTTGCTGAGTGTTTAGTCTTTAACCGCGGCT  
TTGAGTTGGAAGAGTCTCCTAACGTCTTTCCTCGTAGGCAAGCGGATAAGTATCTACTAC  
CGGACGATCGAAATGAGTTGGTGATTGATGCAGTAGCTCATTTAAGCCGTTTAATAACCC  
TCCCCAGGCCCTATACTGCGTTTAGTACCCCGGTGGTGTACCGGGTGCTGCCGAATGGCA  
ATCTCTTAGTTGGGATCGATAAAGCGGGATTTATTATGATTACGAAAACCATTCCCCTCGC  
GTTGGTGAACCGTTGCTTTACGAACGCTAGCTTAAAGCCTGAGCAGACCGATTCCGGTGAT  
AGCGACCCTGGTACATATCTGGCGAGTGAATGATCATAACGGGGGAATGACCCGGGAGTT  
GATTTTCAATGAATTGGACTTGGATGAACTGACCGCTCAAACCCTGTGGAACACTCTTCA  
ACAGCCATTACTGGCGATTAGTCAGCAAATTCGTAAGTTAGCACTGGCTGGGCGATTGGT  
TAGCTGGAAGTTCTCCCCCTCACCATTATCTTGGAGATAGAAGATGAAAACCTTGTTCC  
ACTCAGTACCTATACCCCGTTGACCGATCATAAGGAATTCCTGGGGGCGTATAAAGCGT  
TGTTGAACGCTTTACAGATAACAAGAGAACATTCCCTTCCCGTTGTCTGCTGGTTTTACGC  
ATCCGGTTGAAAAAGAGAACCAGGCGCTCACCACCCGCTTCTTTCACGATAAGAGCTTGT  
TCCAACAACCTCAAGTTGAACCATCCTTTACCTCCGTTACTGGAAGTGAGGGTCCACAACC  
ACATGGCCACCTTTAATTTCCGTTACCCAGAGTTCGGTCAAGATGAAAAAGCGTTTCCCTC  
CGAGTTGATTATGAGCGGATAGCTGAATACGTGTTAGACCGTTCGTTGAAAACCTGACGAC  
CTGCTGGTGGATAACCGTTCGAATGTCATTGACCTGTACCTACCCACGCCTTACTTGCT  
CGTCATTTAAAGCACTTGGAGGTCGCCCTCCAACCATTCAATAGGAACGGTGAATGGGCG  
TTTTCCCTGGAGATTGAGGGTGAAGACGAGGATCCCCAATTGACCGAAGTGTTGTTTTCC  
GATCAAGGGGAAGACATCGTCCACACCTTCCAGGTGAGCTTACGACCGCGTGCGGTGGTT  
CACCTTCAGGGTAGAGTCGTGGTGTACCCCTGATCAAATAGAAGCGCTTACACGAGGT  
CAATATGGCAGTTACTCCAGACTCAATGACATTGTGGATTTTCAATTGGTACGTAATGG  
CATCCTTGGGGATGAACGGGTGGGGGTGTTGGTCATCTCAGCCTCTATGACGTATTAAGC  
GGCTAAGGCCATGGATCCTCAGATCAATGTAAAACACAGTAACCTGTTTCAATACTTCCA  
GAATAAAGTGGGTCCGGTAGACGATCCTTCCAAGTATCCGTACTTCCGCGGTACAACCTCAG  
CAATGGGCAATTTGAGGTCATTGGTGTCCCCTGGGTGAACGATGCGACCTTTAAGACTAT  
CGAAGGGCGTATTTCGAGCTACACGATACCAATTACCAGGAATCCATGGCAGGCCCTAT



TGCCAACATGCTGCGTAACCTGGGTGCGAGTTATACCGTGCATGATACCACCACGACCAA  
GAATTAATTCACTACCACATCCTCTATTTAAACGGGGGATGTGGTAGAACCTTTATTTTT  
TCGTCGCGTGTCTTTTTTAATAGACGTTTTGAACAGAGAGAAGGTCGTATGAATGTTCCA  
GCGACTCAAGAGACTGAACCTTATCAGTCACCCTATATAGCGAAAACGTATGTAAGTAAT  
TGTAATTTCTGAAAGCGTACCACTACTTCGCGGCCCGTTACCTCTCCATTGTGTACGGG  
TGGGACTATGAGAACCTGCTAGAGAATTGTGAGAAGGTCTTCGTACCGAATGAGAATGGG  
TTAAAAGAAGCCAAGTTCGGGGTCTTTAAGAAAGACAAGTACGGAGATCGTGGCCCGACG  
GTAATGGGAACCCGGCAGTTCTTTAACGCAGTCCAAGAGAACAACCTGGCACCTCTCCCA  
TCCTTGGTTCGCGTATACCAATACAGAGGAAGAACAATCTGTAAACGCGGGCGGGCACC  
GAGTTTATTGGGTTCCGTCGGTTGTACAAAGGTAAGAAACAAGCCGCTAAATACGTCGGG  
GACGAGGAAGCGGAGAAGGCGTTCCATGAAATTCAGAATGCCTTAAAGATCTTTAATAAT  
TCTCAATCCGGCGGGATGTCGTCATCCGGTACCCCTTTGTTCAATAAGTCCGGTCATACG  
ACAATCACCAGAACCTGCCGAGCCCTCACCAGTACGGCTAACCTGATCAATGAACGGATA  
ATTACCGGTAACCGCTTATTGTTAACTTACAACAAGACGATGGAACCTGTTTCGTACAGT  
CTCCAGTTCGCCGGCCGTGATTTAATCCAATCGGTGATTGATGAGTACGGGATGACGTAC  
GCCACGGTCGACCAGGTCATGGACATGGTGAGACGGTGTACCGCGTACTACTGGGATAAC  
CCTGTAAACTCAGGGCTATTGAACAGTTCTTGAGGGATCTCAGCCCCTTAGAACTGACC  
ATTATCCTCTGTACCCAGGATTTGAGAGGGCTGTATACCACCAACCCAGATATGATTA  
CGTTCTTTAAGGAATGGTGTGATATCCCGGAGTTTCCGGAAGGGGTTAAGGAAGAGGAT  
TATCCTAAACCCTGAATGGGGATTATTACATCCTGTGTTTAAACCAACCTTGGGGAAAAG  
TCCAGTAAAGCCCAATCAACTTCTTGAATGGTTATCACATGGAGGTTGAGAAACGCTGG  
GGAACTTCATTACTGCGTTCCTCAAATCTTCTATCCCGCCACCGACATCTACAGCGTC  
AAAGAGTTGGTTCGTGAAAACGTAATGACCTCTGATACAGACGCCGGTATTTACAGCATG  
GATCAACTGATCCAAGAGTTCTCGACTGACCGTACGGTTTCGTTGAGGTTCAATGGCGTT  
CTAACCTTCTGCATTCGCAACAGTGCGATTGACCAGCACGCTATCCTTAGTCGCGACATG  
AAGGTGGCTAAGAAGTACGAGCGTCGGTTGAACATGAAGAATGAGTACGTGTATGCGTCT  
TATGTCACGACATCCATGTCGAAACACTACTTCGCGTTGCAACTCATGGTGGAAAGGGGTC  
TTGAATAAGAAACCGAAGTTGGATTTGAAGGGTGTTCACTTACGAGGGGTTAAAATTGCG  
GAATTGGTGAGGAAATTCACCGGGAACCTCATGCGGAAAATCTTGAATTCAGTGTACAGC  
AGTGAGAAGCTGGATGCGCCTAAGATTTTGAGGGAAAGTGGCTGACATCGAGCGTCAGCTG  
TTTGCCAACCTGGAAGAAGGGGGTGGGCGTGGTTAACGATTGAAGGGGTTAAGGACCCA  
TCAGCCTATACAGACCCAGAGAGTAACGAACGGTACATCAACCATTTGTTCTGGGACGAG  
GTATTGGCTCCTAAGTATGGAGATACCCCCCATTCATATAAAGCCTACAAGATCAAC  
CTGACCTAAACCGGTAAGAAGAACTGGAGGGTTTCTTTAACAGCATCGAGGACCCGAAT  
TATAAAGCCCTGTTGATGGATCACCTTAAAGGACGAGATAAGCTGAGTTCAGCTATATC  
CCGACCGATCAGATTGATTAATGGGAGGAATCCCTAAAGATTTTATTCCGTTTATTGAC  
AAACGCCAAATCGTTAGTCATAACCTAAAATCCATTTATGCGATTCTAGAAGCGTTAGAG  
CTCTTTATCTTAAATACTAAGGTAACGAGGCTGGTTTCTGATGAACATTGAGGGTGGGTT  
TACGCTCAGAAACGAGGCGAATCAATAACACTGACATACCGAGAGAGGAAGCCCTAAGCC  
TGCCCTCTCGGTAGTTTTTAACTTTTTCAATAAGCTTATTGGGTAAGTCAATTTT  
TTGACCTCCACAAGATGGCAGCGTGCTATTTCTTGAGATTAATACGGTTTAGCGTATTC  
AACTCGTCTGCCAGTTCCAAGAACCATCCTTTGAAGTACGATTCAGGGATCCGTTGGTAG  
TTATTCACCCGTTTCAAATGACTTCGTTCCACCACACTGTTAATGTCAGCCGCGGGGGAA  
TTCCCGTGGTTGCAAATACTCAACTAGATGGAATACAGCTTCTTTAAAGCCGGTTCCCAA  
ACCAACTGGTTTGCGGAAACAACGCGTTCTTACCCGCCGGAACGTAGTTGAAGTAGGGA  
TGTTTATAAATCGACTCAAGGGTAACGAGGAGGTGTTCAAGGTTAAAGAGTCTGCGTCT  
GTTAAGGCCTCTCCAGGAAAGCCAGGTAGAGGTCCATTAACCGTTGTTCACTGACCGTA  
TTAACCACCACCTTATCCGAGTTCATCGCACCCCTTCAGTGGTTGTTGGTGAACGAAGTGG  
TCGTAGAGGGTGTAAATGACCGTAAGTTGGTTATGAATTAACCTGGGCGTTGGGTAAGGGG  
ATGTCGGCGACAAAGGCTAGTAGACCCGTACCCCGCTCGTTGGCCATTTGCTGGTACGCC  
CACGACGCAACAGCCAACCTCCACCAGGTCCATGCCTATAATGGCCAAGTCATTGATCTGT  
CCGTTAACCGTCTTATCCCGGTTGAGTGGGTGGGAATAACATCGTTCCGGTAACCGTAGAA  
CACAAACGGTACCACAGGACACAGGGATACAAAGTCAATAGGAGCACTGTATTGCTTGGTA  
TTCTCAATCAGACACCTGTGTTCCCGTACACTATCCGGTAGAAACCCATTGGTGATTGCT  
TTACCCACATGACCCAACGAGGTAATATTAACAACGTACATAATGAATACGCCCGGAAC  
CTCGTATAACTGACCACGTAAGAGAGATCCCAATCCTTATTGATGCTTAACTGTTGAAGT  
AATCCTACCAGGACGTGTTCCGTTCCCGGTATGGAATGGCTGCGCCCTGACGTAGTGAAA

AAGGGTTTACGGTTAAACGCTGTTTGCCGTTGCAGGTTACCCAAATCACCGACCCGTAAC  
CGGGCATAAACCGTGTTAGACGGTTTAGGGAATGACAAGGTTAGTATGTGAGTATTTTTC  
CAGTGATGAACTATTATATAGCACACCACGGTCTCCCGGTTTCGTCCGGGAGTCGTTGGAG  
TGCAATTTTCGAAAATGGTATGAGTTTGAACAAGTACCTATAGCATTTCAGCCTAAAAAGC  
CGGACTGTGACCAAGTGCTAGCATTTCACAAACCCATATTACCAGTGTGAATCGGGACAA  
TGATATTTGTGTGTGTAGGCAAACACTACGCGATTCCGTTATAGCGAAGCAAACCCCTTTC  
TTAAGAAAACGATGGAGTTTACCCCATGGCTGTGAATAAAGGTCGTTTCGTCCGAATCCAC  
CACTCCGAACCTCTTCCTGGACCGATGAAGAAGCCGGCGAGAACGGGTTGAGCGCCAGCGT  
ACGTCAAGACACCACCGGTCTGTCGGGCCTCTTCAGCCTGACCTCGATGACTTCGGACAA  
CCGTAATATGGTGGAAAGTCTCCGAAGTCGCCAAGATCATCAAGGAACGTTTCACCCGTAT  
CGCGGAGGCTACCACTCCGGAAGCTCAGCGCAACATCGTTCCGAACGTGGATGAAATGAC  
CGCCGGCAACTCCAGCATCCTCCCGGGCCTGGTACTGCACAAAGTCATCAACAACAACT  
CTGGGTAATGGTTGTCTGTTCTCCAACAAGGACCTGACCATTTCCTCGGAACCGATCCG  
TATCAACACCCTCAACGGTATCCAACAGCAAATCTCGGTGCCGCTGACCCCGACCAACTA  
CGCCAACGAAGCGGTCATGAAGAAGTTGGTGTCTTATTACACCCGTGTGGCGGAACAGCA  
AGGTGTGAAAGGGGTTGAAGTAATCAACATGGTTCGTGGTTGACCAGGAGATGCTGAACCA  
CCCGGAAGCCGGCGATCCCAAGGACCGTCCGGCCAAGCTGGCGGGTTACCTCACCAAGCA  
GTGGGAAACCGGTGTTCTGGTCCGTGCGACCATCGAGATTGCCAGCGCTGGCGTTCCGCT  
GCCGTCCCGTTCGCGGATCCGAAGCCTCCCTTCGGTAAAGACGGTTGTGCGGAAGCGCG  
GATTACCGCTATCCAAAACGTGTTACCAAGGCGTTCACCTGAGCGCTTCGAACATGGA  
AGTGGTGGCGGCTACCATCAGCGACCTCAACCGTAGTGGTGGTGTCTCTTCCAGAACAA  
CAGCAAGGAGATCGCACGCGCTACGGCTATCGTCAGCCTGGCAGGTATCACCATGCAGGC  
TCACCAAGCCAACCTGGCTGCCAGCCGCGGTGCCGCTCAGCACAATGACCTGATCAATCA  
GTTCTGAACTGACCGGTGGTGTTCACCCGCACGGCTACCGTCCGCTGCACCCGGTGAT  
CACCATGGAAACCGCGTACGCCGGTGAAATGATGAACTTCAACCAGGGTCTGTTCCCGTT  
CTTCTTCGGGCTGTACCTCCTGATGACGACCAACACCGACTACGTCTTCTCTGAAGCACT  
GTGTAAGGTGAGCGTGGGTCAACGGGGTAACCTGAGTGCCTGGAACCGCGTATCGACAG  
TCTGCTGGGTGGTGTGAACCCGCGGAACCGTCTGAACTGAATGACAAAAACATCACGGA  
TATCGATGTTGTTAACCAATGGATTCGTCAGAACGTTTCGCAACACGCGATCTTCCGTT  
GAACATCGTCCTGAATGGTCCGGATTCCGCGATCAACAACCTTCCTCAGCCGGCTGAGCCA  
GCAAAACCGTTGTAAGGAAGTGGGGATTGTGGTATCGGTGATCGATGCGATGACCAAGAA  
CAAGTTCTCTCAGATCATCGAGCAGAACCGTTCGGCGCGCACCGGTTGGACTCCGGAAAA  
ACCGGTAATGCACCCGACCCCGATCCTGGTGGTCAACGGCTTCGCTGAAGCGCCCAATGG  
TAAGAACTGAATACCTAGGAAGTGGATGAAATGCTGCTGGGCCACTACAAAGGTGCGAA  
CGGTGCCAGGCGATGATGAACTACCTGGCGGTCATGTACGGTATTACCAGCGAAGACCC  
CAAAGCCCGTTGCCAGAAGCTCAACCTGGAGCTGAACCAATCGCTGTTCAACGGCGCGGT  
TCACATCAACAGTTACTCGCAAGCGGCGGTCTGGGATCCGAACTTCATGGCAGCCCTGGC  
GCAACCTATGGAAAGCCTGGGTAGCATGAACGCAGCGAACTCCGCGGCCAGCTTCCGTCC  
GAATCAGGCTGTTTGTGTGCCGGGTGTAGGTCTGGCTACTACTGCCTTTGCAGGTGGTAG  
TTCCCTGTCCAACCCGAACCTCATGAACGCCTTCTGGGCGGTTTTGCGTTCCGGCTGATA  
GGAGAGTGTGCTGAAAGAGTGAAGGTTAGGGGGCTTTCGGGCTCCCTAACCTTTATTCCG  
CTTTAGTCTTTTTGGAGTTTATTTCGATGGAACCTGAACTAACTCCGAGTCTTTCGTT  
GGCCATTAAACGGTTAACGGAATACAGTGAAGAAGTGTGCTTATCCCTTAAGGACTTTGT  
CGGCTACGCCAGTAAGCTGGATTTTTCCCTGGAGGATGATCCTCGGTTCTCGATGCCGGC  
CTATCCCGATTTTGAAGACTACGGCTACCTGCACGATAACAGCCGTCTTAAGCAAGTCTA  
CCTGAATGACTTCGGTTTCAATGTGGAAGAAGACCCGAGAAGCCCTCAGTCGCTTAACCCG  
GATGGAGTTTGAGGGTAATTCGTTTGTATACCGTTGCGCGGTGTTTGTGTAAGGACGGCAG  
GGGACTCCGGGGTAACTACCTCCTGGATAACCAACGGGTGTGTCCACGGTGTGGGAGTAA  
AGCAGAACTCTTCTTGGATCAAGGGGAAGACACCCGGATCTGGCTCAAATGTTCCGAAGT  
GGTGAAGAAGTTCGATAATATCGGGTTCTTTACGACCTTCTTTAACAATATCAGCATAGG  
AAACCCGTCCCCAAGATCAATGTACCGCGTTACTTCATTGATCCTCTTTATCGAACCAA  
GGTTAAGAAGCAACGGAATGGAACCCTCATTGCCATTAACCAGATGCTCGGTGACTTGGA  
GATCCACCATGTTCGACCTGAACACGCTCTATGATCACTGTGATCGGATCATGGAATACAT  
TCTGGTAGGTCCAGGTGAGCGCTGGTTCGAAGTACCGGGGAGGGGAAGGTGCTGAGATCCT  
GGAAGTGTATCATCGGTATAAACACATCGCGTTCTGTAATTACATGAAGGTACCCAGTCG  
GTACTGCATGGTGTGGAACGGGTGGGTAAAGAAGTCCGGAGTTATGAGCATCAGCCTGA  
AACAGCAAAGCTCTATAACGCCATTGCGGATACCATGAAGTCCAGCAATTGTTATCAGCT

CACTGAAAAGGACTTGCAACGCAATGTGGACATTGTGGGTAAGAACCTGGTGGCGTTAGC  
TGATCAATTCAGGAGTGTCAATAACCCCAAACCGTGTTTAATATACACGGGATCAACCG  
TAAGCAAGTGTGCGCAGGTCCGGTGCCATTAACGGGACGGTCGGTGATTACCCCTCAAAC  
GGGTATTATTAATCACTCTGAAGTGATTATGCCGTGGAAGACGGTCGTTACCATCCTGGA  
ACAGCCCATTACGAACCACCTCTATCCTTTTTCGCGCATAACCCCGGAGTGCCCGTAAGAT  
GATCTATAACGCGGCCTATCGGATCGTTCCAGAAATCGATGCGTTCTTACGGCGTGCGGA  
GGAGAGTCGTAAACTCCTGGTTCAAATGGGGCGTAACCCCTCGATTGAGTACCTGAGTCG  
GCGCACCAATTACCTGATGGTGAACCGGGATCTGGAAGATGAGACTATTAAGATCCCAT  
TACTTCAGTCGGTCTTACAATGCTTAAACAATGATTACCCTATTCTCTACCAGGAGGAA  
TTCGTGCAGATAGAAAGGATATACACAACCTCCGATTAACATCCAGAGGAAGTTGGGTTT  
TATAACATCCAACATTGCCGATTTGGTTGTCTAAAGACGACGTTCCGGATCCTCACAGAA  
ACAGGTTTCGTGGAACCAAGCATAGGCGGCGAATACAAGTACTACATTTCGTCAGCACCTC  
CAAGTGTTGAAACTAGAGACATTTCTTGAGAAGCCAGCTCAACTATCAAGTTGTGGGGG  
AATCACAGGGATGGCGACAAGCGCAATAATCACCTGGAAAACCTTGGAGTGGTGTACTCCG  
TCAAGGAATTTGATCCATGCGTTTAAGACCGGTCTTAGGTTCGGATAAACTTCCCGGTTTA  
CTCACCGATCTAGAAACAGGTGAGGTCTAATCATTTACGAGTTTAAGGGAATGCGCTACC  
TACTTAGGTATCAATCCTGGTACACTCACTGTTTTTCATGAAATCTGATAGAAAGTATCCG  
CTCAAGTTTAAGTACTCTGTCCGTCTAATATCGGAAGAGCCTAGCAAACCTGACTGCTGAC  
GATATTGGTAAAGTAAGGAAGGGTGGATCCAAACCTTGCAAGATCGTCAATAAACTCACT  
AGCGAAATAAAGCATCTGGCCTTTGAGAAAAGCATTACAGGAACGTTCGGTTTATCTGAG  
AGACGTTAACAGCGTGCTTTGAAAGAACGTGGATACGAAGACTGGATTTTCGAAGCAGTG  
AAGACGTATGAAGAATACGTTCGAGTGTTTAAAGGATGATAAGGCGAAGACTGTAAAGTCG  
AACCGACATCTTTCTTTAGTCAAGGAAAAACAGTTGGCTACAGCTAAGAAGATTGTGGTT  
ACTAACAATCTGACAGGCGAAATAACTGAATTCGACAATCTTAGTGACTTCTCAATGGCG  
AATGGTTTCATGATAAGCGAGATCAACCGCGCTTCGAAAACCAAGCTTCATGGAGAGAA  
TTCACATTTTAATATCTGGAATAGGGTAATTGTTAAAGGCTCACCAGGCACGAAAGTCCT  
GAATGAGAATCTCTTGAATTGCTGGAACCTAACA AAAAGTGAACCACCTTACGTAACCGT  
AAGGGGACGAAAGTCAGAAACAACGGTTCACCGGTCTACGCTAACCAATAACGCTAAGG  
GATACTGACAAGGGGCAACCAGCAGCGAAGCCTGTTGTTATTCAACAGGAACGTTCAACG  
GCCATTCGATGACCCGTAATCTGATTACGGCGAGATGTAGGGTAGCAAGCTAATGGCACC  
CGAAACAGGAGACACCTAATCCCTAACCGGGAATGGTGTATGCTATGGTCTGACCACGGT  
CAATAGACCGTGCAGGTGTCTGTGCACACCGGGTAATGAGTAGCGTCATTACTGGACAAG  
TGGATTTTGATGGTGATTCCATGTATGCCATCTTCTTGCTTGACTTGGAGTCTAAAGCGA  
AAGCCTACGGGGGATTAGGTCATCATCAGGTCTTGGATATCAACGTTACCTTCAAGATCA  
GCAAGTATGCGGGACAAACCGCTACCAACCTGATGAATTTCAATACCCTCATGCTACAGT  
AACCGATTGAGTAAGGAGGTGAAGTGTGATGCGAAGTGCTAATGCCTTCAGTCACGCGA  
TCTCAGGCAGTTTTACCGAAGAGTCCATAGCCAAGTACGCCGACTACGTAAACAACCTTA  
CAGCGCTCCTACAGATCGCCGGAGGCTGGTTGGGGGAACAAGCCAAGAAGACCCTGGATT  
GTTTTACCAGCTTCGTAAACTCCCGCGCGTGGGAAGTGGGTAAACGCCTGTTGAATAAGA  
ACGACGGGGAGTACGTCCGGTCCGTTATTCCATTGGCTACCTGGGGAAATATTGAAGCCCTCC  
AAGGTGCTGAGGGATATATGCGGGACTACATCATGGCCAATCCCACCATGATGCAGCTGT  
ACCTGGACGGTGA AATTGAAGGGTATGGTGGGGAGTTCAGTAAGTTCTGTTACAGGTGTTG  
GGGAGGATAACCTCTTCTATCGCCGAGTATGAATGGGTTGCTGAATTTACCACTGTGG  
ATGATAAACCGCATCTACGCCATACCCATTACCACGACAGCCTAGGTGCTAAGATCTCCT  
TCAGGGAACGGTGTGATGTCCAGAAAACCTGGGCGGCCATCGATCACCATCGGGCTAAAT  
CCATGTTTCGACCTCACCAGTCTGCGGGAATAAGCTGAAGAGCGCTGAAGAAGAAACCA  
CCGAGGAGTAAGGTGTCTAAACCAAGCAGGGGTGGTTCCTGCTTGGTTTATTATGACCT  
TTTATTTTGTCTTTCTATAGAGACCCTTCTTTCTTTAGGGAGTTAACAGTATGGCGCGGT  
TTTTCGTTAGGGACAATGGACACTAAGTTAGGGTGGGAGACTCAGTCTCCTGATACCGCTA  
TTTCACGTCATGTGACCTGTTGGATTACCAGTCGAGAGAACCAAGGTAAACTGATTGGAG  
GTGTGCCTAGTTTCTACATGATCTTTAAAGACTTCGCTCAATACCCCGATCAAGTGGTGG  
AACAAAGTCCAGGACAAATTCAAGGCGTACCTGGAGGAATTGTTTCGACGAAGTCATGGTGG  
GTGTAAGTCGACAAAATGTTACTGGGAGTGTCAATAATTACAGGCTCATACTGACCGCTC  
GTGTCGTAGTGGACAATATGAAGTATGACTTGGCGCAAACCATTTCTGATCACCGGTGAAC  
TGTACAAAGTTCTGGACTTAGAGAGACTTAAACGATGACTGACAAACACAACGAGGACTT  
CCGGGGTAAAGTTCCTGATCATATCCAAGAGATGCACCTGGAGAATGACCTTGGTTGGTT  
GAAGGACTTGAAAGTCCACGAACCTGGATGGTAAACTCCTGCTGGGTGAGCCGGGGGAAGA

ACTCCCCTTTAACGCGAGTCATGTGATTGAAGAGAAGGAATTCGTTTCAGAAATGGTTGAT  
TCCCTTTGCGCTGGGGAATTCACCTGAGTGAACACTTCTCCTTCCAGGAATGGGGCTC  
CTTTACCTTTAACGGAACCCGGTCTGTGTTGGTGGTTGCCCGGGATGCTGAAACCGGTAG  
ATACGAACCGACTCTCTTGGTTCCGCCGATTATTTCCAAATCCCTGACTGCGGATTACCC  
CTACAAGCTCCGGATGGCCTCGCAGGCTATTTACAATATCAGTGAAGACAACCGCCAGAA  
AAAGAATCTGAACGCCAGCTTGAAGGTTGCGAATGCCTTGGCGGATAGCAAATAGGTCT  
GGAAGCTATAACCCACGACCTTGACGGATTTGATTACTCCGGCCTCCTTTGAGAATATCTC  
GGTCGTTCCGGAAGTGGAGCGTAAGGTTTACTGGATCCGGGATGTTATCCGGAAAGGAAC  
TGAAACCAATCCCGACGACCTGACTCGTGCCCGGGAGTTGTTCTTTAAAGAACACAAAGG  
TGAAACCCTGACTCAGGAAGAGTTGAAATTCCTAAACCAACTGAGTTTAGGGGATTATGA  
GATTGAAGACCGTCTGGCTGACGCACCGGGTGAACAGGCGGATAGCGAATCGCCAGACGA  
TCCCAACATCGATCCGTTGGCGTGTTAAGGTCGTAAGGGGTACATTATTCATGCGGATTC  
TTTGGACTTCCGACCACCATACGCTGCACCAGACAACCCCACTACTCATGTAAGTGGGA  
ATATGTGACGTTTTACTTTAAAGATCACGATCTGAACAATATTGATCTGTGATCTTTG  
GTGGGGACCTCACAGAACGCATGGTAGAGGCCCTAATCCTGATTTTCAATTAACCTCAAGG  
AATGGGCCAAGGTTTACCTGAAGGCGTGTGACAAGGCCTATACAGCCGTTCTAGTACTGG  
AAGGGACCCACTCCACGACAGGGGTCAGCCTAAACACTTGGAGACGCTGGCTCCCGAGG  
GAATGGATTTCCGGTATGTGTATGCCATGTCCATTCAGTATTACCCCAATGCAACAATC  
TCAGGATTCTCTGTGTTTCTGACAAGATGGGAACCCTGACACCTGATGAGATTTGGGACA  
AGACTGTGCAATTGCTCAATTAACACAAACTGAAGCAAGTGGACTTGATTGTTTTTTCAGG  
GTGCGTGGGAGCATCAATTGCCGGTGCAAGTACGTCACAAGGCTCACCCAGTTAGCCCGAT  
GGGAAACCATTGTTTAGTACTTTCATTCTGTGCGGGTCATATCAACGTCCCCTCTGAAGTGG  
GTAAGATGCGGTGTTCCGGGTTTCTTTGACCGTACAGCCACGGGGAAGAACACCCGAAAG  
GGGGGTATTTGGTTGAGCTTGACCTGGAGAAGGAAACCGCCACTTCAACCTTCCAGGAAA  
TTAAGAACGCCCTTCCGTATTTAACTCTGAAAGTCAAGGAAGACATTACGACCGAACAAT  
TGGTCTTGGACCTCCAGCAGTTCATCCGCCGGAAGAACTCCCGTACCACAGCCAAATCC  
GGGTCATGGGTGGTGCAGCGGATATCGTTAAACCGGTTATACGTATCTTTGAGAAAGAAT  
TCCCCTACTTTGGCTTTAAAGCGGAGAATGCGAAAGCCAATGAACAGCATGTCCAAGACG  
TCTGTTCATAAACCAACATACGACTACCCTCAGTTAACGAAAAAGAACTTGGCATCAG  
CCCTGTTACCTGAATGTCAAGGTGTCTTCGAGAAGGAAGGGATCTCTGATGAAGAAGCCT  
TGAAAGTCCTGGAGGAATTCCTATGAGAAGTACAGGTGCTTTGGGAATGTCCGTAGGGAC  
ATCGTTGGCGTTTGGAGAGTGTGCGGGTCTCTAATAACGTAATTCGGATACCATCCTGCT  
GAACCTTATGACGCTAATACGGAATGCGTATGGCGCGTATGAGAACAAAGAGGAAAAGGA  
TTAACTGACATCAGATCAACTGGTAGAGGGCGGTTACCAGTGATCTGAAGATCCTGGCAA  
ATGGATGGAAGAGACGCGTAAAAGTAAACCGGTTGAACTGGTGGTGTGTTATCCCACCTA  
TACGGGTCTTAATACCCGTTTCCGTCATGCGGATCTCAAACCTCCCTACGACGAAGAATCA  
AATCCGGTACGATACCCTCTCGAAAGAGGCAGCAAAGAAGCTGTATACGAAATACGAGAA  
ACTGTCGTCTAAGACAGACATCCGTATGCCTGAATTAAGGGGCGGGGTATTGTATTGAC  
GCACCACATGGTGGACCTCGCGGTATCGAACAGTGTGGACGTTTAATACTGTTGGAGTC  
GTTTACGGGTAAAACCAAACCTTTACCCAGTGGTACACTAACTGACGGTAGGGGAGGA  
TCTGTTTTACATGCCGTTTAAACCGGTTACCATCCAGATCTTTGGTGACCGTTCAACCAA  
TTTCATGTGTCCTCAACAGGGATTAAGGAGCTGGTGAAGAACTGGCGCTGGATAATAA  
GTGGACGTCTGCCACAACACTTGGACGAATCAGAAGTCATATCAACAACCTGCCACAAGG  
GGTAGATCGAGCCGGTCTACAACCTGATGCTGAACGGTTAGTCTCCCATCTATTCTCACTG  
AAAATTCTATCTTTATTGGTTAGGAATTTTCGAATTTAAGGTAACCTCTCATGAGTGACAA  
TCAACATCGCAAGTTTACCCCGCGTAATAAAACCCGCTGAATGACTGGAAACAGCCTCA  
TCCAACGACCTTGGAACTTTGCCGGGAGCAAAGTACCCGGCGCAGCGGATGTTTCGAGTG  
CAAGAACAATGGGGCGTTTCCCATTGTCTTCAAGTTCAACGACGGCATCTTTGAGAAAGG  
TTCCAACAGTAACCACAAAGAAGTCGAACTGAACTATTCGGATCGGGGCGCGCTCTTCGA  
AGCGATTATTGAGGCCTCGAATGATGCGAACTTTGGGTTCCGTCAGATCCCGATTTTCGAG  
GAAGCAGATGATCTTCTCGGGTGGGAGCGCGCGTCAATCGGAGAACCCGATTGTTACCGC  
GACCTTTACCATCATCCGGGATAAGAACGGTGTATCGACCTGGGCTACACCAAAGGGGT  
TTACAAAGTCCCGCTGGTTTTCCGTGGTTCCAACTTACGACGGTATACGACAAGAATGA  
AGCCGGTGAACGCGATGAAGACCAGGGTCTGATGTCCCGTTGGGTAGCTCGGGCCTGGGT  
GCGTTTCTACCAGGATCTAATGAATGAGATCGAGCAGGCGGCTTGGGAACCCCGAAACC  
GCGATACGGTGGGGTAAATAACAACCGGCAGCCTTCCAATGACACCAGTTCTGCCACACA  
CGATGACTTCGATGACGTGGAATTCTAATTAGACCAAAAAGGGTAGGAGGGGTTGCCGCT

CCTACCCGGTCTATTGGTTTGGTTAGAATACTTTAAACCTACATTATCTTCCCGTAATCC  
TGGACTATTCTGTTTGGAGTGAACGATGTTTAAACATCGAGGTTAAGCGGAAATCCAAGAA  
GACGATTAGAGCCATCATTGTGTCGTTGAATGAGAAGAGCCTCCGCTTTAACGGTGATGC  
ACAATCAAACCTTGAACGGGTAATTAACAACAAAGGACGCGAGTGATCCTAATCTCTTAGG  
TTGTTTCAACAAGTATGTGGAGAACATCTTCGATACGGATAAGAAGATTGAACTCTTTAA  
GTTGTATGAAAGGGCGTATCAGATTGCCGAAAGGCCTACGTATAAGGACTACCGGGTTGA  
AATCGCTGAAATTAACCGATTACCAATGCTATTCTAAACCTCATAGATGTTCCCAAGTA  
CTGTAGCTTCATCCAGTATTCCGAACCCATGGTAGTTCCTCCTGACCTGAGCGTGGCCTC  
CAGTAAGGGGGATTACCCGGAACAAACAACCATTACGGATTACGATTATAAAGAGTTGGT  
TAAGCTGACCTTTGTGATCCGTTCCGGTTTATCCGATCATCTTCTCGTTAATTGCTCGCTT  
TGATGAGGCAATGGGATCAGGGTACAGTGAGCAGGTGTGTGTGGGTCTGATTAAAGATAA  
CGCCACATTGTTAACCTGTATGGGTGGAAGAAGCTTCAGACCTATGTGAACTTTGCCAT  
TGGTAAACGAGGCATACCCAGCAAGCAGACAGCATTGGGGCGTGTAGAGTATTTTCGTGGA  
GCGGGTTCTGTATCATACCCTCTTCTCCCGGCTGTGCTGTGCGGTCATCCCCGAAACCGA  
AGAAGGAAGCACCTGGCCACCGCCATTAACGCTTCGGTACGCCATCATGGATCGATTGG  
GGGTGGGTTTAAAGCCAAGGATGCCGAGGCAGATGAGGATGATAAGCGGTCCTTGTTGGA  
ACGGTATCATATCAACGAAGAGATCAAGGCGGTAATGAAACCGTAGACGCTGAGTATTT  
CAGTTTLAGGGTTGTATGACGAGAATGACAATGAACGGTACGTGGATCGGTTCAAGATCCC  
GTGTCTGGGCCTAGGTATAAAGAATCCCCAGCTGGTGGAACAGGTCTACGACAACATCCC  
CCCGAACTGGGACATGACGTTGAACAATCATGTCATAACATTTCTTCAACTGACGTTCTG  
CGATGCGATCTCTCCTATGATCTTCTGGAGTTGGGACGGGCATCGACTGCGGGCAGCCAT  
TGCCTTGGCTCAGGTCCGTTTGAGCGAACAAGGGTATCATTACCTTCCGTCCGGTACTGGG  
AGCGAGTAATAATCCCGGAGGCATGCGATCCCTTTCGGATGGTTTTCGGGTTGAACACCGA  
AGATAAAGAATTCCTGGTCAGTATTTGTGACATCCAAAGTCGTAATGACAAAGGACGGTC  
CTTTAATGAAGCCGTGGAGGTCGCAACGGAGTTCTTGGAAACCTTTGGGTGTGGGCAATG  
GAAATCGAACCTGTAATATGGGGTATTGGATGATCCTGAAGTCTATCAACGGGTAGAACG  
CGCTGCGTTGTTTCGACCCGGAGGTTGATTTGGAAATGAAGAATGAGTTCATGCGGTTAGT  
TAGACAAGTCAATACCTGGAAGTATCATCCGTAACCTAGACAGAGGAAACAAACATGTCCG  
AAATGTTGGTGACATTGGCCCCGAGCCATTTTTGGTATGGGGAATAGCAACCACGATCAG  
TTCATTGTCATAACCAACTCAACCTGGACAGCACTGAGGTGGGTAACCTCATCATGGAAC  
AGGTCAATGGAGGTGTTACCGCGGGTACCCTGAATCGCATTGCTGCCTCCAGCGGTAACC  
TGTCCCAGCTTCTCAAGGCTACGTCTCCGTCGAAGAAGGCTTCGGCGTACGGCGTGGA  
TTGGACAACACACGTTTCGTCATTGAAAGCCATTCACACTTCCATTCGGAAATGTGTGTGG  
TGGGGTCCCTCTATGGAGGCACTGCGTCGGAACAAGGTATCTCGCATGACACCATGTTTCG  
TTCAGGAACGGACTTGGTCAACCTTGACGACCAATACCCATGACAGTCAAGGCTTCCCGA  
TGACCAAGCGGATGATCGACAGTTCATCAGTTCCTCATGGGATCGGTGGATCAGAACA  
ACGACCTGAAAGCCGTACGTCCGTTGGATGTCGGGAATGAAGCCTTGGGGTTTGCCGCCA  
GTGAAGCAGATGGTTCTGAGATGATGTATGCCGGGACGGTGGGGAGCGACCTCAAGCACA  
ACACCTTGATGTGCAAGACCCTCAACCTCAACCCCACGCATTATTCCCGGGAGTTGCTCA  
ACCTGGCCACCAATGCAGGGTTCCTCCTCCAATGGCAGTTCGGTGGAAAGTGGAACTGT  
CCAACGGATTGATCGGCGAATCGATTGGAGAATCTCCCCGCTCGAAAACCTTTTCATGC  
GGGCAATGATGCAATCCACCGGTCAGTACATGTTGGGTGGGTTCCAGGGGTTCAAGTATTG  
GGAAACCTATCAGGTCTTCGATAACCTGTTGGATGTCATGAACCTCAACCTGTTGAATC  
CCAGTTCCTTTGCGGAAGACAACACCCTGCTCACCAGCAGTGAATATGGGTCTGCGGGTA  
ACCATGAGGTGATTGCTACGGAACCTGGCGATGATGTCGGTTCCTTACTTGTGAGTGTG  
GTCTCTCCCGCATAACGGTTCTCCGCCAGCAATAACCTCATGGAATATAACACGAACATGG  
ATGATGGTGTGGGTGTGCTTTTCGTCATCGGTGAAGCCATGTCCATGTTCAACAATGACA  
TGTTCTGTGAAAACCGGGTGGAGGACTTCAAACGTCTGATTGCCAACACTTCTTCTCGA  
AATACTCGGGACCTCATGTTCAATTTGAGAACCTTGATGAATATTGAAGTGGAGTGTTACA  
TGTTTGGTGAGATCGTTATTACGACTTCGTTCAATGGGGAAGCCAACGAGAAAACCTTCA  
CCAACGCTACCTACTACATTAATGATACCAGCAGCAGCATTGCCGGTAATGAAAACGGCC  
TGTTGGAAGCCAAGAACTTCTGACCGGTATTCGTGAATACTTCAGCTAAGAGGATAACC  
GCTCATGCACGAAACCAATGAACTGAACAAACTGTACGCAGCGATGTGTTTGTGCGTGGGG  
CGCGCAGGTTAAGGAACAGGGACGACTCGTCTTTATGATCGATGGGGAAGAATTCCTACT  
CCGTATTGATGTGATGACCCTCCACCTTCCGCTGAGCGAAGTCCCTGGATGGGAACTGCGT  
GGATAAGGTCTTCTTCCACCCGGCCTGTGAAAACATCGTGTGCGAAAGAAACGGAAGTCT  
CAAGATCATCCGGCGGATGACCTGTATGAAACTGCTGGATACCTCCCGTCGTATTCCGAT

GGTGTATTACCGTTGCAGGCCACAAGCCCAAGAGTACCTGGAACCAACGTATCCACGA  
CATGCTGGAGCCCCTGAAAGGTGCCAAGCGTGCGGTACGGGATGAACTCAACGCATTTTT  
CAACCGTATGCACGTGGAAGTGGAAGAGAATGGGTTGGATAACCGTTTCATTCACTTTAA  
GGTATCTAAAGGCGGTGGTACCAGTAAGACCACGGGTCAACGGATCTATTACAAGACCCG  
TCCGGAGTTTCCGTTCTATACGGAAATCGTTCGTCGTCTGGCACGTTCCGGATGGTCAATC  
GGATAACCAGACCATTGAAATCAATAACACACGGTCTCCCGAGCGGCACTTCGTCTGGC  
CGCCATATCTTCCAGAACGTCCTTCCGGCGGTAAACAGTCCCAGTGACTATGTGTTTGA  
ATCGACTTCCCCGGTGGCGTCTCGTCTAGTGTCTACATGGGGTGCTATGCGGAAATCGC  
AGATCAATTGAATAAGATTGAGAATACCCTCCGATCTGATTTTCGATAAAGCTGGGTTGTA  
CCCGATTGATCTGAGCTGGACGGAACGCCTGGAAGA ACTACCGGATATTTATCGCCAAGT  
CCCAGTACTGGATTACAACAGCCACAACACCCATGATGAAGTCCAGCATCAAGCAGTGAG  
TCGGAATGACATGGGTGGTATGCTGTCCGTTACCAGTAACAACCAACAGGGTGTTCCTCA  
ACATCAATCCCAACCGCAGCACGTTACAGGAATGAGCGGGGACTATGAAGTATCACCTCC  
GCAGATGCAAGCGGGAGACCGGTATGTCCGTACTGAGATCGATTACGTCGGTCAACGGGT  
TCTCCACCATGCGGTTAACCAA ACTACCAATAACCCGGTCGTCTACATCTGTAGCCGTAA  
AGGGA ACTTCCCTGCATCGCTCTGAAACCAACATGATGCTCCAGCAAATGGGTATGTGGGG  
TGGGATGGGTGGTATGATGGGGGGAACGATGCTGACCAACGGGATGGTTCAACTGCCGAA  
CGGTATGATCGAGAATCCGCAGATGATGGGGGGTGTTCGATGCCACACCTACCGCCGC  
ACCGAGTGTATACCCGGACGCCGGTATGGGGTTTGACCTGGGAGCCCCAGGTATTTTCTA  
AGCAACAATAACCTTACCAGTACCTAGCGGGATATCCCGCTAGGTACTGTGTTTTCTCTA  
TTGTATTCCAGTATTTTTACGCTTGGGTCTGATTA CTACGTGCAACGGCCTGTGTCAAAT  
GGGCCTCGTCAATTATCTTGTAACTTTGCATGCCCGCACAAATCGATAAAGGGATCTTCAA  
TCCCATTAGATAGGCGCTGACCCACAGCATATGGTTTTCAACCCCTTGAACCCTCAGGA  
ACCGATAGAAGTCATACCGATAGGCATACAGTTGTGCGTGAGAGATGATTTGAATCTCCT  
GGGTTTGACGGAGAAGTATTTCCCGTTCGGGGCCGTACCAAGACTTTGAACCGTTCAGTAA  
AGAAGAAATCACGTCCTTCACTGAAGTTAACACTAGACAGTGGCATGGAGAAGATCCTTA  
TCGATGCAGCTAACCAATTTTTGAACCTATATTATTTCTCTGACCCGACATAAGGAATTAT  
CCCAATGGAATACTTAACGACCCAACGAAGTCGATTGTATCCGAGCCTGGATACTCGTCT  
GGTATTAACA AAAACCATAGGGTGTTCACGTTTCATATGGAACGCTCTACTGGGTAATCA  
TAAGGAAGAATACGGTTTTTCGGGTAGAGGATCCTGAAACTCATCATAAGCCGAGTTGTTC  
TTTAAGTTCTTTAATCAAAAAGCTGAACGA ACTTAAAGTTGAATACCCCTGGTTAAATGA  
GGTCAGTTCTGTTGCTTTACAACAATCAGTTCTTCATTTTTACCAAGGCTTTCAGTGTGTT  
CCTCCAGGGTATTAATGGTTATCCAAAATTTAAATCTAAACGAGATCCCGGCGGATTTAA  
CCTCAGTAGTGCAGCGGGA ACTTTCGCCAAGGACGGCAAGATGCGAATCCCGAAGATAAA  
GGGATACACCACCTGTGACCTAAACTCGCGTTGGATTAGGAAATTAGGAACTACAGCAT  
TGTCAAAGATCGGGTTGGGAATTACTTTGGCAATTGCTTATTA ACTAAACCTTGTCTACC  
GAATACGGCTAAAGGTCAAGGACTGGTGGGGGTTGATCTGGGGATTAATCCTTAGCGGT  
GGCGAAGCGGTCTACAGGTGCAATCTTTACCTTGGAGAATCCTCGAACCTACATGAAGTA  
CCACCGTAGACGTGTACGACTTCAACGGCGATTAGGCAAGAAACAGAAAGGTAGTCAAAA  
CCGTAATACAGCTAGAATTA AACTGGCCAAACTAGCACGTAAGGTTCGGCAATATTCGCAA  
GAACACCCTGGATACCTTACCTCTAAACTGATTAGCGAAAACCAAGTAATCAGTATTAA  
GGATTTGAATGTTAAAGGGATGCTGAAAACAGCCGGTTGGCTAAGCATATCCAAGACTG  
TGGATTTAGCACCTCCGGAGGATGTTGGAACACAAGGCTATACGGTATGAATCACCGGT  
TATTATTAGCCTGGTCCATCGATTTTACCCAGCACCCAGTGTGTTGTTACAGCGTGTGGTAT  
TAAACGTGAGATCAA ACTGACCGTTAATGACCGGGAATGGACCTGCGCTGAATGCGGGAC  
CTCTCACGTGAGAGACATCAATGCTGCAACGAATATCCTGTATGAAGGACTTCGGTTAGT  
GGTCTGATAGAAAATTTACTCTTTGGAGGAACTACCGAAGCCTACTCGGGTTGTAAAGC  
TGTGGAGCATCAGTGC GGTTAAGCTGGGCACTGAAGCAGGAAGTTTGAGGTTAAAACATT  
GAGATAAAGACAGTCTTATCTCATTAGTGAAAAGACTGCTGTTGACTGTGATGGAGCCGT  
TATGAGTATACAAAAATTGAATCAGGACCTGAAAGGTGTAAGTAGTGAGATCCGTGCCGC  
ACTGATTGCAGAGGATACGGATCTTACCCCTGACAGAGCAGCGGGTCAATTCCTCCAGGA  
AGTCCGTTACAAGTATCCCTGCGGGGAGAATCAAATCCATGTTGCTTTAGTGGGTGTCAG  
CAGTAACCTGATTCGCTTCCCGCACGAAGCCTCCGCGGGTTCGTCTCTATATGCCGGGTAA  
CATGATCCCTAAATCCGTGCCGACCAAAGGAGCGGGTGAACGGATGATGGTAAGCGGGTA  
CGAATTGGAGGAACATTACGGTGGAACGGCTCGTAAGGTTCGAAGCCCTGAGAATATGCT  
GGTGGAAGAGATCTTCTTCGTT CAGAGTCTGGTTCCGGGTAAAGGATACGGATGACTGGAA  
TTCGTTTTACGTGGTCTTTAAGAACGACGAAGAGAACGCCTACGAATTTCTGGAGCTACC

TCGGTATAACACCCATAACCTCTACGTTGGGTTTCGAATATAAATACGATAAAGAGAAACT  
CCGTAAGCTCCGTAAGGTGCCACTTTCGCTAAAAGGACCGTCTTCGCTAAGAGTCCCCG  
TATCAGTGAGAATGGGGAATGGTGTGTTTTCGAATGCCGACCTTGGTAGCCGCCTATTCGGA  
CCAAAGGACTGAGGAGGATGGCGTGCTTATCACCCGTTCCCTATGCGGAACGTTCCGGCTTG  
TATGTTCAAGCACGAGTTCAGCTATGAATGGAATGAGGATGAATGGATTCCTCTGATGCT  
ATACGGAACGGACGAGAACCCCAACCGCTCCCTGAGTCGGGTGATAACATCCGTGAGGA  
TGGGTTTCGTCATGGGCATCCGTCGCCGCATCACAGAGAACGCGCTGGTTTCCCTGACCAA  
GAAGTCCCTACGAGAACCGGATCTGGTGTACGACAAGTTGTTCTATGCGCCGTTTCGATGC  
GGTTGTGATGTCAGTCACCGTTCGATCGGATCGGATGGCGAACCGGTCCAAGAACCGGGG  
AACGGATTAGATCGAACAACACCACAATGCCATGCTGTACCGCTATGAGAAACGCCAGAA  
TGCAATGTGGAACAATGTGATCCGGTGGTACGAAGGGAAGATCGCTGCCAACCGCGGGGA  
AGACATTCCCATTACCTTTGACCTCGATACCTTCATTCCGGAACGCGTATGGTAACTCTAC  
CCGCAATGGGTTGGGTCGTATTAACCCGTTGGCCCGTGTGGAACGGTGGGATAAACTGAA  
AGATTAGAACGTGACCATCGAACTGAAGGAACGGGTCAAAGGTCGTGTTAAATTCAAGTA  
CGCGGGTTTGAACGGTGACAAAGGGGTGTGTGTACGGGTTCATTGAAGACGACGAAGCTCC  
CACCTATCCGGATGGGACTCGGGCGGAGTTCATTAAGATAACGTACCGGCGTTCCGTCG  
CCAGATCTTTTCGTTGCTCATGGAACCTGAGTATCAACTATGTGAACATGAACGTTCAACG  
GGAAGTCAGACAGCTACGGCTACAAGGGGATTATGAAGGCGCTTTCAGGGCGTTGATGAC  
GTACTATGAAACCGGTTTCCCTGAATTCAGTGAATTGGTTGGTCATGCGTTGGTTACGGA  
GGAGGAGAAACGTGAGCACGTCGACGATGTCTGTGCGCGGAAGATTTCCGTGCATGTGGT  
CGGTAACGCGAAGTTGTATGGCGTGAACCTGATCAACGCCCTGCGTCGTCAATAGCCGTG  
TAAGCCGCAGAAAGCCATTGTCGTGAACGCACCTGGGAGAACGGGTGGAACCGGAGAACC  
TAACCTTATCAGCTGTCAGGACATTATGCTCCTGGATAAGTTTGGTACGGACATGAGTGC  
GCAGAGTATGCCGAAGGCTAACCTCTTTGGTTTCCAGCGAAGATGAACGAAGGCAGTAA  
ATACGCCACCCCATGAAAGACAGTAATAACAAGAATACCGGTGAAACCGAAGGCCGGTT  
GCAACTCAGTCACGCGGGCGGGCAGGAAATGATCAAGCAACTGGCCCTGGCGTATTCCCC  
CGAGAACCAGAATAAAGCCTCCCAACGGGTTATTCGTGCGGATGATCCGTTTGAGATTCC  
TCGGTTGATTAAACCGGATGAGTACTTGGGGAGTCGGGCGTTGAAAATGGCGGTGGGAAT  
GTTGTGCGGATTCGGGTTATCGGCTGCGAGCTGAACTACCCAGTGATCGTCGGGAATATCC  
AACCTTTAACATGGATGAAATCCCAGGGTTAGATGACGAGACCTTGAAGCAGCTTCAGTC  
ATCCGAGAAACCCACTCAAGAACGTTAACCCCATGATAGACTCACGGTATGGAGAGGAAT  
GTAACCTCATGGTAAGGAAGATCAAACCTCCCTGAATTGGCTAATTTACCAGAAGAACTGT  
TCTCCGTTGGTTAAACACCCGCGCTGGGTGGAGGTCACGGATGACCTGGACCCAGTCGC  
TCTAACGGAAACCTACGCCCTCATTGTTACCTGGCATGGAATGATCATCCACCGGCATTA  
TAAGGATGTCCCCTATTCCATTAAGGAGATGGTACCCAGTAACAAGGTGGAAGGGGGTGA  
AGACACCGTCTATAACGATGGAACCAACGCGACGCCTTTTAAACAGTTCTTAAAGGTCAT  
TCTTCTACGATTATTGACCCGGTGGAAAGTGGACGGGATTAACGGCTTATTCATATCTG  
GCAGAATAAGCTGAATAACCTGCTGGTGGTGTGAGTGAACGTTACCTTATTTACAGCCAC  
CGCTGAATCCGTAGCGGAGATCATGGAAGATGAAGGGATCTCTGGAATACGGGACCGTGT  
ACTGAGCAAGGAGATTTCAATTCATGAGAGTGAGCGGGAGTTTTCGGATTATGTCCGGAC  
CGCTCATTCCCTTGCCAACAACACCCTCACCTGCTGTGCGGTACGGGGGGGGTGGCCAT  
TAACCACGCGTATCAGAAGACGATCATCCGGGCTAAAGTCTTTGACCTGAACAACCTCGAT  
CATGCCGAATGCGATTACGGTTCGATGCGCATGGGATTACCAACCTGGCTGATATGCT  
GGGTGAACGGAATGCAGCAGGTAAAGCCGGGGTTTTGTCTTCAAAGATAAAAATCCCTGG  
TGGATGGAAGACCATGGGTAACATCCGGGTGGGTGATGAAGTCGTTACACCCGATGGAGG  
TCCCCTTAGGTGCTGGCAGTTCACCCACAAGGTGTAACCAAGGCTGTACGGGTGCACTT  
CAAAGACGGTTCGATATACTGCCGTGAGTCCAGATCACCTGTGGAAGGTTAGACGTCATCA  
TTGGTGCAACGATAAAGCCATGGCTAAACTCACTCGGGAGGAAGTGGAAGAACGTATATG  
GCGAGTCATCACCACCAATGAGTTGAAAGACTATATTGGTCTGTCAACTAAGGTATACGT  
CCAACCTGATTGAACCTGAAAGAAATACCGATAAACCCCTTCAAATTCACCCGTATGTGCT  
CGGTGTCTTGTGGGGGTTGGATGCATTAGTCAAAGGCTGTGGATATCACCAAACCTTA  
TCAGCAGCTATTCGATAAGGTCCAATCGCTATTGCCAGAACATTTGGAATGTGTTTGGCG  
ACCCAACCGTAAAGGTGATGGAGAACCTAAAACGTTTGGGATCCGTTTAAAATCGTTCG  
GTCCGAACAGCACTTCAACTGGCATATCCGTGATGGCCTGAAGGAACCTGGGCTTGTATGG  
TATGCGGTTCGTGGGGAAAAGTCATTCCCTGAAGAATATCTTACGGATCGGCTAAACAACG  
TTTGGAGCCCCTCCAAGGACTGTCGGACACAGACGGAACCTGTGGACAAACACAAACCGGT  
TAGCTTTAGCTCTTCGTCTAAGTTACTCTCCCTCGGAGTGCAATACTTGGTCAGAAGCCT

AGGGGGGACGGCACGTCTCCAAGAACGTACTCCCCACTACACCCACAATGGAGAAAAAAG  
GGAAGGTTCGTACGGACTATCGGGTTTATATCCGATACCCTCGACCAGAAGAACTCTTCAC  
CCTAGACCACAAACGGGAACGTGCGGTCTCGCACCAGCATAACGGAAACCCTGAGACTGCA  
AGTAACTCATATTGAAGAAAGTCCTGATGAGGAGACACAATGCATTACGATCGATCATCC  
TGATCATCTGTACATTACAGACGACTTCATTGTCACCCACAACAGCCTAACCAATAACGG  
CAAGGCCCTGAAATCATCGGAATGGTGCCACCGGAAGGTCCACATCCTGTCCGCTGTGGT  
GGCGGATATCGATCATTTCATGGACTGTGGAACGACCACTACAGTGCCGATCCGTATTCC  
CAATATGCAAGCGGCAATGGCACCGTTGGGTAATTCAGGGTAACCGATACAGGAGAATT  
AGAACTCATTGATCAAACCACGGTGTGGTCAATTAAGCCAGGGGAGTGGGTTAATATTCA  
TAGTGTGCCCGTCTGTAATCCCTACAATAGTGCTCCACCCTGCCGGGTATGCTACGGGAT  
GATGGCGAGCTCTATCCCGTATAACGTGATGATGAAGAAAGGGGCTGATCTCGGGATGTG  
GTGTACCACCTCGATCTGTAACCCCATCGGCCAGGGCATGCTCTCCACCAAGCATTTCAT  
TAGGAATGCAACGACCCGTAAGTTCGCTCCTGCGACTAAGGATAAGAACGTTATCAATTC  
CAATGGTGACGATATATTCCTGACTAAGAACTCTGTGCACCGGGCACGGAATTGGTGCT  
CAAAGCCGATATTGTAACATCCTCTCGGATATCCGTTCCCTTGGATGTTCTGGACAACCT  
GTGCCTGGATAAACTCCCGTACTTCTCTGAAGTCAGATTCCGCTATAAAGTCGAAGACAT  
CATGATGGGGGGTAAAACCTCCATCAGCATGCGGCTTGTACCTCGATGTCGCTCTCGGAA  
TTCCCGGTTCTCGTTGGAGTTCCTGAACTATCTCCTGAGTAAAGGTTGGGCGAACGAAGG  
TAAGAAACATATTACCGTTGATTTGAGTGAATGGAATACGCTCACTCCTATCTTCACACT  
GCCGTATGTTTCGTGAAGACTTGCACATGCACCGGGCTCGGGTAGAGAACTTCATCACGTT  
CAATAAACGCAATAAGGCCTGGAGACAACAGATCGTTACACCCCGTCTCTTTGGTGAGGT  
CTTCGCGGAATACTGGGGATTGATCAACCAGGAAACGAAAGGGATTAACATCATCCATCC  
TGAGGTCTTGCTCTATTCCACGTTGTGTCGGGATCCCATGCGCGGGGATTATTCCCTGGC  
GAATGGTTAAGGACCTAAGTATTTTCGTGAACCTCCAGGAGTGTATCAAAGGCAGGGGGGG  
GGGTATGCTCATGATCTACGAGAACCAGCAAAATGTGCTAAGTGATCCTAAGACATTTTCG  
TGTGGTAAACCGTCAGGGGAGTCCGCTGGAGTGCTTCTTTATCTTAGCGGTGAGTTGAGT  
GGGTGAACCCGTTTCGTTAGTGTGGACCTCTTAAGGGGGTCTCCTCGGAATCCCCCTTAAGAG  
GTTGATTATGCGAGCAACAGCAACTATCCGCAAAGCGAATCATTACTTCAGAATCAACGG  
GTAATGAGGAATTCGCGGTTCCGGGTAATCCTACCGTTTTGTAACTGAATCTCTGCAA  
GATAGCTAAGAAGCCAATACCGGGTACCCGGAAACAGGCGTGTTTGTTC AACACGTTGT  
TGCTCGGTGCAATTATGACAAGAGTGAATACCGGCTACCTATTGAAACCCTTAAAGAGTT  
TGTGGAATTTGCGGGCTACCGGGGGTATAAAGAATCCCGCTAGAAGATTCAGGATGAACC  
GGAGATCGAAGGCAAGGATGTTGTATTGCAATTCATTCCAGGGTTTGATTAGTTCAGGGA  
AGGTCAAGGTGAATGGATTGAGTACATGCTGAGCGATGGGCACCTGAAGGTCAATAACGC  
CTCCACAGGCTTTGTGAAGATGCAACCGCTGTACGCGAAGATCAAAGTCCCGGGTGGTTG  
GAAGACAATGAAGGAGATGACCGTCCGTACCGAGGTCATTGCAGCGGATTGTACGGTCAA  
TCAGGTGACTGGTGTTTACCCACACGGTAAACAACCCATTTACCGTTTGC ACTTCGAAGA  
CGGGCGTTATACCGATGCAGGACTGGATCTCCTGTGGAAAGTGTTACAGAGGAGACTCA  
GGCATGGACAGTCGTTAATACCCGTTCCGTACAGACCCTGTTGGCGAAAGAGCCGGATGG  
GGTATTTATCCCTTTGTGTGAGCCTGAAGACGGTCCGGAGAAGCCCTTTGTAACGGACCA  
ATTGGAAGGTTCCCGCCAACAACGGTTGGAACACCTACGACGACTCATCGATGAGAAAGG  
GTATGTGCGTGGTGACGGTAGTCTGTCTTTTTCCAGTGAGGATGAGGTGGAAAGCACTAC  
GGTTCAATACCTGGTTAGGAGTCTAGGGGGTATTGCCCGAAAGGTACCGTCTACAGGACT  
GTACCGCCGACAGGCAATACCGGGTGTACATCAAGCACCCCTCGTCCTGAGGAACTCTTTAC  
CCTGACGAATAAGGGTGGCTCCCTGACATCAAAGTCGGGTAACCAGTCCCTTAAGCTCCG  
GGTGAACCGCATTGAATTCATTGGGGAACATGATGCCAGTGATCTCTGTAGCACACCC  
GGATCGTCTGTACATCACGGATGACTTCATCGTCACCCACAACACCTATATGGCCATCCA  
CAGCATGGTGAAGATTGGTAAACGGACCTTAATCACCATGCAACCCCGTTACCCGATCAA  
TTGGGTACGGGAACTCAACAAGATCCTTAAGCTCATTCCAGGTGATCTCTTAATCTGGGA  
GAATACCCTGGGATCGTTGTATGAGTGTTTAGAAGACGGGAAGTTTGATCCTAAGGTCAT  
TATTATTCCGATGTCACGTATTGAGGTCTTCCCTCCCTAAAGGGAAAGAGACCCGAGACGG  
GTTACACATGGATGATTTGATCAAACGGATCAATCCGGGATTAAGGATGATTAATGAAGG  
GTACGAAGCGATTTCATCAGATCTTCTTGTCTTAATGTTTGGGAATATCAAGAACTCTT  
CCTGCTCGCAGCCACCTTGAAAGCAGACGATCCCTTTACGAACAAGATGTACCAGTACTT  
GTTCCCTCAACGGTTACGGTTAAAGGAGGCGGAACCCGAGCATTACATCGATATAGTGGC  
GTACCTGTATCGCCTCAACACCCGTCGTTACCAACTCAAGACGGAGCAGTTTGGCCCGTA  
TAACGATAAGACGGTTGAAAAGAGCATCTTAAGTTCGGGTGTACTCCTGGCATTCTACTT



TAAATTGGTCAATAAGGCCTTTAAGGAGTATTACCTCAATGTGAGGCGTGAAGGAACGAA  
GTGTTTGTTCCTTCTTCTCCAGGGTCAGTATGTGCGATGCCATGTTGGAAGTGTTCAGGAA  
AGAATATCCCGGCTGGGATTTTCGAAACCTTTACTGGGGACGATTCCAAGCTGAAAGATAA  
GAAGGACCAGTTCTTAAAGCACGAGATCATCATTACAACCTCCGAACAGTAGTGGACCAGG  
TAAGCATATCGGGGGGTTGGTGACGATGATCTGCGCCCACACGGTTGCGTCTGACTCAGGC  
TAATAAGCAGATCATTGGACGACTCAGGGCGTTGTGCGCTAAGTTCAATAATGAGAGCGA  
CCCTGCCTTTGTGTTCTTGGTGTGTTTGGACTTAGCGAAGCACGTGGAATATTTAGCCAA  
ACGGGAATAGGTGTTCTTTGAGAAACAGAAGACCTTCAAGCGTATCAATTCGGAATGCTC  
CCTGGACTGAGGTCCGAGGGGGTTCCTTTATGTCGGGGTACCGCTACTATGCCGCTAT  
TCAAACGTCAGCCCATGCTGATCATTTCATGCCCTAACATCGGACAGATCAGCTGGGTAG  
CCACCTAGTTGGTCGAGGACTCCCTTTACCACATCTTTGCGGATGGTTCACTCGTTGAAG  
ATGATATTCTGGGAGAATGGTTAGATACCGAAACCGACAACATCCTTGTGATGAAGAGG  
GACAGGTTAAAATGTCCCCCTACTGCACGAGCAGGAATATTGGAACCTGGTTACGGATC  
CTCACGCCATGACCGAGTTTTACATGGACGAAGCCCTCGGTATTCTGGATCACCTTTTCC  
AGTTAAATAAGGACACGCTCGCAGAGGTGTCAAATACGCTATCTGTTGAACGTTACTGGG  
TAACCCGACATCTCCCTAAGCATAGGCTCATAAACTCTATGGAGACCCTAAATGACCTA  
TTCCTGCAACCCTCACAGCCGTAAGTCCAGAACATCAGAACCCCCGAAATGGA  
GTTTTTGCCTCAGAAATTCATCCTGAAGATTCTGGTAACCGAACGGGTTTCGATGCTTCAT  
GGATGAAGTGACCTTTGATATGTCGGGTGAATTTATCCGTAAGTTCATTACAGTGCCTCC  
GGAGTATACGGAACCTGAAACCATCGAACAGTACATCCAACCGAGGTCCTGGACATCAT  
GGAAGCGTTTAAAGCAGTATGAGGAAAACGCAGTGTACCAGGAGGATTTAAAAGCCCTGTT  
GCCGTATAAAGGCCATCGGTGGAATCTGGTGTCTCAACAGACTCCGGAGTCTTGATTAC  
AGTCGAGGCGTAGGGTGTATGAAGTCTGTTATCATTAACTCGATCCAGATACCCGAGCG  
GTGCTGTATGCGTATGTTTCCAATACACTCATGGATTTTCATCCTGATAGAAGCCTTAACG  
ATCGCTTTAAAGGACTATTCGTCATCCGTAGAAACGCTCCAAGACGCAATAGCGGATCCT  
GAATACTACAAAATGATCCGGATACGAACATTGAACAGTCAATTGAATTACTGCTCGAT  
CTACTGAAAGAGCTAGACCGACAGGACGGAGAAGATGTTGAGTCTCCCTTCTACGACGTG  
TCCAGTTATTCGGATTGGCTCAGGGATAAACTGTGTTTAGCCATTAGCTCCATAACAGAT  
GCTAATAGCCCCTTGGATTTTCATGCTGTTGAATGATGTCCTCACTCTTCTGAACTCAGT  
AAACAGTTCATCTTCCAAGGGAAACACCTGAATAACCGTGTGTCATGTTGCTAACCGTA  
GTCGATGACCATCTCTAGACAGTACACATATACTACCTCCCTTCCGCAAGGAAGGGAGGT  
AGTAGTCGTTTATTTATTTATTCCAATGCCATCTCCAAGTCTACGAGGTTTCGTACGGCTG  
CCCGCTCTGTGGTGTGCCTTCATGCGCTGCAATAAAAATGCAGTAGGAATCAAGACCACC  
TCAGAGCTGAGACGATGCCCTAAAGCCCCTAGACCTTCCCCACAACAGGTCTGACAATAG  
TAACCGTCTTTTAGGGTACAGAACTGAGGGACTCTGGCTTGTACGGGTTTATTAACGTAA  
CGATCCTGGTTTTTCAGCGGTGAGCTGTATCAGGACTTTCCGATCCTGGATCCACGTTCT  
ACCCAGTATCCTTTATTGGTTGGGAGGATCGTAAACGGTTTCGGTACCGGGGTACCGCAA  
TCCACGACATCCTCGCTAACGGCCGTACGGCCTATTAGACGCAACGTTTCTTAACCCTA  
GCCCCACCTTACCGGTGGACATAGAACGGCTGTAAGAGCCCTCTACACCCGTGTTAATG  
TAGTCTGCCAAGAAGTTCGGATCCCAACGCTCCGCCAGGGAGTTAGGGAGCAGTACCCAA  
CCGTCTCCTGAGGCATTGGATTCAATACCGAAGGAAATGAACATCCGTTACGCGAGTTG  
TCAATAAACTTCTTTGCAATAAAGA ACTTACGGCTAGGACCAGACATTACGATCTTCATG  
TCCAGCGCCACACACTGATCAATAATCGAGGTAGCAACAACCGGATCATTGAGTTCGTCT  
TTATGCTCTTTGAAGAGACGATCCCTGACTTTAATGACTTCAGGACTTACCGTTAGGGCA  
TCTACTCCACCCGGTTAATGAAGTGAGACCCTAACCTTCCAGGAACTGCCAGTTATGG  
GAGA ACTTCAAACACTGGTCTACACTGGCCTTCCCTGCAGGTACCGCTTCCCCGGTGGG  
GGATTATACACCATGACAGTTTCCAAGATGTTCAAGATAACCGGTTTGGTGGACTCCTGG  
TTAAGGTAGAGTTGGGTCTTCCCGAAGCATTCCCAGAAAAGGATAACGTTGAAGAGTAAG  
AGTTCAAAGGTAGTCGTGACCGCTTTAACTTGCAACACTGGACGGAAGTCTCCCGGGGGT  
ACCAGGATTTTCATCCATGTAGAACAGGGGTTTCATTACCTCCCCATTTACGGTATGGGTA  
GAACCCTTACCTCGACATTGAACCGATTATCCTCCACAAGACAGCATAGGGCTATTTCT  
TTGAACTGTCCAGAGGAATCATCGTCTTCAAACCTGGATAGTAATAATCGATTGAATAGCC  
GCCTTTTCGTTATAGGCTCGGTTATTCAGAAAAGAGTTTAAAGGTAGTCGAGTTTAGTCATG  
GGAGTTCCACTCGCTGAATAAGGTCTTCAATACGGGTCAACGCCAGAGGGTCTTCAATGA  
CCGGATAGAGGTATTGGGTTCATCTTATCCTTAAGCCATTCGTTATTGATTGCAGACACCA  
GGAAGAACCCAATAACCTCCTTGGCATACTGAAGGGTACTGTCTTCCGTTTGTGAGCCA  
GGAGA ACTTCCAAGTTACGACTGTAGAACTCAGGAAGCTCTTTACACGCCCTCCAGTT

GTCCGTTCTTCTTAACGTGTTCAAAGGCCAGAGTTCCTTCAATAAGGGTAGCATTTCGCC  
GAATACGCTGTTCAATAGGGGTGCGAACGTTCTCAATCTCCTCGGGGTTAAAGAGAGCGT  
CCTTAATGGCTTTAAGGGTGACTTCTGAAACATCCTCAATAAAGTTTTTCGTACTCTGACA  
GATCGAGGTCTTACCCAGGTAGAGTTCATCACCAGGAACAGTCGGTTCACAGGGGGGA  
TGTCATACGCCTCCAAGACGTGTTAAAGACCAATCAGGTCTTCGTAGTCCGGCAACTCCA  
TAAAGAACGGCAACAACCGAGTTAAAGCAGGGAGGTTGGCTTCACCAGGAAATCGTGAT  
TGATAACGAACCCAAGCTGTTGAGCACATCGATAATATTGGTCGTGAGGATCAAATACA  
CCCGATGCTTCTTAGCCGGGATTTCCAAAGCTTCATTAATCAACAGATCAGTCAGTTGAC  
TGGGCATCAAGGACTCAGGTTGACTGAGCCTAATTAATTAACGATTTCATCCAATTCTT  
TAGCCTGATTGGCGGGTATGGCGTTCCGGAGTTCGACCAGAGACCCCTACCATGGTGT  
CAGCCAGGTACGCTCCCTCTTCCAGGGTAACAGATTCTTCACGCTCAATAATCATTGGGT  
TAACTCTCGTAAAGTGCGTTTTCCAAAGGGAATCAAAGCCAATGTGCGACTAAACAGCAACA  
GCGTCGGGTTAAGAACTCAATAAACGCAAGCAAGTGAGTAAGCAAAAACAACGGGCTAA  
GAACATCCAGGACGCTTACCTCCGACAGGACTTTGGTAAAGGCTACCAGGGGGAGGCCCT  
GAGTAAGGATGCCTTGTACGATAAGGTCAGGGGTGAAAACAAGGCCTTCTCGGTACGCGA  
CCTTACTAATAACCGTCAACGTCTGGCTGAGCTGGCTGAACAGATGAAGCTGACTTGAGA  
TGAGGACATCCCTCAGCTCTCAGTGGGGAAGAACTCCTCAACGCTATCAACGACATGAT  
TACCGTCACCATTAAGCTCCACAGTGGGGTGATCGTGTACAACCGTCTGGTTGAAGAACG  
CCGCTTTGATATCAGTGAGGATGACCGTGCCGTACTGGAGAACTACGAACGCAAAGTGGT  
GGAGTTAGTGGAAGATGTCTCAGTCGTCACGACCCTGCATGAAGCAGGTCAACAAGCCGA  
GGATTACTTTGAAGTCGTCTTAACCTGGCCGATGTCATGGCAGCCCTCAGTGAGGAGTT  
TGGGGAACCGGTTCTGGATCTCATTACCCAACAGGGTGATCTGATCGAAGCCTATGCCGT  
TGAACACAAACCTGAAGGACTGTCTGTCTACGATTACATGTGTCAACTTCATAGTGAATG  
TATTACGGTTATCCAACAGTTGTACGGTGAGAGCCGGCTGAATGACGGCTTTAACGAATT  
GCACACCCTGGAGCAGGAACTCCCAGATTCCCCTGAAGAGATCCTAGGTGATAACCTCCC  
CTACCCTGAGAAGGAAGAGGTTGGCGAATTCATCGCTATTTCCAACGATCCTGTCATTAA  
TCCCCAGTAAGGGACTGTTTGTATGTCTGAGAATGTAACCCCGAACGAAAACCCTGAACT  
GACTCCCCCTTCGGAGTTGCGCAAAGCTGTTGAACAAACGATTCCCAAACGGAGCCTTC  
CAGCCACTTTGGCTTCATGGATACCCACACGCCTCAGAATACACCCATGAAGGAGGTCT  
GGAACCGCTCAACCCCATACCAAAGAAGTGGTTGAAGACGGTCGAGCTAAGGGGTTAC  
CAGTATCTTCTGGGGGTTGGTAAAGAAGAGAATGAGAAAGCGGCTGAACTGATTACCAA  
CTGGAATGCGTGGAACACGTTTAAAGAATTGAATAAGGTAGGGGAGGTGTCCCAACAGT  
CTTTGCATCAGCTAAGCAAGACTGGGATGCCTTTGTTCAAGAGAACTACCCGGATGTGAA  
TCCCTATGAGTTGGAGAAGACCGCTAGTGATCTGTTCAAGTTCATGAACAGTCTTCAGGA  
GATCGTCCAACCTTCGTACCCGCATGCTGCGGGAAGAGAATATTAATAACGCCTCGCGCCG  
GTTTGATAAACTCACCATGACCGATATCGTTGGTAAAACCCCGTCGGTGAATAAGAAAGG  
GTTGAGTATTGCAGATCGCATGATTGCTCGACCATTCGTTTCATCGGGGGGTGTATACCA  
GTATAACCAACAGCTGCGTAATTCGTTCCCTGAGTATTACGTGGGAACGTCCTCAGAAGCT  
GGAAGTCGCCGATCTCATCAACAACATTAACCGCCGTATTCGGGGGTATGTACGACGGGT  
CAGTGCGAACGCCATGGCGTTGTCTTACATCGCGGGATATATTGAGATCTGGGATTGGTT  
GAAGCCCCCTTGGTCAGTAGCAGTGTCAAAGGCCTAGCGGATTTTCGATGACCTCATCAA  
GGTGATCCGTATTACGGACATGCCGGTGATCTGTGGAGGTCTCTTGGCGTCGATCACGGA  
TGACGGCGTCCAAATGGACCTCCGCTGCATGACCCCAAGCTGTGACTGGTATCAGTTCGA  
TCTCATTGATCCGACTAAGTTGGTGCAGCGTCGTCCGTCGATTGAAACCGATGAAGAAGC  
GGCCTTCTTTGGTAAAATCTTCAGTGGGCGTTAACAACACACCCGTCGATGAAATCCTCAA  
GATGATCGAACAGTCCACCTACGGGATGGACTATCGGCACGTGCACAACGAGGATCAATC  
CATTCGTCTGAAAGTAGGACCTCCCAGTCTGTCCGATGCCTTCGCTACCTTCGACTATTT  
CGTAGGACGTGTAGATAAGCAGTTGGCGGATATTAGCAACAGAGTCAACACGGAACAAGA  
CCTGGAAGAGCAACGTCTCCTTCTGCTTAACAGCTTGCCTGGGGCGGAGTACATGCACTG  
GGTGAAGAGTTCGCTATTATGCCACCTCCGGGTGAGGACAGTGAACCCAGGTCATTAA  
GCGAGCCAAGGAAGACCCTAACTAGTTCAATCCAGGTCTTATGGACTCCCTGCTGACCGA  
TGAGGTGATGAATAAGAACTTGGTGTGTTGTCGTCTACAATAGAGCGCCTTATCTGACCCG  
GACCTTTATTGGTGTCCGTAACCTTCGTGTGTCCGAAGTGCGGTACGGAGTCGGATGCTCA  
ACAAGAGGATCGTAAACGCGGGTATACCCCGATCGATGCCTTTATGAGTTTTTTTATCCA  
TTCCAGCTGATGTTGATGAATCTGGCGATGGAGCGTCAAAGGTAACAACGAAGCCCT  
CTCCTGATTGGCGGTAAAGCGATTTCGCAATCCGGAGTTCTCGGCGGTTTACTTAAACCTC  
CAGAAGCAAGATCTCAGTGGTCTCAAGGAAGAGACTATCCTGTGCAACAACCAAGCGTTG

CATGACATCAACATGGGATATGTCTCACCCCGTAATCTCCCCCTCACCAATCGATTAAG  
TTATTTGCGTCTGAAGTCATGTATTACCACCCCTTCTCGTATGAGAGTATAGGGGAGTAT  
TACGGGACTTTTCGGCTGGATGAATACCTGCCCTTAAGGGATTACTTCGAATTGCGCGCT  
AACAGTGCAGACACGTTGGTTAAGGCCGTTCAAAGGGACGGGAAAAACGGTTGGTAATG  
GAGAAAGAGCATCTGAAGGAAGAGGAAGAGAAACAGGCGAGGAATGGGGGTAAACGAACC  
GCCTCGGAGACGGTTACTATGGATGCATTACTGGATCAATTGTCTAAACTTCGTTAAGAG  
AATGGGTAACCTGGGGGCCTAGAGCCCCAGGTTATCTTATGACATACATGGTGACACCT  
CGTCTCTATATCGCTGTCTAACTGAAAAGGGCCCTCCTAATGTCCAACGATTACAAAGCA  
CCTGAGGTTACTGACCTCGGTAAGAAAGAAGAAAGTCCGAAGACCCAACCTACGCCTTCC  
ATCCCCAATACGGTGGCTACGGCTCAGGGTGCTAAATTGGAACCCGTACCTCTCCGTATT  
GGCATTGGCCAAATGGTCAATGGCAAAGGTAATGCGGTCACGGATATCATGAAAGAACGG  
ATTGTCTGTACCTGACCTACCTGGCCGGTAAGAAAGGCTTCACCAGTGATAGTGAACGG  
GAGGATGAACAGACCTCCTTTATCGAGATCATTGGTTCTACACTGACCCTTCCGTTTCCC  
CAGTACGACATCGTTACTTACTACCTGTTTGCGGTTATCCGGGAGAACCGGGAAATCTTT  
GCCAACGGTACGGCATTCCGCTTTACCTACAAGCTCCGTAAGGAGTACCCGATAGAGAAC  
GTTAAACTCTATCACACCTACATGACCTTCTGACGTTTCATCGCGGGTAACTGCGAAGCT  
CGTCATCGCCTTAACCGCATCATTGGTCTTGGAACGGCTATCCGCGATCTTCTCGTAAG  
GGCAAAGAGAACGCCACCCAGTACTTCAATAAGGTGCAAACGTTTGATTTCCTTTAGA  
CTCTTTATCCAAGGAACGCTTCCAATGGACAGTGTAGTACTTACCGAAGAAGACGGTAAA  
GGTTATGAAATCCCGGATCTCCCTCATATCGGGATTGTGTATGATTTCGTTAACGATACC  
CTGGATCAAGTGGATCGGGGTGTTGCAGGTACGGAAAGCCTGACCGCCTCCCAACACTAC  
CTGGTGGGTGCACTCGCTGCGAACCAGCTGGTTACTCGGTGACCGGTAACGAAGGCTTT  
ATGGCCTATATCGGTGCAGGTTTTAAAGCCGCGTATGACTGCGTGGTAAAGATGTTCAAG  
AGCTTCTTGACTTCTCCTTCAAGCGTGATGTCTCTCAGAAGACCTCGGATGCTAAGAAG  
GAGATTGATGACCTCCAGACAAAACCTGGAGGTGGTTCAGACCGGGGGTTCAGACGGAAGCG  
GAAACCCAGGAAGCCCTGCACTCCATGAAGGTCCAGGTTAAGGAACAGGCACAATCTGGC  
TCTAACATCGACGGGGTAGACGCAGAAGAATGGGTGGAGAAAGAGCCGAAGGCCTCCGCT  
ACCCATGAGGAGAAGAAAGTCGCGGTTAAGACCCTGGCCAAAGAGCTTCTAAGGTCAAC  
ACCCGGGGCAAGAAACGCCTCCAAGGTGTCATTGAGCGGATGATGAAAACCTCAGCAATAT  
TTGGTGAGGGTGATTGATATCGCCGATAAAGCAGCTCGGGAAACCCTGAATGAAAACCTC  
ATGCGGGTAACGGACTCTATGAAACTCCTCCGCACCAATGTTTCATCAGTCTACTGAGCAA  
CTGAGTCGAGTGAAAGACGTCAAAGACCTGACGGCTGTACACAACGTCATGAACGGTGT  
ATTAAGAGATCGATACCTTTAAGAATACTGCTCAGGCCGTGCAGAGTGTTCGCGGCAAA  
ATGGCTGACAAGATTAAGATCGTTGAACAGCAATTGGCCGAGGTGGCTAAAGGTGGAGGT  
GACACCAAACGACTCAAGCAGCGCTGGATGAACTCCGCAAGATCATGAACTTCTGGTT  
AAATGCGGTAAATGTACTAATCATTGAAGACAATGTGAAGCTCCAGAAAGACTTT  
AATGGTGTCTTCGGGCTGTAACCCTGGTAGCCCTTACTACCCCTCTCACCGTGAAGGGAG  
AGGGGTAGTAAGGTCTATTATGCGGTGTCTTGACGGGTTCTTGCGTATCGATGTTAATA  
CGGGATTTACGGTTACGAGCGGTCGCTTGATCTCCTTAAGCAGTTCCTCTCGACCTGTT  
TCCACCATTAACCGTTCAAACCTATCCTTCAATTGATCGAATTGAGGGAATCTAAACAAA  
TCATGGCATAATCCAATGGCGTTCGCTTCTGCACTGCTCGCAAAGTTAACCCCAATCTGC  
CTGAACTTATTGCCGTCAGCGCTTTGAATCCGAAACACTTCCATTTGTGTGGTACGATTC  
CCAACGTTCAATTGCCAAGGTGCGGTGAGGGTACGCACCTTCAACATCGATATCGGACCAA  
TCTGTACGCCCAGTGCTGTATACATCAGCGAGTCCATGGAAGAGCTGAGCGCCGACATCC  
GCATTCTTCTCGGTATTGAGTAACGCAATCCAGTTTGACAACGGAGGCAGTTTATCAATA  
ATGGATTGATCGCGTTTACGAGGGGTACTCCCCCCCACAAACCCATACCGGCGTGCAAAG  
AAACTCAAGGTATCACTGACCAACTTGGGTTGAGAGACGTAGTTAAAATACTCCGAATAC  
TTCAACAACATAGGAAGTGACAATGACAAGTCATTGGTCTTCTCATTGATCTCTTCAATA  
ACGAAGTCATCCCAATGTTGTACATGCAATACAGATACCGCCATTTCCGTTGCATGTAA  
CGGTGCCACTGAGGCGTACCCGGTCGGATATGAGCACCTTCTTCGGTATACAGTTTACCC  
GGTACGTTACATGCTTCGCTGCTCCTTCTAACGAAACATCAGGAACCTTACCTTCGGAC  
GGTTGACGCTTAATGCGGAAGAACGACATCGCGTGTAACCATGGCCAGGTGGCCATGGTT  
CGAACAGTGGGCCATTTCTGTTGAGGTTCCAAGGGCATTTTAGAACCGTCTTCTTGACT  
TTGTGGGTTGTCCCTGAGTTCAGCTCGTAATACCGAAATTCCTTAGGAATACTGGGATCG  
CAATACACATCCTCCAATCGTTACCCTTCAATCCTAAGGGCTTCTCATTCTTGGTCATG  
TCGTATTCAGCATTCCAACCTGGCGACCCAGTCCGGTTGCCATTCGTGCATCTTGTGATA  
CACGCCACCACCTAGACCTGGGGTATCAAAGAGTTGGTATTGAACCACACACAGACGC

CGTTTAAGGGGTTCACTCAACCACTTGCCTTCAGCTTTTTTTGAGGTGCTGAAGAATCGTC  
GCGTCATCCGGTTCTTTAAACCAACTCCGTACGGCTGCAAATACGCCTTACGCTTCATG  
GTAACCGAGGCCATCATAATGGGGTTACCGTGAGCATCCATGTCGGTTTCAACGTCGTAC  
GCTGCTACGGTAAAGGGTTCCTTCTCCTGATGTTCTCCATATTTCTTAAAGAACTGGTGT  
TTAATGTGCACCGGAGGGGTTTGGTCTAAGCCGAAGACGTAAGGACTTCTTTAGCTTCC  
GCTAGACTGGCTTTATAATCTGCTCGCCATAGAGCTGTAAATCACATTAAGGCAATC  
TGTGCCCGGGGAGCCTTGTACTCCCGACACCAGGATTCTTCAATGTAATCTTTATGCTGT  
TTGTACTTCCGTTTGTCTCTTTAACAATGTAGTACGGTTGCTTATAATCCTTAATCGAA  
ATAAACGATTGACTTCGACCACCATCTTCATGAATATTGGTGATCTTTACACACGTTAAA  
TCACTGCCCTGTTGAACCTGCTGACCGAGTACTTACTGTGTTTGCAGACTTTAGCGACA  
ATGGCTGAAGTATTCTCGACCATTCTTTACCCTGCATTTTATGATAGCTTTGGACACTA  
TACCAATAGGGGTATAGGTCCGGTATTTACAGTAGGAGTAACCCGTTAATGTTGGACATGA  
GTTTTATTACCCGAAAGGTAGCGGGTACGGAGTTCATACAGTTCGAGAATGCCACCTTTA  
AAGACGAATTAACCGCTTGTGGATCAGTACATAACGATTACTGATAAGCGTGTGGTAT  
TATCCCCTGAAAACCAAGTGGACGTAAGTGGGACTCATTAAGAAACACACCGGCTTTAGCA  
ACATAAAGCTGGAGTTGAACGACAGTGGTAACCTGTATCTCGACGCGGGGTATTTCTCCC  
CGTACCATGTTCTGAACAACACGGGTACTGATGTGTTGAGTCCAGCCTCTAAGCCTACCC  
TGTATCGGTGGTTTGTGGAGAACAAGAACAAGATCTTTAAAAGAGGTGTTGATTACCGCT  
CCGGTAAAGTGCCTGGTTCGTTCCAAGACGTCCTCTTGACTATTGTGATCAATGTCAACG  
TGCATCAGTTCCTCCCGTTGGATAAGATCACCAAATGGAAAGTCTCCATGGGGGGCGCGC  
TAGCGGGTGGTATTGCTCACGAACTGGGACATGCCTTTGGGGGGGGTGAGCTCCTGCTGA  
CTCACCTGGAAGACAACCTGCTAGCCCAGCGGGCTTGGATCAGTACCGTAAAGCCACCA  
AAGCAGAAGAACGGGTGATTATCCGAAAGACATCGCTGCTATTCTGGATGTCCCAGAAG  
CCAAGTTGGAGGAACCTGAAGAGCTTTGCCGCCCAAGAAGATGGAGAGAACTACCTCCTCT  
ACTACACCGAACTTCTCTCTCAACGGAATAACCGTCGTCCTTGTGAGTTGTGGTTCCTG  
AGATGACCAGTGAAGTGATTGCGGATATGTACGCCATTTCGTATGGGCTTCAGTAAGGAAG  
TGATGGCTGGGATCAGCGCTTTGGTGGACCTTGGTGTTTTTACCATCGCGACGGAGACCT  
TACTGTTCCGGTGCCGTTGCAACACTCTTCTTGTTTTGGCCTACAGCCGCTATCACTATCA  
TTGTTACCGGGGAACGACGGCGCCGGGGGGTATGTTGTGGGGGGTCTTTGCCCTTAGTT  
CGGCCTTCGCGTATTTCCAAGCCGGGTATTCGGGAGTCTACAATTCGACCACCGCCGTA  
TGGAAGATGCTCTGCGTCAATTGATTGCTAAACTGAAAGCCAGTAAAAGTGTTCAGTG  
AGGAACGGGTACGGTTGATTGACGACTTCACCAAAGCCCTGGAAGCGGTTAAGAACTTA  
AACCTGGTACGACAACACTGTCCTCTACCGCTTTATTGGTTGGGTTTTCTCAGGCAGCG  
ATTTCCGTAAGCAAGAAATCGAACACTTTACTCAATCCCTTAATAACCATGAGCTAGCAG  
TCTTCTCCAGTCAAGTGAAAACGCTCGAAGGAGTTTATAATGTCTCATCTCGCCCATGTA  
AACGATTACCGGGCTTACCTGATCAGTCAAGGGGTTAGGTGCTCGTATGCGCTGACCACG  
GCCTGCCAGGAAGCCTACATCCGCGCCATTCTCAAACGCCATGCTCGTTCCAGGACAGT  
TTCACCCTGGCAGAAGACGAAGAGAATAGCATCTGGGTGCAGCTCGATAAGTGGAAATTCG  
GTGTATCCGATCAATGCTTCCTTCATCGTGAATCGGTCAAACCTCCGTCTGACCCGTATT  
CGCGGCTGTCTGATGAAAGAAGGTAAAACACCCGGTAATGCGGAATTCGATGTGTATCTG  
GATGTGAAGCGAACCTGTCCCAGTCCGGGTGACACCACGGTGGATAAACTCGATGCCACA  
GACAATGATCTGTTCTGTGAGCAGGTTTCATTTCTCTACTATGAATTGGTGAAAGGCAAT  
GAGTAATCCAGTGAGTTGGTATTTCCAATTGAGTGATCCGGTTGACGGCGTGCTCCCAGG  
TGATGATAAACTCATTGACCTGGATGAGTACTACGCAGAAACCGGTCAACCCGTGGT  
GGATGCGATGGTCCAAGGGAGTGAGAGCCTCGCGCTCAATCGCTTCTCTCGGGACATTGC  
TATCCAACCTCAAACCTGAAGAATGCGTATGAAATGGATCCTTTCCCAACGGAACGTAATGC  
CGTGATGGGAGCGGAAGGGTTTATCTCTAGCATTACGGAAGGGTTCAAGAAGTTCATTGA  
AGGGATCATCAAGTACATCAAGATGGCCTTTAAATGGGTTCTGGAACACATTAAGGTCT  
CCTGGGCTTCCGTAAGAGCGCGCGTATTAACCAGGCGATTAATGACTCCTTTGAGAACCA  
CCGGGAGGAGTTCGTTAGACTTTTTAACGGTCTGGGCTTCCCAAGTGCGAATTACTACCT  
GTAGAAGTTCATTGGGGAGTTCCTCAATGCCACCGACCGCATTGGTCAACTGACGAACCT  
CCGTACAAAGTTCGAAACCGATGAAGAGAGTATCGAGGCTCTTCGTAAATTCTTCCCCT  
CTTCGAACAAATCATTGGTAAACTAACGGAGGCTTCTGACAAGGCAATACGTGCGCCTGA  
AAACCTTAAAGGAACATCCGTAACGAATACAACGCTACCCGGGGTCCGGGCTCGCCTCCG  
AGAGTGCGTAGACGGTGCGAACTCCCCTGAGGTTATCCGAGTCCAGAAAGCGGTGTTGGA  
AACCTGACCTTCGTTAAACCGGATGGTTTAGTTGAACAGATGGGTCAGTTCCTGGAAC  
CCTCTACAGGGTGAAGTTCGAAAACCGAGGCGTTGAAGGAAGGGTTCATACCGTCCGAGA

GACCCTTAAAGAGAACATTCAGGCTCAACGGGTGAAGTTGACTCGGGTGAACAGTCCGGT  
GATCATGGATCTCGTTCAGCAGCTCAATGGAGCGTATCTGACGATCTCGGATAAGGCGAT  
CGACATGTCTCGGATTCGTCTGAGTGAGTTGGGTAATCTGGTAGATGGAACCGATGCTGA  
GAAGGTCAAGAGCATAGCGGGATACTACCAAGTCCCTGGACTCCTCAGTGATTACCAGGG  
CGTCGCGGTTGCCATGCGTAACTTCAGCCAATATTGCCAATCGGTAGCCACTCAGCTGTT  
GGCGGTTGAAAACCAAGTAGCAGCGATGGTGGGTTGGTATCACCGTTTTTCACATGTGGTA  
TTACCATGGTCTGCTGGATGACATTGAAAAGCTTCGTGAAATCAATATCCAAGCTCGCGA  
GCCGGGGCACTCTCCTGTGGCGAATGCGGAGGGTTATCCGACATTGACGTTGGATTTTAT  
TCCGGAAGCGGATGCAAAGACCTTCCTGGAGAATATGAGTGGGACGATGAGAATCGTGAT  
TGAAAACGACATTGGTGTAGCTTCGTTCTAGTACAATGCCTTGGCAGACAAACTGGATG  
GGGAAGACCCGTATGAATCGTGAAGTGTCTGAACTGGGTATTAAAGCCCTGCACGAACTG  
GATTTGATCCGTAAGACCAGTGAGGACGACCTCGCTCTGCTGAAAGAAGGGATAGGACCT  
GAAGCCGCTTATGTCAATGACCCGGTACTGGTTCGGGTGAACAGGCGGAAAAAATGAAG  
GTTTCGTGTTACGGCTCAGTTCCTAAGGACAACGGGAATATTATCGTCAGCACGTCGTTG  
GGTGAACAGGCTGGTTATATCCTGGCTCTGGGGGCTACCAAGGCCTTCTTTGCAGTGGCG  
TTGCCAGGATCGGGGCTCGACTGGAACAGGTGTTCTCGTCCATTAACCAAGTAGACCTG  
AATGACCCCGTCGCCCTGGAGAAGTACAACGAACTCCGTAAGGAACCAGCCCGGTTCTTT  
GAGTACTTTGCTAACGGGTTTTTCGAAGGGAAAGAAAAGGTTGCAGACGGTGAGATTACC  
TGTTGGACTCAACTGCGTGATCACGCCCGTTGTGTGGTTGACGGATATTACCTCTTCCTG  
GATGACTATGACTTCAATTTGAAGCAGGTTAAGGAGAAGTCTACCAGTAGTACCTCTCA  
CCCTCTTCGATCAAAGAGCAATCTCTGGCCGGTATCGATTACTACCCAACAACCTTGGT  
GTTCCGGGTGCGGTTGGCTAAGTTGTTCTCGTGTTTCTTGGACGAGTTGATTGAGGGTAAT  
CTTCCCTCTAAAGACACCGAGTAACGTAAAGGTGCTCCTACCCACTCCCTTAACGGGGAG  
TTGGTAGGGGTATACGTCTTAAATGGTGGTCGTCATTCTGACCTCATGGGGTTGGAAGAT  
GATATCAATGGCTTCCTGTATCGATACCAATCCATCGCTGGTTAGGGCGAGTCGTTTACG  
GATGCTGAAACCAGTGAGGTCATCCAAGTTACTGATGACATCCACGGTACTGTCGCCCGC  
AAACGCACTCAACTTAACACTCACACCTCTTCACTCACATTCTCCTTTAAGGCTTCTGC  
AAGGTCTAAGGTAAGTACTGACTGTTGTCTTATCAAACAACGCCATATTGCGTTGGCGAGGAGT  
GCTCTCCTCCAAGGCGGCGGAGGTTGGGGTGACGGTAGCTATTTTCCGCTAGGTAGAA  
GGTGACCGAGAATGCCAGATCATGCCGAAGGGTGGATTATAGTTACTGTTGATCACCAC  
CCGCTGATACCCAGCTTACTCCGAGGTTGATAGAACAAGTCAGTTTGGTCAATCGCTTC  
CGAGCTAAAGGCCAGCATGTCTTGGTTAATACCGTTGACAAAGAAGTCCTTCGTGTATTT  
AGCAAATTGGATATCTTATACGTCTTTGCTGTACTGATAGTTTCGCATCGAAGGCAATGAA  
GTCCAATAGTACTTACGTTTACGGGGTTCCAACCTCAACCGGAACACCATTCTCGTAAAC  
GATATCAGTCCCCCTCCGGTACAACAACCGCATTGTACCATCCCGGTTATAGACGATGTC  
ACCCGCCTTATGTTTCGATCACTGGTTTCCCTTCACTGTCGAACACAATCTGTCCATTCTC  
ACGTTTACCTGGGTAGTATCATAACCGTTCCGGGACATCCGCTTCGTAGTGGTTGTACTG  
GGCTTACCCACCAGGGGACGAATCCGACTGTACAGGTTACCCAACCGACGACCGAACTC  
AACTTTGTAATGGGTTTCAATCACCCCAACATCGGGATATCAAAGATGGTCTCATCAAT  
CTTGTATCGATTTGAGACTGAGTCACCTCTTTATCCCCGCTCGGGTAAAGATAAAGGT  
GACATCTGTGGTCAGTTCACTACCGGTCTTACTCTGCTGACTTCCAACAGCCAGAAGTT  
AGTAAAGTACAAAACGTCTGCCACATCCACATCAAACCTGGGTGTTTAAAGGTGAACTCCCA  
GACCCGTTCCCTTATTGGGTAACACTCCCACATGTTTACCTGCTACACTGGCCAGGCTGTT  
ACTGTCCAGTGGGTTAATGGACAGTTGGACCCCTACACTGGTATTCGTCAATTCCCTTATA  
CGAATCCCCCGATTGAGTCACCAAGGTGATGAGATACCCGGTTTCTCGGTGTTCAATGGT  
GATTTGTCTACGCCAGTTCAGACCCAACGCCGCGTCATAGTCCACAAAGGTTTGATA  
CCGAATGATCGGAGAGTCCAAATGATAGGTCCTGAGGACGGCTGGCTTGTTCGTGGTATC  
CAGTACGTAAGTAAAGGGGTATAGACCAAGGTATTCTCCGCCACCATGTCCACCTGCTG  
TTCAGGGGTGATGTTGAAATAGGCATCCCGAGTCAACTTGTTCACCAGAACACTGGTGGG  
TTTATTGATGTTGAACAACACAGTGTTAGGAATAGTCACCCGTTCCCCGTCGTCCAATAC  
CACCCACCTAGCTACCAGGTCTTCGACTGACGCTAAATAGCTCCCGACGTAACACGCCAT  
CGGTGCGTCGAAGCCTTTGTTATCCTGAATAGGCAATTCCTTCGTTAATGCAAAGGAACA  
CTTCGTCATGTAGTCAATGACCTTAAACCGAACTGTACCCGCGTTTCTCCGCCGCCCTTT  
CAGGTTGTTTTTCGGTAATCGGGAGGGTGCGATGTTGGCGACCGTCGATACCCGTTGTTT  
AATTTCCGTAAAGGGAATGGCATCTGTACCCGCCGAGACAATCGCATCCATCTTCCAGGC  
AACACCCACGCATTCACCAGAGGGACTGAATAGGGATCCAACCTTATCAGACCCATAACCG  
ATAGTCCCGGTAGGCGGGTTTAAATGTCCATCGGGGACACCGTGGTAAGGTCTTTGGTTAA

CGCCCCTTTGGTGGTATATGTGTAGATGTTGATAATCCCCCGGCCAATGTCAATGCCTGA  
CGTGATGTACACATCTGGGATCTCATAACGAGAACCGTTTCTTCACGGTCTCGAGACTGAG  
GGCTAGGGTTACATTCAACGGATCAAAGACATCTTGGTAGTAGGACACCCGGCTCTCTTT  
CAGTTCCCATTCCGTTGCAACATCGCACGAACCCATACAGGTTGTCCGTGTACTCAAT  
AATCCCCGACAGCCAGAGGCTTCGTTAGACGTGAGGTTCTCCGTGGCCTTACAGCTCAA  
TTGAGCTACGGGAATCGATACCATCACATACCGACGGTCAACCACTTGGTTGAAGGTACG  
GTCCAAGAGGTTTCGTGGAAATAGGCATAAAGGGGTTAGGCGAGCTTTCGTCTGTAACGAT  
CTTCAACCCATTCCGTTTCGTTGTACTGGATCCGTATCCCATTGACGACCCAGAAGTCGTA  
TCCGTGGACATTCAAAATGGGATCCTTTGGTACGAGGATCTCTTTATACACCACGGTTTT  
CTTACCGACGGTTTTACGACGGTCCACAGTAATCTTCAGGAAGTTCTCAATATCCATGGT  
GAGAATCATCACTGAAGTCGAGGGATTCGCAAAGAACCCTAACCGCTCTTCATCCGACAT  
GTTTCATGCTCAGCTCACTGACATTCCGAGCGTGCAGCAGGAACCTTACGGCTGTTGACATC  
CAAGAGGCGGTTAATGAAGCCATGCGACGTACCCAGGATTAATCCATGGCCCAAACAAA  
GGGGTGACTCTTACTGTTGCGTTTTACGGTCCCCTTGAACCACTTATTCTCGACCTCATT  
CACAATGAGGTTAATACCCCGAATGGGGTTGTTTGAATACGTTCCAGTTCATCTTGACT  
AATAGCCATTAGCGTTTACCCACAATTCCAGTTCATAGTCGCCAGATTAATCCAGGGA  
TACGAGCCGTAACCCGACAAGTACCTTTCCCTGAACGGACGTTGGTAGTAATACTGATTC  
CGGACCCGAGGGTGCAGGTTAGGGTTGACCCTCAACGTGGTACGGTTAAAGGCATCTGCG  
ATTTGGATATTGTTAAACCGGAATCCCTGACAATCAAAGGAGATATCCAGTTCATCAAGC  
CCTTGACCCCTCAGACTGTTCTGAGTACGGTCAATGGTACTGTACGCCCCGACGGGAAG  
GTCGTAGGCCACCCACCCACGGCAGAAAGACCCATTCAATATTCCGCATGTTCTTGTTT  
ATGATGAGGTGGTAAATACGGGTGGTGTAGTCTTATAGTTCTGGAACAACGCATTGGGG  
TACGGTTCATCCCTTCATCCCAAGGGTCACCGCTTCTATGTAGTGAACCCACACTTCG  
TTCATTTACGCCACTACGTTGTGTTAATGCCGTGATAGGTTTGTCTCAGGGTGTAGTCG  
TAGTTGGCTCTCAAGACCCATCGACCCACGCATACACTTCTTTACGGAACCCAGGCTCA  
CTTTTGCCCGCCGGTAACGAGAGATCAGGAAACCCTGAACTGACTTTAAGAAAGTTCGTT  
GCGGGTGGGATCCAAGGGTTCAAGGGAACCAGGGGAGTAATATCGTTCGCATTCGCCGAT  
CCCCAAACCGGATCCAGTAACCCTTTTACGTACGCGTTCAAACCTGTTCCGATGAGGACGG  
TACCATGAGACCAATTGAGGATGAAGGATTACATTCTGATCCGACAGATTCAGCATGGGA  
CGCGACATAAACGCTAAGCCTATGGTGTCTGCTGGGATGGGCGCTGACTGATTGCCAGGC  
CCTAGAATACGAAATCCATGTAACAGGTTTGTCAAGGCGTTATCAAATCCAGGACCGCCA  
TACTCACGGAACGCGTAATTCCACCATTCCAGGATGGTTTCTTCGTGACTTCTCTGCTG  
GGTGGCGTATTCCAGGTGTTCTGTCCAACCAAGCGTCGTAATTATTCGGGTCTTCAGCC  
ATTGTTTATTACCTTAAAGTGATCAGGGGTTTATCATGATAGGACAAGTATTGTGTCTAG  
GTTCTTCTTCTTGGACATCGCCAAGAAGCTGTATCCTGAGAGCAAGGATATCGCCTCGG  
CAGCCCAAGTAACGGACCGGGCCAAACATTCATACAATGTGATTTCCACGAGCTCGGTAC  
AACGTAGTGCAGCCCGCACTCTTTTGAATCCGATGGTTCGCCATTGAGGGGTCCCTTATCC  
ACCAGGAATACACCCCGGATCTCATGACGGTGGTGACCCTACGGGATATTGCCGCATAAC  
TGACTCACCTGGCGTTGCAGAATTTTCGTAGAAGTGGGGGTTAAGCTGGAGAACCTAATCG  
GGAGAATCAGTCCCAACCGCGGTGGGATGATGAGTCTCTTCTCGGGACTGGAAGCGATGG  
ATAACAACATCAAACCCAAAGACCCAGCTACCCCGAACCAAGTTCAGGTCAATAGCAAGA  
CCTACAGTGAACCTGAAGGAGTTCACCCACCTGGCGGGGGGTAAAGTGGTGAACGCCACGC  
TCTACGGAGCGAATGGTAACAAGAGCGAAGTTCCTCACCATTTCGTGATCCCGATTC  
CGGTGGCCCATGAGAACCTGGTGACCCTCTTGTCTGCCGCTAAACCCGATGAAGGGTTGA  
AGATGCGATGGATCATGACGAAGAATGGTGAGATCACACGCCTCAGTGGTTCGTTGGCA  
GTGACGACGTTAAAGCCCGTTTTAAAGCGAAAACGGGTGATACCTCCGGGTATTACAAGG  
AAGCCATGAAACGGGATACCCAGAATACACTGGAAGCGATTTCGTACGGGGAGCATTAGCA  
TGAACCTCATGGCGAACACGGTTCATCCTCAAGATACGGCGACTCAGCTCGAAGTGG  
AAATCGGTTCGTAAGTTTGCAGGACACGGTTAGCCGTGAGATAATCATCGAGAGTATTTCCG  
CGAATACCCTCGTTATTGTGAATGATGACCGGGGTATTTTACGTTCTACAACGATGGTC  
AAACCATGCCGGAATTTTACACACGTCGAGACTTGTCCGTTAAGTCCAAGAAAGAAGGCT  
CTGCGAACACGCTACAAGATCTCGTTAAACTGCTCAACGGGGGTCTCTAATGAATATCTT  
TGAATACGTGAAGGGTGTAAAGACGTTCAAGAAGAACGAACTGATAACCAAGCTCACTAC  
CCTCACGGTGGCCAGTGACGACATGATTTCGAACCTCGAGCGAATGGTAGCGAATAAGGT  
GGATTTGAGCCATGAAATCAATCAGTGGGTGATTACCAAGAGTATTGTTTCGTGAACTGGA  
CAATAACGGGTACCGGGGTGTAGGCTTGGCGGGTGTACCCGGGGATCGTGTGATACGAT  
TATCAGTTTGGTCCCCGGGCTAACGAAAGGGGTGAATGGGTATAAAGACGAAGTCTGGGA

CGGTAAGCTCCTGACCTTGCGTCAAGTCAATATCCTGAACCTGATGGAACACGTGGAGTA  
TTGGTTGAAATACACCAATATGGTCTACAGTGTTCTGCTGAACTTGAACAACCAAGTCAGT  
CACCACCCCTGAGAAGGCCTTGGATAAGGCCGACTTGAAACTGGTGAATGGGAACCTGGA  
GTTCTACAAGTCGGTTACCTTGGACCCCTGAAAGGGTCTCGTCGTCTCCTGGAGGGTCT  
CGATGATTTTCCGGATGTGGAAGTCAGTGAAACCTCGTTGGCTGTTCTGGAAGCCACTGA  
TCCTAAAGCCGCTCCGGATTACCTGAAGCGAGGCTTTGGGGTCCATCTGCTGAATCCGAA  
GGATTGGATCGGTTTGGCGAACGTGAACCTGAACATTGCACGTATCGAGAACATGCGTCCG  
GGACAACCAACTCTTCGCCATGAAGATCTCGAAAGCTGTGAACATGAAGAACGGTGTCAA  
CGACGCCGAAATCGATCGTCAGTTCGAGGTGCTTCAGGACGAGATCATCAAGAACGTTAA  
CACCATTGAAACCATCGAGAGACGCTATGAATAGTTTTCTGTCGCTCCCCAATGTGTTT  
TGAACGCAAAGCTGACGGATGCGGAGATGACAGAGGCCTTTACCAACCTCAATCTCCTCC  
GGAAGGATGCGTACAGTGATTTGGAATTGGTCATCAAAGGTCATGTGGCCATTCAAACCA  
TTCTGGATGTCAGTCGGCTGGTGGGTCCCAGTTTCCGTCAGTTTATGGAAGCCAACTACG  
ACAGTGGCCGTGGACCTATTGCAGGGTTGAACAAAGACATTCTTCATTACCTCAATGGGC  
GTATGGGTCAACACTCGCTGATTACGTCGCTCCGTATTGAAGAGCGTAAACTCCTGAGTG  
CGTCGAAAGTGCGTACAGCGACCTACCGTCAAACCCAAACCACGGGCCGTCCGCTTCCGC  
TCCTGGAAGACGGCTACATCGTCCACGACTACGATCTCTATCGCCTAATGTCCGGTATCA  
GTCCTCCAATGTAGGGTGGACCTTGTTACTACTGGGCGGTGAGAATTACTACTGCTGAC  
CCTTAGGTGGAGAAGAGTGCAATGAATGATGATGAAAAGACGTTGGCTGCTGAAATGGCT  
GCGGTCACTGCAGTCAAATCCCAGGAGATCGTGGAAGCCGCCCGTTCCACGGCGGAACTG  
TCGGAGTAGCAGAACAGCCTCGATGATCACTTCGATCGCGTGATTGAAGTCCAACGCACG  
TTGAACACTCTGGAAGCCCACGAGGTGACACCGGAGTTGGCTGAACAGCTCGATAAAGAA  
CTGATTGCGGCAGAAGCCCTCCCAGAGGCCGTAGAAGCGGCGGAAGCCTTGGGGTTTACC  
CTTCTCCCTAAGTCATACCTTGGCAGCGCTTAGCGGGCTGAGAGACCTTCCCTGAGCCAC  
TTCTTTCAGAGCTTCCGGGAAGTAGTCAGTTTGATTGGAACCTTCTTCCGGGATTTCGTAC  
GTTCTCTTTATGGAATCCCAGGAGAGTCTGAGTAAGCAGATTGACCTGCTGGAAACTCGG  
TTGTCCTCTGTGCGAGAAGTTTGGCAGTCAAGGTACCTTTATCCTGGGTCACCGTCTCTTT  
AACCGGTTTAAAGATCAACGGTAAAGTGGATGAGAACTGGTCCGGTAACCTGACCAAGCTC  
AACCATACCCTGTCGGGTCTGAGTAATAACTATTACCTCAATAGCAAGAATGCGTTGGCG  
TCATCATTAGTTACTTCGGTGGGTTTGCAGGTCTGACCCAAGTGGAAGTCGATGAACTC  
CTCTGCATGATGCCGGTGAAGTCTACCATCAACGCTGTTAAGGAATGTACTTATCCGGAT  
AAACGCCGTTCCGGGACCTAACGTGCTGGCTAAACGGTCGGTTCGAGCTGGTGGGTGGTGGC  
TACTCCTACGATGTTTCGAGTACCGTTAAACCGGTGATCCTGAAGAACCCTGACGACATT  
CGAGACTTTGTGATCCGGTACACTGAAATTGATCACACCGGTTTTCGATAACGACGAAGAG  
TATACCCTTCCGGGATGTTGGGGCTGAAATGAAGGCGTTGTCGAGTGAAGACATTATGACT  
GTCATCAAACCTCCTGCGTCACCTCTTGAAGACTGGGGTAAGGTCATTGAAATGGCGGAG  
ACCCACCGCGTAACGGATTTCGGATTACAACGACATCATTAAAGGTTTCCCTGGAAGCCGAT  
ATCAGTGATGAGGCGAAGACGGAGTTGTGGAAGACGTTTCGCTAAAGTCGTTTCGTAAGAAC  
CAAACCGAGCTCTTGGGTATTTCGCGCTGAGGTCTCGAACTACCTGACTCTGATTGTCAAC  
GGGATGGTGTCTATCTGCAACGATTCCATTGGGCTTTACGAAGAAAGCCCGGACTAAGCG  
GGGTGAGGGTATGAGCGCGGGTTATAAAAGCCAATAAGTTGATGCCCTCGAACAACACCA  
GGACCTGATGCAGGCTCACTCAGAACTCCTTGAAGGTGGGCAGTATCATGGGAATGGATGA  
TGTCGAGGGCAGTGAGGCGTTGAAAGAAGCCGCCATGGACAGTTTGTCTTCGGTAGGTCT  
GGGTTTGTTCAGTGTGAGTAAATGGGTCCGGGGTAAAGCGATTGATGGCTTTATTCATGG  
TATGACGACCGCAGGTAATCAAACCTGAAACAAGAGTTTCAATGACAACCAAGGATTTATTA  
AAATGTCCTTAAAGACGCTGGTAAGGTGGCTGACAAAGATATTCAGGTTACTGGCCAGAA  
GATTGGACTGATTACCGCGGCCGGTAATCCTGACTGTATTCTCCACGACATGGAACCTCCT  
GGTTAAGGACCTCGAATTCGTTGAACAGCACGCCAAAGACCTGATGGGGTCTTGGACCG  
TGAATTGGTGACCTTGAAGCAGTTGAAATCGGCTAGGAAGTCCGAAGACAGTCACAAGGT  
CATTGACGCGTTCAACGGGTTGGAATACCCGGTTATGAGGTTTCGCTGACCGGTTGGATAA  
GGCGTATAAGTCTGAGGGGCTACCGGGTGGTCTGTTTCTTCTTCAAACAGGAAGAAGA  
CGATAAACCTGCGGTGATTCCATTGGGGGTGAACCGCATGAAGGGGAAGGGGTGACCCT  
GAACCTGTCTAAAACCGAGGTCACCTGACATCCTGAATAAACTCGGGAAGGTCAATGCGTT  
GCACTTGCGGGTTAAGGTATCGTATGAGAGTTATCTCGTATTCATCAAATATTGGGCAGA  
AATGGTCAAAGGTGTTGATGGTAACTTGAAGTCAATTGGAGCAAGTGAGTAAGACGGTAAT  
AGGCGAAGGTGAGAAGCTATTGGCCGGGAACATCGGGGCTCTCGCATTTTATAGCGGCTT  
CACTCCTCGTGTGGTTCGGTTATACCGATAAGTACATTGATGGTGTACTTGGGGTATTCCG

TTGATTTGTTTATAAACAATCATTACCTTTCGTTAACGAAACAAAGGAAACAACCTCATGA  
CTATTCTCGAACGCTACACTGGCATGGAAGAGCTTCTGGAGAACGGCGCGGCCAACCTCG  
AAGATGGTGTGACCGAAGCCGCTGTCTGAAGAAGTTCGTGCTGACATCGCCGAGGTTGTGG  
CAGAGGTAGAACAGGTCGCGGCTGCAGTCGAAGAACTGCGTGATGACCTGGAAGAGCACG  
AAGAAGTCGTCTGAAGAACTGGCTGAAGAAGTCGAAGGCCTGGATAGCATGCTGAGCTCGG  
GTCAGTTCAGCTCCGTTGGTTTCGCTCACAGCTACAACAAGGCCCTGCGCCTGAACGCCA  
AGCTGGCCGGCCAATCCTTCGAACGCCGGGGTGCGAATCCATCTCCGACGCTGCCACCG  
TCAAGTTCGCTTCGGTGACTGGCGGTGAAGCCTTCATGGACACCGTGAAGAACGCCGGTA  
AGAAAGCCGCCGAGTTCATCAAGGCGATCTTCAACACCGTCATCAACTTCTTCGTGGGTC  
TGTCCAGCACCGCAGCCGGTATCGACCGTCACCTCGCACAGCTCGCCGACAAACCCGGTA  
AAGCCGACAAGCTGAAAGAGAAAATCAAGCTGGGCAAATGGAACATCGGTGTCGACTAGG  
CCAAGAACGGCGCGGACATCCTGGACAAAGGTCCGTTACCAAAGTCCTGAGCGATTCCC  
TGCCGGCCTTCATCGACATCGGCAAGAACCTCGACGGCGTCAACGCCTCCCAGTTCAAGA  
CTGCGTGCAACAGCCTGGTTCGCTGACGTCAAAGCCGTTGTGAAAGAAACCCGGCGGAAATG  
CTACTGAGAAAGGTTCCGGTGACAAGCGTCAAGTCTGGCTGCACGTGCCGGCTTCGGCA  
TCTATCTCACCTTCGAAGAGAAGGTGATACCGATGAAGAAGTCTGGCTGCCGCGCGTT  
CCATCAAACCTGTCCTTCGGCAAGAACAAGGACGCCTCCGAGTTCGCCACAGGTGAAGCGG  
CTGTGAGGCAACCAAAGCACAACCTGGAAAGCCTGCTGAAAACCTGTGAGCAGTACCGTAT  
CCGTTCTGAAAGACAGCAAGATCAGCCAGAAGTTCCTCAAGGCTGAACGTGTCCGTGTCTG  
TCGTACCCCTGAACGCCAAAGGTGGTGAACAGGACGGCAAGGCCGGCACCGACAAGGCCA  
TCAAACCTGTTGCGCTCGCTGTTACGACCCGGTGCAGGCTGACCCAGTCGGTCAACCCGTC  
TGCTGGCTTACCAAGCTAAGCAATCGCTGGATCTGGTTGCGGCTCACCTGTAAGGTCGAG  
TGTTAGGATCTATTCCTTGAGGTACTACAGGTAGGGGGATCTCCCCCTACCAGTACCCTT  
TATGTCTGCAATACTGTAATTTTCGATGCTATGTACTCAACTTGACTATTAGGTTGTTATCG  
ATGAATACGCATCCTGTAGCGCCCCTCCGATACGTGAATTCACTGACGGTGTATGAAGAG  
TATGAGGAGGATAGGGAGGTTATAATCTAGGCAACGACGAAACGACTATGGTTGCACTC  
TCCAGAGAGTACGACAAGATCAGAGGATTAGAGAGTGTCTACACCTACGTTCTCCACCGA  
CATCAGAATCGGTTGACTGCTTCGACCGGTACTGAGGGGTTTATTGATTGCGTTAAACAC  
GGTATCGGTAAACTCATTCAAGTGGTTAAGGATTTCTTTAAGTGGATTTGGAGTTTCTTT  
GGGACCAAAGGGAAAGCCCTGAAAGACAAAGGAGATGAACTGGAGGTCGCTCTTAAAGCC  
AATGGTGTACGGGAGGATGACATTTTCGTATCCCAAAGCCGCCTTTTATATCTTCCCTAAA  
ACGACCAAGTTACCGTCTGAATGTGGCGTGGGTGGGTAGCGTCATCGGGGATATTGAGCGT  
GGGATTAAGACGATTGAACGGTACAGTGCAAGTGTGGGGAACCTTCTGTAAGGAATCAGGT  
CGTCTGATTGACCATTCGAAATACGCAGAATTCACCACCAAACAGAAGGCCTTCTACCAA  
GAGGTTAAGGGTCTGTTAGGAGTGAACCTCGAAGCAGGAAGCCACCCTGGTGGTTAAAGAT  
GACCTGGTTCGTGGGGAAGAACACCGTGGAAAGTACGATTAACCTGACGCGGGGGCTGGGT  
GTCCCGTCGGCTGATCGAGTGAAGAACGCGACCTTTAAGACTAATGTTTCGCAGGTGCGC  
GAACTCCTGGTCAAGCACAATCGTCTAACAGAATCCCTCAAGGAGATGATCACTAAATTC  
CATTGTTGGAGAATGACTTTGTAACGGCGCTAATGGCAAGTTTGGACGTTAAAGAGGCG  
TCTCCTGAAGCTCAGGCTGCAATTAAGGAGATGAAGGCCATGATTTCGTAAAGCCATGGCG  
AGTCTAAAAGTCATGGAGACGGAAGTGTATCGGAGTGCTAACGCTGTTTACGCGGTTTTG  
GAAGCCGCTGTGAAGAGAACGAGCTAAAGGTCATGCATCTTAGCTTATTGAATCAATCTG  
TTGTGGTGAAGCCGCGCTGGGTGGTTACACGGACATTAACCCTCGGTTTGGGATTACCA  
CGAGGATTAACGATACCGTGTTCAAATACGCCCTCATTGAGAACTGCGTCAGAGTGTTT  
TGATTGAGCTTTTGGATCTTGAGAAATTCCTGAAGGGGAATCGCCAGGACATTAGCCAGG  
TGACGTATAAGGAGACCCCTGAGATCGTTGTGAGTCTTCTCCAGGAAAAGCTGGGGGTGT  
TCCAGAGGAACAGGAACCAATTGTTCAACCCAGCACCCCTCGTCTCAAGGAGGATG  
ATCCTCATAACCAGTACTTTGAACTCTGGCGGAGTTTTGTAGGGTTACCCGGTCTCTACC  
GTCACGAAGTCGACTTGGGCCTGGTTAACGACACTCTCATAATTGACGCACGTTACTCGA  
AGATTTACAAGGGTAATGTCACCGTTAAGGTTAAGTAAGGGGACGATCATGAACGCAGCC  
TATCGTTTAGGTTTACTGGGGTTGATCCTGGGGGAAGTGGGTAAGGACGTTCTCTCCGAG  
GAGAAGACCCCGAATTGGTTAACTACCTGGAAAAACATGGTGTAGTCAATTAACCTGAA  
GAACACATCATGGGTCAGATTGTCAACACACTGAATATTATCAGTCGTGAGTTTACTAT  
TACGACGCCAGTGAGTTGAAAGTGAATACTGTACTGAACCGTTACCTGAAGGAAACCCCTG  
AGCAGTATTGAGAATGGAATCTATCAATTCCTCGGGATATTTCCATGCTGATTTGTTTCG  
TTGGGGATTAAGGGTGGGGCGTTTACGGAGACGGAAGGAGTAGGTGAACTGATCAGCACG  
GGTAAAGGGTTGGTCAATTACCTGCTGGAACAGGATGAGGGTAGTTTGAAGGACTACCCCA



GCTGAGGTGTATTCTGCTACCGCTCGTACACTGTAATACATTGACAAGGTTCTGAGTTTG  
GTGGACATCTTTGTAACATCTCGTCAGGGGCTGTTGGCGGGCTTGAAGAATATGCGCCG  
ATGGACTACACCTACCTCCAACCGATTGAGGTCAATCATTGGGGGGTTCCTGGGTTGGAG  
TGTGCGGGAGGTGATACCTGTGAATGCGGGTGTGTGCTCGACCACCCATTGCATGTTCTG  
CAGGGCTAGGAAGATTACCTGGATGGTATTCAAAGGACCGACCGTGATTATTTCTGACC  
GTTGCTGAAATGAAAGGGGTTAAACTCCGTTCCATTGAAGGGAGTGAGGGTCAAGTTTTC  
GACTCCATTAAGCGGTTGCGCGGAATGCGTACCAAGCGGCTTTCAGTGGGTGGGAACAA  
CTGAAAGCCTGGTACGACTCGTCTGAGAAAGAAAAAGCTGACAACGACGCGGTAGCAAAG  
ACTGGGGAGGACAATAAGAAAGCAGTCCAAACCATGCCACTAAGAATGTCATATCAAT  
GACAAGGCGCGTGAGGGGATTAAGACCCTGGCGGAGAAGGTGGATGTCTCTGAGGCAATG  
TCTCAGGTTGTGAATCGGCTTCGGACACCCGCGGACGTAGGGGGTGTGATCCATGGATTG  
TTGGGTCTTCTTAAGAAAGAAGAAGTCAACGGTGAGAACTCCGGGCTGATAAGAAAGCG  
GTTGATAACCACCTGGCTCAATTGAGAAAAGGGTCAAGAAAGACCGAGTGGGAATGATGAA  
GACAAAGAGGCAGTTAGTGC GGCTAAGGCAGCGGTGCAGGAAACGGTTAAAGCTGCTAAA  
GAAGCCGTCGCGGAGGCCAAGAAGAAGATTGGTGAACACGATAAAGTTGGTTAAAGGTCTT  
CGTAAAGCCATTAAAGGTATTACACCCACATCTTTATTTAAGGGGGTGGGAACACTGGG  
GGGACGAACACATGAAGACACTTCATCCACGTGTCTTGGAACAGATTAAAGCACAATTGC  
CAAAGACAGCGATATACTGGGTACTCAGCCTGTTGATGAAGACGTTGGGTATGTGGTGG  
TTCAGTTGAATAACGACGATAACCATGCTCCCTATCCCGAAGAAGGATATTGGAGATTACA  
TGGGGGTCAGTATTCCTGAACTCCCGGTGGGTGCCCTGGAGCCGTTGGCTCAGGTGTTTA  
AACGGATCAGTAATGCGTTTAAACCTTCCCTCGTGGAAGGGGTGGACTACACGGTTCAG  
AAGGGAAGGTAGACCTGCCCAAGAACGCACCCTCCCCTTCCAGATAGTCACCATGGAGA  
TCGCTCCGACCAGTATCCTGTGGAAAGGACGCCTGGTCCTTAAACTGCTCAATAAAGCCC  
GCTTTGGACCTTCAGGGGTTCTTAAAGCCACCGTTTTGGATTCCCCTCGTCTCCCGATGG  
CGTTAAGTTCTAAAATCTTCCAGGGGAATGGGAACCTCTTACGGAGAACCGGTCTCGGT  
TGTCTGACACCTTCTGTCAGCAGGTGGTTGCTTACCTGAACATCGTTAAGATCCAGTCGG  
TTACGCTGGATCGGCTGAAAGGGGGAGAACTGATCGATAACGTATCGGATTGTTTCTCTG  
GCTTGGTGATCATTAAAGCTTGAGGAGGGTCTCAACTGTTTATTCGGTACCGTTCGGAAG  
GGGAAGAAGATCCTCATCCATCGCCCGGTGACGTAGACCCGGAATAACCAACGTCAGGTA  
CTGGGGAAGGAGAAGGGGGGAACCCCTCTCCCTCCTAGACCACATCGTGCAGGCAGTGAA  
TATGCTTAAACTTTTGTGTAATGCGAAGAAAACACTACGACGCTTATTTGCGTCCTGCGAT  
TTATGTTTCCATTAAAGGCTGTATTGAACTTCTACGGGCTAGACTCCGCGGCCGCCATTTA  
CTACAACGGTGAGAATGAGATTGCGAATAACGTAGGGAGCAATATTAGTGACGGTCTCTCA  
TTCAGATCGGTATTCGGATGGAATTTTCAGGAACAATATCTTTATTGTTTCTGAGGTGAA  
CCGTAGTGAAGCTTGGACGAACCGTCGTCAGATGGTGGAGGGTCCCGAACTGTACAACAA  
GGAAGTGGGTATCCTGTTGTGCCCTACGTTTGAGAACAAACGGTTTGATGTCAAAGTCGT  
CTCGATGTTCAACTCAGAGAACACCGCCCGCAAATGAAAGACCGTATGAATCGGCTCAA  
GGAGAACCAAGTCGTTGACTTCACCTTCTCCCAACGACCCATATGGTCATTAATCCTCC  
TATTCTGGAATTCCTAGAGGTGATTTACGACCTTTGGAGAAGAACAACCCGTCGGTACC  
CGACCCGTCGTAATGGTTGGGTAAGATGTGCGAATTTCCGGTGC GTGTGATCAGTAACGT  
AGCGGGTAACCACAAACGGGTAGTTATCCCGTGTAACAGAACCGGGTCCGGCATTAGTT  
CTCCGAACCCTTTGTAGCGAAGACGAATAAGAGCGCGACTTATGGTCCGGTGGGAAGTGA  
GTTTACGTACAGCTTCTCTTCAATGATTTTATTGGGTGGGAGCTTGAGTTTCCCCTGAA  
CATTTATCAGGATAAAATATCCACTCAGTATATTCCGAGGGTCTAACCTAACATGAATT  
ACCGGAGTTCATTAAAGCCGCTCCTGAAGTAGAAGCCGGACCGGAGATTATGTTCCCGGA  
AGGGTTCAGACTCACCCCTTCTGTTTGAAGCTGTCTAAGCATAACCCCTGGGGCGTGGCC  
TAACTTCGATTGGATGCAACCGGTGATCCAAGCAAGACTCAAAGTCGAGGATGAACCCAC  
TCAGGTACTTTGTAACCTTATTTTCAATTCCTGACTTTGTTGGGTACGACAATGCTAAGGC  
GTATTTAGTTCGTCGTCATGCGATTGCCCTTCCAGCATTTTGAACCCCTTTTCTGAGTCA  
AGTCTTTGAAAATGACCAGTTAATTGCCCTGAACCCCTGACCCCTCGATGAGGAGGGGTC  
TATAACGCTTACAGCAAGCCTGTTTTAAACAAAACATATCGAGTAGTGGTAACCCCTCGA  
CTATGCGATAAGAGACTATTCTGACGCATTCTGGAGCGATTTAATCGATCATCCTGAAGA  
CTGGGGTATTTTGCCTCAAATCTTTGATTGGTTTCGATTTTCAAGTGCCTGAACCGTG  
GACTTACACATCAACTACCTCCGAAACACATCCATAAGCGATGGGGTCCGTTGGACCGA  
GCGCTTTAACCGATATGAGATGGGCTTTGGTTTGTAGGCCTACCGGAACGATTAAGAAGG  
AAATGAAACCATGCCTCTGGATATTAACCCATATCGGAAGGGCTATTCGATTGAACCTGA  
AACGCCCGGATCTACAGTGAGACGTATCGACATTCCATTGTGGATTCCGTTTGGCAACC

CGAACAGAGCCTGCTCTCTGAAGTTGAAGGACGTCCTCGTCTCTGTCAGTACTTCCGTC  
ATTCTGAATCCAGGTGAAGAACCTAAACCCTTCTCCCCTGGAAACACCGATACGTATCC  
GAGTTACGTGCATATTCACCGGTTACCCCTCAAGATCGATGGGGATGAGACGTTTAACTT  
TGATCCTCAGACCGGTGGATCCACCAAGATCTTTAACTTCTGGTTTGCCACCGATGCCAA  
CCCTATTCGTCATGATGTGTTTATTGTGGATATTGGGGATGGTTCGAGCAGGGCTCTTTGC  
GTGTACGGAACAACCGGAAATTCGGAATTTTACCGCAAATAAGGTGTACTTCGTTACCGC  
GGTATTGAGGGGTATCCTCGACCAGGAGACGGATGCCATTCTCCAAGGACGGGTGGTCCA  
ACACCGGGTGTATTACAAAGATTCTGTACTCCATGGAGGGGCTTCCCTGATTACTAAAGG  
GGAAGAGGAGGTTGGACAGCAACTCTTCCAGTGGAATCAAACCATCGCCAGTCATATCCT  
GAAACGGTTATGCTGGTACCCTGAACGCACCATCGTGTTCGATAAGAAGGGGATCAATGA  
GAAGGATAATGTGTAAGACCCTTATCTGGTGAACCTCCTGTCTGCGTTCATTACCCAGGA  
CATGCGACAGAACTACCCACCCATTAACCAGTTCTCGGTTTCAGTACGGGGGATTGGAGTA  
CAGCCGGTAGGGAACGACCAACATTTGGGAAGTGTTATTTAGGGGGGATTTGAATCTCTT  
GAAGGTGTGCGACAACAAGCCGCCTTGGTGGAAAGTGACGCGGTTAATGAACAGCCGGCT  
GTACGGTAACCTGGCGTCGAGTAAGATCCGGTGGTTCGTGACCACCAACCCTAAGGACTT  
CATTGCGTATCGGGTTCATTTCAATATGGATGGGTATCCCATTGTTATTCCCGGGAAACA  
AGAGGACATTACGTACCTCTTTAGTCAAGGCTTTTACCAAGGGAAACCCGAAGGCGCCTT  
TTAGAACCTACTGTACCGAACCCCTACCACGAAAATCACGGATCATAAAGAACTCTTAGC  
CTATTGCGAAGGGTACATTGATAAGGAACCGGTGGAACAACCTGTACGAAGGGGCTATTCT  
GCAGATGCTTCTGAAGGACGCGCGTAAATTCGGAGGTCCGCTATGAGCATGCCCTTAAGT  
CGGTATAACACCATAACGACCCGACTAATCGAACTCTACAACATTCTGAATAATCGGTCC  
TTCGATGTGTGGGTAACGTCCGCAAAGCTCATGAGTTTGGAAAGAACTCCGGGATCGGGAA  
GAATACTCCCAGGAGGGGTTTCGTTGGAGATCCGAATTACTACAACGAATACCAAGTTCGA  
CGGATGAGTGTTCCAGGATCATTGATATCCTACCTAACTTGTCCAGTGAGAAGGATTTG  
GGATTCAGGGAACCTCAGATTGTGATTCCGTTGATCTACGAATCCATTCAGGAGTACATT  
TGCCTCTGGTGTGAACTCTTTAAGAAAGCACCGGAGTTTCCAACACCTGCCATTGATGAA  
CTCCGTAGGCTGGAACCTCCTGGCGTATACCCTCTTTAATTTCTACAAACGGATTAAACCG  
TACCTGGATAAGAAGAACTACGGGAACTGGGGGGTGTATGTTCAAGAGACCGATAAACGG  
AACCTAATGCAGTTGTCAGCGCTGTTTAGTATCAACGCCATGGGAACCCCAAAGCTGAG  
ATCAGTTTCGTCAGTCATTTGGATGAACTCTTCGGGGACGATACGTTGAACCCGGGTCTC  
TCACTCAGTGAACAGCCGTATATCACGAACAAAGCTGTAGCGGATAGTTTAGCCACGCAT  
GATACACCTGAGGATCTCGGTCCTTGGTTGTTCAATAAACCGACAGGATTACCGTGAGTA  
TGGAATTAGCACGTCCATTAGCTAACTTAATCGCCTTAGTAAACTCGGTGAATACGCAAC  
GGTCGGATAAGAAGATCCGACTGTTTGCAACGATCATTACTCCTGTGGAACAGATTGAAC  
TGATTATCCCCACGGGGATGGCTCGGGTGTGATGATTTCAGCGAACTGTTCCGATGGCT  
GGCGTATTCAGGGCAACTTGCAACCCGGGGTTTACGTGAACCGAATCATGCCCTATAAGG  
ACAATCTCTTTATTGAAGTGGTCGAACGTCAAGGCCTTCATCAAACCATGAGTCCGGTCT  
GGTGTATCCCCCTGAGTGACCCGAACCCTGAGATGGGCGGTAACAGTGTCCATTTGGCTC  
ACCTGGAAGGTAAGGACAGTATTAACCTGATAACGGTTAAGTTCCAGATCATTGAACTGG  
GGTACGCTTTGCTGAAGAATGAGATGGTGTCTGACAAGCACTTAATGACCACCTTGGACG  
ATGCACTCCACTACCAACTACCAAATACGGTAAGCAACTTCAGTTGACGGGTAAGGATG  
CCTTTAGAGGGGTGGACATTGAGCGTCCTATCGATAACCCTCGGGTCTTTAAGTTGATTG  
ATATACCGTCTGCGGTGCCTTTAACCAGTTAGGGATGTGGATGCAGACCCATGAGGAGT  
TTGGGATCTATAACCAAGGCTTTGGGATGTATTCCAGAAAGGCCTTTGGATGATTTACC  
CGCTCTTCAAGATCGGTCCGTATGAGAACGGTAAACGGGTAAGTACTGAGTATTTATCCACTAC  
CGCCTCATGCAGTCCCTACCCTCCACGCCACGTAATTTACCCAGGACCCGGGGTACAACGA  
TTCTGGCAACCGGTACAGGCCGTAATGTAGATGGAGCAGACATTGATCGTCAGAATGAGG  
GTACGGGTAAACGGTTGATCAGTTCGGATGCGGTCATGGGTGAAGTGGGTAACCTACTACG  
GTAAGGGTCAGTCAGCATCGACCCGTCCTGATTCCCTCTCCGAATACCAAACCGCTAAGC  
GGAGCAGTGGGGAGGAGATTATACCCTTTGAACCGACCCATAACCAATAACCTCTGTAAGC  
AATTATCTGTGAACTTTTACAACGATGGGTTCGTTGGAAACGATTTCAGTGAATAAATTCGA  
ACAGGGACTTACTAGAACCAGGTATGCCTGTACGGTCTTCTTTATGAGTGGAGATGATC  
GCTTGAAGTACAAGGAGGGTACTCTGATTGGTGTTCGTAAGTCAATGAAGGATACGG  
AAAATCCAGCTATTATCTTTAGGGAACATTTCTGCTTTAACCCTCTTCTTGAATGATAAGG  
TGTTTGTGCTCCTTAGGTAATTTATCACTTAATGTATTTATTGTATTGTAAACTGGCTG  
ACAAGCGGGTGGGGAAAGGGGTTGATTTCTTAATAAAGAGTGGAGTAGTTACCGAGTAAC  
TACGCCTTCTTGTCTATCTTTGATCTTTCTCTATTCTCTTTAGATCTTTCTTTTCAT

TTATACGGAATACAGAGAGGGAAGAGAGGGAATACCTCTTATACCCCGGAAAAAAGGGG  
GGATGAGGAATAAGGAGAGAGAACCGTAGGTTTATCAGTATTCCAACACGTTCTGATTAA  
TACATTCAGCAAGCAGAGCTGAGAAGATTGCTCTGCCATTACCGATTCACTACCGGAGTA  
ACTTCCATGACTGGGGATTTTCGACCATCTCAGTAACCGTCAACTGGCAAACCTTACTGGCG  
GGTTACCATTTGTACGGCACTAAGCGGACGAGCGACATACCGGGGCCTGTAATGCTGAAA  
CTCATCCGAAAACGCCTCCGGGCATCTGAACCTCTACCTGATATCATTCCCTGTCTCGAC  
GACGGCAAAGACGAACGTGTGCTCGGTCTGTTTGGTGAACGCATCACGGTTAAAGGAAAA  
GAAAACCAATGACACATCGTGGGAATAATGAAATTAAGAATACATTTGATCTCTTACACG  
TGCCTGTAGAGGATCAAACGAATGCGGGAATATTAATACGGTGATTCGAAAGGGAGGCGA  
AGATTACCTTTGCTAAGGCGGATACGTTGTTTGTGATGCTGGTAAGGCGTCTAGCAGCGC  
TTAGGCGAGGCGATCAGGTAGAAAGGAGTACCGTCGAGGCGGGTATGGGCAATCGGCTCT  
ATTGGAAGCTTACAGAAGCGTACAAAGTACTTCAAGATAAACCCACTATTGTTCCCTCCGT  
TGTGAAAAGTCCCTGACGAGTTGGAAGAGGTCTTCTTAGCCTTTACGAAGACAGAACCGT  
TGTATCAAGAAGGCCCCCGGTATTACGGGGCGGTGTATGCAGGTGACCGGTTACTGACCG  
CACCACCGCCTGTAGACTTTGAGTCATGAAAACAGTAAATGTTTACGGGTATACGCACTC  
ACTACCCCTTACTGACCTCCCTACCTAAGCCGAGCTTAGGTAGGGGGTGTATACCGCA  
TTTGAGCTATAGGGGAACTCAAACCTATATTACGGCGTGATTATACCCAATGGATCATT  
TAGGAGATTCGGTTTATGCATTACCAAATGGTGTTTGAACAAGACCTATTGGGTAAAACC  
CATAACATGACACCGGTCTGTTTACGTTAACGGTGAATCCAAACGGTTTTTACCACGTTGT  
TGGATCATAACGAATCGGTGTTGTATGACGTGTACGACGGACACCTGGTGATTATCCGTG  
AAACCAGCGAGGGGGAAGTGGAGGAATACCTAAGCGCTCGGTCTGATGATTACCAGACGT  
TACCGTTGTTGGTGGTGATTGCGTGCTATAAGCACAATAAGCGGGTGGTGAAGGTGGGGC  
GGAGTACCCATACCCTGATGTTCCACGACAACAAGGACGGGCGGTTTGAAGCCGTATTAG  
AAGCCGGTAAAGTCACCCTCCACGATAAGGAGGGGTTAGTCTTTACCCAAGACGGGGATT  
ATTACCTGTCTTACCAGGAAGAACACGTGGCGAATATCATGCTGGAACGGTTGAATCACA  
GCTTCAAGTTCTTTGGCGAGAAATACAAGGTTTCGGTTTAAAATAGGACGGAACCTATGCGT  
ATTTCCCGCTAACGGAAGTCTTTGCAGACACTGAGGTTTCGGAATATACGACTGCGGTTGG  
ATAACCTAACGATTACTCAACAGAGCTGGGATCGTATTTCGGGATCAGCTCATGGACCTGT  
TAGAAGATTACCCAACCTACTCGAAGTTCGATGGATCTACCCATTAAGGGGGACT  
AATGGCGTATCAGGAATATGGATCTACTTTCGTTTCACGACGGTAAAGTCTACCACCTCAA  
TGACTTCCTCCGTCGAAGGGAAACACTCCCCGTTAAAACGGTTCCTTAAAGGACTTTGA  
ATGGCGCCTGGCGTATGCCGTTGAAGAGGATAAGGACAGGATTAAGCGAGCGGACTATTC  
CTTTCCGTTGTTGATTACGGAATGGGAAGGGGAGTGGGTGATCATTGATGGCTGGCACC  
GTTCCCTTAAAGCCATTGGGATGGGCAATCCGCCTTGAACGTTACGGTCAGTCCAACGGA  
CTGGTTTAAAGGTAGAGGAAGGCCCTTTAAACTAAAGGGTTACCGTAATCGCGTTACATA  
ACGTGAGATAACCCCTACCCCTAGCGCTCAGCCTAGGGGGTAGGGGGTCTATTATTATT  
TTGTCTTTACATGGCGTCCGATTCTTTCACGACATCACCATTCTCATTAAAGCGTTCTTG  
CAAAGAACGTCTAAAGGTGGGTTTACCATTAATGTCATGGACAAGCCCTAACCCGGGATC  
AAGATCATAGATAAAGAACCGCTTCTCAGGTGAACACCCTTCACCCAGTTGTTTACCAAT  
GTAACAGGTAAAGTCATTCTTATTGACGTCTTCGCCACATGAATGGTAATGACACCATC  
CACTTCGTTGGTAATCTTCGTAGACGTTTCTGTATTGACTTACCAGAGACTTCCCGAGC  
GAAGTAGACCTCAGACTCATCATCCAGTTCTTTTAGTAGTTTCTTAGCTTCAGAGCTCAA  
CTGGTGAGGTGTTTCAGAAAGAAATACCCCGCGCAATCATAAATGACCGGACAGTGCGGAA  
CAGTAATTGAAGTTTATCGGACTTATTCTCCCCAGGGAGTTTATCGAAATTCTGCAACGC  
CAAGTAATAATACCCGTACAGAATGATCTCGTGACCTTTGAGTTCCAATTGCCGTACCCG  
AGCGAACATCTTATCCCGGTTGTCTTTATGGTCTTCAATCTGGTTAATCACCAGGTACCA  
CCCATTCTTCCGGAAGCAGTCCGCAATAGCGGTTACAATGTCTACGCTTTCAGTCACCTG  
AAAGTCCCGGTCTTCTTTGTAAGTTGGTGGTTACGGCCAGCTTGTAGATCCGACGAATCAC  
CAGCTCCATGGCATCCTCAGCCGATTCATACAGGATCGTTGGAATCTTAGCCTTATTCCG  
CAGCATGGGTTTGTGTAATCCCCGCTGAAGCAATCAGGTGAGCCATACCGAGAGACTT  
ACCTCGGTTTCGTCATGGCTTCTAGGAGGTACATCTTACCTCAACGTAATCCTCCATCTGG  
TTCCAATCCTTGAATGAGACCTTGAATACCGGTTTTAATGATCCCTTCTACACTGTTCTC  
CGTCTTCGCCATCTCGATGAGATCGAGCATACTTTCCGGCGTGCTGTATTGACGGAAC  
CACCACCTCGGATTGGCGTTCCCCATACGCGTTATTCACCCGCTCTTGGATCAAATCAAT  
CAATTTAGCAAAGTCTTCGGGTTTGGTATCAACGAGGTCCTTACACAGGACTTCTATCAT  
AGCTTTCTTGAAGTCTTCTCGAAGTCTCATCTTCCATACTGGAACGAATCTCTGTGAT  
CTGTTTATACACCAGACGACGAGACAGTTCCTCTGTTTCCAGGTCTTCCAATCCAACATT

CACCGCATCCCTGAGACTGTCATCATTCTTGCAGAAGATCGCTACCCGCTGCATCAGGAA  
CGATTTTATAAGTGGATCGTCATTGGACTGGTCCAGCAGCCAGCTGATTGAAGACCGGAT  
GCCGTCCCTGACACGTCGGTCTTGTGACATCACATCGGGATTTGGGGCTGGGAGTTCTTC  
CAGTAAGTCTGTCAGTTCTTCGATCAGGTTAGTGACTTTTAGTTTTTTGGCCTGATAAAT  
TGCTGATAACAGTTTTACTAACACCAGCAAATCGTTCATGCTAACCCTGAGAGTGTA  
GTAGATGATTTTTAAATACCCTAACGGTTTACCGTTCGAGTTGTATATGGTAACCGGGGA  
GTTGGTTGACACCCTGGTGGCTCAATCCATCCCGCTCTGTGGAGTGAAAGAAATTTCTGC  
ATACCATGACAAGATCACCTTTGGTGAAATGGCTAACTTTGTAGCTTTGCAGTATGCGGC  
GGCAAAGCCTTTGGTGTGAAATGCCTGACCCTATGGCGTACTTTGGTCATGGGTATAA  
CGCAGGGATGGTAGCCGAAGCATTTAATGGGGTGGACAGTGATGCAATAGCCACCCTCCT  
TCGTACCGCCAATCATTTCGATCGACGGTGAATGGTCAAGTGATTCTCATTGGACTCGA  
GGTAGGGGACCATAAAGCCACCCTAGCTGGGAGAACTTCAAGCCAAAACAGTCTCAAC  
CGCCGTATTGGAAACACTTTATGCAAGGGTCGGTATTTGGAAAGTCATTCGGTCCCGT  
ACCGAAAGCAGGTTTAGGGGAATTGACTCTGGCTGAAGTGTTCAAGCTGATCCACCTTCA  
AAACCCTGATTAAGGCTGCATGAATTTTATGTGCAGTTCTATTGCGCAACAAACATG  
TTTGCTACTCATCTCGATCAGGATTTAAATCCATGGCAAAGCAACTACGAACCTCCATTA  
ATGGAGACAACAATCTTTTCAGCGATGTCTGCAAGTCCCTCGTAGCCGGTAGTCTTTCCA  
TTATCACCGGTAACGAGAGCTTCGCAGACTTCCGTAGCACTCTTCAGAGCGCGGGCGGTC  
AGGAAGGTTTTCTGGTCAACCGTCTGATTGATCGTTCGCTCCCGAACGTCAGTAGTAACG  
AGAGCGCTGAACTGCACACGCGCTTCAACTCGGCTACTTACGACATCGTCCAAGGTATCC  
TGGAACGCAAGAGCCGTGACCTGATCCCATGGACTGCGTTCGTATCTTCCAAGAAGCCG  
GTGATAACTTCGCCAAGGTGGAAGGTGCTGAAGGCTTCTCGATGCAGAACTTCGAGGGTC  
GTGAGCAAGAGATCCGTGCCTCCAGCCTGACTCTGAACGCCAGAGCCACCTTCAAACCG  
AAGGCGGTGAAGCCCTGTTCCGCCACCGTCCGGTGTGCGTTATCAAGACGAAGGCGCTGAGC  
TGATCGTTCGTGCAGCAGGTCTGGGTACCTATGCGTACGGCAACACCCCGTGGCAATCGG  
CTTATGAACTGCGTCCGATCTTCGGCCTGCTCCGCAACGGCGATATGTTCAAAGACGAAG  
CCCTGGCCGTCTACCCGGTATAACCCGGACGTTAACGCGAGCGAAGCCCTTGCCTTCTTCG  
TGGCTGAGAGCGTCATCGCCCCGCGTCTGTGAAATGCGCGCAAGGTGATGCCTACGGTC  
GTGGTGAGCACGAAACCCAAATGTTGGCGGTTCCGGTATCGATTCCGAACCTGCTCGCCC  
TGACCCAAGCGCCGGGCCAACGTCCGTGGAATTCCACCGACGAACCTCGAATCCCACTCCA  
TCTCCGTGTCTCTCATCGCCGCAAGCGGTAAGCTGGACGGTACTGATATTTCTGTTCTTCA  
ACAAAACCGGTGCGATGTCGAACAACATCTTCGCTCCAGCCAACAACGCCAGACGAGCG  
ATGAGCGCCAACCTGAACCTGCAAGTCAAGCAACTGCCGGGCTTCTCGGTGAGCGACAAAG  
ACGGCAAAGTGGTGGGTGAAACCATTTTCGCCAGCTTCAAGTCCGCAGGTTGCGAACCCG  
TGCTGGCCTTCCGCCTGTCTGGTAGCTGCCAACGCCAGACCAACGAGTTCAACCTGCAAC  
CGGGAACCTGTGACCATCACCCCTGTTCCGCAACATCACTACCGCTGTGGTCACCAAGATCG  
GCTTCGCTGACAGCACGGTTCAAGCCCTGATGCGCTCCTTACCCGAAGGTAACTGATCG  
GTGCTATTACCACCCAGAACGTATCGAACACCAACCGCGGTAACCTTCGGTTATCGGATTG  
AAGTGTACGATGCCAAGAAACACCTGTCGGTGAACGTCGTTCTCCGATCTCGGTGAAAT  
GCCCGTTCTCGGCTGATGACGTCAACCAGGCCAGCCTGGACTTCGCACTGAGCCCGATGT  
CGGTGGTGATTAACAACCAATGCTCCGCTCACGCTTTCCAAGCGGCTGAGCAGCACCTCG  
AGTACGTCACCTCGATTACCGGTCAACCGGTGGTGGCCAACGACCAAGGTTCCGGAAGTGC  
TCGCGGGTCAGCACTTTGTAAGCCCGATCGCCATCAACCGTAGCTTCAAGCTGGTTAATG  
TGATCTCGGCTAACAGTTCTTCGGATGTGTTCTGTGTCGGTGGCATCCGCCATTACCAACG  
AGATCGCTGATATCGTTGCGGCCCTGAACACCAAGTCCTTCTTGGCATCCATTGCGGAAT  
ACAGCACTGGTAATAACCAAGAACGCCTGGACGGTGGTCCATCAGAAGTTGAACCGTT  
TCATCTTCCGTTCCGGTGACGCACGGACCATTGGTCCGATCACCAACCTGAAAGTGGTTG  
AAACCAAGTTCGACAGCATGATCGGTAAGATCTACATCGTTCCGACCAACGATTCCAACA  
ACGAAACCATTAACCCGCTGGCGCGTATTGGTGTCTGGTATCGAAGGAGAACATCGTTG  
TACAGGGTAACATCACGCGTGACAACAGCGACTTCGGTGTAGTGATGACCCTGCCGAGCT  
ACAAACACTGGCCGCTCAACGTGGTCATTGGTTCTCTGGTCATCGAAGATGCTGAAGACC  
TGCTGAGCGACAAAGGTCTTATCAACCAACTGGCCGTCAAACGTGTCAAGGTTGAGAACA  
TCGAGCATGCGAAACCCGACCCAAACGCCAGTCCGTGAGTCTGCGAATGACGGGCGGCT  
TGAGTATCCCGAGTTGCCCTAGTAGGTACCTCACGGAAATTGCGTGTACCATTAGCCCTA  
CCCCTCCCCTAACCGGGAGTGGGTAGGGTTATATTTGCAGTTATACCGTTTATTGGAAT  
ATTTTGAACCTACATTATCCTTGGGTACAAGACAATAGGGTATCTGACAGCGCACCAGAT  
GATCTTGACACTAACTTGAGGATCCTCACCATGAATGACGTTTACCCTACTGGCATTTC

CGGCTGACTTATGATATCACCAATATGAGCAGCAAACAGATTATTGTCAAGGCGAAAGGA  
GGTTGAATTACCTTATTCGCAAACCACTAGAGGCTTCGTGGTATCCCGGGGCGATGATC  
GTTATCAAATTCGATCGTCTGTATGTCGGTGATTTTCAGTTTTGATAAGTCAGCAGCGCGG  
AGTAAATTCGATCGTCTGTTGATTGATAAGATCCAAGCTCACCTGAGCTTTGTGTGAGC  
AAAGCGTCGCACGTGGACGTTCCGGCAGTATCATGAGTTCGGCGTCACGATCAAGCTGAAC  
AGGGATGTGGTTGAACACCTGGAAGGTGAACCGATCCACAGTGATATCCTCGGTATCACG  
TTGTATAACCGGGAAGAGAATACCGGCGATCTTTATCCCCTGGATACGCCAGACTACACC  
CTCAATGACCTGATGAAATGGGGAATCGGTGAGAGTGATGAGCCGGGAGGTCTTCATTAC  
TACGTGTATCTGAACGATCCCCTGAGTGTTCAAACCCGTTGTACACCAATGTCATGGTT  
AACCGGTAATGGTCCCTACGGTCCGGGAGATGAATAATGATCATGGGTTGTATGTGGGA  
TTGGTCTGCGGTAATTCACAACCGAAGAAGCTATTCTACACCTTTGACGATCTCTGCGAT  
GAAACCCTGGGTTTCTGGGTATCTTTAAGACCAAAGCAGAATGTGAGATGGGAGGGAAAC  
ACGAAACGGGCCATGACTGGCGAGAAGAAAGTGGTTGAACTGAATAAAACAACCTGAGTTCA  
GCCAACAACGAGATTTCCAAACTGAAGGACTTGGTAGACGAGAATGTCCGTAAGAGTGTT  
GACTTGGGTATCGAGCTCACCCACCTCAAAGTGCTCATCGGTTGTAACCTCATGCCAGCG  
GGATATGAACGTCAACTGGAGGTGAATCGGCTGCAAATCAACAATGATGCGACCAAAGTA  
CGGGGTGAAATGGACAAGATCTTGAGTAAGGCGAATCTGGAGTTCACCCGCCAGCGGGCC  
AGCGCTAAAACCTGTGGAGAAGTGGCTAAGGCGGTTGGGGCTATTGCAACCGTGTTTGCT  
GCGGGGTAGAACTATGTACTTCCCGATATGGTAGGTAGGTAGGATGGACCGGCTACTCA  
TTAAACACATTGAAAATTCATGCCGAAGTTCAATAAGTTACTGGTGGATGGATTTTCATC  
AGAAGGAGTTTAGTAATGCGTTAGGAGTGTTTCGATCATTCCATGAGGGCCATTCTGAAAA  
GTGTTGAGAAACGGGGTGTCTTTTACAAGAAAACCGTACGAGCTTCACCTCGGGAGTTCA  
TTGACTACTTGATCAACAGCAGTCGTAAAGTCTTCGATGTGCATAAGGAAAGCTTGTATC  
CGGTTAAGATCTGGATCCAGTATAAGGACCGAGGGGGTAAGTTAACGGACTTTTACACCT  
ACACGATGCTCCCGTATACGGATAAGTACGGGGATCTGTGGTTGAGGGGATCGTTGTATA  
ACCCTCAGATCGTACTCGCTGAACAGGGTCTACCCGTAACGAAAGAGAACGCCTTGTTCA  
TGAAAGTGCTGGATTTCAAGTTTAAGATTGGAATCGAGCATTTCATTTCTGTCAAGTCT  
TTACCGACACAGGGATTGAGACCCATCGTCAAACGGATATCAACCTGGCGGCTAAACGGT  
TCTACAGTCCAACCGGATCCCGGAGGATCAAGGACAGTAAGACCCCTGTTCCGTTGTTGG  
CGTGGTATATCTTTGCGGACATGGGCTTCAGTACGGCCATGGAGGAATATGCGGAGTG  
ACTTCCGTATAGGCTCTCTGGATGCGCTGCTTAACGAATGCAAGGCAGAAGAGCGGTGGG  
AAGTCTTTACCGGTCCTAAGCGTGCTTCGGATAATAAACCTTCGTTAGGTGATTATGTCA  
GTTTGGACATCGGTATTGCGGTACGGAACAAGTCTAGCTGTGTAAGGAACTGAGCGCAG  
TCGGGTTACAGTACAGCTGTGCTTTATTGTTCAATTGCGAACTGTTGTTTCGTCGTA  
ACTTTG  
ATATTGAACGGTTGGATGATCCGGACTATTGGAAGCTGATCATAGGGCGGTGTTCCGTTA  
AGGCGGGTGACAGTGACGAGTACATCATGCGTTTGATGTATGAGCACTTCGATTCCATTC  
GGGAGTACCTGGAGGAAGATTCGATTAAGAAGTTCGCTGCTAAATCGATCGTAGTGACCA  
ATATGTTTGATCTGTTCAACTAGATCATTGCGAACCGCAGTGAGATTGTCCAGACCACCG  
ACCGTGCGTCAGCGTTCAGTAAAGACTTAGCCAGTTTGGAAATTCACGCTGGACAGTCTGC  
TGACGTCTGCCAATAACTTCAAGCAGGATATCAAGAACAACCTCGGAAATCAACCAGAAAA  
AGGTGGCGAGGTTCTTGACTCACAATTTCCCTATTAAGGAGATCGACAATGCACAATACG  
CCAACCTTATCCTGGAACCCACCCCTACGGATGATCCGTTTCGTAGACTACAGGTTGGGCT  
GCATGCCCCAACCAAGGTCTATACCGGTGGTGGTAAGCGTAAACGGGGTGACTTCGACA  
CGTCAGATAGCTCAACCTTTAGCCACGCGTCGCTTCCCTTTGTTTCATAGTTTTTTACGGG  
TTACGAATCCTAAGCCTGATGCACGGGGATTCTTAATCCAAGCATTATCTGATCATT  
ATCGTACAACGGGATTAGACCCTCAACTTAAAGAACTCTACGAACTAACAGATAAACGCC  
TCAAGAAAAGAGAACCATGGCCATGGCAAACATCCTCCGTCCATCCGGACAAGTCAACCG  
AGGAACCGTCTCAATAGATCCTAATGCGCCCATCCCCGGGGCTTCTGGTACGACGATGGG  
CCTCGGCGCCCGTCAAGGTATGTACAACCAGATGTCACCCTCCATGCAACTCCGTGGTGT  
TCTCGAACACGGCCTGCAAGGGAATAGTCAGGGTGGGGGTGGGGGTTCATCCATTGGGA  
ACGCTACGGTAACTCCCACCATGAAGACGCTGCACTCCGGGAGATCCGGGAGAATGCGAA  
TTCTGAAATCGACAGTAACCAACTCTTCTTGAGAGAAGTTTTCCCGTGCTGGGGTGGAAAT  
GATTCAGCAGCTAGGAAGACGACAAGGGGCGTTTCGATAACGAATAGCGGGAGACCTTAGA  
AACTTTTCGTTTTGTCCCAAACCCCGGTTAAATGTACATTCGGGATGAATTCGTTAA  
CAACCTGAACAAGTACCCTGAAACCCCTCCGCTTTATCTCAACGGCCTCTGTGCCGATGTT  
TGTCCAGCGACTGATTGTCTGGGTAAACAAGGGTCTTCGGAGTTGACGACGTCGGACTA  
TATGAGATCGGCAGTCTTTGCCATCGGTCTGTTTTAACCATGGAGATGATCTGCTGGTT

GTGCAAGAGTCCGGCAGGTCGACAGTTCACGTATAGGTTGACTCCTGAAATCCAGAAAAT  
GATCGCGAACCTGGAGCATTTC AAGGATACGTTTAGCCTCGCCTGTAACACGTTAGGTTG  
TACGAATCCTTATGGGTCCCTGGTGTATGAGGTGAAGACGTCAACCACGACGGAGAGCCA  
TCTCAGCCACGAAGCACAACCGCCTTCCTTCATTCTAACTTTGGAGCCAACAACCGCGT  
GGAATCCAGAACGATCCAACCACGGAAGACATCTTTGAAATGGTGAGGGAAACGGGCTGA  
GCTGGCCAGACGGGACAACACTAGGTGTATACTCGCCCTGAAGAACCTCGGTTCCAACCCCC  
AGAAGTCCAACGCTGGAATAAGGTCCGGAATGATCTTGAAAACCTGACCGTTAAGAACAA  
GGATGAGTCTGATCTCACAAGTTATTTCCAATACATCGGTAAACCCAAGCATTATCTGAT  
TCCGGAACCGGATTGGAAGAGGATAAAGAAGGTTTATAAACGCCACCCTGAACAGTCTCC  
TCAAGAAGAGAGTATCCTCCCGGGTTGTTTCCGTATTGTGATTATTGACCTGGAAAAGGA  
TAACGGCTGGTTCAGCACTGTTGTAAGGAGTCGTACACTCGATATGGTGACTGCTCTGTC  
TAGCCCTGAAAAGCTGTTGCCGTTGCTGGAAGCTACGGAAGACGCTAATGACGTGGTGGT  
CCTGCCGGTGGAGAAGGTGGTAGAAGATACCAAGTCCCTGGAGATCACGCTGGAGACCTG  
TGAAGAATTGGAAGGGATCCCAGTGTTACGGTGTCTGAAGGCATCGTCAGCGCGACGTC  
TAAGAAGCTGATGGCGGCTGTGGTGACGACCAACACCGCCCTGAGTAAGAACATGCCAGG  
GACCAACGCCACGTCGTTCTCCGCTACGATCTGGGATACCTTCACCTGTTCCGATGCTCG  
GGATAAAGTCCGACTCAAGGACTATCTCCCGTTCCTGTTTAAAGACTTTAAGGAGGGCGA  
TCACTCCCTGTCGTATTACCACCGGATGACAGCGGTTAAGGAGTACTTGGATGAAGGGAT  
TCTGGATGAGGAGTTGGGTGAGTTCTTTCCGACTCGTCTCACCGCAACGGTGAATGCGTG  
GTTCTTCAGTTCCCTGGGGTACGAATGCCTACCAAGCTCACGGAACCATCTGTCCGTAAC  
CGACATCGTCGAAGACTTCGACGAGCTGGATAAGATCCTGGAAGAAGATCATCCTGAAGG  
GTACCGACGGTTCAATGAACCGGGAGGGCCGGGTAACCTGACGGAACAAATGAAACT  
GTTTCGTTCCCGATGGGAAATACGATGGTGTGGAAAGTGAAGAGGGTGTACTAAGGCAAGA  
AGCTCAGATGAAGTTGGAGTTACCGTTAGAACGCCGCTTCCACATCACGGTGATCAATAA  
GCGCAATGGCCCGTTGCCGGATCCATCGGGAGAACCCTTGATCATTAAAGCGCAGTCGATT  
CCCGGAGTACTTCGATCTCATAGAGAAAGGATTCAAGGGAACGATGAAAGAGACGGATAA  
CCTGGACGTTATTGATAAACTGATTCAACTCTCCGGAGGTGATCAACTCTGGTTATTCAG  
TACTCAGCCGTCGATATGAATGTCGCCACTCTTCGGGTGGTCAGTCGGAGAAGCCCCTT  
GGTCTGTGGATCTCTTCTGAATACTTTATTTAGTCGCGATTGAATTAATAACTAGTAAC  
CTACCCTAGTGGATCTCCACTAGGGTAGGTATTCTTATTGGTTTATTTATTTAACTTAC  
AGTTATTTTCAGATCTAAATAATCAGGGTGAATAGCAACAATCCTATTAATTGTTAACTG  
TTATACTTCCCATTTCCTACACACGAACGAACATTCACACATGACCACTTCCAATGACAA  
AGCCAAAACCACCAACAAGTCCCTTACCGGTGAGCGCAAGGAAGGTTTCGCAGCCACAAC  
TGTCGCCCGGGATCGTCGGAGGCGTCCTAGGTGCCGCCGCTCATTTCATGGCACCAAAAA  
CATCGGTTTCATCCCTGATCGCCGGTGC GGCCGGTGTGACCGTCGGTTGGGCGGCGGGTCG  
TCTGGTGTCCCCTGTTCAACACCTCGGTACGCCAGCTACCATTCTGGGTAGTGCCTGGTC  
GGGTCTGCTCGGTGCGTCGATCGCCATCACCGCGGGTGTACTGGCTGGTTCCGTAATGGG  
TGCTGCCCAAGAAGCCCTGCCGAGCGCCGGCGAGTAAGTTCTGCCCAAGGAGAAGGTTA  
TCCCTTCTCCTCTTCTTTTTCAGTAACCCGCTCAGCCAGGAAGGTGTTTATTATGAAATCC  
AGCGGCCTGCTTCTTCTGTGCGTTGGTGGTATGTTCCGGCTTCTTGTTCGTGAACGAGAAC  
TACGGCCAAGAGACTCAGGAAGATGAATACCAAGAAGTGATCTTGGGACATCGTATTGCT  
CCTAACGGGCAAGAAATCCTGGTCTACCAACACTGAAGAACCACCCCCCGCTTCCTTGT  
CCTGTTTAAGAGGGATGAGGAGGCGGGTCTTTACGTCTCTTTCAATTTTCACATAGGGA  
AATACCATGCTCACGCCAGATGAAGCGAAGAAACGTCCGGTAAGAGTGGCTGAAATCTTT  
AGTCTGATTTCCGAGGCTAATCAGCTTCTGGTTAAGGTCTCAGCCTCCGCGAATGCTAAC  
AGGAGTGAGGAGATGTTTGC GTTATCCATGTCTCTGCTGGAAGAGGCGGACACCAAGGTG  
AATGCGTACAAAAGGAATTCCCAATTGTCTCTCCTTGAAGTATAACCGTTGGATGCAA  
GACGGGGTGAATTCTGAGGGTGGGGTGAGTAATAAACAAGGGCTTCTCAACCCCCTCTC  
TTGACTGAAGACAATCAGCTCTCCCCTGAGTGGGTGACCTGGTACAGTCAGGTTATGGGG  
TATTCCCATTTCCATCCCTTGGAGGTGGGTGAACTTCTGTTGAATGCGTATCAGGACCTT  
CCTCCCTCCGAAGTGTAAGGATTAACGGCAAACAGTCTCCCCCTTAGGGGAGACTTTC  
TTGAGAAAGACGTATGTTTAGAATGAATAAGGGTTGTTACCCTACCGGAATAAATCCTAG  
TGGAAGTTTCTGAGTCAAGAGGAATTGTGGAAACTCCCAATGGGACTTATGTAACCTC  
CCTTCTCACGATCATCACGTCTATCAACACGCCCGTCTGTTGAAGTTCGAGATGGTCA  
ATGCTGGCTGGTCACTGATCCCAGGTATATCTATTCGCTTGAAGACTTCTTTAAATACAA  
CCTGCTCTACAGGAAAACCGCGTGAAAAAGACCTGGATGTTGATGTCGCGTAGGAGACAT  
TCACAGAGCAGTATGGGATTTACCTAGCGAGTAAACTCGGCTCATTATCGTTGATTAAA

AACCTTTTGTCAATTAATCCACGTATAGGACACCGTTATGTGCGAAGAAAATGCCGCGGGCC  
TTCCGTAAACTGCACCTGGAAGCCTTGTACACCTACCTGAATGAAACCACGGGCGCGTGT  
GTCATCCTGGTTAACACCGACGCCGGCCCTGTAGTGAAAGAAATCGGTCAAGGGAACCCC  
AGGGTCTTCTTCAACATCGGAGGGTTCGCGGTGAAAGTACCTTTATTTCCATGAGGAATAC  
GTTCAATTCGAATGCCGTTGCCAGGGGAAGGTCTACGAGCTCTTCATCAATTATGAAGAT  
ATCTTGGGTGTGCGGTATAACAGAGACTTGATTTACCTGGGTGGGGTGTGCCGAATAGTA  
GGTCAGGATGAAGACGGTCGGTTGATGCTCGCCCCTGGTGAAATCGCTCCGCCAGAACAG  
GATGATAAGAAAAAATCCTCCGTCCCCAAACCTCAGAACGGACACACCTCTACGTTCAAC  
GTCATTGAAGGCGGTAAAGACTAACCCCTCACTATCAATACCCCGGTAGGGATAACCTA  
CCGGTGGTTAAATTATTCTGTTGAGTGTATCTAATACGTACATTGACCAGAATCATTTTG  
AGTTTCATAAACACCTGAGGTAATCCAAAATGCTACCGATTAAATCACGGCTACAAGAAA  
TGATCATCAACGCCCAACCCCTCCCCGGCGTTGTGGATGACATTTACAAAGGCTACGAGG  
AAGTTAGGGTGTCTTCTCCAACCTTCGATCGGGTAATCACTCAACTCCCTTTTCGATAAGG  
ATATTCTCAATCACCTGCCCGGGGTGAAGCCAAGACGGAGGACTTCTTCTATCTCCACA  
CCATCTACCAGGAGCAGAACAAAGGCGCCATCCATGGCTTCGGAGAAGGGTATTCAGGGA  
ACATTCGTTTCCGGATTAAGATCGTACGGAACACTAAAGGGGCCATTGCAGGGCTGACCG  
TATGGACTCTGGGCTGGGGAATGAAAGATCTGGAACGTGATTTCAAGAACAACACCTGT  
TGCATGGGGGTGTGGATTACAAAGACGAACTCCTGGGTAAAGTGGTTCGTCATATTGCAT  
TGGTCAAACCTCTTCTACATCGAAGACATTTAACATCTTTCAGAAGGAGTAACCCGCCCTG  
GTAACAGTTCGTAAGGAAAGCAAAGAACGGTCTCCTCTGTGCGAGTCCCATCGTAGGCGAA  
CGGGATTCCGTTGATTTCCATAACAACAAGAACACCTGGAGAATGGGACATATCGAGTT  
ATCGAGTACGACGGGGAAATCAATTATTGTGTGTTAGACTATCTCGTTGAATCTTGGTAA  
AGCGAGGAAGAACACATGGAATTCCTCGATAATCTACACATGGACCATCTGGCCGAGAGA  
ATAGGCGAGCCATACTGCGAAGACTTGGGAGAACCGTTCACCCAAGTCTTACATGACAAT  
TTCAGTGACCTTTTACTTAACAACACGAGGGGGTGGTATGAACACGTTTTTACATCATT  
AGGTCGACCAACGTTCCACTTCCCACCCGGGAACAATCACTGAGTATTACGCCGAGGATC  
CCTCTTCTCGTGGTTATCCCGATTTACAGCAAGTCTGGATGGACTGTAGCACTTCCACA  
GCCTCGGAAGTGCTACTGAAGTCATTAACCGGATGCTCACTGATAAGAACACTCCCTTCG  
GTGATGGTTCGGTATATCTCCCTCACAGTCCGGATACTGCGTCGTGATTACAACGCAC  
CTGTTCCCGGTACGAAATACGAGTTCGATCTCGCCATTGTGCGAGTTCTCCTACACCGATT  
CCTCCGACTTGAAAGTCAAACAGTTGATCGCTGGGGAGTCGACTTCATATGGGGTGGAG  
GAGATAAACTCGCCAGGACTTTCTACAGCGTCGAAACGAATACCGATCAACCCAACATGC  
CCCCTGGCCGGGTAATAATGAACTAAGTCTTCTACCCCAAGGCATTGGAGGGGCGCTC  
ACCCGTGGGTGTCCTGGTATATCCGCAGTCATGAACTTGAGTTCACTTCCGCATCAGTTA  
AAACTGCTTTGGAAGAGAAAGACAAGGTCATCGGTAAAATCAGTAACCAAAGTTCCAATG  
TGGAGCTTTACGACGAGATGTTTCTAAAGCAGGCGACCGTGTGGCGTGGGGGATCTAG  
TACTCTGGGGGATGTTCTAGCGCTTCGTAATAAGAACTCCGATCTCACCCCTGGAAGAAA  
TCCACCAACAAAATTGTCCTCGTCTCGTTTTCGAATAAACAATAAAGACAGTCAGTCAACA  
GAGGCCCTGTGAGGCCTCTGTTGGTATTTATTTTTCAGTAGTCAAGGAATTTGTAATGGCTA  
GAAAAACCCTGTGTATGTTGATTCGCCATCACAGTACGCGCTGGTAACCAATGACATCC  
AAAAGAGCGACTTCTTTTACACCTGCCCGTTTGAATCGACCGTTGAAGGCCAACCGATT  
TCTGTGCGGTGTTCTACAAGAAACCCAACCCCGAACGCATTAAAGCTGCGTATTTCGCTGA  
CGTCTCTCCCCTGTCATTTGACACTTGAAGCATGGCAGAGCCTGATTGAGGATGCAGAAC  
AACGCGCTATCCTCGTTACTCCAGGCGGACCTATGATTTCCGTGGGGAGGAAATCAACG  
TGTGTAATGGAGAGAATAACGGGTTTACCTTTGGAGCGGATGAATTCGTTACCTTTTA  
GTAAGTACCTCCACGTTAACGTTCCGTTGGGCGCTCTCTACGCCGACTAGCAAATTGGTG  
AAGCATTTGAAGTTATCGCTGTAAAACCCCGTAACTAGGAGGAGTGTTATGGGTACCCAA  
ACGATCAGTTCGGCGAGTAACCCACAACCTTCCATTTTCGTATTTCGGGTGATTTATCGAAA  
GAACGATCAAAGAAGTATTTGAATCGATGGCGAAGAATCTTCAAGATATCCAGCGCCTGA  
AGGGTCTAACGCAAGGGTGTGTATTACCTTAGAGATTGACGGCGAAATAGTCGATTTCA  
TCCTGCATCAGGGATATAACATCAACCCACCCTCTTAACTGCGATTATTATCTCAATCC  
GTATTCACAATGTTGAAGGTATCCATCCCCAGGGAGTCATCATGATGTACAATGATGGCG  
AATTGTGATGGGAATCTACAAAGATGCTAAGTACGGCTGCGAAACGTTGGAAGGTGTGC  
TTCGTGTCGCCGAAGAATACATGAGTGAAGCCGAAGAAACCCCGCACCCCTCCATTGAT  
GGAATCCTCTACCCCGCGTCTACCTCCCTACTCCCTTAAACGGAAGTCATCATGTCTAT  
TTCCTACATCATCCGATTGGTTCCCGTCTCAATAACCAACGAGATGCCGTTACACGCTT  
CTATAACGTTTATGGTGGGGCGTTTGACCATCCCCGCTATATGACCCACTGGTACGACGC

AAAAGCATTACAACGTTCCCTGAAGCCGTTAAAGTGGTTAAACCGATCACTGATGAGGA  
ACCGGGGTTGTATTCCAAGATCCTTACCGGGCGTTCTACGACCTCTGCTCCGCAGGGTT  
GGATCGCCGTATAGACCCGGATGGGTCTACACCTTCGTGATTTACATTATCCGTTGCAA  
TTCGGAGGATCCTTCGGACCCTCGAATGGAAGTGGTGGATCGTTGGGATGTGGAGTTCTA  
TCGGAATAAAACCCTACCCGACGGTCAGTTCAGTTCTATCGTATAACCACGCGGAGGATAA  
CCCCGAGGAGAGTGACCCCGGACGCTTCTACGTCCCAGGGGACAACGAACCCAGTGTCTT  
CTACTGTGACCGATTGGGTGGCGCGCATCATTGGATCCATTGGAACATCATTACCCATGA  
GCTCGAATTCACCCACAAGAACATCGAATTCGCTAAGGATGAGAAAACCCGGGTAATCGA  
ACAACCTGCTGGAACAACAGAGGTGGGTGGCGTACTACAGTGAGAAATTTCTCTCACTTC  
CCGAGAAATCGTTGTTACCAACCCCTGCTGTTGGGGTATGTGTTGAGTAATCGTAATGA  
CAATCCTTCCCTGTCGTTGGAAGAGGTCCATTACCAAGAAATCACCTGGCGCAACACCAA  
ACCGTCTGCTCATCACTGAGCATTCCGTTAATCCTTATTCCACCGATGGAGAATGAACAT  
GGGAATGGTCCATTGGGCTCGATTGGTTAAAGAGTGCCTCCGAGTTCAAGCCGTCAGCGA  
TGATCGCTACCTGGGGGTCTGCTCAGGATTGAGTTTGTGTTGCCACAAGTACTTCTGGC  
CAACGATCTCCCCCTCGAAGCCAACTACCCGGTGTTCACAGCCGCCTTTAAGGAACGGGC  
AGACCTGGGCCACCGGCTAAGGAATCGGTTATGAGCGCTGAACACGCCCAAGAACTGGT  
TGAAACGGTGGAGGAGACCCTTCGTTACTACTTCAAGTTCTATGCGTGGGGTTGTAACCT  
GAAGGCTTCTTCTGGGCGGAGGTAAGGGTCAAGCATTAAATGTTCCACATCCGTTACAAT  
CTATGTCGGGCACTCTTTTTCTAGAGGAGGTAACCCTATGCCACGTGTATCACGTAAACA  
AGCCAACCTTATGCGAGACGCCGCCACAGCGCTGAGTTCGCTAACAAGGTGGGTATCGA  
TCACGAGGTGGCTAAGCATTGGTACGAGGAAGACAAGAAGGTGGGGTGGTTCGACCCAG  
TTCTAATAAAGCGGAATCTTCGAAAAAGAGCCCTACCAAGTCCAGTTAGTCGTTTCAATA  
ATCTTTCCCTTGTAAGGGGTGCTCTCGTAACAGTAACCCTTAGCGGATACTCGCAGTCGT  
CCGTGGCCGAGAGTATAAACAGTACAGGTCTATCTATTCCTTGTGATGGGGTGAATAGGT  
ATGACAATGGCGAACGGACCCCTTTCGATTCAAGTTAACAACCTGGAAGAAAAACTCAATG  
AATAAATATTGTGATCTTTATGACGAGTTGGAACGGTTTGTGGGCTGGTTAAACCTGTT  
GAATTTGGACTCCAACCTGGATTTAAGGACCATCAGATTATCGGGAAGTTGAGATCTGTT  
GGTCTGCACTTGCCGCGTCAATCGGGTAAAACGACCCTGTTGTCCAAGTGGTGTTCGAAA  
CACCTGACGAAGTGTTCATCGTACACGGGTCTTCTCCATGGTTAGAGGCTTTCAAAGA  
CTTTCAAACCTTCCCGAACTCCCCCTTGGGTTTCGATCTCCAAAATACGAGCCAACCAA  
CCCTTGCTTACGGATCACTCGACCCTGAAGAAGATTAATAACGTGGTCTGCTATGGTTCG  
TCGGTTATTTTCTCCTACTGTGGACTCAAGCGTAAAGACTGCAACCAATGGGTGGCTGAC  
ACCCTTGGAACCTGAAATCGTGGTGTATCCATTTAGGTTAAGTTTACTCCGTGATAGCTCAG  
TAGGTAGAGCAACTGTTTCGTAACAGTAGGTCCAGGGTTCGAACCCTGGACACGGAACC  
AAACATCGTTACCCCAAAGACTGGGACACACATGCTCGGCACCACCCTCCCCAGATGCC  
CTGCGCCGTCCCGCTCCGCCAGCCATCCTGTTCTTCTTCTTCTTCCAGGGTGGACCGCG  
CTTCTTGACACGGGTGACGGTGTACCTGTCCCTACCTTCTCAGAGGGGTGGGGAACAG  
GACCTTTTCTGTATCCGCTATGTGCAGAGGATAACGTCATGTCGTTTATTATAAAGGTCA  
TGCAGAGGGGTGTGGGAATGGCACCTCCCGTGACTATTAAGGCATTATTGTGGGTCAGG  
GGGATCGGTTTGCTATCTCTTGGGATCCGCATAAAGAACAGCGGGAGCTTACGGTTCGAGT  
TTGCTAATGGGAGAACCTCGCTCCGGGTGATTGATGGGGATCTTTACGTGGTGAATGCGG  
ACGGTAAGACCATTTCCGGTACCCTCAAGAATAAGCCCTTGATCCCCGGTACTTCCCGCT  
CGAACCCCGAGACAACTCTTCTAAGCTCTAACCCGTAACACCCGTGTAACACCCT  
CCTACCTCCTTTACAGGGAGGTAGGAGGATTTATTACGGTATAGCGTATTTTAAACCTAG  
ATTATTGATGCGTTAAGCGACGAGGAATAAATCAATGTTTGTGAAAAACAAATGAAAGA  
ACTTAGCAGTGCTCGTAGAGAGGATGTGTGGAGTTATGACATATTTGAAATGACACTATT  
CCTGATGGAAACAGACTGTGATGGTGGCGTCCCCTTCTTGAACATATACCATGTACAG  
TTTCAACAAGATGCTCTCTGGAGAATCACTAGATCGTTATGCGATTGGACTGATGAATAA  
AATGATCTACGATACTGAAGGCCATGACGCCAAGGGAACCGTAGAAAGGGTTGTGTTACA  
ACGATTGACTGAAAGCGAGATCCTGGAAGCCCACGCCTCCCTCATGATTTACATACCAA  
AGCTAAGGAATTCCTGGAAGACCTCAGTCAACGCTTCCCCGATCACTTCCGGAGTGTGAG  
CCGAGAAGAAACACCCAAAAAGTTCTGCTTTGCGAATAAACCGTCTCCGGAAGGGACGGT  
CAGGGAACCTCGCCGCTAAATACGGTAAAGTTCGATCAGTGAATCCGTAAACTCAAAGCAGC  
CGGTCGTCTTCATGAACTAGCACAGGGGTAATTGGTTCATGTTTTGGAAATTCACGTGTTA  
CAACAAGGACACTTGGGAAGCCCCAACCAATGACCTTGATAGAAGCGGTGCGAACTCTT  
TATACGGGAAAGCCAATACAGCCAGTGGGATATCACTTCGTGGAGAATCTCCACTAAAC  
TGTTGTAAACAATCTGTTAAACAGAAGGATAGCATTATGAAACCCTTTCGAGTACCTGT



TGGACGTCTCAGTAAAGATCGACTGGAATAGCTCATCCGTCATCGTAAAGAAAAGAAACG  
TGAATGTCCCTTTGGTGTGGCTCACTTCCCCAAAGGAACGATCGCGGGATTTCGAGTCCCC  
AACCCAGCGTTTTCTGAAAGAGGACGAACGTGAGTTTCTGCTCAGCGGTACGCAACGTT  
CGAAGCGGAAGTGGAGAGTGTAGTCCCCAACGGACCGAACAGTTGGGTGGCTGTTCTAAA  
GGACCGTACGGCGATTAAAATCGACTGGGCGCGCAAGATCATTAAACGGGGGGATGGTCC  
TCTCCGCGCCGCGCACAAATGACGTGGAGGACAGTCTGTGGAAAACCAGAGCCACCCACCC  
CCTGGATCCTGACACCCTCCTTCCCATTAAACAAACACCCCAAACACTACTACATCGACTC  
GATCTACCATGTTATCTACGGAAAATTGGAAGAGGTTAATAAAAAATAACTTCGCCACCCA  
TCTGAACGATGTGGATAAGTTGATTTGCTGATGTGCGGTGATATCATTTCGTCAGTCAAC  
CTCCTGAGGTGATGGTGTTTACTGCCATTATCTCATCAGTAATAAGAAGTTCCGCAAGAT  
CTTCAACCGTTGTCTGCCGCGTGCAGCGCACCCGGCCGGCGTAAAGAAGCTGAACGTCAGGC  
CAGGATCGAAGCATTTCGTATAAAACAGGACGTTTGTGACCGTTATGAAGACGATTACGA  
CGACCCGGGGGTGTGAAGAAGTGTAGAAAGCCCCTAACCTGAAGACCGCCCCACTCCGT  
CTTAAAAGGAATAACTCCTACGTGAAGGAGGGGATTACGTAAATGCCGTTAAATCACAC  
GTGTAGTCCCCAAGCCGTCTCTAAACGGATCTTCGGTAGAAGCCGAACGGTTTACTTAAT  
GGACCGTTAGCCGTTAAGCTACCGAGAGTGACAGATTAGATACGCCATCACTGTATTTT  
GGAGAAGGTTGCGAAACATAACGAAACACCCTTCAACGAGCCAGCAGCGGGCATGTCCT  
TCAGGTTCGGTGACAACGGGTCTTGCCATGTGGGGGATCACGGGACCGCCATCGCTGGAAA  
AAATAGCGTCGCCACCGCTGCGAACAATGGACACGCTGTTTCTGGAGCCTATGGGACAGC  
CATCGTTGAACGCTTTGGTATCGCCTCTGCCGAAATAAAGGCAGGGATATCGCCGGAGA  
TTGCGGCAGTGCCACCGCTGGAGATCATGGTATGGCCACCGCGGGAAATTACAGTACGGC  
TACTGTCCGGTACTTAGGTACTGCCACCGCCGGAAAGAAAGGGAAAGCTACCGCTGGAGA  
TTGGGGGACTGCTATCGTTGGACTCGATCGCGTTGCGTCTGCTGGAAAGAATGGAAAGAT  
CCACATCCAGTACTTCGACAGTGTAGCCAATCGTTACCGCACAGCAGTTGGGTATATCGG  
TGAGGACGGTCTCGAACCTGGCGTTCCTTACCAATTGGAGGAAAACCAGGAGTTCGTAAA  
GGGAGACATTGCCATGACAAAATTCTCTACAGAGGGCCACTTGACTATACTCTTCCGAGG  
ATTGGGTGTAGGTCTTATCAGCGTCCAGGTCGTCAGGCTCACTAAGGGTATAGGACATCC  
CAAACCCTTTTTGCATATCGAGGGATCTGAAGACAAGGGTTACCGTTTGCTTCATAACTG  
GAGTGAATGGATTGATCAGATCTTTGAGGCTAAGAAAGCTGTACTCTTCATTGAGTCCCT  
CTACCCCTGTACACCCGATAAAGAGACCGTGAAACTTACAGTGCCCGAGGATCAGCA  
AATCCTGGTTAAAGTACGTGAGTGAATATGCTGGCCTTGATGCTGTTGTGTTCCACAT  
TGACACCCTGGGTGGGGCGTAACAGGTATCCTATAACCGAGCAACTGACCCCGATCTCAA  
TCTGTTGACTCATGTTGAGTTAGTGGTCATTTAAGGACGTCAATCATGGCTAAAAAGAAC  
CTTAAGGTGTTCAAGACCCACGGGGAATTTCGATACGGCGGTGATTTCGTCGTGCTCGACTT  
ATCCTCGACGCCAGGGGTTACCGGGGGAAGATATGTGTGAACGCACTCGGTGAAAGTTCT  
GCATGGAATAAAGCAGATCGCAATGAGGACGGTCATCGTCTGATCGACGACGACACTATC  
GCCGTAGTGGCTCGCTCGATGGTTTACGACACTCTCGATTACGGAGAGTAAGTTTTAACA  
CGTTGACCGTATTATATACGGACAACATGTCGTTTTAATCCGCGTCTGCGGGTCCCGCCT  
GAACTTAAGGGTGATAAGGTGTGGTACTCGTCGAGTATGAGCTTGGCAAACCTCATACTC  
CGAACCTATGGACGGTATAGCCGCTATCGTCAAGTCACACTGTTGAGCTATTGACCTGG  
ACTTCAGTCTCCTTTTCGGTGCTGTCGGCGGGGAGTTTCTCGGACGGTGAGGCGGCTTGT  
GAAGGTGCTAAACTAGCGCTGGATGAACACCTAGCAAGTTAAGGGGAGGAGGGACAGCCA  
TCGGTTCTAAGCAGATGGGTTCCCTCCTCCCTCGCTCCTTTTATTTTTTTTGTCTTAATA  
CCGTGTTACTCGACCGGTTTCTAAAGGATACAGACTGTACGAATATTATGTCTTATCCCC  
CGACTTACCAAGAGGTTAAAGCGATGTCGAAAAACAACGATCAGAAGAACCCCTCCACTC  
CTGAGGACGAGAAGGCTAAAGCGGTAACCACCCCTCCGGTGACTCCTCCCGCTCAGCCAG  
CTCCCGCTACCCCTCAAACGTCTCCCAAAGCCTCGAAAGACGAGAGTGAAGAGGATAACC  
AGGACTTCGACAACATTCTAATCAATGTACTGTCGCTCTAGGACAATGGGGAATTCAATA  
AGGAACTCCTTATTGAGATGGTGGAGAAGTCCGTAAGGTTACCCGTCGGGTCTTATCC  
CGGAAGCATACTACATCGTGGTTCGCCGTACAGCGTTATGTGGAATTCGCCAAACGCAAGA  
AGATTGACCTGAAAAACCTGTCGATCCAGGTGGGTAATCCTGAAACCTCGGTAGAACTGC  
GCTCGCTGAACTTCTACAGTGCAATGGAAGGCCTGGGTCCGACCTTCTTCATGCCGTACA  
TCATTTAGAGGAAAGAGTAACACTGAATAAACCCCTAACCCCTAGCCCCATTAACAGGGC  
TAGGGGTTAGGGGGTATAACATTTATTTTTGATTAAGCAAAGAGATTGGTATCGGGACTG  
TTTTCTTCAGGATTGGTCCCATCCTCATTGCCTTCTTACCCTCAGGAGAGGTTTCTTCT  
TCCTCCTCCTTCAGTACCTGCTTCAGAACCTTCTCCTCCTCTATACCTTCCGGTTCT  
TCCTCTTCCCCGGGAGGGGTATTCTCTCAGGCGTTCTGATCCCCTTACGGGAGATTCCGC

TTATCCGCGGCTTCTTGAAGGTCTTTATGAGCCTTATCGATCTTCTTGGCGTGTGCCTTA  
ATGACCTTAGAGTCCGCATCACGAGTCCCCGCAATCAGGGCTGCCAGGAACCTCCCCAACA  
TTCTGACGCTGACTACAACGGCGTTCACCAAGGAAGCAAGACCACCACCCTTACCATCG  
TTAAGGATGTCGTCTAATGGCATCGGGAGATTATAGCGCCTGAAGGCTTCAACCGTGAGG  
ACTGACTTCACTTGCTCGTTAATCGCTGTCACGATCTTGTTATTCCCTTCTCCATCATCG  
GATTCGGGAATACCCAAGAGCTCAGCAATCTGTTTCAGGTTACCCGAATGACCTGCCATA  
GCGACCCACGACTCCACCAGCTGACTCACCGTATCCAAACTGTCCTTGAGCTTAGCAGTA  
GGTTCAACAGAAGTGGGGATCGGGAAGTGGGCTTTAAGGTTAGTCAAGAAGTCAACGAGA  
ATCATTTTAATGAACTCTTCGTCAGACCCTTCCTGTTTCTCATTACTGTCCGGTGACCAG  
AGTTTCTTATTCTCCGAGATCTTGGTCACCAACTTCTTCATTAAAGGCACGTTACGTTGA  
GCATGCTTACGTTCAAAGTCAATAATGAAGTCTGCCAGGCATTCTTGCCAGTTAACGATT  
TGGTTCAGGAGCATCTGGTGTTCAGCCAGGGCCTCAATCTGGAAGTTGTTCTGATCTTCA  
CTGACATCCAACCAACTCCGAGACAGGTGGAAGTAGTTGGCGATCTTGTTTCGACAGCTCC  
GTATGACTATTCTGATCGACCGGACGGAAGATGTTCTTTTCCCTATTGATCGAGCTGAATA  
TCCGAGGCGGGGAAGTAAGCGTTCCTCGCCCGCATTGACTTTAACCGTTAAGGAGTTCTCC  
CTCATGGTATCCACAAACATGGGGACTGACAGTAGAGATGTTGACAGAATACTGTGCAAC  
CGTGGGTTTCGCTTCAAAGAACGCCGCCCTGGTTCGGCGCAATCCCCGCAAACCTCTCTGCG  
TCGTTCTCCTGGAGGTTAATCGTCATTTGGGTGTGGGGTGTAGCCGCCTCCAGGTTCCGCC  
AACGCGTCAGCGAGGTCTAAGGCCGCTAAACGGGCAATGTGCATTTTAGCCATTTGAGTC  
AACGACTGACCAATCCCTAAACGGTTATAGTGCAGGGCCATATAGGTCATCGCTTCCCCA  
GGCACATACAAACACCGAATCCCCTGTCTCCGGAAAATGCGTTGCAGGAAGATCTTGTTG  
GCTTCCCTCATCGATCTCAATACTGATGTTCTTCCCACGACCACTGAGGACTGACTGGATG  
TACCGTTCGAATGATATTCGATTTTCGAGATCTCAATGAACTCGATCATATCGAAATCACAT  
TCTTTCCCTTCTTGGATTTGACGAAGCTGTTGAACCAGGTTGTTTCGTACTIONACCGTTTTTA  
GGGCGGTTAGCAATCATTTTGGCATTGCTTCGGTTACTCTGGTAGTACTCGAAGTCATTC  
GTATTCTTTCAGGAAACTCCCATGCCGAGGATCTGTGAGGAGGATAAAGTCCGTTTGAGTT  
CCATTACTCCCGTTGATGTGAATCGGAATCACCGCTTCACTGGGAACCTTGTAGGTAATC  
CCCCGTCCATAGGGTGCAATCTTCAAGGCATCGACGGGTTTACTGAATTGAAGGATCTGA  
CCCACCGGATTCCGTTGAGGGAACAAACGGTTACTCAACTCGTTAAATTCACCTTCCGTT  
AAGTTAACGGTAGTGGCTTGAGGATCAGCAGGCTTCATACGTTTGCGTTTCCCTACCTTCC  
GCATCCGTATAGTGATGTTGATCATCTCCAGGGTTCGTACGGGCCACCAGAGCGGGTTGG  
ATAATAAGGTCCAACCCTTCCGCTCCCGCTACCGCGGCAACATTCGACCGACGTTTACTT  
TCCTCGAACTTCTGGAGGTACAAGACCGCTGGTTTATCGGTCAGGGTAATATCAATCAGC  
TGAGCCACTTCCCTTCGAGACAGAGTCTTTATCGTCTTCAAAGATATTGAATTCAACTTCA  
GCATTCTGAGAAGAAGGGTTCAGGAAAAGGGATTCTAGATCACTGACGGTGTTATTTGTA  
TTATGACTGGTTCTATTAACGACAAAGACACCTTCTTCTTACCAGGGACTTTACCGTTG  
ACGACTACGAACTCATGACTTAGCATCTCTTTAGCCTGGGTCATGAACTGTTTCGTTACCG  
GCAACATCCCCGGATTGCTCCGCACCGTTGATCAAATAATCGAGACCTGGGCGACTCAAG  
TTAAACAGAACATAACTCCAGGTATTGTAGAGAATATCCGCGATCATTCCCTCAAATCT  
TTCTCGATCTTATATTCAATTGGTATAGTAGCCATCCCAGATGGTGAGGAGTTCATCATGC  
AATTCTGCATTTTTAATGGGTGACGGTTCGGTGTGCTAGGTTGAGGATTTTGTCTTGCTTC  
CCATTGGGGTAGAGTAGACACGTCTGCCAGATCAAGGTGGCTTTGTGATATACGGCGTG  
ATTAACCGCAAATCAGTAGCCGCGTTAATGTTGTTGCTAATGATATTACTCAGCTTTTCC  
AGTTTGTAAAGGGTTAACCGTCCGATGACCGTTGATCTCATCCCGTTCAGGGGATGAACCG  
TTACGAGGCGTTGCATTACGCAGGGTCGCTGCAACCACTGGGTTTTGAGTCGTCAACGAT  
TTACGCAAAGCAGCAAAATCCACCTGCGTGTTACCCTTGGACTGTCTACGAGTTGTATCG  
ACCATTCTTAACCTTTCGACCGAACTATGGCTAATATTGAATTTAATGCTTATCTGACT  
GACGTGTTTTCGTCTAGTCAGAACCATGGTCATCAAATAAGAAGCCATTGCCTTACGTGAT  
AACAAAGTCTTGAGGAAGCGGGTTATCCTGTGCGGTTGGATAAAAGGACCTGGCGGTAC  
TACATGAACCTGAATGGGGACTACCACCCCAATGATCAGATCATGACCACTACGTCGCTT  
GATACCGGTGTCGAAATTGTCTTCAATAAAGACAACCTGGTGACCCATTTAGCGACGGCC  
AGGGAGTATGCCACCGGTGGCTATTGGTTCAATCGCTTGGTTGAACGGTACCCGGGACAA  
GCTGAATTGATTGCGGGCATTATTGCACCGATCCCCTACGAGGAGACCATAGAGGCCGAG  
GACTATAAGATCTTCAAATAACAATAAGGCTTTCGTGCAGTGGACTGAGGACCAATTGATC  
CCTCAACTCCAGGCTTGGATCTACAGTGAAGTGGAAACAAGTCTTCCGCCACGCATACCGG  
TTAACAGATGACTTGATGCTCCCTTTCGGGATTATGTTGCTGTAAGCTGATCTGTTCTAA  
ACCAATTGTACCGTTCGGCATGAAGCCATTGGGACGCGGTACGCCCATGATTTCTATATT

TGGAGTCACATTGATTCCTACGGGGCGTTATCCAAGTACTAGGAAAGTTTAGATCGGTAT  
CAAACCATGTGGTTGTAACGCAACATTGCGTGGATTGATAACAACCCCGGTCAGCAGTAT  
ACCTTTGGGAAGTCGATGGACAACCTCCTGACCCACGCACGTATTCCCCTGGCCAAGTTT  
GATATGGTGGAGAATACAGCGAATCAGTTGTAAGAATTGGTTCCCAATCCCCTGTACCGT  
GGGCTCCAGCCTAACTTGCAGGAAGACTACGGTCGAGAATCCACGTTTTTTCGATAGCCAA  
CAAATGATCGATAAACAACAACCCTTGGCAAAGAGAACCCTAATCAAGCGTCCATGTAC  
TATCACGACGCGTTGCAGAAAGGGAAACACAGTAACCATTCTGAACTGCCACGAAGACG  
TTGGAATCCATAAAGATGGATTACACCAACCGTCACATCGATACCAAGATGTCGGTAGTC  
TTAATGAATGGATTTACTTAAACCGCTATGGGGTATTTAAAGGGCGTATTCTGGTTACC  
GATCCTAAATCCGGTAAACAGGTCAGACTCCCAGGATGGGGATGCCTACTACGTGTGGCGG  
TACTTGGTGGACTTCGCCAGGGATCAAAAACCGGTCAACATCTGGCCGGCGTATTACCAC  
AATGTATTGAAAGCGGTTCCCTCAACCCTGGAAGCCTTGATTGATATTGGGGGTCCTTCG  
TTCATTACGCCGATTATGGCGTATGACATCCGTAACGTGTGGATTCCGGTGAACACCTTT  
ATTGCACCGGAATACCTCATGGCGTATTCTGAAGAAGTCTACGCACTCATGTGGAAACAC  
AAGAAGATGTCAAGTCAGTTCTACGACTTGAACATGCGGGGCGCGGATGGAGAACCACCG  
AAGTTCATGTACGAGTCTGGAATCGCTACGATCACGGTCCTGACTACCTACCAACAACCTC  
CCGGACCGGTATGAGTTCGACTTTACGGAATACACTCCGGAAGAAGCCCGTAACTTTGCC  
TGGGAGATCTGCAAACGCAACACGGGTTGGGACAGCAACAATAACCCGTCCTTGACGATT  
AAACAGTCAAACCTCATTGATATCATGATGTAGCTGTCGTCTTACACCATCCAGGTCGTT  
AAGGAAATCGATGACGGTACGGACTTAACAGAGCTCCCCAGTGAGATCTTTATTGGGGAT  
CCCCGGTGGATTGGGAAGGAAAATGGCGCCTTCGGGGATTACACCCATGTTTCAGATGGAT  
ATTCCCCTCATTTTCGATGGTGTTCGCACCGTGAAGAGGTTTCATCCCCTGGTTGAACCT  
ATGATCCCTGAGGTGGCAGCGATTGCGGAAGGGTATGGGGTGGCGCGTAGCGATGATATC  
TTTGAACGGGTGGATTTACAGACCAACCTGTTGGACTACGCGGTTCCGATAATCGATGAC  
TCCTATTTACAGGCTGTTACCAGCAGATCGTATGGGCCTCCCTGAAACTAATTACGGGCGT  
CTGGTATTTAAAGAGCTGCATAAGGAAACCCCTGTAGGTCCAGCGGACTATGGGCGCCTG  
GTGTTTAAGGAGCTGAGTCCCCTGACGGTATTGACCCAGCTAACTACGGCAGACTGGTC  
TTAAGAGGGCCGGTTAAGGCGATCACTCCTAGTGGAAGACTTCAATTTAAAGACGTTAAT  
AAGGACTAAAGGAGAAGAGTCTAATGACCAACCAGTTGAGACTCATTAAAGGCGTCTTTTT  
GTCGTCTTACGGGTTAGATAAAGGCAACGGCCTTGAACATTGAATATCAAGGCCGTAATC  
CCACCCCTCAATGCGATGTTTCATCCTTACGGGGACGGCATCCCTTGCACACGGTATG  
AGCACGAACGCATCAGTTTGACGACCCACACCCTGAATCGTTCCCTGGACCTTGACAGCA  
GTCTTAAACTCCACCGTTCGATATTAACGCTGAGATGATCAGCGCTTGATGTAATACC  
ATACGAACGAATCCCTGCTGCCCCAGGACGTGGGTAAACTCATTATTGGAGACCGCGTGA  
CAGTGATCTGTTCCACGGATTCTATGCGCTTTAAGCACTCCTTTTCGATGGCTTTTAAAT  
AGGAATCACCATGGCACTTTCTGCTAAAGAACTCGAGGATCATAATCGATCTGAGGTTCC  
CGCTCAGACGACCACGAATACCTCGATGGGTAACTGATCGCGAAATGTATCGTCACTGG  
TCAACCGATTACAATTTCCAAGTACACCACGCTCAATGAGCATTATGGTATTCTGGCTGA  
AGAATCCCTGGGAAGTAAGAATTCCCGAAATTTCTACTTGAAGTATTTCCGGGATTGGTGT  
AAGGGGATCCAACCTGTGATGGTAAAGACAGTCGGGGGGTTCAGTCGATTGAAGGTTAACCA  
ACACCAACCCATTGACATGCACTTGTTCACCGCAGTTCCCTTTATTGCACTTCCTTTGGA  
CGCCCTTTGGACGTCCTTAACCGCGAGAAGTTTCGGATGAGGACCCAGGAGGCTAGAAA  
CGGTATTCCTTAGGCGTCTATTGGTTGAAGTTGGTTAATTTTCGATAACTATAATCCAAC  
CGAAAACAAGATCACTCGTGATCCTGTAACCGGTCTGGAGGATGTTAAACCTTACATTCA  
CCGTAAAGACGTCCTGGACAACCCACAACCGGTTGACTTTACCTGTGAGGGTAACATTCC  
TGTCAGCAATGAGTACATTAACAGTTCGGCTATTTGGACTGTTTCGTTGACTCAATCTGA  
TTTTCGCTGAGATTTACAAGCCTGCAAATTTACTACGGGGATGCGGGCTACGCATCCAT  
TAACGAAGTGGGTGTTGCCTATGGGATTGATACTCAATTCCTGGGGAGATTGCTGGAGG  
CGCGACTATCCAGTATAACCGAGGTCATGAGTGCAGTCTTTGCTCACTACATGACCGAGCG  
TGATGCTCGCAATGCGCTCGCTAACATCAAGATCCAGCTTTCGCTTTGACCACGGTCCAAG  
CGCGCCCATGCTCTTGCATAACCAACTCAACTCAACCCCCAGCTGGATAAGGAAACCGACC  
CATGTAAATCCCAGCTCTACTAAAAGGAGAAGTTCACCTTGCCTGGTTGAGAATATGAC  
GGCAGGTCAGGCAATTGAGATAGCCAACGCCTCCTATCAAACCACCTGAAACCGGAAGA  
CTTCAAGGAAGCCCAAGCCATCGTTGATGGTGATAAAGTCATTCTGGACCTGCTCGACCT  
TGTGAGGGGTGAGGTTGTGGTGCATTTTCGTCAACAAGCGGGTGTACACGTAAGCCGCT  
GGACGATAACCACCTGGTCAATCCCATGGCGGCGGTCGTGAATGCCGATGAGAACATCAT  
CTGGGCGGGTCCACCGGAGTTTGTGGGGAGTGTCACGGAGCTGGATTGGCTGAGGTTT

TACCGACGCGCTACCACCCATGACCCCTGATCCGATGGACTATGCCAAACGGATGGCCAC  
CCTGCTGAATCAGTACAACATTGCGGGTAGTCGGTGGACCAATAACTGGAGTGC GGCCCT  
TCCACGCTCTGTGACGGCATTCCACGTGGCATATCGTGGTGACGCCCCATGGGCTCCGTC  
CAAGTTCATGTTGAATGATCTTGTGTCTGAGTTCATCGTGGTGATTTACCTACCCTACGC  
CCACCCCGCCTGTTACCTGTGCTTTGCGTCTTAAAGCCCTCTGCTAGTGTACGGGTCTTA  
GCCATAGATCCGTCCACTACCTGTATGGGGGTGAGTGTCTTCGACATCAATATTGCTAAA  
GCTCGACCGTTTAAAGTTGATTTACGCGAACACGATCTTTGGTAATAAGTTGTTGTTGAC  
ATTCCAGCACAATTTGATGATCGCGCGGACACTGGTATTGCGGCAAGAAGTTGCGGTATG  
GCGCGCAGTTTAAAGTCAACTGTTAGCTATCTTCGAACCCGACAGTGGGATCTGTGAGGT  
AACTTCCTCGGTATGTCTCCGCTTACATTTAAGCAGTTGATTCAAGTGGTCTCCTTGTTA  
GGTGAAACCTTCGTTACCCAGGGTATTCATTTGTCGTATCTCCTCCCTCGTTTAGCTAAA  
GCCGTGGTGGGCGCAGATTTACAGTGGGAGTAAGAAGGAGGATGTTTCATAAAGGGGTGATG  
GACTATCCGTGGATAGACGCCGGCGAGATTGATATGACGGTCTGGATGAACACTCCGCT  
GACAGTGTGCTATCGGCCTCTATCGGTGTGAGCAGATCGCCCGGCATTACGGTGTCTCA  
GAGAGGTTAACGTATGACTGAAACAACCTCAAGACGATGACCCAGAGCTACCCGCCAATTC  
TCCTCCTGTTGAAGGAGGAGTGGAACGGGAGATCTTTGGTAAATGGAAAGTATTGTTGAT  
TAACCTCGGTGGTATCCTTTCCGTGTGGGTGGTGTGTTAACGGCACTGATTAACCTCGTT  
TACTATTTACCTGTCAGTAACCACCAATGGTAAATGGCCAGTGAGATGAGTATGTTTCAT  
CATGATGGTGGGGCCGGTATCTGTGCATGGGGGTGGATGAAGGTTAACGGTACCTTAAA  
GACTATTATGTCTCAATCGGGGTTTAGTAACAAAATGAGAACCAAGGTGGCTGAGATCAT  
TGCGCCTAAGCCCAAGACAGAATAAACCCAATAGGAACCTACCTGTAGCCTTTGCGGGC  
TACAGGTAGGATTTATCACGCGTCTGTCATTTAGGTAGAGCTAAACTCTCAATTAACACA  
TTGATGTTAGCAATCAACTGTGAAATGGTACGCTGGCTGGCGTATAACTTCATGTTGCTG  
TCATCCAACGCCCGGGGCGTATTGATCAGCAGTACCCGGGTAACCTCGATAACAGAGCTCT  
CGTGCCTCCCGAGAGGGTTTCTCCAAGCAGTCATACTCCAGCAGAAAGGTCGTTAAACTA  
CTTAACTGACTAGGAGGCATCTCCGCGGGTGGGTCTTGAGTTGAGGGAACACTTGGGTC  
AGCCTTTCCTGAGCTGCCAGCACTTGCTTCCGGTACGTGTTGATCCTTACTTGCTCCGCG  
TGAACCTGGAGGATTGAGTTGGTCTCGGACAGTTTGGGATTGTTGCTGCATCCCACTAGG  
ATCAGGGATACTAGACAGATTAACATCCACCCATACTTTTCAAGTAGTTTTGCATAGCC  
TGAGTTGTCCTCTTCAGTTCGCTGTTCCAACCTGACGGGCGAGGGTTTGAGTCAAGGTGGC  
TGTGGCATTGGAATTGTTTTCAATGTTGTCAGCCACCCGTTGCAACTGGTTGGTAACGCG  
CTGAATCCCATTAACCGCTTCTACACTGATAGTGGGGTTACGTGGCACAATAGCCTGCCA  
CGCGACGACCGCCAGAATCAATATTAGAACCACGTCTCTAATCCAGGTCATAATGGATCC  
TCCTAACGGTATTGGGTTTATAACCGGTCAATCCTCTTGAATAACACTTCGAATGTAAAG  
GTGGTAACCGTTGTACAACGAACCTGGGTTTCAAGCGATTGGTATAACCCGTGAGAAAGGT  
TCCACCGTTGGTAATACCGGTGGTCTTGTGAGGAATTTACGTTGTATGCCTAGGTTCGAT  
GTCTAAAAGTCTCCTGTTGATGATTTTGCAGTGAAGTACATGGGAATAAGGCCATTACT  
GACCATTAAGGGAATAGAACGGGTTTCATGGGTGTGGTAGGTGAAGGGATACTGGTACGT  
GGTGTATGGGCTCCACGGACACATACAGGTTGGGATTATCCAGTACGATGGGGATGGTACT  
GGGATCGGTTAACAGAGTCTTCCAGAAGCTCTCTGTACTGAAGAACCGTTTATCCACGAC  
TTCACATTCTGGATCAATGATCCGACTGAGGTTCGATCATAGATTTCCGGTATAAAGAGGGC  
GGAAAACCAATCCACCTTCTCCTTACGCAGCGTTAAGGTACGGTCACTCATTACCTGTAC  
CACGTCAATTGAGGTTCAACCGACCTCCAATACTCATCCAGACTGTCTTATTCCTTAGACT  
GACCGGAGACCCTACGTGCAGGAAGTCGTAACCTGTCGTCATCCTCAAAGTCGATATCCGA  
CTCTTGGAAGGTGTAGGTCTTGTAGTTTGTAGAGGGTATTGAAGTTAAGGTAGTTCACATG  
AATGTTGTCATTACATTGAAGTGCTTCCCACCGTTCAACAGGTACCCCGCCTGGTCATC  
CGCCACTGCTCGTACCTAATGCCCTCCATTGATCGTCCACAACCCCGTTCAACCAAGGC  
GTTATAATCCACCGCCGTTTCGATCGGTCTTGTATGACCCGAATATCCGGCGCGCTTGTGAC  
GTCGAGGTGCTCCTGGCGATCATTGGCGATCTTAGCGTCACCAGGATACAGGGTAAACCA  
TGTGTATTGGATGTCTTGTAGCCGTTACGTACCCGGTACTCATTGCCGAGGAGGGTATTACG  
GGTCTTAATGGGGACATTGATCTGGGTGTTTAAACCACTGTTGGATCACCCCATCGAACAA  
CAGGAACTGGTTATGATAGTCCGCCAGGTCAATGACCACATCCCGGCCGTACAACCCATC  
TTACACCACAACCTTTAATTCACAAAACGTAGCCACCAGTTCTTTGGTGGTTCATCTCACT  
GATATCCACCAATTCCTCTACTCGGGGGAAGATTTGGTTGATCCCAACCGCCCTTTTATA  
GATGTACATCGGGGTTCAACTCCTTAAACGATTCTATGAAATCTACCCAACAGGCCCCCATG  
GGTACTATACTCTCTAGGGGATTAATCATAAAATGCCTTATTCATTGACTTTGGAGAAAT  
TCTAATGGCAAACATCGTCTATGGTTGGAACCCCTTCCAGGAACGCGTCGATAGCATAGT

GACGAACGAAATCATTA AAAACCTCTGGTAATCTCAACCGCGTCGAGTTCGTTCCCGGAGC  
AGCTCCTTTCTTTGCTCACA ACTTCAA ACTGTACCGTCAAGGGAGTAACCAACCACTCCT  
CCCGGGACAAGACTTCATCTTTGGTCATCCTTTCCAACGGTTTATTAAGACCTATCAGAA  
GAACGTGTACAGTTGCGTGATTCTGCTGAAACCGGTTGAAGTGGTCCTGATGGGGGAATA  
TGACACCATTTGGCGGACCGTTTCGTGTTGGATGATGTGGCGCACGCTACCTTGGTAGCCTA  
CATCAGTAACAGCCCCCGGAAGCCCTCTGGGAGAACCTGGTCAATGTCCCGACCGAGTT  
CCCTTCGGATCCTCATGAACATCCGGCTGCCAGGTGTATGATTTTGCTCAGATGATGGA  
TTACCTGCGTGACCTGATCTTGGCGGTTACTCAAACCATCTCCGATTCCCCATCGACCTT  
GAAGACCCTGTTGGAACAACACCTCGCGGCTGACTTGGCGCAAGCCACAGGGAAAGATAA  
GGGAATGCTGGGTCTCGACAATGTAGAGA ACTTGGGCAGCGCCACGGTCAATGATATTAC  
GGGCAATTCGGACAACCTCGTCGTC ACTGTAGCCGTTATGAAGGGAGCCCTCCGTCGACT  
GGCTGCGGGTACGCTGAACCTTAATTAAGGAGCCGGTTATGCATTTTCCAAGCGTCCGGG  
AATAAAAACCGATATTGTTCAACAATAACCTGGAGAACCAAATTCGAGGTGAACCGTTTA  
AAGTCGATCCAGGAATCTGGTCCC GGATTATTGTGCCTATGCACAGTCCGTTCTTTGTGCG  
ACAGCCGGATAGTGACGTTCCCGAACGGTCAACCCGTGGACGACTCCCAGTCCCGTATTT  
ATCGCTTGATGCCTCGGTTGACGGA ACTCACCGCTCAGAAAGTTGCGTGTATGATCGAAC  
TGCTGGACCCACGATTACCGAAGGGAAGTTGGAGTACGATGTGGTAGGTGAATGCAGCC  
TGTTTGATAACCACCTGCTCCACATGGTGATTGCTGCCTCTGAAGATGACAGTCCGGTCT  
GGTGGGAGAACATCAAGAACA AACCCGTGCTCTTCCCACCGGAGTGGCATACTCACAGCC  
TACTCTTCGACATCATGGCCTTTGGTGACTTTGTTGAAGCCTTGGGGATGATCTCTGACG  
CGGTTGAAACGCATGGGAAACCGTACCTTCAGATTAAGATTGACCATGCCTTTGAACTGT  
TCAATCATTACCTGGGGATTTACAAGAAGTCACTGGCTGATTTCCCTGGCTCGTCATAAAG  
CGAGTTATAACAGCCACGACTGACGGCCTTGCAAGTGGGATTGGAGAAAGTCGACA ACT  
TCCCCACCACTACCGCTTCCTGTGCCTTGGAAGGTAGACGTGACCGTCACCTCACGGTAT  
CGGGACTTCAAGCCATTATTGACCACTATGGCTTTAATCCCAAGGACTTCATTGAGAACG  
GTA AACTTCCCATTGCTCAATTCGGTTATACGA ACTTCATTCCCCCGTCTATTGATGGAT  
CCTTTGAAGGCTTGGGGGGTAAGAGAGAATGTGCAGCCATTACCATGGAGGCGGATGGCA  
GCATCGTCTTTCTGGCTAACCGAATGGATGGGCGTGTGACGGACTTAATTA CTGCGTTC  
TGGAAGATCCCTATACCAACCCCGGTTAATCTATAACCAGTTACCGCTATTTCCACCCCTC  
TGCTCTTAGCGGAGAATGCGGAATGTGATCGGATTGTCCAAGGGAGTGGACGTGAAGTCA  
TTATGCTGGGGGGTATTCGTAAGA ACTTGTTTTACATTGGATTGACCAATGGTACCCTGG  
ATCCCACTAAACACATTCTCACACCCATTA AACTGGATGCGCTAAAGGCTCCCTGGAATG  
GCAATCCGA ACTTCTCCTGGAATACTTGGTTCAGAAGTTTGAGCGTGGAGTATCTGGGGA  
ACTGGATCTACATCTTCCACGCCCACAACGTGGAGAATGGAGAACAAGCTGATGGTGTA  
CGGATTACCGGTATCGGTACCTGTACCGGGTTAGAACCAGTGATGTCAACGCCAGATCC  
CGGTAACCGTTTCGTTGGTCTCCCCACCTTTAAAGACGGTGACGGTGTTC AATGGAATA  
ACCCACCGTTCTTCCGGTGGTGTACCCCTCAGGGGTATCAGCGGGTGAATAACAATGATA  
CCTGGGAACGGTATCACTTTACCTTTAAACA AAGTGATAACCTCGCCTTTACGGGGATTT  
ACCATTTCCAGCCAACGGTGGTGTGCCCTATTCCGAACAAGCCGGGTA AATACCTGGTAC  
GCTTTATGGCGGCCTGGTGGGGCCGGTACGTGGTTCCTGGACTAATAGGTACCTGGGACC  
TCCCGCTAGAGATGGTGTATGAGATGGACCCTGAAACCGGTGTGATAACCCTCCTCCATC  
AAACACCTCGACGGGAAATCGATTTCTGAACATTCCGTCCTCTGGCGACCCAAAAAACC  
GCCGCCTTAACCAATTGGTGTTC AACGATTCCGAACAAGGCATGGAAGTGCTGGATGATG  
AGACGATTGGGGCGTCTACGGGGCCTATCAGTCGTTCCCCCGGTCAGCCTTCTACGTTG  
TACCCAGGTCGTTCAAGTACCGGTATGTCGTCATGGACCGGACGTGGATGACCGACTTAG  
GGGATATTGAAAACCAGCAACTCATTGCGGAGAAAATTACCAGACCGATTGCTTCTCGA  
TCAAACCACGTTCTTCTTGTGGGCAATGGCGGGGATGTGTATACCGCGGGGACCAATA  
CCCTACCGAGTGTTATACCAACCAACTGTGGTACCGGCAGTCCCCTGGGAAGTTAGCGG  
AGCGTCTGAGGTCTCTAACCTCTTCTTCAACAAGGTTGTTTCTCGTCTCTGAGTAACG  
CGGTCTTCCGGGTGGAAGGTCCTCCTCAGGTGGGTGGAGCCTATGTGACTGTCCCTTCTA  
ACCTGTTGGATCAGTACAACACGGACTTGGGGGAATTCACCTTCTGTATGGGAAAGCAGA  
AAGCGAACCTCGACCTGTCGAAAGCAGAAGGGGAATGGCCCGCTGGTAATTTTCTCAAG  
ACATCAAGGTTATGTCAGGACATACTCAGCAGATCAATCCGGATGGTTTCGATGACCATGG  
TACCTACGGGGACTATTCTTACCCATCGTCCATTACGGCTCGGTTTGTA AACCATGTGCG  
CGAATCCGACTGCCTGTAGAAACTCCCCCGGATGTTTATCGGGCTGTGTGATCCC ACTG  
GTTTCTGACCGATAAGTTCCGTTGGTTACCGGTGATTATGATCATCAACTACGGCGAAC  
CTGGCACCACGTCTCGTCACTGGACACTCTTGGTCA TCGACCCGGTTTATACCGGACCCG

TCAATGCCCGAGTGGTCAGTGATTATACCGTGCTGGATGTGGTGCACAATGTCCATCTAC  
AGGGTGCTACTGGGTTGACACCTGCCAGCTGGGATGCCTTCTGGGCGGCGGAGCTATCA  
CATCGGGTGGGGGTGCGATGAGGGTAGGGTATTACCCCAAGAGCGCGACCGAGTTGGAAG  
GCTTTATTGACACTGGGGTCATTGCAGCAGGTCCAGGAGACTACTCACCTCGTTTGGGA  
CATTCCGGTATACGAACCGTAGTACGAAACGGTGGACTGAATGGATACCTAGTATTACCG  
GTCAAAGTGGGGGTGCTTACCACAAGACCGTTACACCGGATAACGGGGTAGCTAACCAA  
TGGCGTACAACGTTTCCACTGGGGGAGCCGCTACGATCTTTGAAGGGTTCGGTGAGTAACA  
CCTTGCTGGGATCGGTTTACCCCGCTACCGGTTGGTACTTGTCTTCCAATCGGAACTCA  
GGGTGGTCTTCAACGAACAGAACTACACGTTGAAGTCCATCTCCGTGGATTTGTCGGCAA  
TAGCCCCAATCCCGCTAATAAGACGTTCTATTTGTACGCAGTTCTTAAGAACGGGAATG  
CGAGCTACGAAGTGACTGTGGAGAAACGAGCTGAGACACCGTTTATTATGTGGGTTCGGAC  
GAGCGGTTACGAATGACAGTCAGATCCTCACCATTGAACGGGTTAATGTCTTTACGATTA  
ACGGGAACCGGATCTCCGAGACGAAACGGGGGAACTGCATCCCGGCGTCGTCAGGCTTGG  
TGAATGCCGAAGGTCAACTCCCGTGGTTACGTTCTTCTGAAATGCTTCCGTAGACCCAAG  
GTGGGAGAGGGTTAATGCCCATCCCTCCTTCTTTTCAATGTTTAGTCCATGGATCCGTTT  
AAAATCGTTCAATTTGATATTCGTCGAACGCGCCCGGAGAATAAGATCACCGGGGAGAAA  
ATGCTGATCAAGGATAAGACCTGTCTTGGTTGATCCCGAATGGGTCCCGTTCTTTGCT  
GACCCTGGCCTGTTACGTTGTATGACGAACGGGGTGCCGAAATGACGCTCAACCGGGAT  
TACTGGTTGGAGGAAGCCCTTATCCCGTTCTGTGAGATCAGTGGTCGAAATGTTTGTGT  
TTCATTCGGTTAACCGAGAGTATTCGTCAGAACAACGCTTTCGTAACCGGAGACTACCAA  
ACCATGGGGCGTGGTTCGTACCGCGTAATAACCTGGACGAATGGCTGGAAAAAATGCGG  
GAAGGGAAGATTCCCATTAAGTGGGAGAATGTCTTCGTTGTTCCACCCACCCTACCGCCC  
GAATACCATTTGCATAAAGCTGATACCGAAATTGGTGATTGGTATGAGCTGACGTTCTTC  
CTGGATACCATGGCGAACATTTACCGGAGCCGAGATCCAGAGTTGGAGGATCAATCGGAA  
GTTGTGATCAATGAGGCGTTTACGAAGCTCAGGAACTTCCGTGACGCCAGATGCGTCGT  
CTTGTCGAACACGACAAGAATTACAACGCCCTCACCTCCAAACGAAGACCAACGTTAAC  
CTGGGCAATCTGGATAACTTTGCTACAGCTACTCCCGAACAGGATAAGGCGGGTACGGCT  
GATATCCTCTCAGTACCCCGCTGGGTGTTAAGGAACTGGTCAGGGGGTATACGCCGGAT  
AAGTCGGCTTCCATGCGTTCAGGGATTATTGCCATTAGTTGATTAGGAGGAACGGATTAT  
ATCCCTCCGGGTATTAGTGGTTCGTTTGAAGGTCGGGGGGGTTTACCCCGGACTGTGCA  
GCGGTATTGGAAGTGAATGATAACCTGGTCTTACTCGGGCTCATTACGACGGACGGACG  
GAAGGGTGTATTACACTGTGGTTCGGAATCACTTGAGCCTGAAGCCCGACGTGTCCTTT  
ACCGGGTATAAATACCAGCCCCCGTCTTTAACGGCCATTGGGTTCGTACCCAACCGGGTC  
TTTACAGGGAGTGGTTCGGACTATCATCATGGTAACCCGTGATGGGACGAACCAGGTGTAC  
GTTGCGCTGACCAATCGTACATTGGATCCTTCTGCGCATGTTTTTGTCAAATCTAACATT  
GATTTGGCTATCCAAGATCTGGGGACGTCAGTTAGTCGAACGGAGTGGAGCCAAATACAC  
CCGTTGGGTCAATTGGGTCTACTTGTGTCACGGCGATGACTGAAGGGCAATGGGGTGGT  
TGGGGGCATAGTCGTACACGGGCCTACAGAGCCCCTCTCAGCGCGATTAAAAATGGGCAG  
CCTCTTACCTTCAGTCGGGTTAAAGTCTCACGGACGAACGTCCCAGGGGCCTTACAGAGC  
AATGTTGACTACATTGAGTTCACCCCTGCTCCTCCAGACGGGGAATTCAGTACTTACGGC  
CCCATTACCGTTGCGCCTTATAAGGCCAAGAAAAGGGTTAAGGGATCCCAACGACGTCCC  
CTGATGTTCTTCTCTGAATCCAGTGACATAGGACCTCAATATTGTTCCATGCATTACTTC  
GGGATGATGTTCTTACTCGGAACATCAACGGGGTGGACGGTGTAAACCGGGGTGTCCATC  
GATTGCAGTTACGATTTCAACCCTGAAACAGCGCCCTTCGTAGTGGTTAAACAACCCCC  
GTACAGACCGTTGACCTGAGCAAGATCATCAGCAAAAATTCAGCGGCCTCTGTGCATTAT  
GCAGGTATTAGTGACGTCTTCTTCAAAATCTCTGATCACTCCAGTCACCTCCTGTTGGAG  
AATAAGGTGATTGTTGGGATGTCTCGTCTAGGGTTGAGGGTCTCTTCCCGGGGTGTTT  
AGCCGTTTGCAGTTCAACAAAAACCCGAATGTAACCGCCAGTGGGATGTTGCGGGATTAC  
ATGCACGCGGACAATGCGAACTTCTCGGGGATGGGGGTGTGGGAAACGCCAGTTACCT  
ATTAAGAACGGAGGGCGAATCAGTGCAGTGGGGTATGAACTTGCCGGGGGGTATGTCTGG  
GCAGACAGCGCTGGTGAACATAACCGGTCGTTCTTCTACCGGAAGGTCAGCGGTGAATAC  
GCCGTCCGTCCCTGGGATTACCAACAGCAACTACCCACCTTATTGGCTCGACAGATCAGC  
GCAGAGGTGTACGAGAACCGGTTAGACCGTAATACTTCACTGCTCAGTGTAACCGGGAGT  
GCGGCGTTCCTGACCGCTGAAGGGATTGAAATGGGGAACAGTTGTTTCTCTGTAATGGGA  
ATGAACCATTTCTACGACCTGGCCTCAGGGGTTGAATCCGATAACCACATGCCCTCGGGAG  
TTTACTTTTAAAGCCCCTAACGGAAATGGCATCGTGTTATCCTGCCCCAGAACCTTCAGT  
CGGGTAATGGACACTGGGGATCAAACCTTTACCATGAAGGGTGAAGCCATCGGGGTGTT

AAGCGTAACGTCATGGATAAACTGATCCAGTTGATCCCCGCTACCCTCGGGGAGA ACTGG  
GCGGTTGAGTTGATGGTGATCAATCCCATCAGTGGTAAAGGGTTCAGTCCGGATGAACTAC  
GCGCTGGCGTTGGTTCATAACCCGGGACATGGAAGGGGGTTCGGTATGTGGTCAAGAGTAAA  
CTGTTGGCCTGTGCACCGGTGATTGGTAATCCAGTCTCGGGGGTCTACCCGATTGATGAC  
CTTACGATTCTCGATCAAACCGCATTTATCACCACGGTGAACAACAGTGGGGATGGGGAT  
GAGTGGAGCGACACAGAAGCGGATGTTGTGGCGTGTCTCAGCTGTCGCTTTATGTGGAT  
GAAGCGACGAATACCCTCTCCGGGCGTATTTTCGTCGTTGTACAACGTCCGAGGCGAAGCC  
TTGGGGTTCAACATAGCAGTCCCTCACCTTCAGCCTTATTAAGACCACTCAGAAATTCTCC  
AGTGTTACACCCTTTAACAACGGGGGAAGGGATGTCCGCGGCGTGGTGTGTGCAGA ACTAC  
GCCAATCCTAACGCCGGGTTAATTACCCAACAGCAAGGCTACGCCTTTGAGGACACTGGC  
GGTGCAGGGTATGTAGAGAAGATCGGCACGAACACGTATTTGATTGGTTCCTGTTACCCG  
GAAGTGGGTTGGACGATTTTCTTCCAAGAAGAAGTTCGAGATGATGATAAACGGTACCGTG  
TACAAAATGCCCGGTGGGTCTATCGACTTTAGGAATGTGTCTCCTCGAATCCTCGTAACAAA  
ACGTTCTACATCTATGCGACGGTTGAAGAGTTCGGAAGGACGGTATATTGTCTCCGATGTT  
AATCTGCGGCGGTCCAGTGAGTTGCTGCATGTGCAACCGCCGTGACGAACGCCAACCCAG  
ATTGCCAGTATTACCCGGCACAAAGTCTTTACCATCTGAGAGTTCCTATTAAGTTACACA  
CGGACGGGAGGGATTATTCCGGTGGGTTCTGGTTTACCGCAGGATGAAGGTACGTTTACG  
TTCTTGAAAGCCTCGGAACTTTTACCTTAAGGTAAAGGGGGAGTAAATCTCCCCCTGATC  
TTTTAAATGGAGTAGCTGTATGATTATCCTTGGCGGGGAACCCCTTTCATCGAAAACCC  
TGAACCCAAGTTCGGTGGAGTGGTCTCCAAGCTCAATGAGATGACCTACAACTGGAACC  
GTGTGTTACAGCTACAATGAGGGGACTAAAGAAAAGATCCGGTTGTTCAACGCAAACCT  
GAATGATTTCAATTAACCAACCCATTGTCCACATTGACGCCACATCAATTCCCGGGGGGC  
AGTCCACGGTGAAACCAAACGGACGATTGGGTTGGGCCTTAAGGACA ACTACCGGACGGC  
TACCCTGGCGGAACAACAGTCGTAACGCCTGTGTTGGCGTATGTGACCCCTCACGGTGC  
TCGCGCTGCGGTTGTAGCCAACAACGTCGGTTATAATGGCGCGGATTATCAACCCAATGA  
CGTGCTTCAAATCTCGTCGTTCTACAACCCGGATGAAAACCCCGTAGTTCCTCCAACGGT  
GGTTCAACCCATTCGTTATTTTGGGTA CTCTTGAATGTGCGGATGATGATCAACAACGA  
CCGTCTGGTGTGTTCTCCGGTACCGATCCGTCTCGTTACCAACGGTACACCGCCTTCTT  
GTCTGGTTCTCTGGCGAACGCAGGGGGAACACAGATCTCGGAGATTCAGAACCTCAACGC  
GTATTACACCGGACGGAATAGGAAGGCGGTAGGAGGGTTTACCAGTTCGGGCAAAGTGGC  
CTTCTTTAAACCCCTGGCTGAGAAGAAGATCTACGAGTTCAGAACACCCCTCCCATTAAC  
CCCCAGTAGTGATAACTTCTGCTGTATCAGGGGTATAGCACGGCGGTCTATAAAGGACT  
GGGGGTTAGTTGGGAACGAGTCGGTACGGTTATGACCCTAAAGCACTATTTCTTCAACGT  
GAACTTCATGGAAACCAATCCC ACTTTGGTGGAGCAGGTGACTGCGTAGTACACCGCCCG  
GTTACTCAAATCAATAAAAACACCGTATAACCGGACCCGCTAACGGGAGTCATTCGTCCGA  
CATTAAATGACTTTGTGACCCTGAGTGCAGGTAAGACCCTGGAGATGAATGGAGGACTGCA  
ACCCACCACAGCCCTCATCTGGAACATTCAAGACCGGGAAATCTACCTCTTTGTGCTTAT  
TCCGGTGAATGTGGTCCAAGGGGGTATTCGTGCGCCGTATAACCTTTCTTCGAGGAATC  
CAATGTCCCGGTACCTTGGAGAATGGAGGAACGGCAAGCTTTACCCA ACTGGGTAATTT  
GGTCAAGGACATTCTTCAACCGAATCTGCTACCCCTGCTGACCCTAAATGGTTGCGGTA  
CGCGAACACCTGGGATTTCAATAATCCGACCTGGTATCCTGGGATCGTTCTGAAGTCAGG  
GGAAGTGTTTAAAGCGGTCGCCACGAAGAACCGTCTACGGGTTAAGCGATGTACCACACC  
CCATAAAGGCTTGAGGGAATGGCTGTTGGGAGAACGGGCTGAAGTGGGGATGAATGAAGT  
TCGTACAGAGTTTTATCCTCCGTCACGCCATAGTCCTTTTGGGCCGGTTCCTGATCGCTT  
ATTCCCATTGAACACACCGCTGGTACCACGCGGTATCTGGCTTATTCGGTTGACAGTGA  
AACTGGGTTGTATGAGTGGAGTGAGTTGACCTGGTTCGAATACCTCCATTGTGGGTGTAAC  
CACGGGAATAAGTTCGTTATTGTTCCAGCGGAAGTTGGGATTATTAATAGGGAGTTGAC  
CCGTATCCCTAGGGCCTTGGCGTCGTTTGATAGCCTGCTGGTGGATGGAGTCAGTATCAA  
CGCCCTGTGTTTACACCCGGGTTACCAGTATAACGGGTATGCTTCAATCTCCATGGCGAA  
TGGACGAGTCCAGGAGGGCGCTGAGGTCAA ACTCTCCCAACCAGCTTGATTACCCTGCA  
AGCCGCCAGTGGGGGTATTCTGGCTCGTGCAGCCATTGCGAACCCCTCAAGTCAACAACGC  
CCTCGGGGAAAGTGTGATCAACGTCTTTGCTGTCGCCGATAACTTCGCGTTGGTGGTGAT  
TACCCATGGGATGTGTTACGCAGAGGCTGCTGTGGTTCCGTATAACGGTGAGTGGTGGGGT  
CTTTAGGCCGA ACTTCCCCTCCGCTACGGGCTTCGTTACTAAACCGGTTACCCAGCCGG  
TATGGTTCGTACCGGGCACGTACCGCTATACCAATTCCGGTGATAACCCGTATATGACCTA  
CGTGGATGTCCAAGTGATTGAAACCCAACGGTATGAATGGGCGGTTGTGGTTCAGTCGACC  
CTTTGGGGACCTCTACGGGCATATCAGTTTCAAATAACGGATTACCCGTTTACACCCAC

CTACACCGTAGGACGGCTCAATCCAGCGAAACTGTATACGGCGTCATCACCCCTTTGATAC  
GGTGAACGAAGATCACCCGCCTGTCTTGATCCCTCGGAAGGGAATCTACCAGTACGACCC  
TGCTAATACCGGCTACTCCACGAATCTGTTGGCGGTCGGAGGAGCGGGGGTGGTGGATCC  
GTACGACGTAAATGAAAGCGGCTGGGTGAGTATTCCTGCTCGATCCAGGGTGGTTATAAG  
GGGACGTGCGTATATCCTGGATACGGAATACCCCATTAAGGTCAACCCTACCGGAACGAC  
GTA CTGTTATTTGGTACGCCAAGGGGATGCGTTGGTAGGGTTGGGGTCTCCCCTACGCCG  
AGAGGTCAATAACTCGGAAGTCCTCTTTGGGACTGCAACGAACGGGATTCTTACCATCGA  
TCATTTCGTACATCGTGATGGGTAGTCATGTGGTGAGTTCTAGCCGTCGGGGTACGGCTAT  
TCCCACCTTTGCGGATCACGGGAACCTGGGGGTTAACACCTTCTTTACCCGACGTGACAT  
CATTGATTAACCCTTAATGAATCCCCCTACCTCCCCGTTAAGGGAGGTAGGGGAGGTCCA  
GTGGATTAAGCCACGGGTGGCGAGGTGGTTCCATTGCCAGGGTCTGCACCTCCGTGAATA  
TGGAAGATCAGAGACACTCTCACGGTCCTCACATCGGTTTGTCCAATAACAAGACCTGTA  
CTCACACTGTTACCGGTACGAGTGGTACTCCCGTTTTGGGTATAATTACCCTCTTGAGTA  
TAGTTCCTTCTTGTTCCGGTATTGCCCGTATGGGTAAATGTTCCCTTCCCAGTTCGTCTGA  
CCAATGGCGATGTTCCGCAAATTGGCTTTCTTGCTAAGAGTGTCCGACTGAAGGTTAAAG  
GTCTTCGTAAAGACATTGATTTCTTCTCCGCATGAAAGCTAATACTGTCTTTGGTGTAA  
AAGGCCATCTTCTCCTTATTGACGGCAAGGGTGGACCCTTCTTGTGGTATAGGTGAGC  
TGATGTTTGTAAATCATCGAAACTGAAGATACTCCCATCAGTTCCTCGAATATCGATGCGG  
CCTTCTTTGGCATTGACTTGGATATCAAAGCCCGTCCGTTCCCCGTTGGACTGAGGGGTC  
CGTAGTACCACTAACCCGTCGTGGGTACTGACCCTGGCTGTATAGAAGTTATCCAGGTTA  
AAGTCCACGTCCTGAGCCAATCCAGGGTAGCCCCCAGCCCCACTAAACCGTCTCTAAG  
CGGAAACGATCCGTATTGTCCCCAAAGATGTCCAGTAATACTGGTTCTGACCTGTGATT  
TGAAACACCCACACCTTAGCCCCTTCCCAGGACATCCGGTGAGGTAAGTCGGTTCCCATTC  
CCAATGGATCGCCAGACGGCTGGTACGGTGTGTTGACACCAGGGTTTTAGTGGTAATCATC  
TCCCCTTCTTTATTCTGGCTGGTTACTTCTTCTGTTCTGTTTTAGGCAGGGTTCTCCCA  
TCGGCGGTAGGAGAATGCGATGGAAGGTGGATCATTGCTTCGTGGCTATTGGTGTCTTCT  
GTGGCGGCAACCGTCCCTACACCAACCATTTAACCACGTTCACTAAACTCATACTCGCG  
TACTCATTATCTGCACACTCACTTTACTTAAAGAATTCATACCATGTTTATATTAAGTAG  
ATTGATCCTAGAGAATTACGTTCCCTCCGTTAAGCAGCGGAATCATACGGGTAGAATTGGA  
TCTGAATCATTGTTAACCTGTTGATCGCTCAGAACGGTGTCCGGGAAAACCAGTATCCT  
CCGAGAAGCCAATCCCCTGGCTCCTGAAAATGCCAACTACCGCGGTATTGGACGTAAGTA  
CGTGGAGATTAACGGGGATTGGACAGTTTCGTTTTGGATTCTAAAACAGACTTACGCAA  
CGGTCACAGTTTCAAGTTTAAACGGGAAAGAGTTAAACAAGAATGGAACCGTCACGGAACA  
GAAGGACTTGGTATGGATCCAATTCCGGTTAGACAGTACTATCAGCCGTATTCTGTCCGG  
GCTTCAACCCAACAGTCTGTTTTTAGCGATGCCAGTGGCTCATCGTAAAGACTTCTTTAT  
GTTTACTACCCGAATGACACGAGTTACGCCTTAGGGGTCTTTAACAAGCTTAAAGACAGA  
ACGTCGTGAACTGTCGGCTGCAATCAAGAACCCCGTCATGCGGTATACGGAAGAGAGTGC  
TAAACTCAAGCAGATCACCGAATGTGGTCCGGAAGAGCCGGAACGTGAGTTAAGACGAT  
TGAGACTGAACTGAGGGAGTCCTTGTGGTACGAGGGGGTTTGGAGCAGGTGAAAGTAGA  
CCCTGAGCTCCAAAGTAAGATTGCTACCTTCAAACGTCTGGCTGAGCAGATGACATTGAA  
CCGAGTCAATGGGTTCTTTGAGACTGAGGCTGAACTCAGACAGTGAATCGAAACAGTTCA  
AGCTATCTTGAGTGTACACGAAGGCCAAGCCACTGCCATTCAAATGGTTATCAGTGAGCA  
CGTAGGGGTTTTGGAAGGAATGGAGGAGATCAAAGAAGATCCCTTTGTCTTCCATCATCA  
AGCCGAACAACCTCAAGGTGGAACCTACTGCTCTCCGGGAAGAATAACAACAACATGGGGT  
GCTATTGTGTAATTACCCTTTGTTCAACGATGACGCCTATGACTTTACCGGTTTGGAAAT  
GGTGTACGAGGCCTTGGTGGCTCAATTGCGTCCGGTGGTGAATTCCAGTACTCCTGAGTT  
AACCGGTGGGCGGTATAAAGAGTATACCGTCAAACCTGGAGCAAACCCGTAATCAACTGAG  
GGCCTCTAAGAATGAGCTGGACACTCTCACCCACCAGTTCAAACATTATGATGCCACGGA  
GCTGGTGACTTGTCCGGAATGTACCCATGAATTCAGGTTCGGGATTACCGCGAATGAACT  
GCGTGCAGCACGGGTTAAAGCGGAAGCCCTTAAGTTGAGTGTGACTAAACTTGAGCAGGA  
TGTTGAAACCCTGGAAAGATTAGTCGAACAGGACAGTGAGTGGTACCAAAGCATGTTAGC  
TCTACATCAGTCTGCCGGATGAATGGTGATGTTAAGTGCCTTCTGAAGTGATTAAGC  
ATACGACATGGGTAAGTCGGATACCAACATCCTTTTAAACGCCCTCAGGGCCTTCATGGG  
GCGTTTTAACTGTAAGAGACGTATCGAGGCCCTACTGGAAGAAGAAAAGCTTCAACAC  
GCGCATAGGGCTGTTACAGAAGGATTCCGGTATCAGACATCGCTACCTACTTAAAGAGTCT  
GGAACACGACCTGGAAGTGGAGAACAGTCGTATTGTTTCTACCGTCCGGCGTGTGAAACA  
GCTTATAAGGAACCTAAAGACCATCCACACCTACACCCGAGACCTGGAGAGCCTCCGCTG



TCTTAAAGACGAGATCTTCAAAGGGTTGGTACAGCAAGGGTTGGTGGAACTGCGTAAACG  
GGTTGATGAACGGATTTCATTTGCTAACGGATGAGAAGGATGAATACCTCGCCTCCATTAT  
CGAAAGCCGTTAGTTGAGTGCGGTTGTCACGTCTATTTTCGGAAGACATTAATCGTTTAAA  
GCGCCGTCTGAAGATTGTGGATGGGTTAATGAACGGTCTGTGTCCGAATAAGGGGTTGAT  
CGGTAAGCAGATGACGGATTTCAATCAAGACCTATTGTGCCAATATGAATGCGGTGACTCA  
ATCAGTGTGGAACACCATCCTGTTTTGTTAAACCCTGCCATAAGGACAACGGGGATTTGAA  
CTGGAAGTTCCCGGTGGTTACCGGTGATGATGAGCCCTCGCCAGATGTCAGTGATTGCAG  
TTTGGGTGAAGCAGGTATCATTGACTTTGCGTTCGTCATGTGGCCATTTCGTTACCACGG  
TAACTTCCCTCGGACGCTGGATGGGGTGGGTACCACCTTCGATGAAATCAAACGCGGTGCG  
TTTCTTCAATTTTCATTACAGGTTAACCACCCAGAAGGACGCTGAACAACCTTTCATGTT  
TAGCCATTTACTACTCAATACGGAATGTTACCAACCCGAATGTAATTGCGATGTATTA  
TGAAGGGTTGAGTTTACCGGGTGAAGTCAATCAACACTGTGTTATCAATGAATTTTAAAC  
CTACATTATTCATTTGCAAGGAATACCTCTAATGAACGTTCAACTCCCACGATCGGTTAC  
CCTGCATGCCTATCTTCAACCGGACGGTACACTTATGCTGGGGCCGGGTGAGGCTCAAGT  
AACCATTAACCTACCGATCCTCAAGAATCCATTAATGCGTGCATTGTCTTTGGAGG  
GGCAATGCAAGCGATTGTGACTTTTGTGATGAAACCGGTCAGACCCCGTGACTTATACGCT  
GTTGAATCCAGGGGGTATTACACCGTTGAGCAGTCGGTTTTTAAACATCTTCTCCTATTT  
CGGAGTCAGTGCTCCGATGAACTAGGAGGCATGAGTCAGGAACAAAGCTGAAGTGATAGA  
ACGGTACCGCGAACTGGTCGAAGACCTCACCTCCCGCCGCATCAGGTGATCCTGTCGGC  
GGGTGCCGCTTGGTGTTAATGGGCATCCGAGAGGAAACAAGTGACCTCGATGTGGATGT  
CCCTACCAGCGTGTTCAACTGGGCGAGTAATAAGTTTGGGGTTATCGAGAACGAAACCGT  
GAATAAACGGGTTCAATACACCCCCCTGGTCGATCTCCATGAATACGACGAGAACACGGG  
AGTGGTGTGTATTGAAGGGGTGTGGTTGTACAGCCCTACGGAGTTCCTGAAACAGAAACA  
CTGGCTCACGAAGCTGGCTGATCGAACGGACGTTAAGACCCAACAGGATCACCGTGATAT  
CCGCCAACTGGAAATTCTCACTCAATCTCAACCATTCACTGCACCCGCATTGTTGTAAGG  
TGAGGTTACGGTATGTTTTACAGTCAATTGGAAGTGGTAGAAGCCGTTCAACGGTTCTCT  
GAGGCTCATAACACCCCATTTGGATAAGATCGCTATTGGCGGAGGTGGGGCTATCATGCAC  
ATGGGGGGTTCGTGAAACCACCTATGATTTGAACATTTGGGGGGAGAGTCCGTTCTTTGAA  
CTCATTGCTGATACCCAGAACGCTCTCCTCAGTTCTAGGAAAGACAATGTGTTCCACGTT  
GAAACGGTTATTGATTCCATGGATCAAACCGATCACTTCACCACACGTCGCCATTACTGG  
GTGCGTAAACCTAACCTGTATTTCCCACTGTTCTTGTTAAGCTGGACCAATGTCCTGAA  
GTCTCCATCTTCGATGCGATGTCATTGTTGATTACAGAAACGAGGGAGCTACAGTCGCCCT  
GAACGAGGAGTCCGTCGTAAAAAGGATTACAGCGACATCTGTTTCTTGAATGCGTTGCTT  
AAGGAAGAACAACAAGTCAGGGCTTAACCTTAGGACAGTACCAGGGGATCACTCCCCTGG  
TACGCTTTCCCCTTATACGGTCTAGGAGATTACAATGGGTAAACACTCACCTGTTGAAC  
GGATTAATACTCCATGAACAACCTGACGTATCACGCCATCTCTATTTTCGTCGAGAACC  
GGAACGAGATCTCTGATGAAGCGTATGATGTGTTGGAGCAAGAACTCAATGAGTTGTACG  
ACCGATACCCTGAAATAGCGGCTAAGTTCGATTTCTATAATCGTCCCCTTCTTATTCATG  
AACCTCGGGGGAACCAATTCAACCCGTACGGTTCGAGGAACCCATGCTCAGCTTGAAGA  
AAGCCTTGAGTGTGGAGGAGGCGGATACATTCCTGTTAAAGTTCCCGGATGGTACAACT  
TCTTTTACGAAGAGAATCTGGATGGGTTGGCCCTGGAGTTGGTGTATGCACAGGGACAAA  
TGGTCAGTATGAGTACCCGGGGTCTGGATTAGTCGGGGAAGATGTGACGCATTCCATAG  
TTCTCTTCGATGAAGCTACACTTCCTCGTACCTTAAGGACACTCCCTGACCGTCATAAAC  
CCCAGGGGGATCGATTGGTTATTCGGGGTGAAGGGTACATCAGTCTGGAACGCTTCGATT  
CTCTTAATGAAACAGGGGGTAAACGGTCCAATCCCCGTAATTCGTCGAGTGGGTGGGTGC  
GGTCCCCTCCCTCAGAACCAACGGGAGGATATCCGAGGAACGCTGTACTTCGCGGCGTATT  
ACGCCAGTGATCGATTGGGGACGAAAGCCTATTCCGAATTGAGGCAGGTTCTCTTAGGCC  
TAGGGTTTGGTGTTCCTGAATCCAGGGATTGGATTGCGGTCTCAGAGAACCGGAGGGGGA  
ACATTCGTCGAGGATGGGATTGTGATTAAGTTCGACAAGTTCAAGGAACAAGACGCCA  
GTGGAAATGGGAGTAAATTCCTCACTGGGCGATTGCTTACAAGGTCCCTGCGGAAGAGG  
CGTTGGCCCAGGTTGAGTGCTGTATCTGGAATACCTCTCGGTTTGGTCCGGTAGTACCGG  
TGCTCCAGTATAACCCTGTAACGGTCCAAGGGGTTATCGGTCAGTCTGCGTCGTTACATA  
ACTACGGTTCGTTTATGGACTTAGGGTTATCAATCGGGAATCGGATTGTTATTACCCGTA  
ACAACGATGTGATCCCTCGGTTGAACCGGGTGGAGGAGTGTGGGGAAGGAGACCTGCTAG  
AAGCGACTACAAGCTGCCCTAGCTGCGATTCTCTCCTAGAGGTAGTGGTGGGTAGGGAAA  
GTTCCGAACTCGTCTGTAATAACGTCGCAGAGTGCCCTGCGCAGATCGTTATGCGGTGCG  
TAACGACGTTTCGATAAGTTTGGACTGGATGTAGACGGTTTAGGACCCGTTAAGGTCAGTG

AATTGTTTTAGAAAGGATGGGCTAAGCAACCAGCTGATATACTTACCCTTCCGGAAGCCA  
TTAAGGATCCATGCCTCACCCCGACTCGAAGAGGTTTGGAGCGTGTCTTCACGAAC  
CCGTTCTTTACATCGCTTCTTAAAGGCGATGGGTATCCCGGATATTGGGATCACTTTGG  
CTAAACGCCTAGCCAACGCCATCCCTGAAGGGAAGATCGAAGAATCCCTTACCAATCCTA  
AGTTCCTACAAAGTGTACGAGGGTTTTTCAGTGGGGATTGCTTACCGGGTCGTGAACGCGT  
TCGACTCCCCGGTCTTTAAGGACAACCTCCACACCCTAAAAGGTTTGTCAACTCTCCAGG  
ACACCGGAACGCAGGACGACTGCATTAAAGTCTGTATTACCGGCAACATTGGACCTTCCC  
GAGGAGAACTCTGTAACCTGTTTCGCGAAGGAAGGGATTGAATTCAGTGATCGGCTTACCC  
AGGACTGTGCCTTCCTCATTGTGGGTGATCGTCTGGTAAATCGAAACTGTTAATTGCAA  
CCGAATCGGGTATACCTATGCTAATTGCAAAGGATTATTCGAGCATTGGCTCCCTCATT  
AGTTCATTAAGGACACTGAGAATGACTGTTCAAACCTGACACCAACGACCAACAACACAC  
TACCACCGACCCGGTAGTAGCAATGAAACTCAAGAAGGCCGAGAAGGCTCTGAAACACTC  
CAAGGAACTGGGTAAGAAGATGAAACACGAAAAGGAACAGTTTGTTAAGAAATCCATTAC  
CCAACCCACTGAGAATAATGAGTACCGTTCCGCCCCTGAGCCTTCTAAGCTCAAGGTGGT  
GGTTGACGCTAAGGAACTGGTGGCTCTCGATACCAAGCCGTACGGCGAATGGATCCGTCC  
CAAAGAAGGACACGATCTTTTTGGGAATACATTCTGGTCAGTCGGTGTAAACCGCGGAAAT  
CGCCCTCTTCTAATTTCAAGACAACCTTTTTGCGGAGTTGAACTCGATCTCTAGGTCGA  
CTCCTATTCTGAAGTTACGCTGAAAACCCGTAAGTACTGACGTTCCCTTGCCTTAACGTCAGTAA  
GCGTAAGGGGAGTGCTGTGGTAGTCAACTCGGTGGTTAATCGTTGTGAGTTTGAAGGGGA  
GAATTGTCTTCTGAATGTGCGAGATTAACGACTGTGTGGTTAACAAGAGCAAGGTGGTTCG  
TACACGATCGACCGAATTGCGACCAATCAACGAACTGATCGACTTCCCAAAAAGAGCGGA  
TGTATTTAGACGAGGGGTCGATCAACGCGCCCGGTAAGTACTACGACTGCCGTTTCATCGAATC  
CGAGATTAAGATTCTCCCATCAATGGCAAGGGCTTAGTGAAAGAGTCGTATGTGGATCG  
TACCCACATTACCGCTGGGAAGTTTGCCATCGTTAAATCGCATCTTACCACCACCGCCCT  
CACCGCATCCATGCTGTATCTCTCGAAAGCTTAGTTTCATGGTTGTTACTTGAGCGTTTC  
TGATACGCTGTTCCCTTCGCAACTTCACCCTCCGGAATAAGACGCTTTACATGAGGTCACT  
CTACGCGCCTAATAAACTGGGTCTTACGGTGATCGAACTTCCGTTCCATCCTCAAATCT  
TATTCTGCACCGCACCACAAAACACAGTATGTAATCTCCATCCGCTCGGGTGGTTCGTC  
CGGCCTTGAAGTGGGGAGCGACGTAAGTTGCGAAGAACTCAGAGAAAATTGGGTAAACT  
CTTGATAGAAACCCCGATGGTCAATAACGAGATCTCTGAAGACGGACTCCTCTTCAAAG  
CATCTTGAATTATGTCCTGAAGTCGGTGATTTCTCGGATGAAGATCATCAAGTTGATGGA  
CGATCTGATGGCTGTTAACCCTATTATCACATCAGATTTTCGAGGATCCTGAGTCCGTCCC  
GTATTGTTAGTACAAAACACCTTACTCCCCAGGTAATCCTGGGGAGTAAGGGTTTAATTG  
CCTACTTACCTGTAAAAGGGAGGTTAACGAATGTCCAAAACAAAGAGGAATGACCGATAT  
GTCATTTATACCGATGGGAGCGCGTTAGGGAATCCAGGTCCGGGCGGTTACGGTGTTTAC  
GCTATATACAAAGGGGAAGAATTCTCCCTGAATAAAGGGTATTACAAAACCACTCACAAC  
CGTCAAGAACTCATGATTCTGATTGCCGCACTGGAAGAGTTTGGTCTTAATATCAAAGTG  
GACATCTTCACTGACTCCCAATACGTCATTAAGTGTGCTACTCAATGGTTGAGAGGATGG  
ATACGGAACAACCTGGATGGGGTATAACTCTGGGCAACCGGTTAAGAACCAGGATCTGTTG  
GAAGTCTCAATGAACTCTTGAAGAAGAATAAGGTCAAGTTCCATTGGGTTAAAGGTCAC  
TCTGGGGATGAAGGGAATGAAAAGGCAGACCAATTAGCCAAGGATGCTGCTAATAATCCG  
GAAGCCCACGATATGGAATACATGAAAGTCTTAGGGTTCTAATCAATCAACCGTGGAGAT  
TAACACTATTAAGGCTTTATTGATGTATCAGTAGTAGACGATGGGGGTAAACAGTTCCT  
CTTCGGTATTACTGCGAATCAAAGACGGGACGACCCGAAGTCGTAGGATATACCGATCC  
TGATTATTTAGAGAGGGTGCTGACCGTGTGTTTGAACAGCTTATCCGGGAAGAACAACG  
AAAGGAAGCGGATATTAAGTCCAGTTAGCCTTTATTCAGGTGGTCACGGAACATCCCGG  
TAAACAACCTGCAACTCACGCTTTGCGACTGCGTAAATGGACCGTCAGCTGGAGAATTTTA  
TTGGGTGGAGGATCGGTGTTATACGGCTGACGGAGTGTCTTCCCTATCGAATGCTCCGGT  
GTGTATCTATCATAAGAACTGTCTGGATGGTACTGCGGCAGCTTGGGCGATAAGACGTGC  
ACTCCCCTTGGTTGAATTGGTGGCTATGCGATATCATGATGATCCGTACGAACTCTTTGG  
CCCGAGGTTGGAATATCTACAAGGGAGAATGGTCTATTGTGTTGATTTAGTTTAAATAA  
AGCAGTTGTAGAAGCGATTGCTAATTTACCGGATACAGGCTAGTTGATCTTGGATCATCA  
CGTGAGTGCTCAACGGGAACTGGGTGAACTCGTCGTTGGTTATTCCGGGAAATCAACGCT  
GGGTGATCGGGTTGAGATTATCATCGATATGACACGTTACGGCGCTAAGTTGACGTACGA  
CTACTTCCACCCTCAACAACCGACGCCTCCGGGTATTCTGGCGGTACAAGATCGGGATCT  
GTGGAAATGGGGGTACGAAGGCAGTAAGGAATGGACCGCAGCTACCTTTGGGTATCCCT  
CACCTTGAGAGTTTCGATAAACTGATTCATCGGGATTACCAAGACCTGGTAGAAGAAGG

TCGTACCGTCCCTTCGTAAGCAGGAATTGGATGTCGAGAAACTGCTCCCGAGTGC GCGGCC  
TTACACGTTGGAGGGGTACA ACTGCTTGATTGTTAATGCCAGTTATTTCCACGCCAGTGA  
TGTATGGGATGAACTGAAGGGTGGAGACGGTATTGACTTTGTAGTCACTTACATGGATGG  
TAAGGATAGCGGGATCTTCTATCTACGGGGTAAGGACAAAGTGGACCTAGCGGAAGTGGC  
TGAACGTTTTTTGAGGAGGCGGCCACCCTAACGCAGCAGGGTTCACCTTCAGCTTCAACGA  
TCCTCGTTTTCTCCCAGTCCACACCTGTTACTATATTCCGGTACTTAACTGGACACTCACAC  
ACTGTACTTAATCATTGACCTGGTAGCTAAATCCGTTTTTATTGGTGACTTAGTGACTCG  
CGGGGTTCGACCATCGACTTATGAAGTCTATCCGATATTTGGAGAATCGGTAGGTGATTAA  
AACAGTTACGGTGACCCAATGTTTACGTA ACTAACAGGTATTCCATTTGATGGGGGGTGG  
TTAGTATAAAGGCTATTCACCCTGTTCTCTCTATTTTTTTTTTCGGGATAAGTGGAATGA  
ATAATTACGGTTATGTGGATGTGTCCTTGGTAGGACCTGAAGTAGAGGAAATCTTTGTCT  
TGCTCTTGGAGTGTGGTCTTGCACCGGTGCGGAGTATAACCTGCATTGTAACCTGATGT  
ACGATGAACAGGCAGAAGAACCCTGGTGA AACTGAATCCTGATGCGAAAGTCACCGCCT  
ACGTGACAGGGATTGATGTACTGGGAGATGGATTGGTGTTTAACCTTACCAGCAAAGACC  
TCGCTGATGAACACCGCAGTTTGA AAGACGGTGGATATAACCCACTCCTTTGATGCCTTCT  
TACCGCACATGCCTGTCACCTATGACTTCGATGAATACGACATGTTGAAAGTGAAGAAAG  
CTTTCGCAACCTGGGGTGGTCGACA ACTCACCTTCAGTAAAGAATCGTTCGGAACCAAAT  
AAGACCCGATACTACCCTACCCTTGACCGGGTAGGGGTAGGTTTAAGGGAGTAAAAATT  
TAAGTTAAGGAATGAAACAAACCTACATTACCAGGGTGAATAGACAACGGGATTGTTTGC  
GGGTAAGTGACTTTCCCTTCTAAAGACAGAAAACGGTTATAAAGATAAGCGTGACTACTG  
ACTTCAATGTCGCCCTGGCGAATGTCTTGAGTGACATCGGTGAAAAGACAGACCGTGAGG  
AGATCCTGTGCATCATCTACCACCACCTCTTCGACGAGACGCGTTTTCAATAAATCAAAGC  
GTCCGTCTGCGCTGAAGAAGATCAACGGGGCGACTCGTTCCCGGTTTAAGATGAACGACG  
TTCGTCACGCCGGTAAGAAACCCGAGAAGTTGATCGTAACGAATAAACTGTCCGGTCATG  
TTGACATTTCCCGTCCGTGTGATGGGTGAAGTGAATGAACAGGCCTCGCAGGCAGAGACTG  
TTCAGGCAACCCCCACTGAAACTGATGCAATGACCTACCTGGAGAACACCATGAAAGAAG  
AAAACCAACCGCTCGCCAACA ACTCCTGGAACGCTCCCAAGGTGCCCGCGCCGCTATG  
AAGAACAGGCGGGGGCTTCCAGCTGGTCCGACAGCAATGACAGCGACGAGGTCGTCGATG  
TACTGGTGGTGACCTTCAAGGCCGATAACATCCTGTCTTACACCATCGAAGCGTGGCTGA  
TCAACGGCGGTCTCCCGACTCACCTGAAGACCGA ACTGGAAGAGCTCGTCAAGAGTCAAG  
ACCCTCGTCCCGGCGGGTGCCTCCGTGCCTTCTGGACGACCACCCCGGACTCAGCC  
AGGAGTTCATCAATCAGTACAGCAAGGCGGTAAAAGACATCATCGCCACCGGCGTGGAAG  
GTGAAAAGGCGCGCCGTGATGCGGCTAAAGCCCAACGGCAAGCGCCGGGTACCTTCAAGG  
AACGTGTCGTCTACACCCTCCGGGGCGGTCTGTAAGAAGGCTTCGGTACCGGCGCGGTGG  
CGGCTGCTGCGGCGATCATCGGCGGTGGTGTGCGAAATGGCATCACGTGGGAATGTGAGCA  
TCGGTTCGGTTGTGGGTACGGGGCTGGGTGCGGCGGCCGGTTACTTCGCGGCTGAGAAAG  
CAGAAGGGCTCATGAAGAGCGAACC GGGTTCGTTCCATCGTGAGTGGTTCGATCGGTCTGA  
TCCTGGGTGGGGCGGGTTCCAACCTCGGACGGACC ACTCAAGGCCTTCTGGGCTACGGTC  
CTCAGCAGCCCCAAGGCGAGCCCGTAGCGACGGTTTCCGTTCCGGGAGCAGGTCACGGCAC  
ATCCGGAACCGGTTCTCAATCCCAGGGCATTCTGGCCACGGTAGCTTCCCTGTTCTAAG  
CAATACGGAATAACGGCGAACATGATTAAACTCAGTTAATCGACTGACAGTGCTCGAATA  
CGAGGGGTTATCCCCTCGTAGTTGGGTATTCGTTCTCTATTTGTTAATACACCTACATCA  
TTCTTGCGTGATGAGAGTGTTTATTTATGTTAGAGGTAAGGTTGTGAACACATCCAACAC  
ACCACATAAATCCCTCCAGTTCAGCCATCAGTTCTTCTACACCATGGTGTATAAGGCTGG  
GTACTACGGAGCTCCACTCGAATTCAAGGATTACTCCTTGTCTTCGTGCCAATTCAATTG  
CCTCTACTTAGGGTATATCCACGGGTATTCTGAGACGAGAAAGAAAGGGATTTGGAATTT  
CCTTAAGAATGGCTACCTTAAAGTGCGGTATATAAGAACCCTTATTGGGGATTCCCAAGC  
CCAGTTTGAGAAGGACTATGGGCATATCCCCCAAATTCGTTATCACCTTAATTCATCTGA  
ATAAGCGAGGTTGATATTAATGGACGAATATGTCAACGATCCAACGCTCCCTAACTTCGA  
TCAACAGATCCGAGCGCTCCAATACCTTAAAGACCATTCTACCCGTAATCCCAAGAAGAT  
GATGAAGATGTGTCTGAGGATGTTGCCGGA ACTCCCTGGGTTTATTAGGGACGCCTTTAT  
TACCAACATTATTCTGGGGAAAGATCCTATTCACTGGCTGGAACACGCATTTCGCTGAAAT  
GGACCAGTATCCTGTCTTAATGAAACAGTTTATTGAGGAAGGGAACCATGGGACGATCTT  
TGATAAGGGAACCCTCTATGGTTTCAGCCTGAAGACCAACCCGAAGTGGTTGAGTAACCA  
AGATGGGGAATGGGACCCTGAGGAAGAGCAGGCGATTATCGATCAGGCGCTGAATGCATG  
GATGGTTAAGGAGCGTCGTCGAAGCTTCCGAGGGCGTATTGTGCTCATCCAAGACTTTGG  
GTTCTCCGGGATTACGTTGCTGGTTCGATCACGCTTTTACGGATGAATACTGGGAGGCATG

TCAGAAACAATGGGAACTGGAGGATAAACGCCAGTTGGATCAAGAACTTAGGGCACTTCT  
TTCTAAGGCAGGTTGTTGAGCATCACGGTCTGCGGAACAACATCTTCTCGCAGGGGCGAGG  
AATACCTCAAAGCCCGCAAATCCACCACTCAGGCTCTTGTTACCTTGAACATCAGCTATA  
AGGAGCTTAAGTAATGCAATACACCAAGAGAGTTTGGCCGAGACTCCAATGGAACAACG  
TATCGAAGCGATGCTGTTTCGGACTCCAAACCCTGACCTTCCAAATGAACACCTCGATCGT  
CGAGTTCTACATCGGCGCGGTCAAGCTGAAAGCGCAGCCGTGTGCTCTGGTTCGCTGACAT  
CGTCGTCGAGCGCGATGGTGAACCGCTGGTGCATTACCGCGCCCGTTCCGAAGGCACCAC  
CATTTTCGATACCGAAGTCCAGTGTGAGTGTGCAGAACTCGTCGAGTACCTCGAGAAGTT  
CTCGGTTCATGGTGTCTACGCTATTCACCGTGCCTTTATCAAGGAACATTGCGATAACCG  
CACTACCCTCATCGATCCCCAAGAGTAATCTTACTTAGGGGTAGGCAACTACCCCTTCCC  
CGATCCTGGGTTATTCTCTGCTGGATCGGAATAATCAACGGTTAGGAGCCCATGAAACCT  
AAAGTCGAACACCCCAAGGTTCCCTATACCCCTTCTTAACCTTTCCCGAATACCTTGT  
GCTACCGATGTGAAGCTACAGGTTAAGGTGTTAAGAAGGAATTGGAACGGATTAAGGAC  
GATCCCCTCACGAACTGAATACCTTGGTCTGTAAACCCGCTTAACCACGCCCACTCTGT  
AAAAGGAGTTGGGGTGGCGGGTGTATTTCTTTTAGTTTAAAACGTATTTATTCTCAA  
CCTACAGTATTCATATGAATGGAGCAATATGATTATTGTTTAAACCCAAAGGAGGAACACT  
TCATGACAGACCGTTCGTTGAAAACCTGACCGAGATGATGAATGCGGGCGGGGGCCCGCTCA  
CGCAGTTTGTGACTACGTTACGAACAAAGACCATATACGGAATCACGAGAAATACTTGA  
TGGGTTCGGTATGCTCGGGGGACGGAATCGCGACTGGAAGCGTGGATTAAATTCCAGTACG  
TCTTCGGGAGACCGTTCGGTGAACGGTACGTTGGGGATCTCAAGTTCAGGGTCTATTACG  
ATTTTCGATACAGGGTCTAGTTGTTTTTCGTTCCCTTTGCGTCCGGTCTCCGTCTGGAAA  
GACAGGGGGATGCACCTATGGTGTTCAGCCCAGATCCCAATCAACCGGGTAATGAGAAGG  
TGTTTCATCAAATTCCTGGTTGAACATCAGGCTAATCGTCAGAAATAAGAACGGGTATTAC  
GATGACCAAATCCCCTTGGAGTCTGAGGAAGAAGTTCCTATGATTCTTCTAACGGAGA  
GTTCAATCCTAAAAGGAGAACGTGGTACGGTAACCAATATGGCCTGAAACCTAAGGAGGT  
CAGTTATCATCAGGTTGAACGGGTTAAGATGATGCCTGAACCAGATCTGGTGACGAGGTC  
AGGTAAACTGAATCCTGTTTGGATCACCTGATACCTGGTTATCAACAAGTTCACTACACC  
CACCGCTCGCAATGCGGGTAAAGCGATTCTTGCTTTACGAGCTAAACAGACTAAGGAGGA  
AACGGCATGAGCACACGACGTTTAAATGAACCGTCCGCCCCTAAAGCCACTGGGTCTCCAG  
TTTGATCGGGAAGCGTTGTGGTTGGCTCGTATCAGCTTCATGATGACGATGGAGATAGGG  
ACATCTCAAGGGGATGAATTCCTAGATGCTGAACGTCGGTTTAGCAAGGATGCCATTGAA  
CTCACTACTCTTTTCTCTCGGGTAATAAGAAGTGAATGTCAACTCTACGGGAAATAGCT  
GAATGGGTACGTGAGCAATCCTTCAAGACCCAGGAGAGTCAACAAAATGTCCCTGTGCGA  
CCAATTCAAGAAATACCCGTTGGCAACGAACTTGCCTCATAACAGAAGTTCCGTGTTTCAA  
TACGAAGATGTACGACTTGCCTCAAGTTAACGCTTCGTATGGGAAATCCCATGTCACACA  
GTTCTTCTCAGACGGGCGCTGTTGAATAAAACGAAGTAACGTTCTGGACTAAAGAGAAT  
AAGGAGTTCTGCGTTCATGAAACACTTTATCTTTGCAATTCTGCTGGTCCCGTGGTAGC  
GTTCCGGTGCGGTTAACCGTGAGAGCGCGCTCAATGGTCTTGAGACCTACACCTGTGAAGG  
GTACACTGACAACGTTGTTGATACCGTTGAGGGGAGTATTGAAATCATAACGGACAATCC  
GATCCAGTGGGAGAGGACCGTAGTGCTACGAACGACTCGGGGATATGTAATCAAAGCGAA  
TTCCTCTTCAAGGAAGATCAAATCCTGATGGCAGAACCTTTGATAACGAAGAAGGCTGA  
CTATGCCGACAATGATTTTCATCATGTTGTTTAAAGAAGTTCAACGATGTAGGAACCCCTA  
TTTCTCTCTCTCGTTACTGAAGATCCCCTGCCAGCAGTGAAGATGAAGATGAGAACCC  
CATTGTCCGGGTCGTCACCATAGCACCTGTCTGTGAGTTAACTTCCGGTGCAGAACAG  
GAGGGACATCCCTCCTGTTTCATCCACATTAAGATAGGACACGCCCTATGACAAATCGTTT  
AGACATTCTCCCCCGTTTCATCAGATTGAGGGGATACGGGAGACGATCATCGACTTCTC  
TACCCGACTGTTTCGACTACGAGTTTGCCTTGTGCGGGAATACCCGCCACCTCAAAGACCA  
ATACGAAGTCCCAAACCTCGGCAAACGCTTATGATGATCTCTTCGCGGATACGGATCTCTG  
TATTCTGGCCTTGGATGAGGATACGCCCATCGGTATGCTGCTGTCCGCCTACGAACGCC  
CAATGCCATCGAAGTCTTGTGTTGTAAGAACAAGTACCAGGAATAAGCACGTCGGTAAGGT  
TCTGGTTGAACAATTCACCCGATTAAGCTGGGTTCATCCGATCTTTGGCACCGTAATGGC  
GTGGAATCCCTCCGCGCGTCTGCTTCTACGAACGGAATGGTTTTATCTTTAAGGAAGATAG  
CCAACATGGAGAACAGGCCTTAAAGGGTGTACGTTCTCTCCTGGATTAAACCTTACTTC  
CTACTCACTTCTAGCAACAATGTTGGAGTCTAAGATGACTACGATTGTGTTTCAGTCACC  
GCGTCTCCCTCCTGTCTTCCGTTCCGTCCACGGGGTTTATGAATCCACGGCGATTAAAA  
CCAAGGACGGACGACTCAAGTTGATAACGGGTTTCAGTTTCGGGCAAATGGGTGAAATCA  
TTCGCGTAGGGTACATCGACCCCAAGAACTAACTGATCCCCGGGAACTGAAAGCTTACC

ACGACCAGGTCTTGGAAGTCATTA AACAGTTTCGAGAACTTACAGTTCTGGGTAAACAAC  
AGATTCGAGAGTACGAAAGAGGTGGGTATAAGAGCTTACCTGAATACGGCTCTTTTCGTAC  
TCCAACAAGAATACCCCATCCTGATCCACGGTAAGATTAAGGGCGCGGCGTTGAAAGTCG  
AGTTATTTGGTAGAGACATCAATGAAATGGTTTTCTCGACCACGCTGAATATCACTGATC  
TCGAACGTATCTTCTCGATAAGTTGGCCGTCATCGTTGACGGTTTCCGGAATCACCTTT  
GTCACGTGGATAATAACGTCACCTCTGGATCAATTGTTTTAAGGAGAACGGTATGAAATGG  
ATTGTTTTGATCACCACGCTCCTGGTTTCTCTGGTTGTAATAACCAACGAAGATAGCTTT  
GTCTGTCACCAATACGGGTTTACCAAGACCCTGAGCGTTTCCATTCCCTGTCCATGAGT  
CCCAGGTTAATACGTTTCGACCTCACCGACGACCGAGTAATCTACCAAGGCCGTTTGT  
ATCGGGGTGGAACCCCGAGACTACGACTTTGATGACACGTTTCGTCACCTACCTGACTGCG  
GAACGCAATGAGATTTTGTACTTCTACTTAGTGGGCGAGCAACCTGAAATAGGGATCAGT  
CGTTGGTAGAAGACTCAGATACGTTTTTCAGCGATAAAGCGCTGTTTACGCACTGTTCA  
TTCATCCCTAAAGGAGGAAGCGACGTTGACGATGCTTCCAACATTCATCTCGTGTTAAA  
ACCGGAGGAATTAGCGGACTTATCCCGTACGACATTGTTAAAGTAAAGGCAGACAAAGA  
CACGGGGATTGTTATCGCCACGGCGCCCTTTGCTTTTTTCATTAAGGTATCCTTCCGGG  
TATTAAGACAGGGGACACTTTGTTCTTGTACAAGGACATGCTAATCCGAAAGAACAACC  
TCTTTACATTTAAGGTGACGTATGACAGTCGAGTTTATCCACACCTTTGATGATGCAA  
CACATTACCTCAGGGTATAGTGAAATCAACCAACAGGGACGAACGGCTCTAGAGATCCAA  
GAGAAATCGAGTGGTGTACTGGAGCTAATACTGTTCAAGTATGCAGCGGGTGAGCGATGCC  
TCGCGGACCTAGGGGTACAGGTCCAAAGACTACCGAGAGGTCTCGGTCCGAGAAGCACAG  
TACCAGGCAGGCCTGGAGCTGCTCTATAAAGACCTTCTCCAGGCATTGGAAGCGAGGGTC  
GAAAACACCACCTCCACGCTCAAGAGTTTCAAGGACGAAAATGGGCTATGGTAAAGGTTG  
AGGTTAAACACGACTCTCAGACTCCAGCGAGAGGTGTTCAAACCCAATGGCTGGATG  
TGGGGGTGAGTGTGGTAACTCTGACGCGGGGAGGTGACGGCAGCCTAATAGGGTACGTGT  
ATACTTTGAGTGGTAAATAACCTATTGGGGTCCAGCTTCGTTTACAGGATCCGTCACCTT  
CCCTGACGCCACAACAGCTAGCCAGTTTTAAGTCTGCGATACGGAAGGGGCGGTTTGTTC  
TAAAGACACGCGATAAGAAGAGGTGAATAGTGAATGTGTGCACACAGTGAATAAACGTG  
TCTTCATACGTCAACATGAGCCTCTCTTGAGTCAAGAGAAGACCAACGCCCTCATTAAGG  
ATGTAACCACGGACTACCTCCAAACTGCGGTATCGATCGTGTTGAGAAGTGTCCCCATA  
CCACGTTGGATGGTAAACCGAACCCTCGCTGGATTCTGGGTGTCGCTCCAGGGTTCCCGG  
ATTATGATGTCGAAGCACTGATCGGGGTTAATAACGGACTGCGTAAGGAAGAAGACGACG  
TCATCGATGAATGTGTCTTCCACCGGAATGAGTCGGCTAATTACCGGAATCTGGATGAAG  
AACTTCAACCGTTTATTAAGCCCGCTGCACGGTCAATGAGAATAACAAAATCGAATTCA  
AGTTACTGGGCGGTTGGAAACCTTTAACCCTGCTGTGTGCGGTTTCTGTACGGAAAAAA  
TGAATGAAGACAAACACTTCAACCGCCTGAGTACATCATCAGTGAGAACGGTGACTGGTTC  
CATATCAGTGGGTATTGTGGGGTGTCTCCCCGTGCTTGTGTGCGGATGGGTGGGAAGTTC  
CATGAGGCTAACTATGTCTCGTTAACCCTGATTAATGTCTGGCAGTGGGAAAACCTGAAA  
CAGGTTTCGTATTTCGTAAACACCGCACCGATGAGACCAATCCCTTTGCCTTTGCCCATTCG  
TTCCCCAAAGTGCCTTATGACCACCTGGTAGAAAAAGTGGGGGAGACGGTTGCGCACCTG  
CTGGTTCACGAGGCTCTCTGGCTGAAATAGACATGTGCTGTTTCGCCACATGGATCGT  
GTGTAGGGATGGGGTGGTGTGCTGTCCCCTTTATCCTGGTGTGTAAAGAGCGAGACCGTTAC  
CCTGAGGTCCTGGAACATTGGTTCACCTGTATTGGTTAACGAATCCGCGTACTTGAAAAGC  
ATGGATGAGGACATGGTGCAACGATATCTCATCCCTACTGAAAGCTGTGCGGGCTAAAGCC  
CACTCTACTAATTCCGCAGACCCGCTCCTATTCTTTACCTCGGAATGACAACCTCAATCG  
TTAATGACCTATAAGGAACCTGAATGACTACCATGAAAGTCCAACAAAACCTGGGTCTGG  
CTGCTTTTGTATCCTGTGCGACCAACTGAAAGCAGAAGGTATTCACGTGATTAATCCGG  
TAGAGGGCGAGGTGGTTACCGCTGACGATGTGGTTGGTAAAGTCCTGGCTGCCTTCAACC  
TGGGCAACAAGATTGAAGTGAACGCGGACGTCCCCGCTAGCAATAAAGGGGTGAATTACC  
GGTTCGAACGGATTGGGGGAGCGTACTACCTGGTCCGGAAGTAGCTAACGACTCGCCCTC  
CTGCCTCATTGGCAGGAGGGTGTATGTCCTTTATTTGTTATGAGGTGGTTATGTCAAGAC  
AATCGTTGTTGGAATATGGAAGAGGGTGGTTATGCAACCAGAGTGGTGAGGGTAAAGAGG  
AATGGACCGGGGGTACGCGGTGTTCTACTCCATGAGTGTGAGTCCCTTAGCTTATCCCG  
CCACCACCTTTTGGACGGGTCGTTTCAATATCCACATGGAGAACATCACTGTTGCTTAC  
ATTCACACGATAATGATCCTGAATTGGTGTGTTCTTCAATAAGCTCAATCTACTGGAGC  
AGGGCGTACGGGAGTATTGCAAGGCGTTCAGAAAGGTCCTCAATAACACGAAGAAACCC  
TAAAGGACCCCGTCTATAAGCGACAGTGGCTCAACCCTGAGAACATTGAGGCGCCCTTA  
CGGGGTATTATTCTATTGCGTCGATCAGGATAAAGCAGGCCGTTCTGCGTTGGGGATT

GCCACCGGACCATTGTGATGTGGATGGACATTCACCACAATGACGGGAGGGTGTTTAACA  
AAGCGTTGTTATAAGTTCAACTCAGCTCTCTCCAATGCCTGGTGACCTATTTGAAGGAGG  
CTCAGGTTAAGATCAAGAGTCTTCGTAAGCAATACAAGGTCTTAGGTTGGGATAAACCGC  
AGGAGCTCCAAAGTGACACGTCCTCTGAGGACGTTCTTCCCGATCCCCAGTAGAAATTA  
TAAACCTATATTACTCAGGTGTAATGCGATTAGGTATGGGTAAACAGGAGTACGAAGATG  
TCTCAAACGCTACTGGTACATGGTAAAGATGCCCTAGGAATCATTAAACAGGTCTTGAGT  
GAGGTGTATGACGCCGTCCTTCGACCATGGGTCCGAATGGTCAGTTGGTGATGATCAAG  
AATGGGGTCTCCACCAAGACCACCAAGGATGGGGTGACGGTAGCCCGTTCATTTCGCTTT  
GCAGATGAAGCCCATGAATTGGTGAACCGGGTAATTACCGAGCCGGCTACGAAAACCGAT  
GAGGAATGCGGGGATGGCACTACCACCACCATCATGCTGACCCATGCGCTCTATCACCTG  
TTCAAGGACTTCCCAGGTTTCCAACACCACCGGAACATTGAAGACTTGGTAGAGCGGGTT  
ATCCAACGTTTGGACTCCATGGCGATTTCGGGTGGAAGTGGATGACCCTCGGTTGTATCAG  
GTGGCCCTGACCTCGTCTAACCAGGATGAAAAGCTCGCCCGACTGGTTAGTGAGCTCTAT  
GCGAATAACAAAGGGGGTTATCCGGATATTGAACTCAAGGAAGGGGTCAACTTCGAAGAC  
CAGATCGAACAACTACAGGGGCGCAATATCCGTATGTTCTACGCGAATCCCTGGTTTGCG  
AAAGGCCACGAAGGGGGTGTGACAGAATTGACGGGATTTACGGCGTTCGTTATCGATCGT  
CAGATTGACAAGGAAGACAGCCAGAAGTTGATTGATACGGTGAATCACCTTGTGAAAAC  
CACAAACAACACCTGGCCCTTCCATCCTGCTGATTGCACGATGTTTTCGAAGAAGCCTCT  
AACTCGACCCTGATGCAATTGAATGCGGCGCACCCAACCCTGGTAGGAGACGGACGTCCT  
TGGTTAATCCCGTTGAGTACGCCGGTAGGTGGTGCAGTTGGGACGTCTGAACTGCAAGAC  
ATCGCGGTCATGCTGAACGCCCTATGCTCAGTGACGTAGCGGACCTGACCAAGTTGGAT  
ACCCATTCGATCAATGGCCAACACGGCCAACCTGGAACAGGGGGGCAATCGGTCTAACCTG  
AAGAGTACCACACCTAAGGATGAAGACCGGATCGAACAAACATGCTCGGGGTATTGAGGAA  
CTGTTGGAAGGGTTTAGCCTCAGCGATAAGTTCTCTGTACGCGCCCGGTACAACGAACGG  
CGTATTCGGGCCCTACGGGGTAAGTTGATCACCATTTCCATAGGCGGCGAAACCTATTCT  
GAAGTCAAGGAACGGGTAGACCGGTACGAGGATGCGGTGAAAGCCCTTCGTTCCGCCTTG  
GAGGACGGCATCCTTCTGGCGGTGGCGTATCCCTGGTTAAGGCGGTCTTCGGTACGATC  
AAGGAAGGCCTCGAAGATAACGCCCTGAGCGCTGAGTTTGCTACGCGGTATATCAACTCA  
GGCATTGCCAATGAGTTGATGCGACTGTCCACTATTCAGCATAAGCTGTTGTTTCATGGAC  
ACGGCGCTGTATAAGGAAAATGGGTGTTTCCATTTCAATGATGATTGGCCCAATACACCG  
ACCGTCATGAATCTGGCAACTGGTGAGATTGATACCCCGGAGGGATTGGGTATTTATGAC  
ACCGCGTATGCCTCTATCACTGCGCTCAAAGGCGGACGCCAGACCGCTAAGATCTTGGCC  
ACTAAGAAGACACTGATGCTAGGGGAGAAGATGTCGGCGGTTAAGGTTTCGGTAAGGGGTT  
TGTAAGGAGTAGGGGGAAGACCCCGACTCCTTTATTTTTGTTTTAAGGAAATCGATGGA  
TGACGAAGCATTGTAAGGAGGTAGACTTCCTATGCAGTGAGTCTTGTAACCTCTTTTTGAC  
TTACTCCCTTAGACCACCTTTAAGAGGATTAAGCAATGGATTCAAACCTGCCAATCCAA  
ACGAACCTCCTCGACAAATTCGTGAGTTCAAACAAGACCGCTACAAAGACCAGGCGCAA  
ATCCTCGCCCTCTTTGACGGCCTGACCCTCGCGGACATCACGATCTCCGACATCACCGCC  
GACGGCGCCAACCCCGAGCTGCAAAGCGCCACGGTCACCTCTGTGAGCCGCAACTTCAA  
GGTGTGCAACAAAATGGCTCCCGGCGAACATCAACACTCCGATCGCCTTCGTGGTGGTG  
AACAAAGGCGCTCCCTGACCGGCGAAGACCAACTGGCGGAGCAGACCACCCCGGGTGCC  
TACGTTTACCTGGTTCGGTGAACGCGAAGAAGCGGTTCAACGCGTGGGCTGGTGTGGCT  
TCCACCACCACCTGAAACCCAAGCCGCCGACGCCCTGGCGCTGTTCAAGGCCAACTTC  
GAATACGTCCTGGACGACGCCTATGTCGATACTGCCACCGGCAAGGTGCTCAAGGTAACC  
ACCAACCCGTTACCCACGGCGAGCTCGTGTACGAAATTGGTAAGGCTCCGATCATCGAG  
ATTCCGGAAACTGACTACGGTCGTCTGGAATTCAAAGAAATCGTTCAACCCGAATCTCAA  
CCGTAAGCTAGATAACTACCAAGTGGGCTAGCCACTTGGTAGTTTACCTCTCTTCGTAC  
CTCATTTCAATACCAGTGAATTTCAAATCTACATCATCAGTGTGAGCCAGGGGCAATAAA  
AGTTCACGGATGAATGAATTTCTTTGCAACTGGTGCTTTAAATGTCATTAGGAATATTCA  
CCATGAGTATGAGTACAGCTAAAAGGGGTAACTTTTCTACGTCCCCCGGCAAGGAAGACG  
ATGATCTTCTCTGCACGAGATCCGGGATGCCTTTAATCCCGCGTTTATGAAAACGTTTG  
ACTAACTGGGCCTCGACCCACAATTGATCAAAGAGTTTATTAACGCGCTTTATCTGCTCG  
ACAACATCGTTAAGACCCCAACTTCGTATCGGGCCGAATTCTGAATAACCGAGATATCG  
AAGCGTACGGCGAAGACGCGGTCTTCGCGTTCAACCGGAATATCAATATCCCGTACTACT  
GCGTGCGGTGCGGTATTACCGTGTCTGAAACGGTGTACAAATTGCAGGACCAGTTTCTGG  
AACGTGATTATCCAAAACGATCCTGAGTATTCTCCGCCCATGCGCACGCCCGGTATTG  
ACGTGACCGTAGACGGCCATCCTTACAACGTAGGGATTACCTTCAAACGCCTCATCCTT

TGTTCCGGTTTGGTGAATTACCAAGATCTCCGGACTGGGATGAACACTTCAGTCACCTTCC  
TACTCACTCGGGTGGGACTTTGATCCTCTACCTGCTCCACTGGGCTTAACGCTCCTGTGG  
AGCGGGGTAGGGGTTATTACCGCTTTAAATTTTTCAATACACCAACCCAAAAAGGTAATA  
ACCATGCCGAAGAATGAGAACAATCCTGATAACAAGGTCTTACGTCTATCACTGATGAA  
GACTTGGATAAGGCACTCAACGTACTGGACAACGCAGGGGAAGACGTAACCTCCGGTGTCC  
GAAGAGACCACTACGCGGCATCCGGGTACGTCGGATATCATCAACCGCTATTACATCCC  
GCCCTTCAGCGGAAGAAGGCAACCCCTGAATACATCGAGTGGAAAGCCGCTCTCAAACAG  
AAGGAGGACCGATTAGTGGAATCCTTGAAGACTTCGGAGACCCGGGAACATGAAGAGAAT  
GTCCTGAAAGGGAATACCCTGGGTACTAAACCGAAGACCAAGCAGGTAGAAGGACTGTTG  
GAGATGGTGGTTCGTCAGAGGGCTGAACTCACCCAAGAAGACACCGTAGACGCCGCAGAA  
CGCGCATTGGCAGCGCTGAAGCCGGTGCCGGAATATAACCGTAAGAAACGTATTGACTG  
TGGTGTATTGTGGTTCGGGCTCTGGGTGGTTGTGGGAAGTGGTCTCTATGTGGGGTGGATG  
TTCGTCCACAAACAAATGCTCACCGGTCATTACAACGGGGTTCGCGGAGTGCAAAGTCCCT  
TACGGGGATTTTGAATTACCGGTAAGCGGTACCACCGCTACGCGTATCAATCGATTCTG  
GGTTACCACCGCGTGGATGAGGGCACGGTTCGAAGAAGTCACCGAAGTCAGACTCCCTGGG  
GATAAAATCATTATCCTGGGATTCGATGCGAGTAAAGGGAAGTGGTGGCGGATGACCTAT  
GACCGGGGAGAATTCGGTACCGTTAAACTCAAACCTACAGATAAGTGCTGGTTCGTCGGC  
GAGAAAGACCGTACCACCTGGTAGCTTATCGCTCGTTCTGCCATTAACGGTAACCTTA  
CCGAGGGAGTCAATCCCATGCTGAATAGTTCAGACCAACCTGTGGGTCTCTTGTCTGTC  
GATTGTACATCGCTCCCAACGATGGTTCCTTTCTTTACCGGTCATTTGGAAAAGTCCACA  
AGAAACGGTGTCACTTAGTACGCCACAAGCTCCAATACGCGATCCGGTATTATTCATCCG  
TTAAACTGCCCGAGGGGTGGTTGGTGGGGATCAATGACCGGGATGCAAGCCGGTATTACT  
TCTTCCCTACCCAGGGAAAACGGAGGAGTATTCTGGTTCCTTTACCCAGTACAGCGTACC  
GAGAGATCTGGTTAACTGTTTAAAGTGATCTGGAGGACTGGTACCCGGGAGGCTATCT  
ACCTGCACAGTGTGGCGTATCCCCATCTCATGGAGCTCTTGACCGAATCCTTAGTCCCA  
GAGTGATTTCTGTTGAAGGTGAAAGGAAAGGGGAAGGGTATATTGCGTCTCTGGAATGGA  
AGCCTGAAAAACCCGGTTCGGTTGATCGTAACAACGACCTTGGATAATGCTAAAAACCACA  
GTGTTCCGATCCAATGGCATCCCCACGATGCGTTGGTTCGTCTCATCCGAAAGTAAGAGG  
AATACATCATGAAAGAAGAAAACCAGAAGAAGACCAACAGTTTCCAAGGTGGCGATGTTT  
GGGTAGTGTCTTCTAAGAAGCATCCAGGTAAATCGAAATTCCTCCCGGTAAACCTCATGG  
GACCGGATACGATCGAGAACCGTGACCAACTGGTCTTCCAAGTTCATCACCGTCTGACCG  
AAGGCCAGAAAGCGTTCTACCACACGCTGGAAACCTACAGGCTGTGTAAGGCCTACAGTT  
CGTACCCGATCCCCGTACGTTGGTGATCAACATCGCTCCCGGTCTTCCCCACACCAAGG  
AAGAGAAAGACGCTCCTCGCCGACGATCGAGCTGGACGCCGGCATTAACTCGATGCGG  
TTATCAGCGAACGGGAGGGTGGGGCCTTCAAATCGTCATCGTGGGAACCGCTACCCATA  
CGTCTTATTTGGTGATCCGTGAGGACGTTGCCTTCTCGTTATCATCGATAAAGGTGTCTT  
TGTCGGTTCAGGATGCGGTAGTACCCCTGTACGCCAGCAACCTCAGCAAAGGTTCGAGGGC  
TCTTCGAGAACCTCGCTAAACACCTTCCGGACTTCTTCTACAAGCTGTTTAAAGCGGTCT  
TCCCGGAAATGGTTCGTCTGGAAGTCACGCTCACTCACATTCATGAAGACAGTGTTTCGCG  
TTGCGCTGTACTGGGATCCTAGGGGACCTAACAAGAATCTCATTGCCTGCAATGGGTTTG  
TCTTCCCGTTGGACATTTCCCAGTTCCCGGGTAAACAAATCTCCCGGGGGTATAAACTCC  
AGAAGAAAGAAACCCGTCATGTCGCTCACAAGAAAAGACATCTGACCGGTCAGTCAAGA  
CCCAGCGTCTGTTGGAAAAGTTCTCGAAATAGTCTGTGAGTACGAGGTGGGGGGTAAACAC  
CCCTACCTCTACCTATGCTGTAACGCGCTGTAACACCCTTTAAAGAGTTTTTAAAGATGAA  
AGGTACCCTACCCATTACCAGATCAGAATTATCGCTAGAAGTGCCTTTACAGACGATTT  
AAAGGAGAGACTCAAACCACTGTATGAAAACCTCTTTCACCACGATCTCCATCTCGTCAT  
TGGTACTAAAACAACCCGTAAGCTGTTTAAACCCCTCCGCCCCTGAAAAATCCCCACCCCTC  
CGTTATTGAGAAACGGTACGAAGACTTCTTCAAAGTAACCGACAAGATAGTACTCGTTAC  
TCACTTGGGAGAAGCCGTGGGCTATCTGGCGGTGGTTAAGATCAAGATCACCTCACTCTT  
TGTTGAAGAAGACGTCGGGAAGCTAGGCTTAGGGCGTATCATGGTGTCCAAGTTACAACG  
GGGTGGACATCCTGTGAACCGGTTCTCTACGTTCAATGCTTTACCCCAAATACAGCTGG  
TATCAACTTCTACCGGAAAGTTGGGTTTAAACGAAATTGACAGAGGAGAGATCTACACGGT  
TTTGTTAATGGAATAAACACCGTACTAGGAGTAGCCCAAAGGGTACTCCTAGGGGTGT  
ATTTTATTTGGTTTCAAAGAAGCGGTAGAGATCACGGTAACGTCCTGTGGTAGTAA  
TCTCCTGATCCAATGGTGGAGGAATTAACACCCCTACCAGCTAAATCCCCTGTCATCC  
GTGAGCATCTCAAAGGCATACCGTTTAGTTACCGTGGACATTTGCTTGTACCAACGGTCT  
TTCAGTATGTCGTAAGTATGGAACACGATGTAACCGTTTTCAACACCCTGGGAATCAGG

AACTGTTTCCACGAAGTCCCCCAGTCCAGCTACTGGCAATAGGTGCTTCTGTTACCGTT  
CTCCAGGTGTTGGTAACGGGATCGTATTCCCTGACCAATCTTGACGTACCCGCGGGGTCG  
TTCCATCCCCGAATACATAGATCTTTCCATTGAACTGTCCGATGTAATGCCATTGAGC  
GCCATCGGCATATCCGCTTTACGGGTCCAGACGTTGGTGGTGGTGTGCATACTGGTGGTTG  
AGGGCTGTGGGTTTATTGGTACTCCCCATGTAACCCCGCATGCAGAAGATCGTCTTGTC  
TCCAGGGTAATACATCGACCTTGTCTCGGGCTCCATCCGGGAGGTTATTCAAGTTCGTT  
GAAGACCCTGTTGAAGGATTCAATTTCCACACGCGACTCACATAGTTCCCATTATTACCG  
GTAATACCCAGAAAGGAACTGTTGCAGTAACACCCGCCACTCCAGGCCATACTGAGATA  
TTCCCGGTAGTGGCCACGTACGGGTGGTAAAGTCATAACGGGTATACGTCTGTTGTTGA  
CCCCACCGGCAAACCTGACCTCTGAAGATATGAATCTTCCCTCCACCGATACCCGTA  
AAGTTAGCAATACCGTTTAAAGGAACTTGAGTCACCCATTCCATTCGTCCCAGAATGTAG  
GGGTTATCATCAGAAGGGGTAAATAGTTGACTCTTAACATAAAGCCGCTCCTAAAGAGA  
GGGAGTTAATCCGTCACCTACTGATTTCAAGTTCAACACAAACAAAGGACCCGGAACGGAA  
GGGAGTTCCTCTGCGACGGTGGCTGCTTCGGCTCTATCCATAAGCGACAATATCGTTTCC  
AGTCGTCCCTGGATACGAGAAGTCACTTCAGTGGACAAGTCAATGGTTTCTTCGGCGGTC  
AGAGAGAGCGTTACACCTTCCCTTGGTACGAATAGAAGCGGAGCAGGGTTTCTCCTCACGC  
AATGCTTCTTTCGCTGGATACTCAAGGCCAAAATGGATTCCGGTGGGTGGATTTCGATC  
AAGAGGGTGTGGGCCGTCTCCCCGAATCGCACTTCCATGCCTGTGTAGATCGCCGCTGCA  
ATCACATTCTGGATTTCTGTTCTTACGAATATCCTTAGCGGATCGGAGGCGTTCTGCGACT  
TCCCCAGGGGTAAAATCCCCGAGTGGTCCACTGCTGGGTCCAATACCCATCAATCTGTTA  
GGGGCAAGTTCAACCGTTACATCCCCGGCGGGTGGCTGGGTCAATTGAACGACAGCCATC  
AGGAAGGGTGTCTTCCAAGGCACTGGCTTGTAGCTTACTGGGAATGGGCCAGTCAGGG  
AAATTCTCCGAACATCCTCAATGTAAAGAGGATATTCCCCCGTACGCGTGTCAATCAAG  
GCGGTGCTTTCATACACCACAGTTACCCTATCCATACTCATTCTCCTCATTACGTGATTT  
TAATCCAATACCCTTGGGAACCGCCAAAGAGGTAGAGGGCTTGGTTGTAGTTCACCCCC  
ACGCACTCGTAGCAACACCCGAGCCAAACTTCCCAATAGCACCCACTTGTTCACCCGAG  
GTTCAAATACTGAATTGGTTGATCATTAACTCCCGCAATCCCGTAGAGTTCTCCAT  
TGTTCCCCCGTACAAAGGCTGCACCAACTGGGATACCAGGAAGAGTCACCGTTGTCCAGG  
TGTTCTGAGCCGGGTTATACTGGTACATCCCAGGGTGTTCGCCCCCGCCACTACCCAC  
TAATAACACTCACCTTCCCTTGGTAAACCATTACCGTAAAGTCAGAACAATCTCCACTCT  
CAGCGAAGGCCTTAAGGACAGTGCGGGTATTGGCAACAGGATCGTACGCGTTCAAGAAGC  
CTTTATTCGTGGTGGGTGTTTCTGACTGTACCCCGCAGATGTACACCTTCCCATTGAGAT  
AAACCGCTGCTCCTGTAAGCGGAGTCAGGGGCATATTAGGTAAACGGGTAACGATGTTCCG  
TAGTAGGATTATACCCGTACGCATCATTTCGAGCGCCTCCTAGGAAGTAAAGAACATCCT  
TACCATCAGAAACCAGGATGGAGTTTTTCCGGGGGGGATTGGTAGGCCCTGTTGGACTCA  
GGGTTTCAAGTACCCGGGTTCCAAAGTTAACCCGACGGAACCTTTTGGTAGCGGTCTCTA  
CCCCACCGTAGTAGTACATCTGGTTTCCATGGACACATCCCCGTCCGGTATTGAATAACA  
ATAAACCCGGCCAGATATCCATCGCCTCACCTGACCTTCAATAAACGGGTACGTCCCCT  
TGGCATAACGAATAGGGCGCCATCCCTTGGTAGGGACATAAGAATCACTGGCAGAGTACG  
TGACATTCCTAATGGTGTACCACCCCGGATACGCTTGGGGGTACCGGGTTCATTACCCG  
TAATGTCTTTACCCAGTTGGTAATCCCGTCAGTATTCCCACCACTGGCCGCTTGATTCA  
TCCCCAGTTCTGCATCCGTGAACCGAGTGGGCCAGTTGAATCCATTGGGATCCGATACAT  
GGACCTTATACAACAACCGGTCCATTTCAGACGTTGCTGTATTGCCATCACTCCCCATGG  
TCAAGAGACCTACGGTGTAAATAACCCCGGTACCGTAGCTCATAGCTCCCTGTCCGTA  
GACCGGCTTGGGTCAACAGAATACGCCGAACATTATTCCGGATCGGCATTTGAGGAATGT  
AACAGGTTTCATTGTGGTTCGAAAACCTTCAACCACGGTTTGGCTTTATTGATCACTTTAC  
CAAAGGCAATCCCAGTGAGTTTCGCTAAATCCTCGTAACCAAACAATTCCGTTGCAGGAG  
TAATCCCGTACCATCCTTGGGCAGGACTACCTGCTTTCAGTTTAGAAGGCCCCCGGATTAG  
GACCGTCCGGAAGGCATTTCGCGGTCGATGTAAAGAGTAACGCTTCTATCATGATGACTT  
ATACCCCAAAGAATAACAGGGAGAGCCCGTAGTGCCCCCTGGTAGTCATACTGTAA  
GGAACAACAGGCCCAACGCACCAATCCATTTTGTTCATTCCAGGTAAAGACGTAGACC  
AGTTCAGATTCACTGACGGATGGGGGAGTTCCGTTATGCCACACCAAGGGTGTTCATCC  
TTACCAGCGAAGGTCACAATACCCCTCCGCCGGTGACATTAAGCGTCAGGACCATCCCA  
CGTACCGGGGCTTTAGGTCCATCAGCAATACCATTGCTTACCCCCCGCCGCGGTGTTA  
TTGATCTGGATGTACTGATCCACCAACGGATTGATTTCCCCTGCTGTAAGACCTTA  
ATCGGCAAATCATAGCGGTCAAAGGTGAGATCCAACCTTCCATTTCAGGAATATCCGTA  
CCGGCACGGAAGACCCGAACGTACTGTTTACCATCCTTGGCCTGGAGGCCTTCAATACCC



TTCGGAAACTCAATAGCTTTCCATTCGGTACCGTCACCTTCTGCATTGACAGCCTGGGCG  
TACTACGACCCTGGAACCGCATTTCGGTACGGGACCAATAGGGAGGGGGACCCAACGGTTA  
CCCAACCGGACAACCCGGCCTTCAGACTCCATGGGGGAATTGACATCACCCGCCACCAA  
CGTCCCCACAGGACCAACCCCGATCAACGGTCTTGTAGAACACATTGAAGGTCTCAGAG  
ACTGCCCAGTCACCGACTCGACCACTGAAGGCATCCGAAGGTGCGTCTACACCCGGCGGC  
AACGTAAGCCACCGGCTGCCTTGCTCACCCCTGAATACCGGGTTTCCCTTGAGGTCCGCGA  
GGACCGTCACCCCGGTCTTACCGGTTTGACCGCGCCATTACCGGTTTACCGCCAGGCG  
TTAGTCGACGTACTCCAGATGGCTAGGGTGTGGACTCCGCCAGGTAATACGCATCCCC  
GCAACCCCGCAGGAATAGCCGCTTGTAAGCTGCCAGGTTTCGCATAATCCCCTTTAATG  
GGTACCGTAGGACCTTCGGGGCCTTGTAACACCCGTTCCCGTTCCTACCCGGTTCACCC  
CGGAAATCAAACCCAGGACTCCACGCGCGCTCATCATTACGAAATACGTAAATGATGC  
TCCAGAACGAGGATAGCGTCATCTTGCTGCTAACGACCTGACGCAGGCAGTCCCGCCAAG  
GTGGGTACCACATCCACCATGTTCAACCCAGCACCGGGAGCGCCATCACTCCCTGGCATG  
GACACCGGACCCACGTTATCCCAACGAGTTCGGTATTACCCAGAGGTCTTTATTACAGG  
TCAACGTAGGCTTTACCTTGAGTTTCCCTCGTTAATCGGAGGAGGATCGGCATCCGCAGGT  
GTCAGGACCTTAATGATGTCCAAGGACTTACCATTACGGCCCTCCTTACCGTCTCACCA  
TCCGTCCCTTTAAAGACACCCAGATTCGCCCATGCATTCGAAATGAATCCATAGATCGCG  
TTTTCATCACGAACAGCATAGACCCATTGATCTTCAGGATTCGCAGGAAGATCCGCTACT  
GTGTCAACCACACCCCGAAGAACAATGTTGGTACCGTCACGACCATGGAGGCTGGCTAGG  
AACTGTTCTTTACTGCCGGTGTTCCTTTGGAAATCCAGAGTTCGTACGTGGACTGGCCA  
TTGATAACCATCTTCCCTTTAAAGGGACCCAGGTCCAACCCAGGTTCGAACTCGCTGCACTC  
CATACGTACAACCGAAGGGTGTCTCGTGTACATAACCCATCGTGGTTAGCCGGAGGGTTG  
GGTAAGTTGTCCAGATCAACACGAGTCCCTACAGTCCCCAAGACAGTCAGGTTCTCACCG  
GGTTCCTTTTTCATGGCCGCCAGAAATCATCTTCCGTCTTACCTTGTTTCTCGGGTTTA  
TTCAACCAGACCTGTACACTTTTCAGACCACCCGGTCTGCATCACCCGTTTCCCTTTA  
AACCCCCAGCTTCCGCCACGCGCTGGTCAGGTAGATGTACAGGGTATTCTCATCCTGA  
ACCGAATAAAAATCCTGTTCTACACCGGGGTTGGTGAGGTCATCTATGGTCGCTACGGTG  
TCTTTAACGAGCAAATTACGACCTTCAACACCGTTTCTACCATCTTCTCCCTTGAATTGA  
CCCAGAATTACCCAGTTATTCTCAATCCACATACGGACTGTATTGTCCGCACGAACCGAC  
CAGGCAGCCTGTTCAACCGCGTTACTCGCGAGTTCACTGGCCAGGTCTACCGCCCCTTTC  
ACCACGATACTCTTACCGTCCGTACCGTCCCTTACCGTCCCTTGCCCTTACACTGGCCGATA  
TTAACCCAATCCGTACGGTCTTCAATGTAGATCCACAGGTGGCCCGTATCCAACGTCACC  
CAGCCATGTTGATTAACCGGGTCTTTTGCATTCAGCGCATTACGGTTCAGCCGCCGTTCCC  
TGTACCTGAAGGTTAGCCCCGCGTTCACCCCGAATGGCTTCCCTGCCACTCTGTAATGGTT  
TTGTTCTCGTTACCGGGAATCTTCTTCCAGGTTTCGAACGCTTCATCTCCCTGAGCACCT  
TTATCTCCTCGTTGGGAAGCCATCAATTCCTGAAGGGTCTTTTCTTCAATCCCAGGAATC  
TCTTTCCACAGCTTGAAGGTAATCTTCCCGTCAGGACCTCGAATGTTCAAACCTTTCCAG  
ACAAACTCACCCGCTGTTTTACCCGGAACCAAACATGAAAATCATTCCGCGACAGGTAG  
GCATCTCCGGGTTTATTCCCTTCAGGCAGTGCGAGATCGCGGTTGTCAGGCCCAACGCC  
AACAGGTTTATCCCCGTTCCCTTGCAAGGAACCCGAAGACGCCATTCGTTACCGTTC  
CATACCCGTAGGGCAAAGTTAACGAAGTACGCGGTACCGATCGGAAGCTCTTTGGTATCA  
ATAGCTTCCAGTTCAGCTTCCGAATTGAGTTTACCTTTAAGGACAACCGCTCGAGTTGAG  
AGGGATTCTAGACTCTCCTTCAACCACCGGGTACGCGAATCCAACACCCGAGCTTGGAAG  
TTAGCCGCACCCTCGCCGTTGTCTCCCCGAGAATCGTACGTCAATACCAAAGCCGGG  
AGGTGTTCTTCCATCGAGACTCCTCGACAATCGCTGGTAGTTACCCCTCTGTTACTGTT  
TCATCGCCAATAGCCATTTAAGAACTTCCCTCTGATTAAGGGGTAAAACAAGATGGGGTGT  
TCAATTGACCCACCCGCACGGTGGTTCGTTTGAGCGACCCCTTTCTTCAACACAATCACGA  
CCCGGAGTATCAAGGTCTTAGGTGCGCTGGCCAATTCAAGGATTTGGGTATCGAAGATTC  
CCTAGAGATCCCCTTGACGCGGAGGGTAATTCAGTTCAGTGTTCTGACCCGAGCGCACAG  
TTTGGACTTTATCGTTCGTTAGGTTACTTCCAGTTCCAACCCAACCTTGCAAGACTGCTT  
GCGCATCGGTTGGAATCGCCAACGACCCTGAGCTACCAATTTTCATCCCTACGGTCAGGT  
TTGTAATAGGGAGATCCTGTTCCATTCCCAGGGTTCGGTTGATCACCGGTAGGCGTGCCCG  
TAAAGGACATTACCTGGTATTCACCCCCGAAGGGTTGGTTTCCCTGGTAATAGCGACGG  
TCAAACCGATCAGTCGATTACCCCAATAACCGGTATTCGAGGCGATCTCAACCGTGGTAG  
TGGTAGCACCTCCCGAATCCCAGCACTACCATCATTACCGATCAGCAAAGGGTTGGGGT  
TAATGCTCCCGAAGTAGTGGGCGGTCTCCGGCGGTGTAGTGCTGAACGGGACGTAACCTGG  
TTGGCAAGGTAATGGTATTCTGGAACCTTCTTGATCACCGCAGTGCGCACATGGTTACCGA

TGATCTCGGCTCCTTTGGGGCTTGGGTGTACACCGTCCCCCAGCATGCCCGCCAGCGGCT  
CATTGACATTACCCGGCTCTACCATGTCATCCCAGGGGTTAACACGATAACACCCCGTT  
TAGGCAGCTCAGAGAGCATCCACAGGTCCACTTGGTAATGAATAGCCAATTGTTTCATCAC  
TGAGCCCAATAGCGGCTTGTCTACCGGTGTTTCAGCGATCACAATGACGGTTTTGCCAT  
TGGCCAGCAATGTGGCGTAAATCTCGGAGAGGTTATTGATCGTTTCATTGAACGTCTGGT  
TACGCAGACGGTCATTCCCCGAATCCAAATGGATAATGACATCGAACTTATCCAAGGAAG  
CCAGCAGTTGGGGAAGACGTTGGGCTTGGTGGGAGGTAGTATTCCCATGGACACCGGCGT  
TCATGGCATCCGGGAAGGCTACGGCTCCCTCGGTCTTCGCACTGGTCCAGAAGGCCAGAC  
CAATGTTACCCATCACGCACTGGTAAGCCCGGCTATCACCGTATACCACGATATTGCGGT  
TAAACAGGAACCGGTCTTCACTTACCGCATTGACTTTGGTGGTCAGGGTATTCACTTCTT  
CTTTCAAATAACGGGTACGAGATTCCAGCACACGTGCTTGCCTGTTTCGCATTGCCGGTGC  
CTTCTTCGGTGGCTTCAACCTTATCATCCGGCATCAGAGCCAGCAAAGGTTCAACCCATC  
CCGGTTGTTCTTTAATCACTACGGGAATGTCAGCCATGAGAATAAGTCCTGTTTAATGCG  
TGAGGGTGCCGTCGTAACGGAATTGTCCGTTAAAACGAGGAATGGCGTCGTAATGGCTTT  
CTACGACAGCGAGAGTACCGGTAACCGTGTGGAATCAATGATAGCCTGAGTGAACCTCCC  
CGTCGAGGGTAATTTGATCATCCGTCAAGTCGTAGTAGCATTTTGCTTTGATCAGGGCTT  
TAATGTGTTACGGGTTACGACTCCCTTTGCACACCAATACCGCACCTTCAATGATATCTT  
CGTCTCGTTTGACTTGGTAAATACCTTCCACCCCTGGGTTTGTAAAACGTCCCAATCAA  
CCGGATCAGGGGTTTCCAGCATGGAGACCCTATTCTTACATAATCCGCAGGGAGGTACC  
GTTGGTTCTTACCGGTCAGTTTACGTTCCGGAATCGACGTTGACCACCCGAGCAAATTCAC  
CACCTTCTACCTCAACTTTCCTGAGGTCAGAGAGGGTAGAATTGCCAGGGTGAGTTGTT  
CTAATACACTAACAAATGTTCCGGTTCATCGGAATAACGTTCTTTATTAAGCGATGAACC  
GTTCCAGCAACAGTAGATGGTTTGGAAAGTCCATAGGCGTGTCCACAGAAGTAGACAGAG  
GGTTCGGTCATTAGACCATAAAATTGGTAAAGAAAATAGTACCCAAACCCATATTCTTCA  
ATTACCTGGTTATTTAACTTGAGGTTCTTTTCAAACCTACATAATCAGGGTGAAGCACAG  
ACAGAGACCGTTCAACGGTCAAGAAGCCTTGTCATGAATACCCATCAGGCCAACAGGG  
GTTAGCCCAGCGTGTTTAAACCCTGCGTCAAAAAGCTCGTCGTTATGCCCGTCAGGAGAT  
GTGTTCCCTAGAACCGTCTTACCGGCATCATTACCGTCAACTGAGCTACGAAGCCAGCCG  
TATGGCAGATCGCCTTCAACGTCAACTGTGATTGGTGTTTACCCCTTCCCCCACACAC  
AGGTCTGAGATGAGCAACGTTATCGATATGTTTACGCTGGCGGGACTCGAAGAATAAGCGT  
TCGAGTCAGTTCTAAGTGCTTCATCGTGAAATCGAAGCACTGTACGTCATTCAGAACCGG  
GCGCTTACAGGAGATCGCTTACAGCGGATACGGTCTTGGCGTATGAACAAGCTAAACTCTT  
CTGATGGATGTCAGGATTGAAATCTACACCAAGAGCATTGCGTTGAGTCAGTGTATCTAA  
GGACATTTAACGTCCAGTGGTAATCAAGGCTATATTACTTGGGTGATTAGGTACACAACA  
TTCATTCTTTTTAGCGGTTTACACCATGGCTAAAAAGTCGAACTTCACTATCGATAACT  
ACAACGCCGTCTGGAAGCTGTTAAAGCCAATAACGGTTACGTGATCGACACCCACGGTG  
GTAGCCGTGGACCTTATCGTGCTGCTGGTATCGCCGCACTGGTGAAGGACGAAAGGGTTA  
CCCCGGTGCTGCTGTGCCATGGTTCCTACTTCTGCCCGAACTCGCTGCACAAGGAAGCCG  
ATGGTTCGGTGACCCTCTCCAGCTGGTCCGGTCCGGTGTACAATCTTCAACCACCAACACG  
GTGGGCTGGAAGAAGCGATCCAAGCCTACAACAAGGAGCAATCCGAGTGGGCGTTGTCCG  
GTGGTCAACTGATGCATGTACGCATCTTCGACTACACCGACGAAACCGCAACTGTGTTCCG  
GCGAGCCAGTTCATCTGGCAGGCGAAGTCGTGGGTGCGCTGGCAGCACAAGAGCCGATCG  
CCAAGGTGAACATCCCTGCTCAAGAACGAGCAGTTTTGTATACGTAATCTGACTTCATTA  
GGAGCAATGCCATGAGTAATGTAATGCACGTTAGCACCATCGCCGGTCGTACCGCCCTGA  
CGGTGATCACACCCGACGACCTGCCGGTTACCAACTGGATGGAAAATGTGCTTGCTGTAC  
AGATCCAGAAAGTGGTTGACGGAGGTAAGGGTTGGCCAAACGACGCCGGGTTCAAGGTGG  
AGGTTACCTACCACACTTGGCCATAGGGTTGGGACCGGGAAGCGTACACGCACTTGTGTA  
CCAACCGCGCCTAGCTGGACTCCTACATCAAGGACCAGCACGAGTGGGCCCGTTGTGAGG  
ACAACATGGTGAAGATCAAGATCTAAACTGGGACCTCGGTCCGAACTTCATGTAAACTC  
GTGAGTTCGGTGGTCCCTGCGTTGCGGAACAGCCCTCTGAGCCGTCTTAGTTGACGTAAG  
GCTAGCGCTACCTCCCTGCCAGTGGCAGGGAGGTACTACTCTTTTTATTTTTTGCTTCAT  
TTCCATTTTTATAGTTCACTCAACACAACGAGCAAAGTAATGCCTGACACTAACACCGGT  
CCTGTGGAATAAAAGATGGAACGTGTGCAGTTCAAAGAATAAAAGTATGGGGTCTTGGT  
AAATCTGGTACTCATCAAACGCTTACTGAGTAACGACACCGATTATAAGAACACTTGA  
CGAACGCATGGCTAAGTCAATGGAACATAAGGGTAATTAAGTCTAGTTCTAATCAGGTCT  
ATATTACCTTTGTGTATATTAATGCGTGGTTGCCTTCTATTTTTAAGACCGAATAAACA  
CAAAGGATGTTATCTATGAGTCAAGTCAAGAAAGCGACCAAAGGTGTTCTGAAAGGTCAC

AGTCGAACGGCCGATAAGTTTGTATTATGGATGCCAGTTGAGTTACGCGATAAGGTTAGC  
GAACGCGCAACGGCCAATGGGCGGAGTATGAATGCGGAATTTATCATTCTCATAACAGGCT  
GCGACAGGCAGTGGGAACACAGGTGGAACCCAAATAAGGACTATTCCATCGGTAGGTGAC  
CCTGCTCGGGTTGAAGGGCTCCCGGGTGTGGTGACTIONGAATTGATACCGACACCGACTGGA  
TTAAAGATCCGGGCAAAAACCTGTGAGGGAGAGGATATTTATTCGTTATGGGAGATTGTT  
TCATATGACTCGTTTTGAGAACTCGGATAAGGAAAAGAAACCCAGTGTTCCTTTTGAAGAA  
CAAAATCGGGTTTTCGGGGGATAGGGCCCAGCATGAGCCCATGTCGTGGACACTCACCT  
CCCCGGTGAAAACCTCGGTGGGTACGCAGAACCTCTCGACCTGAGAAAGAAGACCTGAT  
CCCTCAACCGATCTCTCCGATTA AAAAGCGTTGTATAACCCCTACCCAGCCCTTTTTCGGCT  
GGGTAGGGGTTAATCTCTTTATTATTGTTTACTTCACTTTGGTAACACACGACGATCTGA  
CCAGTTCGGTTATGTCGATCCTCGTAGCTGTCACCGTACCGGTGATCTTATCCACCTCGA  
CCACCCACTCAGCAATCCTTTCAGCTCATCGAGTCGCTTATTGAGGGCTTCTTATGGG  
TGTCGTTACTGTAGTGGTTAATTTGACCTTCCACCTTGGCAATCTTGCTCTCCTGTGCTT  
GGCGGGTCTCAAGGATGCTCACCCAACTGTTGGACTTTGCTCCTTCACAACGACCGATTT  
TGAGGACAACCTTCTTAGCGGAATTGAGGTCTTTGATCGTTGTAACCTTTAGGCAGGCCGA  
TAAGTCCATTCACGTATCGCTGGATACCAATAACCATGCCGTCCGCTACGCCAGAATCCT  
CACCTCCATCCGCCAGATTCTGGTACTTCGCTTTACGCTCATTCCAACGACCCACCGCGG  
CTTCCAGTTTGGCGACCTGGCTGCGCATTAGACTGCTGTGAATGACTCTGGAATCAAAGA  
CTTCCTTGATCACCTTTTTAACCTGTTCAAGTTGGTGTTCACCGGGAGGGCTTTAATGT  
CGTCAAGTTTCTTAACTACGGTCTCCTTAGCACTTTGGTCTCGATCTTGTGGCGATCT  
GAGTGGCTTCTTGGAGAACAGGACCCACGTTGGTTCGTTGTCACCTTAGGACTCGCTACGG  
CGTCTATCGCCTTTTCAGCGGCCTTAGCGGATTCATCTACCTTATCCAGTTTGTCTTTAA  
CGTCTTCTTGAAGAGACCCCGAAGATCGACTTGAACAGGTTCTTGATGTATGCCCAGG  
CTTTCTTAAATCCCTTCGCCAATCGACGACAGGAACCCCTCACTCCCCGCCACTTCATTAC  
GGGTCAGGTAACGCGCGGTATGGATAACGGACAGAGGGTAACGCTGATTTCGCAGTCAGGT  
CCATTCCTTCAGTTCCCATGACCGTATCCGAAAGACCATCGAGTACTTGCTCAATATGTC  
CCATTTCTGGAACACCGTCCATCAGTTCGTCTTCGTATGCAACCGTGGTGGCTTGCTGTT  
CCATTATTTGCTCCTTTAGGGTTAAAAGTGTGAGAGAACACTCCGGGAGGGGATACAAGGA  
ATGGTTTTAGGTTTCATCCCCATATCAAACATCTCTTGGCCGGTGATATTACCCAACAA  
CTCATGGCCCTGTTCTTTACTCATAAGAATGTCCACTTGTTCCCTTAGGCTATTCCATGAT  
GTTAATACTGCGGGTCCATAATGTTGTGTTTATCCCCGGTGTCCATATCCAAGAGTTTAAA  
GTAACATGGAGCATCCTGACCGGTACGCCAGGTACGGGCTTGGACCTGTTTCACTTCATA  
CTCTCGGAAAGGGGCATTCAACAGAATGGTTCAGGTTCCGATAATCAAGGGATACCCTTC  
CTTCAGGGAATCAAAGATAGCAATCAACGCACGGAGAGTGGGGTCTTTCTCAAAGCGTTT  
GGTATTGGTGTCTCGTTCGTTGCTGTTTTACCGTTTACTGTACATTTCGGATACCCGAC  
CTTCGTGAGGTATTCCTCGCAGAGTTTAAAGGGCATCCACGTAGGAGGTAAGATCAGAGT  
CTCCTTCTCCACGTTATCGATGAGCTCAGGGAGACCTGCGTGCGCAATGGTGGCTTTAAT  
AGCGTTAATACGGGCTCGTCCATAAACGTTCCCTAACGCCTCTCCACGCAGTTTTAGACC  
CAAGTACTTAACCGCGGACTTAATGTTCCCTGAAATCCTTCAGGGTGGTCCCTTTAAGGCC  
CTTCTCGATGTCTTCTTCCACCAGCTTACAGAACTGACTGTCTTGGTTATCCGTA AAACT  
GTTGTACCCCGGGTTGTGAACCGGTGAACAATCTGTTTGTACTTCACCAGATGCTCAAC  
CGTTTTAGCATTCTCCTGGATAGACAATTCATACGACGTCATAACATCGTTGTAGAATTC  
CAGGAAGCTCGGCATATGCTTCGGATAGAACGCAATCCGTTCTCCAATGCAAATCTGCAT  
TTGGAGGCGAATAGCATCCAAGGTGTATTGATCCGAATTCGGGATCTTCACCTTAACCAG  
TTCCATAGGAGGAGGATCGCCCAATCCACAGTTACAGGAATGGTGAACCTTCATACGTCC  
AATACGTCTACTCAGCAAATCCATTAACGAGGGACGGTTACGTCAATAGGACGCCATTAA  
GAACTCCCAGACCTTCTTATCGAAGTAGGGATCGATCATAACAGGTCGTTGGGAAGATTT  
ACTCCCCTGAGCCTTTAGCGGCGTCCCTGATATCGGTAGGTGATGCCCGAACAGTTCCAT  
GTCGCACCATTTCGATCAACTTCCGTGTACGGGCTGCTTTAGGGTCATTGAAGTTCTGGGA  
TTCATCCAGAATCATCTTCAAAGCGCCTTTATGCTTCTTACTCAGCGCAATGAGGAAGTT  
CTCCAAGTATTTCCCATAACCACTGGTCATGTAATCGTAATGGACGATGTAGA ACTCATA  
CCTTCTTCTACGACCTTACCGCTGATACTGGTCCAGATAACGGGGTGGAACCTTAAAGTG  
CTGGAGGGGTTGTTCTACCCAGACCTTATCCACAATGTTTCATAGGGCAAAAAGACAACCGT  
CGTAGCCGATTTGATCAATTGAGACCACGCCAAGGACGTAAAGGTAGTGGGGGTCACGAT  
GTAGTCATCCACCACATAACAGCTTCTCGTCATTATCCTAGGCAATGCAGCAAGTCTCTTG  
GTTCTCCACTTTCTCCGAGTACGCCAGCTTACAGTTGCAGGTCTTCATACTGGGAGATGTT  
ATACATTGCTTGAATACGGGGATTGTCTCCAATTAACCCAGTCATCATCTTGCCGACGTC

TCGGTGCTTAAAGTCAACCTTATACAAATCGTTAACCAACACTGGCTCCGTAGCTGTTCC  
TCCAATGGACCACATCAACCGACGGAAGTTCTCCATCCCAATCCGGTTCTCGTGATACGC  
GGATAAGACGGATTCCTGATGAAACACCCACGTGTTCAATCACCGATGTGACTATATT  
CAAGCGATCCCGATACGGGAGCTCCAATACGTTGTCCCCTATTACAACGTCGGTATCGAC  
CAGCTCCCTTGCAGCGACTACAGAAGACGTATCGCAATGGGGGTTGCATCCATTGATCTC  
ACCCACTAAGGGGAAGTACACATACTCTTACTGGCTTTATGGAGTACTTCCAACGTGGT  
TAAGATTTTATTGACCCCATTCACCGTGGTTTTCCACAAATGATACGGATGAGAGACAGC  
CGTTCTACCGTCTTCGAAATAGAAGCGATAAACTTCCGTGATCCCCTGGGGGTAAATACT  
CTCCACACACGCGCTATCACCCCGGGGGTACGACGATATCCTTGACCTTTAGGTCACC  
CAAGGCTATCCACCCATTTGGGAGTTTAACCCGGGTTGGGAGAGGCATGGCTTTTCCTGA  
ACCCGGATTACCATCCAACAACATCCCTTTCAAGTGATAACTGTTCACAATGATGGGGTA  
TTGCTGAAGAAAGTCCAACCTGCTGAGGAAAGGGAAGTGTGTTGAACTGCTTCAGTTTCTT  
AAGATCAAAAGGTTTACCTCCCAGGATTAACCGTATCTTTGATCCATGTCTCGGTTTCAAT  
GAGTTCCTTCAATTCCTCAACGCTCGTCTGCGGGTACGGAGGTTCCGTATTTTGAGGAG  
ATCCCAACAATGGGGTGCATTCTACCAGGAAGAAGTTATGCACCATAATGGTGGCCCA  
GGATTCGCGTCGAATCTGATGTTTCGTTAAGAGAGAAGTGTGTAGAACTTCTCAATGTC  
TTTGGCTAAATCGCAATAGGACACACCCGTAATGTGTACGTAGTCTCCCGTTTGTGTTGAT  
CTTAACTGAAAACAGTCCTAACATTGAAGTCGTCTTAAAGAGGGGGTTTAAATGCGTC  
AAGTAGAAGTAGGATCCGCGGTCTATAACAACCTGGCTCGTGTATACGACAACCTGTGGG  
GTGGAGAATTGGTTGAGGTAGGCCAACGGGTAGAAGGGGAAACGGGAATATCTAGATGTGC  
TGACCCTCGGAGATGTCGAGATCCATTACTTCTTACCCTCATTAAAGAAGGTAAAGAAG  
AAGCCTACGTGCGGTATACCCGTGACAACGGTACCCTCACGTTCCGACTGAACGAGAAGT  
GGACCAATACCTCTTCAATGACGAAATCTTCACCATTCCAGAAGAGATCGTAGAGGGTA  
TGTGGAGGGTCTCTATAGAGTTCCCCAGTAGTTGGTTACAGGTCGCGCCTAAACACCCCG  
CTGATGATGTGCTTCAAGATGACCTGAAAACCACGGATAAACTGGGGATTAAGCTCTCCA  
GTAACCTCCGTGATGCCGTGGATGTTATACCAAGAAAAGCAACCATATGGTTGAATGGG  
TGGGTAAACGTGACCACGACCTCTACCTCACGTTCAAACCAAGAAAGACGACCTTTCTT  
ACTTTACGGTTCGGTTTGATAAAGTCTACCCCGAAGTCCCTAAAGAGGGGATTACCCTCG  
GAGAAGGGGAAACGTTGGAGATTGATAACCCCGATAACCGTCAGGAAGTTAAGGACCTTA  
TTAAGACTATCGGTGAACTGGAACACCAAGTGAACCGACAGATTCAATATTACCGCAAGC  
ATGCAAACCTGACTGATGCAGGTAAGCACTCTTCGAGCAGGAAGTCCGTACCCTTCTAT  
TTGCCGCCAGTCACTTCAGCAAACGCATTTATCCTTTCAACAGTGTGCATGGTATGGAAT  
GGTTGGATAAAGGCGGCTAACGAGATCCTGGAGCGCCTGTACGCCTACAAAGCCACCACAG  
ACGTTCCCTTTGGGTTGGATGTGAACAGTTGGTTTCGTGTGGAGTTATCCACTGGATGGAA  
TTGAGCCGGATAAAGTTCACGGATGAATCGGTTGACTTTATTGAGTGCCTACTTAATCGGT  
ACACGGAGAGTTTTGTTGATATCCTGACGGGTTTCTGATGGATTTGAACCAGACGGAAG  
TCATCCGTCCGTATCACTACGTCGTGCCTGCTGACCTCAGTGACGGATACTCGATCGGCT  
CGATTCATCGGGTAAAATAACGAAAGCGACTATACTCCAGGAGAGCCGTTGGGCTCTCCT  
GGAGTAGTCGGTATTACGGTACACCCAATCGAGACTCTAGATCCTTAATGTATTATCCC  
TGGCCACTAAGGCCACTGCCAGATCTCGAATACGAGACAAATCATTACTGTCATCCGTAA  
TCGTGTTCTTGCGGGTGGTTTCAAACACATCATGCTCATTCTTCGAGACATTCCCAATGA  
CCGGTACAGTTCCAAAGTGGATTTCCCTTCCCTCCGAAATGGGCTTTGATGTGGGGAT  
CGAAATGTAACATCGCCAGACAAGGTTATCCTTCGTCTCAGGGGGTAAACGCACCACAGT  
CGGTGACAATACACATGCGTTCGTACGAATACCCATCTAACAACGGGAAACTATTCAGGT  
AGGTAGTCAGCACATAGACCAGAGGACCACTCCGCGGTATTAACGACACCACCACGGCGT  
TTTCACTGATCGCCTTTTCCAGTACCGCGGGGTAATCTGCTTCGCTGAGTCCAATGGGTT  
TAAAGACCCGCTCGTAGATCTTAATCTTCAGTCCCTGCATTTTCAGGGATCGTTCGAGTGG  
CCTCTACGGTGTAGAACGTATTGGGATTACCACGGTTGAGAAAGGTGCGATAGTTTCAA  
ACCGTCCGGCTGCACCAATGGTTGGAATGATGTTTTGCTCAGCCATTCAATTAATCCTCCT  
CTACAATCCCGTCTTGAATCATTTGCCACCGGGTGAACATCACGTATTTCACTTGACCAA  
TACGCTTGCCACACAGACCTTATCCAAGCGAGTCAGACGGCTGACCCCGGGAGGCAGCA  
AAGAGAACGGCGTAGCCACTTCAGCGGCTGCTACCAGGTCTCCATTCCACGGATAAACG  
CCATAGTAGCCTCACCCATGGATCCAAAATCAGGATCCAGGGCGGGGATCAATTGGTACT  
GGGGAACAATTGAACGAATCTTCTGCATGCCTTGACGGTTGTTCTTTTTAGCTACGAACC  
CAATCTGAACGGATTAATACAGCATGGGTAGGGTTTGGAAAGGATTTTATGATGAAGTCTT  
CTGGTATTGTTGGGACCAAGTACTGCTTGGTAATATCGATTTTCAGTCTCACGATCGCCAA  
TGCGGGAGAACGAGCTAGCACGGGTGGTGCGGTCTACAATCCCAATCATGTGCAACGGG

GGATGGCAGAGAACTCCAGCGGGTTGAAGAGATCGGGGATCTTTTCTTCCCAATCTTCAC  
GAGGATACTTCGAATCTTTCAAGATTTTCATCTTGAATCTGTTTCGTAGAGCGGATCTTCCG  
CCTCGGTACCATTACCCCAGGACAGGATAGACCAGTACCCCATGTTCAACTTGCCGGTGT  
TAATCAGGTCAAGTATCTGGAATTTCTCGACGTTGCGCTCTGTATAGGGCCAGACTGCAT  
TCCGAGTCGCTTCATGTTACGTTGCGCGATGACCGTTCGGGGTGTCCGGTGCGAACCGCT  
CAGCAATCTGCTGATAGTTCATGGTCATCAGCTTGTCCATCTCGTTTAAACGGGATGGGGT  
GGATAATCGCAAATGAACACGGGGATATTGGATCAGGAAGTACGCGTCAGCCATCCACA  
AGTAAAACGGCTGCTTATCACCACCCACGCCATGATAGCCACGAACAAAGCTCGGTAGCC  
AGATCGTGTTATTGGTGACCATATCACCACCGTCTTCAATCACAACATTGGTGGTGAATT  
GGGCTTTGAGTAGCGCAAGGGTGTAGGACGACTGTCAGTGATTTTCCCCTTAGAGCTT  
GTTCATAACAACAGTTGGAGACACCGATTTGAGCTTCAGCAATCGCTTGCGGCATAACAA  
TCTCTGTTCCATCGGCTTCGGAATAGAAATTGACCAATACGGTTGCACTGGGAATGTTCCG  
CAGCCAGGGTAAACTTACCCGTGCTTTGGCATAAGTGTTGGACTTGTTTCGACAGCTCGC  
CAATAGGGGAGGTTGTGAGTAGACTGTAGTCGTGAAGCTTTGCTATTAATGCGAAAGAAA  
GGAACGTGGTACTCATGATGGGCTCACCGTTGATGTAAGGAATACGCCCATGGTTTTAGG  
TATTGCAAAGGAGATGGCGGATAGATTCATAGAATTCGTTCTTAAATTCTTCAAAGGGGA  
GTCTGCTGAAGACCAACTGAGCAAAGCCCTTAAAGTTTTCAGTACTTACTATTGCCCTGCT  
ACTGTTTGGTTTGTGTTGCATTGTTGAGTAACAACCTCAACCTGCGCATGGATCTGGCGGA  
TGCTGAAATTGGTCTAGTTAAGATTAATATGCTCTGCGACCCTACTGTGGGGGAAGGGGG  
ACTTTTAAAAGAGTTCGTTTCGTATCAACGATGCGTTGAGTCGACAACTAGACAGTGTTAA  
GAATCAAATATCATCTTGTGAAACGAACCATTACTGCAACGGCTGACAACAAGGTA  
TAAGGAACACCTACTTATGGTCCTTGAAGAGAACAAGATTCTACAAAATAATAACCATAT  
GCGGTTGAGAAAATGTACACAATAGGGACCGGTTAAATTCCACATGGATGTGTATCCCAT  
GTACACGCACCTACTAGAATGAGTTAACGTAATGGAAGCCATCACACCGTCTATCAACTG  
GGTTATGTACCTCCTGGTAGGACATAACAGCAAGTTAAAGAAAAACGGCTACTTCCCTGGG  
TGGTCATGGGTATTCTCACGATATCCAACAAGAAGGTAAGCGTAAGCTAACCAAGGATGT  
CCCGACGTCGGGGGGGATTATACCGGTAATCCTCAGAAGACCAAGACGGCTGTAACGAT  
TCGGGATATTGTGTCGTTGACCGTAGTGAATGCGGAGAGTGAGCTGGAAGCCCTCTTGAA  
GGGATATTGGGAAGTCCTGAATGCCCTTACCACCGATCCCATCCTGAAGTACCTGTGTGT  
CAGTACCGAACACAAAGTCTTGAAGCCTTGAGTAAGGTGGACAAGAAGAAAGTCGAAGA  
CGCTGAAGAGTTCAAACCTCGGAAGACTGGTTTTAAAGCGCAACGGAGCGAGCGGTGTTGTT  
AGACATCCTCACCTGCTTGGAAATAGCCAGTCAAACAGACTGTCGGGTGGTCTTCGATGT  
CCCAGGTGTTGCAGAAGGGGCTCAAGGGTATAAGGAAGCTGCCAAACAATGGGACCTTGC  
TGAAGCGATCAGACTGTTTGGGTTTATGAAGGAAACCAACCTGGAAGTGGTTTCCCCTAA  
GGAGTATGAAAACCCAGAGGTGGAATTCAACAAGATCGTCAGTGCCTCTCGGTGGTATTT  
CAATACCTTGGATCCTGAAGCGTTCTATAAAGAACAACACGGGTATCGAGTGACGGGTT  
TGGTAAAGTCGAACGGGATAAAACGTAACGTTACGGTAAGCTCACCACGGATGTGACCTACTC  
CAAACCTTACACCACACGACCCCTTCGTTTACTGGATAAGTTGTTTGAATTTACGGTAGA  
ACGGATTGCCAATCCCAGGGGGTATTTGTCAGCAGGGGATCCGAACCACCTTGTTACCAA  
GGATGTGGCGCTGTTAATGGTTCAATTTCCCAGGGGTTCTAAGGAAAAGGAACCGATCTC  
CCTTTACCAAACAGAACACGAAACCGGTTCTGATGGAGCTTATATCCCCGGTCTTGAT  
GTCGTATCGGATCGGGGATTTGTTAATTGGGATGGATATTCTGTTTGAAGGGTTTATGAA  
CAAGGATACCGAGAACAGGTATGGGTATCTGACGTTCTACATTATCACGGATTTGATTTA  
CCAGAAGGAAGTCAATGGAAAAGGGGTGGAGAAGCTTAAGCTGGATCCAGCCTTTAACCA  
GACTCGGGAAACGATCAGTTTAAAGGCCACTCATCCAGCGCAATTAACCGGTAAACCAT  
CAAGCTGTCCATTGGGTACGACACTCCGGATTGGAACGCTTTTAAATTTCGATTACGGACC  
TAAGGTTAAGGTCTGGTGTGTGACAGACACCCGGAAGTGGGTTTTCGGGTACGCGAC  
AATTGCCGAGACGGATGAGTTTATCTATATCCATACGTCGGCGATTGCTAACCTTCGGGT  
GTTAACCTTGGCGGAGTTAGGACGAAGTACTGATAAAGCGTGAACATTATACTACTGGG  
AGGTGTGTACCTCCCAGTAGGTATACGTATGGTACTATTTTGCTTTGGTTACAATCGTCT  
CGGTCTGATCACGGAAGACGGCCCGCAGTTTCGTTCCGGAGGGTCATCATCGCTCCGCAGA  
TGTCCGTAAACTGCACAAAACGATTAACCACCAACTCCACTTCGGTCAGAATCTTCTCAT  
CCACGACGAGATCATTGGTTGTGATCTTCTCAACCAGGAGTTGTCCCAGTTCATAGATCC  
GAGACAATTCCTGACTGGCCATTTCAACATCCCAGCGCCCAGTAGCTTGGCCGACACGT  
TGTAGGTTTCCAGTAAGTTGTACAGTTCTTCGAGATTGACGTAAACTTCACCCAGGGTAC  
ACGTCTTTCGGTGGGGGTTGGATGGGAGACCTTTAAGGAACCTTTTCGGAACGGTCCAGTA  
CCGTATCAAAGTTGGTAATGGTCCAACGGAAACGGGTTTCAGGACGACCGGTCTTAATCA

GTGGTTTAAGCCAATCGTTTAGTCGAATTGCTTCGGTTTACATACTACTGACCAGATAGA  
CCCCATCCGTGGGTACGAATTGGGTATAAAGCCATCATATTACCGAGGCCGGGTGTGTAGG  
TCTCCGGGACGATGACTGGCAACCCAGCGTTCTTAACAAAGAGAATCTCTTTCCGCTGGA  
TCGTTTAACGGAACCTTTTCAACGTCCACAGTGATAACCGACTTTTCGAAGGCGGCCAGAC  
GGCGGTCTATAGAGGCACCGTACTCAGAGAAGAAAAGACCCACACTTTCCCCTACACTGA  
GTTTTTCAGCCCCAAGACTAAGAGAAGCTGGGGATTCTTGATCCGTTTCGATGAAGTCTT  
TCGATGTAAAGGAATGTTCCATAACTGAAAATCTCATGAGTATAGTTTGGAGAATGGGTT  
TTTACGCAGACACATCTAAAACAGGGCGTTGCCCTTTCAGCTAAAGTTCATAAAAATACGA  
GGAATAAGAGGAACATGAGTACGCCTCCTCTGTTTACCCAAGAGTTGGAATCGGCCGATA  
CGTTAATTGTAAATCATCCGTTTTCCCCTATTTTCGATATGTTAAACACCGAGATCTTGA  
TGAGTGCATCAGGGGTGGCCTATAACAACGGGGGTCTTTGTCGTAACCATGCTATCGTCG  
GTGGGAACAACACCCAGAAGACCGGGATGACCGTACTGGGTATGGCACGGGTCTTGATTC  
GGTTAAAGGGTCTGTTGTCTTCTTCTTTGATATTGAGGCCACCTTCTCCGTAGACCGTC  
TGGCGGAAATGATAGACCGAGAGATCGGTATTCACGGGTACTTCAACGAACAGATACTGG  
GCAAGCGCTTCTTCTGCTTCTCTCGGAATGATTTGGTAAATCTCTGTGATGGCACCTTTG  
TTCATGATAAGTTCAAATGGTTGAAGGGGAAGATCGCTGAACAGATTAAGGCCAAAGCCG  
ATATCTTCATGAAGACCCCGTTTACGGACAGCAAAGGCAACCCCGTTAAAATCATTACCC  
CTATTCTGTGCGTGGTCGACTCTATCTCTGAATTGCCCTTCCATCGGGTAGCGGAACATT  
TCCAAGAAGGGGATGTTGATCATGGCGGAGAGAAGAAGACGCGCGATCTGGTGATTGGGA  
ACCTCCGTCGATCGTCTATGAAGACGCCGATATCTTGGGTGGGGTATCGGGTTGTTACC  
AGATTTGGGTTGCTCAGGTTGTTGATAAGATCAACATGACTCGGCGTCTGAGGAGAAGG  
AATCTATTTTCATCCGTCGGGTAATAAGCTGAAAGGTCCTAAGGCCATGATGCGAATTC  
CGCAGATCGGTCACGACATCCTTAAAGGTTCAAGTCTTAAAGGCGGAAGTAATGGTCAAG  
AGTGGTTGTACCCGAATCCCTTTGGTAAAGATGTTATTGTGACTCCTGATGCCAAAGGAA  
TGCCTGACTTGATGATTTATAATAATCAACCCTGTCGGAATAAGGCGGTGATGTCAGGTA  
TTAACGCGTTCTTCATTGGTTCCCAGTCCATGGGAATTCATGAAGGTCTGACCATGTACC  
ATGTACTGAAGACAGCTAAGTACTTCGGCCTGTAAGGGAGTGACCGCAGTCATCACTGCA  
TTCTGTACCCTGATGTGAAGGTGGGACGTACCACTGTATGGGAAAATACCATTGAAGACC  
GTAAATTCCTGCGAGCACTGACCATCATTTACCACTTGTGGTTCACGCAAACCTTCTGGC  
TGACACTTCCCACAAATAGCGTCTGACTCCTCAGGCATTGTACGACGGTATTATTGCTC  
AAGGACTGGAATGGAACGATATTCTGGAGAACACAGTAGACTACTGGTACACGAATCCAG  
ATATTGACAAGTACACTGTTACAACGTATGAACTCATTTCGCATTGCACTGGGTGAACGTA  
AACCTTACTGGAAAGAGAAAGGTGCACCTAAGGCTATTATTTAAATAAAGGGTGTGAGGG  
TAGCCTGAGTCTTCCCACCCCGACTTGGTAAAGGACCCCTCATGGAAACAGCACCGTGC  
CCTACCACCATCTCATTACGGCGGACAGTCACTTTATTAATCTTTGCCTGGATCCGTTT  
GACTACATCAGGCGGTTGAAAGATCGAGTTTCTGCCGTGCGGGAGGATAACCCGTTGTTG  
TATACCGTCAGTGTTCGCTATGGTGTGGGCGAGATTGACAGCGAAATCCCGGTGATTGAA  
GTGAATGACCGGAATAAGACCCTCTTCAGTCAAACCTTGGAGAAGTCTCCATGTTGTTT  
GACGAACTCCAGGCGATGAGTACGGTTCGAAAGTGATCCCTTTATTAAGTCCGCCAAAGAA  
GTGATTACATTGGCCAACAAAACGTTTACACATTGCAAATAACCCGAGGACAGTGTAAATGG  
CTGGCAACCGGAAGGCATTTGAAGAACATGTGTATAAAGCCTTTGGTCCCTCTGACCCAAG  
GGGGTGGCAATAAGAAGATTTATGTGAAACTCTTTGCCACCATGCACGATGACGCTTTTG  
AAGACTTCGTCCAGTGGTTGGA AAAAGGGAATCCGTTAGCGATTTGGGCCAGTAACTTTG  
TTCCTGAAGAGAACTGAATTTTCGATAACCTGATGAGACTCTGTCAACAGTTCGGTATTG  
AAGTTGAACACCAACTGGTTATTTACGACGAAGACACTGGGATCAAGTCACTGACCGCTT  
ATAAGGCGATTGTAGGACGTGCTGAAGTCCGTAAACAACGTCAGATGTTGACCAAGAAGT  
TCAGTGCGGCTAAGAACGACTACGAAATCGATGACCTCACCGGTGAACCCATGGGGGACA  
GCCGGAGTGCGGGGATCAGCGGTCTGAGGTTACCGTACTGCATAACCTGGGTTTGAACA  
TCATGGCGAATGAACTGTAAACCGTTAAAGGCGGGCAGCAAGAGGCCTTTAAGGCGTACA  
AGAACGATTTGTTTACCATCGGTAAGACCACCACCAATGGGAGCCTGCGTAAAGGCTCAG  
GTATCAAGGTGTTGAGCACGGTCCACCACCTCATGCGTGGTTCGTCATATCGACACTAACG  
TTAACCAGAAGTGATCTCTCCCATGGATAAACTCATTCAATTTGTCGAACACCATTAAAG  
AAGTATGGTTGGACCTGTCAACCGGAGAAGCTCCTCCTCCATTCTTCAGACCTTCTCGT  
CGTTATCAACCGTGCTTTGATCTGTTTTAATGAAGCCTATTCAAGTCTTCATGAACCAAG  
TGGGAAGTAGTAGTGATCTCTTCGACAGTTGGGTCTGTATTCAAATGCTGGTTATCACCC  
GCTTGGGCGAGCATCAGGTGGCGTTCAGTCAAGTTCAGTCAAATGTTCAAGGAAGTCTTTA  
AGACCATTGAAGGGGGTAATGGACTGGATATTTCCGACGAGAATGAATATAAACGCTGGA

GTTTCTTGATTGCTTTAGCGTTTAGGGTGTATACCACTCATTTCATTGTACCCCCACCTA  
CAGGACCTAAGGCATGAATCGGGTATTAACCGCCTACGCGGATGTGGACAGTCTCTTCGA  
TTGTAGGAGGGGATTGATTCAGAAGTGGTTAACACGAGACATGGATGTTAGTGATGAAAA  
CAGCTTGAATGATGAAGCCTCTGCAGCGTATTAAGAGGAACGCCGGCTTCAAGGGGACAC  
CCTGTGGGAACCTCATATTGAGAAGTACTACAGGGAGAGAAGGATGGATACGTTTAACTA  
TCCGTTCTTTGGGTTACCCGACAGATATTCAGGGAACTCTATCAGAAACGGAGTTTACG  
GAATTGGGGGTACGGGTATTACCCACAGGGTTCCTGTCTAATTTTCGTCAAGGTGATTAT  
CGAGCATGAACAACGGACCGATAAACCTATCGAGATCAAAGGGGTGACCCTGACGATCAA  
CTGTTTCCCTTATGTCATGGATACAGCCCTTAAGGAGGAGTTGATCGAGCACGTTAAGAC  
TCGGTTAGGCTACCGGGTAGAGGTGAAGACCGTTGTTGACGACATTATCAATGCAACACC  
CTCCTACTATCGTCAGTTCGATTATGTCTTCAAATACGACTTCCTGTTGAATGAAGACTA  
TAAGTCCTTCTTTGAGAACGTCGGTAAACCGCTTATTCCTGATACGGCGTTTTTGGTTCC  
AGATCTCCTGGTTCAACAAACCGAGTATTTGGAAGGGAGTATTTAAGACCGTATCTTCGC  
CCAATACATTGCGCTGGCTCCTGTATTGAAATTGATTCCGATCAACAAAGGTTTCTATGA  
TTRACTTGACGGAATAACTCCTTTATTAACTGGCTGGGGATCTCCCCACCCAGTTATGTTT  
GCTTGGTTAAATTTCTCCCATCGATATCCACCAGCTGAATCCCCTGCACCAGCACTTC  
TTCCGTAATGGGAATCAAGGTAGGATCCAGAGGCAGGGGTTTAGAGGGATCCAGTACGAA  
CTGCGAGAACCTCAAAGGTGGGGAGTTTAATCCCTCCACTTTGAATACGCTCCATAGCCTC  
CAGCATGTGGTTAAGGGCCAGTCGGTTGCCTTCATTCTCTTTCTTCTTAGCCCGCTCTTT  
ACGGTCATCCCGTACGGTCTTCTCAATCTCCGCAATAATCTGGGTGACCCCTTCCAGCAG  
ATGCGCGTTCTTCGGATTATCCAAAGACGCAGACATAGCGTATTCCTGAATGAAAGCCCG  
GTTACGTTGTACTACCTAAACCAGTTCCTCCTGTTTCGATATCCTCCAGATTACCAGTCAT  
TGCCTTACGGAGATCTTCCAGAACCGTTTGCATTTTATCCGTATCCAAAGGACTGGCTTT  
CTTCTTTTCTTTTGTGGTGTGTCGTCAGGCGTTTCCATGATTTTTTCAGACCTACATTAT  
TCGTTTGAGTGGTTAGGAGTATGTGTAATTGGCACTAACTAAACGGGCTCGATTACGGTG  
GTTAAGCTGGATACCTGGTATAGGTAACCTGTTTAACCGAGAACCTGGATTCCCTCACGAT  
CGAGCGGCTGACTGAGATTAATCAACGGTTCTCTTAGGCTTCAGTACGGGTTCGACGGTCA  
GATCCAGGATCTATACGATTGCTTAAAGCCCCTAAATACGTCGTTTGACATCGATCCGAG  
GGTCTACCTACCCTTACCTATTGAACTGTCAACAAAGTCCTCTAAGGACGCTCACAGGCT  
GGTAGAGACGGTACTGTCAGGTTACTCGTGGAACCCTGACGAACACTTCGTGAGTAACAT  
GATCGAACACTACCCAGTTTCTTAGACTGGTACAGTAACGGTTACAGTCTCGACGTGTA  
TTACCAGGGAATGGTGAAACTCATGGAAGTGTATTGTGCCTTATTCCACGTTATACCGAA  
TGAGGACGATCCTGTTGAATGTCATCCTGTCGTAGAGAACTTCTTAACCAGCCGGTGGTT  
TAGGCTGATGGTTATTGACCTGATCAAAATACTGACTCTGGTACTTATCCAACGTCGGGG  
AGGTTAAATGGAAGAAAACAGAGAGAGACCCAAAGCCAGCCGGTTGGAGAGTATCTCCCA  
CAAGTTTGTACGGGATGAAGAACTCAGAGATCCCCCGCCCGGTAATTCCGGGCAATTCT  
GAACAAAGTGGTTCTTACCCTCACAAAGTGGAACTACTTACGGGATTATCTGGAGTA  
TATGGTGACCACCCGAGATCCCCAACGGGCTAAGACCGAACGCATTGCCCGGCAAGGTA  
CATTAAAGCAACCTATTTCCAAAGCTATACGTTAACCTTCCAGAACTCTTGGAAGGGTT  
GTCTATCCTACGGATGAAATCTTGCAGAATCATCATCGAGGTTGTTGATGAACACGGTGA  
AATACTCACAGTGGAAGAACTATTTCGCATCGTAGAGAAGAAGCGTTTGGAGAAACCCAT  
TGTGGATGAACCGGAAGAGTGAATGCAGGAGTAGGTGCGCTAACGCACCTAGTCCCGTTC  
CCCCGTTATTCTTTATTTTTTGGAGTGCCGCTATGGGTATCCTTGACGGGTTCAATCTGT  
CTTCGGGTATTAATGCCTTTAAGAAAGAAACCGAAACCGCAATGCGGGGGGTTAAAAGTG  
AAACCCTAACCCCTATTGATCTCACCGCGAGTCGCCTTAAAGAACGGGTGGCTCTTAGTA  
ACCCGAATGACACCACACTACGTCAACCATCACCGCGTACCGGAGTTTCGGTTGTAGAAG  
CACTAGACGGTGTATTGGAGCCCCGTCAGGCGGTTTACTCAATACGAAGGACATTACCC  
GAGCCATTCGTATTGATAGCAATGGGGTTCAGTTTTCAGTGATGATGACTTGATTACCGCGG  
CAGGGTGTCAAATGGGCGTTAACGTCTGGGGTAAAAACGGCGCGAAGCAACTCATCGCAG  
ACACTCTCACCGCAGAATTCAATCGGCTCACTGGATGGAATGTGGGTCAAATTATCCAGG  
TCGGTTATGGTGACAAAAGTTCAGCCTGCCGTATCAATGACAGTTGGAGAGCTCAGCTCG  
GTAGTGCCACCATCGATATGCTCAGGGATTATACCGGTATTGATGAGTTTGCAGACGTCA  
GTGTTCAATCGGCGTTTTACAACGCAATGCTGTACAACCTCAGCGATGTACGGGATGAGTG  
ACAGTTATAAAACCCAATGGGATAACTACCCGTATCTCTCTCTGATACAAGATGCCTTTA  
TTGAAGCCATTAGTACATGATTACGAATGGGGATGTTGAGAGTATCAGTAAGGTCTTTG  
AACTCATTAATAACCGAAGGGAAGAATACCTTACTGAGTAAATACCCGGATTTTCATTGAAA  
CCCTCTTACGAAGTTCTCTTTCGACAGTCAAGTCCACAGTGAAGAGCACCCCGCCATTC

GTACGAAACGCTTAAACGTTTTAGAAACGGTAGCGGGTAAAGAGTGGTATTACCGGGAGA  
CCCAATTCGGTAAAGCGTACAACCTGGGGTTGGTATCGAAGATCAGTGACGACATGGTAA  
CCCTGTTACGCCTGTTGAAGAGTTGATTCCCCTCTTAACCACTGGGGGGATCTTTCAGA  
CTGAACGGGCAACGGATGTATTGAATCAATCCTTCCCGAATGCCCTATTTCGCACTAAAT  
AACCTAACGAAGACTCCCCTACCCCAATTAAGGGGTAGGGGAGTTATTACTGAATAAGT  
TCGTTTTGTATTGATTAATAGAGGGTGTGATTTCCGCTTAGTAGACTCGGGGGCGTGAAA  
CCCCGAGTATACTGGCTTTCTATCTTGCAAGAGGGCGTGTGGCCAAGCGAAGCAGATCT  
GCCGCTATCGAGTCTTTTATCTTAGCCGCGATGTTATCAGAACGAATACTGGTCTTAATA  
TCCGTGACCACACCCGTCATTTGACAGTTCAAACGCGACCACCGCATAATGGTATCCAGG  
TAGTCCATCCCTGTGATACGACTGGCAAAGTTGTTGAACGCACTGTCAGCCGACAGAATA  
CGACTGACCACCGCATTCTGATTAGTAAGATCCAGGATACTAATGGACCGATCAATGGGA  
AGGGTGACCAGGGGTTCCAGATCGGTAATCTGTAACCTGGCCGTCATATTCAACGGTTTA  
CGATCACGCGTCCACCCCGCATGTCCTTCCCCCAGGGTCAGATCCAATTGAGTCACCAGA  
CGGGTACGGATGATTCCACGAGACTTACAGAAAGCTTTCACGTAGAAGGGGGAGGTATGG  
GTTCCACCGCCTGAGGTATTACCGGCCACTAAGGGCAGTAGGAGGGAAATCAATACCCAG  
ATCTTAACAATCTGCTCATAACGGGTGTGCGTAGTTACAACTGACTTAATGGTGTAGGTC  
TCCGTATGGAGATTGCAGGTGGATTGAGTCCAGTGGTCAGGGATCTTGTGCTAACTGTTA  
TTGGCAACAGCCAGGGGGATATTTCCAATAACAGACCCTGAAAGGGCTCCCATAGCCGCG  
TCTTTAACAATGTTAATCAGTCCATCGACAATGGCTAAGCCAGTTTGACCTTTAGCCACA  
TCGAAGGTGAAGTCATTGGTAGTGCGAACAATGGAATTGAACTTTTCCGCCATAGGCGAT  
TGCCAGTGCTATTAGAGAAGGAATCCCGAGTAGCTCCCCCGTTCCCCTCTACGTCGAAG  
GTGATCCCATCCATACCACCGGCTACAGCGGTTTTAACGAGGTCGTAATATCTCCCATC  
CAGGTACGATCGTTAGGGTTGTCTTCGTAGTAGAACTGATCCTCATTGTTTATAGCGGGA  
TTAGCGGTTACTGAGGGGGTAGCGGGAGAGGGGCGTTGAGGCCGTTGTTGGGGTTTACA  
AGAGGAGCTGAAGTACCATAAGACTCACCCGTTCCCATAGGCTGCATGGTGGAGGTGAGT  
TGTCCGTCAGGTCCGGTTGGGGGTTGTTCCAGTTCAAGGTCGGCAATTCCATATTGCTTA  
ATACGTGCAGGGCCGATGTCTTGATAAGAGCCTCGGTTGAGGTAGGCACTGTCTTCTTCA  
ACGTAGTTGGGTTGTTATCACCCCGGCGTTTACCGACTGTGCTCATTTCCTTTTCAATA  
TACTCTTGACAAGGTCTGCCAGCGGTTACTGAACGATCGAAGGTGACTTCTTGAAGGATT  
TGTTTGGCTCGTTCCAATTTCTGTTGGGGGGAGTTAATTGGAGTGTGCTTGTCCATAGAG  
GCCAGACGCTCCAACATTACCCGGTGTTTACGCAGCCCTTATTGACCAACTGCATGAGG  
TCAATAGTCCCATCCTGGTTGACGCAATCAGGAAAGAGGGTAGACAACTGGATACGACT  
TCACTGTTGTGCTAATCGGGTTTAAAGACCGTACAGGGGATCGGTCTGTTGCTGGTTCATC  
TTAGGTAGGATGGGATCGATGTACCGCAGTTTCACCATGAAGTCATTCAGTACACCGGTA  
GCCACCATGGTGTACGCCCCAACCGCAGGCTTAACAGTCCAGATCTGATGCTTGGGAGAA  
TCTGCTAAGAATGCCAGGAATTGGGTGCTGATACTCATCAGCTGCATAGGCCAAAAGGCA  
ATAGAACCGATGGCTTGTCCCATGTAGAACGACAGACTGGGCGCCCCGCCCTTTGTTTCGCA  
ATGATAGCCGCTGCGGGAGAGAACATGTTTGTAAAGGAATGACAACAGACCAGCGAACTGA  
GCCACGCTGGGGTAATGGTTAAGAGGGTGGCGTTGTTGTCGTAGATCTCTTTATACATG  
GAGCCGAATCCCCCTTCTGAGGTGACCATTAACCGACCGTAACGCGGATCGGTGCGAGGG  
CTCCATTCAGGCACAGGGTTCACAAAGCGGATATCCCCTGTTGCACTACTGAAAACGTTG  
AAATATTTGTCCCAATCGAGGTTGTCTAATACTTCACTCGGTGGGATACCTCGGGTTAAC  
AGACGGATCGATTTGGTGATAATGTACCGGTCGCGTGTGTCACCTGAGCCATCGTAAAT  
AAATTCCTAAGGTTAGGTAAGAGGGCGAGGAGTACATCAGTACTCCCCTATTAAGATGG  
ATCAATTCAAACGGACGGTCTTATCGGTTCCCTGATTACCTGTTTGTCTTGATCTCCG  
CCATGCGACCCAGTACCTTGTAGATCTCAGCCAGAATACTGTTTCGTATCCGAACTGTTAT  
CACCCAGTTTACCCAACGAGGCCTTAAGCTCAGCCACCAACGCAGAGTCATCACTACGGG  
TGGTGCTAAGTGCCCTCGGTACCCCGAGGGGACTGAAGAACAGGTTTCAGACGGCGCAGGGC  
GAACCGGTTGAGGTGCAGAGGGAGGTGGAGAACCCTCATTAGACCTCGGAGTCGAGATCG  
GAACATCCGTAGCCGGGTTACCAAAGGTGGGAGTAGACGTAGGTGGAACGTTCCGTTGCA  
TAGGTCCTACCACACCACCGCCAGTCAGGTGGTATCCTGTCTTTTACGGACTGCCCGC  
CTTGACACAGCGTTAAGGAACTTGTTCGCTGCTTCAGGGGACTTAAAGGCCGCGTGGATAT  
GCCCGCCCGTACCGAGTGCCGTTGACTGCGGTATTCAATTGATGACTTGGAAATTCCTGAG  
GGCTTAACCCTGCCCGACGAAGAATATCCGTTACAATGGCAACCGCTTGGTCACTTCTT  
GTGCACCATTACAGGGTGAAGTCTAACGCCAGGCCTTATAGGATGAGCGCCTTTAGACC  
CCTTATTGATGTGGTAGGCGTCATTCAGTGCAGAGAAGTACCGGAAACCCGGAACCTGTCT  
GTTGAATGATTTTACCCAGTTCTTCCACAGCAGGATGGTGTTCACCCCCCGCAATGGCTT



CAGGGGATTT CAGGAGCAATCCACTGCTTCCCGGTGTATTGGTGTAAACGATCATCCCAC  
CGTTAACACCTGACACGTATTGTCCCCCTCCGCCTCCCATGGTTCCATT CAGGGACGGCA  
GACTACCACCCACAACGCCCGGAGCCGGTCTACTGACTTGAGGACGCTGGGGTTCGCTGG  
GGGCTTCTTGACCGTACAAGTCGGACCCGGTTTGGCTTACTAACCCACTCCCAGCCGTTT  
TATCAGCTGTGGTCAGTTCACCACTTTGTAGTTTCTTCAGGTAATTCAGATAGAGCGCAT  
AGCGCTGAGGCATTT CAGGTAACGAATTACCTCCAGTCAACCCTGTTGCCGCTCTACCGA  
AGTCAACGGTTTGGCTAATACTTCTCAAGAGCTTAGAGTTCCTGAAGAAGTTCACCGCAT  
TGGCTGCAATGACGTTCCGATTGTTACTGGCCAGCTCTGGTCTGTTCTCCCGATCAATAC  
CCAGCTCTTGGCCAACCCTCCGGTAATTAGCGCGACGCGTCAGCTGAATAAACCCACGCC  
TTCGGTAACGGTACCCATCACCCGGCTTCCCTGTTCCCTAAGGAAGCACCTTTACCCCCAC  
CGTACACGGTATTGGCGATGGCCACTTACCCGGCTTGTACGAGCGCTCTCCCTTGTTC  
TGCTCTTCACTTCCCTGAAGAGTTGAACCAAGCGTTCGGGACTGCTGTACTTCATGTTCT  
CAGTGGTCCGGGAATAGCCTGAAGACTCGTAGTTGGTAAGGGCGAGCATTT CAGCGATTT  
CACGAGGGTCCGTAAGGCCTTGTTCAGCATCTCACGGATGATCAACTGCTCCGCCAACG  
GCTTAGGCACACTCACCCCTCGATCCGTTCCCTGGTTCGTACGTACACGGGTTCATATCCA  
AATGACTGGTGTCCGAATCAGCCGTAATAGGCGTGAAACCAAAGGCATGCTCAGGAGTTC  
TGAACCGACCGTCGCTGCTGTACGTATTCCCAGCGTCTCCGCCGAAGGTACCGTACATCC  
CTCCTAGAGCAGAATCTCTCCGAGACCCGAATTGTCTGGGTTAGAAACATTCGCTTGT  
GGTCGGTGAACCCACCCCTACCCGGTGAGGACTGATCTTCTCAGCCCGGGTTTGGGCGT  
CGGTCTTAACCGCTTCCAATTCAGGGTCTTTGAGTTTGGCTTGTACCGACGCTTCCCCA  
AGAGGTTAAACATCCTGTCAACTTTATCCGACCGTCCGCGAGAGGTTTGCCAGGCGAAGG  
GTGCTGCTCTCACATTCCACACCGAGATGGTAAAGCCAAAGACGTCATTGACTTGGGTTT  
GAGTCAGTTCCTTGGCGATCTCATAACCGTGCGGTAGCGGAAAGGGTTCCTCAAACACAC  
CCTGTAGCCCCGACGGTATTTCTCATCAGGGTTCATGTAGTTGGTCAGCACCGGCAGGA  
ACCGATCCCTGAACCACTTGCACCAGGCATCCGCGTACCGATCATCCACCCGGAAGGCGT  
GCTTGAACCGAGCGAAGAGTTCACCTATGTGGCCCTTGAACACCATGTCATCCCCTTTCG  
CCATAAAGAGGGATTCACAATGACGTTCCAACCTT GAGGACGGCTTCGACGCGCCAGGGGA  
CATCCTTATCGTTCCTGATAGGTAGTCACCCGGATAGCGGTAAGCATATCCAAGGCTTTAC  
CTTCTGGCATCAGGTCTTGGATATAGATCTGGCCGACAACCGCATTTGGCGGTATACGCTT  
TCCCTAACCGATCGATTTACCTTTAACCTCCTTCAGGCGATCGGTGGCCTCCATCTTCT  
CCCCGAAGTCTTTCCGCTGGGTACTCCGGTCTTCCAGCTTCCGTTCCAGTTGAACCCGTT  
CCTTCTGAAGGGACTCCAGACTTTGGCCTTTAACCGTAGAGACCGCAAAGGGATCAATGG  
TTGTATCTTTAGCCCCGACATACTTCTTAAGGGCATCCAAAAGGTGACCCACCCGGATGA  
TCGTCATTTGTTGATCAAGGAGAGGAGTCTCTTTGTCAATCTTAGCTACGATCTGGTACG  
GAGAAGGCACCAACCGACTGAGGGCACTGTGGGCTTGTGGCCACTTTGTACACGATTA  
AGTCAGACGGATCGTCATAGTCTTCAACGATCGCAGTTTAACCGCATCCAAACAGGCCA  
GGTAGGTCAAGTAAACGGGTTTGAACCGTCCATTGAACAGGTAAAGACTTCACCAATTT  
CATTACGGTCTTGAGGATTGCCTACGAAGAGACGAAGGACTTCCTCAATAGGCGCTTGCT  
TAGACAGCGACGCGCGCCATTCCCAATCACACATGGTCTTTGAGCAGGTTCTCAACGT  
TGAGGATTTTAGCCGCCAGGGGACCGTGAGGATCTGAGACACCGTACTGAACCATCCGTA  
TATGAATTTGCTTCCCTTTACCTGAACCAAACATGGAATCCCCTCCCCATTTAGAAGTCC  
CCAACATCACCCCAAAGGGACTGTACATCGAAGACCCAGGGCATCCGTAGTAGGACTCT  
TTCCTTTGACCTTTTCGAAAATCCATTACGCAATGGTCTGTCCACCCAGTAAGCCCGCGG  
TGGCACCCACTTGTGGTAAAGACTATTACCGGCTTTACCCACTTTAAGGATTTGGTCGG  
TGGTTCGAGTTTCTTCGTTTCTTCGTCAGTAGCGACCTGGTACATTTAGTACGCAGACA  
ATCCACCTGCGCCAATCAAACCGGCGCGTCTGCACCCAGTTTACCCAAGTGTCCGAGTC  
CACCCAGACCATTAATAACCCACCGAGTCCACCAGCGACGCCCTTAGCGATAATCGTCA  
ACAGTTTAAGTCCATACGACCGAACTTAAACAATGCACTGAACCCGCTCCAGAGGACCT  
CAGAACCCAGGAAGCTGGTCAGCCACTCGAAGCCTTTCTTAACACCCCTACCAAACCTGC  
TCAGGAGACCGAAGATAACCGAACTTCTTCTTACCGAGTTCTTTCTCATCCTTCATAC  
CGAAACCGAAGTTTT CAGCAATCGAGATGATGGCGTTTTTAAACGGTGTGTCTTTCTCTT  
CCTGGAGTTTTTGCGCACAGTCGGCCAGGGAGTTAGCTCGGGTGGCATCATTGGACGACG  
CTGACCGACGGAACCGATCCGGTGTGTCCCTTCCCCCGCATTTCTTTAGCGGCTCGAA  
AGCTCTCCAGGGCGTGTAAAGCGCTGGATTCTTTCCATAAGGGCTTCGGTAAGGGTAA  
GATCGTTTCGCTCTCCTAGGGACCCTGGAGGGCCTTCTGGGCCATCTTGGGAACCTGGTG  
CCGGGGGAGTGAAGGGACTGGGGCTACCATCCGGTGAGTTATACCCCAATGTTTCAAGA  
GGAGGTAATAGATCCGATCCATGGAAGTGACCAATTGGAGAGCGATCCGTA CTGAACGGAT

TCTTAACCCGACCCGCCATGCCTTTCGCATACCCACCTGCGCGGTCTTTCAATTTACCGA  
AGAGGTCCAACCCGAACCTGTCCGGCTTGTCTAAGGCACGCGCCAGCTTGTGATACTGG  
TCCCATGGAGGTTTTAAGTCCACGGTCGTATTCTTCAGCCGTGATCAGGGTATTCCCTT  
CCTTGTACATACACCGGGCCATCGATCTCATCCCATCCCTGGAGTTCAACAAACCCGTCTC  
CACTCCGTTTGAAGTATGGACCTTACC AAAGCGACTCCCCAGCAATAACCGGTTCTGCTT  
CACCTTCAATGTAAATATCCATCCGGTACAGACGGGTACGAGCTTTATCCCAAACCCCTT  
CAATGCAGTTAACAGGATCCAGCCAGTTAAAGGCTTTCATAATGAGATCCCGAACCTTAT  
TCAGGCCTTCAAGGAATACTTCTTGTGCTTTCGGTAAAGAGTTTAGCCGCTAAGCGGC  
TAGCGCCAATAGCGGGTCCATTGGCCAGGTCTTTAATACTCCAGTAATCTGATCCCACC  
CCTGAATGATCTTCGCGTTGAGCATATCCAGATACTCACCTTAAAGAGTTTCAAGGATT  
CAAGGATCGGGGTATCAGACCCTTCTTCGTACAGGTCTTCCGTGTTCTCGGCTCGATGAG  
CAGCCGCTCGGGCACGCAACTTGTTATATGCCATCCCTAGCGCCAAGCCACCTCCTACCA  
ATGCAGCACCTTTCGGGTTGTAGATCGCCATAACCCGCCAATCCACCCAGTAAGCAACCCA  
GTACAAACGGTTGGTTATCCAGGAGTTTGTCTATTCCCTTATTA AACAGATCCCCAAACG  
ACGTACTCTTAATCCGTTCCAGAATACTCCGTTTTTGTGCTGGAGGGTTTCTTCAGCTT  
CAGGAGTGGGTTTTCTCGTAGGGTTGACGTTCCAAGATCTTGGTGAGGATATCGTTCGGT  
TCCCTCCAGTTCTACCAGTTTACGCAGCAGGCTGTTCCCTTGAGTCACCTGGTCGTTCA  
GAGCGGTGAACATCGAAGACGGATGCGTAAGACCCGAACGACTTACACCTCCCTGTTCAA  
TATGTGCCCCGAGTTTATCCAAAGTTTCCCGTACACCCTGAAGGGTTTCATTCAACTGAG  
CGTTCTCAGCTGCAATCATAACCACGGAGTCTCGACGCCCTTCCCCGTCTGCCAAAGG  
AACGGGTCTTACGCACCGCTTCTTCCAGAGGGTTGTCATACCCATAGCACGGTCAGGGT  
TATCAATGAAGGACTGGAGGACGTTTCCGGAAGGTGTCCATATTGACTTCATCGTGGCCAT  
TTTCAGACTTGATGATGCCAGCGTCTTTCATGACGTTGTAATACCCAGACGAACGCAGCA  
TATCGACGCGCTCGGCAATGTCCGGCATAAACCGACCCAGGAGGTTGGATTGTTCCGTTA  
ACTTGGCGGCGGCTTCTCGGGCTTGTCTGTAGGAAGACGAGTAATAGCGCTCGCTCGGT  
CCAGGGTACTGCCCTCCTTAAAGGCCGTAAAGGCTTCCGGGGTAATGTCAA AATTCCGTT  
GGAACAATTCCCGGATTTTCATCCGCTACCTGACGTTTACCCCTTGGTCTCCAAGTTCA  
TGTACACGTACGGACTGAACCCTTCCGTTTATCCGCATTCTGATCCAGTTGCATCGCCA  
ATACACGGCGGGCTTCGTTGGACAATTCCTTATTGGGGTCAATGAAATCCACCAATCGAA  
GGGACGTATCCGCTTGGGACATGACTTGGTCTTTATCCATTACCCGGTTAAAGGTATCCG  
CTTCTTTTGGTTATGGCTGACCAACTTACCCCGTACGTAGTCATAACTCGACGCGTTAA  
GGGTATCATCCCCGTACGGATCTTTTCAATCGACAAGTGAATGTGGCTGAGCAGTTCCG  
GGATCACTTCATTCAGGGTACCGGAGGACTGTTTGTTCAGATCTCCGGTTCGTGGGCAT  
CCATTAACCCCGACGTTTTAGGCAGTAACGACTCCCGGTGGGTTGGTACA ACTCATCCA  
ACAACGCCGCCATGCCTTATTTCGCCCTTCCCTCAGCGTATTAATAACCGTCCATTCCA  
CTTTAGCCAAGGGCTTTTGACCTGAACGGAGCGTACTGAGGTATTGTTTCGTAGTCCCCGT  
CCTCGTAAAACGAGGATCCCCAGTTGTGGTATTCGAAAGGGTAAAGACCATTCTTCCG  
CATTTCTGAGGTTATACGACGCTATGTTACCCAAATCCGTGAGTTGCGCGTACGCGTTAT  
CCGCCC ACTTCCCCAGTTCGGGAATTGTTTCTTGA ACTTAGCAACGTATTCTTTCCCT  
TACGGCAATTGATCATCCGGGGGAGGTTGCTAATGAACATTTGGGCCGCAACGTTACCCA  
CCATGGTCCCTACGTTGAGCGGAATGCCTTCCGACATCTCCGCCGCCATGCGCATGGCGC  
CAATCAGGTCACCTGCACCTCGGATTCCGTCCCCTCGCGCATCCTTACCGAACCGCTCCT  
TAATAAACTCACGTATTCCTCCA AAGGAGCCTTTAACCGTATTGAAGACCGATCCCCGAA  
TGCTATTACGGCTCGCTTGACTGTGGGTGGTCTTTTCGTAATCACTCTTAGCGGAGTTCA  
GGGCAATGGTCTTACGTTACGCAATCATCCGGTGATTACTGGCTTCCATGAACTTGTAGA  
ACTTCGCGCTGGTCAAATAGGAACGGGCCAACAGGTTACCTTGAGGGTATCATTCCTCA  
ATTGAACTTTACGTTGGTAATTAACCATTTGTTCCAGCAGTTGGTTGCTCCGCCAATAC  
TCAGGTTACGGGATTCAACCCCCCTATGGTGCGGCCACCTACTTCGGTCATCATGGCGG  
TAATACTTTCACCCACCCCAATGACCGTTTCCCGGTCTAACAGGGAGTTAGCGTCTTCAC  
TCCCCAGTAGGTCTTTCACATCATTTTTCGCCACATTTTCCATGGACGGGGTGTCACTCG  
CCGACGACGTATATGGCTTCCAGCTGCTGAAGTCATTTGGACTGAACCGAGTCGGCCCAC  
TGGCTACACCCCTGGTGATCTTATTAGGAGCTATTTTACCTGACTTATCACCACCCCGTT  
TATCCAAGTATTGGAGGTCCACGACTGCATCGTAGCTTTCACGTTTAAAGTTTCGTCTACGA  
TCTCCCTCCGACGACGGTTAATGTCCGACGCCGTAGTAAAGGCAGTCCCCCAGGTCTGAG  
GGAGGACCATCTTCAGGGTGTTC AACCGAGCATCGGTGTCCCCTACTGTCTGATTACTA  
CACCTGACAAAAACCCGGATGCTACCGAACGAGTGAACACCGGTTTCTTCCCGTTCGAAAT  
CGGTATCGAAATCAATATCCCCAGTAAAGGGATCCTCTCCCAATCGAAATCATCGAATG

TATTATCCGCCATTGTTAATGCACTCCCGCATAAAGGAAACCGTATGAAACTGACTAACAT  
TACCCTCTTAGACCCCGGACGATTGTTCCGGGTGTCTTTAAACCTATTACGTCTACAGA  
CTCATTGAAGGGATGACCCAGAACCTCAGTGATGACGGTCTCTTCTCCCTTGACATCTT  
CGGTAAACTGGGCAGTAAACAACGTGATAACACGGAAGCGTATCTCGACGTTAAACTTAC  
CATCTTCAATCCCACCTACCTAAAAGCCCTTATACCGATCAAAAGTCTGTATCATTCAAT  
TTTGAAAGGGTCGGAATACGCGGTATGCGATCCCGAAGTGAAGGATTTTCATAAAATCGAA  
CATCCTGGAAGGGGAAAAGGGTTTCGCCTTCTTCTGAAACACTTCGATGAAACCGTCTT  
CTCCCTGACCCCTCTCATAAACGCAAACAACGGGTGGAACCTGGCGAACCAATTCCGTAA  
CACGGCGTTAACGGATAAGGTCCTGGTCATCCCGCGGGTCTCAGGGATATCCAATTCAA  
TCCAGATGGTTCCACACCCGAACCTGTAATCACTGAATACTACCGCGCCTTAATGTTCCG  
GGTGAGAGTGATCCTCGGGAATAAGGAAGATGGCCTGAACCCCTTTACGATACCGTTCG  
GTGGGGGGTACAGAATGCTTTCTTGGAAATTGGATAATTACCTCTTTGGTTTACTCCAGGG  
GAAAGGGGGTGTCTCCAGCGTCGTATGTGCACCCGAGGGGTTACACAACAGCACCCGGAA  
CGTCATTACCGCCCGTAAAGTCTCCAGGACACGTTTAGACTTCGACGACGGTGTAGGTCC  
TAACTCTGCGGACATGGTACTCTACCAAGCCCTGCTGAACTTCCCTTATGTCTGCATCAA  
TGCGTAAACCAACGGCTACCTTTCCAACATCTTACCCTCAGCTCTCAAACCGCTAAGCT  
GGTGAATAGCAAGACCCCTGGAAAACGAATACGCTGAAGTCTCCCTGAGGTGGTTGAGAA  
ATGGACCACCGCCACCGGGTTAATGAAACTCTTCAACGGGTTTGCCGATCCCTCCTTACG  
GAGTAAACCCATTGTCATTGAGTGGAAATACTTAGTCCTCATTATGATGATGGGACTGA  
TGTCTGTGTTCTCCATGACATCCACGATCTCCCGCAAGGGAAAGACCGTAAATGGGTGAA  
ACCTATCACCTACATGGAACCTTCTACTTGAGTTGCCACAGTGTGCATCGAAGAACAGAT  
TACAGGACAAACCCGGTATCCCTTACGGGGATTGGCTCTATCTTCCCGGCTAAGGTTAA  
CCGACGTACCACCACCAATGCGAGCCGGCGGGGCATTCGTAATCCGATTGATTGGAGTGT  
GCGGGAAACCTGTAAACGGTTCCTAAACGTGAAGCCCACCCCGATTACTTCGATGCCAG  
GTCCGTAGACCCCTCTAGAGAAGCTTTGCTCGACAGTGACAATGAATAGATAGTGATGCA  
TGATTTAAACTCACTATACAACTCCTATTGTATGCGGAAGTGTTTCGCATTCGACCATAAG  
GAGTTTTAAAGTTACTAACGTGTTTTGGAAAGAAATACGTGTTGTCTACAACCAACACGG  
TTTACAATGTCACCGATAAGACAGATGTTCCAGTCCATCGGATGACAGACGGGAATACGT  
TCTTCATCGCACGGGGCGATGAAAACCAACTGGTTAAGATCAAACCTGGGGTTAATGATCC  
TCCATGGAGAAGGAAAGTTCATCTTCCCTCTCTCTGAATGCGAACAGGTGAAAGTAGGTT  
TTCAGGATGTGGATGCAGGAAACTTTGCAGCGGATAACCTTTACTTGGTCTATCCTGAAG  
AGGGCATCCCTTAGCCTGAACTCTTGGGTACTACTACATCCCTGGGCTTGAACCTAACG  
CAATCAACCGAGCCGGTGTGGTATACCGAACAGTTAGAAAGAATCTTTACCTACCGTATC  
TGGGTGGTAACACCGTTCCTAACAGTTTTTACCCTTTGTTGGACTGGATGTGGTACAGTG  
GGGATGAACGCAAGTATGTCCACCGGCTACTGGCGGAGACCTTCGGTAAGCCGCCAAAGG  
GCTACCCCAAGCTACTGGTCGACCATAATGACGGTAACAAGATGAACTTCAAGCTCTTTA  
ACTTGATTTGGGTTACCGCTAAGGACAACCTTTCAGAGCGTACAACAATCAAGAAGCGA  
GAGCGGACAATAATCCCTTGGAGATTTTTGACAGGGGAATTAGGTCAAGTCTTTAAGTACG  
TCAGTCAAATGAGTTTGCAGAGAACCATGGAGGTGGATTCTTGGTGCATTAGTCTGGTAC  
TCAAACGTCCTCGTTCAGTGTACTAGAACATGTACGGTCTTCGTCGGAAGGGAGATACAC  
GTGACTTCCAAGAGATCTGGGACTATAAGCCCCCTGTGGGTAAAGAAGATCCTTGCCCGGA  
ATGTCTTACCGGTGAAATCACGGTCTATAATTCATTGGCGGAGGCCTCTAGAGCAACAC  
AGGTAGGGACAACAGGCATCCTGACGTCCCTGAGTAACACCAACCCGAGACCCGCGTTTA  
AAGACCATCAATTCACGCGGGAGTCTGACGAGACCCCTTGGCCTGATTTGAATGAATACG  
AACTGGAATGCATCCGGCGCAAGATGCACCCTGCTACAAGTGTGTATGAAATGTTTGATT  
CGGTAACCCAGGAGACGTCGATTGTGCATGGCGTTGATGCAGTTACCCGAATCACCGGAG  
CCAATCCCCGTACCGTTATCGTTTGCACGAGAGAAGGTAAGTTGCTCCATTCACGTTATC  
GTATCAAGAACTTACACGTTAACGAGTTTATATCCATCACTTAGTCCGGCTAGGCACGA  
AAGTCCTAGACCGTATTCCTCTGAATTGCCGGGAGTTCACAAAAATCTGTTGGCTACAAC  
GTAACCTGGAAACAGTAAGCGTGAATGCGACCGAAAGGTAGAAAGAACAACAGACCTGACC  
TACGCTAACCAATAACGCTAAGGGTCGTAACAAGGGACAATCAGCCGCTAAGACGCTAC  
CGAGTATTAACCCCTATGCGTAAAGTTCAACGACTAAGGGAGTTATGACCCTGTACACCT  
ACCAATGATGGGGGTGGAAGTGGAGGAGACCTAAGGGGGAATAGACCTATTCCTACGGT  
CAAGATATAGTCTGGCCCTGTTAATAAACAGGCAGGCACCTGAGTGTGCCGGGTGCTAG  
TACGGACTGACCACCGCGGGCGATCAATTGTGCGAGCCATTCTGTTGTAGCGGAAGACTGC  
AAACACCAGGCCTACGAACTCTTTGGGAAACGGGACTATTACATCAGTGGTACGGGTCCG  
CTTTTGTACGATCCGATCAATGAACCGATTCTCTTTATGTTTAAAGCAGCGACGAGCGGC

TTAGAGGATATTGAGGTATGAGCAATCCAATTACGTATTCCGAGTTCCTTTAAGCACTATG  
TGCTGCGTAAGAAACAAGACGTTGTATACCCTAAACTCCTGGGTATTGGTGAAGTACTC  
TTCCTAGGGGGAGTTTACTGCCCTTCGTACCGAATACGATTAACGAAAAGGGACCGGTA  
GTAGTGAAGCGTTTATCAGTAACTTCCCTAAAGAGGTCTTTATTGAGTTTGTAAAGGGACG  
GGTATAAGCCGGTGATGGGGCATGGGGCGGACAGGCGCCTATGACTACCCTAAGGCGGTTA  
AGGCGTACCGGGCGAGTCACTACATGTACAGCCGGGTGCGAGAGATCAGCACGGTGTACA  
CCAAACAGAACGTGTTGGTCGCTAAGAACTACGGGATGATTCCCTCAGGGGTTTCGTTTACC  
GTCCGAGTATTATCGTGAATTATGAAAAATACTACAGCATGACGCACCTGCTCATTGAGA  
ACATCAATGCAGAAGCCGAGAAAGGGGTGCGTCGGCGGTATATGCGGATTGACCTGCCGT  
TGAACCTGCCGTCCCTGGTTGAGCTTGAGAAAGACTACGGACGGTTGATTGATGGGTTTA  
ATGATGGGCATCCTGTCCTGATGCGCAATATGTTGGAGAGTACGAAGGCTGAGAACTGCT  
ATTGGCTGTTGGACATACTGGGGTTCCTGTTTGGCCAGTATTCGTGCAGTTTGTGCGGTA  
AACTCACCGACCAGGCGTATAAGGATTTGCATATCCTCTTTACGTACAAAAGTAAAGTCA  
TTGTAGTACATCTGGGGCTGTTGAAGGGTTGGTTAGATGAAACAAATCCTAAAGACGAGA  
ACACCTACCCCTCTGCTCGGAAAGAGTTTGAAGTCTGAAGACATTGACCCGCCATGATG  
CGGTTAAACGTTTCTATTTGGCTTTGATGAATCTTTCTCGTGGAGGCGTTCCTGAGAATG  
TACTCATTAAAGAGGAAACGAAAAATGTCATCCCAATTGCCGGAGAGAAAGGTACCGTTG  
ACCAAGTGGTTGCGGGAACGTCACGAGAAGAAGAAGAAGAAACATCCCATCTTCCAGAAA  
CCCGAGACCATACTGGCTCGGGCACGGTTCCTCGTGCCCATCGTCCTGCTGGTTCTATCC  
TTGATGTTTTTCAGCCGAAGTGAAGGATCTGGCGAGGCACATAACGAAGACCAAGACACAG  
CGGAGAACGAGGTGCTGATTCAAATCTTGAAGAGTGAACATCGCCGGTAGATGATGAAC  
TGCTGGAGGTGGAGAAAGTCCAAACCGAGATCAGTACCGACAAGAATGTGTTTAAGACGC  
CTGAGAGTGGTGTAAAGCGGGCGTTGGAGGAGCGGGGTAAGGAAGGTACGCTGACGGTGG  
CTGAACATGATTTCTTCATGCGTAAAGCGACCCGTTATCAGCACATTGAGATGGAGAACG  
GTCAAACGTTTCGAAAAGTGCATTCAGATCAAACCCGAAAAGGTTAAAGACCTGGGTGGAG  
AGATTGAAGCTGAGTTTCTCCCCGTAAGTGGATGAGAGCATGTTGCGGAGTCGTGCCAAAT  
CCCTCAAGATCGAATATCCTCAGAAGTTTTTACACCGGGATATTGGTTCGAATGGTGTGG  
GTCTTCAGAACGCTGGCTTTGCGATGAACGACTACCGGCGTGAGAAGGTCGTCAGCGTAG  
AAGGCAGTTACGAGGTCCACAGCATTACAGTTACACGAAGTCAATGGTGATCAGGTCAGT  
TACATACTCGGTTGCCTACGGTGCTGAAACACGGCACCTACGTCATTGGTGGTGGTAAGC  
AACACATGCAACTGCAACGTCGGGAGAAACCTTCCGGAAGATCAGTCCTCGGGAAGTGG  
TGCTGTCGAGCTAATACGACCGTAAGCTCATGGTGAGTCGTAGTCCGAAGATGGTGGATA  
ACCTCTCTACGTTTATGGTGAAGCAAATCTCCCTCCAGAGTAAGCGGAAAGGGTATACGG  
TCACTAAAGGCAGTACGTGGGATCGCTCCCTCAAAGCCCCCGGATCTACAGCATTCTGG  
CTCGTCAGTACAAGTACATTACTATCGACGGGTTGGTATTGGACTTCCGGTTGAAGGATC  
ACCTGGAACCTCACCCCTGAGTTCAAAGCCTATACCCGCCCTGATCGGTTCTTGATTGGGG  
TAAAAGACGGATTACCTTTGATCATTGATGATTAGGGTAACCTGTACAAAGGGGAACAGG  
AACTCGGTAAGTGAAGACTTGCTCGGTATTGATGTTTCGTAAAGCGCCTTTGACACACG  
TGGTGATTAACATCAGCGGGTATTCTTTTCCGTTGGGAGTGGTCCAGTGCTTCTACTTCG  
GTATTGATGAACTGTTGCGGGTGATTAAGCCATGACGCGTTCGGTACCCGTAGTGACTC  
GCCCTCAATTGACGGAGGATGAATACGCGATTACAGTTGAATGACGAATACTTGATCTTTA  
ACCGTCGGGAGAAGCTCACACGTTGATCTTCGGTGGAAATGCCGAAGTTGAACAACATCA  
GTAACCTCAGTCGGAGTGATTTGAATAATAACAGTATTGGGAGTGCGTTAATGGGAGACC  
CTCGGGTTCGCCATCTCAGTTCCAGGAAATGAAGAACCTCTCCGATCTCTATATCGATC  
CCATTACGAAAGAGCTCTTGAAAGAGATGAAGCTGTCTGAAGACTTCCATTACTTGCTGA  
TTGATGCGGCTAAGGCATTGGAAACGAATTACAGTCGACACGAGGTGGAGATTTAAGAGC  
AACGCATTGTAGGGTATGAACTCTTCGCGGGTCAATATCTACACGGAATTTGTAAAGTCCA  
GTCGTCAATAACGGAATAAGGGGAAAGGACGTAAACACAAACTGGACTTTAATCCGGACG  
CGGTTATTATTGCCATTGGTACTGACCGGTCTACGAACTAGGTGGAGGATGTGAAGCCAG  
TTCACCAAGTGAAGGACCAAGAGGAAGTGACGTTTGGGGGTACGGGTGGTTCGTAGTGAAA  
TCACCATGGTCAAACGCGCACGGACTCAGGTGGAGAGTTACAAAGGGGTTCATCAGTGAAG  
CCAACATTGACAGTGGTAGAGTGGGTTATGTGACCTACACCACCTCTGATCCGGGTATGG  
CTGATTTCCGAGGCAATGTTGATCCCAAGAACAAACGTAACCTACCCGGTGACGGTTCCG  
TAACTATGAACCTGATGTACGGTGGAAACGCATGACGATTGAGCTGTTGAGAAAACAATAG  
ATCACTCAGTCCAACCAGGGAGTAAGCCCTTGTACCATTACCTTTAATTGCGGGAACCT  
ACTGAGAGCCTTATCTACCAAACCCGAGCAGGAAACCAACGGGTGGCCAACCATACCGGG  
TTGGGGACGGTAATAACGATAAGGATTGGGGAACCTACGCAGCGAAGCACCTTCGTATT

GTCGAGAGGACAAGATAGGGTGAACGTTCAACGACTACGGATGAAATATCCGGTAGAGGG  
GTCAGGATGCTACTTCCATAAGTAAGGTTGCCCTGTATGCTGGAGGTGTGAATAACACTG  
AGTACAGGGATGAAATATAGTCTCGTCATATAAGTGAAAACCTTAGAGCGTGGTGCTACG  
CGCATCGGCGGATAGGATATCCGTGAAGAAACGGTCAAACGAGCAGTATTCACATCGACT  
CAGGCCTCTCAAGCAGTGATGGCTAAGAACTACGAGATCTTACCCTGAGAACGGGTTAC  
GAGAATGTACTGGCTCACCGGACCTCTGACCTCTACAGCAAAGTAGCCGCTGAAGATGGT  
AAGGTCATAAAGTGGAGAACGATCGCTTACTCGTCCAATACAAGGACGGAACAACGGAC  
TCGTATCCCTTGGGGTTGGTGATTGGGGAAGCCAGTGGGGAATATCATCCCCACAGCCGT  
ACCACACATCTGAAGGTCGGAGATACCTTCCGTAAGGGAGGTGTCATCGGTTGGGATCAA  
AACTGGTTCGGTTCGCGATCCCTTCTGCCAGGGCAAGTCGGGGTTAAGATCGGTAAAATG  
TGCCAGATCGTTATGGCGGAAGATCAGGATTTGTACGAGGACTCTATTGCAATTTGCAAT  
GAATTGGCGATGGAAGCACGTACCCCATTCATTAAACCCAGTCAGTTTGGCCGAGGACGTG  
TCAAACAACCTGGTAATGCGGGTTAAGGTAGGAGATTACGTCGAATAGGACACGATTTTA  
TGTGATATCGAAGAGCCTCACTTGGTGGAGGGCGAGGAGCTTCCTGAGCTCGAAGCAGAC  
ATCAACAAACTCGGTATCAAACAGATCCGTTTCGAAGCATCATGTAAAGATCGTACACATC  
GATGTCCGGTACAACCTCCTTAGACAAGATGTCTGACTCGTTCCGTTTCGTTTATTGTT  
CAGAAGGATAAGGAAACGAAAGGGAAAGGGTTGGTGGAAAGGAACCGGTGTCGAGAACAAT  
GCCATTTCCACGATGTTCAATCTTAATCGTCCCATGTTAGGTCCAGGTAAGGCCGTTTATT  
ACGTTCTACATCGAGTCGTTAGACCCGAGTACCAATGCGGATAAGTATGTCATTGGGAAC  
CAGATGAAAGCCACTGTGGGTCGTATCATGGAAAGACCGCTTAAGACCGCCAGTGGGATT  
GTCATTGATGTGAAGTCGAGCTTTAAAGGGATGTTTAACCGAATGGTGCTCAGTTTGAGG  
AACAAGCTGGTTGCTAACGAGTATGGTTACCAAATCACTCGCCACGCCATTAACCTCTAC  
AGAGGTAATGACGATGAACTTCCGGACGAAGAACGGTTACCGAGACCTGCAAGCGTTGG  
TTAAGGAACTGGGTCTTCATACCGGGCAGGTTGACGGTGTGTGGGGGAAGGGAACCTTCT  
CCTCCACTGAAACCCTGCTCCGGGGGTATGCCGAGGTGGTGGGTAAGAATACCGGAGGTA  
TCGGTCTCCCCATCTCCTCGGATGCCAGTGGTTATAACGTCATTACAGCGCTCCAGCGTA  
ATCTGGCCTTCTTGGGTCTCTATAACCCTGACTGTGGATGGTATTTGGGGGAATGGGACCT  
TGAGTGGCTTGATAAAGGCATTCGAGGGGTACAAGGAGCGTTACCGCACGCCGACCTACG  
ACATTGCGTGGAGCGGTAAAGTCAGTCCTGCCATTACGGCGAAAGTGAAGGATTGGTGCG  
GCGTTCATGTGCCGAATCACCGAGGTCCTCATTGGCTGATGGCCTGTATGGCTTTTGAGA  
CCGGCCAGACATAACAGCCCGTCTATTAAGAATGCGGCGGGTCTGAAGCGTATGGGTTGA  
TTCAATTCATGAGCCCAGCCGCAATGATTTGAATGTTCCGTTGAATGTGATCCGATCTA  
TGGATCAGCTGACTCAATTGGACGTGGTCTTTAAGTACTTCGAAATGTGGATGAAACGGG  
GTAAGCGTTATACCCAGGTGGAAGATTTCTATTTGACGATCTTCCATCCAGCTTCAGTAG  
GTAAGAAGGCTGATGAAGTCCTTCTTCCAGGGGAGTAAAGCGTATCTCCAGAACAGGG  
GGTTCGATGTAGATAAAGGATGGTAAGATCACCCCTGGGTGAAATTTCTTCTACAATGTACA  
CCACGTATTAAGGTCTGTTGCCGTAAGTTCGTCACGTTATTTTCGTATTGATTACCT  
TCTTTTCCGTAGGAGAGTTTCCCTGTGAAAGCAGAACTAATCAACAATATCATTGCACTG  
GCGAATACCGCGGTGTTTCGATAAACAGACGATCCGTAAGGTAGGGCTGGAGTACATTGCG  
CCGCTGGATCCCAGTATTCAGGCTGAGAAGATCAGCAAGGCCCTCACGAAGCGTGTTGTT  
AAACAAGGAGCGAACCAATGATCAGTAAGGACAGCCTGGCTTTGGCAGAGAACATCGCCG  
TCGCGCTCCCTGAAGGCACTGTAGTCCCATCCACCCCGATCCTTCAGGGGTTGAATACCC  
TGAGTTATGGGGCGTTCCCGTACGAGGAGGACTTCCGGGATAAGGTGGTTAAAGTGACTT  
CCGAGATCACCGAGCATTCCGGCAGCGATTGAGGCGGGGAGTGACAAAGCCGCTGAGACCA  
TCCGCGGTGCGTTCGAGATGGTGAAGTCTACGGCGTCCCGATGTCGGACGCCATCCAGG  
AGAAAGTGGGTCTGCTGTACAGCCGAGGTGATCTGAACTGGTTCGTCGTTGCGTCATTTCA  
ATGTCACGTACATCAATATCTCTGATCCGTTCTTTGACTCGGCTCTTTATCCTACTGAAG  
TCAAGAACAAGGCGTTGTCGTTTGACAGTGTGGGTCTCGATGTCCTGAAACGGTTGGTAT  
TTGAATTCGCAACGGAACAGGATATCCGGGATTACGTGGCAACGTCTCACCCAGAGATTA  
ATGCCATCCTGGATTCCAGACTCTAAGACAACGTGTACGCGTACTACGCGATTACGATGC  
TGGCCGATCTCAAATCCCTTTTCCACTACAAGGGTGAGGCGACCTTTTACTTCACGCGTG  
TGAAATCGGTACGCCTTAACCTGCTGCTGAAGACCTACGTGATCTTGACGAAGATGTACA  
GTCAGGAAGACCCGGCGTTCCCTGGTTAAGGGGTCGTTGGAGGATTACCGGGAGTATATCA  
ACCTGCTGTGGAATGGAATGACCCATTACCTCATCGCGTTGAAGAACACGGTTCAACTTT  
ACCGTAACCGTAAAGCGGCTATCTACGACGCTGAAGCCTCAAAGTTGGTGGACTTTAAAC  
CAGTTGATGCCCTGGACGTTACCGTTAAGGGATTGAGTGGTAATGTCGTCGTTGATTACT  
GTGATGAGGTCCTCAAGACAGTAACCGGTAATGGGGGGAGTTTGAACGACTGTGTGATCG

CCTCGATCTATGGGCGTCTTACCGGTCGTCCGAATGGCTTCCTGGACCTCATCAATAACC  
CTGACGTGGTTAAAGACTTGACGGCTAACTACTTCGAGGGTATTACCGTCCACTGAACC  
AAGATGCCCGTAAACATTTTCATTAACAACAGTGTTGGGGCTATTGTTTCAGTTCCTGAATG  
AACGGGAAGAAGCTCGGGCCGCGTTGTATGAGCATTGGATGCAGAAGGGTCTTCGGTCC  
GTACCCTCATTGAAGAGAACTGAGCGGTGACCTGGCCGTTCTCGACACCCTCTACGAGA  
ACGACGTCCGCAAGAGCAGTGGCGTTGAACCTGTGAGCATGGAGATTGAGGCGCAACGGG  
CGAAAGAGGTCATCTTCCAAACCAAACCTCATCCCTAACTTCTTGAAGTTGTTGGGGTGTG  
AACTGGCTGCGGAGATCATTGAGCTGACCTTTGTAAAGCTCGGTGAGGAAGACAACCTCA  
ACAGCAAGCGTGAACGCCTCCATGGGGCGTTGATTGAACTGCTGGTGGGTGAACTGCTGG  
GAGTTTAATGAATGGACGTTACTTCTCTCGAGCGAGAACGAAGTAAGATCCGTAAGGCGT  
ACACCCTCCACCACGATCACAGTGTCACTGCAAATCGTCCTCTGGAAGTTCATATTCCCA  
AATGTTTTACTGAACATGGGTTAGCGTTTATTGGGGATAAGGTGACCACTACGTTAGTGG  
CGGGTGTGTCATCCCGGGGGAGTGTTACTCCCTTGGGTGGCGTTGACGGATGTCACGA  
TGATCCCTATGAACGTTCCGGGAGACGGGTATTGACGGCGTTCAGTACCTAATCCTGGAGT  
TTGAAGAAGGGGATACCCTTATTGAGAATCTTAGGTATATCCAAGACCCCAATAAGCCCT  
ACTTCTATTTCACTGAGTTTGACATCTACGCGAAGATTCCTTGGTACTTATCAGACAATG  
ATGGCACCTCCTTGTGTTGATAACGCTAAGAGACAAACAGGCAGTGAAGTTGGTGATACGC  
CGAACACATGCGGATCTTTAATTCCGTTATGATGCGGGATCCGGATAACTTGGACAATC  
CGTATCGCAACAGTCAAGCCATGCTAGACGGTCGCCCTCCGGTATGGGTAGGGTTGAATA  
CCAGCTCAATGCTAATTGACGGCACCTACTTGAACTCACCGGAGGTTACCTCCAAGACA  
ACACGGTGGCTGCTATTATCAAGCAAGACACCAAAGTAACCGATCTGGAAATGATCGTTA  
AAGGGGTCCCAGATGAGTAATACTTTAACCTTTGAGAATACCCTGCTGGCAAACAGTGGT  
AAACGGGGTATTCTCAAACCCATGGACAGTTCGGGGTACTACCGGATCAATGCGGGAGGG  
TTCAATATCCCTAACCGTTCGGTATTACCTACCGGGTGAATGACTACATTCGTGAGTGT  
GCTCGTCCAGGCAGTGATTTTAAACCGTCGGGCGAACGAAGGCCAGATGAATTGTGAAATC  
GGCCAGCCACCTCAGTATGACAAGATCTTGGTCAATGGCGAAGTGGTTCGCAAGCAGATC  
ACGGATCTCTTGAATGGATTAACCGCCTTCGGACCATTGACTTTGATAATGTCTGTGAT  
CATATTCGTAAAGTCCATTGGATCTTTACGGGTGGACCGAACGATCCGGTTTACAATGAC  
ATTGAAGTGATTCCGTGGGCGAAGAACCCACATCATAAGCAACTGCTGCAAGAAAGTCTG  
GATAATCCGGATATCAATACGGCGTTTAGTATCCGTACGGTAACCAAGCCTGAGAACTTT  
GGCGATAAAACGCGCGAGGTGGACTACTGGAGCACGTATGACGCTGTCATAGAGCAGGGT  
ATACTCCGTGCGTGTAAACACCTCAAAGCGGGCTTGGAGAGCCTTCTGGACGATTATTGC  
GCTGAGGGTGGTGAAATGGAGTTCACCACGACCATGGAAGAGCTTTTATTTCTCTGCGAT  
CAGAAGAGGCGTTCACCTGAAGTGGCGGAACGTGAAGCGGGTACGGAAAGCTTTGTTTCA  
GTACAGGAAATGCTGGATGATCTCCGTAGACGAACACCTGCTCAATCCAGACCTGCGCGG  
TTGTTTGTGTCCAGTTCGTTGGACGTGTTCCGGTAAGCCTGAGCCAGCATGCCTAGCCTT  
GGGGTAGACCCCAAGGCTAGGTTATTAATTTTAGCTGTTTGTGTTTATTCTTATAGTCCGTT  
GCGGCTAATCATTAAACCAGAAAGAATTCCTTATGTTGATTGAAAAGCTTAGTTTCCA  
AACCTGGTGTTCATCTGCGTGAGGTGAAGGGAGGGTTTAATGTTCTCCAGGGATTGTG  
GGAAACCGCCCAGAAGGAATGGGAACGTTCCAAGAATGCTGATACAGACATCCATTTTCAT  
CAAAGCGTGTTTACTTCCACTCAGAAAACCGATGCGGTCCGGATCTATGTGGCGAAGCT  
GGCTAAGCTGTACATGAACACCGTGGGGGACTGCCGGGGATGTGGTCCAAACATACTCT  
GACCATGAGCATATCCTGACCAAAGCCACTGTGGACAAGATTTGCACCATGGAAGTGAA  
CAGTTCCGACCAGTTGTTTGAATTGGTTGCCACCCGTTGATTGGGAGTTGATAAAACCT  
GTTGGAGAATATCCTGACCGATGAAGTCAAACCCCGGGATCGCGCCCGTATCCTGATTAA  
CTACCTGGGGTACCGTGTGGATGAACCGGGTGTCCCGGCAGAGGACTACCCTGACCTCAT  
CAGTAGCCTGAGTGTGTTGATCGGTAACAATGGGTTTACAGATGAGTTCCTTGGAGAACCT  
GTTGAAGGAAGCAGAAACCTACTTCGATAGCGGATCGGTTGACTTCCAACAAACCCCGTT  
GGATGTGTTGGAGAACTTCTGCACCAACCCTGCAAGCAATAAGGGGTTTTGCCCAAAG  
ATTTCAAGTCTATATTACTTGGGTGAGCGACATCAGGACCTACCTGACGAGGGCAGTACA  
CCTCTTCCCTTGCTTTGTCTTGTGCTGTCGTCACACCACCTTTTTCGACAGTAAGAGGTTG  
TTATGTCGATAAATAAAGAATACGGCGATTGGGTGGAAAAGGGTGTAAAGGGTCTGGTAG  
ACTCGCACGACTACAACAAGGCCACCAACCACATCACGTTTCGATTCCGGAGAAGGTGGAAC  
TGCCTAAGGGTGTACCCAAGACAGTATTCTCGAGCACGTCAATTTCTTCAACGATATCA  
GCGCGCAGGTTGAAATAGCCACCTCCCTGATCGCCCGGAGTCAATTCGAAGACAACAAGG  
AACTGACCACCGTCGACGGCACCCCTGAACCTCGGGGGATTGAACATCAATTCCCAGCATC  
ACCTGAAACAGAAGGTGGGTGAAGATTATTTGTGGGGGCAAAGCACCACCGCAGTCGATT

ACACGCATACCGAAGAACAAGCCGTTTGGTTGGATACCCAACGTACGGCCAGCCAGGAAC  
AGGCCGCCAAGCTGTCCGAGTAAGCATTCCCTTCAATAAAGCTAGTGACCGTTTGTGTAC  
TAGCTTTATAGGGACTAGTTTTTATTAGGAAACGGACCCCTGTTGACCGTTACCTTCG  
TCAGACCTCAATGGAGACAGAGAATGAAGTGGTTAAAAGCGTTGCTTGACCTTCTCTTTG  
GGAGTGGGGAAGATCAGCGTGAGACGAGGGACGTGAAGTTGGAGAACCTCCGCGAAACCT  
TGTTACCTCGGGTTAGATTCCCTTTGGAAAGTCACCACGAAGACAATTATAAACCCCTCT  
TACTCCCAGAGTCTTCTAAAGTGATTGGAGAGAAGGAGCAGAAATGGAATGAAGGATAAC  
TTCACGTCCGTAGGTAAACGAATATGAGTCATGAACGGTGGAAACACGGCTCGTTTTGAAG  
CCATCAATTGGGAGGACAATCAACGCGGTATCCCTATTGGTATTAAGAACAACCTGTATT  
TCCGGTTTGACTATACCCGTAAGGGTGAAGGCTGGGAGGTTACCTCTGGAATACAGAAG  
GGACGATTGCCCGGATTGAAGATAGCCCGACCGGGTTCTCATTCTCCAGTTACCGAGTGG  
ATCTCGTAGATGCCGAGTTGATGGCTGAGATCCATACCCAATTGAAAGATCAGATCAATA  
AGGTTAAACCCACTGAACTGATCGAGGTAGGGGGGTGAAAGCATCTGAATCACACCGTCT  
TTACGGAACCAGATGCGGAAGAAGGGTCTCTCGGGCCTTATGATCCAGCCGAACCGATTT  
CAAGACCACGAGGGGTACCTATGCTAAGTAATCACATCATTACGTTTCGAGATGGCACTGG  
AAGCTGAACCTTCGGTGATTCCGGACATTTGAATATAAACCCCTTGAGGGTTATGATGGGAC  
AGCTTGAAACCTTCATTGTCATTGAACAGGGGAAGAAGGATGTGGTGTATGCCACGATCG  
AAATCCCCAGTGACGGTGATATTAGTGTGCATAATGAAGGGAGTCCGTTTAGCCGTAAAG  
ACACTGAAAAAGCCCTCTCGCTGAGCTTTGAACAGATCTCAGAGAACTCAAAGCTACAA  
CACCCCATCTTCCACTCTCAACTAAGAGGTTTATTCCATGATCATCCCTAAACCGATCG  
CTAAAGAACCGCACGAATTCAAGAAGTACGGCGAATTCACCTACGGGGTTCATTCTCCCA  
GTGTTGAAGCCTTGATGCCTGTTAACGAGGCCACGATCTTGGGCCAAGAAGCCACCCTCA  
AGATCCTGAACGAAGTGGATAGTGCAGTCATGGGTTCTGTTTCGTTCCCTGAACAACCGT  
ATGAACCTTCCGTCAAGGGATTGCCTACGGTCTCCCGTACCGTATCAGTACCGACGGGA  
ATATCGAGTTCGGAGTGTACCAACGTACCAAGAAAGCTGGGGATCAACGCCTGAGTAGCT  
GCTTGTCCCTGGCCCCCGGGGGTTCATATCGAGAAGGAAGACATTTCCGACTACCCGGACG  
CTGATAAGTTCTACGGGGAACTTCGGTGATCGATTGGGCTTATACCGTGGAGGCTAACCC  
TCCGGCGTGAATTCCTGGAGGAGATCGCCTTCTACTCATTACCTGGCGTGATATCACCG  
TAGAAGTTACTCAGAAGGCGTTTCTTATTGGGTTCTTGATGGCTAAGGGTGAACCCGGGT  
ACGTTGGGAATATTCCTCGTGGTGTCTAGATCCAGTTGTGGAACACAACGCCA  
CGTTCGATATGTCCAACGAAGTGAACAACAAAGAAATTGGGTGGTTTACGGTCAAATAGT  
TGGGCGCCCAACATACCGGCGAAGACGCCACATCAAGTCCGATGACGGTGAACCTCGTTC  
GCTTCGAACCCTGGTTCAGGTTTGATCATCAACCGAATTGACCAGATTGTGGATATCATCA  
AGGGGCAGGGTCAGTGAGAGGGGATTCCTTCTGTACCAAAAACAACCGTAAGACACTTTT  
GGACACGTTGTTCCAACCTGTTGGAGGTTCTTAAAGAACAGGGGAAGGATCAAGCGACCAC  
AGTATACCAGACCGAAAGTCGTCACGGGTTGACCGCTGTTATCAGTCCGAATGGGGTTTG  
GTTCTACCATTTCCCATCCCGGAAACACCGGTGGCTAAACTGACCTCTACGGGTGAGTA  
TGTCTCTTTGGGCATTATCAGTCTGTCCACGCGAGAACGGATCGCTTTCACGAGGAAGA  
TCTCACCGTGGTACTTAAAGAGATCATTGCACACTATCAACCGCGATAACCAGGCGCTCA  
GTAGGTAGGGGTATCCCTACCTACTGTTTCTTTATTTATTTGGAGGAAAGAGGATGGC  
TGTTATTAATTTGGCTTGGAGTGGTGGGGTGGAAATCCGTGGCGGTGTCTCATAAAGCCAT  
GAAAGCCGGCCATACGGTGAATCCATGCTTGGTGAATGCCACGGGCAGTGCATGCGTGAC  
CTTGGTGGAAATTAATGGCACTCGCTAAAGTGGAAAGTTTATTTTCAGAGATCACACGAATGA  
CTATCCAGGGTCCATTGGAAAGACCTTCGTGATGATGGACACGAGTATGGCCGTTCCCTC  
CATTTACACCATTTGATAGCAACAGACAGAGTCCATTCGTTTCATATTGCTAATGAATCCCT  
GAATGTGGTATTGGGGATGATGCAAGCGTCTCGGAGTAACATTCACCTATTCCCCAGTAC  
GTGGGTAGGGTTCATACAAGAAGATGGCTCAGAACACACATTAATATCAATGAATGGAG  
CGAAGTAGATTACCAGGTGCTGCTGAATCTTCCCGCCACACTCGGTAAATTGGCGGGCAC  
GGACTTAGGTTGTCGGCCATTCATAGCCCCATTGTGGGATGTTCCCTAAGCGAATCCTTTA  
TAACGATCTTCCCGGGGAATTTAAAGAGCTAGTACTCCCAATCTCATTTCACATTGGTA  
TACTCTAAAAGAGAATGATGAAGTGGTCCTTACGGTCTCTAAGGAGAAGGAAGTAGAGTG  
GGAAAGGGCGGGTATCCCTCTACCGACACAACGCTTTGTCTTTCCTTTGAAAGATTCCAC  
CCCTGCGATGAGGTTATTGGTAGGGTTGCCACCCCTAAAGACCTAGTGATAGAAGATGA  
TCTTGGTGGAACTGCATGAGTTCACCCAGGGTATCATCAGGAGGAAATCCGGTACTG  
GATGAACGATTATGAAGAAGTTAAGGGGGTTTATCTGGATTTGATTAATGATATCTTACG  
GAGTAGAGAATAGCCTTTAAACTGGAGTATTCGTTATGGCTAACAACGACGTTAAAATC  
GACCGTAAACTACTGGAATCCCTCGGTAAGGTTTACGATCATATTCCTGAAGAACGCCGT

CCGTACGACCCAGCAGACCTGAAGGGGATGCGGGTATCCTCAAGACGTAAGAGAAACCC  
AAGCGATTCAACTTTGGAATAAAAATCGGGAAATGACTATGAATTCGCTAGTCTCTACT  
CCGGAATGTTTTGTGTGGTGGAGGGGTTGGATGGAACGGGTAAAGACCACTGTTGTTAATC  
GCATGACGGACTGGTTAGTAGAACGTGGTGTGGATGTGGTTAAGACCCGAGAACCGGGTG  
GGACCACGTAAGTACCGGATCAGGGATTTGCTCCTGTCGCTGGATGAGGGTGGAGAAG  
GTCCTTGCCAAATGACGGAACCTCTGTTGTTCAATGCCGCTCGGGTACAACACCTTGAAA  
CCTTGGCTAAACCCAGCTTGCAGGCCGGGAAGTTTGTACTCTGTGATCGGTATGTGCATA  
CGACCATAGCGTACCAAGGGGAAGCCCGGAATTGGGGGTAGGGAAGATCCTGGAGTTAC  
ACCGCTTGCTGACCCAAGACTTTTGGCCTCAATTTGCGTTCATGCTGGATGCACCGGTTG  
AGGTGGTGTGGACCGAGTCCATCAACGGGGTGGTATGAACCGTCTGGATTCTCAAACGG  
TTGAATTCTATGAAAAGGCCCGTACAGCGTATCGTCGTATGGGGCAGACAGGCCGTGCTT  
GCGCACTCATTGACGCCACTGTGAGTGCAGACGAGGTGTTCAATCAAATGACCACCTATC  
TGAACGACTGTGTAATAAATATTAGAACACATCGCTACTGCCTAGCCGTAATGGGCTAG  
GCAGTAGGTTGGCGT

>NewGenomeName\_36

CCGCGGCTTGTAATGAACGAACAACAATTTTTTAGCGTAGCCGTCGAAATTATCGGGCGC  
GTTGGGCGGTTGGTGGATGCCCTTATGTGGCAATTGCCTAAAGAACTTCAACAGCAAGA  
TTCAAAGTTTGCCGATAACGTCGGCAATATCTAAGTTCTTGTAGCCGGGCACTACGTA  
GCGCGACGATATGAACCGCGATATTACCGCAATATTCGCAAAGCTTGAACGCATCGAAAA  
CAAAGTAGACAATAAGGCCGACAAATGAAGAAGCCCGAACTTATCGAATATGGGCTCGAT  
TACCGGCGCTTTTAGTCGGTTCGACTGGCCGACGTCGGCACCGCAATTACTGGCCTTCTT  
GTTGCGTGTCCCGACGCAGCGTTGGCCGCTTGGGCTATCCTTCCGCACGAATTGAAGTCG  
TCGATTCCGCGCAGTATATGCCGCTTATCGGTGTTGTTGTTTTTCGCGCTTTCATCGTT  
GCCCGCTTGTCAACCAAAAGAAATTGCACAAGGGGCGGAAAGATGAATAACGGACTTCC  
TTGGGTAGCCGAAGACCGAAAGTATATCGGACTTCGCGAACACACTTCGAAGACTTCGCA  
TAACACGAAACTTCTTGCCATGCTTGACAGCATGGGCGAATTTTCCAACGAGTCCCGCGA  
TTGGTGGCACGACGACGAAACACCTTGGTGCAGACTGTTTCGCCGCTATCGCGTGGGCGT  
TGCCGGGCTCTACGTCGTCCGCGAATGGTACAGGGCGCGGGCATGGGAAGCCCCGCAGCT  
TACGAAGCTTGACCGGCCCGCTACGGCGCGCTTGTGACCTTCACGCGAAGCGGCGGCGG  
CCACGTCGGTTTTATTGTGGGCGAGGATGCGCGCAGAAATCTTATGGTTCTTGGCGGTAA  
TAAGTCGAACGCCGTAAGTATCGCAGGGTTCGCAGTATCACGCGTCACAGGCTATTTCTG  
GCCGTCGTTCTGGCGAAACAAGACAGCAGTTAAAAGCGTTCCTTTTGAAGAACGTTATTC  
GCTGCGGCTGCTGAAGTCGAACGGCGAACTTACGACGAATGAAGGGTAAAGGGGCATCGC  
ATGTTTTCCGTAATTTGGGCCAAGTTTGGCAAATGGCTTGGCGCAATCGGCGAGGGCCTT  
GTCATGCTGGCAAGTATCTTTTATGCCGGTCGCAAGTCGGGCGCAACCAAGGCCGACGGC  
AACGCAGCAAACGTACGGGCAAACGACGGCGAACCAATCGCAGTTCGCCAAGTTAACAAC  
GCCCGCTAGCTTCCGAACAACAGGTAAAGGCCGTTCAAATGCGAAAGAAGTTACTTCC  
GATAATTCTACTGTTGACGACCACGAAGTCACTAAGCGGCTGCGCGACGAATGCTCGCGC  
AACTGAATCACAAGCATCGCCGACGCAGTACAACGAAGCCCGTTGTAATCGACACGGC  
TTGTAAATGGGTTGCGCCCTTTTGGATTTTGAAGGCCGACGGCTTGACCGCTGGCACGGC  
CCGGCAAATTTCTGAACCATAACGAAGCCGTCGAACGCAATTGCGGGCCGTTAGTCGCCGAC  
TAAATCAGCGGACAAGTCTTAACAGAACGCGGGGCTTGCGGTCCAGTGAAGCCACGACG  
ATTAAACTAGTCCGACACTATGTCCGACGAACTGAAGGAAATCGAAAAAAGGCCGCATA  
CGCGGTCTTCTTTTGAAGAACGCGACCCGTTTAAAGGCTGCCCTTTCGCTGTTTCCGAA  
CAACACGAATCGCGGGCTATGGGTTGCGAACCAATTTGCCGAACGACGACGAAGTTAATGC  
CGAACAAAAGCGCCTTACCGACTAAGGCCGCGATAGGGCATTCTTCCGGGCAATGGCGA  
CCTTGCCCATGACATTAGGCCGCGTATGCAAGGTACGACGCTTCCGCACGGCTTAACCAT  
TACGCCGACGCCCAGGATTACGCGAAGCTTGCGAAGCTTTACGCCTACGGTCGCGGGTT  
CATCGGAAAACCGCAAACGAACGTTAACGTAAGGACGAACGTAACCGCGTCGTCGACAT  
GCCCGTGTTCGCTAACGAAAGCGAATGGGAAGCGGAACCCGCACGTCAACAGCGCGAATT  
GTTAGAAAATGCACGCACTCGCCATTGTTACGAAAGGGGTGAAGCCTGTTCCGTATGAAG  
TCGTATTTAAGCCCCTTCCGGGGTCTCAGACTATTGCCCTTTGGTTGATGGCAGCGCACA  
CGCTGTACGAAGGCGCACGCCGCCACGGCAAGACGCTTACGCAGCTTATGCGCTTTTACC  
GTAACGTCGGCAAAGGTTACGGCAGGTTGTGGCGCGGCCTTATCTTCGATTTGGAATTTG  
TGCATTTGGGCCCGCCTTGTGCGCAATCGAAAAAATGGTTCCGGAGATAACGGATAGCTAA  
AAGACGGCGCAAGTTTTACGAATCAACGTCTGCTTATAAATGGGTTTGGCCGACTGGCG  
AAGAAGTGTGTTTGGGCACGTTAAGAAGCTGTCGGATTACGAAGGCTTGCACGCTCACG



CATACCCGTTTATCGGTTGGAACGAACTTACGAAGCATCCAAGCGGCGACCTTTACGACA  
GATTTAAGTCGATCAACCGCTGTACGTTTCGACCCGATTAAGACACGCCGAAAGACCCGA  
AAACCGGGCGCTATTTGACGCCGAACGGTTTACCGCTGCCGCCTGTAAAGTGCGAAGTAT  
TCAGCATGACGAACCTAAGCGGCCCGGTACAATTCAGTACAACGTCGCTTTATCACAA  
TTGCCCCGCGCGGCACCGTAGTTCGTCGAGAAATTCAGATTTACAGCCCGGCGACCGAAA  
AAGAAGAAACGCTCGTAATTAGCCAAATTGCTATATTCGGTTCGTATAAGGAAAACCTAT  
ACCTTCCGGCGTTCGTATATCGCCGAACTGGAAAGTATCAAAGAACCGAACTTTCGCGAAGT  
CTTGGCGATTTCGGCGATTGGGACGTTACCCAGGGCGGCGCAATTGACGACCTTTGGCAAT  
CGCATATACACGTTGTACCGCGCTTCGTCATTCCGCCAAGCTGGCGAATCGACAGAACAT  
ACGACGACGGGTATTCGCATCCTTTTAGTGTAGGCTGGTGGGCGGAAGCGGACGGCTCCG  
ACGCGACCATAGTTCTTTTCGGATGGCTCCGAATTTACGTTTTACCCGCAACCCCGTTTCG  
TTATTCAGATGTTTGAATGGTACGGATGCGCGAAAGACGAAAAGGGCGAATATATACCGA  
ATAAAGCTTTGAAGCTTTTCGGCGTCGAATATCGCAAAGGCATAAAGCGACCGCGAAATTT  
CGCTAATGGCGAACGGCTGGATTTTGTTCGACGCTTGGCCCCGGCCCTGCCGACAACCGCC  
TTCGCCAGTAATCGAGAGCGAACTAGACACGGGCCAAAAGCTTATGTTCGAAGAAGGGCG  
TGCCTGTCCTGCATCGGACAAGTCGCCGGGTTTCGCGCGTAATCGCGTTGCAGCTTTTCG  
GCGACCGGCTAGAAGCGTCTGTTAATCGCGAAGGGCCGGGTATATACTTTATGTTCGAATT  
GCGTTGAAAGTAGTGATTTGCTGCCACGCTGCCGCACGACGAAAAGAAGATAGACGACC  
TAGACACGAACGCAGAGGGCCATTGTTACGATATGGTGTGTTACCAGGTATTGAAAGGCG  
CGAACAAAGCGGCAGCGAAATTCAACTTGTATGCCAACTTAAAGGAACCGAAATCATG  
CCGAACGTTACATTTATTCGCCCGAACTTGGTAAGCTGCAGCCGCTGTTTTACCTGATT  
CGCGACGCAATCGCGGGCGAACCAACGGTAAAGGGGGCGCGGACCACTTATCTTCCGATG  
CCGAACGCCGAAGACCAATTGAAAGAAAATAAGGCGCGTTAGGAAGCGTACTTGAAGCGG  
GCCGTTTTCTATAACGTAGCCCGTCGAACCTGTTTCGGATTGGTTCGGTCAACTGTTTCATG  
CACGACCCGGTTGGAAAGGTGCCCGCGCTGATGAACCCGAGTGTTCGCGAACGCGACGGGT  
TCGGGTATCCACCTTACGCAGCTTGCAAAGCGCGGCGTATCGCTGAACCTTGCTTATTCC  
CCAGCCGGGCTGTTGGTCGATTACCCGACAACCGCAGCCGAAGGCGGCGCGTCGATTGCC  
GACCTTGAAGCCGGTTCGATTCGTCGACCCTGTACGTATGTGCGCCGACTGAAATTATC  
AATTGGCGAACGACCAACCAGGGCGCGGGAGAAGTTTTATCGTTGGTTCGGACTGGTTCGAA  
ACTGGTTGCGCTGCCGATGATGGTTTTGAAATGAAAACGTCGGTGCAACTTCGCGGTTTTG  
CGTTTTGGACGAAGAAGGTTATTACGTCCATGAAATTTTCGCGCGAACCGCAGCCGACCAA  
GCCGACGCGACGAAGATTCCGAACGGCAATTACCAACAATACTTCGTTTATAAGCCGCC  
GACGCACAAAGTAAGCGCCTTACCGAAATTCGTTGATGTTTCATCGGTTTCGGAAAAAAGC  
GATTCGAACCCGGACAACCCGAACCTTTACGACCTTGTGTCGCTGAATATGGCGCATT  
CGCAATTCGGCGGATTACGAAGAAAGTTGTTATATCGTTGGACAGCCGACGCCTGTTCTT  
ATCGGACTAACCGAAGAATGGGTTACGAACGATCTTAAAGGTTTCGGTTAACTTCGGTTTCG  
GTCGGCGGTTATTCGCGTCCGGTCGGAGCCGACGCGAAGTTGCTTCACGAATCCGAAAAC  
ACCATGCTTAAAGAAGCAATGAATACCAAAGAACGCCAAATGGTTCGCACTTGGCGCAAAG  
CTTGTGAGCAGAAGGAAGTGCACCGCACGGCAACGGAAGCCGAAATGGAAGCCGCTTCG  
GAAGGTTTCGACGTTTTTCCAGAGCAACGAAGAACGTTTCGGCGGCCTTTGAATTGGCGTTG  
AAATGGGCGGCCCGTTAGGTCGGTCAAGCCGACCGCGGCGTTAAGTTCGAACTGAATACC  
GATTCGACATTGCCCGCATGACGCCGGACGAACGCCGTTTGGCTTGTGTAATAATGGCAG  
AAAGGCGCAATCACCTGCGAAGAAACGCGAACC GGCTTGGGTAAGCTGGCGTCGCAACC  
GAAGACGACAGCAAGGCGATAGAAAAAATCGCCAAGGATACCGCCGGAGCAATGGCCCTT  
CCGACTCCTGACAACGTCCCGGGCGATGGCGGCGGCGGCGATAATGTGGGCCTCAGTGTA  
TAAGGGGCGCAATCATGGCACTATCGGACAATAAGCGATTGTACGATATTGCGACGCCCC  
TCGCTGTTTACGTCGAAGACGTGAAAGTTTGGCAGTCCC GCCGATTTCGGGTTTCGTACTAC  
GCGAAGTAACTTGAACTAACACGCCTTCTTGGCCGTGTATGTTATAAGACCTTTGACG  
GTCTTTTCGAAGGCGCAGTTAAACAAGCTTGTTCGGAATTACGGGAATCGCAATCGAAGA  
TTTACAGCGCATAACGCAAACGCTACTTGAACAGTTAAATGAGTTCATTTCGGGCCGATT  
TGGAAGTAAACCGGCGCGCATGGGTTACGGATTATATCGAACTTGACGGCGAAGAAAGCG  
ACGGCATTATTTTCGGACGAAAAAGCGATACAGTTTCTTTTAGAAGTACCCAACGCCGATG  
CGAACCTTTGTCTGGTTTGGCCGCTGTTACAGGAAGCGACGAACGCATTTGGTTCGCAAG  
TTACGAATACGGCAATTCGGCAAAAAGGTTTGTAGTTGCTGCCGTTTATCCAGACGTTTA  
CGAATTCGGCACAATCTGGCGTCGAAAGCATGATTTCGCACAGCTTGGCCGAACCGTTGGA  
CTGTTCGAAGAACTTTAACAGCACTTGTGTCGATGGTACCGCAGCGCAAGGCACGCCGT  
CGCAGTTGCACCGGGTCAACGCGCAAGCCGCGTGGGTAATCCATACGGCAACCGCGCACG

TTGCGGCGTTCGTTGCGGCTGGCGTTGAGTCTGCGGCATTTCGGTTCGTTACGTCTGGTATT  
CGGTAATCGACGGAAAGACAACGGACATTTGCATAAGTCGAAACCGGCGAATCTACCGCT  
TCCGCGAAGTGCCGTAGCCGCCCGCGCATATCCGTTGCCGGTCGCACGTTGCCAGGCAA  
ATACCGATAGTGACTIONAGCCGAAGAAACGTTTTACTACTTGGGTTGCCCGTCAACCTGCC  
AAGTGCAAGACGACGTATTAGGCGACGACGGCGGCGAAGCTTTGCTCGATGGTCGCTTAA  
AGGCGAAGGATATTCCGAAGTATGATGCGGACAGGTTCGCTAACTTACGACGAATTCCGAC  
TCAAGATTAAGAAATTCTTTCACGCTGATTTCGGTGAATCGGCATAATCGCAAGGAATCC  
TGGAAATGGCGCTGAAAAAGAACTTACCAAAGAAGAACACGCGAAGCTTTCCGGACGCAC  
TGAAAGCCGAATATATCGAAGACGGCGACGGCTTCCGCCTTGACGATGACAGTGACGAAG  
ATACGGACGCTTTGAAGCGCGCCAAAGACCGCGAAGCGCAGTTGCGGAAGGACGCTGAAA  
AGGAAGCGAAAGAACTTCGCGAACGGCTGGAATCTATCGAAGGCGACGACGCGCGCACGC  
AAGGCGACATTGCGACGCTTGAAATGTCTTGGCAATCGAAGCTTGAAAAACAGCGCGAAG  
AATACGCAGGCAAGGTCTCCAAGCATACTTCGCATACGACCAAAACGCTTGTCGATAATG  
TCGCTTCGCAGCTTGCCCAAGATTTTCGAACGCCACGGCAATCATATTCCGCATATCA  
AGTCGCGGCTTATCGCAGAGTTCGAAGTCGACGCGCCGGTTACGCGCGTTTTGTAAAAGG  
ACTGCAATCCGTTCGGCCCTTACTATCGACGAACTGGCAAAAACATTCGTTGCAAACAAGG  
ATTTTTCTGCTATTATCACGGCTAGTAACGCGTCCGGCGGTGCAGGTAAGCCTTCGCAGA  
ACGGCGGCGGTGCCCGAAATTTAACGGTCAATCCGGCAAACCCGCCGACCGTTTCGAAGA  
TGAATCCCGCATAACCTGCGGCGCATCTTCCAGAAGCGAAGGCAAACGGAACCTAAGGACG  
TTTAATCATGGCACTCCCCGACCTTGCTGTTTACTCCGAATACGCTAGTTCGGCTTTCTC  
CGAAACCCTGCGCCAACAGGGCGATTTGTTCAACACTGCGACGGGCGGGTCTATCTTGCT  
GCAATCGGCAGCGCACCATGGCGACTTTTCCGACGTTGCCTTTTACGCCAAGGTAACGGG  
CGGCCGTGTTCCCGTCGTAACGCCTATGGTTCCGGCACCGTCGCCGAAAAGGTCTTTAA  
ACACCTTGTAGACAAGTCGCTTAAGGTCGAAGCCGGTACGTCGCCTGTTCCGCTTGACCC  
CGGCCAAGTCCGTTGGATTACGACGAACCCGGAAGTGGCAGGCGCGGCAATGGGGCAACA  
ACTCGCCGTCGCTACGATGGCGGATATCCTGAACGTTGGTCTTGGTTCCGGGATATTCCGGC  
ACTGTCGACGTTTCCGACGTTGTATACGACGCGAACGCGAACACCGATGCCGCCGACAA  
GCTGCCGACTTAGAAAAACCTTAACAGCGGCTAAGCCAAGTTCCGCGACCAATCATCGCA  
CATTGCCGCATGGAGTATGCACAGTACGCCATGCACAAGCTGTACGGTTCGAACTTGAC  
CAACGGCGAACGCCTGTTTTCTTACGGCACCGTGAACGTTGTTTCGCGACCCGTTCCGGCAA  
GCTTCATGTTATGACCGATTCCGCCAACCTGGTTGCCGCAGGTACGCCGAACGTTTATCA  
CATTCTTGGCCTTGTGCCGGGCGGCGAGCTGTTTGGTCAAACAACGACTTCGACGAAAG  
CCAAGAACCAAGAACGGCGACGAAAACGTTCTTCGGACTTACCAAGCCGAATGGTTCGTA  
CAACATCGGCGTTAAGGGCTTCGCTTGGGACAAGGCAAACGGCGGCAAGTCGCCGACCGA  
TGCGTTCGTTGTTCACTTAGACCAATTGGGACAAGTACGCAATTTGGCATAAAGACCTTGC  
GCGCGTTGTCGTCAAGACCAACTACCGGCCGACGGTGGACGGGGCTCCGCTCCCGTACT  
TCTGGTCTTACAAAATTCAAAGCAGTTTCGAAGATGAAACCGGCAAAAATTCTGTTATT  
CCTGGACGGCAACGCGCCGACCCCGAAGCCTTCGCAACCGCCCGCAACTGAACGCGCA  
AGTTATGTTACAGGCAGGCCCGCGCTGTTCCCTCCGAACCGCATTACCTCGAAATCTGCGA  
CGGCGTTGCGGGCAAGGTTCCGAAGCTGTACCCCGACCCCTCAGCCGGCAGCGAGCCAAGC  
ACTCAAAAAGTAGGCCGCGGAGCTTAAAGCCCTTACTTTGGAGGTCCGCGACGCCCCGGC  
ACCGAAGGCCAGCGGCAAGGCCGCCGACAAGTCCCCAGCCGCTACGCCGGGCCAGACCCC  
GGCGCGGGGCCAGAAGGCCCGGCACCGGCCGCGCAGGGCGGCAGCGCCCGGATTGGAA  
CGCCAACCCGGCGCAGTAACGAACGGACGGCCTGTCGACTAATGTGGGCAGGCCGTTTCA  
ACAACGGACTAAGGAGTCATCGCAATGCCGACCAAAAAGGTTGTTTATTTACGGCAGGC  
ATTAACGCAACGGCTGGCGAACTTGCCGACATTGCGATGCTCACCGCAGCCGCCGAACCG  
CAATACGAAGTTTTGGTAAACAACGTTCGCAGCAAATGCCGAATACGGAGAAACCGACCGA  
ATCATTACGTCGGATTACGTCGCGGGTACTGCGCCTTCGGCTTATTTCGGTAGTAGACGTT  
ATCGACCACGACGCAATCCCGAAACAGGTGCTTACGGCGACGCAAGCAATCGTTAACGAC  
GCCGAAGCCTTGTTCGTTCCGGTACTGGCACTTACACGACGACGGCACCCAGTTAGCGTT  
GCGAACGGCGTTGTAACCGGCATCGTTCTTTTGTAAAGGACGTGGAAGCATGGCAATTACA  
ACCGCTGTCGAAGACGGAAGCGGCGTAACAAGCGCGAACTGTTACGTAAGCTTCGCAGCC  
GCGCGCATTTACCATTCGAATCGCCGCGTCGATCTTCCGTTGGACGACGACGAATTGGCG  
GCTATGCTGATTCAACGGATTATTTAGAAACGCCGGCTCGCCGGTTCCAAGGCAAG  
CCAACACTACGACGACGACGGCCTTGCAATGGCCGCGAACTGGCGTCTTTCTGAACGAAGAC  
GAAGTACCGTCGAACGTTAATCCGAAGTTTCTTATTGCCGCGAAAGTTCAACTTACGATG  
GCGATTAACGCAGGCTTCGCCCTCAACCGAACGTTTCGCCGCAAGACTACGTTACGCGC

GAAAAGGTCGGGCCGATTGAAACGGAATACGCCGTCCCGCTGTCGGTTGGGATCATGCC  
ACCGTTACCGCAGCGAACGCGCTTCTTCCGCCGCTGTTTGGCGGATGCTCTTTCGAACAAG  
TTTGGCGCTTCGAACAATAAGGGTTTGACGAATGGCACAATTCGATCGCGCAATTAAGACG  
GCCAACAGCTTCTCGCGAAGAACGGCGAAAAGGTAATAATGGCGCGTTATCGAAGACGTT  
ACGCCAACCGGCCGGAACAAGCCTTGGGAACCCCGCCCGGATTTGCCCGAAGACAAAGAC  
GTTACCATTTTTCTTTTTGCCAGTTGACCGGCAGACGCGAGAAACCTTAAACTTCATTCAA  
GGCACCTAAGCTCCGAAGGGTTCGGGATGGGGCTTATGGGCAATGTTCCCTTGGCCCG  
AATTTGAAAGACGTTGTAATTCGCAACTGGGTTGAACTTCGCTTGGCTTATATCGACGTA  
TATTCGCCGAACGGGCAAAAGGGACTTTATACGATCGTATTTCAAGCATGATTGAATTCG  
ACCAAGTTAAGGAAGAAGTAGACGCGCTTTTTCTTGCAACTTGGAACGCAGGAAGCGCGG  
CAATTGCGGGCTATGTTCCCGAAATTCGTTGACTGGGCGTGCAACATCGCGACTTGCCGT  
ACGGTTCGAAGTTTTGAGTTCGGCTGTCGAAGCAAACCGTTGTTGAAGAACAAAGCGACCC  
TCTCAACCTGCGAAGGAGTACCGGGGCAACGAAAATACACGGCGTCGGGTGTTGTCTTCC  
TACAAATCTTTTTGCCCGACATCGAATACGCAAGCGTTCGAACTTGGGCAGAAATCTGCGA  
AGCTTGGCCGCAATGCTTTTCGCGGGACATCAACTCCGGGTAAGGTTTGGTTTCGCTATA  
GGCGAATTAACGAACTTCCGCCCGAAGAAGTTTACGAACGGCTTAACGTCGTTACCGAAT  
TTCAATACGACGAAATAGGGTAAGGAGTTCTTAAGATGGTGTGCGAAATTGCCAAAATCG  
ACAGCACCATCACCGGACTTGCCCTCGCCCAAGAAGAATGCTTGAAGCAAATTCGACGA  
CGCCCGTTTGGGATGGACTGGAACCCAATAGCTATTCGGACTTCGGTGGCGAATTTTCGA  
CCGATGCCCGCGCGCCTATCGACCCGTCGCGCCAGAACAAAAAGGCACGATTATCGACC  
TTGACGCATGGGGCGGCTTCCACGCGCACTTACGAAAACAAATCTTGCGAGAATTCTGC  
AAGGCTTCTTTTTCCAGACGCGCGCGAACTTCCTTCGACGCAGCCGCTTAACGGCGCAT  
AGGTCACGCTTACCGACGTTACCGCAATCGACAGCACTTACGCCGCAGCTTCCGGGCTTG  
GCGTGTTTGGTGCCGATAAGCTGGTATATGCGACCGGCCTTGCCAAGGCGGCGAACACG  
GCCTTAAAACCGTCGTTTATGCTACCGCTGCTGTCGTCGTTGCGGCTGAAACCTTGATTG  
GCGAAACCCCGCCCGTAGGGCGGAAGCTGGAATGCGTCGGTCGCCAGCTTGCCGCCGCGAG  
ACGCGAACAAATGCCGTAACCGGCAACGTCGTTTTGCTTGTGCTTACCGCTGGCGACTTTA  
CGACCATGCCCGAACTGTTCCCGGTCGTTGCGTATTTGTGCGGCGGCCATGTGACGGCAA  
ACCGATTCGCTAATAATGTCGGCTATCCCGCATTAAAGTCGGTTGCAGCGAAGGCGCTTG  
TTTTCGACGACGTAACCTGGCAGGCCATCAACGACACCGGAACCGGCAAGTCGATTCTGTC  
TTTTAGTCGGAAGTGTATCAAGAACGAAATGACCCCGGCGCTTATCAAGCGTCGTTCTG  
ATCAAATCGAACGCACCTTGGGCGAAGGTTTGAACGGTACGCAGTGCGAATATCTGGAAG  
GCGCAGTACCGAACGAATGTACGTTGAACGTTCCGCAGGCCGACAAGCTGAACGCCGACC  
TTTCGTTTGTGTCATGCGACAACAGTTATCGCAGCGGCGACCCCGGCGACGAACAGAAAA  
GCGGAACCCCGCGTGCCTGCGCCCGGCGAAGATGCTTACAACACTTCTTCGGACGGTTCCC  
GAATAAAGATGGCCGCTCACGACGCCGCGTCGTCGAACCCCGCCGCCCTGTTCCGGCTACG  
TTTCGGAAGCGAACGTTTCGATTAACAACAACGTTACGCCGAACAAGGCGGTTCGGCGTGT  
TGGGAGCGTTCGATACTTCGGCGGGTAACTTCGAAGTCGGAGGTTTCGATTACCGCTCACT  
TTACGACCGTCGCAGCGGTTAAGGCTGTTTCGCGCGAACGCCGACGTTGGTTTGTGCGTAA  
TCAGTGCGGCCAAGAACCCCGGCTTCGTGCTCCATATTCCGTTGCTTTGTTTGGGCGGCG  
GTCGTCAGATATTCAAAAAAGACGCGCCGATTACCGTTCCGCTGGAACCCGCATGCGCAA  
AAAACGCGTTCGGCTATACGATGCTGTACGAAGTGTTTTCTTATCTGCCGAATCTGGCTA  
TGCCGACTAATTGCGGTAGACTCTAAGAGCCGGGTAATACCGGCCCTTTCGTCATGCAA  
TCGGAGTAAATCAAATGTCTGGACTGTTTAAGCAATTCAAAACGAATTCGACCAAGGAAG  
TGGAAGGCGACGAAAGCGAATTTCTCCAAGCCAGATCGACGACGGCAGCGTTCCGACTT  
TCGTTATCTCCCGCATGGGCAAATCGAACAAAGTCGTATTCAAATGCGCTTGACGCGGCGA  
CCCGTCCTTATCGCCGTCAAGTCAAACCTTGGCACGCTGAAAAACGCAGTCCCCGAATCGC  
TGTTTATGGGCGTGTTCGTCGATAACCGTATTGCGCGGCTGCAAGAACGTTAAGGGCGAAG  
ACGGCAAGGAAATTGCGTATTCGAAAGACGCCGAAATTTTCGCTTCTTCCGAACTGCCGG  
ACTTTTACGAACGTTTGCAGGAAGAAGCGAAGTTGGCTTCAAACCTTCGCGAAAAACCTT  
TGGAAGCCGAAGCTAAAAACTAACAGAATTTTTGGCGCACCTGTTGGAACCTTGGCCACA  
CGCACAGGCGATAGCAATTCAAGCGATGCGCGGGGGCAACCGTTACCCGAACGCATCGC  
TAACGCACCAAGTACTTGAAGTCGGCTTGCAGTTGTATTTGCAAGCCTTCTTCGACCTAGA  
TAGCGTACGGTCCGACAGCAACGGTTAACGCCGATACCTTGGACAAGTATTGCGGCTTA  
CGAAGGGCTTTCCAGTTTACGGAAGATCAAAGCGATGACTTGTATCATTTTTATGCGAAA  
GCTTGATTTCGGAACATTTTAAGAACTAGCGGACAAACAGAAAGCGGCGGCATCGAATGG  
CAATAAGCCGGCTAGACGTAGCCGATAGGCTGGAAAAGAAAGCGAAGGCAATAGACGAAG

CGGCCTCGCAAATCTCCGTCGATACCGCTCTGGCTATTGTGGGGCGACGTGGCTTACAAGA  
CGCCCGTAGATACCTCGCAAGCTTTGTCTAACTGGATTGTAACGCTAGAAAGTCCGTCGG  
GTCAATACATCAAGGAGTATGTTCCGGTTTCGCAGGGTTCAACGCAACGCGCTTCGGCGG  
CTGAAAGGTTGAATTTCTGCGAAGCTGGTTTTACGGAACAAGAAGCCCGGGCAAGCGATTT  
TTATTACGAACAACTTACGTATAGCCGACGGCTGAACGACGGTTATTCAGCACAAGCCC  
CAGCGGGGTTTCGTGCAACGCGCGGTTTTAATTGGCCGCTAAATGCGTAAGAAGTTCAAGA  
TTAAGGATTAGAAGAAATGGCCGACGAAAACATAGAAATTTAGGTTCAAGACAAAAGTTTA  
GCCGTCCATGTCGACGAAGCTTCGCACAATCGCCAGCGAAGCCCGCAACGCCGACGCCG  
AGTTAACAACTTTCAAACCTCAGCTTTCCGGAATCAGAGTCGGCGCCTAGTCGTAGCTTAT  
CAGCGCATCGGCCGGCGCAACGCGCTACCTTCAACAAGGCGCACTTGCCGCGCAACAAC  
GGCAGCCGAACAGTAAGGCCCGCACGCGCCGACGCGCAGGCCGACGCCGCCAAACGCG  
CGACGCCACGGCTGCAACCCAAGGGGCCACGGCGCAAGCCATCATTGCCACGGCAACGCA  
CCGCACGCAGACGGTCCAACAGCAGACGGCCAACGCAGCGTAGCGCCTAGCGACAGAACA  
GCAGCGGACAGCCGTTACAGACGGCCAACGCGGCGGCAGCAAACGACGGGCCCGCCCTTGC  
CGGCCTGCGGCTGCAACAGGCGCAAGACCGGGCCGCTAATTCCACCCGCAACGCGACTTC  
GGCCCTTGCGGATAACATTCGAACCGCTGCCGTAATTCTTGGCTTAACGATTTCTTCAA  
CGCAATTCTTGCAAGCGCCGACGGATAGGTTAAGCTTCAAAAACAATCGCAGAACTTAAC  
GAAGTCGCAAGAAAATGTCAACACGCTTACGAACAACTTTTCGAACTTTCGAACCTCAC  
GCGCGCGGAATTGAAGAAACGCGGCCAGCGTTTACGCGCTTCGACCGCGCTTTGGCGTT  
TATGGGCAAGTCGCAAGAAGATTCGTTGCGAATGACCGAAACCATTAACAAGGCTTGAT  
TTTTTCCGGCGCAACAGCGCAAGAAGCGTTCGTCGGCTTTGTTGCAGCTTTCGGAGGGCTT  
CAACGCCGTAAGCTGCCAGGCGACGAATTCGCGCCGTTCCGGAAAATATGCCAATCGT  
TTTGGACGCGGTAGCGAAGGCGCTGAAAGTTCCAATTAACCGGGTAAAGGAACTTTCGAC  
CGAAGGTAAGATAACTTCTGAAGTTCTGGTTGAAGACTTTAAGCTTATAACAAGACCAAGT  
AGCCGCAAATTTAACAAGACGACGCCACAATCGGCCAAAGCTTGACGGTTCTTCGCAA  
TAACGCAATTCAGTTCTTCGGGGAACCTGAACAAGGCGACCGGCTTTACTGCCGGGCTTTC  
GCGCGGATTATTTGCCTTGCGGAAAACCTTGAAAACGTTGCGTAATCGTTGCCGGACT  
TGGCGTCGCGTTGCTTGTTCCTTCGGTCCCCCGTTGGTTGGAGCGCTGGCCGGTGCGAC  
GGTCCGGTAAAATCCTTACGCTGGCGCTTGCTTCGAACCCGCTTGACCTTATCGTCGT  
CGCACTTTCGGCTGCGATTGCTTACCTTGCGCTTTTCCGCTACGAAATTAACCTTAGGAAT  
CGACGACTTTACGACGTTGGGCGATTTCTTCCCCGCGGCCTTGAAGGCATCGGCCAAGC  
AATCGACGACGTTAAAACCTATCGCGTCGAAATTGTGGGCAGAAGTGCAGGCTTCGCAAG  
TGCCGCACTTGCGGAAATTAGCTCGAACGTTGACGATTTCGACTTCTTCTTGGTTCGGACAC  
CTGTGCCGCATTCTTCCAACCAACCGTACAGGTTGGGCAGGTGAGCTGGAAAACGCCGC  
AAAAGTTCTTGACGCAATCGCCGGGCTTTTGACCGGGGCCGGAACGTTTGCAGGCCTTGC  
ACTGGCCGAAGTTGTTATTTTCGGTTCAAACCGGAATCGCAAACGCTGACAACGTTGTTGC  
GGGTTGGAGCGAAAACGTACCGAATAAAGCCATTCAAGCCGCGAACAGGCTTCGCGCGAT  
GGTTGGTAAGTCGGCTTACGAACCTGTCCAATTGCAACGCCTGGGCAGCGCAAGCCAAAG  
CGAATTCTAATCTTGAGCAAGCTTTGGGCGCAATGGCTGGAAGATGGATGTAACAGCCA  
AGGCGGAGCAATGAAAAACCTGTTAAACGGCCTTTTTGACCGTACGCAGCAAATCGGCGC  
GCGGCGCAGGGCCGCGAGGAAGTGGGCAGCTTACGGGGCCGGTACGTCGCAGTTTGCCGG  
GCCTACCGCCGCGAACGCGGCGAAGGCTACGGAACGTCGCGCGCTGGCAATGGCAAAAAT  
CAATATGCAGCTTGATAACGAATTCGCGCGTTTATTCCAGCTTCAACCGCAGCGCGAAGC  
GCAAGTGAAGTTCGACCAAACGAAGAAAGGTTGATTCTGAAGAAGATTAAGATTACTTC  
GGAAGAAGCCGAAGCAATCAAGGCGAAGATTAAGGGCGTTCAAGACGCGACCGAAGTTCA  
ACGCCAGTTCGACGCAATTTCCGCCGAAGCTGTCAACCCGTTGAAGGAATACAACGCTTC  
GCAGGACGCGGCGAACAAAGCTTCTGCAAATGGGCGCAACTACGCAGGAACAGCACGCCCG  
CGAAGTAACGAAGGCGTCGGAAGCTTACTCAAATTCGCACGACCCGTTGCGGCAGTATAA  
CCGCGACCTTGAACGGCAATTGCAGCTTTTGGAAATGCTGCCGAAGCAAGGCGACATCGA  
ACAGCAGATTATGCAAGTTCAGAACGATTTGCTTGAAAAGGGCATCGTTCTAAACGAAAC  
CGAATTGGCGCAGCTTCGAGAAAAGGTGTTGCTTATTCAGCAAGTAAACGCCGGTTCCCA  
GAAACACGCGGCGTTGTTGGACGCCAGCGTAAACAAGCGCCAACAGTTTATCGACCAACT  
TAAAGAGATTCAGAACTACCGCAACAATAGCGGAAGCAGTTTCAACGCAGGCGACCAAGC  
CGAAGCAACTAAGAGCATGTTGCAAGGCATGAGTATTGAGACGACGGAGTTTCAAACGCA  
TCTCAACGCGCAACTGGCGCAATATCAAACCTTACGTCGAACAGCTTAGAATGCCGAACGA  
ACAACGTGTGATTAGCGACCAAGAATACGCCGCCGCAAGTAAGCAACTTGTATTGCAGCG  
GCAAAACCTGTACTTGAATTCGGCAAGCAGTTTCTTCGGAAACTTGCCCGCGTTTCAACA

GTCGAGAAATGAGAAAATGGCGGCGGTTCGGAAAGGCCGCAGCAATCGTGCAAGCCATGAT  
TAATTCGTATCAATCGGCAACTTCGGCTTATTCTGGGATGGCGTCGATTCCCTCACGTCCG  
CCCAGCGTTGGGCGCGGCTGCGGCAGCGGCTGCAATTGCCGCAGGCTTGGCGACCGTTCA  
GCAAATCCTGTCGCAGAATACCGGCTTTCAAATCGGTGGTTATACCGGGTCAATGGGTGT  
AAGCGAAATCGCGGTCGTCGTACACGGCCAAGAATTCGTTATGAACGCATCGGCAACCAA  
CCGCATGGGCGTTGCCGAACCTCAAGCCCTGCAAACGGGCGCGCCAGTGTTACAGCGAAA  
CGACCAACAGGCAATGGCGGCTAGTGTGGGCAGGGGCGGCAATTCCGAACCCGGGCCCGC  
GCCGGTTGGCAATGCACCTTTAAGCGCCGTTGTCGTACAATCGATAGAAGCGGCCTTAGC  
AGGGCTTTAATCTTCGGACGGCCGGGCTTTCATTTTGGGAACCATCGAACAAAACGGCGG  
CACCGTCGCAAAAATCGTCCGATTTAAATAAATGGGTTTTGCAATTGGAACATTTGCGAA  
AGGCGGCGGGGACGATAGCCATTATCAGGTTTTGGCAGTTATCAAACGCTGGCGGAAGC  
TAACCGCTGGCCAACCCATCGTTACGTGTCAACCGGACTTGACCGCTAATTAATTTTGAA  
AGGCGTTGGCTTGTCCGGTCTTGAAGAAATCTTTGTAGGGTTCAAGTGTTACCTAAGCGT  
CGGCGGCATTATTACAATATTAATTGTGGAACCTTCGTCGGTTACGTGAGCGGAAACAG  
TTTCGAAACACAACCGGGCGCGCACTTTAGCGCAATACCGGCCACAATTACGCGATTAC  
GTATTTTCATATCGGCCAACGCCAACGAAACGTCGGATGCTACAAAGTCGGTACGCCGGT  
TTATGAACATTTTTACGTCGGCAATTGGTTTCAGTATGCGCGGCCCGGTGAATATCCGTC  
GCCGCTTGTGGTGTAGCATGTTGAACGGGTCAGAAGCAAAGCGTTTTCCAGACGTCAA  
CCAGCAATTCCCATATCCGGGCGGATATTATTCGACGGCCTGTTATATGTGGGTTTCGTTA  
TCAGACCGGCCTTACGTCAAAAGTTTGGTCGTATCCTAACACAAATGCAAATACCGCAAG  
CGGTCCGCCCTTGCAGGGCCGCAGGGTTATAACACGCTTGTTCGCTGGTGATGATTA  
CCAACCTTGAACCTATAAACCTTTCCCAATTAGAAACAAGCGCCGGAATGGGCAACGTTTG  
GGGGGAATTGGACGGCGTTTATTTTTGTTCCGGTTTTCAACAATGGCCCCGAAAACGTGCT  
TCAAATGGGCGGAAGTTCTGTTGAAGACCAAACAGGAATGACGTTACATCAAGCCGTAGA  
CGCAATTATAGCAGTTGGCGGAACCGCTTTTGAATGTGCCAGAACGGCAACCGTACAAC  
TTGGCGCGATTTTCGTCGCTTTGGAAATGAAATAATGGCCTACTATAACGGAAGTGCCTCT  
CCTTTCGCGGATTTGAAAACCGCTATTGAAAATGCTTGCCTCGCTAACGGATGGACGCTT  
TCAAACGGCATTCTTTCAAGAAGTGTGTTTTTCCAACCTTGTCCTCCACTACGCCCCAA  
CTTACGTTGCAAGGCGAAACCGGACAAACTGGTTCAACACTGAACGCCGGCCCGACGAAAC  
CTTGTAAGTATGTCGCCAACTGGAACGCCTATCGTTTTTCCAATCAATTACGAAATT  
CACGTAATGACTTCGCCGGACGACGAAGTTGACTGCGTGTTGAACTATAATTCGGATTTT  
TACCAACAACCTGCCGTTCCGAAAGTTCGTTGATTTCCGGCATTGGTGGAAACCGGCCATGG  
TTTACCGGCAGTTACGATAGTCGCATATAGCAAGCCGGAAGCGGAAACACTTTCTATATG  
ACTTCAGGTAGTGTTCATGGGTTCTGCCGGAACGCGCAGTTTTTLAGGCAATAGCAGGCTGA  
GTTTTCTCCACGCGCTTGGAAAGCAAGAAGGGATATACTGGCAATTATTTTCATCGAGGG  
ATTGACGCTGTAAATTGGTATAACCCAAGGGGTTTCGAATTTGAGATACCCGCATTGAGCG  
GGAATAATAGATAGTTTGC CGGATTCTTCAAACATGACAACAGTTCTTGTGCCAGTAAAA  
GGCATTAAAGTCAAGAAGTCACGGCGGCCTTACGATAATCGCAAACCCGCCAAGCGTTTCGT  
GTTTGTGCAATTGATAATTTGGAACCGGGAAGTTTTGTCGTTTACGGGGCCTATCAATGG  
AAAATTTACCCATTTTACAGAAAGAACCTTGCGCAAAGGAAAGGTTCTTCAAATGCTTTA  
CAAAGCGGAACTTTCGGATACGCTATAAAAATACAATGGAAGTTAAAGGATGGCCGGAAGA  
ATTGGCGAGTTTACGCAACAGTATATATATGGCGGAGATAACCCCGATTATTCTTCCGAA  
CTTGACAGATATTCGGAAGTTGAATATTTGCAGGTTCGGCTTTGCCGTAATCGGGCGCCCC  
ATTTTCGGCCCTTCTGCGGATCGGTGCGTACATGCGGCGAACCGCTCGCCTATTGACGGT  
AAGGAACAGGCGACCTTTCTTCGCGATTTTTATTTTCGCGTTCACGTTTCGCCGTAACCT  
TTGGATTTACAAACCGATGCGTTCGTCACAAACGCGCGGATACAACGTTTGGTACGCATGG  
CCCGACCTTGC GGCGAATCTTGACGACATTTTGGTAAGTAATCCGGTTCGGTATTGAAAGT  
ACAGGCCAGGAGACGCCGTATGCAATGCCGCCACGTCAAGAACTTACTTACGAAATAACC  
GCAGGCGTTTCGGGGCAGCCGAATATCCATGTTGAAGTGCAATTTGATTTTTCAAACGTC  
GGCGACCCTTTACCGATTTTGACTACTGGCGTTGGTGCTGTAAAATTCGACATTGTGCC  
GAAGTTCGTTGAACGAACCTTGGGAAGGGTTAAGCGACAATATTGTAGCAATAGACGGA  
ACACAACAGCGCATAGCACTTCGCGGCGAAGTTCCGCGTATTGCAGAACGCTTGAAAGTA  
ATTTTTGATTCTGTGCAAGCCCTGATCCGTTTTTACGGCGACGTTATGTCGGCAGTCGGT  
CGGCTTTGGATTCCCGAATTTACGTACGCGTCCCGAATTAAGTTCGCGAAGCAATAGCGGC  
GAGCTTCAACTTTATCTCGACCCGACGAAGACCGACGTTTCGCGATAGCGAATACGGTTG  
GTTCAAACGCCGCTTGTGCGTGTGCGTTTTGAAATTGACGTTATTGACAGCCGACTGGACT  
CCGCTTGGTTCGCCATTGCTGTTTCGACATTCCCGAAGGGTTCGTTAATCGTTCCGGGGTCA

CCTGAGCTTATTGACGACAATACAGCACTTGTGCGGTATTCCGTCGGTACCGTCGGCGAA  
GTAGAAATTAACGCGAAGATGATTCGCCAGCGTTCGCAACTTACCCGCCCGGCGCAACC  
GTCCTACTTGAACAGGTCAGCGGCGTGCCAGTTTTGTGCGAAGCGCCCGCTTGCGTACGAC  
CTTATACGCGACGAAGTTTCATCCGGCCAAATTTCAATCGACAATCAAACCGGACTTGCC  
GAAATTATCTCGCGTTGGGATTATAGCCGCATCGGCGGTCCGCGAAGCTTCAAAGTAATT  
CGTATTTGCAATCCCAGAAATGGAATATTGGAAATCAATTCCTTGCGTATGCACGCGGA  
CAGGCGCGCAAGTTTAGGAGGCCACATATCGATCCGATTTGGCCTGGGCCGTGCAACCG  
TCCGACGGGGCTGCCGTCTATAGCGTAGAAGAGTCGGAGTACGCCGAAAAAATTTGGCAA  
ATTATAACGCATCGCTGTCTTGAAACAGACAAAGCGTCCGGCATTATAGAACTGAAATA  
ACAGGCGCGTCGAAAGGGGAAGAAGACGTTTCTATAAATTGTTTTAAATCGCCCGCTTCCG  
AGCGGGACCGAATGGATGGAAGTTAAGCGAATTTAGTACTTGTGCGGTACGCCTTAGC  
GACGATAAAGTAGAATGGAAGCATTTCCGGTCTTGAAACAATCTTGAATCTTTCAATTGCA  
ACGGCGGAACCCTAATGTCTGACTACGACGACAAAGAACAAGCGTAGGGCGATAACGCGG  
GATTTGAACTTTACGAATTCGTCGGTTCGTATCGCAATTATTACTTGACTTCCGACGCC  
TGTGGCACGACTTCAACGGTGCAGACATATAACCCCGTTCCGGGTTTGAAGCGCAGTCCGC  
TGATTGTCGGAACGCACGAAGACGACAACGTAGATAAGACGGTTACGCTTCCGATTACGG  
AACACATCGTTACAGACTATGCGCTTCAAACACTACGCCGCCATCTTTGGTTTTGACGATTT  
ACCGTCGCCAGAGCTACGCCGCAACTTGGGTTGCGGACATGAAAGTGCCGATTGCTTCAA  
TTTCGGTAGACGACGAATTTGTAACGTTTACGAAACGCCAAGCAAGTTCGGTTCGATGCTGT  
CGGCCAATATAACCGAACGTTTACGTACAGCCGCCTTGAATAACGTTTTGTTTCGACGAAT  
GTTGCAAGGCAACCCGCGTTACCAATTCGCTAAATACGCAGGTTTGGGCGGTGCAAGGTC  
GTAATATTTGATTCCGTCGCTTGGCGGTATTCCCAGCGTTGGTTTATCGCCGGCGAAA  
TCGCAATACCTGCGCGCAACGAACTTCGAATGATTGTCGCGCAAGCCGAGGGAATTCTAA  
CGGTAAATTACGATTTCGCGCTTATTTCTGTGCGCATTTCCGGTTCAGGTTACCGCAGGTT  
GCGACCATTTACAACGAGGCCAACGGTTGCCCAAGTTCAACAATCAACCGAACTGCG  
GCGCTTGCCCGTTAGTTCCGGGCGAATCGAATAACGTATGTCAAAGCGGGGCTCATTAA  
AAATGTGGATTGCAATTGTCTACGGCGTCGCTTCTTGCTTATGGCGGCGCTTATGCCGA  
AACCGAACATCGAAAACGCACGCGCGGCGAAACTTGGCGACTTCCATGTTCCGCGTTCTA  
AGTACGGCGACCCGATGCCGCTAGTGTGGGGAACAGTCCGCCAGAAATCGCCTATAACGG  
CTTGGTTTTGGCGACTTCCGGTCCGGTGCCAATTCCTAAGAAAATGAAGACCGGGCTGTTA  
GTTGCAAGAAAGTTACGGTTCGGTTATAAAAATTATCTAGGCATTGATTGCATTTTGTGCC  
TTGGCCGCGGCGTTCGACTTAGTAATTTGCTGACCGGTACTTACCTTGTTTGGGAAGGCA  
ACGTAACCTTCGTCCGGCGATATTTACATTAACAAGCCGTACTTGTTTGGGGGCAAAGACG  
AACGCCGCGGCCTGCAAGGTACGATTTGTTTTGATGACGGTCGTTTTGAGCCGCCGCAAG  
ATTCTTACTTGGTTTTCTAAGCTTGGCCCGAATGTTCCGGCTTACTACGGCTTGGCCTGTG  
CGTTGTTCAAAGCCTTTTATATCGGAACAGGTACGAAGCCCGAACCTCTCAGCTTCGAAA  
TTCAGCCCATTACATCCGGCTTGACGCGACTTATTCAATATTGCCAAACGTGTTGCACC  
TTAACCCGATGGAAATTGTTTACGACGCAATGACGCAAAAATGGGGACGCTTCCGGCAACC  
TTGAAAGCGAAATTGATATGTCTTCGTTTGCGGCCTGCGCGCAAATGCTGTACGATGAAG  
GCTTAGGTATGTGCTTATTGTTTCGATCTGCGATTAGCGGAAAGGACTTGATGGAAGAAG  
TAATGCGTGTGCGCGACGGCGTGTGTATCAAGCCCCGGCAACGGCGAAAATTGTTGCGA  
AACTTCTTCGCCAAAATTACACGGTTTCCGAACTTCTTGTCTTGACGAATCTTCGGATA  
AAGAATTTGCAACTTGCAGAAAACAACATGGGAAAACACTTTTAACCAATGTCGCGTTA  
CATTCAAGAACCGCGCGAGTAGTTACGACGACAGCGTAGCAATTACCCATGACTCCGTAA  
ATATCAACTCTCAAACCGTGTTAAGTCTACGGAAGTTTCGACGCCC GCCGTTACCCACG  
CAACGGTAGCAAGTAAGATTGCGGTGCGCCAACTTACGATTTTGAACGTTACGCTTTACC  
AGTGCGACTTGACCGTTAACCACAAGGCGCAGAACGCGCGCCCCGGAAGCGTGTTTGTTC  
TGAATTGGTGCCTTCCGGCATTAGAAATATGGCTATGCGTTCGTACGAAAATTGATTTG  
GCGAACTTAGGTCCAACCAAAATCAAGCTTTCTTGAGTTAAAGAGTGCTTTTCGTCTTCGA  
CGTTACGTTTCGACCCGCCGAAGGTTTCAAGGATGGCCGCCGATTGGTTTCGGAACCCACAC  
CGTTACAACGCGGCTTTTTTTTTACGCCGCCGGCGTGCCTTACAGGATACGACGACAGCG  
AAACCAAGGCTGCGTTTGAAGTCTGCCGGGCGTCTGTACCTTATCGCAGTTGCGCCGGGT  
CTACGTCCATTTCTTACGAGGCAATGACGACCCCGGACAATTTCAAGTTCGTCGCCTATTC  
TGTCGCTTGAAGCGCCTCGTACAACGGCGGCGGCGTGTGCTGAACACCTACGCTTCGA  
CCATCGACAGCGAAACCCGCAACGATACACGCGGTAGCCTTATCGTAACCGGCGTGTCGC  
AAGCAAGCAGCGAAGGTTGCAAGCAATAACAAGATGCTCGACCAAGCGCGGACGCTTCGG  
ACTTCCGGATGATTAATAATGAACTGTTTGTCTATGTGGGCTTCGTTGACAATGGCGGCG

GTCAAATTACGTTCCCGAACGTATATCGCGGGTTTCTTGATACAACACCGGGTAATCTTG  
CGGCGAACGACCGCGTTTGGTTCATTAGCGGAACAGTCGGACTGTTGCCGGAAGTAGTTG  
CGGGCGGAACGACGCGATACGTTAAGCTTTTTGATACGACTTCGGGCGGGAATCTTGATA  
TTTAGTTGGCTCCGTCGTTACGCGGATCGTTTACCAACCGGGCCGGGTTGCCGCTGCCGC  
CGCAGTACCTAACGCTAGCACAAAGCCGCACGCCAAGCCCACAAGTAGGGCGAACGCCGA  
TTGCAGTTGCATGGCGCAACCGCAGCCGGGTCGATACCCTGTTGCGCGTGTATGTCGACA  
CGGCGAACACGCGGGAAGCTGGCACCGAAACCCGCATTCGCTGGCGCGTAGGGCGGCGGCG  
GTTATACGACCGTTACGACGGCCGGAAGTTCAACAACCCCTTGACGGAACGGGCAAGTACG  
GTACGCTAGAAGTTATTGTAAATTCGTTTATTGCGTCGAATTCGAACTATTCAACGTACA  
GCGATCCGCTAAAAATGACCCTAACGGCACCGCCACGGCCGTAATCAAAAGAACGACAGC  
GCGGCGGTTTTGGCCTTGTTC AACCGCCCGCAGGCGTACAGCGTTTCGACCGCTTCGTTA  
ATATAACAGTCGTAATTTATATCGTTCGGGAAATTCCGTCGGCAAGTCCATTACAGGGCGT  
GCGCCGTCGGTTTTCCCGACTTTGTTTCCGCTGGATACGTAAGCAATATAACCCGGGTTCCG  
TTCTTCGGGTAATACCAACGAACAACCTTACCAATATAACGACTGTTCTTTTCGCCGCAG  
CCGCGCACGTTCTTTACTGCAAGGAAGCGCCGGAAGTTGCGGCTCTCTTTAATCGTCTTT  
TAGAACGGCGTTCCTCAACAAGGAAGCAAACAAGCCCGTCGGAACAAATCAGGGTTTCG  
GGCTTCTTCGAAAGAATCGAATGCAAGGCCGACCCGAGTTCGCAATAAGCGCCCTTCTTG  
TTTGCGCCCAATTGTACGTCAATATAGCGCGCATCGGGGTCGCCGCCGTCTTCCTTGATT  
GCGACATAACTGTTAACGTTCGCGGCTGAATACGGCCTTAAACCGCGTTTGTTCGGTCTTG  
TATCCTGTACATTCTTCCAAGCCGCAATAAGCGCCCTGACTTCGTTCGTGTCGCGATTG  
TGATACTTCGAAATAATGCCGTTCGGTATTGCCGGAATAACTTCGATGCCGATTTGTTCC  
AAAGCTTCGATAAGCATCAGCAACACAAGTTGCCCGGTAATCGATAGTTGCAACATAAGT  
TGCGTACGTAAGCGTCAATACTTGTGCAAGTTTGCCGAAGCTTCCGATAGTGGA  
ATCTTCAAGCTGTCGGCAACGGTCTTCCATTTCTTCGCGGCTAGGGCGGGCGCCCGCTTC  
TTTGCTTGGCCGCTTCGGCTTTGGTGTGAATTCGAGTACTTACGATTTTTTCGTAACG  
GTAAAAAATGCGTTCGACCAAGTGC GGCGGGCAAAGTCTTTGATTAAGGATTGTTTCGCGGG  
TAAAACGATCCTACGCCGTTGTCTGCCAAAATTATTTTCGTCGGTTCGAGAGCGCGCCGTT  
TTCTTTTCGGTTAAATGCAAACGGCCCATGCCTGGTTTATACGTCCAACCGCCTATGGTT  
ACTTTCAGCTCTTATTGTTTCGGGCGGCATGGTTTGCGACCCCAAGCCGTCAAGATAGAAG  
CGGGCGTTTCGCACGACTTCCAGCATTTTCGCGACGCTGCGTTCGTTGATAGCAAACGAAG  
TCGGGCACGTCGTAACCAAGACCGTATCGGCGGATAGTGTGGGCTACTTTGGATAATAG  
CCAACGACTTATTGAAGTTCGGAGTAAATAACCGCGTTCGGCTACTTGC GCGTCTGATTT  
GACCGAAGGTCTACGCCTTATTTTTCCGACATTTTCGGCCCGCAATTTCAATTTCGGGCGCA  
AGTTCGTTCAACATAAGTTACGTATTCGAAAGGTCGTTGCAGCAATAAGGCCCCACTACA  
TCGGCGTCTTCTGCGTCAATACATGGTCTTCCGGAATGGGCAAGTCTCGCAAACGTTTCG  
CAATGCAAGCGCCCTTCGTACAGCTCCAACGAACCTTGAAGCGGCTCGACTTCGATAAAG  
TCTATATGATTCTATCGCCCAATTTGGACACCGTCTTCTTTTCAAACGCGAAGTTCGTT  
ACTTTTTCAGCACCATAGTTTCGGCCCGCTATTACTGATGAAATCGGACGCTTCTTTAAGC  
TTCTTGCAATCTGCGCCGCGTGC GGCTAGTTCAATCATCGGCATATCATAATTGCGGGAA  
TTGAAGCCCACAATACAGAACCGCCAAAGCATGCAAAGAAGCTTCGTCGGGTTAAGATCC  
TGGTTCGGCGCTGCGCTCGAATGCGACGAACTTTCCGTTATCAAGCGACTTTAACGCCACG  
ATAAAGAAATTTACGTAAGTTTCAACGTTCGAAGACGATGACACTTCCGGCAGGCATTGCC  
GTTTCGTTCTTCGTCCGACATAGATTCGAGAGGCCGCAAAGCCTGCCGAATGCTTGC GGCC  
ACCTTATCGACGACGCGGCTTTTCTTTGCAACAATAAAGCCTTTTTTCGTTAATCATGCGG  
AAGCCCTTAAAACGGAATGTCGTCTTCGTAATTGTCCGACGGTTTATGCGTCGCTTCGC  
TGCCAAGGTCAAGACCCATCAGAACGCCGGCCTGGTTTTTCGCCGAAAATAACGACTTTGT  
TTGCGTCCGCAGCGAAATGCCCTTTCTTTTACGCATGTTTCGACGGAAAGAAGCAACTTCG  
CAGAAAAGCCCATTGGTTCCGGCAAGCCTTAGATTTTGTTCCTCCGAAGCTTCTTCTTTGT  
GCATCTTCGCCAAAACCGCCCCCTCGTCGAAAAATAACGTTCCCGTTCTGGCTGAACGACT  
GAATAGCGCGAAAGCCGTTGTAAGCATCGTTCGGGAACCGGCCAAGGGTTCAAGCCTTCAA  
CTTCGAAAACGACTTGGCAATTTGGGTAACGTTTCGCCGTAAAGTTGCGTTTTGATAAACG  
CCCCGTTTTTCGAAATAGAACGTTGCCGACGACGCCGAAAAGCCGTAGCCGGTAAGGGCCG  
GGGCAGCCTTGGCGACAGCGACCGCCGCGCACTTGTGTAGCATCATGTCCGGGGGAAGGT  
CGATAGCGTGCCACGCTTCCAGCAAGGCCGCCGCGTTGGTTCGCGACGGCGCTTCCGGCTT  
GCAGCAAGACGGCAGCATAGGTCGCATTCGGAGCGCTGTCTGTTGCAAGCCCTGCAACCG  
CAGCGAAGGCTGCTTAAATACGGTCGACGATTGTGGCGGACTGCGCGTAGGGCGCGGAAA  
TCGGCACGTCGTTCGAAGCCACACAAGGAACCAACGCCCGGACCCCGCCAGACGAAACGG

CAAGGGCGTTCACGGTAAGCTGCGCACTCGACAGTTCTTCCCGACCTTCGACAGCCCAT  
CGATAAACTGCAACGCATGCGGACACGCTACCAAGTCTTCTTCGATAGGATGCGCAACGG  
TCAAACCCCGTGGGAAGCCGCCGCCAATTGTGGGCAATATGGCCGAACTGAACGTTTCG  
TCGGCCCGGCCTTTTTCTGAGCCATGGCAGCGAACTTCAACGCCGCCAAAAACGACGCCG  
CAGGGCTTGGCACTTTGGCTTTGGTCTTTCGGCTGCGGCTTGCATTCGCGCCCTTGGCT  
TGCCCTTTGTCGGTCTGCGGATGGCGCTTCGTCTTCGGGCGGAAGCGGAATATTACCGT  
CGATTTTCATTTTCGGCCCCTTGTTCGTCAAGTTTTGGAATTGCCGCTTGATTATAGTTC  
GCCAAGTCTAGCGTTTCTATTAGCGCGTGTGCAACCAATTGCGACACGACAACGGGATA  
TTATCCGTCGTTACGCCGTACTCGGCAAGTCCAACGATTGAACGTTGCAACAGTAATTCG  
CGGTGCATTTCTACTTTGGAATCCGGTGAAATGAGGCCAGTTCGCGCAACTTCAAAGGCG  
ATTCTCGCCGCCGCCAAAGGGCTTTCGACTTCCAAGGCGTCTTCGGCAGTTGCGCCGCAT  
TCCGCGACTTGTTCGTTTTTCCATTCGTCAAAGCTTTTATAATGTTGCTTGATTTACCA  
TTCAGCGGAAAGAACTACGGGATACTTTTTGTTACCCCTACGCGGACCCGGCGCGGCGT  
GCGCAGTCTGAAACACGCTGCGAAGCTTGATAACTTGTTCGGCGGCGGTTCTTCGGCGTG  
CCGCGGCCGCCACCAATCGCGCGAACGTTACGCATCAAGCCCCGGATGTTCAAGCATTAT  
AAATTCGTTGAAGATTTGGAAGCCGCAAAAGTAACTAACTTTAATCATCCGCTGTTTCGT  
TAAATTTTCGTTTGCCTCGCGCTTTTCGTGCAAATGTAAAGTACGTTTTGAACGTCGAA  
ATATTCGACTATCGGCGCGTCTTCTCAGCGGTTCCAGAGTTCACCAGTCGCCAACAA  
CTTCGTTTCTAAAATAAATTCGGTGCCGCGAGTTGATACACTGCCGGGCCGCGAGCGTAATT  
ATATACGCCTCATATATCGCAAATACGAACGGGCGCGTCGCCGCCCTCTGACCGGTCT  
GTTCCGAATTGGCGGGTCAATTGATTGGGCCTAGCCTTCGAACGTTTACGGCGAACTCCGC  
GTACAGACAATTTGTTTGCCAGTATCCGGCGACGGTCAGGTTCCGCGTCCCAACTTTTG  
TACGTGTTTGCCCGCGATAGCCTCGGGTTCAAATCGCCGATCAAGCCAATGGGCAGATG  
GTCGAAACCCCTTGTAAGTTTCTGCCCGATACCAAGCCGCGAAGTTCGCCAGCTTTGAA  
AGCGCGCAAACGGTCGGTATTGGTCATCGAAGGCAACTTGGAATTAACCGCCAGAACTTC  
CAAGCCGTAAGACCGAATTCCGTTTGCGGGGTGTTCGGTATTATCAATACGTGTTGCGAA  
GATAAGCCAAGTCGAAGAGTCGCAAGCTATATCGGTTCGTTTCCCGAACAGCGTTAAAAAC  
AACTTCGTCGGTGTCTACGGCGGCCTCTAGTTGCTTGTGCTGAATTGGCCAGCCGTTAC  
GCCTACTTACGACAAGTCGATTTAGGTTTCGCGTCGGCCTTTCGCTGAGCGCCTTGAAGTA  
GCCTTCGGCGATAAGTTGGTTAAACGATTCAACGCCGGTTATATCGTAACAAATGACGGT  
AAAAATTCCGTTGTCGGTAATTAGCCCGATTTTCATTTCGATAGGGCGTTGCCGTGAAGCC  
GATAACTTTAAGATGCGGGTTAATCTTGCGAAGTTCGGCGATAATATATTGGTAATGCGA  
ATCTTCCTTGTTCGCTTAACAAATGGCATTTCGTCGATTAACAGCTACTCGCGCCAACCGAA  
TTGGCGCAGATGCACCGGGCGACCGTTCGTTCTTCAAGCCCCGGGTTTAAATCGCAGGCGC  
TACGGACTGAACGCCGCCAAATACGATTGGCATAATCATATCGCGGGAGTTCAAGCCTGC  
CGAATAAATGCCCATCGGCGCGATAGGCTAAATCTACATAAGTTTTTCGGCGTTCTGTTT  
GATTAGTTCTTTAACATGCGTAAGCCTCATTATTCGTTGATTTCGGCCAGTAACCGAAAAT  
TCGGCGAACAAAATTTGCAATTACGACCGACTTTCGGGATTTCAGTCGGCATAGCGACCAT  
GGGGTTTCCAACCCCGCCGCGCTGGAATAATCGAATATTGAATATTCCGCTTCGTCTTG  
ATACTAACGCGCAACATAAATGTTAGACTTCCCTCGCGACGGCGGTAATTGGTGAATAAG  
AATCGCAACCCGCGAGCGATGAAATCTCCCGGAACTACGCCGTTGTGAACTTCGAAAACC  
ATTCGCCGTTTTTCGACAGGGTTTGCGGCCTTGCAGCTTCGGCAGTTCTTTTCCGGATTTCG  
CGCCCTTGTGGCAAATCTCCTTCGCCGCGAATATCCGCACTTGTGAAAAGTCGTATTGT  
CCGACAAGCGCGGCGCGCTTTCTGCGACAGAATGATTTCTTCGGCCTTTTCCATGATTT  
GTTGGCCTAGCCGATGGTCTAGCTTTACATCTTCGCAATGCAAGTCGTCTTCGTTCTTGT  
TAATGTTTAGGTAAAGACCATAACGAAAATGATATTCGTTGCCACAGGTCGAAGTTTGGG  
CGAAATGTTGCGGCTTGCATACTGCCATTCCTTTCCACATTAAGTCCCAAACGCCCTTGA  
CTGTTCTGTTGCTCTTGAATTCCAGCAAAACGGGTTTCGTTCGTTACCGGCGCGGTCGGGAA  
GCCAGGCGATAACCGTCAAGCGACCCGCCGAAGTGCCCCATTACGCCGGAGATGCGGTATA  
GTCGGAATTCCAAGCCGTCGGCTTTCCCGCGTGGGTCTTGTGGGCGTAATACGGATTTT  
CGTTCGTATTAAGGGCGCAAGCCAACGCCAGTTCCTTCGCCTTCTTCAATACGCCGAAAC  
TGTCGCTTTTCGGCTTGGCAAAGAATCCGTCGCGTTTTTCGTAACAACATTTAACGGAGA  
TGCCTTCCAGGCATTCGATAAAGCGGGCTTCTCACGGAGCCACGATTAACAAGCGTT  
GCTTGCAGCCGTTCCCTTCTCCAGAAAACAGCAACGGAAGATATACCAAAGCTACCGCT  
TTAATTCGTGCGCTATCAACGACGCGCTGCGGTTTCAGAAGGTGCCCGCCGTCATAGGAGC  
GAACGCAATATTCGTCTATATCTTCTTTTATGCGCTTTGCAAGGGCAGTTGCAACGTCGG  
GCGCGTCAAGGTCTACACTTAGTTTTCTGCGTCGGATTTTCGTTCGGCTGCGCGCCGTTCA



GCGGTAATTGTGCGTTCTTCGCGTCTTTGCTGTTTTGCATCGTTCTTCACCTTGCGCCGG  
ATAAGGGCTTCGTAATTGTTGCTAGATAATCTGCCGAAAATGTAGCAACGTCTTCAAGT  
TGGTCTTTTCGACAGCTAAGATATATGGCAATCCGACGGGTCGATTCATAATTCGTCCGCA  
AGCCAATTGTAAGCCTTCGCGCGTGACATTAGGCCAGTTTGCCCAAGGCGGTCAAATTCG  
TAATGGGCTTTTGGTTCGAAGCTGGCGCGTTGTTTCGGTTCGGCCATACGACCCAACGGAATA  
AACGTGCGGGGATGGCAACCAACGGCGGGCGGACAATCATGGCAATAATAACCGTGCGGC  
CAATTACCATAAGTTCGCCCGTAAAACCTTATCGTTCTTAGTTTGTTCATGTAAACGGAA  
CAACAAGTATCGCATTGTTTCGGGCATCGGCAATGCGTCCTTTTTTTTTTCGACATAATTTTCG  
CATCCGCCTTAAAAAGAAACGCCGGGGCCGGGTAAGACCCCGGCGAACCTACGCCGCTAC  
GGCGTTACGCCTAACGCTGGCCCCAAGGTGCCGCGCCAGCCGGTGCGCCGCCCTGCGCG  
GGCTGGCCGCCCTGTTGCCCGGCGCCGCCCTGCGCGGGCTGCTGTTGGGCGGGCTGTTGG  
GCAGGCTGGCCGCCCATGCTGCGCCCTTCGGCTGTTGGGCCCGTTCCTGCGCGGGCTGT  
TGCCGGCCTCCCCAAGCGGCACCGCCTGCGGGCTGCTGCGCGGGTTGCTGCTACGGTTGA  
CCGCCCAAGCCCCGCCGTTCTGGCCCTGCGGGCTGCTGCGGGCTGCTGTCCGAAGCCTGCG  
ACGCCCTGCGGCTGCTGGTGCTGCGGGCTGCGCTGCCGGTGCGCCTGCGCTAGCCTTGCCC  
GGTTCGTGCGCGTTCCTATCAAAGACCTTTTTAACTTCGGTATACTGCGGGTTCGTTTTTC  
TGCGGCCCGACTTCGATAAAGAAACGGCCGGTTGTGAAATTGCGACGAATCGGTAACCTGG  
AACACGCTGATTACGTGGCAGATTGCCGAAAGCTGCCGATGCGCGATTTCGACGGTCTGT  
TGTTTGAATGTTACAGGCTCAGGCTATAAGCGCCGGTCGTGACATGCTCCGGGCCGTCG  
ATAATCCGCAAGGTCAGCTGCAGATAACCGCCGTCGTTTCGCTTGTGGCCTTGACTTCG  
GCAGATTCGACGATTGCCGGATGCTTGCCAATCGGCAGGCGTCCGACGCCTTGGGTAGGG  
TCGAAGTGTGGGCGTTGAACGCTTGGATAAGTTGCATGATGTTTCACCTTTTCGAAAAG  
TCTTCGCCAATGGTTACGGCGGCGAAGTAAACCGTTTTATTGCATCGCTTTCGCGAACAA  
TGCGGTAAGGTCGCGCTGTTTCATGTCCGTGAAGATTCCCAAACGGTTCGCGCGCGAAAAC  
ATCGGGAATTTCTTCGTTTCGACGCGCCGAACCGGCTTCGGCATTCCGCGTACGCTTGC  
TTCACCAAGTGCCTAACGTTATCGAACAAATACGGAACCTTAAACGTTAAGGTCCTTGCC  
CGAACGAACGGGTGTTTTTGCATGATCGGTTTCGTAAGTAACTTCGCCGTTCTGCAAAAT  
CGTTTGCCGTCGGTTCATAAGGGGCTTGTTTCGCAATCATTACGATCTGTATTTCCGG  
CATGTAATAACAAGTCGTTTCGCGATGTTTCATTACAGTTCGGACATATTGCCGTAAGCCTT  
CATACCGTGTGACCTTGCCGAATTCGTCGGTCAAGATAATTTGGCGATGTTTCGAAAT  
ACTGTCAATACCCAACGTATCGAAATACGCAGCTTCGCGCGATTTAATCAACCATTTCGAA  
GAATTCGACCGTAAGCGCGGGCGTATACGCTCCCATGCGGGAACGTTTCGAACCGCGCAT  
GGACAGCATAACGGGTTTCGGTCAAAGCAAACCGGTCGCGGCGCAGTATTGATAAGTGG  
CGTTTTGCCGGAACCGGGCGCTCAGAATACGACGGACTTTACGCCGGCGCGGGGCCAT  
TTGCCACGCCGTTTTTAATTGCGACATTTGCACAACCTTGCACCTTCGGGAATGACCCCGG  
CGCTTGTGGGCAACCGGGGCGGGTGTACTTCGACTTCGGCTCGACAAGTTCAAGCGC  
GTGCGTGGCCTCCTTCGACGTTACAACCTTCGTGGAAACGCTTACGGAACCTTGTGCTGAAG  
GTTCTTGAACCTCGGTAACGGAAAGTTCGGGCTTCCATTTACCTAACGTTTCGGCGATAAA  
TGCGCCTTCGGGGCCGGTCTTTTCGATTTTCTGCAAAGCCTCTTCGACGGCTTCTTGCC  
GCCAGCGAAGCTGCGGTTAATCTTGAACCGGCTTTCAGTTTGTAGCCTACGCCAAGTTC  
GACGTTTTTCGGTTCCTGCGCGCAAAGCTTCGGGGTTGAAGTTGAAAGCGTTTTTCAGAAT  
TTCGGGGCGCGATGCGGATTCGGCTTCTTTCGCTGCGGCAAGCTCCTTCGTTGCTTCCTG  
CCATTGCCGAATCAAAGCGTCGCGGTTAGCGTTTTTCGTTGAAAGACATTGTTGTTCTCC  
TTCGGTTGGGCCCGCCGACAAATTGCGCCGGTATGTACGAACTCTACGACGGCCCTTCGTT  
GATGTCCAGCCCTTGTTAAAGGATTTTTCGTTCTTCGGACAAGTCGCGATTGTTGGCGT  
CGAATTCGGTAAAGGCGTTCGGGAAGCGACGACGAAGCTTCGCGATGTTGACCAACTGCA  
CTTCGCCGAAGTTCGAACCAACGGCGTGCACCAAAGCGCATCGTACCAAAGCCGTCCG  
CGTCTGCTTCAAACGCGTTAATAGCGGGGAAAGCTTCGCCTACGGCTGCGGCGCTTAGGT  
CTTCCAACAGTTCGTCCGCTTCGGCCACTTTGCCGATAATTGCATGAATGACGTTAACGG  
CTGCGGCGTTCGTGTTTCGAGATGGTTCGTAATCCAAGCGGGAAGCTTCGCCAGCGTTGCCG  
CGTTAGTTTCCGGGGCCGGAACGCCCGTGTGCGGACCGAAGAACATGGCTTTCTTTATTG  
CGTCAAGTTTGTAGGGGCTTCGACGACATCGGCGATGGTTTCGCGGAAGTATGCAAGCG  
GCACGCGGTGCGCGTAATACTTGTGGACGCCGTAACGTGGGCTTCTTCGATATAGTCGA  
AGGGGTCTGCGGGTTCGTTACATACGCACACCTTTTAGAAGGGGCCGGCACCATGCGCCCG  
CGTTCCAGCACTGTAACCGACCGCGCCTTTCCTGTCAACAACAATTGTAAGCAAGCAAGA  
AGCCGGGTATGCCGCCACAATTGCTAGAAGGTGGCGTTATGGACATTGAAGAACTTACG  
ATGCGGGTAAAGAACGCAAGCGTCGAGCGGTCGCTGTGGGCACTTGCCGCGCAATGCAAC

GTTTCGCACGAACTTATAAGAAAGCTTTTGGCTTGCGAATTCGGCGCCGAACATAACGGCG  
ACGACTTATAACAAGATTGACGAAGGGTTGGCAAAGAATAGACTTTAAGAACATTCTGCA  
CGAAATGCGGATTTGCGCGCAATGGGTGGTTTGGCGATAAGAAGACACGGAGTGAAAGAA  
ACCGACGAAGGTTCCGTATTCAGCTAAAACCGGGCACCTGGCCGGCGTAATCGACCCGAA  
CACTTGGGCCGGGTTTCGACGAATGCTTTAACGCAATGTTCGTCCGGTTGGTATGCCGGAAT  
CTGTATCGTATTGACTTAAAACGACCCGTATTCTTTTATCGACCTTGACGACACAAAAGG  
CGACCAAACGGCGCTTGACCGCCAAATAAAGATTTTAAACGAATTCAACAGCTACGCCGA  
ACGGTCGCCTTCCGGTTCGGGGTTGCATATCATCGTTAAGGGCGCGATTCCGTCCGGCCA  
CCGTCGTTTCGTTTATCGAAGTTTATTCGTTCGCTTCGTTAAATGACAATGACGGGCGGTAT  
TTACCGTAACGCGCCGGTTAACGATTGCAACGAAATATGAAACCTTCTTTGGGGCCAAT  
GGGGCAAGGTTCCGGTCGCCGTCGCGCATTATGCCAGACTTGCCCAAGCCAAGGAAACCGA  
CGAACAGGTTTATAACCGCGCAGTCGCCGACGGCACTAGCGACAAGTTCGCAGAATCGTA  
CGCGGGCAAATGGGAAGGTATGTACGCTTCGCACTCCGGAGCCGACTTTGCATTGGTTCGA  
TATTATCGCGTATTATACCCAGATCCGAGCGCAGATTTTCGCGAATGTATCGCAGGTCGGG  
CTTGGGGCACCGTGACAAAGCAAACGCGACGATTACGTTTCGTACATGCTGAACAAGTG  
TTTCGACCGCAGGTTGCCGCCGATGACGTTGACGGATTGCGCAACAAGTTAGCCGAAGC  
AATAGAAAAGAAAGAAGCCGCCGACAGGGCCGGCGCGTGTGCCAGAACAGCGAAGCGAC  
GCCGCATCCGAAAGCCCCGGCCCCGAACCTTAACGAAGCTTCGAAGGTATACAGCGTCCC  
GCCCGGATGAGTCGGAGAAATCGCGCAATACATTTAAGCACAGGGGCCGCGCCCCGGTTCC  
TGAAATCGCGGTGGGCGGTCCCCTTGGCGTGGTCGCCGGTATTGTGGGCAGGGCCTACAA  
CATTTACGGCACTGGCCTTAATCAATACGTTCAATTGCTTCGACCCGACCGGAACAGGTAA  
AGAAGCCATCGCAAGGGGCATTGATAAGCTTATGGCGCAGGTCATCCGAACCGTTCCCCG  
CGCGTCGGACTTCCTCGGCCCGGCGAAATTGCTTCGTTCGCAAGCGATTATTATGTATAT  
GTGGCGCGTGCAGAAAGTCGTTTCGTTTCGGTGGTTGGCGAATTTGGCATTATCTTCAACG  
AATGGCATGCGTCAACGCACCGCCGCACCTTATCGGGCTTCGTTCGCTTCCTGTTGGATGC  
TTACAACAAGTCGGGCGAAGGCAAGGTACTTCGACCTTCGATTTATTCAGACAAGGACAA  
GAACACCGCCTCAGTAATGGCCCCGTCCTTTACTTTGCTTGGCGAATCGACGCCCGAAAA  
GTTTTACGAAGTTTACACGAAGTTTGATTTCCGAAGGTCTGTTCGCCGCGTTTTACGAT  
GATTGAATAGAACGGCGACCGCCCGGCGTTGAATCCGGGGCACCTGTCCGGCCCAACCTTC  
TTACGGACTTGTAGACAGGCGTTCGACCTTGTGCGCCCATGCGCTTATGTTGAATTGGCA  
ACATAAGGCGATTACGTTCAAACCGACGCAACCGCCCCGGAACTGTTCCAGCAATTCGA  
CGCGCACTGCGACGCGAACATTAACACAAGCGACCGCGAAGTTCGACGGCACCTTTGGAA  
CCGGGCGCAAGTAAAGGCGTTGAAGTTGGCCGGAATTATAGCCGTTGGCCTCAACCCTTA  
CGACCCGACCATACC GCCGACGTTGCGTGTGGGGCGATCAACCTTGTTCGTCGCCGACGT  
TCGAAACTTGCTTGCCCGCTGAGATGCTGGCGAAATTGGCATAGACAACGACGAATCGAA  
ACAGCGTGCAGAGGTTATTGCAGCCGTTAAGATTTTCATCGTTTCACCTTGCCCGGACGT  
TGCGAAGTACGCAGGCGAACGAATGTCCAACCTTCATTTCGAACCGAATTGTTCCGTACAG  
CTACGTTCAACGCATCCTTGCCGCTGTTGCCGCTTTTTGTAAAGACCGCATCGTCGCAAC  
CGGGGCAATCAAGCGCTCCTTGAAGACCCTTTGCGAGCGCGTCGATCTGCATGAAGTAAG  
CCGGGCCACACTGGCGAAGGATTACGGAACAAGGGCCGTTGCATGCTTGGTTCGCGCATCC  
GGGCGTTTTTCGGCCGTAACGCGCGCCCGCCAGTGTGGGCAGAAGGGGGCCGATTCCGGG  
GGCTTTTTTCGTGCCTGTCAAAAAAGTTCGTTCGTACCTGTTGACGTGGAATCGAAGGTATC  
GAATATTTGAACAATCGAAGCAAGCAACGAAGGACTAACGAACATCAACA ACTATGAAAC  
TTTTTTAGAAGAATTCCAACGCATCGGCCGAAATTCGCCAAGGTAACGCAGTTCTTACCAA  
AGACCGCGAAGGCTTCCGTTTCCGCAACGCGCGAACTCTGTTTGCAGAGTTCCGTCCGCA  
CTTGTACGCCAACGGCAGCGCCGAACGTGTTCGAAGCGTATTGGAACGGCATTGTCCGCAA  
CATGCGGGCCGCTCACGCAGCTTAACCCCGTAGGCCAGCCCCGGCCCTTGGCACGCGCTC  
GGGGCCGCACAGCCTGTCCACAATCAAGGGAAGCCGCAGCCATCAACCTAGCCCCCGCAG  
ACATTTCAATAGACACGTTCCGCAAGCCCGGCTCGTCGGCATGGGCTCGCAGAGTCGAAA  
CCTGCGTTCGCATTACCCATATTCCGACCGGCGTTTTTTGTTCGAACGCTGCGACCTTCGTT  
CGGCGCACGCTAACAAAGTCCGCCGCAATGGCAGACCTTCGAAAGAAGCTTGACGAAATGA  
CAAAGGCGATGCCCGCATTTATTGGACGTATTACCCGAAATACCGTCGCGGGTATTGGC  
GCGTTTTCGCAATGCCGAAGCGTTGGAAGCCGGAAGACGGGCCAGCAGGGGACAAGGCGC  
AAGAATTCGCCCGTCGCTTGAATGATGCGATACTTCGAAGATTGAACAGGAACTCGCTC  
GACTGCCGGTTGTTGATACGGTTAAACATTTGAAAGACCTTCCGCCCGGTTTCGTACATTG  
TTTCGGGCGACGCTGCGGCAGAATTGGCCCGACAGTTTGCAAAGCGTTTCGATGAATTCT  
TAATTGTTTCGAAGGTTCTTCGCGTATAATAGCCGACGAAACGTATGATGGCCCCGTCATA

ACGCTTAAACCCTTGATACATAAGGCTTTTAACGGATTTATAGCAAGTATAACGTTAAAC  
GCCGTTCCACCTGACCCGGCGGGACTCTTTATTA AAAAGTCACTATTGATGAAAAGCTATA  
TTATAGCTATGATATTGTATTATCTTATTGTATTTCTTTATTTTCTAGGACTTAGGGAC  
TATACAGACCCTTAAACACGTATAACGTTTCTAAATTGATTAAATGCTGGCCACTTGATA  
AATTGTTGCCTATGCTTCGGCTATTGATTAAAGGGGCTTGCCATGACGAAACCGACGACGT  
AGTAAGGCCGACCGACGGGCGTTATTCCGAAGCGTGCGCCCTGCCGCCAATTCGGGGCGCG  
AAGTTGCGGCTAATATGAAGGTTTGCCCGTAATCCTTGAAGTTGACCGGGCTTGTATCTA  
CTGCGAAGGAGTTAAAGAAAGGACCGACGAAACAAAGAAGGTTCAAAATCTACCGTCGTC  
GCCGAAGGCCCTTGCGCATGTCGAAGTTTACC GGACAGTCAACCGGAACGAACGCCCGA  
CGAAAATGACGCGAAGTATCCGTTTCGTTTCGTTGCAAGTTGGGGAATCGTTTGCGATACC  
GATTGCAGACCTGAACCCCGGAACGTTGGCGTCGCTGCGTTTCGTCGGCCAGATCTTACGG  
CAAGAGGCTTAAACCGGAAGTAGCGCGTATTCGTTACACGACGAATATAAGTGCGACGAAAT  
GGCCCGGCTGAAATGAACAACGACGCGCGGCCGATTGTGGGCAAACCTGGTTAACGTATTC  
GGATCGTCGTATCTTGGCCTTCGGTTCGCAGTGTCCGAAAGCATTGTGCATACGACCAACA  
GCGACAGGCCATCGGGCCGTCGTAATCATTGAAGAAAGGGCAAGGCATGTACGAAATCGA  
AACCGGCCATAAAATGCCGAAGCAACGTCGCAAGGCTTGAAGCGAACCGACGGCGGTTCA  
ACAGGCGTTCAACGTCTACGCCGACGCATAAAAGGCCGTTTATGGCGTGCGCCCGCTGTC  
GTTACGTATGACCGCGAAAGCGGCTTTATTTCGCGTCGAAAGCAGCGGGCGGCGTAAGCGG  
CGCAAGGCTGCGCGAAATGACGAAACAGCTTCGTTACCGAAAAGTCTAAAAAAAATTAC  
TTCAAACGTTGACGTACTGTGCAAGCCATCGTCCCATATAACCATAACCAACGAACACAA  
AGAACCGCCGAAATGCAAATCTTCTCCAACCAACCGGAACGCGGGAACCTTTC AAGCT  
GGATTCGGACCCAATATGCTTTAAGTGGCTGGTGCCAAGGGGTTTTGGCTATCAGCGAA  
TGGGGTTCGTACTATTTGAACGAAGACGTTTCGCGCCATAGGCAAGCATTCTTTTCAAC  
ATGAACGACATTTAATAAACATGCGCGTCGGGCGCAACCCGGCATTTC AAAGGGGTTATA  
ACAATGTGCGTCGTCTGCGAGAAGAAACAGGCCGTCGAAGTTTCCGGGCCGAACAAAGAA  
GACCGCGCCAACATCCTTGGCTTGGTCGAAAAGCTGGCCGAAGCCCTGGGCGATGTTCTG  
CAAGTCGCGCGTGAAGTACACGAAGCCAAGCCGGAAGCGTTCCAGCCGGCACACGTCGCG  
AGCTTTCAGAACGCCGCGGACTTGCTTAAACGACCGGGACGAAATGCCCGACGCCCTGTTG  
GCCCTGCTGTTGGCCGCCCTTGGGCGCGGCGTCAAGGTGCAACAATCCGCGTCGAACTG  
CGCGAAGGCGTAACGCCAGAACAGGCCGTCGCGCGTGCAATGGCCGAAAGCGAAGGCAGG  
ACCGGAACGAAACACTAACCAAAGCGCCCCGGCTGTTGTATAGTCCGGGCCTCTTTCTAT  
CATGGGGAACGAAAGAACATGGACGGCGAAGTAGACCAAACAGCCGACCGAATAGAAAAC  
GAAATAAGCTTTACGGTCGGCGAATTATGGCGAAAGTCCGCAGCGATACCCGCACGCCGT  
CCC GGCGAATGTGATTTTTGCGGGCAAGACTTCGCGCGCGTGTGTCGAAGTTACCGACCCG  
CGAACGGGCGAAGTCGTCGAAAGCTGCTGTCGCTGTCGTGACCGTAGGGGCATCGCATGA  
CGCCCCATCCCGTGCCAAGTCTGGCACCGAACACGCGCACAAAACGGCGCTTTTTGTCT  
ATGCTGCTGTCGACACTAGCACGGCTTCGACGTTGCCGACGAATAGTCGCAGACCGGCA  
AGTTACCGAAGCGCGACCCTGATGCACCGCCGAAGGTGCCCGCCCTTGAATGATTCCACG  
CCATACCGAACGGCGGCAGTGGCGGGCAGCAGCACAAGTCCCGCACGATACGCGGCGCGC  
AGTTGAAGGCCGAATGCGTGCGGCAGGGCGTAGACGATACGGACTTGCCTTGGCCTGTTT  
ACGGACGGTGCCCCGAGATTCGCTGATGATGATGAAATGGGCGGTCTTTATATCA  
AAATGAAGAAGCCGACCGAACGTCCGAAGTCGGAAACCGCAAAGGGCGGCGTATCGGACG  
CACAACGAGGTTTCCGCGAATACGCATAGCGCGTCGCAAATAGTTGGGCCTTCTGCTATG  
ATTGGGAACAAGCGGCGTCGTATCTTCGTTGTTATTTGCAATGGGGTACGCAATGAAACT  
ATATGTTGACGATATGACCCGGCAAGACCCGGAAAAGGCCGCGCTTTGTATGCGCGCATT  
AATCAAACCTTGACGGTAAGAAGGTGCAACGCTGCGTAACAGCGGACGAAGAAGGGCGTTA  
CGTCGTCGCATATATTTTCGCAAGAGGACCCGCGATTTAAGGCCGAAGTAATTAAGCAAGG  
TCGCGACTGTTGGCCGGTTCGAAACGTTGTACGCCGTTGTTAGCATCGGTGACCCGGACGC  
GAAGTCGTGAATCGTCCTCGTTGTGAGGTGACCTGCGCCCCGTTCAAAGCTGCGGGCGCTG  
GCCCTTGTGGGCTGGCCCCCTTGACCGCATCGCCGGGCATTTGTCCGTTTGTATGGCGAA  
CGGTCTTACGTCGAAGGTGGCAAGCTGTATCGCGCGTCGAAGTTGCCGCCGTATCAACCG  
CACTTGATAAGTGACGAACAATGAAAAAGACCGACGAAGAATTGATAGACAAAGCCCGCA  
ACATTGCGCGTTTCGAAACGCTGTTTCGTCGTAAGGAAGCCAGCTTATTTGCTGCTGTACC  
GCGAATGCACGCCGCGTAACGTATGCGTGGGCAAACGGTCGTCGGCTTCGGCGTTGCTAC  
AACCTGCGAAAAGGCTTGACGCAGCGTCGAAGCTTCTTACACTTCTTCGTAAGTTGAA  
CGAAGCAAGGAGAAACGACCACGCCGCATATAATGTCACAACCGAATTCGAAATGACCG  
ACGGTCGCGTTCTGTCTTGCGAATATGGCGTATCGTATACGCCCGCTTACATTAGAGGCC

CGCCGAAGATTGTTACCCGGGAGAAAGCGACGCGGGCGAACCAGCGTACTTTATCGACG  
GCGAAGAAGTCGATTATAAAGACCTTCCAAAAGGCTTGGACGCAATCGCCGACAAGCTTT  
ATTACGCGGAGCCGGGCGAATATTCGTATTCGCAATCGGACGTTGACACCGAACCAGGATT  
ACGAACCGGATTACGATTACTGTTAACGAAGGAGTAACGAAAATGTCTTGGCTTGTCCGA  
TGGGGCGTACTTCCGTCGGCGTTGTTGTCGGCTTCTTTTTTTCGGCCTTGCTGCGGGCC  
AATGGGCGGGTCGTGCCGGTTCCTTTCGGCTACCGTTACCGTTCGTGTCGCCGCAGTAACGT  
GCCCCGATGGGCTACGCGCTGGCAAGAGCTGGCGACTTGTGGACAGCGGGCGACCTTGAT  
TACGTGTCGGGCGGCATTATGGTGCAAGGCGTAGGGCACGGCGTCGTTATTATCAAAGGC  
GATTTGTCGTTGCGGGTGGCCAAAGAAGAGTAAGGACGAAGCGCGCGAAATGTCCGAAGC  
CGTAAAGGCCACCGGGCGAAGATTGACGGTTGCGCCCGCCATCGCGTCGAAATAGCCGA  
CCCGCCGTAAACGTTTCGGGCAAAAAGTTCCTTGTTCGAACTGCGGGCGGTACAATGGACGC  
CGTACAGGCGTTCCGATACTGTCAAGTCTTCAAGGCCGACGTCGGCGACCCGAACGAAGT  
TATACCGGGTTACGAATAACGCTTGACAAGCGGGCGAAGGTTCAACGAAAGTCAGACGTAA  
CGAAGAGACCCTGTTAAGGAGTTGCCGAAATGACCGTTCTAATTTTGTCTCTTTCACCG  
TTGCCGCTTTGTTCAATTCTTCGCATGTTTCGTTCTTTCGATATTGGATTGGTTCGAACCAC  
GCGAATACGCCGAACGTATGCGCCAAGCTGAACAGCGCGCGGGCGCTGGAAAAGGCAAGGC  
GGGCCAAGTGTGATGATCTACGTACCGCGCGAAGCGCTGTCCAAATGGGACGCGCGAAT  
TATTGAACTTGCAGAACACGTCGCCGGATGGTTCGAAAGGGCCGCGTAAGCGCATCGGGCG  
GGCTATCGCGAGCCGAATAGGTCTATTGCGTCGCTTGGGTACAACGGCACGCCGCGCGG  
CTTCGACGACGCCGTTTTTTTTGACCATCACACGCGACGAACGACACGCGGTGTAATTCA  
TGCCGAAGACAACGCAATTCGACAGGCTGCGCCGGGCGAGGACTTGTCCGCGTGTACGCT  
GTACGTTTCGCCGCTGTTTCCTTTCGCCATTTGTGCCGACCGCATCGTTCGGGCCGGTAT  
CGGTCGCGTGTGTCGCTCATTGCGGGCATATATCGCCAGACTGGCCCGCGTGTGACGACGA  
AGCCGAACGCATCTTAACTAAGCGGGCGTCGAATGCCTGTTGACAATGGATTAACGAAC  
AGGATACCGCTAGACCATTTCGCAAATCGAAAGCTTGTGTTCTATCAAGACCCGACGACG  
CAAACCATATCGTCGCACCGAAGGCCGACCGGTTTCAGCCAAGCCGGAAGCTTCGAAGCA  
TTCGGGCCGCGTGTGCGGTTGACCCGGCGTGTGATAACTTGCTTGCAGCAGCGCAGACA  
ATGTACCAAGCCCTTTCGCTGCAATACGCTTACCTTCAAGCTCAAATCGAAGTTATCGAA  
CGCTTGCCATAGGCGGGGAGAACTTGATAAGCTGTTGTCGTCGTTAATCAAAGCGCAGAAC  
TCTTGCCTAATGGCCCAACGTATAGCGCAAGTCGGTTACGAAAATGTGCGCAAATTCCTT  
GACAAAGGTTTCGAAGCGGTCTTAAGCTTGAACCATCGAAACGAACAAAGGTGCCCAAAAT  
GAACCGTAAGCTCCTTGTATCGCTGTAATCGTCGCCTTCGTCGCGTTGCTTGGTATGGC  
CGGGCAAACCGACTTCGAAAACGAAGTCCGCGCGCAGCTCTTGTATTGTGACATCGTAGC  
GAACGGCGTTTGGCCGCATTACGACAAAATTTACGATTCTGAATGCACGCCCGAACGCAT  
CGTAGAAATCTAAGAAATTTTTCGTTGACCGCTTGCACGAAGAACGGTTCGGCGTAAAAA  
CAACCCGTCGCAACAACGCGACATAACCTAAACGTTAAGGAGTTACACAAAATGGCTACC  
AAGAAATCGAGCGCGAAGAAGAACACCGCCGCCCCGGGTATCGGCCTTGCCGAAGTTGTT  
GCAGCCGGGCCGAATGGCCTGTATACTTCGCTGCGGTAGATGGCCCGCTTATCGTAGCC  
GGTATGTTGGAAATCAACCCGGCAGTTACCAACGAAGCGGGCGAAATCGCAACCCGCGCA  
ACCCAAAAGGAACCGACGAAATGAACCAGAAGACTGAAACCGGCATCGCCGACGCTTCC  
GCCCCGTCGCTACTTCCGTCGCCATCGAAGACAACGTACCCATGCCGACCGGCAGCGGA  
CGCGGTGCGGGCGGCAACTTCTATCCGTTTCGACGCGCTAGAAGTCGGCCAAAGCTTCTTC  
GTTCCGAACAGCGAAGACAAGCCGAACCCCGCGAAGTCGCTGGCTTCGACCGTTTCCAGC  
GCAGCCGCCGTTTGGCCGTGCATTCCGAAGAAGGCGGCACCATGACCAACAAGAAGGGC  
GAAACCGTGCCCGTTGTGGTCAATCCCGCAAGTTCGTTGTTTCGATCGGTTCGAAGGGGGC  
GCGCGGACTGCCGTACCAAGTAAGCAACGGCGCGGGCTATGGCCCCCCTACGACTTCG  
CTTCAACGAAACCCCGGACATTGCGCCGGCGTTTTCTTTTGCCTTTCTTGTCAATTTGT  
GCTAATCCGTGCTAATCTTCGGCCGTATCGATTTCCGGG

>NewGenomeName\_37

TGTTTACTAACGATCTCTTCACTTACTATGCCTCCAAATCAACGGAGGCTTTTCTACAT  
GCAACAACACTCAACCGCTTCGGACTTCTAGCGCAAACCATTAATCGACGCAATTAAGC  
TCTTGTGCAAACTGCTGGTATGCCTGTGCTTGTCAATCTCCTAACCTCCGAATCTGGGA  
ACAGTGCAACAATCGCGTAAACTGCTGGAAGAAATTCTAAATCATTACAATAACGGTAT  
TCGCCGTCATGATAACGGTGACTTCTTCTCCACCCTGAATGCCAACTCGCCACTACAAT  
TGCGTATCGTTCTCACAAAAGGGTTATGACCCTCGCTTGAACCTATACCTGAGTCATT  
CACTCTGGACGATATTTGTAAGTGGCAAACCCATTCTCAGACTGCACCTTCTGAGCTTCA  
ACTTACTGGTGAAGTCTGCGAGGATAACCGCCTTACTGTAGTCTCCATAAACGAAGAGTT

AGACGAATGGTACAACGTGCTCGGACAACGTGATATTAATAACACTATTGAGGAGAAACC  
TCTCGGAAACGCAAAAATGGACTTAATGAATGAAACACCTGTCTATAAACACTGGTATGA  
ACTGGTAACAAAACGACCCGTTAAATCAATCAGAGAGGACTACAACACTATGCTAACGCTAA  
GGGTACTAAAGCTGAGTGTTCATATCCTTGAGGAGTCCACCATGCAATCCCGCCTTCG  
CATTATCGTCCAGAGATTGATCAATGCTATGCGTACTGCCCCACTGAAGGCTGGTATGA  
TGTATTTCGATACTCTCACCTTAGCTGATGATCGTACCAAGTACTTCTAAGCTAACCCCAA  
TGCTCGTCTGACTATTATCGTGATATTGGCCGTATGGTTCTGACTCCCGAGGGTTCGGTC  
GGTCCATGATTCATATTCGGACTGCTACCAGTACTTTTATATGCCTGAGTATGGCACCGA  
GCATGGCCCATTACACTTTCACGCAGAGCATCTTATGCGCACACTTCCTTTGGGTTCTCT  
CGACTCTATCTTTAGTGATTTGGTGTGTACTAATCGGCAAATAAATCGCTTGCAAACAC  
ATCGCCTTATGGTTACTCTATGGCCATCGCAGTCCAGTATTCCCGGATGCTCTCTATCG  
CGCCGGATGGCTCAGGCCTGTCGATCCGAACGAAGAACCCTAAAATCCACCTCGTACAT  
GGCTGTAGGCTTCTACGTTGCTAAATACGTTTATAAAAAATCTGATGTTGACATAGCCGC  
AAAAGGCTTAGGTACTCGAAAATGTAACGCTACATTA AAAACGCAGATGGCTCTTTGAAC  
ACAGAACTATTTTCGAATTCGAATGACCCGCAACTTCTGGATGAACTACTCCCAATGAC  
GACGCTGACCGCGGAGTGTAAATCCAACCTACCCAAGTGGGTTACTAAGTGACCCCGTT  
GAAGAACATCTTGAAGCAGAACGGCAATAATGACCTACGATTGAAGCTGGCAGTGAATC  
AGTAGCCGACGTGTTGGAGGCGCAACCTGTGACGACTAATCTGCTCAAATTCATGCGCAA  
TTTGACTCGAACAATCGGAGCGTCCATCCTACAGAGTTTTATCGCTTCAATGACGCAGAA  
ATTAGCAAATACGGATATTTCTGGTGTGACTAAAACTACGATACTAAAGCAGGAATGGC  
TGTTGCTGACTTCCGACTCAAATCAAAGTGGACTGCTGGTGGAAAATGAAGAGCTACAAT  
CCCAACTTAAAGCACTCGAGGGCGTCTTCCCTGCGCAACCTATCGTCATCATCTCAACGTG  
GTAGCAAAGACTGACGCGCTTGATGAAGAAATATGGCTCGATATGATCGGCGCTCTTCTT  
AAGGACTGGTTCGCTATGAACAACATTTCTGACATGGCAAAGAATCAATGCTTGACATT  
CTAAATGAACGTGGCTTATTATCCACCTTGCCAAATGACTGAACTTACAAAAGAATCAAA  
AATGACAGCAAATGAGGATGCAGTAGCCTTTCAAACGGTTATCATCTCCATCTAACTTAT  
TCAGGCATCTTCTGTTCTTGACCTGACTGAGGACGATTTTCGAATTGTTAACTCCTGAACG  
TGATGGATTGCAACTGACCGCTCCCGTGTCTCGCCGCACTATTGAGGCTTTCGGCTATGG  
ACCTCTGGACTTTGTGGGATACCCTCGCTTTCCTACTCCTATTGAGGTTACTGCTGCCGT  
CATTTCTTATTATGGTTATGCCATTAACATTCAAACGGCATGGCTTATTATGGAAGGCGC  
TCAACTCACCGAAAACAGCATTAAATGGTGTCTGCTGCCCCGGTTAAAGCCGGTTCACTCTT  
CGCGTTTAACTTGCCTGTACGCGCCGGAACACCGAGCTTATTACCCAAGCAGAAAACAA  
TGCGCGTGAACAACCTGCGCGCTCAAGGAGTGATGGAAGTCTAAAAAATCTGTTTCGCTCT  
CTGGTGGCAAATCTAAAGGTGCTTGCCTCTGGTATGTTTCGCGGCACACAATTCTAATCTC  
TAAGGGGCTTCGGCTCCTCTATTTAATTATACAATATGTCGATCGTACAACTTCCGCTG  
AACGTATTACGCATGACCTCTCACGTCTGGTATTTCGAAGGTGCTAGAATCGGAGGACTTA  
AACTATCTCCTGCACTCCGGTTGTCGCTGGTGAATTTAACTATACTGAAATGGTAGGCG  
CTATTTCGCTTTCCTCTCCGTCGTGGTTCGGGCTGTCGACTCTCGAGTCGACGTCTTTA  
CTTTGTGTATCCCTCAACGTCATGTCTATGGTCAACAAGGGATTGACTATAGGAAGATTG  
GCGTTAACGCTACTCCTCTGGCTCCAGTAACTTGATCCTCAGGCTTTGATTCTGGTGCCT  
ATCTTGGCACTATCCCGTCAACTGATTTGAGGGTTCCTAAATCCCATCATCAATCTTATC  
TTAATATTTAGAAAACTACTTTAAGCCGCCGTGGTCTAATGACCCACCTATGCTAACCC  
CATCTAATAAGCACGCTGAGGATTACAAATGGGGCGTTCGTGTCGCTAACTTAAAATCTA  
TCTGGACCGCGCCCCTGCCTCCTGCTTCATTGACTAGGCAGGATATGACTACTGGCGCTA  
CCACTATCGATATTATTGGCTTACAAGCTGCCCATGCCAATCTCCACACTGAACAGGAAC  
GTGACTATTTTCATGAGTCGCTACCGCGATATTTTGAAAGACTTTGGCGGTACACGTCCA  
ATTACGGTGATAACCGTCTCTGCTCCTGATGCGCTGTGAATCCTGGGCCTCCGGCTATG  
ACGTCGACGGTACTGACCAAACCTTCATTGGGTGAGTTCCTGCTGCGTCCAACAAACCT  
TTATTCATAAAGTGCCTCGCTTCTTTGTTTCTGAGCATGGCGTACTTTTGTCTTTATCTG  
TTACTCGCTTCCCCCTACTCACGAAAGTGAATGCACGATCTCGTGGGTAAGGAATCTC  
TGACTTATACTGACATTGCCTGTGACCCTGCTCGTATGGCAAACCTGCCTCCGCGTGAAA  
TTGAGATATAAGACCTCTGTCACTCTGCTGTTACTGGTAAATTCAAATTTGCCGAAGGTC  
GATGGTATCGTACTCAACCTGACCGCGTGCCTTCCCTTATAACTCTCATGACAGCTTCT  
CTTACTATTCAGAACTGACGTCAACGGAGATTCTCGAACGTGACTCGTTCAAACCGATA  
ACTATGAGGAAATCTTCCAGTCTATGCAACTTGCACACTGGAACATGCGAATTAATTTA  
ACTCTACTGTATAACGTCATATGCCTACCACTTGTGATGGCATCATGACTTAATACAACA  
AAACGTTGTACGGGTACAAATCTTCATGTGTGACTGTTCAAGGGTGAACAAGGGAAGCGC

GTTAGCTAATTTACTTAAGGAACCTTCTCATGTTTCAAATTATCTCTCTAAACACAATTC  
TCCGTTAACTTCTCAGTCTATTACTGCTATAAAAACACCTGCGGCTGCTGGTCCGACTAT  
TTCAACACCGGAGCTTAGCAGCACTACTATTTTCGCTGGCTTAATTCTGACTGCTGCCAC  
TACTCATTCTGGTGTGCGCCATGCCGTTCTATTGACGAAACCAATCTTACTGACAATCA  
GGTCTTATCGGTGCGCGCTTCTTATCTGGCGTACCGTCTGATGGTATTGCTATTGGTAT  
TCGCTTTGAGGTGCGTGGCGGTACCGTCCCGACAGCTCTCCCTGCTCTTGACTCTGCTTA  
TCCGGTGGGATTCTTCACTTCTGGCGCTGCTCTGTCATGTGAAGATGCCGTATCTATTCC  
GACGCAGCCTGTTACTGCTGGTAATGCTGTATATGCTGGTATTCTTATCAGGGCCAAATC  
TTGGTCCGCTGGCGTCTGTCCGGCCTCTTATCTGTTAATCAGGTAAACCGTGAAACTAC  
TGTACTCTAACCGCTTAAATCAGGTCTAAGCTATGTTCCGGGGCAATCGCTGGAGGTATTG  
CCTCCTCTCTTGCTGGTGGACTACAGAACAAGCATTCCGGTGGAGTTTCTTCCGCTCCCC  
AATCTGGCGTACAAGGTAATGTCCTCGCTACTGACAATAATGTAATGGGTGCTAATGATG  
CTGGTATCAAATCCCCTATTCAGGGTTCTAATCCTTCCATTGGTCAACGAGCTGCTCCCC  
TACCTATATCGGGCCTTCTTCCGATACTGGCAAAGACGCCCTATCTCCAATCACTGGTG  
CTTGCGTTGATAAGCTTATGGAAAATACCGGAATGTCTAAAGCTGTTGCTGCTAAAGGTA  
TGGATATGAAAGATTATCTTGCTTCTGCGTTCCCCGAACTCAACCCGTGGGAACGTTCTG  
GCGCTCGTGCTTCTTCTGCTTGAATGGTTGATGCTGGATTCCAGAACCAAAAAGGAATTA  
CTCGAATGCAGCATGACAATCAAATGAAATCGCTAAGATGCAGCACGATACTCAAAGT  
ATATCGCGGGTGTTCAGTCTGTTACTTCTCGGCAACATACTAAGGACTCTGTGTATGCTC  
AAAACGAAATGCACCAATACAACCATAAAGAATCTATGTCACGCGTTGGCGCGATTCTCG  
AGAACACAAGCCTCACCAAACAACCACAAAATTTCTGACATTATGCGGCAAATGCTTCCTC  
AGGCTCAAACCTCAGGTCAACACTTTACAAATGACCAAATCCAAGATCTTATTCGAAGGG  
TCGGCGCTGATTTTCATGCTGTTAGTGATAAACTGATCGAACAAATGTAGAAACGGACC  
GCTCTAAGCAGGAGGTCCAAAACCTCTCGTTACGCTTCGTCTCAATTCGGTAAATGCGCCA  
AGGATGCATCAAATGTCATGAGTGACGCATCTTCTGGAATTCTTGATTATTTTCGTGGCG  
TTGATAATGCTGTCGAGGATACTTGGAAACAATTATTTCAAAGATGGCAAGTCCGGATGGGA  
TAATCTCAAACCAACGTACCAAAAAA

>NewGenomeName\_38

ACCTTGACATAACCATAACTACATATCTATCATGCCTCCAAATCATCGGAGGCTTTCTTA  
CATGCAACAAGCTAGTGACTTCTACAACAGACCACATATCGACGCTCTCAAACCGCTCGT  
TGAAACCGCTGGTATGTCTGTGCTTTCTCAATCTCCAAACCTCCGTATCTGGAAACAGGT  
AAATTACCGTATCAAATATTGGAAGAAATCCTTGCTCATTACACCAATGGTATCCGCCG  
TGATGACAACGGCGACTTCTGGATGAATCCCAATTCTCAACTCGCAACCACAATTGCCTA  
TCGTGCCCATCAAAAAGGACACAACCCAAAACCTTATTCAATACCCTGATACATCACTCT  
GGATGACATCATCCGTAAAAAGCCATTACCACAAAACGCGCCTGACGAATTAACACTCTC  
CGATGAAATCGGGGAAGACTATCGCCTTACAATCATCTCTCTAATCGAAGAAATGCAAGA  
AATCTACGACGTGCTCGGACAACCTTGATATTAATAACACTATAGACCACAAACCTATCGG  
TAACGCCCACTGGAATCTACTCTATGAAAAACCTGTATATAAACACTGGTATGAACTGGT  
ATCAAACGACCCCTTAAATCAATCAGAGACGACTACAACCTATGCAAAGGCTAAGTGTAT  
TAAGGATGAATGCTCGAAAATCCTTGAGGAATCCACCATGAAATCACGTAGAGGCTTTAC  
CGTACAAAGACTAATGAATGCTATGCGCACTGCCACACTGAGGGCTGGTACGTTGTATT  
CGATAATCTTACTCTCGCCGATGACCGCCTTAAGGATTTCTATGAGAATCCCAATGCTCT  
CCCTCACTATTTCCGTGATATTGGTCTGATGGTTCTCACTGCCGAGGGTTCGTTCTGTCCA  
TGATTCATCTTCGGACTGCTATCAGTATTTTTGTGTGCCTGAGTATGGCACCCAGCACGG  
CCGTTTACATTTTACGCAGTGCACCTTATGCGCACACTTCCTCTGGGTTCTATCGACCC  
TAACTTTGGCAAGCTGGTGCCTACTAATCGGCAAATAAATACCTTGCAAAATACATGGCC  
CTATGGTTACTCTATGCCATCGCGGTCCGGTACTCCCAAGACGCATTTTCGCGCGCTGG  
CTGGCTCTGGCCCGTTGATACAAAGGGCGAACCTCTTAAAGCTACCTCGTATATGGCTGT  
CGGCGTCTACGTGCTAAATACGTTAACAAAAAATCAGATATTGACATGGCCTCTAAAGG  
TCTAGGGAATAAAGAATGGAACAATCACTCAAACCAAAATCAACCTGCTGCTCAAGAA  
AATTTTTCGCATCAGGATGTCTCGCAACTTCGGAATGAAGCTGCACACAATGAGTCACCT  
CTCAGCGGAAACTCTAATCCAACCTGACCCAAGTGGGCTACGACGTGACCCCGTTCAACAA  
CATCTTGAAGCAGAACGCCAAGAAAGAGCTACGATTGAGGCTGGCAAAGAAATCTGTGCGC  
CGACGTTTGGAGGCGCAACCTGTGACGACCAATCTGCTCAAATTCATGCGCAATTTGAC  
CCGTCAAATCGGAGTGTCCAACCTGCAGAGTTTTATCGCTTCAATGACAACGAAATTAAC  
AAGTATGGATATTTCTGATGAAACCAAAAACCTACGTTGATACTGCAGGAATTACTGCTAC  
TCACTTACGAATTAATCGAAGTGGACTGCTGGTGGAAAATGAAGAAATTCATCTGAAC

TTAAAAAATTCGAGAAGCTCTTACTTCGCCACCTTTCGCCACCACATGAACGTTCTGGCA  
AAGACTGACGCTCTCGACGAGGAAAAATACCTAAATATGCTAGGTGCTCTCCTCAAGGAC  
TGGTTCGGTTACGAAGAACATTTTCGTACATGGTAAACAATCAATGCTTGACTTATTAAT  
GAACGTGGACTATTATCCACATCAACAACCAACCCAAAAGGAAATACAAAATGAACTCTA  
ACGAATCTGCTGTTGCCTTCGCTACTGCTCTCGCATCTATCAAGCTCATTGAGGCTTCAT  
CTGTGCTGGACCTCACCGAAGACGACTTCGATTTCTTAACCCGTGACCGTGTATGGATTG  
CCACTGACCGCTCCCGTGCTCGCCGCGCTATTGAGGCTGCGTATATGGTACATTGGACT  
TTGTCGGATACCCTCGCTTTCCTGCTCCTGTTGAGTTTATTGCTGCCGTGCTATTGCTTATT  
ATGTTTCATCCCGTTAACATCCAGACAGCATATCTTATTATGGAAGGCGCCGAGTTCACCG  
AAAATATTATCAATGGTATTGACCAGCCAGTTAAGGCCGCTGAACTATTCGCTTTTACCC  
TGCGTGTACGCGCCGAAACACTGACCATGTTACACATGCAGAACTAACGTACGTGAAC  
AATTACGTGCTCAAGGAGTAATGTAATGGCTAAAGGCTCTCGTCGGCGTTTCGCCGTC  
CTTTAAAGGTGGTCGCCTCTGGTATGTTGGCGGCACACAATTCTAATCGTCTAGGGGCTT  
CGGCCCTCTATTTAAGGATATAAAATGTCTAACGTTCAAACGTCCGCTGACCGCATTC  
TAACGACCTTTCTCACCTCGTCTTCGAGGCTGGTAAAATCGGCCGTTTAAAACTATCTC  
CTGGACTCCAGTTGTCGCTGGCGACTCATTGAACTGAGATGGTAGGCGCTATTCGCCT  
TTCTCCACTCCGTCGCGGCCTTGCCGTCGACTCTCGCGTGGATATCTTCTTTCTATAT  
TCGGCATCGTCATATCTATGGTCAAGAATTCATTGAATTCATGAAAGCTGGCGTTAATGC  
CACTCCTCTCGCACCTGTTACTACTGCCTCTGGCTGGGATGCTTCTGCCTATCTTGGCAC  
TATTCATCCTCAAACCTCAAGGTTCTAAATTTCTTAAATCAAGGATACCTTAATATTTA  
CAACAACACTTTAAGCCACCGTGGGATGCTGACCTTACATACGCTAACCCATCTAACAT  
GCCTGAACAGGATTATAAATGGGGCGTTTCGTGTCGCTAACTTAAAATCTATCTGGACCGC  
CCCCTTACCTCCTAACTCTAAAACATCAGAGACTATGACCACTGGCGCTACGTCTATTGA  
TATTATGGGCCTGCAAGCTGCTTATGCTAAATTGCACACCCAACAAGAACGTGACTACTT  
CATGACTCGCTATCGCGATATTATGAAAGACTTCGGAGGTCACACCTCCTATGACGGTGA  
TAACCGTCTCTGCTGCTTATGCGCTCTGAATTTGGGCCTCTGGCTATGACGTCGACGG  
TACTGACCAATCCTCTTTAGGTCAGTTCTCCGGTCGCGTCCAACAAACATTCAATCACAA  
AGTACCTCGCTTCTATGTACCTGAACACGGCGTCATTATGACTCTCGCCGTTACTCGCTT  
CCCTCCTACTCATGAAATGGAGATGCACTATCTTGTGCGTAAAGAATCTTTAACCTATAC  
CGACCTCGCCTGCGACCTGCTCTTATGGCTAACCTGCCTCCGCGCGAAGTATCCCTTAA  
GTAATTCTTCCACTCCTCGCCGGACTCCGCTAAGTTCAAATGGCCGAGGGCCAATGGTA  
TCGCACGCAGCCTGACCGCGTCGCATTCCCTTATAACGCACTTGACGGCTTTCCCTTTCTA  
CTCTGCTCTGCCGCTACTGACTTAAAACAAAGTGTCTAGTTAACTGATAACTACGA  
CGAAATCTTTCAGTCTATGCAACTCGCACACTGGAATATGCAAACTAAATTTAATACTAC  
CGTCTATAGACATATGCCTACGACTCGTGATTCAATCATGACCTCATAAAGCCTATAACG  
TGACAGGAGGAAAAATTTTAAATTTTTCGCCCCCTGTGAGGTTGAACAAGCGCAAGCGCGT  
TAGCTGCCTAACTTAAAAGGAAATTCAAATGTTTCAGAAATTCATCAAAAAACATAACGC  
TCCGTTAACTTCTCAGCCCGCTATCTTAAGGCTGTTACTCCATCTATGACCGCCGCC  
TCTTGTACTACACCTCTCGGCGTGTCTTCTACTCAATTATTCTTGGAACTTACAACCAC  
TGCCGCCGCTGGCGGCTTCGCTTACGCTATCCGCGTAGACAATTCTAACCCCTACTGAAAA  
TCAGGTCTTCTCCGTCTGTGCTCACATCACATCTTACGTGGACCCTAAATATATTGCGTG  
CCTCGTTCGCTTTGAGGTCAGTCTGGTACCCTCCTACCGCTATGCCTCCTGTCTATGA  
TGCTTACCCTATCGCTGGTTACTATGACGCTGGCTCTTATACTGTTGAAGACTGCGCTAC  
TATTCCTACTCACGCTGTCTCTTCTGGCAACGATGTATATGTCGGCCTTATGCTTTTCTC  
GCGCATGTGGCCCGTTGCAAACTATCCGGTATCGCTTCCCTTAAATCAGGTAACAAGGA  
AGTAACCGTTCTCCAACCTCTTAAATAAGGATTTCTCTATGTTTGGTGAATCGCTGGCG  
GTATCGCCTCATCTTTGCTGGCAGACTCATCAACAAAGCCTTTGGGGGCGGTCAATCCG  
CCTCCTCTACTGGCGTTCAAGGTGATGTCCTCGCTTCTGACAATAACGTAATCGGTGCTA  
ATGATGCTGGTATCAAATCCGCTATTCAAGGCTCTAATCCACCCAATGGCCAACAAGCTG  
CTCCAATGCTATTTTCGGGCGTTCTCGCTGACACTGGCAAAGACGCCCTATCTTCAATCA  
CTGGCGCTGGCGTTAATAAACTTATGGAAAAAATCGGACTATCTAAAACCTGCTGCTGATA  
AAGGCAAGGACACAAAGGATTATCTTGTCTTCTGCATTCCCCGACCTCAACCCGTGGGAAC  
GTGCTGGCGCTGGTGTCTCGTCTGCTGGCATGGTTGACGCTGGCTTCCAAAACCAAAAAG  
AATTAACCCGCATGCAGCTTGACAATCAAAAAGAAATCGCTAAGATGCAAAACGACACAC  
AAAAGGATATCGCTGGTATCCAATCTGTACATCCCGGCAAAATACTAAGGATGCTGTCT  
ATGCTCAAAACGAGATGCTCGAGTATAACCAAAAAGAATCTATGTCACGCGTTGGCTCTA  
TTCTCGAAAACACAAGCCTCACCAACAACAACAACAACTTCTGAAATTATGCGGCAGATGC

TTACTCAAGCTCAAACCGCAGGTCAACATTTTACAAATGACCAAATCAAAGAACTTACAC  
GAAAAGTTGGTGTCTGATATTGATTCTGTCCGCGCTAACACTGACCGTACACATGTAGAAA  
CTCAACGCTCAAACAGGAAGTTCAAACCTCTCGTTATGCTGCCTCACAAGTCGGTAAAA  
CCGCTAAGGATGTCTCTAATGCAGTTCCTGATACAGCTAGTTCTATTGTTGATTATTTTC  
GTGGTATTGATAACAAAGTGGCAGACGCTTATAACAACCTATTTCAAAGATGGTAAATCCG  
ACGGAATCGGGTCTGAACATCAAATAA

>NewGenomeName\_39

TTGTTGACATTCCCTAAACCCTTATGAGACTCTTGCTTCAACGAATGAAGTAGGAGTCTT  
TATTATGAAACCCGCTTACCGCTTGACTCATCCGATTCTCGGCTCTTGGTTGTTTAAAGTG  
CCCCGTTTATATCCGTTATGAGCACCTTCATCACGGTTCGTTATCAAGGTTTCGCGCTGT  
TCGTGATTTGTCCCCGCGTCAGCAGCTTATTGCTAACCTAAAACTGCTTTGACGTTGT  
TAATGCTGAGATTGACGTTACTTATTGTTCTGTCACTTATTTTAATTATGAGGCTGAGGA  
ATATACCGAGTGTGATTCAGAACTATGGATAATATCCTTGCTTATATTAACCTCTCCTCA  
TTCCCTTCGCTCTGAGGAGGATTCATCCGTTGATGTTGACGATATGGCGTGGCTTTATGA  
AATTGCGGAGTAAGTTATGGAACTGTTGTTCGGAAAATTGATTGCTTTGGCTGTTGTTGC  
TCTTATGCTGTATGGAATTGCCCGCTTAATTCGGAGGTTCCCGTGAAGTATTTTAGTCTT  
GTGGATGAACATTATGCTTATTGCCCTGATACGAGGATTTTGCACATTACTCGTAGCCGT  
GTTTCTGACCCTCGTTATGAGCGTCGCTTTCTTACTGATGAGGAACATTTTGCACCTTTG  
GATTGGTTGAAAAATCGCCCACTTATATTAATTCTTGACAGGCCTTTAAAATACCCTCT  
ATATTGCCCTCATAGTTTCACTACGAGGGCTTTTTTGCATGGCTTCTGAAATCTTCTCTG  
ATGTTGTTAAGTCTGTTTGGTTCGCACGCTACGGCTAATCACGCTCATCTTCGTATGGCTG  
TTCAGGTTGATAATCGTAGTCGCCTTCTTTCTGATTTGGTTTACCAGTTGGAAAACCGCC  
TTTCCGAAGAGACTCATTGGATGATGAGACTTATGCCCTTATGAATCTCAGACTGGCC  
TTTTGGAAGATCATATGGCACTGGTTCGGAAGTGTGCAGCCCACTTGATAATAGTAACA  
CTATAGACCACCGTACCCCTTTGGATGCCGAATGTGTTTTCTGTTTGAATGATTTGCC  
CAGGCGTTCGCTACGGTAAAACGTTGAATTCTCTTTGGACTAAGTATGTTGCTCAATGGC  
CTGAGAAGTTAATTCGTCAAGAGTTAGACATGGTTAAGCCTTATCCTTTTAGGATGAGG  
TTGCTAAGTACATGGAGAAGAGGCAGGAAAAACACGCAAAAATCGCATGACTCAAAAAG  
TAATTAATGAGATGCGTATTGCTCACAAAAGGGCTGGTTTTTCGTATTTGATACGTTGA  
CACTTGCTGATGATCGTTTGCAGGCTTTTAATGAAAACCCCAATGCTCTTCGTGATTCTT  
TCAGGACTGTTGGTCGAGCTGTTCTGCGCGCTGAAGGTCGTTCCGGTTAAGGATTCCTACA  
ACGATTGCTATCGCTATCTTTGTGTGCCGGAGTTTGGAGGTCTGCACGGTTCGTTTATT  
GGCATGTTGTGCCTATGGTGCAGGACTCTTCTTTGGGAAGTTACGACCCTAATTTCCGGTC  
GCAAGGTACGTAATTATCGCCAGATTAACCTCGTTCAGTGGCATGTGGCCTTATGGCTTCA  
CGAACCTATAGCTGTACGCTATCAACATGATGCTTATTCTCGCAAAGGTTGGTTGTGGC  
CTGTTGACAAATCAGGTAAAGCAATGCAGAGTAAGCCCTATCAGGCGGTCGCATGGTATG  
TGACCAAAATATGTAGCTAAGCAATCTGACCAGCGTCAGAAAGCTATTACTGAGAGACAAA  
AAAATGCAAGAATCCACTTATGGCAATCTGTCTGAAAAAGGAATTCAGTGTTCGCAACA  
GCCGAAACTCGGAATGGAGTTACCGTCGATGGCGCATCTCAGCAACAAAGTGCTTCTGG  
AGCTGAGCCGAATCAGCTTCGATTCCAGCCCTCTGTATCAGATAGTGAAAGAGAACGCCA  
AAAAGCAATTGACCTTGAACATCGGCGCGCTGCCTTTGCACGTCATTTTGGATGTGCGCC  
CGGAAGTGAGAAGTATGTTGAAAAATATCCGTCGTTTGTATGAAAAAGACACCCGAGTTCA  
ATTGGCAGAGTTCTATCGCTTCAATGACGGTCACCTTAAAAAATGGGGATATTTCTGATG  
AAGCACGTCAATACATTAATGATGCAGGAATTACGCCTTTTGACTTGCGAGCTAAAGCGA  
CTCAAACCTTCGGCGGTAAGTGACCCGGATTTTCTCAGGAGTAGATTCATGCTGAGCTC  
GACTCGTTACTACGCAAGTTATCGCGCTACTTTGACTAAGCAGCTGATGTTTTTACTAA  
AGCTGACTTTACCAATGATGATGAAAAATGGCTTAAATGCCTTTGGTAATTTGCTCCGTCA  
GTGGTTTCAGATTGAGGATTGGAAAGGGAATCATAAAAAAATTGCTTGACGATTTAAAAAA  
ACGTGATTACATTTGAGCTGTTTCAAGGTTTCTTACCCATTAATGTTAGGAGAATGTTA  
TGTCTAATCTTGTGCTACTGATGTTAACTTTGCTACTTCTGTTGCTGCTCTGAAGATGC  
TTCAGGCTTCCGCTGTTTCTGGATATTACCGATGAGGATTTTGAATTCCTGACTGGTGATA  
AAATTTGGATTGCTACTCACCGCAACCGTGCAGCGTCGCTGTGTTGAGGCTTGTGGTTATG  
GAACACTGGACTTTGTGGGATAACCCTCGCTTCTCTGCTCCTGTTGAGTTTATTGCTGCCG  
TCATTGCTTATTATGTTTATCCCGTCAACATTCAGACGGCCTGCCTTATCATGGAAGGCG  
CTGAGTTTACGGAAAACATTGTTAATGGCGTTCGAGCGTCCGGTTAAAGCGGCTGAGCTCT  
TCGCGTACACCTTGCCTGTTAAGGCCGGATTCAAAGAAACGGTTCTGAGCGCTGAAGAGA  
ATGCTCGTCAGAAACTTCGTGCAAGTGGAGTAATGTAATATGAAGAAAGCTCGTTCGTTCC



CCTTCTCGTAAGAAAGGCGCTCGTCTCTGGTATGTAGGCGGTTCTCAATTTTAATTAACG  
GGGCTTCGGCCCCCTATAAGAATTCTTAAATGTCAAACGTGCAAACCTCCGCTGAACGTAT  
TCCTCACGACCTTTCTCATCTGGTTTTTGGATGCAGGCAAAATTGGTCGTTTAAAGGTTGT  
TTCTTGGACTCCTGTTGTTGCAGGTGATTCATTTGAGCTTGATATGATTGGCGCTATTCG  
CCTTTCCCGCTTCGTCGTGGCCTTGCTGTTGACTCTCGTGTGACCCGTTACGTTTTA  
TGTCCCTCATCGTCATGTATATGGTGAGCAGTGGATTGATTTTATGAAGCAAGGTGTTAA  
TGCTGCTCCTTTGGCCCCCTGTTCAAGTCTCTCGCGTTGGGATAGTGCTCAGTATCTTGC  
TACTATCCGCTCTAGTAACTTAAAGGTTCTTAAGTTTCTTCATCCAGGTTACCTGAACAT  
TTACAATAATTACTTTAAAGCTCCGTGGATGGATGACCTGACTTATGCCAACCCGCTCTAA  
TATGGAGAGTGAAGATGTTTCGTTTTGGTGTTCGTGCATGTAACCTTGAAAACCTATTTGGAC  
TGCTCCGCTTCCTCCGGATACTGAAACCTCTCATTCTATGGAGACTGAAACCAACTCCAT  
TGACATTATGGGTTTGCAGGCCGCTTATGCTCAATTACATACTGAGCAGGAGCGTGATTA  
CTTCATGACTCGTTATCGTGATAATTGTTAACGAATTTGGAGGTAGTACTTCTTATGATGC  
GGATAATCGTCCTTTGCTTGTTATGCATTCTGAGTCTGGGCTCAGGCTATGATGTTGA  
CGGCACCGACCAAAGCTCTCTCGGTGAGTCTCCGGTCTTGGCCAGCAGACGTTTAAAGCA  
TTCAGTACCGCGATTCTTCTGCCCTGAGCATGGCACTATGTTTCACTCGCATTGGTCCG  
CTTCCCGCCGACTCATGAAATGGAGATGCATTACTTAGTTGGTAAAGAAGATTTGACTTA  
TACTGATTTGGCTTGTGACCCTGCTTTGATGGCAAACCTGCCTCCTCGTGAGGTTAATAT  
GTCTCAGTCTTCCATTCTGGAAGTGCTAGTGCTAAGTTTAAAGATCGCTGAAGGTAAGTG  
GTATCGCATGCAGCCTGATCGCGTTGCATTGCCGTATAACTATCTTGATGGTTTTCCGTT  
CTATAGCGCGATTCCGTCTGATGATATTAAGCAGCGGTTCTGGTTAATACTGATAACTA  
CGATGAGGTTTTCCAGTCTATGCAGCTTGCAGCACTGGAATATGCAGACTAAGTTAATTG  
CAGCATTATCGTAATATGCCGACCACTCGCGACTCTATTATGACCTCTTGATTATGTGG  
GGCTTCGGCCCCCTTTAAGGATATTGATTATGTTTCAAGTTTATGTATCTAAACATGTTG  
CTCCGTTACCTCTGTGAATCGTGCCTTTTTCTATTGCCCTGCCGCAATCCCGAAGTTG  
TTAACTCTGGTGGGATTGTTGCAGGTGCTTCTACTTTTCGCATTGCTTCTTCTATTGCTT  
CTGCTTCCAATGGTAGTGGTTTTGCTTTTGTTCAGATGATGGATCCGAATTCTCCTGATT  
CACAGCAGGTTTTCTCTGTTGCTGCTTCGTTGTCCTTTAGTGTTGATTCTGAATTATATTC  
CTTGTGTTGTTTCGTTTTGAGAGCACTGTTGCTCAGCCTACCAGCTTTGATATTGCAACCG  
CTGATTTTATTCCGGTTGAGGCTTCTGCCCTTCTCCTCGTGCGCTTAGCGTTCGCGATT  
GTGTTACCGTTGATGTTAAGCCTCGTACTGAAGGCAATAATGTTTTTGTGTTGGTGTGGTTT  
TCTTCTCTGCTGCCGCTAATGCTGGTAATGTCACTGGTGTGTTTCGATGGCTCAGGTTG  
ACCACGAAGTTACAGCTTTGCAGCCGCTTAAATAAAAAGGCTGCCGCACTCCCGGTTAGAT  
GCCTGCCTAGTGTAGGGCAGACCGAGCCGTACGGAGATACCCGATAAACTAGGAACGTGG  
AAGGCGCAAGCCGCCTTCCCTCCTGCTAAGCCCCAAAAGGAGTTACAGCGATGTTAGGTG  
CCGTTGTAGGTGGTATAGCTTCAGCCTTAGCTGGTGGAGCCGCTTCTAAGCTGTTTGGTG  
GTAAACCTGCAGCTCAAGCCGCTACCGAGTCTCTGGCCTTTCTAATGGTCAAGGCGTTA  
TTGGTATGGATCAAGATGCTGGTATTCAGTCAGCTATTCAGGGCTCTAATGTTCCCAATG  
GTCAGATTCCTGCGCCACGCAGACTGGTGGCGTTATGTCTGATGCTAAAAATATGATTA  
AGAATGCTGGTAAAGATTTGCTTGATGGCGTTATGACCGCTGGAAGTGATCGCATTAAAGC  
AGGCATTGGTTGATAAGTTGAGTGGTAACGATGCAAAGAAAAAAGGACAAGCAACCCGTG  
ATTACTGGGCTGCGGCCTTCCCTGAGCTGAATGCATGGGAACGTGCTGGAGCTGGTGCTT  
CCGGTGCCGATTGGAGTCTTCCGGCCAGAATCAGCAAAAGGGGTTGATGCGTATGCAGC  
TGGATACTCAGAAGGATATTGCTAAGATGCAAATGCATAATAATTTGCAGATTGCTGGTA  
TTCAGTCCGCTACTTCTCGCGAGAATACGAAGGATTCAGTTTATGCTCAGAATGAGATGC  
TTAAATTTAAGCAACAGGAGTCACAGGCACGCGTTGAGTCTATCCTCGCCAACACTGACC  
TTACGGTTAAACAGGCTGCCCATGAAATTATGAGAATGGCCCTTACTCGTGCTCAGGAGA  
CTGGTCCGCATTTAACTAATAGTCAGATTATGGCATTGGAGAAAAAAGTTTATGCAGAAA  
TCGGAAAAATTCATCAAGATACTCAAACGCTCGTTATGGTAGCTCTCAAGTTACTGCTG  
CGGCGAAAGATGTTACGAATATGATTACCGATGCCACTTCTGGTGTGCTGCCGATTGGGTCT  
CTCAACAGTGGAATTCTTTCTTTAAGGATGGCAAGTCTAATGGTATTCCCCTCAATACCA  
GAAAATAA

>NewGenomeName\_40

CGATTCGCGGTGGTACTATTCCATCACCAGTTTAGCCTTAAACACAGAATGTCAAGATGG  
ACGAATCGCTCGACTTCGCCCCGCAATTCGTTGAAGGCGGGGGCCGGAGGCCACCGGTT  
GGCCCCATGCAACGAGTGGCGCACCTAAAGGGGGGCACGTCATCCGTACAGGGGGGTACG  
TCATGCTTACAGGGGGGTACGTCTCAAAGGGGCGTCCCCGTACCGGGAGTTGCGTACGC

GTACAGGGGGGTACGTCACCTGCCAATCACAAGCCGCCACGTTGCGAAAGTGACGTTTCCA  
AAATGGGAGGGCGCCAGCCTCTCTAAATATTTAGCGCTCTTACCGGTTCGGCAGTAGCTATA  
CGCATGGCGATTTCGGGTGGATGCTCGGGAACGGCCGACAATCGGCCGCTGGGGCCAGTGA  
ATTGGCGCTTAGCGGAGAGGGGCAAACCTGGACCCAGCTGAGCCGGGCAGGGGCAAGTAAT  
TTCAAAAAGAACGCTCTCCGAGAAGATTCTCCACTAGGACCATCGACGGTGTTCAGCGCAC  
CAACAAGATCACGGGCGATGAAAACCCCTCAAGGCAGCGACATCCGGATTGGTATCGCTG  
GAATTACAATCACTCTATCGCTGTGTCGCTACACGAGTGCTCCCGCTCCCGCGCTAAGAT  
ATGCAACTGCGGACAATTCCGAAAGTACTGGTTTCAAGAATGTGCCGGACTTGGGGATCG  
ATCAACCCAGGCCTCCCTCGCAGAGGCGATCGTGCGACCCCTCCGAGGAAAGGGTACGCG  
GGGTAAAAGACACCTTGAAAACCACTACTCCAGACAACCCCGGACCGCAAAAAGGCGTA  
AAAGATTGTAAGATGGCCAGACGAGCTCGCAGACCGAGAGGTAGAATTTACTCCTTCGGA  
AGAAGACGGTGGCACCACCTCAAGCGACTTCGACGAAGATATAAATTTTCGAAATCGGAGG  
AGTCAGCGGTTTCGTAGACGAGGTTTTGGGAAGGCCTTTCACAACCCCCGCCCGGTACG  
GATAATGCAACGCTGCCGAACCCCAATCTACTATGACTATCCGCTTCCAAGGGCTCTTC  
TGTCTTACGGAAGGACTCATTCTGCTTAAAAACAGCACAGCTGGGGGCTATGCAGACCAC  
ATGTACCGGGCGAGTGTGCGCAAGATATTCGAGAACATGAAAGCGTTCCTGTAAACCCCA  
ATGAACCTGACATACGGGAGCAAGATCGGAGGCCAATCACCGGTGAGTTGATTACGGAC  
GGGTCTAGATATCAAGCCGCGGACAATTGGACTAATTGCTGGCTGCCGCTAGATAATAAC  
GAGTCCTCCGCTACACCATCGGCATTGTGGAGACGGGCCTTAATGAGATTGCCGCCTACG  
GACTCTTGACGGTTCTTTAATCACTCCAAGCAGACGACACTGCAAGACATGGGTGCGCCG  
TTTGGGGGCTGGCGCCTGTTCCGACACATTAACCCAGTTTCACCTCCTTGCCACTAAA  
AATGGGGGATCCTTCAGCCCTGTGGCGAGTTTTCTCTTCCAGGGAGAGTAACTCCCGCGT  
AGAGATAATGTTATTTACAGCAGCGATCACCCGAACCGGGGCAAGAAGGCAGACAACCG  
ATGACGGGGGGCATTGCTTATGCGACCGGGAAAATGAGACCCGACGTGCAGCAGTACCCT  
GCTATGCCCCAGACCCCTGATCATCACCGCTACTACAGCGCAGGGCACGCAAGTTGGC  
TCCCTGAATAACACGCAAGCTTTGTGGTTCATGTGTCGAGATTTGCGCTTTGCTATACTC  
ACAGTACACGGTGCACAATCGTCTTTTCTCCAGCGCAACGTTTCTTTCTAGACTGTCC  
TTCAACCCCGTAAGGCGAGAGGAGCCGGGGTACCCGAGGGCAAGAGATGGCACATGCTG  
GTGCCGCTCGGCACGGAGGCCAGCGCCGACAGCTTCATGTCAACACGCGCATCAGAGCTG  
GACACTAATTTTCGTTACGTTCTAAGTAGGGCCAGGCACAAATAAGTAGCAACAGTACAAG  
TCCAGCACAGCTCTCTACGCGCTATCGGAGCCGCTAATGATCATCGAAGCATGGGCAATA  
CTACGCGTCCAGTCTTTCTGGGAGCTGGGTGACAGGGAGAGGCCATACCCATGGGAATTC  
AACTAGGCGACGAGCACCAGGTAAGTGGGAGAGGCAGGCCTGAAGAGTGGGGGGGGCAAAA  
GCCCCCCCCCTTAAACCCCCCCTGGGTGCGAATCCCCCCCAGGATCCCCTTTTATATT  
GCACACAATAAACCGCAGAAAATAGATTTATCGCACTCTA

>NewGenomeName\_41

CTCTACCTACTATACTTGCAAATTATCGGCATCAAGTTTTGCCATTAAGAGCATATAATT  
TGTTATTTAATGAGTATTTTCGTGACGAGAATGTCCAGGAGTCTTTACCTGTTTGGACAG  
GAGATGCTGACCCTAAGGCTGATCCGACTACTGGAGAAGAATATCAAGAGGATGATGCAG  
TTCCTTATGTATATAAGTTAATACGTTGCAATTAGCGATATGATTAGTTTACTTCTGCTC  
TTGCGGGTTTGCAGAAAGGTCCTTCTATTGGAATATGTATTACAGGTGGAGATTCGGGAC  
GTCTTCCGGTTCATGGTTTAGCGATTAGATCTTATTTGGGTGATTCTTCTGAGGATCAGT  
GTAGTTTGGGCGTTTCTTATGTAAACGGGTCATAGAGATGGGTTACTGCAGACGGTCGTT  
TGGCTTCTGCAATGGGTAGTGTTCCTGTTGGTACTACTGGTAATTTTCTATTGATAATG  
TTGTGCCGCCATCTTATTTTGGTACGACTGTTGCCAAACTGGTAGGCCATCCGCTTCTT  
CGTCTCCGCCTTTTGTACGCGTATTTTCTTATTTATGTTGATTTAGCGGCTTCATCTT  
CCGTTACGATTAATTCGCTTCGTAATCCGATTACTTCGCAACAGTGGTTTCAGAAGAGTG  
CTCGTTTTGGAAGTATATAGGTTGAATCTGTTCAAGGTCATTTTGGCGTTCATCTTGGTG  
AGTATCGTGCTCAGCGACCTATTTAGTTAGGTGAATCTGAGCCTTATGTTTATGTTAATC  
CTGTAGTACAGAACTCATCTACAGAGTCCGCTTCTCCTCAAGGAAATCTATCTGCTTATG  
CATTATCTTCAGATACGAAACATTTTTTTACGAAGTCTTTTGTGAGCATGGTTATGTTA  
TAGCTCTTCGTGCCCTACGGCGGATATAACTTATCAGCGACGTTTAGTGCGTCAGTGGT  
CAAGATTTAGTTGTTCTGATTATTATTGGCCTACTTTTGTGTAATTGGGAGCGCAGCCTG  
TTTATAATAAAGAGTTTGAATTGCCAATGAGATACTGGTATGGATCCTTGTGGTCTGAAAG  
TTAATGATGTGCCTTTTGGTTATCAAGTGCGTTATGCGGAGTATCGTTATATGCCTTCGA  
TGGTTACTGGATTATTTAGATCTAACGCTACAGGTAAGTGTAGATTCTCGGCATTTGTCTC  
AGAATTTTGTGAATTTACCAACTTTGTCTGAGACTTTTCTACACGATAATACGCCGAGAG

ATAGATCGTTAGCAGTTCCTGATTAGACTGATTTTATTGGTGACTTCTACTTTAATTATC  
GTTGTATTAGGCCTATGCCTTTGTATTCTGTTCTAGGTTTAAGAAGGATTTTCAGATCCCA  
ACGAGAGTAACCCAGTGAATTCGAGAAGAGCAGCGAAAGAAAATAGTAGTCAATGTAACG  
TAGTGGAATTGAACAATACTGTTCTGAAGCGAAAAGTATGCATTGGGCCACGTAAATTAC  
ATAATTTTAGAGGCATTAAGAGTTTCACGGAGAATGTTGTTAGATTCAAAGGAAATTATG  
TGAATTCCGCCGGAAGTGTTAGAGGAGATGATCTTCAAGGTTTTTATTCCACTCAGTCTA  
TTTCCAGTGGTAAGCTGGCAAGCCTTCTTAATAATTTGCCTGTGCCTTCTCTAGGTAATG  
GTTTAATTATTGGGATGTTTGGCGGTCTTGCTTCATGCCTTCTTTCTTATAGAGCTGTTA  
AAAAGAAAAATAAGGTTATGCAGGATATTACTAAAAGACAAATGGCTCTTCAGGAGCGAA  
TGTGCAGCTCGGCTGTTTCGTCGGCATGAGAAGGACTTAAAGAAGGCAGGTTGGAATGCGC  
TTTTAGCATGTGGGGGATCTACTTCTACTCCTCAAGCTGCTTTTTATTCTCCTGTTAATC  
ATATGGAGTGAGGACTTAATTCTGCGATATCAGTTGCGGCTAAATTTTTTGAATATCAGG  
GTTTAGCTTATGCTGATCTTCAGGGTCGTTTGAATTCTGCTATGAGCGTGGTTCAGTTGG  
CTTATGCTGTTTCAAGAATTATAAAAGGAACTATGGACAGTTTGGTGATGTTGCATATTGGT  
CTGATCGACATGCTGGCGAGTGGTTGCCTGCTAGGCTTTTCTATTTGTTAAGAAAGTATC  
CCTTTGGAATAGCGGTTTCAGCTGCAAATCTGGTTATGCTGTTCTTAAGGGTGCTAAAG  
GTGTTAATTTGATGGTTTTCGAATTTGAATAGAACGGCTTTTCAGCGTAATAATTCTAGAT  
ACTATGTTTTCGATGGGATGGAGAAGTTAATCAAGTTTAGAACGATTTATGATGAGGAGCG  
TCCTGCTCCTGATTTGGAGTGTAAGGATGAACGTCTATGTATAGCTTATCAATGTAAGTGA  
GACGTCTCTAGCAAAATTGGTTAAGTTCGAGAATCAGAATCCTTCTTATTTACATGCATT  
TGCTCTTGATTCTACTCGTCAACCGGAATATGGAGAGGGGCCAACTCGTTTGGATTATCA  
AGACCCTTTAGAGATTGTAGCTCGTAGTGAAGAGGCTTTTTATTCTTTACCTGCGAATAT  
TCGAGGTAATCTTTCGAATCCAATGGAGTTTTTGTTCATGATTGGATGACCCTGCTAATTA  
TGATGAAGTTGAGAAGGTAGGTTTATTGGATCCTGAGAAAGGTCAGATAAGAGAATCTAA  
GTGACAAAAAGATCAAAAAGATGAGGTTTCTACTGAGGATAAATAGCGAGCGCTATATCC  
ACTTGCCTATATAGCCCAGCGACACAAAATATATAAAATCTTAATAGAAGGATGTAATT  
CGATGGTTGGTAGAAGACGTTTGGAGTAGAGGAATAAGTAGAAGAATTTGTAGAAGAGCAG  
AAGCTAGAGTTGGAAGAAGGCGTAGCTCATTTAGTGGTGGTTGTAGATTGTAAGGCAAAA  
AAAATGGAGTATCTTTATAATGAGCTACTGCTTAGACTCATATCTAATATCCGTTTATAT  
CCGTTCAACACAAAGGAAATCAGATTATATGTGTACTGATCCTATTATACCTATAGTTCA  
ATATAAAGTTCCAGTGAAATCTTCGTTAGGTGTTGTGGATTGGTCTACATTTAGGTCTAA  
GTTTAAGTCTAATCGGTTTTTTTTTCGAGAAGAATGTTGTTTCGTCGTGCGGTAAGTAATGA  
AGATGAAGCTTTTAGATTTACTGAGCAAGTGAAGACAGTTAGTTATTTATCTACTTATGA  
CCTCGATGGTTATCACCAGGTGAAGCAGTTTTCTTTTCCTCATCTTTGTAGGAAATGTTT  
TGAGTGGTTCTAGTAGCGTTCTAAGGATTTAGCGGTTCAAGCTCCTATGACAGCGCGTTT  
TCATGAGGAGAATTCAGTTTTGATTCATTCCTATGATAATGATCATTAGGCGATCATCT  
TTTAAGTTATGATCATATTCGAGTTGTTTCAAGCGTCTGAGTCGTTATGTGGATTATCA  
CTATAGCAAAAAGATTAAGTTTTTACTGTAGGAGAATATGCTGATAAGAAAGATCGTCT  
GCAATGGTATATGATTGTTTCTGCTTGAAGCCGTAATCTGACAAACAATTAGTGCCTCA  
TTTAGGATGAAGGTATCGAACGGATGTTTCGGTGTGCTTCTCGAAAGCTTAAGGAACTATG  
GAAATTCGGTTAAGTTGACGTAGATGAAGCTACACATGGTAATATTTTTAATGTAGCTCA  
TTATGTGCAGAAAAAGATTGTGGTTGGATGTGACTTAGATTCTTATAAGTCTTGTCTAG  
GAGTGAGAAGACGACAACCTCCTCAAGCTTTAGCTTTTGTCTTTTTTTTTTCATATTTAAG  
GCAATTTCTTACGACTCAGAGTATAGTTTTAAATTGTTTCAAATACTGATTTCCGCGTTA  
TTTTAAGGGTTTATTGAGGATGTTGGTTTCTGCGGATTCGGAGTTTGATCCTGAGTATTA  
TAATGGTTTTAGGAAAAGGTTACTTAGTGTATGTTGTTATTCGTTGGCAAATAAATATTT  
TACATATTTAGAATGCTTAGTTGAAGTTTTGCGAGTTTTGAATATTCATGATTTATACCA  
GGGTGCGCTTAGGTGTATGGATCAATCTTTTCCTATGCCGCAAGCTGGTGATCATGATGG  
AGACTATAATACTAGTTAGGAGATCTGATGCATAAGTTTTGTTATTCAATTTATGATCGA  
AAGGCTCGGCCTTAGGGAGATTTGATCTCTTTCCTTCAGGTGAGAAAGAGGCTGCTATT  
CGATGTTTTATAGATGTTGTGATGGATTCAGATTCTAAGAATATTTTGCATCGATATCCT  
GAGGATTTTGATTATTGCTTTATTGGTCATTTTGATAAGGATAAAGGACGCCTTTATCCT  
GTTGATGCTGGGATAGGTACGATTATTAATGCAGGAGAGTTTTTTTTTAGATTCTGAGTAT  
AGACAAGAAGAGGTTTAAATATGCCTAAAGGCCGAAAGCTTCCGTCGATTGTGAATAATCG  
TACTCAGTGGTACCGACAGCCACGATTAGGCCGTTCTTGCTTTGATCGGTCTCACGGTTA  
TAAGAGCACGTTTGATTTGAATTATTTAGTTCCATTTTTTGGTGATGAAGTTCTTCCAGG  
AGATACTTTTTCTCTATCGGATACGCATCTTAGTCGTTTACTATGTTAGTGCAACCGAT

CATGGATAATATTCAGTCAACTACCCAGTTTTTCTGTGTTCCCAATCGTTTGCTTTGTGA  
TTATGCGGAATTGTTTATTACAGTAGGTGATGAGCCTGTAGCATGGACAAGCACTAATCC  
TGCTAATGAGTATTTTGTGCCTCAAGTAACTTCTCCGGACGGAGGTTACGCAGGGAATTG  
TATTTAGTACTATTCTG

>NewGenomeName\_42

AAAACATGTACTACCCACCCCTTTTACAAAAATTCCCCCAATGGAAATTTGAAAAGGAA  
ATGAAAGAGAAAATCCATTTCCAACACTAGCCATTCTAAATATCAATCATCTATTATCTT  
CTAAAATCCTTTTCATCTGTTTCTATTATCATTATATCACAATTTAGAAAAATGTCAAGAA  
ATAAAATCACTAAATAAATAAAAAATAATTTCAAAAAATCTCTTGACAATCATTTTAGTAA  
ATGCTATAATGGTTATAGTTAGAAATGAGATAAAAAATATTACTAAAAATAAATTAATAAAT  
AATTTCAAAAAACACTTGACTAGCATTTTGAGAAATGCTATAATAGTATCAGTTAAAACA  
AAGGAGAAAAGAAAACATGAAAATGAAAGCCTTATATGTAAATCACAACGATGAAACTTTT  
GCAGAACTTACACACGGGCAAGCGCTAGATGTAATCTTTCATGCTGATAACGCTGAAATG  
TATGGCGACCATGTAATCCAGATTGTAGACCTAGGAAATGAGATTAACCTGAAATTGTAT  
AGAAATAATGAATACATTCCATTTGCTGGTACTATGAACGAGTGAAAACACTGTCTGAA  
CTATACACAAATATTTTCGGACTGGTTTGAAGAAGTTGAGTAAAGGAGATAATAAAAAATGG  
AATTAAGACAATTATCAGTAAACAACATTGAAAATCTTACTAAAAAGATTATTGACCTTA  
AAACGCTAACGTTTAAGCCAGATGAATTTATAGAAAGCTCTATGGTATGTAGCGAGGAAC  
TTATAACCAGCACACTTAAAGTTATGTATGTGTTTAGTGTTAAGTGGGATTTAAAAGATT  
AATTTTACATAGATTTTTTCTATAAAAATTTAAATAATAGAAACGATGAATTACACATTA  
AACGATTAATAATTTATTTGCTATTGTTGGTTAAATACAGAAAAATAATTTACTTTCTTAT  
TAAGTTTATCACTTGCTTGCTATTTGAAAATGTGGTAAACTTAAATAAGAAAATAAATAA  
TATTTATTTTCTTAAATGTAAAAAGCAAATTTTAAAGAAAGGAGTAAAAGCACTAGACAG  
ATTTACCTATCAAATGTAGCTTTAACGCTACGCAGGTCACTTTCAATCTTTACAAAAATG  
AAGATGGGAATGTGACTATCACTACTGAACAAGTGACGATAAACCAATGTCGCCAGCTTC  
CTTACATTGAACGTTATCTGAAAGAGCGTTTCAAGGGCTAACTCACTATTGAGGTAGTAG  
ATTATGAATATAAAAGTTATTCGGCTTCTATCCCTTTCGCTACCGCCTTAGAATACGCAG  
AGGAACAACAAGCGGAAGGGGTGTAATTAATGGCTTTAACACCAAAAACAAAGGAAGGTA  
AGACGGGACTATTTAACCAGAAAAGAAAAGCACACTACAACAGCAGGGCGCCTCTAATGCT  
GAAATAAAAGCTATTATGGGCGGTTCGGTGAATTTTGCAGGAATGAGTGATAAGGAGCTA  
GAACGTGCCTATGATGGGATTAAGCAAGGTCGTAAGTCAAGTATTTGGCAATCATGTT  
TACACTAGTGACTATGTAAAAAAAGCTAAGGCATGGTACGGGGATAAGTTTTCTGTAGAA  
AAGCTGACTCAAGGTTTTTCGCTCTTCTGAACGATCAGAGTTGAACCGCTTTCATTCAGTT  
AAGGAAGTCAAAGAATACCGCTCAGAACGTGACAGAGAAGCCAAAGAACGCTCTATACAA  
GCGGTGGAAGAGATGCACTATAATACAAGAGACGCAGGCAACAAGTCGCAATAAAAAGCC  
ATTAAGTCTATGATTTACGCATAAAGCGAATGAGTGCCAGCAACTTTTGTGCATTTCTA  
ACAGGCGGACGGTCTGACAAGGTTTCATTTGATAATGTATGTTGTTTGTAGACACGGAC  
GGTAAGGAAACGGCTTTTGAATTTACAGGACAGTCTAGCCCGTGAAATCCTTGATAATGTA  
GATAAGTTTTCCAAGCAATTTGTTTCTGATATGAGAAGACGAAAGAAGCGAGGGAAGAAG  
TGACTTGCTACTATGCAGGCGACTTTGAAACAACACTACAACGAGGAAGACACAGAGGTAT  
GGCTATCTTGCTTTGCTAAAGTTATTGACAATGACAAGTTAGACACATTCAAGGTAAAGA  
CTAGCCTAGAGGATTTTCTAAAATCGCTCTATCTTGACCTATAACAAGACTTATACGGAGA  
CGGGAGAAAATGAATTTATCATATTCTTTCATAATCCCAAGTTTGACGGCTCTTTCTTGT  
TATCTTTCTTTCTAAATAATGATATAGAATGTACTTACTTTATTAACGATATGGGGGTAT  
GGTATTCTATTACGCTAGAATTTCCAGACTTTACGCTACCTTTTAGAGATTCTTTAAAAA  
TCCTTAATTTCTCAATCGCTACGATGGCTGGACTGTTTAAAATGCCAATTGCTAAAGGGA  
CTACACCTTTCCTAAAACATAAGCCAGAAGTGATTAAGCCAGAATGGATTGACTACATTC  
ATGTATACGTTGCAATACTAGCCCGTGGTATCTTTGCTATGTACTATGAAGAAAATTTTA  
CAAAGTACACATCAGCAAGTGAAGCGCTGACCGAGTTTAAACGGATTTTCAGGAAGTCTA  
AACGAAAATTCAGAGCCTTTTTCCCGATCTTAGATGTAAAGGTGGACGACTTTTGCCGTA  
AGCATATCGTGGGGGCTGGACGTTTGCCAACCCTAAAACACAAGGGGCGAACCTTGAACC  
AGTTGATAGATATTTATGACATTAACAGTATGTATCCTGCTACTATGCTACAGAACGCTT  
TGCCAATCGGAATACCGAAACGATACAAAGGCAAGCCAAAGAGATAAAGGAAGACCACT  
ATTATATCTACCACATTAAGCCGATTTTGAAGTAAAACGTTGGCTACCTCCCAACTATCC  
AGATTAAGAAAAAACTGGACGGTTTAAAGAATCGGAGTCCGCACTAGCGACTATGTGCCAA  
CATCGAAGAACGAGGTCATAGATTTAGATTTGACTAATTTTGAAGCTTGAATTTATTCTTAA  
AGCACTATGACGCAACTATCATGTATGTTGAAACACTTGAATTTTCAGACAGAATCGGACT

TGTTTATGATTATATCACAACCTTACAGATACAAGAAAGATAACCGCACAAAGCCCAGCAG  
AAAAACAAAAGACTAAGATTATGCTAAATAGCTTATACGGGAAGTTTGGCGCTAAAATCA  
TATCTGTTAAGAACTAGCCTATCTGGACGATAAAGGTATATTACGCTTTAAAAATGACG  
ATGAAGATGAAGTACAGCCCGTTTATGCACCCGTGGCGCTTTTTGTAAACATCTATTGCC  
GTCACCTTATCATCTCAAACGCACAAGAAAACCTATGATAATTTCTTATATGCTGATACAG  
ACAGCTTGCACCTTGCTCCATTCTGACAGCCTTGTCCCTTGACATTGACCCGTCAGAGTTTCG  
GCAAGTGGGCGCATGAGGGGAGAGCCGTTAAGGCCAAAATATTTACGCTCTAAACTGTATA  
TAGAGGAACTGATAAAAAGAAGACGGGACAACGCACCTAGACGTTTAGGGCGCAGGTATGA  
CCCCAGAAATCAAGGAAAAAATCACTATTGAAAACCTTTGTTATCGGGGCAACCTTTGAGG  
GTAAGCGTGCAAGTAAGCACATTAAGAGGGGTACGCTGATTTATGAAACAACCTTTAAAA  
TCAGAGAAACAGACTATCTTGTGGTGGCCTTATACTCTCGGTATAACCGCTCATTTTTT  
AAAAATTTATTACATAAACAACAGGTTGAAGATAAAAAAGGGTACTACTACCAGAAATCA  
AACACGCACGTAAAAATACTATTTTTCTAAAGTCCTATCTAAAAGCACATTATGCCTAT  
GAAAATTTTGACTATATCATGGAATTATACAAATTTGTTTCACAAGGATTTGATAAAATT  
TCAATCAATGCTTTTTACAATCTTTGCAACTATTTAGAAAGAAAATAAAAATCTATTATCTG  
TCTTCTAACGCTCTTTACGATGGTTACGAGAAATCCAAAAATCGTCAAAACGATTTAGAA  
AATCACAATACAATCATCACACCATTAAGATTTTTAAAATCATCAAACGGAGATAAACAA  
AATGTCTAAACAACACAAAAACATGAAAACCTTTGATACAGTTGTGGCTCAGGCTACAAT  
CACAGCAACGTCTAACAAATCAGACGGCAAGAATAAGCAAAAGAAAGCGACTAAAGCCGT  
TTACCTTGTCCCAGCGACAGAAGAAGACACTAAAAAGCTCGTAGACTTTGGCATGACTTT  
ATACACACCAGACACGGAGAAGGACCCAGACGCAAAACCTTACTTTAATGTTAAGGCAAC  
CGAAAATGTGAAAATTTTACAAGTGAAACGGACTTTGAAGAGGTCAACTTCGGGGTATC  
TTACGAAGACGTAAACCCAGAGACAGGGGAAATCACAGTCAAGAAGACCCCGAACTACAA  
AACAGAAGAACCCGTACACGTTGCGATTATGTTTGTGAGGGTGGCGACAATGGAAACGA  
CTTTTTCCGTGTTAATGCTCTGATGATGGCTGACACGTTGACCCTTGAAGAAGTGCAACC  
CGTGAACCCGTTTCGCTGGATTGTTTGGAAAATAAGAAAGAGCCTTCCCAATCGGGAAAGC  
TCCAATTATAAAGCGTTTTTCATGGCTTGAGAAGTCAGTTGGTTACAATGACTCGCACCA  
GCAAGCACCCCTTGAGGTGTAACCATCTTGCCAGCACTAGACAGGCGTTGAAAAGCCTTA  
CAGGTTTATCATATCATACTTGCTTTATTTGTCAAGTATGATATACTTTTGTAAAAAT  
TGAAAGGAGAGGGCTATGACCTCACAGGAATGCCTCGCAGTGCTAGACGCTGCAATGGCA  
AAAGTCGGAAATGATGTAGAAATTGAGAGCCTAACGGCTGACTTGATTGAAATTAAGGCT  
TTTGTTCGGAGAAATTGACACAGTTGTCTCAGTCTTGAATGAAGACGTTGAGCGCCCAAT  
CTTAAAAACGGTAACTTACGTTCCGGCTAATAACGAACTTTACCGCCGTTTAGGGCAACAA  
GATGAAATCATGAAACAAGCACAGAAGACATGAGCGTAGTATCAGCAATCAATGCTGTT  
ATTTAAAGAAAGGAAGAAAAGAAGATGAAACCATTTTCACAAAGCATTAACTGGTATCCT  
AACAAAGGCACTAGACGCACTCAAGGACTAACCAGAAACAGTCGCAGAAGTTACTCCGCCA  
GCAGTTATGCCTGCCGACACACCAGCGCAGGAAGTGCCAAACTACCCAGCGCAAGCCAG  
CCAGCGAACTTGAGGGCGTAGAAATGAACATCGACCACGAAAACATTGTAGAAGAGGGAG  
AAGAATAGAATGGCTAATAAAATTACCACTTTCTAATCAGGACAAACTGGTAAACAAATT  
TCAAACATTGACCTATTGAACTCTATCCGCACCCGTGCAAGTGCTGACTATCAGGCAGAT  
ATTACAGTTCTTGAGGGCGCACGCATTAACCAAGCAACAGTTCCATATGAGGATTTTCAA  
AAGCACCCCTAATGAGTTTTTTCACAGCCTTGGTCAATCGTATCGGGTCAACCGTTATCAAG  
GCACTTACTTATGTAATCCGCTTGCTATTTTCAAGTCTGAAACCTTTGAGTTTGGGGAC  
ACATTCCAAGAAATCTATGTACACCAGCGGAAAAGAAAACCTATGACGCTAAGTCAGAC  
GTAAGCCCTTTAAAATTCGCTGATACAGAAATCGAAGCCTTTTATCACACTTTGAACAAT  
GAAAACCTACAATGAGCGTACCTTTGAACGTGCTTGGATTCAGAAAGCCTTTGTTTCTGAC  
ATGGCTTTTGACGAGTTTGTGGACAAAATGTTTACATCATTGCTATCATCTGACACGCTG  
GACGAGTACCAAGCAGTTAGGGTGTACTTGAGAAATCACTTGCGGAAGTCTCTTATACAG  
ACCTTGAAAGGTAAACGATAAGACAATTGCCGTGGCAGGTACGAAGATTGACGAAACAAAA  
CAGGACTTTGTCGTAGACTTTAACCAGTCTCTAATTAACCTTGTCTAAAGGTTACAAAATT  
CCAAGCCGTACAACGTTTAAACAACCCTGTAGGCGTGCCAAACATGACGGCGATTGAAGAC  
CAATATCTGGTTATCTCAGCAGAATTTTCTACACATCTTGACATGTTACTTGCTAACGCC  
TTTAAACATGGATAAAGCAAGCGTACTCGCTCGCACAAATCGTAGTAGATGATTTGGAAAAA  
TTCACGGGAGAGGACGCAACAATGGACGCAAGCCAGTTGCTTTCCCTATTTCTGCTAAG  
TCTATCATTAACAAAGATAAACTGGTACACATGGAAGCAATCCGCAACCCTCGCAACATG  
ACCTACAACCTATTTCTACCATCACCCTACATGACCAGCCTTTGACTTTTTGAAAACATT  
CATTTCTGGTATGTTTAGGAAGCCTAAAGGCTGACCAAGGGCGGCCAATAGCCCGCCTAT

TTTATTAAGTGAAAGGGGACTAAATGAGTTACAAGAATTACAAGCGACATCTTGGTAAGA  
TTGAGGTAAACAAAGAAACCGTAGAGCGTAACCGTCTAGCCTTTTTTGGAGTTTATTTCA  
ATTATTTCTATAATATCGTGGTAAACTATTTCACTTGGGAGGGTTTGCCTAATGACTTTG  
ACGAGTTGGTTATAGAAAAGAAGCTGATAGAAAATGGGCATGTAGCTTTTTTTCATGATG  
ACACTTTTGGCTATATCGCACAAAGGTGGACCACGAGGGGAAGGCTTAAACCCTTATGACC  
AGCCTTTGACCTATCAACCCGTCAACGCTAGCAGTATGAACTATTTTAAACAAATGGAAA  
TCGCTAATACTGAAAATGATTTTAGAGTTATTGAAGACTTACACAAGGATAATCCAGACA  
AGATTAAGACCTTGTATTGTGATTCCCTAACATAATTTCTATGAGCCGTTTATAGGCT  
ATTTAGAGTTATTTTGGGAAAAGTTGGCAGATATTGAGCTTACGATTCAATTAATAGAA  
ATGCACAAATTACACCGTATTTTCATCTTTGCGGATAATACAAACGTGCTATGTGTGAAAA  
ACATCTTTAATGAGATTGCCAATTTTGAACCCGTTGTGTATCTCAACAAGCAGATAGACC  
AAGACGGACAAGACAGCTTTAAACAGTTGTCAGACTATATCCAAGTATTCCGAACGGACG  
CACCGTTTTTACTTGACAAGTTGCACGATGAGAAATTACGAGTGATGAACCAGTTGCTGA  
CTTTCATTGGGATAAATAACAACCCATCAAATAAAAAAGAGCGTCTGGTAGTCTCAGAAG  
CTATTTCTAATAATGGGGTTATGTCAGCGAATAGTGAGGTAGGCTGGAAGTCCAGAAGAA  
AAATCGTTGAGCTCATCAATAAATGTTACGGGCTAAAAATCAGCGTAAACCAGAGGAAA  
CGATTCAGCAGTTTAAACCTTGACAAAATGGCGCTAGACTTGGCAGAAAAGGAGGGGACAA  
TCATTGACCCAGAATAACACAACAGCAACGATTGCCACCTTTTTAAAATCCAGATATAGA  
AATCCCGTGACGGGACGGCTGGACGGCTTGGCAGTAGATGAAAACGGCGAGTTTCTGCAT  
TACAACACGATTATAGACCAGACCAATAACGAGTTATTTAAGGACATGCAGCTAGTCAAT  
GGAGTTTCAGACAATTTCAAGAAAGAGTTTTGCAAACACTTTTACAACAGGGAGATAGAA  
CTTGAGACTTTCGCACGTTGCCAGATAGCCCTTGAGGAAGTTCTAAACAATGAGTGTTGC  
AATCTAATTAATATCTCGCTGAAATCAGAAACAAGGCTATCAAGGACTTAAATCAGTCT  
ATGAATATTGACACGGTTGGAAACCAGAAAGCAGACGGGCAAGCCTTGCAAATCGCAAAC  
ACCACACCCCAAGAGCGGAAAGAAATCGTCTTTACTGAGCGCTACGGCGTGATAGAGTAC  
GCTGACAACCTGGTAGAAAACCACCAGAAAGACAACGCTGACACAAAAAGCAACGCTCTCA  
AGGTGGAGCGGTTCAAGCCTTGCCGAACACTTCCAACATAACGCAGAATTAAGGATATA  
CAGTTTCAGATATATAATATATGTGATAAGCTGTCTTTACAAGTCTTTTAGAAAGGTGTA  
TAGATGAAAGATTTATCAAGCGCTAAAATCCTAAAAGATGATAGTATGTTAGAAGAAATC  
ATGCTTTTCAGCTTTCAAGACTTTGCTTATAGTGATGATGGATTATATTATATCCAGTCA  
AATAGCAGACGGTTAGGCGACTAGTCTAAATTGTGGATAAAAATTAAGCCTATCTGTTAT  
CATTATGAAAGCATTGAAAATGAAACTTTCTGGACTATCCGCAAAAGCTACAAGCCGTTA  
CAATCCATTAAGGCGTTGTTATCCATTTCGCTTTAAGATTGTGGGAGCGTACTATAGCTTT  
GAAAAACTGACCAGCAAAAGCAAGCTGAAAGGCTTTGGCAGAGTGATAGACGATAACAAC  
TATTTTTACGCATACCCCCTGTAATGAGGTGGTACATTGGGATACCGGGGTTATCGTA  
ACACCTAACTATCAAATGAACATCACAGGACTAAAAGAAACCCGAGTAGAGGTTGACGGT  
CAGCAACTCTTTGAAGATTGGTCTACCTTTAAAATCAATGTTACCAACGATAGAAAGGGA  
GTACCTCGCACAGTTATGACAGCAGAAAAGGACATGAAAACCTATGATAATTATCAACT  
TGTCCGAGACAACGGACACGCAACAATCGAAGTCACGGGACACGGAGACGATATAGACC  
AGTCTTGCGCCCGTGTATCAACCGTTTGCAGTTGTATTTACTTATTCTTAAAATCTAACA  
TAGATGATTATGTTAAAAAAGATGGTTATACATTGCTACGGATTTTTAAAAAACTTACTG  
CGGTACAACTTTAAAAGCTATTTTAAAGTTACATCGTAACGCTTGAGCAACTTTATAAAA  
ATTCAATTAAGGTTATAAATAAAGAAAAAGAGGTAGAAACAAATGGCGAAGACAACACTACA  
CTTGTACGAGGTATTCATCATGGATTAAGTTCCAAAAACACCAAGGAGTGGAGAGCCTT  
TCTCTTGAGGGTAAGCAGGCGCTTTCTGACTTGTACAGGATAAAAACGGGGACACAACC  
CTTATTTTAAATGCAGATGTTGATAAATTAATACTATTCATTAAGCTATACCTTTTATT  
TCTGTTTCAGAAAAATTTTCAGGAGTTGACCCTAATCAAATGAAAACAGCAACCCGTCAGC  
CAAGATTTAACAGAATTCCTCTAAATAATGGGGAACTGGTTAAATTTAACAAAGAAAAA  
GATGGTATTTCTGTAAATGATGAAGAATTGAAAGCAGAAATTTCTCAACTTATTGAAGCT  
AAATTGACAGGGTTTCCAGTTGTATTAAATTATGAACATATTTTACTTGATAATTTTCA  
AAAATTGAAACATCTATCAATATTTCCACTTATCAACCGTTTAAATGATTTTGTGGAAGTA  
ACTTTGAGCAATCCAGCTACACATGAACAAGACACTGTTATTATTTCAACAAATGAGTTA  
TACCATGGAAAAATGATTTTTAATAGATTTGTTTGCAGTGTTATAGTTGAAAAAGATGAT  
AGACATATTATTGATATAACTGTAAATTCTCATAAAGAAGCTGACAGAATCCATGTTACC  
ATAAAATGGTTTACACAATACAGAGGACAAAAAATCCTTGACGTAAATGAAATTGGTCAA  
GACGCACACTTTGAGGGATATGAAAACCCTAAAGTAGAATTGACTTATAGTCCTATTCCA  
CCAGCTGTAAGCACACCAACCGAAACACCAAGCCCAACCCCTGAAACAACCTGGAAACACA

CAGCAACCAATTGCAGAAGAATCTCAATAAAATAAGAAAGGATTTTAAAACATGAATCCG  
GAAGAATTTAAAGATGAATTTTTAGGGCTTACCGTGGACGCTATTAGTCTTACTGGGTA  
GAACGTTGGGGGCTTATCCCCTCAATCCCTACCAGCTTTGAAAACGCCAATTCTATCTAC  
GAGCTGTTGGCGTGGCTACAGCGTGCCTTTAAGCAGTTGCTTGACGACTTTGTGGCGTTG  
GAAAGCTAACTGAAGACTATAAGAACGCTTTAACTGAACTCATAGAGCAACTTATACCT  
TTGCTTATCCTTAGATACATGAAGAGCAAGGAAGCGGACGACTGGTTTAAATAAAAAAGCG  
GCCATCTACTATAACAAGCTTATCAAGCCTTATATTGACGCAGAAATAGCTAAAGTCAAT  
AAGAAAATCGCTGACCTTGA AAAAGAAAGTAGATGATGACGTTAAGCGACTAGATGGACGG  
ATTGACGCTTTAAACGATAAGCTAGAAAAAGAAATCAAGAACTTGTCGACAGAATCACA  
CAGGAAGTCGCTAAGTTAAACGAGCGTATAACAGCAGAAAACAACGCACTCAAGGAGACA  
ATCGAAGCGCTAGAAAATCTAACGCGGGCTTGCAAATGCTTTGCGTAAAATCATTGAAA  
ACCTTGAGGGGTCAGGCGCATGGACTGGTGGGCTTACTGGTCGCTTTAACCAAGGGCGCA  
ACATCGCAACAGGTAATATTA ACTTTGTTTGGTGGTACACCAGACGGTTCAAGCTTTATCC  
GAACCAACAGCGGAAGCACAGAAAACGACCTCGCAGGAGGTATCTAATGCCTTTAGAAAC  
ACGCTTTTTAACCTCTACTACAGCCAACGTAGAAA ACTTTGGTACAGGTGTTGCCCTTG  
GACGGAAGCCTATGCTAATGCTTGGCAGTTCTCAGGGGACACAGACTACGGCTACATGAC  
CAACGGGAACCCGACCTATCTACAGTACGGGCAAAATGACCCGTCTGTATGGGCGTCCAT  
GCGTTTCTGGGGCGAATCCGTTGAAATCCTAGAAGAGACAAAAACGATGTTAATTCTAT  
CACGGCTAAAATCAGAGTTAAAGTCCTCTTTTGGTGGTCAAACGGGTGAGCTGAAACGC  
TGGGTATCGGGTAGAATATGATATTA AAAATCTATGGGCGCACCGTTTGGACGTTTAGCGG  
ATATA CAACCGATGAAGTCATTA AAAATGATGAAGTTGCCAAGACTTTCCCGTAACCAT  
ACCAGCCGAAGAAAGTTCAGCAGCCAATGCCTTAAATATAAATGTATCTTATCCAGACGG  
GCAATATTCAGACAATTCTTTCTATGTTGGTGTGTACCGATATAATATCAACAAGAAAA  
GCCTAAAACATTAAGCCGTGGGCAATCCGTAAGAGCGGAATCTTTAAGACCTTAAACCG  
TCCCTCTGGAATCTTCCAACAGCGCAAAAGCAGTTGGCAAGACATCAGGGAACAGCCAGC  
AAACGCAGTCGGGCAAGCAGTCACAGCACCCACAGCATGAGAAAGTCGGGTCAATGGAT  
GGGACAAGGACAGATAGGACAAGAATAAGGGAGGGTTTCAGCCACCTAATTTTAAAGGA  
GAAGACATGCAAGAATCAACCAAGATATGGCTTTATGCCAAAAGCCCTTTTAAAACGAT  
TATGCCAATGTGATTA ACTTTGAGACAAGGGAAAGTGTGGAAGACTTTTTCACAAAGAAG  
AATCCGCATATAGAAATTGTGTACGAGTATGACAAGTTTCAATATACCCAAAGAAACGGC  
TCAATCGTAGTTTCTGGACGGGTAGAGAATTATGAAAATGTGACTTATGTGCGCTTTATC  
AACAAACGGAAGAACCTACTATGCCTTTGTTTTGACGTTCTCCATATCAATGAAGATGCT  
ACACCCATTATTTACGAGGTGGACGTTTGGAACACCTACCAGCACGAACTAAAGGCGCTT  
AATGTGATTGGTCAAGTGGAACAGCAAACCGTACCTAATGTGTTGTCGGGCGCTGAAAGAC  
AGTCAGCAAGGTTTTTCAGTTGGGGCGAAATACGCTACACGGGCTGGAGAAGTTGGAATC  
GATACGGAGTGGCTTGTAGTAGTCGCAAAACCTACGATTATAATGACCACCCAGGCAAAC  
CGCCCCGTCAATATGAGTTATTCAGGTATGCAAAAACCTTTAAATACTTTTTTATTCTT  
GTAAATTTGAAAAGCGGAGCGTCCAGCCGCTTATTTTTCAGGGCAAAAAGTATGATAGCT  
TTTACCTTGAGAACCTGTATAAGCACCTTTTCGGCTTGAATCAAGACGGCAGTAGCACCG  
TAAACCAGATTGTGAACATGTATTTAAGCCGTGACATCGGGGTAAAATTCATAGAAACAA  
CCGAGGGCGACAAGACCTCTATAGACATCTTGTCTAATATCACGGGAAGCGTTGCAGAGA  
TTGGCAGAAAGAACAGCCGAAACTATCGGACATCTGGAAGTTCATCAGACGGAGGCAGTG  
GAAGCACC AACGAAAGCGGAGGCATTTCAACCGAGGAAAGCCGTGTTAGACTGGTTACTA  
GAATCATTAAAAGCTAGTACCAGACGCAACAGCGGAGAGTATCGCTGGAATTATCGGGA  
ACTTTTCAGCAGAAAGCAACGTACAGCCAAGAAATACGAGGCAGACTATGCTACTGGGT  
ACGAGTACGAGAAAATGGAATCAGAGCCAACAGCCGAGAACCTTATGGGAAGCTGGGGCG  
CTTTTGCGAGTCTCTACTCTATCAGCTTAAAGTGAAGCTGGATATAGAGGGTCAGACGGCA  
ATCACTGGATAGGTATTGGGATAGGACAGTGCCCGTACCGAGGGCGGAGGAGCTTTTGA  
ACTTTGCAAGAAGTGAAGGGAAATCATTATGGGATTTTAACTACAATTTCAATTTATGA  
ACCAAGAGAGCCGAGCCGATACGTTTAGACGGGTAGCCAGTTCAGAGCAAGCGCCAGGA  
ACAATCCAAGGGACTGTATGAACA ACTGGGAGGGGGTAGCCTATAAAGAAGCGGAACGCA  
TAGAGCACTAACGCCTGGTTATCTAAGATACAAGACGAACTACAGAAAGGGTAAACAATG  
GCAGAAGCAACAGAAACGCTAAAAGCACTAAATGAAATCAAGTCACGGGTAGGAACAACC  
GTGGGAAGTGGGCAATGTGACGGCTAGTCGGCTTGTATTCTCAACTCTTGGGCGGATGCG  
ACATCGGGGGAGGTATCAACACCCCAACCCCAACGGCAACGGCAGACAAGCCAGTGGA  
GCGATACACAACGGGGTATGAGTGCCAGCAACATTGGGGGCGACTATGTCTGGGAAGCGC  
TGGGCTGGAAAGTCCGATTTGACCCGTCTTGGGCTGATTTACGGGTAGGGTGCATTGTCT

GCTATATCCCAAGCGGTAGCAATATCTGGGGGCATACGTCTGTTATTTTCAGCGGTCAACG  
GCTCAAGCTATGCCGTTATAGAGCAAATTATGCTTGAATGGCTACACCACAGAACGCA  
CGGGTATAGATACGATTGTCAATATTGAAAGTATTATCTACCCTCCCGAAGTTGTCGCAG  
GTGGCGATATTGGAGAGATAACAGGTAACACAGGAGATAGACAGTTAGGAAACGGGGACT  
ACTCAAAAACCGCCTTTGACGTTGAAGCCTTACTAATTGAGCTGGACGTATTTTTTACT  
ATCGCCCTAATGTATATGAAATCCCGCACCTCCTCAAGATAGCTTATGACCAGATACAAG  
AGGGGCTACGCTCATAACATGGGTAAAGACGACCTAGAAATAGAAGTACAACCTATTAATA  
GTGAGTTTACGGAGATAGAGCTTTATGATATTTACGGTAACAGTTATGTGTATCAACCGC  
AGTATTTACCGAGAACCATAGACGAAGCACACGAGTATAATGTTATTGTAAGCAGATGCC  
TTGGGGATAGCAATCAGGTTTCAATTTTTCTTGAGTATAACAACGCTAACTATGTAA  
GCTATGCTGATAAGAATATTCTGGATAGATTGGAAAGTGGCGACTGGGCGGAACACAATC  
CAGAGCATTTTAAATACGGTTTGAATGACGTGACAGGGAAAAGCGTGGCTATTTTTGAATG  
ACGCAGAAGCCAGCTATATCCAGAGCCATAAGAATCAAATGGAACATACACAGCTTACGT  
TTAAAGAGAATCGGGACATGCTGAAACAGAGCGTAGACCTATCTGATAAACAAGTCGCTA  
CAGCGAACTACAAGCCAGCTATAACGCACAATTTGCCGTAGATAGCGCCAATATCAACC  
AATGGACGGAGGGCGCTAGTGGTATCTTAAACGTAGCTGGAAATCTCTTAAACAGGGAACT  
TTGGGGGCGCACTTGGTGGGCTTGCCTGCTGGCGTTATGAAAGTCTTTAACGCTAACCGTG  
ATTATAATGATAAAGTGGTGCAACAAGGTTTACAAGCGAAAACAACGCTTTGAAATCTC  
AGTCAATCGCACTTGCAAACATCAAATCTAAGATAGCACTTGACCAGTCTATCAGAGCTT  
ACAACGCAACGATGGCAGACCTACAGAACCAGCCTATCAGCGTGCAACAAATCGGGAAATG  
ACCTTGCTTTCCAGAGTGGGAAAAAACTGACAGACGTTTATTGGAAAGTCTCCCTAGCTC  
GAAAAGAAATCATGGGACGGGCAAACGAGTACATAAAATGCTATGGGGTGCTTGTCAACT  
GGTTCCTAATGACGCTCTAAGTGAATGAGGTCAAGAAAACGTTTTAATTATATCAAGA  
TGATTAACGTTAACCTTGAACACTAAGAGCCAACCAGTCGCACATGAACGCTATTCAGG  
CTATTTTTTCAGTCAGGTGTCAGAATATGCAATTATTCAGCCAATAAAGAAGACGGCATT  
TGTTTGATAATCAGAAATACAACCCGAATTTTTAAAAGTATGATATAATGAAATAGAAAG  
GAGTGATTTTCTATGGAAGCAACTGAAAAATGGTACAATCCGCAGAAAATGCTATCTTAT  
AACCAGTATTTAAACTTTGTTATGGGTGGTCGTGGAATTGGTAAGACCTTTGCACTCAAG  
AAATATCTGTTTAAAAGGTTTCAATTGAGAAAGGGGAACACTTCATCTACCTAAGGCGGAAC  
AAGTCAGAGCTTGACCGTATCGACAAGGACAAGTTTTTTACTACCGAGTTATTAAGCAA  
GTTTTCACTAACTTTGAAGTGATTGACAGCGACGCCAGCAAATCCAAACTCAGATTATT  
TTCAAAGCCGACAACATGGAGGAAGAGGAAAATATACTTGTTTTATCTTCTACTAAAATT  
ATTCTTAAACGGGAAAATCGTTTGCTATCTCAAGAGCCTTTGTACATGGGTAGACTTGAAA  
GGGTCAGAGTATGATGATGTAATGAGTATTCTATACGATGAAGTATTGATAGACGTTACC  
AGTAAAAGAGGTATCTCGATAACGAGGTGGAGGCGTTACTAAATTTTCTCTCTCAGTA  
TTCCGAAGACGGGACGGGTGTCATGCTTATCTACTATCAAATGCAAGTAATTTCAACAAC  
CCTTATTTTGGCTTTCTCAAGTTCTATGACGACAACGGCAAGCGCTTTTACAATCTGAAA  
CAATATGCAGCCTTGATAGAGATCCCCCTCATTACGCCTTTCAAACAGAGGAAGAAAAA  
GAGAGCGGATTCTTTAAGCTATTGAGTAAGTCAAGTATTTATGAAAGCGTTGCTAATAAT  
GAATTTTCAGAGTAAGAACGACAAGAATATAGCAAAAATTAAGGCTCGAAGTCTAGGCTA  
TATAGTTTCTATTGTGACGGTACTTTCTTAAACGGGGTACTATATCGACTATATGGTATAT  
AGTGCTAAAGAGTTTGACAAAAATTTGACCGCTTATTGTTTAGAAGTGGAAATAGGTGGAA  
GACGGGTTTGTGTAATTGAATAAAGCCAGCGCACTAGGTAAACTTTACGGAGTTTGTAA  
TTAAAAAATACGTTAATTTATGAAGATTTAGAACTAAAAACAAATTTATAGAGGTTATC  
AATCATGTTATATAATATTATGCTAGAAGTTGCTAAATGCGACTATATCACACTTCTTTT  
TGCATTGATTCTGTCTGACTTTATCACAGGCTCTTAAAGCCTTGGAAAGTGGAAAGTGAC  
CGATAGCTGGACAGGGTTAAAAGGAGTTATCAAACATACCCTAACATTTATTTTTTACTA  
GACTGTAGCGGTATTCTTAAACATATATTACGCTATGGCAGTCCGTCAGATTTTGCTTAT  
TATCATTAACCTTCTACTATGCACTTTCAATTATGGAAAGTCTTGCTGTTATGGGTGTCTT  
TATCCCTAAATTTATGACGGATAGAGTACAGGAAGAATTGCAGAAATACACCGCACAACT  
AGACGCAGGAAAAGACCTGCTAGAAGAATTTAAAGGAGAAAAGAAATAATGGTTAAAAAG  
AATGATTTATTTGTAGATGTTTCAAGTCACAACGGTTACGATATAACAGGTATCTTGGAG  
CAAATGGGAACAACCTAACCATCATTAAAATTTCTGAAAGTACGACCTATTTAAACCCT  
TGCTTGTCTGCTCAAGTGGAGCAGTCAAACCCTATTGGCTTTTATCACTTCGCACGCTTT  
GGCGGAGACGTAGCAGAAGCCGAAAGAGAAGCGCAGTTTTTCCTTGACAACGTGCATATG  
CAAGTTAAATACCTTGTATCGGACTACGAGGACCACCAAGCGGATACGCACAAGCGAAC  
ACTAACGCATGCTTAGGCTGTATGCAGATGATTGCTGACGCTGGATATAAACCTATTTAT



TATAGTTATAAACCGTTTACACATGATAATGTGGACTATCAGCAAATCCTTGCACAGATC  
CCTAATTCTCTATGGATTGCAGGCTATGGCTTAAACGATGGTACAGCTAACTTTGAATAC  
TTCCCAAGCATTGACGGGATAAGATGGTGGCAGTGTTCTAGTAACGCGTTTGACAAGAAT  
ATTGTACTGTTAGACGATGAAGAAGACGACAAGCCAAAGACCGCTGGAAAGTGGAACAA  
GACAGCAAGGGGTGGTGGTTCAGACGAAACAATGGCAGATTCCGTTATAATAAATGGGAA  
AAAATCGGTGGTGTGTGGTACTACTTCGATAGTAAAGGATATTCCTTAACGAGCGAATGG  
CTCAAAGATAATGAAAAATGGTACTACCTCAAGGACAACGGCGCATTGGGGACTGGCTGG  
GTGCTAGTCGGGTGAGAGTGGTATTATATGGACGATTCAGGCGCTATGGTTACTGGTTGG  
GTCAAGTATAACAATAACTGGTACTATATGACAAATGAACGTGGTAACATGGTTTCTAAT  
GAATTTATTAAGTCTGGAAAAGGTTGGTATTTTCATGCACACAAACGGAGAGCTTGCAGAC  
AATCCAAGTTTCACGAAAGAACCAGACGGGCTTATAACCGTAGCATAAAAAAGAAAAGCT  
AGAAGGATTTTCTACTAGCTGTTTTTATAGTCTGCTATAATTTTATAGGCATCTTCGTC  
TGGATTATCCAGAGCGATGGAACAGATTGCCGACAGGACGCTGTTTCATCTGATTGATTT  
CTGTAAGTAGTGATTTTCTAGCTGTTTGTAAATTGCTGATATGCTTTTTCATATCCAGCCAG  
AGAAAAGGAGTGGTGTAGGTTTATGAGTTGCTGGGTGAGTCATGCCTTGTCTAGCCCGTC  
AGGTATGCTTTCATCATTCTGAAAGCGTTTCTAAATAGCTTGTAAATGAATGTATAACC  
AGTTCATCAAGCGTTACCATTCCCCGAACGCTGGAAGCGTTAGGCTTGAATCTTTTGAC  
CGTGTAACGTTAAACTGTTTTCAAATTGTAAGGCTATTTCTTGCTGTTCTAAGCGTGTTT  
TGTCTTCCATAGTATTAACCCCTACGTTTTCAAGATAAGCGACTAGACGCAAAATAGAA  
GCCGTGTTACTATCGTTTTCTCGCTTAACTTCGTGATGGTGCTTTGTTGTTGCTCAAGT  
TGTTTTGTTGCTTGAAAATGGTATAGGTCAAGAGTGACATAATCACTAGAAAAACCAAG  
ATGGCAAGGTTACCAGAAGCGAACCACCAAACAGAAACGACCTTTTTTGTAAATTTG  
TTATATGAATTTTTCTTTTTCTTAATACCTCAATTTGAATAATTCTTTTCTACTGATAA  
ATAAGTAACCTCTAATATACCTTTGTAAGCTGTAGACCCAGTCTGGTTGGTAATGTTGTT  
CTACATCATATAAGTTATAAGTAGTGGCTCAAATGCCCTCTATATCGGCCATTATAGGCT  
TTATACGACTAATAGCATAATCTAAGGTAATGATAGGAAAGCCATAAAAAATAATATTGCT  
TGACGACCTTTCTAACCGGTTCTATTTAAGTTGGAGAAATCTTGTTTAAATCGTTTATCT  
AGTAACCGTCCCTTCTTGTACATAGCGCTGAAACGCTGTTTTTAAACAATAATGTGAAT  
ATTTTGAGTATTTCAAGTTTTTCACTTCCTCAAAGATAATAAGCGTGTTTAAAGCGCTCAT  
TTTTAAATAGTTCTCATGGACTTCTTTATATCCATGATTTCTTTATACCTCTTTTTCTG  
TTACCAGTTTATCGTCTGGAACTTATCAATACATTGTATTTTAAAGAGGAGTTACCCCT  
CAAGAATAATCTGAAACTGTGCTTTAATGTTTAGCCTCCTATTTGTACAAATACACGTTT  
TCGTTTCCACAATATCCAACATATTCTGAACCAAATAAGATAGGAACTTTCAAATTT  
TCAACGCTCCAAGGCTTCTTTTGAACCTCTACATAAGAGTATAACCCTTTTTCTGCTAG  
GTTTGCTTTCCCTACAAAATAACAGGTGTTGCTATCTGTAAAACCTTGCCTTTTAGCAAG  
TTTCACTAATTTATCTTTTCATGTTTCATGCCTGCTTGCATAGTCATCGCATACTGGTTAAT  
GATAATCATTTTGTATACCTATTTATCTTTCTGATACCATTATAGCATTCTCAAATG  
CTTGTCAGTGTTTTTAGAAATTATTTTAAATTTATTTTLAGAAATGTTTTTATCTCATT  
TCTAACTATATACATTGTATCATTTTATAAAATGATTGTCAAGAGATTTTTGAATTTATT  
TTTTATTTATTTAGTGATTTTCAATTTCTTGACATTTTTCTAAGTTGTGTTATAATGGTAAT  
AGAAACAGATGAAAGTATTTTAGAAGATGATAGATGATTGATTTTTAGAAATGGCTAGTGT  
TGGAAAGGGATTTTCTCTTTCATTTTCAAATTTCCATTGGGGGAATTTTTGAAAA  
AGGGGTTGGGGAGTACATGCTTT

>NewGenomeName\_43

ATACAGCTTTATCTGTTTTTTAAGATACTTACTACTTTTCTTAGTGGAACCTATTAGTGG  
CTGTGAGGTCAAAAATGAAATTAACCTTAGGATAGGGGTTATTTCTAATTGAGCTGGTA  
TAGGCCCTTTTCTTTTTTGTGTCAGGTTAACAATAACATCTTTTAAAGACCATCCTTAATA  
GCTCGTTCCTTTTTCTCTGAGCTTGATTCAATGTGATACTGGTCCATTATTTTATTTATGT  
TGTTTCTCGCTGTATTACTGTCTATTTCTGATTGTGTATCTTGAATCAATTGAGCTCAT  
TCTTTGCATTTTGGAGCTCTTTAAATTTCTTCATCTAATGCAGCTTTTCTTTCAAAAAA  
GTTTCATCACTGTAAATGCCACTTTCATATTTATCGAAGATGAAGTTCTCTTTGTTTTTTA  
GCTCTTTCTCTTTTTGTGAAAGGTGTTTCAGACATTTGCTTTTTTTGTTTTTCATGTTACTGT  
TGTCGCTTTCGTACTTTGAAAGCATCGAATTGATGTGTTTTGTTAAAGTACTATCATTTA  
AGTCATTTAAGGAAGAGAGGTAATCCAGAATTGCATTTTCAACATCGTTATATCTCACAT  
ACGTACACTTATTTTTCTTACATGTGAGCGATTTAACGTGATAAACGCTTTCAGTTCCAT  
CTTTGTTTTTTCGTATGCGTTTAGATTCGTATTTAGATAAAGGCTCACCACATTTTGAGC  
AAGTAAAAACACCGGCCAGTTCACTTAATTCAAATTCATCTTTATTTGGCAAAAGGGGCA

CTTTGTTTGC GATTTTTAATTGTGATTGTTGAAATTGTTCTTTCTCAATTATAGGAGCAT  
GCGCATCTTGTACTACAATTTGTTCTTTTTTCAGGGCTAATTGTTCTGTTTCCGTCTTTTG  
TTTTTCTCTAACCTTATATTTAACAGTTCCTATATAAACTTCATTTTGGAGAATTGCTT  
TGATTGTGATTGATTCCAACGTTTTTTCGCTGACGGTTTAGGGATTTGTAATTTGTTA  
GATGTGAAGCAACTGCTGTATACCTATAATCTTTTCCATTCAACCCATTTACAAAGATGT  
TAAAAATTAATTGAACTACTTTTGTCTGCATCCTCAACTGGATCTAGTTTAGGGCGTCTTTT  
TGTTTAATTGGTATCCATAAGGTGCCAGTCCAGATATCCATTTTCCCTGTGCTGCATAAG  
TGTATTTAGCGCCTGTCATACGCTCCCTAGTCATTTCAAATTCTTCTCTAGCCATAAATA  
ACTCAAACGATCTGGCGCATGTCAACAGGGTTTCTAGGGTCATAAACCTTATATGGTG  
TAATTATGATCAATCGTTTGCTTTGAAGGAGGTTAACAATTTGTCCTGCATCGCTATAAC  
TCCCACGACTAAGTCTTGTTATTTCTTTAACAGCAATTGCCTGATATTTGCCTTCCTCAA  
GATCTCTAAGACATTCTTTGAAAACAGGTGACCATCAATGCTTTCTCCTGATCCAATCT  
CCATTTTTAATTCATAAGGGATCTCAATGGCCGTAAGTATTTTATTCATAAGTTCCTTTT  
GTTCTGTTAGTGTGTCTTCACCTGTTCTTTTTTTTTCGTTCCATCTCCTGACGAGAACGTC  
TAAGATACCCTAAAATATTTGTGATGTTGTAAGAATTAACAATGTTTTTTAACTCCAAA  
ATTTAGCACCTCTTTATTTGTGTTAATGTCAAAACAGAACTTAATTAAGAATATTTTA  
TCTGACATTGAATACGAAAACAATAACAATAATTTGAAGGAATTGAATTGATTGAAATTTT  
ATGAAAACCTTCTTGAACATGGGTTATAATTAGTTCATCTAAATTCATTGTAATACTT  
TATAAATCCAGGAGGGCTTTATGAATATTCGCTTTTCAATGTTAGTTTGTGTATCTATTA  
TTTTCTTCACTGGTGGGTGTGCTGAAAGTAGTGCGAATTCAAATGATGGTTCTAAAAATA  
AAAATGAGTCTAAAGAGGAATCCTCCGAAGAAGGTGTAAGGAAAATGATAATAAACTCG  
CGGATACTCCAAATATGGATGATTGTATTGAAGTGTACGGAAAAGAAGAGTGTGAACAGA  
TCACTGAGTACTATAAAAGTGAAGAAGGGCAAAGGAGTTGGATGCAAGCGAAACAAATA  
AATATTCTGCAAAGTCTCAAACAAGTACTACACATAAAGATATCTATGAAAAAGTATCCT  
GGCTTGTTAAAGAAATGTTCCGGAGTACCAGAAAGAACAATTCAGCTGATTATGAAAAA  
GTTTGGTAGAAAAAAGGGATGATGGTTTATATAACATTCAATCTTCTTATGAAATAAAG  
GAACTGGAAACCAAGCGGATACTTACTATGAGTTTGAATGTTGATGGATAATAAATACA  
ACTTGATAGACGCATATTTTCCCGGCAGCACAGGAAGATATTCACGCCCTATGGTGTATG  
ACAACTTAAAAACATGGAAATACCAGAAGTAAAGAAAGTATCTCCAGAGGAAGAGAAAA  
GGGAAGAGAAAAACGTGAAGAAACAATGAAGAGTATTTATGGGGAAGAGCATATAAAGG  
ACAATAAATAAGTAGCAGTAAAAACAAGTGTACGTTAAGTAGTTTAAATAAAATTCACAT  
TTTATTTAAACCTGAAAGCTGCTTGAATACATCACAATATAAAGTATCCTGTATATGTA  
TCATAGTTGGTGTATCAACCACTATAGGCCAGAGAGTTCCCTCACATAATCTCTGGCTTC  
TTTTATTAACCTTACATTATTATTTATGGAGGATAGTATGGACAATCGAAAAATGCTTCT  
TAGACAGAAGTTGAAAATAAACAACAAAAAAGCCTCCGAGTAACATTGATGTCAACACT  
GCCTCGTGATATGGCAACTACTATTGAGGATTGTAGTCTAATCACATCTCCTGAATTAGA  
AAGAATCCTAGATAAAGTTCAGAAAAAATGCAACTTTGAGTTACATAAAAAATGATTTTGC  
AATTAATAACAGTGAGCATAGAAAAGAATACAGTTGGGAATATGAAGTGATCAATCATGT  
GCAACAAACTAAGCTTCCTGATGAACAAGTTTACTTATATTTAGGGATAGAGGATAGCCC  
AATTTTTCTGATTAACGGTAACTGGATAATAGATAACTTTAATTTTTCTGTGGGAACAAAT  
AAATAACAACGATTTATGGATTATTGACTTTTCAATTTTAAATATGGGCTTCTAGTGTCTCG  
ATATGGCGGATATTTAGATCATGATCCTAACCCAAATGAAATTATTTATGCAGTCACTGA  
ATGGGGGATACAAAATTGATTTATACAACAGAGAGTTGCAAAGGGCTTTGGATCTGCATT  
TTTGGTGGATTTGTAAAGTGATTTACTTAGTGAAGGAAATTAAGAATGAAGGGGCGAGC  
CGCATTGTATAAAGCATAAGTTAATTCGTGGATTACGTGGTATGATAATCTCAAAGACGA  
AGGGGGATAAGCATGTTTAAAGAAGTAGACTATTGCACTTGTGAAGTGTCCAAAGTTTAT  
ACCGAACAAAATGATATGGGACATTGGGATGTATGTGATATCTGCAAGAAAGTCATTGAA  
GATACTTTTGTAGTACTTTAATTACAATTCAGATGATTATAATGGATGAAATGATTTGACA  
AAATTTTTGAGTCAACGTGACACTCTGTTTTGCTTTACATCTGCTAATATGATAATAAGG  
TAATAAATAGCCAGGCGTATTGCCGAAGGGGAGAGCGCTTATTTTTATAACGAGTTAAGC  
CCTCCCATTGTTAAGCGAGGATCAAAAGAGTAGGAGGCCTTCTCAGTGAAAAGGCTAAAC  
AGGTGGACACTAAAAATAAGCTTGAAAAATTTCTTCCAAGCTCAATGATTTAACTGTCA  
ATTTTAAACCTAAAGAACCCGATAGTTTTTAAAAAGTGTTACTAACTCATTTGGTAGACC  
AAGCTATTTTTTTATATTTTTACTATGATTATTAATAAACCATTTCTCAGCAAAAATCCAC  
TGCTTCTGTAAGTGAAAAAAGGCGGCAATTAGCAGAACCCTTTGCCAGCTTTCATATT  
ATGTTCTGCTTCAAACGCTTGACCGACTTCTTGAAATAGTTCTTCTCTAAATTCAGTTC  
TTTATATTCTTCCATACTCTTTTACCTTCTACTATTATAGGTGCACCCCTGTTTATAAT

TTTTTGATAAGGAATTCTGTACTCAGCAAGATGGAAGCAGGTACTACTATCAAGATCAGC  
ACCTAATAATAACATATGATTCCCGTATATAAAGTTTCCCCAGATGTGATTGTTCCCC  
CAGTCCGAATTCTAAAGGATGTTGATTAAGGATTTTGTTTTTATGTTTTCCCAAGCTAC  
AAAGGAGTAGTTTGGGTGATTACTTCTTTAACTTCTGGATAAGACCTGAATAACTCTTC  
TATTTGCCCCATCCCTCTAGTAGTGGGGGTATAGTTAGAATTATAGGCTGGCATACTTTC  
TCTAATAATATCCCCCCTCCACTGGTACGGGAGGGTTTCCCCATTCTTTTGGGTCAGA  
TAATTCACGGATTGAGAAGGCATCACGATGGAACCTTCTTCAGTAACAACATCTATTA  
TGCTCGAATCACAGCAACAGCTCCACCATTTACCCATCCTATAGAAGATAAAGAGGAATG  
TACAAGTACGGTCAGCCCTTCTTTAATCCGAAAGCTTTCAAATCTTCTGTTATAGACTG  
TTTTGTTCTTGGAAAAGTTGTCCTTTCAACTATTTTTTTTCATTTAGTTCATCTCCTATCT  
ATAACCTCTTATTAGATACTCTGTAAGTTTGCACAACACTAAATTAGCAAGACCCCTTGAT  
GAAAGGTGTTGTTTTTTTATTCATCTTCTTAAACTAACTGACCCGTTAATTTAAGTGGAA  
GTTATTACAATCTCTTTATATTTAGTTTAAACATAAATAGCCAAGTAAACTTAGAAATCCA  
TTTTAAACTACATAAAATATAAGAACTCCGTTATCCATAATATTAATCAACCTTTATC  
TTTAACTTAGCCATATAAAAAAAGAAAAGCCCAAAAACGGGCTTTTTATTTTGTGTTGCTC  
TCTTAGTATAGCTACTATTTTATCAAGAGAATGTTTCATCAATATTTCTAATGGTACGCTT  
GCTACTCATTCCAAGCTTACCTTTGAATTTTAAATGGAGGATACCCAATTGCATCGTGGC  
CATTCCCAAGGGATTTGGAGCAATATCGAAGTCAACTTCTTTGATACTTTTATATTCAAC  
AACTTCAGTATCTTCACCCCCAAAAAACC GCCTTTCATAGTGACAAATAGAAGTTTCTT  
TTCAGTGATAACCATAAAACCAATTTAGTAAGCTTTGGATCTGCAGAAGTCATATGTAA  
AATCTTTTCCCTTTTCCCAACTTCCCTTTGTTAAAGCTTTAATTGCATACTCATAAACTT  
TCTTTCTGATTTGGGGAATTCTTGAATGATGGACTCAAGATCTTTTAAAAGTATTGGATA  
ATCTATGATTCCATACTTAGAGTTTAAATTTATGAAATTTTTGTCCCATCACTTATCTCCT  
TTCATCGTTCACAAGCATAGTTGTCATGATCCCTGTCCATTTTAGATTGGTAAGCAGGGT  
GGGAGCTAGGCACTCAATTCGGATATTTCTTTCTTAACTCTGTGCAATTTTTAAATGTTT  
CTGTTCCCTCCAGTTGTCTCTGAAGAAGCTTCTTTTTCAGTTGTAGTCGAAGTTTCACTTG  
TTGCCTTTGGAGTTGTAGGCTGTGTTGCTGCCGTTTACATGTTGTTGCTTTTTTAACTG  
CAGTGGTTTTCTCTTTCACACAGCCATTCAATCCTCGGTACGTCACATATCCATTCTTGC  
TCCAGATTGAAAGCTTCTCTGATTTTGTCTTGTCTCGTCTTTCTTAAATTGATCTATGT  
ATTCGTATTTGGCTCATATACATACGCTACTCTGGCCAATCCTTCTTTTAGCAATGTTT  
CCTGAACAGATTTGCCATCCACATAAACATAAAGCTAATAGTCTTCCGTATTTATCTCTGC  
GATCACCTTTGTCAAATTCAAGCTGCAGCTTACCCTGTTGACCAATTCTTTAGTTCTGTT  
TTGACGCATCCTCACCATATGGTTGAACACAAGAATTTGGTTTCTTTGTTTCAGGTGTGT  
CTATGAGCAAGTAGCGTACTGTGTCTACATTTCCGTTGTAGGTAACCTTTAATTGTGTAC  
CATCAACAGCTCTATCTAGAGTAACATCGACCAATTCCTTTTTGTCTTTTTCTGAGACT  
TGTCAGCAGTTTTTTCTTTAGTAGATTCCTTTTGTCTGTTTTCTTTCCACATCCGTAG  
ACGCTTGTGGTGTCTTTTTCTGTGCTTACTTTTTCAGAATCATATGAGCTGCAGGCTG  
GTAACGATAAGCTCAAAGTGAACGCTGCAAGACCTAATAATAATTTCTTCAACTTCAGTT  
CCCCGTTTAGAATGTTTGTCTCTATTTATATCGCTAAACCATCAATAATTATAATCCTG  
TATCCAATTTTTGTGAATTAATTTTCTTAAATTTTGTCTTGTGATGAAATAAACTG  
GCGACTGTCATTGTAATTAGTTTAGCTGCATTTTCATTTTCGATCTGCTCTACAAAATGA  
TTCCCGTCTTACTTTTTTATCGAATAAAAAAATTGATAAAATAAAATAATTTGGCAGGTTT  
TTTGTATATTAATATATAAACTCTAGATGATATGAAAGGGCGGGTCAAGAAATGAAAC  
ATGATAGTCTTTTAGATGCAACATCCCAATATGGACCACAGGATCTTTTATTAGGAAGAG  
ATGGGCTAATATCTACTGGATATTGGGCAAAAACCTCAAGCTAATATTCTTACTGGAACGG  
GTTTGCCTGTGAGCAATGATGAGATGAAAACCTATTTGAACTTACCGAAAAACGTTGAAA  
AACCTCAAGATTTTCAGAAATTATATGATGTTTATAACGCATATAACAAGTTGTGTGACT  
GGTGGTTGGAGAAATTATTAAGCTATGTTAATAAAATGGCTAATGATATATACAATGTTG  
GGTCTACCACTTCGGAATTGATAAACGAAGCATTACAACCAGGTTTAAAGGGCAAGTACAA  
CTGCAAGCAATGATCAAGATCGACAAGATGCTAATCAAGATTTTCATGAGGTCTGTCTTA  
TACTTATGAGAGAGCTCCATGAAAATCAACAATCTATGAAAGAGGTTCAAAGTCTACTAA  
ATTCCTTTCTTCAAGGAGGTAACAACCTTGATAGGTGTTACACAATTGAACAATTCTTTTG  
AAGAAGTAATGACTTATTTAGATTCACAATACAATGATGTGAGCGAGATACATGATTTAT  
TGAATATACTCATGCAATTTAAAAAATTGTTGGGTGAAAGTCTTGAAGAGCATGAGATAA  
ATGAGAAAGTAAAATTCAGCTCTGAGTTAGGCCCTTTAATCGGGTATATAGTATCCGAAA  
TGTTAGAGTATTCTGATGTTCAACTGTTTAAACAACGAATTGATAATTTTCAGAATTTCA  
ACGGTGTAGATGCACAAGTTGCATTAGTTGTAAAAGTTTTAAGTCTGTTTCACGGCATCA

ATATAGACTTGCATAATGTAGTATACCAGGCAGAAAGGTCTCTGGAGTTTATAGAACAAA  
CTGAAGGATACTGGCATTCTATAGCAAATCAATTTTATTCACTCGCACAAAGGGTTTGAGA  
ATGAGGATATCAATAAGCTTTCTATGGATCTTGATAATGCTGCGGCCACTTGGGAAGCTG  
TTGCTAATAAGGCCAAAAGAGTTTGTAAACAATTCATACCAAGGATAAAAAATGGGTAATC  
TGAAAAAGTGTA AAAAGAGGGTTAAAAATAACCATCCTCCATTGCTTTAGTCAGTAGGGA  
AAAGTCAGCACCATAGTCTTCTTCATAAACCCATTCATAGCCTATTTGACCCCAATTTGG  
GACTTGATCAGGTCACAATTTTCCGAAACTAGCTTCAACTTCTTTGAATTTCTTTTTTAC  
TTTACGATAACCTTGTGTAAACAATATTTTTGCTCTAAGAGCTTCAAATGAATAACCATA  
GCTAATATTGGCTCCTTGTCTTAATCGAACAATTCAAGGATTCAGTATAGGCGTTTGTA  
TGGGAGAATTGAAATAGTTGAATATCTCTTCTTCCCAATTATTCATTGACTTAATCAGGT  
TTTTAAAATAAGTCATTA ACTCTTTAGGAACCTTTGAAAGCCAGTTTTGAATCATATTTG  
TTAACATTATTACTTTTACCAATATGAATAGAAAGAAATCCAAAAAGAGATGCCGAAACA  
TCACTTTGATGTCAATATGGGGTGATTTATTTGTCTAACTTTGTTCATAAGACGGTAAAT  
GGCTTGAAAAGTCTTTTAGATGAAAAAGGAGCCATTCTATTGTTTTGTTTCAGAAGGTGAT  
ATCATGGAGTTCCTTGTACATTTTACCAGGACAAAGCAACCCTGAATGACATTCAAAGC  
TTTGAGGCTAAACACCAGCTTTCCCTTCCAGAGGATTATCAGAAGTTCATCAGACTACAT  
AACGGTGCGAAAATTTTTGAGATTCTTTCTGATGGGGAGAATATAGGTGGAGGACTTCAG  
CTATTTAGCCTTGAAGAGATTGAAGAGGAACTAAAATATGAGGATTTGTTTTGAAGGTATC  
AATGGTATCCCAATTGCCTACTTATTGGAAGAATGCCATTTAATGATCGATTAAGATAAA  
ATTAATCAAGGTGATCCTAATTATCTCTATAAATTTGAAAGTGGTTTAGAATATAATCCA  
TTAAATTTAACTTTGAAATATTTTTAGACCGGTATATATTGGCTAATGGGGAACCTTTT  
TGGGATTGGCGCTACTATACCGCAGAAAATTATTATAGAACAAGATAGTGTGATGTATAA  
GACATTCAGTTCTGGCTGTCTTTATCTGTTATTCAAGCAAATGATTGTGGTAAAATTTAC  
ATAGAGTAGGCTTGAAAGGAGAATGAAATGAAGGTGTTTGAAGCTGATTCAATTGCTCTCT  
GATGCGGATAAGAGAACCAAAGAGTATAAGGAACTAAGGTTCGCAAATGGTGAAGCTCAA  
AAGGCGTTTAAAGCTGTAGCTGACCTAGACGACAGCAAGTTTTTCAGGTAAGAGTGCAGAC  
AACATTAAGCATTTTATCATGACCATGTCGGCGTTACAGATCAATGGATTGATCTTATC  
GATATGAAAATTGTTTTCTTAAGCAGCATTGCTGCAAACTTGAAGACGCTAAGATGTCT  
GATGCATACATAGAAGAATCCTTCTTAGAACATGACCTTGTAATGCATACACAAAATCA  
AAATCCATTATGTCTGAACGGAAAAAAGCAATGAAAGACATTTTAAACGACATCAATGAT  
ATTCTTCCACTTGAAATATTCTCAACAGAAGACTTGAAAGACAAACTTTCCTCTGCAGAT  
GACAAACGTGAAAAACAATCGATAAGATAAACAAGCTTGATGAGGATTTAAGAACAGAG  
CACGCTGAGACTGAACAAAATGAACAATTCATCCAGCAAGATTTTAAAAAGCTGCAGGAA  
TCAACAGGCAAAGGGAAGAACGCCACACCGATTCACTATAGCGCCAAAGCGTATAGAGAA  
AGTGACATACATAAGAAAAAAGGCCATATTGAGCAGCATT CAGAATCTTATTTAACCGTG  
AAGAAAGAAGAAGCAAAGGAACGTGAAATCAAGGAATTAAGAAAAAACTTAATGACGGT  
GTGTCTGATCCTGATGAATATTTAGTGATTGCTTAGAAAGTATGGTACGAGTATCTGGAG  
CCAGCTCAAGTACAGCTTGCAGTGCAAATTGAACAAGCAAAGCAGCTAGAAGGAGCAGGA  
GAAATCACCTGGGACATCGTAAAAGGTGTAGGGGTAGGCTTATATGACGTTGGCAAAGAC  
ACTGTAACCGGCTTATGGGACTTCATCACCGATCCAGGAGAAACATTGTCCGCGCTTGGC  
AATGCAGTTATTCATCCAGTTAAAACATATGATGCAATATCTGCTGCAATTAAGAGTCA  
TATCAAAGGATATGGTGAATGGAGATGCCTATTCAAGGTCAAGATGGGTAACGTATGCA  
ATTGGCTCAGTGGCTGCAGCTGCTATCGGAACAAAAGGTGCAGGAGCCATTAACAAAGCT  
GATGCAGCAGGCAAGGTAATAAATAAAGCTAGTCAAGCAGGGAAGAAAATTAAGGCCGTC  
AAGATTCCAGATTTGCTGCCTTATAACCCTAAGTACTATCTTGCTATGGCAGGGGACGTG  
CCATACAATGTAGTGGATGGAGAAAACCTTAAAAAATCAGCTAATGAGTTTTGCTAAAGGG  
TCAGATAAAGAAGTAAAACCTTTCGATGTCGTTGATTATAGACCAAGTAACAGTCCTTTA  
GAGAATCATCACGGTGTAAATGGACGTATGGGCTAAACACAATGTTCCGAATTATGTCCGT  
AGAGGGAGTAACACACCAACAGTAGCTTTAACTAAGGAACAACACAACGCTACCAAGAAA  
GTATATAGAGAATGGTTGTTGAAAAAACAGGGAAGAAAGTTGGCGGCAAAGTAAACTGG  
AAAGAAGTATCCCCCAGAGAAATACAAGAACTTACTGAGAAGATGTTTGATGCTGCTAAT  
GTTCTTAAAAAAGCTAGACAGCGATATTATAACGCATTTAATCAATACAACCTTTAGAAAG  
TAGGTGCGGATTTGAGCATTGACATGTTAATCAAGAAGATTGCTTCTACATCAGACTGTC  
GGCTGTTTGAAGCTGATGGTCTCCAGTAATAGACGAGAAGCATTAACTACCAAAGATA  
TTAGTGAATTTTATGAACAATGTGGTGGAGCAGTTTTATATGAAAATGCGGATTATCCAA  
TATACATAGTACGACCAGCTGAGTTTGAATTAGCTAATCCATTATTGTTGGGGAGCTCT  
GTGAAGAAGACATTTTCATCCGAGTGGTATATTGTTTGCACGGATGGAAAAGGAGAATACC

TAACAATTGACTTAAACGATCAGCGAAAAGGAAAATGCTATGACAGTTTTTTTTGATCGAC  
ATGGAATAGTCGGCGAAACACAGGTGATAGCAAGTTCACTTACAGATTTAATACAGAGAC  
TGCTTGAAAATAAGGGTAAACATTGGTGTGGTTAAGGGATGATAATGTATCACTAGGCG  
ATGCATATGATGGCATAGAAATTGAATAATCTATTAACAAAAGTATTGCAATTGTTTCAT  
TGCTAAAGATGTGCAATGCGGAGGGTATTAATAATGAGCTTCACTAAGATCGAACAAAAGT  
TGAAAGAGTTTACGATTGATGCTGGCAGATATCCTAGCATTAAATACAAATGAACAACTCA  
AAGAGCTTGAAATGTACATAGGCAATCAATAACCTTCAGATTATAAGGACTTTTTGAAGA  
AATATGGAGGATGTTATTTAGAAAAGTAAAAAAAACAACAGATGAGATTGAGTATGACGTTT  
GCTATAAACCCCTTAGAGAAACATCCATGGATGGGCAAGGGCGATGATACACAATTGTTAG  
AAGGTTTTTATGGTTTAGCGAATGATCATAACAGTCTTCAGAAAGCAATCGATACATATT  
CTGATCGCTTTCCTAGAAATATTATTCCTATCGCAAGCTCTGCAGGCGGGAATGAAATAT  
GCATGGATATCGATAATGGAAAGATATTGTTTTGGGATCATGAATTAAGTCATCCCGACA  
AAGACTTTTTCTTAATTGCCAATGCGTTTGAGGAGTTTGTCTTCAGTTTAGTTGATGAAC  
CAATTGAAGCTGATAAAGAAGATGATGGAATTCTGTATATTGAATTAGATGATGACTTAC  
TAAGCAGTTAAGAAATCGTATGGAAATAACTGGAGGGAAAGTTAAAATGGCAGTTACTTA  
TTGGACAGGGGAGAATCTTACTGCGAGCAATCAACCGGAAGATATCGTTATATTTGA  
TTTGTTAGATGATGAAATTCTGCGAAATATGGACTCGCTACATTTTCTCGTTCAGCTAA  
TAACATGAGAGAATGGGTTGAAGAACAATTAGAAAAGATGAATCCGTTTTATTGCAGT  
TGAAAGTGATAATAATATAGTAGGTATGATCCAAACCTTTGACTGTGATAGGAAAAATGG  
TACCTTCGGTTATTATTTGGCTGTATTCGAGCCATATAGGGGCAAAGGATTTGCCAAAGA  
AATGATCTTGATGGTTCTTCGCTTTTTCTTCTTGGAACTTGCTTATCAAAAAGTAAATAC  
AACTGTTTATTCTTTCAATAATCCATCCATACGATTACATGAAAATTAGGTTTCGTGAA  
AGAGGGACAACCTAAGAAAGATCATTTTCACTAAAGGTGCCTATTATGATGGTATTTGCTT  
TGGGATGACAAGAGAAGAATTTGAACTGAATCATGGATAATATCACTTGTGCATCGATAA  
AGTACTGGGTTCCAATAAGATAATGGTTTTATTACCAAGCAATAGTATTGCAAATACCA  
TTTTTATATGGTTATAATTAGGGTAATGATACAATTATATAATTATTTTTTGCATTTTGT  
TTAATTAATGCATAAAAATAAAAAGACCAGGGTGTGGCAGCACCTGGCTCTGTACAAA  
AGCTGCCCATCAAAGGGCTTGCTCGTTGTCAAATCTGCGTAGGCCTAACCTTCAGGTGT  
CCAAACTCAAGGAAGGTCTATTTTTCTTTGGCTTGACGTTACAATCATCATTATATT  
GAAGATCAACAAGACGGTATTTAATAACAATCCGCCAAAATTGATCATTATCATTAAATGA  
TTCGTAAACAGTCATTTTCCCACCCCTTTCATAGGGGATGAGCAAGACTCCCTTGAGTGA  
GCAAACCTTTATGTACAGGAAATATTATACTTTACATAAATGTCCTTGTCGTTAAAAATTC  
ACAATAAATTGACAATATGAAAAGAAGCTTGCTTAATGCAGGTTCTTTTTTTATTTCAAAT  
ATTAACAATTCCCTTCAAATGACGATATATAACATGTAAACTTGTACCAAGGAGGATGT  
AGGAAATGAAGAAGAGAATTACATATTCAGTCTTGCTCTTCTAGCAGTTGTTGCTTTTCG  
CTTTCAGTATTCATCAAAGCAAAGCGGCAGAACATTACCACTCTTCTATCTACAAC  
TTACAGGGATTACATCAGACGGAAACGATTTTGCTTGGGATAACCTCACTTCTAGTCAA  
CCTAGGCGCCAAACGTTTTGAAGGGGAATAAACTATATGTGAAAGCTCGTTTTATGGGTT  
ATACCAAGTTAACAGTTATCACAGGCAAAGTCGGTAAGAATCTGTTGTATAACGGTACAG  
CTAAAATGTTTAAATCTGATGCTATCCTTGGTCAAATAAAGGTGGTAATAGGCTGGGATA  
GATATTTGAGATTTCCATGGTCGCACTTCAAGATAACTCTATACAGATTAAGCATTGA  
GCTCAGGCACCACTTTTGTTTACAGTCAAAAAATTGATTTTGAAAGAGAGTGAACCAGGT  
GATTAGTACTTCTAATTATGATGTAACCTAAAGATCCAAAATTCTTAGCTTTTTGTAGCTT  
AGCAACAGAAGGGTATGGACACAACAATACTCAGCAATCTTCAATAGGTTTTAACGAGTT  
TTGCGAAAAACTTGAGAAAAATGCGATCGTTAAACCCGAGAATAAAAAAAGCACGCTTGA  
TTTGAATAAGTCTTTAGAAGACTGGAAATTGAGATTTACTGCAGGCGGAAACCTTTCTAC  
AATGGATTCGCAGGTATTAGATGTTATCAAAAAGCTTATAACTTAGGCATGGTTAATAA  
AGATAATATGCTATTACGAAATGAAGCAATTAATGCTTATAGAAATTATATTTAAATAAT  
GAAAACAATGCCAGCTTAAATAAAGAGCTGGGCATTTTACTTATTGGGGTTATTTGCTT  
TCAAATACTCTCGATGTTCTTTCTCCAATTTATTAATATCATCTTTTAAATATATAGATCT  
TATATTTTTCTTTGCTTCTCTAGACAGATTATCTTTTAAATACTCACGGAGCTTTGCTT  
CACTTTTGGTTTGATCCATGCCAATTGTAATTGCCGGATCTGTTTGACCAATTTGCACAC  
TGGATATACCAAATTCATCCCGAATATAATCAATTACTTCAAAGGGGACTTTTTATTTG  
CTTCGATTAAGTAATACCTGACATAATCAAAGCAGGAACTAAGACCAAAAATCCGATTA  
GCCTCTTCTTCAATTAAGCATTACACTCTCCTTCATGGAAAAGAATCCCTCCTTTATTAAT  
ACTACGCAAATCATCATTGACCTTTATATTTTATTACCAACATTTACATCGAACTTTTGT  
TCTGGTTTATCTTGAATGAAGAACGTTTGTCTGTTAATATTAGATCAATAAAGGAGTGG

GGCGATATGCTTAGAGATCGAGGAACAATCAAATGGACATCAATGATGCTTCCAGAACAT  
TTGACACAGCTTAAACAAGATTTGATTGATGTATCAAAAATTGAAAAGCCATCCTTAGAT  
GATCAACAAATTGAAGAGATGGATATTCTCGTCTCTGAGGCACTTGAATTTAACAAAGAG  
TTGCAATTTAACTTTTTCACAATGGATTCGTTGAAAATGTCACCGGCAGCGTCCATTAC  
ATAAATTTTGAACAACAAAAGCTTCACGTAAAAGACCAGAATGACAATACAGCTTATATC  
AACATGAATAACATCATAGGAGTTACATATAATGATTGATTACTCACAATTACCACGTAA  
GAATATACTTTGTGTTCGATATGAAGTCCTTTTATGCTTCTGTATCGGCTGTAACAATGGG  
GCTGAACCCTTTAACATGCTATCTTCTGTTGTAGGGAATACGGAGAGACAGGGAAAGTGT  
ATTATTAGCTGCATCTCCTGCACTTAAAAAAGATTTTGGAAATCAAAAACAGGATCGAGACT  
ATTTGAGATACCTGAAGATCCAAGGATACACATTGTAAATCCACAAATGAAGCTTTTCAT  
CAGAGTTTCAACTGAAATTACAAAGCTGTTTTACAGATTTGTTTCTGAGAAATGTGTCCA  
TACGTATTCAATTGATGAATCTTTTTTAGATGCAGGAAAAGAAGATCCTGAAGAAATGGC  
CAAAGCAATCCAAAGAAGCATGTGGAGAGAATTTGGTTTGATGTGCACAGTTGGTATTGG  
AGACAATATGCTACTCAGTAAGCTTGCCTTGACCTGGAGAGTAAGAAAACAAATAGTGG  
CATTGCACTTTGGAGATATGAAGATGTACCAAATAAACGCTGGAAGGTTTCGCCCTTTGTC  
TAAAATGTGGGGGATAGGAGGGAGGATGGAAAGAAACCTAAATCGGATGGGAATATCGAC  
TATAGGTCAGTTAGCCAAATTTCTTTAGACCTGCTTGAAAAGAAGTTTCGGAATAATGGG  
AAACCAGTTGTACTACCATGCTCACGGAATTGATTTATCAGAAATAGGTGCTCCGTTGAT  
GCAAGGTCAGATTAGTTTCGGTAAGAGTCTGATTTTACTGAGGGATTACACAAGGAGTGA  
AGAGATTAAGGCGGTTCTTCTGGAGATTTGTGAAGAAGTCGCAAGAAGGGCACGTACACA  
TAAAAAAGTTGGTTCGAACAATCAGTCTGGGAATTTGGGTACAGTAAGGATGAGCTTGGTGG  
TGGTTTTCATCGTTCCAAAACAATTGATCTTCTTACAGGTATCACGATGGATATTTATAG  
ATGCTGCTTAATGCTTTTTAATAAGTTTTACTCGGGTAAGACTGTGAGAAGTGTCTCAGT  
CACGTTATCGAATATTGAGGATGATGTTAATCAGCAGCTGAGTTTATTTGAAGTGGATAA  
TGAAAAGAGAAGGAAACCCGGTTTTGTAATGGATGGGATTAGAAGTAAATACGGCTCTAA  
AGCGATTCTGAGAGCAGTTTCTTATACACCAGCAGGAACTGCACTTCAACGAGCTGGATT  
AACAGGTGTGCATAAGAGTTAAGATAAATTTAACTTATATAACACATCGCTTAAAGTTT  
TTTTGTTTTAAAACTTAAAAAACATGGTAAAATTATATAAAAAACATAAGAAAGAGTGAT  
TATATGGAATATGTAGTTGTGATAATCATTTTATTAGCACTTTTCTTTATTTTTACTGTT  
TTCCTAACACACGTTATAGTTTTGATGAAAAATGCTTAGTCTTAAAATTTGGTTTTATCT  
AAAACAGAAATCCAAATTAATCAAATAGTTAGTATTAAGGATCAGACAAGTGTGGAGTT  
GCAGATAATATCGATTATAAAATTGGTATGCCATATGCTCAACCTGATAGAATTGTTATT  
GAAACTACAAATAAGCGTTTTCTAGTTTTTTTTAAATGGAGCTCAACAATTTATTCAAAG  
TATAAAAGGGTTAGTGTGTTGAACATAAAAAAGTACCTTCTTACAATAGAAGGTACTTTTT  
TGTATCTATAATTATTA AAAAATTTACCTAAATTTTTATCATTATTAATTCAAAATAAATC  
CATAATAGTCAATTTTATTTAGTGTATTACAACCAATCTGTTTATTGATAGGTAAGAAA  
GTTTTTTTTCTATGATTTATGAACAAGTTTCCTTATAATTTTCAAAAAAAAATAAAAAAT  
ATGGTTGAATTTAGAATTATCTTCTTTATATTA AAAAATGTAATCCGGATTGCAAACAA  
ATGGGGAGGTTTTACAATGGAAAAGCTATTTAAAGAAGTTAACTAGAGGAACTCGAAA  
ACCAAAAAGGTAGTGGATTAGGAAAAGCTCAGTGTGCTACGTTGTGGCCACAATGTGCTA  
GTGGCGGTACAATTGGTTGTGGTGGCGGAGCTGTTGCTTGTCAAAACCTATCGTCAATTCT  
GCAGATAAAACATTTGTAGAGGGAATATTTAAATATTCCCTCATATTTAAAGCGGGGAT  
TGAAATTGAGTAAGAAAAGAAATATGTTCTTACTAACAGTTTAATAGTCATGATTGTG  
GACTAGCTTGTATCTCGACAATTTTAAAGTTTCATAACCTTAACTATGGAATTGATTTCT  
TACTAGACCTAATTGGGGATAAGGAAGGCTATAGTTTTAGAGACTTAATTGTTATTTTTA  
AGAAGATGCGGATAAAAACCTAGGCCACTTGAATGGCAGGAAAATAAGACATTCGAAGCCC  
TAAAACAAATAAAGCTCCCTTGTATAGCTTTGTTTGAAGGGGAGGAATATGGACATTACA  
TAACAATATACGAAATTAGAAATAACTATTTACTTGCTAGTGATCCTGATAAAGACAAAA  
TAACTAAAATAATAAAAGAGGATTTTGAAGTAAATTCACAACTTTATATTAGAAATTG  
ACAAAGAGTCAATTCCTGAAAAAGAAAAGATCAAAAACAACATTCTTACGGTTTTAAGG  
ACATACTTTTTAGAAATAAATTGATCGTTTTTTGTGATTTTATTGACTTCTTGTTCGTTG  
TGGGTCTTGCTGTAGCTGGGTCGTTTTATATAAAGTTTCTAGTTGACCTAATTATCCCAA  
GAAGCTTAAGAGAATCTTTAATCACAATCACTTTAATATTATAAGTATGGTCTTAATAA  
GGTGCATCTTCGATTTTGTAAAGATCATATTTGATAATAAAATTTGCTTACAAAGTTGATA  
AAGAGATGTCAAATGTTTATTTTCATAAAGTAACAAAATTACCTATTAATTTTTTTGAAA  
ACAGAGAAGATGGAGAGGTAATTTCTCGATTCAATGATGGTATATATATTAAGACTTTT  
ATAGTGCTAACTTTGTTACTGCAATAATTGATATAATTTAATACTGGGATTTGGAGTTA

TTTTATATAGAACAATAACATTCTTTTCTTAACAATTATTCTCCCGATTTTGCTACTTT  
CATGTCTAGCGATTTTGTGTTGTTGATCATCTTAAAAAGAAAAATCAAAAACCTGGTGGAGG  
ATAAGGCTAAATCTACCTCTCTTTTAATTAATTTTCTGAAGAATATGACAACTGTTTATT  
CTTTAAATAAAACCTCGTTTTTTTTAGAAAAATTTTCATCTTACAAATGATAAAACAATTA  
ATTCAACCTTTAGTGTAGCAAAGGCAGTTATTAGCAATGAAAAACTGAAAGGATTAATTA  
AAAACCTTTTTACCATAATTATTCTATGGGTTGGGACAAGACAAGTTCTAAATGATTCAA  
TGAGTTTGGGTACACTGCTATTTATAAACACATTAGCAGCCTTTTTGCTAAGTTAACTAG  
ATCGTATATTGAGTATTCAATCAGATCTTCAGAAGGCACATGTTGCTTCCATAAGATTTT  
TTGACGTAGTAAACTATCCAGTTCAGCAAGATAGCAATGAGAATTTAACTGAACTTGATT  
TTATTCAGAATATCAAAACAGTTAATCTTAATATTGGGGCAGACCCAATGCGTTATATAG  
TTGAAGATATTAATTTAATATTAGACAGAAAGGATAAAGTCCTTATTATTGGAGAAAGTG  
GTAAGTGGAAAAAGTACGCTTGCAAAAAGTTTGTCTAAAGTGTATAAAGTACCCGATAAGT  
CAATTTATTTAAATGGATTAGATATTAATCGATACGATCATTTATCAATAAGAAAAAGGA  
TTGTGTATATTGACGAAAATCCTTTTTCTTTATAAGGGAACCATTAAAGAGAATCTTTGCA  
TGGGAGAGATTTTTGCTCAGAACGAAATTGAAAACGCGTGTATAATGTCCCAATGCCATG  
AATTCATTTGTACCTTGACACGCAGTCCAGTTATAAATTGTCTGAAAACGTTTCTCTATC  
TATCTACAGTACAAAAACAACGGTTAGCATTAGCAAGAGCAATTTTACATCAACCACAAG  
TATTAATTTTAGATGAGTCATTATCTAACAGTGATCCGGATAACACAAAATTGATTTATG  
AAACCTTTCACAGGCTGGATTGTTAATTATTCTTATAACTCATAATGACCCAAGTAACT  
TCAAATACAATAAAAAATTAGTATTCAGAAACAATTGGATTATAGAGTCGAGCTACTCGG  
AAAATAAGGAGTATTCTATATGAAAAAGTGGATTGTTTTATTTCTTGTTTTAATAGCAGC  
AGCCATTAGTATTTTCGTTTATGTTTCTACAGGTAGCGAAAAACCTTTTTATAATGATAT  
AAATTTAACTCAATATCAAAAAGAAGTAGACTCTAAAAAACCTAAATTTATTTATGTTTA  
TGAGACAAGTTGTCCTCCTTGTCAGAAATAAAAACCTGAGTTAAATGAAGTAATTAAGAA  
AGAAAAGTTAAAAGTACAGGCTTTAAATATTGAAGAAAAGGAAAATTATGACACTGAATT  
TTAGATAAATATAATTTGAATAAAAACCTCCAACGATTCTCTATTACAAAGATGGCAAAGA  
AAAAGATCGGTTAGAGGGCTATAGAAGTGCAAGCCAAATAGAAAAGTTCTTTGATAAAAA  
TGGTGATAGACAATGAAACTGAGTGATATTTATTTGGAATTAAGAAAGGCTATGCCGAT  
TCTTTATTGTATTCAGATTTCCCATTTGTTGGTTAATATAATGGAATATGAAAAAGTTATT  
GATGTGATGTCAATTCAATCTTTGGTTGCAGGTTATGAAAAATCAGATACTCCTACAATA  
ACATGCGGTATTATAGTTTATTACGAAAGCAAGAGAATTAAAAAGTGTTTAAATAGTGTT  
AAAGATGATTTTAAACGAGATTATTGTTCTAGATTCATACCCCACTGATGATACCGTTGAT  
ATTATTTAATGTGATTTTCTGATGTTGAAATTAATATGAACAGTAGAAGAATGATTTT  
TCCTATGCTAGAAATAAAATTATAGAGTATGCTACTTCCGAATGGATTTATTTTATTGAT  
GCAGATAATTTATACTCTAAAGAAAACAAGGGAAAATAGCTAAAGTAGCTAGAGTTTTTA  
GAGTTTTTATCTATTGATTGTGTAGTTAGTCCATATATAGAAGAATAACTGGACATCTA  
TATTCTGATACACGAAGAATGTTTCGGCTCAATGGTAAAGTTAAATTTTCATGGGAAAGTG  
TATGAAGAACCTATGAATTATAATCATAGTCTACCTTTTAAATTCATTGTGAACCTTAAG  
GTTTACCATAATGGATATAATCCTTCAGAGAATAATATAAAATCAAAAACACGAAGGAAT  
ATAAATCTCACAAAAGAAATGTTAAGATTGGAGCCCGAAAACCCAAAATGGTTGTTCTTT  
TTCGGCAGAGAACTAAATTTACTTGATAAAGATGAAGAAGCAATTGATTATCTGAAAAAA  
TCAATAAACAACCTATAAAAAATTTAATGATCAAAGACATTTTATAGATGCTTTAGTGCTA  
TTATGTACTTTATTATTGCAGAGAAATAATTATGTTGACTTAACTTTATATTTGGATATA  
TTGGAAACTGAATATCCAAGATGTGTTGATGTTGATTACTTTAGATCTGCAATTTTGTTA  
GTAGATATGCAAAATAAACTTACTTCTTTAAGCAATATGATTGATGAAGCTCTTACAGAC  
GAGAGATACAGTGCTATAAATACAACAAAAGATCACTTTAAAAGAAGTTTAAATAAGCCTT  
AATATTCAACTCGAAAATTGGGAAAGAGTAAAAGACATATCAGGGGAAATTAAAAATGAT  
AATATGAAAAAAGAAATTAACAATATCTTGCCAACTCACTCCACAATATTGAACACGTC  
CTGAAAGGAATTGAAGTATGAATACAAGATATGTAAAATCATTTTTTTTTATTACTGTTTT  
TTCTCTTTTCTTTGGCACAATGGCTAGTTTATTCTACAGTGAGTTCAGGCATTTCAAAC  
CATGTGTTCTATGTTTGTATCAAGAATAGTTCTATATCCTATACCTATTATCTTACTAA  
TAGGCTTATTAAAAAAAGATCTTAATTCGATATTTTATGTTGTTTTCTTTTCATAAATTG  
GATTGATTATTGCGTTTTATCATTATATTATCCAACCTTACACAAAGCAAAGTGTCGTAT  
GTGAATTTGGAACCAACAGCTGCGCAAAAATTGAAGTAGAGTATCTAGGCTTTATTACAT  
TACCCTTAATGAGTTCAGTATGTTTTGCATTGAGATTTGGTATAGGACTGAAATTAATTA  
TCAAAGCGAGAAATTAACAACAATCAAAATGTATATAATTGAATAAGAAGTAACCCGC  
CTTGTAAGAGGGAGGTTACACAGGTAATCCGAAAAAAGCTATTTAAACAAGTTCTCTTT

TTTTAGAACTTGTTTTTTGTTTTTTTTCCTTTTGCAGTTATGTAATTGTTTTTTGAACCATGC  
TGCGGTAGTAGTACTGGTTGTGAAGACGATAGTGAAAATTGTATATAACAATCATATAA  
ATGATTTATGTCCTCTTCGTTAATGATGAATGCTGCTTTACCCAGCATCACCATTATTTG  
ATTGAGTAAAGCTATAGCGAGCAAAAGAGTCCTAACAAATTGTGCCTTTATCAATATTCTC  
AAACATTGAATTCCTCCTACTTAAAATTTTTGTTTCGATTTTATCGAGCTTTTCAATTACAA  
CATCGTACTTTTCTACTGAATATACCCAGTACTTCGTTTTGAGAATCGATTTGATTACAAA  
GTTTCGACTCTCTTTCCTTACTAGTTTTTCATTACGTAGAAAAGTAGCCAACAAAATAAAA  
CAGCAAATGGCCCCTGGGTACTTAAATATTGTGCTATATCCATTTCCATAAAATGTTTAC  
CACCTTATTACCATAGAAAAGGATATTTACTGAAACATATTGATCAATAAACATCCTCCG  
AGATAATTGAATATAATTAGATTGTTGATCCAAACTGTCCCAGATATATCCACGTTTAC  
CTTTATAAATAACTTCCCAGTAGCCATTGGAATTGTTTTTACCTTTAACTGAACCAGAAA  
TTGAAATAGTGCTTCCAAGCTTAACTGTGCCAATATTTTTAGAACTATTTTCGATCGGGCT  
TGTCCATTACGATTGCAGCGCTTGATACACCCGACAATTTTTGATTTTTTCTACAGATTTAA  
TAGATGAGGAACCTGAAGAAGTTGATGTTGTTTTTGGGGCAGAGGAAGAGGTTTTAACTG  
ATCCGGTAACATCAACATATTTGTCAGAAGCAGTGATGTAATATGTAGTGCCTTTTGAGT  
TCTTAACTTTGTATTGATAGGCAGATCCAACCTTAACTTTCTCTACAACGTAGGAAATC  
CGATGCCTTTATTTACTGTGCCGACAACATCTTTATCTTCCCAAGATGGTTTTGAATAGA  
AGCGAAGTCCGTCAACTTTTGATTTTTGGTGAACCACTTACTGCTGATGAAGAGGAATGGG  
AGGAGGTTGTTGGTTTAGTTGGAGAAGCTTTTTGAAACATATTTGCCTGACATTTTTGCCT  
TTACTCGATTTTTAAAGTCTACAAATTTTTGGCTGTTAGATACCCATGGTGCAGGGCAAT  
TCTTATGGGTGATGTCATAATGACGAACAATATCATCAATAGGATCTAAACCAAACCTTAT  
TACATAATTCAACGAACACATCCTCAGTTTTTTCAACTGTATCTGAATGGAATGAACCGT  
CTTTTTCAAGGCACATTTCAACTCCAATAGAAAGAAAGCTAGCGTTAGGTTTCAGCGCAG  
CAACTCCTCGATAAGGATTTCCGGCACTATCTCTTTGCTGAATATCATTGTCATGGTAAG  
CTACTTCAATTAATCGAATGATACAAATTGCTTCAGCCTTATCTACGAAAATGTGAGCTG  
ATTCATAAATTTGTGCATTACTGAAGTATCTTCGATGATTGTCTGCACCTGCACCCGGAT  
TGGCTGTATAGTGTAGGACGCATTTTTTTCACACCCTGTAATTTCAAACCTGGTCTAGTAT  
ACTTATTGACTGGAATGTAGCTATTAGTGAAAACCTGACATAAAAACATCTCCTTAATTTT  
TAATTA AAAAGAGTCTCGAATGGACCATTTTCATAGCGATTTTCGAAACTCGTTGAATTGA  
ATCTCATTATTGTTGGATGTTCCATAAATTTTCATGGAAAAGATTGTGGATTTTTCTTAGTT  
AGAGGGATTCCGAGTCCATAATTTAAATGAAGTCTTACACATTCATTTTTAATTTCTCA  
AGCTCATTGACTGTAAAGTCGCCAATTATAGAATTCATAACTTAAATTGCTCAGTGCTTC  
TTAACAATCTCGCTAAAATTCTTTTTATAGTGGTGCACATGAAGGTCTTTTTGTAGAGTT  
AGTTATTGCACATTTAAATGAATATTTCTCTAATGAGGGCTTCGTCCAAACTTCATAAAC  
AGCTTCTCCTAAAGTTTTATGTAACGAAGAAATACCGCCTTTCCATCTAGAGCTATTTTC  
GCCTGTGAAAAGAAGTAAATAACACTTTCTGCAGTTTGCTAAACCTCTTACCATGTTATG  
AAGTGGAGCGTATTGAACTCCAAAGTCTATATGTTCTTGCCTAGAAAAGGGAGATTTTC  
CTTATCGTGATGGTATGTATCGAATAAAGGGATATACGCACGATCAGAAAAGATGCTTG  
TGCACATTCAACAGAGTATTTTTTAGCACCTTTACATTGAAAACACTCTTAACTTTAAA  
GAAGTTGCAGGGAAGGTGCTCCCATATATGTCCTTCAGGGCACTTAGCTTTTAGTTTAGA  
ATGACAGTTTTTATAGGTGCTTAAAATCTAATAGCCTTTAAGGGCATATCTACTTTTCAC  
AGTACTTATGTTAAGCCTTTTTCTAAGGGAGCCTTCAATTATCCTGCATTCTGGACATCG  
AGTACCTTTTTTAAAGTGTTTCGTAGTTTACTTGCCATGTGTGTTTATGTGACATCTGAC  
TTTCACCTTTGTTTTCGAATTTACCATGTCTCCAGAAATGTGAATGTAGTTATTCTGAGC  
TTATAAATCAATAAATTTTCGTTGAGCTTCTTCACGTTTTTTTTAAATGATAATCTGATAT  
CTTCTTGCCATCTATCCACCTAATAATTAATTTGAGCACAAATAAAAAGAGAAGGGGAC  
TAAACCAATCTCTCTTTATCTCACGTATGCTCTTGTTATCTCTGTTTTTCAAGAATGTA  
TTTTGAATAAAAATCTATATTTTATCTAGAACGTAACCACCACCTTTATTGTTCTTTATT  
CTTAATCCAAGTTCAAGCTAGGTATATTACCTACGTTACCCGACACTCGTCTTCTATCTA  
TATCTGATGGAGTTCTAATGAAAGCTGTTCCCTTCAACATCACTATAAACTGAGTTTCCAG  
TTACAATTAATCGTTTTGTTCCAGTGTCTTCTTGAATAAAGTAAAGGTGATAATCAGAGT  
GGCATTGCTTGAAAACATTATCAGAGAAAACAGCTTCTCTTACAGATCCCCAAATTGCGC  
GATCAATATTATTAGTGATAATGTTTCTGAACAAATTGCATTTTGGAGAGGTTTTGTACC  
GGACGAAGGTTTTTAAGGATTTTGGCAGGTTATTCTTAGTGAAGATAATTGCAGCATTAC  
CCACCCAAAGGGCAGTACCGCTAAATGTGATCTCAGAGTCAATTAGTTTAATAATTTCTC  
CTTCAGCAACGTTGATGCACTCATTGGCTATATTGGAAATATACATTCCTTCAATCGTTA  
TAGACTTGCCGATCCCGTGAATACTCACTCCTCGGTCTGTAGCATTAAACCAAGCTGCAGT



CTTTCATTTTAAATGATTTTATATTTCCACCGGCGAACAATCGGCAGCTACTCTTATTTA  
CACTGCTGTTGCCATCAATTTCAATGCCTTCTATATAATTGTGATCTGTGATTCGCAACA  
ATTCATCAAGTGAGTGATTTGGATTTCTGAAGGAGTTTAGTGTAGGATCGTCTTTACCAA  
CAATTGAGAAATTTGAAGGGAGTTCAATTTTTTCACTAGCGCTAGTTGTATTCTGCTTAC  
CGATTAATATGTACCTTTCTGA AAAAATGTAGTTTCCCTCCACCTTTTTTCAGATAAATCAG  
TAAGGGCTTTTTTAAACTTGGCTGTATTATCGATTAAGCCATCTGGTGAGGAGCCTAAAT  
CCAATACATTCCAAGTAGGCTTGGATTCAATAAACTCTACACGTCTGTTTAGACTTGTTG  
CCAAACCTCTTCTTCTTGA ACTTCAAAAAATCTGCTATCTGTATCGTGATAAGGATATG  
AAATTGTTAAGGTATCGACCACTGCACGTTCAATGCCATCACTAATGTTATTAATATATT  
TTGCTTCAACAGCAGTTTGAGAGCTTCCACCACCATCTAAAAGAAATGCATTAATACCGC  
CTTCAGATAAAAATAAAGATGGCATATTATAAGCTGTAATACCACTGGATCGAAGTGAGC  
GGCCATCTACAGTAATGAGAACTAGTGTACCATCAGATCTTTCCCAATGGCTTTTCGAG  
GATGCTTAACATTTAAATGTGCCCATGTAGTCATTTGAGCCGTTCTTGGCTTAGAATCTT  
TAACTAGCCAAATGCCAAAAGCAAAACAGTTTCGTGCGCCTTTAGAAATTAGGATGTCGG  
CATCAACTTCTCTGTTTCCGTAAACCTTTATAGTTCATCATCAAAAAATACACAAGCCT  
CAGCGCCTGTGTATCCAGCAGCGTCATAATCTTTGTAGAGA ACTCCGTCTTTAATTTGAT  
GCCCCATGACTTCACCATTTGATCGCCAACCACAAGCGTTTATTGCAACAACAGATCTTT  
TTCGTTTTGCCATACTTAAA ACTGTTTCACGATTTGTTGTACCAAATAAGAAGATGTGG  
GATCTATGGATTTTTCAAAGTCATATGCAAACGTTTTTTGCACCATACTTTTTTTAGCTT  
CGTTGTTTTAGGAGTAACCTTTGTAACATAGTACTCAATACCAAGTGTGGCATCCTGTT  
TAAAAGA ACTTGTTACTGTAAAATATCTGTCATCAGTTAATACCTTGTTTAAAATTTCTG  
TTGTGTTCTGTTTCTACTTCATTA AACTTCTGGGTAATCTTAGGAGCGGTGTATTCTTCTC  
CTTCTGAAGATAGTAGTTCAACAGGCATCGGAACATATTTATCTAAATTTTGATCATATC  
TATAAAAACCAGCCATAACTTTCTCCAATAAAAAAGATCCCGGAGGGGATCTTATTCAG  
TTTTGTACCATACTTGTCTGAATCTGGTGCTGTATCTGAAACAACA ACTCGTTTTTTCT  
CAGGTGAAAAGAGGCATCCTTATACCAGATATAATTTGCATTA AATGGTTCTGTTGCGC  
TTAGGAGTATATTA AAACCTTCATATACTTCGGAAGTTCCAGTATCTACCACTCAAATC  
CATCCCATCGATAAACGATTTTTGTTTCTTTAACAGGCACCGTCCAACCAATCAGTGGGG  
TTGGGTAATAGGTGAAAATATCTGAATAGGTATAGACAGATGGTTTATAAATTTTTCTTG  
TGTTTTCTACA ACTTCTTCATAATTTGATGTAGCCTGTCTACACCAGGCTGCACTTCTT  
GGCATCGTTTTGTA ACTCGTTCACATTCAGCTATACGTTCAATTCATTGGAATTATTGTAT  
CTTCAGCTTAATCGATATGTCCTTGAAGAGTTTCAATAACCATATTCCCTTGTCGTTTTA  
TCCA AATTCGAGAGGCAGGGAAGAAGGAAGCTCCTTACC ACTATAATTAAGGTTAGCG  
ATTTTCTTCATTTGATGCATTA AAAAAGACA ACTCCCATAAGGTAATCAACCTTAAAAT  
AGTTGTCGTC AAGTTCTCCATCTTCAATCTCTCGCCATTCCCTGTTGTCCCAGTAACTC  
CAACACGAAATTTCTGTTCGGAATCTCAGTTAGGAGTGCTCTTCCATTA AATATTGTCA  
ATGTTTCATTGTAAGTTAGATAGGGGTCTTCAACAGAACCGATTCCCTTTTTACTTAATA  
TTGGATCATTATATAATTTAGCAA AATCAGCCAGTTTAGTTCACCTCCGTTAATTTTGTT  
GGTAGGCTTCCCAGATATCTTTAACGTGTAATTTATTTCTGTG CAGTTACTATCTGAGC  
CTGTTACAAATAGATTGTTTCCCAAAGCACCGTATCCTAAATCTCCTCCAATAAGGGAAA  
GTCCAGTTGAAGTAACTTGATAGGCATAGCCCCCACTTGGCTTTCAATTACTAGTTGAC  
TGTCTTCAGGTGAAATCGGAGTTATTTTGACTAAATCAGGAGAAAGAGTAAGGGGGATT  
GCTTACTGAGAGTGCCGTCTCCTGTATAAATACCTTTTGCAA ACTTGGGAGGAATGGGGA  
TGTTTTCAGCTAATGCATAATCAGATGCTGCTCGTCCACCTAGCATCTCTGCATTACCGT  
CTATTGAACCACTAATGATCCCTTATTCATTA AACTGGTATAGAGTTTGGAGAAGTCG  
TTGTTGAAGCTGTAAAACCATTC AAGGAGTCTGCTGAACCTGCAGATGACACAACCCATT  
CTTCTCCGTTAAATAGTTCTTGTTTATTGTTCTTTGGATTGATCCAGATTGTCCCTTTTT  
CCGGATCTTCTGGCTTAGCTTCCGTGGAGATTGTATAGAGGCCATTA ACTCTTCCACTAA  
GACTTCTTTAACTTCAACCGAATTAGAGGGGAGGTAGGGGTTCTCTGAAGGAAATTGGG  
GTTGAATAATGTCGGA AAGTATACGTCCGCTGCTATCAATAGACGCTTCAACAGTCCGGT  
AGCCTTGACTTCAAACGTATAA ACTTATTTGAAACCTGGCCTGTAAGGGTTGCGATT  
TCTTATCATAGCTAACCGATAGATACTGTT CAGATGACATCTTTGATCCAAATATATAGG  
TGTCGAAGATGTATCTGAGTAA CAGTGGACAAGGGATCCGTCAATATTGTACTTATTCT  
CTTTAGAATTTGGGAACTGCCATTCAATGGAGATATCAACCGATCCATTATCGTTGACAA  
CATGTGTTATTGCAGTTCGTTATTAAGAATAGTTGGGTTT GCCACAGGAGATGAGATAC  
GATCATTACGTGCATTGTAATTAACAAGAAGTGTATCATAATCAATTTTTTTCTTATTAT  
ACTCTGTGGATGCTTTCTTAGTTGTATACAAAGTATTAGCAAATTCCTGTTCCAATGACC

TGGCTCTTTTACCGTTTGAGAGTGTAACCTGTATACTCTGTTGATCAAAAATCGAAAGTCA  
TCCCTGAAAGGGTTGCTTTGACATCGGTTCTGAAATTCTTATTAACCTACCCTGATTATAT  
CTCCGAGATATATTCTATCCCAAATGCCTTTTCGCTATTAACATTAATAGGTTTACGA  
TGTTTCGTTCTGATATCAACAGGGCGAGCGTTTCTATTGCTCAGTTCCTCTAACCCTTTT  
CGTAAAGCTCTGTCTCATCAAAAATATTATCATTAGTCCAATCATCTTCAAATATAAAAT  
AAGACAGTTGTTTCTTAAGCTCCTCACCAAGAACTTGTCCATCGATAAACGGTCTTTTA  
GTTTTTCTATTTCTGAGAAATGTTTGTGATTTGCGAGTTTATTCTGGATATTTAGCTT  
TTTTGGCGATAACTTCTAATAGTTTTGCATCTCTTTGTTAATAAGATCTTTTGTGTCGT  
CACCGGCTTTTTTCGCTACGGTTATCTTATCTAAAATTTGCTGTAGCTCAATGTTTTCAA  
GAGTGAAGAGTTTATTTTCTGAGTCGTTTTTTGGGTTTCTAAATCCCTTTTTTGGTTTA  
AAAGGAGGTGGAAAGAAGAGCCTTCTTTATTGACAAGTTCATTATAATCCAAAATCGCAT  
GACATAAATCATCATCCATGTAATCACAGTGTGTTATTACATTTCTGTTTTTATCACGTT  
TAAAAGGATATAAAAAATAAGAAAAATCGTCCAAGTAACTCTGTCCAGTAGGGTTTACCG  
AATTAATCACAATCCGTCTTTACCTGTGATGGTTGAACGTGTTACGACTTCATCAATAT  
CAATGGTATCTTCCATATCAATCATAAATCGTTCAGGGGAGAATTGGACACCTTTGTACT  
TGGATACTGTGTCTTTCTTATAAAAAGAGACAGTGTCTTTACAGTGTGCAAGACTGGGA  
CTGCCTCAAAGTTTCCCATATCGTTTTTAAAACTCATATCTTGTGGAAGTGACATCAA  
ATGATCGTCTTTTTTCAATTAATGAAGGATCAATATAACCGATATTGAGTCTTGTGCCTT  
TAAGACAATCAGTGGCCACTTCTGTAGATTCTTTGAACTCCTTGATACGACCTTATTT  
TGTTTTTATGAAGGATGTACGGTAGTCTTGACATCTAACTTGATTGTTTGTCTCCTCAT  
TTTCTGATTTTGTAAACCGTTATCACAAACCATTCAACTCTGTTTAAAGGATTCTGCCT  
TGATAAGATACCACTCACGCATTAGTTTTGCCACATGGTTTGGCTTCATCAAAAATTTAT  
ACCTGGCTTTGAGTGAATATTATAAGATAGATCATTTAAATCAGCAAAGCTTAGATTAA  
GAGATACATTTGAGAAATCCGCAATATTAGCGATTTTCTTTTTATTTGGTTTTGCTAAAG  
AAAGGAGGATTTTCGCCTGGTTTAACTTATTTAACAAAATACATCCTCCTATAAATATTT  
GTATCGGTATTTAATCGAATATAGCACTCACGATTTATTTAATTCTGTTTTTACCTCT  
TGTTAAAATCACATACTCTTCACTTACTTGGTCATAACATTCATAACCCGAAATACTTGA  
AGTGATCAATTTTTTATTGGAATCAACATTGATAACTTCATGATGTTTTATTCCCGTAAA  
CTTCAGAGGTGTTCTATATAAAGTTAAGTTCTCAACAGTTATGTCACCGTCGCCTATCTT  
CTTAAATTCAAGAGATAACGGAATGTCCACATCTCCTATGTTTTCAATTTCAATATTCTT  
AACACCTGATGTGACATCAAACCAATGAGTTGTTGTTTCTTGTCCATATTTATAGGGGAA  
TACCTTCATTGTGAGCTTCACATATCCATCGTTAGAACAGTTATGAACTAAATCTGTAGC  
GTTTATTGGCAAGGCGAAATAAATTATGGCTAAATTTCTACTAAAGGAGAGAGGTTTATA  
ATCATCTACATTTAACCAACGAGCAACTCTACGAACATTTTTTTCATCTAGATGATTTTC  
TATGTAAAATCAATGGGATCTCAAATGGCTCAAGTTTGACATTGTCTACATATGGTTC  
TGAAGATAGCCTAGTGTATGTTTCACTTACTGTTCTATTTGCAATAAACGACTCCTTTAA  
AAGTCTCCTTCTGTATTTACATTTACGGCTCCTAATTCATAAGAAGGGATATTATTGAA  
CATAAAGTATTGACTTTCTCTAATCATGAGTTTCCACCTCAAGTTAAGTTAAATAAAGAG  
TCTGCTTTTGAAGACTCTTACATGCTACCATTTAGTTTTACAACCTTCGTTTTTAATGCTT  
TCAAACATCGATCTCGCTCCCGATTCTCCTCCTATTAGCTTATCAATGTGGAAAGTATTC  
GTTTAAATTAATTGTTTTATCTCCAGAAGAGGCAATTGTTTTTGGAGGGGATCTCAATCTTC  
TTTAAATTTGGAATTAACCTGTTTGTAAACATTGATTGATTAACGTTAGGAACTAATGAA  
GGAATAGAAGTAACTCCTTTTTTAATAAGGTCTGCTAATTTTACTCCTTGGCCCCATTTT  
GGGGAATCGTCCACAGCGGTATCACGAACAGCTTTTACCGTATCAAGGATGTTGGATGTG  
TCAGTTTTATTTAGGATCAGTTCCTTTGTCATGTAGGAATGCAAGTTTACCAGCACCTAAT  
CCTGTTCCAGTGTACCCTCCAGAAGCGAAAGAGGATACTTTTTTACCTGTGCTGTTGCCT  
TTGACAGCAGTATTCAGTGCATTAGATGCTTCTTTGAGTTTATCAATCAGGTTGTTTGA  
ATACTTTTTCCAATGGACTCCATATTGGTATTAATAAACTTAGAAAACCTATTAAGCTGC  
TTAGCGATATCGGTGATTTTTCCATTCATAATCTTATCCTCAAGCTTTTTTAAAGGCTCGT  
TCATCATTTACAAGATTATCGTGTTTATTGTTGATTGACTCCTCATCTTTTTTCGAGCTGA  
TCTTGGAGCGCTTCTTTCCGTTTGTACTTTCGCGATCCTTTAGAAAATCATCAAGGTCT  
AACTGCTCTTTTTGAAGCTGTTTCAAGTTAGTTCTTTGACTTTTACTTTCCGAATTCAGAA  
TCATCAAGAGAGTATTGATTAATTTGGTCAAGTCAACTTTTGAATACTGTCTTCTTTCT  
TTTAAATCTTTTTGAAATTTAGCCTCGTCATCAGTCTTGTCTATCTCAGCGATCAAGTCT  
TGAGTCGCTTTCTGATGCGCTTCAAACCTCAATATCACGCATTTTTTTCGTACATCTCGTTG  
TAGATGGATACAACTTCATCAGCCAATGATTTATAGATCTCCTTGATCGACTTCTTGGTG  
TTATAAAGCTCAAGGTTAAAATCTTTCTGTTTATCTTTCCAGCTTTGCATTTCTTCAGTG

ATCTGTTCTGATGTCAGGAAAACCTTTTCGCAGCTTTCTTTTGTTCCTTCAAGCTGCTTA  
ATGTATTTCTTCGCTTCTTTTGTGTTGTTGAATGAGCTTTATTTGCTTGCTATAGTAT  
TTAACCTTGTCTTCATCTTCTTCAGTCATTGAAATTTTGTATGGACATATTTAATTTTC  
CCTTGGGTTTTAGAAGATGACTTTTCAATTGACTTAAGTGTCTCATCAACTTTAGATTGA  
ACAAGTTGTTTCTGTAGCTCACGAACCTGGTCTTGAACAGAAATTAATCTAGCTTGGCC  
TGTTAAGCTCTTCTTGAAGCTGTGCACGTTGAGCGGAGTTCAATGCTTTATTTGTTTTA  
ATTTCTTTTTGAATCCAATTAACTTTTTGTTGTTGGATTTTAGCTTGCTCTGCCACAGCT  
TTTTTCTGATCAGAGGTGATTTTCGGCATTCTTGTCTGTCAGAAGTGTATCTGTTAGCC  
ATTGACTCATCTTTTGCTATCCGAACATCAAAATCTCCAATTCTTTTATCAAACCTCATCG  
AGTTTAGATTGAACTAGTTCATACTGAAGTTCTTGAATCTGATCACTGACTGAACTGATA  
TCTCCTTGGAGGGAGCGAAGATCAGATTTAGCCTGAGCTATACCTTGTGTCGTTCTGCC  
TCAGCTTGTGACGCATCTGAAATAGAAGTTCCAATACCTTGCATGTACTTTTCAGGGTCCG  
ATTGTTTTTCCATTTTGTTCGATCTGTAAATGAAGGTGGTTCCCAGTCGAGTTTCTGTGA  
CTACCAACTTTACCAATAGTTTGACCGGCTTTAACTGATTGACCTGCTTTTACAGAAGGA  
GTGTTAAGCATGTGCATGTACTTGGCAACTGATCCATCATCCTGTTTAATAACAACCCAG  
TTACCTGCAGTTTTACTGTAGCCATCAATTGGGACTTTACCACTTTGAAGAGATTTAATT  
GCTGTACCTGCTTTTGCAGCAAATCAGTTCCTTTGTGTGGGGAGGAGCGGAGACCAGAT  
TCCTGTTGTCCATATTTGGAGCTTACCCTAAAAGCGCTATTATTTGTATAATAGCTGGCG  
ATTGAAGAAGTGGCAGATGAGAGCAATTTGCTATAGTTGGCCATAATCTTCTTGACGTAA  
TTCTGTGTTTCTTTAAAAGGAGGGATACCACCATATTTAATTACGTTACCAGGCCAGCA  
TTATATGCAGCCAATGCTTTTTCAACATTACCGCCACATTTTTCAAGTTGTTGGGCGAGG  
TACTTTGTTCCACCATAACACTTTGATAAGGATCGTAAGCGTGATTTACTCCTAAGCTT  
TTTGCTGTTGCTGGCATCAGTTGCATTAATCCCATGGCACCTACACCAGATCGTGCTTTA  
GCATTA AACCTGATTCTCGCTGAAATACAGCTGCAATGAGGGCAGGGTCAACATTGTAT  
TTACTAGCTGCTGAATTTATGTAGCTTGAATACTTGCCTGAATATGATCCACCAGTTGAG  
GAGGGGGTTCCACCAGAAGAAGTTGTAGAGGTTACAATACCGTATTGAGTAATGTTACCG  
GATTTGATTTGATCTTGAAGCAGCTTATCTTGTTCCTGCATAAGCTTTTTCTTTTACTGA  
AGTGCTTTAATTTCTTTCTTGATTGCATCTCGAAATTTCTGAGAGTATTTAGGATAATCA  
TTGACCTGCTTGTGACTTGTCAATCTCAGCATTAACTTTTTCTAATGCTTCTTGTAT  
TTATCAACAACATACATGGAAGTCTTGGTTTCTTCATTGGCTTTTTCTTGTGATCTGTC  
CAATTTCCAATGATGTTCCAGCTTCAACAAGTGCCTGTTTATTCATTTCTTGTGACTG  
GAGGCTTCTTCAGAGGCAGAAATATAAGATTCTAAAGCTGATTTAACGCTTTTTCATTGCT  
TCAATTTGACTATTCGAGTATCCACCAGGTTGAAGCATTTTCTCTTCAAGCTTTTTAAGT  
TCTTTTTTTGCATCTGCAACATTATTAATTGACTTAACTTCTAGGTCTGACAGTTCGGCC  
TCAGACATATCAAGCTTTCGTTCTTTTCGTAGCTTTTTTCAGGCTGTCAATCGGTAAGGTA  
TCAGCGTTTAAAGTTTTGATAGCGTTGTCAACTTCTGTTTTCATCAATTTATTGCTGTAG  
GTAACAATGTCGTTATAAGCATCAAGTTTAACTTTTCTTTGTTGATAACTTCATCACGG  
TTAATTTTACCACGCCATTTTCGATGCTAATAGCCTGGGCAAGTTCCTTATCTTTTTGA  
ATAAGGGTATTAGCTTCATTTGCAGAAATACTTTTACCTTCAGCCATTTTTTCCAGAAGA  
TCATTGAGAGGAGCTCCTTGATCTTTGGTGTATTAAAAATATCCCCATTTAAGACATCT  
TGAACGGAATCGAACTGCATAGCATCTGACATTTCTTTAATAGCTGCCTTAATATCATCA  
ACACTATTTGCATCCAGAGCTTCTTTTAGCTTCTTACCAAATCTTCTGCCTCGTAACT  
GCTTCTGCCAGCGTCTCACCTAAATCACCAACTTCAGGTTTGACGGAAGATAAGCTCTTA  
TCCCCATCTTTTATGTTCTTCTGTGCTTTGTGCGAAGCTCATTTTAAAAACATCAATAGAA  
GAATCGGATTTGGAGTATGTTTCCAAGAGACTTTGAAGATCTTTTTTTGCGTTATCGAAA  
GCTGTTTCATCGCCTGGATGTAAAGCTTTTTGCATTTTTTCTTGAAGCTTTCCTAAAGAA  
GAGGAGAATTTTTCTAATTCTTCAGGATCTAAATCTTCTTTTAAAGTTAAGTTTGTGACA  
ACATCACTAATACTCGTATTTAAAGTATTACTGATATCAATTGAACTATAAGCATTTGCA  
ATTGAAAGGACGCTATCTTTAACTTTAGCATTTCCACTCCCAATGTCAGATTGAGCTTTG  
AGCATACTTTGTTTAGCTTTCTCAGCTACAACCTTATAGTCATCGTCATCTGCAATGAGA  
TCCCATTACAGGTCTACCTTTATCGTTGTAGTCAGCTATTTGTTTGTACTGCTTTAATTCA  
TCCTTAGACTTTTTAATTTCTTAGAAGCGTCTTCGAATGTTATCTTTGCGCTGTCTCTT  
GTTTCTTGTCTTGAAGCCAAATCCTCTTTAGTATTCTCACTCGCTTTTTCAAGCTCT  
TTATTTCTCTTAAGAATTGCATTTCTTGGAGAATCATAGCCTTTAACTAATGCAGGCAAA  
GTTTGTGCTAATTGCTGAGTGAATGTATTCTTGTCTTTCATCTGAAGTTAAAGAT  
CTTGACTCTTTAACTTTTTGAAGCTCTTTATATTGCTGTATTAGTTTATCAGTGGAGTCT  
TTATTGGTTCGTAATTGCTTCGACATTGGTTTGTCTGGCTCTGCTCAAATCATCTTTAGCT

TTTTAGCTTCTGCAAAAAGAAGAAATTAATGATTCTAGCGGCCATCCCAAAGCAGCAAAT  
GCACGGCCAACTAAAGTTGAAACAAGCAACCCTCGAAGAGCAGTTTTTTAGAACTCTTGAG  
GCGATTGCTGCACGAGTCATAACCAGCTTCTAGCCCAGCAGTCGCTAAAGTTTCTTGCCCC  
ATTGCACGTGTGCCAAAATTAGGCTGCTGGCTAATGTGCGGGTATTCTTACTGAGCAA  
AGGGTTGCAGTGCTTACTGCAGCTAAAAGGGGAGGTCCGAACCCAACTGATTTGATTACT  
CCTGTAGAAGCGTTAAGCAAAGAACCAGCGGCTTGAGTAAATTCAATTAATCCGTGCGTA  
ATAAAAGCATCAGAAGCTGCAATAGCAAATTCAGTGAAGTTATTTTGAAGCTTATTTACC  
CTAGCTTGTAGACTATCTGCATACTTTTGCTGCTCACTCCAAGCACTTCTGTTGAGTTA  
GCCGCAGTTTTAGCCGCATTCTGAGCAATAGAGAAGTTGTTTCATCATTGCATTAACACGG  
GATAATTGATAAATACCAGCTACTCCAATTGACGTATTTTGTCTGAGCATCAGAAAGC  
GTATCCCACCTACCAGCAACTTCACTAATTAATCACTTGCTGATTTAGCTTCAACACCA  
GCTGTTTTGACTGAGATACCAATCTGTTCTAACCCTTTAATTGAGCTTTGATTATTTCCA  
ATCCGCGCGAAAATTGTCTTTAAGCAGTTCCCGACGATATCCCTGATTCACGTGTTGTA  
CTAGCAATTGCAGTTGTATAACCAATAAGATAATTTAGCTCTACCCCGAATGTAGAAGCA  
GTTGAACCAGATTTACGGATAGAATTGGCCAGACCTAGAGTTGTAACAGCATAGTTATTA  
TCAACCTCATTTAATTTATCTGCAATTGATATTGAATCATTGCTGCAATATTAAGTTG  
GGCATTGCTGCCGTTAGAGTGTTAACTGTATCATCCGGAGTTAAATCAGAGACATTTTGA  
AGGACTTGGGCAGTTTTCGTTAACGTGGAGAGCTCACTTTCATCGAACTCATTCTCCCA  
AAATCGCCTGTCATTTGAATAATATCTGTGATTGTATTTGAAAGTGTATCACCTAAGTCA  
ATAGATTCTTGGAGAAGTTCAATATTTATAATCCGGCTCATTATAACACGGCGAATA  
TTTGTATGAGAGTATCAATTTCTATTGCCCTGGGATACCATTCTTTAAGTCCAGAGATA  
GCTCCGTAGAATAAAGAACCGGAGATTAATAGGTGGACATGCTTTTGAAGGTTTGGGTT  
AGTTCTGCTCCAAAAGAAGAGGCTTGATTAGCAGCTGTTTGAAGGTTGGAGGCTAATTCT  
CTACATTGCATATTCAATCTTTGAATTTGTGATCTGATATTATTGCTTCCAGTGCTTACA  
TTAAGACTATATAACCGCATTCAAATAATCTTGAACAGCTTGTCTATTACTAGATCCCATA  
CAACTGCCATACCGTGTATTTAGGTTTTGAACATTTACTTGTGCCTGTCGCTGAAATAAT  
TCAATGGTTTTCTTTAATTCATTGTTCTTCGCAACTGCCGCAGATTTATCATCTAACATC  
CTTATCCTATTTTGCAGTGCTTCAATTTGTTGAGCGGATTGAGCTGTGTTTATTTTTCGG  
CCAAGAGATGAGATGGACGTATCAGTAACAATACCCTGCTGTCTAAGCTTCTCTAAATCT  
TGCTTAAGCTGCTCAATTGCTCTCCTTTGTTGGTCATAATTAGTTGTAGTTTTTGAAGGAG  
GTCGAATTAGTTTTAGGATCAGTTGTATAACAATATCATCGAACCCGTGGCGGTTTTTC  
TGCACACTGTTTTGTTGGCTGTCCTTGCAGATTTCTCTGCACAGTCTTTTTTGCACCTAT  
CCTAGTTTCTCAGTGGCCTGTGTTAGCTTGTAACTCTTGAGTTTCTTGCTTTAATGCT  
GTATTACGATTGTTGATTATTTTTGTTTACGTTGAAGTATCTCACCATTTTGCTTATAC  
TGCTGGGTGAACTTTTCAACTGATCCGTCAGCATTCTTAATTACTGTTGAGGTTTCTTTA  
GCTGTTTGAATTATAGGATTTTAGGTTGTTTCTGATATGTGTGATAGCAGAGGAGAATTCT  
TGCAGAGCTTTTAAGGTTGTAGAATCAATGTTTGTATTGAGCTTGAGGGAGTTTCAAGTTT  
TTTTCCAGGGATTTAATTTGCTGATTTAACTGTTTCGACAGTTTTGGATGAGGTATCAGCT  
GGCGGGGTTAGTATAATTCTGAGGTTTTGACTCAAGTAAGAATCACTTCTTTTCAAGTAGG  
GGAGAGGACAAAAGAAAAAGCCACTCAGTTATTGAGCCACTTTGTTTGTCTTTCTTAATAA  
TTACATCCATAACACCATGCCAATATTCTGCATTCGTAAGTGCTTGTGAATGACATTGC  
TATCTTTTTTATACCCCTGAATATTATACCCTTCAACTTCTTGTCTGGGGAGAACTCGA  
TAAAATGGATAGGCTTACCGAGGTCTTCAACAGTAATCTCTAGCGTGACAGATTTGACCA  
TTTCATTTTGTATTGAAGAGGCAGACAACCCTCCAATTGCAGCTACAATTCCTCCAGCTA  
ACAGGCCACCAGCTACGATTCCTGATTTTGATACTTTAGAAATTTATTGATTGTCTAAAG  
CAATTTCCGATTCTATAACATTGGAAAAGGGATTGTGTATGCTTCAATATGTTTCATCTT  
TATTAAGCTGATATACTTTCACAAGGGAATCAGATTCCTTAGATGCAATTGTAGTTTTGT  
AAGTATTAAGAAATTGTCTGGATTAACACCAGTTCGAAGTGCTTAAGTGTTCGCGAT  
TTTCTTTTAGTTTATCTATATTTTTTTGGGCTTTAATTTTATAGGGCTCAAGTGCTAATA  
GGGCTAAACCTACAATTATTAAGCAAATTCATGCTTCCAGCCGTCCATTAGCAAAA  
AGAAAAGACAGAATAAAAAATAGCCACCATAAGCCATAAACTTATACCCCATTCACCCAC  
CCCCGGTATCATTCTCCTACATTATACCGTTGTTTCCAGTCATGGAGAAGTGTATAAGTG  
GAAAGTGAAATCATTAGTTCTTTTCTGATTTTATCTGAATGAGCAGTTCTTTGAGATAAT  
CTGCAGTTGTAGCATTTTCTTTGTCTTTTAAAATATTACGAAGTGTCATAAGCAAATTA  
TGATTGTGATTAATACGTAAATTAATGCATTCAATCGGTTTCCCTCAGTAATTTTTGATA  
TATTCACACCAAATAATACTTGAAATCCTATAAACGACGTTCCCAAATCAAACCTCCAA  
TCCCCAAGTTTTAGATGGATCATATTGCGATTTTATTCCTTCCGTCGTTGCAATGGCAG

ATGATAATTCAGACGGGCTTAAAGATTTTATTATTTGGACTTCCCCTGCATGTGTATGAT  
AATCTTGTCCATTAATAGGAAATTCATGCTTGATAAACTTAATTAATTCTTTAGGATTCA  
TTTCAGCCAGATTGTGCTTTAATACTTTTTTATTGAACATTTTCATCACCTCTCCATATT  
ATCGACAAATACGCAAAGGATTTTAATGGAAATTAGGTTTCTGAGAGTACGTTTCTCTAA  
TTTTCAACATGAATGAATAGTCCTTTTTAAGATTTATACACAGTCATTCTCCAAGGAAAA  
ATGACTCAATTTTTTCGATTTTCTATGTAATCAAAAAAGAATCATGTTAGAGTAGGGTGTG  
CTGAAATAATTCAAAAAATCATTTTGCAATATGATTAAGTAATATTGCCAGAGAGTTCG  
GGTTGGACAAAATTGTAAGTATTTAATACTGGGGCTGCAATCAAATATGCACCGGGAA  
ACAATTGCTAAACGGGGGAGTTTAAACGAACAACAAGAAAAATATCTTTGATATCGTAAT  
GTACATTATTTTCGGTGTGTTAAGTCTTTTTCTAGTTGCAAAAAGTATTATGGCACTGG  
AGTTTTAGTGTGTTGTTGCAATTTTATACCCCGCTGTAATTGCTTATACAATTAAGCAAGT  
ATTTAGTAATTCAGATTCTTAAGGTGTAACACAAGGAGGATTTCAATTGAGAAAGAAAAG  
AGTTACTTGTGTTATGGCTGCATCATTGACTTTAGGCTCACTTTTACCTGCAGGTTA  
AGCTACTGCAAAGGAGGACTCTAAGCCAACCCCTTCTTACGAAGAAGTAGCTCTACATTA  
CAAATGAAAAGTGAAAAGATTTTCATCGAACGGGAAATTAGTTGAAATTGAGTATGTGAG  
TGGAATGAACTCACAAAGTTCAGATGAACGGAAATGATCATACTGTAAAAGTCGATGG  
CATAGAACAAAAGGCTTAAACTTTGAGTATGATGAAAATGCTGCTAACAGAACAAATTA  
TGAAAACAATAATTTGAAATCAAATGAATTCACAACACAGGCTGCAAAACCTAAAAAGGG  
ATACCATTATGTGGGGACTTTATCTGGGCATACAAAAGCAGCTAAAAATGCGTTATCAGT  
TACAATGTCATTAGACGGTATTGTCCCTGGCTTGGGATGGGGGAGTAAGGCTGCCACTAT  
TTTATTCTCTTATTGGGCAAACGAACAAATCCCTGATGCGTATTATAAATATGATTTATA  
CGAAAAGGAGCAATGACTGATAGTTGGTATCAGTATGCTACAGTTCAATTTTTTGAAGA  
TAAAGCCATAAAAAGAAAATGGGCAAACCGTGGACTAGTACTCCTGCAAAGAAGATTT  
AACTAAGAGCTAATTTCTATAATCACTTTGTCTTTATCGGGGGACAAAGTGATTCTTTGTT  
TTATACATAAGCAAACCTCCCTCAAACGAGGAATCTTGATTCTGAATAAAAGAGGGATTTT  
ATGCTGAATTGAATAGAATTTCTCTGATGGTTAACACTAAGCTCAAATTATCAATTGGAG  
GAGATATCGTGAAAGTAATCCATGGAATCAGAGTATATGAAAAAGGAGAAAAAGTCTTTT  
TTGAAACTGAAATGCCATCCATTCCAGAAAACATGTATTCTAAATTCGGGTGGAAAATTA  
TCGAAATAGATGGTAAGAACTATTGTGCCCGATGGAGGAGGAAGAATATATACATATTG  
TTGCAAAATATTTAGGGATTTACCCGAGTGAAGTTGATTTAACTTAATTCATTGTGGAA  
CGATGGGGGACAATGGTTGTTTTGGAGATTGTACCGGAAATAGATTTTGTAAAAGGTGGA  
GTACTGGAGATTCAACAGGATGTATTTGTGGTGCTTAAACTAAACAAATATTTGATTTT  
TTTCTTCTTCAAATCCCGTAAATCATAATGTTTGATTGTTGTTGAGACATCTTCATGAT  
GAGCTACATATTTGCTTATCAATTCAATTTTGACTTTCTTAACTTCTAGGAGATAAGTGA  
TGCACGAAGCTTTAAAGAGGTGGGGGTTTATACGTGACCAAGGATGTCTGATAACACAT  
CAGAGCAAAAATAATCAGCCCAAGACTCTGACATCCGTTTAGGCTCTCCGCCATACTGAG  
TAGTGAAGAGGTATTCATGATCATAGCCACGTTTTTCATGCCATAAGCGAAGATACTCCA  
GTGCTTCTCTGTTAATCATGTACTCAAGAGGTTTTCTTACCTTTACCTTTTCCAAATA  
CCTTATGACTCATCACGTATGACTGACCCTCTGGAACAGGGTAATCTAATATCTCTGTTT  
TTAACTGTATGAGTTCTGCTCTTCGCCCGCCAAACATTAAGGCAGTAGCAAGCCATGCCA  
TTCCCAAATAATTTTCGTCCTCTTTTAGGGCGTCCATCATCAGTTTATAATCATCATATG  
TAACTTTAACTTTTTTCATAGGTTGTGGTTTTAGGAATAGCTGGAAGCCCGCGGGTGTAA  
TTCTGAATTTCTCATAATTATGATCTTCTTCTGCAACAACATTTTCGATATAATTATTTA  
ACGATGATACACCGGCTTTTTTAAAGCAATCCCCTTGAAGACATCCCACGATTCTTTA  
AGAACTTTGATACCTAATGAAATCACGCTTTGAGATCTTATAAAGGTTTTTCCCGTTAA  
GAGAGGTATGTACCCACCAAAGAATTGGCGAACGGAGGAGTAATACTGCTCTCGTGTTT  
TATCTCTAAATGAATGAGCATCTAAAACTCTCGAACCAAGTTTCTGTGCTCTTCATCTA  
CTTGCTCCCACATTGATTCCGTGATCTCGGGGAGTCTTATTGCTCGAGATCTGAGCATAT  
TCTTTTCAATTGGTTTGGTCATTAATTCACCACCATTAGTCTGTTTTAATACCATCTGCG  
TTTAAATCTTTTTTTAGCGCTGCGGTTAATCGTCCATCTCTTAAAGGTCTCAGAGGTATTC  
TTCATAAAAGGACGAGGGTTACCGTATCCATATCCATATGAATCAGGGTATGTATACCCC  
TGCCCGGTTTCAATAACTGTAGCAATGTCTTTTCCATCATCTTCTCTAATATTGTCCAAT  
GACACCCCGTTGCTTTTCGTTGGTGGTTATAAAGGCATCTTAACTTGTCTGTGCGTTCA  
TAAAGTAGGGGATCATATGCACCGTAAACATCTTCAACAATATGCTCTTGTCTGTCTT  
ACCATAATTTGTTTACATTATAGGAAGACTTATGAATTGATTGAATTGCAGCTTGTTCA  
ACCATAGCTTTGATATCTTTAATTGTTTTCGCCACTAACTTACCAGAACCAGTCTCTAT  
TTCTTCTACCTTTTCTAGAATAAGCTTGCTGATTTCTGTTGGCTCATAGTTAACAAGTC

TTCAGTGATTTTTTCTAAAGCTTTTGTTCATCCTTAAGCTTCTTCATACTTTCTTTTTGG  
AAAAGTGTAAATAATCATAGGGAAGAATTCGGAATCTACAAGCTTAAGGTACCATTTAAC  
TTTATTTTTGATGTCATTCGGAATCCCCAAATCTGAAAATCTTTGACAATTGAAAAGAA  
TACCCTTTGAACAGTGTTGATTTTACTAAAATCAATACCTTTATCTTCAGCTTTTTGTTG  
ATCAGAGATCATTTCAGTTAGCATTTTTGCTAACCAGAGAAGGAGAAAAGTATCGGTCGAT  
GAATACATGTACATCATCGGTTAATTGGACTTTTTCTTTCTTGTTCATACTTATTGACACT  
TTCCTCAATTAAGCTTAAATTCAGTTTTTTTGTATGCCATTTAATATCCTCCTTAATATCC  
TCGTTTTGAGCAAACAATGATAACGTGTTTATTCTGTAGATAAGGTAAGTGAAGTATAGG  
CTTCCCCAACAAATTTCTTGATAATTGTTTCAGGAGTAATTAAGTTATTGTCTACTCCTTCTT  
TGAGTTCTTCCTTAGTTACATCATCGTAATAGTAAGCTTCTTTAACCTGATCAAGAGTTG  
CCCAGTTTTTGTAGGGCTATAACCCAAAAATTGCTCATGCTGTTGTCCCAACTTTCAA  
GTTTTTAACTTCATTTTGTAAATTTAAGATTATGCGATTTTGTAAAAATTAATAATTCT  
GGCTTCAGCTAGTGATTGTCCAAGGAATTCACATCAGAAGGTTCTGCAGGGGGCGGTGA  
GAGGCTGTCTATATATTCTTGAGAGGCTGTTTCTATCCAACTTGTTTTGATAAATCAA  
TCGTGGAAGGTAATAGGAGGGAGAGTCAGGTAATGGAACAGAAGTGCAATTATCGGGAAA  
AATAAATCTCCCTTTTCATCGATTTTCAGTTACAAGTGGGGTTCAACGAACATAAAATT  
TTCGTCATATTTATAGCCTTGTATAAAGACTTACCTCCTAAGTCAACGGAGCAACTACAT  
CTATGTAGTAACCCGTTATTGCAGCACTGTTGTCAGCTGATACCCCACTTAGCTGAAGGT  
CACCATTAGAGTTTACAAATAATTTACTTCTGCCGAAAGTTCCACTCACTTCAACAGACT  
TAACAGCACCTTGTGTTGGAGAAAATTCAGTTGGAATAGAAGCAAATACTACATCTCGGT  
TTGTTACAACGTGCCACTAAGCTGGAAAGTCCCAGCTACTTTACGATATTGAAGTGGCC  
TTGAGCCTGTCTTTGCGCCATTTTTAGATGTAACGCTTAACCAAGGCACGTTATCAATTT  
CACTGCTACTTATCAATCGTTCCCAACTTGACCGTGCTCCGTATATCAATGATTTTCTGT  
AAGTCTTATTATCATTAGTCAGAACAATAGCTTGACCATAAAGTTTATTAGCACTACATG  
TCCAAAATCCCCGCCGTTACTTGGAGGAGCTTCTAAGGCAGCCTTATCATATCCGAAAT  
ATGTTAAAGTAGAAGAATTCAAAGTTCAGAATGGAAGTCGCTTGTATAGAACTAGTG  
GTTGACCATCATCGCTTGATATTTTAGTTAAGTGAGCAGAATTCCTTTTACTTCTTTCAG  
TGCTAGTGATATGACGCTCATTATCTTTTATGTGAGCATCAAATTTCTAATTTTGTGCGTT  
GTTTATCATTGTAAGGTTTCCCTAACCCGACCTGAATTGCAGTTACTTTATGGGGACTGT  
TTGTGTTCTGCGAATGTGCGTCAGTATACTTTTTAGAAATTGCTTTCCGCGGCATTCCAAG  
TAGTTCTCTCTGGAGCTGTAATATGAATAATTGTATCATGAGCATGTTGATCAAATTCAG  
TTTTAGTTGCTTGTTTTTTCAATTCAGGACATTTGCTAAACCAACTTGGCTTTTTTATTACTG  
AATGGGGATTGAGAGTATCGTTTAGATGTTCGTCAAATTCCTCTTTAGTTGCTTGGACAT  
TATTTAAAACATTGCCCAAACCAACCTGCTCTTTGGTGACTAAATGAGGATTAGACTTAT  
CATCAGTATGTTTCTTGAGCTCATTCTGTTGATATTCCATAAACAATTTGTTTTTTCTG  
TTAATGCTTGTGCATGCTCAAGCATATGTATTTTCAGCTCTGTTCATTGGATCCTCTTAATG  
AATTGATCTGAATATTGTTTTGTTTGTAGTTGACCGTAGTATTTACTGCTGCTCATCTGAA  
CTCACCACAATCCCTTTAACAGTTACATCACCAGTAACAGAACTACTACGAACATAACT  
TTAAACAATCCAGCAATGTGCAATTCCCAATACTCATTAGTATTTAAAGTACTGCTCCCA  
AGTTGGAAGTCTGTTTTATTGGTGCCACTAAGTGCAGTTTTTTTCGCCATTTTCATCAACT  
GCATAAAAATTTATTTCTCGTGAAGTTGAGGAACCAGAGATCTTAACAGTAAGTTCCCGA  
AAATGACCCACTACAAATTTCTTCACCTTCAGATGGGGTAGTTGCGGCTTCGTGAAATGTA  
AATGAAGTTTTGTCTGGAATCGTGATTACGACATTTTCAGTCGTTTCTGTCAACAACCTCC  
ACCTCCTTAATTTGAATAAGAAGTGTCTTTTATCTAGAAAAACAAGAGGGGAGGACTTAT  
TCAAAAAGCCATCCTCTTGCAGCTTATCCACATACCTTCCCAAGCTGGGGTAGAGGAA  
GGGGATGACTGAAGCGAGCTTAAAGGTTTCGTACTCATTGAAGTCGCCTTCAAAGCGTTGC  
TTGAAATCATCAACACTGATATAGGATCCATCTGATAGTAATAGGAATTTTTGTTCCATA  
CCATCAAATTTGTTTGAACAGACCACATACTTCATCAAATGTCATTATTCCATCCCCAAC  
CAACGATTTTTTAAACCCAGTTAGATCAACTGTACCGGCTGCTTTAACTGTCAGATGTATTT  
TTGGAGCACTGAAAGTTAATTGTTTTTTGTAAAGGGTAATTCTGAACAAAAACAATGCTGT  
TGAATACAACAGAATTATCATTACCTGATGTAGTTGCAGAATAAAATGGGATGTTTTTCG  
GTACGGAATAAATACTTGCTAAAACCTTGCTGTATGAGCTTTCTGTTTGTAGTTGTGTACA  
TAGCAACACCGTAAGTTCTGAAAACACCAAGTGAATCGATTAGATCAACTGTATAAGACT  
TAGTTGCACCTGTAGCTATTGTATCAGCATCAGTAACAACAATTCAGAATAGGATTTTT  
GAACTTGGGTTTTAATTGCTGCAGTGTTTTTAAACCAAAACAGGGACAGAAGCCGTATTAG  
TTATATTTACATCAAGTGCAGTGTTGGCCACATTAACATTAAGAGGCTGGTCATTATTGA  
GACCAACCTCCAAGGGGACAGTCGAACGTTCAATTGATACAGCTGTTATGGGATTACCTG

TCCCATCATCTTTTGCAGAGGTGTATTTATCACCGTCCTGGTTTAAAAAAGCAATAATAA  
ACGCCTCCTTAATTATTCAGTTGTTTCGGCCAAGATCTGAGCTTTGAGATGAGCCAGTTCC  
TTCATCACTAGTGACAACGCCCTTTGTCCCATCAGCTTTACGTTTTACACGAGCAAACCTT  
ACGGATTTTTCCGTTATTATCAGCAAGGGCTCGATAGCCGATTTCCGGAGTGTATGCATT  
TCCTTCTTCAAACGACATATCTGCTTACCAGAGAAGTTTACTTTAGAGAGCTGAATATA  
AAGGTCACTGTAGATTTTTGAAGTCTTAGGATCGTATTCAATTGTGTGAATTTCAAAGTA  
GTAATTCTCAGAGAATTTTTACCGTTAATTTCAACAGTCTCGGCTTCAACTTCAATTTG  
ATAATGAACTGCTAAAGCTTACCCTTGGTTGCAAAGGTATCAGGCACAGTAACTGTTTT  
AGATGCAGCGTCAACTTCAATTTTATCTCCATCTGCGTTAGTTAAAGCAACTTTAGACAA  
TGGGAGATATGAAAGGATAACCGTACCAGTATCACTAACTGTTAAGCTTTCAGCTTCCCA  
CACAGAAATTGTTTCGTTTTCAAATTTTACACCATGCTGCATTGCCATGAAATCAAGATC  
AAAGAAAGCATTTAGGACATTACCCGATACTACTTTACTTGAATTAATAACATCCAGGTC  
TCGGTACCCCATCCGCCTTTTAAAATGTCTTGTGAACTTGTGGGAAAACCTGAGTCAT  
TTGTGTAACACCTGAAACAATAACCTTATTATCGCTCAGACCTTTAGCTGTAATTTTTCC  
AACTTCATGGATTACAGTTTGTATGCCAAATTGTTTCCTCCTAAATAAAAAATAAAATGC  
GACTAAAGTTAAGTAGCCTCCAAATAATTGCTCGATATTTTTAGCATCTTTAGTGCTCAG  
GTGATAAGACTCTTCTTGTAAGATTAATGTGACTACTCCAATCACTTACTTTGACATC  
AGGAGAGACGGTAGCAAAAAGTGTGGTTGTGTTATAATTCATAACTTCAGCCATCCTGTA  
GAACGACAAAGATAGTTGATACATCGTCATTTAGATATTTCTTCATACGTGTATCCGTT  
AAATGCAGCAACACAGCTTACTATATCCTTTAAATCACTTTGAGAATCTTGTGCTTGAG  
TGATTTACTTATATCATGGAACCTCGAAGTTCATCATTGTCAACGACCTTGTCTTCAGT  
GATACAATGCATGTCTAGTATTAGTTTACGGAGACGGGGAAAATTATGTTTTCCAATCAA  
CGATAGGGAATCCTTGTATCAATACTTTTGAAAAAACTTTGAAATAAGCCTCGTGAAA  
ATCAGGGAGTACCGAATGTACAATTTCAATAAGATCTCTCTTTTTCAATTTCAATAATAAA  
TGGGTCAAGCGAGCCATCCTCATTAACCTTGAATATTTCTTTAATAAGACTTTTCTTATT  
CATCCTCAACATGCTTAGTTCTTTGGTGTAGAGAGGATAATCTATTAAGCGGATGAAATC  
AATCTCTCCTATTTAGTCTGGATCGGTTTTCTTAAGAAAAAGAAATCCTTTAACTCATT  
CATTTACTTGCACCAAAAGTAAGGATCATCTTGGAGCCCAAATATCCGTCAGGGGGATTA  
CTAATAAGCAAACGTTTATAGTCTACTGTTACACCAAAACCAGCAATATTTTTATTGAAA  
AATAAATTTGAAACCTGTGCGATGATTTTCAAACCTTCGATACTCAGATATCTCAAATGTA  
TTAATGTGTGTGATACATCGATCATCAATTCGTGATTTTACAACATAAAGCTTTTGT  
GTCGGCTTAGGCAATGCATTCCCTAAATAAATAACACATCCTACATAATGGTGAATCCGAT  
AGATCATCTGTTTTAGGTGCTCGCTTGAATATGGTATTGATTATAGCGGGAGAGTCATTT  
GTGGAGTCATAATAATTTTCGAGTGATTGAACATCTGGATGAGAAGGGGAGAGAGGATCA  
GTTTTGTAATAACAAGAGACGATTCAGTTCAACATCATCCATAACTAATCTGAAGACTTTT  
GTCATCTGTTCAACAGTCATGCTCATGCTTTTTACCAACTTTCTTTTTGGCAACCAATT  
TTATTGTTCCGCGGTCTCCATAAACTTTAGAATAGTCAATATCATCGACTTGATAATCTT  
CGCCAAAGAAGGTGAGGGTAAGTCCGATTTTCAATTTTTCATGAACAAGATAAGGAATTG  
TTATGTTTGCTTGACCATCAGGAAGATTTACCGCCAATTCAGTGCCATTTATTGAAGTTG  
TCCGTTTCGAATATGCAGGGGACTTCAGTTGTTTCGCCAGGTACTTTTTATAAATTGGCT  
TACCAGTGATTTTCGTTAATTTTGCCAGTATCGATTAGGTTGTCTTCTGGAGTAAGAAAA  
ATGATGTTCCACATATTTTTATCTCAGCCTTTTTGTAAATCTGATTACTGAGAGGGTGGG  
AGGTGATGAGCCATGTTTCATCCTTAACTTAACAACCTCCGCCACGATAAATGTCAGCAA  
TTTCACCTAATATATATCTTGCAGAACCATCGCCACTAGAGTACTTAGAAGTGGTCATTA  
CTGTTTTTTTCGATTCCATCAATTGTGACTTTTTTCAGATTCAAACCCCTTAAGGCCTTGT  
GGAAAATAAGCTTACCATCATGAAGAAGTATAATTATAATGTTAACCTTGTGGTAATTAC  
TGTAGTCCTTCATTTCGAATCACCGTCTGTGACTAAGTTATCCCTAAGTCTGCTTATTTCA  
CCACTTACTGTAATAAATAGTGTCCCTGATTTCTGTGAGTTCAGGAGCACTTAGCAGCTTT  
TTATTAAGGTATTTCTCCAATTTGAAGAGGACTGAATTGCTTCTTTTACACAGTTTATTG  
CAAACAACATCTAAGTCTCAAGCTTTAATTTGTCCATCTTTATGTGCCGATTTAACTTTA  
ATTGTAATCATAGATAATCCACCGCAGCGTTCAATATCAAGCGCTCAATTTCTGCTTTCT  
GCTCCATTACACTATGTTTAAAGTGAATTGAGTTGCGTACCAAAGTTCTTGATCCCCACGT  
CATTCGTGGAGGGCTGCCACGTATTCTCAAACAAGGTCTTTTTATTTAACAACAAACATGT  
ATCTCAAGAAGTGTGCAAGAATAAGAAGATCATCCTCAGATAATTCTCGATTAACAGTTT  
CAGTTGAATTATCAGCTTTTAAATTGTCTCTAAGCCGGTATTGAAATGAAGGATTGCAT  
TTCGAATTAATTTATAAATGTCTCTTCTTGTGAGGAACATCAAATCGGACGTCTCGC  
AGTTGTTTAAAAAGGTTTCCCATATTTGATCATAAGATGTCATAAAAAATCCCTCCTCTTA

GTCAAAGAGAAGGGAAGGATCAGCGACTCCCAACCAATTAGCCAAAACCTTTTAATTTGCC  
TGCAGCAATGTCATCACTAAATTCTGAAGCAACGTCAATAATAAATTGCTTCTCAGAATC  
CACTGTGATTTTATCGAGCTTATTTTTTAGTTGAGCAATATTTCCCGATTTAATCATCTT  
TTCAATTTCTTCTTTGGTATGAATGTTATTTTCATAAGCCTCCGACTCAACAATAGAAGC  
TTAATCTCTTTGGTTGTCTCGTTATCTTCAACAATAACTAATTCACCTTTATCGAAACA  
AACGCTGTTTATTGTGAGCCATTCAACAACCTTCTTGTGGACCTTCTTTAATATCAGACTT  
CCCATTTTTACTACCAGACCAAGTGTATTGTTTATGTCCACCATCGCCGGTATACCCAAC  
AAAATAAGACGTACTTCTGTATCGTGCTAACTTAATTTTCTCAGTCAAATTTACATCCTC  
CTAAAAAATCCTCATATTTTGATTTAGATAGATACTGCAGCTTGTCTTCAATAATTCGG  
ATTGCTTCTCCAAAAGAAGGTTACAGAAGCATATTGAACAATTTTCATTTTGATTCTT  
TCATCTTCGATATCTTGTCTGTCAATTGACGCAGTCCGCCATACTCAACAACAGAATAT  
GGTTTTTGAGAAACGCCGCCGGCAAACATATAGCCTTTGTTGATAGGAAGTTCGACTTTA  
CTATTTGTATCATCTGTAAATGGGTTAGTGAGGTTAACAGCAGTTGTTCTTCCGATAGTT  
GTTAGATTTAGAGCAGTAAGGAGCTCTCCTTTTACTTCTTCTGTTAAGAAGTTCTTAAAC  
GTAGAGTCTGTTTCTTGTGGAATACGAAGTAGCCAATGAGAAGAGTGTGAGCGAGGAAG  
ATTGGTTTTCCACCATAACGTTGAAGCACGGAAGCGACTTTGTTGTATTGTTGAAGAGTA  
AGGTTTGAGCCTGTTTGAACATTTTTTGCAGGGATTTTACCAGCTGTAATTGCGCTTGCA  
GTTAATTGATGAATTTTATCGAGGTACAAACGGACTTTAGCATCTGCGATATCATTACC  
AATTTATTGAAGTAAACAATTGAATCTGTTACGAGATCTAGAGGTTAATAATAGAAACCT  
GTTGACATAGTTTTCGGAACAACAGGAAGTGTCTTGTCTTCAACACGAACTAAATCA  
ACACCAGAGCCTGTAGCAGACCAATGACTTATGCTTTATTCTTTTTTGGAAATTTAATT  
TCTTTAATATTGCCTCGTTTTTCTTGTGTTGGACATTGGCCAGAAGGGAGAGGAGCTGTGTT  
ACTCTTGGTTTTCGCAATTTTATCAGCTTGTTCACGACAAGGTTATTAATTGATGGAGC  
ATGGAAGGGTCAAGGTGTAGTACCGCCATCACCAACACTTTCTTAATGTAAGTTTGGATA  
TCAGCTTTGCCTGTACCGTCCATTTTGTATTTAATACACGGCTAAACAAGCCTTTGATT  
TTCACAGTATCTAATTTTCAATTTAAATACTCCTTTTATTGAAATTTATTTGTTATGTATT  
AGGCCTCGATTACTTCAAGGCGAACAAGTTTTTGTCCCATTGTGTAAACAAGGTCATCTT  
CATTATGTACAACACTAGGAAGTGTAGCAGAAGCATCAGCATAATCCTCATGAGGTGAAGTAG  
GATCACTTAGAATAACTTTTTGAGTAGCAATATCAAAGTGAGCCACTTGACCTTGTTTAA  
CCTCGGTCACCTCCTGTATTAATGAAAATGCAGAAACATCAAACGAGTATAAGCTGGCT  
CAAGGATAACAATTCGAGCATGTTCTCCTACACCGTTATAAAAATCTCTCATTGATACAC  
CAAGGTAGCGTGCTTCAGGAGATGCAATTAATATGCTTTTTTTTTGTTTCATCTGATAGTT  
TCGAAGCTGTACGGTTCCCCTCAGCATCAAACCAAGTTCAACAAGCATAAAGTTATTAA  
TGTCTGAACCAGTCACTTTTGCACCGTGAGCAACTGTTTTGATTTTTAAAGAATTCAAGT  
TTCCAGTAGTATGATTACCTACTTCAGTAAGGGCTTTTTGTAATCTTGTAGCCATTTTTT  
ATTCCTCCAAGTTTTAAAATTTATTGTGAAAAGCGTGATTCAAAGAGTCATCGTTAGGGA  
TTAAATTTTCCCGTTTACTTGAAAATTTCTCTAATGGTTGTATTTGTTTCAGTAGGAACAC  
TAACTAAATCAACTAACATTGTGTTAAGTTGTAATACAGCTTTTTCTCCTTCTTCATCTT  
GTTAACC GAAGCATGGATAAGGTTTTGTACTTCTTCTGTAATTTTTTCTCAGCAT  
TTAAAGCTTCAAATTTTCGCTTATAGAAATTCATTCTTCTCACTTAGTTTTGCTCTAATA  
AAGTTTTCTCGTGTTTTTCTTTATAAGGCTTCAATTGTTCCACTTCAGAATTTAATTGCA  
CAAGCTTTTCACTGGCAGTGTGTAATTGCTGTTATATCCTACCTTATCCTTATTGATTT  
GATTTACTTGTTCGTTAAATCTTTGATTTGTTTCTTCTGTTAAGTTGTGATTGAA  
TAGGCTCAGGAACAACCTCCTCCAGTTGCGCGTCATGAATACCTCAGTTTTAATGTCAA  
AATCAATTGAAACAGTATCGCCTGTTCTTGTGTAATTGAACTTAAAGTATTTGTCATAGC  
TATTTTCATCTGACCAGCTATACAGTTTACGATGAAATACGTATCATATACATCTGCAA  
TAAATGAATCTGATTCTTTATCCAGGGTTGGATCTAATTGGCTATATAGAAGCGTCCGCA  
CGTCAGAGTGAGACAATTCACACCCTTTTCTAAACTTATTCATTTTTTTCACCTTCTCAT  
TATTTTGTCTTGTAGCTGCTTGTAGCCACTAGTCTTTCAAATCGTTGAAGTTCATTAAAGC  
TTAGAAGTTTGGAAAGAATCATAGGTGGGGAGGACAATGTCATGCTCTCCACGTTTCCCTG  
AATTTAAAATTGCATGACCTTCGAAATAGATGGGGGACTGTAGGTGTTTCGATACCATCTT  
GTACAGTGTAATTTGAATAAAGGGTCTTACAACCTTGTATTAATGTTGATGCCTCTACCAT  
ACCATTCAGTAAAAGTTCACATGCATCTTTAAAACGAGAGCTCCAAAGTATTGCATCTG  
CTGGCAATACTTCTTTTTTCCATCTGGGGTTTCAATTCAGTTATGTATCCCTCGGATG  
TAAAGACACCGATTGGGACAGTATCTTTTTTACTTCAAGTTCTCCGTGCTTATCTGTGT  
CTAGATAAGCTTCATGAGTTCCCAATGCATCTGTAGAAGTATTTAATTCATCAACCTCGT  
AATATTTTGCAGCAATCGGTTTATTAATAATTGTTGAAGCAGCTTCAAGAGCAACATCCT



TACAAATTACTGTATTATTGTGAGCGACATCGAAATCAAAAATGACAAAGCTACATGACA  
ACTTTGTTGGGTCATCTGATGTTTTAATCTCATTCAATTGAAGTTGCCATAGTTTTTTCT  
TTTGCTTCTTTGTCAAATAATTTACCTCCCTTCAAAAAGTGAAGTTTTAAATAGGATTGT  
CATTACCGTTGGATGTAGCTGACTTCACTGTGTGTCGTTGTTTTATTACCTTCATTTG  
GGCGGCAACTTCATTCCCAGTGAAGGTATATGAAGTTTGATAAGGTCTAATTTTTTCTT  
GGAGTTTCAGCTCTTCAGTTTCATATAGAGTTTGTTGAAGGTAACCTTACCCAAGACTC  
TTGCCAAATTGTCAACTACGTGCTTAATAGACCAGCCCTTATCGTTTAATTTAATTAAGA  
TGTCCATTTTTTCTTTAAGAGTGAGCGGCTTGCTTTATCGTAATTCATATAGTAATTGT  
CTTTTTGGGCAGCAGGCAAAACAAGGTTGAATAACTTTTTGATAACCCTCTTGTTCAATAC  
CCTCCATTAACGCAATACGCTTATAAGATGTATCCAAGTTTAATGACGAAGTTGCGT  
AGTTACCGCCATCACCATTTAAAAGAGGGCCGGATAATCCGTAAGCAGATTGAATGTCGC  
TATTGATATGATCAAATTTGCTCCATCTAATCCATCTGCTTTAACATCTGGAAAATTGA  
TATCAGCAAAGTCAGGGATTGATACTACAGTCACTCCATCTTTTTGGTTTTTTTCCAAAG  
CCGTTTTAACGCCACCATGAATTTTTTGTTTAACTGCTTTAGGCAGCTTCATGTTTGTGT  
ATTCGCCATTACCTTTATCTGTTCCAATCGTTAGAACGGCATCAGCGTTAATAATTTTAT  
TTGCAATCGATCTTTCAACATCTTTAAGTTTCTTTTTATGGAGAACGTCATATAGACCTG  
GTGTAACCCAAGATGTTCCCAATTCCTTGATTTCTTTTTAGCGTCCCTGTGCGTAGTGAA  
AAGTTCTTTCTTGTTGGCAATTCCTTAAACCGATATTTCTCTCGATCTTTCATGAAGTTTT  
CATAATCGCTTTGTTAATATAAGGGGAGAGGCTTTTTAACAATTCGTTTCTTTGATCAT  
CTTTATACTTAGTGAACAGCTCCATGTCAACTACACATACCCAGTCTGCGTTTCTTCTAA  
AGGAGGGGAATACATATTTAATTTTCATCAAAAATAAACGGATACGGGCTCTTAGCATCCC  
CAATCCATATACCAACAAGAGTACCAGCTGTAGCTACCTGTTTTAACAGATCCCTAGTAA  
GTCTTTTGTGCGTAACCTTATGTAAGGATTTATTCAAAGGGAAATATGCTTATCTGAAG  
ACTTAACTTTATTAAGGAGTCAATTTTATAGTTGAGGGTAGGGAGGGCTTCAATCAATT  
CAAACAATTGGTGAATCTCAGCAGTCGAAATGTA AAAAATACTGAGCAAGATCTTCAATTT  
CTTCTTGAAATTCATCGGGGTTAGAAAAGTAATTCTTTAATTGTTTCGGCCTCAATTTCCG  
TAACAATGCCATTGGAAAACATATTTGAGATAAAGCCGGAAGCAAATGTAGAAGTATAAG  
TTGAATAGTCATTCAGAATTTGCTTATACTCTTCAGACTCAATGTCAACTTTATTTAAGG  
TTACCATGTTTCACCTCATTCTTTTTAAAAATAGACTAATTCATCTTCAACGTCATATTC  
AGTTTGTTTGTTTAACTGTCTTTCTAATACAGTAGCAATATCGTTGCCATAAGCCACTGA  
GCTATATCTGTCTTTTCGTTTACTCTTTGGCTCTTTAAGCTTAACTTGTCCGTTATCGCT  
ATATTCAGCTTCTAAGTTGATCATTTCATTTATTAGAAGGGTAATCTGAGCATAGCTTGA  
AAGGAATTTTCCTTTAACTTCAGGAGATAGCCCTTCATAGCCTTTAAATCTTTTCAGGTA  
TTCTTTTCCTTCATTTTCGTTGATAGGAATTTTGATTTTTCTCGTTTGAATCCATCTTT  
TAGTAATACCGCAATTTTCGCTGATCAATTGTGCATTACCTTTAATGCTATAAATTAATTT  
TTCAGCATTTTGTATAAGTACAACGCGCAGCCATTCTTTCATCGTTAATACATGAAAATGG  
CTCATATTTCTTTGCACGTTCTTTATCATAAAAAGGCTGGCATAATGCATCATACACACC  
AAGTCCGATACTTTGAGTATCTAATACAATATAATCGCAATCATAATCTTCGTATATTTG  
TCTAATCTTGTGCTTGAGTTCCTGTGTGACCTCCTACGATGCTCTCCACGTATAACAAT  
ATGACGATCATGTCCATTGGAGTTTGGTATCAGTCTGAATACAGTGTAACACTGGCATC  
ATTATCCTTACCGGCCATTCCAGCGATATCATTGCTTACCAGTCTAATTTCTCCTGGTTT  
CTTGCTTTTATATTTGAAGTTGGAATCCTTGATTAGACTGTAATAGTCAGGAGGGAAGAG  
GGGAGAAGCAAGCTTGCGGTTCTTTTCAATGTCTTCGGATTTAAAATAGGCTTTTTTCAGA  
TTCACCAAACCAGAGAGCTTCCATTTCCATAGACCAACCGATAGGATCAAAGTCTTCTTC  
GGCCATTTTCATCTCTAAACTGATCTTTATCCAAAAGACCTTCTTTAATTGCGATCTGATA  
AGGGAGACCACACAAAATATTTGATCTTTTCATCATGGCATTGTAGTAAGTTATGAA  
TCTGTTAAATGACCAATGAACCTTGTACCAGCAGGAAGACAAGTAAAATCTTTGTTTCG  
TTCTTTTAAAGTGAGCGTATTCTTCTTTTTTCGAGATATTTAGGAGAACGGGGAGCTGTCAG  
GAATTTTCGAAGTACTTTACTGATGATTTCAAATCAACCATTCTGAATTCATCTACAAT  
AAGGAGGTTTGCACGCTTGGAGCGGGCGCCATCATTGAGGCTACGATTTTAATCCAGCT  
GCCATTATGAAACTCCACTTTAGCATCATTGTTGAGGTTTTCAAATCTTCAATTTCTCG  
CCTTAAATTAGGTGATTCTTTGCGTAAGTCATCAATTTTCTCTATGACTTCACGAGCTTG  
TCTCTTTGTGCCCGATGCGAAAATATTTTAGTACCTGGGTAGAGTATGGCTTGCACACA  
GCAGTATACAGAGATTAGCCAAGTTTTACCCTGCCACGACTGGCCAGGTACATAAAAATA  
ATGTTTATGTACCATCATGTAAATTA AAAATACATTGAAACAATTTAAGTGTAATACCCAA  
GTATTCTTTTACAAAACGATGTGGGTTTGCTCTATAGAAAGAAGTCCATGCGCCGATACC  
ATCCATTAATCTTTCAGAATTTGATTTCTTTTTAAAGTTGTTTCCCTTTTTAAAAATATT

GATTCCTCGACTGTGCTTGTGCGATCTGTTGTAAAATTTTTATGTGAGGTCATTTTTCTC  
GATCCTCTTCTTCTGCAACAGGTTCTTCAACAGTATGCTTATTCATTTCTTCGCAATATT  
CCTCTGAATATTGATTTTTCAAACCAAGCATTTCGAGACAGATGCCCAAGGAAAAATACCT  
TAATGTATTTCCCGATTTTATCAGGATCTTTCCATCTAGGCTGTGGCTCAGGAATAGGTC  
TCTGATTCTCATATTTTTGATCAGAGTGCCAAAAGACTCTTGTTTCATCTCCACTTGCTC  
CAGTTTCTTGAACGGGTTTTAAATTACTTGACCCAAGTAAATCTTGAAGAGTTATTTGCT  
GCTGATTGACTTTTTACCATTTCACGCCGTTTGCATATATCTAGCCGAGTCAAACATA  
TTTTATTTATAAGAAGTTCCATTCCCTTAGAGTCGCATTACATACCTATTCGTGAAGTCAA  
TGTACTCATTCTGAAGCCAAATAAAATCTTCAACATCAAGACCACGACCCCAAGATTGCA  
TTAATTCATCTATGTCTTCCTTAGATATATCTTCTGTACTTTAGCTAGTAACAATTGTG  
TTGTATATTCTTGTCTTCTTCAAAGTCAAACACTCACTGTCTGCCCAAGTTTTTACTTGT  
AATCTTTCATTTCGGATTTTTTCATATAAGTACCTAACACATTTCCAGCTGATTTTTTCT  
TGGACTCTGATTCATTAACAGCGGAAACCCACAAGTCGTAAACAAAAGGACGGTCAATCA  
TTCTTAAGATGTTTTCAACATTCTTTAAGTTATCTTTGTCTTTTTTGGAAATTCATTCTGGA  
GACAGCTCTTACATACTGACAGTTTGCCTGTTGCAGAATTGATAGGAGATTCCGATATAT  
AATATTGATTGGCATTTTGTTCTTTGCCGCAGCATGAGCATTTTATCTTTTCAGCAGACA  
TATTTACCTCCCTAAAGTTTATGTAAACGCATTTTACGAAACGCCCAGCAACAGAGCGG  
AAGGGGAGTACCGCAATCTTCGCTGGGCGTTCTAAAAGGTGCTTAACTATAGGTCAAAT  
CACCACTGGGAGACATTTTCGATATCTTGTGTTTTTAACTTTTCTATCACCATAGCCATTA  
ACCCTTTACCAATTCCACATGTATCAATCAACAGTTTGTGAGGGCGTTTTTCTTTTAAAA  
TCTGAACCAATAGGTCTGCTTGATATCCGAATGTCTGAGAAGCTATTCTTCTTTTAAATAT  
TTTCAAATTTGGAGTCTTTAACATTAACAACACTAAAAGTGTGTAATACTGTCCGGGGAT  
CAACGATTAACAACCTATTTCCTTTTGGAGAATCTACGCCTATTTTATAATCAGCAATGT  
TTTCGCTTTCAACATTGCTACCTAAGGTGTAATAAATAACTTTTGTATTTGATGCAAGTC  
CCATTAGTTTATGTAATTTACTAATAACAGTAGGTATCTCTTTATCACATTTGTATCCAA  
ACTGCTTGAGTTGGGGAAGTGTTCCTAAGTGCTTACTCAGATATATAAAGTCTTCATTTCG  
TCATTTTCTTCTTCATCCTCAATCGTTATTTTGTATTAATTTAATAAACCTTTTTGCAGT  
CAACCATTAATGCGCCTCCAATCTAAATAAAAATTAAGTTTTATCAAAAAAAGATTAATA  
GTTTAACTTTAGGTTTAAAAATCCACTATTGGATGTTGACATCTGATAAAAAAGTGGATT  
ACACTATTTATGTATTACGATATCTAAAGGGGAGATCACGTTATGGAAAACAAAGTTACA  
TTATCAGATCTTGTACGTAATAAATATGCCAGTGATTTTAAAGGGTTCAAACACCATCTT  
ACAGAAAAAGAGCTGCTTGAAGAACTAGCAAAAAAGATACTGAACCTTGTTAAGAATGGT  
GAATATAGAAATGGAGTTCTTCGAGGTGTATTAATAAATTATCTACACAGCCAGTTGAT  
CGATTAGGATTTTCACGTGAGGGTAATCGAGTTAAGTATTATTTTCATTACAGATAAAAAA  
ACTGAGCTTCAAATGTTATTAGAAATCTCATCAGTGAGAATAAAGAAAAGGAATTATTG  
ACAGTTGATTACTTGAATGATTCGCCTGAAACAATTGACTATAGAAAAGATGTATCTACT  
CACGTTAAAGACTTAGAGGGATTTACAAGATAAACATAATTAAGAAGGCCTAATAGGAG  
CCTTCTTTAATTTAATATGTAATCGTATTGAATAATCCGACCTTTACCGGACTCATAAAT  
TGAAAGGTTTGTCCAGCTTTGGCACCTGTCATTAAGCTGTCACTGTATTCATCGGAACC  
CATTACAGAAGGGAGTTGTATAACTTGGATATTATGAGTGGCTGCTTCACCTACAGTGAG  
CATGTTTCCGTGGTGGAAGTGGGAGATGTACATGTAATCGTCGACTTTTCGTTTCATCTG  
TGAGATGTCACGAATGGCATTCTTTTTGTTTTTAACTGGTGTCCGTGACATGCGACAAT  
TTCAAGTTCAAGTAATTTAAAATCCACAATTCCTTCGTCGTATAAAGGAACTCCAATTCG  
CTCATTGTCTTTGAGTACGTCATGGATATAAGTAGCTATAATACGCTCTACATCTTCTTT  
AGGCATTTCCGAGCGATTTGTATTATGTAATCTTAGTTTCAGTATGATTTGCAGAAGGGAT  
ATGTATGTAATTTTACGCTGCTTAGAAAAGTTCTAAAAGCCATTCAGCTTTGTACCT  
AGAGTATTTTATCACGTGGTCAATAAACCCGTAAGGGCAGTTAATTGCGATACCGG  
CAATGCCATACCTTCGACACTGTCAGCACCATTTAACACGACCAGCTCATCTAAATTTTT  
TTTTTGAATGTCCTCAACAGTTTCAGAAAGAATCTGATTCATACGCTGCAAATAACTCTG  
TTGGTTGTATTATTGTTGTTGCTTTTTAAATGCTTCCCGAAGTGTTCATCTCAAACCC  
TAGAACAGCAGCTCTTTTTCTTTCGTTCTTATTTAATGGATAGAAGGAAGGGGGAGGGAG  
AGTACCTACTTTCTCAATTGCTTCAGTTACAGTTTCATATAGCAGCTCTGTTCCGGCCTTT  
GACGCGTGTGTTTTTATGTATATCATGCTTTACGGCTTGAAGCTTTTTTCTCTTCCAT  
GATTTCAACCTTTTCGGTTCCAATTCAAGGAGAGAATTTAATTCATCTGACCTTTC  
TCGTTGGTATTCAACTCCTTCAATAAAGTTGTTGAACCATTTTCTATAAGCTGATTCACC  
TTTAGATTACCAGTTTCCCTTGTGATTAACTCTATGATTTCTTCCAGTTTAGATTATA  
AATGTCTTTATTAGAGCAGATTCTTGTTTTCCATTCTTTAAGGTTTTTCATCTGAGTGACG

CTTAGTTTGAAAAGGATCGATCATTTCAGTTAGTCATCTCCTTACTCAACGCCTTTAACAG  
GAAGTTCATTTTCTTCTTTTACAGTAATTGAAACATTTTTCATTAAACTCTGAAAGAA  
TTTCTTTGAAATCATATGTGTATTTCAGCTTCTTTAGTTTGTTCAGTAACTTCCATTACGT  
CCATATCAAAAAAGCCTTTAACATTAATTTGATGTACTTTTTTGCTTGCCATTTAAATTC  
CTCCAATAATTTTCTATTTACGTACAATAAGCTCCTTCGGAAGCCCGATGATCCGAAGCA  
TCGGTAACTTCCGAGAAGGGGATATAAAGGAGATGAAAGATAAGTCAGATAGGCGTTGGG  
GAAACGCCCCGAAGGAGATTATTGATAACTTGCGAACCGGAAGGCTCGTAAACACATTCCG  
GCTGATCAGTAAAACGCAAGCACAAAAAGGCCTTCTAACGATTGAGAAGACCTTGTCTG  
ATTACATTCTAACCCCGTTTCACCTACGTCATTAGCTCACGTTGGGACGCAAGCCTTCAG  
ATCGACAGGGATTACGCTGATTTCCGGTTCAGCGACTGAAACCTTTGAAGTTGACAACT  
ATAAGTAAGTCGAAATATCAAAAGATGCCAAAATAACGTCTTCAGGAACTCCTTGTACAT  
CATGGTACATGAGCATATAAACCGGTAATCGCTGTGCGAAAACCTGATTCTCCTTCTGCAC  
ATGGCAGATGAGCTAATTCATTTAAGAAGTGTGTAATAATCTCCGAATTCACAGCGAAGCC  
TTGATTAGTAGCGGCAATGGAAGGAATCCCAAAGCTGGACGTATCGCGGGATCTTTAGTG  
TCCCCACGCGGGATTAATCGGCTACTCTCGATCAGACAATGAAATACTAACTCTAAACC  
TCGACACATTATGGTGGCGAAACACCAATAATGAGAAGGAAAGACCCATTATAAGCCTTC  
TCAATGGCGTTTTTCAGTCTCTTGTTCAGGTTAAACGCCTTATTGAGAAACAAAGCGTCT  
CAAACCTCTGCCATTTATTTTGCACAGTTTTCTCTGACCCGTGTAAGGAGGTATGTGCAT  
GGGAAAGCTAAGTTTCTTGACGGAAAAGTAGCGTATATGTTACTAAGTGAAAGGAAAAGG  
CAAGACCGAAAATAATCCTTTTCTGTGAAATGACAGCGGTGATCAAGCGCCCAAACCAT  
ATCAATTATTTTACGAGGGTATGTAATTTCAAAGCCTCGTTTACCCGGAAAAATTTTGT  
GACCGCATAATAAGCATCGAATCTTACAAGGGCATTATTTAAAGGGAAGGGAGACGCATC  
TACATTCCCTAAGTGTAAGGCGAAGCAGTACACCGCAATTAATATTCAGGGATACATGTC  
ACCCATAGTAAGACTGTGATGGGATTCACCCTACATAAAAACTTGAGTAGCAAAGGTCT  
TACCGACATGTTTAGCCCGATAATAGCCATTTATCTGTCTCCTGAAGATACAGACATCCG  
AGTTAACTCGCACCCCTCATAAATGACTATTCTCCGACTAACTGCAATGACCAGCCGCAG  
TTTTGTGTGAGAATGATACAGAAAAGAAGGGAGTAGATATTGTTAATCGAGAAAAGCTA  
GTTACACTGGAGAGGAATCTCCACTAATATTCATTTGGATTAGTCTTTACCTTCATAAA  
TGAACATTAGTCGAGAAGTATATCCCAAATATCAGTAATCAACTAATTATTGACGGCAC  
CCCCATGCCATAAATAAATAACTATAATTAATTAACCCGGAGTTGAAGATGAAAAGCGAA  
AAGAGGGGAGGTCGCCAATTTCTCCATAACTTCCAACCTCTGCCACTTTTAGGAGCATAA  
GCTCTTTGTGACAAAGCGTGCAGGTAGCCTTTCTGTCTCCTCATTAACTGATTATTTA  
GCTTTGACTGTGTCTTTAAGTGCTTTTGTCTGGCTTAAATGTAGGTGCTTTTGTAGGCGGA  
ATATCAATTTCTCTCCTGTCTGGGGATTTCTCCCTTACTAGCTGCGCGTTCACGAACT  
TCAACAGGTCCGAAACCAGGAATACTTACTTTTTCTCCACTTTTAAATGCCTCTGAAATA  
GTGTCAAAGACTTTTTCGACACTGGGAGCTCCTTCTTTTTTAGATACCCCTTGTTTTCT  
GCCCTTTAGCGATTAGTTCTGTTTTATTACATAATCAATTTCTCCTAAGTATTATTA  
TTTATTCTAAATGAACAATAAAGATTGTCTTTTATAAAGACGGGGGCAACGTACTAGCCC  
TTTTATGTGGAATTAGCTTTCTGTCTCCCTTATGACGATTATCTCCAATGTGCTCTCA  
ACCCTGTAGCACCAAGGGATAAAGACACTTTTTTGTGAAAGTTTTTTTCGGTAAAATCGC  
TGACACCTTGGGGGAGTAAGGCTCAAGGCACTTTCTAACGCTGGTTAATTTCTTTTTG  
TTATATTTTTTGTATTTGTTCACGTTCTTTTTTCTCTCCACAAGACTGACAGTACTTCGCT  
TTGTTAGATGTTGGCTTAAAAGCTTTTCCACAATAACAGCATCCTTTAAAGGTCTTTAAA  
TTATACTTAATGTTCTCCAGTACAATATCGCCAAAGCACTCCCACAGTGTGATTTGTAT  
TTACTTTTTTCTTATATAGATGTTTTACCAATACATCTGTAATAAATCCGTCATCATT  
TGATTTCCAATAGTTTTTGTGATAATCTTATAGACATAAAGTTTTTGTCTGTTTA  
GCTTCTTCATCATTATGAGCCATTCTTTATTTTCGATCAAGACGTTTATATTCATTTATT  
ACGGCTTCATTAAGTTTAAATCTCTTTTGTGTTTTGAGTAAGAAGCGGTAATCAAATTTTCT  
GCAACTGCAGCAAAGTTGATTCGGTTCAGAAGGGATAATGGAGTCTAACTTATTTACTGTA  
CTTAAATTAATCGATTCTACGCTATGTTATTCTTTATCCTTTGCATTGATGAAGAAGTGG  
GGCACTTTATTATTTATGTAATCTTTGATTTTCTCATCAGCGTGATCAGGGCGGGTGGGC  
ATGAATAAGGTTTTTGCAAATCGATAGTAAAGTTATTCTCCATGCATAACCATTTGATC  
ACGTCCAGGTTTATATTGTCACTGTTCCATATCTTAGTGATGTTGTTACTGTACTCCCCG  
ATATTGATTCCATAAGCAAGAGTTAGTGCTTCATAGATGTTTCTGCTATTAAGCTCTTGT  
TTCTGGGCTACAGGCATTTACATAATAACAAGGAACGATGTCCGCCATATTACGCTTCGCA  
ATATTGACGATTAGCTCATCAGAAATAATAAAGGCCTTATCCCCTTCATTGTCAAACCTGC  
AGCAGCTTGGATATCGGATCATGAGTGCTGGTATAAACACCTGGGGTAATGAACCCTTT

TCATATTCCTCATTFTTTCTGGTTCACCTAACACCATGCTCTCTGAATAGGTGAGGGGAG  
CGGAGGATATCAATATACCCTTCATCATATAAAGAACAATGGACATCGCTTCCTGAAAGT  
AGTCCTTTTGGACTCTCAATTCCAAGAAACAATCTTTCACAAAAAGCATATAGGTCAGGA  
CATAAATTTGTGTACCGGGCGTCACTGACAAGTAATTTTCTGATTTCGGCGTCCTTAATC  
TACTCTTCTTCTCATTCTTAATGATTTCTTTGGTGTGATCATCATTTAGCAGCTCAGGA  
TATATTAGTAGAGCTTCTTGAAGGCTTGTCTTATGTTTATTTTTCTCGGTAGCCCCTAAA  
ACTTTCATCATTGTTTCTTTATCAGTGACTAATCGAGTAATCTCACTAACAGTCTTTGAG  
CTGATTTGTTTCAATTCCTCATCTGTGATATCCGTGAGTGTGTTGTAGCATCTGGTAAGTC  
AGTTTTCCCTCAACAGATGGATCTTCTTCATTTAATTTAGCTCCTAAACTTCCATACTTT  
TTAAATTTATAGCGATAACCATCCCAAGAATCATAGTACCTCCACATCTTAAACTGGCTT  
TTCGTAAAAATTATTTGGATATCATCATTAAATAATGTGCCATTCTTTACCGTAGACGTCT  
TTAACTATAAATGAACTGTGTTTTTCAGCAAACCTTTCTAAAGTCAAATGGAACAAGTAGC  
CCCTTAACCCAAGGTAATCTGCCATAAAGCTTTTCTGACTCAAACCTAGGGAGCGTCATT  
CCACAACCATCTGTATGTTCTATAGGAATATCCATAATCATAACGTGTGATTTTCATATGTA  
TCCCGGTCAATATAATCAACTAGGCTGGAAACATTTGTTTCTAAGTCATTTACGACAATT  
GCTTTATCAATATCAATTTCCCATGAACTGCTGGCGCTACTCGATAAGGACATGTAGCTA  
TTCCATTTGTTTATGCTGCTTCCACCTTGAGCATTGATATGCTCCACACTAAGACCACAA  
GTTAAAGCATTTTGATACTTATCTAAGGTGCTTTGCTTGATAAAAACAAGATTTTTTTGTT  
CTTATTTGACCGGCACTGCTAGTGAAATAAACGTATTTCTCATTGTTATGTATGAATCCT  
TTATCAATAATGTCCCTTAAAATTTGAAAGTGATAAGTTTGGACAACCATGATCTCTTCA  
GAGAGAGAGTTTTCTTTGATTCCCAGCGTTCGAGTTAAGACTGATTCAAATAATGTAATC  
ACATTATTATCTTTCAGAGAATCTGTTCTAAGTGTTCTTATTTGATTATGCTCGTTAAAG  
GCGTTATAAAGCTTTTTCTTTTAAGGAAATAATCCTTTGCGTTAAGTACTTCTTATGTTTT  
TTATCAACATGTTCAAGTTTTCTGAGATGATCTCTGTACCTATATGATGTTAAAGTCTTG  
TTATGTAACCTGTTTTCTTGATCATTATAAAAAGCAGAAGTGTCAATACTGTAAATATGT  
ACTTGTTTATTTAGGCCCTCTTTTTTCCCTTCAATAAATCTCCCCTTATTACTTTTTAT  
GCATATTTTTTGATTTAATAATCGCTTTTTAGAACTTATGTACAAGATTTTTATATGTA  
TAGCTCTTTTTATCGATTGTTCCAAATAGTTTATAGTCTCATAAAGAGTGTTTTTCTTCT  
TGTGAAGCAGTTCCTTCAATAATAGCAGTCTCTAAAAATCCAATTAATTAATAACATG  
AACGTTACTTTCTCTGAATCCTTTTGCATTATCTCACCTCCTCACTTATGGAGTTATTAT  
ATACATATTATTTGTATTTGTCTATTGTTTTTTCGCTAGTGTGTTAATAGCTCCAGGTTA  
AGAGGTGAATTCTGAAGCATTTAGAGAAGGGGGGATTATCGTAATCTAAAAACATGCTTA  
TCGTAAAAAATATTAAGAGTTTTAAAAAGCCAGTAAACATAAGGAGATTTGCTGTATCGA  
ATGGTGATTAGGGGATAAACGATCGTAAAACATAAGTGAGAGTAGGGGAAAGTGGTTGCT  
TTATCTAAATATTGAAGAAATCGAGTAAATTTGAAGAGGGGAAAATGTTGATATTTAAGG  
CTTTTACGATAGCGATTACGATGTGAAAAAGGGTGATTTTGGAGGTGGAATTCGGAAAATG  
AAAATTTGGATAGGGTGTGGAAATGGAAGTGCTATGGGTACATCTGTTCCCTAATTTTA  
CCATTAGATGTAAATATACCCCATATATTGGTATTGTAATGCGTGTATAAGGAACATTA  
TACGTGCATTTAATGACTTGGGCAGGTCTGCACCAATGCTATCATAATTCAGGTCAAAC  
ACAAGAATTAATTTTTTAAAAATAACTTGTTTTTCAATTTAAAAATGAATAACCATTCAT  
TAAAAATAATCGTATTTATAACGCATCCGAGGGAATCGAAGACATAATTTATTCTTATCC  
ACTTACATTACTATAGCATATCTTCATATATAACCCTTGTATTTACTGACCATCTCAGCC  
TTGAAAGGTAGTCGGCAACTTGTCTTTAACTAAGGTTCTCTTTTTCAAATCAACATCTCC  
TTCTGTAAACAGTTTGTTCCTACACTGTTAACAATTAAGAAACCTTTAGTTTCTCCCGA  
TATATTTTATGAACTTTTTGCTTCTTTTTGTTTACGAAACTATTTGCTTATATAATAAT  
AGTCAAAGTGAGGAACCTACTATGTTTGGCGAACGTTTAAAAAAATGCCGTACCTCCAAA  
GGATATAGCCAGCAACGGATGGCGGATTTCTTAGGAATTACGAGACAGAGATATGGGAAA  
TATGAAATTGGTAAGGCTGAACCTGATTTAAAAACCCTTACTAAATTAAGCAATATATTA  
GGAGTATCTACTGACTTTCTTCTAAAAGGCACACATGCACAATTTGATCTCGATGAGATA  
TTAAATGATCCAGAGACTTTAATTGCTGGATATAATGGAAAGATCTCGGAAGAGCAAGCT  
AAAGAGTTACAGTATTATCTTTTTAAAAAAGAGTTCGAAGAACATTAGTAGCTATTCTTA  
ATTCTTCTGGTAAAACACTTGTTTAATAAAAAAGAAAACAACTGTTTAAACACCATTAAGT  
TAAATGAAAGAAAAGAAAAATAACTGGAGAAAAAAGGGGAAATGAAATTGTTTAAAAAA  
TTGGGGATTTACTATTAATCACTTCACTGATATTGCTCGCGGCTTGCAAAAATAGTGAA  
GAGTCTTCTTCATCATCAGAAGACACAAACAATGCAACTGATACCAACACATCAGAAAGC  
CAAGACATCTCAGTTAGTGGTCTGAAAAAGTTGGGGATGTTTATGAAATTGATGGTGGT  
ACAGCTAATGTAATGGCCATCAGCAATAAAGAAACCCTGTGAAAACCTGGCCCGATCCAA

TTTACTGTAAAAAAGTAATTGCCGCTGTTGCCAACGAACAACCTTTTTATTGATGTT  
CAAATTGAATCAGAAAATACATCTGATGAAGTAGTTCGTTTCAGACCAAGTCTAGCACAA  
TTAGCAACAAGCGCTAGGGTACAGATCGATGAGCCATCATTGTTGGAAAAGTGACAGGCTT  
CTCGACGAGTACGTAGGAAAAGTACATGATAGTAGATCCATCATATATGTATTTGATAAC  
GAAGACGATCTAAAAGATTTAGAATCAATTCGGCTGAGAATCTCTTCTCCATTTAATGAG  
GACTTAAAGAATTTAGGGGACAAGCTAGACTTAAAAATTAACCTTAGAGCATTAAAAACAA  
GCCCTATTTTGGGGCTTTTCTTTAGAAAATAAAGTCGAACATAAGTTTTTTATTTTGTGG  
TAGGAGGCTTTACCTTGTATCATATTTCACTTCTTGAGGAAAAAAGACGAAAAATTTACA  
CCGGATCCCATCATACTCCACCTAATCTCACTCATACTAATAACACGCTCTCAGAGCCA  
ATATAACACCTCTCTAAGCATCCTTAATCAATTCACAATCCATTTGTATTCTGGTTCATT  
CAAACAGCACACAAGGCATCTTAATACCATCCATCAACACACAGATAACTTACCACAAAT  
ATAAAAAATATGTATATAAAAATCATGAATTATGTTATAATAGAGTCATAGGAAAGGAGG  
TGTACATAGTGCTTGAGAAAATAGGTATCGTAGTTGCTTTCCTCATATCTTTAACGGTTC  
TTACAATCAACAGTCTAACAATAGTTGAGAAGGTAAGAAACCTAAAGAATGGGACAAGCA  
TGAAGAAAAAGCGTATACACAAGCGGCTCCGACCAAAGAGACAACGCCAACGTATACGCC  
GATGAGAGCTAAGCTAAAGGGGAATGAACTTCTCCTTTAGCTACTACCCATATTATAACA  
TGATCAATCACATTGCAAACATGAATCGATTCTCATTATGGTTTACCCATATCACATTCA  
TTGGCTTATTCTTAATGTTTCAACTCATCAAAGATTGCTTCAGCAGCGAAGGACAGGGCGC  
TAATCAACACAATTTTTGTTGTCACATGTATCATTGCCATATTGTTATGGATCATCTATT  
GTGTATTCCTTAAACTAAGAAACAAGTCACACTAATCATATAGGCCTCATGGTATAATTA  
GATCATTGAGGTGAGATGATTGGAGAAAAACGCCTGGATGCTATTCAGCAGCTAACAAA  
GGAATTGGAAATGCTCGAGAAAGATATTGACTCCATCAAAGAAGCAACTGTCAGAATTGA  
GAAAGACCTTTTAGAGTACAGAGAAGAGATAAGCAAAGTAAAACAAGATGATTCAGTATT  
AATCATGCAGCAACACAAGGATAATTAATATGCGTTATAAATAAGGGAGCGGTAAGGCA  
ATTATCGTTGCTTATTTTTCGATACAAAATTAATAATAAAGGAGGATATATGGAAAGAGT  
TAAAGTTATCGATTCTATTATGGGATCTGGTAAAACAACCTTACATTATTAAGATGATGAA  
TGAGGCACCAAAGAATGAGCATTTTATCTTTATCACACCATATCTTGATGAGGTAACAAG  
AATAAAGAGGGCATGTACGAATAGAAAGTTTTACGAACCAAAAATACATAGTGAGGAAGG  
GGAAGCGCTCTATAAACTGGATTCATTACATAAACATTTAGCAGATAACAATGACATTGT  
AACAACTCATGCTTTATTTCAGTATGGCAAATTAACAACCTAAAGAATTGATTTACTCAGG  
CAATTATACTCTTATCCTGGATGAGACTATGGAAGTGGTTAAGAAAATAAATATATCCAA  
GGATGATCTGGATATGCTGTTCCAAAATGAATGGATTAAGAACAATAATGGCACTACCAT  
TTGGAATGATGAACAAGAACGAAATCTTAATAGGGAATATAAAGGAGAGTTCCAAACACT  
TAAACATTTGGCCAAGAGTAAAAACTTAATTTTGCATAATGAGTCTGTATTGTTTTGGCA  
GTTTCCTGCAGACATCTTTGCCCAATTTAAACAGGTCTATAATCTTACATATTTGTTTGA  
TGCTCAGATTCAGAAATATTATTATGACATTAACGGAATAGAATATGAACTTTATGCAGT  
AGTCAAAGACAATGACAATTATAAATTAATGCAGCACAGTAGGCAATTTGATAAAGCAAA  
GAAGGATGTCCTAAGACGTAAAATTAATAATATATGAAGGTGACTTGAATAAAATTGGTGA  
TGATTATTATGCATTATCAAAAAACTGGTTTGA AAAACGTTTCAGTGTTACATAAACGGCT  
TAAGAATAATATTCTGAATTACTACCAGAATATACTTAAATCAAACCTCTAAGGGTAATCT  
TGGGACAACCTTTTAAATCACATAAAAGTAAACTAAGTGGGAAAGGTTATACGAAAGGCTT  
TTAGCCTGTAACATAAAAGCAACGAACGAATACAGTCACAAAAGATCTTTGGTTTATTC  
AATAAACAGATTCGTTAATCCTGCAATTGATGATTATTTTAGATCCAAGGGAATAATCAT  
AAACGAGGACAATTTTGCTTTATCTGAGATGATTCAATGGATTTGGAGATCAGCTATAAG  
AAATGGACAGGATAGTAATATATATGTCCCATCATCACGAATGAGAAAGCTGTTAATGGA  
TTGGTTAGAGAACCAGAGATAAGAATAGCGTATGAAAAAAAAGCAATAAATCGTTTTTA  
AAACCCTTGGTACATAAGGGTTTTAAAGGGGTCTCTCGTAGAAGAAAAGAAGTAAATAAA  
TTAAATAATAAAAATAAGAGAATGGGGGTGCTGCTAATTGTTCAAACGGTTCGTTTCGTCA  
CCTGAACAATTTTTGCTCACACCACCCCAAACCCCTCATGAGCAATTAATATTAACTC  
TATATCAAATACAAAAAATATGTATTTAATTATTGATTATTAAGATTATCAAGTTATAA  
TATAAATAACAATAACAGATAATATGTATAAAAACAGGAGGTAGTTAAAATGAATGCGCA  
ACTTTTTAATCTGGAGTCTAGACTTGATGATTTGGAAAATGAAATTAATACACAGTACTG  
TGAGTTAGATACTAATCTTGATGCTCTTAAATCCAATCGTATTGAGCTGGAATCACAGCT  
TGAAAAATTTGAGTCTAGTCTTACAAATAGCTTACAAGGAAGCATTTCAAATAACTGCCG  
AAATGACCTCCTTAATCTGGGATACACGCTTTCACAAGTTGATTGCATGTCTGACGAAGA  
AGTTTACGCTGCACTCGATAAAAATTGATGAAGAAATTCCTAATACTGATCAAGATTATTC  
TACGGGATGTGAAGATGTTGAAAAACAAATCATTGAGATGAAGAGCGACTATTTCAATTGA

TCGAAAAGAAAGAGGGTCAGGGAATTTTCGATGAGGCATGGGAAGGAGAAATCCTTGATTT  
AGAATTTGAGTACACGGTTCTTTGTTTAGAAAAGTGGTTAGAACCACTCAATTATATTAT  
TACCTGGGAGGGATAGGAATTAGCTTTAACAAGTGATTATACCGTTTTAAATGAGTCACA  
ATAGTTCAAAGCAGCGATTCTTTTCTTGAATAAAGAATGTTTAGCTTGAGATATATATCA  
AAATAAAATGCATATCTTAAATAGAATATGGATAGTGAAAGCTGTACAGAACAAAATTGG  
AGATGGTCATGATTAATCTTCAAGAAGACAGGTTTCATTAAATAATCGCATAGAATTAGGG  
ACAGAGAATTAAGAAAAGAAAGAGCAGGTTTGGAACTCTATGGGGAATGACCTCCTTAGTG  
AAGGAATTGCAAAGTAATGAAGAAGTAAATAATAGACTTTAAAATTTGAGAAAATAAT  
TAGGTGATATATTTGGAATATATAGCTCTTGAATCCTCCTTTTTAGAGTACGATATTAAT  
GAACCGATTAATAATCTATACCGGCCACTTTACACTTGAAGTTGCTGATGATTTTTTTGAA  
ATCTTGGGAGAAGTTAAAATTGCATTTTTACCAAAGCTAGACTATTATTTGAAGGAGCC  
ATTTCAAGCAATCTTAGCAAGCTTTTCGAATTTGAAAAGGCAATGAAAAGTAATAATATG  
ATGATTAATGTACCTGGATTTATGAAATCTGAATTTCTTATTTTCAGGTATAACAGACGGA  
AGTAAAGGGAACAAAGTATCAGGGATACTAAAACGATCTATTTTAACCTCAGCTGAAACT  
AAAGTGAATAGAATGGAATTCACGGTGGTTAACTTCGTGAATGATTTAGGTAGAAGGATT  
GTGCATGGAAGGTTTAAATTTTCAGGGAGAACAAAATTAATAATAAAGATTGGGAAATA  
ATTTTGGATAAGCAATATGACTATTCAAACAAAAAATCTTTGATAGATTAAAAAATTCG  
GGTGGATACTTAATAACACATGTAGGATATTTAAAAGAGTGGATGATAAATTATTTGAT  
ACTAAAGAAGTAGAACCCTTATTTTCAGGGCTTTATTGGTTATTATCCTTTTCAGCAGGT  
AGACATGTTGCTATCCCTACATTGGAAGGATACCACAACGAGGAGGTAATATGGAGTAAA  
TACCAAGTTCCATTAATAGATGGCTGGACTAATAATATTACTTGGTTTCCAAAACAAAA  
TCTCCATCCTTAGAACATTTATTACCATAGGTGATTGAGAAGCAAGAAGATACTTTTTGG  
AATAAAGTTTTATGGGAAGTGTTGAGTTGGTACTCCAAGCACATTCATCAAGTATAGTA  
GAAAACAAGGTGGTATCTGTTTCAGGTTGCATTGGAACTTTGGCGTGGGTGTATCTTATT  
GTACACAGAAAATCCAATATTAGTAAATCGAAATATAAGTATATGAATGCAGCAGAGAAA  
TTTAGAGAAATATTATCTAGATTTTCAATTGACTTATCAATACCAAACCTCTTTATTGAC  
ATTAAGGATAATTATGACGATGGCCACACCTTTTTACTGTATTTAGGAATAAGATAGTC  
CATCCTACAAGGGAAGTTGATTTTGACAATCCGATAGATAAGCTCCATGTACTTTATCTT  
GGTGTTTGGTATCTTGAATTAATAACTTTGGAATATTGGGATATGAAGGAAGTTATGTA  
AACCGTTTAAAGTTACCTATAATAGAAGGAGTATATGAATTTGTCCCTTGGAAAACAAGA  
GATAATTAATAATGTCTTTATAAGGATTTACAGTCAGTTGGCGATAAAAATTTCTCAGAG  
TTGCCATACAAAAACATTTGCTTTTGACTAAGTATCTATGTTGTAAGAAGTTAAAAGG  
TTTAAACGGTTTTTCGATTTAGATCACGAATAACAACGATAAAACGAACTTAGATTTATGC  
ATTATTGACCAAGTCTTATCTGGGTCTTTTTTATGTATCAGTTGATTACTATAAGGTATC  
AATAAAAGACAAATGAAAAGAGTGGAAATTATGCTTAGATCAAATTTAAAGTCCATAATAG  
ACGAAAGAAAGATCAGTATCCGGAAGCTATCTAGAGATATTGATCATGAGTATCCAAGTG  
TCAGAAAGCTTTATAATGACGAAATGGAGCGGTATCCAAGAGATCTGTTAGATAAAGTCT  
GTACATACCTAAACATCGAGCTGCAGGAATTGCTGATATTCGAAAAAAGCCATAACCATA  
TCGATCACTCACGATGAAAATGGCATACTAAAGTTACAAGCATAGGAAGGAATTACAAC  
TTTCCAGGTCTACATAAAAATCGTTCTTATATGAAAAGGTGAACAATTAATAAGGAGAAC  
ATAAATGGATTTGTATAGAAAAGCTAAAAGGCTAAAAAAGAATTATCGAAACATGAGGA  
AATTAATGATTCCTTTGAAAGAGCTTGCATTTGATATTTTTAAAGAGTTAACAGTAAAACC  
TGAATTTATAGACAAAACACCAATGATGTTATTGGGGAGGAAAAAATTAACACCAGCAC  
CTTTACAAATAAAGAAAGGTTAGACATTTTAATTGAATGGACTATTGAAATAGATCCAAG  
ATTAAGTTTTATTATTGATAAATGCGATATTTCCAATAGAAAGAACGGGTGGGGATGATTT  
AGATGCTTTTATGGAGAATGTTTATACAGAATATATAGAAGAATTGCATAAGCTACCCAA  
TAGAAAATCATTTCGGTTCATCAAAAATCACAAAGATAGAATCTTTTGCGCAACAAATTAC  
TAAAACAATTGAACTTTACTTAGATGGTTATGTGCATTTAGCATATGCAGAATTTGATAA  
AGGAATGAATATCTTTTCTGAAGAGGTTAACATTGAAGAGCTGCTCTTATATAACATTGA  
TAGTATTCGTATTCCTTGTAATTCCTTTTGAATGAGAACCAGTAGCACAGAGGTTTTTTTC  
TAAAGATGATATGTTTCATATACCATTTGAGAAGAGAGGAATAATACGCACAAATCGTTT  
TAGTATACCAGGATTTCCATGTTTTTACGTTGGAAGTTCATCACTTGTTTGTGGGAAGA  
ACTAGGAAGGCCTGACCTAAATACTACCTACACTTCGGTTTTTTCACCTTGAGGATGCAGA  
TATAAAAATTTCTGGATTTAAATGTTTCACCTACGGAAGTGGCAGATAATCTAAAGAAAT  
TTTTGAAATAACATTTAGAAGAAAATATATAACTTTAATGCATACTTTATGACAAGGAA  
TTTAATATCTGCATGCCTAATTAGAGTAAAAAACAACAAAGACATTTTTAAACCAGAATA  
TATCATTCTCAATTTTTGCTTGAATGTGTTAAACAGACAGAGTCTTCGGAATACTGGGG

AATCTGTTATTTGTCTTCTAAGATTAACAGACAAACAATTGAAAATTTCAAGCTATATAA  
GAATTATGCTATTCCTGTTAGGCCAAAGAAAAGACAGTGGACATTGTTTCGTTATTGGGCGA  
GACATTCCAAATATCTGACCCCGTAGCTTGGGAAACGTTCCAAAGTCATTAGGACTCACC  
AGAATCGCTTCCTATCAAAACTCCATTATTTCCAGAAACCGAAGGGACTCATCATGATAA  
CCATAAAACAGAGTTGGGGAGACTAGAGGTCTTTTTAATTAGATATAGATCAGTTGTTAA  
AGACCAACTGTAAGTAAATCTAAAAACTACGATTTTATAGGGAAATGTGAAACAAGCGG  
AGGTGCTGATTTGAGCCTCAATCAAAAAGCGTTAAACAGTTATGTTTATACTCTGGCGTT  
TTCAAGTTTGTCAATTTGGTCTAATTTTTGGTCTGTATCTGTTTGTACTCTGGATTGAT  
GGCAATAGCATTAGTCCCAATTGCCATCATTGCATTTTACGCTTTAATCACTTACTTGGT  
GTTTGTCTGCCCTCTGCAAGTGTGGCTAAGAAGAAGGCGCAGAAAATTCAGTTTGATCAA  
TTTTTTAATTTATATTGCAGTGGCCTTTTCAGCTGTGTTTTTGTCTGGTTTGTTGATTA  
TCCGCCAAATGCTCTTACCATGTTTACAGAGCTTTGAGTATTACATTATGAGTATTGTAGC  
TGCGTTTATTTATTGGTTTTGGGATTTCGATATTCCTACGAAATTAACATATTAATTAATG  
AATTTACACCGTTTACAACAAGTAAGAAGGCTGCTGATCCAAACAGTAAATATTCGGAC  
AGTTTTTGTGTTGCTTAATATCGCTTCAACTCCTACTAATGATAAAAAGGGCGGCAACAAAT  
AATTGCACAACAATCAACAATAATTCATTTTGTATTGAACAATGAGTATACGCACAAGACT  
AATACAATGCAAGAAACCGAAATTTTTGCAACTTTTAGCAAGGTATCACTCCTTATGCTA  
ACCTTAACACTATTACGCGTCTTAATCCGAGAGCATAAAGAATCAAGATAAAAAGAAGTGT  
TTTAAACAAAAAGAGCATTACACTAAATGCTCTTTTTCATGCCACACCTTCTGCAGTCAC  
GTAATAATATCCACTCTTACAGAGCTTTTAAACAAAGTGTAATCACAAATTGTCGCAGC  
GGCCGATTTTACATCAGGATGTTCTTTGTAATCATATACGATTGAAGTGTATATCCGT  
TTGTTTCGTATTTCTCTTCCACAAGATCACCTACATAAATTATTC AACATACTCAAGAAT  
ACCAAATTTTCGTTTCGATATAGGGAGGGAACAAATGATTGGATTAGCTTATTTTTTAATTA  
TTTGGCTTGGAGTTGGATTATTGACTGGCATTAAAGTTTATTTTTGTTGATCAGGTCTATG  
ATGAAGAGTTTAAAGAACGCATGGATAAAGAAACAGCAGCGGGCATGGAAAGGACTTTGG  
CCAGCCTGTTTTTCAAAAATAAGCTTAATGTGATTGCTTTTTTTATGTTAATTGGTTTAC  
TGCCATTGGCAATGAGGATTACAAAATAATTTAAAAGAGGTTGATTTATGCCTTTGATTT  
ATTATTTTTATGTAAGTGTGAGTTTAAAACAAGGAATACTTTAAAGCATTAAATTAGGTG  
AGAGTGGTTATTTGACATCTAGCGACCTCCATGAAGCTTCTAAAATACATAATATGTTAG  
AAGTCCTCGAGGTAGCAAGTGAGCTTAAAACGAAGTGTAATGTGCAATGTGAGGTAAGGG  
AAATTC AAGTCGTAAAGCGTTAGGAGTGTT CAGGTGTATTGGATAGAGTGGATTGAGAAT  
GGAGAAAAGAAAAACATTGTTGCAGAAGGTTGGATTGAATGGGCTGCTATACTTGAAGAC  
TTGTATCAGAAGCGGTTTCGAGTATGTTGAATGGAAGCGGCTATAACATCTTCACTATTCT  
ATAAATATGAGGTGGTTGATTATATGAGTGACCAAAATGAAAAAAGTCCTTCATGGGTAG  
GTGACATTATTAAGCTGAGCCCTAAATATTTATTGGGACTAGCAGTTTTTTCTGGAATTG  
GGCTTTGGCTAGGGAATGTTGGATTAGGAAAAACACTTGGTATAAAAGATGCTATAAATA  
GCTATAAACTTTACCTAGGGCTTGTTTTCTTAGCATCAACCAGTTTCATTTTATCTCGCT  
TTATTTGGTGGATAAGTTTGGGGATAAAAAATAAAATGACCAAAAATACGGTTATAAAC  
TGCAAAAAGAAAGACTCCGAAATCTTAATAGGAGGGAAAAACAAATATTAAGCCCCTACA  
TCTTTGACGATGTTTCGGTCTGTGGAATTAAGTCTAACTGATGGGACAGCTCAGGAATTAG  
AACATTTAAAGATTATTTATAGAAGTTCTAATATTAGTAATCGTGGTTCTTATTTTGCAT  
ATAACATACAGCCTTGGGCGAGGGGATATTTAACTAAAAACAAGCATTTATTACATGAGT  
CAATAGATCACATCTTATAAGACATACAGAAAGGAAATATTCAAATTTGAATAATATAGG  
AGAAATAATTTCTAATTTTGAAGGTATCATTGGGGCTTTATTGGGAGTTATACTCACTTT  
AATTC TACTCACATATTAAGCACTTTGGGCAAATTAATTTTATATAGTTGACTTTGC  
AATATATTTTAAAACCGATAATGATGGTTGGGGAACTAATGTTATGCCATCTAAAGATGA  
AGCAAAGCAAATAGAAATACACTCCCAGATTGAAATATACAATGGCGCTGAGATCCCCAA  
GGTTCTACGGGAATTTAAATTTTGTCTTTACAAAAACACAAATTTAATTGTTTCTGTAC  
CCCTGATGATAAAGCAACA ACTGAAGAGTTTGTGAGTTTGGCTATTACAGGGATAAGTT  
ACTTAATATTAATGTGCCTTCTAAGCAAATCATCGCTATTAATATAATAAAATTTTTAAA  
CGAAAAGGAACTAAACAAGTGAAAAAATGCAATAGGGTTTATCTTGAGGCAAAGATCA  
TAACGGGAAAATGTACAAAGTATTCTTAGGGGAGTTTTAAAATGAAAAACACATTTTTAT  
ATTTTAGATGGGAAGACCTCCATGGTCAAATAGGTGTTGATTCCTTTAAATTTATTGAGAG  
CAAGTTATTCTAATTTGAGTGAGCAGCAATTAGTAGAGTTAATTAAGAGTTGATATCTA  
TAGAGCGGGAGGATATCGCTGCAAAATTTGATATACACCTATCTGAGAACGCCCCAGTTT  
TCGATGAACGGCAACATGTGGTTTATAAAGGCGTTGCCGGAGATATGAACTACAAAGACA  
TGTTGCTTTCTTTGGTAACGGCATTAGGTTTACTAATACACTTGACCATGTGCAGAATA

TCCTGTCCTTAGCTAAATGCTTAAGAAGTGTTGATAGAGAAATTTTCGCTAGGTTTGCAA  
AGGATATTGCGGATGAGGTGTATTATAGCCTTAAGTAGGACCTTTTGCTTTAGAAGAACA  
CAATGAGGTTTAGTCCTCATTGTGTCTAGTTAAAATAGGAATTTTAAAGAGATTACAAAT  
ACAAAAAATATGTATAAAATAATTGACTCGTAATGTGATCTATTGTATTATTAAGTTAAC  
CAATAAAGACAACAAAAAGAAATGAGGGGAAATAATGGAGTTAATAAGGATAGCTATGAA  
GAAAGACTTGGATAATGACAACCTCTTAAATGAATAAATGGGCAACAGTAGCTGGCCTTAA  
AAACCCCAATCCTCTTTATGACTTCTAAAACCATGATGGGAAAACATTTAATGAATTTTC  
TTCAATAGTCAACATTGTTAAGAGTCAGTATCCAGGCCGTGAATATGAATTAATGAAAGA  
TTACTGTTTAAACCTAGTTGTTAAGACAAAGGCAGCAAGAAGTCCATTGGAGTATGCTGA  
TGCAAATATGTTTTTTGAAATAGAAGATGTTTTAATAGATTCAATGATTTCTTGCAGCAA  
TATGAAAAGTAAAGAATATGGAAAAGTGTATAAAATACATAGAGAACTGTCTAACAGTGT  
TATTACTGAATTTGAGGCAGTGAAAAGACTCGGCAAATTAATATAAAAAACACCTGAAAT  
GAATTCCTTCTCAAGACTCTTGCTGCTTTATCATTATTTAAGCACTGGTAACGTTTCTCC  
GATGGCCCAACTTATAAAACAAATTGACCTAAGTGAGATTTCTGAGAACATGTACATTAG  
AAATACATATCAAACAAGAGTTCATGTTCTAATGTCTAATATAAAGTTAAATGAAAATTC  
ATTAGAGGATTGCAGAGAGTACTCTAAAAGGCATTGGAAAGTACAAATATCCTGAGATT  
TCAGGTTTTAGCTACTTAACTATTGGCAACTCTCTATTATTTTCGAATTATGAATTGGC  
TCAAGAAAACCTTTTTAAAAGGGCTAAGCATTCTGTTCAAATGAAAATTACAACCTGAT  
TTTCCAGCAGGCTTTGTGCTTCTTAAATAATGTATGGCGCAAAGAAAATAAGTGGATTAA  
TTTTGAATCTGATTCAATTATGGATTTGTAGGAGCAAGCTCATTGTTTTATCAACTTTAA  
CGAAAAATCCAAAGCAAAGAAGTTTTGGATTAAGTAGATCTTTTAGTTTACAAACGATTA  
TGAGCTTGCAAAGCATTATTATTTGAAAGCAAGACTCGAACAAAATAAAGCATGTTTCTA  
TTCTTCAATCGAGTATTTTAAAAAGTCTAAAGACAAATTCCTTATTAGGCTGCCACTGTT  
AGAAGTCAAGAGATGGGTGAAAATCAAAAACCTTTTAGAATTACTTTTACGTTAAAGGAG  
GTGAGACAGTGAAAAAAGTATTATGGCTTTAGTTATCTTGGGCGCACTAGGCACTTCTT  
ACATAAGTGCAGATTCTTCAATCCAACAAGCTTCAGGTGATTATGAGGTTGCTGGAATGC  
CACGTGGAGCATAAAATCCATTGACACATAAAGTTATTAGTATTATTATTATTTAATTA  
AATTAACAGAGAAAAGGAAGACGTTTGGCTCTTTTGAGCTAAGCGTCTTTTGTAGTGT  
AAGGCCATCACTTAAATATTAGGTCTAATAACATCTAGTGATCAACTTCAAATACATAC  
ACCCTAATTTAATGAAATACATTACAAAGCAGCACATTCGCAAAAAAATTGCGTAGAATG  
TGCTATTTGTCGTTAAAAAATCTTTACTTCCCTTTTGTAAATGCATAACAATTGCTATAG  
ATGCAAAAAGATAAAAAATATGTATATAGGAGGTTGGTGGTATGTCCGCAATTAGTTACTT  
AAAAAACAGTATGACAATGCTTAAAACCATTTACCAAAAAGAAAGTTGAAAGCTTAGTTAA  
AAATGATTTGTTTTTTCATGAAAAAAGCATTGAAAAGTCAAAAATAATGAAGAATGAAAA  
TGTTGGAAGACAACCTAAAGGATACATGAAATTGCTAAGCGAATACAAGGAGGATTA  
ATGATGCATGTTGTAGAACTTAGGTCTACAAATCATAAAGATATTGATGCCGATTTTGTA  
TTAAATGCTAAACAACTTACATAGAGAGTGTACTAAACATTAGGAAAATGATTGTTAAT  
GCAAAAACCTGAAGATGATCTACATGGTGCAAAAATAGAGATAGCAGCATTATTAAGAT  
CTAAATAGAGTATTATTAGGTGGAGATTGATTAGAAGGAAGCATTGAAAATAATCCGCAT  
TTTAGATCCCTAATACATTTTGTGAAGAATTTAAAACGACACATTGCAATTGAATTTGAA  
GAGTTTATTTATCAACCGTAACATATACGCACTGCAGTCTATAGTATACATAAAATTAGG  
AGGTTGACATGTCAGAGCGAATAAAACAGCTAATGGTCAAACGTGGCATCACAATAGAGG  
AATTGTCGAGGGAGACAATGGTTGATATGCAGACATTAACAAAATCATTGAAATGCCAG  
ATGAATCAGATGCTACAACCATAAACCTTATCGCTCTGGTGTGAAATGTCTCTATTGATG  
AGTTATTAGATGAGAAAGGAGGCGAAGATAATGCAAAAATAAAATTAACAATTAACAAT  
TATGCGGTTTACGATGATATCGAGGGCATTTTAATCAATAAAGATATAAGAAGTAGCTCA  
GGGAATTCTAACTATATGATGCCTTCATCAAGTAGAAGGGTGTGCAACACCAGAAAGAAT  
TATGAAGGGGATATTAAGCAGTTCCTTATAGTGTGATTAAAGGTAAGATGTCAAAGTTTA  
GTTCCCGATGATTTAGTTGTAAGTAAAAGCGAATTAAGCAACTATGTGAAGTATCTTACG  
GAAAAGGGATTAGTTAATAAGAGTATTAACAGAAAAATGACCGCCTTGAAGATGCTCTAT  
ACATATTTGGAGCATGATTATAAGGACTATATTGACTTGTGCGGTGTTTAATACTGTGCGAA  
AGGCTTAAAACAGTAATTAAAAACCTGGGATAAAAACAACGCAGACAGAAGCCGAAAGAATC  
GCTCAGGATATGTATATAAATGAAAGACAGAAACCTTTAATGAAAAAGCTGTTTGTTAAA  
TTCGCCATCAGAACCTTCTTTTCGTGTAAGTGCGATTTTTCGAGTAAGATGGAAAGACATA  
CAGCTTGATGAAGGTACAGGCCATTATATAGTAACAGTTATTGAAAAAGGATCTCAGGTT  
GTGTCTACAGGCATTAACCAGGTATTTTATTAGGAATTGTTGCAGCTGAAGGAAGAGGAT  
GACAGCGAAACTGAATTGGTTTTTTCAGGGGCTTTTCGGAACAATCTTTACGACACTCTAA



AAAAGGTCGAAAAAAGGTTAGTAATACCTCCTGAAAGAAAATTAGACTTACACTCATTT  
AAGGGTGTAGGAATTGACTATGTTTATGAGAATTCTGGTCACGGTTTACTTGCAGCAAAA  
GAACAAGGAAATGATAAAAACACATTAACAACAGAGAGATATATGAGCAGAAAGATTAAC  
ATAGCGAACTCTGCTGGTGTAAACAATGGATGAAAAAATCGATTTAAATCCACTATATGAA  
GCAACCAAGAGGATTTTATTAGTTTTTTTTGAAAACGCTGATCTTGTTACATTAAAAAAG  
TTTATAAAGCATGTAAATGAGCGATAATCATTTCTTCGGGATATTACTCAGTTCAAATGA  
TAATTCTTCTTGATTTACCAGATTGCCTTTGGTAACTTTTAATTTAGCTACATGACATGA  
GGTGAAAGGCTATATGACAGTGATCTTTGATCAGTCTGCAAATCAGAACTGCTTTCAGA  
AATGAAAGATGCTATCTCGAAAAATAAACACATAAGATCTTTTATTAACGATATTCAATT  
AGAGATGGCTAAAAATAAAATTACTCCAGGGACAACACAAAAATTAATTTATGATATAGA  
AAATCCAGAAGTCGAAATTTCTAAAAAACATATGTACTTTTTAGCCAACTCCCTATACTC  
AGCCCTTGAAAGTGAAAGGTTTCATCCACGAAATTACTTCACAGAAACGGATATGAGAGA  
AATTGAAACGTTATGGGAAGGATCTGTGGAGGAAGATATAAAAATTTCCGTATACATTCAA  
ACAAGTTGTAAAGTATTCGGATGATAATTATTTCTTCCCATCACTGCTAAAGAGTTGTT  
TATGCTATTTGAAAATAAGTTATTGCACTATAATCCTAGTGCTTAAAGCACGAACAAAAC  
CAAAAACTAGAGGGCTCAGATATTGAGATACCTGTACCGCAGCTCAATAAACAATCGGT  
TGAAGAAATAAAGGAACTGTTATTAGATGGGAAATTAATTACATCAGTTTTTACGTTCAA  
TGCACGTGTTGGAAGCGCAAGTTGTGGCGAAGAATTAATAATATGATGACGACACTATGTC  
TCTTACAGTGACTGAAGACACCATTTTAGACGTTTTAGACGGGTATCGCCGGCTAAGAGG  
CATTACTATGGCTATAAGACAACATCCTGAGTTAGATCATTTGTTTGAAGAAACCTTTAG  
AGTGGACATCTATAACTACACTCAAAAAAGGGCAAGAGAGCATTTTGGGCAACAAAACAC  
AATAAACCCAGTTAAAAAATCTAAAGTGCTGAGATGAGTCAAATGTTTATTCAAATAA  
AATTGTTAAGTTTATTCAGGACAATAGCATAATTCGAGATTATATAAAGACAAATGGAGA  
CTGGATAAATCAGAATCAAACTTACTTATAACTTTTTCTGACTTCAAAGGGCAATTGA  
AAGAAGCTATTCTAAAAAAGATTTTTCTACTCAAGCAGACATCTTCAAACCTGGAAGATA  
CCTTACATCTTTCTTTGATGCTTTAGCTACACAAGATGTAGATGAGTTCCTTAGGTGATAT  
AGCAAAAGAACGGAAGAGAAGTTTTGTAAACAACGATTTGTTTATTAAATGGTTATGTGGG  
ATTAGCTAAGAAATTGCAATTAGATGGTGTAAGCCTAGACGAGTTGGAAAGTAAGATTAC  
TGATGTTTTAGGCTCTATAGATTTTAGTAAGAAAAATAAGTTGTGGGATGAATTAGGTGT  
AGTAGACAAGAATGGAAATGATAAATCACCACAAAAGATGTGGAATTTCTTCAATAATTT  
AAAAATAGACGAGTAATTACTTAGGAGTTGTTTGTGCAATGTTCAATAGTGAGATTAAG  
GACAAATATTTAGATACCTTATCTGAGGGTATGGTTATGCAGATGAGGCCTATTTTTGCA  
AAAGCAGAGATTACTGAGACTTTATATAATAAAGACATATATGATTTACATCAATGCAA  
ATTTTAGAAGTTATACGATCATTCGATCAAACCACTATCGGTAGTGTTCGAAGAACCTTA  
GCATTATTGTCATCGTATGTTGATTGGGCAATTTTATATAAGTTAAGTAAGGATTAACA  
AATTTAGCAAGAAGTATTTCTGAAGAAGAGCTTTATGAATGTCTCGGGGACAAAAAATTA  
TATATTACTTATAGTGAATTAGAGGAAATGGAAAAATAAATTAGTTAATTATAAATCTAAG  
GCTGTGTTAAGACTACTTTTTGAAGAAGTTTCTGGTTTAGCTCATTCTGAATTGCTAAGT  
TTAACGAAGAAGCAAGTTGAGGATGCAACGCTTAACGGTAACGTTTTAACCTCTATGAT  
TCAAAGCACGGTGAACGAAAATAAAGTTAGTAGTGAATGTCTTGTTATTGCCTTAAAT  
GCAGCTCTGGAACTAAATATAAATTAAGAATGGGAAGGCAAAAGGCCAAAACAAAAGAA  
GTCTTTTTAGTTGAAAATGATTATGTAGTTAAAACAAAAGAACGTCCAACAAAGGAGAC  
GTCCAAGCAAGTAAATTTGTCATAACTAATCTAATTACTGATATATCTGAGTTCCTTAAA  
ATTAACTTTTAACACCAATACGATTGTTAGATCTGGTCATTTGTATAGAGCATATCAG  
CTTTATAACGAAAAAGGGGTTATTGATAACTCTGTAAGGTATCAGATTATAGATGACTTT  
AATTAATGGTAAATCCAAATATCGAGCATTTTATTCAATGCAAGATTATATTAATGAG  
GAAGAAGTTAATAAATATTACGCAGAAGAAGTCTTAAAGAGACGACCATTTAATTA  
TGAAATCCATTTGACTATTTTGGTTAAATGGATTTTTCTTTTATCTCAAAAAATTGAGAA  
AAAATTCGCATTTTCGACAAAAATAGACAAAATAATCACTTTAAATACATGTTTAAATGTA  
GTAAGATGGTCATGTAAACCATATGGTTTACTAAGGAGGAGACCAAGACCAAAGTCTTAG  
TCGTTTTCAATGCCTTTCAACCTTGAATTCATAGAGGTCTTCTACATTACAATCTAAAGCA  
GCAGCAATTCTTTTTGCAGTTCGAATAGACATATCTACTTTAACTAATCGATTATAGTCG  
CTCAGCTGCTGTTTCTTAATCCCAGTTATCTCTGAAAGTTCATTGATTGTAATGTCCTTC  
TTTTTACATAATTCAGGTATCAAGCATTGCCCGATCTCAACTTTAATCATAATCGGACAT  
CCTCCTGCGTTCTGTTATGGAAAGACATAATACATATCATACCATACGAAGCCGATAAAT  
AACCCTAGCATAACACCTACTTTCTATGTATCATGATTATACAAAACAGAACGCACGTT  
CCCTTAACACCTCAAGGGTTTATCACAGAAAATTGAACATAGGAGAATGAGGATGGCAGG

TTATTTAAACAATATTGCACTGAATCTGGAGATTGTTCTCAAAAACAAAGCAGATAGTCC  
AGAAGTCTCTGAAACATTAGTAACCAGGATTTGTGAAAATTTACTTTTATCTAAAGAAGT  
CTCGTTTCTAAAAGCTGACGGATCAGTTGAAAATTTTAAATTAAGTGATATGGAATATGA  
AATAACAAATACAGAAGAATTGCCTGAGTAAAAATAAAAAAAGAAAGACTCCATTAAC  
ATAATGTAATCAGCAGCAAGAGGAGAATGAAGGTATTGTTCTGAATATTTTTGTTGATCA  
AGATAATTACAAAGAGGTTAGTCTGAAACTTACAAAAAATTGCTGACTTCAGAACATTA  
TCAATTCCTACTTTGTTTCAAGGGAGAGAAATTAGATATTACAATTTAGTTACACCACT  
AAGCCTCGTTAAGCTTAGGGATGACATCAATGAATTGATCTTTATGTTCTCAGATTA  
TTAGATTCGGTCACATAAATTGGCCGAATCTAATTGACAGATATTAATGATGGGTTATC  
GTTTATTCAAATACAAATAATATGTATATAGGAGATGGTAAAGAGAGCTATGTTGCTTGA  
TGAAAAGCTCGATAAATTAATGAAAACGATTCTGCGATTAAAAGCATACAAAGAAGAGGA  
AAATTTACGAAGAGTCATCGGAGAATTTCAATTCAATAATTGATTATGCTTACGAGGGGAT  
GTATATAGCTGAAGATATGTTAAGAGAAGAAGAAAATAAGGGCAAAGAAGTAAGTACATA  
TTGAATTGTGTAATTTTCACTAAGGTAACAAAATTAATAATTAGTGGATAAAAATGTAAGTT  
TCATCGAGATTCGAATTGGAGGGGAATATCACTTGGAAATTATCATTAGATGAATTGAAGC  
TCTGTCTTAAACCATTAGTGTTTTTCGGTGAGTTAAACCTTGAAATCAGTGATTATGAAG  
AAGGTAAGAAAATTTAAGTGCTGGATCATTATGAAGGGTCTTTAATTAATTTAGCAGACC  
AAACGATCAACGAAAATTATGTGTGTACTACATGTAATTGTACTTTATATACCAATGAAA  
ATAATGAAGTATGTTTCATAGAGCATCCGTATCGTGCAATCACACCTGTAAATAAAGATC  
AAGTGATTCATTTAACTAAGCTAATTGGAGCAATCATAATTACGGACGAGGAGGATCCAA  
TTGAATGAACACAGCATAACAGAGTTTGGGACGGCGAGCAGATGCATTATTGGGATGATGA  
AGGTTTGAGCCTTATCATCAAAGCAACGGCGATTGGACTTTGAATCGTTTATACACAGA  
TGTTTTGGTTCCGGTTGTAGACAGCACGAATAGAAACGCGGCTCTCATGTGGGGAGCAAA  
GGTAAGAGGCAAATTTATTTATGATAGGTCTATAGTAAAAATAACGAGTGATGATAAAGA  
ATCATCAGATGTTTGCGAAGTTAAGTTTTTCAGATGGCGTTTTCCAAGTATGATCAAA  
AATTTCCGCTGAATATGACGTGACTGCCGTCGGGTGGGTGGAATATGCAACTATTGAAGG  
AATCGGAGACGTTTATCAAATCCTGAGTTATTGGAGGGTGTGAAATGACAATCAATTTG  
AAAGTAAAACAAGAGAAGCGCAAAGGGTTATCATTTAATGATATCCAAGATGGATACTTC  
ATTCTAAGAAATGACGATGTTTGGATTGTGAAAATGGCTGTTACAAATAGAAATAAGATA  
CATTTAATCGATTTAGAGACGTTCCATGTTAAACTGTATCAACAAAGAACGACTTGAAA  
AGTTTGTTTGAAGATTGGAGCCGAATTAAGAGATTAAGTCCGAAACAGGTGAATTTAAAT  
ATCGGGTTCCAATGAAAGGGTAAAGGAGGGCGCGGAGTGACAAGTGAAATGCAATTACA  
GGCACAGATCGACGTTATCGAAAAAGAAAATAAGGAATTGCGTTCGCAGGAATGAGGAATT  
AGGGCAGACGGTCAATGTCAGAACACACAGATCGTCACTCAAATTTGGAGACTGTTGTT  
TTTCGCTTCATCCTGGATCGTTTATGGAATTGTTAGTGCTATAAAACACCTTTGGGGATA  
AGGAGGGCGTTGAGTGATGGAGGAAATAGATAACAACGAATTGAAGTTCCGAATGATTAC  
GCCGGATGGAGAATCATTTCTGGTTAATTCTGCACCTATTGAAGGCTGGCAAATGATAG  
TTGGAAGACGTTTGATGAACAGAAACGGGTTTTTCGATGCAGAGATTA AAAAAGCATTGGA  
ACACTGTAACGTACCGTTGGAGGAAACAATTGAACGGGCTGAATTAGTCGTAGATAAGGA  
CGACAACACTGTTCTGACCATAGACAAACTACCGGTTCTAATCTTATATAAACCTGAATT  
TTTATATTCGAAAGGAAAAGCAGTTCAAAGATACAAACGACTTTATGAGGAGGACGTGGA  
ATGAGGGAATTTCAATTTGCACAAATATCCCGTGACATCACTTGAAGGGAATGAGTATGCC  
GTTAGCATTTATAACGATAGACACTCAAAGGTTTTGTCAAAGTATCTTTATATAAAAAG  
GTGCGCGGCTTTTTTCAGGAATGAAAATTCAGTGTCTTACAAGAGAAGGAGACTTCGCT  
CCGAGTTATTTTCGAAGAAAAGTGGGATTACGATTACATACAGATGGCAATCAATGAAGTT  
ATTA ACTATGAAA ACTCCATAAAGGAGCAAATTAGTCATGAAAATAAACAAAAGGCTGCA  
ATAGAAAATTTGAAGCATGGAGTGGCCAGGAGGTGTA ACTGTTATTTGAGGTTAATGTG  
AAAACAAACCAAAGAGAAAAATTCATCTGAAATGGTATCCCATATGATGAACTTGATACA  
CAAATCATTCAATTAATTGATATTTTAAATTTTCAGAATTGGATTA AAAACACGCCACTGT  
TGTTTTGGGCATAAACCATACGAAGAAATTCAGTGTGTTTGA AAACGAAGTGAACATA  
AAAGAAGATCAGATTCTAGAATTAGCAGA ACTAGCGGGTAGGGAATGGAAAGGCCTACAG  
TTAACCTTTAGCAAATGGGCAAGATTTTCCCCATTGATGTTTAAAGTGGTCATTGGTGTTA  
TCGAAGAGATTCAGAAACCCAGAAGATCCAAATAAATACCGTTATCTAAGATCAGTTGAA  
GAATTCCTTGAGAGCTATGCTGCAAAGAAGTGATAAAAGATGCATTTTAAATTAATGAG  
ACGGAGGTATTTAATGGAAAGTTATCTAACAGTAATTGAACAGAATGGACAGCTTTTGGT  
TGACAGCCGTGAAGTGGCAGAGATGGTAGGTAAGAGACATACAAATTTACTTAGAAGTAT  
TGATGGATATGTAGCGATCTTACTAAACGCAAATTTGCGTTCAGTGGAATTTTTCTTAGA

AAGTACATATAAAGATGCAACTGGTCGCTCACTGAAGCATTTCATTAAACCCGAAAAGG  
ATGCGATATGGTTGCTAATAAGATGACTGGTGCTAAAGGGGTATTCTTCACAGCTCAATA  
TGTTTCTAAATTTGAAGAAATGGAGAAGGCGTTAAAAGCAAGACCGTCCCTAATTGATAC  
ATATCTAGATATCAATGAAGATGAACGTGCCATTGCTTATTTCACTGAAAGAAAAGCAAA  
ACGAGAATTGCAGGAGCAATTAACATTGGCTGAACCACAAGTGGAGAAATATGATCGCTT  
TCTTAACAGATGGATTAATGAAAATAGGACAAGTGGCAAAAGCAATTGGCATAAAAGG  
AATGGGCCAAAACAATTTATTTTCGCTTTTTGAGGGAAAATAAAGTTCTTATTGATGGAAC  
AAACAAATACGCCCCATATCAAAAATATGTAGAAAGAGGATTCTTTCAAGTGAAGACCCA  
GGAGACAAGTGTGGAAATTAACAATTACTCTTGTTACTCCTAAAGGTGCTGATTTTAT  
TGTTGATCTTCTAAAGAAAATGGGCACAAAAGAGAAATAGCATCATAGATTTGAAAAC  
TTAGATAAAAGTAAAATTTTAAAGAGAATCGGAGGATTGAAGATGGAGAATAATGTTTTA  
TACGGAGTTTACAGTACTAGATCACGAAAGTTTTGCTTTGGAATTGAGGAGCCTTCAAAA  
ACAAAAGCAAGAAAAGAGCTATTCAATCTAATTGGTACAGATGCATACAAATGGCGTTTT  
GAAATAAGAAAATTAAGAAAAGTAGATGGAAAATGAAATTTGCACCAATGGATAAAG  
TTAAATTTAAAACAGCTAGTCATCTCAACAAACCTCGAACTTTAAAAAAAAGAGTTCCTG  
AATTAGACGATCCTTTACTCGGCCGAATGCTGGGAATTTGAAGAAGATGGTTTGAGACAAT  
TTGATTGGGAGGAGAACTACGAATTTGTCGCTAGACCCAAACATTTTAATTGGGATTA  
AACAGAGTCTAATTGAAGTTAATGAGAATCGGGGGAATAAAAATGGAGAAAATGAACCT  
GCAAAAAGAAAATAACAATATTTGATTTAAATAAAATCAAACCTGGCACAAAAGTTCAAGT  
AACTTGGTATAAAGGAACAGAGATGGAGTATACACATAATGGCGAAGTTATCATTAAATA  
TGGGGAAAAGTTTTATTATAATTACGTTGATAAAGAAGGATATGTAGGTCACTGTCATGT  
AAACGCACTTGATTTGAAAACACTATCCTTACAGTCTAATTGTTGAGATTAATCAAATA  
AAATTGAAGTTTTAATCAAATACAAATGAATAATCAATCCAGAAATAAGGGAAATTA  
AATAAAATTGTGAGGAATTTCAATGAAACGATTTATTTGAGTTTTATCCTTTTTAAGTA  
TTATTGTTGCCTATCCCATTCAAACAAACGCCAGTCCAATGCCTTGCAGTGTAATACTGG  
AGCCGGTAGATAAAAATCTTAAAAATGCTAAAGGTGTAGCAATAATCTATAAGGTGCAAT  
TGAACCCACCGAGTGCTGCCAGAACCAATATAAGTATTCTTGCTGTCCATCTTCCTGCAC  
CTTCCTCTTTTGGAATTACGACAGTTACGAAGGATTTGCTACTAAACCAGGTGAGATTA  
GTTGGCGGTTTAAACTTTATCCTACTCCTGAGGAAGAGAGTCTAGTTGGGCGGGAAGAA  
TTGACACAATTTTCGGCCGAAATGAAGAATGTTAAAGTGCAAGTGCCTGTGCAAATTCTA  
GCACACAAAAGTTGGGGCCAAGTATATTAACGAAAAATTTTCGAGTCTGTTATTGAATGT  
CTTGGGGCAACAGTGTAACAAACTTGAATGGATTGATGTAAATGATTAATCGATTA  
TTTTACCTGAAGAAAACAAAAATAACTGTAGGTAAACCGATAAATGATGAATCAAATA  
CAAAGGTAATTGCTATTTATGACTATAGAGAAGAACCAGAAGAAGCTTTCTGGGTACACT  
TATCAAAGGGGAATGATCTATTTGTAGATAACCATGAAGTCATTGTTGAGTATGAATAGG  
TCTGTAAATAATGGTTGAATAAAAAGACTGTTTTAAAGAAAGCGTGAGAACCGATAGTCA  
ATGTCAAAAAACTTAGTGATCCAGAATATATTAAGCAGATGGAAATTGAGAGAAATGAAC  
GTGAGCGGATATATCAAGAAAAGGAGTCTATAAGATAGAAAACCTGTGTGCTTCACTGGTC  
ATAGGCCGAACAAATTGGGTGGATACGATATGAAAATCCAACAATGCTTAAACTCAAAG  
ATAAGCTGCTTGCAGTAATTGAAGAATTAATCACTAAGGAAAACAAGTATAGGTTTATAA  
CTGGAGGAGCGTTAGGAACTGATCAGGCTGCTTGTGGTGTGTGCATATGCGAAAGAACT  
AACACCCTCATATCAAAAACATAATTTCCACACCTTTCAAAGAACAAGATAAAGTTTGGT  
CTGCAGACCAAAAAATAGGGTACAAACGTATGCTTAATGTAGCAGATGAGATTATTAATG  
TTGAAGAATTAGATAAATATAAAGTTAGTGGAGAGGAACCAGGAGAGTTTTTCGCCAGCTC  
AGATGCAAAAAGCGAAATGAATACATGATTGATCACAGTGAGGCAATAGTAGCTGTTTATG  
ATGGAAGTAAAAGTGGTACAAGAACTGCTTAAATTACGCCAAGAAAACCTTACTTAGGAC  
ATCAGCTATGGAGACTTCATCCTGTTTTTAATTTGAATTAGACATTACGTATTTTGTG  
GATGATAAGGAGAGGTGAACTTTTCTGAAACTAATAGACGAAAGAACATATGAAGAACGA  
TTGTACATATATTCTGATGATATTGAAGCCAGAAAGCATTTCGTAAGTGAATTAACCA  
AAAGGGTGGATGGTGGACAATTGCTGGGTTGGGATTGATCTAAATCAAATAAACAGTTT  
TATCGATTCAAGAGGCAATTAACCTGATGATTATGTGTTAACAGATAGACTAAAGAGCAG  
GGGGCAATTAATATAGATGAAAATTAAGTGATAGTAAAAAGCATAAAATAATACACGGA  
TATTATCACAAGAATTGTATAAAGTTGTAAGCCGCTTACCGGCAACTGAAGAGAATTTT  
TACTCTGTGAAGAAAATAAAGGATGGACTTCATTCATACTGTAAAGCTTGTGTATTA  
AAA  
AAGGCTAAAGAAAGCATGTTGAAGAATTATGACAAACAGCTTGAACGAATGAGGGAAAGA  
AATCTTCTCCAGGGATGAAAGAGGCCAAAAAGAAATACAACCTCAAGTTTGAGAAAGAAA  
AAAACACAACAAATCTGGCAAGAAAAGAACAAGCGAAAATTAAAAAACAACCGTTTACAA

AGAGATGCTCACAAAGAAACATAACATTACAGCTGTGCAGTGGCAAAGTGCAAAGACTAT  
TTAACAACAAGTGTTCTATTGCGGGCTGAAAATTGAAGATCATAAGATATTATTCAAA  
GGAAGCTATATACAAAGTGATTTTCATAAAGAGCATGTATATCACAAAGGGGCTAATGAT  
ATAAGCAACTGCATACCTGCTTGTAAATCATGCAATAGCTCAAAGCACGACTTTGCATTT  
GAAGAGTGGTACAACCTCATCAAACAAAACCTTTTCATCCGAAAGATTACTAAAGATCAA  
GAGTGGCTAAATCGTTTTAAAGAGGGAACGACAAGATTCAGAATGGAGGACAAAAGGATAG  
TCTGTAACAATAACATAATTGATACTGTAATGATACTTGCACAAGTAAATAGAGGGGAAT  
TTGAAAACATTGAGCGCAAAAATCTCCTAAAAATCAAAGAGGGGGGAACACCCCTCGA  
TAAATCAATAATTTGCTTGGTACTTCCCTACATACCATCCATCTTTATATTCAATGCCTT  
TTAAGTACCAGTTTCTACCGTTTTCTGCTTTTCTCAATATTTTTAAATCATTAAATATTGT  
GATGGTAAATATACTTTGTATGCAATTCTTTCACACTTATTTCTGCTTGAACAATGTTAT  
TCTCTTTAACCCCTAGCAGATGGGCTAGTCGCGAATGCAGGAGAAGCAGAAACGAGTAATC  
CAAGAGATAAAACAGAACCAGTCAATACTTTTCTTAATTTTCATTTGAAGCATCTCCATT  
CCTTTTAATGTATTGCAATTACATTATACGGTTTTTAAAGAAGGCAATATAGCGAAATTA  
CTCCCATACATATGGAAATTGTGTGTCGGTTAATGTCGTGATAGATGAGAAGGCAAATGG  
AGAGATGGATTATAGGATGGAATCATAAACAACAGTAGAATAAAAATAAAAATAAGTGGAG  
GTTAAGTTGGTGATAAAGAGGAATCTGCTTAGCAACCACGTTGATGAGATTATCGGAGAA  
TATTACGCTGCTAAAGGATATTCAGTCCATAGCATTGACCGCCAGGAAAATGGACAACATA  
ATCGTTGTTACGGAGCGAGTAGCAGAGGAGAAGGAAAATGCAAAAAGTTGATATAGCATT  
GATTTTGTACATAGAAGACCACATAAGAAGAAGTATTTAGCATAAAAAGGCAAAGAGGA  
ATTAACACTCTTTACCGTTAGGTTTCTTTTTTAGACGATCACAGATAAATTTTATTACAC  
TGATAGCTATTGCAACAGATCCAATTATTAATGTGATTTGGAGGATGAATATTACTCCGG  
AATTTATATTACATTGTCAAATAAGTCACTCGACAAGGAAAGAAGCTTATGAATACCCA  
AGGCAAGTACGAAAAGGTGAGGCATATTACGACAAGGGATGCTTTGGAATAATCTTTAG  
TGTGGTCAAGATTATAAATTGCTATTGATACAAATAATAAACCCGTAGCGATCTTGTGGG  
ATAGCGAATTATTCGCCGAAAATGATTGCACTACTATGCTTAAGAAAATCCAGTAATAC  
CGATTGTTTTACTCAAGGAATCACCTACTCTTATGTAAGTTAAGTATGAGTTTACCAATT  
AAAGGGGATTTTCTCAAGATGATACACATTAAGTTAAATTAATAAATCGTGATTTAAAGGA  
GCGGAGATAATGAACACTTATGTAGTCGATGACGGCAAGTATAAATGTATTTATGCGGGA  
ACTGAGAAAGCAGCTGCTTTAATAATGAATTTGAAAACGGAACAAGAGTAAGGGGTTGG  
TTTGAAGGCCATCACATAAAAACGTTTGAGAAAGAACAAGAGAAGTCTCTGGAGTAGGA  
GAATGGATCGTTAAGTATCATGCTGCTACTGAATTGCAAAAAGGAAGTAAATCGTTTGGAA  
AAGACCTATTTCAAGAAGAAAGAGTTGCTAGACACTATTAGACAAGCTGATGGGGTCGGA  
AGGGAAATCAATGATAAAAAGAAATCAATACTCAATTACAGTGGATGTTAATGGAGGAGA  
ATATAATCAGGAGTTTGTATTTTAGCGGATTCGCTGAGTAAAGTTGGGCGAGATAAGAT  
AATTGCTGATGGTGTGACAATTCAATTTAATGACCAGATTCTTGAATTGAATAGTAATAA  
AGAAGATTCGAATGATTATTATAAGGGTCAAACAATAACTGTTAAAGAAGATTGCCTAAA  
TAACTTCTGGAAAGGCGGAACCGTTACTGTTGAAGATGTAGATATACATAGAGGCATATT  
GATAGACGGTGTCTGTTTACTTAGAAAAACAAGTGGTAGACAAGTATTTTTCCAAAGAAGA  
GGAATGACATGTACAGGAAGATTTTCGATATGGTTAACGGTAGTGAAGAGCAATCAAAAA  
TAACTGATTGGCTATATAAATTAATGATTGAGGACGAACATTCCTTTACAAAATCGACA  
TTAGAGTTTCGAAAAGGAGGATTTCTGAACAAGGAGATATTTATAGAGAGGAGGGAGAAT  
ACATAGAGAACGCAGATCTTCAAACCTTACCAATCGGGACAAAATCCTTTGTGCAAAACG  
GTTGTTGGAAGGGTGAAATTGTTTCTAATGAAAAGAAACATTTATATATGCCACAGATTG  
GAGAGATGAGGGAAATCAAAGTTGGATCAACTGGGTTGAATATAGAGATTGAATGAAAGA  
TAGTTTTTAACTAAACATATTAGGATGGATCGTTATCGAAAAGCACACGTATGGATCAC  
GATCATAAAGTATTAATTTCTATGCCGGCGTTTTTCTTCGAAGTGATCAGGATAATTCTG  
TTTAGATTTTCGATTTGAACACAAAATAAAGTCCTGCAATTAAGATGTAGTCCATGATTTT  
GTCAAATGACCAATTCACGAAACAATCTGAGATTAATTCCATTTATTTACCTTCGAGAC  
AAAAATGTCCAGTCTCTTTTATATGGCAAGCGTATGACAACCTGCTTGCAGTAATAAAGG  
TGAAATGAATCTTGGAATTTAAAAGGTTTTAAAGAAAATAGCATTAAAATAAATAT  
TTATTTAATGGAAGGAGGTAACCGTAGTGCCAAATCAAGAGCAAATAAAAACGCATGAAC  
GATATTAATGATCTGATAAAGCTTATTGCAAGCATTGATCATCGTACATTCTACCGCAAG  
TCAAAGGATCGTATAGCGTATTTACGGTTTTAAAAAAAACCTGTTCTTCGTTGATGATTAC  
ACGGTTGATGACGTTTATCCGTATGAAATGGGATACGGGAGACCAAACGGCTTTTCGCAT  
GGAGGCAACAAGTGGCAACTGGTGAACAGTTTTAGAAAGTTCATCATAACAGGGAAATGC  
GGCGAGCTGAGGGATTATAAAGAAATATGGGCTTACAGCTATGAAGGATGTATGAAAATC

CGTCAGAAGGCCAAAAGAAATAGGGTTTATAGAGACTGTTGATTATCCTTATAGCTTCGAT  
GAATGGATGAATACTAATTGATCCATGTACTAAATTTTCATTGAATTTTAAAAGGCTAGG  
CTCTAAGAAGTTATGTAACGGAGAGAATACACTGTCCAGGATTCAAAGGAAGGTATGCGG  
AGTTTAAACGTGCTTAGTCTTAAATCTGTGCTTAAACGTTACATAAGATCGGTTTCGATAAAT  
ACATATTCATCAGATTCAGACTTAATTTGTTTCATAGAGTGGACCTTAGTTTCGTTCTGCA  
TGTGGCATAAATTCATAAATCCAGCTGAAGTTCATCAGGATAAGACAGCAGGAATTTT  
ATATCCTTTTTTGGTGTAGCCAGTTATGAGAACCTCAGTGTAAATCGTAATAAATCACTTTA  
AGCCAATTATGCGAACGTTTATTGATCTCATAAGGGGAGTAAGCTTTCTTGATTACGATT  
CCCTCTAAATGCTTTTCTTTGGCCAGGTTGAAGTAAGCAAGACCGTTACCTTGAGTTCCC  
TCTATAACAAGGACATTAGGATGATCCAGTTCAAGTGAATTCAGAACTGCTTACGCTCA  
GTGAGTGGCTTAGCTGCAATTGATTGGCCGTCTTTGTAGATAACATCAAAGACACAGTAA  
ACAATATTATGAGCTTATTTTTTGGACATAAAAACGTTCCATTACAGCCTGAAGGTCGGGA  
GCACCACCTGAGGCAGCTACAATAACTTCACCATCGAGCACTGTTCCATCTGGAATATCT  
AAGTCCATGAGTTCTGGGAACCTTACTTGATACTTCGTTGTTGTGACGAGTGTATAGCTTA  
ATCGGATTATCAAATTTAGAAAGGATGAGTCTGATTCCATCAAATTTGAGCTCAGTGATA  
TAGTTCTCGTCGTTAAAAGGCTCTTTTCTTGAATGCAAGAGCATTGGCGATACAAACAAA  
ATATCACCTCCTACTTAGAACATATTAGCTAAGCGAAGGTGATATATAAAGCGATATGGC  
AGTGGTACTTAATGGGATTCAATGAGCTCAGGTGAATTTGTTTTAGGTGAATTCACTAAA  
GATGAAACCTGGTATGCTTCCATGTCATCAGCATCATATGGCTGCAGTAAACTTTGTAGA  
TAATCAGGATCAGTATTTTTAGGGTTGAGTCATTCTTTTCGTTCTCATCAGTAAGGATA  
ACCGGCATCCGATCATGGATGTCTACCATAAGCTCATTAGGCTTTGTTGTAATGATTGTG  
CAAGTGTATAAAGGATTGCCTTCTGGTGTGTTCCACTTTTCGTATAAGCCTGCAAAAAGCG  
AAGAGATTGGACGATTTAAGTTTAATCCGCATAGGAATCTTAGTCTTTGGATCAAGGCGT  
TTCCATTCATAAAAACCTGTCAGCCGGTATGATACAACGTTTGCTTACGAGCGGCTTTTCGA  
AAGCTGGGTTCCCTCGGACAATGTTTCAGCACGGGCATTAATCATTTTATAGCCGATCTTT  
TCGTCTTTAGTCCATGGAGGGATCAGACCCCATCTAAGTTTGCCAGACGGTTATTGGAT  
CCATCGTTGATGATTGTCAGGATGTTTTGTGAAGGAGCGACATTATAGCTAGGGTGATAT  
TCACCTTCAGGTAAGAATTGATCTATATTGAATTGCTCAATGATGTCATCAAAGTCAGAA  
AATAAAGTGAACCTGCCACACATGTTTCATCATCTTTAGGGTTTTTGAATATTGTACAGG  
CTTGATACACGAAAATCAAAAAGGAGGAATGTGATGCCGCAGCAAACAGTTGAGGTTAAA  
GACGTTGATGTGTTGATTAGGGGAATATGGAGAAAGAAAAAGTTCACCGATATTCAAAAG  
GGGCAAACCTTTAAGATTGAGGAGAACGGAAGAACAAGAAATACATAGCGAGAACAGAT  
CCTTATTGGGATGACATGTTTGAAACTGACATTATTGATTTGTTGGATAAAAAATAAAT  
AGAAGAAATAAGTAAACAGAAATCTAGATAAAAACGATATTTTAACCAGAATCCAGGGAG  
GGAATTGTAATGAACTTATATGAAATTATGTTAGAGCACTTTGCACCCAGGGGAAGTGAG  
CGGGGTATCTTTACATATTTGCTTGCACAATCTGATGAAGAGGTATATGAATGGTTGAAA  
ACTGATCCGAGCTTGTCTGACGGCAGGGCAGTCTATACCCCATATCAAGACAACGAAGCA  
AACGGTAAAACATAGGCATTATATCATCAGAGCTTTGATATTGTTGGTCATGAAAAATAT  
AAAGATCGAATGATTCGATTA AAAAGGTGAGTTGAATGATGAAGGTGAACTAACCGATCTT  
TATTACGGAATGACCTTAGTCGGGTGGAGTATGGTGAAATCGGATATTCCATCGGAACAA  
ATTGAATTGTTAAAAGATACTGGCATCAGTATTGAGTCTGCATAAAAAGTAATTTTTTATT  
CGGAGAAGGGGGTGGTCTAATGTGATTGCTTATAAGATGAAAGTAAAAAATAAAAAATA  
TCGTATTTAAGGAGAGTTGTTGATTGTTAAAGTTTAAAAACAGAATAGTAGAAAAAAGAG  
TTAAGGGGGCAGAGAAGGCAAGCTTTGGCGGGCCAGTCCTTCTCTACCGCACACTTCGCA  
AGGTTACGAAGCTATATAAGTATATCACAGACAAGAAGTCTTTTCCAATCCTAGTTACTT  
CATTGTTTGCATTGTTAATCCCAATTCAGTTCTAGCTGCAGATAAGTATAGTAATTTTG  
AAGAGTTGAAAGAAAATGAGTCACCTTTGAGCTATAACATTCTAACTACCGATGTTGACA  
GGAGAGTGCTTATTCTGGCACCCCATGGTGGAGGTATTCCAGGAGGGACTAGTGCGCTTG  
CAAGAGAATTAAGTAAGTCTTACTCTGCCTATCTATTTGAAGGTTTAAAGGATTCCAGGAG  
CTTCTGAGTTACATATTACAAGTACGAATTTTCGATGAACCTCAAGCTTTAGATTTATTGA  
GTAAGCATGATTTAACAATCTCAATTCACGGGTATGCATCAAGTAAGAAACACACTTTAG  
TTGGTGGGACAGACAGAGAAAAAGCAGCAAAGATCACATCATTACTTACCGATGCAGGCT  
TTTCTGCAGAATTACTGTCTGAAGATTCCCGTTTAGCAGGCACAAATGAGCAGAACATTG  
CTAATAAAAAATAGCACTGGTATGAGTATTCAACTTGAAATAAGCACTGAACAACGAAGAG  
AAATGTTTAAATACTTTTACACTTGCTGGAGGCAATGGAACGCAGAATCAAGTTTTCTATG  
ACTATATTGCTGTTCTAACTAAATTCACTAATGAAAATGTGTATTGTATGGCTGGTGTAG  
CACCATGACATTGTGGAATAAATCCATACTATTCTATGTTGACTTTGATCAGTGGGGAAT

AAATGCTTTTAACTCGAATCCAATTGAAACAACATAAGGATTTAATGAAGCTCTTATGTA  
TGCATCAGAGAACAACCTTTCCTATTGTTGAAGTTCCAAAAGGGAATTTTATTATTGATTC  
AGTAAATACATTAAGCAACGAAATCCTGAAATTGGTGGGGGAATTAATAATCCCATCAA  
TATGGAGCTCCTTTTGGATCCAGAAGCAGTGTTCAGTTAACCCTAATGGGTATCAGGG  
CTCTTCTGTTTTATATTGGGCTTGCAGAGAACGTAATAATTAGAGGAGGTCGTATTAT  
AGGTGACCGGTATCAACATGATTATTCTCTAATTGATACCGATAGAAAAACACATGAATG  
GGGATTTGGAATACATGTTTCGTGGAAGCAAAAATGTTTTGATTGAAAATGTACAAATCTC  
AGATTGTATTGGAGACAACATTTGGATTGCAGCTCACGGAATGATGAATTTCCAGGGAT  
GGTTTATACGCCTTCCAAAAGTGTACCCTAAGAAAATGCGAACTAAAAAGAGGGAGAAG  
GAACAATTTAGCTACTAACGGTTGAGAAAGATTATTGGTTGAAGACTGTGATATAGAGGA  
AGCTGGAGGAAATACAATTGGCCCTCAACTAGGTATTGATTTAGAGGGCTACGGAGAAAA  
CGGAAGAAAGTATGATCCTTATGAGTTAACGATATCGGATTGCAGCTTTAGAAAAAA  
CGGTCGTGGTTTCGGTACTGCTCATACAAGCGGTAAAGTTTCCATCAAAGATAACGACTG  
TGACAATGTTATTTTCATATGGCTACAGTACAGATGTGAGTATTAAGGGTAACAAGATAAT  
AAATGAAGGGGGTCTAAAGAGTACGGAATAGACTCTGTAGGTGGTTCGAGCACTGAGAC  
TGGCAACAGAATTCAAATAACTGATAACAATATTCAAGGATTTAAAATAGGCATGATGAT  
TAGAGGGAAAGGGGTATCGATTGATAATAATACCGTAAAGAACGCTTCAAATTTGTGCAAT  
AGCAACACATATGGCCGAAGATGTTTCCATTTCAAACAACAGAATACAGGACAGCGATTG  
TATTCAGATCCAGGTGAGAAATTCATCAGATATTAAGTAAGGAATAATAAGGGAAAGG  
TACAACTTCAGCATATGCAATTAAGTGATGGATTTCGAATGACGTTAAATTCTTAAATAA  
TACGTTCTCCAATCTTACGGAGGTCTATATTGTGAGAGATCTCAGGCAGTCAGAATTA  
GCTAAACGATTTCTTATTGCGTGGAAAAGGTTACGGGATATATTGGGATAAAGATTCAGA  
AGTCTTCTAACAAGGAATGAGATATTTGAACCAAGAAATGTTGCAATTATGGGGGCAGC  
TGATATGTACAATTTGAGAATAAGTGATAACCAGGTCTATAATTGCAAAGCAATCATTGC  
GATCCACTTAATAGGCGGTTCTGAGCATATGGTTAGAGGAAATGAACTTATGTTTAAACAG  
TGATTGAGATCAAGGCTATGGAATATATTTAAACGGGACAAAAAAGGTTTCGATTAATAAG  
GAATGATGTTCAAGGTATTGGTGCAAGAGTGCTTTCGCATCCATTTGCAACGTTTAAATGC  
TTCCAGTACAACCTTAAATACATAATAAATACGACAGCGGCACAACCTAGATTAGCCTTAGA  
TGATACAGTAATAGATTATAAATAAAAAATTTCTTAAACGAGAACAACCTGTTCCCTTTATGG  
GTTTTGGTATATAATTTAGTAGTACCAAAAATTTCAAACAGGGGATAAGAGTATGAGTG  
AGCAGAAGCTTAGAATCGGAGAAATACGGTATGAGGTTTTTCGATGATTATGATCCATTAA  
CAGAGGACTATTTAGGAAAGAACCTAGCAAATGCTTATTTTATTGCTCAAATTA AAAAGT  
AAAATGTAGTTCAAGTAGGCAATAGGATAATTAATCACTCAAGCGATGTTAAAATTGGTT  
TTGATGCATTCGGGGAAGAATCTAAAGAGAAAATCAAAGAGTATCTTCTGGCTGCCTTTA  
GTCTCATAGCAGAAGGGGCTAAAGACGATGGTCTAGTAGAATATTTATAAGGCAATGCTG  
GGCTAGTCTCTAAGATTAGCCTAGTTATCATAACGAATAAAGGGGTTAACTGAATGTCAA  
CATCATTTCTAAAGAGCAAGATGATGCAATTAATACTTTAGAAACAAATTAATTTATC  
AGACAAAGACTTATACATACCGTTGATTAATTTTGAACACTTAGAGACAAGAACGCGCT  
ATATGCGAACATTCTTTATAAGCTGTATAAAAATGATCCCTCTTTGTTTATTAGAGCTTT  
AAAGGAAGGTTATGTGGTTAATCAGCCAATTGCATTTGATGAGGCCATTGTGCGATTGTT  
TAATGGAGAAGAAGTGGCTATTGTACATAAAACAACAGGCAGAAGATACAATGTAAATGT  
GAAAATGAAGCAGCTGCCTGATGGCTTTTCATTGCAAACAATGGATATGTGCTTGTGGAG  
TGAGCTTGTGTTGAAAATAGCAAACCTTTGACCTATATAATGAAAATATGATAGAATATAG  
AAGAAATAGATAATTGAGGAGATGTTTTTGTGGAGTTTAAAGTTGGACAAGACGTATCAG  
AAATTTGGAATATCCATGGATCAATCTTCCGGAAGTTTTAATGTATATGTTCCCTCGTT  
CAGACGAATCTTATGATTGGGAATTTGTAAATGACAACGGAAAGACATATCTTACTGCAT  
GGAGAAAAAGTGAACCTATTCCTACATTAGAGGAAATTGAAAAAGCAGCAATTGAGCTTG  
AAGAGAAGAAAAATGCACCTAAGCCAAAACTCTCGAAGAAAGAGTTGCTGATTTAGAAA  
AACAAAGTAGCTTACTTAAACGAGTAAGGTTGAAGGAACAACTTACAAGAGTCCCTTATTG  
GGGCTTTTAAATTTAAATAAAAATGATAATTTTATTGCAATTA AAAAGAGCGCAAATGAAA  
TACAAAAATAAAAAATATAAAAGTTTATAAAACATGTAGACAAAGATAAAAAATATGTAT  
ATAATAAAACCGAGTTAAAGGGAAGGAGGCGAATTACTTGGAGGTACTTGGGATAACAGA  
GAAAGCGTTAACTATTACAGAGAAAACGTTAAAGACAACAAGACCATTACTCCTGATCA  
GGCACTGTAAAGATGATAAGGAATGTCCTACTTGTCAAAGAACTCATCCTGAGCGAGT  
GAAAAACGTTTATTTTGCACAGAGTACGCTTACGGAAATATGATAATCAAAGTTAACAG  
AAAAAAGCAGGTATTTGAAATTGTAAATAAATCAGGATGCTTTTCTGACCAAAATGGTTG  
GAAGTTCCACAAAGAAGGTACATAGA ACTTAGTAAAGAACTTGGAAATCAAAGACTGCAA

GTTTAGAAAAATTACATATTCAAAGAAAAATCACAATAAACAAAAATAAAAATAGAGGAT  
GATTA AAAATATGACAGAAAACAAAACGGTATTACGTGAAGCATCCAACGTTGTAACAAT  
TGAAGGAAC TTTAGCTGAAGTACGACACACTGAATGGAAAAATGGAAATGGACTAAATAT  
TGAATTAGACATTGAGGTTGCACCTAACGAAGTACATACAGTTAAAGGCTTTTCCAAGTA  
TAAGAAAGATGATGGTACTGATAATGCAGTTGCAAAGGGGTACCAGACTATTGTAAGCGA  
GTATAAGTCAATCGCAAACACGGTAGAGATGAAGCTGACAAAGTAAGAATTACTCAAGG  
TAAAATTAGCTTAAATGAGTATTATTCACAGGGGATTTTTAAATCATATCCACAATTAAT  
GGCTAACTTTGTGAACAGACGGGATGGTAATGAAGAATTCAATCCCAGAGCAGAATTTGA  
TGTTGAGGTGTTTGTAAAGAACGTAAACCGAAGAAAAAGTAAAAGGGGAAGAAACAGGTAG  
AGTTAATTTAAATGGCTATATTCCTGTGTACAACGGAAAAGTAATTCCTTTTACATTTGT  
AGTCACAAAAGAAGGCTCACAATATGTTGAAAATAATTATGAAAAGGGAACTACCGTTAA  
CGTTTTTGGGAAGTTCATTAATTATAAAGAACAAAAGTAACAACCAAAGTAGCGGCATT  
TGGAGAAGATAAGAAAGAAATTACTTCAATTACAAGAAGAGAGTATCTAATTACAGGTGG  
TATTGATCCTTATGATGAGGATAGTAAGAATGCTTTTTAATGCAGATGCAATTA AAAAAGC  
GTTGACTGAAAGAGAGATTTGTCTAGACGAGCTTAAGAAAGAAGGAAATAAAGAAAACAA  
TAAAAGTCGGGGTTTGGTGGAAAGTGCTCCTAATAACAAGCCTTCAAAGCCGGTTGAAAT  
TTCAGATGATGATCTCCCTTTCTAAAATAAAAATAGATGATTAATCTAATACATAACTGGG  
GTGAGCTCCGACTCACCTAACAAATTCAAAATAAAAAGGAGAACTGAAATGGCAATCGATA  
TTTTCAACCCACAAGTTTCTGTACTAGCAAAGGATTAGAAGGAAAAGTTATCACAATCT  
ACGGTTCTAACAACTTACGTAAAACCTAAGCAAAGCACTCGGATGAAGAAACCGTTATATC  
TGCCATTCGAAAAAGGATTAATGCTATTGCCGGTGTCTTATTCATGCCTATCAATAGTT  
GGGCTGATTTTATAAAGGTAAACAAGCAGTTAACCAAAAATGCTGAAAAGGCCAAAGAGA  
TGTATCACACAATCATTGTTGATGAAGTAGACGCTTTTGCTAAATATGCGACTAGATATA  
TCTGCGAGCAATATGATGTAGAACGGATTAAGATGGTAATGATGGGTTTGGCCTTTGGA  
AAGAGTATGAAACTGAAGTATGGGAAGAAATCAATAAATTAATTGGCGTAGGATTTACGG  
TTATCTTTATTGCTCATGCTGCTGAAGACAAAAAAGGCCAAAGTATATCCGAAGGGGGATA  
AACGAGTTTTAGCTCTAGTAATTGATAACAGCGATATTGTTCTCTATCTAAGTTCTAATG  
GTGTTGATGAAGATAGAAAAGTAATCAACTCAAGTGCTTGGTTAGCTGAAACTGAAGGGC  
ATTTTGCTCGTAGCCGATTTGATTACATTGACACGTATCTTCTGAATTTACTGCAGAAA  
ACTTAGAAAAAGCAATTATTGAGGCAGTCGAAAGACAGGAGCAAGCAGAAGGAATTGTTG  
CTGTTACATACGAAGAGCAAAAACAAAACAACGCTTCAGAAGA ACTTGATTTCAACTCAT  
TAATGGATCAAATTAAGAAATTGGCATGAAGCTTAATGAAGAAGGCCGTTTAGAAGAAG  
TTAATGAGATTACAGAGAAGCATTAGGTAAGGGTGTAAGGTTACTGAGTGCAGCCGTA  
AGCAAGTAGGTGTCATGTCTGTAATTCTAGATGATCTAAAAGACCTTCTAGCAGAATAAA  
AGAGGAGAGATTATTCTCTCCTCCTTATTAGGAGTGATTATTTGGGGAGACAAGTTAAAT  
GTCCTTATTGCGAGACCAAGTTAGACAAAGACTCAGCCATTCTTATAAAAAAAGATATT  
ACCATGAAAAGTGTTTTAATACCTGGAAGCAAGAATCAGATCACAGAAAAGAGTTAATTC  
AAAACATATGCAATTTATATGGTCTTACATCTCCA ACTGGCATGATGTTGAAACAAATTA  
AAGAGTTTCAAGAGGAATATGGGTATAACCTTAAAGGCATTGAACTAGCGCTTAGGTACT  
TTTATGAACTTTGGATAATCAACCAGGAGAAGGTGATGGCATTGGAATCGTTCCATTTG  
TTTATGATGAAGCAAAGCGGCATTACATTAGACAAAAAGCCATCCGAAAATCAGCTGAAG  
ATCCAAAGAATCATAAAAAGAGAAGAAATTACTTTGGTCATAAAAAAAGGAATGAGAAAGA  
AAAGTGGGCTAGTTGATATCTCAATGCTATAGGAAGGAGAGTACATTTGCTACAAGACAA  
ACAGGCAATAATTCAAGTTTTAGGGAGCATTTTAAAAGATCCCAATCTTGTGAGAGAG  
CAATAAATAAAGATAACTACGGATGATTTTCTTCAAGGTTTCATTCAATATTATTTTT  
TGCCATGAGCAACCTATTCATCAAGGA ACTGAAGTATTGAATGACGTTGAAATAGATGG  
ATATCTAAAGGATTACGATATTCAATATAAAAATTTCCATGATAATGAGGGTCTTGAATA  
TATAGAAAAAATAACAAGGGTTGGCAGTTGTGCGAAA ACTTTGATTACCACTATAAAAGATT  
AAAAAAGTTTAGGCTGCTTAGAGAAATGGATGGCTTGGGATTCGATATTAAGGAAATATA  
TGATGAATCTCTGATTGACCCAAAAGAACAAGAAAAGATGCAAGAACAGTTTGATAAGAA  
GTCGATTGATGAAATTTGGACAGCTTATGAAATGAAGATTGTAGACATAAAAGAAA AAT  
CAGAACTTCATCTGTAAGTGTGGGAATCCAGGGTGGAGAAGGTATTAATGAATTATTGGA  
TTCATTCGAAGAGTCGCCGATATTGGAGTTCCATGAAATAGCGAAATGCTTACTTCAAT  
TTTTCGGGGATCACGGAAGAAAAGTTCTATCTGCGCTCAAGTATTACAGGTGGCGGCAA  
AACAAAGAACATGGTCGCTGACGCTTGTGCTTAAAGTGA ACTGAACTTTATGATCCTAA  
AAAGAAGGAATGGGTATCAAACCCATGGAGCGAAAGTTCTACAGTTATTTCAACAGAAAT  
GATGGCCGAAGAATTGCAAAGTTTAGCACTTGCCTACATAAGTAGTCTAGAAGAGAAAAA

AATCCTTAGAAACACAATCAATGAAAAAGAAAAACAACCTTGTTCGTAAGGCTGCTAAGGT  
TCTTCAAGAGTCTAACATATGGTTTCGAACATCTGCCTAATTTTAATATTCAGGAGATTGA  
AAGTACAATGGAAAAGAACGTCATTAACCAATGTAGAGTACGTTTATTTTCGATTATAT  
TCACTAATCAGTAACCATTTTTTCAGAGATGAGCAAAATAAGCGGTGTCAACTTGAGGGA  
AGACCAAAGTCTTTTACTTATGTCAGATAAGTTAAAAGGCGTATGTAACAAATACGATGT  
CTATATGATGAGTGCAACTCAGCTAAATGGTGATTGGAAAGAAGCATGGTTAAAAGGACA  
AGTAATAGATGCTTCTTACTTGAGAGGAAGTAAGGCCATCGCAGATAAAACAGATACTGC  
AATGATAATTCTTCTTTAAGTAAAAAAGAGAAGGATCCAATTGATCCAATTTTAAAAGA  
AGGATTTTATCCAGAGCCAACCTTTTGTACACATGTATTTAAAATAGGGGAAATGAGTA  
TGACAAAGTTAAAGTCTTCTCCCATATCAATATGGGCAACATGCGGATAAAGGACTGTTT  
CACAAACAATCTTGACAATGAACTAATCAGAGTTGAGAAATTGAATATAAAAGCAGGATG  
AAGGGTGTAGCGCCCTTTGAAGTATGATAAAGACAGAGTAAAAGAAAGCCTAACCATTTGA  
GGATATACATAAGATTTTAAAAGATTTAGGTAGAGAGAACAATCTCTGGGATCAACAAGG  
AAATCCAATTTACAGAACCCTTTGTACCAATGCTTCTGGTGGGAGCTATAAGCTGTATTA  
CTATCATGAAGCAAAACAGTTTCACTGTTATACAGAGTGTGGGGATAATTTTGATGTATT  
CGAACTTGTATAAGAGCAAAAAGCCAAAAGGAAGTAATATCTCTTTAATCAGGCTAT  
CGAATATGTTGCCAAAATAGCAGGTAGAACATTTGGATCTGGGAATAGAGAGACATACAT  
AAACAATGATTTGATTGATGACTGGGAATGGATGGGGAAGTTCAAAAGAAGAAAAAAT  
ACATATTGAGCTCCCCAGCTTTAATGAAACGGTCTAGATGTATTTGTGCCTTATCCTCA  
CCAATTGTGGCTAGGTGAGGGAATAAGTCACAAGACATTAAGGGTTTGAGATTGGGTA  
TTATTTAGACCTCATAACAGAATGGGTTACCATTCTCATCGAGATTTAAATAATAGGTT  
GATTGGTATACGTAAGCACTCAATGATTAAGAAGAAGTTGATGCAGGCTATAAATATAT  
GCCTTTAAAAGTAGGCAATATCTTATATAACCATCAAACAACGATGAATCTGTATGGATT  
ACATAAAACAAAAAATTCGATAGAAGGGTTCAAGAAAGTATTGATTTTTCGAATCAGAAAA  
ATCAGTATTAATAATGCCAAGACTTTTACGGTGAATCAAACCTTCACCTGTGCTGTTTGTTC  
AAGTAATATTTCTGATTTTACCGTGACATTTTATTGTATCTTGGTGTGGAAGAAGTTT  
TATTGCTCTTGATAAATATCGACCACCAAAAGAACATGAAACAGAGGAGAAATATCAAGA  
AAAAGTGGTTGAATACCAGAAGAAAATTCTAAAGCTCGCAGCAAAATTTACTCCTTATGT  
TCGTGTATATGTTTTGTGGGAATATGAAGGCTTACTGGATTATAAGGACAGCCCAGCGGA  
CAAGGGAAAGGAAACTCTAGAGGAGCTAATCAGAAGGAAAATTGAGATTGGCACAGATGA  
AGGGGGAATTTAATGGAGTATAGACTAATTGGCGACAATGATTATAATTTTCGATCCGTTA  
GCTACTATCTTAAAAAATAGAGGCATAGAATATCCAAAGTTGTTTGTAAATGTTGATCAA  
AGTTCAGTTATGCATTATTCAAAGCTTAATAATATTGATAAAGCTGCAGATTGTCTTATC  
AGGCATTTAAATAATAAAAAATAAATTGTTTGTTCAGGTAGACAGTGATGTTGATGGATAC  
ACATCCAGCTCAATCATTATAAATTACATAAATAAGATTTGTCCGAAAGCTAATATACAC  
TACAGAATTCAAGATGGGAAAGAGCATGGGATTTTATTGATACAATTCCTGATGATGTT  
GACTTAGTCATAATCCAGATGCAGGATCAAGTCAATTTGAGGAACATGAGGCTCTTAAT  
AAGAGAGGCACAGAAATAATTGTTATTGATCACCATGAATGTGAACGAGCGTCTGAACAT  
GCGATCGTAGTAAATAATCAACTTTCGCCTAATTATTTCGAATAAAACTCTGACAGGTGCA  
GGAATGGCCTATAAATTTTGCCAGGCAATTGATGAAAAGCTAAATAAAAAATGAAGCCGAA  
CAATTCCTTAGAGCTTGTATCTATTGGTAACATTGCTGAGTCGGCTGATTCAAGAAACCTT  
GAGACCAGGTATTTTATGAATGAAGGCTTGAAGAAAATAAAACATCCATTATTAAAGAAG  
CTGTTTAAAGAAGCAAGAGTTTTCAACCAAGGGTGACAAGAGCATAACAGAATACACAGTTC  
TTTATTAACCCTTTAATTAACGCTGCCATTACGGTTGGAAGCAGTGAAAAAAAAGATCAA  
ATGATGAGAGCATTCTCTTTCTAAAGAAAAGGTTCCCTACAAAAAACGTGGGCAAAGT  
GAAACTGAGCTTGTATCAATACATGAAGACACAGTTAGGATTCTAGGAAATCTAAAAGCA  
TAGCAGAAACGGATTGTAGATGCAGCTGTAGTGGAATTTAAAATTGAATAGAAGAGAAA  
AGTTTAAACAGCGAATAAAGTACTCATTGTTTACATTGAAGGAATTCTAGATAAAAGCCTA  
ACTGGACTGGTGGCCAATCAGCTTGCAGAAGAATATAAAAAGCCGGTCTTGTTAGGCAGA  
AACGATCCCGAAAAAGGTAAGATATCTTGAGTGGCTCTATACGAGGATATGATAAAGGG  
TTTATAAAGGATTTTAAAAAAGAGCTTATAGATACTGGATTATTTGAGTTTGTGGAGGT  
CACCCAAATGCTGCGGGCTTTTCAATTAACGACAGAACTTAATCCTGGTGAACAAAGTG  
CTGAATGCAAAATTTAAGACATAAATATCGAAGAAGATTTTCAAGATGTTGATTTTGGAG  
ATCCAGCAAAACGATTGACAAAAGAAATTTATCCTTCAACTTGATGGTTCCAAAGACTAT  
TGGGGTTACAAAGTTGAAGAACCCTTAATAGCTATAACGGATCTTGAAATTGAAGTCGAA  
CAAATTGAGCATTTAGGGAAAATGAATAAGACAACCTGTTAAATTTAAGCATGGCGATATT  
GAATACATAAGGTTTAAAAGTGATGAGAATTACTTTAATCAGCTTACTGCATCAAATGGA



ACGTTAGTCATTAATGTAATTGGCAAAGCAAAGGCAAATGAATTCAAAGGCAAGAAAACA  
CCTCAAATCGAGATTTATGAATTGGAGGTGGTTCGCACAAAACAAAAGAACTTGTGTTT  
TAAGGGGGAGAAAAGTTGATAGGATGTCACTGTACACAGATAGGAGCAACATAAGGCTT  
CTAGACTCTACAACTCAGTTAAAGAACTGCTCAAACTGCAGTAAAGATGGAATATAAG  
GGATTGGCCATAACAGACCATGAAGTCCTCTCAGCACATTTAGATGCTATTCGAACAGTT  
AGAGAAATGAAATAGAAGGGGGATATGCCAGAAGATTTTAACTGATATTGGGCAATGAA  
GCGTACCTAGTCGATTCTTTAGAGGAAGTTCGAGATAACTATAAATCGGGAGTGACAAA  
TTTCCGCATTTCTTGATGTTGGCAATGGATCCAAAAGGACATGAGCAGTTAAGAATACTG  
TCTTCTCAAGCCTGGGAAAACCTATTTTATACAGGAACAATGGAAAGAGTGCCGACAGTA  
AAAAGGATGTAGAGGAGCTATTAAGTAAAGATCCAGGCCACATCATTGCTACCACAGTT  
TGCTTGGGGTCTGAGGTAAAAATTCACCTGTTAAAGATAAAGGCTTTTGAAGAACTGGT  
GATTCTCAGTCAATTAAGCAGCACAACTAAAGATTCATGAGTTTATAACTTGGTGTATA  
GAGGTTTTTGGGAAGGATAAGTTTTTTATCGAGCTTCAACCTGCACTGAGTGAAGAACAG  
ATTTACTGTAACAAGAAGCTGATAGATATAGCCAACGGGTATGACTTGCAAATGATTGTT  
ACAACAGATGCTCACTATCTAAGACCAGAGGATAGAGCAATGCATCAAGCCTTTTTAAAC  
GCTAAGGATGGAGAAAGAGAAGTTGATTCTTTTTATGAAGGCTTTTTTCGTTCAAACGTT  
GATGAAATTCACGAGAGAATGGACTACATTGATAAAGAAGTCATCGATCAGGCCATAAAA  
AATACAATGCTCATTGGTGAGATGATTGAAGAATATACTATAGAGCACGAACCAATTATC  
CCTAAGATGGAGCTTCTAACTTTAAATTAAGACATTTATTTAAACCAGCATGTGATCAA  
TATGAATATATAAAAAGATGTCTGAATCAGCAGATGAACAAGATAGATATCTCCTTAAG  
TTAATTGAGGTCGGATTTGAAGAGAAATTAAGAACAAGCGAACTAACGAGAGAAGCTTTT  
CATAAAATATTGAACAGGATTAACGTTGAACTGGGTGAACTTTGGGAAATCAGCCAAAAG  
CTGAATCAGTCTATGTCTTCTTATTACTTAACAGTTAGAGAAATCATTAAATATTATTTGG  
GATGATCAGTGTGGAGGAAATAGTTTAGTTGGGGCAGCCAGGGGAAGTGCTGCAGGTTAC  
TTAGTTAATTATCTACTCGACAATACTCAAATTAATCCAATGCAATATGATTTACCACAT  
TGGAGACATATACATAAATCGAGACCTGACATACCAGATATCGATATTGATACTGAAGGA  
TCAAAAAGACAAAAAATTCTTAAGGCACTAAGAGAAAGGTTTGGAGACAAGCGTGTCTT  
CAAATTGCTACTTTTGGAACTGAGGGTTCAAATCAGCGCTTCAGACAGTATGTAGAGGC  
TTAGGAATCGATAATGATATATCCCAGTATTTAAGTGGAAATGATTCCATTTGAAAGAGGA  
TCTAACTGGCCTTTGAAGCATTGTTTTTATGGTGACAAAGAACTGGCAGGAAGCCAATT  
AAAGAGTTTATTAGGGAGGTTGAACAATACCCGAATCTTAAAGAAACAGCTTTAAAAATT  
GAAGGGTAACTAATAAGCGCTCTTCTCATGCAGCCGGAGTGATTATCTTTAACGATGAA  
TATACAAAGTCGAATGCAATGCTGAAAACCTCTAAAGGAGCTTATATTACACAGTTTAAAT  
ATGGGTGACAGTGAAGCCATGGGCTCAGTAAAGTTTGACCTTCTTACAATTGAAGCTTTA  
GATAAGATTAGAGTAACATTAGACCAATTAATCGAGAATAATGAAATTGAATGGCAAGGA  
AGCTTGAAGGAAACATTCAACAAATACATCCATCCAGACGTAATTGAGTATGAAGATGAT  
AAGCTATGGGAAATCGCTGGTAATGGGGAAATCATGGATTTATTCCAGTTCTCAACAGAA  
GTCGGTCATCAATCAGTTGTCAAAGTAAAACCTAAGAAGTACTTGAAGCAGCAGTAACC  
AATTCTTTAATGAGGCTTATGTCAGACGGTGAAGAACAGCCTGAAGATACATATGTTAAA  
TACAAAATAATCTTAATAAATGGTATGAAGAAATGACACGGTACGGTCTAAGCGAAAAG  
GAAATCAGAGTAATGGAAAGGCACCTTAAGGACATTTATGGTGTGCTGATACTCAAGAA  
GTGGTTATGCAGATGGTTATGGATAAAGATATAGCTAACTTTGACATTAAGAATCAAAT  
TATCTTAGGAAATCCATAGCAAAAAGAAAGAAGATGTACTAAAAGAAGTGGAGAATTG  
TTTTTTAAAAAGGAAAGGAGATTGGCACTTCTGATAACCTGTTGAATTATGTCTGGAAT  
GTTCAATTTAAAAGACAGTTTTGCTACAGTTTTAGTTTACTTCATACCTTGGCATATTCA  
ATTATTGCAGTACAGGAATTGAACTTAACTATCGATATAATCCTTTATACTGGAATACT  
GCTGGTTTAAACGGTAAACAGCGGAGGAATAGATACCGAGGATACAAAAGACAACAAAAG  
ACAGCTGCTACATACTACGGAAAAGTTGCTTCAGCCATCGGAAACATTAGACAAAGAGGG  
ATTAATAAGACCTCCAGATATAAATAAGGCTGATTTTGGTTTTAGGACTGATATTAAC  
ACAATTCATTTTATTTGGACTTAAAGGAATGAGTCGAATTGGAGACGATGTTATTCAT  
CATTTAGTTCTAAATAGACCATATAGTGACTTTAACGACTTTATTGAAAGAATCTTTAAG  
AGCGGCATTATTAAGAAAGGACAAGTAATCCAATTAATAAAAGGAGGCTGCTTTGATTCT  
TTTGGAAACAGGCAAGAAATCATGAAGGCCTTTATTAGCTTAATATCAGAACCAAAAAGT  
AAGCATAACGTTGTCTAATTTAAAAATGCTAATTGAAAACAACATTGTTCTTCAGAAATTT  
GCACAAGAAGTGAGATTCTTTCGTTTTAAAGATTACATCAGCAAAAAGGTGTACAAAACA  
TTAAAGTCGCCAAAAGATAAACTTTTTTTATTGGACGATGTATCAGCTTCGTTTTATAAC  
CAGCAATTCCTGAGGATAGTGTAGTTGACATGTTAAACGGGCAGCTTGTCAATTTCTGAA

AAAGCTTTTAAAAAAGAATGTGATAACAAGATGTCTAATATAAAGTCCTGGATAACAAC  
GAAGAACCCTCAAGAAATTGAATGATTGTTTATTAATAAAAAGAGTGGGAAAAATACGCC  
GATGGGTCATTACGAAAGTGGGAAATGGATTCATTGAGCTATTATTATAATGACCATGAG  
CTTTCTGGTGTAACTTTGCCAAGTATGATATTGCTGACTTTTATAAACTGCCAGCAGAG  
CCGGTCAAAGGTAAACCTTATCAATGGAGAGGGAAAACTCTCTATGAATATGAGACTACA  
CGGATTATAGGCACTGTTTTAGATAGGGATAAAAACAAACATGCAATTACTCTTTTAAACA  
CCTACAGGGGTGGTTACAGTTAAACAGTGGTTCGGGCAGGTTTAGTCATTACAATAAACAG  
ATTTCTAGATCCATTGGTGGCGGAAAGAAAGAGGTAATCGAGACATCTTGGTATAACCAGA  
GGAACATTGCTCATGTTTACTGGTTTCAGAAGAGGTAACAATTTTATTCCGAAGGTCTAT  
AAAGATAGCATATATAATCACACAGTCTGCAGAATAGATTTTGTGATAATGAAGGAAGT  
ATGAGTTTGACAACATAAAAGGGCAGAAATATAAATCTTAACTGATATAGGAGAGATAAAA  
ATTTTCAAAAACTTATAGACAAACATAAAAAATATGTATATCATAGAATTAACAAAATG  
GCACTTTATGCTACAATTGGTTTGTAGGAGTAGGGCTCGTATATAGCGCTAAAACTTG  
TATACACATCAAGATAATCAAGTCTCAATAAAAAAGTCATTTTATTTAAATAAAAAAGAG  
GTGAGGCAAAAACTTATTCACGAAATTGACGTTCCAAGAATCCTTCCTAGGCTAAATAGT  
GAGGAAGAAAAGCAGGCTGAAAGTAGAAAAAAGGATCTTAATGCGACAATTACATATCTA  
ACAGAAGAAAATAAAAAAGCAGCAAAACATAAAAAACAAAAAAGTGCAAAAAACCAAT  
ACAAAGAGAAATCTTGATAAAGCAGTTTCAAAGGTACAAACGCAAAGGCAGTGAAGAGT  
CATGACGTTGTTGCTACTGCTTATAGTGCGTTTTGCTCGACAGGGTGCACAGGGAAAAACA  
AGAACCTGCTACGATGTATCAAACACATCCTATTACAATGGAAAAAGAATAATTGCTGTT  
GATCCAGAAGTAATTCCTTTGTATTCATTAGTGCAAGTTTCATATGAAGGAAATAGCTTT  
CAAGAATATGCAATAGATACAGGAGGGGACATCAAAAACAATCGTATTGATATTCTAATG  
GACAGTGAGCAAGAAGCAAATGCATTTGGTTCGTA AAAATGTAAGAGTAAGCTGGTAAATC  
GATCCAAATCACTGAAAGGTATAATCATTTCACAATTCGTTTCGATGCAATACATAACAT  
GAAATTTTCCCAAGGAAAACATAACATAGAGAGTGAAGAGGATGTTTCATTTTGGATAA  
AGAGGCTAAGGTAAAATCAACTGGAGAGCGGGGGATTATTGAAGCGATCTATCCTGAAAC  
AGAAACAGTAGAACTCTGTTATTATGATGGAACCTTATGATGAAAGACGTTTTGATGATGT  
TGTTATGGCAACAAGCAGTTAAAGTGCATGACAAAAATAAAAAATAGGGTGAGATAATTG  
AAGTGTATTCAAATTGAAATGTCAATTCACAGACGAATATGGACAGGTGACCCGATTAAT  
AAGACTTATAAACCGTTCGATTATTGAAGAACATAAAGGGGAAATCCCTAGATTGTTGCTA  
GATGATTTTAAAGAGGTTCTTGTGTCCCTTGGGTTTAAATGAAAAACAGGTTTCGAGAATA  
GTAACAGAAGATTAAGAGGTTTTTTTATTGAGGGGAGGTGGTATTAAATTGCCTAAATTCT  
GGAGTTATCCTGTTGGACTAGCTGTAGAAATTAACAATAATGCACGATATGGATGCGCAC  
ATCATGTGGGGCGAAAAGGAAAGATTATCGAGCATTACATTACAGCTACATATGACTATG  
CAGTTAGCGATGAAACAGGTGACATTACTTACTTTAAAGAACATGAATTAACACCACTAA  
AGGGAGGTTTAGCTTATGTTTTAAAAAGGTCAAAGGTAATTGTTGATTTTACAGATGAG  
ATTGGAGCTGTTTCGAAAGTTGATTATCGATACAACCAGGTAGAAGTAAAGTATCCTGAT  
GGCACTTACCAGGTTGTTGGATTTTCATAAAGTTAGAAAGGTGGAGGATTAATGACATTA  
TTATCTTGGAGGGGCTGATTGCTGCTTTAAATTAACAATTGCAGCAAAGCTAACTAAAG  
TACTGAAGTATCCAATTATCAAAGGTTCAACCTTTGAGTTGGCCAAAAGCGGAAATGAGA  
AGTTATTTGAACACTTCAATAAACTAGCTGATGAAGACAACGTGATTGTTGACAGGTTTG  
TTTATTCTAACTTGGTATATGCAAAGAAATTCAAAGATTACTCGCTCCTTATAGAGCAAC  
AGCTTAGATTTATTGAGGATAGAATTAAGCAAAGCGAAGGTTGTATACTTACACGCTG  
ATCCAAGCGTTATTACGAAAAGGTTGAGGGTACGTGGAGATGACTATATAGAGGGAAAAG  
ACATTGATTCAATTTTAGAGTTGTACAGAGAAGTTATGAGCAATGCGGGATTACATAAAT  
ATTCATGGGATACTGGACAATGGTCAAGTGACGAAATTGCTAAAGACATAATCTTTTATG  
TGGAACAGGGGAATTTATGAAAAAAGTAATTGCGATTGACATGGATCAGGTCTTAGCTGA  
TTTACTAAGTGATTGGGTAGCTTACATTAACACATACGATGATCCTTTTCTCAAAGAGAA  
AGATATCCTATGTTGGGATATAAAAAAATATACAAATACCAACAATAATGTTTATAGACA  
TTTAGATTACGATTTGTTTCAGAAATCTAAATGTTATAGAAGGGAGCCAAAGAGTGACAAA  
AGAGCTGATGAAGAAATATGAAGTGTAGGTTGTGACTACAGCAACAACCATCCAGATTC  
CCTTAAAGCAAAGCTTGAATGGCTTACAGAATATTTTCCATTTATTCTCATATCAATGT  
TGTGCTTTGTGGCAATAAAAAACATAATTAAGCAGACATCATGATCGATGATGGAATACA  
TAACTTAGTATCATTTGAAGGAATGAAGATACTATTTGATGCTCCCATAACAGGAATGA  
AAATAGATTTATTCGTGTTATGAATTGGGAAGAGATTGAACGAAAGTTACTTTAAATAT  
CTCATTTATCAAGAAGGGAGAAAACAGTGGAACGTTCAATTAAGACTGTCAGCTTCTT  
GTGAGTCGACAATTCATCACAAGGTATATCAAATTATGAACGAAGCAAAAACAGAGTTTG

AAAAAGTGCTAAAGAAATTAATAAACAACGATCAATTATATTTAGAGTAAAAATAAATAT  
ATGGAGGTTGTTTGTGAGTAACTACGTGTAATGAGCCTTTTGTAGTGGAAATTGGTGCAT  
TTGAAGCTGCATTAAGAAACCTAGGCGTTGATTATGAACTGATTGGCTTTAGTGAAATAG  
ATAAATATGCAATCAAATCTTATTGTGCAATTCATAATGTAAGTGAAACATTGAATGTTG  
GAGACATAAGTAAAGCTAAGAAAGATAATATCCATATTTGATTTGTTTACAAGTGGAT  
TTCCTTGTCCCCTTTTTCAGTAGCCGGCGGCCGTGATGGTATGGAATATAAGTGTAGCA  
ATTGTTTCGCACGAGCATTTAATTACTTATGAGGATTATAAGAAGGGAGTCATATGCCCGA  
AGTGTGAAGCTGTTTCTAAGGCTAAAGATGAACGGGGAACGCTCTTTTTTGAACAGCTT  
TGTTAGCAGAAGAGAAGAAGCCGAAGTTTGTGATATTAGAAAATGTAAGGGGCTAATTA  
ATAGTGGCAATGGACAAGTGTTAAGAATAATTAGTGAGACTATGAACAATATAGGCTATA  
GGATTGACCTAGAGCTACTTAATTCAAAGTTTATCAATGTTCCAAAGAATCGGGAACGGG  
TATACATAATTGGCATTAGAGAAGATTTGGTTGAAAATGAACAATGGGTTGTAGGTCTGA  
AGCTAAACGATGTTCTGAGTAAAGGTAAGAAAGAGATTGCAAGAAAGAAATATAAAGAGTT  
TTAATTTTAAATGGCCTTTACAAGACGCTGTCACAAAGAGGTTGAGAGAAATTCCTTGAGG  
ATTTAGTTGATGAGAAGTATTACTTAAATGAAGAAAAGACGAAGAAACTTGTGAGCAAC  
TAGGAACCGCACCGCTACAAAACAAGAAGTAAGGGAGCCGTTAATGGTGGGACACGTGG  
ATTCAAAGGTCACGATGCCATCAAAGAGTTTACTCGCCTGAAGGACTTTCACCGACAT  
TAACTACAATGGGCGGCGGTCACAGAGAACCTAAAATCGCAGAAAAGCAGAAAGAAGTCA  
GGGCAGTGTTAACGCCAGAAAGAGAAGAGAAAAGACAGAATGGAAGGCGTTTTAAAGAAA  
ACGGAGAGCCGGCTTTCACGGTTAATACAATTGATCGACATGGTGTAGCAATCGGAGAAT  
ACCCAAAATATAAAATTAGAAAGCTCTCTCCATTAGAATGTTGGAGACACCACGCATTTG  
ATGACGAAGATTTTGAAGAAAGCTTTTGCAGCAGGAATAAGTAACTCACAATTATACAAGC  
AAGCCGTAATTCAATTACAGTTAGTGTGCTTGAGTCTATATTTTCAGGAATTAATACATA  
CATATGTTAATAAAGAATCTGAATAAAATTTGTCTTTTAAACCAATATAAAATAAGAGGA  
GTGGATCGATTGGATAGTTACCCAGAGTCCCTAAAACAGAGACAGAGGAGATTAAGAG  
CGTGTAGGAATGGAAATATCAAAGAAGACAAGATTAAAGAAATTGCAGAAACGACAGTT  
GAGTTTTTGAATCAGAGGAGAAAAGACATAAATACTTTTCTGAAGTTGCTGCAGCTATG  
GCTGATAACTTAAGTGAGTTTTTCAAGTCGTATTTAAAGGAGAGTGAATATGTTAACTG  
ATCAAGAAAAAATTGACTTGGTAAACGCTCTTGATTTTGTAGTTATTGAACCACATACAC  
AAAGCATTACGTACATAACGAAGAAAAGACTAATGGAGTATTAGCTAAGGTTTTGCACA  
CTATTTTCAGTAGATGAAAATATTGAGAGCTTTAAGAAAGGTAGTCTAATTGATATCTTTC  
CAGCAGCAATGCAAGAAGCCGGTGCAGGAAGGATTTAAAGATGGCCAGTTTGTGATTATGC  
CAAAGAAATTTTATGTTGATCAATGTTAGGCGATGAGTAAGGAAACCGAGCGGTTAACTA  
ACCTAAACAATCTACACAATATTAACCAATACATATCAAGGCTTGATTCATTAAATTG  
TTTCTAGAAAAAATTAAGGATAAAGGGATGTTTATTGAGAAAGTATTATGTAAGTTGTA  
AAGACAGCAAAGGTGAAAATGCGTCTCTAGTTATTGAGGCGCTATCACCTGAACTTGCAA  
AAGAACAAGCATAACGAAGTTTATGAGGTAGGGGATATTTATAATGTAAGCCTGGGCGAAG  
GAAAGTCGAAGAATTGCCTAGACCGAAAATATCCCCATACATAAAAAATGACAATGGAA  
AAGCAATAACCATATTTTCATAGGGAGAGGGTATCATTAAAGGATATTGTTAGGGATCTTG  
TAATTGATGATATAGATGCTGCTGAAGGAGTATTGGATAAGCTAAATGTTTATCTAGAAA  
ACACTTTAAGGCCTAAAGAAATGCGTGTGTTGGGAGCGGTGTGATAAAGATATGATGTCTG  
TTTTTGCAAAGCTGAAAAATAGTAAACAAATTATTTAAAAACCGATAGACAAAAACAAT  
AATATGTATATAATAAATTTACGTTGAGGCCGAAGGAGAGTGTAAATGAATCATATATGTG  
ACATCTGTAAGGAGTACATAAGCGGAAAAACAATTTGTCTTAGGTTTCAGCGATGAAAAA  
CTTATGTAGACTTCAACTGCTGTGAAAGTTGTGCAAAGGGTTATTCCGATCACGTGAAAA  
ATGACTGCAGCAATTTAAGTGTAAAGAAGACAGTAGAACATTTAGGATTAATATCAAAT  
ACAAAATAAGAGGATAAAATATTCCTTTTATACAAATGTA AAAAATAAAAAACCCCATAG  
AAGTTTTATGGCGTCTATCGAACAGGGAGGTGCTTCAAAGGCTCTGGATTTACTCTGAGA  
TTAGTATAGGAATGTAGCACCAACAATGATCAATAGGATGAATAACACCACGATCAAGAC  
GAAGCTGCTTCGGTATCCGCCGCCAGAGTATCCACCAGAATATCCGCAGTAGAATCCCAT  
ATTGCCACCTCCTTTAGTAAGGATAGTATATGGTATGGCAAAGGTTAAAAATTCGACATA  
GATTTTCAGTCTAAAAAAGAAAAAATGAAGACTTTGTCTAAATTTAAGAGTTGAATAAGGA  
GAGTTGATGAATGAACATGTTTGTAAATTGCTGCAAAGAGTGAAGGGAAATATCTCTATGG  
TTCCACCCACATATTTACTCAAATCTTAAACAAGCAGAAAATGCATTGAAGACAATGAG  
AAAAACGGAAAGTTAACTGAAAGAGACAAGGTATATGGACTAGACGGTCTGATGTTGGT  
GGATTTATAAAAAAGGAAAGATATAGATGGGGAAATATGATCAAAGGAAATACTAATGATT  
CCCCGGGCAAGCGCAGTATACGACAAATTAACAAGCAGATAGAAATATTAGGGGAGAT

GAGAGTATGCAAACTTAGATGCACCGATTTACGAAGTTAAACAGGAAAGTGACTGGTAT  
AAATCTGAGAAGAAACGCAAAGAGGATATAAACTCTTTCTTTGATAAATTCGGAGAAAAG  
TATGGAGTCAAGGAAGGCTTCTCGTTTTATCACTCTGAGTACTTTGGAGTCTACGAAGGA  
ACAGAAGCGTATGAAATATTTAAAAATGACATCGTTAAAAATCATGTGCGACGGATTCTAT  
GCTTTCAAAAACGATCTAAATAATTTAAAGAAATAAAAGCTATGATTGAGCAAATTGAA  
GAAGTGTATCCATTTAGGTCTCATGACGAGCTGGGGTTAAACAACATGACTGGTCCTCAA  
TGGATAGGTGTCAGGTGGTTCTTTGGAGTTAAAACTGAACAGCTTGTTAATGGAGACAGT  
GTGGTTGCTACTGACTATAAAGATTATCTAAAAATTGTAATGGATCATTGAGATTAATAA  
TCAATTTTTAAAGAGACTTATAAGGAGGTGAATAAGTGGGACGCCATAAAGCAACGATTG  
AAGGATTGGTTATGAAAGAAAGGTATTACTCACACCGTGCCCCAGGCACAGAGAGGTGGA  
TACTCAGCCAGTGTGAAAGGTAACCTCGTACTGAACCAATCTTCGAGGGCTATATAGATA  
TTGAGCCTATAGAAATTGGAGGCCAAAGTTTATATCCCTGGACTTAATGAATATGTCATAG  
TAACTGACGGGCAGCGAAACATAACATAACAAGTGGACATATCAAACAGACAGAGTTATTA  
AGACAATTATAGATGAAAAAGCTTGAAGGAATGCCAAGAACAACAATACTAGGAAAGCAA  
AAAACAATGATACTCAAATCAAAGACAGATAAAAACTTCCCTGGTTGCAAAGGCTAACTA  
AAAAAGACTATAGGAGAGATATTTATTGAAGAAGGATACAAAAGATATTTGGAGCGGATT  
CTCTATGGGGTCAGGTTCGTTAATTGTAGTTGGATTACTTCTTTTTGTTGAAGCGTTGAC  
TATGTCACTAATTGTTTATTACGGATTGAATCATGTGATAAATCCTTTGCTTATTGATAC  
ATACAATATTCAAATGTCCATGTCACTTTACCTCATGCATTTGTTATTGGTGTTTTACT  
CAATGTATTTGTCAAAGGTGTACAACGGTCAGATCAGGAAAAAGATGAGAACATTTTCAA  
GAAAGCCGGTAAGTCTTTATTTCACTTTTCGATTGATTGTTCTATAGGTTAGCAC  
ATTGTTTATCTAAGGAGGCCTCAAGATGAGTGATGATAAGGCTGCAAAGATTATTTTCA  
AAAACAATCAACTGGTAAAATTGTCGGCGAAATGAAAGCTACATCTTTAGCTGCTGACA  
CCATTTTGCAAACGACAATAAGTCTAAATGAGAGTTTTATTTTAAGCCGAAATTTTCAA  
AAGGAGAGTTAGATATGATCTTAAAAGAAATTGCCGTATATGAAGAAACACTGAATAAAC  
ATTTACCAAATGAAACAAGAATGGTTCTTCACTTACAAAATGTAGAGGCACCTGAAAACG  
AAGATAAACTCACAGTAAGGATTAGTAATGATTTATTGGTTTATAAATGGGTTGAACTAG  
GCGGTGTATCTAAGGGCACTTATAAAATGAAAATGACTAGTCTAGAAGATGAAACAAGCG  
AAGTTAATGTGAAAATCGAAAGAATTCAAATGAACTCAGACAGAGATTTGGCGGTAGAAA  
TAGAATTTAATGCGGTCAATCCATTCCAGAGCGTTGTGGGTGTACCTGGTATTGATTCGT  
TCTCCATAAAAGGATGAGTTTAAAGGGATTAGTGGATTCTAAATCTAAACAATAAATATT  
AAGAGGAGCATTGTGCTATGGGAATTAAGGCAGCAGTTTTTTGAAATAAAAGCAACTTGT  
ACGCTCATGAAGGATTTATTGACGAAAGTCCATCTGTTCAAGGAGCAGCGTTAGAACAAC  
TAGGCAAGGATATGGTAGATCATTGCTCGAAAACGGAGTTGATGATGTGAAAATTAAG  
GCGATTACGTTGAGGAATTGGAAGTTGAAAAACCCATTATGAAGTATTTTGAAGTGTTG  
ACCCCTATTATGCATTGATTAAGGCTTATACAAAAGAAAAGGCAATGGAACGTGATACAG  
ATACTGTTACAGATGATGATGATGGAGTGTTAAGTGATGAAATGACAGAAGTTGGGCAAG  
TTTATGCGGCGATACAACATGGAAGGGCGCCAGGAGAAGATAAAGAGCACATGCCGTTA  
AACAGGTTCTTGAGGAGATTTCTAATGACGAAGAGATGGTATTGCTTATTGATGGCAGTT  
TACTTTAAAGAATAAAAATAAATTAAGAGGATGATGAAGATGAAAATGAAATATGGACTT  
TATTGTATGGGATCCCTTGTTAATACTTATGATGATGCGATTGAGGCTCATAATGATGCA  
GTATAAGCTCAAGAAGAAAGCGGAGTACCGCATGAAGTAAGAGAAATTCCATAAAAATAA  
GAGGAGGATATTATATGATTCAAGGGTTTTATAAAGATCAGAAACTTCATCTTCTAGAAG  
ATCCTATACAGCAGTACACCCTCATGAAAGTTGAAGAAAATGCAGTATGTGTATACCGGT  
GGATCGATGATTATAGACACAAGATTGAAAGATTCACAGATGCTGAAGAGACTAAAAAAC  
TCCTTGGAGAAGGGTGGCCGAAACAATAGAAGACACAATGAAATTTATACAGAAACAATT  
GGAGGACGAATAGATGTGCGAAAGTAATTATAGGCCGTGAGTTCCTAGATGGGTTGGCGA  
TATACTAGAGCTAGACAAGAAAAGAAGACAAAATCAGTACAGAGGCTCACTAACGTCAGG  
TCAAGAGAAGAAGGACTGGGACGAGTGGAAGCGTAGATATTCAAGAAAATTAAGTACGC  
AAGATTAAACGGATGGACGATCGAAGAAGAGTGACAATTCCTAAGGAGGACGAATAGGTA  
CTGCTTGAATCTAGATAAAATCACAGCTTTAATCAAATACAGAAAATAAGGAGATGTAA  
AATGGGGGCAGCTAGACGTATTGATCCAACCTCAACCATATGTAAAAACGAAGAACATTAT  
TAACTTTACAGTAGCCACTGAGAACACTCATAATCATTTAGCTGATGGGCAATCTTTCCC  
TGTATTTAAAGGAGATATTATTGCAACTGACCAACAAGGAAATCAATTTGTTGAATTAGA  
AAAGAATCTAGATGATTACGTTCCCGTTAAGAAAAGTTCCCTTAGATGAAAGTATGGCACA  
GGGCTACATGGAAATGGGGGACATTAATCATGAGATATCAGAAGCATTCAATTACGCTGA  
AAGTGAAGCTGCAACAGTGACTACAAAATTAATTACAGGGGCTTATAACGGTTAGTGATC

ATTACATATGAGAGTAAACAGGAAATGTAAAAAGGCTTGTCAAAGCGCTGCAACAAGAG  
TTTGACGTTGAGGCAATTGAAATCACTGATGATACGATCATCAATCAAGGATTCATACAT  
ATTACATATACGATAGGCTTTGGGGAAGTACCTGAAAGGACTTTGAGTTTTATCAATAAG  
AATAAAAATAAAATTAGAGGAGTTGCTGTTAGTGGTAACAAGGTTTGGGGTGATAACTAT  
GGTTAGCTGGAGACAAGCTTTCAGCTAAGTTCACACACCATTGTTATTAAGTTTGAA  
CTTAGTGGAACGAAACAAGATCTACAGAAAATCATTGAGGAGGTACAACCTTATTGACAAA  
CACAATACCAAATTGGATCAAGCTCAATAATGAAATCATGATCCAGAAAGATGGGAAGTA  
TCAATTTGAAAAGGATAAGGAGGCGTACATAGTACTTCGTTGATTACATAAATCAAAA  
CACAGTCTTTTTCCATGATCTGAAAGACAAGCTGGACTATCTGATTAATAAATGATTATTA  
CGAGGAAGAATTCTTAAGCAAATATACATTCGAACAGATTAAATCAATCTATAAGATTGC  
TTACAGTTACAAATTCAGATTCCCTTCTTTTATGAGTGCCTTTAAGTTCTACAATGACTA  
CGCATTGAAGACAAACGATAAAACAAAGATCCTGGAAAGGTATGTGGATCGTGTCTCAAT  
TGTGGCTTTATATTGCGCTGATGGCGATTACGAGAAGGCTGTTGAGGAAGTACATACTAT  
GATGAAACAAGAGTATCAGCCAGCAACACCTACTTTCCTTAATGCTGGACGTAAGCGAAG  
AGGTGAAATGGTGAGCTGCTTCTTACTTGAAGTAGGCGACAATTTGAATGATATTTACAG  
TGATATTGATATTTCCATGCAGCTTTCTAAGCTAGGTGGAGGAGTAGCATTAAATCTAAA  
CAAATAAGAGCCAAAGGTGAGGCGATTAAAGACGTAGAGAATGCGACTAAAGGTGTCGT  
AGGTGTTATGAACTTCTAGATAATGCCTTCAGATATGCCGACCAAATGGGTTGATTTGG  
CCCCTTTCATCAGCAATGGTGATCGAAAACCTCTTTAATGCATGGGAACTCCTACAGGGA  
CAATCATGAGCGAAGCAAGACTAAGTCTTGAACGTGCAACGACTAGCCGAAAGGCGTAGG  
CTGCAAGCTATTGGCAGTCGAGACAGGAGGCCCTTAGAGGGTGAAGATATAGTCTAAC  
CTTCATGTTAACATGAAGCAGCCATATGGCGGGACGTGCTTAGCGAACACGTTTGAATGG  
TCTCCAAAGACAAGGATCAGGAGCAGTTTATCTAAGTGTATTCCATCCAGACAATACAGA  
CTTCCTGGATACCAAAAAAATAAGTGCTGATGAAGATGTCCGAGTTAAACCACTGGCTAT  
TGGCGTAGTTGTTCCAGACAAATTTATTGAATTGGCAAGGGAAGACAAGGATTATTACAT  
GTTCTATCCGCATTCAGTATACAAGGAGTATGGGCAGTATCTAGATGAGCTAGACATTAA  
TGAAATGTATGATGAGCTTGTGAAAATCCAAGAGTTAGAAAAGCAAAGGGAAATGCTCG  
AAAGTTGTTGAAGCAATTGGCTATTCTAAGAAACGAATCTGGCTATCCGTATATTATGTT  
CGCTGACAATGTAAATAAAGTGCATCCAAATGAACATATTTCAAAGTGAAGTTTTCAA  
TTTGTGCGTTACTGGAGAAACACTTCTTTTAGCTGAGAATGGATATGAAAAAGCAGCCGA  
TCTTTATAAAAAGCGGAATGATCTTAAAGTGGTCATTGATAATAGAACAAAAGATTTTGC  
AGTTGGTAGCAAAGGTACCACAATTGTAGATGCAATTCGAATGCAACTGACTAAAAAAGA  
TGCGGAAATATTTAAAGTCAAACGAAGCAAGGATATGAAATTAGGGCATCTGAGTGGCA  
CAAATGCTATGTGAAAAGAGATGGTGTAATTCAAAAGCTCCAATTGAATCAACTGAAAAC  
AGGCGATAAATTATTAGTCCAATCAGCTGAAGGAGCATAACGGGAAAATTCATGAACCCGA  
TCTTGCATACATTATGGGCATTATAGCTGGTGATGGAACCACTTACTGTAAAACTGCCAA  
GATTTATTTATACGATAATAAAAAAGTTCTTGAGCAGAAAGTTACTGATGCAGTTCACCG  
GATTATTCAAAACACAAGGTTGTTTCGTGCTTATAAGCACAATACATCTCTTCTCCCAAC  
ATTTAATATGGCCAATCCAGAAAAACAAGATTTGCTCTACATGAATAGTACTGTCTTATT  
TGACATCTTGAAGAAGTTCGGTATGAACAAAGAAACAAAAACAAGAGTCCAGAAATTCAG  
TTTTCAAGCTAATAAGGAAACGGAAGCAGCTTATTTATCGGGTTTATTCCAGACTGATGG  
GTGTGTAATGCAAATCATAAAGCCAAAGCATTAACTATTGAGTTAACATCCATCCACTA  
TGAGAGCCTTCAGGACGTTCAGAAGCTGTTACTGAACATGGGTGTTTATAACAACGATTTA  
TTCTAACAAACAAGCGCTCACAAGAACTCCTTCTGATGGAAAAGGTGGTTCTAAGCTTTA  
CAATGCCAAACCAGCACACAAAATCAGTATTTAAGATAGAACTCAAGAGAGTTGTTTAT  
GAGTATTGTTGAAATGAAAGAATACGATGTTTATAAATTCATTTGTTAACTGAGACATT  
GCAACCCAAGTCAAGAAAGCCAAAGCATGATTTTACAGCTGAAATTATTAGTATTGAGGA  
AGATGGTGTGAGGATGTTTATGATACAGCACAAGAAGACTATCACTCTCTGATTTTCAA  
TGGAATTGTTACTGGTAACTGTTTCAAGGTAAGTCAATCGTCACAAGTATCAGTTTATAC  
GGATTACGATAAAGAGGATGAAATTGGCTTAGCTATCTCATGTAATCTTGGCTCAATGAA  
CATTGTAAATGTAATGAGTAATCAATCAATTGCTTCAACAGTCAGAATAGCAATTGACTC  
ACTGACAACTGTCACAAGGAAAACAAACATTGTAAATGGTCCAGCAGTTGCGAGAGCAAA  
TACATTAATGAGATCATTGTTGTTAAGGCAGATGAACCTCCATGGATTTCTAGCTTAAAA  
TAATATTGCTTATGACAGGGAAGAAGCTAAGGATTTTGCAAATACATACTTTATGATGGT  
TAACTTCTACTCACTGCAGCGTTCTATCGAAATTGCACGGGAAACAGGGGAGACATACTA  
CAAGTTTGATGGTTCGACTTATAAATCCGGCGAGTATTTGAAAAGTACGGAACAAATGA  
TTATAGCCCTCAGTATTAAGGTTAAAAAGCTATTTGGAGATCAACATATTCCTAATAT

TCAAGATTGGATGAAACTTAAAGACGATGTAATGAAATATGGTCCTTATCATTCCGATAG  
ACAAGCTATTGCGCCTACGGGAAGCATCTCATATGTTCAATCATCTACAGCAGGTGTAAT  
GCCAATTATGGAGAGAATTGAGGAACATACATACGGAAACAGTAAGACATATTATCCGAT  
GCCAGGTTTATCGGCTCAGAATTGGTGCTTCTATAAGGAAGCATACGACATGGATATGTT  
TAAGGTAGTTGATCTTAATGCAACAATTCAGCAGAACGTCGACCAAGGGATTTCAATTAC  
GTTGTTCTTAAAGGATACGATGACGACGAGAGACCTAAATAGAATAGACCTCTACGCACA  
TCATCGTGGAATTAACAAATTATATTATGCCAGAACCAAGATACGACCCAAGAGGGATG  
CTTGTCCTGTGTAGTTAATAGGTACGTTTACGTTTTGGTTCAAATAACAGGATCTCC  
CGGACGTCGTTTGCACCTAATTTTTGTTAAATTTTTCTCATAAGAGCATTACAAAGTAAACC  
TAATATAAGCTTCAAATATATTCGATTAAACATGATAAAAGCCTATCACACAACCAGCC  
AGTTGAAATGACTGTACTCTCTAACAAAGATATAAGGTTGTCTAAAAAATTCAGTGTCTT  
TCATTCCTTTCGAATGTTTGACAGTAATATAGGAGTCTGTCAATTCAGCTTTTAAATTCA  
CTGCATTTTTTTCGGAAAAAATATTTCAATTGAAAGGACATGATTAATTGACAAAAATT  
TATGACGCAGCAAACCTGGTCAAAGCATGAAGACGATTTTACCCAAATGTTCTATAACCAA  
AACGTGAAACAGTTCTGGCTTCCGGAAGAGATTGCTTTAAACGGCGATCTCCTCACATGG  
AAGTACCTCGGAAAAAATGAGCAGGACACTTATATGTAGGTACTGGCCGGACTTACGCTT  
CTTGATATAGAGAAGGGGAATACGGGGATGCCGATCGTGGCTGAACACGTTGATGGACAT  
CAAAGAAAGGCAGTTTTAAATTTTCATGGCCATGATGGAAAATGCTGTTTCATGCAAAGTCT  
TACAGCAACATCTTTCTAACATTGGCTCCAACCGAGCAGATCAATGAAGTCTTTGAATGG  
GCGAAAAACAATAGGTTTCTTCAAAAAGAAAGCTAGAACAATTGTTTCAGTCTATAAAACA  
ATCAAGAAAAACGATGAAATTTCTTTATTTAAAGGAATGGTTGCATCTGTGTTCTGGAG  
AGTTTTCTTTTCTACTCAGGGTTTTATTACCCACTTTATTTTTATGGACAAGGAAAGTTA  
ATGCAAAGTGGAGAGATCATTAACTGATTATTTAATAGTCCCTTTCGTCGGCAACGGCA  
AATGTGAACCTCTCTCATTGCTGGAAAATCCTTATTTGGACAATCAGCAGCGAAGCTATG  
CGAACCCAAAGGAGGTGAAAATGATAAGGAAAGAAGTTCGAAGAAGCACCTTGGTGGATAA  
CGGAAACGGGAATTATCATATCAAAAAAATTAAGAAACCAAGAACGACATTTATTACTC  
CACATGGCTATGAAATGATAGGATACACGCATCCGAAAAAAGGAACACAGAACTATTTAG  
TACATAGGTTAGTCGCAAAATATTTTATTTATGATATACCAAAAAGTAATGTTGGTAAACC  
ACATAGATGGAAATAAACTTAAACAACCACGTTTCGGAACCTTAGAAATAGTTACACCTAAAG  
AAAATACTCTACATGCAATGAAAATTGGATTAATGTCAGGACAACCTGGAGAAAGTAATT  
CAATGTCAAAGCTACTAATATGGAGGCAACAAATTTAATCTATGATTTGATTGCTGGAA  
TGAACAATGTTGAAGCTGGTGA AAAATACAGCCTTCATCCTCGTTAAGTTAGTCTAATTC  
GTCATAAAAGAAGATGGAACACTTTATGGGATCGCATAGAACGTTCAACGACTATCGCAT  
AGGCGGCGAAATTCCGCAAAACGAGTCGGGCGCAAGCTATTGGGGTGGGTGAGAAACCTT  
TAAATCGAAACGGGAGGCATCCTACAGGGATGATGATATAGTCTGCTCCTTACGGTAACG  
TAAGGCGGTTGCGACAGAGCAACGAACCGAAAGTAGCGAACTCGGTTGAACTAAGGGTAT  
TAGAGACGAAGCGATACATGGCGTATATGTAGGATTGTTAGCTCAAGAGATTTATAAGAA  
GCAAACGCCACAGAAGCAAAAAGAAGTGTACGCATGGGCTTTAAACTTACTGCAGGAACT  
TTACGAAAATGAATTGGAGTATACAGAAGATGTCTATGATCAGGTTGGATTAGCTCCAGA  
TGTAAGAAATTCATCAGATACAACGCAAATAAAGCTTTAATCAATCTGGGCTTTGATCA  
TTGGTTTGAAGAAGAGGATGTTAATCCAATTGTTATCAATGGTTTGAACACTAAGACTAA  
ATCCCATGACTGCTTTTCAACTAAAGGGAACGGATACAAAAAAGCAACAGTGGAGCCTTT  
AAAGGATTCAGATTTCAATTTTTACCGAGAAAGGATGTATTCATTGAGATTAATTGAATTA  
GAGCAGCCTAATTGCAATCCATGTAAAATGGTGTCCAATTAAGTAAACAAGTAAATATT  
CAATTTGAGACTGTTGACGTTACACAGGAGCCAGAAGTAGCAGCAAGATTTGGTGTCTAG  
GGAGTACCGGTAACCATTCTGCTGAGTGATCAGGGAGAAGAACTAAACCGAAGTGTGGT  
TTAAGCCTAATGAACTTGATGAGTTACTAAAGGAATTACGATAAAAGGGGAATTTTAA  
CAAATTTGAATTA AAAAGGAGCTAATACATAATGCAAATTA AAAATCAAATACGTAGATGAA  
ACATAACAAGAATTAACAAACTGGAGCAAGGTGATTGGATTGATCTTTGTGCAGCTGAA  
GATGTAGCGATCAAAAAGATGAATTTAACTTGTTCATTGGGAGTGGCCATGGAATTG  
CCTGAAGGGTACGAAGCACATGTCGTTCCCTCGTTTCGAGTACGTATAAGAAATTTGGTGTG  
ATTCAAACAAGCTCAATGGGTGTTATCGATGAGTCTTATAAGGGTGACAACGATTTTTGG  
TTCTTTCTGCTTATGCGTTACGTGACACAAAGATTAAGAAAGGGGATCGAATCTGCCAG  
TTCAGAATTATGAAGAAGATGCCGGCAGTTGACTTGATCGAGGTAGACAGTCTAGGCAAC  
GGTGACCGAGGTGGGCACGGATCAACTGGAACGAAGTAATTGGATTTTGTATTTGAAATA  
TAGATTATTTTAAAAGTCATCTTGAAAAACATTTTTAATCATATTACCTTTTTCTAGGAA  
AGGGGATTA AAAATATGAAAATAACTATTGAAGAATTACCTGAATTAAGGATTGCTTATTT

CCGAAACTTTGGAGAGTATGGTGGTAAGCAAAACAAAGAACTAATGGAATCTTTTAAAAA  
GTGGGCACAGTTGAATGGTGTATTTTCATAACTCTGTAATTTTAGGAATTCACAAGATGA  
CCCAAGTATTACTCCTAAAGAGGAATGCCGTTATGATGTTGGTGTGTATTAAATGAAGA  
TTTTAATGTGCTGCAACCAGCTGAAGTTGGTAAGTTACCTGGAGGGAAATACGCTGTTTT  
CTTGCTTGACCATAAAAAGAGGCAGTAAGTGAATTTTGGGGCAATATTTTCTCTGAAAT  
AGAAAAAATAGTCTAACTATGAGAGGAGAACCAATTATAGAGAGATATACTTCACAAAT  
GATTGATAATCACTTATGTGAAGTATTAGTTCCTATCCAATAAAGAAGGTGGGTAATTTTC  
CCACCTCCTATATATGTATAAGTTAAATGCTCTGGATTAACCTCGTGTATTTTATCAAGAT  
TAATGGTAATGTTGCATATTGCAATTACGAAGTATAGAGTCCCTTGGTATCGTTCCTTTGT  
TAACAAAACAGTTAATTCCAAAACCAATCAAAAATGCAATTATGATTAGCTGAACGAACA  
CAAATAATTGTGAATTAGGACTGAAGAAAGAATAAACCAATAATAACAATAGAATCAGTA  
AGCTAACGATTTTTAATGTTTTTTCGCAAATCAACACTCCTTTAAATACATTGTTTTTAAT  
TTACCATAAAAAGATTTTTGTTGGAAATATTTCCGAATAAAAAGAATACTTTTATCTAATAT  
TTCAGGAGGAAGAGATTATTAACAGCAAAGAAAGAGATTCACAAGCGAAATATGACGACA  
TGCTTTATAGGAACGGTCTTTGCTTTGGGTTTCTTCAGTTACAAGGACTTGAAGATGAAT  
TTATTTAACATATGAGACAAGTTGCTGAGTACGAGAAAGACCTGAGATACAAGAAGGCAG  
CAGCTAACTTCATGAAGATGCATGACCAAACCTGGGTGGAGGATTAATTGTTAAAGGATA  
AAAATAAAATAATCAAGAGTGTGAAAACATCAACAACTTGAAGAAGGGTTGTCGCTAT  
TTGAATAAGGTGACGAAGAATATTTAAGTGTATTTGTGAAAATTCAGGGGCTATATGATG  
AAACCTCAGATACTGCTTTAGAGTGTTTTAAAGAGTTGGCTACAAAATTAGGAAAATTG  
GTCAGAAACGGATTATAAAAGGGATTGATCGGTTGCCACAGACAATTAAGAAAACATTG  
CTGATCAAGTGAATGATTTTAAAGGGGGAGCTATTTGAATAAAAGCAAATATTAACAGTA  
TAGAGTTTGAGGGTGAGTAAAAGCCAACCCAACACAAATATAAAATTAGGAGATGTTTAC  
TATAACATATGTAACCTTTATTTCTATCAGCTTATCTAATTGTATTAACATTAATGAGGT  
CAGGTTGATTAGTCGAGGGGAAAGCAATACGTATATAAAAGTAAAGAGTGTGCTTGATAA  
TTCAACTCCAGAAGATGCGAAACGAAATAAGAATTTCAATTTACCTGTTCACTTTGCTTAA  
GGGGAGTTCTTTAATCATCCCCTTGGCATATAACGGTTTAATTATGCATGAAAATATCCT  
GATGCTCTTTTGGATAGCATTTTAAGTTATATACACAGTCCTAAGCATGTTTAAGGTTTT  
AGACGTGTTGGAGGCCGAAACAGTGAGCCATAGTAGGTATATTTATTTGGCTTATGTCTT  
TGGGAACCTTATCTTTGCTTTGAGAATTATTTTTCATATAATGTGAAATTGTGTTTAGCT  
GCACTCATTATACGGCTCAAGCCCTTTTAGCATTGTGTCAGGGCTAAGTAAATGGATTTAA  
GAATGAAAATAAAAATAACTATAGACAAATACAAATAATATGTATAATATCATAATAGAAG  
ATGATGAAATGACAGTTTTTTTTATCTAATATACAAAACAAAAAATATACATTTTTTAAA  
ACTAATATTTTATTCAACTTTAAGGAGGTGATTCATTGGAAGTAGGAGACACAATACAT  
AACACCAACGAACAGATAACAGCCTTAGAGAAAAAGAAATACCAAATTGAAACAACCTTTA  
CTTGAAAAACAAAGGGATCTGTAAAACCTCGAAACACAGCAAACAAAGCTAAGCTTGAA  
TTGTTATTCGAGCTAAGTGAAGTCTTAACCCAATTGGAAGGTGAAGAGTGGGTAAGTGCC  
ACTATTGCTTTACGAATTATTAAGAAATAAAAGAAAGTACTTGGATCTCTTTGATCTT  
AATGATGACAAAGCATAACGTAAATAAGGATAAATTTAAATTTCTTCATGATGAATCTTT  
GGGCTGAAACAACAATTAATGATATCTGAGGAGTTGTCAGTTGACGGTAGCGAAATTGG  
AGGTGACAAATATATGTGTACATGTGAAGAGGGTAGTGGCAAATGTTCTTATTGTGACGG  
AGCGTTGGATATATTCTAAATGAAGAGAACGAAATTTAGAGAGTGGCTAATCAAAGGAGG  
CAATAAAATGGTACAGACATTACACAGTGCAAGTCGAGGAGCTTATTAATAGTAGTTAGT  
GACATAAAAAGAGGTGGAAACAATACCATTAGTTCTGTATGGATTTAGAGAAGACTTAAA  
AAAGAGAGGGGAATTATCCCCCTCATAAATTAATGAAATTGACCGCCCATGTTTTGTTGA  
GCTAAGCGAACTAAACGTTTAGTGATTTCTCCACCAACTGAACCGTTTGCACGAGATGTA  
GTCTCAGCGCCTAATTGAACACCAAACCTCAGAAGCTATTTCAAGTTTCATTTGTTCAATA  
GCTGAAGCTGCTTGAGGAATTAGTAAATCATTATTGTTGTTTGATCTTGATCTACTTTGT  
TGAGCCATCTTATTCATCTCCTAAAGTGTAATGAAAACAATCTTGTTTGATTTCATATTAT  
GGAGAGATTATTTAATTTATACACGCCAAAGAAATAAATTTTTTCATTAAGAAAGGTGGA  
GACAAAATGAAAATTGATTATGTTTCAGATCTCCATATAAATCATTGGATTCCTTGGAAT  
GTAAATCAGATTAAGTGGGAGAAGCGAACAAGAGAAATTGTAAATAGGTTAATCTCAAAC  
GGTAATGGGGACGTACTGGTCATTGCCGGCGGTTTTACTGAATGGAATCAACAACTTTA  
TGGGTTTTAGATGAGGCAGCAAAGCAATACGAGAAGGTTTACTTTACATATGGTAATCAT  
GATCTTTATGTACTTAGCAAGAGCCAAAAAAGGAAATACTCAGACTCGTTAGGCAGGTTG  
AATGATCTAATTCAAAAAGCTGCTGACATGAAAATGTAACACCATTAATTAAGACAACCT  
GAAACATACAAAGGAAAAGTCTTTGCAGGAGATGTAATGTGGTACCTTCCAAAAGGAATC

GAAGGATGGGACTTCTGTAAAGGAGTATCTAACGATTCTAATTACATTTGGCTTAATGGT  
TATAACAAAGTAGATGGTGTAAAGAGCGATGTGGAAAGAATCAATGGATTGGTATGAAACG  
CTTGAAAATACACAAGTTGATGAATTTGGCTCACATGTTCCACCTGTTCAACAATCCTTAT  
TCTCCATTTGAGCCTAATACATGCTACATGGTTGATGTCCCGTTCATTAACGCAAAACAC  
TGGGTTTGTGGACATGATCATTTACAAGCTGAGTTTTACAAAGATGGAACGAGCTTTCAC  
ATGAATTGTATCGGATACCCGTATGACTATGATAATTATCCGAGTGTCAATGTGATACCT  
GGTGAAGAAGTAGATTTCATATAAAAACGTTTGGAGCTTAAAACATTTCGAGATTTAGATTTAA  
TTAAAATTCTAATTTTATACAGAAGGGAAGGGGAGACATGGAAAATGAAGTTGTGTTTTT  
TTGTAGAAAATGCAATCATCACTTGTGTTGCTAAAAATCCTATGATAAACACATTAAGGT  
TATATCTGAAATTGATTGCCCTAATTGTGGAGAAGAGGGTTATCATAAATTGGATTCTTGC  
GCATATAGGTGATTCAGAGAAAGAAAAGGAGAACTTCAATTGGAAGTAGATAAAAATGTTG  
AATTTATTAAGAAAGAGGTGTAGCTATGATGGACAGTAGAGAAACAATTGATTGGACTTG  
TAATGAATGCAATTTTAGTTGGATAGGTGACAATTCAGATTTTTTCATGTCCTTCTTGTGA  
TGAAATCGATATAAAGCCAAAAAATAAGATACTTGATTGATTAAGACGTTGATTTCAATTT  
AGTGGGATAAACTCAATGAAAGAGATTGAATTTGAAGAAGTTAAAAAATTTGTTGAAGTA  
CTGTCTCGGCGACTTAGATCAACCTAGGTGATAAAAATTCATATCAGTTATGCAGAATGG  
TTAGTTGCAGAAGTCGAACGCTTAAGGGGGTTAGTCAAGTGAGTAATAGTTTAGATGTAC  
AAGGAGGGATTGAATGGAGAACGTAATGTCCTGGTTTAATAAAGACTTTGAAATTAATC  
AGACAATAACAATGATAAAACTTTATTGTGATTATTTGATCTTATGAAGGAAAGTCTCAT  
GACTTATTTCAATATTGAAAACACTTCTGATATTCATGAGTTTATAAAAATCGCAGTAGC  
AAAGAATGATGTTGATTATCCCTTCCCTTGAATGGATAAAGGAAAAAGGTATTCCAAGATT  
TAAGAATATTGATTTTAATAAGCTACCCAATGACGATCGCTTCTTCCCATGATTGAGTT  
TGATGAATTTGTTCTGCAAAATGAAATGGATTTTCAAGATCCTGAAGAGGTTTCGAGGGTG  
TATTATTTCAACAGTTAATAGCCTGAAGGAATATATTAATATCTGCCACAATAAAACATG  
ATTGGAGGAAAGATACCTGATTGTTACAGCCTGGATATTGTTAATTGTGTTTGGTTTATT  
CGCTTATCAGATTTTAACTTAACTGAGAACGAGACAAAGCATATTAAGTTTTTCATTTT  
AATGAAATTTGTTTCTGTCTTTATAGCTGCTATTGCAGCAGGAGTGATTTCGGGAGGATT  
ATTTCAATGATTGAAATTTTAAAGATACAGGAGCTACCCATGATTTAGTTTATCATGCT  
AAGATTAACACGTTTGTGTTGGGATGTGGAATTTGACATGTTTTATCAGACAGTAAGGAA  
TTAAATAAATGTTATTTTGTGAAATGCTTTAATCCGTATCGAATAAATGGAAAGTGTGAT  
TTTGCGGTTAGTTCAATAGATATATTTTCCGAAGGTAACGTCTCTTAATTGAAAATGAA  
TTCAATTTTAAAATTACAAAGGCAGTCCACGTGGCAACATCAAAGACGTAACCTGAAATA  
GTTTTGCTTTTAAAGTGAGAGAATCAGTAGTCCATTCCCAATTGTAAAAGAAGTTGTTTAT  
CTAGATTAAGGTAATAGGAACAGGATACAATCGGTCTTTTATTTAGAATAAAAAATAAAA  
TTAGTGGAGGTATTATGTGTAATCGAAATGTTATTACAATTCCATATGAAGAGGATATGT  
CAAAGTATTCAATACTACACCAGGTAGGGGGGGGAATTGAGTATTTTCAAAAAGAGTATT  
CACAATATCCAATGTTTCGAATTTGATAGTGAAGAGGATTACAACGAATATAAATGCTTAA  
TAATGCACCTTAAAAAGAATAAAAAAATCTCTAGTTTCTCTTTTAAAAGAGTATGGTAT  
TGCAAACAACAGTTTAAATATGCAAAAAGTAATGAACTAAATATTGCACATATGGGAAAGA  
GGTGAGAAAAATTAACGAGGCTTATCATTCAACTCAAACACTGTAAACAAGATGGATAG  
ACAAATGAAGACAGTGAAGGAGGCCATTGAAGAGAAAGATTTGGAACGAGCACATCGTAA  
CTTAATTAACCTGGCTGACAATAATGAGGAATTAATGCAGGAAATAAGGTGGGTCAAAAA  
GGGAACCATATTATAAGTTATTTGGTTAATTGTCTGCGCTCTTTAAAGTTCCATACATAA  
AGCTCTTCTATAGAGCAACCTATGGCATCAGCAAATGTCATTGCTGTTCCAATATTCATA  
TTTGATTTAAAACCACCTACATAATCATTAAACGTTGTTTTGATAATCCAGTACAATCA  
ACAAGATCTTCAATTGAAACGCTATATTCATGCATGAGCTCATTGAGTCTTGAACCAATT  
GGTTTCCATTGTTTTTCACTATGCACACCTCTTTCAGCAACGATTTTAGCACATACATA  
ATTTACCTTCAATATAGAATAGGAGAGTGATTGATTGGGAGCAAACAATCAAGGGAAAGT  
TTTTGAAGCGAACATTGAAAAATCTGCAGCAGATCAAAGTTATTCTTTTACCGGATTAA  
AGATGTTAACCCAATGTTCTTGAAAAGAGGGTTCATCAGTATCAAAAAATAAATATGATTG  
CTTCTGTTCTTTAAGGGGTAAGTTGTTCCCTTTGAGCTTAAAGTCGACAAAAAGCAAGTC  
CATTTCTTCAGCGAGAAAATCATAAAGCCGAGCAGATTAAATATTTAAGGGAAGCAAC  
ACAATACCCAAACATAATCCCTGGTTTTCTGTTTCAATTTAGAGAGCCGGAAAACAAAGT  
TTATTTCTGATACATTAATGATTTCCCTTACATATAAGAACATAGCTGAAAAACAGTTGAA  
ACATACATATAAGAATCAAGTAGACAAAGCCAGTATCCCGATTGCGATTTGTGAAGAAAT  
CGGTACTGAAGTGCGCTCGATGAAAAAGAAAGTGAATTATACATATTATTTAAACAAGCT  
GTGCGGTGAACTAATAAAGAAAGAACAGTCAAGAGACAAACCATTACATACATATAATAC



TCCTGTGAAAACGGGGGTGTAGCCTTGGAACCTTACCAACCTTATGAGGAATTAAGAAA  
AAAACAATAAAGGTAATCCAGAAAGAAAATTACAGTATTCGATATATAACTCAGGTTGAA  
GCAAGTAATGACTTAGATGAGTTTTACAAACAATTTGATCAACATTTATTAGAAGCTGCT  
CTGGAAAGGAAGGCAGAGGAAGTTTCTTTTTTTCGTTAGATATGTAGTAAGTAACTTAAT  
ATACAGCTTTATCTGT

>NewGenomeName\_44

TTAGTATTACCCGCCGCCTGGGGCACCGGGGCACCGCAGCTATTGGCTGCCTTGCGGAGG  
TGCCCGCCCCTAGGGAGGCGTAAATGGCGCCGTTAGGCGCCCGTTAATCTCCGGAGGATC  
ACACTCGTCCGGGAACCATCCCGTCCAAGGAGGGCTATGGCTGTCGCCGTTGGTGTTTCA  
CTCTTAACAACCCTACAGACGGCGAAATCGAATTCGTCCGTTCTCTCGGGCCTGACGAAT  
TCTACTATGCCATCGTTGGACGGGAAAAGGGTGAGCAAGGCACTCCCCATTTGCAAGGCT  
ACTTTCCTTTTAAAAATAAGAAGCGACTGAGCGCGCTTAAGAAAATGCTGCCGCGAGGTC  
ATTTTGAGGGGCGCTAAAGGGAGCGACGCGGATAACGAGAAGTATTGCAGTAAAGAGGGGG  
ACGTCATACTTACCCTGGGCATTGTGGGGGAGAGACGGTCACCGCGCTTTCGATGGAGCTG  
TTGCTGCCGTGATGTCCGGACCCAAAATGAAGGAAGTCGCGCGAGAGTTCTCAGATATCT  
ACGTCAGCCATGGGCGGGGCTTGCATAGCCTCTCGCTATTGGTTGGTTCCCGCCCGCGTG  
ATTTTAAGACTGAGGTTGACATCATTTACGGGCCACCGGGGTGTGGCAAGAGGCGATGGG  
CCAATGAGCAGCCTGGGACCAAATATTATAAAAATGCCCGGTGAATGGTGGGATGGATATG  
ATGGGGAAGATGTCGTCATCTTGGACGACTTTTGTCCGGTGGCTTCCTTATTGCGAGATGC  
TCCGCTCTGCGACCGTTACCCACATAAAGTGCCAGTTAAGGGCGCTTTTGTGGAGTTTA  
CGAGCAAGAGGATCATTATCACGAGCAATAAGGCCCTGGAGACCTGGTACAAGGAGGACT  
GTGACCCGAAGCCACTGTTCCGGAGATTCACTCGTGTTTGGTGGTACAACATTGACAAGT  
TGGAACAAGTCCGGCCAGATTTCTCGCCCGCCCATCAATTTTTGATAGTCTCGGTGAT  
GTTTAATAAAGTTAGGCGTCCGATCCGAAGGCCCGATGCCGAGGGGGGGACCCCTGCCG  
GAGGGTTCGAGGGCCGTCAGGCCCGAGAACCCGACCAGCCGGAGGGCCTAGTCTGTAT  
CGGGGGGGGGGGCCCCGGGGGGTCCCCCGACAGGACGAACACGGTAGCGACGAAGGCGCC  
AATAAACACTCAAAAAGGTATTTGCTGCCTGAGTCTTATTAAGTACTGGGATTGTTAGG  
GGCAAAGTACGGAATTGAACATATATAGTGAGCTTGGTTACATAAGTGATCGTTTGTTC  
TGGGTGAGGGAAGCTGAAGCCAATGCCGTAGTGCTGACTTTCGCTCCTGCTGCGTTGGG  
TCCTCCTTGTAGTGGGATCCAGCCGGTCTGGCGATGTTTAGCCACAATGCTGCAGACTG  
GTTTCGCTGTGGTGGGTCGTTTATCGTTATTTGTGGTTTTGGTTTTGAGGAGACGTTTGAA  
TCCCCTGCTAACATAACATTTTCTGGCACCGTCGAAAGGTGCCAGTGGGTCTTGTGTTTTG  
GTCTGCAACAGTTTTTAAATTTACTTATCCTGGAGTCTTGGATTACGGCCGTGTGGCCGAA  
TCCGTCTCCTTGTATGGTGTAGTGTCCCCATGTGGGCCTCATTTCATTTTAGCTAGCTT  
AATCCGGTAGTTTTTCGAAATTCAGTGTTTGTGGGTTTTGGTGTGTTTGTATAAAGTCTGA  
CAATGCATAGGTTACAAAGTAGGAGCTAAAATTAGGTTGCCAGTACTGGTGGTTTTGTTT  
TTGAATTTGGAATTTGAATTGGCGTGTGAGTCTGAGAGTGTAACCCTATTGGTTGAGAA  
ACGGCGTCTGCGGAAGTGTCTACGTCGCCGGCGGTATCGCCTGATGTGACGTCTGCGGTA  
GTATGGGCGGGCATAACCGTCGTCTAACCTGAAATATAGCGCATGCGTAGTTAGAGGTGCC  
CCATAGGCGGCGG

>NewGenomeName\_45

ACAAAAGTACAAATATTGTCAACGCTCCTATGCGTGGGGGTATACGTTTCTAAGGTGTG  
TACTGCTTTATGGACGCATCCTACTCATGGTCCGCTAAAATGCGGTCAATGTATAGAGTG  
CCGTCTTGCATTCGAGAGAGGGGGCTATCAGGATAACCCACGAGCAAATGATGCACGA  
GAGATCTTGTATGCTCAACCTTACATATGATGATGATCATTTACCTTTGCACGGCTAGCT  
GGTTAAAGCTGACATGCAAAAGTTTTTTAAACGCTTTCGTAAGGCAGTATACAAATTCG  
CTATGTTGCTTCTGGTGGTATGGAGACGCTAGTAGGCGTCCCCATTTTCACATTGCACT  
GTTTGGTCAAGACTTTGAATTTGATCGGCAGCAATTCGGCAGCTCTAATGGAGATAAAAC  
TTACACAAGTCAAAGTGTTTTTAGATACTGGCCACAGGGTAATCACCTAATTGGTACTCT  
TAATTTTGAAGCGCAGCGAATATCGCAAGATATACTTAAGAAAATTAAGGCTTCTGA  
AAAGGTCTCACCTTTGCCGTTACACGTAGATAAAGAGGATGGGGAAATAATATTTCCCTAA  
TCCTGAGTTCTTAACAATGTCGAAGGGCATTAGTACAGGGTGGTTTAAAGATTACTTCAT  
GTCGGATGTTTCTCCGTCTGCAAGTGTGTAACCATCCAAGGCACTAGGGCACCAGTCCC  
TAGGTAATAAAAATTTTAAAGGAGTTGGGTCATGATTTGAGTTTAGATATGCAGTT  
TCGCTCTTCAGCGCGAGCTGATTTGGAAGTAGAGCATAAACGATACGAAAATCTTCCTG  
TTCGAAAGATCGCAAGACAAAATGTCAGCGAATCTAGAGTTCAATTATCAAACGTACAA  
TTTAAAGGTCAAAAATGTTGCAATATACAGTTTCTGTTAAGGATAGGGCTGCTGAAGTTT

TCAAACGCCCGTTTATTGTTCCACATCGTAATGTGGCTGTTTCGTGATTTTACTGATGAGA  
TTAATCGTGCTAGTGCCGATAATCCATTGAATAAACATCCTGATGATTTTGATTGTATT  
TGTTGGGACAATTTGACGATACCGTCGGTTCCTTCATTCGTGAAGGTGCCCAATTGTTT  
TCGTCCGTGGTATGGACGTTGTTCAAAGCTCTGTTTGACCCTTGACCCCTTAGGGGGTA  
CTTTTTTATTTTLAGGAGTAATTATGTTTTCTAATAAATCTGCCAGTGCTCATGATTTTCG  
CAATGGTTCCTAGAGCGGATATTCCGCGTTCCTAAGTTTTCTATGCAGAAAACGCTTAAAA  
CTACTTTTGATAGTGGTTTTTTAGTTCCTTTTTATGTGTGAGGAGCTTTTACCCGGTGATA  
CGTTCAACACTAAAGTTACTATGTTTCGGTCGTCTCGCGACCCCATTTTCCCAGTCATGG  
ATAATCTCCATTTGGACTCGTTCTTTTTCTTTGTTCTAATCGTCTCATATGGTCAAATT  
GGTTGAATTTAGGGGGCAGCAGGATAATCCTGCCGATTCTATTTCTACTCTATACCTC  
AACAAAGTTTCCCAGCTGGGGGTTAAGCTGTTGAGGCTTTGCAAGACTATTTTGGCTTGC  
CAACTCTCGGGCAAGTTGGCTCTGGTCTTACTGTTTACATTCTGCGTTACCTACCAGAG  
CTTACAACCTTGATTTATAACCAATGGTACCGAGATCAGAATTTACAAAATTTCTGTCGTAG  
TTGATCCTGGTGATGGTCTGATACATCACCTAGTACTAAGTACACTTTATTACGTCGTG  
GTAAACGACACGATTATTTTACTTCTGCTCTACCTTGGCCTCAAAAAGGTGGTAATGCTG  
TACTATCCCTTTGGGTACTAGAGCTCCTGTATATGGTGTGGTGTAGCTACAGCAACTT  
CTGGTAATGGTTCACCGCTGGTATTAAGATCCAGCCGGTCTTAATCAAACATGGACTA  
ATGCTACAACAGCAGCCCATATATTAATAATGACAACACCTGTAGGTGCATCAGCATTGC  
CCGATATTTATGCATATTTATCTGCAGCTACAGCTGCTACTATTAATCAGCTTCGTCAAT  
CTTTTCAGATTCAAAAGTTGCTTGAGCGTGACGCCCGTGGCGGTACTCGGTATACCGAGA  
TTATTCGCTCACATTTTGGCGTTGCTTCACCTGATGCACGCCTTCAACGCCCTGAATATT  
TGGGCGGTGCTTCTACTAATATTAATATTTACCTATTGCTCAAAAATAGTGCTACTGGTT  
TATCTGGTTCCTACTACCCCTATCGGCAATGTTGCCGCTTTTGGTACTTTTTTAGGGAAAG  
AACATGGATTTACACAATCCTTCGTCGAGCACGGTATGTTATTGGTCTTGTTCCTGTTT  
GTGCTGACCTTACTTATCAGCAGGGTCTTAGAAGACACTGGTCTCGTAGTACTCGCTATG  
ATTATTATTTTCTGCTTTCGCTACTCTTGGTGAGCAGTCTGTTTTAAATAAGGAAATTT  
ATGTTACTGGTAATAACAACCTCAAGATAACTCGGTTTTTGTATTATCAAGAACGTTGGGCCG  
AGTATCGTTATAACCCCTCGGAGATTACCGGCTTATTTAAGTCTACTTCTTCGGGTACTA  
TTGACCCATGGCATTATGCGCAAAAATTCACATCTTTGCCTACATTGAATAGAACTTTTA  
TTCAGGATAATCCGCCTTTAGCACGCAACCTTGCTGTTGGTGCTTCTCCTACTGGATAGC  
AGTTTCTTCTCGATTCTTTTTTTTACTACTACGGCTGCTCGTCCTATGCCTATGTACTCTG  
TACCCGGCTTGATCGATCATTCTAATATGCTCGATTGGCTTACTTCACCTATTGCTTCT  
ACTGTTTCTGGTATTGCGGGTTTTCTTGGTCAACAAGATACTAATGCTGCAAACCAAGCA  
AACGCACAAGCACAAATGGATTTTCAAGAAAGAATGTCCAATTCTGCTTATCAACGACAA  
GTTAAGGATATGGAAGCTTCTGGTTTAAATCCTATGCTTGTATATCAAAGGTGGGGGC  
GCAAGTTCCCAGCTGGTTCTATGGCTACTTATCAAACCCAGCTGCAGCTGGTGTTCCT  
TCTGCTTTAGGGTCTGCACAAGTTTCACAACTCATGCTAGTACAAGGCAGACTTCTGCA  
CAAACAGATTATCTTACCGGTCCTCAAACCTGAGATGACTAATCAACAGATTAACAATCTA  
AAAACCTGATAACGTAAGACTACTCAAATTATTCGTTATCTTAATGAAGAATTTCAAAC  
TTGATGAAACAAGGTTTGAATTTAACTGAAGTTGGTAATCAATTACGTGAAAGCGTTAGT  
TTGATGAAGTCTCAAATTAATAATTTTGGAGCTTTAACTACTTCTACACAGTTCCAAGCT  
AAGATTAATGATTTTAAATCAGCAGTTGTTAAAAATGGATGTAGATGCTGCTAAACCACCT  
GGTAATTTTGGTTCGTGAATATAACCAATATAGACCTCTAATTGAATTTCTCAAATCGTTT  
GTTAAAGCCAGATAATGGCTAGATTTTTTTTTAAAGGAAATGAAAATGAAGACTGTTTTTT  
GGCGTTCTCCATATAACTATGATAGGGATCTAGCCAGCGATAAAGCTGGCCTTTCTTGTA  
ATGATCCTTCTTTAACGCAACAGCAGTTTAAAGAAGAGTCTGATAAAAATACGATTGTTG  
ATCGTTTTATGAAGTCTGGAGTTTTGCCTAATCCAATTAATATGCCTCAATATATTGATT  
ATGAAGGCGTTTTTACTTTCAATCTGCTATGAACACTATCCGTCAAGCAGATGAGAATT  
TTATGCGTATGGACGCTAAAGTTCGTGCTAGATTTAATAATAGTCCCCAAGAGTTCCTCG  
AGTTTTTTCGGTAATCCCGAAAATCAAGAAGAGGCGATTTCGCTTGGTGTGGCTACGCCTC  
AAGCCGTTGTAGAAACGAAAGTTTCTGCTGCGGAACCGACGTCTAAGTCGGAATAATGGT  
ACAGTTCGCTACTTGTATGTAACCTGTACCTAGTGACACCAACTTCTAGGGAGAATGAAATG  
AAACCTTTGCACAGATCTTTTGTAATAAAAACAGTTCTGCTAAACAATTTAAATCTAAT  
GTTGGCAA

>NewGenomeName\_46

TAGACTGAAAGCAAATCGCACTACGTCAGCAAATTAGCAAAAAGGCACCGCAACGTGGGGG  
CTGGAGTCTCTAAATGCGCACAAGGCACCGAACATGCCTTCTTATTACCCATTAAGCGCT

TATCAATGCGCAGACGGACACATTATCTTCCACGAGAGTAGACGACATGGCACAGTAAAG  
TCATTATCTTTACCCTGCAGCCAATGCGTTGGCTGCAGATTAGCACGCTCACGCCAGTGG  
GCTATTAGATGTATGCATGAGGCCCAAATGCGTACACAAAACCTGTTTTATAACTCTCACA  
TACAATGATGACAATCTCCCAAGCGATAAATCTTTATGCGACCGACCCTATCAACTCTTT  
ATTCAAAGATCTCGAAAACGGTACTTTGGACTCAAAAATACGTTATTACATGGTTTGTGTG  
TATGGCGAAAATTCCGACCGACCTCACTTCCACGCCTGCCTCTTCGGAATCGATTTTCGAT  
GATGAGAAGCTATGGAAAAGGACTTCCGCTAATTCTATGTTATATACATCCAGGGACCTT  
AAAATACTCTCGCCATTTGGTTATTCCTCCGTTGGAAAACGTTACTTTTGAATCGGCGGCC  
TATGTGCGCGGATACATTATGAAAAGATGACAGGGAAAAACGCAGAGGATCATTACACA  
GAAATAAACTCCGAAACAGGGGAAATACTTACACATAAACCCGAGTTTATGAAAATGGCT  
CTTAAGCCTGGTACAGCTTACTAATGGTATAAAAAATACTCTTCCGATGTCTATCCCAAC  
GATTACGTGGTAACTCGTGGAAATAAAGTCAAACCTCCAAAATATTATGACAGAAATTCC  
AAAATTGACAATCCATATGAGTTTGACGAACACTTTACCTCCGAGAAAAGTCTACTAAA  
CTACATTTTGAAGACAATACGCGTGAACGCTTGCTTGTAATGAGCAAGTTACAAAGGCA  
AACTTCAAAAACATAAACGTAACCTCACTTAAGGACAATACCTCATGAAAGTAGTACTA  
TGTTCTGTAAGAGACAGAGCAGCTGATGCGTTCGGTCGACCAATGTTTGTACCTCTGTT  
GGTGTGCAATTAGGAGATTTAGCGTCGAAGTCTACCGCCAGTCTGATGATAATCAGCTA  
CATAATCACCCCGATGATTTTATTTATATGAAATAGGCGAGTTTGACGACAACCTCAGGT  
ACTTTTGTCTTACATGTCCAACCAAAAACCTGTTATCTTTAGGAAAACAGGTCAAATACT  
AAGGAATGGTTTTAAATAAGCCGACTCAAAGGGTGTATGTTTGGGTCGGAACGATAAGGA  
GCTTAAAAACATGCATCGTAATCAATCGGTAGATGTCCATCAATTTACTATGATACCAA  
GGCCGATATACCTTGGTCTTCGTTTGATAGCCAGTCTACACACAAAACAACCTTTCGATGC  
TGGCTATCTCGTACCCGTGTACGTGGATGAGATGCTCCAGGCGATACATTTTCGCTTGAA  
TATGACTGCGTTTGTCTCGATTAGCAACGCCACTATATCCAATTATGGATAATATGCATTT  
AGATTC AATCTTTTTATTTGTACCCAATCGATTGATTTGGGACTATTGGCAGAAATTTAT  
GGGTCAATAAACGAATCCAGGGGATTCAATTAGTTACGTTGTACCCCAACAGTTAAGCCC  
AACTGGTGGTTACGCTATAGGATCACTACAAGATTACATGTGACTACCGACTGTTGGACA  
AGTCGGAAATTC AAGCACTGTGTCTCATTGTGCTTTCTGGCCACGTGCTTATAACTTCAT  
ATATAACGAATGGTTTAGAGATGAAAATCGACAAAATACTGTTGTTGTTGATACTGATGA  
TGGCCCTGATACTGTTACTGCTTACGTATCCCGTCGGCGTGGAAAACGCAAAGATTATTT  
TACGTCCGCACTTCCATGGCCTCAAAAAGGTGATGCCGTTACACTTCCATCAGGAACTTC  
TGCACCTGTTAAGTTCCAAAATATTAGTGGTAGTGGTACTGCATTAACCTGGTAGTGTGAT  
TGAGTTTTTCAGGTCGTGATAACGATACTCCCGCAATATTTTCAGCACGAAACTACGGAAG  
TAGTACAGGAAATGCAAATCTACCTATCGCTAATACCGCAAACCTGTATGCTGATTTAAG  
CGCAGCAACAACCTGCAACTATTAATCAATTACCACAATGTTGCCAGATTCAAAAACCTGTT  
AGAAAGGGATGCGTGTGGTGGTACACGTTATACTGAAATTATTCGCTAACACTTTGGTGT  
TATTTCTCCTGATGCTCGCTTACAGCGTCTGAGTACATCGGGGGTGGATCGACCAACAT  
CAATCATAATCCGAGCGCTCAAATATCAGGTACGAGCGCTAGTGGAACTAATCCCCCTT  
GGGTACACTTGCTTCTATGGGTACTGCCTTGGCTCATAACAATGGCTTGACTTACTCGTC  
TACTGAACATGGCGTAATAATCGGCATGGTCTCAGTTCGTGCAGACTTGCCTCATCAGCA  
AGGTCTGCAACGTATGTGGTCTAGATCAACACAATACGATTTTTTACTTCCGAGCTTTTTTC  
CGTTTTAGGTGAGCAAGCTGTTCTTAATAAGGAAATCTATGTTACAGGTGGGTCTGGGGA  
CAATGATGTATTTGGCTATCAAGAACGCTAGGCAGAATACAGATACTCTCCTAGCCGCAT  
TTCAAGTTTATCCAGTTCTACTGCTGCTGGAACCTATTGATGCCTGGCATTTTGCCCAAAA  
GTTTCCAAGTGTACCAACGTTAAAGACTACGTTTATAACAAGACACACCTCCGGTTAGCCG  
AGTAGTGGCAGTTGGAGCATCTGCTAACGGACAACAATTTATTATTGATAGCTTTTTTTGA  
TGTTAAAAAAGCACGACCAATGCCAATGTACAGCGTACCTGGCTTAATCGATCATTCTA  
ATAGGATTGATGCCCGAGCTGCGTTTGGTGGTCAGTTGGGCTTTTGAGGCCAACAGAAAA  
CCAACCAAAAAAATTGGAATATAGCTCAGGCAGCTAATCAAGCTGGTGTGCTGAGCAAGCGC  
AACGTCAAAGGGATTTTCACGAACGTAGGGGCAAAAACCTCAATATCAAAATGCTATAGAGG  
ATATCCAAAAAGATGGGATAAGCCCCATGCTTGCATATTCACAAGGTGTAGCGGGTACCA  
AATCGGGAGCGATAGGGCAGGTGTCGACGGCAAAAAGTAGGTAATGCTATTGGATCTGCAT  
TGCAAGGTTATCAGACTATGGCAATGACTCATGCGGATTTAGACTTAAAAGACGCAACTA  
CAAAAGGTACAACCGGTCAAACCTATAGAAAACAGAAGCCGATAAGATAAAAAACGCCTCAGG  
ATATAGGATACACGTTAGAAAATAATAAGTTAAACCAGCAACAACAAAAAACTTGACCG  
AAGCTTTAGCTAAACTTACGGCTGAATTAGCTAATGTGAAGCCAAGTACTGCGCAACAT  
CTGCGCCAACAAAAACATAAAAAGAATTACAAACCCGATCCGCTGACCCTTTTTTGGTATC

GTGATATTAATAAAAGGGCGTTAAAGGGATTCATTAAGGTTTTAAAAATAACCCCTTCATAGG  
TTGTTCCCTCATTACACAGCTGAAATTATATATAAGTCAGGTAAGACTGGGTAAAACATA  
AATATCGACAATAGATAGGCAAATAATGAGTAAAAAACTGTGCTTTTACGTACACCAGA  
CAACTACGACAAAGATGCTGCGTCAAATGAGTCATGGTTGCATTGTGGGGATGCCTCCCT  
GGCTCAGCAGCATTTTAAAGACGAATGCGATATTATTAATATCCTTCGTCAATTCGACAC  
GACGGGCCAATTGCCCCGACAGCCATTAACGTCTCGTAATGGCGACTTTAGCGGAATTGG  
TGACTACCATAACCGCATTGTACCGCGTTATCGCGGCTCAAGATGAATTTGACCGCTTGCC  
GGCTCAAATCGGAGCTATGTTTCGATAACGAACCACCAAATTTAATAGAATTATTAGAAAA  
TTCTGACAATCGACCCGAGACTGAAGAGCTCGGATTAGTTGAAAAAGCCGTGGAAGTGGG  
GCAAAGCACAGTTACTCCACTTGATGTAAGTGTGCTAGGAGACACCAAACCCCAAATGC  
TCATTAATAAGGAATCCTAAAAAATGATGTATAGCAAACCAGTAAATAAACGTCGTTCCGC  
TCGTTCCCTT

>NewGenomeName\_47

ATTGCACACCTAATTTTCGAAAATGGCATGTGATACACCTTTTTATGTCAATAACCCCCGC  
TACCCTATCTACAGCAACTACCGGCAAGTTCAGGTTCCCTTGTTGAAAGTGTTTCAGCATGT  
TTGTCCAGACGCACTAGAGTCTGGACATTTTCGTTTAAAACTCACGCAAAAAATGCTATA  
TCTTCTTACTTCACTTACTTACTTACGATACCGGATATGTACCTATATCAAGTAGGGGT  
TTCCTTACACTCCATAAACGAGACGTTCAACTCTATTTTTAAAAGGCTTAGGAACTTCAT  
TCAAAGATCACGAACCCCTAAAATATTATTTAGCAGGAGAATTTGGAAGCAAAACATTT  
AGACCCCATATCATATCATACTATTTAATGCCAACATCGACCTAATTCATAAAGCATGG  
GACAAAGGAGAAGTCCACCTAGGGGAATTAACAGAGCCTTCGGCCGCATACACTGCAAAA  
TTTATAAACATAGGAAAAGTTATACCAGTGCACAAAAATGATGATAGACTGCCAGAATTT  
AGTTTAATGAGTAAGAACTAGGACTTAACTATTTATCAGAAAAATAATTCGATATCAT  
AGAAGCGATATTGAAAGAAATTTTATAACATTGGAAGACGGAAAGAAAATAAGCTTACCT  
AGGTACTTTAGAGCAAAAATTTGGACAGAGCGAGAAAGAATAACAAGCAGATAAACTA  
GCACAAAAATTCAAAGAGTTAGAGCAACAAAAAGAAACAGAGTACTACACAAAAAATCAA  
ATATTGGAAGGATATGTACAACCTTAAAGCAAGTGGAAAAGCCCATAGAATTATTACACAC  
GAAAAACGAGCCCGAGAAGGGCGCAATAAAAGTTAGATCAAGCTTCAGTTATCAAGACAA  
AACAGAGGAGCAGGAGGAGAAATCATCAATGGAACCAAGCCAAACAGTTACAGACATGAC  
TTTGTCAATTATCAGAAGTACTAGTACAACGATACACCAGAGGACAATCAGTGGCAACCTTTAC  
ACCCGTTTATTACGGAGAAGAGGAAGAATTCGCAGACGCTAGCAGAATGGATCCTATTGA  
GCGCATAGAGTATGCTCGATTCAATTAGAGAAAAATACTCAGAAACCAGACACTCCCTAGC  
CGAGCAGCAAGCTGGCGACGAATGAGCAGCCGAGCCGCAAATGAGCGATGGGCAAGAAAA  
AATTGAACAAACAACCACCCACATGTATAATAACAAAAGAGTAAAAAAAGGGGAAGTTTA  
ACGGTACTACCGCTAAACTTCCCGATACGTGGCGCTATGGCAAAAAACAAGCGCAAT  
TGCAAAAGGCCTTCGAAGAGGAGGCCAAACACTAATAATCCTTGATATATTAGTGCTAAT  
TGACACCAAGTAAAAACGAGAGCCTGCGAGAGTAAAAACGAAGATAGAAAATTAACCCA  
AAAAACA AAAAAGTTAATGGATCCAGTAACTACAGCCGCAGCAATCACAGCCGGCGTCAG  
TGCCTATCGGGCGGAGCCCAAGCATAACGCCACAGGAAAACA AAAAATCTCGTGC  
ATTCTCCAGGGAGATGTACGAAAAACA AAAAGCAGACAATTTGATGTTTTGCTATATGCA  
AAACCAGTATAATTCACCAGAGCATCAAATGGCAAGATTA AAAATCTGCAGGATTAACCC  
AAGTATGGTATACGACAAAGGCGGGGCTATTCAATCTGCTGGAAATATACCAACACCAGA  
TGTTCAAGGAGGACAATTCAGAACTCCCGACTTTGCGCCAATATCAGGAGCTGTACAAGG  
ATATTTTGATACCAAAATAAAAACAGGCTCAGTACGATAACTTAATGGCTGCAAATACATC  
CATTCAACGAGAAGCTATTTTAAAAGCTGCACAAACATTGGCAGCAACAGAAAAGTACAAA  
AGGTCAATCTATAGCCTATGCATTGGCACAACAAACTTTCAATATTCAGTAGAAGGAGC  
GAGATTAGCAAACGAGCAAACAGAGCAAACACACAATATACACTTTCTGAAAATGAAAG  
AAAGTCAGCCTTACAGGCACCTTCTTTAGCAGCAGCAGTAGAAAATGTATGAAGAATCAA  
AGCGGAAACTGCTAATACAAATGCTGCAAGAGGAAAAATAAACCAAACAATTAAGACCT  
CCAACAAGATTAAGATCAAAGAATTTGAAGAAGATTTAGCAAAACAAGGGATATACAA  
AAATGACCCTTTATGGTCAAGGGCATTAGCTCAATTTATTGAAGGTCTCACTGGAGGTAT  
GTCTATGAAAGATTTAGGAACAAACACAGGAGGATTGTTTAACCAATCAGGATTTAAAAA  
TGCAACTAAATCAACAATGTCATGGTGGATTCCCAAATAAAAACATTACAAAAAACGTCT  
GAAGAAATAAAAAAAGATGTAATGATTTGATAGATCAAATAAATAAATTAGTTTTAGAA  
AATGAATCAAATGATGCGGTAGCATTAAAGCAGATTAGATTCTGTATGTTCTTTACTACAA  
ACTACCCTTATTCATATTAATAACTTAAACAGCAAAACCCAATGCGCTACAGAAGAGGCG  
GAAGATCCCGCAGAAAAGGCTACGGCCGCAGAAAAACAACACTTACTGAGTTAAAAGAG

GAGGCATAAGACTATAATGGCAAATGCAAACCTTATTTAACTCGGTTTCAGCTACCTAAAGT  
AGCTAGCAATGTATTTCGACCTTTGACATGATGTGATAATGTTCGTTGAAAATGGGTGGTCT  
TTACCCAACATGTGTAATGGAATGCGTACCAGGTGACAAAGTAAAAATAGGCACTGAAAC  
GATGCTTCGATTTGCACCACTTATCGCACCAAGTAAATGTTACAACCTCA  
TACTTCTTTGTGCCAAACAGAATATTATGGCCAACTGGGAACAATGTATTACAGGAAA  
CTTAGATGTACAAGCACCATGGTTTACTACTATTTTCTTACCAGCTTCAGGAGGATTTCC  
TGTTAAATCTTTAGCGGATTATTTAGGATATCCAACCTTTGTTAACGCCAAACGCTATAACC  
ATATCCTGAGCCTGGAGCTCAAGTAGGAAGCCCTTACCCTGTAGCAGCTTACAACAAAAT  
TTATAATGAATACTACAGAGACCAAAGTCTTCAATCTCCAGTTTTAGATTCAATTAACAGA  
TGGAGAAAATGATCCATTTAGGAACCTAGCAGCAGGACCTGTTAAAAAAGAGCGTGGCA  
GCATGACTATTTTACATCATGTTTACTATGGGCACAAAAAGGTGACGCTGTAACCTATTCC  
AATAGGAGATGTAACCTATAACTATAATGCAGCTGCTGGAGGAACTGTTATGCGACAGGT  
AGATAGCACACCATATATAAACCAAACAGATCTTAATTATTCAGATGGTGGAGGACAACC  
TAGAGCAAGAGGAGTAACAGGGACACGTTACAATATTGATAACTCCAGCCAACTATCAGG  
AACTGTAGAAGCAGCAGATATTAACCTCACTTAGAAGAGCATTAGACTTCAAGAATGGTT  
AGAAAGAAATCCTAGAGGAGGAACAAGATACATTGAAATCATACTTGCTCACTTCGGTGT  
AAAGTCTTCAGATGCTAGACTTCAACGTCCAGAATACTTAGGTGGTTCAAAGGTAATAAT  
GGTAATTAGCGAGGTATTATCTACCGCAGAAACAACACTCCCAGTAGGTAACATGGCAGG  
ACATGGTATATCCGTATCAGGAGGTAAGAATTCAAGTACAATGTTGAAGAACACGGGTG  
GATTATGGGAATAATTTCTGTAACACCAGAACCAGCATATCAGCAAGGAATTCATAGATC  
ACTCAGCAAATTAGATAGACTAGATTATTTCTGGTCAACCTTTGCAAATATTGGAGAACA  
AGAAGTATTAGGGAAAGAAATTTATGCAAATGGTATAAACATTGGAGAAACATTCGGTTA  
TGTTCCCGGTATGCAGAATATAAATTTCTTAAAGAGAAGAGTAGCAGGAGAAATGCGAAC  
TTCACATGATTACTGGCACTTAGGAAGAAAATTCAGTGCAGCACCAAACCTTAAATGGAGC  
ATTTATTGAATGCGACCCTAGTACGCGAATCTTCGCAGTTGAAGACGCAGAAGTTGACAA  
CATCTACGGACATATCTTTAACAAAATTAAGGCGATTAGAAAAATGCCGAAAT

>NewGenomeName\_48

GTGTGCACATCTCTATGGTCACTTCCCACCCATGGCCCTACGAAGTGTGGTAAGTGTATA  
GAGTGCCGTTTGGCTTATTCGAGAGAATGGGCTATTCGTATAACTCACGAGCAACAGATG  
CACAAGGTGTCTTGTATGCTGAACCTCACGTATAACGATGATTGGTTACCTGAACATGGT  
CAACTTTTTAAAGATGACCTACAACGGTTTTTCAAGCGGTTGCGTAAGGCTGGTTTTAAG  
TTTCGTTATGTTGCCTCAGGTGAGTATGGTGATCTTTCTAGAAGGCCTCATTTTCATATT  
GCGTTATTTGGTTTGGATTTTGCTCATGACCGTTTACGGTTTGGCAGTTCTAATGGTGAT  
TTACTTTTACTTCTGCAACCGTCTCTAAGTTCTGGCCAAGGGGTAATCATTTGATTGGT  
TCCCTTCATTTTGAATCCGCTGCATACATTGCCCGAGATATCTTGAAAAAGATTAAGGGC  
TTCCAAAATCCTGAACCGTTTTACATTGATGATTCTACTGGTGAAGTTGTTTTGCCTAAT  
CCCTAATTTCTGGTTATGTCTAAAGGCATTGGCCGCTCTTGGTTTAGGGATTTCTTCATG  
TCGGATGACTTCCGCATGCTTCTGTTATTACTCCCCAGTGCTCTAAAGCCCCAGTTCCA  
CGTTTTTACAAAACCTTTGTTAAAGGAGGTTGGAACCGACCTTGCCTGGATATGCTGTAT  
AGGTTTTCGGTTTCGTGCCGAATTAGACCTCGAGCGTAAAGCTTATGAGGACCTTCCGGTC  
CGTAAGCGTTCGCGTTCTTTTGTAGCTCTACTAGAGCGTCTCTTTAAAAACGTATAATT  
TAAAGGATTTGTCATGATTTTATTTGTTGTTTCTGTTAAAGACCGCGCTGCCGATGTTTT  
TAACCGTCCCTTTTTTGTTCCTCATCGTAATGTTGCTATTCGTGTGTTCACTGATGAAGT  
GAATCGTGCATCTGGTGATAACCAGTCGAATAAGCATCCCGATGATTTTGATTTGTATTT  
GTTGGGCGAATTTGATGATGCACGTGGCGCATTTGTAAATAATGAGCCTCTGGTTCAATGT  
TTGCGCAAAGACGTTTTGACGTCGTCATGACCCTTGTGGACCTTCGGGGCCACTTTTTT  
TAATTTCAATTTGGAGTTTTTATGTTTACAATAAATCGGTTGATGCACATAGTTTTGCA  
ATGGTCCCTCGTGCTGACATCCCCCGTTCTCGAGTTTCTCTGCAGAAAACCTTTAAGACT  
AGTTTTCATAGTGGTCTTCTAGTTCCTATTATGTGCGAAGAGGTTTTACCCGGAGACAGA  
TTAATGTTAATGTCACCTATGTTTCGGCCATTTGGCTACACCCATTTTTCCGGTTATGGAT  
AATCTCCATTTGGACTCATTCTTTTTATTTGTTCCCTAATCGTTTGGTTTGGACGAATTGG  
GTTAAGTTTGTGGGGGAGCAGGATAACCCTGCCGATTCTATTTCTTACACTATCCCTCAA  
CAAGTATCCCCAGCTGGTGGATACGCTATCGGGGCCCTCACAGGACTACCTTGGTTTACCG  
ACTGTGGGTCAAGTTACCGCTGGTGCTACGGTTTACATTCGGCGTTACCTACCCGAGCC  
TATAATTTGATTTATAACCAATGCTTTAGGGAAGACAATTTACAGAATTTCTCGTGTGTT  
GATAAAGGTGATGGCCCTGATGCCACACCTTCTACTGTTTATGCTTTGCAAAGACGCGGT  
AAGCGTCATGATTATTTACTTCTTCTTTACCATGGCCACAGCAAGTTGGTACTCCTGTT

TCTCTTCCTTTAGGTACTTCTGCGCCTGTTTATGGTACTGGAAAGACTCTTGGTCTTTTC  
GATGTTGTTACTAATTTAGGTTTGCATGCTGATACTACTAATACATTGCGTAATGCTTCT  
TCTTCTTACAATACCAATATTGGTTCTATTCTACTGGTGTAGGGGGTGTATTAGTAAG  
AATCTTGGTGGTGTGCTTCTGGTGTCTGGTTTATATGCTGATTTGTCGGCTGCTACG  
TCTGCGACTATTAATCAGCTTCGTCAATCTTTTCAGATTCAAAGTTGCTTGAACGTGAT  
GCTCGGGGTGGTACTCGTGACACTGAGATTTTTCGTTTCTCATTTCGGCGTTACTTCGCCG  
GATGCTCGCTTGCAGCGTCCTGAGTATTTAGGTGGTGGCTCTACTCTTATTAATATTTCT  
CCTATTGCCCAAACCACTGGTACTGGTATTTCTGGCCAGACTACTCCTCAGGGTAATTTA  
GCTGCTATGGGTGTTTATCATGCACACAACCATGGGTTTACCCAGTCGTTTGTGAGCAT  
GGTTATGTTATTGGTGTATTGCTGTTGGCGCTGATTTGACTTATCAGCAAGGTTTACGG  
CGTCATTGGAGCCGTTCTACTCGTTATGATTATTATTTTCTGCTTTTTCGATGCTTGGT  
GAGCAAGCTATTTTAAATAAGGAGATTTATGTTACTGGTGGTTCGATGATTCGAATGTT  
TTTGGTTATCAGGAGCGTTGGGCTGAATATCGCTACAATCCTTCTGAGATTACTGGTCTT  
TTTCGTTCTACTGCCGCGGGTACTATTGACCCATGACATTATGCGCAGAAATTTACTGCG  
CTCCCTACTTTGAATTCAACTTTTACTGAAGATACACAGCCTCTTGCTCGAAATTTGGCG  
GTTGGTTCTGCTGCTAATGCTCAGCAGTGTGTTGCTTGGAGCGTTTTTTAATATTAACGCT  
GCTCGTCTCTTCTACGTACTCTGTACCTGGGCTTATCGATCATTATTAAGCCTCTATC  
ATTCGCTTCGGGGAATGATTGAGGGAAAAGTTTTTATGTCTTTTTTTGAAACTCCTAAGA  
GTGGTTTTGATTCTGTTAGTTCAGTTGTTAATGCCATTCCTTCTAATATTATTTCTGCTG  
GTGCTTCTCTTCTTGGTTTTAAGGGTCCAGCTAATAACCAATGCTGCTAATGTTGCATTGG  
GTAATCGCCAGATGGATTTTCAAGAGCGTATGTCTAATACTGCTTCACAACGGCAAGTTG  
AGGATATGAAGGCTGCTGGCCTTAATCCTATGCTTGCTTATATGAAAGGTGGTGGTGCTT  
CTACGCCTTCTGGTGCTATGCCTCAGGTTCCAGAACCCTTATGCTGCCTGTGCTACAACCTG  
GTTATCAGTCTGCCCAAACCCAAGTTGCTAATAAGCAAGTTGGTAAGGTTGGCGCTGAGA  
TTGAGAATGTGGATGCTGATACTATTAAGAAGCGTGCTGATACTCTTTTATCTCTAGCTA  
ATAAGTAATTGTCTTTTGGCTTTTGGCTGATGAGAAGCGTCTTCTATTAATCTTCAGTCTT  
TTCAAGCTAAGAAGATTGCTGTAGAGACTAAGAATATTCCTATAGAGGGTGATCGGTTAG  
TTGCTGTTATTAACAGCTTGTATAGTCTGTTAAGCATATTGAAGCGCAGACGTTGACTG  
AAGAGCAGCGTAAGCAGGAAATTTTCGCTCTTGCTTTGAAGACTTTGAATGAATCCGTTT  
AGGTGGCTGCTGATTTAAAAGCTATTAACCAAGCTGACAATTTGGGTAAAGGAGTTGGAC  
AGTTCAAACCTTTGGTTGATAATGTTATGAACATTTTTCGATGTTGAGACGTTAAGGAG  
TTTTTATGTTATTTGCTTCCGCGTATGATAATTTTGATGCTCGTTGTGACGACTTTGGTT  
TGAAGTGTTTAGACGATGCTTTGAGTCAGCAGCAATTTTCGCGATGAGTCTGATATCAACA  
ATATTGTTGCTCGTTTTATGAAGACTGGTCATTAACCTGATCCAGTCTCTATGCCCCAGT  
ATGTTGATTATGAGGGCGTCTTTGATTTTTCAGTCTGCTATGAATGTAGTTCGACAGGCTG  
ATGAGAAGTTTATGCGGATGGACGCAAAGTTTCGTGCTAGATTCCATAATTCCCCTCAGG  
AATTTTGGAGTTTTTCGCTGATCCAGCGAATTCTGAGAAAGCGGTTCCGCTTGGTTTGG  
CTTTGCCAATACCTAAGGAGACTCCTCCGGTTCGATGCAGCTCTTGCTGCTTAATCGTTTT  
TGGGCACAGTTCGCTACTTGATGTATCGGTGCCAATTGTCACCTTTTTGTCTTTCTGTTT  
TACTGGAGTAACTATGAAGCCTTTGCACCGTCACAATGCCAATAAGCCCTCAAGCGCTTC  
TTCTTTTAAACGTAACATATATACGACTAAGTTGATTAATATCACTGCTGGCCCGATGCG  
CGGTGGTATACGCCTCTAAGGTTCT

>NewGenomeName\_49

ACCGGCCACTTGGAGCCACGGAGCCCCTTGCAGCTATGCCTCCGCAAGAGGGGGAAGCAG  
CGGCTAAGAGGCTGTGCTTACGCTGAATAACTACACAGATGAAGAGGTGTCCGCCGTGA  
AGGCGTGGAACGAGAGTGAGTACCATTACGCTGTCGTTGGACGCGACAAGCGGGAGAATG  
GTACGCAGCATTTCAGGGCTACATTCATCTAAAGAAGAAGGCTCGGCTAAGCACTCTGA  
AAAAAATACTTAGCCGTGCCATTGGGAGAAAGCTCGCGGTTTCGGACAGCGACAACGAGG  
CGTACTGTACGAAAGATGGGGACGTGATACTTACCCTTGGCATGCCGGTGGAAAGGGAACC  
GTAGCGATATCCCCGGAGCTGTTGCCGCCGTGAAAGCCGGAAGTCGAATGGTGGATATCG  
CGCGAGAGTTCAGTGAAGTCTACGTCAAGTATGGGCGTGGCTTACGTGAACCTGGCGCTTC  
TGATTGGAAAGAAACGGCGAGATTTCAAAGCGAATTTATCGTTGTCACCGGTCCGTCGG  
GCGTGGGCAAGTGCCGTTATGCTAATTAGTATCCAGGCACTAAGTTTTATAAGATGAAAG  
GGGACTGGTGGGACGGCTACTCTAACGAGGATGTTGTCGTTATTGACGGCTTATATGGAT  
GGATACCTTTTTGTGAGTTACTGCGTCTCACTGATAGGTATCCACATAAGGTTCCCCTGA  
AAGGATCCTATGTGGAGTTTAAAGTCGAAGGTCGTCACAGTGACCAGCAATACGCACACCG  
ACTCGTGGTACAATCAAGAGAAGTGCTATCTACCCGCGTTGTATCGGCGGATAAATAAGT

GGCTGACGTGGAATGCCATCCGGTTCGAGGATGCACCGGATTGTATGAAGAACTACCCTA  
TAAACTATTGATTACGCCCCCTCCCTCATAGTGCCTTTCGAGGAAAGAGCAATCGCGGCC  
AGCCAAGGCGGCCGCGTTCACGGGTACTTCGCGAGCGCACCGGCGCGAGCGAAGTTCCCT  
AGTGAAGTTCCCCGAGGAAAACACTTGAGATGAGGCGATTTATAATTTTTACTTAATA  
AATAAAGACAGGAACCAGTATTGTATGTCTGTACTTTATTTAGGGTTTGGCAGGTGGGT  
AGGTTCAATTTGTCTGAACTCAACATATATCGTCACTTTTGCATGGAATAGTAAAGCGTCG  
TGGGGCTGGGGCCAACTGATGCCGAGGCCGTAGTGCTTACTCTAGAGCCCCAGCTGGGT  
AAGTTTTGGTCTCCTTTCTTCATCATAGGTATCTATGCGGATCTGGGGTTGGTTAGCCAT  
TGCCTGCAGTAACGTTCCCGCGTCGGTGTCCGGAATGGTAATTTGGGGTCGGGATCGG  
AAAAGACGCTTGAATCCTTTGCGGAGGTCCTCGTGTCTGGCGCCGTCCAGTTTGCTAGC  
GGGTCTGTCTCCAGGACTGGCTTCTTGTAGAATTCTTCAAGTTGGTTGTCTTGAATGGGC  
ACACTGTGCCCTATGCCATGCCATGATCCCCAGTTCTCGTTTGTAGTGACGCATTTGCAAT  
TTTGCCAGCCGGATCCTGTAGTCTTCGAATGGTAGCCTCCAATTAATTGTTCCCCAGTCG  
AGGAAGTCGTCCAGCATTATGATGAGGCCGTCCGGTAGCCATTTTCAGGGTAGTGTACCT  
GAGCCGGCGCGTTCGTGTCTGTACAGGCGGAGAACTTGAATCGGTATACTCTGTTAGTT  
CTGTGACCACGCCTATTGGTGAGTCTGCGTCTGCGCCAGTAACGTCGTCGCCATCGCCGT  
CTAATCGCCTGTGTCTGTGCGCGTCTCCTAGCAACCTGTATGAAAGAGCCAATCACGAGG  
TGTCACGTAACCGTGGCTCCAAGTGGCAGTTGAGTGTT

>NewGenomeName\_50

ACCGGCGGGCCGCGCCATGGGGCCATCTGGCCCCTGGCCAAGCATGCGCAGTAGTGGTG  
CATGCTCGATGGCCGCGCAGCGGCCTTTATTTGCGGAGCATGCGCTGAAGGCAGCGCAGC  
GGCCGCTATCTGCGAAACATCACGGCAGCACGGCGAGACAGCGGAGCCCCGCGCTGGTGC  
TTTACTCTGAATAACTACACTCCCGAGGAAGAGGAGACCGCTCGCAATCTGATTCAAGAT  
GCAGATAAGGACGCGTTCGCGATAATCGGCAAAGAAGTTGGCGAAAGCGGTACTCCTCAT  
CTGCAAGGCTTCATGCATTTTAAGCAAAGCAGCGGCATACCGCTCTAAAGAACTTATT  
CCTCGCGCGCATTTTGTAGAAAGCTCGCGGCAGTGATCAGCAGAATGCTGATTATTGTGGT  
AAAGACGGCGAAATACTTACCATGATCGGTACTCCGAGTGATACGAATTCGAGTGATCTT  
GCGGGAGCTGTTGCCGCTGTGTAACGCGGAAGTCAAATGAGTGAAATCGCGCGAGAGTTC  
AGTGAAGTCTACGTCAAGTATGGGCGGGGCCTCCGTGATCTCCAGTTGCTGATTGGTTGC  
CCGCCCCGCGATTTCAAACAGAAGTCATCGTTCTGATTGGCCCAGCTGGCTGTGGCAAG  
TCAAATTTGGCCAATGAGATGGAAGGGTCTAAGTTCTACGAGATGAAAGGTGGTTGGTGG  
GATGGTTATGACAATCAAATATTGTCATAATCGATGACTTCTACGGTTGGCTCCCGTAC  
TGTGAGTGTCTACCTCTGTGTGACCGTTACCCTCACCGTGTGCTGGTGAAAGGTGACTAC  
GTGGAATTCACCAGCAAGAAGATTGTGTTTACCAGCAATCGCCATGTGGATGGGTGGTGG  
ACAGGTGAAATTGAGAAGAGTGCCTTCTACCGACGGATGAATGTGTACAAGTTTTATGAG  
ACTGGCGAATTCAGGACATGCCCGGACACATGCTCCCGCACCCAATCAATTATTCGGCG  
CGAGATGAAAACACCCCCCTCGGGATGCCAGTCGTTTTATCTCGCGCCCCCGAGTCGCG  
GAGCTCGCGAAGCGAACGGAGCGCGAGTGGCGCGCGAGATTGTCGACGACCGACGCGCGT  
AGCGCGGAGGGAGGAGACCACTTGCTTAGAATTTAATATGCTATCTTTATTAAGAGATC  
CAACAACATTCCTGTCTATGTCTTTTTTTCATTGTGTCAGTAATTGTTAAGCAGTCCCCGAACC  
TTGACAGGTCTTCTTCAGATTTCTTCAACATTATATGAGCGAACTGCCTGAATGTTACAT  
ATATAGTTATTTCTGCATTATATCTCAGTTGCAGCCCAGGTGAAGGCCTAGAGAATGCCA  
GCCCCGTAGTGCCTACTCTTGTACCGTCCCTCTGGGGCCCTGCTGGCCTTTTTAAAGGTA  
ACCAGCCTTATCTACTGCTATTCAGCCACATTGATGCTGAAAAGTTAGAGGCTGTCATAT  
CTGATATGGTTAGTTGAGGCTTTGGGCGTACCAGCCTCTTAAACCCTCTGACCAATTTCC  
ACGCCCTCGCCCCGTCCCAGTTATCCAGTGGGTCTTGCGTTTGATCCTGTAATTTTATAT  
CTTTAACTCCGGCGTCCAGAAGTGGGACTGTGTACCGCCAGCCCCTTGCAATTTTTGTAG  
TGACACCTTCAGGCCTCAGCACCACTTTTGCTAAATTAATCCTGTAATCCTCGAACGGCC  
ATTCTGCCGGTATTCCTCTTGACATATAAAGTCATTCAGGTTGAAGGTGAATAAATCTG  
AGGCCCACTTTTGTGGGTGAGTCTTGGATGGGAAGTCCACTGTGAATTGCCGTCTAAATC  
TGAACAAGTATATTCTGTTTCACTGTGTGCGCTCTTCGGTTCCTGGGCAACCTGGGACGTC  
TGCGCAGTCGTCTGTGAAACCGCCTTCTCCGGAACCGCGAGTAACACGCCTCCTTCTGG  
TTGCTGAGCGACGTACCTAAAAAAGAATGGCCCCACGGCCCCGCGTATAGTATT

>NewGenomeName\_51

CTAGTAGTACATACAAAGTGTTCCTCCCCCTACGACCTCCTTATGCTCACCCCAATGCGAG  
CACCCATATGGTGACTTTAGGTTTACTTTGGTTATACTTGAAGTGTACTTGAAGTGTACT  
TTAGGCGTACTTAATCCTTAACCTTATGTGTGACATTGGCCTTACTACTAGATGTAGTGC

TTACGGGGGACTTTAGGGGACTATATGAAGGCCTCTTACTGTCTCTATCTGTAAAGTCAAC  
CTCTGAGTATCTCCTTATGTCACCACCTTAAGTCATCTCGTTACGTCACCACCTTATGTC  
AACACCTTCAGTCCTCTCCTTATGTTACCACCTTAAGTCAGCCTCTATCCCTATGTTAAC  
TGTCAGTCGGTGACTTCAGTCTATAGACATTATGTTACTACTCTTAGAGGGACTACTTAG  
AGGGTACGTAGAGACTACTTAGGTACTACTTAGAGACTACTTAGGGACTACTTATAGGCT  
GCTTAGGGACTACCTATAGGCTACCTAGAGACTCCTTATGGGCTACCTAGAGACTACTTA  
TAGGCTATCTAGCAAGACCCTTACACTTAATACGATTCCCTATTGGGAAGGTGTCTATCA  
CTATGCCTTTCCCTTATAGGTATAAATTAGAGTGTAACTTAAAGAACAATCAAAGAACAC  
CTAAAGAACACGTAACGAGGACTTTTTCTTACTTTAAGTATTGACTCTAAGATTAGATAC  
TATATTATTCATCTCAAGCCAAAACAGTGAGTCGCCCTCTGATACCACATCAGGTGTCAA  
GGTGACAATCACTAGGTTGACATGCAATAACACTAAGACGTACAATGATTCTCACAGATT  
CACATAGATTCACCGGTCTTTAACAACATCGATAGTAACACACTTGAGAATGACAAATAG  
TGATTAACTCAAGGTGACTCGAAGAGTGAAGCCTTTATGTTAAGCACTAACTTACTAACT  
AATGAGTTCATCACAGTATGAAGAATTACTCTGGCGGGTACTCCAGATATAAGTCAATCT  
CTAGGTACTTTGGGACACATCATTGACAGGTCTAACGCCACTAGGTGTAGTGACTGCTG  
CTCTCTTACTCATCGCAATGCGTAAGTGAACAAGTAGGGCATTAACTACTATCGCGGTA  
AGCAGCTCGTAAGTCTCTAATTGTTCCCTGGCAGCCCTATTAAAGGGTCTGAGGATACAC  
AAGGCTAAGCTCTAGCACTTGAAACAAGGCCTGGTCTCTACAATAACCTTCTACTATCT  
TAAATAGGACACACTCTAATGAACTACACCGATATTCACGCACGTCTGGCAATCATCAAG  
TATGTCCCTATGAGTGAAGTGGACAAGCGCCAGCCTCTTCTGGTTGAACTAGCTGCTAAC  
ATTGTGAACGGTAACACTAATACCGGTAACGATACAGGTGGGTCTAAGGGTCTTGTGAAT  
CAGGACTGGTGGCATATCTTTAGGTAACCTCATGGGTGATGCAGGGTTCAACCAGTTAGGT  
AATGGTCACTTCAGTGCAGCTTACTCAGGCTAAATTTTACCCGGTCGAGCCATTAATGTT  
GGCTTGAAGAAAGAGTACTCAGGACCTTCATACACTGCGTTCTGTAGGATGCACCAAGGT  
CGAGCTGGTATCCCTAACATCTATCACGTAGCACGTCACGCAGGCCGCTACACAGTTGTA  
CTTGACCATTTGAGTGGGTCTAAGCGAGACACTAATGAGACTCACGCTAAGTATCCGTAT  
GTTGCAAGAGCACTCATTGAATATAACGATATCAATGTGCAAGCTCGTGTACATTTTGT  
GGCACTGAGTTTATCGAGGCGTGCAAGATGTTTCGTGAGTTCTACTACGGGATTGCGGCT  
TTAGATATGCACACTGGGAACAGTATGTTTCGACAAGAACGATGTGGCGCACTTCTCTGAC  
CCTGTTAGCACATCTCATGACCGTGAACCTGAGGATAGCTTCCCCTGGACCTCGATGCA  
ATGATTGCTGAGGTCGAGGCGATAGCTAACGGGCGTATCATCGAACGTTGTGCGAACCGT  
AAGGCAAAGCGTGAGCCTAATGGTACATTCCGTGCTGAACATAAAGCGGCAATGAAGCGC  
CGCAAGTGTGACCGTAAGTTATCTGAATGTAGAGCTGCACGGGTAGGTAAGTGTGAACT  
CAGCAGGACCACTAACATTTAATGTCCCGCCAAAAGGAACACAACTAATCGACCGAAAC  
GAACGTCGTGTTGGGTTTCACGTGGGTCTGTATGGCATGACTTCGGGTTTCTCAATGGG  
AACTCAACGATAGACAAAGTTAACCAGTGTACGACTTTATGTTGGAAGTACCTGACGGA  
TTAGCTATTCAGGCAGGAGGTTCACTATTGATAGATAAAATACTAGACGCACACCTGATG  
GGATGATACGGTGTATCTTCAAGGTTCGGTACTAACTACTGGGCGTTATAGATAATCTTCC  
TTAACAACACTGCGGCAACAATTACTAACTTACTCAACGCACCAAAGAACGACTACTCTGA  
TATCGCTAATGCCATCCAGCCGTACAACATCCTGGCTGCCATTACGGTGCCAGCTCGC  
AGCTACACGGCTCAAGTTGGAACATGTAGCGCACACTGAGGAGGAGAAGCGTTCCCTTAA  
GGCAATGGAGCGTCAAATCAAACCAGGTGAGTTCGGTGATAACACGGTAGCTAGACCGCT  
CCTCTCATCCCTTCATCCAAAGTTTATCGAAGCGTGGAACACTTCGTTTATTGATGTAGA  
AGCAAAGCGTGGTAATCGTCCAGTGGCCTACATTCTGTAACAGAAGGTTACACATGAAGC  
TGCTGCGTTCATCACTCTGAAAGTGACACTCGCATGCTTGACGAAAGAAATGTTACCAA  
CCTGCTGTCGGTAGGCACTAAGAATGACCGCAGAATTGAGGACGAGTTACGCTTTGGGCG  
CATCTGTGACGAAGTAGCGACGCACTTTAAGAACCACGTACCGGAAGCACTGAATAAGCG  
AGTCGGTATCGTCTACAAAAAAGCATAACATGCAAGCTGTAGAGGGCAAGTTGCTCGATGC  
CGGTCAACTGCAAACCAAGTGGACTAGTTGGACACCTCAAGAATTAATTCACACTGGTGT  
ACGTATGTTAGTGTAAATCATTGAGTGTACTGGTCTCGTTGAGTTGCACCGTCCGTTTGC  
TGGCAACATTGAGAAACACGGAGAGTACATCCAATTGACCGAAATAAATGTTGACCTACT  
GTCTAAACGTGCTGGTGTCTGGCTGCAATTGCTCCAATGTAACAACCTAGTGTAGTCCC  
TCCTAAGCCTTGAACCTTCCCGTGGGTGGTGGCTTTTGGGCTGCTGGTTCGTAAGCCTCT  
CTCTATGCTCCGCACTGCTTCCAAGAAGGCGTTAGAGCGTTACAACGGTGTGTATATGCC  
TGATGTCTACAAAGCAGTGCACATTGCACTGCTTACTCCTTCGAAGATTAACAAAGAGGT  
TCTGGCAGTCGTCTACGAGATTGTGAAATAGAAGCATTGCCTGGTTGCTGACGCACTTCC  
TATTGAACATGGTGAAGTACCAGTGAACCCTGTAGACATCGATACAAACGAAGCGTCTCT



CAAAGGATGGAAGAAAGCAGCACCTGCAATGTATCGTAAAGAGAAAGCTCGTGTGTCTCG  
TCGTATGAGCATGGAGATCATGTCAGGTAAGGCGAATAAGTTTCGCACAATTTAAAGGTAT  
CTGGTTCCCTATGAACATGGACTGGCGTGGTTCGTTTATACGCAGTACCAAAGTTTAACCC  
ACAAGGTAACGACATGACTAAAGGTCTGCCGACATTAGCTCAAGGTAAGCAATTGGTGT  
GGAAGAGTTCTACTGGTTGAAGATTCATTGTACTAATACTGCTGGTGGTGTCAAGTTGGA  
CTTCGGAGAACGCATCAAGTTCATTGTTGACAACCATAAGAACATCATGAGCGTTGCAGC  
TGACCCTATTTGTAACAGTTGATGGACTGAACAATACTCACCTTCCTGCTTCCCCGCGTT  
CTCCTATGAGTATGCAGGTGTGCAACATTACGGGATGAACGAGAAATGCCCTCTGGCTCT  
GGCGTTCGATGGTAGCTGCTCTGGTATTAACACTTCCCTGCAATGCTGCGTGACGAAAT  
GGGTGGACGTGCTGTTAACCTACTGCCAAGCAAAGAAGTACAAGACATCTATCGTATCAT  
AGCTGAGCGTGTGAACGAGGTTCTTCATCAAGATGTAATCAACGTTGCTCACATGGAAGT  
AGAAACAATGACTAATAAGGACACTGGAGAACTCACCGAGAAGCTCAAGCTATGGACTAA  
AGAAGTGGCTGGTCAATGGTTGGGCTGGGGTGTAAACAGTAATGTAAGTAAGCGTTCCGT  
AATGACCTTGGCATAATGTTTCCAAAGAGTATGGCTTCCGTGACAAAGTGTTAGAGGATAC  
CAATGAGCCAGCTAACGACGTTGGCAAGGGCTTGATGTTCACTCGACCTAACCAATCAGC  
TGGCTACATCGCTAAACTGATTTGGAATGCAGTAACAGGCACAGTGGTTGCAGCAGTTGA  
GGCGGTTCACTGGTTGCCGTCCGCAGCTAAGCTTCAGGCTGCTGAAGTTAACGACAAGAT  
GACTAGAGAGATTTTTTCGTAACCGTTCGCTGTAGCCTGGGTAACCTCCAGATGGCTTCCC  
TGTGTGGCAGGAGTATCGCAAGGCAGTACAGACCCGCTTGTACTTAATGTTCTTAGGTCA  
GATTCGTCTACGACCTACAGTGAACACCATTAAGGATAGCGGAATTGAAGCGCGTAAGCA  
GGAGTCAGGCATCCCACCTATCTTTGTCCACTCAATGGATGGAAGTCACCTTCGAATGAC  
TGTATTTTCGCGCCTATGAGATCTACGGTGTGGAGTCCTTCGCACTGATTCATGACCCATT  
TGTTACTATCCCGGCCGTTGCTGGTAACCTGATTCAGCCTGTACGTGTAACAATGGTGAA  
CACCAACGACGAAAACGTTTTGCTTGCATACGTCTATGACCAGTTAGCTGATCAATTACA  
TGAATCAAAGCTTGATAAGATGCCTGAGATGCCAGCTAAAGGGTCTCTAGATATCCAAGA  
AATCCTCAAGTCAGACTTTGCGTTCGCCGAGCGGAATTTAATTCGACTCCCTATTGGTAG  
ACCCAAGGGTTTTCCCTACTTTCAGATACACTTTAAGATATACTCTAAGAGGCACTTTAAT  
TTGACTTTAAGATGAAACAACCTCATGTGTACCAACTTTGAACCAAACACTAAGCATATC  
GACGCAATCAACGAACATGGTACTGAATGGCAGGAACGTAAAGACCACTTCAAGAAACGC  
CACAATACACAGCGTGGTAACTCTGAGAAACGAAACTGGAAGGATGCACTCTAATGAGTA  
GCTTATATAGTGGGAACCTAAACGCCTTCAAGGCTGCTCCTGACAGAGTCTCTAAGATGG  
TCTTAGTGGTCGCAAGTGAGGACTGGTATGAGTCACATGTAAGTCTGAACTGAAAGTGGC  
TACGCATAGTGGACAAGGAAGGTAAGTGGATTCCTCCATCACTTGTATTTCATCAAGACG  
AAGACGTTCTATACAGTATGGAAGCCGCGTTGTTGAACCGAATGTATGACCAGTTGAAAG  
ACTGGAAGTAATACGACTCACTATTGCGAAAGAGTGAAACTCAAAGTCATCTAAAAGGGG  
GCCGTTGAGATTAACCTTTGTGATTAACCTTTGATTAACCTTAACCAACACAAACACATA  
TACATCTATAGGACTGCCACAATGCTAATTTCAATTCAGACTTCACCACATAAAGCTGTT  
TTATTCGTAGAGACTTCCGTTAAGAAAGCTCTCAACAAAGCTGGCTACCTTATCCGCGCT  
GTAAAGTATGATGGTATTCGTGGTAAAATTGAAGTTGACAGTACGGCTGACGGCATGTGG  
CTCTCCCGTGTCTGTAAGACCATCCCTGCCCTTGAGCACATCAATCGGTTTCGACTCTCGC  
TGGCAGCGTCTTCTCAGAGATGACTCCTGTATCTTCCCTGATGGTGTGTCATGCTTGATGGT  
GAACTGATGGTCAAAGACGTAGACATGAACACAGGGTCTGGCCTCCTGCTTACCAGATGG  
AGTAACCCTAAGAATTTCAGTACCAACGGTAACGCTTTGGCATCTGACTTCGCTATGAAG  
TCTGCGATGGTTGCCTACATCTTGTCTCTGATAAGCTTAAGGTTCTTCTGTATGGTGTC  
ATGCCGTATGGCGCTCTGGTTTCTGGTGAGACGTACAAAGTGATGAACCTTCTGATGCGT  
GAGCTCATTAAGGCAATGCTTCCGTTAATGACCGAGTACTTCCCTGAAATCAAATGGAAC  
ATCTCTGATACCTATGAACTCTACTACTATGCGGAACTGACAGCACTCTATAGGAAAGCT  
CGAGCCGATGGTCAGGAAGGCCTAGTAGTGAAAGACCCTCTGGCATTCTATCAGCGTGGT  
AAGAAGGCTGGCTTCTGGAAGCCAAAGCCTAAGTGTGAAGCTGATGGTATAATTCATTCC  
GTCAATTGGGGAACACCGGGTCTCTCTAATGAAGGCTTGGTGATTGGCATTTCATGTTCTC  
TTAGAGACTGGTCGCCATGTCGCAGCTAACAATATCTCACAGAGTCTTATGGAAGAGCTC  
ACAGCTAACGCTAAAGAACACAGTGAGGACTATTACAATAGATGGGCCTGTCACGTAGCC  
TACATGGAGGAGACGAGAGATGGATCATATCGAAATCCCTCATTATTAGGATCAGTGGT  
CTAGAGTCACACCAAAGGGTCTAGTGGTGAATCCCTCAATGGTCAGTCCTTAACAAGGGG  
CTAGCCTTTAGCGTTTCTAATTAGATTTACTATGGAGGAATAACAACATGCTATTCCCTAA  
TTGTTGCTATCATCGCTCCACACTTGCCTTATTTATCGTTGACGACAACCTGCTGGCCTG  
ATTGCTAATACGACTCACATATGGATGACACACGTATGCTACGATTAACCTTCAATAGAT

CTAATGGCACCAACTCGGTTCTGTGAGTCTAGCCGCTCTCTGGCCAATGATACCGAGAAAC  
ATGAAGTCATTCCAAAAGTGCTTGGAGCTACGATTGAGTTAGCACCTCGTGTTACGCTG  
TGATTACTACTGGCTTATCTAAAGAAGCAACAATTGGCTCCCGGACTTTCATTCCGGTTC  
TCTTACCCGTTTCCCTAAAGTCCGTCTGGTCATAGAGTGTATCATAGTGGTTTGCAAAT  
GTATGGTTGCACTGCATGTATAGAGAATGACCACCGCCACCCACATACCTGTGAGCCTGT  
AGCTAAAACACAAGATTTAGATTGTGTGCGCGCTCAGAGCCACTATATGGTGTGTTGATGG  
CATCGATGCGATCGAAGTGATTGCCCGATCGATGACCCGAGAACAGTTCAAAGGGTACTG  
CTTGGGGAAATTCCCTAAGTAATGTCAAAGTGCTGGTAAGAAATCCGAGCGGGCATTCTT  
AGAGAAGGACATTGCAAAAAGCTGGGTTCTATGGAGAGCTGTACTAGAAACATAAAGGTAA  
ATGTTATGCTTAAACCTAGTGAATGGCGTGTGAGAAAATTCAACTAACTGGCAATGTGCG  
ACTAGCTCGAAATGTACAACCTGTGGAAAGGGAGAGGACAATGAGCATTTTAAACAAGGG  
GTCACTGGTTAATGGTGACATGAAGTTCTTAGCTACTGTAGAAGGCAAAGGCCGATCATT  
CGAAGTATGTGTGTTTCGATGCGCCCCTTGCAGAGCCCATCGAATTAGCTGAGTGGCAATA  
TGTCCCAGCTGGTTTTCGAGTGACCCGCATCCCTCCAGACACAAAAGTTTAATTGGACTC  
ACAATTGGGCGACGCATAGTTTCCCCTTTGAACATTAATAAACTTAAGGGGAAACTTCA  
TGGCTTTCACTAAACGTAAAGTATTCACTACTGCTCGTTGTATCGCTGAACAGTACTGCT  
ACCTGTCTAAGCCTGACTTTGGTAATGGTGAATTCAAGAACGAACGTGGTGTCTATAAAG  
TATCACTAACTGTATCCAACGAACACCCTCACGGTCAGAAAATGCTTGTGAGATTGGCG  
GGGCCATGAGACGCCTTATGCTGCAAGTATGGAAGAGTACGCAGCTAACCCGCCGAAAG  
TGGTTAGGGGTAAGAAACCGCTGAACCCATATGTTGGCGACATGCCTTTCCTGGTTAACG  
AAGATGGAACCAAAAAGTTCACCTTAAAGTTCTATGGTTCATACGCTAACAGTACGACTG  
GAGATAATAGACCAATCAACATGTCTATCATGGACTCCAAAGGTAAACGCATTCGTGGTG  
AGCGTCTAGCTATCTCTGGTGGCTCCGAGCCCAAGTTTAAATAACAATCTGTTCCCTTATG  
GCCGGTCTGCTGTGGCAGGTGCCTCCGTTAAGCAACAACCTGGATTCCATTACGCTGATAA  
AGCTGGTTGAGTTCGGTGGCAGGGGTGAGGATGACTGGGCTGATGAAAACGAAGAAGACG  
GTTCTGTTGCTGTTGAAGCACAGACCCGTAAGCCTCAGAACGGCTCTGGCTGGTATGAAG  
AACCAGAACAGGACGATGAAGATGATAATGAGACCTGCGACTTTTAATATACGATAGGGA  
GGGCACATGGCAGGTTATGGTGCTAAAGGAAATAACAAGGTGGGTATGTACCGTAGTGGA  
CTCGAAGAGAAGAACATGAACTCTTAGGGTACAAGGGTGTATAGCTGAGTACGAAAGG  
TGGAGCGTTCCTTATGTGGTTCCCGCAAGTAATCACCAGTATCCACCAGACATTTTATTG  
CCTAACGGTGTACTTGTGGAGCCGAAAGGCTTAGGGGAGCGTGACGCCCGCAAGACACAC  
CTGCTGATTTCGAGAACAGTACCCCGACTTGGATATACGCCTGGTTCGTCTCACGCAGTCGC  
ACCAAGACTTAAAAGGGGCCTCCTAGAAGTTATGCGGAGTTCTGTGAGAAACATGGCCTC  
TTATTTGCTGACAAGCTGATTCCAGTAGCGTGGCTGAAGGAAGCATCCCGGCATGTAACA  
TTAGATAAGCTGAGGACCAAGATGGAGAAGAATAAATGAGTACGGTACAATTTTAACCAC  
GCAGTTTTACAGAAGCAATCTTCGTACACTGCAGTGCAACACACGCAACTATGTACGTCG  
GTGTCCGAGAAATCTGTCAAGTGGCATAAAGAACATGTTTCGGTTAGCAATCGGCTATCATT  
TTGTGATTTCGCCGTGATTGGACCATTGAGGAACGTCGCCAGTAGAAGTCAATGGCTCTC  
ACGTTAATAGCTGGAACAGTAAGTCAGTTGGCACGTGTGTTGTTGGTGGTATTGAAGATA  
AGTGCCACTTTGAGGCAAACCTTTACGCCTGCTCAGATGGTCTCTCATAAAGAGAACTGG  
CAGACCTGATGAACGTGTATCCAGACGCTGAGGTGAAAGTTCAACATGATGTTACACCTA  
GAGCGTGTCCGTCATTCAACTTGAGCCACTGGCAGAAGACTGGAGAACTAGTGACAAGCG  
ATTGGGGCAAATTAATAGAACTCACTTGGGGAGAGCCGAAAGGTTTCTCCCTTTATTTCG  
TAAAAATGATTTAGGAGTATACACAATGTCTAACCTTAAAGAGCATGTGTTTCGTCGATTT  
AATCTGTGTAATTCGTTGAGGAGCCTGCCTGCGTCCGTTTCTATAGGAGGTATCTAA  
TAGATATGGAACAACAGCAAGCTAGCGTGTTCCTGTACTACCTGCCGTGTGAAAACCTGCG  
GGTTCGTCAGATGGTGACTCAATGTACTCCGATGGACACAGGCACTACTCCGTGTGTGACC  
ACTTTGTCCCTCCCTCGGATGAGACTCGTAACCAAGAATCAACCAAGCGTCGTCGCTCAT  
GTAACACTGGAGGTGACAAAATGTCTAACCTTTTAAATTTTGTGGATTCAGAGGGTTCGCT  
ATGCGAGCCTCAAAGCTCGTGGCCTTATGGATGCTATCTGTCATCAGTATGGATATTGGG  
TAGCGAAGGTCAACGGCGAGATGCTTCAGGTTCGCAAACTACTAAGACTCTGACGGAAACC  
TTGAGGGTCAGAAGGTGCGCGACGAGAATAAAGAGTTATCTGCAAAGGGGAAACTCAAAG  
CTGACCTATTGTTCTGTACGCAGTTATGCAATTGTGGCAAGCAGATTGTAGTTACAGAAG  
GTGAGATTGATTGCTTACTGTAGCTCAACTTCAAGCACAGAAGTATCCCGTTGTGAGTC  
TCCCTATGGGTGCTCGAGCCGAAAAGAAAACATGCTCTGACAACCTATGAACACTTTGACC  
AGGTCCACGAGATTAACCTTATGTTCCATATGGATGTTCTCGGTCGTAAGGCGATCGTAA  
AGTGTGCTCCTGTCTACCTAGTGGTAAAGTCCGAGTTCGCTGCACTGCCTCTTAAGGATG

CCAGTGAGTGTTTACTCAATGGACAAGCCAGAGCAGTAACCGACCAGTTTTTGGAATGCAC  
AACCATGGGTGCCTGATGGTGTAGTCTGTGCTCTGTCTCGTTAATACCGAGTGCTTGAAG  
CTATGGTCAAAGAGGTAACAAGGGGTCTTCTATTACGGGTGAAACGAAACTAAATGATA  
TGACACTCGATGCTCGTGGTGGTGAAGTCACCATGATCACTTCAGGTTCCGGTATGGGTA  
AGACCACGTTTCGTTCGTCAAGAGATGCTCCAGTGGGCCAAGGGCGCTGCGAAGGTAGGCT  
TGGCCATGCTTGAAGAAGCCGTTGAGGAACTGTTTCAGGACTTAATGGGCTTGAACAATC  
ATGTCCATCTACGTCAAGACAAAGAATTCAAGATGAAAATCTTCGAGGATGGACGCTTCG  
ATGAATGGTGTGGTGAAGTGTTTAACACAGAAATATTCACCTGTATGATTCCTTTGCGG  
AGTCAAAGGAAGAGTGTGTCTTTGCGAAGCTGGCCTACATGGTCGATGGCTCAGACTGTA  
ACGTCATCCTGTAAGACCATATTTCTATTGAGCTATCTTGTATGGAGGAAAACCTCTGAGG  
CACGTAAGACGATTGACCGCTTGCTGACCAAGCTGAAAGCCTTTTCGAAGACTAAAGGAG  
TGGTCGTTGTGGTAATCTGTTCAGCTCAAGAATCCTGAGAACGGGAAAGCACATGAAGAAG  
GTCGTCCAGTAAGCATTACTGACCTAAGTGGCAGCGCTTCTCCACGCTAACTATCAGATA  
GTATCATTGCTCTCGAACGCACCCATCAAGGGGATTATCCAACCTGGTTCAACTTAGGG  
TGCTTAAGGGTCGCTGTACTTGTGATACTCGTATGGGTGGGCATATGGCCTACATAAATG  
AAAGAGGATGGCTTGAACCGAGTGTCTCACCTGAAGATGTGGCAAGTACAGATAGCGGAT  
CGGGACCAGAAGAACACGGTCAGGACTTCTGATGGTAAACCTATACTCACTACTAATGGG  
GCAGACAACCTGTTCCCACTCATCAATCCACTTAAAAAGAAGCACAATGTTTAACTTCAT  
CATCACTCCCGGTAAGCTGGTAGTGAAGCTCTAGCTCTTTGAAGCTAAACGTATTAACAA  
CAAGGCGCGTAAAGATCCTGAGCGGGCACAGCGCTTGGCTAAACATGCACGTAGGATGTC  
TGAAGCTGCAAGTGCTGGTGTAAATGCCTGCTGCTAAGATTACCGCTAAAGCATCCAACCT  
CGACAAATTCTTCCCTGTAAGGAGTAGGATATCATGGCCGTTAAATTCCCTGGCATTACCA  
TTCGTCTCTCGGTCACCGTTGACCAATATGCTCGTCGGGTTACGTCAAGGTTTCGTAACG  
GAAAAGCCACTCTGGTCTACCGTTGGAAAGACCACAAGTCTACCAAGGCGCACACACAAC  
GGGTACCTTTTGTGATCTGCAGGTGGGTCGTCTATCATCTTCCGTTGCGGTAGCTGCAA  
CTGTGGCTGTAGCTGGGGACTATGTACGTCAGGCTATGCTAGGCACCACAATTGAAGCTG  
AAGGCAACATGCTTGTGAGAAGTCTTAGGCGTAAGAAGAGTTAAACTAAAGGTCATCTC  
GGGGGGGCCTTCTTGATTAACCTTTTGTAAAGAAAATATTCAACTAGCTAATGGCGTAATA  
GCACTGTTACTATCCCACTTAGAAGCAAATGGGTTGCTGCACACCGTTAGTCAATTCAC  
TGTGCGGTGACTTACGACTAAAAAACCTACCAGTACATCCGTTATCGACCTGCTCACTTT  
GGGGCATAACATGGATGCTCTCAAAGATGAGGTGGCTCGCGGTGGTCTCATTGTGTTTCAT  
AATGGCCCGAAGTATGACGTCCCAGTAATCTAGTTGCTCGCCAAGAAAATGTTAGGACGT  
GATGTCGAGTTCCTAAAAAGAACGTCTTGCATACGCTCGTGCTGTCGCTTTCGCTTAC  
TCAAACATCAAGGACACCGATGCTCGGCTGTGTCGTGCATGCAAGCTACCACGGAAACGC  
TTTCGTTCCACGGTCTGGAGGCTTCGGGTTATCGCTTTGGTGAAGTGAAGGGTGAGTAC  
AAGGACGAATTCAGGCCTCACTGGTTGAGGCTGGTGAAGGCTACGTGGTTGGTCTGGAA  
TGGTTGATGTTCAACGAGGACATGCTGGAATATCATGTTCAAGACGTTGTGCAAACAAA  
GCTCTTTCGAGAACTTGATAGTAACGCATTCATCTCCCTGAGCTGGAACCTTATGGA  
AGCACTGAGGCAGCACGTTTCTGGAAGGGTAGCATGGAGGCTGACAAGCTGGAACACGAT  
GGTTCATGGTTGGTAGCTAAGATGGAACGTGGTGGTTTCCCTATTGACGTCAAGTGCTTA  
GAGAATCTTTATGCTGACCTTGCTGGTCCCGTGGTGAATTTCTGGTTCGAGTTGACATCC  
ACTTGCGGCTCACGGTATCAGGTTAAGGGTGGAGTTGAAGCATTCCGTCACCCAAGGACT  
GGTAAGCCTCTCACTAAGTAATCTTACGTGATATTTCCGAAACAGGGAGGTATCTTTAAA  
AACCTATAGAACAAGAAGCAACATAAAGGTCTGGAGCCTTGTGAACTGGCCAATCGTGTT  
TACGTAGAGGGCGCTCCATATACGTCTGTAGAGCACGTGCTGTTTCACCCTTCTAGTCGT  
GACTACATCACTCGTGTAAGTACTAAACCGGGCTGGGTGTCCTTGAGCTCACTCGGAGT  
GGTGCACCAAAGGTAGACGATGAGGTCTTAGAGCACGTTAAGGTAGACGACCCTGGTGCA  
AAACGTTGCATCAAGTTGTCTAAAGACGCCCTAATGATTCAGAAGCGTATCGGTCAGGTT  
GCTGAAGGTGATAACAGTTGGTTCCGAACGATGGGAGAGGATGGTCGATTTCTCGGTAGC  
GTTAACCCGAACGGTGCAGTAACTGGACGTGGAACCCATAGTTTCCCTAACGTGGCACAG  
GTGCCTTCTATCCGGGGTGCTTATTGTGAACCTTGCCATGCTGCTTTCGGTTCAGAGCAT  
AACAAAAAAGAGGATAAGCCAGACCTTTGGATTCAAGTAGGTGTGGATGCGTCAGGCCTT  
GAGCTACGTTGCTTGGGTCACCTCATGTTTCGAAATGACGAAGGTGAGAACGTTGAGACT  
ATCGTTACTGGTGATCCACATAACGAGCCAAATTGCCCTGGGTTACCTACAAGCGAA  
AACGCTAAGACGTTAAACACAATGGGCGTCTATAAACCTATCTCATTTCGATGGGCATCCC  
TAAGGGACAATATCCAGCTAAATGATATTCTGTCGCTTTTAACTAAGGAGGCTCCATTTG  
TATTCACTGAACCATAACTAACCTCAATCCTCACAGACCGCGCCTCCAGGAAGTACCCT

CAGGGGCACTTTCAGGATAAGAAGTTTAAGGGTTGCAATTTGGTATTTAACCCCAAGTCT  
CCAGTTGAGTTATACGGCTCCGATAGGTGTAAGGCTAGGGGAATCCAGAAGGCATATCTT  
CTGCGCAGCTACGACATAACTCTTGATGACTACGCTGAGAAGATGGACTGCCAGAAAGGT  
CTATGCACGATATGTTCGACCGAGGGTTTTGCTATGAACCCAAACGTGCACAGGATGAAA  
CTTGTGTTGAACACTGTTCGCACCCAGAGGTAAGTTTAGAGGTTTATTGTGTCACAACTCC  
AATCGTGCATTAGGGCTTCTTAAAGAAAACGTGCATTCTCTACAGGCTGCTATTAATAT  
CTAAATGTGGAACGACTCCCACGGAAGGGCGTAGGGCCAAGTGGCTCGAAACGGTAAGGC  
GCTGAGATGCAAGATATAGTTTGTCTGCATGGCAACATGTAGCAGTTCATAAGAGAACG  
GGCACGGAGTAACGACCCCTGATGAACACTGAGGTATCTACCGATTTTTACATGGTGCCG  
GTAAGTGCAAAGATTGGCCAGATTCTTGGAGGTAAGTCTGAGGATGGTAAGAGAGTCATCA  
AGAAGTTCCTTGAGTAAACAACGGCGATCGCTGCTTTACGTGAAGCAATCACAGGGGCAC  
CCCTCAAGGACTCGAAGTGGGTTGGTGGCGAACAAATGCTAACTTGGAAACGTCGTTGGT  
TTCCTGGCTTGGATGGTCGTAAGGCACACGGCCGTAGTTCTCACGCTGCGTTGAGCACCT  
TGTTGCAGTCTGATGGTGTCTGCGTTGTAAGTGTGGATTGTCAAGACAGAAGAGACGC  
GCCTTGAGACGGGCCACAAGCACGGCTGGGATGGTGGCTTCTGCCTGATGGGATGGATAC  
ACGATGAGCAACAGCTTGCTTGCCGTAAGAGATAGCCTAAGTTGTAATCGAAGTGT  
CTAACAGGCAATGCGCAGGGTTGGAGACCACTTAACTTCCGGTGCCAACTGGATACTG  
AAGGAAAGATGAGACCGAATTGGCCTGCAAGTAACTAATTAACAGGCGAAATATATCATG  
GCTATTACTAAACGTTTTAAAGTACCATTCTGAAGTAACCGCTGTAATCAGCTCTGCGATG  
GAGAAACAATGTAAGTGGATTGATTCAGTTGTCTAAGAAGGCTGCTGGTGGTGAAGT  
CATAGTCCCCTTGACCGCGAGTTTCTGGTTCAGCATTGACCCAGAGTGTTCGAGGGTGT  
ATCGCCTCTTCTTCGAAACACGGTATGCGCGGGGTTATTGCGCACAGAGTTTGCGGAAGCA  
GGACTGAAAACTCTCCAGTAACTACTCGTGAGGTGAAGTATTGGGTGTAATATACGTG  
TACTGGCGGCTATCAAAAAGTCCGTAAGACCTTTCAGTCAAACCTTGTGCATAAAGATT  
CGTCCCTAGTAGCTGAGGCTGCAAGCCGTGGTCATATCCCTTGACTATCAATCGATGGGC  
GTAAAGCTGCTGCTTGGGAAGTAACAGGTGCTGGTGTCCGTTTCTGATTGAGATTGGAG  
GTTGCGTATGGATTTGCTTACTGACAACGTACAGGTGACTCGTGAAGAGTTGAACGACAG  
GCAGATGTACATTCAGTCCCGTGAGAAAGTCCAAGCTTTCCTGGATGCTCTGAGAGCCTG  
TGGTGTGGACATTTGTGATGGCGACCTAGATACTTTCGAAATGGGATATAGGGATGATGG  
CTTATGACTGCTATTACACTGAAGGACTTCTATGAGTTACGCCAAGGTAGACCCGATAAG  
GGAGTCTAGGTGATGGATGGCGACCGCCTGGTATTCCAAGCGATGGCAGCAAGTGGAGTC  
GAAACCCAATGGGATTATGACACTTGGAGTTTAGGGTGTGACCACGGGAAAGCGCGGAAC  
GTCATGGTTGAGTGCCTTAGGTGCTATGAGAGCCGTAAGAAGGCTTGGAGTGAYGCACCT  
ATCGTGATGGCCTGAACTTACTATGTGAACTGGCGTAAGGAATTAGTTGACCCAACCTAT  
AAGGAGAACCGTAAGGCGTCGCGTAAGAGTTTAGGCTCCCGGTCGTTTCGTCGAGCATGTT  
CAGGCCTTTGAGGCCTGGACGTCTATCCTTGAGCCTCGCTTAGAAGGTGATGACGTAATG  
GGACTCAATGGGTCTGGTGTGAACACTTTGGGTTCAAGAATGCTGTACTGGTCTCCTGT  
AATAAGGACTTTAAGACTATCCCTAATTGTGACTTCTTGTGGTGCATTACTGGTAACATG  
TTGAGTCAAGAACAGACTACCGCTGACTATTGGCACATCTATCAGTCCATTAAGGTGAC  
GTGACTGATGGGTATGGTGGCCTTCTGGGCTGGGGTGGAGACAAGTGTGACTGGTTAGAG  
AACCCGTATGCCTATGAGCAGGTTGAGAAAACCTTTAAGTCTGGTCTCCTCGTACGGGACAC  
ACAGTTATTGAATGGAAGAAGGTGGACATGTGAGACAGATCCTTGTGGGACGCTATTGTG  
ACCCATTGTGCCAAAGCTGGGATGACTGAAGAGGAAATCATAAAGGAATGTCAGATGGCT  
CGCATCCTTCGTGTCGAAGAGTACAACCTTTATCGACAAGGAGATGTCCCTACGGTCTCCT  
GAACAGTTACATTCGTGAGGGCCACAGTTATAGCTTAGAGTGTGTAAGTCTAGGCATTCT  
TCTCTATGTTAAATTAATACGATTCACGATTGGAGAGGGGTGCCTATATGATACCTACTT  
TAGGTTCTAACTTCAAGGAGATCGGTAATTAAGTTAACGCCTATCAAGAAGTACATTGAG  
AACCCACAAGATATTCCTAAAGTTCCTCTGAGCGTCTTGGAGCTTCTTCAAGTTCAATAC  
AAAGCTGAATATGCTATTCAGTCTGGCCGTATCGACCGATTGAAACAGGCTGGGTGGTCT  
GAAAGCTACATCGCTGGGTTCCTCGCGGGTCTCAACTATGCCTCTCAATCCTTTGACGAT  
ATGGAGGCAACCCGTAAGGAGCAGGCGGATTCCTAATAACAGGAGGTAAGCTAATATGTT  
TTTACCAAAGATTAAGGCAAGGTTAGATACCAATCAGGTACGTGCAATCGACCCTG  
CGCCACTAACAGAGACATCAAAAGGTTTCTGTTTGGTGGTACGACACGGTTGCACCGA  
AAGATGGCCCAAGTCATGCAATAACTACAGGTGGTAGGAAGTCCCTCAAAATGAACTTG  
AAGACAGGCCATCCAGGCACTTAGGAGTGACAATTTCGACAGAGACGGACCGGGTCCAAAG  
CGTCTACCCGCAAGTCTTATTCAACGACAACAAGTAGTCAGGAGGTCAATCATGGGTTT  
GGGCCAGAGCTTAGACAAGGGTTTCAAGAAAGTACCTAAGACACTCGAAGGTATTATTA

AGGTGCTCTAGGAGCTGCTGCTAGTATGCTGGGTGGTGGTGTGCCAGATGTCCGACAAGC  
TGCACAGATTGTTGAGCCACCAAGCCAAGGAGAGGTGAACACTGATGACAGTTCTCAGAC  
TGAAAGTGGCAAGAAGAAAACACGTGCTAGCGGTAGGAAAGCACTGAGTGTGCTCGCAT  
TTCTGGAGGTGGCCTAAATATCTAACACGGAGGCGCTAAATGGCAAGCTCACAGAAACGC  
GAAGGCTGCGCTGAGAATGGTGCCAAGTCGTTGGCTGATGCATTGAAGAACGACCGGAAC  
TCCTATGAGACCCGTGCGGAGAAGTGTGCTAAGTACACCATTGCCTCGTCTGTTCCCGAAG  
GACTCCGATAACGACTATAATGGCTATACTCAACTCCGTCTCAAGCGGCGGGCGCTTGTGGT  
CTGAACAAGTTGGCATCTAAGCTCGAGCTTGTCTGTTGCCTATGCAAACCTTCGATGAAG  
CTGACCATGTCTGAGTTCGAAGCGAAAAAATTAGTAGGACTACCAGCTGAACTGGTGAAG  
GTAGAAGAAGGTCTATCTATCGTCGAGCGATTATTGATGAACTACATCCAGTCAAACCTCT  
TACCGTGTACACTCTTTGAGACCCTCAAGCAGTAGATCTTAGCGGGTTACGCTCTGCTG  
CACATTCCTACACCGGCATGTTCTTACAACCACATGAAGTTATACCGTCTGTCTTATGAT  
GTTCCCAACGAGACGCATTCGGCACGGTACTACACATTGTGACCTTGGATTAGACTGCC  
TAAGCAGCACTTACCGGATTCGTAAGGAACTCTATGGACTCTAGTCAGGAGCATAAGGGT  
GACGAAATGATTGATGGGTACTCTCAAATATGTCTCGATGAGGAATCTGGAGAGTACCTG  
AAGTACGAAGAGATTAATGGCGTGGTAGTCCAAGGCACAGATGCTTCTTATCCGGTGTAC  
GTTTGTCCGTATATCCCGGTTTCGCACCGCGCGCATTGATGGTGAATCATATGGTCTTTCG  
TACTCTGAGGAATAGTTGGGTGACTTACGTTCACTTCAGAACCAACAGGAAGCAATCGTC  
AAGATGTCTATGATTAGTTCAAAGGTCATCGGCTTGGTTAACCAGCTGGTATCACACAG  
GTACGTGCTTAACGAAAGCACAGACGGGTCACTTTGTTTCTAGTCGTCCAGAAGACATC  
TCGTTCCCTCAGTTCGAAAAGGCTGCTGAATTCTCTGTCGCGATAGCTGTGAGTGAACTA  
ATTCGAGCCCGCTTGTCTACGCCTTATGTTGAACTCTGCGGTACAGCGTACTGATAAG  
CGTGTGAAAGCTGAAGAGGTTTCGCTATGTTGCAGCTAAACTGGACGATACCCTTGGTGGT  
GTCTATTCTATTCTCCACAGGAAGTACGGTAGCTATGTTTCGTGTACTACTGAAGGAA  
TTTCAAGAAACCAACCAGATACCTGAGTTACCTAAAGAGGACGTTGAGCCAAGTACCAGT  
ACCGGGATGGTAGCATCGGGGCGCGGTCAAGACCTCTACAAGCTGGAACGTTGTATTGCC  
ACGTGCTCAGCTCTTGCTCCTATTCACGGAGACCCGGCCATCAACATTGCGAACATTAAG  
CTGCGCATTGCGAACCCCTATTAGTATCGACAGTTCTGGCATCGTTAACACACCTGAAGAG  
AAGCCACAGGAAATGTCTGAGGCCGCAAGTACTGCTATGCAGAATGCTGCTGGGTCT  
GCTGGTGAAGGTTCTGGTACAATGGCTCCTGCAAGTCTGAGAAAATGAAAGCGGCTGAT  
GCACAGGCTGGCATGGCACCTTATTAATACTACTAATGAGAGAAAGACTATGTCCT  
CCCTATGATTTATACATTTTATTATCAAAGGAGATAGAATATGTCCGGTGACTCTAATGC  
TGATGTTTACGCAGCGTTCCGGTGTGGACTCTGAGCTTGTCCGGAGGGTCCACTCCACTGA  
CCACGAACAGGCCATGCTTGAAGTCTGATGTTGCTGCCCCTGATGGCGAGGATGAAATCGA  
GATATTAAGCACTGATGTCCATTACGGTAATCCAGACCCGTTTGGTGAAGAAGACAATAA  
TCGTAAGTACTGAGATTCGTATATCCACTGATGGTGAACCTGAAGAGACTGGAGAGGGTGTGAT  
TGATTACTATGAGAGCACTGAAGAAGAAGCCTCAAAGAGTTTGCACGTGTGGGTGACGT  
TCCATAAGAAGTACTGAGTGAAGCCTCAAGTCAACTAGTAGGGCATGAAGCTGGCTTCGAAGA  
GATGTTCAATCAGGCTGCTGAACGTGGACTGTCTGAAGAAATTATCGTCCGTATCCAACA  
GGAGTATGGTGAAGATGGTCTGTCCGAAGAGTCCCTATGAAGAAGTGGCTCAGGATGGGTA  
TTCTAAGTCCCTTCGTTGTGTCCTACATTCGTGTACAGGGGAGAACTGGTCTAACAGTACGT  
TCAGTGTGTTATGGAGTATGCTGGTAGTGAAGCACAGTTCGAAGCAATCTACAATCACCT  
CGAAGTGTCCAATCCGGATGCCGCCGAGTCTCCGGTTAGTGTCTGGAACCCGCTGAACT  
TGCACCGTTAACGCTATCGTGTATCTCGCTGGTGCAGGCTATGCGAAAACCTTCGTTAA  
AGGTGCTGCCCGTAGTATTTCTAAACGTGCCGTTCCCTGCTGGACCTCTACGAGCCAAACA  
GTCTGGCTTTGAGTACAGGCTGAGGTGTTTGTGCAATGTCTTACCCTCGATACCGCTC  
GGACTGTATGTTCCGTGCTGAAGTTCAGCGTAAGATGATGTACAGTAACTTCTAAAATA  
ATACGACTAACTATTGGAAGAGACGTCACGGTGTCCACTTTAAGTGATACACAATGAGA  
ACCAACTCGGGTCAAGTAGTACCTCACACATTAACACTTTATAAACCAACAGTAGGAGAA  
TAAACATGGCTAACACGAATCGTGGTCAACAAATGGGTAAAGACCAAGGTAATGCCATGA  
GAGCTGGGGACAACTGGCTCAGTTCCTGAAAGTCTTTGGTGGCGAAGTTCTGACTGCGT  
TTACCCGTACCTCCGTAACCTATGAACAAACACCTTGTTCGCTCTATCCAATCTCGTAAGT  
CTGCTCAGTTCCTCTGCCGCGTCGTATAAAAGCTGCTTACCTATAACAAGGTGAGAACC  
TCGATGACAAACGTGAAGACATCAAGCACACTGAGAAGGCCATTAACATTTATGTAGTAC  
TACTGCTGACGTTCTGATTTAAGACACCGTAGACGCTATGAACCACTATGACGTTTCGCT  
CTGAGTACACTGCACAGATGGGTGAATCTCCTGCAATGGATGCTGGTGGTGCAGTACTGG  
CGGAAATGGCTAAGTAATGTAACCTTCCAAGTCTAACAATGATAACATTGGTGGTCTTG

GCAAGGCTCACGTA CTTG CAGTTGGCG ACCACGCTACCCTGCAAGGTGACCAAGTTAAGC  
TAGGTCAGGCGATTATTGCACAGTTGACTCTGGCTCGTGCCAAACTGACTGGCTGCTATG  
TACCATCTAGTGACCGTGTGTTCTACACTACTCCTGATAACTTCTCTTCGATTCTGGCAG  
CTCTGATGCCTAAGGCTGCAACCTATCAGGCTCTGATCGACCCATCTACTGTTTCTATCC  
GCGACGTAATGGGCTTTGAAGTAATCGAAGTTCCATCTTACTGCGGGTGGTTCTGGTG  
ATAACCGCGCTTAAGAAGGTGTAGCACCTACTAATCAGAAACACTCATTCCCTGATACTG  
CTTCTGGTGATACTTATGTTGCTTTGGATAACGTGGTTGGCCTGTACAATCACCGCTCTG  
CCGTTGGTAATCTTAAGTTTAAAGATATGGCTCTGGAACGAGTACGTCGTGCCAACTTCC  
AAGCAGACCAGATTATCGCTGAGTGTGCAATGAGAAACTGTGGTCTACGCCCTGTCGCAT  
GTGGTGCGCCGGTGTTCAAAAAGGATTA ACTTCTCGCAA ACTCATAGGGGCCTCTGAGTC  
GCTTACTGAAGTTGAGCAAGATCTAACCCCCATCAGAAAGCTGCCCGTACCCGTGCGGC  
AAACAAGGCTCGTAAAGATGCTGAGTTAGCTGCTATTAAGTATCCATTATGAGAAACCCC  
TTGGGTGCCTTCGCGGGTGCTTGAGGGCTTTTTTCGCTACAATCCGGATACTTATGCG  
TTCCTATGAAACTACCCTAGAGAAAGCCGAAGAGTTGGCTGCTGTCTACGACATCATGGT  
CCCTATTGGTGAACCCCCAGTATCCACTCTGGAAGGTGAGACTAATGCGGATTTGGATAA  
CGCACGTCGAGTTCTCAATAAGACTTACCGACAGATTCACTCGAAAAGATGGCACTTTAA  
CATTGCGGGAGGACAACAGTTGCCACCTGATGTGTTCAACGGTTTGATTCTGTTACATCTC  
AGACTACCTGTCTGTACTCTGGGAAGGTGGAGCAACTGCCTACGTTAACCGTGGTGAATA  
TCTCTTTGATCGGACGACCGGAACTGATATCTTTGAGGTCCAGTTACTGTGACCATCAT  
CAA ACTCCGTGAGTTCTATGGGATGCCTAAATGCTACCGCTCATGGATTGCCCCCTAGGC  
AGCCCTCAGTTTAAACAACAGGTTCTTTGGTGCACATGAGATTGACGCAGTGCAAGCTGA  
AAAGGAACAAGCTGCCAAGATGCAGTTTCACGACTATGATCTGAACTTCAGTAAGTGCAA  
CATGTTAGATGGTGTATGCATTCACAGATGGTCCACTATATCCTTAACGATAACATTTTAT  
AGGAGGTGTCTAATGGCTCTTATTTACAATCCGTCTAGAACCCTGAAGGGCGGTACCAGT  
CAACAGCCGAACCTCTTAAGGTTGCGCCGAACAGGGTTCCAAACAGATTAATGGTTGGTCC  
TCGGAGATTGAGGGTCTTCAGAAGCGTTCACATTTTATATTCATTAAGACCATTGGAGAC  
CAGAATGCCCTTGGTGCCAAACCTCTAGATCACCTCATCAACCGTGATAGTGCCGAACAG  
TATAACGTAGTGTTCGGGAGAGGGTGTTCGTGTGTGCGATCTAAACACTAAAGAGTAC  
GATGTAAGGGTGGGTAGTCCACGTTAAGGTAGTGTACACTCGAGATGACTTAAGGATC  
ATCTCTGTGCCTGACTACACATTTATCGTTAATCGCAATATGGTTGTGCGCCAGAGACT  
AACCTTTGTATACCCGTAAGGAGAATGGAGTCCGCTTGATTAACAGCCGCGGGTTTCTG  
TTTGGTTTTTACGTTGGCATTCTCTATTAACAACACAAAGATTGATTTCTGTGATTGCCAT  
GGGGACGGACCTGAACATTCTAATCATAGTGACCCACAGTGGCTCGTTAAGAACTTGCT  
GGTCTCGCGCGTTTGAATGTTGCCTTTAAGGGCTGGAGGTTACCCGAAGGGCCTGCGTAC  
AGCCCTGTGGTTGCTCCAAGTAACAGTCAGTGTA ACTCTCTGTCCGCTGAAGATGGCTAC  
GCCGACCAGGTGATGAACGCAGTGATGCACACCGTCCTGTCAATCAGTACGTTGCCCGTG  
GAAGCCCCGAATGGATAAACAGTGGAAATAGTTGGGCACACCTCTATGACAACCGATATG  
TTCTTCGTTACGTACGACAATATGAAGAAGGTATGGAAAGAGGTTTCTGGTTGGGGTGTA  
CAGGAGGGACTTAACGGAGGCAAGATATCTCATGCTCTGGTCCGACAGGCTGATGGGTCA  
TTCCAGATGCAAGTCTACCGTGGACACAACGTTCCCTGTGGTAACCTGGACACTAACCT  
ACGCCGCCTATTGGTGCACAGAAGATTAACGATGTATTCTTCTTCGGGAACCGCATAGGG  
TCCCTCGCTGGTGAGAACATTGTGATGTCCCGTACCTCTAAGTATTTTTTCAATTGTCCCCT  
GCATCAGTAGCTAACCTGTCCGACGAAGACCCTATCGAAGTGGTTGTGTCTCATAACCGA  
ATCTCTATCCAGAAGTACGCCGTACCGTTCTCTGAGGAGTTGCTCCCATGTTCCAGACCAA  
GCACAGTTCGTGTTGTGCGGCTCATGGTATCCTCTCACCTAAGTCAGTGGAGTTGAACCAC  
ACGACCGAGTTCAATGTGTGTCAGGCCAAGTGAGTCCTTCTGGCGTTGGGCGCGGTGGTTAC  
TCTGCGTCACCTCGTGCTTCCCTATACGTGACTTAACCGTTATTATGCGGTGCAGGAGTTT  
ATCTCTGTGAAGTCTGCTGAGGATATGAGTGCTCACGTTCCCTAACTACATTCCGGACGAT  
GTTTTCTCTATACGAGGCTCCAGCACTGAGA ACTTCATCTCTGTGTTGTCTTCAAATCCT  
CCAAGCAGAAGCTTCCCTCTAGAAGTTCCTCTACATGAACGAAGAGATAGCACAACCGTCCG  
TGGTCACATTGGGGACTAGGAAGTAACGTTACCGTACTGGCCTGTGACTCTATTGGTTCA  
ACGATGTACCTTGTGTAGCGCAATCAGTGAAACACTTGGATGTGTGTCGTGTCACCTTACG  
AAGAACAGCATCGACTTCCCTGATGAGCCGTATCGTCTGTACATTGACAATACGGAGCAG  
TATGTGATTCCTTAAGGTTCAATCAATGATGGCACTTACGCTACCACTGTGTAACCTGTA  
GATGCCTATGGGATGAGATTTTGTTCGGTAAGTTCTACATTGTGGCCTCTGAGGGACTG  
GTGTCATGGTTCGAGCCTCCTCGTGCTGGTTGCCCTAATGGTGTACCTATGTCAACAATG  
AATGGGAACCGTGAGGGTGAGAAAATCTACGTTGGGTGCGCTATCAGCTTCCGCTATGTC

TTCTCTAAGTTCCTCATTAAAGAAGACCGCTGATGATGGCTCTATAGCTACTGAGGACATT  
GATCGTTTACAGTTACGGCGAGTGTGGGTGAACGAAGAGGACTCTGGTGCATTCATAGTG  
GAAGTGGAGGCCACCTCTCGACAGTTCAGCTATGATATGGCAGGTGCACGCTTGGGTTC  
AATGTGTTACGTGCTGGTGGACTTAATGTTGGTACCGGTCAGTTCGGCTTCCCGGTGACT  
GCTAAGGCACAGTTC AATGAAGTACGTATTATCTCTGAACAAACCACACTAAACGTT  
ATCGGTTGTGGTTGGGAGGGTA ACTACCTTCGTCGTTCTTGTGGTATCTCATTGAAGCAC  
ACCGTCTAACTCAAACAGTGAACAATACGACTCACTATTGGGGAACGGTGTTTATACTCT  
AGGAGAGAACTCTATGATTATCCTACCTACAACAGAACGTGACTTTGTGTTATTCAACC  
CATCAGAAGATGACATTGCTGAGGCCAAATCCTACAGCATTGAATCTTCATTTCCACCCG  
CCTCTGAGTGTGTGACAATGAGTTTACCTGGGGTACCTTTAGCTATTGGAAGCAGCTGTG  
GTGACCAATTGTGGTTCGTAACGTCTGACGAAGTGTGGAGACTATCCAGACCTGCTAAC  
GGGAGTTCCTCAAGCTCATCCTAGAGTACCGCGATACGATGCTAATATAGTCTCCAGTAA  
TCTGGTACTCTGCCGGGATAGGCAACAAGTCCACATTAGGTTCTCGATCGCTATCGGTG  
CGGTATTCCATAATGAGTCTACTGGTGACAGTAATCAATTCCA ACTATTCAACAATAGGAT  
GCAA AATTATGTACTGGGTGGCGGCTATCCCTCTCGCTATGCAAGGTACTTCCATTATTA  
TG GTAGGTATGAAAGGTGAACTAGCAAAGGCTGCACAGATTGACCAAGGTCGTCCACAAA  
GTTGGCAGGCGCTGAAAGAGATGAATAATACCGATTCTAATCTTAAGTTAGAATCCCGTG  
ACCTCATCGACTCAACTGTCCAAGAGATGCCCAAGCCAATATGAACCGTGTTAGAAATA  
TGGGGTTAATCCGTGCGGCTGTCCGTGAAGGATTGCTTGAAGGAAACCCTATGGACCGCG  
TACAACGCGTGACCGAGGGTGACTTCCAGCGAGAGTCTCAAGGTTTGTCCGAGAACAACC  
AACGGGACTATTTTGTCTCTTAGGGAAACCGTTTAGCTAACCAGGAGAACACTGTTGGTC  
AGATTAAGAAATCAACAGGTCCGGGCTAAA ACTAAAAGGTCGATTAGAGCAAATGATCG  
ACGCGTTAGGTATGGGTATGGGTCAACTGGCTGGTATCGCAACTTCTGGTGGACTGTTTCG  
ATGGCAAGTTCGACTGAGAAGGGTACCACTAAGGTTAAGACCCCGGGCGTTAAATGAGCAA  
ACCAAGATGGTAAATAAAGGAGGTACAGTTTATGAGTAAGTTAGCGCAAGCATTAGGTAA  
CATGAACCCTCCGTCTACTAGTCTTCTGCGTGGCACTCGTTCGCATGGAGGTAAAAGGTGC  
AACAGTCTATGAAGACCCTAAATATGCGGCGAAGTCTAAGCTGCTTGGCACTGTAGGTAA  
ACTGTCTGAGATGGGTGCGGATGTATAAATGCAGAATGACCAGAGCGAGAAGGCCAATGC  
AGACGAACGCTATCACGAGATTATTCATAAGCTGACTTCTGAGCAACGCAGACAGGCCAT  
GAGGAACGGAACCCTGTTATATCAGTATGACCAGTACGGAATGCGAGCACTCAAGCTTAA  
GACTGGACGTAACGCTGCGGATCTAGTCGATGACGAAGTGGCACAGAAGGTGCAGAACGG  
TGAGTTCCGCACTCGGCAAGAGTTGGAAGAGTTCCGTAACAGTCGACTGCAAGAAGCATC  
TATGAGCTATGCGGAACAGTTTGGTATTAATGAGACTGATGACTTCAAGCAGAAGGGTTT  
CAACTCCGACATCACTCAACATAACATTGCCCTCGATGGTGCTCACGATAACTCCCTGAT  
TGACCACGCTCAGAAAGGTGCTGGCATGAACAGTCGCGTCGAGTTAAACTCTGTGTGCA  
CGACCCGGATAACCTACGATTTCCGTATGCTGGTGAGTTCTTTGAGAACTACGTCACTGC  
CGGATTGACGACTAGGAGTTTCCCTAGTGATAACCAAGCGTTGCAAATGATTTGCCAAGG  
TCTGTCTGACGTGGGTAACCGTGAAGGTGGCGGGCAGTTCCTGCAACAGATTGAGAAGCG  
TAAGGTGAAACTCCACGGAAAAGAGACAACCTACAAGGAACTGATGGGCGCCGAACAGTG  
GAACAATCTGATGTATAAGACTCAAGATAATGAGTTCCAGTTGAACGCTAAGACGACCTA  
GGTGTTCCAAATTAATTTTGGACTTTGTGTTGAACCAGGAGAACATAAGCACTCGTTGGAA  
AGCGCTTCAATCTATGAAGGCCGAACCGGATACATTGCAACCGGGCGAATAGATGACACC  
TGAAGGTCAAGCGTTAATCAATGCACAGACACAGATGCAGGACGGCATGAATCGGGAGAC  
CTCTGAGTTCGCCAAGCAAATGGACAAACA ACTGAATTCGATGAACAAAACGAACGTCAT  
GGATACACCGTTCCATAAGAGACTCAATGGTCAGTACGTGTCTACTGCGCATGTCTAGAT  
GCCGACCAAACATAACACAGGCGAGTTCACTCATAGTGATATGGTTATCTATGCGAACAA  
GAAGCTGGCCGATATTAATCATATGAATATTCCAGAGGCACACAAAGGCCGAATCAAGCT  
GATCTACCTCGAGGCTGACTCCGAGACGTGTGCTTTCCGTACTGCGGCTGGTGA ACTTAT  
TGGTGACGCTGAGAAGGAATGGACGTTCACTGTGATTAACGGGAAGATGCCAGAAGATGG  
TGTTGTGGCACTTAACGCCCTTCGACGTGTTTCGTAATGCTGACCCCGACCTGTTTCGCTGC  
ATTGTATCCTGATAAGGCCGAGATGTTCCCTCACTATGGATATGATGGCCAACCAAGCGAG  
TGACCCACAAATCTTAATGCATGCAGCTAAGGATCGGCAGTGTCTAACCAAAGTGATGCA  
GTATGAGGATGATAAGTATTGGGCTTCTCTAATGGACA ACTCGCAGTCCCCTGAGATTAA  
GTACATGCCACCACTCCGCCAGAACGATGCCCGTAAGATTTCTGACTCTGTAAATACCG  
CACTAGTAACCCTGATATGGCAATGCAACAGGTCGCTTGGTATCGCATAGTTCACACTAC  
GACTCTTACAGATGATTATGCTGACGGGGATACAATTGATGACTTAACGAGAACTCTCT  
GCGTGTACGGTTGATCCGGAATCTTGGAACAAGGTAAGGACATAATAGACACAGCCCG

TAAGAACTCGCTGTGACTAACCCTTGGGTGACTCGGATGCAGGTCCTGTGTTTGAACG  
TGGTGATTCTATCTACTTGATGACCACGACCGGACAGGAAAACGTTCTGGGACGATAAGTA  
GTTGCTCTCTAAGATGTGCAAAGAGACTCAAGCGAAGCTGGATGAGGAAGCCCGTAATAA  
GGCACACCAAGATTCCAACAAGCGAACTCTACATACACGGGCTCTGAACCGCAAGGGTGA  
ACGTGATGATAAGAAGACTAAACGCTCTGACAGCATGTATGATAGCGTGAGTGGCAAAGG  
TTTTCTGGATACACTTACTGGTAAAGACTAATAGAGCACGATAGGAGGTTCCAATCGGAT  
AAGTATAACCCGAACGAACCGCATGAATATGATGCGTTACTTCAAGAGGGTGTGACGCA  
CATGGAGTCACCTTTGGCCTTCTCCCAAAGGTCGGTTGGGTAGAGTCCCGCTTTAAGCCC  
ACGGCTCAATCACCAACAGGTCCAAGAGATGTCATGCAGTTCGCTAAGGCATCAGGTCAG  
GCTTATAGTCTGCAGAAGGATGAAGACTTCACTGACCCTGCTAAGTCAATTGATGCAGGT  
GCTCGTTACCTTTCAGACTTCGGTAAGAAGTACAACGGGGATGGATTTAAAGCTGCCTTA  
GTGTACATCCAAGGTGAAGGACGTAATTGTAAGCCTCGGTTAGATGGCTACGTTTCGGGC  
AACTTTGCGAGCATTGGGGACGAAGTCCGTAACCTGCGTTCCTGACAGGATGTTGCT  
AAGTCTCCTAAGAGTGGAGACCTTGAGACATTCGGCGGTATCACCCCAACGTTTAAAGGC  
ATTCGGCTGGGAGCTGATATGAGCGGTATCGGGAAGAAAGGAAGTGTGACAACTGGGCTC  
CCTGAGTCCCACGACATGTCCTTTAGCGGTAAAGAACAGAACGCTCTCAATTAGCCGTT  
GGAAAAGATTATTGGGAAGCCAAAGGGAAAACCTTTGACGAAGCCTACAAGCGTTCAACC  
TTCATTGGATTGGGTTCATGCTACTGAAACAGAACTCACCAACTCAACCTTGGGTGTTGCC  
TTCCGTGCTGGTAAGCATGAGGATGGTTTCGATGTTCTTACTGACGTACTTCAACCGACA  
CGGTTTAAATAGCCACATTTGGACGCCTGAAGAACCGGTGAAGATTAGGACTGAAGTGAAG  
AACCTGGGTACATGAACGTTGTACTTGTGGGTTCCGCTGAGAACGTTGAGGAACTAATC  
AAGATGGCTAACGACAACCTATGAGACTGACGCTAAGGCTGCAGACGCGGGCCTAGGTGCC  
AAACTGTCCGGTGGTCTTATTGGTGCTGGTATTGACCCTCAGACCTATGTTCCCATGCT  
GGGACTACCGCTATGGGGTTCAAGTTGGTGAACCAAGCGTTAATGGTAGGTGCTGGAGCT  
GGTGCACCTAATGTTGCCTCTGAAGGCCTACGTACTTCGATTGCTGGAGGTGAGGCCAC  
TATGCTGAAGCTGCCTTAGCTGGGATGCTAATTGCGGGTGGACTGACTGCTGTGCCAGAT  
GGTGTAGCTGGTGGTCTCCGTAAGTCTGGTGCTGAATATATTGAGAACCCGTTTGCTGCT  
GCACAGATGCGCTTTGAGGCCCGTGAGACTACACGCTACCCTGGTGGATATGCTGCAAGC  
CGTATGCCTCCTAGTGAAGACCGAGTGTCTCACGGCACAAATGCCGTTGAGTATGCAGCA  
CTGGAAACCGAACCTGGTGCTGTAGTACTGAAGTATGGTTCCATTATTAGTCATACCAAT  
CTAGAGAACCCTTTGACAGCCATAGAGTTTGCCGAGGTGGACCCCGAAGGTGCTGCTTGG  
GGATTGCCGATGCGCGGCCCGAGTGTAAATAGGTTTGTGAACACCACGTTCCGACCAAGCT  
GAAATCCGGGGTCTCGCCAAGCACTTAGTGCCTAACCTTCAGGTATGCAGTCTGGCTCC  
GGCGGTAAGTTAGGGGCTACGGCTTCCGATATCAAAGAGCGACTTCACAGTACAAACCAG  
ATAACCTACAATGACCTCTATGGTTCAAGGAAGGATGCAATGGCTGACCCTCAGTGGTGT  
GTGGGTGCGTCCAAGAGTGGTGCTCAAGTTGCTCGTCAAGAAATCTTTCGTCGCGCAGCT  
GTGGCTATCGAGCCTCCTGATCTTCGGGCTAACTTGACCAAGGCAGAGCGTTAGCTGATG  
GACAGCGTGAAGGAACATTTTGACCTCAAGCGTGAGATGATGGAGAACCCGTCGATGTT  
CGTCACAAGGCCAACTCTATATTCCTATCAGTCGCCACAAAGGGACTTACGTTCCCTCAT  
GTGTACTCGAGGGAAGCCAAGCGGTAGTACTCTCACGCTCTGGGGGGTCCCGATGGTCTA  
CAGGAAGGATTTGCTGCAAGCTGGATGACACCCTATCGCTCACGACCTGATGTGAAACCG  
CGTGTGATGAAAACCTTAGCGGAAACCTTAGGTATTGACGTTAAGCCTGTTACTGAAGAG  
ATGGTCATGAAACACGCTAGTGGCAAGGCATATGTTATCGCCAAGGCTGTTCCGTTCAAC  
TCTTCCAGTGTGCTTATGATAACATTGAGGGTATTGTTGGAATCGAGAACAACCTCATT  
CTAGGGGCCCCTCACCTGTTAGATTGACATGCCTGTAACACTCCCTAACGGACACCAT  
TTCTCCCTGAATGACTTACGTGACTTCGATATGAAAAGCGTCACGCCAGCCTATGACCCG  
CGTGTGATGGTCATATTGCTCTCATGGGTGCTAGAGGGAATACTACTGCTGAACTCGTA  
GCTGAAAACAGGATGATCGATAAGTAGTGTGAAGGTAATGGCACAGAAAGGGGTGAGGTA  
GGAGCACTGAAAGATAACCATTAAGATTCTCAATGGCCGCGCTCGGCGTAATACGGATACT  
TTGGGAGACAGTATGGTTCGCGCTCCGTTCCGATATGTCCTTCTTTACGAAGCACGCATAC  
CTGGGCTTGCACAACGTAACCTGAAATCTCTGGTATCTTGGTAAAGAGTAACATTCGTGCG  
TTGCTCCATGGAGTCCAGCACTTTGGGACTTAGCGTTCCGTAACAAGACTGTCTCTGGT  
TGTGAACTCAATAAACTCAACTCAATGGTGTTCGGCAGAGAGCTCGACCAGTTAATTCGA  
CCGTCCCCTCAGGACATCATTGAGCGTCTGCGAGAGTCCACCGAAACACCAGATGTAAC  
CCTATGGTTGCTGGTTCTATCAAGCATACTGACTCAAGAGTTAGCTGCCCGCCCACCTCTT  
ACAAAATTCCTTAATGGGACGTCAAACCTTCTGGAGATGGGTGACAGGTTGTGATG  
GGGGATGTGGTAACTCATGCTGTTACAGGCAAAGGTGGCAACAAGTGGAAATAAGGGTGAC



ATGCTGAAGTCTGCGAGTATCTCTAAGGAACAGTGGGGAGGCATTCAGTCTCTCATTAGG  
GAGAACGTAACCTCGTGGCGAAGACGGTAAGTTTACCTTCAAGGATAAGCGTAAGCTGGCT  
AGTGATCCTCGTGCCATGGACTTATGGCGTTTAGCTGATAAGGTTGCAGACGAAACGATG  
CTCCGACCTTATAAGGTTTCTTTACAGTATCCCATGCGTTTGGTGCCACCGTTAAGTTC  
GTCCTGCAGTTTAAGCCGTTTGTTCATCAAGTCGATGAACCCTCAGTTGATCCGCTCTGGT  
AACGAAGCCTTAAAGAACCAACGCGCTATGGACATGGCGTTGACCTATGCTATCTCTGGT  
GGTATTGCTGGCTCCTACTATGTGGCACAGGCTCATTTGAAAGCTGCTTGCCTACCTAAA  
GAGCAACAGAAAGACTACTTGAAGAAACCCCTCCACCCTAAGATGATTGCCTACTCCGAG  
GTCTCCAGAACTTTACACTTTGGGGCTCCGCTGACTATTGCTAACTTCGGTATGTGAGCT  
GCAGGTTATGACCAAGGTCCTATGGTCCGCTCAAGTATTCTACCTATTGGTGAGGACAAA  
AGTGAGAACAATCAGGCTGTATCTTCTGGTGACATGAGTGATTCCATTATGGGCGCTATT  
GGTGAACAGGTGCCTCCTCTCGGAATGGCTGGTTCGGCTTTTCTGCTAGTCGGAATGCT  
TATGGCGTCCTTACAGCTCCGAACAAACTGACCGAGCTTGAGATGATGACTGGCTAAATG  
AATGCTCACCGAGACTTGATACCCAACGACCCAATCTCTCAACAGATGCTCATAAAGTTC  
TATGAGGTCAACGGTGTGTATATTAAGTCTAACAAGAAGTAAACAATACGACTCACTATT  
GCGGAGGCTCTCTTAGCTGCCCTTTCTATTTACCGTTTATACCTCACCAAAAAGGAGGAT  
ACAGATGGCTAACAAAAATTACACTGTACGTCCTTAACCGCTGAACGGTTCGGTCAACTT  
CACGATTACCTTTGAGTATCTACCACCTAAGTTCGTCCTAGTGACACTTAGAGGGAAATA  
CCGAAGGGAGTTGGTTCTTAATCAGGAGTACCGGTTTACTGATAAAACCCAATCAGAAC  
CGGCAGTACATGGACTGCTGCGGTCGGCTATGAGATGATTGAGATTCGTAGATTCACTTC  
TGCAACCGACCGTCTGGTTGACTTTGCTGATGGCTCAATCCTTCGCGCATTTGACCTTAA  
CATGTCACTGATTCAGACACTACACTTAGCTGAGGAGGCACGTCACCTTACTGCGGATAC  
TATTGGGGTCAACTATGATGACAACCTACATGTCCGTGGTCGTAAGTTTCTAAACCTAGC  
GTTTGCTACCAGTAACTATGATGTTGTCCCTCTGAAGCAGATTACTGACCGTGAGTCCTC  
TGGGTGAAACGCTCTGACCAAAGCTAGTGAACATGCTGACCGTTCTAACAAGGAAGCCAA  
TCGCTCACGGGACCAACCTGAGCGGGCTAAACAAGAAGCTCACCGCCGACCCATAAGGG  
AGGTGTCTCTGCGACACAAGCAGTCGAGGCCAATAGGCAAGCTGACCGTTCCAACCTCTGA  
GGCCAACCGTTCTAAAGGTTAAGCTGATGGGATGACCGCCAGTGTGGAAGCTGCTAAGGC  
CTATGCTGAGAGAGCCAGTATGGAAGCGAATCGTTCCTGCTGAGGCTAATCGTGCTGC  
AGATCAAGTTACTAAGGCCGCTGCAGAGGTTTCCAAAGCTGCTGCACATGTGTCTATTGC  
TAAGATTCAGGGCGACCCTTCCAGTACTGTGGCTAATCGTGCGAAAAGTGCAGCAGACCG  
TGCTAAGACTGAGGCCATAAGTTCGGCAATATCAATGAGTTCGCTGGAACCTCTCGAGAA  
GGAGGAGGGAGTAACACCAACTTTCAAACCGGGGCTTAAACTTCGTTCTGGTGACGTCTA  
TGCCGATAGTGGTATCTTCACCTAGAAAACACAGGGTGGCGACTGCAGCCAGTGGACTGG  
ATCTCTGACACCAGATGTACAACATGATATAGAAGGAGTAGAGAACGTCGCTTATCTCCT  
TGAGCGAGCTACAACCTCTGAGTAAAGAGCAATTATATGCTAAGTGACTATATAATAAGGG  
TGTTGACGAAAAATTTCTTATCAGGCGGTATCCTCGAGATGCACATTTTACTGACGCGC  
CGAATGTGCTCTTATCTGCTCTTCTGGTAGGAGTATCCCAGCGGATGGTAACTTATTCAT  
CTTGAATTATGCGGCGAATCTTGATACATGGGTTAATATGCGCCTAGGTGCGCACGCCTA  
CAGCAAGGGTGAGGTTAACATGATGGTCGATGGACCACTCACAAACACACCAAAGTGATGC  
TCGTTGTGCACGCAAGAGCTATGGTTAGACTGTGGTATGGCAACGCTCTGCAGGTGGCGG  
TGTTTCAGTAAGCCTCTCACAGGCTGTCCGCTGGAGAACTATCTGGATACTAGTTAATAA  
TGGCACGTGTTGTGTTTACAGATTGGAGCTGCTGCTACTTAGTTTCGTGGTGGTTATGGGTGG  
TTGGTTGAAGTTCACAATTTCCATCAACGGTAGATCTTTCCGTAACGACCAATATCGAAA  
TACAGTACCTGAGCAAATCTTAGTTCTCAACTTATAAGGACAATACAAAAGGACCATGGA  
TGGTCCCTACCAATGAGGAGGACACAATGTTGTCTTTAGACTTTAATAATGAAGTTGTGA  
AGGCTGCGCGGATTGCAGGGACAGGTGTGGCCGATGGTGCTTCCCGTCTGTTTTGCGGAC  
TGTCGTTTACCGAGTGGTTCCACTTGGCCGCAATTGCCTACAGAGTGGCTGAAATCTGTG  
GCACGGTAGTCGCTGTGATTATCAAGTGGAAGAAGAAGGGTAGAGATGTCTAACGAAAAG  
TCTTTAATAACAATGCCTTGAGATGCTGGACACTGAGGTGGCATAACGTATGCTGAAAGAC  
CTTCAGGATGGTGAGAAGCGCACACCTCTACTGTATTACGCAATCGGTAAACTGTTAGAG  
CGCCATAAGGCCCAAGTCTCCAAGTTACAGCCAGGCCATAACATCCTTGGTGGAATGGCA  
GCTGGACTCGAAGAGTACCAGAACCTAGTGGGTGCTCATGGTCTCGCTGAAGACGAGAAG  
TACACGCTGAACCTATCGAACAAGGCAAGGCCACAACATCTAGTGGTCTGTCTGATATTT  
CCACACAACCTACGGTGACGCTACGAGAAACGTGAAAATACGGGAGGGTAGTTATGCTCA  
AGAATTTAAAGAGGTACGCCTTAATCGTTGCGTTTGCCTTCGGGATTACCCTTGCGTATC  
ACCTCTGCTATGACAGAGCTAACACTAAATGAGAACAGCAGGAGAACAAATGAGTACGTCA

AAAATCTGAGGGGACTGCGGATAAACGGGCGCTATCAATGAAGTCTCACAGCAATACC  
AAGAAGAGCTTGCGGCGCTGGAGGGCACCCTGATAGGTTCAATTAATGATATGGGTCCT  
ACGGTAGGCGGCGGAGTCACAAACGAGCAGACACCTCACGCGAACTACAAGCGCACGTTG  
GATGCCTCGTTGATGCTCGAGCCCACTTGACATAGAGTTTAGATGACGTCTTATCGGAG  
TAACTCAAAGAGGGGATGCGAGGATTAAGTCGCTCAAAAATAACAATCAAATAAATGCAAC  
ATAAGGAGAAAGACAATAGGTAACGTTAGAATCAGAACCAAATCCACTCTCAACGGACGT  
GCACCGGATAGTCTGGACGTGTGGGATCAGAACAGTGCGGGCCTTCTAGTGGGTCGTATT  
GAACTTCCTGAGTTCTCTATGGGAACAGTAGAAGGATACACAAAGTTAGAATCTCAGCTG  
AAACTGTCTAATGTAGCTATGTAGGTGTACCCCACTTCACTGCATTCAACGCTGCGAGG  
AGCGGAAACATTGAGTCTAAAGTTGGCAGTGGATATATGACTGTGTTACTTAATAGAGCT  
AAAGGTGACACATGGGGTCTAGCACAGATTGATGTACATAAAGAATGCGATGACTCTACT  
CGACACCCTGAGCCAAATCCGTCTCCTGAGATGGACGTGCGGGCTATCACTAAGTACTTT  
ACGCCCTATGTGGATAACCCTGAGTGCCTCCTCGAGTGGAGCTAGATAACCCTATAGGT  
GGTTCAGAACGTAACCCTCGTCTGCCGCACGAGAGGTTTGGTGTGCTCTGGTTAACTCT  
ATACAGCATATGTGCTCACAAACCCTCAAGATTCTTCAGGATGCGCTAGGTAGCACAGCA  
CCCACCGAGTAACACTAGGAAGCCGCACTGTCCAATCAAGCAAACAAGAATCCGCACATA  
GTGGCGCAACTTAAGGGTGAATTCGTAGCTTTCTCGTTCGTCATATGGACGGCTCTGAAC  
TTACCTAAACCAAGCAAGAGCCAGATTGATATGGCACGTACACCCACTGATGGTGACCAC  
AAGAAGTTTATCCTTCAGGCGTTCCTGTGGTATCGGCAAGTCCTTTATCACTTGGGCGTTC  
GTTGCGTGGGTATAATGGAGGGACCCTCAACTTTATGTTCTGATTGTGTCCGACTCTAAG  
GAACATGCTGATGCTAACTCCATCTTCATCGAGCACATCATTGACCTGCTACCGTTCCCT  
TCTGAGCTGAAACCTCGACTGGGACAGCGTGAATCTGTGATTAGCTTCGATGGTGGCTTA  
GCTAATCCAGACTATTCTCCCTCTGTGAAGTCTGTGCGTATTACTGGTCCGGTTAACTGGT  
AGCCGTGCTGATATGATCATTGCGGATTACGTTGAGGTCCCTGGTAACAGTTTTACAAGT  
GCTGCTCGTGAGGAACCCTGGACGCTGTTAACTGAGTTTGCTGCATTACTCAAGCCATTA  
CCAACCTCTCCTGTTATCTACCGAGGGACGCCTCAGACCGAGATGACTGTCAACAAGGAA  
CTTGAGGATATCAAAGGGTACAGCACAGTAATCTGGCCCGCACATTAGTCACGCAATGAT  
GCTAAATCTCTCTATTAGGGGGGCGTTTGGGTCCATGCTTAAGGCTGAATATGATGAA  
GGCTTTGAGTTACTCCGTGGACAACCTACTGACCATCTTCGATGCTATAAGGTGCTCTT  
CGTGAACGTGAACTCGAATCTGGCAAAGGTGGTTACAGTTTTCTTTTCATGCTTAACCCT  
AACCTTAGTGATGCCGAGAAGTACCCGTTACGTCTCCGCGCGCTATCGTGTGCGCTGTA  
GACCCTGAACGTGCCCCCTGCCAACTTGTGGTTCGCGAACCGTCCAGAACAGCAATGAG  
GAGCTTCCTAACTTTGGCCTGAAAGGTGATGACGTCCATAGCTTCCACACGTGCTCCTCT  
CGAACCCTGATTACCAGTCTAAGATTCTTGTCATTGACTCCTGTGGTTCGTGGTAAGGAT  
GAGCCCGCGTTTGCTGTCTCTATTCCCTGAATGGCTACATCTACTTGATGGAAGTCAGT  
GGAGTCCGTGGAGGCTCCGATGAAGCTACGCTAGAGAAGCTCACTAAGAAGGCCAAGCAG  
TGTGAGATTACAGACAGTAGTCCAAGAGTCCAACCTTTGGCGACGGTATGTTCCGGTAAGATC  
ATCTCTCCTGGTCTCCATAAGTACCACAAGGCTCCACTCGAAGAGATACGAGCTAAGGGC  
ATGAAGACGATGAGGATCTGCGATAACCATTGAACCATTGATGGGCTCCATAAGCTAATC  
ATTAGTGATGAAGTGATCCGAGAAGACTATCTGACTTCTCGTGTCTTAGACGGGAAACAA  
GATATTCGCTACAGTGCGTTCTATCAGATGACCCGTATGACTCGTGAGCGAGGGCGCTGTA  
GCACACGATGACCGACTTGATCATATCGCATTGGGTATTAAATGGCTACGCGAGGGGATG  
ATTGTAGATAGCAAGATAGGCGAAGAAGAGATGACCCTTCAGTTCAGGAGGCACACATG  
GAGAAACAGACGATTGGTGATGACCAGATTCATAGCCTTAATGTTGGTGGCGTGGACATC  
TATTATCTGGACGATGCAGGAGGCTCTAGCTTCATCGACTGGTAACAGCTACCCAACAAG  
AAGCAGGTGTGAGTAATGAGAGTGGCAATTGATAGTATAACAGGTGCGCCTCACCTTCCCTA  
GGGTGTAAGACTAAAACCTGGCTACGGTAGGATTCTGTGTTAATGGCGTACGATGGATGGCC  
CATAGATACGCCCGGCACGTCCACCTGAAGCGTCCCTCAAATGAAGGATGTGTGGTGGACG  
CATTTGTGTGCTAACCCTTCGTGTGTGAACACTGAGCACTTCTCAGAGGGAACACATAAA  
GTAATCATAGAGGGCTGTAGGTGCGAAAGGTAGTATGGCCCATAGTGATTCTTTAGGTGTT  
TCTCCCGGTAGGCACCAAAGTACATCGATTGAAAGGCAGTTAATAGACGACTG  
TAGGCTGTACTTGATGATAATGGTACAGCTTCTGAGGTTGCTAAGAGACTTGGCGTAAAC  
CCCCAAAGGGTCAAGAAGGGTCGGTCTGGTAGACTAACTATGCACATAAAGTGACTTAAT  
ATTCACAATGGGCACCCTTTGGAGTGATGTGTAACCTAATGAAATCAAGGGTGTCCC  
TAATACAATTCCTATTGGGAAGGGCCCCCTATGACAAGTTAAAGACACTTAAAGATTGC  
ATATGCATAGAGCATACTTAGTGACTAGTATTAGTTACTACTCTTAGTGACTACCCTTAG  
TGACTACTTTTGGTGACTACCCTTAATGACTACTCTTATTGACAACCTTATAGTGACTACT

CTTAGAGACCCGTGCAGTGAGGGGTGATAGTAATAGTAATTACAACCCCACTATCAGTGT  
AACGATAAAGCACACCAAGAATGACGCTGTATACGCTTACTATACGTGCACGAGGAAATG  
GCAACGCATCAAACACTTGTAAATTTCTCGTTGTACTTGCTGGTGCCATTGGTAGCACA  
TCTGGTTCTGAACACATCGGTGAACTGGAACTCTGGTTTGTCTATACTCACTTGTGTT  
CATTAGACTACTCAATGACCCTTAGTGTGCTCGTAGTAATTATGGTTCGATATACATCTTC  
CCATATAATCACTGCAAGAAGTCAACTCTAATAGTAACCCTTATGTGCCCTATATGAGCC  
GACGCGGTGTCTTAGAGTCTATTAACGTCTATTAGTACCTCTTAGTACGTCTTAGCGTCC  
CTATGGGCCTCTAGTGTGCGCTCAGGACCACCTTATGATAGACACTCCAAGTGGTGGACC  
TCATGAAACTCTTGGTATCCCCCATTAAAGAAGCCTACAGAACAATCCGATTGAGTATCT  
AATAGTACATACAAAGTGTTCCCCACTATGGCCTCATTATGCTCACCCCAAAGAGAGCA  
CCCCTATGGTGACTTTAGGTTTACTTTAGGTGTAATAGAGGTGTACTIONTGGAGGTGACTTT  
AGGTGATTTAATGCCTAACCTTATGTGTGAGATTGGGTTTACTACTAGATGTAGTGCTT  
AGGGGGGACTTTAGGGGACTATATGTAGGCCTATTTCTGTCTCT

>NewGenomeName\_52

CGATTTTGTGATTGAAATTGATTTGATTTGATAAGATATGAGGAGTGATTGAGTTGAAAT  
AATCACAACCTGGCGATCTCGTGAAAAATCTAGTGCAAATCGATCCTCCCTGGCTAGAGA  
TTGTATCTTTTCGTTCTCGACCGTTCACGAAACCATCCGGCGTAGTTCTCCCGCGTTGTT  
TCCAGTTTGCACACAAAAAGAACAATAATACACCATATAATAATAATTAACACAATA  
GCTTAGTTATATATATTAGTTTAGGTGATCTTTTATGTATAGCGTGTTCTTAGGGTATG  
TGGTAGGGTGTGTTTATTGATATTCCTGTCTGTATATGATTTAGCCAATTGGGATTGCT  
GTTGGCATTGGCTTCAAAAATGTATACACGTATTTAAACCTGCACAAAATCGTGAACAC  
CTGAAAAGCGACGGAACAAGGATTTGTTCTCAGAAAAATCATCAACTCGAAATTTTTTTT  
TGTGTGCACTTGGGTATGGAACGTTAGCATACTAAACTACTTGACTCGAACAAACGGC  
GGCGATAATACGCCTCCACCAATTAACCAAAACAGGAGGATACCAATCATCGCAGCTACC  
ATAGAGTTTCGCAACAGCTTGCAGGATGCTGGCTCATAAGCTGACAGACGGAGAGCCATAG  
GAATTCGTAATCACTGACGCAACCATTACCGATAAACTGGTTGAAGAAGACCGGAAGAAG  
ATTAACGCTTCGTATTTGCGCACGATAATCAATCGTGTTACAGAGGTGAAGGAGATCGGA  
ACGGTTTCAATTACTCGCACTGAGCCGGTCGAGGAAGCGCCAGGTTTAAAGGTGGAATC  
AACCGCGAGGCAAAGCTGCAGGTATTCACCAAAATGAGAGATTCCGGCACTGGAAGAGCGG  
ATCGGTGAGCGAATCGCCAAACGGTGCGTGAACACAATGCCAAATATCACGTATCTGGAA  
GGTGAACAACCTCCACGGCGCGCAATCGGGATTAAGCGTTATCAGGATCTGATTAAGTCA  
TGTGCAACGGAGGTATAAGCCATGAAATACGAACGCAAAGAGAAGATCGCAAAGGTCATA  
GTTGATGAGTTTGGTTCGCGTCGAACTCACACAGGACCAATCGGAGGAAATCCAGGAGGCA  
CACAGACACATGATTTTACCACGCGTGATTGTCAGATCTGGAGGCAGGCAATTTAAATAC  
GTGGTTGCTTCTCCAGCGCTTAAAACGCCTGTAAAAGCATAGCTTAATAGGGGCTAAGAA  
TTCGGAGTCGTCAAGGAGCCCGTAGATTGAAAGGATTCGCCTTTGACGCCGCGATGTGGT  
GTATTATTATTGAAAGTCATGGCGTGGCGCTGGTTGTGTTTGGTTTTATTTATTGGGGG  
TTTTTGATGAATAAGAATCTTTTAGATCATGCCCTGGTGTCTTTATCGCTGCTCCCGGA  
TTTTCGCTGTTGTCAATTCCATTTTCAATCCTAGCTTTTGCCGCGTCAATGCTGAATTTA  
CAGATTACATCCTGATTGGTCAACACCACTCTTTGTTAAAACCTGAATGCGGGAGGTTTGA  
CATAATTACCCCATTTGACACGAAATGAGGAATATAAAATGTTTGGACTGAAACGCGTAAC  
AGTTGAGATCCTTAATGATGGCTCTTATAACGGCATGTAACACTTATCCTTCCAGGTCCG  
GATTGAGAATTGCAATGATTGTGGGATTGAAGGTGGAATGGTTGACGTTCAAATTGATGC  
ACTTATTGCGGCTGGCTATGACCAAGAGAAAGGCCAATATGCCAATATACTGCATGGCCA  
TGAAAGCGACACACATTTCCCGTTCACATATGGCGAATGCCGGATTGTTGATTGAGGTTT  
TAAATTGAGCAGTTGGCACCAGGTGAACGTAATGCGATTCCACCGACACAGAACAAGAT  
AATGCTAAATAACACCAATTGCTAAAACCTAAATCAGGGGGATTTGTCATAGTGTCCCTAT  
TTTAGTTAAGCAAATGAGAATCAATAATCTTAAGCATCTAAAAGAGAAGCTTCGCGATCA  
CATTTAAATACTATCAGCCTGACAACGAAGATACCGACGCCACTAAAACGCGCGGAGAGT  
GGAATGATGGTGGATGAACAGGATTTAAACTTGAGTATTTTCGTTAATATGCACAACA  
AACTCCAGATAACATCCCTGGCAAAGGTGGGTATTACATAATGGCGGCTTTTGGCCAAG  
AAGGAAAACGCGAGGATAACGATCTGTTTCGGCGCGTTGAACTATTTAAATATCAAGCCTG  
GGCAGGTCAATTCAAACGGTGTCTATTCCCTGCTTCGGTAGATGCTAAAGATTACGATT  
ACATTTGCAATGTTGAATATATGCCAGTCGCCGCCACCCTGTTAGGTCTTAAGCGTGAGA  
AGGTCTAATGGCACGAATAGTAATCTAAACCGCGCCGCGTTGAAGTACATGACGTTGTTA  
TTAGCTTCTTTCCGGTTATATTGGTGGCTACAAGAGCCGTAATAATTACGGCGCTGACA  
TCAACATTAGGAGCGGTACTAGCGTAAATATCAACAACATCACGAATTGCTAAAACAGAA

TTTTGGTCTTGCTGTATAGTAAGCTCATACCAAACAACGAAAAGGATAGAAAAATGGATT  
GATCACGGCACGCGGTTTATGGCTTACACGTCAAAGGCGGTAGAGGTTCAACATATGCCG  
ACCTGCTTCATGTTAACGAGCGCGGCCAGGTTGATGTCGCAATGCATGTTGACCAACTGG  
TTCAAGGCAGTGAGTCCGACAGATTTAGACCTGATTTTCGTTGAATATGATCTCGCGTACA  
GCCACGACCAATGGCTAAATGGATATAAGTTTACAATGCTGGATAGCCATGTTATTGACA  
CATGCAAGTCAGCAAAACGAGACTATAAGCGCATGGTTCGCAAAGTTTAGAAGGAGAGAG  
CGCAATAGCTCAGAATGTTAAGCGGTGATGTGAGCTGATTGGTACAAAGCCCAGCATGATG  
CAACAAGAGAAGATAGAAAGATGTCAAAGACTCAAATAAGCAGTTTCTGAAATACGGCT  
CCATGATGGTGCTCGGTACCGTTTTGGTGGCTGGGATCGCGTATAGGATGGTTGACTGTG  
CGGGGTAATGGATGTTTATGATCAACTAGTGGGGGAGGGACTACGCTAAGCCCCATGTTG  
CGACAAAACAGCGTTTTCGTAATTTTAGACCTTGACGGCACATTGTCGAATGGTGAGCACT  
GCTAGCACCTGTTGCCGTAAGTGGATTTGCATCTTGCTGAAAGCTGGAGTGAGTTTCATC  
ACGCCGCCACGGATGATAATCCAGTCCAGGATACGATAGCCGGTAGCAATGCCATGTTTG  
ATGCCGGATACGTTGTGATCATCCTAACTGATCGGATTGATGAAGTTGAGGCAGAAACGC  
GAGCATGGTTAGCTGAAATCGTAGTTTGTCTCGATTGGCTGCTTAGGCGCCGCGCGGATG  
ACAACCGGGAGAATTCGTTGATCAAAGACGAAGTCTTTCGGACTTTCGGACTTGATCGCA  
TTTTCGCATGTTAGGCTTACTACCAAAGGTTATTTTCATCCTTGCAGCGCCCTGGGCTTTA  
CTCTTTACCAGGTGATTGTTGACGGCGAGCCGTGACACGATCACTGAATATCTGACGGCG  
TAAAGAAATTGAGCACTGACAGCAAAGTTTATTGAAGATGGGCCTGGCGATAATGTGCTG  
ATTTACATAAACGGTTAATCAGTGTGTATTGATTGCAAATATTGGGATGATACAAATTTG  
CTGTTTCGCGGAATCTTTGACGAGAAAGGAGCGTTGGAGTTAGCGGAGCACATCAAGCCC  
ATTTCCGGAAGAATTACCAGAATAGAGGGTGTATTATGTTGACTTTTATCTTCATCGCTAT  
TGTTTTAATTCTGTATGTTTACGGCTCTTTCCTGATGCCAACGCTACAAAAGAGGCTGA  
CGCTGATGATAAGGATAGTTGGAAGCCGATTGTTTTGTGGCCTGGCTATATGATCGTGCC  
GATTTGCGAACTAATCTTCGATGGTGAGTTCAAGTGGTAAATAGCGCTTTTTGCTAAAGC  
TTGCTTAGGTACATTTGTTATAGTGTGCCTTGTGGAGACAAGCAAGGAGAATGACAAATG  
AAACACTACAGGTGCGGCCGTCTCATTCTCGTGACGCTGGGATTAATATTATTGTTGCA  
TATTATGACAAGATGGAATTTTTTGAATCCATTTACACAAGGGGCGTTTTTAATTCTATG  
GTTGATGCTGGATTCATGAAAGAGTGCGATCCACCAAGTGGGAAGCCGTATTATAAGAAT  
GTTGAACTCTGGCATAACGCCGTATAGGTGACAATTCTGTTAATTGGCCCTATGGTGATT  
ATTTTCTTATGATGCTTGACAAGCGTAAAGAGACGGAAAAAAGATCAGCTATCTTCGTG  
TTCTTGCCGATAGAATGCAAAATGGCAAAGTAGGAGTCAGTGATGCTACTATTGAAGCGC  
GTAATATTCATTGGATCGTTGAAGAAGAAGCATTAAACACCATAAACTGTTAAGGCGGTAA  
ATAATGGCAAAAATTAACATCCTTAATGCGCCCCCTGGGGCTGGGAAAGACAGTCTCGGC  
TAGATGGTTTCTTTCTATTCGCCGGGTGTTCAATGCCGTATCAATAGCTTTAAAGAGCCA  
ATGTGTGAAGTGGCATTGTCTACCCTGGGTAAAGAGA ACTATCAGCGATTCATGTTGGCT  
TATAATGGCGGAGGGTAAAACGAAAGGCCGCAAACCTTACTGATGAGTATGTCCCCGCGT  
GAGTTCATGATCTGGATTAGCGAGGATGTAATCAAACCTCGATTTCGGCAAGGATTATTC  
GGCGTAAGATTCAACTAGACAATAAATGAGTGTGATGCTTCGGTTGTTTGCATTGATGGT  
GGTTTTCCATATAAAATTATCGCTCTAATCAATGCGGGCAATAAGGTGTTGCTATGCCGC  
TTGCATCGCGACCGGTTACGTTTTGGAGGTAATAGCCGCAACTACAGTCAATTATCCGC  
TATTACCATAAAAACGGATATAGGGAGCACGTTTTCTAATTGACTGAGAACATGCCAATG  
GGAACCGTAGACACGATTATCAGCATGTTCTTTAAATAGCACGAATTGCTAAAAATTGCG  
CAAGGCCATTTGATATAGTGGTCTTATTGAAGAGAAGCAACCAATCAGTCGAATAATCAA  
TGCAAATTAATGAACATAATCAAACACCATGAATCTGACACTTGGCGCGATTTACCATA  
GGGAAGAAGGTGTAACGGGTTTACCCCAACTGTTACGCATGAATACGGCAGTCAATTCT  
TCTTAAACGCTAAAGACGTTTTATCTGAAGATGTTGGCTCTTTCGTGCTTGCAGCGTTTG  
ACAGCATGGAGGAATAAAATGTTCTGGATTCATTCGCCGCAAGGCTTGCTTTAGGTGACT  
GAGGTTGAATTAGAAGATTTACGAGACGGCGAGACGGTAAACATCATTGCGAAGGATTCT  
AAAGGCAAGACGCTTAAAAAGTATGTTTTTAACAATCCTGTTAAGTTTGAAAAACATGAT  
TAAGATGTTTTTAATATTTATCCTGCTTGTGATAATTGGCCATTTTTTTGATTGCCGCTGA  
TTGTGTTCAATTTGGTGGCTCTGTGTTGGGCATGACTGGTTATTACGTTGTGTATAAAGG  
GAATGCATTAGATTAATGGAAAAATGCAGGTACGCGCATTCGTAAAGATATCTAACAGAT  
GGATTTATTCAGCTAAAACGCCTTCCACGTTTAGCGTGTACGGTTAAAGACTGCTCTCG  
CATGGGGTTCGCATCATTGCAGACAGCTATGGATCCGAGATGCTGGAGTATTACGCAAACA  
TGATTGAGAAGACCCTAAGTGTAGGGGGCCAGGCTGAATATAAGTGTTCGCTAGAAGAAG  
AAATTTCTTGTGGTAAGGGGAATTAACATGATTGCTAAAAATAAACTTCACAACCTTTT

AACTACTGGTACTGATTATCAGGTAAGTGAATAGCACAAAAGACCGTTATCTTATATACTG  
TGATACTGGTATCCCATGTGGTTGCGTAAGGATTTTTTCTAAATCGAACACCTCAACAA  
TGCAAAGCGGATCTCGGATGAAGCCTGCGCACTAGCAGAGCGTGCACGAATTTGCGAATT  
CGTAGCAGGGCAGGTTAGAAATTCTTGATTGCCTGATGGCGATCTCTTCAAATCAATGCG  
TGGTGAATGACGGTTGGAATTCTAGATCGCGATATTGAACAATCAGCTTACTATGTAAT  
TGAGAATGCGTAATTAATGCGTTGAGTAACTCAAAGCATAACGAATACGTCAAAGTATT  
AGAGCAACAGCTTGAAGTGCTGCAAGTGGCGGTAGGTGAAAATAAAATGACTCATACAAA  
GGTTGTAATAGCGTTGGCTGATGCTTTGCTTGGCGTTTACCCATGAATGAAGTGCCAAAA  
GCACTTTTTGTTAAGGCTTCTGCGAGGTCATTTGTTAAGGTTTCGTCTTTGAAGCGAAAG  
ATGGAGATTTACAACTGTCTGTGTACACTGGAAAGTTGTTTGTAAAGAGAAAACCTTATT  
TACGCCGGCACTTATGAGATAATCATTGATGAAGTTCGCGTAGTTCCGGCTGATTAAGAT  
AACTAGAAATATTGCGGAGTAAAAGCCGATAAATGGGATAAGGCCGCTTTCTTTCTTGTT  
GTTATTAGCCGCGTCAAGTTTTATGCAATGGAGGAGGCCGGATGGTCACAATTAGCCTAT  
CAGAGGAACAATCGAAAACATTATTGGGTGGCCTTGGCTGTGGAATGGGTAGCGGTAGCG  
AGGCGGTTGTTAACATCAAAGAGGAAGTAGCAAGAGAGCTTTCTACAAGGCTTGAGCATC  
AACTGATGCCAGCCTCAACAAGCGGGGCGTAGTTCGCTGTGTGGAGGCATGGAAACGGCT  
TTAATGAAATAGATGTTGAGAAGTGAAGCGAAAAAACGAGGTGTTAGCATGGTTTACAT  
TCGCTCTTACGGAGTTGGCTAGTTTGGTAACAAACAGCTCCGAAAAATTCACCACAGGCT  
CGATGAAGGAATTCACAGCAACGCGTTTCAGGTGGTGGGGTTCTGGCGTTTGAGTCAGT  
GGAAAACATAAGAAAGTGAGTGGATGGATCGCTAGCAGGTAAAGGATCTGATTGTTGGTGA  
GCTGTCATGCCTGATCGACGAGCTACAACGGACTTGCCAGGGTCGCGGATAACCTATGA  
GCCAGGTTCAACGCTACGGGACTGCTGGAAGGTA AAAACGCTAAGCAACAGCCGTGATAT  
TCTGGACGGCAAATGTAAGGAAAATTGATAGCTTTTAAAGCGCCTCAATCGCATTCTAAG  
AGGCGCATTTTTTGGGAAGGTGATTCTAGGCTTGAATACATAAAAACCGTCGCAGTGGTTC  
GCACAACACCTAGAAGAAGCGTTAGAGCGCGGCGACACTTACCCAGCGTTGCACTTCTTT  
GATATGTTTCAGCTTTAGAAATCAAGCGGACCGTAAAATGTTAGGACTTAATGAGGCTGA  
AGATAACATTGTTAAACGGGCTGGAAAAGAGTACGAGAAGGATCTGAAAGTTGAAGTAAC  
AAGCAACAACATATATGACCATATTGCGGCTGGAATTATCGCACACAACATAACACGACACT  
TTTTACCCTCATCACTCGAACAATGTTTGTATGGCTTGCTGGCTATGTTCTGGTCGATG  
GGGTAAGCCTGTCCAGCATGAATAATAAGCACTTGCATCACTGAAGGTTAACGGCTTGTT  
GTCTGGCTGGTAGATTAACGGCGTGTACATAAGAGCCTCTATAGAGCAAAGCGCAGCGC  
GTTAGCCGTAAAGTCAAATCGGATGGGATTGCCTTGCAAATGACCGTCGAGCGAGCCGTA  
TCCCGAATCACTCAGGAGATTAGTTGATGAAATCCACATTGCTTTTTCAAAGAAGAGTT  
TTACACCCTCGTAACGAACCTCCTGTTATTCGCGTGATGGTTTCAGAAGAAGCTTTTCGCT  
ATTGATGTTCAAACGAATGGTGTACATAATCTCAAACAAGAAGATACAAAGGCGTTCTCA  
TTTCCCAAACACGACATCATCCAGATTATCGAAGAGGAAGTAAATATTGCAGAATAAAGC  
GAGTGCAATGGTAACTACCACATTGAACGTGACCGCAAGAAAACGGGATACAGAAAGCG  
TTCTGCATAAGGCGAGGCGGTTTGAGACAGGATCGGTGCTTTTACGGGAAAATTGCAAGA  
GGATACGCCGGATGTTCTTCAAAGTTAATTTAGCTATCAGGCGCATGGGTGCAATTGCG  
GATCATGCAAGCTGCAATTTGAAAAGGTTGTTAGAGCATGCATAGCCAAAATGCCTGTAA  
GATTTGCTAATGAATATTCTGGAGCAGATTAATAAACGAACGAATATTCAATCAATTATG  
CCACGGCTATATAACTGATGTTTATCGCTGGTTTTGGTTTTTGTGCGATGTTTTGTTT  
TGTTGTTTACCGTCTCTGTTTCGTGGTGTGCTCGTCGAAGAATTAAGAAAACGATCTTGT  
GATCGCGTCTTACATAAAGAAAAGCGATGTTGGGGAAATTACACGAAATTACGAAGAGAT  
TGCTGATGAACTTGCAATTCAGTCACAAGTTTGGAAAGCCTGGAAGCATTAAAGTATATTGA  
TTGATTCAACCCAAAAGATTACCCGCCTTGTCGGGTTTTGTTTGTCTCTGTAATTTAGC  
TATTATCACGCCTCAACAGGAGGATTTTATTAGAGCTAAAAAACAGCAGTGCCAGCGGC  
GGAAAGTCTAACTTTAAAACGTTATGAAATAGGCGAGTATCCGAACTGGTAGGTAGTGA  
GATTGAAAACGCGCAACGCTAACGACGGAACAAGTCATGACCCTGATTGTTTATTATTT  
TGAGTGGGCGGTGCTAAACAGCATTAAAGCGGGCGAAACCGCATCATTTTCAAGGTTGAGT  
GTATCAGCATAACGATTCACAAGCCGCGTATTATTACATGGGAAGGGCTAAAACCTGTTTTG  
CGTTTTTTCCGGCACAGCACTAGCAAAGGGGAAACTTAAACCAGGCTATGATGGTATTAT  
TGGGTTGACTGAATCGGGAATAAAAAGAACAAAAATACCAGTCACCTGCAAACGGAATGTT  
TTACAGCACCATGATCGCAAAGGGCTAAGCATTGATAAAGGCCACACGATCAATAATAG  
CACCAACCGAAAAGAGCAAGATAATACAGAACAAGCCATGAAAACGCAGCCACAGGCCG  
CCTAAGCAAGTTTTAAAGGTGAATGCTATGTTGATTTGGAAAGTTTTTACAAAGCTTGAA  
AAGCTGGCTATTCAGGAATTAGGCACACACGATTTTGTATGATTTTATTAAAGTTGGTTC

ACGATCCAGCAGGGCGAAAAAAGGAATCCTAACTGGCATCACCTTTGTATTGCAAGGGCA  
ATAGATGAAATTATTGAAGGTGTGCGCAAAGATACCATTTTTTAAGCTAACGCCAGGCTCA  
CGCAAAACTGAATTGCGTTCGATCTACTTTCCTCCTTAGTCATATTTGAAATGGAACAAC  
GTGCGAAATCGTATTACTTCTTTCGCTGATACACATGTTGAACGTAACAGCGAGCGTGTG  
CGAGATCGAGTTAACTCGCGAGAATGGCAAGAGTTTCCCCCGCAAAAGCTGGTACAAGC  
ATGGATGACGAATTCCAGAACCTTAATGAGGCTGGCAAAGGTCGCTGGTAACGATTAGT  
AAATCGATTGGAGGTCAGATTACTCGTAGCCTTGGCGGTTACATCACGCCTGGCGTTTAT  
TCCGGTTGTGTGACGCTTGATGATCCAGAATAGCAGGATGAGATGTTTTTGGAGCTTAAG  
AGTAAGCGCGGTCAACTGATCGCAAAGAACCAGTCGATCACGTCGCGCACAGTCAGAA  
ACGTCGATTATCATTATTCAGCAGCGTCTAAACGCGCAGGAAATGACCTGGTTTCTGAAG  
AATGATGGAATGGGTATTGCATTGCTTCAGATATCAATTCCGTCGAGGGTTACGGTGCAA  
TACGGGATATCGCTTCCCTGCTTGCTTACAGTCTCATTTTTGAAGAAGATGTGCTTCCGTCT  
GAATCCCTCGTTATTGACGGCGCGAAGTATTAGTCTTTTTTGGCCTAGCAAGGAGATCATT  
CATGATCTTTAAACGCTACGCGATGCGGATTTTTACAGGTTCCCTTTGTGCTTATCAGCAA  
GAGCCAACTGCGCTTGGGGGTCCCGCGTTTAAACGTTGTATCGCTCTAGTATTAGGAAACC  
AGAGATAAATCAACTATGCCAAAACCGGATCGCTTTGATTATACGTTTATTGCAGCTGCT  
ACTGGTCACAAAGAAGGTGAGCTAACCGACTACAGCGTTCATGTTATTGGGGCATGTCC  
AAAGTCCGTATAAATTTTTTCGACGTTGTGCGCGGAAGATGTGAAGCGCCAATGTTAGAC  
ACGCAGCTAAAAGTGTTTGTTCATCAGTGCTGGAACCGAAACAAAGAATGCGGAAACTTA  
GGTTACATTAACCTGGAACATAAAGTCAGCGGTACACGTTTAGTCCAGATTTTTCCGCAA  
GCATATACGAGAGATATTAGTCCAGTGCAACGACGTAAGACTGAGTAAGGCGCTGCATG  
GACGCAGAGCCAGTGATCAAGAATGGTTATGTTGCATTGCCGGAATCGCATCAGAGGCTC  
GCTGAATTTATGGCGGAGGCGGCGCATTCTCTTGTGATGATAGCCATCCTCATGATGAT  
ATTATTGATAACCTTTTTGATGCGGTTAATATTTGGCTTACCCTTGCAGACAATGAGGTT  
GATAGAATGAAGCGTTTACATGGAATAGCGAAGCGTTGATGTATAAATCAAAGACTGGA  
ATCTTCCGGCCTTTTCATTATGGGGGAATTTATGAGCGACAAGGTAAAGGCCATTACTAA  
GGAAGAGGGCTACGACAAAATTTACAGATCTAATGATGGAACGTATTCGCCAAAGGCTTT  
TTAAATGCAAAGATCGGCATTTAAAGCGTTATCGCAATTTTACGAAGAAGATGGAATGAC  
GCGGCGCATTGTTCGATGTTATTCGCCAAGAAATGGTAACACTTGGTTTTAAGGTTGAGGG  
CGTGACAAATGAAAAGTCGTTTAAATCTTGTGGGATGAATTGCGAATACATGCTGAAAT  
TATTAATGCGCTTTCATGGTCGCGTTTAAATTGGCGGTTCCGCAATGCTGACTATTGTTTC  
TGATAACAAATTGCTGAAAGCAACTGTAAAGTCTGGTGCACAACCTTAAAGATCTTCGCGT  
ATAGCATCGATATCAGATCGCGATGCATGCACGTAAGACTAATGCGCTGAGCGTTCGTTA  
CGGTGAGACAAAACCTGTATAAGACCGCACCCAGGCGGAGATATAACCAGAATTCTTTGATCA  
TTTCTCGCGTATTTGCATCATTGATGGTTAGCGCGTATCGAGTGAGCAACCCAGTCAGAA  
TCATGATTTGAGCGCAACTATTTTAACTAGCGTTTAAATTGAGGCAATGGTGGATTAGAA  
CCACTTCCACGTAATAGCAACGCAATTGCTACGCCGAAGACTACAAGAAGTTTTGAAAGC  
GCGTGATCTGGCTATAATGTGCGACGATGAAGTAAGACGCTATGCGGCGCGTTTGGCGTTT  
GGCTCAGGTTGTGGACAAAAGCGGAGTTGGTAATGCAATTGGTATTGATGCCACCGATGG  
GGAATATGAGGTTCTCAATTCTGAGGTTTCCGGGGTTCCAGAGTTCTTACAGGAAAGGAC  
TTATCGAATTGTTCGCACTAACGGGCATTCATGACATCACCTCAAACCTGAGCACACTGG  
CGGCGTTTGGAGCGAGTGAAAAGACGGCGCTAGTGAAGGTGTATACGTTGATTGATCGCAA  
GCGCGTAAGGTATTACGAGCCGATTCTTGAATACCTTTTGCCGTTTCATGATCTCAGAAAC  
AGAATGGTCTATAGAATGCGAACCCTTAAAGCGTTCAGAGTGATAAGGACAAAGCTGGAAT  
CATGGCGAAGGACGATGAATCTGTTGTTAAATTGAAAGCTGAACACGCAATTACTCTCAA  
AGACACCTGAGACACTTAGCGATCCATTAGTCCAGATCTGTAAATTATGGACAATGACAA  
CATTGAACTGCCGGAGCCGGAAGATTTAGATCCCGGGTTCAGGGCATGAGGGAGGATTGAA  
TAAATGCTGTTTTCCGATATGCCAGAGAGCGACGTTGAAAAGGCGCTTGATGATGTGGCG  
ATTCATATCACTGAAAACAATGCTGTTGTCAGAGGCGGCAATTGCCGGCGTTAGGTTGCTG  
GATTGCGGGTTCGCCGTTAGTACATACAAATACCACACTCGTCAATTTATCAAACCTGGCA  
AAGCAAACAGGAGGCGCAGATAATCGATCCGTTATCATTCTGATTGGTGGCGATCCCGGT  
TACATGAATTCACGTTGGTTCAATTCAAATGCATAACCTGGCGAACACTTATTGAGGCG  
TCCGCAAGGAAATTTGCGGATAATGTGCCTGATTATTGAGATGTGCAACAGCTTTTAAAT  
GAGTTATGGGACCAAGCATAAACAAGAGCGCAGACCCGAAAGCGCCTAAGAAATTATAAG  
GCGTGGGCTAAAACAGGGCGACTGTTTTTGTGGTTTGTGGTATTCTGTGTTAATATCT  
CAACGCGTGGTTGATACCGGAGTTACCCATTACATTTGTCAAACCTTAGGATGATAAGAGG  
GTTAGACCTGACTATGCTAAATTGGACTGGAAACGGAACCTATTGGCAATGTAGCACATA

TTCCTATGGCATGAATATAATTGTCGTTGTAGGGCGCTACCGGTTAGGGAGACAGAGGAA  
GAGGTTTATTCATGAAGAATGTACAACGTTTTGATAGCGTCAGAGTCAACGCGCATTTTG  
ATGCACACGGCTTTTTAGTGGACCGGCTTGTTGTGACGACAATTGGTTTGCTGATTTATC  
AAACACCAGTAGGGCAACGTAGTGAAGTTAGGCGAGCAAGTGAATTGTTTAAAGCTGATA  
GCCTGCCTTGTTACGGAGGCAAGCCGATCACAGTAGGTCACGTCACCCTAACGCCTGAAA  
ATGCGCGTGACGTTGTAGTTGGTACTTGTTAAGGCGCTGGCATTCCAAATGGGATCGGAG  
GTGAATCACCTTTGAACATTTATGCAAATGATGCAATTGAAAGCGCCAAGAGAAAACGAT  
CGGCTGAAATGAGCGTTGGTTATACGTAGATTGATATTGATAAGCCTGGTTATGGATCTA  
ATGAAAATGGTGAATTCATCTTTGAAGAAGATCTAAAAGAAGATGAACAGCCGCCTGAAG  
GATAGGTA AAAATTTGATGCGCTTCAGACAAGCAATAGTGTTAACCATATCGCGTTGGAGT  
CTTAGGGTCCCGCTGGCATGGCGACAGTTAAGCGTCATAGCGAGCAAGAATTCCCGCATG  
ATATCGACTTTAAATTAATAAAAGGGGACGACGTTATGACCAGTAAAATTTAACTTGATA  
GTGCTGTTAAACTTGACGTACGAAAAGAAGTTGCTACTTATATTGAAACCGGGAAAGCAG  
ACGCTAGAGCGGCAAAA ACTAAAGCCGATATCCAGGAAACAGCGCGCGATGCTCTAAATC  
CGAGGTTTGACGGCGTTGCGGCGCAGATTGAAGAAGCAGTGCAAAAAACAACACACACG  
CTGACAAATATGCCGCACTAGTAGCTACCGCTTAAGATATAGGCGTATAATGCGACGGCC  
TAGCAGCCAAAGAAATTCAGATTGCATATGTGAAAGAGGTCATGGGTACTGACATTAGGG  
CAAACGCTGATGCATATATTGATACCGCTTTTGATATCGCAGGAGAATCTGATATAATGG  
CTGCCATCGCATCGCAGTAGCAGGTGATGCAGCTAAAAACAATCACGATGCAGCGGGAT  
CCACTCTTGATCCTTCCGCACGTCTGAATAAAGCTAACCAAGAAGAAAAGATTATGGCTC  
AGATTTAGCAAGTTACCATGCTGCTCCGGCTCGCGCCTTGCCTGGTCAAGTGTCTGACA  
CCTCCGCGTATAACATCGTTGGCTCTTGTGTTTCGTGATGGTGTGCGGATCAACAATTT  
ATGTTGGCGTTGGTGTCAACATGGCGGAGTTAGCGCAAGCGGTGAGAAATTAATCAAGG  
CTATCGGGTAGTCTGGTAATACTTATGGTGTGCTCTTCGATCCA ACTTCCAGACCACGT  
CTAAAGATGGTCGCATGGTTTATGAGGCTGGAAGCTGCATCAACGTAACGACTAAAGGGA  
CCGGTTGGAGGGTTTCTGTAGAATCAGAAGTGCCAGCATTCAAAACACCCATCAAAACTG  
ATAATTCAGAACAGGTGGATTGAACGTCTGGCTCAATTGAAACTACTTGGATCGCAACTG  
GAGACATTACGAAATTGTAAGGTCTAAA ACTCGTTGAGGTCCCACTGGTATAATAATAAG  
GCCGCTTTATTCGACCTTTTTTATATGGTGTTTTTATGTCTGATTACGGTTCTATAATA  
GGTATAGTTGAAAATGGGTGCTCGGTAGATTCAAGCCTTTATAAGATAGACGGCTCCCCG  
TTTATGGATGTGTCAGCCGTGTTTGGTAAGGCCGTATGTGTTGATCGCATAGCTTGCGGT  
TACAAAATAATCCGCCACAATCTTAATTA AAAAATCAAAGCATTACGGAATCGTTACGCGT  
GATTATATGGATTTTTGAAAAGAATCTTACGACGCCGGAGATCCGGTTTACGTAAGA ACT  
CAAGGTGCAATTGCGGTAATCACTCAGGACGAACAAGATATTT CATGGTATAAAGATCCT  
GTTTTGGTTAAAGACAATGGCTGTAATCAACAAGTGGATTTCTACCAGTTGGTTTTTT  
TCTGATGTATACGTTAGATATTCACACGGATATATCTCTCTTTCAGTT CAGTTGTGCGGT  
GCTAGCGAAAAAAACTTTGAGCGTTTATCAAAAAATGCGGTATTACAGCCCTTATTAGG  
ACGGCTTTTCTATGCGGGGGAATATTATGTCTAAAGAAATGAAATATAATGAGTTTGAAG  
CTAACGTGATGTACAACCAGATGCAGTTTCGCGGCGCTAAAACGACGCATCTGAGACGG  
GTATTCGGACGTCTCAAGAGCTTTTTAAACTTAAGGCTCAGCTCTCTGAGAAAGAATAAC  
CGCCAGGTTCCGAGACGCTTATATTCCCTGTGAGGTTGGA ACTTTATGATAAAGATAAAA  
CCTTTGAATATCATGCCTTAGACAAAGTAGGACTCGCAAAAATCATCTCTGATTCCACTG  
TTGGTCTGTCAATTCTTGACGCGCTGATGACTTCGTAATTAGGTAAAGTTTTCCCCCTCG  
GCAATGCGTTCCTTATTTCCATTGACGAAAGCAAAGCAGGTCAACGCACCGGCAAGAGCC  
TATCAACCCGGAAGGCCAACGTGCGCACAGACTGTGCGTGATCAGCTTGTATGTCACCTGG  
TTTTCTAAGGCTCTAAACCTCATAAAAATTTTCAGCGTGCTGAGCTTCCAAACCAGACAA  
CTTTCAACACCGCAGGTTGGA ACTACGCCGAGGTCTCTGGCAACAAGGCGGAAACCGCAC  
ACGATGAACTGGAGCAAGCTATTGAAAAAATCGTAACGCTGATTAACGACCAGACTCGCG  
GTAATATTATCCTGATTCGCGAGTCAATGCGTAAAGTTCTGATGGTTCGGATGTCAGAAT  
CCACCATGAGCTATCTTGATTATGTTAAGGAGCAGAGTGGGGGTGACACTTTCGAATCCA  
TGTCCGAGCTTGTGGATATCGACGGTTCAGGCACTAAAGCGGCGCCGTTTACGAAAAAG  
AACCGATAAACATTAGCATTGTGATTCCAGAAGCGTTTAAACATGCTGCCACTCAACCTA  
AAGACCTGCATTTCAAATTGCCTTGACCTTTCAATGAACTTGCTGGCGATTTATCGTT  
CGTTGTGCTTGTCTGATTAAAGGTTTTGTAGTACGCTGATACTTCAATTAATATAGGG  
AGCCTTTAAAGGTTCCGTTTTTAATCTCTGGAGAAAAGCTAATGGCTAAAGAAAAGAAG  
TTACAGTGCTAAACACTGCCGTTGAACTGATTATTATTGATCGGGATGATGTTATGACAG  
ATAACGAAATTACAGTTTCGGAAAACGTGTTAGAACGGCACCGTCCAAAATCGCTGCATG

CCCAGGGCAAGTTAACCGTAAAAGAGAACAGAGAGCTAAGCGATAAGATCATTGGAGCGG  
CCAACGAAAACCTGCAAGCCGAATCCATCCGATGGCAAAGGAAGGCACAGCTTGAGAAAG  
GCGGCGAGGATTAATTAGAAAGGGCGCTCATGTAGCGCCTTTTTTATTATGGAGAATACA  
ACATGAATGATGTCGAGATCCTAGAGCAAATTTATAAAAATCGCGACAGCATTCAAGAAAG  
TAGATCCAGAATTGATTCATGCATGGATTGAACAGGCTACAGCTTCCGATTGCCAAAAGG  
ATTTGCAAGACATATATTTCCGCGCTGGTGTCTTTGACACTTTACCCCTTATGACTCCTG  
ACTGAGCTCTGAAAGGCTAAAGTTAGAGCGTAGAAAGCGTCTCGCACCGTATAGAGTCAT  
TTGCCCTGACTTGTAAGATTATGCAAGCGTTCAGCAAAGTTAGCCACCACACAAGGGGTA  
ACTCGTTGCGCCAACTCCGTGCAGTAAAATGTACGAAGTCTCAACAAGAAAAAAGACG  
TAGGATTTGGCCTTACACCTGCACTTCATCGGAGGTGCTCTCGATGAATTATGAACAAAT  
CAGTTCTATGGAATCGGCTGGAACATAATTTTTGTATAGTTGGAACGGGTGAATTTGATTG  
CATTACTTGACTTGGAAGCGTTGACATTGTTGGCGGTATTCAGGATGAAAAACCCGAAAT  
AAAGGTGAAGATTAAGGTCTTGTGAGAGCACCACGGACGCGAGAAGTTGACGGAGAGCT  
AATTAGAGGTACCGACTAGTTAGGCGTTTTTAATGCTGAGGTAGAGCGTAAAAACGTATA  
TCAGATTGTTAAAGACGGCGAGCGTTATATTATGGTTGAAACAAGACCAACCAGAACAAC  
ATGCATTACCGTTTCTTACCGTCCAGTAATGGGGAGGGTTGCGGTTTCATGGCTAATTATA  
CGATGCGCTAATTTCAATTGAAATGTTGACACATGGCTCAAGTAAGTAGCAAGGGGATTGA  
ATGACGTGATTGAGCTTTTTGGTGAAAAGGTTTACGGCGCATTAGTTGATATGGCGCCAA  
TGGACACAGGACGATTAAGGCAATATTCAGATCACACCAAACACGCCGCTCTTCTCG  
CGCTCACTCAATATGATCCTGATGGGGGAAAAATAAAGGCGAAAGATCGCAGGACGATTT  
AAGCTTAATTGCATGGCGGCGGCGCTATTAATCAGTATACTGTACAAATATGCAGATTT  
ACCCTAATGCTTTTTGAATATGAACATTCGAAACATTTGCCAGCGTGTGTATTTGGTATCG  
TTGAGATCCGGTTGGGCTCTTACTTGACGGAAGCGATAAGGGAGGATAGAAAGAACAATG  
CAGTATGGGTTATCTGTCGCGCAAGAATGGCGCTGTATCAAGAATATGAAAACGAATAT  
ATGATTGATTATGAAAACGTTGAAGTCCGCCACCAAAAGGCGGAGGCATTTGGCTGAAA  
TATAACTACACAGAAGCAGATACAATAATACATGATCTTAAACGGAAATGCATTAGCTAT  
ATTGGAATGGTTCAGATCGGAATTGAATTCCCACCAGGATGAGGAATTGATACGGCTCGC  
AAGCTGGCAAAAATCTTGCTGATTTCAATTGAAGGTCGTAAAATGCTTTCGAATGGCTAT  
GTTTCAGCAGGTCCAAAACGGCATCAAGTTCAGAAATCAGAATCAAGCTGGTTTTAGCCA  
TCGCGTTTTCTATCTACGTTTTGAAGGTTAACAAGGGGGCTATTATGCACTTGCCTATCG  
TAGCACAGATTTTTATTGAGTAAGCTCGCGCACAGTCGGTAAGCCCACCAACGTAAGTA  
CTGCCACCAAACCTGAATTCACGCTTGAAAGCGGCGGGTATGCATTCAATAAAGGTGATT  
ACATTATGGTTACCGCATCAAGTTGGGGTAAATTGATTGGTTCGCGTTTGACGGGTGTCGG  
ATGTTAAATCAACAAAGGTTACTGTTGACGGTATCGTTCGCAACCGATACTGACGTTTTTC  
ACGACCGCTCTGTAAGTGTGAGATTTGCAAAAATCAACGGTTGGACAGAGATTCATGCA  
TACAGGACATGGGGCAGGACGGCGACGAGCGGCAGTATTACAATTACCAATGCTTAAACG  
GTGACCAGGAGCCGCAGTTACCAACCTATAAAAGTGCGGTATCACTGACTACCACATTTT  
CGCATGTATACGATAACCCGATTTATCCGCTCGTGCCTAACGCTGACGAATCCGGCGCCG  
TTAAAGGATTTTGCATGTATGTTCCAACAGCGTAAGAAATGCGCCTTTGGGCTGGTGTGC  
TTTCCTTCAACGAGATCCCACAAACGGCGGTAGCCGAAATGGAAACCGTTTCTTTGTGCGG  
TATGCGTGAAATGTCGCTTTACTTTTCATCCCTGCTAACCATGAATAATATGAAGGGGCGC  
ATTGCGTCCCGTATTTATCTGATGTAATATCTCATGACTGTTTAAACCACTCAGGAGATAT  
TACAATGGCTGAAATAAAATTGACTCTTCCCCGCTTCCAGATTTCAAACCTTCGAGTCAA  
ATTTGTATTGCGGAATGGTAAGTTGCAGAAAATTGTCTTACCGTTTAAGCATAAAAATGC  
CAGCGAGATTCAAGAGCTTTACCAGAAAGAAGCTATTAAGATCCTGAATTCCTCATGAA  
TGTTGCCGTTGGTTCGGACCTGGAATAAGAATCACCGAAGAAAACGCTCAAATGTTAGT  
TGATTATCATCCTGGCTCGGGGCTGAATCTTATGGGATGTTATTTAAGTCCGCTGGCAAG  
GCGACGCGTAAAAGACTAAATCGGGTGTTTTATCTCTATTACCTGAAACCGCCAACAGCT  
GCAGAATTGCAAGCCGTAGGATTAACGCGCGCAGACTATAAAGGAGAAGCTCCGCCAGAG  
GTCATCTTTGGTGAAAGTCTCATGCAATCATGGGATATATTTTGGCGGATGTGTACACAG  
TGGCGTTGTGCTCGCGATGGTGTCTTGCATTTTATTATAATGATTTGCCTATGTTATTC  
AGAATCTATAAACTAGACGATGAAGAACAGGCCTTAAGTGACTTGCGCATAATGGAACCA  
AAAGCACTGGGAATGATGCAAGCAAATAACATATAAAGCGCCTACGGGCGAGTTTTTTAT  
GAGGGTCAAATATTTGGCTGAACTATTTGCAGGTTTAAACACTTGACGTTAACGTCTAGCA  
TTTACACAGGGCTGTGAAGTCATTGCATGACTTGTTAAAAATCAAACGACGAAGGAAAGA  
AAGGCGTTGATAGCTTTGTTGATGAGGGAGAAATTGCAATGCAAAGAGCAAAAACAATTAG  
CTGAAGAATTGGCGATACAGAGCCGTGAACTAAAAAGCATTACAGGACACTGTGGCTCCGA



CAGCGGCTCATAAGCGCAAGCTAATCCAGGCCTCAAGTGATCTTGATAAGCTATGGCAAC  
AGGCAACTGTTACCGATGAAACTTTTTTCCAGATGGGGAGTATGCAGGAAACTCGGATCA  
TTAAGCTGGACCGTACTACTAAGGCGTTAACGGAAGAAGGCCTCGCAGAACTTCAGGAAT  
CAAAGTCAAAGAGAACGCAGCTTTAGCCGGTAAAACCTTCCCTCCCGATCTGGACACGC  
AAACCCCGCTCTTGGAACAACATAAGCCGGATTGCTGCAAATGAAAGCGGCGCACCTTG  
GCGTCAGTGCTCAGGCGGCGTTATTTCTCGCACAGTTTAAAGCGCAAGTAAAACCGATGA  
AGTTAGCCTGAATGACCGCGGGGCAATATTACCAGGCCATGCGAATGCTTCCCGCTCATA  
TCCCTTACGTAGTAGCGTCGCTGGCTTCCGGTATGCCTGTTTGGTTGGTTGCAATCCAGC  
AGGGTGGACAGATTAAGATTCTTTCGGCAGTGTGCTAATACGTTTAAAGCGCTGATGT  
CGTTCCTGAATGCGACAAACGTTGGCCTTGTCGCATGAGCCGATTCAATGGGTGCTCTTG  
TTAAGGCTGGCTATGATGCGTATAAATCGCAACGTGACTTGCCGGAGGCGTTGGTGGTGA  
CTTGTGGATATCCTGGCACAAGCGGCGCACTGTTTCGATAGGCTGGCGCGGGACATTAATT  
ACAGCACTGATGCGTCTATAGGAAACATTCGATACACCTCTACAGAGCTGGCAAAAATCCG  
GTAAGTTCATGATTAATCAGATTAATCAATCACGGAGACTACCGCTCAGTGGACAACCG  
TAACTGGTGAATCAAGCGACAAGATAACCCATTCCTTTACTAAGAGTGCGCGCGATCGGG  
TTAAAGGTCTTGCAGAGCTGAACGAGCAGTTCAACTTTTTTAAGCGAAGGGCAGTCAATTT  
TTATTGCAGGCCTGGAGTAAACGACAGGCAAAAACGGAAGCGGTAATGGCGGCGAACAAGT  
TATTTGCAGATGTTATGGATCTGAGATTAGCTAAACTGGCATAATCCGCAAGGTCATTAG  
AAAAGATGTGGGCGAACATTAATATATTCGAGTCAGATGGATGGGGTTCGGCTGGGGATC  
ATACGATGGCGGCGCTTAACCTGATTATTGACGTTGTAGCCGGAACCAAGTGAAGTGGTTC  
GTTACTTGCTTAATCAGGGTGCTATCCTCATTGGTGAGTTTATCGTGTCTGCAACTAAGC  
CTATGCAAAAATAACCTGGTCTTGATGGAGTTTGTGATTCAGTAATTGCACAGCAGCAAC  
AGATTATTTATAATTCAATAGAGCAAAAACAAGGAGTTATTAAGTCTATTGCCGAACGTC  
ACGATAGTGTGAGAAAAGGCGATCAAGGTCACATTGACATGATGAAAACGCGTGCGGCAG  
ATGACCAGCAATATCCTGCTAAAACAAGGAGAATATCAGGAAGGAAGCCGAGGAATTAG  
CCGAAGGCGATAAAAAGAAAAATGCTGAAAAAGTTTTAGTATCGTCTGGCGCTGAGCTGG  
AAGAACAATACCACCGTGATATCCCGCCTTAAGAAAGTCAATTTAGAGTTTTGAGAGAGC  
ATAAGACGATCACTGATACCATAAGCCAGCAACGTAGATCTTTATGGGCAGAACAAAGCTA  
AAATTCAGACTTTGCATGTAGCCTCAACAAAGCGGCAACTGACTGATGAAGAAAAAAGCA  
TTTTAGACAACCAAGATAAGATCCTGGCGACGGCTGAACAAATAGCCCTTTTAGGGCGATC  
AAATTGTTGAACAAATGCGCCTTAATCAGTTGCAAGATAGCGACATCAAGTTTATCCGGC  
AGCAGAAGGGAGCAATGGAAGCACAAGCAAAAACCAGAGGGTTAAGCGCGCGGGTAGCAG  
TAAGAGAGGCGGCACGTGCACCGGTTGACTCTGAATATCTCGCTAAGGGAGGACAGAAAG  
AAGATCCGCAGCCTAAAGCCATGACGGATGCCTTAGACAACCGATATAAAGAGGAAGATG  
CCAAACGAGATGATTGGTCGTCTGGCGCTATGGATCCCTTTGTGGACTATGCCGAGGAAG  
CAATGAACATGTATGATAATATCGCTAACATAGCCAGCCAGGCGCTCAACGGCCTAGCGC  
AGAAACTGGCTGACTTTTTGACTATTGGATAAGCTAACTTAGAAGACTTTGGAAAATCGA  
TCACTAGCCTAATAGTGCAGATGATCTCAAAGATGATTATCTTCATTAGCATTTCGGTA  
TGATGTGCGGCCCAACCAGGGCGCGTAGGAGCCTTATAAGCGGTGCTAGTTTTGCTGGGG  
GCGGTTATACTGGCGAGGGTGGCAAATATGATCGGGGTGGCTTTGTTTCATACAGGTGACT  
TTGTTTCCCCCAAAGGGGCAACGCAAAGGATCGGAGCTAAAACCTGTATCGCATGATGC  
GTGGTCATGCTAACGGCGGTCCAGTAGGAAGCCTGACCACCGGCGGCGCTAGGATCAGTC  
GCGGCGCATCACAATTTGCGTTTGGTGATATCAACGTTAGCATTGACAACGGTCAATATC  
CAAAAGGGATGAAAACCTTATATTAAGATGATTTTCACCGATATGATTCAAGGTTTCATGCT  
GGCAAGACGAAGAGGTTTATTACTTTGTTTCATGGCAGGGCTTAATGTTATATGAATTTAC  
TTGCTCTATGTAGATTCAGAACGGCGGCGGTGTAATGACAACCACCAATAACGACAGGGA  
TGTGGTTTTTGGGAACGCTTATCGCCAAAAGGCAACTTCTGGATTTAACACGGAGCAGAG  
GGAGTTGTCTAATGTTTACGCTGGCACCGATTATAAAAAATTGAATGCCTTCATGACGGA  
TCACGGATTAATGCCTTTCTTGTGGAGGATACCGGATGGTGATTTAGGTTTGTTTACGGT  
TAAAGTCGGAACGGTAGGGCTAAGGCCAATAACCACCACCGTTCAGGAAGTCAAAGCTAC  
ATTTACCGCAGAATGTCCCTCCATGCGATAAATCAAAGCCGCTATCGAGCGGCTTTTTTTA  
TTGTTTCTATAATGGTGCTTTATCCGAGGGCATTGAATATGGCTGAAAAACAGATCAAAA  
AGACTTTCGTCAATTGTCTGCCATCGCTTTTCCCTGGTAAAATAATTCCGCTTGTAGTGG  
TGGTCGGCACAACTGTGGTGCGCAGGTTTACCGCTTTCATTCTGGCAATATCGCGTACA  
CTCCAGAGGAATTAATGCAAGGGCTTGATACTGGAATATCCCTCCGAAAGATCTTAAT  
TTCGTGGCTAGGTTTACGGGGCGCGGCTTTACGGAGTAAGGGTTTTGGCTTTACAAGTG  
ACGGAACGGCAGCGAAACCACAATTAGCGCTTTCAAATTTGGATAGCCGATTATGTGCAG

TAATTAGATCATTATGGGAGTGATGCAAATCAAACCTGACAGTTTGAGTTACATCAGGTG  
ATTTAATTAATGAAGAATTAACCGTGGAGGACGGCGAATATAGAAAGTTTGTATTATA  
ATGTGCGTCCAAATTTTGTCTAACCCAGACAGTTGGACGGTTTGAATTAACATCACCTTATG  
GAACGGATGATATTATGATCCCCCAGACTCACGCAAAGCATTGTATTGAGCGCAAA  
GGGATGGTATAGAAGCGGGAAAGGTTGCGGATATAACGGATCGGCAATGTTCTATAATG  
ACGATAATCCGGTAGGATATACAAGCAAGGATTTTTGCGCCGGAACAGTGACAGCCTGGA  
AATTGCGCTTTGGCGAACTAAAAGAATTACATTTTCGGCGGTAGCGCGGTTACATCAGTAT  
TGAGTAAAAAATAATGATTAACCTTTAGAATTAAGTTGAACTTATGCGCCATGCCATGA  
CGTTTACCCTAATGAATGTGGCGGCCTTGTAACCCAAAACCCACGCGAACGGAACCTATCT  
CCGGATCGACAATGTACGCCAGATGCCGGA AAAACATTCTGGAATGGACGCTGAACAATA  
TGCGGACGTTGAGGACGGCGCCTCTGATATCCTAGCAGAACCTCACAGCCACACAGGGGT  
AGGGGGAACAACAATCCCTATCGCACCTATTTGTGGATGTGTGATGAAGCTTGTCTTTC  
TTGGGTTATCTTTTCGGTAGCAGAAGCAAACGTCAGAATCATAAAGCCACAATCGCGGCC  
TTTGATTGGTTGCCCTTGGTTCGCTTGGCGCGGCTGATTGTGGGGGACTTCTTTTGGCCAG  
GCATAAAGAGCAGGGCGTGATCCTGAATGATTTACAAAGCCTTATCAATGGTGGAAACA  
TGAGTTAGGTGAAAACCTATATCAAGAGAATTATTGAAAAGAGGGCTTTGTTGAAACGGG  
CGAACACCCAAAACACGGAGACATTAACATAATGCAGCTTCAACTGCCAGTATGGCACCA  
TGCCGGAATTTATTAAGACAACAATGAACTATTGCATCATCCATTCGGCAAGTGGTCGCG  
GGTTGATTGAAATTCTGGATCGTATCAGGAACACTCACAAATGCAACGCAGACATAAGGA  
TCTTAAAAATGATTAATGTGATTTACGTAATAAAAATCTGGCTCATTGGGTGCGCGCTTTT  
GTCTTTTCTTACTTTTGCTATTGATAGTTGGCCTGAATGCGCAAGGGCATTATAAAGCG  
AGGTTGAAGGATTATAAGGATTGATGAAAAGTGAAATCGGATAAAAAGATAAAAATTTGCAA  
TTTTCGTTGATGATAAAAATCTTTGCCTGAATACTGTGAGAGACTGGCGTTGCACTCGTA  
AGGTTAGAATCGTACGAGTTCCAACCGTATTAATAATCTGGAGGCCTATTTCAAGTTGTGT  
TAGGAGCTGTAATTATAGTAGCTGCATTCTATACTGGTAGCGTTTCAATTGGTGCCTTGC  
GGGCTCTTTCTTCATCAGCTCTTATGATGGGCGGGGCTATAATTCATGGCGGAGTAATGC  
AGATGAGTAGCCACGACTGGGAGCCCTAAGAATGGAGAGTTAAAGCGCGGAGAATCAAC  
CATCATCTGCGTTTGGTGGTGCTGTTAATACTACGGCGGCCGTTATCCGGAATGTTTAC  
CTTATGGATATAGAACGGTAGGCGGCGCTCTATTCAGAGATGGCTCATACGCAGATGATA  
AACTTTAATAATATAAACCCCGCCGTTCCGCGGGTTTTTTGTTACATGTACAACGGCAGCA  
CGTTTAAATAGCACAAACAGGTTGACAGCTATGATCAAAGCAATGATAACTGGCAGTGAGT  
GCGGTTCTGCAAAGCCTCATACACCTGTTGAAATCGAAGGTAACCTAATTTCTATCAACA  
GGAGCAGAATTCTTTTAGCCGTTTGTGCTGGTGAAGTTGATCCAAAGTTTTTCATTGAAAG  
ATTAATATTTTATGACGTTCCGGTTATGAATTAGGATTGTTCACTAAACTTTCAAATTT  
TTGAGGCAGAATTCAGACCAGGGACGCAAACGCAGGATTATATTCAGGGCTTTACTGATA  
CAGCCAGCAAAGTTTCTGCTGCCCGCCTCTGACAGCCGCAGCGCCGTATATTATGTCTG  
TTATCCATAAGATCCTTTCTGCGATCCGTATTATAATTTAATGTCTCGCGGGGTTAGTC  
AGGAAGATAACGGAAATCTAACAGGTGTACGCGTTGAATATGCGGTTGATATTGGTGTG  
TTGGTGCTGATTAGAAAGAGGTTTTGCATGCTGTAACCTGAAGGTAACAATGAGCGGTT  
ACGACAGAAGGCGAAGAGTTGATTTACCTGCTTTTAAATGAGTGTGTCTGATTGCGCGCCC  
GACGCCTTACAGAAAGCACGTCAGCAAGGGTAACGGATCTGATTATTATGCAAAGCTCTG  
CGAACGTTGATAGACGCTAAATTTCCCTTACCCACTGACTAGTTTACTACTACGTTGAATATG  
ATAGAGAATTATTCCCTAATGCGTTACCGAATAACCGCATCAAAAAGAAATGGAACATCA  
TAAATGTTACGTGCAATTACGAACCGATTAGCCGCTTCTATTCAGGGGTATGGGATGGAC  
TCTGGAAGAGTGCCTGGTCTAATAATCCGGCTTTTGTACTATATGATTTAACAACCAATC  
CGCGTTATGGACTCGATCAAATAGAGTCCGGCGCGGCGCTTGATAATTGGAGCATTACG  
CATATGCGCAACATTGCGATCAGATGGATCCAGACGGTAAAGGCTGAACCGAGCCGCAAT  
ATCTTGGGGACGTTGTACTCCAGAGCTAAGTAGAAGCGTATCAGCTAGAACGTGATATTT  
GATCCATCTTCCGTAGCATAAGCCTTTTGAATGGTGAAGAGCGTTGCAATCGTGATCGATG  
AGCCTAGCGATGCGTCATACTTACTAATGACAACGGGGTTAACGGTGAATTTACTA  
ACACGTTTGCCAAGGAAAAAAGCATGTACACGGAATGCAATGTGAATTTCCGCCGACGAAC  
TAAACATGTATCAACAGGATCTTGAGGGAGTTTTTCGATACAGAGGCCGCGTTACGCTTTG  
GCTATCACCGAACATCTATTACTCCGACTGGAGGCACACGACCTAGAGAAGCCAACCGCC  
GTGGACTCTGGATTATGAGAACCAACGTC AAGGGCACACGGTAAACTTTGCTACAGGTC  
TGGAAGGTATGATCCCAACCGTAGGTCATGTGGTTCGTTGCATCTGATAACTTGTGGTCCA  
GGCCTCTAACGCTGAATCTATCATAGCGCTTGTGAGTTTTCGCGGGTTTAAAGTGTTCA  
CGCCGTTTGGAGCTAGACGCAAGAGCAGGTGATCGCATTCTGGTAAATAAGCCGGATGGTA

ACCCAGTTGGTCGAATCATTGCCCTTTGAGTGATAAGGGTTAAACGCTAACGCTAAACA  
TGACTTTTGGTTTTGACGTTACACCGGACACCCTTTTTGCAATTGAGCGGACCGATACTG  
CACAGCAACGCTGTGTTGAGACCGGAATCACTAAGGGCGCTGGTGATGAAGAATTTCCG  
ACAACTTTACAGCTGTTGATTACGATCCGAACAAATGCGATGTAATTGATTTTGGCGTAA  
GCATTGATGACAGTCCGACTTGAATCGCCAGCCTGACATTTTGCTAGCACTGCAAAACG  
TCTAGATCGAATCTTATTTCGCGTGTGTGCCAGGCGCGGGCGTTCGAAACAATGCATGTTT  
CAGGGGATAAAGTTCGAATATGCAAGCATTATTAATGCAGTGGAGAAAAGACCATGGTA  
CTTGGAACAGCACGCCGCGAACAGCCTGCAACGAAACGGAAGTTGAAGGAAATTATGCTG  
CTCACTATCACGTAAGGCTTAGATCTGTTGCAGCGAATGGTTCAGCGTATGGATGGTCTG  
CGATCGTAAATGCAGGATTAACCCGAAACGAGGGAGAGCCGGAAGAGCCCATTAACCTTA  
CAACGTCGGACAATGAAGTTTTCGGAATAGTCGTAAAGTAGTGTATGCCAGAAGAAAGCG  
GAGACAGGGCCTTAATAGAGTTGCAGCATGCGCCAAACGGTTCTGATGATCATCCCATG  
TTGATGAAGGAACGCTCTAACGCTGGTACCGTTCCCGCAACATGAGTATTGGCATTCAA  
TACTGCCAGCGGATCTTGTGTTTGTACAAGGCAAGGGCATTGAGAAAATCGTTAACG  
TTTCGGATTGGACTGATTTTGTGCGCGGCATGGCTTCTGTGATACGAGCATTAACTCGG  
ATCAGGTTAAGGTCTATATTGAACATTCTGATGGCTATAAGTGTGTTGATGGAAAACGCGA  
TAAAGACCATTGATAAGATACACAGCACACGGGACCAGTGATTGAAAACGCAATAGCTC  
ATGATCGAGGTGTTTCGACGTATGACAGTTGAAAACCGAAAGCGTAAAGCGAAGTTCTTGC  
AATCGTTGCAACTCATTGCAGACGAATGAGAAGCCAGGGTAACCCAGGTCCTCAAACGA  
GTGCGCAATTTGCCAAGAAATTAAGGGCTCAAATAGCGGGGTGAGAGGAGTGATTGCTA  
ACAGCATTGCGACCATTAGCCAAAGGATTGTTACAGCTTACAGATACTTTTGAGAGTGAAA  
TTGATGGGTTTAAACCAGGATATCAGAGCGTATATAACTGATGTTAACCCGGCAATCACTA  
ATGAAGCGGATGAGCAAGCGTCAGCGGATAGGGCGTTATCAACACATACTGGAGTTACGC  
AATTAGCAGAGAATCAGAACTTGATCCTTGTGTTAATGCAGATAGCGTTGGTGCCATGT  
ACGGCGTTCAGTTTGAATCAGGTATAACGGGCAGGAATATAGCGCAGGTTTGGCGCTAT  
CTCTTGTGCGCTGATGGTGGCGAAGTTAAATCACAATTCCTGTTTGTGATGCAGGACGAATCG  
CGACCATCTACAATGCTCAAAGTTCAGCCTTACAGTGCCCTTTCTTGTGAAAATAATC  
AGGTGTCTATCAATAGTTTGTGTTGTTAAAATGGTCTATCGGTAACGCACAGATTGATA  
CTTGCATCAACTATAACAACAGGCAGAGCGGGTTTGGAGGATGGGCGATTAACAAAGAGT  
GTTATGCAGACTTTAACGAGATAACGGTAAGGCGTACTGTTTTCGTAAATGCCGGTTCGA  
TCACTGGTAACGTCTTCGCTACTGATGGTTGGTTCACGGGTACTGTTGACGCAGAGAAAA  
TAGAGGTTTAGGTTGCAAAGGCTGTCGTCGTTCCGCTTAATGGATGGGTTCTATTTCCAG  
CGGTGAACTACAACCCACGTCTTGTGATCCCTTATGTTGGGATTCTGGGGTACAAATATC  
CAGGTGGTACATCGGGCAGAGGTAAGTGTGTTGGGTTGATTCAACATATGGCGGGCACCTTG  
CTAACGAGCAAGCATCTGTAATGCGTGGCTGATCAAGAGGTTATGTACTGTGCGCCAGAAC  
TTAACGCAACCACGCTCTCATATGGGGGAGATCTAAACCACGCAAACGCAGTACCGGTCT  
TTACAGTTCTGCTATTCAAATCATAAAAGTAGGAACTCAATGCCCTGGCTTAACGGTCG  
GGGCATGTAGTTTTCTTTCTTCCACTATGTTTACAACCGAATGAGGCGTAAAATTGAAA  
ACGTCTTAATAACAAAAGAACATTTTCAATATCTATATAATACATACTTAGAGTTAA  
TTATTAATATATATATCTATATGTATCCTTATTGTTTCCATTGTTCTATATGGTTTGTGG  
TGTTTGTGTTTCTATTCGTTGATGGTTATATATCACATGGTATCTATATATATATTG  
TATGCAGTGTCAATGCGTGAAAAATGGCATACAAAAACAACAATTGGTAGAATGATAAAC  
TTACGATGTGATTTTGTGTTTCAATGCTAGTTGTAACGTATTCAAATCAAAAAGAATACC  
TAAATCTTCTTGACTACATGAAACAAAGACATATAATGCAGCCATAACCAACGAGAGGATG  
ACAAAATGAGCGATTTTAAAGTTTACTCTTATGACCCGTTAACCAATTAATGATATCACT  
ATCATTAACTTGGGCGACGGACTACGTTAGCGGTTCAAGCCTGGTAGAAATCATTGCCA  
GTTGTTCCGGCAGCAGGGAAATACAGACCACGCGAGGAAATCAAAGCGCCTCTTTTCGGTA  
CGTAATCGTATACAATCATTAAAAGAAGTGTATTGTTAGCTAAAGAGTACGGACGACCGC  
CAGCGTCGGATGATTACGACAAATTAATCACAGGCCAAACGGCATTGGCCAGCAAGTTAC  
AATCTTTTGGCCTGACTGGTACGAGCGGTAAAAGTTATCCAGACCTGATAATAAAGATGG  
TTGATTGTGGTGACGATTTTAAAGGTACATTGGCTTATTGAAATGATCGCAGAGAGCCAGG  
CGCGAGCGGATAACGTTGAATTGTTTCCGGCTAAATCTTACTACGCTTTCGTTATCATGC  
GCCGCGTAGTGGAAGACATCACGGAGCACAACGCTTGCATGAATAGCCCAACCGGACAAC  
GCGAGCTAGCAATTTTCGGCATTATCAAAGGCGTGAAAGTAAAAGTAAAGGATTGCCAAG  
TTGCTATTTCCAAAGATGTGCTTGAACAGTGATTTCCGGCTATGATGGTGATTGTAATC  
CGGGATATGAATCCACGCGATTTGATGAAGCGTTTTTGTATCACGGATGATATAACGACGT  
GTCGCGTTAACCCGTCAGACTTTGCCAGGCTGGCTTTCAATCATGGCTACTCCAAGAAAA

TGCCATTGCCGCATGACCTATTCAAGAAAGTGTATCAAGCAGAAACAGCCCCCGTAGACG  
TCTGTTTGTCTCCGGAGGATAAAACGGAGCCTTCTTTACGGGTTGCATACCCGATGACGG  
ATGAACAATTGAAGTTCGGACGGCTTCAAACATCAGTGAGCGAAACCAGTTTGAAGAAT  
GCCAGGCAAATGACAGTTGGCCTTCTTACACAAACGGAGAGCCTGAAAATGATCTTCAAG  
GACCTAATTGGGATCGTCGTCAATACAAAGGTTTGTATAAAATTGCTCTATATGCTAAAA  
AAGCCATTGATGCGTGGTATACTCGACGCATCAACCAACGAGAGGGAGAAAATAAAAAAT  
GGAACAGCAACTCAATCAACAAGAAATTCAAGATCTGCGCGATCACGTAGGCGGATTTGT  
AAACGCAGTACGAATTATGCAACGCCACCGCGCACGCGTAATTGATCCAATCGGATCACC  
GGAAACAATTGAAAATGTCCGACAGGGTGCATATTCGATTCATAGCGTCATGTTAATGGG  
TCTGCAAATGGAAAATAATAAAGACCATCGCAAGATGCTTCATCAGGCAAGTGAAATCAT  
GATCCACCATTTGATTGATTATAACAATGAGAACGAAGAAGAGCATTATTTAACACTGCG  
GCGCAAGCGGCCATTATTAACCGGAGTCAATGAAATGAAATTTTCCGAGCAAAACGCAA  
AGGTACTTAAGGCATTGTTTGGGGCGCTTCGATTATTCACCAAAGTAAAAAAGGGTATGC  
AAAACGCGCACCTGAAAATAAATATGTAACCCCTTGAGAGTGTCTTGCTGCTATCTTGC  
CTGGCTTTAATGATAAGGATTTATTCCTTACTCAAGATCAGAAAAGTGTGCGAAGATTCGA  
AATCAAGCACGGATTTAACTCGCTTCATTCACCTTGAATCAAATGAATGGGTTGAATAGA  
GTTTCACGTAACCAACGCAGAAATTACAACCACAAGGCGGGCGGTTCAACGATCAGCTATG  
CCCGACGTTATGCTGTTTGGACGGCACTTGGCCTGGCAACGGCTGACGATGACGCAAACG  
ATGCCACCAAAAACGCGCAAGATTGGAATAAAGATCTTGATGCTTGCATAACCTTCCAT  
ACTTGCAAGAGACGTTTAAACTCCTTAGAAGCAATCTGACGCCGCAACCGCCGAAACA  
TGAAAGACCAATACGACAAGCGGAAAGCTAATATGGAATCGGAAAGGCTCGCGGCTTTA  
ATTCGCCTGAACAAGCCGCGAATGTTGCTAAGGATGAAAAGCTTGATAAGGAACCGCCAG  
ACTAAGTAAAATCTTAGTCTATCACTGTATTTGAATAATAATTTGCGGGGCGTACTGCC  
CTATAAGGGGAAATAATGCACGTTAGCACTGGTGAAATTGGCAAAGACCCTTTTGGTCCG  
CGAGGGCAGAACGGCACACTTTTTATTGTTGAGCCTTCAGAATCACAGAAAGATCGATAG  
GGTAACAGCCAATACACAAATTACAAATTATTCGTTAATGCAAAAAGCGAGGGGAATGAAA  
AATTGGTATCGTAAAGCATTTCGAGCTGTGTAAAATGATTTCTGGGACGGGCGACCAAGTGG  
CTCATTGCTAGCAACGAATATAACGGGCAGATTTATAAGACTCTAACAAGTCCCGGATTT  
GCGAAGTTGCATTTTAGCAAGCGCGGTGGAAGTCAAGCACCACAACAGCAACGACCACCT  
CAGCACCAGCCACAACCGAAACAACAAGCATCACAAAACAACGAGCATCCAATGGACATG  
TCCGACGACATTCCATTCTAAAATAAAGGGGCTTGCGCCCTTTTCCACCGTCTTCGAA  
ACCCGAAACAGCAATTATCTTAACTGAGATCCGGCTTGAAGTTCAAGCTGTTGTGCGTT  
AAGCGTTCCTGTATTCATGATAGACAACTGTGCACACATAGGCCCAAGAGCGGTAAAATA  
AGTAAAGGTTGATTGCATCATATCCAGTTGTTGATGACCATCATTACAATCGCTTGTGC  
GGCTTATTCACCCAATAGAAATTGGTTCATTGCAAAGAATTGGTAAATCAAAAGAGGAGG  
CGTTGCGCTTCCCTGTGTATTATGGTAGCTCTGGAATCGTTTCGGCATTACCTCCAGCCA  
ATCCGACAACCATTTTTTTAATTGTGCAAACCAGCTTTTAAACTTGAAATTTGACTTT  
GTAACGCTTCATTTTTACCCAGCAACTCTTGAACAGCAGCAATCAGATCAGAAATAACTG  
CTCGATAATTAACGTTACGATTTCTAATTCATCACCGTTATCATCTGTTGCAGTGCCGC  
CAGTGAAAACGTAAGTGGCGTTTATTTACAGCCATTTGTTGCGCAAGGAATCCACGCTGCA  
AAACATCTTTTCTTATAATAAAACTCCGTAACATAAATCTGTTAGACGCGATACCATG  
CGCAAGGCTTAGGATCTTCAAATCTATACTTAATGCGAACTTATTATCCTTGCATAGCGT  
ATCGTCCCTCTGCGGCATAGAATCCATTATCGTTTCTCATTGAATACCATATGACGTTAC  
AGCCGAATGTGTTTAAAGAACAACATATTGATACGCCTGCCAGGAGTACCAACTAAAT  
AATTTTGAATTCCGAATCATGAGCTATTAATATAGGTAAGAAGGTTTGAAGCCATCGCTAG  
ATCGCCGTGATTTCTCCTTTATTAGAGCAGCAGTACTAGCGCGGCCTTGTGCGTAATAAG  
CTTAGCCCATACGGCATTAAAAGTAACATTCTTATCAATTCCAACCCCTAAATATCGTC  
TAGCTTGAGCGACATTATCTGCACCACTGCCACCGGATACCATTGGTAGATCATTTAGTA  
CTCCAGCGGAGCTATCAAAAACCCCAACATCACAGCGCTGTAAACGAATAAATAAGAGT  
CTTAAACAGGTGCCCAAAGTGACGTTAGTTCTCACAGTCTGTCAACCGGTTCAACAAGCA  
GGTGTTCATGAGCTTTTGAACAGTTGTTGCAACAGTAGCCCCGTGATCAATACCTAGAG  
CCGACCAACCTTTTAGATCGCGATTGAACATACCCCATGTGCCATCATGCCTTACAGATA  
TCCCGTTTAAACCATCTGGAGAAAGCATTGACATAAGAACAGAATCCTGAATAATTCTAT  
TAAGTTGCAGATTTATTTTTGCTTGCAGTAAAGTTTTCAGCACCAGTCCCGGAGCGCAA  
TAGAAAGTTCCGCTGTGCTGTTGTTGTCATTACGTGCAACTCGCCAGTCTCCGTTGTTGG  
AGATCCGCAATATATAAGTCCCTGCAGTATTTGTAACAGTTGTATGCGGCAGTATCTG  
GATGTTGTACGGAATTAACAGCCTCAATTTTCAAAGCTTCCCTTGCAAGGTCTTTGTTT

CATGATCATTAAAGGTTTTGATGCTTATGCAGCAGAGTTTCTGGTTGCGCCTGTTGCGCCC  
ATTTGCGAGCTTCATCACACGCGTCCACCGCTTTATTTTCAAATACGGTTGTCTCAGTAA  
CGGCAGAATCCTTAATCTCTTGTGTTTGGTTTTTTATTGCGTCCGTGTCTGCCCTAATCT  
AATTGGTTTCAGCGACAGCGGCGTCTTAAATCCGTTGCGATTCAATTAACAGCGGTATCTT  
TATTCTGTTGCGTTTCAGTAACAGCGTCTTCCCTTTATTGTTTGGCGTGTGGTTTTGTAAAT  
GTTTCAAGTCCCAGGCTCAGTTTGCATCAGTATTTTGGCAGGAAGCCTCAGCGCGTGCAACAA  
AATCCTGTATTGTTTATAAATCAAATTTCTTGAAAAATTCAAACGCATCCGCAATAACAG  
TTTTTTTACTTTAGTAAGAACCCAGCGGGTCCGGTACCCCTTGCGCTATTCCATCGATAG  
TTAACGAGTCAGTTAACAGGATCACATAATTTCCGTTTTATACTGGATCGAAGTCCGTCT  
GGATCGCTTTTCGTTTCCGTTTTCGCTTTCAATATCGCTATTTCGCAGCCAATTTACGAGGCG  
ATGTGAGAAATACGATTGTTGCACCAAGTACTGATAAGAGAATGAGGATCACGCCAGTTTG  
TGTCAGTACCAGTAATAACGTCGTGCGCGTCCATTGTAGCCGTGCCAGTTTCGATAGAAAG  
CCATAATTATACCTCATTTTATTGATTGAAATAGTTTATTGATTACGCGATATTGCTCTG  
TTACATGCAATACAAACACCGCCTTAGGGGGGTTTCGTCAAATGCAACGAGAAGTTAATGA  
AACAGTTACATCGAAACGTGTTACACGCAGGATTAATATTATAACAAGACACATACCTTG  
TAAAGTCTCCGCTCTATTCCCTTTTCCAATTTACCGTTAACTGGTAACATCACGTCTAAT  
TCGCGATCATCGGCAGCAATCAAAGTGTGCGGACCATTAACCTGCTAGACAACCCGCGTA  
TTACGCTCTCCTTTGTATCTGTATGCAACAATTTCAAATTTGAAGGTGAGAAACACGCC  
CATACTTCTTGCCTCGTCGCCAGGTGTATACGTTGCGCATCAATCCAGACATAGCAAAGG  
TAAATTGTTCTGTGAGTCTTCCCAATTATCGCAACGCTTCCCTCGCGTGTAAGCTTTCGCG  
TAAAACTGCTATTACCTTCCGCGTTGACGAAACGAATATCGCACATCTCATCATCCTAT  
TCATCACGATGCACCAGGTGGCTAGGAATGGCGTGTATCTGCTCGCATTTCCTATTGTTA  
TGAGTTTTTACGCCAATTTGATACGATTTCGACTTCTAATGAATAAAACACCTCGAAAACG  
CTTAGAGTAGTTATTCCCATGCGTTCAGCTTTATCCATCACCTCAACACAATTTTCATGC  
GGTGCTTGCAGTCCCAAATTGTAACCAGAATCACGTTTTGCGCGTGTGTAACCATGTTG  
GCAAGCTCAACAGGAACCAAGTTTAACCATTTCGCCTAAAATGTCGATGTCTTCACTGTAA  
TATTCACTACGAATGCGCATGAATAATCCGATCACTGAATCATTACCGCATTGGCTCCAA  
ATGTTGTGAGGTCGCCTTTCTCGTCAATTATGTGAGTCCAAACAAAAGCGATCTTACC  
CCGCAATAAGGGCAAGGCTGATGTTTGGCGTTAAAGGTTATTTGAGGAATCTCGCAAAT  
TTCATTAATAACGCTTGCCACAGGACCCGCATCTTGGGGATAACTTCTTCTTTTTGATAA  
TGAATTTCTCTACCTCCGAATAAAAAGCCTGGCACGATTATAAACCATGCCAGGCCGGAA  
TTTGTAGCATGCAGTGCTATCGAAGGAAATCACACGCGTTTCATCTGATTGGCTTCCGT  
TGCTTTGCGCCGTTCTTCCCTTCGCCCTTTCGCGTTCAGCTTTACTCCGCGCTTCTCCTT  
CTCGCGTTCTTCTGGACGCATAGAACGCAACGGATCGTAAGGCCGCACTAATCCGATTGC  
TTCCGCTACCGCTTTGGTTCCAAATCACATCAGCTTTCGGTTGCTGCACCGATTCTCTAA  
AGGCTTGCCGTTATTATCAAATTCGATATCTGGACGGCAAGATGAAGCGCGGAAGCCGTT  
AAAACCTTTGCGACGGTCTCTTTCTGGCTTAGTTCAGCGCCTTTAGTTAAAATCATTCC  
CTACTATTTGCATCCCCATACTGTTTTAAGGTTAACGCCAATAGCACGCGGCAGGGCAGC  
GCGACCGCCATAAAGCGTTGACTACTTCATCAAGCCGCGCCTTTAATCCTGCTCTGACTGC  
GTACTCTAATAACAACATAACCGCGAACAGGTGATCGACGTTTACGATCTTACGACGTGT  
TACGCCGTTGTTACCTTTGATTGGTCTTTTATCGATTTTCGCTAGTTGAGGAAGAAATTT  
GAATTCGCACATATTTTACCTATAGCACTTTTTGCTAAAAAACTTGCTTGAATTTGTGT  
ATGATATAACCGCACATGGCATTAGTCAAAGGATGAAAAAGGATTCTACCATTGCAAC  
GCAGATTGCAGATCTGGGAGAGGGTAGAATCAAGGCAATCCAGAAGCGTTGCACGGTTGG  
TGAGTTTGTCCCGTATAAATAACCAATGCTTTGTATACGCTGAAATTGCAGAGCGCTTGAG  
TAAGTATATTAATCCGTTTTTCGTCAAAGCGGCCGTGTCGGCAGGTAACCAACAGCTT  
TGCTATGGTTGCGGCTCTGTGCACGAAAATGGGATTAATAATCGTTAATTCTGGCGCGTCT  
ATCTGAGATTGTTGAAGAGGATCCAAAAGAGATTAGCGCCTTTGTTGTTCCGAATTCGCT  
TTATTGCTCTGGCCTGAATACCAAACACGCTTATTTCCCGACTGTTGCTGAATCGGAAGG  
TACTGTAATGGCGGATTGCATAATGCGTTAGATGATTACGTCGCATAGGCTTTAGGTAT  
AGATGAGTGTACCAAGTCAACGGGAGTGAGGTTCTTAAAGCCGAGGGAAACGGCGAAAG  
CATAGAGCAGATGATGATGCCGAAAGGTTAACCAGATGAAGAGAAACCGTTGCTGATTGG  
TTGAGGCCGCGAAAAATACACCATTATCATTGCAGAAATGCGCCGCGGTTGTCTTGAGAT  
TTACGGTCATCAGTTGCGTATATGTGGAATGAACCGATCGGAATATCGCGGAATTGAGCC  
GATACTTGTGGAAGATAAAAGAATTCCTTGGTTTTGGCGGGAGCAGAGCACAAACATTGA  
TACTGAGTACCTGGTAAAATTTCCGTCAGTTGATCGCACTTATTTTGGCAATCTGGGTGA  
TTTTGGGTGACGACTTATCAAATTTACGCCCGTGCAAGAATTTGGGGTGGATGATTATGA

CCGGGAGCAATTAAGGCCATGAGTTACAAGATTCACCAATCAGGAACAATGACGCAGAA  
ACTATTGCAGGTGGATCACGAGGTGATGAAATACCGCTTGTGGACCCTTCTCACTTCCGC  
TGACGATTGGCACTGCAAAGTGGCGGCGGCGGCGATTCCGTCTCGCACGAAAAATTACAT  
TCTTACCGGAAAACTCGAGAGAGTCAGCGGCGATTATGGCTTGATGATTCCTATGAATG  
GCGAGTGAAATAGATTTTCTGGTTCAGGCGCTAACAACTAGCGTTGACGTTCCGCCGTG  
GGATACCTCTGTAATTTTGCGCAAGATCGGAAGTCTTACTCTATTAACTCAGCTCTTGGG  
TCGTGGTATGCGTCAATGACAGACTTACCATAAAGTAGTTTTGGGATTGAACAAAACACA  
TCATCTTGGTTTGGAAATTATCCGGCGCGATGACTGAGATGGGTAATTTGTATTTTCGATCC  
AATGCATGAGCAAGCGCAATTCCAGTTGCGTAAATCGCAGGATATAGATCCGAAATGTTG  
ACCGATTGGCCGAACGGAAATTGCATTCGTTGCGGGGGGTTGCCTTAACGAGGATGAAAA  
CGGAAATCGTCTTGAGCACTTTGGGACGTTCCAGGAATGTGAGGATCAGATCGATCAACG  
TCCAAAGACAGTTATTATAACCGGTTGCGGCGGAAAAAGTGACGTTGCGGAGCGTGTATG  
CCGATGCTGTAATGATCAGTTACGAGATCCAATTGATGGCTTATCCGGCAAGGGGTACTG  
TAAAAACGATTGGTGCAGCTGTTAGATTTTAATGTGACGCTGACAAAAAACAGGCTGG  
CGTTAGGTTCTGAGACACCTTGCTAGATAGTGGCGGCGTAGAATTCAGAGCTTACGCAA  
ATATTTCCCTAAATAAGACCACAAGATATGCGAAACGCTTTGGACAAAAGCGGTTTGAAC  
ACACGTTGTAGATCGACAGTCTGCGAACTATATCATCACTTGCAGCCACGCAATTAACAA  
CATGAGTTATGCGACGCAAATATGGCCACCAAATCACGTAACGCAACGCAAGAACACAAA  
GAAAGAAGATTTAACAACATTGAAGGAATTTGAATAGGGTTATTGATTCAGGTGAGTATC  
TGGAGTATTACGACAAGTCCGATCCAGACGATAGAAAGGATGAATCCCACCAGGTGCGATT  
CTTATTCATGGCTAACATATGAGGTGCCCATGGGGCTTGTTTGTCACACTAAAAACGAGG  
GGAAGAAAACCATCGGCACAGCCTTAAAGGATCAGCAAACGGGTGTGAAGAAGGGAGTTA  
GCGACATTCTAATCCGGACTGGTTTTTTGGGCTGCAAGTATTCATTTATAGCCGGTGACC  
TTAAACGCGCCAACGAGAAAGGCACGAAGATCAGAGACGAACAACAGAAATTCTTGCGAC  
GTGTCAGAGAGTGCGGAGGTTTTGCTCCGTATGCTATGGAGTAGAGCTAGTAAATTGG  
CTATCGCATAAGCTACAAAATAGCGCGTTTTGTTAAACAGGCGCCACGAAATGCGCCAT  
GATGCACCCATCAGCACGAAACGGAGAATTAACCAAGAAATAGATGTTATGAGTTGGAGC  
TTTATCACTAGCTCTTGTGCGTTGCATGGATAAACCAAAAATCATGTACTTGCGGAACCGA  
AGCGTTTGAGGTTACAAGCCTCCCTATGAAAGTTGGGCAACGCAAAAGCACAGGCGATGT  
AATGGATTCTATCAGCGTAAATCAATATAAGTTGTGTACGCCTATTGGAGCGGCTTTGTA  
CACCATTAATGAAATCACAATTGATATTATAGTTAACTTTTATGAGGACACTTTAACTTG  
AGAGGTAATAATATAATGGCTAAAGATATTCAGGACAAAACCTCAATTGACCCTTTCGCAC  
AAGAAATGTATTTTCATGAGCGGCAACACGGCACATATTCAGATATTGAGTTGCGTTTCAG  
GTGGCCATTATCAGCCAGTTATAGAAAACCCAATGTTCAAGGTTAGCAGCAACCCCTCATG  
CAGGAAGGAAAACGCCCGACGTTTTGCGTGACCTGTGGGAAACTACAGACGAAATGGTTG  
AATACCTTGCGGAACGTTACGGCAGATTTTCATCTTGACACAGCAGCAACGGAAGATACTT  
AAAAATGTGATAAATTTTGCAGCAAAGAAACGAACTGCTTAAAGAGCTCGTGGGGTATCC  
AAAAGCACGTTTGGTTAAATCCACCATAGAGCCCCCAGCTCTGCTTATCAAAAAAGCAA  
TTGAGCAGTTGGAAGACGGAGCCCAGATTGATATCTTACTTTTCGCCTGAAAATTCAACCA  
CATGGTTTAGGGACCCACAAAAACACGCGGCCGAAATTATCTGGATTCTGGTGAAACCT  
GGAAGGATGAAGCAGGTGCGGAATACTCCCGAACTGGTCGAGTAGCGTTTATTTCTGGTA  
TGGCAGGTGAACCAGTTAGCGGTAACAATAAAGGTAGTGAATTTTTATGATGCGCCAAT  
TGAAGAAGGTGACCAACAGCTAACGC ACTATGTGAAGAGTTGCGACATTTGCCATTCCG  
TAAAAAATAAACGAGCCAAAGCGCGCAGTATTTAAAATGAGGATTCGATTAGCCGATCAC  
AAGAAATGGGGTTTGTGTTGTTGAGCTGACACTTCGTTTAAATTGATATGCAGGGTTATAGC  
GCTGATAAAATGGAGCTGATAAACTGACTGGATATGACATTCGACGAAATTAAGTTGCT  
CCTTTGTAATGTGGGAAAGAGAAATTGAGCACGACCTGATACAAGACTAACGCAGAGAG  
GGTGCATGATTTTTTAATGTGAAATAGCCCTTTTTGTTAAGACCCGGTACGGCGGGCTTT  
GTATTATGCTATTAATGGAACAAGAGGTTTTCAACGATGAAAATTGTAAACGTCGAAT  
ACTTCAAAGATGGGCAATGGCTGACTAAAGAATCATTATTTATGCTGGACCGCAAAAATC  
CACAGGTCATTTCCGCAATGCTTTGGAATGACGCAATGGAGTTACTTAAAAAGGCTTTTCG  
GTTATGAAAGTGACAAAAGGTAATAAGGCAACTAGGGAGTTAGAGAAAAAATGGGGTCCCT  
GATGTAGGGATCTGCAAAATAGCGCGATATTTTCGACATCAAAGACGTATGCGTTATTGCC  
AGTAAAGAAATGGCCTATGTGGAAGAACAGCCGCGCAAGGTTACCCGCGGTCCGGCAATT  
GCGTCAACAATCGACTAGAAAGAAGTTATTAACAACACTCAAGACCAAAAAAATATATTTCC  
AAATGAGATACATTTGCGTTATTACTTTTCTCCCGTTATAGCTTGGGTTATGGTTTCATA  
TGTGAGGTATGGGGTTGTCATGAACTATCACGATTTATTCTCATATGAAAATGGAGCGCT

TACAAGAAATGTTGCTAAATCTAAAAGATGTAGGATTGTCAATCCTGTTGGATTGATCAA  
AGGAAGTCGTTACTAGCAAACAACGTCTCAGGTAACAATGTTGTTGTTGATCGTATAAT  
ATGGGAACTGCAAAACGGGAAAATTCCAAATGGAAGGGACATAGATCAGATAAATCACGT  
TAGAGCCGATAACGGGATTGAAAATCAAAAAATTGTTGATCACAAAGATAATCATAAAAA  
CGTATCAATGCAATCAAATAATATTACTGCGGTTTGTGCGGTCAGGTTTATAGTAAGATG  
GAATAAGTTCAGAGCATCAATAAAGGTTTACTGGGTAACATATCTTTGGGATACTTAAC  
CAGCATTGATGATGCTAACAATGCCGGAAAGAGAGCAAATGATAGATTTGATTTTCACAA  
AAACCACGGAATTTAATAAATGACTTCTAAAAAAATAACGGATGAGCAATTGATTGCAGA  
GCGCGAAGCGGGTTTAAAGTTGCGAGAGATTGCTTAATATAACGGAAAGATCTTACGCCA  
GATTGAGCACCGTCTCATCTAATTGGCTAAGCTTGGCGAACTCGCAACTATCGGATCACC  
TGGGTTTGCGGTAATAGGTGAATCGCACCTTATACGTGATCAGGATGAGGTGATAATTAC  
TCGGACCAAAAGGCAGAAAGATAAAGAGCAATTAGAAGCAATTCCGCAAGCTGCTGTAGA  
AGCATTTTCGGAAGAAGTGCGGGCATTGAGCCGTAACCGGATACAATGACTGTTTACTT  
GCAAAGCTGGCGCTATATCCGATCTTTCTTATTTCAGATTGGCGCACTGGCTCATAAGCT  
TGAAAGCGGTGAGAAGTAAGATACGGTAACGGCGGAGAGCGTCATGTATGCGTTTATCGA  
TTAAGCAGGTGATAAAGCGCCTAATACCCACAATGCTGTGTTGCTGATTGGTGGTGATAT  
GATTCAGGGCGACGGTCTGGTGGCTGTAACACCTGCAGGCGGTCACTTTGTGGATCAAGA  
TAGCCGTTACTTAAAACCTTGATTATGTTCCCTATCCGCGCCACGCGTCGAGTAGTAAGCAG  
ATAGCTGGCAAAACATAAAGAGGTTTAATTGCAGATCATTGGAGGTAATCACGACCAAGC  
AGGAATGATATGGCTGCGTGCTGCAACGGAGCCGACGTATGAGAATGAGCCGCGCGTAAA  
GCATGATGTTTCTCTGCATGTCGTGCATCACACGCAATGTGGAAAACCGTTCCTGGCTTA  
TCATCAGGGTTAAACTAGATGCAAGGCAGAAACGTATTTACTGATGTATGCAGCGGATTG  
ACGGGAAGATCTCGGAAACTCCAATTCAATGTATGCGCATGAAGGGCATTGTCATCAATG  
GACTGTTCCGGAAAAGATCCTTGGCGTTGTTGAGGTGCATACCACTATGGGGGCTAAATA  
TACTTATCCCACGCGTGACGGTTGGTGTTCACACCGACGAGCGGCGGTAATTAGCTATAA  
TAAGGAATATGGCGAGATAGGCCGCCTTGTGTTCTATCCAGACATGATTGCATAATCAAA  
TTCTCACCTAAAAGGCTAGCGAACTGCCAGCTTTATTTTGTTTTTGTGCTTTACGCAAT  
AAGACTATTTTGTACATTTCTAATTTAATTAACCTGAGGATCAGATCCTGACGGACATTC  
TTTTAATGGCGGAAAACCTTTTCGGAGGTGCAACCGCAGTTGGAAATTTTACAGGTGAGT  
TTTTGCTTGCACCTTGCAGCGTTGATGTTGTTTCGCTATTTACGGCTGTTGGGGCGCATGGC  
TGAAATCGGGTGATAGTAAATCGATCGGAGAGGCTCGAGATTCAGGTGATTTATAAACGA  
CGCTTAACCCAGGGCAGAAAGAGAGGGAGTAATGACAAGCACGAAAGGTATAGCCGCCAC  
CGTCACAGGGGCGGCTTTAATGTTTACATCGCCTTTGATTGAAGAAATCGAAGGCGTAAA  
GTATAGGCCTTACAAGGCTATTGCCGGTATCTGGACTGTCTGCCCTGCACCACAGGAAA  
TCATGTGATTCTGGGAAAGAAATATAACCAGGTGAGAGTGTGCTGCGGTATTAGCAAAGCC  
TATGAAAGTAGGGGCTGACAGTGTTGATATAGCTTTTAAAGTCTGATATTCCTATGTGTAT  
GCGAGCGGCTTTGTACTTATTCACATTCAACGCTGGATAAGGGGCATCTAGGAAATCACC  
CAGGTTGAAGAACATCAATAAGGGTGTTTTGTATGGTGGTTGTGGCGAGCGTGGGAGCTG  
GACATATTACCGGGGCCGAAAACGGGCAAAAAGGATAAATCATAGGGATTGAAGAATCG  
CCGCGCTGTTGAATATAACTATTGTTTAAATGGATATGAATAAATGAAAAGAAAATAACTG  
GCAAGTATGCTGTGCAATGGACTTTCTGGCTGTTTCAGCTTCAAGCGTGTTACCTTGTGTG  
ATTGGTACTAAGCCTTATATAACGGCACAGGCTGGAGCGGAGAATGTGAAACAGACTGTT  
GGTGAACCGCAAAGCAGCATACTCAAGCAAGTAGGAAACCACACTCAAAGAAACGGGA  
GTTGGTCAACTTGACACATCCAATATGAAGCAGGTGCGTATCTCAAGCATCAAGGGTGAT  
AACATTAAGGCGGAAAGCTTAGAAATTCGTAATAATGACGGCCTGGACGTCCCGGCAATC  
GAAATGGGTTTATTGATGTTCACTGATATGCCGGCAGGTTGAACGCTAACACGTAAT  
TAGGCGGCATAAGCCGCCTGTCCTTTGACGCAAATTTGGTAACATCAAGTAGCAATTCAC  
AATTATGATGTGTAAGTTTATGCTCTTGCTCCAAAATGCTCGAATATCACTGTAAAGCA  
ACAACATTAACGCATAGACAAAATTATCATGCGGAGTTTGCATCGCTGAACTATCTAACA  
AAATATGATCAATCAAATGCTGGCTTGCGGAAATAATTCTACATCGCTCCTTTTCCCAAAG  
TTCATCATCTCCCACGCATAAAGATTGGAATCACCTTCCAGGGTATGAAACTCAACATCA  
AACGGCCTCTTCATCTTGTTTTTGCATCAGTACAGGGCTTGACCGCCGTCAATGTATGCA  
TAACCCATCACCCGCGCTATAAACTCTTTGCTTGAGCTTGAGGCGAAATAGCGCGGCGTT  
ACCCCGCATTTTAGGTGAACCTTACACATTCACAGTGACGGAATAAAAATCTTGCTAAC  
TCCTGGCGGTTGAATTTCTAGCGAGCCTCGCAAACCTCGATACAGATCTAATAAGAACGTG  
ATTACCCCATTAACGCAGGATTTACATACAGAAATTTACCAACGCTGCAAACATAATTCT  
TTTCTTCAAGCATAGGCAATAATTGTTCCCTTAACTCGTTTCATCACGCTGATTGACCTG

TAAACGGCTTAAACTTACGCCCACTTTCATAGATAGCCCTTGCATTGATAACGCCTTTAT  
TTTGACGTGAGATCTTAATTATGCCTTCAATTAAGTTGATCATTCTACATCATCGCCAG  
CGAGACCGGAAGCATTCCCGGAGTTGATATATGTTGTGCGTAATTCGCTGACCATCACCA  
AAGCCTCTTGCATTGTCTCCACTTAAATTCCTCGGGACTTTTGGCAGGTACCGTTTGGAT  
TAAACCAATGGCGGATCGTGTGCATTACTGACGAAATGCGAATCACTGGCTTATCCATTT  
GAACCAAAGTACCACGCAACATTAGGTGTGAATATTTCCCGCCGTCTGCTCAATATGGCT  
CTAATTTCTGGCGAGCAATATTAAGAACGCGCATTGGGGACCGTGACGGCTTCAATACAA  
CCTTATGCTCAGTCATGATGTTATGAATCAACCGCAAATACTGCGCCTTTAATTTCTTTAT  
TAACTGACGTGTAATCAAGATCACCATATTGATCAATAGAGACACCCTCGCCTAACATTG  
TTTTTTCACGTACTAGCAAGAAAAGTTCACTAACAAACGATAACCCCCGCCCTGCATCTA  
CGATCCCTTTTATCATTTCATACTGGACAATGACGCGCGGGCATCCAAAGGCAACTAAAC  
TCACAATGTTTTTTCAGAGTTCGCGCGAGCTAATGAAACGTGTCCGGCGTCCCAAGCTTTTA  
GAACTAACTGGTTGTTAGTCTTGGGCTCACTATTAGCGAATGTCAATCCGAGTTAGCTGT  
TGATGCTGGGTGCTTCAGCGGAAATGACGGCAAAGTTACCCTCTCAATTGTAGATCCTGC  
CTAACCTTTTCGGCGTGGTGTCTGATACCTGAAAAAAGATATCGCACATTTTTTCTAACT  
TTTCTCTAATTCCTCCTGTTCTTCAAACAACGCCGCTAACTCACTGCAGAAATGTTTCAG  
CTTTCAATTTCTTTTTCAACGCCGTTAAATTTAGCTGCAATCTTCTTTTCGCTCTTTCTTG  
GTTGTTTCGTTTATGAGATCTACTTACAGCCCATGGGCGCAATAGCAAGGCTGTTGCTTG  
CTGATTGACCGGTTGCCGGAGGTTGACGGGTTACAGCATAACGCGCAGTTGGTTGTTTCAG  
TGCCATGGTACTCAACCCGGAAACGTCCAACCATAGCGGCGGAGACGCAACCAATGAAAT  
GCATGTAGGCCGATGATTTAGGAAATTGAACAGATTGCGCAATGCTACGTGACCGTTTAC  
CCACAACATCAAGATCAGTCCCCAAAGAGATCACAGGATAGCGGTCATTAGCGCCGTTGA  
TATCCTTAACGGGTTCCCAAAGCTGGAAGATTGGCGGTATCCGTTAGACTGTATGGTAA  
CGCGGAGCTGCGATGTACTCTGCGATTATGCAATGGCTATAAGTTGTTAACGCGTCGATT  
TGTTGGTGTCAAATCAAACATCTAAAAATCTCCTTCTTGTGGCCGCTATTTATAACGGC  
AACATTCTACGACCTTTTAGCAATTCGTACTATGTGATTGGCTCAACCCTGCGCAATAAC  
TTTCCGTTTATAATGCTATGACATTCCAGAGTTTTAGGATCCAATGCGAGCGAAAGATGG  
TACGTATAACCTATCAGCAACTTACCAGGCTATTCCCTCACCTTGTAAATACTTATCGCCA  
GGTTTAAACATTGCCGAGTCGCTGTAAAGGACTTTATACCGGAATTCGCCCATCGTTGTT  
GGGTAGAGCCTTGTATATTCAACGCCTTGAAACATTTGTAAAATCTTTCAAACAGATAAG  
CGCCACCGGCGGCACAGTAGCCGACTTTCTCGCGATACAGCGTGCATCGGTTCGCCGTTTT  
CGTCGAACACATGTCCATGAACACCACCTAACATTCGGGCTTGTTCATTAGGTAACCCT  
TATCAGCATTGAAAGTTTTCTTGATCTGCATGGAATGGTTTTCCCATGTGCATTTAATAG  
TTTAGGTCCTAACATTTCCGGAATGTTAATCCGGGTAAGTTCACGTGAATCGAGTTCCCAT  
CGAACCTATCGAAGGTATCATCAGTTTCGTCTACCCGCGCTTTGTATAGGCAGTTATCAG  
ATCCGATTAGTTTGATGGATATGAATTTAGCCATTTGGTACATCTCCTTTTCTTTTCGTT  
GAAAGCGTCATGCCGGATACGTGATCCGGCGTTTTAACAAAAAGTCTATCTTTGATTTG  
CCATGCTTACAACAAGCGCAAAGCCTCGCGGAGTGAGTCCGCGGATCAGCTTTGTACGCT  
TAGACTTACCTCCTAGCTTTTGCCGGCATGGATTGGTGTTCCTGTTGGCAATACTGCGT  
TTGTATCCGGCTTCTCATAACCCTTATCCGTCCAAAGACAAGTTTCTTTGGGGTACGCAT  
CGCCAGCAGGAATGGTGTACGAAACTGAGGATATTAATCACCTTCCTGCAACAGACCAC  
CAAACGCGAAAGGATGCAATATCAAAGGGGGCTGGCGCCAGATCGATGACAGGAAGCTAA  
CAGCATGCTCGATCACGTATGGCACATTGAACCAATCCGCAACTTCAGCCGCAATCTTCC  
ATGTTGAAACTGGCTTATCCGGGAGTAGCGGATCACGTACACGCGTTGCGGAAAGGTGAC  
GCGAATCGTTAACATCTAAACCAGTGACGGGAGGAGACGCGATCACGCAATCAGGCTTCC  
CGGAAACCTTATCCGACCCTTAAAGCTGAAATCTGAATCAATCCAAACGTTCAAAAAC  
CAAGGCTGGAATGACTTACGCGCACTGAATGGTAATCACCATGATCAGCATCATCATAAT  
TGAAACAGATTACTTTGTGACCACATTCAGCCCAAGGCAACGCATCAAACCCGGCACCGC  
TAAAAAGAGAAAAAACTTACATACTTAAATCCTTTGTGTATGGCATTGTGAGGCGTTTTG  
TTTGTGGTGTGCAACTGTATAGGCTACGGCCTGAAATCGCGCCATAATTTGAAACCGGG  
CGCAATTTTTTACTTACAGGATGGGCATTTTTGTTTTGTACCCGCTTCCGCCGTGTTTTG  
GACGGTAAATTTTTGCAATAAGTGTCAATTTAAGAACTCCGTAGAAAGGGGAAACAACGCT  
TACAAGATGGATCGAATTTACAACCGCAATCATTATTCCGTTAGGATCAGAAAACA  
TTACGCTTTTTTCTTGATCCATATGCATACCCGCTAATGCATCATCAAGCGTCACTTCAA  
GATAGGCAACTTTAAGCGCGCATTCCGTGTTGAGTCCACCCACGTCCTTCTCATGGAGGC  
GAGCAAATAAAGCATGTTGAATTATATCGGCTCCACTTCTTAACAAAGAAGATCATTG  
TCAATCAACGCGTAAGCACCGCCTTTCAGTCATGCGGCGAATTTTTCCCGCTGGGTCTTCG



CCAACAGCGTAACCAGATTTTTTCGCGGGTAATCGATAACTGATCGAATCCAGAAGCGCGA  
TTCATATACAAATCTACTTTCCCGTGAGTGCTGAAAATGTTTCATGATGGATTTCAGTTTTTC  
AGTTGCATGTTTGATGCTGCATTTTGTATGTGAGCTTATGATACCGATGAGAGTGAAA  
TCCTTTTTATCAATTCGTGCTCTTACGGCGAAAAACGGATATCCTGTTATATCTTCAGT  
TCTATAACGTGCAGTCCGAATCCAACAGCCGCTTAGCTCATAATTCAACCGTTTTTATC  
ACGAATGTTACGCGGTAATTTCTTCCGGTTTTTATGTTTTTCAAGTATGTCATAATCTA  
ATCTAATGCTATTCTTTGAACTCTTGAACATATGCGCATTTGCGCGGGCGACTCCTGGACT  
TCTAGGATTCCACAGTCACCATAAACCAGAAAGCAATATTGGTAAAGGTTGCCGCCTACG  
TTTTCTCTGCGATCTGAATTCGGGTACACCAACCGCCACCAAACCTACGAACGAAATGA  
TAAGCGGAACACCTGCAATTAATTTGCATACGCTTTCTTATTGCCGTGGTTTTCTGAGA  
ACCCCTGTTTATTTTTTCTCTCTTAATACACATGCCATCTGATTTCAGATGAATCAAAAAG  
ACCAATATGGATTTCTTTTCGCGCCTACTTTTAATATTGGTCTGCATTATTTAGCTACGGA  
ATGCCACTACACACCGTTAAACCCTGATTTAGTTGATTTGCAATATGATTGATTTTTCCC  
GTATTCATTTGCACTAACAAAGCGTAGATTTTCGATCCTGTTATCAGTCCTATCGTGTT  
TATATGATCAATTTTCATTCCATCTGGAATTTTGCCATGATGCATTTCCCAAACGATTTCG  
AGCCGCAAGATAACTTTGATCATTAGAGACATCTGTATGTAGCCATCATTCTTAAGCT  
TCCGGCAACCTTTCCAGTCCATTCAATTATTTCTTGCAGAGTCCCTATATGATCTTATGAT  
TGTGCGCGGCTTTCTGATAAGACTTCCGCAATCATATATAGAAAAGTCGTGCCGATCCAT  
TGCAAATTTCTCGGTTAGTTTTGATGAATGGATCAAGCCAAAACAAACCGGATCGCTTTT  
TACAAAAGTGCGATTTAGTCAGATTCCATTACGATTACTTGTTCCTAACGCGATCGCAC  
AAGCTTGATATCTGCAAACGTAGTGGGACGTCGCTTCGTCAATTCCCTCATAGGTATCAGT  
TGCAATGCAAGCGCTATCACATTCATAGCACAGAACGCGTTTACTATATGCGCAACTAAT  
TGCAACCGCTCGATATGTATTCTTGATCATTTCATCTCCTCGATTGAATAAACATGATCA  
ACGACTGGCGCGTGTACGCGATTTTTATCTTCAGTAACGCAAAGGGAAAGAGGCAAGCGG  
CGATTGTCTGTAATATGCAAGTGATTTTGTATCCATCAAAAATTCAGATCCGCGATCT  
TCATCTAATCGGCGAACTCTCAACATACCATCGCCCCGCATATTTATTTTTGTTTTCTTG  
ACCACAAATTTTTGACCGTTCATTTATTTATCCACCACAGTTTTCAATACGGTATTAAT  
GCCAGTAGTTTACATTTCTTTCCAGTCTCAAACACTGCGATATTCCAGGTATTTCCGCTG  
AGATATTCAACCATCGCATCAATATCGTCTCTGATTAGTGTGCCCTTCTTGAATAAGCCA  
TTTTCATGCCTCGAATCGCGAACAGTAGCCACACTTTCGAATTGCGTGTGTTGTCCAGAG  
TTCATCTTCGATTCTCCTGATTGGTTGATGTGTGTATTTGCCTGAATAAGATCAAGCAC  
GTCTAACAATAAGTGCTATTTCAAACATAAAAAGCCCCGGCGCTAACAGTACTATCTTTC  
ATTATATGCCGCGCCCCCAGGCCACAAGCTTTGCTGTGAAATTTCTTGCCTCGTCACCGCA  
TCACCTTGCATTGTTTGAAGCGCAATAATTAGCACGTGCATCATTTTTCGTATCCTTAAT  
TCTATGCAAGATTAATGTGAATTGATGCACTTCCGAGAATTCAGCGGTTCCAATCTCAA  
CCATGTATACCTATTCATGAGGGCTAAATGATCTGTATTTCGTGGAATAGGTTAGCGATGC  
GCATAACCGGAAGTTCCTAGGTTTTGGGTTAGGCACTGCATATTCATTGCCAGTGCCT  
TAATGCGTATGAGAATCATTTTATACTCACGCGGTCCAAAAGATAGAAATTAGTGAGTTT  
GTACGACTCCGGCCATAATTGCGAATAACAACAGATGAGTTTTTCGCCTTGCCGATGCCCT  
AAAGTGATCGGCATTTTCAGAACCATCACCTAATTCATCCCCAACTTTTTGGACTTTTTCT  
CGCCTCGCGCAAATGCAACCAAATTTACCAGGAGTGATATTGCAGTATATGTTAGCAAGG  
GGAAGCTTAACCCCTTCTAAGTCTACCCTTTGCGTCAAACCTGCGGAGGCTAATCGTGGA  
AACATAAATCTCCATTCCAAATTTCTCCGAGTACTTGAGAATTGTAAGATCCTGCGCGATC  
AGCTAACAAAACGCCTGGCACAGTGTTCCATGCGAGCGGGATACTGTCTTGCTGTTTTCT  
GTGTCACCAGGTAATCAAGGTAGTCATGGCTAAATCCTCAGTTGATTTCAATGTAGTAAT  
CACAGCACTTCGCTGTTGAATGGTTCTAGCATAAAATGCTATTCCTGCGATAGACCGACT  
TGGCTAGAACGATGAGGCCCATGAACACATCATTTTTTGTATCGAACCCATTCACTCTCC  
TGTTACGTGATCGTTATATGATCAGTTGATTATTGTAGTGTT

>NewGenomeName\_53

CCCGCCTACCGGGAAAACCGGCGCGCCCTCCTGCCGCTGCCTCGGCGTGCCTACGGCAGT  
CTACGCGTGGGACATATCGCGTGCGCAATGCGTGCGTAGCGAATTTCCCTCCTTCGCACTT  
GCATCGTGAGGTTAGAGCGTACGGCGGGTCAAATGTTCTAGATAGGATCGTCCTTCTAG  
GGATTAGGAATGTCGTAGGCGACCAGGTGGATCCCTGGGGCCTCCCTCATCCCTTCTCT  
GATAGGGGTTTGGCTCCTGGGTTACCAGTGATGACTTGACGCCTCCCTAGGGCTGGCCGA  
CCCCGTTTGCCCTGCCCGCCTCGACGCTTTACCCGCGTCCGGCCATGGATGCCCTGAGA  
GCGTCCGGCTCTCTTCCCGTCTGTCCGTCGTCGCTGTGAGCTCCAGTTACCGCAGGGTC  
TCGGGGGCTGCGTCTGTCCCCGCCGCCCTCCCTTCTCTACTAGTGCGCCAATTCTTG

TCAATATGGCTACCACTACGTTAGATACTGAATGGTGACAGAAGGGGCAACAATAGGTCT  
GTCGAGTCCGCAGACATCTTGAGGGCGTTAGGCATACGCACTAGCTAAGGCAAAGCGATG  
TGGAGGTTCTGGCCTAATGACTAGGCGAGGCGGGGAACGGGACTCGCCAAGTACTCG  
TCCATCAAGGCACGGTAAAGGGTAGCCAAGCCTGACACGTTTAAACGTATGCTATAAACT  
CGAGGCGATACTCAAGATAGACGCACGTAACCGGGTGCAGGCTGAGAGTTAACGTGCTAA  
TTTGTTCGTCCTTGGCTCTAGACGTTCCGCGGGTGTAGGCCTTGGTCAGGGAAAGCCCC  
TGGTCAAGGTAGCCGGCATCGCTACGCGCAAGTTGCGATGGTGAGGAGACACAGAGTAC  
GATCTGCTGAGATTACGACGGTGCACACCCTCACAGCTATTTAACTATTCGGGTCTCCCG  
TCCAATGCCATTTAATCAACGTGAAGGATATACGTCTTCCAGGCTAAGCTAACATAGTGC  
TTGTCAAGAAAGTCTAAAGCACGTACGATAAAGTCCAAGCTAGCATGTCAACGCTGGACC  
CCTTTCCCTTTCGTATTGCAGGGGTGACCGCCGTCTTCAGTAATTCCGGTATCGTATGGT  
AAACCAACCTCCGTGGGGACGGTTACACAGCCAACTAACCACCGAACGCCTAATTCGAA  
CGACGGTCATCAAGCAGGCCCAAACGGTGACGCGAAGACAGGGGCCGGGCTCTGGCCAA  
CGAATGAGTAGTAAGCTTACGTAGCTCTACGACTGATTGCTGTTACATGTACACTGAGC  
GGAGAGTTATCTTACCCGATTACGCACCTCGAACTTGCATTGGCCCGACGAGATTACACC  
CTTCGCACCGACGGGGTTAGTGATCCTTGCCGTAATGAGGAAAGTGATAGTCCCGAGTG  
CGTACCCTAACCTTGTGGCGAACCTTGGCCACTGCAGGCTGATCCTACATTGAATCTAG  
GCAGTCGGGGAGTAATGCACTGCCCCGGATGATGGAGAAGCAAGCACAAAGCTCGAATGGG  
AGGCTCAGCCATGCAAGAGAGTATTCCCCTCTTAGATCCCAAGCTGAAACCTTAAGCGCA  
CCGTCAGCAGCGCCGAACCGCAACCTACGGCCTAACATGAGCGATATGCAGACGCGAGC  
CGAACACGACCTGCGCTGGCGATTGCAACTCGTTCCTCAACTCTAACGATGCTGGCAGGTT  
GAATGAGCGGGCAGTGGCGTTGGATGATGAGCGCCAGCGTAACTACGTGTGCAAAAATCG  
TCATTGCCGAAACTGACCGGATGCAGGAATTCGCAATCAGGATAGCCGACTGTCGGCGT  
CATCCGCCTTCAAGGGACACGGTATGCCATTGTGCCTAACCGCGTAGCCCGGCCACGAC  
CTCTATAAGGCTATGCCAGCGTATAACCACTTCGCAATAACGCCAAATTTACCTGGGTA  
CTGTTGCCTTATTCCACAAAACCGTGCGGCTCGTTGGGCAGTAGGACACCCACCTGGCG  
TACTCAATACTACGTGCTGAATGCTATGAACCATTATGATGAGATAAACAAGCGCGCTGT  
CCAAGCCGTGTAACCGCTCGCCTTGGGAAGGCGCTTGTACCATGGTGCTCACGGAGTAGT  
CCGTGTTCCGACTAGTCGCTGAAGCTGGTGCCAAAGGCCCTCTGAAAGGCTTTGGC  
CGGTTGATTCTAGAGCTTCGGCCAAACCACTGTGAGCGCAGTATAGTCCTACGCCAGGAT  
CTTCCCGCGTGTATAAATCAAGGAAGGCAGCAGCGACCGACACCGCGCGGCAGCCTGGGA  
AAGGAACAAGTGTATGCGAGTCGGCACCTGGCCGTGGGGGTTGATTTCTCTGTGAGTT  
AGCGTTGCTGCTGCACCATTCCGCCGAAGAGGAAGCGAAGGGCCTTGACCTAAAGGCTGC  
CGACTCCCTGTAGAGATGCAAGGACTAGTTGGGGTCTGACACCATTCAGGGTTAAAACCG  
ACGTAGCCCGTACCTTCCGAAAATTGTCGATAGGGCAAGTGTTGACGGTGAACGAACAGA  
ATATGCGAAAGAGCTTCAAGCGCAACGCCGAGAATGATTTTTTGGGATGTTGGCTGTACG  
TAGGCCTAGGCGGGCTAGTGCAATTTATGCTAGCAATTGTCGTAAGCTCGTCCCTCCTGCT  
CAGCGCCCCGACGCTCGCTAGCGGAAGGTAACGAACTACCACCGGGACGACGACCGCCG  
CTTAACGGGTGCACTCGGGGCTCGAGAAGCGGGAAGACGAGGTGCGTCTGCGGGCTGTAA  
TCGGGAACATCCGGTACGGCGCACGCTTGGCTACCGTATGCTGTGCGGTGTGACGAAAGG  
GAGGGAACGGAACCGGGTAGTTCTACGGCCACAGTGGCGCACTTATCACACGACGCAATC  
CCAAAAGCTAACGTTCTCAGCGCATGTCCCACAAGGTGTCCAACCTATCCAAAGAGCGTAA  
AACATTTTCCACGCCAAGATCGAGCTTAAGCAACACGCCGTTAGCAAGGAGCCGATGGAG  
ATCATGTGCTGGGCGATTTGCTTCGCTTTGGTGGCACGCGATATCTGCCCTGACGCGATC  
GCCGCGTTGAGTCGTACCGTTTAGGAATACCTTGATAGGTTTGGTGCCCCGCCAGTAAGT  
TTCGTGTACAACGCGTTGCAGCGTATCCGCTCCTGTCCTGAGCATTGCGTGTATACCAT  
TCGGTGGCCGAGGGCGGTAAGCGTCTGCTAATTCTGGCGCGAGTACTCACGAAGCTGG  
GACCAGCATGTACGTAGACGTTCAAGAAGTATGCCACAAGGGCATCTAAGCCTGCCAGAA  
CTGGGCGGGCGAGGAATGCGAGCATATCATGTGCCACGCCTTATGGCGTGGATTTACTGT  
GCACCTCAGCAGCTCCGACAATAGCTAGCCTGCCAGGGTAGCTATTGGGGCCTACGTGCC  
TAGCACCTCTCCTGGGCGAACTCCATCGTTGGGGCACTGGGCAGGTAGCGTCGGCGGAG  
CCTTCCACGACTGCCATTCGTGCAGGCATACTAATGGAAGTGCACCGGGACGGTCACGA  
CGGGGGGACGCCTTAAGTCTGGACTCGCATCCCGAGACCTTTTTGGTAACGAGACAAC  
GAGGGACTAGGAACTTATAAGAATTCTCGTAGCTGACAAGGAGGCTACGATCAAGCGCTA  
ATAGGGTATTCCGGGTAGTAAGCAAGTTTCCATATATACCGTAGATCAGCAATCCGATGA  
CCCTCAGACGTTACACGCCAGCGGGAGTGCCTCAAGTATCACTTTAGACCCGACGTCAA  
AATGGAGGACGGGCAGACCAGCTTGTACGGCAATGCCAGGGCCAACCCATGGTTCCGGGC

CCTCAACCGCTTGGCGACGTTTCGCGTTGTACCGAGCGACTAACTACGAGGAGGAATTGCC  
GCTGGAGGTGACCAAGTTCAGAGAGCTTGTTCCTCAATCTTTAAAGAGATGGGAGCCCCCAT  
GAGGCTGTTGGAAGACAGGTATGGTCTAATTTGGTCCGACGCTCTTTGTCAGAGACAGTT  
ATTCTCGCCGTCGGTGTGGCTCCCGAACGTACCGCTGGTTTTTGTTCGGAACCTTTCCCGT  
AGCACCGGACTGGATAGTAAACGGTGCAGGTGGTGGTGCAGGCGTATGAGACATGAGAA  
GAACGACCTCTCACCGGGGTCTTCGGCATCTATCTGTTCTCTCGCTAATGTGGAGG  
CTCTCCACATAGCCGCAAAGCGGGTTCGGTACAGATGTGCGTCTACTACGTCAACGTGTT  
GTTAGCGTTTTTCGTACATTTGGACTCAACCGGAGGCGGGTTCGAACTGCAATGGGGGGTA  
AAACTACGACTACCCGTCAAGGACTACCTCTCTTAGTGAACCAGTCTGAAGCGTAGGCCA  
TCGCTTACGTACCATGCCCGGGCCCGGTAACGCGCATAATGCAGTACCCTACTTCCTCGA  
GCAAAACGATGCGGTTCGTCCGGGCACAGCGCTTCCAGTCTGCTAGCCTCTGTCTGTACA  
GGAATCTGGGGCACTGGTAGAGGATTTAGTTGACGCGGTTTTGACTTGATGCACCGAGCTC  
TGTAGCTCCGGGCTCTGCCCGTCTGGGGAAATTTTTTCGCAATGCCGGGGAGCGGTTGAT  
CTATCCGGGCACATACCAAGCCTGAGCGCCGGTCCACGCCCGACTAAAACGAGGAGTGGA  
TTTTTAGCTAGTCCGCTACCTGAGGCTCTCTCAACCCGGTCAATTAGAAGCACCCCGAAGG  
AGACCGAACGTTTAGAGTGGTAGTGTCTATCCGATAACAACGCAGCGATGTAATGAGTCG  
GTATATAGGTACAACCTAATCGAGTTGCCACCGTGTGGTGGTGGCGCCACGCTATATCT  
AGTTGCTCCTAGCGGTGTGCGAGCCGGACCACCTGTGCAACCCAGTGCACGACGCGGTTG  
CCGGAGGGTCTTTTTATAAGACTGGGCTGCGTATAGTTTACGAAGACCCCTATCCGACT  
TGGGCATGGTTGCTATAGCTCGAGGTTGTCATCACGATTTCGAGCGGACTCGTGTGTCGG  
TGCGTTATACTGTCTCCCGGTTCTTACGACCAGAGAGCGAGACGATGACCTCGACGCTT  
ACGGTTGACGGTATAGTACTCGTGGCTTATAAATCAGGCGGTTCCATGAGCGAGACGGAC  
TGTCTCCTGGAACGTTCCAGACTGGCGGAGGGCCTCACACGCACGGTGCCTTCAAGTGC  
CACGGCAGTTAGGCATGGGAGGCCGACAAGGTGAGCCAGTATCTCGAGTCCGAGGCACTG  
GAGCGATGGCTGTAGCAGGGGGGTATCAACTGCGGTAGCTGCCAAGATGGTCATGCCTGG  
CCTTTTGTGTGGTACAGAGAATAGACTAGTCCGTCTTGGCTAAACCTTGGGCGTAGTGTG  
TGATCGTCGGGCCTGAACCTGACGACCTCTGCGGGGCAAGCGATCGCCCCAGCGCGAGGG  
AAGGTATCGCGGCCAGAGACCACCCGAACATCCGCGAAGTGAGGCAGCGAATGGATCCGG  
ACCAGGTTACCGTCGAGGCAGTGTGGTTCTTGAGTACCCAACCGCATGATGGCCGCACCA  
GTACCCGCTAAGTGAATGAGAAAGGAACTGGCGCGCCATCGTTAAAACCTGGCCCGTGTAC  
ACAAGGAGATGCCGTGATACGTGAACCGCGTCAAACAGACGAACACCCACCCAGACGG  
CGCTCTCGAACGGATGGTCTAGAACTGTAATGATCGCGTACGCTTATGTTTCTGAAGT  
AGTGGCCCCGGATGTGCAACGCGCTGTGATCTGCCACGCAGTATACGCTACATCACCGT  
TGCATGGGATCTCCGATACCCCTCCAACATAGCCAGCGGCTCTGTGGTAAAAGTTCGACGG  
GTATGGAAGTATAGCAATTTCTGTGGGCGACGTCATGAACGTGGCCCCCTAGCCTGACCAA  
GGCAATCGTTTTGAGCTGTGCGCCGCCCTCAGATCTGAAATAGAGCAACTGTAGGGGCT  
AAAGCAGGCCGTAAGAGCAACCGCGGGAAACACAGCCAACCGCCGCGTCGATTTCTGCCCT  
GACAGAGCTTTCCGTGAGAACCCCGATGTCAGTTCCTCCTGCCCTCGCTGCTACGGCGA  
ATTGGTGTGGTGAAGCGTAGGAGTACTCCCTGAGTTTAAAGTCGGGCGTATTAGTGGCC  
AGAGGTAGACTGTATCACCTGTCAACGGTTCGCGTATACTCGCAGAGTTGAAGAGTCGTTG  
TGCAAGGCTACCCGCATGTGGAGTTAAAGCTTATCCGGTAAGATGACCGCGGTCCCAACG  
TCGGCCGGAACCGCTCCGCTGCGTAATAGGTAGGAGTTAGCCTGGCGATTTAGGATGAAC  
TCGGTGAGGAGTAGCAGACAACAGTTTTTGCATAGAGTCCGGCTAAGGATCTCGCGCCCT  
CACCTACTACCCCGGCTCTACCGCGAGGGAGCGCCACCATCAGCAACCATATCCAATA  
AGTTCACGACCAAGCGCGTTCCGTCCATCCCAAGGCAGCCGAGCTGTTAGCTAAACCCAC  
TACCCTACGCATGTAGGTGGTGTCTTTGGAGCGCCTCCAGAGGATCGCCTAGAGGGATGC  
CGGGTCTTCGCCAGTGGACGCCAGGACGCCAAGATGGTTCAGCAGCGGCGCGGTAGTGGG  
CAAGGCTAAGAAGGAAGCCGAGCGGCAGCGACGCGTCTCGTTGAGGCCTGCTACGAAAG  
CGTTTCGGACAGTATCAAATCTAGGCATATCGCGGACGTGCGGGCGTCCGCAGCCTGGAAA  
CATTCTGAGGTCGCTGATCATCCTAGCGAGTAGCATCGGGTCTTAGTGCAGGAGGATGG  
CCGCATTACCCGCCCCCTTGGCGTCTACGAGAAACAGCGACGCTCGGTGCTCAATGTTCGG  
CAACGACGAGGTTGGACCATGGAAGTTGTTAAGAACGTGAACGGCCCTGCCCGCTGGGCT  
GTCCACGGTAAGGCGGATGCGGATGACATGGACCCGCGCATGACCTTTCAGCAGGCGCAA  
CAGGAAACCGAGGAGCTGGCTCGCGTGCCTAGTACGTGCACCGGTACCCCGGAGAATAC  
TAGGGCTCGTGCAACGAGCTTGAAGGAGGCGAATCACCCGATCTCATGGCTAGATGGAACC  
TGGAGAAACCAACCCTACACATGCCAGCTCCTCGAGGCCAGGTAAGTGAACCAGGATGAT  
TTCGTGAAAGAGCTGGAAAGGGATCAGGACGTTGACGGTGTGCCGCTTACGTACCACAGG

AAGCCAATCACTACTTTGCACCTGATAGCCTACGTTCTGGCCGGTGCTGTAGCATGAGTA  
GACTGGAAGCGATCCCAGCAAACGGTTAGTTTGAAGTAGAGCTGTGAGCATTAACTCGG  
GCTGTAAGTAACGTTGAGTAGGCAAGACAGTCTAAGCCATATGTTCCGTGAAGTGATTCA  
CGTTCGTAGATTCCGCGTAAAGCTTTCCACCTCTATCGGGCCCTGATTTACCAGGGGC  
CCTCGATGGTTCCAACGCCCTGCACGCGTAGTCCGAGGCACTGTGGCCTCAGGATGCAA  
ATGGCAAAGAAGTCATAGAGATAGACATGAGCCAGCATTATGTGAAGCCCAAGCGTAATT  
CCTGGCACTACGCACAGAGCTGCTGGGGGCACGCTGATAGCTGTGAAATCTGGACCACCC  
CGCGCGTAGTAACCCCTCTAGTCAACAGAGAGTGGTAACTCCTAGAGGCAGTAGCTATTG  
CGCCGACTGCTGAAGTGACCCAGACATGACCTCCGCCACGCGCCGGTAGGGCGGGGCTG  
CATTATGCGTCATCTCACAATGTCCGACCGGTCCGACCTGCAGGAGGCAGTGGAGTGGGA  
TTTAGCGAATTGTGCCGATGAGATTGTCTTCTTCGCGCCGATTTATCAGATTCTAGAGAG  
CACCATCACTTGTCAAAGGGCAGTAAGCTTTGCCCTCTCGACACGACCCCTCAGATAGGC  
CGGTGCGAGCCGGCGCTGGTTGAGGCAAGGGAAGGAATACTTGAGTATGTACCAATGGGC  
AATTCTGACGGCGAGTACATCAGTACCCTAAAGGCCAAGACAGCTCTATACGCCACAGC  
CAAAGGCAATCGGTACGGCCAACCGGGAGAACGAGTTTTTGGCAAACGGCGGAGCCTCTGG  
CCCGCCGGCAACCCGCGCGCACTTAGCTCCGGGAGGTGAAACGTTAAAGCTGCGCAATCG  
GCAAAGCCATCGAGTGTGCTGGGGGAACAGCCACCGCTGTCGCGAGGGCCGGCAGGTGA  
AGAGGAAACCAGTTCTCGTGGGGGCAGACGTCCAGCCCCAGGAACCCCTTAGACCACGGA  
CCGACGATCCTAAACGCACAGTAAGCGAATCGCTGCGCCGCGGCGTTGACTGAAATCAGA  
TTGTCAATGGCATCAACCTGTTTGTGTACTGGCAAAGGCCCCCGTTTAGATTAACCGCC  
GCGAGGGTAAGTTGATACACGCCATTGCGGAGGGGTTGTTGGGGCTCTCTAAAGGCCAG  
TCCAGCCGAAGTAGTGGTCCGACTGACACCAAGGTCAGCGCCCGACTGTGTTCCCTCCTG  
ATCAGTACGATCAACGTACGAGGCAGTGTGTGATCATTGAGGACTACCTCTCAGCGATCT  
AGATGAGACGGGCGTAAAAAGAGCCGAAACTAATTCGAATGCGGTGCTCGGGAGTTCGAG  
TGCCTAAACGCCTGGCGGCCGCTCACCTCGAAGCAGATGGGGTGCCTACGCTCCGACG  
GAGATCAATCCAGGGTTGACGCGTGGCCAGACGCCCCCCCCGCTTACGTGGCCGCCGCA  
AGGCAGTGCTAATCTGCAAGGCTCCACTATGTTTAGACCTTAAGGATATGAAGACGCCAC  
TGGTAGAGGAGTTGAATCATGGGTGCGCCCCCAAGGGCGGAGGAATACGGGGCTATCGAT  
CGTCCCCACGCTGCCGGGGTGAAGGCGCAGCGCGCGTACCGACTGTACAACGGTCCCTGCG  
GGCTTTTGGCACCGGATTGGGACGTTGCGCGTCATGTAAAGATAACATTGCGGCTGGACG  
TACATCCGGGATGAGAAATAAGCAACCGTCACGAACCGATCCACATTTTCCGGTCCCTGGA  
TCAGAGATAATGGTAACGAGAGACAGTCGGGGCAATACCGGAAGCTTACCTAGGCGGTCC  
GCACGTAACGTGTGCCCTAGGAGCAATATGCCCGGGTGGAGCGTCCGCTGACTTCTGGGG  
GCGATGCCCTTGCTGGTCCCTATCTGGCGACGGTCCAGGAGTATGGTCTCGGATATTATGACC  
CTTAAAGCGCTGTGCTAGAGGTAGACGGAACGAACGCTGATATTAACGGTTCCTCGTCCGG  
AAGGTTGGCCCCGAGGCGCAATTCCCATAGGACTGGGATCCGGTATCCCACCACGGGTAC  
CCTGTTAGAGAGTACCCGTACGTCGGTGCAATCGGCTGCCAGGTGAATCACCTGTGCGTT  
CATAGCCGGGTGCTGGTCCGTGCCGGAACGCACCGCATTGCTGAAGCTGCGCCAGAACGTT  
GACAAGATTCCCATTTTCGAGAGTCAAGAACAATCTGCGCGGGCGGGAAGTCTCCATTAGT  
GCCGGTGTACGCTCGCCAGCATAAGACCGGGGCAGCTGTTGATGTAATGTTTCGACCCC  
TGTCGCTGTGTGCATGAGATGGAGCTCGGTTTGGCCCAGAATGCCACCTCCGAGTGGTTA  
AGTCCCAGCATCGACCACAAACCGAAACTGGCGGAGAACGACTCCGCCAGACTGCTCCAG  
CTTCATGTCTTGAAGGCGCATCTCTACGGCCTCCTGGGTGGTGCCTCAGTGATTTTGACG  
GGGCGCCAGAGAATGGTAAGATGAGCCTCATGGTACCCACCCTTGC GCGCTTTGCGGAA  
TAGACAGACCGATACTCCGTCACGGAGCGAGCTATCCTTTGGCTGAACACCGAGGGTCTG  
TGTCAGCGATTTCATGCCACCGATATACGGGGCGGCCATAGGCGCTGGCACGGACTTGTTA  
GTGGGCTTGTGCGACGCCGTGCGCTGCGTGATGAAACTCCTTCTAGGTTTCGCACTACT  
GATCGTGTCCGTTTACCCGTTATGCATTTTTCGCTGCTCGGATTAATTCGAGCAAGGCATC  
GCATCAATCAGGCCCGCTATGGTCTGCTTGGATCAGACGTCGTCCTTCCGGCCGGGTCAA  
CGGGCCAGGAGTATGTGCAAGGTTCGATGAGGTGGAGGAGAAGTCGCCCGCCGGCCATGCT  
CTGTCGACGCGCCACGACTTGGGGCGCCAAGGGACTGTACACATCAGCGTCGTGGCTGTG  
ATCATGCAGTAGCCGGCGTACTCGGGCCTCAAGGTCAGCAATACCGGTAGCAAGGGCGCG  
CACGATCTCATGGTGACCATCGGTTTCGCTGGTTGAGCCCGCAATGCCGCTGCTTCGTGGT  
TTCAGCACGCTGAAACCGAGGGTCCAGATGGCCAATGTACCAAGCCATATTATCTCGGAA  
TTATTGTTGGGTGCAGAGAGATGTGACTTCGACCACGGTTCGTAAACAGTGGAGAGTAAG  
CGTCACAAACCTTGCCTAGTATGCCGGGCACGGTCTTTTCTTATTACAAGCGGGGCACAA  
GTGATAACCACGCTTCATTCTTATCCGACGCCAGCCCCCTATATCGCACAGCTGGA

CGAGCGCATGGAAATGCACATCAACAATGTTCTGTACGACCTGGGTAGCATAACGTGTATG  
GATCAAGACATTGGCCTCAAAGCACTCATATAGAGACAGACGAGGTGGAGGTTCGCAATT  
CATGACGCATGACTCCTTCCACAGCGGTCTCATAGTGACACCCGGTACTGGAAGTGC  
TTCCATTCCGAAGTCGCGCGCCCTCTGAGCACATCATATGCACGATCCTGTCTTCCAA  
ACGAAAGATCATGGAACCTTTACGTAGGCCAGGTGCCTCGCCCTTAATTTGCCTCACGTC  
GAAATGCATCGAACTGGACAACCTTGTGGTTCATGAATGAGACCCACCTGGGCACGTACCC  
CCAATAATACCAGCGGGACGGTGGATCTCGTACAATGTTCTGAGTAGCCGGCTTGGAA  
GGAGTAAGTGTGCTTGCCTTCCACAGCGGACCGTTCGAACCTTATGCTGTGCTGGAACGC  
GACGCGAAACCTACGTTGGTATCTCTTACAGGAATGGCAAAGGTAGTTAACGTCACCTCC  
AAAAGCGGAGCGGGTCGGCAACCTCCGGGCACACGGCTATTGAATACCCGAACACGTGTG  
CTCGATACTGGGGCATCCCCGTACCACAGATGAAGCCTAGTACCCTTAAATTATGCATTG  
GTCCTAAGATCCGTCCCCTCTGGCATTCTACCGCGCACAGTCCGGAGGACGGGGCTCCAGG  
AGGCACACTACAGGCGTATAGACGCAAGCACGCTCCATGAATGTTAGAATGTAGCTGGGT  
ACATCGCACCCGATCCGCCGGCCCTGACAAGGGGATGTGCAGTAGACGTCACGCGAGGGCA  
TTAAATGCAGGAACTTGAGTGGAAATTGCGGTTACGTTTCTCGAACCCAGTTCTCCGCAT  
TTACACCACCGCCGAGAGATCATGGCGGGGTGCTCCAGATAAGCGACAGGTCGTATGAGG  
AGATGGCCATACTACTACGCCTGCTTACGCGGCTGCACGGCGAGGACCTGAAAAATGTGC  
AGGTCCTGATGTTTCGACCTGGGAATACTAAGGGAGTATTAAGGCGGGGCCAAGGCTGCCT  
TTAGGAATGTGCTGCCCTTAGACGAACGTCGTCCCCACAGTGGTTTCTAGGTGCGGCCCC  
CATTCTTCCGATGATCGAATGCCGGAGGCCCTGTCCATCTAAATAAAGTCTTCGCTCG  
ACTACACACTCTCTATTATCAGGGAGCTGTCCCAGCGTGTCCGGACCGTCGAGTGC GGAG  
GCCTGATCCTCATGGACGCCCTCCGCCTACTTCGCTACGGCAAGATCTCCGGGTGCTGGA  
AGGTGAATCCTGCTTTCGCGCCCCGTTGGCGATTATGATTGAGACGGATAGTATTGTCA  
TCGACGCCATGTGGGCAGGCCCGTTGAGTCGTCCCCGATAAGATCGTCAGTTGACCGG  
TCCGTATGGCACACGGGGATGAAGTAAACGCACGCGGGTTCGACGCATCAACACAGGGCCT  
GGGACAACCTTAGTTATCCCCAAGCGCGTATGAGGGCGGCCTATCCCAAACCTCCCTATT  
ATTGCCGCGCCCGTATCGTCCCCTATATGGAGGGAACCTAAGGTTGGCAGTAAGCGCCTCC  
CAACGTTTCGAGCGGTTTTGTGAGAGCGACTGGGCAATTGGATTGACAGCGACACATCGAC  
TTCTATGTTGCGGCCTGGCCACAGGCCAAAGGGCGGGCTGGGACTAGGGCGTGTCCCGTA  
TAAGTCCCGACCCTGACAAGCAAGGAACGTCCGGCTGGATGGTGGGCAGTTCGGATCCGG  
TTCCCTCGGTGTGGGCGAGGTGTGGTTAATCTAATAGTGGCCTAAAGGAAGGTATGGGCA  
ACCGATGCTGCGTTAGATAACCAACCCCTGATCCTGGCGGCTAGCGTCCCCGCCCTGCCT  
GAGAGCCACGTGGACATGCCCGTTGGATGTGTCCGCGCCACGGACACATCCGTAGCCGG  
GTA CTGCATCCGCACATCAGGTCCCAGGGGAACGAACCCAGCTAAGATTGGATCATACTC  
GATGGGGTAGTGCCCTCGTATCACCCATCGGTGTCCACGAGGTGTACTGGATCGTGACG  
CGCTACCGCAACGACTTCACGAGGTCCCTCAAACGTAAGTGGCCGGGTGATTGTACCCAT  
TTCGCCGAGTACCTCCGGTCTAACGCCCCCAAACGTACCCAGGTTTGACGAGAAAGCG  
TCGAAGTTCGGTGGTATTCCCAAAGTCGATGCAGTCAAGGAAGACTGCAAGGAGTGGCAC  
CACATGAGGAAGATCGAATCGGAGCTCCGCGCCGAGTACTCCGCCTTCCCAAACGGGAAG  
GTT CAGCACACTCGTCGCATCTTGCGCAGGCTGATGACGGTGCTCGAGGAGAGCGTTCTG  
TGGGGGAAGTTGGTGGAGCGCTGCGCGGAGTCGCTGGCTTCCGATTCTGCGAGCTCTAC  
CGCTGGTACCTGAACACCGAGGGTGCAGTGGCCAAATGGACGACTCAGGAACCTGAGCTG  
CACGAGCTGCGAGTCTCCGTACGGCAGCCGCGGACCGCTCTGCCTACTCAATTGCACTAC  
CACAGTCGGAGTGACTACTATCGCAGCGCCTGACTGTAAAGCGGTGCGTTGAAATGCCGG  
ACCCGCATACCTCGCACCCATGCTGGTGGACACTTACTGTACGAGAAATATGACTTTGCC  
ATGCTCGGTGACTCACTACCGCTTTGCTCTACCCCAAACGGACCTGTGCGAGGCGGCCGTC  
ACACACTTGACCCGGGAACACAAGAACCCCGATGGCTAGAAGGCCGGCCAGAACAAGACC  
CAGCTGAAGGGTCATAAGGTGGAATATGATCACGCACAGATGAAGTGTTTTGACCCGGTG  
TTTGTGTCTCCCGACACCAAGTGGACGCAGCAACTGCCTTACAGACGTCTTGGAGGAGTAC  
GCGTTAGCCGGCACGGATTCTCGCTGGACCAGGCTATGGAACGGCGTCTGCCTCCGGTGC  
GACGTGAAGTCCGCGGCGTATAACACAAGCTCGGAGGTGCCGGAGGTACTGGCCTAACCC  
ACCATCTAACCTAACGATAAGCTTGAACCCACGGTGAGCCTGGCGAAGGCTCACGCCACG  
CAGTACCGCTCAGCGGCGTTCGACAAGGAGTGCAAGGCAATAAAGGTCATTGGGATGGAA  
CAGGACGTCCAACCGGACGGGAACGACCACAACAGATTGAAGCTTACGCAACGGACTGA  
GATTGCCTGACTCTCTCGTACCGGCGCCTCCAGAAAATTCCTCGAGCCGGCAAACCTTAGG  
GTTATGGTGAGTGTGAGTCTCTCTTCTGCAATGAGGGGCGGATAATGGCAGTGGACTAT  
TCAGTCCTGTAGATAGTGAACCTTGGCTGCGCTCAGCGCCGACTACAACCTGGTTATGTAC

CCCGGCCACGGCTCATACTCTCAATGCCTGCGTCTGGCCGCAAGGACCTTTGAACCCGAC  
AATCAGGTGCTGCACAAAGCAGTCGAGAAGAAGCCAGATCCGGAGCATAAACGGTATAAG  
TAGACGCGGACGTAAAAGCAGCCAAGAGGATCCACTGTCTGGGAAGGGCCCGGTGCCGCG  
GGGAACGCAAGTGCCTCGGATTTATCTGTCTGACCGCCGAAGGTTTCTACGAAACGGAC  
ACGTGCCTATTCCCGCTTAGCATCCTGTTCCGTAGGCTAATGCTCGCTAAGGTCGAGCAT  
AGGGACGGCATGACTAAGGGCCGCCAAAGAGATCAGCACGACGCCAGTGGGGCGCGACGG  
TTCTTCAGCGGTGGCTCCCAGTAGGCGCCAGCTAGTGCACGTTACAGCTGCCGGTAGTGG  
AGACTTTAGAACAAGGAGGTTTGCCACCGGGACCTCGAGTGAATGGACGGTCTGATCGCT  
AATTCCTGGTACCAGATCGAGGCTTTCTCACTCATGGCGGTAGCGGCAGTACGAGTACTA  
AGTTGGGTCTGTTTCGGGAAATCCCTATTGAACTCTGAGTTGCCGCAAGGGCGCGTGTGC  
TTCATCAACAAAACCCGGAATCGGCTTTAGCGCGACGTAGACAAATTGCGCGAACGGGTG  
GTGGCCTTCCAGGTTAGGGGCAGCATGCAAGAATAGTAAACGTAGAAGACCGCTAGCTTG  
CTCACAAAAGTGCGCATTTCGCGTTCCTACACTCGCTCAGGGAGGGCTCAATAGGGCA  
CCCAGGGAGCACATGCACTGGGCAACTCCAATATCCACACCAATCACTGGCCCTAACGGT  
TGATTGGCTGTACGCAGTACCCAGGACGCTCGCTACTCTTGGGCCAGACAGACATGTAA  
TAGGGATTGCGCAGGCTTGGGGTACCGACATGACCCAGGCATCGGTGGTCTCTCCGTCA  
CGGTGGCCAGGCTTACTCAGGCGTACTTGGCATCCACGTACCCACTTAGTTCGTGCCAT  
GGTATGGGTCTAGGCCGCCGGCACCGCGCAACAGCAGAGCGAGGTGGCGACGAGACATGG  
CCGCTGCTGCCAAACCCAGGTGACTCCACCTGCCTACCCCGATCCCCTGGGGGACGCCAT  
GGTAGGGCGACTCTACTTGTCAAACCTGAACGTGGTCGAGAGCTTTGACGCGTCCCCTGT  
ACCGGATATAGTATAATGCAGAACTCCCTGAACAACCTGGCCCAGGCCAACGTGGGGCGCC  
TAACCCACGTCTCTAGAACTGTGCCAACGCTTCAAGTGAAGGGCCGGTGGTAAGGACTAC  
CCCGGAGCCAACGTCGTCGACTAACTCGTGCGGTACGTCTTGATCGGTATGCACGCATAG  
GGAACTCAAGGAACGTCCGCGGACCCTGCCCTTCAATACCAATGGGGCTGCACCATTGTC  
GGTGGGGGCAATCAGACCGTATACCGCACGCCCGGCCTCTGGTTGACCTATCATATGATG  
ATATGCAACAACGCGCATCCGGCCACTAGCATCATCTCCGGCAATATGACCTGTGTGGGG  
CCGGCCAAGCCCTTCATGTGAATGCTCCGCGACGCCGCCCTCGTGAAGATCGTGCAACAAC  
GTCGTGAGGAAGAGCCAGGTAGAATCGCAGACTGATGATCGTAATCGTGAGCGAGCCG  
CCCCTCGTCAGGCCAGCAAGAACGAGTACAAGACTCCCCGCCTTCGCGACTACCCGTTT  
GCCCTCCTCCTGCGACCACATCCGACCAAGCAAGCCTCGGACGACATCCACATGGAGGGC  
ACAAACGAGACCACGAGCCCGTGCAACAACCTGCCTCAATGATAGGAACCCGCTGGCTATA  
GTCTTGCCTCGATCGGCCCTCGAGCAGTGCCTGTGCCGACGAGGAACCTGCCCTCGCCA  
GAGCAGCTCGACGCTTCTCCCTTGCCACGCCCCAGTTATCCCAAACGCCGCCCCCGCCT  
CCCATCCCGCCAACCCCGGCTATCTCCGCTACCAAACGTACATGGCGCCTGCTGCGCCG  
CCGGTCCAGGTAGTGGCCAGGTGGCCGCTGTGCCACCGGTGACGGTAGCGGGAGTCGTC  
CTGGACTTGCCCTATAAGGTAGGTATCCAGGCAGGGGCGGGGATACCGCTGTATTGGCGC  
TTATCCGAGTCGGCGTGGTAACCGCGCCCCGGTGACAATTCGACATGACGGTGCCTAATC  
GACTACCGCTGTTGGACGGCGTTGGGGTGCCCTTACCGCTTTAGCGCGAGTGTGAAGACTC  
ATAACTGATGATCTAGGGGCTGACAAGGTGACGCTGGCCAACCAGTGAGGCTCTGGTC  
GCGAGGATTCCCGCAAAAACCTCGCTCGCCAGGGGGGTCCGCATAACCTGGAGTACTGT  
ATGCGACGCGGAAGCCCTACTAGTGCCTCGCAAAGCTACGCCTAAGTCGGCGCTCTTGG  
GGCCGCAAGGGTGGCTCCTGGCTAAGGAGACGCTCATCGATGACGGAATCCCCGAGAAGA  
TCGTGGTCCGCCTGAAACGATACAGGTAAGACGGCGAGCCCCGGGTCTGGACGGGGTGC  
CCTCCGGCGTTCGGTCCGTCAGGGCGGCTGAATACAAGGACCTCCGGTCGACACCAGCCC  
CCGTCCATAACGGGGAGAAGGGAAGGATCGATGTCCTCAACTAGGGCGAACGCATTGTCT  
GCATCAACACCGGGTGCACGTGATCCCTCTCGCTCCGAGCCACGGGGCATAGGGGGGGGT  
TCATCACGGCGTAGGGTTTCAACGGCGAGACTGTAGATCACGTCCCAGGCCTGGCTCGCT  
GTCGGCTGAAGAGCGTCGTAGTCGCCGGTATGCGGGAGGTGCTAGGTGGTGTAGTGACCG  
AGAACGAGGGGGCGAACTTAATCTTTGGGGTCTAAGCTAGCATTGGCCAGGATACGCTGG  
CCGAAACCCATGTACTGTTACTGCACCGCCCCGACCAGGAGTGCGCGTCCCCTACATCT  
GTGAACTGGCCCTCAACCCAGACCTGCAGTAGTCGTTGGACTGGATGAACGGTAAACACC  
CACGAGTCGACAACCAGAAGCTTGAGGAGCGTGATGCGTTAGCAGAGTAAGACGAAGCTC  
AGAGGCGTGTGGTTCACCCATCTACCCAAAGAGCTGGGACGCCTCTGTACGTCCTGTTTT  
ATAATGAGTGAGTTGAGCATTGCACGCGTAGCGGTGGTTGATAACCACCACGATACCGGC  
GGACTCCGGTGCACATCTATCGGTGCTGTAATGCGGCGGGAGGCCTGGTAGGCAAGGCA  
GTGGGTAGGTGGGGTACCAGGAGGACTAGGTATGGGGCCATCACGGCGTTCCTGGAGAAT  
GGGTTCCAGGACCTGAAAAGCCACGGGCCTGAGTTAATGTATCCAGCCCACGAGCCACTC

GATCTAGACGCTGAGGGAAAGGGGGTAAAGGGCAGTCATGAAGCACCAGTGCGCGTGGAT  
TCCTCCGAGGGCCGCAAGAACCCTGGTCAGGATCCCTGCCGAGTATCTGCCTCGTTACAG  
GAATTAGTTACCTGGAAGCGGCCCTACCGGATGCATTGTTGGTTGGCGACGGTAACACGC  
CACACGGTGCACATAACCTCAGCTATAGAGGACGAGGGGTGGTAAGTCAGGAACTCTTAC  
ACAATTTGCACGACAGGTTTGACAGAAGTCTCGCACTAGCAACTGTGAAACTACGGACG  
GGCTGACCGGAGGTGCCACGAAAACCTGCGGGGCTAGGGGACCCGCCCTTGGAAAGACGGCC  
CATGTATTTTGAGCAACGACAGCGCGACCCGTCCCAAAGTCGGGCCCGTCAGGGGACTAC  
GGAAGCAGACCCAAGGTCTTAACCAGTTAAGGCAGGAATCGAACATACGCAGCTAGCGGG  
CGCACTGTTTGTATGTTGCTATCGTGATCGACTCGGAGCTCGACTGGGGCTAGAGCATA  
GGGAGGATGGGAAGCCTGTAGCTGCGATCTTGGAGCGGCTATCGGGAGGAAAAGGTGGAG  
TGGAACAAAACGGTACCTGATTCGACCGGCTGAGGAATTAAGCCCGTCTCCTGATGGATT  
GTTATAATCCAGCTCGCCCGCATCGGGTAATGGGAACAATGGTGATCGCGAAGCGCCGGT  
ACGCGTTCACGAGAAAAAAGCTGGAGTGGTGGACCGGCAAACAGTTGACCGCAAAGAAGC  
GCGAACATTTGCAGTGCCCCAGTAGGTCATGGTGGAAACCACTACTTGGCCGGCAAACGCG  
AATCCTGGGAGGAGATGCAGCACTCCATAATTGAAGACTGCATCTCGGTGCGAGGGTTGG  
AGTTTAGCTAGCACCCCGGTACCGTTGTTATAGGCACGTGCGTGTCTCAACGATGAGC  
AGGGGATCGGCTTTCCCAAATCCTCCTCGCACGCCCTGACGGTCGTAGAGACGACTGTCC  
CCTGGTCCTGTTAGCACGAGTTTGGGCATTGCAACGGAGCAGGCGGTTGCAACGTTAGCC  
GCAAAACCTTACGCTCGAAGCAGATGCGTTAATCTCACCCATGCAAGTGAACCTCCCAGT  
CAATACGAGCGCTGTTTCTACGCAATTTCCCAAACTAGTCCGAGCGTTTCGGTTATCAG  
TACTGTAGGGAGGAGGGTCTGCATCCGCGGCTAAGGACGGTCGAGCTATAGAACCAGCAT  
CTTGTGGGCGGAGAAAGGAGCGCCGCCGCTTACATAGCGGACACCAGCAGGTCTGGCTGG  
ATCGCCCTTCTACGCTCCGCCAGTGGTGGTGGGCTCGCCTTGCGGGCCGTGCGTCGCCTA  
CTGAGTATCGCTGTGCGTCCTATCCGTGAAGTTGGCAAGCGGAACATCCACATTTCAAC  
CGGCAAGAACTGAACGTTAGTACGTAATATAAGGCTGCCCTGGAACGCCGGATCGCCCAA  
AACCGCGACGGACTGGCTCACGATGGTGAGCACGGCTAGTCGCTCTTGGAAACGTTGCC  
ACGCCTTAACTGATCCTCAGGGTACTGGATAATCCGAGGGCGAGCACTGATGAGTGAGTG  
CATGTGCTGCGTGGGAGGCACTGGGAGCTGGAAACCAGGGCCACGGAGATACGTGAATAC  
AGCATTACGGGACAACAACGAGCTGGGCCCCTAACACACCAGGCGCCTAGATCATCCCTT  
TACGCTCGTGGCTGAGGCGTTCGGGGAAAACAACATTGGCCGGCAGTCCCACAAGCGCTA  
AGGCCCGCGACCAAGGGCCCGCGCAAAGCCAGGTCCAGCGTGCGAACCGCCACTTCGC  
TCAGGCTAAAATCCACCAGCGTCGCGAAGTTCAAACGGCCCAGGCGGAGGGTCTA  
GGAATGCCCTTCTGTACGTCACCTGACCGCCCGCACGTAACCAATTGCGGGAAGCAAT  
TGATCTTGTGTGCACTGCAAGACACGCGGCCAAAGGAGCCTTCTGTGTGCCTGGCCCTG  
CCGGGGCGGACAGAGACGCACGCCGGTGTGAGCGGCGGGGTCGTACTGGCCACATCAT  
GCGGCACACCGCCCGGTCAAGAGCCACCCTAAGCTGCATCCCCACGTCTTCGGGCGAGC  
CATCCTGCGCGAGGCATTTGTGTAGGATGGATAACCGTACGACGGCACGATACTTCGACCT  
GACTTGGTTGTATGTGCGTAGAGCGGGCACGTCCAGGAAAGGGCGCACCCCGATTACGAG  
TGGTCCCTCCGTAAACAAAGTCCGGGTAGGTCAGTTAAGCCGGAACATAAGGACCAGTGG  
CTACTTCCACGTGCGCGAGCACGGCCCGGAGGCGACGATGGATACTGCGCGGGGGGAGAT  
ACGCGAACTAGGTCCGGGTGTCAATTCGGATGCGAATGGCGTTCGTACGGTTGAGGAGCG  
GAAGGTTCGTGGCTTACGTGTCGTCTTAGTTTAGGGGAGACTCGCCATGGTATTCAGTGT  
GCCGACCGCATGGGACGGGAGCTCAGGCGGGGGGCCCTGCACTGGGGCTATTACAGTCTA  
CTTACCACTGAGCCGTTTGACCTGCCGTACTCGCGCGCCGTTTCGACCGGAATTACGGGA  
CAACCCGTGGAGATGCACCGATGTGATCGCCTGTGCGAACTAGCTTCAGGCCGCGGCTTT  
CAGAATAAACTCCCGCACGCGGAAGCTTATCAAGGTGCTGTGACGCAGCGGCCGCGGTTG  
GATGGGTATGCGTAGGCGGGAAGCGCCTCCCTAGATGGCTTCCGCATTCCAAGACACCAG  
GGACATGGACTCGTATCCCTAAATGTCCCTGAAGCGGTTTACGCGTTGAGGGCGTCCGTA  
GCCCGTCTCGCCGATGGACAAGAAGGAAGGCCACCAAGCTGACCAGCCCGTAGGCAAGGC  
CCCCATGTGCGCCGCCGCCCTTACCTCGAAAATGGGTGCCGACGTTACCTACAGCCA  
TGGCGGGGACGAGTAGCGTACGTTTTGAACCGGCCAGAGGACCAGACTTATAGGGAGCT  
GTTGCACCTGGACGAGATCCGCCCAGGGATTAAAGACGCTTCTATCGGACCAAGGTGCG  
TGTACCGTATATTACCCGCTATCACATGGCCCGCTTCGATCAATGATCAACCTTGGTAGT  
TGCGCGCAACTCTGATTTGTACGTCGCCCTGTAAGCACCGCCAGACAAGTGATCGCCGA  
AGCCTACTCAAAGCTCGGGTCATTCGCTGCTTAGTGGCACTTGCGCGTGGACAAGCCTTC  
CCGATAGCGATCCACTTACGGACGTGCGCTCCGGATCCACAAAGAAGCGACCGGCTCTGA  
CATCCTGTCCTTATCCTCGAGGCTGCACGACCCGATGGGTGGCGAGTAAGTTCCCTCAA

TCAGTGCGTTGGCGACTCCAAGCCGCACTCCTACCCCTAGATGGCCGAGGAGGAGGACGC  
CCGGATCGACCTCGACACAGAAACCCCGGCCTCTAAGGAGCGGCACCTGGCCCAGCTGTG  
GCCAAAGAGGGACTGTCCCTTCGCCCTGGCTAACGAGCCCGTCATCACCTACGTATTTGG  
AGAGAAGTCGCCGGGTGTACAGGAGGGCACTTCCGACTCCGTGGGAGAGCAAGAGGGCGAT  
CGTACCCGGTTGCGTTAGTCTCTTGCAGCCATAATACCACTCGCGCTATGTGCTGGTCTC  
GGCTATCGAGCATGCTAAGCCGGGCGGCCCCGCACCAATTGGTGGCGTGCGGGAGCAGGA  
ACGCAGCGCCACTGACTTCTCACCGATGTTGAGTTTGTATGCCGACTGGACAACCTCGGCGA  
CCACGATGACGGCGTCGGCCCGAAGCAACAGGTTAAGAACGGGCGGTTGGGTGTACGGA  
GATCGTGGTGGTAGAGGGCGCGCTACTTTACGCGACCCCATAGGCTGCGTGCTGCCGCGGA  
AGACAACCTTCGTACACGTCCTAGGCGCACCGCGCCTAACCTACACGGCCCGACTGAAAGA  
TGACAATGGGAATGCAGTGGTGGCGATCACCGAGAAGTTTTGGACACACACCTCTAGCGC  
CGAGGAAGTGCACACTTCTATCCGGCTAGGGTTCGTGCCGCTGTACTCGGATATCGATTC  
TAGGCCTGTGTGTCTAGGGGCGCCGGTGAAGAGAGTGTAGGACCACGGGCGAAAAGGGT  
CCCGGACATGACCGTGTTCCGCGAGACCGCCATTTAGGTTCTTTGTACTGTCCGACTATAA  
TGACCTGCATGACATCGTCCCCAAATAAAGCGAGGCAGAGGTTGAGTGCCCATCGGGCCA  
GCTCGTGTGTTGGTTCAGGACCTAGGAATCCCAGCCAACCCGCCCGGTTTGGACGGGAA  
CACAGTCATATACACGACAGGTGAGGGTAGTGTGATCGCTGCCTTTATAACCACTTGCTC  
AACGCCGGTATCTCTTCACCTTGCCACTTTGAGATAACCACTGGCGGCAGACAGCTTCAC  
GCCCTAACGGACCCTGCTACATGGAGGAGTCGCAGGGAGTGTATTACGATCATCATTGTA  
CACCACTTCAGGTTGTTAAGGCTCGTGTGTGGAGGGGGAGTGTACTGGTGCGCCTGG  
TGTCTTGGTAACCATGGGTGCAATGGCAACCGGGATCGCTGTAGTCGCCGCGGACGATG  
TCCTGCAGATCGCCGACCTCCTCTCGGTGTAGTGGCCGTACATCCTGCCCCAGTTCACGA  
ACGCGGGGGTGGCCCCACCGTCCGTTCCGCCCGAAAAGAATCGTGCCCGGCAACCGAACA  
TCACGCCGAGATCCCTTTCTCCAGTAATGATGCGGGGTAATAACAGACAAGCTCCAGGA  
GGTTATATGGCTAAACCGATTATAAAGGAAGTGGGTAGTGTCTCAGGGGCACCATTGTC  
GCTGGGCATAAGAGCGGTGGCGGCGAGGTTGGCGGCGGTGAGAAGGATTCCTCGAAACAA  
GCACTGGCAGCGTTGCTGAAGAAGCAGCGCCCTGTAGCCCAGAGGCTACAGCTGCTCCTG  
AGCGAAGATAACATAACCAACGATTGACACAGGTTGCAATGGCTAGGCGCAGAATGAAGCC  
GCCGCTAAGGAGCGTGGTGCACGTTGCGTAGTTAACGTACGTTCCCTTGCCATTAACATC  
GGACACCAATCTGACAGCAAACCCCTGCAATGTGGGCGGTAATCGTAGATCCGACTGCGA  
GACAGAAGGCCAGGGCTTCAAACAGTTGTCCATAGCCTTTCTGTTGGTGGCCACTATCG  
AGAACACGCGCGAGTCGGAATTACTATAGTACGTCTTGCCCGCTGCCGGCGCCTTCCTCA  
TAAGCAACTTGCCGCCGAAGGTGGCGGTTAGACTCTTTCCACGTGGCTGTGTTAGCTCGC  
CGATCGAGCTAGACGAGACGCGACAAGAACTCGCCGCCACTAACGTTACCGAACAGTCCG  
AACTGCACCGTCGCACTGCCGACCTGGAGCTACTCGTTGCTCCGCTCCACTTCTTATACG  
ATGGCCTGGCGTTGCTGCACCGCCACCTCATGCTTTTGATAGACACCGGCATCGCCCGCG  
AATAGGGCGACCCTGTCTAGTTAAGGATCCCTGCTGGCCTATGCAGACGTACACGGTGC  
GGAGCAGCTTACTGCCACACCGCCCTGAATGTAGTCCGCCAACAGATGGTGCACCCTG  
AACTGACTACCGCGACCCATGCAGACGTCCAGGACCAGCTCATTGCCAAACGCAACTCGG  
ACAATACCGCCTAGTAACGGTTGATCGGGGCGCTCACTACCCTGAGCGGGAGGTGCATCC  
CAGCATGGGACGAGCAAGAAGGTTAGTGAGTCGGCCCGGGCTCTAGCTAATTTGATGACG  
TATGTTCCGACTGTTCCCGATGGTTGGATCGCACCCACGTCGAGCAATTCGCTGCTGGCC  
ACGTAGAGCAGTACAGTGGCCAATCCTCTCGTCTGCTCTTCTTCAGCGTGAACCTTGGCC  
TGGGCAAGTTCGAGGAGGGGAGTATGGTCAGCCTCTGGGACGTTGCAAATCGCGGCGCGG  
TGGACGTCTATGGTGACATTAAGACCGGTGGCTTCGTACCGGGCCATGTGGATTCAAGTTG  
CGAAGTAAGAGCAAAGCGATTTCAAACCTAACGGCCAGGCCTTCGCCAGTTTCGAGAGGT  
TCGTGATGCGCTAGACGCGAGGTGACATGTACACCGAGTCAGTACGACACACTGAACTCG  
TGAGGGGAGAGGTGTTTCGAACTGTGGCTCCGACGTCACCACACCTCCTGGGCGTCGCGA  
ACAATCGTCCGGCTGAAACGTTTCGCGTAGCCAGGGGCGTACCTGAGCACGCACGGGGCAT  
CGCGAAGTTACGGCGGGATGCTTCTCGGGATGCCCCCGAGCGTGTACCGTCTGAGCATT  
GCAGCGGAATCCTGGCGCTGTCCAGGACCATGGAGTCCACCAATATCCTGAGCGTAAGAC  
TGTAGACCGGAGATAGCGACCTGACGCTGGACCAACTCACTAACCTATTCGCTCTTGAGA  
AGGTCGTAATGGGTATGTTAGCCTACATCCTTGTGGCTTCTCTATGTTGTCTTAAGACA  
CACCCGCTATGGCTGCAGAGGCCGAGCAGGAATCTCCCTTACATAACAACCACTGGCAG  
TAGTTCGCGGGGCGCTGGTCCGCCAGAAATTAGTAGGAGTCCTAACATCATGTGTGGAGA  
GGCGCAAGCTGTGGTATCGGTGCCGGCCCCCACGGTGAATCGACGCCTACCTCGCCGCC  
TGCTCCTGTAGCTGGCCCGCTAGCTTACGTATTTGCTTCTCCGACGCTGCTCGTTAGGG



TTCAAACCAGCACGCTGAGTCCACGGCAGCCACATCCGAGCGTGGTTCGCCTCCTCGCACA  
GACTGGGTAGGACGTGTTCTGCGACCTGGCTGCAACCCTAAGTATCGGCATGGTAAATCT  
CATCATCCATAGTAAGCACCTGGAAATCTCACGGGCTTTTTCTAAGCCTATCGGGGAGGG  
TGACCTATGCTTCATGGACGATCTGTAGCTGATCGAGGTGTTGCTGAGCAGCTACCAA  
GTTGCTTAACGGGGAAGCTGGTTGGCTGCCTACTCCAGTAACCCTAACTCGCCACCGACT  
GCGTCGTCCGTTGCTCACGGAAATCGTTGTCGGTAAGTATACCGTAGCGAAATGGGTATA  
GGTGTATTATCTCTGTTGCGGACGAATCAAATCGGGACGCGAAAGCCTACGACCGCGACAT  
TGGGGAACCTCAAGAACGCGAAGTTGGCACGCAAGCAAATTATGGACTTTGCGATGTCCTG  
CGGGCTAGTTGTTAGGTATAACATAACAACCTGGGGGCAACCCAGTCACCATGATGTGACT  
TCTCCACGAGGACTATAATACGGACGTGGATCTGCGCCAACCTCTCCAGCACAGAAATCA  
GGTAGTGCGTTCCCCCTGAAGAGTGGCATCGAGACAGTTCCGTATGGAAATTGAGCCAG  
GACGTATTGCACTGCAAATACCCCCATTTCGTTAGGGTCTGGGTGGTGAGAACGCGGATGG  
TCGCTAGCACCTCCAGGACCCCCTAGGCGTGCTGGAAGCTATCTATATGTCCAGTTCGAA  
GCTCACCTCCAGATGAACGGCCGCTCCCGGCACGGCACCCCTCAAACCTGCCCTAGACCG  
CGTTTGGCCAGGCGCCATTGCCGGCCGGATCGCCGGGGAGGCCGAAGTAGGCGTGAGTCA  
CGCCAGGGACTACCTGAACCTTACCACGTACACTGTTCTATATGCCAGACACTACTTCGA  
GTAGTCCGACGGCAAGACATCCAACCTGGATGTCCGCAAGTAAACCGCTCGGGCGGACCA  
TAGGGCTTTGGCCGGCTATTACGACCAAGCCTGCAAGGTACGGCTCCTGAAATGCGGCGA  
CTTGTGAGTCCCCGCTCATCACGCGCCAGCCTTTGACTATAGTATAGTGCTGCCGCTTTC  
CAGTTCTGGCTGTGCCGTTGGTGCCATACGCGTTGCCGACGTCCTGCTACCCATTCACAA  
CCTAGACTTAGAGGCCGTGGTCATCCGCGCCATGGACGACTAGATCATGTTTCGTTGGTGT  
CACCTTCTGGCCTTGGTGATCTTCTCGATCCTGTTAGAGACGGTTCGCCAACTCAACGT  
AGACTTTGACAGCATCCGTGGGGACAAGCCCCTAGGGGTTGGTTGTATCGTAATGCTGAA  
CGGCGCTCGTACGGCCACACCCGCGCTTCTAGCAGTCCTAGATCCAATCGACCGCCCA  
CGGTGCCTACGTCACCGTCACCGTCGAAGAGGTTAGAAGTAAGAAGATCCACTACCTCCC  
GAAGATGGGCCTTACGCGGCCCGCGTACACTCGGTATCCGCCAGCACTTGTAGGGGAA  
GAGCATCTGGTACCACTTCCGGTACACCTGCCAGGCGTAGATCATCTAACAGCGTCGCCC  
CTAACTTGTAGGGTTGCCCAACCGCCCGGACCCAATCCCACAAGGTCTGCGGTAATAGCA  
GTGCCAGGTCATTCGGCGAGGGACGTTGTGTAGCTCCTACTAGCAGAGGAGGCCCAACAA  
AAGCATATCCCAATCGATCTTACATTTCTAGAGCCGGTAAACCAACCCCTATTTGTCTT  
CGCGAGACCCCCCGCCGTAGTATGGCGAGACGTACACGATACGGCCCCAGAGTCTAATC  
ACTGAGGCTCACGCTCGCCTACACTCTTGGCAGAGGGATGGCGTTTGATCATCTTGAAT  
GACTTCCCCCGAATTCCCGCGCGGGGTCGTGTAGTGCTGGTATCCGCAGTATCATCCGCG  
TTGTATGCAGACGATTTGGCGTAGTTCGCCTGCGCCAGGCGTTACATCCATGGCACTCTT  
ACAGGGTCTAAGATATAGGTTTCCCGGCTGTAGATGCCTGACGTAAGTGCCTCCCCCGAC  
AACGAGCTCCTGGAATGTGACCGCTATCCCGTAGTCTCCAGCGGCGCCTAGGCGGTGTAA  
GTAGCGGACCTATGAGCCAAACTACCGCAGAGAGCATTGTGATCATTCTGTCCTCAGCA  
TCAGAGCATGTGCGGCCGGTGCATCAGGCAGTGGGAGCTTCCCCTGCGGTAGCGTATT  
ACGGCCACCCGAGTCTTAAAGCGAGGTACAACCTAGGGAGATACTTTTGAGGAGTGTCCG  
GCGGCTACCGTTTTGCGTCCGGTGAACAGACTGCCGAAAGTGGCCTTAAGTTGCAGGTCAG  
GTCGCACTGGAATATGCTAAGTGTTAAGCAGACAGGACGTCGCCGCGGTAATCCGGTAAT  
CCTGAACACTGACGCCATAGCCCCTACCGACCCCAACCGACACGCGTGCATCCTTCCCAT  
ATTGTCGGGGAACGAGATCCAGCTCATAGCGCGTAGTCAGGACGCTACGCTGGGTTTCTT  
CCGCAGTCCATACGGGGAAGGACTGTTCACTGGGTACATTGCGAGCGTGCGGCCCGTAC  
TGGAAGAAGCTTCGTACGTGCTACACTACAGGACAGCGTGTTTCGTGGTGCATCCTAGGT  
TATCTCGCGCACCTTGCAATAGTCAGGCCGGAGTGCGCACCCGGATGAAAACCGACCTGG  
CTACCCGTAAGTTACGGCGCCTTCTCGAAGCTGTGAAGCCTAACCGTCACCAACCA  
AGTCCTGTGGCTCGGTAGGCCCAGGCAAATGTCCACATCTGCAACAAACGCCTATCCGTC  
TGCGCGCGGATTCTGGTCACTCCTCTCCGACCGGAGTCAAATGCGGGTGCACCAATTGG  
TACTTCTTCTTTTTTTCGTGCTTCGATGACAGTCCGGAAGTGTACGTTAGCGCCCTAGA  
GGCAATCGCGGTCACTGCTTACTGAAGCAGTAACTTCCATCGTGCAGGTAATGCAGTCAG  
TATTTGGGATGCTGCTGAGCTGCGTGCAAAGCTACCTGTAAATGAGGAGGGGTTGATCAT  
CGGTACCCGCGCCTGTAAGAACCTGTAAAACAACGCTGAGTCGATCTTCAGGGGTAGTG  
GGACGAGGCTGCGTCTTGGGCAGCTCAAGCAGAGCTGATGGACTTGCCTCGAAGTGTCAC  
GTACTCGGCCCAACCTTACAGACCCACTACGTTGTACTACTAGCGCCGCGCCTCTTCGGA  
CGGTACGGCGAACCTGCCTCGGAGTGACGCGAGAAGGGAACCTTTTTATTACCACTGT  
TGAGTGTCAGTTGGTCTTTCGGGCTGGCGATTACCTGTGCGTATCTGGTGGGGGCAACCC

GCTCCTAGGGTTGCTAGCCTATGTCAGGGGCCGAAGTAACAACGAAACCATCCAGGTGGG  
GGCTACTACAAAAAGGCGTTCCCGTACGAAGATGTTGCGTCCGACAGCTAGGAACTGCT  
ACTCGCGGCCAAACCCTCAAGGGCCAGGTGGCGAGGCCTAACTTACTTACGAGTCTCAA  
CGGTACCCTGGGTGTCACCAGGTAGACCAGCTTTCAGGGCCCGTGCCCGAACGTGGTCTT  
TGGGCCCGAAGTTTGCTTGGCCAATCCCCGTACCCCTTCAGCGCGCAAGGAGTGTGACCT  
GCTTGCCACCTAATACGCTGCTGCTCCAGTGGACCAGCGAGACAGTAAGTTGTCACTGCC  
GACGTATACTTCGAGGCTCATACTTTTCTAGGCGCCTTCCAGTACACCGAACGTGCGGGT  
CCTCGGCACGTCGTATCCCCACGAGATGGTTGTGCACCGATACCTCGGGCATAAGTCAGGA  
GCAGTTTCACGGTGCCTTGTACAAGTGCAGATTCAGACAAGTCAGCAGGAGTGC GTTTCAT  
ATGGGCCGTCAGCCTCAGCTCGCGATCGAAGGTTGCCGATCGGGTCATTCTCAGCGATCT  
ATTCAATGAACGACTGCCGACTGCGGAAACGATCATAAGTGGACTCCTGAACCTGTACCG  
TGTCCGATTTTCGGAGTGCGGACTAAGAAGCGGCAATCCAAGACTGTCGTGAGGACGTGTA  
ACAGGAGGATAACAGCTTCGCCTACAAGCGCGCGCCCCGGGTGCAGTCACTAGGCCAACA  
CTGTGAGGATACTCCAGCAGACTGCGTCCCGGTGTACAGCATGGCTGTGCGGGACACAGGC  
GAGGGATCACTACTTCATTTCGCTATCCGCAACTCTCGGAACTGAGGCAGAACCGCCCCAA  
CCTCCGGGGCCTCACCGTTGTCTAGAAAACAACAACACGCACGCAGTTGCACCGACAAAC  
GTTGTGCTTCGATAATACCAGTGTAGTGGCCTTCCGTGTGCCCGATCACGCACGCAGGCC  
GCTAGCGTACACGAGCACGTGGATTTGCCCTCCACACTCGAGACCTGGCTGGGTGTATGCA  
ATAAAAGCCTACGGCTACCTCCCGCACCCCTGCTATGTTGCATATGTAGAGGACGCACTT  
GTCGCTAGAAAAAGACCACCACTCCGATTTCAATGACCAGCCTGGAGAACGGATTCCG  
TTACAACCAGCCATTAGGAGGCAGTAATGGCATTACCAGCGCCACTCGAGTACGGCAGG  
TTCGCGGAAGCTGAAGGGATCCGCGACGAATTGCAACAAGGCGAGCAGCCTAAGGCGACA  
CATATACTCAACGAGGAAGCCCCCGCAGGCAACTCCCACAGGCGTCCCAGGGCATGTGCG  
GCTAGCGACGTGCAGCGCGGGCAGGTTTCGCGCACAGACCGTCAACAAGTTTCAGTGCACG  
GGACCTGATGAGATTGAATTGCGTGTGAGAGCAACCCTCGGCTAGGCCACGTCCGGTGTG  
AAGGTGCGAAGCGTTTGAACAATCCTGAAGGAGATGGGCGTTCAGCAGGCCGATGAATCT  
CTTGACCTTACTCAGCTGAAGCGCGCGCAGCGGGGCGACAGGAGCTACCGTATCCGGGAG  
GTGTTTCGTCGGCACCCACGCACCCTTGGGCCGGCTCCGGGCGGGTCCGGGTAACCAGCCA  
TATTTTCTAGGGGTCGCTGAGTAGGGTGGGCTGTCATCAGGTGCCGCATACGGCCCTGTG  
GCAGTCTGGTTCGTCAGTATCGGCAGCACATCAAACACGTGAGGCACCTACGGCCATTGC  
GGCGTAGTCGTTTCTGCTCAGGGTAGATTCCGCCTGGGCGGAGGTCTTGTCCCATAGGAG  
AGACATACGGCAGAACGTGCTCCGAGACGCTCGGGTCCGGTTAATGGCCACCTGGGTGCG  
GTTGTTCTCCATAACCCGCATCTACTGCAGGCTGAGCGGACACAGGTCCTGGTTAACCCC  
ACTCTCACGGAACGGACTATCCTGCTCCAGATTCGCGCGAGTATCGATCAAGCGACCTTC  
GCTTCCAGCTGGATGAATTTGTACATGCAGGGTCAGCTGCAACGCATGCTCGCGCAGGCT  
CTGGAGGATTTGGATGGCTATCACACGCCCCGTCCGGTTAATTCGGGTTCGGCCGCCTAGAT  
TAAGACGATCGTATCCGCCAGGATGACACTGGGCAGCGCGTTCAGGCGTTCATCCGCATC  
CACGGTCTGTTGTTGCCGCCTGAGGAGTTCGTTAGAGGAGTCGTGGTTACAGTCCCGGGTG  
ATCCTAAAGGGCATGGGTGACAGACTATCTAAACAGGGCGCTATCAAGGGCCTCGCCTCC  
CATAGTCTTCTGTAGCAAGGCCTCGACGATGCCCATGCTAAGGTCTGTGAGGCGAGGGGT  
AGTGAGGAGGATGGTATGCGCATCGCTGCCCTAGGCCACACTATCCTGCCAAGCTAAGGA  
GACCCCAAGCTCGGCTGTGACATCGAAGGGCAGTGGTAGGAAGACTTGCAGATTTAACGT  
TTCCACAGCGCCGTAGGTGCCTTCGATTCCCGGCGCGAGGACGTGCACCAGCAGTTTGCT  
GAGCTGTGCCTGCTGGACGCGCTTAGCGAAGATCACCGTGAGGTGCCACGGCTATGAAG  
AAAGTGGGTCTACGGGACACCCGTGGTTTTCGAATTCCGGATACACGAGAAAGAGGAGGT  
CCGATCTCGGCGGGCTGGACCGGCGCCCTGGACCCTGAAGCGAACAACGGCAGCATGACT  
GAGTTCGAAGCCGTAGGTGAGCAAGGGGCCATTACGTCCGTGCCGCTGCTCCTGTATACG  
GCGCAGATTGTTACTGTGGGGCGCACGACGGCTAATCTGCCGACGGCCCTGTTTGACAAC  
ACGTAGGCGGGCCGGGTTGAGTAAGGAGGCATTTGTGGGTGTTATGCAGGCACTGTAAGGG  
GGTGCTAAGCAGGCCCTGAACATTCTCAGATCTTCGGTTCCTAGGAGCTTGTGCGGCGGG  
GGTTGCTGGCTTAACTTCAGCGAATGACAGGGGCTACTACGGCCGCCATGGCCCTGTGG  
AGCGGGGCGCGCCTCGGCACCATCACGGAACACGCAGCGAGTGAGCTTAACGCAGCCGTC  
AGCAAGTTCACCCCTCAAACCGAATGCTCCAGCTCCAGCCCCGGTCTAGCTCGATCGGGCT  
TGAGCGAGGGCCAGCGAACTAACGTCTACCACACGCCCCGAAACGGAGTCCACGCTCCTT  
CGCGACCTGTAACGGGTGCTTCCACCTAGGTTACGCTGACCACCGGGTACGTGCCAAC  
GGCGCGGTAGCGGTCCAGGGGCTACGAACAGCGCCTCTGACCCCGCTACACTATGAACCG  
CAGGATTCACGGTCACGGCGTGCTCACTCCCGCAAGCTCGACGAGGCTGTCGGGGATGCG

ATGCAGACAGGCAGATTCTCCGGACTCCGGGGGCTGGTTCACAGCAGGAAGCAGTAACCGG  
GACGAGAGTCTAGCATTCGTGCCGCTGGGGGCTCAGACGGCGGCGGAGGTCCTTGGTCTG  
ACTAGACAGGCCAGTAATCCGGATGGCCGCCAAGTGGGATTGACCTACCGGCTACCGCC  
AGAGACAGGGAATACACACGCCAAGTTAGGCCGAAGGGAGGCGAGTCCACGAGGGGAGAG  
CTTCCAAGACACGTCGCACAAAACGCCTAGTAGATACCCCTACAGCCACAAAAGGACGG  
GTGTCGCCTGCAGTGTGACGTCATACCCGTAACAGCGAAATGATGCCTAACGGACCCA  
TACTGGGACGGTGTGGGCGTATGGACGATGGGAGTGTACGTCGATTGCTGCCCCGTAGCG  
CAGGAGCTGGTGAATAGCCAGCTCGTTAGTCTGCAGATAATCAAGGAGATCGACCAGAAT  
GCCACTTAGGGCAATCACCGTGCCGTGGGTCTGTCGCTCGGCGAGGTCGAGCTG  
AAAATCTAAGGCCAGAAAAGCACGAGTAAACGAAGGGACGATGGGTTGGGCTCGCGCCTA  
GCTCTTGCGCAGCAAGACAATAATCGTCTGCCTGCCTATGCGGATAGCAACGGTCAAGCC  
ATAGGCGACGGCGAATAAGGCATTGGGAGCCTGACTTTCGCGAGAACGATAATCGGGGAA  
TAAGCCAGGTTGGGATTCCTTGGCAGTTCCGACAGGGCCAGCTAGACGGCGGGCGCATT  
GCGCATGAGTTGGGCGTAACTAATGTGTGATCGAAGCTCGCCCTCTGCCGTGCACAGTTT  
GAGTCCGGCACGCCAAGTGCCCGTGAGATCTCGGAGATCTCGGAGTCAAAGCGCAACAGC  
GACTTCGTCACCAACTCGAAGCATGAGCGGAACTCCAAGTTGTACAAGCAAACCTAGTT  
TGTGTTGAAAACCTAATCGCCAAGAAAGAGGGGCACTGCTTCAGCAACTTACCGCGGCTA  
GATCAACTACCCAACAGAATCAAATATTCATCCCTCCACGGGGGAAATGATACCATGGCA  
CGCGCGTGCTGCCACCCCGGTTACCCAGGAAGATCCCCCTGTCATCCTCGTCCCGGCTGG  
AAAGTTACCAGAGCAGCATCAACTGTTTCTAGTTAACTGGTGATAGTCGAACGTTTAGA  
TGCTAATCGCTGCCCTAGGATTAAGTGGCAAGACAGTCCGACCGGGACAAGGACCTATTA  
CTTGGAACCAGAACACCTGGAGCAACCGCACGAGACGTTCCCGGTCCCCGACCCCTAGTT  
CGACTTCAAGTGGGAGTTCGGCGACATCCTCCTTGCCCACCATATTCAAGATACCTACGA  
CAATCTTACAGCCACGGCGGATCTCAGGTCACGTGTGGAAACGAGCTGGATCGACACGTG  
CACCACCGTCACCGAGGCCCGCCAGCCTACCATGAACGGCCACTTATTAGTCGCCTGAAC  
GACAAGCAGGGTGAACCACTGACTGCCCTTATTCTAGCGCAATCTTCGGCGTGACCAT  
GCCGCTGCAGATGGGCAGCCTGTCGCGCGCCCTCGGTGGCAGGAGTCCTATCCTCGGGT  
GTCTGTGATGGCATACTACGTCCGTAAGGATTATTAGGCCCTGGGCTACGTTTTTAGCTT  
CCGCGTGAGCGGCCGGGACTTCTCCTCGGTGGATGGTTGTGGCCTGGACGCTCTGCTTTC  
AAAAGCCGAGCATCCTAACGCGTCTGGGTGCTTATTGGGGGGTCTGACGAACTTCCCTACC  
ATTCATCAACAAGCGTATCTCTCCAGCCATGGAGTCCGCGGAAGTGCTGGCCCGTCTGGT  
CGACGATCCGGAGAATGGTTCCGCTATCGTAACTAACGACAAGGAGGATCGTACCTTTTG  
TTAGAACTCAATCTTTCTCGACGCCTACTTTTCCATTGTGACGGTGGGTGCGGAGAGTAC  
TGTCGCCCAGGTTTAACTCTCCACAGTTGGAGTATCAAATTGGATGATAGTGGTTCTCC  
CTGAGTCGCGGCGGATGCGTTGGAGGGCAAAGTGCCAGGGGTGCTTGCCCTCCCGCGTGC  
GGGCCGTACCCGTGACCGTGCATTCTCGGTCTTACGCCCTTAGACGGACGTGAAGCGCCA  
TGCCGACGTGCAGTTTGCGGTGATTTTCGAGAGGGCGGACCTGGCCAAGCGCCACGGAGG  
AGCTGGGCTTGCGTACTGCACATCCAGCCCCGGCTCTGCCCCCGCGCCTGCATCCTGTT  
GAGAATGCACGGCTTTGAGAACCCTACGGTGCCAAGACCGCACAGAATCAGCTAACCGG  
GAGCATCCTGCCGGGCCTAATCCCGACCAAGAAGGAGGATGGGCGGCTCTGTAGCGCGAT  
TCTGACAGGGATCCAAGTCAAAGACGCCGGTGTCCGGCCCAATTTTCATGGATCGCCCCGG  
CAAGACACACACGGATGTAATCAGCGCCTAGTCCCTTGGAGGCCGCCACAGACGACGTGAG  
AGTCTAGAGTATCATGAAGAGGCGCAAGGAGAAAGTTGATGAGGCCGGCATTTCACAGGC  
CAGCGAGTCTCGCGTACCGCTTGATATGAACGTCCAGACGATCATGCCAGACGGTGGGGC  
ACTCTCAGGGCTCCACATGATGGGTACCGACCAAAGCCGCTTTGCTGATACCTACAAAGA  
ACCGCTGGGTGATCGGTGCGCCATCTCAGCAGGCTGTGTAGACGGATAACGACGATCTAA  
CCTGTCCTTCCGGTGCTACTACTTCCGGCACCTTGGTGTAGGCAAAGTGCATCGTTGCAA  
CCTTTACGTTCTTATGCTTAAAGTTCAACCCCTAATGTGAGACTTGGCCGGCAAATTCCT  
ACAAGCCTGTATGTGTTTTACAACAGCCAAACGGGTCAAGAGCCTGTGGCAGCTCCCAA  
GCTGACATCATCCGTGCTGTTGTAGGTAGCTGGATTGTGGACACTGGAGTCCCGCCACGC  
GATCGCTTGTACGATGGTAGAGCTCTTCAAACAGTGCACATGCGTAGTAGGGGTGGACCC  
TACGGCGGATCGTGAGCCTGATATGTACAACGAGTGGTTTCGCATGTCTCGTACCGACCT  
CGCTCGCGAGGTCCGGGTAATAGCTGTCTTGTGTCAGTGCGAAGCGATCGTACGCTCATG  
GGAAAACCTTGCTGGACGCCGTGCGTTACGTGGGCAATCAGGCCACCCCAATCCGGAATGT  
GACGTAATGTGTCGACGCGCCCCGGTAGGGCCGAGACTCCGACTTAGCCATGTAGACGAG  
CGATAGTGTGTGGGACGTGAACGCAACGCGTTGCAGATGCTGTGCTGGTACAGCCTCGT  
AGACCCGTCCGGGGGTAAGATGAAGGAAGCTTAGGATGACAACGGCGAGTTCAACGGTAA

ATACGTCAGGAGTAGGGGCGGGACCGACTTGCCCCGAGAATGCCAACGATTCACGCTTCAG  
AGTCGAATCACGCCTCATGCCCTACACGTTCTGTGCGGTCCGTCCGTTTCAGGGGCACGAG  
TTTAGCGCGAAGCCACCTCGGTAAGATTCTGAACCAGTTCCAGAGTTCCGTCATCTTCGG  
GCTCAACAGGCTGTAACGGGTTACGATCCAGAAATCACCTGAAACTACATTGGTACTCCC  
TCTAACGCAACAGTACCCAATCACCCTATGGCCGGAGTTGGAAGCGGACGGGCGCAACGG  
CGAGCATGGGGACCTGGAGCCAGAGGGCGGGCCTCAGGAGCTTGGCTAGCAAAGACTTTGG  
CTACACTGTCGGTATGGGGTTGATAGATGACGCAGCAGGTTTTATCTGACAGACTGGTGG  
ACGTAGGGGGCACTCTGCCCTGTTCCACGCCTGGCCAACCTTGCCTGGTCGTATTGTTCC  
GGTAGCGGGGCAATGACTCCAAGGCGAGGGTTCAATGCTCAATGGCGATTACTTGCAGGC  
TGCGCGTACCGCACTTTCATTCATGGGAAAGCAAGCGAGTACTGCACGACGAGAGATCGG  
ATTGAAGGAGAAACAACCATGGCGAAAACACCAAGTACGTGGGTAGACTTCCAAGGGGAC  
CGAGTAAAGGATACGGTCCACGACACATTCCCGTACAGGTGATTGCAGAGGGCGTTTGGAG  
ACTGCGCGCGGTGATCCGGAAACGTGGACATTCATCCCTGCAGGTTGCATTCAACTGGCA  
GGGGACCAGGTAAAGGGGGCCGGAATCCGTGTACGGCGTATCGCTGAGACAGTCCAGCCC  
CGACGCGACGCCTCCGACACCGTGCCCATATCTCGGCTATCCATAGACACTAATATTAAG  
CAGTCCTCGTACCCGATAGAAGAGGCTATGAATGAGACACAGGCCACTTATCGCGAATCT  
CTGGGACTCGCAGGAGATGCCACGGACATTGGGTAGGGCGCCATCGTACTAAGCGTAGTTT  
GCCACCATAGAACACGCACGCCCGTTGCTTCTAGACCCCGCCGTCCCGGAAAAGGCGCGA  
GGGGTGGTAGGCTTAGACCGCGGCATAAGTTATCCGAACGGGTCCGCTGATCATAGCATC  
CGTTTTCTGAATATGAACCGGGACACTGCACCCGACGTTTCGCACGGTTCGTGAAGTCGCC  
AGCCACACACTTTCGTCGCTATTCGCGACCCATCGGAAGCTCAAATTGTCCATCATCCT  
GAAGTGCTGCTCTACGGCCAACTGGATTCTGCTGCGTTACACGCTGCCGTGGATTCAGGG  
GCACCTATTCACAGACCGTTTGGTGATTATCCGATAAAGAGTATAATTAGCCGGTGTGGC  
TCTCTGCCGATTTACGGTGAGGGCGCTGTAGATATTATACGCCCGTCTGCTGCGTTCACC  
GATACGACGCCTCTCGGTGGTGGGCGGGAAGTACGACGCTCCCGAATATAGCCTTCGTG  
TCGTCTGGATCCGTACCACCCGACGATGGCAACACCCCTAGTATTGTTAAGGAGAATTTA  
TCGATTTTCTATTACCCGCGAGACAGCAGATTCACGGGAGTTCGCGCTAGCTCACGCGTA  
GGAGAGTTCTGTGGGGACAGGGAAATAAGAGGGACCACGGTGATAATTCGTTTCAGCTGCC  
TCTGCCGTGAACGAACAGTACACGTACGCCAGCTAAGATGTAGTCTTTGTGGTAGTTCTT  
AGAGCCAGCAGCCACATCCTTTGCTGCACAGTACTATTGAAGGGACTGGTAGTAAAGGGA  
GTCGCTTTACCGCGTGTGCTTGAAGGTCACCATTGTAAACGAAGCCAGTGTCTCT  
TTCGCCACCGCTGTGACCCTAGGAGCACAATGAGTATATCATCGAACCTCCGCGTCCGA  
GGTGACGACTTTGGCTTCATGGTAGGGGACTCTCACCGCCGTTGGTCTGACATCTCTAAA  
GTGTCCACTTGTACCCCTTGCGTAGAACTATTGGCGTTGCAGAATGAGGCTGCCTCCCG  
GTCTGTAACAGCGTTTATGTAGATGCACACTTGGGAATGATGTTGCCTGACGTCGACAC  
GACGTGTCATTCAACGGTACGCCGAGCAGGGCAGCAAGAACAACCTGTAGGCTTCACGGG  
GCGCTGTGTTGGCAGGTAGAGCTTTTCCCTACACGCACTGTAGAGTACTATCTCGTCG  
GGTGGCCGGATGCTTATATCCGCAGAGATTATTAGTGCTACATGCCCTGCAGTCCACGGC  
ACTTTGTACACTTCTGCTATCCCGAATCTGTTTGGTGTGGGTTTACCGAAGAAGGCCGA  
ACCTACCCAGGGCTGACTCCTAAAACAAGGCAACCGTAGGAGTTACTTAAACAAGGGGGC  
TGTCGGCGGGCGACCTGATCCAGTAAGTATCGTTCTGTACTGGGCGCTCGGCTTGATGGG  
AGCACAGTTCCACTAAAGATATAGTCAAGCCCGTAGTCTATTGATGCATGATCTGGGGCC  
AAGGTGCTACACCGGCATATCACCTCGGTCAGTATCACTCGGGGGTACTTGTATCGTGATT  
ATTCTAGAGGGGATGGCACGCTGCATCACGCCGTCGTCTACAACCTGGCAGTTTAGCAAGT  
GCCCGATGCGGTTGTGTGTTCTCCGAGGTAAGGTCTGAGTAACTACGGCAACGAAGGCG  
AGTGCCGTTACTCCTCCACTCAGGTGCAGGTATATTTATTCCAGGCACACAGCCGGCGAC  
GCCAATACGCCGGACCGGACATACGGTGGTAGAAGGATCGGTGTTGGTATCGCCTATATA  
ACAGAACCGTCTGAAGCGACGTTGGGACTGTTTAAGGAGCTCCCTGTAAAGTTGAGCTCA  
GATCTTCCGAAGCAGCTCAACTGGCTGCTGGGGAATTATGAGGTAACACTGTGCAAGCAA  
CGAGTCTATCCTCTGGTAATTCCACCGCGCAAGGGGGGAGCTTGTGTTTACCAGCTGC  
GGTATTCTGAGAGCGGGATCCACCGGTTCTTTTGCCGACGGCTGTTACTGCTGCTATCC  
TAGATTTCTATTGGGATAACACCAATATGTGCGATCCGACATGGGGCGCTGACCTAGGGG  
GGTTGCGCTACCAGCGCCAGTGGTAACTGATGGAAGCATCACCCGCCACGGATCCAGA  
TAGAGATTGCATGGGGCTACGTAGGAATACTGTACGGACGTTATCCTATGAAAGTCCGCG  
AACGTTTTGAAAGGGCGCAACGTGTGCGGATGATGTATACGATGCTCGTGGACTGATCGC  
GCGGGGTACGGGCGTGCCTCCATTACAGCAAGCCTTGTATCCAGGAAGACCTTGCAGAGT  
TGATGCTCTACGGTCTTAACCCACTATGGTTCGCCGACCAACGGGGAGAGTCTATCGGG

CCGTTACATGTTTTTTCGGTCTCGGGAACCTGGTGAAGGACCCACACAGCTCGTGGTCC  
CCTTCAGTAGCGCCAGCATGAGGTTTCAGGAGACGGGGAATGACATGCATCGGCCGATCC  
TCAGTAGTCCGCTGTTGTCCGACCTGGCACGGGAAGAGGCCGCCGGGGACCGAACCCTG  
TGCGGGAGTTCTCAGTGCACCTGGGCTTGTGCTGGGTGTGACAAAGTCCGCATCCCTAACTT  
CTTTGGGTATAACCTGGTCCCTATCAGGCTGAAGTTGCATCCTGGTGATCCCAGGCGATA  
CCGAGGCCACCAGAAGACGGTCCATTGCCTACGGGCGTGCTAAGCACAACACGCTATCGA  
AGTCGTAGACCTCCGATGCGGCCGACAGGACCGGTTGCTGCGTGTACCTGGGTCCACCGC  
AAGCGCGGGATTCCATTGAGGGCACTCGGACTGTACGTGGCGTCATTGTCAGCGTACAGC  
CGGGCCGATAACCTGACGACAGGAAGCTGCCGAAGTACAACGATTCGCTGGGACCCGGCT  
CTCAGATAGAATGAGGGTACTCGGCGATTCCGGCCAATCTAGTCGTGGCTCGGACGGTA  
CTCGATTGTGCAGGTCCAAGCGCGAGCCGGTCACTGCGGAGGCAAATTGTGCTAAGGAGC  
TGGGCAAGGCACTATACAACTGCGACCTCCGGTTCATGTGCGCATCTGTCCGTTTTAAACC  
CTGCCCCTCCGCTTTTATTGCTCCGCGCGCTGATGGTGCCCGTCTCTCACGTGAACAAG  
GACCCAGGACCAGTTTCTGGGCGGAAGGCCCTGGAACCATGGTTCGAGTAGCCCTAGTGT  
TACCGATTGAGTCAGTTGGGATAGTCTGCCCTAGATGGCTTCATGAACGTTTCGCGCAGC  
TCAAGTCCATCATCCTTTTCTCAACCCCGGCGGGAACGGCGGGGATGGGCCAGCGTGT  
CCAATGACCGTACAGTTTTTGGTGTACATCCAAGTCGCAGCCTGGGGCGGATCCAAGGACT  
GCGGCTCTAAAGAGTAGCTCGCCAGGTTAAAACATTTGTGGAATGATCATGGGGATAAGG  
TCGTCCCTCGTAGTGTAAGACAAGTGC GGATGTATTGTGACCCAGCTCTGCCGTGAGGGT  
CCCAGGGCTTTGGCGATTACGGTAAGCATAGCCCCCTAGGCGTAGGTGTGGGCGAGCAGC  
ATAACATCGAGCTGGAGGAAACGCGGACCCCGCAGCACAACTGTGCAGTCATGCGGAAGA  
ACCACGTCGTGCTGCAGCGGACCGCCGTCACAGAGGCCCGGAGTTGTTCTAGCAGTATC  
CAGTGGAGTCGCGCGATAAGCGCTCGGGTCTGTGCCGGAGGCACAAGATCATCTCAGGCG  
GATACCCAATGAGCATTGAGGCCCTAATGGATGCTCTTGC GGGTGTGGATTTCGTAACCTC  
GTGTTATCCTGGTGACCGTCGCGATGTCCGACCAAGAGCACCACCATGCTCGAGTAGTGG  
AGGAGTGCCAGCGTAAACTATCGCGCACGGCCCCGGATTTACGCCGGGCATTCCCCTCGT  
GCCAGCGAGCTCGATGAAAGAGGTTGGGAATATTATAGAGTTGGCTGACTTCACGACCAA  
CTCCGAGCTGCGGCCTAGATTTGCTTTTCTCTCACCGGAGGGGTCACAGCTACCTTTCT  
AGACTAACTCGTGAGCGACTGTCTGATGTGACGTGCTGTGCACTTCCAAGTACAGCCGCT  
GGGGTTGGACGTGCGGAAGTTGTTCTGCTGGCGAGTGGTCAAGAGGCCCGCGGACGTTCA  
AACCGACATTGACTTCGGCCGACCGAGCCCTCATTTTGC GA ACTTGAGGCGTCTACAGCG  
AATCGGTGACCTTAGGTCCAGAGCCCGCCCTCAGCCCCCTACTGTACAGGGCCATCAGGT  
ACGTCACTACTTGGTCCGATGGTCACTGTGTTGGGCACCCCTAATGTCCGGTTCATGGACC  
AGGAGTGCGCGGAGGCCCGGCTGAGCGCTGTCCATGTTTACTGAGACTACATGAGCTTGT  
CCGCGACCCTGGAGGACATAGAGAGCGGAAAAGCCGCTACGATATCACTGCCGTACAACA  
TGGGTCTGTACCGCCGGGCTGGGTGTTAAACGAGAGGGCTCGCAAGGTGCCGCCCTCGCC  
TCCGGTTAGCCCCGGCGTCCCGCGACTGTGAATCGACTTGCCAGGCCATCCAGGCCATGT  
AGCAAGGTAAACCGGGGGTAGCGTAAGGTTCCAAGGTAACGGGGCAGTGTATTCTTTAC  
TCGTCCCTCGATCACCGTCGATCGGTTGATGACCGACTGTGTACGGAGGAATTGCGATGAG  
GCAAACGGCATACTGAGCCTGGCCCTCGGTCTACTGGCACGAGCGGGCCTATAGCCAAC  
GCCGAAGGCATGGCAGTACCATCGCAATCCCGAGACCCTAGCGTAGAAGCTAGAGGCCGC  
AGAGGCCCGAACCGCGCATATTCAACGAGGGCTACTCCCTGTCCGGACCAGCGTCACAGC  
AGTAAAACGTCAGGTGCGGGGTGCGATCCATGGACAAACTGCTTTGAGAGATACTCCTCT  
GCCTGCCGCCGTTTCGTTGCGAGACGGGCGCGCAGCCAGGGGACGTACCTGTCCGCTGGC  
AGCAACGCACTCTGCAAGTGATGCCTACCACTGGATTGGTCCGCGGCCCTGCTCTCGTGGC  
TACCGACTGTAGAACGGCGCAATGAGCTACACTGCCTGGATGACGGGAAGATAAACATCT  
GGGCATTAGTTCGCAACTGTTGGACCCTTCCGTACCGCCC GCGATAATGCAGCGATGGC  
AGCACCGTATCCCCAAGGCGTCACTCTGGGCGAGTAGGAACCGGTGAGTCATGCCGAGGC  
TGCCACCTTGGTACCCGACGTTTCTGCCCCTGGATCTCGCGTGGTGGACTAAGCTAAG  
TGCCGGGAATGTACTGCCGGACGCGCGGCCCGTCTGTTGGTGTATGGGCAGTTCTGAACGG  
CGTACCCCCACCGACACCTACGGCAACACATGGGCCTTCACAGTATTTACTGGCGCCAT  
CACTGCTTGGGACTAGAATTGTGGATCCGTCGTGCTCAGAGGTCTCTTGTCTTCGCGGAC  
CCCTCGCCTGCGTGTCTTACAGTGTGGGGTGGCCTCACTAGCGGCTGGAATTGCTGCA  
CCTATCCGCCAGTGCTCGCACTACTTTCTAGTCTACGAACCCCATCGGTCGCGAGTGCG  
GTTTGTCTCGCTGAAGTGCTCGCGGTACTGTTCTCGTGATATATGCGTGGTTAATTTCT  
CGCGGGTACCCACATCCGGCGACAGGTTTGGGTCCACCCCGCGTAGGCATGTTCTAACGC  
GGATCTCCCTTCTGCGGCCTCGTGACTTGGTACTCGGGCTAGACGTTACCGGTGCGTTC

ACTACTCCCTCCCCGGACTCGTATCATTTAGATGGCGCGTCGTGGTACCTGGCCACCTC  
CCTGAGCCTGCCT

>NewGenomeName\_54

GTCATCCGCGCCCGCCTGCGGGCTTCACCAAGTAAATTTTTTGC AAAAGTGGATTACCGC  
AAAACCATATGCCAGACCGCGCCAGATAAAGGTTCCGCAAGGCATTGAGGATCTCAAAG  
GATCGAAAGGAATTGCAACGTTGTACAGTTCGAAAGAGCCAGGGATGGCAGTAGAGAAAA  
CGTAACCTGTTGAATCTATTGGGTACGTTATAGTTTCCGTGGGCATTCTGAATGAAGGGGG  
AGGACCTGATTAGTTGCATTGCAACGGTTGAAAAGCGTTTTGTTTCAGATGGTTAGGCAT  
GATGGGGCAAGATCTCATAACTGAAATTTTGA AAAACCGGCGACGCCCCAGACGCTTTGGC  
TTCCCTCCAGCACGAAAATCGGCTCTCCATGTCGAGGCCCTTGAGTTCTGTTCTCATC  
CGGACCTGTGACAGACTGCCCCGCTCAGACAAAGAGCCGATAAAGAGCGGGAGAATTCTAA  
TGGTCCCCGGGGTCGGACTCGAACCGACTCGTCTGGCAACGGCGGATTTTGAAACCGATG  
GGATACCTTTTAAATCAATAAGTTACTGATTTAAAAGGGGGCGGAAAAAAGCAATATGGCT  
AAATAACGCTATATGTTACGGGCCTCGGTCGCCACGTTGTCGCCATTTTTTAGCGAGGAG  
ATCGGGTTGAGACGCACCGCATCTTCCAGGTGGTTCGGGGTCGAAGTGGGCATAGCGCATC  
GTCTGCTTGATGTCGGTGTGCGCCGAGGATGCGTTGTAGCACCTGGATGTTGCAGCCGTTT  
ATCATGAAGCGACTGGCGAATGTATGGCTCAGAACGTGGGGGCTCTGGCCGGCGGGCAAC  
TTAATGCCAGCCCGTCTGGTTCGCCTTCCCGAAGTTCGGCATAACAATCATCGAACAGGCGG  
CCAGTTCGCCGGGGCAACATGGCCAGCATCCAGGGAGGAACGGCAACAGTCCGGTTTCGC  
TTGCCCTTGGTCTTGGTGTAGGTGATCCGACCCATGCCGATATAGGAGCGGCTGACCTTT  
TCTATCTCGGACCGGCGGGGACCGGTCGAGAGGCAGAGCAACACATTGTGCCACAGATCC  
GGCTGCTCTTTGCTGGCATCAAGCAGTTCCTCTATTGCATCCTGGGAGAGATAGGCCAGC  
TCGCTTTCCTGCACCTTGTACTGGCGCAGCTCGGCCAGCGGGTTACCGCCGCTCCACACC  
CCCAGGCGTGCCGGCTCATTGAATAACCGCCTACAGATAAAGCTGCTCCCGGATGATAGTG  
GTCGGCGTCACCTGCTTGCATGCCAGGCACATAGCGCTCACCCAGCCAGCTGTGCTCG  
CGGTATGCCGAAAAGAGCTCGGAGGTGATCTCGGTTCGCAATGGCGTTATCCAGTGCCTCG  
CACAGCCACACCAACCTGTCCCGTCGCCTTCCACCGTCAGCCAGGGTCTGGCCGTGTCGT  
CCGAACCAAGCGGCCACGAGGTCAGAAAAGCCGCGCTCATCGCCGGTAGCGACAACCGCT  
ACTGTCTGTTGCAATGGCTTTACGGTGACCATGTGGGATTCCCACGCCAGCGCCTCCCC  
TTGTTGGCAAAGCGCTTGCCTTACGGGGCCCATCTCGGCCATCGGGGAATATTTAGAC  
AGCCAGGGTTTTGACTTGTGATCTGTTTTACGCACCGACATGACCACACACCGCCTGGGC  
TTGTTTGTGGGATGTGTTGACCTGCGCCAGTTGTTCTGGTGCAGACTGCACCGCACTGGC  
GTCACCATTTCTGGCGAAGGTATAGAGCTGGCCGACAAACGCATCCGTTGCTGCCCCAG  
GTCAGCAGCCTGCCGGATAACACATCATCATCTAGGTGGCAGGGACGCAAGCCGTTTCAT  
AGAACCACGAACGGCAGATATCACCGATTGACAGTGCTTACCCGATACTCGGCGTTCTG  
CTGATAGTCAATCTGCTGGCCATCAAGCACGCCGCCAAAGCGCGCCAACACGCTATCAGT  
GGTTTGGGTCATCTGCTGATAGATGTCCTGTTCCAGTCGACATTGTTATGCGCGGGATAA  
GACACGCAGGGCCTTGGCTGGTTGTTGCTCTCTGCAACCATCCCGGTTTCCGTGGGCGG  
CATAGGGGCATCAAACCCAGCCGGGCGGAACAACCACGCGCCAGCGAGCGCTATTACCAA  
CAGCAACCACACACCTGATCCGGCTTTACCAAGGCGTACTGATGCAGCCCTCTGAGCCCG  
TACCTCTTTGCTCATCTTGAGTACAGACAGGGCATGACTGAAGAACAGCAGAATCCCATG  
TACTGCAGCCAACACGGCCAACAGCACCAATCCGCCAGACATCTCGATTTATCCTTCCGG  
CACCATGCTGAGCAACGCTAAACCGAGGAATGCATAGAGCCCGATAGAAAGCGCATTCCG  
CCGGCGCGTCTGTCCAAACAAAGGCGGTTTAAACAAACTGATCACCGTCATCAACAAGCA  
TAAAAGGGCTGTCAAGATAGCCAACACAGAAAGCATGAGA ACTCCTTAAAAGTTCTGACC  
AGCCACACCACCCGGCCGACCAGGTCCAGCTCGGCCAGCTCGGTCTTGCTCAGGTGCGG  
AGATTTATACAGAGAGTTGTCAGAGATGATGCGAACCCCGCCTAGGTTCGAACTGCAAGCG  
CTTGACGAACACGCCGCCATCGAGGCGCAGCACATCGAGCCGATCGCGGGGTGCTTCCCC  
GTTCTTCAGGCGAACTAGGATCACATCACCATCATTGATGGTTCGTCTCGATCGAGTCGCC  
CTTGGCTCGGATAACCGCCATCTTGGCCGGGTCAAACCCCTCTCGGCCGAGCCAGTCGGT  
ACGCAGCGCCATCGGCTCGGCGAGTGTTTCATCTGTGATATTGGCGCCTTGCCCTGCGCT  
AGCAAACACCTGATATTCGCGAATCGTGGTGA ACTCTTCGGTTACCTGAAAGCCTTGAAC  
ATCAGAAGCTGGCGCAATAGGAGGATTTGTACGAGCGCTGGACCCTGCCTCGCCGATAAC  
AAACACCAGTCAGTCATAGGTGACACCGCCTGCTCGCGCCTAGTTCAAAGCTCGATCAAT  
AGGAGGAATGGTTCCCTCATAACAGATAGCGCTTTAGGCCGCTACCGCTCATGTCTGCTCG  
TCGAGCGAAAGCGCGAATTGGTTCGTTGCCTATCACCTTAGTAAGACGTTCTGAGAAGGA  
TGACTGATCTAAATCAACCTTTGAAGCTTACTCCGTAGTCATAAAGCACCTTATAGA ACT

TTATCGGGCTATTAATACTCCCTCAGCTTGACCAAGCAACTCTTTAGATCAACATTTCCC  
TTTGTGAGATTGAATTGAAGCATTAGCGCTATCTCGAGCCGTGTTGAGCAACGTTTAAGG  
GGAACATCATGTTCAGAGACTGCACTCAAGATCGACACACCAGTCAAAACCAACGAGCGG  
TATAGTGACGATACCGGCATCCCTGTTGGCAGTGTCAAGAAAATGAACTCCAGTGGTGAG  
CTGCAGATCATGCCAAAACAAGGCCAAAGCACCGCGGCCCTGATCAACCTGGTCTCGCTC  
TACCACAAAGCCGCAGCAGCAGCCTTCTCTCTGCCAACTCCTGATGACTACGGCACTCA  
ATGGATCGAGAACCATGTTTATCAGTAGCGGCTGCAAACACACGCACCTCGAATCTGCAT  
GCTGCAGATGTAAATCCAATCCCGTGTTCAGCCAGATCGCCCCCTCCGCTGGCATCGACG  
CCCAGGTGCTGAGGTACAAGCTCAGTCCTGACCAGCCGCACCAGCTTACCGCGGTTCGATC  
TGATCGCGCTCTACCACGCTACCGACGGGGACGAAACCCTGATCGACGGCATGCTACTGG  
AGTGTGGCCTGACGGACATCGCCATCCCCAGCGCCGACCGAGCGCCCTCCCTACCCGACC  
AGGCGATCCGCCGCAACGCAAACGTTGCCAGTATCGGCCCTGCGTCCGGTGGAGCTGGCCG  
AAGGGGGGCGGGTCACCCGCACCGAACGCAACACCATCATCAGTGTGGTCACCGCCACAA  
TGGGGTTCGCTGGCACTGCTCATCCACGACGTCGAGGCCCGCTTTCAAGCCGTTCCCGCCG  
TCGCATGTGCATTAGACATCCGAATGCAAACCATGACCATGTAAGGGGAAACCCATGCAA  
CAGACACAAATCAAACACGACGAACGCAATCTCGCGGGCCTGACTCCGCTGGAACAAGTA  
ACCATGAACACCGCCGGATGCCAGATCCTGCGGAAGTTGTTTCGGCAAACGCGCTCCAGC  
CTGGGCACCGACTGGCTGGGCCTGACGCAGGCCAAAAGGCGGCCATCTGTCCCATCGCC  
AGACAGCCACAGGGCGAGCTGATGACCGCGACCATGTCAGCCCTGTCACATGCACAACGC  
GAGACGGTAAGGCTTGCAGTATCGCTCTCGAGTACCAAGGGGTGTTTCGCGGAGGCTCT  
GACGCCAATGTGTGGCACCCGGCGCCAGTGGCCAGGCCATCGGGGATATCGAGAGAGAG  
TAGAAGGAGACAGTCGACAAGCTGCGCATGAAGCGCGCCGTCATGGCAGCCAGCCAGATG  
ACACAAAGCGGCCGGCTAGCAATCGGGCAAGAAAAAACCCCGCAAAGTTGGTGGCACACC  
GCGGGGCTTTTCATCAGTGACTTATCGACTAGGAAAATCGACATGCCAACTCTAGCCATTC  
TCGACACAGTGCGCAACCTGCGCCTGCAAACCGCAATCTGGCCCACGCGGTCAACGCT  
ACAGGTTACGCCCTGACCAGATCCATGCAGTAGAACGCTCGGCCGCCATGGCGTGACGTG  
CGGTCTAGTCGTGCGTCAACAGCCGTGGGGGGATCTGATCATAGCCCCGTTATCACTCG  
TCACACCGAACCGACCATCAAGGCCGCTGCGCCTATCTGGTCAGCCGCAATTACATCAA  
CTGCGCCACAACCTGGCTACGCGGCAAGAACGGGTAAAGCCGGATGGGGCGCCTGACCTC  
ATGCTCGATTTCGCATCATCGACGGGGTGGCATGAAAAAGCTGTTCCACCCCATCACCCGG  
CGGGCCGCCCTGGCCGATTTGGCCGATCTGCCGCACCCCATCAGGGCTAAGACCTACACC  
ACCAAGCGCGCCCCCGAGGGCCGCAATCTGCGTGAGCAGGCCCGGCTGCAACTGCACTGG  
CACCAGCAATTCCACACCATGATCCGGAGGGCCCAAGCATGAGCTTAGACGCGATTATA  
TCCCCAGGCGGGCAGAGCGGGCCGTGCTGCCGCTGTTCTCCGACCTGCTGGCCACCGGTG  
AGCAGGAAAACCGCATCGCGCTGGGCGAGCTCTAGTCCGGGGACGAGTTCATCCAGTTGC  
TACTGGTCGTGACCAGCCGCCCTGCCGATCTGGTGGATGACGACTCAGTGATGGGGGATG  
AGGGATGACAAACCTGTTGGAACCGGAGGCCCGCTGGACGGCCAGGGAACACAGTGGC  
GGCCTCGCTCATATGCAACCGGCGGTGACAGTCAGCCCGATCACCAGGACTGGGAAGC  
GGCACAGGAGGAGTTCAGCGCCTCGGGCAGCGACGCAACGAGAAACAGAAACATCACCCA  
GGAGCGGCTGGCCCTGGGCGCCATCCGCGCCGTGTACTTGCAGGCGCTGGGTAGCAGTGA  
CGTCTCGCTGGCGAGAGAAATAGCCGAGTGGTGGGCCGACTGTGCACCGATTACGGGCA  
GGGGGAGACCATCAAATGAGCCACCGCCTGACCTCCAACCTGCAGACCCACGTGGATAGA  
TTGTTTCGACACCGTGATGGACGACGAGGCCCGCCCGCGCAGCTGCCAGCGCGAACGGCTG  
GCAATGCGTCGGCTATCACCTCGCCACGCTGCACGGTATCCCTTACCCTGCGCCAGTGT  
GCCGCAGCCCGAAAGATGGCGGGGCATGCCCGTCGCACCCCGGACTACTTCCGGAACAAC  
ATCAAAGAGCCGGGGGGTAGAAATACCAATGACCAACGAACAAATAACAGGGCCAGCCG  
CCGAGGCTGGCCAATTTGTTTTTCCATCAGCCGTGTGCCGCCCGCCGAAGCGGAACCAGC  
TACCGCTGTGCAAAAAGACCCTCAAGGCGCGTGATTATGCCCTCGCCAACGCCATGCCAG  
GCACCAAGCTCGAAGCCGCATTTGTTGTGGCCCTGATGAATCCGATCTGGTCTGGGCGG  
TGCAACTGCTCGATGGTCTACCATGCATTTACAGCCAGGTGCTGTTCAAGCAGTATGTGC  
GCCGCCGCAAAGATGGCACCAACCGCAACTGCCGCAGCGCAAACATCTGGCTTTGCGAAC  
GGGTGAAGTGGTCCGCTCCGTGGTGTGATGGCGCTGCCGGTCGATGCCAGCGCCTGCGCG  
ACGAAGAAGGCCGCAAGCGTGTACAGACCAGTTCGCCAACAGACCGCTGCCATCTGAA  
AGAACATCGAGCCGAACAACACCGCCGTTGAGCTGGCTATGATGGAGACATGGGAAGCCA  
TCAAGCAGCCAGCCGACCAATGGGCATTCATAGGCAAGATGCCGAAATTCAAACCAAAG  
AGGCAAGGGATAACTGGATCCTGAGCGTGTGGTGCAGCCTGCTCTCAGCCAAGTGGCTCG  
AGAAGCGCATCAACCGCTGCTGGGACAGGCTGCAAGAACACATCGCCATTCTGCTAGGCA

AGGGGCGCAAGGGGGTCTCCGCCTGTGTCTCGAACGCCACCATGAAGGTGGTGGCGCGCG  
GCAAGCGGGGCATGATGCGCTGGCTGGCCGAGGCGGAGGTGATGAACGAGCAGCACGACC  
TGGTTGTCTAGATGAAGGATTGCTGGGAGGCCAGCAATGCCAACAGGTCAACCGCCTAG  
CCGAGATGATGAGCCCCATGCGTGGCTTTGAAGACTACGCCGAGGAGCAGGGCCAAGTGG  
GGGTGTTCTTTACCCGGACAGCCGCGAGCCGCTTCCATGCCTGGAAGACGGGGCCGCAACG  
GCAAGACCATTGAAAACGACAAGTAGCAGTGCGCCACCCCGCGCGACACCTCCGCTTATC  
TGGGACAGCTATGGATCCGGGACCGCTCATAACTGACGCGCTGGCGCATGCCTATCTATG  
GCTTCCGGGTTTCGGAGCCGCACCACGATGTCACGCCGACTGGCACATGCTGCTGTTTC  
TGCGCAAATGCGACCGGAATGGGGTGATCAGCCCCATGCAGCGTTACGCTCTGACGGATG  
ATCGGCAGCAGCTGGATCGCAACAACCTGGGCATTCCCTTACCGACTTTACGCCCCGCT  
TCGACTGGAAGGAGATTGACCCGTCCAAGGGGGACGCCTCCGGCTACATCGGCGCCTATA  
TCGCCAAGAACATCGACGGCGAGCATGTTGATGGTGATGACGAGGCAGGTACCAAGGCTG  
ACCAGGGCGCACAACATGCATGCGCCTTGGCCAGTTGGTGGGGGATCCGCACGTTCCAGC  
AGATCGGCGGCACACCCGTTGGCGTATCGCGCGAGGTGCGCCGCATCAGGAACGCCAGGA  
AGAATGGCGATCTGGTGGAGCCACCAAGCCGGTATTGCAAGACCCACGCTTTGCGGCCG  
CCCGCTATGCCGCCGATAACGCCATCTTTAGCTGCTACCTCGAAGCCATGGTCCGGGGCAA  
TGGCTACCAGAGCCGAGCACCCCATCAAGCTGGCCCACCTCATCGAAGACCATGCTAACA  
GCTACGGAGAAGACATCAAGCGCCTGATGGGGCTGCACATCGCTCATCTTGGTATCAAGA  
CTCGCCTGCAAGGGTCCGGAAGTGGTACCAGCAGGCACCTTTGAGGACACCAAGTCCGCCG  
GGGGTTCCGTTGGGGGGGTTTTGGTTAAGTCGGGCGGAAGCCGGGCTCCTTGGAGCTCTG  
ACAATAACTGTACGCAGCCGGATCTAGAGGCGTTCGCGGATCAGTTGATGGCAGAGCAAT  
GGCGTTCATCTCCCTTCTCTATCGGGCGTGTGCAGGCAGGTGCCAACGTGACGACGGACG  
GCTACACCCTCCGGCTTGAGAACGGCCAGTTGCAATCGAGCTGGTCCGTACCAAGCGAAC  
CGGACTGGGTGCCCGAGGGTCAGTCGCCAGCCGAGCCGAACCAGCAGGATGAGTGCGCGG  
TACCGGAAGGCGATAAGGACTGGCCCATGCTGGTTGAACTGTCCGGCAACGTTTACCAGG  
CACAGGGCCACGCCAGTACTCGCTGCTGGATAGAGATGCTGCCGGAACCATATTTGTCAG  
AGATGTGGCGGGTATTGAAAGGGCTAGATGCACCCGAGTGGATGCAGTACTGGACTACT  
ACAGCGCGGAGTGGACATGAGCATGAGTAGCAAACGGACCCGTCAGCCGCTAAGAGTACCG  
CCGCCTGGATAGCCGTGTGACCTGCATTCTCCAGCAGCGCTGGCCAGCCAACGAGATCAG  
CCGGTGGGTGGGGGTGCTCAAGGGTAAACAGCAGGCTTTGGCGTGCGCCATTCTGCGCCG  
CCGCCACCCCGACCAACATCGCAGGCCCTGCCGACCATCGTTGGCGAGAAACCGAACCC  
ATTTACAGGCCAAGGCCAACC GCCCCACGGTGTCCGGGCTGACAGCTGATGGCCGCTCGGT  
TGGCCGGCGCCATATCGTGGACGGACTGACCCCGGGGCCATAGACCAGAGCGGCGCCTT  
CCGGTGCGCCGTA ACTGGCCGCACCCTATTGATCGCACCCGGGCAGCGCCATCGACCCGAGC  
CAACCCGGGTGCCGCCGAACAGCTCAACGCAACCTACGGGCCCCACCGCACCCAGGTACT  
GGTTGACCACTGTCAACATGTAGAAGCCGGGGAGTAAACATGAAGCATATCAACTAGAAT  
CAGGCGAGCGAACTGGGCCTTATCGTTCGCATCAAGCGCGAGGTTCTTACCCAGAGGGA  
CTGGCCATGACCAGAAATCCGGAGAACGGGGTATCGGATATGTTGGTGGTGGGTCCAGAT  
GGGATCTGGGAGTACGAACAGCAGCTGATGACCAATGCACCAATAGTCAGCGAAGATGAA  
GCACGGGCAAAAATTGCAGAGTGGACGAAGGAGCAGCAGGCAAGACAGACCCCGCAAAC  
ATCCAGTACCGCACCCAGTACTAACC CGCTTCTGTACCACCAGGGAAGTGACCGACATCA  
AGTGCAACGACCGTGGCATAAGTACCCATGTGGTGTACGGAGATCCATGTACCGATGCCC  
TGGCGAGGGAGGCAACCATCTCCAGCTGGCGGGCATGGGCCAAACGGGCTGTTGTGGTGG  
TCAGAGAGGGAGCAGCATGGATCTGACCATAACCAATCAGCCCCATGGTTCGAGTTCAGTA  
GCTCCAACCCAGAGCATTAAGATTGATATTCATAATACAGCCGTGCCTGAAGGCTGGTA  
ACTTGTACCAGCGGAGCCTATGAGAGCCATGTGCGGAAGCCTTTCATAAGCCATAAAGA  
GTTGGAGAGCGGTAACGATTGGTAGCTCGTTCGTCCTAACCAACCAATGGAAAACCATGTT  
GGCTAGGGCACCAAGGCCATAAGGGGAAGCAGGATGACCCAGCCACGCAAGCCGGTCCA  
GTAGGCTAGACAGACAGCTATTGGTTTCAACCCGGTGGCGATGCTGCTCTCCGAGCGAGA  
GCGCCAGAAGATGGAAACGCTGCGTATGGCCCCGGGCTGGTTCGCTCTTAGCCCTACTCGAA  
CGATGAGTAATTTAGTACCGTGATCTAGCGGCACTAGAAACGCTGGCTGGATATGCTGAG  
CCAGCAAGACAGGGAAGCATTCAAGCCGAGGCCTGGCTGGTCTCGCGCATTAAAGAGCCTC  
ACCCAGGAGCTGGAGAATCTGGGCCAGTGCTCGCGCGTCAATCACGCCCGCCAACGCGCC  
AACTGTAAGATCGCCACCTATAAGATACTGACTCGCCAGAGGCTAGA ACTACCAGGCTCA  
TCGTTCCCATCGTTTACTGGTTGTGACTCGTGGTGGCTCTTAGTGGTTTTAAATACACA  
TGTATACTTGCAAGAATTA ACTAAATGCGTCTATTGACGGACATGCGCGTTGTGCAAGCT  
ACGCCCTAATCCGAGTCCCGGCCATTAGATGGTTGGGCGTTCGTGTATCTGAATCACGG



AGGCTAAAATTGCTATACAGCACCTATCTTGACGAGTTTGGCCACGCAGGCCCTATCTT  
GGTTATGACCATCCAAAGTACCATACCCAGTCAGTGTGGTATTGGCGGCTTTGTGCCA  
CCGTACTACAAGGTACTGGCATTCTCCTCTTTCTTCTTCCAGTTCAAAAATCATCTCCTA  
AGTGCTGATCTTGCCGATACTCAAGCCAAGGCGATGACGGATCAGCAACCCTTCCATCCC  
GCCAAGTGCGAGAAAAAAGGGACATCCGTGCTGACTGAGAAGAATGTCACCCGCTATCGT  
GAAACCAGAACGGCAATCAACCGAGGCTTGAATCGTATCAGAGACGATGAGAGCTTCGCC  
TTCTATGTGGGCCAGGAGAAAAGACAGGGGCTTGAACCTGACTCAACCTAGCTTTATCTC  
GATGTGATGAGAGAAGTGATCATAACGGCTCGATCAGGAATGCCGCACACCTAAGAGCCAG  
TGGATGATCATCATCGACCAGGACACTGAACGGAAAAAAATTGTCGAGACAGCTTCAATG  
GAGATGTTTGGTGAGCAAGGAAGACACTGTCTACTCGAGCCGCCAACGCAGGTGCAAAGT  
CACCTGTCTCAAACCTATACAGTGTGCTGACTGGCTATGTGCTCTCTACGGCCGCTTGAGT  
AACCTTCCATGTGAGCCATAAGCCAAGGCTGGGTTTCACGTCTTCGAAAAGTACTCCGGT  
GAGCGGTTAAGGCAAGTTCATAAAAGAAGCCGCATTCGGACATTTGGCGGGCCAGCGAGC  
ACAGCCAAACTGCAACTGTTGGCCGATAGGTAACCTCAGCGTTCGGATGAATCAAGAGGCGC  
TATTGCGCCCCTAGTCCTTTCAGTATCAACAGCCGGCCCTCTGGCGTCAGTGATCCAAGG  
AGCCCCAGCACCAACTGGTTCGTCGTCCTGGCCGACGGACTCAGCGTATGAGTGAACGAC  
AGTGTGGGTACCCAGCTATGACGACACACCGCATCAGTGCCTGGCAATAGAGATCGGAG  
ACCTGATCACCCAGCCGATTGGACTTGGTAATATGGCCTCGCTGGTAACACTCTTTGCAA  
AAAACCCGCATCACCCCGCCGATCATTGAAATCTCAATCACCCAGGTTGCATCTTACAT  
CAATCGGACTGTCTTTTATAACAGCGGCACCTTTCGTTTCTCGAAACGTAACCCACAGCG  
CCCGGGGCAGGCCAGCGCTGTTGATGGCGTCTGCCCCAGTTCACACAGCGGCAGCACTT  
CGTTCCTGGCATAGGTGGGGTTCGTCCTTCTCGGTATCCCTGAGACCGGCCCCGCCATTGG  
TGGGGATAATGCCGGCCAGCGCTGGCGGGTACCGATGCGCCGTCAGCACATCCTGCTCAG  
TGATCCCCTTGATAGCCGCGAACTCGTCCTTAGTTGCGATGTGCCTCACCCGGGATGAGCT  
TGATGCCATCGGGCTTGCCATCAGGGATGTTACGAATATCGGGTGGAAGTTCCTACCC  
ATTTGGAGTTCGCGATCATCTCATTCATCTCCTCTTTCGGTGTCTTCGTGCTTGTAGGGGT  
CGGTCGCGACGGAGATGATCCCCATGTGGGTGCCGTTGCGGAAGTAGCGGCGTCGGAACA  
GGGTGGCGTCGTGGTTGAGCAGCGCAGACTGCAGGCCGCCAAGGTAACCGGGCATGCCAT  
AGACCTGCTTCGCGGGGTCATACTGGGCCACCCAAATCACGTCATCCGGGCGGTAAATCA  
GGTTTACTTGGCCTGGTGCAGGTAGACAAATCAGCCATCCTCGCGCCGGCGCGGCTAGA  
CGCTGGAGAGCGGGTGAACCCACCGCCTGGCCGAAACTGTTGCGCAGCTTCAGCAAGC  
CAACATCACCAAACCTGCAGGTAGTTGTGTACGCAAGCCGTGATGGTGGCGCGTTGGTTGG  
TGAAGCGCCCCGCAACCATGTTCCGCCACGCCATCAGGATGGCCACATGGTGGGCATTGG  
CCCGGGATACCTTAGCCAGCCCCTTGCGGTCGATGGGAGGCTGGTAGTATTCCCCATAGG  
GGTTGTAAAACACCCCGGTGTAATCGGTCTGTCAGGCCGTGGGGTTCGATGGCCTCCGGCA  
TGCTGAACACCACCGAGGGCCGGGGGATGAGGCGGCCGCCTGGGCCGGTTGCTGCTGTC  
GTTTGGTCATGCGAGGGCACTCTCCTGAGAGTCTTTGAATTGGCACATGAGGACGAAATT  
AACTCCTCCTGCCGGTACTCGTATTTGAGCTCATCAATGTCCATGAGATTGCAGCCGAG  
ACGAACGGCATCCTCAATGGTATGACATAGCGCCAATGACGTTTCAGGGCAACGCTGGCC  
GCCATCTCTCAACGATGAATCGCTAGGGAAAGTTATCGCGTCTCTGCCGGGGTAGAGGTT  
CTTCCAGTGCGCCCCACACCCGAAGTTGTGCGCCATACCGCGGCGCGCAGAGGGCGTTGA  
ACAGTAGATCTTGCGCCAACGATTGTGCTTAGCCATAGCACCGGCCAAGTGCAGCGCTTT  
TCCAAAATCTGGCATCCTGAAATACTCATCGACGCAGACACGGCCCGCTTACCAGCAA  
GGTCAGATCATCAAGAGAATGAAAATGGATATGGGCTCCGTTTCGACAGGACGATGGCGCC  
ACCGACCAGGGTTACGCCGAAGAAATTTCTGGTGTATAAAACAAATATGGGTGCGGTAGAC  
ATCTGCCATATCTGGGGTTTCTGCCAACAAAATGTGATTGTCACCAGTCAATAACGCATC  
TTCTAAAGCCTGCCCGTTCGAAGTAATAGGTCATGACGATCTTATGAGCTTTCATGATGTT  
CAGGGCGCGCGCAGGGACGGGTCTAGCGTGGCCTTTCGGCAGCGCAGTTGGTAGCCAAA  
CAAGGTGCCGAGCCATTCGTGAAAGTGCTCTGCGGTCGAATGCCTGATATCGTTCTTCAT  
GCTGCGTTTTTCTCCTGGCTGGTTGCCAGCTGGATTGCGTTTTGCGGTGGGTATCGAGC  
GGCTCATTGGCCACAGCGTGGGCGATGGCAAGAAACACGTCGGCGTGACCGGTACGTTG  
TCACGCGCAGCCCGAACGTCTTTTGAAGCCCGCCGGTAGTGCTGCGCTCGGTGGCGAGG  
AAGGCGAAGGGGATTTACCGAGCCGAGCTGTCCACTCGATGCGGTTTGCCTCCAGTACA  
TCGATCATCTTGAGGACCAGCCGTGACTTGCTCTCGATGCCTTAGTTGATGGGGTGGCGC  
ACCCCTTTGAACACCGGCTTCGAGAGGCCATATACCCCGGCGCCGATGCCGGAGACATCG  
ACACCCAGATAGGTGACCCGGAGCTTCTTGGCGATGCGCTCTATCTCCTGCGCCTGATAC  
TGGAATTTCAACCCGCCCCAGTAGTGCTCTTCCACCACTCGGAAGCGCTCGCCAGCCACC

GTGGGCGGGGCGACCACCACCAGGGTCACATTGTCGCGGGTGC GGCTCGGGTCATAACCC  
ATCCACACCTCGTGCCGCGCGAACGGGTCAGGACGCCCGGGCGTGAAGTCCTCCCATCGG  
GTGGGGTCCACCCCTGCCGCTCCATGTCTGGAAC TTGTACACAGACAGGGCATCGTCG  
ATAAAGCGGCGCATGTAGAGGCGGTCGAACAGCTCCTCCGGGTCCTCGTCCTTGACCTCC  
TCTATGCTGATGAGGTGGCGATCGATGCGAATGGCGTCCTCGATGGTGATGACGTAGCGC  
CGCTACCTGTGCGGGGCTGATGCGGCCTCCGTGCGGTAGGTCATCTTACCAGGTAAGTCG  
ATGGCCACCCGGCTGGGCCGCTCTCCCTTG CAGTGATCCCCCGTACAGAACCGGTACGCC  
TCGTGCAGCTTGCTCGACGGGGTCGAGACTTAGGTCTTGCGCCAGTGGCTCTGGGTGCC  
ATGGCACTGGCCACACCAGACAGCTTCTCGTAGTTGGGGATCCAGAAGTATTCGTCGATG  
AAGACGTTGCCGGAGCGCGACTGGGCACTGTTGGAGTTGGTGGAGCAGAAGTGCAGCTTG  
GCCCCGTTGACAGCACGATGGGGTTGCCGGT CAGGGTGACGCCGAGGCAGGTCTGGGCG  
ATCTTGACAGATATAGGAGCGGAACACCTCCGCCTGGGGGCCGGTGGCGGACAGGAAAAAC  
TGGTTGCCACACGTCACAATGGCATCCTCCCACGCCTCGCCGGCGAAATAGTAAGTGCTC  
CCGATCTGACGGGACTCGAGAATGTTACGGGTGCGCGGCAGCGCCGGGTCTGTTCTTGGGC  
TCCCACACACGCAACTGATAGCCGAACAGGGTGGCCAGCCTCTCGGTAAAGTCATCGTCC  
GTCAGGGGCCAGATCTCGTTGTTGGCCTTCTTGCTACCCTTGCGGCCGCCGCCTCCCTGG  
CTGTTGTGCTCACGCTTGCCACGGCTGGGCCCGGGCTCACTTCCCTCCGCCCGCTGGGCC  
TTGAGGGCCTGCACGCGCTCGGCCCACTTGAGCGCCTTCTGTTTGAGGCTGCCATGGTGG  
CCGATGAGCCTGTCCAGCTCCTCCTTCTCGCCCGGGGTTTTCTTCTCACGGTGCATCAAC  
ACCTGCACCCGGCGAGTGATGGCATCCTCCACAGCCTCTTCGGTCCGACAGGTACGCCAG  
CCGAGCTTTTCGGCCAGTAGTAGATGATGCGATATGAGTTGAGCCCTAGGTCGTCTTG  
ATCTCCTGGGGTGTCCATCGTTAAGGTAGAGACCCTTCGCCGCATTGCGGATCTCTTCG  
GGGTACGCCACGTGCGCTCCATCCGGTGAATGATGCCGCCATCATAGCCAGCCCCTTCCC  
CCA ACTTATCCC ACTGATGTTCTGAGCAATTCGGATTTCTGATGGATCCGAATCCAGCA  
GAACGCCGTAGGGTGAAACCCCATGCCGGGCCGATAGCCTGCGCCCGCATCACTTGGTA  
TTAGGCATGTACACATCAACCTTGAGAACTGGCTGGGTCTAGATCGCCACCGAAGGGACC  
ACCATCGATGGCAGTGAGTTCACCGCTGCTTGGCTGACTGATATGGCCGAGGCCTACGAC  
CCGGTATACTACAAAGCACTGCTATGGCCCAGCACGCCCGCAGGGCAA ACTTCGGCTAT  
GTGCAGGAGCTCAAGACCGACGTGCTAGAGGGCAATGTCAAGCTGTCCGCCATCCTGAGT  
CCGAATCGGGATCTGGTTTATTACAACCAGGTTGGCCAGTACCAGTTCTGTTCCATCGAA  
CCACAAGAGCAGTTTGCCGATCAGGGCCGCACTTATCTGCGCGGCCTGGGCGTCACCGAC  
CTGCCAGCCAGCACAGCCACCTCCCACCTCAAGTTCAAGAAGAGTGGCGAGTCTCGCCTG  
ATCGGTACCAGCGAACCGCTAGATCTCTCCATATTCAAGCTACCCAAGCACGAGAAGGCC  
GATGGCCTGATCGCCAAGTTTTTACCTTCATGGCCAGCCACGGCGAGACAGCCATCCAA  
CCTACCCCTGCCAACCTGAGGATCAGGAAATGACCAAAGAACAGTTCGATCAGATGCTG  
GGGGCCCTCGATGGCCTTGGCACCAAGATCGTTGGCATCAGCACCAAGCTTGAAGCCAAA  
CCGGAAACCACCGCCCCGGTGACCGAACCAAGCAGAAAGAAGAGAAGGCCGGCATCAGCGAC  
GAGCAGTTCAGCAA ACTGGAAGAGTCTTGAACGGTCTGGCCAGCACCGTCCGGCGAGCTG  
AAAGGCCAGGGCGACAAATTCGCCACAAAGTGCGGGTCCAGCGCCCGGGCGCCATCGGC  
GGTGACGATAACACCTACCAAGTTTGCTAAGGAGCATT CAGTGAGCCAAACCCTGACCGT  
TTAGGCCGAACAACGCCTGAACAAATACTGCGATGCGCTGGCCAAAGCCTACGGCATCGA  
CATCAGTATGCTGGACAAGCAGCTCCGTGTCACCGGCCCGGTGGAAACCACCCTGCTATC  
TGCCCTGCTCGCCTCCGTGAGTTCTTGGCCTCATCATCGGCCTGGCCGTGGACCAGCT  
CAAGGGACAGGTCGTGCAGGTTGGCGTGGGT CAGCTCTCACCGGTCGTAACAACGCTGG  
TAGCTTCAAGGGCAAAGTCGGCGTGGATGGCGACACCTACGATCTGACCGAGACCGACTC  
CTGCGCCTCGCTAGATTGGGCTACCCTCTGGACCTGGGCCAACGCCGGTAGCGAGGGCGA  
GTT CATCAAGCTGGTAGGCCAGTTCGCCAACAACGCGTTTGCTCTCGACATGCTGCGCGT  
CGGCTGGACTGGCGTGTCTGCAGCCGATGACACCGATCCGACGGCGAACCCGCTGGGTCA  
AGACGTCAATAAGGGCTGGCACCAACTCGCCCGC GAGTGGAAGGTGGTAGCCAGATCAT  
AACGTCCGCGGCTGGCGAGAAGATCTACTTCGACCCGGACGGCAAGGGCGAGGACAAAAC  
CCTGGACGAGATGGCCTCCGACCTCATCAACACCAACATTGACCCACTGTTCCAGCAGGA  
CCCCGTCTGGTGGTGCGGGTCGGCACCGATCTGGTCGCAACCGCTCAGGCCAAGCTCTA  
CAGCGAAGCCGCCAACCCGAGCGAGCAGATCGCCGGTCAGCAGTTGGCCAAGTCCATCGC  
CGGTCGCAAGGCCATATCCCGCCCTTCTTCCCGGGCAAGCGGATGGTGGACACTACCCT  
GGACAACCTGCACTGCTACACCAGCGCGGCACCCGCAAGCGCAAGGGCGGACGACAACCA  
GGACAGCAAGAGCTTCGACAACCTGTACTGGCGCATGGAGGGCTCTGCCCTGGGCGAGCA  
CAAGGCCTACGGCGTCTTCGAAGCGGCCGAGATCGGGAGCGGTGCTGATCCGGCAGTCT

CGCCGTCGAAGCCGCCTCTCAAGCGGGCCAAGGCTAACCCATGAGCTTATCCGGTCAATG  
CCACAAACAGCGGGTACTCGCCAGGCAGGGGGCCGAGCAGGCCGCCTGCTCCGGCGTTCGC  
CACCGGCGCGGTGGCCGACAGCGTGCACCTACAATAATTGCCCTGGAGTAGGACATGGT  
TCGCTTGCGCAAGCTGGCCCGCATTGGGGACCGGGTGAACATGAAACGCGATGAGCTGAT  
GCCCAAGTACCGCCCCTATGTGGAGCGCTAGATGGCCGCTGTCGCTGAGTGCGGCCAGCC  
CTATCAGAACCAGCTGCCTCAGCGCATCATAATCTGGGGTTCGTTGTGGGCGACTTCGA  
CGACGGCATCGCCTGGGCGAATCTCGCAATCGCCCAGGGCCAGCGCACCCCGGCCAACAT  
CATGCGCGACTGGTCCCACTTCGTGACCGACACCGTGTGGAGTGGGCCAGAAAGCAGGC  
GGCCGAGGGGCACGCCGTGAACCCTGCTTCTCCCGGGTATTCAACAAGGTGCTTAATGA  
CTGGCGCTTCAACGAGCGGCCGACCGCCAAGTGGTTCAAGGCGGCCGGTTGCCTGCTGCT  
GCGCGACCACGACGGTCATTCCCGCCCCAGCGCCGTTGGGGATTGCGCCACCCTGGAGCA  
GGCAGACCACTGGTAGGCCAGGCCGACAAGCGGCTCGGCAAGGTGGGCGTCGGCACCTT  
GCGCCAGAAGACTGACATGCGCCTGCGGGCGCTGAGGCCGGAGTAACCGAATCTCCGCGC  
CGTTCGACCCCGGCGGGTAGGCTAGGCCAGCCGCAAGGCTCGCGTTCGAATCCTGCGATAC  
GTGGCTCCAGGGGTGCACCTTTTCTCGCCGCGCCATCGGGGACTCGGGCAACCGGGGCGAG  
TGGTGTTCACATTGGCAAGCATCAACAGAGGGCCAGACATGTTTGCAGGGCGATGACATAG  
ACTACACCCCGCCGCTATCCGCAATGACGGGTTCTGGCCGGTTGAGGCCGTGCGCGACT  
TCGAGCGCCGACGCGCACTGCCTGCCGATCTGGGCCAGCAGACCCCGGCGCCCGCCCTGC  
TGGCCGTCGTCCCTGAAACAAACCGTCAACTCGCCGGCCTCCAGGCCCCCTGCAGGCCA  
AGGGTTATGCCAGCGCCGCGGCTGTCCCGGGGCCAGCCTGGAAGTTGGTACCAATGCC  
TGAACGAGCAGTACCTGGCAGACGTCTTCGCCCGGGCCAAGGCGGCCTTGCTGCCAACGT  
TCGCCACCGTCACCGAGCGGGCGACCGCCAACAACCAGGTAGAGCGTTCGCCAGACCACC  
GCAACAGACTGCTGGCAGGGAGTCAGCAGTTGGTCCGCAGCATCAAGAGCAAGCGCCGTG  
CCGGGGTAGCGCAGATATGAGTAATGACATGAACGAGCCGACAGGCCAGGGCTACTTACT  
CCATGCGCTCCACGCCGAGCAGCTGCGGGTACTGCCGGCCATGTGCCACAAGACGCTCGA  
TAGCTGGATGGAGAACGGCACCATCAAGTTCGAACCAAGAAGATGGGGCCACCAGGGGT  
GGAAGTGGCTTGGCTCACCTATCAGGCGGTGTTTACCATCGAGCAACTGCCGTTTCGAGC  
GCTGGATCAGGCCACCCTGCTGGCGGCCGTGCGCCGCTGTGTGCAGGAGCACGACGAGGT  
GCGCGAGCATCTCGGGCTTCCCGATCCCGATTACGCCGTACCCCGAACGAGGCGCAGAC  
GGCCGACCTCGAGATCCAGCTCCCTTTATCCGAGCCTCGTTCGTTTATCAAGCACCCGCA  
AGGGCCCATCAACTGGCTCGGCAAGCGCTGGAACGTGGCCCCCTATGACATCTGGGTAGC  
CGAGCAGATTGACCTGAACGTGGGTGATTCCGGCGCTCACTAGGTAGGCGGCCTCTCATG  
ATCACCATCACCTGGACACCTGTGCGGGTAAAGACCAGCTCAACATGCTGGCCCTGCCA  
CGAAGAGGCGCAAGCGGCTGGTATGGTGAAGCCGACAACGAGATGAAAAAGCTGGCTACC  
CGTAACGTGCGCCAGCAGCAAGCCCCTAATTGCAATGCTTGGACACGGCGCAAGCGGAGC  
AAACGCAAGATGTAGCGTGGCCTGCCCAAGCCGTTGCAGATCCCCGAGCCTCACCAGGAC  
ACGGCAGAGCTGGGGTTCACCAAGGGCATCGTGAGCGCCCCCGCAGGGGGCATGGCCAAC  
ACCCACCAGAAGGTCCACACCTACAAGGTGACGGCCGCCAGCCGGCGCCGCATTGCCCCC  
AGTGATGTGGGCAAATACAAGGAGGCCAGCAAGGCACAGGCGCCCAAGCGCGGCGGGCTT  
CCGTTCAAGCGTCTTGGCAAGCGCAAGCGGGCATGCCGCTCGGCATCGCTGGGTTTCGATC  
ACCGCCATTCTCATCTACGCCAGGGCGGGGTTCTTAATCAAGAAGCTCAAGGACGAACCG  
GTGAAAGAGAGCTGGGAGAGCCAGCTACCAGCCCGCCCGTTCTTGGGCGCAAACGCCAGG  
CATCTGCAGTAGGCCTTCGCCCTGCGCCCGGAGAGCTTCCATTACGGATGGGACCTCAAC  
AAGCAAGACATGAAGGGGAAATAACGGCATGTGGCCTTACGTACAGATCTACAGCTTGAA  
CCAGATGCAGGGGCGCGTGACGGAAGTCGAGCGCCACCTGCTGTTTCATCGGCAGCGCCGC  
CAGCAACACCGGTAAACTGCTCTCCCTCTACGCCCAATCCGCCTTTGGTCCGTTGATCGG  
GGCCGCGGGCAGCGAGCTCAAGGCCAACCTGCTGGCCGCCCGTGATAACGACGGCCAGAA  
CTGGTCCGGCGGGCCTATGTCCTTCCCACCGACAAGCCCTCGCTGGACGCGTCCCGCGA  
CGCCAGCAGACCCAGTCGTTAGAGGGGGTGTGTTGTGCTCGATCAGGAGTGTACCAGGC  
GGCCATCAACGCCGCCGAAGCCCTCAACCAGGAGCTGATCGCCAAATGGGGGCGCTGGCA  
GTTTCATGCTGCTGGCCGTGCCGGCATTCCGCCGACGATCAGGACTGGCCCGCCTACGAGGC  
CGAACTGGCCACCCTGCAGGACGGTATCGCGGCAAGCTCGGTTCCCTGATCCCGCAGCT  
TTGGCCGACCCTGGCTGGGGCCTACGCGGGCCGCTCTGCAACCGGGCAGTGAGCATTGC  
CGACAGCCCCTGCCGGGTGAAGACCGGGCGCCCTGGTGGGCCTTGGAAGAAGCCGGTGGG  
CAAGGACGGGATCCCGCTGCCACTGGCCACCCTGCAGACCCTGGAGGCCAACCGTAATC  
GATGCCGATGTGGTACCCGGACTGTGACTGGATCTAAGGGGCCGATGGCCGCACCCTGGA  
CGACGAGGGCGGGGACTACCAGGTGATCGAGAACCCTGCGCATTGCCTAAAAGGTGGCGCG

CCGGATGCGCCTGCGCGCCATCGCCCCGATCGGGGGTTCGCTCGTTGAACTCCAGCCCCTG  
CAGAACC GCCCGCCATCACCTACCTCGGGCAGGATCTGTGTGAGATGGCCAAGTCGAC  
CACCAACAACGGCCACCCGTTCCCGGGCGACATCGCCTCCCCCAGGATGGCGACATCCG  
CATCCAGTGGGTGCGCAAGAACCTGGTCTCGGTGTTTGTGGTGGTGCGCACCGTGGACTG  
CCCCAAGGGGGTCAACGTCATGCTCGATTTGAGCCTAAACAATGGGGACGGCTA  
ACCCATGTCCCGTCTATCTCCGGTGCCATCTTTGACACCACCTCTTGGGGGCGGTGGT  
CCACGTGCGAAAAGGCCAGCCTCTCCATCACCGACAATAGCGCCGTGGCGCAATCCCGGGG  
GATCGCGGACGGCATCGTCGATGCCGATGTCGCCGCCGAGCTGGAGATCGCGCTCGACAG  
CAAGAATTTCTCGCAGTTGGCAGATGCCGCCTAACGCGCGGGGAGCTGGTGCGGAATTGA  
GCCGGACTATGTGCTGTTCTACGCCTACACCGGCTCCGAGACCATGAAGGTGGAGGCCTT  
CGCGGTGAAGCTCCTTGTCTCCGACCTGCTCGACATCGACCCCAAGGGCGGCAGCAGGAC  
CGTGCACAAGGTGAAAGCCTTTGTGACCTCCCCGACTTCGTTACCTCAACGGCGTGCC  
TTACCTCTCCAAGGAAGACACCCGCCACCTATTGGGTAAAGGGGGACGATTGGACTACAC  
CGACCGCGCCACCCGCCCCCGCCTCCCGCATGCTGGCGGTCCAACCTGGCCAGCCAGGTGGG  
CAAGGGGCACCACCAGGGGGGAGAGCCTGCCCCAGTGCGAAGAGTGCGGGGACGACATCCC  
CGAGGGACGACGCCGCCACGTACCCGGGGAGCGCCTGTGCGTCCCTGCCGCACCAGCAT  
TGAACGGTTGGCCCCTACTCAGAGCAACGGACATGAACACCGTGCTCCATAAAGAACCC  
ACTCTCTGGGCCCTGCTATTGGGCTGGTTGATGGACAACATGCCACCGTATATGGCACT  
GCATTAGCAGTATTAACGGCCTGGCTGCGCATCACGTATGGCGCAGGCAGTGGCCGTCGT  
AGGCTCCTGGAATCCGTCTTATGCGGAGCCATTACCTTGGCATTATCTCTGCCTTTGGC  
CGTTTCGGGATGCCAGGAGAGGCTGCTGGACTTGTCTGCGGCATGCTGGGCCCTTATCGGT  
GTTGAGACCATTGCGGGCTTAGCCGAACGGTGGCTCACCACCAAATCACCGAAGGAGTGA  
GCAGTCGTGAGTACTGATCAAATGCATATCAATAAACATAGCGAGTGCATCAAGCTGTTC  
AATGCAAATTCGATGGCCTACCTGAAAACCATGCCATCTCGCAGCTTGGATCTTGTGGCT  
GTTGATCCGCCCTACTTCCGAGTGAAAGACCTGGACTGGGATGACCAATGGCCCCGACGTC  
ACCGCCTACTTGGATTGGTTCGAAATATGTGTGATAGAGTTTGCCCGGATCCTCAAGCCA  
AATGGGTGCTATATGTGTATTGTGGCCCCGGGCTCAATGCCGAAATCGAACTGTTATTG  
CGCAAGCAGTTTAAGGTTCTGAGCCACATCGTCTGGTCAAACCCTCAGGCGTGTGGAAC  
CGGGCGGACAAGTCTACCTTGCCTATTTCTGGCCCCGCCAGCGAACGCATTATTTTTGCG  
GGGCAACTGGACACCCATGGTATCGCGCAACACAGCGGCTATGGCCAAGGCTGTCAGGGC  
TTTCGTAGCCAGGTGATGCAGCCGCTGATCGACTAGTTCCAGCAGGCCAAAGCTGCCTGT  
GGCATCTCCAACAAGAGATCGACCAGGCCATGGGGTGCCATATGGCTGGGCATTGGTTC  
GGCCGCAGCCAGTGGAGTCTGCCAACTGAAGCACAGTACGCCCGCTTGAAGCCCTGTTC  
GCCAAGAAAAGTACGCCCTTTGCCAGCCCCATCATAAGCTCAAAGAAGCCTATTGGGGGA  
TTACATCGCACCTACCAAACCGTGGTGGCCAATTATGACGAGCTGAAGGCCGACTAGGAG  
CGACTGTGCCGCCCGTTACAGCGTCACCAAAGAGGAGCCCTTACCAGAGTCTGGACCTAC  
CCCTCGGTGCACGCTTACCCGGGCAAGCACCCCTTGCGAAAAGCCCGCTGCCATGCTGTAG  
CAAATCGTGTGCACGAGCAGCCGGCCAGCTGATGTTGTTGGAGACTTCTTTATGGGGTCT  
GGTGCCACCGGAAAAGCAGCCTGGCGGCTTGGCCGCTGATTCAAGTGGTGGAGGAGCTGGAA  
ACCCCGTGGTTTTTCCCAAACATGCCAGGATTTTCAGACCCTAGTCAGTAAGGAGGAAAAG  
CACCATGCCGCGCAGTACTGCCACCCCCAGATGGCCGCCTTTCTCCACCTGCTCGCCTA  
TGCCGGGGGGCGCCAAGGGGCTGGGCGACGACGTTTACAACAAGCTGATCAACCCGGCCGG  
GTTCTTCCAGGACTATCGCGAACACCCCGATGTGTTGGTGCGGGTCAACCCGGCCCTTCA  
CGGCACCGCTGCCGAACACTATCAATTCCTGTCCCGTCATTGGCGCCACTACCAGGCGGC  
GCTCGGCCTGCCGGACTTTGGCCCCGTCTCACAGGACACCTGCGCTATCCAGCTTTTCCG  
CGAGCGCAAGGCGCTGGACGACGTGATCATGGGGCGCATCCCCAGGGCGATCGGCAAGTG  
CGCCAACATGTGGGCCAGCCTGCCCGGCGCCGGCTACGGCCAGCGGGAGCACAAGCTGGC  
GGAAGTGTGGCCAAGTTGACCGAGTTTGGCGGTGTGCTGGCATGAGCACGGTCATCCGG  
GTGTTGCCGACCCTGATGGGGTTGGTAATCGACAGCTTGCTATGTGCTCAGGGGGAGCGG  
CTACCCAGCGCACCCGGGAGCTCGCCACCCGCCAACGACACCATTGCCACCCTACGAGAT  
GCCAACGACAGACGGGCGATGAGCTTAAGACGCTGGGAGAAGAAGACAGCGCCCTGCGC  
CATCTGCTCGCCATCCGAACGCGGCGTTGGCCGAACTAGACACCAGAACAGGAAGACA  
GCCAATGACCTGCAACAAGCCCTGGCCATACCGCCGTTGGGCCGCCAGATTGCGCTCGC  
GAGCCTTTGCCTGCCGGCGCTCTCGGCCTGCTCCAGCCAGCCACAACCGTGGTGCAAAC  
CCGGGTGGTCAAGCGGCTGCCGCCCCCGGGACTGGTGCCCCACTGCCCGGAGCCTGAAAT  
CACGGAGAGCACCTATGGCGACGCCGTGCGGTTTATCCCCACCCTGCAGATGGCGCTGCG  
CCGCTGCCCAACCCCGATCACCAACAAGAACAACGGGATAACCAAGGGGACACAACCC

ATGAGAAAGACCCTGACCCTGACTGTGGTTGGTACCGACTTCGGCTTTCAACCGACCATG  
ACCGCCTCCAACGGCTTCATCAACGACTTGATGCCGAGCGACAAGGTGGCATCGGCCAC  
AACTACCTCAGGAAGATCGTATGCCAGGAGAGTAAGGCAGAGCTCGACGAGCTGCTCAAG  
CGGCCGGGCGCCGCCCTGCAGTTGGCGGGGGCAATTAAGTACGAGTTCCGCCCCACCCTG  
GAAATCACCGTAAAAAACTGACC CGCGCTGCCGAGGCCATCGAGCGCAATCCCCTGGAGC  
AGGTGCTGGCCCTGCGGGCCTACTACCTGCCCATGAAGAGGACTACCTCGACAGCCTGG  
CTCGCGCCATCTGGTTAGACAAACAGCACCGAGAGTCCGACGCCGCCCGCTGGCCGAGG  
GCATTGCTAAAGCACTGATCGGGTCACGACTTATGGCGTGGATGGAAAAATTGATGATGC  
AGGTGGCCCTGGTTGACCAGGTCACCAAGACCCTGGCCGGCATTAAAGCCCAGATGGACA  
AGGTCAGCAAGGCCGGCCGAGGGCTGGAGCAACATTGCCATGGGGGCCACCACCCTAG  
GCGCCGGCGTGCTGGCGGTGCAGGCGGCCCTCGGCCCGCCATCGAGATGGACCGGGTCC  
TCACCGAGGTGGCCTCCCTCGATGTGCAAAGGACGTGCTCGGCGCGCTCGGCCGTGAGG  
CCCTCAAGCTGTCCGTGCAGTACGGTAACTAGGCCACCGAGATTGTGCGCTCCTCCTACG  
ACATCCCCTCCGCAATCGCAGGGCTGGAGGGCAACGAGCTGGCTGCCTTACCCGCGCCT  
CAACCATCCTGGCCCAAACCACCAAGGCCGACACCGCCACCATCGCCAACATACATGGGCA  
CCATGTACGGCATCGTCGAGCAGCAGGCCAAGAGAATGGGAAAGGCCAACTGGGTGGAAAG  
ATGCGACGGGCAAGACGGGGCTGGCGGTACAGCTGTTCAAGACCACCGGCCAGGACAAGG  
CAGATGCCTTCGGGGCCATCGGTGCCAACGCCACGGCGGCCGGGGTGTGATGGATGAAC  
AGTTAGCCGTGCTGGGGCAACTACAGGCCACCATGGGCGGCGGCGCGGCCGGGACCGAGT  
TCAAGGCGTTCCTGGCCGGGGTGGGCAGTGCCAGACGGCGCTCGGCATGGAGTTCACCG  
ACTCAGCGGGCAACATGCTGCCGGTGCTCACCATGCTCGACAACTCAAGGTCCTCTATG  
GCGAGACCCTAAGTGTGGCCGAGGGGGACGAGATAAAGGAGGCGTTTGGCTCGGATGAGG  
CGGTGGCCAGCGTCAAACCTCCGGATGACCAACACCAAGGCCCTTCCACCAACATCAACG  
CCCTGGCCAACACCCACGGCATGGGCAAGGCCGAGCAGATGGCGGGGCCATGACCCACC  
ATTGGGAACGGGTAACCCATGCCTGGTTCCGCCATCCCGGCAGCCGCCTTCGGGGTTGTGC  
TGCCGGCCATCAACCAGGTGTTGGGGATCTTCCCGACGGGACCGACACCGTGCTGCGTT  
GGACCCACCTAATCCCGAACCTCACCCGGGCGGTGAGGTATGCCCTGCTCGCCATCGTGG  
GCCTTGGCATGGTGTCCGGTGCCTGGATGCTGGTTCGCTGGCGTGGCGAAGCTTGCCACC  
TGGGGCTTGGCATCGCCTGGTTCGCTTCTGCTCGCCCCGCTAAACGTGCCCAAGGCCGGGA  
TCGTTGCCTTTGTTGCCATCCTGCTGGTTCGTC AACATCATGATGACCGCGAACCCAGCCG  
TGCTGCTTGCCTATGTGGTTCGGCGGCCTGCTCGTTCGGTGCTATTAGCGAGGCGATCTACT  
ACTCGGACAACCTCAAGAAGACCCTGGCGGATTTGGGCGTGTATGAGCCAGTCCAGGCGA  
TGATCGACGGGGCCCGCTGGCTGGGCCAGTTTCATGCAGCTGCTCGGCAACCTGAGCC  
CCTTCCCCTTGCTGGGGCGGGCGGTGGACTGGCTAATCGAGAAGCTCAACCTGATCCC GG  
GGGTCAATATCGAGCTCGGCAGCATGCTGGACCTGCAGATGCCCGCGCTCACCCCGCTGA  
CCTTCGCGGT CATGCCCGGGTTCGGTGAAGGCCCCCATGGTGGCACAGCAGCAACAGGCCT  
CGATCATCGCTCCCCTCGCCCCCTATCGCCAGCCGGAGCGGAGCAAGGTGCCGGCCGGCG  
GACTGGGCCAGAACTGATCCAGGCCAACGCGGCCGCGTGCTCTGTCAACCGGAAGCCCG  
CCAAGTCCCTGCAGATAGGCGAGGTGCACATCACACACCAGAACCCCATGACCCCGGAGC  
AACTGGCCGAATACATCTGGCTGGAGACCTAGTGATGAACGAACCCAAGTACATCGACTT  
CCTGCTGGTGAACGGTGCCTGGCAGCTCGTTGCAGGGGGCCAGCCCCGCACCACCAGGA  
CCGCCACAGCATCGTTCAGGACATTAAGCACCGCATCATGGAATCCGGGGCTCGCCCCGAA  
GCTCATCGGTGAGCGTAGCCCGACCTTGAGCAGCGTCTTGGTGACCGGGATTGAGCTGCT  
GGTGGAAGACGCCGAGCGGTGGTGCCTGGCACCATCTTCATCAGCGAAGAGGCCCCCGA  
CCGGGTGCTCGTACCCGCACGCACCTATTAATTCGGCGAACTGGAGGTAACCCTGTGAGT  
CTGCGACCGACCATGGACTTTCTGACCCTGTTGGCCGAGGCTGGCGGACCGACCACCGAG  
GAGGCCATGTAGGCCGAGCTCGAGAAGGAAGTGGTGGCCGCCGGCTCCCTCTTGACCAAC  
GACTGCGATGTGAGCCCCTTCAGGCGGCTGGTGGGCGGCGGGGTCATCACCCCGGCCCTT  
CGGCTTATCCGCACCCTGCTGGCGGGCCATGTGCTGCCTAACACCGTTCGCGGCCACAGCC  
ACCGATGCCTATCTGGACCTCAAGGCCTGGGATGTGGACCTTACTCGTAAGGCGGCCAG  
AAAACCCGGGGCCTGGACAATTTTCGTCAAAGCCAACCCGAGCGACGCCGTACCATCCGG  
GCCGAGATCTGGATCACCACCGAGCGCATCGACGGCACTATCCATCGCCTGCGGCCCTTG  
CAGGCTGTGGTGAGCCCCGCCGGGGAAGCGATAGCCCGGGAGGTGTACGAGGCCGAGCTC  
GCCGGAGCAGCCTGGAACCAGGCTCCGGGGTATTACAACCTGCTGAGCAAATCGGTGACT  
GGCATTCTCTGCCCCGAACGATGACAAGGAGTGGATCACCACCCAGGGCAGCGACGTT  
GAGAGCAACGATGCACTCGGCCTGCGCATCCAGAACCAGTTTTCTGCGGTAGGCCGCAAC  
CACATCTACGCGATTTACCGCTCCATGCTGGCGAGCGTTCGCGGGGATCCGCGTCGATCAC

ATCTTCTTCGAGCGCGAATCCCCGCGGGGGCCCGGCACCGCCAACTCTTACATCCTGCTG  
GAGGTGGGGGCCACCCCGGCCAGCCTCATCAATCTGCTCCACGACTCCGTGGGGCGCCAG  
GGCAATCATGGCCATGGGGCTGACCTGTACGTAATGAGCATCCCCGAGACCCAGCACAGC  
TTCATAACGGCGCTCTGGCCCCAGGCCAACCTCAGCGACGAGCAGCGGGGCTGCGCTCAA  
GCGGGCACCGAGAGCCTGGCACGGTCAGGGTTTCGCCAGTCGGCAGATTTCCCGGCCGTC  
ACCCGCCCTGGCCGCGCTCTCGCTCCTCGCTCTCCAGCTTGCCCCGCGAGCTACACAGC  
CAGTTACCGCAACTCCTGAGCCTACGCCTTCGCGAGAGTGACAACGTTGCAGGACTCGCC  
ACCCATCACCTGAGTACGCTGGAGGTGACCCTGCATGACTGACCCGACGCCCTTGAGCA  
CGAGCGGCAGGGCGCCGCTGCTACCGGATGCCTGCGCCCCGCTGGTGGAAGATGGCTACAC  
CATCAGCCCCCCCCATGCCGAGGGCGGGGTTCTTGCCAAGGGCATCAACGCCTTCTGGCA  
ACGCCTCAAGGGCTGGCTGCTGCTGCCGTTGGCCCCGCAAGATCCGCTGACCTGCTCGGA  
GTCCTTGCTGCCCTGGTGGCCTGGGAGCGAGACATCACCCGTTTCAATGGCGAGCCGCT  
GCTGCTCTTTCGCAAGCGGGTCATATTCGCTTCATGAACGCCCGGGATGCCGGTGAAGT  
GGCAGGCTTTAAACCCATCTTCGAGCGCCTGGGCATCGGCTGGTGGCAGATCCACGAACG  
CCGGGCCGACACGCCCTGGGACGTAATCACCATCGAGGTCACCGATAGCGCTATCGCGAG  
CAACCAGCAGATGATGGAAACACTCATCCAACACTATGGCCGTACCTGCTCCCGCTACCT  
CATCCAAGTGGTTTACCCGGTCACCGCCACCCTGTGCCCGGTCGCATCGACATGGGTCA  
GCAGGTGTTTCGGCGCGACACTCAAGAGGACCCCATAGCCAGATCATTAGCAGCGCTTTC  
ACCAGTACCTGCAGGCGTGCCTCGCCAACCAGACGCCGGTGGTGCTCGATGGGTTCGTG  
CTGGCCAAACGTGCCCCACCTCGACCCCGAGGCGGGTATTGAACAGGACATCGCCCAGCCG  
CGCGCGGGCCAGATTGTGCATCGTCACACAGTGGATCAACGCGGTTCGCATCAACAACGAC  
CTGGTGGACTACACCACCGTGATGGACACCAGGTTTCGGCGATTTACAGCTTCAACGCCCTG  
TACCTCATCAACAAGGCCAGTGGCATGGTGGGGAAGGTCGTACATAAGGGGCTGAAGACC  
AAACTCAAGACCCATGAGGCCATCGGCCAGACCCGGCAACAGCCTGGTCAAGTCCATGCTG  
ATGGAGTACGACCGGGCAAGCCAGGCCACCACCACCGTAGATGCCAGCACCTGGCAG  
ATTGACTATGCGGGCCCCGTTGCGCGGGATGGACGACGACCTGCGCCTGCAGGCCCTGCGG  
TTCTTCGGCCCCGGCCACCTTCCACGGAGACGGCTTCAAGCTAGTAAGCGAATCTGGTGTC  
TATACGGTGCAACCCCGGGTGGCCTATGTGGACGGACTGCGCGCCCAGCTCGACGAAATG  
GGGAAGGTCACCCCGGGTCCAAGCCGGTGGGGCTCTGGCTCGACATCTACCCGGGCGGGC  
TCCCTGCTCAACGCCTGGGTGAATCACTTCTCCCTCACTCTTAGCGTGCCAGACATGCTG  
GATTACGTGGACAGCAACGGCTATATGCACCACGTCCGCAAGGTAGCAATCGTCAATGGC  
AACGGCAGCGTCACCGATGTGCGCCACAAGCGCACCATCGAGCTGACGGGGGACGTGACA  
GGAAAGGGCATTGTGGAATATGCCACGAGCGTTTCGATCTCGGTGGAGATCATAGACGGC  
AGTCACCGCCACAAGTGGGATGAACTCGTGCAGGGGCTGACACCGCCAGCCGCTGGCCC  
AGCTACAACGAGTAGACCAATAAGCCGAATTTAGCCGTGGCCAATCATAGCCATATGGGC  
ACCCTGACCAATCCGAACCAGCTGTTCAACGAAATCCTGAATACCATCGTCAGCCCCGGC  
ATCTATCGGCAGGACTGGAACGGCAACGCGTCAGCCGGGCTCAATTACCCAGAGACAAAT  
GCGGGCTGCCTGATCGTGACAGTTGGCGCCGGGGTGCAGCAGCTTACCACGTATATAAC  
TCGAGTCGGGTCTATAGTCGCGCCCAGTACCACACGGGGGCTTTCACTGCCTGGGCCAGG  
GATTACAACAACCAGAACAACCGAGCGCCGCGACGTGGGGCTAGGGAACCTTGTGAAT  
ATGGGTTGGAATTATGTCGCCATAGCAGACAAGTATGCCGTTTCGCGATACTTCCGGCGAC  
CTTAATGCTAGCCTGTTTCAGGGCGACTTACCCCTACGAGGCAACTTGCTGTGGAGCCTTG  
GCCTTCCGGGTAAACAACGACAATAACTCTTACACCCGATACTGCAACAACCCGGCAGCG  
GTGCGAGCCTGGCATAATTTCGCATAGAACATCGTGGGATATGGGGTGGCGAGCATAACATC  
GAGGATCCCAACAACCCGATGACCGAATAACCACATTCCAGGTAAGTCCGCGTTAATTACC  
TACCCGACCGGGCAGCGAGCCTATTTGATTGCCTCAGCCAACGGCGGGGGTGGTGCAACA  
GTACAGCGTCTGCGCCTCGAGACAAACGGCAACCTCTATGCCACCGGCGGGGTGCAGGAT  
ATGGGGCATCGGGTATACAGCCCGGTCAACCCGCCCCACAACCTCTCATAATCACACGGCC  
GCCCAAGGCAACTCAGACATTGTGCGCCGGTGGCTGGGCGCGGGTTCGGCACTCACATCCTT  
GCCTCCAACGCCTCCGGCACCACCATGGGCTTAGGGCTCAATGGTCTCGGGTTCAGCCTG  
GTATCAGCCTCGGCAGGGGAACGGCACCATGGCGGGGTGAGTCTGCCAGGCACCTCGAAA  
TGTCACGGCTATTCCGTTGGTTCGCTTGGCCCCCTTCGATACCCGCACCACTCTCTGGATA  
AGGATAGCCTGGTGGGGATCATCACCGCCAACTCGCCATCGCCTACACCAACCGACCGG  
ACGCCCTGGACATGGAGGTTGCCCTTCGGCCACCTGCCCGGGCAGTTTGTCTCCTTTACCG  
CCAGACAGGACGACTCGGCCGAACATGGGCGCGAGCTTTATGAGCGAGCCATGTTTGGCG  
AGTTTCGACAAGATCCGCACGCAGGCCCAATCCGAGCACCTCCCGAGCGAAGCCGAGCACC  
AGCGCAAGCTCGATGCCCTGCTGGCCGAGGTCCTCTGCACATCGGTCCCTGCAGGACG

CCAAAGAGCTGAAGCTGGCCACCCCGCAAGAACTCGACAAGCTGGAAGCCCTGCAACGCT  
CTCGCATCGCCCTGATGCGCCTGCCGCAAGCGAGGGCTCGCCAAGCTCAGGAACATGGC  
CGGAGATGCCCAATAAGCTGGGCCCAGGGTGCCTGCGCTGGCCCGCAAGTGTTGACAC  
CTTGACACCCCGCAGCCGGGAGGCGCTGGGGCAGCTTCCGGAGAGCAAGGCGAGCGCCAT  
GGATCGAATCCTGGGATTGGCCGCGCGGGCCAGTATCGGCCCCACACACTAAGCGAGGC  
GGCCGGGGGCTTGGCCGGTCTTCGGACCGAGCTCGACCCGTTGCTGGTATTGGCCACTG  
CCTCACCATCACCCCCTATCAGCAAGGAGTGGGTCTACTGAAGGGCACCCAGCACCATCT  
GTCCGCCCCCAACTCGGAGGCGGCCCTGCCCGCCACGCTGCAGGATGGCCCTGCCGACG  
GCAGCCCGGCGGGCAGCAGCATGCCCTCGCCTGGGTGCTGCCAGGCAACAGCGCCGATGA  
CCTAGCCCGGCAGCTAGCGCTCCTCTGCGCCCTGCTGCCGTTGCCGGAGTGGTGCGCCAC  
CTCGCCCCGACTCACGGCCAGCAACGACGCCTTGCACCAGCCCTGCGCCCCAGGGTGCC  
GCGCTGGCGCGCCGGGAGCCCCTTTGTGCTGGGCACCGCTGCGCCCCGGCCGGCCGCCACT  
TGACGCGAAGCTGTCCCAACTGGAGAGCATCGCCCCGGGATTGCCAGAGCCCCATCGACAA  
GCTGCAGGGGCTCGCCGTGCGCCGACCGCCCCGCCTTGATGCGCTGGCCACCGCCCCGGC  
CGAACTTGTAAGCTGTCCGGCACGCTCTGGCACTGGCAAGGCCAGGGGGACGCGGGCAG  
CCCCAGCACCCAACCTCGAGCAGAGCAGGCCGCCGAGCACAGCATGAGCATTACGGTCGC  
TCCCCTGCTGCTCTCCCCTTCCCCTGCTCAGCTTCCGGCAGGAGTTGACCCCATGAGCCAA  
GCCATGCTGACCTTGGATGGCGAACCCATCATCATGAAATCGATGCCGGTGTGCGCATCG  
ATGCAGTTTAAGAACAAGGACCAGAGCGGCCAGACCAGCGCGACGAGCAGTGCCGAGCGA  
GGCGCCAAGGGCACGTGGCTCGACGTCTCGGGCCTCATAGCGTTCATGGAGGAGCGCATG  
TTGAGCCGGCTGTTTGTAGCTGGCCGATGCCAAAGGTAGCGGCGGTAAGCCCCACATCTAC  
CGGGTCGGGTTCGATGCTGGCCAACCTCGGTGAAGGTGCGCCAGGCGCGGTTCCGCCGGGCGC  
ATCACCGCGAGCGACAAGGAGGGTCTGCGGTGCGGGCAGGTGCAGTTCACCTTGAAGGAG  
TTCGACTCGGTACCGTAGAAGCGGGAACAGCGTTTGCCTAAGCAAGCCCCGACCATGGGC  
CAGAGTACCTCCAATAACAACGCCGCCAAGCCCCGGCGAGAAAGGACCGAAGAACCATTAA  
CAAGGCCTCAGCAGTTTCGAGCGCTATGTGCTACAACCGATGGATGACATGCTGGCATGA  
AACTGACCGCCTCTCTGACCGTCGCGGGTCAATCGGTGCACCTCATGGACCATGATCTGG  
TGCTGGATCTCAACGCTGGAGGCCGCGCCGCGCTCACTAGCGAGGGCACCGCCCCGCAAGG  
GGCAGCCCTTACCCTGGTACCGGCTATAACGGCGACCTGCGGCGCTGGTTCACGGGCT  
ACGTGTACGACGTGCACCCCGCCGCCAACGGTGTAGCAAGCTGCTGTGCCGGGAGCTCG  
CCGGTGTCTTGAGATCCCCTGCCCCGTCATCAGCAGCATGCCACCCTGCGCGGCCTGC  
TCGCTGGCTGACCGACCGCTGCGGGCTCTCCTTCTGCTGCCCCAGGGGGTGGACTACA  
CTGACCGACCGATCCCAAACCTTACCAGCGCCGGCACCGGCTATCACTTGCTCGATAACG  
CCGGGCGCGGCTTCGAGGTACCGGACATTGACTAGTACCAGCAACCGGATGCCTCCATCT  
ACGCGGGGAGCCTCGCCATAGCCACTGGCATGGCAAGGAGGTGACGCTCGATCCCCT  
GGTCAGGGCGCCCAGCGGGTACACCCCTCATTCTGTCTCCGGTGCCGGCCATCAGGCCCG  
GGGCCATCATCAACGGCAAGCGGGTAATGCGGGTACGCTCCAGGGGAGACGAGGTGACCC  
TCACCACGGTTACCCCGGCAAACCGGTGAAGTCGCCGGAGCGGCGCAAGATAGAGGGCG  
AGTTCCCGGAGCTGGCGGACAAGATGCACCTACCTACATTCGGGCAGGTTCGAGGCGGTGA  
GCGATCAGGCCACTGCTCGCCAGCTCAATGATCCCTTTCGTCCCCGCTATGCGGTGGATG  
TGCAACTGCTGGGCGAGGATCGCGAGCCGGACAAGGCGGCCCGGCGGTATCGGGCGGTGC  
CGCTGTGCGGTGCTGTTTCGGCGAGCAGGAGCAGGGCCTGCTGCAGTTCCCCATTGAGGGGA  
GCTTGGTTGAGCTGCGGTTTCGTTTTCGGCCGGGCGACCGGCGCTTCATTTCGACCGGTGC  
TCGGCAGCGCCTGGGCCTTGCCCGACATCACCCCGGTTCGAGCAACTGCAGCAGCAACGGG  
CTGAGGTGTTTTCAGTCGCACCGATACCGTGGGGAACCTCTGCCACCACACCTACCGTCGCC  
TGATCGACCAGGCCCTCCAGATGCAGCACCGAAGCGATGACTACCTGGGCGATCATGGCG  
AGCATCGGCTGCAGGTGGCGCAGCACAGCGACGAGGAGGTGGGCGGGTTCAAGCTCATTG  
AAGCACTGGGAGCCATCGAGCGGCTGGCCGGCGTCTGCTCTACCCTGCGGAGCAGGGGCA  
ACCTGAACCAGACGACGGCCGGGATCTGGTTCGAGGTGGTGGGACAACCGCGCCGGGCGT  
TCGCCGGCGAACTGCAGGACTTGGAGGCGCCACGCTCCTGGGTGGCGACAGATAGCGTGA  
ACCTCTTCCGGCTGCTGATGCAATTGATGAACGTCGTGGAGCAACTGGCCTCCGCCACGG  
CTGGCCATAACCCACGGCCGCGGACCCAGCCCCAGGGAACAGCGCAGCCATGACGCAGCATG  
GCCAACAACCAAGCCCCTGGCCAACGCCCTCTCAGCCATCATGGAGTAACTTGCCAAAC  
CAAGGCGGCCCCAGAGTGTGGGGCCTTCTTCTTATCAGCCTGACAGCGCCTGAACATGGC  
CAGGGACATGTGCCGATTAAGACGCGCCATCGGGCAGCGCTACAACCTGCGTGAAGCCT  
GCGCACGCTCGCAGCCTCCTGACGAGTCACGGAAACACCCACGGCGCCGTCTGCGCCACG  
GAATCCGCGCTGATCCGCTCCC

>NewGenomeName\_55

AGCAGGGGGGCTTATTATTACGCCCCCTGCTGGGCCGGGAGATCCGAAAAGTAATAGGCT  
TAATACATAAATGGGCCGCAAGTAGGGGTACAGTTGAGTATCTTCGGTTTGGGCCTCGG  
CCAAAATTAAGAGCACGTGTGCGCTTGTGGGGCTGGACCGTAGGTCCGGTTCGAAAGC  
GGAATATTCCTTGCTTCTATAGTAAGAAACAGCGAAATAAAATAAATCGCTGTTACAAGT  
GTCAGCAGACTATTAGTTCGCAGAGTATAAACCTACGCTTCAAGTAGATGGGTGTGGTGC  
GCTCTCTTATGTCATACGTTGTGCCATGATGAAGCCCTCCGGGGCGACAGAAGGGCGG  
AGGTGGAGGCGCCGCCCTGCCCGTCCCTCCGACGAAGGATACGACGTCGTAGGTATGTCA  
GGGTATTTATAGAGGCCTCGTATACGAAACGCGCCCGTCTCATCTTTGTATTTGTGTATT  
AAAACATTTAATAACCAACCTTAAGGAATAAAATATATGTTTAATAAACTAAGACATGA  
CAATAAAAGAAAACAATGATACAATAAAACTGTATTATGCCAACGGTGTATAATGAA  
GGTCTGTTTAATAAACCTATATATATGTACATTACGGTCTTGTCTAATAAATGACTTG  
GAAGGAAATAATAAGTAATGATAAGCAATAAAATATACCGACTACATAAAAAGGGGAA  
AATGCAATTAAGACCTGTCACGTTTTTCACATTTTCAATATATGAAGGGCCGAAGGCCCT  
CACTCTGCAGGTATATCGGTGATTGCCTCGTGACGAAGCAAGGGTATTATTGTA AAAAAG  
AAAGCATCTGACAGCTTTAATAGTGGTCCCCTATACAGCTGTAATCTGACAGCTGGCCAA  
GGACCCTTGGGGGGACTCCAAATATATATTAATATAATATAATATAAAGGTATA  
GATACTACTCTTAATTA AAAAGAGGCGGGAACGAGGACACGTGCGCCGCACGCCATATTAG  
TGGTGAGACCGATGTCCCGAGTTAGTGCGCTTACGTC

>NewGenomeName\_56

AGCGGCCACTTGGAGCCAGGGAGCCACCACAATGGCACCTGTTAGAGCTGCTGCTGCAAA  
GAACTGGTGCTTTACGTTGAATGACTAAAAGGCCACGAAGAAGCTAAAGTGAGGCCCT  
GCTCCCTGGTGAGTTCCACTTTGCAATATGTGGGAAAGAACGGGAGGAGCAGGGAACTCC  
TCATTTGCAGGGCTTTCTACATTTTAAAGAATAGCAGCGACTTAGTGCCCTAAAGAAAAT  
AATTGCCCGAGCTCACTGGGAAAAGGCCCGTGGCTCAGATCATGATAACGAGGAGTATTG  
TAGTAAGGAAAACGACGTGATAGTCACCATTGGGGAGCCTGTTCCAGGCAACCGGAGTGA  
CCATGCCGGAGCTCTTGCCGCCGTGAAGGCCGAAAGGAGAATGGGGGATATAGCGTGAGA  
GTTTAGCGAGATCAACGTCAAGTATGCGCATAGTCTGAGGGATTGGGGCCTGATGATTGG  
ACAGAAATCCCGTGACTTCAAGACGGAAGTCGTCGTTATCACGGGTCTTCCGGGGTGGG  
CAACTCGAGACTTTCCTCTGAAATGGAAGGATCGAAGCTCTATAGGATTAAGGTGACTG  
GTGGGATGGGTATTCCAATGAGGATATAGTCATCATGGATGACTTCTATGGGTGGGTGCT  
TAGCTGTGAAATGTGGAGATTGATTGACAGGTATCCACATAAGGTTCCCGTGAAGGGGTC  
TTATGTGGAGTATACGTCTAAGAAGATTGTCATAACGAGCAACACGCACCCGCAAAGTTG  
CGCCTGTCCGGATAAGTGTTATCTGTCTGCTTTGTTTCAGGAGGATCATTATGTGGATGTA  
CTGAGTTGGACTGGGATTTAAGGATGTGCCCGATGCTATGAAGAAGCACCCGATCAACTA  
TTAACACTCAGCCCCGAGGAAAAGAACGTCTCGGAAGTGATTAATCAAAAATGCACGCGC  
AGCGCGCGGGGAAGGCCGAAGGTA AAAAGCCGCTGAGACCGCGCGAAGCGCGGCCAGGCG  
CGTTCGACAGCGAGGGGGCGGCCCCCGGGTCCGCTCGGGGTACCCGCTCTAGGGGCTG  
AAGGCCCAAAGCAAGCTATTTTGTACCCCCCTCAAATAAAAAGGCTTCAAACA ACTAA  
ATGTTTGGTGTCTTTATTTTGGAGTAGCCAAGTGAGTTAAGTTCACTTGCCGGAATTCAG  
AGTAGATGGTGACCTTGACCTGGTAGTCCATCTGTTTGGGTGGGGGTTCTGGCCAGCTGA  
AGGCTAACCCGTAGTGTGTTGACCCTGCTTTCGGAGCTGCGAAGGTGCTGATCACTTTTCT  
TCATGATCGATATCCAGAGGGAATTGGGATTGTTGAGCCACAGGGCCGCCGTGACGTTTG  
CAGCATAAGTGGCGGTACGCTTAGTTTTGGTCTTGGTTTATATGGCCTTTTGAAGTCTT  
TTCTGAGATCCCATTACGAGCCCCGTCCAGTTGGCTAGGGCGTCAGCATCAAGTCTTG  
TCTTTTTGAAGATGTCGTCTAGGTGATTGTCTTGGATAGGTATCTTGTGCATGAACGCTT  
TCCACTCCTTCCAGGTTTAATTGAGGTGTGTCATTTCCACTTTTGCTAACCTGACTCTAC  
AAAGTTTAAAAGTAATCTCCGGTTGATAGTACCCCAATCCAGAGAGTCATCCAGTATAA  
TGTTGGTTCCATCAATTTCAAGTTACAGCTGAGACCCTCCTGTCCCTTTTTGCAGTACCT  
GACCGAAAACCTTAACAAATCTGACTCTATAACCCTGTTGGTTCTGTGTCCCCTCCTGC  
TGGCATGTATCCTTCTCCTCCTCCYCCAGTAACGACTCCTCCATCTCCTCCACCTGGGAG  
CCAAAAGTCGTCGTCTGCGACCAGCGTGGTTAAAGGTTAACCACATCGGGGTAAATATT  
AACCAGTGGCYCCAAGTGGCCGTGRCAGTAGA

>NewGenomeName\_57

TCGTTTTGAATACTTATTTTAGGCTTGTTATTACGCATTTTATAAACTCCTTAATTGTTA  
TTTGATAACCAATTTGATACCGTTTAATCAAATATGCTCATAGCTTGATGTTTTTTATCAG  
TATATAAATGTGAGCACGTTTGAATTGTTTCTGTAATGTTAGAATGCCTCATTAATTCCA



TTAATAAATACATATCGACACCATTATTAATTAATAAGCTAGCGTACGAGTGTCTTAAAT  
GGTGTATTTTTAGATTTCGGGAACGCAGATTTAAAATGATACGAATAAGTAACGTATCTAA  
TAGGTTCTAAACCCCGAATATAAAAATAGTTTTTCGTCAAATATTTATATCTTTTAGAAG  
ATTCATTATACATGTTTTTAAGCATATCTCTAATTAATTTGGTACAGGTATTATCCCTT  
TAGAGCTTTCTTTTTTTAGATTATATTCAATTTTTCTATTACTTAAATTGATTTTTCTTAT  
TTACGTCAATTCGCCTTTTATTTTATCGTAATCTTTCCACTGCAAACCTAAAGCTTCTC  
CTATTCTAAGACCAGAATAAAAATAACAGTATAGTCATCTGACGAGAAGTATCATTGTGA  
TTTGTCTACTTTTTTCATCAAATTCTTCACGAGTGATAAATTTAGCTTGTGGTTTTGTTC  
TGGGCATAGGAGTTACCGATGAGGTGGGGTCGTATAAGAGCTTGTAATGCCTTTTGGCGT  
AATTGATAACTGCTTTAAAACCTGCCACACAGATCGTGCATAGTCAACAGAAAGACCTG  
CATCGTTTAAACAAATAATTCCTGAAAGCAGTACATTACGTAGTAGTGATTTTGCCAATAG  
GGATATTTCCGAACCTTTCTTTTATGTGAGTATTATATTCTGTAGTTCGCTTTTCTATTG  
AGCGTGCAGAAAGATTTTCATTTTTTAAACGCTCAAAAAATATATATTCAAAGGGTGGAT  
TGTCCGAGTATCCATATTTAACATTTTGTATAAATTCGCTTTCAGCTAGTTTGGCATCTT  
TCTTACGTTCAAACCCACGCTTCATTTTTTCGTTTGTATTACCGTATACATCTTTAGATC  
TAATGGAAAAATACCATTTACCTGTATTACCATCCTTATATACTGGCATTTTACTTCTCC  
CTCCTCAAAATTGGCAAAAAATAATAAGGGTAGGCGGGCTACCCGTGAAAATTGTATAAA  
AAAAGAGGGAGCGCAGATGCACCCTCTCATGTCGCAAATATTTTCAGCGACTTGTCTAATT  
TGAAGCTTGCCGCAAATATTTTCAGCGGCTTGTTTTGTATAGATGTAATATAACCATCAAAG  
AGAGTGTAGTTCAAGCGATGTAACACTACGAAATCTAATTTTTATACTATTTTCAATTTTAT  
CTACTGTTTCTTTTGAATATGATAATTTCTCCGGCAGGGTCATACCTATTAATTTTCGATA  
TTCTATGCTTGCTGATTGTAGTGATATTTAGAACGTTAGCATAGGTCTTTTTTATACTAGA  
ATCGCTCATATCTTTTGCGAACCTTCGAAGATTTTTTGAAGTCGTCATTCAGCGATTTGT  
TTTCATCAAGTAATTTCTGATCGTATGGGTTTGTGCTTTTGTACACCTTTTCAAGATTGT  
TCATGATTTTTTTAGCTAAATCCTTACACGTTACGTCCATTTTTTACAATACTAAAGGTA  
ACAAATCTTCTTCGATATGCACATTGAATTGGCTTCTGGAAGATGTAAGTGGCACTACCG  
TTAATATTGGATTTTTTATTTGAATCGTGATTATTGAGTACCATATAAAAATGGTTTCCAG  
AAGACTCTCTGCCAACATTAACACCTATCTTTACATAAATTATAGTGCCTTTTTTATATC  
TGGTGTAACTTTTGTTTTCTTTTAAACAATCTAACTTCATGCAATAAAAATCTGGATATT  
CAAGACACCATGAATTCATATATTTAAATTTGTAATCTCGCTATTTTGAATCTTTTTAA  
AATTATTAAGTCTGTTTCTAAAGGTGCGCTTCTTCCATCCCTCATCCTCCTCACGCTA  
CACAAGCGCTATTAATCAATATCCAGTAATTGTTGTTTTTCTTATCGAACTCTTCTGA  
GAAATTACTCCGACATCTAATAATTCTTTATATTTTATTAATTCATCAGCAACAGATAAA  
CTCATTTTTTTCAGAATTGGATGATCCCATAGAACTTCTCGAATAGAGATTTGTTCTTGT  
ATTGTTTCCGCCATTCTAGATACAGTGTTTTTTGATATGCTTCTATAGCGATACTTGAT  
GAACCGTGATGTATAATTTTCGCCAAAAGAAGTCCTTTTTTATACGAAACAGAATTG  
ATTTTCTCGAATGGAAATTCATGAAATTTCAAACCATATATCATACCTTTATCTAAGAAT  
ACAATCTCAGACCAGTACATACTATTAAGTAGGTATTATTATTGTACAATCCCGAAGTT  
ACATACATTATGTTTTTATTATCTTTTAAAATCTTAGGTAGTTCTTTCACATCTTTTTTT  
GTACCAAACAATCCTCTACACCTATTTTCGCTAAATCTTTGGTAGATTTTAGATAAGTTT  
TCGCCAGATTTATTGATTTCACTTTCAAATTTCACTGCTTTTCTAGGTTTTCTTTGGTAT  
TCTTTTAAAATTTCTCTTTTGTCTTCAACAGATAGTTGCTTGTATTGCTTCTTTTTCTTCT  
TTTGTTTTAGTTGCTAAATATTGACTCTCAATGATAGTTTCTTTGAACTTTAATCTGCTC  
TTAGGTAATACTATCATGTTTCTCCTTTATTTATATTTCTTTATGTTTTAAAATCTC  
TCAACGGCTCAAATGTAATCGAATACTCGCCATCGTGAGTTCCAATACCATATATCTTTT  
TAGATAGTTCTATTGCTTCTAATATGTATTCTTCGCTTAAATTGTAGATACTCAGACAAC  
CATACAAGTTGCGTACGCCATCATTATAAGCTTCTTCAATTTTCGCGTAGCGGTACAGCTG  
ATATAAAGCCGTGTCGTCTTGCCTAATTTTCGAACTTGCCTGATTGTTGAATTTTCGATTGAT  
CTAAAACGTTGCCATACGGCAACTTGTGGTGGGCAAGTTCTCATATAATACTTTTAAAT  
TGTTCTTTTCGGATAAGGTAGGTCTAATAAAAATTTCCCTTCTTGATACCAACCATCGA  
AGCCTCGAGGTACTCATTGTGTTTCTTTCACCTTCAACTTCACATTTTATAAGCAATTCTT  
CGTATTTTCCCATGCGCAAACCCCTTTGGCGTCTTATTTCTTTCTATCTCTAACCATT  
CCATAAAATTTTCGATTTCTTCCATTCTTCGGGAGTAAATTCATCTTTATTTGCATGAT  
CGGCTGTAGTTTCTTGATTAATACTTCTTCTTCTGTAATTTCTCGATTTAGGTACATTAA  
ATTAATCTGCTAATTGTTGGACTTTTGTATTTCTAGGATATTTAAGTTCTTGAAGCCAGT  
TAGAGATTGTTGATTGACTTACCCTGATTGCTTTCAGACAATTCTACTTGAGTAATGTCGT  
TCTCTTTCATAAGTTGCTCTAAGTTCTCTGATAAAAATTTTTCTAGCACTCTTATATCCA

TAATTTTCTTCGTTAGTATTACTTAATGTAATACTAATTTACCTTAAGTAATATCACTTT  
TCAATACAAAATATTACCTTTTTGAAATAAATATCACTTTAGGTGTTGACATATTACTTT  
AAGTGATAGTATAGTTGTAAATGTCAACTGGAGGTGATACGAAATGCCAGAAAATTTAAA  
AGAGTTCTCTGTAAAGGTCTGGAGCACTAATTCGAATATGACACAACAAGATGTGCTGA  
TAAATTAGGCGTTACTAAACAATCTGTAATAAGATGGGAAAAAGATGACGCAGAATTTAAA  
AGGCTTACAATTGTATGCTTTAGCCAAATTATTCAACACAGAAGTTGATTATATAAAGGC  
TAAAAAAATTTAACATTAATATCACTTTAAGTGATAAAGGAGGAACTCAGATGCAAGCAT  
TACAAACATTTAATTTTGAAGAATTACCAGTAAGAACATTAACAGTAAGTGAGGAACCGT  
ATTTTGTAGGGAAAGATGTAGCAGATATTCTAGGTTACAAAACCTGGCAATCGTGATATTA  
ACGCTCATGTTGATGCCGAAGATAAGCTGACGTACCAAATCGGTACCGCAGGACAAAGAC  
GAAATCAAACAATCATCAACGAATCGGGTTTATACAGCCTAATCTTCTGATCAACACTAG  
AATCAGCTAAACGATTCAAACGTTGGGTAACTTCAGACGTCCTACCCGCTATTTCGAAAAC  
ACGGTATCCACGCAACAGACAATGCAATTGAACAAACATTAAGATCCAGACTACATCA  
TTACAGTGTGACTGAGTATAAGAAAGAAAAAGAGCGAAACTTACTTTTACAACAAGAAA  
TTGGAGAGCTAAAACCCAAAGCAGACTATGTAGATGAAATCTTAAAGTCAACTGGTACAT  
TAGCCACAACCTCAAATCGCGGTATACTACGGTATATCAGCACATAAGTTAAACAAACTAC  
TACACGAAGCTAGATTACAACGAAAAGTGAATAAACAGTGGGTGCTCTACTGAGACCACA  
TGGGCAAGAGTTACACAGAATCAGACACTATACCAATTGTACGCTCTGACGGTAGAGAAG  
ACACAGTTTTACAACTAGATGGACACAAAAATGCTGATTCCAAATACATGAAATCATGA  
CTGAATTCGGTTATGATGCTAATTTAGGGGGAGCGTAAATGACACCAGAACAAAAAGAAA  
AGCTAAACAATATAGTATTAACACTTTATGCAGTTAAAGAAAAACAAAAGTCAAACATACA  
CACACAAAGATACTCTTACTGTGACATAAGCAGGCGAGGTTGAGCACACTTACGAGGTCG  
ACAGAGAGACACACCTTGAATCAATGATTGAGTGGGCAATTGACCAAATCGAACAGCACC  
TTGATTTAGACGAAGAAGAATAACACACAATTGAACAAACAACTTAATAGGAGGAATTAC  
AAATGAACGCACTATAAAAACAACCCTCCTCACCGCAAGGGCAGTTATGACGTCGAAGG  
TTGTAAAGATTGAGAAAATCACAAGATTTAACTTAGAAATTTTGATTATCCAAAAAATA  
ATAATGCTCAGAGCAAATCATTGTTGGATATTGCCAGTCACGATCTAAAAGATATTTAAC  
TGTATTCAATATTTTCATATCTTGTGAGCTTTTAAAGCTTTTCGTATAAAGCTATTGAATA  
CATAATTTTCGTAAGATACGTTTTTCAGGAGCATCTTCTTTCACTTATTTATTCTATCTCT  
AAAAAAGTCACTGTCACCACCGAATTCTTTTTTCGGCTTGATTACTAAGTTCACAAAAGAC  
ATTTTGAAAATCATTAAATTCATACTTATCACCTCCTTGCCTAGGAGATAACTAAATT  
ATACACAACACAAAAATAAAAAGGAGGAATAGATATGATAAAAAATAGTTTGCAAGCTAA  
AGAAGTTGAAGTTATTTTATCTGTTTCGAAATCCAAAGCAGGACAAATAATAAGAGAAGT  
GAATAAAGTGCTTGAAGACGAACGTTACATTGCGATTTCGAGGCAGAATACCAGTCCAATA  
AGCTAGAGAAAAATTCCTTATCACTGCTTTTCAGACGAGAGAATAATGGAGGCGTTGAA  
AAAAGAAAATGAGTAACATTTATAAAAAGCTACCTATTAGCAGTATTGTGCTTCACAGTCT  
TGGCGATTGTAATCATGCCGCTTCTATACTTCAATACAGCATGGTCAATTGCGGGATTTCG  
CAAGTATCGCAACATTCATATTTTATAAAGAACACTTTTATGACAACAAAGGAGAATGAA  
AAGATGTCAGATAAAGACTTGATGGAAAAAGTTGACAAGAGAAGGTAAGACAAAGATTTA  
ACGGCGAGAGAAGTACTAGGATATTTGCTAGGTTTCTCTGATACTTGTATTTTATTAAGTTAAGA  
AATGGTTCAAGAAGAATTATCGATCGGAAGAGAGAGAGAATTAATCGTTATTTAAACGGT  
GAATACGACAATGTAAAAATTCCTAAATATTCACGAGATTCTGAACAAGTAGCGTATGAC  
AAGGATAAAAAACAAGCTTTAAAAGATTTAGAAGAATTTGTAATAATAAAAAAACTGCT  
ACATGCGACAACAAGTAACAGTGACAAACACTTAAGAAAAATTTTCATGTTCAATATAAAA  
CGAAATAAAGGAAGTGTCAACAATGTACTACAAAATTGGCGATGTATGTCAAAAAGTAAT  
TAATGTAGACGGATTTCGATTTTAAATTAGCAGTTAAGAAAGAAGATTACAGCATTCTAGT  
GAATGTCTGAGATTTAGAAGATAGATTTATCGACGGTATAAATATAACCGATGAGAATGA  
TCTATACACAGCATTAGACATATTAATCAATTTATTTCTGAATGGATTGAAGAGAACAC  
AGACTAAAGAGACAGGCTAATTAAGTACTGATAAGATGGTAGGAGGTCGCTATGAAGCA  
GGCTGTAACCTACATCATCCGTCATAGGGATATGCCAATTTATATAACTAACAACCATC  
TGATAATAACTCAGATGTTAGTTACTCCACAATAGAAATAGAGCTAGGGAATTGAACGG  
TATGGAAGAAGCGAGTATCAATATGGATTATCACAAAGCAATCAAGAAAACAGTGACAGA  
AACTATTGAGTACGAGGAGGTAGAACATGACTGGACAAACATTTTGAACAGTTGAACA  
GTAAAAACGTGAATGATCATAACAGAACAAAAAAATGGATTAACCTTATCTAGCATGGTCAT  
ATGCACACCAAGAGCTGAAAAAGATTGACCCAAACTACACAGTAAAAGTACACGAGTTTC  
CACATCCCGATATTAACACAGAAAATTATTTTGTACCTTATTTGGCTACACCAGAAGGCT  
ATTTTGTACAGGTATCTGTGACTGTGAAAGATAGTACAGAGACTGAGTGGCTTCCAGTAT

TGGACTTTAGAAATAAATCGCTTCCTAAAGGTAGTGCAACAACCTCCGATATTAACAAAG  
CGCAAAAACGATGTTTTGTTAAAGCTACGGCTGTAGACGGTTTAGGCTTATATATCTACA  
ACGGCGAGGAACTACCCAGTGCAAGTGACAACGATATTACAGAATTAGAAGAGCGTATCA  
ATCAGTTCGTGAACTTATCTCAAGAAAAAGGGCGAGATGCAACTATCGATAAAACGATGA  
GATGGCTAAAAATATCTAACAGTAATAAATTAAGTCAAAAACAAATCGCAGAAGCACACC  
AAAATTAGATGCGGGATTAACAACAATTGGATAGTGCGGAGAAACAATAATGTTAAACAG  
AGCAGTATTAGTAGGACGCTTAACAAAAGACCCAGAATTAAGAAGCGCGCCAAATGGCGT  
AAATGTAGGTACATTCACATTGGCAGTAAACAGAGCATTACGAATGCTCTGGCCGAGCG  
TGAAGCAGATTTTATAAACGTAGTAGTGTTC AAGAAACAAGCTGAAAATGTTAAAAACTA  
CCTTTCTAAAGGGTCGCTGGCAGGTGTAGACGGGCGACTACAAACACGTAGCTACGAAAA  
TAAGGTCGGGCAACGTGTATTTGTGACAGAAGTAGTAGCGGACAGTGTTAAATTCTTAGA  
ACCGAAGAATAACAACCAACAACCAACAACAATTATCATCAACAAGACAAGCTCAAAC  
TGGTAATAATCCTTTTGATAATACCACTGCGATTACTGATGATGACTTACCGTCCTGATT  
GGAATGCTTAAATGCCGAAAATTACTAGTTATATCACTCAAGACGACGGCACAACAACAG  
TTGTCATCTCTGATGTTGAATTAGGTAATAAAGAAACATTACTACTTGATAACGGATTTG  
ATGTAGAAGTCGATGTAAGCGTCATAGATCCATTTTCGAATTACCGGCAAGCAACGCAAAT  
TGATATTCGCATTGTGTAACGATATAGAAGCTCATAACAGGACAACCTCGAGATTATATGA  
GGCAAATGTTCCATGATTATGTGAAGTTTCTGTATGGCCATGAAGTACGCATATCTTTAT  
CAAATTGTTCTCGAACTATAGCTAAGCAAATTATAGAAGCGATGTTTGAGTTGATTTCTA  
CAAATGCGATTCCATTAAATTATAAATCAAGCAAATTAATGAAAGAATATAACAATTATC  
TTTATTGGGCAAATGTTACGCGTCATTGCATTAGATGCGGAAAGCCTCACGCTGACTTAG  
CACATTATGAAGCAGTCGGCAGAGGCATGAACAGAAACAAGATGAATCACTATGACAAAC  
ATGTATTAGCGTTATGTCGCGAACATCACAACGAGCAACATGCAATTGGTGTTAAGTCGT  
TTGATGATAAATATCACTTGCATGACTCGTGGATAAAAAGTTGATGAGAGGCTCAATAAAA  
TGTTGCAAGGAGAGAAAAAGGAATGAATAGACTAAGAATAATAAAAATAGCCCTCCTAAT  
CGTCATCATGGCGGAAGAGATTAGAAATGCTAGGCATGCTGTAAAAGTGGAGAAAATTTT  
AAAATCTCCGTTTAGTTAATACAGGTTTTTACAAAAGCTTTACCATAGGCGGACAAACTA  
ATTGAGCCTTTTTTGATGTCTATCACCCAGGGGCTGTAATGTAACCTTTAATAGTTCAAAT  
TCAATGCCAGAAAGTTACTTATTGTTTCTACGTTGTGTCCTGACTTTAACATTCTTTTA  
ACAAATTCTAACCCCGAAACAATCTTTGTTTTTCTATAATCTTATTAAGTGATTTAAA  
AACTGAGGAGCATAAAAAGTTATTATAAATTCCTTGTTTTGTTAAGTAAGACATGTCAAAA  
GTTTCATTTAAAACCCCTAACCTTACTAGGTTATTAATTGAAATTTTCGGTTGATTCTATA  
TCTAACGGAGAGTCTTTTATTAACGTGTCCGATATATTCATACCGTCATTCTTTGGGTTT  
AAAACCGCTCTATATTCAACGGCAGGATCTACTTGGTGATTCTTTAAATGTTTTAAAAGA  
ATAGCATCATTTGGGGATAATTGTTTAATTGTTTCAACAATTGAATGGTCGGTTAATGAG  
TTTTTTCTGTCATCCATAGATGATGCTATTAGTTTTGCGAACATATAACTTAAAGTTTTT  
TCACTAAAGTAAAACCTTTGCAGCTTCTAGAGCAGGACCTAGAAGAGAAAATTGTGGTTCT  
TGTA AATTATTTTCAGGTACAGAAGATATTTCTTATTTAAATTGTTCTTTGAATTTTTCA  
AATTCTACTTCTCTTTGATAAATAACTTTATCCACATAAAGGTGGAATTTCCCAAAGACA  
AGTTCCCAAAGTTTTAGAGAATGTTTCTACAGGCCCTTTGGATGCGCCTTCGATAATTTTA  
TCAATACCTTTACCTAAAATAGGATCCATAATTATTCACCCCAATCTAACCCAATAGCG  
ATAATAAAATTATACCAGTAAGGAGATAACGAAATGGCAACATTTAGACCGATAAAAAGAA  
AGTGGCGATTTTGTA ACTGTGCATAAATCGTTTGTGTTTCGATAGTAATTTAAGTGCTAAA  
GCTAAAGGGATATTATTGATTTCTAAGTCGTCCTGACAAATGGCAAATATACACGTCA  
GAAGTAGTTAAACATATGACTGATGGACAAAATCAATCAATAGTGGCGTTCATGAACTT  
ATGGATAATAAATATGTTTCACAGAATACAAAAAAGAGCTGAAAACGGTGTGTTAAAGGT  
TTTGAATACTTAGTTTAGGAAAACCAACCGAAATGCCATTTTCGGAAAACGGATTATCG  
GCACACGGGTTTTTCGGAAAACGGAAAACGGAAAACCGAAAAGGGCCTACTACTAATAAT  
AATAGTACTAATAATGATTTACCTAATAATAACAATACTAATAATGATGGAAGTACATTG  
TCGGGCGGCCCGACTGTGTATTCCATTCCCTATAAAGAAATTATCGAATACTTAAACAAA  
AAAGCAGGAAAGCATTTTAAACAACAATACAGCTAAAACA AAAAGATTTTATTAAGCAAGA  
TGGAATCAAGATTTTAGGTTGGAGGATTTTAAAAGGTGATTGATATCAAAACAGCTAAA  
TGGTTAAACACGGATAGCGATAAATACCTTAGACCAGAAACACTTTTTGGCAGTAAATTT  
GAGGGGTACCTCAATCAAAAAATACAACCAACTGGCACGAATCAATTGGAACGCATGAAG  
TACGACGAAAGTTATTGGGATTAGGGGGATATTAAGAAACCACTATTCTGCGAAAAGATA  
AGCGAAAGCTTGAAAAAATATCAACCTACTCATGTGCGAAAAGGATTAAATGTGAGAGA  
TGTGGAAGTGAATACGACTTATATAAGTTTGCTCCTACTAAAAAACACCCGAATGGTTAC

TAGTATAAAGACGGTTGCAAATGTGAAATCTATGAGGAATATAAGCGAAACAAGCAACGG  
AGGATAAACAACATATTCAATCAATCAAACGTTAATCCGTCTTTAAGAGATGCAACAGTC  
AAAAACTACCAGCCACACAATGAAAAACAAGTACACGCCAAACAACAGCAATAGAGTAC  
GTTCAAGGCTTCTTTACAAAAGAGCCTAAATAATTAATTTTGCAAGGTTTCATACGGA  
GGTAAAAGCCACCTAGCATGCGCTATCGCAAAGCAGTTAAAGCTAAAGGGGATACGGTT  
GCTTTTATGCACATAGCAATGTTGATGGATCGTATCAAAGCGACATACAACAAAAATGCA  
GTAGAGACTACAGACGAGCTAGTCAGATTGCTAAGTGATATTGATTTACTTGTACTAGAT  
GATATGGGTGTAGAAAACACATAGCACACTTTAAATAAACTTTTCAGCATTATTGATAAC  
AGAGTAGGTAAAAAAAACATCTTTACAACCTGACTTTAGTGATAAAGAATAAATCAAAT  
ATGAACTGGCAACGTATCAATTCAAGAATGAAACACAATGCAAGAAATGTAAGAGTAATC  
GGAGACGATTTACAGGGAGCGAGACGCATGGTAACCAAAGAATTTTTGAAAATTA  
AACTTGAGTGTTCAGATATGTACGATCACAACCTCATAGACGAGGCACAGGGCGATG  
AAAATAAGTTATATGACCTATTTATCCAAAAACTTGCAGAACGTCAGACACGCCCGCT  
ATCGTTCGAAC  
ATTAAGGAGTGTTAAAAATGCCGAAAGAAAAATATTACTTATACCGATAAGATGGC  
CACAGAAGATATTAAGGTCAACAAGTATAAAAAGAATGAGAATGAAGTTTATTCGCT  
CACAGGAGCCCATTTACAGCGACGAAAAGAAAATTATGACTGATAGTGACCTAAAACG  
ATTTAAAGGCGCTCACAGGACTTCTATATGAGCAAGAGCTAGGTTTACAAGCAACA  
ATTTAATATTTAGAGGTGGAAGATGAGTAAATACAACGCTAAGAAAGTTGAGTACA  
AAGGAATTGTATTTGATAGCAAAGTAGAGTGTGAATATTACCAATATTTAGAAAG  
TAATATGAATGGCACTAACTATGATCGTAACTACAACCTAAATTTGGGAAGCAA  
AGACCGATTACGTATATAGCCGATTTCTCTTTGTGGAACGAAGGGAACTGGTTG  
AAGTTATAGACGTTAAAGGTAAGGCGACTGAAGTTGCCAACATCAAAGCGAAGAT  
ATTCAGATATCAGTATAGAGATGTGAATTTAACGTGGATATGTACAGCGCCTAA  
ATACACAGGTCAAGAATGGATGGTATATGAGGACTTAGTGAAAGTCAAGACGTA  
AAGAGAAAAGAGAAATGAAGTGAATGATCTAATGCAACCACAAGCATATATAA  
ACGCAACGATTGATATAAGAATACCTACCGTAGTTGAATATCAGCATTTTGAT  
GATGTGGATAAAGAAAAACAACGCTGGCAAAGCGCTTAGATAACAATCCGGAC  
GAATTACTAAAATATGATAGCATAACAATAAGACATGCATATATAGAGGTGGAA  
TAAATGAGTATCGTAAAGATTAACGGTAAACCGTATAAATTTACCGAACATG  
AAAATGAAATTTGATAAAAAAGAACGGTTTAGCTGCAGGACTGGTTGCACAA  
AGAGTACGGGGTGGCTGGCGGTTGTTAGAAGCCTTAAACGCACCTTATGGC  
ATGCGCTTAGCTGGGTATAAAGAAATGTGTTATCCAGAATTATGCAACGAGAG  
GGCTAGAGAACGTGAAATAGCTAGACAACGACGTAAGAGAGGCTGAATTAC  
GTAAGAAGCCACATTTGTTTAAATGTACCTCAGAAACATTGACGTGATCCG  
TACTGGTTTGATAATACTTATAACCAAATGTTCAAGAAATGGAGTGAAGCA  
TAATGAGCATAATCAGTAACAGAAAAGTAGATATGAACAAAACGCAAGACA  
ATGTTAAGCAACCGGCGCATTAAACATACGGCAACATTGAGATTATAGATTTT  
ATTGAACAAGTTACGTTCTCAGTACCGACCACAATTAGCATTTCGCAATAG  
GTAATGCACTCAAATACTTGTCTAGAGCACCGTTATAGAATGGTCATGAGG  
ATTTAGCAAAAAGCGAAGTTTATGTCCATAGAGTATTTGATTTGTGGGAG  
GGGTAAACGATGGCAACGCAAAAACAAGTTGATTACGTAATGTCATTAGAG  
GAGCAATTGGATTTAGAAAACCTGCGAAAAATATGCAGACGAACAAGTTAA  
AGCAATGAGTCATAAGGAAGTTAGCAATGTGATTGAAAACCTATAAGGCA  
AGCATAAGTAATGAAGAGCTATACGACGAATGCATGTCGTTTGGTCTG  
CCTAATTGTTAAAAGGAGTGATGACCATGACAGCTAGCGCGCTAAAGA  
ATACCTAAATCAATTCTTTGGATCTAAGAGATATCTGTATCAGGATAACG  
AGCGAGGGGCACATATCCATGTAGTAAACGGCACTTATTACTTTCACGGT  
CATATTGTGCCAGGTTGGCAATGCGTGCAAAAGACATTTGATACAGCGGA  
AGAGCTTGAAACATATATAAAGCAACATGGTTTGGAAATACGAGGAACAG  
AAGCAACTAACTTTATTTTAAAGGGCGGAAACAATGAAAATCAA  
AATTGAACAAGAAATGAATTTACCTGAACCTTATCCAATGGGCTTGGGATA  
ACCCCAAGTTATCAGGTAATAAAAGATTCTATTCAAATGATGCTGACGCA  
ACTGTTGTGTGACTTTTGATGTTGATAGCATCTTACGTAATGTGACTGG  
ATACGTATCAATTAACGATAAATTTACTGTTCAAGAGGAGATATAACAAT  
GAAAATCAAAGTTAAAAGAAATGAGATTAGATGAATTAGTTAGATGGGCG  
CGAGAAAATCCGGATCTATCACAAAGGAAAAATATTCTTTTCAACAGGAT  
GTAGTGAGGGATTTCGTTTCGTTTTCATCCAAATACAATAAAGTGTTTCG  
ACGTCAAGATTTATTCTAATGGATATCCCCTTCATAGCTGATATTGAA  
AAAGAAGTAAGGGAAGAGACTAAGGTTGATAGGTTGATTGAATTATTCG  
AGATTCAAAGAAAGGAGACTATAACTCTACACTATATGAGAACACGAGT  
ATAAAGAATGTTTATATGGCAGATGTGGGCTACCAAAGCATTCTACATCT  
TAAACGATGACCTAACTATGACGTTAATGTGGAAAGATGGGGAGTTGCT  
AGTATGATGTTGAAATTTAAAGCTTGGGATAAAGATAAAAAAGTTATGAG  
TATTATTGACCAAATCGATTTTAATAGTGGGTACATTTTGATTCAACAGGTT

ATAAAAGTTTCAATGAAGTAAAACCTATTACAATACACAGGATTTAAAGATGTGCACGGTG  
TGGATATTTATTAAGGGGATATTGTTCAAGATTGTTATTCGAGAGAAGTAAGTTTATCG  
AGTTTAAAGAAGGAGCTTTTTATATAACTTTTAGCAATGTAAATGAATTACTAAGTGAAA  
AGGACGATATTATTGAAATTGTTGGAAATATTTTAGAAAATGAGATGCTATTGGAGGTTA  
TGAGATGACGTTACCTTATCAGATGAACAATATAAAAATCTTTGTTACTAACTCTAACAA  
GTTATTAGATAAACTTCACAAAGCATTAAAAGATCGTGAAGAGTACAAGAGGGCGACGAGA  
TGAGCTTATTGGGGATATAGCGAAGTTACGAGATTGTAACAAAGAAGTGGAGAAGAATGC  
AAGCGCATTGGATAGGTATTGCAAGAGCTTTGAAAAAGATTTAATAAACGAATTCGGTAA  
CGATGATGAAAGAGTTAAATTCGGAATGGAATTAACAATAAAAATTGTTATGGAGGATGA  
CACTAATGAATAACCGTGAACAAATAGAACAATCCGTTATAAGTGCTAGTGCGTATCACG  
GTAATGACACAGAGGGATTACTAAAAGAGATTGTGGACGTTTATAAGAATGCGCAAGCGT  
TTGATGAAATACTTAAGGGTTTACCTAATGCTATGCAAGATGCACTCAAAGAAGATATTG  
GTCTTGATGAGGCAGTAGGGATTATGACGGGTTCGAGTGGTCTATAAATATGAGGAGGAGC  
AGGAAAATGACTAACACATTAACAATTGATCAGTTACAAGAGTTATTACAAATACAAAAG  
GACTTTGACGATAGTATACCAACACCAAATTTACGAGATAGCAAGATTGCGTATGCGGTT  
GAATTCCTTGAATGGTTTAAACACATTGGAAACGTTCAAGAATTGGAAGAAGAAACCAGGT  
AAACCGTTAGACGTACAGCTAGACGAGTGAGCAGACATGTTAGCGTTTGGATTGAGTATT  
GCTAATCAACAAGCAGATAACATGGAAGAAATTTTTGGTTATTTAGATGAGGGAGATTTT  
AACGACTATATAGAACGAGTTGAAATCGATTATAACGATAGTGATGTAGTAGATGAATTT  
ATGTCAACTATAGATGAAATGTATTAAGTCCATATAGTAGCAACTCATTTTTACCGTTT  
GCATTAGCGAACAACCTACTACTATCGATCAACTCATTGACGCATACAAAAAGAAAATG  
AAAAGGAACCACGAAAGACAAGATGGAACAGCAGACGCAGGGAAAGTATACGTATAAAGA  
CATATTAGATCGGCTCAAGGAGGATTTGGGGAAGTGACACAATACTTAGTCACAACATTC  
AAAGATTCAACAGGCCAACACATGAACATTTTACTACTGCTAGAGATAATCAGACGTTT  
ACAGTTGTTGAGGCAGAGAGTAAAGAAGAAGCGAAAGAAAAGTACGAGGCACAAGTTAAA  
AGAGATGCAATTATTAATTAGGTCAGTTGTTTAAAAATATAAGGGAGTGTCTGAAATGA  
CGGATGTTAAAATTAACACTATTTTCAGGTGGAGTTTATTTTGTAAAAACAGCTGAACCTT  
TTGAAAAATATGTTGAAAGAATGACGTGTTTAAATGGTTATATTTACGCAAGTACTATAA  
TCAAGCAACCAACGTATATTACATCAGATACGATTGAATCAATCACACTTATTGAGGAAC  
GTGGGAAATGAATCAGCTGAGAATTTTATTACATGACGGTCGTAATTTGGTACTACATGA  
AGATGAATTATTTAACGAAATAGTATTTCTTTTGGATGATTTTLAGAAATGATGATCACTA  
TTAACGATAGAAAAAGATTATGGCAGAGAAGTATTGAACAAAGGTTATATAGTTGG  
GATTAATGTTGAGGAGGCAGACGATGACTAAACAAATATTAAGACGAGTATTCCTACTAG  
CGATGTATGAGCTAGGTAAGTATGTAACGGAGCAAGTATATATTATGATGACGGCGAATG  
ATGATGTAGAGATGCCGAGTGACTTCGCAAAGTTGAGCGATCAGTCTGATTTGATGAGGG  
CGGAGGTGTCAGAGTAGATGATGTGGTTAGTCGTAGCAATTATATTACTAGTCATCTTAT  
TATTTGGTGTGATGTTGCAAGCTGAACAGTTGAGAGGCGATGTGAAAGTTAAAGAGCGGG  
AGATAGTGATATTAAGTAGTAGATTGAGACATTTTGAAGATTAACATATTTGTACGGAG  
GGTATTCATGACTAAAAAGAAAGACGGATTAATAATCATCAACAGTTCGGAAATTAGAAGA  
CGAGTTGTGCGATTATCCTAATTATCATAAACAACCTGAAGTTTTAAGAAGTGAAATAAT  
GACACCGTGGATTCCAACAGATACAAATATAGGCGGGGAGTTTGTACCATCTAATACATC  
AAAAACAGAAATGGCAGTAACTAAGTATCTTTGTAGTATAAGAAGAGGTAAAATACATGA  
GTTTAAAGAGTGCATTGAACGTATAATCAACACCTCAAGTAGGAAATAACCGCAATTCAT  
TCAAGAGTATTATTTAATAAAAAGACTTTGATTGCGGTTTGTATGACATACACATCTC  
TGAAAGTACAGCGCATAGTATCAAGAAGAAAATCGTGTCTAACTAGCCGAAGAATTAGG  
AGAATACTAAATTTAACAGTAAAATGCCAGTATTTGACACCTATAACGAGATATTATGAT  
AGTGTAGGATATAGACTATCTTACTGCGTTACCCTTATCGCAATTAGGAATAAAGGATCT  
ATGTGGGTTGGCTGATTATAGCCAATCCCTTTTCTAATTTTAAAAAGCGTATAGCGCGAG  
AGTTGGTGGTAAATGAAATGAACAAATTAATAAAAAGCGACGTTTGTCTGCAGAAGTAT  
ATACAATACCTGGTACTGAATGTTATGTCAATGCTACTAAGTCAGCTGTGGATGCCGGAT  
ATAGCGAAAAGACGGCGTACTCACAAGGACAGCGTATGTTGAAGCATGGTGAAATTCAGA  
ATTATATCAAGGAGGTTGAAACAAAACCTTTGACGAGAATATTATGTCAGGTCAAGAAG  
TGTTGTATAGGCTAACTAGAACAGCTAGAGGAGAACACACGGAAGTTGAAGCTGTTCGTAA  
CAAAAACCTGGAGACTATAAATAGAATTCGTATACTGGCAAAAATGCAATTAGTATACGATG  
AACACATACAACCTTGTACTAAGTCACCTAAAATAAGTGACCAAACAAAGCCTTAGAGA  
TGTTAGGTAGACACCACAAATTTTACAGACAAACAAGAAGTCGACCACAAATACCGA  
TGTTTGTGATAATATCCGGAAGATGATTAGTCATGTATGAAATACTTGATCTAAAAAA

TAAAATCGGTGGTGGCTACAATAAGTTTTGGCACAACAAAACTTTTTCCGTGTTGTTAA  
AGTTCAAGGGGTAGCAAGAAAAGTAAACTACCGCTATTAATCTCATTATCGAATAAT  
GAAATATGATTGGGCAAATCTACTTGTAGTCAGAAGATTTAGCAACACTAACAAACAATC  
AACGTATACAGATTTAAAGTGGGCAACTAACCAATTAGGCGTTGCTCACTATTTAAATT  
CAACGAAAGTTTGCCGGATATAACGTATAAACCTACTGGACAAAAATACTGTTTAAAGG  
TTAGACGACCCATTGAAAATAACATCGATTACTGTTGATACAGGCATTTTGTGTTGGGC  
TTGGTTTGAAGAGGCTTATCAAATAGAAACATTCGCTAAGTTTGGCACTGTTGTTGAGTC  
AATATGTGGTAGCCACGATAGTCCGGAATTTTTCAAGCAAATCACAGTCACTTTTAACCC  
GTGGTCGGAAAGACATTCGTTGAAGCCTACACTTTTTGATGAAGAAACAAAATTAACAA  
TACTTTTTCAGATCCAACCACTTATAGTGTTAATGAATGGTTAGATAAAGTCGATATTGA  
ACGATATGAAGATTTGTATCTAAAGAGTCCTAGACGTGCAAGAATCGTTTGTGATGGAGA  
TTGGGGTGTTCAGAAAGGCTTGTATTCGATAATTTTAAAGTGGAAGACTTAGATTGTTT  
TGAGGAGTCTAAAAGAACGCAAGAAATATCTCACGGAATGGATTTTGGATTTAGTCAAGA  
CCCTACACCAGTAGTTAGTACGGTGTAGATTTAACAAACAAAAAGTTATTCATCTATGA  
TGAACACTATAAAAAAGCGATGTTAACTGATGATAGAAAACAAATGCTTATTAAAAAAGG  
ATTAGGTGATGTAGATATTGCAGCTGATTATGGGGCTGGTGGAGATAGAGCGATCAGTGA  
ATTGAAATCTAAAGGGATTAAGGTATAAAAAAAGCGTTGAAAGGCGCTAATACTATTTT  
ACCAGGCATTCAATTCATTCAAGGCTCTGAAGTTATTATACACCCTTCATGTGAACACGC  
TATTGAAGAGTTCAACACTTATACATTTGACCAAGATAATGATGGTAAGTGGTTGAACAA  
GCCTATATATGATAATAACCATATTATCGATGCATTGCGTTATAGTCTTGAGAAATATCA  
TATCGTGCGTAAAAACGTAAAAAGAACATAGAAAGCAAAAACAAAAGTAGCTAAATCTCT  
AGGATTATAGGAGGGAACAAATGTTAAAGGCAAACGAATTTGAAACGGATACTGATTTAC  
GAGAAAACAGAAATTACTTGTTTAAACGATGAAGCTAATGTTGTTTACACATATGACGGGA  
CAGAGTCTGATTTATTACAAAACATTAATGAAGTAAGTAAATACATTGAACATCACATGG  
ATTACCAACGACCTAGATTAAGGTGTTAAGTGATTATTACGAAGGTAAAACCTAAGAATC  
TGGTTGAGTTAACACGACGCAAAGAAGAGTACATGGCAGATAACCGTGTAGCGCATGATT  
ACGCATCTTATATTAGCGATTTTATTAGCGGTTATTTCTTAGGTAATCCGATTCAATGTC  
AAGATGATGATAAAGATGTATTAGAAGCTATTGAGGCGTTCAATGATTTAAATGATGTTA  
AGTCACACAATAGATCTTTAGGATTAGATTTGTCAATTTATGGCAAAGCTTATGAGTTAA  
TGATTAGAAACCATGATGATGAAACGCGTTTATACAAGAGTGATGCAACGAGTACTTTTG  
TCATATACGACAATAACAATTGAACGTAATAGTATCGCAGGCGTTAGATATTTAAGAACTA  
AACCAATAGACAAGACAGACGAAGATGAAGTGTTTACAGTTGATATATTTACTTCTCAG  
GTGTTTATAGATATCTTACCCTAGAACAAATGGATTGAATCTCACACCACGTGAAAACG  
GTTTTGAATCACACTCTTTCGAACGTATGCCTATTACAGAATTTAGCAACAACGAAAGAA  
GAAAAGGAGATTATGAGAAAGTAATCACTTTGATTGATTTGTATGATAATGCAGAATCAG  
ATACTGCTAACTATATGAGTGATTTAAACGACGATATGTTATTGATTAAGGTAACCTTAT  
CATTAGATCCAGATGAAGTAAAAAACAAAAGAAAGCTAACGTGTTATTTTAGGGCCAA  
CCGTTTATGAGAATAGGGATACAGGTATCGAAACAGAAGGTTTCAGTTGACGGCGGTTATA  
TTTATAAGCAATACGATGTACAAGGTACCGAAGCTTATAAAGACCGTTTGAACAGTGATA  
TACACATGTTTACCAACACGCCTAACATGAAAGATGATAACTTTAGTGGCACTCAATCGG  
GCGAGGCAATGAAACATAAATTGTTTCGGATTAGAACAACGTACTAGAACTAAAGAAGGAT  
TGTTTACTTAAGGGTTAAGACGTCGTGCTAAGTTGTTAGAGACAATAATTCAAATACAC  
GGTCGATTGACGCTAACAAAGATTTCAATACTGTTAGATACGTATACAACAGAACTTAC  
CTAAATCATTAAATCGAAGAATTAAGCTTATATTGATTCTGGCGGAAAGATTAGTCAA  
CACTTTAATGTCTCTATTCTCGTTCTTCCAAGGCCCTGAATTGGAAGTCAAGAAAATAG  
AAGAAGATGAGAAAGAATCTATTAAAAAAGCTCAAAAAGGTATTTATAAAGACCCTAGAG  
ACATCAATGATGACCAACAAGATGATGATACAAAAGATACTGTTGATAAAAAGGAATGAT  
TGAAATTGCCAAACAAAACACTCAAGAATCTTGGGAAGAACGCGGACGCAAAGCAATCG  
AGAATGAGTTGGAGCGTTATAAAACTAAAGCTGAAGTAATAGAACGTATATTGAATACGA  
TGATTAGGCGCATTGAAAAGAAATCAATGCGTTTATTGTTAAGTACGGAGATTTTGCAG  
GCGTTACATTACAAGAAGCACAAAAGATTATTGATGAGTTCGATGTAAAAGCGTTTCAAG  
AAAAAGCAAAAAGATTGGTCGAAAACGAGGACTTTAGCGATAGAGCAAATGAAGAATTAA  
AGAAGTATAACACTAAGATGTATGTATCTAGAGAACAGATATTAAGATTAAAATAGAAT  
TCTTAATTGCTTATGCAACAGCTCAAACAGAATTATCGATGAGGGAATATTTTCAATCAA  
CAGCTTATCGTGTGTTTCAAGTATCAAGCGGGTATTTTTGGTGAAGGTGTACAAGTAGCTA  
AAGAAGTTATAGATACAGTCGTTGATACACAATTTTATGGTGTGCTTTGGTCAGAGCGAT  
TATGGACTAATACTGAAGCGATGAAACAAGAAGTAGAATAAATAATTGCTAATGTGGTAA

TTAGAGGTCGACATCCTAATGAATATGTTAAAGATATGCGCAAGCACCTAAACAAATTTCG  
AAGGCACAGCAAGACAAAAGACTGCAGCAATTAATCATTGCTTTATACGGAATCGGCAC  
GTGTTTCGCGCATAATCAAGTATTGACAGCATGAAAGAAATTCACCGGAAGGATATTATA  
TGTATATTGCAAAAATTGATAGAAGAACAATAAGTATGCGAGGGGCTTAATGGTGAAA  
TATTCAAAGTTAAAGACGCTAAAATTAGTGTTAATTTCTACCCTATTCATATCAATTGTC  
GTTTCAGATTGTGCATTACTACCTAAATCTATGTGGCCGAAAAACCAACCAAGAAACGAA  
AAACATAATACTTCGGAGGAAAAGTGAAAAGCGATGATTGATTTAAAAGTAAAAGTTTTT  
AAATGCAAATTAGCATTGTATGATAGTAAATTAAGTGTTTGGAGGATATTGGTATGAGCA  
ATACTGACAGATACTTTAGAGACATAGCAACAGAGTTAAAAGGTATACGTAAAGAGTTAC  
AAAAGCGAAACGAAACAGTTATTATTGATTCAAACCTTAGACAGCGTAAGGTCGGCAGTAT  
TAGCCAATAACGAAAAACCGAAATATAACGTACCGCTCTGTTAATAGCTAGCACTTAATT  
GTGTTGGCTATTTTTTATGTCCAAAACGTGCTGATGACATAAAAAGCACGCATGGAAAAA  
CAGTCGACAGACTATAGATGGAGGTATATCTCATGGAAGAAAATAAACTTAAGTTTAATT  
TGCAATTTTTTGCAGACCAAGCAGATGATCCGGACGAACCAGGCGGAGATGGTAAAAAAG  
GAAATCCTGATAAAGAAAGAACATGACGAAGGTACTGAAATAACTTTACGCCAGAGCAAC  
AAAAGGAAATTCATGAAATACTTGAACGTCGTGTAGCCCACGAAAAGAAAAAAGCTGATG  
AGTATGCAAAAAGAAACAGCAGAAGAAGCCGCTAAAGAAGCTGCTAAATTAGCGAAAATGA  
ACAAGGATCAAAATGATGAATATGAACGCAACAATTGGAAAAAGAGCTGGAGTACTTAC  
GCTCAGAAAAACAATTAATGAAATGCGTTCAGAAGCAAGGAAAATGTTAAGTGAAGCAG  
AAGTAGATTCATCAGATGAGGCTGTTAATTTAGTTGTAACAGATACTGCTGAACAACTA  
AATTGAATGTTGAAGCTTTTTCTAATGCAGTAAAAAAGCGGTTAATGAAGCGGTTAAGA  
TTAACGCTAGACAATCGCCATTGACTGGTGGAGATTCATTTAATCACTCGACTGAAAATA  
AATCGCAAACTTAGCTGAAATAGCTAGACAAAAAAGAATTATTAATAAATTAACGGAGGC  
ATTTAAATGCAACAAGCACAAAAATTAATAAATTTGCAACATTTTTCGAGTAACAAT  
GTTAAACCGCAAGTATTGAACCCTGATAATGTAATGATGCACAAAAAGAAAGATGGCAG  
TTGATGAATGAATTCACAACCTCCATCTTACAAGAGGTTATGGAAAACTCTAAAATTATG  
CAATTAGGTAAGTACGAACCAATGGAAGGTACTGAGAAGAAGTTTACTTTTTGGGCTGAT  
AAACAAGGTGCTTACTGGGTAGGTGGAGGTCAAAAAATCGAAACATCTAAAGCTACATGG  
GTTAATGCTACTATGAGAGCGTTTAAATTAGGGGTTATCTTACCTGTAACAAAAGAGTTT  
TTGAATTACAATTATTCACAATCTTTGAAGAAATGAAGCCTATGATTGCTGAAGCATT  
TATAAAAAGTTTGATGAAGCGGCTATTTAGAATCAAGGTAACAATCCATTTCGGTAATTCA  
ATTGCACAATCAATTGAAAAAACTAATAAGGTTATTAAGGTGACTTCACACTAGATAAC  
ATTATTGATTTAGAGGCATTACTTGAAGATGACGAATTAGAAGCAAATGCGTTTATCTCA  
AAAACGCAAAACAGGAGCTTGTACTTAAAATTGTAGATCCTGAAACAAAAGAGCGTATT  
TATGACCGTAACAGCGATGCATTCGACGGTTTACCTGTGGTTAATCTTAAATCAAGTAAC  
TTAAAACGTGGTGAACATACTGGTGATTTTCGATAAGTTGATTTACGATATCCCTCAA  
TTAGTTGAATACAAAATCGATGAAACAGCGCAATTATCTACAGTTAAAACGAAGATGGC  
ACACCTGTAAACTTATTCGAACAAGATATGGTGGCCATTACGTGCAACTATGCATGTAGC  
ATTGCATATCGCTGATGATAAAGCATTGCTTAGTTAGTTTCGTGCTGATGCAAAACCATC  
GTTAAATCCAGGAGAAGTTTAATAAATAATTAGGAGTGAAAACATACCCGAAATCATTGG  
AATTGTTTAAAGTAGATCTTACAGATTTAGAAGATAACAGACATGTCTATATGAAAGGGCA  
TGTCTACCTCGCAAAGGTTATGATCCTACGAATGAACGTATAAAATCTTTAGCCAGCGT  
TGAAAATAAACGCTATGAGCAAATGATTTACATTGTAATGACAAATTAACCAAAAAAGA  
ACTTGTGCAAAATAGCTAGTGTGTTGGCTTACAAGTTGATGAAAAACAAACAAAAGCTGA  
AATTATCAACACTTTTGAGTCGCTAGAGTAGGTGGTTTTATGACTACGCTAGCTGATGTA  
AAAAAACGTATTGGTCTTAAAGATGAAAAGCAAGATGAACAATTAGAGGAAATTATAAAA  
AGTTGTGAAAGCCAGTTGTTATCAATGTTACCTATTGAAGTTGAACAATACCGGAAAGG  
TTTCGTTACATGATTAAGAAGTTGCAGTTAAACGCTACAACAGGATTGGTGCTGAAGGT  
ATGACATCAGAAGCGGTTGACGGACGTAGCAATGCGTATGAATTGAACGATTTCTAGGAG  
TATGAAGCTATTCTTGATAATTACTTTAATGCTAGAACGAGAACTAAAAAAGGAAGGGCT  
GTGTTCTTTTGGAGATATGAGGATAGAGTAATTTTTCAATTAGGACAAGTAGCAACTTACA  
ATCCTAAAACCTAGCGAAAAAGAAAACGCACTAATCACTTATGATGCGATACCATGCAATA  
TTAACCCCATTTCTAGAGCAAGAAAGCAACTTGAATTTGGCGATGTAAAAAACGAAGTAA  
CTGTCCTGAGGGTCAAAGAATCAATATCTTACCCTGTTAGCCACGTGTTGGTTAATGGCA  
TTCGCTACAAGAGAGTTGGTACAAGGATATACAGACACGAAACGTCATATTATATCGAAG  
AGGTCAATTGATGAATATAGATGGATTAGACGCACTGTTAACCCAATTTACGATATGAA  
AAACAACATCGATGATGATGTAGATGATACTTGACAAGAAAACGCCAAAGAATATGTAGT

ACGAGCTAGATTGAAAGCTAGAGAAGTAATGAATAAGGGTTATTGGACTGGTAATTTATC  
ACGCAATATTAGATATTA AAAATCTGGCGATTTACAATACACTATCACATCGCTTGCAGC  
TTATAGTAGTTTCTTAGAGTTTGGTACTCGATACATGGAGGCATAACCTTTTATGTGGCC  
AGTATATGAGGTAATAAGAAAATCGACTGTAGAAGAGTTGAAAGCGTTGTTTGAATAGGA  
GATAAAAGCATGACACCAA CTTACA ACTTTATAATAATGCGTTTGAAACGCTACAAGGA  
TGTGGATTCCCTGTTATTTCTCGTAAAGAGATGAAACAAGAGGTTCCGTATCCTTTTTTT  
GTAATAAAAATGCCGGAGTCGAACAGAAGCAAATACACGTTTGATAGTTATTCTGGTGAC  
ACGAATTTAGTTCTTGATATTTGGTGTGTAAGTGATGATTTAGGACATCATGACGGACTT  
GTTAAAAGATGTATTGATGATTTAACACCTAGCGTTAAAACAAACGTTTATGACTTTGAA  
GTAGATGATACTAACATCACACAGTTAGTTGATGATACTACCAATCAAGAATTGCTACAC  
ACATCAGTAACGATATCTTACAAAACATTTTAAAAAACGGAGGATTATTGAATGGCAAAT  
ATGAAAAATAGTAATGATCGTATTATTTTATTTATAAAAAGCTAGCGAAAAAGTAGATGCT  
ACTAAAATGCTTTTTTTAACTGAATACGGCTTATCACATGAAGCTGATACAGATACAGAG  
GTTACAATGGACGGTTCTTATAACGCAGGTGGTTCTGTTGAGTCAACACTGTCTGGTACT  
GCTAAAATGTTTTATGGTGACGGTTTTGCAGATGAAATTGAAGATGCAGTTGTAGATCGC  
GTATTGTATGAGGCTTGGGAAGATGAAAGTAGAATACCTAGCAAAAATGGAGATGCCACT  
AAATTTAAAGCGAAATATTTCCATGGTTTCCACAATAAATTTGAATTTAAAAGCAGAAGCT  
AACGGTATTGATGAATATGAATGTGAATATGGAGTGAATGGTCGTTTCCACCGTGGATTT  
GCAACACTACCTGAGGCTGTAACAAAGAACTTAAGCCGACTGGATACAGATTCCATGAC  
ACTACAAAAGCAGATGCGTTAACTGGCGAAGATTTAACAGCAATTCCAGAACCTAATGTA  
GATTCATCAACGGTTACACTAGGAGAGGTATAAAAATAGGGCGTTAAGCCCTATTTATTT  
TGTTTAAATTAATCATGAATGGAGATTTTAAAGTTATGAATGTAGAAATTAACGGAAAGTC  
ATTAGAATTAAGTTTTGGTTTTAAATTTTTAAGAGAAATCGATAACCGATTAGGTTCAA  
AGTTGAGCAAGCTTCTATCGGTCAAGGTGTATCAATGTTGCCTGTAAGTTTAGAGAGTGA  
AAATCCTGTTGTGATTGGCGAACTTTAAATTGCAGCTACATCTCACTTAAAAAACAAGC  
AATTACTATTAATATCCTTGCTGAAGCGCTAGATGAAATCGCAGAAAATATCGGACTAGA  
AGAATTCGGTTCAGATATTTTACCGGAGTTGGGAAAGCGACCTATGACCCGAAACCTAGT  
CGGAGTAACGGAAGCGGAAGAGAAACCAGCGGAAGCGTAATAACTTACGACAGAATCGTT  
ATAACTTGTATGTCAACACTTGGTATCACAGATTTGAACGTTATTGAGAAAATGACATTA  
ACAGAATATAACTATCGAATGTATGCGAAAGAGTATGAAATTCTAACCCAAGAATTCGAA  
CGTTACAACTTGCCTTTGCTATTCGTGATGCTGCAGCTACAAAAAATGTTGGGACAGAA  
AATAAACCTAAAGAGGAATATGTTTTTAAACCACGCAAACGACGTATTGCCTTATGAAGAA  
AATATCCAACCTGCTTAAACGAAGATAAAGATCTAAGATTTAGTAGCGAACGTGATGAATAC  
GAACCACAAAACAATGAATTCTTTAAAGTTATAGCAGAATTTAACAAGCAATAGAAAGAG  
AGGTGTTAATGTGACGGAATATAAAATTAAGCGACTATTGAAGCTAGTGTAGCCAAATT  
CAAAGGCAAATCGATAGTGCGGTTAAGTCTGTGCAAAGATTTAAACGAGTAGCAGATCA  
AACTAAAGATGTGCAATTAATGCTGATGATAAAAATTA CAAAAA ACTATCAAAGTTGC  
TAAAAAGTCTTTAGATGCCTTTAGTAACAAAAAAGTAAAAGCTAAATTAGATGCTAGTAT  
ACAAGACTTGCAACAAAAGGTACTAGAATCGAATTTTGA ACTAGACAAACTAACTATAA  
AGAAGTTACTCCAGAGATTA AATTACAAAAACAGAAATTGACTAAAGATATTGCTGAAGC  
AGAAGCTAAGTTATCCGA ACTAGAAAAGAAGCGTGTCAATATTGACATCAATGCTGATAA  
CATCAAATTC AATCGAGTGTTAAAAGTATCTAAAGCTAGTCTTGAAGCTTTAGATAGGTC  
TAAAGCCAAGCTATTTTAGATGTAGACAACAGTGTTGCTAATTCTAAAATCAACCGTAC  
TAAAGAAGAGCTTAAAAGTATTCCAAATAAAACTAGATCTAGACTTGATGTAGATACAAG  
GCTTTCTATACCAACTATTTATGCGTTTAAAAAATCATTAGACGCATTGCCAAACAAAA  
AACAAACAAGGTAGATGTCGATACTAATGGTTTAAAGAAAGCTCATGCCTACATAATAAA  
AGGAAACGACAATTTCCAAAGACAGATGGGGAATTTAGCTAATATGTTCCGTGTGTCCGG  
TACTGTAGGTTCTAATATGGTTGGTGGATTACTA ACTTCATCTTTTAGCATTTTAAATACC  
TGTAATAGCGAGCGTAGTACCTGTAGTGTGTTGCACTATTA AACGCTATCAAAGTGTTAAC  
TGTTGGTGTACTTGCTTTAGGTGGTGTGCTGTAGCCATAGCTGGTGTGCTGGCTTTGTAGCATT  
TGGCGCAATGGCTACCAGCGCTATAAAGATGCTAAGTGACGGCACTTTACAAGCTAGCAC  
AGCAACAAACGAATACAAAAAAGCTTTAGATGGCGTAAAGTCAGCATGGACTGATATTAT  
AAAGCAAATCAATCCGCTATCTTTACA ACTCTTGCAAATGGTTTAAATACTGTTAAAAC  
AGCAATGCAGCGCTTACAACCGTTTTTTAGTGGTATTTCAAGAGGAATGGAAGAGCCGTC  
TCAAAGTGTA CTTAAATGGGCTCAA AATAGCGGTGTAGCATCAAGGTTCTTCAACATGAT  
GAATACA ACTGGTGTTCCTGATTTTAAACAAGCTATTAAGTGCTGCAGGCGGTTTTCCGGTGA  
CGTTTTAGTCAATGCATTACACAATTAGCACC ACTGTTTCAATGGTCCGGCTGATTGGTT



GGATAGATTAGGTCAATCTTTCTCTAACTGGGCTAATAGTGCAGCTGGAGAAAATTCGAT  
CACTCGTTTTATTGAATACACAAAAATAAATTTGCCTATCATTGGTAATATTTTTAAAAA  
TGTTTTCGCTGGAATTAACAATTTGACGAATGCATTAAGTGGATCGTCAACTGGTATATT  
CCAATCTCTCGAACAGATGACAGCTAAATTTAGGGAATGGTCTGAACAAGTAGGAAGATC  
TCAAGGGTTCAAAGACTTTGTCAGTTATATACAAACAAATGGACCACTAATAATGCAATT  
AATTGGGAACATTGCAAGAGGATTAGTTGCATTCGCAACAGCGATGGCTCCTATAGCTAG  
TGCAGTATTACGCGTTGACAGTAGCAATAACTGGTGGGATAGCTAACTTGTGTTGAGGCGCA  
TCCAGCTACAGCACAAATTAGTTGGCGTCATTATAACTTGAGTTGGTGCATTTAGATTTTT  
ATTTGCTCCAATATTAGCGGTAATGGATTTTCGGGGGCCATTAGCAGCAAGATTAGGCGC  
ATTAGTAACTAAGTTTGGTTGGGCTAAAACAGGAACTTTAGTATTGAGTACGGCAGTGAC  
ATCGTTAAAAGGTCCAATAAAATTAGTTACAGCTATATTCCAATTGTTATTCGGTAAGAT  
TGGATTAATTAGAAATGCTATCACAGGACTATTAAGTGTGTTTGGTATTTTAGGCGGTCC  
ATAACAATAGTAATTGGTGTAAATTGCTGCATTAATATCTATATTCGTTTTATTGTGGAA  
TAAATATGAAGGATTCAGAAACTTTATTATAAATGCTTGGAAATGCGATAAAAGCGTTTTAT  
GGTTAATGTTTGGAAATGTATTCAAACACTGTAGCTTCGGTTGTATGGAATGCTATTTTAAAC  
AGCTATCACTACAGCAGTATCGAATGTTTACAATTTTGTAAATGATTGTTTGGAAATCAAAT  
AGTCGCTTATTTACAAGGGCTATGGAATGGAATTATCGCTATTGCACCAACAGTATGGAA  
CCTTTTAGTTACAATCATTACAACACTGTCTTCACGACGATAATGACAATAGTTATGACGAT  
ATGGATAGCTATTTGGACGTTCTTAAGTACAATGTGGAATACGATAATTACAATCGCTAC  
AACGATTTGGAATTTGTTGGTCACTGTAATAACTACTGTGTTTACAACAATCATGACTAT  
CGCAACGACAATTTGGAACGCTATTTGGACGTTCTTACAGACGTTGTGGAACAGTATAGT  
TACTGTGGCAACTAAGGTTTGGAAACGCTATCACTACAGCTATCTCTACTGCGTTACAAGC  
GGCATGGAGTTTCATTTCTAATATCTGGAATACGATTTGGAGTTTCTTATCTGGTATATT  
AACGACGATTTGGAATAAAGTTGTGAGTATATTCACACAAGTTGTATCAACTATATCAGA  
CAAATGTCTCGAGCTTGGAACTTCATTGTCACTAAAGGTATGCAATGGGTATCTACTAT  
AACAGTACGCTAATTAACCTTTGTTAAGAGAGTTATTCAAGGATTCGTTAATGTTGTAAA  
CAAAGTTAGTCAAGGTATGACAAATGGAGTAATTAATAAATAAAGTTTTATAGGAGATTT  
TGTGTCTGCAGGTGCTGATATGATCCGTGGTTTAAATTAGAGGTATTGGACAAATGGCTGG  
CCAATTAGTAGATGCAGCTAAAAATGTTGCTAAGAAAGCTTTAGATGCAGGTAAAAGTGC  
TTTGGGTATTCACTCACCTTCACGTGAATTCATGGATGTTGGTATGTATTCAATGCTAGG  
TTTCGTTAAAGGTATAGATAATCATTCAAGTAAAGTTATCCGTAATGTTTCTAATGTTGC  
AGATAAAGTAGTTGATGCATTTCAACCTACATTAACCGCACCTGACATTTCTAGTATTAC  
AGGGAACCTAAGTAATTTAGGTGGAAATATAAATGCGCAAGTACAACACACACATTCTAT  
TGAAACATCACCGAACATGGAAACTGTTAAAGTTGACTTCGATGTTAATAACGATGCGCT  
TACTAGTATTGTTAACGGCAGAAATGCTAAACGCAATTCTGAGTATTACTTATAAAGGAC  
GTTACAAATGGACATACAATTAACAAAAAAGATGGTACTGTCAACAAATTAAGTGAATA  
CGGGTTTATCGTTAACGATATAGTAATTGATAGCATGCAATCATCACAAAGTATCAAGA  
CAAAGAAAATATGAACGGTCGCGTATTAATGGGGATCAATTATATCAGTAGAGATATAGT  
TGTTCCCTGTTTTTGTAAAGTAAAAAATCGTTCAGACATTGCTTATATGCGAGATATGTT  
GTATTCGTTAACTACTGATATAGAACCAATGTATTTACGTGAAATCAGAAGAAAAGAAGA  
GTTGAATTACAGGTTTACTCAACCAACTTCTGATGATTACGAGAAATTAGATAAAAAACAA  
CTTCACGGATTATGAATATTCAAGACACGAGCAACAAATTTATGTAAACGGTAAACAGTA  
TAAAGTTATTTTGTAGCGGAGTTATAAATCCTAAACACAAAGATAACAACGCTGCTTTCGA  
ATTGAAGTTTGAACACTACAGAATTACCATACGGCGAAAGTATTGGAACAAGCCTAGAGTT  
AGAAGAAAACAAAAGGTTGGATTGTGGTTCGTTTGAATTTAATATTGATTGGCATGCAGG  
TGGGGATAAGCGTCAGTATACATTTGAAAATGTTAGTAAAGATACAGTTTACTATCATGG  
TAGTGCTCCTAACCACCAATTCAACATGTATAAAAAGACAACAATTATTTTGGGCGAAGA  
TACAGAATCGTTTGTATGGAATTTAACGCATGCTGAAATAATGAAAATCGAAGGTATCAA  
ACTAAAAGCTGGGGACAAAATTTGTTTATGATAGCTTCCGAGTTTATAAAAACGGTGTGGA  
AAGAAGTACCGAAACGAATATAGCCCAACCAAAATTTAAATACGGAGCTAATAAATTTGA  
GTTAATCAAACGGTACAAAAGTTTCAAGTTTGAATTTTATTATAAGTAGGTGTC  
AGAATGACAATAATTGTAAGAGCACCTAAAGGTAATGGCGCACCTGTACCAGTAGAACCA  
ACTTTAGTGAATAAAGTTAATGCTGATGGTGTATTAACTTTTGATATTCTATAAAAATCAA  
TATACTTATGAAGTTATTATCGCTATAGGGAAAAGATGGATTATTAGTCATGTGCAAGGT  
GAAAACGACAAGAAAGAATATGTAATAACTGTCATTGATAGGAAATCAGAAGGCGACAGA  
CAACTGGTTGAAGGTACTGTTAGAGAGATTCCCATAGACAAGTTAATGATTGATAGAATT  
ATTTTAAATGTAACAGGATCTTTTACAGTAGAAAGATATTTTAAACATTGTGTTTCAAGGT

ACTGGAGTGCTTTTTGAAGTCGAGGGCAAAGTTAAATCTTCAAAGTTTGAAAACGGCGGT  
GAAGGCCACACAAGGTTAGAAATGATAAAAAAAGGTTTGAACATTTTGGATTAGAATAT  
AAGATCACATATGCCAAAAAGAAAGACAGATATAAGTTTGTATTGACGCCTTTTGCATAT  
CAAAAAGCGTCTTATTTTATTTCCGACGAAGTGAACGCCAACGCTATAATACTCGAGGAA  
GATGCAAGTGCTTTCGCCACCTTCATTAGAGGATATGGTAATTATTCAGGAGAAGAAACA  
TTCGAACACGCTGGGCTCGTAATGGAAGCTAGAAGTGCATTAGCTGAAATATACGGCGAC  
ATCCACGCAGAACCATTTAAAGATGGTAAAGTGACTGACCAAGAACTATGGATAAAGAA  
TTACAATCGAGATTGAAAAAGTCGTTAAAACAATCTTTGTCTTTGGACTTTTTGGTGTTA  
AGAGAATCATATCCAGAAGCAGACCCACAACCCGGAGACATAGTACAAATAAAATCTACC  
AAACTAGGTTTGAATGATTTATTCCGAATAGTACAAGTTAACACGATTAGGGGTATAAAC  
AATGTAATTGTTAAGCAAGATGTAACGCTTGGTGAGTTTAATCGAGGACAACGATATATG  
AAAAAAGTTAATACTGCAGCTAACTACGTTTCTGGTTTAAATGATGTTAACCTTTCTAAT  
CCTAGTAAAGCGCCAGAAAACCTTGAAGGCTAAAGTAGCGTCAATAGCTAAATCAACACTC  
GATTTGATGAGTAGAACTGATCTAATTGAAGACAAACAACGGAAAGTGAGTTCTAAGACT  
GTAAGTGCATCAGATGGCACTATCGTTCATGATTTTCATAGATAAATCAAACATTAAGAT  
GAAAAACAATTGGAACGAGTGGCGATTCTGTAGCTCGAGGATCACATTCGAAAGCTAAT  
TTCACCGAAATGTTAGGCAAGAAGTTAAAAGCTAAAACGACCAAGGTTGCAAGAGGTGGC  
GCAACAATGGCAACAGTTCCAATAGGTAAAGAAGCGGTAGAAAACAGCATTATAGACAA  
GCAGAGCAAATAAGAGGAGACCTAATCATATTACCAGGTCCAGATGATGACTGGTTACAT  
GGTTATTGGGCAGGCGTACCGATAGGCACTGATAAAACCGACACTAAAACGTTTTACGTC  
GCTTTTGTTCTGCAATTGAAGTTATCAGGAAAAATAATCCAGCTTCAAAACTACTTGTA  
ATGACAGCTACTAGGCAATACCGTATGAGTGGTACAACGATACGTCGTAAAGATACGGAC  
AAAAACAACACTAGGGTTAACTTTAGAGGATTATGTCAATGCTCAGATATTGGCTTGTAGT  
GAACTGAATGTACCAGTATATGATGCCTATCATAACAGATTATTTTAAGCCATATAATCCA  
GCGTTCAGAAAATCAAGTATGCCAGACGAATTGCATCCGAACCAGAGGGGTCATGAAGTT  
ATTATGTACGAACTTATTAATAAATTATTGCCAGTTATACGGATAGAAAAGGAGGAAGACA  
TGGATAACAAATTAATTACAGACTTAAGTAGAGTCTTTGACTACAGATATGTAGATGAAA  
ATGAGTATAACTTTAACTTATTTTCAGACATGCTGACGGATTTTAATTTCTCTCTTGAAT  
ACCATAGAAATAAAGAGGTATTTGCACATAATGGAGAGCAAATAAAGTATGAGCATTAA  
ATGTCACAAGTAGCGTCTCTGATTTTTTAACGTATCTTAACGGCCGTTTCAGCAATATGG  
TACTAGGTCATAACGGCGACGGTATCAACGAAGTAAAAGACGCGCGCGTTGATAATACAG  
GTTATGGTCATAAGACATTGCAAGTTCGTTTGAATCATGATTATTCAACACTAGATGCTT  
TCACTAAAAAAGTTGAGAAAGCTGTAGATGAACACTATAAAGAATATCGAGCGACAGAAT  
ACCGATTCGAACCAAAAGAGCAAGAACCGGAATTCATCACAGATTTATCGCCATATACTA  
ACGCTGTAATGCAATCATTTTGGGTAGACCCTAGAACGAAAATTATTTATATGACGCAAG  
CTAGTCCAGGTAATCATTACATGTTATCTAGATTGAATCCCAACGGACAATTTATTGATA  
GATTGCTTGTTAAAAACGCCGGTACCGGTACACACAATGCGTATAGATACATTGATGGAG  
AATTATGGATTTATTCAGCTGTTTTGGACAGTAACAAAAACAACACTAGTTTGTACGTTTCC  
AATTTAGAAGTGGAGAAATAACTTATGGTAATGAAGTGAAGATGTCATGCCGAATATAA  
TTAACGACAGATATACGTCAGCGATTTATAATCCGGTAGAAAATTTAAGGATTTTTAGAC  
GTGAATATAAACCCCTGAAAGACAACCTAAGAATTCGTTGAACTTTGTTGGGGTTAGAA  
GTGCTGACGATATTGATAAAGGTATAGACAAAGTATTGTATCAATGGATATACCTATGG  
AATACACTTCAGATACACAACCTATGCAAGGTATCACTTATGATGCAGGTATCTTATATT  
GGTATACAGGTGATTCGAATACAGCCAACCCTAACTACTTACAAGGTGTCGATATAAAAA  
CAAAGAATTGTTATTTAAACGACGTATCGATATTGGCGGTGTGAATAATAACTTTAAAG  
GAGACTTCCAAGAAGCTGAGGGTCTAGATATGTATTACGATCTAGAAACAGGACGCAAAG  
CGTTTTAATAGGGGTAACCTGTTGTACCTGGTAACAACAGACATCACTCAATTTATTCCA  
TAGGCCAAAGAGGTGTTAACCAATTTTTAAAAAACATTGCACCTCAAGTATCGATGACTG  
ATTCAGGCGGACGTGTTAAACCGTTACCAATACAGAACCAGCATATCTAAGTGATATTA  
CGCAAGTTGGTCATTACTATATCTATACGCAAGACACACAGAATGCATTAGATTTCCCGT  
TTCCGAAAGCATTAGAGATGCAGGTTGGTTCTTTGATATACTGCCTGGACACTATAATG  
GTGCTCTAAGACAAGTCCTTACCAGAAATAGCACAGGTAGAAATATGCTTAAATTCGAAC  
GTGTCATTAACATTTTCAATAAGGAAAACAACGGAACATGGAATTTCTGTCCGAAAACG  
CCGGTATTGGGAACCTATCCCTAAGAGTATTACAAAATTATCAGATTTAAAAATCGTTG  
GTTTATATTTCCATATCACTACTGAAGAATCACAAAGATTTACCGATTTTCGTAAAGACT  
TTAAAGGTATTGCAGGTTGGATATTAGAAGTAAAATCGAATACACCAGGTAACACAACAC  
AAGTATTAAGACGTAGTAACTTCCCGTCTGCACATCAATTTTTAGTTAGAACTTTGGTA

CTGGTGGCGTTGGTAAATGGAGTTTATTCGAAGGAAAGGTGGTTGAATAATGGTAGTAGA  
TAATTTTTTCGAAAGATGATAACTTAATCGAGTTACAAACAACATCACAATATAATCCGGT  
TATTGACACAACCATCAGTTTCTATGAATCAGATAGAGGAACTGGTGTTTTAAATTTTGC  
AGTTACTAAGAATAACAGACCGTTATCTATAAGTTCTGAACATGTTAAAACATCTATCGT  
GTTAAAAACCGACGATTAGAACGTAGATAGAGGCGCTTATATTTTCAGACGAATTAACGAT  
AGTAGATGCAATCAATGGGCGTTTGCAGTATGTGATACTGAATGAATTTTTAAAACATTC  
AGGCAAGGTGCATGCTCAGTCATTCTTTACACAAAACGGGAGTAATAAGGTTGTTGTTGA  
ACGTCAATTTAGCTTCAATATTGAAAATGATATAGTTAGTGGGTTTGATGGTTTAAACAAA  
GCTTGTTTATAACAAATCTATTCAAGATCCTATCGAAGCTGTCGGTAAACACTTTAACCA  
ATTCAAGCAAAATATGGCTGATAGACAGACGTTAATAGCAAGAGTGAATGATAGTGCGAC  
AAAAGGCATTCATCAAATCGAAATCAAGGAAAACGAAGTTATACAAGCTATTACTGCGAC  
GCAAACACTAGTGCAACACAAGCTGTTACAGCTGAATTCGATAAAAATAGGTTGATAAAGAGCA  
AGCGATTTTTGAACGTGTTAACGAAGTTGAACAACAAATCAATAGCGCTGACCTTGTTAA  
AGGTAATCAACAACAAATTGGCAAAAGTCCAAACTTACTGATGATTACGGTAAAGCAAT  
TGAATCGTCTGAGCAGTCCATAGATAGCGTTTTAAGCGCAATTAACACATCTAGGATTAT  
TCATATCACTAGCGCAACAGATGCGCCAACATTTAAAGATAAAGGCACCTTAGAGACGCC  
AAAAGAAGATGGCGTTGATGATGGTTCTGAAGTTTCAGCAACTACGAATAATTTAGGGAA  
ATCAGGCTTGTAGTTGTTTATGTTGTTGATTACAGTACAGCTCGTGCTACATGGTATCC  
AAACGATTCAAATGATGAGTACACAAAATATAAAAATCGGTGGCACATGGTATCAGTTCTA  
TAAAAAAGTTGACGAAGAATTAACGAAGAAATTTGTTGAATAAACGGCTAACAAACGCTTT  
GAATCAAGCTAAGCAGTATGTAGATGATAAATTCGGAACAACGAGCTGGCATCAACATAA  
GATGACAGAGGGCAATGGTCAATCAATCAAGTTAACTAAAATAATGCGCAAGGCGATTT  
GGGATATTTAACTGCTGGTAATTACTATGCAACAAGAGTGCCCGATTTACCAGGTAGCGT  
TGAAAGTTATGAGGGTTATTTATCGGTATTCGTTAAAGATGATACAAACAAGCTATTTAA  
CTTCACTCCTTATAACTCTAAAACGACTTACACACGATCAATCACAACGGCAGACTTGA  
GCAACAGTGGACAGTTCCTAATGAACATAAATCAACGGTATTGTTTCGACGGTTGCGCAA  
TGGTGTAGGTACACCAATCAATCTAACTGAACCGTTCACAAACTATTCTATTTTGTGGT  
AAGTGGAACCTATCCAGGTGGCGTTATTGAGGGATTCGGACTAACTGCATTACCTAACGC  
GATTCATTCAGTAAAGCGAATCTAGTTGATTCAGACGGCAACGGTGGCGGTATTTATGA  
GTGCTTACTATCCAAGCCAAGTAGCACTACTTTAAGAATAGATAACGATGTGTACTTTGA  
TTTAGGTAAAACATCAGGTTCTGGAGCGAATGTCAACAAAGTTACTATAACTACAATTAT  
GGGGTGGAAATAATGAAAATCACAGTAAACGATAAAAACGAAGTTATCGGATTCGTTAAT  
ACTGGCGGTTGACGCAATAGCTTAGATGTAGACGATAAGAATGTGCCTATTAATTTTAAA  
GAAGAGTTCGAACCTAGAACGTTTGTTTTCTACTAACGGCGAAATTAATACAATAGCAAT  
TTCGAAAAAGAAGACGTACCGAATGCATCAAACCAACAAAGTGCCTCGGATTTAAGTGAT  
GAGGAACTTCGCGGAATGGTTGCGAGTATGCAAATGCAGGTGGCACAAGTAAACGTATTA  
ACAATGGAAATAGCTCAACAAAGCGCTATATTAACACAACAGTTGACTGACCTGAAAAC  
AACAAAACAAGTACTGAGGGGGACGTTAACTAATGAAGATGATTTATCCAACCTTTCATG  
GACATTAACACTTTTTATGTGTGGGGTTGCTATAAAAATGACCAAATTAAGTGGTACATA  
GACATTGGTGTAAATCGACAAAGAAGAATATGCATTGATCACTGGAGAAAAATATCCAGAA  
ACAAAAGATGAAAAGGCACAGGTGTAATGCTTGTGGCTTTTTAATTTAACACAAAGTAGG  
TGGCGTAATGTTTGGATTTACCAAACGGCACGATCATGAATGGCGAATTAGAAGATTAGA  
AGAGAATGATAAAACAATGCTTAGCACTCTCAATGAGATCAAATTAGGTCAAAAAACTCA  
AGAGCAAGTTAACATTAATTAGATAAACTTTAGATGCTATCCAGAGGGAAAGACAGAT  
AGACGAAAAAATAAGAAAGAAAACGACAAAAATATACGCCATATGAAAATGTGGATTCT  
CGGTTTGATAGGGACTATCTTCAGTACGATTGTCATAGCTTTACTAAGAACTATTTTTGG  
TATTTAAAGGAGGTGATTACCATCCTTAAAGGGATTTTAGGATATAGCTTCTGGGCGTGC  
TTCTGGTTTGGTAAATGTAAATAACAGTTAAGAGTCAGTGATTCGGCACTGGCTTCTTAT  
TTTGATTGAAATGAGGTTTACATACATGGGATTACCCAATCCAAGACTCGAAAACCTACAG  
CAAGTGAAGTAGTAGAGTGGGCGTTGTATATTGCTAAAAAGAAAATAGCTATTGATGTAC  
CTGGTTCTGGAATGGGGGCGCAATGTTGGGACTTGCCTAATTACTTGCTTGATAAATATT  
GGGGGTTTAGAACATGGGGAAATGCTGATGCTATGGCTCAGAAATCTCATTATAGAGGTA  
GAGATTTCAAGATAATTAGAAATACAAAAGATTTTGTACCACAACCAGGCGACTGGGGTG  
TTTGGACTGGTGGTGGGCAGGACATGTAACATTGTAGTGGGACCATGCAGAAAAGACT  
ATTGGTATGGTGTGGATCAAACTGGTATACAAATAATGCAACAGGAAGTCCGCCGTATA  
AAATCAAACACTCTTATCATGATCGACCAGGTGGAGGAGTTAAATATTTTGTGGTACCAC  
CATATCATCCGGAGAAATCTACGCCGGCACCTAAACCCGAAGACTACAGTGATAATAACG

AAAAAATAATAAAAAAGTTCCGATTTGGAAAGATGTAACAACCTATAAAGTACACTATAT  
CTAGCCAAGAGGTTGATTATCGAGAATAAATTTATCACTGTATAGTAGAAGGTAATCGAC  
GACTCGAAAAACCTAAAGGAATAATTATTAGAAACGCACAAACGATGAGCTCGGTAGAAA  
GTTTATAAAAGAGTAGGAAGAAATACAAACAGGATGTAGAATATCCCCACTTTTATGTTG  
ATAGACATAATATTTGGGCACCTAGCAGAGCTGTATTTCAAGTTCCTAATGAACCTGATT  
CTATACTTAAAGACGTATGTGAAGATTATAGTGCAGTAAAAATGAATTTATTTTAAATG  
AGATTCACGCAATGGCTGTAGCTGTAGATATGATGGCCAAATATGAGATACCTCTAAGTA  
TTGAAAATTTAAAAGTAGACGACAGCATTGGCGTTCGATGTTGGAACATGTTAATTGGA  
ATATGATTGACAACGGTGTTCCTAAAGATAAATACGAAGCATTAGAAAAGGCATTAC  
TTAATATATTTAAAACAGAGAATAATTATTAATTCTATAACCAACCAACATTAACAA  
AATCTAGAATAAAAGTTATGGTAGATAATAAAAAACGCTGATATAGCGAATGTAAGAGACT  
CATCACCAACAGCTAATAATGGCTCGGCATCTAAAAACCGCAGATCATAACAGAAACGA  
GTCCTTATACATTCAAACAAGCACTGGATAAAACAAATGGCAAGAGGTAACCCGAAAATAT  
CTAATGCTTGGGGTGGCCTAACGCTACACGAGCACAACGAGTTCAGCAATGAATGTTA  
AACGAATATGGGAAAGTAACACGCAGTGCTACCAAATGCTTAATTTAGGCAAGTATCAAG  
GCGTTTCAGTTAGTTCGCTTAATAAGATACTTAAAGGTAAGGGGACTTTGAAGAATCAAG  
GTAAAGCGTTCGCAGAAGCTTGTA AAAAGCACAACATTAATGAAATTTATTTAATCGCGC  
ATGCTTTCTTAGAACGTGGATATGGAACAAGCAACTTCGCTAACGGAAAAGATGGGGTAT  
ACA ACTACTTCGGCATCGGCGCTTACGACAACAATCCTAACTACGCAATGACCTTTGCTA  
GGAATAAAGGTTGGACATCTCCAGCAAAGCAATCATGGGCGGTGCTAGCTCCGTAAGAA  
AGGATTACATCAATAAAGGTCAAACACGTTGTACCGAATTAGATGGAATCCTAAGAATC  
CAGCTACCCACCAATACGCTACTGCTATAGAGTGGTGCCAACATCAAGCAAGTACAATCG  
CTAAGTTATATAACCAAATCGGCTTCAAAGGTATCTACTTCACAAGGGATAAATATAAAT  
AAAGAGGTGTATAAATGTATAAAATAAAAGACGTTGAAACGAGAATAAAAAATGATGGTG  
TTGACTTAGGTGACATTGGCTGTCGATTTTACTGAAGATGAAAATACAGCATCTATAA  
GAATAGGTATCAATCACAACAAGGTCGTATCGATCTAAAAGCACATGGCTTAACACCTA  
GATTACATTTGTTTATGGAAGATGGCTCTATATTCAAAAATGATCCCCTTAGTATCGACG  
ATGATGTA AACGGTTCCTTACCTACAAAATACCTAAAAGGCTATCAAACACGCTGGTT  
ATGTTTCGATGTAAGCTGTTTTAGAGAAAGAAGAAAAATACATGTCGCAAACCTTTT  
CTTCAATATCGTTGATAGTGGTATTGAGTCTGCTGTAGCAAAGAAATCGATGTTAAAT  
TGGTAGATGATGCTATTACGAGAATTTTAAAAGATAACGCGACAGATTTATTGAGCAAAG  
ACTTTAAAGAGAAAATAGATAAAGACGTCATTTCTAACATCGAAAAGAATGAAAGTAGAT  
TTAAAGGTGCGAAAGGTGATAAAGGCGAACCGGGACAAGCTGGTGTGAAAGGTGATACAG  
GTAAAAAAGGAGAACAAGGCGCACCCGGTAAAACGGTACTGTAGTATCAATCAATCCTG  
ACACTAAAATGTGGCAAATTGACGGTAAAGATACAGATATCAAAGAAGAACCTGAGTTAT  
TGGATAAAAACAATATCGCAAATGTTGAAGGGTTAGAAGATAAATTGCAAGAAGTTAAAA  
AAATCAAAGATACAACTCTCAACGACTCTAAAACGTGTACGGATTCAAAGATTGCTGAAC  
TATTTGATAGCGCGCTGAATCTTTGAATACATTAAGAGAATTAGCAGAAGCAATACAAA  
ACA ACTCTATTTCAGAATGTGTATTGCAACAGATTGGCTCAAAGGTAGTACAGAAGATT  
TTGAGGAATTCAATCAAACACTAACTGATTCATATGCTTCAAAAATCATTATCATGACG  
AGCGGTATGTTTTGTCATCTCAAGCTTTTACTAAACAACAAGCGGATAAGTTATATCAAC  
TTAAAAGCGCATCTCTACCGACGGTTAAAATTTGGACAGGAAGATAAAATGAATATAACT  
ATATATATCAAAAAGACCCTAATACACTTTACTTAATTAAGGGGTGATTTTTATGGAAGG  
TAATATTA AAAATGTAAAGAAGTTTATTTACGAAGGTGAAGAATATACAAAAGTATATGC  
TGGAAATATCCAAGTATGGAAAAAGCCTTCATCTTTTGCAATAAAACCCTTACGTAAAAA  
TAAATATCCGGACAGCATAGAAGATTCAACAGCAAATGGACAATAAATGGAGTTGAACC  
TAATAAAAGTTATCAGGTGACAATAGAAAATGCACGTAGCGGTATAATGAGGATTTTCGCA  
AACTAATTTAGTGTCAAGTGATTTAGGAATATCAGGAGTCAATAGCGGAGTGGCAAGTAA  
AAATATCAACTTTAGTAATCCTTCAGGGATGTTGTATGTCACTATAGGTGATGCTTATTC  
AGGATCTCCGACATTAACCATTGAATAATTTTAAACGACTAATTTTTTAGTCGTTTTTTA  
TTTTGGATAAAAGGAGCAAACAATGGATATTA ACTGGAAATTGAGATTTAAAATAAAG  
CAGTATTAACAGGTTTAGTTGGTGCATTGTTGTTATTTATCAAACAATCACAGATTTTT  
TCGGATTCGATTTTTCAACTCAATTAATCAAGCCAGCGCATATAGGCGCTATCCTCA  
CGCTACTTACAGGGATTGGCGTTACTGAGCCAACGTCAAAGGCGTCTCAGATTCAT  
CTATAGCACAGACATATCAAGCGCCTAGAGATAGCAATAAAGAAGAACAACAAGTTACGT  
GGAAATCATCACAAGACAGTAGTTTAAACGCCGAATTAAGCGCGAAAGCACCAAAGAAA  
ATGATACATCACAACCTTTCACAGACCCTCTAACGATGTTGGCTTTCATGTGAATGAGC

ATCATCATGGAGGTGGACACAATGCAAGCAAAATTAACATAAAAAAGAGTTTATAGAGTGG  
TTGCAAAGTTCTGAAGGAAGACAATTCAATGTGGACTTATGGTATGGATTTCAATGCTTT  
GATTATGCCAATGCTGCTTGGAAAGTTTTGTTGGGATTACTTCTGAAAGGTTTAGGTGCA  
AAAGATATACCATTTGCAAACAATGTTGATGGACTAGCCACTGTATACCAAATACGCCG  
GACTTTTTGACAAAACCCGGCGATATGGTTGTGTTCCGGTAGTAATTACGGTGCAGGATAC  
GGACACGTAGCATGGGTAATTGAAGCAACTTTAGATTATATCATTGTATATGAGCAGAAT  
TGGCTAGGCGGTTGCTGGACTGACGGAATCGAACAACCCGGCTGGGGTTGGGAAAAAGCT  
ACAAGACGACAACATGCTTATGATTTCCCTATGTGGTTTATCCGTCCGAATTTTAAAAGT  
GAGACAGCGCCACGATCAGTTCAATCTCCTACACAAGCACCTAAAAAAGAAACAGCTAAG  
CCACAACCTAAAGCAGTAGAACTTAAAATCATCAAAGATGTGGTTAAAGGTTATGACCTA  
CCTAAGCGTGGTAGTAACCCTAAAGGTATAGTTATACACAACAACGCAGGGAGCAAAGGG  
GCGACTGCTGAAGCATACCGTAACGGATTAGTAAATACACCTTTATAAAGATTAGAAGCG  
GGCATTGCGCATAGTTACGTATCAGGCAACACAGTTTGGCAAGCGTTAGATGAATCACAA  
GAAGATTGGCATAACCCCTAATCAAATAGGTAATAAATATTATTACGGTATTGAAGTATGT  
CAATCAATGGGCGCAGATAACGCGACATTCTTACGAAATGAACAGACAACCTTTCCAAGAA  
TGCCTAGATTGTTGAAAAAATGGGGATTACAAGCAAACAGAAATACAATCAGATTGCAC  
AATGAATTTACTTCAACATCATGCGCTCATAGAAGTTCGGTTTTACACACTGGTTTTGAC  
CCAGTAACTCGCGGTTCTATTGCCGGAAGATAAACAATTACAACCTAAAGACTACTTTATC  
AAGCAAATCAGAGTGTATATGGACGGTAAGATACCAGTGGCCACTGTCTCTAAGGAGTCA  
AGCGCTTCAAGAAATACAGTTAAACCAGTTGCGAGGGCATGGAAACGTAATAAATATGGT  
ACTTACTACATGGAAGAAAGTGCTAGATTCACAAACGGTAATCAACCAATCACTGTAAGA  
AAAATAGGACCATTCTTATCATGCCCGGTAGCTTACCAATTCCAACCTGGTGGATATTGT  
GATTATACAGAAGTGATGTTACAAGATGGTCATGTTTGGGTAGGATATACATGGGAGGGG  
CAACGTTATTACTTGCCTATTAGAACATGAAATTGTTCTGCCCCACCTAATCAGATATTA  
GGTGACTTATGGGGAGAAATCAGTTAGAATGACATAGACATGTCTATTTAAGCAGGTGCG  
TTACATACCTGCATTCTATTTACATTTAAAGATAAATGTGCTATTATTTTACTAGAACT  
TTTTAACATTTCTCTCAAGATTTAAATGTCGATAACCGGCAGGTAACCTACTGCTACTTGCCT  
ATTTTTTATGCTATAATGTAATTACATTACCAGTAACCAATCTGGCTTAAAACCACTTT  
CCGGTAGCCAATCCGGCTATGCAGAGGACTTACTTGCCTAAAGTAGTAAGAAGCTGGCTG  
CATATCTAAACCACGCATACTAGTTACTGGGTGGTTGTTTTGTTTCGCCATTCTGTTCTG  
TCTAGCTCTTTTTGCGCAAGTTGTGTATTATGTATATATAGTATAAATAAGGGATATTTT  
AAATGGAAGATAATAAAAAATTTAGGAAAAATGTATTCATTCAAAGCTTTATATTTTTTTA  
CTGCAGCTTTTGTAAATATATTGACTATTATAACAACCTAAAAATTTTGAGGTGCTATGT  
TAGGTGTAACACTTTATTTTATGCCTATTGTTCTAGAAAATTACATGAAGAATGTTTACA  
ATAAAGCAACTAAGATTTTGAAGAAGAATAGGATATATATTTCTACTTTATTCATATTTA  
TGAACATTTTAAATATTTATTTTATGTTATTATATGCCTACATATAAGTTTATCATTAGTA  
TAAATTGGTATGTTTCGTGCTATTATAATAACAACAATACCATTAGTTTTTATTAATATAT  
TAGATATTTTTCTTTATGGATTTAACAACGAGGAAATCAAAGCTAGTAATGATACTAAAG  
AGTATTTGAGAAAGAACAGAGAACAAGTAAGAAGTAAAGAACTAAAAATAAAGCAAGAGAAAGTAC  
TGAAAGAGGAAGAACGTCAATTTAAAATAGAACGTTCTAAAAGAAACGGATGATAGTAAT  
GGTTATAAGAATTATAAGCGTTTTTCGTTATAAGTGCTATCTTATTATTTTATTTGTCAGC  
GGTAACTTTCACCGCAGTTAGATCTTATGATTATAATGTTAAATTTAGTGTACCAACGCT  
ATTTGCAATACCATTAATTTTGGTTCAGTACACATCTAAAATTTACAATACCTACAAATT  
TATTGACAGTAAAAAGCCTTCAGAATGCTTTTATTTATATTTAAAAAATATCCGGTAGC  
AATAGCTATGTTTTTAACTATTATTGCCACAAATATCGCTGAACAAAATGTGAAATTATC  
AAATGGTGCAACTTATAAGAAAACCTGAAAATTTAAAGCAGAAGAAACGTAAAAAATGAT  
TAACAAGGTTCTGCAAAGTAATACTTATGGAGAAATGCTTTTGGGAATATAAAGAAGTTA  
CTTAGTATTTCTTATGATTTTAAATATAATAGGTTTATTATCTTTTCTTGATGAAATTATA  
ACCGTACCCTTTAAGATGCGGTTATTTTTATTCCTATACAATCAACAAAACCAACACC  
TATTAATTTAGCAGTGTGGTTTCGTTATATGTGAAGCTAAAATAACTACAAATGATACCAT  
TTTTGATACCATTTTGTGTTGTAACAGAAAAACAAGGAAAATAAAAAAGGCAAAAAACG  
CATTAAATCAACGTTTATTGTCTCATGAAATTTAAATGTATATAAATTTCACTTCGCATT  
CG

>NewGenomeName\_58

AGCGCTGGGGACTATTATTACCCCTAGCGCTCGGCACGGGACATGGGCTAATGGATTGTG  
GATATAGGGCCCAAAGGGCCCGTTTAGATGGGTTTTGGGCTCATGGGCTTTATCCAGAAG  
ACCAAAAACAGGCGGGAACCGTCCCAAATTCAAACTTCGATTGCTTGCCCTGCCACGCAT

CTAGAAGTCTATAAATACCAGTGTCTAGATAGATGTTTCAGTCAAGAAAAGGCTAGGTATC  
CGAAGAAATCCATCAAGAAGAGGGCGGGTTGGGCGCCGGAAGTATGGCAGAAAGGCGGCAA  
CGAGCCACGACTACTCGTCGTCAGGGTCAATATTAGTTCCTGAAGACACCGTCAAGGTAT  
TTCGGATTGAGCCTACTGATAAAACATTACCCAGATATTTTATCTGGAAAATGTTTATGC  
TTCTTGTGTGCAAGGTGAAGCCCGGAAGAATACTTCATTGGGCTCTGATCAAGAGTTCTT  
GGGAAATCAACCATCCGACAACCTGTCTGGAAGCCCCAGGTTTATTTATTAACCTGAAC  
ACAGCGATCTGGTTAAACTGGTATGTAGTGGGGAACCTGAAGCAGGAGTCGCAACAGGAA  
CATCAGATGTTGAATGTCTTTTGAGGAAGACAACCGTGTGAGCAAGAATGTAACAGAGG  
TGGATTATTTATATTTGGCATTCTATTGTAGTTCTGGAGTAAGTATAAACTACCAGAACA  
GAATTACATATCATGATTGATATATTTATGTAAACATAAACTATTGTATGGAATGAAATC  
CAAATAACATAACAACACGCTATGAAATACAAGACGCTATGACAAAAGTACTGGTATATGA  
TTAGGTCTCCTAACGAAGTGGGCGGAAGGCCCGTGAGCAATATGCGTCGAAATAATGTT  
TGACAAACAAATATACATGATACGGATAGTTGAATACATAAACAACGAGATATACAATAC  
AACAACTATAGTAAAGAAATAAAAAATAAGAAGAGAGAGTATATTTGTGTCTGGATCAGC  
ACCAGACCCACCACTTTAGTGGTGGGCCAGATGTCCCGAGTTAGTGCGCCACGTA

>NewGenomeName\_59

GGGGCGGGTCATAGTATTACCCCCGCCCCGGGTTTCAGAGTCACGTACGGAGTGAGTTATG  
GCCTTTAGATTATGATACACGTGGACGATCAGGGTCTGTGATTCGTGAAGCGAATCTGAC  
GGAAGATCGTCTGCAGCTTCGTGGTAGGTCCTAATTGTTGCTTTAGTTTGCTTTTTTAAA  
AGTAAAGTAAGATGCTGTCTCTTACTTTATTCCTTTGAGTGGAATACAGCTGTCTTTGC  
TTCTTCACGAAGCAAAGCATTATTTCTCTCTATAAAAAGCTGTGTTTCGTCTTCGTTGT  
TCTTACAACGAAGATGGGTCTGAAATATTTCTCTCATCTTCTGAAAAGCTTAGAGATAA  
GATTGTCCGCGATCATCTACAACAAGAGCGAAAGAAAGAGTTTCTTCAGAAGGCAATAGA  
AGATAGTTGCAGAAGGCATGTGTCTGTTATTAAGTACAGACCCATCTCCTTCAGAGATGTA  
TTCTCTTAGTACGTTTTTAGATTATTGGGTGATTACGTTGGTAGACAATTAATACACG  
TTGTCTGATTAAATGGGGGAAGGATCTTCTGCTAATATCTAGTTTCAAGTTATGGAAGA  
GCAACACTTGTCTTATGTGGTTTTCTTGATATGGACGACTTATCATGTCGTGAAGTACT  
GCCGCTGAAGAGGACGACGATATTACATACGAAGAGGGTATGATTGTCAACTGCAGTGA  
ATTGGATAAATTATTTGCGGCTCTTGGCATTAGAGTTGTTTATTAATGTAATTAATG  
TTGTATTTGTATTCCTTTGAACAAGGATGTTGTAATTAGTTGATTTAATGTAATTAATG  
ATATATTATTGTTAATGTTACTATCAAATACATATTTATTGTTTTTTAATACTATGCGAA  
GCTATATGTTAAGGCCCAATCGGCCCAATAGCACTAAGGCCCAATAAAAATAATCTGTAA  
ATGAGTCAGCTGACGTCAGCTGACTCTTTGATGACGTAG

>NewGenomeName\_60

ATGGGTCTGGGGCTTACTATGACCCCCGTCACAGGTTCACTCAAGTCACCACGCGAGAAGC  
ACATGACATCAAATGTTATCATTAAATAGCAAGAGGATCTTGGTCCCTACCACGGCACTAT  
AAAATGCCGCACAGAAAATATGCTTTGATTCAATTAGTACGCAAAGGTAATGAATATAAAT  
GACTTCTGATTGCTTTATTCCTTGTGCATAGACTTTAAATGAATGGTTCAGATTTAATCG  
TACATATATTTCTTCCAATGGAAGATTGGTTATCCCACTATAAATATAGGACGCCTGTGG  
ACCTGATCTTTGGGTATTCGGAATTCCATAGTTGTTGTTTCGTTGTCTGAAACAAGATGCC  
CTAGATTAGGCGTTTCAATCTTTCTATGAGAGAATTGTATAAGCTGAAAGAAGAACGAGA  
CTCTTTCTGGAAATCATATCATGAGTATCTTGGAGCGAACGAAGAAGCGTTGGGAGGGTT  
TTGTAGATAACATGGAAGGAGAATCTTAGCCTATCCACATATAACCAAGTTATGCTCTAAC  
AAGGTGGCTGTTGAAAACCTCGGCCTTTGTATGAGATCAGAGTTGTGGATTGTGAGGAATG  
CCAGAAGCACGAAGAATGTAGAAGTCGTGTCTCTGTCAGAAATACAGAAGGCGTGCAGGA  
CTTGGATGATTACGGTAATTACTTATATCCAGTGTATTATGGTAATCATAATGATGTATT  
AAGATATTAAGTTAATAAACGACAGCTATCATTGTAAAATATTAGCATATGTTATGAAAG  
TTTATTACGGTTTGTGTTGCTGGGCCTTGGTGCTATTGGACCTATTGGGCCAGAAGATAT  
TCAGTTCGTGTATTCTGTATAATAAACTGTAACGGAATTGTATCCATTGTTGTGCCATA  
AAGAATAAATAAATGTTAACTAATATCACTATGATATTGATACAGTTTTTTTATGAAC  
TCTGCGAATCGATATGTATTTAATTGTATTAATAAATGACGTCTCTTGATCCCTTGCTGAG

>NewGenomeName\_61

ACGAGGCGGGTTCATAGAGTTACCCCCGCTCGGTACACTACCACGTTACCTTTTCTCTCTC  
TAGAGTTAATGGCATCTAAGCGTAGTCGCTTTACACTGAACTATCAAACAGCGTTAGCTA  
GAGAAACCTTCATTTCTCCCTTCCCTAGCGACGCATTGAACTATTTTCGTTAGTGGAAATCG  
AATTCGCTTATACTACTGGGCAGAAACATCTCCGAGGAGCTGTTTCGATGAGGAATTTAC  
TTCGTCTGGGTGGATTGAAGAAAATATTTGGATGTTTTGCTCATCGCGAGATCGCTAAGG

GACACGATTTTCAGAATCGCGATTAATGTACGAAGGAAGCTCTAATCGCAGAAATTGGGG  
CTCCGGTTAAGAAAAGCTCAAAGCGAAGGAAGATACTGGAGCCATACTAATAAGATCCAG  
AATAAATGAAATTTTCGAGATCCGGTTACTGCCCTACGATGTAACGCGAAGAAATTAAGAG  
AAGAGTCTTGTTCTGTGCTTTTCGGTTTTTCTCTGTGACCTTGGCAAATTGAGTTATGCA  
GAGCCTTAATGGTGGATCGTGACGGGAGAACAATTATTTGGACGTAGGGCCCAGATGGAG  
GCGAAGCGAAATCTACCTACGCGAAAGAATTAATCAGATATGGTTGTTTTGATTCTGCAG  
GAGGAAAGACCTAGGACATACTGTATATGCATCCGCAGGATCCTGAAAGAAATATTGCGT  
TCGATGTACGCAGGTGTTCTCCGCAGATGATGAACTATCAAGGATTGGAAATGATGAAGA  
ATCGAGTATTTGCAAGCACAAAATATAGGCCTGTTGATGTTTGTATCAGAAAGAAGTTGC  
ATTTAAATGTATTTGCCAACGTGGAACCGACCTCACAAAATTAAGTGACGACAGAATTG  
GTATTATCAATTCTTGATTAAATGAAACATCTATTATTTTATGGACCTCCTAAGCCCCAG  
CTGTCTTTTTATTGGATAGTGGCCAAACAAACCTCGTTACACTATATCT

>NewGenomeName\_62

ACGTAGGGGGCGGGGCTTAGTATTACCCCCGCCCCAGGATCAGCGGAGTGATTTACCCTCG  
CTATAGGCCGTTAGATGTGTATACACGTGGACGATCACGATCTGTGATTCGTGAAGCGAA  
TCTGACGGAAGATCGTGCGAAGCTTCGTGGTAGGGCCCCCATGTTGCTTTATCTATACTG  
TAATAAAGTAAAGTAAGATGCTGTCCCTTGCTTTATTCGTTGGCTAGTTGTATACACCTG  
TCTTTGCTTCGCCGCGAAGCAAAGGACATTCTCATCGTCTATAAAAGCTGTGTTCTCCGT  
GTGTAATTCGTTCGGAATTATCGAGCGAAAGTCTCGTTCCTGTTCTATGGAGGATTTCAAT  
CAACCAAAGCTCTCTTATGGAGAGATAGTTCAAATGAAGGAGGAACAAGATGCTTTCTGG  
AGTTGTTATCATGAGTTTCTCCGTCGCAATGAAGATGTTCTTGGAGAGATGTGCAGACGC  
CATGGAAGGAAATTGCCTGCATATCCAAAGCTCCCTACATATGCCCCGATACGGTGGGTT  
CTTAAGACTAAGGCAAGTTATGATGTCAGAGTAGATGAATGTAAGTCATGTTTCGCATGAG  
CAAATTAGTAGAAGGGATTATAATCCCATTAAGAAAGAAGGTTTAAAAGACCTGTATGAT  
TCAGGTAATTATAGATATCAAGTGTATTATTCTTCATCGTGTAATAGAGATAAATCAGAT  
TAATAGATCAATAATTACAATTATATTGTTTCTGCTATTGTTTATGTTTCATAAATAATT  
TATGGTTTGCAAACCAGAGCTATTCAGAGGCAGAAGACAACACTACAATTGATACCATATG  
CATTACAATGATATTTGAGAAATATATTATTTTAAATAACTCTGCGAAGCTATATGTCTT  
GGCCAATAGGCCCAAATGCTCTGAAGCCCAATGAAATTAACGCTGAAGTGAGTCAGCTG  
ACGTCAGCTGACTCCTTGATG

>NewGenomeName\_63

TAGTATTACCCCCGTGCCGGGATCAGAGACATTTGACCAATAGTTGACTAGTATAATAGC  
CCTTGGATTAATGACACGTGGACGCTCAGGATCTGTGATGCTAGTGAAGCGCTTAAGCT  
GAACGAATCTGACGGAAGAGCGTTCACACTTAGATCTAGTTAGCGTACTTAGTACGCGTT  
GTCTTGGGTCTATAAATAGAGTGCTTCTGAACAGATTGTTTCAGAATTTTCATAGCGAGATA  
GATTCAGGTGATGGTTACGATACATACTCATATGAAGAAGGTGCTGGAGATGCGAAGAAG  
GAAGTTTTATATAAAAATAGGTATTATTATGTTATGTATTGTAGGGATTGTAGTTTTATGG  
GTTTTAATTATATTATGATGTGCTGTTCCCTCGCTATGCTAAATCAACGATGCACGCTTGG  
TTATCTGCGTCTTCCATTATGAAGAGGATGATGGCTTCAAGGATTACTGGTACTCCGTTT  
GAAGAACTGGTCTCATCGTGAAAGAAGATGGGCTGAAAGAAGAACTGAAGCGACGAAC  
CAGAATAATAATGATAATGTAATAGATTTAGTTGATATGTTGTAATTTTATATGGATTA  
ATTAGAATTATTATTATTCTGTTCTTCGTCTGTGTTTTTTAAGCTTTTTCTGTCTTTTAA  
TGGCGTCTGGAGTGAGAAAGGACTAATTGTAAGGTAGGCGACGATGTAGTGGATTACAGT  
TGTCTTTACTTCGCCTCGAAGAAAGACGCATTTCAAGTTGTGAGTGTTATTGCTTTTGAT  
GAAGCTTCCTCGAAGCAGCGTATAACTTTAATTTGAATTTGGTTTTGGCGCGTTAGTGAA  
ATTGCGGCTGTAAACGTGTCAAGTTGTGAGTGGCTGAAATAAGATAATAGATATATTATT  
ATTGTTTTAATTTAATTCCGCGAAGCGATATGTCAAGTGATAAATGAAACGAAGCGTTTT  
GATGACGTCATATGTCTCCGCGCCTACGTCAGCACGGGGCT

>NewGenomeName\_64

ATGACTGAGCCTGGAGCATCGGAGTTCATTTGGGGACCGGGAATGCATACGCATCCTGAC  
TTGGACGACGACGCGGGGAAGTCTCTCGCGCCCAACAATGTGGAGACGCTGCACGATCAG  
ATTCGCGATCTGCAGGCGAGCAAGCGGAGCAACGCCGCACGCGCTGGAGAGACGATGCGG  
GACATGTACTTTGCAGTCGGGAATCCGGATCGCTACGGGCCCAAGCCCAGCGCTTGTGCAA  
GGCGATGGCAAGCCGGAGCCTAGCCCCACGCCCGAGGAGTCACCGCAGACATTCGAACGC  
AAGCCGTAATCGTTTGTGCAATAACAGATGTGGAGTCGGTCCGATTCTGTGGCCAGGGAGG  
CCACTGCCGGCCGACAGTATTATTGAGGGACGAATCCGAGCCTGACAAAAGGGAATTGCA  
ATGCCACGAGGTGATACCACCAAGGAGCAGACCCGAGCGCACCGTGGGGAAGCCCCGACGGG

CTAGAGGAGTTCCGCCCGAGTCTGGAATCAAGGTCGGAACGTTTACAATGCGTCGCAAG  
GATTTGGACCATCCCAACTATCGCAGCATGCCGTGTCTGATGTTCCATGTGCCGTTGCAG  
TTCCGCGGACACTATCGTGTGGAACGTCTCGCGAACTTCTCGGGCGACCCGGACGACTAT  
CGAATCGACATCCACGGCTACCGGCTGTGTGAGGCTCAGACGCCGCGACGGCCCACGGGT  
TGCCTCAAGCGTGCAAGCAACCGACAGCCGTACTTCGAGCTGCATGGCGCGCGCCTACAC  
CCGCTGGACAAGGTGCGAGTTGATCCCAAGGATCCCAGCACCATGACGCGCATGGAGCTG  
TTGACGCACGGGTACATTGATGTGGAAGACCTCACCGACGACGAACTCAAAAATGGGCTT  
GTGGCTCCGGGGCGTGGTGGTAATGCAATGATCCACTTGCCCAAGGACGTGTACACCAAG  
ATCGTCAACAGCCACTTTGACCGTGTCAAGGAGCTGATGGTTGATGGGATGATCCCGGCC  
ATCAAGGTGCTCAGAGACATTGCAGAGAACAAGCACGACATCTACGAAGCCAAAGACCCG  
GTCAAGGCCGCCACCTACATTGTGGACAGAGTCCTTGGTAAGCAACCAGATCCGGCACTG  
GTGCTGGGTGGTGTGATGGCGGGGCCAGGGGCCCTGGCACCAGATTGTGGCCGGGATC  
ATGGACAACACGCGTGCAGGAATCCCGTGCGGTGCAGCGCTCTCCCTCTGGCGGAGAAGGC  
GCTACGCTCAACCACAACGGTGAAGGCCGAGGAGGTGCTCGATCTTGAGGTTGTGGAAGAG  
TCTGCGGCAGATGATGATTCAGCGACGCCGCGAACGCCAGACGACACGGGACCTGATGCG  
AGCGCTCTCATCGCAGCCGTAGCTCCCAATGCAGAGCTCAAGCGCGCCAAGGCCAAGGCG  
TCTGCTGGCACGAGTGGCACTAGTGGCACGAGTGGCACGAGTGGAAAGCCCGCCAAGCTG  
CGGGTCAAGCGGCCGAAGCGCGACGCCAGGTAAGCTTCGCGGTGCGGGGTGGACGCCAGG  
CCGCCAAGCAACCGGAGTGGACCCGGGATTCGCGCAGATTCCCTTCTGTCCCGAGTTCAC  
TCCCAAGAAGTGCAGGACTGGCAAGGAGCTGAGCATGGCGAAGCAGGGTGTGCGTCCGGGA  
CATCAACGGTCCCACCAAGCAGGCACCGTCTGTCCACCAAGGCTGTGCAGCCCGCGCCGAA  
GACCAAGCTGCACCGGCCCAAGACAGCCTAGGAGGGCACCATGGCCAAGGGCGTGAAGAA  
GCTTCCAAAGCGCAAGGGCACCAACCCCATCCCGCGTGACAAGTGGAACTCTGGCGACAT  
CGCTCGGCGTCAGCTCGAGCAGGACCAGAAGCTCCACCTCACCACCAAGGGTCCGCACAC  
CGGGACCAACGACAGCTTCAAGTAGCACCTCGCCATGGACAAGCTGCCCGTGGCGGTTAC  
CCGGAGTGGCACTGTCCAGGTGGCTGGGCGCGGTCCCGCTGGCGAGGCTGTGGTGTGTA  
GACGACGCTCCAGCTCTGGCGGGCAGCCAACAATAAGTCGAGCGCGTGGCCCATGCCCT  
CGGGTTACCGGCGCGAACCGACCCGACAGAGTAGGATCATGTGCATGCCCAAGAAGAAGG  
TCACCGGAGCCAAGCTCAAATGGGGTAGCGCTGCCAGAAGCGCGCTCAGCGAAAGGCTG  
CAGAAGCCAGTGCCCGGAAACGGTGCAAACGAGGCCTGCAGGACATTCTGAAGCGCAAAA  
GGCGCGCAGCCGGTAGCTTCTCCGAGGTTTCGTAAGAGCTCGGTCAAGGTGGCCAGGGAGC  
ACGACCTGTGCGGTACCGGGCGCGGGGCCAACAAGGAGGCCTACCGTGCCAGTGCAGCCG  
AGAGCCGCACGATCAAGGCCGCTGGCGGGACGAGCTCGGCCGACCGCGTCTACAGCACTG  
CCCGCAAGCTCAAGTACACCGCGCCACGCGGTAATGCAGGCAACCAAGGCAAGGTGGGCC  
TGAGCTCGCGTAGCAAGGGTTCAGGCTCGTCGTCGGACAAGTTCAAGCAATGCGATACTG  
TCTATGCGGACGGCAAGTCCTGGACAATCAGGAGTTTCCGCGAGGCCAATGGCAATACCT  
ATGTCGATGCCAAGGCCGACAACGGAACCGATCTCTCCCTCGTCATCAAGGGCACCGGGC  
TGGACAAGAAGACCATCCGGACGGCTGTGGGCGATCGTCCGCGTTCAGAGTCCAAGACTG  
TCAAGCCTGGCGACAGCGCTGCTGCACATCGCGCCAAGAGCTTCTCTCAGAATGCGCGTG  
GCGTGTGATGGGTGGCCGAGGATCGAGCACCAGAGCGCCCAAGGACCTGAGCAGCATGT  
CCGACCGCGACTTGCAGAACGGCATTCTGAACGCTCGGACCGCAGCCGACAAGAAGGCGT  
ACTCCAACGAGTTGGACAAGCGCAATCTCGACAATCACTTTCCCAAGGGCAGCAAGAACG  
CCTCGACAGAAGAGCTGCAGAACAAAGGTGAAGGACGGCACCACTCCGTCCCTCGGTAAGA  
CCGCCATCGCCGCCGAGCTGGACCGCCGAGCCAAGGCTAAGGCACCCGCGAAGGCCCGTG  
GTCGGCGTCGACCTGAGAAGCCGATCGCCAGGTGATGAAGCCGCCAAGGACGCGGTGC  
CGCTGGTTGACAAGAATGGCAATACGACCCCAGAGGGCGATCCGCCGATACGGGAACGGCA  
AGAAGGAGTCTGGCTATCCCGACGCCGATGATCGTGCGGCCTGGAACAAGCTCGTGGGTC  
GCGAAACATAACCGCGACTTGAGAGACGACATGACACCGCGCCAGCGCGCCAACCTACCGCA  
AGGAGCTGCAGCGTAAGCTGGACAACCCGCGCATCAGCGACACTGTCAAGAAGCAGGCC  
GCGATGAGATGGCTCTGCTGGATGCGCTCGACAAGGGGTCTGGCAGAGGATCCGCGAATT  
CGGGGGATGCCAGGGCACAGCGGTACTTGATCTGCACGACCACGAGCTGCAGGACCTGG  
CCAGCGAGATGGCCCGTCTGGACTTGTCCAAGCGGGATCTCCAGGGCGAAGGACACTTCG  
ACCGGAAGCCTTCCGAAATCTCCAAGGAAGAGCGGTTTCGCAATGCCATTCAGGGTCTGA  
TGCGTTACGTCGAAGAAGATCTTGGGTACGAGGTCGATTGGGACGAGCAGCGGCTCGGCA  
ACGCCCTCAACAACGACCCGCGCCTGAAGAAGCTGCGAGCCATCCTGGCCAAGCTGGGAA  
AAATGACAGGGCGGACCGAATCCCGGTGCGCCAATCGCACAGAAATCAAGGGTAAGACTT  
CGGACGATGTGGATACGGCCATTGATGACCTCGAGGCTGCACAAGACAGCAACAATTCCG



ACGCCAAGGCTAAGGTCGCTCTGGAACGTA CT CAGCACTACGACAGCCCCGCCGACTTCA  
AGCCTCCTCGATCTGCACAAGACAACAAACGCCAGAGTCTAGCCTCGTACCGGGATGTGT  
CCACGGCGATCAACGGCTCACTGCGCTCTGGCGAGAATATCTCCAGGAACGCCTGGAAGC  
GTGGCGTTGTTGAGGATCTGGACAGCATGATCAGCGAGTCCACCGTCAAGCGGCCGATCA  
CCGTGCGCCGCTTCATCGGTCAGAGCGCTCGCGGAAGTGGTATTCGTGGCGACTATGCAA  
GGGTCAAGAATCAGCTAGAGTCTGGCACCTTCAAGGACAAAGGCTTTATGTCCACAGAGG  
CCGTTACGCCGGGATACTCGGTTCGGCCAGATGGGACGGCTGTGGTCCGACCGAGAGAAGC  
CCGGTGAGAACGATTTAGTGCTGGAAATGGATCTTCCCAAAGGTTTCAATGCGCTTGATC  
TCAGGAGGGAAGACCTCAACGACAAGCATCTCAGCGAGATCCTCCTGCCTCGGAACACCG  
AGTGGGAGGTGACCGGTACGCGCACCGAGGACGGCATCACCGTCTACAAGCTCCGGCCCA  
GCACTAAGCCCACGTATGACGAGGTTCCGTCCAAGCGACGCAAGAAGTCATGACCAGCAC  
AGCCAAACCTGCTGCTGCACAACCTTGATCGCTGGCGGATTTACGACACCGAGATCGAGGT  
CACCACCGAGCGCGGTTCGAGAGCGCCGCAAGGTCTGGGACCCACACGCTGGTCAGCTCGC  
CATTGAGGAAAGCCCTGCGCGTAACAAGGTGGCCTCCTGTGGCCGACGCTTCGGCAAATC  
GGACCTGGGTGGCAAGCGGCTGGTTCGCGCTGCATTCCTGGCGTACTACCGACAGGACCT  
GCTCCGCACCACCAACAAGGCGATGATCTACTGGATTGTGGGGCCGGAGTACTCGGACGC  
CGAGGAGGAGTTCGCGTTCGTGGAAACACCTTGGTATCATTGGGTGTACCCTTCGACTA  
GCCTGGCAGCTACTACGATGCCGTTGGCGGAAACATGCACCTGAGCCTTTGGCAGGGTGC  
ATACCAGGTGCATGCCAGCAGCGCTAAGTATCCCGACACGCTCGTGGGTGAGGGCTTGAG  
TGGCGTGATCATGGCCGAGGACGCGAGGCAAAAGCCGTCGGTGTGGACTAAGCATGTGCG  
TCCGACGCTGGGAGACTTCACGGGCTGGTTCCTACGTCAACTCCTGAGGGCAAGAA  
CCACTTCCACGACAAGTTCAGATGGGCCAGGATCCTACCAATCCGGAGTGGGAGAGCTG  
GCGCATGCCAGCTGGGCGAATCCGTACGTGTACACGCGCACGGGCCGTCTGGTTCGCGCT  
GGGCAAGCTTCCTCCCGAGACGCCCAAACCCGACCACGAGTACACGCTCGACCGACACCT  
CACCATCATGCAGCAGCTGATGTGCGAGAACCCGACGGTGTTCGCCATTCAAATCGTTGC  
GGACCATAAGCTTCGGGTTGACCAAGAGGTGATTGAGCTCGCAGCCGACATGAGCATCGA  
GAGCTTCAACCAGGAGATCGGCGCGGACTTCACCGAGTTCGTGGGCAAGGTGTTCAAGGA  
CTGGGACGAGGAATACCATGTTGCAGACCTGGTTGACTACAACGTCAAGCAATTCGGAAC  
CTACTTCAACCCCAATTACGAGACCTATGCAGCTGCGGACTACGGTTACACAAACCCAAA  
TGTGTGGCTAGTCATACAGATTGGCAAATGGGGAGAGGTCAACGTCCCTCCGCGAGATCTA  
CATGCCGGGGCTGAGGGCCGATGCGTTCGCTGATGAGATTCGGCGTCAGAGGCGCAACCC  
GCCAAACCTTCGAATCTTCTATCCGGACCCCGCTGACCCTAGGTTCGTCAGAGACGTTGAG  
CCAAAAGCTCGGCATCCGCTCCGCTGGCGGAACAGGTGGTGTGAGAAGCGCATAACGCTCAA  
CCTGATTCGACAGTTCCTGAAGCGTGGGCGTAACGACCCACCGACCTCACGGGTATGGG  
ATGGCGTCCGCAGCTGCTGTTTGATCGGAGCTGTGCGAATGCGCGCCGTGAGATGGAGGC  
GTACCGCTACCCAGACAGCAAGGATAAGCCGAATCCAAGCTCGCTGGTCTATGAGGAGCC  
GCTCAAGAAGGATGACCATGTGCCGAGGCGCTGGGTGATTCTTCGTGGGGCACTACGG  
CGAGAAGGCGCTGGTGAACGAGCGTGCCGTAACACGCATTTCCAAGGCCAACATCGAACA  
CCAGCGGACAACCCGCGAGCGCCGTAGCACCAACGCGCCCAAGGACATCAAGTACCAGCG  
CCTAACGGATGGTGAACCTCATGCATAACAGTACAAGAATCCCGACGTGGGTTGGAGTAA  
AGAGCTGCTCGACTGATTCGGAGTAGGATAAACACCAATGGGCCAGGACAAACGCCAATA  
CGGCAGTTCGCAGCAGCTGCGTGCAGGAGAAGCCATTTTCCCAACGCCGCAACGGATTT  
CGACAAGGCGCGGCTGGCCAGTTACCGGCTGTACGTGGACATGTACCTACCAACACGTC  
CGACTACCAGGTGATCTTGCGTGGTGGCGACGAAGATGACCAGCGGCCATCTACGTGCC  
CAACGGCGAGCAGCTCATCGAGGCGAAGATGCGCTTCCTCGGACAGGGGCTGCAGTGGGG  
GTTCTCCAAGAAGGATGCCAAAGTCGACGACGCCATCAGAGTCCGTTCGACCGGGAGAA  
CTGGGAGCAGAAGTTCGAAAGTCTCAAGCGCTGGACCGAAATCCGCGGTGACTATGTGCT  
GCTGCTGATCGGCGACGACAAGAAAGACGAGGGATCCAGGCTCTCCTTGCACGAGGTGGA  
CCCCAGCACGTATTTCCCGTACGAGGATCCGTGTTACCCTGGCCATGTGCTGGGCGTGTA  
CTTGGTGGATGAGTATCCGCACCCGCATTCGATAAGAAGAACGAGAAGTGTGCGCGCGT  
CCAGAAGTACATGAAGACGCTCGACGACGACGGGAAGCCAGTCCCCGGTGGCGCGATCAA  
ATACACAGAGGAGCTGTACGAGCCAGGAAAGTGGGACGACCGTCCCGAGTCACCTCTCGA  
GCCCGACGACATCAAGAAGCTGAGCACCTCACTGAGGAAGAGCCTCTGCCCCAACAGAT  
CACGCCACTGCCGGTGTTCATTTCCGCGGACACCCGATTATGAACGCGATGTTCCGGACG  
CTCTAGCCTGGCGGGGCTGGAGTCGTTGATTGCATCTGTCAACCAGACCATGACGGTTCGA  
GGATCTGATCATGGTGTGTTGGGGGACTGGGCTTCTACGCAACAGGCTCAGCTCCGCCGCG  
TGATTTCGCTCGGCAGTATGGTGCCGTGGACAATCAGCCCGCTGGGCATGGTTCGAGCATGC

CCAGAACAACAAGATCTACCGAGTCAATGGTGTGCAAGCCTTGAGCCTAGCCAGACTCA  
CATGAACAAGGCCGAAGAGGCCATGCAACAAACCAAGGGCATCCCCGCCATCGCTGTAGG  
CGTGGTGGACGCTGCGGTCGCCGTGAGCGGCATTGCCCTGGATCTCCAGCTCAGCGCAAT  
CCTCAGCAGTTGCGCAGAGCAGGAGCTAGAGCTGAAGTCAGTGCTCAAGCAATTCTTCCA  
TAATCTGGTGACGCAGTGGCTGCCGGCGTATGAGGGTGTGGGGATAGACGACGCTGACAA  
GAAGCTCACCGTCACCATCACCTTCCGAGATCCCAAGCCGGTCAACAACGAGAAGCGATT  
CGGACAACCTGTTGGAGTTGTGGGAGGCTGGGCTGATCCCTGCGAAGAAGCTCAGCGAGGA  
GCTCAGCAAGATCATGGGCTTCGAGCTGACCGAGGAAGACTTCAGGCAGGCCACCGAGGA  
CAAGAAGACCCAGGGCATTGCCCAAGCGGAAGCCGCCGACCCGTTCCGGGGCGCAAATGGC  
AGCAGAACAGGGTTCCTCCGACGAGGAGGACGACCAAGCCCTGAACGGACAACCGTTGTG  
AGGAGCTAGCCATGGCCAAGGGTAGGCGCAGCAGCAAGAAGCGCAAGACATATGCCGGCT  
TCAAGTCAAAGAGGTCGTGGCGCTGGGCTTTTTCGACCAAGCAGCCCTTGGCACGCGAGA  
AGTCCCACAAGACCAAGGGCGGACCCAAGGGCCGTTACCGTCCACTTCCAGAGAGCAAAC  
ACTCTGGTGCAGGCAAGAAGGTCTACAGAAGGAAGAAGCGTTGACGATCGAGCTGTAACG  
TCCTGAGGACGAGCAGGTTTGGACACGAGTTCGCGATGAGCTTCCCCAGGACGCGGTGGC  
TTGCCTGGTGCATATGTGTCAGCAGAGCCCCAAGGCCGAGATGTGCGGCTTTATCACCGC  
AAGCCATGGCATCACCCAGATTCCGAATGTATCATCAACGCCGTAACGCGAATTCGTCAT  
GGACCAGGGTCAGATGATGCAGCCGCTGTTTCGAGAGAAGGTGATCGGCACCTACCATGC  
CCACCCGACGGGTCGATCCTGGCCAAGCGCTTACGATACTGATCACATTGGTTACCTGTA  
CCAGCAGGGCTGCCCGTGGGATTACTACATAGTGACGAATGCAGGAGTGTTCCGATAGGA  
GCACAGGGACAGGCGCGTGGCGGACGTCGTTGAATCCAGAGATGATGATAGTTTATGTGA  
TGCCGGTGGACGACCTGATTGAGCATGTAGAATCGCCGACTGCCCGTGCGATCCGGACC  
TCGAGCTGATCGAGCGTACCGACGACCATTTTGGACAGATGTACAGCCACAATGCTGCCG  
ATGGTCGGAATGATGAGGCTGAGGAAGAGGATCTGTTTTGACCTCTCCACTCGAAGAGCC  
GTCAGTATCACCTCAGCGGCCTCGCAAAAACCTGGCTCCTGAGATACCTTGGAGTACAGGA  
GAAATACGATGCAATCATCGCAACAGCCCTGCTTACGCTGCGGAAGATGCGGAACAACG  
CATGCGCCAAAGGCTTGGCGACGGCCGACCTGGTTCCTCGACTCGAAGATATCAACTGCA  
GCTCGCGCAGTCTGCTGCACGTGACTCAAGCTGCTTTTCCGAAACGTGCATTACAGC  
GATCACAGCGGGTCAATCGGAGGCAGCGGTGCGGGCGGTGCAAGCAAGATTCCACGACGA  
TCGCCGAATTCTGAATCGGCTGTTTCGCGAACCCCGCTCGGGCGGCCAAGTACGAAGACTC  
CATGCGGCAGAGCGCATCCCGTGGCGTTCAGGCCATGATGACGCGTGTGCTACAGAGCAA  
CCGACCCCTTAGCCAGCGAGTTTACCACAAGCAAGCCCTGGCCAACGGCACGGTCGACCG  
AGTGATCAACTCAGCACTGGTGAAGGGTATGGTGGCGCCGCAATCGCCAAGGCCGTGCG  
CCAGAGTATCCGCCCGGACGTGCCTGGCGGAGTCAGCTACGCTGCAATGCGCTTGGGGCG  
CACCGAGAGTAACAATGCATTCCATGCTCAGGCGATGTACGACATCAACACCAAGCCATG  
GGTGGATCATGTGAGTGGCACCTGAGCAAAACACACAAGGAGCAGGGCTGTCCGGTGCGA  
AGTGTATGCTCGCATCAAAGGCTTTCCAAAGGAGGCGATTCCAGACAAGCCCCATCCGCA  
ATGCCTCTGCTATATCACGGCTTCGCTGACACCCTGGGAGGAATTCGAAAACAACCTTTCT  
GATGGGAATGTACGACAGCTACATCGACAACAATTTGCGGTAATAGGGTATGGTAATCCG  
CAGGAAGGAACCTCATGACTGACACATTCCTCGCATGGCTCGCCGCTACCGGCTTGACG  
CTGTCTGGCCACGACGACGATGGCGATGGTGACTTCGATGGTTACGACGACGATTCGGAT  
GATTCGGACGACGGTGCATCGGATCGAGGATCGTCTCGAAAGTCCGACGACGGTGATGAT  
CGCGGCAGTGGCGATGACGCCAATGGTGCTGACGACGACGATCTTCGAGCAGATCGCAAG  
GCGAAGGACACGAAGATCGCCAAGCTCGAGCGGGACCTCGAAGACGCCCTCGAGATGATC  
CAGGCGGCAGAAACCAAGCGCCTCAGGCGAGGTGACGATGACTACGATGACGACGACACG  
AAGTACCACGAGCTGCGCGACGAGAACGACAAGCTCCGCGCTCTGCTCAATGGTCCGTAC  
ATCCGTTTCGACAGATCTCGAGCTTCCGCGACACGGACGGGAATCCCAAATGGGACAGGCAG  
GACCCGGAAACCGTGTTTCGCGCTTCTGAAGACGGCAGACCTCGAGGTCGACGTCGAGACG  
GGCGAGATCGACGGTCTGGAGGAGCAGCTGCGAGATCTTGCACGGAACAAGCCGTCCTG  
TTGCGGCAGGGCAGCTCTCGTCTTGGCGCTTCGGGTAAAGGTCCCGGTGGCTACAGCGAC  
AAGAAGAAACACAGTCGGGAAGACCTCGCGTCCGACTTCTCCGCATTCAACACCATGATC  
TGATTGAGAGGTTGACCAATGGCGAGGTATGACAAGTACAACACCTACGGCGGAGGCTTT  
CGAGCCCCGCTGGCAGCCGACTGGACTGACGCCTACGCTGGCAAGCTGTATGCCGTTGGC  
ATCAACAACGTCGGGGCTGTGCTGAAGGGCGCAGGCCAGTCCGGCGTGGCTGGCGTGCTG  
GTGCTCGCCAAGGGGGCCAAGGCCGATCCATCGTGACGTCATGAAGTTTGGCGAGCTC  
GTCGAATTCGGTCCACCTCGGGCACTCCCCGCACTGCCTTCGGCGCTGATGGTACGGCG  
TACTCCGCCGACACCAGCACCAGGCGCAATCAACTCCACGTCCGGCGAGGCCAAGGTCAAG

GTCGGACACACCGTCTCGGTGCTCAGCGACTGATCGTCGCCGTGGCCGATGGCGTTGTCGAA  
CCTTCGCCGAACGAGGAGTGAGGCAGCCCGATGAAAACGCAACAGAAGGAAGGGTCATT  
AGGGAGAGTTTCTAGAGATCATCGCTGCGGTGGGCCTCTCTGGTCATGACAACCAGGGT  
GGCTTCAACACTGCCGGTGACATCAAGTACAAGAACGCCGATGGCGGGTTCGTACGACAGC  
CTGTGGAACCTGTTTCAGCAAGGTCACGGACGAGTGGAAACAAGCACAAGTCCAAGATGGTT  
CAGCTGATGACGTTCCCGGTCATCAACCAGACCGAGAGGGTGCCGCGCATCGGCCAGTTC  
GGCTTCGAGAAGGCCTCGGAGTTCGGCGTCCCCGAGAGCAAGCGGACCGAGCTGAGCTTC  
TACCAGCTCGCGTACGACTTCGAGGACTACGACCGGGCCTTCCGATACACCTGGAAGTTC  
CTGCGTGACGCTCCGTCGTCGAGATCAAGGCGTACCACAACCAGGCTCTCCAGGCCGAC  
GCCAAGCTCATCCACCGCAAGGTGATGGAGGCGATCTTCGACAACCGCCAGCGCGAAGCG  
GACATCGAAGGCCTGCCCTACAAGGTCTATCCACTCTACAACGGCGACAACATGATCCCG  
CCGGAGTACAACGGCACGACCTACACCACCGGCCATAACCACTACCTGGTCTCCGGTGGT  
ACGAAGATCGACTCCGCCCATGTGGAGATGGCTGCCGACCACATCCGTGAGCACGGCTAC  
ACGGAGGAAAACGGCACCCAGCTCATCGCCTTCGCACACAAGGCCGAGATCCAGGAAGTC  
CGTCGGATCCGCTTCGGGCAGATGAACAACAACCTCGGCCGTGGCGAACTCCGACTTCGTG  
CAGTCGCAGGGCGAATCGCCCCTGTACCTGCCGAACGCGAACGGCCTGCTCGGCAAGCAG  
CCGCAGTCGATGTGGAAGGGCTTGCGCCTCAAGGGATCCTACGACGACGTGCTCTGGATT  
GAAGAGCCGACCATGCCGGCAGGCTACGTTCTGTTCCCTGGCCACTGGCGGAACGCTCGCC  
CAGCAGGACCTCGTCGGCTTGCGCGAGCACGAGGACGCGGCGTGGCGCGGTCTGCGTCAG  
ATCGCCGGGAACCAGACCCGGTACCCGCTGATCGACAGCTTTTACCAGCGGTCGTTCCGC  
ACCGGTATCCGTCAGCGTGGTGGTGCAGTTGTCCTGCAGGTCAAGGCCTCTGGCACTTAC  
GACATCCCGACCAAGTGGACGAACGGTGGTGGATTTCGAATGAGCCGTGTAATCCCAGAGG  
ACCGTCCGCTGTCCGATGAGGACCGCGCATGGCTCAACAAGCGCAGCATGGGGTGGAAAGG  
TCGAGCTGATCGACCGCGCCTACCCTCCGGGGTTCGGACAAGGTCGAGGATGACACCTCGA  
CCAAACCGTCCGAGCCGCAGGGCGATGACGACGCGGAGGTGGAGGTCGACAAGGACTTCT  
CGAACTACGCCGAAGACCTCCCCAACAAGGACGCCGTCAAGGAGCGCCTGATCCTGGAGG  
AGGTGGAGTTCGAAGACGATGCGAAGCGTGAGGAACTCAATGGCCTCCTCGCGATCCACC  
TGCAGGAACAGCGGAACGCCGGCAAGGACGTCGAGCTCGGAGACGGATTGTGGCCTCCGA  
AGCAGATGTCCGGCTGTTTAAGACGCAGCTGTCCGGGCGTCGATGGTATTTGGGAAGATTC  
CGAGATCTCAGATAACCATTGACGCCCTCCGGTCTGTCCGGCAAGGCAGTGCGTGCTTACTG  
GTCCAAGGGGGTCAACACCACATACTGCTGATCGATGTGAGCGAGAGTGGCAGCTCGCG  
TAACGCAACCATCATCTACCGCAATGCCATGGAGCAGTTGCAACGGTGGGATGAGATCAT  
CAAGGAAGAGGACGCCAAACAGGAAGCCGAGACCGACGGTAATGTGAGGTTCAACCGAAT  
TTCGAGGAATTTCTCGTCATGACCGCGTCAGCCAGTGCGCAAAGGGGATTGGAATTCCTG  
CGTGCTGGCACACGCGCATTTCATCGACGATGATCCGACCACGATCGTCCTCAATCGTGCC  
CAAGCAACCCGCGTCGAGAAGCCTGGCGGGCGGATACGATTTACCCCCAGGGGCTCCACGA  
ACTGCACAGATCTTCAAGGTCATCAACCAAACTGGCGACGGGTCGGCCCTAACCGAGGCC  
CAAGACAGCCTCCAGACGCTGGTACGCGAGTACATCCTGCTGGGGGCTCATGATTCTGTG  
GCCGAGGTTGGCGACTGGTGGGTGACGGTAACAATCGGTACACAGTGACCGAATTGCTC  
GTGGCAAATGGCTACGAGTGCAAATGGCGTGTCCGCAGCGTGGGGCTGGAGCCCAATTAT  
GGCTATGATCGAGTTCAAGTTCAAGGACTTCGAGCTACGCCAGGGGGTGGAAAGATATGGA  
AGCCAAGGTCGACCGCGCCATGAAAGCCACCAGCAATTACCATGCGGTCGAGGGCACGGC  
CCACATGAAGGAGCATGCTCCCTGGACTGACCGGACGGGTGCTGCGCGTGCTGTTTGA  
CGCTGTGGCCAGCACTCCACAGCCCCGACCGCTACGAAATCGTGTTTGGCCACACGGTGCA  
CTATGGCATCTGGCTCGAGATCGCAAACAGCGGTCGGTAAGAGATCATCATGCCACGTT  
CCATCATGAGGGCAAGCTCATGGCTCAGCGTCTTCGCGGCCCTCTGGGGAGACTCCGATG  
AGCAGAGCCGCAGTGCTAGATGCGCTCCGGGCCGATGTGGCGCTCGGGCAAATGCTCGTT  
CCGGGCAGCATTCTGACGAACTACTCCAAAGAGGGTCCGCCCAACCATTTGGCTCCAGGG  
CCATTTGCAGTGATTTCGTTGGGGTGGCAAACGATTGACCCTGCGGTGAATCGCGGACCC  
AGAGACGTGAACATCTGGGTTACATCCCGCAACGTCAAAGCACTGACTACACGCGGATC  
GATCGAATCCTCAAGCGCACCAAGAGATCATGCTGTCTCTGGAAGACGTTGCTGGCGCT  
GATGGGGCCCACTTGGTCAGCACGCCCTTCTGGCGGAGAGCGATGATCTCGTTGACCCG  
GGATTCGAAACGATCACGCGCTACGCGACATTCCGCGTGCTCAGCAGAAGCACCTGAAGT  
CAAGTACGATAACCAACAGGAAAGGATGCTCTCATGGCGAATCAGATTACCCCTCCGCC  
TCGGATGTCAAGCCCGCAGCGGCCTCTGCACCCGAGGCCAGGATTCGTCTCTCGGGCAAG  
CGGAAAGATCTCAAGTTCGTTGGCACGAAGAAGATCTCACCTTCGCATCGCGCCGGCAGT  
CACTACCACATCCCCGAGGCACAGCTGGTGGTAGCCGGTGTGCCGCGCGAAAGGTGCTTC

AAGTGCAAGGGCTCTGGCAAGGATGCGCTCGCGGTGACCGAGGTCAGCTTCGGCGCCGAG  
ATTCAGCACAAGGTGCCGCTCGACGCCTTGTACAAGGAGGCCGCAGACCCGGCTGTTGCTG  
GAGCCGGACATCATACTCGTTGAGGAGTAGGGAACGCGTGAGTGCAATACCGATGCAAGG  
GCAAGGTTACGGGGAGCTGTCGGAAAACGGTCTCCTCGTGTTTATGTGCTCCCACATCA  
CTTGACACAGAGGGAAGAAGCGATCGTTCGTCTTCACTACATGGACCCGAACACCCGGCA  
CCATCAAATACACCTCGCGACCATAACCGGAACCGATTGAAAGGTAAGGAAAATGGCAATT  
GACACCGCATTGCCCTATGGTCTGAGGGACGTGAGGATCACACCCTATGCACACGAGGGT  
GGCACCGTTCTCGGCGATACGAGCTACGACCTGCCGGACGCACAGACGTTTCACTTCAAC  
GAAACTGAGGAGTTAACCAGCTTCGTGGCGCTGACCCGGCTGGTAGCGACGCACGGCAAT  
GGCGCACAGGTCGTCTGGTTCGCTAGAGGCCGGTGGCATCAGTCTGGTTCATCTGGACGATC  
CTGACGGGTGGCCAGTTGATCCAGTCCGGGCTGACCCCGAATCGCAAGGAGATCATGCGG  
AAGCGCGGCACCGACGTGCGTCTTACTTCCGCGTGACGGCCAGGTCTTGTGCGGAGTCC  
GGCGGCCACATTGTGGCGCGCGTGTACCGCTGCCGCTGCAATGACAACATCGGCGGTGAC  
TTCGGCGACGTTACTTTCCACATCACAGCTGCTCGGGTGTGCGGTCTGCCCTGCTGGAT  
GAGGCGAACGACCTGCTGTACGACATCATCCGTAACGAGACCAAGACGTCTCTGACGCTT  
ACCCCTGAGCCCAACCCGCTGCAGTCGCCGAGAACCTGTCGGCCGGCACGACCACCGCC  
ACCAGCGTCGTCTGTGTCGTGGACGGAAGTCGTTGGCGCGGACGAGTATCGGGTGCAGAAT  
TCTCCGGACGCCGGTGTACCTGGAGCCTCGTCGACGACGTGGAGGACCCACCATCACA  
GTGAGCGATCTACCGCCAGCTCGGCTTACCAGTTCGTTGCGGTCCAAGGTCGGCAGT  
GCGCTGCCGGTGTCTCGGCTCCTTTGCCGGGCACCACGCTGCCCAAACCTAACCCAAG  
GCTCTCTGGGGCGCAGGGTGTGGCAACTCGACTGCGCCCCAGAGAATTCCATCTAGAGCC  
CAAGGAGGCCATGCTATGCCCGAAATCAGCGAGCAAGAGTTCGAAGAGCTCAGACGGATC  
AGAGAACAGACTCTGGCACAGGAGAATGCCCGCATGTCTTCAGAAATCGAAGAATAGGCC  
AAAAGGGCCGCTCTTGATGCCCTGGCAGAGGCCGAGGAAGACAAGTTCCCCGTCAAGGGC  
TGGGGCAAGGATGTCGTCCGTAAGACATTCGACCTCCAATGTCCCAGCGGACAGTGGTGC  
CACGCCAAGACTTTGACTATCGAGGACGCGATGTCGCTCGGTTTGTGGACAGCCTTGAT  
CTGTTACACAGTACGCTCATGGCTCCGATCATGGCCAACGATGAGGACAAGGAGCGCGCC  
GAAGAAGAGCGGAATGCTGGTCTCCTCAACAGCCTCAAGGCTTCTGGCAAGCGTGCCAGC  
GTCTTCGGCACGGTGAACCGTGTGACGGCGCATTGCGTGCTGAAGCCGCGCGTGGTCTC  
GAGGACGGCGGCAACCTCCCCGAAGGCACTGTCTTCGCCGACGACATCCCGTTCGCTGAC  
AAGATGCACATCTTCCGGAATGTGTCCGGGGCAATGGGGAATTACACGATGAACACGTTT  
CGCGAAGGACCGGAAGGCAGCGTGGCAGCTGTACCAGATGGCGCTCCTGTACAGGACGCG  
TCCGAGTGACCTAGTCGGTTTGGAGGATCCGTTGCTGCGATACTCCTCTGATCGAGGGCT  
GCGGTTCTTCGGCGTAACGGTGCAGAACAGGGTTCGATGATGCTGGCCATGCTGCGGGCCG  
TGGCGCCAAGAACAACCGAAATAGGGAAGCGCTTCCAAACGGTGGCGCGCAAGCGCACCTT  
GGCCTAGCTGCTGGGCGAAGACATGGTGAGTAGCTAAGCTGGCTTCCGAGATCCGGCGAA  
GGCGGTGTGACGTGCCAGATTACGACCTTGGGCGTGCCCATGGCAAGATCGTCTTCGACG  
TTGACAAGAGTGGTGTTCGACGCGCCGAAGGCGCGATGGACCGCATGGAGGAGTCGGCCC  
ACAGGGTAGCCGAAGGATTCGACGAGGCTGAGAAGTCAACCTCTGCTTGGGAGAAGACGA  
ATCGCAAGGCTGTGCGCGCCACTGAGGCTCAGGCGAGTGCGGTTCGATCGGTACAGCCGCA  
TTCAGGAGGAAGCCGAGCGCGCTGCAATTTAGCGTCGCAAGGCCGAGAAGGAGCTCAAGG  
AAATCCTCGATGCCGGTAAGGCTACCGAGGAGGAGACCCAGAAGGCCATCGAGAAGACCA  
ACAAGGCCAAGGGCAAAGCGCTACAGCTCGCCAAGGAGCGCAAGAAGGCTGGGCGCGATG  
TCGAGCGAGCTGCAGCTGGCCTGCCACCGAGCACGAGACCAAGCTCAATATCAACACCA  
AGGACGCCGATCGGGACGTCGATCGTTTCTTCGACAATGTTGATCGTTCGTGCTGAACGTA  
GTGCGCTCGTCATACCAAGCTGGGCACAGGAACCATCAAGGCTGGTGGCGCGACGGCTG  
GCGTAGGTGCGCTGGGCGGGTTGCTGGGTGTAGCGGGGTTCGGGTGCTACTGGCGTCCGAA  
GCATCGGCATCTTTCAGCTTGGCGCGGCGATCGCTGATCTGTCTGGTGCACCTGGGTGTTT  
TGCCAGGCGTCGTGGGTGCAGGTGCCATCGCGATGGGCACGATGCAGCTTGAACCAACC  
GATTCGGCGAGGCTCTTAAGGACCTCGGAACCGACGACTTCGCCGACGCGATCAAGGAGC  
TAGCTCCGGCTGCACAGTATGTGGCCGTTGAGCTCAACACGCTTCTGCCCGTGTTTAAGA  
AATTCCAGAAGAACGCCGAACAGGCGCTCTTCGTGCCGCTCAAGGGTGTACCCTGAGC  
TGAGGACGACCTTCTGCCGACGATCCAGGGTGTAACTAACAGATCGCCAACATGTTTCG  
GTCGCACCGGCGCTCGCCTCGCGGAATGGCACATGAAGCCAGAACAGCAGCGCGACATCC  
AGAACTTCTGTGCAACACCGTTCGAGGGCTTCGAGCGTCTGTGCGGATGCTGCTCAGCCAC  
TGCTGCAGGCATTCACCGACATCATGACGGTGAGCGGCGAGTTCCTGCCCCAGATCGGTG  
GTGAGATCGCTGAGGCTGCAAAGGAATTCGCTGGCTGGATCCGCACCATGCGGGAGAATG

GCGAACCCGCCGCGTGGATCCGCGATGGCATCGAGGAGCTGAAGACCTTCCTTGGTGCGC  
TCAAGA ACTTTGGGCTGGGCTGGTGTACATCGGCCGCATCGCCAACGAGTTCGGCAGCG  
GTTTCATCGCTCTGTTGAGAACTTAGCCAGACTTTCCTTTCCTGGACGCAAAGTGTTG  
AGGGACAGGAAACCCTACCAAGTTCATCGCCACGAGTGAGGCCGCGCGTGTGCTCA  
TGCCGCTGCTTGAGAAGCTGGGCACGCTGTTGTTTCGGCACCATCGGAGCAGGATTGGCGC  
GCTTGGGAATTGAGCTCGCTCCGGCGTTCAAGTTCCTGTTTCGAGACGCTGAATGTCGGCT  
TCCATGATCTGATCCAGGGGCTGATCAACAGCGCACCCAGATCACCCAGTGCCTCACGA  
CTCTGGGAAGTCTTTTCGTAGACATCATCAGACAAGTCGCACCGCACTTGCAGGCATTGC  
TCGGGACTATTGCAGATTTGTTCTACAAGCTCGGGCTGGCCATTAGTCCGCTAGCGAGCG  
CGCTGGTTCAGGGTGTCAACCTGATCATCAACGCTTTCATGATAAGTGGGACACAATCG  
CCAACAGCCTCAATGGCTTTGGGGCTTCTGTTGCGAAGGCGATTGAGACTGGTGATTGGT  
CTGATGTCGTTGATCGCATCACGAACCTGTTCCAGCCCTTGGGCGATGCTGCGATGCAGG  
CTCTGCTCGACGCTATCAATCGTTGGACCGAGGATATCGCGGAAGCCGGTCTCAAAGTCA  
TAATCGCCTTGGCCGACGAGATCTCCCCCTGGATCGAGATCAATGCCCCGACATGGGGCG  
AGAAGATCGTCAAGGGGCTGCTCGACGGCATGGTCGGAGCTATCCCGGTCATCGGACCGG  
TGCCAAGAAGGTCCTTGGGGCGCTGAGCGATTGGTTCCCAAGTTCCTCCGGCCAAGAAGG  
GGCCGTTTTCGGGTACCGGCTGGACGCCGTACCGTGGCAAGGCGTTGATGGAGGGCTTCG  
CCGAAGGCATCCTGGCTGGCGGAGCATGCGCACAGAAGGCCGTGGGATCGGCCGTGGGAG  
GCGCGAGCGCCGGGATTA ACTCCGGCGTCAGCGACCTCGTCAGGGACCTCACCGAGCTCA  
CGAGCTTTGGTCGGAGTCTGCCAGCTTTGTCCAGGCCATCACCGACGTCGTGTTCCAGA  
CGATTAAGTTCGCCACCACAGACTTCAAGACGGGCGAGAGCACCCCTGCCAAAGCGCTTCG  
TGCGCAATGTGAGCGATGAAGAGCTCGCCAAGCGTCGTGAGGACAAGGCGTATCGCGACA  
GCCTCAAGGAGCAGAAGGAGAGCCGCACCGGTCCACGGTCGCTCTGTGCGCCGGA ACTTC  
AGCGCCTGCTTGAGCAGTCGAATCCTGGTGGAAACAGGTGAAGCCGCAGTTCGTTGATCC  
AGTAGGAAGACGGCACCAAGACTTCTCCGAACAAGGAGTGGGCCAAGCTCATTAGCGTG  
AGTCGCGTGGCAACGCCACAATCACCCAAGGCCCTCAGGGCGCCA ACTCCGGCGGGGAATG  
AGGCCGAGGGGCTGTTCCAGATCACGCCGAGCACTTGGAAGGCGTATGGGGCCACAGACT  
TTGCTCCGAACGCGAAGGCCGCCACTCCGCAGCAGCAGGCGATCATCGTTGCGCGGATCA  
TCCAAAAGAATCCGAGCGCGTCTGACTGGGGTGCGAAACTTCCGGGGCGTGAGGACCCCG  
AAGAGCTGCTGAGAGGCTAGACGACTGCCAGCGCAACTAGCACGACGAGCGATCCATCGG  
CCAAGTCGAAGCCCAAGGCTGCAGGCAGCGAGGAAACGCTCAAGCCTGCGACTGGCCTCC  
AGATGGAGGAGTTCGGAGACGGTTCCTTCAAGGACAAGAAGACCGAGGCCGTCTATCGAG  
AGATCGATGGATCTTATTACAACGTCACCGATTTGGCCGTCGGCAAGGACGGCAAGCCGC  
TCGTCATCGAGGACGGCAAGCCCATCGCCCCGACGAGCGCCAACAAGAGCGCGTCTCGGC  
CATCTGCGCAAAGGCACGGGAGCCGTATGGCCTCAAGCCTGGCACCGATACGCATGGCT  
ACGGGAATGGCAATGCCGATGTGTTCCCGGAGTGGGTGATGGATCTAGACGATCAGTTCCG  
GCATCAAGGCCAGCACCTACAAGGGTTCATCAGGAGTCTGACCGCAACGAGCCTGGCTATG  
CACCAAATCCGCAGCGCCTCAACCGAGGGGTTGACTGGGTCCGACTAAGAACCTGC  
AGGCGTTCGCCGAATATCTCGAGACGATAACCGGACGCCCTGGAGCAGGAGATCTGGAAGA  
ACCCCGACACCGGCCGCAAGACCGGTACGGCTGGCGGAAAGATCAACCCTGGATACTATC  
CGCAGGACACCTATGATGTCCACGGCGGCAATGATCCTAGCAACGTCCACGTTACACCC  
GGCAGTCGATGTCGATCCCGTTGCCGGGCGAGGATTATGTGCCTGGTGAGACGCCGACCA  
GAACGGGTGATTCGATCCTGGACGAACTCCAGAAGATCACGGCGAACACCGAGGAAAGCA  
GCAGCACCGAGGACAAGACGCTGCGCCAATTCCTCGATCAGAATCCGATCCTGAACGAAC  
TCGTCACGGCCGCACAGGATCCAGCACCTCGGATGAACAGGTACATGCTGCCCTGGGCG  
GGCTGCAGACAGCCATCGACGCTCAAAAACAAAATGGACACGCCTGCCAGTCGGTATCTTG  
CCGATCAGCTGAGTGGCATGCAGAGCCAGATCTTGACAGATCGTGGCTTCGGCGTGGCCG  
ACAATCCTGTTGATGCGGCTCAGGCCATCGCCAATGGGGCGATGGGCCTGGTTGCCGACG  
TCTTCAAGATCATCGACGACACGCTCAAGTCCATTGAGCCGGCAAGCGAGATCAGCTCCA  
CTCTTGTGTTGCGGTATTGAGAATAACCGAGGACATCATGAAGATCATCGACAACGTTCAGA  
GCTTCATCCAGCTGGCGGGAACCATCGCCCAGACGGAGACAGACGGCGCGAACTTCGCGA  
GCTCGATCGCGAGCATTGCCGGCGGAGCACCCGGTGGCCAGGGTGGCGTGGGCGGTCTTC  
AGGCGGCAGCGGCGATCTCGGGAGTCATCACGTCGGTGTCCAATCAGTCAATGCCGCAA  
TTGATCTGGGCCAGGAAGCGTACCGAATCACCGAAATACTACGGCAAGTTCCTCAGCT  
ACCTGCTGGGAGCTGGCGAAGGTTCTCTGGTGGGCGACATCAGATTCCATCTGGTCATGA  
ACGATTGGACGCTCAAGGCGTGGTCCGAGGACAATCCCGTGGACAAGCGCAGCCATCAGG  
TTCCGGCCTGGCTGCGGGATGAGCGGAGCGTCGCGGAGCAGGGCGGCAAGATCCGAGACC

TCAACATGTACACCGGGCCTGGCACAGACGCGAATGAGGCCATGAACGAGGGCTCGTGGC  
GCGTGATGACTGACCAGGGAGTGGTGTTCACCAAGTGTGATTAGTCTCGAACCTGGCCAG  
TACCAGATCGGAGATCTGGTGTTCGTCCGTGGCACCATGTATCCTGTGACAAGCATTAAAG  
ATCCAGAGCTCCCAAGTCCAGGCACAGGATTTCCAGGTGATTCGCAGCGACGAGGTGCAA  
TTCGGGCAGGACAGCCTGCTGCCCGGCCAATCGTGTTCGAGCTCGGTGTGTATGATTC  
AAACCAATCGCCAATGTGGAGCCGTACACAGGCCGTGTCTTCAACGAGGAGCCCTTCAAG  
AAGCTCCTCAACAAGCTCGCAGCCGAGTGGCGGGGTGACGACGTCCGCCAGAACTGGGGT  
GCGATGAAGGCGCTGAAATGCTGCGAGCGTGATGGTAAGGTACTTGTGTGGTACGGACGT  
CCCGGCAAGTTTCAGACCACCAAGCGATCTCGGAAATCGTCTTCTTCACGGTGACTGCA  
GAGTTTCGTAGTGCAGACACGCTCATGTACTCCGACAAGGAGTCTGGCGACAAGGTGCTC  
AAGGGTGATGTCCCGACAATCATCTATCGGGCTGACGGCGAGGCCAAGAGATGGTTGCGC  
GTGGTGGGCTATGGGCCGCTGACGCACCCGGTCATCACCATCGGAGCCCAGCAGGTGCGAG  
CATGACGTTGATTTGGCAGATGGAGAAGCCGTGAGGTCAGCTCGTATCCGTGGAAGCGT  
CGTGCTATCAACAATTCTGGACAGAACATCAGTTCGAAGCTGATCGGCCGACTCCCAGTAC  
CTCGACCGGCTGCAACTCCTTCCAGCCGGAGTTCGACGCCGGTACGGTGGACCTCCGAC  
GAGATCAACACATGGGTCCCCGAGCTGGGCAATCAGTCTTGGATGGAGACGATCGAAGGG  
GTGAACAACCTTCAATCTTCCCAACACCTTCAAGGCGATCCATGGCCGGGTGGTTCGTGCGA  
TTTGATCTGTTCAATCCGGAGTTCGACGAGAAGTTCATCGGCTCGGGCATGCTTGGCGGA  
ATCAGCGCCTGCCTGTACACTAAGAAGACCTTCGCCACGCGGAGCCAGTACTGCTAAGCC  
AAAATCTTTGAGCCGTGGGGTGGTTCGGAGCGGCATCGTCATCATGAGTAATGCCACGATG  
ACCAACTTCGCACTGCTCGAGGTGACTTCAGGACCCAAACAACGACTACCTCTAGATCCGT  
ACTGGCAGCGCCTACAACACATACTCGAACGTCCGGGACAGGTGGAAGAATCCGAATAGC  
TGGAAAGAGACGGACGTGGTGGGAATCGGCTCCTCGTACGATGAGGACACCGAGAACACC  
ACCTACACAGCGTATTTCAATGGCGATCCCGTCGCTGAGTGGTCCGACGAGGAAAATGTC  
GTCAGCACAGCTGCGACCAATCGGTCACAGGGATTTCATCTTCGACATGGACAGTCAGCTT  
CTGACCATCGGCACAGGGTTCAAGGACATTCTGGCTTACTACACTGGGACGGTGCAGGCT  
CCTACCGGCAGAGTGTTCGTGCTCTGGCGTGATGCATACACGGTGGCCTCATGAAAGCCC  
ATGACCGCTACCGATTCATCACCTAGGAAGCGCGCACGGGCCGAATCCTCACCCGCGATC  
TTCACGTACAGAATCCGAAGATCCTCAAGAAGCTCAGTGGCCCTTGC GTTATTGAGTTTG  
ATGTCGATCACCGACACCCCTCGGTCCAACACCCCGACGGCACAGGCCCCATCCTGTTC  
AGCCCTGGGGCCACTGGTGCCATGTTGAGCGCGAGATTTCGGGGCAAGCGCGTCATCATCG  
CCTCAGCCCTATTCCAGCCCAGAGAGGTGACACAGGAGACAGACCTGCGGAAGGCGCAGT  
GGCAGGGCTTCTCGGGATATCCCAAAGACCTTCCCTGGTTACAGA ACTGGAATCCGATCG  
CGGTCGATCCATTCGAGATCGTGCACCGCATCTGGACGCACCTCCAGAGCTATAGCAATG  
GCAATCTCGGCGTGCAGGTGTA CTCTCCTGGCCCTGCCGGAACACGCGTCACTCCGCCAA  
ACAGCAACACCGAGCTGCTTCATGGATTCTCCTTCGATAGCCAGCAGTTCATCCAAGACT  
TCTTCGCCATCTTCATTTCGGCGCGTTGACTTCACCGACTGCGGGCATTACATCAACAAGC  
TGGCTCGCGACATTCAGTTCGACTACTTCGAGGAGTCGGAATGGAACGAGGATCACACAG  
CCATCGACAAATTCATTCGGCTCGAGTATCCGCACCGGGGTGTATTCCAGGATAATCTGA  
GCTTCCGGATGAACGAGAATGTGATCCGGGGCAAGAGATAGATCGAGACAGAGATTGAGT  
GGACCAGCGACATTGGCATTTCGCGACTGGTTCGCCGCAAGGTCTACAGCTCTCAGATCA  
GCAACGCCGACCCAAACCGCTACAGACGCTTCATCCTTGAAGAAGATGCTCCCAAAAACA  
GCACCGAGCGGTCTGAAGCCTGGGCGCATCGGCAGCTGACCAGACGTCAATTCTCCTCGG  
ACTGGGAAACAATCACCATTACTTTGCATCATCCGAATGCTCCGTTCCGGTACGTGGGATG  
TCGGCGACCAGATCAGAGTACAGGGGCTGATGCCGTGGGTCGGGTATGTTGACCAGGCGC  
ACAAGATCATTGCCTGGTCCCTTGACGAAACGTCGGCGACATTCGAATTGACACTTCGAG  
CTGAAGGCGCATTCAACTACGATCCGATCTTCTTCGAAGGCAAGCTTCCGAACCTTCTGG  
CGAATCCGAGTTTCACCGCCAGCATGTTCAACTGGACTGCCGCTCTGGGCAGCTGGTTCG  
GTGACAGCCTGCGAGGCAAGGATTTTCGCGGAGCGGCTCGTGCGACGTGTAGCGGCCAAG  
AGAAGCTGCTCCTGAGCGAAGCCGGACCAGTTGCGGCAGGCGATGATGTAACGCTGAGCA  
CGTGGGTGTATTGGCAGAATCTCGTGGCCACCGGCGAGCCGCTCGCGGTGATCCTCAACA  
CCTACA ACTCGGATGGCGAACTGCTCAACACCGTTGTGTTTCGATAGCACATCGGGCTCTG  
GAGAGTCGCCGGGCTGGGTACAGCTCAGCAGCGCATATACGATTCCTCAGGAGTCGCGT  
CGATGTGGGCTGGTGCACGAGTCACCGAGGACGCCATGACCGGGTCTGTATGGTATGACG  
TGTTCTACTTCACGAACGACGACTGATGGCCTACGAGTGCAGAGCAAGGAATCTCGGGC  
TCTGCGGTCTATCCAGAGCAAGAACTACCCTGACACCAACAAGGATTTTCGTCAAGAATCT  
GAGTCGGCTCAACAGTTCTGTTGACTACATCTCGTCTACATGATCATGCAAAAAGGG

CATTGATGACGCCAATAAGAACTTCATCGAGCAGATCCAAAGTTTCATCAATGATCTAAT  
CGTTCTGTTTGGCTGGCGGAGAGCCCACGGGCATCGAGCTCGGCGACCTCAAGTACATCAT  
CCAGGCTCTGGGCGCGCTGTTTCGGCTTCAACGGGCCATTCCCGATGAGCTTGATCGACGC  
GGTGCAGCACTTCTTCCCTCGGGTATGTTGTTTCGCTGCAACAGTTTACAGACGTCATCAC  
CGACACCATCATCGCCTGGGCCGAAGAGCGCGGTCTGGACCCAGAGTTCGTTGATGCGCT  
GCGCGAGCGCGCCGACGCCATCAATGATCTTGGCATGAGCATTGGCGATTTGTTTCGCCAA  
TATCATGAGTATCTTCAACATCTTTCAGATTCCAGAGCTCGGTACAGGACCTGTTCGCCGA  
ACTATGGGATCTGCTGGCAGGCATTTTCGATGGAACCAACGGGAATGCGCTGCGGCCGGT  
ATTCCTCGCCATCAGCAACTGGACCATTCCGTTTCATCGAAGGTCTCGCTTCACTGGTCAA  
CTATCTGGACGCCCTGGTTCGACGGCCTTGCCAACGGAAAGTTCCTCAAGATAAACTCACC  
GATGAATGCGGCAAATCTATTCGGGGCTATCGGATCTAATCTTATCAAGGTTCGTTCTCTGC  
TGGTGCACCTGACCAATCGTTCGCGTTGAGCTAATCGACAATCCGCACTTCACCGAGGATGC  
CATCGCTCCGGGCAGCGAGTGGGCCGTGGACATGCTGTTCGTCGCCGACCGACAATGATGG  
CACAGGTAGCGCGACGGTGTTCGCCAACGGTTCAGCCCCACGCACTCAACACCGGGGCAA  
CAAGGACGACAAGATTTCCTTTCGGCCCCGGACAGCGTATTCCCTTGGGCATCTACATAAG  
TCATGACGGCGCTGTTCGCTACAGGACCGGCGATCATTCTGCAGGTTTCGGCGATTCAATGG  
CAACATCCCTATCGTTCGGCCTGTACGAAATTGGATCGTACAATCCTCCTGTGGAAGACCT  
GCCGTGGCCTGGCCACAAGCTCGAGGGTGTCTACACAGTTCGAGGAAGATGTCACCCACAT  
CCAGGTGCGCGTGTACGTCACCGAAGCCGCCCTGGCGGGTTCGGTATCGCATTGACGATGT  
GGATTTTCGCCAAGGTCACCGACCTTGCCTTGATCCCTAGTCTGACACAAGCCTTAGAGAC  
GCTCGAGTCTGGCCAGCGTGTCTGTCAGCACGCAATCGCCAACGCGGTTCAGCAACATCCC  
GATCATCGGCGATGGGCTTCGAGGATCTGATCAATGCGCTACAGAACTTCAATCCGGCCAA  
TATCGCTGGAGCTCTGGGCAGTTCCTGCTGAAGGGCGAACTGTTTCGGGATCATCCGACA  
CATGATCGCTGCGGCGCGTGGTGTTCGGTGTTCGGCGGTAGCCGAGGATGCCACGCTCGC  
AGACCTGTACTACGCGATGAATGCGGCGCTCAACAATGTCGCCGGATCCGACGAGACAAC  
CTTCGTCGATACCACGACATTCGTTCCGGTGATTGCGGGCTGGGACCAACTACATTGATGT  
CATCGGCGTGGGCAAGGGCAAGGACGGCATGGACGGCCCGACGGTGGCCCGATCCCCGG  
TGTGTTTCGGACAGGGTGGGCACCTGGGAAAGGTGCTCGCCACCACATGGGTCAAAGGTGT  
CCACTACGACAATGATCTCACCGGCGTCCAGGTCACCTTCAACAGCAATGGCTCTGTGAC  
CTTCTCGATTCCCCGTTACAGCCTCACCTGTCCTCCTGCAAGCGGACCTACGCGCCAATT  
TCAATTCGGAACAGGCTGGCACGGCAAGGGTCCGGGCACATATGTCTACAACGACCGCCC  
ATACGCTGCTGGCGGAACACAAAACCAGCCTGGAGGCAACGGAATTGGACCGCGTGGCTC  
TGGCGCTGGTGGTGGCGTGTTCAGAGTGGTGGCCGAGGCGGACCTGCCGGCGGATGGGT  
GCGTCGGCGTGTCTGCTGAAGCAGAGAATCCGTCTACTGGATCAGACACGACGCCTCCGAC  
CCCTCCGAAAGTTAGCGTTGTCAATGCGACGAATGACACTCTGTATCTGCTCCCGAGCGG  
AAACGTGGACCAGTAATGGCTAATCATGTTCAGCGGCTTGGCCGGATATCTGTTCTACCTT  
GAGGACTCAACGGCACCCCTCAACCCAGAGCCGTTTCTGCCAGCTCTGGTCTGCCGTAT  
CCCATACGAGGCCTTGACACAAACTGATTATAGCAATCGCATCTACGTCACGCCGATC  
GACAATGCTGACAATTAGACCGACCCCATCCCCTGGAGGAAGCTCTCGACGAGCTGAGC  
CCATTCCCCGCCAGCACGCTCAGTCCCACGCCAGAACAATCGCCCATGAACTCAACTCGC  
ACCACTGCCATCGACAACATCATCAAGCGATGCATCGCGGCTGGTTCGGGTCTTGGTGTG  
ACGGTGGGGATTACGAGCCCGTGGGGATACTACCTTGGCAGCTTCGGTGGAGGGCACCGGC  
GTCGCCCGACACTTCTCATGGGCAGCCAAACCAAGAGCTTCCCTCATCTGGGCTGTGATG  
ATGGCCATTGACGAAGGCCGTCTCTCCCTCGACACCACAATCAACGACATTCTCGACACG  
GCGTGGAGCACAATCCGACCATTCAGCAGCTGATGATGATGCGGTTCGGGTATGTACAAC  
TACCAATCGGACTCGGCATTCGGTCTGCAGGTGGCGATGAACCCTGCGATGTCGTACAGC  
CTGCAGCAAATGATCGCCAAGAGTCGCAACGGCGCCAAGCAGTTTGGAGCTGGCGAGAAG  
TATGACTACAACAACGGAACTCGGTTCGCTCTAGCATTGATGCTCGAGGAAACGGACCCC  
AAAGGCCGCAAGATCCAGGAAATCATCAAGCAGGACATCCTTGATCCGCTGGATCTCGTC  
AACACGAATTTCCCTACTGTCACCAGAGGACCTCCGGCACCTTCTGCCATCCTGTTCTCT  
TGGAACTTCTTGTGTCGCTCATCGGCATCAAGCTCCGCCAGAACGTGACCGTGCAGACC  
CCCATCATCATGTTGGCGGCTGGCTGTATGGCCAGTGTTCGTTGGCGACAGGCTGAAGTGG  
GGGAAGGAGCTTCGCGACTGCACGCTGCTGTCACCAGAATCAGCCGATCTGATCCACACA  
ACTCACATCATGTATCCGAGTGCACCCTATGGCCTCAACAAGGACGGTGCACAGAAATC  
GGATACGGATTGCACGGCCATATCAAAGTTGGCTCCTGGCGGGGATCCCACGGCAGTTGG  
ATCGGCTGCGACTCTGCGACAATGTACGAGCCCACCACCGGCACCATCATGACGGTATAC  
GAGAATTTTCAGACACCGGGATTGCTTTCCTTGGCCACAGTTTGGCACGAATGCGCGGAG

TATCTGATGCCGGGGTCGGCGACGTATCCGGGCTACCAGACCGGGCGAGAATGCGGCAGGT  
ACGGTCGGCACATCGGTGAAGAAGCTTGGCACGTAGTCCGAGGGTGCGGTGTTTGCTCCT  
GGCACCGAAGGCGTTGAATTCGACAATGCGAGTGCGGTGAGCAGACTCGGGACGAAACC  
GCAGCATTCAACATCGCGTCCGATGCAAAGGCATTGGTGGCCTGGGTTTCTGCACAAGGT  
AGCACGACTGGGGAGGCGCAGCCGTCAAGGCCAAGATTGATGGCATTGAAATGGAGAAG  
GTTGTGTCGACAACCGATGGCACCACCTCCGGGAATGGCCTGGTATGCTTCCGCCTCCTC  
AATCCGCCGACCGGGGCGAACAAGATGGTGACATTCGAAGGGATGGGATCTCTTGCACAC  
TATTATGCCAATGGCGCAGCCTCGTACAAGAATGTCCGGGACCTTCGGAGCGCCTGTGAAG  
AACAGGGGTTCCGGGGTCGACTGCCAGCCTTACTGTCCGGCGGCACAACATCTTTGGATATG  
GTTGTGGGCGGATACTATTTCCAGGGTGGCGACAACCTCCTTCAACAAGAATGTTTCGTGGT  
GTCAGAGGTCAGGCAGCATTTCGTCAACCAGGGCCTGTTGTCCGGAGACTCTTCCGCTGGC  
GGAGACGTCACCTTGACCGAGACATTCACGAGCTCGATTTCAGTGGTCAGGGACGGCGTTC  
GTTCTTCCGGGCTGAGGAGGGCTGATGGCTGTCCGATGGAGGGCTGAGAGCTTCTCGATAA  
TACAGACCGAGCTTAACCAGCTCGTCAATGAATCTGTCCGGTGACCAGAGCCAGTATGGCC  
TTGCCACCGTTGAACTCCAGAAGCTTCGAACTCAAATGGAGGCAATCGCTTACGACTATC  
TAGTGTGTCGTCGGCGACTGAGTTCAAGAACTCTCCACGAGCGCCTCTGCTGGACAAGTGT  
ATTTCCGCAACATCCAGACAGCCGTGAAGAAGCTCGTGACCCAAGCGCTTGCCGGAGTCA  
CAGCTCCGGTAACATGGCAGGGCACAGGCCCGCTCCCGACAGGCGTCCGGCATCCCTGTCC  
AGAACAACCTGGACAGCATCGGCTGGAACCGATGTGTACATCGCAGCCGTCATGGACCGCT  
CGGGCAGGTTACCGGGCGCGACATTCGGTTGCGAAGCGGGCACTCTGATGGCAGAAGTGT  
TGCACAACAACAACGCTAGCACAGGACGTACGGCGTTGTGGCGTTTCGCAGGCAAGGGCG  
ACGGCACCAACAAGACCTTCTCCATCACAGGTAGCGGCTATGGTTGGTTCGGTGTGTGCA  
TCTTTGCCTTCTCTGGCGTTGTGTCCGGTCGGAACACCCGTGACCACGTACGGATCGGGCA  
CTTCGCCTTCGCAGGTGGTCACGGAACAGGGGTGCAGATACTCGGATGAGGCGCTGGCG  
GAGCTGGTGTCCGGCACACCGAGTGCCTTCTCTGGTGTGACCAACAGAGTCAACCAGAACA  
TCAACGGTTCGAGCCTCGCAGTCAATCAAGTTAAGGTGCCAGGAACAAAAGGGGCAACCA  
CGCAGAATTACCCTTATGGGTACATCTTCTGCCCTCCGGAATACATAGGAGTGCGAGT  
TGAATACAGAGTTGCAGGCGTTCAAGGACGCAATAAATACCCTTGACTTCGATACTGCGC  
GTGATCTGGCCAAGTTGTATGTGCGAGAACCATCCGGAGGAGTTCGTGACTATTACCAGA  
GTGTGGAGGAGTCGGCCAACGAGGAAGAAGCGATCGCCAAGGTCGTGAAGTCCATTGAGG  
TGTTGCGAGCTGCAGGCCTCACCCAGCAGCAGTATCGTGGTGAGACCTTCCATCTGTTC  
GCTGGGACCCGCGAACAATTGGCGCCACAACGGAACCTTGTGGTGGCGCAATCCAATCCCGC  
CGACTGTGAGGAATGACTGAACATGGCGGAGGCATATTCTGTACGCTGGATGTGGCCCA  
GGGAATGCTCCGGTGGTAGCACCAGCTACGCCGAAGCTCTTGGGTCCTCGCCAAAGATCAA  
GATTTACTCAGGCACTCCACCGGCCAATGCTGGGGCTGCGCTGAGCGGCAACACGCTACT  
GGCCACTCTCACATGCGCAAGCACGCCTATCGCCAGCCAGAGCGATACTGGCACTGCCCGC  
GCGTGC AACGTGGGCCACGTTCCGCGTCTGCGGTGGCCGCAGCCGCAGGTACGGCCACCTT  
CTTCCGCACCACCACGTGGTCCGACACAGTGAGCGACCAGGGTACCATCGATACTACTGG  
GGCAGTCTCAACATGTGACGACGTCGTTGACCGCTGGTGCCACCATCGCAATGAGCTC  
GAGGACAACAGACTTTCCGTACGGCCCATAGGAGACAGCATGGCATTTCATCCAAAAGCAG  
GGCTACTGGAAATCCGAGAATGGCTGGCGCATGCGTGACACAGCCGAATTGGACTACAGG  
GCTGTGCCGGGGACGAGCTTCAAGCTCGGCGTTCTCAAGGGACCACCCAACATCATTCTC  
AAAGCACTGATCTGGCGTCTTGAAGAAGATCGAACCCATGATCACGTAGCAAATCGGTTGC  
TACACAGCCGAAAACCTCGATGGCGAACAGCAACCACAACCTCTGCGACGGCGATCGACTAC  
AACTGGAACAAGCACCCCTACCAGAAATGGGGGACATGGCCAAATCGTGCGGCCGTCGAT  
AAGATCGTGCAGGATTTCCGCGGAATCATCGAATTCGGGGGTGACTGGACCTCGCCGCGT  
GACGAGATTCATTTGAGCTGCACTTCGCCGAGGGGCATGCTGGCACCCGAGGAGCTCGCC  
AGGGATTTGGCCAATGGCCTATGGGGTATCTGGAAGCCCGGACCAGCCCCAGCCCCACC  
CCCGCGCCTGGCGGAGGGAACGACGGCATTCTGCGGATCGGCTCCGAGGGGGCCGGAGGTG  
CTCAAGATGCAGCGCGGTATGAACTCTGTGTTCAAGAATTACCGCGCCATGCCACTGTTG  
GAAGACGGCATCTTCCGGGGCCAAGACCAAGGAAGCTGTCGTGAGTTCAGCAGCGTTCA  
CTCATTGATGTGGACGGTGAAGTTGGCCCGCAGACCAAGGCGAAGCTCGCCGAGTACGGC  
ATCGTGCTGACCGGAGCGACTGCTCCGACCGCTCCGACAGCCATCGTGCCGCAGAAGGTC  
TGGCCTCAGACCGCCGGTGACCGTGAGCTTCTCGAGTACATTGCGGGCGCAGCTCGGGCCT  
GGCGACCCGTCGTGGCCGATCAAGCTCGGCAACAACGAGAAGGCCGATCCGCTCACGGTT  
CGCGATCGACTTGGCTTGACGGCCAAGGACATTGAAGAGATCAAGGGAAGGCTGTCCGAG  
TGAATAATCTTTCGAATTACTGGAAGGCTGGCATTGCGCTGGTAGGTACGGCTGGCACAG



CCGTGGCTACCCTCGCAGCTGACGAGAATGTTTCGACCCGCGGTGGGGGAATCCGGTGTCA  
CCTGGCTGGCTGTTGCCGGTGTCCGCTCACGACCGCGCTGACCTGGCTCAAGCGTAATG  
AGCCACGGTAACTGAAGCAGAAGAGATCCTGCGCCGTGCATAGGAACGCGCATCCTCGT  
CCTCCTCTGCATAGGAGGATGGGCGCAGTGGCTATGGTGTGTTGACTCGTATTGACCTGT  
GTGTCGTGTCCGCTGGCTGAGTGCTCAGCCGACGGCAATGACCAGCACCATAGCCAGCTG  
TGCAGGGATGAGGAATACGCCAAAAGCATAACGGTCGAGTGTGGACAGGTGCAGAGTGGC  
CCCATATCAATCACGCCTCCGACTGGCGGACACGGTGGGGGAGCTCCGCGCCGAGGTTTG  
CTCGGGAGGATCCTGGACAAAGTAGGGCTGGGAGGGCTCCTCTGATGTTCCGTCCAACAG  
ACTCTCGACGCTTGCAGCATAATTCCGCAAGCCTCGTCGGATTGACCACGGCAGAATGT  
ACGTGTGCTGTATGATGGCGCTCTGGTTGTGGTCTCTGTTATTGCTGGTGTGCGACCTG  
TTCGGAACCTCAACCATCGACGAGCTCACAGGCTATGTCCAAAACATCCTTGCTTCATGTA  
TCTTCATCGGCTCGTTCGTGTGTCTCTGCGGCATCGCCCTCGGCACTAAGTACGTCCACC  
CCAAAGCGGATATCCGCTTGTGCTACCGCTTCTCGTTGTGGGGGAATCCCCGCCTTGGCAG  
GGAGCGTCCGAACGTACGCATGGGCCATCGCCCACAATACGGGCTCATTTTGGGTATTGG  
CGTATGCAGCTTCCATCGGAACATTCATCTGCCTCGGAATCGTCTGGAATGGGATAGATT  
TGCTCTTCGAGATTGCTCGACTGACTGAGGAGATCAATTATCTGAAATACGGTGCGGGCT  
CTGAAGAGCGGCTAGAGGACAGGGACGATGAACGGAAATGTTGATGTTGGCTGGATCCTC  
ACATTCCTGGCCATCGTGTCTGCTAGCGGGCCAGTGCTTTCGTTGTTCTTGACTATCGC  
AGCCGCAAGCGACAGGAAGAGGCAGAGGCGAACAACAAGATGCCGATATCGGGATAAAG  
AAGGTTTCTGAGCAGGAACCTTTCGCAACGCGTTCGTCATGAATGATGAGCGCTGGATC  
ACGCGTGAGAAGCGCTGGGAGGAGCGCGAAGACGCTCTCGAGCGCAAAATTCAGAGCTG  
CGAAAAGAGACGGATAATTTGCACTCTGACATGAATGCCTAGCTTGAATTCATCGCCAAT  
GATGAGCAGTGGCATTCTATGACCGGATGCACCGCATCCAGCACGATCTCCCTGCGCCA  
CAGGATCGGATCACATTCCAGCAGTTCATGGAGTCGCGCCGAGAGGGCGGGGAGGATG  
TAACATGGAACCTAAGGTTGGCTCAAGCGACGCGAACACTGATGGTGAGGTAACCTCGCTG  
GCAGAACTGGGTAAAGCGGTATGCCGCAACCTATTCCGACATCATGGGCCCCATCGATGG  
GTAATATGGCTGCTCGGATGCCGACTTCACCCGTGAGCTACAGCGCCGTCTGGGGCTGCC  
GATCACCGGCGTGTTCGATGATGTGACAGACCTGCACCCAAAGGTCAATTGCCGCTGGAA  
GGGGCAAGGCGCCGGGCAACGAGCCGCACGCCGAAGATCTCGTTCTACTCCAATCCCCG  
TTCGGTTCGAAACGAATTCGTCGGCCATCGTTCGAGGTCGGCGAATTCTGCAAGAACGT  
CCTGAAAATCAACCACCAGCCGGTGCCTTCGGCCATCGGCGGATATCTCGTACTGATGGG  
TGCGGACCCCAAGGTCAGCTACAACGACGTCATCTATGACCAGTACAAGCCGCTGGAGTG  
GTTGCTGGACAACAATCCTGACACCAAGGACCCAGACGTCGAGTTCTGGTTCTCGGGCTA  
CTCGCAGAAGGCCGACGGCCTCGAAGACGCACTCGAGATCTTGTTCGGCGATGGGGGATT  
CCCCATCCCCAAGACGGGCGAAACCGAGGGTCCGGGTAAGTACCGGCACCTGCGGCCAAG  
AATCAACGGCACCATAACAGTTTGGCAGTCGCAGCACGCAACCCGGCCCCACGCGCGTCCG  
GAATCGCCCACCCGGAAGCGGCATGTCCCGCAAGAAGCGGCCGCGAGTGGCTCAGCATGCT  
CACCTGGGACATCGTCACCACTTCCCCAGGGGCACCGGACTTCTACGCTGCCTGCGACGA  
TGACATCCGACAGTTGTAATAAGAGTGGGTCAACAAGGCCGACACGGAACCTGCCCTTCGT  
GGTGTACACGCCGAGATCATCATCCCGGCGCTCCTGAATCTTCTGGCTCCATTCTTGGG  
AGGCTTCGGAGGGGTGACGAGCCCGCTGGCTGACGGGATTCTGGCGAGCGCTACCGTCTT  
GCCGATGAACCTGCTCCACGGCCTGCTCTGCGGGGTGGCCGCAGCCGACAATGCTCCGAA  
CCCCAAGCTCATCGAACTCCTCAGCGTGCGTGGTGTCTGACGAACATCCCGCAGCTCAT  
CAAGCTGCTGACCAACATCTCCGGCGTCCAGACGCACGGCGAATAACCACCTTCCGAAGCC  
AGAGCTCAACGGCCGACGCGGAATCCAGGTCCGGCTGCGACATCGTTGCGGGCTTCCGGCG  
GTAAGGAACACTCATGGAACCGGTGACAGTTTACCAAGACAGCAACAACGAATGGCGCTG  
GCGGTTCAAAGCCAACAATGGCCGGGTGATGGCTGACGGCGGCGAGAGTTACCAGAACAA  
GCAGGACGCCCTCACAGCGATCGATGCTGTGTTTGGCGGGCTTCCGCCAGAGGTGGTGGAA  
TGAGGCTGGCTAGCAGCTCCGGGTAGTGCCGAACGACCCAGCGCTCGAGGCCGCGCTGAC  
GCTCTTGACGCTGATGACAGGGGACGACTGGGACCGCCCGAAGCTCGTGAAGTGCTCAGC  
GAGCTTGCGCCAGCACGCTTGCGCAACGCTCGTGAAGCAAGGTGTTGGCGTGCACAAGC  
AGAGGCTATCGTGGGCGAGCGGTGGGCCGAAGAAGGGAGCCCCGAACCAGCTGAGCATA  
GCCTGTAGCTGCAACGGCCGATCGCTCGGCAGAAGCCTACGTAGCACCCAAAATGGATCT  
GTCTCCGCGAACGCCTCCCACCGGCGATGAGCTTCGGCTCAAGGCGCGCAGCCGCATCGA  
CAGATGGCGCAAAGTAAGAGCCGAAGCCCTGAGGACTCCGGCTCCGATACTTAGCCAGA  
CTAGATTTCCAGCGCGGGCTGCTCGTCTCCTTCTTGGAGGCCTGGAGCTCCTTGCAGC  
TGGCTTGACGGTGAACCTGAAGGCTTCGCCGAACCTCGCGATTCTGTAGACCGGGCCGAT

GCCCAGGTAGACGCTCAGCTCCTCGGTCAACGTACGGGTGCAGGCGCAGCAGATTCCGTA  
GATTGCGCCGAACCTCCTTCATCTCCTCGTAGCTCATCCGCTGCTCGTCGGTCAGGCCTCG  
GAGCGGCCGCTTGCCCTCGAACTCGAAGTGAGCGGTGAAGACGGTGCCAGCAGTCTCGTC  
GTGGCGGTTTTCTCGACGACGACCAAGCGCTTGGCGACCGGGTGGCCGCGCTGGGTTTT  
GTAGACCTTGTAGATGGTACCGTCGGCGACGCGGTACATGCCATCTTCCAGTTCGTCCGT  
GGCAGGCTTCGCTTTCTCGGCGACCGGGGTGATGTGGGTTCCCTGGATTTTCGACCGTCTC  
ACCAGCCATCTCGGTGGTCCCGATGACCGGATCTGCGCCCTTGATGGGCATGCTCTTCAG  
CCAATCGATCAGGTTGCTGGCATCCTTCGAGCTGAAGGACTTGTAGCAGAACTCGTAGCC  
GTCCGATGCACCGTGGTTGTCGTCGACATAAGCCAGGGCAGCGTTCACGCGTTCGCCGAG  
CAGGTCGCTACTCATGGCCTTCCCTGATCTCATCCATGACATAACGGGGTGCCGTCCACACC  
GTTGTGTCGTCGCGCTTGATGGCCAGTCGATCATCAGACGGATGATCGAAGCGCGAGACAC  
AGCCTTGTGGCGGTAGTCGCTGGCCACGCACGCTGCTCGAGCAGGTCCTTGATCCAGTT  
GATCCGCTTGTGGTTCGCGGGCTTGACGGTTCGCGGTCGCGTTCATTTTGGATTCCCTTCT  
CCGGTGTCCGAGGCGCTTTGGGTAGCCTCGCTGACAAGACGAACGTTACGGCAGAAATTG  
CAGTTTCGCTACTCCTTTCAAAGTCAGCGCTCACGGCGCGTGGGTCCGGCTCGCCTACC  
AGGACAAACCTTCTGCAGTTGCACAAGACGCCCTCGTCGTCTCCCGGCAAGCCGCATGG  
CCGCCACCGCGCGGGCTGGTAGTGCGAGGACCACGGGTGTCCGCCGGCGCACTGGTCTACG  
GCGTACCGGGTGTGTCGGAGAAGCTGCATTCCCCGCATCACCCACTGCCAAGGCTCCATC  
AGGCGATGGCCCGGATCAGCGCCCGCACCGCGCGGCATGGCGTTCTCCGGCATGCCGG  
TGATGCCACGACAGTCTTGCCGACGCGATTGACGACCCACTTGGCGCTATCGTCTTCGC  
CGACTGCGAGGGCGTCTGCCACCTGGCGGTGTCACGGTATGCCGTCACGCTATCGCGCA  
GCGTACGGACGGCGAGATCGTCCCTCATCGGTGTCATTGCCGGCCAACCCGGGAACGCTCA  
GCGCTTTCACGATGCTGTCTACCTTGTACATGAAGTTCAGGCTGTGGTCCGCGCTCCGGA  
CCGCCCCGTCAACCACCTTGTCCAGGTAGTTGGAGCGGACCAGAACTTGCTTGGCCTGCC  
CGCGCTCGAAGGTGATCGCACTGGCCACCGTTTTGTGCGGCGATCACCTGCTCGCGGGACG  
TCCATCCGAAATTAGCGGCAACTTCGGCGATCTGCATCCGCTGGTTGACGTTGGTGTGATGG  
GCATGAGGCCTCCTGGGCTCGTGGGGATAATTGCGCGCCGAACGTTACGCCACCGCGCCG  
ATTCGGGCTACTGCCTTCTACATGCGTTCGTCGTAGGGGTGGCAACAATATTCGGCCCCGA  
GTAGCGCGAATCGGGTTCGACTAGAGTAACGTTCCCTCCTGTCCGCCTCCCCACATCCCCAG  
GAGCCCCAATGAGCATCACATTCCAGCCCGGTCAGCAGGTCGAGGTCCTACTCCGGCGACA  
ACGTGCTGCACCCCGAGATGCTGAAGCCCTTCAGGTATCGCATGGTCGTCACAGCCGGAC  
CCTTCGCGCTGAATAACGGCCACGAGGGGTACCGCGTCCCTCGGTCCGGGGAAGCCGGAGC  
CGTCATTCGACCAGTATTGCAAGGCTGCGAATGGGATGCGTCCCGTCGCCGACGTCGATC  
CCGAGCTCGCTGCCCGGTACGACGCGTTCGGGAAGTGGGTTCGGCAAGTGATCCGGCTGGC  
ACGCCGCGCAGGTTACTGGGTCTGGAAGCGGTGCTGGCAGGGCAGCCATGGCGGAGAGAA  
GTGCCTGTACTGCGGGAGGGCCAAGTGAGCGAGCTGTGTGCCCTTTCGCGGGCACGAGTTC  
GAGGAGCACTACTCGCAGGGAGACTCGAGCGGAAGGCTGGTGCAGGGTTGTGAGGCCGAT  
ATCAGGATACCCTGCCAGCCTACAACCACCGCGACCCGGAGCGTTGCGAGTGCGACTAC  
GTTCCCTGCGATTGCCGGGGATTTCGAGAGCGAACCCGGCACCCGACCCCGACATTACCGAA  
ATCGACATGTACGACCCGGAAGGACGCTGATGGAGTACATCGACGTGCTAATCACCACGC  
ATAGCGCAAACGAAAGGAAGGATCTGGACCAGATCATCATGCCGACTCATATCGCCAAAG  
ATCTTGAGGCTGCTGGCTGGACTGTCCGCAGCACAATCGTTCTGGATCACAATACGGGGC  
TGACGGGCAACTATCGCAACGAGAAGGTTTCAGCACCCGCATCGAGAAGGAAGCAGGACACT  
GAAATGGCCAAGGAAAGCATCATCAACCGAGTGCAGAAGCTGCTGAACCTCGCGATGGAC  
CAGAGCGCCACCGAGGACGAGCGCAAGCTCGCCCAGGAACGCGCGGACGCGCTGATGGCG  
CAGCACATGATTGACCAGATGGACCTCAAGCCCGAGGACCCCGGTTCGGTTCGCGCGTCACC  
AGCACAAAGTGGGAGTTCTTCTTCGAGTTCGAGTTCGCAGTGCAGCTAAAGGACTTGCTC  
GCAGCCGTCGTCCGGCACGCTACCTGCCGTGCCACGAGCATGCGCAGGATCGCCAAGGTC  
GGCGAGCCCAACATGGTGGTGACCAATTGTTGGTACGCCTGAGAACATCGTCTACGCCGAG  
CGCCTGTGGATGGTCGTTTTACCGAGCTCACCAGGAACATGTTCCCGAAGGTGGACCCC  
AACGAGAGCTTCGACAGAAATGTGGACAACCTTCGTGAAGGCTGGCTTTAAGTGGCAGGAG  
ATCCATGAGCTGCTCTGGCGGCACAAGGACGATCCGCATTGGATGGAATTCCCGTTGAAC  
GACCCGTATCCGCCAGAGACGCAGAGCGAATATAGCTGGCATGCCAAGGTGTATGGTGGC  
GACGGCGGACGCTGAAGCGTGCCTACACTCGTAAGGTCAAGCGTCTCGGCGAAAGCAGA  
GCGCACACACCACCCGACATGGCGTGTACCGCCGGAGCTATGTGCAGAGCTACTCGAGC  
ATAATCTCATTGCGGCTGCACGACATGCGGAGCAAGAGCGAGGACGCTGTGAGCGATCGC  
GACAAGTTCGCCCTGGCGGTGCGCATCTCGCAGGACGAAGCTGGCGCCGAGTTCTATCCG

CTGTTCCCGCAGTTCGACCCGGAGAACATCCGCAAGCAGCGTGAGGAGATGCTCCGCCAG  
GAGCAGATCCGTTGGCAGAACAGGACTCCCGAGGAGCGGGCTCGCGCTGAGAAGGAGCGC  
CTCAAACGTGAAGAACGCGCTCGCAGGCACTGGGAGAAGACGCGGGACACGAGCTACGAC  
CAGGCTGGCTGGGCGCGCGGCAGTGTGTGGCCAAGAAGGTCAATCTCAACGACGACACG  
CAGATCCACCACAGCAAGAAGGAGATTGGGTGATGTGGATTGACGACTGGCTCGAGGCAA  
CCTACGAGGAGCGCACCCGAAGCTCCCGACGATCTGGACAACGACGAGTGGTGGCCGGAGG  
ACGATGGGGATGAGTGACCAAACGCTCAAGCTCGCAAGCGAACTCAACGAGGCAGTGATC  
GCCTTCCGGGACGGCTACGTCTACGGCAAGAGCCTCACCCGAGCTCTCGACAAGCCCATC  
CTCATGGCCGATGCGGGCCGACCGGCTGAACGGCCATCTCCTCGACGTCACCAAGGATCAG  
CAGTAGCAACACACCTGACCATCAGCAGCTAGGCGACGCCTTACCTCGTCTCAGAAGGGA  
ATCTGACACATGAGCAAGACCACCTCAGCCATCGCCACAGGCAAACCGCCGACGTCTCC  
GCTCTGGCGGAGAAGCACGACTGGACGGCCGAAACCAAGGAAGACGTCAAGAACGACATC  
CCCACCCTCAAGCTTATACGCGGGGATGAGTGGGTGAGATCCGCTAGGACGGGAACTCC  
TGCAAGGAGATGCCGACGGTCTGCCACGAATGGCAGCTCAGGTACGTCCGGAACGTTGCA  
GCTGCGAAGCGCGTCTCGAGGCTACTGCCGAGCAGAATGCTGAGCCTTTCAGAAAGCGG  
GCTGTGGCCAAGCAAACCTGCGCGCAAGACCACGCCTGCCAAGCGGCCTCGCCGGAAGGAC  
AAGCTCGAGGAGGCGCTTCCCGACTGCGACGACTAGCAGATCAAGGAAGCCCTCCTCGGC  
CGAAGATCCTCTGGCGTAACAGCACGAGCGGCGAGTTTGAGGAGGATGTGGTGTGGCC  
GGCAAGAATCCGAATGGCCATTACTATGAGTCCCACGAGGGTGAGAAACGCCAGATCAAC  
TTCATCGGCGCATATGGTTTTTCGAGCGGTGAAGATTTCTGCGATTGCGCAGGTGAGATAG  
GCAAACGAGCAGCCGAATCGGATCGAATAAGGTACGATTGTCTTATCCAATCGGAAGC  
AAGAAGTGAATCTCTAAATGGACGTTTCGTACCCTCACCTCCAGGGATCGCAAGGTTGCCG  
CCCAGCTGGCCCAGCTGGCCTCTGACGACCAGCTGACCTACCGGATAGCCGAGGGTGCTC  
GTCGGGCCAAGATCGGCCGTACCGTGTGGTACGAGATGGCTGCAACTCGTGTGTCTGACG  
GTAGGCAGTACCCTATTGGCTTGCCAAAGACTCGGGTAGCTTCCGTGGCTCATTCTGA  
ACGGCTTCGACCTGTAGTAGCGGAATCGGGCCGATGGGGTAACGTTCCGGTCTGTCAACG  
AGGAAGGGAATCAAATGAGCGGGCTCAATGTAGGCGATCGAGCGCGAATCATCAAGGTCA  
GCGATCTGGACAACGACCGCTAGGTCATCACCGACCCCGCCGGGGCAGCTGCGCTGTTCC  
GAGGGTACGGACCTGGAATTGGCGATGTCGTGGTACCACCGCGAAGACCCTCGGCGAAC  
TGTACGACTACGAAGCCGAATGGGAGATGGAGAAGGGCTACTAGACCTTCAGCTTTCTGG  
AGGAAGAGCTGGAGCCAGTCAAGTGAGTAAGCGCGAGTGGAAGATATGGTTGGAGGACGG  
CAAGATCGTCCTGCTGACCGACGGGTACGATAACGGCGGTCTGTCGAGAACATCAAGCTGTA  
CTTGCCGACGCCGCGCTCGCCCCGGCGTACCACCAAGACGTGGCACGTCCCCCAGATGTG  
GGAGACTTGTGTGCGCCCTCCGCCACCTCGCCAATCGGCATCGAGCCGACCTGAAGATGAG  
CGACGAGCTCCGGCTGTGGGCTATGGCCGAGAAGCTCCGGCTGGCGAGCATCCCCGACGT  
CAACGAACACAACGTGCTGCAGCCCATCCCGAACATTGAGCGCGAGCTGACAGCCATGGC  
GGAGGCGCTGAAGGCACGCCCTTCCAGACAGTGGGCGTTCGGTTCGGCGCCACAGCGCG  
GAACGTTCTGATCGCCGACCACCCCGGTCTGGGCAAGACGCTGCAAACGATCGGCGCTGT  
GGCCGAGTGCGGCCTGAAAGGACCCGTCCCGGTAGTTGCCGCGCCGAAGTCGGCGGCGTT  
CGTTACCTGGCCCAACGAGCTGCGGCAGTGGGTGCCGGACGACGTCGTGATCCGGATCTC  
GGGGAGCATGAAGCCTGCAGAAAGCGCGGAAGCTGTCGAGCGCGCCAAGGCTTACGCCGA  
GCACGGCGACATAACGCGTCTGGGTCTGTCACGAGCCCCAACTACGTTTCGCATGCGGGCTGA  
GCTCGACACCTACGGCAACTATGTGTACGAGGGTGGCCAGAAGATTGTGCGGCGGTTACG  
CGAGGCTCTGCAAGGGCTGGTCGACTTCGAGTGGTCAGCGATCGTCGTGGACGAGTCGCA  
CAAGACGCTCGCTGCGGTACGGGTAACCGCAAGAAGTGGTCTGCACAGCGCCTGGGCCT  
AGAGCTGCTCCGGGTGAAGAAGGATGGGCTGCGGATAGCCCTGAGCGGCACACCCTTCCG  
GGCAAGGAAGACAACGCCTACGGCACCTTGCAGTGGCTGCGACCCGACCTGTACACCGG  
ATTCTGGAAGTGGGCTGAGAAGCACTTCCAGATCTACGGCTATGGTTCCGGACAGATCGT  
GGGTGGGGTCAATGACTCAGAGGAGTTCTACAACAGCCTCAAGCCAGTCATGGTGCGGGC  
AACCAAGGCCGAGGTCGTCAAGGACCTGCCTCCGAAGATCTATGCCGGTGAGCATCTGGA  
CCCCGAGGACCCGCATTCCGGAGTGGCAATTTGGCTTCCGATGGAGGGGAAGCAGCTCAA  
GGCGTATCAGGCTATGGTCAAGGATGCAGCCGTCAAGCTGGAGAGCGGTGTCCTTTCCTC  
CAACGGCGTACTGGCGGAGATGACGCGTCTGAAGCAGATGGCCTGCTCCTATGGCGATCT  
GGCTATTGCTCCGACAGGCGAGCAGACGTTCCGTCCGTTCGTTGCCGAGCAACAAGTTTGA  
TTACCGTGTAGACCTTCTGAGCGATCGTGGGATCGGTAGTGGCGAGTTCGACCCTACCGG  
GAATGTGATTGACGCCAGCCAGTTCACCAAGCTGCTGAATCTGTTCTACGCCGAGCTGAA  
CAAGCTGGGCATCAAGTGCCACCTGCTCACCGGCGCGACTTCGGAGAAGGAGAGGGTCCG

TATGGCAGACGCCTTCCAGAACACCAAGATTGGCGACGTCACGCCGCACGTGTTTCTGCT  
GAATACCATCGCTGGTGGCGCGTCTATCACTCTGGACGCTGCGGATGATATTGTGACGCT  
TGACGAAACCTGGAACAAGGACGACCAGGAGCTGATCGAAGATCGCGCTCACCGCATCAG  
CCGTACCGACCACACCGTAACCATCCACAACCTTCGCAGTAGGGGCAGCATCGAAGAGCG  
AATCGCCACGAGTGCCTTTGCTCAGGATCGAAACATCAAGTCCATCATCGACGGAGCGCG  
CGGTGTGAGTTGCGACTCGAGCTCCTGGAAGGAGTCAAGGCATGAGGACCCTCAGCGCA  
TGCTTCATCACGGCCATGCTCAGCGGGTCAATCAATGATTTGCTGGCCTGGCGGATTAC  
GGCAAGCCTCTCACGAGAGAGGAGATGCGGGATTACATGGAGCGGTATGTACACCGGGAG  
AAGGCAGAGCTGGCAGAGCGCCGTCTCCAGGACCAGCTCTACAACGCTCGGCGTCGGGCT  
GTGCCGCATCCGGACGCGGTTGCACCCGTGCGGATCACGAGGTTGCACGTGTCTAGAAAG  
GGGAGAGGCGAGCGAGAGGAGTAAAGTCAAATAAAAAGTCGGAAAAATTACCGATTCCGAC  
CAAGAACCAGTAAGCTTCATTCCACGCCCAAAAACCTTCATAATCCCAACGAACAGAAGGA  
AAAACGATGTCCCCGAAGACCGCGTCCAAAGAGACCAGCACCACCCGCGAAGGCAAGGTG  
CGTTTCGATCCGTTTCGCCTATCCGGGCACCCTCGCCGAGCAGGAGGCCGCGTGGCTGAAC  
GAGCAGTTCCCCGGCCTGAACGTCAAGGCCAGCCACGTCCGTGCGGTCATCAGCAACCAC  
ACGCACTTCCAGAAGTCCGACCTTCGCCGCCAAGCGCGGGACGCCGAGCGAGCCAAGCTC  
GCCAGGATCGCGAGGCGCGGAAGGCTGCCGCCGAGCAGCGCAAGGCCGACGCCGAACAG  
CGAAGGCAGAGCGTGAGCAGCGCAAGGCAGAGCGTGCGGCCGAGGCAGCAGCCAACGCT  
GCCGAGAAGCCCGAAGCCAAGCCTGCTGCCAAGAAGGCCACTCCGGCCAAAGCCGCGCCC  
ACGCCTGCTCCCAAGAAGCGCGTCTCGCGTCCCCGGAAGCGCACCCGGTGACGTGCCCGCG  
GAGGACGCATTCTGATCCACCCACCCCTCGGGGTGGCTGAGCCTCTGGGACATGGGGA  
GGCCCAGAGTCTCGGTGGAGGTGAGCAAGTGCACCTCTGAGCATCGGATCACCATCAC  
AGGACTCCGGTCAAGTCCAGGAATTACTCAGCCTCCTCCAAGACAAAAGCTCACTGACAG  
AAGGTAATCTGCAAAGTGAAACGCATCAAGAAAGCCGCGAGCGCCGGTGTGGTGGTTACG  
CAAGTCGGCCTCGGAATCCTCAGCGCCGCACCCGGCGAACGCCGACTATGTGATGGGGTGT  
GAGCGAGTCCGCTGGGGCTTCCTGTTCAAGTGGCTATCGCACCATCTGCGACGGCCCCAAG  
CGTCCGGACGGCAGCTGGGACCGGACGCTTCGTGAATGGACCCAGCGCACATGGCTGGT  
GGATACTGCTCGGGCAGCAGGTATTACGTGACCTGACCCCGAGCTACTGGTTCAACGAG  
AGCACACGACGCCTCGAGACCTATCCGGTCACTGATGCCACTGTGTTGCCTGGCGAACCC  
GGCTGGCTCCCTCCGGGCACGAACAGGATCCTCTGATCCATGGCACCCAAAAGCCACGA  
ACATAAGGGAATCCATGAAACTCAAGGTGTTGACATTCAATTGCCTGCGAGCAGTGCGACA  
CCCCTTCGGTGGGCCAGAAGCTGGCGAATACGACTACCGAAATCTTCCTGGCAAGATGA  
CGAGTGCCGAATATCTCGTGAAGAAGCTCTGGCAAGTATGCGGACTCGTGTGATCTGGG  
GAGCCGACGACGTAATTCTGTGTGACCCTGATTGCGTCAAGAGCTGGCTTGATGAGGTGG  
TGTCGCGTGGCAACTAGAATCCCGCTGCCCCTGCTACGCACGAGCGAACCGCAGCGTGTAC  
AAGAGGTGCCCGTGGAAAGTGGTACCAGAGCGTTGTGCGCGGCCTCGTGCCTAACAAATCCC  
CGCCAGGACGCGCGGTGGTTCCGGTACTGGCATTACCTGTGCAAGGTCGAGTGGTACGTC  
CCCGGACGCAAGCGTGGCCGCGACATGCACGAGACCTGGGACGAGTTCTCACAGGGTACA  
TTCACCATAGTCAGCTCGCAAGGGCTGGTGAACGACGAATGGGAGAGCGAGTGGGTTGAC  
GCAAACAAGCTGGCGCACGCCATGATTGACACCCACCTACAGGCGTATGGGAACGACGAC  
AACTGGGAGGAGATCGCTGCTGAGCATCCATTTTCGGTCTGATCCCGCACCCCGACAAG  
ACAATCAACCGTGCGGTGTGCCGGTGCCTCGGCACCATCGACCTGATCATCCGCAAGCTG  
GACACCGGCGAGATTTGGCTGGACGACACCAAGACCCGCGCGCATCTATACCCACCAC  
CTGACACTGTTGGAGCAGCCAGCTGCGTACGTAGCTGCGGGTACGCACGTCTCCGGGAG  
CAGGAGATGATTGGCCCCAAGGAGCGGGTCAAAGGCATCATCTTCGACTTCATGCGGAAG  
GGCTTCCGGACGATCGCCATCGCAACGAGCGCGGCGAGTATGGCAACAAGCCGGTCAAG  
AAGCACTTTGTCGAAGCCATCCTGAATTGTCGGGGTTATCAAGGTCCTCTGAACACCGAG  
CGAGATCTGCTTCGGCTTAAGCTCGACGAACCTGCAACACATCGCCGATGAGCTCAACCTG  
ACGGTTCTGGGCGATGTCTCAGCCAACAGGGTGCGCCCTCCTGTTGCGAGAGAAGATC  
GTGAAGAGCCCGAAGGAGTGCTCACGGCAGCTCCGCAAGGATCGGCGAGGAGGTGCTACAC  
ATGAACGCTGTGCGCGCCGGTAAGCTCCCGATCCTCAAGACGCCGCGAGGACGACTGCAAC  
TTCTGCGATTACTTCGATCTCTGCGAGCTCGACGATTCTGGCGGAGACACGGAGTATTC  
GAGTCGCAGGCATTTGTGGTTTCGTGATGCCTACGCGGATCATCGCGAAGGCCGCTGAGACT  
TCGAAGATCAGCGTCAAGAACAATAAGACAGGAGTGCAGTGGGAGGAGGTTGAGCCT  
GAAAGATATGGGCTCACGGAGGTTGCAGCCCTCAAGAAACGCGTGAACAGCCAGTACGC  
CTTCAATCGCATCAACGGTGGTGACCGAGACAACCTAATCGAGCTCATCAACGAGGTTGA  
GGCGTACATCATAAAATGCCTGAAGGCCGAACGAAGCATCCCCGATTTCTACTGAGAAAG

GAAGGCTGATGGTCCAATCCAAGATCATCAAAGTCGCCGACGACGAGGACTACGTGAATC  
TCCTCGTGTTCGGTGACTCCGGGGTGGGCAAGACGGTGTCTGCGGCAGTGTGACAAGG  
TGTTGTTTCGTTGCGCCGGAAGACAAATCAGACGGCCTGCTCTCCGCCAAGCTGGCGGGTA  
CCACGGCGGACAAGTGGCCCATCCGGGACTGGGGTGATCTCGTTGAGGCGTACAACATC  
TCGACGAGCTCGAAGAAATCCATACTGGATCGTGGTCGACTCGCTGACCGAGATGC  
AGCTCATGGCCATGCGGGACATCCTCGATCGTGCCGTCGAGGAGAATCCGAGCTGTGATC  
CGGACATCCCGCAGATCCAGGACTGGCAGAAGTGTACGAAATGGTGAAGCGGATGATCA  
AGTGATTCAGCGCTTTGCAAGTCAACTTTCTGTACACGGCGCTGTCGCGGCAGACCGAGG  
ACGAGGAAGGTACCGAGTACCTTCTCCCCGATCTGCAGGGCAAGAAGGACAACACTACGCC  
AGCAGGTGGTCAGCTGGATGACCAGCTTCGGTTGCATGCAGATCAAGCGCGTCCGTGTCA  
AGACGGACGACGCCATCGCCAAGAAGGTGAAGGAGGTGCGCCGAATCACCTGGAAGGACA  
CAGGTTTGGTGACTGGCAAGGACCGCACCAACGCTCTCACCCCGTACACCGACATCCGCG  
ATGTCACCGATCCTGAGGATGATGGACTCACCTCAAGGACATCAGGCTCCGCATCGATC  
GGAAGAAGTCCGGCTCTGCCAAGTCGGCAACCACCAACCGTCCGGCCAGAAAACTGCGT  
CGGCTCGTACTCAGAAGGAGAGTGCATAAATGCCCAAGCTCAAGCCATTCGGCATCGGCG  
ATGTCGAGGACATGATCAACGCCGAGAACTCCTTCAACACGGAGGTCGTGCCCAAGGGCG  
TGTACCAGGCGAAGGTCAAGCGCATGAAGCACGCCACCATCCAGAAGGAAGGTCCGAACA  
AGGGCGAGAGCCGCTTCTGGATCTTGATGGAGGTCGTGCGGCCGAAGTCGACGCCGTAGA  
AGTACATCGGTGCCTCAATCTCGCACAATATCAGCGTGATCGAGTCCGGCGCTGGTTTCT  
GCAACGACTTCCTCAACGCGCAGGCGGGACCGGAGCCCGCCAAGCAGGCCGCGCTGAAGC  
GTGCGTTCTGGGCAGCCGACATCGTTCGTGATGCGGACGGGCACGTCATGAAGATCGGCA  
AGAAGCGTGTCAATGGCGACGGCAATGGCGAGCTCGTTGTCACCGTCAAGACCAAGCTCG  
GCAAGGACACTCGTTCGGGCCATCCGCAGGCACAGGTTGGCAAGTTCCTGGTCCCGCAGG  
CTAACGACGACGACGATGACGACGACCTCGATGAGGACCTCGAGGACGACAATGATCTCG  
CCGATGTCGACGACGAGGCTTCGGACGACGATGATTCGGACGACGAGGATTCGGACGACG  
AAGACGACGAAGACGACGAAGACGACGAAGACGACGAAGACGACGAAGACGACGAAGACG  
ACGAGGACGACGAGGACGAGGACGAGGACGAGGACGAGGACGAGGATGACGAGGACGAGGACG  
AGGACGAGGATGGTGAATCCGACTCGCGCCGTGCGGAACCTCGAAGCCCTGACCATCGCCA  
AGCTCCGCGTCGAGGCCAAGAGGGTTCGGTGTGCCGCCAGCAACGATCAATGGCCAGTCCA  
AGGACGAGCTCATCGATACCATTAGCGGCCGCCGAGGCTGACTCGGACGGCGAGGACGACC  
CGTTCTGATCGGGTAGTACATCGGGTACCTGACAGACGAAACCGTCAAGCTAAGTCGTGG  
TAGGGACGTCCACAGCCCGACCCCAATAACTTTTCAGCAAAGGAGCCATCATGGCCGATGA  
GCGTCGGTGCCTGCGGATGTATCATGGTCTGGTTCGAATGAAAACCACACATGGCTCTG  
CATCCACTGCGACCTCAACATCGAACCTCAGGAGTACGCCTCGTGAAATCTGTTGCCATC  
CTTGGCCGTGGGCCTTCTGGGCTCCTCGTGGCTCATGCAGCCGCCATGCTCGGCTGGGAC  
TTCTGAATCTACAGCAAGAAGCGCAAGAGCTTCTCGTTTGGCAGCCAATACCTACACGAG  
GCCATCCCGGCATGACAGAACCAGTTGCGGCGATCGTGGCATAAACCTTGTGGGTACG  
CCAGAAGGCTATCGGCAGAAGGTGTATGGCGCTGGCTACGATGGCAGCGTGTGCGCCAGAA  
GACCTCGAGCACGATCACTACCCCTGGAACATCCGCACGACCTGCGACAAGCTGTGGAAT  
GCCTATCACGACGAGATTGTCGACGTGGTGTGACGACAAGCGCTGGGATTCGGCCGAATTC  
TTCCGGAATGGCAGCACTGACTTCCGCCCCGACCTTATCATCAGCACGGTCCCTCGCAAG  
ATCTGGGCCAAAATTGGCGATGTGTTTCGCAAGCCAGAAGGTGTGGGCGATCGGGGATGCG  
CCCGAGCTAGGACGGACGTTCCGTTTCGAGCCCAAACAGGACAACACGAGCATCTGCGAC  
GGCACAGCCGATGTCGGCTGGTACCGGCTGAGAAAGGTGTTTCGGCTACACCACCATAGAG  
TGGCCACACGACCGCAAACCTCGTATCCCGAACATGGCTGAGGTCGAGAAGCCGCTCTGG  
CACAACAGTTCTGGAGCCAGCGACTTCATTCACATCGGTTCGGTACGGCGCCTGGGAGAAG  
GGCGTGGTGACGACATACGCCTTCCACCAGGCCATGAAGTACCTCGGACAGGACAAGTTG  
GGCTGAACGATGATGGGCAAACCTGTTGTTGGACTTGACATTGATGGGACACTATTCGAC  
TACCATGGGCACTTCTTGCCTTTGCAGATGATTGGTATGGCCGACCAATGCCGGACCCG  
CAGGACATCAACCCAGGCCTGCCCTTACAAGTTTATGCGTCCGTCGAAGGCTACGTAC  
CGGCAGTGTAAGCTGGCATTTCGCCAGGGAGGCCTTGAGCGCAGCATGCCGGTGTATGAT  
GGGGCGTCGGAGCTGACCCGAGCTATCCGCCGCGCTGGCGGAGAAGTGTGGATCTGTACG  
ACCCGTCCATATCTCAAGCTCGACACCCAAGCGCCAAACACCATACTTGTGCGGCGC  
AACAGAATCCAATTCGATCACATGCTCAGCGGGCCACACAAGTATCTCGACCTCGTGAAA  
CAGGTGGGTGCGGACCGAATTGTTCGGAGTGCTTGACGACCTGTCAGAGATGTACGAGCAA  
GCAGAAATGTTGGGGCTCAACCCATACTTCGGGACCAGCCGTACAACCGACACATCACC  
GCAAACCGCATCAAACATCTGGACCTCACACAGATCTTATTCTCGCGAGGATCGAAGTG

TACAAAGAGAAACAGAAGGGAAACTGATGGGCTCGACATATTCAACAGACAATCCGTTGA  
GCTTCGCGCTGTTCCGGCTGTCCCGCCAGGCAGAGTGGCCGGTCTGGGGGAGGCTGGACT  
GGGGATACCCCATCCTGCACCTTGGTCCTGGCGACAAGATTGTCCGGGGCGCTGAGGAAC  
TGGACTACCCCGCATTCGATTTTCGATGACCCAGAGATCAGCTTGCCATACGATGACGGGT  
CAGTCGGCGGTGTCATCGCCACGCATGTGCTGGAGCATCTGGCTGATCCACGCCACTCA  
TCCGGGAGGTGGCGCGTTTGTGAACTTCGGGTGCCATTCAACATCCTGGTGCCACACG  
GTCAGTCGCCGATGTATTTGCAGGACCTCGACCATAAGACACCGTTCGTGCTTGACACGT  
GGAAGAACTTCCTGCACAACGGATTCTATGACAACAATTACGGCGAGGGCGGATTGCCCG  
TCTGTATCGGGCGCCATCTTCAAGTTTGCCCTCAAGGAGGGCAACGAAACCATCATCACC  
AGCTCATCAAGGAGTGACAGTGTCCAACGAAAACAAGGGTGTTCAGTCATTCTGGAAGA  
GCTCACCTCCGAGTACGCCAGTCGGGTGGATGACTTGATCGCCAAACATCTTCCGCGCGT  
GCCAGAGCTGTTCCGGAGCAAGGCGCGAGACTACAGCGACCGCTCCGGCATCTTCGCGGC  
CGAGTTGCTCGGTGCGGGCGGGCAGTTCGCCGAGATCTGGCGCAAGATTCCCAAGCTCAA  
AAAGGGCATGTGGGACCAGGACGCACTCGAGAACGAGACCGTCAAGAGATCCTGTTTCA  
TCTGATCGGGCATTGCCTGCTCGCGTTGGACATAATCCAGACAGAATGCGGATCGGCCA  
GGCTCCCAGCGGACACTCATGGATACGAGGGTACGGGATCGGCGAAGTCAGGCGCGTTCC  
TTCTGGCACCGAACGCTTCACTGAATCAGACAAGGGTCCGATAACGGGCAAGCGCGATGC  
TAACGGTGGCGACTGCCGTGTCTAGGGCATGGGTGCTCGGTGGCACGTCCGGCATCGGGA  
AGGCTTGCGCCGAGCGGCTCGGCGAATACATGGTGGCCACGAGCACCGGTCTACGAGAAG  
GGGATTGGGACGTCCGCAGCGATTTGCGATCCATCTTCATACACGATGAGGTGATACTC  
CGACCCACATCGTGTATGCTGCAGGTATCAACCATCTCGACTGGATCGGGAATGGTGC  
GGAGCCATGTGCAAGTTATCGACACCAACCTGAATGGATTCATTTCGTCTGATGGACGGC  
TGGTGCCTTTGGCTACTACAGCGCTGGCAAGCTGGGTGGGTATCCGTACCACATAAAGC  
CCAGCATCGTCTGATCAGCAGTGTGCGGCTGAGCGACCGCTCCGAACCTCTATCGGGT  
ACTGCGCAAGCAAGGAAGGGCTCAACATGGCCGTCAAGGTGGCTGCCCGAGAACTCGGTC  
CGCACGCCTGGCGGATCAATGCCGACTCGCCGGGGATGACTGCGCCACGGGCATGAGTG  
ATTACATCGACAAACGTGTTCCGCAAGCGCGAGGTTGGACTCCGATCGAAGCTGCGCAGT  
ACGAGGCACAGCAGGAGGTCGTCCCTGGACGCATCGATCCTCGAGAGGTGGCAGAAGTGG  
TGTACGATGTGCTACCGGACCTGAGCACCTCAACGGGTCCATCATCACCATCAATGGCG  
GGCGCTGACCAGTAGGAATTCGGCCTCCCCGAGACGGGAGGCTGAATTTTCTCCGAAAC  
AACCCGATTTGCGCCGGTGTAGTAGGCTTCGGCCAGTGTCTAGAAGGGAATATTGAGTT  
GAAGGACCTTGAGGTCAGCCAGCCAGACCCGATCCGCGAGAAGGGAATTGGTGAAGGAGCT  
CTCTTTTTTCCAAAACCAGCAATGGCTTGTGCGGTGAAACCGATGAAGTTCGTATCGCTTCA  
CACCCACTCAACGTTCTCTACGGCGATGGCTACGGACCAGTCAAGGAGCACGTCCAGCG  
AGTTGCGAAGCTGGGCATGGGCGCTCTGGCGCTACCCGAGCACGGCATCCTGAGCAGCCA  
CGCAAACTCGAGAAGGCCTGCAACGAAATTGGAATCAAGCCCATCTTCGGGTGCGAGCT  
GTACGTTGCTCCGCCAGGCGAGAACCGCAAGTGCCATCAGACGGTCCCTGGCGATGAACGA  
GGTCCGGGCTCCAGAATCTGAACCGCATCGTACCAAGAGCTGGAAGAATTCTACCGCAG  
GCCACGACCAGCTGGAAGATATTGGAGGAACACAATGAGGGGCTCATCGTACTTTCAGG  
ATGCGCCGATAACGTGCTATCATGCACGCTGCTGGGTGGTAAGTTTTACGGTGACAAGCG  
ACTACCGCAAGCAAGTGCAGCATCGCTCGTGCCGCTGGGCTTATTGCACGGTACCAAGA  
GGTATTTGGAGATCGGTACTACCTTGAAGCCCAGAGATTTCCAGGACTTGATCGCACTTG  
CGTCTCATTCCGCTCCTCGCACGGCTACCGGAACTACCGGAGCTCGTCTTGTGGAAC  
GGCTGATGTTTATTATCCACGTGTATCCGACAATGATATGCAGAAGATTCTTACGCGGC  
TCATCGCGGGTCTACTGTGGAGCCTACTGAGGTGTCCTGGGAGTATGACATTCTCCTCAC  
TTACCCGGAATACGACCGAGAAATCTATATGGACCTGGTGGGTACGGGGCTGACCAAAGC  
CCAAGCGCGCAAGCGGTTCTGGAGTCTGGCCGAAACGCTGAGCGCTGTAACGTGATTCT  
GCCGAAGAACCAGCCGATCCGTTTCCCAAGCCTACCAAGGAAGTTGACGGCACGCAGGT  
GCCGATGAGCGCCAACGAGCTGACCCGTTAGTGGCTCAACGAGGGCTGGCACTTCCGTAT  
GGCGACCAGCCGAACATGCGGAAGAACCGCCAGGCATACAAAGCACGCGTCGAGCATGA  
GCTTGGCATGATGGAGGAGAAGGACTTCCTTGATTACTTATTGGTACTCAGCGATGCGGT  
CCGTTGGGCCAAAGACCACAAGATTCGGGTTGGGCCCGCTCGCGGTAGTGCTGCGGCGTC  
GCTTGTGTGCTACGTGCTTCGGATCACTGAAGTCGATCCGATGGTCTTCCCGCACATGCT  
GTTTGAACGTTTCTTGTATCCCTCACGTACAGAGCTGCCCCGACGTCGACCTTGACTTCTC  
AGACGGCCGGCGAATCGAAGTCAAGCGCTACCTAGAAGAGAAGTACGGTGCGGACCGTGT  
TGGAACATCGAAACTTACGCGTATCGTGGCAAGGACTCGATCGACGACGTGGCTCG  
CGTGTACAACATCCCCGTCTGGGAAACGGAAATCGTCAAGAACCTCATCATCGAGCGCTC

TGGCGGTGACAGTCGTATCAGTGATTCTCTCGAGGATACATTCAACATGTTCCCCAAGGC  
CGCAGCAATTCTGGAGCGTCACCCCGAGCTCGCCAACGCGATTTCGCCTGGTGGGAAATTA  
CCGGGGGATGGGAGTTCATGCTGCGGGCATCGTCATTAGTCACACTCCCATCACCGATAC  
CTGCGCAGTGTACGAGCGCAATCGGCCGGCAAGTCGACGCAGGTCATCGCATAACGACAA  
GAAGGACGGCGAGTATGTGGGCATGATCAAGGCAGACTTCCCTCGGTCTGTAGACGATGGG  
CATGATCGGTATCGCCCTTGACATGATTGGGATGGACCTTGACGACCTATATCGAATCCC  
TCTTGATGACCAGAAGGTGCTGCAGGCATTCCGTCGTGGAGACGTCACCGGCATCTTTCA  
GTTTGAAGGACGAGCTACTCGGATCGTGTGCAGTGACGTTGTGCCAGACCACTTCCAACA  
CCTGGCGGATATCAACGCACTCAGCCGCCCGGGTCCGCTCTTCTCAGGAATGACTGCGGC  
TACTGCGAGGTCAAGCACGGCCGCAAGACTCCAGAGCGGTACCATCCCATTCTGGACAA  
TCTGACTGACTGGACATATGGTCAGGTGGTGTACCAGGAGCAGGTTCTCAGCACCATCAG  
GGAGCTCGGAGGCTTCCCGATGAACGAGGTCCACAATATCCGTAAGATCATCTCCCAAAA  
GCTCGGCGAGGCCAGTTCAGGCCAAATAACAAGATGTTTCGACGACAATGCTTGCCAGAA  
CCACCGCTGGACCCCGGAGCAGGCGCAGAAGATCTGGCGCTTCCCTGGCGACATCAGCCAC  
CTACTCATTCAACACCGCGCACTGCATCAGCTACAGCATGCTCACCTACTGGCTGATGTG  
GATCGAGCAGCACCACCCACCGCGTTCTATGCGGCCAGCTGCGCAAGGTCAACGACGA  
GAAGCTCTGCAAGTTGATGCGGGATGCGGTGCGGCACAACCTTATCTATCCTCCCGCCAAG  
CATCAACGAGTCGATGGCGAGCTGGTTCGGCTCTCATGGAAGGTGTTGTGCGCGCAGGTTT  
CCTGCAGATACCGGGAGTGGGTCCCAAGACATCGGAGGTGATAGTCGAATGGCGCAATCA  
GAAGATCGGGAAGGGACAGAAGGCAATCGCAGCCAGTGCCCCGGACATCATGTGCTCGGA  
CCTGCTTGAGGTAAAGGGGATTGGCCCCAAGTCCATCGAGAAGATCGTGGCATTCTGAGA  
GGCAGAGGACCCGTTCCGGCTCAACAGGGTTCAAGATATGTTCAAGTCTCTGCGGCGGAT  
CATCAAGCCCGCAATGGGTATGGGGTGCCAGCGCCTACGCATAACAGCGAGAGCATCCC  
ACGTACGGGCGACCACGACGGAATTGTCTGGATGGGCATCCCCAAGGCCAAGA ACTATCA  
GGACTATATCGAGAACCAGCGGTCTCGGTACGGCAAGGAAGAGGCCGAGATTCTCGCTGA  
GATGAAGGATCCGCTTCTGGTCAAGAGCTGTGTGGTGCAGTGCTTTGACGACTATGACGA  
CGACGTGTAATGCCGGTGAATCGCTGGCAGTTCACCAAGTTTGAGAAGATGCTGGAATC  
GCTGGCCGTTGATGGCAGCAACGTCCTCATTGTGCGCGGTTCGCAAGCGTGAGGACTTCGG  
AGTGTCACTCCACGTGACGGATGCGTGGGTGCTTGAGTGGGACGAGGACGATAGGCAGAA  
GTATGGGCAAGAAGAAGAAGCGTGAGGGCAAGCCCCGGCCCCAAGCACAACCCGCTGAAGC  
TGGTGGGTGGTGGCGAGGACTCGGCCGCACGCGTCACCAAGGTCATCCAGAACATGCTCA  
AGCCGCCAGAGACGGTGCTCGCCACATCCAGCGCGTAGGGGCTCCGTTCTGGGTAGCAC  
CATTTGGAGTTTCGCAGGAGGGCGAGCAGTACGCGCGTCCGTGCCTGGTGGTGCCGTACG  
ACGACCAGATTTCCGGCCGAGCTGGCCCATCTGGCTGCTGGCGGGGAGCTTGCCGAGACGT  
ACACGGAGGAAGCCCGCAATGCGAGCCGCGCAGCTGCACGTAGTGTGCGAGGCGCACAGC  
CCAAGAGCGACCTGGACCCACAGCCATTCTGGCCAGGTCTAGGAGATGCTGCAGCAGG  
GTCACGGCGCACAGTCGCGGGTTGCTGACACAGCATCAAAGATCGAACCCACCGAGCTTT  
CGGACGAGGAGCGCGACGAGCTCCTCCGCAAGCTGCGCGGTTAATTCCAACAACAAGAAG  
GGAATCACATCATGACCGGAAAGAGATCGCCAACACTACGCCGACGTGGCGATGTTCAAGG  
CCGAGGAGATCGACCGCACCAAGGGACCGCAGGTGTTCTGCTGAGCTGCAACAACGATC  
CGCTTGGGAACATCGCGGCTGCTGCCAAGGCGTACAAGGGCGAGTTCGTTGAGTCACTGG  
CCCAGATCACCGACGACGAGCGCCGGTACTACCTCAAGGAGGTGCAGAAGTCGGTGCTTG  
AAATGCCTCTGGAGGCTGTCCAGTTCACCTTCCGCATCACCGGTGTGACTCGCGGGTTCA  
CCCAACAGATGGTCCGGCAGCGCAACGCAGCCTACTCCAGGAGAGCACGCGCTTCGCCG  
TCAAGGAAGACGTCCCAGACGGATAGCCACTCAGCCTGCAAGACACGATGCCATGGAACG  
AATGGGTTCGAGGAATGTCCGATGGAGATCTATCCAGTTCGCAGCCAACGGCGTGAGTATC  
TTCCGGACACGCGTGACCAGGCTGAAGAGTTCGCCGAAACGATGGGCGACAAGGATCAGC  
TCTGGCGTCGTCGATGGGATAGGGCTATCGGCGTCATCGAGGAGGAGTACAACGCTCTGG  
TCAACGAGGGCATGCCAGCCGAGGACGCGCGTGGATTGCTGCCGACGCAGCTTCTGACCC  
AGATGAACTACATCACCGATCTGCGTGGCCTCAATGGCCATGCAGGCGTGCGGCTCTGCA  
CGCATGCGCAATTTCGAGTGGCGTCAGGTCTGGGCCAGATCGTCCGGGCGATCCGTGAGT  
ACGGGAAGACCCAGACGTACATGACGAACGACAATGTCCATGTCATTCCGGAGAACCAGA  
AGTCGTGCGAGTGGCAGTTCGATGCCTTGGCGGACATCTTCCGGCCGATCTGCTCCTACC  
GGGGGAGCAGCCAGTTCAGGCAGACTTCGACCCGGCACTGCATAATCCGTGATCGCGTCCG  
AGGAGAATGCCGGTATCAATCGGCCGAGCACCGACTGGGACAATGCATGGGTCCGACCGA  
ATCCTCTAAGCCCCACTGGCGCTGAGGGTTACATCGGACCGATCTTCCCGGCTGAGTGGC  
TCCTGGATCCCTCAGCGGCAAAGACGAAGTGACCAAGGAGACCGGCGCATGCCGACTGTG

TGGGAGGGTGGTCGATCGGGCTGCCCTCACCAACACTGGCTACACAGCTTCATCTGCGC  
GCGATGCAGTGAAGGATTGAAACGATTGAGCGCGAAGCTATTTCCCACGACAGGAGGGGA  
TTCAGTTGGGCATCATCGTCATTGATTTGGCCGAAGGGAGGTTCGCACCGTGCCGCTATGC  
GTAAGAAGAAGCGCAACAGAGACAGCGAAGCCGGCATCAACTATTCACAGCACCGGTCA  
TCGCTGTTGATCCGGGCGGAACGACCGGCTGGTCCTTCATGTGTGTGGAGCCATTGGCTC  
TGCACGACCCCGCAGGAAATGGTACTCGAGAACATCATTACTCATCAGCACGGCGAGCTCA  
GCAGTACTGTTCGGATGCAATGTTCGAGAAAGGCGAAAACCTCTGCGTTCGACAGACCAGTATG  
AATTCATCTCGGCTTGGCCCCAGGCCGCTGTCTTGGTGGAGGACTTCGTTATCCGAAGCA  
ACAATCGCAGTCGCGAATTCTTTTCGCCCGTTCGGGATTACCGCCGCACTCAAGCACCTGC  
TATGGGCCGACAACCGATACATCATTCCGACAGACACCAGCAAACGCCAAGATCACTGCGA  
GCGATGACCGGCTGAAGAGCTGGGGCTTGTTCGACGAGCATGGCAGTCTTGGTACGCAC  
GCGATGCCGATCGGCACGCAATTACATTCTTTCGCGCAAGGCCAAAAGCAAACCGAAGCTCC  
GGGCGATGGCTTGGCCGTACCTATTCGGAGAGGAGGGTATTTATGCAGTCGAAGACGACG  
GACAAAGGTGGTGTGATGTGCCGCCAGCGTGGCTGGTTCGGGTGCTGGGCGAACACCAT  
CCGCAGATGACTGGGCTGTGGTCCACATGCTCTTGGAAAGAGCACGGACGCCTTCGGCGCT  
CCGAAGCACTACACAACCTTCTCTGCGGAACATCAAGCGGCCGAAGTACATCGCGCTCTG  
AGTGATGGCGTCGCAGCCCTTTTCTAGGAGGTTTCGGTGAGCAAATCGGACGAGTTCTATG  
CCAAGGCGTTGGTTCGCGCTAGGTAATGCAGAAGCTGCGCAAGCTCACCTCAAGGAAAGCT  
TCGACGACAATCACTACACCTTCTGGTCTAAGCGCGGACTTTCGCACTGTGCCTTGGCGA  
ATGCCTATCTCAAGGTCGCAGAGTGGGAGCTCGGCGTCGAGGCCTGGAACAGGAAGGAAG  
AGGACCAGGTCTCGGTGCTCACCTTCGGCACAGACGTGGTGGTTCGCGACGTTCCACGACG  
ACATCGAGGAGCGCCGATGAGGCGCGCGGGTATGAACGACCTCAATCCGACAGTCGTCAA  
GAGCCAGAACGACGACCAATAACAAGAATAACAATCCCAAGGACGCCTTCACATTCGGGCG  
CACGTGCCCGGACTGCGCTGGCGGGCTACAGGTCAAGTGGGACCGGATGAAGTTCGGGCC  
CAAGCGCAAGGTATGGATCTGTCCAGCCTGCTACGAGATTGAACTGGAAGGGCTGCCACC  
AATAAACACGGTTCGGCCCCGCATCGGAGGAGGAAGAATGCCCGTGGAGCAGCGATGACT  
AAGGAGCAAATCGCAAGGGCGGAGGAGCTTTTGAACGAAGGCTGCTCTTACCTCGACGTC  
TCCCGAACCATCGGCATCGCCGAGGTCAGCATTTCGCTCAAGTTCCCGGTCGGGGCTGG  
ACACAAGAGCAAAAAGCCGAGCACAAACGTCTCAATGATCTGTTCAAGCGTCTCGACGCC  
ATCTGGGGCTTGGAGAGGGCACAGAGAGGCGAGAGGCGCGCATCATAGGTTTCAGTAGCCC  
GCATCGGCCCGAACCAGTTCATCAAACCGTAACAAGGAGGAACCATGAAGCTCACCGG  
AACTGCCCGCGAACGTTCGCGGGTGTGAGCGGGTGGGTTCGAGCCAGAACTCGACCGAGCGCT  
CAAGGAGTATGCCCGGAGCTCGGCACCAAGACCTCACAGCCTTTCGCGCCGCGTCATCAT  
CCTTGGGTTGAGCCAAGAGGGCTTCCAGATCGACAGCGAAATGGTTCGATGCCTGACAG  
ACCATCACACAGGAAGGATTGACCGATGAGCCGAGTGGAGGTGGCCCTAGCGAGCGTAGC  
GCTGTCTGCGGCGATGCTCCTGAGCCATGCCGCTACTGTGGGCGCAGAGCCCAGCAGCT  
GTCCGGGAAGGACCAGTTGTACCTCACACCCCTAGTCATTGGCGAGGTGCCATGCGGATC  
GGCTGCAAATGCCCTCTCCATTGCACGTTCGTGTATGCCAGGCTACCACTGGCGGAGACTG  
GGACGCCACCTCTCTCGGGAAGCTCGGCCAAGAGATCATCCGCAACAACCCGAAGTTCGA  
CGCCGACTCGGCAGCGAACATCCTGGTGTTCGAGCATGACACTGTACTGCCCGAGAACAT  
CCCCGACTGGTTCCACGCCGAGAGGGCCAAGTATCTCGCCGAGGACGCCTCTGTGGCTGT  
CCCTGTGGCGACGAATCCTGGTCCCTACAAACCCCTCCACGCTAGGAGCGTCTGCCATG  
GAAACAGCGCCTTTTGGCGTATCTACCGCTGACTTCATCGTCTGGGGGACCACCTTCGCG  
CTCACGGCTCTCACAGCTTGGCTGCTGAAGCATGGTTGGCGCGTGAAGACTCCGCTAGAG  
CTTGTGCATCGCACCTTCAACAAGCACGGCATGCCACCAGCGGTATCTGCCACATGGC  
TTTGATCGTACGGCGCACCACTACGCGCTCCGAGGCTATGAGCAGGTTCGAAACCCAGGGG  
TGCGGCGAATGCCTGAAGGAGCTGACCCCAACTCAGTTTACCCACATCAATAGCTGTCCC  
AGCTGCTGGTTCGTTCGGGGCGCTACCGTTCGGCCCGATAGAAGAATACTTCAATCTCCA  
CCCGAGCAGACGATCTGGGTTCGAGAATAACGATGGCAGCGTCCATCTCCGCAAAGCCTTG  
GGAGAGAACTGGGCCGAGACCAAATAACAAGGTCTGGGGGAGAATGGCAGCGAGAATGCAAG  
ACCAAGGACCTGAATCTGATCCGGGAATTTGGGTGAAGCCTGTGGTGTACCGCATATGC  
CCCAGTTGCGCGTACACATGGTTTGGAGCACTAACCGAAGGGAATACATCATGATAATGAA  
AAACAGTTCGGAGGACGCACTGCGGAAGGCTGCAGCTGCATTTGCTCTGCGTCAAATTCG  
TGAGGTCAAGGAGCGCGCTGACTACATGCTCGTCCACGGCCTGACCGAGGCCGACGTGTA  
CGAAAGCATGCTCGTGAGGGCTGGGAGCAGCGCGAGAATCTTGGTTCGCTGGATCATCAC  
GCCAAAGGACTCAAGAGGGTAGTCCCAGACCCGGACGACGTCGTCGGCTGCGTGCCGGT  
TCTCGTCCGAGACCCGGACGACATTGGCGAGCACCGAGAGCGTAACGAAACGTTGCGCCG



GTACTACGATCCGCGCTTCGGCAAGGATTGGTCGGGCTACGTCGGCAAAGTTCCCTACAA  
GCAGAGGTATCGGGAACACAAGGAGCCACAGCATCTACGGCACAAGCCCTATGGGTATCC  
GAGCCCGGCCTGGGAGCTGAACTACTGCCGCGTCAACACCTTCGGCTGGACGCACTATGT  
CTGCCGAACCAAGCATGACGAAAGCTGCTGGGGCACGAAGAGCCAGAGGAGGTGATGGA  
CTGATGGACTGGAATCTCCTGATCCGCGTTGCGATGGGCGCTGCGATGGGCGCGACGATC  
TATTTGGTCGGATGCATCGTCGGATACATCGTCGGATACAGAGCAGACAAAAGGAGGCC  
CAGCAATGAGAGGCGTGAAGGGCTCTGGCCAGGGCACATGGGCAGCGCGCTACGACAGCG  
TGTGCTCGGTGTGCCCGCACTGAATCTTCAAGGGTATCCAGTTCACAAGATGCACAACA  
AGGTAGGCCACGAGGAGTGCCATACGCTTGATGAGCGTGGCGGGTTCGGCCTTGATGTCA  
GCGGCATTGAGCAAGAGCGCATCGACGGCCGATACGGCAAAGGCTACGAGGACCGGCCGA  
GCCACACAGTCCGGGGCCGACGCAAGCACGAACGCAAATGTGGCGAGTGTTCAGATAC  
ATGCAGGAGAATGCCCATGAAACTCGAAGACACACGCGCATAACGCCGGTCAGAGCTT  
GGCCGAGAAGATGCAGGAGAACTCGACTCTGCTTACAAGGCGTGGCGCGATGCCGGTGG  
CAGTGATCATCGACAGAACTCGCAACAGGGACGGCACAAACAGGAACTTCGACCGGGTTGA  
GGGCTGTGCGGCGCAACTCTGAATCCTCAGGGGCACAAGTACAAAACATGAGATCGAGGA  
AGCGGAAAGGCGAGACAGATGAGGAATCCCTTCAAGTACGGTAGCCCGCAGCGGGTTGTG  
TTGGCGTACTGGCTGATGCGGTGGGCGTACCGGATCGTTGAGAGCATTGCTCGCGGTCCC  
GTCCCGAAGATCAGCATGTGGACCTTCACCTTTGAGCGTGGGAAGGGTGCGGTAGTTCGC  
TAGGACGATCGGGCAGAGCACAAGGGTTGCAGACTCGTGTACCTCAATGATCGTGAGTAT  
GACCGTGCCTGGTCGGATAGTGCCTCGTTCGGCAAAGACGAGGACGAGGACCAAGACGCC  
TTCTCACCCTGGATCTGCCCCGATGAGCGGTACAGCCAAATACGACAAGAAGATCGGCAT  
CAATGCCGACTGGCGGAAGACCACGACGCGCGGGCCACGAGGAGCGTACGGCAGTCGCCC  
AGACAGTCCAGGAGACCCAGAAGCACCCAGTTGTAAGGGATTCGGGTCACGCTGGCTGCC  
AGACGGCACTTGCCCCGGCTGCGGCAGGCACTGGACCTGCGTGTACCAGACGCGCGACGC  
AAAACGCAATCCCTTCGGCACCAACGGAAAACCTACCATACTTCTCACAAGACCAAACC  
ATTGGAGGGACAATGAACGATCCAGTCGCCGAAGCCGGACAACGGGCGATGAGGAAGGTG  
CACGACTACCCAAGGCCCAACCATGACCTGATCGTCGCCGCCCGTGAGGCGTTGAAGCCG  
ATCCGCGAACTGCACTACCCACAACCTGATGACCGAGCCCCCTTCTGCCCGGAATGCCTT  
GTCGAGTGGCACTGCGACACCGCCAAGCTGGTCTACACCACCGAGGAGCTGGAGCGATGA  
TCTTATGGCATGCTCGGCGTGAACCTCGAGCGCTCTCGGAACCAACGTTTCTACAATCGGC  
CGGTGGACAAGAGTGTCCAAGCTATGTACACCTGGTGGGAGTACATGGACGAGATCGACT  
TGGTGAATGGCGAGAACGACACCATGCGCATCACGGTCATGGAAGAAGAGACTCACCTC  
CTCCAGGAGGTCTGCTCCCTGAAAAGCCCAAGGTCATTTCGCGCACTTCATCAGAGGTTGA  
CACCGAAAATTAGCCTCGAGTACCAGATCAACACAGCGTACGTAGCCCAAAGCACCATCA  
GCCCCGCTCGAGGAGCTCAGGGCCGACGGGTGGATGGCGCTCGGCCACTACAAGATCCATC  
GGTACTGCATCCGAGGCCGCATCAGGCCTGGCGGAGACGGTTACGAGCCATATCGCATT  
TCATCCTGGCGGGTGAGGTACGCCCGCCGGGCATATGGTATCCGTGGTCAGAACAGCCCG  
AGGACGTGCCGAACGAGGTAATTGACGGAACTTACCACGGGATGTTTGTAGCAGATAAAT  
AGCCATCCCCAGAAACAATAACCATCTCCTCACAGAAAGACAGCATATATGTTCTGTGCG  
TAGGAATCGCGCGGCCGCAAAAGAGAACGCGCGCATGTACAATCTCGGCAAGGTCTATGG  
CTACCTCGACGCTCTCAACGAGCTACCACAGCCATCCAAGTGCAAACCTCAACTGCGCGA  
AGAGAAGGCGCATCTGGTGTCTCCGAGCGGGCCCGCGTGACCCCTCCACAGTTTTTACCTG  
CTGGTTAGAGGGCGAGGTGCTTCAATGAGCAAGACAAAACAGATTCCGCCAGACGAGTG  
GGTCAATGAGGTCGAGCGCGTACAGTCACGCCTAGACCGTCTCACGCGTCGTCGGAGGTG  
AACGACATGGATGTCGACCTCATGATCGCAGTACGTAAACAGCGGGCCACATGGCCTCGA  
CGAGGTGGGTGGAAGCCGCACCCACCGACAAGCCCAAGGCTGAGCCTGTAAACGGTAA  
GCTATCTAGCTGCGGTAATAGGTCGACCTTGCGGGTCTAGGCCAGAGAAGACGAGACACA  
TCGTATCATGTCAACAGCTGGAATATCAACAGCGCCAAGCCATTCCGACGTGCGGTAGA  
AGGCTACCGTGAACGGGGATGGGCGGGAACGCTACCGCTGCCGCCTCGGAGCAAGAAGAA  
GCCGCCAACAGGTTACACCGGGCACACAGCGCCGTACCCGAGCGACGATGACATCGCGAG  
CTGGCTGCGAATGCCAAGTACGCCAGGGCAATATCTGTCTGCACCTGGGTCAGGTAGC  
GACGCTTGGGCCGCACGGAAAACGCCTGGAGCTCATCGGGATTGACGTCGATGACTATGA  
GGAAGGTGACAACGACAAGGAGGGCGGCAAGCAGCTCGCCGCGCTCGAAGCCGAACTCGG  
GCCACTCCCCAAGACGTATAACCAGCAGCTCGCGCACAGGCGTGGGCGGGATCCGCTTCTT  
CCTGGTCCCCGCTCAGCACGCAGGGATGGGGAAGGCCGCGCCGCACATCGACATTGTCTG  
CAACACATAACCGTTACGCCATCGTATTCCAAGTTGGCACCCAGGCGAGGTGATGAGGA  
GACGGGGAAGGTCATCACCGAAGGTGGCCAGTACAAGTGGCGCGATCCGCAGGGGCAGTT

GCTGGATGGGCTAGAGGACATCCCTGACGTTAAGGATCTGCCCATCCTGCCCGATGCGTG  
GGTAGAGCGGCTGAGCCGTGGCGGCATGAAGCTCTCGGACGAGGACGCCGAGATCGACAT  
GGATCTGAACGTTGACGAGATGTTCCGGTGGGCCGTGGGTAGGTTGCCGGGCAGTGACGA  
GGAGGCCAGCCCTGCTACAAAATGAAAGCGGCAGTTAAGTACTGGCAGGGGCAGATTGA  
GGAGGACGCCTCTACCCACGACAAGATCACCGGCTCGCACTGGAATCTGGCCTGCTTGGC  
GACCGAGGGGCACACCGGCTGGCGGCAGGCCATGGCAGCTGTGGATGCGAGCGTCGCCGA  
AGACACCATCAAGAACCGTGGGAAGCGCGAAATCAGCGAGCTGCGCTCAGAAATCACGCA  
TAGCAAGGTGAATGCACTCCGAAAGCTCAAAGCCCAGATAGACAAGGGCAGGCGCAACGT  
GCTCACGGTGTGCACGTGCTACGAGCCCAGCGCAGACGAGCTCGACGCGTTCACCGCCAG  
CCTCAACAGCGCAAAGGCAGCTGCCAGCGTGCTACCGAGGAGCGCGCGGTTCGCCAGCGG  
CGAGGGGCGAGACGGATATTGGCGCGATGGCATGCCCAATGGCACCCCGCAGAACCCCGG  
CGACTACGAGCAAAGCGACCAGGGCAACGTGCATCACTGGATCAACCTGCACAAGGGCAA  
TGC GTTCTACGTTCCGGCGCTGGGACAGTGGATCATGTGGACAGGGAAGAGCTGGATCGT  
GGGGGAAGGCTGTGCCGAGCGGAGCTACCGACGCGTGAAGGCTCGCCAGAAGCGGAATGC  
CGAACAGCTTATGCGGCGCGCGGCTGAGCTCAAGGCTGCGCAGGATCCTACGGCCAACGC  
GGCTGTGGCGATGGCGAAGAGCTGGCGTAGCTAGGCCACCCGCAGCGGCGATGTGGGGCT  
GATTGAGCGTGCCCTCAAGGCCGCCAGCGTGGAGCTCGGCATCGAAGAAGGCGAGCTCAA  
CTCTAATCCGGCGCTGATCTGCTGCGGGAATGGCGTGCTCCAACCTCGATCTGTGCCGCT  
CGACTCCCTGGCGGACGACTACCAGCGCGCTGGGCGCAACGGGGATAGAGGTAGGCGCAA  
CGGACGCAACGGCACTGCAAATGTGGCTAGCTTGGCCGAGGACGACGAAGAGTTTGATCT  
TGACTACGAGGCTGTGGCCCGCAATAGCCATGTGCGCCTGCGAGAGATCCGGCGCGAAGA  
CTTGCTGACGCTAAGTACTGAGACTAACTACCTGCCCTGGCAGGAGCTGGTGGCCGGGGA  
GTTCCGCAAACAGGAAGCGCTGTATGCGAGCACGTGGGCCCGAGCAGTAGAGATGTATCT  
GCCTGATGAGGAGGTGCGGATGTTCCCTGCAGAACTGCTAGGGTACAGCCTGCTCGTCGA  
CAACCGAGAGCGCATCGTCGTGTTTCCGCACGGGCCAACGGGCAGTGGTAAATCCACCTT  
CCTCAACGCCACGCTCAACGCGCTCGGCGAATATGCGGATGTGGTTGATCTGGGCATCTT  
CAAGGGCGACCGGCAGACCAACCCAGCTCAGGCTAACGCCCTCCCAAGCGCATTGTGAC  
GTGCTCCGAGGCTAGCCAGCGAAACGTGCTGCACGCCGACATGTTCTAGCGAATTACGGG  
CGGTGACCCGTTGAGTGCAGAACTGAAGTATAGCAACGAATCTGTCAAGCGGAAGCCCGC  
ATTTGTGCCGTGGATCGCCACCAACACCCACCCAGCATCCCTGGGGCCGATGCTGCGGT  
GGTTGATCGGACGGTGGTGGTGGGATTCAATGAGCAGATCCGTAACAAGACGTCGGCAT  
GAATGCGATGCTGTCTAGTCCGAGGGCCAAAACGGCTGTGCTCGCGTGGGCGGTCGAGGG  
CTGGGGAATGAACCGGCGGAGGGGCTGAGGCGCGCTGATTTCCCGACTGCAGTCAAGGG  
TGAGAGCATTGAATTCACCAACCAGATCTCCGATGTGAGCGAGTTCCTGAGTGACTGCGT  
GGAGGAGGCTCCGATGAGCCTCCGGCGGAAGGCTGAGAGGCGCGCGTGGCGCGTGTGCGG  
CTGGCCCGAGGAATGGCACATAACGGTCAGCGAGGTGTACGACGTGTACGTCACCTGGTG  
CCAGGAGAACCGCGTTTCGGATCGTAACATCATGAAGAAAAATGGGTTCTCGCGCCAACT  
GAAGGACTATGGATATCGGGCCGAAGTTGTCGAGAAAGATGGCTTCACTTCGAGAACTTA  
CGCTGGCTTCAAGCTCAACTCTCAAATGCACGCGTTTTGAAATTGCAAAAAGACAGCTG  
ATTATTGGACAAGAATGGCTCTGAGACGGGGCTGTTACGCAATGCGTATCCCAATCAGTA  
ACTACATTTGACCAGCGGAAACACATCATTTTGGTTACTGGGTGGGGTTCGTTTTCGCTT  
AGGGCTATACCTCCTCTCGTTCTTATACTTCTACCCTGTTTTCCCTACTACCTATTATCT  
AAAAAAGCGAAACGGGTAACCTCAGGAGGGTATGAAAATGCTGGTAGAGCAATGGATTTCG  
ATTTTTGAGAGACCCGGAGTGCCTACCGAATAGGTAACCCGAACACAGGCTACATGCGG  
AAACATGTTTCGTTTCGCATAATTTCCGGTGTGACGGATAGCCTGGGAGGGTATCAAGGAGC  
GTAATTTGTGGGATCAGAGATGGTTTGGACAGCAGCAATCAAGACTGATGGAATTGGAG  
GAATGGC

>NewGenomeName\_65

CTGAAAGACGGTCTTTCTTAATCCCCAAAACGACAAAACATACGAGTTCGTAATGTGCAAG  
ATGTCAAAGAAAAGGTTAAACAAGATTACGAAAAAGGTTTGAAACAAAAGGAAATATCAG  
CAAAGTATGACATTGGTTTAAACCCTTTAAAGACATGGATAAAAACAGAAAAATGGGGTA  
GTGAGAAAAAATGGGTCCACCTAGAGATAAAAGCGGTCCACCCATAGGTCATAAAAATG  
CCACTTGCTTCCCTGGAATAAACTGCTGAAAAGTTTGGATTCTTCTGAAAATATCTAC  
CTGTAGAAGCTCGGGAATCAATACAAGAAATGTCGATACAAAATAAATTCGATATTCTTT  
GGGAACACATATCAATTC AATATGCAGAAATAATAAGGGCACAAAGGATAATGAATGTTT  
AAGACAAGGAAAAAATAAATCAGGAATTAAGAAACATGAAAGCACAGAAAAGGGTGAGA  
AGATTGCATATGTCTTCAATTTGCATGGGATCGGCCAGCATCTTTTCTTACTGCACAGA

GTCGGGCTATGAGCGTGTAGGGAGTCTCATTA AACAGTATGGTGAAATGATGCATATGG  
ATTGGAATTTATCTACAGAGGAGTATAGAAATAGAGCTGAAAGGATAAAATGTGAAGATA  
ATAACCTTAAGATTAGTGATACTGGAGCTGATTCGGAAATTTGGGTTGAAGCTATACAAA  
ATATTGCAATGAAACGTGGTGTACCAATGGCTAAAACCTTTATTGAGGCTATTAGGTTGT  
TATTCGGATAATCCTCTTTGGTTGGCAAAGGGTATGTTAAAGGTTAATGCTGAGAAGTAG  
CCATCTGATGATCTGATGTCTTTAGCCCACACCTCACAAGTATCTATTAGAAGTGGTCAA  
GGAGTAGGTA AA ACTGGATTACCAAGCATTGCAACTGTATGGTATGTAAGCAGTTGACCT  
TTTCCGAAAGCAGTTATTACAGTTCCAACACGACAACAATTATCAGACGTA CTATGGGCT  
GTAATAGCTAAATGGCTAAGTATTAGCTAGGTTGAGAAGCTACTTGAGTTGACTAAAACA  
AATGTGTATATGAATGGCTTTGATGAATGATGGTGGGCTACACCTAGAACAGCAGTAAAT  
CCCTAGAATATGCGAGGTTTCCATGATGATGATGTGTTATTTGTTGATGATCAATCTCCG  
GGAGTTGCTGACCCCAATTATGGAAGCTAGACTACGAACATTATCAAATGCAGAAAGTCAG  
CGTCTCTTATGTGGAAACCCA ACTCGGACGAGTGGAAACGTTTTACGATAGCCATAATAGA  
GACAGAGATTTATATAATACAGTTGAAGTATCTTCTTGAGACAGCCCTAGAACATCCATA  
GAAAATATTGATATACGCAAAGAAAGTACCTTGGAGGTTCTGACCCTTGGAGTGTGAGA  
GTA CTTGAGAAAGTTCCAAAAGGTGAAAGTGATTCTTGAATATCTTTAGAAGCTGTTGGA  
ACAAGCGCAATAAGAGAAGTGAATCTATTTATTGACTATATATTGAATATTTCCGCGGAT  
ATAGCAAGATAGGGTGTAGGAAACCCATAATAGTTCCTAGAATAGGTGGTAACGTATTT  
GATTTATTA ACTTACTCAAAAAAAGATACAATGAAGACCGGAGTAACTATAATACGAACA  
GTTGATAAATTTAAAAATATCTATCATCGAAGTAACAGAGTAAAAATAAAAACGGATGAT  
GATGGCTTAGGTGCAGGTGTAACAAATAGATTA AAAAGAAGTTATAAGACATGAAAGACTT  
AAATATGAAGTAATAACTATTCAAAATGGTTGTAGTTCATAGAAAAAGTTAAGTAGTAT  
AGTAAAGCTTCTGATATGTGGAATAAAATGAGAGAAGAATTAGAGGCACATTTACGTAGT  
TTAATACAAAATAAACAAGCTATAATACAGCTGCCTAATGATGCTAAACTTATTAACAA  
CTATCCAACATAAAATATCCAGTAGATTCAAGAGGGAATATACAACGAGATAGTAAAAAG  
GAAAGGGGAAAAGGAATTGGAGAACCACCCGATAGCGCTGATGCAGTAATATATTATTAT  
GCAGAAAGTAACAATACCGATTTATCTTTACTGAAAGGGGGACGTGTATGGGGATAATAT  
CTTATTTAAAAAACTAGTTGAAACAGCTGCAGGCGCGATTATGCGTATATCTAGTGGTA  
ACATTCGATTATATAAATTAGACGATACTACAGTTGATTACGAGTTACCTAAAAAAATGT  
ATCAAGATAGAAATCCTAATTACAAGTTAGGTGATAGTTTAGTTAGACCGATTGTCAAGG  
CAACA ACTCGTTCTATCGGTGGACCTCATTTTCAAATAGAAGATGAAGAAGCACAATATA  
TAATATATGAATTTGTTTTATATAACACATCTAAAGTGTGGAAAACACATACAATTGGTT  
TAAAGCAAGGTGATTCGTAAATTTGGATAACTAGAGACGAAAGAGAATATCCTTTATCTC  
CCGAGAAAAAAGTTAGATTAATATATAACTTCATATCACCTGAAGAAGTCAAAGTAATAA  
TATTAGACCCCACTACAAAAGAGCCCAAAGCTTGTATATTAGAAAGTCATAAGGAATGGA  
CTGACTCAGGAGAAAACGAGTGAATGGCTCACGTTGATCAATTAATAATTGCTGAGAGTA  
GATTTGTTGAGGTTGAAGGTGATAAGATAGAAGGTTTAGAAGAGGGGGAAACGCCTGATG  
TCTGGGGTTTTATACCAAAAATACATTTTAAGAATGAAGTTGATGAAACATTGAAATATG  
TGCAAAGTGAATGGCACCAATAGAACCTCTTTTAAAAGCCGATCATGATGTTATGTTAC  
ATGCGTTAAAAGGAACCAAAAATACCCTTTTCTCCACCGCTAAAGTTGAAATTA ACTGCTG  
TTGCTAGTTTTTTAGCACACCATTTTGGTGTGTAATGCTCAGTTAAATTTGCCTAAGAAG  
GTGGAAAGATAATTCTTGATGGGCATGAAATACTATTCTTAAACAAGATGAAGAAGCTC  
AGTTTGTAGAAATGAAATCAGCCATACGTGATGCCAAGGAGCATTAAAGCTTCTTTTTT  
ACTGCATAGTAGACGTATCCGCAACACCCGAGTTCAAATTTGGCGTACATACACCTTATG  
GTTTAGCTTCTGTAAAAGTACAAATGCCTATCATGGTAAATAAGATACGTAAAAAAAGAG  
AGCAATTTACAAATAGCTGGCAATTACTTGCAAGCATGGGTTAATATTGAGTACTAATT  
CTAGTGGTATGAAATATTCATCTTAAGATGTGACAATAGGTTAGGATGGAGTAAATCCAC  
TAGATGCTAAACAATTAGCTGACACGCTAGAATAGGTATCTAGTGCATTAGATAAAGCTT  
TAGAGGGTGGCTGTATTAGTGAAGAATCAACAGTGA ACTTTTTATCACAGTATATATATA  
AAATGTGCTATTGTATAAGTGATCACCATGCCATGGTTGGAGGAAGAGAAAAGATAATAA  
AAACCAAGATGTTAAAAAACATATTAATAATTCTCTTGGTTTAAATGATGAGTCAAAG  
AATATGAGAACGAAAGAAATAAAATACATGATTATAAAGGGAACGGATAAAAAGTAATTCG  
GATTTAATAACTGGTGCAGGGGAGCTCAAGATATGGGCATTAGTAGCTAGATAAAAATTT  
ATAGATTAAGGCTCAAGCAAGATGATGAAATAAGGTCAGTGTGTTTTAACATAACAAGA  
AATAATACAAAAGAAATAGGAAAAGAAAATCTGTTAGACTTTAACGGAGTTTGGTTAAGT  
CAGATACTAAATCAATTAACACAAGAAATACCAATATTATATCAACA ACTAGTATTTAAT  
TTTGATGAGCACTTGAATAACAATGTTGAAATAGCTATTAGTAACTCTAAAAATAAGTTA

ATTAATGCATTTGAGACAGCTGAAATAACTAAGGTAACCTAAAACCTGTGACCCAAAAAGCT  
TTCTGTGATATTAATATAGGAACCTTTAAGCTTATTATACACGGGTTATGGATGGGTTA  
TTTTTCTCTGATAGAATTTAGTCTTAGTGTAAGAACAACAGAGAAGATATGAAAGTTAGA  
TTACAAACAGCAGAAACAGAAGGTCGAGCCTGTGTTGAAACAGCTAAAATGTTAGACAAA  
TATGTTCTAAGAGGTAAGCAAACCTTAGCTGATGGCTATCCAAAAATGATAGAACGAATA  
GGAAATAGAGTACCTCAAATATAAGTTATAAAGACTTATGATTGGTAAGAAGCTGAAATG  
ATTCAGATTATGGTGTCCGAGTTTTAGCTTCTGCAATGATTAACCCTGCAACCATAGGT  
ATGCGGTTTTATGTTTTCCAGGGAACATCCTCCCACAGATATATGAGACGAAATATGTGGA  
GATGAGAATTTTGGTTTGGGTAAAGGTGTTAATCCTATAAATGAATCTCCTGTGTGTCCA  
TTCCCCCTCATTGCTGGACTTTAAGCTTAATGTACTCCAACATTTAGACAGATTAGTT  
GGAAGGTAGCAATATTGGATTAAAGATCCTATGAATAATGTACCTCTTGAAATATGGAAT  
CAAGAGGTGTATGAAAATTGGAATTTTTCAACAGAAAGGTGGTGATTAATGAATGTGAT  
AACTGGAGAAGTGGATTCAATGAATGCGTTAATAACTAGTATAACTCCTTCTGATTTTCC  
TTAAGCTAAAGATATAGCCATAGAAGCTTTAAAATCTATAGATGAAGAACCCTCTTGAGGT  
AGTTGCGTATATACCAGCTACAAAATCTAGATGGGGATGGAATTATACTGCTAAAAGCTT  
GAACTCTATCGTAGATAACACTAATGACAATAATCTTAATGGCATTTTAGGACCACAAAA  
AGCTGAAATTATATGTAATGAAATTGCACTACCTGTAAAGCATTGGATAGGTGCACAATT  
GAAAGGGGATAAGGCTTTTTTTCAGAGGGCTGCGAGATGCTGAGGCAACAAATTTAAAAAG  
ATGGACTAGAACTAAATGGATAAACGAATTTAGAATATTTGGTCATCGAAAACCTAAAAA  
GAGTGCTAAAGGCAAAATGGATCTTAGAGGATATGAGTCACTATCTATTGATTGGACTCC  
TCTACATAGACCAGGTATGATACCAAGTATTGTAGGTATGGAAATGAGCCCTAATGGCGA  
ACAATAAGATGCAAGTTTTGAATCATCAAGAATAGATTTAAGAGAAGCTTTAAAAGCCAA  
GTTTTCTCTAAATGATAATAATTCATATCTCGATATACAAAACCTTAAGATATAATAACAA  
TACTGTCATATATGAGTGAAAGCAAAATGTATTATGCACGCTTTATGGTCTACCATTTAG  
TATATTTGAAAATAAAATAAATCCAGGTGAAGCAATTGAAGTAATAAAGAATATAAGCTA  
TGAAGTTAAAGGAGAAACGTAAGGAGGGGATAACAAATTGGACGGAAAAGAGTTAACACA  
AAATGTCAAAGGACTACTGCAAACCTAGTCAAATATCATATTCAGAGGTCATACAAGGAAT  
AGGCTTAACTAAGGAAATTTTGACAAGAGAGATGGGATAAGTAAAAAGTTCATAAATAGC  
AGAAAAATAATTAGGAGAAGTTAAAAAAGCAATAGGAATAGTAGGAGACATGGACACAGT  
TGAAGTGGCAAAAAGGCTTCAAACGCTTTAGAAAACGAGACAAAGGAAGCTTGGACCTG  
TATGCTTAATAAAGCAATTAAGATAAAGTGCCTGGTCTAATAGGTCAAACATTAGTTAA  
GAAAATGTTAAATTATTAGGAAGGCCCAAGTTAGGGAGTAATAACAGGAGAAAGAGAAAA  
TGTATTGAATGGTGTGTTTGTAAAATATACAATGTCTAATAGGTATACAGGTACTACCAC  
AACACAAGTCTATTAGACTCTAGCAACGCTGGATGTTTAGCATCTAATAAAAATAGATT  
ATCAAGGAGTGATGTTTATATGGCATTACAGGTCAACCAACGCCAAGCACAGTATCAA  
GAAAACGAGAGTAAATTAAGGGATGGGAACCTCTAAGAGTTATTCTTTTCAGACGGTGG  
AAGGACTAAAACACAACAATACAATCTTATAAATGGATACTTTGGCGTCGCTAGGCAAAA  
GGGAGAAAAAGGCGAAGAAATTTTTCGAAAAGAGCCTGCTGAACACGAAACGGATAT  
TATTTTTACATCAGAAGATTTTGAGGCAGGGAAATTGATTTATTGGGAGAATACAGCGCA  
GAAATTTACTACTACATCTGCAAGTAATAGGCTAGTTGGTAGAGTAATAGTTGGGTAAA  
CAGTAATAATGTAATTTGGTTCATATTATTACCTCAACAATACAGAAGGAGTGATAAATT  
TATGGAATTTAAAGTAATTTGTCAGGATAATTTGCTGGAACAAAAAAGAAAAGAACTTT  
AAAAGAAGATATACCATTTATAGTATATGGTGAAATGGAATATGTAACAAAGAAAATATC  
AAATGGAGAAATGGAAGCATTGGACTTAAATGAGCCACTCGGTGACTTGAAGACTTTTAG  
CACGACTTCAAGTTTTAAAAGAGTTGTTAAGAAAAGTTGCATTCGATGTTGAAGTAGGCAA  
AGAGACAGTACAACCTATTATATAAACCACGCTCTGACAGTATCTCAGATTCTAATCTACC  
ACAAGTTATGGATGCTAATTGGGCTTGGCAAGTTATCTGTGCATTCTAGAGCATATTGA  
CGGTGAAGAAATTAAGTCCGTACACTAAATGCACAAAATGGTCCAGTTGCAAGCATAACA  
AACTTACGCAACTGGTTTTGAGTATACTAAAGAAATGAAGGATTTTAACCAACCGTTAAG  
TGTTGCAATATTAGAAACATCAACTGGTGAGAGTGAGAATGCCTTGTTAAGCTTCATACA  
TCTAAGCCCAAGATTATATTTTATTATAAAGCTTCAAATAAGACAGCTTTTAAAGGTGA  
TACTAATGACCCAATATGGCTAGGAATTTGGAGAACACTAACAAAAGCACAAAAAGATAC  
AGTTATAGCAAAAAGGGCAAGGTAACACATTAATGGGTTCTAGTGCTGAATAAATTGAATT  
AGAAATGGCGTTAAATGGAGGACATTTATTACTCGGAAGCATGTATCCCTCCGTAGAATT  
TATATCAACAGTAATTTATTATGATGTGTGGGTGGTACTGTTGGTAAAAAACATATTC  
TTACAAAGGTGTTACAACAGGCAAAGGTTATTTGTTAAGAAATAAGCGAGGATTTAAGGA  
GTTAATAAAGAGAGATTTAACAACCTCAGATTGGAAATGCTGACTTAAGTAGGTGAGTAGG

CAATCACATGGAAGGTCATAGTGATAGAGCTGCTATGGCGGCGGTAGAAGAAAATGTACA  
AGAAATAAGTTTTAGATCAAACACTCATAATCGTGTAATTTTTATGAGGTGTTAATATCT  
GACATCAACAAGAAAGGTGATAGAAAATTTAAGATTATTATTAAACGATCATGATAAAAA  
TTCATTTACAGATGAAGAATTAACCTGTTTTTAGAAGAAGCAGCCTGTTTTACTGTGC  
AGCTTTTCAAGGATGGGCATTAATAATTTCTTCAATATGATCATAACAGTAGGGGAAATGTA  
TGAGTATAAAGTGGGTCAAGAAACATATAAAAGCTCTAGTGTAATGACCTAGTAGCTGG  
AGATTTTCTAAATGCAGAGAAATCAAGGATATGGGTACTAAGAAAAAAGTAAACGGAAG  
TCTTATGTTAGGAATAAGCTCAGAATTTGAAATACGCTTAATAATGTAATAAGAAGAAAA  
GACATAATAGGATCTATTAATATGATCCCTACAAATATTACGATAACTAATATTAAAAAA  
ACTGAAATAGATGGAGCTTTAGCAGACACTGAAACAGAGATAAAATGTGTTGTTAGAATA  
TTTCATGAAAAGACAGCAGAGGAACCAACATCAAGTGAACAGCAACGTACAATTAGTTCT  
ATTCGAACATATGGAATGTTAGTAAGAGTTGATGTTGTCTAAGATGTTAACAGTAGAGAT  
TCTTGGGAGTTTCAGCGCATATATAGCCGAATGAAAATTGTTCGATGTATATCCTCTAATT  
GTAAAACGAGAACTTTGTGGGTATCAAGGTTCACTTGAAAGGATTGATCCAAATGAGTGC  
TATCACAAAGGCAATAGATGATATAAATAGAAAAAAGCAGTTATGTTTGTACGTTGTAT  
GAGTGCAGAGTGAATGATAGAAACGAAAGCTAAAGCAAATGCAAGTTGGACACACAGTAC  
ATGACAAGAAAGAAAAAGTTGAGATGCAAAAACCTTTGGAGGAAGAAATAAATTCATTAT  
TAGATTATTCCATCGTGCAGAATATGGAGGCATACTTGAAGAAGGTTTCAGAACCACATGT  
TATTACTCCAAAATCACCTCCAGCTTTATACTGGAGAGGTTACTTCACATACTGTAAAAGA  
AGATCAACATCCTGGTACATAAGCAAGGCTTATCATAAACTAACTAGTGATAAATATTT  
AGAAAAAATAGGTAATATGATTTTTAGATAATTGGGGTGATGAAATGAGGTCAGGAATAAG  
AAAAGGTTTAATAGATAATATAAAAGTATTGAAAGGTTATTATTAACCTAATGTCCCAA  
CCAAGCTACAAAAGGCCTTATCTGGTAGGTGGACAAGGGCAAGACAATGACGAGGGGAGA  
TACGATAGGGTTTGAGATGAATATAGACGACTTGATTCATGAAGGTATAACTACATTTAA  
GAAGTTAGATACATTAACCTAACCAACTGATTGTAAGCTGAGACATGAATATTATAGTTTA  
TGAATGTGAAATTGAAGCCTTCACTTGCATTTATAAAGTGACAAATGAGAATGATATTGT  
GGTTCAGGAATGGGATGCTATAACAAGATGCATATGGTTTAGGGTAGTAGCTTCAGGAGA  
TTAAGAAGATGAACTAGCATTAGAGGGGTAGCAGCTTTATCGAAGTACACAAAAGATTA  
CTTAGAAATTGGTAGTTATAAACATATTTGGAAGAAAACTTTAAAGCTCCATTCGCATT  
ATTGCGAGCTACAAATGCTGATAACAAAAGAATAAATTATCATTTCATTGAGATTACCAG  
AACTACGAAATGCAATCTTATAAGAAAATATAAGGATGAAATCGTCAATTTTCGTGACGC  
ATTAGAAATAAGTTTAATAAAAGATAAAGGAGTAAGACTAATAGAGGATAAGATTAGAGG  
TTTAACTCTTGTTAGAGTAGTTGAGGATAGGGACTCAGTCACGTTGACAACAGGACAATT  
AACAGTTGAGTTCAAAATGTCAGGTATGAAAAAAGAGAAGGACCTGTCATGGACTAAAT  
TTATAGTAATGGAECTCTATAATGGGAGGTGTAAGGGTTGGGAGAAACAATAAAAA  
GACTAATTTAAGTAAGCAGGAAGAAATTTATTTGAAAATTTCTTTATCGAAAAAAGTGA  
AGCGCTTGTCTACGTAAAAATGGTAGTTGCCGGTGCTTGATTTCAATTGTAAGAGACAAGA  
ACTTACAAAATCAGAGTTTAAGAAATTAATAAAAGATTTTTTAGCAAGAGAGGTGAAGTA  
AACGGGCTACTTGTACATGGATTGAAAAGACCAAAGCAGATACCGGGCTTTGATAACA  
GATTCAAAACACAAGCCGAAAAGTCGGCAAATACAGGATTAAGGGTTCGATTAGCAATCC  
CAGTTAAGAATAATTGGGGAGATGATGGAAAGTTTTTAACAGAAAAAATGACTTGAGAC  
AGCTTAAACTTTGTTTTGTGGTGTGTTGAACTAGTCAACGTATAAGTTACGTAATTTAG  
CTTTCTTAGGAATTGTAAAGGAGCTGTTATTAGATCGGCATCTTGATTGAACAGTAATGA  
AGGGTAAATTAACAACACAGGATACTACAGAGAATAGTGCAAAAGATGAAATTAAGCTTG  
AGGCTAAGTACCTAACAGCTAGAAGCTTTAATGTGACAGTAAAACCTAATTTAGTAGATG  
CAGATAAATAGGACTTTATATAGTTTGAACAGACTAAACAGTTAATTAGTTCAAGTTTTA  
ATGGCACTATAGATGAGATAGAACTAGGAATAAACTCAAATTTAGATAATGAATCACTAA  
TCGCAACTAAAGTAGCTGATGGTGTACAACACTAGCAATCTTAGTAAATGTCGCACTTG  
AACGTGGTACTGATGGTCGCGTATCTATTACTAATGAGTCTTATTTAAAATCTTTATAAG  
AATTTGAAAGATAAAGTTTTGATAGCGTTCCACTTGACGGTGTGGCTAATGCGGCATTGC  
AGGGAACCTACAAAAGCTTGGGTAGCTTAAATTAAGAATTAGGAAAGGATATACTACTTT  
TTCTAGGTTGAAAACTGAGGATTATATAAACCAAATTAATGATAAATCGAAAGATTTTA  
CTGATGAAAAGATAATCAATGTTGGGAGCTCAGCTTATTACGAGGGTATAAAATAAACAC  
CGAGCGAAGTAGCTGTTTATATAGGAGCATGGGCGGTAAGCAAAGGTATACCAGGAAGGA  
TCCGTAATGCTAAGACTATATTTGCACAAGTAGAACCTCGCTCAAACCATTGAGAAGTTA  
GAGACTGTTTGAAAAGTGGTACAGTGGTCTAAGATTTGGATGATCGATACGTGATTAAG  
TTGATCCTGTGACTACATTCAAAAAATATGTAGATGATTAACGAAGCGACGGGAAATA

TCCCTAATATTATGTTTATTAGTAATATAAAATCAAATACTTCATTGAAAAGAAAAGAGT  
TTCTAGGTAAGAAATCTAATGATTCAACCGGTGACACACCTGTTATATGAGCATTGTAGA  
AACATTTTGAAGAATTAATGAGTCAAGGTATTATATCAGAGATTAATGTTGATATAGATA  
CAGAAATTCAGCAACTACCTAAGCAGAATAATTTTAATGGAAATGGGATGTTGTTAAGG  
TTGCTGTAATATAGAAAAGTTTATGGTACTGGATACCTAGGATAGGTAGGTTATAAGGTAA  
GGGAAAATATGATAAAAATATTATAGATGATACAAATGTTGTCGATGGTTCAAATGCTAG  
GATAATAAATGATAGAGAAGAAGAAGGATAGGGAACAGAAGTTACAGGTGCAGTTGAAAA  
TGATAAACAAACTTTTAGAGTAAGTTGTTGTAATGGGAACTAAACAAGGCATGCACTCA  
AAAAGGTACTTTTTCTTACTAGTACTTAAACTACATCTAAGTGGATTAAAAAAGGATT  
TAATAAATTTGAAAGAATTACAGAAATATTTATTCCTGGGCTAGTTGGATCTGAGAGAAT  
TAGATATAAAAAATGTCTGGTCGAGAAAATACAACCTAGCAAGCATAAAAATCTGATCAAAA  
TCTAGAAATACAAGTAGATGGAAGTTTTCAAGGATTTGAACTTATAGATGATATAACATA  
ATAACTAAACCAAACCTACACGTAATTAATTTTATGGGTAGCTTTTTATAACCCAATAAC  
GTTGGAGGAAGTTAAAAATGGAATAATTAGATAAATAATTTTTTCATTGAAAGAATAGCAG  
AAGACGGAGAGCTTACTAAAGATGAAATAGCAATGCAACAAGGATGTAATATAATTATGA  
CATTGACGGAGGTTGCTATATTACCTGAAAAAATATTTTTCTAAAAAATTAGATGTAC  
CACTTACGCTTAGGACTTTAACGGACAAAGAGACAAGTGGATTGCAAAAAAATAATACCA  
AACTACTAAGGTAAGAGGTAGTAGGCCAAAGCAAACGAATGCAAGATGAATTTAATATAG  
CTCTAATAGAGAAGGCTACATTATTCCTAATTTTATTGATGCACGACTCCTTAATTCCC  
TGAATGTATCTAAAGGTGATGAAATTATAAGAAAAAAGTTCTTAGCGGGAGAAATAGCAT  
TAATTTGTGATGAGCAACTAGAATTGTCTGGAATTTATGAAGAATTAAGTGATGATGAAA  
TTAAAAGCTAATAAAGAGAGGTGGTAAGATTACTATTTTATATAACTCTTAGGTTAAACA  
TAGTGTCTTCCAGAAGATTTTCTGAAAAGAGAGAAAACACCTCAACAGCTTTTTTTGAGT  
TTTTACACAGCATGAAAAAGAGCAGGAACATAAACTATGAAAAATAAATAAAATTTAAA  
CTGAAAGCGGAGTGAGAGAAATAGCTAAAAATGAGATGTATCACATTGATGTTGTCATTG  
ATGTTACAGAAGATGAACAACCTAAAAACATTTTAAGTGATATGAAAAGATACACGACAC  
AGACAAAAAACAATAAACGCCTTAATAGGACAAACGCTAATCCAGTTATACAAGCTC  
GACAAAAAACAGCTAGTGTGTAAGTAGAATTAGCCACAACCTTAAACAGAGTGGGTATAA  
CTATATCTCCCACTATAAATGCAATAGATAAAGCATCTAGTGTGCTAAATCGAGTGGAAA  
TTAAAGTAAATAGTTTGCTTACAAGTAGAAAAAGGGAAGTGCTATTAAGGGCTAGAGACA  
GAGCTAGTCAAGTTGTCGATAAAGTAAAAGCTGAGGTACAAAATTTGATTGCGGCTACTA  
TAATGAGTTTGAATATGACAGCCGACCCATCATTAAACAGTTATTTCTCAAACCTAAAACGA  
AATTAGGAGACCTCAAGAATAATAACAATATCAAATATTAACCACAAGGGGAAGAAGCAT  
TGAATACTATTTCTCGTACTAAGAGTAAAGTACAAGATTTTTCTAATAGAACTTACCAAG  
CAATTGTAAAACCTAAAAGATGAAGCGAGTCCAAGATTGAGTGGCTTAGATGTTACGAGAA  
GTACTTTTCTATGTACTACTATTAGGGAGTTGACACAATCAGCAGTAACAGACACAGCGT  
TAATAGGTGGGGTTGGGGTAGTAAGTGCTGAGAATGGATTTGCAGACTTAGAACAACAAA  
TGATAAACGCACAACTGTATCAGGTGCAGATACAAAAGAAATTGCAGAAATGACGGCAA  
TGCCAAGGGTGATGGGTCGTAGAACTAGCTTTACAACCTAAAGGTGCAGGGAATGCTATGT  
ATTTTATGGGGATGGCTGGCTACACAAGCATAGACATGATTGCTGGTCTAGGTGGTATAT  
GAAATTTGGCAGCAACAGGTCAGTCGGATTTAGCTCTAACCGCAGATATTGTGACTGATG  
GTTAACTGCTTGACGGCTAACTGCATAGGCTACAGGAATGTTTGTTGATGTCATGGCAG  
CAATAGTTGTAACTACAATAAAGACATAGATAGAGTGGGTGAACTTTGAAGTATATCT  
GAAGTGTGTAGGAGCATTAGGTGTTTCCGTGAAAGCTTTGAGCTTAGCAGATGGCTTAA  
CGGCTTGTGCATGTGTTAAAGGGAGCATGCCAGGTACGGCGCTTAGAGGTGGTTTAGTAA  
GATTAATAAAATCCCCAGCTGAGGCACAGAAAGCTATGACTAAAGTTGGAATATAAACAA  
GTAACAACAAAAGATGGAAATTTAGATTTAACGCGGAAAATCGTTGGCCTTAGAGAAAAAT  
TAGGCGGACTTGGAGGAGTACAATAAGTTGGTGCAATAAGTCGTTTGTGTTGGGCGTACAG  
CCATAGTAGGTTGGGCGGTTGTAGTAAATGCAAGCGAAAAACATTTTAAACAAATTAACAA  
AAGCGATTGCAGAGAGATAAGGAGAAGCTAATAGAATTGCTGACATAAAAAAAGATACTC  
TATCGGGACAATTTACTATTTTAAAAAGTGCTATTGATGATGTTAGCGTATCAGTAGGAC  
AGAAGCTTGGGTAAGGTACGAGAGGTGCTGTTAAGCTACATACAAACGATATGCCTAAAT  
TAGGAGATAAATTAGTTGGCTTTGTAAGCGCTTTTATTAATAAAATTTTGATAAAATTAAC  
GTGTGATACGAAGGGTAATTTTATTATTGGTGGTGTGTTGCTGGATTTATGGCTTTGA  
AGGCTTTAACAGTAATTTCTAGCGTAATACCTATGATTACAAAGATAGCCACAGCACCAA  
GATTAATAGGAGGGTTAGTTGGGGTTTGTGGACCCATTGGAGCAATAGTTTTCGCCATCG  
GCATGTTGGCAGGATCATTCCAATTGCATCTCAAAAATCCGAAATTATTAATAATTTGTA

TTACGAATATAGGGAAATCAATTTCTAATTTTTTAATCCCTTAAAATACTCTTGTAGAAT  
AAATGAAAAGTAAATTTAAAGAACTTATGAATGCGTTAAAGACTTGGTTTTAGCTGTTT  
CTGAATTAGGCTCCATGATTATAAGCGCCTTATACCGACTTGTACAATTTTTGGCGACAG  
TTTTATAATAAAAATTTGTCAATTCGTTAATGTCATTTTTATCAAGGTAAAAGCTATAG  
TAAATCCAATAACAGGAGTAGTCAATGGTTAAATAGAGATTTAAAGGAATAGCTGATG  
TAGTTAAAGGCTTTATAAATGGAAATGTAAGCCAAGTAGCTAACGGGTTAAATCTAATT  
TTAAAGGGATTATAGACATTGTTACGTCGTTGTGGAGTGTGTTATTATATTTTTGGGACAT  
CACCAATTCAAACTGTAGTCGATTTTTGAATACTAAGTTTGGTAAAATAGTGGAACACA  
TAAAGAAAAAATGGAATCAATTAAGTCCTTTTAAAAAATCCTTCAGAAGAAGTTCTAA  
TGGTTCAGCAAGTTATTTTTAAATAGCGAGAAAGCAACAACGAGTTACAAGACTCTTCAA  
ACGGAGAAAAACATATATAAGCTCACTAAGTCAAATAATATGGAAAGGTTTCGGAATGA  
TTAAAGAGAAATTTGGACAACACAAAACATCTGCGACAGAAGTATGTAATAATATAGTTA  
CTTTACGAGGTGGCAGAGCAGCTTAATTAAGACAAGCTTTTAGCAGGCATAAAACCTG  
CTTTAGATACATTTAAAGAAGCTTTTTCTAACCTTAGAGAAACTTTCTGGGGCAACTTGG  
ACCGTATAAAAGCAACTTTTTGAAGTTAAAGACTGTATTTAATGAACATAATTAACAA  
CTTTTGAAAATTTAAATCAAAAAGTCTTAGTAATAAAAGAAAGTTTAAAGGAGTTTTTG  
AGAATTTAAAACACTAGTTCTGTAGAGATAGGAAAAGCTTTGAACCTAAAAAAGAGGACT  
TTAGGGGAATAAAACGATATTTTTCAAATCTATATAAACGAATTGAAGTTAATGGGCCAA  
CTAAGCCTACTAAAACATAATATGGATAAGTTAAAACATCAACACAAAGTGCAGGAAAGT  
CTTCCTAAGAGCTACGGAAAGCTTATAATCAATTAATAAAGTAGCAAAACCCTTTGTAG  
ATTATTTAAAACGAATAAAAGATGCTTTAGCATCGACTTTCAGAGATATGGGAGGAGCAT  
TACTAAAAGGTGTAGCAACTATTATAGTTTTAGTCATTACTTCCGTTATTAATGCGATTG  
CATCTATTAAAAACGCTGCAGCAGGTGCTATAAAAGGTGTAATTTACATAAGGCAAGTAA  
TATTCTAAATCATAGGTGGGATAATGAGTGGTTATGGCGAAAACATAACAAGGATTTT  
CTGATGTTTTCTAAGGAAATGGGGAAGTAGTTAGATCATTGTGGGAAGGTATAAAAGGTG  
GTTTAGGAGAATCATTGGAAGCCGTTGTAGATTTTTGTAACATAATGGTTTTTTCGGAAAAAG  
TAGGTCAGGTAAAACATAATGGTGGACAGATTTAAAACACTACTGTAGGTCAAATATATGGG  
GATTTGTAAGTTTTGTAAGCAATGTTTTTCAGCAAAAAGTTCCACAAGTTGGTGTATGGT  
GGCAAGCATTATACTCTAAATTATCTGTTAAAATTAGTGGATTTGTAAGTCTTGCAGAAC  
ACGGATTTAAAACATAAGTAGATTCAATTGAAGCGGCTTGGTCTTCTATTAATAATGCAAC  
TATCAACCAAAAATAAGTGAGGTTTTAGGTCTAGTAAAACACTGGACTACGTATTGTATTAG  
ACCGTTTTGCGGAGGCTGGCGATGCAAGTAAAAAAAGTCTTTGTGGAGAAGCAGGCCCCCG  
AAATGGTTATTCCTCTTGCTGATAGCAAGCGAAGTAGAACGTTAAGTTTGTATGAACAAG  
CAGGACAGATGCTTCGAACTCAAACAATTAATAGGGCTATTCCAATCTCTCAAAAATTAG  
GAACTAGCTTTAATTCTACAACACTAGCATCCAACATAGTATTCCTAGTATTAGTAATAATG  
TTAGGCAATTTCTTTCAAAAAGAAGAATTTAAATATACAGAAAACAGAATTTCCCAAG  
AAGATCAACCCCAAAACATTACTAGTGGAAAGTATTGCGAGTAATGTTGGTGGACCAT  
CTATACATATTCAAGGAACTATTAACAAAGAAGAAATGATGCAAGAAATATTGTTTCAAG  
TAGAAAATGAATTAAGACAAGCAATAGAAAACATTGCATAATTGTAGAATTATTGTTGAA  
ACATTGCTCCTTATAGATGCTATAATTTAATAATAAATCATGTGAGGGGGATTTTTACTA  
ATGTGGGAAAAGTTTAAAAGTCTAAACGTTTTTTTTAAAGATAGTTATATAAATTATAGCT  
ATTGGTATGTAATCAGAAACATTATATGTTTCGGTCAATAATGCTTTTTGTTACACTTTTT  
GAAAAGAAAAAAGATTGCATGCATGATGTCACTTATTTTAGTTCCCTTACCATTTAAC  
TTTGCACATATTTGGTATTTGATGGATACAACTGTGCCTGCCCGTAATCCAAAATCAGTA  
GAAATAAAAACAACACGTAAAAAGAAATGGGAAGTAAAAAAGTAAAGGGGAAACTGAT  
AACAAAGAAAGAAACAAGGACAACAAAAATACTTGGAGAATTAAAAAAAGCAGATGCAAAG  
AAAAACAAGCAGAAAAGAAAGTACCAACTGAACAACCCAAAGAAGATGAAGAAGCAAAA  
AACACAGCAGGTGATAAGTCGAAACAAGAAGATCCTCACTGAAAAGCTCAAGAAGAACAT  
ACCAAAAATAATGAACTTGTGCAATACTAGAAAACATATGAAAAATTATATTTAATGATA  
CCTGCCAGTGTAGAAGAAAGATCAGCTCCAATAATGTAAGTTGCGTTTTCAAAAACATTT  
GCAACGGGAAGAGATGTCGGTTCAAAATGTTGGAAAGAGCTAACTGATTTAAAAGATATA  
CATAGTCGTGAATCAAATGAGTATAAAGCAATACAGAATTTGCAGTTAGCATTTTTTTGAA  
GTAGAAGAGGCATGTAATAATGGAACATAATTTTTTACACAAAAGTGAATATATTTATTAT  
GAGAAACATGAAAAAATTGTAATGATGCGGGTGTGTTGGTGTGGTGAATTTTGTAACTTTA  
AAAGAGAATATTAATAAAAAAACTAAAATCAATATAAAAACGTCTACTAATTAGTGGGT  
GATCTTAATATACACTGTAATAAGTGAGGTGGTAACTTGGTAATAGGCATATCTCTGAAA  
AACGAAAAAGAAAAAATAGATTTCCATTTCCAGTTAATACACAAGATTCCTATCTATT

AAAAAAGAAAAAAGGATTCGAACACTTGAAATATTAATTTATGTGAATTTGACATTA  
AAAGAAGGGGAGAAGATAATAAAAATATCATACAAAACCTTCTGACCCAATTTATATGAC  
GCTTTTTATTGCAGTTACAGCGAGTTAAAAAATCCAATCGAAATAGTGTCACTGATTGAT  
AAATGGGTAGACCAAGCCGAACCTTTAAGAATTAATATCGCTGGTTTTGGTTAGACTGGA  
TTGGTCACAATACCTAGGTTTAGCAATACTTAAACAGCAGGAAGAGAAGGAGATAGAGAC  
ATTGAGATAACACTTTGTACATACAGATATCTGAAGATGGAGACATTGAAAAAAGAACT  
AAAAGTACTACTAAAACAAATTTAAAGGATAATAGACCTAATACGCAAATAAATCCAAA  
ATATACACGGTTAAATCAACAGACACATTATGGAGCATTGCAAAGAAATTTTTTGATAAA  
GGCTCAAGGTGGACACAGATTTATAATATCCCCGAAACAAAAAAGTCATTGATAAAAAAT  
CCTGTTGTGATTAAAAAAGGACAAAAGTTGGTGATACCAAGCAAATGAAAATTATACTAA  
ATGGAAAATATGATATTATAAACTTTAACCAGGGAATAACGTTACGTGAAGCTATAGACG  
GGTTGCATACAAAATGGAAGTATCTATAGTAGGACCTGAACAACCTCAAGATATCGGAA  
TTAAAGAGGGTGAGAATATAGTTCTAATCGACATTGCATATGAGAGTAAAGAAGATGAGA  
TGGTATTTGGTGAGGTCAAATGGGATACTAGGAGAAGAGAAAAGATCAAGAACTGACAT  
TATCTTGTACAGAGAGAACGGTTTAAATGGAAGAATAAGAGGAACAATATTCGTTTAAAG  
AAAATACAGCAACACAGAGGATTGAGTACTACTTTATACAATGGAATATATCTTACTTCA  
ATCTAGCATATAACCAGGAAGAACTTGCTAAAGTAATACATAAGACTAATATATTAGACA  
TGATAAAAACCGAATTA AAAACCAAATGTAACAAAAGGTGGGGAATTATTTATAGTAAGAA  
TGGATAATAAGCAGGAATTATTTAAACTTGGAATAATGCAAATGTATGCATACTGCATA  
GTATATTAGAAGGTTCAAACGTGACAAGTCGTTATAATGCGGCAGTGACATCTGTAAAGG  
TTCTAGCAAAGAGTAAAGACAAAATACAAAAGCACCTATTCTCGGACCATATAAGAGAG  
AATCAGATAAGTCTGGAACACTACAAAGGCTTAAACAAAATGAAAAGATAAAAGATGCTA  
AAGAAGCTACGAATTTTCGCAGAAGCAATGTTTGGTTCGGGTGAAGAAACAATAACTGAAG  
ATTGCATGGTACATAGAAAGAGAACAAGGGCAGGTGACTATGTAAGTATAAAACGTAAAG  
AATATTCTGTCATAGATTTCACTCATACTAGATTCTAGACTAGAAATTAAGCTCAGGA  
TACGGACTTTACGATATATAAGAAGGAGGTTCTATACAAATGGCTGGTGCTAGATTTAAT  
GGAGTTGCTACAATATTGAAAGAAAAAATGAATAAAAGGGTTAATGATGGAGATTTTGG  
ATTGTATCCGAACCTTGCAAGAAATAAAAATAAAAGGTCTTACGGTGATCGGTTATTAAGAT  
GAAAAATAGGATTATTTAGAATGAGAGAATTGGTCATTAAGAAGATTATTTTGCTTTT  
TCAGATGAAGCTTTAAGTGGTTCATATCGGTATAAGCATAAAATAGAAAGTACAAAGGAA  
TTAAAACCATTCTAGATAGGTGATAAGGTGTTAGTAGCAGTCATGGGTGCTGAGTTTGTA  
GTCAGTGCGAGGGTTGTAATGGCAAACCTATTTCCAGTTAATGAAGCATTGAAACTGG  
AGAATTAATAGTAAAACGAGAATGAACGGGACCTAAAGGATAGTAGGTTCTTTCCTT  
AAGAAAAGGTGAGTTTGTAAAATGCAGATGGAACATTA AAAAGATGTGATAAAGTTCA  
AGCATGTAATCAATGGTGGCAAAGGCTCTATTAGCACCTAGATACAAAAAAGGCGCGTA  
TACCAACATTTATGGAAGTGACATAAAAGACTTAATTGCCAGTAACTTATCTCAAAGCGC  
AAAAGAGCGTGAATTA ACTAGATTAATAAAAGAACTATTTTAGTTCTTCCATTTACAAA  
AGAAGTTAGTAATTTTAAATTTTTATGGCTTGAAAACAGTCGACTTGTTAATTTTGAATA  
TGATGTACTAACAATAGATGATGAAAACATAACCTTAGATGGAAATATAAAATGGGAGGT  
GATTACATGGAAAGAGAGGTACCGCTACCAGTTTTTTTTCTCGTAAGATGAAGACCCTATA  
CAGGAAAGGATGTTAAGCCAGTTTCAAGATGTTTCTACCTAAGAAGATGATTTAATCTCT  
GAGTCAACAGGACCTACAGCTGATCAAATAGCCGAATTAATACGACTGTGATTACAAAAT  
AATTTAAAAATAGCATTACCGCAAACCTTGCTATAGA ACTTAAGTTCAATGGCTTGGTGAA  
TGTAAGGAAGTATTTAAAAATCCACCTACGAAAGCAATAGGAACTATTACGTATACAGGT  
GTACAAGGTACTGTCATTACGGAAGGAACTATAGTAACTACTATTGCAACTGAGGAAAAA  
CAGTGCATAGGATTTGAGCTTCTGAACTAAAACCTTAGGAAAAAATTAAGCAGTACAT  
ATTAAGCAGAAAGTAGGATTGTCTGGGCCGATAGGGAATTGTTCTAAAGGTAGTATATCC  
GTTTTAATAGGCTCTCTTAGTGGTGTAAATCAGTTACTAATAAAGAAGATTTTCAAGAGGT  
GGAACAGATATAGAAGATGAAGGACATATGAGAGAAAGAGTTCTTGTAGCGGAACAAGAA  
GATAAACTTAGTGGAGCTTTTTCAGATTATAATCGTAGGGCTCAACAAGTTAATGGAGTT  
GGATATGCTTATGTAGTTCCCGAATGGGCTGCAGCAGGTACAGTAAAAGTATTATTACTA  
CATAAAAATAGATAAGGAGCAACCCAGGAATTGATAAATAAGGTTCAAGAATATAAATAT  
CCAAATGTGGAAGAGCGTCAAAAACGGGATCCAAAAGCTCATAAAGGTGCCATAGTGGAT  
ATAGCCACTCCACTAACATTACTAATTAACGTAAAAGCTCGTTATGTTTTTTTCGATTGGA  
ATTAGTCAAGAACTGTCACAAATATCTTAAAAAATAGAATTGACAAATATCTGGCTTAA  
ATAGATATTGGAGGTACTGTTTCTTATAGTTCAATTTATCTACTATTAGGTTCTATGGTG  
CTTGCAGATGCAGGAATACATGATTTTCTAACTTAACAATAAATGATGGAACAACAAAG



ATTATATTAATAACCAAGGTGTTGGCTTAGGTGAACTAATCCATGATGTGATAGCGTGT  
TAACTTCTAACAAAGGTAGAGAAATGCTTCTAACATTATCTCCTATGTATGAACAACCTA  
ACATAATGCAAAGGTTGAATGAAGATATAGGAAGCGACTTTGATAATCTAGAGTTGTTGG  
ATGAAGAATTAGAATTAATAATATCCCCTCAGAGCGCACAAATGGGGACTGGGATTTTGGC  
AAAATAGGGGAGGTTTATATACTAATATAGATGAAGATATAGAAGATAGAAGAAGAAAGG  
TCATTGCTATGCGACAAATGAAAGATATTGTTAACCCTGACAGAGTAGCGACCATAATAA  
AAAGCTATACTGGTGCAGACGTATATATAAACGACAATGTAGCTCCATACGTTTTTTAAG  
GTACTGCTATTGTTGATGATGTTATTAATTCTGAAGATTTAAAATATAGAACAATAAAA  
TTAAACCAAATCATCTTCATTGGGTGCCTTCTTTGCACCCAAATTCACAGATATAGAAA  
AATTTACAGGTAAAGATGATTAATCGCATATTTAGAGATTTTAGAGGGCTTATAAGAATTT  
TCTTAGATGCTATGTGGTTATTACATGGTGTAAATACTAACGTTCTTATAAACTTTAAA  
ATGAGTCAATAAGCTTAAACATGACAAATAAGTTATTTGTAAAAGAAAGAGAAGTATTTA  
CAAATCTTCACGTCATAATTAAGAAAGAACTTATATTACCTGAATGTGATACAAAGGCTAA  
ATGGAAATAAACTGCTTAATACAGAATTAAGAGAGGAAGTGATATGAGTGGCAAGTGCAT  
GTACAATAGGAATTGCAAGACAAAAAATGTGTAGAGATAGAGAAGGGGATGTACCATTGC  
CTACGATAGTGGGTATGGTGTGGGAGATGGGGGGGTTGGGAATGATGGAAATACAAGAG  
CTCCACTTTCAAGTGAGACAGCGCCTAAAAATGCAGTTGTTAGGAAGTATATCGGAAGTT  
ACGTATATCCACGCCAGCTAATTGCATATATTTCAACTACTCTATTAAAATATGAAGCAG  
AAGGAAAAAACATTAATGAAATAGGTTAATAGATTTCGGTTGCTGACTTAATAGCAATAA  
ATACTTTTGTAAATAAGTATAAAGACAGTGATATGGAAATGGTTTTTCAGATTGTTGACG  
AGTTCTAGGAGATGAATAGATGACTAATGAAATAAATTTAATAATGAAATAGCAGAATA  
TTAAATCACTACACCAGCTCATGTGAACGAGTTAATAATCGACAACAAAAATGGATAGG  
CAATCATAACTATTTAAATAATAAAAATTGCTACAACATAAAAAAGAGTTAAACACTAGCAT  
TTACACAGAAAATGGTAAACACAAGATAAAAAATTGACCACTAATTGCAGGTGGTTCAAG  
TGCTGGATGCACTCAAAGGGTCGCAATTGATGATTGGGTGGAGGATGGGGAAGATGGATT  
CAAAGCAACTGTAACAAATAGTTTGTAAACACAGAGAATAGTTGTAAATATTATAGATGC  
TACTACAAAAGAAAATGGAGTTACAAACATTAATAATTATAGACGATAATTCTATTCAAAT  
TAGGAGTGTAACTAGGTGAGAATTAACGTATCTGCGATCAATGGAAATCCAGCAACTCA  
TTTTATTAAAGAAATTGTAGATCAAAACAGAGAGTCTGAAATGACTACTTATTCATCTAA  
GAAAATAGAAGACAGCTTTGTTTCATATAGAGGAAAAAATAAAAGGTGGTTTATGGAATAT  
TGCAACAAGTGTAAGAGATTGATCACTTATTGATAGAGAGGACAGTGAGAAAATGCAGA  
CTTAATGGAATTTAAGTATGCTAATTCTGTACAAAATGTTTCATTGTCACCTGGGCGAT  
ATAAATATGCATGTTTGGGTGCTTGTGGTTGTCCTGTGCGACCCCTGCGATTGGACTGATT  
GTTCAAAAAGTGGTTATTTCAAAAAGTGAGATTGGATTTAAAAAAGAAGTAACTACACA  
TTTGTGTCGCTGACTCTGGTTATTAGAAAGATTCTGAAGGCGCAAGACTTACTACAAATG  
GTTTTAACGGTGCAGGCGCTGCTGACAAAGTTACTACTGGTAGCTTTGCTTATTTTAAAT  
ATGGTGGTGCAGCAACTGATATAAGGCATTATCATCCTAGTGCAACTAGGGGTACCACCG  
AAAGTTTGCATTCTCGCATACTTGTTCAGCCGGTGGCGGAGGTAAGAAAAATAATTTCA  
CTTCTGCTCGTTCTATTGGTCATGGTGGGGTTATGTAGGCCATAATGGAGTTGGTCCGGG  
CCCGAGATTTTTGTGGCGGCGGTTCTCAATACCATGGTGGCCCAAGTAACGACACCGAAG  
AACACGATGCCTTATTAGGAAAAGGAGGTTATGGTAACACAGGAATAGGTGGTGGAGGGG  
GTTGGTTCGGTCGTGCTGGTTCTTATTCTATTGAAGGTGGAGGTGGCGGAAGTGGTTACG  
AACTAAAGAAAGATAGTTATAAGGCACCCGGATATACACTAAGACCTGAATATTATCTTG  
AACTATAGTCATGACAATTGGAGGTAATACTACTAAAGCAGATGGTTATGCTAAATTA  
CGTTACTACAGGCATTACCATTTTTAACATGATCTTCTTATAATTCCATTACAGCAACAT  
TTAAACCTGCCACACAGACCCTACATTGCTTACGCAAATAGAATATTTTATAGATGATG  
TGTCAAAAGAACTAGAACAAGCAATTTAACTCTTGAAAAACAATTAATACTATACATTAG  
AATATAATGCACTATACACACTTAAGATAGTTGTTACAGGCAGTATTAATGCTACATATG  
CAAAGTGTTACGTATAAGTAAGGATATAATGCCACTGCCCGAAAATGTAAATTAGCACG  
ATATAGCTTCTAAACTGCTTGAAGTTAACGAAGGATTTAAAAGTATAAAACAAGTATTA  
TAAATACTCTGGCATTAAAGAATAGACAAGCAAGTTTAAATAATACACTTGTGAGTTGT  
CCGTGAACATAAAAAACAGGTTTTGATAGTTCCGATGCTCGTGTACAGGATTTGATGAATC  
TGTGAAAACGAGCTACTAATACCATAACACAGATAAATTCCTGATTTCAAGTAGCAGGTG  
GTAATCTGTTGCACAAAGAAGCGACGGAATTAAGCTTACTGATGAGTATAAAACGTCTA  
CAAATCTAAATTTGCTGGGTGGCTCAAATTAATGTATTAGCGTTGAAACCTAATTTTT  
TTGTAGCTGAATTCGAATATTATGACGGCGATAATAGAGTTGACTAAAGATTTTTTACAA  
TTGCTTGTGCTGGTGTACTACAAGTGGTAAACAAGATTTTGTCTGTAGGAGTTTGG

GTCGCTCATGTGGTATCGATACGTACACTGATGTCGGTTTTGTTTATAACAATAATGAAG  
TGGCTGTAGGGTTTAATGCTAGTGGCGTTTAAGTTCCTGCTTATTTACCAGGTGGTGGTG  
AACGTACGACTTATGCTTGGAGATCCGTTAAAGTTATGAATACTTTATAGAGGTGATAAA  
GTAGATAGAGCTAATAGAATTAGATGTGACCAAACAAGTAAAATACTCTTGCCGACTGGA  
GAAGCAACAGGGGATGTATCACCACACAATAAAAATAACTGAATTACGTTTTATTGAGAAT  
CCCTATCGAAGTATAGATTATTAGAAAAATAGAATTGTACGGATAAATGAAGAAACAAA  
CAGCCAATTTTGGCATATATACCACTAGGTGTAAGTGAAGCAGAAAGAGAAAAAGAAGAT  
GTAGAGGCTCAATTACTTTCATTAACACATCAAGAAATCCGCGGAGGTACTTTATAATGA  
ATACCAATAATGTAGTGGTGAGACTAATAGCAGAGAGAATAAAAAATGCACGGTTAAACC  
GTTTGCAAAATAGGGAGTTTCAACTCGATGTTGTAACACTAACACAGAATATAGAAAAGTAG  
TAGAGGATTGGATTATAAAAAATAGTGTAGTAGTAGAAGGAATAGAACCAGCAGCACAGG  
TGGGTCTCTTTTTTGTGAAAGAAGGTGACGAAATGGCTTTTAAAGAGTTAGTTAATAAA  
GTTAGAAATCTAGTATTAGAAGCAAATATTGTAACCTATAAGATACAGAGAATAATTTT  
ACAAGTGTTAATATAGAAAGAGCTTTAAAACAGGTTTTTCAGCGTGGAGTTAATGCTAAC  
AATTATGTAGTAACAGCGTAAAACCTCAAAGGTCCAGAGGTTCCAACATGCGATACACGG  
GAAGAAATAAAGAATTAATTTTATATAAAAAGGGGGGGGATCAGATTTAATAGAACCAACA  
CTTGAGGATAAGTATCCGTATTTAGTAAGAAATGGAGCTATGAAATAAATTGAAAGATGT  
AGCTGGAACCTAAAGACATTTGAATACGACGAACCATATATTTATGTAATAAAGAATCT  
CAGCTAATTAATAATTAATGCTATTTATGAAACATTAGTTGTTGACATTACTTTAGCTCAC  
GTTAACTTCTCATGAATCTGCGTTACACATGTGTATTTGTTTATATCAGACAATACTAAA  
TTATATAAAAATACAGAAGACATCAGGAATTGAAGTGAAGTCAATAGAAGGTGCTTATTAT  
AAGTTTTGTACTTAAGGGGAATTTATGTGTGTAGTATATGCATATTAGACTTCTACTATA  
CTTCATCAGACCAGAATATCTGATACGCATTTAATCTTAACTAAAAAGTTAGTTTCTAAT  
GGTATTTACAAGTAGAAAGGAGGTAAGCTTGTGTTGTAGTAGGAATGCTATTAATACTGCA  
GCAAAACCCTCAAATTTCTAGTAGGACTACAACAAGTCCTTTATCTAAAATAAATTTTGAT  
TGTGCCATTGCTCAAGATTTTAGAATTGGAGGATATTTGCATATGAAAAACATTAAGATT  
TTAAATGATTTTGTATTGCATCTGATGCAGAGGGAGGTATAGAAATTGAGAGGAAAGAA  
AAAAGTGCTTTAGTCGAATCTGACGTAAATTTAAATTTAATTGTCAATTCAGACGATAGC  
CGATATGACAATTTTCATACATATAATGGATATATAGAAGCTATATAATCGCTTTCAGT  
AGTCCTTTCGGAACAATGAGTTTAAATGCTGTAAAAGGTAACGACCGCTACAGAAAACCT  
ACTGAAAGATACCGAAGTGCTAGTATGTTTGAATAAATGATATAGTTCTCCCTGTTAGT  
AGTGGAATTTTLAGAAATATATCGGCGAAGAAGGTTTATTCGGAAGAGAAAGGAGAATCA  
TTACAATTTATTTATGAAATTTAATGGGGAAAGAAGCACAAAACATAAAATATGTTGGTA  
TGATACCCTATGAACCAAATGTGTTATCGGATGAAAACCTTAAAAGAAGGTATTTTCGAGAG  
AGGAATTACGAACACCAAAATACACTCTACTTCAAGAAACGAAGTTATTTATAAAGATAG  
AACTAAAGAGGTTTTCTATAGATATACACATATTATAAGTAGCATAGAAGACAAAGAAA  
ATTCTAGACAACGAACAATATCAGATTTAAGATTTCAATTAATGTCAAATGGGGTGATAT  
AATGAATTGGTTCAAGACAATAACAGATTTCTATAATAATGGTAATTGGACTAAAGAGC  
AAGATAAAACGGCACTCGAAAAGAATAAGGTACCAGCCCGTGAATATAAAGACCTTTTAG  
GAGAGGGCTATATAGCATAGTCTTTTTGAATTCAAAATTTAGGAGGTTTTTCATGAGAGAA  
GCACTTTTCGAAGCAGATTTAAAAATTCATGAAACAAGAATAAATAATGATGGAGAAGAA  
ATAGACGCAATAAAAATAGCGAATATAGAGTCTAAAGGAGAGTTAAAAGCAATGTGTGTA  
AATCTAAACTCACTTGCATATATTCTCAAAGGCTAATTGTTACAATGAGTACAACACTT  
GTAGGTTTTCGTTATTTTTGCAGATCAAAGTGGTATATTTTAATTAATTAGGACGATAAGA  
GATTGATAATTGTATAAGTTTTATACCAGAGGAGTTGCTATTCTTAGTAGCTGCTCTCTC  
TAAAATAGGTAAGGGCTGTAAGAAGTATAAGCAACTAGATAACAAATATATTCCAGTAGT  
GTAGTTAATACTTGGTATAGGATTTTCGATTGGGATGTTAGGACTAATTACTGTTGCAGG  
CTAACAGGCGTGATTTGTTGGGGTATAGAAATAGGTATAAACCAAACCTTACAAACAGCT  
GAAGGGGGAAAATAAATAATGAAAATATGTATACCAGTAGGACACTGTATGTTAAAAGT  
GGACTATATATTTCTGCTGATGAAGTAGATGACCAATACCAATACAACAATCTCTTGCA  
CGAGTATTAGCACGTACATTTAGACAACAAGGGCATTAGCTTGATGTAATAATATGCCTA  
GAAAAGCAGTTTAGAATAAGAATGAAGAAAATTTCTTGAAAAATACCTAGAGTTAATAGT  
GGAGGATATGATTCATTATAGGTTTACATTTAAATGGAACCTAACGGTCAAGGTAAAGGT  
TCAGCATTCTATACTATTGTAATAACGGCTTAGAATACTCAGCTGGAATATGTAGTAAA  
CTAGGTACGGTATTTAAATATAGCGGTGATAAATTAGATAAATAATTATATATCTTATAT  
AGGTCAAAGCCTACCGCAGTATTACTTGAAAGTTTCTTCTGTGGCAACAATAAGGATTAT  
GATAAGGCTAAGAAACTAGGTTACGGAGATAATGCTGAGTTAATTGTAGAAGGTGTATTA

AATAAAAATATAAATTATGAGGGAGTTAAACAGATGTACAAACATACGATTGGTTATGAT  
GGAGAAGTTGACAAGCTCTCTGTAAGTGTAGTAGGTTGGGGTCATAATGATGGGAAAATA  
CAGATATGTGATATAAAAAGATTACGTGCAAGGTCAGAGGCACAATCTATAACTTGTAGGA  
GGTGGCGCATGTGAAAATATAAGTCTTACTAAAGAAAAGTTTATTACCATAAAAAGGT  
AATGATAGATTTGATACACTTTATAAAGCATTGGCTTTTACTAATAGACACATATAAGTT  
ATCAACTAGAAGTGGTTGTTTGTGTGATAACTCTATTATTGTAATATATTGTAATATA  
TTAGTGTGATAATGGAGGATTTATATATGTTTGCATTGGTCTATGAGAGATTTGTAAGAG  
CGACTTTTAGTATTAACCTTAATAACTTGCTAACTGGAAGCGAAGATTTAGGTGGATTGG  
CTGAAGCTGATATCTTTAGAGCAGCAAATAATTTACATGAATTAATGAGATAAAAATAG  
GTAAGTGGGGCTACTATTGCAATTTTTAATAATGAGATATTATAGTCTTGTAAATGTTTCTT  
ATAATATTAGCTATATAATAATAAAACTAGTTGATAGAAGCTTAATGGCACCTTCAAGGG  
ATGAAATATTGGATATAATAAGGGAATATGACACTTATAGAGTACGACATTTCACTTTTA  
ATTGGAAGAGATAGAATGTTTGTAGTTAGGAAGTAGTTATTTTCGTTAGTTATTACTTTCT  
CTCACATCCTTTTATTATCTCAGTAAGAGTATTTCCAGATAATAATTTATTCAACTATAC  
TTAGTAGAAAAAAAATTTTGAATCATTATAAAAATTTAATGAAATGAGATAGTAAAATGT  
CGGTTAAAAAATAGACGTAACGCAGCTTATAGTAAAGAGAATTGCTTACTATAGTGAAA  
AATCAGAAAATAAAGCGAGTTTTTTTTATATTATTAAGTAGTGCAATTATATGTTTTTTAT  
TTTCAGGGAAGGACAAAATAATGAATCACTTAAGTATAAAGAGATATTAGATGTTTAGAGA  
TGCTATTTGACATTGTTATATAATATACATTTGTTGTTTCAAATGATTTTTTCGATTATGT  
TTTTAAAGCCAAGGAATTTCTAAAATAGAAAATGAACATACATCGATTTTTTATACTAAAG  
AGATAGCCTCTTAAATAATGAACATTACAAAAAAGCAATTGAAAATGCATTTAAAGACA  
AACAAAACCTTGATTAATGCAGCACTTGTACAAATAAAAGAATTAGCTTTATTTTGTGATA  
TGAAAATGTATAATGTAAATAAGTCAGTAGAAGCTTTTGGTTTAGGTGGAATTATATTGT  
TTATATATACTCGTAGCAGTTTTGAATGCCATTTAGAAAATGTTTTATCTGAGTAGTA  
TTCGTCTATGAAGATAGAATCAAATAATAGAAGAATACCATTTGCTTATTTGTAGATTCT  
TGTCATTGATTTAATTTAATTTTTTAAATGCTAGTTTTACAGTTTCTTTAAAAACAGGT  
ACTGTGTTTTTCATTAATAATCTTCAAGTTTATCCTCTCTTATCCATATATGTTCTGGATGT  
TTTGATGTGCGTTCAAACCTAAGATATGTCATATGCATTTATCATTCTGCAAGAGTTATA  
ATCCCTTTGTGATACCATCACTTTTTTTAACTTGATAAATTGCTAGAGGTATAGATTGG  
CAATCATCTCTTCTTGTGCATTCCTAATATGATCAATGTTTATTGTAATAATCTGTTTCA  
TATTCATGTTTATTAGTCTTTATAATTGAAGTTTCTAGACTTGCCTTAACACAACCAAAT  
TCCCATGTAAGTTCGATTATTATTTCTATTATCCCGTCTTTTCGCATTTAATATTTTGGAA  
GTTGATTTATAATAACAAAGCGCAACTCAGTGTAATGCCATTAAATCTGCTTTTCTATAG  
TCTTTTTCTATTGTATTTATATCATAACGGGGGTCTGTTTTAGAAAATCACGTCGACTATT  
TTTTCAATCTTAACACGAAGGTTTCTGTGATACGTATATTTTCCAAAGCGTCCGCTACA  
GAATCAAATATAAAAAGAGTCAATTAGTACTTTACTTTCTCCTTTTTTATAAAAAAATAT  
GCTCGAACCAATAAATTTTCTTCTATTTAATCAACAGAAAACTCTCATTAAAGTTATATA  
TCATTATTTATTCCTTTCATATGATAACAATTGATAGGGTATAGTTTATAATTCCAGATA  
GCCTTTATTTTTTTATATGTAATGATATGTAAGTTTGTATAAATATCAGCTTTTCTTGAT  
CTTATATAACCTAGTTAAAAACTAAGAGAAATTCTTACTGGGCATGTTGGCTTTGATATT  
CTTAAACCCGGATTAATATGACTTCCCTAAGAACTCCAATATTTTATAATTATTGTAGTAA  
TCGTACATAGAAGAAATAGTTTCATGTTGTTTATTATTTCTAAAGCATTAAAATTCGGA  
ATGCATGATACTTTAGCAATCCAGGCCGCTCCTTTAATAAAAATAAGATTTTGAAGGTCC  
ATTAAGTTTTTTTCAGATTCAGAAAATCGTTCTAGTGTAGAGAATATATTTACAATGTAT  
ATATCTTTAGCAGTGCTTGTTAACATATTAACGTTTCATACCTATGTATTTATAAATTTCA  
TCATGATTTTTTCGTACGATAATGAAAATTACCTCATCACCAAGAAGTCTCCAAAGTTAC  
GCTTAAAGTTTTTCATAAACTCTATATCGTAAGTTACGTAGTATATGTGATAATTCCTTA  
GCCAAAGCGCTATGATTTATTTTTTTATATCATGATGACTTAGCTATATCAAATAACGG  
AACAAAATCACTTGTGGATGCTTAGGTTCTTTTTCTTTTTTCATAAATTTCTGTATTAATA  
CTTTCTGATGTGTTTCTTATACTTTTTAAGTTTAAAAGCGTTTTTGTTTTTAGCTGCA  
CGATAAACATTATGTACATATTTAGTTTGTATTTCCGTGATCAACCACCATTGTATATATC  
CTAACCTTTCCCTCTATTAGATGCTCCATAAGAGGAAACCTTTAAGAAATCTGCACTTT  
TTGAAGTGTGACCTTAGTACCTACTGTTTTTTCATCCAAAATCCTTGTATATTAAGGTC  
TAGGCAGCAACAAGGCTGCTGCGAATTCATTGGATTGAGACTCCTTGTGCTACTGGTAC  
CTCTAAAATACTGACTTCCAGCTTACTATTCCATAGTCCATCATCATTGTTATATCCCA  
AGTGTAATAACATATGCTCCTTGTTCATGCTAAATGGTAAAATTTCTTTCTGCTATCTGGGT  
GATCAGGAGAAGACACTATTACAAATGAATCTTCAACTTGTCTATAAAAATCCTTCAGCGT

ATCCACTTACAGA ACTATCTTCTATTACCTTTACTCCTAAAGCATCACCAACTTGATTTA  
TATTTTCGTATTTCGAATTTGGATTGTGTATGTTTGGTTATTATGTTGAGTTATATCATTAA  
TTAGCTCGCTGATTTTGG AATCCATGAAATCCCATTCTATATGATATTTCCCTTAAATA  
ATTATTTATTATAATATTCCTTATATTA AAAACTATTTTTTTTTGGTACATTTGATATTA  
TTATTTTTATTAACCTTTTGTATTATAACAATATAATTATACCATATATAAACAGTTTTTT  
GTCTGATGTATATTTAAAAAATAAAAATTAGTATTATATCTTAAACATAATTAGATATA  
CTCTGGAAGAAATTAGAATCTTAACAATAATATAAATCGTTGAAATTCCCATTTGTGCTA  
CATAAAAACAATAAATAAATAATTA AATTTTAGATTTTCAGAATATCAAATAACCAAAAA  
CGATTA ACTAGTCATCTTAACTAAATTCATTTAGTTTATGTTAAAGTTTGAAAGCTATAG  
TAGAAGTTGTAATAATAAACGAACGAAAATTATGCAACTAAAACATAACACATGCTGTA  
ATTGTATTAGATAACTGCCGGGATATATACCACAAGTAATCTGTTTGTAAGAGTGCTTCT  
TTTTTTGACATCCATCAACATATAAACTATCAAGAATATTACTCAACACACCTTCAAATT  
GTTCTAAATTTTTTTGCATTACACAGTTATAATATAACAATAAAGAAGTCCAGTTGTAAC  
CCCAACACATCTATCCTAATTCAACAAATATTATATAGAGCATTCTTCATTATGGAGAGT  
GCTTTTGTATCTATTTGAATAATCATGCTGATTATTTATAATATTTTGGATTTAATTTATC  
TATTTCTCTCAAATTTAATACACAATTAATACAAATGTGAGTTTTTCATATGACCTTTGTT  
ATGAAAAGTAATCTACTTATTATCAACTTGATCTATTCCTTTATTACTGTAGTCACATAA  
TTTAGTCTTAGTCATATTTTAATTCACTTCATTTTATATTAGCCATAATTAAGTTTAAACA  
TATTTTCGTATATCCCTATGTATATAGATTTAAAACAAATTTTTTTATCGCACCATAGAAT  
AGATTGGATAAATATAAAAAATGGAGAATACATATTTGATAATTGTAAAATAATGTTATAA  
TTAAATGGGAAGAATAATCTTGTGCAACTACAATCTAAGAGTGGAGCTTCATTTTCTACA  
TTCCATACGTTAAAAGGAAGGAGGTGGATAGAAGAGAGAGTTTTTACTAGGAGTGTTAGC  
TAGTTTAAAGAGGTAGCTTTATTACATATACTAATCCCAGAGAAGTAAAAGCCAATCTGG  
CAGGAGTGACGCTGAGCTTGATGTATGAATCGGGATTAATAAAAAACGACATTAATATTT  
AGTTCATGAAACTTCAATCTAGGCTAACGAATTAAGTTTCTTTTTTTGTTTTTGATACG  
AATTTACGTCTTTATTTTCATCTCCTTTTGC GCAAAAATAAACTATGAATACTAGA ACTA  
TATCTAATTTATCTCTTGGTATATATATTATTAGCCACCTAAAAA ACTTTTCTAAAAAC  
AAGAAGAACAATATCTGTTTGGCAACTGGCTGGCATCTTTTACAAGGATTATATAAATCT  
TAGTCCCTGTATCTTTGGGTC ACTAATCTCTCTAGTGTGCGGATTTAGTTGTGTTATC  
CAACTAAAATATTACAATAGAATTAATTAATGTTCAACAAGGTTGTATGAAAATTAATA  
AAGTTATAGGACTGAATAGTGTTTATTCCTGAAGAGGAACAGAGTATTTAAAGGGCAAGG  
TAAGTTAGAATATTATTGTGAGGTACCAATTGATTATGCGATATTCAATGAAACAGGAAC  
TCTGTGACTTTTCGCCACGGGACTTTCAGTGTATATCGCTTCTAGCAATAGCCATAAGTTT  
TCTATTTATTTGGGCTGACTAATAATAGCCAAGTGGATACTATATGTTAGTCCAAATAAT  
TGTATAAAATTAATAGTGATGTTTTTGT TATTATCTGTTTCTCTATAGTCTATTATAGAT  
AACTAAAAACGTCTGCGTTCGACCCTGGTTC ACTCACTAGGCATCTCATTTCTATCAGTA  
TCTAAGAATTTTTTTATATTA AATGTATCAATAATTTGAGTCTCCCGTTGTTCAATTTATA  
TTATCCAGTTGAGATTGTAATTTTCAATAATCTTTTCTATAAGTCTCTTTATCGATCAA  
TCCTCTAAATTTAAATCTTTGATTTTATCTAATTTTTTCATGATTTTCTTCTTTTCATCT  
TATTTGTTATCTTTTCTATTTTCGTCTGATGTTTGGATTTTGTGCTTCCAATTTACCATA  
TGTTCAATAAATTGTGGTTCAAAGTTAGTCAAATAATAGTTTCTATATGTTTTTCATTA  
TGTGTTACCTTGCCACACGATTTTTTATTTATATAGAATGTAGAACATCTATAAGATAAA  
TCAACTTTTTCTCCAGCAATACTAGAATTACCCTTTAATGTATAACCACACTCCTTACAG  
TCTAAAAGACCAGAGAAAATATGATAATGTATGTTTTTATTAGGTGGAGCTTCTTTATTT  
TTTTCCAATATCTTTGGATTTGTTTAAATGTTTTTTTCGATATAATAGGTTCCACTAA  
TCTTCAACAGAATATCCTTGTTTATTATAGATTCCTATATAAAGTTCATTTCTTAGAATA  
TCCTTTATTTTATTTTAACTTTATTCTTCGCCATGAAAATTATCAAGTGTTTCTATTAAA  
GTCCTAACAGAACCTAATTTGTGGTATTCGTCAAGTG TAGCTTTAACTATAGATTTTTTT  
TCTTTATCAATAACTTGATGCTTATCTTCGACTGTGGAACCTATGGGAATTGTACCACTT  
ATAACTTGTTAGCGTCTCATTTTGTCTGAAAAGAAATTTTATTCTTTCAGATGTTTGA  
GCTTCTTCATTTTCTGCTACAGATAACCATAATGTTTCTACGTAAACTACCAGCAGCAGTG  
CTAGAATCGTAGGTTTCTAAAATGGTTTTCCAATAACACTTATGTTTTTCCAAGGTATCA  
ATTCTTTTATACTAGATTTTGGACGCCAGACTTAGTCTATCAATTTAAGACATTA AATCT  
AGGACTGCATAATCTTTTTCCACATCTCTAAATAATCGTTGTCAGTTAGGTTTTTCTAAA  
TTAGCTGCAGATCCACCTTCATCAATCTATCTACCAACTATCTTAAATTCATTCTCTCTT  
GGATACTGTTCTAAAGCCACTTTTTGTGTCGGTATGCTGTGTACATTTAAATCTTGTTGT  
TCTGTGCTAACATGTATATAAAGTGCGACTCTTAAACATAATACATTCCCCCTTATTGTAA

CTTTAAGTTGATCTGGACGGCTCTTAAGTTTATTACGAATTGCTACAAAAAATTTGCATT  
CATAATACTAAATCTTGGCTCACAAAATATCACATACTTATCTAGAATAGCTGAACAAGC  
ATATTAATTTTTATAACATTCTAAAGCTTCATTTACAACTTTACTCTTACATCAAAGTA  
TTCTTCCATTTGGGTTATAGTCTAACAAGCAGCATTAAACTATCAATGAGAGCTTTGAG  
ACCAATTCATTGGTTGTAAGCCATCAATCTAGCTTTATATTCTTGTGGTATTTTCAAC  
TTATTTAGGTCTCACATATTTCCATTTGAAGTATAATGATATACTAGTTCTTCTGTTGA  
CGACAAGCTTTTTCACTTATATGATCGAGCGAAGTATTATTTAAAGCTTTCCATTATT  
TTCATATAATCAATGAGAATTAGAAATAAAAAGGAACCTCTCTATCAATAATATTCTTATC  
ATCTGCTTTAGAGAGTAACTGTTTATAAATTATTCATAAGTTCACCTACCTATTTTACCAA  
TTATCCATATCACCCAAATCTAGATATATTTTTTCAATATCTCCTTCTTTATGTAATGT  
ACATTGTGTGCCGCTACTGTGTCTCTGTGATGTTTATTTACATGTTTACCTATTTGAGTA  
AGTTCATCTACTCTTTCTATTGCTTCATTTTGTCCAATATCGTTTAAAGGCATTAAAGCTT  
GATGAAAGCTTATTTACTTTAATTTTAAATTTCTTGGCCGCTTTCGTTCCACCCCATCTA  
AAAGCAGGAGATTCACTAATGCATGTGCTAAAATTTCTAGCTTATCAAGAGGATTATTC  
TTTATAGCTCCCGTTTCATAGTTCTGTAAAGTGGGCTTTCTTTGACAAGTCTGTAAACC  
AAATATTGATACGAGTTGTTAATTTCTAATCGTTTATTTTTTATTCAATTTGTAATCTCC  
AACATTTTTAAATCATCTGCAGTAGTCAAATTTATTAACTCTATAAAGTACATTATAAAG  
GATTTTTTCTAATTGCAACAAATACATTGGAAAATCTAAAAAAATGTTGCATTTTTTTAC  
TTGACAATATCAAATGGATGTATTAATATTTCACTTAGCGCAAATAGGCGCCGAGGTGTTG  
TAATGAATATAAGTAAATTAAGGAATAATGGTCGAAGAGTAATACTCAAAGAGAT  
TAGGAGAAGAGAAGGGTGTGACTGATCAAGCATTAAATGCGAAATTAAGGTTTCGTCGGT  
ACTTCAAGATTGGAGAAGCAGTTAAGATATCAGATCTTTTGCAAACGAAGAGCCTGGTT  
AGATTATTTTTGAGAATTACATCCCAAATTTGCAATGAAATTAGATAAGAAAACCTCACA  
GAGAAAAATTAAGACTAGAGAGGTAGAAATTATGAGTAATAATTTACAAGTAATGGAAAG  
AAACAACAATAGAGCTCTAACTAGACAGCGACGAGCAGATTTAGATGAATCTGACTCAA  
GAATAGAAGTAACAATTACAACAGTAACAAAGATAGGATTATTCGAGGTTAACATTATTT  
GTTATTAAGGGGTTGAGTTAAGGAATTTAACCCTATTCATACGGACTATCAAGTGAT  
TTAAGTAAGAATGAAGTAAATTAACCAAGTACCTTGAAAACCTGAATAAAGAATATTGAA  
GAGAAGTGAGTAAATCCAAAAGATCACACAACAATGCGCCTGCCTATATAAGGCGAATA  
AGCGCAAAGAGGACTTATTCTTATGTTTCTTTCCATTTTTTCAGCATTTAATTTTTCAA  
ACCTAATTTGATTAATTTAATAGTAGCTTGTGTTCTTATAGGGAACCTTTTATCAAACGT  
AAAATCATCAATTTGTTTAAAAAGTTCATTATCAACAGTTATTGTGAACCTTTGTTTTG  
AGTAGCCCTTATATCACCTCACCTTAAGTGTGTTATACACCAGTGGTGAAAAGATGTAAA  
TATAAAAAATAAAAAATGTAATAAAAAGGTGTTGACATGGTTTACCAGTTGATCTATGATA  
AAAGTTTTAAAACTTTACCATTGATGACAAAAGGGGGATGAAAATGAAAACCTAAATCTA  
AAAGCATTTCAATAACTATATTTCCAGAATTCGAAATAGATATAGATGCTTTAAAACAGG  
AGAAGTTTTATAAAGAATCTCACAGTCAAATGCTAAGGTATCTTATTAACCTTGGGCTAC  
AAGTAGATAAAGAAAAGGTCTAAAAAAACGAATAAAAGAGTAGGTATAAGCTTGAATGAG  
TTGACAATAATACAGCAAATAATAACTTCATAATTCAGAGTAGAGAAGGCGCAGAGTTA  
ACAGGAAAGAACTTGAAAATTTCTTACGCGAGAAAAGTTGAAACAAGAAAATTTTAGAG  
GGCTCATTAATTTGAGGCTTCATGATTTTTTACATAGAGAGTACTTATATAAAAACACAT  
AATGAAATTCAGCCTTATTTCTTATTAACCAAAAAGGTAGTGACATGGTAGCTAATAAG  
ATGACAGGTGAAAAGGCAATTATATGGACAGCGATTTGGATAACTAAGTTTGAAGAAATG  
GAACGAGAAATAAAGAACAACAAGCTTAACTAATAACTACATGCAAGGAACCATTGCAA  
CAGTTATTAATAGATGTTGAGGAAAAAGAACAATGACAATTAGAAAATCAAGAAATAGAT  
AGGCTAATTCAGTTACAGCAACCATAAGTAATGCTTGCTGATTACAGTAGTAGCTTCTGAC  
ACTTCTATCTTAGTTGGAGAATTAGCAAATAGCTTAGACAAAATTGAATTGATACAGGA  
CAAGATAGATTATTTGACTGGTTAAGAAATTAAGGTTACTTAATAGACCGTAAAGGCGAC  
GATTACAATACACCAACTCCAAAAGTGTAGAATGAGGAGTTATAGAAACAAGAGAAGGT  
ACCAGAGTACATGCAGATGGTCATAACAATTACTAGAACACCCCAAATTGCTGGTAAG  
GGAGAAATATACTTTATTAATAAGTTTAGAAGGAACAATCGGATCTTAATGTAAAGCGCA  
ATCATAACAGCACTTTGAAAACCTAAATACGGAATATTTTGTAAATAGCGGGTTGATTTAA  
ATGGGTAATAAAGTTAATACACAGTAACAACAGTTGGTGAACCAAATATACATGCATAC  
GGCGCACCTATAGCTAAAAGGCTTACAGACAAAATTTGGTGAACCTAATTACTCATAACAT  
ATTGAGAATATGATTTTGTACAGAGAGAGGGGTTTATGTAGATGGAGCTATTGAGAAG  
GAACTGTTATCTAGAGAAATTATAAATAAGTCAATGTAGTGAGTGTAGGTTCTAAGACGT  
TTGGGTTAGATATTAATTGTATTGTAGAAGTAGCAACTGAGCCGGACCTAAAATTAGCTT

ATTATCGAAAAGATAAGTGATGTATTGAGTATGACGCACTGATACGAGAGGATATAAGAT  
ATGGTGATTATATTCTTGAAAGATTACGCTAGGAGGAAATAAAATGGCAGCTTTAATAAT  
AGTAGACTTATTTGCAATCTATTTAGGAGGATTTGTTCAAATAGAGATTAATTAACGG  
GGGTTTAGTTTTGGAAAGTTTCAAATAGTAAAACAAAATGTGGAAGGACAGGTCAATG  
TTTCTAGGTTAGAATCAACAACAATAAGGACACTTATGGGATTCTCAAGAATAAATCTT  
GCAGAGATAGGTCAGATCACATAAACGGAAGTACTGATGGATTTACACAAGTAACAGTAAACG  
AACGATTAATAAATATTTGCTGAGACATTACTACAGTTGTTAGATACACAAATCAAATAT  
TAGAGAGTGAAGAAAGTGAGGACTATAAAAGTCTTTGTATGGGCGTAGACGAATTTGGAA  
GAGAGTGACCTATAGATGTCCAGATATAAGAAACGAGCCATTAGAAGAGGCTCGATTGAG  
AAATTATTTAAAATTAATAATATGACTAACTCATAGCATAAACGGAGGGAAATTATGAGT  
ACTTTATATCATTAACTACCGATTTATTAGAAATCGAAGGAGGTCACACAGAGGGGAACA  
GGAAATGAGACTTAAAAACTAGAGGAAATAAAAGAATTAAGAAAACAAGGGATTACAAAT  
AGAAGCACTCGGATCGTGTGTCAGTGATAATAGATATTGATAGTGATATAAACTCTTTAGAC  
GTAGAGATTAAGAGAAAGCAAGAGTTAAAGATGATTAAGAAGAATAATCTGGATATATTT  
AAAAGTAAGATAAAGGAATATATCGAACCCTGTTGGTATTATAAAGGTAGAAACATGTTTA  
GGAAATATACGTATATGAAAATCAGCAGGTAGCTTAGTCATAGAAGATGAAGGAAAGATT  
GTTGCTATATATAAAACGGTAGAGGAACTTGTAAAAGTAAATAAAAATACCATTAAAGAC  
GTTGGCAGAAAAGGTCATGAGATTGAAGGGTATAGAATTGAATATGGAAGTACTAGACTCACA  
ATTCCGAAAGCTAAAAAAGAGTAGGAGAGGACCATGGAAACTCGTAATGTTTACATAAGA  
CTTGTAATTTCCAGTGTACATTCAAAGCTCCTAAAATTTAATTTTATAGCTATGGGAAA  
TACAACTATAGGAGATGCGAGGATCTACTAGATGGTTTGAAGCCTAATCCAAAAGACGAA  
AAAGCTTTAGTTATGTTAGATGATAAAATTATTAAGATAGGCACTAGATTCTATGTAGAA  
CCTACAGCAACTTTAATAGGTGCAGAAACAGAAGAAAAGTGTCTGCAAATGCATTAGCG  
AGCGAAGATGAAACTCAAAAAGGCATGGACTTAGCACAAGTGACTGGAAGTGTATCAAGT  
TTGGCAAGAAAATATGCTTGAAATGGACTATACTGCATTGATGATACAAATGATAGTGAT  
CCAACAATTACACTTGTAAAAGAATAAAACGAAACAGAAGTTAGTGAAGATGAATTAAGT  
ACACTATATTTTTTAGGTGAGTCTATAGGTAAGGATATGAAGAGAGTCGATAGTGAGGTT  
TATAATAAGTTTAGTAACCTAGCAATATATTTGACGGAGCTAGAGTATGAAAAGATTCTA  
AATGGATACAACCGCTTTTTAGATAAGCAAAGCGAGAGTAGGTGATATTTTGAATTTA  
ATAAGGAAACATACTTTTACATAATCTTTGATGACCCTTTTACCAGAGTACCTAATACAA  
TCCTTTAAAATGAAAAACTCAGTTATTAAGTATAGGAGTAGTTACACAGATGTTAAGGT  
TTCAAAGGTCGGGTAGTCATACAGTTTATGCAAATCATTGATAAGCTACAGAAAAGGAA  
GAAAGACAAAATAAGTACTGCTTTAAAGGAGCCTACGCAGGAAGGTTATGTTATTAGGA  
GACAATTAAGGGATGAAAAGCTCAAATGAAAAGTTATAGATATGATATTTGAGATACAC  
CACAATCTGTAAATTGTGAAAGTGTTGAAAGGACTGAACCTCTACCGTGTGCCGTTTTCC  
CGACTCCGGGAAACCCGGAAGCTGGTAAAACCGAAGTGGGTGACACCGGAAGGCGGCACA  
ACTGAGGTCGGGAAATCGGCAACATACAAGAAAATAGTTCTAAAAGAAAATAGGTTTAC  
GAGAAAATGATGGTATTACCACTGTTATTTCTAAACAATCTGAAAAAAAATAAGTTTGT  
ACATAAATAAATATTATGAATCTAAGATAGCTGTGAGTACTCCAAATTATTTTCTACAAC  
TACTCACTTATTAAGATGTTGGAAGGGTAGGTGATGGAATATTAAGAGATGTTGAAGAAG  
CTGTAGACAGTGGAGATAAGAGTTATAAGTATGTAAAGACAATTTTAAATAATTGGATAG  
AAGCAGGTTTAAAAACTGTTTTATTACGTCCAGAATATCAGAATGCAGTTGAAAGAAAGA  
AAAAGATTAATAAAGGAAAAGAAGGAGTCTAATAGTAAAAGTGTGAATACTAAGCATGTGA  
ATAAAAATAAGTCTGATAACTTCAATCAGACTTTCTCTCAATATGGAGAAAATAGAGCTAG  
ATGATATTATTTCAATGAGTCAGAAGGAAAAATGTAAAAATAAATAAATTAATTAATTA  
AAATATCAATATCTTGCTTCTTAGAAAAGGGGCGGTATAAAATGGCGAGAAGATATACAC  
AAGGAATTGCTCCTTTAATGAACAAGGTAGATTGAAGTTATTAAGATTACTATGCAAAG  
CTGGTTAAAGAGTAAAGCTCGCTAGAGCGAAGCAAATAGCAAGACAAGTCATACTTACT  
TTGTTGCGTATACAGAAGAACAGGAGGAAAAGTAAAGGGGCTACTCGAGAGAAGACTA  
TAGCCTTAGTTGGAAGATTAGTTCCAGAGGCAGAATTGAGGTACCTTCAAATTCAGGTA  
CTCCAAAATAACCTTTTCAATGGCAATAGAACGAAGGTTTAAAGATAAAAATGGAAATA  
TAATACCTGATTCTAATCCATGCCACGATTTGTAAAACATGCAGAGCATCTCGTACAAT  
ATCATGTTAAAGGTAAGCCTATATATGCTAATAGAGAGTTAAATATAAATAATTACAAAG  
ATAATAATGGTTACTGGAAATCTATTGCTAAGGTTAATGCCAATGCTTTAGAACCCTTT  
CTTGTCAAAATGATAATAATGCTAAACAAGAATGTGTCCACCAGGATTAGACCCATATG  
GTTTTCAAGCAATAGATGATTTGATATACCTTCTTAATTAAGTTAATTAATCTAGGGAC  
TAATGATGCCATATTACTTACTGGGAGTTAAAAAATTGGAGGGATGGTAAAGGGAAGAAG

ACTATAGAACATTTTTTTTAAATGCGTAATGGTGTGACAATTGAGATAGTCCAAAATTGCG  
AAGGAACAATAAATAAAGTCTAAATAATATAAAAACAGATAATTGGCATGGAACTTGGGA  
AATCAAAGGCAGAAAGCGCAGCTACAGTGCCGCTATACCTAGGTAAACTGCTTTTTGAAG  
GAATGCTGTGTCTTAAAATATTGTATCTGATAGTAGTTATAGAAGAAAAATTGATGTTGG  
GGGATTAAGAGTGGTAATAATTACATGTCTAAATCAATTAGATTTAATGAGACTTAATG  
GAGTCGAAATAGATAGTAGGTACGAATATGCAGTGTTTGAAGGTCAATCAAATGTTAGAG  
AACTAGGTAGGTATAAATCGGAAGAAAGAGCTCTCGAAGTCCTAAACAGAATCCAGGAGG  
CTATTATAGGAAGAACTAAGCTTTACATTATATAAATAAAGGGGTTAGATGCTACAAAG  
AACAAAGTGTATGAAATGCAAGTTGAAGAAGGAGGGGGCTGAAATATTAAGGTTGATAGA  
TATTTAATGGTTCTGTTGCAGATAGTATATTTGAAGATGATTTGACTCTTAGAAATTAT  
TTAGCACCATATTGCTGTGTCTATGGAGTAGACAAAAATGGAGTACCTGTATCTCCAACA  
CGTGGAAAAATCCTAAAAAAGTTTAAATGTTGATCGGGATATAAAAAAGAGAAAGACAAC  
TCAAAAGTAAATTTATTTAAACTCAAACTTGTGAAGAAAAAATGCTTGATTCTATGGAT  
AGTGCAGCATTTTTTTAAGACTACACTGTCAGACAGTCTACCAAACGATTA AAAAGAAA  
ACTAAAACAAGAGGAGGCTGGAAAGCTGAATATTTTGAGCAGAAACAATGGAAGTTTCAA  
GTACTGAATACGCAATAAAAAGAGGAAAAGAGTTATCTGATAATGGAAAGGATATATTTA  
TTGCTATAGATAAGGCTAGAGAAAAATATGATGTGTAGGTTAAAAGTGAATATCTTAGCT  
AGTGTGATATTATAAATCGGGAGTTTTATGGCTGGTAGAGTTTATGAGTATTGATTGAAT  
TTAAATTA AAAATGATGAAGCTGATTCAAAAGTACTTTTAGATGTTGTTAATGAAATTAGT  
GTGTTAAGAGAAGAATAGAGAAGTCTTAAAGTAAAGTTACCAGAGTAAGATTTACTATTC  
ATCAATAGATTAACAAATTTTTTACATGCTTAAAAGATATGCGAATGTTGAATTTTTGAC  
TGTAAGATTGATGATATTGAATATGCGTGTGATGATTGTATCAAAAAGTGGCTTGCTAGC  
GAAGA ACTTATATGAGAAACCAAGAAATATCTAATTA AAAACAGTTTAGAGAGTTGCAAGA  
TGTTTTTTAATAAAAATTACTACTGAGATGTTTCGTACCTCTCAA AATTGAAGATAAGGAG  
GCGTTGTATTGCTTACATTTTTATCTTTAATCGCTGGGATAGGTGGCTTTAGGCTTCGGT  
TGGAAAAAGCCTGACAAAAACGTTTGGGACATTGCGAATATGATAAATTGGCAAATTTAA  
GTTATAATGCCATGAACAACCCGAAGGACGATGAAAGGGTTGACAGAAATATCAGAGAAA  
TTAGACCCGAAAATATTACGAGAGCAGGTGTCTGGTGTTTTGGATTCCCATGTCAAGACA  
TTTCTGTTGCAGGGAAACAAGTTGGATT CAGCGCAGAACGTGAAAGTGTTTTTTCTACGG  
AAATTA AACTCATTAGAGAACTCAAAGAACAAGATTGACCCAAGTATTTACTTATTGAAA  
ACTTTAAA AATCAACTCATTAATGGAGGATTTGATTTCTCAAAGTTCTCGTGGAAC  
TGGCTGAAATCGGCCATGCTGTAGACTGGCAAGTACTTAATTCTAAAGACTGCCGAGTAA  
TCTAAAATTTTGAACAAATATCCATTGTTTGACATGTTAGAGGACGAAGAACAAGAAAAG  
TATTTCTTTTCGAAAGAAAATGTAGACAAAATCTTGAGCTTCTAAATACTCCA ACTCACA  
GTACAAATAGAATTTATGATTCAGTTGGAATCCCTAGATGTATTAGAAGCCACGCAGTAG  
GTGGAGGTGCCAAAACAGGACTATACTTTATAGACTTAAATAAAAATCTCTAAAGTAACAT  
TAACTGCTACAGGCCATAAAGCAAATTCTAATGTAGGTGTGACAGATAGAAATTGTGATA  
ATAGTGGAGTTT TAGCTCCTGCAGTTGGAAGGCCCGATTAGCTTGAGAAGGAGAAGTAAA  
TAATAAGAGCCGAAAATTA AAAACTAGTTAGGAGGAATAACTTATGAAGATTTATTTATT  
GACTATACTGCGAATAATTATGTGTATATTAGCAAATTATGTGAGTAATAGCATATACAA  
AAAATCTATAAATAATCTATAAAAATAGATATCCTGTAGGGGAAAAGATTATATATCATCA  
AATAACCTGTTTCTTTAACCGAATGGTTGGTGGTGC AATTTTAGAAAAATGTTATAGTAG  
GAAATTTCTGTTAAGAAATACCCCGCTTTATAAAAATAAAAGCCTATGTAGGTGATAACGC  
TACAACATGGGTTATACGTGAGTCGAGAATTGAATGTTTTGCTACTACTTATGGAGAATG  
TCCTAAATATTA AATAATAGAAATTGGCTGTAGAAGGAGATTGTA AATTACGTTTAAAT  
CTATAAAGTGAATATAAAGACAAAAAGCACTTTGGAGCAGGTAAGA ACTCAAAGATTAGA  
CTTTGACTATTAAGAAAAAGAAATAAAAAATACTCTGAAATACTATAACCTGATTGAGGA  
TTTAAAAGTGT CAGCAGTTAAATGTGGAGATGAATATTGTCTAGCTAATTACAATGAACA  
AGATAGTAATGTAATCATTGAAGCACATTATGTTTTTTGAGCAGGTTGAATAAACTTGATC  
TTATATAAATGAATATTAACGATTTTAAAAA AATTGGGTCAATAGTAATCGTGATGGGGA  
AGCCTCTATCTTATTTT CAGATGATGTAATTGAGATAATTAAGAAGAGAAGCGAGGCTTA  
AATAGGAATAAAAGATTTAAAAGGAAAAAAGATGATTCCATAAAAAGTTTAGTGAAAGA  
TGTGTCAACTATGACTGTGTAATCAGCAACAACCTTATAACTCATAGAGTGTGTATAGGA  
TGCATATACAAAGAAAATATGGATAAAGTATGTGAAGAGA ACTATAAGAAATTAACAAGT  
AAATATAATTA AATAGTCAAGGTAAGTTTGTGAATGAAACTAAATTGTTATCGGCTTGCC  
TTATAAAAGGAGTGC GTTAAATCGGATAAGATATATTGTGAAAATTATTACTGTAAAAAGT  
ACTTTGCAGATAAGTGTATACTTGA AAGGATTGAAATTAATAACTTCAAAGTATATGACA

GGTATCTTGATGGAATAAATGTGCTATATGAATAAGAAAGCCAATATCATTACATCCTA  
AAGATTTGAAAAAGGCGAAGAGTAAAGATTATTCTGTTGAACTTCCACCTATCCCAACTG  
GTTTTAAAGTAAGATGCCGTTCTACAAATAGGAGTTTTAAAAATTAACATAACCGTTTGA  
AAATTCTGGAAGCAAACTAATCAAAATAATCTCTCACATAGAGCTAGAGGATTTACGAT  
AATCAGGAAGTGGTTTTAAAGAAATGAAGAAGATGCAGTTCGTGGGGAAAATTATTTTATC  
TCGAAGAAAATCTAAGGATATTTATGGCCGTTAAGAATGTAGGCAGAATGCTAATAAGC  
TCAAATAATGTGAGCCTTTCCTCAAATAGAAGGAGAACCAGTTACTAAAGAAAGACCTAG  
ATTTAACTTAGCTACTAAAAGGACCTATACACCACAGAAAACCAAGGACTCACAAGAATT  
AATAAAATGGTAATTCCAATTTAAAGTTAGACATTATTTGACTGGATACATAAAGATGAC  
TTTAAGATGTAATTACTCTATTGCAAAAAGTGACATTGAAAGGATTAAGAGCAGAAAAG  
AAAAAATATGTTAAGCTACAATAAAAAACGAATTATCGATGATGTCGTCAAGATTATTGC  
TGATTCCTCACAGAGATAGCTGATAAAGATGATACGCAGATTGTTGAGGTTGTAGCTAG  
TAAATATTACAATGGTGAATCAACAGTTGATGTTATTTTATAGGATATTATTTAACCAAC  
CGAAAAGCCGTTTCGTACAGATTAGGTACTCAGTTTTTTCATAAAAATGTGAAAAGCTGAA  
TAGAGAATATATCAAATGGTAAATGAGAGATAAATTATGAAAGAAAATATAAATAAAGAA  
ATAACAGTTCTTGGAACCTTTAAAAACCGACGAAATGAAATTTCATAACATTGAGCGTAGA  
TGTGGAGAACATAACTAAGCAATTCTAGTAATAGTTATTGGGGAGATAAATAATAGTGAA  
TCTAGTCAGATTAATGAGTTTATAATTAAGCATAGAAAAAGTTTAAAAAATGGAAAAGAC  
ATATGAGATTTGTTAGGTGAGGGTTTGGACGATACCAACATAATAGAATTACGATTTACT  
AAGCAATCAATAAATTCTTATTGAGGGTTAAATGACAAAGCGTTACTATCTGGGATATAT  
ATATTATCTGAACGAAGTTATGCAACGTTACCAAAAAAATTAGAACAAGTTATAACTTGG  
GAAATATATGAGAAGTTAGTTGATGGATATTTCTCTATGAGAAAAGAACAATAATCTT  
CTTTTAAAGTGCATCAAATGAGTTACAACCTATATTTCTGCTAGATAAGAAAACAAGAATTC  
TTAGAAACTAAAATAGATAATGTTAATGAGAAGTTAGAAAACCTTTATGGTTGATGCACCA  
TTGTTAAATATCGAGTGTGAGTGTATTGTTAAAGACGCGAAGAGAATAGCTACAAAATCA  
CTTGGTGGACACTGAAGTAAGGCTTATAAAAATGATTCGCTAAGAGGAAAAGTTTATAGT  
GATATTTACCATCCGATTAAATGAGAATTTGGCGTAGATAGTTATAAAGCTAAAAGCGT  
TGTCAGTTAGATAAAGTATTAGAGATTAGAAATAGTTTTAAGTTACCTATAGTGTTTGAA  
GAATAAATAACTTATGAAAAGTCGATTATCAATTGTGAGTTAAGACAATAAAAGACTT  
TTCTCCTTTAAAGGCGAAAACCTGCCTAGTTAAAAGAAAAGGGGAGGGCTTTCAC  
ACTCCACTGGTCAAGCATATGAAACTGTTATTTACAAATATGATCATAACATAAAAAACT  
GCTAGGAGTGTGAAAAAATGAATAAAAAGACACTATTTCAAGAGGTTGATGGTATAATAT  
ATAACTATAAAAAACAAGAAAGTCGAAAAAGAATAAAACATATACATATTAAAAAATTAG  
AGAATGAAGCTGACGGACGCAAGGCTCAAAGTAAAGATGAAAGAACAGGAACTACCTAAA  
ATATAAGTTCAAGTGTTGAAAATGAACTGGTTGAAAGAGAAGAGGATATAAATAAATCAA  
ATGAAGATAAGAAAACATTAGAACTGAAAAAGAACTATAGAACGTGGATCAAAAAGTT  
AGAACAGTTTTGAAACGGAGTTCTTCAATGTAATGTATACGCATAATGAAACGATATATC  
TGGATTATATGTGTAATGCCACGCCCATAGATAGAACTCATTGCTTTAGAATAAGACAAA  
GGATAGTTTGTAAGATTATGGAAGTTTTATATCCAAAGATATAGGAGTTTGAATTACCCA  
TCTTTTCATAGAAAGCTTACAATTGAGTCTACTTTGTGACTTTTTGGAGACTACTATGAG  
ACTTTTGAGTGGTAAAGACATGAGACTATAATACTGTGGAGATGAAGATAACCCTGTCAA  
AATTAATATATATAAGGCTAGAGTTAAGGGATTCTCTTTGCTCTAGCCAAAGTAAATAC  
TTTATATAATTAAGGGCATCATCTACAAAGGTGAAAAACTTTCAAATGACGCTTCAAATA  
TAAAAAATAAATATATTTCTCTTTGGATACTGACACTTTTGCATTAGACGGCTACAATAA  
ATATATATAAATATAAAGGAGATGCATACCTGAGCGGCAAGTAAATTGAGATTAGAAGTT  
CCCTATGAAATAGGTTATACGATTGTGCAATGCTTTAATAAGGCAAACGAAGAAATTA  
GAATCTATAGGAAAACAAAACCATACACCTAAAATGTATTGCCTTTTCAGTTTTGGTAT  
TTGTTAAATGAAGCAACTGATACTGCATTTAATAGGTTTAGTCTTAAAGCGTATAAATCT  
AAACGTGGAGGTTGGGGTATGATTTTTATATATGATAAAAATGGCAAGTACCCTTATGTG  
TTAATGAAAGAGAGAAGATCTAAAGAACATCATAAATAATGTTAAAAAATAGAAGAAATG  
CATCATGTTGATATTTTAACTAAGGTATTAATGGAGATTTAAAAGCCCCTATTTAACAA  
ATAACAGATTTTACATTAGAATTTTATAATGATGCTAAAATTGATATATATTTACAGAAA  
TTAATTGATACCATAAAGAACGATGATCGTATCATTGAACACCATGTATTATTGTTATTT  
AATCAAACATCCGGATATGATTTCAAGGTCTATTCGTTAACTGATCGTTGACTCAATTTA  
AATATTATCTAAGAACAATAATTTGATGTCTTATATATCTATAGAAGAATATACAGTTGTA  
GAAAAAGTTGATAAGACCAATTCTATTGCAATAATCCTCCTCCTGGATTGAAGTTAACT  
GCAAAAGCATATGCAAGAAAGAAAACAGATCCTTTAAAAAAGGCGAAAAGAAAGGAAGAT



GCCAAGTAGGCTCTTTTTGATAAATAGATGGAGGAAATAATTATGGAAATTAATTTTAAT  
GGAGAGCGTTTAAATAAAGCTCGTATATATAGAGAAATGACAGTATCTGAGATACCTGAG  
ATAATTGACTGTCAAAGACAGACTGTTTCAGTGTATGTGTATAATAAATCGAAACGAAAA  
GTTAATTTTGTAGTGAAACCAATAGCTAAAGAGTTACGTTGCCAGTTAAATTCTTTTTA  
GAAACAGGAAATAACTGCAATAGGTTCAACGTATTTTCAGAGCATTATTGACTACAAAT  
TAAATAATAGAGCAGAGAAAATTCAAAATATGGAATTCCTAGCAGAAAGATATTTCTTA  
TTACAAGATTATATTGAATCCCCAACATTAATTCGCCAGATTGTTCTGGGAAAACACCA  
GATGACGCTGCTCTACTTTTAATAGAACTCGGGGATTAGAATTAAAAACCTATTGACCAT  
ATCGCATATGAAGGAGAACAACACGGAATACATGTAACAAATTTCTCGACTTCTACAAAT  
GGTATAGATCCATTCAGTCGGCTGGTAGATATGTCGGGTGAGACATTTTATCTGATTGGA  
AATTCTAGCAATAAGACTTCTTCTTCTAGAATTCATTTTGATATTGCTCATGAATTTGGG  
CATATATGATTAGATGAGTGGCGCGATGAGGTAGAAGCGTTAGAAAAACAAGATTTCAAT  
GACAAAGAATCAGAAGCCAATAGATTTGCATCTGTATTCTTGTTACTAAAATAGACTTTT  
AAAATTGATGCTAAGAGAACTCTTTTACGTATTCGAAACTATACAGAATTGAAAAGTAAA  
TAGAAGGTTTCAATTCAAGGAATGATTCGTTGTTTCATATTCTTTAGGAATCATCAGCTTG  
GATGAATATAATTCTATGATTTCGTAATTTACAACGTCGGGGACTCAGAAAATCAGAACCA  
TTAGATGATCAATTATTAATTTCTATAACCAGCATTGTTAAAAACAGCAGTTTTGACGCTA  
TTAAAATAGCACGTATTTACTCCAAAAGAGGTTATGGATGAACTTTCATTTTCTATAAC  
TTTCGCCTTGAGCCAGAAGAAGTCGACTGTCTATTAAGTTTACCTAAAAATACTCTAACT  
TCTGGTAAAGTTGTATCATTTCCTGATTTTCAACTTAAAAAAGAGTGTGAAATCATATTT  
TAAATAGAGTGAGGACTTATGACCTCCCTTATATTATATGAAATAGGGGGAAATATGAAA  
TGGGAGTACAAGAAGGTGCAAATAAAAATAAGAGAGATAGCCATAAAGATGGCTATAGAAA  
TATGAATAACAGTGCAAGAGGCATGGAGTGATGCTAATAACGAGTACAAGGAAAAATATG  
AATTTAGTTAAGTCCAATGAATGGTCTTTTTTTTTATTTCTTTGATCAGTCTAGGAAGGGC  
GTGAGGACCCACTTAGTTCGATTCTAACTATGTTCAAATATTAATCAACGTATACTACTAA  
AAGTAGAGAAATTGAGGGCAAATCTTATCTTTTGTATCTTAAGTCGCATGTCTAAAAAA  
CGAGTGGGGCTTTGTAACCTCACTCACCATGCAAGTACTGGTTTAGTTTAGGTTTCGACTC  
TTGGAATTTGGTCCCTTTAATAATTTGTATCCCCCATTAAAAAGGCTTAGATTAATCTCT  
AGGTCTTTTTTAATACAACAATTTAGTAGAAATGCACGGCATGCCTGTTTCAGATATCGA  
CGTCATGCATGTCTAAATTCGAATATTTAATATTTTCGATGTATTAATTTGAGGGGTCTGA  
AAAAAATACAGGAGGTAGTAGTATGTTGAAAATTTCTCAAGAGAAAAACGTACAAGTAA  
TGTTGTCCAAAAATGGAGAAGAAGATTGGGTTAAAGTAAATGACGTAGGAGAAGTACTGG  
ACCTAGTAAATATTCGTAATACATTAAGAAGTATAGAGAAAGAATATAAAAAGGAATTTA  
ATGAGTCTACTGGCGGAGAGTCCCTACACTAGAACTTGCAAGATAAAAATGCCTAACATGG  
GTCCTACTTTTGTACAGAAGAAGCTGTCTACAATATGTCATTTAGAAGTAAAAAATCAG  
AAGCAAAGATATTTACAAAAAGGGTTACAAGCAACCTTAAACCAATTAGAATACATGGTT  
ATTATATTGTTATAGAAAAAACCAGGGATGGCTGGATATAAGGACAGTAGGCAAAAAAG  
TAATAAAATATTTTACAGATGAAATACAAGACTGTGTATATTATGTTAGTAGTCGAGGTA  
GCAATCAACCTCAGATGGATTGTA AAAATTTTACTGAACTTGTA AAAAGAAAAATTAGATA  
GTCCAGAAGGTGGGCAAAGAGATGAGTTAAATCAAAGCGAACTATTTGATATAACAAGCAC  
TTGAAATAATTATATCTATGCAATTCCTAAGTAATTAGATAAAGATATGAGTTATAAAG  
AGGATTATAAAGGACTCAGGAATTAATAGAAATGATTTAAGGGACTGTC

>NewGenomeName\_66

TCCCGACTCTGATCAGCCCACCCTTCCCCCGTAGGCCCTCCGCCTGGTGGGCCATCCTCG  
CCTTGCCCGGGTGTTCCTGGGTAATCCCTGGGAGCTTCCGGCTTCGCCGGTGGTGCGGT  
GGGCTTCCCTGCCCTGTCGCCAGCCATTCTACACGGCTCAGCGGGAGTGTCAACCCTTGG  
GATAGCGCTGTCGCACTACCGGGCTTGGCCGTAGTACCTGGAGCGCTCCAGCGCGTCCGCG  
GTGCATGGCCCTGGCTACCTCGTACTCCTGGGATGCCTGCCGCTTCTGCCCGGGTGGTGC  
GTAGTGCCGGTGGTCTGCGCTGCGCACTGTGCTAGCTGCCTCTGCCATGCCGCGTCTGTG  
CTGGTACCAGGCACGCTCACCTCTGTTCTGTCTGCTGAGGATCTTCTGTGCCTCCTGTGG  
TCCTGTCCGGGTGGTGGTGCGGGAGTGGCTGGCCGTGCCTCTCAGCGTAGCCTTGCCTCTT  
GTCTTGCCATGGCTCTTCTGGCTGCTCCCTGGGTATACTGGGGTTGCCTGGGTGGTC  
CTGGCCACTCCCTCTAGGCCACGTACACTACTCGCCTCTACCTGTCCTGTCTAGTCCTGC  
TCCCTGTCGCTCCCTGGGTGCTGGTCTGTCTCCCTGGCGCTGCACTGGTCCAGCTGTCCT  
ACCTCGCCGCTCCCTCGCCTGCTCGGTGCGCACCTGCGGGCCTGATGGACTCCTATTTGTC  
CATTGTGTGTGAGAGAACCAGCAGCCTTAGTGCCATGCGGGTTCCAGGGCGATGGCCTAGC  
TGGCTGGGTGGACCCTGGCTGTTCCCTGGGAACGATAAGCCTGGCTAGCTAGACTGAGCC

TCGCATGCGTGGGTCTCTATACGTGCGTGTGAGGCTCCAGGCAGGGCCTAGGCGGGGTGTT  
GACAAGACAGGTAGGCGTCTGTACTATGCGCCCTGTCTCCACGCAACACCGCCTCTACAG  
GCAGCCTGGAGACAAGGTTGACACACTACCGGGACATCGGTAGAGTGCGTAGCCAGAGGG  
ACGGAGCAACGCAACCTTCCAAGCGCGGCACAAGCCATAGGCGCAAGGGACACGGCGAGG  
TTCCAGGGCAAGACCGACTACGCGTAAGGCCGGCAGGCATCGCAGAGGGGATTGACAGTA  
ACACGCTCAGTCGGTACGATGGGCACCACTCGGCAAGCAACGCCACATCAGCTACCGGGT  
TGACACGACAAGGCCGAGTCGCTAACATGGCCACCAGCAACAAAGCGAACCGGCGGATAA  
CATGGTCCGGTAAGCTCCAGCAAACGGGCTGGGCTGGACGGTTAAGACGAGTGAAGCTGA  
CATCGTAGGCCCTTCGTAGAAGGCAGCCGAGGTGGATCACGCACCAGAAGGTGAACTGTA  
GGAATCGGGCAGCGCAGTAGGACTGCCAGGGGGTCAAGGCTAACCCCGCAAAGAGACAG  
CCGAGCGTTAGGATCACGTCCCAGGAGCGGTGTCCCAGGACAGTATCTTGTACAACCGACAG  
TAGTCGGATGCCTGCAAGCCGAATCAACGGCTGGCCTACGGGCTGGGCATCCCCTCGCAA  
GTCGGTTGTATCTGGCAAGAGCCATCGGGTTGGCGGATGGGCTGCGAATGGGCAGCGATG  
GCTCTTGACCAGATAACAACCAACCGGAGTAACCATGAGCAAGAACGCCTCTGGTGCAGCC  
AAGGCCGCAAGCTACGGGACGATATGAAACGCTATCTCGCTGGCCACCAGCGTCACGAAG  
GTAGCCGAAGTATCGCCATCGGCGACAGCTCCGTACGGGCTGAACTGCGCAAGATGCGC  
GATGTTCCGGTACAGCACGGACAAGGCAACCACTCCCAGCACTTCTTCAATCCCAAGCGC  
AAGCACTTTGCCCGTGGTTCCGAAGGCAAGGCACGCAACATCCTCAAGGGCTTCAACGCC  
CGCAAATCCCAAGCAAAAAGGACTCTGACCATGACCAACCAACTGACCAAAAACCGTCATCG  
CTTTCGTGCGGTTACGCTGCCATCACCAACGCCCTCGAAGCCATCAGCGTTTCGTGGCAAGG  
AACTCGACGAGGCCATCCAAGTACCGGCCCTGTCCATCCTGAACCACGTCGATCTCCACG  
GCGACATGACCGTAGTCAAGGCGCTGTAAGAAGCCATGCCGACGGGTAGTCGCCCGCAATG  
CGCTGGTCGAGTGGCTGACCATGTTTCGGCCAGGTACAGGTGAACACCGACAAGAAAACCA  
ACAAGGAGCATCCGTTTCTGTACAACAAGTTTGGCAAGACCGATCTCGTCGGCGCAACCA  
ACGAACCGTGGTACGCGTTCAAGCCGGAGAAATCGCTCGATCAGGAATTCAACCTCGCCG  
CCGCACTCGCCGCTGTCCGCAAGCAAGTGCTCCAGGGCGCAGACCAAGGCAAGGTGATCG  
TCGGCGCTGAACGGCTGGCCGACCTGGAAGTCTGGCCGCAAGGCCGCACCCATGGTTCG  
AGAAAGCCGAGCGCGCTACTGCCGACTAACTAGCTCAAGTCGAGCGCCTGCGAGGGCGGGC  
GATCCGCTGGACCTAGTACAAGTGGAGACACCACGATGACTTTCAAGCAACGTCTGCAAC  
GTCAAATCGCTCTGGCTCAGTACAGCCGGCCCGCCACTATCCCTACGGCGAGCAGGCCG  
TACAGGAGGCAAAGTAATGGATATCTGGATCGCTCTTCCCTTCTTCGAATTCGGCCTGAA  
CGTTAGCGAGTGGGCCGTGCAATTCACGCTGGGCATGATCGCAACCGCCCTGTTTCATCCA  
TCTGCTGCTGAATCGGTGACTCAAGTCATGGCCCTGGCGGGCGACCCTCGCCTACTCCGG  
GGCCATCGCTGGACCCATACAAGACAGAATAAACCATGCAAGCTTTGAATACTCTGTA  
GATGGCAATTCCCAAGGACCTGGCAGGCCGATTCAACGCAGCCGACAAGGCGCTGTGCGC  
CCATGGCTTCTTATGGGTGACCTGAACCGCGCCACGTCCTGACCCCTGGCGGGTTAC  
CGTGGTAGGGCGCCGGCGTGACCGTCAACCGCTACGACGAAGCGTATCGCTTGAGCCGCGA  
TCTCGACTCCGCAGGCTTTGACGTGCTGCTGGTCCAGGGCAGCCCGCTGTCCGGGCACGT  
CACCTGCCAGGCGTACGGCTGGATCAACGCTGAGTACCACAAGGGCTGCGCAAACGGGCG  
CCCGATCTTCGACATTGCAGTTACCACGTACCATGTCCTCGCGCGATCCCTACCGTATCG  
GCAACCGCGTGGGGCTGGTGAATAACAGCGACCGCTACCTGGGTGCCGACGCGGCAGGCA  
CCCGGGGCATCATTGGAGCCATAACCCGACCGACCCGCTGTGTGACGATCTACCACGTAC  
GCTGCGAGCGGACCCTGCGCCTTATCGAGGCCGAGGCCCGTAACGTGGGGTTCATCAGAC  
AGCTACCGACCCGCAAATGACGTGGCTCATCATCGCTGTCAGCCCGTCGGGCGGTTGCGC  
CTTCGTGTGGAGTCGCAAGCGACCGGTGCGTCCATTGCGATTCTACTCACACAAGGCAGC  
TAAACGCTGGCTTCGCAAGCATCGCCGCACGGCCTTGCTTGGGAGCCGATTCTCATAGT  
GAATTGGAGCAAACGCATATGGATCCTACTTACGTGCTCCGTCTCAAGGACGGAACCACC  
CGCCAGGTGGCCGCGACAGCATCATACCGGCCACAACCTTCGTGCAACTCTGGTTCCTC  
GGTGGCGTGGTCGCTATCTACCCGGCCTGTGAAGTACAAGAGGTGCATCGCACTGACCTC  
GTGAAGGAGGGCGAGTAATGACCGTCGAGACCGTGTATGTCAAGCCTGAAGACCCGGCGC  
CACCAGTCTTGTCCGTAGGACGCCTGTCACCAGGTGAACTCTACAAGGTGGTGACGCCTA  
GCTCGGCAGAGGGCGCCGTTATGCTGGCGACCAAGCAGACGCCTGCCCTCGCTCAGGCAG  
TCATCGTACTGCACAGCATGAACCCCGCGCAGTAGGCGGTGGGCACGGCCATACTAAACA  
TAGACTGGCGGTGCCGCCGCTGGGTGCCGGCGAGTACATCAAGCTCGTTTCGAGGGGAGG  
CCGACAAATGATCGCTGCCCTGTTTCGTACTCGACCTGTACTGCTGCCTCGGCCTGCTTGC  
AGGCGACTGCTACTGCATCGCAGTGGCGCCCGCCTTCGAGAACCCTACGGAAGTGCAGTT  
CCAGGACGCCTGCCTGATCGGGTGCCTCTGGCCCTTCGTGCTCGTAATCATGGTCTACCT

AGGGGTGCGATCCTTCTTCTGTGGCGCTCTGGGTGGCTTGCGCCGCCATCGGCAACGTCT  
TCACAACAAGCGATAAGGAACTGCGATGATCCGTACTCATATCCACGGCACCAACCGTGA  
GCAACTCCGTCTTACAAGCACACTGAATTAGAGGGCGGGCGAGCTGTACCGAGTCGTGCA  
GCCCCAGTCCCGTCGGGGCACGCTGGTACTCGGGCTGGGGAGCACGACCGACCGTGGCGT  
CCGCACGGTGGTGCGTGTAGTCATCCACGATGAAGTTGAGGGGAACCTGTCTACTCCGAG  
TCCTACCGTGCTGCGTAACGACACCTGGCGCATGGTGTCTCGTGAACAAGGGCACCCAACT  
GACTCACC GCCGAGTGACCAAGGCGAAGGCTGGCGCGCCAGCCTTCCACCGTGGCCAT  
TCCTTGCCGCGAACCAACTCAACTGAGGAGCTACAGCATGACCAACGTCAACACCACCAC  
CGAGACCACCACCGCTGCCGTCTGGGGCGCCAAGATCATCAAGAAGCCGGCTACCGTGGA  
AGACTTCCGCAACAACGTGGTCTTCCACTACACCGCCCTGGCCAAGCTGACCGAGACCTA  
CAACGCGGGCGGTCGCTGCCCTGCAAACCGCCGAGCGCCTGTCCAGCCTCGTCGCCGGTGA  
CGTTATAACCTTCGACCACGGCAAGGGCGAGAAGGCCGAAGTGCTGAGCGGGCGAAGTCAT  
CAGCGTGGTCCCGGGCGTCTATCAGGTGCTGGTGCATCAGCGACAGCGCCCCGGCCAA  
GCTGCTAGACGTGAAGGCTGGCGCCATCCGCGCCGTCCAAGCTCCTGCTGCTCCGGCTGA  
ATCCCTGGACGAAGCCATCGCCCAGGGCGAGAAAGGCCCGCACGTAATAGGTCTGGCCCT  
GCCGGGCTATTGCGAGCTAGCCATAACCGTAGGAGGAGTCAACGTGAGCAAGCACAAACC  
CGAACACATCAGCGGCCCGGTACGCAGCGTGAGCGTAGCAAAGTCTCCCGTCGTCCAGGA  
CCAGGAAGACCGCCTGGAATCCGCCCTGGGCGTGTGCCAGGAACACGCCCAGGATATCGA  
CACCTGAGCCGCCGGCTCCAGGCTGCCGAGCGGGCACGCCGCTGGGACATCGACGAGAT  
TCGCAACCGTCAGGCGACGATCCGTCTACTCTAGAACGACTTGAACGCAGCGCATGATGC  
CCACGAGGCACAAGAGCGCCGCGCACGCAAGGCAACCATCATGGCCTGGGTATGCCTGCT  
GACCGCATGTTTGGCCGTCACCCGAAGCTGGCAGGAGCGTGACCATGCAGTGCAAAGAC  
CTTTACACGAACCTCGCACCGGACATGTTACGCGTACCGTGCTCCAGGTGACCCCGGAG  
TTGCGCCGCGTGGCCAAGAGCCGGGCATTCGCCACGCCTATACGCCAAGAAACAGGCT  
TCGGGCGGGACTTACACCGCCCGTGTGAGCGGCGTCACCTTTGACGGTGGTAAGGTGGAG  
GTGCGCCTGGATAACGTGGAGCGCGTCAGGACCTGTGACTATGCCGATCTAGAGGCGCTG  
GTAGCGGCCAGCTTGTGCCAGGCCGATGCGAAGCGCGCCGACGAGTACGAAAAGCTGCTG  
CTCAAGGCATTCCCGCTGGTATCGAAGAAGGCCCGGCCGCTGTCTGCCAAGGACTTCGAG  
GTACGTCTGCACGATCTGCTCGTAATCAAGCTAGCGGTAACCGTGCCCTGCGCGATGCC  
GGAATAGAGATGGACGGACCACTGCGCAGCCGGGTACGGAAGCTTGCGGACCGGAATAAC  
GAGATGGGCGCTAAACTGTTACGCTCCAGCAGGGCTTGACCCGGCTGGTGGAGGTAGGT  
CAACGGGCCGGCCTGTATTGGGACGACGCGGAGACTCAGCGATTGCTGACGGTGGCCCCG  
ACCAAGGCCGTCTGTGCGGCTCAGCAGGAACCTGACCGGCGTGCGGTATGCCTCCCGCGCT  
TCCGTGGCGAAGGCTGAGGCCGAGGCTCGTGAGCGGGCGAAGGCCGGCGGCTAAGCACACC  
TGTCAGGCAGCAACCTTCGCATCCACCATCGCCGGCGGCGTCTGTGGGCAGCGTGCTGACG  
TACCTGCTCGCCTAAGCGACCGGGGCTACTCCGGGGTCAAATACGAGGGCGTTCCTAGA  
GCGCCCTCCCGTGTGCGTCTGGAGGATCACGAACATGCAATACCACTTCACGCATTACAA  
CGGATACTGCTTCGGCGTTCGAGCTGGAGGACGAAGCCGTCTTCCCGTGCATCAACGGAAA  
GCGGGCGACCTGGGACAATGTGGCGGCGTGTGCCGGTAGCCTTGTGCATTACATGGCGCA  
GGACCTGATGGACTTCGGCCAGCGCAAGTTGAGAGAGATCGAAGATCAGCAAGACGAGTC  
TGTACCCGCTGAACCTGAATCCCGGCCTGATACAGATCAAGACGATCCACGTATTACGCA  
TCCAGGCGTTCGAAGGACGAGCCGAACGGGTGGCAGTGGTTCCTGTGGCAGCGGAAGTACC  
ACCCACTCCGCGACAGCCTGGACACGGCGGGGAACTGAGTGCAGATATCGCCGAGTATG  
TCCACCGCCTCCGCCGGAATGGCTGTGAGATAGGGACATCTGGAGCAACAAGGGCGGGC  
TGCTGGCCCTCGGTGCCTTCAGCCTCGCCGGCGAGATGATTGGCTCCTGCCTCGTGGTGG  
ACAACGAACCTGCGCGCCCTGTGCGTGGACGACCGGGACAAGGGGCAGGGTATTGGCGCTG  
AGCTGGTGC GCGCTGCCGAGCTGGCAGGTGCCGAGCGCCTGAGTTGCTTCGAGTTCCTGG  
AACCGTTCTACGCCGGCTTGGGCTGGCGCACCGAGCGCCGCGCGGCAAACCTGGACTGATG  
GTGAGCCGGACGTGCTGCACATGAGGGCGCCCCGGTTATGACGCATGAGGTGATGACATGG  
CTTATCGGAACAACCGCTGGTCATCGGAGCCGCCTTACGTCTGGTGGCCCTGGGCGTT  
CTGATAACGCAGGACAACGGCGGCCCGCCTACGGCACCCGCATGACCTGGGACCTCCAGG  
ACATGTTTCGAGGCCCGAGGCGGGCTGCGTCCCCTGTGGGAGGAGTGGTATCAATGGCACT  
GCGCCGCGACTCCTGGGTGAAGCAGGCGCAGGCGCTCGCCGTAGACCAGACTGGCAGGGT  
CCGTCACGTCTGGGATGCAAGAGCATGAGCCGGGGAGGGACCAACATGACCGTCAAAAA  
TCTGCCGGACCGTTGGGTAGCGTATTGCTACCCCTGCCAGGAAGGTGGCGTGGTTCGAGAA  
AACGCATGTGCGGAGGGTGAATGCGCGGATCAAGAACGCTTTATGCCCTGGCCCGAAGA  
TGCCTTGGACTGGACGCGGGCCGACTGCTATCAGTCGCTCTAGGGTTTGTCTGCTGTCCAA

GGGCATCGACTACAACGTGATGACCCCAGGGCTGCCGCTGCTGTACAGCGGAAGGCAGCA  
TCGGCTTATCTTCCCTACCGACGCGGGCTGGATTGGGCGCGCTACTGCCGACCAAATCC  
CAAGTGGGTGGGCTACGTGTATCCTGCCCCGATTACCATGGATGGCCCCAGGAATTATC  
AAAGGGCAGGGCATGGGTGCTGACGGAAGACTACTTGTGCGGCGCTGAAGGTGCGGTGGGC  
CTGTCTCGAAGTCTCTGCTGTGCGGTCTGAACGGTACAAAGCTGCGCGACAGGCTGGCGGC  
GATCATGTTGCAGCAGACCTGCAAGCGCGCCTTCATCTTCTTGGATGGCGACCCGGCAGG  
TGTCCGTGGTAGTGCACGCGTGATGCGTTCGGTCCCGTCCCTGCTTATCGAAGGCCAAGT  
AATACCTACGCCGGGCGGGTTCGTCCCCAAGGACCTGACCCGCGAGCAGATAAGGAGCCT  
AGTAATTGGACGTATTGACGCTACACGCACTGAGTAACAGGGACCGCTTCCGCACGTTGC  
GGTGTGTGGTGCCTGAAGGGATGATGGGGCCGGAGACGTGCTTTGTCATCGACTGGATCG  
AGCAATACTGGCAGGTCTACCCCGTGCATCAGAAGGTGGACCCGCGAGGCGCTGCGCGAAC  
TGATCAAGCTGCGAGGTGGCTACCAAGCGGAACAACCTGGCGGTAGTCCTGAACCTCGTCA  
ACCAACTGGACAAGCCGGCAGACCCGGACTCGCTACAGGGCGTTCGTGTCCAGCTCAACG  
AGCTGTATTTTTAGGGCGGGTGGATGCCCTCCTGGCGCAGTACAACCAGGGGCGAGGACA  
TCGACCTAGCGGATGAGCCGCGCAGGCTGAGCGACGAGGCCCTGCGCCGCGAAGGGGTCA  
GCAAGCCGACTGACTACGTGACGGACGACGTGTTGAAATCCTTGGCGAGGAGCAGGCTG  
ACCACGGCATCAAGCTGCCGGGGTGGTGCTACCAGCGTATATGAAGGGCCTCCACGCCG  
GGCCTCGGTGCTGGTGGCTGCGCCACCGGATGCGGGCAAGACCTCGTTCATGGCCTGGA  
TCGCCGGACACATTGCACCGCAGCTCAAGCGGTAATTTCGACCCAGGCCGGCCATCCTAT  
GGCTGAATAACGAGGGCAAGGGGCGGCGGATCAATCCGCGCCTGTACTCGGCGGCCTTGG  
GCATGACCGTGGGCGAGATCCTTGCCATGGACCCGGAAGAGGTACGCAAGCAGTACGCCG  
ACATGATCGCCGGCGACTCCGAGCTGATTTCGCATCAAGGCCTTCCATGGTGGGTCCCTGG  
CCCAGGCCGAGCAGGTCATTGACGCGATGAAGCCGGCGGTGGTGTGTTTGGGACATGATGG  
GTCACGTCAAGGGTGGCCCGCGCAAGGACCAGAACCAGCACCGACGAGATGGAGTATAAGG  
TGGCCGAGGTCCGCGAGATGGCGGTGCGCCACGACTTCATCAGCTTTATGACGTGGCAGG  
TCAGTAACGATGGCCACGACCAGTTGATCCCGCCGAGTCCTGCCTCAAGGATTTCGAAGA  
CAGCGGTACAGGACGCCGTGGATGTGCAAATCCACCTGGGCCGTCTCAACGGTGCAGGATC  
AACAGGTCATACGTGGCCTGTCCCTGCCGAAGAACAAGTTCCAGATGGACGGGAAGCCTT  
CGAACGTGGAGGCGATGATTAACCTTCGACACCGCTCGGTGTCGTTTCTTTGAGAGTGTA  
ACCATGCAAGCTAAGCATAGCCGGGTGCTCGAAGGCACCAAAGAAATTCACCTGGGTTC  
ATTGCCCTGCCGACCGCGGCCAAGGCCCTGTTGCTGCGCCTGTACTCTGATGCACGGCCC  
AACGAGGGCGTCGCCCTAGCCGGTGGGTTCCTCGCGATTCATGCATGGCGCCACTCCA  
AAGGACGTGGACATCGCCCTGTACGGAATGACGCAAGTATCAGGCTGAAGTGCTCATCAAC  
AGCGTGTTCCTACCCTGGACCCGCGCTTCGTCCGGGACGGTGGCTGGAGTACCGAGTAC  
GCCAACGCAGGTGAGGGCCGTATCGTCAAGGGCGTGCTGTCCCTCGTAGGCTCCCGTGGC  
CTGGAGGGCATGGACGTGGATTTAACTACTACGACGCCGACAGCCTTGTCCGGGTCATG  
GAGTCGTTTCGACTTCACCATCAACCAGGTAGGCATTGCGTACAACCAGGCCCGACCCCGAA  
GGTGGCCCGCGCCTGGGTGCGTACCTGCACAAGGACGTTACCTGGGGCGTGAACAAGGAA  
GTCGGTGCAGGCTCACGTCTGCCGGAACGATGCGAGAAAATGCGAGCCAAGGCCGCGTGC  
TACGGATGGGGTAACGTATGATGAGCAAGCGCGACGTGGTACTGGATATCGAGAAAGGCA  
TCTGGCGTGGTGTGACCAGAACGACAAGGCCGTCGAGGCCATCATCAAGAAGAACGGGT  
ACGTGATCCTCGAGCCTAAGATCGACGGGTGCCGTGCCATCGTCGGTGCGCATGGCGTGG  
TGTCCCGCAGCGGGCGCCGCTTCCCTGCCCTGGACGGCCTGGAGGATCGCATCCTCGCCA  
AACTGTCCCGTCCGGCCTGGACTCCGATCTGGTGTGGACTGTGAGATGTACCTGGAAG  
GCATGCCCTTCAGTCAGGCGACAGGGCGTATGGGCGGCAAGACCCCGCTGACCGAGGCCG  
AGCTGAAGTGCCCTGCATTCGCGGTATTCGTGCGCCACCCATATCGGCGTGCTCCGCAAGT  
CGCGCAAGTCCCACCTCGTGTACGTTGAGCGCCGCGCCATGGTCCGCAGCCTCATGGAAG  
ATTGCCGGCGGGGCGACACCACGTACTTCTTCCGGGTAGCCGCAACAATCCTGCCGTGCTA  
TGGAGGCGGTACTATGCTGGCACGGTACCACCGCTCCATGGGCTTCGAGGGGTTCGATGG  
AGAAAGACCCGAGCCTGACCTACCGGAACGGCAAGGTTGCTGGCTGCTACAAGCGCAAGC  
CGGAGATCACCGTGGACGGGCGTATCGACGGGTACGTGATGGGCAAGACTGGCAAGAACG  
TGGGCCGCGTCGTGGGGTACCGTGTGGAGCTGGAAGATGGTTCGGCACCGTGGCCGCCA  
CCGGCCTGAGCGTGGAGCACATCCAGCTCCTCACCTGCTCCACCTCAACGCCACATCG  
ACGAGGCCATGCCGAACACGGTGGTATCGTTCGAGGTCTCCGCGATGGAGCGCTCGGCCA  
ACACCCTCCGCCATCCAGCTTTAGTCGCTTCCGCGACCTGGCCAGTAACCCTGAAGTGA  
AGGTACGAAGATTTCGAAAGTCCCATAACCGCAACTACCCGGAAGATATGGTATACCAAGC  
CACCAACCGGGATTTCGCTGCTGTATCCGAAGTACGTCATGGGTTCCGTGTTACGACGCCA

GGACGGAACATTCCGCATCTGCGTCATGGCAGGGACTTGGGACCACGTTGGGTCCGAAGT  
TCGGCATCAGGCGCGGGACATCAAATCCCTCGGCGCCGGTTCGCCGGAAGTTGCACCGCGT  
CATGCGAAGGCTGCGTCGCAATCTGGGACAGGTAGCAGTCAAAGTATGAGAATACCCCC  
GCGGAAGAACGTATGATCCGCTGCTTGCTGGCGTATATCCACGAACCCCTGGGCCTGCTG  
TTCCCCGGCCTCCGCACCAAGGCCACGTGGACCCTCAAGCGGAAGAGTTGTTCGATTCTGA  
ATTGACTACGACCATGCGAAGCTGGGCCGTATGGGATTCTGCCACGCGGTCTCCCTGTAC  
CAACTGACCAGATGGGGACGTGAAGGAATGGACCGCTACCTGATGCAGGAGATTCCCCGC  
CGTGTGCTGGAAGGTCTGCTGGTCAAGGCGCAGCAGTACAGTCAAAGCAACTGGTACAGC  
AAATGACGACTATCCGAATCCCCGACCTCGAAACCGAGAGCTACGAGCACAAGGGGCGCA  
AGGCGTCGCCCTTTGACCCCCGCAACTACATCGTCATGGCCGGCTGGCGGGACGATGTTG  
ACGGCAAGGTCGGCCAGAAGGTGGAACATCGCTTCCGCAGCCGGGCCGAAGCCGAAGACC  
CGAACAAACCGCTGGTTCAACCTCGACGGCGTGGACGTGATCGAAGCTCACAAATGCCATGT  
TCGAACCGAACTGGTTCTTACCCGCTACCGTGACGAGTACCTGGCCTTCTGCGACGCG  
GGGGCCGGGTCTGGTGTACCCAGCAGGCCGAGTATCTGCTGAGTCATCAGACGTGGCTGT  
ACCCATCACTCGACGAGCTGGCTCCGAAGTACGGCGGCACCCACAAGGTGGACGGCATCA  
AGATGGTGTGGGACCAGGGAGTGCTCACCTCGGAGATGGGCCAGGACCGGCTGAGCGAGT  
ACCTGTCAGGCCCTGCGGTGATATCGAGAACACCGCCCTCGTTGTCTACGGCCAGTTGT  
TGAAGCTTCAGGCCCGTGGTATGTCGGCAGGTTACCTGGATCGCTGCGAGGCCCTGATCG  
GTTTCTCGGCGATGGAGTGCGCCGGCCTGAAGGTGGACCTCGAAGTCGCCAAGGTGAACC  
ACGCCAAGCAACTGGAAGAGGTGGCCGGGATCGAGGCTGAGCTGAAGAAGCTGATGCCCG  
ACTTCCCGGAATACTTCGAGTTCAAGTATAACCAGCCTGTATCACATGAGCGCATGGCTCT  
ACGGCGGCGAGGTGCGGTACAAGGGCCGGGTGCCCTACGGAGATGGCCGGATGGAGAAAG  
CCGACTTCGTGCGCTTCGGTACGGCCAAGCGGGGGACACCAATCGAGAGTACCTCGGTGC  
GGATCCCGCTCAGCGAGGTGATCCTGGACGTCGACCAATGGAAGTGGGCGGCCATCACCG  
AGCTGGCGACCAAGTACGGCCCGGTCATCACGTTCTCCGCCGGCAAAAACAAGGGCAGCA  
TCAAGGTGTTCCGCGAGGACACGGACATTCCGGCGACCAAGTGGGATGACGACCAGCGAT  
TCCGGTTCCCGGCCTGAACAACCTGCCCAACCAGCCGGAAGTAGTGCGTGAGACAGTCC  
TGGGCAAACGCCCAGGTTCCAGTGCGCCCTCACCTTCCGGATGGATCGCCCGTGTTC  
GCACCAGCGGTGAAGCCCTCAAGGCTCTGGAGAAACAGGGCTTCGAGGCGGCCGAGCTGT  
TGATGCGCCTGGCCGAGCTCCTCAAGGACAACCTTGTCTACATCACCCATACTACA  
ACAAGGATGGGACGATTAAGGACACGAAGGGGATGCTCCAGTACGTGGACGACGACGGTA  
TCATCCACCATCCACTGAATACGACGGCGACGGCGACAACGCGCCTGTTCGTCCAGCCGCC  
CGAACCTCCAGCAGCTCCCGTCGAAGGACGAGGACGACCCGGAAGCCGGCAGCCGCGTGA  
AGGAGATGTTTCGTGTCTCGCTTCGGCACGGACGGGATGATCGGCGAGACCGACTATACCG  
CCCTGGAGGTGGTGTATATTGGCGGCCCTGTCGAAGGATCGGAACCTCCTGGCGAAACTGA  
TGGCCGGCACTGACATGCACTTGTACCGCCTGGCAGGGAAACACAACAACCTGGAACGGGT  
TCGCCTACGACCAGCTCGTGGCCATCAAGAAGGACCCCAACCAACCGTGGCACGGTTCGCA  
TGATGCAGGCTCGAAAGCACATCAAGCCCAAGGCATTCTCGGCGCAGTACGGCGCGAGTG  
CGGCTTGTATCGCATTCAACACCGGCTGTACAGTGGAAAGAGGCCAGGAATTCCTGGACA  
ACGAGGCGGCCCTGTTCCCAGAGTACATCGCATTCCGGCAGATCGTCCGCGACAGTGCAG  
AGGCCACCAGCCTCGTCATGTACAAGGCCGAGGACCAGATGCCGGCAGGCGCCTTCAGCG  
AGATGGGGCCGGATGGCAACTGGCGCCAGTACCGCCGGGGATTCTGGCAAGCGCCGGGTG  
GCACCTGCTACAGCTTCCGCCAACAGGAGCGCTGTGACAAGGAACAGCGCAAGACGGTCA  
TGGACTTCAAGGACACGCAGATCGCCAACTACTGGAACCGGGGCGAGGCTGGGTTCATGA  
TGACCGTGAGCCTAGGGCGCATCTTCCGTTGGATGCTGCATCGCCAGGATTCATGGTTA  
CAGATTTCCCGATCAACGACATACGATGCCGTGTACACCGACTGCCACAAGGACACCA  
CCGCCGAGGTCAACAATGGCGTGCGCGACATCATGGCCGACGCCGCCCGCTACATGAGCG  
AGCGCCTGGGCTACGGTATCGCCGACGTTCCCTTCCCGGCAGTGGCTGAGATGGGGCCGA  
ACATGTTCAATATGGAGGTGATCCAGTGAAAGAACTGCACCCGCTGCACACGCCTGAGTT  
CGTCAAGACATTCTGGACCAGACCGGGTGCCTGCCGGGAGTACGCCGTACGGGCCGCAC  
CACCGGCAGTGCTCTACAGGCCATTGGCATGGCGCTGTCCCATCCGAGGGAAACCCCTGAC  
GTTCTGTGGACCACCCGGACGGCAGCGCGGCAGCACTGGTGGCCAGCATTGAAACCATACT  
GGCGACCTTGGGCTACGAGAACGTCTCGTTTCGACCCACAACCCGTGCGGATGGGCGCAG  
CGTGAGCATCGTCTTCAAGAAGCTGGCGAACGCCTGATGACCCTTCTACTCCGGCCTT  
AAATCTTCATCCGACACGAGAGAGACCACACATGACTCAACGACTCAACGCTCTGCAAGC  
CGCCCTCGCCCTGGCCAACAAGGCTGCCGAGACCGCAACCATCGACATGTCCGAAACCC  
CACCGGGGGTGGCGACGGTTCGCATCTTCCCGGCGGGCACCGCCCTGGGCCGCATCTTCAT

CTACATCGAGCTGGGGGACCACGCCAAGGAATTCCAGGGCAAGCTCAACAATACGGCCCC  
TCAAATCCGCCTGGGCTTCGCATTGTGGGGCGACGTGAACCCGCAGGCCGTAACCCGCA  
GAGCCGCCCGGACGACCTGTTCCACACCTACGAGGCCGACGGCTCGATCAAGCCCGCCT  
GTTCCGTACCTTCGAGATGACCCTCGGCAACAACGAAAAGTCCAAGACCAAGCTGGCCTT  
CGACAAGATGAACTGGAGCGGGCAGCATACTACTTTCGCTCAGAGGCTCGGCCAGGCGTT  
CATCATCCCATAAAGCGCTCCAAGATCACCAACGGCAACAACGCCGTAAGGAACGCAA  
CGACATCGATTGGGGCGGCATCATGAAGCCCTATAACCCGGTCGATGGCAGCCCGTATAA  
CGTGCCGGAAGTGGCGACGGACCTGTTGCAGTATTTCTTCTTCCACGCGCCGACCAAGGA  
GACCTGGGACGCCCTGTATATCGAGGGCACCTCGGACAACGGCAAGTCCAAGAAGTCTCT  
GCAAGAGACCATTTCGCTCGGCCACCAACTTCCCCGGCTCGGCCCTGCACCTCTTGTTGGG  
CGGCGGCGACGATCTGATCATCAAGCCTACGAGCCAGGCCGACGGCAGCAACCTGCCGGC  
AGTGCCCAACGTGGCCGCCGATGCAAGCGTAGCTGCAGCCCCCGCCGTCCCGGCAGTCCC  
GCAGGCAGTGGCTCAGGCGGCCCCAGCGTGCCCCAGGTGGCGAATGTGGCTGCCCTGT  
GGTAGGTACTGCCGAGGCGCAGAACGTGCTGCCTGACGTCCCAGGTTGGCCAGGTGGC  
GGCTCCGGCAGCAGTCGAAGTGCCGTCCGGTCCCGGTAGTCCCAGGAGTACCCAGGGTTA  
ATGCGGCTGCCATCGGAAGAGTTCCTGTCAGGACTATCCGAGCAGTTCGACCGTACCATG  
GCAGGCGGGACGTTGGTGTGTGACGCCGACGGTCCCGCTTACGTGGCTTCGGCTACTGCA  
AAGACCCTGGACACTGCGCTCCGGCGATTCTGGAAGATCATACTGGAGCAGCAGTTCCTG  
GCGCACTGTACAGGGACACGGGTCCACCTCACGGCAGCAGGTGGGGCTAGGGCGTACCGC  
GACGTGTATCCGACCATGAAACCCTACCAGGGCCAGCGCAAGGGGAAGGCAAAGCCCGCC  
CTGCTGCAGCCGCTGCGGCGGGCTGTGGCCGACGTGCATGAACGAGGCGGGGCGCCTGAA  
GGGATCGAAGTTATCCTGCACACGTTCTTCGAGGGCGGATGACGGCATGATGATGGATGCC  
TACGCCATGCAGGACAAGGCCATCATCCAATCCGACGACAAGGACTTGCGGATGACGATC  
TACCCGTATTGGGTGATCGATACAGCGTGTGTGAGCAGGATCGACGGGGGCTTCGACTAC  
CTCAAGGAGGCGTATACGCCGTCCGGTCAATTCAGCTCAAAGGGCACGGACGCAAGTTC  
TTCCTGGCGCAGTGGCTCGGGCGGGGATACCGCTGACAACATCCGAGGCATCGATCGATTC  
AACGGTAAGCTCTGCGGGATGAAGACGGCCTTCGATATCCTCCACCTGATCACGGACGAG  
GACGAGGCCCTCGACATGATCCTGGAGGCGTACGCCAAGATCAAGCAAAAACCCGCTGGCA  
GAGGCCGCGGTGCTGTGGATACGCCGAAGGCCTACCGACAATGCAGCGCAGTACCTGTTA  
AGCCGAGACCTTCGTCCGGCCTTCCGCCAGTGGATCATCGAGCTGGACGCCGACCACGAG  
GCGCCGCTCCAGAAGCGGAGGGAGAGTGACTATGACGAGTGATCCGAAGGTCTATCAGAT  
ACCGCGCAGCCAACAGCGCACCTTCCCCCTGAAGCTGTGGGCCGAGCAGGGCAAGCTGTG  
GCCGCTCTGCGGTAAGCCCATCGATATCAGCGTGAAGGGCGAGGCGGTGATGGACCACGA  
CCACGAGACGGAGCTGGTGCGGGGCGCCCTGCATCGATTCTGTAACACCGCAGAAGGCAA  
GATCACGAACGCGGGCGGGTTCCTGGGGATGCAAGTCGATGAAATACACCGACATCATCCC  
CTACCTTCGTGCCCTCCTGACGTACCTGGAGGGGCCGAAGCATCCGCTGATCTACCCCT  
GCTTAAGACCGACGAGTAGAAACACGAAGCGAAGCTGGCCAAGCGCCGGCAGGGAGTCGC  
CAAACGCAAGGCGGCGATGGCCGTCGCAAAGCACAAACGCGAGGAACGTATGAGCAAACCTC  
CGCATGCAATGCACCAATGAGTACCTGCGCAACGTCTATGTTCGAGCAGGGTCTCAAGACG  
GGCGACGAGCATCTAACCAGGCATTCGCGCTTCGGCGAAGTGAGCCGCCAGTGCTTCCGC  
AACTGGTGCATCAAACCTGGCCTTCCACGACAGCAGGACACGCGGCACGTACGCCAAGAAG  
GGCGCTCAGCACTTGCTGGGCCGAAAGGCCGCCGAGGTAGTACGCAAGTTCCTGGCGCC  
GTGGGCAACGTTGTTGGCAAGGGTCCGAAGGTAAGTACTGAGCCTGGACATCGAGACCTCGCT  
ATCGAGGGTTGGGTCTGGTTCGCTCTGGAAGCAGAACGTTGGCCTCAACCAGATCAAGCGG  
GACTGGACCAATTCTGGCGTTCTGCGCGAAGTGGATGCACGGCGACGAGGTGATCTACATG  
GACTGCCAAGGTGATCCCTTGGACGACATGCACCTGCTTGTTCGCCCTGCATAAGCTGCTG  
GACGAGGCCGACATCATCATCGTCCAGAACGGCAAGCGCTTCGACGTGCCCAAGATCAAC  
GCACGGTTCCTTCTGAACAAAATGCCGCCGCCGCGACCGTTCAAGGTGATCGACACCTTG  
ATCATCGCCAAGCAGCAATTCGCGTTCACCAGCCGCAAGCTGGAGTACATGACCCATAAG  
GCGTGCGCCATCAAGAAACGCCTTCACGGCAAGTTCGCCGATTTCGACCTGTGGGCAGCC  
GGCCTCCAGGACAACCCGGATGCCTGGGAGGAGATGCGCCTGTACAACATTGACGACGTA  
CGGTTCGATGGAGGAGCTGTACATCCTGATGCGCCCGTGGTTCGTTCGGCCATCCCAACGTG  
GCCGTGTAATTCAACGACGCCGAGCCGACCATCCGATGCCCGAAGTGTGGCGACACGGAT  
GTCAAGCAAGAAGGCTGGGTGAATACGCAGACCCGGCAAGTACGAGCACTATCACAGCGGC  
GGCTGCGGTGGCTGGAGCCGAGGGCGGTACACCCGCAACACCTCGGAACGGCGCAAGGCC  
CTGCTGAGCAACTAAGGAGACACCATGATCGTTCGACAAGTCGTATGAGGTTCGCGCTAGCT  
GAGCGCTACAAGAAGGGCGCCGCCCTGGACGAACGCAAGGTTCGGCAAACCTCCCGATGCAC

CTCGTGGTCGATGGCTTCCCGCTGCTCAAGCGGGAGCTTGCCCGCATGATGCAGTGGGCC  
GCCGAGGTCAAGGGCTACAAGCCGCACGACTGGAAGAAGATGTTCGGTTGGCGAGTTCAAG  
GCCGCACAGCGTCGGCACGAGTCCAAGCGCCTGCTTGAAGGGCCCCCTGGATTACGAGTCG  
GGCCTGATGCACCTCGGGCATGAGGCATAACAACAATGGCTGCCGCCGAGGTGGCCCTG  
ATGGATCGGGAGAAAGGCAATGAGTAAAATCTGTTGGTGTACCCGACCGCACGAGACCGA  
TGAAGGTGTTTCGGGTCATCTGGGCCTTCAACGAGCGGGGCATCGGGGTCAACTACGTCAC  
AGCGTACATCACGCCGGCGATGGTCAGCCATCGGGACTGGAGCGATGTCATACTCCCGGA  
CATTCTCCGGGTGATGGCGGAGCGCCTGGAGCGGGAAGTGAAGCTGGTGGAACTGCGCTG  
GTTCCGCGCTGAGATTCTGAGCTGCGGGGAATGGCGTGACTIONGAGCGATGACGCTGGA  
TGGGGCGGTTAGCCTGGCCGAGGCCGAGTGGGGTCCCGAGGATATCGGGCGCGTAATCGA  
AAGACGATAGGAGACGGAATCGACCTGATAACAACAGCAGATCGCCACGAAGAGCCCCTG  
GTCGGGGCGGCGCAGAATGACGCCCGCATTCCTTGGAAAAGGCGATTGCCCAAGGGTCC  
ATCGACCGCATCCCGAGGGCGCGCATCATGTTGATGCGGATGCTCCCCATCGTGACCGAA  
CCGATCTACGCCACCAGGAAGCGAAGGCGGGCGGGGCCGAGCGAAGCTACGGCACCTG  
CTGCGGATCATCGACGCCAGGACCTCGCGGTTCATGGCGCTGCGGGCTGGGCTGTTCGATG  
CTCATCAACTACCAACGATCACTGCGACGAAGTATTACACCCACATGGGCAAGATGCTC  
TGTCGCGAGATCGAAGTGCGGTTGGCCTTCAAGGTCAACCAACCCTATTACGACCGGACG  
CTGGACTACCTCAAGACCAGCAGGACTCGCAGCGTCCGGCACATCAAGTAGACGATGGAC  
GCTCTTCTGGACGCGGTGCTGCCGAAGAGGCGCGCATCGACCTGCCCGATGGCGACTGT  
CTGCGCCTGGGCAAGTTCATCGGCGATCCGCTCATCCAGTGCGGCCTACTCGAGCCGAAC  
CGGTTTGTAGGGCAAGGCGGCACGAGTGTCCACCTGGAGACGTCGCCGGAGGCCAAGGAG  
TTCTACAGGACCCCTCGGCGGCATTGACCTGGGGCGGCCAGGGCGTAGCGTGATGCTG  
GCCCCGCCAGACCCTGGCAGGACTGGTGCATGGAGGCTACTACAGCGCCAAGGGGCAG  
AAGCACCACGTACTGGTGCAGCACCAAGCACCAGACCAAGCGGGCACGGCAGATGCAG  
CTCCGCCACCTGGGCCGGGACTAGATGCCCGAGTCTACGAGGAGGTCAACGTGCTGCAA  
TCGGTAGCCTACGAGATCCACCACGACGTGTACGAGATCATCGAGCGCGTCTTACCTCC  
GGTGGCGGCGTGCTGGGCATCCCCAGCGCACGAACCCGGACAAGCCTGAGGTCCCGCTC  
GGCGACGAGTGGGCCAAGGAGAATGCCAGTGAGCAAGAGCTGGAGGCCTTCAACCGTTGG  
AAACGCTCCGTCCACCGGTAGTACACCGAGGAGCGAGAGCATAACCGCCAAGCTTCGCGAA  
TTTGCTGCACTCTACCTAGTTGTTTCGAGAGCATCATGGCAAGGCAGTGTACTTCCCCATG  
CACGTTGACTCCCGTGGCCGCATGTACTATTGGGGCACACCGAATCCCCAAGGGTCCGAC  
ATCTTCAAGGCCGGCCTGCGCTTCCACGAGAAGCGAGTGCTCGGCAAGCGCGGACTGTAC  
TGGCTCAAGGTCCACGTCGCCAACTCCCTCGGATGCGATAAGGTGTACTTCGACAACCGG  
GCAGCCTGGGTCGATGAGCGATGGGATGACTTCCAGCGAGCGCTCGACGAGGGGCCGGAG  
AACTATGCGAGTCTCTTTCCCGAAGCCGAGTCGCCCTGTGCGCCATCGCAGGTCTGCTG  
GAACTGCGGGCGGCTTACGCCTCCGGCAACCCCGAAGGGTACGCCAGCGGCTTCATCGTC  
CACATGGACGCCACCTGCTCGGGTCTCCAGCACTACTCGGCTATTCTCCGAGATGAGAGC  
GGCGGAGCCTACGTCAACCTCCTACCTCCTGGACTTGCCAAAGCTGACATCTACTCCCGA  
GTGCTCGGACTCGATAATGAGGCTCTGGAGAGAGACCGAGCGGAAGGCGCGGGTGGCGAG  
GCGCGGGGTTATGCCCTTCTATGGGATAAAGCTGGTCTGACGTGGAACCTGACCAAGAAG  
CCCTGCATGACGCTGGTGTACGGCACCACGTTCAAGGGCGTTCGTGGACCACTGCCTGGAC  
TACCTCGACGAGTCCGGCGTGGAGATTCCCGAGGGTGCCCCGTCATAACCGCCTGGGAAGC  
TACATTGCGACGCTCATACTGGACGCAATCCGCGAGACAGTACCATCGGCAGTCTTCGCC  
ATGGAGTGGCTCCAGCGGCTTGCTAAGGCCCTTCTGACGCATCCAAGGGTTTGCAGTGG  
ACAACGCCGCTCGGCATGCGGGTCTTCCAGTCTACCCGAAGACCGAGGAGGTGCGGCTA  
CATCTGCGAGGCGAGGCTGTCGAGTACGTGACCCTGTACGAGGCCAACGACGAGCTAGAC  
CCGCTGCGCAACGCCACCGGCATCGCTCCGAACCTTCGTGCATGGCCTCGACTGCAGCCAC  
CTGGGACTGACGGCCCTGGCCTGTGCGGCAGAGGGAATCCCGATCCAAGCCATCCACGAC  
AGCATGGGGACCTACGCTGGCGACGTGGACCGGATGCACGTCCACATCAGGGAGCAGTTC  
GTCACCATGTACAGCGGCCCTGCGTGCTCGTAGAGCTGGCTCGACAGCTTGGGGTAGAG  
GCTACCCCGCCCCGTCGGGGATCGTTGAATCTGGAGGCTGTGCGGGACTCCTGGGCGTTC  
TTCTGCTGAGTAGATTATGTCACCCACATAGGAGCACGTGCATCCGTCCAGAGGCCTCGT  
AGAGGAAGAGGGCTCAGGAAAGACCCAAGAGGAGGAGAAGTGAGAGAAGACGACTACCAA  
GGATTCTATATAGAGTAGAATAATCAGCATAGGAGATAAGATAGATGGTTACTATGAAGA  
GTAAAGGGCCAAGGATTATGTCACCCACAGTGAAGGATCGAGAACAGGCAAGGGTAAGG  
CCCACCCTGTGACGTTACGTCTCAGCAGATCGAGTGGCTAGAACAGACCTTCCCCGAAC  
ATCAGATCAGTCTGGAACCACGATGGAAGACATCCAGTTTCAGGCTGGCCGCCGCGATG

TGGTGCGGGCTATCCGCCTGCGTCGCCGCGATGCAATCGCAGTGGAGCTTACAGGATGAA  
CAAGTCACTCTGGCGAGTCCACGCAAAGCCGGCGCCCTTCCGAAGTATGGGGCTGTG  
CTAGCTGGCAGTACAGGAGCTGGAAGAGTTCACCCTCTTCCGCTCGAACGAAGAAGCCCT  
GGAAGCGATGCTCGTCAGTATCGAGGGCAATGATCGGACCGAGCTGCTGGTATTCCGTGA  
TGGCCAACTGGCCGGCGGAGCCTGCATTGTGTTGAGGACGATCCCCACATCGGCCCGTG  
CGTCACCGCGCAGTGGCAGTACGTTTTGCCACGCTCCCGCAATACAGGCGTGGCGCGAGA  
GTTTCATCCGCGAACTGCACCGACAGGCCGGCTGGGGTCAAATCCCCCTCGTGTGCTGGAG  
CCATCGCGAGAGCGATAGCCGGTATACGATCCACTACCGGAGAGCCAAGCCTTATGGGCA  
AGAAAGTGAAAAAGGTGCTGGGCAAGACGATCATCGGGAAATTGCTGATGGCCTGCTCG  
GCACTGACCTGATCGGCGCACAAATCCGATGCCCGCAAGATGGAAGAGCCGAACCGCCTCA  
TGCAACAGCAGGCCGGTCCAGCTCGCAAGAAACCAGCAGGTTGACCTCACCACCGAGAACG  
TGGCGCAGGTTGACCTAGGAGCGATGGCCGATGCCACTGGCACCGGCAATCCAAGACGCC  
GGAATCAGGCAGGCACTGGCGTATCGCAAACCTCGGTATCAACTACTGACGAGGTACGC  
CATGAAGTCTACCGCAGCAATGCTGTGGGAAAAGCTTCGGGATAGGAGCGTGAAGCAGCG  
AGGTATCGAGTTCGCCAAGACCACGCTACCCTACCTGATGGTTCGATCCCATGTCCGGCAT  
CCGAGGAGTCGTAGAGCACGACTTCCAAGCTGCCGGTGCCTGCTCGTGAACAACCTCGC  
CGCAAAGTTCGCGCGGTGCTGTTCCCGACGGGGATTCCGTTCTTACGTTCCGAACCTTAC  
CGATGCGATCCGGCGCGAAGCCGACAGCCGGGACACTGACATCACCGAAGTGACTGCTTC  
CCTGGCCCGCGTGGATCGCAAAGCAACACAGCGCCTGTTCCAGAACGCCTCCCTGGCGGA  
CCTGACGCAGGTGATCAAGCTACTGATCGTGAAGTGGCAACGCCCGCTATAACCGCAACAG  
CGACGAGGCCACGGTAGTCGCATGGTTCGCTCCGCTCCTACGCGGTGCGCCGAGAGGGCGAC  
CGCCGATGGATCGACGTCGTGCTCAAGCAGCGCTACAAGTCCATGGACCTGGACGAGGC  
GTACAAGCAGGACCTGATGCGTGCGGGTCGCAACCTGTCCGGTTCGGGCAGTGTGACCT  
CTACACGCATGTTTACGCGCAAGAAGGGCACGGCGATGGAATACGCCGAGCTGTACCACGA  
GATCGACGGCGTGCCTGTGGGCGAGGAAGGCAGCTGGCCTATTCACCTCTGCCCGTACAT  
CGTACCGACCTGGAACCTCGCCCCGGCGAGCACTACAGTCGAGGCCACGTCGAGGACTA  
CATCGGCGACTTCGCCAAGCTGTCCCTGCTGAGCGAGAATCTCGGCCTGTACGAGCTGGA  
GTCGCTGGAGGTCCTAACCTCGTGAAGAGGCCAAGGGCGCGGTGGTTCGATGACTACCA  
GGACGCTGAGATGGGCGACTACGTGCCGGGTGGCGCGGAGGCCGTCCGGGCCTATGAGCG  
AGGCGACTACAACAAGATGGCTGCTGTCCAGCAGGGTCTCCAGGCTGTAGTCGTCCGGCT  
GAACCAAGCGTTCATGTACGGCGCCAACCAGCGCGACGCCGAGGGCGTCACCGCCTAAGA  
GGTCCGCATCACTGCGGAGGAGGGCGGAGAACACGCGGGGTGGCACCTACTCGCTGCTCGC  
CGAGAATCTCCAGTCGCCCTGGCGTACGTCTGCCTCTCGGAGGTGGATGATGCGCCGCT  
CCAGGGCTTGATACCAAGCAGCACAAAGCCGGCTATCGAGACGGGCCTCCAGCCCTGTC  
CCGGTCCGCCCGCGTGCAGAGCATGCTCAACGCATCCCAGGTCATCGCAGGCTTGGCCCC  
GATTGCTCAGCTCGACCCACTCATCTCACTACCGAAGATGATGGACACGATTTGGGCCGC  
TTTTAGCGTCGACACCTCGCAGTTCTACAAGAGTGAGGAAGAGCTACAAGCCGAGGCAGA  
ACAGCGGCGCCAGCAGGCCGCGCAGGCCAGGCCGACAGGAGACCTTTCTGGAAGGCGC  
TTCCGACAAGACCAACGCACTCGCTGGCTTCTGATAGATGCAACAGAACGAACAGCAACG  
GCCACCGGGCCTCGCTAACCTGGTTGCCAACGTCCCGCCCGCCGCCGACCCGACCCCGAG  
TCATGTGCAGGTGATGCCGAATCCCGTCATCCAACCGCAGCCCCAGTATGCGGCGCAGCC  
GGGACAGGCAGGGTCCCGCAGCAACTGGCTATCCCGACCCAGCAGCCGCAACCCGTTCC  
GACCAGCGCCATGACGCCGCACTACCAGCCGGTAGCGGTGCCCGCCGCTTGCCAACCCGT  
TGTACCGCAAGCGCCCGCACAGCCGGCTCCGGTAGCTCCTCCGGCTCCGGGCGCAGTTCC  
TCCCGAGAACCTGGAGGTTCCGCCCGCCGCCGCAATCACTCCAACGGAGAGATCGTAGG  
CACCTGGCGGGGAATCTGGAAGGCCACCCGCAACTGGCGCCGTCCATCAGCTATCTGGA  
AGCGTTCACCGACAAGATCGACACCGTTCGGGCCTCCGGTAAGGCCGCCGAGCACCGCGT  
TCCCCGCTTCATCGACGAGCACTATCTGAAAGACGCCCTGGGCGAGGCCCAAGCGCAGCA  
CGTCATCAACGTGGCGAAGGGCGTTCTGACCTACGTGGATGCTCAGACCCAGGCAGTCTT  
GAACCAGACCTATGCCGCCGTCCGGCGGTGAGGCTCTGCTCAAGTAGGCCGCCAGCGTCTT  
CAACCAACACGCTGACCCGGCTACCAAGACCGCCATCGGTGCCTGATGGACTCGGGCGA  
TGCTCAGTCCATGCAATAACCCCGCGAAGCTGATCGTTGCCTTCGATCAAGGCTCCGGTGC  
CGTGGTTAAGGCAACCGGCCAACCCCTTGGCGCAGCGGCCGCTGCCCTGGCGGCCCTGTC  
CGCTGAGCAGTACCGTGCCGAGGTCTCGAAGCTCCCGTTGAACGCATCGGAAGCCGACAT  
AGCCGCTCTGCGTGAGCGCCGCAAGGCAGGTATGGCGCATGGTCTCTAACGACCTTGCCC  
TACTCCGGCCTTAAACCAACATCCAAAAGAGAGCATCTCATGAGCTTTCTGAACGACT  
TGACCCGTCCGAACCTACGCTGGCAAGAACGCGGACGTTGACATCCACCTGGAAGAGCACC



TCGGCATCGTCGACAAGCACTTCGCCTACACCTCCAAGGTCGCGCCGCTGATGAACATCC  
GCGACCTGCGCGGCTCCAACGTCGTCCGCCTGGATCGCCTGGGTAACGAGCAAGTCAAGG  
GCCGTCGTGCCGGCGAAGAGCTGGAGCGCAGCCGAGTCGTGAACGACAAGTGGAACTGA  
CCGTCGACACCCTGCTGTACCCCGCCCCAGTTCGATCACCAGGACGAGTGGACCCAAG  
CCTTCGACATGCGCAAGGAAGTCGCCAGCTGGACGGCCAGGAAGTGGCCATAAGTTCCG  
ACCAAGCCTGCCTGATCCATGTGATCAAGGCCGCAGCGATGGATGCTCCGGTGGACCTGG  
AAGATTCTTCTCGCCGGGCGTGCTGGAGAAGCTGGACCTCACCGGCGTCACCTCCTCCA  
CGGAAGCCGCCAACTAGACCGTCCGCATGCACCGCAAGGTGGTTCGAGTCCTTCATCAATC  
GCGACCTCGGCGATGCCGTCTACTCCGAGGGCCTGACTCCGATGTCGCCTCGTGTGTTCA  
GCCTCCTGCAGGAGCACGACAATCTGATGAACGTCGAGAACCAAGCCACCGGCGCGACCA  
ACGACTACGTGAAGTCGCGTGTGGCCATCCTCAATGGCGTGAAGGTGCTGGAGACTCCGC  
GCTTCGCCACCGAGGCCATCGCAGCACATCCGCTGGGCCGCCACTTCAACGTGCGCGCCG  
AGGAAGCCGAGCGCCAGATCGCCCTGTTCTCCCGAGCAACACCCTGATCACCGCCAGG  
GGGCGCCGGCTCAGTCCAAGCTGTGGGAAGACCACGATCAGTTCTCGTGGGTCTGGATA  
CCTTGCAGATGTACAACATCGGTGCCCGTCGCCCGGATACCGCTGGCGCTATCGAACTGA  
AAGGCATCAACGCCTTCGACATCACCGATTGATGCCGCGAAACCCCGCACTTCGGTGTGG  
GGTTTCTTCAAAGCCTAACGACCCGCGCAGATTCCCTGCGTGGGTTTTTTCGCTTTAGGA  
GAAACCCTATGCTACTACTCGACTCAGTGAATGTCATCCTGGGCAAGATCGGCGAGTTGC  
CGATCCCGAGCATGGATGAAACGTACCCAACCAGGGCCATCGCCCTCCCGAGTTGGAGG  
ACCAGCGCATCCAGTTGCTGACGCAAGGCTGGTGGTTCAACACCTGGTGGAAAGCACAAGC  
TGACACCCGACCCGACGGGCCGATCAACCTGCCAAAGGACACCTTGGCGTTCTACCCGG  
ATTCCCCGATCTCCAGTGGGACGGCCTGGGAGTGC GCGACGCCAACACC GGCGACGACC  
GTATCGGCAAGGTAGTAGAGGCCTGGCCCGTGCTGTCCCGTGAGTGGGACCGTATCCCCG  
AGATTGCCAGCGCGTCATAGCGCACCAAGCCGCCCTGGCCGTGTCCACCCACGACATCG  
GGCCGGACGAGACGGCGCAGGTCATCGCCAGGAGTTGCAGGCGTACCAGAACGAACTGA  
GCCGCATGCACACCCGATCCCGCCCGCTCAACACCAGGCCAAGCGCAGCTTTAGCCGGT  
GGCGGGGTAGCTTGAGGACCTGACCATGAGCTACAAGAAATCCGCGTACCCCAACCTGCT  
GATGGGCGTGAGCCAGCAGGTGCCGTTTCGAGCGCCTGCCAGGGCAGCTCAGCGAGCAGAT  
CAACATGGTGTTCGGACCCCGTGTCCGGCCTTCGCCGCCGTAGCGGTATCGAGCTGATGGC  
GCACCTGCTGCACACTGACCAGCCATGGCCGAGGCCGTTCTGTACCACACCAACCTGGG  
CGGTGCGAGCATTGCGATGCTGGTGGCGCAGCACCGGGGCGAGCTATACCTGTTTCGACGA  
GCGGGATGGCCGCATGCTGATGGGGCAGCCCTGGTCCACGACTACCTCAAAGCCGCCGA  
CTTCCGGCAGCTTCGCGCCGCCACGGTGGCTGATGACCTGTTTCATCGCCAACCTGAGCGT  
GAAGCCGGAAGCCGACCGCACTGACGTGAAGGGCGTGGACCCCAATAAGGCGGGGCTGGCT  
CTACATCAAGGCGGGTCAAGTATTCGAAGGCGTTCTCCATGACCATCATGGTCAAGGACAA  
TGCCACCGGTACGACCTACAGCCACAGGGCCACCTACGTGACGCCGGACAACGCCAGCAC  
CAACCCCAACCTCGCCGAGGCCCGTTCAGACGAGCGTGGGCTGCATCGCGTGGCAGCT  
CTACGGCAAGTTCTTCGGCGCCCCGGAGTACACCCTGCCCGACTCCACGAAGAGGTACCC  
CAAGGTTGACCCCGACACGGCTGCGGCGACGGTAGCCGGCTATCTCAACCAGCGGGGCGT  
GCAGGACGGCTACATCGCCTTCGGGGCGACGGGGACATCGTGGTTCGAGGTGTCTACCAA  
TATGGGCAACAACACTACGGCATCGCCTCGGGTGGCATGAGCCTCAATGCCACCGCAGACCT  
ACCGGCCCTACTGCCGGGTGCGGGTACGCCGGGCACTGGCGCGCAGTTCATGGACGGGGC  
CGTCATGGCCAGTGGCTCGACCAAGGCGCCAGTCTACTTCGAGTGGGATTCGGCGAACCG  
CCGCTGGGCGGAGCGCGCAGCCTACGGGACCGATTGGGCCTTGAAGAAGATGCCCTTGGC  
CCTACGCTGGGACGAGGCGACCCACACCTACAGCTTGAACGAGCAGGACTACGACCGGCG  
CGGCTCCGGCGACGAGCACACGAACCCACGTTCAACTTCGTCACCCGGGCCATCACCGG  
CATGACGACCTTCCAGGGCCAGCTGGTCTCTGTCTCAGGAGTACGTCTGTAAGTCCGGC  
GAGCAACATCCCGCACCGCTGGTTCAAGAAGTCGGCGGGCGGCGCTCAACGACGATGACCC  
CATCGAGATCGCGGCCAGGGCAGCCTGACCGAGCCGTACGAGCACGCAGTCACCTTCAA  
CAAGGACTTGATCGTCTTCGCCAAGAAGTATCAGGCCGTGGTCCCTGGCGGGCGGTATCGT  
GACCCGGAGAACGGCCGTCATCAGCATTACCACGCAGAACGACCTCGATAACCCGAGCGGC  
ACCCGCCGTCACAGGCGGTAGCGTGTACTTCGCCGCTGAGCGTCCCCTGTGCTTCTGGG  
CCTGCACGAGATGGCCCCATCGCCACCCAAGGACAGCCACTACGTGCGCCGAGGACGTGAC  
CCGCCACATCCCGAGCTACATGCCAGGGCCGGCAGAGTACATCCAAGCGGGCGGCCTCAAG  
CGGCTACCTCGTGTTCGGCACCAAGTACGGCGGACGAGATGATTTGCGACCAAGTACCTGTG  
GCAGGGCAACGAGAAAGTGCAGAACGCATTCCACCGCTGGACGCTACGGCACCAAGATCAT  
CGGGACCTACTTCACCTGGGACAACCTGATGGTCTGATCCAGAAGGGTCAAGGAGATAGC

CCTGGGCCAGATGCACCTGAACAGCCTGCCTGCACGGGAGGGCCTGCAATATCCGAAGTA  
CGACGACTGGCGGCGTATCGAAGCGACTGTTCGAGGGCGGGCTGGAGCTGACCAAGCAGCA  
TTGGGACCTGATCAAGGACGCCCCTGCCGTGTACCAGCTACAGCCCGTGGCCGGCGCATT  
CATGGAGCGCTACCAGCTCGGCGTGAAGCGCGAGACCAACACCAATGTGTTCCCTCGACGT  
TCCCGAGGCCGTTGTTCGGTTCGGTCTACGTGGTTGGCTGCGAGTTCTGGTCCAAGGTGGA  
GTTACCCCCGCCAGTGCGGGCGGGACCACAACGGCCTGCCGATGACCGCGGCCCGTGCAGT  
GCTGCACCGCTACAACGTCAACTTCGGATGGACCGGAGAGTTCCTGTGGCGCATCAGCGA  
CACGGCCC GGCCCAACCAGCCGTGGTACGACACGACGCCTCTACGGCTGTTTCAGCCGGCA  
ACTCAACGCCGGCGAGCCGTGGTGGACAGCGCCGTGGTGGCGCTGCCGGCCCGGGTCCG  
TATGGCGACCTCCAAGTTCGAGTTGAGCTGCCATAGCCCCTACGATATGAACGTGCGGGC  
CGTGGAGTACAACCTCAAGTCCAACCAAACCTACAGGAGGGTGTGATGGCATTCTGGCTA  
CCACTACTGGCCGCTGGCGGCATGTTCGGCACTCCAGCAGGGCATATCCAACAAGGAAGAA  
CGCCGCACGATCAAGGCCCAAGAACAAAGGCCCGCCTCAAGACGGACCTCGACAACCTGGGC  
GCCGCTGCCTGCGACATCGCCAACCTGGGCGTTCATGGCTGCAAGCTACCGCAAGCAGGCC  
GTGGCCTCCCAGGTCGAGGCCAAGCGGCATGGCATGCTCGCCGGCGGGTGGCGCCTCGGCA  
CAGGCAGGGGCTTCGGGGTCAAGGGTGCATCCGTAGATGCGGTGGCCCTGGACATCGAG  
CGCGAGGTGGGCGAGGCCCTGATCCAGATTGACGATAACCTGGACAACCAGATGTGGAAC  
CTCGCAGAGGAGGCACACTCCAGCCAGGCCAGGCTAAGGCCGGCCTGCTGGGGCAGAAG  
AGCACACAGCGGGGCAACGCTCCCAGCTGGTCGCCGGCCTGATGTCTGCGGGTTCCTA  
TACGCAAGCCAGTACTTCAAGTTCGGCGCCACGCCTAAAGGAGGCAACTGATGGCGGAAT  
CGAACGTGCCTCCCAGGAGCTTGGGATCAACGTCGGACAGACTCAACTCCAGCCGGGCC  
AGAGCGTCCGGCGCGGGGTGCGAGACTCCGAGGTCAACCATAGCGGCCCCAGCGTGGGT  
CGCAGATTCTCGACGGCATACTTGGTGGCGGTTCATCAGATCGCTGGCAAGTGGTTCGAGC  
ACAACGTGCAGCAGGAAGTGCTTCGCGGGCGAGCGTGCCCGCATGGCCGGGGAGGCCGAGG  
ACGCCGTAGACAGCAACATCCTGGCCAAGCCCTTCGTGAAGGGCGGCTGGCGCAAGCAGG  
ACTACCGGATCGCCAGGCTGACTTCAGTATCAAGATGCAGCAGTTTATCGCCACCAAGG  
GCCGGGAGATGACTGCCGACGAGTTCGAAAGCACCTGTTCGACAGGAAGCGGCCACGTGC  
TGGACTCCACCGAGGGCATGAACCCCAACGACGCCCTACAGGCGCTGGCCAGCAGCAGA  
AGGCCGAAGAACAACCTTTCGGCATGCAGGCCCTAGGCCTACATGGACTGGTCCATCGACC  
AAGCCGCCCGAGGCTTCCGCACCCAGGGTAACAGCATCCTGGCCAAGGCCGTGCAGGCC  
AGGCCACAGGCGACGAGCTGTCCCGGCAGTTGAGCCTGGAAGAGGCCGGCCTGTTCTACA  
CCAACATCATGACCTCCGAGGACATCCCGCTGGAGGTGCGCGACAAGGTGGGCATGCAGT  
TCCTGGCCGCCAGCCTGGATATGAACCAGCGGGGCATCTACGAGAGTCTGCGCGACGCCG  
GCTTCTCGACGGCATGGCCTTCGACGACCGACGTGCGCTTAATGGCCTCTACGAGAAGT  
CGAAGGCACAGACCCTGGCCAAGGACTCGATGGCCACGCTACGGGCCTACGCGGACTTCC  
AGCAGCGGGTGGCCAACGGCGCCATCACCGACCTTGCCGAGGCCGAGGCCGTATTCTCGGG  
GAATGGTGGCGGAAGGCCGGTGGAGCGACGCACAGGCCATCTCCCTCATGACCAAGGCTA  
TGACCGGCCTGGGCAACGCACAGCGCATGCAGGGCATCATGGCCGGCCCTGGAGGCCGGCG  
ACATCAACGCACCCGCACACCCTCGGGACCAACGTTACCGAGGCCCTGGAGCAGTGGGATA  
AGCTGCAGGCGGCCAACGGCTCCAGTCTCACCGATCGGTTGGTACAGGGCACGCAACTCG  
GCCTACGCCTGGGGACCTTCCCGAAGACCTACGGCGAGTCCGTTGGCAGCGCGGTCCGCA  
TGATCCAGGCCGCCAAGGAAGGCGAGGCCAACCCGGAGTTGGTCTACACGCTGAACAGCA  
TCTTCGAGCAGGTGGCCTCCGTGCAGGAGATCAACCCATCTGCCGGCAACGTGATGCTCT  
CGGGTATCCCGGAGGGCGAGCAGGGCGCCGTAGCCTGGGCACTCACGCAGATGAAGATGG  
TCATCGCCCCGGCGCAGGCCCTGCGGGAGTTCAGCGCCAACGCGGAAGTCGTCAAGCAGA  
TGACGAGTTTGAGAAGGGCCTGAACACCAAGGCCTTCAAGTACCAGCTCGGTAAGCAGG  
TCAACGACAAGTTCGTGAACAACATCTTCGGTTCGGGCCTGGAACATGCTGACCGGACAGA  
GCGACCTCAGCAACAACGAGGCCGTCTAAGCATGTACCGCCGTGCAACCATCGACGAGG  
CCAACCTGGCCGGCAAGCGACCGCAAGCACGACGAGACTCCTACCAGCGACACAGGCCGGG  
AGGCTCTGCTGGAGATCGCCGCCGCCAACGTCGGCAACCCGGACGATCCAGGTCCGGTGAAGT  
CCCGCAACCTCAAGGAGGGGGAGCTGTTACGCCGCCGCGACAGCGCGCCGCTGATCCTGG  
CGAGAGGCACTACCGCCGAGCAGCTATTCGGCACCAACGACACCGAGACCACCGGCGCAG  
TCCTGGCCGAGCAGCACAAGCCGACAGGTTGAGGGCCTCCTGGGCTACAAGTCCGTGGTGG  
CGTTTGAGTTCGACCGCACCAAGTGGCAGCCTACTCGGCGTCGAGTACGCCGAGAGCGGGG  
TGGCCCTGGACCGTACGCGGGTTCGATCCACAGGCCGTGGGTAAACGAAGTGCTCAAGCGCA  
ATTCGACAAGCTGAACGCTATACGGGGTGGCGAGTATGGGGCCAACGTCAAGGTGAGCG  
GCACGGACATTCGCATGAACGGCGGCAACAGCGCCGGCATGTTGAAGCAGGATGTGTTCA

ACTGGCGTAAGGAGCTGGCACAGTTCGAGGCCTATCGAGGGGAGGCGTACAAGGATGCCG  
ACGGTTATAGCGTGGGCCTGGGTCCCTACCTAGGCAGTGGCAATGCTGGGGCAGGAACTA  
CGGTCACGCCTGAGCAGGTCGCGCAGTGGTTCGCCGAGGACACCGACCGAGCGCTCGACC  
AGGGCGTGAAGCTGGCCGAGGAGCTGGGCGTTACGAACAATGCTTCTATCCTGGGCTTGG  
CCTGTATGGCCTTCCAGATGGGCGAAGGACGTGCCCGGCAGTACCGCAACACCTTCCAGG  
CGATCCGGGATCGCAACAAGGAGGCCTTCGAGGGCCGGTGTGTCAGGAACAGCAAGTGGTACA  
CGCAGACGCCCAACCGGGCAGAGGCATTCATCAAGCGCATGGCGCCCCACTTCGATACCC  
CGAGTCAAGTCGGGGTTCGACTGGTACAGCGCCGCAACAGCGGAGTAAGACATGGCAAAGC  
AATTCAAGGGCCGTATGACGCCCAAGTATCCCCTCGACCAAGCAGTCCCTCGACGAGGCC  
AAGTACAGGGTCTGCTCGATGCAGTGTCCACCGTGGAGTTCGACGCCCTGACGGGCCGCG  
AGATCCGAGGACGGAATGTGGCGGGAGGCCAACGTGCCAACGCTCGGGAACCTGGAGCGCA  
TCGTGCGACACCACAACCTGCCGGCCCTTGACCGTGTCTTCTGCACTCTGGAATCAGTCCA  
CTCTCGTCGGCCGCTGGGACGATTCGCTCCAACACGACGCAGACCTTGCGGGCGAACAGCA  
CCGGCGAGGTGGACCCCAACTTCGACGCCGGGACCTACGGGGTCCAGGCGCTCCAGGCGG  
CTGGCAACCAGCCGACTGACAACTACCACCAGATCATGGCCCAGCGCCGGCAACGCCGAGG  
ACGCGGCCTACCTACTGTGAGGATTCAACGGTATGAGCAAGACGAGCAAATCGTGGCGG  
ACAACCCGTAAGTGGAACTTCGACGCGGGCATGCTGGACCCGGCTGCGCCGGCAGTTCGATG  
CGTTACTTTCGGTGTGGCCGCGTCTACGGCTCGGTGCTGCTGGCATGGCTGCTGCTG  
GCGGCGCTGGCCAAGTCGGGTAAGTTGCTGGGCTGGATGCCGCAGGTGTGACGCTGGATG  
CCGGAACCTACATCGTTCGCTGGCGCTCTCGGTGCTGGCGTGGGTGCTCTGCTGGGGTCTG  
GTGTTGGACGCAGTGCCGCCGAAGCCCCAACGCAACCGCATGTGCCCGAAGTATCGGCGC  
CTACTGTGGGCTGCCAGGAGAAGCGATGACCGCCGAGGAAGCCGCGCTCGTGGCTTCA  
AGGCAGGCGATGTGGTGGACCTGCTGGACGAGGGGACTGTCTTCCGGGTAAGCTACC  
GAGTGGAGCAGGCCGAGATAACCGCCATCCCAGCGCCGGGACACTGCCTTCGGTGACGAGC  
TGCACGGCCTGTGCGGGCCGCAAGCTGTGCGGAGGTGGTGGACCACCTCAAGACCCACGCCG  
AGGTGCCCAAGCCGTTGCACGGCGTGGCCGCCAAGGTGGCCGAGACGTTGAAGACCCTGG  
AGGGCCTGGGGCAGCGCACCATGTTCCGCGTGGTGCAGGGCGGGGATAACCGCTAGCTCCG  
CCTTCTCAAGCCAAGCACGGCTGGTCTGCATTCGACGCAGGGATTGGACACTCTGGTCC  
AGGTGCGTGGCAGCACGGCGCCGGGCGCGTGAGAACCAACCCGGTACGGTCCCTCCACG  
AGGCGGTTACGCCGCCACGGTAGGCGTGATGAATACCGCCCTGCGGAATCCTGGCGCGT  
TGAATCCCAAGGTGGCCAGGCCATGCAGACCCTGGAGAACGTCCGGGGTAACGTGCTCA  
ACGCCTTGAAGCAGGACCAGGGCCCGCCGGACGGCAACTTTCGAGTACCAGGAAACCCTGC  
TGGCGGGCAACTCCAATACCCTGGCGATCGTCAAGGAGCTGGTGGCCTGGGGCCTGACGG  
ACACCCGCTGCCAGAAGACCCTGAACCGGCTACGCTACGGCGACGGCGGGAAGGGCCTCT  
GGTCCCGGTTTCGTCGAGGGCATGCGCAGTCTGCTGGGCTGCGGCCTGATGCGGACACGG  
CGCTGAGCAGCATCCTGGCGGCTCAGAGACAATCATGGACTCCATGCCGGGGTACACCA  
AGGCCAGGCCAAGTGGGCCAACAAGGGCGCGCCAGTGACCGAGGAGGCCAGCCCGGAGA  
CGATCGTTCGATCCACCCGGGAACGTGCCCGAGAGGGTGGCGGCTTCGTGAACCGATTCT  
ATAGCGAGGCCGACCTCCTGGCACAGCCGGGAGAGGGTGCAGCGGCGACTCCTGAGCCGTC  
TTATCGATGACCCGGTACGTCGGGATGGGTAGAGCACCAAGACAACGCACCGAGCTATT  
TGCGCCGCTACCGCAACGAGTTCGAGGGCTACGTCAAGTCCAACGACGAGATGATGGCGA  
AGGCGATGGCTGGGCAGGGCGTGGGCTGACCGCTCGGGCACTCAACTCCCGCCGCGCTA  
TGGCCGTCCGGGATCAGCTCAACGAGCAGGTCACCCGGGAGGTGCTGCGCTGGGATCGGG  
AGTGGACCGCCTATGGCAGCGTCCGCGTAGACCCGAACCTACCGGGCACCATCAAGGCC  
TGGCTGACCACTCCGACGAGATTCACGGACTGATGGGCCAGCGTGCACGGGAGGCCGGCG  
TGGTGGGTTTCGAGAACTTCGCACCACGCCCCGGGTACTTCCACCGCTCGTGGAACTGGT  
CGAAGATGGCGCAGCTTGACGAGGCCGCCAGGCTTGGCTCGCCGCGCTATCAGCGACG  
CCGTATTCCGGGGCATCCCTGGATTGGACCGTGCAGGATGCTGACACCATCGCACAGGCCA  
TCGTACAGCGGTCACGAGACCAGGGCGACCGGTATCCGCTCCGAGTTCATGGGCGCGATGG  
GCGAGGCTGATACGGCCTTCATCCGGCAGGGCGTGGAAAGAGGCCAGCGTGTCCAGGCCA  
AGTTCGACAGCATCATGGCGAAGATCGAGCAGAAGCAGTCCGACCAGGGCACCGTCAAAT  
ACGGCAAGGGCCGGCTGTGCGGGACATGACCGCCGAGCTCAACCACAACGGCACCGTGT  
ACCGCGTACAGGACCTGATCGACCGGGACCTCGACCGACTGATGGAGAGCTATTCAGGCA  
GTATGTGCGGGCCTCTCGGCGCTGGCTCGGGCAGGTATGCCGGGCGACTCCGAGGTTCGAGG  
CGTACATCCGTGAGTACCAGCGGGAGGCCGTGCACCTGGGCACCGACAAGGTGCAGGAGC  
TGACGGGCCAACTGCGTGGCATCTTCGGGGACTTACCAGGCAACGTGCCACGCGAGCACC  
AGCTCGGCCCCGCTCGCTCAGCGGGCCAGCGGGCTGACCAGCGCCACCATGCTGGGGTCT

CCGGCGTGTACCAGCTTGCAGAGCTGGCCACGATAGCCCACCGCCATGGCGTCTTCAACG  
TCATGAAGGCCATGATGCACTCCC GCCTCGGGGACTTCGTAGGCGCCATGCGCCGTAACC  
CGGACCTCGCCGACGAGATGCAGACCGTCCTCGGCCTGAACCTCGCAAACGACATCCGCA  
TGAAGGCCTGGAAGCGGCAGTTCGACACCTTCCCCGCCAGCCAGGATACCTTCATGGATC  
GCTTCTGCACGCAGGTGAGCAGGCTATCCCTGGCCTAACGGCATGAAGTTTATCCACA  
ACTGGCAATCCCGCATGAACGCCAACCTCACCTTGAACAAGGTGGCGCGGGCCGCGCAGG  
GGGATGAAGCAGCCCTTCGAGTGCTCCAGCAGTACGGGAAGGACGTGGACTGGATGCCAG  
TGCTGGCGCGGGTTCGCGGTTATGTACATAACAGAGGAAGGAACGCCCAATCTATGAATT  
GGGGCGTCTGGAGCCAAGCAGACGTGAACACCGTCATGAACACCGCACTGCGGATCATGG  
ACGACTCGCTGCTGTATGGTAGGGTTCGGTCAGAACTCGGGCTCTGCCCGGTACCTGTG  
GTCAAATCCTGGGCCAGTTCGCGAGCTTCGTGGCCTTCGCGCACAACAAGCTCCTCCGGG  
GAACCTACGAGA ACTCCGGCGTGCTTGGCGTGGCCTCGCTCCTCGCATTCCAGTATCCGC  
TCACAGCGCTGATGATGGGTGCCAAGGCTGCGATCAACGGCAAGTTCGACACCTCTGATG  
AAGGCATCCGCAAGATGGCCATCGACGTCATCGGCTACACTGCTGGCCTCGGCTTCACCG  
CCGACATGTGGGGCGTAGTCACCGGGCACTCCCCGCGGTCCGCCCCGGTCTTCGGGCTGG  
CGGAGCACTCCAACGAGGTGTTCCGTGGCGTCAAGGACCTAGTAACCGGCGACGACCCCG  
CAGCCGCCACCGGCGATATCGTCAGCGGCCCGCAGAGGCACTGCCTTTCGTCAACGTTT  
TCCCGGCGACCAAGTTGCTGCTGGAATCCATCAAAGGGGAATAACGTGGCTCGGTTCAAG  
TATCCCGAGACCATCCACGTTACAGATGGGGTTCGAGGCTGTCTTCAGTCTCGACTTCCCG  
TTCCTGCGGCGTGAGGACGTATTCGTCCAGGTCGATAAGATACTCGTCACCGACTATACG  
TGGGTAGACGACACCAACTTCCAATTGGCCGTGGTGACGAAGAAGGACCAAGAGGTCCGC  
ATCTTCCGCGACGCGCCCCCCCCAGGTCCCGGACACACACTTCAGCCAGGGCATCCCGTTC  
CTGCCTGGATACATCGACGCGAACAACAAGCAGCTCCTGTACGCTGTGCTGGACCGCATC  
AACACCGCGATCCTCGCTCTCGATGGCGTACTCGACGCGATCCGTATCGCCGAGGAGGCT  
CGTCGCCTGGCGCAGGAAGGACTCGACGCCGCCAATGCGGGCGCTTCGCCGTGCCCTGGGC  
TTCGCTGAGATTTCGCACCGTGTCCGAGGACTCGGCTATTGATCCGAGCTGGCGGGGTTAC  
TGGAACCGCTGCATCACTGCCGACAAGCCTCTGACCTTGACCATGCAGATGGAAGACCCG  
GATGCACCGTGGGTTCGAGTTCAGCGAGGTTCACTTCGAGCAGGCCGGTGTGCGTGACCTA  
AACATCGTAGCCGGTCCCTGGCGTTACCATCAACCGTTTGCAGAACACCACCACGCAGCTC  
TACGGCGAGAATGGCGTGTGTACTCTCAAGCGGCTGGGGCGCTAACAACTGGATCGTGTT  
GGGGCCATGGAGGTGCAATAAATCACGGCATTATCGCGGGCATCATGGCCTCCCAAATTC  
GACGGCCCAAGCCCATCCTGGCGACCTACCCGTATCCCATCATGGAGGCGGATAATCGCT  
GGGCTGCTCGGCCCAATATCGTGGCAGCTCTGACCAGGGACACTCTGAAGGAGGTCCGGC  
CAGAAGACACGCTGGAGCAATACTGTGCAGCCACCGCTGTACTGGACGCCGGCATGCGCA  
GCCTGACACAAACGGGCTACGGCGGGGCCTGGCCGTACCAGCTCTTAACAGGTGTGGCAG  
ATACCACCCTCCGGTTCGCTGGTGAAGTCTACTACGGTTCGAGGCTCAGCCCTATCTAGCCA  
CGCCGGCGATCCACTCGGCGGACCTGCGGGTAGTGCTCATTATCTCGAATTACGAGGTAG  
AGCCGTTCCATTACACCCTGACCAACAGCCTTGTACAGGCGGAGCTGAAAAATGTTTAAAG  
ACCGAAGTAAAGAGACGTTACACCCTGATTCGCCGCAAGGCGGACGGCACTCCTGTGGAG  
ACTCTGGAGTTCGACAACATCATTACGAATGCGGGCCTGGATTGGATCGCCGCTATGGAT  
ACCGACCTCATGGGCGAACCCTAGCGGTTCAGCACTTCTACAGCCGATCCCAACCCGAGC  
GCACCCGCCATCGCGGAGGTTGTGCAACGCACGTCCGCATCTGCCCTGGTGGAGGTACT  
ACATCGGGCCTGGATGGCGAGTGGCTGTTCTGGCGGTAGCGTTGGAGATTCCCGCAGGGC  
ACCCTAGCTGGTCAAGTCTGGCCACCGTGGGCCTCATCTGCAACTCGGATCGTCGCTTC  
GAGAATAACACGGGTGAGCTGATCCCGAAGGATACCCCGCTGTCGTACACTCGCATCAAG  
GACGCCGCCGGGCGAGCTACTACTCTGCTGGTGGCCGCTGACGAGATTCTGGATGTCCAG  
TACGAGTTCGCGAGCCGGCCCCGTAGGAACGGCTGAGGCCAAGTTCGTGATCTCCGGCGTG  
GAACGCACCTTCCGGCTGATCCCACAGCCTTTTGCGAACCGTGCTAATCTCTCCGGGGAA  
CGCTACATCTTCTACAACACCAACGCCTACATCAACGGAAAGGACGCCTCCGGCGGCAAT  
GTCCTAGACGGTTCAGTGGCAGAAGAAATATCCCAAGTACGTGCGCGCCTCTTACAAGGCG  
CAGATCACTCTGCTGACGCAGGTCCAAAACGGCAATATGGCTGGCGGCATCACCGGCACC  
GAGGAACTCAAGATTTACAGTGGACGTA ACTATGTGCTCGATATCAACCCGCCTGTTGTG  
AAGAACAATAACCCAGGAGTTCACCGTGACCCCGGAGTGTACGGTGGCGAGGGCATAACCT  
ATGGCACTGATCTACGACTTCAACCCGGACCTTGATCCGAAGGCTAAGTCCAAGTTCGTA  
GGTGGCGCTGGCCGTAGGGACTTCAGCGACGTGCTGGACTTCTGCGACGGGGGTCTGGCT  
ATCCAGGACCCGTGCGAGGGCATGATGGTCCGCGTGTGGCGAACAGACCTTCGCCAGGAT  
GGGACCTACCTGGGTACAGAGGACGCCTCGAACGAGATTGCGATCGGCGGAGGTATCGAA

GAAGGTATCTCCCCGATGTCCCTCGACTTCGACAGCAACATGAACTACGTGTGTGCCTTC  
GTACGAGCCGACCGGACTGGTGAATCTCCTACTTCAACGTGCAGCAGGGCCCGGCTC  
CTCGTGGAGCTTGGGCAGGTTGACTATGCCAAGGTGGCTCTGGACGACAATCGTCCGGGG  
GCTACCGCCTGGGCGCAGGTTATCGTGCCTTACTCGCAACGGGAACCTTACGTCCGC  
ACGCAAAACGGAAGTACACCGAAGAGCACCTGGAGGTGGATACCGGCAAGGTATTCTGG  
CCTCTGGTGAAATGCGGTATGGGCACCAACCTCCGCTTCCAAGTCCAATTCAGAGGGCAC  
ATGTAATGAGTAAAAAGCAGACCGCGAGTGCTGAGCGGCTGGGCCTGCTTCACGAGCTGG  
TCTGCACCGCTATCGAGCGCAACTTCAAGTGGTAAATGGACAAAGACCTCCCGATCCCCG  
CATCGGATATCGTGTCCGCCACCAAATTCCTCAAGGACAACGAGATCACCTGTGATCCGT  
CCGACACCATCAACATCGACCGTCTCCGCGAGGAGATGCGGCAGGCGCAGGCCGAGAATC  
GCCGAATTGCCTTGGAGGGCTTCATCGCTGGCGAGACCGACGACGAGATGGAACGCCTGT  
ACACCCACTAAGGAGGCAGCATGACGCCGCAAGAACGATTCCAGATAGCCACGAAGTGC  
GGGATATGTACCCGCGCTTCCGGGACTTCTGCCTGGACGCCATGCTGTTCCCTCGGCTTCA  
AGATGACCTGGATGCAGCTCGACATCGCCGACTTCATGCAGGACTCGCCAACAAGGCGA  
TGGTTGCTGCCAGCGTGGCGAAGCTAAGTCCACCATCGCCTGTATCTACGTGGTCTGGG  
GCATCGCGCAGAACC GGGAACCCGTGTCATGCTGGTCTCCGGCTCCGGGGACAAGGCCG  
AAGAAAACAGCCACTTGATCACGAAGCTGATCATGCATTGGGACCTGTTGGCGTACCTGC  
GCCCGGACGCCCGCATGGGCGACCGGACCTCGGCTACCAGCTTCGATGACAACCTGGGCGT  
TGAAGGGCGTCGAGAAGTCGGCCTCCATCAACTGCATCCGGATCACCGCCGCCCTCCAGG  
GCTACCGGGCTGACATCCTGATCCCTGACGACATCGAGACCACGAAGAACGGCCTGACCG  
CAACCGAGCGGGCAAGCTGACGCGGCAGTCGCAGGAGTTCACCTCCCTCTGTACCCACG  
GTAAGATTCTGTACCTGGGCACTCCGCAGTCGCGGGAATCCATCTACAACGGCCTCCCTG  
CGCGGGGCTTTCTCATGCGCATCTGGCCGGGCCCCGTTCCCGACCCTGGACGAGCAGAAGC  
GCTACGGCGAGTGGCTGGCCCCCTCTATCGTGGACCGTATCGCCCCGCTGGAAGAGAAGG  
GCCACAACCCCGCAAAGGCAAGGGCCTGGACGGCACCCGTGGCTGGGCCGATGACCCGC  
AGCGCTACAACGAAGAGGACCTGCTCGACAAGGAACTGGACCAGGGTGCCGAGGGCTTCC  
AGCTCCAGTACATGCTGGACACAAGCCTCGCCGACGAGCAGCGCATGCAGCTGAAGCTTC  
GTGACCTGCTGTTTCATCGACGCGACGCACGAGAGCGTACCCGAGCCGGTGGCCTGGGCTG  
CCGACGAGCGCTTCAAGCTCAAGTTCGACGCCACCGATTCCCGGTTCATCAAGCCTGAGC  
TGTACCTGCCGGCGCTGATGGCTGGCGGCTGGGCATCGCTCCAGCAAATGACGATGTTCCG  
TGGACCCTGCCGGCGCCGGTGGCGACGAGCTGTCGTATGCCGTGGGCGGGACTCTTGGCC  
CGTACATCCACGTCGTGAGCATCGGCGGCAGGAAGGGCGGCTTTGCCGAGGAGAACCTGG  
AGAAATGTATTGCCCTGGCTGCGCGCTATGGCGTCAAGGTGATCTATGTGAGAAAAACA  
TCGGCGCTGGTGCAGTTGGCCAGCTCTTCCGCCACCACATGCGATCCATCGACCCGGACA  
CAAACAAGCCCCGCTATGAGGGGATCGGCGTAGAAGACCGCCAGAAGTCCGGACAGAAAG  
AGCGTCGCATCATCGACACCCTGCGGCCATCATGCAGCGGCACCGTCTGATCTTCCACG  
TATCGGGGATGGATTCCGACCACGTGGCCTGTAAGCAGTACCCAGCGGACAAGCGCAATG  
AGCGCTCCGTGTTCCACCAGATTCACAACATCACACCAGACTGAGGCTCACTGCCTAAGG  
ACGACCGGATTGATGCCCTTGAGGGCCTTGCCGGCGAGCTGACACCATCGCTCGTAAAGG  
ACTACGAAGCCGCAACCCGCGCTCGTGAAGAGGGTGCCAAGAAGGAATGGCTGAACAACC  
CGATGGGTTACTAAGTCTGTCTTCCGGTCTCTCGGCATGGGGCGGGAGCGTCGCAAGG  
GCCGCCAAAAGGACGAAGACTATGATGATTGACACCGCCACCGAGGGCGGGCAAAGGCAC  
CCTCGCCGTCTCCGGCGTGGGGATCGCCGTTTACTCGCCCTATGAGATCGCCAGCCTCTG  
TGCTGCGGTAATCACCGCGCTCTACGTAGGCGCCAGCTCATCACCTGCTCCCGAAGAT  
GCTCGATAGCCTCGCGGAGTTTCGCTGGAGGTTCAAGAAGTGAACAAGCCCTGCGCGGC  
TCAGCCCTTGCGGCTGCCCTCGGCGGCCTTGTCGCCCTGGAAGGCAGTGAGACCACCGCC  
TACCGAGACATCGCCGGCGTCCCCACCATCTGCTCCGGAACACTGCGGGGGTCAAATG  
GGCGACAAAGCCACACCAGAGCAGTGCTACCAGATTAGGCTCAAGGACTACCAGCGCTTC  
GAGTGCATCGTCTGGACGCCATCAAGGTGTCGATGAACGTCAACGAGCAGACCGCCCTG  
ACGTTCTTCTGCTAAAACGTGGTTCTAGTCTGTACAACCAGCACAGCGTTCAAGCGCTTC  
AACCAAGGCCGCGCCACTGAGGGCTGCCAAGCCCTGGCCATGTGGAGCAAGGTCACGATC  
AACGGCCAGAAGGTCGTATCCAAGGGCCTCGTGAATCGCCGCAACGCGGAGATCAAACAA  
TGCCTCGAACCATCGTCGCAATACTCGTCTTGTGTGGTAGCCCTGGGAGCCTCGTACG  
GCTTCGTCCAGGGCTACCGGGCCTTGGGTATCGCCAGGAGGAGATCAAGCGGCAGACGG  
CCCGTGCAGGAGCCCTGGAGGTGCGCTACGCCACCTTGCAGCGCCACGTCCAGGAGGTCT  
CTGCCAGGACCAACACCCAGCGCCAGGAGGTTGACCATGCCCTGGACCAAAACCACCCGT  
GGGCTGACCGTCTGTGCCTGCTGCTGTTGGTGGCAGCCTGTGTAACCGCCCCGGCGCCC

GCTGTGCTGTGCGAACACCCACTGATTGACCCTACCGCCCAGGCTAGCCTGATCCGCGCT  
GTAGCGGCCTATCAGGACGCCCTGGACCTATGCAACGCCCTAAATCAAGGAGATTGACAT  
GGCGAACACCCGCGAGCAGTACCGCGCTGGCCGGGACACCGGCCTGACCTTCTACCAGGT  
GTGCCAGCCCGGCACGAACAACCGCATCGCCCTACACGACATGGACGAGGCCGATGTCAG  
GGCCAAGGCCACCGCTGGGATCGCAGCAGCCACTGCCCTGGGCGGGCAGGGCGGGCGCTAC  
CCCACCGGACCCGCTCACCCGCCTACAAGGTGAAGAACGGTAACACCCTGCCCCTGGACGG  
CGGTGGTTCCGTGAAGGTGACCATAGCCAACGGCGCCATCACCAAGGTCGTGTACACCGC  
ACCGGCGGGCTGAGCTTCAGCCCCTCAACCTGACTCCATCCGTAACACAAGGAACTGAA  
CCATGGCAACCTTCGCCTGTGCAACTCAGAAAGACCTCCGCGCCTTCGCCGGCACCATCA  
AGCACCTGATCCGTCCGCTGGAAGAAGCGGCCCTGGGTTCTGGCTACAACGAGACCAAGC  
TGCGAGCTGAGCTGGTCGCACACCTCGACGAGCTGATGGCTGCTGTCGAGACTGCCAAGG  
TCAAGGTCTACGCGTAGTAGGTCCAGCCGAGCACCTGCATAGTCGGGTGCTCCACTGGAA  
CTACTGGAATTTTTATTGAGGGTGTGTGTGGGCTGGGTTGGCTGGTGTGGGCGGGAGTAG  
TACTCCGGGTCTAATTTTGGTATCGTCGTGTGAGAACCCTCCCGACTCTGATCAGCCCA  
CCTTCCCCCGTAGGCCCTCGTCCTGGTGGGCCATCCTCGCCTTGCCTGGGTGTTGCCTG  
GGTCATCCCTGGGAGCTTCGGGCTTCGGCGGTGGTGCGGTGGGCTTCCTGCCCTGTGCG  
CAGCCATTCTACCCGGCTCAGCGGGAGTGTCAACCCTTGGGCTAGCGCTGTGCTATAACC  
GGGCTTGGCCGTAGTACCTGGTGCCTCCAGCGCGTCGCGGTGGATGGCCCTGGCTACCT  
CGTACTCCTGGGATCCCTGCCGCCTCCGCCAGGGTGTGCGTAGTGCCTGTGGTCTGCG  
CTGCCACTGTGCTAGCTGCCTCTGCCATGCCGCGTCCTGCTGGTACCAGGCACGCTTAC  
CTCTGTGCTGTCTGCTCAGCATCCTCTGTGCCTCCTGTGGTCTGTCGGGTGGTGGTGCG  
GGAGTGGCTGGC

>NewGenomeName\_67

TTAAAATTTAACATTCTTAACCAGTTTCATAAAGTCTTGTGCGCGTTTTGTCGTTTTGCAG  
AATAACAATACCAGTTATCAACAATATCATAACAGAAACGGGCTATTCTCTTTAAACTCCGC  
ACAAACTGCTTTAATTCGTTTCGTTTGCTGCCGTGAATTTTTTCATCACAGATCTTTTTAGT  
TTCTTCGTCCATAATCCAACGAGTATGAAGGAGTAACTTGGAAACCTCGTTATTATAATG  
ACCACCGTACAGTCTGTCAATAAATTCTGGAATACAGCGTTCTAGTTCATCGCCATGAAA  
CAACATAGTGATCACACCCAGATATTCGCCATACCCAGATGATTGGTCTTAACCTTCTT  
CGCCAGACCAGCCAGCGTACCGCGAACAAATTCTAGCGCACATTCCAATTGTTCTTCAAC  
GAGATATTTTTGTGTCTTGTTCGAGTAATAATACTTTGTTACCCCGAAGTAGTCAAG  
CGCCGTATGTAATGTATTTTCACTATAGATCGATTTACGACTACGGCTTTCGAATGCATC  
ACCTACGCGGAACATGTGCAAGCCTGATAACTCGCGAATCTCTGCCGTTTTCATGTGATG  
GCTGGTTTTATGCCAACTGTCACCAATCTTTCCATGATATAAACGTTAGCCAGCATGGG  
AGTCGCTTCACGTTGTGTACGCTCGGTCTTCTCCGGCTTAACTGCTTTAGCACGCAGATC  
ATCGGCCTCAGAAACTTTAAACACGGTCATTTCAGAATCATCATAATACTGTTTGATGTA  
CTCGAAATTCTCCATATGTTTTTCGTTGCGCTGACGGAACACAAGTACCTTTTTATTGAT  
GCCGTATTCCTGGACCATGCCGTTAATAGTCATTGCACGCAGTTTCGGTTTTATCGGTATC  
ATCAATAAGACACATAATATCTTCTTTATGCATCCATACAAAATGCGCAATGTTGTAAGT  
ACTGCTAACGAAAGCAGGGCGCAATTTGCTGATTGTGAGACGAGTACGATACAGAGTATA  
CACCTGACCTTCTACGTCATTAGGCGAATCTTTACTCGCATTACAAAATTTATTATAGAT  
TGCTACCGGATCGTCCATTGTCCGATCTTACCCATCTTGCTAATAATATTGCGTTGCGT  
CGATGAATACTCGCTCATAAATTGAGAAAGTTTACGCTCTGTTTTAATGTTGGCGATCTG  
TTCTTTAACCTTTTCCAACATCACTTCATTGATTTCTGCAATGCGTTTTTTCGATGTTGCG  
GTTAGTCTCAATTGACAAGTGAACCTTCTTACGCGATGGCATCAGGTCCAGATCACCCAA  
CTCAAAATTAATGTAAATGGTCTGGTGTGGCGGTTTACAGCTTCTAACCATGTTCCGCG  
AACATATTCATACGGGATCGGATACTGGATCTTACCCATGATTGCATATACTATATAGGA  
ATCGTTATCACGCCATTACAAAACATAATAATTATCAAAGCTAGGGAAATAACTAATTCC  
GATTGCATTGATATTCGGTTTTGTGTTCCCCAAAATGACGCAGTACAAAATTGCGCTTGTCG  
ATGCCATGTCTGAATGTCTTTTTCTTTCACCGGAATAGTGATTTTTCAGACCAATGTCTTC  
ACAGTTCGGTTCGTCGACAATCTGCACCATTTTTCGGCATAGAGTTTTGCACAAATGCCGT  
AAAGCCATAAGCGCGACAATTGTAATAGTTTACGATTGTAAGGTGTCGGTATAGCTATA  
AGCAGACTTCGCACCTAAACCAAAGATCCGATATAATCATTAGTCTGGTCTTTTTTTGA  
TTCAAAGTAAACCGTAAACAGTTGTTCTAATTTCTTTCTTAGACGGAATACCAGTACCATA  
ATCACGCACATAAAAATACGGTTCGATTGCAGTCGGTAAATGAATATCAAACGGACGATC  
TAATGTTCCGGCTTCTTTGTGAGAGTGGGTAGCATTACATGAATACTCCCGGACGCAAGC  
ACGCTCACAAATATTGATAAGTGTCTTAGAAAGCACCATAAAAGCCTTGCTACTTGCTTT

CAGTGAAAAATCAACCGCAACGCTCATGTCACTGCCAAATACTTCTTCATTATCATTAAG  
CACTTTCATAATATAATCCTCACTTAATTAATAATCTTCTTAGCCCATCTCTGCGTAGATT  
ACATCCCACGCCATAAATCAATAAACGCATTATATATCACGGTGCAATCGTTGTCAATC  
ACTTCTTTCGCATATTTCTTGATGTTTTTCGTAGGAACTTGC GGATCAATTTTGTGTTA  
CGAAGGTGTGCATATTCATACCTCAAACATTCATAAACAGGTCCATCGAATTCTTTTCT  
CGATGGCACTTGGCGATCAGAAAATCAAACCTTCGACTCATTTTCTACTCCTTATACATG  
TTCAATCACTCATTGCAGATGGGATTCTGCGTCAACCAGTTCAGCGCGGCTTTTCTCTAA  
GCACTTGCTGTATTCTTTACGTTCCCACTCCGCAATTTTCGGTTTTTCAGGACGTCTTCATA  
GTAAGCAATTACGCCTTTCAGGTCTGAACTTTACGGCTTGCCAATTCGATGTAATGGTT  
ACGCATTTTGTATTCTCCTTAGTGGTATCTCGTTTCGATGGGGACGTTATGATATATCCCC  
GATCCAGTGTCAACAGATTTTTAATCTTTTTTCAATGCATCCATTACTCGCTCTGCGATC  
AGTTCTCGTAAGCACTGATAACCATGATATTTGATGGCAATGTCACGCAGATCATTAACC  
AGTTGCCGTACTTTATGGTCTTTCAGATCGTCTCGGTATTTTCGATTTAACCGTGTCTTTA  
GGTGAATTGTGGATAACCTGAAAACCTTGTTTCGGCAATCACTGCGGATTCGCGCTGGCGT  
TCATGCTGTACTGTATTTTTGATCAGGTCTGCTTCCATGAACTTTGCCATACTCATCATC  
ATGTTATTCTTTTTGCTCATTATTAATCCTCAGAATAGAAAAGGGAGACTCCCATTATA  
GAGAATCTCCCTTGTATGTCAACTAAAATTTAAAGATGCAAACCTCCCGTGGTGAATTTT  
TGCATATGCATCATATGCTCTAGCGGCTTCCCTCCGGAGTAGCAAACGAACCTATGTATTT  
TCTGTATCCGTTTATCCTTATTTGTGCTTGCCACGGTCTTTTGCTCGATCCTTTGCGATG  
AGTAACACCATTATATATGCTCGTGCACCCGTCCATTTTCTTTTTATTGTACATGTTTTG  
TTGTTGTGTTGCCTCCCGTAAATTTGGTGGATTGTTGTTTTCTGGATTCCCGTCTATGTG  
GTCTATTACCTTAACCTTTGTTTCGATATTCAAGAAACCAGACAATTGTATGTACAAGATA  
TG TAGATGTATTCTTTTTAACCTTATTGTAAACATCTATTGCCAAATGACCGTAATTTAA  
TTTTTTTTGTTTTTACTTTATCCCGACTTGGTAGAAATATCCCTCTGGTAGACCATTAAA  
AGACGGACTATTTATTTTGTGATATAGTATACCTTCCGTATGTCCAACCTTTCGTTTTAA  
TTCCTCTTGAATTTTCGCTATTCTAAAATTTTCGCACTTTGCATATTATGACGCCATCTATG  
CCTTCCCTCATGTCTGAATCTTCACTATAGAGCAAATCGAATAGCTCTTTATAGTTTTCCG  
GTAACGTGATGATCTCCATGACTGGTTCGTTGATCACGCGATGATAGTCTGATTCTGTGA  
GCGATGCTAAACCTTTGATATATCGATTGTTGTAACCTTTGATATTATCTCGGTCGTTCT  
CGAAATCTTCTAGATCATAATACCATCGAACATCATCACCTTTCTTTGGTTCAGCAATGA  
TAATAGGTGTTTTGATAAAGCGGATTCGTCCATCTTCGAACAATTCAGGCCAACGTGCAA  
AGAAAGAGATCAGACTAGGTTAATAGACCCGATCCCGTCAGTATCAGCGTCGGTCATAA  
TCGCAATATTTTTGTATTACATAACTTCCAATGCATCAACACCAAATTGCAAGCCAGTGA  
TCGCCATGGTGTAAAAAATTTTCGGCGTTCTTAAACAATCATTGCCTCCGGTTGTTCCACG  
TTGTAAGAGTTTTGCCTCGCAACGGGAAACCTCCATGTAATCTGGATCACGTACAGAGA  
TCAGATAGATGATCGCGGAATCACCTTCCGTCAAAAACAGGGTAGTTTCTGCGTCAGTTC  
CGATAAGGTTAGCTTTAACGTGTTTTGCTACCTTAGCCCGTTTTGCTGCCTTTGCTGCCT  
TAGTCCCTGCCGCTTTATCTGCTGCCTCTTTGCGTGCCAGGACTACAGCAATAATAGGCA  
TGATAATGTTTTCTTTCTTCGCAATGACTTTAGTCAGCTTTTTTAAAATCAAGATCAATAT  
GACGCTTGATATCACAGTTGGGTTAGTCAAGCGTCTTTTTGTCTGTGAATCAAAACGAA  
GGTTAGGCAATTCACGAACAATCAAATAACAGGTCAATCCAGACTTAACCGCAGCTTTAA  
TAACATCAACCTTATAATTCTTTCTTGATTTCGCTTTACAATCTCTTCACAAAGATCATCTG  
TCACGTAGTCTAAGTGTGTTCCCCGTTTTTGGTAAACAGACCGTTAGCAAAGGATACTG  
ATTTAAAACCTCCTCCCTCGACCGCCGGGACTAGGGCAAGTGAAAAGTTTTTATCTTCAA  
TGACGAACGGATCATCATTGTATAGGTTAGCATAATCCTTGAACCTACTAACAATACGTT  
TACCGTAAAACCTTAAACGTATCTTAGGAAATATTACGCTCAATGATTGCAGACGTTTAT  
GAACAATATCTAAAACAGAGTTGTCCATCATATAACCTTCGAAGTGGTTCGAAGTCTGGGC  
AAAATGTAACCATTGTTCCCTTCACTTTTTGATGGTGACGATGACCATGTGATATTTTTAG  
CACCGTTTGTACATAGAACGGTCAATTTCTGTTTCGCCGTCACAGGTACACACCAGTAAACC  
AATCGATAAAGAAATTTGATAACGACGACCCAACACCGTTCATCCCGTGCCTTAATCGAT  
TGGTATCATCAAGGTTAGACCCTGCTTGCCTTCGTGTCCATGCGGCTACAGGTTGCGGAA  
TCGGCGTACCCTCTGGTGTAGTAACCATATGTTGAGGAATAGCGCGTCCGTTGTCTGTTA  
CCGTAACAATATTGTTTTGGATATCGACGCTAATCATATTGGCAAAGTCAAATTAGTGC  
GAATCGCCTCGTCTACAGAGTTGTCGATGATCTCATCAATGATTTTACCCCGTCCAGGAA  
CATATGAAATTTTTGTCCATTTACCGAACAGGAAACGTTGATGTTCTTCGTAAGTTGTTG  
ATCCTATATACATTCTGCACGCTTAAGGACATGCTCACGATCAGATAACATGCGAAACT  
CACTCATTATAAAAACCTCTTCATAACATAACCATAACTTACTGCAACCGCCACAAAGACG

GCTGCAACAATCATATTA AAAAATTGAGTGATTGTCAAGTATATGACTCATGACACGCGCA  
CATTTTTATCATAGTACCCGCCATTAATACCGCGCGGGGAGTTAATCCCTGTTTGCATT  
CTTACCACATTCAGGGCATTGTGCCTTTTCACGTTTCGGAAATTTTGC GGATTTTCTGAA  
ATTGACCGTGTTCACCAAGAATAATCATATAATGGCATAATTATCCCCTTTGTTTCTTA  
ACTGAATTTGGATCTGGATTTTCTGGCAAGTCTTCCAGACCCATAGCATAACGTTGTGCA  
TAGATTAGCATAAGAATATCGCGAGCGCAATCATGCATTGCGTCATGCGCGATAAATGCG  
TCTAGCGTACTCATTGGTAACGGGCATTACACATAACCACGATGCATCATTGTACGCTCA  
ATGGCGGTGCGAACATCTTGGATATTCCAGAATCGCACAGGTTCAAGGCTGAACGTCTCT  
CGTGTATTGTGTGCACGGCGGATCATATCTACTAGTAACGGAATATCAAACGCATTACCG  
CGTGAGCACATTACGGATTTAACCGGATCTACTCCTACGGCTTACAGAATGCGTTAAAA  
CGCGCTAAACCTTCTTTAGTTGATACTTCCGTACCATTTGTGATTAATTGCTTTTCTCATG  
CCTTCTGAGGCGGTATTCTTCCACCATTAACAACACCATGATCAAACACCCTTACACGT  
TTCTGGGAAGGAATATCAAATTCACCAGAAAGGAATTGTCAACCAGTTCCTTAAAGTGTA  
GGTGGATTGTGCGGATCTTCTTAAATCCGGTTGCCGCCATATTGATAACCGCCCCATCA  
GGCGGATAACCTAATCTTCAAAGTCAATCATTAAATCCACTGGAAGCATTTTAAATAAC  
GTCCGCGATATGCCGGAACAACCTCCAGATCGTTTTTATCCAGAATGAAACCGCTACAATC  
AATAATGCCGTTACCGTAATTATCGGTTAACAGTCGTTCCGTTGCCATGTATGCGCGTAC  
TTTGTGTTAAAATTCATTACATGGAGTGCATAATCACAATGAATCTTTTGACGGTTCCA  
CGCGACAATTGATTCTAGATTTATTACATTAGCCACATTATTAATAACAACCATTTCAA  
AACCTCGCTTAGTGAAATGCTCGATCATTATTTATTGATACATGCAGCTTCACTATCGCCGG  
ACACGTTCCAGCCGTATAGACCCCATCTAAAGCACATGGTAACAGTTCATTGTGACGGC  
TTCCGTCACATCATTAAATCTGGGATACTTCGCATAATCATAATAATTTCCCTCAAATA  
TAGTCTACTCGATACCGCGCACGGGTAACACCAACATATAAGAACTGCATTGCCAATTCA  
AAGTCAACATTGTCTGTACACATGCAAGGAGTATACAGGAACACGCGGTCTACGCTGATC  
CCTTGTGACTTATGAATGGTGCAAGCTTGTAATGCATTTACATTCAAGAACATACGGTTC  
ATCGTCCAGAATGAATCCCAATCTGGTTTAAATTTGGATTCTCTTTCTTCATTTGCGGA  
TATTGTCCGGCGACCGTATTCAGATAGATAGAGAAAATGTTCTTCTGACGTTGTTCTGTC  
AGAATGTTCAATTTCTACTAAATCCGGTTTATCTGTAGAGATTCCGACTGCATCTAAACCG  
ACTTTCTGATTTAGGATCTCTTTGTCTTCGTCATCATCGACGCTTCCACTGTCAGAGTA  
TATCCTAAAACCTGGTTGCGGATCTACCCCGTACAACGTAATGAAAATTCGCGCGGTATA  
ACCTCTTTAACTCGGATCATCTCACCATTGTTAAAAATAACACTAGGAATCTTCTTCCCG  
CGTTCATCTCGCAGATATTCGATCAATGGTTCCTGAGTAACCAGAATGTCATCTACAATC  
ACTGGTTCAACGGTGTATAAACGCGCTTACGGACAATTTCAATTGAGTTTTTTCGACGCTC  
TTGTTAGTGTAGTCCAGAATACGGTTTTCTAGAAGGTCTTCCGGCGTTTTAACGGTTTCG  
AATTAATGGTTCATAAACTCCGGCAGAGTTGAGCTATGGAATACACCCTCGTCACCGCAC  
TGCTTTTCGAATCCCCATTAACCATTACAGACTGCGGTTCGCCACATCAATTATTGGCGCA  
TTAGATCGTTTTAATCTCTGTAAAGTTCTACATTTGAAACCTTTCATCCGTGAAGAAAGGA  
GAGATCGACGTTGCACCGCTCGGATCAACTGGTCGTAACCTGGAGCGGATCGCCAACCTGCA  
AAAATAACGATTCCACCGTTGATACTCTTCATGAGAATATCAAATAGTTCCTTATCGACC  
ATACTCGCCTCATCAACAATGATGATCTGAACATCATCTAGCTTAGGAGTATCTTTTTGC  
TCAAATAGTTGAGTATCTTCATAGTTGGTCGGGTTTAGTCGCAGTAGTGCATGTAAAGTA  
AATGCTTGACGACCTACCGCTTACTCAAACGTTTTTAGCCTGGTGGGTAGGCGTTGCC  
AAAACCACACCAGTTACACCACGGCGGACCATTTCTGAACAATGAATTTTCATCATTGCG  
GTTTTACCACTACCCGCCGACCCACGGACAGTTGTATGCTTCTTTTGTTCATGCGTTTC  
ATTAGAACAACAAAAGCATGTTTTTGGCCGTCTGTTAACATATCGAAAGTTAGTACTCGG  
CTCATTATCCTAAAACCCTCACCTTGCGAACACAGATAGTATTGAGTTCTCGCCGTACCC  
GTTCTTTTTCATATTCAGGAATTTTATATTCGATACCATCCCGAACAAATTTAGAGGACC  
GGATTGTGCCAAATTTTCGTTTAGGTACAACCTTGTATTACGGTTCACCCGCCAATAGAC  
TCTACAATAATCTATCTGATCACACATTGACGCTAACGCAGCATCATCTGTTTCGCAAG  
TTAGGACGCGACCCTTCGCGTCCACTGAGTATTGAAAGAATCCGTCTTTATCACGATAAC  
ATACAGCAAATACATGCATTATAAACCTACCTTCGCTTTCATCAATTCAATCCACGACGC  
ATCAATCGGAGGCCCGTATTTAACGCGTTCTTTTTGTGCTGACGGTAAGTTCTCATACTT  
AGAAAGAGATTCAATCAAACGCTGGTATATTTAGCACGACTTCGGTATTGTTTGAAT  
AGCCTTAAGTTTTTCTTCTTTCTTGTGATTTTCGCTAAGGGCTTGCTTGAGATCTGCAAT  
TTTCTGATAACGTTCTTCCATACGGAAGAGAGTATTTTTAATAGCTCGCTCGACTGCCTC  
TGCTTTCTACGGTTCGTTGTGCTTTTTGTGGCGCTCGATTGCCAATTTCTTTTCTTCGAT  
TGCTATTTCTGATTTTTGATGCGATTCTCGTTAAGTTCGATCCACTCTATGTACTTCGC



ACGTAGGGCAATTTTCATCATCAGAAAGTTTACCGTTAGTTCCTAGTTCATGGATCTCTTT  
AAGAGATTCGATAGTGTGATTGCCACGGAAAGAATTGTATTTTCAGATTAACCGGCATTAC  
ATTGCCATCAACATATCCCAGATTTCAATCAATGTGCTCTAAGGAGAGTCCATCATCACC  
TTCACCGAAAGCCTCACCGGAATAGGCGTAATGAGTCTGTGCGTAAATGTTACGCATAGT  
GACTAAGCTCATAGAGAAGTCTTTGTTGCGACTTGAGGCACCAGCCATGATAGAGTTCAG  
ACGGAAAACAAGCAGCGCCAATTCTTCGTTAGATTTAAAAGCAAACAGTTTCATAATTGA  
GTCTCCTTAGTTGGTATGTGTGTATTATTGTCTATCTGGTTTGTGCTGTCAACCCTTAAA  
TTAAAGAAAATTTGTCAATCTCAATCAGATCGCCATTACACGCGTAAACTTCCTCGATCT  
CATCAAGGATCATGGTCGTCCCTGTCTTGTATATGCATTTCGCGCTCATCTGCCAACATAG  
CATACAAAGACAGTCGCGTAGTCGGATTGTCATACTCTTTAGACACCCTCGGTCAATAG  
CATGTTTCGTAATAATTCATGCAAGGCTTGGTAGGTTTTATTGCAATAATCTTTCCCGTTG  
CATAAACATCTGTTGCAAAGTCTCAGCTGTTGATTGCAGTGGCGTAAAGTTCATAGGAC  
GCTCTACAACGACAGAATCACCTACAATTAAGGTATCCAGCTTACGGCCTTCTCTTTTGC  
TCACACCGCGATACAAGACTTCATGATGCACTAACCGCTCAGTCTTTTCAATCAATCCAT  
TAAGGATCGACATATCGATATTTTCTTTAGAGTTCATCACTTCATCAATGATGTTAAGTT  
CTTCTGATGTAAATTGCATAATAAAAAAGCCTCCAATCTTTTCGACGGGAGGCATAATTA  
ACCATGATTGAGTTTGTCAATCACAAGTGTATGTGATCTATAAATAAGTTTGTAGAA  
CTAAAGGAGATCACAATAAAGTATAAAGTATAAAGTATAAAGTATAAAGTATAAAGTATA  
AGACTAGAAATCTCGACGGATACACAGAAAAGCATCACATCATAACCACGTTGTATGCATG  
GAAGCGATGGCCCCACCAACCTAGTAAGACTTACACCTGAAGAACATTATATGGCACATC  
TTTTGTTAGGTAAGATATATCCAGATAATAAATAAAGTATAAAGTATAAAGTATAAAGTATA  
GCGTTTTCGTGTCATGGACAAAGACAAACAATAAAGCGTCACGGATGGTTGCGTAGAAAA  
CGACGGAAGCCCATAGTAAAAGAATACGCGATAGTATGGAGAACGATCCAGAATATAGAT  
CTAAGGTTTTCGGAATGGGCTAGAAAAATGGGTAAAGCCATGAAAGGCGTTAAGCGAGGAC  
CGGAATCTAGCAGAAAGTTGGCAGTAAACAACAGAAATACCGTGAGGAGAGAAGAAACCA  
AACGTAAGATCGGGGAAGCCAACAAGGAAAGAAACGTACAGAAGAATATAAGAGAAAAC  
ATAGTGAAAGGTATAACGGTGAAGGTAATCCGATGTATGGTAAACGAGGAAAGGACCATC  
CGGCATATGGTACTAAACCGTGGAACAACCAACATCATTTGTTGAACAGAAAGCATGGT  
GGCGGTTTCGCTGGCATGTTTTATGACTGGTAGCGGAGAGATATTGACCGTGGAACACATA  
AACGCCACGGTCATAAGAGAATGTTGGATGAGTTAGGTATCGTTGGTTGGCGAGAAAAAG  
AGCCAGCCGCAGCAAGACGATCAATTGAGATGTTTCGCTAAAGGCTGGAATCCTTATGAAG  
ACCAAGCATGGTTAGATTATGTTAATACCCGCTTTCCAAACGACGAGAGTTTTCCCGTT  
CTTCAACATATAACAAGACAAACAGATCCTTCGCAGTAAGCCCCAACGCCAAGAAGTTACA  
CATAATGAAATGGAGTTGGTCGACGGCTTCTAGGTATGTTTCCAAACGATCCGCCTCAGA  
TAAATCACTAAAGAGGCGGTCTCGTGCTTCCATATGATTGGCTTTCAGTGTTTCCACAC  
CGCGGTAGCGTCTTTCCCGTTAGACATAACCACCAACGCAGTGTACAGTTCTCGCGTTTC  
GTCGTCAAGCGCATTATCATTAGCTCGAATAGAATCTAAAATCTCTCCACATGTTTTCAA  
TTCATCAATTTTTGCGACCCACGGACGGTCATTAGATACCTGGTCTTGTAGTGCTTTCTG  
CATGTCCATCATGTGTTGAAATGGGTTATCACCGTTGGCGATAATCTCTTTATATTTTTTC  
TTGTGCAAAATTCAGAGTTTCCGCCTTTACTAAGTGTGCACAAGAATTAATTTCTGACAT  
ATTCACCTCATTAATTAATAATTTACAATATTTTCATAAACCGCATTTTAGCGATCAGACTT  
TGTACGGTGTCTCTTTGATAAATTCCATGATCTGGTCGCGTGTAGCGCCCTCGTCCTGA  
ATCATGGCATTAAACGTCTTTAGAAAGCCGTGGGCAACGATCCCACAATACAATCTTTTCC  
CCTGCATTGATAAAAATTTCCAGTCGGCGCATTGTATCGGCAGATCGTGGATCCGCATCA  
AGTACAAACTCTCGCTGGTCTGGGAAAGGTATTTTCATCTAATCCCAAAGTACCGCCAGTA  
ATTGCACACCCGTTATCAATAACAATGAATCGATCGGACCTTCTAAGAAATACACTGGT  
TACTCGGATCGGCGCGTTCATGACCATAGACCTTACTCGCTAACTCATGAGTTTTAATC  
GTCATATATTTGGTCTTTCCGTAATCCTTTCTCAATGCTCGCCCCTGAATGGATTCTATC  
TTGTTCTCTCGGTTAAAGATAGCAATCACTAAACGCGGCTCAGGTTGTGGATTCTCGAAA  
GTATCAGCCTTAATGTGATTTGCTACCTTTTGCCATTCTCTCGTGAAATACAAAAGATCC  
CATTTATCGTGGGGAATGCAACGATCACTGACCTACTTTCTTATAGGATGATTAGTCGGA  
AGAGTATCTAATCTCTCGCCGAAAGGCAATGTTTGCACCTTCTTAATCTCCGGCTTTTCT  
ACCTTTTTTATTGGCTTAAACGTGGTGTCTTGTGGTCGCCTTGTGCTTCCGTCGTTCC  
ATAAGCCATTCCCTGAATAAGTCCGGCTTATACTGTTTGAGAAATTCACCTCACGGCTGA  
TTGTAGTTACAGTTGAAACAACCACAACGCAAACACTATCCTTATGGGTATAGATACGGAAT  
CGCGCTTGAGTATGATTTTTCTTTGAGTCACCGCAGAACGGACAACACTACAGACCACCGTA  
AATGAGCTAGTATGCAACCGTTTAAAATTTTCGTTTCGCCGTAGATGGCTTTTTCCGCTATT

TCATAGTCTACGTAGTAAATCATACTAACCTCTTATAGCTCAAATTTTCATGAAAGTTCCC  
ACACTTTTCATTTTCATTCTCTCCGTTTTTCATCTAAGCCAAATTTGTAGACACTACCATCT  
GGCGATATGTAAGAGAATACTCGAAAACGGCCTACCGGGTCAAGTTCAGTAAATTCATAT  
TCTTTTTTCGGCTTCAAAAAGTGCATATGCGCTTTTAAGACATTTTCATCGTAATCATTAA  
GCGCCACCGATGAGAACATGATAATAATACCAGAATACATAACAGTCTCAGAAATTTTTT  
CTGTTTTTGTTTTTTATCCAGACAACCCGAAAAGACAACACCCGAAATAGCCGTCACAA  
GCCCGATAATGAATACAATAAACTAACCATTTGTCTTTCTCCTTTTTGCGTTTATCTTTA  
CCCGCTACACTAGGTCCACGATTGGTAATAGATCCGCTCGTTTCCCCTGCTGCGATCTTA  
TCAGGATTGCCGCCAGCATCGCCAGCGGTCATATCTTCTTTGAGTTTATTTTTCTTCAACA  
AACTGTTTAAACCAATCATAGAATAATCTCTTTTCAGTAAGTCAACAATCTGGTCTTTTCG  
TCAGTTTATCCTGAATCTCTACAATCTTGATAACCCAATCGTTAACATCTTTGCGAGTCA  
CGCGGGACATCGTTTTAATACGATGAAACGGTTCGTAGAAATATACTGCTTCATTATCGG  
TCGCAGCAATTTTTTGACGCATTTGATCTTTATCGGCCATAAAAACAATTGCAATTTTTCG  
GATCTACACCAGCCACATCATAAAGTTCGGCGACTCCCCAGCGTCCGCGGTTCAATCA  
TCCCAGCGTGTTTACCGTTAATAACGATAAGAATGTCTCCGTTATTTGCGGTTTAAAATG  
CTACATCTTCCGGCGTAATCATATTCTTCATAATATCGTCTCCTTAGAGTTTCATTATAG  
ATCAAGAGAACGTAGAAAGCAAATGTTTTATTTCTTTCAGTTGTCGTTAAAGGTCTTTGC  
GTTTCTCTTCAACTGTCGTTTTGCATTGTTTCGTTGTTTTTCAACATCTTTATCAATGT  
GCTTAGTACAATTACCTATATCAGCATAAGTTGGCATAACCAATTCTAGACCTAATGCGG  
TTGGATGCAGGGTAACAGTCCATAAACCGCTAATCTTCTTAAATACGACTGGGTGTAGTG  
TACTATCTACATCGTCCGGTGTCAACTCTTTTTCTTCTTTCAGTGGTGGGATCTCGTCAT  
ATGGTTCCAATGCATTTACTTTAATATCAGATACCTCATCAAAGGATCCGCGTACATCCG  
CAGGAAATACACAAGCTATTTCCCAACCGTGATCACGCAGAGAAGTAATATTTTTCTACTC  
CCCCACCATGTGTGATGATTGATGTGACATTGCCATCGAGGTCCACAGAATTTACGAGAA  
ATGGCTTATCGTCTGTCAGATCATTATAAACTGTGCTTCGGCTGTAGTCATCTCCAGAA  
ACAGATCTCGGATCGGACGACCATCAGGTGCGTTACTTTCCTTGAGAGTATAAAAGCGAC  
TTACGATCCATTTTGGCGGTAAAGCATTAGCGATCATGTTATATCTCCTATCAGATCATT  
CACCAGCGCCCCGAGGGCGCATTGTATTAGAAAGTCATGTTGTTTGCTAGCTCGTCGAG  
TTTTTCTCGTTTCTCGGCTTGCTGTGCGCTCTGTGGTTAACTTGTGCATTCTCCTGATC  
TGCGATCTGGTTTGGTACTTCAATCCAACGCTGATTGCATTTCTTCACACCAACGTTAAA  
CCGTGAATAATAGTTTCTGTACCCTAAAGAGACTTGATCTGCTTCATGAGTTGGACGCC  
CATTTTAGCCGGGTCTTCCGTTTCGATAACACCCAACACAAAGTCGGCAGTAGCAGGAAG  
ACCTGCTGATTCAGCGGTATCACTCATGTTAAGGTGCGAAGCATAACCAACCCGCGCGGGT  
AGTCTGTGCCGAGTCCAAACCACAGCATCCTACTTAACAAAGAATCCTCGCAGTTCTTC  
CGAATCGCCTTAACTAGTGTGTAACCTATTTCCAGAGTATACACGCAAGCGAGACGATGC  
GCAAATCCCCAGATAGTCAACAATCACAACATCAGTTTTAACTGTTTCTTGAGTCGCAA  
TTCATTCATTAACGCCTCAAAGTCATTGGAGTTCGCGCCACCAGTAGGATACTGCTTGAT  
CATCAATTTCCAACCGGACGATCTCCGATCTTCTTATTCTTAACACGCTTCATGCGTGC  
GGAATATTCGGAAAAGAATCATTACCATTATCCACTTCATCTAATGTAATGTAAAGCAA  
GTTTGCGGCGATACGTTTGGCTACGACATGCTCTGCCATCTCCATTGAGATATAACAAGAC  
ATCATAACCACATTCCATATAATCCGCAGCAAGAGAACAACAAGCCAAGCGATTTACCAAC  
GTTTACACCAGCAAGCAACACATTTAGCGTTTTTCTTCCGCCCTCCTTTCGTGATTTT  
ATTCAACATCGGCATCTTAAACTGGATCTTATTTCGCCTTAGTCTGATATAGCAAGAATCG  
TTTTTCAAAGTCATTAACCAGTCATGACCTACATCAGAATCAAACGTAATGGATAGTGC  
TTCCTGCATGATCTCAGGAATAGCACCTCACTAGGCAATTTCTTATTCTGGTTCTCTTT  
TGGTAGATGTGCGTTCGCTGAATCTCTAGCGCCCGTGACATTGCATCATAACGGCACG  
GTCACGAATAAATTTTTCGGTTTCTTTCATTAACCAATCAAGGTCTTCCGGTGTATTCTG  
AAGCGAATCAAGAAGAGTTTTAGCCCCTTCATATGTTGTCTGATTGCCTCTCTCCTTGTG  
TAAAGCAATCTGTAATGCAGTTGGTGTAGGAATATTGGAATATTCGTCTACGTGCTTTTT  
AATCAGCTTATAAATCAGTTTTTCTTGGTCTTCGGTTAAGTAGTCAACTTTAAGGTGAGG  
CCATACATTGGTAAAGAATGCGCCATTGTAATCAACTGTGTAAGATAGTTTTAATCAT  
ACATATCCCCAACTACACGCATAACAAAGGTCTTGAGTTTATACCAGAAAGTTTCTTTT  
TTCAACTTTTTTCTGCCTCTTTGATCTGCGAGGTTAACGCCTTAACGACGTGTGGAGAT  
ACCACATCACGATCTGACGGCGTGGAGTAGTCGACCACAATACCTTTAGTGTCTGGATCG  
TATTCAGATTATGAATATATACAATATGATGTTCTCCCTCTTCATCAACAAATATCAAT  
TCCTGAATAACTGTCTTCATTGCTTCTTGAATCAAGCCGTGTGCTTCTTCTAAACTTGTT  
GGTTTCTTATCCATAATATAATCCTCTCTAGATATGAAAAGGGGCACGTAGCCCCTTTA

CTACCATTGTTATGCTAACATATCTTAGATTTCTTTGTCAACTGCTTCGTCGCTGATCAC  
TGGCCCCAGCTCATAATGATCGTTGATTGCTTCGTTAAACTTATCGTTTGTGAGAAGTGG  
TTCCAGAACTCAATGCTATTGGTTTCTTTAGCACAGAACTTGCGTTCTTCGGTTTCCAT  
CTCTCCGGTCTCTGTATTCAGGATTGAACGAGAATACCAGCCGTTTGACGGTTTCACTAC  
CCAGCCTAACTCTACAGCCAACTCCAGCAAACCGGAATAAGGATCGATACCTCCGCTATA  
TGTTACGCTAATCGGGAACCTTAGATTTTTCTTTAACGGTTCGTGATTTTTCCGCATTAG  
GATAAAATCATAACCAGTAATTTTCGGTTCCTTCTTTCTGCTGACGACGACCAATAATGAA  
AACTTCATTGGGTGAATACATCGCGCCCGTACCGCCGGACATAACGGTCTTACTAAACAT  
TTCTTGCCTTCGTAACCTGTGGTTAATAGCGATGCACGGGATATCATTATAGTCAGATA  
CGGCGTAACTATACGGAACAAGCCTTTAAGTGCTTTCGCTCGCGTCATATCCTGTGCGGA  
TTTCTCATTAAATCGCGTCTTCAACTTCTTTGTTACTTGCTAAGTTACCGATTGAGTCAAT  
AAAGATGATCACTTTATCTTACGGGTAATTTGCTCAAGCTGGTTCATGATTTCAAATTT  
AAGTTCTTCGATGTTCTTGATTGGAACATGCACCACGCGATCAGGATCTACACCCATAGA  
TTAAAGATAAGCGGGTGTAAATACCGAACTCAGAATCAAAGAACAACACGCCGCATCAGG  
ATTCTGTTTCATGTATGCACTAACACTAGTTAATCCCATGTTTGATTTAAAGTTCTTAGA  
CGGACCAGCAAAGAAAATCAAACCAGATTGAAAGCCTTTCTTAAGATCACCTGAAAACGC  
AATATTCAGCATCGGGATCTTAGTGCGCGTATTTGTTTTTTCGTTAAAGAGGCTGGATTT  
AGACAGTACCGCAGTAGTTTTACAGGGTAGAGTTCTTTTTTCAGTTTTTCCAGTACAGACAT  
TATTAATACCTCTATTCAGTTAATCCGTAATACTTTAATAGCTTCATTGTTATTAGATCT  
TTGTAGTGCTCTTGAATTAACTTTTTTCATGGCATCAACATTGATCGTCACAAATACTTCG  
TTGCTGTGATTTCCGTGAACTTTCTTGAAATGCTCTATGCCTTCCCTCACGTTACGTTA  
ATCTTTTCAATGTCTCTCATAGTATATTTCTCACGTTGGCGGGTATCGTCACCAAACACC  
CGCCATTATACACACTTTATCTTAAATGTCAAACAGGTCCGTCAATGAAGTAACTTTTTT  
ATATTGCAGCTTCGCAGCCGTGGTAATGTTCTCCAGTGGTTTGACGAAAGTCTTATTA  
CAACAAAGGCCAGTCCAACCCCTTCAACACCTCTGATTCAAATTCTCGCGGAATACGCGT  
ACCCGACAACCAACCAAACTGATTTCTCAAACGGATTTCCGGTCTTTAAGCGGTACAAT  
CATAACCTTCTCGCCTTCACGAATCGGATCTAGTCCGAATTTTCCAGCATTACGATTATA  
ACACAATACACTCTTAAACCGCATAACGACAACCCCTTAAATCGGATACCCGTTTGAATCGCT  
GTATTTCCGTAGGTTGTTTGCAGATGATACCGCAGCAACATCAAGATAGTCAAGTTTTCT  
AAATTCCTTGCTCAAAAATACCGTAGTATTCCTGCAATGACTCTTCACCTTCCCTGCAACAT  
ACGGCGAATACATTCTTTCAGTGAATTTCTGGCATGCTTTAGGGGTGGAGCTACGTTGCGT  
TTGCAAGCCCATGAATTTTAGCTTAGGTTAGCAAAAGCGCGTTCCTTGCATGTACCAAAC  
ATTAAGAGCATAACGCTTTTTTAGCAGTCCAGAATCCACCGATACCCGCAGATTTCAACGG  
AGGACCAGCAATTGCCTCACGGTCCATAAACATCAAGTGCTCATAGTTGTTTACTGACTC  
GCATAACTCGCGATATCCCTTGTGATAATAGGTTCCATTCGATGTTTACCGAAATTATC  
AAGGAAGTCAACAAGTTTTTCGGTATCGTCGAAACGGTCTTCCCCGCCAACCTTATCAAT  
AACATTGTTAACCAGCACATAAACGGAGTCAAGTATCACAATAACGAACATATGCAAAATC  
AGTCGTTCCGCAAAGCTCGTTTAAAGTATTCGTTAATCTTACGCTCAATCCACTGAACTGC  
AATCTGACCGAACAGTGTGATCGCACTAGCGTTACGGAGATGATAAAAACGGAATTTAGG  
ATTCCCCAACGCTCCATTAAGGGAGTTGATCAAACTTTACGAGCAAGCTGGTTTGTATT  
GCACAAGATCGACTCGTCTTTACATTCTTCCAGTAATTTCTCTAATGCATCTTTACTCAA  
TTCAGAAAGCATGGATTTAAACGCTTCATCGAAGTTCGTGACGCACTTCAACGCTATAGCT  
AATGGTTCCCCATAAACATGATTTTCATCGTGTAGAATCGCTTACAGAGTTCAGAATT  
GCGGTCACATGCCAACATCATGTTTTTGTACTGCTTACGCTGATCGAATACCTTTTTAAT  
ATCAATCGGTACGATACCGTGAACATCTTTTCTATACATCCATCCGTTAGGCGAGCAAGA  
CTACTCATCACTCGGACGTGGTGCAGTTTTATTGATATACTCGTGCATCGGTGGAGCATC  
AGAAGATCCGGCGATTGTTGCCGGCGAAATTTAACCTGACGGATGATTGATGGATACCA  
TTATGTTACGCGTGGTTCGCTACTCCCAGCGCCCGTTCTCTTGCCTACTGCTACATGTCAC  
CATGTAGATCAGACTATATCACATTCTCATAGAGAATCCTGCCATTTTCAATCGTTTGT  
TCTACTTACTCGGTTTCGTTACCCTTTTCGATAGTCGTTGAACAACCTGCATCTTTAAGCTC  
ATTTTGTATCAACGGAGTTCTCTTACAGTATCCGCTATAATTCTTACCCTGATACGGAT  
TAGACACCAGTTAAATGTAGTCGTTTAAATGCTTCCCTCGTTATGTATTTTCGTACTTTCTTA  
AAATGTCTTTTATCTCGCGCCTCCAATGTATATCAATATCTATATAACATTATAAGACACG  
TTAGCTCAAAATGCAACTGCTGCTGATTGCTCCTTAGAGATTTCCAGCAATTAAGCAG  
GTTATTCGATCACTGTCACCAGTGAATGCCCATATCAGTTCAGGGAAGTAAGGTCAAAG  
CTCATCATCCAACGGTAAGCATTCCGGCACAGGTTCTTTTACGAATTCGCCCGGATAAGTC  
TGCTTAGGCTGTATCTTGTCTCTGGTACTACTTTACCCTCACCTTTACAGAGATCCGAAG

ATAATAGCATCCCATACTTTTCATCGGGTTATAAACATGGTTAAATTTAATCTTTGCTTAG  
AACATGTGCTATACACCAAATCGATAAATCCGGGCTTTTTATCAATCGCCAACACACGG  
TCAACGTCACCGATGTTATAAGCGATGTAAAGTTGATGGTTGTCATCACGCAATTTGTTT  
AACGGACCATCATAATCAACCATACCGATTCTGTCTCCTATTCAGCAACATAATCTAAC  
GCATATCTTGGTTGAGTCGTAAAGCTAAGTTTCTTGTACAGGTCAATATAATCAAGGCTT  
TCGATCCCATGATCGTAAGTGCTTACGATCGTTGCCAAAATCATCCTGTGAGATTCGG  
GATTTAATCTTACCGCACGGGCTTAGACGGTTAGCGGTTCTACTTCCGAACCTATTACTG  
ATACGTGTAATGATATATGGAATATCGAATGTTTCTGTGTTCCAGCCAGTGAAACCAACG  
GGTCGGTTTTCTCAAAGAATCGGATGTATTCTAACAGCAATTCATCTTCTGTGTCATAG  
ACGTTATAAACACGCGCTCTACAATATCAGGTGGAAGAATAGACTTGTAGATTCCCAG  
ATTTACCGTTTTTTCTTTCAAATCAGATACAAAGAAACGATCATGTACGGAAACATAA  
TGCATAATTGCATCGATAGGATATTTCTGCTTCTTCTGGTTTAGGAAATCTGGGGCAGTG  
ACCTCGATATCAACCCATGCTACACGGATTTTATTTTGCTCATATTGAATCTCGCCTTTA  
TACGTATCAGACAGATAGGAGGTGATAAAGTCATCCATCCCTAGCGCCTCCTGCCCAT  
TCTCCTATCTTTTTACGCCGTTTGTGGCCTCGTTCATAGATGGGAATTTTTTAGAAATT  
CAAGGCTTGGCATAGATATCTTTATAATTCGTAACCATAACCAGGCGCGGCATGATGAAAT  
AAAGTTGGCGTATATTCAGCGTAACGCTCTTGTCTTGTCCAGCATCAACAATATATCGC  
TCGTAGATCTTATAACCCACTCGCACACCTGACAGAAGATACATAATATAAACTCCTTCA  
CTTATGAAAGACACTCATTATAGGGGAATCGACTTAGTTTGTCAACACCCCTATCCCATC  
AGTATCTTAGCGTCCGATCTGATATTTCTCTATCAGCGTCCACTCTTCTTTCTGTTTGAA  
AGACAGTACACGGAAATTATAAACTTCGGTAGTTTCAAAGCACTATCAATCAGGGTACA  
CAGATTCCACTGCGCAAGAAGTTTGTCAATGTTATTACGGCGTAAGTCATCTTCCCACGT  
CATTTTAACACTACGACCATCTAATTTCAACAACCTCCTGAAATGAACGATGTAATAGCG  
CCGTTTCTTTTGGAGCAAATGACAAGACTGATTCAGTGTCTTGTCTCGATTGTTGGCAAT  
GCCGCAGCGGGTTAAAGTTTCTTAATTTTAAAGGAAGTTTTCAGGACTAATCAAATTAAT  
TTCAATCATTTTACCACCTTTCTATAATCTTTTTAAGTCGTTTCTTTCTGTCTGATTCT  
TAGTAACACCCGCCAAAAGGTCATCGGTCGCATACGGTTTATTGTGCTTCAATAACTTGT  
CCATATATCCCTTTTCATTAGCCAAATCGAGATAAAACCGGGTGTCCATATTTACAC  
AATATGCTTTTCGCCACTGCCATTAACACCAATTTTTGGTCCAATTTCTTCTGTTAGTTAG  
CCCGTTTACCGTATCGTTTCCCCTTAGAAATACTCTGTAAAAGATAATCAAATGCATTT  
GATATGGGAGGCCATGACCGATCAAATTCATCACATACGCGCTATATAGGCAATCTGCGT  
GCTGGGCAAGCGCGGTGTTAATCCATCTCTGATTATATGCAGAATAGTTTCCCACATTAA  
CACGCTGTTTATCTAAGGTGATATGATCCATGAGAGCAAATTATGCATTGTGCGTTTTCT  
CGGTGAATGTGACAGCTAATTCAGACACCTTTTCCAATCACGAGAGCGCCATGCAATTT  
CATGCTCGTCTAATTGTGTATCATCTTACCGAAAAATTGACCTAACATTATACGAACTC  
CAATTCAACCATTAATTGCATTAACAAAAGACAATGTGAATCTCTTGATAAGCCGCGTG  
CGCAAGAATCTGATTATTTTCACAGATAATCTCCGTGAGACGAATAAAAGAAGCTGGCTT  
AACTTGAGTATACAACCTCAGTATAAAGTTTCTTGACAAATTGAGCATATGTATTGGTATA  
GCGTGGTGCAGTTTACGCACATTAGCAAACCTGTTTAGTTTTAAGTGCTTCCACCACATC  
GGTTACTTCAGTATTGCTACTTTTCGATAACCATGCTCAATACGCAAGCATCAATTTTACC  
ATGTTTAGCGTAGCGGTACAAAAGTTTCAATTACGCGCCGGAAGTCTGGGCAGTTCTGCTT  
AACCAGTCCGCTAATACGCGCATTTCTTCTACTGGCACACCTTCTTTATCAAGAATTGC  
TTTACACCGGACGATCATTTCTTTCAACATGCGAAGCTGATCATCTCTAGTCGGAGATCC  
AAACGTGATGGGGTCAAACGAGAGCGTAACGCTGGGATAATACCTTCTAGATCGTTTGC  
TGTGATAATGAATCTCACATTGTTTGTAGTATGCCTCAGAGAACTACGCAAGAGTCTTTG  
AGCGTCAGCCAACCCCGCTCGGTCATACTCATCGATAATAACAACTTTGCCCTTTTCTCG  
TTTTTCTTCATCGAGTGATACCCTCTGTGCAAAGCGTGTAATCTCATCGCGGATAAAATC  
AATCTTACAATCTGCGCCGTTAACAACAGATAATCAACACCCACATCTTTCGCAAAGCGC  
CTTAGCAACGGTTGTTTTACCAGTACCCGGCGAGGGGCTGTGCAGGATCATAGAAGGGAT  
TCGGCCTGGCTTAAACAATCTGCGGAAGATTTTTTTTATCTGCTTCCGGCAGAATACATTC  
AGAAATTGATTTCCGACGGTATTTCTGTTCCCACTGAAACACATTTTCATTAACACTCAG  
CATGTAATCACCTCTCACAAATTCATCATTAAAGTGGGGAGCATTACACTCCCCACAA  
ACATTATATTAGTCGGTGTAGCTGGCGTCAAGGTCACACGCGATCATATAAGATATGGTT  
TCACTTGACAGCCATACAGCCTTACGGCGAGTGAAGCTCAGTTTGTAAATCGCCGAAGTCC  
GTAGCAACCAGTTTCATGTTATCTTTACGAATAAAGAAATGGAAGTCTGCGTTTCCGGTA  
TATTTGCCCATATCAAGACAAAACATCTCATTAGGATTGTTTTTGTCAATCTCTTCCCAA  
CCTTTGATCATCAGACGACCATCAATCGGTAGAAAGTTCAAGCCGATCCACTTTAAGCTGA

TTGCTCATTTTTATAAGCTGTTTCAGATCGTCGTTGCTCAGTTCGTAATCGACATCGCTT  
GCAGGTGGAGTAACTCGGCCTTTTCGGTGATACGATAGTAGCAGCACTAGCACCAGGATAA  
TTAATTTTGAGACGATCATTAGACACACGAATGTTTCCGGTGCGGTTATCAACCGTAATA  
TCTGCTTCATCGCCCACCAGATTCAGAATGCCAGGAAAGAGTTAAGATCATAGATCCCG  
ATTTTCGTGTTCCAGTTCCTTGATTAGTGTGCTTCACCATATAACAACGTTTGTTCATGTTT  
TTGGTGATTAGGACGTTTCTTTTTTTCACGATGATACCTGGGTTAATAGCGGTAAGTTT  
TTCAGGGTAGCAATGGTTTCTTTAATCAGTTTCATCAAAGCACCTTTATCATGTTAATCA  
ATTAATTACGGGTTTACTTCGTGCTCATTTTGAATCTTTAGCATTCTTTTCGATAAATTTT  
TTCTCGGCTTCTTATCTGTTGAGTGAGTATACTTCAATCCAATGTAAGCTGTCAAGTAT  
TGTTGCAGAGCATAGACAGTAACAGGATGCTTTGCGGTCTTTTTTCCGTCGAGATATACC  
AGATCACCACGAACATCAAACGCAAGTTTACGACGAATCACATCATCAACAAATTTATCT  
AGGACAAAACACCACTCAATACACTCTATCCCGTGACGGTAGTTCATTACATCATTATCT  
TTGATATAGTCAAACGGAATATGACATAATTTACTATTTTGTAAGATGAATAGCATTGT  
TCTTTTAAGCTCATAACGTTTGTATTCTATCACTTCCCATCAGCAATTGCGATCAGACGAGT  
TACTACTACGCTAGCGGCTTCAATCAGCAGTTCATCAGTGTCAATTTGATAACCCTTTTC  
GAGAATATCTTTACCTCGAATAGTTTTAGCGCCTTTAGCAATTGAATCATCGTAATACTT  
GCGCATTGCCGCGATCCATTCTTTTTGCACCATATCATCAATATGCGCGTACTGTTCAA  
GCGTGCGTGCTGCGGGATAACCTTCATTTTAGGTTTCTCGCTTCTGGCATTGGTAGTAC  
CCAAGCTTTACGGATCTTGCTCATTGCTCGGTGAAATTCGAGACTGGTTTTCTTGTTCTG  
AATGTCTGCTACATTAATTTTAGCCAGGTTTGCGGAAAGTAGTCATAATATTAATCTCAA  
AATAAAATCAGTATATTACGTTCTAAGGTTTGTGCAACTCCAGCATCAGGGTAATCAAG  
TTTATCAAAGTTGGGGACCAGCATAAACTCATGATGACGACAAGACAACATTTTTGTTCT  
GTCCGGATCGCTGTATATGCTGTTTTTCATATCCCCATACTAACTACATATTCTTCACC  
GGAATATAGATTGATTAATGTATAACAATTCTAACTCCGGCTGCGTTACTCCGTCAAATGT  
TAACATTCATTTAGTGAATCGCCCACGTTTAAACCATCTTGAGATGACGGCTGAAATCAT  
CAGGGTTATGGTCACGATGGCAGATAATATACAGTTATCATCTAACTTGTCAATGATGG  
AATCAAGTTCTTTTACGCCCTGAACGTCCGTAGCCCCATCATAAATTCGTTGAGTACCA  
ACAAAGAAATATTAGTACCAGATACTTTACCAGCAACATCACGCCATGTAAAGAGCATCG  
CAAGGTCAATACGTGCCTTTTCGCCCTGACTGAATGATGTATAACGAAACGATTCACGCC  
CCCGTGATTTGATTGTTTCGATAAACTCTTCATCTAGCGTAAAGATATCATCCGCTTCCA  
TGTGATCAAGATAATACGAAATCCGATCATTAAAATATGGAATATATTTCTTGACGATAG  
ACGCCTTAACACCGGAATCCTTCAACATTTCTGTTACAAATCCACGGTGATATTTTTCAA  
GAACTAGCTTTGATTTTTCACTAGTAATCTCTACCAGTTCGTGTTCCAGTTTAGCAAGTT  
CTTCGGAAATGTCAACCGTTTCTTTTTGCAGTTCCTGCTTTGCTTCTGGATCTGTTTAG  
CCCGACCTACAGATGCCGTTAAATTCTCTCTCGGTGACTCTATAGCGCGTTAATTTCCA  
AGACCTTAGTTTGTGCTGTCTGGAAAGAATTGGCCTTCTCTGCGTATTCTACGCGTTTCT  
CGTCAATCAGAGACAGTTTATGTTCTGCTTGCTTTTTGTTGCGGTACAGCTTGATCAA  
TACCTTGAATGATCGGTTGTGTGCACGTAGGACAGATCCCGCCTTTCTCGTGCATATGGA  
TAACACGGTCAAAGTTCTGGATCTGCGCACCAATGTGTGCGATAGCCGTATTAATTTTAG  
CCAATGCCGCGCTAGGATCTTCCGGCATAACAACAACCAATAGCTCATCGGTCAAGCGCG  
TTTCTTCGGCTTTAACTGCTTTAGCGGATTCTACCTCTTTATCATAACATTTCTGCAAAC  
GCTGTAGATTCTCGGCACTAGCCTTGCTCGCGTCTCTATGTACTTTTTATGAGTGTGTA  
TTTGATGATGAACGTGATTAGCTTTTCAATTTCTGCTGCTGATATTCTGGGTAATCTCGC  
GCACATACGCTTTATTCCGTTTATCCATTTTCGCCTAACGTAGCAATATCAAGCAAATCCT  
CGACCAGTTTACGGCGACCCGCTGCCAGACGACTCATAAACGGAACATAACCAGCAGTGC  
CTAAACAACGATCTGTTTAAAGCTGGCTAGGTTTCATTCCTATGATACCTTCAAATAAT  
CCTGAAAGTCTTTGGTGCTTGCCTCTCGTAGATCTCTTGACCGTCTCGATGCACTTCGA  
ATACTTCCGGTTTTTGGACCAGTTTGTATATAAACTCTTTTCGCGTCCAGTTCAAACCAGA  
CTTCGACTAACAGTTTCTTTTTGTTGACGCTGTTAATCAATTGGCCTTTCTTGATACTAC  
GAAACGGTTTACCGAACAACAACAAGCAAAGCGCCACGATCATGGTTCGATTTACCAGCAC  
CGTTAACACCAGTTATTACTGTCTTTTTGAATCCGTCTAGGTGAATCTCAACAGGGTCAG  
CACCCACGCTCATTATATTTTGATAGCGCAAGGTTTTAAAATTTAACTTTGCCATTAAGC  
CACTCCGCAATCACACATTCCATAATATTAAGTCTAAGACATCTTCATCAATGTTGTAA  
ACACATGCTGCCTTCACTTTAACTAATGTGTCTCTGCGATCAGGCAGCATGATCACATAA  
TCCAGTGTGCGCAGGATCATATGTCATAAAGGGATCAACATAAATCCCTTTATTCAATGCC  
AGATATTCGCGAAGACCTTCTATAACCCTGTGTCTAAGGTAGGTCATCGATAGAATCATT  
TTAGTGATGTTCTCTAAAATTTCTTCAATTTACCTTGCAGGTCTTCCGCTTGCTTTT

CCAGAATATCGCGAAATTCACCTACTGTCAAGCGGTAATCACATTTCCACCAGTCGTTGCG  
GGAGAATATAACCCTTTATACATTGGCTCTGACGCTTCTAGGAATACCCCACTGTGCATGA  
CAGAGGTCCAACCTGTAAACGTCAATGGAGTATTCGGAAAATAATACTTGCTGGCTTGTT  
TCCACTGGACGAAAGCACCATATAACAATCGGATTATATTCACCAACCACACTCTTAATAA  
TGGATTCTACTTCGTCTTTTACAAAGTCGCCAATGCCCATAGTCACCATCAATTCTTGTTG  
GGTGAATCACTTTAAGGTAACGACGGTAGCCGTCATCATACCACAGCTTAACCACTGGCT  
GACCCACATTTTAGCAATACGCGCTTTCAGATAAACCATAGATCGGATTCTTGTAATATG  
ATTGTTTTAGTGTGTACGCGTGCATCAATTCAATCAAATATTCATTGCTATCGAATCAG  
GATCAGCCGCGACCATAGTCGTATTCATAATATGTTCCCTCGTTCAATTTTCATATTGTTTC  
AGGTCTTCTAAAAGTTCATCCACTGCTTGTTTCAGCACATGACGCAGCGCAAAGTAATAG  
CTTTCATCAAATTCTATTTTCAGCGCGAGGAATAGATCGAATCTTACACTCACCAGTAGTA  
TCGGTGAGTTGCTTTTCGACCATCATCCGAACTTCTTCATGCTCTTTGGAAGACCATA  
TCAACGCAGATTCCCTTGCCTCGAGCAAACATAGGCAATGCCGCATTAATTTCCATTACC  
TTTTGTGCAAGTGTTTTCATCATAACAGACTCCATAGACCCACGAGCAATAACATTCTGGG  
TAATATCAGCAACTTTACTGGATACGATATTTGTTAGCCCCTCTTTGGTGATATGTTTCAC  
GATCAAATGGGATTTTCGTCATGAGTCCACAAACCATAGTTAGACCGATATGATAGCATAT  
ACTGACCATCTCGCACAACCTCAAATACATGGATCTTAGTGAATTTTCGACAAACCTTCGT  
TGATTTCTTTCAGTGTATTAGCAATCATAACAACCTCCAATCAATTTTTAGAGAGTATAA  
CGGGGATTTCTCCCCGCGTCAACTAACTTTTTGCGTTATTTACTTCGGCTAAAAGTTCAT  
CAGAAATACGCTTGACCGCCGCAAGTTCCTCCGGTTCTAGGTTTTGTTCTTCCAGATATT  
CATAGACCATCTGAATAGTGCTTTTAACTTCAATAACACCTGTTTCCTGTGATGCGCTAC  
TCTCCAGTTTATGGACCACCTTTAGCTTGTGTAACCGCCTCTAACGCGCTTTCTAACT  
TAGTTAACCCATTATCAGCGACCGTTGCGATAAGACGCACACTAAGCCCTTAAAAGCGTT  
CTACATCGATTTTATCGTCTGACGGGTAAGTGCTACGCACATGATAAGTTTTGTCATTCT  
GAATAAACTCTTTTTTGTGTGTATCGGTATCGAATACCCAAAAGCACGCGGATCGTTA  
CGTCACCCGCGGTTAGTGTGTATGGTGTACCAATATACGTTACGTTACCGCTATCACTGA  
TAGTATGAAAGTGTCCCGAAAACACTTCACGGTATTTCTTGAGGAAGTCCGCGCTATAAC  
CTTCGGATTTTAGCCCTTTATAGACATAGTAGCCAGACAATTTCCAATGGCCTACACAAT  
ATTCGCTGAATGAGTTTTGAATAAACTCTAAAATCTCTGATTTATTGTCATCACAAAACC  
ACGGGAACAGGTCAAATGATACACCATCAAAGGTAACCTGGTTCCGGTTTATCGATATCCT  
TAATGTAATCATATTGGCTTAACTTTCACGCGGTGCGTTAGGCTGGATCTTATGACGTT  
TGAATAGATCATGGTTCCTACGGTACATAACAGGTGATTCCAGATTCTTCCAGTAACG  
GGATGACCTTAGTACGGTTACAACCTCATCGTCGCATGAGTAATAGCTTTTCGGCAATCAA  
ACCAATCCCCTGTTTGAATCCATGCTTAAATATTATGCTCTTTGGAGTATGCAACCGCTT  
TCTTGATGGTATCAAGAATACTCATGCACCCACGGATCATCGCCACCGATACCAGTAT  
GCAGATCACCTAAAAGCAAAATTTTCATAGTCTCTTCTCTCTGCGTTTTTCGATGCTCTC  
ACTATATCACAGAAAATAACAAGGGAAACCCCTTTCAGAGTCTCCCGTATAAAAGCCAT  
TACAGCATACTTAATATCGTTTGCCGTGTAATGACCCACATAGCAGAAGTTAGTTCTGGC  
GTGTGTGACTGTTTGTAGATATCACGTAATTTTCCGATAGCGTAGATCTACGCATCACGA  
TTATCATCGATGATAGCTTGTTTCAGCCCACCGCTTAAAGTCGTGCAATCTCTCGCGAGTTC  
TTACGCAAGATCTTTTCCGCTTTCTTAGCGGCTTTAGCCTCTAGTTCTGCTTGTACTTTG  
TCTACTTCATTCACTGCAATCTTGTGTCATGCTGTTTCATCGTAAGTCATGTTATTTTACCTC  
TGGGATATAATCAATTATTAAGAAAATTCATCTTCTGATACATTATAGCTATGTGAGAT  
TGGACCCGTCAAGACCTCAAGATCCGGTGATTTGATATTGCACGGATAGATAACCACCGG  
AACGCCGAGTCTCTTAAAATAATTTGGCCAAATACGGCACGAGGTCAGTTACGAACTC  
TGCTTTTTCCAGCAAACGGGAAACGTTAATTTCAATCTCATAAAATTTGGTCAAGGCTAG  
GCAATTCCTCAGTCAATACATCTTCAACCTTTGGCGCTTTCGGGATATTGACCGATTCTC  
CGTAGTTGTTGATTTTATCGTAAATGTCCTGTATGAATGCCTCATCAGCAATCTGGCACA  
TATCAGCGTCGCGTTCGTCATATAACATGATGCACAAAGTATTTGTATTTTGGGGCTGTCG  
CTGTTCTCTCTTTTTTAAATGCGCTGTACAAATGCATTAAGCACGCTTGCGTGATGTAAG  
CATCAGGATTTTTATACTTTGTCTCGTCAAATTTATTCAAACCTTGACCGCCGCTTCGA  
TTCCGTCGTCGATCATTCTTCGCGCCATGTTTGACTATAACCAGAAAAGTTAAAACGAC  
GTGATAGATTTTTAGACATTTGCATAATTGCTAGGCCGATTTGATCGCACATTGGAACCT  
GCCGACCTTCTGCTGCAATTTGTTGTTTCAAACGGCAAATTTCTTCGTAAAGCCCTTTAC  
TGTTTACATAATCAGACACTTCGCACCGTCGCTATTATTTAGGAAATAACCCTTTCCGGG  
TATTCCCATTGCCATTATACTTTCTTTGCTTGGTTATCCACACTCTAACCATCTCTACT  
GATTCACCGTCAGACGGATCAAGAGTTTTTCTTTTTACTTCATGCGATACTTAAATCCG

TTAAATCTTGCAATCTCTTACTCGTTAAAGTCGAACATCTTTTTAAATGATTTTCGCCCT  
TTACCCCTCAGCACATTCTAGCGGAATCATTCCGGTCTGTTATTACATTGGCATTAGGTAGA  
AACGTTTTTAGATAATCTACCGACGCCAATCAGGAACATATAGATTAATATTCTCCTTG  
CTCTCGTTGTCTCTCAGGTTCAAACGGAAACATATTTGAAATGCTGGTTCAGATAATCA  
GACACATGACGCGCTTTGAAAACTCGTTTATCGGGAGATCGCAACTATTAGTAAGACCT  
TTAAAATATCAATCTCCCATCGTTGAGGGTTAAAGCTGAACATCACAGCAACATTTTAA  
GGATGAATGTAAGAGTTAAGACCATAAGATCCGTAAGGTATCCGCTACCAATACTATTT  
GTGCACGCTTCTCGGTCCCGATTACGGTATAAATGAAGTCATCGCCACATTCATTTTAA  
ACCAAATCAACAAGACGTTCCAAGGTATTGTTTGTCTGACTGGTGACGCGACCAGCGT  
TCGGAGCCAGACATTAGGATGATGTTAACTATATCTGTATTTTATACTCTTTGAAATAT  
AGTCTGGATTCTAGCGCACTCGGAACAAAATCGCAATTTGCATAGTATCGTAGATACTTC  
CCGCTATATGTATCAAAGAGGATTGCACATGCTATCGTAACCTTTTTAAAGTCTCCCCAC  
GTGCCGTGTTTGTATCGTTCAAGAAAACAATTTTCGACCCATTCTTCCGGTGTCTTCG  
TTATTTTTTACCATAACGTTGATTTTCTTCTCTAATAACGCCTCATAAAGCCCTCGAAGA  
GAAGAATCGATCATATCAGTACCATCCTTTGCACTTTCTATCTTTTCTTTGATAGCGGCC  
TTCTCAGAGTCTTTTAGAACTAAGTTCTGTAGGCATTCCGATTCGTCGGCGATTGGTTCG  
CAATGCTTCGTGATAAGTTCCAGATTAGACTTAAACGGATACTCATTAATTC AACCAAT  
TGAGGAAATTCATCAATGTAAAGAGCATAATCACCAAACATTTTTGAACGTTCCATATTA  
GATAACGCTGTATGTGTAATGAATATCACATCAGCACCGTCTTTAACTGATTGCATTATC  
GACGCTTGCCTGTCTTAAAGGCTTCTTAGTCTTGTGCTATCGATCACGACAGCACGACCG  
CCCATTCTTGTAACCTTATTGTAAGATTGTTCACTTAAAACACGAAATGGCGAAGCAATA  
ACCGCTTTTTCTTTTGTCTCTAGGACGTGGGAAAGTATAGCATCAGTTTTCCCCACCACT  
GGCAATGCGATTAATGTTTCAATCTTCATTAGAAACCCTTACGTCGTGCTTTCTGGCATT  
TCTTGATCATTATCAGAAATTGCGCGCTTAGGTGCAATCTCTTTCACACCGAAAGCAC  
TAATGCCAAATTCAGCGAGAATATATTCAACTAACAAATTCACGCACACGCGCTTACCGA  
TATTCACGCCGTTATTTTTCAGATATGTCTGGCCTTCGACTGGCATCAGATCTAAATCTG  
CGTCGGCAATATTGATTTCTTCCATGCGCCCAAATCGAGAATAAACCATGTGTGCGATTG  
CATTGTGTAACATAATATATTCCCTCACTCAAGAATTACTTAATGATACTTCCTTTAC  
CAGATCCGTGACAATGAGCACAACACCTATCACCACTCAATCCTGTTCCGTTACAGTGTT  
TACAGTTCTCCAACGGTAAAGCCATTATAGCAAACAAAGCAATAATGATCACCGAAACTA  
AATTCTCAATAAGAATAATTCTCCCTAAGTTCTTTATAGCCTCCAATGTGCTCGTTGTCA  
ATGAATATCTGGGGGTATACAAATCGAAGGCTCTTTGAGTTCAGCCTCCGCGCCAGTTCT  
TCAATCATATCACGGTCGGGAATAATGTCAACCCCAACCTGCTTGAATACTGGTTAACT  
GTATACGGAATACCCAGATCATCCAGTAGCGTCATTGCACTAATACAACCATAACAATGA  
TAAGCCTCTTTCGGTATGCCGTATATCTCGATCATTCTCAGCCTTTAATCGTTCTAGTT  
CTTCTTCCAGTTCCTTGATCCGTTGGTACGTTCAAAGTCACGCTGCAACTTAGTGCGA  
ATACTCGTTTAACTGATTGTAATCATCGATTTTACACACTTCATCTTCCGCATAGCGAC  
GTACAGAACTTCGTAGTTATTGAAGAATTGTTGCATCATTGCTTCGGATGATAGTTCTG  
CCGATACTACTTTAAAATATTGATCTTCTGTAGGCGAAAACCAATTGCAAGCATAAAGAT  
AAACCTATTCAATTGCCTGGACACTGGTAAGCGTTACCACCGATTTCAATCACAGAAACAT  
AATCAGGTATAGTAGATGAATCAATAGCTAAGACTATAAACGAACGGTCCCCGATAAACT  
CGGAGATCACACGATTTCGCATCACTGGTTGCAAATGCTTTACGCGCTTGTTCTGTTTTTCC  
ACTGATAGGTCATACCAACAACAACATATTACCAACCTCGCTCCTTACCAATCAAAAAT  
TCAACTTCACGACGTTTAAATGTCTTCTGGAAGGTCTTTAATCTTCTGGCGATCTTGCATT  
ATTTCTGTCATCTTGTCAAGTGCTGCGATCAAATCATCGAAACGTTTCGAAGGTTTTACCT  
TCATTTGCTTCGCCAAATTTAACCAATTGTCAGGCCGTAACGACTACTAAACAGACGTTTT  
AACTGTCCAACGATTTTAGAATCAGTGTTATAACTTCCAATTTCTTACTTCACGAAAG  
AATTTTCTATCAGAATCAATAAACAGCTAGTTCCCTTATGGTTCGCTATCTTCTGTTGCG  
CTCATTAGAGTATGGTCTTTACCATCAATTTCAATTACATCAATTTGCCACATGGACTA  
ACATTTTTAACAGTAAAAGGTCTATAATTTTTTGTCTCGAGCAATAACATAATTAAGGTTA  
GATACGTTTTTACGATAATGGGAGAAGTCTGTATAGCATTCGCATCTTTCCAAGTATAA  
GTTTTACCAACTTCCATTTCTGGGGAACCTTCTTCAACTTCACGAAAGAATGTTCTATCA  
AATGGACTAAAGAAATATGTTGCAGTCCAAATGTCTTTTCTGTAGCCGTTTTTCGCCGTA  
TGATAAACACCGTCTAGCTCTATTGCATCAATCCAACCGTTACCCTCGATCTTGATGATG  
GTAAATGGCTTGTACCAATAGCTGCACTAATATCGCTGTTAAGTGGAGAAAGAACACCT  
TCTCCGTTAGTAAAAAACTCAGTTTTAGCGTTTTTCGTTTTTCCAGGTGTAAGTTTTACCA  
ATTTCCATTTTATAATATTTCCCTTAAACCGATTTTATCAAGTTCGTTTAAATGCTTTC

TCTGCTTCCTGTATAGCTTGCACCCTTTCCGGCATTTTGTCAAGAAAATCTTTCAACTCT  
TCAAACCTGGAGATATGACGCAAGGCGTTAGCACCGATAGCCGCATGTGATTTGGATTCA  
AAGCGGATTTTATAATTATCCATCGCCAATTTGAGAAGATCAATTAATTTAGATTCTTCT  
GGAATAATAATTTCTTCAAATCCGCTACGGTCATGATCCAGAAACCAACAAGATAGACCT  
ACATCGGTTGAACTCATATAAGTTCCATCATGAAGATAAACAGACCGCACGTATCCTTTT  
TTCGCATCAACCGACGCAACTTTAAACGGTAATCTCAGATATTTCAAATAATCAACATCA  
TACCATTTAAAAAATTGGTTTGCATCTTTTACATCTTTCCACGTATAGGTCTTACCCACT  
TCCCATTTCATAATATCATCTCTCATTTTTTGATACGTGCTTCTAATTGGATCATATGGTC  
GCGCGTTTGTGTTGATTTCGCGGATAGCACCGATCCGGCTAGGCATACCATCAAGCACGCT  
CTAATACCTTCTAGGGTAGTAATTTTGGCAATGCTATTATGTAACCCCATCTTATCGAT  
CAACTGAATGTCGTAGGCTTCCATAAGCAGACCCAGGCGTTCTAAAGTTAGGTCTTCTTC  
TGTTTCTTCCGATTCTGGAATCTTAGGTTCAATCGTAACTTCGGTAAAGAAACGTCGCTC  
ACCCGACCAAACCATACACCGGAACAGCCAATAGGGGATTCTTTTAAACGTCATAGAGTC  
GAAATTACTACCAATAATAGTAATTTCTCTAACATCACCATCATCGTCAAGGTCTTCTAC  
CCTAAACGGGCGACCAGCCACCAAGTCCACAATACATCTGTTAATAGACGACGAAAATTT  
AGTCAGTTCGGCTTTTCGTCGCTTCGCATTCAATCTTGTAAGTTTTACCAACTTCCCATT  
CATAATAATCACCTCAAATAATTTTCACTGGAATACTATTAACAATCTTGTATTGTACTT  
GATTGTCAGACCCCCGCCACGGCTTCTTTCGTTGGCATAATCTTTAATAAACGCCCATCGA  
TGAACATGTCAACTGATTCTACAATTTTTCTTTGCTCATCATTCAATTGGTCAAGAGTAT  
AACCGGACCATAGCCAAATATCTTTATTTGGCGTCCATGATTTTACTTCATCGATGATCC  
GCTGTACACCCTTTAAATTGCGTTTATAACAACGGATCACCACCTAAGAATGTTAGCCCT  
GCATAAAATCAGGTCTAAGCAGATCCAGAATCAATCCCATTGTATCACCGGTGAATGGTT  
CCCCGTTCTTAGGATTGAGTAGGCTAGCATTAAAGCAACCATCACATGCGTGTGAACATC  
CGGTAACGTGAAGGGAGACTCTCACTCCCTCACCGTTAACCATTTTACAATCTTTAATAT  
CGGCATCGCGTAGTTTGCCGTATGTATCAGAACTCATAGTCAATTACCCCGAACTCGTTT  
ACAATCTGCGCTTTATAGTAACCACCGCGAGATGCTAATAGAGAAGCTGGGCTTAGGTAT  
TCGTATTCACGGATTTCTAATTGTGCGTTTTTCAGTTTCCCAAATCAGTAAAGTCCACATA  
TTTGATTCTCCTGTAAAGTTGTATCTCGTCTTGATGAATATAGTATAGGGGATCTCGCGA  
TCCCCGTCAAGCATTATTTAAATTTTTTCGAGAGATTTCTACCACAGGCGGCTGGTAGG  
TACTCTCCGGCAAACATGAAGTGGTCATCTGGATAAGAACGCAGCATATTTCAAATAAAC  
TTCCGGCACTCTTCGTAATCTTTACGTTTAAAGATAAATGACATTCTCGCCAGTACCGATC  
ACACCTTATCTGGATCCATGCTCTTTACGCACAGACCATTGTACAGTATATTTTTTAACC  
CGAATCACAACAGGTTCCCAATACCCAGCGCATCCGGCTACACCACACGAACAGGTGAGG  
AAGTATTGACCTTTTGTCTTCTCCACCCGATATTAACCGGATGCCATTCGTGA  
TACTAGGCTAAAGCATCGTGTGTCGCTTCGAACTGTTTATTGTCAATTCTTACCGTAACC  
ATCCATACAGGGATCTTATTTGTTGGTTCATCATCATAACAAGAATCATCATCAATATGT  
TGTAATGTCATGTCAACATTAATTGATTTTTCGCGTGTCCATGTATCGTTGTGCTTTACGC  
TTACGATTCAATAATTTAGACATATTCACCTCACATTATAAACGAAATTTGTACGCCATCA  
AATGAGAACCTTGATTACAGCTATTATAGATAATAAATCCTGTATCTGGCGCTTGTACT  
ACAAATTGACCTGCATTAACAGCGGCAACAGTAAAAATACGATCCGTGAGACTATGTTTA  
ATTTCTGTCCCAACTTCCAATGGGGTGTACTCTTCTCTTCGGCCCCAACACCAAACAG  
CCTTCTTCATGGTACGCCTGAATCTTTTTATCACAATTACACGGTTCAGCAAAATCAAGC  
GTATAAATTCACGAGAGTTGTGCGGTATAAACCAACACAGATTGATTATGATAGAGAATC  
ACATACAGGTTATTATCTTCGTCAACGACACAAAACACTACGGATTCGTGTGCCTTCGCTT  
TTACTCCAGCAGATATTAACAACCGTTCCCATATAAAGAACTTTCTTTTGTACCAAAG  
CTAGCCAGTGTGCTAGCGTGCATTTTAAACAACACTACCCATCACCAATTTGTAACCTGCGA  
ATTTAATTTCTTTATTCAATATACAAAACATAATGTTGTCTCTCTTGTTTTCGATGTG  
AGCATTATACACGAGATAATCCGGTTGTCAACACCCCAAACGAAAAAGCCGGGCCTTTT  
GGATCGACAAAAAATTCATGTGCTTAAACGCGGTTTACCATGTCCGGAGTGTTCCTCGTG  
TTAAATGGACGCAGATCAACAGATCCAAGATATCCACTAACGCGACGGATAACATTCATA  
TTTTCCAGATAGTCATTTCCGCAATGAGGGCAAACAAAACAGACTCGGTTCGCTCTCATT  
TCCTTATTAGATCCGAATACATGACATACATCAGAAGGAGTATTAACACCGAAGTAGTGC  
AATTTATCCATTGCATAGTCTACTACAGTTTCAAGACCTTTCAGGTTGTTTTTCATGTCT  
GGGAACTCAACATAAGAGATCATGCCACCGGACGCCAGCCAGTGATAATCTTTCTCAAAG  
TCGATTTTCTCAAATGGTGTAACTTTCCGGTCTACGTCAAGGTGGAATGAGTTGGTGTAC  
CAGTCTTTATCGGTAGCACCTTAAACAATTCCAAATTGCTTTCTGTCCAGTCGATTAACG  
CGATAGCAAAGGCTCTCGGCTGGCGTACCGTAAAGACTAAACCCAGGTTCCGTTTCGTC



TTCCATTTTTTCAGTATAATGACGCGAGATGTAAAGAATATGTTTACCGTATCGCTGCGCA  
TCTTCCGAATCAAACGGATGTACTCCAAACAGGACGCTCAGTACCTCATGTAAACGAATA  
TATCCAAGAGAGATACTATCGCGACCATCTTCCAGCACTTCCAAAATTTTCATCGTTTTGA  
TGAATACGCAAAAATGCACCTTCTGTATACAGTACAGGACCAACATTGGCTTTAGCCCCT  
TTAAAGCGCCTACGCGACTCATAAGCGCATCAAAGCAAATAGGCATACGATTAGCTAGC  
TCTTGTTCGAATAGCTCAATTCTGCGCATAATAGACGCTTTACCAGCACGACGCGCGGCA  
ATAAGAGCAATACGCGGAAGATTACAGAGTCACAACAGCCAAGTTATTACGTCCGTCTAAT  
ACTTCTCGCCTTTGTCGTTATGCCACACACCCAGGAACTTCTACACATTATTTGTTGA  
GGGTAGGTCGCTAATCTACCCCCGCTTTTCGGCTGCTACATGTGCGCCATGCAGATCAGAC  
TCTATCTTCTATCTTTTCGTTAGTCTACCATTTTCGGATCACTTGATCCTACGCCGCTACAT  
TCATCACGGCTAGTCGTTAGGCATTTTCATAGCGGAACTCATATTCATAAGTATTGGTTTT  
TTTACCATCAAGAATTGCAGATACATTTTTACGATGCAAGCCGAATGTTTCAGAAAGACT  
TCTCACGCTTTTAAATGTCTGCTCTTGTCCGGTTCCTTTATGGATCGCAGTAACCTCATA  
TGAACGACGTTTGAACCTATAGCACCCGTTGTCGTAACCTTCTTTTCGTGTTTTTCGCTGTT  
AGTCCCCCACTCAAGGTTAGATGCATCGTTTATAGTTTTATCGTCGTTTTTATGTTTTAC  
ATATCGATAGCCGTTAGGATTCGGAATCCAACATTCAGCCACACTAACATGAACACGCAA  
ACATAAAGTTTTCTTGTCTCTCCTTACCCTTACTAATGTATATCCAGTATTGTTTTCTAT  
CCAGGTACTCAACTGTTTACCTTTAGGAGAAAACACCCGTCCTTCTTTTCGCTACCATATA  
TTCGGTATCACGAACTTTTCTAAGTTCATAATATATCCGCTTATACACATTGGCGTAAA  
GAGAATATGACCGCTATGTTTAGCACGGGATTGTCTTCTAGAGAGTTCCCCGTTTTAGGC  
AGATTTTAGATGAGCTGTTTAAAGTTTATCCATCGGGCTAACCGGAACACTAGATCCAGT  
GATGCTACGGTTATTCTTCGCAGAGATATAATCAGGGTAAAGACGCTTACTAGAACATTC  
CAATGCAAGTTGCTTAATGTCGTAGTTCGGATCTTCCGGTTTAAAGTTTAAATCCTTCTTC  
TAAGAACATCACCGCTTAGGAAACACCGGAGTTATACCGGCTTTACCTAAACCTTTAGT  
TCGAACTTTTCAGGATCGCTTTCTGAATCAGTTTTTCTCCCCAGCTAGTACCATAACAAA  
GGTTAAAGTCACAAAAGTTGTTTGACCGTTGGTAGAGAACAAGTGTTGATCTCATATTC  
CAACGCCTGATATGCGTCTAACGTTTCTTTTTCTGTTTTCTTGTGGATAGAGAGTATC  
AGCTTTGATTCCGCAGGTTTCGGCATCAGCAAGGTGTTTATGATATGTTTTCTTAACATA  
CGGCGTAACACCTGGTCGATGTTTGCAATTGTGGTCCCGCCATGTTGATGACCTACCAC  
CTGTGCGATAATTTGAGCGGTTACAGCACATGCAACACCGATCGATTTAGGAATTTTCGAT  
TTGTGCGCTACCCAATTTAAAACCATTTCTCTAACATGTCTTTGAGATTAACAAGACAGCA  
GTTAGTAAAAGGCATAGCTGGGGCATAATCCATATCATGATAATGAATATCACCGTCTAC  
ATGCGCTTTATAGATGTGCTCAGGTAACCCGGTTTTAGCAATATGTTTAGACACAGCGCC  
AGCAATCAGATCTCGACGTGTCGGGAATGTTTCGCGCGTCTTTGTTTCGCGTCTCTTTGCT  
TACTTCGTTTTCTTTACCCGTTGCGATCTCTGTAATGTCTTTGATTAGTATTTCCATTGT  
ATCACCTATGAAAAGCGGGATTTCTCTCGCTCGTTGATAGTTATTTTACCAGTTCTGCT  
AATCTTTTTCTTTAGCTTCTAGTTTCAGCTTTAAGCTGTTTAAATCTCTTGTGCTTCTTA  
TTAGCGGCTTCTGCTTACTATTTTCGGATAACCTGATCTAGATACAACCTCCCAATCCTGA  
ATATTTTTGATAATGTATCCGTCAACATTAATTGGTTCGGAGATTCTGTACAGCTTCCAGT  
TTAGTTGCAAAAACCTTTAATTGCTGGGGTGAAGTATTCATTTTCGTTATCTTCAAACCAA  
TAACCTAGACTTGCATTCTCAATACGAAGATGAAGTTTAAAGATCAAGGTCTTTATCATCG  
GTATATAGGTCTTTTACACACCCCATAGAATTAACAACAACCTTTAAAACGAATTTTATCT  
ACACCACCAAAAACATCTTCAAGAATATCAGCAATTGAGCTATTAGCGCAAGAATGGTCCG  
CTGAATGCGTCAAGGTTTTTCGTTAGTTACAGTATACCAAACATCTTGTACCCAAATAATT  
TAATCCTCTCGTTGTTAAGTGGGAGTATTATAGCATACTCCCTTCGCAGGTCAAGCACTA  
ACTTTTTTCTTTACTGCTTTCACCTTCTGGCGGATTACTCGAATCTCTTCGATCTTTTT  
TCAGTCTCTTTAACAATTTCTTTGCGATTCTGAATATCTGTATCGAGATTATCATCAAGT  
TTAGGCAGCATGTCAATCAAGAACCTTTTTAAAGTCTTCCAGGTTTCGGATAACAGCACCT  
TCACCCATTACCACCACACCAACACCGTCCGGCAGATCACCAAACAGTTTAAACCAGTTCA  
GACAGATGATCATGGTCTTCTAATGCTTCCCTCCGTTTCAGATGGCAGTGCAACAAAGTTA  
TAACGTTTCATCATTGCTGATCAAGTGTTACCAGCAAAGCCCGAAAGATTTTCGGTGTATAT  
TCTACACCATCAATTTCAACCGCGTCAACACTTCCATAATCATCTACTTTAGTTACCTTA  
AATCCTTGTTCCAGCTTTTGAACAATTTCAACAACATGACTTGATACAGTTTCAGCGGTA  
AACCAATATGGCAAATTATGCTGATTTGGCTTGTAGCGTTCACCTACTTTAAATCTCTGA  
CCATCCGCTTGCATAGCATAAAAATTGTTGTTTCGTGATTTCCGCGAAGTATTCAAATTCG  
CCACCATCAAACACACAAGCTCATTGAACACAAAAACGATCTGCCTTAACAGTTTCACCT  
TTCGCGGTGATCATGGTAGCTGATCCGTGCAATTCTTCTTCAACTAAATAGCCATAGTCG

ACAAAAACAACAAGTTTCATAGCTTCTTTGTGATCTGGATCATGCTCTCCCCAGAATCGC  
TTAAATTCTTGCAAACCTTCTGGTGTAAACGAATAACATTTACCTTATTCAAAGTAAGTC  
GGCATTGCATCCTCTTTCTTGTTCATCGCTTCGTATGCCTCTTTTGAGATGCGTTTAAAG  
TATTTACGCTCATTGTGCATAATCATAGTCGCCAATAATAAACGATATCCTCAGCGGAA  
TAAACTACCTCTGCAGCTTCAATAGTAATAACATGACCGTTGCCATCTTTTTCTAATACT  
TTAAAGCCCTGTTTCGCCGATTTCAGCAACCCGAATATGACCACGGCGCGAAGCATTGGTC  
AGGATAATTGAATAGCGAGAAAAGTCTAGAAACTCATCTTTACCACCTTCACGGAATGCA  
TAGTAATGACCTTCAAAGAATTTAGCCATAATAATCCTCTCGTTGTTTAAATGGGAGT  
ATCTTACTACTCCCGTTTCATCATGTCAAGCGTTATATGACTTTTTGGATCTCTTTCAGT  
TCAGCTACTTTATCGGGCGCTGAATTTAGCGTAGGTATCATGTGCAATAATTTCACTTTCA  
AGAAAGGTTTCCAGCCGAGATCTATTTTCAATAATGAACTCTTTCAGATCTTCCGCGTTC  
TTAATAACGATCTTATTGTGAGTAATGTGATCTTCAATCGCAAAGGAGATAGAGCGAACT  
TTACCAAACAAGTTCATCAGATCTTCCAGCGATTCTTCTTTCTTAACTGGTTTCATTCT  
TCAAACCTGCTTTTTAGTGATGCGTTTTAAAGTATTTACGCTCGCTTGATGAATCATGATT  
AACGCACCCTCATAATCATGAGTTACTACCAAATACACTTTACCCATAACATTAACCGTA  
AGAACTTTAAAGCCCCTGTGAAGCACACCATAACAGGAACTTGTTATGTTGTGGATAGCGT  
TTAACCAATTCCTCTGCGGACTCAGCATTACGGAAAGTGTAATAACGACCTCGTTCAAAA  
ACAGCCTCATTTGAAGACTTAGCTGGTTACAATTTATACGTTTTCTGTACCATAATATAA  
TCCTCTATCATTTCACTAATTGAACAGCACGAGACAGAATGCGGTCACACGGAAGAAGCA  
TAAATTCCCAACTCGGATCAAAGTCTTTAGCGGTATATGTTTTCCCATCAACCGAGATTT  
CACTTACATAACCATTAGGTGAACTTTAAGAACAGTAAACCCATTCTTGATGACTTCGG  
AGGTATCTTCAATCCTTCGTAGTCATCCTCTAGGAAGTCTTTACGTGCTTGCTCAGATT  
TAAAAACATAGGCCACACCGGATTTAAACATCTTACGCATTGTTGATTCTCCTTCTTGAT  
TAGATGGCAGTATTTTACTACTCCCATTTTCATATTGTCAACTACTATCTTAACTTTTGTA  
TAAATTGTTTCGTATACTTCTTCGTGATCTCTTGTCTTGTATCAGCGTCACAGTAATCGA  
AACCTTCTGCGTCCATAATAGCACCCATTTCCGCGCGTGTCAAGCGTGAAAATCGTTTTA  
CTTTATCAACAGCATATTGAGGATGTAAATGATTGTTGGTGTAGTCTCCTTTGATGTAAT  
TAACATAGTTTGTAGCCCAAACAACGAAATCAGCTCCTAAAGCACCAACACCAAACCGTT  
TAAAGTCTCCGGTCAACGATCCTTCTAGGCGGTTGCAACACGAATGAAGCAATCCCCTTA  
CACGGCCTTGCCCTTTCCCATCTAGATCGTGGTTCGTGGTCAAGATGGTTTTTGCTCATAT  
CCTCAAAAAGAGGAAATTGACAAAGGGGGCAAATACCCCCCTGTTTTTTCGAATAGTTCTT  
GTTTGTACTCTTTAGCACTCTTAGCAGTCAGTAACATAAATTCATCCTCCAAAGAAGGTA  
TTAAACCATGAATCTTGTTTTTACTACAAAGGATCGGAACTCATCAAAGCCACCAATAT  
AATCACCATCATAGAAAATGTGCGGCATGGTGGCAATATCTTCTACCCCTGCGCGATCCT  
GAATGTCAGCAATGATAGAATCAATCTTTACAGGGCGACCGTTTTTCGTGGACACCATAAT  
TGACAGGAATATAGATGTAAGGGATCTTACGCGACTCATAAAGGCGCTTTGCATTCTGGC  
AATACTTACAGTTGTAACCCTCAAAAACCAAAAATTTCTACCATGATGTACCTCAATCTAA  
GTTAGTTACATAAACTTCTTGATATATCAGAAGACTTACCACCTGAACGATCTAGGCAAGA  
GGTCTTATTCAACAGGACCCAGTTTAAATCATTCCCCTTGATAAAGTCAAGGAGATGATC  
ATTTACCTTTCCCTTATGATGTGTGACATTACTGATACCAAACCGAAAACCACGCTCCAT  
AATAGATTCTACCCACTGATAGAATTTAATCTCTTCTCGTCACTCCAGAATTTATTGTA  
TTCCGCAGAAGTGATAAGGTAAGGCGGGTCCAAATAAACGAAATCACCTGGCAAGATCTC  
GATCTCGTCATAGCGACCAGACGTAAAACCTGATTCGACCGTCTTTGTTTTCTTCCTTAAA  
ATTCAGGACACGCTCAACCGCGTTTTTCGCTACAAGTCCGGCGACCAAATAGCATTAAA  
TTCTCCCTTCTGTTATGGCGGTTAATGTTGCTAAAACCTGTGCTGAATCAGAAGAAACAG  
AGATAGCGGATCTGGATTCTCATTATACTTCTTACGGAATGCCATGTAAGCGTCTTTATC  
TTTGCAGACAAACCACTCTCGGCAATAATCCGCTTGATCGTAGAAACCGGGTCAGGACA  
CTCGTCAATCGCTTTGTACGCGTCAATTAAGCGGTGATCATAGTCATGAGCCAGCACATC  
CCCTTCGACGTACAGAGACACGCTCAAGCCGCCACAAAAGGCATCAACAAAGCGGTTATA  
GTGCTTAGGGAAATACTTACTAACACCAGGCAGTAACTTTTTGCTTATTGCCAGTATAGGT  
AATTAACCTAATGCTTTCTTATTATCCCTTCTCAATTGAGTTCTCTCGATCTCTACC  
AGTTTCGAAAAATTCTTGCCAATCACACGGAAAACCTGCTGTTTCCGAAATGATCCTCTTTG  
TAAAGTTCTTTACCGGATGGCAGCTTAATATCTGTTACGCTATAGTATCCGCAACAATCG  
CAATCACCATCTGTATATTCTGTTTTAGTCGGAATATCCATCATTGCCAGATACAAAGGT  
ACATCGTCTTGCTCAAAGTTCTTGTAACCTTCATGGTTCGCATGAAACAAAGTTATCATCA  
CCACCGAAAGGGATATAATGGCCATAATCGGTTACAGGGTGACCGGGTAATTCCCATACT  
ACAATTTAACATTACCACTCAACTTTATGCCATAAATTTCAACAAGAAAATGAGTATCG

TCAATGTAGATCTTACTAGGGGTTGAATAAACCATTTATATAATCCTCATACTCAGAGAA  
TAGAATCTCTGTTAGCTTCACTGACTGCTCTAAGAATGTTAGCGTATACTCGAAAGGAAA  
GTCAATACCCAACCTTCAAAAGAGAATAGCCTACCGCCTCTTTATGCTTATCGGTTAGGGC  
GATCCTAACCAATCCCGTTGAATCTCTTTAGGCGGTGAATGGATAGTAACACGGGTATT  
ATGCAATGTCCAGTCACCATTACGAATCAGGATTAACGGTTTATCGTCATTGAAGATCAC  
CGACCCCATACGGTTCGGTGAGTGTTTTATACTAATCATCAAATTCTAAGTAATATTCTG  
GAACGATATAACCGTTAAAGTCATTACACTTATAAAAAATGGGGTGCATTTAAGGCTGGAG  
GAGCATTAGTAATGAGTTTACCCTCTAGAAAGAGAATGTAATTAATAGGTCTAATACCTA  
CAGAATCAGGGTCTAAACCTTTTTCTTTCAGTTCAGCCAGCGGTAAAACCTCATCCAGATC  
GTAACCTTAGCCATGATTTACCCCAATTCATCAAGGTTATGTCGCCGCATTTTCAGAGTAT  
TTTTCTTCTTCTTAATCTTAGTGTGGATCTCCACGATCTCATCTTCACTATCAGAAAGT  
TTAATGGCAATAGCGGTACTTCCCTTGATCCGTCTTGATCGCTTCTTTCAGTTCAACCAAC  
ATTTCCGCGTGTTCATAGCAATTCCTCACGTTCGAACATAAGCGACGGTCAAAGCCTCA  
TCAGCGATTTCTAAAGCATTTTCAGCAACACCAACAACCATTTTACGAGTAGACAGCATA  
AATTCACCTCACATTATTTACGTTAACACCGTTCATCAATCCAGCCGACGCTATTTGGTT  
TAACAGTTTTACCATAGGATGCATACTTAATCAAGCAGGATTTAACATCATTATCAAATC  
TTCCTAAACGTACTCCCAAATCAGGAATATCCATGTATGCGGGCTTTATATCCCCATGTAC  
CGTGTTCAGAATCAATCTCAACCGGACGGCCTTTACAAGCATACTACACCGTGACGGT  
CAACGATAACATAGCGATAGCCAGCCGGAAGATACACAGTATCGCCGTAAACTTTAACTG  
GAATAGCAGAAGAGATAAACATAATATAATCCTCACATCGTTCATTTGATGCGGTCATTA  
TATGATAACCGCATTTTCATGTGAACAGTTTTTTAAAAATCTTCTTCCGGTTTATATCGA  
CCGTCATCGACTGGTTTTGGACTGAATCCTTTATGCGTGCCGCGGCTTCGCTTCCGGTTTA  
CCAGCAGTCATCAAACCAAACATTTACGCCCCTTATAACACATAACATTATCAACCACG  
GTCCAAGTTATAGGCCATACGATTGCAGCAATACAAATGCTCCTGTATCGACCTCTTTG  
GTGTCCTTGTCCAATCTGGCGTACAAGCAGAATACTAGATACGAGCTCATTGCACCAGTA  
GTCCAGATATAAAGCACATTAACAATATCTTGTGTTGTCACATTATCCTCCTTACATGTC  
TTGCAGTGCACAAAAGCATTTTTCTTCATAGTCATAGAAAATGTCAAAGTATGCTTTTTTC  
CCCATACTCGCCATTAATCCAAGCGGCAGTAACAATCAGAGTGGTCCAGTTAGATCCGCT  
CTCAACGGTAAAGGTTTTAATACCCAGCTTCGCTGCCAAGTCGAACGCAAACCGGACGCA  
ACCACGGCAGGAAGTGATATTGGAAGTTTTGATTTTAAAGCCTCCGCGAGTTTTAGAAAT  
TTCTACTTTAGCGAAAGACAGGTTGCTCATTTTATTCTCCTTAAGAAAGTGTGTTTCGT  
TTTGATGTGTGTAGTATAGGGGTTACGTGATCCCCTGTCAACAAATTTTTTATGATTTTA  
GTTAATTAACCACTACATCAAATGATGGACAGAGCACACCTTATTAACCACATACTCAT  
CGGGTTTAGGAATAGCGCCTAACCGCTTTATTTTCGCTCGCTGACACGATAAACCGCTTAT  
CCGGTGCATTTACCTTACATGCTTCAACAACGCACGGGAAACGCGTTTCAGAGAGTTCTG  
GACGGTTTTGTGAATCCATCAGGACAATGAATACCCTGTTACATTGATTGTAGAATCCTG  
TTTTTGATTTTCATCAAGTTTTCTTCTCTGTACAATTCGTGCAATCTTCCTTTTATGATTT  
CGTTGGTTCTTGTCTTACAGTTTACCCATTCAACAAGATCTTTACCCAATTCGAAAGCC  
CATTCTCGGTCTTCCCTTACGTTTTGTAGGTATGGACTTTCTGACACTCTACGAAGTGAT  
GTTGTGTAACAAGAATGATCCCAGGAATGGTGGGATGTTCCCTTTCCATATAACAATAGGA  
CGCAAGTCACTATCCATACCTTGTAAGAAGGTGTATCCTGAATCACTTAGAATCATATAC  
TTTTTCATTTACACATCACAGTTTCCCTCAACCAGTTATTAAGCGACCAAACCATGACG  
CTTTTCGTGCTTCTTTTACTTTATGTGCACGAAAACCACTGAAACACCATTTCATAGTCAT  
CACCGAATCATGATTCAACAGGAACACCCGCATTTTCGTAGTTCTCTGGTCTTTATCATAA  
ATCCTTGACATAAGGGTCGACCTTCAACAATGATAGGAAGTTAACTTTTTCTATGAAAG  
TATACCCAGCACGGTCAATAATTTCAATTTTCATTTTACATTATCTCCATAGATCTTCC  
AGCAATATCAATTTACCAGCGCGAACATCTAGGATAAGATGCGGTTAGGTGTATGCAGTT  
TTCCACCCCACTCGCTTCAATTTCTGAAACCGTGACGTAAGCCCATCCGTTCCGCTGTAAT  
AAAGTCTACTTGAACCTTGAGAGGAAAGCAAGACTTTTCTACGTCTTCAAATCCGGTAAC  
GTGTTTTGTGCTTGAATATGGAATATATCCGCTGATCATTTTTGTGATCTCCTTATACTCA  
ACACACCATAAGCAGGTCGCCATGATAAACGCTCATAACGCTGGCAGAAATCGGACCAT  
AGATATTGTGCACCGTTCGGCATAATTTGAAATATGCGATTTCTCTCCAACCTTTCACGAAA  
TAAGTATTCGATTTTGTGATCTCGACCGGAGTATATCCGAAAGCGGGTTCCAACCTCAACA  
TCTGAACTAAATGCCTATTTAACAGAAATTTGTTTTCTGACCGCTGTCCGGTTTCTTCT  
GGGTACAGCACAGCAGGTTTAGCGCCTAAGCGGATAAACTCAGTATTTTTAATGAACAGA  
ATAGCAGGATAACCGTTATATTCCGACACTTCCATAGTAACAGGAAAATCGACATGGGCT  
AAACCTGGTAGATCTCGCATATCATGAAAGGTGCCATCAACTTTTTCTTCTATATTCC

TCACTCTTCTGTTTCATTTCTTTTATATGGTAATATAACAGGATTAATACAGCAAGCACC  
AATTACGTTACGAGCCCCACAAGTTAAACATTTATAGTCACGGAAGTTATTAAGGAATCG  
ACCAAACCTCATAACCGACTAGCGCCGCGTGTACTTGAGTCTCGATCTCATCCATATCAGC  
CAATGTTTTAACCTTCATAGTATAATCCTCCAATGGTAGTTTTGCGAAGATGGTCATTAC  
ATGCTTTTTAACGCATCACTCGCGGTGTCATAGCGAGTATTATCATAGCACCAGTAACCAT  
CTGTCAACTGATAAGTCAATCCGTCCTTTTTAGCTTCAATGAAAGACAATTCTTTGAAAG  
TTTCTACTTTCTTTGCTGATACTCCACGGTCACGGCTTTTATAGAGTTTAGCCAAAATGC  
GTTCAGCTTGTTCTCTTTATTGCCAGACAGATCCCAGATGATGTTTCTTATATGCTTGA  
TTAATTGTTCAAGTGTCTATCTTTGATTCTCCTTAGTTTTGTATGCGTGCATTATAGCATTG  
TGATTATCTTTGTCAACACCCAAAAACA AAAAAGGCTATCCCGAAGGATAGCCATAAAA  
TTACACGCGTGCACCGTAGATCGTGCCTACTTTATCCCAGCGTGGAGCATTACCAGAAAC  
GGCTTTACCAGCAGCACCACCGTTATATTCTGTACCGTTCCCTGAGTATTACATCTTCC  
TCCAACAGCACCAACGTTACCGCCCGCACCGCCGGTATATGCACTAAGAGACCCCTCACC  
AACAGATCCTTTACCAGGAGCGGAAATATTACCAGCAGTTGCACCGGAAGTTCATATGAGA  
GGAAGACCCACCAGCACCGAATGGGCGACCACCCACCACCAATACTAGTCGACCCCT  
TATACCGCCGCCACCGCCGCCACCGCCGCCAGCGATAGCACCAGTTATTTGTAATTCGTAG  
ACGTGTACCGATAGCGTTATTGATTGCGTTTTCCACCAGCAGCGCAAGCAGCGTTACTACC  
ACCATTACCCACAGTCCGTAGACAGTCAACACCAGACGTAATGATCAATGTTACATATTC  
GTTTGTAAACGAGCTAGGGAAGTCAAGACAAGCAATGCCAGTAGATTGGGAAACAATATC  
ACCAGTGATAGTAATTACTACAGGAGTAGATCCTTGTGCTTTCATCCAGTTAATAAGAGT  
GTCTTGATTGTAAGAGTTACTAGCACCAATGCTATAATGAATCTCTTTAGAGCGTCCGAC  
CATTGCCGACATATACGCCGGACGACTTAAGCGTACAGCTTCCATAGCGGCACTCACCCA  
CCGTTGACCAGTCTCGGACACAGCAGATGATCCCACCCATCCAGAAGATATTGCCATAAA  
ATTTCTCACAAGAAAAGCCCATTTAAGGTGCATTGATTGATAATATTACTTAGATGAT  
CTCTGCTTACCATCCAAGAAGAAAGACTATGTTTTGTTAGGATAGCGAAGCGCCCATGA  
TTCGGCAGTTTTAACTCCAGTTTCGAACAATGGACGGCTGGTCACTTTAGCCATACCATC  
TTCGATGGCAACGTTTTCAATAATCATCGGGTACTTATCGCCACGCATGAAACCGCAGCC  
AGCGGAAGATTTGATAATTTAACAGGTGCCATTTTTGATTCTCCTAGAAAGTGTCTGTGT  
TTCGATCGGTGTATTATGCAATAACCCGGATCGCTGTCAACACTTCTAAGAAAAATTT  
TTAAACTAATCGAATATAGCCCAGAATTTAGCACCTTTAGCCAGTCCATAAACTTCCCA  
TTC AAGGTCCGCGTAGTCATAATTTGCAACCATCAACTGACCATTTTTTCATGCACCAATC  
ATGAGAGAAAATTTGCCCGCATAAACTACGATAGTAATAAGCTTTCCTCATTCTGGCGG  
TGTGCAAGACAAAGCGACCATATGACCATTCAGCTTAGTAACCAGTGATGGAACAACAAA  
ATTCGGGCTAACCTTAATACCGTTAAATTCGTTTTGTGTCTTTCATGCCAGACCTCGCAA  
ACACTAATAGCATAATCATGCTGGTTATTCATAATATCAATTGCATTGTGATAACGAGCT  
AAACCATCAAGGATAAGTTCTTGTTTATCCTGTTTCAGTTTGGTATCACGCGCAGCCATA  
AGAGCATCAAGAACAGGTCCAAAGTGATTATCTAAATCATCTTCGGTTGCAATGTTTCT  
ATTGCCCTCGTCTATCCGTGATTCTAATGCTTGCTTTTCGTTGATCACATGCTGGGTATAT  
TCCAACACATCAAGACTATCGCGGGTAGCGTCGCCATGTTAAGGTATTCCC GCATGAAGA  
TGATCAATTAGGCGTTGAATGTCAATGTTCAATTTGTAACCCTCCTCTGAAAGCACATCCC  
AGATCGTTGAGTCAAGCTGCATTAAATTCCACATAATAGAGTCATAACTACCGAAGCCAG  
AAGTAAAATTACATCACACAGGCGATATGTCTTATGAAAATCGGTGGCTGTCTCTGCAT  
CAATAGGCATATCGTTACCTGAAACCACCAGACATTTTAGAATCATAACTCTGTTAGCCG  
GTGACGCTTGCTTAGTCTTTACAGCATATTTTTCGATGATCCGTCTTGCTTTTTCTTCTT  
TGATACGTCCAGACCAACTCCGGTTTTCGGTATTGATTATAATAATTTCAATCACATCAT  
TTTTGCATTCTTACGGTCTCCATAATGGTTTTGTAAGCCAGTTAAGACGATCACCGAAA  
AACTTTGCGGTGTTACCCTTCGGATCGCGGAGCATGGTTTCTACAATCTCATCGGCAGTA  
ACAATTTCTCCTTTCTTTGCTGCATGTTCTACCATATACTTCAAAGATTCTTCGGAAGCA  
AGTGCTGCGACTACTGGATTAATCATTTTTGATTCTCCTTTGTTGTAGATGTTTGCATTA  
TGCCATAACCCTATTCGGTTGTCAACACCTAAAAACGAAAAGCCACCCTTTCGGATGGC  
TTTTTGATCATATTTTATTCAGGTCCATTTGTATAGTAGCGTTTGAATCGACCTATGCTA  
AACTAGTTAAACATAGTAACCAATTCACCATCCCTTTCCAATGATAACCCTTCTCGTCT  
TAGACGGGTCTTCCGATTCCGGTAGTAATTGAACACGCGAAAGTATGAGGAAGCCAAATAG  
TTGTGTTAATGCTAGTATTCTTTACTTCTGGTATGCATCCCACGGTGACTAACATTAAG  
CCAGTCGAGTGAGTTTATAAATTGTTTTAAAGCATAGAGCTTTGGTATCGTCTAAACCGC  
TCTGTGACGAGCTATCAACATCATTATAAATCTCACTAGCCATTTGCGTTAACTCTTGCA  
AATAGGCAATTTGCTAAACTCCTTGCGGACGACCAACTTTGGCTGATAACGACCAGTGA

TCCCAATATTGGTTTCAGTGAAATTATCAACCAATTCTTGCACCTCAAGATAGAAGTGT  
CTTGAGCCTTATGTTTTGCATAAGATCCAGGACCAGTTACCCCAAATGCGCAGCATGCG  
AATAAGCAACACTCATCAGACATTCCCCGATACAGCGGTCAACTTTATTAGCCTTTCCCT  
CTTCGGACGTCTTTAGAAAATCACTGAATTTTCATGTTCTAGATTCTCCATATTATGCGAC  
AGAACAAATTGTTGTGCGGCATATCCCCCATAATAAAACACTGCCTAGAATCCATACAT  
TACTACGAGCATAACATCTTCTAATATGGGCATGAAATTTCTGGCTGGTTTCAATGGAA  
GGAGATATGTGGTTTACATATACTATCATTGCGCCGTCGTAATAATCAGTAAAGTCACCA  
GTTGGATCATATTGATCAGCACCGACACTTCCGACCGCAGTCAAGCATATTGCCGCTGTT  
AGAGTTTTACGAATATATGACATAAGTCATTCCCCCAGAGTGAAAATATTCAGTTATATT  
TATAATCTGGGGCTTTATTTATGATTAACTCTTATTTGGTAGTACCTTCAATAAAATGTT  
TACTACACACAGAAACATATTTATCCTCTGCACCAACTTCTATTTGAGCACCATCGCGAA  
TAACACTACCCTCTTTATCTACACGAAGGACCATTGTTGCTTTCTTGCCACAATGACAAA  
TACCCTTCATTTGACAGGTTTATCAGCAATTGCCATTAATGCCGCAGATCCTTCAAATA  
GATTGCCCTGAAAGTCAGTGCGAAGCCCATATCACAGTACAGGGATATTAGCATCATCAA  
CAAGCGCACACAAACCTAAAACATGCTCTTTAGTCATAAATTGGGCTTCATCTACAAATA  
CAGCATTAGGACGCCAGCGATCCGGTCTACGTTACCTAACGATTCACGAGAAACCAAAT  
CGAATAGATCATCCGATTTAGTGAAGGTGTTGCTGGGGCACTTAGGCCAATTCGGGAAA  
CGACTTCACTTTATGAATCTCGATTATCAATCACTGGCTTAAGAATTAATACTCGCATAT  
CACGTTCTGTACAGTTATAAGCACTTTGTAACAGAGAAGTTGATTTGCCAGCGTTCATAG  
ATGCATAGTAGAAATATAATTGCGCCATTAATTAATCTACAAAAATCCAACAAGACCTAA  
ACCGATATAAGTCCAGATACCAATAAAAAAGAAGTTAGTGCTCATGGCAAGGATAAACCC  
TTTCAGCGTTTTGGGATACCCGACCCAATATTTCCCGACCGTCTTCAAACCGGATCAGTTT  
ATTGCCTTGAGAGTCCATATCAACCACAACATGTTAATTTTCGAGATTGCAATAGATATTG  
TTTTACAATCTCTACACCCGCCATAATAACAATAACGAAAATAAAAGACCACACAACAAG  
ATTAATGATAGTCTCAAGCATTCTTCTATCACCTCCACCCAATCAGGTGTTCCCTGAAAGA  
CTCCTTCTCCTTCATGATGGTCGCAACCTTTATTGCTACAATACATACACCAATCCCACA  
TTCCCCACGGAAAACGCTGCATATCGTCGTTACAGCAAGTGAAGATAATAGGCCAACCGC  
ATCTAACACATCGGCAGTTTTCTTTTCATGTGAGCGGTATTCGGCTTCTTCATAGATGACT  
CCACTATAATCGACATTTACATTTAGGGCAATGCGGTTCTTTAATATAATACCCGTCTGT  
CTTTGGAACACTAACAGGAGCGGTTTTTATATTGTATTCAGTGAAACAACGAAAACAGGC  
TACGTTTTCTACAGACTGACGTTTCACCCAATCACCGGAATATAGATAATTTTTATTGGT  
CATATTCAACCACCACAATGTTAATGTCTGGAGTTGCAATATTAATGAACTCCTCTACAC  
ATTCCCCTCAAGGCCACCGATACCGCAACCGATTTTAGGAATATAGCAAGGCTGTATAG  
CACCTTCAAAAACGTCATTGATAGTCTCAAATCCTTTAGGATAGCACCATATTCTGCTT  
TTGGACTCGGTCGGAATTGGGTATATAGATTACCCCGCACCAAGTTATAACCATTAACTT  
GATGCGTCCAGACACTAAACCCACCCAGCTTTTCTACCTTGCCGCGAGAAGTTTGCTTGT  
CTATCTCTAACGCTTGCGGGAACCTTTTCGCGATCTTTGCTGCAATACCAGCACCCATAG  
TATGAAAACGATTACAACCATGAATTAATGATCGTTTCTTGTAAACAGGGCGATGA  
GTTTCGCCCTTTACAGTATCACTAATCATAATATAAACCTCTCATTAGTCCCGGGAAGACA  
ACCCAGCCAAAAACGGCTTAACAGAGTGTGCGGATAAGCAAAGCATAATTGCTTATCAG  
GGGACAGTATCACAAGGTTGCGTTTTGTTTTAGCAAACCTGGCAATACTCAGATCCCACG  
CTCGATTTTTTCGTTTTTCGTCTCGACCTAGTTTGTATGCTTCGTGAGTTCAAGTGCGA  
TAAAATCCCTACACATGTTATCATCATCACAGAAAGTTTTAATGATCTTTTTGTTGATCT  
CAAATCCTTTGTATTGAACTTTGGATAAGGGCGCTCATTACTAGCAAGCGCACCCAGCCG  
AGAACATCATAGCAATCATAGCAATTATGGTCAACTTTTTTCATATATTCTCAATAGCGT  
TTAGTCTTAAGGATGCCTTTACTCTTTAGATGGTTAGCCTTTTTTAGTACACCATCAGCA  
TAACCTAACCCAGCTTTATAGTTCCATCCAGCATTGTAAGAAGCTAGCGCGAGTCCGGATA  
TTACCGTTTCGAACATCCAGCCAGTATGCTAACTCATCCATCGCGTAGAAGGCAGAAACC  
TCGCAAATCATGATAAAGTTGATAGTCTGGCGATCACTCATTTTAAACCCGCGCTTTGCA  
TTTTTCGCTTTACCGTTTTTAGGTAATTTGAAATAATCCATAAGCATGATGATTTTTTC  
TTTGGTTCTAAGTTTGCACCCGCGCTTGATTCTTGCCATGCGATACCCGCCAGGATGTGA  
CCTAAACCCTTTCCGTTTTAGCGATTATTCGGATGGTCCTTTTTCAACTTACCGCTTTTT  
TTGACTTGCTCGCCGTGTTGATAGGCGAAATGTAATTAATCTAGTTGGTGTGCTGTAAAG  
TCGTCTATCGGCCCTTTTTGATCGGTGCGCTAGTCGGTGCGTGTGTAGCATCAACGGCT  
AGTGACAGAGTCAATACTATCGCTTTTAGAAGTTTTAACATTAATTTCTCCTGTTTGGCT  
TAACTTTCTGGTTCCATAATATCGCCCTATCACAGAAAGTCAAGCATTATTTTTAACCA  
ATTTCCATTATTGGTCTACCTGCAAAAACAACCGCCGACATTTTACCCGCCAGTTGTTTTG

GATTCTCTATAATCATTTCGGCAGGATAGACCGTGATATGGCTTACCCTCTTCGATTAGAT  
CTACTGTCATCCCGATCAACATGTTACCGTCAGTAATTTCTAATCGATTTCGGTTCGGTCTT  
CCATTTTCAGGAAGTCGAAGACCTCCGGCAAACGAGTTTCTATCTTATTGAATAGTTCCA  
TTGTCTTATGTTTCATCGAAAAGACGATCGGTTAGACGGTCGATCATATGCGGACTAAAGC  
GAATGAAAATATACTCACCGTAACCATCATTCAAGCACTTTTCTTTGATCTGCGCATTGG  
TTTTGCGCATTTCGGTTTTCGAAGAATCTACGCAGCTTACTACGGCGAACATGTACGTTAA  
TTGTTTTCCATTATATTATCCTTTCTTAAACAAATTGCGAATCCAGTATACAAACGGGATT  
TCTTTAAACTTGAATTTCTCTATAGTTAATTTCTTTAGTAGCAAGATGAATACCATAAGCA  
TCATGTGTAACTATCTGCCATTTTCTATAGCCCAAATGTGAACAACACTGTCTGGATCTAGG  
TTAATAAGAGTTTCTCGCTCACTAGGATTATTTTTCCACAATTTTGTAAATAGGATCGCAC  
ATAATTCGACCTAGCGTACCATGAATAATCTCACAACGGTAAAGTTTTCCAGCAGTGAGA  
TAGGGCGCCCCCGTCATAGTCGGTATAAACAAACACTTCTTTAACACTCATTTTAATACTC  
CTTTGTTGTTTTCGCTGGGGGTATATTGTTACCCCGATCATGTGTGTCAACTACTTTTTT  
AAGATTTTTTTTGATTGCATTCCAAGACCTTTATTTCCAGGTTGTTTTGGTTCTTCGAT  
CAGTGTCCATGTTTCGACCGTCTAAGTGTGCACAATTTTTAAGGCAAATAAAAATCTGGTG  
TCCCTTATCAGCACGGATATAACCACTATTCGCAAATCTTTCATGTGGTGTATATTCATA  
CAGTGTATTAGGTGTAATATACTTGCGGTACTATAAGGCGTCATCACGTACATCATGGT  
ACTAACTCCCAACGATCACCGCGAAGATGAGAACATCCACCATCAAGAAGTATCGTAATA  
CGATAACCTATATCATCTATGATGTAACCGATTGTCGGTGGATTTTCGTCGTCTCGTGCC  
GGGGTAAAATCATACTTTCCGGGCGTAATATCTTGTCCCTTATTGGTTTTGGTATAA  
ACTTGCATTTTCTTAATCTCCTATATTAACCTAACCGGGTATAGTGTTCAGAACAAACG  
GTCAGATGAATATATTCTAATAGATCTTTCCAAAAGTCAACATCTGGTTCTTCCGGCATA  
CCGTTTTTCTTTGCCTCTTCACGCGCGAGTTTAAACACGCTCGTGGAGATCTTTCGAATTCT  
TCCCGCACATTATCAAAGGTTCTTTCCCTAACCTTACACGCTAAAATAGAAGAACTTCGC  
GCGAGCGGGAATTGTAGATCACCTGTCTGATAGATTTCAAGTAGCTGATAACCAACATGC  
AGAGCATGAGAAAGATCTTCCAGTACTGAAATACTTTTCAGCATTGGCTACCTGCTTT  
TTGAGATAGCCAGACAAACCCACATACGAACATGATAGAATTTATCTCGATGTGTTCCG  
ATGTATTCCATTCTCTGGAGGATTCAACCAACATGTTACTAGGCGCGTGCACCATATCA  
ATAGCGCCGATATCGCCTTTACATGCCAGATTGATAAACCGTTTTAGACTGAAGATATTA  
ACGTCAATATCGTCTTTGGTGTCTTGGATCCCTTGACCGCTAGTGCTTTGATCATAGTGT  
TCTTTCATCGATCCTAAGATAATTTCTTTCGCGAGTCGGAACAAAGATAACCACGATAATCT  
TTATCGGAATTTTCAGTATCAAGGCCGTATAAGTGAGATCCGAAGACCATTTTAAACCATT  
GTATGCATAATTAACCCCTCATTAGTATTTTACGTTACGTCGAACGCCTTTTCGAATCTG  
ACAAATAGCAGACGGTGAAACATTATATTTTCTTGCAAGTTCTATACCCTTCATATGGGG  
AGAAGATAAAAATATCTTCCACTTGGTCGCCGGTAAGTTGTGCGTTTTCCGTGGTTCTCTCC  
CCAATTTTTGTTTAAATCCTTCTTTCGCGATGAACAAGATTTTCGGGTAGCTGTGCTCCA  
TTCAAGATTATAAAGGTCATAGTTTTGTTTGGTTCCATCCTTATGATTAACCTACACGGTA  
GTTATTTGGATTCCGAATAAACGCAACCGCCATAGCTTTATGCATGTTACCGTTTTTCT  
AAATCCATCCGGCTTATAACATACTGTAATTTAGAATAACCAGTTTTACCATAAACACT  
AATATAATTTCCGGTCTCCGTATTTCTAACCCCTACCATGAGAGCTAATCTCAAATTGAGT  
GTAGGGCAACAGCGCAACAATTACTTTCCATTCTTCGACAGGATGGTCATCACAATATCT  
TTAATCATCATATCACCTCATTAAAATAAAGCCAACCCCTTTCGGATTGGCTTAAAAATT  
TACATTGCTTCCGTAAAGGTGCGCGAAATAACGTCACGTTGTTGGTCTGGAGTCAGACTA  
TTGAATCTTACGGCATATCCGCTAACGCGAATGGTTAGTTGCGGATACTTATCAGGATTA  
GCAACCGCATCGAGAAGAAGATCGCGACTCGTAACATTGAAATTAGCGTGCTGACCACCT  
TCGACAACCGGAGCACCATTATCTACAATCACCGGACGGAAGCTAGTTGTGTGCAGGGCC  
AGAGAATCGACGTCTTCTGCGTCGATCACATGGTCTTCTGCGAATGTTTTACTAACAAC  
ACTTTATCGCCGATCAGTGCTTTCGGTTCGGATACCAGAATCATAGGCGCGAAGTGTCCA  
CCAATAATAGTACCTTTATGCTCCCCTTTCATGATTTGAATTGCTTTAAATTCCATAATT  
CACCTCTTATAGATCACGACGTTTCGTCATTAATTTTACCTACCAAACACCATAGAGTTT  
ATCAGTTGGACTTTACGATTCTTTTTAATTGTGGCACGGAATCGACGAGCTACGCTATC  
TTTATTTTTTATTAGTTGATACCTACGCCAATGACAATAGGTTGGTCTTCTACATTACCC  
ATCCCAACACTAAGTCGATTCAATTCTAAAACTGCAATACGCTGTCAGTAAATCCGCGC  
ATGGTAGTATCTAGGCTAAAAATTGTTTTGTCAAGACTACGACTTCGCCATGTGATCGGA  
TTCAGGAAAGTTCCGGATAGATGTACAATCTACATCTGAAATATTTACATTGTCACCGCGA  
CCGCGATCTCGGATCGTTTTGGCATGTTCCCGCGTCGTTGAAACGATAAAGACACTATAG  
CCTTTTCGCGTATAATGGTCATATAACTTGATTGTAGCGTCTGTATGCCCTCTCTGACGG

CCTAAATTGATTGAGACGATGGAATCAAGGTCATCAGCAAATTTGCGTCGCTCTCGGGCT  
TCTATGATGCCATTTACGGCAGATACACACGCAGCATAAATCAAATCTTTACTTTCTAAT  
TTTACATCAGTATTCATGGTAAAGTCTCCAGCGAACGGGGAGAGATCCTTAGATTGTCTC  
CCCGTTGATGGTTAATATTTTATTTTCGATCTGGGAAATTC AATAGAGCATATTGTCCAT  
AAAATTTCTAGCTGCATTATCATAAGCGATTGCAGCTTCGATTTCTGTGTCATATTGTC  
CAAGAACATGTCTTTGTAGGTTGACCATTATACTAGCTCTCCATTTCTTACGCAAATCCT  
TCCTGTTACACTTACTAACACCCTTATACACACTAGAAAACCTTTTTAGACTTTTTCTTTC  
TATTATGTGGATTCTGCGCGTCGGTTGCCTCCCTAAGATTTGGAGGATTGTTATTAGCAG  
GATCACCGTCAATATGATCAATTAATCTAACTTGCCTCCCATGTTCTAGAAACCAAACAA  
CCCTATGCACGAATAGATAAACTCTAGGAAGACCGCCATCTCTACTATGCCAAAATCAA  
GATGACCATCTTTATTTGTTCTGACTTTAACTAAATCACCGTGTTTATATCTACTCCCTA  
ATGGTCGTCCTTTGATAGCTTTACTACCGACTCTATCATATAAGATACCCTCTATATGAG  
CATATCTAAGTTTCATCTCGTTTTGTAGGGATTTCATCCCAATATTTAAAAGGCCATTTTAT  
AATCCTCACAAAGCCAGCGATTAAGCTGGCTTTATTTTAGTTATACCGGGTCTGGATATA  
CCTTTTTATCGAGTTCCATATGCGGTCCGTCTTTAAAAGTAACCCAATCAACACCGCAGA  
TAACAGGAACACCCAATTCTCGACCAGCTTGTTTAAATGCATCAGCGATCATACGGTAGT  
ATTTTCATGTTCCATGTATCCTTATCTTTCGGATACGCTACAACGTCAACCGCGAAACCGT  
GAAGATGACGAGATGTCATAGTCTTAGATTTACCTTCCGCAACATATTTCTTTTGCCTTT  
CTAGACTACGTACACCTTCCGTAATACCAAAGTCGACCGGAGTCAGTTCTAACGCACGAT  
GAACTACTTTTACCAGGTCTGGATGCACACCAACAAGCCGATCTTTGCTTCTTTGAGATA  
ATTTAGACATTATTCACCCCTTTGTGAGTGATAATACTTAGATCCCGGCGATCCTGCAT  
AGAGTTCTTGTATTAGCACCAATAAGGATAGCATTAAACGACAACCATTCCCAATTAACC  
CACTGATTATTAGAAATGCTAAATCCGTTTGTAGGCCAAATACAAGCATTCCGGTACAC  
ATACTCACAGCAATAATCAACATCACTGTAAAACCAAATGCAAATCTCATTTTATTTTCC  
TTTTCACTGTATACGTTTATAAAAAGTAATACATTACCTCATCGCGTTCGGTGATCCAACA  
TGCTAGGGCGGTAAACAGGTTTACAATTCCCAACACACCTACTGACGCGGCGCTGTCAAC  
AGACATAGGAACAGTAAAGGCCATAGCTAACATAGCAACGCCACAATGACATTAAGCAC  
CATTTTAATAAGACCGAAGAAAACCATTGTCAATCCTCCGACACAAGAAAACCAACAATC  
ACGCCAGTGATAAGACATGATGCGCCGCTAATCAGACAACCCGCACCACGTGATTCCAC  
CAGATCAGAGAAGCGACAATAACACAGAATCCCCATACTACCGCAATCACAACATAGGCA  
AGGGTCGCCAAAACATATATTTGTTTATAATAAATCCCATTACCAAACAATAAGAAA  
AAAGCCATATCAACAGATACGAGGCAATTGACGCGCCAAGCAAAGGATATTAGAGAATC  
CGCCGTCTATCCAGGCGACAAAACAGAATACGCAAGTATAGAAGCATAAACCAATTACAA  
AGCATATTATAAGCAACCATAGATAAAACGCCATAGAAAGCCCTCCATCGAGATAAATTA  
GTGCGGGTAGCACATTACCATAACCCGCATTGTTAGCCATCGCAGAGCGGGTTCTAGAACG  
ATTCCACACCAACCGCTAACACACCCAAACACACAGCAACAAGCAGATTCAATTCGGTCT  
TTTGGAAATCATCGCAAACAGAACACACCCACACAGAAAGCCATTACCATTGAAGTTAAC  
ATTTGTTCAACGATTATCACACCTTTAAAGTCATAGACGCATAAACATTAATGTCAGGCC  
AGTTAGGTTTCGAAATTATACTCAACATCCCACAATATAGCGGTTTAGATGTATCAGCCA  
AGTTTTTAAAATCTTCTACCCACTTTTCAAGGCTATATGATGGATAAACAAGGCCATCAT  
ATCCGCCGTAACGTTGGCTTACTGGTCGGTCAGTAAAAACTACCTCAAGATCCGGTAATT  
CTTTTTCAAGGATAACCGCCAGCGCATAAATCAGACGGTCTCCATGTTACGCTGCCGAA  
GGACCGTTGTAAGTGGGTTTTTCTGGTTCACTAGCAAGCACCTCCACATTTTACAGAAAT  
GAAATTCTCACAGACACAATTTTACCATAAGTGAAGAATGAATATAACATTATCGAGATAT  
TCAACGTACCTACAATCACATCAAATGCGGATCAGCAACCGCCGCTACATATTCTACC  
AGTTCATCAAGAGAATGCAACTTAATTTTCATCAATTCGGCTGTATTTGGTGGCAGCTTTG  
ATTTTAAAACCAGTTCTTTTCAGCTTATCATTTAGAATTTACGCGGAGTTTCAAACAGT  
TTTCTCATAATATAATCCTCAGATAGTTAATCAATGGTCAATAATCTTGTACATTATAAC  
AGAAAGAACAAGACCGCAACCCACATATAGATCCCAGCAATCAATGCTATTTCAATAAC  
ACAATATCCCAGATATAACAACAGGAATAAAAACAAACATACAGACCAGCGCAAAGAACT  
AGCAAACACGCTAGAAAATCCGATAGCAGTATTAGTAATATTCATATTAACACTCCTCGC  
GGCTTAAGTCAACAGCAGTTGCATACAGCATATTGAATATGCTAGCCGATCCGAGAATCA  
ATGCACCCTCACATTTTGAAGTCGCTCATCAAATGTAACATTATCCATCCGAGGATGT  
TAAAGGCGCAGACCGCGCCTATGTTTCGCTAACCAATTAATCTTTTTTATAATATATCTTA  
GAAAGAAACAGTTTTCAAGAAATCCAGATTTTGTAGTACCGAAAACAGAAAAGTAGTGTTT  
TCCTTTTTTCGGTTTTAGAGAAAGCGATTGTCTTCTCTACATGGTGACGGAAGCCAGACAG  
ACGATCACCCAGGTCAAGGCGGCAAGCGTAAGTAGTGCCGTTTTTCGAAAGTAACCTCGAT

TTGAGTTTTGTCATATTCGCTTTCATAGGCTTTTGCTGCGCGCTTCCTGTGCTGTACGCTC  
GAAGTCTTCGAAGTGAATACTTTGTTTTGCGTTATCGAATACAGAAGATTCAGAGAAGAT  
AACTTTAACAGATACTGGTTACATTTTGATACTCCTTAGTAGTTCGTGTTTCGTTTCGAT  
GGGTGTATTATGCAATACACCCTCTCTCGTGTCAACAACCTTTTTAGTCTTTTTTCATAAT  
TTCTAGAGCAGTTTCTACAGCAGCTTTCCAACCTTCCCATATAATGGACATAGTAAGGAA  
GTTAAAGCACCCGCAGGAATCAACCTTTTTAGAGCTAAACCATTCTACAAACGCTTCGCT  
CATACCATGCTCTTTAGCGGATTCGCGTAATTGTTCAATTTGGTCTTCCATAGTATCACC  
TCAACACTTAACGTTATTCAAACCTCAAACGGTCTATTTCATCCTATTGTAAGTACATAT  
AACAAAGCGTAGTTATGTTTTGGTTGTACCGTATCAGATAGACACGCTTTTACAGCCTCAC  
GGTCCGCTGGGTCTACACTCTCAGCTTTAAGTAATGCTAAAATCTGGTTATAGCGTACTC  
TTAGTTGTACTAATGGTTTATCCCCCATATTACCCCGTATAGTTGATCAGCGATGTAAG  
CGTGACAAGCGCGGAGTTTCATTAATGCACTACCTTTCACTTCGCCTACGATGTTTCATAA  
CTTCTAAGCGGTTGGGTGGACTCATCTTAGAGCACCAGATCTGGTTAGCCAATTCCAGTT  
TACTCATATTTGGTTCATCTCAAAGAGTTCACGCTCAAAGTCGATAGTTTCTTTTGCTG  
CGTCTTTAAAGTTAATCATGTTGATTCTCCCGTTTCGTTGATGGTTGTATTGTAGGGGAG  
TTATCCTCCCCTGTCAACACGTTTATCAGAAATATGCAATAAAGTTTGCCGGTCCGACAG  
AGTCATCATTGGCATTGCTTTTACTGCCAGTTCCAACCCTGCTTCTACTTTCTATTTAG  
CGGATTCTTCGTTATAACCCAGATTACCAGAATAGCTACTACGTTTTCTTTGCTTACTG  
CTTTTAGTGCTTTAGTGATGCGACGTGCCATAATTTGATTCTCCGTTTAAAGAAAGTGTGT  
TTCTTTTCGATGGGTGAATTATGCTATAGGCCGGATATGGTGAATCAACTTTTTTTAAA  
AAAAATTTTAGGCAATAAAAAAGCCACTCCGAAGAGTGGCTTATAGGGAAGGTAGCGAA  
TCTTCCTTGTCTCCAACCTGCTAGCGGCCTAGCAAGTGAATGCTTACCGTACCGGATCG  
CCCATACGCTGCAATAAATGCGGCTAGGTGACGTCAAATCATTCTAACCGCGCTGTCTT  
TAGTTCACTGTTATTTATATCGCTTCTCTCGTGACGTATTTGAATCTCTTCCTTGATAG  
AGTTAAATGCATCAAAAAGACACTTGACACTAATAATAAACATAACCGTATTTTCTACGA  
TATCCCAGTGCTTCGCATCAGTACAGATCCCCCAAACGGTAAGAAGTGCGAATAGTGCAG  
AAGAGATCACAAGCATGATACTTGCTAAGATATAAAAAGTCATTTTCATGGTTTTACCTC  
AATTCTTCGATATTCATCACACATCCACGCCGTAAGCAAGAATCCTAACACATAAGCAAC  
AAAATACGTTAATGATTCTTCTGGTTCTGTGCTGTGTATCATCATTAAACCAGCTAGAAC  
GGTCTTAAACAATAACATTTAAAATAAATTAGCCACGCAAATAATTCATCGTTTGCCCCAT  
TTCGGTTCGAGTCTTTCAAACCTTGACATTCCGTAACAATCTCGAATTATCCACGTAACA  
AGAGCACCAAGTCAACACAGACAATACACAGAAGAAGTAAAACGGTCCATTTGCATTATGA  
ACATGAGCAAGCCATGTAAAGAAAACACATGCTAAGAATGTAAAGAACATCATAAAAACAC  
AAGAAAGCAAATATTTTATGCTACTCATAGCGCCACCCTACAACAGATCATAAGAAAAC  
CCTACGCAATAAGAATTGCATCAAATTTAGTGAACCTCAGGTCCACCTATCAACGTCACTC  
GTTCTGTTCATTCATAGATCACAGAGCCATTTACAGCACCACATAAAGCGATCAAAAAG  
ACTAGGTATAAACGAGATTACAACAAGTTTACAAAAATCATCTAAGGTAACACCGGAATA  
GCTACCTACTGTAACAACACCGATCATCAGCCACAGAAAGAAAACAATGCAATCAGAAA  
CAAAGTATTGCTAAACAGTTTAGTGATCATTAGACACCCCCACGACGATCACTTTCAAAA  
ACTTTTTTACCATCAACGAAGCATGTCACAACCTGCCTCGTTGACTTCCGCAAATTTGTTGT  
GTCACCCACTTAAGGTCAGAGCGAAACAATGTTTCGATTAATAACAATGTTTTACCGCTC  
TTATCCTTACCATAAATTTTGCTTTAACCATCTCCAATACCATATTATCACCTTATTTG  
CTAATCGCTAAACCCAATCCGAAGAGAGCACCCGATGCTACAGTATACCTGAAAGTATCA  
AATGCAGTAAAGATATCTAAGCCACCAGCTAACAGAGTTGCAGGAAACAGAGTACCAGCT  
ACGAACATAAAAGTTTTACCGATAAATTCATTTTGATTCTCCTTTCGTTTATTTGTGGG  
GGTATCTTACTACTCACGTTTCATGTTGTCAACTGTTTTTAAGAAAATTTTACTTCGTCT  
ACAACGTCTTTCATGACATTGATTTCCATTCCGGTAAGAACACGTTGGAACATGTGCTGC  
ACATACGCTTTCAGGTATTCATTTGATGGCTTGCTATCGAAAGTCTTTTTTAGTGTAGTAG  
TCATCACCGAAAGGTACTGTAATTACATTTTCGTCGTCGGTCCAAGCGATATAAGCAAAT  
TTCCCGTTATCCAGAAGCGAGCACTAATTGCTACTTTTGTTGAATCGAATCCTACTTCG  
CTGTGAGATTCAAGAACTACTTGCGTACCAGTTTCTTTATGAATGTAGTAGCGGGATACT  
AAGTCAAAGTTACGGGTGTAGTGACATTCGAATTTATCTTTAAACATCATCATTTTGATT  
CTCCTAAGTGTGTTTCGTTTCGATATGTGCATTATGCTATAGTCGTTTATGGTTGTCAAC  
ACCTAACAAACAAAAACCCGGAAAAATTTTCGGGGTATAAAGTTACAGTTTGGTTCGTCCA  
CTCCAGGTCTAGATCTTCGGCATACTCATGAGATCGGACAATCTCTAAATCGAACTCTAG  
GTCAGTGCCAAATTTCCGCGCACCAACATCATAAGAAGGCGTGATATGCGGTACATATTC  
AGGATAATCCCACGTCGCGCCTAAAGCAGTGCCGATATCGTGTCTGAATTGCATGTAGTC



GCTTTCAAATGCCAACAGAAGCGCATTAGTACCGGATTGAGTTTCAAAAACCTTTCAGATG  
GCATAGAGAGCCAAAAAACTTTTACCCTCTTCTGGGATAAACGGAACATAGACACGAGA  
ATATAAGATGGTGCTATGCAGTTTATCACGAAGAACGGCATTGTCAGATCGTAGAACTC  
CTGCAATTTTTCAATGCGGTCTACTGTATCCTCAGTGCATTTAAGAGCCGCATATCTACC  
TTAACGGATTCTCGAAACGGGGTCATAATCAAGCCTCCGTGATCAGTTCTACTTCTCT  
TCTGCCTCTTCCGCTTCTTCGTCTTTAGGGAGAAGTGCTTTCACTTCTTCGACAATAGCA  
TCAAGGGAAACAGTCCCGTTTTTCGTCTGGCTGAATACCCAGTATGCGTACCAGTTCATC  
AATACACGCTCACGATCTTTCGGTTGGCCTCCTAAGAATGCGGCCTTTTCTTGAGTGTCA  
AACAGACGTAATTCAGGACATTAATCATTTTTTTCATGCTGATTGGACATATTCGCATCT  
CCTACTTGTGATAACTTTTTATTATATGTTTCGCGAGAATCGCGCTTTCAAATTCTTCTA  
ATGTACCATTATGTATGATAATGGTTTAAACCGTCAATAGGCAAAATTCCTTATTCGGTGG  
AGTGAGTCGATACAATACCAGTATCACGCTGAATATGCAACACCTTAGCACCCATAGCAC  
GCACGAGAGCAATTTCAATAGGCTGAAGCACATCAACCACTACAAATTAACCTTCTTCAT  
TTTTGCGCTTCATAAGCTCATTACGAATAGATTACACCAATAAAGCGGATTGATCAAGT  
TAACCATTATATCAGTACCGAGAGTGGTTAACATGAGACGAATAGACCAGACGTTATTAT  
GTTGTTTCGCCAATCTCATTAAACGACCTGGTAAATCTCAGCCAGACGATCACAAGTAAAGG  
AACTACCGCCATACTTCGAATCTAGCATAAGCAGACACTGAATAAACCCTTATGCGCGG  
TATAGGTATCAATACCTAGATCGGCTTCTCTGTCTCGCCCTGACCCGTCAAAGTCAAGTT  
AAGTCAGACCTTAGCCTGGTTAACATTCGCACAATATTTCTTTGATGGGTGCTGCCAGTT  
GATAACTATGTCCATCAATGATTAACGCGGCAGTATCTTTTCTACTCGCTTTTTACCAC  
AAAGTGCAATCAATTTTCATGATATAAGCCTCTTAGTACTTTCTAAAAGCAGGGTGCATCG  
CTTTAATACCTTGCACCCTCTGACGATCCGCCGCCTGAATTGCTGGGCGAGGAACGATCA  
GTTGACCATCACGTTCAATGCTCATTGTTTTAAAGGGAAGAATTGCAGTACACACCAGAG  
AATCATGCATATAATCGGTGTATGTTAACTCAAGTTCCTTCAATTGTGAACACCAACAAC  
CATAAAAGTTAAAAGTGACACACAATGTTACGTCGGTCGTTGTCCATCATGTGAGCTTGAA  
CGGCTTCCGGCATTGAATCCTTCCTCGCAGTGGAGTTACCGTTATTGTAGTCTACTATAG  
AAAGCATCCATGTGTAAAGGTTTAGATAGCTTTCCAAATGCTCATCGACAATAAACC  
CTACCAATGGGTCAAACCTCCACATGACTAGACGGATAATCACCGACCGCCAAACCAATTT  
GACCAGCAACTTGCTTAGTCGGTGGATTGGTTATAGCCGGAAGTGTAACACCTTGAGCAT  
TTAAAGTAAAGCCTTTTGTAGTTGTCCATCTGGAATATTGATCTGCCAGTTGCTGGGGT  
TAGCATAGTTAAAGAGATTAGACATTACTGATTCCTCAAGTGAAAATATTTATTAACAAT  
TGTCGCTTTGCGACGTGCCGGCGGCACTGACTACTTTTTAAACCGAAACAAATTTTCTATT  
ATTCTAAAGATCTTTCTTCGTTAGGTTATGTTTTAAACCAATAACTATCTTTTTTATACAG  
TTATAAATAAAACGGGTACTATACGAGGACTTCTTATGACAGAAGACATTGTGTTAAAC  
TCTATGATCGTCTGGATAACGAATTAGCAACATTGCGGGGTGAAGTTCTCTATTTGTCTA  
AATGCAATACAGATCTGTTAAGCAGATTGCAGAAAGGGATGATCAAATAAAATCCCTTT  
CAGGTGCATTACGTGATCGCGACAAGGCATTAGAGATTATACAGCGTGTACCAATCAGG  
AAGAATTAAGACTTCCCTACATGGTTATGCTCGTGCCATCGATCTATAATAAAAAAGCC  
CGTTATTGACGGGCTTAATGTTAACTATTGATCATATCAATGACGTTTTGTAGCTCTGAT  
ATGGATAGCGTTTCTGTATATCCATCTGGCATACTACTTTACTAACATAGAAACCTTTA  
TACTTTTTCTTTATTGCACATTCCATAGAACGAGCCTCATACCGTTATCGTATTTTTTA  
TAAAATGTCAACTCATGACGAAATATAGATTTTTAAGATTGGTTTTGTCTTCATTTTATT  
AATCTGTTGTTGGTTATACCAATTTTATAGCAACCGCAACATTTTCTTTGTATAAAGTT  
TGTACATAAATGTATGCAGGTTTATCCTCTTAAAGCCATGATTGCTACACATAGGGCAA  
CCGCTATTTTTTGATACGCAGTCTCCTAAGTTTGGCGTAAATTCATGTCCGCTACTACAA  
CGCATTACCAATTTTGTTTTTAGGATTCTCTATACTCACCGCCAACAAAATCAACAAAT  
GTATCACCTTTATCAATCGCCTTATCTGTTATTTCTTTACTACTTGCTCAGTTGACTTC  
TTGTTTTTACCTGAACATAGTTTACATCTAGATCCATTAATAAAAACGAGTGACCGGAT  
GCAGTATATTCATGTTCTTTAGGGCATTAACTAAGATATTTCTTTTATAAAAATCTTTA  
TAATCAGACACATAGCCAATGACTTCGTGGTCTTTTTGGTTCTTCTCATCTCTGTTAGC  
AACTCTTCGCTATCCCAGCGTTTACCCTTAAACGCAGAGACAACCATGACCTGGATAAAGA  
TATATAAATTTTCTAGTAAAGTTTTTGTGCAATCAGGACAAAGCATTAGTAATTCTGTC  
ATTTGACCTGTATATCCTTTAGGAATATCGATCAATGTGCATTTTCCGCATATTGTCGTT  
AATGCATCATCTATTCTTTAATTGGTCCAGCGTAAGCGACCAGTGCATTCATGACATTTT  
ACACCCAGTCTAAGAGTATCTAAACTAAATATAGTTGACGTATGTCCTTTATCACATTTT  
AACTTAAATCTAGTATCCTTTGCGTTGGTGTATTCTCCGACTAGAACATACCATTTCATAA  
CAACATGGGATATGTTCTTTTACCTTCTCTGGATATACACCGAACGGTCTAGGAACTGAA

TTGGGTTTTCTTTCTTTAGTCATATTTTTATATCCTGTAAATTAAGCGCCGTCACCAGC  
GGCGCTATTTTAATAATCATTAAAACAATTTCCACACCTTACGAGCATCATATTTCTGT  
CTTTGCTCATAAACTGGTAGAGCGGAAGGTACACAGCCGTGCTCCAATCTTTTGGTGCGA  
TCTCAATCAGTTTTGCTTGGATGTGTCCAGGCAAATATGCTTTGATCATGTGGTCTGCGC  
CTCTCATATCTATAACATCACTCCATTTAATTTTTAAACGAGTTTTATTACTAACAGTAG  
GTGTACTCGCGGATTGTGCAACAACGCTTCTAAGAACTGCTGGCGGGCTTTAGGTGGCG  
CATAGTGCAAGTTCAAACCTAGCATAATCTCGTTTCCCGCTTTAGATGTACCAAATCCTA  
GACAGATAATCAAGGGGTATCGGTCAAAGAATGGCAAAGAATCCCGATATTTTGGGTTAT  
ACGCATAAGTCTAGATCCGTCCCCTTGTGGTATTACCACCTGATGACCTTTTACACCAT  
CCTTGATGGTCTTCATAAACCACTCCTGTGATTTTTCTTTAGGACGACGCTTCGATACAG  
GACGCATAGACGCACGAAAATCATTAACTACTATCATTTCGCGTTGCTGCTTATTGAGAC  
CCTTTGCACCTTTCCCTTTTAGTTTTCAACTTCTATTGCTGTTTTAATTTTCGCTGGTAT  
AACGAGACATACTTTTAGTGAAAGTAGCATAGGCTATTCCCTTAGAATCTGCAAATGCTT  
TAGCTGTCATGCCTTTGGCTTTTGGCTTTTCGCAAATTCTACACCCAATTCGACCCACTGTT  
TAGACTTTTCATTTTTGGGGAAGACGGCTTTTCGTGTTCTGTGACAATTTCAAATACGCTC  
ATAATATTATCCTCTATTTGTTAAGCCCGTTAAAGCCAAACACTTTCTTTAATGCATGTT  
CGGTGATGATCTTAAACTCCATGTTATGCTTTTGGCATAATTTACGGCAGCTAACCATT  
TTTCAGTATTTTTTGTGTATGTTCACTTCTTGCATATATCGTTGCTTTGTCTTCGCGG  
TCATTCTTTTTGGCTTTTCCGGTGGCCTTGTCTCTTTAGCTGGTTAACTTCCATAAAT  
GCTCCTTGCCACCAACAATCTTAATGTAAAAATCCATAAAGTATATGTGTCTTTTTCCGT  
CTGTTGATGGCTCATAAGGAATTACTACGGTCTCAGATCCCCATTTTGCAACTCTAGGAG  
TGCGGTCTAGCCACTGCATGATCCATCTTTCCAGCTTGAACGGTATGTGATCTTACGTA  
TATCCCCTTTATACTTTTCCCTTATACTCAGGAACATACTTGCCTTATAAGTGTTAGATT  
CTCCCATTTTAGCACCTTTATTATAAATACATAATACTATTTATCAATTGAGGGTGATA  
AAATGCTCTTTTCATTCTTCCCTGACATTGAATAACAACGGCAAGATGATTACTGACATTG  
TGCGCAATTACCGCGCATATTTCAACGCTATAATTTCTGATTATAACATAACAATCATATT  
ACATTCAAGGTAGTCCACGACCGGAACAAGGTGCATATGAAGTATCCGGAAACCAACAAC  
TTTACTGGGTCTTGTGATGCTTAATGACGTATACGATCCGTTCCATGACTGGATCACCG  
ATCAAGAGACAGCATATGAATCAACCGAAGAACGATATGCAATTGTCCGGAGGAAATCAAG  
TATTATACCACGTTGATATTGACGGAAACAAGTCTCCGAATCTTACCGAATATCCGAAAG  
GATCAAGCAATTGGTATGATAAAGGGGATATTCATCACCGTCATTTGCAGTTTCATGGTG  
CATTGTCCGGCAGTGGACACACTGGAAGATGCGATCCTCCGTAATGAGGAACGACGCAAGA  
TCAAGATCATAGCTCCTACACAAATTAACAATTTATTAACGCATTCATTTCGAGAAATGG  
AAAAGGCTGATGTGTAAGGTGATTAATTATGCAAATGTTAATAACTCCGTTAAATGGTT  
TACCGAAATTGTAGAAAACAGGGAAGACCCATTAATGCTGGGGCGTGTTTACGGTTAGGAT  
TCATGGTATACATCCCTCGCTATCCGCGCACGGTGACATTCAAGCTCTTCCAACAGAAGA  
TCTATTATTGATTACGCCAGTACAAGATATTACAAGCGCGGCGATCTCCGGTAGAGGTCA  
AAGCCCTACTGGTATTGTTGAAGGTTCAATGGTATTAGGTTTGGCTTAAGACGAACGTTA  
TTTATACTGCGTTATTCTGGGTACTATTGCCGGACAATATACAGAGAAACCACTCACTAC  
AGAAGGTTTTTGCACCCCTCTGGTGCATATCCTCGTTATATTGGTAATGATGTTAATAT  
TCTTGCTCGTGGCGGTATTAACCCAGAAACCGGACAAACAACAAACCTGACAGTGTCTA  
TATTCGAGTTGCAAACACTGGAGTTGCAGTAAATCCAGACGACGAGCCGTTAGACCAAAT  
TCCGTTGATGATAATCCTGATTTTACAATAGAGAAAATGCTGAGGGGCGATGAGGGATA  
TCGCGAGAAATGGTATCTTGATTCAGAAGGATATCCGACCATAGGCATCGGGCATTGAT  
CATTTATAAGAAAACAGTGATCTGGGTATTATCAATAATGAACTTTCTAAGCTGGTAGG  
GCGTGAAGTTACAAACGGAAGACTCACCGCCGAAGAAGTTAGTAAAGTATTTGCTGACGA  
TATAGAAAGGACTCGTCGTGATATTGCAAACATCCACGAATTGCACCTGTCTATAATAA  
ATGTAATGCCTCTCGTCGTAGGGCATTAGAAAACATGGCGTTTCAAATGGGTGTTGGTGG  
ATTCGGTAAATTTGAGAATAGTCTTGCAGCGATCTTAGCGGAAGAATGGAAACAAGCCTA  
TGATGGATTACGTCAATCTGTATGGGCTAATCAAACCTCAGGACGGTCAAGCCGTGTTTC  
TAAAATTATTCTTACTCGTAACTTAGAATCATATGGCGTAATTGCTCCAAGAAAGAGGA  
ATCTGTTTCTGATGATCCGCGAGCACGTTGGAGAAATGCCCGTATTGCTGCCTATAAGAC  
GCAGAGAGCAGAAGAAGACCCAGAAGCACCGTTGACCCACAGGACACACGAATCATGTT  
TAAAGAGCCTAAGAGTTCGCATTCTGCGAGGTATCCTTAGAACCATGTGTACGAGTCAGA  
GAGCGGTCAATATTATCGAGATTGATGATACTCCTTCTCATGAGCGTTATGACCGCAAACA  
TCCTTCTGGTACATTTGTAGAAACAGACCGGACGGAACGAGGGTAGAAAAGATTGAAGG  
TGATGATTATCTAATCGTTAAACAAGGCCGGAAGTAAACGTTAAGGGTAATTTGCAAGT

TGTTGTTGAAGGTGACGCGCAAGTTTATTATATGGGTAATGTGATGCAAACCATTGATGG  
TAACGTCACTGAATTTATTCGTGGCAATGTTAATCAGACCGTTGAAGGTACGGCTAACAT  
GCATGTTGTAGGTGATGTTACCGCTCAACTTGACGCTAATTTAACGGCTAATGTCAAGGG  
TAATGCTGAATTAATGATCGAGGGTAACACTACCGAAACAATTAAGGTAACATGATTT  
AACCGTTGAGGGTAATTTAATATGACCGTCAATGGCACTAAATCAGATCAGGTTAATGG  
TGA CTGGTCCCCTAATTGTGGTGCAAGCGTTAAAGATATTACATCTGGTACAGTTCAAAT  
TGATGGTAGCCGATTGATTTTGGGTGAGGTA ACTATTGGTTGAAATTCTTCCGATGAAT  
TCAAAATTGGAGGATATCAGCGAGCGAGAAATCTTTGAGGTGGTGTCTCTTATAAAGCA  
ACGCCACCGGATGCAAATACCACATACACAATTAAGAGTTTAAGATCAGCGAGTATCGC  
CCTAATAAGGGCGTTACCGTTGAAGAACTAAAATATCTGGTGAGTATCGGGATAGTTTT  
TCGCTTGGCGCGGATTCTCTTAAATATAGAACGAAAGATAGAATTA AAAAATCTGCTGGA  
AGTTTTGATGATTTACCAGATCCA ACTACGGCAGATCTATATTTTTTTAAAGCTCCTACA  
CGTCTACAGGAGGTTTATACTTATAAAGTAACCGTAACCTATATCCAATCTGTTTCAGAG  
TCTTCTGGTGGTCTGGTGAAGGAAATAGTGGTGGTTCCAATAGCCGAGAGGGTGCTGGA  
GAACTAATCCTCCTCCGGTAGTAACCGAACACAGAATAGAGAAAGTTTATACACAAACC  
GTTTTTGAAATTGGGATGTGTGGGAGCAGCAACTAAGAGTTTATGTACATAGGGGTGTT  
TAATGGCTGGATTATCCTACGATAAAGTTAAA ACTACAGGGCACGGAACTACCCACCTA  
CGTAATTAATGCAACTCAATCAAAGGTATTTGTTGAGGGTATCCAGTATTAGTCGAAG  
GAGACCCAATTACACCACACACAAAAACAACAAAGCCTTATGATACACACGGGGGAACTA  
CGGTCGCCAGTACCCCGAAAGTATTTGTTACCGGAAAGAAAGCAATTC AATGGCAGATC  
GTATTAGCTGTGGCGATACGGTCGCTATGGCATCACCGAAGGTATTCATAAAATGACAAA  
GCAAAGATTACACAAATCCCTGATATTTTTAATGCTGCTACATTCGATGAAATTA AAG  
CGCATTAAACAGACTGGATGAGAAACCAGAAAGAATTTAAAGATTTTGATTTT AATGGTGC  
TGGTATTAACGTATTGATGGACTTGCTCGCATATAACACTCTGTATATTCAGCAATTCTC  
TAACGCCGCGCTATATGAATCTTTTATCAGAACGGCAATTACGCGTAGTTCAGTTGTTCC  
AGCCGCGCAAGATTTAGGATATTTGCCAGCAAGTAAAGTAGTGCATCGACTACAATTAT  
GTTGCACGTAACACATGCTCCAAATCCGGCAAGTATTCGAATCCCACGAGGAACTAAATT  
TATTGCAAGTGTTGATCGCCAGACGTCTTATCCGTTTGTGACTACAGAAGACGTTTTGAG  
CGTTTTAGGTTCAAATGGTTTATATACGCCTATGCTTAAAGTCGCACACGGTTCGTATTGT  
TCGTACAGAAATGTTATTTAATCCGAAGAAACAAATTCGTATCCGCGATCCTGATATTGA  
CCGCGCTCAGGGTAAATTGTGGGTAGACGGTGCTGAATGGAAAGACTGGACACGAGAAAG  
CATTGTTAACGCAACTGGTGCAAGCAATATTTTCTATATGCGTGAAACCGTAGACGGTCT  
TACAGAAATCTTCTTTGGTAAAGGAGAATCAACTTTATCTGCTGCTGGCGGTGCACTGGA  
AGCAAATTATATTGGTGGACTTAAGCCGTCAACTGGTGCTAATATTGTTATCGAATATAT  
CAGCACTAAAGGCGCGGAAGCTAACGGATCTGTCAATTTTACATACGCGGATACATTGGC  
ATCTATCTCTATTGTTAAAATTAATGAGAATCCGACAAATGATCGTGATTATGTCGGTGC  
AGATGGTGGTGGTATCCTGAATCAATCGAACGTATGCGTGA ACTTGCTCCGGTAATGCG  
TAAGTCTCAGCGTCGTTGTGTTACTGCTTCTGACTATGAGGCTTTTGTATCTATCCGTTT  
TGGTAGTATTGTT CAGGCGGTACAATGTTTACCAGCCGAGAAAAACCGGGTAATGCTTT  
TGTTGCTGTTAAGCCTAAATCTGGCTTGC GTTAGACA ACTGCTCAAAAAGAAGATATGCG  
CGATTATCTGGCAAAATATAATCTTGCCCTATCACGCTGAGCATCATTGACCCAACTA  
TCTGTATATTAACAGAATATTAAGTTT CCTATTCAATCAATGACTTGTCAGAATCAGT  
GCAGTGGTTGCGCGGTGCGGTTATTGATCAGATTGATGCATACTAGACCGACGTAGTGGA  
AATTTTTAACTAGACCTTTAGTAAGTCTAAAATGCTTGCTCGAATTGACAAAGCTGATGT  
ATCTTTGATAGGTTCTAGTGCAGAAATCGAGATGGTGC GAGAGATCGACA ACTTCTATAA  
AGCACCTATGGCTGGAATCAAGTTTTTGAACCAGTATAAGAGCGGAATCAAGTCTAGATC  
ATTCAACTTAGAAAAGGACGACAAGCAATATCCGATCCATTATGTAAGTACAGAAATGAA  
CAAAGAATCCGGTTTAGCTAAATTGCTGGTTGGACCTTTCCCTGTTGGTTCTGCAATCGC  
TTTACC GCACTATTCGGCACTGATTTTGATAAAGAGGTTATCGACGGTGCGGACCTATA  
CTTTGAGGTTGGAGAGGTT CAGCATTATGACGACCTTATTT CAGGGGATCTGGGTAAACT  
GAATATCAATAGCGATCGCTTTACTGGTTCATATATTGAGTTGACAGCTAAACCGATTGC  
TGATAACATCTTTACTAAAGACGGTTCTTTGATCGTGTTTGAAAAGGATCTCCTTCTCA  
GTACACA ACTATTAGTCTGGAGGCAATTGCTCAATGATTAAAGCGCCTAGTGTA ACTAGC  
TTGACAATAGAAAAGTTGTCTGCTAATCAGGCGTATATCACATGGGATGACGTAGGCGAA  
AACTTCTTTTATTTTGTGTAGTTAGCCGAAACCAGAACACGAGACGGGGAGATCATCCCC  
GTCGATGAGTTAAGCTGGGTAAACCTGGGATATACTGCCGAACAAA ACTGGTTTGAGGAT  
AAAAACCTTTTTCCAGAATATTATTACAAATTTTCGTGTAGCAGTAGCCGCAGAAGGATTT

GAACACAGTAAATGGATTGAAACCGAAGAGTTTCAGACATTTAAAACAAACGCATATAAT  
TTTTCTATGATGCCAGAGTTCAACCTTGCAAACGAGTTTGTTAAACAAAAGTGTACATAT  
GATAATCGTGATTATATTAGATTCAATAGTGATTTAATTCAAGCATCTTTGATGAAGGAA  
GATTTTGTCTTTAGTCCTGAATATGCAAACATGACAAATATCTCAAACACTACATTGTAGTT  
GATGAGAACTTTCATGAAATACAGGATCACATAGACAACGTTTGTATTGATATAAACCGC  
ACTATGTTAGCGGAAATGAACGGTGTTTTGTACCTTTTCGAACGGTTCAGCCGATTGTG  
AAAGTGTCAAATGATAACGGTCAATCATGGAAAGCATAACAAGGCTTTTAATGACCGTGTA  
GGCAATCCGGTTTCCAGTACGTGCGTTTATCAGTCTAAAACCACTACTTACGTTTTAGGA  
TATGACCGAATCCTTTACAGACGACAAGCTAGAGATACTCGATGGAGCGCGGACGATGTT  
CGATTTAGTGATGATACGATCATTATTGCAAAGGTTGGTGACGAGAACGATTTAGGCTTT  
GCCGTTGAGGTCTTTGGTGTATTCTCCAGATTGACAGGTGACACCACAAAATACGCCGAA  
GCTATGGCGTGCAGTGCCGATTATTTGTGGGTTGGTGCTAAAGATGTTATTCGCCGATT  
CGTCTTAAGAATACTCCTGTTGATACGGTACAGGGTTCGCTACGTTTGGAGAAAAAATA  
TTCGATCCTGATGTTATCCGAGTAACAGGAAATGATAAAGCTGTCATTCAGAAGATGGAT  
GTGATCGACGGTAAATTGCTTGTATTTGTTACGGGTGAAGTTAAACAGCGTTATCAAGAT  
CCAATAAACCAGAAAACGTTGTTCCGTCGGATGATACGGGTGTATACTTAATAGGGAGA  
GATGGTCTGTCTTTTCAGAGAGGATTTGGCAACACTCCGCAGGAAAGGGAATATAATTCAG  
CATGGGTTTCAGTAATATGTCAACCAATGGGGATGAGAAGTTCATAATCAATTATAATCAT  
CACTTTGAAAGCATTTCACCTGATCCAGAACTGCCGCGAAATATGACTTAGGCGAAGCT  
GTGAAATATTCTCAGGAGCCAACCTTATCTAACTGATAAGAAAATACATCAAACACTTTTC  
AGAGCAATTTGTGATGATTTGCGTATTTGGGAGTTGGGACCGCAAGCGTATTATAATGTG  
GCTGATTATTCATGGATGCGTTCGAAACGGTGTCCGTGTGTGGATCACAAATGATAATCGC  
CCGTTGGTTGTTTATCCAGAGGTTATCTATACTCAAGAAGTTGATACATCAGGCATTCTT  
GACCAAAAATTGGGTCAACCGAGTAGTTTATGATAAAGGGACCGTGACCTGTTATCTTAAC  
AATGTTAAATTTGAAGGATTCAGACAATATGCATCCGGTGTAAATGTTCCATAAAAACACG  
GGAGAGATCATAGGATTCTATCAATTTAATTATCCTGTTGGTGACCAAGTTGGTGTATAT  
TCGCAACCTACATATGTCGCATTTGTTGCTGAATTGCAAATCAGGTTCCGGAGGTTCCC  
TGGGTTCCCTGTTTATTATGACAGAGAGCAAGATCCAGAAATTCGGCCTTTACTGAATAAG  
ATGACGCCTGATAGCTTTTTACTTGAGAACGAAAATTCAGAAAATTCCTGAATATTAT  
CTGCAATTCCTAAGTGATGGTTCAGGAACATATTATAATAAACTAAAAAATCTGATTAAA  
AACAAATATCCACGCGAGCAAGATGCATATGAGTATCTTTGGTCAGAAATGAACAAACGA  
AACATCTATGCAGATAAAAACAAGCGAGATGCGGTCGTAATATTCTTTGAATCTCGCAA  
TCAGAGTTTTATTCCACTAAGGGCGTGGAGGCTTCTTACAAGTTCTTGTTAAGTTACTT  
TATAATGAAGGTGTGGAAATTGAGGTTGAATCCCAAGCCGATTAGAGTATGATATTGTT  
GTTAGTTCAACGAACATTGACGAGGATATCGTAGGACGCACGATCTATACTCCAACCGGA  
CGGGCTAACGTGACTTATCTTGAAAGGGAATATGAAGGTGGACGTCTACGCTGGCGAGTA  
ACCATTATAACCTGATCGGGCGGTTTGTGCAAGGTCAAGTGATCAAATCAGAGAAAACA  
GCGTTTGAGGGGATGATCCTTGTTGGTGTACGTGGTAAAGAGTTGTGGAGTAGTTCAATC  
GACTATATCAACCGCTCACGAAGCCAACACACCATGAAGAATAAAAGTGCATTGCCAGTT  
TCGCGCTATGAAAATGATGGAATGCGATTTCGTTTCATCCTGTCGGCTTTGGTTTCATAGGT  
GTTACTCTTCTTACAATGTTTATTAATAGCGGGTTAAGTATGAGACACGTAGAAACTATA  
ATTCAATCTCTGAAAAATTATAAGGTTGACAGCGGATTGCCTAGCGTGTATCCTGATCGT  
GTTGCTGATCTTGATGTTGATGGAAATATTAAGATTGACCCACTAACAGGGAAACCATTA  
TACATAATGTCACCGACAATTGGCGAAGAGTTCCCTGTTCCCTCCTGAATATGATCACGAG  
AACAGCGAATTGTTCCACGGACTTAAAGCAAGCGAAGGATTTGCAATGAGTCCACTG  
TTTGACCAGTCGGCGGTAACATTCTATATGTTCCGTCAACTTGATAGATAAACGGTTGAAG  
GATAATATAGGGAATCCACGCGACCCGAAGAATCCGACACAGAGGAAAATTAATGGCAA  
TGAAAATAGTGTGATCTATCGCTCAATCATTACTAGCAAATACAGAACAGAAAACTTCT  
GAACTTCTATAATTGGGTAGGCGATGGAGCAAATCAAATTACAATTTATGGAACGTTTGG  
ACGTTCCGGAGCCGTGGTCAGAAAACGAAAAAGAGGTGGGCTTTGCCCCACCTTATCCGAC  
CGATTCAACGGCTGGTGTGTTGACATGTGGACCCATATGATGGGGGCGGTTAAGATTAA  
CAAATCACTTCTTGATGCGGTTATCCCTCGTAAAGATTGGGGTGATACCGGACAGGATAA  
CCCGCGCACATTCTTTATCAATGACATTGTTGTTGTCAACTCAGCACCATATAACCGAAC  
TGATGTTGGTAGCGGCTGGATGGTGTATCGCGTAACCGATGTTCCGGAACGCGGTTACTG  
CTCGATTTCAAGCATTGACGCTTATGTAGAGTGTGTTGAAGTTGGGCGGAATGTGGACCCA  
CACTCATGAATCAATTGCGCCACCTGTAGGAAAGGGCGATTCTATTGATAGGGGTGATGG  
GTATCGTTGGGAATATCTGTACACAATTCCACCTGATGCGGCGATCAACCGTTGCACCAA

TGAACATATTGTTGTACCGTTCCTCCGATGAACTGCGACAAGATCCGGCGCGTTGGGGCTA  
TGACAATGTGATCACGTGGTATAATGACTATAATCTTCTTTATCGGCTGAAAGTAGTAAC  
TTTGCCTTTTCAGGCTTATATGGACTCTGCGCAATTCCCAACTACCGCGTTAGTGGGTAA  
TACTGGCTTCCGTCAGTTAGGCATTATCCTTAACCCATTGGAAATGAAAGCACGCCCTAG  
CGATCCAGATGTTAAAGCGGTCAAAGATAAGTACCGACCGCAAGACTTAGAGCCACACTC  
AGGCGAAATGATCTACATGGAAAACCGACAACCTATCGTTCGGTTCATTAGATCAAACAGA  
ACTTGTCTCTGTATTGTTGAGTTCTAAGTGTATGATTTTAAAAGCCAATTTCGAGAGAGT  
TGGCTTTTCCCATTTTTGGGGTTGACGATCTTATTTGGTAAGGTACAATACACACATCTA  
AACAACTGAGGATAAATTATGGCACGTCGTAAATTTAAAGATACTTGTGAAGAAATTCAG  
GTATCCCATTGCGGTTGGGATGTGATCGCGAACGGTGAAAAGATCCGGCGAGATCATCGAT  
CATACTCATTCACTAGCCGATTACACCGATGAACTATGGGAGGGTATCAACTTCATG  
AATGACACTAAACGATTCAAGACTATCGACGAAGCTATCTAATTCGTGTTTAAATCCA  
TTCGGTATGTGGGGAAGTAAAGATAAGTGGCACGCGTAAATATTAATTCGATTACACATTGT  
ATAAAGCTAAGTTCCCAATGCAAAGCATTACTATGGTCTACGTGCACAAGATCCTAAAC  
TCTATGGTACTCATTGGTTTTGTAAACATGATAAACAATGGCACACATGCGAAGAAATGC  
ATGAGATGATGCAACAGGGTCTTGAATTTAGTTGTTCTAATTATGACCATCGTATAACTT  
GCATTCGAAAATTGAAACGATGGCTTCGTAAGAATCCGCAATTTAAAAACTTTGTGTTCT  
TTATGTATCATGTTTATTTGGGACATAGCGTTACCGTACACAGCAAAGGTTAAATAATGGC  
ACGACTTTCTACACAAGAACAATAAATTACACGATCGGATGATGGAGTGGATTTATTCAGA  
TCGCCATTGACATATGAAGAAAAGAATTTTGCTATAATAACTATCATGGCGATGGTCT  
AGGCGGTTCTGGTGCATTCTTACCCCTGAAGGGCTTGCATGGGATTTTACCATCGATGC  
ACATTGCACAGGAAAAGTATTAGATCTTTGTGCTGGGAACGGTCGCTTATCTTTTTGTAT  
GTTACATCGTTGTAAGCCAGAAAAGATCGTATGCGTCGAACTCAATCCAGAATTTGCGCG  
GATTGGCAAGAGACTATTACCGGAGGCAGAATGGATCACCAGCGATGTATTGCAATTTGA  
GTCAAACGAAAATTCGATGTGGTGTATCAGCAATCCACCTTTCGGGAAAATCAATAAAAC  
CGACACAAAGGATGTATTTGAGTACACTGGCGGCGAATTTGAATTTAAGGTTATGACATT  
AGGCCAGAAGTTTGCCGATGTAAGTTATTTTATTGTTCTGCTGGTTCCGCTGGTTTTGC  
TTATTCCGGCAGACCTTATTATGACGGGAGCATGAAGTATAATAAATATCTAAAATGGAG  
CAAACAACTGGTTTTGGTGACTTACGCCGGATGTGGGATCGATACATCAATCTATCGCGA  
TGAATGGCATAGTACCAACGTTTTAACGGAAGTGGTTGAGGTTCCGGTATTACGAGAAAGA  
AGCTGTAGAAGCGCCTAAATCACGTCCTAACGAACAAATAGAAGAAAGTAAGGTGATTAC  
CTTACCGAAACAGGAAAGCGAGTCTGCGACGCTCTCAGATTTGTTTGACATTTAATTATA  
AGACGTCCTTGTGGGCGGCTTTTTTTGTATGTATTCTATAAATAATACATCATAACATGAG  
GAATTAACAATGGCACAAGTTCCAAAGAAAAGAATAGACACAGGTAAGTGTGCGGCAATCC  
CAGCACCGGGGACAACCTCTATGACGGCGGTAATAAAATTAACGATAACTTTGATTCAAT  
ATATGACGCATTTGCTGATCAACGCTTTAAAGACGTAGACCACGGCGTAGGAAGAATGGT  
TATTCATGCAACCGGATACTATCAGAAACATTCACGTCAAAGCTACTCTGGTTCCGCTGT  
TGAGATTGGGAGTCTACACGATATCGATACAAGTCAAGGCGCTCTTATTGCTATTCTACC  
TAAAGCAAAGGTCGGTGAGGGTGTGTTGATTCATAAATAGTAACGGTAGCCTTTCAACGAC  
TACACCGCTCAATATTCGAACTCAAGCAGGTGTTTCTATTAGCGGGTATTCCCGTGATGC  
TACAATAACACAACCATTTTCAAAGTCACTGTTTGGTGTACTGCCGTTGAAGGTAGTCG  
CGTAACATGGCCATTGGGTATCGAAAGTATGTTTACCGATAACAACGCCATTAGATAA  
AACAGTTAACGTAAGTGGAGTAGCAACAATCGTTGCTATTGCCGCAAAAACAGAATACGT  
TTCCATCAAATTATTAACCTACCGTAGCAATACATCCGGTTCAAATAATGCGTTCAAGTGA  
AACGCTAATGATGATCGATTCTAAAGCCGGAAAAGTTTATGCGACGGAATATGTAGTTTT  
GCCGGAGACAGAAGACGAATTATACACCATTGTTATTCATCGGTTCCGGCGATAAAGT  
ATATGCAGAGTATAAGGCTACTGGCGAAAATATTCGTTTAGCAGTTAAAGCCATAGACAC  
TATTAATAATCGGGGTTGCTACATGAAACAATTAGTTAATATCGGTCACGTTGTTGATGAC  
GGTACAGGTGATTATCTAAGAAAAGGCGGTCAAAGATTAATGACAACCTTTTCTGAACTT  
TATACTAAGCTGGGGGATGGTGATATCCCTCATGCATCCGGCGCGTGGAAAACCTCACACA  
CAACCAGTATTAGAACCAAATTTTGTGATGCATGGGCGATTAATACAACGAACAACGCT  
GTTTCTGTTGAATTGCCTAAAGGTGGAGTTGGTGATTATAACAAGACAATTAACCTTCGT  
GATGTTTGGCGCTCGTGGGCGTCTCATAACGAAACACTTAAGCCAGCACAAAGGTGATACC  
ATTAAGGGATCTCTAATCGACCGTGAGTTGTATAAAGATTTTATGGATGTTGAACTGGTT  
TATTGAGCGCCTGGACGCTGGGAATATATCGAAAACAAGCGCGTTGACACGATCACCAG  
TCTGACCTAAGCACAGTAGCTAAGGAGGTTGATATTGCCACAGAAGGGCAAACAGATTTCC  
CCTAATGTATTTGGTTCTAACACATATAACACTCGAAATGTTGAAGTATATTATTGAGGA

AACCTTTTATATTATGGCAAGTCTGTTAGTAATGACTCTAACTACAGTTCAATTGGTGAG  
GATGGATCACTTGTGAACTTGAAGGCAAAGCATAAACTTCGTTTCCTTGTTCGGCT  
GGGGATACCGTCCAAATTATTACATACATGGACGGAATTGCATCATTCCGATCTAGTTAC  
ATCACACACAATTAGAGTGTATGATACCGGAATGACAGCACTAGAACTATTCCTGGT  
GAAGTGTGGGTAGGTGATTTATCGACGAAAAAAGAATCTACCAATGCTGATTTGGGAGTT  
AGTAGACGTGATATAATTAACCCAAATTCATTTGAGTTATTAATAAATGGTACTCAAATG  
ATTAAGCTGGTGATTCTGATCTTCCTTCGTTTGTGTTGTGAAGGTGATGACTGAGAAACC  
GAAGAGAGTTGCGCACTTGTGGCGGTGAGTGGGTACAGTCTGGAGCAGATTATTCCTG  
GTATTTGATGAGAATAGCATTGTAACAGGGATTAATTATCTAAAGGGTTGGACAATAGA  
GATACTATAACAATTCGTTGGTTAATAACGATATCGGAACTCTATTAGAATGGGATGGT  
GTCGGCGGAATTAAGAAAAAGCAGACAAGATTTATCTCTATAACGAAGACGAAGTTAAT  
ATAACAAAACAAATTGAATATACCGACTTCCAGAATCCTAGCCAGAAAAACACTCGTCCG  
GAGGAAGAGTATTCAGGTCGAATTATGGATATATATGCACTGTTTGATATTTTCCATCCG  
ATCGGCACTATATATGAAAACGCACATAACCAAGCTAACCCAGCGAAATATATGGGTATT  
GGTATCTGGGTTCCGGTAGGCGGAAGGAGAATTTCTTGCTGGTTGGTCTTCCGATGCCAGC  
GACCAGAATTTTGCATTAACAATAACGATCTTGATATTCATGGACAGCCTACACACACC  
GCTGGTGGTACTGGTGGTGAAGTTGCCTATCAATTCAAGAAAGATATGATTCCTGAATTA  
CAATCCAGCGATCGTGTGTTTGGTGAAGACGATACAGGGTCAATTATCATTGGTGGTTGT  
CAAGTTGACCCTGATGCGGCAGGTCCAGCGTTACGAAATATAGAGAGGATATCGTAAAA  
GTTAATACTGGTAATGCTGATCCATGAATGGTGGGTATTCTTCCATATCGCACCGTT  
CATCGCTGGTGAAGGGTAGGTTAATATGATTTCTCAAACGCGTTCTAAAGCAAGCGTATT  
TTCTAGCGACGCAGCATTTCATTCATACGATCCAGGGTCTAAAGACCCATTATTGGTGA  
CATTCCGCAATTGGTGGATTAAACGTAGACCGATCTCGCAAAGGTTCTTTTATTAACAA  
CGTACAATCAGCCATTGATGATTTGGATAGCATTCTATGCTTAATGTCGGTGATGTATT  
GGTAGCTGCAAATTCAACTCCACCGGAAGCGGCGGACAAATAGAACTCTTTCTTTCAC  
TGAACGGTAACAATAAACACGATCCAGCCGCGAAAAAAGTTGTGATTGAAGTTTGGG  
TTATCCATTTGTTGTTAATGTTGGAACATCGAATGTTGCATTATGCGAAATGGTCACAAC  
AAAATTTACTGAATTGGGAGACAAAAGCATCCTGTTCTTTAAAGTTCAGAGGAAAGGCAC  
TGGCAACGATCAAATAGAGATTCAGTATATTGATTCAAACGCACACGACGCAACGGTCGT  
AGAAAAATATGGTATTAGCGTTCGTGGGGAAATAAATTCCCTGCTTGTTATGGTTATGG  
TGCATGGGCCAGTTTGGGAACGGAAGAAAAAATTTGATTCAACACTAGTTTATTTAAGCG  
TATTGCGTAGGGTCTAAAATTATGAATAACACTATTAATCACGTAAGACGATGCACAG  
TATGTTAAGTTTACCCTACCGGAAATTGGCCTAGCAATATAAAAAACGTACAAGCGGCA  
TTAGCCGCTATTCAGGGATTTGCTATTGCAGGTCTTCCAACGGCAACCGAAGAAACAGCG  
GGTATTGCTGAAATTGCTACTCAACAAGAAGTAGATGATGGGTTGGATGGAACATAAATT  
GTTACCCCAAACATTGGCTGTTAAGCTGTCAAGAACGGACGCAATAAACTTGTCAA  
GGGATCACTCGCTATGCTAATAACGATGAAGCTATGGGCGATACTCCAAATATTGCAATT  
GGTCTGATGCATTAACCCATGTTTTTCGAGAATAAGAAAGCAACGGAACTGTACAGGGT  
ACAATTAATAATCTGTTCTATGGATGCGGCAAAAATCGGTAGTAATGACACTATGGCGGTC  
ACGCCTAAAAAGATGCACGCTGCTATTGCTCAGAATGTTACTGGGTTGATTCCAGAACAA  
AACACGGCGACCGAGTCCCGTGAGGGTTTAGTTCGACTGGCGACAAGCCACCAAACGCTT  
GCTGGTACTATCAGAGAAGGATTTGCCGTTAGCCCATATGCATTTTCCAACGCAAGAGCC  
AATGAAAATCAGGCGGGTACTGTTAAAATTGCGTCATCCCAACAAATGATTGACGGTAAT  
GACAACACAGTAGTAGTATCAGCACAAAAATTTGCGAACACTAAAGCCACCCTGGACAA  
TTCGGTGTGTTAAGCTATCAGATAACCCAGGATCAGGCGAGGCAAACACAGAACTGTGC  
GCAAATGCTCGTGTATCGCCTCTAAGTGATGGTGTGCTTACTTGTGATGTGTATCGTCAT  
AGTGGAGGCGACGGAACAGTTTATCATTAAAAATGAACTGGATGGTCTTTGTATGCC  
ATTGGTGGCATCATTCTTACAGCATTTAACAGTTCCGACTACGCACACTTCAAATCTGC  
AACGGTCAATGGTTAAATAAAAACCAATATCCAGTATTATTTTACGAATCGGTTTCACT  
TACGGCGGAGATAGCGGAGACAACCTTGCTCTACCCGATATGCGAGGGCTTGTGCTAGA  
GGATGCGACCACGGTCGAGGACTAGACCCAGGTTCGTGGATTTGGTACTTATCAAGACGAC  
ACCATGCAACATATGACAGGTAACCTCCCTGTAACCAACCGTTGGCGAGGTTGGACTGGT  
GGTGTATTTGCCATCACAGGCGGTCAATGGAGCACGAACTATAAAAACGGTGGTGGTGT  
GATTGGGGTAGTATCGTTAACTTTGACAGCGCAAGACAGGTTAGAACGTCTGGCGAACT  
CGCGTTAAGAGCCTTGCATTAACACTACATGAAAAGGGTACAATAAGGATCGAACAGTTAA  
ACATTCGAAAGATCCCTTACGTGCATGGTGTCCCTGGAGAGGGACAGCATTCTATTAGCT  
GGATTAATAAATGGTGAATGTCTAAGCGCAGGAACCACAGAAACAGGACACGAGGGGACGC

TTAACCGCGCCCCTTATGCGATTCAAGAAAATATTGTTTCGTCTAGATGAAAATTCTAAGA  
CAACGGTAACAAAAGTTAACGAAGTTGATACAGCAGTTAATGATATTA AAACTACTTTAG  
GCGCGGTTGCCGATGGTAGTATTATTGATATTGTTAATCAA ACTATTGCAAAGGTTGATT  
CAGTAGAAGAAAATATAGGAGAACTTCAAAGATATTACAAACCACAGTAGATGAACTGG  
CAGAGACAGGAAAGAAAATTGGTGTTTCGTCCGGCAGCAGCTCCGAGTACACGAACAATAT  
ATGATGATATTTCTTTCATCAAACAAGAATTGGGCGCTTTCCCTAACTTCAATATCAACG  
GTTCTCCAGATCCGGATACTTCCGGTTCGGTATCAAATATCGAGTTATCCAAAATACGG  
AAGCATTAAACAACCACGGTCAGCGAATCCGCCAACTAGAAAACGACTGGTAAGATTCTG  
ACGTTGGAGAGCTAACAAAACAAGTTAACAAAATGCGAAGCGAGCTAGGCGATACATCAC  
TAGCAACACAGGACAATGTTTTCTCGTCTTCGCACAAATACTCGCAATATCGCTAGTA  
TATCAACCGAAGTTAAGGAAGTAAAGAAAGCGATTCTATTTGATTAAATTCCTGATATCG  
GGACTAAAGTGACAAGGCTACAATCTGATTATACACAGCTAAATGATGAAGTCAACGGCG  
TTGACGCTGGTATCCGTCCTCGTTAACTCTTCTGGAAAATAATAATGGCATTCTCTCAAG  
CCGCTGGAAGTATTGATTATCGATTGACTAATCAAGAACGGGAATTTGTAGATCTTAAAT  
CTGTTGTTCGGTGTAGTGGTGCTGTCGGTCTACGTGGTGAGGTGGCACGAATCTCTAACA  
CAGTTGGTACTGATAGTGAGCGTCATACTATCGCAGGTCGTCTAAAAATTGTCGAAAACA  
CACAGGGACGACTAGAAGCTAGCGTAAAGGTTATCGAGCAAATGATCGGCGATCGAGATT  
CCGGTCTAACCGCCGGGGTTATTAAGCTGTCAAGCGCCATGTACGGCAATCCAGAAGGAA  
GCACGCAGCTTGAACAAGATGGGATCGTGAAA ACTGTTAAGGAATTGAGCACATCAGATG  
CAACCAAGGTAGCAGACGTTCTGATGATGGTTTCCATTATCTACGTAAGCACGGGGAAT  
GGGTTACAGGTCGGATGGGCGGCTGGTGCATTGAAAAACACCGCTCAGATTGATATTACTC  
TCGACGGACAAGATCAATACAAAGGAATCCCACTAAACGATATGACCGAAGAAGTTCCTG  
CGCGTGGAATGGTTAAGAGCGAATCTCTTGTACGGTTAACGACAAAGGCTTATTCCGTT  
GTGATTTCCGTTGTTCTGTAAATGCGGCACATAACGCTACTTTTCGTAGTCGGTATTCCTA  
AAAATGGTCTGATTGTACATGAGGTACGGAATGTTTATTATGGA ACTGATGATTTAATTA  
GCTATTCTACCAGTGTTCCTAAATATTGAAAAGGGCGACCGGATCGATATTTCGCATTA  
AGGGCGTATCCGAAGAAGCATTAGCGCAACAGCTACAAATTAAGAGTTCCTCTTTGGAA  
TTTCTCCGGTATAAGAAATTATAGGGGCGTTAAGCCCCTTTTTCGTTTATAGGTGATATT  
ATGTCAGGATATGTAACCAATAACCAAGAGAATTAAGACGCTATTCTGCGTCGTTTA  
GGCGCACAGTAATTAACGTAGAAGAAACAGAAGACCAGATTTACGATTGTATTCAGAGA  
GCATTAGA ACTCTATGGGGAATATCATTTCGATGGTGTGAATAAAGGATATAAAGTATTT  
CGTGTTAGTGCAAGCAAGCGCAACACGGGGTATTTGATTTAAGCGATTCTGGAGTATTC  
GCAGTAACTAAAATAATTCGTACAAACGTAGGTAGCGCGGCTACGATGGATGGTACTGCC  
GTTTATCCGTTGGTTTACTGACTTTCAGTTGGGTTTAGCGGGTGTAATGGCGGTTTAGGA  
TCTGGCTGTAGTAAATTTTATGGACCAAATGCAATGGGCGGTGATCTAGGATATTTCGAA  
CAGCTTATGAGCTATCGAGCCGCTATGCAAAATATGCTTAATCCGCTGCCAGATTATTGG  
TGTAATAGCGCAAACGGACA ACTTAAGATAACAGGAACTTCCGAGAAGGTGATCTCATT  
GTTGTTGAATTATATGTTAAAAGTTATGTTGATGTACCTGATATGATCGGCGCGGTTGCT  
GCTTATGCTCATGCGGGAGGATGTTCTACCGCTGGCGGGATTAGCGCCGTTTATGATAAC  
CCA ACTGCTGGTTAAGCCGGATTGTTGCTGCCATGGGACCGATCCGTGATAACAAGCAG  
GGCGCACATAATAACCGTTGGGTTAAAGACTGCGCGACTGCGTTTACTCGTTAGCTATGG  
GGCAGATCTTAGCTAAACATCAAGGGTTGCAATTACCAGGTGGTGGCACTGTTGATGGG  
GTCGGAATCATCGAAGAAGCACGCGCGGATATTGAGAAATTGCGACAAGCACTACTTGAC  
TTAGATCCTCCGTTCCGGCATCTCATGATTTGATTTATTGGGGGAGTATCCCCCATTTG  
GAGTAAAATATGTTTAAACAAGACTCTTTTTGCTCGCCTTGAATCGCAAAGGTTTATGAG  
AATACTACAAACCGAGATTCTCAATCCTTACGTAAATTTCAACCGTCATACAAACACC  
CAGACGTTAGCCGACGTTATGGTCGCCGAAGCTATTCAGATGCGAGGTGTAGAATTATAT  
TACATCCCTCGTGAATTTTTTCATACCAGATATGATCTTTGGTGAGGATGTTCAAAGCAA  
TTTACTAAAGCATGGAAATTTGGTGCGTATATAAACTCTTTTCGACTGGTATGAAGGTGCA  
GGAAACTTTTTTCAATCTATGGCTTATACGGCAAACGACGAATTAACATTTGCGGTGAAT  
CCTAACCTATTCAAGCATCAAGTAGATGATCAAGATCCAAAATCAGGTGACTTGATTTAT  
ATTCCAATGAGTAATGATCTCTTTGAAATTAATTACGTCGAGCCATATCAGCCGTTTTTT  
CAGGCTGGCAAAAATGCCATGCGTAAAATTATTGCAGAGAAATTTGTGTATAGCGGTGAG  
GAATTGCGACCAGAATTACAACGCAATGAGGGAATTAATGTTGATGAGTTTGCGGATTTG  
GATCTTGCACCGATCACTAATCTGGACGCGTTAACAGATATCAACTTAGATAAGTACAAA  
GAAGATAAGCAATTCAGAAGCGAAGGACAAGATTTTATTGATCCGTTTGATCCTATTAAT  
GGCAAGGGTTCACCTTTCTCCGATTTTTGATAAATACCTGTATTGAAATAATATTAGGAT

CTAATGACTTATGAAAACTATTATCTATACGAAATAAAGAACAATATAAATGGTAAGAT  
ATATGTTGGCATTTCGTGGGTATGATGGTGACATAAGTCAAGATCCTTATATGGGTAGTGG  
ATTGACTCTTAAGAGGTCTATTA AAAAAGAACGGGATAGAAAACCTCACAAAAACAATTCT  
CAAAACGTTTGACTCATGGAAAGAGGCAAGGAAAGCAGAAAGAGAAATAGTTACAGAGGA  
ATTTGTAAAAAGAGAAGATACCTATAATGTTTCGGTTGGTGGACAAGGTGGAAATACTCA  
CGCTGGGATCAGCGAAGAACGAAGAAAACCTTGCAAGCGAAAGACACGCTGAAGCAAACCG  
AAATAGAGTATGGAAGCAAGAATCTAGAGATAAGGTTAGCGCAAGATTCAAAGGTCATAA  
GCTATCACAGAAGCAGATAGACGCGCTAAAGAAGGCAAACACAGGAATAAAGTTCACAGA  
AGAAAACAAGTTCAAAATAGGTAAAACGTGGCGAGGAAAGAAACGACCAGATATAGGAGA  
GAATGCTGCGGCAACATTAACAGGGAGAAAACCTACCCCGAACAATGTGGCAGCAATAAC  
GCAATATACACCGAGAGGATAACAACACTTTAGGGCCAAAAGATTCTTCGTCGACGATAT  
GGAATTTTATATTTTGAGTAATGCAGCTAAAATGTTTGGTATAAGTTATAAAACGGTTAG  
AGCTAGACTTCTCTCAGATAAGTTTCCTACATGGAGATATGAATAAATGTTTTACATTT  
TTACAATTCGTCAATTAGAAGGTATATTGTATTGCTGGGTAATTTAGTACCCGGCGTACA  
AATTA AAAGGGTGCGTAGTGACGGTGAGCGTTTTATTAAAGTTCCTATCACCTACGCAA  
GAAAGAAAATTCATGATGAGTCCGGACAAATATAACAATATCTTAAGCGAGGAAGACGT  
CGCAAAGGTAGAACTATTTACCTCGTATGTGTCTTTCTTTAATTGATATGACATACGC  
CCAGA ACTTTAAAACCAATATTGCAAATAAGACAGTACCAAATATAACGGCTGATGGAAT  
CAGGAGCGTAACACAATATAAACCTGTACCATATAAGTTTACTTTTCGAGTTAGGGATTTT  
TACGCGTAACGAAGATGATATGTTTCAGATAATTGAACAGATTCTTCCTCACTTCCAGCC  
TCATTTTAACTGTAAGATTAAGA AACTACACGGTAATGATGTATGGATTGATCGAGATAT  
TCAGGTCACAATTAGTTCTATTACTCCAGATGAACAGGTAGGGCAAGATAAGTTTTCTCG  
TCGTCGTCTTGAGTGGACCATTATGTTTGAGTTCATCGGGTTTATCTATCCTCCAGCCAC  
CGACGTTAAGGGGGAAATCAGAACGATTTATCTTGATTTTCATGCTAATTCTCGTGAATT  
AAATCCTAGCGGTAATATTGAATCAGTGGATCATGAAGTTGTTAAACGTGATGTTGAGCA  
AGAAGAATGGGACGGA ACTATCAAAGAATCATATTCTAGTGATATTCCAATACCAGTTGC  
ACCGACTCAACCGGGTCCACGTATTGTAAGAGAATTTGAAGAGGTAATTTATTATGTCAG  
ATCTAGGCTTAGAAATGAAGCAATTAATGAATTTTCGAAAGTCTAGGTCTTCCGGGGTCAT  
TCGACGAGGAAGAAGATCGAGTGAGCTATGATCCGCTCGTCTTGACTCCGGTCGAAAGCC  
ATCCAGAAGATCGTAATATTGACTTACAACGAGCTTATAAGGAGGCACGTCAGAATATTC  
ATTTTCAGAATCAGATGATGATGGACGCCGAAAAGATTTATCTTGA ACTTGGTAAAAATA  
GTGAATCTCCGAGGTTCTACAGGCATTTAACGGCCTCATGCAGCCAATGAACAACATCA  
ATAAAGAATTGCTGAACATCCAAAAGGATATGAAGAAAATCACCGAGCAAGCTGGAGAGA  
AAAAGAAAGATAATACCCAGCCGCACCAGTTAATATCCAGAATGCGACCGTCTTTATGG  
GTTCTCCTAGTGATTTAATGGATGAAATCGCAGACGAGGAAGCGCGAGTTATTGAAGGCG  
AGACAGTATGAGCGTGATTGAAGGGATTAACGCAATGGCGACGGATGAACACCCGCTACA  
TTTAGCTCACCCGCTCCTACTAGAACTAAAATTTGATTCTAATGGTATTGAATGGATTTT  
ATCAAAGCATGATGACAAATGGTATCCTAAAAGTTTTCTGACTATCTGAAATTAACAG  
ACCGCAGAAAATAAGGATGCAAAGCACTGATCCAACAAATTATAAGTTCTATTAAGATAG  
GGACAATATTCGCACGCGGTATATGCGGTTAAAGAATTTGCGAAGGGCGAATATTA AAAC  
TCAGTATACCCCTGAAATGATCGCGGAGTGGAAGCGATGCCGTAAAGATATTGTATATTT  
CGCAGAAACCTATTGCGCAATTACACACATCGACTACGGTACAATCAAAGTACAATTGCG  
TGATTATCAGAAAGATATGCTTAAGATCATGCATGAAAACCGCATGAGCGCCATAAACT  
CAGTCGTCAGCTAGGGAAAACCTACCGCTGTAGCAATATTCCTTGCTCACTACGTTTTGCTT  
TAATAAAGACAAAGCGATAGGTATACTGGCACACAAAGGATCAATGGCAGTTGAGGTTCT  
AGAACGGACTAATCAAGCAATTGAACTATTGCCGGACTTCTTACAGCCTGGTATTGTAGA  
ATGGAGCAAGAAATCTATTGTGTAAGAAAACGGGTTTAGTACCGGCGCTTATCCATCGTC  
ACCAGATGCTGTTTCGCGGAAACTCCTTTAGTTTCATATACATAGACGAGGCAGCCCTTTT  
TAGTGCGTGGCAAGACGCATGGTTAGCTATTCAACCAGTTATCTCATCCGGTCGTGAATC  
TAAACTGCACATGCCAACA ACTCCGACCGGGCTTAATCACTTTTTATGACATTTGGCAATC  
AGCCATTGATGGTAAAAGCGGTTATGCACCTTATGAGGCGGTTTGGCATTCTGTAAAGA  
ACGTCTGTCCAATAAAGCTGATATATTCGAGGATGGTTATGAGTGGTCTCTCGGGCGAT  
GTCCGGATCTAGTCTTGAGCAATTTTACAGGAACATAACGCTGAATTTTTCGGTAGTTC  
CGGTACTCTGATCAGGGCAACCACTATCAAGATTATCATTTAGTGACGTTGTTAATGA  
CAACGGGTTTAATCAGTTTGAGAAACCGAAAGAAGGTAGAAAATATGTTGCTACACTAGA  
TTGCTCAGAAGGTCGACGACGGGACTATCATGCAGTGCAAATCATTGATATTACGGAATT  
TCCTTATAAGCAGGTTGCAGTTTATCACAGCAATACTACGTCCCATTTTATATTACCGGA



TATTGTCTTTAAATATCTCATGATGTATAACGAATGTCCAGTTTATCTCGAGCTAAATAG  
TACGGGTGTATCTATTGCTAAGTCTCTTGCGATGGATCTTGAATATGATAATATTATTTG  
CGACTCATTCATAGATCTAGGGATGAAACAATCCAAGAGATCTAAAGCATTGGGATGTTCC  
GGCACTAAAAGACTTAATAGAAAAAGATAAGCTGATCATTAAATCATAAAGGAACTATTCA  
GGAGTTGCGCACATTCTCCGAGAAGGGAGTAAGCTGGGCGGCAGAAGAAGGTTTTACGA  
TGATTTGGTTCATGAGTCTGGTAATATTTTCGTTGGTTAACAACCTCAAGAAAAATTCGCCGA  
ATACGCAGGAAAAGACGAAATGCGGATCGCCTCCGAAATATTCGAAAGAAATTAGATGA  
ATTGGGGGAAGAATACGCGCCCGTGGTAATATATGACGGTGCAAACGGCATCGAAGCATA  
TAGGCCGCGTGAAGGTCTAACAATGATATAAATACGATAATGCATAAAAAGATGAGGAAA  
TTCTGATGACTCTATTATCACCGGGTTTTGAAACGAAAGAACTACTCTCTCCACTACCA  
TTGTGCAATCTGCGACTGGTCGCGCGGGCGCTGGTAGGTAATTTCAATGGGGTCCAGCTT  
TCCAGATTGTTCAAGTAATAAGTTGAATTAGTTAATAAACTTGGTCAGCCGGATA  
ATAACACCGCAGACTATTTTATGAGCGGGGCTAACTTCTTCCAATATGGCAATGACCTGC  
GTGTTGTTTCGTGTACTCAATCAAGAAAAAGCAAAAAACGCAACTGCCCTAGCTGGTAACG  
TAGAGTTTGAAATCACAAACGAAGGTTCAAACCTATGAAGTATGCGATACCAGCAAGATTA  
AACATAACCGTCAAGATATTGAAACGGCAGGTAAGTAACCAAAGTTGATGGTGTATGGTA  
AAGTTAAGGGCGTATTTATCCCAACTGGTAAAATTATCGCTCACGCTAAAGCAATCGGCG  
TATATCCAGAACTTGTATGGCGGTTGGACGGCAGAGTTCACTTCTTCGTCAGGTAACGGTA  
GTGCGGCGTTGTGAGTAACTAAAATTGTTACCGATTCCGGTCTTCTCTTAACGGATCTGG  
AACTTTCCTGAGCCAATATACCAATCAAGATTTTTTGACAAAGCTCAAAAAGTATGATA  
TGCCAGCGGTAAATGCAATCTATGCTGGTGAGATGGGCAACTCTCTGGAAGTTGAAATTC  
TGGCACGTAGCTCGTTCAGTGGCGCGGTAGCACCTGAATTAAGTATGTATCCGTTCCGGCG  
GAACTCGTGCCGCAGCACGCAACCTAATTCCATATGCACCGCAGAATGATAATCAATATG  
CGTTTATTGTTTCGTCGAGATGGTGGTGTGGTAGAATTCTATGTACTGTTTACACTGAAAG  
GGGATAAAGACGTATACGGCAATTCTATCTACATGGACGACTTCTTTGGTTCGTGGTTCTA  
GCCAGTACATCTATGCAACCGCTCAAGGGTGGGTAGATGGTTTCAGTGGTTTTATCTCTC  
TTGCTGGGGGTGTGTCTGCTAACGAAGCCAGTACGGGCGACCGTGGAATGATCCGTTCA  
TTGGTGCGATGATGCAAGGTTGGGATCTGTTTGCTGACCGAGAATCTATTCACGTAAACC  
TGTTGATTGCTGGTGATGTGCTGGCGAAGACGATGCGTTCCTACCGTACAGAAACATG  
CTGTTTCCATCGATTATGAGCGTCAGGATTGCTTAGTAAGGGTTTCTCCGCCGCGTAGCA  
CTGTTGTTAATATTCCGGTCACTACCGCAATCGATAATCTGATCGCATGGCGAGAAGGAA  
ATAGCAATTATTACAGACAACAACATGAACATTAATACCACTTACGCGGTTATTGATGGTA  
ACTACAAATATCAGTATGACAAATAGAACGACGTACACCGATGGGTTCCGTTGGCTGCTG  
ATATTGCTGGTTTGTGCGCTCGTAATGATGCTGTATCCCAGCAGTGGATGAGTCCGGCAG  
GTTATAACCGTGGTCAGCTCATGAACGTGGTTAACTGGCTATTGAGCCTCGCAAGGCAC  
ACCGTGATCGTCTGTATCAGGCTGCAATTAACCCGGTGATCGGTGCTGGTGGTGAAGGGT  
TTATCCTGATGGGTGATACAACCGCTAGGACTGTTCCCTAGCCCGTTTGACCGCATTAACG  
TTCGTCGTCTGTTAACTTGCTGAAAAAGAATATCGGCGATTCAAGCAAATACAACTGT  
TTGAAAACAACGATAACTTTACTCGCGCTTCTTCCGTATGTAGGTTTCGCAATATCTCA  
GCACGATTCGCTCTCTTGGTGGCATTATGACTTCCGAGTACAATGCGTCACCACGAACA  
ACACGTCGGATGTAATTGATCGCAACGAATTTGTTGCTGGTATGTTTCATCAAACCAGCAA  
AATCGATCAACTATATCATGCTCAATTTCACTGCTGTTGCAACTGGTGCTAATTTTGACG  
AAATTATCGGTCCAGCTAACCAGGCATAATCAGTAAATTAGCATAGATTAAGGTTAAAT  
CAAGCGGGGATTTTCTCCCCGCTCTATTAAGGAATATCAATTATGGCACTCGATTTGAAT  
GATATTACACGCGGTTTAGAGTCTGGCGATTTTGCTCGTCTAACCTGTTTGAAGTTGAG  
ATCCCGTATCAGGGGCAAACTTTAAGCTGATGTGTAAGGCTGCGACTGTCTCGGCTGCT  
ACCGTAGAAAAAATTGCTGTAGGCTATCAAAACCGTAAAATTAACATCGCTGGCGACCGT  
GTATACGACGACTGGACCCTCACTGTATTCAACGATGACGCACACAAGATCCGTGATGCT  
ATCGTTGCATGGAGCGATCAGACACATGGCACAGGTGCGGGCGATCACTGGTGCAACTCCT  
GCACAGTATAAGAAACAAGCTATTGTTTCGTCAACTTAACCGTAACACCGAATCAACTAGC  
GAAAAAACATTGTACGGTATTTTCCCGACCAACGTTGGTGAAGTAACCCCTGATTGGGAA  
CAAAACAACGAAGTTGAAACGTTTGAAGTTACTTTTGTATCGATTGCGTAGAATAAATA  
TATTATCATGCGGGGAGAAGTTCCCCGCTTAATTTCTCCCAATTCGAGGGGAATAATGTT  
TAGTAGATTAATAAATGCTTGCAGGTTGGGCTGATTTTGACAACGACAAATACGAAGATCA  
AATTAAGATAAAGCAGAGTCTATCGCCGCACCTAAAAACAATAATGGTTCTACGGAAGT  
AGAAATTAATGATAATTCACCTGCTAGCGCGTGGAAACCCTATTACCCAGCAATTTTCCAG  
CACCGACCAGAAAATCAGCACAACTAAGCAATTAGTTAACACATATCGCGGGTTGATGAG

TAACAATGAAGTCGAAAACGCTGTACAAAATATCGTTAATGATGCGATTGTATTTGAAGA  
AGGTCATGAAGTTGTTTCATTAAATCTTGAGGGCGACTGGCTTTAGTGAATCCGTAAAAGA  
GCGCATTTCATGAAGAATTTAAAGATCTTTTAAACACTATCCAGTTTGATAAGCGTGGTCA  
GGATATGTTCCGTCGCTGGTATGTTCGATTTCGCGTATTATCTTCCAAAAAATCATCGGCAA  
AAATCGAAAAGATGGTATCGTAGAATTACGCCAGCTTGACCCACGAAATCTTGAATACGT  
TCGAGAGATCGTTACAGAAGACACACCGGAAGCTAAAATTTATAAAGCAACAAAAGAATA  
TTTCATTTACACTGTAGGCAATAGCTCTTATTGCGCAGGTGGTCAAGTATTCTGTCTTAA  
TAGTCGAGTTACAATCCCGCGTAGTGCTATTCCATACGCTCACAGCGGCTTGATGGATTG  
CGATGATAAATATATCATTGGTTAGTTGCATCGGGCTGTTAAGCCAGCAAACCAGCTTAA  
ATTGTTGGAAGACGCGATGGTCGTTTATCGTATCACGCGCGCACCGGAACGCCGAGTGTT  
CTGTATTGATACCGGAAACATGAACAACCGCAAGGCTGCACAGCACATGAACTCAGTGGC  
ACAGTCTTTTAAAAACCGCGTTGTTTCATGATGCATCGACTGGTAAACTTAAAAACCAGCA  
AGCAAATCTACCAATGACAGAGGACTACTGGTTACAGCGTCGAGATGGTAAAGCAATCAC  
CGACGTTACTACTTTACCGAGTGCATCCGGTATGAGTGATATCGATGTTATTCGCGACTT  
TAACCGTAAATTGTATCAAGCGTTGCGTGTGCCATTGTGACGTAGCAATCCCTCCGATGC  
TAATATGGTGATCGGTGGTATGGTTCAGAAATTAATCGCGATGAGTTGGAATTTTCGAA  
ATTCATTAGAATCTGCAATCACAGTTTTTCGGAAGCATTGCGCGATCCTCTGAAATATAA  
TCTGATTCTCAAAAATGTACTTACGGAAGATGATTGGGATCCTGAAATAAATAATATCAA  
GGTGGTTTTCCATCGGGACTCTTACTATACAGAAGTTAAAGACGCGGAAATTTTAGAACG  
TCGAATCGGTCTAATCGAACGTATTACACCTTACATTGGTAAATATTTCTCTAACCGAC  
AGTGATGCGTGACATTCTGAAATATACGGATGACCAGATGGACACCGAGAAGAAACAGAG  
CGAAGAAGAAGCGAACGATCCGCGCTTTAAACAAACTCCCGATGAAATAGAGGATTTTAA  
AATGAAACAATTTATCGAAGCAATTAAACTCGCGATCTAACGCTGATCGGAAAAAGATT  
TGATAAGATCATGGAGGCTAAAAAAGCCAGATCATCGAATCCAGCGTATCGAAATCGC  
ATCAAGTATCATGATCGAAGGTGAAGAAGAAAAAGACCGCGATGATGAAGAAGATATGGA  
AGATGAAGATCAGGACGACGAAGATCGCAAAGACGATAAAAAAGACAAAGAAGACGACGA  
ATAATAGGAAGCTAACATGATTAAGATTTTACACCTAAAGCTGACTTAGAACTTTTCG  
GCCGGAAGCACAGGAAAAATTGGACATGTGGGCTATGTTTGAGTCAGAAGAATTTGAA  
AATCGTTGAAGGTATCTCCTAGGATGAGCCGGAACCTGGCTGTAGCAATGCTGTCTATCAT  
CGACGGAATTACTGTAATGAAGCAATGGTTAAACATGTAAACGCACGCGGGGAAGTTGA  
ACGTAAGAAAGATCGCAAACCCGTGAGCGTAATGCTTACATGACTACTGGCCTAAGCAA  
AGCTAAACGCCGTCAAATTGCCCGTCGTGCTGCACAAACCAAACGTGCAAATCCACCTAT  
CGAACTTCATGCGGAACGTAAGCGCAAAAAAGCAATACGTAAACGTAAAGGCGTTAGGATT  
ATAACAGGAAACAACATGGAAAAGAACGAATTACTGATCGAACAATGGGGCGTTCCTTGT  
GCTCGCGGTAGTTCGTCATTGCTTGAATCATTGATGATAAGGCTACAGGAAATCTCTAT  
ATTCAAGGGATTTTCTTGCAAGCCGAAACGGTAAAACGTAATAAACGCTGGTATCCTCGC  
AGTGTCTAGAAAATGCGGTTACTAAATACATACACGAACAAGATGAGACACATCAAGCT  
CTAGGCGAACTTAATCACCCAGCAAGAGCAATGCCAGATCCATCTAATGCTTGCATCATG  
ATTGAAAAATTGTGGTGGGAAGGTAATAACGTGATGGGTAAAGCCCGTGTATTGATGGG  
GATAAAGGCGCAGGTGATAAACCTGCTGCACTGATTTCGCGCTGGCTGGATTCTGGCGTT  
TCCTCCCGTGGATTGGGTTCGTTGAAAGACTCTGGTCGCGGATACAATATTGTACAGGAA  
GGTTTTGTGTTGACGGTTGGTGTGATGTTGTTTGGGGTCCGAGCGCACCGGATGCGTGG  
GTGACTCCTGTGTTTGTGAGTCAACGGATAGCGGTTCTAGCGCGTAAGACGCACCAGAAAGC  
GATAAAACCGAAAAAGTACTAACCCTACAGCCTCACAAACAAACATCGTCAATCGAAT  
AATATCGCGTTTATGGCGCTCGCAGAAGCGTTATCTAAACTCTATAAATAATAACGTCGT  
TATCAACAAGAAGGTTATAACCATGCTTAAAGTAATGCTGCTCGAAGAAGCAAAACAGAT  
CACCGTAGACGTTGCTCTCGATGACCAGTTTGAATCCGTGCAACTGTGCCCCGAAGTAAA  
AGAAAATTTTGGTACTATCTACGCCAGGCGGTAAAAGCTAATGCTGTTGCTCTGGCAGA  
AAGCCACATTGAAAAAATCGCCGCTAAAGCCGATGAACTGGTGAATCAAAGGTGCAAGA  
AGCACGCTCCGAGATTGAAACCAAACCTGTACGAAGATGCAGATAAATTCCTGAATCACTT  
AGGCGCTCAATGGCTGGCAGAAAATAAAGAAGCCGTTCCCCGTAATATTAAGCGGATCT  
GTGCGAATCTCTGATTGGTTCTCTGAAAGATGTTTTCGTTACTACAATGTTGTAGTGCC  
GGAAGAATCTGTAGACGTTGTTGCTGAACTTGACGAAGCACTCAAAGAAGAAAGAGAAAA  
AACCTCCGAACTCTTTGATGCCAGACTGCAACTTGAAAGCGAAATTCGTGGTATGAAGCG  
CGAACAAGCGATCCATGAAAGCGCTCGTGATCTTTCCGATACTCAAAAAGAAAAAGTAAC  
CGCGCTGATTGAAGGTCTGGAAGAGAGCGAAACTTTTCGATAAGAAATTAAGTCAATTGT  
CGAAACGGTGGCTAAGAAAGAAGACAAACCAGCGAAGATTGAAGAATCACTAAATAATGA

TGCCGACAAGCTGAATGTTATTGCAGAAGCTGTGCAAGAATCAGAGAAAAAAGCATCTGT  
AGATTCGCGGTATCTCGCTACCTGAATTTTCATCTAATGAGATTCAAATCTACTAATAAA  
TACTTTAGGTTAACAACAAACAAGGTTTAAAGAACATGAAAACCTACCAAAAAACTGATGG  
AAAAATGGTCCCCGCTGCTGGAGAACGAAAAACAACCGGAAATCGCAACTGCGTCTAAGC  
AGAAACTGGTTGCTAAAATTCTGGAATCTCAGGAAGCGGAGTTTGCTGTAGATCCGATCT  
ATAAGGATGCAAAAGTTGTTGAAGCATTCCGGTGGCTTTATCGCAGAAGCCGAAGTTGCTG  
GCGACCACGGTTATAACGCATCTAATATCGCGTCTGGTCAGACTACTGGTGCAATCACCA  
ACGTAGGTCCGGCTGTTATCGGCATGGTACGCCGTGCTATTCCTAACCTGATCGCATTG  
ATATTTGTGCTGTTTCAGCCGATGAGCACTGCGACTAGCCAGATCTTTGCAATCCGTTCTG  
TATACGGTGGCGACCCGCTGGCTGAACACGCTAAAGAAGCATTCCATCCGATGTACTCTC  
CGAATGCGTTCCATAGCTCTCTGGCTGCTAAAGATGCAACGACTGTTTCTCCTACTGGCA  
CTGCGTTCCGGAAACTCACTCTCAGTACTCCTATTGCCGCAGGTGATATTGTACACCACA  
CCTTCGCAGAAACTGGCATCGCATATATGCAAAACGTTACCGCAGAACAAGTAACCCCGT  
CCAAAGCTGACAGCGAGTCAGATGATGAAGTTGTCATGAAGCTGCTGGAAGAAGGTAAC  
TGGCTGAAATCGCTGTCGGTATGGCTACTTCCATCGCTGAATTGCAGCAAGGGTTAATG  
GTTCTCAGAATAACCCGTGGAATAAATGTCAAGGCGTATTGACAAACAGGTTGTTGAAG  
CGAAATCTCGCCAACTGAAAGCCCGTTATTCTATCGAAGTTGCGCAGGATCTGCGTGCTG  
TTCACGGTATGGGTGCTGATGCTGAACTGAATGCTATCCAGGCTAACGAAGTTCTGCTGG  
AAATCAACCGTTATATCGTTGACGTGTTCAACTTTACCGCTCAGGTTGAGAAAAGTGGTA  
TGAATCAGACCGTTGGTTCTAAACCTGGTGTATTTGACCTGCAAGACCCGATTGATACTC  
GCGGTGCTCGTGGGGCTGGTGAATCCTTCAAGTCTCTTATCTATCAGATCGACAAAGAAA  
CTGCTGAAATCGCTCGTCAGACTGGTCGCGGTGCTTGTAACTATGTTATCGGTTCCCGTA  
ACGTTGTAAACATTCTGGCTTCTGCTGATCAGGGAATCAGTCTTGCTATGCAGGGTGCTG  
CACAGGGTCTGAATACCGACACCCTAAAGCTGTTTTTCGCTGGTGTCTGGCTGGTAAGT  
ACAAAGTATTCATCGACCAGTATGCTCGTCAGGACTACTTCACCGTAGGTTACAAAGGCG  
ATAACGAAATGGATGCTGGTATCTACTATGCTCCGTATGTTGCTCTGACTCCGCTGCGTG  
CAACTGATCCGCAGTCTTCCACCCGGTTCTGGGCTTCAAGACTCGCTACGGCATCGGCA  
TCAACCCGCTTGCTGACAGCGAATCCAGGCGCCGTCCGAACGCATCACCTCCCGTATGT  
TGAGCAAAGACAGCGTAGGTAACAAACGCATACTTCCGTCGTGTATGGGTTAAAGGCTGCT  
AATATAAGCCATTCCTGAAAACCTCCGGGCGGGTGGAAATACCCGACTTATCATAAACCTTA  
TGACAGTGTAAAGTGTTAATTCCAAAGGGAAGACTCGAAAGGGTCTTCCCTTTTTGCGTA  
TTATAACCCGTCATAAATTAGGTTGAAAGCCTATACTCTATTGGGAGCTAAAAGAGATAT  
ACACAACAAACAATTCGACCAATTTTCGTAGTAAGTGCATGGCAAAGGGACCAATGAATG  
AAATGAACGTTTCATGTACATATTGGGTCCGATAGATTTAGGAGATATACAGATCTGGTGT  
ATGCCGACCTTGTATGACATTCCAGCGTGACGCTAGCGGTAATTTGGTTTTGGTACGC  
TGTTCCCTGAATTAACCCCAAATTCTCCATAAGGAGGAAATGCATGAGTAAGAAAGAAAA  
CAGCTATGTTATGACGCGTAAGGAATACAACGAATTGATGTTAGCATTAGCTTATGCAAT  
TATTCGTTCTGATCATGCAATTAATCTGGTAAACAAAGTTAACCGTAGCGTTGATAATGT  
TTCTAGGAAGAAGTAATTTTATTCTGGAATCCTTCGGATTCTTTTTCTTTTTGTATAAA  
TATGATATATCCATTAAGGCAAATACAGGATTCATAAACATGACTCAAATTATTACTGAA  
CTGTTGCGGGTATCTACTTCCCTCAGTAGCTAACCCAGCCAGCGGACCCGCAACTATTATCA  
ATAACTCGCGCGGTAAACAACCTGATTTTCTCTGATCTTGTAGCAATCCAGCCAACGGAT  
CAACCAGTACCTGCATTGTACGGCCTACGTTATCTTAATCGTGATGGTCAGATGGCTTTC  
CGAAAAGCTACAACCTACGGTGGCCCGGCTGGTGTATCGCACAGAGATTGAAGAGTTTTCA  
AAAGAAAAATCTTATGACGAAGGCGCACTGTTCAAATCAGACAATGTTGTATGCGAAGTT  
GTGACCGCTGGTACAGTCGGTGCAGATGCCGAAACTCCAGAAGCTGCAATCTTTAAAGTC  
ATAATGACAAACAAAATTCGTTTATAAAGCGATCGTGCATCGGTAGATTACTTTGAACAT  
AAAAACACCGAAATTTTCGTCTACCTCAATGCAGTTTGATAAATGGCAGGTTAATGTAGGT  
TCTCGTAAACTGAAAACCTCATTGACGACCGAATTGACGCAGGATCTTGAGGCAAGCCAA  
ATCAACTCTGAAAACCTCTGTAATTGATCTTCTGGCTACGATCGCTTCAGAAGAGATCAAC  
AAAGATATTATTCAGAAGTTGATCACTGTATCATCTCGCTATAAAATTAAGGGATCACC  
CCTGACGGCGTACTTTCTCTCGTTAGCGTTCAGGATGCACCAGCACAAAGCGCATGAACTT  
TACCGCTATGCTGACGAACTGAGCTATCAAATGTTGCGGACTTCTCCTTTTTCTGGTTCA  
TACGTTTTGGCGTCTTCTCGCGTGGTTGGCCTCCTACAATCTACCGGATGGATGGAAGAA  
ACCGACAATGCTCTAAGCGAAGGTCGTCTACGTTGCGGTCTGGAAGTGTACGCAGACACG  
ACAGCACCTTTCGATTATATTCTCGTTGGTTGTAAGCACATGATCGGTGATATGGAGAGT  
GTAGGTTCTCTGTTCTACTCCCATATACAGAAGCCGACGGCGCGGGCGGTATAAGAGT

GTAATTGACCCTAATAGCTTCCAGCATCATGTAGCTATTATGAATCGTTATACACTCTCT  
GTCAACCCATATACATCAAAGTTGATCAGGAAGAACCAGGTCATCAAGGGTGACGAT  
TGGGGTAAAATGGCTGGCCGTTCCAGAAATGGCCTACATTTTAGGAATCGAACTGCCACCG  
CTTGAGATTGTCAACGCTTCACTAAATATCTAACCAAGATAAGTCAAATCCGCCAAGAT  
TTTTTCGACGGCGGATCTATTTTCTTGATGATATAAGTTAAAACATGGTATCCCATGTCT  
ACGGGCAACATAAACAGCAATTCTAGTTCCTCCCGCAACGATTCCATTAACCTTCTTTTCGC  
CCAGAATATCACACAATCTACAGGATCATCAAGTGTCTCACCTAAGACTTGAGCAACATT  
TCTAGAAAACAGATTTTGCATGTATAACGGTATAGAACGAGGATTATCATAAACTTGTTT  
TAATTCATCCATCGCCTAATTTTTTTTGTCTAAGGTTTGCCATGCAATAATATCATGACC  
GTTTTGCTTGTGGTCATAAACTTCCAGTTTGGAATGAAAATTTTTTCTATAATCTGGATC  
GTAATACTTCATGAAAGCATTGTCCATACCGTAAGCCCCTCCAGAATGCGCTACAACGCA  
TTTTTCTGACAATACCCTCCCAATGGTACAAGCCATTATCAAATGTCGCTAGGCCCTTT  
TCTAGAGCCTATTAAGCACATCTACGAAGTGGTTTTACTCCAAATAGATCTTGTAACCTG  
GTCAAACATAATATTTCCCTCCATAGAAAGCCATATCATACTACAAGTTAATAACAAATAC  
AAGTATCCGCGTAGCGGAAGCGAGCACAGGGAGCAATAAAAACACTTCCAGTAATTGATTA  
ATAAATGTTTCGAAACAAATTTTTATTATTCTATAAGATAAGTCTTCGTTTTGATCATTAT  
TTAATCACACATGTAAAACTTCCAAAAGGATATCGCTTCGCGAACTCCTACGGAGTAT  
AACATTTGTGTTCCAATATGTAGTGATTAATAATTAACCAAAGATACATTTTCTATGTCC  
TAAAGATCTTTCTTCGTTTTGATCATAATTTAATCAAACAGTATTAGTATTGTGCACATG  
TAAACTAAAATTATGTTAATAACAGACAACAAAAACGCCGACCCGAAGGACGGCTAATG  
TTAATTATTTGTTGATAACGATCTGATTTTCGGCGAATGGTAACATTACTCTTAGAGATGA  
TCAGATCATCCGGCACTACGTTAGTTTTGTATGGCTGGAAGCGAACAAGCATCTGATTGC  
GTCTAGACCCTTGTTAATCTTTATTTCCATCTGGATATTGTTGCCTACGTGAGCAACCG  
CAATTTACCTTTATTCTCATAGACCCACTTGCTGGTAACGTCTCCTGCAAAAGCCTTAA  
TAACTTGCAATGCTTTGTCGTATGCGTTAGAGCTGTGAACTTTCAGAAGGCCAGCCGTAG  
CAATACGGGAGCAGGTGGTCGCCGGAGATTGCCAAACATCAACATTAATTTGCTCAATCA  
GAGTAACACCGCCCTGATCAACTGCTTTAATGCTTAGAACCTTGCCTTTTTTCATTGCTA  
CGTGGTTGTTACGGAATTCATAATTAGTCACCTCTATTGATTAGTTATTCAGAATATTA  
ATTACAAATCAGGACATTGCCCGTTTGAATGCGTCCATTATAACAGTGTTATTTGGCTTG  
TCGACACGTTTTTGAACCTTATTTTTAAATTTTTTGTGATGTGGTTTTTACGATAAACA  
ACTTTTTCACGGCTGGCGTAAGCCTCGCGTGCATCTTTTACCATCAATCATGCCTTAGCC  
GCATCTTGTCGCTGATCCCGCCAATCTTCTTAGCAATATCAACAAAATTAAGACCGTGG  
TCTTCGCGTAGCATGTAATCCGTTAACGCTGTTTTCTTGTCCATCACTTCGCCCCATTGA  
CGATTAACAGGATAGTTATCAGTACCGGAACTTGATCATGACAGTACAAATAAACCGGA  
TAAACGCATTTTCTGACTTCCACACATGACATGCGACTAGCTGATAGCCATTGTTGCAA  
CCAAAGCCAGAAAATACATCTCGATTGGTGCTTCTTTGATCAATCGTACAATCTCATTCC  
TACTACGCCTCATACATTCATAAACACAACAACGAATAATACAGTAACAGTTATCAACGC  
CATTTTCAACCCCATATTCATAATATTTTCTTCGCTTCACTATTGACAGTAGCATGTGCA  
TGGGTGCCATTATAGGCATCTAAATCGCTCTGTCAAGCACAAAAACAAAAAGCCACCCC  
GAAGGATGGCTGATAGATTTCTTTAAGCAGGATGCGTTTCACGAATGCGTAGAACTCGCT  
CTAACGTATCTCGGTCCGGTTTATGTAAATCTTTGGAATGATACATGAAACCATTGCGAG  
ATTCCATGCACGTGCAATCACTATATTGTTCTTCCGCTGCCGCGATTGTTTCCAGATCTT  
TGGCGTACTTGCTGGTTGAATAAACTTCTTGATCACGCCACTCTAACCCAGCCTCATTGA  
ATTTAACAATCTCGTCAAATACCCACCATCCAATGTAGATAAATGAAGTTTTGCGCCACG  
GGATCGGGTGTACGTAACGAAACATTTCAACAACCTTCCATTGTACATTTTCGGCTTGTT  
TTGCTGCAACTTGTAAGTTCATCTTCGATCTGTTGATATAGTTTAGCAACACACCAGA  
ATTTGGCTGTGTCATCGTAAGTAGCACTCTCTTTGAACAGATGACCGTCTGGCATGATAG  
AAAATCCTTCCAGTGCTTCGCCGTCCTCACTACCGATTAGAGTCGGTGACAGTTGCCCTT  
CGCGCTGCAAATACCAGTTATGTTTGTTCGTCATTCAGGCATACCGCTAGAATCGCCTA  
CAATGTCTCTGACACAACATAATTAAGTAAGATCTCATTACCTAGTGCCACGGTCTTTG  
ATTCCACCACATCCTGTTCTACGTTCAATTGTTGCCAGCATGATTTTAGTCGATGCGCTAT  
CGGCTGAAGTTTCCGACTCACCCACCCTTTTACAGTATACACGCCGTTTTTATCTGCTG  
TAAATTTTTTGAATTGTAGTATTCTGTTTTGTGTCTATAACTTCTTCGCCCTTACGCCAAC  
TATAATGTAGTTCATAGTTGTCTGCTGGAGTCTTCCCACCCGAAAAATTTACTGTTGCAT  
GTAATTCTACATCTTTTTGTGATGGTACGTAGAATTACGGCGGTTCCGGTGATATTTATGA  
TTAATTCCGCTTCTTCCATGAGGAAAACCTCAGATTCTGCTGATTCCATCGTATCAGTAT  
CTTGTACCTTGACTTTATAGCTACCCGCATTTTCACTTGTTGCGCCTTCTACAGTTAGCG

TAGCTGTGTTAGATTGATGCTGTTGGTCGTCCTTTGTCCATGTATATGTCAAATTGCTTG  
CTAATGGTTCGTCACCCGCTAAAGTCGCCATTAAGGTGAAACCATCTCCAGCAAGAAAAC  
ATCTTTTGTAGAGTGTATGGATAGTGTGAAAGCCATATAAAGCCACTCCCATAGAAAAT  
CGGAATTTAATTAATTGAAATAGTTGATTGCCACCAAACAGATAACCATTGCGATATTCC  
AATACATGAGTATTAGAATAATGAGGCAACGAGGCCGAAATAGTCTCGATCTCGTCTGGG  
TATTTGTTCTGTTTGTATGTAATACATTGATTTTGTAGGCATGTAGTATCCTCTTTTAA  
TTGCATAACGGAECTACAATTATAATTATAACAAATATTTTACAACCTTTTATCACCCAAA  
AATTACTTGAGTGTGTGGAATTGACTATGTTTAGTCTCTTGCACCTTGACAGACCCATCG  
CGTTTGATATTATAGATCAGTGACTTGAGGGTGTGCTTACATACGCGTGCGGGAAACGT  
TCTGGATACTTCTTCCAATCTGGAGTATTAACGATCCAGTCGAAAATCCACCACGGGCAG  
GAGTAGTAACCACGACCGCCACCGATCAAGCAAATGGTCTGACGGTAGCCAGTAAGATCG  
CAAATGAATCAGTGTATGTGCTAGGGAACGATGCTCTGCTTCGTCAGAGAAAATGTTT  
GCTACCGGAGATTTCACTTTAACTTCCGGTGCTTCTTCAACATCTGACTTAACTTCTTCG  
ACCACTGTTTCAACTGCTGGAGATTCTTCTTTTGTCTTCAATGACGATCTCAGGTTCT  
TTCATTGCTTGAACCAGAGACGGATCAAATTCGTCGAATACTATTTTATCATCTGCGGTG  
TCTGCTGCCTGAATAAGATCGTTAATACTGGTTCCTTCTGCCGGAGTTTCTTCTTCCATT  
TCGGAAGCCAGTTTAGTTAATTCGGTCTCTACGAACTCGATCATGTTCTCTAGTGATAAA  
GTCCTTTTGTACCTTAATATCAAATTGTTTTGCGTAGTCAGCTAATTCTGTTTTAGCTGTC  
TTCTGTGCTTCTTTGTGTCGGATGCCGCAATAGCGCGGAGTTCTTCGAAATATTCTTTA  
TCAAACATGTTATTCTCTGATTGGGGGTGTTGTATAAATATTTGTATAATGTATTTAT  
TGAGTGAGGCTATTCGCTATGCAAGACATTAATAATTCACTTTCTGAACTATTTCCATGTT  
CAAATTGAATGTAGCGATTCAATTTTATTAGAAATGCGAGATTATTTTAGTTTTGAAGTC  
GAGGGAGCGCGTTTCAAAAACGAGTAAAATACGGAGGCTGGGATGGGCGTATTCGTCTT  
TTAGAGTACAACGGAAAGCTGCCAATCGGCCTAACTAAAACCGTGGGAATCTTCGCTAAA  
AATATGGGCTATAGTGTATGGGTAGATCCTCGCTTATTCGAAAAAGAACAACCTTACAGAA  
GAAGAAATTACAAAATGGTGTATGCCTTAGAATTATATTCGGGTGCTAACAGGATCACC  
CCGTATTGATATCATTCTTAGGCTGTCTTTGAAGGTATCCATCATAAACGCCGTATGTTA  
GTTTTGCCTACGTTTCGCTGGTAAATCTGCGATTGCTTGTATGTTGTCTCGCTGGTACTTA  
GAGAACCACGAAGGGAAAGTGCTGATCATCGTTTCTAACACGTTGCTAGTGCTGCAATG  
CGTGATGACTTTGTTGATTATCGCAAGTTTCTTATGAAGCAATTCATACTATCATGAGC  
GGTACTAGTAAACACGTAGGTGATCGCCTGATCGTTGTTAGTACGTGGCAACCTGCATGT  
AAACAACCTCGTGAGTGGTTCAGCAATTTGGGATGGTTATTGTTGACGAATGTCACAAA  
GCCACTGCTAAAAACCTGCTAAACATCGTTACTGATATGGCTCATTGCCAGTTTAAGATC  
GGCATGACTGGTTCCTCGTGACGGGAAAGCTAACATGATGCAGTATGTCGGGGCTTTTC  
GGTGATATTTCTAAGATCGTGAGTATTGACCGCCTGATGGAAGAAGGGCAGGTGACAAAA  
CAGAAAATTAAGTGTCTTTTCTTCGTTATACCGATGAGGCATGTAGCGCGGTTAAGGGG  
CGAGAATATGCGGAAGAGATCAAGTATATTAATCTAACCCACGACGAAATAAGTTTGT  
TGTAATTTGGGGCTAAACTCGCTAAGAAGGGCGAAAACGTATTCCTGATGTTCCGCAAC  
ACTAAGCACGGAAAACCTTATGTATGACGCGTTACAGAAGGTACACGACAAGGTTTATTAT  
ATTGACGGTGGAGTTAAGACAGAACAACGAGACGAGTTCAAAAAATTAGCGGAAGGGGAA  
ACAGGGATCATTTGTGTTGCGTCTTATGGTGTATTCTCTACTGGTGTTCATTAAGAAT  
TTGCATCATGTTATTTTCGGTCATCCAGTGAAGGAATCAACTATCGTTCGTCAGAGCATC  
GGTCGTGCATTGCGTAAACATGGTTCTAAGGATATTGCAACGGTCTGGGATGTTATCTAT  
CATTTGGCAGCTAAGACAATGAGCAAGAATGCTAAGAAACAGTTTAGCCACCTTAATTAT  
GCTCTTAAACATGCGCTTGAAAGAATAAAAATTTACAACACCGATCAATTCGAATATGTC  
ACGAAAACAATCGAGATCTAATAAACAAGGGCTTTAATGTCCCTCTATTCTACGGAGATT  
AAAAATGATTAGCTTTAAACATTTTTTGGTTGAGGCCGCTATTGACGGTTTCATGAGTAA  
GATTTATTCTTGTAATACTATCGAGGGATTAATGAACTTGAGGCATATCATGAAAAGTG  
CAAGAAAGAAACAGAATTGAAACCTGCTGATGACATTTTCGATCCGTGATGCTATCGCTGG  
ACGCCGTAAGCAATTGGAAGCGGACAACGAGCCAGAAGAGGAGCCGGAAGAGGATTTTAA  
AGATATAAAAAAGCCCCATCAATGATGGGGCAAATAAACCAATTAATAATCGGTTATCAA  
CAAATTACATTAACAGCATTGTCTGCTCTACGAGTTGTTCTTGTCTTCGCCGTTTCGCAT  
CTTCACTGATCGAACGTTCTTTTATTAGCTGTAAGCAGTAGCCAGTGTGAACAACGCCGT  
TTTCTGTCTGGACGGATAACGCATCCTCGACAGGTTGTTTACAACAAATACAGATTTTCA  
TAAAAATTCCTCCTGCATGTATTTAGCGACCAGATTCCAGCATAACGAATTCTATAGCAT  
TCTTGATCGCAAATCCACGAGATTTAACGATATCAAGTGCGCGACCAGCAACATCCATTA  
CCATCTGGTAATATGCAATTTTTGTATCAAGCGGTAAGATCTCGTCGTCTGCTGGCATGA

CAACGTTCAATTCTGATTTCTCATATTCAGCACGGCACCAGTCATCACTACGGTTAGTGT  
AAAAGTCAAGACGATTTTTTCATAGCCTTTTTCTTTTTAGCCTGAAGAGCAATCGTCTCTC  
TTTTCGCCTCGCTGTAATCCTTAACCACTTTGAATATACTACCGGATTATTCAGCGCCT  
CCCATTGCAACTTAGTCGCATCGATCTTCGTGTCAGCTTCTAATTGTTCTTTCAAATCGG  
TTAGGTCCATTATATCCCCTTATTCACACTAAGACCTATATTATATCACACACAAAATCA  
CTTTGCAAGTCTTATGCGTAGTTGTTCAAGATCATCTGGGTTATCTATTAATGAAAAGTA  
GATTGATACTATGATTGAGTTATCGTCGTA CTGCGGAGTTACTTCTACTGTCAGGTTTCG  
GACCCGTGGTTCATAGTTTCGGATCGCCTCATTGATGTTTTTTTGATACGGTATCCACTGT  
CATTGGGTTTCATGTTCTCAAACAGTGATTTATTGAGTTCGCATCCAAACAGTGGATCAA  
TGGACGATATCCCTTGCGAGTAGTCACGATCAGTAGAATAGAATCTTTAACCGCTTGAAT  
CCCTATGTTCTTTTTAACGTCGTTATTCCACGATCTGGATATATTGACATCCGAATCAGT  
ATACATCTGATTAATAGTTGCCATGTTATAGCTCAAATAATTTTAAGGAAACTGGATAGA  
CCTGATAATGAATATACACCCGATTCCCCGCATTTCGCACTTGAACGGTACTGCCAGCGTG  
ATTTGATTTCTTGTTAGCTCGTCGATCACTTCTTCCACTTTATCCGTGGTAAGCATATCC  
AGCACGCGGTCAACGTCCTGTGCGCTCAGGTCGTCTATATTGAATTGCTGATCGCCGATC  
ACGATATATTCGATACATGCAATTACCATCTGCATAATATCAGCATCTTCTGTAAACTTA  
GGTTGACGAAACTTGATTTTTACTGGTCCTAAGTCCAGAATATACGGTTCAACTTCTGGT  
ATCTGTGTGTATGAAACATCAAGAGGGTAGACTTTCTCTTTATTGCATACACCACACACC  
CAAGTAGCATCAATTTTCATCTTATTGGGGCTGTGACACCATAAAAAGAAGAAAAATATAT  
TCTGCTTCGCATTTCTTAGCTCTAATGCATTGATCCCCGTACATTCATGTATGATCTCT  
ATAACAACCTCTGACAGGTTGCCAGTCTCTTTTGCTGCTACCAGTTATTGAAATTCGCCG  
AAGGTGAAAGCATGGGCGTGTATAAACTTTTCGCCTAATTGGATCTTGAAAAATTATTGC  
ATAATAAAACACCCTTTATAAACACATAGAATTATTTAGTATTCTATAAATACCCGAAAG  
GGGGATTATACCATGAATATTATCCGAATAAAACTGCCGGAAGATGTGCAGAGGTTTAAA  
CCATTCACGGTAAAAGATTATAGAGATTTCTTCTGGGGTCAACTTAAATTAAGATGAAT  
CCAGAAGAAGAACAACGATTCTGGAAGAGCTATTAAGAAATATATCGAGAAGTAGAT  
CCGGCATTTCGTGAAAATATTTTCTGAATGTCTTTTCTAGCTCAATTGGTAAAACAAAG  
ATACCGCTTTGTTTTAGTTGCACGACTTGCAACAAAGAAAGAAAAATGTTGCTTAACTGA  
CAGGTTGAAGCACTAAAACCAATCGTTCTAGAGGCCGAGGGCTCAAATAACTTTCCGA  
TATGTTAAACCATCAACCGACTATGCAAAAACGTTTCTGGATGCGATAGAGCGTGTATCT  
GATGGTATCAATGATTATCTATGGACTGAATTACCGGCAGA ACTTAGAGAACAGGTTATC  
GATTCAATCTCATTGCTGAATTTGAAGAAGTCGTTAAGCAGATGCACACAATCCAGATC  
GAACAAAAGATATCTTGTGTGAAAGTCATGACCTGAAATACATAGGTCTTCTTCCATTA  
TTCAAATTGTTGTTGAATCCAGATGAGTTATTCATCTTTTATCAAGTAAACCATCTATTG  
GCAAAATCAAATTATTCTATCAGTGTTCTTATGGATATATTACCGATTGAGAGAAACATT  
GCACTGACACTGGTCGAGAAAGACGTAAAAGAGGCAAATAATGCCAAGAACGAGGTTTCC  
TAATGTCTAAATAAACTTTATCAGGATTATGAGGCATGTCTAAATCATCGCTTTATAGA  
GTTGGGTGCTACCTTTGTTACAATGACTCTGCGTGATTTCGATTTCGTGGGGTGAATGAAGG  
ATTGTTGCAATTCTATGATAATAAGGCGATGCATACAAAATTAACGGGAGAGAGATCAT  
TCATATTTTCGGTATCCACTGCTAATACAGCTGAAGTGTTTAAACCGAATATATGGGATCTC  
CCATAGTAATGTAACAATTGACCAAAAATCCGACAACATTTTAAACATACCAGTGAAAGAG  
CTATCACGAAACCCTAAACCTTAAATTTTCTCGCTCATTGACAAATAACGCGGCTAATAA  
CGTAACTAGCATGATTGATGCCATCTATAAGTAAGATCCTTTATGGAAACCTACTATAAA  
GGGTGATAACGTTGTTATTCCTTGTGTCCGTGGGTTAGTACCATAAATGACTATATGGA  
TTTTGTTAGGGCATAACGGGCAAAGCGTAGAAACCGAGTCTTTCGTGTATTGCTGGGAAGC  
TTTTGATAGTATAACGATTGCTGGATACGATACAATTAATAAAAATGAGCCAATACCAGC  
TATAATCTGTGAGCCAAGACTCATGGGGCAATTTATTGATATGTTCGCCTAATCTGATGGT  
TTTTAATTTTGAAGTGGCAGACTAAGCGCAATGCTAAAGTTAAAAAATTCATTTAGCAATG  
TGACATACACCACTATTGATTTTGTACTAAGCAGTATAATAAAATTTATTGGTGGTAATG  
GGGATAATATTGCACACTTTGCTCATGGTGGCGCTTATGGCGATTTAACTTATAAGAATG  
CGTTTTTGGAAAGTTCTAAACTTGCCACATTAGAACAATATGATTCATATGCTACCGCCG  
TGTGTCACAGTAATTTTTTATTGCGCCCCGGTATGGTTATTCGATTCTTTGATGAGAAGC  
ACAAGCACGCAATGATTTTATTGTTGACGAAGTGGTGCATGAAATTAGCCGAGAGCAAT  
CAATAACTCACCTGTATATGATCGGTAACAGCGAAGAATTACAGGAAGTCAAATTTGAAG  
GTAAGATATAATGACAGAAAGTAAACCTATGTTAAAATCTGTTGTCCCTGTAAAAAAATT  
AGAGATAAACGGGAAACATATGAAGATCCCAAAAATGGGGATTAAGCAACATCGATTATT  
AAAAGATGTTTCGTAGCTGTGATGAAACATTAAGATTCTGCTTGATTCAATCTGTCCTGG

GTAAACGCAGCCGAGACTGCGTTGATTATGCTTAACCTTTGTGCGTTTAATGGTAAGTG  
TCTGGAAGAAAAAGATGGTCTTAAGTTGTCTGATGTATATATTTGTACAGAGACTGAATT  
TACTTTAAATGGTAAAGCCTTTAAATTAATAAATCCAACGTATACTTCTGACCCCATTAT  
CGATGACGCTGATTTCTTGAGTCATCATTATCACGATCCTAGCGTAGACTTCCATGATTT  
CCCAGCTTTTATTATGGATTGGGCTACAGGATTAAGAAAACTATTGCACTGGACACACC  
GGAAGTTCTATCTATGGTGGAAATTAACATATTGGGTGCGCTATCATGAATGACGCATTA  
ACATCATTTTCGCGGGATGCGGAAGGAAGCGGAAGAAAACCCGATTGATAAACTTAACAAA  
TTAGATAAACTTAATTCTATTGATAATTTGCAAGCCGCTACCGAATTGGTGGCAGAGACA  
GTAGAGCAAAAATCTAATGAAGTTGTTGGTGCGGTTCGAGGATAACACGGCAGCCAATGAA  
TTGACGGCAGAAAATACACAATCTCCCCCTGGCAATACCCAAAAAACTTATGAAGAACTG  
CAAAAACCTCAATAATTACTCTTCTCAGATGAATGAGAAATTACGTTGTTTTGGTGTTTTG  
ATGGAACGTAGATTTGGTGTGTCAGTAAAATGGCTAGCGGTATTGGTGCCATTGAAGAA  
GCATTGAAAAAACCGGAACAACCGCAAAAATGCCATCACCTCAGCCAGTTTTGCCTACT  
GTACCGGAACAGCCTAACAATGACAACCTATCAAGGTCTCCAAAGAAAAAACAGATGCT  
GATGACCGAAAGAAAAAGAACGCCACAGATAAGCGTAATGCTGATTCTATGGAACATCTT  
CTTAAAGTTGTTTCGTGGAGGATTTAAAGAAACCATAGGTATCTCTAATAAGGTCTTAGGG  
ATGTTATTTAAGATCACTTTGACCGCTATGGCAGAAGCCGCAAAAATGGGGTGCTATTTTG  
ATGGGTATTGTTTTTGTCAATTGATACCCTGATGGTTCATTTTCAGATATTGGAGTGATTTA  
TTCGAAACAAAATTCAATGAATTTATGGGTAAAGCCGGAGGATGGGCTGGTCCTATTAGC  
GATAGTTTAACTACTGTTTCGTTCAGTTTCGAGATTATTGGTCTAAAGGCCAATATGGAGAG  
TTAATTAATCTCTTGTATGGGTATTGGTGTATGCATTCTATAAAAACCTTTATCCAACCT  
GATCGAATTATCACTACGGGTATTGCTAAAATTTTTTCGTATGATCCCTAGCATGGGTGAT  
TATGCCGATAAGTTAGAATATGGTGCTTTAAAAGCTGCTGTCGCTCAAGGCTATACGCCA  
AATGAAAGAGAACTCGAATTAATGGATAAGGTTCGAGTCTGAACACGAAGAAGACAAATAT  
GGAGAGCGCACAGGGTGGACCGGAAAAGCCCGGGATATTGGCGAGGCCATAGGCCAATCT  
ATTAAGGTTAAAGTTAACGAAGGTCTTGTAGTCTGGGCTGGAGAGAACAAAAGGATGTT  
GACGCAGAGAAACGACAAGAAGAATTAACGCGGAGAATATAAGTCTGTTTCTGCTGAA  
CAACGATCTGCTAGTCGTAACCTTAGAATTAAGCGAGGGCGCGATCAATAATATTAAT  
GAAGTTATGGAGAATTTGATCGGTGACTATGACAAAGAAAGACTGGGAGAGTTGAAAAAG  
GATATTGATGTTTACCGTGAGCAAGTTCAGATCCTACATTAGTTGAAAGGGATCCTTCT  
CAGTTAGAGCGTCTTATTGAAAAATTTGATGAGATGTATGCTGATAAAACTTAGGGTGTG  
GTTCCAACCTAAATCTGTTCCGGCAACTGAAACGGAAACAGCAAAAACAAGCGGAACGTACT  
GAACAAATGCAGTAACAAGCTACAATCCAGCAACAACGACAAATCAGACCTCAAACGTA  
AATAATACACAAATTGTAACGAACAATAGAACTATTAACAGGGTGCACCAACAACCTAGA  
ATTGATGCCCCAGGTACAATTAATATGGGGTACTTTTAATGAAAATTAGTGTTATCAATG  
ATGCCGTTGATAGCTTTAAAGCGCGGGTTAAAACCTCCGCTGGTTTTACCTCAAAAATA  
AAGGGAAAACATTAACCGCTCAATTCCTCCGCTGAACGTGCTAGAGGTAATGATGCTAGCG  
GTTATTATATCAACGACTTATATAACAATGGTCTGTTATTTACTGCATACGATTACACAT  
CCCGTACTACTGGATCGTTGCGTGATTTTCAGGAAAAAGAAAAATGTTGCTAGCGGTTTTG  
GCGGTAGCGTTAATATCGCTGGTTTTGATTTAAATTTGGGTGGGAGAAATGCTGCATTTG  
ACCGAGAGGCAATTGCTAATATTCTTCTTCTCCTCGTAGTCAATCTGACGTTGACGCTGCCA  
GCCATAAGTTAATGATGTTGGTGAATCTGTTATTTCTCGCGGCGGTGGTACTTTAGGCG  
GTGCTCTTCTAATATGCAATCTACTGCTATTTTTGGTGGTATCGAAAGTATTACTGGTG  
GATACCTTGCCGTTACGGTGAACAGATTTCTAATACTGCGCGAAGCATGTATGCGGGTG  
CTGACGCACGAACGAAAACTACGTATGGCATCTAACCCACGTAGTATTGAAGACCTTC  
TCAATCTTCTGATCATATACGAAACGTTTTTAGAGTTGTCTTATGGTTCTAGTGGTATTT  
CCAGCACCGCAAAAGAATTAAGCGGAAGTTGATGCGTGGTATAAAAATACACTATTGA  
GCAAATCCACTCCAGCTGAGGCAAAGAGAAATGATACGCTGTTGGAAGGAATCACCGATT  
TTCTATCCAACGTAATTACTCTATCTAACCCGACAATATGGATGATCTCTAACTTCGGCA  
AGCGTACCTCGTTTGAAGGGCGTAGCGATGCATTTGGTCCCCTCAGATCTCAAGTGATC  
GTCTGGACAAGTCGCCTGATGGTAAGTTTAATGGCCTTGCTATTTCTCCTAACTTGCCGA  
GTACCTTTCTTCTGGAAGTATCATTTAGAGAGATTTTGACACTTTCCCGTGGTACTATAT  
TTGGGCGTGCGGCAAAATGTTTGAATTTAAATGACTTTAACTAACAAAGCCGCTAACCTTGA  
CTTTCAGCGATCTAACTTATTCTGCGTGGCATTGTCACCCTCCAAGTAATAAGACACA  
AGCGGTCTAGAAAGTATGGGTGGTGCAGTATATGATATTATACCAAATGCATTAAATGA  
CTATTTCCGGGTTACTCGTGGTGATTATACCTACGCATTAACAAATCTTGCTGTCCAGGG  
TGTTAGGCGTGCTGTTGATTCATCTGGTGTCAAAAAGTATCTTTTAGGTGCAATGTCATC

CCGCGTAGTACAATCTCTTCTGGGGCAATTTGATGTTGGTACATATGCGCTTGACTGGTT  
CAATATGGCATATAAGACAAGCGGTCTTCTGGTGTATGCTGATAAGGTTCCAGAAAACAG  
ATTGAATTGTGAAATGGACCGTAACCACAATGCGCCAAACATGCGAATTACCGGACGTGA  
TTTTGATCCGCTTGTATTGAGCTTTAGAATGGACTCTAGCGGATCAACCTAAAGAGCAAT  
GCAGGATTGGGTTAACTCAGTAGAAGACCCCGTTACAGGGCTTCGTGCGCTTCCTGTTGA  
CGTTGAAGCAGATATTCAGGTCAACTTACATAACCGAATGGGAGGTCCTCACACGATCAT  
GATGTTTAAATGGTTGTGTTCCCTGTTGGTGTGAGTGCACCGGAATTAACCTATGAAAACAA  
CAACGAAATCACAACATTCGATGTTACTTTCGCATATCGTTCTATGCAAACCTGGTGCTGT  
AGGAGAGCATGTCGCGCGAGAATGGATTGAGGATAAGGCAATAAACGCAATAACAAACAC  
TTTCGGTAATAATTTACTTGATAGTGGGTTATCTGCTGCTGGTAATGATGTATCGCGTCT  
AAATGGCGTTGGTGGGCGTGTGGTGAATACTGTCACTAACTGGTTCTGATAATCGAAAGG  
CGGGGATAATCCCCGCCTTTTTATTTTGCAAATCATTGCACTATTTTAGTGCCTTACTT  
TGAAATTCTGCGCTGTTAAGTTCTTCATAACGGGCACAATCACCGTTTAAATGCTGCCTTT  
CTTGCTTCTTCCATCTGCATGTCAGACATGATAATACAGCGATCCCTTGCTTTGATC  
TTCTCCAGTTGTATAGACTCTTCTTTCTGTTTGAGCAATTCTTCTTGACGCCTCTTTTCT  
TCTCGTGCTTTCTTCCCGCGCTTCTTTGATTGCATCCTTGAAGATCTGCGTTTGTGGT  
GCTAAACCAACTTTAACGCGATCCACGTCTGGACGTTCCATTTTAGAAATAAAGCATGAA  
TCGATCTGATCATCACTTGCATATGCTGCTTCCATTCACGAAGCAAGAAAACCGGATCT  
CATTTAGCATTATCATAGCTTCCATGTTAGCACAAACAGTAAGAATGAATTCAGCCGCA  
AGACCAATCAGTTTAAATCATTTCATTTAGTACCTCACCGAAAATTGTAAATTGTCTAC  
GATTCTCATCGCCGAAAGATTCTACTACGTCGTTACCTTGACGCAAGTCCCGCGCGGTA  
AAATTACTTCACATTCGCAAGGGTTCATGCAATGAACCCAAGAACAACAAACCTTTATGAT  
CTTTTACATCAATCAACCATGATACATTACAAGAATGTTGCATCTTTCGGGTCATTGATT  
AATATCGATTCTCACAATAAAGGCTAGTGCTGTTTGATTGCCATTCTCCAAAGATGATCG  
GTGTCATGCTGGTCGATACAAAGTTTTTAAAGGTAAACTGCTGATCTTCAATGATGCGCT  
CTATTGTCTGAATGTCAAGATGTTGACCGCGATAAAGAGTACCGTTTAACTTTTCGGTTT  
TATCCATGACGCAATCCATCAAATCAACAATCTCTGATATCTCATCGGTCATGTCTTCTT  
CGCCTAAGAGAGCACCATTTACCCAATCGTATTGTTTCAGACACATAATCACACATTGCAG  
TATATTCGTCTGGGGTTATGTTGTTATGTTTGAATGTTTGAATACATTATCTCCAAATT  
CTTCGGAGTGTACTTCATACATCACATTAATGATTTTCTTGACAAATCCATAATCTTGTTG  
TCTCACGCTCTAGGAAGCGGATAACCTTCACATAATCATCAAAGTTAATCTGATCGCTGA  
TCATCTCATTGATCATTAAACCATTATCTCCTCAATGTCATATGTTTCGATGTAATTAT  
CCATACGTTCCATCATTGATTTCGCGTGATTCTTCCGAAAGACGAAAATCCTGTAATTGTT  
TGAACATGTTAAACCTCCCATATAACAGAGAACGGGGCTAGTATAAAACTAGTCCCCGTT  
TGAGTCAACCATTATTTCTTAAAAATTACATTTTAAATTTATCGGGCATTGCGTCTACAG  
ATACCAGATCAGCGATAAGCTGACGTAGAGTTGCCTTATCTGCATTCTTACGTTCCGGTTT  
TAGCTTCGCTAATGAAGCTGGAGAAAGACAGGTCAGAAGCAGGTTTAAACAACACCTTAC  
GGATGAATGCATCACCGTCTGCGATCATCTCGCCAGATTCTTGAATGCTGCCAGTTCAT  
TTTTGTTTATAATTTGCCTCAATGTAATGAGTTTCTTGTGAATCCGTCGATGCCGTAG  
CACGAGTTACCGTATGAAAGGATAACACAACACCGCGAGGAAGTAAAATCTCGCATTCTT  
TGTAAGCAAATGCTTTGTTACCTACTGGCAATACAGGGATGTTTTCCGCGCCAGCAATGG  
AGAAAGCAACATTAGCGCCATCTTACCGCGAGAGCCAGCCATAGAATCAACACCAGCAA  
CGGCACTAGCCACGTTTGCATTCCAGCCGCCAAAATGTTAGGTGCAAGGGAAGTGCTCA  
CGTAGTTTTTAAAGTAAAACGCTTTTTGCTTACGTGCAGTTTCCCACATTTGCGACCGGA  
AGTCCATACCAGGATACAGAATAGTACCCGGATCTAGTTTAAACGCCATAGTTGTAGAAGG  
CATTATCCAGTGCATCGCACATCTTGACCAATTCTTCTGGATCTGAGATTCCTTCAAACCT  
CTTCCAGCTTACGGTTCGGGTAGGAAGTTGTTTCAATTTGATGTATGCTGCATCGGCATAGT  
CGCTCAACACAATACTTCCGCGCCTGGCAGATCAAGATCAATATTTGCCATCATTTCAC  
CCATGTTACTAGCAATTGCTTCAAACATAACCGGGATCAACATTACGTAGGGCATCGGTTT  
TAATCTGGGTGATATTACTACGCAGCATTTTCAGCTTTTACATCTGCTGGCATAGACTGGT  
CTACTCGATCCATTGCCAGTGCGGTGATCCTGTCTTTCGAATACTTCCCTCGCTCATGATTT  
CTATCAAGCGTTTGTGTTGATGCTGCGATAACTTCCGCGAGACAACGGATCATATTGATCCT  
GAACTTTTACCAGTTCGTTACTGCGTATTTTGCATCGGCTTCGCTTTCAAAAATAGTAC  
GCATGAAACCATAGCGAGTGATAATCACTTGTCCAGTCATTACAGAGAATGGGCGGTTG  
AACGTTCTAAGGCTTGACGATCAATCAGAGTATTAATCTGTTTCTTAGGTTCTGCTCCGG  
TGATATCTCCTTCCGGTTTAAAGATTAATTTTTTCTGGATGATTCACGTAGTGCCTTTTAT  
AGGTCGCTTGAGTTTTTACGATTTTCTTCTTTAGTCAACGAGATTTAGCCGCTACGCGTT



GTTCCGCTTCCGCGTTTCGTTCTTCTTCTAACACAAGACAAGCCGCATACGCTTCATCTT  
TTGTCAGAGAGTCACCAGTAGCCTTAGATACCCAGCGATCAGCTAAATCACTTTCTACTT  
TAGTGAACAAGGAATCATCAGGTTAATCCCTTTAATCTTATCAATCGCCATACCGCGAC  
GATTGACAACAATAAGCGATCTTTTTGCTCGTCATTACGTCCTGCTGGAATACTTCAA  
ACTTCGGTGTACGACGCACCAAACGCTCTATAACGCGCCTAACCCAGTTCGGTCTTTCTT  
TCATGCGGGATACGTTAAAACGGAACATAACAGCGTCTAGTTGCACTTTATGGGCTGTTG  
CCATAACCACGTCAAAGCACTTGACATAACTGCAATCGGGATATCGCCTAGACCATTTT  
TAAGCTGTACAATACGACCGCTTTTGTTCATTTTCGCACAGTACAACATGTGCGCTCTTGT  
CACCCATACGAATGGTTTTAGGTGTTTTGTTCGTGAAGTTACAAAGACGGACAATCACAT  
CTTATCGCGTGTCTGTACTGCAAGAAGCTGTTTAGGATTCTGCTTAGGCTTTCAACACT  
GTACCGGGGCAATACTACCAAAGTTTTCTTCTCTTTTCGTCAACAGCCATTGCTCGAAAG  
ATTCAATCATTAGATCGTCGATTTCTAAGTTAAACATTTTATATCCTCTAGTTGATAACC  
TATAAACCTATATTTTTGAACACGGGGCTTAACGCCCTTTTTATTATAATGCACCATTG  
AGCAATTGCTCTAAGGTGTATCCTGAATAGTCTTTTTCAATCAGGATATACTTTCCTACT  
CGTTTAATACAACCGCGCATTTC AACGTATTTCGGCGTAATTGATGGTACGAGTTGTTCCA  
TCTTCCAGTAATGCAGTACCGATTTTCGTTAATGCGGTCATAAGTTACGTCGGTAATGATG  
ATTTGATGTTAGCCATTTGATACTCCTGAGTAGTTTCGTTTCTGTCTGGGTGATTACGA  
TATACACCCTCTGTTATGTCAACAACCTTTTAGAACATTTTTGAAATTAATTCTGCTTTGA  
TTTCGCAGAAAACATCTAAAGATTTCTCGTCCCCCGCTTTTGCTGCTTCTGCTTGTATTT  
TTGAAATGGCTTCAATGTCAAGTGAATTATAAGCCGCTTGAACCTTAGCGATTGCGATGA  
TTGCCGATTTCGATGGTTAAGTGTTCATGTTGATTCTCCTTTTCGTTTCGGTATGTGTGT  
ATTCTAGGGGATCGAAGATCTCCTGTCAACAACGTTTTTAGTTATTTTTTAATTGCTCAT  
CTTGCAATAGGGCAATCACATGCTGGCGGTGTTCTTCCGATTGAGGCACACCGAAAAAGT  
TTGTTTTGTAGAAATACTCTAATCGGTATTCTCGTGAGCTCTCTTCCATCATTATCGCGG  
GTAATCCGAGATTTTCGGAAACGTCGCTTTTCTGCTGGCGTAAAATCACTGTATTACAACA  
TAGAATCATCATTACCCGCAATGCTAAACTCATCGTTCATAAAGGAGAATTTTGCGTTTA  
AACGCTGTTTACCGTCCACGATTTTCGATCTCATAGCGAGAGCCATCATCAATCTTAGCGA  
TTGCGATAGCACCAACCGGAAAATCATTAAATCAGGTTTTTCGATAAACATACGTTTGTTTT  
CTGTGTCCCATACTAAAGGACGCTGATAATCTGGGTTTCATGTTGATATAGCCTTTTTCTA  
ACCATCCATCATAAACAGAGATGACAACGTTTTTAGTATTGGTATAGTAACGGCGTTTAG  
GCGTTAAAGGGTTCATGTTATAGTCTCCTGAATGGATCATCACGTAAATCAATATCTTTT  
AAGAATCATCCCATGAATGCCGGATATTGTTCTTAATTCTCCAGATAAGCGCAGGGATT  
GAACGCTCTCCCATCTGGAAGTAAGGATCATATGATCCCTATGCCCAATATGCTACTACA  
ATTCCACAATCAGCGCAATAGTATTCTATTTCACTTGCTGGCGACCAAAGTCCATCAATA  
TGATCGGTGATCTTGCTTTTCGATTTTACGGCTATGACAATCAGGGCAACGGATGCAATGA  
CCTTGTTTTTCGTAATTTGACGTTAGCGAATACTTAAACAATCTCATTATAGATCCTTAT  
TTGCTTCAAATACTGCCTTTTCGAATCCTCGCGGGGTGAGTGAGCTTATAGTCTTTTTTT  
TCGTTCCCTTACCGCCTCGCTTAGAATGCTGTTACTGTACCCTTATTAATCTGCAACG  
GTTTCTTTTCTGGCATTATAAAGCCTTGTCGGGACCATAAGCAAGTCTTTTTTCGGGTACA  
TATCACGGGCGGCAATATACTCAGGAAACGTAGGATGCTTATCATCTTCCGGCAAATAAC  
CGCCATATTCCCACGGATGGAACACATAATCAGGTTTACGCCACATGCTAGAGATAACGC  
TTACAGGTTTCTCTATCATGTAGGGAACCTCCTAGCCATTCACCCAAATATGCGGTTATTT  
TTCCTGCCCGTACATCATGAACTTGAATCAATGGTCCTTGCTCTCGTTTCTTTTCGTTCAA  
AGTGTGCAGCGCCACTAACAGCTAAATTGGTGCACGGTGGGACTGAAAAGATAATATCCG  
GTTTCCCCCATTCGAGGTCCATTGCTCTTTCCAGCCAGTTCAAATCAATCCAGGTGTTTA  
CATAGGTAATGTTGGATGTTCAAATCTGGTATTATACTTTTTGTATGTACCGTGGTCCG  
CGTCATCCGCATTAAAGCAGACTACCTGATGACCTGCTTTAGCCGATTCTAGCCCCATTA  
TCCCCGATTTCGTCAAAGTTGCAGAATATTAATTTTTGTTTTACGCTGCCCCCATTTGGTTT  
GATAGTAACAGAATCTAAAAGACCTTTGTTAGCCAGTTTCGCGGCAAGTTTTTCAGATCCGC  
AACTTCCCAGCCAGCCGCAATCAGGTTATCAATGAGGCTGTTAGCAACTTCTTCGCTCAT  
GAAAGAGCACTGTTTGCCGATGGTGTAGCGTACACGCTGTAATTTAGTTTACGGAAGCC  
TCTAACGTTTCATGTCTTTAGCGATTTTCTTTGCGGTTTCGATGTTAGCCATTGTTTGATT  
CTCCTAAGTGCTATCTAGTCTTGATGGTTGTATTGTATGGGAGTTATCCTCCCCTGTCAA  
CACTTTTTATAAAATTATTGGATAATTTCTGATGCGTTGGTAGGATAGCATCCTTCTTTA  
ACTCCGAGATATTTTCGCAACCATCCCTACAATCTTCTGTGCTACTACAAAGTCAAATTT  
AGATAATCCTCGCCGTGGGTTTTCAATGATATATGCTTCACATGCTGCTTTAGTCTCGAAC  
ATTTTGATTCTCCTATTTTCGTTTCGGTATGTGTGTATTATAGGGGATCGGTGATCCCCTG

TCAACGACTTTT TAGCGACGGCGACGATGTCTTTT GCGAGTTGCCTTTTT GTATGCTTTAT  
ATGCCTTTTT ACCGTTTTT ATATGCGTTTT CTGGTATAGGATTGATTTATCTTATTGTTTT  
TGTATGTTT CCCGGTCAGTATTAATTT CGTTACATTCCACGAACCGGTGTCGATGTTCTT  
GTGGTATGATCAAACATTTATCATAATTAACCATTTTCGTTTTTCGTTGTTTGTGGTTTTCT  
TTGGTGTGTTGTTTGC ACTAACAGACCCAGCAAAGAGAATGAGTATAGCGCTCATTAACG  
AAAACATTGTTTTCTTAATCATAATATTCTCCTTTAGTTCCTGCGGGAGTGTGAATATAA  
CACTCCCTTAATATTTTGTATTATTCGTGATTAGTTTCGATGTTGTGCATTTTGCACCAG  
TTCAGCCAATGGCCCAAATCTTGGTAGTTAATGCTTTTATCTGCTGCCATCGTTTTTGTG  
TTGATACCCATATGTGCGTTATGAGTAAGCATTTTTACAGTGAGCTCGATTTTATCGTCT  
TTCGCTTTAACATCAACCCGTTTGGTCCACTGGCTACCAGCAACGCGAATGTTTCATGCCA  
ACGATGTTTCCGTTGAATGCTTCTTTGCTTTTCAGGATTTTCGGTTGCTTTGATGAATTTT  
ATTTTTGATTCTTCAGTTCGTTTCGGTATGGGTGTATTATGCTATGTTCTTACTTTGGTG  
TCAACAAC TTTTTTAGATATTTTCAGAAATAAATTTTAAAAC TTGACGTAAATGTTTCT  
CATCTTTGATGGTATCCGGAAGTTCCTTCTTTACTTCCTGTGCAAGATAGATATTTCCGT  
TCCAAGTGAAAGATCCGTCTTCGTTTACTCGATAGATGATCATCCACTCGCAATCATTTT  
CGATTTCATATACACAGAGAAGGGTGTAAAGCGTTAAAGCTATTGATTTCAAGGTGCAAGC  
CGTGACGTTTTGCAAAGTTGGTAGTGGTTTTAGTCAGTACCATTGTTTGGTTCTCCTAAG  
TGGTATCTCGTCTTGATGGGTGTATTATGCTATACACAGGATCTGGTGTCAATGCCTTTT  
TTAAAATTTTTTGCAATAAAAAAGCCGACGCTAAGGTCGGCTAATAAAATCATTTAGACA  
ATAATCATTCAGTGCAATCCGGTCGGCGTATGCTGGTGTACGTCAAGCGCAATCACTT  
TAACGCGTGCTTTCTCGCGACCTGGGTTTTCTCGTAACCAAGTGCTCATGAGCTTGAACAT  
TTTATACTGCGATGCTTCTTCGAAAGTACGGACCCGGACAAGGGTAATCAGCGTAAAGGAT  
CTCTAGCTCTTCGGTGTATGTA AAAATATACATCATAATTACTGGTCTCCAGTTTAAAGCAG  
AGACTTTCCGGAACATTGGGAGATTTTCGCGGGTAAATTCAAAGATATTATCTTTCATACT  
ATTATCCTCAATAGTTGGATGAAAAGGGGGGCTTAATGCCCCGTATATTA AACAGTCTT  
TCCTGTACACCGTAGTAGGCTTCATCGATGATAATTTCATTAAATGCGACGGTGTGCATAT  
TCCTGATTCGCGAAGTTGTCAGCAAGTCTACCTTAGTTTCGCCATCATGAGTGCATTTA  
GTGATAACTTTACCATCGGCAAATCTGAAGTTGACCTCTTAGCTACGGCATCGCGTACC  
AGACGTGCAAAC TATTGTTGCGGATTGCATTGTTCGGTTTTCGTGTGCAGCGTGAGCGAAT  
TTGTTAACTTTCAGAGTGATAGTAATGTATGCCATAATTTGATTCTCCTAGTTAGAAAGT  
GTATCTCGTATCGACGGGTGTATTATGCTATACACCCGATCCATTGTCAACGCCTTTTTA  
TAAAATAATTTTCGATATCTTTATGATGTTTTTCTCGTGCTTGGTCTGCCTCGGCTGGCG  
ATAGGTTGGAAGCGATAATCTTCACTACTGTTGCACCTTTTTTCGGTGTCCGACACCCAAT  
GATTATGGAAACCGCTATTATTA AACACTTGATAATAAAATGATTTACTGTTAGGGAAAT  
TATAAGTGTAATCACGTACCCTTAATTCTGAATCTACGTTTAGATAGATCAACGCACCTA  
GATAGACCGTCTCACTCGTTCGTC AACTAACAGTAGAGTATTTTCGCAATCTTCTAATT  
TGTCTTTGGTAAGGAAAATCATAGTATAATCCTCAATTA AACCAAATTA ACTTGGGTGTT  
GTGGTGCTTTTCTCGTGCGTTGTCCGCTTCTTCGGTGTACGTTACGAGCGACGACAAT  
AACCTTGCTGCCTCTCCGTGATGATAGATCTCTACCCAATGGTTATGATTTGCGAATCC  
GTGTTTTATTGCGTAAGCGAACGGCTTAGACGTCCAGTAGAAACTATAATATCGTACATT  
AAGATCGCTATCAATGTACAAATATGTGCTGTCGTTTACATTGCCACTAACAAACAAAAC  
AAGACAATTGCGAAGATCTGACAATATTTTGTGAGTCAATTTTATAATGTGACTGTTAAT  
AATTAACACCACTCAAGAGTTTTTGA AAAACACATCTATCCATTGCTGAGTATATGCGGTT  
TCTTTCCATGACACAATACCAGTCGAATAATGGTGTGTTGTTTCCAGAAAAGGACGGGCAT  
TTTGATGCATCTTCCATCATCTTTTCGGCGAATTCTGGTTCGTATACCCGCAGAATCTGT  
TGATATCCTTTGTATTCTTTAAATTTGCTCATAATCATTCACTACCTTATCAGCTTCTTT  
TGTTGTTTTTACATCAACTGCGATAACCCGTAAAGCTTCGTCATGGTTCCACCAATAATC  
GTGAATATCGGCTTGTGATTTATCACCAAAGGAATCACGAATATCATTTGTACATTTATA  
GTTAATGTGACCGTCATAGTCAACATAAAGGTAATTATCGATAATCGGCGTTATTAAGAT  
CATACCGAAAATCTTTCTTTGTGTCTTATCCAGTGTGTCAGTAATTCGCATCATAAT  
ATATTCCTCTTAGAAAGGGATGGTCATTTCTTGAGCTTGTACATTCTCGTTAGGATTA  
CTTCATCCAACCAATATTGTCTACCAGCATATGCACATTTTTATCATATCCTACGTGGGT  
AGTCAATACTGTATGTGCTTTACCTTCAACGATGATTTCCATGTACTTCTGAACTACGAT  
AGCTTTCATATTGATTCTCCGTTTGTGTTGCTTGTGAGTATCTTACTACTCCCTTTAA  
TCATTGTCAACTATTATTTGGGAATTTCCGGTACGTTCCCTCGGATAGTAGCCTTCTTTAA  
CACCCAGATATTTTGAACCATTCGGGTGATGTTCTGTGCTACTACGATATCGAATTTCA  
GGTAGTCTTACCGTGGTTTTGCCACAATGTATGCTTCGCATTCTGCTTTAGTCTGGAACA

TTTTTGATTCTCCTATATCTCGTTGGTATGTGTGCATTATAGGGGATCACCGGTCCCCTG  
TCAACAAC TTTATAATGCTTTATATGCGTATTTTCATAAATTTGTCTGCCACTTCATTGGG  
ATGTTTCAGATTCTACGCCTGATTCGAGAACAATAGCTAGGTTCGGTTTCGTCAATCCAGCC  
GTACCAATGATTTGAAGTTCGATTTTTTTCAATTGGAAATTGGTCACTTTTATCTGTGCG  
ACAAAATACATCTAACTGCTCATCGATGTAAAAGATCCAATCTTCATAAAGAATAACGGG  
TATTAGCAAGATTTTTATTGCCTTCAACGAAAGTTTCGGCTACAAACAAATTAGGATGTT  
CCATAGTAATTTCCCTCAAATTATACAGCTTCGTAAACTTCCCAATGTCCAACACAAGCA  
CGCTTAACGAAAAGGTTTTCTTTGATGTTATTCATAAACGTCTGGATGGATTTAATGCGG  
TTTGAAGGTTTCCATTGTTTCGTTGGCATTGCGGCGATAACATAAACATTACCAGTTCGC  
TTATATTCAGCAACCATTTTAAGACAACACATAATAAAAATCCTCAATTTGTGGGAGAGTA  
TTTCCCCTCCCGATGTTGTTATATTACATTACACAAAATGGCGTGTCAATGCGTCTGTTG  
CGGTTCCGCTAAGACTTTTCGATCTCGCCTGGCATAACATCAACCGCCAGAACTTCTACAA  
CATCCTCGGACCCTAACAGTGAGTATGGCCTCTGTAGA ACTTGATAACCAGACTACCTT  
CCTCGTCCCATTTAACGCTATCGCTAGCCCACCACACATCACCGTCGATAAAGTTGATGT  
AAAGCACACTACGCCACATTGAATTAATTACTTTCAATACTGCGACTTTCATCTCTTCCA  
CGGTATGGTCTTCCATTTTGAAGACCTCACCTACCTGAACTTTTGCCATGTTACATGCTC  
CGAATATGTTGAGCTGCATCTTCCAGTTCGTCGATACTGACACTGTGTGCCAGTAAGTGT  
ACTGGTTGTGGTTCTTCACCTACCATAGTATTGATCAGATGACCGTTTCCCTGGGTGGAAT  
GTATCGTTGCCGTTCCAAATAGGATACACATCATCTTCTGTTACGTAGATAATAAGTACA  
ATCGGTGATTCTGGTAATTGAAAAATTTTACCCACTGCATCTTTGCTATCGTTTACGATA  
TCTTTTATTGTCTTCAATTAGTTACCTCTCGTAAAATTACATCACAATCACGCCAGCCGT  
TGAAAGTTGATGTTCAAATGGGCATTTTCTGCTACTGTCAAATCAATGATTTCTTGTGA  
CGCTGCAATCATATAGCCATTGGTGACATTGTTTTGCATCAGTTAAATGGTTTCTTCGTT  
GTAGCGGATTTTAGCGATGATTTTCGTTGAAGTTCATGTTTGATTCTCCTAGTGCGTTTCG  
GTATGTGTGATTATAGGGGAGTTTAACTCCCTGTCAACA ACTTTTATAAAGTTTTTC  
CTTGATAACGGTCATAATTACATCTTCTTCGCGAGCGGTAAGATTATCAGCGTCAGCATG  
TGGGCGGTTGGTTGTTACAGAGATAACACCGTTGCGCACTGGTTTGATATTGATATCAAG  
ATGATCCGCGAAACGTTTCGCCAGTTACAGAATGAATTTTGGTGTTAAATTCTTTTGCCAG  
TGCCTTGCGA ACTTCACGAATCAGGATAGCGTTTTTCAATTTGGTTCTCCGCGCTCATGGT  
CTTCTGGGTGTGCATGGTTCCGTCGAAGTCAATCATTGGCAGCATTACGATGTGTTTCAT  
TTTTGATTCTCCGTTTAAAGAAAGTGCGTTTTCGTTTTGATGTGTCTAGTATAGGGGATACG  
TGATCCCCTGTCAACA ACTTTTTTGAATTATTGTTTTCATGTGCTTAATGGCTTCTTCCAT  
AGCCAGCACGTTTCGATAGTTAGGGTATCGTGTTAGATCGTCATACATTTCGCTTAAGGGT  
GGAAACTTCCCTCAA ACTCTGGGTTTTCTAGATACAGTTGAACAAATTGTTTCCCTACCAT  
CTCGGCTTTTAGTTTTGTCTGCTTGTTCCTGTTTCATATGATTTTCGTTGGACCCAACACCAA  
CAAATGATAAAGGTGATCAACGGGCTAATGATCAATGATAGGATAACATAACCGATAAC  
GCTACGGTTTAAACGGCTTTCGCTACATGCCTACCAGGAAAACAGAAAGGATATAGATAAA  
CAGAAAGAACATATAATAGTGACTCCTTATTTTCGCGCTCATACTTTTCGAAATAAAATT  
CTACTGGCTGGTCATGAATTGACAGCAAGCCAAAGCGTTTAGCCGCTCGCAATCCCATAT  
TGCCTGAATATACTTATGGAAGTTCTCGCGTATACACTTACGCCAGTATTCTAAGCCCA  
TACAGCTTTTATAAAGATTGCATTGTACACACGCCGGATTTCATGTTATCAAGTATATCAT  
GGTCCGTTTATGCATTCCTACGACCTTATACTTCCCCGATCCATCATCATTACGGGCAA  
TTCGTCCATTTTCATCATAGACTACCTTTGAGCGTCTCAATACTGGTTTGATGTGGTCTG  
CGTGCCAGCGATCCCCTAGTTCCCTCGCCACAATAGGCACAACGTCCACCATATTTCAATTT  
TCAGGATCTGGCGATGCTCTTTCTTTGACACTTTTTTAGGTTTAGGGGCTTTTCGCCCTT  
CATTATCACACATCGGATACCTCTTTTACTGTATTTGCAGTGGTCTTGTCTAGCGAATA  
CGTTTGATGATTGGGAGAAATAAAGAGAACTCCGGTTCATCTTCTTTACCAGATTTGCAG  
CGGATAAACCCGTTGCATGTCATCTCAATGACTTTTCCAATCAGGTTATGACGGTCAGCC  
CATAACATTTCTCGGTTCGAGTTTTCGACGATCGAACGGAATTACACGTTTCAGTACCA  
TCATCACCTTTTTGGGTTGTAGTGTGGTAAATCCCGATCCGGTGTAGTCATCATTTCGT  
CCGCACGCACTATGGACAGTAAAACCGCCTACCTTATTGGGGTCTTTACTATGCGGATAT  
ACATCAACAATTTCCGCGCCGAAGTCAATCACTTCTTTAAATTTAACCTGATCTTTACTA  
CGGCGATCTTCAAATACACCATGTAAATTTTAAAGGATAATACTTCGTAGCCCATGTTT  
ACATAGCGTTGTTATACTTCGCGAGCTTCATCTATATTGTTAACTACAGTGTTTTCGATT  
ATCTGAACACGAGGATCGTTAAGTTCTTCAACAATCTGTTTTAGTTCTTCGAATCGATCT  
TTATATTGCTTCGTTGCTTTCTCGTTTCCGTAATACACATCACGGTCGATAAGATCCCAG  
ACAGTGTAACAATACATTGGGCTTCTTATTTTGAATTGTTTCTTTCAGTGATTTGTTG

AGGATACCATTTCCGGTCTGACGATCTGCAACAACCGATTCTTGTACTGCTTCCGCTACT  
GGCGTTAATGGCATTTCCTCTTCTTCAAATATCCATGACAGAGTACCATAATAAACGCTT  
TCAACGAAGTTCTGCGCTGGTGTCTGCGAAAGGGTAGGCATATATACCAATTCCCCATCT  
AGAACAATTCCCCGGCCTCGCGGACGCTCTAAAACAGCATTCAAATCATCCAGCCCCTGA  
TAGGTATTACCTGAACGGGTATAGATTGCTAATGTTTCCCCGTC AATATCAGCCATCCCA  
CCAGCGCCATCGCTTTTAAGTTGTGCATACGCCAGATACTTGATATTAGCAATAGTCTTA  
TCAGAACATGACGATGCAAGGTGACACGGTTGCTGGGGGATCAGTTTCTTCCATAGCTTG  
TTTGCAGGGGTAGCTGAGCAACCGAATTCAGATCACGATTCAGGACAATCATTGCAACT  
TTAGCATCATCCTCTGACAAGCAAGTCAGAGTATCCGTA ACTAGCTGTAATGCTGCATTA  
CCAGTACTTGACGCGTGGCAAGTTTATTTTTAAAGACCTGTAATGCACCCGGATAAAGAC  
AATACAGACGAATAACGCTATGGTTTATCGTATTTCTTTACGCCAAACGTAACCTGTTG  
CAATATGCCAGATAAAAACATTCTTTACAGTGTAAATTGCTTGCAGATTCTTTACGGATC  
TTTTCTTGCAGCGATGTTTTGTCTGTTGCTGCAAACCTGGTTAATGATATTAAGAATTGAC  
ATTTTCACCTCGTTTTGTTAAACGTTACGAATATCATTGAGGATACTACAAAATTCCGA  
TTCAGTCAATATGGTCTTTAACGGATCAGTTCCACCTATGCTATGACGTAATTTCTTATT  
ACCTGTAGCGAGTAATGCTTTACAAAATTCTGGGTTATTCCGTGCCATCGTAACAAATGC  
CAGATGTACCAGTCTGTAATAATGCTCACTCCTACGATGAATCGGGCGAATCTGAAAATA  
TAACATGTGATTCTCAATCTTTTCAGTTCTTCCGGTTCTTTTTGCTTTGCCACCGTGCAT  
CAAAAAGATTGCTCTTTGTCTCTGAGGGTTCTTAAATCCTAGCCCCTGTAAAAATCCTTC  
TGTGCTGTTAATATCGCAACCAATAGACGGAATGGTCTTTTATTGATATTACTCAATTC  
ACCCTATGGAAAAGGTGACCCGCATAGAGATCAATTCAGAAGTCATTGAAACTAATCT  
CGTAATCAGAGAGAACGGATCACAATCGTCATTAGGAATATCGATAGTAATCGAATGAG  
GATTTACCCATAGACCAAACCTGGTCTTGTTCGGTGAATACTTCGGTATGGATTCCGTGGA  
TGTTTACATTCATAGTTTTTCACTAAAATTCTTAATAATCAATAACTTACAAAATCAT  
ATAGCCAAAATATAGGCGGGATTATTTCCCGCCGTTTAAATCATTAAACCGTAAACTACC  
ACAATATTCTGTTTGTGTGTTACAGTCCATGTCAGGTCGATCTCTTCTTAGTTATTAACG  
CCGTTAATAACGTCTGGGTGAGGAACTTTATTCATCTTGCCATGTGGCAGTAGAACAGTT  
TTACCCCGCAATTCCTTATCTACAGTCTCGCCAATATCAATAATCTTACCTACCAGCGGA  
ATCTCGCCCATAGTGCCTTTTGCTCAATAATGATCCCCATAGAGCTTTTTACTTCGGTC  
CCTGCGCTTTCTGCTTTAGCTTCGATAATTACATAATCACCAAGTGCTTTAGGAGTTTAA  
ACGGTCTTAATTTTTATTACCTCTTCAAATCAATACAGTTTAAATGATGAATTATTTATAAA  
TTTTCGACGATCTGCGCGGGAGTCAGCCCATCTTCATTAATCAGACTATCAAGCCAAAAC  
TACGGAAACCTTCAACTGCAATTCATATACTGGCAAAGATGTTTCTGATTCTTTACGCG  
GTTTTTCAACATTCGGAACCTAACCTTTTCGTATGTTTTCGAACGGCATCAGTGCCGGAT  
CTCGCGTGGCGATCAACTCAGGGACAGTACCATCTTTCTTAATAAACTGCAAAGAGTAAG  
TACCGACCGAAAACATTTTCTTTAGTGCTTCGCGAAGTGCGATATTATCAACTTGTTTACG  
TCATTATCAATACCCTTCAAATCAGTCAATAATGCTTTTGGAAATACGCGCGATCGTAATA  
TCTGCATTATTCAGAATATCAGCCCAATCACGCCACCAGTTCGATCGTATGTGTCGCTA  
TACTATAGATGTTTAAATCCACTGTTTGTCAATTGCTTTAGCGCAATCTGGACACGGTGAA  
GCAGTACACCACATACTAGCGCCTTCAATCGATACACCGCTACGGGCAGCAAACAAAATA  
GCATTTAATTCAGCATGGATCTCGTTTTTCTGTGACCATGCACTATACTCTGGTTCGTTTT  
TCTGGGATCATTGTTGCCCTCATCATCCATCCAACCGTTTTTATGTGCATGACAGCTACAA  
TTTACTTGCCCTGCTGGAGTTCCGTTAAATCCAGTAGAAATGATTCGCACGTCTTTTTTCG  
ATCAGTGCGCATACTTCCACGAAACACATTTAGAGTTCTTTACGATTAGATAGTCGATC  
TGCATGTAAGTTTGTGACAACGTAATATAATCCTCACATATTAATTAACCGTATACGCGA  
AAGTATTCGACCGATCCGTCGCTATACTGTTGTACATTGAATGTATTCACACCATGATCA  
TTGCTCATAATGACATATACTCCGACGCTCATCACCAAACGGGTTAACTAGTGCGCGT  
TCAATTTCAACATTA AAAACCAGTTTAGCAAGTGCTTCGCTAATTGCTTGAGTTTATCG  
GTAAACATTA AAAAGTCTCCGTAGTTAACTGAAAACATTCTACACCAATTGAGCGGTACA  
TGTC AACCCTTGATCACGGTCATCTACTGCCAAAACAACATGATAACGCGGTGCAATTT  
CCGAGAACAAGATCTCTTTCTTCACTTCATGGTCTGGACGTCGATCATTAGTTTCACGTT  
GGAAGTGATCGCTAGGTTCAATACCCTGTTACGCAGCCATTGCAGAGTATCTTCTTCGC  
AAACATCCTCACGCCCTGAGCATGTAATGATACGATAACCATTATCACGATACAGTTTAA  
GCATTTTCGATCACTTGCGGACGCGGTTTATCTTCTTTGACCTTTGTCCAGTCAAACGGAT  
GACGACCGCCCTTATCCGCTAATGTCCCATCAATATCAAAGATCACCGCTTTCGGTAGCA  
TGGTATTCGGTTTGTATACTTCTTGACCCATATATTCTGCTAAGATAAAAATTGGTTGC  
CCAGATGAGAAAGTGGAGTTGCTTTCTCGCCGCGATAGAAATTACGTTTCTTTAGTGTCT

CAAATGATTGATTGAACACTTGTTTCAGTATACACCGCGTTAAATTCTTTTGCAAGTTCTT  
TGTAGAATACACGATGTTTTTCGTTTCAGGTTGGTATCAGAGATAATGATACTCAATCCGC  
GTGATAGAGTCTCGCGAGCAATCATTCTCTGAATAGACTCTACCAGCTTTTCTTTTCT  
TAGTATACTTGTGTTTTCAAAAGTGAGTCCACACCAACAACATAAGACGAAGATCATCAC  
GATTCACATTACGATAATTACTAAACCGTTTACATGCTTCCATAGCCCATCTAGTTTTAC  
CGGACACAGAACAACCAACGGTTAAAATCACTTCACATTTTCGGCATTATTTCTCCTTCGG  
TGTGCACCGTTGCTCATTAAAGTTCTTTGCGATAATAACACATGATCAACTTACTTTCAAG  
TGTATATCTCTTAATATCAGCCAACCAGACTCTAAATTTTTGGGAGTCTCCACGCCAT  
AGAAACTCTAGGTTTACCGTATTTTGTATCCACTTTCAGGTCAATGTCAACTTTTTCTAT  
TGGTGCTGGTAGTGGAAGATGTAATGTCGGTTCCTGAGAATAATGGTCCATTGTACACGA  
AGAAAGAGCAAATACAATAGGTACAGCGAAGACATGGATTATGGCGGTGTGAAAATTCTT  
ATGTGCTTTCTTAAACAACCAGTGTATGACGAAAATTGAAAACACCATAAGGATAATAAT  
GCTTGCACCTATCCCCAGATAATCACCCAGATTAATAATTGCTTATCTGCTCTTGCGTAGG  
CAATATTTCTATGCTCATTTAGTAGCCTCCTTTAATTCTTCGGTAAACTCCTTAAATGAA  
TCATTAAGCTGTTTCTCTACCAACTTGGCTTTTTGTGCTACTACATAGCCTCGTGTAGCG  
TCTTTCATTGCTTTGTTTTGTTCTTCTGCAAACCTTAGGTCATATTCCGTACATCTCCTTT  
TGAGTGAGTCTACGACCTTCATCTTTTCATCTGTCTTTTTCTTATACTCTGTAAATTC  
TGATTGAATCGGTCCACCTTCTTTTTATTTTCCCACCACATTTTGCCTCCTACCCCCAGC  
AACACAGATATGATAACAATGTATATCAGCTTTGACATATTACCCCCAACGACAAAAGGC  
GGGGAAGTACGCCCGCTTATTATTACCCATCAATCTTATCAGCCGGAATCAGTTTCTTAT  
AATCCGTAGATAGTAAGTTTTTCATTGAAGCCAGAATACGGTCATAATCAAGGCCATCAA  
ATGCAATCATCAGACACATGAAAATATATGATTGTGCATCACCATGTTACGTGATTCTGA  
TAGTCGCATTGGATGCATGTGTCTTTCTGTCTTCTCCCGCGTGTGCGTTACAAAATTCTG  
TTGCTGTCGTAAGGCATTGCGAAGAATGCACCTGAATGCTTCTCAGAAATAGCTCAATTC  
GTTCCAGTGCTTCCGGTTCGCCTTCATATGCAGCACGCAAATCATCGGTTTAGCCTTCTA  
CGACATAGTAGATCAGGTTATTAGGAACTTCGATGTGTTTTTAATGTTATGCATACGAA  
TATACCATTCACTCTTCACCTTGAACATTTGACCGTCTTTAGTGCGTGCAACAATTCCTT  
CGATACCTTCTGCGGTCCGAACTTGATCAAGAATATTGCTAAAACGCGCTGAATCAACCT  
GTAAGGCATTTACCAGATGAGGACGTAGGATTGCGTCAGCAAATAGCACTTGATGCGGTA  
CGTACTCTCCTGTGACGTTATGGCGTACATTCAGAAGTGTTAGCGTCCGGTTCAGAATATT  
CTACAACAATTCGGTTGCTGGGTGCTGTATATTCAAAGTTGAAATTATATTCAGACCCAA  
TATCGGCGATCTTAGCGCGTAGATCCGCATACTTCTCTGAATACAGAAGACCGTTTGCTC  
TCTCTGCCTGGCTTGAGTACAAGGCCGCTTTAGACTTCAACTGAACATAGCCGTTATCAA  
TGATATGTGCTTACTAGACTACCCTCCATTTTGTCCATGACAATTTCCACATCTTCCGGCT  
TAAAGCGAACGCGATCATTCTGACCCAAATTAAAAAACTTCTCCATAGGACGAGATGCAA  
TGCGGACAGGTCGGTCTTTATCATCGATTTCAAACATGATCCCGCGACACTCTAACGCAT  
CTGGTTTATCCACATATCCGGTTTGTCTCAAGTACAGATAACTAAAAATGCGCATACGGG  
TTTGCATCGCCGTAATTTTCATCTTTGTAATAGAACGTATCAGATCCGTCTCATAGTGCCA  
TCAGATTTTTGAACAATGCTAAAACCTTTTTTTGTTGTTTTCTTTTGTGACATAATTTGT  
GTTCCATTCTGGTTTAAATTTGGTGATCAAACAGGTTTTTCGATATCGGCAGTGCTTAT  
AATATCTTTACCCGTTGGATTCTCGATGTACAACCTCAAAGCATTGGCGGTAATAGAATGT  
TACTGTCTTACCTTCTAGCGCCTTATGAATATTCTTACTCTTACGAGTATCCGCTGT  
TGGTGATTGTCTGTTAATGCTCGTCCGGTAATAATTGATCCGCTTTCTGAGATTAACAGT  
CTTACCAATGTATAACCAGTTCATCATCAACCAGAATAGCGTAAAGAACATTTAAACGGTT  
TTTCTGAGGCGCTAGAATCACATCACCATCTTTACTCTAAACATGAATATTTAAACGAA  
TCCATAGTTTTCTATTAGCTCATTAAATCATTATCCTTTCTCACGTCACAACAAAGGCGG  
GATTTCTCCCGCCACCTTATTAACCTTCCAGAATATCTCGAGCTTCGTTACGCTCCTTG  
ATGATTTTCAGGACAAATTCCAGTTTCTCTTTGTTTCAGTGGTCCGTTTTCCATTGCTTCT  
TTGACGGTAAACACTCCGCCACCTTGCCCGTATACAGTGACAGTGATTTACCTAACATC  
GTGGTATGACAACCGCCAATTTTCGGTGATTTCGAAAGACACAATCACCTCACGGATAGTA  
TTGCCATCGGTGATTTCTTCCAGCGTAATATCGCTATTGTAAGCGGTTGCTTTAACCATA  
CGGATCAGCATAGTCTGATCTGGGGGATGGTCATTTTGTCCATTGCATGTTGCAATGCA  
GCGTAAACGAAAACCTTAAACGACGTCCAGACCGTCTTTGCGAGTTTGAACCTTTGATCATC  
TTGATACTCCTTAGTAAGTTAGTTTCGTTTCGATGGGTTATCTGACTACCCCCGTTTGGAG  
GCCGTCAACTACTTTTTAATGTAAAGTTCGAATTTTGTACCTTACGTCCTCGTTTATTG  
AAAGAAACCCACGGACGGTTTTCAATGTAGAACAATTCTTCGCCAATAATGAATACTGGC  
TGATTGTAAAGGCGACCCATCAGGTCACGCTGGCGAATGCTAGTAGATTCTGTATACGTCG

CCTACTACAAAGTGTTTGTCTGATAGAGTCGGTGCAAGTAAATTTTCATTTTGATTTCGCCTG  
TGTTTCGTTTCGATGGGGGTATCTTACTACCCCCGCTATTCAGTGTCAACTACTTTTTA  
CTTGTTGTATTCAATTCACCATGAGTGAGCTTATCAATTATTTTTGTGTTTCTATCCAA  
CTTATCCCACCGTTTCCGAGGGTTTATCAACCGGAATAGGTAAGGTGTATTTGTTAAGTG  
AACTCGGTCACTGTAGTAATTGATGTACTGCTTTTCATTTCTAAGATTTCATCTTTTTACG  
ATGAAAATAGGCAATGACTTGTTCTTCTGTTTCGATATGTTACTCCTTTTCGATGTGTGT  
AATATGCTATGGTAAGATCCGATTGTCAACACCCAATAACAAAAAAGTCGCCACTATTG  
GCGACTTTGAACAAACATTAATCATGACCGAGATTTGCAATATCCGCTCGTGTCTGTCT  
TTGTGATTACCTACGTCAAAGACACGATAACCATTTTCACGAAGAAGTTTAAACACTTCT  
GGGTTATCCTCAAAGACTCCGACAACCTTCATCTTTATCAAAGGATTAATTACCTCTAAT  
TTGATGTGATAGTCTTTACGGGAATCATTGCGACCTCTCATAAAGATTTTATCGAAACAC  
ACATCATTAGCGATCAACCATTCCACCGTTTCCATGTAAGCATGTGAAGTTTCGTCCGGTG  
AGGATGTAAATCAAATGCCCGTTGTGCGAAAGAGCATTGATAACACGGATTACATCGTAA  
ATGGGGGAATCTCACCCACATGCCTGGTCTATTTCGATCCACGACTCGACTTTATCAAGA  
TTTTTCGGTTGGCATCTTTGCTAGTCGTTGTGTTGGATCTGTGATCGTAAAATCTAAATCG  
ACAAAATATATCATAGATATTTCCCGAATCGGTTGTAGTCATCGTCTGTTAAATCGGTAT  
TAACCTGAGACACCAGATAATAATCTCTACTTCTGCGCTGCATTCTGCACTTCGTCAG  
AGTTGAACCACTTACGCATCCACGGTGAAGGATGACGACGAACACTAAACGGGCTTTTCA  
GTTTCGGCAGCACGCATACGGGAATGTGCCAGGTATTCTACATAGGTTTTTCAGAATTTCCG  
GTTACAGGTTAGGAATTGCCCCATTGCGAATAGGTGGTCTACCCATTCTTTTTCTTGCT  
CGACAACATCCAGAAAGATTTTCGTTGCTTCGCCTTCAAGTTCTTCCGCAATCTGTTTCC  
ACTCATCACCATCAACCCCCGTTTGCCATTGACGAATAATGTATCGTGTGCCATTTAAGT  
GAAGTTGTTTCATCACGCGCAATAAATTTTCATGATCTTTCGCGTTACCTTCCAGTAAACCAC  
GTTTCGGCAAAGCTGAAAGTACATGCAAAGCACACATAAAAACTAATTGCATCCAGTGCGT  
TGACGCAGTGTGCACACAGATAAATCGAAGCCATCAGATCTCGTTCTGTATCTTCAAAAA  
ATCTTCTTGCATAATCTAATGCTGTCTGGTTCGTTCTCGTTCTTCCCAATAGCGGAGATCTT  
CTTTTGCATTCTCATACTTACGAATCCAATAAAGAACATCATCATAATTTTTCCCGATAG  
ATTCCGCTCGCTTCATGATAGCAGGGTTATCGATGTTCTGGTTCGAACTCACTAGCCGGAT  
CCATGAAACAGTTACGCATAATGTGTGTATAGCTTCGGCTATGAATCGTTTCGCTGAATG  
TCCATGTTTGCAACAATGTATCGAGAGTTGGATCAGATAACAATCGGACCAAATGCTGCCG  
ACAGTGC GCGACCTTGAATAGAATCAAGTAATGTCTGATACTTCAAGTTTTTCAGTAAAGA  
AACGCTTTTCAACGTCACCCATATTAAGATATTGAATGCGGTGGGTGGCAAGTGAAATTT  
CTTCTGGACGCCAGAAAAACGACAGAGATTTTTCAATGAATTCTTCAAATACTTGATGAC  
GCTGAATGTCATAACGAGCGATACCTAAACCGCTACCCAGAAACATCGGTTTCATTCATAA  
TATCAAACGTGTTCTCGATTAAATACCGTATTACCCATTCACATATTCCTCATTTTACAGT  
TATCAAAGTGGCATCGTAGAGCATTGCCTTTATTGGTAATTTTACCGCAATGCGGACAAG  
GATGTGCCATTGTTGCTTCCCTTTGTCCGTTGTGAAATCAGCTTTCTCATTTCCTCGCTAT  
TTGGTATTCCTTTAGTTGGCGATGGTTTCCCAAACATAGGATTTTTACTTCCCATTCAG  
CTTTTGAAATGTTTAAACGCGTGCTCCTTTGTTTTTGGCTTACGCATTTTAGCTTTTGTCT  
CTTCTGATTTCAATACACCTTTCGAAGATTCGCTAATCTTTCTTTCGCGTTTCTTCTTTCT  
TCGGCTTGCCCTTTCTTTGTTTCAGAGATAAGTACCCTAGCTTGTTTCATGTACCCTAGACG  
AAACAATACACTCTCTTTTATTGGTCTTCGCATTTTTTGGCTAAACACATCATACCAAATG  
CTTGTGCCATAGGTCCACCATGAATTTTGGCCAGCAGATGATGAATCACGAAGTGTCTT  
TTGCTGTCAACTCAATCAGGTTATCAACTTCATCACCGCCACCCATAGATCGCGGTAAAA  
TATGATGTGTTTCTTATATCCTTCAACGGTGCCTCTGATCTTTGCTTTTTCTATGATTG  
CGTCATGTAGTTTTTGTAGTTTCATGAATTAATCCTCTTTTCTGTATACCATTATTTATC  
AGGTATCCAGAAGAAGGATTAATTCACCTCACTATTATCCGACAACCTCAAACATTTAT  
CATCAGGAAGAATAGCCATTCTACGCCGATTTCATCCTCAACGTAGTTGCAAGTCCCAT  
CATGTCGAGCATCATAATCATCACCGACAACAAAGCTATCAGCTAGCTCAAATCTACAG  
CAACACATTTTAAATTTGGGCATAATAACATCCTCACTTGTTTTTGATGGTTGACTTATAG  
CAGGGATTTCTCCCCGCGTCAACACTTATTTTACAGCTTGCATGATGAGCACTCGCTAGC  
GTCTTCGGTACCATCTGCACCGTCGCGAACGTTTCGCATAATAGAGGGTTTTTCAGACCGAA  
ATATTGAGCAAACAACATATCATCTAACACATCAGCAATATCGACGTTTCCAGTCTTATA  
AGTGCTTGGATCGTATGATGTATTGGAACATAATCGCCTGATCCACAAACTTCTGCATGAT  
CGCTGCCAGTGTGAGATAAGGCTTGTACCTTTCTTGATCAGTGTCCAAAGCAGGTCAAT  
AACATCAGCATTATTCTCGACGTTTCGGAATAACCTGATTAAATTGCCCTCCTTTCGATCC  
TTTAAACCGATACAATCCC GCGAGGCGGTTCAATACCGTTGGTGCTGTTAGATACCTGAGA

AGACGACTCACAAGGCATCCGCGCCGCCAGTGTACTGTTACGATGGCCATATTTTTTCAG  
GTCCTTCGCGCAGTTCCTTCCAATCCATCTCATAACCCGCATCCACCAGTTCATCTACTGT  
CTTTTTCTACCAGTCGATAGGAAGTTCACCGCGACCATAGCGTGTTTCGTGCATCAGTTC  
GCAAGCACCCCTTCTCTTTAGCCAGTCGCACGCTAGCCTTAATCAGAGCATATTGCAAGCG  
TTCAAACGTTTTATGCGTAAACTCGTTAGCGTCTTCATATGTGAAGAAATTATCTGCTAG  
ATATGATGCAAAGTTAGTCACACCAACACCCAGAGAGCGACGTTTTTTGGCTGTCAGCGC  
TTGTTCTACAGGATAAACCTGATAATCTAGCAGGTTGTCAAGAGCACGCACCATAACCAG  
AGCAATGCGTTCCTACTTCTTCCATATTTTTCGATATCGAAATTACCTAAAACATATGCTGC  
CAAAGTACATAGGCTAATTTCTGAATCATCACGACCCATCGGTTTTGTAGGCAGAGCAAT  
TTCACAACACAGGTTAGATTGTGTAATCGGTGCTCCATTACGAATAAAGGCCCCCGTGATT  
GTTTCATGTTGTCTGTGAACGTTGGGTAGATTTCGACCAGTGTTAAAACGTTCAATTGCCAC  
CGCTAAAACAGGTCTTCGGCTTTAACACGAGTTTTACGAACACTCGGATCTTTTTCCAG  
TTTTTCGTAAAGCTGGCGGAAACCTTCTCGTCTCGGAAGTAGAGATCCCACAACAAGCC  
ACCCGCAACATCTAGACTAAACAGAGTAATGTAATCCCGTTTTAAGGAATCGCTCTACGAT  
CAGGTTATTAATCTGTACGCCGTAATCAAGATGACGTATGCGGTTATCTTCCACCCCTT  
ATAGTTCTTTAACACAATCAGACTTTCAAACCTCTAAATACCATATTGGGTAATAGAGAGT  
CGCCGCCCCGCCACGAATGCCGCCTTGTGAGCATGACTTAACGGCCGTCGGAAAATGTTT  
CCAGAATGGGATAACGCCAATATGACGAACTTCCCCATGCCCGATCTTAGTTCCTTCCGC  
GCGAATCATGCCAGCGTTGATACCGATACCAGCACGCTTGCTAATACTTGATGATTGC  
ATTTGCTGTTTCGTTGATGCCCTGCAATGAGTCATCAGTTTCGATCACCACACACGAACT  
AAATTGGCGTGTGGGGTACGCACACCTGCCATACTCGCAGTAGGTAGAGAGATTTGCTT  
ATTCGCAACAGCATTATAAAAATCAATCACATTTTCAAGTCGATTTTCTGTCTCTTCTTG  
ATGCAATCACATACCGATCAGCATATACGCAAATTGTGGTGTTCGATGATTTTCTTAGT  
GCTGCGATCCTGAACAAGATATTTCTATTTTAACTGCATCGCACCAGCATTGGTCATTTT  
AAAATCAAGTTTATGGTCGATGAATTTCTCCAGATATTCCACTTCTTCATGGGAATACTT  
TTGCAGAATTTCCGCGATCATATTTTCCGGTTGCAATATTACACTCAATATGGCTGTAAA  
ATCAATCGGTTGGAATTGACCGTATAGTGATTTGCGAAGCGCGAACATTGCAAGGTTACT  
TGCTACATATTGATAATCGGGTGTTCCTATAGTAATGTTATCTGCTGCGACCTTAATCAA  
TTCTTTCTGGATATCGTTGGTGGACATACCTTCTGTTAGAAGTGGTTCAACCATATCAA  
CAATTTATATGGATCAACGTTATGACCTTCGGCTGCCGCTTCCAGAATTTTCATTACTTT  
TTCTTTTTCAAACGGAACAGTCAGACCGGAAGACTTAATAACATTTTAAATCATATTACC  
TCACTTCAAACCTTTATCAGGAACAAGTTTATCCTCCATATTGGGGGCCTTCGCCCCCTTT  
GTTATACTGCCATTTGAGCGGTGATCGCTGGATGGCTTTGATAGTTGTGAATTTCAAAT  
CTTTCGGAGTCTTTGTCAATACCTCATCTAAAGATTTAAAATCCGGCAACTCAATTATTG  
GTTTATCAAACGGAACACGGCTTAACTGGTCCATCACTTGATCAAATGGTTTTTTGTAAA  
TGTGGCAATCCCCACACTGATAAACCAGTTCGCCAACTTCTAATCCGCAAATCTTCGCGA  
TGATATGCGTTAACAGTGCATAGCTCGCTACGTTGAACGGATTCCCTAAAAAGGGATCAT  
CCGAACGCTTGAAAAATAAACAACCTCAATTTGTTGTCGTTGGAAACATAAAACTGTACAA  
TCCGATGACATACACCTAACACAGCATTATGCGTTTCTGTACGTTCCATGAATCAATGA  
ACATTCGACGACTATATGGATCATTCTTGATCATGTCAATAACTTTTTGTAACCTGGTCTT  
CCCAAATCTTCGGGCGATAGACATATTCTTCATCGTCTTTAGTGCTTGATGTGTCTGCGT  
CCATATTAACAAACATCGTGGTATCAGGTGCTATAATATCCCCACCCAGATAATCACTAT  
CAAGCAGATAACCGAAATAACCATCATCTACCCATTCTGGAACCCCCACAAGCAATATG  
CATCATTAAACAAAATTAGATTGAGTCTTCCAGTGGTCTGCTCCCAGAATATAATCAAACC  
CTTCATAACGCATACCACGCCAGATAGCACATAAACGGTCTTCTGTTTCATTGGTTGGTG  
TAAAGGATTCTACCCACGGGTGCTTAAATGTATGTGTATATTTGCTCTTAACGCGCTTAA  
TTTTGATTTACCGTGTGGATAAATCGGTTTTTCGTGCGCCATGCCATGCCATACATATTAT  
CGACATTATAATCATTGAATCGCAAGGGATTCTTTTTCTTTCATATCAAGACAGTTGCCGA  
GCCAAATATCAAAGGCTTCTCGTCAAACCTTGCCGCGTGTAATTTCCCGTAAGCGACGGC  
GGTCAAGTGATCCCTCCATAAACCATAGCAATTCGCCAATTACAGAGGCTGTAGCCATCT  
TTTTAGTGGTCAGAAAGGGGAAACCCCTTGCTTAAATCAATTTCGCATTTCTGCACCGAATT  
TAGAGAGCGTACCTACCCAGTTCGGTCTTCACGAAGCCAGCCATTTTCAAGAACATCAC  
GCAATAGTTTCAAATATTCTTTCATCCACACCCACTTTTTCTTAGTGATTGCTTTCTTA  
CGCAGATTAGCTACTGTCTCGTCAATGTCTATAAAGATAACACCACGGTCGAATACAGTT  
GCAGGTCTTGAGATATCGCTATTTTCTTGCACAGGAAGCCATGATGCGCTCGTTCATCA  
TAGAGATATTGTAACCTGTAATAATCTACGGCTACTGCGTTGTTTTCACTAGTAGCCGTC  
CATAATTGAATAAATACCGACTTTCATTATTGTTCCCGTCCACAATGTAAACACCGACTAC

CAGCAAACATCCAAGATTCACCACAATGTTTTCACTCATAATCTGTCAGAATTTTCCAGT  
TACGCCTTCTTACGTTCTAAAATGTGTTTCGCTGATCAGGTAATCATCAAGGAAGTAATTA  
TGTGCTTCTTTTGTGCAAAATCAAAATATAATTCCTGAATGATTTCTTAGAGATACCA  
ACATCATATTCGAACGGATCATTAAATTCCTGCTCGTTGAACATATGTTAACACAATACGG  
TCCGCAAAGTCCACCGCTTTTTCAATCAGGGAAGGTCCACCAATAACGCTTACCAAACCT  
AGCAATTTCTCTATGACTTCTACTAATTCCTTCAATCCACCATCATTAGTAATCGCGGTA  
TACACATCTGGTTGGTCGCCGTTACTTGCTTTCGGTGCTGGCTTACTGGTATCGGTGCTA  
ACAACCACATTCACGCGACCTTCCAGTGCTTTAGGAAGACTTTCAAAGGTATTACGTCCC  
ATTACCTCCGCCGCAAGATCAACATCTCCCATAGTGCGCATTTTAAAGTTTTCCATGTCC  
TTTTTGATTGGACGTCCCCACGCTAAACCGCCTTTAAACCAAAGGCCAATTTTCATCT  
GACATTTTAGTGTCACCAATCGCAAATACACATTGAATCATAATATAAATCTCCTATCAA  
ACCAGCTTGAGATAGTTTTTCGTTAACGTTTTCTTCTGTGATGTCGGTTTTAAACTCAATA  
CCAACATCAGGAGAAACATAATAGCGTTCGGAATATTCACGCCACATTTACAGTAGGCTG  
ACTCCAACATTAACACCATTTTCCCAGAAACGGAAGATAATTTTATTTGCGGTGTGGCGG  
TAATGGCTTTGAATCAAACCTGCCATCACGGCGACGTGATTCATAAACCGTAATACATTCA  
CGGTTAGCTGCTTTAAGACATTCTTCAATAGTGCCGCATGAGATAATTTGCGTTGAGTCG  
TTTACGATTTGTTCTACAGTCCACATAATAAACCTCTCTTGGTTTCGATGTGTGTATT  
ATACAGTACCACATAAGCATGTCAACACCTTTTTTCATAAATTTTTAGGCAATAAAAAAGC  
CTCCCCGAAGGAAGGCTTTAAAATTCATTACATCCCTAACAGAGCGTCAAGATCATCCAG  
ATCAGAAGCGGAGGAAGTACCGCCACCCAGATCCAGCGATGCCATCAGGTCAACAGCGGA  
AGAATCTAACGCCGTGCTAGCTGCGTTCATAACCAACTACAGTGCTAGCTGCGTTAATACC  
AGCATCGAATGGATTCATCTGTGCGTCAAAAACGTCAAGCTGGCTGTTAATCGCTGCCGC  
AGCAATGGAAGCCGCAGCACCAGCTACCATAGAATCGCCCATAGTTTTCTTAAATTTGGT  
TTCCCGTTCATCGAACGTTTTAAACTGGATAGGCGCAACAATCTCACTCAGGTCAACCAT  
GTTTTCCATCAGATATTTCTGATATGCTTCGTCTTCAATTTTCGAAAGCTGTGATTGCTG  
CATGAAACGAGAATCATCATAGTTCTGGTGTTTATCAACCTGCTTAGCTTTCAGGCCGGAA  
GTTAGCACCGGAGAACACACAAGTTACATCTACCGGAACCTTCGTCCATATCGGTATTCAC  
GTTACCATTTGCAACGATCTTATCATAAATTTTCTGACCGAAGCGGAATTTGAATACCTT  
ACCTTCATTTTCTGGTGCTTGAGGATCTCTCAGTATCAGAATATTTGCGTAATAAGAGGC  
TTTACGCTTAATCAGTTGCCATTCGGTTTTATCGATATGATACAGATCTTTTTTCGTTAAT  
ATATTTGCACACAGGGCAAGAATCAAATCACCGTGGGTGCTGGAGCAGTTTTCACAAATA  
CCATTTGCCATTAACCTTTGAAGGAATGGATTACCAGTTTCACAATCGGCAGACCGTCTTC  
TGTCTTAGACGGCAGGAAGCGAATCAGGGCTGCAGCGTTACCGGCTGCATCAGTCTTACT  
CTTCCACTCTTTCTGATCTTCTTTGGAGAAACCGTTGCCACCTTTCAGTGCGGCCAGTTG  
GGCTTGCAGTTTGAAGAATCTTGGCGTTTAAACATATTCACTATTCCTTCTTTTGATTA  
ATTTACTAGACTATCATACAAATTTATATTTACTTGTCAACTATTTGTTTCAGTATTTAA  
TTGAGATATTTCTTGACACTCTTAACTACTTTAATAAATAATGCTCTTGCTTTTGCGGC  
GTCATAACAAGTAGTTTCTTGACGCCTTCATTTAACACTATAAGTTTTCCAAATCAA  
GTCTTTGGCTACCTTGTGCTGTTTCGACGGTTATATTTAGAAAGCTATCTAACAACATAAA  
CGACTCAAACGATATAATCCGATTTTGCTGTAGTTTAAAGATACCGCTAGTTTCGGTTGC  
GGGATTGTATGTAATTAGCTTTTTAAGAGTAACCCCGCGTTTCTCGGAGAAGTATAACCAG  
ACTTTTAATGTCATCGTCAAATCGTGTTGCTGCATCGGTTATCTTTCCTATGTATCCAT  
ATAAAAGCCGTATGCGTCAACATCAGTGATTTACCTACCCATGCATCGGTATTAGCTAC  
CAGATTGCTTAGGAATAGGAAGTATGATTCTCTTAGATTGTACTTTTCCGCTAATTTTGC  
GAAATAACGTATCTCTGCGTTTATTGAATGCGGCATCAGACAACCGCATCCTCCAATT  
GTATTTTACGCAATCATAACGTCCGTTTCATGTGAGCTTTCATCATGCAATATAACATATA  
CACAGATTTAGCATTAAATTCGCATATCTGGATCTGGAGGAAGACGGTTTCTGATCATA  
TACCCCTTAAATATCGAGAGTGCTGGTCGGTTCGTCGATCACTCCCTCCTGAGCGTTCT  
ATTTACTATAACATTTCTGTGTGATCTTGTCAATAATGGACATCGGAATATACTTCTGATA  
GTGACCATAATTCGATAGAGTTTTCTCTACAACTGCGTTGTCGCTTCAAGATAAGTCAA  
ACCCTCTTCAACAACCAGTTTTTTCGATTGCAAGACCGTTTGTGTTTTGTTTCGCGGCTTT  
TACCGCATGTTCAATTAAGCATTGAACACCCGATCATAGAGTTCTACCGCTTCGTCGCGTT  
CTGCTTCGAACGTTTTCGCGCGGTTGCTGGTGATACAGTTTAAACAGAATGCCCCACATTT  
TACCATCGACGCCTAATTTCTTTAGCACGCTGTTTGATCTCTTTGATCTTATCGCCGT  
ATGCTTCTGAATGGTTTTCTGATCGCTGGCTTCTTTAATCAGTTGTGCCAGGGTATTT  
CGTGCCTGCTTCGTCAAATACTACATTTTCTTTTTCTGTTTCAGTCACAATATTAACCC  
TCTTTCGTCATTAATTTAAAACCAGTTCAGCTTTTGAAATTCGCTAGGACTTAAATCG



TCACCAACATATTCTAGCATCATTCTCGGAGAATGTCTAATGCTTTTTTCATCACCTGAT  
TTAACTCGAACTCAAGTTCATTGTGAGCCTCTCCCAATCTTTCGCCGACTTTGCAATAA  
TAGAAAGTGTCTTTGCACATTTCCACTATAGCACCTCAAGGTCAAGTGTCAATGACTTG  
CGGTATGTCATTACTTGAATAAAGGAACGATATGGTCGGAGTTTACGCCTAGACTATCA  
ACATAATGATAGAAATAATCCATTGTTGAAAAAGTGATTTCTTCTGGGTTGAATAGTCCA  
GATTCACCAACACCTATTTTGACCATAATCAATGATCTATTAACGTCAAGTCGAGCATAA  
ATTCTTTTCTACGCATTCCATGATCTTCGGTATCATAATAAAATTCGTGTTTTAGAGTG  
TTAGCACGATCTACTAGATTGTACCCGTCATACATTGCTACCCACAAATCTCAGATTGTT  
TCGACGCCAATTTGTGAGTGTGCATAGTATCTTAATTCAAGTTCTTTCATATGTCAACCC  
TTAGAACTCACCAATTTTCTGCAACATTTTAACTAACGCATTGGTTACAAAATAGTTATA  
AATTTTACCGCGTGGTGCTGGTTTTGATTTCTCCCATGCTAACAAAATTCATATTCGAT  
GTTATCAGGAATAAATTCAAAATCAATAAGTTCGCGGTTTTCGTCAAAGCGTAGTGCTTC  
TTCCTCTGTCATCAAAGACTTTGGATCTTCGGCATCGAAAATTTGCTCTAACCATTTGGT  
TGCAATTGTTTTAGCTCGTTCCTCCAGTCGTGAGATAATGAAATCACTACGGCACTT  
GATAGGAGCTACACCGTCTTTGCGTCACCCTTAACACATTTTACCATAAAGGTCTTTGTA  
AGGGCTAGCATATTTGCATTTCTTCCATGCTTTCTGTACTGGCGCCCACTGTTTCACGTT  
TTTGTATTTGTGCAACTGTGTGTAGTACCATCGCCGGAGTTGATTAGCACCTGGCGACC  
TTCTACAGAAAACTTTTAGTTAACACAGCGAGTATATCATCTGTTTCTACTTTGTCAAC  
CTTAATAACGTGATAAGGCATGTGCTCTTTATTCTCTTCGGTGATCTTATTGATCGCAGC  
AAAGATCATCTCCAATCATGTGGATCTGCGTCTCGTTTTTCTTACGGTAGCGTTTATA  
GTAAGGGGCGATACCGTCGCCAGTAACCTTACTTGAATCAAAGGCAAGTACCGTAAT  
TGGGTATTGCTCTTTGAATTTGTGCATATTATAACGCATGGTCTCAAGGATAAGATGACG  
AATCAAGCCTTCATTAATAGGATCTTTCGGTTTTAAAGGAATGCGAGATAGTAGCAATCAT  
AAGCTGCGACACATCAATCAAATGCACACCTTCCGGCAGTTTATCTTCTGGATCATCGAA  
GAAGTCATTAAGTGTAGCGGTAGTTTTTGTAAACGGGTTATACGTCATAATTAAGTTCTC  
TCCACTCTCACAACAACATATTTGCCAAACGAGTTAGATACTTCACGATCATACCCGTAT  
TTCTCCATAACTCGCAGAATTGCATTGTTTAATTCGGCACGGAAATAATTATAATCCTTA  
TCAGGGATTCTGTCAACTACCCACTTTGCACCTTCTGACAAATCAACTTTAACCATAATA  
TATCATCCTCTTTTGTCTTATCAAGCCTCATTTTATAAATATGAACATACTATAAAAGG  
AGACCCAATAATGGCAGATTTTTCTCAACATTTCAAGGCGACATTTGGCTTTGACGCTGG  
TAATGAAAAGGTCGTCAATGTAGCATAACGACGATTAACACACATCAACGGATGCGGTCAA  
CGTTGAATTTTTCAATTACCATAATGGTATTACTCAGTATGACACAACCTCGCGGTTATGA  
TCAATACGAAACTACAATCTATCAAACCGTCCGTATTATGCAAAGAAGATATCACAAA  
GCCAGCAGGTGATTTTGACCCGACTAAATGGCAAGCACTGCGCACGGACCCACGTTGGGA  
TTATATTGCAGCAACTTCCAGTGATACTCCTTTAAAGTCTGGTGATTATATCGCAGCAGA  
TGGTCAATTTGTAAACTTGACATTCTATGCCAACTATAACCAGCAGAGGGAGACTAT  
AACAGTAAAAGATATCGGTGGCAAGTGTGGTGTTAACGAATTATCGTTCTTGAGTTCATG  
ACATGAGTTTTACTATAACGGCAATGTGTACAACCGAAAATGGTATTGCGCTACCCCGTA  
TGCAATGAACTATTTTCATCTTTGTTGCGGAATCGTTGGCATGTTTATCATACGGGAACAGA  
GCCGCGCGGTGTATACGCACAGCCAGCGATTGATGCTATTCAAATGTGGAATGGTGATCA  
GGTATTTCTGTCGTTGTTGTTGGGTAATAGTACCTTAGTGCTTCCTAAGTTTGCCAACAA  
TGGCGACTTGATCCAGACTACAGACCTTGACGGATTAACCGCAACCAACCACGTTACGCT  
TAAAGTTCATGAGCACGCAGAAGAACAATCAATTGGCACGTTTCGGTCTAAAAGAGATTAT  
CGGTAAGCGTAGCGGTTCATGGTGTATTCATCTTTGACAAGACGGAAAAATTATGGCGTTT  
GTGGGATGGTGATCAGGCTGTTCTGTTAAACCGATCATCGATGACACTCGCTTGCGACC  
TAATAGCTATGTTTCTGTATTTGGTGGTCTGTGATGTTACTCTGACGCTGCCGACCAATGT  
CGAGCTGGGTGATCGTATTCAAGTTTCTATGCAGTATATGCAAGGAAACAAGAATTGCCG  
TATTATCACCGCCACAGAGGATACAAAAATCCTTATGCAGAAAAACATGGTTCAGTTTCC  
TAAGCGTAGCGAGTACCCATTCAATGGGACTGATACATGGACTGGAGTCTCTGAATTGTC  
TTTCAACGCTGCAAATGATAATGTACCTTATCTGGAGTTCTCTTATTCAGAAGGTGATGA  
TGGTAAGAAATACTGGTTGGTGGCAAATGCTCACCCGATCGTAGAACGAGTAGATCCGAC  
TCGTAAAGATCGTGTTGGTGTAAATTGCACTGGCTGCCCAAACCTGAAACGAATAAAAACCA  
TGAAGAGAATCCTACCGACGAAGTTGCAGTAACACCAAAAATGCTGGCTAATAATACCGC  
CAACGAAACTCGACGCGGTATTGCTCGCATTGCGACTCAAGCGGAAACGCATCAAGATAC  
TGGTTCCAACCTTCTGGATGATGTTATCGATACGCCTAAAAGTTAAATGACTGTGTTCC  
TACCGAAGCCCGTCTGTTGGTGTGATGGAAATTGCAACCCAGCACGAAACCAATGAAGTTTT  
AGACGATACCCGCGCTATTACTCCTAAGAAATTAGAAGAACGTCGCGCTTCCGAAGATCT

CGCTGGTATTGCTGAAATTGTTTCAGGCTGGCGGCAGTGCTGCCGCTCGACGTGGCGAAGC  
TGGTACAGGGATCTATAACATCAATGACCATGCTAAAATTGTTACGCCTAAAAACATCAA  
CGAAGTCAAGGCGACCGAACCTTCCCGTGGTGTGGCTATCTGGCAACTGACGCGGAAGT  
GCAAGGGGCTACAGAATCAACCCCGCAAGATGCTTTACTCATCAGACTCGCACGCTAAC  
GAAACGTACTGCTACCGAATCGCGCACTGGTATCGCTGAAACTGCAACTCAGGAAGAAAC  
AACTTAGGTCAAAGTGATAACGATATCATCACGCCTAAAAAGTTGCAAACCTCGCCGCGC  
AACGGATACTTTACACGGTTTAGCCGAAATTGCAACTCAGCCGGAATTTGACGCAGGTCT  
TCACGATGCTCGCATTTCTACCCCATTTGAAGATTAACCTTCTTTGAGCATGCACAGCG  
TTTGAAAGTTCGATCCGACTCAGGGGCTTAACCTTACTGGTGATTTGTGGCAAGGTATCAC  
GATTCGCGGTTTGGATGCAACCGAATATACAAAAGGCGTTCGCTAAAGTTGCTACTACTCA  
GCTTACGGATGCTGGTCAAGATGATACTACAATCATCACGCCTAAAAAGCTGCAAGCCAA  
AAAGGCCACCGAAGGTAAAGAAGGTATTATCCGAGTTGGTACTCAAGCCGAAACCGTGGC  
TGGTGCCTGGCTAATGTAGCAATGTCTCCGACGAACTTCAAATATGTTGTTTCAGACAGA  
GGATACATGGAAAGCAACCGAAGCGCGTTCGTTTCTTGAAAGTTGCTACTCAGGAAAA  
CTGTTTTGTTGGTGATAATCTGCAAGGTTCTACTCAAGAACTAGGAAACTACCAGCATGA  
AGGAATTGCTGTTACCCCTAAAGGATTGAACTACGCACTTGTAAATTTCTTACCTAAGAT  
GGCAACCGCTCAGAATAGTTTCGAATTGGGTAAACGTAGAGGCCGCTAAATGGGCGCGTAG  
AGACATTGACCAGACCATAGAGAGCAATTACACGTTTAATAAAAACGTTAACGTGAAGGG  
CGATTTAGAGTGCTTAAAATCAGGTTTCTTTGAAACTCTGTCTGTGACTAAGAACTCAAC  
CCACGATCCGAGTAATGGTTCATCTGGTGTGGGTGAGCGTGGAGTTGACGGTCACACCGG  
AATTACTCTGCATGGCACAACCGCATCGGAAGGCATGAAAACTCGTGGTCTATTATCGT  
GGGTGGGACTGGAACAGCGCAAGTTGTTGATAGTGATGCTATCGCTTTCGGCAAATCAA  
TGATGGTGGAGTCGTCGAGCATTACGCCTTTGCTATGGAACACAATGGCGACGCGACAGC  
ATATAAAGACTTTATTGCAGGTCGTAACCTGTATGCGAAACAAGGCGGTTTAGAGATTGT  
TGACCAGTCTAATCCGGCAATGACTCGTTCCCCAGATGCTATGCTGAATATCGGTCACGG  
TGGAAGTGTTAACATCAAAGCAGGTCATCAAACGTTAACTACAGAGATCGCCGGACAGAA  
ATATCAGATCGTACACGCAGGAAACGCTGATGAAGTTCTTAACCGTCAGTTTGTTAAGAA  
TGCTGGCGATAACAATGGTTCGGTAAGCTGACTATGGATAATGCGCCTATTGGTTCTGTAA  
GCATGAAGCTAGCGCGGCAACCGCTCCGGCAATCAGCAACATCGGTTTCTGGAATATGCG  
CGTTACTACTCAGAACATCAAAGAACTTATCCAGAAAAGAAAAACGGTACTCTGATGCA  
ATGGGGTACTGACGCGGACGGGCTTACCAGCTTTGGTCCCCAGATGGTACTCATAAACA  
TTATATCCGTTCCGGTACTGGTGGTCCATGGACCGCATGGGGTTAAATTTACACCAAACA  
GAATAAGCCTACCGCTCAGGAAATCGGGGCAGTAGTTGCAGAAGGTGGTTTAAATGAACTC  
TATGACGGTGCGTGACTGGATCAAAGTTGGTAATGTTAAAATCATCGCCAATAGTCTGAC  
TCGTACCGTTGACTTTATCTGGGAAGACTAATTAAGGGGGCGAAGGCCCCCTATGGGGT  
TATTATGACACAAGATATAGAACTACGCAACACTGGAATTAGGTTTGCGCATTTTCGACGA  
AGACTCTGCGACCTTTACCAGCATTTTCAGAAAATAACTCTGTGATGTATAAGCTGGAAC  
GCGCGGATCTAATGCGGATTCGACCAAACCAGCAAGGATTAGATTTAATGGAGTGGAGAT  
CGTTGGCACTGGCTATGAAAATGGCCTAAATTCTAAAGTTCTTACTCCAACCTGGACAAC  
ACCCGAAGAAAAGGTGTTCTATGGTTCGCGGTGCTGTTTTGGCAATGCGTGATTATCTTTA  
TTTGCTGAAAGGTGTCTATATCATTGCGATGGCAACACATTGAGAATTGTTAGCACATCC  
GATAAGTGATGATATATTTTCTAAGCTGGGATCTGTATCATTCCCGAATCACATTTTGT  
TCAGCAAATGCCTCGTGTATCCTATGCAGCAATTTATTCTACTAAAATGGGTAAAATTGT  
GTGCGAAGGGATGCAAGCAACGCACGGAGATGGTCAAGATTCGTCTATACAAATTGAAAA  
AGTTTATGATACTCTATACGATCTTGCAATAACAGGAACACCACAACGATTTTATAGATTA  
TCCGTTGAATATGTTAGCGAAGATGCCGAACATTTTCGAGCTAATAACAATGGCCTCATGA  
TGAGATCAGCGCACCCCTTGAATATTTTAGCATAAAGGCAGGTGACAAACTATCAATATC  
CTTTGAATTGTTCCGTGATAGTGCCGACCCGACCCAACGTAACAGCGCGTTTCTATCA  
CAACTACTTCACTGGTGGACAATATCTAACTGGCGTTCGTTATAATACCAGCCAGAAGGA  
TCAATGGGAAAAGTTTGAAGCCGTCTATACCGTACTGGAAGGAGTTGCTAGTGTTACCAC  
TGGTTGTATCAGATATCCAACCAACTCAAATGAAGGTATTGTTAAAACCTAGAAACATACT  
AATAACGCCGATCAGCGGAGTCGTCAAACTACTGGTCCGACTTCATTTGGTGTTAATGG  
TGTTAAAAAACTCATATTCAGGATAACGGTGATTTTACTAACCCTGTAATGAGTCTTCT  
TAACTGCCTAGAGTTAATAAACACATCACATCCAACAACCTTTAAAGAGTTTCGATGTTGA  
TTAACATTTTAAACAAGCCGATCCTCGTGGTTGGCTTTATTTTTATACAGTTGGTTAAAA  
CGTAACCGAAACGAAGAAAGATCTTTAGAATAATAAAAAATTTGCTTCGGTTAAAAAATA  
GTCAGTGCCTACGGCACGTTCGCGAAGCGATATTTTGTAAACATTCTATATATACGCGGAA

CTATAACTAATTTTTGAGGGTGGCTTTATGGCAGATTTGAAACATGGATCTTCTGTAGGCG  
GATCTCCCATTTGGACGCAAGGAACTTGACGAGCCAGCCAGCGGGGGATCAGCTTTTCT  
ACAAAGGTCATAGAATCTATACCGCTTTTGATACACCTTCGGCTGCCGATTTTGATGCTG  
TTAGTGCTAACGACGGTGGCACATTTTCATAAGCAGGTCCATTTTGAGGAAGGTTAAAGCG  
TAGGTAGCGCATCGGCTGGAGAAAACAAAAAGAACGGGATCTTTAAAGGAAATAGAGATG  
CGGCTAACTTTGATGGTGTAAAGTTGGGGTTTGCATTCGTGGAAATCTATTGGTTTTGTTA  
ATGCCCCTGATGGCGTTATCATGGCTTATATTGATACTACCACAGGTGATTTTAAAATA  
AAGGGACTATCGAAGGGACAACCATTAAGACACAGGTCAACGCGTCTATAGCCCTGTTA  
ATATACCAACGAATAATGATTTAGATTTGGTGTCTCGTCGCGGTGATACCCACAAAGGAA  
CATATAATTTAAACACTGTCACTGTAAACTATCGGTTGATTCGAAATTAATTGCAAGGG  
AACGTGATTTAATTAATTTTGGATGCGACTAAGATCTATTATGGTAACGTTCTTGATACGT  
TGGTCTTCCGAAGTAAAGATGAGCCTACCATTTTGTTAATGGCAGAGAAGGTCGTTTTT  
ATCACGCCAACATAAAACCAACTAAAGTCGATGTTGCGCTAGCCAATGTCACCAATGATG  
CACAGGTTAAACGTGCTGGTGTATTATTGAAGGTAACCTGCAAGCGCCTAGAATGTTGG  
CAACAAACGATCCGGCTGGTCCCAATGAATTGGTTCCTTTGAGCTTCTTTGAGAGAAAAT  
CAATGGTAGCAAATCCAACCATCATTGGCAACGTTGTTTGGAACTCTTATTAATCGCG  
GTATCTATCGTGTGAAAATGCTGGGTCAGGTAATAAAACCGTCTGATAGGTATTATA  
ACGGCGTTTTGATGGTATATCGCCCAGAAGATGCGGTCGGTACTCGTCGAATTGTTTCAGG  
TGTATTGTCCTGAATCTATTGACCATCCGATGTGCTGGCGTCCGTGTTCTGATGAATCAT  
GGACTGCATGGAATATGTAGATCACCGTAAATTAGCCGATATTTCGCTATGTTAACGTAA  
CTGGCGATACCATGACAGGACCGTTAACTGTTCCGGCTGCAAACGGTGTTAGAACAGCTA  
GAGGTGCACATAATGGTGATAACTACTATGCTGGGTTAAATAGTGCCGATGGCACGGCTA  
TGATTCACCGTATCAGCGATATTAAGCCACTGAAAAATTGGGTATTACACATGATTTCGA  
AAGCTGTTTTTCGTTAACTCGCGTGGAATACTAGAGCCACAGACCGCTATAAACTTTACC  
ACGAAGGGCATAAACCTACCCCTGCCGAAGTTGGCGCGGTTCCACGTAATGCGGTGATTG  
ATTTTGGTACTTTCTAATTTTAGCGGGGATTAGCTCCCCGCCTTTCTAATAATATTATT  
CTAATAACCGTTTAAGGATTTTATAAAATGGCAGATTTAAACAGAATCCAATTGAAACGT  
ACTAGCACGAAAGGTTGTAACCTGATGCTACTACAATGACGCAAGGTGAACTTGCTATC  
AACCTGCATGATTATTATTGTTTACAACAAATGACTCTGGTTCTATTATTTACTTAAGC  
CGTCCCTCCGATCTATGACCGCGATGTTACCATGGCTGGTAAAGTAAAGGGAGATTATTAC  
ATTTTAGGTAACCGCCAATTATCATGAAGCTCAGACAGCGGGAGACCTTAACCGCTTT  
GGAGCATTCCGTACCAACGGTCTAGATGGATTTTTAGATTTGACCTTGCATGTTCCCTCAT  
TCTGCTGGCGTTCAACATGGTTCGAGGATTTACTTTCCATTATGCGACTGGCGGATCTCGT  
GTTGAAACATATGGGTATAATGCACAGGGACAAAAGCATTAGCTAGAAAATGTATGAT  
GAAGGTGATAAACCAACTCCAGGAGAACTGAACGTTTCATAGCAAACAAGAAGTAGATAAA  
ATGTGTGTTAAAAACGTTATACTTTCTACAGGTTCTGGTGATATCGTTGACGGTTATTTT  
AAATTAGCGACTGCGATGATTCACAAGACGGTCGTAGTGTATTTTTCCGTATTCGTGGT  
GGTAACGGATATAACATTACTCCATACGATCAAGTTGATATTGTAAAAATTGTTATTCGC  
AGTGGAATAATCGTCCTAAAGGTGTTAACGTTGTTGCATACCGCCGAAATACAAACAAA  
GCATTTGATGTTTTGGCTGTTAATACTTCTGGTGATAACTATCATATCTACGTGAAATAT  
CAGCCTTACACTTATAACGTTATTGTTGAATTTGGTAAAAGTGTTGATGTTAATCTGGTA  
GTCCATGACGTTCCAGACTTTGTTGTTGATCGTCCTGTTGGCGATAATGTTATTGGCGGT  
CGCGCGGTAACCTTTTTCAACACCGAAAACAAACGAGGTGTGTTGAGTTTTGACGACAAT  
ACACAAAACAGCTATGATATTATTCACATGAGTAATGATAAAGGTACTGGACGAAAATAT  
ATTCGTAAATTCGTTAGTAACTATAATGAAATGATCTGGCATGAGACGGTTCAAGGTAAC  
GTATATCGTTTTAGCTGCTGGAACCTACCGACGCAAACGAAGTTCTCAAATTACCTACCGC  
ACGTTGCAAACCTGGCAATGCTGTTTTTGGACGGTGGTAATAATAATGTGCGTTTACATCGT  
AAACCCGGAAAAAGTAACTATCTGGAATATTATGATGCCCGTGACGGAGCAAATAAACGT  
CAGGGATATGTTGCGTATGGCGATGCCACAACCTACCAGTTGTCAATTATTAACGAACTC  
TCCGAAGGTAATAACCCGATTTTCTTTAACGAGACAGGTCAAATTTCACTTAACGTAGGA  
AAGACAAAATTTGTTTCATAGCAACGGACAATATATTTCTACCAACGCCGATAACTATCGC  
ATAATTTATGGTAATTATGGAACATTCTGACGAAATGATAGCGTGAAACGTTATCTCATG  
TCCACTGCCGAAAATGATAAATGGGGTACTTGGAAATAGCTATCGACCATTCAATTTACAAC  
CTAACCGCGCGATGTTCAATTGGGTGGTGTATGATAGCGAATCGGCATTAACGTTAGAA  
TGTGCTTCTCGTGCCGCTCGCTTTAGTAATGACGTTTACATTAAGAAAGGGCTTTTGACT  
TTCGACGCTGGGCGATTAGGATCTCGCGATTATATTAGATTTAATCATTGGGGCGATAGC  
ACTAACGGTTCGCGATAACATCCTACAGAGTCAAGACAGTCAAGGACGCACATTTTACCCT

GAACGTGCTATGGGTAAGTGGTAACATAACAGCACGTTTTAAAGGCTTTGTTTCGTGTTGAC  
TCTGGTGAGATTGCATTTGATGCTAATCGGGGGTTCGCAGTCTCAATTTACCTTACACACA  
TGCGGTAACGAGCAACGCAATCACGTTTTTGAATGTAAGGATGCTACAAGTTATACCTGG  
TATACTGAACGTAAGTCAAGGTTGGCACTGGACCTATTCTGTTTCGTTATGGCGGGTAGTCTA  
AACGTTGGTAGCAATATCACAACTGGTCCGGATAGTACGTTTAAACGCGCTGGCAAT  
AAGCACATCTGGTTTATAGAGATCCAAACGGCTTAGAGTTAGGCTTGATGTACTGCGATGAT  
GCTGGTGCTATTCGTTCCGTGGTCAGAAACAAGCCCAGGCGTGGAAAGTTGCAGATAAA  
ATGATCCAGTTGGAACTGGCTCTGTATCCGGTGGCGGTAATGGCCTGATTCGTGGTGAA  
GTTGCTGGCGGTAGTTGGGCTAGCTGGCGTGACCGTGCTGCTGGCCTTATGGTTGGGTGT  
CCTCAATCAACCAATTCCGCTCATAACATCTGGAAAGCTACTCATTGGGGACGATATCAC  
ATTGCAGCAATGGGTGTACATGTTCCCTAACGGTTCTATCGGTGATGCTATAGCTCGCCTA  
AACGTTTCATGACGCCAACTTTGACTTTAGCGCCTCCGGTGACATGTCGGCAGGGCGTAAC  
GGTTCGTTTAAACGATGTTTGTATTTCGTTCTGATGCTCGCCTTAAAATCAATAAGGAAGAG  
TATAAGGAGAATGCCACTGATAAAGTTAATCGCTTGACTGTGTACACCTACGATAAGGTT  
AAATCTTTAACTGACCGTAGTGTTATCGCCCATGAAGCTGGTATGATTGCTCAGGATCTT  
GAGAAAGAATTGCCCGGAGCAGTAACAACCTTCTAAGGTCGGCGACCCAGATAAAACCAGAA  
GAGATCTTAAACAATTTCTAACTCTGCTGTCAACGCTCTTTTAAATTAAGGCGTTTCAGGAA  
ATGAGCGAAGAAATGAAAGCCGTTAAAGCTGAACTAGCGGAACCTTAAAAGAATTAAGGA  
AACTCCCAGGGAAGGGAACCTACTAAGGAGAAACGGCTATGGTCTATAATATCGTCATTGG  
TGCTTTGTCTAATTTCCGAGTCAAATTATTGTCAAAGTTATTTAGTGAAAAGATGCTCAC  
TAAAATTTTCTTCTATTGCGCTCGTCTTGGCGCCTATACCCAAACGCCAATTGATGA  
TCGTTTTGTGGAAGAACATTATAAGGAGTTTAAATAAAGATCAGTCAGAAGATAGTAACGA  
GCAAGATAAACCTAGTGATAGTCAACTACCTAAATAAGAGTTCACGGTCATAGTTATCAT  
AGGGCATTATATGCAAGTTTCTGAAAAAGGGAACGACTTTGCTATCTCAAATGTCCTGCG  
CGCTATTTTCACTAAAGCAGGAGTTGCCCGTACTTAGTGGTTTTGCTGCCGTAGT  
GTTGTCCATAGTGGCATTGTGCTTTATAGTAAAACGAGTTATTTGCGCTTTATAAAGA  
GCCTCGTTATGAGACTTATGCTCACATTCTCCAGCTAGAGAAAGACCGCAATTTTGATAA  
TGCAGCACAGGAGCAGTTACAGATAGTTCATGTATCGGCTGATGACGATTTTTCTGCTGT  
TTTTAGTTTTCTGTCGAAAACCTAAACTATTTTGTGATTTGGTGGCATAATGAAGGAAA  
GCTGCCGCATACAATCGATGAAAAGAATTTAGGCGGATTCCCTATCAATAAAACGAGTGA  
AGTATATCGTAGGCATCTTTTAGGTAATCATATTTTACCGATAAAGATTTCCAGTATAT  
TCCATCAAAGAAAAGAAATTAGAGAGTATCGATATAGGGGTTATGTATTCTTGTCTAT  
ATTCAATTTTCGACAATGTCTATGCTGGTAGTATCTCCATTGCATGGAAGAATAAACCGGA  
TATTGACGTTGAGAATTTAGATACTCTTTGCAATCAATCTGGCAGAATCCTCGGAAGGAT  
CAGATACCTTACAGGGGAAGGCTTTAGGCCTCCCCTTCTTTTTATTGGCGCATAGAAGCC  
CCTGAATCACATTTTGTGCTGTATGATGAAAACAGGTAGCGTACCAGTCATCGGCTTGT  
TCGTCTTCGTCAGAAAACGCGTAATTGCGTTCGTATACCGTTTTCTACTTTGACCAGTGCA  
ATAGCTGTTTCTGGAAGATCAATCAATCGGACAAAATCACCATCTTCCACTCTACACGA  
GCAATATCATAGCCCATCTCAAAGTATAACAATCGCTGGTTCTAATTTGATTCTGGAACT  
TCCCGTAAACATTTCTGCCAACCTCCGTGCATCTTTTACAATATCTTACATGTAATGAC  
TATAATTTTATAGCTAGATCAATGATGCAATCAACAAAGAAGTAATAGCGTCGCAGTGCTA  
CCAGCACAACTTCAAGACGACCATTTTCTCCAATCGCTGAAATGTGTTTAAATTCCT  
TTTGGATCGCGTCCATCGCTACATTAACCTCTTTTATAGTATCTTTCGTATTATATGCAC  
CTCGGCTAATCAAATTTTGGTTAGGTCTTCTGCTTTTTCTTGAAAGTTGTCAATTTCAA  
ACTCAATCATAATCACCTCTCATAATTGCACGCAGTTGTTTCAACATTTTTCTGTTGTT  
GCTAATTCTATACCTTGAATAGCAAACCAGTGCAATTTTCAATGATTCATCATCTTTC  
ATAATCAAATTTACCGAAAATATTCTCTGTCATAATTCCTGCTTCGTCGATAATTTTCG  
TCATGTTTCATGGTGTAGTTATGATCATTTAGTGCTTTAATAACAACGAGCAAGGAATCTA  
AAAACACTCGAAACCGGGTATATTTTACGCTATTTGTGAATACCGATGTTCTCTCCACTT  
TATCGATCAGATAGCCTAAAACCGATACCGCCTCGTTTACTTCCCTTGTACTTTATCGG  
CGCTAAACAACACCGGATAAATACGCGGTGTGATTAACCGCGCTGCCTCTTTCAATTCGA  
TCGCTTTCCATGATTCATATTTATCATAGTTAAACATTATATAATCATCTTACAGATGAA  
AACCTGTTACGATCACCGCATCGATCATAACCGCTAGGAGTAAACGGTTCGCCCTCTTTA  
TTTCAACTTTGAATTGACTCCCTTTTCGCTAATACTTCTTCCGGTACACCCAGCGATTTCG  
CGTCTGCATTAGTTTCATCCGTAATCCAACCTAGGCTGCATGAGCGCATAGTTTACATAGT  
TCATTTCTGGGGTCATGTATCAATGTTAATATAATTTGCAGTTGACGCGTTTACGAATTT  
CAAATTTCTTATTATCAACCTGTACCATGTATAATTCAGTAGTTTCTGGGATCAGTTCCC

ACACAATCAGTACATTTTTTCATAGATCACCTCACTTAACAAAGATTTTTCTTTAATGCTTT  
CAGGATCGTTGCTTCCGGTGCTTCTTCCGGTGGAGGAAGCAATTCTACCACTTCCTCTTC  
CAACTCGATATAGTCTACCAGATATTCTACATAGAATGCAAGTGCTTCCATGAAATTAGA  
TGCTACATCCGATTCACCACAAGCGCCTACACGCATTGTATCAACATCACTGCGATCAAG  
TTTGTGGATGCTTCCCAGATAGTTTCGGTCTACCAGACTTCCCACACTGTCAGCTTCC  
GGTTTTGGTTGCTGTTTTATAATCGGTTTTCGTAATGATGCAATTGACGTTGCAAATAATT  
GATAATAACACATTTTTTCGTAATTGTTTTGAATTTCCATGATGTAATCCTCACTTATCGT  
TAAGAAGTTCTAAAACCTTCTGTCATACTTTGTCAATATTAGTTGATTCAAAAACCTGTAC  
GGTATCCCAGCTTTGACCGTATGATCGCGAGCAATCCCATATCCCATTGTTCAACCT  
GATAGTATTCAACGAATGGGTGCTGCCGA ACTATGACACCATCGCGATTAAAAATTACCA  
TAATATAATCCTCACGTCAACA ACTTATTTTTCGGCTGGACTTCTGCCACTTTGGGTAATA  
CTGTTTTGTAATATTGTTTTACGTTTTACCATCTTTACTATACCTGTTATCTACCATCAA  
GTCAATAAGACCTCCCGGTGTCGGGTAGGTCCTCACTCGGATAAGTTCTTTAATTAAGT  
GCCCTGATGATCTTTGTATACTACGTTAATGATGGTCTTTTCTGCTTTCTTCGTCCCAG  
CATCCGGTGATTAGCTTTCATCACATCCCACCAATCTTTTGTGATCTTCATGTTATTA  
TTTCATCACTTAACCTCTTCGCAAGTATATCTCCACTCAATACGTTTTTTCGTTTCCACCG  
CGCTCAGCATCAAAGATATGACGGAATGTCAATTTGCTTTCATCATCAACAAGTTTATT  
CCTTCGAATTCAGCGCCATGTTTTGCAGAAAATATCAATCCGATTTTATAATCTTCGCTG  
TTGATCATAGTTCCGTTATCTGTGATTTCAAAAATCCCTAACTACAGGGTCTTGCATTGTG  
CTGGAGATCATGATTTTAGCAATGTCACCTCTCGTAGAACTTTAATTTTTGCATTTCTG  
TTCATAATATCATCATCTTCTACACTCATGCCATTGATTGTAGTAATTTAACA ACTTTC  
GGCAAATGTAGGAAAACGTGGTTTTCTTCGGATTGATTACTTCCGGCTGTTTCTCTTCA  
ACCTTCGGTTCTTCCACC ACTTTTTCTTCTGTTTCGGTTGTTCTTCTTCAACCTTCGCA  
GAAGTCTCTGAATCGCTTCTGGTGCTGTTTCTTCTTTAGGTAATACATTCATCATGTTT  
TGAATTTGAGCGTTATATACAGCCTCCAGCGGCTGAATCTGCCC GATATTAATCATTGTA  
TCACGAACAGTTTTATTCCAGTTGCGTTACTGATGCTTCAGAGTCGGATCAATCTTAACA  
GTCTTAACATACACCTCATGAAGTTTAGCGTCCAGTGCGGAGATTGACTCATTAGCCCAA  
ATAAACTTCTCTGATTTGTTAGTAGCTTTAGCGCAATCAAAGGACGCAGCGTTAGCACCG  
AAAGCAGTAGCAGAAAGAACGATAGCAGCGATAATGTTTTTCATAATATATTCCTCAGTG  
TTTTGTCCTGATGGGAGTATCTTACTACTCCCTTAATCCGGTGTCAACTACTTTTTTAAA  
TTTCTTCTACAGTAAAATCCTCAATGTTGTTGTGCTCGGCGAACGTTGCAAGACCAGCAT  
TCCATGCATCATCCTCAGAGAAGAATACACCGTAACGTT CATATCCTTTAGCGCCTTCAC  
ACTTAACCATTAATTTGTGAGTATGTTTCATTTTGATTCTCCTTCGTTGTCTTGATGAGT  
TTAGTATAGGGGATCGCCGATCCCCTGTCAACA ACTATTTTTTAATTTTTACCCGCTCGT  
GCATTAATACGCATTTTCTGCATAGCCATGATCTGGCTTACTACTTCTTCTTTACGTTCT  
TGCGTGATAACGTGACCAGATTCCGCAA ACTTCTCCGCAA CTCTTCTACGATCTCGCGA  
ACTTGAGAACGTCCAAAGATGCGGTTTCTTCGTAGCTCATAAATCTGTTACTACTTGC  
TCGATAGACTTCATGTGATTCTCGTTTTCGTACGGTATGGGAGTATAATACTACTCCCATT  
TCTTTACGTCAACA ACTATATTA AATTATTTTCGACCTTCACCCATTCCGCGTATTCTTG  
CGCGGCTACTTTCGGATTTAGGCCGTCTTCGTACATTGCTTCAAGTAATTCTTCGTCCGT  
GGGCTTATACCCTAGATAAGCCTCCACCTGATTTTTCCAAATTTTATACCAGTTCCTATT  
ATCACTAATCAAGAGCGCGTGTCTCTGCATCTTCCCATGCTTGATCCATAACAGCCTTGA  
AAAGATATTCTAGAGTATCATCTTTATGGAATCCGAAGACTTTAGACGGAATATCTTCAT  
TTGCTCCTCCAGCAACTTCTGCATTACGAGCTTGGCAATAATGCAACTCTAAGTTATCGA  
GATAGCGACCGCCTAATTTACCATATCATCCCAGCATTTCCAGTAACCTACTTTATTG  
CAATTAACACTTTGCTGTTTTCGTTGCTCATCTTTGATTCTCCTTTTGTGGTATG  
TGTGTATTATGCGAGTCTTGATTTCGTGAAGTCAACATCTTTTTAAAATAAAAAAGCCGAC  
CACAAGGATCGGCTTAATAATCAGTTACTTACTAAATTTCTTTTTGGCTTCGTCTACCGC  
ATGAGATGCCAGTACCGGAGCCGCATGTGCACTTTTATCTGTGTTGCAGAGAACGCCAG  
ATAAACATCACGCCAAAGGTTAATCATCTCTTAGATCATATCAATATCATTTTCTTGTTT  
GTTGGCGATGCTATTTCGTGTTATCTGGTAAGGTAACGGCTTGATCTGTACTGGTTCCGC  
CATCGGGCTAATCGGTTTCGGATCAGTCAAAATAGGTGCTGTTGTGGGAGGTGTTCTCCA  
TACCCCATTAATCCACGGTTTAAGCGTTGTGTCGTAAGTTTATAAGGATTTTTGTCTGG  
GTCAACCATCCATGCATGATGAGTACCCAAACCTTTGAAGTGATGCGTCGTTCCAGTAC  
AATTAATTTCTCTCTGAAAATTTCTTTCATCAAGCTGTCAATCTTTGCTCTGGGTTCTGG  
TGTGTTTGTATCTCTGCTAATTTGCTCAGAGATTCACTGGTGATCCGGTTGGATTCTTC  
CAGTGTTTCAACGACCATTTGGCACAATCTTTTTATTTTTGTACACAAATGCAATATAACC

GCCTTCTGGATATTCTTTTCATAATCAACCCTTCTTATGTTCTTTAAGATCTTCCTTATAT  
TCCTTCATTGCGGTCGTCCTTTGTCCAATACTCATATTCATGATGTTTATCGGCATCT  
TTGACCAGTCGATCATACTCTTCTTGAGTAACGCTATACAATGGCATAGAACTAGCTTA  
TCGGCGTATGGACGCAGTTTTTCAGGTCCATTGATGGATTGCATTACCTCGGCCTTTTTTC  
TTGCCCTGTAGCTCGATTTTCGCCCTTAATTACGCGATCGATATACTCGGCTTTAGCCATT  
GCATAATTGTATGCTTCCAGCGTTTTCGGCTTGCATCAATTCAATGCGTTTATCGACATAC  
CCTAATCGGATTTTCGACGAATCGACGGATCAGATCGCTCGCTTTCTGGAATACTTCTACT  
AAACCACGTTCAATAACCACTACTATATTCTGGGCTACTAACTGTGTTAGTTTAAAATCC  
TTCATGATTTGCTCATGACGAGCGGATTCATCTTCGCTTTTGAAATAATCGCGTTTCAGT  
GTTACTTCAAATCTGAATCCATCCTTAGAGCAACGGTCAATTATATGATACAATCAGATCT  
TTTTCTTCCAGTGTAACCAGTACCGCTACCTATTCTTCGCGGTCGAACTTATAAGGAACT  
TCTGATATTGTCAGCTTAGTCTTGCCGTTTAGTTCATATGTACCCTCAAGAATCACACCA  
TCGCGGTCATCACGAGGGATAACTTTCCCCGCGAATTTTCGAGACTTGAACACTAGGATCT  
TTATCCAGTTTTTCCGGCAAGTGCTAGCTCTGTGCATTCATTAAGGCTTTCCAGTGAATGC  
GGTAAAATGTCAGTTTTATACCCTGTAGCAATACCACTAATACCATTAGCCAATACCATA  
GGCACAACCTGGCAAGTAGAACGCTGGCGGGATGTGTTCCAGATCTTCGTGCTTAGGTGCG  
CAATTCATATCTTTATAGATTTTAAAGAAGTTTTTCATGCACCCGAGCAAAGATATAACGT  
GCCGCACCCGCTTTCTGGACTAAACGCGATCCGAAGTTACCTTGACCGTCAAGCAGTGGA  
GTATTATTAATCCATGTATTCGCCATGAGTGATCCGGCTTCTACGGCATTAGTTTCCCCG  
TGGTGATAACCCAACTCAGCAACACCACATCCAATATCTGCCATCTTACGGAATTTCTTA  
CGGTCGCCTTTACTCTTTTGAAGTGCGCACTCCAGAACAAGCGTTGCGCTGGTTTAAAGT  
CCATCCACCAATTGAGGAATCCCGCGTTCCCTCGGCAAAATAGATCGCATATTCCTTAGCT  
TCAATATGTACAATGCTTTCAAGGCTGCGGTAAGTAAATGTGTTTACAATTTGACTAATT  
ATATCCATCTTACCTCATAACGCTTACAAATCACATTTCTTTACTTTATCAGACTTATC  
AGCCCAATCCAATAGCCATTTTAAACGGAACGATTGACACAATAAACGGGGCAGCAATCAA  
AGCAAACATGATACACCTGATAATCAGTAAAACGCAAGTGACAAAACCTAGCGATAGTGAT  
CCCGACAAAACAAAATACCATAGAAAACAGAGTAATGAGATAGAAAGGCCAGAATACCCA  
CTCCCGCAGCTTAACGCCTTTGTATGCTCTGAATTGCTTAAATTCTACAAACAACCTCTCG  
GATAGACGCGTACAGGACCGAAAAATCATCTTTCATTGCTCTGCATGAGCAATCTTCTAT  
TTTGAATGACCTAGCATTATTAACCGGCTTTCATCATTGATACAGGAATTGTTTTCTGA  
TTTGTGTATAATTGGCCTACTTCAATTTTTTTCTTGAATCACCACGACGTTACAATATCCA  
CTGTCTTTAAGTTTTTCTGACAATGACTCGCTTGTGTTTCGTGCGGTGATAGCATTGACTGTT  
CTCACCAATTCACCGCAAATAATAGCACCACCTTTACAATTGCCAGTAACTTTTCATGCTA  
CGACCGTGAACAACAACCACATCACCGTAAATCACATTTTCGTGCTCGTATTTGGTAATA  
ACCGTGACCCCTCATAATGTATTCCCTCTAAGAAAGGCCGCGCAGAGCGGCCTATGTTGAT  
TATTGTTCTACAGTATAACCGATGTTTTCAAGCCATGCAATAACAATCTTTTCGCCAATT  
TCATCGAATTTTCATCAGCGCCGATTCTTTAATGAAAGTAGATGGACCATTATTTCTT  
ACTACGTGCTGGATCACAATATGTTTCAGGAATTGCGTCTAGCAGTTCATGATCATT  
TCATTAACGATATCTTCGACACTAACATTATTAACCAATCAACATCATCCATCGTCACA  
GTAACGCGACCGGACGGACGCAACGAATATTGGCTACTTTCAACTTCAACATGTGCACTT  
TCGCAAGTAACTTTTCATATCAATCATAATTAATTCCTCTGTTAGTAATGGCTAAACCCTT  
CGGTCACATCTTCAACCACATAGTAACGATGACAGCGCATTTTGGCATTTCGCATAATCTT  
TCGGGATACTAACAAAGTGACGCGGATCAACTTTACATTTAATGATGCGGCCTCGCCAC  
CGCCATAGTGCGGAATATAGTTTTTCGATGCAACGTGGAGGCCATTAGAGCAAGTGAGAT  
CATCATCTGGGTCCACGTCTTACGATTCATTTAACCCTGCGCCCTGGGCTATTATCAA  
ACGTATGAGTAAAGAAATCTTTATAATTAACATCAACACGTCTCCATGCATAGAAACAAC  
CATCTTCCCCGATCTCAATGTCGTTGTGCTCTAAGAAGTCAAATAGACGATCTACCGCCT  
TACGGCTAGGGTTTTTTCTTGCATTTCTCAAAGAAATACAGATAGTGCGTATATGGCTTAT  
TCTCTTTAATCGACTCAACAACCTCAACGAGTCAGATTAATATCAAGAACAATATTATGAT  
AATACACAATACCATTTTTCGAAACGGAAAGCACCATGATGATATACTTCAATCGCTTTCT  
TAATGTCCATCAGCGTAATAGCTTTGATGAAATCATTATGTTTAAATCGCTTCCAGTGCTT  
CATTAAAGTTAACATGCGACGGATCAGCAGTATAAACGATGTCACCACGTGTAATAGTAA  
TAACTTAGTTGAGGCTATTGCTACGATTTTTGAGTGAGTAGTCACGGGCTCTTTTGCGC  
GTTACCCCTTTTCTTTACTGGTTTTACGGCGTGCTTTACCTTTTTCTAGTGCTTGC  
GACCTTCAGCTACAGCGTCTTTCTGAATGAGTAATACACGGGAGGCAGTACTACGAGATA  
CCCCAAATGCTGCCGCAAGTGCTTCGCGTGTAGTAACTTACCTTCGCCACACTGTATAG  
CCAGTTTGATTTGTTTCGCAGTATCCAGGCATTGAACGTCTCGGTTCAGAGACGGTAATTT

TTGCTATAGACATAGTATTCATTCCTCTATTAGTTGGGCGACTATCGCTGCCCGATTAC  
ATCATTATAACCAGAATTATTTTGCTTCTACCACCTTGCGGATTGTGCGGTCTGATACATT  
ATAGATTCGTGCCAGTTCACCTTTAGTCAAGCCGCGAGCGTATTGTTTACGGATGGTTTG  
TTTCTGGATAGCGGTTCAGTTTAGTCATAACATCAACTC

>NewGenomeName\_68

GGTAAATGTTCTATAGCTAATTAACCTAACAACTATGGTTTCCCATACAACACGAATAT  
CGTATACGTTATTACCAGATTTTTTCCACCCATTTTCAAGTTTCACCTATTTGTTCATATA  
GTCTGTAATTTCTGGAGAACAAATTTCTTTGCATTAGCACCTCTGACCACATCCAATTAT  
TGTTAATACTGCGTGGTATTAACCTCTCTCATTAAGGACGCTTTATTACTATGTTTTTCAT  
TTATTGATGCATACGGTCTGTGCCAAAGAGTTTTATATTTTTCTTGTCTCTTCCAAATC  
CAAGATGATCTATGTCTTGAGATATTCTATTTACAATGCTTTCCTCAAGCTGAAACTGTG  
CATTTATGGCATTGTAAGCACCATAAGAAAATATTGTTGATATTAAGAATAAAAAGAAA  
AATATATTCTTGATATTAACCTGCTTATCTTCAAAGCATGGAATACGCATAGGCATCAAA  
AAAACATAAAGCCACCCATACCAATCAATACCTTCGGTGCATATATTGGTGATTTTAGAA  
AAATCATTGGTCCGATGATGAAAAACATTGATGCCAATGAAATTAAACTACTAGCAAGA  
ACTTTGTTTTCTTATTTTCATCTCTTTTGATTACTTTTAAACTATGACTATCAAAGAAA  
TGATTAGCGCAAAGAACAGCGAGTAGTAGATTAAGTAATTATCGCCATTCAAGATCGTGC  
TGAACATTCTATAAAATGATAAGACGTTAGAAATTATCCCTTCAAATAAACTTGAGTTTA  
TCTCTATAATCTTACTATGTTTCGATATTGTAAGAACCTGTTACAAGTCTTTTTGCCATAA  
AGTAAGAATTGGCATAATATCCTACTGTTAAACCAGCGACAGAAGACGCTGTATTTTTTG  
TGATATTTGAAATTGAGTTTTTCTTAACCACATCTGAAATTATAAAGGCCAACAAAGATA  
TTGCGTAAGTATTCAGCGCAGCCTGATAAAGACTAAGGAATGCAATGGTTAAAATGGATG  
ATATTATGATATTTATAGGCTTGTATTGATAAGCGACTTACGATCAGATAATAGATATTC  
CCACTCATGCACATTGTTAATGAATCATATCTATATGATAGATTTTCAATAAAGAATG  
GGTTTGCCAAAATCATCATAAAACAAAGAGATGCTGTGATGTAGTCATCTCCAAACAGCT  
TTCCCTGATGCAGGATAGTGCCAATGCTAGAATAACTATCCCTAGCATTAAAGGTAGCG  
GAGAAGCATCTATAATTGGGGTTCCAAAATTAATGATAGAGAAAATAAAGTCGGAAAGTT  
GGCGACCATTCCTGACCAACCCACCCGCCATATAAAGACCTAGCCAAGTCATCAACGA  
AAAATGATTGATGTGCAATAAAGGAAATGTATATATAATCGCCAATCCAAGAAAGATTG  
ATATAAATATCCTATCATTACTATTAATTTCACTTTTAAACCCCTACTCTTTAATGTG  
TATTTAGGCCGCTGTTTGGTTTCTATGTAAATTCTACCAATATATTCTCCAAGAATACCT  
ATTCCTATCAATTGAACGCCACCCAGGAAAAGAACAGAAACAAGAAGAGACGGGTAGCCA  
GGAACATTATTTCCAAATATTAATTCATCAATAATCATCCATGCACCGAAAAGGAATGAC  
ATACATGCAATAAACAATCCAATGTAAGTCCATATGCGGAGCGGAAACGTTGAGAAAGAA  
GTTATTCCCTCCAGCGCCAGGTTCCATAATTTCCAGCCGGTGAAGTTCGAATCACCGGCC  
ACGCGTTCGGCACGGGCATATTAACGACATCCGTTTTTCCGCCAACCCAACTCAGCACA  
CCCTTCATAAACAAGTTGCGTTCTGGCATTGTTTGTGATGTTCTCGACAACCGCACGGCTC  
ATAAACCGAAAGTCGCCAACATTTTCTTCGATTGTTGGATTGCTGATTTTATTGTGCAGC  
TAATAAAACCAGTCAGCTGTCTTACGCTTCAACCTCCCATCAGTTGAGCGGTCTGAGCGC  
TTATCCAGCACCATATCCGCGCCAGCCTGCCACTCCTCAATGAGATAAGGGATAACTTCT  
ATCGGATCCTCTAAATCGACATTAATAGGAATGACCGCATCTCCGGTTGCATGGTCGAGA  
CCCGCGAAAAGAGCAGGTTCTTTACCGAAGTTTCGCGTAAACGAAAGCGGAATAACGAGC  
GGATCAGATGTGGCTATTTTGTTAATTATTGATTCCGTCGCATCTTACTACCATCATT  
ATAAAAACGATCTCAATTTTCATATTCTTTGAGCTATTAAACTCACGTACCGTTCTATAG  
AAAATCGGTATCGTGTCTTCTTCGTTAAAAACTGGAACGACAAGAGAGATTTTCATCTTA  
TATCCCTGAAAACAATGAATCTGGAATAGATGAACCCGCATACTAGGCTAATTGCCGAGA  
AAGTGATAAGGGTAATCAATGGTGGCAAGGAACATTGGTCAGCCATCCAGCCAACAACAG  
CGCTCAGTGATCCCATGAATCCCACATACATCATGTAGCGAAGCGTGGTGGTGGTGGCAT  
TAAAGGTGACACGCGCATTGGCATAGAAGCTGAACGACACGGCGATAACAAAACCGGAAA  
AGTTCGCCAGCGCCTGATGCGTATGCATCCCATACACAAAAAGCAAATACGCCCAAT  
GAATAAGCGTGTTAAGAACACCGATCGATGTGTACTTAGCGAATAACTTCAACATTATGA  
AAATCAGGGGATTCGAAAGGTCTGGAGTGTAGCACTACAAATTTCTTTGATCGATATAA  
ACGATCAATAATGTAAACTTTGATAGTTTAAAGTTATTGTTTGTCTCGTTAATTGATCGTT  
GTTACCGATCAAATTTTATTGCTGATTGCTAAGTGGTTTCGGACAAAACGGGACACACA  
AAGCTTTGCATCGGCTTGCAAGGCTTTGCATGTTTTTCGAAGATGGGACGTGTGAGCGCA  
GGTATGACGCGGTATGTTGTTGACTTAAAGGTAGTTCTTGTAAATTCGTAATGCGACCGT  
CGTAGGTTTCGACTCCTATTATCGGCACCAGTTAAATCAAATACTTACGTATTATTTCGTGC

CTTCCTTATTTTTACTGTGGGACATATTAGGGACAGAAGTACCAAAAATCGAGTCAACTT  
GACGAGCATGTTTCAGTCATGTGATTTGGTGCCAGATGAGCATATCTGCGAACCATTTTCGA  
TAGACTCCCAGCCACCCATTTCTGCAATACCGAAATAGGAACGCCAGCCTGAAGTAACC  
AGCTTGCCACGTCTGCCTCAGGTCATGAAAACGGAAGTCTCCAATGCCTGCTCGTTTTA  
ATGGTGACCACCATGCAGTATTAGTGTCATAGCGCATCTTCCCTCACTACAGGTGATTTAG  
TTCCGTCTGTCTTGGTGCTGCTTTCCCTTGTAGACGAACACCCAATTGTGATGGTTGCCTA  
TTTGCTTTTTTCAGCACCCGGCAAGCAGTATCATTACGCGCCACGCCAATGGCCTGATTTG  
ACTTACTTTGTTCCGGGTGTAACCATGCCACCTTTTCGCCGCATGTCTATCTGCTGCCACT  
CCAGATTGATCATGTTAGACCGCCTTAAGCCAGTAGAAAGCGCAAAAATCTACGACTGACT  
TTAGCGGTTCCGGGCATTCAATCAACCTTTTTGCCTCGTCAGGCTCAAGCCAGCGGA  
TACGCTTATTTTTTCGGCTGAGGAACTTTGATGATCGGAGCCTTATCCAGCATCTTCCATT  
AGCGTTCAGCAGCCCGGAGGAGTGCCTTAATGAATGAAAGGTGAGTTGCTTTTGTGGCCA  
ATGCTGCCGGCTTAGGCTTGAATACCGGAGGTTGCTTCCATTCTTCCCTGCAAGCTTCAT  
CCATTA ACTTCCAGTTTTCCCTCATGCCGCCGATTAGTCATCTTCTGGATGGCGGAGTAAA  
TCTTCGTCTCGGTAATATCCTTCAACTGCATCCCTGCAAAAATGCTGGAACCATAATCCTA  
TCCGACTCTTGTCTCATCCAGCGACTTCTTATGCGCCTTCTCCTCTAACCACCTGACAC  
AGGCCTCCTCAAAAGTCATTTAAGGCGTCTCTCCTAACTTACTTACCCTCCATGCTTCTG  
CCTTCAGCTTGTTCATGAAGCTCTGTGGCCTGCCTTTTGTCTTTGTCTTAAGAGACTGCT  
TAAATCTTTTGCCTTCCGGCAATGTGAAACTGGCGTACCAGGTTTCACCTCTTCGGAATA  
GTGACATTTTCAGTTCCTCTGTTATGTCATCACCCGTACTCACCTGGACAGTATGCAGCGG  
AGACTGAAGTGCCCAATGCAGGCTTGTCTGTGGTGAGGTAAGGGGAGTTCGGTTTGGT  
GGGTCTTTACGTGTTGCCTGTAGTCGGCCTGTGCGAATCCAGTAGGCTGCGGTAGGTCT  
GGATCTCTTGAGAAATGTACAGGCCTCATCGAGTGTGAGACTGTGTGATTCCATGATTAC  
TCCACAGCTTCTTCTTCAACTTCATTTCGCGATGTCGTAGAATTTCCCGTAAGTTATTTTC  
TTGAAGCCGTCAGGGATAACAACCTGCGCCAGGCCTCTCTTCTTTGTTATTTGGTATTGCA  
AAAATAAGACAATCATTGCGCTTCGGGTGCTTACCGCCATACGTTGATAACATAACGAAA  
CCAAGTCCACGGCCCGATTGACCACCAATTCCTGAACGCATAATCCCGTAGTGGTTGGT  
ATGTAGTAATTGCATTCAGGCAAGGATTTAGCTTGGCGTTAGCGTTATGTATGATTGCA  
TCCAGCTCTTTGTTGTATACGCGGCCCTCCTTTGTGTTTCCCTTTCCTCGCGCTATCACA  
ACTATCTTCCCGTCCCAAAAATCCTCGTGTTGATTGTTATCTCGCATGGGAATTCATAT  
GCTTTTACCCAAACGAAGCTTTGTAGAAGTCCGCCTTCTCCACCCCAGCTAGTGGTTGTA  
GTCCATGCGTTTTCGCGCAACCTTTTCAGCGGCTGTGGTTAGGATTGAATTTTCGTTGGTTCG  
TTAATGGTGTCGTGTGACTGGATAAGCTCCTTAACATCCTCACCTCTACCATGTAGTAG  
TCGTAATATTTGCTCTGGTCTGACATTTCTTGTCTCCAATAAAAAACTGCCATCAGGCGG  
CTTGGTGTTCTTTGAGTACTTCAATTCGAATATTGGTTACATTGTTTTTCATATATGAATA  
AATAAATTAGCTTTTTTTCGTTGCCTTTGCGCTCCTTATTAATTCTGACAAACTCGTTTTT  
ACCACGCTCTCCAAATGCGTCTTTAGAGACGTTGTTTCCGCAATCGCAGCACACATAATC  
ATCAGACCATCCACGAATTGTTTTTCTTTTGAATATTTCCAGAACCGCATTTTTGACA  
AGACATGTCACTACCTCCACAGCATGAGTGAGATGACAACGTAACATTGATTGGAGATTA  
ACAATAGATTGCTGATGTAAGATATGTATAAGCTTCGCTATCAAAGGGGAGGATCTGG  
TAGCTGCATCCAGTGGCTTACACCGATACTTTCCATACCCTCCCACCAGTCAAAGAACCC  
ATCATCGTCGTATGTAGCAACGAACATCCCCTGACCCAGACTTTTTCCGGTAAAAATTGC  
GATGGGTTTAGATTCATCATTATCTGGCATTTCGCTCACTACAGCTTATCCAGCCACCCGG  
AATTACCGGAGAGTTGCCATTCACATCGAAATTTGGTTCAGCGTCTGAACCAGAAGAAT  
GTAGCCATTCTTTGCTGTGTCCAGTTCTGATACCTCGGTGACAGTACCGAAGTAGCGATT  
CTCGGCATCAGCATCACAAGTGCTGACATCAATGGACGCCTCCATGCCTTCGATTAATTC  
TGGCAACTCATAAGTTTGGCTTACAGGTTGGTTTAGTTTTTCTAAATCCTGATACAGGGC  
GGCGCTAACTGTACGCGCAATTCGTTACGTAACAGTTGTGTGCCGTGATACTCAATAGC  
AATATCATGCAGCTCGTTTACAATCTCCCGGATTTGATTATCTTTCACGATCGAGCTCCG  
TTGAGCATGGCATTGCGGCAGGCGTTATAGCCTTGCGCAAAGATCTTTTGATAAAGATTC  
ATGTCATCAGATGTCGCCATTTTCATCAGGCACTACCGGCGCAGGCTGCTCTTTGATATGC  
AGCCGCGGCTCGCCGTCTTTCTGCTCCGGCCACTGGCGGGCCTTGTTTATCGCCAGCTTT  
TCCACCATGGCCATGGTAATCTCCTCGTCAGTAACACCAGCACCGCGTTGAGCATCCCAT  
AGCACGA ACTGCATATCAGCCCATTCAAGCGGATCGGATGGGTGCGCAGCGGCCTCCAAT  
GCTTTTTTTCGAGAGACGTTTCAGCGGACCGACAGGGCCAACATGGCCCAATGTCTTATCT  
GACCACTCGGCGTGCTCATGGCGTATCCGGTTGCGTTCTGGTGCAGGCTGCTCTTTGCCA  
ACCAGACGCGTTATTTCTGATTCCAGGAGTGAGCCAGAAACTGTACTCGTGACAGTGCTCA



GCCCGTTCGTTTTTTTTTTCAGCAGGCCGATGATATTGAGCACATCATTGTAAACGCCAGTG  
TCCTGCACTGGCGGGGCGGCGTAGAGCGGTAGATACACGGCAACATCATCAGCAGCATT  
GGCTGCTGCTCTAACGTCACGCATGTACCGGAAAATTTATTTCAGGTATCGCACAGACTCA  
GCATACAGCGATGCCGGCGCACGCTTCAGCACAATAAAAATTTTGGCGTCATTATCGTTCG  
AGGCCAAACGGAATATCGTCGCGAGTGTTCCTCAAATTCAGCGATAGTTTGTGTAGCCAT  
TCTTTGGTAATAGTGGTCATGGGTTAGCCCTCAGCCTGCCGTGCTTTCAACTGGAGATGG  
GAAATCAATAGCCCCTTCAATATGCGCACCTGCTACACGGCACGCCGGGGACCAGTCTGC  
CGTTTTGGCAGTGTCCAGCGCCTTTTCAACTTCGTTGTATTTGCGCAGGTCATACAGGTG  
AATATTCGAATCGCCGATGTTGTAAAAACCGATTTTTTTTCGGTGGCGGGCAACGGGCCAG  
CACCGCGTTAACCTCATCAAGCCAGGCTTGTCTTTCTTCGTTAATTTTGCCATTTGTTT  
TTAGCCTCCACATCAATGAATGCACCGCAGCCGCCGCATTGATATTCGTTAATGAATCGA  
CCGTTTTCTGTCCAGTCGTTAGACTTGCATATGTTGCAGCGAATCTCATAATTACCAAGT  
CGTGCTATATCAGTGGCGCTTACCCACTGACCATCATCAAACCTAAATCCGGCTATCTCA  
TGCGGCGCATAGCGGATAACCATTCCGCCCCGCGTCGTGCACACATTCCGTGGGATAGCGT  
AAAAAATCCGAGCCATTCTGTTTACGCCCTTGTGGGGCGTCTCCGTTAATTAGGTGCTC  
CAGAACGTTAATTCTTCAGCTACGTGAGAATTGGCGTCATCCTGGTCTCAAATGGCGGA  
TCTGTATTGAGGTGTTCTTCAGCTGTGATTGCGGCATTCTCCCGACGGAATGCTTTCCAC  
GCTGTACGGCCACCTTTCCAGCTTTGCCCTGATGCCATGCCAAAGCCTCTGTTTCGGTA  
CGCCATGCCCGGTTTGCTAGCTGCATTTGTGTCTTAGCCATGCGCACCCCTTAACCTTAA  
TGCCAGGGGTGCGTGTTCGTGTATCGCATTATCATTACGAGCACACCCACCCTCGGCAT  
AATCCCTGCTGAATCCGCTCATGTGCATGACTTCTCCAACGCTGAGTCTTGACAGGTTGA  
CCTCCGCGCCTCCAGTTCTGCCACCCGGCGAGGCGCACGGGTGCAATTCCCGCGTATT  
GAATTAGGCGTTGGTCCAGTTCGGCTATGAGGCGTCTGCTGTATCCAAATCCTCGCCTA  
ACTTCTGCTCCATCCGAAACCAATTGGCGCGCTGTTCTCTTTGGTTTCCAGCGCATCCA  
GCAGCGCCAGCATGGTGGCGGGGTTGGCTTGCGGCGATAAATTCCGCGTCACGTCTCTCA  
ACAGTATGGGCCAACGTCACTTCTTCACCGCAAAGAGAAAATGGCGTTACCGTGATGCCA  
TTGAACAGTGATGAGGTGCGGCGCCAATTCCCGGCGTAGCCCACTCAGCCACTTCACGA  
AGCGCCCCTTTGTCGATGTTGCTCATTGGGCGGCCTCCTGGCGAAGTTGGGTTTCACATT  
CTTCTATCGCCTTCTCCGCATATTCACCTGACAAACCGTCATCCGCGGGTAGTGGGTCAT  
TGGCTACATCCTCTTTCGCCGACAAAATCATGCGTTTCACGTCGAGAACTTCTGATACAG  
GTTTATCGAGGAATCCGTGATTGACTGCGGCGGCGAGGCGGCTGGCGGCATAGTTGATAC  
CTTCATTACGCGCACTTGCCCGCACCTCAGCCAGCGCCGCGTATTTATCCTCAAGCTCCG  
CATAATCACTATGACGCACCATGTCAGTACAGAATGATTCTCCTGTTATTGGTGGTGATA  
ACTGGTCACTGACAATCGTGTATATTTTCACTTCTTTTCACTTCTTCCACTCCGCAACAT  
TGCATTCAAATATTAGTTTTTCAATTAACAGAACCGAAACTATTTTCGCTTAAGCACTTCTTC  
GCGTGGAATATCGTTGATGGGTTTGAAGCGGTGTCGAACAATCATTTCCGATGGAAGGAT  
GCCGGGGTCGTAGGAAAACCTCTCATGATGAATTCCTCAGTTATTGCTGATAGCGCCTT  
AACGCGAACGGTAATTTTAAAGGCGCGGGTCTATTTCAATGAATTGGGTGTATGTGGCTT  
TGCGGAATGGCCGGATGGATGTCTGGTAAATTCGCTCGCGTTCTTCTTTCTCTGCAAGCC  
ATATACAGTGGCGAAATTCCTTTTCTCTTTTCGTTTCTCTGCGGTAGCGACATTATCAGGT  
CGTAGTTCTTTCTGAATTTTTCCAGCATCTCCGATACGGAATTGCCGGGACAGCGGCGCG  
TGTCATCCGCACCATATAGAGGCGCTGGCATAATTTACTCCAGGGTAGGTTATCCGAATA  
ATGTGGTACGTATAGGGTTATTTTCGTTGGTAAACGTGATAGCCTGCTTTTTACCGACTCT  
TCTCTTCGCCCCGAGAATTTTTGCTACATTTCTTTGCGTATAGCCTGATGAGATAATCGCC  
TGCATCTTTTTGTCTTCGTCGTCGCTCCATCTTGGCTTAACGAATGCCGTTTTTAATGAC  
AGTTTTTTTGCTATGTAATAAACTGATTTATGTTTAGGCCAGATTTTCTGCTGCACGG  
CAAGCTACCATGCGACCACAACTGACTCCATCTCAGCTGGAGTTATGTTTAATCTTCTC  
ATTAAGCCACCTGTTTAAGCTCATTTATTCTGATATTCATTACCTGAACGCATCTTGTCT  
GCGCATCATCGTGACCAGCCAATAATTGCCAGTCATGCTGGTATCTCTCAATTAGTTTTT  
TCTTGTCCGTTTCTGTTGCTGCATAATCACTGAAGTCTTTCAGGATTTGTTTCGCAGTCAA  
CCGATGGAGATTTCTGGTTGGTATTTTCTGGTGTGGTTGATTGCATGATGCTGGCATGG  
CTCAGTCTGGCAGCGATGGGGGGAGCCAGTAAAATCGTGATCCATCCTTCAGTTTGGCCC  
TGTGCCATCCTTGTTCCTTATCACTGGATATCTGCGCAAACCTTCTCAAGGTTATACA  
GATACCGACCAATCCCATTTGAACGGCAGCACGCTTCATTGCGCCGGAGCGACCACCTT  
TGACGGCTTCTACCTGTGTGTTTTTTCAGCAGCATCCCATTTAGTTACCCATTCCGAATCAA  
TCTTGATTGATATGCCGCATTCAACGCCACCGTTGTTGGGAATATCGCGGTATTCATTGC  
GCCATCCCTCTTTGCCGCAAACATCGTCCAGGCGCTTCATGATTGCCCTGTCCGTGACAT

AAGCCAGCACCATAGCCACACTTTGCCATCGCGTGTTTTACCGCTCTGCTGTATTCGCC  
ATTTCGATATCTGCAGGAATGAATGGGGCGTGAATTTATTCAAATCTATGATTCACCTCA  
GAATGGTAATTCGGAAGGATTAGCCAGAATTTACCTATGTTTATTCTCTCGTTTTTGGC  
TAATGAAAGGCAATTTTCGTTTCATCGATTTATTACCTGACTTGCGCCAGTACATTGCTTC  
TGTCAGGTGATACTGACGTTTTATCTTGCTCAACTCCGGTGTCTTGCTAAAGCTACTGG  
TATCATTTCAACCTCCATTCGCGAAAGGCTTCTAAAGCTTCGCGATACATTATTTTGTCA  
CCAAGATAAACAGCAATTGCGAATTTAGACTGAATAGCCATAAGTGATTTATCCATTACT  
CGGCACTCCTGGTTGATTACAGGATATCGACCAGACGTTTCCATCCGGCCCCTAATTTTCT  
GGAGATACGCTCTAAAAGTGATTCATTAAGGTGTGCGATACCCATGACGGCACCGCCC  
GATAGCAAATGTTATCGTGGGATTCCCATATGATTTATTGGCATAAGCTAAAACGCCTC  
GATATGAAGCGCTGTGGATATGCGATAAAAACGGCCGCACTCAGGCGGCGGCTGTTGTGTC  
TTCTTTTCAGGCTTTTCGATATATTACGCGGGTTCGTCGTAACACTGGCATTTCGCTATACCA  
ATCCACCCAGCGATCCGTAAGCTCCATTTCTTCCAAATCCTGGTCAGTAAGGCTCTCATC  
CCACATATCAAGGCCGTTAGCGTTGCAGTAGTCAGGTTTGATGTTGTTGTCATACTGAAA  
TGCCTCATAATCAGCCAGTGCATCCATCACTGGCACACCCTCTTCAACACTTGCTACTTC  
TACAATGAATGGCTTCATAGGAGCTTGCAGAATATGCCAGACACGTAATTTTCATATTTCC  
TCCAGGTAAAAATAATGCCGCCATATAGAGCGGCAAATAACATCAATGGATGATTTTTTC  
GATTAACCAGAACGAGTCGTCGCTCCTCGCTTGGTTACGAGCGATATTGCTCACATAGCAG  
ACTCCTAAATCTGCTATAGGTGCTTATTCGCTGCCAAAATACGCTTACCCAGTTACTTC  
ATCTGCATATTTCTTACTTGTAAACCAATCCGGGCGTTACCTTTACCAATATAGAAATC  
GATAATGTCCAGAAGACGTGGATAAAAATTAAGAGCTTTACGACCATCCATCTCAGCAAT  
GTCCTGCTTACTATATTTTCTCCATTCCTCAAATGTGTGGTTCTGGCATCCTGCTCGTAC  
ATATTCACCGTTCGTTATACTTATGAAGTAATTCTCACCCAGAATTACGAAAGTGAGATC  
AGGCAGGTCGGCATCGCACAGGTTCGGCACCCGCGCAGGTCGGCACCCGCGCAGGTCGGCACC  
GCGCAGGTTGGTACCGCACAGCTCGGCACCCGCGCAGGTTGGTACCGCACAGGTCGGCACC  
GCGCAGGTCGGCACCCGCGCAGGTCGGCACCCGCGCAGGTCGGCACCCGCGCAGGTCGGCACC  
GCGCATGTCGGCACCCGCGCAGGTTGGTACCGCACAGGTCGGCTCTAGATCAGCTCTCAGC  
CATTGAGGTAATCCACACCTTGTGTTCTTAAAGGATCTTCGATACATCTGCTGAATTCAT  
GTTGTTATTCCTTAAATTTTGGCAATAAAAAAGGCCGCAATTGCGAACTGATTAGATATTT  
GAAGTGAGATAAAAGAAGACCAACTATGTAGCCTTTAGTTTTTCCAGCTCTCTGGCAATC  
ATTGCGGTGGTCTGATTGCACATTTATCGACAATCTTTCCATCTTCTCTCACCAGAGCC  
ATTTCTCAGGCTTACCATGCATTCAGCAACAAGCTTGCAGCCTTTGCATTTACAAAAG  
CGACTACACCATTGGTTGGTATCAATAGTCGTAGTCATATTGGTACTCCTGGTATTCTTC  
CATCACATCCTGAGGATGCTCTTCGAACTCTTCAAATTCGTCTTCCATATCTCATCTCAA  
TCGTAAGAAGCCGGAATTGATTTTCCGCGCTGCTTCTGTACGGCGTGTATTTTATTTCCC  
AGCGGGTTAACGTCCCAGTAGTAAATGCGGTTCTTCTTAAACCGCTGTTACTTCAACTTTC  
TTCTGACGCGTTCCGGCAAGCGAAATGGCTTTGGTAACGCGGTCAATTTCTTTTGTCTTTG  
ACCTCATGAGAAGCATCAGGAACATCTCAGCCAAAATGAATCGATGATATTGCAGATG  
GTGTCTCGCTCTATGGCTAGCGAGCTGCGCCGCTCATGACGGCGAGTTTTAGCATTGCCT  
GCAAACGTTGACTTCCCGTAGGTTGATAACCGTCATGATTTAGCCCTAAAGAGATTTTATT  
GATTGTAGTTAAAAGAAAGACGACGTACCAGGAGTGGTGCCCGGTAATAATGGTTTATCTA  
AAAACGAATATTTGTGAAACCAAACACGACCTCGCTCGTCTCCATTTCTGTTGCCTTCAG  
GGCGACGCTTTAAGGTGAAATGAATAATTGTTTTTGTAGTGTTTTTTGGCTTACTCATCT  
GTTTACCCTCATGTGAAATGGCTTTGGTGTACAGATAGCCAGGCGTCTAACCCCTGACAG  
CGTACTCATTGCCGAGCGCCTCCGCCGAAGAGGTTGGCTTCTACCTGCAACCCAAACCCA  
TCTCGTTTGGTATTTGTTTCGCGCTTTGTCAGCGCATCATCGAAGTTAAAGAGCGTTGCCT  
TTCCGTTTGGTACCAGCGTCTGCTGATGGCTAAACAATACATAATGAACTTAATATCG  
TCAATACAACTGTACTTAAAATTGATAAATAAATACTATGTGTATGAACTGAATGGAA  
AAAATATTTTGGTATTAATAAACCCGCATAGGCGGGCTAGGGGAGGGAATTGTTAGAGGC  
CTTGCTTTTTTGGTTCAATGACAACCCGATAATGCGGCAATTTCCGTTTATGGGGATCA  
TGTGATAGCTGGGGTTTAAACGGTTTAAAGATATTTCTGTCCAGCGTCAACAATATATTTCT  
TGAAGGTTGCCTCATTTTCAGACTCAAGCTTTGCCACCACGAGTCTTCCATTAGTCGGTT  
CGATAGCGGGATCAACAAGAATTTGCATTCCTTCCGGTATGCTTAATCCGGTAGGAGATG  
TCATAGAGTCGCCACGAACGGTTAGCCAGAATGACCTTTCGCTTGCATGTGCAGTTGTCG  
CAGCCCACACCTCTATGTCTCGGAGTTGATAAGGTTCAACAGCCTCACGCCAGTTACCTA  
CGCTCACCCAGCTAAGAAGGGGAAATCTTCTTATTTCTGTGTGTGGACGAGGTTTAAA  
CATTGCTCAGGCTGGAGTTTGGATAATCAACCATCCCATCAGAGCTTAATACAAGCTCCT

TCAATCCTAGCTGTTTCATGATCGCTGCAATATCTTCAATACTTGGTTTCGCGGGCGGCCAT  
TAAGCCAAAGACCTATCGCCCCCTGACTCTTACCGAGGGCTTCAGCAAGTTTATCCTGGG  
TTAGGCCTATTTGTTTCATTCTGGCTTTCGCCAGCTCATTCCACGGTGTTCATGCGCA  
GATTATTACGAGATGTATTGACTGTGACAACATACATATTGTATTAATTACCTTGCTTTT  
ATTTAGTACGAAATGTATTATTGAGTTACGTACCGTCATTACGAGATATAACCGATGAGCA  
ATCTTCGGAACATCCGGGAAACCATGAAGGTATCCCAGGCGTTCCTGGCCGAAAAGATTG  
GGTGTACTCAGGGAGCGATTGGTCATTACGAATCAGGGCGACGCCATCCGGTATTCGGAA  
TGTGCCCGCAGCTCGTAGAGGCGCTCGACAGTTTTGGCGCGAATGTTTCAGCTAGACGATG  
TGTTCCACCTGAACTTAATGCTGCCTAAGTAGTACTGCTCTTTACCAATCTGAACCGCC  
GACAACGCGGTAAATCTATCCAACGGATTGCGTGTATTTGCGAATCCAACCTCTATCTAA  
TTTCTAAGGAATATTTTGAATGAACGTAGTTGCAACTAAAAGCTAGAAGGCGGCTCGCAT  
TGAGTCCACTTTACTCAACAAGTTAGCCATGATGGGCCAGAAGACATTCGCTAAAGCTAT  
GGGTGTTCTGAAATACCAGGTAAGCCGATAGAAGAACGGTTTCTTCTCTCAGGTCAGCAT  
GTTGCTTGCGGTTCTGGAGTATGGAATCGAAGACGAGGAAATGGCAGAGCTCACCGGGC  
ACTTGCTACCTACCTGACAAAAGAAAAAGCCCCGAAGAACGGCGAATTCTTCGAGGCCTG  
ATGTAGAAAGACTGGATCAATCCACAGGAGTAATTATGCCAAAACAACCTCAGTCCTGACC  
AGGACAAATTACACAAAACATACTACGTGATCGGTTCTATCCAGCTTCAAACAGCCTG  
GTCGATTTTCGGGCTGAGTTGGAGAAAGTGAAGCTAATACTGAAGAGGAAAGGTCATGAGT  
AACATATCCAATCTAGCCGAAGCCAGAGAGGCCAGAAGGATCCAGAAGCCGCGTACAAAT  
GGCGGCAAGAGGTTTGCCTTGATTCACCGCCAATTCATGGATAGCAAGCTTTACAAGGAT  
TCTCAGGCTGTACATCCTTTCCGGCATCTGATACTGAAAGCCAATCACTCTCCGGCAGTC  
GTAACCTACCGACATTGATGAGATGTTGGTTGAGCGAGGATAGCTAATCACCTGACGGCCA  
AAACTGGTAAGTGAAACATTCATCCCGGATAACAAAGTGAAAAGTTTGCTTCGTTCTTTT  
GAATGTAATGGAATGATTTGTATCGAGTCGAAAGGGAGAAAATTCAGCCTGAGAACAGTG  
TTGAAATATGATGATTTTTCAGGCTCCAAATTGTCCAACGGATGTCCAACGGATGTCCAAC  
GCAAACACCGGTAATGACGCGGCTCACAGCAAATGTTGTCCAACGGATGTCCAACGATTG  
TCCATAAACAATAGTATAAATAATATCTCTAATACTAACGTATTAGAGACTACTGCAGCA  
GACGAAAATCCTGACAAGAAAAATCCGCTCCCAGTTGTCTGGATGTTGTGCGATGCTTTC  
CACGAATTACTTCTCAAGCTTCCAGGGTTCGCGCACTGAATGACAAACGTAAAAACCAG  
ATCCGAGCTTCTGGCGAAAAGCCGAAGTGATAACACGCCAACTCGACGGGCATGGGTTT  
ACGATGCAGGACTGGAGAAATTATCTGAGCAACGTAGGCGAAAATTGCCGATGGATGTTT  
GAAGAGCGCCAAAACCATCAACGCGGAGCCGTCTGGCACAAAAGGGATTTGATTTCTCTG  
CTTAACGATAATACCTACCTGAAAGTTCGTGAGGGTGAAGACGATGACCGATAATCTTTA  
CGCGCCGCCACATAGCATCGAGGCGGAGCAGGCGGTGATTGGTGGATTGCTTCTGGATGA  
TGACAGCAGTGAGCGCGTGCAGAAAGTTCTGGCGATGCTGAAGCCTGATTCATTTTACAG  
CCGACCACACAAAATCCTTTTTCGAAGAAATAACCAGAATGCACTGGGAGCAAAGGCCAGT  
AGATGGCCTGACGCTTTTCGATGAACTGGAGCGTAAATCGTTAACGGTGTGAGTTGGCGG  
TTTTGCTTATATCGCTGATATCGCAAAGAACACGCCAAGCGCAGCAAACATCGTTGCCTA  
TGCAATGCAGGTTTCGCGAAACCGCAATGGAACGCTACGCCATCAACCGCATGTCTGAAGC  
GCCGGAATTGCTCTATTCCCGCAACGGAATGACTGCAACGCAGAAAGTACGAAGCTATGCA  
GGCGATCTTCACGCAACTGACAGACCACGCAAAAACCGGATCACGTCGCGGCCTTCGCTC  
ATTTGGTGAGGTCATGGAGGACTGGGTTGGTGACCTTGAAAAGCGATTGGCCCCGTCAGG  
CGAACAACGAGGAATGAGCACAGGGATCCCATCGTTGGACAGGATGCTGTACCTTAAGG  
TCTGGTAAAAATGCTCTCTGTTTCGTCATTGGCGCTCGCCCTAAGATGGGGAAAACCTACGCT  
ATCCAGCCAGATGGCAATCAACTGCGCAGTGCATGAGAAAAAACCTGCCCTGATGTTCTG  
CCGTGAAATGCCAGGCGACCAGATACTGGAAAAACTGGTAGGGCAAAGTCAGGTGTTAA  
CCCGAATATCTTTTACCTTCCGGAGACAAATGACGCTGATGACGGCTATCAGGGTGATTA  
CGATGGTGACTTCAACAGGGGCGATCGAAACAGCCAATCGCTTGAGTGAAATTGACATGCT  
TTACATCGACGACACTCCGGGATTATCTCTGGCTCAAATCGTCAGCGAAAGCCGTGCAAT  
CAAGCGAGAAAAAGGATGTATTGGCATGATTCTGGTTCGATTACCTGACACTAATGACCGC  
TGAAAAGGCCGATCGCAACGACCTTGCTACGGCATGATCACCAAAGGACTGAAGAACCT  
TGCCAAAGAGCTTGATTGCGTTGTTGTGCTTCTGATGCAGCTTAACCGCGCACTGGAAAA  
CCGAACCAATAAACGCCATTACCAAGTGACTCACGAGATACAGGGCAGATTGAACAGGA  
TTGCGATTATTGGGTTGGGATCCATCGTGAAGGTGCTTTTGATGACAGTGTTCCACCTAG  
TGAAACCGAACTAATCCTTTCGTGTCAATCGTCATTGCAATACCGGCACGGTGTATTGCAT  
TCCGGCAAATGGCGCTATTTATGACACAGACCGACAGTCTGCTGAAATGCGCCGCCGTGA  
ACGCGAGGAACCGCAGTCCAAGAAGAAAGGAGGGTTCTGATGACCATCTACATCACTGAG

CTAATAACAGGCCTGCTGGTAAACGCAGGTCTTTTTATTTGGGGGAGAGGGTAAATGAAG  
GATTTATTAGTAACGCTTAATGTCGGTTTAAGCCTTCTTGGTTACGCCTACATTATGTTC  
AAAACAGGCCAGTGGATTATTACAAATGCACTTAAGCAGTGGGATAAGCGTAGAAAAGTG  
TCAGCCAAGCAGAAGGCGGGTGTATGCGCTGTATGAAGCATACTGGAATAAGGTAAGC  
GAAGGAGAGACTGTAAAAGTGGCGACAAAAGAAGGTCTGGTAATCATGATTTGCAGACAT  
GAAAAGACTAACCCCCCAGCACACTGATGGAGAGGAATGATGAGTACATTGGCTCAATTC  
ATTAATGCCGACCTTGATGAGTCAGGAGCACGGCATTATCGCTATTGGAAAGCTTCGGGA  
CTTCCGACTAGAGAGCAATAACAAGCGTAGGCCAAAACCAAAGAGCAGCCAGCGAGACAGG  
GTACTIONAAGCGCTAATGCAGATAAACATGGCGCAGTTTACTGATTTACCTGGTTCAAG  
CGGTGATGGAGAGGAATATGGACGAATCAAGAAAGGCTTTCGAGCAATGGTTCCAGAGCA  
AATACAAATGCACTATGGAAACGATGAAGATTATGCAAATCAAAGTCGAACTTGCTTGGG  
AGGCATGGCAGGCCAGCCGTGAAGCTATCGAGATAAAGCTCGATGACAAAGTAATGGTTG  
AGGATGAGTTCGACAAAGGCCACGACTGCGCAATCGACTATTGCGCTGATGTCATCCGCG  
CCGCCGAATCAAAGTGAAGGAGTGAGTATGATCAAAGTATCAAGAGGAATGAAAATATA  
GCTTATTTTCATCCCTAATCCGCATCGTATCTTTTTGGCTTCAGCAGTATGCCTGTCAGA  
TTTTGTTTATTGGTTAGCAGATAAATTGGATGATTTTTCGAGATGGCTTGAGAGTTTTGC  
GAATGCGAGGTTTTGGTTATGGCCGCTTATCGCAGAGAGGATGTCTGACGAATTAACCG  
GTATTACGCGGATAAGCGCAAGGAGGAGAGCAGGAGGGCAAGTGAAGCAATTATTCCTGC  
TTCGCAACGAAGCAATCAGAAATAACGCCATAGACGCGATTCTCTCACTACTCATCGACG  
ATAAGTCACCCACGAAGTCCACGTTAAAGCACCCAAGCGAACCAAAGCACAGAACGACC  
GTATGTGGCCGATGCTTCATGATGTCTCCCGTCAGGTGCTTTGGCATGGTCAACGACTGT  
CTCCGGAAGACTGGAAAACATCTTCACTGCGCTGTGGCTCAAGACTAAAAGCTGGAGC  
AAAGAAGCGTACCAAGTATTGATGGCGGTGTTGTTCTTCTTGGGGTACGTACCAGCAAGA  
TGAGGAAGGCGAGCATGACAGAACTTATCGAAATCATGTTCTGGTTCGGATCAGAACGTA  
ACGTGCGATGGAGTGATGATTCCCGGAGAGAGTGCGAATGGTCACAATAACAGGGAGAG  
TTGCATGAAACGATGTTACCGATGTGGAGAAAGCAAAGACGATTATCGATTCCGGCCAAA  
TCAACCTTATTGGCAACAATGGTGTATCAGATGTGATCGGTTCGCCAGTAGGTATTTTCCC  
GCTGCCAGAGACGAAGGAGGACGTATGGCACGACAGCGACGAAGTATCACCGACATAATC  
TGCGAAAACCTGCAAATACCTACGAACGAAACGCTCCAGAAATAAACCCAAGCCGATCCCC  
AAAGAATCTGACGTAAAACCTTCAATTACACGGCTCACCTGTGGGATATCCGGTGGCTT  
ATAGAACGTGCGAGGAAATGACAAGGGAGTATTCACAGTTAAGTGATTTTGAATTAACC  
GAATGGTAGGAGACATAATTTTTAAAGGCCTTTGGGCATGTAAGCCGAAACGTCAGGGA  
ATAACACCAACAAATGGTATTACGGAAACGCTGATACAACCTTTGAGCCATTAAACCATT  
TACCTGACTACTGCAATGATCCGAGTGCCTCATGGCCGATTATTTAGAAACACAGGATTT  
CTATATTAGACCAGTGAACCTGAATGGTGTGTTGATGCAAAACGCGTAAGCCCAATATTTG  
ATACCAGACGTCTCCGCGCCGACGATTGTCTTTCTCATGATGCAGGACGCCAATAATG  
CTTAGCCCATCCCAATCCCTTCAATACCAGAAAGAAAGCGTTGAGCGGGCTTTAACGTGC  
GCTAACTGCGGTCAGAAGCTGCATGTGCTGGAAGTTCACGTGTGCTCCGATTGCTGCGCA  
GAGTTAATGGCAGACCCTAACGGACAAATGCTGGAGGAAGATGATGAGTGAGTTACGCGC  
AGGTGGCATAAGTAATAGTCATTTTCTCAGAAAACAAACCCGAAATTGGCAGATGCGTTGA  
GTTAATCGAAAAAGTAACAAACGGATATGTATTTAATTTTCTGGTGCAGGTACGCATGG  
GTGGCGTGATGATGCCCTGTGTGGTTAGTTAAAGGTGATGTGTGCGATTTATACAAACAA  
GCCTTCAGGTGGTTTCTCTTATTTTTACAGTGTGAACTCATGCCAATCGACGGAGAAGA  
CTTCTCTCACGAAGATGAACAACAGAAGGAGCTGGCAAATGGCTAATCTACACAAAGAAG  
CGCGCGGCCGAGAATGCCAGGTACGTATTTATCGCGTATGTAATGGCAATCCTGAAATTA  
CAGTTATAGCACGTTACCGGATGGCTGGAATTTGCGGAACGAGGATGAAGCCTGACGACC  
TGATAGGTGCATGGGCTTGTAGCGCGTGAACGATGAAATCGATCGACGAACCCATATTC  
TCGACAACAAAGACGCCAGACTTTACCACCCCGAAGGCGTGATCAGGACGCAGGCGATAC  
TGCTTAAGGGGGGGAAGATTAAGGCATTAACAAACAGACCGAATAAAATTTGCCGTGGCCTCC  
TTCAAACAACCGATATGGACGACACTCAAGAGGGGTCCACTACATCAGCGATTGGGGAAA  
GCGATACCGGCGAGAAGTAATCGAAATAGTTCAGCAACAACAGCTAGACCTTAAATCAC  
ACCCCGCATCAGAATCACCATTCTCGCAAGACCTCCCGATAACCGCAAACGCGACCTGGA  
CAATCTACCAAAGCCGTTTTTGACGCACTCACTAGTGCGGGCTTCTGGCTGGATGACGG  
CCAGATAGACGATATGCGCATCAAGCGCTGTCAGGCGATTAAAGGCGGAATGCTTGTGCT  
GGTAGTGACTGAGACGTGCGGGAATTTGCCAATAATTACGGAACACTGGAGGCCCGCATG  
ACACACACTGTCAAACCATTCAGATATGCCCATAGAGACATACGGATACCAGACAGAA  
GTAGCCAGGCGATTGTTGTGCCATCGAAACACAGTCAGGCGCTATCTGTACGACAAAGAA

GCTAGGTATCACGCCATCGTTAACGACATTTTAATGATTTCATCAGGGCGGGAGAGGTATT  
TATGACCGTAACCAGCATTAAACCAGGCGAAACAGCAGCGTGAGCGTGACGAAGCCGAATT  
GCGCAGCGTCGGTGAGATGACGGAGCAACGCCAGAAGGCAATGAATTATCAGCATGAGCG  
AGAGCGCGAACTGGTGAACCGGCTTGGATTGAACAAGCCAGCGCTAGGCGATGCTGGATG  
AGTATACGAGAATTGAACCTCACTAAAGAGCAGCATGACTGGCTTAATGAGTGGCTTGAG  
CTATGGGGGGCATGGGTTTATTTCGGGTCGTCTGAAAAGCGCATGAGCAGCGTAATAGCG  
AAGTTCATGGAGAGCGTAGAGCCGGGAAGAGTTATGACAAGACCAATGTGCAATGGTGAT  
GATGGAATGTTGATTTCTCAGGTCGTGATTCCGTCATGTACATTGACAAGAAAGCCTTT  
GGCATCCTCCTCAGCTACTACGCTGATGGTTCATCCAAGCGAGCAATTGCATCCTACTGT  
CACGCGACTGCAAAGCCACGCAAGGTGTGTGGACGGGGTGGCGATGGATTGAGAAAACCT  
TCACAGGCAACCTGTAGAAATGAAATTGACGAAGTCCTGAATGCGTCATTATTTGTTTTA  
TACCAGCAAGTGCAAAATGCTTTCAAATGCGTAAACGTGTAGAGAAAGTTGAGCATGTT  
GCTGTTAAAAGTCTTGACATGCAATTATCCATTTAGCCATAATTAGAGGGTAAGCTGCCG  
TTAGTGACTCTTAAGTTGTAACGGCGGCTTTTTTATTTGGGTTCAGTCGTATAAAGGTCAT  
TACGGAAGGCTGTTAACCTTCTTATCGTGGTTCGAGTCCACGCTGTTCGCGCCAAACATGC  
TGGTTCAGCTCAATGGTTGGAGCGCCTTCTAAGAAGGGAGTTCGGTTCAGTTCGGTCA  
ATCAGCACCAACCAATCCCCTGCCAGGGATTGCAGGCCGTAGAGTATACGTGCCTTACC  
CTCTTATCTTCTTTCCACCTAGCCGTGGGCTTTTCATTCAGGCCGCCGACAATCACCCCT  
CATAAGCGACGTAGCTATCATGTTCGGACGGCCTTTCCCCACTACAAATACAGCAACCCGT  
TTCTTCGGAGGTGGTATGCCAAAACGTATGAATGACGACCATAAAATTGTAGGCCTGTCC  
TGGCTAATTCTGCTTGGAATTGCCTGCTGGGGCGGCTTAGTTCGCTACCTGATTGACGTA  
ACGCAGAATAAAGCAACCTGGAGTTGGATAAACGCTTTCGCACAGATCGCGGTATCTGGC  
TTTACCGGCCTGATTGGCGGGTTGATAAGCGTTGAGGGTGGGCTTAGTTTTACATGATC  
CTGGTAACGTCGGGAATTAGCGGGGCAATGGGTTCCGTTGCTCTAAGCTACTTCTGCGAG  
CGTCTTACAGGGATGAAAAATGCAAACCAATAAGTTTAAATTTTCTCAGCGTAGCGAGAA  
GAACCTGAACGGAGTTAATCCTGACCTGGTCAAAGTGATCCGCCGAGCACTGGAAATTAC  
ACAGTAGACTTCATCGTTATCGAAGGGGTGAGAACACAAGCCAGGCAGAAAGATATGGT  
TGCAACTGGGAAGTCACAGACGATGAACAGCCGCCACCTGAGTGGTAATGCTGTTCGACAT  
CATCCCGTTAACACTACCTGGAAGATTGAAGAGTTCAAGCCGTTGCTCAAGGCGGTTAA  
ACAGGCAGCTGATGAACAGGGCATGAATCTACGATTTCGGCATTAACTGGAAGCATGATCC  
GTCACTGCTCATTGAAACCAAATTCATCGATGCCCCCCACGTTGAGATACCCGCATGAAA  
ATCAGCCTGAAGTCGCTGATTGTGCCTGTTGTAATGCTGTTGCTAACGGCAACGGCATA  
ATCTATTACGGCAATTATCAGGATGAATTGGCGCGAGCGGAACCAGCCGAAAGCAACCTG  
GTGCTGGCCAATCTAACAAATAGGTGACATGCAGAAGCGTCAACGTGACGTAGCGAAGCAC  
GATGCCAGAAACACAAGGAGCTTGCTGATGCTAACGCGACTATCGAAAGTCTTCGTGCT  
GATGTTTCTGCTGGTCGTAAGCGCCTGCAAGTCGCCGCCACCTGTGCAACGTCAACGACC  
GGAGCCGGCGGCATGGTTCGATGAAGAAAGCCCAAGACTTACAGCAAATGCTGTTCTCAAT  
TATTACCGTCTCCGAAGCGGAATCGACAGGATAACCGCGCAGGTTAACTACCTGCAGGAG  
TATGTCAGGACTCAGTGCATGAAATGATTTGTCAACCAAGCGGTAGCAAAGCGAAGTA  
GCCATTACAAAGCCCATCTACGGGTGGGCTTGATAATGAAACCGGAGTTAATTTCTGGTC  
ACCAATTAACGGCAGTACCTCGTAGCAACCCAGCCCAGTAAGTGCGGAAATAAACTGGC  
AGCCACTGAAAGATGAACCTCCTGCCTTATGGCAAAAAAGATTCTTTGTGGTGTCCGGACT  
GATGGAAAGACATCGGTTATTGCAGGGGCTATTAATGAGTGGTCTCGACAATGGCTTAT  
CCCAACAACCGGAGCCAACACAATCGCAGAGATTACAGCATTGACAGAATTACAGCAGAT  
GAACCTCGATATCCTCCGTTTAGTTCAAAGCGATACCGCAGCAGCAGAGAAAGCGATCGC  
ATTCGTTGCTGGAAGTAAGCTGAGCTTCGAAGTGTTCAAAGACCAACTGGTTTTGGCGCA  
GGGTGTAGGAACTGCATTAGCTCGCGCAGAAAAGTCTATTCGTGAGGCAAAGAAGCGTT  
AGACCTGTTCACTGCCGGAGCATAACGAATGGCAAAGACGAAGTGGCTTAAACTTCCCCG  
GTTCTTCGTGCCATTGTTCCATAGCGCCTATGTCTACCTGTGTGCTTCAAAGGAAGAGTG  
GGATCAGGCTTGCATTCATCTTGGAGTTGGTAGCGGGCGGTAATGAGATGCTGGCGGGGGC  
AACACAGTCATATTGCAATACCGAAACAGGGCGAGAACCTTTACCTGCTTGGTGTATTCAA  
TGGTGAGGCGGCCACATTGGTTCATGAATGCGCTCACGTTGCATTTTATGTCTGCCGAGA  
TGTTGGTGTAGCCACTTATCCTGGCGACGCAAACGAAACCTACTGCTACATGCTTGACAG  
AATGTTCACTTCCGGCCGTTCTTTCATGAACCATAAAAAGAAGGATCCAAGTAATG  
GCAAACCCAAACTTCACGCCAGCATGGCCTCTATACAAAGATGCTGACGGTGTATATGTG  
TCTGCGCTTCCGATTAAGGTATCAAATACGCTAATGACGGAAGTGCAAACGCAGAAATTC  
GACGGCCCGTAGGCAGACCAGTACATGTCAGCGCAAACAGTAGCCGTATTCAAGCCGGAG

GTTGGCGGATATCTGTTCCGGAGCCAGTACGGCGAGCTGCTCTATATGAGCAAGACAGCA  
TTGGAAGCTAACTACACTTCTGCAAGCGGTTTCAGTAGCTAATGGAGAGACGGCGGATAAG  
TTATCTACTGCCCCGACTATCACACTAACCGGAGCGGTACAGGTTTCAGCGTCCTTTGAT  
GGTTCGGCTAACATGACTATCGAAACAACGTCAGGAAGTTAACTTATGGCAGCACCAAAG  
GGCAACCGATTCCGGGGAGGCCCGCAGTAGCCATGGGCGTAACCCGAAATTCGAGTCGCT  
GAGGCGCTGTGGGCTGCTTGTTCGAATACTTCGAGTGGGTGGAGGCTAACCCACGATGG  
GAGATGAAGGCTTTCTCATATCAAGGAGAAGTTACACAACAGCCTATTGCCAAGATGAGG  
GCGATGACCATCACTGGGCTAACGCTATTCCTCGATGTGACGCTTGAGAGATGGCGACAA  
TACAGGGTGAGAGAAGACTTATCTGAGGTCGTTACGCGAGCGGAGCAAATCATCTACGAC  
CAGAAATTCTGCGGGCGCAGCCGCTGATCTTCTCAACGCTAACATCATCGGCCGCGATTG  
GGCCTCAAAGAGCAGTCGCAATTTGAAGACGTGACACCTGATAAGGGAGATCGCGATAAC  
CGCCGCTCTCGTATCAAGGAGCTACTCAACCGTGGAACCTGGACGCGATTCTTCATAACCT  
GAGCGACGAATAGCTAATCGAATTGCTCGAGCTACTCGAAGAAGAAGAGAAGACTACCGAAA  
TACACACTTGCTATATGAGTTTACGCCATACAGCAAACAGCGTGAGTTCATCGACGCAGG  
TCATGATTATCCAGAGCGATGTTTTATGGCTGGTAACCAGCTTGGTCAGTCATTTACTGG  
CGCTGCTGAAGTCGCGTTCCACCTTACCGGGCGATAACCGGGAACGAAAGGTTATCCGGC  
TGATGGTAAATATGGCGGAGAGTGGAAGGTAAGCGTTTCTATGAGCCAGTTGTCTTCTG  
GGTTGGCGGTGAAACAAACGAGACTGTGACCAAACGACTCAATGCATCCTGTGAGGGCG  
TATCGAAGAGAATTATGGACCTGGCTATGGGTAAATCCCGAAAGAGGACATCATTAGCTG  
GAAGAAGTCTCCGTTTCATCCCTAATCTTGTGATCGCCTTCTTGTTAAGCACCCACACGCC  
AGAAGGCGTCGAAGATGGCATCTCAATATGCTACTTTAAGCCTTACTCACAGGGCCGCGC  
CTGCTGGCAGGGCGACACAATTCACGGCGTCTGGTTTGACGAAGAGCCGCCATATAGCAT  
CTATGGCGAAGGTCTTACCCGTACAAACAAATACGGGCAATTCTCAATTCTGACCTTTAC  
CCCGCTGATGGAGATGTCTGACGTTGTTACGAAGTCCCTGAACAATCCAGTAAGTCGCA  
GAAAGTGGTCAACACGACCATCTATGATGCTGAGCACTACACCGACGAGCAGAAAGAGCA  
AATCATAGCATCCTATCCTGAGCATGAGAGAGAAGCACGTGCTCGTGGTAGTCCTACGAT  
GGGTAGCGGTTCGAATATTCCAGATACCGGAGGAGACGATTAAGTGCCAGCCGTTTGAGTG  
TCCCGATCACTTCTATGTTATCGACGCTCAGGACTTCGGATGGAACCACCCGCAAGCTCA  
CATTAGCTTTGGTGGGACAAAGACGCAGATGTTTTCTATCTGGCGCGTGTGTGGAAGAA  
ATCAGAGAACACCCGAGTTCAGGCATGGGGTGCTGTTAAGTCGTGGGCTAACAAAATACC  
TGTCGCGTGGGCTCATGACGGTCACCAACACGAAAAGGGCGGTGGTGAGCAACTAAAAAC  
CCAATATGCGGACGCCGGGTTCTCCATGCTTCCCGAACACGCAATGTTCCCGCATGGCGG  
TAACTCAGTAGAGTCCGGCATTGGTGAACCTTCGTGACCTGGTGCTTGAAGGAAGATTCAA  
AGTATTCAACACATGCGAACCATTTTTTTGAAGAGTTCGCTCTATATCATCGCGACGAGAA  
CGGCAAGATTGTCAAGACCAACGATGATGTGCTCGATGCTACTCGCTACTGCTACATGAT  
GCGCCGCTTCGCCAGGATGATGCGCGATATCAGAAAGCCGCAAGAAAAGAAAATCCCCGC  
ACCGATTCGACCAGTACGCAGACGACGATAATGGCCGACAATGAAAACAGGCTGGAGAGC  
ATCCTGTACGCTTTGATGCGGACTGGACAGCCAGCGATGAAGCCAGACGCGAGGCCAAAG  
AACGACCTTTTCTTTAGTCGGATCAGCCAATGGGATGACTGGCTATCACAATACACAACC  
CTGCAGAATCGCGGGCAGTTCGATGTTGTACGACCAGTGGTGCGCAAACCTCGTTTCTGAG  
ATGCGTCAGAACCATATTGATGTTCTGTATCGCCCAAAGGATGGAGCAAGTCCTGACGCC  
GCTGATGTGCTTATGGGTATGTATCGTACAGACATGCGGCACAACACGGCAAAAATCGCG  
GTCAATGTGGCTTTTTGTGAGCAGATTGAATCTGGCGTAGGTGCGTGGGGTCTGGTCACT  
GACTCCGAAGATCAAAGTCCAACGGGCAACAATCAGGTTATCCGTCGAGAGCCTATCCAT  
AGTGCTGCTGCCATGTTATCTGGGACAGTAACAGCAAGCTGATGGACAAGTCCGACTCC  
CGTCACTGCACAGTTATCCACTGAATGAGCCAGATTGGTTGGGAGGATTCGCTGAAAAT  
TACGACCTCGATGCTGATGAGATTCCATCATTCCAGAACCCCAACGATTGGGTATTTCCA  
TGGCTGACGCAGGACACAATTCAGATCGCTGAGTTTTACGAAGTGGTCGAGGAGAAAGAG  
ACGGCGTTTATCTACCAAGACCCGTTACGGGTGAGCCGGTAAGCTACTTTAAGCGCGAA  
ATTAAGACGTCATCTACGACCTGGCTGATAGTGGATTTATCAAAAAGTGCAGAGCGCCAG  
TTTAAGCGTCGCCGGGTATACAAATCGATTATCACCTGCACCGCTGTACTCAAAGACAAG  
CAGCTCACTGCTGGCGAGCGTATCCCAATTGTTCCGGTATTCGGAGAGTGGGGCTTCGTT  
GAAGATAAAGAGGTGTATGAGGGCGTCGTCGCGCTGACAAAAGTCGGTCAGCGTCTACGC  
AACATGATTATGTCGTTCAACGCCGACATCGTGGCCCGCACCCCGAAGAAGAAGCCTTTC  
TTCTGGCCTGAGCAGATTGCAGGCTTTGAGCATATGGATGAAGGTAACGACGATTACCCG  
TATTACCTGCTCAATCGCACGGATGAGCACAATGGAGAAACGCCAACTCAGCCGCTGGCA  
TATTACGAAAACCCTGAGGTACCGCAAGCCAACGCCCTACATGCTGGAAGCAGCCACCGCA

GCAGTCAAAGAGGTAGCGACGCTCGTTCGTTGATGCAGAAGCAGTAAACGGTGGACAGGTA  
GCCTACGACACTGTTAACCAGCTAAACATGCGCGCTGACCTTGAAACATATGTGTTTCAG  
GATAATCTGGCTACCGCTATGCGCCGTGACGGTGAGATTTACCAGTCGATAGTTAATGAC  
ATGTACGATGTTCTCGAAACGTGACAATCGCCCTTGAGGATGGCAGTCAAAAAGAGGTT  
CAGCTAATGGGTGAGATTGTTGACCTTGCCACTGGTGAACGGCAGGTAGTAAACGATATC  
AGGGGGCGCTATGAATGCTACACGGATGTTTGAGCATCATTCCAGTCCATGAAGCAGCAA  
AACCGCGCAGAAATTCTTGAGTCGCTCGGCAAGACGCCACAGGGAACGCCAGAATATCAA  
CTGCTGCTGCTTCAGTACTTTACCCTGCTTGATGGTAAAGGTGTTGAGATGATGCGTGAC  
TATGCCAACAAGCAGCTTATACAGATGGGCGTTAAGAAGCCAGAAACGCCTGAAGAGCAG  
CAATGGGTAGTGGAGGCGCAACAAGCCAAACAAGGTCAACAAGACCCGGCAATGGTTCAG  
GCTCAGGGCGTACTCCTGCAGGGGTAGGCTGAACTGGCTAAAGCTCAAACCCGACGCTG  
TCCCTGCAAATCGATGCAGCTAAAGTCGAAGCGCAGAACCAGCTTAACGCGCCCAGAATC  
GCAGAAATCTTCAACAACATGGACCTCAGTAAACAATCTGAGTTTAGAGAGTTCCTTAAA  
ACCGTTGCTTCATTCCAGCAGGACCCGACGCGAAGACGCTCGCGCAAATGCTGAGTTACTC  
CTTAAAGGCAATGAAAAGACGCACAAGCAGCGAATGGACATTGCCAACATCCTGCAATCG  
CAGAGACAAAATCAACCTTCCGGCAGTGTAGCCGAGAGACCTCAATAAGAGAGAGTTAAT  
CATGGAACCAACCACCGAAATTCAGGCAACTGAAGACTTAACCCTGTCCGGCGATCATGC  
AGCGGCATCTGCTGATAGCTTAGTTGTCGATAATGCCAACGACAATGCAGGTCAGGAAGA  
GGGCTTTGAGATTGTCCGGAAGTACGATGAGAAAGCACCAAACAAGACCCGGCAAAGAA  
CGCAGAATTCTCCCGCCGCGCATCGAGCGCAAACGACAGCGCGAGCTTGAGCAGCAGAT  
GGAAGCAGTTAAACGCGGAGAATTGCCGGAGAGTTTACGAGTAAACCATGACCTTCCACC  
TCAGCCGGATATTAATGCCTATCTGTGAGAAGAAGCCTGGCCAAATTTGACTATGACAA  
CAGCCGTGCGCTTGCCGCTTCAATGCTGCTCATAGCGAATGGCTAATGAAAGCGCAGGA  
CGACCGCAGCAATGCCGTAACAGAACAGGGCCGCAAGACTCAGGAGTTTACCCAGAAATC  
AGCGCAATACGTCGAAGCTGCACGCAAACACTATGACGCGGGCGGAAAAGCTCAATATCCC  
TGACTATCAGGAGAAAGAAGACGCATTTATGCATCTGGTTCCGCTGCGGTTGGGGCCGA  
CATTATGCGCCTGTTTCGCGGAGAAGTCCGCGCGCTCATGTATCACCTGGGTGCAAACCC  
GGAGAAAGCCCGCCAGTTACTGACGATGGATGGGCACTCCGCGCTGATTGAACTCACTCG  
ACTATCCGAACGCTTAACTCTCAAGCCTCGCGGTAAACAAATCTCTTCCGCTCCCCCTGC  
TGACCAGCCGATTACCGGTGATGTCAGCGCAGCAAATAAAGATGCCATTCGTAAACAGAT  
GGATGCAGCTGCGAGCAAGGGAGATGTGGAAACCTACCGCAAGCTAAAGGCCAAAACCTAA  
AGCAATCCGATAATGGCTTTGAACGAAGGTCAAATTGTTACACTGGCGGTGGATGAGATT  
ATTGAAACCACCTCCGCAATCACTCCAATGGCGCAGAAAGCCAAGAAATACACACCCGCT  
GCTGCTTCCATGCAGCGCTCCAGCAATACCATCTGGATGCCTGTAGAGCAGGAGTCCCCC  
ACTCAGGAGGGTTGGGACTTAACTGATAAAGCGACAGGGTTACTGGAGCTTAAACGTCGCG  
GTAAACATGGGAGAGCTAGATAACGACTTCTTCCAGTTACGCGCCGATGATTTGCGTGAT  
GAGACAGCGTATCCTCACCGAATCGAGTCCGACCCGCAAACCTGGCTAACAACGTTGAG  
CTGAAAGTCCCAAACATGGCCGCGGAGATGGGGTCAATTGGTTATCACTTCGCCGGACGCT  
ATCGGCACTAACACCGCACACGCATGGAACCTTGTGGCCGATGCAGAAGAACTGATGTTT  
TCCCGCGAACTTAAACCGCGACATGGGGACATCGTACTTCTTCAACCCACAGGACTACAAA  
AAGGCGGGTTATTACCTGACTAAGCGCGATATCTTCGGGCGCATTCCTGTAGAAGCGTAC  
CGCGATGGCACTGTCCAGCGTCAGGTTGCTGGCTTCGATGATGTCCTGCGCTCTCCGAAA  
CTTCTGTGCTGACCAAATCTACTGCAACTGGCATCACTGTATCCGGTGCAGTCCTTC  
AAGCCTGTCGCATGGCTACTGGATAACGATGGCATCAAAGTTAACGTTGATAACCGTTTT  
ACTACCGTACCCCTGTCTGCAACTACCGGCTGAAACGAGGGCGACAAAATTTGTTTTACT  
GGCGTGAAGTTGCTTGGTCAGATGGCTAAGAACCTACTGGCGCAGGACGCGACTTTCTCC  
GTAGTTAGCGTTGTTGATGGTACTCACGTTGAAATAACGCCGAAACCTGTAGCACTGGAT  
GATGTTTCTCTTTCTCCTGAGCAACGCGCCTACGCCAACGTTAACACCTCACTGGCTGAT  
GCAATGGCGGTGAACATCCTGAACGTTAAGGATGCCCGTACTAACGTGTTCTGGGCTGAT  
TACGCCATCCGTATTGTGTCTCAGTCGATTCTGCTAACCACGAATTGTTTGCAGGTATG  
TAGACTACCGCATTACCATCCCGGATGTCGGCCTTAAACGGCATCTTCGCTACACAGGGT  
GATATTTCCACCCTGTCAGGCTGTGCCGTATTGCGCTGTGGTACGGCGTAAACGCGACA  
CGACCGGAAACAATCGGTGTTGGTCTGCCTGGTCAGACTGCGTAACTAACAGGGGCTTCG  
GCCCTTTCTTATTTGAGGTGACATATGGGCGTAATGCTATATAAGCAGGGGTCGTGGAAC  
GAAGGTATGGGGCAAGGAAGTTCAGGCTAAAGTTGTGACGACAGCGATGTAGAAGATCA  
CCTTGACGATGGTTGGGTTAAGCACCCAAATGAGGTGCCGGAGACTAATGACGAACCAAT  
CGGCGAGTCAGGAGTGCCAAGAAAGACATGGGTGAAGTATCTGATGGATAACCACACCTT

TAACGAACTATATGCACATCGAGTGCCTGTTTTCAACACTTATGAATGCCTTCCCAGA  
AAGCGCATGGTGGAGCTTCCAGCATCATGGCGGCCAGCAATGGGATGGATGGGTGTTAGC  
TGGCATCGACACCCCAAAGGCGCGGTAACATAACCACCTCCCAGAGAGTGAAATTGAACA  
TCTGCCTAAAAGCAGAGAAATTGAGTTTTGGCAAGGAATGGGACGGGCACACGGCAGATGA  
TGTGTTGAAGCGTCTGCTAAGCCTGCGACCGAAAGGACCGGCAACCAAAGAACGCAAAA  
GCCAGGACCAACGCCTGAGGCGGAAAGCGATGCAGATAAAAATAAGGCGATCTGGCCA  
GGGCGGCGCTGCGTAAGCTTGGTGTAGCATCAGATGCAACTCTCACTGATATCGAACCTC  
AGTCTATGCAGAATGCTGTTGACGACCTTGAAGCGATGATGGCTGAGTGGTATCAGGACG  
GAAAGGAATCATCACGGGATATATATTCTCAGATGATGATAATCCTCCCGCTGAAGGTG  
ATGATCACCGTCTTCGCTCAAGCGCAGTCAGCGCAGTATTCCACAATCTGGCCTGCAGAA  
TTGCTCCGGATTATGCGCTTGAAGGCTACCGCCAAAATTATCGCAACCGCTAAATATGGGA  
AGGAACTTCTCTATAAGCAGACCGCCATCGCCAGAGCTAAACGAGCGCCTTACCCGTCAC  
GTATGCCAACTGGCAGTGGAACAGATTTCGCCAATCTGAACGAATGGCATTATTTCCCC  
GAGAGCAGAATGCCGATTCAACAACCTCCCATGATGAAGGGAATCTGTAAGGACTTCAAG  
AATGCCGACTAAATTGATTACCTACCAATCAACATGTTGGCCACACCAAATAAGTCCTT  
GACTCATCGGGTTATTTACGCTCATTCCCGGGCATAGCGAAGCGCAACGATGTAATGGA  
GTATCGCGCGGAGATGAGTATAACACCGCTCGGAACGCTGTATATCGTGTGTTGTGGCGGC  
AAGCTCTACAAAGGTGAAGCCGTAGTCGGTGTGTTGCCGGAAGCGGTCGCGTATCAATG  
GCACATGGTTCGCACATCACAGGCGGTAGGCGTTAATGGTCAGCTCATCGAGTATCGCTAT  
GCTGGCGCGGTTAAAACCGTCTCAAACCTGGCCTGCAGACAGCGGATTCACGCAGTATGAG  
TTAGGCTCAGTCCGTGACACTTACGCTTACGTGGGCGTTATGCATGGTCAAAGACGGA  
ACAGATTCATGGTTTATCACTGACCTTGAAGATGATTTCGCATCCTGACCGCTACAGTGCA  
GAATATCGCGCAGAATCCCAGCCTGACGGGATAATTGGCATAGGTTTATGGCGAGATTC  
ATCGTCTGCTTAGGCTCGTCGACGATAGAGTATTTCTCCCTGACAGGCGCAACTACCGTT  
GGCGCTGCGTTGTATGTCGCGCAGCCATCATTAAATGGTACAGAAGGGGATTGCCGGAACA  
TACTGTAGAACGCCATTCGCTGATTCATATGCATTCATCAGTCACCCGGCTACTGTCCGA  
CCTTCCGTCTACATCATCGGGTCAGGGCAGGCTTACCAATTGCGACGGCCAGTATTGAG  
AAAATTATCCGCTCATAACGGCTGTTGAACTGGCAACCGGGGTGATGGAGGCGTTGAGG  
TTCGATTCGCATGAACTGCTGCTTATCCATCTCCCGCGTCATGGGCTGGTTTACGATGCC  
TCATCAAGCGAGAACGGGCCGCAATGGTGCAGGACAGAAAACCGTTTTATACGACGAGGTT  
TATCGCGCCATCGATTCATGTACGAAGGCAACCAGATTACGTGTGGCGACCAGTCAGAA  
GCGTTGACAGGGCAGTTGCAATTCGACATTAGTAGTCAGTACGACAAGCAGCAAGAACAT  
CTGCTGTTTACTCCCATCTTCAAGGCTGATCACGCCAGATGCTTCGATCTGGAAGTTGAA  
TCCTTGACAGGCGTTGCGCAGTACGCTGACCGCCTGTTCTGTCTGCAACGACAGACGGA  
ATCAATTACGGCCGCGAACAGATGATTGAGCAGAATGAGCCGTTTGTGTGCGACAAGAGA  
GTTTTATGGAAGCGTGTAGGTCGTATTCGTTCGATTAATCGGATTCAAACCTGCGTGTAATC  
ACCAAATCACCAGTAACACTATCCGGGTGTCAAATTCGTCTGGAGTAACATATGGCTGAC  
CCGTCATTTAATAAGCCTGTCGTGGTTCAGGCTACACGCATTGATGCATCTATTCTCCCT  
CGAACATATTCAGTCAGTTTTACCTTCTGTATGTCATAAATCAGGGTAATGATGTTGGC  
TCCATTGCAGAAAAGGCAAATCAGGCAGGAGGCGGTGCTTATGATGCGCAGGTCAGAAAG  
GATCAGCGGCATTTAATTCTTGATGAGCACGAAAAAAGAATTGCAAAAACAGAAGAGGAT  
ATTCAGGAATAAAAGTAAAGGTTCTTGAATAGAGAATGATGTTAATGGCCTGAAAATA  
AAAGTTCAGGATATCGAGGGTAAGCTATCAGCGATAATCGTTGATTATGTTTCACGCATT  
AGAACAGGAACTCAAACCTTTCTCATCCCTTAGCGTATCAGGAAATTATTCTGTTAAC  
GGTACAAAAGTTGTTGGCGCTCGCCAGACTGGATGGACCGCGGCAACAGGTACGGCCAAT  
AAAGGCGTATTCAACGCTGACCTGACATTCACCGTTAGCGATACTTACACGCAATCTGAA  
ATACAGGCTATAGCCAATGCTCTAATTGCTGAGCGTCGGCGCACTAAGGTTTTGGAAGAC  
ACCTTGTGTGCACATGGGTTGTTTGAATTAATGATTACATTTACTCCAACACGCAACATCG  
ACCTGATAGAACTGTGCGCAACCATCCTGACATTATTGCCGGGAGCAACAACGGTGACG  
GATACGACTACAAGCCTGAGTGCCGCTATTTGAAAGTGAACGTACATGGACAGTTGGGTG  
GCATCGTGTATTACAACGAGATTCAGCCGCTGACCTTTGACTGCCACGCCATGTATCTGC  
CTGAGATTAGAGGATTCAGTAAGGAAATCGGGCTGACGTGCTGGGGATACATTCTCGCCA  
ACACCACCGTTCAGTGCGTTACATCATTTGCTGCACGCAAATTCGCCACGGTCAAATGT  
ACTGCGCAATGAATGGCCTTAAGCGTGTGCGAACCATCAAGTAATACTTCAAAGGCGTGG  
ATGACGTGACGTTTTACAGCGCCACACGCGAAGAACTAATCGACTTCTGAATCACGGGA  
GATAGCCATGTTATATGCATTTAAGCTGGGCGAGGAACTGCGCGGTGAGGAACCTCTTTA  
CCCTGAAAATGCCGGTAAAGGCGGCTCATCAAGCAGCGGAGCAAAAGAGGCCGCAAGAGC



AACACAGTACGCCGACACCTGCAAAACCAACAATTCAATCGCGTGATGGAAGAGTTGGC  
ACCTTACGCCGCCGACGTTTGGCAGCTCTCCAGCAGATTCAGCAGCTATCAACGCTGGA  
GGGTCAGAACAGCGCTCTCAATCAGTATTATAACTCAGACCAGTATAAACAGTTGGATGA  
TCAGGCTCGCTATCAGAGCCTGAATGCAGCGGAAGACACCGGAGGTCTTGGCTCTACAGC  
AACATCAAACCAAATTGCATCCATTGCACCAACGCTCGGGCGGAACTGGTTGTCAGGACA  
GATGCACAACCTATGGCGCCCTGTTAAACGTTGGTCAGTCTGCGGCAGCAAGCCAGGCATC  
GGCAGGACAGAACTATGCAAACAACGCAGGTAATCTTGCGCAACAGATGGCGGCGATCCG  
CTCTCAGGGTTCTGGTCAATCAACGCTTGGAAAGTGCCATTAGCGGTGGTACAAGTGGTGC  
TCCTGCAGGAGCTAGTCTTGCCGGGATGCTCGGTGCATCGACGCCATGGGGTGGTGGTAT  
TGCGCGAGGTATCGGATTGCTTGGCTCACTCTTCTAAGGAGTTATCGTGGCTACATTTCA  
ACTAGCTGGTTTGGCATCAATGCAGGTGGCGAACCAGAACGCTCCCGGGCAGCCATCACT  
ATCAAACCTACGACTTTAGCCAGCGACCAAACGTTGGAGTTCAACTTGTCTCAGGGTCTTGG  
TGCAGTTGGTCAGGCAATGAGGCTTTCTGACTTTCAAAAACCTTTTCGGTTCATGCTTATGC  
GGCAGCTGACCGGGATGCCTTGCCTCAACTTGGGGCCACCAATCCAGACCAGCTTGA AAC  
AATTCGTCAGGGCATTGGGTTTGTGATGCAGATCGCAATCAGGCAATGGGAGATATGTC  
TGCACGATTGAACATTGCCGCCGCTCAGGGGCTGAAGCGGTGATGCGAGAGCTTACCAC  
GCACCATAATACTACAGCAAATTGGCGTATCTCCTGAACAGGCGTGGCAGACATATCA  
ACAAAGCCCTGAAGGCTTACGCAGTTAACAGACCTTATTGGAATGCACGCGGTAGGACC  
AGAAAAGTATTTAGATATTCAGGACAAGTTGACAGGTTCGCGAGATTGATCGAGGTGACT  
TGCTGAAACAATCCGCAGCAATAAAGCTGGGGAAGGACTTCAGGCTCGCGGGCAAATAT  
TACTATGCGCGAACACGACATGTCAGCCTCTACAGCCC GCCCGGTCAGGATTTGGCAAT  
GCAAAGGCCAAACGCCAGAACCATATCAGGAGTTGAGGGGAATCGGGTCGTTTCAGCTTGT  
AGATGGTAGAACAGTCAACATTGACGGAAAACCTTACGGCGCAGGGGCTAATGCATTTTA  
CGAAGGTATTGACGATAACGGCAATATGGTTTCGTGTCCAGCATGTGCTATTGCAGCGCC  
TCCAACGTCTGCAGCAAGCGCACAGACCTACGCCATGAAGAAAGACATTGACGCAATCGC  
AAATGCACATGCTTCTGCTCTCGATTTTCATGACTGGCATGACTGGAGGAGCAGGAAATCC  
GGCAATTGGTGCAGATGTTTCGACGCCGACTCACAGGCAAAGAACAACGACAGTTATATAA  
CTCCGCACAACGTATTCAGGGAAGAATGCAGAATCAGGGCGTGGCAGCAGCAAGAGATAT  
GGGTGCTAGCGATATCAACACCAATTGAAGAAGCAAAGATGTATTTTCAGGGTATGCCGCA  
GGTTGACTACTCAAGCCCGGAGGCTATGCAGCAGTCGATTCGTGAGACTCAGGAATACAC  
CAACAATTATAACAAGCAGTACAACGTTAATGTTGGTAAATGGCAGTATCAGCAATCTCA  
ACCTGTACAGGAATCACAGCCTGCATCCAACAGCAACTTTTCTTCACTATGGGGTGATTA  
ATGGCTAAGGCATGGAAAGACGTTATTGCCTCTCAAAAGTACCAGGCATTAGCACCAGAG  
CAGAAAGCACAGGCGCAGGAGCAATACTTCAATGAAGTAGTAGCACCCGCAAGCCGGA AAC  
GATGCCGAACAGGCTAAACAGGCTTTCTGTTCTGCTTATCCACCTCCAACGGCTCAACAA  
CCAGCAAAACAACCACATGTACCGGCGCAGCCACAGCAACAAGGTGGCTTCATGTCTGAC  
CTTAGCAATGCTGCTGCGGACACGGGGCGTGGATTGCTTCAGGCTGGCGTTAATCTGGCA  
AATATCCAGGCATCAATGGCTGATGAAGTCGCCAGCGCCGGGGCATGGGCTGGTCAGAAG  
CTTGGCATTGGTGACGGAACCTTATCAGCCATCGCCTCGCGTCACGACACAAGGACTTGAG  
CAGGACTTTGGCTTGAACAAGGTGCGCGTACTTCAACAACGACAGAAGGCAAAATCTTC  
TCTGAAGCAGTGCCATATTTGACTCCTGTTGGGGCCGAGAGAATTGCAGCGCAGGCATCA  
TCTATTGCCGGTTCGAGTTGCTCAGTGTGCATCACGCTTGTGGCGGAGAACGCTGTTGGT  
TGATTGGCTGCAAACAGTGAGCGTGATGATCCAGGAGCACTGGAAACAGACTTAGGAACT  
GGTGTTCATTAGGTGGGGCAATGAATCAGTTAGGCCGTGCCGCTGGTGCTGCTTATCGT  
GGGGTTTCGCGGGACGATCGCACCAGATGCGCGGCAGGCTATTCAGTTCGCTAATGCTGCT  
GATGTTCCTTTGCATACAACTGACGTTTTGCAGCCAAATCCC CGCTCGGGCGCATGGCA  
CAGACCACCGCTGAAAACATCCCATTTGCTGGAACAAGCACTATGCGAGCTAATCAGCAA  
GAAGCGCGCAGCCAGTTGGTAGAGGAATTTCCATCACGGTCTGATGAGTATGATCCGTCA  
AGTGTATTGGCAGCCC GAAGGCAAAAACATCAGGGATTTCGAAAGCAGCAGGGAACCGT  
CTTGAGCAAGTTCAGAGCGCAATGACAGTAGTCAACATTCAGCCAACGAGAGCAATTCAG  
CAGATAGATGATGAGATTGGAAAACCTGCAAAAATTGGGACAAGTTGCCGACACGGATACA  
ATTAGCAAACCTCAGGCATACTGGAATGAATTGGCTAAAGGTGATGTAACTCGAACAG  
TTAAGCAGACTGAGAACGCAGTTTAGGATGGATGTCAGTGGAGAAAGGACACAAATGCCA  
CCGCCAGCTGAGGCGGCAGTGCAGCGTGTATACAGGGCAATGACAGGAGACATTGATAAC  
TCGATTGGCCAGAACCTTGGAAACGACACTCTGCGCAGATACAAGCAGGCCAATGCGGTA  
TACGCAGATGAGGCTAGTAAGCTCCAGAATACCCGCTTGAAGAACGTTCTGATGAAAGGG  
GATCTAACTCCTGAAGTTGGCAACAACATGTTGTTACCAAGAATAAATCAGAAGTTCAG

AATCGGTACCGGTCAGTCGGTCAGGTGGGACGCGCTCAGATGCGTAACGGCATCATCGCA  
AAGGCTATGGAGAAATCAGGCGGTTCTCCGGATCAGTTCCTGCGCCAGGTTAATTTAATG  
TCTACCCAGACGGGAATCGCTTTTAAAGGACGAGATGCTGCGTATCTGAAAGGACTGAAG  
AACTATCTTGGGTCAACCAAGCGTGCTGGTCAGGCAGGAGTAACAACGCCTACAGGTCAG  
CAAATAACCGTTCATCTAGGTATTGGAACGGTAACTACCCCTGCGCGGGTAGGTGTT  
GGTGGCGGGTATGGTTTGTCTGGCACGAATGGATGAGAGTGAACCAGCACGTAATGCAATG  
CTTCGCCTGGCCAAAACCTCCACGTGGTCTACCGCATTTCGAGAAGGCGTTAGCCGAAGTT  
GAGCGGGCTGTTAACTCTGTTGCTCAAGGTGCTAAATCAGATGCATTAAGCGAATAGCAG  
TCTACCAACTACGATGCCGAAGATAAGGAATGCAAAGTTCAATAAGTCTCTGTTTATAAAA  
TCCTCGTAGGAACCAATAGAGATCATTCTTTGATCTATATATTATCTGAATCCCTTACTT  
AATTGGGTGATGATAATGAAAAAAGGTGTTATGGTTGGCTGTTTTTGTGTATTTCTCGCT  
GGGTGCGCTACAGCAACAAAACGTATGCTCCAGATGGAAGAGAGGCATATACGATAGAA  
TGCTCTGGAGTAGGTGGTTCATGGGCTATGTGTCAGGCCGAGGCCGGAGATCTTTGTGGT  
TCCAAAGGCTATAACCTGATTAGCACTGGTAGTGATCAGGGAGCTATTGCAAACGTTGAC  
GCAATTACTGGCAACGCATTTGCGACAAACACCATATCAAGAAGCATGTATATAGCTTGC  
AAAAAATGAGTAAAGCCCGGTTTCGCCGGGCTATTTTTTTTCGATCGAAATCTTTCAACTTT  
TCGAATACTAATTCTTGAATTTCTCTGGATACGATGTCTGCTTCGAGTTCAGCATCATCC  
CGGTATCCGATTACAGGCGTAGGCTTTTCAAGTGAATCAGCCACTATCTGCACTAGCCCT  
GCATTTAGTGACCTTCCGTTTGCCTTTGCCCTCTGCTTAACCTTTTCTTTCAGCTCGTAG  
GGTAGCCTGAGGTTAAATTGGGGGTCATCTCTTCCATTTCTGATGCCCTCTTTTGTA  
GTGGATCGGCATCATATGATCTACTGGTTATATCCACAATAAGACCACCGTGGTGTAAAT  
CACGCATTGCCGTAGTCACGCTGCGGCGATTCCCTTGCATCTGGAGCACATTAATGACAG  
ATATCACTGCCAACGTAGTTGTTTCTAACCCCTCGCCCAATCTTTACTGAATTCCGTTTCGT  
TTAAAGCTGTTGCTAATGGGAAAATTTACATTGGTCAGATTGATACCGATCCGGTTAATC  
CTGCCAATCAGATACCCGTATACATTGAAAATGAGGATGGCTCTCACGTCCAGATTGCTC  
AGCAGCTAATTATCAACGCAGCCGGTAAAATCGTATACAACGGCCAACCTGGTGAAAATTG  
TCACCGTTCAGGGTCATAGCATGGCTATCTATGATGCCTGTGGTTCTCAGGTTGACTATA  
TTGCTAACCTATTGAAGTACGATCCAGATCAATATTCAATAGAAGCTGATAAACAATTTA  
AGTATTCAGTAAAATTATCAGATTATCCAACATTGCAGGATGCAGCATCTGCTGCGGTTG  
ATGGCCTTCTAATCGATGTTGATTATCTTTTTTATAATGGAGAGAAAGTTGATTTTGGTG  
GTAAGGTTTCGGACTATAGAATGTAAAGCTAAGTTTATAGGAGATGGAAATCTTATTTTTA  
CGAAATTAGGCAAAGGTTCCCGCATTGCCGGGGTTTTTATGGAAAGCACTACAACACCAT  
GGGTTATCAAGCCTTGGACGGATGACAATCAGTGGCTAACGGATGCCGCAGCGGTTCGTTG  
CCACTTTAAAACAATCGAAAACCGATGGGTATCAGCCAACCGTAAGCGATTACATCAAAT  
TCCCAGGAATAGAAACGTTACTCCCACCTAATGCAAAAGGGCAAAACATAACGTCTACGT  
TAGAAATTAGAGAATGTATAGGGGTCGAAGTACATCGGGCTAGCGGTCTAATGGCTGGTT  
TTTTGTTTAGCGGGTGTCACTTCTGCAAGATGGTAGACGCCAATAATCCAAGCGGAGGTA  
AAGAGGGCATTTTAACCTTCGAAAACCTTAGCGGCGATTGGGGTAAGGGTAACTATGTCA  
TTGGCGGACGAACCAGCTATGGATCAGTAAGTAGCGCCCAATTTTTACGTGATAATGGCG  
GCTTTGAACGTGAGGGTGGAGTTATTGGGTTTACTTCATATCGCGCTGGGGAGAGTGGGG  
TCAAAACTTGGCAAGGTACTGTGGGCTCGACAACCTCTCGCAACTATAATCTGCAATTCC  
GCGACTCGGTCGTTATTTACCCCGTATGTGACGGATTTCGATTTAGGTGCTGACACTGACA  
TGAATCCAGAGTTGGACAGGCCTGGGGACTACCCTATAACCCAATACCCACTGCATCAGT  
TACCCCTAAATCACCTGATTGATAATCTTCTAGTTCGCGGGGCGTTAGGTGTAGGTTTTG  
GTATGGATGGTAAGGGCATGTATGCGTCTAATATTACCGTAGAAGATTGCGCTGGCTCTG  
GCGCGTACCTACTAATCCATGAATCAGTATTTACCAATATAGCCATAATTGATACCAATA  
CTAAGCATTTCAGGCTAGTCAGATATATATATCTGGGTCTTGCCGTGTGAACGGTTTAC  
GTTTAATTGGGATCCGCTCAACCGATGGGCAGGGTCTAACCATAGACGCCCTAACTCTA  
CCGTAAGCGGTATCACCGGGATGGTAGACCCCTCTAGAATTAATGTTGCTAATTTGGCAG  
AAGAAGGGTTAGGTAATATCCGCGCTAATAGTTTCGGCTATGATAGCGCAGCGAGTAAAC  
TGCGGATTCATAACTTATCAAAGACCTTAGATAGCGGAGCATTGTACTCCACATTAACG  
TGGGGCCCGTTCCTGGCTCAGAGTGGACTCAACTACTGCTATTTTCAGGTAACACACTTG  
AGGCTGTATCATTAAAAGTTAACCACAAAGATTGCAGGGGGGCAGAGATACTATTTGTCT  
CTGACATCGCGTCAGATGATTTTATAAAGGATTCCTCATGTTTTTTGCCATATTGGGAAA  
ATAATTCTACTTCTTTACAGGCTTTAGTGAAAAAACTCAATGGAGAATTAGTTAGATTAA  
CCTTAGCAACACTTTAGATATGTAATAAAAATGGGTGTAAACACCCATGTTTATTTTAT

>NewGenomeName\_69

ACCCCCGCCCCAGGTTTCAGCGGAGTAATTGAGACATCATCGCATCCGTTTCATTGAATAGC  
CGCATGCACAATGAGGATCTGTAATTCATGACGCGAATCTGACGTAAGATTGTACACACT  
AAGGTTGGTGGCCGACAATAATTTTCTGTACTTTTTAAAAGTAAAGAATGATTCTTTTTA  
TTATTATATCATATGTAATATATTGTATCATTGCTTCGTCATGAAGCACAGAACTTTATC  
TCTCTATAAATACCGGTTCTGTTTTTCGTCGTTTCGTACAATGAATAATGGTCAGCAATTGG  
AATTGGTCAGGCATGAAGGGTAGAAGAACATCTCGTCGTGGTTACACCAGGCCATTCAAG  
TCAGCTGTCCTTACAACCAGAGTCGTCGTTTCATCAGTCAGCTGTATTGAAGAAAAATGAC  
GTGTCTTGTACTGAAATTAAGCCTGATGGTGATGTTGCGCGTTACAAAAGTCGTAAGGTG  
TTGTTGAGTTGTACCCTGAGGATGTGTCCGGGAGAGTTGGGCAATTATCTGATCGTCAAG  
TGTAGTTCAACTATTGTTAATTGGTCTGAAGCTTTCACAGCACCTGCTCTAATGGTGAAA  
GAGAGTTGTCAAGATATGATTACTATCATATGCAAAGGTAAGGTAGAATCGAATGGTGTC  
GCTGGATCAGATTGTACTAAATCGTTCAGTAAGTTCATCAGATTAGGAGCGGGTATTAGT  
CTATCACAACCTTTGTACGTTGTAATGTATACCACTGGAGCTGTAAAGACTGTGTTATAA  
CATAGAGTCTATATTGAAGTTTAATACCAGTGTGAAACGAAGAACATATGGATAAAGCAT  
AAATATTGCATTGGATCTCTTTACTCCGCATAGCGGTATGTTTTCTTGTCTTAGTTTTCCA  
TAGATTCCCTTCGTTAATGAACGGGTAATGTCTATTTTGCCCTTATGTGACGACATTTGA  
TCCTGTGCTGAGCTGGGGCGCGGCTTAGTATT

>NewGenomeName\_70

TTGTTGGTCTGATTATCTTGGCTGAATTAATAGCAGAAAATAAATTAACCCTGGCTTCG  
GTCAGGGCTTTTTCTTTACAAAAGAACGGAGAGTTATATAATGTTCCCTGTTCCAAAAT  
ACTTTTTTCATAAAGTTTATCCTAAGCGTCCCTCTCCTAACTGGGGCGCTTTTTTTATGC  
TATAATATAGTCGGGATGTTTGTAGATTTTCATCCTATTCTAGAGTCAAGCCATTCTTC  
GGAGTGGCGTTTTTCATAGCTTCTTTTACTTCATCAGTCAGAGGTCTGCCATCAAATGAA  
ACCCACTTGTCCCAATTAACCTTTGCTATCATCTACTAAATCGGCAAGGTCAATACCTTGT  
TTTTGTTGTTTCAGTTTTAATAGAAACAATTTTAGATTACTGCTCTTCTTGTCTTTTAAAT  
TGACCATTTGCAGTATCTAAAACCTATTTTTTGACTTGGCTCTTCCAATTTTCGTCATAACT  
GTAATAGTTTCTTCTATAGTTTCATAATCATTCTTCTGATTCTCGCGGTTCAATCATCGGA  
AGGTCATAACCCATTAACCACGGCTCACTAACTCCCAAAGTTTGAGATAATAATATCAAT  
TTTTGTTTATCGGGATTAGATTTTCCATTTATGTAATTAGATAAATGAGTTTTTGGCATT  
TTTTTACCAATTTATCTTGAAAAGGTTTTGATTTTTCAAGTATATCAACCAGTCTTAAT  
CCTCGGTCGTTTCATTATATTCTTTAATCTCATTGAGAGTTTTCTTTTTTTCACGAACCTA  
TTATAAAAATATTTATAAAAAGTTCTAACTTTTTATACTTTTTCTTGACAATTATTTT  
CCAAATGATATAATTAATCATAAAGTTCAAACATTTGAACTTTATATCAAACAAGCGA  
ACGATCATGGAGCATTACAGTACGGCAGACGGAACAGGCTCAAATCAAGGTACACGACGTA  
TCCACCGCGACGTAAGAAGCAAGTTTGGCAAATAAAAAGCCCCAGAGGGGCAGAAAGGAT  
GTATAATGACTATTGCTTATTCTAAATTGAAAGGTCGCATTAAAGAAAAGTATGGTAGTC  
AGCAAGATGTTGCAAAGGCTATAGGTTAATCAGAAAAAATTTTCCGATAAGCATAATA  
ATAAATCATACTGGAAACAATCAGATATCGATGCCGCTACAGAACTTCTTGGTATTGAAA  
AAGAAGATATTGGTATTTATTTTTTTAATAAAAAAATCCAAAAAATTTGAACTTTATAAA  
AAGAAAGGATTCGAAAATGAATCAATTAATTACAATCACACAATACGAAAACAACGAACA  
AGTAGTAAGCGGTCGTGAACTACATCAATTTTTAGGAGTAAAAACTCGATATAATGACTG  
GTTTGAAGATATGGTCAAGTACGGGTTTACAGAGAACGTTGATTTTATAGGTTTTACTGA  
AAAAAGAGTAAAAGCTCAAGGCGGTCGTCCAAGCGTTGACCACGCTCTTAACTTGACAT  
GGCAAAGAAATTTCTATGATTCAACGTAACGAAAAAGGGAAACAAGCTCGTCAATATTT  
CATTGAAGTTGAAAAAGAACCCAAACAACAGCTTTTACCGCAAACCTCCTGAACAACAAT  
TGCATTACTCGCTCAAGGTAACGTGAATTTGAATAAAAAAGTTGAGCAAATCGAAAATTC  
AGTTCTTGATTTGACTGACGGATTTCGGGCTTCTTCAAATAAAGCTAACGTTTTTGCAAAA  
GAAAGTAGCAAGCAAAGTTTATATGTTTACTGGCGTTAAATATTCAAATGCTCATCAGAA  
ATTAGGAGCTAAGGTATTCAGAGAGTTCTATAAAGATTTGAAACAATCGCTTCGATGTTGT  
TAAATATAGCGATATTCCACTAAGCCGTTATGACGAAGCAACATAATATCTTGACATGTG  
GCAACCATCTTTCGATACAACGCTTGAAATTCGTGGATTGAACTCACAACTAACTTTGA  
CTTTGAAGATTAGAGAGGAAAACACATGGAACAAACACTTGAAGTACAAGCAACTATTTT  
AGTTTTAATTCAGAAGAAAAGATTCTTGTAGATAAAGTTGGATATCAAGAGCTTAAAGA  
AAAAGACTTTGACGGTTGGGTTGGTATGGATGTATTCATAAAAAAATCAAACCGTAGTAT  
TCCAACAGTTTCCAAGGTTTTAAGAAAACCTGATTTAAGAAAAAGAATATCAGTTGAAAA  
CGGAGGTTGGGTATATTTCCCAACTGGTAAAGGAGATAACTGGTCGTTTAGGTTTAAAGA  
AATGATGGATTTTATAAACAAAGAATTTTATCAAAGTTTTTCAGGAGGGAGTAAATAAAA

TGTTTCGCATTTAAAACAAAAGAAGAAAGTGCGATTCTTGCAGAACATAATAATACGGTTA  
GAGATATTAAGAGATGATGGCATTGATTGTCCAAATGTCAGCTACAATCGCAACACAAG  
CTCAAATGATTGGTACAAGAGATCAATTGGTTCGACGAAGCATATTTAAAACCTTGAATCAG  
CCGAAACAGAATTAATTATTCGGCGTAAAAATGATGAATATCGTCAAAAAGTTGGCGGTGA  
TGAAATTA AAAATCAAGAAAAACAATTAATCATCTTGGTCAAGTAGTTTATCAAGAGTC  
AGTCGAATTTTATAAAGGAAAACCTTCTGTTTACTCAAAGATTTTCTTAAAAATTTCGCT  
CCTCCCACAGCTTTATGAATGGTCAAATGCTTATAAAGCAGCGGTTGAACTGACAAAATA  
AAAAAGCCCGCACTGACATGCGGACTCGGTAGAAAATTTACGAGAATTTCTACCTCTAGT  
ATAACA ACTTGGAGGAAAAATGACAATTAATCAAGGGGGGGATATGGAAATGAAATCAAT  
TCCAGACTATCCTAACTATGCTGTGACTCGAGATGGGAGAGTTTGGTCCTATATAAGTAA  
TAAATTTATAAGACCAAGGGTATCTAAAGAGAATTCCGTCATAGTAAATTTGAATTTTGA  
AGGTATAAGGTTT CAGAAGGAATGTTGCTAGGCTAGTATTTATAGTTTTTAAAGGATCTGA  
ACCTGAAATGGTACGTCATATTGGTGGTAATCCTCTTAATAATAATATTGATAGCCTCAA  
AGCAATGATTAGAAATGAACACTTGAAAAGTTTAGGTAACCCTAGCAATTTCAAAGTTA  
TAATCGTAACTTAAAATGATTAAGTTGATGTTGAATCAGAAAGTAAGCAGGTTGTTGC  
ATACCCATACAGGTCAACTGAATATGATTCAGCTTTACTATGTTGCAATTTAAAAAGATT  
AACTTACAAAGGAGCTTTGTACTTTTGGGAGAATCGGAAAAGTGAATTAATTGAGGAATT  
GAAAGTTAGAATTATGCTAAATAATTTACGTTTGAATTCTGATATAAGTGAATTTTCAGCT  
GATTGGAATGTATAAAAAGAAATATAAAAAACA ACTAAAATATCTTGAAATACTAGAAAA  
AATTTAGAGGAGAAAAATAAATGCTTGACAATTGCCTATGGGTTCTAATGGCAGAACGT  
CAAATAAAAATTTCTAGTATTAGTGATGATACGGGTATATCTAGGACAACACTA ACTAGC  
CTAAAATATCGTTCGAGCAAGCAGAATTGACTTTAAAACCTTAGATATTCTATGCCAATAC  
TTGCGTATTACTCCAGGAGAATTTTTTGAATATAAACCAGAAAAGAAAGGATTTTAAATA  
ATGGCAGAAGAAAAGCCAAGATTTAGGTTTTCTGATATTAGA ACTTTTCAGGAATGTCCT  
GTTAGATTAAGGGAAAGAAAAGCAAACGATATATGGAATCTCCTACAGAAGCCATGCTA  
GTTGGCTCTTATGCTCATGCAATGCTTGAGGGAGATAAAAGCACCGATGATTTTATCCAA  
GAGCATTAAATGGATACGATGGGCAATATTGGTAAGAAAAACCAAGGCATTA AAAAAGTT  
TTTAAAGATATTGTGATCGCGTTAATGAAGTCAAAAAGACTAAA ACTTATCAGTCTTTC  
GATACTTTACATACTCATAAAGAACGTTATGTCAGAGCAGATTATGATGATTTTGTGATT  
AGTGGAAGAATTGATGTCTTAAGGTTTGACCACGAAAATAAGATCAGTGATATAATTGAC  
TGGA AAACTGCCGCAAGCTTTGAAGATATTTTCGACAAAATATCCGAGCTGATTTGGAA  
TGGTACTTCCATTATAGAGAGCAATTAGCTTTATACGCATGGTTAGTTGCTCAAGAATTC  
GGTGATTATACAAA ACTAGATTATAAAGTGGTAGGTA AAAATCGTAGGTTTTACCAAGAAA  
CTTCCAGTAAACATTAAGACAATTACAATGGATTTTGGAAA ACTTGCTGATATTTTCAGAT  
AAAATTTCTTGTTCAACCTGGGTTATCTGAGTTAGATAATATTGCTCATAATATTGAGCAT  
GAGGGAATGGATGGATACTTTTGT CATAATTGCGACTGATGTATCCAAAATAAAAAATAC  
GAAGAATTAGAGGTAGAAGTATGTTAATGCAAATTA AACCTGCAGGGACTAGAAGCCCTA  
AACTGACACGAGTCCTTATTTTCAGGAGGGCGGGCTTTCAGGAAAACGACACTAGCGGAGA  
AGTTTGCCAGTAGTAATGACAGAGCCTTATTTATCACTACTGACGGGAATGCATACAAAC  
AAGGGTATCAAGCGATAGATTTTGTAGTTTTT CACAAAAGGCCGAACAAATCATCACAACT  
TTAATCAAGCATTAAATATGGCAGAACAAAATGCTGAAAGCTGGGATGTCCTTGTAATTG  
ATTTGATTGAAGACTTTGACGAACGGGCCCAAACCTTATTGCGTGGCGCACTTAATGATT  
TTAAATCGACAATGAAAGCATGGGGTAAAATTAACAGTTTGTATAAGGATATGCAAAGTT  
TAATGATGAGCAAGTTCCATGACAAGACAATTATTTT GCTTAGTCGAGATGTTGAAGCAA  
TTGGCCAAAATCAGGCGAAGTCATTGGATATAGGCCTGCTTTAAGAAAATCTCTCAAAA  
ATATCATTCTAAAAGACCAAGATGTTAAAATCAGAGCTTATTTTGATAGAAGCGGTAATC  
GTC AATTTGATATTTCTAATTTAAGGTATGAAGAAATGAAAGGGATGCTTCAACAGATTA  
TTGCTAAACCGTTT GAGATGCCTCAACCTGCCATTGACCCAAAAGAGCAACAAGAATCAA  
AGGAAAAAGCTAATAAATTA AAAAGCACAATATGATAAAGCTTTTGGCGGCTGCAGCATCTC  
ATAAAGCAAGTGATAAAGATATTGAGTATTGGAACAATATGGAACCGTCAGAAGCGATTA  
TGTCTATTGCAGATTGGATTCGAATTACAGAATCTGCTCAGTCAGGCGTTGATGAAGAAG  
AACTAATTGTGGATGAATTATTTCCAGTAGGTCAA AACTAAACCTATGAGCAAACCGCAG  
TCCTCACTAATCCAGTGCAGTAGAATTAGAAATAATTCAACTTTAGCAAAGCCACCTTGG  
GCGGTCGTTTCGTATCTAGTCAAAGCTGGAGGGTGGCGTAAACGTCCGTAAAATCCATGAG  
TATTCAGTGCCTGCACATAAACACTCATTGCCAGCTTTTAATTTGAAAATAAAA ACTTGA  
AATAAATACTCCATAGAAAGGGGAAGTGTGGCAAAAACAAGCAAAAAGAAAATATATTTTC  
TGTTAAA ACTGGATGAAA ACTTTTTCAA AAAATATAGTAACAAAAAAAAGCAAGAAAATCT

GCTGGTGGAGATACAATGGTGCTCATGTATCAGCGCATGATGCTGCAGTCGTAAAGTAGT  
GAAGGTGTTCTTTATTATGAAGGAGCACTTGATAATCTTTCTGAAGATTTATCGCGTAGC  
TTGGATGAAGATGTCGAAAAAATATTAATGACTTTAGCTTTCTTTCAAATATGGATTG  
ATACAAATTGATGAAGAAGAAAATGCCGAAATGTTACAAGTTCATGCGATTGTAGACCAA  
GAAACAGACTGGGCTAGATATAAGAGAAATCAAAGATCCAGCCAAAAATGGACAATGTC  
CAATCAGTGTCCAATACTTGTCCAACAGAGACAGAGTTAGAGACAGAGTTAGAGACAGAG  
TTAGAGAAAGAGAAAGAGAAAGAGAAAGATATAGAGTTAAAGAAAGATATAGCGATTAGA  
GATATAGATTCAAACCTTTACTTTCCAAATTTCTAGATACTCTCATTAAATTTTTCAAGT  
AAAAACCTTTCAAACCGTGATGTAGCAACTGCTGAGTTTATAAAAACCTCCTTTCTTTCAA  
AGAGAACAGGCACTTATTGGGGCCATGAACTACATACAGTCTTATAAAAACCTACCATCCT  
GAGCATGAAACTGCTCGATATAGTGTAATGCAGCTAATTTCTTGTCCAACATGATGTTT  
ATGGATTATCAAGAAAAAGTGAAAGCAGATACTGGATATGATGAGGATTTGGGCTTTTAG  
AAGGAATACATGCAGTCAATGGCAGATGGAATCCGAGAGTTCATAAAAAGAGAGAAGTT  
AAAACAGGTCTATTTTGTGAAGAACATCAACAAACCGAACTGGTTAGATATAAACATCCA  
GTAAGTATAGATTATGATCGGTTGATTCATGGCGAGTTAGTTGATGGTTTGCAGGTCACC  
TCAATGAGTTATTGTGCAGAATGTGCTAAAGAGGGAATATACCAACATGACCAACAATCA  
AGTGCTTAAATAAAAGCAAATGAAGATTTCTTGAATAAAAGTAAGTATGGAAAATATAGC  
TTGCTTAAACACAAAGCCTTGTAGGCAAGAAATCGCTCTGGTTTGCAGTTTCAACACT  
GTTAAGGCAAATAGCTTAGAAGAGCAAAACGTGTTAAATCAAGCCAAAGAATAGCCAGA  
GAGTACACTCAAGGTCAAATGTTTAAACAGTGTATTCGCTGGTGGAGCTGGTAAAGGGAAA  
TCTCACTTAGCAATGGCTATTTTGCAGAAGTAAATGAAAATCTTAAAGATAATAAATTC  
TCAACATAGTTTATCAATATTAGTGAATTAATTCGAGAAATTA AAAATAGTTGGAATTAC  
TCTGTTACCAAACCAGAAGAAGAACGACTGACAACATTAATGCGTACAGTTGATTTGCTT  
GTTATTGACGATTTGGGAACTGAAAGCACGTTTTCTAAAGATAATAGCTGGGTACAAGGT  
GTTATTTACAATTTTACAATGCAAGAGAAGGCAATACGATTATCACATCAAATGTA  
ACTGGTTAAGAAATGCGTTCATCTTATGACGATCTAATAGTTTCTCGAATCATGGAAGCCTCA  
AAAAATAGTGTTGGTAAATTTGAGGGCATTACTGATAAGAGGAAAAGTAAATGAAAACAA  
TAATCATTGAGCAGTGGGAAAACGAGCATTACCCACTCGGAAGAATTA AAAAGCAGAAGC  
TGGCTGAGAAATCTGAGCATGAGATTATTTTATTCTTAAAGCGCATTTGCTCAGATGCCTG  
CAATTGCTAGATTTGGGGAAGCAAGTGAACCTTGTGATTTATTTGCCGAGATTGGTGGGA  
TTTAGACTTGGCCTTGAAGCAAGCCGGACATGAATGCGTAGGGTTTTGCGAAATCGATAAA  
TTTGCCCGCAGAGTTATAAAGCCATTCACAATACAGAAGGAGAACGAGAAGATCATGAC  
ATTACAACAGTCAGCTATGAAGAGTGGCGAACCTTACGCGGAACAGTTGAGCTTATTTGC  
GGAGGATCCCTTGCCAAGCTTTATCCATTGCAGGTAAAACAAAAGGATTCCTTGATGAA  
ACTCGTGGAACGTTATTCTTCGAGATTGCCAGAGCGGCTGAACAAATCAAACCACGGACT  
TTATTCCTTGAAAACGTTAGAGGGCTTTTATCTCCAGACAAAGGGAGA ACTTTTAGAACT  
ATCATATCCACCCTTGATGAATTGGGGTACGATGCAGAATGGCAGATACTTGACAGCAA  
TATTTCCGGTGTTCACAAAACCGAGAGAGGGTGTTCATTATCAGACATCTTAGAGAAGAA  
CGTGGACGAGAAGTATTACCTATCACCAGAGAAAGCAAATGAAATGGAAAGATTTATACA  
AAACACTTGACGAATTGACCAAAGATAAACAATAGACCTGTAATAGCTCTAATTCATGA  
AAATTACGGTTACATTGAGCGCTTAAACCATTTTATGATAATTGATCACGAACAAGCTA  
AAAGCGCTTAGAAGCTAAAATATGAGGTAGTAATATGTTTACGCAAAAATGAAATAAGGCG  
TGGAGATAAAAATATGCTTCCGCGACACAAAATTCTTAAAAGTTATCGAAGTTACTGACAA  
ATACATAACGGTTGAAAAAGACCAGTTCACTAAAAAATCAGTTAAGCGTGAGGTTTTTAG  
AATTGTA AAAATCAATGAAAGATAACCATGCATGTGAACTCTTTGACACAGTTGTGAAGTG  
AGGGATGAGATGAAGTGTA AAAAATGCGGTAACAAAATAGATTGTGATTGTATGGGATGC  
CATGAGTGCCATCCAGAATATACTTGTGAAACGTGCGGAATTTGCCATATTGACGGTTGG  
GAAGCTGGGGCATGTTGGAGTTTAGCCAATGACCCTGATTATGACCGATTTGACATTTAA  
AGGAGATAAGAAATGACAAATTTGTATGATGCAACAGTCACGATTACAGAAAGCCACGAT  
AAAAAATTTGCCGATATTGAATATATTGGTAGTTCAGAGACAAAATTAATACAAGTAAA  
GCGCTCGAACTGATGAAAAGACAAAGTATTATAGCGGTTATGGCGGTCAAGAAATAGCA  
GAAAACCTAATGATTAAAGGGAATGGTTTCTTCATGACACAAGGGGAATATGATGGCTCT  
GAATGGTGGGATTATATGCAAACAGACCCGCTTTACCGCAAGTAGAGAGAGATGTTAAA  
AGTTTTAAAGCAAACATAGGCTGGGACAGCTCAGAGGGAATTAATAGCTTGGAGGACACG  
AAAATGACTAAGTTTGAAGAAGAATTTAACTACTTGATTGAATTATCAGGAAAACCTATT  
ACTTGGACAAGTAGAAGCTGAAACATTTAAAAAAAACAGAATTGCATTTTTTTAAAAGTA  
TGAAACAGACCAACAGCAAGACCTACCAGTCGTGCCTGAAGATGTTGATAAAGCTATCAA

ATACTTGAAAACCTCAGAATAATTTTTCCACACTTACTGATTGGAAGAATCTTGATATTTT  
GACAGAAAAAGGCTTTTTGGTGGCTGAATGATTTCGAATTTAAAGATAGACGATTTGGTTT  
TGGAGGTCTAAATAAGAAGTTATTTATCCTTTCTCATTAGCTATTACAGGCTATCAAGT  
AGAAAAACCGCAGCTCGTCTATATTGACTTACCAAAAACATTTTGGATTAAGCGATTCAAC  
TAGCGATTCAACCTTCGTATCAAAAAGCGGAAAGTGAATAATCCTAGCATTACAAACGG  
GAAAGATTATGCATTAATAATTAACAGAACAAGAAATCAAGTCAATTGATGAGCGTTACTG  
GCAGTTTGTCTGTGCCTCTGGAGGTGCAAGAATGAGCGAGAAAAAATATTATGTGTTTCTT  
AGTCCGTTAAATAATGGGAACAAGCCATTTTTTCAACTAGTAAGTTTTTCGATTTATGGCA  
GAATTATTTGGTTTTGCTAAATGTAATACCAAAAATAAAAACGGTAGATATGAGCATAAA  
TACTCTAAATTCACAAAATCAGAACGTGCTGAAATCATGGGCGGTGCTTTGTATAAACAA  
ACAGATTCTTTACCATTTGAATGGCTTTATTCGTTTGAATCGCTAAAAGAAAAGCTTGGG  
TGGGAATTTAACGAAAATATTGATAAATGGGAGTATTATAATCCAATAATTGAGCTTGTG  
CCTGTGGAGGACGGAGAATGACAATTACTGAGTAACAATTCTATGACATGCTCAATGTTG  
ATGAACATATGAATTCACAAATCGAATTCGAGAACTTGTTTTTGATAAAAAAGGACGTG  
AAGAATTTTACTCTAAAATCTTAAATATCCACCATGACATGAGTGTTGATTTTTTTCAGAG  
ATTATTTTATGACTCACTTGGCTGTTTCGTCAAAGGGCAGCATTATACACCAAATGAAA  
TTGGTAAACTCACAGCATTGCTTGTAGGTGGTTCTGGAGGGGCTGATTTAACTGGAGCAG  
GAACAGGAACCTAATTATTCAAAAATGGCAAGATGACCGATTGAATGCAGACTTTTTTA  
ACTATTTGCCGAGTAACTATTGGTACCAGGCATTAGAATTATCGGATGAAGCTATTTTCAT  
TCTTGATTCATGCTTTTGGAAATTAGAGGAATGAATGGCGTGATTATTCCTGTAATGCAT  
TGGAAGTGGCCGTGAAACAAGTTTATTTCAATTCAAAACAGTGCTAATAATCCAATTGGTA  
TCTCATAGATAAATGTTATCCCTCACAGCAAAGATGCAATGCAATTTTTAGGGATTTCATG  
AATTGACGGAACAGCCAATTGAACATATTGAAAGTAAATTTCTGACTGGATTCCACTAA  
TAGAATAAAAATAAGGAAAAATAAAAATGAAAGTATATGTTTTAAGCGCAGATACCTATGGT  
GAACGTAATGAAACAACACCGAAAATCACGGTACTTTAGTGCCGTGAGTGTTCAAGGAGA  
ATATCAAATGAAAATTACAAAATTAGCCAGCTTATCAAAGCTCTTGAATACACGAAAGA  
AAATCTACAATCAGATGATTTATCAGAAGTCATGTCTGTTTATGTTTCAAATCAAGCACG  
AGAAGACGGAGTTCAAATCACAGACCCAGCATCTTCTCAGAAGATGATGGAGATCCATC  
AATTTCAATTAATATTGTTGCGGTTGATGCATTGTCCTATATTTTAAAAGATGATGAACC  
GTCACGGATGGGAAGGGAGTGCTATTAATGAAACTTTTGTGCAGGCTGTTCCGGGCATAAG  
TGGAGATTTAATCCCATGGATGATATTCGTCCATATTGTGCTAGATGTTGGATTGAAGAA  
ACTTCACTCGATAAAGAGTTAGACCAACGAATTAATCTTGAACCGCTCAGACCTTGAC  
GTGTCTGAGAACGTGTTCTGAAAAATGGCTTGATAAGCATATGCATTGAGGTGGAGAAT  
GCGTAAAAAATAAAGAGATTACTTGACAAAATTTGTTATATTCGTAGTTGTTTTTCATGAC  
TACTTCTAATATGATTAGTATGTTTTCTAAAAATGCAACAACACTAGCGAATGGACTTTTAC  
TATTGTTATGTCTTTAATCGCAGCATATCTATATCTGGATTGAGGTGGATATGAAAAAAT  
TTGAGTTATATAGCGCTGCAATCTGCAAGCCAGAAGGAATTGCATTTGAAAAAATAACAT  
TTAAAGCTGATAGTTTTGCTGATGTTATTGAGTATATCGAAAGCAACGTAGGTTGGTACA  
CTGCTATCAACGGAGCTTTCAAAGTCGCCTATATCGAGGAGGTTGTGGAATGAAATTACT  
TAAATCGGTATTGATAGCAATTGGCATTGTAACCTTTAGGTTTTACCATTGTTATAGGAGA  
AGTATTAATATTTAAAGTTTTTGGAACAGTCGCTTTTCTTTTAGTAATGGCTCTGCTCTT  
AGTCATTGCTTATACGATTTTTGTTTTACTTAAACGGAAAAGGATAATTGAACGCGAAAAAA  
GCCCAAGATGACCAAGCTTGGAGCGATTATTGTAATAAATTATGGAACAACACCGAAAAACT  
CGGTACTTTAGTGCCGTGAGTGTTGAAATGTTAAATTAATTAATTAGTAGAAAGAGGAAT  
AAATAATGAAAGACATTAACAAGTATCATTGATTCAAAGAGTGCTATTAGAAGTTGGAC  
AATTTAAAAACATAAGCTAAATGAATTTTTAGTAGGGGAAACGGACTTGTGGTATTCTC  
CTATCAATGATATTGTAATGGCTATGACTAATGGAGAAAAACCTGGACCTTTTAAATATG  
CTGAAGTAGAAACAAACGATTGGCTATGGGTTATGTCAACAATAGACGGAAATCTTGTAT  
CGGAGGGAAAAGGCGGAATAGGAATCGAGGTTGAATAGAATGTTTAATAAATAAAAAAC  
TTAGAATATCGAATTAACGACTTGCAAAAAGGCAAATGAAAAGTTATGTTAGATTTAAAGA  
CTGGTAAACAATTGATTTTGTTCATAAAAAGGAGAAAAAATGAAGCAATGGACAGATGA  
GTTATCTCAAAGCTTAGATATAACGTTCTGATTGAAAACCTGAATCGCGGTAAGCTTTG  
TAAAATATTAATAAATAGGTAGCCATACATTAATAAATTTAGAGGAAGGTTGTTGCGAAAT  
TAAACAATCAACTTATATGAAATTGCTTGTATGGTTAGTTGGTTAAATAAAAACAAAAGC  
CCGCTGGGAACGGGCTTCGGCATGATTGTATCTAATATCATTATACCATAGACGGAGGAA  
TCTTTTAAACGGCGGATAGATTAGATTTGTTATTAAGTGACTACATGACTGGAATGCTTC  
ACGTTAAAATTAATTCAAGAGAACGATGGATCACTCGTGAGAAACATGAGGAAAGAATCG

GAAGTGGTGGGAGTAGTTCAAACACTGCACCACAAGATCGCAACTATTTGATTAAAGAAG  
CTGACAAAGAACTTGGAAAGACTTAATGACCAGAAACAAACGCTTGATGAATGAATGGAAG  
TTATACAAGGTACAATTGCAAAAGATATTAGTATTGCTAGATTTAAGCACAGAATTTCTT  
GGCATAACGTGGCTATCAGAGTTTGTCTAGAAGAGAGTACAGCTAGAAAGCAGTATGATT  
CATTTAAAAAACTTTGAGAGATGGATTATGGAGAGAACTTTAGACTAATCTCACTTTC  
CTTTTTATTACGTTTTATTACGTTTATATCCTAATTTAAGTGCGTTAATGGTAGCATG  
AAGTTATCAGCGTAAGCAAACAAAATGTAATTCGTTTCGGTTGGATATAGTTCTAACGTTG  
CTGGACGATAAAACCAGCGTAGCAAGGAAAGCACCCTGGAGAGTGCAGGGGTTGACT  
CCCTGACTTGCTATTATACTTTATTACAGGTTGTCCAATGGGCAGCCTTTTATTGTTGAT  
GAGAGGAGATTCTATCTTGCCGATGACTGGACGTTGTCGTGAGCCCAACTGCCACGCTGT  
AGTTATTAGACCACTACACTATTGTAATAAGCACGCTGATAAAGAAGCTGCATATCAAGC  
AAGCAGAGAGCGATGGACTAATCGTAATGATAATACAAAAAGATATAAGGACTAAAACAA  
ACGCAAGCGTGAGTATAGCGACATTAAGTAGAACAGAATAAGTTCTACCAAAGCAAGCA  
ATGGAAGTCTATACGTGATGTAGTAAGACGTAGAGACAACCTTCCTTTGTCAGTACTGTAA  
AGCGCATAATAGAGTAAGAAGTGGTAAAATAGTGGACCACATCGTGCCAGTGGAGATTGA  
CTTGTATGGTAAGACCGTGATGGATAACTTGGCTTTCTGTTGTAGCAAATACCACACAAG  
GAAGACTAAGTGGGAACAAATTTATTATGGAAGTGGGTACGGAAATAAACTAAAAATCT  
AATCCCCATAAAAAATGTAAGAAGATGTCCCTGATTTTCAAAAAATGAACGATAATTTTT  
TACAACCCTCCCCCTATCTTTTTACAGGGAAAGCACACACATAGGTTTAGAAACGTTTT  
AAAGTTCAATTTTGAATTTTTATATAGGGGGGGTCAAAACACTAAAAGAAAGGAGAAA  
AAATGACAGCTAAGAAGTTCAGAGACAGTAATGACGGGAAGTTGTCCTATCGTGCACCTA  
AGCACCTTCTCCTCTCGCAAGTGCTTGTGGCGCAAACCTGTTGCCTTGCTCCAGGAAC  
AAAAGCCAGTCGATAAGATTGATTCGTTTTTAGTTGAAATTTACTGTACTCAGTATGAAA  
TTTATAGAAATTCATATGAACATCTCAAAAAACATGGTGAGGTTCAAGAAATTTATAAAC  
CAGTTCAAGATATGACTGGTGAATTTATTGACAGACAATTTCAAGGTTTCAAACGTAATC  
CAATGACTCAAATTTACTCGGATGCTATAAAAAATCTTAAAAAGATTGGTTCTGAATTAG  
GGTTATCTCCAAAATCTCGTTCTGAATTGTTGGAACCTAATATGCAAACAAACGAAAATG  
AAGATGATGGAATGGGGGATTTCTTCGATGAAGATTGATTTAACTCAAACCCATGATATT  
ATCGGTACATATCATTAGCTAAATTATGAAGATATTAGAGAAGAATATCGAGACCATGCT  
ACAAAATATGCTTTTGATGTCTTAGATGAAAAGTACACAACAGGATATTTAATGCAATTA  
GCATGTTTTAGGCATTTACAGGACTTAAAAAGGATAGGAAATGAAGATTTTCCTTTTAAAT  
TACGAAGTAAAACATGTAGAAAGGTTAATGAAATTTCTTAAAATGGCTCCAAACGTTAGAT  
ACTATGGAACCGACTAAATTAATGGAGTGGCAGAAGTTTATGCTATCTTTATTAATAGGT  
TGGAGAAACAAAGAAGGTGGTAAACGTTTCAGTCGTGCCATTATATCTGTAGGACGCGGT  
CAAGGGAAAACCTTATATGTTAGCCATATTAATGGCCTACTCATTTTTTGTAGAAAGTCGT  
GGTTAAGTAACCAGGACTTTTTAGTTTCATCCATTAATGCAAACAAACAGGTAATTA  
TATGGCTATTTGAAATCGATGATTAATGTCCTTAGAACAATTAATCCATGTAGAAAAATC  
GCTGATAAAACCGACCTAAGCTTACAAGCTGACAAAATTATTATGAAAAACCATAATAAT  
GTGATTCGCCAATTTCTCATGAAGCTGGACAGTATGATTCATATCACTTTACAACCGCT  
ATCTTTGATGAAATAGGCGAAGTTAAAAGCCGTGAGAACATTACTAGGATTGTGTCAGGG  
CAAGTTAAAGTTCCTAACCGTCAATTTGTTCAAATTTCAACAGCATATCCTGACCCTACA  
GTTCCCTTTCATGAAGATGAGAAGATGCTGCAACAAGCAATGGAACAAGACTTTGTAGGA  
GATGCTGATACTTATCCATGTTTAATTTGGAGTAATGACAGTTTAGATGAACTTATAAG  
CCAGAACTTGGGTAAAATCAAATCCTTTATTAGATTTAGCTTCAGAACATGATAATCTC  
ATGCAAGGACTACTTGATAAGCGTGATAACGATGTAATGTTGCTGTTTCACTGACTTC  
CTATGTAAGAATCTAACATGTGGCTTTCATCAGATATAGACAGTTATTTAAACCTAGCA  
GATGTTGAAAAAGCGATTGTTCTGAATTTAATATCTATGGTCAACGCTGTTATGTTAGT  
GTTGACTATTCTATGTCATCAGATAATACAGCAGTTGCTTTTTGTTTACCCTTATGTAAGC  
TAAGAAGGGCAGGCAAATGGCATGTTGAACAACATTCGTTTATTTCTTTTCAAGCTGCA  
GGGTCAATTGAAGCCAAAGAAAAGCAAGATGGTATTAATCAATGATGATGAATTCTATGAG  
TGGATTGTAATTTCTATAGTAGAAAATTTCACTTAAACGTTTTATTTTTTTGGATATGATGCA  
ATGGGAGTACTAAAGTAATTCAAATGCTGCTTAATAATACTCGATTTAATTTGCAACCT  
ATTAGGCAACGGACAGGAGAACTGGCAAAGGCCACTAAATTCCTTACAAAAGATATTTGTT  
GAAGGAACAATTAGCCGTCTGGATGACTAAATAATGGAAAAAGCATTATTAATGCTGTA  
TTGCGTGAAGATTCAGTTGGTATTCAAGTAGATAAGCGAAAATCTACACTTAAAATTGAA  
GTTGTTGATGCAATTATAGATGCTCTATTCCAAGGTATGAATCATTTTGAAGATTATGGT

ATGGCTAATGATAGAAAGTTGGCAAGTTGAGCATATGACACCAGAACAAGTAAAAGAATGG  
GTTACTAGCCAAGAATCTGGCTAATTAGACCTTGAGGATGAAATAGATGGTGATTGGGGA  
TTCGATGAAGATTTTTAAAGCGCTTTTTAAAAAATATGGGATGTTTTTGATGTTCTATG  
CTTCTCTTTAGCAGCTATTACGTTAAATATCACAGTTTTTCTAATGAACTTATTTGCTGG  
TGGAATTACATTAACAGTAACATTTATTATATTTGGCGTTGGTTCTTGGTTTATTAGTTC  
CAAATTACGAAGGGAGCTGATTGAATTTGCCAATATTAACCTTTATCAACCAAACAAT  
GATCCGCCAGAAGCCGGTAGTGTTAAAAGCTATTTTCCAGATGGAAATGATGCTCAAATA  
ATGGAAAGTTTGCTTGGAGATAATAATGGATGGGTTTCAGCTCGTGCAGCATTAGGAAAT  
TAAGACCTATTTTCTATTATTTTGCAACTATATAGTGATTAGCAATAGTTAAGATCAAC  
GCTGAAAAGAAAAAGAATCGAGGAATCATTATAATCCAAGTACTAATGCTAATAAACAT  
GGGTTTTGGCAATCAATGTTTACACAGTTGCTTTTAGGAGGCGAAGCATTTCGCTTATCGT  
TGGAGAAATGCTAACGGCGCTGATATGAAATGGGAATATTTAAGACCATCTCAAGTGAAT  
ACTTATTATTTGAGTATGAAAATGGAATGTATTAGAACATCACTTTTGATGAACCTAAG  
ATAGAACCTATTTACGAGCACCACAGAGCGATTTGATTCATATGAACTACTATCAATC  
GATGGTGGTAAAACCTGGAATTAGTCCACTTCACTCTTTGAGGCGTGAATCAAAAATCCAA  
AGAGCCTTTGATAGATTAACAATTACTTCATTGAATAGTTCATTAAATGTTCTGGTGT  
CTTACTGTTAAAGGTGGTGGGCTTCTTAGTGATAAAGATAAAGCATCTCGTTCTCGTTCCG  
TTTATGAAACGTTCAAGAAGTGGTGGCCCTGTAGTATTAGATGACCTTGAAGAATTTACT  
GCACTAGAAATTAATCAAATGTAGCTCATTATTATCACAAACAGATTGGACTTCTAAG  
CAATATGCTAAAGTATATGGGCTTCTGACAGCTATATTGGTGGACAAGGTGACCAACAA  
TCTTCAATCCAACAAATAAGTGGAATGTACGCAAGTGCATTAAATCGCTATTTAAGACCT  
GCTATAAGTGAATTAGAGTATAAGTTTAGCGACCACATAAGCGTTAACATGAGACCAGCT  
ATTGACCCTCTTGGTGATAATTACTTATCTACTATTAGTACTGCTACAAGATGGGGTGCA  
TTGGCTGAAAATCAAGCTACGTTTGTCTTGCAAGAAGCAGGATATATTACTAAAGACCTA  
CCGGCTCCTGAAAATACAAATAAAAAGACAACCTGGCCAAAGTAATGAGCCAGTACCATAG  
GAAAGGAGGTGGTCATGGTGATTATTCTTAGAAAGGAGGTAAATGATGACAGTAATCGAC  
ATTAAGGAGATGTACTTGAATAAGTTACGGATTGATGTATGACTGGTTTGAATCGAT  
TATACAAGTCCATCTAAAGTTAATGATGCCTTGGTAAATGCTGATGATGAAGAAATTGTT  
TTAATTATCGCTTCTAATGGCGGAGATGATTTGCAGCTTCTGAGATTTATACTGCTATT  
AAGATGAATGGTAAACCTGTAACCTGTAATATTTCAAGGGTTGGCAGCATCTGCAGCATCG  
GTAATTGCAATGGCTGGCGATAACGGCAAATATCTCTCCAACAGCCCAATTGACGATTCAT  
AAGGCTATGAGTGGTAGCCAAGGAAATGCTGATGACTTTGAGCAAGAAGCTAAAGTTTTA  
AATGGCGTTGACCAATCTATTGCTGCAGCTTATGAATTAAAAACCTAGTATGAAACAATCT  
GACTTATTGCAGTTGATGTCTAACGAAACATGGATGACAGCTCAAGATGCAGTGGATAAA  
GGATTTGCAGATAATATTATGTTTGTAGATGCTAATAAACCAGTATTTTCTAACTAAATC  
GGCAATATTCCAACCTGCTGATAAACTTACTGAATTTATGAATTTTCATGAATTTCAAAAAT  
CGGAATAACCCTCCGAAAGAAGAAACAATTATAAAAAACAACAAGCTGATTTACGTTCT  
CGTAAGTTGGCTATTTTATTAGGAAGATAAAGGAGACTCAAATGGGAGTTAAATTAACAG  
TAAATCAATTGAACGAAGCATGGATTGCTTCAGGAGATAAAGTCCAGACTTTAATGACC  
AAATTAACATGGCTCTTAATGATGATAATTTTTTCAGCAGAGGCTATGTCAGAATTA AAA  
ATAAACGTGATAATGAAAAAGTTCGCCGCGACGCATTGAGAGAACAACCTTGTTGAAGTTC  
AAGCTGAGCAAGTAGTTAATATGCGTGAAGAAGAAAAAGATCCATTGAACAAAAGCGAAA  
ATGAACTCAAAGACAAATTTGTTAAAGACTTCGTGAATATGGTTCGTAACCCTATGGCAT  
TTCTCAATACCGTTTCATCTAAAACCTGAACTAGCGAAAGTGATACTGCTGCTGGGCTTA  
CTATTCCGCAAGATATCCGTACTATGATTAACACATTGGTTCGCCAATATGACTCGCTAC  
ACAATATGCACGTGTTGAGAGTGTCTACTTGAAGCGGTAGTCGTGTATATGAAAAAT  
GGACTGAAGTTACACCGTTGAAAGCAATGGATGAAGACGATGGAATAATTCCTGATCTTG  
ATAATCCACTTTTGACAATTATTAATACTTGATTAAACGTTGTGCGGGAATCATCACTG  
CAACTAATACATTGCTTAAAGATACAGCAGAAAATATTCTTGCATGGTTATCAAGCTGGA  
TTGCTAAGAAAGTGGTTGTGACTCGTAACCAAGGGATTATTGCAGCAATGGGTACAGTTC  
CTAAAAACCAACAATCGCTAACTGTGACGATGTTATTACGATGATTAATCCATCTGTTG  
ATCCTGCGATTATCGCTACTTCAAGTCTTTTGACTAACCCAGTCAGGGTTGAATAAACTTG  
CTTTGGTTAAAACCTGCTGAAGGTAAATATTTGCTCAAACCAGACCCAACAAAACCTAATT  
CATATCTAATTAAGGTAAACAAGTTATTGTTGTTGCAGGTCGCTGGCTTCCAAATAGTG  
GATCAACAGTTTATCCACTTTTCTATGGAGATATGTCTCAAGCTATTACATTGTTTGACC  
GTGAAAACATGTCACTGCTTCCAACAAATATTGGTGTGCTGGTGCATTTGAAACTGATACTA  
CTAAAATTCGTGTAATCGATCGCTTCGATGTAAAAGCTACTGACTCAGAAGCTTTAGTTA



CTGGTTCATTTACTGCAATTGCAGACCAAGTAGGTAACCTTCAAAACTACAACGTCTACTG  
CCGTATAATCAGGAGGTATTTAAATCAGTCTAACTGTTGATAACTTACTAGATCAGTTAT  
CAGAAGATGATGATCGCAAACCACAACCTTCAAATTTATTTTGATACAGCTACAGCATATG  
TGAAAAATGCAGTGAGTGCTGATACAGTTGATGCTCCATTTTTCAATGTAGAAAACGTTT  
CTCCAATTTATGATGTAGCTGTTCTTAGCTATTTCGATGGGTTTGTGGATTAATCGTTCTA  
CAACTATGCCTCCTACTACGGCTGTAGATCACATGGTTCGGTCAGTTGAGAGGTCTTTATT  
CTTCGTGGAAGGAGGAGCAAGGTGGCCAAAACCTTACAAACCGAATGATTATCACAGAAAA  
TGTAAGATTGGAGTTACTAAAACAGTAACTACTCCAACCTGGAGGTAAGAGTGAAATAATT  
GACCCAGCTACGGTTTTAAATGTTTCGATTTGCGGCTAAAATAAGATCACTTGCCTCCAA  
ATTTAGATAAATTGGTACAACCTACGGCTGATACTTTTCGACATTGCAATTAGACAGAATAAG  
CTAGTTACAAAGAAAATGTTTTTTCAAATAGATGACGTTCTTTACAACATTATTAATATT  
TCTTCAGATGGATCTGCAAAGCTTATTAATTTGATATTTTACTCTTCAAGCGAAGAAG  
AAAGGAGCATAATATGGCTACTTTTGAGGAAGCAATGCAATTAATGATTAATCAAGCAGA  
ATCATTAAAGCACAAAGATGACTGTAGAAGATAAAGCCGTAGTTACAAAGGCGAGCGCTAA  
AGTTTTTGAGCAAGCATTAGCTTATGAAGTTAGAAATAGACACTACCGTCATCGTGATAC  
TGGAGAAGACCCACATTTAGCTGATAGTATTGTTATGAAGAATAAGAATATTGACGGTGT  
TAAAGATGGCCAAAGTGTGTCGGATGGGAAAGAAGTACGGAAAAACGTACTCATACAA  
AGTTATATCGCTAATATTATTAATAACGGTAGTCGTTTTCTCAGTTCACAACACGTTT  
TGGAAGAAAGTACAAAAAGCCTGGTGAAGTTGCAGTTCATGCAGATCATTTTATTGAAGA  
AACAAAGAAATGAACCTGATTGTTTCAGCAAGGAATATTAAGAGCTGAAGCTGAAGCAATGAG  
GAAAATAATTAATAGAAAAAAGAAGGAGAATAACTTATGAAAAGACCAGTTGAAATTGTT  
CAAGACATAATTGCAGCGAGTGACTTCCGCATGATGAAATCTTTCTTGATTTTATTCCT  
AGTGA AAAAATTAGATTCTAGTAATGAAACTCAGGTTTTACTTACACAATCAGAGAATGGT  
CCTAATGATTATTGTAACCTCAGATTTTATTTTCAGTCATGTATGGTGTATTATTTCAAATC  
TTTTACACGAACGCTGAAGATTCGGATATAAATATTGTTCAAAGCGAAATTAATCTGATG  
AAATCATTATACAAAATGACTGGCTTATTGCGCAATCAAAAAGTCACTATATAGACCCT  
GATACACGGCAAATTATTA AAAAATTTATCGGTGCAACGCATCATGACATTAAGCGAGATA  
GCAAATAGCTAACTCATTTTTTATTTAAGAAAGGAATTTAAAATGGCAACAAAAGGTTTA  
AAAATGGTTACTTTGCTCTATTGGATGAAAAGGAGTGATCGTTAAAGGAGACAGTGGT  
TTATCTACCAATGGAGTCTTCCCAATTATTGATGAAATGTTAGGTACAAAACCTGCAAAC  
ATCATAATTTATCAAGCGCTCCAACAATGATTTATGGTAATGATGGTCAAGTAGATGCA  
GATATTGCAAAAGGAACCTCCTCAGTAGCTTTTGCATTTAATGGTCTACCAGTAGATATT  
AAAAACAAGTTGCCTGGTCGTGTAACGATACTAACGGTGGTTATACACAAGGAAGTATT  
CCAAAAGTAGCAGTCTTGATTCAAACAACCTACAATCGGTACTGCGAAGCCACAATATATT  
GCTTTTGCTGCTGGTAAAATGAACGAAACAGCAATGAACTTGCAAACAATACTAATGCA  
GTTGTTTCGTGTTGATGACGCATTGACATTTACTGCATTCTCTGGAAGTCGTTGGGGCGGA  
GAATCTGTCAAATCTTTGATGGTGGAGATTCAAATTTACTGAAGACGTGATGATGGAA  
GATGTATTTAATGGTTATGCTGGAGATGAAGTTAATAAATTATACAACGACTATAACTA  
GACATTAATAATTA AAAAGGCGGAGTAATCCGCTTTTTATGTGGGATAGATAGATGGTCTA  
TTATATTAGGTTTCGATACCTGACTATTCCTTTACAAAAGTAAAATAGAGGAGATATACA  
ATGAAATTATCATTACCAGAAATTAGAGAAGAATCATTGAAAGTTAAAACCTTCAATTAAG  
AACATTA AAAAATGCAAGCCTACCAATTGGAACCTAGCAAAAAGCGAAGAAAAACTTGCT  
GCAGTTCAGGATGGAACACTAGAAGAACTAACCAAAGCAATCGCTCTTGATGATATGTCA  
GTAATTAATAATGCTGAAAATTTATTACTGAAATCTAGGTTTAAATAAAAAGAAGTA  
GATAAATTACAAGAATTTGACCGTGGGCAATTTATGATTTTACAATCTAACTTGTTCTT  
TCACTTCAAGGGTATGCTGATGATCACATCGATACTATGTTTACTGAGGAGGTTGACTCT  
GCCGAAAAAAAAGTTCAAGCATTGAAGAACGAAAAGGCTACCACCACAACCAATTAATAG  
CTTTACAAC TTTTGAAAAAATATTATCGAAAATTGGCACTGGACATTAGAGCAAGTAG  
ATAATCATGATTATTGACTTAATTGATGTGTTTAAAGCGAATGAAGATAATATAATGG  
CTTCATTTGATGATTTGAAGAAAATGTTTGGACAATAATAGATATTATCTTGTAATATGA  
ACTATATAGGGGAATAATTTACTTATTA AAAAATCAGGAGAAATTCATGAAATATTGCCCT  
AATTGTGGAAAAGAAATAATAAGTTCATCTAATTTTTGCTCAAATTGTGGTTTTAATTTT  
AACCATAAAAAC TGAATTAACAAGAATCTGGTGCTATTACTGTACCTAAAAAAGTGTT  
GAAGAATTCAAAATGCTTACTTAGCTAATATTTATTTTCGCTGTGATAACTGGGATTTAC  
GTTGTTTTAAAATTTTTACAAATTTTTGGAACATATACTATTA ACTTGAAAATTTTTCCA  
TTTATAATTTTAGCTTGTGCTATCTATGCAAATGTTATTAATAAAAAGTTCAAATTA ACT  
TATACAGCTTCAATTAATTTATATTTTTAGTATATTTTCAATATTTTTCTCAGGATTT

CTATCTCTTGGACTTATGTTCTATTTTGCTTTAATATTGATAGTAGTACCATATGGACCA  
TCGGCTGTCCTAAGTGCAACTTTAGCATATGGAATAAAGCAGAACATTTTAAAGTGATAA  
AAGACTCAATTCAATAAAAAATAAAACGTCTAGATGAATTAGGCGTTTTTTTATACTCAA  
AATTAGAAAGGAGTAAAAATGGCATATATAATGGTTGATTCAGTCACCCACAGGGATTGAC  
TTAATGAGACAAAGGCTGTTGAGGCTATCAACCGCTTAAAATCAGCATTAAAGATAGT  
ACTCGTGAATGACAGATAAATGAAGCACAGGCTAAATCTGCTGAAGATGCTGTTTCTGCA  
TCAAATATCGCTATGAAGGTCTTAGTGAAGCAATGGAAAAGCAAAAAGCTTATATTGCT  
AACCTTTCAGAAGGTATGAAGACAATCAATAGAGATACTGATGCTGGTGAAAAGGCTTAA  
CAAAAATATAATGCTCAGTTAACCACGGCAGAACGTTCTCTTGCCTCAATGACAGTGCAA  
CTAAACCGTGCGAAATCAGCTTATGAATATCAACAAACAGGAATTGAGGATTTAAATAAA  
TCTCTCAGTCGTAATGATAAACTCATCCAGTCTCAAATTGATTTATGTGAGAAAACCTCGT  
AATAAAATGGGAGCTGCCAAAGCTGAAGTTTCTGGTATATCTACTTCATACGCAAAGCAA  
ACTGAGATTTATAGAGCCCAAGTAACTGAGCTTAAACGTTAAGAATCTGCTGAGGGCACA  
AGTTCAGAAACTCTTGTGCAACAAAAACAAGAGTAAATGAAGCTGCGTCGTCATTATTG  
AACAAACAGAAATAAACTTTTAGAAGCTAACTTGGCAGTTACAAAGATGCAACCGTTTAAAT  
TCTGAGTCTCTCATTGTTAAAGGTTGAGATACTGTTTATCAAACAACCTGAGAACGCTACC  
GATGTAATGACAGCAGGATATCAGAAAGTAAAAAATGCAGCATATCAAAGCGCTTTTGGT  
ATTGCAGCAATTTCGAGCGGCAGCTATAAAAGGCTCTCAAAGGGCAGCTGATTTGCAGGAT  
TGTTATATTAGAACATCCAATCTTGCTGTAACCTGGTGGAGAAAAAGTTGCGGAAGTGACG  
AAAAATGTTGCTCAAATGCAAAAAGATGGGGCTCAATACTCTGTAGAATATGGTAAATCG  
CAAAAAGAAATTGCAGAAGGTTATCAAGAACTTATTAACGTTGGATATACTTCTACTGAA  
GCTTTGGGTGCTATGCGTTCAGAATCCAAGCCTCTGTTGCTTCTGGCGATGATTTTAAAT  
AATGTATTGAGCGTAACCTCTCAAGCTGTCGATGCTTACGGCATGCGTACTGATAATGCA  
GCACAAATGACTAAAAATACAAAAGATGTAGTTAATCAATTAGCTTATGCAGCAGATATG  
ACAGCGACAGATTTTGCAAGTATGGGTAAAGCTATGGAGTATGTTGGTGATTCATCTCAT  
TCAGCAGGTTTTCAATTATCAGAGGCATCTTCAGCAATTGGTATTCTTTTGAACCCAGGT  
TTAGAAGCTGATAAAGCTGGTACTGGACTTCGTAAAGTAATTAACGCAATTACTGGTGCA  
TTAAGTGATCAGTCAGCTATCCAAGATGATGCTGCTATATCAGAGTCTGCACATAATGAA  
AAAATTGCAGAGCACCAAAAAGAACTTGAAGAAGCTCAAGCGGTTGTTAATTCTGGTACA  
GGGAATACTAAAGCAGCAACTAAAGCTATTGAAAAGCAAAAAGAAGCAATAGGGAAGCTT  
CAAGATAAAGTAGACCAATTGCAATCTGGTGGTGCTGCCAAAGATATGCTTTCTAAACTT  
GGAATTAATAAATAGTGATTTAGTAGATGCTAATGGTATCCTAAAGGATTTAACAACCTATT  
ATGTCCATATAAAATGATCATACAAAAAATATGGGAAGCTGCTGAAAAAACTCTGTTCTT  
CAACAATTATTTGGAACAACAGGGCAACAAGCTGGGATTATTCTCGCTCAAAAATAATAAA  
GAACTTGAAGAGCTAAATAATAAAGTAAAAACCTCTGCTGATGGTCAAGGATATGTTGCA  
AATCTTGCAAAGAAAAATATGGGATCGGTTAAGTCGGAGATAAAACAAATCAAGGCAGCT  
GGTGAGGCTCTTTAATTATGATTGGTCAAAAGTTCTGCCAGTTTAAATCTGATGCAGCT  
ACTTCAATGGCTAAGGCTTTTAAATTCTAAAGAAGGTCAGCAAGGGCTTGAAGAAATAGGT  
AGTTGGATTGCAAAGATTTTCCAAGGTATTGTTGATACTGTCAAAGTCATTGGAACCTCAT  
AAAGATGAAGTAGTAACCTTTGGTAAAATCTTTGCTGGAATTTGGGCCACTAAGAAAATT  
GGAGATGTTATTGTATGGCTTGAAAAATTGAAAAAATCTTTACTTGAATTGAAGCTATT  
GATGCATTATGAGGAGGTTTAGGAACAGGAGGCATTAAATCTTGTGTAGGTAAATGTGTC  
GCTGCTGAAGCTGGAACAGTTGCTTCAACAGTAACTAAAAGAGGCGTAGTTGCTGAAGGC  
GAAGCGCTTGTTGCCTCTGGCGGTTTATCAAAGCTACTTCTTAATTCCAAGACTATTA  
GGAATTATTGGTTCTGTAGGCGGAAGTACAGTCTTGTCTGGCGGAATAAATGCAGGAGCT  
GAATTAATCAGTAAAGATAGTACAGCTCAGAAAAGCTGGTGGAGTTGCTGGCTCACTCGGT  
GGAGCAGCAGCAGGTGCAGCTATTGTTTCTTATCGATCCTGGTATTGGTACAGCAATT  
GGTGCAGCGATTGGCGGAATGGGTGGTAAAAACTTAGGTAAAAGCTTGGGGATTTGATT  
AATTATGGATTAAGAATCTTCATTAATAAAGCGAAAAGCTACCAGTTGCTAAGTTGAC  
CCAAAAGCACCAACAAAAGATATGAAAGAGTTCTCCAAGGACTACCAAGGTTTCTTGGAT  
AAAATTAACAAGGCATCAATGTTGATATTGTGATGAGAAGTCACTTGAAAAAGCTAAG  
AAAGCAACTGCTGATGCTTATGCACAAATGTCTAAAGATATCGATAAATTCGACCAAAAA  
CAAGAAAAGGATTCTAAAACGCAATTTACATTCTAGTTAAAAATGGTGTAAATTACTCAA  
GCTCAGGCTGACCAATTAACAAAGGTCAAAAAGACTCAGACGATAAGCAGAAGGCAGCT  
GAGAAAAGAATCTTGTGAGATGAAGAAGAATACTGATAAATATTATTCCGAGGTGGCC  
AAATCTCAAAAAGTTATGACACACAATCTCAAAAGGATGCTAGTAACCATGCTGCAGCA  
CTTAAAAAAATTAAGTCAGGCAATACCGATGCGCTCTTAGCTATTGAAAAAAAATATGGT

AAAATTCACCTCAATATCAAAAAGAGATGAATAAAGAAATTGCTAAAGAAAATAGTGAT  
TCAATAAAGCTGAAAAAGCTGCTAAGAAGTAACATAATGAAGCGATGGATAAGCTTGAA  
AAAGATTATGCAAAAAATCAAACCAAAGCCGAAGAGCAGATGAATAGTCAAATCAACACT  
GCTACCAAAAATCGCCCAAAAACAAGCAAATGGATCTTTTAGAAGATTTAAAAAATAAAAA  
GGTAAATTAATCAGAAACAATTTATTGATACTATTGAAAAAGCTGACTATGAATATAAA  
GGAGTTAAGGATAAGGCTCAAAAGCAAAAAGATGAAGCTGTTAAATCAGCTAACGAAAAA  
TACAAGAAGACAGTAGCAGCAGCGGACAAAGAACGTGCAGAAAATGGATCAATGTCTAAA  
GCCCAATATGATGAAATTGTTAAAAATGCTAAAAAGCAACGAGATGATACAATTTTCATCA  
GCCAAAAGCAACAAGAAGATGTTACTGATAAAGCACAAAAAACCCATGATAAAACAGTT  
GAATTAGCGAATAGTAAAGCCGATAAAAATGTGAAAGCTGCAGCTAAAGAGCAAGGAGAG  
ACTGTCGAACAATATACAAAAGGATTTAAGGATTCTAGAAATTTAATCAATTCATTCATT  
GATGGAATTAACGGAGTTCTTAACCTTCTTACATAAAGGTTGGGGGAATATTGGGCATGTA  
AGCCTCAAAGGTTTTGCGACAGGTACTAGTGGTTTAGCTCAAGATGAAACAGCTTTAGTT  
GGTGAAGATGGATTTGAACTTGCTCACCATCCAAACCGTGGTATTTTTGCGGTTGGTCAA  
CAAGGCCCTGAAATTCGTACTTTGAAAGCTGGAACCTCAATTCTTCCCCACTCAATGTCA  
AAAGAGTTTCTTTCATTAACAGCAAATTTACCAACTCATGCGGACGGTGTATCTGGCTTC  
CTAGCAGATGCGCTTGGATGGGTTAAATCAAGATATAAAGATGTTACTAGCGTTATTTCA  
AAAGGTCCTAAAGGTGTTGTAGAAGCTATTTACAACGGATTAGGATTAGATGATTTAGAA  
AATGACTTTCCGCCAGGTGTAAGTACTAGGACGGCAAAAAGGTTCTGCCCAAACAGCACAAGAT  
AATTTTGTAAAATTTTACAATCATTTTTCAAAAAGCTGAATCAGATGCAGGAGGTTCA  
CAAGGCTCGCCATCTGGTTCCGGTGTTC AACGTTGGGCTGGACACGTTAAACAGGCGCTT  
GCAGCTAACGGCGTAAGCACAAAGCCAAGACATGATTGACCGTGTGCTCCGTC AAATTTCT  
TCTGAATCAAGCGGAAATGAAAAAGCCGTTCAAGGGAACATCGGAGATATTAACAATTTCT  
ACTGGTGACATTGCTAAAGGGTTGATGCAAACCATTTCTCAACTTTCAACGCCAATAAA  
TTCCCTGGTCACGGTGATATTTTTATCGGTTACGATAACTTATTAGTTGCTCTTAATTAT  
GCTAAAAAAAACCTATGGTCCAAGTTTGTTCATTCCTTGGGAATGGACATGGGTATGAAAAT  
GGTGAATCATAAATGCTCATGGTTTCTATGATATTCCTGAAGGAAATCGTCCTGAGATG  
GTTATCCCCCTTGACCCACAGAAGAAATCAAGAGCTAATCAGCTATTAACCAAGCTAAA  
CAAACAATTCATTCCAATTCATCACATCAAAGTAATTCCTTAGGAGATGGTGGACAGTTA  
GCTGCTTTAGTTTCAAGTATTTTAACTATTA AAAAACGGTCAAGCAGATCCTATTATC  
CAACTTATGTTAGATAAAAACAGTTTTGCACAAGAATTGGCAGAGCCTATGAACAAACAA  
TTAAGTGTTTTAAATGGCCGCAATAAAAATAATAAATGCAGGAAGGACAACATAATGACAT  
TTTCAGTTAATTAGAATGGTGTGAACTATCTGAATTAGTAAGTGGATTACACAGCAATTG  
ATAGAGGGTTTGGTTAAGTCTGGAATAATACTACTATCAAATCAAGTAGCTAGATATGGTC  
AATCATTTGTAAAGAATACATTAAGCGCAAAAAAATTACTATTACCATTAGAAAAAGCG  
GAATTC AAGTGATTGGATAGCCTTAAAAAGAGAATTAGCAAAGGTGCTGGACGTCAATG  
AACCAGCGCCTTTAATTTTTGGTGATTAGCCTAATAAAGTTTGGTATGCAGTAGCAGATG  
GAACTCAAGCCGTATCAGAAGATATCTCTAACTTAGTTGCTACTGGAACCTTACATTTA  
TAGTCCCGGAAGGGCACGCTTATTCGACATATACTAATGTTTTAAACGCAGATAATTCAG  
GTGGCGTTAATGGTTCTAACACTCCTAATGCTGATGGTTCGGTTGGTATCACAATTAATA  
ATCAAGGAACATTACAGACTTGGATTGATTTAAAGCTTACCAATAATCATGACAATGGGT  
ATTTTGGTATTGCTGCGGTTAACGGAAGCTGAGAATTAGGTAATCGAGAAGAACTCGATG  
GTGTTACTATCAAGCATAGCGATATTCTTTATGATAGTAAA ACTGATCCTAAATTTTCTA  
AATTTGTATCAGCCG CAGGTCAACCCCATCCAGAATGGGCTGGTGCAGGAACAAATGGAA  
CAATTTGGGTATCAAGAATATCATTATAAGTCTTCCAATGGGCAACTGAAAACAATGAAGG  
CTGTTAAGTTGATTGATCCTGGAAGTCAGACAGGATTTCTGTTGGGGGCATGACAGAGCTTG  
TGTTACCACCAGATTAACATGGGGATTCTGGTGCAGTTAATTTCTATGCTAGGTTTCAGAT  
TATTTACTTGGACA ACTGTTCTCGGCCAAACTGGGGCGATGCAAATTC TAGTCACTGATG  
AAAAGGATAATTTTGTGGCTGGTTATGGGACATTA AAGGATGATAAAACAGGAAATATTC  
GTA CTGTTGGATTTTGGATTGGCGGACCTAACAAAGGGCAATGGAAACATATTCCTTATG  
TCGCAAATAATGGAGAACAAACTGGATTA AAGATAATAATACGATGCTTAATGATAATC  
GAGGGCAATTAGAGTTCGCTAAACAAGGAGCAACTCGTGGTTTTTATTGGAAAGGTGGTC  
ATCAAACAATTGTAGTTCCAGA ACTTCAAGATGTGCAATTCATAAGGTTAAGTTCTTCT  
TTGGGA ACTGGGCAACTAACCCAAGAGGAACGATGACACATATGGTTATTCGCGACTTTT  
GGTGCCGCAAAGACTTTGTTAATACATGGAATGACGTACCAAATCGGTATAATAATGGCT  
CAGTCGTTGAAATTGATATGGCTAGTGGTAATGTATCCAATGATGGAATATCAGCCAATA  
CAGAGGTAGTAAATGGAACACAACCTTTCAATATTCCATCTGGAATTAGTCAGACCAAAA

TCATTCAATCATCTTGGAATAATACACCACCAGACGTTGAAATATCATGGAAAGAAAGGA  
TTTTATAATGCTCATTAATGTTTTAAATGGTTCATTAATAAAGTAGCGATCTTAAGTAA  
TGAACCTCCCAATGCACCTAGTTATTATAACGATGAGTTTCATGACTATTTAGAACAAGG  
AGCAACTACATTTAGTTTTACAGTTGCTAAAGTGATTAATAATCAGCTACAGGATTATAC  
ACATTTCTTAAGTGATCAAAGTTATTTTAGCTTCAGGAAAAATGGTCGCGACTACTTGAT  
GACTCCTTCATCCGAGCAATCAGTTCATGAAACAAGTACTGAAATTTTCAATTTTCTGCGT  
TTCTTTAGACCGAGAACTTATTAATGAGCAAGCAAATTCATTAGCGAATACTGGAAGCCA  
TAATATTCAATGGTATTTTGACCGAATGGGTTTAATCTCTAGGACTAAAATTACTATTGG  
AATTAACGAAGTTTCAAATCTAACACGAGTGCTTAATTATGATGCGCAAGAATCTACATT  
ATCAAGACTTATTTTCGCTAATCAATAATTTTAACGCTGAATTTGATTTTGTAACGACTTT  
AAATAATGATGGTCTCTTGGAACTGTTGTTCTTAATATCTATAAAGAAAATGACGGTCT  
AAATATTCAAGGTGTGGGAACAAAACGTGATGATGTCAGACTAACATTTGGCAAAAACAT  
CGAGGATCTCGAAGTAGATGTTAGTGATGACGGATTTTTTAACGCCGCTTATGTGACTGG  
TGCTGACGGTTTTAGTTGGAAAAATTACTATTTTCAGTTCCTTAAAATTCAGACGGTGTAGA  
AGAGTTCTATAAAGAAAGGGTCTGAAGTAGCTCATGCTCGATTATCTGCCAAAATGTT  
CCCTCCTCAATTGAAAACAGACACAGGAGACATTTGGACAACTCAGACCGAACTACTGA  
ATATAAAAATGACAATGATATGTGGGGCTATATTGTCAGTCAATTTAAGCAATATGCCTA  
CAAACAAATCACATATACCGTTACTCCTTCATCTACTTTAGTTAATCAACTTATTGGAGA  
TGGAAGACCTCTCCAAAAGTGAGATACAGTTATTATCCAAGATGATAACGACATGGATAT  
TGATGGCAATGTTGGTCTAATTTTATCTGCAAGAGTCTCTGAAATCATGACATCAGATAC  
AAACCCTGCTAATAATAAAATTGTTTTTTCAAATTATAAAAAAGTAAAGAGCGATGCTTC  
TTCTGATATCAAAGCGATTGTCAGTCAAGTCAATGATGCTACACCGTATTTTCGCAGT  
CATAGCAACTTCAAATGGAGTTCAGTTCAAAACCGGCACTGGTTCATCAACTTTATCAGC  
TCATATCTATAAAGGTTCTGCAACGACTGAAGCAACCGCAGACAGCTACGAATGGTCGAA  
GGATGGAACACTATTGTCGCTCCAACCTCAGACTATTACAGTTGATGCCAGCGGAGTTGCGGA  
TAAGGCAGTTTATAGTTTTAAAGCAACGGTTGCCGGTAAAGTAGTCGCTAGTCAGTCGGT  
GACTTTCACTAATGTGAATGATGGAACAAATGGACGTTCTGTTACAAACGTTTCTCAAAA  
GTGGCGTGTGACAACGACTACTGCAACACCAACGCAAGCTTGGTCAGACGCAGGTTGGCT  
CACTACTCAACCAACAACGACAGCTACTGATAAATATCTATGGTCTATCACTCTAACAA  
TTTCAATTTAGCACCTTTAACGCAAGATGTTATTGAACAAAAGCAGTTTATGGTGATAA  
AGGCGATAAGGGAGATACTGGAAAAGATGGAAGAGCAGGTAAGGACGGTGTGGAATTA  
TTCAACTACAAATACGTACGCTATATCTTCAAGCGGTACAGTTACCCCAACGGCTGGATG  
GAATTCACAAGTCCCTACTTTAGTCAAAGGGCAATATCTCTGGACGAAAACAGTTTGGAA  
TTACTCAGACGGAACGAGTGAATCGGCATATACAGTCTCTTACATTGCGAAAGACGGGAA  
CAACGGTAACGATGGAATTGCTGGTAAAGATGGTACTGGTATCATAACTACGACCATTAC  
CTATGCAGGCTCAACAAGTGGAACAACAGCACCAACTAGCGGTTGGACTTCTACAGTTCC  
GACAGATGCAGCAGGTAGTTATCTGTGGACTAAGACCGTTTGGGCTTATACGGACAGTAC  
CAGTGAAACAGGGTATTCAGTTGCGATGATGGGAGTTAAAGGCGAAGAGGGAGATCAAGG  
TATTCAGGTATTCAAGGTGTTGATGGACGTCAAGGTATTCCTGGACCTAAAGGCGCTGA  
CGGAAAAACACAATATACACATATCGCTTACGCAAATAGTGCCGATGGTAGCCAAGACTA  
TTCAACTTCTGATTCTAATCCTACCTATATCGGGATGTCTGTTGATTTTAACATCAATGA  
TTCAACCACTCCGAGTGATTACTCATGGACACTCGTAAAGGAGCGGATGGAACGCAAGG  
GACACCGGGTAAACCCGGGACAGACGGTATGACACCGTAGTTTCACACAGCATGGACTTA  
CAGCGCAGACGGTACTGATGGTTTCACGACTGTTTATCCGAATTTGAATCTAGGAGATAA  
TACCAAACTTTTGTGCGCGCAGAGTATGAGTTAAGTAATATTAGAGGTTCTATTAGAAT  
AGACCCATCAACTCAAAAAACACAGGATGGAGATTTTTATCATTTAACCGTTAAAGCACC  
AAGAGATAATTATCATTGGTTTATGATTCTATTTAAGACCAAAGTCAACAATGCCTAATAT  
GACGAAAGTCGCGATTAAACCAAATACAAAATATACATTTAGTGTTATGCTAAAAGGTAC  
TGGACAACATACGATTTATGCATACCAAAAATTGGACTGCTCCCAACACGCCTTGGACTGT  
ACAAATTAATCTAACTAGTGAATGGAAGATATATACATTTACAGTAACATCATCAATGT  
TATTCCAGATAGAGATGTTCAATTCTTTATAAGAAGTAACAATGGAACAGAAATTAATCT  
TAAATACCCTAAAGTAGAAGAAGGCTCAACTGCTACTCCATAGATGCAATCAGCTAGCGA  
AGTCACAACCTGCTGATTATCCAAGCTACATCGGTGAGTACACAGATTTTTCGCAAGCTGA  
CAGCACTAATCCATCCGCTATACTTGGAGTCTGATACGGGGGAATGACGGGGAAAGAGG  
TCTATAAGGATTAAGGTTGACCCTGGCGCAACTGGTATCCCCGGACAACCCGGAGCTGA  
CGGAAAAACAAGCTATCTGCACATCGCCTATGCCACAACTCTACTGGTTCGGCTGGATT  
TGATGTATCAAATGCGACCGGTAACCTTATATTGGACAATATACAGACTTTACGAGTGC

TGATTCTACAGACCCAAGTAAGTACACATGGAGCTTGATTAAGGGTGATAAAGGCGAAAA  
GGGAGATACTGGAAATGATGGGAGAGCAGGTAAGGACGGTGTTGGAATTAATTCAACTAC  
AATTACGTACGCTATATCTTCAAGCGGAACAGTTACCCCAACGGCTGGATGGATTTTACA  
AGTCCCTACTTTAGTCAAAGGGCAATATCTCTGGACGAAAACAGTTTGGAACTACTCAGA  
CGGAACGAGTGATTCGGGATATACAGTCTCTTACATTGCGAAAGACGGGAACAACGGTAA  
TGATGGAATTGCTGCTAAAGATGGTACTGGCATCAACACTACGACCATTACCAATGCAGG  
CTCAACAAGTGGACCAACAGCACCAACGATCGGTTGGACTTCTACAGTTCCGACAGTTGC  
AGCAGGTAGTTATCTGTGGTCTAAGACAGTTTGGCGCTTATACGGACAATACCAGTGAAC  
AGGGTATTCAGTTGCGATGCTGGGAGTTAACGGCGATAAGGGAGAGCGAGGCATCAAAGG  
TCCTGCTGGAAACAACGGTGACCATGGTAAAATCGTTTCCGATACTGAGCTAACTACACA  
CTTCAAAGGCTTGACTTGAAGTATTTAGGTATGTCTGACCTTACAGCTAGTGATGGAAC  
AGTTATATTATCTGGCACCGAATATTATTGGCCGGGAACTAAGTGGATATTAACGAAAT  
AAATGCACATAATATCAATGGTGATAATCTAAGTGTTACAAACGGAACTTTTACCGACGG  
GAAAATAAAAAGTACATGGAACTCAGCTACAGCATCGTGTAGCACGCAAATTGAAAATAG  
TCACATCAACATGAGTGCAACAAATTCATCATGTAAAGTTACAAATAGTTTAGGACTGGA  
TATCCAACCAGGTTTTTGGGATGCGTTGGACTGATCCAGCTTCTAATCAATCAAGATCAGT  
TTCACTTGATTATGGAACTTAGCTTTTGATAGAAATGGAGTTGCAGCAGGAATAAACTT  
TGATGGTACCAATTTATCAAGTTCTATGCCTATTCAAGCCCAGAACAACAATTGTTAAGTC  
AACTCAGTTTAGCGTTAGTGGGATAGGAATCCGTTTAGACCGAATGATGTCATTTGTTGC  
AGTTACTTTTTCAGGGCAAGCTTCTTCAACGCTTAACTCTCCAACAATTATCAATGT  
TCTTCCAGATGGATTTAGACCAATTAGTCCATACTCAATAGACTATATGGTGCCTGGTAA  
TTCAGCTAATAATGGTTATATCTATTTTAATCCAGATGGTTCAATTAGGATTATGGCAAC  
TATTAATAGTGGTTATTACATTAGGGGAACAAGTTTTTATATCACTAATGATGTTTATCC  
ATCATAAAAAAGAAAGGAATTTATTATGACAGTAAAAGCAACGGGCGAGTCTATGAATCG  
CGAATTTAGAAATGAAAATGGAGAAGTAATTGTTTCATCATCAGCCAATGTTGGAATAAA  
CACCATCGGATCAATGACCCTTAGACTATTAGATGCTCAAAAAATTAAGATTTCAGAAAC  
AATTGTAGAAGAATTAATAATTTTTGATTGATGATGTATTGGCAATGTCCGCTAAATACTT  
GAATTAGAAAGCAGGGGTTATGGAATTAACACAGCTCGTAGAGCAGCATGAGACTAACT  
CAACCAACATGATAAGGAACTGTCTCGACTCAACGACATGTCGGTTGAAATGCAAAAAACA  
AATGAGTGAAGGACTTGCTCGTGTGGATGAATCCAATCGCTTTTTAAGAGAACAGAATAT  
TCGACAATCTGAACAAAATGCGCAAATTTTGCAAGCCGTCATCAAAGGCAATGAAAGTTC  
AGATGCACGGCAGTTTCAGTTGAAGATGCTTGATAAACTCACTTATGGAAATAGATTTT  
CGGAATTGGCGGAGCTTCGGCGGCCATATATACGATTCCCATGGCAGTTATAAAATTAAT  
TAAATAAAAGAGGAAAAATAAAATGGATCAAAATTTAATGATAATCTTTAGTGGTATTTT  
AACAGTAGTCGGCTCTGTAGTCTCTTACTTCAATTCACAGCCTGCTAAAAACATAGCAA  
TGTGAAAAACATTGATGCTTTAGCAAATTTGGCTAATCAAGGGGTAAGTTGGGCACAGAA  
ATACTTCAATGAGAATCCTGAAAAGTTATCTGAAGCTATTAATTATGTGACATAAGAAGC  
TAAGAACTTAAAATTAAGACTAATCCAGCTCAGATTGAAGCTCAGATTGAAGCTTCTTT  
GGCTCAATTGAAAAGAATTTACTGCTGACCCTGCTAAAACAATTAAGATGTTGCACA  
TGCTACATCTGAACTTGCTCAATCAGTATCTAAGACAGCAGATACTATGTCTACTAACGC  
TGAAGAATGTCTAATCTTGTAGACCCAATTATTAATGGAATAGAAGGACTCACTGAAGA  
ATAGGGGGGTATTATGAATGGAATTGACATTTCCAGCTATCAAGCAGAATTGAATGCTGG  
AATTGTTCTTCTGACTTTGTATTTATTAAGCAACGGAGGGAACAAAATATATTAATCC  
AACTTGGAGAGAACAGCAGGTCAAATCACTCTGGCAAATAAGCTTCTAGGTTTCTATCA  
TTTCGCTAGTACTGGCAATCCAATTGCGGAGGCAGACTTCTTTATCAGCGTTGTTAAGA  
CTATATTAGTAAAGCAGTTCTGGTCTTAGACTTTGAAGCTGGGGCAATTAATGCATGGGG  
AAATGTTGGTGCTCGTCAATTTTTGAATCGTGTAAAAGAAAAAACTGGCATCAATCCAAT  
GATTTACATGTCAGCAGAAGTACTCGTCGGTTTAAATTGGAGTACTATTTCAAATAGTAA  
TGCTTTGTGGGTTGCTCAGTATGCTTTTACAAGTCTACTGGTTTTTCAATCAGAACCTTG  
GTCAGATGGCAAAGGATATGGCGCTTGGAGTTCTGCTGCGATTTCATCAGTGCAGTTCGTC  
ATGGACTTTAATGAACTGGAACGGACACCTTGTTTTAACTTGGCTTATATTGATGCTAA  
TCAATGGAAACAGCTAGCTAGTGGAAGTTCTACATCGCAAATAACAGCAACTCAGATAC  
TAATTCAAAATTGGCGGATGATGACCTTATGAAATTTACATATCAAATTATTGATGCAAA  
AACAGGAAACACGCAAGGAACTATTTACTACTATGATGGAAATAAAGTAGTTGCTTTATC  
TCATGAAGATCAACCTAAAATTATCCGTCAAATCTATAAAGAGACGACAGGAAAAGACCT  
GAAACAGTATAGTTGGAGAAGTATGCTCCTTGGTACGTTCAATTCATGCAAGCAATCAA  
CCGAAAAACAGTAGATGTTGCTTGGAAATAAACTCTGTTAGAATTTTTCCAAAGAATTA

AGAATTGCCCGACCTGAAACTATTTTTAGACTACTGGTGGTTTTGGCTGATTATAG

>NewGenomeName\_71

TTCCCGCGAAGCCGCCTGTGCGGTGCGGTGGTGGGAAGAAACCGGATAAAAATAGCCGCATT  
GTGCAGATATCAATTGAATTTTCGTGCTGCTGTGTGATATCTGAACAATCACAGCGTTCAG  
TATACATCAGTTTTTAACTCGGGGACTCAGAACGTGACATGGCAAAGCTGGAATGGTAAA  
AGCTGGAGCAGGCATTCCGCTGCCAACATGCTGAAACGGGAATAACATTACTAGAATGGT  
GCCGGAAGAAAAAGATTCATTGCAACACCGCCAGAACCCGTATAGAAATGGGCAAAATCG  
ATCATGAACGAGATAATTAACCGGCACATGAAATAGATCATGACATCTCAGATGAAGGAC  
CCATCAATGACGCGGGTTCCGCGCATGAAAAATGTGCAAAAAACTCTGAATAAAACAGCG  
CAAACCTCGGTAGCAACGAAACGGATTGGTGGTTCCCGGCTTTTGCCACCTTCAAACGCTT  
TATCTCAGAGAAACCCCCACGCCGTAAGAAACCGTCGATATGCGAAGTGTCTTGAGGCAG  
AAAACCTCATGGATGGTGCCTCCGACAAGCTACTATTCGAGGGACTGTTGTTACCAGGG  
CCCGCGCACTTTCAGTAACTAAGGCCCTTAAAGGGATGGGCCCCCACTTGGCAGAGGCAA  
ATGTCGTGTAAACCCGTGTTGCTCTTACGGCAAATTTCTCCAAGCTGATCAGCCCCTTG  
ACCGAAATATTGAACGTATCGAGTCTACTGTACGCTGCCTGCTGACGCAGGACGTCATGG  
GTGAGACAGCAGCATAACTTCGTGATGACCGGGAAGGAATGCACGCTGCCATAGATAAAC  
TCACGGCTGAAACCAATATTCTACCAACCAGCGTCGGGGCGTTGTTACGCCTTTCAGAG  
ACACCGTGTACCGCTGCCTGAATTGAGTAATTCGGGGAGACTGTACGACATTCGGGAGG  
AATGACCCGCGAAGTGATGAGCCGACAGAAATTACCGAGGCTGAACTACGTCGGTTCATC  
ATGACCAAACCTGAACAATCCAGGTGGCAGCTCAATCACATCTACAACATACTGAAGGGA  
AAAGGTGAACTGGTGACCTTCAGTATGCGATCGAGGCAGCGCCAGTTGTTCCGGAGCAGG  
CACATTA AAAATATTATCATGAAAGCACGCCGGCCGGGATTTCGCCACGGCCAATGATATA  
AATCTTCTCTACCAGCCATTATGCATCCCGCTTCTCAACTGCGGGATCTTCGCTCAGGAT  
AAACAGTCTGCCAATGAAATTCTCCGCACAAAAATTGCAGTACCGATTGATCATCTCCGT  
GATTGGCTAAGAGCCTCATTCACTATCGTTGGACGTCGCAGAGGTGCCAGCCGTGGCTAT  
AGCCTGATTGGTCTCGTCTCGAGTATCAAGTGGTAAACCTCATTCCATTCAAGAACGATC  
CAGCGCCTGCATATCTCAGATCAAGGTAAAATTTGCGCGAAATATCCGGCTATGGCGGAA  
GAACTGCGAGTCAGTACTCTTAAAGCCGTCTCTGTTGAAGGCATTATTTTTGATGGGTCA  
ATAGCTGAAGGCGTAGGTGGTGATTTTACGAGATGAGTAACCAAGCACAGGAGATCACT  
GCATCAGGCTTACTGTTGTCGACACGGAATTATATATTCCATGTATACATCTGGTGGCAG  
GATACTCATTACAGCACCAAAGTTCGGGATAGCGGACTGAAGCTGTCACGCGAACAAAGG  
ACGTACTTTGCTACGGTTGAGAACGCAATGAACATCAAGCTCACTGCCGAACCGAAGCAT  
TGGAACATCAATAAAGAAACGGTATAACGTGAGTAAACGAAGCAGGCGATTCCCTCAAGT  
CCACAGGACGCGTGTCTAACGTCCGACTACGTGTTTTTCAGTGCCGAAAGTATATTGCAG  
GCCGAATCATTCTGATCGCCACCGATGTTTGTATGACATTGATAATGTGACAGGCACG  
AAGACCAAAGCTCAGTCTCCACGTGAAGGAAATAAAAACGAGTTGCGGCGTACCCTGATG  
AATGATCTGCTGATATGGGAACTCCCGGATCCTAATGAAGGGTATGTTTGTGGAGCAGAA  
ACTGCCGAAGGGATGGAACACTGAGACCGCTCTTCGCTGAATGTTGTCAAACGCAGTAAT  
GGCGAGGAGTTGCTCACTGGTGTGGGCATTTTCGATGTTTACTTTTTCTCATCTCATT  
TCGCAGGTCAGTCGTATGTTTATCAAAGCGTCTTTGGGGGCGGAGCTCGATAATCCCGGT  
TATGCAGTTATCCTGAAACTCCGGGAGCTCTAACCGACACGTCATATATAACAACGAATTG  
CATCTTGAGCAGCCTGATGACGACGATACGCCCCACCCTGGCTGGCTGCCAGCCAATCAG  
AGGAAACTTGTCTGACCGCAGTAATGAAAACGCTTCTGAATAATGGAATAGCAGGGATC  
CGCTTGTGAGGCACATTATCGGAAATGAACATGTATGTTTATGACGCGAAAGACTGCAGG  
AATGCACAAGACGGATGCTTCGATGATCAGCTCATGAGGCTCATAATTGCCCCGGTGATG  
CGCGCCAGAATGCCGGGGGGGGTAAAACCGACAACGGATAAAGCGCAGTACCACATACTGG  
ATGCGTCACTGATGTAAAAGAAACTAACCCCAAGGCGCCCAAAAACGACAATGGGGCCA  
CGCCGCGCTTTTCTCAGCGCCAGTGTGAGAGGCTTTGTTCTGCCATTGACCGCCAGCCTA  
AATGGTGTGGTGCCCAACAAGGTCTGTGCGTATTGCGATGGCTATCAGCTGCTACGGG  
AAGTTCTCCAGGTATTGAAGGATCGCGGGCGGCCCATGAGTATCCATAACCTGATCGTGC  
GTACCGACAAAGGCGTTCTCGGAATGCAAGCCAAAACACGGACTGATCGGGCGCTTATGA  
CAAACGAGCCAGACGATCACAATGAAAAATTGGCTGAACCTATGAATGCTGAAGTTGCCG  
AGGCATGCCGCTTGGCAGTATGAATAAAGCCCGCTCTCATGCCTAAGCGGAACTAACGA  
AAGCGGGCATCAGTTGTATGGAGGTCTGACGAAGCAGCCATCCGGCAGAGCCTGAATTTT  
TGGTGCCTACTGTCAGCCGGAATGGGCTTTTCTGGGACGGGCTGAGCGGTGAGGCAGATT  
TAAATGACAGCCGATGGCTGATGCGTTGCGTCTGGATGGATAACGTTGAGGCAGAAGCAA  
CAGTCCTTGAATGGCACCGGTTATCGATTACGCCATTGACGAATGGTGTGGTGTGTCT

ATACCACGGGTGCTGAAGCCAGCCAGGCCGTGTATGAGTGCATGACACGAGTATTAAT  
CATCGGATCGAACGCCGAACGAATGTACTCAGCGTGAACGCCGATGTGTGCTGCTTGATG  
TACTTTACTGTACATTCGAGCGTCTTTCGGTGATCGCACTCAGTAAGAGACGGGTGG  
TGGCCTTGGCTAAAGCACACCTGACGCAGGCGGCAGCCGTGGGGTCCGGGTGGGTTCAGG  
TGAAAGCTGGGGGGGAAAGACGTATTCGTGAAGCCTGGTTTATCGGCCACACTTTATTG  
AGGATCGCCTCGGTAGTGCTCCGCATGGGATGTTTCCGCTGCATCCTTTCGGGGGGTACC  
GTAAGGATAAAACCGGGGAGCCAGACGGGCTAATTTCCCGCGCCATTCCGGCACAGGACG  
TGGTGAACCTCTCGTTGGGGCCAGCTGACCCGGTTGCTTCAGGCCAAATGCGCGATTATGG  
ACGAGGATGCCACCACGTTGTCAGACAACCACCCGATGGAGCATATCGAACGTCCGGATG  
GCACTCTTGAACCTGAACCCGGTCCAAAAAATGACCAAAGTGTTCAGGTGTTTTACGGA  
TTGAGCCAGATTTTCAGGTTGCCAACCAGCAGTTTCAGGTCATGCATGAATCGTAAAAAC  
TTTTCCACGATACCACGCGAGTTTATTCTACATTACTTGGGCAGGATTCATGTGCGACGT  
CAGGCATTGATATCAGTCAACTGGTGAAACAGGGGGCGAAAACCTTTCGCTAATCATCG  
CTATCTACCAGTTTGCCTGCCAGCAGGTGGATCGACAGTTGCTGCCTCATTTTCTCGATG  
ACCTGCAGATCTGCCGTAATCAGGCAGTGGCGATTCTCGCGAGGATCGCCAGCGTCGCC  
AGACAATTGTCCGCAATGGTGAAGGTGATAATGGTGAACCTGACTAATGATAGTTGTAGGT  
TATATACACATATTGACCTGGCTCGTGTTCAGCAGACACCAACGTTTAAAGGTATAGCGTG  
CACCGGAATGTCAGAGGTTATTCAGGGGCAGACGCCCCCGGTGTAGGCTGTTGTGCTTG  
ACCGGGGGGTTAACCTTCTGGATGTGCCCCAGAAACAGGAGTTTTTTGAGCGTATTCGTG  
CCGCACTGGCGACACCATAAGCACCGGGGGAAATGACGCAGGAAGAACAGGAATTAGCGG  
CCCAACAACAGACACTTCAGCTACAACACGCGAAAGTCCAGATGCGCGAGATGGCTGAGA  
TTGTGGCTAAACAGGAAGCTGACGCCGCCGGGGCACATGCCGCGGCACACCGGGATAATG  
CGAGTGTCCAGCTGGAATCGCACTGACACAGGGGCACCGCTACGTGGATGGGCTTAAGC  
AGGCACATACCTCAGAAATTATTACGGGCGTAAAGCATATGGAACAGCAGCAGTACGATC  
CCCAGTAACGGAGGTTGTATACGTTACAACAGCGGTTCGACGGAAATTTTCGCTCTGAAAAT  
TCTGGCATCAATTGCACCCCGTCATATTACGGGGTTTTTTGTCTACGGAGGTAAGCGTTC  
CGGAAGCGGTGCGCTTCTTCGCGGGGGCGGCGATAAAGCCTTATATACTCAATCCTGCCGA  
TCTGTCTGATACATCGATCATGCGCAGTTATTTATGGATTTTGAACCTACGGTCGAAGAA  
AGCCCGGACAAACTAGAAACACTGCTGGCAGGACTTAGGGCTGTCGATAGAGGCACTCCC  
GCAAAGGACGTCGTCACGGAGACTACCACGGACAAAGATGTGGAAGAGGAACCTCAGACT  
CGTACGGGCGATAACACTGTTGCACCGACGCCCGATGCCAAAGTGGAGCACACGCAGGAC  
GTGAAGGGGCGGAAGTGAAGGGGGGTCTCACCCGCGACGGTAAACACGTCATTCCTTAT  
CAAATCCTAGAGGCTGAACGTGCCGGTAAGCAACAGGACGAACAGGATGCCGCACTTCTC  
CGTGGGCAGACAGCTGGAGTAAAACGCAGGGCGGAACCTGCTGACGTCCTCAGATCCACCAT  
GCCGGTATGCACCCCACTCCGTTATCGGAAAACGAAAAAATTTCCGATGAGCAGATTGCC  
CGGATCAGGGTGATGAATCGGGAAATTTGTGACGCGATAGCTTCTCTCATCCATAATAAC  
TTCTCTCTCCAGGCCAGTGATCAATATTCAGCCCCGTATGCAGCAGGGAATGGTGATGAG  
GATTTATCAGCCGTTCTTAATTCGATGCATGCCGTGCGGGTGCTTAAAACGTGGCAGGAG  
TCCGATCCATATCGCTTCTCGGTTGCTGTATTTATCGACGGGAAGCTCTAGAATGCCAC  
GAATGGAAGACAATACGCTCACTGGACGTGTGCTGAAGTGGCCGGGAATATGCATGTG  
GCTTTCGGAGAAACAAGTGAGTCGTGAGCTGACAACAAGGAAAGCAAACGGGATATCCGG  
AAAACGGCGGAAGAGAATGTGAAGACCGCTGAAGAGGTGCAGGCAGTACCTTCTTCCCC  
TCAGATTAAGGCACCACGGCTTCCGCCGAACCGGTAATAATTTTGAACGGTTACTTTGC  
GATTCGCATTCAGAGGCAGAGGCGATTATGCGCGGTGTGACGAATGCTGACATAGACGAG  
CTTCGGGAGAAGCTCGGGTATCTTGCTGAAGAGGATCTGAAATAAGGACGACTGTAACAT  
CAGCCCAGTCGAATAAGCAGCATCAGGTGGCTCTTCTTACCGCTGGAAACTGCAACCGAT  
TGATGGTAAATTTCTCATTGAACAGCAGGACGCGCCAGAATCGGTTTCGCCGGACAAGA  
CAATCACGATACAGTCCGGCGGGAGTGCAGCGGGTTGTCCGTGTCACAAACCTTAACAAAC  
TGGCCCGTGATGAAGTGACCATCAGCATCAAGCACCAACTCTTTAAACGTCCGACTCTGG  
GAGATTAGCGCGTTGAAGGTGCTGGTGCAGGATCTCAACCATGCGGACTACCCCTGAAAA  
TCCATCACGTACGTAACCTGGTGTATGCAGCCGAACATATGAGTCAGCAACACTGGAAGT  
TTAACCTGGCAACCTCACCCAGCACGTTTCTGGGGACGTACTTAAATGACCTGCAGGAAC  
ATAGTGCGATAGTGCATCTTGCTGTAGCTCGTGCTAATTATGATGCTGGCTCAGAATCCT  
GCCTACGGCGGAGCACGCTGAAATCAAAAAGAGCTTGATTAACGATGTAAGTCCACCGAC  
ACATGACCGTCACTATTTAGGCTGCGATGCGACAAGCTTTGAGCATATTGAAGCGGCAGC  
TATTTTTTCTATTGGCCTGGTAGGCAATCTCACCTATTTATTGACGAAATGCCGCGTGC  
GGAAAAGACGGTTCCTTTGTCCGGTGATGAACTTTACGGAGAAGAGCCATATTACGTCCT

GTCCGTCACGCCGCGTCAGGGGAATAAGTGGTACACCCAGAGGTCCGGTAAGGACTGGGA  
CCCTATGATGGTTCGTGCCGTGAAGCGTGCAAAGGTTTTAATCATCCGCTGTTGGAAGG  
TGAATGTGCTATGAGGTCCAAAATCCTGGATCGTAAGCGAGCGGCAATGCCGAACCATTT  
CTTTCAGGGGTCAAAGGTGCTGGTATCAAAGACTAACATGACAGCAACCGCGTAAGAGGT  
CGCTGTTGCAACGAATTTGGACGGGGCCATGTTAATGGGGGCTCACGTGCTGGCCAATGC  
TTACGTTGAGAAGGCGGTCCGGTAATTCAGCATGGTTGAGAAGAAAGCGGATATGGATAT  
CCGTACTGAGATACCAATCATCTTGATCAACAGTCTGAAAATAATCCGTTTGCCCGAGCA  
GAGCGTCAAGATGCAGGGTCCCGGCGTAATTGCCGTTGATTCAGTCGTGAAGATCTGATT  
AATTCCTTTCCTTTTGCCGGGTTTTTCGCGCTTCTTTTTAAGGAGTCATTAATTATGGCAA  
AGACTATCCTTTCCCCTTCCCTGAATGAACGTGTGTATACGGGTACACAAGGTAATGATT  
TAGTGTGAGAAGGCGTATTTACTGTGAATGCTGCGGAGGCGGAAAGTGTTATTCATCTTC  
TGTCACTGCCAGTGGGCATCCGTATCAACCCGCTCGAACTGGTCTCTTCGGGTGGTCTGG  
CTCCTGCAACCTTCAGCATTATGTCCGGTGAGCACGCTCTCATAGATAACCAGCGATGCTA  
TTTCTGCACAATTTGCGAGATATGTGCGAGGGGAGCCGAACACCACACTGCATGACGGGG  
AGCTGGTTACTGTCACGCTTAAGACTGCCGTTTTAACCGACATCATGAATCTTGTGCTGC  
GTTATACCGTGGAGCGAAACTGATTAACCGACCGACCCGCTTCATGCGCGCTTTTTGT  
CCGGGGAATTATATGAGTGAGACAATTGCCGTTTTCTATCTCGGCCAAAACCCGTGGCA  
AAGGACACCATTACCGGAAGTCGCACGCCATTCCCACGTCTCGAGCCTGTGCATGTTGAC  
AGCGCGATAGGCTAGCTACAGCCGCGGTTTTCCGGATTTCTGCTTTCATCGTGAAGAGCTT  
GGTGATGCTGTGAAAAGCAACAAAATAATGATAAGTGCGGCAGGCACAGCAGGCGCAT  
GAAAGAGTGCTTGCTGCGCAGGCAGAAGCTGAGAACAGTTTTTGTGTTTCAGTTAACGGC  
CAAGAGGTGGGTTATAGTGAGCTCACCTCAGCTCGGCTGGCGACGCAGTGTGAGGCCAAA  
GAGCTGAATATTCACAAAACCCGGAAAGAAACCGCAGAGGCTTTCCGTATCCGTGTGCAT  
GAGGCATTTCCGCCGTCGCGTTGCGGAGCCTGACCAGCATGGCGGAACAGAGTGACATTTT  
ACCGTATGTCGGCCGGCAGATGATCGGTCCACTGAACATTATGATGACGGATGCTCTGTC  
AATGTCTGGCGTGGCATTACAGCAGCCAGTCGTTGGTGTGCCGTAGGGTGATTACTCTTGT  
ACAGTAGCAGAAAAAGAACTCGTGGTTCCGTATGAGCAAGACGCTGAGGAGTGCGTTCA  
TAGCATCCGTATCTCTGGAGATAATCATTAGCCGTTTGTGGTTTGGGATGTGTATATCAT  
CACCGGGCGCTCCCTGCGATTTGCCGTGTGCTCCCGCTGAGGTGAGCGTGCTTCATGGCGT  
CGTCTCTAAAGCCGAACGCAGCCAGATACCTGATGAACTCCTCACATGGCCGCAAGAAGT  
GGCTGCGGGGGCGCTAGGGCGTTTTTTCATGCAGTCTGGTGTTCATGGTGACATCCGTT  
ACGCGCAGAGTATTTCTCTGTGCAGTTTTCTGAGGGGATTTGTGCGGCATTTTCGTCATAC  
AATGGAGCCAAGCCCGTACTCTTCATACCGCTAGCCTGTAATCAGGCATAAATTGTTCTG  
ATGACGTCGAGAACAGAAATCATCGGACGTGTAATAACACAGCTGGTTGACCCGGTGTG  
GTTTACTAGCCCCTGCACGAATTGTGCGATTATTACAATGAAGCTGTGAGGACAGGTATT  
CTGGCGAGACTGGATGCTGGCAGAAGCCTGAAAAGCATAAGTTGTGTTCCGTGCGCCCGT  
CTGGTTGTGCCCAGTGGTGTAAATACCCGTCTTGACGTGATATGCCTCGGAGACGGTAGA  
GCAGTGAGACCATCATCCCGGGCTGTGCTGGATGCGCTGTATCGTGAGTGGCCCACAATG  
AAGGGTATTCCTGAATGTTTTACCAGCAAGCACTTGTCCCCGCGCACATTCAGGCTGATT  
CCTGCGCCTGACAAAAACATAAGTAATGATGCAGTGGTGAGCCGGATACGGGAGGCAGTT  
TATGTTCTGACTCAGGAAGATGATACGCTAGTACCCTGGAAGAAGCTTATTTTTGGCTA  
CTGGTGGAGTGGAGGTTGTCTCGTGCTTTCAGTTATGAAGCGGCCGGTGGCGCAGAATCG  
GGGCTGGCTGCGCTGCGTTATCAGAGTCTTGTGAGCAAATTGGGAACCAGCAGGGGGCA  
AACAGTGCACTGTATGTCCGTAAAAAAGTGTTAACGTAGGGTCAGAGTGAGTGTTGTTG  
TTCCGGGGACGCTAATATCTCTGTAGTCTGGCGATATCGGGAGCAACTACTACCTGA  
CGGCGCTGACAGTTTACCAGGATACGCTCCGCGGCACCAGTGCGTTGGCAGCGCCTAGTG  
AATATGGATCTTACGGAATGTCGATGGATCCGGGGGAGTATGCTGTTTCCGGTGACGGTCA  
AAGGGAAGACTGCGGTCTACGGACGTGTGCGTATTGAGGACCCCGAAAGTACGGCGACGC  
TGATATGCCGTCACGACGCAGTATTGTTGAGGTTAGCATAACCCGGAGAACTGGCGACAG  
ATTTCCGGCAGATACAGAATAACGCGGGCGGATGACCTTGCCACTATTCTTCGCTGAATG  
AAGACACGGGGACGAAAAAGACAGAGGACACACAGGAAAAAAGAAGTGAAACTGGCAGTG  
CGAAGTATGCATTTGACAGTGCAAAGAGGGCAACCAGCAGGGCGCCTGAAGCAGGACAAA  
AGCCCACTGATGTCACCGAGGCTGGGACCCGTGCAGTGACAGCAACGGCGAATGCAGATG  
AAATCTCGACCCGTGCCGGATAGTCTAATAAAGCTGCCGCCGAGAAAGCAAAAAAAGCCA  
CAAGGGCTGCTCAAAGGCCAGGCTGGCGCAGGAGAGCGCCGGAGAGATCCCTAAGCGGG  
CAGAGCCTGGCACTGTGAGGGCTGAAGTGGACAGACGTATGGCTGAGAATGCTCGGGGGC  
CCCGGGGGCCTCAGGGAGAAACTGGTCCGTAGGCGGATGTCGGTCTAAAGGCGAAAACG



GTCCAGCGGGCCCTAAAGGGCCCGCAGGGCCGAAAGGAGAGCGTGGTAACGTTGGTGCTT  
AGCGTGCTGTAGGGCCTGCTGGTCCGCATGGTGAACACGGCGAACATGGGGGGTGACGAC  
CGCAGGGAATCTCAGGCTTGAAGCGGCATACCGGAGAGCGGGGGCCTAAAGGGGACCAGG  
GGTATATGGAGCCCAAAGGCGAGAAAGGTGATCCGGGGGGTCTTGGAGGCCCGCAAGGTC  
CTAAAGGGGAACGAGCAGAAGCCGGACCACAGGGACCGCTGTAAGCACGAGGTCAGCGTG  
GGGAGACTGGCCCCCGAGGTGAACCTGGTCCACTGCTCCGGGAGCCGAAGGCGGAGAGC  
CCGGACCTCAGGGACCACGTGGAGAGCTATGTCCGGCAGGCAACGCTGCATATGTAGGAG  
ATGCAACGACGGTACAGAAGGGAATTGAGGAGTTAAGCAGCGGACCGGTCGGTGCTCATG  
ACATGAAGGCTACAACCCCGAAAGCGGTGCATGCGGAAATGGATGTGGCAAATTAAGCGA  
TAACAAAGGCAGAAGAGGCTGCAGCAGGAGGTGGAGTTCCTCGGTCCGAAAGGAGGTAAG  
GGGACACGGGGCCAGCATGTCCGGCTGGGACGGAGGGTGATAAGGGAGAGCGCGGTGCCA  
CCGGCCCTGTCGGGGCACCCGGCAAACGGAGACCGGCGGATCTTACTGGTCCGGCAGGCC  
CGCAGGGGCCGCATAGTGACAGGGGAGAGCTGGGAGACACCGGTCTGACTGGAAATGCTG  
GTCCACAGGGTCCAAAGGGAGATACCCGTGCGGCAGCCCCGGCAGTCTCACATGGACTGA  
AAAGAGAAACAGATGCGGCAGGCCCGGTGGGGGCGACCGGACCCAGGGGCCGAAGGGCG  
ACCCGGGGGAAACGCAAAGACGGTTCGCTCTGGGGCCGGGAAACATTATTTGGACAAAA  
GCCATATCTGGTTCCTGGATAAAGATGGCGCATTACATTACGTGACTGACCTTTCTTGACC  
CCCAAGGTGCCAACCGGGTTCAGGGTTTTTTCCAGCATTGCAAGTCAGGTTTTCGTGACG  
GGCCGGGGCAAGATGCCAGGCGGCAGGGTGAAGTGGACAGAGATACGGGCAGAACAGGAG  
AAAGCCATGAATATTGTGAGAAAGCTTATGAAGAGTCTGTGTGGTTGCGGATAGGATGAG  
GACTGTGAGAACAGGCAGGCGCTTACAGCAGAAGTGCATGGAGACCTGGAGAGATTCTG  
GCGTCAGATCAGAAGGGCATAGTTCGGAGCGGGTCCGGGTAAACGCTCAGGTGCTGATA  
CTGTGTTCTGATAAAAATCAGACACAGTGTGTGTTAAGACCGCTGCGAATCTTGCGTGCT  
GACGGTACGTGGGAAAGTAGTGGCGGGATAAAACAGCCGACAATTGCAGAAAAACCGTAG  
CCCGGCTCGGGTTTTGTGTTGTCTAGTATAGGCGGGGGTACTAGAGCGTGAAGTAATAAA  
TATGTTAATAGGATGGAGTGTAGGATGCCGTGTAATCTGGTTCATTAGTTTTTTATGCC  
GGGAAATCGCATGATTATTCTGGATAGTATAGAATCCTGGTTAATAATCTGTGATAGTCA  
CGTGGGCCATTAATTCGCAGTATGTATCAGGGACGCCGTTTTATTACGCTGAATTTGGA  
AACCTTGAAAGGGGTACATTGTGTGGACTTGCAGCGCAATTGGGAATTCACACGAACACA  
GTGAATAGCCTTGTAGATACGGGAAAGGCGAAAAATGGACGGTATGGTGGGAGTTTGTAC  
CATCTCGCGTGTGCGGAGTGTATGCGTCTCGTTGTACACTGTCAAAGATAATGCTAGGCA  
AAGAGGGGAGGAATATCCTCACCCAAACCGAAAGAAAATTGCAATGATCAATGAAGTTAT  
ATAGTCATCATTAGAATTCATGCAAGACATTTTGTTCAGTGATTCCGATCGCGATTTT  
AGCGAAGTCCCTCTTATAACCCGAGATGTAAAAGCCTGAAGCAGTCAAATGACTTTCTAT  
GCGCTATATCGACATCTTCAAGATGCGTGGGATGATGCCGCGCGTTGTGACATCTATGCT  
GCTCGAGCATTCCGCTGTAAGTGGCGGAAGACTGCCATTTCCGGTTTTGGTGGTATTACACC  
AGACTGTCAGATATTCGTGGTAGAGAAAACATTCACAATTAAGCCAATAACCATTTTTCA  
TTAGCGTGTGATTTCTGGTATGCATGGCCGGATGTGGTGGATGAGATCCGCTGAACGAT  
CGCTCAGGACCGCCACGAGCGTATGTACGACACTGACGGGCGTATTCCTAAAGTGACTGA  
TGCGACTATTGCCACAAAAGGAGAGGTGAATCACCCGATATCAGAGTATGGTATGGTGCT  
CTCGGCGACGACGACAACCTGTCTGAACTGTTCCGGCAGGGCCTCCATGTTTCCGACGA  
TAACCGAGATGATGGTAAACCCCGGTCTTATAGGGAAGCCTATGACCCAGATTATGGTGA  
AGAAGGTGCGCCAGGTCTCGCGTCTCTGGGGGTGGCACTCCCTTCTCGAGCTACTGAGGT  
TCACACGACGCTGGCTCCGGAGCCATTGGTGAATTCCAGTATTAACGTCGACGGATTTA  
TCTCTCTGCATCCGGTGGGGGGCAGGCGGGTTTTTTACTTGTGCCTGAGTTGTATGCATC  
CGTGTTAAGTTACACGGACGACGTAAGGGCGATAAACCTCGCACCTTCCCTGGCGACATG  
GGATCACCTTCCGCTACCAGAGAATGTGACAGGCCTTTGCCTGATGGCTAACGGTATCGT  
CGCCGGGTTTTGCCCGTAATGAAGTCATGTTTTTCGGAAGCGTATCTGCCGTATCCACCGCC  
GTAGGTGAATCGAGACACAACCGCAGACGATATGGTAGCTATCTGTAAGCTGGGAACGTC  
ACTGGTGGTGGCGACAAATGAAGAGCCTTATCAGTTCAGTGAGGTATCACCGTCCACAAT  
TTCTGATTCGAAAATCCCTTCAATGCAGGCGTGTGTGAGCAGGCGGAGTATGGTTGCGAT  
GGAGGGGTTTTGTGCTGTATGAAGTAACAAATGGCCTGGTGTCTGTTAAAGCAAACGGGAA  
TGTCGCGCTGGCGAAGGAACAGATAGCAGCCCCGGAACACTGGCAGAGTCAGTTTAATCC  
GGCCTCCATCGTGGCTTATCCCTGGCGTGGTGAATACGTACCCTGTTACCAGAAACCGGA  
TGTTAAGCAGGATGTGGTTCGATTTCCGTCCGGTGTACATGGATATCCGTTATCACAGTAC  
CCCGTTTGAGTGCGCAGGACTTAATCTCGCGAAAGAAATGATTCGTGTGGTGACAGGAGA  
CAAAAAGTCAGTACTTGCCGGGGAGGCTCTGCCCTCCAGCATAAGGTGGACTCTAAAAAT

TTTTTTATACCCTGAAAGAATCTCTTCTTCTACATCAGGGTGAAATCTCCAGCGCCTGA  
GCGGCTCTGGATCATCAATAGGGCTCATGATGTTCTGTGATTCATTTTGCGCCGGGTAC  
GTTTAAGGGAAGTGTGGTGAGACGTCCGGCAGCAACCGGGCCAACCTGGCAGGTGCTAAC  
ATCCGGATTCCGGGCAGCTGCAACAAATAACCCTGACTACATCAATGTTCGAGATGCCGAC  
ATGTCCAGTAAACGGTGGCTTGCGGGGAAGGATTTATCCACTGTTGTGGAGAATATGGAA  
ATTGGCACCGGGCAGCGCGATGAAGGAAGTCATGCATTTGTGACCCGTGGGGAACTGATA  
GGCCTTAAACTCGCCCCGCGACGAACATTAGGTGGTGGCTTATATGCACCGAATCCGCGT  
TTAAGATTGACAGTGCTTTAATCACTGTTGATTTTCTAACAAAACCGCTGTATTTAAG  
GCGACCGGTGGACTTGCCTCGGTTATTCTTGAATAGGATATGCCTAATTAGCGCGGACAT  
TCACTGACTCTAATCTGGTGGGGTACGGAGCATATCCTTCTGATGCAGTGCTGGTTTCC  
ACGACGCCCGGGCAGGTTTACGGCGATCCGATTGAAGCTGGCTGGTCGGGATTTTGCTCG  
ATACGTTTGGTTAACGCGGCAGAACTGAAAGGTCCATGGAATACGGAAAAAGGCAGTCCG  
GCACAAACACAGATGGGCGTGACGGCCATTAGTGACCCGATCCGAGATAGGGCTGCAGAG  
TTGACGATTGTGTCCGAGCGGCCTAAAGCAATAACAAATGCGCAGGAGCAGGCGGTATAG  
GATGCTGCAATTGAGACAACCTAAGTTATAGGAACTCTAAGGCAAGAAACCACAAGACCG  
ATTGGTGGTATTGAAACCCGCCTTAGCACACTGGATTCTTCAACCAGTGGACCGAGAAAT  
GAGGTCCACAAGCGCAATACAAAATTGGATAAAGAACGCGGTGAAGCTTTTCTCGCAATG  
TGGTCTAACAAAGCCGGAGTTGATGGTAGCTACCCGGGAATCGGGATTGTCCGGAAAA  
GACAGTGAAGGGAGACCGCTAAGTCAGGTTACACTTTATGCGTCGAAGTGATTTGTCATT  
TATCCGAACCATCAGGATAACAGAGCCTATCTGTTTCCGGTATAAGGTCGCAAGGTAGTG  
ATCCCTAAAGCGATGATCTACGACGCGGTGTTTGAACGCTGGTGTCCGGAAAGGTTGTG  
GCATATCAGGTAAAAGCCGGGGTAAGTATCACTTACCCGTTAGCCGGTGTGCCATTATA  
CATAACGGGAACCTTTCAGGTTGATTCTCAGGGTAACATGAATATTAGAGGCCTTTTATGT  
GTTACGTCACAAGGGCCACTTACCACGCGCTACTCTAATCAGAACGTAGGATTAGTGATC  
CGCCATGATAAAAATTGTGCTTTATGTCCAGAAGGGAGGACTTGCTGGACGAACAGTCAAA  
TTACGCTGATCAGTAGGTCAGTATTGGAATGCGGTTGTGCCATTTATAACAGAAATAATG  
TCAATGTTACGGGCCTGCTGACTCCAGTAATTTTCTGGACAGACTTACTCCGGAGGCTG  
GCTCAAAGCCGTACGCTACTAAACCAGACGGGAAATCATTGTTGGCTGTATGTTGTTTAT  
TTCCCTGGAATAATGTATTTACGGAGCGGAAAGTTCCCAAGATGACAAATAAGGACTATA  
CGGTGACGTGGTTCGAATCTTGAGCAGGCTTTAGGATCTGGCATCTATACATTTCCGGGAT  
AAGTGTCTGTACGTTTGGAGATTATGAAGGCGGGTGGCAGCGGATGGTAAAGTTCAGG  
TTTTGCGCCGAGTGTCTGATCAACAAAGGCACCTTGCCCGGACTGAAAAGTCCTTCTT  
GAAAACAGCAATCAAGTCAAGCAAAAGTTGTTTCTGTTTATCAAAAACAGAGAAGAAGGC  
GGAAGTAATGTAGAAGTATGGACAGATCGAAGGATATCATGCACCAAGGTTTCGTGTAAT  
TGCCAGGGGACCGAACCCCTGGTTACCCGACGGGTTATGTGTACTCGGATATGGTTACTCC  
ACCTTCTGAGTAGGAGATCGCCATGTAGAAACCGGACGGTGAGCTGATTTCTCAAGGCGA  
ACGGATGCAGCTGGACGCGAAGTAAATACCCGTTGGTAGCAGTTTTGAAAGGGACCTTGG  
ATATCAATACGCAACCATGCCTGCACTAGTCGGGTATTATAACTGGAGAAGAAGTCTTA  
AGATCGACCGAATCATATGTCACCCTCTGGTGTGCAAGAAATAGTTTATATTCCTGTGT  
CCAATGTTCCGGTGGCGCTACATGGGATATTCGAAAGCCGTATATAGATAAGGTCCTGGT  
TATTAACAGTCTGTATATGAATAGTTGCAGTGAGTCATTAATGTTTCATTGAAAATGTCT  
ATACAGATCTATTATTA AAAAGCTTAGCGTGCTAACTGAATACAGGATGTCTTAAATCAA  
GAGTATAGAAACACTGGTTGATTGTGCAATCAACGGGATGGCCTGTGTAACCTTACCTGC  
ACATGCAGCAGAAGGAGAGCATACAATTTCTCTGACTATGTGCACCTTCGTTGTCCGGG  
GCTAGAAGATTTGGTAGATGATGCGGCTGCCATAAGAGGGAGATTTTATGTCATCTCGA  
CAACAGAACTACTTTTCATCATTGGGCGAATATACAGATGGTAATGTCAATAGATATGA  
AGGCTAGGATATAAGTCCACAGGGCATTGACATCAGGTCGAGCTACGAAAAACGGATGA  
TTTTGGCGTTAGTTGCTCTTTTACGTGACGCGTTGTCTACTAACTCACAGACATTTAT  
TGATGTTTCAGTCAGCCGATGATTCCAGGAAGATTAAGAAACCGGCAGCTTCTGCCAGCAC  
GGATATCAGGGCGCATTACTCGAGTCTGTTAGCGGGTTCTTCATGCCATGTTAATCAGTA  
CATGAGTTTATATGCGATGGCATGGATGAGCGTTGCTAAAGTTAGAGCTTACCTGAAAAT  
TAAGGACAATACTAACAATACAGGCGGATTTTCTGAAAGCAACAGGACGAAGAAATCCTC  
CCTTGCCTGTGCTGCAGGTGCACGGTTTAACTGAATGAGAGTGTGACAGCGGATGTGGC  
TACTATGATTGCGGCTCTAGAGACTGGCGCACGCGCGGCGTAACAGCTGGCATTCCGCT  
AACTTCTGACCTGTATCCGGTAACCGTTTGTATCCCCGCTGTGAAGGCGGGTTTTTGATT  
GCCCCAACAGGGAAACAACCGTATATTACGTGTGGGGGCTTTTCCGGCTGTTGGATGGAGG  
GTGAGCCTGATGGCCTGATGTGAAAGGGCCCCGATCAGAGTTAACATTGACCCGAGTCCC

CAACCCTTATTACCTTTAGCAAGTAGATTGTTAGCGGCTCTCTGTAAAAGGAGTCAAGCG  
CTATGTTCGCAAAAAGCGCTTATGACCTTCTCGAGTTACATGACGGTTCTCTTACCATCT  
GGATCTTGCACGGTTCACAGTGTGAGTTCGGCTGACTTCGACGGGAGCGGAGATTGCGG  
GGTCTTACAGAGTAAGCAGTAGGAAAAGCGCGACGGGGACGAGAGTCCCCGGCAACTCG  
TTGCTGAGGTTTCAGCCGATATGCCACCCGTTTCTGTGAGAGAATGAACGATAAAAATTCT  
CTGGTATATATATCGAGTTGTGAGCGATTCCCACAACACTATGAATGTATGAATGATCTGAA  
AGAGGGCGGCCTTAAAAAGCTGTGAGTTTATTTTGTAGGTTAGCTGATGGCTCTTAGGCGCT  
GCGTTCTGGGGACAGTTCTGATCGTATTCTTATGTTCTTGTGTTGTTGGGCGTGTGTGC  
GGGAGAAAACAGCGTTGGGAGTTACCATCCGGAGGTGAAGACATTAACCCATCTGGCTGG  
CGGACACTGGGATGAGTTCATACCGCAAGGCGGGGATTTATGCGGCTGGGAAACCGAGT  
GGGCTTTGATCGAATGCCGGATGAAGACGATGGCTTTATGATCTTCTTGATAGGGGTCTG  
ACGGCTAAAGTGTCTTCAATTATGTTTAAATCCAACGTTGTAATTCACATTCAGACCCTGC  
TACGGCAGGCTTTTTTGTATATCCAGGGGGCCATGATGGGTGGAAGGAAAGGCGGTGGAGA  
TACTAAAGTAAAGCCAGCTGCAGCGCAAATATCACAGGAAGAGGTGGCCTCAAGAGGGTG  
GCTGGATTTACAAAATAGCCTCCGCCCGTTCAGATAACTAGATGGTAAAGGTGGATGA  
CCTGAACACTGAGCAGCATTACGACAATAACGCGGGCACCACCAAGCTGGGGTATCAGAA  
ACAGTTTGGAGAGGAACGGTAGTTTTTTGCGAGTAATCTGGCTCAGTCCGGCGTTGACCC  
ATCGCGTGCTCGTTTTAATACGGTAACCCATCCGAACCAGAATGACCAGGTGACCGTGCA  
GATTGACCCACCCACATTGGGGCAGATATCGCAGGCGGATAAGTATGTTGCCCGTCTACG  
GGATGTAGCTGCTCTCGGTGCCGGTACGACGCGGATGCGTTACAGACTTCTAACTCTCT  
GACAGACAGCCGTCTAGCAAAAGCTAAATGGGATGCACAGGCGACGTTTACACAACAGCA  
GTGGCGAGCCTCTCTCGTTGGCGCTGGTCTGGGTGCCGACAGATGCATCTGCGATGCATGA  
GGCTTGCGGTAGTGGAGTAAGTGGCGGTCCATAGCCAGCCGCCACCAGCGCTAATGCCTG  
TCATGATCCGGCACAGAAGTGGAGACTGTAATTATGGAGTATGGCAAATACGAAACTCTC  
GCATGGGCAGGTTAATCAGGAGCAGCCCGCACACAGCGGGACTGGCTTACGTCAGCAACG  
TTGACACCCTAACAAACACGACGAATGGCGAACAGATAATTGCCCGCGTGGCAAGGCAG  
GATGACCTTGGGGGGAACAACAGCCTGATGAATGCACAGCATTACGGGTGGGAGGACTT  
GCAACTTCCGGTCTCCGGACAGCTCAGATGGCAGGAGGATTGCCAGATCGTGAGAAATGGG  
GTATACCGCCCGGAGAATCCCGACAGGAGAACGCTGGGGTTACGTAATGCACTGACAATT  
GCTAGCGTGAAGCATGGCATACTGTAAGCCGAACAGGATCGACAGATGACTATTCTGACC  
GGGGCCTCTGCACAGGCAGGACAGAACTGAGTGTGGCGGCCAACTGGTGGAAAGCGTAA  
GGCGGGGATATGGGATACGCAGTAGTGGATATTGCAAATCTGTCGCGGCGAGAGGCATTA  
GAAGGAATAAGTGACGGAGACAGAAGACGTGAAGAAATTGAGGTTGCGTCAAAAAGGATT  
GCGACGCAACACATAGCGCAGAACAAGCACAATATCGGTACTGGCATTACTACGGGGGCG  
GCTATTGGCGCATCCGGTGTGGTCCCTGTTGGAGCTGTTCTTGGAACTCATTGGCGGC  
GTTGCTGGGTCATTGTTTTAAGGAGTGGTGAATGCTCGGATTAGCACAGGGGTAACCTGC  
CGAATCAGCAGCGTCGATCATGCAACGACCCTTCGTAAGGAGCTTGGTCTGCGTCACGT  
ACAGCATGCCCGGCTCCAGAAAAATGATGAGCGCGATTTTGCCTTGGCGGAATCTCAGTT  
TGAAGACAATAAAAAAGGTAATCAGCGGAACCTTTGATTACAGAGCAAACTAGAAGATCG  
TAAGCATGCACTGAAGGAGAGGGAGTTTAAACGCTAACCAGGATTACCGGCACGCGTCACT  
GCGTATGGCGCCGACGACTCCAGTTGCAGAAACACAACACTAGCGACGGCTTGAGCATAA  
CGATATAATTGCCATAGCGAGGGAGTAATGGAAGCGGTAAGAAAAGCAATTCAGGATGT  
CGATCAGCACGCTGTAACGCTTCGGTTAGGGCAGCTGCCAAAGGGACATCCATTAATTCT  
TATGTCGAACGAACTACGCATCTAAAGCTGGTGAGGCCGTGTGCAACCTGCAAAAAAT  
TTTTGGTGATAAACAGACATGGAGATCGATTCGTGGAATAGCCCGGAAAATCTCGATGT  
GCTTTCAGGCGTGCTTGCCCCGCGAGTACAACAGCGTGTGCGCATGCCTGAGCCAACCGG  
TGAGCAAACGATACAAGAGGCCACGATTGGCCGTATCGTACCAGCACAGCGGTAAGCGAA  
GGCACCTATCGGCCTAGATTTCAAAAACAGCAATGCCTCCAGCGCGCATAAAGCTGTAAC  
AGAGTACGGCAGTGCAGCAGCTGATGATCAAAACGTCTTGGCGCTACGAGTTGATAAGGC  
TATCGCTCTGGTACAGAGCTCACAGCAACTTGGCAGGGATATCGACGAATTATGGGTATCT  
TATGCCGACGCAGCAGCGACTTCATCTGAAAGAGCTTTAGAAGGGCGCCATCAACGTAGC  
GTCGGACTCGATCAAGAATGGCGGTACTCCCCGGCTTCGGGGGATTACTATTATGCTGC  
GCCGGTGTCTCAACCGCATCAACAGAAAATTGAGCAACAACAACACTGCAGCAGCAGATTAT  
CAACTGGGCGGGAGATGATACGGATAAAGGTGTCATTGGCCAGTAATGTAGCGGCCCGTCA  
GCCTTAAATACTGGAACCTCAGAACAAGAGATTGCTGGGGAACGGGTATACGAATCTTCT  
CCGTAATCAAAAGGCGAGGGGGGAACAGGCCAGAGATGAAATAGCTTCATCGGCATCTCA  
GTTTATACGTGGACTGAATCAGAATTACGCCAGTAACACTCACGATATTCCATTAATACCA

ATTCCTGAAGACCGGCCAATGTGCCGGGTTGTTTTATGGGGTCTGTATGGTTCGATGCAAC  
GGAACAGCTTCCTGAGTCGCAACTCGGTAACCAGAATCGTAAAATCCAGAACATTCTGCA  
ACCCGCCGAAAGTAACAGCAATAAAGCATTTCCTCTGAACCGAATCGCTGGAAGGATAA  
CAGTACGTCGTGCAGCCTGGGTGATGCATAGCCAACAATGGGTAAAGATTCGCCCAGTC  
CGTCCGGGGAATATGGGAAATAACCCGTGGAATCGGTCATGCGATTATTCAGAGCTCGGT  
ATAAACAGGGGCGCGGATTGTAAATGAGGTCAGCCGCATGGGCAAGCCGCGAGTTC AAC  
TGTGAAGGATATTTTTGCCTGTGGCAGCAGGGGGACTGATGATGTCATCGATACCCTCCG  
TAATGGCAAAAACGCGGTTACTGATACTATCGGTAAAGGTCTGAGGGCAAACGGTCAGGC  
TGTCAGTGCTTGTGCCAGTGCCACTGATGAATGGCTGAATGGTACAATGTCGCCGGGTGA  
AGTTCGTGCCATGACTGCGCCGATGACCGAAGCCTCTAATGAATCTGTGGTATGGGTGGC  
GAAGGCTGTAAACCTGATTAGGGCGCTTTTACCTGATATGATTGTTGGCGGTGTGGCTAG  
AAAGGTGGGTGAGGGCCACTGCGATAAGTGATAACCGCAGGGCTGGAGTAAAAATGCCT  
CGCGGAAGGGATGCAGCTGGCAAAGCCACCGCACTGTCAGCAGAACCAGTCGATCAAAA  
AATCCCGGATTTATTCAAGGCGGGACTGATCACCCATTCCACTGTGAGTGCATAGGGCCA  
GCGTGCAATAGGGGCAGCAGATGCTGTTCTAAATGCAGAGTGCTCTGAGTTGGCGCAGTC  
ACGGAAAATTCAGCAGACGTTTATGTCCATTGAAGCCGACCCGCAGCAGGCACATCTTAC  
CGAACGCCAGAACCTGGATCTAGCAAAGAGCGTTTTCCCGATAAGGAGCGTACGCCGCT  
GGCAACCGATCCTGAATAGAGAGCTGTCAGAGCCGTAGCGGGAAAACCTGTTCCGGCGCACA  
ACTGTTTAATCTGGTGACACGAGGCACAGCGACGACCGGTAAAAGTCGCAGTGCCAGAAA  
TGCCACGGAAGAGGGGCCGATTAGTGCGGCGCACATCGGCTATTCACGCTATCAAGAAAA  
CACGGCATTGCAAGGGACTGCCCCGAAAGGGTTTGCCACCGTGGGAATGCGTCGCTGATAC  
AACGATCGAAGGTGCAGCCTTTGGTGCAGTCATACGGGCTCCGTTCCGGTGAGCTTGCCGG  
ATATCGTGGCTAACGTCAGGCCGCATAAGCAACCGCCATGCCTGATACTGAAACCCTGCC  
GCAGGACGTCTCAGCCTCCAAACCAGAATCTGTCCCTCCGGTTGCGCGGCAGCGTGAATG  
CATTAAAGGGCATGAAAAGCTGGCAGCTTCTGGGGCAGTATGCTGACCGGGATTTGGGGAC  
AGTGGCTGACGTATCTGCGGCTTAGCGCCCGACGTTACCAACCAGTGGTGCCATGAACT  
GGACGACCAGACGAAGCGACGGGCTGGGATGAATGAGCTCAAGGCTAGGCCGCGTTCTGA  
ACTGCGTGATGCATACGGCAGACTCAGGCAGAAAAGAGGGGCGCACCCAGACTAAAGAAAA  
ACAGTTTTCCGGGATAGGCGGATTCATTCCGCCACAACATCAAGTAACGGCAGGAAAGCACA  
GTCACAGCCTGAAAATGCGGAGGGCTCGTAGCGGGTGAATTTACCCGACGGTGCGGGACCG  
GGATCCGAAGGATGTTTCGCAATGGAATTACCGGGATTGGAGCGTCCAGACCAGCCCAACG  
CATTGCCAAGGTGCGCCCCGAAAACCGTTATTTACGGATGAGAGAAGCGCCATGGGGAG  
TGATGTTTTTCGTAATGCCACCGCCACCGCCCTGTAAGCGTCTGTAGTGAAGAAAGGCGA  
GAATCAGTGTGCCGTTGAATTGGATGAGCCTGCGTTCCTCAGAAGATGTAGCAACGGAAAC  
CTTAAACTCCCTTGCTGACGACATGCGTATTGCTGATGGTGACCCGATGGCGCGGCCTGC  
GTTGATATGTAACCAGAGTTTTCGGAAGCTTCACGGGGGATGATACGGAGGTACAGGCACG  
TCTTGTCTTGGCTACGCGCCGAAGGCAGAGGAGCTTGTAGGTTACATATGGTTGAAGA  
TGTTGCCGGTCCGCAAGCACATCAGTTAACAGAGAGTCCACGCCTGCCCGCTCATGGCGA  
TATTCCTTCCGGACAGGGATATCCTTTCCCGGCAGAAAGTGGCGCATACGCCGGATTA AAA  
TCAAGCCGGACGTGCTGGTCCATTTATACAAGCGGTGCGGTTACAGGGCCAGGGATTCCA  
GAAAGGACAAGCTCGGGCCCCGGAATAGGTCCCTGGCCGACAGGGGGAAACACTCGAGAG  
TGACCTGGTTTTGTCCGGGTCTGCCGTCACCGGATTCGCAGAACGCGACAGCACCGGTACG  
TGAAGGGCTAGCGGCTCCGGACATTGCGAGTAATGTTTCGTATGCCTCATT CAGAATCGCT  
TCCCCGCACTGTACTGGACTCACTTCCTCAGCTTGACAGCGGGCAGAAGTACGCCGACA  
GGCCTGAGGAAATCGTGACATCCCGCAGCCTGAGCCAATCGTGCCTGTATCTAAATCAAC  
TGTCTCTACTGGTAGGGAAACTACTGTGCGCGGAAGTGACGTTAGGGGCAAAAAAATTGA  
AGACTTTGGTGAAGATATTAAGGGCGCGGCCAAAACACCGTTATGCCAGCTTGCTGAAAC  
ACTGGGTAAAACGCTGGAAGACAGGGATTATGTCACGCAGCCGCACAGCAAACCTGTTCCC  
GAAACCGGACTACGTAAAACCTGGCGAACAAGGTACTGATGCTCCTACCCTGGGAATGAT  
ACCGCTGTATCGTAACGATATTGCGACGAAGAGGAAACAGAATACGGCCGGATGGGGGGG  
GAGCACAAAAGAGTACGACACAGTATACCGGGAATTATGAACGTAAGGGTCAACGCGAA  
ACGGCTCGCAGAATGGATGGAAGGCAGAAGGCCCTCCCGTTACGCGGATACCTGGCAACT  
GTTGCGAACTGTGCTGCTCTCACAGATAGAGCGGGCTTTTGCTTATCGGGTGGGAACGGG  
TGTGTATCAGGCGGGACGAGGACAGCGTTTCGATTTCGACACAGACACTTTATTGACTGCG  
CGTTAAGGACAGTAAGGGGAGTAACCTCTTCTTCCCGGAATGCAGGGATGAATTACTAGC  
AAAGGCGAGATTCTGGTTTTATGAGCTGGAGGAAAAATCACAGGCGAAAGGTGGTGAAAA  
AACAGCACCGTCACCGGCTGACAAAATCGGCTTTAACGTTTTCCCGAATACCCGCAGGGC

CGACATATTTATCGCTTAAGTTAAAGAGAGATTGAGGGTGAGAGGTGGCTTTAAGTCAGC  
CAGTGAGGCCCGTAAGTACATTGATCCACATCGTGATGAGCTTGTTCGTGATGTTAAGGA  
GATCCGGGAGATTTTCGCGAGAGGAGCAGCGAACCCCCCGAACAGCTACCGTACCGGACC  
AGACCGCTGTAAGGGGAATGTTTCACGAGAGCAGTTCACTGTTGCGTTCGGTTTCCGTGG  
TTTGCAGTTCTGTAAGTAAGGGGTAGGTTTCGCGACGTTAGGCTGATTTTAACCGGCATTA  
TGACTCGCTGCATAAGCTTTCGGGAGTACTGAATGTACCGACAAAAGCGTTTTCCCTGAT  
CGGTCGGCTTGGACTGGCCTTTGGTGCCAGTGGTAAGGGCAAGGACGAGCCACACTAGGA  
ATCAGGTGACGTGGCATTCAACCTAACAAAAAGTACCGGATCGGGTTCGCGCTGGCGCATAA  
AAGGTTCTATTCTTTCATAAATTACTTTGGCCGTTATGACGTTTCCACTTTCGGGAAAAT  
TACGTCAGGTGGCCACTTGATGACGGCAGCACAGCTTCTCCGGCGCATAATCTAAAGACGG  
CAAGTATGTTTGTGCTGAATAGCCGGTTCGTTAAAAGGTTTACGACGCCTTTAATGGTGT  
GATTCAGGCCATTA AAAAGAGTGACATGTTCGGGTCGTTTCAGCGGTTCTCGATGAGGTGTG  
CACAGAACCGTACTGGTCAACGGAGATTGAAGTCGCGGCACGTTCCCTTGAAGCGTTATGT  
TCAGGAACAGGGCGCGTATGGCTTTCGCTGGAGAATGACTATCTGGTCTACATCCGTAACGT  
ACCTGAGTACAACACAGAGAACATCGACGATTAGACGACGAATCCGGAACCTGGATGGCGG  
TAGTCGTGAGGCATTTCGATCACCTGTTCCGCACCCTGAAAATGCCTGAGCCGGACAAGGG  
CGTTGCGTATGATTCACGAAAGGGCGTTACCCGCACACCTGAATGTAATCTCATTACGGA  
TATTAACCGTAGTTCGGAAGCCGAAGGGCGGCCCGGTGCCGCAGGCTGAAAAGGTTGCCCG  
TGCGGTGAAGAGCAGCATTGTGGACAGTCACCTGAAGGTCCGTGTGGTGAAGTCGCAGCA  
AGAGGCTGAAGCGCTGGCGGGTGAATTGTTCCATGATTACGGCAGGGGGCGTTCATTTCGA  
TCGTCCGGATAAAGGAGAAATTGTCCTGGTGGCGGATAAATATCCCTGCCGGGGCCGACCGC  
TCGCATGAAGCTGCGTCAGGAGGTCATTTCGTCAAGCCGTGGAGCATGCTGTCACAACATC  
GGAACATCAGACGATTTGGAATACCGTGCTTAAAACCCGCGACAGTGATAACGTCGCCCT  
GCGTGAAGCCTCGCGTAAGGTTGAAGATTCCTCAGGTCAGGTATCCCCGGAAGTACAGGT  
GGGCGAATTTCTGGCACATATGGCGGAGATACTGCCGGA AAAAATTCGTTGCGGCATGGGA  
GTGTGTTGTTACCCTGGTTAATGAGGTTGTGCGTTCGTACGGGGTACTTAAGCCGACTAA  
ACTGAACGATATAGGACTAGTTCACGCGGCCATGCGTACGTTAGGCCAGCGGGTGAGGCA  
AGGTTACACGCCGCGTGAGGATGGCGCGCGGCATCCTTTAAATCCTACTGTCGTTGTAA  
ACGTGATCCGGTCAAAGTGCCGGCAGGTGAGGGGGAGAGTTACCGTGATGAGCTTGCAAG  
AAGGATGGAATCTCAGCGCACACAGATTCACGGTCAACATCGGGCGTATGCCACCGTT  
ATTGCGTGACCTTAGTGTACCGGGCTTGAAGGCTGGTAATTTCCCGCGATACTGTGCTGAG  
GGTCACCAATGGTGTGAAACATGAGGTGCCGATGGAATTTATCGAGAGAGTACCGGTGCT  
AATGCACGAGCCGTATGCAATTCGCAGCGCAGCGCCAAAAGCAATGCAGTTGTGAGGCT  
GCTTGATGTCGTGGAGAAAATGGTGATACGGTGGAGTCAGTGGCACAAATGAAGGCTGT  
CCGGTCTCGTCTGTAATCAACTAAGTAGCTTTTGTTCGGTACAGAATATGGCTAAAA  
ACTGAAGAGTATAGAAATGACAGGGTCAACGTTGTACCGGAGCAAAGAATTAAGCTGCGA  
TAACCTTCTGCACAGAGGGCTCAAATTGCCCAAAGGGGCACATTCGTATAGCAGCTCTGC  
GGATAAGATACTCTATCCAGAAGATATGCGGAAGGGGGCCGTATTACTCCCGAACCCAGCAG  
TCTGACACAGAAAGCGAAAATTGCCTCGCGGTTAGTACGCCAGAACCAGGATAAAGTCCA  
GGCGCTGAGTCCGGAACAGGATAAGATCCGAATAACTTTTCGGCAGAGTGGCCGATAGTAA  
CAACGCTTAGATGGCGGAAAAGCTCTTCCACGGAAAAGGCGCAAACGACCTGAACTTGAT  
GAAGGTGCGCTACGTTACGCACTGGCTAACCTTCTGGCGGAGGACAAAATTGCGCAGGC  
CGATCTTGATGGGTACCTCTTCCCCGTCACGCGCCGCAACGTAACACGCATAACCGGAA  
TTTCAACTCGAAAATGCCGGACGGCACTTCAGAGATGCCAACGCCGACGCGGCGGAAAT  
CATGCACCGTGGATGTAACATTGGCAAACCGGCAAAGTATGTCCGTTCGGGGAGGGATTGT  
TGACGATATGCTGGCCATCGCCGTGAGTTTATCCGTTAGCAGGCACTTGAATAGACCGT  
TGTGGTGGATCACTGGCGGAAAGCCTACCGTTACTACGTTTCCCTGTAAGGTCACGATGT  
TGACGGTGTGGTGTCACTGCCACACACAGGTAAGGGCGTTCAGCACCTGCATACGTGAAAG  
GAGGAAGGCTACGTGGCGTGCATCGCTGCCACTGTCTCCGTCCAGCCAGGCGATAACAGGA  
CCTGAGTGGATCGGTGAACCGTTATCGCAAAAACGAAGTGGGGGACGCCTTCCCTGATAACC  
GGTGCAGGATAATCCCGACAAGGATTACTGGCAGGTATTCACGGATGACAGACCGGATAA  
TATCCGAAGGGTTCTAGAGCGCAACGAGCTGGCAGCTGGTGAAAACATTTCGCTATGTTGT  
AGGCCGACCTGTACCGATGGCAATGATGGCAGACCCGTACTTCACCACTGAAAAGAACGG  
CAAAATTTACTACATCAAATCCATGATCCGCGCCTGATTCGTTTCGATGAAGAGTATGGG  
ACCGGAGACCATCAATGCCTTTGGAAGTACGCGGGGGAAAGATAACCGCTGCCTGGCAAC  
GGTAAACACTTGGTATAACCCGGAAATGCTGGTCACTAACTTCGTCCGTGACGTACTGAA  
GCCCTGATGAACCTTAAGGCGGAGCAGGGAATGAGCGACCGTAAACTGAAATGGCTGTA

TAAC TTATCCGCCCGGGCTGTGGTGAAAGACAGCCGTTCTTCCAAGTCAGCCATATAAGG  
CAGTCTGCGTAGTAAAACCCCTCACGTGAACAGGTGCACAGTGGCACAAAATGTGAAAGGA  
GTTTGTGAGGACGGAGGGAAAACCGGCTCATTTCACACGGGTGGCCTTGAAGGCCGTAA  
GAAGGAAATGGATCGCCTTGTCTCACTGCCGAAGGGGGATTGAAAGGCCAGACAAAACGG  
GGCCTGGAGTTCGTTCCCTAACCGTGACGCGGACGCCAACGGTGCCTTTGAAAACGCTCT  
GCCTCTTTCTGCCTATAAGAACGCGCGTGATGCCTCATTGTCCTGACACCAGGCGGTGTC  
CCTTGACACAAACATGACGGAGGTCTTTAACCGTAGTGGTGAGCGGGGAGCGCTGATGAA  
TTCGCTGCACATGTTCCGCCGAGGCGAACATTACAGGCAACGGCAAATCTGGTGAGAACGCT  
CGGACACTCTAATGGTGAGAGACCTTTACTCGAGCCCCTTCTCTTGAAGTATCCGAATGT  
TCTGGGGAAAATCGGGCTTGCCGCTCTGGGAGCAGGTTACCTGTTTAGCTCGCTGCACCG  
AAGCGTGGCCGGTGAGGATGCCGATGGGATTAAGTGAATGAAAAGGTGCCAACGCATGT  
CAAAGAGCGTAACCTCGTCATTATGAAATCGGAGTTCGGCGGAAAATGCCGGAGAGAACTA  
GAGTTTTCTCTAGCTTACGGGTACAACGTTTTCTTCCCTGCTCTGCGATACTACTGAAGG  
CGTGGAGGCGGTTGACCTGACGGCGTCCCCTGTTGCCTGTAATGTTGCTCGTGGTGTGCT  
CGGTGCACTCAACCCGATTGGCAGTGAGACGGCGGAAACACTGTCCGGGACAGTGTGAA  
AAATGCAGCGCCGAACATTCTGAGTCAGTTTGCTAACCTTGCCATGCATGAAATTGTCAT  
GCGGACGTAGTTTTACCTGGAGAACATGCCTTTTGGTATACCAAATCTGGCAACGAGCT  
GGCGAGAAGTTCAACGCCAGAAGCATAACATGGCCTTTGCATCCTGGCTGAATGCGTTCTC  
CGGCGCAGCCAGTACCGTCCCCGGGCGGTGGATATCACACCGGAATGGCTGAAATTCTC  
CATTGATTACACCTCCGGCGGGACAGGGCGCTTCATTGCTAGA ACTACGGTTGCGGCGGC  
TAAAGCGCTGAATGGTATTGATATAGCGGAGGAGCAGGTGCCCTTCCCTGATGAAACCCCTC  
GCTCGAGGTGATGCTGTATGCAGACCGGGAGATTATGTACGACCGTAGGGCGGAGCTTGC  
GCCGTCACACGCAGAGCTGAGAAGTATAACCGTAGCAGAAAGGACACCGTGCATTGCCTA  
GTGCAACGGAAAATTGTCAATGAGCGGGCTTATGTATGATACCCGGCAGAGTCTGAAGGA  
GTTGCGTAATCAGGGTGATGCTATTTACGCCGATCGAACGCTAAGTCCGTCGCAACAGTC  
GGCGAAGGTGATATAGCTAGTGCCGGATATGCAAATTGCCGTGCATCGGTTTAACCGCGA  
GTATACCACAGAAGTGGGACTGGATGAACAGAAATGGCCCCGGAGGGAAAATGCGGGGCTG  
ATTAAGAAATCAACACTCATTGACGTGTAATTACCGAAGGGATTA ACTCATAGTCAGATG  
AACATTTTATGTGATGCAGAGGGCCGATTCATTTTTTATGAAGAAAAGTTGCGGCAATG  
GCAGTATCTTTGAGCAAAGAGCATGGCCGATGTATGCGTTTAATTAAGTTGAAGGAGGAG  
CGGTAATGGCTAATGGCAGTGATGAGCTTAATAATCTTGATATGTTAGTAAGCGATCTGA  
TGCAGGCGAAATGATGTTACACCCCTTCTCGCCAGGAATGAATATCCGCAAGCAGAATTGC  
GGTTGGA ACTAGTCAGGCCACGATGAGATCGAAGAGGAGTAGTTTACCCAGTATTGGT  
TGGCATTCTTATATCCCAAGATAGGCCATTTGACATCCTCCACGCCATGAATCACGGAGA  
TTTACACCGCAGTGGATAAGACTCGGTGTTTTGTTGGAAAAGCCTGTGATAACTCACAGA  
AACCCCGTCAGTAAGACGGGCTTAACAAGCTGGGACGGTTACTTTAATAATTTTCAAGTGA  
TTTACATCCACTTTAACGCTGCTCAAGCCTTTAGCAATTTACCCCTCAATTCTTACTTTG  
TTTTTCGGAGAGACATCCGTACGGCCCATATGCTGTTATCGAAATACGTGACTTTTGT  
CCGCTATTGTCGCGGAACTCATAACGTTTCATCACCCACTTTTTTAATGATGCTCCCTTTT  
AGGATACCCCATGGATCATCCTTCAGTTCTTTTGCCTGCGCTACTTTTGAACGCTCTGCT  
TCAGGCCCTTGAAAACCGCCCTGCCGTGCAAAAAGCGCCACAAGAGACAAAACAAAAGAT  
GCTGCAACCCATTTTCAATTTTCAATTCATAGTCTCTATCTCAGGTGAACATTCAAACAGCA  
TTTTCAATACGGTAATGCGCGGGGGCGTTGTGATGCCTTAAACATCAGTGGTGATGGGA  
GATTACTCTCTGCTAGGGCTCTTAGTTGTGAGAGTCGGAGTCTACGAAGACAGCGACCT  
CCGTGCGACCGGTCCGGACTCGCACCTCACAGACGTCATTCTCGTTACCAGTGCCGTCA  
ATATGACGGTCAACCAGACGACAAGCAGGGCGATTAACATCGCCCATTGCTGCGTCATCG  
CCTGCTTCTCCTTCCCTTTTGGCACGAAAGAGACTAATCTACCTATGATCAGCATGGATT  
GACCCTCAGGTTAATGTTAAGCTTCTTGCCGGACCCGTAATGTAGAATGGGGCTTTTCTG  
TACCTGCCCTAGGAGTTCATGCCCGAGGCAGATGGCCTCAAGCACCCGCAGCAATTCTCC  
TGA ACTCTTTTTTCCGGCAAGCCGTGTTTATGTCCAGCGAAAAGCGAATGAACAACAA  
GCACCTCTGCCATTACTGTTCTACATCTGCGAATACTACAGGCCGGGTTATTGATTCAC  
CATCTTGTCAAGATTTTTAATGGCACTGTCCGCATACCGTATTGCAGATCTTCCATCCCG  
CAACCGTGCTTTGGTGTCTGTTCTTACGCCCCTAGACTGGCAACAGATTCTCGGAGCTG  
ATCGTGTCTGTTATGAAGCTGTGATCGTCCCCACCACGGCCTACCACCGTTTGAACA  
CCGCAGAACTTACCCAAATGGCGCCACAGCACATCCACACTGGAAGCACTGGAAAACGGG  
AGCCTGTTCTCGAACCTCATTGGCGGGATTTTTAAAGCTCTGTTGTGTGTAGTTTATTCT  
GCCATATAATGCAATGTTTACAGCAGCTTCTTTCATCGCGCTTCGGCTGCATCAGTGTGAT

GATAGGAGCGCCTTCATTTTCGATCAGTTCACGTCCTGCGGGCGGGTGTGATAGCGGCATC  
CCGACTTACGGTTTCCAGGTCACCTCCCGGAATTCATCCCCGTCATTAGCGTCAGGATGC  
CCCGGCATGAAGGTGGCCCCCTTACTCGCCAGTCACCTTTCTTGACATACTCCACGGCA  
ACAAGAACGGCTGTCATGCTATTCGACATTCGCTCACTTGGACTTATCCAACCATCCCCA  
GTTAGCGGAGAGTTGTCAGACACCGCATACTGCAGCCGTTACAGGTAACGTATTCTTGA  
AACCTGTTTCCGTCGCACGCCTGAAGCCATTGCTCAGCCTTTACCGCGTCAATGTGAAAG  
GCACAAGTTCCACCGCCATCAAATTGAATTTTCGAGAGGTCCGCAATCTGTTACAGTGC  
GGGTGTGGCAACTTGTAAAGTTTGGCTTACGGGTTTCGGCTTCCAGCTCTGATATGCGCTTC  
TCGGATGCTCCAATAACGCATGCTTATCGCGTAACGCTTCTTGCAGTTCGGCAAGATGG  
CATTCATATCAATAAGGTCGTTCTATTCTGCTCCACCTCACCTCTCAGCTTCGCATAC  
GTAAGCGCAATCTCCTCGTTGTCCTGGTCGTGGCGTTCGATGTATTGCTGCTTTCTTTCC  
CGTTCGTCCAGCAGTTCAGCACGCTAGCCGGGTTAGTGTCTGCTATGAATTCAGCGTTA  
CATAAGCCTGCGCATCTCTTTCAATCAAGCTATTAACATGACATTGTGCAATCACACCAC  
CGTGTCTCGTTTCCATTTTTCGGACACAAACACTCCTGTTAAATAGCCGTGCTGGTTAA  
CAGATGTACGCCCGACGATGTAGCTTCTTTAGTTGCTTTCTCTGCCCTATAACGGAGTG  
CCTGATAGCGATTCTTGCTCATTTTACTCTTCACGCGGGTATACATGGATTACTACGCC  
CCTCATCTAATTGCGCAAGCTGGATACCCCGGTTCCATGCCGTA AAAACCTAAGGTTTCG  
AAAATGCATCTATTTCTTACGGCGTTGCTCCTACACTCGGCGTTTCGTCCATTTTTC  
AGGGACAACAGTGACAGACCTCCTCCTCTGCAGAACATGATTTAGAAAGAACCAGGAGA  
ACTAGGCCGGTGTTCAGGGCTGTAGTGATCGTCGTCGTTGTGTTTATGTTACGTCACAC  
CTCTCTGTTTTTTGATAATTTCAATATCCTGCTAGCAACTGGCGTAAGCTCTGCATCCAC  
GAACAGCCAGGGGCCCGCTCATCTACCGGAGCCCCACACTCGCAAAAACGAATAGCAG  
ATGGGGCATTCTGCCGGAATCGTATTTGCGTGGGGAGAGATTGCGCTGAGATTCTTCGA  
TTTCATCGGCGTTGTCGATGACATCTGCTGATTTCTTTCTTCAGGCATGAAACAAGGT  
GCCGAAGCTCCTTTTTTTTTCGTATTGCAATTGCCTTGCCTCAGGCTTTTCAACTTTGG  
ACTGGCCCCTGAAGTAAGAAAGTCGACTGGTCAAGCCGTGCAGCCTCTCTCAGAATCAC  
ATATCTGTTTCGGCGTCACCATGTAGAGGGTCTCATAACCAATGTCATACAACTTGTTCTG  
GTAGGAGGAGTTCAGCTCCTTCACGATCGGATACAGGTGAATACTGAGGTCTGGGCTTT  
TTCCACCCAGACTTGCTTGTAGCAGAGGAGGATCATTTCCTCGTCCGTGAATTCTTGCTG  
TAATTATGATTGTGCTGACTCCATGTTGCGCAGTTTGTTTTCGCATTTCGATGAAGTATCT  
GCGTATTTGTTGGCCTATTTTCGTTACGATCTAACGCCCGCTTTCTTTGACTGTAACGAG  
GGTAAGGTGATGACCAAGTCTCCCTCGCTCATAACCTTTTTCCCGGTTCTGGGAAATAGC  
TATATAGTCTGGTTTCCGACGAATCCGTAATACTATTCAATACGTTCTGTAATCCGGGTTAC  
CAAGCGTTTTCTTATTCCAAGAAAAGTATGTAAATCACGGGCATTAAGCAGAAGGGTGTT  
TTAATTGGCGATAGTGCCGTTGAATACGGGGATTAGTGGCCTGCTCATGATGATCTCTTT  
ATATGTTTAGTTTATAACCTCGCGTTAGAAGCTGGCCCTCGGGTGTCAACTGAGCCAAAT  
AAGAAGCTCAGGGCATATTACCTTGCGGGGGGTGATTACGCCTTACCACCGGACCTTT  
GTTGGGATGTAACCTATCTAAAATCCAGGCATAAAAAGGACGCAAGGCTACGGGGTGC GG  
AGCCCGCATTTTTGTTCACTGCGGTAAGTTTTCGATAGCAGTCGAGGAATTGTCAATCGG  
CGGAATACTGATGCACGCGTAACGGCAAACGCCTCATCCAGTAAATTAACGCAAATTCGC  
ATCGGAACTTGCCTGAAATATAGGAAATATAAAGTTAATTACCCTTAAAGGTATGGGGC  
ACTAGTGGGACTAAATGTGGATGTTTGGGGCATATTGTGGGCAAAAACAACGTATAACG  
AACGGTTTAAACATTGATTTGTTTCATGGTCAAATGACGTGTAACACATTGAATAAGATAT  
GCTCTTGGACGAGGTTCCGTAATTCTGTGTTTTAATGCTTCTTGGTTTCCGCACATCTA  
AGGATATGGTTTATCATTTTGA AAAATCTAATTTTATTTTCATCCTCCTGGTCACTTAGGG  
TCACCTCTGGGGCACGGGCTTTACGGACAATAACCAGCCTGGCATCTTGAGTCACGCTCC  
GCTCAGGGATCCATGCACCATAAACATTGTTGACCATGCTAGCGCTGGAGTGCCTCATCT  
GTGTTTCAATAAACGTCGGGTCTGCTCGGGAAGATAAAGCCCAACACGCATAGGTATACC  
GTCTCAGCCAGGCTTTACGGGATTAGATACCCGCTCGTTTTATTGATGAATCCCATGTGG  
CTTCGATGGGGCTTATCGCGTAGGTAATAGCCGACATGTGACGCTTGCGAACGATTTGCG  
GACAGAAAACAATAGTCACTCTAGCACAAATTGTTTCATCCGTA ACTAGCGAAAGTGAACAG  
TGATCTGATGCTGCCTGCGACGACGAGCAGGCATTGCCTGGCTTTTACGCGCTTCACTTG  
CTCTTGCCAGAAGGTGTATGCCCCGGCTGGTGCCTGAGTCGGTCTATGGTATGGTACAAT  
GGCCTATTTTTGTAAAATTTAGTCGCACTGTTATCGGGACAGCTTTCAGGTCCATAGCCT  
CCCATGTCAGTCCGACAATTTACCCGTGTCTCAACCTTGTA AAAACAGCCACTGCCCAGC  
GGTTTTAGGTCTGTAGATGATGGCAGGCATGAACGAAACGGCTAAACTCATCTCTGGTCA  
GTGGAGCCCGCTCTGGTTTTAGTTTCTCAGCGGTGTTCTTGAAGTAAACGAGTTTTTCT

CCGCATGCCCGTTTTTCGGCAGCAAAGCTGAACATTCCGGCTGTTCTTGTCATGTAACAGT  
TCACTGTGGGTTTCGGTTCATCCTTTTTTCGGGACGTGCTGGTGTGCCAGGTTCCCTCTTCGC  
CGGGCAGTAAATCTTTCCTGATACACAACAGCTCTTCTTATGTAATGGATGAAGCCAGCC  
TACCAGGTTCCAGCCTCGGTAGCATATTTTTTCATCACTGTTTGGTAATGAATTAAGGCGT  
TACTACTGATTTCCATTGCTTTCAGAGTAAGCCATTTCTGTGCCAGTTCGCCGACGGTGA  
TATCTTTTTTTTTCCAGTCCAAATGTCTTCCGGTCAGGTCAGACGGGGAATCGATCGGCAT  
AACCAAACGTGCTTGTCTGATTGCAGAGTAGATCGTAGCCCTTAACTCACCAGCGATCT  
TTCTGTATTGCAGTGTATCCGGCATGCGAAGATTTTCGCGCACTCGTTTACCCCTGTACT  
GAAACGTTATGTGGAGTTTTACTCCGTGATTGTCATCGCCGGGTGGAGAAAATGAATTTT  
CCATTGTTCCCTCATGGGTCCAAGAGCCCCTCAGGTTACTCTCAGATGGACAAGATTTAA  
TCACCCAGAGATACTAAGCGTTAGTTTTTGAGCCAAGTGTTGGTGGTACGTAGATGTCAG  
AGAGATTCGCAGGTCTTCTTTGTCGTTCCGCCTGGGGCTACTTGTATTTATTCTCTGCCG  
TTCATCCTCGCACTGTCCAGACGCGTAATATTGTCCCTTTTCTCAGGCCTGATACCGAG  
ACTATGAGCTCCAGTGTTACCCAATCATCCGCATTTATCCGTACAACAGGGGTGATGACT  
GGCTGGATGACATGGTTCGTAGGTTTCATCACTCACCCATAAGTTGCCTCTGCATGTGT  
AAGAAAAACCCGCCCTCGGGGGGCTTGGTGTCTTTTTAGTTTTTCAATTTCGAATCTTGGT  
TACGTCTTCTTCGATACGAAATCCTTTTTTTTTCGTCTTTTGATTTTGCTAAGACATAAAT  
TTGCGCGGCACTGTACCGATCTCGTATCCATGAATCTAAGGCGCGAACAGCCTCGCTACG  
CTTTTTATCTTCTCTCATTTTTGATATCGACGAGGACATCAACGCAAGTATGGAAAAT  
GTGGATTTTGACTTTACATTTGATCATGACGGCATCGCCATCATTTCGCCCATACAGTGA  
GGACAAATCTTAAGGGTCTGGCTGGTATTTCTATAACGTTAGAGGGTTGAATGTTGAACA  
CGCCATTATCATCTCCATAAAACAAACCTCGCCGTAGCGAGTTCAGATAAAAGAAATCCT  
CGCGAGTGCAGGAATGTTATACAGTCGCGATATTCATCTCGAAAGCGATTCCCTTTGCC  
GGTTTATCACCGAAGTGCAGGATGTGTGATTGTCTTGATTTTCATATCCCTTTTACGGAACA  
TTAATTCTTCGGCTGGAATCGTCGCGCTTCGGGTATCCCTTTGTGGTTATCATGCGGTCA  
TACTCGCGGAACATAAATCGGTTATTCCACTAGTTCTTAAACAGGCGATACTCTTCCGTT  
TCCTGTCTGGGAGTAATGGCATCGAGGAATTCACGTTTAACTGCAAGTGGCAGGTTAGCC  
CCGGTTAGCCTCCTGCGGCGGTTACGGTAGCGGCATCCGCTGAGTCGCTTGCTCAATACC  
ATCACCCGGCCTAACCGTTGCAACTCACCTCCGAAAGGTGCTTGCGGAGTACCGTGCGGA  
CCATATTAGCGCTTCAACGAAACCGCTATCGAGATTCACCGAAATAAGCACGTTCTGACG  
TTTTTTAGGGAAGCAACCACTACAGCTTATCCAATTCGGAATTACCCGAGATTTACC  
TGCCTCATCAGCGGATTTTCATCCAGTGCCTAAGCGTTGAGTTGCTTACACATAACCAATC  
AACGTTTATGTTTTCTTTTTTTCTGACACCCATTCTTGTAGTGAACGATTGGCAGTCCG  
GCTTTGTGCATCAATTCGTGGTAGGAAGATAAATAGTGGTACATTTCCCGGCTGCATCGT  
ATGCTCGCGACAAATAAACGTGATACAACAATATTTAACGACGTCAATTTCCACTGTGTG  
AGCAGGGTCGAATGGTTCAGTGGTCAATGCAGTCAACGCTATTTTCGTAACACGACGCAC  
ACTATTATCTCGCAAGTCCAGGCTGCCGATACGCTCTCTGGTTTCTTTAGTCATTTCTTT  
CTAGGTGAACATTGTCATGTCTTAGTGAATCTCTACTTCGACGCCATCTTTCATCGTGAA  
GCCGTGCTAATCATCCGAAAACCTGGTTAACCCAGGCGCATGAAGGCTAGGAATATAGAC  
GCTTGCAGTGGGGTAGCCCTTATCGTAATTAATGCTGGCAACGTGCTCGCCGTTTTATAC  
GCTCAGCGTGTCCAGGACACAATAAAAATTTCTACGGCTGCCCTAAAACGCTTTACTGC  
CTCCACAAGTCGGTTCACGCTTTTTCTCTTCTGGCGTCAGGACAATTAATTCCTCCAA  
AGATGCCATTCCAGTTGTCTTAATATGGGTTGCTTTTTATGAGCTGTGTGTTGAGCAACA  
CCCACACCACCTAATTAACGACTCACTAACAAGATCAATCCTTTACCGGTTTGCCCAGA  
CAAAAATTTGCGGGGATACCGGTGTCAGCAGCCCGATAAACAGAATGAGAAAGAAAAATT  
CTGTCGCAAGACCTTTTCCCGGATACGCTTTTCAGGATAATCTAAGCACATCATTCTCCT  
TTGTTGGTCTCAAATTTTATGCCCGGCGCAAAGCACGCGTTTTGTCTTTGCTTATT  
GGACAGCGATCCTTGCACGCCTCTTTTGTACATCCAGCCCATTACCGACCGATATAGTCA  
CCGAAGCCTGGCCACTTATCCTTGCCATCTGTGCAGCGGAGGCAATCACTATAGATATGA  
ATGGTTTAACTTGACGCAAAGCCATATCCCTCTCTTTTAGTGCGCAAGTGGTTTTACCT  
GCGGTTTTGCACCCAGCTGGGCTTTTTGCAAAAACCACAATCCATCATCCCGTAGTATTT  
CATCAACCCCATCCGTCGTTTGATGAGTCAACCCACTGCCATACACCAGGAGCGTTTCT  
ACGAACTAGCAGAATCTTTGCTTTACGGTATTTTCATCGGTTTAGTCTCCTGCATCTCTTT  
GGTGTCTCGGCGTGGCGACGTAATCCCGGTAGGGCGGCGCTTTGGTGTCCGGATGATGTT  
TTTGCCAGAAGCGCAGAAGGCCGACAACGAGACGGATACAGTAACAAGCAGATACATGCC  
ACACGCACTATTCACCTCTTTCGATGGTCTGTGATCGGCGCGCTCGGCTACTCTTTGTT  
CCCAGAACCCTTGTGAAGCGCCATAAGCTTGTGTCGTCATCGATGCATATTTGCGATCAG



AGTAGGCCTGAGCTTCATTCTCACATTTCGCCAGGTAATTCGCCAGGGCCAAACAGTTTGT  
TATAAATCCATATTAGTCCGTTCTTAACGTCGCCAGTTAGCTGCCATTCGGTGATCGCAG  
CCTGCATGACCAGAATGCTATGCCCCGATTAATAGCTTCAGATTTATATAACGTGTGCGGA  
TGTTTGCATTCTCGCTTAGTACTTTTACGTTGCGCTTTTCTGAGCCTTCATGTAACGCCT  
GCTTATCGCGTAGAGCTTCTACCAGTCCAGGAACATGGCATTFACTCTCAATTAGGTTGT  
TCTCTGCTGCTTCAAGCTCAACACGCAGCTTCCCAACCGTACGCGCAATCCCCGCGTTCT  
CCTGGCGACTGGGTCTGATGTATGGCAGGTGTTTCTCCTGTTTCATCGCGCAGTACCAGAA  
TGGAAGCCGGGTAGTCTATACTATGAATCCAGCGTTAGCATAAGCGTGATCTTCTGTGT  
CAGTCCCCCGTTAACATGACATTTCGGCAATTTTCGTCACCGGGTTCTCCTTTCCATTTAT  
GGCTAGCAACAACACTACTGTTAAATTGCCGCGCTGGTTAACGGAGGCATGCCATACGTGGT  
AGCTTCCTTTGGATGGTTTTTCTGCCTTCTCACGCAGACCCGGATAATTAATTTTCGCTCA  
CTTGGAACCTCTCTGTTTACTGATCAGCCTCAGCTCCTTCTAACAACCTTGCTCAAGTCCG  
CTAACCTAAACGGACATGCGTCTCCGCTGCTCGAGGGAATTGCCACACTCACAACATTG  
ATTGGCAGAAATTGCCTGGTAGTTCAGGAGGCGCAATTTTATTTCTGTGTGCGCGCTGTAA  
TTCTTCAGTTTCTCATGTTGAATCAATGACGTCTGCGATCTTTCATTAATCCCTAAACTG  
TTAGTGAAGACGCTTGAGAGTGAACGCGAATAATAAAAAAGGAGCCTGTAGCTCCATGGT  
GATTTTGCTTTTCATCTACTCGGTTTCATAGAGACGCCGTTTAAAATTCCGATCCCCAGA  
CCTAAATGAGTCGCATTGAATCCCATTAGCGTTACCGACTCGCGGAGGTTCTTCACAACA  
CTTCGGCAAACGTGATCGTAGTTTTTATCTGGAAACCGCTGTCTGGCTTTTTTGATTCA  
GTAGTTGCCGGACGAGCAATGCTGCGACGGGCGTTTTCTGCTCATGTGTCAATTGAACAA  
GTCCCGCTCGGCCAAAATAAGCCAACAGAATAAGAAGCCTGCTGCCAGACAAATTCATT  
CTGTTCTTGTCAAGCCGGCGCTCTCTAGTTTGCTTCTGCTTTCGCCGCCCGCATTTCTAG  
CCTTTGTAAGGGATGTGACTGACGTATGAAATTCGTCGTCTGTTTCTACTGGTATTGG  
CACGAACCTGACTCCAATTTTAGCGAGGCTATGTGCCCAAGAGAACTCGTTCTTAACTC  
AACGGGAGATGCTGTGTGCAGACAGAGGCCCGTTTATTATTTATCTCCTAAGCCAGCTGT  
TGTGCTTTCAGGTCATTTCTGATAATACAAAGGCCGGGAAATACCCCGCCTAGCTTTGTA  
ACGGAGTAGACGAAAGCGCTCAAACCTACCCGGATATTATCGTGAGGATGCTTCATCGCA  
ATTACTACCAAATACAAACCCACTTTCAGCCAGTGCCTCGTCCAATTTGTCAATGAACT  
ACGGCACCGTATCGTCAAACTCGCCATGTACTTTTCATCCCGCTCAACCACGACATAAT  
GCAGGCCTACAGGCTTTATACCTGGGTACTAGTTGGCAAATAACCAGGCATCTTTTCGTG  
TCACCCACAAGCTGGACTTCACCTGGGCCCTTTGAGCCGGCTTTATGGCCTCGAAACCAC  
CGAGTCGGAACACTACACGAAATCCCGGTAGGTAATCGGGCATTTCAGTTCAATGCCATGTG  
AGGCACTGCATAAAGCATCGGGAGAGCAGGCGTTACGCATACTTTCATCGCGAGAGATGA  
TCGGGGATTCAATAACAGTCACTTCTGATGTGAACTCAAACAGGGTTCTGACGTGCTTCG  
CGTACTGTTTTCCCAGGGCAGTTCTTTAGCGTTAGCTTCCGTAGCCACTCCGGTGCAA  
CTTCGGCAAGCAGGTTGTGGAAGTAGTAAATTTTCATGTCAAGGCCACATCTTTCCTGAGC  
GGGGAAGTGCTGTACGATGTACACTTCTGACGCGGTGATGACCCCGAACCGAAATTTGT  
GCCGTGTATCACCCCCCTTTTCGACAGCTCTGACGTCGTTCCGGTAAGCTGCAGGATAA  
TGGCCGGTGTATGTAGCCACCTTCTCCTCAGAGGCTTTCTGTTTCAGGAATCCAAGAAC  
TTCCCCTGCTTCGGCCTGTGTCAATTTCTGGCGAGGCGCGAATGTGCAAGCGAAATATCTG  
GGAACAGAGCGACAATAAGTCGTGATCCCATGTTTTATCCATGGCGAACAGCAGAATGTT  
AATCTCCTGCACGGTTTCATCGTTCACCGGAGTGATGTGGCGTTCCGGCTGGCTTGCTGC  
AGTGTAGGCAGTATTTGCGACAATGCGCTCGGCTTCATCCTTGTGTCAGAGATAAGATCCA  
TCCGAAGGCTAGACAGGCACCCTGAACCAGGGGTTTATGCCGTAACATCCGGTTGGGATG  
CGACTGCCACGGGCGGGTAATTTCTCTGGCTTCGCGGGTTTTGAATGGTTCCGGTGCGGCA  
TTCATCAATCCACTCCGTAACGCCGATCGGATGATTACGGTCCATGCCATAACTCCGGGA  
TGTACAGCATTCAATTGTGCTGCTCACAGCCCTTGCTATCAAACCTGCCGGTTTTAAATTGAT  
GACGCGGGGCCAGCCATCAACGCCCTTACCAGAACGATGCCGTTCTGCTGATCAGGGAA  
GGCGTAAATTACTTTTCGTCCACGCATTATGGCCGTAAGTTGGCGACGATCAACAAGGC  
GGAGAACTGCGGATTTATGGCATCACCCACAAATGCCGTCTGGCGAGGAGTGGTGAACAG  
TTCCTCTCGCTCGACTGAATCCATGCAGACACGTTACGCCAGCTTCCCTGCCAGCGTTTC  
GAGTGCGGTGCTCTTCCGGTTTATACCTCAGAATCAATATCAACCTGCTGGCGACCACTT  
GTTTCAACCATGTCTGGTACGTGTTCTACCGTGTGGTCCTTAAACTCAAATCGACCTCA  
AACGCACGGTTAATAGCTTTTTTGGCCGGCCCCGAGGCGTTGCAAATGTTCCCTCGAGAGT  
GATTCAAACAGTTGCTGGGACGGACCTATGTCCAAGTCGGCTGCCAGCTCTGCGTCGTTT  
TTTTACGGGCGACCTGCTGGTAGCGTTGCGTCCAGCGCTGAGCCTCAAGACAATCCTGA  
AAGGTATTAGCGTTCATGGTTGAACTCCTCATATAGCGCAGAAAATATCGCCGGCGAAAT

GCCGGGCTGATTGGGAAAACAGGAAAGGGGTTTGTAGTGTATGCTTTAGCTTGATCTCAGTT  
CCAGTATTACTATCCATCTTTTGTGAGCGTGGACGGCCTCACGAAACATCTTTTCATCGT  
TAATAAAAAGTTGCGCTAGGTAATTTAGTCTGGATAGCCATAAGTGTTGGATCCATTTTTG  
GGGACTCTTGGCTGATATAGGCTGTGCGATAAGGCGTTGCGATCCTTCACGTAATTTACGG  
CTGATTCGTTCAAATAAGAATTTGGAAGGGGAGCCAGCAACAGGCTACCTCGGAAGGGCA  
CAGTACATGGTGTGCTCAATATTTATTCATGAAGAAAACCGCCTCGAGTCAAGCGTTATG  
GGTATGCGGTAACGCCGCGCGCAGACGGCTTTGCTTGTACATCATCTGAATCAAATAGA  
AATGATGTATCGATATCGGTAATTTCTAGTTTCTTCGATCCCATCCATTGGAGGCCATGCT  
TCCTGACCATTTCCATCATGCCAGCCGAATTCACACAAAACCCATATGCATTTAAGTAG  
CTTGAAAAAGCCATAAGCAGGGCACCTCGCGCAAGCCTGATTAATACAGCATTTAATAAA  
GAGCCGTGTTTATTGAGTTGGTATTCAGAGTCTGACCAGAAATTATTAATCTGCTGAAGT  
ATTTCTCTGTCTTACGTCATGGTCGTTTGAAATTTCTATAGATTCTTTTCAGTCGTAA  
TCAATGATTTATTATTTGATGTTTGACATCTGTTTATATCCTCCCTGATAAAAATTCGCC  
CTCACATTGCATAGCGCAGAAGATTACCAATAATCAGAACAAGTCGGCTACTGTTTACTT  
ACGAGCGTGATTGCTCCGTGTTTTCACTCGTTGGAATCAATACACAGTGTGGGTTTATA  
CTCTTGTTTATGCTAGAAAATAAAGGCCACCAGTAGCTAGTCTTGTTGTAATTGTTGCAGG  
TACCAAGTAAGCGATTAGATGGAGCGCCATAAATTATCAATTCATCGTATGCCGGGTTCA  
TCTCCACCTCTTGTGCTATGGGCTTTCTTGCGATAGTGTGTCATCGGAGAAGCATACAA  
CAGCCCAGGCACCGATTGTTTTAAAAAGAACTCCAATGGGCTGTGGTTTTCTGCATGTG  
CGTTAACGCGACAATCTCGAATCGCGGTTTCATGAAATTCATATATCACCTATAACTAC  
TGATTTGCTGCCTAATTTCACTTTTTGGCAACCAACAAGTAAGCTTGCTGTAAGTTGG  
TTGCATTTCCGGCAGCCTGCCGCTTAAAGAGCTAAATTTGGAAGGCGAGTTGAGTCTTCA  
TATTTTCTGATCAAAGCTGACGGTGTCAATTTCTTCTGCTCTGAGCGCTGGTTTGCCTTCG  
CATTGTCAGACCACTCGTGATGTCTTCGGCCTGTGTGGTTTGAGGGAGATAAACGCCACG  
TGACTTTGGATGTTTGCGCGACGAGCTCTACGGCGAGAAGCTGCGGCGCCTTCACATTCT  
GTTTTTCGGGACATAGATTCATCTCGAATAATCGTTCTCGATGCCATCTCGAACCTCTTC  
CTGAGTCCGGTGGTTCTGCAAGGCCCTCCACAGATTATGTGGTTGGGTGCTTTGGCTTCT  
CAGCCACGTAGTCGAGAGTCCACGTGGCTTAAAGAGCCTGCCACTATGTTCCACTTGGCC  
TGCAGCGTCTGCTGAGGGTAAAAGTGTAAGATATGCAATTCAGTTGGTTAATGCAATTT  
GTTCTAACACGGGGCGTTTTTTTTGCAACGCTTTGTATTTAATAGTTGTGTTTTTTAACGT  
GTGTGATTGCATCGGCGATGTAAGGAAAGATCAGAATTGCGTTGTTAAGTGAGATGTAT  
CACTTTAGTTGCCAATAAAGATATTTGTTTATGTGTTTTTTTTGGGCGAAAAGAAGAGAAA  
ACCCTGCCTGGAGGCCGGCTTGATGATTACCCGTGTGGCCTTGAGCGAGAATGCTCAGAC  
ACATGTTCAAGAACTCCATGCCTTAATCGTTCACAGGCATTCGCATGAACTGCTCGATTG  
AATTGGTCTTTCAATTTGTATGTAGACATCTGTATTTTCTCATAATGGCCCCACCCGAAA  
AACCGCTTGAAAAAATGTACCCAACCTCGCTAAGGGTACATCGCAAAAATTGTGTACCTTT  
ACAATGAATCCATTTGGAGGCTCTGGTTAAACTGCATCAATGGCGCACTTGGGAGTTGGA  
CATTGTGCAGAATGCTTTGGCATTATTGAGGCCGTACGTAAACTTTCAGCATTGAAGAGT  
TGCCTTCGGCTTCTTCGTTTGTGGTATCGCTAGGAATGCCGTTAATCGTAACTGTAACCG  
CTCATTTCGATTGAAGAAGTACTGGAAGATCATGGCTATGATGTGCATTAGCCTCGCCTT  
CGACTTTTGTGGTTCGCCAGTCAAATCTTTTCTCACTGGATGCGTTGTTAATCGGAT  
CGCCTGGGATTTCTTCACTACCGTGGTCAGCTTTAGACTTTTTGATTTCAATTTGAATGC  
GGCTTTTATAGGCAGTCATGCTGCTGTGGGTAGTCTTCTACTCAGTTCCTTTGATGTATC  
GCTCGGCACGCTCATTACATCAAATTGAGTAACATTAATTCATTTCTCTCCTTGGACTA  
CCGTTAAGAGGGGATCGAATGAGTTTTTTTTAATTTGAGCGGTGTCAACCTTCATTATGT  
TCATTCACAGAAGATCTTCAAGAAATTCCTTGAAGGCCTGCACGCTAACGTTTGATTTAG  
CCATATGCTCTCTCCGTAAGTTATTGACTCAGATCGTGTTAATCCACGAATTGATATGCA  
TGCAAGACTCAAGTCTTCAGAGTTTCCCTTCCCGATCCCTCTCAGTAAAAAAGGCAGTA  
GCTCTGCGACCTTTCATCTCCTAAATATCTTCTCTCCTACCTATAGAAACAGCAGGCTCG  
GTAAGCCCTAACAACTTCAAGCGCATCGTTCAGAGAAAGCTCCTTGCTATATAGGTGTTA  
TTTTCATATCTTTTTGTAGCCAATAAATTTTCCCTCTGTGCATAGAGCGTATGCCCTGGTT  
TCTGGTTGATGCCAAGACGCTTTTTTCCCCAGACTCACCTGCCATACAGGACGCTGCTCA  
CCGATTTTTATCGGCCGGTCAATTGACCTTATAGACAATTTCAAGCTCACTACGGATGTAG  
TCAGATGGCCTTCGGCTTTCATGAATAGGTCAACTTCTTTTTTACCCTTGCTACTCAT  
AGCCATAAACTCCAGCTTTCTTCTTTACCCATACGTCTCTTCAGGGCATTGGCCGACGA  
TAACTTTCCCCCAACGGAGTAACTCTCAGGGCATGGGATCATTGGATATCGCGGGTTTA  
GTGGTTGAAGAAAGAGCTGACCGCTATCCCTGATCAGTTTCTTGACGGTAAATCCATCAC

CACCAAGTCTGGCCATGTAGAAACCGCCGGGCTCAACAGCTTCCTCAGGGTCAGCCAGAA  
TTAATATCCCGTCATGAAAACGAGGTATGGAATCAGTAGGTGCGGTCATTGACTTACCTT  
CAGCCCCAAGCTGGCCGACAGAGTCAATGGCCCTTTTGGTTGTGCTTACAAATCTCTCCG  
CATCATCTTTGGTGAAGTTCCAAGTTCTGGAGCAAACATCCCAGGCTAAACATGAGAAA  
AGACAGTGTAGTCATATTGTTTCTTAGCTAGGGCCGACGTCTATTCGCCACCAGGTGAAA  
ATGTCCCGTCGTGGTTAAACGATATGTTATCAATACCTAAGTATGTCAACACCACACCAA  
AATGACTAAGAGATGGATCACGAGACCCTCGCAACAACCCTCCTATTCCGCCGTGCGGCA  
AACCTAGCCTCTCGGCTCACTTCGCTTGAGTTATCCCGAGCGGTTTAATTCCTAATCTGG  
CCAGTTCATAACCATTTCAATTTGTATGCCCTTATTATTACGCTCAGTACAGGAACCACCCA  
TGCACAATGTGTATTTTTACGTGTATTAGAGAAGTATATATTGTATTATTTTTATTAGTGG  
TTRACTATGGAGGGCATATGAGCAACCTACGAAAGTCTCCAGGGTCACCGAATTTCTCTCC  
TACAACACTTGCTAAGGCAGTTGGATGCACACAGGGAACCTATCGGTCCTTGGGAAGCTGG  
TCGTCACTTCCCATAACCTAACACATGCCGTGCCCTTCTTGCCGTGTCTAAAAAACTTAGG  
CGAAAAGAAAGTCTTGAAGCCGTGTTCTCGCTGGAGCAAAAAACGGCGTAATAAGCAGT  
GCAGCCCTTTGTAACCACGTACATTCGAAGTAAGTTGCTGAAAGTCGAGTCCCAAGATAT  
CTGACCAACTAAGGCCATATGCGTTTCCACGTATACCTCTCACCAAGTTATTCAATTATCT  
GAAATCTTCACAAATGGAACCAGCAAGTTGCAGACAACCTATCTCTGCCAGAGATTGAACT  
TGCTGAAACTGATTTCTCATCATCCTGTCAACGCTTACCCGGCGCGGTCTGGCAAAGAT  
GATTGGGCGACAGGAAGCGAAGATATGGATATCGGACTGGAGATTGATTGCTTCGGTGT  
GTGTGGTTTCGGACTGGCAGCAGACATCAGTCCCATTGGCAGTGCTTTGAAGTACGCGCT  
TGATGAAATCACAAGGAAAAAAACCCCGGCCGCCACCGAGGTTTTTAAGAAAATTAATAG  
GCATTTCTGAGGGAATTACTGGATCAATCTAGCGGATCAATTAACACAAAACAACCTCAGT  
GCTGGCCAGGACAAAAGTCACAAACACATCCTACGTGTTTCGCTTACTGTCCAGCTTCAAT  
CAGCCTGGTTCGATTCCGGCCTTAGTTGAAGAAAGTGAAGCTAATACAGCAGGAGAAGGGT  
CATGGGTGACACATCTAATCTAGCGGACGCAAGAGAGGCAAGAACGCTACAACAACCGCA  
TCAAAACAGCGGTAAGGGGTATGCCTTGCCTCACCGTAAAATTATGGATGTGCCGTTTTA  
AAAGTACGCAGAAACAGCGCATTGTGGGTCCGCTTAATCCTCATCGCAAAACATACGCC  
CGAGTATGTAATGACTGCCGCAGGAGAAATTCTGGTAGGCAGAGGGAAGCTACGTGGTGG  
TAGAAACTCTCTGGCGCTTGGAAACAGGACTCAAACCAGACCGCTTTCAGTGCCTGCGCAG  
AAAGGTCAAAAAACTCGCCGTGATTGGCGGGGTTTCACATGGTAAATTCTCAGTTTTCTC  
GGTATAGAAATATGTCGATTATCATTTCATATTTTATACCAGCAGTTTACCAGCAAATTAC  
CACCTCAAATCCAGCAATATCTATGCATGCAAGCAATGCTGTACCAGCAGATTACCAGCA  
GATTACCACATATAAAGAATATGAGCATATTATCTATAAGACTGACGTATTAGAGAGTGC  
CACAAAAGACACAAAGTCTGTCAAGATAAAAACCTTCCGTTAGCTGTCAGGATCTTGTCGT  
CTCATAACCACGAGATACTTCTTGAAGCCCCAACAGCCGCGCACTGAATGACAAGTGGAA  
AATCGCGATCCGTACGTTCTGGCGCAAAGCCCCAAGATATGACCCGCCGGCTTGACTGGCA  
TGGGCTCACGATACAAGAGTGGATAAATTATTCGAACTACGTAGGCGAACATTGCCGATG  
AACGTTCCAAGAGCGCCCAAACAATCACCCCGGAACCAGCTGGCAAAAAAAGGGGTTTTA  
GCTCCTGCTTAACGATAAGACCGACTTGAACGTTTCGTGAGAGTGAACACGATGACCGATA  
ATTTTTATGTGCCGCCACATAGCATCGAGGCAGAGCAGGCATTGATTGGTGGATTCTCTGC  
TCAAAGATGACAGTGGTGGAGCCCGTCCGCAAAGTTCTGGCGATGCTGCAGCCGGATTTCAT  
TATACAGCCGAACACACAAACTCATTTCGAAGAAATAACCAGAATGCCCCGGGAGTAAA  
AGATAGTCAATGGCCTGAAGCTTTTCGATGAACTGGGGCATAAATCGGTATCGGCGACTG  
TTGGCGGTATAGCGTGTATCGCTGAGATCGCTAAGAACACGCCAAGCGCAGCAAACCTAG  
TTGCCTATGCGATGGCGCTTTGTGAAACCGTAATGGAACGCTACGCCATCAACCGGAAGA  
CTGAAGCGAGGGAATTGCAGTATCCCCGTAACAGAATGAGTGCAACGCAGAACTACGCAG  
CTATCCAGACGATTTTCACACAACCTGACAGACCATCCAACAAATGGATCACCCCGCGGCT  
TGCCTTCATGTGGCGAGGTCAAGGAGGCCTGGGTTAGGGACCTTGAGAAACGATTTGGAC  
CGTCAGGCGAACACAGAGAAATGACCACAGTGATCCCATCGCTGGACAGGATGCTATCAC  
CGAAAGGACAGGTGACAGGCTCTATCTGTGCCATGGGCGCTCGCCGTAAGATATGGAAAA  
TGACGCTATACAGCCAGATGGCAATCTTTTTGGCGGGGCATGGGCAAAAGCCCCGCTCAGA  
CGTTCAGCCGTGAAATGCCAGGTGATTAGAACTGGAAAACTGGTAGGACAGAAGTCAC  
GTGTTAACCCGAATTTTGGTTACCTTCCGGCGACAAACGACGGCGATAACGGCTGCCAGG  
GTGCGAACGATCGCTACTACAACAGGGCGATCGCAACAGCTAATCGCTTGAGTGAATCG  
ACTTGCTTTACATCGACGACACTTCCGGGATTATCTCTGGATCAAATCGCCCGCGAAAGCA  
GTCGAATCATAAGAGAAAAGGATGCGTAGGCACGATGCTGGTTCGATTAAGTAACCCTAG  
TGACCGCTGAGACAGCAGATCGCAAGAGCCTTGGTTACGGCGTTATCACCAAAGGACTGA

AGAACCTTGCCACAGAGTTTTATCGCGTTGTTGTGCTTCTGACGCATCTTGACCACCTAC  
TGCAAACCGACGCAATAATGCCCACTACCAAGTGAAGGAGATACAGGCGAGAGTG  
AACGGGATTGGGATTATTAGGTGAGGATCCATCGTGAAGGTGCTTTTTATGCCAGTGTT  
CACCTGGTGAAACCGAACTAAGCCTACGTCTCAATCGTCATTGCAATTCCGGCACTGTGT  
AGTCCATCCTGGCACGTGGCGCTATTTGCTACGCAGTCCAGGAGTCTGCTGAAATTCGCC  
GAAGTCAACGCGAGGAACCGCCGGCCGAGAAGATAGGAGGATTCTGATGACTAAAAAAA  
ATTAGCCATTCTGGAAAGGGTATTGGGTGCACAAATATCCTTAGCTATGAAAGAACAGGC  
ACTACAAGTAATCCAGACCGAATCGAAAGTCACCAGGCAGTTATGCGATGGCGGATTCCA  
GGACGATATTTAAATAACGCGCCAGATGATAACGTTTAAAGGGAATGGTATAGATCATCA  
TGGTAGAGCCGCGTATTGCTCCCATCTGCCTGATGACGTTGACGTTGATGAAATGGTTAG  
GGAGACCAAGTATTGACCGTCTACATCCCTGAGCTAATAACAGGCCTGCCGGTAATCGCA  
GGCCTCTTACTTGGGGGAGAGGGAAGTAAACGATAGCTGCCGTCGGTTTTGTAAACGGGG  
GGTCAAATAACAAAGGCCAGTTCACGGGAGATTATGAATTAACAGAGTTTACTTGGGTGA  
TATGGAAGGCATCGAGCTCTGCTATTGAACTGCATATCGACTGCCCGAATCGATTGACG  
ACTTTGGGTAGCATAGTGAGGAAGTTGCTTATGCGATGGGCTATGAGTATGGGCGGGACA  
AAACGGTAATTGCAGTAATCAAAGCCATCAGCGCCGCGGGAATCAGAGAAAAGAATTTG  
ATTCAGCAAATAACAAGTCAAAAAAAGACTTTTTAGGGATCACAATCGCTCTGTGCAAG  
GTAAACGCGGGCGAGTCATGCCAATAAGCAGCGAGAATGCAACAGGCGGGAGAAGGTGTG  
TGTGGAGGTGTTAGGAAGTGAGTACGAGAGCTGAGCTTGTCTGGGCTAAGTTTCGCTAAG  
AGTAGCTGCGTACGTCTCGGTATAGTTCATCGTCCAGTTTGCGGTAAGATGAGTGTTATG  
AGCATTATCCTGCCGCACGACGCTATCCGCGTGACAGTGTGTTGTCGACGGTTGTTCAAAC  
ACAACATTGACTTTAAGCGCAACACGATTATCCGGAGTCAGGATTAAGAGAGACGGAGTT  
AGCTAGAACGACCGATCCTTAACCCATCCAACGCTAAAACAATTTCCGTTTTGCGCCGGT  
AATGCTCGTCTGTGGGTTTCAGCCCGGAATAAATAATGAGGTGTGGAGCTAAGCAGAATAT  
GACCTCTGTGACGGCTGAGTGTCAAGGGCACCAACGGTTGCTTCGGCGGCTGAAAAATGT  
AACCGGAGAGCCAGAGATGAAGCAGACCATTCTGCTTCGAAACGAATGAATCAGAAATAA  
CGCCATAGACGCCATTCTCTCAGTACCCACAGACGACAAGTCACCCCGCAAGTTCCCGT  
TAAAGAACCAAGCGCAGGAACGCCAGTATGACCGTATGTGGCCGAAGCTGACCGGTGT  
TTCTCGTCAGGTGCTGTGGCATGGTCAACGGCTGGCGCCGTAATACTGGAAAGAGCTGCT  
AAATGCCCTGTCCTTAAAGACCAAAAAACTGGAGGTACGAAGTGTACCTGGTCTCGACTG  
TGGCGTTGTCATGCTTGGCGTGCGTATCAGTAAAATGCGCAAGCCAGCATGACTGAGCT  
TATCGAAGTCATGTTCTGGCTCGGCTCATAGCACAACATGCGGTGGATTGATTACTACC  
GCGAACGTATGAATGGTCAACGAAAAAGTAGGGCTGCATGACTAGCAAACCAAATACG  
CCAGCAGACGACGAGGACTGCTGGCTAACGCCGCTTTGGTTTTTTGATTCACTGGATATT  
GGGATTGGATTCTGCCTGGATACAGCTGCGAGCGACAAAAACGATCTGTGTGCGCCCTGG  
CGAACTGGGGCTCACGACGGATTAATGCTACGGGGATAAGTCAAGGTGCTGTCTGGAAT  
AACCCATCGTCCAGCAATATCAGGCCGTGGGTGGTAAAAGCCGCAGGGCAGTGCATACGA  
CACCCACAGACGGTAGTGATGAATCTGCCAGAGGATATGTCAGTCGGATGGTTCAGCATG  
GCTCTGGACAGTCTGGACGAAGTTCGCATCCCCGCTGATGGACGGATTAATGCTATGGAG  
GCGTCGACAGGGCGGCAGATGAAGGGAAACAGCTGAGGCTGAATGTCGCTTGTGTTGTCGA  
CCGTCCATCAGTTCTCGACGGATGTTTACTTTTCAATAACAAAGCGGCATTGATGGCGAGC  
GGGCTGGGCGTAAGCAGGGCTGCATGAGGCCACAGCGACGAAGTATCACAGACATCATCT  
CCGAAAACCTGCAAATACCATCCAACGAAACGATCCGGAAGTAACCGCAGGCCAAACCCAA  
AAGAATCTGACATAAAAACCTTCAATTACACCGCTCACCTGTAGGATATCTGGTGGCTAA  
GACATCGTGCACATAATGACAATGCTTTCAATGCAACCTGCATTTGGAGTTAAAATCAA  
AAAAGGCCACATGTATGTCGAGAAGGAGTCACAACGAAAAATGGCGTCTATCCGATTGCC  
CTTTGTCAGTCTTTATTGGCTAATCATGGAGGCAACAAATTATTGGTTTACATGCGCCAG  
AGCCGCTTTAAGGACCCAGAATGGTTTTGTGATAAACCACCGCTCGGTTTCGTTAGGCAA  
GAGAATGGCCCATATCACCTACATGAAGGCGTACAAAAAAGCATGGAAAGGACACCGCGA  
TCGATAACATCACGACGTGGGAAAGCTTAAATCAGAACACACGGAAGAAAGATGAAACGT  
TGGTGAAGCAATACGAGACATTGATGCCTACAATCGACCTGTAAAAGGTGACAGCCATGC  
TTAGCCCATCCCAATCCCTTCAATACCAGAAAGAAGGCGTCGAGCGGGCTTTAAGGTGCG  
CTAACAGCGGTCAGAAGGTGCATGTGCTTGAAGTCAACATGTCTGGGTAATGCTGTGATG  
ACCTGAGGAGCGATCAGGATAACACAATGTACGAGAAAGAAGACGATGGATTAACCTGCG  
CGATGGAAATCCAATATATGCAAGGAGTGGTTTGACCCGGCATTCTCAAATTAGCGGTGG  
TACTGCCCGGAGCACGGAACCTGAGTTAGCACTCAACCTAGAAAGTAAACAGCGAGAAAA  
GTGGAAAAACAGCGGCGGAGAAACCCCGCCGAGAGGAGGAGAAACAGCAAGATAGAATG

GAGATTGAAACTCGCCCTAAAGCCCCGACGTTACTGGATTTAACAAGCCAAACTAGCC  
GGAACCGCACGAATCAGAGAATGAGACCACGACTTATGATGTATCGCGTGCGGAACGCTA  
ATGTCTGCTCAGTGTGATGCCGGACATCACCGGACAACTGCTGCGGGCGCCTCAACTCTGA  
TTTAATGAAGGCAACATTCACAAGCAGTGCGTGGAGTGCAACCAGCATAAAAGCAGAATT  
CTCATTCCACATCGCGTCGAACTGATGAATCGAATCGGAGAGGAAGCTGTATACGAAATC  
GAAGCAAACCATAACCTCCACCCTGGACTATCGAAGAGTGCCGGGCCATCACGGCAAAG  
TAACAACAGAACTCAAAGACCTGCGGATCAGCATAATTGATGCGGCATTACGTTCTGAG  
GAAAAACCATTCTGACATGCTCGTTGAGGCATATGAAAAGAAGATCGAGGTACCCAGAA  
TCTTGAACCTTAGTCGCAACTCTGCCAGTAAATACACGGGGCATAAAGAAGAAAAAAGAC  
TCGCTATGGCCATCGGTGTTCTTATAGTTCAACGCGGATAGGGAAAAGCTACCGATGCGT  
GATATCCGGCAGGTTCTTGAGTGCTGGGGGGTACGAGCGGCAAATCACCATGAGGCTGTG  
ACCTGGTCACCCATTGCCGCGGATTTAAGCAACTGATCCCACAAAAAGTAAAATCTCGC  
CCGCAGTGCTTTAACAATGATGAGATGGTGATATGCGGCTGTATGGCACGCCTTTACCGG  
AGCAATCGCGAGCCGCATGTCTTGCTGGTTGATTAGTACATGCTGGAGATGACGTTTCATG  
GCGCTGGCACCGAGGCCCGGTGCTCTGACACCAGGATAGCTAAACGCCTTCACAAAGCG  
GAGGGGATCGTTCAAGGTCTGCAGATGATGCTGGGAGTGAGGCTTGACGTGGAACGGTAT  
GTTGAGTGTGAATAGCCGTGAGGGATAACCTCTGTATTTTGTGTCAGCGAAAAAATAGTGGA  
CGTTCGTAAAAGTCTGCATATCATGATAAGATTGGAAACATTGCCACGCTGATTCACCCC  
CCGATGCGCGGGTTTTTTGCTAATCACAATCCTGGCAGCTAGTCGAAAAGTATACAGAAA  
GCAAGGTGCGACCAGAATTAATACCAAAAGCTTAAAAATTGCACATGGCACTATTAGTTT  
ACTATATAATGTGTCTTTTTTGTATTGCAGCATGATCGTGTAACGAATTTTCCGTAAAAG  
CTTTTTTCTCCACGTGTTTGCCAGCCTCCCCAATGGATGGCTTTTTTATGCCCGTAACA  
CCTTGGTATCAATAAACATCGTCGTCTACGTACGTCAAGCCGTCGCATTAGATCTCACC  
AGATATGTTAAGGTTGCAGCGCACCTTGAATCGAATTATCATTTTCATCCCGTTACTGTT  
ACATTTATCCGGCGCGCCGTAAAACGCCGTCTTCAGCGGATGAAGGATGTCAGGAACAT  
AGGTATTGTATGGTTCCCAAAGAGTATCGTGTATCATTAATAATAAATTTGAGAGTGC  
TCGATTTTTCGTATGTTTTCTTTCTGTTAATGTGGTTGCGAAGGAATTTACCTTAGACT  
TCTCGACCGCAAAGACGTCTGTAGATCTGCTGTATGTCATTCGCTCCGCAATAGGTACAC  
CATTACAGGCTAGTATATGAGGAGATTCGTCTTTACTGATGATTGATCGTGGCTCAAGGG  
ATAATTTGTTTGCAGTTCGTGTCAGAGGGTTAAATCCAGAGGAAGGGCGGTTTAATAATC  
AATAGCTTATTGTGGATCGAAATAATTTATATGTGGCACGGTTTGTAAACACGACTAATA  
ACGGTTTTTCTCGGTTTTCTGATGTTTTACAGCTTACCTTTCCAGGTACAACAGCGGTTA  
CAATGGCTGGTGACAGCAACTAAACCACTTTACAGCGTGTGTAGGTATCAGGCGTTCCG  
GGATACAGATTAATTGCCTTTCCTAGACACCGTCATATGTGGTATGTATGTGAAATATTG  
GAACCTCACTGACTCAGTCTGCGGCAAGAGCGATGTCAACGTCTGTTACTGTGACCGCCG  
AACTTTAGGTTTTTCGGCACATACAGAGGGGTTTTCTGTGCAACACTGGAGGATCTGAGTG  
GGCGGTCTTATGTAAGTACTGCTAAACATGTTTATCTTACATGTAAGTGGCGAAGGTTGA  
CTAGTGCTCCTGCCTGATTTTGTATGGACAAGACTCTTTTCGTGTAGGAAGAATTACTTTTG  
GAAGCATTAAATGCAATTCAGGGAAGCGTGGCATTAAACTGAATCGTCATAATCAGGCAT  
CGCGAGTTGCCAGAATGGAATTTGATGAGTTTCTTCTATGTGGCCAGCAGATGGAACAG  
TCCGTGGTATTACGCACAATAATATATTGTTGGATGCATACGCTCTGGGGGCAATTCTGA  
TGCGCAGTAGCATTAGCAGCTGAGGGGGTTAAATGCGAAAACATTATTAATAGCTGCAT  
CGTTTTCTACTTTTACAGGAAGTGCCTGGCGGCACCTTATTGCGTAACTGGAAGCTCG  
AGTATACAAAATATAATGATCACGATACAGTTACAGTCAACGTGGGTGATAAAGAATTGT  
ATACCAAAAGGTGGAATCTTCGGTCTCTTGTCTCGGCCCGCAAATTACGGGTCTGACTG  
TAGCCATTAAGCTGATGCCTGTCATAATAGAGGGGGATTTAGCGAAGTTATTTTTCGTT  
GATTTACAATAGCTCAGTGAAAATAACAGGGTGAGATTCAAGAATGTTAAAGCCATCTCA  
AGTCAGTCCCTTCTTACCGTTCTATTAATGGATGTCCTAGAAATTTTCTGCATGCGGAAT  
CCCCCTGTGCGGAGGGGGCGATAGGTGAACGGTAAGATCTCTTTATTGATCGTAAGCGAGA  
ATACGCGGGTTTGGCGGCCCTAGGCCGTAAGTCCGCGGGAGGCACCCGGGTCTTTGAAATG  
GCACAGAGGGTCACTCTCCAGCCCCTCTCCGGAGGGGCTTTCTTTTTTATAGAAGAAGCC  
CGCGCATCGAGACGCTGCCGGCGACGAATACACAACCAAACGTGAAGTCGTATTTACAGCT  
TGCGAATAATATGCAACAGTAATCACTCTGCGCAATACCGCGGCCGATTTTCGTATTGCGA  
ATTGTCGTCTATCTTCTCCCGTTGTCGTGTAGCTTCCGCATTTACAGCACGCTCATCATTG  
TACACGCAATATTATCACGGCCGGGACGATTCTTGGCATTGCCACACTCCGATGCGGTCA  
GGGTGGCATGGCCGTGACACCGTGCTGATGCCCTTGCAGCAAAAAACCTGTCAAGGATGGC  
ACCCATTCCGTGCGCCGTTTTCTTCGTATACGGATGATTGCGCGCCACTGATTCAGGCGA

TTGGCACAGAAGGTGATGTGAGCACACCTGTTGTGGTGTAGCTGAGAGGTGGAGAAGCTG  
CAGTAATCGGCGCCACCAGTGACCCCGTGTCTTTCTTTGTCGTCGTTCTGGCAGGGCAGT  
CACACGCCCTGTCTATGGTGAAGGGCTTCTGTTTGCAGGACTTACGAGAGTCCGGACC  
CGCCATAAAGTAGTTGGCGCGTCGCATTACGAAGGCACCGCCCGGTGTCGCCTGTAAAT  
ATAACGACATCATTCCGGCGGACCATGTTTTGCATGGTATGCAGGACATTATCCGCCTTA  
GCCATCCGAAAGCGGACCTGTTAAAGGGGGCAGTAAGGAACCGCGGGGACGGGGCTACATA  
TCGCCAAAATTCGCAGCGGTTTATAACGGCGAATCCGGGCGTTCTGTTGGGTCCGTA  
GTCGGGGTGGTTAACCGTTCACCACCGGAGGCGAGTGCACATGCAGTGCCGCGAGCGGTG  
CCTCGGAGAATTCAACCCGCTCAGGTGTGGATAAGCCGCTGTACAAGGACCTTATCGGTC  
TCACAAAAGCCGCGATCAAGAATTATCCGAAATATGTTCTGATTGCAATGGTGAGGACGG  
AGGGGGAATTTTATTTTGGCGGTACGCCGGCAAATCACGCAGCATAGTTTGGTGAGGTG  
GTGATAAATTCGTGTAGACCTTGCAGGAAATGCCAGGTGAGTGCAGTGCAGTGCAGTGCAGT  
AGGTTGTTCCCTGGATCTGCGGGTACACTACGTATTTCTGGAAGCAGAACAACGAATCCT  
CGTACCCGACTGTTTACGGCAGCTGCTAAAACAAAACGGAAAAGTATATCCATTTCCGCAC  
CGTCCGTGACGGATCAGTATTGGGTGAACGTGCCGGCGAACAACCGGATGATGTCCCGG  
ACATTCGGGGTATAGGATATTGCGGTTTCGAAATGGCGTGACAGCTCAGCCACCTGGAAGT  
CACAGGACAGTGTGAGCCATTTCTGCGCCTAGGCTCGCCGTCGGAATATTGCCACCCTC  
TGACAACGGAGATTATGCGCCATTCCAGAAGATTGGCGCTAAACGCGGGGGCATCATCGA  
CAGTATCAGAGGCGGGCCCGATATCGCCTTCCGGTGCAGAACCCACAGCGGTCACTCA  
TGCTCTCTTAGGTTGGCCGCGAGTACAGAGGCAAGCCTGAAAGTACAGGGATGCCAGCAC  
GTGGCGGGAGGGGTCCAGTCGTCGGCTAGACTGACGGAACCGGAGGTTAGGCAGGGAAGC  
TGTCCAAGAGAGCCGGTAGCAGGAGCTGGGTGTTGGTGTACGCCGAGGGCACTGGTGCGG  
ATCTGTTCCAGACAGGGGGGCGAGATTGCTGCCAGTTTTAGGTTTCTGGAGTGCTAGTTG  
CGAACAGTATGTTTTGCCGTTTTACTGGACGGTATCTTCGCTGCCACAGGGGGTTGCGC  
TTACCAGAGACAGGTCGAATAACCAGTTGGCAGCGTTCTACATCTAGAAAGATGCAATAG  
AACTGAACGTGATGTACCACAATGCGAAAGTGGCGACAAACAACACTGATACAGGGAACCT  
TTGGTGCATTTGCTATCGTATGGCATAACGGTTGCCCTCCGCGTCGCCGGGAATAACAGCC  
TTCAGGTGACGCCGTTATCGATGTTGAGGATGGCATTCTTTACGCTGACGCAGTCAC  
CGGTCAGTCCAATTGCGGCGGATAAACCAGCATGTGACAAACATAACCAAAGGTGCTTCTT  
TCCCGGTGCTGATGCACAGCACTGCGGTTGAATTGAACAACACGGATACCCCGGCATGAT  
CAAAAATACCGTCAGGAACAGGAATCCAAGCTGGCGGTGGTAATACCTATGGAGAAAAAA  
TAAAGGAGCGATACATTCGTGATATGGATTCTAAAATGAACACAGTTCTTAGTGTCAACC  
CTAACGGAAAGAAATTTTAAACATTTTTGTACCAGTTAAAGCTGTACTTCTGTAGGGTAGT  
CTGTGGGCAATATCCCCTGTGTGGTGGGTACTCGGCCATGCGTGACTTGTGGCACAGACG  
TATTGCCAGAATGGCCGCTGAGAACAGCGGTGCCAGTCACTCAGCCGTTAACAAGCCCGA  
AGTGCCGCACATTTAGCGGCAACTTTCGTAATCACATCTATCGACGAACAACATCCCCTGT  
CAGGTATTAGATCCCAGGTGACTGCTGAGGCACTGAAGGAAGACCAGGACTCTGAAGAAG  
TCCGGAGGGCCCTGAAAAAGATACTTCCGGCAAACCTGGAAACGCGTCTTGATGCAGAGG  
TTGATGCCATTCTGCATGAGCTCCTGGCCGCACCGGCAGCTCCGGTGCCCGAAGGCATCG  
CGGGTGAGGGGAGTGCTTCGGATTGCGGTTACCCACACCGGCCAGCGACACGATGATGT  
GTGCATGCGTCATGTAACATCGGTGTGTGCCGGTGGTCTTGTGTTTCTTGCTGTGTCCTGC  
GGTTTGCAGAAAAGGGGGTATGTACTAGATGGAAAAAATCCCAACCGATGTAGCGTACAC  
TACGTAAGCGGAGGGAATGAGCTACTGGTTCCTGCAGTTGCTGGACAGGGGTGTCCTCCGTC  
TCAGTGGGCGACCATAGGCGAGCTGGGGATTCTGCTGTTTGGGCTGCCGACATATCTGAC  
GAACCTGTGTTTAAAGATTAAATGAGATCGGCATATGGAGGTTACGGGAGAATTAGCTGA  
TGAGCAGGAAACTCCGCTATGGTTTATCGGCTGCCGTTCTGGCGCTGATTGCCCGCAGGTG  
CTTCTGTGCCTTCAATCCTTGACCAGTATCTGGATGAAAAGCATGGTAACCGCACACAG  
CATCCCATTATGGTGCGGGTAACTAGACCATCTGGCGGGGAGCGACCCGGGTGGTTGCTA  
AGCGTATTATTCCTAGAATGTAGCCCTCGAAGGATAAAAGCGACCAAGTTAACGCCACTG  
ACCGCGATAAAGCGCTGGCATCGGGGGACAACAACACCAAAGTGTGCGCTGACCGAACACC  
ACAAAGCGGGGAACGCGTCATTCTGGCCGTACAACATTGGTCCCGGTAAGTGTTTCCCTT  
CCACTTTATACAGACGAATTAAGGCAGGTGATCGAAATGGTGCATCCGAAACCATTGCT  
GGTGGATTAAGGACGGTAGCAGAGAGTGCCGTTCTCGTTCAAACAATGTTACAGTCAGG  
TTTCCCATCGTGACCAGCCGAGCGCGCCAGCGTGCTCGGGATTGACAGATAAGATGAAT  
ATTCTGCTAGGAAATGATGATTGTTTACAGGTAAGTAAACACGAAATGCCGCAACTTGG  
CAAAATGTACGTGCATAAAGTCAAACAGTAGTATAACACTTTGGCAACGTACGCAAGCC  
TTTGTCAATTCAGCGTATCTCACGCGCATCTCCCAACACAGAACCTTTCAGGATGACACA

TCAGGTTACCGGTTT TAGCTGTCGGCGTCTTTCTGTGGGCTGGATTCCAGAAGGACGAGGT  
TCGTGACTAAAAGGAAGTAACCGATGAATACGATGGCCCTGCCGTTTCACGGCAACTCTC  
TTTATGTACTTAACCATAATGGCCAACCATACATTCCCATAAAAATTTACGTTGCGGGGA  
TGGGGGTAGCCTCGAAATTCCAGTTGGCTAAGTTAAGATGGTGTTTTGCCTCACCTAGAA  
CGGAAATCGTTATGGCTGGTGAGGATGAAAAACAACGCCATAGGGTGTCCATGCCACTTC  
GCTCACTTGCCAGCTGCCCAAAACCATAAATCTCAATAGAGTAAAAGCCGACAATTGCG  
ATAAGGTCATCCAGTATCAGGAAGGGTGCAATGATGTTTATTACGCGTCTGGACCTCGG  
GTTTTGTCGTTACTCACCGTAAAATGAGCGTGATTGAAGAACTAACGAGGCTTGTGCGG  
ACCTGAAACGGGACAAAAGCATGGCCACTGTGTGTGCTGCCGGGCTGAATGAGTCGAAAC  
AGGTAAGTGCCTCGCATGTGTCAAACTCCGTACGCTGGTAGTTGAAGCCAATATGCTGA  
TTGATTTTGTCTGGGTGCTATAGGCAAAGGGAAAATAAAAAGGGCGGATTGATGGGGTG  
GCCAATGATCTCACATTGACTCATAACGAGGGTGAAGAGCCTCTATCTACTTGTCTGCAT  
ATCATGCTTAGGCCTGCAGGTTGCCATTTTCTTTTCCACCGCCTGTCGCGTCTGACGTT  
ATCGGGACTGGTGGGGTCAAACCGAGATGAACCCTGTTGGCTGGGTGGCGGCTCTTGTCC  
TGGCGGTTGGGTATGGTGCCTATGGCTGGCAACAAACCATTACGGTGACAACGCGCTCA  
CCTATAGAGCTCAGCGCGATAAAGAAGCCAGACAGCTGGAACATGCGAATGCCAGGATTA  
CTGACATGAGGGTGCGCCAACGTGCTGTAGCTGCCCTCGATGAAAAATAATCGAGCGAGT  
TAGTCGATGCGAGTGTGAAAATAAACTCTGCGCGCTGAAGTTGGCTCTGTTCTTAAGC  
GCCTGCGGATCAACACCAACTGCGCCGGTAACGTACTTGTAGCCACCCGCACCTACCGCG  
TGGATAATGCAACCGGGCCGAGACGGGCAGAAAACGCAGAACGAGATTATTGGGTCTTCG  
GAGGGAGGGTGGTCACTATGCGAAAACCACTGGAAGGAACCCAGAAGTATATTAATGAGC  
AGTTCAAATAGAGTTGCCCATATCGATGGGCAATTCGTGCCATTATTGTCAGGAATAGAC  
CCGCGCATTACGCGGAGTATAAATTACTATAGTAATAAAACCGTGCAATCCATATAAGAT  
TATTTGCGCGGCTTTTGTCTTAACAACCTTTTTAGTGCAACGACAATGTTTGGCTGCACC  
TACAGTTTTCTGCTGCCGATTTCCAGAAACGAAGAACGGATAGGTGGTGGTTGTCTTTGG  
TGCAATTGCTGTCTGTTTCTTTTGAACAGTAAGCGTCTGTTGAGCACGTACTGTAATAAG  
AAGGGCCAGCCCCGTAGTGAGTCGCATTTTCTCGTTGGTGATAATCACGATGCTTTTTGA  
AGTTGCAAAAATGGTATGTGTGGAAAATTAATGAACCCTAAACAATGAGTGGAAATCGT  
ATATTGTTAATAATTATTAATGTATGTGAGGTGCGATGAAAAGACATTGTATCGCCGGGT  
TAACTATGTTACAGCCCTGACGGGGCACTTCCCTGGGGGAGTGTGCGGGCGATAATCAA  
ACCGATGCACACAGGGTTTTCTCACTTTTACAGAGATGGGAGCGAT

>NewGenomeName\_72

CAGTCGGTGAAGCAGCAGATATTATGAACTGTGTTTGTGACATCCTGTATTTGCAATACA  
AGGCAGATTATCCTGAACTCAGTGAACTCAGATTGTGGATTTGTTTAAAACCGAATTGA  
ATTTCCAACCTCAATTTGAAAACCTGAAAATGGATGATGAAAGCATGTACCAAGTAATTT  
TATCGAAATTGTCATAGTCGTCCTTTTTGCGTGTACATGTCCATGTGGGATGACTATTG  
GAACGGTAAATGCAAAAACGAAATCACTGAAATTGACGCATGGCTCAAAAAGTATGGTAT  
GACACTTTGAAAGACATCAAATAAGCCAATGCCAGGGTATCAGTATCCGAAAATTGTAT  
AAAGCTCTAGCTGAAATTCGCAAAGACGATATTGCTAATCCTGATTTTCGATCAAACCTGGA  
AATTTGATGTCTTTTCTTTACAGATCGCAAATGAAAGATGTTAAAAAAAATCCATTTGGG  
AGGACTAAATCTCAACTGCAGCTGTCATTGCGAGTATTGTGCTCATGTTTCGCAAAAACAC  
AAAGTAGTGATATAATGGCAACTACTCTATCAATTCATTTTGTAGGAATATTAATGTCTGA  
TGAATTCAAAGTTCTAACTCCTCGCGAACACGTAATTCTTCGCCAAATATGTATGTAGG  
TTCTGTGCGCATATGAACCACATGAGTGATTCTTGTTCGGTAAGTATCAATCCGTTTCCTA  
TGTTCCGGGCCTGGTAAAAATTATCGATGAAATCATCGATAACTCGGTTGACGCAGGTAT  
TCGTACCGATTTTAAATTTGCAAATAAGATTGATATTGCTTTGATTTTCTTAAAGGTTT  
TCTGATGGTAGCGGATAACGGCCAAGGGATTCTCAACCCTGGTAAACACTCCAGACGA  
AGAAATCCCTAAGCCTGTCGCTGCCTGGACACAACCTATGGCAGGCTCAAACCTAATGA  
TACCAACCGCGTATCAATGGGGATGAATGGCGTAGGTTCTTCTCTGACAAACTTCTGCTC  
CAAGACTTTTATCGGTGAAACGTGCGATGGCAAAAACCTTCTCACTGTCACTTGTCTGTA  
TGGTGCATCTCAAGTCAATTGGGAAACCAAGCCGGGTAATATCAAAGGAACGTCGGTATA  
TTGCATCCCTGATGAAAAGCACTTTGAAGGAAAAACGAACGATCCGCAGATAGTAGATAT  
CATTTACAGATCGAATCACGGCATTGTCTGTGGTGTCCCGAAGATTAAATTCACCATCAA  
CGGTGAAGTGGGTTCAATGAAGTTTGCAGAATACGCTAAAATGTTCCGGTGTGATGATCTCT  
CATTCTCGAAAATGATAATTTTAGCATCGCATTCTGCAATTCTCCTGAAGGATCCCGTCA  
AGTCAGTTATGTCAATGGTTTGTAGTATCAAGAATGGTGGTTCCACATCGATTACTTGAT

AGATGGCATTGCCGACGAACTTATTCCATCAATCAAACGAAAGTATAAAAATTGAAATAAG  
CAAAGCTCGAATTAAGAATGCTTGACAATGATTGTGGTTGTTTCGTGGAATGACTAATCT  
TCGGTTTGATTCTCAGACAAAGGAACGTTTGACCAATCCGCTTGGCGAAGTGAAATCACA  
CATTGAGCTGGATTTCAAAAAGTTAGGAAAGCAAATCATGAACAATGATGCTATCCTGAT  
GTCAATCATCGAGGCTGCTCTTGCTCGTCATCTGGCTTCAGAAAAAGCAGCATTGACGAA  
AGCCACAAAGCAGCAGCAAAAACCAAAGTCGCTAAGCATATAAAGGCCCGTTCCTGGGG  
TGACATTTCCAAAGAAAAAACTCTGTTCTGACAGAAGGTGATTTCGGCCATTGGTTATTT  
GCTGAGTGTTCGTGACAGCGAGTTGCATGGTGGATATGCTCTTCGAGGAAAGGTTATGAA  
CAGTTGGGGAATGAAAGGTTCTGACGTGCTAAAGAACCGAGAATTGGCTGATATTTGTGC  
AATCATGGGTCTCGATTTAGCTAATCCGGATGATGTCGAAAATCGCAAAGACAAAAAAGT  
TGCAATGATGACCGACGCGGATCCAGATGACCAAGGCTCAATTTACCCATGTCTACTCGC  
GTTCTTTAGCCGTTTGTCAAAGTTGTATGATCTCGGTTGCGTACGATTTGTAAATTCTCC  
GGTAGTCATCCTTTCTAAAGGAAAGCAGACCAAGTGGTTTTATAACCATAACTGAATTTGA  
TGCGCAAAGTAAAAGTACAAAGGTTGGGAACTTCGATATATCAAAGGATTGGGTTTACA  
TCGCGAACACGAATATTCCGAAGTTGTTACTAACCCTCAGTATGATATCGTCGATCTTGG  
ACCCGATTGGGAAGAATTGTTTCGAAATGCCGTTGGCGGTGAAGCAGAACTTCGAAAACA  
AGGGATGTCACAATGAAAAGGGCTCTTCGGAGCCCCCTGTTGTTTTTGA AAAACAGTGTA  
CAACGCTTAATGTGAATGGTATTATGGCTCCATCAAATCAACCAAGGACTACATCATGAA  
ATTCGTTTCGAGTTAAATTCAAATCCCCGGAACATCGTAAAGCTTTTGCTAAATCTGCCTC  
GTACCAAGCCGAATTTGAGAAATTCATGCCAGACGAATTTTGGCTAGGCTTGACCCACA  
CAAAAATGTTAATGCCGTTTGGTCGATTCTGATGGTGTGATGAGCGAGCTGCCGGAATC  
AACTGGTGGTGGCGGAATCATCTTCGACGACGAAGA ACTTCATTATTTTCATGGAAATTAT  
TGAATAATTTACAAACAAAGCAGTTTACAATCGTGATGCTATGGGATACTATAGCCTCAA  
GTTAAACGAACTAGCAAAAACATGGAGTATTTTAAAATCATCAACTTCACCGAAGCATT  
GGCAACGTTAAATCCCATGCGATGTTCTTCTCCCCGATCTTGATACCTTGATCAGTGTT  
TACGGTGTGAAACTGATTCATCGTCAGTCTTCATGTACAACAAAGGCACAAAGAAAGCA  
TAGCGTCTCGGGGGCAAGAAAGCTGCTGCATACATCGAATACGTACAAATTGAATTGGCG  
ATAGGAGAATAAAAATGAAAGCACGTGTCAAATCTGAAGAAGCACGTCAGCAGTTCATAGA  
CTACGGCGAAAAGCGTTGGGCAATTGGCCCTCTGGGCGACACAAATAACAAACGTCGCAT  
CGCTCGTCATTGAGGAATGCAAGAGTTCGATGTTGTCAAATCGATTTTCCATTGGCTGG  
CTGGTTCGACATCGTCATTGATGACATGGTGTTCGAGTCTATCGCTAGTGACGAAGTTTG  
CTTCTTCGAGTTCATTGATTGATTA ACTGGCCGGGAAGCCGCCCGGCTTTTTTGTATCAA  
AACAGTTTGAGGCTTTACCTCTTCGAGCGAAGCTCGAATTTATCCTTTTAGGTATAATAT  
CTATTAAGCCATAAAGGATAAAAATATCTAGTTCGACTGGGTGGAACCAGGTAAACCTGG  
CTGATCTCAATAGTTTAGTCAATAATACATTACATAAGAATTAGGTATTATCCAGGTTT  
AACCCAGTTAATCCAAAAATTATTTAACTTTAACTGTGTCAATTGTAATGTTTACTGTGT  
TAGGATAACACCAGTAGAAAAAGAAAGGAGGTCATTATGACCCTGCATGAAGAAATATTT  
GAAGCTCTGGTTCGAATTTGTTCGCATCAACGTACGATTCATGGGTGATGAATAAACAGCC  
GATGAACTGAGCGACGAAGTTAACCCAATTATAGCTAATATCAAAGCTGGTATGTCAACC  
CGAAAGAACTCGGCCGGCTGTGTCAATTTGGGTCTGTGTGCACGAAGCTAATCTTTATGGT  
TCCGATTGGGGCAAAATGTTTCCAAAATCGAACACCGCATGAAAAAGGAACATAGTTAT  
GCAAATCACCTTTAAATCCGAAGAACATCGCAAAGCATTGTCACGTATTGCCAAATGCAA  
TGAATGGATTGCTCACACTCTCGGTATGGACACATGGGAACGCCGAGAAGAACCGGCAGA  
TGAATATGACAAAACCCAGTATTCGCAGTTCTTGACGGTTTCGGTAATCAGGTCGCCGG  
AGTGTGTTGTGATGACGGCGGTGAGTGTGAAGATCATGCATGGATTTTCTGGGGTGAGCG  
CAAATATTTTCGATATTTCTTAATAAAGGAAGCACATAATGATTATCGGTTCTAACGAACA  
GGATGTGATGATTGGTAATGCACCTTCTAAACGGACCGGTTTTAAATCCAGGCTGGGCG  
GAAGGCCTTCCAAGTACTTTCTGAAAAGCTTTATAAAGACAAAGCTGAAGCAGTTTTACG  
TAAGCTTTCGTGCAACGCGGTTGATATCCATTGCGAACTTGGA AAAAGGACATATCCGTC  
CAACGTC ACTCTCCCCACTTCAATTTACCGATGGTTCGTAATCCGTGGTTTTTGGAACTGG  
GCTGACGCAAGAGCAAGTTGATGAAATTTTCACTGTCTATTTTGCTTCCACCAAAGATGG  
TTCCGATGATTCAACCGGTGGTTTTCGGCCTTGGTTGCAAGTCTCCATTTGCATACAGCGA  
GTCGGGTGGCGGTTTCACTGTAAAAGCTATCAAATGGCATGTGTACTGTCCACAACAT  
GTATATGGATAATCGAGAACCATTTGCTACACCGATGTGCTACTACTCCGACGCCCGAAGA  
AGATGGTCTCGAGATTCTCGTTCCTATCTCTGAGCACGAACATGCTCGCTGGAAAGTTCT  
AGCTCGCAAAGTGTACCGGGAATTTGATCGCTGCTAACCTTACATCACAATATGGATGC  
AAGCAGCATTGAAGAGTTTCCGAATCAAGATTCTTCAATACTGACGAATTCGCCCG



TCCAGGAGAAGTGTATGCTGTAATCGGTGGAGTAGTGTACCCGATCCCTCAACGTCTCCT  
GGAATCCGATATGGTATTCCGATATGCTGGTAAAGCTGCATATACCAAGTGCCCTATTGG  
CTCAGTAGACATTGCTCCTTCTCGGGAAGAAGCTGTCGTTGACCAAAGAAGGCGAAGATTA  
CATTATTGCTCGACTTCGTGATGTTTCTGATAACTTTGCCGAATCGATAAAGAAGGAATT  
TGACGGAATAATCGACAAACGAAAAGCCGTAATTAAGCCAGTGAATACAACAACACTATGT  
TCGTCAAGCTATTTTAGATTTGACCATTGATGGCGAGCGAATTAACGATCTTATTGATCG  
ATATACCGACATGTCAAAGCTTAGTGACATTACCGTTTGCGCATATCGTGGCGGTAGTTT  
GCGCCAGCATATTACGCGTTCGGGATATTCGTTGAGAAGTTCCGATATAGATGCAAAAAGA  
AGTCTTTGGCATCAGTCGGCGTAAAGTGCATGTTCTCATCAAAGATACAGGTGAAGGTAT  
TCCGAATATGGTTCAGGCGTATCATCCTGATATTGGCGATACCATTCCAGTCGTTGTGTT  
GAACAAAACCTCGCAAACCTAAAGAAGAGTGAGTACGCCCGATATGGACGAACCATGAAAGC  
TATTTGCGAAAAGTTTAGCGTTGACGAACGCTCAATTCTCAAATTTAGCGAAATGAATGA  
TATTCGAAAAGCATTACCCATACATAAGCGCAAACGCTACTTCTCGCGATGCTAAACC  
AAACGTTACGCGTCATTACATCAATGACTCCGACCTTCGTGACGTTGAAATAATTTACAT  
GACATCCGCTGAAATAAAAGCTCTTGAAGGAATTGCGGTTATTTTCGTATAGCGATACATT  
TGACAGAATTGCGCTTAAAGCTTCGCAGTATACAATGCGTAGTGCCCTAGCAAATCGAT  
AGAGCTTGGAGCAACCGAAGTTTACGTCATCGATAATGGAAAGCGTTCTACCCGCTGTGA  
AGGCTCCTGGTTTGAATGCGGTTTAAAGTGGGCATATGACCAGTACAAAGTGCCGAAAG  
ATGCTTTTGCTATTCTTAGTGCCGAGTGCCCTAATATCGGAGACTATGAAGAAGCAACTC  
GTCTTAAGCAAATGGGCATACTTGAATTGATATAACCGAAAAGTTTGACGAAAACAATG  
ATGATTTCTGAATGATGCATCCCAATGGGTTGAAATCGGAAATCCCGATTATGCCGATT  
TTGCTGAAATCAAAGAATATGTTGATGAACAGAATATAAAGTATTCCGAAATGTTCTATG  
ATCATAGGGAGTCATTGAAAATTAACGCCCGCTATTGTTTGCAGTTGCCGTTAGTGGTA  
TAGAATTAAGTCTGAAATCATGAAAGATATCGAAATTCTCCGGGCTCAGTAAGAGCCCT  
TAAAACAAAGAGGTATGATATGGCTAAGGTTAAAATTGTTAAGTGTTTTGATAATGAAAC  
CAAGCAACAGATTTTTGACAAATATTCTCTTGGCAATGTGTCTCAAGCTTATTTGGCAAG  
TGAATACTGCGTATCGGTAGATACAATTGCTCGGGTTCTGAAAGAAGTCCGAAATTGGAA  
TATCTCTGCTGCAACGTCAGAGGATTCACCTGCGGAGGAAGAAATTGCTGATAAGCTGGA  
ATGTACCTGGATGGCCAATCCAAGTTCCTTTCTGTGACCATCGGCGCCGAAACTTATAA  
CGTATCTGGCGATCACCCACAGTTCATGGAAATCATCAGTCTTCTGCGCGAAGAAAAATA  
CGATGAAGCAATGGAAATGTTGAATATCAAGCGTGGTCTTGAGCGATATGTCTCTGGCGA  
TCTGGTTATCGAAGGCGGCACACTGAAATGCAAGGATCTGATCATTGATTCTGGTCTTAC  
TCGTGCGATCGTCGGAAAGATGCAAAACGGCGAACCTTTCGAGCCGCTCGTTCCATTCTT  
TGCAAATCTGATGGCTAACCCGAGTCGTGCGAGCCGTATATCAGCTGTACGACTTCCTGGA  
ACACAACGACATTGAAATCACCGATGATGGTTATTTCAATTGCTTGAAGCGTGTAACAG  
CAATTTCAAAGACATGGACACTGGCAAATTCGCTAACTCTCCTGGAACAGTGGTGAAGGT  
TAATCGCTTCCAGATTGACGAAAACCCTCACGTTACCTGCTCTCACGGTCTTACGTTGC  
TGCCAAGTCTTATGTCCCTCATTATGGTGGTGGTTCTGGAAAAGTGTTTGCATGCAAGGT  
CAACCCAGCAGATGTGGTCGCTATTCCAACCGACTACAACAATGCCAAAATGCGTTGAGC  
CGGGTAGGAAGTTCATTACGAAGTAACTTCTAACTTCAAACAAATGAAGCACTACTAATT  
TTCATAAGCCCTCTTCGGAGGGCTTGTTTGTAAAGGGGTTGTATGAGCTCACCATTTAGCA  
TTTTATTTTACAAAGACGATGACATTGTTGGTTCGGGTTATGGAAATCATAGTTGGATTT  
CGCCGAATGACGTACAGTAAGCGAAGAACATAATTGCAGTTGTTGAACGAACTTCTTGGC  
AGTTAGGACCATTCGAAAAGAATGGACTCATTTCAATTGCTGCTGGCCGAGTGTTTTATG  
CTCAAGATTACGAGAAAATGAAACAAATCCTTTCTCTTATAGAAAGCTTGGATTTATCCG  
ATTTTTCATTGTCATATTCTGAAATTGTGAGGAAATTGTAATGACGGTACCGATGAACCT  
ATCCCATGATGAATTTATCTCCCTTAGTCATATGCAGCCGTTTGCAGCGGATATTATTCCG  
TCTTCGGATCTGCGACCAACTCAAAAAGCATCCTGACACGAGGGATGAGCTTTTTGAAA  
ACGGAAAAGGAGATATGATGATACCGTCCAATACGCTCTCGATGAAGCGGCTGGGAATGA  
TATTCCTCGGCAAGAGGTCATTGATAGAACGGTTCATTCAGTGAATGCCGAAATGGGTGT  
CGCATATATCCTGGGTGGTGTCTAGGGAGTGTGTTGACTGGTTAGACAATGACAATATCAC  
CTTTGATGTGCCAACACCTGGGTTCAATCTGGTAATAAAGACTTATTTTGCGAAATGGCC  
ACCAATGCATACCGCTGGTGCTAAACCGTATGGCAAATCAGAAGGGCTGTGCTTGTACGC  
TGGTTTGCGCGGAGATGCTGATGTTTACTTGGTATTGAACATCAATGAATATGCTGGCCG  
TATCACATATAGGCCGAAATACTTCTTCAAAAGCGAGCTATGGAAAATTATCCGTATGT  
GATCTACGTTCTCAAGCGCGGCGGTGGAGCATAACATCAATAGACAGCAGAACAAATTTGT  
TTATTTTATAACAAGTGGTGTACACTCTGATTGTGCGTGATAAAATGCTCCTACCAACA

ACACTGGAGCATTTTGCATCTAGGAAATGAAAATGAGAACTCACGATTTTCTGAAAAGAC  
GCGCCAGGCGAGGCCGTGCCGAGCAAAAGAAAGAGCTGATAGCTGAGCACAGAATGCTTT  
GCTCATTGATAGATCATCACATCATCATGTGCTATGACCGCGAAGACTCACCTGATCTCA  
TTCAAGCCAAGAAAGACCGCGATGCAATCGAAAAACTCCTAATGGAGATTACTAAATGAA  
AACTAATACACATCACGTCACAGCTATTGATGCCAGTGTGTTGGCACTTTTGAAGTTGA  
ACCGGCAAACTTGC GGATTCAAAGTACACTTTCGACGAAGTGATGCATAGAATCGGTTA  
TACGATGATTGATTCGTTAGCAACGCTTGAAAGCTCCCTGGAAGTTATTGAAGCACTTGT  
TTATGAAAACATGATCACCTTCCCCTGCTGGGTAAAACGGGTTGGGAATCACTTCGATGA  
AATGTATGACGTGAACTGGGTTTTCTTTGATTTTGTTCCTTTCTGAATAAAACAAGTT  
TACAACTCGTGGCTATAGGTTACTATAGCCTCAAGCTAAACAAATAGATAAACACGGAG  
TAATTTTATGATCAACTACACTTTCAAATGGGAACTTCTACCGAAGCCTTCAATTATGT  
TGTCGGCACCAAGCGTGGTAAAGCCTGGGCAAATAAAACTCTTCGCGATTATCTGGATGA  
AACTGGCGTTAAAGATGCCACTATCACCTCATGAAAGAAGGAAAACAGTAAATTGAGCA  
AGTTATGAAAGGCCCTAAAACATTCGACAGCCAATTCAGGCCACGCGGGCGGTTTTGCGTA  
AGACATCAGCAACGGGGAAATCAAGAACGAGCCAATGTTTTTCTACTCAGACTTGGAATT  
CGCGTCCGAGAACGGCGGCCCTATCACTCGCAATTTTATCGAGAATCTCCCGCTCGATAG  
GAAAAGCATTGTGATTTTCGATTCGCGTGTTCACATGCTTATGCCTGGGTGGTACCCCGC  
GATTCCCGGATATCACCATGATGACGTGCCGCGCCCGCGATTCCGGTAGGCCAGCACTT  
TGCAACTGCAGGACAGCCACACTATGACAATCCCCGTTATCTGTCTCGCCATATCCTTGG  
TTTGGTTAACGGCGATATCTGTCTACTCATTTTCCAGTAGGACGATCGGAATTCAGCCA  
AATTCCTGATGGTGAAGTTATCTATCGGCATTGGTATCAGGAAGTCATGGTTAAACTCGA  
AACTGGCGAGTTAAGTAAGCATATTGCTCCTGATCGAACTCTTGTTAGAGTTTACTGGCA  
AACCTGGCACACTGGGTCAAAGCGGTTAGAAACGGCTGGCGTTGGTTTGGTTCGAGTTTC  
TCGCGACACTGATCGAGTTCTGGCACCGTCAATGAAATTCGACGTCAGATTCAAGTTTA  
CGTGGAATCCCGATGGAGGGTTGGTATGGTTAAGTATCGTTTTGTTAGTGAAGAGCAA  
TTCAACGCATGGGCCAAGCAAATTTATGCACAGGAATTGGCATTGCTTTTGATTCATGG  
GATACAATCTTCAAATGGAAGACATCGGGCGTAAAGTTTGTCTGACACCACCGAAATC  
GACGGCGAAATTTACATGAGTACTCAATGGTACCCATTCAATATAACAGACCGTGGCAAT  
CGCATCATCGAGGTGAAAGAATGAAACTATACTTCTTGCAGCACATTGAAATCAAATAGC  
TGGCACGACTTCTGCGAATTTGAAATCGGAAATTTATGGTACAAAAGATTATCACGTTATT  
TGCTTAACAGCTGTGTTAGTTTAAAATACAAGTCAACGAATTGGATAGAGAAAATATCA  
TGAAAATAATCTTACTGCTCATCATATTGTAGTTACTGGTGCCCAACGTGTTGGTGCTT  
TTGAATTTAACGCAGGAAAATTCCTGGATGCGAAATTCATTTTGCGCCTGGCAAAAATC  
GTGAAAGCATTAGCAAGCCCGGCATTTATGTTATCGCTAAAGATGATGTTGCTGTAGCTC  
GTACTTTTGTGGCCAATAAGAAAAGAGTGTGGTTTTAACGAGATTATTCGCGAGTAA  
TTAGCTGCTGTTGGAATATACTGACGGTCTTCCGCGGAAGATTTACCGCTAAGTCACAG  
GTCAAAACAGACACATACGGTTTACCATATCCCGATGTCCTTGGTGCCAAGACTGTTGA  
ATATGCAACAACCTTGAGCTGTTTGAAGATAACACCACCAAATATCAGTCGCTCACTGCTG  
TTTACATCAACTGTTTAAAGGTAGATAATTTTGAATATCAAAAACGATAAGGAATACCCA  
TGGCATTTAGTTTATGATGATTTTTTTGATCAAGAGCCGATTTTGCCGGTTCCAAAACCGG  
CATCTAATCCCGAAACTGCGCCTTGAATGAAAGCAAAGATGATGAATTGTTTCTCCCGC  
CAGGAATTACCATCAACCAGGTCACCGTTGAAACGGTAATCGAAACTGAAGTACTCGATT  
CTTCGGTTGTTAAAGAAGTCGATGAAACTGAAGTACTTGAAGAGCAAATTCGGCAATGCC  
AATCTGAAATTGATTCAGATATTCGGCATGGAAGAAAACCGTTTTGCAAAGTCATTTAA  
CTAATCTGCATAATCGACAGCTGCAATCGATCATCAACAATGAAGCTTTGAATTTGCGA  
TGTAACAACCTTGAAGAACGTGCAATCCCGTCTATCATCGATGGCTTTAAACCGGTTCAAC  
GCTTTTTCATGTATCGCGCATTGGAATATGCCAATCAATATAAGACCAAGTTTAAACAAG  
TAGCAGCGCTTGCAGGCGGTGTTTCTGAGGCAGGTTATCACCATGGCGAAGGTTCTGCCG  
CAAGTGCTGGACAACCTTATTGCAAATACATGGAACAACAACATTCCAGTATTGGAAGGAG  
AGGGAAACCTTGGTTCTCGTCTTGTTCACAACAGCAGCTGCACCACGAAATGTGTTGTGTC  
GTGTCCATCAGAATTTCTGGGGCATCTTTAAAGACATTTCTCTTTCTCCGGTGCATCCAG  
ACCCTGAGCATTGCGCCCGGTTTTATCTGCCTGTTATTCCTATGGTTCTCGCGAATG  
GCGTAAAAGGTATTGCCACTGGCTATGCTACTACAATTTCCCGCATTCTTACGTGAGTC  
TAGTGAAGTGACACTGGCTGCAGTAAAAGGCGAAGAAATCCCGAGCCGTAAGTGCAAGT  
TCCCATGCTTTAAAGGTATTGTTTCGTGCAATCAATTCAAATCTATCGAAATCGAAGGTC  
TATTTGAGCTAGTTAGACAAACCAAACCTCATTATTACCGAAGTTCAGTTCGATTTGATC  
GTCTTGAGCACGTCAATATTCTCGACAAGCTCGAAGAACAGGGAAAATCGTAGGTTACA

AGGAAAAACAAGTGATGGAATCCGGTTGGAGGTAACCTCTCAAACGTCAGGATAAACTTG  
GCGAATTGATGTAAAAAATCCGGAAGTTGCACATGAGCGTATCATCATAATGTTCAACC  
TTCGCCAAAATCTTTCGCAAAACATCACCGTTCTCGGCGAGAATGGAAAATTGGCAGAGT  
ATCAATGTGGCGCCGGTCTGATTCGAGACTTTGTGGAGTATCGCAAAAAATACACCAATC  
AGCGTGTGGTCTTCGAAAAAGAAAAGGCAGAAATCTTCGCGTGATTTGGCTTGGGCCAAAT  
TTGCCTTTGTTAATGAAGTGATTGAAGCAAAAATTGTTCTTCGTGGAGAATCAAAGCGC  
AACTTATTGCCGAAGTAAAGTCCAAGCCGAATATGGCAGGATTTGAAAACGAGCTAGTTG  
GCATGAGCATTAGCGTCTAACTGAAGACGAAACTCCTAACTTCAGGAAGAAGCTCTGA  
AACAGACCAAAGAATACTACAACCTGGTCGAGCACTACTCCAGAAAACGAATATGTTAAAG  
ACCTCGAAACTTTAACAAAACAAAACAAAGGTCTCTTCGGAGGCCTTTGTTGTTTCTAG  
ACAAAAGTGTGTACAAATGCTTTAGATTGTATAGCATAGCCTCAAGCTAACTAACTGTC  
ATGGAGCATATTATGATTTACAAAGCGCTGATAAACAAAAGCAGCAGGTATTATGAGGAA  
CGTTATAGTGGATGCGCGAAAATCATATCGTTGACGTGCACACTCCAAATTATACTCTC  
AAGTTTACAAATCACAAGGGTTATATTGGTCAATGCCATTACTCTAACCGTGAAAACAGT  
ATTTAGAAAACAAAATCAATATGCAACATGGGAGTCCTTTATAGACACAATCAACCAT  
GAGCTGGCTCACTGGGCAACCATAGGTCATGGCCACGATGAAGCATTGCGGCAAGTGGCC  
GTTTCGTCTTGGAGCAACTCCCGCGAAAACCTTGCAACCCTTGGCCAACCTGCCAAAACCGTAT  
GTCATAATGTGCAAAGACAAAGTTGTAGGATATTCTGAGGTATTGCGAGTTGGTTCAGAC  
GCTGCCACACGATACATCAAAGGAAAAAAGAAACAAACTCTTGGATTTTTGGAGTATAAG  
GTAATCCAGAATTCATCGATAACTCCCCTGGTGCGAACCAAGTGTGCGAAATGCCAACA  
CGAATCAAAAAGACAAACAGCATTATCGCCGATTTTCTCAGCGATCTTCGAGGAAAAGCA  
TGAAATTTTCAAATAGTGCAAAAACCTAGTGTACTCCGTTTGGTATGGTGATACTATAGC  
ATCATACCAAACAACCTGATTAAAAACAACGGAGTATATCAAATGTTCAAATCACCAAA  
ATCCAAGTAATGCAGATCAACCTCATGAAGAAAGCTGTTGAAAATTTCCAAGGTTTTGAA  
ATCAACGCAGTAATCATGAATCCGCTCAACAAAATGATGAACAACGAAGTTCTCGATCAG  
CGTGAAATGAATCGCTGCGAACAGTTCTTCAACGACATTATTCAAGACGATCTGATGTGG  
CAAATGCTGATTGCGCTAAACTCGCAAAATCCATGAAGCGTAAACTTGCTGCAGCGATG  
AAAAAAGCTTAAGTTATCTCAACAAAGAGGTTTACAACGCTAAACCGCTTGATTAATA  
GCTACAAGTTAAACAAGCTACCACAAAGCAAACGGAGTATTTAAATGACCATGACCAA  
ATCGAAGCTATCGCAAAAGTTCTGATCAACTCCAGCATCTCTGAAAACGCTACTTCTGTC  
TTCATTCAAGTTGCCAAGAAAGCTTTCGTTACTGCTGTCGAAATTGCGGAAGCCACTAAA  
ATGAACAAAACGCAGTTTACTCCAATATCGGCGTGATGATGAAAAAGGGTTTGATCGAA  
AAATCTGGCGACGGCCACGTAACCACCGAAAGTGGTGATGCCATTTTCATCGAAGCTGCC  
GAAATGTGGAAAGCTGCCCAACCTGCAGTTGAAGCTCCTAAAGTAGAAAAGAAAAAGGA  
ACTGGTAAAGCTCGCGAAATCACAGTCGAAATGACTAAAAATATCGAGCTCGTCGAGCGG  
CTGCTGGCTAAGCTCGGCATCGAGCACAAAGCAAGCAGTCATCAATCGCCAAAACCTACTAA  
ATCACTCTGAACAAACGCCACGCTGATGGATAACCGCAAATTCGAAATTCTCAACCGCGGC  
ATCTTCCGTATCGTTGGTTACAAAGTATCTGAAGAAATCATCAACAACCTCAAACCTTTG  
GGTTGTAATAAATCAAGCAAGGTCCGGCAAACCTGCTACATCGACATCACCGCGAATGAAAAC  
AACATCGTTCGTCTGATGGAAGAAATTCAGCCGCTAACTAATGCGACTAATTACAAGCA  
ACTAAGAAAACCTATCAGCCATCGCATGTTATAATGTGATGGTTGATTTTCAATTTGAGCAA  
AATATGAAAATTTAATTATTGATGCTGGTTTACTGGAGCAATTATTGCGCTTTGTCTC  
GCTTAACAATGGCATGACATCACAGTCATTGACAAACGGAAACACATCGGCGGAAACTGC  
TATGACGAAGTACGAAATGGTAAACTAGTACATAAGTACGGACCACATCTTTTGCAT  
AGCCACTTGGGTGTGCACACTTTCCTTTCACGCTGGACTTCCTGGATTCCCTATGAGCAC  
AAGGTAAAAGTCGAATATAGAGATACATTAATCTCATTCCCCGTGAATCTGAAAACACTC  
CAAGAGCTCTATGGTATTGAAACGGAGCAAGAGGCCATCAAGAATTTAGAAAAGGTTCTGA  
GACACGAAATCTCCACCAAGTGTGATGAACTTTTCGATCATTCCGTAGGAAAAGACCTT  
GCCGATAATTTCTTTAGACCATACACGAAGAAAATGTGGGGCACTGATCCTAAAGACATT  
GAGTTTGCTGTTGGCGCAAGGATTCCTGAGCACCTCTGATGATGACCGATATTTTAGT  
GATAAGTACCAATATATGCCCGAAGGCGGTTACTCTAAGATGTTTGAAAGAATGCTTGAC  
CATGAACGAATTGAGGTCAAATTCGCACGCCATTCCAAAAGGAAATGGAAGCTCAATAT  
GACTTCATTTTCAACTCGATGCCTATCGATGCGTACTATGACTTCAAATTTGGCAAATTG  
CCGTACCGTTCTTTGCGCATGGAAGTAAAAGAAGAGAAGCATGATCATGGAAATACTACC  
GTGAATAACTCTGCTTCTGAAGAAGGTCATACTCGTTACACCGTTTGGAAAGAATATTCCA  
GGCCGTGGCGATGGTGACATGGTGACTTACGAGTACCCGTGCGACTACGATGGCACAAAC  
GAGCCGTATTATCCAGTGACTCACGGAATAGAACTCTATGCTAAGTATGCTGAGCATGCA

AAGAGTGATAAAATGATGTTAATCGGCCGTATGGGTGCATATCAGTATATTGATATGTGG  
AAAGCAGTTCGCACTGGCCTCGATATCGTTTCAGATTTCAAAGCATAAATCATAGCCGGC  
CGTTGGCCGGCTTTTTAAAAGGAAATAAAATGAAAATTCTTGGAAGTGGGACTAATAACT  
ATCATGCTCGACCAACTGGCAGCTGGAAAAACGTTCTCGCTATCGTCTCGTACTGCGA  
CTACCGGTCTCGTCAAGCTCTCAAAGATATGGGCCACGATGTTGATCAACGCTTCGTTA  
CCCAGGTGAAGACCTTAGTGGCTACGACAAAGGCGTCACTGCTTATTTGAGTCTACTG  
GCGGTATGCAACCAGGTGGTTATTGCGTTTACTGGCTTCTGGCAAATCGTCCCAGCGCGA  
TTATTGTGATTGATGACTGGCACACTCCCGAACGTTCTGATGACAGGTTTCAAAAAGTCTG  
CCACTCGCACCCGTGAACAATTTGAAGAAGTTCTGTTCCGCGAATTTATGCTGAACGACC  
AGCACAAAGAAGCTACTGATGCAATCACTGCTGATCCTTCGCTGAAAGAAGATATCGGCC  
GCGGTTATGCTAAGAACGTCTTCGATTCTCACCGAATTCTGCATTTTGCATTGACAAGT  
TCGAAGTTTCCAAGATTTTCGATTATCCACATGAATCTTATTCGTTCTGTCCCAAATCCT  
ATGTTCTAGCCCAGATGATCGGCTGCGCGAAATGGGTCTGGCACGTCAGATATTTTGC  
GCGAACGTAAATGGATTTTCGCCGGTATCGATGGTCTTCTTACAAAGAAAGCACGTAAGT  
TCATAGACAACCTTCACTTGGGCTGTAGAAGTATTTGGTTCGTGCAACTATCGACGTTGATG  
CCAAACTTACAAAAGAGCCCGATGTAATTCAAGCTTACTCGGGTGCCCGCGCTATTTTCT  
ACCCAGACCAAAACGACTTCGGCTCCAACCTGGTGGCGCAATCGACCACGCCAATGCGCTG  
ATATGAGTGTCTTCTTTATGATGTCTGATGAAGAAGCTTCATTGTTAGGCCCATCTT  
AAATGGGGCTTTTCGATCGAGAAGTTAGAAGCCATGACTGACGAACAGCTCGATGATCCTG  
CTGCTCGTCAGAAGGCCGATTATTACAAGTCAAATCCTCTGGACAAAGAAAAAGTTAAAT  
CTTGCTTGATTTGATTATGGCGAGATGAGTTTTACCAAAGCGGCTTCGGCCGCTTTTTTC  
GGGAATTTTATGAAGCAAATTATCGTAAGGCTGTTACGCCGATTTACACGAACAAGAAA  
TCACACAAAACGGCCTGGGCACGAGTGTGGCAAGCTGCTATCGAACACAACACTGGGTTT  
CCATGTGAGTTGATGCATGAGGCTAAACCATGGTCAGAACATGATCGGGTCTATGGCTAT  
TTCAATCTTGCGCCGTATGACAGATTGAGTTAGTTTGGCGGTCCTCAGCCACAATACGCT  
GAGTTTATTAATGTACTGAAGAATGCACCGGTGAAGTTGTTGCATTAGACAAACCTTTG  
GCCCCGTTTTGGTGAATTCTGCAAAGCACGTTGTTTCAACACACATAGTGAACCCAACATG  
AAAGTTCCCGAGCTATGGAGAGGAATTGATTGGGGTTCCATTCAAGCGCAATTTGACAAA  
GCCACCTGTTAACGATGGCTTCTTTGCCGCTTGAAGATGTTACACTCGGTGATTCTCAC  
AGTATTTCAAGTGTGGCAGCCAGGCTATACGGCTTATCGCTGCGACGCGCAGACATTACGT  
GGAGCTTTGCAAAGGGGATTGTCAAGTATCCTTCTGATAAAGTTCGGAATTTGACAATT  
TATTTTGGAAACATCGACGTTCCGGTATCGTTTCGGTTTACAAAATAACCCGATTTCCGAT  
GTAAGTGTGAAAGCTCGACGAGTATGAAAAACAACACTAGTCGGACTAAAGGAGTCTTGACAA  
TTTACCGGAGAAATCGAACTTGTGCACCTGCTTTTCGATTGATGATGAGTCAAGAAAAATC  
CCAACAAACAATATGCTTAACGGAAAATCGTTTAAACGGCAGTTGGGCTGAAAGAAATTCA  
TGGATGAGCATTTCATAACTGGATTATCGGAAATAGCATTCAAACCCGGTTTCAAGGTT  
CATACTTGGCCAAACAGCTGGTATGTTGAAACGTATAGAGACCCAAAATCATTCTTTACT  
CGTTGGAAGCCATGAAAGGTTTGCATCTTGCCTTACCATTCTATCGGTATGAAGGGTTT  
AAAGATAGCAACACTCTAGAGTTGTTTGCATCTAAAGGCCTTCGGGCCTTTTTTTGGGAT  
AAAAGTGTGTACATGTGTTTTTTTTGCTTTATATTATGGCATTGCTTGATAAAGGAGAATT  
GAAAATGTCAAACGACCAACATGTTATAGCGACAATTAACGGCTCGAGTACGAAAGTGC  
GCTGTATCGCTGTCGTGCCATGGGGCTAAAGTTTCCGGGAACCGAAATTTGTGAATTTAT  
CAGTGTGTAAGCATAACAACGACTGGCTGAATCGTGAAGATGACGATGGCCTGATGAAATA  
TGAAGGCAAATTCGATCGGACCCACCCGTTTCGTCGTAACAGTCAAGCAGGCTGGTTCTCG  
GAAAATCTATGTTGATTTTCATCGGCGAAGAAGGTCAACCTTTGGTAGATTGCGAGTACTA  
TGCCTTTGTTCTGAAGATTTACGCCTCATTGAAAAGTATAAGGACATAGTAGGCTTCA  
GAAAAGCGATAAAGAGTGAAAATAAATGTGTACTCACAATGAGGCTATTGATACTATAG  
CCTCATCAAATAAACGAATACACAAACACGGAGTATGTAATAATGCAAGTAACCATCAAAA  
ACGGTCTTTACTTTGGTAATGTTGTTAACGGTACTTTTGAAACTAACGGAAACACCTGGT  
GGGATGCCAGCGAGAACGATCCCCGCGAAGGTAAAGTTAACGCCGTTCTGAAAGGCAAAT  
CTCGGATGGTTTGGGTAATCGCAATGACATCGTGATTACCGAAAGTTTTGATGGTGTTG  
CGCAAACCTGATGTCGCTGAAAAAATGTTGACGAAATGCGTTCTCGAGTCGCAAAACGCT  
TCGATGTAATGGACAAAATGACCTTAGGACTTGTTAAAGGCACCATTTCGTTCTCTGATTA  
TCTCTGGTGCTCCTGGAATCGGCAAGACCATCAGCTTGGAGAAAAAGCTGAAACATGCTG  
ATGATATTGGCGGCATCTCTTTCTTCCATAAAAGGAAAGTGCTCTCCCATCGGCCTCT  
ACATCCACCTCTGGGAAAACCGTGATGAAGACTGTGTTGTGCTGCTGGATGACGTCGATG  
TGTTACCAACGAAGAGACTCTCAACGTAAGTAAACCTCCTCTTGACACTGGCGAAGAAC

GCATCATCACATGGGGTACTGCCAGCAACTCCTTGGCAGAACGCGAAATCCCCAACAACT  
TCGAGTTCAAAGGTTCCATCGTCTTCATCACTAACGCAGATATCGACGCTGATATCGATC  
GTGGCACTAAACTTGCACCGCACCTCGATGATCTGCAGTCTCGCTCCATCTACCTACACC  
TTGAGGGTCACTAGTCGCGAAATCATGGTTCGAGTGGAATACGTAATCACTAAAACCTG  
ATATGCTGCAAAAACGCGGACTGTCTGAAGCACAATTGTCAATGCGTTGGAATTGATGA  
AAGAGAACGTGGACCGCCTCCGCTCTCTATCTCTGCTAACTGCCCTCTACCTCGGCGATT  
TCATCAACACTGATAGTGATTGGGCCGATGTTGCTGAAGTTACACTCCTGAAGTAATACC  
GATGAGCTGGAGGAATTCCTCCAGCTCCTTAATATTGTTATTCATCTTTGTCAAAAACAAT  
CAAGCTGGTTCACACTGGTTAACCCAAATGGAGAAATGAAATGAATCCGAAAAAATGGTC  
TTATCATGAAATATTTTGGGAGTGCAGAAGCAAAGCCCCAAATTCCTACGGTTGAAGATA  
TTCGAGCAAATGCTCTTGAAATTTTCAAGCAACTCGACGATCGATTCGCTGCTGATTTCGC  
AGACTCTTGACCAAATTGCTACTCGCCGGCAATACGAACTGCAAGCGCATGAACTTGCCA  
TCAAGAATTTGATGGAACGTCATTCGGCCATAATGAACAATTTGTCTGCTGAGCAAACCTC  
AAGTGAGTGACTCCATCATAACTGCTCAAGTTATGAAGGCTAATATTGCTCAAATTTGCT  
AATAACCAGAGGGCTCCTGAGGAGCCCTCGTTTTTTTGAATCAATATGCAATACAGTTTT  
GGCGAAATCACGATTTTGGTAATTGCTCTAATATTCATTATGTGGCTTTTGTATAAAGCT  
CGACATTTTCATATTAGATATTTGGATGCTGTTTGTGGCACGTTTGATTAGGAGAGATTT  
TGAATCCAGTTGCTAAACATGACTTCAAGGAAGGTGGAGCTCATGTAGACAAGAAACGAC  
GCTTAAATGAAAAGCGCAAACAAAAACATAAGAAGGTGTACAATGATGGAACCTAATTATT  
GATGATTGAAAATTTGTAAGCGTCGCAATCGGCGCATTATCATCATGCGATTGATCGTA  
ATAGCTTCAGCTAGCAAAGGCTTAATTTCTGCAAGCGACCAAATCAACGAAATTTTAGAC  
AAATGGCCAAGTTTGAATCTTCGGGTCAAGAGTTGTTTGGTAATTACAGCATTGTTGTC  
ACCCCTTTGGTCATTGCTCTCCTTCTTGTTTTGTACTCTGTTTTGGCCAATTGTGTTG  
CTGTATATTATCGTAAAATAAAAAGGTATGTACTTTTTGAAAAGTTTTTTGTAAAATGTT  
ACATATCAAATTTTGGCGTATTGATAAGAGAAACAACATGGCATACAATGAAACAATAAA  
GGAAATCATTTCGAATTGCGTCAGTTCTGATCAAATTTGGCTGTGAAGACATTCGGAACAA  
TCAAGAACATTTTCGTATCGTTCTTGAACGAATTGGGTTTAAAATCACCAAGTGGGGCAGA  
GTTCACTCGAGCTGGTTTTAGGACAAATGATGAAGCGTCTACCAGCTGATCAGCGTGAAG  
AATTAGTAGAAATGTTCAACCAATGTCATCGCGACATCAATCACCAATGATCATGTATC  
CAAACAGCAACTATGGAAATATTATGGAAATCGAAATCGAGAAAAAGTACCGTGTAATCG  
ACGCCTCTCGTTTTGAAAACGAGCACGGCATCAAAAATGGCCATGAATTCTTCGTGGAAT  
CGCTAGATGAGGGTGGAGATATTAGGTCTCGCGGAATTGCTTGGAAATGGAGTAGACGGCG  
ACAGCAACGATGCTCCATACGCCGGTTGGGCATTGCTGATGAAAGGCTATCAAGATCATT  
GTCCATAAACACCAGCGGATTACTCAGGCGCTATTGAACAAGTATGAAAAAAGGGAACCG  
TAAGGTTCCCTTTGTTTTATCTAGCTCTACTCTAAAAGTCTTTCGGCTTGATTGCAAATA  
ACGAAAAGATTGTTTTCAATTAATTACTGGCTTTTTACGCCAAAGCATCGATACTGCCCA  
GCATAAACGTTGTCTAAGTTCACAAGCGGGCAACTGTACATGTATTCAAACCTCATTGTGC  
CCCGCAGGAAGAAACGCAAAATCCTTGTAATTGCTAAAATGTCTTCCAGAAAAATGGACC  
ATATATTCATTAGATGTTTTGTTTATTGGATACCCGCCCTTTCCATATCTACAAGTTCC  
AACGGCGTTTTCCCTTCCGTGGCGACCATTTC AACGAAATAGTTCAAGTATCTAGGTCTA  
AAAGAAAATATAACTGAAAAATCTGCTCGACTTGAAACATATGCTATATCAAGCTGTTCT  
TGTGTCGCTACCTCAAATTTTCTATTGCGTTCGGCTGGAAGAATTCCTGGTAATTTTGA  
AAACGAGTATCTCGATAAACATTGAAGATTTTCGTCCTTGTGTACCAATTGAAACCAAGT  
ATGAATACAAGGATCAGCAAATTTGCCGAAAAAATACAACCTTCGCCGGTGATAGCGTCT  
TTGAACAATCGGTCCAGAATTTCCATCAGAATGCCCGCACGACCAGGGGGTTGAGTTCC  
TGCGTTTGGTTTCCTGTACTCATAAAGTTGTTACTCCTGTATAACAGCTCTATTTTCATGC  
TTTCGGCACCTAACGGTGCCGAAATGTCATTTATAACCATCCACTGTGCCAGTTAGGACA  
TCTTTTGAACCTCGCATTGCCCTGTTGGGGGTTTGTCTTTGCCCAAGATGAATTAAGCAAT  
TCAGAGTATGCTTTAAACCAGTCCTTATTGGCTATGAATGCGAGTGATATTTTGAATCCA  
GATAGACGAGGACCTCCATTTGGAACATTAAGTTACAAATAGCATTTTTTTCTAATAGGG  
TCACAAGGATCATATCCTAATTTGATATTAGGATATTTCTTGATTTCACTTTTACTGTT  
TGAACATCAGAGCTAAACAGTGCCTGCACTGCACTCTCAGAGATAACCCCGTTCACCTGG  
CAACCAACCTGTTTACTCAATGTATGGTTTATCAAGGCCATATCGGTCGTCTTCTGAGGT  
ATAATCAGGTGACCTATCCCAACAGTAGGGTACCCTAGATGGTCCCAATACACTTTCAA  
ACTCTTCCCTCATCGTAGATGAGCATGTCTTCTAACGTCATATGCATTCTCCTTAATTAT  
TTTCCGAATATTGACGGGTTTGGTGGCCAGAAAATGATTTAAACAGCTCGCCGTTATACG  
CCGCAAGATGCCCGGCACCCGGCAAAGCCATATTC AAATATGGCGACCATGACGAATTTT

GACCTCTATCACCCACATCATGTTGATCAAAAATCTCCATACTTTCCAACACTTCAAATT  
GTATTCGGCCTCGGCCCGTTGGATGCGTGATGTTGAAAGTACGTGAGCCATACCAATCGG  
AAACATATTGAGCTGGTGGCGTGTATACTCGAGTTTCTTGCCACGGCTGGTTATCCCATC  
TCCATCGTAAATTAACGTATCCGAGAATTCCGCCGCAATGAGACGCCCGGCCAGTCCGA  
TGATCCGATTTTTATGGTTGCACGTTGACTTGAGTGAATTCCGTGGAGTAACTGAAAT  
TCTGATTTCTGTTGTACGGATATCTAGAGCCAGACCTCATGTAGCACCGCGATGGCGATC  
TGCTTGTATTGAAGAACTCGATACCCACCAATCTATAGGTGACGCACCTTGTCCATTAT  
AAAACGCCGAAAGTTGTGGGTCTGCCGCGTTGCCTGCGGAAGATAGTCCGGCAAATCGCC  
GGACGTTGGTAATCCAATTTGGCTTTTTGATATCACCGGTATAACCAATCGCGTTATACC  
CAATGCTCCAAAATCGCCCATGGCGTTGAGACATTTTGCCTCCTAATGTTATCTAAAGTT  
CAACGCAGCGTTCACAGTATAAACTATTGTACCGCCTTCAGTGGCAGCGAACTCGTAAGT  
TTGAGGTCGAACTGTTCCCTTGTGGATTAAATACCCCGCGGTGCAGACCATCTACTTG  
ATACCATCGAGCCTCTGTGCAGTTGATATATGTGATGCCACCATATCGTATACGCACCCA  
TGCCCTGCCGTCCAAAATAGGGTAAGATTTAACGGTTGTGCCATCTATATAAGTGTAGAT  
TGTCTGACGGGTTGATGCATTATAGCTAAACGTCGCATATGGCGGTGTATTGTGTCCAGT  
GACAACGGATTGTGTAGATGCAATCTGCTTAAGACTGGCCATTCCAGCCAACTGCCCGAG  
TAAACCTGTTGTTCCAAGACCGGCTTTACTCAGAATGTTAGAGGGCCATCCATTGGCCTG  
GAACTCGGTGTTTGCCTGAGACAACCAGAAGGGAACGTTAGCTACGGCCATATTCCAAC  
CCTTCACCTTCTCGGAGAGGTCCTTGACTGCACCCACCAGTAGCGCAATCAATGCGGAGT  
TTGATAGCGTCAGGATTTCCGGTCCCGTCTTCGTTCCCTGAATCCACTACTCGAGTAAACAG  
CTTCGGGTAGCACCTGCTCGACGCTTGTGCAATCAATCCGACCTCTTTTTTGTGCGTACT  
CAGTGGCTTCAAGCGTCTGCTTCTTGTGCGTAGGAGTAGGCGGTCAGTGCTGACACTTCC  
GTAGCGCGTCACGTACTTCCACAACGTTCTTCTTAAGTCGCCGGTATGACCGGATGTA  
CGTCATTCGCGTTCACATTCCTTGTGATAATCCCTGCATACGAAGCGAGTCCTTGTGTGT  
GGAAGAGGAAGTCCCCTCCCTTCCACAAGTGTAAACGTAAGTACTGGCAAAGCGGCCTGCCATGT  
GGAGCCCGACGCCCGGGCGACTGTCGATAGCGGGGTTACCCTTCACCTCGATAGCGCACT  
GGAAGTAGTCGTTTCCCACGGCATTATTTACCACAAACCTGTCGCATTGTTGCACCAGCT  
CGAAAGGCCCTTCTGGGCACCGGCCTCCTGTCCGCCAATCCACGCTTTAGTTCCAGCAA  
AGTTGATAGCCAAGTATCCGAAGAATCCTACTGCGTTTCCGTGAGCTTGGTTGAAGAGAT  
AGGTCCATTAGTATTCGGAATGCCCGCAATGTTGGGTCCCTTGAAGAATCCAGCTTGAG  
GACGGAGATTACAATCCCCAAAACCTGTGGAATGCCAGTTCGTACGTCCCAAGAGCAA  
AACCTGCCGGAGCCGCACCAACATCCGAGGCAGGCGGCTTGTTCCTTAATGGTAAATCT  
TGCAGATAGCCCCACGTGCGCCACTACGCCATGTGAGAGAGTTATCAGCCCCTATCGTGC  
CCCCAATCCACAGGCGTCTCGCTCAGAGCCATCAGGTGCGCTCCACACGATGTCTGCCA  
TGTCACTAGCAGAGTGCCCTACAAGGTCAAGTATCCCTGCGACTCCTAGCATCCCGGGTA  
CAGTCCCACCAGCAACAGGCAGAGCCCCAATTTAGACAGCGACCAACACACGTCACCCG  
CGCCGTTAACGGACTTAGCAGCGTTGCCGATAGTCAGGGTGCAGGCTGTACCCAGTTCCG  
CCGTGGTCATGTTGCCGGAACAGTCAAAGTTGGTGCCGTTAATCTGGCGAGCCGTAGCCA  
CCTTGGTTGCCGTGGCCGCAATTGCCAGCAAGAGCGCCCGTGAAGGTCCGAGCGGTCACCC  
CAGCAGCCACGACAAGCCCTGTAGGCTTTAGTGACATCCAATCGGTAGTGTTGCTCCGT  
TTACTACTCTGCCACTTCAAGTATTCGTTACCGTTATCCCCGGTTTTTGAACCACATGTAGC  
TGTCGGTGTGCTGTCAGAGGCATTCTTGAAACCAATCTTCGCGGAATCAGAATTGAAGA  
CCCGGCCAGCTCGCAGGCAGCATCGAGGAACGTAAGCCCAACGGTCATTGCATCGCCAG  
CTTTAGCAACCGCACCAAAGTTAGTTGCAGAAATCGAAATATTCGATGTGCCATCAAAG  
GAACACCTGCAATACGTCTAGCTGTCTGTAATCTAGAAGCCGTAACGGCATTTCATTGA  
CTGGAAGAGCTCCTACTGCTTCTGGAGTTGGGTTATATCCGTTATCGTAAACACGATTGC  
TTCCGTTATAAGTACCAGAGCCTTTATCAAAAATTCGCAAGAACAATGGTTTTTGTATTT  
CAATTAATTGGCCATTAACGGCAAAGATAGATGTTCCATATGTAACATCAGCTGCACATG  
CGGTAACGGCTGTTTCGATATCGACATTAACCTCATATCGGGAAAGCACGTGTTTCAACGT  
AAACAACAAACCCATCTACGGCCTCAGATGGTCCGTGGATTGAGTAAATTGCTCTTTCTG  
ATGTAGAATAAATCGTAAACTGGCCTACGGCATAACTTGCACCGTCACCCCATCCACTGG  
CGCGAACATTACCGGTAAATGAACGATTGTTTATTGGAAGTGTGATGGCCAGATAAAG  
TATCGATAAAGACAAATGAGTTGGATACACCATTTGTTTCAAAAAGAACTGGAATATATC  
CGGAAGCAGGTGCTCCAGCAAGAAGTGTGATCGTCAGATCTTTCACACCTTTACCTGAAG  
CAGTAACAGTCGATTCAACCAAATCGCGACGTGCCACAGAATTAGCTTCGGTGCCTTGCT  
CGGCACACAAAAGATCTTTTGAACAGTCAAATTGACAGACATAGTGTGCCGATTTTTT  
TAACGTAATCGGAGCGTGTATGGATGTCGTTTGTACTGTCACTGCTAGAGAAGCATTG

CACTGCCGTCGAACGATACTGAGCCAGTTGCGCCTCCGGTCAAACTCATAGTTCTTGCGC  
TTTGCAACTTTGATGCAGAAACAGCATTGACACCGGCAGCTAATGCACCAATTTCTGCAG  
GAGTAGGTTTATCAGATTCGGTATAAATCTTTTGGTTTGCTATTTTAGTGCCTGCCGAGT  
CGTATGCGTATGTGTACATAACCGATACTTCCGTAATCGAAAGTAATACTACGGG  
CATTCGCACCGTTACTGGCCGATGGATGAGAAACGTTAATAGTCAATCCACTGAATCCGC  
CCAGACTGTTATGTCTGAAGAAACCGGAATAGCCCATTGACAAGTTATGAGGTGTTCCCA  
TATCAGACGATTTGCTCAGCAAGTGTCATTTTTTCGCAGTATAGGTGTTTCACTGCTGATA  
AATCGTGCATCAGCCTCGCTCTGGTTATAGTATGGATTATCCATAGCAGATCGTCCGATA  
AGACCGGTGTCGCTAATCAAAAGTCCGCCCGTCATATTGTATACGGCGGAATCAAAGCGA  
ATTTAATGGTAGTCATTCCATCTTGGGCATAACCGAGTACTAAATCAGTTCACCAGGT  
GCGCCAATATACAGGTTTTTAGACGAGTTTGCTCGAATGAACTGAACACCTCCATACTTT  
ATATCAAAGTTTTCCAGTATTAGCGGACACCAACGCTCCTATCAGAGAAACATCACCATTT  
AGATTTAGCGTTATTAAGTCCTTCAAATGCCCATGCGCCGTTGGTGTGAGTCAATTGCCAC  
TTTAAAGTCACCAGCCGCATCAGTTCCAACATATGACTGAGGCGTATTTCCCTTTGAAAA  
ACGAATATAAGCAGGACCACTAACGCTTGACTTAAGCGCTAATGGGTAATCCGTGGTAGT  
TTCGATGTACAGAACACCCGAGATAGTATCGCCAGCACGAGATACTACTTGGAGTTCATT  
TGCATTTGGTTTATCGTTTTCCGAATAAATTCTTGGACCCTTGTACAGGATAGCATTACC  
GCTTGGTACCAGCGCAAGATTGCCTTGGTGCCAAACAGGTGAACCATCGATCGTGGTTC  
AACTTTTAAATCTGCCATATGGGCTCCCTTGTTAACGAATGATTGGTGAATTCTTATTA  
TATTTAAAGCACTCAAATTAAGCAATCCTGGCACCAGGTTCAAGCTTGCCTGAACTTA  
TCTTTTTATCCTTTTAGTTATAATATCTATTAAGCCATAAAGCATAAGTTTTGGCAGGGC  
CAAACCTGGAAGCCAGGATTTGATATTCTATTTAAAGCAAACAAGGGCCAAGAGGCC  
TTATCTTTCGTTAAAATCGTTTGAGGTTATGATATGCTTTTTGTTTCAGATTCAAAGCTG  
TAATACAGGATTTGTGTAATTACCGGTATTGCTTATGATATTAGCTCTAATACCATTAC  
ACCAATTGCTGCATCCGCCACTTTATCATCATCCTCCCTTGTAACCCGCGTTATAGTGAC  
ATTCGCACACCTGCTGTTCCAGCACTGACGCTTACGGATATCGGTATGCTGCAGAAGA  
AAAAATCTTCGCCCTGAGCTTTGCGTTGGCAGTTTGAAATAACCTTCAAATTTGTCCA  
CACACCTGGGGCCGGTGTGTGCGTTCCCTAGCCATATACTGGTTTTGCATATGCCTGAAGA  
GTCTTGAGTCCATACATAAAAAAACATCTTCGACCGGCGGTAACCTAGTGTCTAGTCGCT  
GTGCAGCTCGCATTGGATATGATACATTGATTCCCATTGCGTTGTTATATTTTCAGACAA  
ATAACGCTTAAATTCGTATTGATTCCCCACTGAGAAATATTCATTTATGTCATCGACATG  
TCCTGACGGTAATCCACACGCTCCAATATCGACACCGTCGTCAAAAACAACCTTGCAAATA  
GGCATTGTGTCTTCTGCGAAACTGTCAGGATTATCCCAACAACCTTCTCGTAACAAAA  
GCGCTTTAATGTTGTATAGAAAATTGCAACGTACGAACCTTCTATATGCTCTCGGAGTAAA  
AAGAGCAACGGATTGTGATTTAGATAACTAGAAACAGGCCACGACATAGCTCCATATTG  
TTTCATGAATGTGACAAAATCCTCTGACGATCTGATAGCATCATGCGAACTACTACTAC  
TATATTGTCAGATGGTGCAGACATTAGATATGTTCTTAAAGTGTCAAGATGCTCGCGTCT  
AGAATATATGTCCAACGTCGCAAATTAGATGCTACTCCGTTGTAGAAATAGTGATAGC  
GTTACACCCCTCCCGTACGAAGGCAAACCGAAACAACATTGATTTTGACATACGGCAC  
TCTGACACTGGAGTCATCATTGACTCCAAGTGCCTTTATCATATACTTTATTGCGTTATT  
TTCACCTAAGTGATTTGATTCAACGTAAGATGGCCCAAGATGAGCCATAAATTGTTCTGT  
CATAACGATTCCTTATTCTTCCAGATAAACTCAACTGTCTTGGTCAAGTTGTTGGCAAC  
GATTTACACATTACCAATTTAGTTCCAATCTCTAATCGTTATATTATTGGAAGATAAACC  
TGTAATGTCAACTGGACCTACGTCTTGAGCAGTAGGTTTGTACCCTTGTGATCAATCTC  
GTACTCAAAGTTTTCCGATCCTTACGATTGGATTCTGATTTCGTATCAAGACACACACGGCC  
ACTCGCTGTATCGGTATTTCCGAAAACGAAGTCATTTCCACGAGAGGTAATGTAACGATT  
TGAGTTGTTGAAATGCAAATACTTAACATAGTCACCAGTGTTTGACAGAAGCATTGCTTC  
AGTCATAGTCGATGTATCATCACGACGAAGATATGTTGGGTTGAGCTTTGTCTGAGCGTT  
GGCAGTATGAATTACCGGTGATCCATTAATTGTGAAGGCATAAGTAGAGCTTGCCAATAC  
AGCCATTGTTGAACTAGCATTACCAACTATGAATCCCCCTGCAACAGATTGTGCATATTG  
ATTCGCCGCTAATTCGGTTTACCCAGATAAATTCTCGCACCTATGTTTTCCATAACAAG  
GAAACCAGCAGTAGATTTTATATGTTGTGCAATTCGTACATCACCGGCTCTATTACTTT  
CAGCTTACAAGAGAAAGTTGAACCGTCTTTAGTTGCAATAGCAATATCACTGCCAGAAAC  
TTCAGAACCACCAACGCCACCTGCAATAAATGCCCAATCGTTTATTGCAGCATCACTCC  
AGACATTATGGTGATACCATTGGTTCATCAGCAGCTCTAGTTTTACCTATTTGAACAGA  
GTTTGTGACATATTATCATTAACTACTCTTGCCTAGTTGTGCTAGCATTGGTAAGATC  
TGCAGCTACCATTGCGGCAGTAAAAGTCATTCCGCCTGTTACGGTTTGAGCAACAGTTCCG

ACGGACCCAATCGTTAGCAACAACACCACCAAGTTTCAGTGAGTTCTGGGCGGTTGCCAT  
TTTCGGCATATAGATTTGCAACGCATAGTTCAGACTCAGTGGACTAACGGCCAGCCCATC  
ATTTGAATATGATGTGTACGCTTGGGTTGAACCGACAATATCGTGTCCAACGAAAATTGA  
CTCTACTGTTGCTGCTTTGACAAACCCACTGCGTGTTCATTTCTGACCATGTTCGGTTC  
AGTTTGCGCTATATATATGAAGTCTTCTGGACTAACAGCCAAATTAGTTGCTGTTCCAGT  
TCTAACTTCAGCGGTTGTCTCAACCCGGATAATACCGTCCAGAGTTCTTGTTCGCTTTTCT  
TCCATCGAGTTTCTTTGGAGTTACGATGGTATTGTCTGAACTAGATCCATTTCGCCTCAAG  
TTGGGTTGAAACACGCAATGTCCAACATTGAGCTTCTGTAGCAAGACTTATTCCAACAGA  
GACAGTGCTCCAAACGGTTCAGATTGGGTCAAACCATCAGTCGTGTTTACCGAAATTCT  
TCCCGTATTGTTGAAACGATTCTTCAATTTCAATGGAGTGATAATAGTTTAATCGTTTGT  
CGCAGTGTCTATCTCAGATGTTCGTGGCAATACGGGCAATACCTGCGAGTGTTTCTGTTGA  
AGTGCATCATTCAACTTTTTGGGAGTAATAGCACGGGTATCATCAGTTCCGGCATTGT  
TTCAGTCTGGGTTGCAATCTCAATCAGACCATGATTTGATTCTGTTCGCTCGACGTGCTCC  
CAATCTTTCGGCTGTTACAAGCAAAGGCCAAGTGGATCAGATGATCCCCCGTTCGACTTC  
CGCCTGTGTGACAATATAACCTATCCCCTTAGCTGTTTCAGTAGCCTTGAATTCATCCAG  
GGTTAACGGTGTGACAGCTTTCGACTGATCGGCTTTGTTATAACCAACAGTCCCAGCAGC  
TGACCGAGTTGTACCAGCTGTTCCATTTTTAGAAACCACGGCTAAGATACCGGTCAGAGT  
TTCTGACGCAATACGATTGTGCAACTTTTTGGGAGTCAACAATTGTTATGTCGCCAGTTGA  
GCCGTTTGCTTCTGCTTGAGTTGCAGTCTCCGCTAAACCACACCGAGGTTCCGGTAGCAGT  
TCTGTCAATTAAGTTTTTCGGAGTGACGATAATGTCATCCAAATAAGTTGAAGTGCTTAA  
CTGATTGACTTCAGCGGCTGTTGCCAAACGGGCAATGCCACGACGAGTTTCAGTAGCAGT  
CTTATTAGATAATGTTTTTGGAGTGACAATAGTTTCGTCATTCAGGTTATCTTCGTGATT  
TTTGTTACTTCTGCTTGATCCGCGAGAGAAGCCACGCCAGACGTTACGACGAGTTGT  
ATCAACCCGTTCAACTTTTTGGTTGAACATTTCCGATCATCCATCCGTATTGCGAAGAAGT  
AACACCCACCAGGGACGGGTCTAAGTGTGCGTACATTAGCTCGACATATGGAACGTAATC  
TGTGTCAGCACTTATAGAAATAGATGAAACCAATTCCCACCCATTTGTCATCCGGTATTC  
CGAACGACGCTGGAACCTGCATTTGACCTGTCGACCAAACAATCAGCTCATTGAACTGG  
ATTTACTCTGATTGTACAAGTTTGGCCTATTCTCAGATGATCCATAGTGATTTGAACACG  
GTCACCTATGGCTACTTCTCTGGAAGAGTCAGCACGGTGGTCTGACTTGGCAAATTACT  
GTTGCCAGTCACCAGAATGTGTCCAATCGGCAGCAGTGTGTGTCAGTTTGGTAACACG  
AATGCGTGTCTTTGGTCTCCATCCCATACTTTCCGAGTCAAAGAAGGAAAATCGACTAC  
GAATGATCCGTAACCAGAAGTGCGCGATTTCGATTTTTGTAACACCGGTTTCATTAAGATT  
GTGACCTGAACCTGGGCAAGTCTCAAGAGTCGAGTGGTTAATCGGGTTCATCCCATCAAT  
ATCATGGGTTGTAATTACATCGCCATGCCTAGTGTGATTTGGCAGAACAAGCCGAATTGT  
TCTTGCCGACGACGTCTCCCGGTAACCATCCCTGACTGCAACTGGAATCCTGGAATCCA  
TGGCTCAACAAAATCCTTGTTTATTGCTGTAGCTGCTACATCTACTTGCCATCTGTTTCC  
AGCTGCTTTATAGACGGACATATATTGGCAGAATGGGACAGTTGCCCGGAAGCGAGCGCC  
GACTGGCTGCCTTATATTCGATGACTGCTGTTCTATAGATACAACTTCCAGATCGTT  
AACACCTGGCTGACCGCCTACGTCCTTTATTACTAAAGTATCGCCATCGACTGGTGATGT  
TGGCAAGTTGAAAACCAGATTGTTGAATCTATTGTCAGCACTGATCTCTTGACCAGAACT  
CAACTGAAGTGAGGGCCAGTCGAGTTAATGAACTGCCATGTTGGGTCAACACGGAGACC  
AGTCCATTTTGTGACGTCGAAAGCTCGAGCCGGGGAAGTAATATCTGCTTTTGCGTAAATA  
AATTCGACGCTCGAAAATTACAGCATGTTTTGCATCATAACCACTGGTGCTGTCATGTTT  
GTAAATTGTGTTATATTTGTGGAAAAATCCAACGCTAACGCCATCGGACAAAATTGTCTT  
GTCGGCCATTGCAACGTTGATCAGTTTTTCGCCAGCTGCATCAAGGCCGCTTGTGGCGCG  
AAAGGCTTGTCTAACATTTTTGAAGCTCTCCTGTTTCTAACTTAGTTATTTATGTTAGT  
ATGTCTAGGTGTTCAATAAGAGAAATTGAAATGAACTTAAATGATTTTCATGGGTGAAACC  
ACAAAGGATGCTGTCAATATTATTGACGCATCTCAATTAATTATCGCGACAATAATGGCT  
AACTTTACTCCTGCAGATGTAAATGAGCTAATGCTCAGACATGTAATTCTGGATACGGTT  
CGAAACAACGTCAAAAAGTTCAAAAAACGAAAATCCCGAACTATTATCACATTTGACGAT  
TCTGCCAATGGTTATTGGAGACGTGACATTGCTTGGTATTACAAATTAACCGAAAGGCT  
AATAAAGAAGAATCTCCAGCTGATTCGGAACCTTCTCTTTAGTATTATCAATAAAGTGGTC  
AACGAAAGGCTTAATATCTACCCAGGTGTTAAGATGATCAAACCTTGATAAACTGAGGCT  
GACGATATTATTGCAGTTTTGGTCCAAACGTTACCGAAGAAGGTCGATGTGTTATGATT  
TCATCTTCTGACTCTGACTTTACTCAATTGCACAAATACAAGGGTGTCAAGCAATAATCA  
CCTTCTCAGAAGAAAACAGTATAGCCAAAATATGGTAGTCCAAAGCATGACCTGTTTGT  
AAGCTGATTAAGGGTGATGCAAAAGATGGTGTTCGGGAATAAAAGTTCGTGATACATTT



GACCTTGATCGTGTGGAAGGAGAACGTGCTCCACCTTGTCTACCAAGTGGATTAATTCA  
ATCGTTGAATCTGAAGACCCTCGAGCTGCATTGGAAAATGAAGAATGGCAAAGCGTTGG  
GATATGAATGTTTCGGTTACATGATTTGGATAAAATTCAGCACATGTTTCGGATCGAATC  
ATTCAAGCTTATAATTCTTCAGTAGTCAATCCTCGTGGTAAATTGTACAGCTATTTTGT  
AAAAATGGCTTGGTTAAACTTCTCCATAAAGTAAATCAATACTAAGGAAATAACATGAAA  
GAACAGAAGCAAAGAAAGAAACAGAACGAATTCACCCGGCTGTTTCATGGCGAACGTCT  
CCAAGAAATTATTACCGAAGCACTAAATCTGCGCACCATGCAAGAATCTTATGCTGAAAA  
GGTAAAAGAGCAGCTCAACATTGCCATTACTGAATGCGGTGTTGACGCCAAACTGTTCAA  
TCAGCTGTTCCGGATTTACCACAAGCAGGAACGAGAGCAGTTTGAAGATGCTGCCGATGA  
AGTTACTTCAGTGTATGACCAAACCTTTAAAGGCCAATGATGTCAAATCCGAACAATCTG  
AATGATAAAACCGCAAACGGGATAGAGATAGAAAATCTGGTTAAACTGGATTGACATAT  
CTGGAAGCATGTGTTTCAGTGGTTGGAAGAAAATCTTTAGAAATTAACCTCGTGCCACATA  
TATATCCCGCGAGCGGTAATTGACTCACTTTCAAAGAATGTGTTCGATTCGGACATGCTT  
TGACCTTCCATTGCAAATCGATGATACGAAATAGTTTGGACTTTTTGATGTGAGATTTG  
TATGATCGCTCTCCGATATCCGCCTAGACCTGATAGATTTATTAGTGCAAAGGGCGCGTT  
TATGCTTTATTTGATGATGAAACAACATATGGCTGGAAAATATGACATAATCAATTATAG  
TTGGAATATGAAAGTTATTGATTCTGCCTTTAATAAACGCAGAGATAAGTACTTCTTTGA  
TAAGACGAGCGATAAATTTACCTTAAAGACTTGACAGAGATATTTCTGGCAACGTTTTT  
GGAAAATTCAAATGGCTGGGCCGGAGATCTTGTCTTCTGAAGATGCAATGGCAGCCCATCG  
AGAATTGTTGGGAAGATACATCAGATTCCTGACAGATACAGGGAAGACCTGAAAAGCCA  
GGTGTATTTTTCCAATAAAATCAATGTTCCGATAGGTAACCTATTGGAGTATAATGAAA  
AACAAACAACGAGCCCAATTTCAAATTAACCTCAATCTGGCCTGATCAAAACAGAAACAT  
TTTTGGTTATTGATTCATTCCTTCGTATAATCGACAAAATCGATGAGAAAATGTCAGCTG  
ATATAATCTTGCAGAACTGGCATAACAAATTGGTCAATTACCGGAAATTGGTAGTAATAA  
ATAATGATATAGCTAAAGCCAAGTTTATTCAACACGTAAAAGAGTTTAAAGCTGAAGTTT  
AGCTATATCAAATTTGATGTAAAATGTAAAACGCAAAAACAACCTGTAAAAAATAAGATA  
GGAAAATAAATATGTTCAAGCGAAGCAATCCTTCTCAACTTCAAGCTCAACTGGCCGCAC  
TGAAAGGTAATGCAGGTGGTTTCGGTGGAGATAAGAATGAATTGAAACTTAAACTGATG  
CAGCTGGTAATGATCAAGCAGTAATTCGTTTCCTTCGCGGTAAAGGTGATTAAGGTCTT  
CGTTTGTTAAGCTGATTAACCACGGTTTCAAGAAAATAACAAATGGTATATCGAAAATT  
GTTCTTCTACCCGCGGTGATTTTGACAACCTGCCCGGTTTGCCAACCTCTCAGCCGCGATG  
ATTCTTACAACACCAACGTTGAAGAATATAAGCTGCTGAAGCGTAAGACGTCCTATTGGG  
AAAACATTCTGGAAATCAAAGACCCTGCCACTCCTGAAAATGAAGGCAAGGTGATGAAGA  
TTCGCATTGGCGCAAAGGCAATGGAAAAAATTACTGCCATGATCAACGTCGACCCGGAAA  
TGGGCGAAACCCAGTAGACGTAACCTTGCCTTTTGAAGGTGCAAACCTTCGTTTACAAA  
CCAAGAAAGTTGGCGGTTTTACCAACTATGATGACTGCAAATCTTGGCTCAATCCGAAA  
TTTCAAAAATGAACGATCCCGAATTCCAAAAGTTCTCCTCACTGATGGCATGGAAGATTTGA  
GCAAAAATCCTTGCTCCTTCCGAATTCAGCCTCTTGAAGAACTGCAGAAGAAATTCAG  
CAAGTAATGGGTACTTCCATCGCTGCCGGCTCTGCCGCTTCTGCCGCATCTTCTCTGTCT  
AGCGAACTGAATGACTTCGACGAACAGCTTACCTCGTTCGACACTGATGTAGTTCAGCCA  
TCCGTGCCTAATGCTTCTTCTGATCTCGATGACGATCTGGATGCTCTTTCGCGGCTAATAT  
AGAAAAGCAACCTTCGGGTCCTTTTTTTGTCATCACAATCTTTCAAAAGTAGTGTACAAC  
TATGCCATACAGTGTAGAATGTCTCCATCAAATCAACCAAGGAGTAATAAAAATGAAAGA  
CATTCTCGATTATCCAGTTGACATCAAGGGTTCGGATTTGCCACAAGAATTTCTCGCTTT  
GCACGTAAGTCGTTGTGAAAAGACGGTTGCCGCGTTTGGAGGTCAAGATGAATTTTTCGA  
ACTCATCAACACTAAAGCATGTGGCGGTAGGGTTTTGGACTATAAGGCCAAGTTTGAAGA  
AGAAAATGGCGTCAAATTCCCAGCAATATCCGATTCGAATTATAAGGAAAATTGAAATG  
TCAACGAACAAAGTTCTCATCAAATTCAAATCTCCTAAAGCTCGTGCTAAATTTGCAGCT  
TCCTCTGCAGGTAATAGCGCAATTGCTGAATATATGCAGCATTACGAGCTGATTGCTGTC  
AATAAAGGGAATGGCGATATTGTCATTCTCGAAGATGGCAAAGAATTTGAGCTCGATGGA  
TACTGGACTCCCGCGATTTTTATGTCAGAGCGTCGATATTTTGACATCGAAGTGATTTAA  
CTCAAAACATTGTTCAAAGGAAATATTATGAATGTTAACACTAAATGTTGGCACTATCG  
TTTACTGAATTTCTACAACACAAATATCCCGAATCTTTATGCCCGTATTTCTGGAAAGT  
CGTGTTTACGATCGCATGGATCACCGGCTCTATTTACTGCTCAGTGCTCTTTTACATC  
TATTGGTGCCAGAATCTTCGAAGGACTTGGCTTTGCCCTCGATAATATGGTATTGTACTG  
GAGCCTTGCCGCTGTAGTAGGTAAGTACTGTCACCGTCACATCTGCTATTGTGCTGGTTGTCGC  
AGTAATATTCGGACTTGTTTGGGCCAAAGAAAATTTCAAGCCACCATACAAAGACGAACC

GGTGATTATCACCTTTGTCAAGCACAAAAAGTCTAAAATTTGCCCGCGTCTGGAATTTGA  
AGACAAGAGCAAAAAGACTGAAGAATAAGTTCGCAACCAGTGAGGTCATGATAAAATGAC  
CTCACTAAAATAAAACAATCTCCGGCTTATAATGTTTCACTAAGTAAGGAAAGACTAATA  
TGATTATTAATAATGAACGTCAACTGGCTTCTATTCGCAAAGTTCCCGATCTTCAGCCGA  
TCCCGGGTGCTGATGCTATCGAATGCGCAACCATCGACGGCTGGGAAATAGTCGTGAAGA  
AAGGCGAATTTCGAATTGATGAGGATTGCGTATATTTTCGAAATTGATTCCATGCTACCGA  
CACATAATCCTGCTTTCAAATTCTTGGAATCCCGTGCCAGCATGTCCGAAGGCAAAATGC  
GAGCTCGAGTGAAGACCATTAAACTTCGCGGCCAACTTTGTCAAGGTATAGCTTTGTCCG  
TTAACGCGTTTACCATCGGAGAAGTGGTCCGGTGTATGAAATGGAACAAAGTCTGGACC  
AAGTTCTCGGTATTATCAAATATGAGCCGGCTCAAGACGGTTCTGGCTGTAACCCGGCCG  
GTACTTTCCCTGTTTTTCATTCCGAAAAGTCAAGAACGCTGCCAAAACATTTTCAGCA  
AATACAGCGCTCGTTACAAAGATGTTGTGTTCCAAAAGTCTCTGAAGCTGGATGGTAGTT  
CTATCACCATGGCATGGGTAACAGATCCTGACCTGTCCCTCGCGCTTGGAACCGAAGATG  
AACCATATGCTCACGATTACGACGATGCTCACTTTATCCTAGCTTCTCGTAATCCGGTTC  
TCCGCTATAACCCCGAAAGCAAGTGGTGGATGGGTGTTGAAAAGTACCAAATCATCGAGC  
AACTGAAGAAGATGGGCAAATCTGTCGCAATTCAGGGTGAAGTACGGGTCTGGTATCC  
AGAAAACCCGCGAAAAGTTCGACAAGTACCGGATTTTCGCATTCCGTGCCTGGTTTATCG  
AAGAGCAACGTTTTGCTTCCGACGAAGAGTTCACGACCTGTGCCGTGCTCTCGGCATGG  
AAATGGTGCCGCAGCTTGGTCGTTGCAAGCCGTTTGAACAAATTGAAACTGTCAAAGAAA  
TGTTGGCTGATGCGGATATCCGTCCATCAACCACAGATTGCTGACGGTCTCGTTTATA  
AGTCTGTTGACCTCGTAGATGGCGAGATTAATCACTTCAAAGCAATCACCAATAAATTCT  
TGTTGAAATGTGAGGACTAACATGAAAATTAAGAAATTGCAACCTTTACAAGTCTTGTGT  
CCGAAATGCTGGATAATTGAGGATTATTGCTACTGCTATTGAGAATTCTATGTCTAATAG  
ATTGGGGCTGAAATGCCCTATTCTCTTGAAGAGATGAAACATATATCAAGTCATTTAAC  
CGAATCCAACACGGAGGTCCAGTGTGATTAAGCCGTATTTGCTTTAGGTGTACCGTCCG  
ATTTTCATAAGCATGGAGTTTTTGTATTTGGTAAAGATGGCGATTTACCATGGCCATCGA  
TCCCGAAGACTTTAAACTTTTCAGGCAAAAAACCGATGGGACTATATGTGTTATGGGTG  
CAAATACATTCCAGTCGCTCCCAAAGAATCTTCAGGGAAGGGTAATGGTTGTAATTGGCC  
ATCCTAAGCGTGAGTGCCGGAACAAATCAGGTGAAGTTCCTCATAATTTTCGTCAATCTTG  
ATATTGACTGGATTTCTGTGGTAAAAGAAGTATATCCAGCAAATGATATATCGATTATCG  
GTGGCCTTGGTCTGATTCTGTGTCAGTCGCCACAAGTGTGATGAACTCCATATCAATTTTC  
ATATGCTTACTTCTGACTATGATACAATTGACCCAACAGTTTATATCACTGATACCGCAC  
TAGGAGTTTTCTGTGTAACGGAAAATGAATACTATCGCGTATCGAGTTGAACGTGAAC  
ATTGCACCAATATTAAGCAGAAATTTGGAAATGATTCAATACGCCGATTTAGTATGCGA  
TATTATCACCAATGGGCGAAAGAAGACAGATCGCACTGGAGTAGGCACCCGTTCCGGTATA  
CGGTCGAATGCTTCGCTTTGACCTCAGCAAAGGCTTCCCGGCCACCACATGCAAACGTCT  
AGCATTGTTCCAGTCGTGGTTAAATCGCTGTGGTTTATGCAAGGTTCAACCAATGTCGA  
GCATCTGCGCAAATTGACCTATGGCGAAAAGTCTGATCGTTAAACCATCTCGGATGATAA  
CTATAACAAGCAAGCCGTTGATCGTGGATATTCTGATGGATACCTTGGTCCCGTTTATGG  
CACGCAATGGCGTATGTGCGGTAATAAAAACCCGGTTCGATCAACTGCGAAATGTGATCGA  
TCAAATCAAAGCAAACCCCGACAGTCGTCGCTTTGGGTGCTGCATGGAATCCTGAAGA  
TATCGAAAATGGCTTTGCCTCCATGTCACCTTTGCGCTCCAGTTTGAAATATATGAAGGC  
AAACTCAGTTTGTGCGGAGCCAACGTTCCGTGCGATGTTGGTCTTGGTCTGCCATTCAAT  
ATTGCGTCTATGCGCTTCTTGTCCATATTTTAGCTCGAATTTGCAATTTGGAAGTTGGT  
GAATTGGTATTCTCTGGTGCAGATCTCCACAATTACGAAAACCACCTGAGTCATCACGGC  
GGTAGGCTTTCTCGTGAAGAACGCCCTTTGCCTACGTTGAGTTTCCCGGATATTGACAGT  
TTGAGTGATCTGCGTTTACTGGAAGAAGCCGATTTCCGTCTGGACGGGTATGACCCACAT  
CCAACAATTAAGTACCGAAGGCTGTGTAATGACTATATGCACCGTTGTAACGTCAAG  
CACGAAAGATGTGACGTTTCGTATACAGCGAGGCACTATATGGGGTAATCCAGACGGAGAA  
CCCCATTGGAAACGGCAGGATTATCTTGACAATTACAAAAGCATTTAAACACCAAATA  
AAAAGTGGGGTAATTACTCTTGCCGATTTAGAATCACTACGAGGCAAGAAATTGGGGTGT  
GGTTGCAAACCATTGCCATGCCACGGAGATATTCTTTCTGATCTAGTTAATCGCATGTTT  
AAGGATGTGTCAAGCGTAGATGATTTTCATATGACATTAAGAAGACCGGATTCATTCAGA  
TAGCAGAATTGACCATAGGTAACAAACGGACGTATATCCAGAGATTTTGTAAAGACCCA  
TCACTAAAACACATCATTTATTTGTTTACAATTGATGATGAAGTTGTGTATATTGGTCAA  
ACTAAGAAGTTGTACAAACGAATGGACTCATATGCTAATGGCAAGTATTGGAAAATACG  
AACAAAGTCACATATCCAAAATCCAAGTTTCTGGAAGAAGCAGTAAACTCGGGTAAGAGA

GTTTGTGTTTGGATAAAGCATTGCTTCCAAATCGTTATAAACCCTCTTGCTGGGTCAAAC  
GTTATAGCTGACCTAGACGCGGAAGAGAAAAATTTATCGGGATTTTTAATCCTGTTCTAA  
ATTCAAACTGAAGGTTAAATTATGAGCAGAACAACCTGAACTTTTTAATAACTTGATGTC  
TGTTGTTGAAAAATCCGAAAAGCGCAATTTCTACTTCAAGGACGTCATTACGAGTATGGG  
GACAAAAGCTCGAATTTTCAGCTATTTTATCGCTTCATATACCGATTGGGTGCAAGATGA  
TGCTTTGGAATGTCAAGGCATTATGTTTGAGCTAAATGCTAAAAACGAGGCAGTTCGAAT  
CATGGCTCGCCCAATGCAGAAGTTCTTCAATCAGAAAGAACACCCCATGACCATTGGGCT  
CGATTAAGCTAAGATGATCTGTTTGATGGAAAAACCGGATGGGTGCTGATTAGCAGTTA  
TCATGATCGAGGCTACGTTTAACTGAGATCTACAGCTGCGCTTTTCTCCGATCAAGCCAA  
TAAAGCAATGGTGATGTTTAAATTCGCCTGCTTATGAAAAATTGCGCGATGCAATTGTACG  
AGCCGGTCCCGATTCTACTTTCAATATGGAATATGTTGGACCAAGCAATCGGGTTGTCCT  
TCCGTACGAGGAAGATGAATTGATTGTTCTCAACGTACGTCACAATGAAGCAGGTCAATA  
TGTAGAATTTTCTACTCTGCTGGATGACCCATTGATTCGTCATCGTATGATCGGGGTTTA  
TCCTTGCCCGAATTGGAGTAACTTACTCCCAGAAGAATGAGAAGCTGAGACTCGTGCCGA  
GACCGATGTTGAAGGAGTTATCGGTATTATGCCAGATGGCCAGCTGTTCAAACCTGAAGAC  
CGACTGGTACTCCTCTTTGCATCGTACCAAAGACTCGATCAATAACAATAAGGCATTGTT  
CCAAGCCATCAAAGAACGTGCTTCCAACGATCTTCGTGGCCTGTTTTCCGATGATAATGT  
CGTTTTGGCAAAAATCGAGGCCTTTGAATCCGCTTATATTGATACGGTTGCTAAATACCA  
CAAAATTTGCGCAGAACTGTTTTACGATTTGCGAGGTTTTGACCGTCGAAGTTTTGCTAT  
CGAAGCACAAGCGAGAAAGAAAGAATGTCGGTATCTATTTAACGTAGTTATGCAACAGTA  
CGGCCGCGATTGGGACGGCGAACTCGCTGTCGAGAAAATCGAAGAACACATCATCAAAGA  
ATACGCAACATACGTTCCAATGGCGTACCGTTGAATAAAGTTGCAAAAACCTGTGTACATT  
TGACGTTGTAATGCTAAGAATAAATCCATAATCAACATGGAGTTAACCGAATGAATCATT  
ACAATTACACCGTCGAAATTCTCATCAACACGTACGCTATCGGCCGCGAGTTCGGATAGAA  
TTCGAATTTTCGACAAAAACGGTAAAGTTGTAGGGTATATTACTGATTTGCGCAAAGCTG  
CTCATTCTGCAGCCGAAAAGAAAGAAAAATCCTAATCGGACTCTCGGGAATACTATCAAC  
AAGCTAAAACCTAACATTGGCCCAATGGTCAATGAAGTTGTGAACGAGTTGAAAAATGTTT  
TTGCAGGGACACCCGAAAAGGTGTTTATTAACGACACGATGCCGAATGTCAATTTTCATGG  
GAGCCAAGTTCTATTTTATCTTGTCTCCACTGACTGACAAAATTCGTGTATACATCAGTC  
ATAAAGATCCATGCCGCATGAAGTATGTTTTCCCGCAACATGCCAAACTTGATATACGTC  
AAAGCGGAAAAAGCATTGTTGATTGATGGTTTGACACAGAGCGAAGGCATCGCTCTTGTC  
AAGGATTCTGCGGAAATGTTGTTAACTTTGAGTTCTCTGCTCGGTTGGCTAAAAAGAAAT  
GCGTTATATCTCATCATAATGGTCTTAAATGGCCAGTATGATGAAAAGTCAACACGACGAA  
ATCTCTACGATAAAAAATAGTTTAGAATCGATGAAATAATTCCAAACTAAGTCGTATGAG  
AATGCAAAACCCGTCCTGAGGCCCTGCAGAAATCTCCAAAAGCTACAAAGCAAATGGAA  
AAAATTGCGGAAAAGAAACCGCAACTATTAGAAAAACGAATGAATATGGGCTTCCAGAAG  
TTAGCTGATCAACTTCAGGAGAGTACGAAATGAGGAATATCGTCATTCTACTCGGATGTC  
TCCTGATCACATCCTGTGCATCTAAGCCCATGTTGCCAAAACCATCGCCGATACACAAAC  
TCGATATAACATGGAAAGCAGCCGAAAATGGAGCTTTACTAAGTTTTGAGGATTACAATA  
AGTTGGGTGTATGGTTAACCCATGTCAACAGATATATCAAAGATCAAAAACAAATAATTC  
AAATATGTGAGGATACAATTAATGACTGAACGTTTCGCATCTCAACAACCTCATTTTGACT  
GTTGGTCCCTACTTGTTCGGAAAAGGCATCTGGGCAAAATGAGCAAGTTAGGACAAATCCT  
ACGAAATACGTTAATTTGACTCGTGATGATTTTCGTTTTAGCCTTTTTGGCTGCCGGACT  
TGATCTGACTACAAGTTCAATAAGCATACTGAGCAACTGGTAACGAATGCTATCCAAAA  
GCAGCGATTGAAGCTATTGCCATGAGCAAGACTATCATTATTTCCGACACCAATCTGAAT  
AAGACGACACAAGGAACCTGGAAAATTTGCGCAGATACACATAACGTTGAGTTTGTGCTGA  
AATATTTTGCGCCGGGCCTTCTGTCTACTCTCATGGAGCGTAATCGCTAGAGGCGAGCGG  
GCTTTGCCTGAATTCGTTGTGAAGCGTCAATATGTCCAATATATGGTTGATTTTGGAGGC  
CAGCGGGTTTATACACCTGACTTTGCAAAACCTCGGGCAATCATTTTTGACCTGGATGGC  
ACCCTGATTGATAACAGCCAACGGCATGCCTTCTATTGGTAGAAAGTTCTGGATGACACT  
CCCCGTGACTCTGTCGTAGAACTTTTCAAACGTAACGTTTCATCGCGGTAATGCTTGCATT  
ACCGTTTCTGGCCGTGATGGTGTCTTCTGCAGCAGCTTCTATCAAGGCTCTGAATAACGCC  
GGTCTTTTCCCTGCTGCCATTACCAACGCGCTGCAGGCGATTCTCGTTCTGATGATATC  
GTAAGAGCAGAAATTTTCTGGCAACAGATCCAGCCCAATAGGTGTGCTGTTTCGTGCAATC  
GATGATCGTCAAAGGTTGTTGATATGTGGCGTCGTATCGGGCTGGAATGCTGGCAAGTT  
CAACCTGCTGATTTCTGATTCAAAGGCCCTTTCGGAGCGCATTTTTGTAAGAAATCAAT  
CAAAAGTAGTGACAGGTCGGTTTAGTGTGATAATATCGTCACATGAACAAAATGGAGTA

AAAAAATGTTTTTTGACACCTACGACACTGCGCTGGCAGAGTTGGAAAAGCGCTGCGGCG  
AATTCCAGAACAAAGTTAAAGCTCGCGACAAAATGCGATGGTTTTCAATAAGTCAAATTA  
GCATCAGCGAATTTGAGTAGATCGTCGCCAATGGTGCAGGCGGGCGTGACAATTATCTGT  
TTGCAATTTTCGTTGACCCAACCTCCTGTGCCGAAGTTTATCATCAGCTGCTCTCGGGTAA  
TCGCATCAAAGATAACAAGTGTATTACAACATGCCTATATCGTTGCACAAGAATCTCATTG  
TGTGTCGTGGAAAGTAGGTGCTATCATTTCGAAAGATGGTTCGAATTATTTTCGACCGGTTA  
TAACGGAECTCCAGCTGGTTGCAACCATGCCAATTGTGATGACCATGCGAAGAAAAGTGG  
TTGACTTGACTCTTACGGTAAGCTGCGAAGAATGTATCGGCAAGCACACAGTGAATGGTC  
AAAGGCAAATGAAATTCACGCAGAATTGAACGCCATTCTGTATGCAGCGAAAACCGGGCA  
AAGTATCGATGGTGTGAAATGCACGTTACTGTTTCTCCGTGTGCAGATTGTGCAAAGC  
CATAGCTCATTTCGGGGATTAAGCGAGTCGTCTATAATGGGTTATATGATCGTAATCCGCC  
TGGCTGGGATGACATACTCATTAAAGTCTGGAGTAGAAGTAGTGAAAAACGAACAGCCTCC  
CAACATTATCAAGAAAATTTACACCACCAGCAACCAAATTTGAGGAATTTATTATGATCG  
TTGAAGTATCTCCTAACGCCGAAGCACTTGAAGTCAAATTCCTTTGAAGTTAATAGCGTCG  
CAGAAGCTGCCGTTCTGGGAATCGATCCCGAATGGGTTGACGATGTCAAAGCCGTGCTCC  
AAGTTTACAAAAACCAACCGCTGTTTGGTTATTATCCGTGCCTTATCGGTTTTGTCACTG  
GTCATCCGGACTTTGCGGATGGTAAAGTGATTCGCACCTTCTACTGTAGATATGGTAATTC  
ATACTCGTGGTGAGTTCGAAGAACGTAATCGTTTTCACTCGCAATTCTCGTTATGCGG  
TGATTAATGAAAATTCAGCTTGATCCTAAAGCACTCGAATCACTTTTCCCCGAAGGTTTC  
GGAGGCTCGTGTAGAAGTGCAAAATGCAGTTATTGCTAACTTCGCAAAGAAAATGCAAGA  
AAAGCATCTTGAAGATGTAACACGGGACCAGATTCGTACAGCTGTTCAAGAGGCTGGTGT  
TTCGATGGATTCATTTCCATTGGTCGTGACATGCTGAACAAAACGATCACCAACAACGG  
TTGGGATGCATCAAGTGCGCAATTGAAGACCAATTCCAGTTTGGCTCGTGCTATCCATAA  
CTATGCCATTCAGCAAGACCTGAAATTGATGAAGGGTATGGAAGCATGGGCCAATGAAAT  
GGTTAATAAAGAAGTGGAAAGCGCGAAGAAGCTGGCAAAGGTTTCGTTGAGCATTACAT  
CCAAGAAGCTGAAATGAATAGCGCAAAGCAAAGAACCAAGCTTTTGCGGAAAGCGAATC  
TCGGATTGTTGCTGCCTGGAAGCAAATATGCCGGAAATCATTTCGTGCTGAGTTGGTGAA  
TTATCTGAGCAAACCAATACTGTAAGGAAATAAAAATGTCTAAGCAATATGTAATTC  
ACAAATGCTGTTCTCTATTTTGGCTGACGGCGAACATGAAGTGATTTTTTCGAAAAGCAGA  
CGATTCGCATCGGGTAATGCTTGCTACTCGTGACACTGTCCTGATTGAGGTTGCAGAAA  
AGGTGATAAAGCTTTTACGGCAACAGAACCTGAAGAAAAGAAAGAACGCAAAGAATGTAA  
TCTTTTGAACGTCGTCGTTTACGAGTTGGAAGCAAGAGCTTGGCGATCGTTCCGAGTCGA  
TCGACTCGTATCTATCAACGGTACTGGTATGGCCACGCTGGCATCTCTTATTGGTGCTCA  
ACATCGCAATCAACTGAATATGGGTCACATCGAAGAGCGTTACGTTTCTACCGAAAGCAA  
GGTTATGTGAATTTTAAATCCGTTGACCCCGATGAGTTGAGCGATTTGGTCGAAAACCTC  
TTCGCGATTTGAGCTTTTGTCCGACGAACACGGTACCAATACATGGTTCCTTGTAGACGA  
CGAATCCAATTTTAAATCTCTGCTGAAGTTTGAATACGATGGGATAACTTATAATTATC  
CCATCAATAAAACAGTTAAAGAGAAAATCATGACTAACGTAACACCTATTGCTCAATTTG  
AAAGGATTATTCTTGAATCAAAAAATTTGGCATCCGCAGGTGATGAAATCATTTTCAGATT  
CTGAATTTGTTCTTGGAAAACGCGATCTTCTGAAGTTGCTCTCACTGCAGAGCTTATCT  
CAGTCGGTAAAGACGTACCGAACCATTTGAAAGTAGGTATGCAAGTTTTGATTCCAAATG  
GCCGTATGCACAATTTACCCGATCCTCGTTATCTGTCCGGCGAAATCAGTGCGAACAATA  
GTCGAAAGCTGTCAGCATGCCACGGGAAAGATATTCAAGTCCTGTATGCTTAATTGATTG  
TCAATATAAGATTAAACAAATTAACAAAAGGAAATGAGAAGGGCTAAGAAAAAGAAAGC  
AGTTGAGAAAAAGTACAAGCTCCCAAACTGGCCGTCAAGGTTAAAAGCGTAAATCCAA  
CAGCCGTGTTGATCAAGTTGGTGTGCTCTGGCAGCTCGTGTTATGCGCCAAGTCAAACA  
TGTTGATAAGTGTGGTCAGCCTAAGCACGAAGGTTCGCAAGCGCCAGAAGTGATTAGTGG  
ACCTTCGGGCCCCATTTTATTTTAAAAGCGGTTTAAAAGGAAATATAATGCAATACGA  
AAGACCGATTATTTGACTGAAGTCGACGGGTTTTGGTTCAATGGACAACCTGGCCTCGC  
ATATTTTCGCTCAGAAAACGGCATTTCGGACCGACGAATTTTTGAAAACCTCTGATCGACGA  
TCGATTCCGCACTGGTGAAGAATTGTTCCGGTGTCAACCCGCGAATTGCAAATATCTTGAT  
GCGCGATTATAACAACCTCAGATTTTCGTCAAATATCTTTCTGGATATATCGATGCAATCGA  
TGTTGTAAATCGAATGAAAGATCCATATGACTTTATTGCCATTACTGCGCTAGGTGATTC  
TAACCAAGCTCTGCTCAACCGGTGTTGCAACCTGAACACACTTTTCCCGGGCGCGTTCAA  
AGATATTCTGTGTGTTGACATCGGCCGAAACCAAATTGCCGCATTACATTTCCGTAAAGCA  
AAAATATAAAAATCGTTTGGTTTGTGTTTGTGTCGATGATTTGGTAAGTAATCTCCAAGATTG  
TCATGATGCCATGTCGCAAGTGCTCAAATTCATATGCTTTCGAACTGCAGGCGGGCGTGA

AGTAATACATGATATCAACAAATACCACTCTGCTAAGAATTGGTGCGATGTTGAAAAGCT  
ATTAGATCAACTTGATCCAAAACCAAATACAATCAATTTGTACATCATTTCGACTTGGCA  
AGATAAACCTACCGTCTCTGAGGTAAAATGAAATGCATATTTTAGACATTCTGAACGAAA  
TTTCCTCAACCGATTCGTCAAAAAGATAAAGAAAAAATCCTGAATCGCAACAAAGAAAAT  
AACCTTCTCAAACTGTTTTACCCCTTGCGTATAACCGTCAATTAACGTACGGCATTACA  
CCAAAAGGTTTGAATTTTCGGCGGTTTCGGTGGGACCTATGAGTTTGGAAAATTTCTGCTTG  
GAGCTTGTCAAAAAATATTCCACCCGAAATTTGACAGGTAACGCGGGTATTCACTACATG  
CAACAGATGCTTGATAGTATGTCAAGTGCTAGTTGTGAAGTTGCCAGACGTATTCTTTCA  
AGTGACCTCAACTGTGGAGCATCTGTTGCTCTTGGAACAACAAACATGGCCCAGGCATCATT  
CCTGAACAACCTCAGTTTCTTGCAGCACCATAACAGGGAAGAGAATTTGAAGAAAATCCGT  
TGGCCTGCTATTCTCAATTGAAAGCCGATGGTGCCCGTTGCATGCCTCTCGTATCTGCG  
GATGGCTCACAGGTATCAATGGTGTACGGAACGGTAATGAATATCTGAAGTTGTATGAC  
ATTACATCACAGTTGAAGGAACTCGCTCAGGTTGTACAGAGAGACTCTGCAACATTATGGT  
GATTTTGTATAGACAGCGAATTGATTCATCGAGCTCCATTCTCTGCCTCCATTAACG  
GCTAAACAACATACTGGATGATCTGTTTGGAAATTCCTGAGACAAATGATGAAGAAGAA  
ATCGAATCAGATCGACACAAGTCCTATGGTTTAAAGTGATAAAGCTCAAAATGGAACAATT  
AGCGACGTTGAACAATCCGAAATGATTTTAAACGTATGGGTTATTATTCCGCATGAAGTT  
TATTACGAGCGGAAAAGAGCACATTGTACTACGAGAATCGATTTGCTACTCTTGCTTGC  
CTGACTGAAGCTTTCGATGGTACCCAAAAATATAAAAACATTCAACTCATTGAATCCGAA  
GAAGTTGAGACATGCGAGCAAGCTATAAAAATTTATCAGAGATATGTTGATCAAGACCGA  
GAAGTTATCATTCAATAAAAATAAAGATGGCCTGTGGGCAAACGCTAGAACAACCTGACCAA  
ATCAAGTTCAAGGTAGAAGTAGAAATTGATTTGAAGATTGTGCAAGCTTATCCTCATGGA  
AAAGATGCGTTCGAAGGTAGGTGGCTTTGTTCTGGAAGATTCTTCAGGTCAAATCAGGGTT  
CGTTGCGGTTCCGGCTTAAAAGACACAACCCATAGAAAGGTAAATGACGCTAAAGTCGAG  
ATTCCTATCAGCGAAAGGCATGAATATGACCGCGAAGCGCTTATGCCGATAAAAAATGAG  
TTGATCGGCCAGTTTGTTCATGCAAATGCAATGGATTGCAAGAGAGGCAGGGGCGTCAG  
CCGAATGAAGCAAAATTCAAGCTGTTTCTTCTTTTTTCCAACCTCATCCGAGGTGACAAA  
TCAAAACCAAATCATAACCAGGATGTTTTCCACATGCTATTCTAGACTGAAAAAGGCCT  
TCGGGCCTTTTTTCGTTTCTTGTGTACATGTAGATTTCGGCTTTGATAGTATGAATACG  
TACACAACCTATTGGAGAAATTCACATGATTGTTAAAGTTTCGATATAATTTTGAAGGACAC  
ACTGGCGAAGCCGACGACGCTCAAACCGCTTTTGAGAAAACCACTGAAGTTATGCTGTCA  
CAGCTTCCCCAAAACAGAAAACACGTTTTACGCCACTGTTCCAAATGAAAGCCGTTTT  
GGCAGCGGTGATATTCGTGCAATGAAAGTTATCCGTATGACCCGTGTTGACCTCATGGCT  
GTTCCGGGCGGACGACTTCGAATTTCCGTTCTTTGTAAAAGTATGTGAATAAGCTCCTTCG  
GGAGCTTATTGGAGACAATTATGCTAAACCCTTCAACTGTTGTACCTGTGGCTATTGAAA  
AGCCCATATTTTTCAAATCACATCCGTCATTCGGCGGATCTACCGCGGACACAATAAATT  
CCCCAATAACTTTAGAAGAATTCGAGTGGGCATGTAAAAACGTCGAATACGCTCATGATG  
TTAGCAGCCACAGAAACATGCCATGGATGAATTTGGGATTGGGGTCATATGAGCAAGTGC  
GGCTAAATTTGACTATCATGGTAAAAACTCCCAGATATAATCAGAATGTGCAATCGTA  
TAGCGGAGCAACGATAACCCGACAGTGGCATGTGTATTTTGAAAAAATATGACGACTACG  
TGTCTAGCTATTGCGATGAAGAATTTTCAAACGTTTCTGCTGCTTTGCGGTCTGGAATAT  
TCGACGATGCAATAAAAAGATTCGTAACCGAGTGCATACGACGGATGGATTCACATATAG  
CAGAATCTGAAAATTTAATAAATCTGTATGGAGAGGAATGTCTCTCAATAAGGCAGATT  
GTATTAATTTAAAGATAGTGGGTCTATTCTTTTAAAAATTCGGTATCGACATCATTTT  
GCCCGCTTTTTTCACTTACGGCATTGCGCAATGCAGATATCTCGATTTTAAACGAAATCA  
CACGCGAAATTGTTATCGATGGCGACCCACATCGACCTGTCATAAACATGCACATTT  
ACTGTCATAATGTGAAACACCTGATTCCGGGAAACCTTAGTCCCTACCCGGAGGAGTGCG  
CAGTAATTTTGGAGAAAATGACTGTACTCGTAATAGATGAGATTTTCGAATATGTGTCTC  
ACGTCGACAGTTTTTGTGTTTAAAGCGAAAGCGGTTCCGTTAAGTCAATTCAGTGGAA  
CAACATTAGTAGTGTAATAACATTTTAGACCTATAAGGAAAACAAAATGATGTTATTTG  
AGATGACAAATGAGCAATTGGACGAGGTATTCGACGGTGGAGTTGGAAAATACCGTGTGG  
TCAATCTTTTGCGAAAGACAAAAGTTCCGTATGTATTAACATCCAAGTTCTGGTTTCAG  
AAAATCTGGCTTTGCGATTCTGTAATTGTACTTCAAAGGGTGATTCCGCGAAGCAGGTCA  
AACCTGGCGACAAATTCATGCAAACACAGGTCATCCAGATTTTCAGCAAAAAGGGACACCAC  
AGGTTCTGAGAGATGCTCTCGGTAGTGACCCCATGGCGCAATGAATATGATAACTGACA  
AAATCGTTAATATGCTTGTACGGTATAGAATGGATGCAACGCTTCTGATGTTTCCGACAA  
AGGAACTGAAAGGCCAAGCTAAAAATATTGCGCGAATTACATCCCGGCTTTTGCAAAAAC

GATCTGGTGGAAAGTTTATTGTTTTGCCAGAATTGTTGAAAAGAGGCCAAAAAATATACAT  
ACATTATGATTTACCGAAAATCAACAGGAAGCACTAGTGTCAAAGGATTGGAAACTGATC  
CTGAGCTTTATACGGTTTCATCTACCAGTGTAGGCGATGTCGTCATTGATGTGAAAACCTG  
GTGAAAAAGTCAAAAGGCAGAAGCTATTGCTGGGTCAATTGAAAAGAGAGAAGAAAAAC  
CCTCTACTAAGTCAAGGACAACTTCAAAAATTCCACGTGGATATTTGATCAAGGCATTCA  
CAACCTGTATTGCCTCTTCGGACAAGGAAAACAACACTACTACGACCCTTTGGTGTGGCC  
CAGTCGAGAAAAAACCGCAACTAGCGAGGCTGAGGAAGCAGATATCAATGCTTCTAACA  
CGATAACCAGAGAACAATAACGGAAATCGCATTATTACAAATTCTCTAATTTAGCCGCTG  
CTAATTGTCTTGACAACATTGACTTCGACAAATATGATGCGTCAAGCCATGAATTGCTTG  
CTCTCTATGCGGAGACGGTTCGTCAAACGTCAGAGAAAGCCGCACAGAAATGGGTAGATG  
AAAAGATTCCGGATGAACATCGGGGTGTGAAGAAAGGAAAAGTCGATTTTCATGGTTTATA  
AGGAGGTGAGACGCGCTATTATCGAATGGGCGAATTATGTTGGTAACAAATTTGATGATA  
CTGTCCGCAGTGTTAATATGAGAAAAAGATTGCCACCTGAATGTGTTGATGCTATACAAA  
CTTACACTTCGATTGACTATCGTAAGATTAATATTGTTTTTCATCGCCAAGGTAAAACCAT  
CAGCTAAAACCGTAAATGATATACAGAATCTCGACAGAGCTTTTGACATTGCAGGAATTA  
AACTTCTGAGAATCTCACCTTTGGCGGGGTATAACATGCCCAAATTATCCAGCTAAAG  
TTGCTTTGGAAAATAAAATGTATTATTTTTCTAACTACGTGTCTAGTTCTGCTGTTCCCTA  
TTGTATTTTTAGGTGGGTCTATTACCGAGCATGACATTGACATTCTTAATGCTAAAGAGA  
ATGATGACGCGCAGGTTCGAAACAGCCAAAAAACACGGGGCTCATTTTCGATTTGCTATC  
AAAAATGTCCAGGTCCCAGCTCTTATAGTTAACGGGATGTCGAATTATACGAAAGAACGC  
GAAATTGTTCTTCCACGCGGAACAATTTCTGAATTTTAAAAAGTCAGTAATCTTGGTGAA  
TTACTTCAGGAAAAAGGAAATATCTGATAGATTGTTCTGCCGTTCTCAAAGTCAAATC  
GACGAAACCACAGAGATTTACGACGGTGAATTTGCTAATGCAAACAGGCGAAGTCAAACCTG  
ATTGAAGGTTTTTCTGGATTCATGAAATCTCGCGAAGATGAAGAAAAAGAAAGACTAAAA  
GCTGAAAGGATACAAAGAGACAATTAATTTGTCAACTCTCATCGACTTAGGTGGAGAAAGC  
AAATTTGTCCAGGTAGTAGAATAAAAAAGGGAGCCGTATGGCTCCCTTTTTGTTACCCAA  
ATGAACCAAATTTTGACAACCATCCACCAGCTTGTGTTGCCGAGTTCAGGTAATAAATCAC  
CCTTAAGCCAGTCTTTAAGCATTGCTTGATTAACCGCACCTGTGTTTCATGACTCGATACG  
CGAATGTAACGTCAAACGTTGTAATAGCATTGTTATCCTCGTAGGTAAGTTCAGGTTCTG  
ATACGCTAACAGGTATGCATCCATTAACATCGTAACAGTGTGGGGTATACCGGCTCTCG  
AGTGCAAATTCATTTGTATAGCTTCTTCAACATCAGCAGGCAGTCAACGCAGTCCGGTGA  
CAGGGTCTTCGACCGCATTTACACAATCCTGCATAGCCCGTTCATTGGCAGCCTGATGGT  
CCATTCTGAAACTAATTATGAGAGGATCATACTCGCCCCACATCAATTTGATGTTTGGAG  
CGTTGTGAAATTTGTCCATTTCATAATTTAGCCGGTTTTCTGGTATTTTTACAGAATAAA  
CCGTTAAACCAGTATGTGTATTGCCAGCAATGAAAAAGTCAAGCAAACACGTAGCGACTT  
CAAATGACCAAGTAGGGACTGTATAGTTTCGAAACGTCATTGCGCCGATCAAGTATCTCG  
AAATACCTGATTTGCGTAGGATACTTTTGTGTGCCTTGAACATGACTTTGTTCAAAGTG  
CTCGAAAGCATACTTGTGTCAACCCGGCAAATCCTTCCCAAATGGAAGATTGTTATAG  
AGATATGCACCGAATCCATCAAGCAAATCGGTTTGTGTTTAGATGATGGGGTTGTTGCGAA  
AACAAACAGAGAACATATTTGTTCTCTGAAAGTCTTTATTCCATTCTTGTTGAAATTCATC  
TAATGTATACATGATTATTCCTCATCATATAGATTAGATCGATTGCCGGCAAGAATCTCT  
CTGAAAGTGACTTCAAGTACAAAACCTTGAAGGCAAATTAATGTGCTATTGCTAAACCGCCG  
AAGAGACCGTCAGGGCTCTTATCGAACCGTATACTTTGAATTTGCGCTGGCCCAAATAAA  
TCAGATCGCATATCAAATGAACTTGTGACCGAAATTTCTAATAGTCCAAATAATTGGA  
TTGGAAACAACGTTAACATTACTCAAAAATGATGTTATTTCTTTCAAACATCGTAGTTTGA  
CCATGAGTTGCTTCTGGTGTGAGTGCGTTAATGAATGTTCCCATGTATGCTTCATCAAGA  
GTGCTTTTTATTTGACTCTCCGTTTTGACTTTTCTACTGCTCCGTACGGGTAATACGAG  
CGCATTTTCGTACATTATCAAAAATTTGCATTAGGTTCGTATACATTACGAGGCGTTAATTGC  
CAGGTATATGTTTTTGTACGATTCTCTGCGCCAGCGTACAGTGCCCTCGATGCGATGTAT  
ACTTGCTCACCACGGTCAGCAAATGCTCCCTGGGTAATGGACTCCAATCCACCATACAAT  
GCATGAGAAGCCATCGAGCTCAGTGCCCCGGTCTCAGAAGTGTGCGCTCGTTCAACCAAGT  
GATTGCTGGACATCATTGAATTTATGGCTAATTGTATCTACATCTGTCTGTCCCAGAGGC  
ATCAGGATGTTAGCTATGGCTTCCTTGACAACACCCTTACGATAATCGCCAATGTTATTT  
TGACCTGATCTGAACGAACGCAAATCCCCAGTCTGTCTGCCGGCATAAGTTAAATGCTGAC  
AATGTCAAACCGTTTTTATACAGATCATTAAACATTGAAATCTTACGCAGAGTCATTTCGCT  
CAATTTCTCTCGGCAGGGAATTGGGCAATCGCAATTTTGCTAATAGGCCCGCGAGGTGAA  
GAACCCGTTGCCAGGTTCTCTCCTTTCAATATTAGGCCTACAACAGCCTGAACCCCGCCG

TCTAAAAGTTCAGTTACTCTAATAAGATGTTATTTCCCTATACCAGGTCCAGGCGAAGATG  
TTCTTGGAGCCTGGACATATGTCTGATTCTGATTTTTGACAATGTTAGCCTTTGTGTGAT  
CGTTGTTTTGACTGGCTGCCTCTTGCTTCTTGCTTTCAACTCTCTTCACTTCTTTGTCGA  
TAGTTTTAACAGTCGAAAACCTCTGGTTCAGGAGCAGGTTTTATTGCTGCTGTCGGCACAA  
CCAATGTTTTCTCATGCTCGGCCAAGAATTAAGTCTGTTTGTCTATTTCCACTCTAAGTT  
GTTCATAAGATTCCCTTAGTCAAATTACCTTCTTGATAAGACTGTTCAACTTCATTTCGAAC  
GATCATCGAGCAACTCGCGGTGTTTGTTCATAAATTCAGGCGAAGTTTCATTCTTTTTAG  
CAGTAACGCCAACATGGTTTATTTTCCCGCTCAGAACGTCATATCTGCCAAATTGCTCTA  
CTGTAGCTTTTTTGGCGATTACCATGCGTTTTTCACGCTTTTTCTTCTCGTCCGGGGTTT  
CTTCATCTTCCCCATTCACTTTACCCCATTTGCTTTGTAACCAATTAAGTTCCGGTGTAT  
TTGCGTCTTCAGCTTCGCGTCTTCTAACCCGGCCGATTACTTCTTCTCTTCTTCTGAAG  
GAGTATATCCGACTTCTTATGTAGCAACTGATCTTGCAGGAGCTTCGAGCGAATCGGCTT  
TTTCATCTGCACCGAGAGCTCTTAATATAGTTGCGCCAAGTTTGGCCAAACCGAGCTTCA  
TCATATTGACCATATATTTCAATTTGGTCAAAGGCACCTTCGGCAAGACGAACAAACATTT  
TTGTATATTCATCACTCTTGAATAAATTCATCAGGTTCGGTTATATCTCCATGAACATTTT  
CAAATGGTGTGCTAAAGAGCCCAAGTGATTTTTAAATTGGGGGTAATTCTCTTCAAACA  
TTTTAGTGCAATGAGTAAAATGACGAGATAAAACGTCAAATGTCATAATCAAGGAAAGCA  
CGAGTGCAGCCATTTTGGCAAATGAGAACGGCAGTCAAAGTGTATTTGAACAACATTG  
AACTTATTGAATCGGCAACGCTAATAGTTTTCTTAAAACCATTATCGACTGACGACACAA  
TACGATCTCCGATTCGGTCAATCGCACGTTCAACATTTTCTTCTTTGTCTGGTTAACTT  
TATCCTCTTTTTCTTCTTCTTCTTGGGTTATCGTTTTTTAGGAATTTGATATCTTCAGAAA  
TAGTTTTCAAATAACCTAAAACCTGGGTTATTTTTGGGTGTTTGTCTTCTTCTCTACTA  
TCTTTTTAGATGTTTGGTCCCTAGTGTTTGTGCGTAATTGGACTTTTTTCACCATCCG  
CTAAGAAATTATTTTTAGCTTTTCAGCAAATTCAGTTAGTTTGCTAAATGTTTTCATGG  
AAGTATCTGAAATCTCTTTCAAGTGTTGATTAGAAATTTCAAGTGGCTTCTCGGAAAGTT  
CTGTTGCAGCAGCATTAGTTTCGGTTCAGAATTGTCGTTAACTATTTTACGAAGTTCTG  
AATTACCTTGTTCAACTGTTTCAGCTCTAAGCTCAGATGAAGCTAAAAGATCGCCAGTGT  
TGTTTGGCGGATTTTCAAATCAGTTTTGATATTAGATTGCTCAGAATCTCTTTGCCTAT  
CTCTTCCAAGTCTCTTAGTGTCTTTTGTAGTAGCCATTAATTAATTCGAATAATGTTTGA  
GCCACCATTTATTTTGGCAAATGGTGTATCAAGTGAAATAGTAGAAACTATAAAATCTGC  
CCAATCCAATACAAGCGCAGATGCATCTTCGAAATTAAGTAAAACCCGCTTTTTTCTTT  
GTCGTATTGCTTGGTCAAGTCTGTCCAATTTGCTACAAACGTATCAGTTATCATGGGAGG  
TTTGAAATTCAGAATATTGCCGTTTAGCTCGAATTCATATTTTGTGCTAATATAAGCTTT  
GTCATATCAACGTCAAACCGTTAATGGTTTGAACGGTTCGGCAACTTTTTGTTGAATGC  
CAGCAGATGCAAAATTACCATATCTGGTTCAGCGGCAGTCAAACCCGAGCGAATAGAATC  
AAGCAAGTCGATCATACATGAGTCTACACCCTCCATATCTTTCAGCAATTTGATATGCCT  
GAAACCCAGTTTTGGAAATTGTGATCTGTTTTCCATTGACTTTTATAGTCTTAACTGCAGG  
GATAATGTTCAATTTGGGTTTCATGTTATTTGCCTTTCGTTAAAATCTGTATGAGCTTTC  
GAGTTGTTGAAAAGATACATATTTGTTATAGATTGCTCTCTGCTTATTTTCATATATAACT  
GCATCAACGAAATACTCGCCTCTAAATTGATTCTTTTTGATCGTAGAATTCCAAACGCATG  
CCTGGTACGAGACCAAATTCTCCGTATGTTTTTGTGCTGTGCAATACGCATCGGATTCTGAA  
AATATTAGAGACCTATTGTACTCTTCGGCACCAGCGCGGCTTATTTGGTCATAATATGCA  
CCAGAACTGCTAAGACAAACTGAATTTAGCCCTTCGCCAGTAACAACCCGAGTTTGCATT  
TTGTTTGTGAAGGAGTGAGCATAAAACGAGGATTCTCGGATGGGTTACGGGTATACGCG  
TTTGCTTTTGTCAACCATTCAAATCACAGCATATTTTTTATCTACCATCGCAATAGTT  
TCACCAAACAACCGCGCTCCGTCACGACGGATTGAATTGGATCATTTTTGCTAATAGAT  
TCAAAAACCTGACATATGAATGCCTAACATATATTCCCAGACGAATGGAACACTTTCGTAT  
CCAGTCGTTTGGCCATGTGACTAACTAACTTGTAGTATGCATTTATGTCCAACACCCAA  
TTTGTCAATTGGCACTCTAGTGCCGATCGAATTGATTGCCGGCGCGAGTTTGGGAGTTCCA  
GAATACCAATAATCTATCATCTCGTTAACGGATGCTACAGCATCATTTGTAAATATTCTG  
CAAACCTTGAAGATTACGTACCGAATGTAATGAACCAACTGGAGTGTTATGATGTTGTGCG  
CCTTTCATATCTACGTTTGGAGAAAGATGTTTGTGATGCCATACAACCGGTTATAAGTTATT  
TCAGTGTTTCGCTGTTTTGAGAGATCTTTGGATTATTTTCATCACCAGTCAAACGTGTCTGT  
AAACCGTTTGAAGTCATAAATTAGCAGCAGCCCTTCATTTATACCATTGGTTAGACCATCT  
CTCATGGTCATGGTAATAAAAGTTGCTGCTAATTCAATAAACCTATTCTCCATCCAGGCA  
TCATAATTCTGGTAAAGTTTTATAGAGACGTTGGGATAACCAGCGCGTTGTAACATTAAT  
TTTTCTCTTTAATTCTTTTTCCACCAGGCTGAGAACAATGGACATTTTCGACTGGTAGCA

TATTAATTATGTCGGCCAGAGAATAGTCATGTCTTACTAGCGCTCTGTTTATCTTGTA  
AATTGAAAATTTTCATCAGGACTAACCAAAACCTCAAACAAATGGAGCATATTAGTAAATT  
TGATGTCATAATCTTTACAACATTTGATTTTTTGGATTTACTAAAATCGGGTTGAATGATT  
TTGATAGTTCAACAAATTTCTCGTTTGCAATCATATCAACCAATTGACTGCGCTCATCTT  
CACCCAGTTCATCCCAGGTGTATTCGTTGTGCCCGTCAAATATCCTATCAACAGTCTCAT  
AGAAGAGTTCGTCGGGTGAACCTGATTTACGAGGCATACGAAATTTGAACGTTATGTTGT  
TTACCTGCAACTCTGGAGTTTTTAGTGGCTCTTGTGTGTCAGCTTCAATCTAAGATTGTGCA  
TCGACTTGGAGTGCGGGCCTGTGAAAGTTGCGTCCACAAGTGATTTGCCCAAACCTCCAG  
AAAAAACTATCAGAAAAATATGTTACGTTCAAACGGCGTATAATCCGGATACATTTCTT  
CTAGCAAATCGAAAAATATCTCAGATTTCTCTAAAGGCTTACTTCTCATCTCATTCTGA  
TCAATAATAAATCACGATATACTGAAGCTGTTATCGGTTTAAATCTGTGTGTGCCGCTCG  
GAAGCTTTATGCGGATTATATTCATTATAGATACACTCCTTTTAGGTTATTTAAATACAT  
TTAGGAGGACTGTATGGACATTAATAATCCCAGTTGGAAATAAGCAAGTAGAAACTACCAT  
GTTGTCCGGTGCCCGAATATCTGTCTATCGTAAATGATGCAGATGAAATGATTCCGAAAAT  
CATTTTCAATAAAATAGGTGAGCCGTTACCGAAACATCTAACTGAGCAAGCTCTCATCAA  
ATTGATAGCGATCTAAAAGAAAAAAGTCATCAAATGACATCAGAGTGCACGCTATGTCA  
AAAAGAAAAAAGTTTGAAGTGCATCCCGATAATGTCTGTGTTTCTGACGGATTGGGGCT  
ATCGCATGGCGCTGGCGGAATGGTTATCAATATGAGATACCCGATGATGTTTCGAAGATCG  
GGATATGTTTGAAGATGATAGACAGATGTATCGTGTCAATTTGAATATGCAGATCAGCAATA  
CAAGTGGGAACATTCAACAGAAAACGAAAAAGACACTTTAGTTAAGCATTGACGTTTTTC  
AGATATTGAAGCTATCGTAGAAAACTTCAATCTCCACAGGTATATGCTGCAGTTCCAAT  
CGAGTGTGAATGTGGAAATCAATACCCAGCGGTTATAAATGGTGCTAGTAAATTGTTTCGA  
TTCACTGGGGGTAAAATGAATATAAATCTGCTTTATTCAGATCTTGACCCAGATTTGAAC  
AAATCGTGGGACAATGATGTGTTAATGACACGAGGAGCTCGTGCCGTAAAAAATTCTATC  
ATAGGGATTGTTTCTACTCCCATTTGGTGCAGACCATTTAACCATACTTTGGCTGCGAC  
TTACCAGACCAGCTATTTGAAAACATTACGCCGTTGGTGATAGACACGGTTAGACGAAAT  
ATTCATACGGCTATACTAAACTTTGGGCCACGTGTATACAATCTTCAAGTCGACTCAACT  
GGAAATTACGATAATAACGAACATAATTGTCAATTCGATTTTCAATTATCGATAATCCA  
GCAGTAATAGACGAAATAAAAATGAACTTTCAAATTAATTTAGCCCTCTTCGGAGGGCT  
TTATTGTACGAAAATGCAACAAAAACGTCACTTGGGAAACAGCATAAATAAAAAGGCAGT  
TGAATTGCTGAAAAGAATAAGATACTCCAGGAAACGGGATGTAAAAATCAATACTGGAGC  
CCATGGCTCCAACGAGCTTGCTCGTTAATTCTTATCCTTTTAGTTATAATATCTATTAAG  
CCAAAAAGGATAAGTTTTGGCAAGGCCAAAACCTGGAAGCCAGATTTTACTGTTCAACTA  
TCGATTTATAGTGTTATACTGGCCTCAACACTAAAGGAGAGTAAAACATGATCATCAATA  
AAATTCAAGAAGTTCGTATGTCTTGTGCGGAAGCTTGGCTCTGATGGCGCTAAAGCTGCAA  
CTCTTCTCGGTCTAGTAATTGGCCAGATCCAGCAAACCTGGAGATAATTCCGACGCTGCAG  
TAATCAAAGTAATCAATTCCTTTTGAAGGGAATTCGCGAGCGTATTGCTCCAAAACACA  
ATCAGCACGACCTCGGCAATGCATATCGAGAAGAAGCACTTCTTCTCAGTTTATTCTC  
AAGCCATTACTGACGAACAATAAATCGGTCGTCAATGGTAAAGCTGTGCTAGATCTTT  
ATCGGGTGCATGGCCAAATACCAATCTTATCACTGGAAAACCTTATGGCACAGCTGTGAG  
CCGGTGTGAAAGATGGAAATAGGTCTATCCCTGACGCTGCTTCGTTGAAAAAACATATCG  
AAGTATACATCCCTATCGCTTTGGACGTAATTGGAGAATAAAATGAACGATGAAATTTGC  
GTAGTATGTAACAGTTAGTTCCTAAAGCACTTGTGTTTACACATCTTTTGGACCAGCG  
CATCCTGGTCCATGTTCTTATTATGTTGAAACTTTACCTCTTTCAGAATCTACCGGAATT  
ATTGAAGAGACCGAACTTCTGGTGTAAAATAAAAAGGCCTGCATACGCAGGCCTTTGTTT  
TATCAGGAGTCTTCAGGCGGTTTCGTTTCTTCTCTGGCATTTCGAATTTCTTCTACGG  
CCAGCGATAGCATCTCGCACCGAAATATCATCGGTGGGTGTGAATTCGACTTCTCTAACT  
CGTTGTTGTAATATTTTTCTAGCTCATCTAGTCCTTCTGCTGTTTGACACGCGGCAATT  
TTAGACATAAATGAATCCACTGTTGATTCTGCTATAAATTGCTGAAACATTCCCATTGCA  
TCCCTCCTATAACGAAATATTATGCAATGTGTAATTGCATTTTTTCTGACACATATCTTTA  
AATACGTTCTATTGCGTGTGTCAGGGCGTAATTTTTCTTTGTTTATTTCCCATGAACATT  
GATTATGCCAATATCGTCAAAAATGTCCATACTGTAGCAATACTCTTAGATGAAAGCTT  
TCTCAAAACTCGCCCAATAGTTTGGAGAACAGTTACCTTTGATTTAACAGGATGTGCAAA  
AATTATATGATGCAAAATTTTTGGTTGACACACCAGTAGAGAAAACCCATATGAAGCTAC  
GAAAACATGACCAGTTCCACCTTCGGCGATGATTTTCATTTGATCACGGATTTCCGGTGT  
TGTATCTCCAGATATAAAATGAACTTTACCTGGGACATGAATCTTTCTAAGCGTATTGTA  
CAAAGCCATACCATGCGCTTTCAGGCGAAACATAACAAATGCATTTTTCATTTTTGTCTGC



CATTTTTTTAGCCATCGAACATACAACTTTATTTCTTTTCGTATGATTCGTGATAATTTT  
TATTTCTTCATCAGAAGAAAATTTTCTGGCAGAAGTTCGATCTTCGCTCGAATAACCACG  
CTGAATTGCTTTAACTTGTAATCATATACTTGGCCCTCTTCCATTAGCTGTTTTGATGT  
TACTGGTCTAAATATATCCCCAAACATGGCAACATATTGCAAAATGTTTGCTCTCCATC  
TCTCAGAGAACCAGACAAACCGTATTTAAACGGTATATGATCGACGGATTCCATGATTTT  
CTTTATTGATGTCCCAGTTGATAGATGACACTAGTCGTTTCATAACACAACCGTATTGGTC  
AAACCATTCTTTTTTCTGCTTAATGGCAGATTGCCAAGTAGAAACATAGATCAAAGCATT  
CGACTCTTTTACGGGGCCCACTTTTTATCCCAAGCATAGCTTCTCGAGGGAAAAGACGGTA  
ATCGACAAAGTCATAAATCATTGGTTGACAAGAGATGTCGTTGGAACATTGACAAGAAC  
TTTGCCTTTGTAATTTTCCAATACCACAGAGACAGCAATCCTTGAATCAGCGATTTACC  
AGCAGATGTAGGCAAATTTAGCAATTTTCTTCTTGCGCATATCCCCTCATAACAACATC  
AGCCTGATACCAGTGAGGAGTGATTTTGTGTTACCAGAATAAATATCTTTGCTGTTTAC  
CCATGCATCAAATTCGGAACGTGAAATACTTTGTCTTTCCCTGATCTACGGGGTCGACAAC  
TATTTTATAATCGTTCAGCTCGGCAAACCTTTATTGCTTGAGTGACTAGTCCATAAGGAAG  
CAAATGATCATATCCTAGCAGGAATATGTCACCAGACCAACCTCCACACTTGAAACGCCG  
AGAAAATTGATAGCCACCTGCTTTAAATGAAAAATACTCCCGCATTTTCATGGAAGGTGCA  
GTCTTCGCAAACAACCCTGGCATAACTGTAGTTTTCAAATACAATACTTATCATTAAACG  
TCTCTTAAATAAGTCATATAGTTTTATTTATACAAAGGAATCACCATGAAACAGCAACTT  
TTAGTCGCTCTGATAGCGAATCTCAGATTTGTTCTCTTTCTGCCGCAGAAGGCAAGAAA  
AAACTAGCAGATTATGCTCACAAGAATTACGACATTAAACTCGTCAGAAACAAGTCCTTT  
GAAAATATGATGAACGAATTTGTATCTGCTGTCAATCCCAATTCGAGGCCGCTCGTGCG  
GAAGCTAGAGATGCTGAAGAACTATCGATATGGGAGAACGTGTTGACATATCAAAGGGG  
ATTGAGCTTGACCCTGATAAACTGGATATTGAAGATGAAACATCTGAAACAACAGAGCAG  
CCTGTTGTTGCTGAACCATCGGTCAAGATTGTCGATCAAGACCAAGTAGAAGAAAAACCG  
GCCATCCCATTTTCTGAGTTGAAAATTGAAGCCCCTACAGCAACTGAGACAACACTACCCAA  
GTAGAAGAAAAACCGGTTTCTGATTTTGTGTTTGTGATTCCCTGAAGACTATCCGCCAAA  
TATCGGCTGGTCGGACCAGAAGGCCGCGCATTATTAATGTTCCGTATTGGATACACGAT  
TGGATGCAGGGAAGAAATTGGAAAATTGAAATTGCAGAATGTCAATATGACAAAGAGCTG  
TTGAAGTCATTGGCATTTTACATTGAGCGAGACGGTTCTGTTGCCATTCGCGAATCACGA  
AATAGCAAATTCATCGTTATTTTCATAAACCAGGGGTCTATGACCCCTTCATTTGTTTAAGG  
AAAAAACAGTATGGCAATTACTGCTTCTATCTCTCCACTTGATCCATCCGGTTCGGAAGG  
TAGTATTGTTGACTTTACCGTTACTTTTAGCGGGGATGACACGGGTAAGGAAGTTGTTGG  
TTACGAATGGCTAATTGACGGCGTTGCTCAAAGCGGAGAAACGTCAACTACTTTTAGCAA  
AACCTTTGATTCGGCCGGTTCGTTTACTGTAAAATGCAATGTGACAGATGCTCTTGTTGC  
TGACGACGGTGCTGAGCCCGTTGTTCTTGGAGCCGAGAGTGCTGTGACCGTCAAGAAGT  
ACCCGCACTTGATGGAAAGCATTGGTTCGTTACCCCTTGGCTTTCAAAAACACTAGAGTTT  
CTCGTGGGTTCCGTAATGGGTGCACTACTGGATGGTAGCGAATCCAACATGGCGTCCAGC  
ACCGGCAGAAAGTCCTTGGCTAATCATTACTTTCTCGATTGACCAAGCGGTGGAGGAATA  
CGGCGAATGCTTGATGCAAGAATCCCGTAATGGGTACACTTACAAAGCATCTGCTTATAC  
CAAGTCAAAGGAGCCTCCGGGCTCCTTTTTTGTTCACATTTCTAGAAAAACGAATTATGA  
TGGCTTTGCCAACTTTGGGAAATTCACAAGGTTCCGAATAATTAAGGAATCTTCCTAATC  
GAAAGTGAGCAAATTATGCTGAAATCGGCATTAGAAAATGTGATTTTGGAAAATAGTCAA  
GCCATCGAAGGCAAAGTGCTTGTACCGATGCCAAGAAAATGTTCACTGACCCGGATTTCG  
CCAATTCATCACAGAGCCAAGAACCGTGATGAGCGGTTTCAAATCCAATTTCTGTGATTTG  
ATGTACACTGCAGCAACTTATCCAGTTGCAATTGACGGCCCGATATGGGAATCGTCGTAT  
TCCATGATGTATCCGATGATTCTGCGTAACCATTTTGGTGATTTTAACTCAATGGCCAT  
AATTTACGTGACGTTATTGATACTCTGCTTGAACCTCAGGCTTGAAATCAAAAAGAAAATG  
GCTCTTGCGCATCTGGCAAACTGCGTGACTGTCCAGATGACGGTGTGATTACAACAAA  
GCACAGTGGTACACTAAAGCTATTTTATGTTTGATGTATGCTCGATTTGCTGATGATCGA  
GAATTCGACATCGAAAAAGTTGTAATAAATTGCAAAAAGCGAATAGAATCGAGCCGCAATT  
TCCATAATCTCATCCGGTGGGATTTTGTCTCAATGCCTCAGTCGATTTCATATGTTTATGCT  
TCCGCAATACCGATTACTTTTTCTGAGACACAACATAACGACAAAATATTCAAAGATAGTG  
ATTTCTGAACACGGATACGTCGCTGACCCGGGCAAAATGCATCGAGTTCGTCTGCTAACA  
GAAAAAATCAAAGATCGGCTGATCAAAAACCAGCGTCAACAATTCATGAAATAGTTGTAC  
AGTGACGGGCTATGTGTTATGATAGTCCCATCAAATCTACCAAGGAGCATATCATGAGAA  
CAATCCACTGCAAAGCCGACTATGTGCGAGTTTTATCATGGCTAGTGTACACTCGGCCTTA  
AAGGTGATATGTTTCTTCCGCCTAAAGCAACAAACACGATTTCCGAAAAGGGCCGGAAAA

AGA A C T T G G A C C G T G T G T T T T T C A C C A A A G A C C G C G G T C A A G C C A A G G T T T A T G C T A G A C  
G T G C T G C T C T T T G T A T T G G C G G C G A G C C A A A T C T A T T T C G A G T T A T T G C A C C G G T T G A C A  
C G G T C T T T A T G T C T G A A A C G C C G G G C G C G A C G G T T A C C A T G C T G C C T G G G C T T T T G T T G  
A A C A G A T T C C A T T T G G T A A A T T G A G C G A C T A G A A A G A T G A A A T T C A C G A C A A C T T A C T T C  
A G T T T C A A A A C A A A C C G T C C G G A C C A T A T C A T C A G C G G T G C G A T A G T G C C A A A G A C A A A A  
G A A G A A T T A A C C A A G G C A T C A A A G C T T A C G T T G A T T C T A T T T G T C C G G T A G A A G A T C G G  
A C C G A T G A A A A C G G A A A T G A C A C T C T C A A A A T C G A A G A G G G T G C C C G A C T C C C A G A G T C G  
A T G T G T T C G C G G C C A A T T C A A G T C A C T A T G A G G T A A T C G A A A T G A G A T A T A C T C A A C A G G  
A T C T C G C A G A T G C C A T T A G C T T T G C T G T G G G C G T T C A C A T T G A T C A A T T T G A C A A A G G C G  
G A A A T C C G T A T A T T T T G C A C C C A T T G A A A T T G C T G C A T T G G G C C T G C C A T G C C A A T G A A G  
A C G T T G A T G T T C A A A T T C T G T G C A T G C T T C A T G A T T G C G C A G A G G A T A G T T C G C T G G G T G  
T T G C A G A G A C A C T G G A T T T G A T C G A G A T C G C T T T T G G C A C C G A A A T G C G T C A A C T C G T T G  
A T A A T C T G A C G A A G C G T G A T G G T G A A A A A T A T G A G G A A T A T C T T G A T C G A A T A A A A T T G A  
C G G T C T G A T C C G C G A A A G T G A A G T G C T T T G A T C T T A G A C A C A A T G C T G A T C T G C G C C G A C  
T G A A A G G T A T T A C A G T C A A A G A T C A A G A A C G T A C C T T G A A A T A C C A A G T C G C T A A T G C C A  
A A C T G A A T A T T T G G A T T C A A G A G C A A A A G G A A G A A G A A A A T G C G T A A T A T T T C T G A G G T T  
T C G T C A G C C G A A A A G G T A C A A G T G C A T T T C A T G T T T C G T G A A A T G A A G C A T G G A T T C G T T  
C A A A T C G C C A A A A T G T A T G A C A T T C G C G A G A C A A A T G T C A T C G A T G T T G T C A A A G A A G T T  
G A T G A A A T G C G C G A C A A T C A T C T G G A A G C A C T T A C C C G A G A G C C G G T A G T G T A T C G G A A G  
C A C C T T G T G G A T C C C A C A C G G C A T C A A A A T G A T G G T C G C T T C A A A G C T C G G A A G C G C G C T  
A A A G G C G A A G C T T T T G A G A C T T T G C C A T C T A C A T T G A C T C C C G A G A A A T C G C T T G A G A T T  
T C T C A A G C C T C G G C C A A C A T G C C C G T C A G G C C A A C A A G A G A A G A G C T T G A A G C T T T G T T G  
A A C A A A T T C A A C A C A A A C T G A T G T A C A T T C T C G G C G A T T T T G G T T A A A A T A C T C C C A T A A  
T G A A A A A C C G A A A T C A C G G A G T A T T A A A C T G T C A T C T C G A A T G G A T A T G C T T A T A C G C T C  
C A A T G C C A T T G C T T C G G C C T C A G T C A A A G T T C C T G A A C C T G T C A A A A A G C A T C A T T T T G A  
A A T T C T T C G A G G G A A G C G C A G C A C C G A A A T C G A A G A A A A A A T T C A A G C A G A G C G C G A T G A  
A G T T G C T C G T C A A A T T G A A T A C A T G G C T T T C T T C A G A G C A A A T A A G C G T T A C T T G C A A C C  
G T A T C A A G T A A A A G T A A A A A G C T G C G A A G A G C G C G G C T T A G A G T G G C G T A T A A C T T T T C A  
A C A A T T T G T T G A A T T G T T G A A A G T C G A A A A A T G T G C A T A C A C T G G T A C T G T T T T C C C G A A  
A G A C C A T G G C C G T T C T A T T G A G C G C A T A A A C C C C A A A G T C G G A T A C A C G A T G G A A A A C G T  
G G T A A T C G T C A T T G C T C G T G C A A A C A G C C A A A A G G C T C A T C T T G A C C A A T T T G T T C A C G A  
A G T G C A T A T C C C C G C T G A T A T G A A A G T C A A A C T T T T T G C G C A A A G C A A T T T A T C A A T T G G  
A G A A A A A T A C A A A A T G A A T T G C A T T A A A C G T T T T G A A A A C T C T A T A G T A C A T G A C G A G T A  
G A T G G T A T T T T C C G A G A A C T G G A C A A A T C A A A G T G A T T T T G C T G C C A A A A T C A T C G A A T T  
G T T C A A T G A A A A T A C T A A A C A T G G T G G C T C C G C T C C A A T A G T T G A G C C A A T G G G A A A T T G  
G C C A T C T A A G A G C T A T C T T A G C A A C A T G C C T C G T T T G T G T A T G T T G A A A C G C T A T G G A T G  
G G A A C T G A C G C A C G A T T A T C G T C A C T C G T G C A A A G A C A A T C C T G G C A A A A T T T T G A C T G T  
C G A A G T A T T C G G C A G C C C T G A A G C G A A A T A T C C T A C A T C A T T T A T G A T G A A A T A C G A A A A  
A G G A T T T A A A T T C A A A T T G T T T T G A T A A A A G A A A A G C C C C G A C G A G T C G G G C C T T T G T T G  
T A T T T G C A A T T T G T A A A T T G A T C A G A T T A G A C C G G A A T G A T T C T G G G T A A T T T C A C A C C T  
A A C A T A G G T G A C A T A T C A G A T T G A C C T A C C A A G T C A T C C C A A T C A T T A C C T G T T A C A T T A  
C G T T C A C C G G A T T G A C C T A T A C G T G T A G T G T A C G G G T T A A G G G A T A A A C C A T A C C G A A G C  
A T A A T G C C A A C A G A T G G T T G C A G T G A T G T T G A G T C A T T G A T A A T T T T A T A A G C A T C C A A A  
T C A T C T G C T T C A A T A T A C G G T G A A T A G A A C A T C G T A C C T A C G T G T T C A A T A T G A T T G A C G  
T A A T G C T T A C A G C C A G T G A T C A G A T A G T C A A A T G A C G A T A C C G T A T C A A C A T A C A C T T T C  
A G T C C G T T G C G C A G A G T T C C T G C T G A A A G A G G A T C T T C G T T C G C A T A C A T T C A T C C G G A T  
G C T T C A A G C A T A G C A G A A A C G C G A G T T G T A C A G A G A A C A T A G G T C G C T T A A T A T G A T G T G  
T T T C T C A G C A T C T A A T T T T T C A G T T C G C A T G C T T G T T G A T A C A G A G T T C T T C C A A T A A C C  
G G G G C G T C A G T G C T A G C G G T T A A A T C C A G G A T C C C A T T T G G C T A A A T A T C T T C T A C T T T A  
T A G C A G C G C G A A A C G G T T A T A A G A G T C T G A A T A A T G T C T T T G T T A A T A T C A T C A C A T A T C  
A T A G T T G A C A G G A C A T C A T C G A C T A C G C C T A C A C C A G C C A T T T T A T T T G C T T C C A A A T C C  
T A C A T C A A T T C A A C A C T T A T A T T T G T C T T A A G T T T G C G T G T G C G A A C T G G A A C T G T C C A C  
C G A T C A A A C T T G A A A T C A G T T G C G A C A A A T G A T G A T G C A C C T T C A A A T T C T T C T G C T A A T  
G C T G C T T C A G A C T T C A T T C T C A G G T T G A T G A G C A T T A C A G C A T C A C C G A T T G C A T C G G C A  
A T G T T T C C A G T T G A C G A T G T C A A A G T G A G T G G G T T T G T G G C A G T G T A A A C C A C A T C A T T T  
G A A T C T T T G A A A C A T A C C C C T T A G C C A T G G G A G T G T C T A G T T G C G C A A G A G G A A T C G A A  
T C C C G A T C T C C G A C T G A C C C C A T G T A A G T T G C A G C G C T G G A G A A T G A T T G A T T A C C G G C A

GGGTTTCATATATTTTCACACCGTACAGTGTGGAGGTTGGCATGTAAGTTTCTTGAATTGCT  
ACCATATCGGTA AAAAATCAAGTTGTTTGC GGCCCGGGTCAAGCCGACAAGGGCAGGACGG  
CTCGGACTATTTGCCCGGTAGTTGTTGCTTCAGAAATCAAATCGTTAATGCTGCTCATA  
TTTTTCTCTCATTGTTCTGCGATTATACGAACTCGTGAATCGTGAAGTTTGACGTTGAT  
GAAACCAATTCCAAGCACCACCATTTCGTGGCATAATTTCCGTTTTTATCAACACTTATT  
AATTAGTTGCAGTTTATTGTCTGCGAAGCCTGCCAGATATTCTGACGACAGTCAATGTA  
TCAATATTTACCCCTGCATTAACGGTGAGTTCCAACGAGTTTGCAGGTTCTGCATCACCA  
AATGAGCCAGTGATTGCTATTTTATATTTAAGTGACCTGACGCGCCATTTGCAGCTATTT  
GGCATGTCAGTATTCCATTTTGGAAAGATTCATGCATAGAGGACATAACTGGAATATTTG  
ATTTTATTAGCAGCATATATTTTTCCTTATGCAGAAAAGGGAGCCCGAATGCTCCCTTAA  
CCATTCCTTAGTTGTGGAACCAAGTCCTTTTGAATTACAGACCTTTAACCATAACACGGC  
GGAAGTAGGCATTCTTACCAACGCTGTGCGCACCAGGCATACCATTGCTGATTGACTGG  
TTGGAGATTGGGTGCGGGATTTCAGCGAACGTGTTAACACGGATGGCGTAACTAGTCTTGA  
AGCCCATGACCGGTTGGTATTTCTTCGGATCAGAACCACGCAGCGGGGTCAGTGCAAAGT  
ATGGGCAGTAGGAGATAACGGCATCCAGGTTGTTGGCACCGCGGTACCCCATGGTGAAGT  
AATCTTGACGGGCGTATTGGTCTGTGTAGACCTTGTAACGACCACCAGAACACCAGCGA  
ACACACCATTGGTAGTATCAGCGTTCAGGCCAGACGCCATACCTTTAGCAGCTGGGGTGA  
TACCAGTATCAACCAGAGCCAGGACAGAACTACGTTACGAGAAGCGATGATGAAGTTAC  
CAGCACCACGACCAGTTTGACGAGCAATTACGTTAGCTTCCTTGTGACTTGGATCAGCA  
GAGCTTTGTAGCTTTTCGCCAGCCCAACGAGCACCACGTACATCGATCGGGTCTTGGAAGT  
CAAACACACCGCCAGCAGAACCTACAGTTTGAGTCCAGCCAGATTTACCAACTTGAGCGG  
TGTAGTTAATCCAAGCGATCACTTCACGGTTGATTTCCAGCATAACTTCGTTAGCCAGAA  
TGCCGTTCAGCTCGCTGTCAGCATCCATACCATGAACAGCGCGCAGGTCTTGGGCCAGTT  
CGATAGAGTATTGAGCTTTTCAGTTGACGAGATTTTCGCTTCGACGGTTTGCTTGTGATAC  
GGACGCTCATTCCGTTCTAAGGGTTATCGGTGGTTCCGTTAAATCCTTGACGAAGTTCGG  
CGATAGAGGTAGCCATACCTTCAGCAATTTTCAGCCAGTTTCGCAAGCAGCAATCTTGGCAG  
TAACCAGGGCATCCAGAGCAGCACCAGTTTCGTTGGAACCGACAGTCACGCTTCGGGCAG  
TCACGTTCTGCAGATAAGCTGAACCAGACTCGTAGAAGAAGTGATAAACGGTATCACCGG  
TAGCAACAGCTTGACCAGCAGTCAGCGTAGCAAACGGAGTGCCATCGTCTGCACTGCTAG  
CACCTTGGCACCCCGACCTGAATGCCAAGCATCAGGAGCATAACATCGGGTGGAAGCCCT  
CCTTACCACCAGAAGCCAGAGCGTCTTTGCCGTA AACAGAACGCAGGGCAAATACTGGGC  
CAGTAGGACCAGTCATCGGCTGTACACCAGCGATATCGAAGGCGATCAGGGATGGAATTG  
CGCGTCGTACCATGCCGATAACAGCAGGGCCGATGTTTGTAATTGCTCCGGA ACTGTGGC  
CAGCAGCAATATTGGTAGGATCGTAACCGTGATCACCAGCAACTTCGGCTTCCATCAGAG  
ACTGACCGAAGGCTTCAATCAGTTTGTATCGCGATACACCGGATCGGTTTTTGAATCTT  
TTTCCTGAGCTTCGAGAACGTGGGCTACAAGAGCTTGCTTGTTTTTACCGGCAATTTCCG  
GCAGACCTTCACCTTCCAGCAGCGGAGTCCATTTGTTTCAGAAATTTCTTTGGTTTTTCAGAG  
ATATTGTTATAACCGTTATTTAATTAAGAAGACATACGGGAAGCAGCGGCCAGATAGGCG  
GCCCTGGAATTATTTGCCTGCTTGTATCATTTTGTCTCAACAATAACTTCGGGTTTCGAAG  
TTTACCGCAGCTGCAGATTCATCAATATTTAATGCTTGTTCTGGATCGGTTTTTGTTC  
TTTTGACCAGAATTAGCAACCATTTTCGACAATCGCAGACAGTTTTTGGTGAATAACTATCA  
CCATATTCCAGGCCTTCAACAAGACTCAGAACTTTTTCTTTCTGTGACTCGGTTAAAGCT  
GCAGTAGCTTCTGAAATGGCTTTTTCTTTCTTCAGTGAAGAAATTTGCTCTTCCAGAGCC  
AAATTTTATCAACATCGATTTAATTTTCAGCTGTAGATTCATCCAGCTCAGCATTAGTTC  
GTCTATAACATCTACTTGCTCTTCTGGTACAGAGACGTTATTTTCGATGAACAGTTCTTT  
GAGACCGGTTGCAAATGATTCGAACAGCACAGACTAGATGTTTGTCTTGACTTGACGCGC  
ATTTTCTTTTCAGCTATTCTTTGCCAAGATGAGTTAAAAATTTATCAGCATCTTCGTAAG  
TTTTGTTTGA ACTTCTTCACGGGCTGCTTCAATTCCTTCGGCCAGTTGAATTTCCGGCTGA  
AGAAGCAATATCGGAAATGTGAGATTTCAGCGAGCGGGATTACAGCCGATCGTACAGCTGG  
CTCAAACGCAGTACTGACATTTTCTTCTACGGATTCGTCCAGCTGAACAGACTCGAAAAT  
ACTGTCCAGTTCAACGGCTACCGCGCCAGTTTCTCGCTGGCTTCAGCCAGCAGTTTATC  
TTTAAGGGACATTTGGTTTTTCTTTAGTTCAACATTTAAGCCTATGTTTTTAGCCGATT  
GGCTGAACGCTTCATTAAGTGTACTTACATTGTTATTTATGGCATCTGTATGAGCTTCAG  
ATTCTTGTTCTTTGCTCTCTTCTAGTGGTTTAAACGTACGCTTGTGGAGCAGATGGCCTCC  
AAACA ACTTCAACCGCTACTGTGAGGCGATAACCCTCCTGAACAAAGCCACCTTTAACTT  
GCCCCGAGACCAGTACTGACACTCCCAGGAAATCCAACCAGCTCGTATATTGGCGGCAAGTT  
TATCACCTGGACGAAAATCACCTTCAATTACCATGGCAGACCCAGTACATTATCGCCTT

CCCACCATAGTTTTCTACGATGATTGAAGCCAAATTGGGGGCAGGCATCGGCCTTGCAG  
GATGTTTAGTTTTCGCCGAGTGATTGTTTAGAATTTATTTGGGTAGCAATATAATCGTCTGA  
CAGCTTTGGCAAGAACAGCATTAGGATAAATTCTCCCGTTCCTATTCTTAACGTTAGCTT  
GCATAAAGATGCCTTCACTCTACAACGCACCTTTACCATCATCCACTGATTGGACTACAA  
GTTTCAGAACAGGTGCCGCCGGGAAGTCCCCATACTACAAGTAGCAGCTCGTCTTCCATCT  
TATAACCCCAAAGCTTCACGCCGTTTCAAGGCACGTTTGTGTTTGGCGCTGCGCCTTTATCC  
CAATGATTGGTTGAGAGCGCTTAGTTTTTCGCCGCCTTACGAGCAATTTGTCTACGAGTA  
GCAGCAGTTAGCCCAGTAGTTTTAAATGCATTGCGCTTACGTGTTTCTCGATCTTTGGTA  
CGAGTTACTTCACCTGTCGAATTAACATGTTTGACAATTGCTTCTGAAATGGAAATATTT  
TCAACTGCAGCAATCATTGCCAATGACATATATGTTTCGTCAAGTGAATGTTTGGAAATA  
ACACCGATAATTTTCATCGGTGCTAAATCCGGCTTCTACGAAGGATTTAACACGAATCACT  
GCGTGCGCAAACCTGAGATTCAATGACTGGTTGATTTGCTGAATAGCCGGATGGAATAAGC  
ATTTATTCCTCCTCTTCATCTTCATCATCTTCGTCGTCATTCTCATCATCTTCGTCGTC  
TCGGGTTTTTCACCTTCGGTAACAACCTGCGCGAGCAATGGCCTGTTTTTCTTCGGCGTAT  
ACTGACTCGTTCACAAGAGCCATTTTCGCATTAATTCACGTTTTGCTTCATTCAAATCA  
CCTGATTTGATAGCATCGTTCAATTTTTCCATTTAGAAATCATCCTCGTTTTTCAGGGTTC  
TGGAATCGTTTCACATTCGCCTCTTTTTCTATTTGCTTTTTCTCTTGAGCAATTTGCTCA  
TCAGTCATCTGCAAAATGTTATTCATGACATAATCATGCGTGACATATCTACCTACATAC  
GGCTCGAGTTGCGAAAGGGCGTCAACTCGTTGTTGAAGAGTTTCAATATCTTTCAATACG  
GTATAATCGGAATCTTGATGGAAATTAACCTTTATGTTATTTATTTGCTCTTCCCATTTCG  
CTTTCTAACATGATTTTCTTGTAATCAAATTTGGTTTTGAGCGGGTCAAGGAAAATTTCT  
TCAAATTTGTGTTGAAGCTGAACAATAAATTTCTCTGAAATCTAATTCATCGCGGGTGATA  
GCCATATCTTAGCCACCAATTACCATTCCGCCATCGTCGCGAGGCATCCGGGACAAAGGA  
ATTCTCAGAGCTTCTCAGAGCTTTTTATTGAACTAGCGAACATGATCCATTTACCCATT  
GTTTGGGCGCCTGGAAGAGAAGTAACTTCGGTAACAGATTTACTATCTCTCCGCATCAAC  
CAATAATCTTCAGTCATTGAAAGATTGCGTTTTTGATTTTTCACGGTACCTGTATTCGAA  
TCGTATACAACACGATTCTTCAGGCTCTGCATGATGCCATTCACCTATTCAGTTGCTTTG  
CGATTAGGCATAGATCCTACGTCAATGTAGAAAACACGTCTTTCCGGAGCACGCGTAATA  
CGATATATTACCAAAGCATCTTCTAAGAGTTTTAATTGGTCTGCAGGCTTAACAGCATT  
TGCAAATAACCGACAATCCCACGATCAGAACAATCCTGAAGGCCTGAATGCGCATATACA  
AAGGCACTTCTCGGAATTTAATGGGTGTGTTCCGGTTTAAACAGTCTCCCGTTATAGGCA  
TAACCTTCGCTTCCGGCGGTATAAACAATAAATTCGCGATAGCCTTTTACTATAGAAGTA  
CCACCGACGTCAGCCGTAACGATTTACGATAATATTCGACATGACGTGGGTCTAACCTG  
CGTAATTAACAATGCCTTCTTTAGGATTAGGCATTATTTTATGGAAGAATATGCGGGAG  
TCAACATAACCATCTGGAGAACAACGTGTCGGGTCTGCGAGATACATTTAGCAATCTGCAA  
ATATCATCAAACCTTCTAAAATTTTGTCTTTGATAGATGAACTAAATTCAGTATCATCC  
AAATCAAGCGATACTACCTTGTGACCCTTTTCGTAAACAACAGCTTCATTTCCGATATTT  
GCTACAGCTCGCTCAACTTCAGGATTATTCATGAGTTGGCGATATGTGTTTATGAGGTCC  
TTGGTACCGGAAATGTTGTTATCGATATCAAAAAATTTGTTGCATTAGAGCGTTATATGAT  
GATTCTCCGTCGCGAGCTTCAATCTCCGTGGCACCATCATCTTCTTTAGGACTCGCAATC  
GATTCGTGGCCTTGTCTGAGCCGCTCGTCATATTCATTTTATGATCGACACGATCCCAAAAT  
TTAAACAATTTCAAAAACCTTCATACAACTCCTAATCAGGGAGCATTACTGCTTCCTGTA  
TTTATTATTCCCACCAGTCGAGTGCAAACGTAGTTTTAAATGTAGAAACTGTGTTGTTAT  
CATCCCAGTCGAGAGTAACTTCACCAACGTTAGTTGGGAAAAGACCGACAATGGTATATT  
CTTTAGATGTACTTTCATTACGATCTTTTTGACGAACAATGCCAGGCTTTTTATATGCTT  
CTGGAATAGCGCCAGTGATTTCAATTACCCATTCCATGATTCAAGGCAATCCAATCGACAA  
TTGCCTGTTGAGTGTTATGGGCCGAATCGTTATAAATCGTAATCGTCCAGTCGTCAAAAA  
TACGGTCACCTGCAACGTTAAGTTTTCGGTTCATGTATCCAACCGGGATTTTTTCAACAG  
TGGCTGCCGGCATTGTACCTGCTTTAGCTTTAGATATGGAATTTTGGCCCAGGTATGGGA  
TTTTCAATTTCAAACCAGTTAGCGCGGGCGAAATCACCGGACTCAAATCCCTGAGGACAT  
CAGTTACGTCGATTATCAACCTCTATGTTTATTTATGCGCCCATATTTGAGCCCAACGCT  
GAATTATGCTAATTAGGCAGGGCCAATTAACCTCGTCAAAGTTAGCACCAGTTGATGTGCG  
TACAAAGTTTCAAGAGTGATGTAGTTAATTGAACGAGGAGCTTTGAGATAAATCGTAGCTAC  
AAATTCACTACTGTCGATAACTTGCAGGAGTGTGTTTGTGTTGATCGCAGACAACGCGGAA  
GTCATAAACACCACCAGTGACCTGATGTTGTGCGAGATATTGCGAAACTTCATACGAAT  
CTCTGACGAGTAAATGCATCGTTATTTCAAACAAGCGTATTTAGAAGTATACCAATAT  
TTTTCTTCAACATGTTGAAGATGCGACGAACGTTAATTCGGTCAAATGGAGATGGAACCT

GAGTTGCCATTTTGTCTCCAAAGAGAACAAATCCGTCACCGCCGGCAAACCTTTAACGG  
GGATATTTGACACTTGTACATGGTATCACGCAGCGATTGCTTCGGTTCAATTGCCAGTT  
TGATGGTGTGGCCAAGTTGGCCGCGACGATATCCAGCAGGGGACATCGATGGATGTCCTA  
CTTGATCGGTGGAGGCACACAATCCGGCAATATCGGCAGAAAGAGGAACCCACCGGTTAA  
TATCATTGTATTTGTCATACTGATATTTATAGTTGCCTGAAATAACAGCATATGTTGAGC  
TAATATTCATGATATTGTGCGACAACTTCACCACCAAATGTCACACCATTTCGCCATTCGA  
CAATATTCTTAACCGCTTGAGTGGTAGGAACACCAACAAGTTATTCTGACGGACGATTGA  
CGCATGCTACACAGTCTTGGCGGTCATCTGGGAGAGCAACGACATGTTTCTGGACAGTAG  
GTGCAACAGCAGCACCGTCAGATGCATATGCTCCAGCAAGCATCAGGTTGAAATGCAGAG  
CTTCTCTGTCGGCAAACAGATCCCAACCAGCAATCAATTCATCTGAACCAACAGCATCAC  
TTGCCGAAGCGCCTCCACCGAGCCGGCTGAGACCGGCAAAGCCAGCGTGCCAATTTACAC  
TAGAAGCATAAATGAAATTAAGTGAACCAATTACGGCAATAGTCGTCCATGAAATGTATTT  
CCATAAACATCTCGGTCTCCGCGACGAGTGGACAACACAGTAGATTTCGACTACGATGCCG  
TCTCGACGAACAATAATAGCAAATTTGGTCATCAGTCATCGGGCCGTATTGAATGACGCTT  
GCGCTTTGCTAGTGCAGTACCACCAAACGGGTAAATTTGGCCGGGCTGCACCACTTTGGA  
ATGCGGCCTTAGAAATTTTCAACTTCGACCGTTGAACCGATTTCCCCGGGATAGACGG  
CTGAAATCAGTGGCATTCCATATTTGGCAAATTAGCCAGCACTTTGGTAGAAGTCATAA  
CATCTGGAGCTTATTCCGAATTACCAAAAAGTTACTCCAGAATCAACTACGATATTACCCA  
AGGTTAAAGCAGCAGCAGATCCGCAAGATGCGCCCGATACTTCTGCGCGCCAGTTATTT  
CTAAGACAGGATATGATCCCAGCTGTTTGGCTTTTGAATTAAGTGCAGCTGAAGGAACAA  
GCAAAGCCCTAATTTTACCGTCAGCATCAACTTTAGTTACTTTTCTTCTTCTGTAACAG  
TTGTGGTGTATGCTTAATAGAAACGGTATCACCTACGGTATAACCTTGTCTTCCGGTTG  
TAATTGTTACTTCGATTTGGTTAAACAATGGAGATGCGTTTTTAGCTTGCACCATGTCAA  
TTACGCCCACGAGACGAAGATCATTACCATACTGCAAGAAGTTTATACCACTCATGAAAT  
ACGGAGCAGTGACATTGTCTGAGCTACCTAACATATCAACCAATTCGACTTCATTTGTTA  
CTTGACGAATTTTCATAGGCAGGACCCCATGCGAATTTGCCGACTAATGCGGCACGGCCAA  
GAGCTGACCGAACGGCAGTTGAATTGAAGGAAGTTTCTTCAATTTCAATGCCAGGGCTCA  
GATGTGCCATATTTTGGTTCCCTGGACGTTAGTTTAAACACATGTTTAAATATTGCTTTAT  
ATTTACACGAACGACATACCATTACTGGCAACTTCGAAAGTTTCTTGTCCGCTGTCAACT  
ATAACGACAGGGCTATAGTCGTCATATAAATTTCCATTCCCTGACGAAATATTTCAATC  
GCCAATCGCATGTCATCTCTCTCGGTAAAATCAGAAAATCTCGGTTGGGTAGTAAGCCAT  
GCAAATATTACCAATGATATCACCAGTCATCATGGAACCGTCTTCGGCGGGCGCATGAA  
ACACCTTTTTCTGAAAATGTTCTCAGTTCCATTATCGTGCCTTTATGGTAATGCACTAAT  
TTTTCTTTTTCTGATTAATCCTTGAGAGTAGAACAACCTAGGGCTTTTGACCGTTTAGTT  
TGCTTAATCCCGAGGTCGTTGTACGAGTCACATATAATGTTTTCGTATTCCGGTTCGGAA  
TACAACCACTAAGCTATGGATACACCCGTGGCATGCAGCTCAATATAGATGTATGGCTGA  
TAATACATATTTAAGTACTTGAGCAACACATCAGGGAGTATCAGGTGTGACGTGGTGTG  
CTGAGAAATACTGCAACCTGTTTCGTACGGGAATTCTGTTATGTCGTATATGTGCATAGCA  
TGAGAATCTTGCCACGACCTTCAGCAGAGTCAAGTGTTGAGATATATTTATGACCTTCA  
ATTGGTTCCCTTACACATCGTGAAAGTGTCTGATGCTGCAACTTCTTTCCACGTCATTTTT  
GACAGTTTGAACCCGTTGATCAACGTTCCAGATGTTCCCTGGAAAGCAGTATTAAGCTCC  
TGTTGAAATGCCTCAAGGCTAGAACCGGCGATTGTCTTGGCTGACCAAGAATATCCGTCG  
TCAAAATATGAATCGATGCCATCTGTTTTAGAACCATCCGAATACATGCGCTCTTTTACG  
GCCGACCATGTTGCGGTATACGGAACAAAACCATATTTGCTTCCACTTCCATCCGAATTA  
GGGTAATTGCAGCACTCCAGATATCGTACCAATGATTAAGCCATTTCGGCGTTGTTGTC  
ATCAAAATCTTCGAATGACGACCTGATGATATAACTGGCTGGATTGCTAACCACGCGTCG  
TTGAAGTTGGGAATAAAAGCAACTTCGTCGATGTAATCAGCGCAAACGAGTTACTCCGC  
ACAGCATCAGTGGAACTGGAAAATGCACCAAGCGCACAACCAATTTCCAAGAGTGATAGAC  
CCTTTATTCCATTCAACTATAACCAGGCTGCAGAAAATCTGGCAATAGCTCCAATGCCTAC  
TTTGTCTATGAAGAACTTCCGCTGACATGGATGCTTTATGCACAAGGATACCAACGTTT  
TCAGCCGAATTGAAGCAAACAAAATGCGCCAAGAAATTAGCTACTACTGTCGTTTTTCCG  
AGCTGACGAGACAAATGTGCTGCCATCAGACGATTGCCAGCCATTATTCTAAGCATATCT  
TTTTGGTAGTCACGCAATTGGTCCCGGATAATGCCATAGTCAATATGCTCAATGCAGCAA  
TAGTTTCCGGCGAAATAAACGATATCTTCTTTGCATCTCTTTCGCTCGGCTAACATCTCC  
TTTGTACATTTTAGTTTAAATGTTAGCACGCTTTTGATTCCGGCAAACCAATTATATCCAGAA  
CGCTTGTGTTTATCTTTAAACGTTCTAAACATTGACGGGTCGTCTGCTTGGATTTTT  
ACCCTCTTACTCCCTGTGTTTTAGATATCTATCAAATGTCGAGGGATAACCACTTATCA

TCGTGATTTGATAAAAATCCATTCCCCATCTTCGCGCATTCTCTCTTTAACGTGGATGGA  
TAGGGCATGTGCAATGGGTAATCACTTTCGAAGATATTCATACTTCATCACCCAATTCCA  
GTACAAGCAATTCATCAGGAGAACCTTCGAATTCTATAATTTCTCCGCTTTCATCATT  
GAACTGTGCCGAGTATGGATGGTTCTGACGATGTTAGTTCTTTCATTTCCCTTGTGCATTT  
TAATGAATTCTTTATTGGTTGAAGTCATTTGACCCATTAGCTGAGAAAATACTTCAACTA  
TACGTGGACTATCGGCATTTTTGGCATTTTCCAATGCAATCTTTGCCATGTCAATCATCA  
ATTGAGTTTGAAAATGCATGTTGCGTCTAACAAGCGTATAGTCATCATCCGGGTCAATTT  
TTCTATTGTTTGGATTTGATGTCGGTTCTTGTAAGACCAACGGGGCGTATACCTGCACGT  
CTTCCCCGGTGAGTCTTCGATACCAGACAAATCCTTGAGACTAGTGAAGTCTAAAAGAT  
CATTTATCGAGTATTTCCCTATTGTGGTTCGAGGCGGTGAATTTTGATCGGTATTGTTTGT  
CATACTTCCATCGAACTCCCGTCCCAATCTTGGGCTGGCACTGTTTTTGGATCAACTTGG  
TGATCAACTGATTCAAAATGAGTATCTTTGTTTATTTCTCTTTCATTGCCAAAGAAATCA  
AGATAAATCGTTCTAATTCACCTGCAATATTTTTGGTGTGGATATAACCAACCAGTG  
AACTAAACATGATTGACCATTCAATACGGCGTCTGTTGTTTCGCCAGGGCCATCTAGCTGC  
TCATCAGGCGTTATGGATGTGATAGTTATATTGATAACCCGCCCTTTAATAATTATTTTCG  
GTGTCAAACAGCTCGGTTATTGTGCATGAAAAATGTGGTTGAAAGTATGGTAAAATTTGT  
TCAACTATTTGAAATGCATCATCCTCATGTGGGGTCCATATTCCTAGTTCAAACATGAAT  
GTGTATGGCACAGGGTTAGATTGCGCCAACGCTTTCCCATTTGGGTTTATTTATCCATTTA  
TTTTGAGTATTTCCAGTTTTTACCATTGAGTTATATTGCATATCGATCAAGTGCAAATTC  
ATTCTAGGAAGAATTGCTTCGACTTTTGCAATGTTGAATTCGGAAGTTGGCATCGTAATA  
TCATCAATAGACATTACCAATTTTTCTTTACTTTCGCTAGGTGATAGGAACATCTTGAATA  
TAATGCTGGCCATCTCGAAAACGAGAACTTGAATATGACCAAAAAGTTCCATTAGCATC  
AATACATATCGGCGTATTGAGCTGTTATAAAAATTATTGCCAAACATTACTCTTCCTCAT  
GCCGCCAAATGGACTATTAAGCTGTTCACTGGGTTTGTACCAATTGGATCAAATGGCT  
CAACAAATGGTCGAGCTTCTTTTGGCCCTGAACACTCTACCAAGCTGAGCGATTTCTT  
GATCAATCAAACCATCTAAATTCATATTGGCTCCAGGTCTAAACCATTATATGGATCC  
TCAATTTCAGGTTTTTCTGGAAGTGGAGTCCAATTATTGCACCAGAGTATATGAATTT  
CTGGGCAACTATTACCCTGATTTGATTTTTTCGCATCTGATAAAACGGCGTGAAGGTT  
TACCCGTGTTATCTAAAACAGGCTGTTATCCATTGGCAAATAAATCAGATCACCTAGTTT  
AGGTTCTTTTACATTAACCTTGATGCTTGAAAAGGCCTGGGTTGATAGAAATCTGACTTC  
GTCATTTTGTGATGGCCAAATTTAGAAAAGAACTCTGTTGTGCCTCATATGACTCGAA  
GCTATTGATCCATGCCGCAAATTTCCATGCTTTTTCAAATCTGCAATTTGGGTCTTCTGC  
AAACACAACGTCCAAATTTGTATATTCTCTTTCGAGATAATAAAAATTCTAAGCCTCTCAT  
TTGAATAGATTCTGCAACTAGAGTGTCGTGGAGGGCCTGAGAGCCCTCATACCGATTGAA  
TTTGACATACGGGTTTCCAGAATATTTTGTCTATTCTGTTTGTGATATCCGCTTCTATTTT  
TAAAGTAGCGAATAGTGACTTATCCATCATAATTTACCCCATGATAATAGGAGGAGGCC  
ATCCAGCAATTCGAGTCTTGTCTAAGCTTATCGGTATCTATTCTAGCTTCTTCAATTAG  
GCGTATTCAATCGAGTGTTACACCACCTGGAAGCTGCATACCTCGATGTTTCGCTAAAAC  
TTGGCCGTTTAGTTCTTTCTTTTTGCTTTTGGCCATGACTTTTACCCAGGGATTATTGT  
ATGACTTATCTTTTGTACATACCATTGGGTTGGCCTGCATAAATTTGGCCATGTGACATAT  
TAGGATTTGCGTATTTTTGCGCCACTGACGGCAAGCTATCGTCATCTGACATGGCAAACC  
CATATCCAGCCGAAGTGCCTGAAAGCATTGAGTCAACATTCGCATACGATTTGCAGTAAA  
CCTCAAATACCAGCAAATCTCCTTATGCAATTTGCCAGCAACTCTCATCATGTAGGTAG  
TACTGGTGAAAAAGAAATCAGGCAAAGAATAAAGTATGTCTCCCATCATGTCTCGATATG  
ACATCAATTGAGTGAAATATCCGAGATCTGCGCCAAAAGCATTAGGCCCATACCATGGGC  
ATTGGCCGCTAATTGAAGCTCCAGTCATACCATAACAAAACAGTAAACAGCGGATAAA  
CAGCCGTGCCGTCATGGTTATAATTGACCCAATATTGGTTCGAATTACCTGAGTAACTG  
CTAAATCATTGCCACCTCCAAAATAATTACACCAGTTTTAGCTTGTCTTTCGGTTAATA  
CTAATGTTGCATATGTTTTGTGAAATCCATCGTAGTGATATTCAGCATAACAATTCAAGAG  
CTCTAGATCTGCAATCAAATACTTGTGCTCAGTTACTTCGACGTGCACGATAGATGCAC  
CTAGACGTCTAAGTATAGCGTCTTAAATTCTAACGGGTTATTAGTGGTATATGACATAA  
GTGTCTCCTTGTGCTTTTTAAGCAAATTATGGCGGAGCCTTTCGCGCTAGCTCGAAAAT  
GTTATCCTTTTAGTTATAATATCTATTAAGCCATAAAGGATAAAGTTGTATTTACAATAA  
GGCTCCTGAAGGAGCCTTGGAGATTATGCTGGGACAATAACAGCAGACTTTTTGCCGATAG  
TTATCGATTTAGCTGAACTTGAAGTCAAGTGCTTTGACATAAATTGCGATAGTATCATCCA  
AAAATACCTTGTACAGCCAGTTGTGTGCGTAGAGTCTACCATTTGATCTCAGGGTAAATT  
CTTGCAAATTGTTGTATGATGTAAGTCTGCCGCTTGTATGAGCTATTGAGATATCCAGAT

TATCTGTTTCTAACAACCAGCTGTTTCAATTTTCGCTGCTTGCATTAACATAACCAGCCAT  
CAGTGAATTTGATTTGTCCGGATTCCAATATGCAACCGTTTGCTACGGTCTGATCAAAT  
CAACAAATGGAATAATCTTCGACGTTTCAGTTGTAGTTATTTGAAAATCTCTCTTTTCAT  
CAGCAACCATGATGTTAGTTGCTTCAACCCAAACACCGTTTTTCGCAATACCAGCGACCTA  
CTGCAAGTGGCTTATCTAACTTAAGTTGAAGAGTTTCGCTGCTTTCTCTGACAGTTTTCT  
TAATACCATCTCTTTCAAGTTGTGTAATTCGCGCCGCAATTCATACAAGTCGGTTGTCA  
TCAGAATGTTTGCAGAAACAAGACCTGAATTTTCATCACCCACACGTGAAATAACGTCAT  
TCAACGATAAAGTCATTTGGTTGTGATTTGTCTGTAAAATGTACAGTCGTCCATTTATAG  
GTGATGGTTCTCCGATAGAGCCAATAGCGGCATAGAGATCTGAAATATCCCCCTGAATTC  
TACTGGAAGTGTCTGCCCTAAAATCTGCGTAATTTGTTGCAATATTAGAGGTATTTTCGAT  
TGATGTCGTGCAAAATTGTATTTTTCGCTATTAACATCACCGATTTTCTGCACTACCGCTC  
CAAGACGAGATAACACACCTGTCACAGGGGTATTCATCGTGTTCGCGAGAGAACTCAACG  
CACTTTCCTTCAACTCCACCCTTGACGCTATCGATACAGGGTTGGAAAAATCGATTTTTA  
TCTTCATTTGATCAACGCCATCATTACCACCACCTAAAGTATTTTCGATAGCGGTCAATC  
TGGTATAAATCGGAATTCCTGTTCCAAGATTAGTATTGCCGACTTCCATCCTCAAATCAT  
ATAAATCAGACGTCAATGGACCTACATCTGACTGCGCCCATGAATTTTCAAGCGCGGGTA  
TGCGGTGGGTGTTTCAAGAGACGGTTTGGTTTACTTGACTAAACCGATACTTTAATCCCG  
AACCTATCGAAGAAGGAACAGAATTACCGTTTATGTCGAAGCCTGGACATGCACCTAATT  
CGTTTTTTATCCATTACAAATCACCATATACAGATCGAGCTGTGTCGTCTTTGAGATATC  
GATGGCCAAGCATTTCGGAAGTTGATTCTGAAAGAGAAATAACACCTGCTAAATTAGTTT  
CAACCTCGCGAATATCTTGCTTGATAGCTAAAATATCATTAAAATTAGCAATGATTTGGT  
CAATTACTGTATTATCACCGATTACACCCAAGTTATCTTGGATAATATTTACCGAATCGA  
CAATCTCATTGATTTTTAGGAATGACTGGGCATGGTCTTCGTCTAGCTGAACAACGTTCT  
GTTGAATATTAAGTGGAGCCTTGTGTAAACACCGTCGCTGGCTGTTTGGGTGGAAGCGG  
CCGAAAGCCGCTCTCCGTTTTTAATCCAACCAATTCGATGTTGACCATCACCTGGAGTAG  
TATCAACATAAGGAATAACTCCTTTCGTGATTTTGTCTATCATATTTTTTTCCTCGAGTTT  
TTCTAATCTGGATTTAAGCTCTTATGAGCCTCAATCAGTAATGCAATGAGAGACATTGG  
AGAAACCGTAAGAGTTCCGTCGTCAAGTGTTTTGACGCCTTCTTGTAAAACTTTTTGCAA  
TTGCTGTGCAAAAATACCTGCCTCTTTGCCTATCACGATATTGTCAGTCAAAGATTTATG  
TTTTGTGTAAATCCCAGCGTCAAGGCTATCTATTTTTACGAGTGCATCTTTGATAGGCTG  
AATCTCAGATTTTAACCTGGTATCGCAACGAACATACATATCGTTAATGTGATGTTTCC  
GGCTAGCCATAAATGACCACCTGGCCTAAGCGTAACAATTGTGGTATCTACGTCATTGGT  
GCGAGTTGTCCTTCTAAAATACTCGTTGTTATTGTCTCCAACAGCAAAAAGCAAATACGA  
ATTCGTGTCAACGTCACTATCGTTTTTGAATGTTATAGCAGCCAAATCGGCATTTCTATT  
CCACAAAATTCCTTGATTGTTTGTGCTGTGAAATTGATATTACCAGTCATTGTGCCACCTGA  
GCGATACAACACCTGGGCATAAGCCGAAAGAGCCGATTTCGCTGTGAGCTTTCAGTATT  
AAGAAGGCGAACTAATCCTTTTTGAGTGCTAGTAGCATTCAATATGGAAAGTTTAGCTAG  
ATTAATAACGACAGTGTTATCAGCTAATGCTAATGTTTGCGAATTTGTAGCTACTTTCAG  
CAATCCAGCTAAGCTTTCGCTCCCTGCCATTCTTGATAAAGTATATGGACTAACAGCATA  
GCCATCTCTAAGAAGTCCTGCTAAAGCTTGAGCCAATGTGGCCAAACGGACAACCTCCGTC  
TGAGCTTTCAGTTGCAGTTCCCCATGATTCTGAGAAATGCGCAATGGCCTGCTTGGTCTT  
AAGAGGAGTCATATCAGTGGTATCGTCGGTGCCAGATATTGCCTGGGCAGCAGTCGATT  
AAGGATTGTTCTCTTTCGCGCTTCGGTAGAACCTTTATTTGCAATGACATAACCCAGTTT  
CGAAGGTGGTATTGCAGCGGTGTTAATAGATGAGGCCAAAGCTTCGTCATTTGTTGCGTG  
AGGAGTATTACCAATAATGGCGTCGGTACCCTGCGGGCTCTGCATCGCAATCCGCGGAAG  
ATTAGGAGTAATAACAGTATTGTCATGCCAGCCGCGGCTTCAGCTTCAGTAGCAAT  
TCAAATAATGCCAGGTACAACCTCAGTTGCTATCGGCAGGCCATTAACAGTTAATGCCCA  
TGCGCTATTTCAATTCAATGCGTCTGATACGGATTCAACTGAACTGGTCCAATCTGGCCC  
AGAGCAAAGTACCGAATCCGCTGAATCCGAAATATAATATTTGATATTGTGATTCATTAA  
TCAATCTTCTTGAAGTAATAAAGTTCAAATGAACAGGTTACTGACCCACCAGTAAGAGTT  
TTTGACTCTTTACCCATATATTCCCAATTACCATATCCAGGCTTTCCAGGAACAGTAATT  
TCACGTTGAACAACAATTCCCCAACTGCTAAAACCTTTCAAATTTCCCATGCTCAGCCGAA  
TCAATGAATTGCACTTCTATGATGGGAGTTGTTGTGCCAGATCGTCTTTGAACAGAATAA  
AATAACATGCCGGCATCTCGCATTTCTTCAAATTTTGCCAAAACCTATGTGCGATACTGCA  
TCAGCGTTAGTTCCAGCGGCAATAACGAATGGTATACCGTAAACTGTAATGACTGATTTG  
TTTTAATTCAGAAGGAAGAACCCTTCGCTAAATGTAAGTGTCTCAGCTTGACGAACACCT  
TCTGGGGAAACTTGAACATCTGAAGTATATATCGCGTTAATAGCCAACATTGTCAGTGT

TGGAATTCGTCGATAGCAGATTGCCCGTTTGGATAGTTCACACCGTCAATAAATGAGTCT  
ACCGTCGGCCACCTATATTTCTGGCACTCATTACTTGGGTGCCCGTTTGGCCAGATAC  
TCGATATGAGTTGCTTTTCTAAAGATGTTGTGTGCACTGTCTAATGTTTGTGATATCATT  
TTCCCACCTTACCCATTTGTATGCTGTAATTATCGGAGGAAGAATATTGATGTCTCCTG  
GCGATGTATTTCTTTATTTACAGCAAGAAGTCTACGTATTTTGTATAGCCAGGAC  
CAGATTCATCAGGGTCAACTTGGCAGCCGCCAATGATGATATTTCCATCGTTATTTGCGA  
CTAAAAATTTATTGCTTGAACAAGCTCAGGCACATTTTGGAGGAATTAGTTCAACAGATT  
TTGAACCGTATGTTCCACCTGCGGTATGGCTTGGATTACCCTGATTGTCGAGGTCGTTAT  
TGTTTAAACCAAATTCGACATCAGCCTGATTTCGATGTCAATCCTGCGACCAAACCTCCTT  
CAGCATATCTTTCCATACACCAAACCCCATGTAATCACGTGGGTTGGCAGGGTTGTTGG  
CATTCTCATATATTGTCCCAATCGGATAGAAAGCAGCGAACAACCTGTTGGATATTTTCAA  
TTCTTCCGCTGAAAGTGCCTGGAATAATTTGTGACGTACGCTGGCCAGGATTGTCAAAT  
CGGTGTATTTCGATTTGATCTTGGCTTATTAATTCTTGTCTCGGTGTTGAGGTAAACAGAAT  
CAGCTATTCCTTTTATACCATTTGTACCGTTCCAATCCAACAGAGTACCAATATTCTTAT  
TGAACCATCAGATGGTGATCATGTCACCGGATTCAAATGTTCTTCCAAACTTAATATCGG  
TACTATTGCCGTAGCCATCCAATACGATAGAATAATCAATAGATGACGGAATCCAGTTTC  
CACCATTATCCCAACACATTTGTTGACTATCGCCATTTGCATTCTCGCAGAAGAATATCG  
GCAAATCGCCCCGCCCTGCTCGATTAAGCATCGTGCCATTTAGAAGAAGTTC AAGCGAAT  
CTGGATTTATTCTATTGTTTGGCTGAATATCGGATTCGTCAATAGTGAAATCAGTTTTTC  
TCGAAATATCTCCAACCCAGGTTTACCAGGCGATGACGTTTTTTGTGTTGTTGATGCAT  
CAAAAATCTTAATATTCTTAAGGTTTTATGAACTCCGGTAAGAAGCGATTCCATCCATGT  
AGGTGACAATTGTTACAGTATCACCTTTTTTGTATGTCAATATCACGAATTCGAATACTTC  
TTCCATCTAATGGCAGCACTGATGTGCAATTGTCTGGGTCGCTAGATCCATAGTTTCGAGT  
TTTCGTTTAAAGTGTGCGCGTAATACAGCAAGTTACCCCGTAGATAGACTTCGAGGTTTG  
CAATATTGTAATTTGTTGTCCCGAACACATTAGGAAAATCCGTTTGACCATCAACAGTCA  
CAACTATTTCTATGTTGGCAACAGTACTCAAATCGGATGTTGTAATTTTATCCACACGCT  
TGTTCTCTACGATTCCCATCTGCCTGGCGGACAATATACAAGCTCAACTTCCATCAAAT  
TTTTGTCAAGATTACGAGGATTTGGCGAACCCCTTAAACGCATCTCCCGTAGCAACAACCA  
AAATTACGTTTTGACTTGCCCATGTGCCCCACACATCCCGCAATTTTATTGCTTTATTGT  
AGTCGGAACAGATCATTTAGGCCAAATTGACAGTAATAGAACCAGCGGTGGTGTTTATTG  
CCCATGAATCTCCGAATAATGGAGAAAGAGCTCCTACCGAATGATTTTTCCACGCACCTA  
GAGCGAATGGGCGATCTCCGTCGCCAGTTGAGAATAGAGTTCGGTAAAGTTGTTTTTGA  
CTTTTTGCCACCACGGCGGAGAGAATCGCCTTGGCCATCATCAACAACGTTTCCGATTT  
TGATTATTTCCATTATGATATTGCCCAATATTAATTGTGTCAATGGCTTTTATTGAAAA  
ACGTATTTGCCACTGAGATATTTTACTTCAACTGAGACGTTGTGGCCCGCGCCAATAAA  
GAAACGAATTGTACATAATTCGTTAGAGGTATTGTTAAGAACAGCATACTCAGTATTTAA  
AACCGCATTATAACCGTATCTACTGATATCAAGTATTCCGAACTTTTAAAACTGTGCC  
AGCAGTGTTCGGGCAGCAACCATCAACTTTATCGCAGAATATTCGTTTTTACCAGCAAT  
ACGAATATTAGTTGCAGTAGTTGTGGCCAAAATAGTTTTTTCAACTGGCATAATAGAATT  
TCCAAACATTCGGGTTATTCCGTATTCCCAATATTTTTCTGATCCTTCGTTCTTTGTGCA  
CCAGACAAAACTCTGGCGTATGGAGACGTTATAATAAGAGAGCCAGATGTTTCTAAGAT  
ACTTTCGCCCGCTTGAGTGCGAATTATGAGAGGATTTGACGGAGAAATTGATCCATTACT  
ATTTATAAAGATCCAACCTTCCCCAACTTTGCATTTGGTAGAGTCATGGTCAACGCGCC  
GCCTGACGTGTCTGCGTCATGCATAGAACCAATATCTATCGCATTCCCGGCATAATATTG  
TCGCGATAATTTCTGGTAATATCCAGTGTGTAAGAATTTCGAGAGTCAGCTCCTTCAGA  
AGCTGACGAATAAAGTCTATAATACCAAATGCGTTATAAAGCGCATCAGTAATTTGGTT  
GAGTTTGACACCACCGTCATAGAGTATATCACAGTTGAAGGATTACCTATAACGCCTAC  
ATCAAGTCTCTTTTTTGGTAGATTGTAACATTTGTATTCTTTAAATGAGAAAGTGATAT  
TGATTTCTTCTGTCTGATCGAGAGCTCGAGTGATAGGCTGTCTATTTTCCATGTATATCA  
TTTCTCCTGAATAGTTTTCCAATTCTTCAGGTTTACATGCTATCGGGGTCGCTTTAACAT  
CTGGATCGGACAGCAATGATTTTTTAACTAACGGGTTGATGATTACGCTCATCTGTGCGAA  
AACCAGTGTGCTGGGAGTGATGCCTCCGGGAAGTATACTGAGTCCATATACGCTCGGA  
ACCGGAGTGTGTCTACTTTAATCCGGTAAATGAGGTCTAACTTATCCGGATACCATAGAA  
TAGCATGTTTACATCCCGATCTCGCAGGATCGTCAGAAAGTTCATCCGCGAAAGGCACAA  
CAATATGTTTCAATTTGTGCGTCTGTTTATTGATACATCGGGCGGAATAGTGTACAGATAGT  
CCCACACATAGCCATCACTCATATCGATTGCCATAGCAGTCCCGCGAGGTGGTTCAACTG  
ATTCATGAGTTGCAGTCCATTTCCACCTATAGTGACACACTCTATGTTGTCTATTC



CCGAGATAGAGCACGAACCAATAGAAGGAACTTCAACACAGCGGTAAATCATCCAACCAA  
CCGAAGTGTGGTACGATTGTAGGTAGCTGAGTTGACTACGACGATATCGACGATAAAAA  
ATGTCTTTGGATTGTCATATCTGATATCTCCCAATCTTTACGCGGAATTATTGCGTCCA  
GTAGAGACTTATTAATTTTTACTGCACCTAGCATGTTTGTCCACAGGCCAACACGCCAT  
CAACCGAATCATTGGATATGGAGGTGCAAAGCCGACATCGGTTTCATTGTTGACCACG  
GAGTATCACGTCCAAATCTGGCGTATATTGTGTTTTTGGTGGGCTCGTCGCCACCATGT  
CGTAAAAGTGTAGCAAATTTTTTGTCTAAATTTACTACTAACAAATAGCACGAGAGAAAT  
TACTCATCTATTTTACCTGTGTTGGGTTTTGTGGATCACGAGGATTTCCAACGTCATCT  
TTCAGTCGTTTTTCAACTAGTCGTCTAGATTGTGAAAACGTCACAGCCGACTGATCAAAC  
AAAGGACTCATTGCAAGTCGTCGTTCTGATGGATGTTTTCTAACCATGATTCTTCTTCA  
GTGTCATATTCAGGAGGAGGAACAAATGGTTCGCCAGCATTGGCCCAACCAAGTCTAAA  
GCTTCTCCGGTGTGAGAGTCATGCTCAATATTTCCGTCAACGTCATAATTTGGCTACCCGA  
CCGTATTGCTCAGTTGGGTAACCAGCATCCCATCGATACGTTTTCTAAATTATCGATGAT  
AGTTTCTACTTGTTCATCGATAAACAGAAATTGATGAACATCGTGAGAAGTGTTATTCC  
AACAAATCCAAAACCAACTGGAGGAACAAAACGGAGAACATCTTGCGCATACTAGACGC  
CGGAAGAGTTGACTTTATAGGCATGGTGTATATGATCTACCTCGATTCTATAGTCAAT  
CGAATCACTCATAAGCTCCTTTCCTCTAACCCCTACCAATATTTACCTACGAACGAACT  
AGTTTCGGATTTTATTTGCTGGCCTTCAAAGAATTTCCCAATCGTATTGTGAATGGTTAT  
TCTCCACTTCAATTGGCCTTCAACATACTCACGATCCACGAATGAGACGTTTGCACGTCC  
TGTTGGAGTATATATGGTTCCTTCAAACAATGTCTTGGCTTATGTTGGTTGAATAAACTAC  
GATGGTATATTCTATTCAATTCTTTGACTCGATGTCGATTTC AACATCTTCGTTATAAAG  
CAATTTGAAAAGGAATTTAGATGATTGTTCAACCCCTTTCGTGGAATTA AAATCGTAGGC  
CCGAGGTTCAAAAATCTTGCGACAGAATCTCTCTCAGCTTCGTCCAATAGATGTTTCT  
TCTTAAAACCTTCTGACCAAAGATATTCATACGCATATTGCTCGCGAGGGTATTTGTTTTT  
TATCAAATTGAGCAATTTGTTGTAATATGTCCCGTTTCTGTCCGACAAGAATTGCAGATA  
ATATTTCGCAAATGCACCAAATTTGGTATCTTCGTCCAAACAACCTTTCAGGCATCATT  
AGTAACAAGTGGCTGAAGGTCAGAATCCTTTAATCCAACAATGGAGCAGGTGTCCACGG  
AACTTCACGCTCTTGATTGCGCAGCTCAGCTACCATCATGACGTTGGCCGGCTTCCAGAA  
AATGCATATAGTATTTCTAACCCGATATGGGAATTCATAATACCCAATTATTTCCGCCAGT  
ATTTTTATGGAAAAGTACCCCATTTGGCATATTGTTTGAAAGCGGTAAAGTACACGTTTTT  
TGCATACAGTGTTACAACGCCTTTGTTGTAAGTTTCTCTGTTTACCCTTTTATCACTTTC  
TGTTCCCTTCGTGTCGATTGAGAACGAATATTCGATTTTTTGGTAAACAACAAGAGCTCT  
GTCGTTGTGTGTTATCCAACACCTCGTGCTAGAACGAGCCATACATGTGAACGCTGCTTC  
GTTATAGTATTGCTGAGGGCCAAGTTTCCACTCTGAATCATCGGTATTGATTCTGAATGT  
TCCCATGTGAATTGGGATATCGGAATTATAACCTGGAGTCAATTCGATTTTTACTGCTTC  
AAATACGTTGTCATATTTGTTTGGTAAATCTAGATCTGGCAAAGTACTTGGATATTTGAA  
GTTTATCTGAGAAACAATAATCTCTCCTCCATTTGTTGACAGATTGCTATATTCATGCCA  
TATAAAAGTATGGCCTTCGCCAATACCAGAACTTATCGCCAAGAAGTACCATCGAACTC  
ATAAACTCCAGCCATTGGGTCATGGACAACATTTTTGGGGATTGTTGGGTCTAGACCTGC  
CTCAGTAACTACGCCAGTAATCAAAGCATAAAGCTTGCCGTTGAATGTATCAAGCTTTTT  
CGTAACAGCCCGTGCGTTTTGCTGTTATATTGAAAGAGGTTGGGTCAAAAAGTTTCTCACC  
AAATATCGGACTACTTGGATCAGTATCAATCGGGGCATTAGATGTTTTGATTCTGCGCAA  
TTTATTTCTAGCTGCTACATATACCCAATCGTCATCGGCAGCATTATTTTTCTCCCTTCC  
TAAAAATATCACCAGGAAGCCGAGCGTATGAGATGAATAATTCAACATCAGAACCAAGAT  
TCAGTTCATCGCCAGTTTTTGGAAATGTCAAACCTATCTGAGCTAAATCTGAGGTCAGCAG  
CTGACCATCTGACATCATTGCCCCGACGACCGTAATAGATGTTTTAATATCCAAGAAGAT  
ATGTAGTAGTGCTAGTTTGATAGGTTACTGTGCTACTAACTGGGTTGCCGACACGCCCGT  
TGAAAGCTTTGTAATAATTTCCAGTTTTCCCCTTTGTCAATTCGACACTTTGGCCATTGGCT  
GAAAACGCTCAAACAGATACAACACGTCGTCATTTTCAGCTAGCATTGTTCTATTTTTGT  
CAACACACACTTGCTCAATAAAGCCTTGTATTTTCGTGATAGTTTTTCATCTGAAACTATTT  
TGTCATAAAGATTCGTCGAATCAGTAATTTGATTACTGAAAGCGAAATCTTCGCTCATT  
GCGAAACCATAATTACATCAGTATTGAAATTGACGTAGTTTCCGTTCTTTTTAGAGAACT  
TTTCTCTCAACAAGGAAGGGTCAGGTGTGAATCTTTTCATGGCAGAAATGTAGTAGGCAT  
TTCCGAATAGGTTTGAAACTCCTCAGTTTCTACCCAATCAGACATCTCAAATCCGTTTC  
CAGAAACGCGTACTCGCATTTTTGTAATATGTGCCTGCTTGTATAGATGTGTCTTCAAACC  
ATTCTTCGACCGATGTTGCACCTAATTGACCCCAACTGCTTCCGGACCCTGCTCTAGTCT  
GAAGAAGTTCGGCAATATAGTAAAAATTTGAACCTACATCGTCCCAAGTCAAATATACTT

GATTCGCCGATAAAAATTTTGATTTTAAGGCTCGTTACGGCCGGTACTTTTTATGATCATAA  
AATCTCCAAAGGGCCGTTAGGCCCTTATTGTGAAATTGCTTCAAGAGTAATAGCAGTGTA  
CTGTTGACCTAAATCATTCTCAAATACGATAAGAGTTCCATCTTTCGCAAAGATAGCGTC  
ATCAACTGGTAATGCTACTATTTCTATATATGCTCCAGCAAATGACTCTGCTGGTACAGG  
TAAAATTCCAAGGTCAAAGTTTATAACACTGATAGCATAGTCAACTGTTACAACCTCATA  
TACTTGTTCCTCCACCCACTGTTGTTTTTGTGAAATCACTACAAGAGTACTCTGATGC  
AGGAATATCGCCATCAGCAAATGGCCCAATCAAATTTTACCAGTTTGTGACGTAGAAAAC  
GTAATTAACCTCATAACGTTACGTTCTTCTTGGTGAGTTTGTATTGTAGAACTATTGACTGA  
CCCCTTTTTTATTAGCATTATGGAAAGGTATTCCAGCCATCGGAGTTTTGAAGAAATTAT  
CTGCTTCCCTGACAAGAGATATTTACAGCAGAAGAGCCGATAATAGAATCATCCGACGAAT  
CTACACGTGTCAACATCTTTGATTTAGAGAAGTTTTTGTGAAAATTTCAACTTCATCAG  
TGTAATAGCGGTCAATAGAATCAATTTTGGCCGCGAAGCCATTCTTCAGAGTTATACA  
TTTCTGAAAGGTTATATGTCACCTTGTATTTTTGACTTGATGTACATGTAATTTGGGTCTA  
TACTGCAGGGGTAATAGGGCGCGGATTATATTGTGACAAATAATCTTCAATGTCTCCT  
TTTTGAACAATTGTTAATCTAAGCCCTTGTTTTTGGCTTAATAGCGATGAACGCGTATACT  
CTTTTCTCACTGTCAGTGAAGCACTGAACGGCTTGAACAACTGAACCAAACCTTGTGAGAG  
ACAAAAGACTCCTAGTCGGTTGTAGTAACAGATCTTTGCTGAGATTCTCTCATAACCGGG  
GAACAGTTCGCGGATTGTTTCGATGTCTTCGGGATCACACCACCCTGAGTACCCACATA  
ATCGGCGTCATTAGTCGGATACTCAATCAGAACAGTTATGACCATATTTTGAAGAGTATC  
GGTGTTCGCGAAATCTCTTGACCCATATGCTGGCTCACACGAGTGCTCAAATATTCGAT  
CACGATTGTTGGCCCGATATTCGGTTTGGACCCGCCAATGTAATTTGCTACAAGAGCCCC  
GCCAGCGATTCGGTGCTAGCTTCACCTTCGCCAAAGAATATCTCAGTCGTCTGGTCAAC  
GGTCTCACGCATGTAAATTACGTTAGAAACACCCCAAATATCAACCATCGAATTATTGGT  
CCAATCGACCCAAGGTGAACCATCTACCCATACACGAACTTTAGATCTGTGATATTGGG  
GTCACGAATCAAATTTGACTAATTCCATCAAATTTCAAGTCAGTCCGAACTATTCGTCC  
TTGATACACGTTTACAAGGGATTCTGTAAGTATTATTCTGACCACGAAATATTGTACCATC  
GTCAAGAGGAACGAATGGGTAGTTATCAGTACGTTCCACCGTACCAACGAATTTAGTTCC  
TCTCGGAATACGAATGCCGGTAGGATTCAACGTGTTTGTGCGCTTTGAGCAGTAAAGTCGT  
ACTAGAAGCAGTACGAGAATCTGGCATATATCCCATGTCTGAGAATGTTGAACAACTGA  
ACTTCTTAATACACCCGGTTCGGATAAAACTCTCGAATAATGCTGAATTTGAAAATTGCTG  
AATATAGAGTGTGCAATATGCCAGAAAATCGGTTAAAACGTTTAATCTTGAACCAATAAA  
GTCATAATCTTTAAATCCAACCTGGTTACCTAACCAGTCAATTAAGTCGCTTTTGATTGC  
GTCAGAGGTAGCGCCTTTAAAAAATATCTGGGATATTTGTTTTCCAGTTCATGGTATAAA  
CACCTTACTAGATGATTGCGCAATTGTGTCTCCGCAAGATATTGGATCACCAATTGATAG  
TGCGGGTTTTCCACCAACAAAAACCTTCGCCGTAGTGGGAATAACGTAGCCGTCATGAAC  
ATCATAAGGCTCAACAGTATTTTCGATGAGGTATTATTCTGTGCGCGTCAACGACGACCTT  
TATACCGTCAACAAAAACTTTTCCCTGCGTGGCTTGTATTTGTGTAGGAGGATATGTGTC  
ATGGCCAGTTGTCCAAGCCATATCGTATGTCAATGCAGGCATAAAAGGCCCTCCTATGTG  
ATTCTATTTAAGAGCTCCCGGGAGGCATTAATAAAAAAACAGGAGTGTATCTATCTGA  
TTTTTTTCATTTTTTGTACCCAATAGATTATCAGGGTAAATCTACTACTGATATTTTTAAG  
AATTACAGAGCGTATTTTAAACGTGTTATCGTAATATAACAAGCCTGAAGTGTATTGGATA  
AATGGTTCAACAAGACCTGAAATGTTGGCACATGAGCTTTATGGCAATCAACAGCTATAT  
TGGGTTTTGCTAATGCTAAACGATGTATATGACCCATTTTTCGGGATGGATAACTACACAA  
GATGCTGCATATTATTACGCGCAGCAACAATATCCAGTAAATAAGGTCGTATATCATGTT  
GATGCCATTGGTGAAAAGTATTGGAATTTGGGAGAAGACCCAGATTTCCCGAGACATTGG  
TATGATGCTGGAGATACATCTAGATCACACATTCATATGTTGGAGCACTTCGGGCCGTT  
GATCCCCTTGAAGCTCAATCTGCTGTCAATGAGCAGAAAACGAAAATTTCTGATAATTAGC  
GAAGCTGATATCAACTCGTTCCTAAACGACATGATACGTGAAATGGCAAAGTTTAAGGT  
GCATAATATTTAAAGGTATTGATAGATTTTTTACTGGCGTCGTAGAAGATCGTCAGGATC  
CGTACATATTAGGAAGGGTGAGAGTGCGTGTACACGGTATTCACCCAGAACAAAAGGTTA  
GAGCAGACAACTATGGTTTACGAACCTAGGATTTGCTGTGGATGTCAGTAACCATGCCTG  
TAACATCAGCGTCAGTTTCGGGTGGAGGCCAGGCTCCAGTAGGCATCGTGACCGGTACTC  
ATGTATACGGAATTTTCTTGGATGAATTTTATCAAAGGGCCTAGTTCTCGGAACATATC  
CCGGCATATATCCTATGATGCCTGATTTGAATAAAGGTTTTCTGACCCATCCAGAGAAT  
ATCCTCGGTACGTCGGTTCAGATGTGAATATTTTGGCTAGAGGTGGAAAAGACATACAAA  
TTTACCAGGCCCAATTGTAAAAGAAAACCAAATTGTTCCAGTTGTGCGTAGAAGATCAAA  
ATCTCAACCGAGATGTTGCACAAGGTACAGATAGAACACCAAATGACGAAATACACCCAA

ATCCAGATCCAGACGTAACAATTGAGGATATGTTACGTTATGACGAAGGTATTCGTGTAT  
CGGTTTATTGGGACAGTGAAGGATATCCAACCTGTTGGACTAGGGCAGTTGATAGTTCACG  
AAAAAACTAGAAATATGACAAGAATAAACCAAATGCTCAGTCAACTAGTAGGCAGGCAGG  
TTAATGGGAGAATAACCGAAGAAGAATACTCTATGCTGTTGCGAACACGATCTTTCCAGCG  
TCTATTCTAGCATATCAAGCAATTACAAGGTCGGCCCCGGTATATTCGATGCTAGACGTTA  
CTCGTAAAATGGCAATCGTCAATATGACGTTCCAAATGGGTGTTGGTGGCGTAGCAAATT  
TCAATATGATGCTTGGGTA CTTGGCACTAGGCCAATACGATAATGCGGCTAATGCTGCTC  
CCGATTCTTTATGGGCTAGACAACTCCATCACGAGCTCGTCGTGTGTGTCAGAAGTCATAA  
GACATGGAACTTGGTGCCATACGGTGGGTCACAAGGGTCTGCGCCGTCATTGCGGACGA  
TGAGAATGTTCAAACCGGCAGGTGTATCATCAACCGCCCAAACCTCCCTCGTTCACCGAGC  
CTGAATCACCTTACTCGGCTGTATATCCATATAACAAAGTGTATGAAAGTTAGTCTGGTC  
AAATCCAGGAATTTGATGATACACCCGGGCATGAACGCATAAGAACATATCATCGGACGG  
GTACGTGTGAAGAAATACATCCTGATGGAACAAAAGTCACGAAAATTATTGGCGATGCTT  
TCTACATTGTCAAGAACGATGGGAATGTTTCATATCGGCCGGAAAACCTCAAGATCGTTGTG  
ACGGGGATGCTGATATTTTTGTTCTAGGCGATTCTAATAGCACAATATCTGGAAATGCTA  
CCCAATTCGTTTCGTGGTAATGTTGACGAGCGAGTAGAAGGGAATGTCAATCAGTATGTCA  
CTGGAAATTCATCGGCGTGAGTAAATGGAAATCTAAATGCCGATGTTGATGGAAACGCCG  
ATATTAAGTTATGGGCGACTGTTTTAACACGATTGATGGAAATTACACTCTAAAAATTG  
GAGGAAATTTTTCTACCGAAGTTGGAGGAAGTAGGACAGATGATGTTTCTCGTTATTGGA  
ATAGACAATCGGCCCATGTATCCGATGTTGCAAAAGGAACCTTCGAAATTGATGGTTCTA  
GAGTAAACTTGGGGTAATTCATGTCAAATATATTACCAGCATCAGCCGTTTTGCCTGTTA  
AAAGGGAAAAGAAATAGTATCGCAGACATTTAGCTCAAACCTAACTGAACCACGGGCAA  
CCCTCGTTTCTTTGGAAATTAGTGCTATAGATAAGAATCAAGGAATAGTTATTGTCAACA  
ATGGATTTTCAGGACAATATACTGGAGCTTTTACCCTTGACGGTGGTGTATCATATCGTT  
TAAAAACCGGAGAACGTGAATCAGCAAATAGATGGGACGATTTGCCTGATCCACAAACCA  
CGGATTTGTATTCTTTTCTTGCGCCCAGAGTAATGGAAAAGAATATTCAAACCTTGTTG  
TTTTAACATACGACGTTGTTACGCCAACTAGAGCCAGGTAATACTCCAAGACTAACCAGT  
TAGATATGTGATAAGCAAGACGTATACACAAAAAGTAGTTGGTTAGTGGAACACATGGGC  
TAACAATTTGCGAGATTATGTATATAGGGGTAGATAATGGCATAATTTTGGAAATTTAGGC  
TAAAAACATCGAAAAATACAAGGGCAATGCAGATCAAATCACGTATAGGTCCAGTTGGGG  
AGCGTCGGTCATGAAATTTTGCATCAGTCGCGTTCAGTTTTAGCATGGAATTCTGAAGA  
AGGAATAATCCCGTGCTTTTCGAATGCCGACGGAAAAAGACGAAGGTATTTTCATGGATTT  
TTGTGTCAAATGTCAAACGGCCAAGCATTCTGTTGCAAGGAAAACCCGAAAAGGAATG  
CAGACCTCACCAGATGAAGTCTACGAATACTGCGAAAGCCAAAAAGCAATTTATGGGAGA  
AATGTACACGTGGCAAGTGAATACAGATAAGTGGAAAGCTGCTAATGCCTCGAGTATGGA  
AAAAGGTTGGAATTTCAAGATAATAACTGCAGATTCTCTTAGAACTCATTTTGGATGGAG  
AGGACAATGATTTTTGACTATATCAATGAAGCTCCACAGAAAAAGTCAAGAAACCAATGG  
GTAACATTGGGAATAGAATGGAGAGAAGCAAATCCATAGGTGTAGCGGGAAAGGATTTT  
GCAAATCAAATGGTCTAAATTATGACACGTTTAGACGGACTATGCTTAAATTCCTCAAAG  
CAAGTTGATATTGCCAAAGAAGTCGAAAGTCTAAAAACTAAAGCAAATTAATGTCACGC  
GAAAAAGCATTAGTCATGATAAATGACTTTAGAAGTCAATTCCGTTCTAGAGCAGCAGAC  
ACTGGAGCAGCAAACACTAATAAATCTCAAAAATGGTTCAATGATACTGTCAAAAAATCA  
ATTCGTGGTCACATGGTATCAAACCCGAAACCAGGGAGAATTTACACTTTTGCATATGAT  
GCAAAGCACAAAGATACTCTCGAATATTGGGATAGATTCCCGCTAATTTTTCTTTTTGGAA  
ATAGGCACATCTTCATCAGGCCCTTAAGGTATGGCTTAAACTTGCATTATATTCCTCAA  
AAGCTAGACAAGGCTTTTTAGAAGAATTGCTAAAAAATTAGGCAAGCACCGAACGACTAT  
ACAATAAAACGACTCAGAAAATAAATTGGTCAAATGATAAAGTAATGAATGGTTCGGACG  
TCATGATAAAAGCATACTACCAGCTCATTTAAAAGGTTCAATGCTAGAAGTGAAACCTA  
GCGACTGGGTAAAGCTCATTTACATGCCGCTGCAGCAGTTTATGTGCAAGGCAAACGAT  
AATCTGCCAAAAAGGTATGGGCACGTGCTTAATGGTAATGGCCTGGACTTCGTCTGGGCC  
ATTTTATTTTATGGATTAATAAACCATATATCTCGACGTAATGAGTTTAGCAGGGTGATC  
CCGGTTAAACCCTGTATGCATCCAGTTATATAAAGGTTACTGGCTTGCCAGATTCAAGCT  
TGCTTGAATCATTCAATTTTTATCCTTTCTGGCTTAATAGATATTATAACTAAAAGAATAA  
AAAGATAAGTTTGGAGCAAGCTCAAACCTGTAAACAGGGTTTAAATTTTTTTGGAGATTTAC  
AATGGCTTTAAACAATCAATCGAATATTACTAACTTTACGCTTGATATACCGTCATCTGC  
TGGTATTAAGACCATGCTCATGAACGTGCAATCAGCATCAATACCAGGTTTTAGTATACC  
TCCGACAGAAATGCCATTAATTTCCAGGGAACTGCTAGACAAAAGGTGCCAGTTCAAC

AACCGAATTTGATCCGTTGATTGTTTCGAGTGTTGCTTGATGAGGATTTTGAAGCATATAC  
CGAGATGTACAGATGGATGCTTTCAGTGAATGACTAGGCTCGGCAAACCTCCCCTAAGTG  
GGGAACGGTTAATCATCTGCCAGCAATAACGCTTCATGTGCTTAATAACTCTAAGCGTGA  
TATAATTGCCTCATTCAATTATCATGGTGCTTGGCCATCTGAAATCGGTGAAATAGAGTA  
TTCTTACCCTGAAGATGGCGATGTTTCTGTGACATTTACAATTACCTTTTTTCTTCAAATA  
TTTTGAAATTGAAAAAGATGGTGAATTAATACAACCTTTGAGAGTATAACAATGATAATT  
GCGTTATCGGCGAAAAAGAGATGTGAAAAGACACAGTAGGCGATCTATTGAAAAAGAA  
GGTTTTCATAAGTACGCTTTAGCACAACTATCAAGATTTTCTGTACCGTGCAATCCAA  
GATGACAATCGGTTGCCAATGTTTGTCCAATATTTTGATATGAAGGATTTTAACGGTCTT  
GGTTATGACCGTGAAGAATATTTGCCATTTCTAATTTCGGATGTTTGGAGAATTATGCGA  
TCTGCATGGATGCTTGTGTGTGATGACCATCAAATCGATTACACGTATGCGCATAACCGGA  
TTTATTTCAGAAGCAGTTCATGGCAATAAGAAAGCATGGTCACTTCGTGCGACTGATGCAA  
ACATTTGGAACCTGATATTGGTTGCGCAATAGATAACCGTATATGGTTGCAATATCTAGAA  
AATTTCCATATCGAATCACGAAAATGTCGTTGTTGCTGACTGTCGGCAAGACCATGAAATG  
TCAGAAATGCGAGAATTGGGAGCAGTCGTTGCTCATATTATTCGTGCTACTGATTCAGTA  
GATACTCATTCCACCGAAGCAGGTCTTCTATCCTGTCTGGTGATCATATAAATGATAAT  
ACAGGAACGCTTGAAGATTTGCATGAATGCGTTAACAATTTTCGTAAAAACACTAAACCCT  
AAGGGTAAAAAATGAACGCAGAACAAACCAACCATCGCTTCCCTGAAAATTCGAGTTTTTG  
ATCTGAGCGAGCAACTTGTGCTACTCAACAACAAGCAGAAGAATTCCTAGTTGCGCTCA  
CCAAAATCGTCCACCTTTTGGGTGTGACCCCGCCGATGGTGAAGATAGCACTGCCCTTT  
CTTCGATTGTAGAAGCAGTAGAAGCTCTGGTTCCTTCTCAAGAAGTTGAAGTGGTAGAAG  
AATAATATTTACAGACAGCTTCGTAGGAAGATACGTTGCTTGTAATTTAGTGATGAAAC  
GCTGGATTTTATCTAGCGTATTCAAGAAGAAGTTCAGATTGCCAAATCTTGTTCCCTCGAGA  
CGAACTTCATTCTACTATCGTTTATAGCAGAGTATATGTTCCATTTATCCCAGACGATTC  
GCCTGAACATTTGGCCGATAGTTGCTATCTGAGAATTTTTGAAGCTCCAGAAAAGAATTT  
TCTTGTCTGGCGTCTGATTCTCCGCACATGCAAAAACGACATGCGTACGGCCAGGTCTT  
TGGCTCGTCAGCTCATGATTTTGACGAATACATTCCCTCACACCACGATTGCAAAGACAT  
TGGTCCCTTAAGTATGAAGGATCATAACGACTTCCCTATAGTAACAACACACGAATATGT  
GGAAGAATTACGTGAAGATTAAGCAAAAAGCAGATAATGTTCAAAGCTGCGAAAATTGA  
TGTACTATGAAATTCATGAACAAAACATTGTTCAAGAAATGAAAACCTAAGCAACCTTAAGG  
AAAATAAAATGCAAAGCAAGTAATTCTGTCCACTGGTCCCTACCCTGACTGAATCCGGCC  
GTGCTGTTTCTGTTGAAGTAGGCCCTGTTGTTACTGCCCTTGTCAAAGGTGAAGGTGCAA  
AACCGCTAGTAGTTGCTGAAGTTCGCCGTGAACCTGGTTGATGTTATTGTTTCATGAACCTC  
GCCGCTGGGTGAAGCTGTGACGCTGCTGAATAATTTTCAAATGCCCTATTCGGAGGGC  
ATTTTTGTAACCTATAGGAGAAGTTATGGAAATCTTTGTGTTTTATTTGTGATCACATAT  
TTGGCAGCATGTACAGTTTTGGCTATTAACGTGATAAAGTATAACAACATCAACATTCAGA  
TGGAATTTTGTCTGGCAACTGGCCAAATATGCGGAGTTGTATTGACAACTGCACTATGC  
AGCTACATTATCCGTTTCGCGTTTATACAGATACAATTGGAAAAATAAATGACAGATCA  
GCAAGAAGAATTTTTACATACGAAAACATCCGAATTAGTTAAAGTCTTGTGTGAATATGA  
CATAAATGGCAGTTTTTGGAGGAAACAACAACGAAGAAGTTTGTGCTATCATGTTTCCATC  
AGATATGCCGCCAGATGGTTATTCTGCTCATATTATCATCATGGTTATGAAACATATGAA  
AGAGCAATCTGGCTTAGATGTAGACGATCTTGATTGTCCTATTGGATGGGACTACTTTAC  
GCCTATGGAATTGTGATGGAAAACGTTGGCATTGCAAGAGTTGTCAGAACAATTGAGTTC  
GATTAACATAAAGCATAGACTTGAGGTATAGAAAATGAAATTTGCACCCGGAACCTGTAAT  
TCCAGAAGGATACGTCATTAATAAATCACTTCCCTGGGAAAATGATGGTGAAGACGACGATCA  
TGTCATTCATACCGGCAGGCCAATGAAAGATATCGAATTCCTTTGAGAAAATCAAACCGAT  
TTTCAGTTCATACCACGACGAAACAATAAAGGCTATGGCAACAAGATTATAATCCTGG  
GATGGCCGCCGATTTGTTTGGAGATTTTTGTAGAAAATAGGCATTTCTCTTTGCAATTCAA  
ACGCTATCTAGGGTTGACACCAGATATGTATGATCCACTTGATGGCGATTTATACGAATT  
CATTCTGCCATGACAATTTCCGCAAAAATGCTGAAAGAAAACATCACCGGTTATGCCAAAC  
AGTATTACTTCGATTTAATTTGTGTGGTCGAGTCAATTGAAATCGAGTATAACCAGTCTG  
AATACGTTTTTCCAAAAATTACACCTCGTTAAAATTAAGGTTATCTAATGCAATTTTTAT  
TTGCATTATTTGCAGCTAGCGTTCAATACACTGCTGTTGCACTGATTGTATATGTTTTGC  
TATATGGTTATGAATCTGTGAAGAATGGCGGAAAGGAAAGCCCGACTCAAAGTTTCCAG  
CAAAAAGCCTATCAACCAGGCAGATTTATGGAGCCATTGCAGCAGCATAGCTACCTGTAG  
CTTTTTCTAGCTATGGAAGCTAATTGAATTCATTTACGTCAAAGTAGTAGTCGATAATA  
TTTACAAAAGGAGTTTACATTGATGGGACTATGTTTTATGATAGTCCCATCAAATCAAC

ACGGAGTAATTTAAATGAAAATCTATCACACGCAACATATCGCGAAAGTTAACGGTATTA  
CAAAGGTTGACATGATTCGCGGCCATAAAACTCAAGGATTTTCATTGCTATATCATGTTTA  
AAGATGGCAAGGTCATTGATTGCGCCTTCAAAAATGTCACGGCACAATTCCGCACTATTG  
AAAAGATTGCTCGTGAAGTAGCAGCAGAACAAGAATACACTCTGTGAGGAACAACACAGT  
TCTGGCAATGGGTTGACTATAATACCCATCAAACCTGGCCGTAGAGGGAATCAATAACCC  
GTGCTGAAATACTAATACCGAAGGAGGTAATAATGAAAAAATTTGTTTGGTTTTGGCTCTT  
GCTTTTGCATCTGCTTATGCGAGCGCAGATTCAACCAATTTGATAATTGGTGGTTTTTTC  
AAAACATTACGAAAATGATGAAATTAATGAAAAACATCCGGAGATAGGGGTGCAAATTGA  
CAACTTTTCAATAGTATATACGTCGAAAAACTCGATTCAATAACCTTCGGTTCAGTTGGC  
TTATTCTGACACCTTTTACACTTATGGAATTTTGTATATTGGTTAGCGCGTTGGTTTTAT  
GACCGGTTATCGATATGGAACCAAATATGCCAATATCCGATGGTATAATGGTGTGATTT  
GGGTGCCGGGATAGCCCCGCTCGCCGCCATTGATATTTTCGGTAGATACCCCTATTCCGAG  
AGTCAAATTTGTTACAAGCGTAACACCAGTTGTTACGATGTTTCGGATTAAGATTGAACT  
TTGGTAAATTTGAGAACGCAAAATGAAACTATTTACCCGAATGGTAAAGAAAAAACTTTC  
AAATCGTGAAAAGCCTGAAAGAGTCCCTGTACGCTAATTTTGTATTCGTGGGATGCTGAT  
ATATTAGATATTCCATTTAACTCGACTGTACATTGGGGTCTGTGCCCATTTGATCAAGAT  
ATCTACAATGGAAAAGAAACGTTTGTGTTGGAATTTCTGCAAAAACCTTTTAGAAAAGGAA  
CTCGAGAGCCGAGCTGAGGAGCTTTGAATTGAAAACCTTCGTTGTA AAAACTGCCCGCTCA  
TCTAAAAGAATGGTTCATGTCTTATATGGGCGATTCGGGTGAACAGCATCTCATGGAACC  
ATGGCATGATGAAGGCATCGAAGGCGATCGCGTCGGTTTTAGATATCCATATTATTCTCG  
AAAGCGTGCCGAAGAAGTTGACGAGACCGCTGATATCGTAGTTACTGAGTATAGGTGACT  
TATTGCGAAACGTTTTTAAGTTATCGCTGAAATCGAGCCAAAATTCACATACCAGGCCCC  
CATAAATAGATATACCAAATAACAAAAGGTGAGCGCGATGCGGTAAGGAAGCGAAGCGG  
TTACATGCTTAATACGGAACCGATTAAGTTACGGCGGATGGACTGGGCTATCGGTAAACG  
GGGAGCATAGACCCGAGCACCTGGCGTTATTATGCAAGTATGGTGGAAATTGGTATACAC  
TGGAGGCTTAAAACCTCCCGCCTTCGAGATTGTGGGCTCGAGTCCCACTACTCGCACCAA  
ACTCAAATTTCTAAAGCATATTGTTTACACGCTTTGGAATAAGATATTATTA ACTTATC  
GAATCAATACACGCATTCAGTCTTGGATGGGATAAATGGTGAAAAGCCATGGTTTTCTG  
GAGCAAGCCTTAAGTGGACAGA ACTCTCATCCTAGTGATGCAGGAAGTGTTTTGTTTTGA  
AAAGAATTCTGGAAGATTGGCCCGAGTTGGTTAAGGCACCGGTCTTGATAACCGGCGAT  
CGTAGGAATACGGTCCATCCGTTTCAATCGGATATCTTCTCCTCAAATTGAGGTGCTGTGA  
GCCGAGCGGCTTAAGGCGGACCTACTGCAGGACATAACGAAAGCGTATCGTAGGTTTCAAC  
CCTACCAGCACCCATTAATTCTGAAGCATATTGTTTCAAGAGTTGCTGGAAATGAGATCTTA  
TTGTCTCATCGATTAACAAGTTTATTTTGGGGTGATGTAGCATAACGGTCATGCGGCC  
GGCTGTTAACCGGTGAGGAACTCTACGTTGGTTCGACTCCAACCATCAGCGCCAAAATG  
AATTTTCATGGAACGTTCCGGTAATGGTATCCCAAGCGGCTGTAACCCGCTCGCTCTGGC  
ATTCTTGGTTCGAGTCCAAGGCGTTCCACCAATTTAACATGAGAAATATATTTTATGAAG  
CAAGATCTATTTGATAGATACGGATCCTTCTGATTCAAAGAAGGAATAGACGGTGATTTT  
GCAATAACTGATGATTTAGTTCATTTCGATATTTTTCAATCATATCTATCAGACGACTAAA  
TTGCCATTTATATGAAAAACGGCAGCTGGGTTAAGAGCATTTCGCGCCAGATGAATTACG  
TTAGAGTATCTTCTCAATTTGAAATATTAACGATCTGGAAAAGCGTCGGGACTAAATG  
AAGGTTTTGTTTATCTGATAACAAATCCAGCTTGGCCTCATCATTTTAAAATAGGAAGTA  
AATTATCAATACAATCTCGATTATCATTGTACCATATTTTTTTCACCGAATCGCGATTTTG  
ATATCGTCTCTTATTTCTTCTCTAAATCTCGTTTTGCGGATGATATAGCTTTACACAATT  
TGTATGGAGCTGATGGCGAGCGGATTTATGACAAAACGGGAGATAAAGTGACAGATGCTC  
TGCAATTCCTCAATCATAAGCGCAAAATAGATAAACAAGTTTTACGAGCATCTCTAACTC  
AATTGGTAGAGTAGCGGACCTTTAATCCGTCAAGTCTGAGTTCAAGTCTCAGGGGATGCA  
CCAAATAACGGAGAGGTATTGCGGTAAGAGCCGTCCCGGCATGTA AAAACCGGTACCTTA  
CGAGTCTTGTGGAATCGAAACCAACCCTCTCCACCAGTTTTGTCAGTAAAGAAGTTGTAA  
TGCGTTGTCATCAGGCACTTATGCCGAGTGACGTTTCAACCATAACGGAATGATTCCAGG  
GTGCTACAATTTGAGCGGCGAGTGTATGGCCGAGCACACCACCTTTTAGGCGCCGGAAGA  
CGGGTTCGAGTCCCGTACCGCTGACTGTAATTAATTTCAAGTAATCATTGGTGTGACCTT  
AGTACTAATGGTAGCTATCCTGGATGTGACCCAGGGAGTACGGGTTTCAATCCCGTAGGT  
CACCCCAATGATTATTTTCGCGGGTAAGGTGTTTATGGATACATGCTAGCCTTCCAAGCT  
TGAGAAGACCGGTTTCGATACCGGCTACCCGCTCCAACACAAGTACAGGGCTCTAGATT  
CCTAGTCAGTTTCCCACCCTGGTTGATGCACTGTCCATTATTGCGCCGTGACTGGAGCC  
GGCGAGTTGGACAACCGTATTGTCTCCGGCACTTAGATGACCGGCTTTAACAAGATAAAC

CGGAAGACGTCCCGTAAAATCCTCGGACAAAACCTTCAGTAGTCACTCCCGTCATTTTGGC  
CGGTGAAACGAGGAAGTATAGACGGGTAAACGTATTCAATCTCAGCGTAGGCAAGTGGTAT  
GTCGTTCCGTTTGGGACGGAATTTACGGGTGTTTCGATTCACCCCGCTGAGACCAAATTAC  
GTATGCGGATACTTGGTTGCAAACAAGTCCGTAAAGTCCCTCGAATGTGGTATCATCTCT  
CCTGGCACTATCCCAGTGATGCGGTTATCCAGAACGGCGCAAACCTGAAGAATTGAGTCAC  
ATCCGTAAGGCCCTCACTCCAATTCTTCAAACACTCTTGTATTATGTGGTGGTTCGAGACAT  
CCCCACGTTCAAACCTGAAATCTCTATGTCCCGAGCTGCAGCGTTAGGGAAGAGTGTTTG  
AAGGATTGAACTAACTCTGAGGAACATTTTATGAATGTTGTCAAATTACAACCACGCGC  
GATGTCTGTTGTGATCAAACCAATTCATTGGTTCACATGAATTCTGCTATGGCCCATGT  
GATGCTGGTGTGATTGGATTGCTAAATGTGCGGTTTGTCAAAGAATGGGAAATCGAT  
AGCAGCAGTAGTACCATAGTCGTTAAGACTTAGCGTGAAATTGAAGTTGACACAAACAAA  
ATTTCCGCGTGACCTGACCGTTGGTGATTTAGTTACATTTAAGCAGATTTGATTTCCAT  
ACTCCAATTGATAGCATTTCGATTGAAAAGTTCATCTAATCTTGTATTTGCTTCATCTAAC  
GGAGATGGCGTAAATATACATGGTTAATTGCCGGTTTAGCTCATCTGGTAGAGCACAGCC  
TTTGTAAACGCTGGGGTGGTCCGTTTCGAGTCGGGCAATCGGCACCAAATTTGTAAATGAGG  
AAAATATTATGTTATTTGCTTATCAAGTTATTGCTGTTATCTTCTTTATTTGCTCTTTCT  
TGGGCGACTATAAGCGATATTCGGATTCCCCTTCGAAATTGCGGGTAATTTGATTGGCT  
CTGCTTTTGCAGGTGGTTTGTGGTCAATTGACGGTACTTATCCATATTTTTTGCATCGCAA  
ACCGTAATCGCTAAATAAATACAAAGGAAGGGACTTCTTCGGACCCGTTTCGTTAAGTAAA  
AGGGAAGACCATCTGGATATGACGAGTGCCTCGGCCTGTATCATATCTTGTGGCCCTTG  
GCCTCCCTCGAGGTTTTGTTTGGAAATGGTGCGCCAGCACGTTTCAATATGACATTGGT  
GTTAGCGGTAGCATGCCGGTCTCCAAAACCGTGCGGCCAGGGTTCGAATCCTTGATGTCA  
TGCCAATAGTGGATTAGCTAAGTAGGTAGAGCTCTCGACCGATAATCGAGAGCGCATAGG  
TTCGATCCCAATATCCACTACCAAATTTTTAGGAGAAGTGGATGAGCGGCTGGAATCGCT  
TCCCTGCTAAGGAAGTAAACCGAAAGGTTTCGAGAGTTCAAATCTCTCCTTCTCCGCCAA  
ATGTATCCTGAAGCATATTGTTTCAAATTTCTCAATGAGTGATATTATTAACCTACATCCA  
CAACAGAGTTTAGAGCGGAGACATAGTTTATTTGGTTAAAATAGTCCCCTGTCACGGAAC  
ACCACCGTGTCCGATCCTCGGTGGCTCCGCTCCAAATTTTGATGCGATGTAGAGGAGAGG  
TCGTCTCCTCGGGCTCATATCCCGAAAATCAGCAGATCGAATCCGCTCATCGCTTCCAA  
CTTCAATCGCTTGTGAAACGTGGGAAAATAGCAAATCTGGGAAAGGGTTCGCGAACCCGGG  
ACCTTAAAGTAGCTTTCTAAGTACTTGTGTCTGGCAGTTCACACATACCTATATTTGTG  
ATGGGTTTCGAGACCCTAACATGCGCCCGAATAACAACGCCGGCGACCAATCGAATGATCG  
TTATCGGCTTTTTCAATTTGACGGCCCTGTAGCTAGACGGTTCAGCAGGCGGCTCATAAC  
CGCTCGTAGTACGTTTCGATTCCCTACCAGGCTCACCAATTTGGGTTCTTCGTTTAAATGGGA  
ATACCCTAGGTTGCTTTGCATCCTGGTGTGCTATTTTCGATACTAGCAGAACCACCAAT  
TTGAGGAAAATACTATGGATAACGGATCCGGCGCGCCTTGACCATCGTGTGCATTGAGTA  
ATTTTGCTCCGCATGAATTCGTTATCGATGGGAGTAAATGTTTCTCAATGGAAGGATTCC  
TTCAGTCTCTCAAATTCAAATCGCCTGAAATGCAAGAACACGTTTGCCTCTGGTTGGTA  
AAGCCGCCAAATTTAAAGGCACAAGGAAAAACTGGTGGAGAGATCAGACTCTGTACTGGA  
AAGGTAAACCGATGCGTCGGCAAAGCGATGCTTATTCTGATTTAATCTACCGTGCGTACG  
ACGAAATTGCGAAGAATTCGGGATTTCAACGAGCAATCCTAGCCACCCGGAAGTCTTCGT  
TAACCCATTTCGATGGGTAAAAGTAAACAGAATGAAACAGTGTTAACTGAACAAGAATTT  
GTTACAGCTGTATCGTATTCGAGATAAACTCCAAGCCGCATGTTTTCGGCTTTTTAGTC  
ATATGGTCTCTTAGCTCAGTTGGATAGAGCAGCGGCCTTCTAAGCTATGGATCATTGGTT  
CACATCCAATAGGGACTGCCATATTAAGGTGATCTCATGGCGACGATGCACTCAAATC  
TCATGCCCGAGAGGGAAGGGGCAGTGGAAATGCACGAAGCGAGAATTGGTATAATTCTGC  
ATTGTGAAAAACACCCGGCCCAAATAGAAAGCCCGGAGTAGTAAAAGTACAAATTCAGA  
AGATCAATTAACCTGATGAACAGAAGCTTCGCAGGCGTCAACAGGAATTGCTCAGATCAAT  
TTATTAAGGTAATTAATATGTCTCATTTACAACGTATGAAAGATGAGCTGAGTGAATTGG  
GTCTTCGACTGAATAAGCTCAACGATTTTATTATCATATCTGATATTTACAAGACTGTTG  
ATCCTGATGAGAAGTTTCTCATGGAGCAACAGTATATCGCGATGGACAGGTATTACGATA  
TGCTAAAACGGCGAACTATGCGTCAATCATAATTAGGGCTCCTTCGGGAGGCCTTTTCGA  
ATTCTCTCGACGAGGTTTCAACATGAACAAATATTTTCGATCATAACTCTTTCTTCGTA  
TGCAATGCGTGTTGGTTCGGTCAATTTACCCACCGGGGTGCGAGATGGAGGTATTGAAAGA  
TCGATCAGATTTTTTAAAATTCAAATAGAACAATATCCATAAATGTTGGTTCGGCAAATCGG  
TAAAACAACCTTCATTTATCAAGCTTGGTAACGAATTAAGCAATCATGCCAAAGTCGCAAT  
GGTAGTCATGAACACCCAAAATAAGAAAATGACCAAAGTATGGGAGCTAAATGCGATAT

TCTGACTTTTTAATGATATTAAGAGACAATTGCAGATTCTGGATTTAGAAAGAATTCAAT  
TCATCATGGTTGACGAGAGCGAATTTATTCTCTTTGATGAGAACAGGGTGCACGATTTTT  
ACAAATGGGCGAAATTAGTAAAGGCCGAATTTGTACTAAAACTTGATGCAGTCTGTTCA  
ATTATTCAAGCCTAGTGTTAATATTGCCATATCAAATAAACACACATTACAAGGATTAAT  
AATGTCTAAAGCTACTCACACTATCGATTTTCGGTTTTGGTAAAATCGATGCTCAGAAATC  
TGGTCATTATTTCAATGTTATTGAGAGTCATGACCCAATGATTCCCACAAATACCAAATT  
TCTAGTCAATGACACTTTGGTTCTGGATGCAAAAAGTAATCGAATTTGAGTAAGCGGCCTT  
AACGCTTATTTTTCACTATGGTAAAAGACATAATGACTGAGCACTACAATCGCGATAGTG  
CAGATGACCCAATCAAAGTTGTTAAAACATCGGGCGTAATTTATACGGCCATTTTGATGC  
ATAAATTATCTTACGATCAACTACCTGGAGGAGCGCTGCTCGTAGCAGACAGAGATATTG  
CACATGACATATGGCATGCATGTGATAAACCGAAAATGTTAGATACTTTGTCATTTTGCA  
AAGATAAAATGCATTTTGAGCTTTTGCTTAGGCCTCCAGTAATCATTTTTGTAAGTGTG  
CCAATGTAGAGAGCATAACGCACTGTTTTATTTCAAAGACTGGGTTTTCAAATCTACCG  
AATTTACGGCGTATTACCTCGAACAAATGTGACGGTTATCTCCAAAACTGAGAAATCTTA  
TAGGATTTTTAAATGTACTAACTTTACAAAACCCTTCCGATATATCAAAGCCAAGAAGGTT  
GGATTATCAAATACCCTGAGTTAGCCAAATTGGCAGTTGAGCAAATGCATGCTTTTTGGC  
CATGGGATGAACCAGTTGTTGATAATGTTGCTCAAGATCTGCGCACCAAATTGACACCTG  
GCGAGTTGAACGGTATTACGACCGTTCTTAAACTGTTTACACTTTACGAGCGCAAAGTCG  
GTGAAGATTATTGGTCATCACGAATCGCTCGAACATTCGGTCGCCCTGAAATCAAACGCA  
TGGCAACTCTATTTGCCGCCGTAGAAGGTAACCTCCATGCACCTTTTTACAATAAAGTTA  
ATGAAGTTCTTTATCTGAATAACGAAGCTTTGTACACTTCTTGGAAAGAAAGCGACGAGT  
TATCTCGTCGCATTCAGTTTGTCTGGTAAATCGGTATCAGACCCCGATGATGCCAAATCTT  
TTGCAGCTTTCACTTTCATCGAAGGTGCCGTACTTTATTCCAGCTTTGCATTCCTCAAAC  
ACTTCCAAGCCCAGGAATGTGGCAAAGACTTGATGCGAAATATTTGCCGTGGTGTGACC  
TTTCAGTTGCAGATGAACATCACCCTCAATTGAGGAAGCTATGTTGTTCCAAACACTTT  
GCAGTGAATGAAAGAAAAATATGGCGAAGATGTCCGGGCAAACTGAAAGATGACATTA  
TCAACATGGCATATCAAGTGTTTGATCACGATACTGGCATCATCGATCTCGTTTTCGCTG  
AACCAATTGATGGTATAACTGCTGACGAGCTACTAGTTCTTGTCAAATCTCGAATTAATC  
TTTGCTTGAAAATCTTGGTTATGAGCCATCTTCGAACTCGAAAATAACCCTATCGCTG  
ATTGGTTCTATCGCACCATTAATGCCAAGAAATCCATGATTTCTTCACTGGCTCAGGTT  
CGGAATACAACATCAATTGGAACCGATAAGGTTTCTCTGATTGCTGGTAAAATAATTCTG  
CCCTGGTAAACCAGGGCAATCTTTTTAAAATCATGGTGCTTTAATGTCTAAAATTTCAA  
ATTCGTATCTTTGTCAGGGCGAACGCAAACATATGCACTCAATTGGCGAAATGCCAGAGTG  
GTTTACAACGCAGGGCTATTCGATGTTCCGGAAAAATTATCAGTACAAAGGAGAAACCGT  
TCGTGGTGCCTCCGGCGAGTCGCTACAACACTTGCAAAGCATGATATCGGGCCAGAAGC  
TCCAGAGCGCTATTTGACCTTCTCTGGTCCGGTAAGCTGGCGATGGCTACCGCAGTTTT  
CTGTAACACCGGCACAGATCGTGGAATGCCTGTTTCGTGCGCAGGAAGTTATGATGGGGA  
CAGTGTCTTGACTTCTACGATGGCCAAACGGAAGTCGCAATGCTCGCTAAAACGGTTT  
CGAACTGCGTCATATCTTGGAGACATCCGACCTCTTGGGTCCGATGTCTCGACCAGCCA  
CAACAAAGCAGAGGGACTCGTACCTGTATTTGACAACCTTCGTAAACACCAAACAAGGT  
TGCAGCTGCTGGCCGACGTGGTGAATGGGCCGGTTACGTTGACTTCTCGCATGGTGATTT  
ATGCGAGCTTTAGTGGTATGTGTTGAAAAACCCGGCTTCTGCACACGTTGGTTGGGTATT  
TGAGAAAGAAGATTACGATAAGCTTCTGGCTCGCGATCCTGAATATATGGCACGGTGGAA  
TGAAGTCTTTATATGCGCGCTCGTACTGGTAAGGGCTATATGTGGAACAACCTGGATCGC  
TAACGATCTTGCTCCACAAGCAATCAAAAATTCAGCTATCCGTATTCGTTCAAGCCAGCT  
GTGCACCGAAATCGCATTGCCATCTGACGATATGCATACTTTTACCTGTATCCTGAGCTC  
ATTGAATTCGCCTCGTTGGGATGAAATTAGTGCTGAAGATATCAAATGGGCTGTTCTGTTT  
CCTTGATTCCGGTATGGTCAGAATTCTTGGAAAAAGCGAAAAAACTCCCGTATGACACTCT  
TCTTAAAGCTATCAGATTTACCGAAAAAGCACGTGCGCTCGGTCTTGGTACTTTGGGTTT  
CCATACCTATCTCCAGATGAATGATAACCGCGTTCGAATCTGGCGCCGCCCCCATTTCTGAA  
CAATAGCATTATTCGCAAATCAAGGTTTATGCAGAAGCAGCTTCTCGGGAATTAGCAGA  
AGAGCATGGTGAACCAGAAATGGTGTGTTGGAACAGGTATCCGTAATGCTACATTTATCAC  
TATTACTCAAATATGAGTTCTGCTCTAATGGCTGGTGGTGTATCTCAAGGTGTTGAGCC  
TCTCGTTTGTAGCAGCTTCATCCAACAGTCAAATGCTGGTGTATTTAGTTTCGCTCGAACCC  
GGTATTGGCTAAAGTATTGTCCCACCGTCTTTCTGATAAAGAAATCAAAGACCCCATGGA  
AAATATTGCCACCTATCATAATGGTTCTGTTCAACATCTGGATATTTTGACAGACAATGA  
GAAAATGGTGTTCAGACAGCTTATGACATTGACCAACATGCAATCATACGTCTTGCTTC

AGATCGTCAACGGCACATTGACCAAGCGCAATCAATCAATTTGTTCTTCGATGCTGATGA  
AAAACAATCAGTCGTTGCGTCCGTTTCATAGAGCGTTTATGGATGACCCACGTCTGAAATC  
TCTTTATTATTTGCGTCCGAGCGTGGAGTAAAAGCTTAAACTGGTGAGGCGGAGTGTTT  
AGGATGCCAGGGCTAACTGCAAGGGGCGAAAGCCCTTTTATAGAACATATGTGACAAAA  
TTCGAAACATCATCAGGTGAGAAAATTTAGTGTGGTATGCATAAAAGTACGCATGCTAAT  
CCTTTATCGGACCCCTGTTGTGGGTCTGGACTAAGTTTAAGAAATGCCAGATCAAATAC  
GGTGTTCCTTGTATAAAATCGGTTGAGTGGTTTGAACATTCAACCGAAGAAGAGATGATT  
GAAGCGGAAATTTTGTAAATTTCAAGTATGGTTGATAACCCGAATTGTAGTAATATCGCA  
TACGGTGGTTTTGGTGGAAATGCTTTACGGTATGCATCCGATGAGAGAAAAGAAGCATT  
CGCGAAACATCACGCCAGAAAATGATCAAGCGATATAAAGACAGTGATGAAATTA AAAAG  
CACAGCAACCGCGTGCGAGTTGCATGTAATCGACCGGAAGAACGGCAAATACGAGCTGAG  
CGACATGCTGAACTTTTTACCCGCCCTGGTTAATCCGAGCGTATGTTCGGCAATACAAAA  
GAAACGCAAAGCCGCCCTGACGTCAAGGCCAAAAGGGCTGAAGGTGTAAGAGCGGGCGAGA  
AAGGCAATAAAATTCTTAAAACAAATTAATATGTCGGACGTAATAACTATTATAGATGGG  
CGATTTGTTGATAACTTAAAACCTCGCGGATGAGTTGTCAACAAAATATGATATCAAATAG  
ACCAAATATTTTGAGAATTATCGACCTGATCTTAATTCATTGCTGGGAGAAATGTGGCT  
CTACTAATTTTATGCGCAATTTTGTCTATGCCAATCCGCTTTTTGGATTTGGGTATATA  
ATTCAAGTATTACTTTCAACTGGGATTTCTTTGTTTGTGTTTGGAAAGGAATTACTGCAATA  
GCTTATTATACAGGAAAAATAAATGATTTATCTTTCCGCGCTGACTGGTGTGCAAACCTG  
CTAACTCGTAAAACCTATGCTTGCCAATGTTGACTATAAATATATTGATGTCGATTCTGA  
TGGAGGCATAGTTCTAACAGCAAATAACGCAATTCGAGGTTGGCCTACAATGATTAATGT  
AGAAACAACCGATCGTTTTACGGGAGTGCCGAAAACGTTGCGGAATTGAAGCAAAAAAT  
GGGAAGTAAACAATGGGCTCTTGGGCGCCATTTTCACTTTCATTTTATGGTGACATCG  
CGAAAAATCCATGGTAGAATAAGTTTGAATCAATAACATATGGAATATTATCATGAATCG  
CTACAAACTTCGGAGGACCCTCGCAGCAGAGTTTAAAGAAATCAACAGAAAAATCGTAGA  
AGATCGGTTGGCCTCTGGTTCATGGCCTCCGTTTTCATCTGGAATACACTTATCATTTTCAT  
AGATGTCCTTTTGCTTCGCAATATCAATATCGATCATACTGAGCTTGATCAAAGGTTT  
GAAGGAAAAAATACACGAAGTTGACGCATACATGTCTCTCCGTATCCTCCGCATCTTCA  
CGAAAAACGAGTCGAAGGTGTAGAATATCGACCAATTCGCTTAGAAATCACTAATGGATC  
ACTTTGGAGTGGAATTACTCCTTCCAAAATTCCGCCATCATCAGAATACAGGTCTTCTTT  
GACATGTCGAATGGCAATAGTCAATTTACGACGTTTAACTGCAAACGTGACTACAAAAGT  
AATTA AAATGTAGGGGTTATGAGGCTATTGATGATTCTCTTGATCGTATTTGCCACACAT  
GTTTATGCCGGTCCGTCGGTAACAGATTTTACGGGACTCAAAGTACAATTTCTCGTAT  
GCTTACTACTATGGAAAAGCTTATGACTTGACGGGAGAATTGCGAGATGTCAATAATCCG  
AATTACTGGAACGATCGTCATCTTGGCATATTATTCGCTGCTATCGCATGGGAAGAATCC  
TCAGCTGGAATAAACACTGGTAGATATAAAACGGGTCATCATGCGTATGGGATGGTTCAA  
AATCTTTACACAACGGTTACATCTAACTCGACAATGGAGGAATGACGTACAGACATTGG  
TATCTGAAAAGCAATTTGGAGCGTAAAAGTTCTTCTGCCGAATGGGCTATGGGTGAACTC  
TCATACTGGCTCAAGGTTCCAAAAGGTAGCATTGCAATTGCTCTGGCTTCATAACAACGCA  
GGTTGGAATTACCATGCTGGTTTCGAGCTATCCCGATCGTGTGTTTGGCAAAAAATCAAGAG  
CTCAAACAACGGACTTTATTTACAAATAAATGTTTACATTTTTGAGGTTATGGGATACT  
ATAACCTCAGTTAAACAACCAATCAAATGTGGAGTAAGTTATGGACTTCATCATCAATA  
AGTTCTGTATCTCGGTTATTGTGGCTGTTGAAGTTGATCGCGCTAAATTGGAAGGTTGCC  
GATTTTTCAATTCATTTACGATATGAACGTAGCTATGCCAGAAGAATCTATCGGATACG  
AGTTTTTGATTACTCGGATTCCCACGATTCCCAAATTACGATTCAGACCGATTACCGAA  
TTATGATTCACACCGATTTAACTCGTCTGAAGTCCGCATAGATACTGAAAGATTCATTC  
GGGAGTACTGTTTGTGAGGTAAGCGCAATATCATCTTTTGTATTGCAGGGCGTCCATA  
CGTGGACGCCGTAGATATCGAATTC AATCGTATCCATTACAGCAATGGAAATGACCGTTA  
TGGCTTGGCTCATTCGGGTGGAGTCGGCTTCCAGAGCTATGATTTCAATGATGTTCTCGC  
ACACGAGGGTGAAATATGAAAAAGTCAATAGCAGCTGTTTTAGCACTGTGAATTTATGGT  
TGC GGCGCGGCCGCTCCTGCAGTAGCAAACATGAACGAAACGCTCTGGTTTCTGAAAAA  
TCTGGAGTAATCAAAGAATTCACCGATGAAAATGGCACGTATGAATCTGCTCTGTCCGTT  
TCATGTGATATGCAATACGCACAGAAACGTGACGATTGCCTTGGGATTATTTTCAATAGT  
GTTTATTGGATAATTGACTCTGCACGATCTGACCACAGTATTTTATCTGGGCCTGGGCGA  
GTTATGATTA ACTTCTACGGAGTTGTACAAATCGTTGACTATGTTCCGGACTGGGTCCGCT  
ATCGTTATTTGGCGTAAAGATAATCCCGATTGCAACCCGATAGGCAAAGTAATGTCAATT  
ACTACACCTTCCGGCAAACGAGAGTACACAGTATGATCGGTAACACAGTCAAAGGCAATG



CAATCAGTCTCTTTCTGAACGGCGAATATGACATGTTTGCATGGGTGTGACATTTTAA  
ACCGAATGGGTTTTGGCATTGCTAAAGAAGTTCGTGAACGCCTCCCTGAGCTTTGGGTTT  
TCGATCAAAAGACAGTCGAAGGTGATCGTTCCAAGCTTGGAACGATCTCGGCCACAAGTT  
ACCCCTATGCTGGCCTTGCCCTCAACTTCTATACTCCGGCGAGTTACTGGGACCCTAGCG  
ATATGTTGTCCTATGATGCGGCCCGTTCATGCTTTGAAACCTTGAAAACCTATGTGTCAAG  
AAACTGTAGATTTTGGCCTCGGTAAGCCGACTATGTGTATTCCTAAAATAGGTGCTGGTC  
TTGCCCGAGGTGAGTGGGGCAAATTGAAGCAATCATCAACGAAGTAACTCCAAATCTCG  
ATATTACAGTGGTGGAAATTCGATGGCAGTCGGTAAATGGCAACAGTGTGGTCCGTTGATG  
AACCGTATCTTCGAATGTGCAATAGTCGAATGACTTGGCGAAGTATGTAAAGGTATTATA  
ATACACTAATATCGTGACGCGGGGGATGTAGTTCTCGTGAATTACGAGTTGATGTACCAC  
GGCCGAGTGTATTGGCCAAACCTCAATGGTGCCGTAATGAAATTTGAAAAGAATTTT  
TGATTGAACGCATTGGCGAATCGCTGGAAATCATCCAGGAAAAGGTATTCATCAGAAC  
TGTGTGGCACATATGAAACTTCAGTAAACGTAGTTGTGACCGCGGGCGCTAGACTGTTT  
ATTACGACTTTGTTTTCTCCTTTGAAAAGGATGGAGTAAAGCGCCATTTCCGCGAACCAT  
ATGAAGTCGGTGC AACAGAAGAGCAGGACTGCGCGATTTGGGAAAATGAACCTGATCTGG  
TGGATGTCAGTGAAGTCGAACCGTATGAAGTGACTACAATTGCATACAAGTGGAGAACA  
ATGGCTAAAGAAATAGAACGTAAATGGCTTGTTAAATTCATTCCATAACAAGAATTTGGAG  
CAGTTTCTCATAAGCAAATTCACAATTTTACTTTGATGGTAAACGCTCTCGAAGTGTG  
ATGGAAACTGGCGTTCGTTAAAAATTCATAGAAACAGTGAAAACCTGGCGCCGGTTTGGTT  
CGCGAAGAGGTGAAAACGAAATCGACTAGAATACTCCATGGGAAGCCCAGGATGCTGCC  
GGTTTACCAACTTGTGTTGTTAAAAACTCGGTACGAAATCCCGCATGGTCATGGATTAAC  
GATCGAACTCGATATGTTTGCTTGTGGGGAACAGTATATCGAGATCGAATTTGATAACGT  
CGAAGATGCCAATGCATTCATTCCACGGGGCTGATTCGGCGAAGGAGTTACCAATGATGA  
ATATCACACCAACTATGCACTTTTCAAGCGGCTCAACGAGGTCTAAATGGCAAGTCTTCA  
TTTTCACTATGCTGCAATGGATTCTGGCAAAGCACACATTTGCTTCAAGTAGCACACAA  
TTACGAAGAACGTGACATGCGTTCTATTATCATAAACCCCTGCGATAGATACGCGTGATGG  
TTCAACCGTATCCTCAAGAATTGGTATATCGCGGCCTGCTATTATGGTGAGGCAAAGCGA  
TAGTTTGACCGCCTTAATCAGCAAAGAGCATATTGGGCAGCACATTAGTTGTGTTTTGGT  
AGATGAAGCGCAATTTCTGCTTCCAGAACAAGTCAGCCAGTTTACGGCTGTTGTAGACGC  
ACTGGACATTCCAGTAATGTGCTATGGATTGTTGTCTGATTCAAATGGTAACATATTTCC  
GGCAGCAGAACGACTGATGGTCTTGGCAGAAGAAAAGGTTGAGCACAAGACCATATGTTG  
GTGTGGCACCAAAGCTACAATGAACATGAGAATCGATGAGATTGGCAAGAAAGTCTGGGG  
GCAAATTTGTTTCGATAGGTGGCAATGATCGCTATATTTCAAGTATGTGAAAACACTGGAC  
ATTGGGAAAATCTTCAAATAAATTTCAAAAAGATGTTTACAACAATATTGTTTTGTATAG  
AATATCCTCAAGTTAAACGAAATGAGAAACACATTATGAAATGTTCTGATGTTTTTTGCC  
AAGTTCAACTTGCTCAAGCTTTTGAACCTGAAGAGTTGAGACGCAGATTAGCTCCGGTTG  
GAAAATTCGTTGCCGACGAAATGATTTCAAAGCGTGTCTTTACAATCACCTTCGCGGGCG  
ATAAATTCCTGGAATTTACACCAGAAATATCGTTGACTATCTAAGAACTCTTGAATATG  
AGATTCGAACCGAACCTCATCGTAATGAAAGTTATATCATCGTAACTGCAAACCCTAAT  
TCAATCAAAGGAAATATAATGCGTACTATGTCCACAATTCGAAAATTACCATGAACAT  
GGGCCTTTCTATCGCAGCCGGTCTGCTGACCGCAACTACTGCCCTGAATACCTTTACTGT  
GGTCCATGATGGTACCGTTGCAGCCACCCTTACTGGGTAAAGTTAGCCCGAATATCAT  
GCAGCCCGGTCTGAATATCATCAACCCGCTGGCATCAGTTGATACCTATTCAACTCGTGA  
TCTGAAGATGGAATTCTCAAACGTACAAGTTCCTTGTCAAGATAAACTGAAAACCTCTGT  
CGATACCACTCTGATGCTGCGATTTCGACGGTGATCAAGCCCAGATGGTTCGCATCAACGG  
CGGTACCGAACGTCAGGCCATTGATAAGTGCGTTGCGAAGAAATTCGAGAGTACTGTTCC  
TGAATCCGGCAAACATCAAGAAAGCGCAAGATCTGTTTGGCGATCCTACCACTCAGTC  
CATGCTGCAAGACATGATCAAACTGAAGTCAACGACTATTCCAAGCCGTTTGGTTATGA  
GGTAACCGAAGTGTTCCTGCAAGAGATTACTCTGCCGAAGCTGATTCAAGACCAGGTTGA  
GCAAACCAAATAACGTGAAGAAGCCGTAAACCAAGCCCAAGCGGATCTGGATAAAGCCGA  
AAAAGTGGCACAACAACAGGTTAAGACCCGCGAAGCTGCGCCTGAAGCTCGTGAACAAA  
CGCGGTTGCTAACGAGCCTGATGCTGATGCTAACTGTACGCCGAGGTAAAGAAGCTGA  
AGCTAACGCTCTGCTGCAGAAAACCTTACTGCTGAAATGATCAAATGGCGCCAGCTGCA  
AGTCGAAATGATTCATGCCAACAAATATCATGGTGGTGTACCGCAGACTGTGGTTCGGCGC  
TGGTTATGATGGCCAAATGCTCATGGACATGCGTTCCAAGTAATTTAACTCGGGCTCCTT  
CGGGACCCCTTTTGTGATGAGATAACTTGTTAAATTTGGAATATTTTATGTTTAGCCGTGGT  
TCTACTTTAATCGAATTGATGGTATTAGTGGCGATTGTTATCATTCTGTTAGCCATAGCA

ATACCGGCTTTTTTCGGAGAACGAAATTTATAATCCGATCAATTCAGTATGCCCTCATGGG  
TTAACAACCGCAATTACGCCAAATGGCGAAGAAATCCTTGTCTGCCGAAAAAATCAAGTG  
ATCAATAAACAAACACTAACAAATCGGAGAATAAATGCAATAGCAACTCAACATGGGCATC  
ATGGCGGCATTCGTAGCAGCAGCACTTTCTGGTTGTGGCGAGCAACAGTCTGATACATTT  
TCTTATGATGGTCTCGGTGGAGAACCTAGGCCTACCGTAACAGCGACTTGGGCAGAGCAA  
TGTCAGAAGTGGGGGGTGGTTCGACGGAACAATGCCAACTAGCATTTAAGCAAGCAAAG  
GATGCACACACCTCAGCTGCACCGAAATTCAATGACCAAACATCATGTGAATCTGGCACA  
GGTGCTGTATGCACCCAAACACAAATTCAGAATTCGGATGGTAGTTTCAGCGACGTGTTT  
GTTCCAGCTATGGCTGGTATGATTGTTGGCCAATTGATGTCAAGCAATGCTCGCCCGATG  
CCAGTATATGCGCCAAGTCGACCCGAAGATCCTCGAAATGGCTTCATCACTGCGAATGGT  
TCCTACGTTCTCCTGGAAAAGGTTCTATCGGCGCAACCACTTTCAAACTTCCTTTTGC  
AAGGGAAGTTTTGCCAAGCCGGTAGCATCTTCTAAACCTGTTGTGAGAATGTCATCTGGC  
GGTTTCTGAAAATCCGGTGGCTTCGGCTCTTCACGTGGTTAATTTCAAAAAGCGGTTTAC  
AGTGATGGGACCATGATTTACTATAGTCCCATCAAATCAATAAGGAGTACATCATGATTT  
ATGCTGGCCAAAAATATAGAATCACCAGACCTGTAAGCGAACAGCACATGGTTGTTGTTG  
GTGATATTATAACAATCTCCCAAATCACTAGAAAAAGGCATTCGTTCTATGGATATTTCT  
GTTGACGATGATGGAATTCATATGAAGGAATTCTAATGTTTGATGGCCCGTACAATATC  
CAGGAGTACTGGGAAAAAATCGAAATGTGCATGGAGGCCGTTTAAATGATTGACGGAATT  
TATCGGATTATTGGCGAAATCTCTATGAATCATCGTTGCATTAGCCAAGGTGACGAAATT  
TATTTGAAAGAAAATGAATACGGAAATATCCGCGGTCCATCAGTTGACTGGGACGGGCAT  
GAACTGAAATGGTTACATTTTGTGCCCAGACGCAGTGGGAGAAATTTCCCGACAAAAT  
TACCACGGGGCTTACCGAATTTGGATTGACACTGTTTTGGAGAAAGTAGAATGAAACGCG  
TCTCTATTGAAGCTCGTAAAGATTGGTTGCCACAGTTGACTTCTGAAGGTGTTTTGTGGA  
CCACTACTGACGAAGGTCCTTATTGGGCAGAAGCAATGGTTCAGCCCAAGGATTACTCCT  
TCACTCGCAAAGAGCAAGATCAACTCGAGAAAGCCGCTAACAAAATCCATGAAATGTGTC  
TTGAGACAATGGAATGGCTGTTTACTAGCGACGCCACAAAGCAAACGAAATTTTCAACA  
TGTTCAATTATCCCATACGATTCTCGTGATCAAATCATAACGCAGTTGGGAAGATGACGAAT  
AGGGCCTTTATGGACGGTTTGATTTTCATCATGACCGAATACCGACTCAAGCTTGTCGAAT  
ATAATGCCGATACCCCGACCATTCTCATTGAATCTGCGATTTCTCAATGTTATTGGTTTA  
ACGTTCAACGCGAAAAATGCCCTCAAGAAGCGTTTCAATTTAACGAAATTCATGAATCAT  
TTGTTAATCACTGGCGTGACATGAGCACTTATAACGCAATTGGCGATAAACTCAGCTTTG  
TAGCTACTACGCAAGTTGAAGATTTTGTACATTCGCATACATGGCTGAAACTGCTTCAG  
AAGCTGGACTGAATGTAAACCTGTTTCGATATCGCGGAAATTCAGCTAGGTGATGACGGTA  
ATTTTTATGAAATTGAAGGCCAGCATATCGACACTTGCCTCAAACCTGGATCCATGGGAAT  
GGATGCATGAAGACGATTTTGCCAAAGCCATCGAGGGTTCGCAACACTCTGTTTATTGAAC  
CAACCTGTAAAATGCTGCTTTCCAACAAAGCACTTTTGGTTCTCCTTTATGAGCGTTATC  
CTGATTCCGAGTGGTTGGTCCCAGCCTATACAGAACCTGATTTTGACCGATTCAATCTGG  
TCACATATGAAAATCCGAAATGGGTGTCAAAGCCTATTGTTTCTCGCGAAGGATGTAATG  
TTCATATTTTTGAATATGGCGGAGAAAGTGGATTCCCGATGATAATTACGCAGAAGAAC  
CGTGTATCGTACAGCAATATATCGAATGGAAAGATTTTCGATGGCTGCTACCCAATGCATG  
GTGTATGGATGGTAGGTAGCGATGCCGTGGGTTTGGGTATCAGAGAAGATGATAGCCGAA  
TTACCGGTAATAACAGCCGACTTATCCGCACGTCTAGAAAATTGACAAACAGCAGATG  
ATTTAAACCCTCTGTAAGGCGTTAAATATGATAGGAGTATATAGCCATGGATTGGCCATA  
TGCCTTGTCATATTGGTTAAACCAGTATGCGCTAAAGACAAAGGCATCAAGTAGGCTTTG  
CCTTTGTTTAAATACCATCAAGGAGGGGTCAATGGCCCATTTGTGCTTTGTTAAAAACATT  
TTCAATAATCACATCGGTTTTAGCTTCTATGCACTTCGTAGAGGCGGACCGTGAAAATGG  
GTCTTATGATGAGTACATGCGTGGCGCTTTAATAATGTATAGCAACGAAGTTGCGCCATC  
TCTAGATAATTCGGTTGAATTTCTTAAGCATTGTAACGATAAATGGAAATCTGCTAAATG  
CTCTTCGAGTTGTTATCAAACCTGGAGATCTTGAAGCAAAGACATTCATAGCGGAAAGAGA  
AGGTCATGGAAGTAAGATTCGGTGTGTTGTAACCGAGCAAACAAGCATTTTTGTGATGAGT  
TTATTGGTGCGTGTTTAATGTCAAGCACATGTGCGCATTCCGCGCACGTTTGTGAGAAAG  
TCGTATGAAAAGCATATAGCATAACGAATATTGCTATGCCAATATGCCAGGGCTGATTGAT  
ATTTTCGCTGAAGCGTATATGGGTTTACGATTTACATATCGGCCGCGACTGTCCATTTAT  
AATGGAACCTTTGAGTGATTTGTCAAGCAACTTGCCAAGATGGCGGAAAAGGTATCTGCC  
AGTGCACCTAATACGGTTCTCAAATACACCTAATATGATATCCAAGAGCTTTGTGCTATG  
ACAATGTATGAACTATCATTGCACTAATTCAAATGCCCTGGTGTGAACCAGGGCATTTTT  
GTATCCGTTTGAATCAAATCAAATGGTTGTACTCTTACGTTAAACGAGCTTAGAATG

TTATCATAATCAACCAACGGAGACAACCGATGAAACGTGTTAATCAAATGCCCAAAAATG  
GTCAGCTTGTAGTTGTCTGGGTATGTGACGGCAAACCTCTGGTCTGAAACCTGGCGCTTGA  
ACAACGGGGTGGTTGAAATCCTGATGGATGATGACACTGCTGATGACTGGCGTACAAACG  
ACTGTTATTACGATGATCGTTATGAAGATCTCGAACTCAACTATATTGTGATTTAAAAAT  
GTCTATAATTCAGGAAATCGACAAGCTGTTCGAAACAAATAGGTGTGGAAGCATCAGAATT  
CAAGATTTCCGCCTTTTAGGAAAGTTGTGCGCAAACCTGAGTGGTCCTATGGGCTTTCATT  
TGAGCGCGAATTCACTATTTACGAACATAAAGAAACGGGCTATATTATCGCAGTTCATTC  
TGAGCGGCATAGAGCTCAATTTGTCAACGAAAACAACGAAGAGGTTATGGGTTTAGCTGA  
AATGATCGTTTCGGTGAGCGAAGTAGAACCTCACAATAGCAAACATGGCACACGTTGGCA  
ATTTGTGTAACGCTTTAGTCATTTTAGTGTATATTACCAGTACAATGGTTTAGACTAAAA  
AGACTGGAAATAAAAACTCGAGCGAAGCTCGAACGCGAAGCGGTAACCTAATTGGAGATAA  
TATGCAAATTATCCTTCAGCCTGCAGGCGAAGGTAACCGCCGAAACAATCAAATCTGC  
CTATATGGCAGCAATGAATCACCTGTTCTTATCGTTTGTCTGTAGAGCATCCAGCTGT  
ACTGGAGCATCGAGTTAACATGTTTCAGTATTCAGAATCCTGCTATGAAAAACCGCTATGA  
CATCGTTACTTGTGGAACTGCAACTCCCGAAATGTTCAAAGATCTTGGCTATTTCGA  
CCGTTTTGGCACCATATTCTGGATGTCAACTTCGCAATGAGTCGCGGCCCTTGGATTAC  
AGTGTGTGCCGAACCTCGAAGCATATGGGTATGAAGTAATTGCTACTCAAGAACTTGTTAA  
ACCTGCGCAAAAATCCCACAAAGTGTATCACTGATATGATCGTGGCCCCTTAAAAGGGGC  
CATTTGGAGGAATCATGAAGAGATATCGTTTTAAATCTGAACAAGCTCGACATGAATTCG  
CTGCCATAAGCGACATCAATGCTGCTATTGCTAATAGCGTTTGCATCGTGTGTTTTACG  
AAGCTATGACACGAAATACTATCGATGAGATTTTTTTTCGAAATCAACGGTATTACTTTGT  
TTCCCGAGTATTGTCCTGTTTTCTCAGCTAACGAAGTAAAAGAATATTTGGAAGAAGTAT  
GCGCTGGGGATGTTGCTCACGAGATATCCAGAAGATATTGGATAATAACGATGTTGAGC  
AATTGCTTGCAGAAAACGCGGCCCTGCGGGAACGCATGTCTAAACTTGAAAATCGTCTTG  
AACGTCTTGAACGGTTGGTATAAATGAAATCTACAGCTTTAGCGTATGTTCTTTGGTTTT  
TTCTGGGGGGTTTTGGTAGTCACCGTTTCTACACCAGAAATTATGTCACCGGAGTTATTT  
GGTTTTTTACTTGCAGTCTGTTTGGTCTTGGCTGGTTTGTGACTTTTTTATCACAGCAG  
GATTAGTCCGACGCGCAAACATTGAATGGCGCCAAAATCAGATAGAAATTAATGCAATGA  
TTCGTCGAGGTATTGACATAGTTTATAATTATGATCGTGCTGTTGTAATTGGCCGCTTT  
TTCCAGCTTTTTCCACCGTGGACATGAAATGCTGATTTACAAAGCGCTTCAAACCTGCTGA  
AACTGTTGCTGTTGTCTTCGGGTCATCCCATTTGTAATCAAACACAGTCAACCCAGTTCC  
AACACTGATTCGAATCAGAATGTTCAAAGAATGGATGAGTAACAATCTCACTCCTAGCGA  
ACAGGCCAGAATTGTTTTCCGTAATGTTCTGACTACCGCTATAACGAAGATCGCTGGTA  
AACAGAAGTTCGTGAGGCCGCGCAAGAGCAACCGGGCGAGCGTGTTCGCGATGATTGCATA  
CGATAAGGATTAAGATTCTTATTGGATCAAACCTTTGGATGGGACCATATTCAATGCAT  
GGGCGTTTAGAATCACGGAAAAGACATCTCAAATACCCCAATGCGCGATGAATTTCTTCG  
AACCGGTTCTATCCACGACGATTTCCCTATTAATCCGTCAGTGCGGTCATTTCTTTTGA  
ATTTTGAATACTGAAGGTTACGAACTACGCAGCCGGTTGACGGAAGAACGTGCGATGTG  
GGACAATGAACATGCAAAGGTTAAAGATAATCCATACGCTGATGCTCTCAACTGCAATAC  
TGCTCATGCCGTAGTAACGTGCAAGAACCATATTCTGGTTATTAGCCGCAAACATGCACC  
AGGCAAAGGTGCTCTTGCTCGTCCAGGTGCTCACAAGAATTCCAATGAGACCTTCAGCGA  
TTGTGCAATTCGCGAATTGTATGAAGAAGTTCGGATTGATGTCGATCGTCAAAAAATCAT  
TGGTTCTATTAAGCACACGAAGTATTTGATCACCCAAAGAGAACGGCAGAGTTCTGCAA  
ACCGACGGTTGCTTATTATATCGTACTTCTACCCAATGACGACGGTAGTTTGCCTGAAGT  
TCGTGCTGATGATGATAAAGCAGCATTTTGGATGCCAATGCATGAATACAAGAGAAA  
TCGGGCAGGTATGTTTGACGATCATGCTGAAATCATTTACGCTTCACCAGTATCTAGGA  
TACAATTACGGAAAATGTGGAAACATCAGTAAAGCAGAATAAAAATGAAAGCAATCTGCA  
TTCGCAAGAAAATCAAAAAGCAAAAATTTGAGCGCCCTACACCCGGTGATGACGTGCGAT  
ACCAAATTGCTCGTTGGGAAGTTGCAACAGTTTGTGTCATCACTGAAAATCCAAAGATTA  
TTTTACGCAAAAAGATGAGTCGAATTCATGTTATTATCGAACTTGCCACTGACTGCAGCG  
AAATGATTTCCAGGTTAAAGAAATTTCTCCCGAAGGTAACCAGCTGGTGTGAAACGT  
CTGAAACTTCCGAAATCAAATTCGTCAATGGTCATTTTCGGCGTGATGAAAGAAAACGAAG  
AACTGTTTTTACCCCGATTCAAGTCGGCGACGAATTCATCCATCGTAATCATGATAAAC  
GATACGCGGTTAAATTCATCGCAGAAGACGGTTCTCTAATTTCTTGGGATTCTGATTATC  
ATAGTTACAGTTTTCGTTAACCGCAACGATCATGATCAACTTAAAGCATATGAAATGAAAT  
TTTCTTATGGTGGTAATTATGTA AAAAGTAGTTTTTGGAGGGCCTTCACGGCTCTCATCTT  
TACGGTCTCAATACTCCTGAATCTGGCCTGGATATGAAAGGCATTTTCATCCCCGATCCC

AAAGACATTCTGCTTGGCGGAGCCAAAAGAAGCTATTCCATCACAACCTGGCAACGACAAG  
TCCAAGAACAGCAAGGATGATGTTGATATCGAAATGTTTTTCGCTCCAGCAAATCATCCTG  
GATGCGGCCAAGGGTGATACCTATGCGCTGGATATGCTGCATTCTCCAAAAGACAAAAGTC  
ATCACCGACTCGTCTGTTTGGCAATGTATCCATCAAACCGGTCTGCTTTCTACACGACC  
AATATGACTTCCTATATGGGTTAGGTTAGCAGGCCAGCGGCAAAATATGGTGTAAAGGT  
TCTCGTTTTAGCCGCATTACGAGACGTAACACAGTTCATGGATGCTCTTCAGATTCACGAA  
AACCCAAGACTGCGAGACCTAAAAGATCATCTGCCACAAAACGAGTTCTGCTTCTGGACT  
CACGTTGAAGAAAATCTCGACACCATCTCGTATTACACCATGATGGGCCGTAAGTACATT  
GCTGGTGTAAAGATCGCTGAATTCTGCGGGGCAGTTGACAAGCTCTGGGCCGAATATGGC  
GATCGAGCTCGCAAAGCCGAAGCAAATGAAGGTATCGACTGGAAAGCTCTAAGCCATGCG  
TTGCGAGGCGGTCTTCAATTGCTTTAAATTTACAAAACCTGGCGATTTGAAGTATCCATTG  
GCCGATGCTGAAGAAATCAAACCTGGTTAAAGCTGGCAAACCTCTCTTTTCGATGTAGTTCAA  
GAACGACTGGAAGAAATCGTTGAAGCTGTTGATACGGCCGCAAAAGAGGCATCTAAGAAC  
GGAATGCCCCGATAAAGTGGACATTGGACCATGGGAAGCGTTTGTGCAACAGGTTTACGCT  
GAAGCAATGAAAGAATATCTGGAGAGCAAATAATGAAATTGACTCGCTTTAAATTCAAAA  
GTAAGGAAATGCTGATCGAGTATACTACTCGGTTTCAGACGCCATATTTGGGCAGTAGGTT  
TCACCGCAAACACAGTTTTTTATTGCCAGTATCAACAAACGTGGCCAAGTCAAAGTATTT  
TTGATGGTAAACCTCTTAAAGAAATTGTTTCTTCGAAAGAAGGTTGGGTTCCTTTTGCC  
CCTTTGAGTTTGAAATCTTTTGTGAAAAAGTAAGCTAAACGGTTTACATTGACGGGGCTG  
TGATTTACTATAGTCCCATCAAATCAACAAGGAGTAGGTCATGAAAATCACTAAATCAAC  
TAAACTGCAATCCATGGATTTTCGTTGGCCGTGTCGTTAAGGCAGCGGCAGAAACCAAAGA  
GGTAAAAAATTTACCCCGATTTCGAAACCATTGCTGCCGGTATTACCGTAGGAATCGTTGG  
CGCATTGGCTGCAATGTGCTTTATTGGCGATATCGATATGGCTCGTAAAATCTTCATTGC  
TGGTATTATCGCTGGCGCAACTTTCCCTCGTTATGAAAAAGGGATTGATGAAGTGATTAAA  
GCGGCTGAAATGGCATAAATGATTGCACAGAACTCCGCAGAAATCGTCAATTCCGTATCT  
GTGCATTTTGATGATTTCTTCAATGATAATATGAAGGACACAATGATTGTCAAAGGCGGC  
TATATGTGTGATGACGCGCGACAATTCTTGCCTTACCTACGTGAAAAGCAGCCTTTTACT  
CATTTGCATAATGATGACATTATCAAACGTTTTTATTGCAGAACTGCGGGGATTGGGCTAT  
AAAGCACAACCTGTTTGTCCACCTATGAGCCCTGATTACATTTTCAGTAGCGTTGGTAACA  
AAATGATCGTTTTTGGGGCATTAAATGGAGCTGAACATCGTTAAAGTATACTTGGTAAGCA  
CACTCCAAGTTGAATCGCTCATCGGTAATAAAGTCGGTGAACCTTGAGATTTTCGCTAAAG  
ACTATTGGCTGGTGAAGACGGATTTATCTTTCAGCATGACGGGGCAGGTATTTCCAAA  
ATGATTGTTTCGCTCTGTTATGAAATTCTCCGAAATGTCACGTTTTCTGATGAAATCACGG  
TGTTTATGGTTGACGATTATGTTTCCGAAAGCGCCAAGGCTATTGTAGATATTACTGATA  
AGGAAGACAAATCATGAGTGGATAAATCTACCCTTCGTTCTCAACGTAACACCAGCGCC  
GACGTCACAACGACAGTGCTCATGTTGGCAATCTTTGAACACCTTACAATCCGAGCAGC  
ATGATCGCGATTGGCTCAATCTGGTTTTCGCAAATGTTCAACGTTAAAACAATGGTGAAT  
GGGATAATACGTATCAAACACAGCCAGGATTCGGGCGTGGTTTTGGTACAAAATTGACC  
GAATTATGAGGGAAAACCATATTCCATGGTGTAAAGCCAACACTGGTATAGCCATATACA  
TTCATGAGAGAGGCGTCTCGCGAGTTCGCGAGTTGGCGTTTTTATACCGACAAATGCGTAT  
TGGTGTCTCGCACGGCTTCTTGAATTTGAAGTTCATCCCTCTGGTATGAATTTAGTTTTGC  
CGGTGTTGAATCGCTATCGGAACCGCCGAATACCGAACTTCTCACGAAAATGGTTCATC  
CTAAGCCTGAAAACATTCATTATGCGACTACCGAAGACATTGATTGCATGAGAGATACTA  
TTTGCATTGATAAAATGTTAAAAGAAATCCCAGCAATCGAGTCACGAATCAGCGCTCTTG  
CTCGGAACTTGCCCAATTGCAAGATAAACTCCAAAATACACGACAAGATGTGCGCGATT  
ATCTTTCGAAAAGTATGGTATTTGATTGAAAAGTTAGTGTACAGTGATGGGAACATTGG  
TTATAATGTTCCCATCAATAAACGAACGGATTAATTTAAATGTCCATCAAACCTGCTGCA  
ATCAACATTGGGTACATAGCGTCATTTGCATTGTTTTATTTCGATGTATATCGGAACTGCT  
TATGCCGTTCTCGGATGTGCAAGGGCGGATATCGGTTCAACCATTATTGCGAGAATTCGC  
GAAAGAATTCTAATGCGACAGTTAAGAACTTTTTGGAAAATCGTCGGGATACTTCCAATA  
ATCACTTTAAAACCTATAAGCCTGTAGCTGAACGGTTGGCAAATTATCACCACTTCATGA  
AGTTGGTAAATGATATTTTGCCGAATCTGATGCCCGCATCGCCTCTCGGTAAACACAATG  
GCATCTCCATAATCAAGCCAAAGTACTTTAATGTTGATGCCGAAAACAACGTCACGGTTA  
AAGGAGTTATTTGGCTCAACACAGTGTTTGAAGCAGATTGTTTTGCAGCGAGACTGGAAC  
TGCTTAGGCATTATGGGGCTGCCGTCAATATTGATATTTCTGAAAAGGGCATAAATCAA  
TAGTTAGATTTAGCATCATCTTGAGCGAAATTAACGTGTCAAGCCTGTTGGTGAAGATG  
CAAACCTTTGTGCAAGAGGCACGATCGGCAGAACCTGTTAATCTCGAAACGGAAAAAGAAA

TTAGCGAAAGCATCTTCTTTTCTGAAGCGATCGGAAAAGCTATCAACATTGTTTCGAGGTG  
CACTCCACTTTGGCTCTAAACGTTTGAACGAAATTGACAGTGAAGTCGCCAAGTTGCAAG  
CACTACGTAAAGAAATCGAATACAACATGAAAATCATCAAAAACCTCAATTGGGGCTTAAT  
TAAGAATATGATCCGACCACACATCGGCGTGACAGGTATCCCTCTGATCGCAATGACTGA  
TTATTGCAAAATCACACATTGGAACCAGATGCCTGAAGGTACCGAAGAGGCAGTTTTCTA  
CGTCGAAGCTCGTGGTGGCAAATTCGATGAAATCGTTATCGGTGGCGTGGAGTATCTGCT  
GACCAAGTTTGCAGAAATCATCACCAAAGATGATATTGACGAAATGGATGCCATGAGAAA  
GGCTCACTTTGGCCGAGACGTAGTCAACCGTGAAGGTTGGGAAGCAGTCCGCTAATATCA  
AGAACAGCATGGCTGCCTGCCCATCCAAATCGTTGCTGTTCTGGATGGTTCTGTTGTCCC  
AGTCAAGCATGGTCTGCTGACTGTTCTGTGTCAAAGCACCATTCTGTTTGGCTGGCGGGCTG  
GTTTGAGCCAATCATTTTGGAGAGCTGTCTGGTACACTTCTACTGTTGCCACGCTGAGCCG  
CGAATGTATCAAATCTATTCGCCGCCACCTGATTGAAACTTCTGACCTGGAAGTAGGCAG  
TCCTGATTTTCGACTTTGTGCTGATGACCTGACTACATGATTTTGGTTCTCGCGGGCGTTAG  
TTCTGGTGAATCTGCTGCAATCGGCGGTTGTGCTGATCTGTACAACCTCCATGGGTACTGA  
CACTGTTGAGTCGCTGTATTTTCGCATAACAGATGTTTGGCGCTGGAAGGGCAGGCATCTC  
TGTACCAGCTCGTGAGCGCTCCACCGTAACTCTTGGCGTGCCGATCGCGAAAAAGACGC  
CTACCTCAACTCGGTTGAACTCTTCGGTGCGGGTGCATATTCCATTGTGTATGACTCTAC  
CTATTTCAAGAAGGCAATCCGTGAAATCGAGAGATATAAGGACAAAGTTATCGCCGAGGG  
TGGTACTCTGATCGCTCGACCTGACAGTGGTGATAGGATCGACAATATCAGTTTTGCTCT  
GGAAACTCTGGGCGAAATCTTCGGTGTGAAACCAACAGCAAGGGCTACAAGGTTCTGAA  
TAAGCATTGTCGTATTATCCAAGGTGATGGCATCCACGGTCCCGAAGTTACCGACCGCGT  
TCTGACTGTTATGAAAGCTCGCGGGTGGGGTGTAGAGATTATTGCGTTCGGTATGGGTGG  
CGGTCTTCTGCAAATGGTTAATCGTGACACCTGCAAGTGGGCCATGAAAATGTCTGCCAT  
CAAATCAACGGTGTATGGAAAGACGTATTCAAATGCCAAAAGGCGCTGAATGTAAACC  
TTCCAATAAAGGTCAGCTTAAGCTGCGAATCATGGATGACGGCCGCTATTACTCAGAAGG  
AACTATTGAAGGTGGTCAAATGCTGTACGGCGTAAGCACCAAGACGGTTTTGTTGAACT  
GATGTCGAAAGATGCATTCGTCCTGTATTATGACGCTGAAATGGGTCAAAAATTCTAGAG  
CAATCTGGCTGAAATCCGCCAGCGTACTGCAATTAATAATCATTCAAATGCCCTCCGAA  
GAGGGCATTGGTCATTGTAGAAATCAGGATCAAAAAAATTATCAAGTCGTATGAGCAAGA  
ATGGCTGTACAAAAGAAAATAATCTATGAATGGGAAAATTCATACCTGGTAAAATATTT  
TTCGATTGACGGAGAATTCGGACATATTCCATCATATTGGGGCCAAATGTATGACGGATA  
TAAGTTAAATCGTTTACGACTCTATATTGTTTCTATTGAAAGGGGTTCATATCGTTATGTC  
AAAAGGGGAGTGGGAAAGTAAAGCAAATCAAATGACAAGAAATGAATTCAAAAAAGCTC  
TAGAAAATAATGACCAATACGATTATCCTCTGCACAATGAAACAATCAACCAATTGCGTT  
CAGTTATTTCTGTCCCGCAAGTTGAATATGTTTATTTGTTATTTCAAGAATATCAATCCA  
TTTTACGCATAATCCCTCATGACGCGAGTATGTATGCGCATAATAATCATGCCAAAGAA  
TTCACCAGGGTGATCGGTGGCAATATCAGAGTTAATCTCTTGTGCAAACTCATGAACAA  
ATCAAAAACACGATATATTGGGCATTTCCAGATATAGAAGAAGTTGAAATTGGAAATTTCG  
AAATATTTTGGCCAAAGACGGTAAAATATATAACGCAACAATAGACTACAACACAAAACAG  
GTTATAATGGTGGCAAATGACCCTCAAGTTTAGAAAATTCAAAGCCAACGACGAACGTA  
ATATGTTTAAAGTTACCACCAACTTCAGCGACAAGTTTGATGATAAAACGATTCATTGGG  
AACTGCTAGCTGTTAATTTAAACGAAGCTTCTATTGAAATTGAGCGCCTTGCCATTTTCC  
TGGAAAAATGCAAAAATCCATACCCAAGGGTAAAGGGTGGTCTGGACGATTTACCCGACA  
TTCCCGACTACTATTGCTATTTCTGCGAAGAGGAAGAAAGCATAGAAATCTGGGAAAAAT  
ACGGTGTGAAACGCTATGGTGGCCACGCCATGATGGTGAATATCAAAAAACCTTGCCA  
GCTATGAAATCGTATATACTGATAACGATAACGTGAAGTACAGTGTAACCGTGTAATTA  
ATAAGAGCATATGGAGGAATCTTTATGCTCTTAAATTCCAAGTCTGCTGATGAATTA  
CAGAAATTGTTTGAAGAACAAAATAAGTGTGTAATTTGTCTGGAAACGAGTTTGACGGT  
CCATACAATAAAAAGCATTGATCACGATCACGATTGCAAGGCCCTAATGCCGGAAAG  
ATTCGAGGTCTACTTTTCAGTAGATGCAATCTACTTGAAGGCATAATGAAACACATATTT  
ATACGGTCAGGATTAAAGGCAAAGGATGTTAATTACATCTAATGGATGAGATCGATATTA  
CAATATGTAGATTCAGATCACTCAACAAATCCAATGCACCCGTATTACGCTTCCGTCAGG  
ACCAAAAATTTCTCGCGGAAAAACTTGAGTGAATGAAGGCCGAACCTACGCGAACTAGGA  
TCTGAATTTGATGAAAAAGATCAAAAAGCTGTTTTATTCAAAAAATGCAGAAAGCAATTT  
AAGAAGGCCATTAGTGGTTACCCGATCACTTGTAAGCAATTGGTAGAAGGCCAAACTG  
GCCTGCACCACGAAAATGCGAATAAAAACGCTGACTTTATCCCGACCATGCGAGATATGA  
TGGCATCTATCTCCTTGTAGGATTACGCTAAAAGCATTTTGCCATCTCATTTAATCGAAG

CACATGATAGTGGAGATATTCATATTCACGAGCTAGATTATGCTTTTACTCTTCCAATGA  
CAAATTGTTGCTTGGTTAATCTCAAAGAAATGTTCAACAATGGTTTCAAATGGGTGATG  
CCCAAATTGAAGAGCTTAAATCCTTTGGTGTAGCTTCATCCATTATGGCTCAAATTACCG  
CACAAAGTTTCTTCCCAACAATATGGCGGGACTACTCTTGCCAACGTTGACCAAGTCCTTG  
CGCCATACGCCATATTGTCATGGAATAAGCATTCTTCTGTGCGACTGCAGTTTCATCAGCG  
ACAAGGATAAAATTGAAAAAATGCATACGAGATGACTGCTAAAGAAATCTATGACGGTA  
TGCAAGCTTTTCGAATACGAAGTCAACACGATGTTTACCACAAATTGCCAAACCGCGTTTCG  
TTACAATTACATTTGGGATGGGAACTAACTGGTTGGAAAAAGAAATTCAAAAAGCTATTT  
TGAGAGTACGAATCAAGGGTCTTGGAAAGAATGGCATCACACCAGTATTTCCAAAAACTC  
GTTATGTTTCATGGAAGCTGATATAAACTTAAATCCTGGAGATCCAAAATATGAAATTA  
CACCTTGCTCTGGAATGTTTCAGCCAAGCGAATGTACCCTGACATTATCAGCGCGAAAAAC  
TACCGATCCATCACTGGTAGTAAGACTCCTGTTAGTCCAATGGGTTCCCGGTCTTTCCTG  
GCTGGTATAAAGTCTGGGGAACCTCGATGGCAGAAACAATTTAGGTGTTGCCTCTGTCAAT  
ATTCCCCGGATTGCTATCGAAGCAAACGGAACAAAAGAATTGTTCTTTAACTACTTCAA  
GAACGTTTTGAATTGTCAGTTGAATCATCTCTGGAACGAATTAACACCTAGAAGGTGCT  
AAGGCAAAGACCGCCCCAATTCTCTACACTGAAGGGGCTTTGGTCTATATCTTAATCC  
GGAAGAAGAGTTTTTTGCCGCTTTGAAAGAACGAGCATCGATTTCCATTGGTTATATTG  
GCCTTTATGATGATGCGCTGATTATGACTGGCAAATCAACAGCCAATGATCTAGAAGCAC  
GCAATATTGCGCTTTCGATTGCAACATATCTCAATTTTTTCATGCGCAAAGCAAACACTCA  
ACACCGGATGGAACTTTAGTCTTTATTCTACTCCGTCTGAATCGCTGTGCGATAGATTCT  
GCCAGCTGGATCGCAACAAATATGGTGGTATCGAAGGAATTACGGACAAAGATTGGTATA  
CGAATAGCTTGCATATTCCTGTTGATGCCAGTTGAACCCGTATGACAAAAGAGATGCCG  
AAAAAGAATTTCAATTGGATTGCATCGGGTGGACATATCAGCTATGTCGAACTACCCAATA  
TGCGAAACAATCTCGAGGCCCTTGAGCAAATTTGGGATTACGCTATGGAAAAACTTTTCC  
TATTTTTGGAACAAACACACCTGTTGATAAATGCTACGAATGCGGTTTTGATGGTGAGTT  
CAAATACAGCTCGAAAGGATTTAGTTGCCCGAGCTGCGGTAACCACGAGTCGGCAAAGAT  
GTCAGTTATCGGAAGAGTTTGTGGGTATGTTGGTGCTCCGTTGGCGAGAGGATTCAATAA  
AGGCAAACAAGCCGAGGTTTCATCACGTGTCAAGCATGTGAAATAATTATTAATAAACTTG  
TTTACATTTGTGCAGATGTGTGTTAATAACATCTGCACAACTAAACAGCCCAAATGAG  
GTTATTATGTCTGATATTAAGCAAAGTATTGAAACCTTTGAAAAGAAATTCCAGGATATT  
AAGTCCATCCTGGAAACCCCAATGGATAAAGATGAAGCTCAACAAGCAATCCACAACCTG  
AATTGTATGTCTGAGGAATTTGAATCAATCGCTCAAGCTGTTGCTGATCGATTCTGCATT  
TCCTTCTCGACTGGTGATTATGGATATGGCCGTACCTATTATCCTAAAGGTAACCGTTTT  
TGGTCAGAAAGCAACGCCGAAGAGTATGGCCAAGGAACCGAGTATGGCTACTGCCTCAGT  
TCCTCTGATATGTGTTTCAGGAGAAAAGCAATGGCTAGTCCTAATGAATTGGTAGAAAAGG  
CAGTACAACCTTCAAACACTTCTTGTGAAAGTTGAAGCACTGGCAACAGAACATGCTTACG  
GCATGGAAATCAATGGCAATGAAGTTGATTTTCGACGACTGGCTGTCAAGCAGTTGTTATG  
GCGAAGTTTCTGAAGCATTGATGCAGATGGCTCCGTGTGGATGGAAAGTAGTT  
GCTAATTAAGGGGCTCTTCGGAGCCCCGATTTGAGGGTTTTGTTATGATTATTGTTAGCT  
CTCGTGCTTTTCAATCTAGGCTAGCTCCGTTTGTTCCTCCTACAGTAAATATGGACCATG  
ACTTCATTGCATACGAAGAAGAATGGAACGAATATCAAGTCAGAATGCAAGGTCGGACTA  
TTGAAGTAAAAGCCCGAATGTTGGAGCTTTCGTCGTCGGGGATGGTAAATCTCGTTGCT  
GTTATCACGAAGCATATATCGTTCAACCTGGCTCGTCCCTTGAATGATTTACAACTCA  
TGGATGCTGTTCCCGGTAAGACGTATATGCCACTCCCGAAATCTTCTCGCCATGAAAA  
TGGCTCATCGGTTCAACAAGACCACTCGCAATTTTCATCAAACCATGATGCACATTCGTG  
AATTGCGTTAATTTGGTATAGTCATGGGGCCTGAACACGTGGAAATTTCAAAGCGTG  
AAAAAGAATCTCTGAATTATGGCCACCCGAAGCTTAACGTGCGGTAAGGCGCATTTTTCA  
AAGACGACATCTACACCAATGATCATGACACAATTCACGAAGCAGTGGCGGTTGAAGGTC  
TTCCAGCATATCGATCATAATGTTGATGGCGCTGAAGTAATGACGTCAAAGAAAAGAACT  
TCTTTAATTGCTCTCGTCGTATTTCAGTTGATGGGTGTTTATGAAGAATCTTGTGTTTTGG  
CTCTGGAACGTTGTCTTATTCTTTCCAGGAGAAGTTAAACCCTATAAAGCTTTTTCAGA  
TGGCCCTTGAGAAAGTATGCACAACCTATTACATCTGGCTGGTTCCGTGAATTTGCGTGGG  
AAAATTATTGTGACGGTATGAATATTTACCCCGATCAAGTCAGTGCTGTCGACTCATACG  
ACGAATTGTTCAAACGAAACGAGCATCTCCTGAAAATTCACAGTAAGTAAATATGGATTT  
TCACATAGGAGGTATACTGTGGAAGGATACATAGTCCAACAAAAGTTCGTCAGAACTGAC  
ATCCCGGAACCAGAACCGGAAAAAGAGGATGAATCCGAAAATCCTAAAACAGACGAATAA  
AAGCTGTTGATAGTTTATGCCCATGTGTTATAATGACCCTGGGCATTTTTGTAAATTGGAG

AATGTAGTGGATATTGAAATGCATATTGAAGCACAAAAACAGATTTCGAGAAGCTGAATGG  
TCTGTTTCGCACAGCAAACACGCTCGAATGCGCGAACTGCGAAACGCATATGGAGAAGAC  
AAAGAAGCTGGCCGAGTCGAATCTGAACTTATTTTCAGAAGATCATGTTGCTAAAGCTATT  
TCGAGTTATTTGAAGTCGAATGAATATGACGTAATGCTTGACCGTAGAAAAGAAGTCGCA  
AATCAAAAATTTTCGTTGTCCATGTTGCGATACCGATCAAATCCAACCTTGTTTCATGGGT  
AATAAAGTAGTTGATCTTCGATGACGCAAATGCAACCGGAAATTTATTTGAGAGTCTCCG  
ATATGATGTTTGGAGAAGCTAAAGAGTTAATAAACCGCCCTCCTAAACTTTTCTTTGGTG  
AAGAATATGATGGGACTCATGTAGGCAGTATTTTGGAAAAAATACAGAAATAGAATGGTC  
CAGGAGATGCTTATCGAGTGGAGTATCGGGTACTGCTAGACGGCGGTGATGTCGTAAC TG  
GAGTAGGAATATCCAATTATAACTGGATAACAAAAGTTGGCTACAGGCCTGATGTTGAAA  
TAACAAGAATCAAACCCACAGAGGCGACGTTAGACCGATGGAGATGTATCTATTCGGAGA  
AATGGCATGATTGAAATATACGGAATTGTTTCAGAATCGCACAAATGCCCGGCATGCGAC  
TTTATTGCCAATCGTCTTGAAGAAGATGGCATAGAATATTCATAAAAAAAGTGTTTTACG  
GGATGCTAATACTGATCTCGGGTTTGGAGCACCAGCGAGACGTCACCGATGAACTCAGGCG  
TCGTATAGGGCAACCCAAAGGTTCCCTGGAGCTTCCCAAGGTTTTTGTTAATGGGATATA  
CATCGGCGGTGCCAAAGCTCTCCTGGATTATCTGGATTCATAGGCCTCTTCGGAGGCCTT  
TTTCGTTAAAGTAGTGTACAAGGTATTTTTCGCGATGATAAGATAATTCACAAGTCAAGTG  
AATGAGATTTACATTAAGATCGATATACCGAATATTATTGAAAATATGAACAAATTGTTT  
GCGATTCTTGGGTATAAGCCCAATAACGGCAAAGCGTGGACAGTCTATGTTGACGCAGAA  
GGCAAAGGCCGCCAACCAATCAATCGGCAAACCTGCTAAAAATGGTAGGCTTGAACATCTGG  
TCGCCGCTGTGCCAGCACGAGAAACGGTTTGGAAATTAAGTCAACTCCGCAGCAACTTGAC  
GAAGGTCGCAAGTTTGCAAAGACAACCAACGAACAATTAGTTGGTCAAATATGCTGGTG  
TATTACAAAAGAACAACAATAAGAGCAATGTGTTTGAATTGCTAACCTATGTCAACT  
ATGTGAGAAAATACTTAGTCTATGAAAAATATTGCCGAATTTATTCGTACAAAATCAAC  
TCGTTTGTCAAGAAAAATACTTCTGTGCAAGACCAATATGCGAAAGCAGCAGAACAAAGTG  
ATTAGCCAAATCACCAGGCTGGAAACGGCACATGTGAAACCCGTTTCAGAAGAAAAACGG  
TTGAGTCAATATGCAAAGATAAGCAAGTTGAGGGGCGGCGAAAAGATAATGAAATTCGT  
ATCCTCATGGACCAAATGTTCCCATCGAAACTCATGTTAAACTTGCTATTCTGTACCGT  
CGTACGGCAGATGCACTGAATACCAAAGCTGATGAGTTGGAAAAAATGCGGGACGAGATT  
AAGCTGGCGGTTGTTGAACTCGACAATTCTCGTTTAGACTTGGCTGCCAAACTTGAGTTT  
ATCCGCGAAAATCGCAATGCAGAAGCGCTTGGTATTTCTTGTTCGGAAGATGTCATCGAA  
TTGGCTGGTCTCACCAAAGTCGATGTCAACGATGTTATGCTGCGTATCGAAACCTTCAAC  
GGCGATAAACAAACAGCTGTAACAATTAGCGAAATTGATAATTATATCAATGGTCCGAAG  
TATTTGAAAAGGGCCTCCTTGGAGGCCATTTGAAAATGGAGTATGTTAATGATTTGCTCA  
ACATTAGTAACTCTAGTCGATCCAAATGGAATTCGAACTAACTATTGGTATAATCCGGTG  
ACAATGGTATATACCAACACGAAAGGCGAATCTATTGACGCATACACCGCTGATTCTAAG  
GGATATACTATCAGCCGAACCGAAGAAGCCAAAGAAACGATCGATTTCGTTTCACAAACTG  
TCTAATGCCGAAATGTAAAAGAACTATCGCGAAATGATAGGTAAAGATCGTCAGATTGAA  
CGAGAAGAGCATGATGGCAATGCTAAAATCGATTACGAAACTTTGGCTAGAGCCACTGAA  
ACTGCTGATAGTCTTATACTCAATAAGATTTAAACGAGCGATCTTTTGAATTTGAAGGCG  
CAGTATCTTTCAACTGTTTCTGGTATGTCGGCTGCTGCGGCTGCCGTTGAACAAATCTCC  
GGTGGTATTCAAATGGGAGTAGAGAGGCGACGGAAGCGGACTTCGGAAGCCAGCCACGGT  
GAAAAGTATATCGCGCATGATAGCATTGCTGTAGCAGATTTTCAGAGCCGTTGGTGAC  
GCATTCAAATTCGTCAAACCTCTGCGGTCTGCACATCCTCAGTTGTACATATCGGTTTT  
ACAAAATTTGGCTTACACTAACTGGCTTTAAACAACCGCGAAAGTGACGTAATAATTTGTC  
AAAGAATGGAATAGCCGATTTACCGAGGACGTGCTTATCAATATCATGCTGGAAAAAGGC  
TATAACATGTCGATCAGCTGCCCAAATCAAATATTGCTGTTGGGTGAGTTGTCGAATTAT  
TCCATTCTGAAATTTTCGCGAATTGAAATGTTTGTAGACTATTGCCGCCGAACTGCTCCG  
AAGAGAGACTGAAACAGTCTACAATGACCGTCGATCGGGGTAAGATAATATAGTTGAAAC  
AAGCTTTCAAATTTGTCGAGAGGAATTCAAATATGTCTAATGCATTCATTGCGGTTTCGTAA  
CTTTGCTGTACACACTGCCGCCCGAATTCACCGCTGACAATATTCTTGGGCGTGAAAT  
CACCGAACAAATGATCGACAAAGTTGCAAACACAGTATGGGATGCTATGATGGAAGCGGG  
TCTTACCGGCATAGGACGCCGAGCGATTTCGCAGTGTTATTGTGCAATATATCGCAGATGA  
ATTCGGTACCCAGCCGCTTGGCCACACTCCTACACACGCAGGTTACAAGCAAGTCGCCGA  
AGACGCGTACAAGAAATATCAAGGAAAAGCTCGCAAATCCGCCAAGAAATGTACGGCAA  
CAAGCGATAATTTTCTTAGCTCCAAATAAAGTATCTGCAGGCTTTTCGCAGTCTTCCGAA  
ATAGGAATATCACAATGGAATTCAAATATTGTTTCAAGCCGTCATGCTGGTCCGATTG

ATCGCTATATTATGGATTTGAAAAATATCGACCCCGTTTCTACGGGTGGTTGCGAAATGC  
ATATTTTACGTACTACTTCTGGTGCTGATATCATTTTCCATGTTAACGCTTATGACCCCG  
GATTGTCCAACGAAGTTCACCGGCACGTTTATTACATTCTGAATGCCATTCGTGTGCCGG  
CTGGTGACACGCTAGTCGGAGTTATATAACGAGAAATTATAGCGGCCAGGCCGAGAAAGC  
TGTTAGCGAATTTATCTACATGGATTAATTAATAATGAATTTCAAGGGCTTTTATGCTGGT  
GTAGGGAGTCGCGAGACTCCGGAACATATTTGTCGTTTGTATGAAAGATATCGCGGCCGTT  
GCTGCGATCCTAGGATATAACCGGACGTTTCTGGTGGTGCCGATAAAGCAGATGACGCATTT  
GAAACTGAATTTTTGTGTCAGTTGCTGATAGTTTAGCGATCGATAAATATGGCTGAATTTGAT  
GTTTATCTGCCATAGAAACGATTCAATGGCCGTTTTGCGCCAAAACATGCTCGTCACAAC  
CTCATTTTACCAAGCGCCAATGAGTGGGACGCCGAGCAAATCATGAAAACGGTCCAACCA  
ATTTACTCCAAAGGAGGTGAATTGACTGGTGGTGCTCTTGCATTTTACTACTCGAAATGTG  
TATCAAGTTCTAGGTTTTAATCTGAAAACACCTTCAGAATTCTTGGTGTGTTGTTAGGTT  
CCAACGGATAACGGAGTTTCTGGAGGAACAATACTGTGTGGCAGCTTGCAATGTGTCAT  
GGTGTAGAGTGTATAATCTATAACAACAGTTTGTAGATTGAGCCGCTTAAGGAATTTACG  
GATCTGTGAAACTTTACTCTCTCCGCTATAACCAGCTGCAGGAAAAACTGCAGCTATTA  
TAAATCATATTGTTGAAAATAACGAAAAGGCAAGTATAGCCAGCATATCTAGACAATTGT  
CGAAGCAATCTTTCGTATACTTTGTCGGTCTGGGCAGAGAAGGCGAGTTAGTTGACACCG  
ATAACCGTCAAAGCCAAACGTCGGTACACGAAGCAGTTATCAAAGCATCCGAAGAATTTG  
ATGTGATTTTTATAACGCACGCGGCTTTAATGGTTCTACGAGATATTGATGCTTAAAAAG  
ATTTTAAATCTGTATATCGACGAGGTTCCAGAATTAACAAGCTTCGAGCGATTTACTTTCA  
CAACATCAGTCGAAAGTCACATACTCGAATTGTGCAAAAATAGATGAAACTGGACTATTAG  
CGCTGCGAGATGAGCATCGGAAATCAGTCCAAAAAATGGCTATAGATGGCTTTAGTGAA  
ATGATGACATTTATTCAACTCTTTTTCCGTTGTATAAGGCACTCCTGACAGGCGTCCCTG  
TCAGGCTGTGAGTAGAGGGAGGTGGGCCGCAATGTTATTAAGTGAATGACGCGTCAAATG  
ATGATTGGGCAAAAATTCAAGTTAATAACTGTCTGTTCTGCAAATTTTGAGCAGACTTTTA  
CTGGCATGATTATGACGCATTTTAAACGGATGGGCATTTGAAGAGTCTCCGCTAGTTGAGC  
GGTTAGCTTTCCGAGATTATCCTAAAACCTGCTCGCGTAAAAATTCATGTAATGTTTGATG  
ATGATTGGTCTCGTTACACAGCCGACAAGGAAGTAGATGGGATTTTGAATTACTCTCGCA  
TCGAAAATACTCTCGACACAATCATAAATGGCGATTTTCAATTTACAATCGAAATTTTATC  
GGCCAAGAATGCCAAAGGGGACGGAAGTTCCTGATAACCCGCACGATCTAAACAATTATT  
CGGATTTTACCAATGTGGTTGTGATGTTTTTCGTATAATCCGGCGCCTTGGCAAGTTCCAC  
TTTTGAAAGAACTCGCAAAGTCGGTAGGCTTAGATGAAAGTGCAATGGTTGACGCGTACA  
TAGTTTCAAAGTATCTTGAACCCGCATTTCAACTTTGCACAAGATGTGATATCCGAAATG  
AACATTCGCTAAAACCCATCAACCTGTATGTTTCTGATATGAAATTAGCTCAATATATGT  
TGAGATATTTGCCGCACGCTGAGATATGTGACGGTAATTCAATCAAAAATCACTAACAGG  
TAAAAAGAAATCGAGAATCGTATCAAGCGCTATACCAAATGACCGAGAAAGAAAGGTTCA  
AATACAAGTATCTGCTAAGAAAACCTGGGGCAATACTCGATATCAATTCTGCGAAAGACC  
AGGGAATTATCCAGGACTGGATGATCACAACGCGAGAAAAAGCCAAAAAGAAGGCCTCTA  
CATGAGGCCTTTGTTCTATGCACAGGATAACATAGGGATCACTCTGGGGTTATCAGGAAT  
TTTTGATGATAGGTTATTAGTCTAATGACCTTGTTTAAACCTGGCTGATTATAGAAATCC  
TGTTCCAGGTTGAAGCTTGCTTGAACCTTATCTTTTTTATCCTTTTAGTTATAATATCTA  
TTCAGCCATAAAGGATAAGTTTTGGCAGGGCCAAAACCTGCAGGCAGTAAAGTTAAATAA  
GTTTAGCAAGCTTATTAGTATGATATAATCAATCATAGGAGGAAGTGCCCTATGAAATAT  
GTTGACAACGAAGTTCTATACCTGAATATTTGCAAATGGAAACAAGATATGCGTGATGCA  
GGGCTTCACATCAAGATGCCAGATGTAATTGGTATAGACATTATGAAGATTGCAAACGGT  
TTTACCGGATATTACAAATTTGCTGGATATACGCAAAATTGGAAAGACGGAATGAGATCT  
GATGCAGTCTAAGCTGTTGTAAAGGGATCGGTAAATTTTCGATGAAGAAAACCTACATAAAC  
TCCCATGCTTATATCACACAGGCTAGTTACCGCGCCTTTATCGGACGCATCAAGTACGAA  
AAACACGAAATGGCTATCAAATACCGGTATTTTTTTGACCAACGTGTATGACGAGCATGAT  
GAGGATATGTCACGATTGGTTGATGAAAATTTTCATCCAAGACATCCATGGCAAACCTAGTA  
GCCTATGAATCATCCCTTAAATCTAAAAGAAAGATAAAGAGGATGTTCCCAATTTGGAT  
TCATTCTATGAAGACGGCCCTGAAGATTAATCTTTTACCCCTCATTGATTCAACATGTGA  
AGAAATAGAATTATTAAGCGTATTTTCGTAAAACCTCAATTATTGCATTATAATATTCCTG  
TAGTTTTAAAATCCTGCCAATATTTTCATGGCAGCCGTTTGAAGTAGAAACTAGCCCAACT  
CGATTCGCATATTGATGTAGACACAACGACAATGGAGATTTTCATATGTGCGCCTGATGACG  
ATGTTGACCTTAGCACTGGTGCAGAAGCTCTGAGTGAAGTTGATGACCATAATCTCATGG  
ATTTACAAGAGGATCTACGAAAAACAAGCTGAAGAAAAAAGCCGCAAAGCATCTTAAAAAC



TCATGGGAGAGAAATTAAGCGGCTGAAGAAACATGCTGAACGAGCTCTATTTCGCAAACAA  
TAAAGAACTGTATGCGTATGCTATCAGTAAAGTTCGTACCCTTTACAAGCAAAGCAAAT  
TCCGCATTCAGCAATGATCACTATGTTTGAAACTAGTCGTCAACAAATTGTTGACATGGC  
TAAAGTATATGCTACTGCCATCCAACCGGCAGAAAAATAATCGAGCAAATCGCAAACCTG  
TTCCAGTTTGTCTAGTTGCTCTATTATAGGCTCCACAGAGCCGATTTTTGTATTAGGAT  
TTAAACATGAAACTTTTTGCATCTCGGTGATATGCACAATGGCGTAAAAGATGATGACCCT  
TGGCATAAAAACATCGCTGAACACATAATTGACCAGGCTGTTGAGTATTCTAAAGCAAAT  
GGGATAACTCAAGGGCTTCAGAGTGACGACTTTTTTGACGGTAGAAAGGCTGTAACACAG  
CGTACAATGGAATTCGTCAGGACTCGAATTACGCCAGATTGAAAGAAGCTGGTATTATA  
TGCTATGTGATCGTGGGAAATCACGACATGAATAAGAAGGATAAAAATACATCCAAATAGC  
GTAAGCGAAACTCTGGGTAAAGATGAAACGTATGTCGTGAATGAGAAACCGAGGACGGTC  
AATATCGAAGGTCTAGATTACGACCTTATCCGTGGTTGTGTAAAGAAAATGCATCAGAC  
ATTTTCGAGTTTGTCAAAAAGTCAGAATCCGCATGGTGTCTTGGTCATTGGGAACTAAGC  
GGATTCTATTTCTACAAAAATATTCCGAGTTCGGGATCCAGTGGAGATTTTTTGAAAAAG  
TATGAAAAAGTTGTCTCTGGACATTGTCATACTCAAGCAGACGGTGAAAATATTCCTAC  
ATCGGCACTCCTTAAACGATTACAGCCGGTGATGAAGATGACCCTCGCGGTTTCTGGGT  
CTTGACACAGAAACCCGTGAATTTGAATTTATTCCGATTTCCAAAACATGGCACAAACGA  
CTGACTTCTCCTGGTGTACAATAGAAGAAATGCGCGAGTGCTCCGGTTTTTCTGTGCGT  
TTGATTACTAATGAAGTTGATGAAGGCTTGACAAAAGTTGAATGTCTTCTGGCTAAAATT  
GTTTCATGATTTGAGAACCATCAATAAATCTGCCAAAATTGAGGTTGATTCTTCATCTGAT  
ATAACCGATGACGGCGAAACTCTACTGTTTCATCTATGGATACTTCTGGTAGTTTGATG  
ACCATAATGGGTTTATTTGCTGAAAGGCTCACAAATTCCAGCATCGGTGCGGATCATAAA  
GAAGCAATCGTAATTATGGCAAATGAACTTTATGCTGAGGCTATTGCATCATGATTGTAA  
TTAAAAAGAAGCACCTTGGATTTATTCTAGTTTCGCTACAAAAACATCATGTCCGTAGGCG  
ATGATCCTATCGATATGTCGCTTAACAAATATGCTAAAACATGGTGTACTGCCAAAAATG  
GTGCCGAAAATCGACAATGTTGGAGGCAATTTATTTAGCGCTATACGGTAAACCTTTTC  
GAGATATTACAAAAAACCAACAGCTGAATGAAAACAATGGCAAAAATTTGTTAGTGGAAC  
TTTGGTTGGAATACGAAGAAAAGGTTTTTCACATTACCCGCGGAATTATGCCTAATAAGT  
TCTCGATAACTTGTGACGGCGTGGCTATAGATGCTGCAGCATCAGTTAAAGACTTTCAGT  
CATATTCGAAGAAATGATTGGAATCAATTCTAACAGTTTTAAACAGATAGTTGTTTTGG  
GCACTGCTGACTATACGCCGTTTATGCAACTAAAAAGCGCCGGAAAGGCGCAAACCTGGTG  
GAAGATTTGGTGGAAAGTATCCGTCTTAGCTCAAATGGATAAAAATCAATAAAAGCCACGGA  
TTAAAGGGTTAAACCAGGATATCACTTCAGTTGATATGGAAATAAACCATATAAACTCAC  
AGATGAAAACATAACCAGGATCACCAGATTAACTCTAATGCATCCAATGCTGCTGCCATAT  
CAGACCATCAGGCATTATATGACACTGCTCGCGAAAAAGGAAAAGAAGTCACGTCCGCTA  
TTGATTTGCTCACAACGCAAATTACAGAATTCGTGATGCCTGATCCCCTGCATCCGATC  
TTGGCAAGTTTACAATGGCTAGAGCAAAGCCGCGCAGCGCAACATGAACAAGTTTCCGGTA  
TTGCTCATATGCATGAAGATGGTGGAAACGTGCCCAACATGGATGCAGCAATTTGACGATC  
CTGAACTGCTAGTGAAATTGCGTGATAAAAATGTCGCAGATCCAAGGTCAACTGGATAAAG  
CCGATATTCGCATAAATGAACTCAACCAAAAAATGATAGAGTTCAATGAAACAGCTGTTA  
ATTTCCGCGATCTTCAGAATAAGTTAAACAAAGAAAAACAGTCTATTAATCTTTATGTTA  
CCCAAGCTAAAGCTGCAAAGCTGCAATCGAGCGTCTGCAAATGAAAGAACAGATTACA  
CATCGGAAATCGACCAACTCGGGAATAACCTACGTCTAAAATTAGTGCTAAGTCTGATT  
TAGAAAAAGAGAAGCACCGTAGGTCTTTGATAGCTGATCTTTTGAAGGATTCCGGGAATTA  
AAGCCGTCATCATGGCCCGCTATATCCGTATTTCAATAATCGCATCTCTTATTATCTTG  
ATATAATGGATGCAGATTTTGGATTTGCTCTTGATTCCGAATTTAAAGAAGTAATAAAAT  
CTTCAGGAAGAAGCACATTCAGTTATAACGGTTTTTCTCAAGGCGAAAAAGCTCGTATTG  
ACATGGCTGTCATGTTTGTCTGGCGTTATTTAGCATCTGAAGTTTCCGGTGTAGATGTTA  
ATGCGCTGTTTATGGTTGAAGTATTTGACGGTCTTATGATGATGATGCACAACGCTAAG  
TGTTTTCAATCATAGAAAACATGAAAGCCAACGTGTTTATCATTTCGCATGGAGTACACG  
ATCCTCAGAAATTTGACAGACCCATTGTAATGTCAAAGCTAGGGAGAAGTACCGTAATGA  
ATGAGGCAATTTTTGATGTTTTATAATCTTCCAACAACCTGCTCTTGAACCTAGAAGTTAT  
AATTTAACTGATGAAAATGGTCATGTTAATTTGATTGTCCTGATGAAGACCTGAAACAG  
GTCTTCAGCGAAGAAGATATCCGCAAGTTGAAATCAAATCGCCATGCTTATTACAATTTA  
GTTGAAATTTTCGACTAATGATTTGCGTGAATAGAAATTATATTAGAATGTTTCGTTATAA  
ACACACTGAGGAATATGTATGCGTACTCAAGCCGTTCTTTTTGTACCAGCCGATAGCCGG  
CCTATGAGCGATAACGTGTTTGAATAATCAGTTAAAATCCTGAAAGCTTGGGTACCATTT

ATCAGTGATATTCGTGCAAACCAATTGCAAGCTCTTGAGCAGAAAATTCGGTTCGAACTA  
TATGCCGAAATTGATAAAATGGTTCGAGACATGGATATCGACTTGCTCGTACGCCGCCGA  
GAAAACATTCTGTCCAATGGCGGATATCATGTTAAAGGCATGAAGGACAAAAAAGTACTG  
GCCAAACAATTCCAATACGACACTGACGAACTAATTATTCAAGCTGCTCAGACTGTCATG  
GCAGATTACTAATAAGCTATATCGTAGTTGTGTTATAATATTTCAAATACTGAAAGGAAT  
ATGAAATGAACTTACAAAAGAACCCTGTCCGTAATGAAGAATTTTGCAGCTATCAATC  
CATCTCTGCGACTTACCCCTGGCAATTTTCATCATGACCAAGTCGGTAGATGGTGTTCAT  
ACGCTGAAGCTACAATCGCTGATGAAATTGATACCGAGCGCAACATTTATGGCCTGCCTA  
ACTCCCTGTCAAGTCTTGATCAACTGGGTGAAGGTTCTGAAATCAATCTCTCAAACGGGG  
AAATTGTCATCCTTAATGGTCGTGCAAAGTAAATCTGCCTGATGTTGAATCTTCAGTCA  
TCGTGGTTCCGAAGCAACGGCTGCGTATGCCACCGGCTGATGTAGAGTTTGACCTGAAAG  
CTGAAGATTTAGCAGAAATTCTCAAATCTCTCGAGCAGTTGGTGCAGACCCGCATCGCGA  
TTACTAACCGCACTGATCATAATTGTTATTGATGCGTTCGCCCTCGAAGACGGCGATAATG  
CACGAACCCGATATTCTTTGACCGTCTGTCCCTACGAAGGCACCAACAACCTTCAGTTTCG  
TTTTCAACCTTGAAAACGTCAGTGTGCTCGTTCGCGATTACAAAATCAATATTTCTTCCA  
AGGGCGCTGCTCAATTCCAGGGAATTAATACCGCATATGTATTTGTCCTTGAAACATCTT  
CAAAGCAGACTTCTAATAAATCCTGGTGTGATATAATGCGGGCGTAAAAGCCCGCTTTC  
TTTTGAGAGGAATTTTAATATGTTGACAGTTAATGCCGGCGAATTCATGTTTGAAAACAA  
ATATCGCCCAGGAACAATCGATGAATGCATTTTGCCAGAATATGACAAAAAGATTTTCAA  
ACCTATCGTTAAATCTGGTCGTATCCCAATATTATTCTACATTCTCCTTCCCAGGGAC  
AGGTAAAACCTACCGTCGCCAAAGCTCTGGTATCAGAAGTTGAAGCCGAGTTTCTGTTTCG  
TAACGGCGCAGACGCAACAATTGACTTTGTTTCGCGATGTTATGACTCCATTTGCAAGCTC  
TAAAACCATGGCAGCAGGTGGAAAAGTAGTTATCATCGATGAATTTGATCGAGCAGGTCT  
TGCTGATTTCTCAGCGTCATCGTCGCTCATTTCATGGAAGCTCATTCCAAAAATTGCACATT  
TATCATTACTGCGAATGATTTGGGTGGAATTAATCCAGCACGTCAAACACGGTGTCTGTGT  
TATTCAATTTGTAAGCCGATCAATCTGATAAAGTCAATATGATGAAACATATGATTGT  
TCGTGCCGAAGCAATTTGTGATGCTGAAAATATTGAAGTTGAAGCTCGCAAAGTTATTGC  
CGCTTTGGTTAAAAGAAGTTCCTGATTTCCGTAAAACCTCTCAACGAGATGGATTTCTA  
TGCATCCGAAGGTAAAATTGACAGCGGTATTCTGAGTCTGGTTCTCAATACCCGCAACGA  
TATCGAACAAGTCATTGATGCACTTAAAGCTAAAGATTTGAAATCGCTTCGTGCAATGGC  
TGGTCAATACACGACTGAGTACCCTGGTTTTGTTGAACGTCTATGTAATGCACTGTACCC  
GCTCGTTAATGGTCCGGCAAAAATTCGCATGTACGAAATTATCGGTGACAACAACCAACT  
GTTTGGCAAAGCCGCAAATATCGAGTTTCATGTTCAATATATGTTTCGTTTCAGCTTGCCGT  
AGAATTCCATGGTAACTGGCTGTAAGGAGTTCGATATGAATTTGAATTTCCCTTATGGGTG  
ATGATGAGCAACTCAATGAGCACGAAATTGCTTGGAATCGAAAGATTGGGATGCCGTAT  
CAGCATTAGCTGATTCGTTCAAAGAACCTGCCGAAAACAATGCATTCGCATTGTTGGATG  
ATATCCCTTACACCAAAACGGAAAGATGTGTATAAAATAGTGATTATCCGGCATGGTTTA  
TCAATAATGCTCTTTCGATGCATGCAGAAACACTGTATTCCGGCCTACGTCACGAATCTTC  
TGTCAGCATTGCCGGCCCAAGCGCAATACAATTACCTGGTGCATCTGTAAGAAAAGGCA  
AGATTTACGGCAAATGGCCTAAACTAGATGAATCAATCAACGAAAAGCTTTATATTGCCG  
TTATAACAAGCAGCGAATAACGTTGATTTCCATACCGCAAAGATGTATATGCAAATCATGC  
AAAGGCGAAACACTTTGCATGATTTTCTGAAAAATCACAAATTTATTGTAACCTCAGCTT  
TTGTTAAAACCTGTTGCGAAAACAACAAAAGATCAAACGCAGATGCTGAAGTTGGCTAAAA  
AATCCTAAGGTTTTCTTATGATCCAAATCGATATCAATCATCCTGATGATTTTCTGAAAA  
TTGATGAAACACTTCCACGAATTGGCATTGCATCTAATAAAGAGAAGAACTTTATCAAA  
GCTGCCATATTCTTCAAAGCAAGGCAAATATTTTCATCGTTTCAAGGAAATGCTGA  
AACTAGATGGTCTACCAGTATCAGTTTCCGAAGAAGATATTTCTAGACGAAATAACATTC  
CTTCATTGCTTCAGTCATGGAATTTGTGTAATAACTAACTCCTATTGAATTGTCATCTC  
ACAATACTTTTAGAATTATTGGCCACAAGCAGAAGGCCGAATGGCAACTATTCGCGAAGT  
ATCAATTTGGTTAATGAAATGGCCTCAACAGAGGCCACTTAGAAGGACATATTATGCAGC  
ATTACACGAACATCGAAGTTATTGTAAATACCATTTTGTAGCGTTACGTTAAAGACGGTG  
TAAGACTATCGCGAAAAACAATTCTCAGCCAACGCTCTTTCATCATGCCGCCCCAGGTG  
TAGAGACTAAGCACAAAGACATCTCTGGGCGTTTTTTCGTAACCAAAGAAGCATGAAAATA  
TTTGGGAAGCAAAGCAATGGCAAAAACGAATGGCCGAAATTGGCCAAGATGCCATGGGTA  
TGGACGACTATTGTATTTCTACATCTCCGATAATTATCGCGGATTTATTGATTTTGATC  
GTGACAATCTCATTATCGTTGTAGTCGATATCGAAGTAACAGCTCCAGAATTCCTGATC  
CCAAATTTGCAAATATGAAATTGATATGATTTCCCATGTGCGTTCGACGAGGGCAGAA

AGACATATTACATTTTTGACCTTGTTAAAGATGTAGGCCATTGGGACCCATCTAAGTCTG  
TTCTAGACAGATATATTCTTGACAATGTCGTTTACATGCCATTTCGACACTGAAATTGATC  
TTCATCTCAACTATATTCAACTATGGAAATCATCTACCCCTGATTTGGTGTGGTTGGA  
ACAGCGAAGGTTTCGATATTCCGTACATTATCACTCGAAGTATCAACATCTTGGGTGAAA  
GTGCGGCTAACCAATTAAGTCCGTACGGCAAGATCGGCTCAAAAACAATTACAAACATGT  
ACGGTGAAAAACGATCTATCGTATCCATGGTGTGCACTGATGGATTATATGGATGTTT  
TCAAAAAGTTCATTTTACTGTTATGCCTGACTACAAGCTAGGTAACGTTGGATATCGCG  
AAGTTAAAGCAGACAAGTTGGAATAAGAGGGCCGAATTAATAACTTCCGAGCAGCAGACC  
ACCAACGATATGTCGATTACTGTGTGCGAGATACGGATATTATCCTGTTGATCGATGGCC  
GTCGATGCTTTATTGATCTTATTCTGTCTCTTTGTTATTACGCGAAAATTCGTTTCGAGG  
ACGTATTAGGAACTATTAAGTGTGGGATTCTATCATTTTTAATTCGCTTGTGCGAGAAAA  
ATATAGTTATTCCGATGGTGAAAGCTAGTCCAAAGCAAAGTTTCCCTGGGGCATAACGTAA  
AAGAACCTGTTCCCTGGTGCATCGATATGGCATGAGCTTTTACTTCACATCTCTGTATG  
CGAGTATTCTACGTCTTCTCAATATCAGCCCAGAGATGATTGCCGGGGTGTGGCACCTG  
CACATCTTGACGACTATATCAATAAGACTGCTCCTAAACCATCTGAAGTTTATAGTTGTG  
CCCCAACTGGCATGATGTACAAACGGTGTGAAGTTGGTGTACTGCCGGCTGAAACTGAGA  
AAGTATTCTTGCAACGTTAAGCCGAAAAGAAAATGATGCTTGCTGCTATACGCAATCAGG  
AAGCAATTAAGAAAAATTCTGGCTTCCAGGGGCGAAAGGGTAGACCACTAGTGTTCCGCT  
TTCGTATGGGTGTTAAATTATGCACCCATCTTGGAGGAATTACATTATGTGGTACATTTA  
CTAAATAACGAATGAGCTAAACGGCAAATTTACGTCGGGGTTCAGAAATCCGAAGACAT  
GAAAAACGACCCTTACATGGGTTACAGGCCTAGGTGTTAAACGAGCAATCGCCAAATATGG  
TGTTGAAAATTTCACTCGGACGACGTTGTTTCGAATTTGCGACAGCCGAAGATGCTTACAA  
GATGGAAGCCGCCATAGTGACTGAAGAGTTTTTCAGCCGTCCAGACGTCTACAACGCAAT  
GGTCCGGCGGTAAAGGTGGTTGGGCCCATATCAAAAAGCACGGGCAGCAGATGAAAGACCC  
CGTCATGGCTCCTTACATTGGGTCTTGCCTTCGCCGCGCATATGAGCAAGACCCGAATAA  
AAAGCTTATTAACATCGCCAATTTCAACAAAGCGTCCGAAAGGGACCGTGGCAAGAAACA  
TTCAGATGAGACTCGCCAAAAGCGGTCAGACTCGCTAAACGATTTCTACGCGAATAACAC  
ATCTGTTTTAACTGGTATCCCAAAGTCAGCTGAGCATCGCAAGAAAATGAAAGCCGCTG  
GACTTAAGAACGCCGCGCAAGCCAAGCAGAGCGTCGAAAGGCCCTAGTAGCCTCAGGTAA  
TGACGCATTTCGCTAAAAACAGGCTGGGCAAACCTAATAGCGAAGAAACGAAGGCTAAGAT  
GTCCGAAGCGAAGAAAAAATACTGGGTTGAAAACCCAAAAGTTATTGTAATAATCTCCACA  
CTGCGGAATAGAAGGCATCAAGCATGCCATGCTCAGATGGCATTTCGACAATTGCAAACA  
CAAAGAGGCATAATTATGGAACCTCGAATTATGCCGCGACTTCAATGAAGATGAACTCGCG  
TATTTGAATACTCTTTCAACCGATGCACTTCATACCATGATCGGTCGTTGTGAAAAAGAA  
GAACAAAAACGCAACACCAACCAATTGAACCGCAAATTTTGATCAACTCGCTTTACGGA  
GCTTTTTAACTTCATTAACCTTGGAGCTCCTTAAACCCGGTGAACCTCAGGGAATCTCTC  
AATGAGACAATCCTGAGCCAAGTCTCGAAAGAGAAAGGTGCATCGACTATCGAAAGGCGG  
GTAATACCGAACCGAGTAGAGTACACCCAAGTGGGTGGAAGCGCCGGGGGTACAGCAATG  
CATATGATATAGTCTGCTCTGCATAGCGATATGCAGCTGTGAGTAAAGGTCGCGACGACA  
TATCCACGGTCTTTGATTAACGACCCAATGCGAACACCTGGGAGGTAACAACCTCTTCC  
GATCCTACCATTTGCGAACTGCTGAAGCTATTACAACCTACGGTCAATTGGCTATTCCGGT  
GGATTGAGCGTAAACTGAACGAATGTATCAACAATCTTGTCAAACCAACTAATGTTGATT  
ATGTGTGTTATATTGATACTGACTCGGTGTCTCTCAACATGGAAGCAGTGGTACTAAAG  
TAGGGATTGACAAATTCCGGGACACCAACCATCTTATCGATTTCCCTTGATAATCTCGGAC  
ATAAAAAGCTCGAGCCATTTATCGACGAGTCATACAAAGAACACGAGGAGTATATGGACA  
ATGAGCAGCATCCCTTGCTCATGGACCGCGAAGCCATTTTTGGAGCTCCATTGGGTTCTG  
ACGGAATTGGTGGTTTATGGACAGTTAAAAAGCGATACGCTTTGAACGTTTACGATATTG  
AAGGCACTCGATATGCTGGACCGCATCTGAAAATCATGGGTCTAGAACTCAACGATCAT  
CCACACCTTTGGCTTGTCAAAAATCGTTAAAAGAGTCAATTCGTCGGTTGTTGCAAGAAG  
GTGACTCCTCTTTGCAAAAATTATTTCAATTCGAATTCAGAATGAATTCAAAACAATCGATT  
ATCAAGAGATTGCCGCGAGTGTCTTCTGCGAATAATGTCGCCAAAAACGCGGATTCCGGCAG  
GATATCCAACCTAAAAGAGCTCCGTATCATGTGAAAGGAGCCCTTGCATATAACCGGATTG  
CAAAAACCTGACCAAGCAATTCCAGAGATTGTTGAAGGCGAAAAGGTAATGGTTATTCCTC  
TTCGTGATCGCAATCCATTCAATGAAGCGTGTGTTTGCCTGGCCGTCAGGAACGCAAATTC  
CACCTGTCGTAGAAGCCGATGTTTTGAAGTTTATAGATATAAATAAGCTTTTTTGATAAAA  
CTTTCGTTAAACCACTTGTCTCAATTTGCGAAGCTACGAAAACAGATTATGAATTTAGGA  
ATAATTTGTTGACATGTTTGATATTCGAGGAAATAGTATGTGTAATATGACACTTCAAG

ATATTCGTGACATCATGGTGTCAAAAATATCAATCAAATGAATTTTTTTACTGACAAATCCG  
GGGTTAAAACCGTTCGAAATTGACCCAGTAATGTTTAAAGGCCGTTGAAAATCTAATTTTCG  
GTAAACTTAATCACGATTATATTGAGCGAGAGTTGTCTTGGTATTTGAGTCAATCTCGTT  
ATGTTGCTGATATTCAGGTAACCCAGCAATTTGGGAAGCTGTTGCAGATTGTAACG  
GTATGATCAACTCCAATTATGGCTGGGCTATTTTCAGCGAAGAAAATGGAAATCAGCTTG  
CAAATGTTGTCAAACATCTAATTGAAAATCCATACACTCGTTCGTGCCAACATGATTTATA  
CTCGACCGTCTATGCATACTGATTACATTGCAAATGGTATGTCCGATTTTCATGTGCACCA  
ATAACGTCCAATACCAGATTCGGGATGGAAAACCTGAATGCAGTCGTTTCATATGAGGTCCA  
ATGACGCTATTTTCGGTATCGGAATGATTGGGCGTGGCATGATGATGTTTTGTCTTGAC  
TGGTTAATACTCTTCAATCCCATGAAATCATGGTAGAAAAGGGTGATATCTAATGGTGTG  
CTGATTCACTCCGTGTGTATGAAAGACATTTTGGCCTTATTGAACAATATATTGCTCAAT  
AATTCTCAATTTAGCATAGCGAGCATAATGTTGCTCGCTATGTTTAGAATCTTTATAGG  
GTTGATATAATGTCACCACACAAAGGGAACATTTAAGGCATCCACCACTGAAGATGAAAC  
TCCCAAAAACCTTAAATGACGCTCATGCTCTTATACAGCATGCTATGGAAAACGTTAAAA  
AGAGCTGCTGATAATCGATAAATCAGGCAAATCACAGCTTGTATATTTTTTGATGCTCAT  
ATACATGATGGAAAACCTGCACGTAGATTACAAAGCAGTTAATGAAAATGATGAAATTCAT  
CAACTTGTTTCATGCAGCTATGAATGCACAAGTCAAACAAATTATGAAAGATAAAGAGGCA  
CAAATTGGTTGAAACAATCCTTGAAGACCTTCTCTTCAACAATACGTACTTTATTTTCG  
GCGTACCCGTCCATAAAAAGAAGCTTATTTTCGACCGTGGGCCTTACCGCGAGATTTTTAAA  
CTCATCCAAAACACGTGAATGAGTACAATACAATCCCAACCAAAAACCTGCACTTGCAATC  
GCACTTGACAAAAAGTCTATCGAACAAGTAACTCATGACGGTGTAAAGGAAGTTTTGGCT  
CGTCTGTCTTCTAAACCAGAAGATCATGCCTGGTTAATTAAGAAACTGAATCTTACTGC  
AAAGTCCAAGCGATGTATAACGCGTGTCTAAGGCAATCGAGATACAGGAACATGCGGCC  
AAACCATTTGAAGAAGGACATAAGAAATTGCCGGATGTTGGCGCAATCGAAGATTTGATG  
AAAGAAGCATTGGCTATTTTCGTTTGTATGGCTCAGACGGACATGATTGGTTTGAAGATTAT  
GAACGACGTTATATGCTTGATCAATTCAAAGCTAATAAATTCCCGTTCATCTCAAACATT  
CTGAATAAAAATAACCAAGGGTGGTGCAGAACTTGGCACGCTAAATGTTATCATGGCGGGT  
GTCAACGTTGGTAAAACCTTGGTCTTTGCTCTGTGGCCGACAGATTATCTCCAAACTGGC  
AAAACGTCGTTTATTTCTCGATGGAGATGGCTGAACATGTTGTTGCGAAACGTATAGAT  
GCCAACTTGCTTGAAGTCACGCTTGACGAAATAGATGATGGCAACATGAGCTGGGCTGAG  
TATAAACCTCGGATGGAGCGTCTGAAATCCAGTAATATGGGTCGTTTGATTATCAAGCAA  
TACCCAACCTTCTGGTGCAAATGCTAATCATTTCACGCGTTTTTGAACGAGCTGAAGCTG  
AAGAAAAACTTCAAAGCAGACGTTGTTATTGTGGACTATCTGGGTATCTGTGCATCCACA  
CGAATTCGTGGAGGTTCTGAGAACTCGTATACTTTGGTAAAAGCTATTGCCGAAGAATTA  
CGTGGCCTGGCTGTCCAACATCAAGTTGTTCTATGGACTGGTGTCAAACCACTCGATCT  
GCATGGGATGCGACCGACATCGACATGTCAGATGTAGCCGAATCTGCTGGCTTACCAGCA  
ACTGCTGATTTTATGCTTGCAGTGATGGAACTGAAGAGTTAGCTCAAATGGGTCTCCAA  
CTGATGAAGCAAATAAAAATCGCGGTATGGAGATAAAAATTGGATTAACAAATTA AAAATA  
GGGCTTTAAAAGGGCAACCAGAGATGGTACGATGTAGAAGAAGAACAATCAAGGCCAGG  
AACGCCAAACACACCTTCTCCTAGACAAGCTGACAATACGAAGGGCAATAACTCAAGACA  
GCATCTTGACGAACTTGCCGCGACAATGCATTTCTGATGGCCTAACGGCCATCTACATAG  
GAAACGGATGATGAAAACATTTCTAGAGTGTTCTGGTAAACAGAAAGATCATGTCAATAT  
GGATATACAGGTTGTCGAAGACGTTGTGGCTGGTGAATCTGCAGGAGACCCCGTCAACTT  
CGCAGCTGGTAAAACGTCTGGCGCAGTTATTTCCCCTGGGCCTAAACTCCTTCTAAGAA  
GGACAAGAAGAAGAAATGATTACGTTTCGAAGCCGCTCAAGAAGCGTGCGAAGCTTTAGGT  
CATGTAGCCTTAAAGATTCTTAGAAATCAACCTCATCTTGATATTCTGAAGACAACCTAC  
ACGAATTGCTTTCCAAGCATGATGAAGGGTGTCTGTATGAGATGGCTGTTAATGCTGCA  
GAAATTGATTCGTACTTGGTTACCCGAGGAAAGCCATTCTCTCGTATATAATATGCTCAA  
CACCGTGAAATTCTGTTAGAGGCATGTCGGCAATTGGATGCTAATGGATTTTTGTCTGAG  
TATAATGGGGCCAAGAGCCCCATTTGGAGTTATTATGTTTGTGATTTTTTTGTTTGGCGA  
ACGAGCAATGATGCATTTGCCAATATTCAAACGAAAGAAGGGCAAGTTCAAGTCAAGATG  
TCCAACATGTGGTCATTCCATGACGGACATGAACAAAGACCGCTTTTGGATGTATGAGAA  
GAAGGGCGAGTGGCAAGTTGATTGCTTTAACTGTGATTATCAAAGCAATTTGGGCGGGTA  
TTTAAAGGAGCGAGAAGAAGTACTTTCTCGTTGATGGCTATTAGAAAGAAGAAAAGAAAG  
CAATGTCTTCAAGCCAGAAGCAAACCCAGTAGAAAATCTCTTACCAAAAAGATGCCGGT  
GTTTAAAAGTTAAATTTCTGTGAACGTCTAGAATTGCTACCAGCGAACCACCTATAGT  
AAAATATGTGCAAAAAGCAAAAATACCAGAATCAGCATATAAGCGGTTATGGTTTACTCG

CGAATGGCAGAAATTGGTAAATTCTATTTCCACCAGATACGTATACGCGCGAATCACGGGA  
AAATAGATTGGTTATACCGATATTTGACAAAAACGGTGACATCCAGTCTTTTCAGGGAAG  
AGCTCTATCAGCTAGTCCAAACAAATACATCACCAGAAAGGCTCATGAAGATGCATCAA  
AATTACGGAATGGATACAATTGATGGGAACCGAACTCTATGGTTTATGGAAGGACCGATT  
GATCCCTTTTCATTCCGAATTCTGGAGCTATCACTGGCGGTAGTCTCGCATTAAAGTGAA  
GTTCCATTCAAAGCACTCGAGTCTGGGTTTCGTGATAGTGAACCATTTCATCCTGATACG  
TGCAAGCGACTGTCTAGACTAATTGATGCAGGTGAACGAGTTGTGATGTGTGACAGGTGT  
GCTTGGGCGTCCAAAGATGTAAACGATTTGATAATGAATGACAATGCAACTCCCGAAGAT  
ATTTTCCAGTATTGCAAGGACAACGTCGCGTCCGGTTTGCAAGCAAAACCGCGATTTGGC  
AAATGGAAGCGTTGCTAAGGCCTTTCGGAGGCCTTCATTGTTTTTATTGAACGATGACG  
AACAAAACAGTGTACACTATCTCTAAAGAGGATACTATATCATCATACAAAACAACTGA  
GTAAAACAACGGAGTATATCATGACAAGTATAAATCTCGAACATCCTGCTCTATTGTGCA  
ATGCTCACCTCATAGGCGAATGGTAGGAGAATCCTCGGGTTGCGAGCATTITGATCAAGA  
GAAACGGAAAGACTGGTAAAATTCCATCAAATTTACCGTTGGCACAATAAAAACCCCTC  
TCGGCGGTTCGAGGGCGTGTGGCTTTCTTTTACAACAAATTGGCTTGGGTACGCGATCGAT  
ATCTGATGCTAATGGAAGAAATGACAAAACCCGGCCATTTCGGCGACTGACAATTTGAAAG  
TTGCAATTTTCTTCGCTGAATACGCCATTTGTTTGGTGAATGGGAACCGTCAGACGATG  
ACATCTCGCTGAGTCGCACAAGCATTCTGAGATGATTCCCGAAAAGCATAAGTTAACTG  
AACTGCAAATTCACAACCTTAAGCAGATTGACGAATATAAGGAAAAAATGAACGAAATCT  
GAGCTTTATAAACGTGGATACAAGTGGGCTTTTGACTTTAATGAATTTGATCGCGGCGCA  
CTGCAGGCTGTCCGCGATATCCAAAAACGGAGAACAAAACATGAAAGCTCTGACTATTG  
CTCTATTATACGCTGCTTCTACAGCTTCTGCTGCTAGCTTCGATTGTCAAGTAAAAAATG  
TGAATGCCATCGAGAAAGCTATTTGCGCTGTTCCAGAACTTCTTTGCTGGATGATCAA  
CGGCAGAAGCATTCAAGGCAGTATCTCATATTCCTGAAGTTAAGGCTGACCAAAAAGCTT  
ACTTCAAAGAGCGCAACGCATCAACGTCTTTGTCTTCGCTTAAGGACAATATGACTGACC  
GCATCATTGAGTTGCAGATTATTGGCGAATTGGAAGGTGTTTCAGAAAAAACCGCATTCTG  
AAATTTTCCGAACCGATTTTGTAAAGCTACAAGTAATCGACCCGTCGAAAAAGACACGG  
TGGCAGATCTCACTTGGCAAGCAAAGCACGGGGATGAACTTAGCTTGCCTGGAAAAACG  
AGCTACACAGATTACCGTGACAAAAATGCTCCAATTTGGATGCGCGACTTTGCGTACAGG  
ATAGTTTCGCAACGATGTGATGGGCAGATGGGTAGCTCAAGCTCGTTCTGCTGGTCTAATT  
AATGAATTCAAATCTGTAGAGTATAAAATCGAAACCGGTTTTATCAATATGACTATTGAT  
AATTTGAAAATTAATATTCAGCAGGGTCGTCAAGTGTGCGAACTATGGCAATAGGATCA  
ATGAGGTAATACAAAATGTGGATTCTTATTCTCACCATAGTTGGAACAGGGATGTCTTCT  
GTTCAATCTATCCCGTTTAAACACGTATGATTCTTGTGAAAAAGCTCGAATTGTGTGAATG  
AAAATACCCCTGATTCTAGGAAATATACTGCTGTCTGTGTCGAAAAGTGATATAATGACT  
ACAACATAACATAGGAGAACAAAATGACACCTCAATTTAATGAATGCGCACAACTAACTCA  
TAGTATGGATAAGGCAGTAAATGCACTGTATGATTGCCCTATTGCCAACGATAATCCTCT  
CAATCGAATGATTGACATGCAACGTCAACTTCAAATTGAGCTCGCACAAACGGCATCCAAA  
ATACAATCGCGACCCACGAGAGCTTAAACTTGTGGCGAAATTCGTGACTGGTGTACGC  
TCAGGACGAATATATTGCCGACGATATTCGCGAGCAGTATACTGCTCTAGGTGGAATGAG  
TAACCCAGGCCGAATGCGATCTGGAAACCATGGCACGCTGAACATGCCGAATATCGCAA  
TCGACTATTTTCTGAATTGTGCGCCGGAAGACCTACTCGAAGCAAAATTCGAGTTGATTGA  
CCAAATTCATTTTTTCTTAAACACGATGATTGCGATGGGCATTGATGGCGATGAAATCTT  
CAAATCTATTATTTGAAAAATGCCGAAAACCTTTGCACGGCAGGAGAATGGATACTAATG  
CTTGAACAAGATGAAATTGATGAAATCAATCGATTGCGCAAACCTAGATGTTGAAGAAGGA  
AGGGCGGATCTTACGCCCCATATATCCATTTCAAACAATAAAAATATGAGGATATTTAT  
TATGTATGAAGTCAAATGGATTGAAATTAACAGAGACAATCATGGCGTAACATTTGCTAC  
GAATACACCCAACGGCGTTCTAATCGGTGTTAATTACACTTTTAAAGCGGAAAAGTTTGA  
TATAACATTCATTCCTGATATAAAAGTTGTCAATAATCCCAATGGAAATGGATATATTTT  
CTGCCACGGGTGATTCATGAAAAAATATGTAATCCAATGGAAAGACGTCGAAGGATTCTG  
TCATTTTCTGGATGGGAATTTGTATGGCTCATCTAGTGGTGTGCTATTCCATAATTCATG  
GGAAGATGCCAAAACCTAATATGCAGAAAGCGAAAGAAGCCATAACAGAGTATTTGAAAGG  
AACAAAAGTCGTCAAAAACCGCCTATTTGGGCTCCAACGATAGCCATAATCAACAAGCC  
GTCGGAACATTTGGCCAATGCGCATAAACGAATGTGTGATACAATGCATATCGTTGATCT  
TACTGTGATCCCAAAAACAAATGAGGTAAAAATGGTAACATATCATGATTTGACTGTTGGC  
CAAAAAGATGCTATTGAAAAAGCACTCCAAGCAATGAGAATAAACGTCATATTACCATT  
CGAGGGCCTGCGGGCTCAGGTAAAACTACTATGACCCGTTTTCTGCTGGAGCGTCTTTTC

CAGACCGGCCACCAAGGTATTGTTCTCACAGCACCTACGCACCAAGCAGAGAAAGAATTG  
TCCAAACATGCCTTGCGCAAGTCATATACACTTCAGTCAGTCTTGAAGATTAACCCAAGC  
ACTCTCGAAGAAAATCAAATTTTTGAGCAGAAAGGTA CTCTGACTTCTCCAAAACACGT  
GTGCTCATCTGCGACGAAGTATCGTTTTATACGCGCAAATTGTTTGACATTCTGATGCGA  
AATGTTCCATCTCATTGTGTTGTTATCGGCATTGGTGAGAAGAAGCAAATTCGGGGAGTA  
TCAGAAGATGATACGCATGAACTCAGTCCATTCTTCACAGACAAGCGATTTGAACAAGTT  
GAATTGACGAAAGTAGAACGTCACCAAGGTCCAATCATTGAAGTTGCAACAGATATCCGA  
AATGGCAAATGGATTTATGAGAAGCTTGACGATTCTGTTAATGGCGTATAGCAATTTTCAT  
ACGGTCAAAGATATTCTTTCAAATAATTCGAAAGAACAGAAACGCCCAATGAGCTACTT  
GAAAATCGCATAATCACTTACACAAACAATTCTGTTGATAAGCTTAATTCCGTTATCCGC  
AAACAGCTATATGGAGCAAAGGCTGCGCCATTCTGCCTGATGAAATATTGGTCATGCAA  
GAACCGCTCATGTTTGACATAGACGTTGGTGGCCAAACTCTAAAAGAAGTCATTTGCAA  
AATGGGCAAACGTACGAGTTATAAACGTTAAACCTTCTCGCAAACGCTTAAACCAAAA  
GGTGTCCGGCGAAATTGAGGTCGAATGCACACTGCTCGAGTGTGAATCTTATGTAGATGAT  
GAAGATGACTATAGACGAGCGTGGTTTACGGTTGTTCTGACCAAATACTCAAATGCA  
ATACACGAATTTTTGTCTATTATTGCTGAAAAATATAGAAGTCGTGAAGTTTTCCCAAC  
TGGAAAGACTTCTGAGCAATACGCAATACTTTCACCAAAGTTCGACCCTTGGGTGCAATG  
ACATTTCATAAATCACAGGGTTCAACATTCGATAATGCATATCTTTTTACTCCGTGTTTG  
CATCAATATTGCAGAGACCCGGATGTTGCACAGGAATTGATTTATGTCCGAAATACTCGT  
GCCCCACAAAATGTCTGTTTCGTATAAGTATCCTGATCAAGCGATTTATAGACCAGGTCA  
ACTGGTCTATTTTATCAAAAAACGGGTATCGCCATAGCGGAACCGTATTACAATACAAAG  
TCGGATGTTATCGCATATTGAGTGATGCTTTTGATATGGTATTGCACATTAAACCAAACC  
AAGTGAGAGTAGATTAGTATGAGCAAAGTGACAGCTTTTATTATTGACTGCGAAACAAT  
GGTCAATGCTCCTGATGGTGCAGTAGTTGACCTTGCTGTTTTGGTGTGTTGAGCATGACCC  
GTACAAACTGCCTACGTTTGAAGATCTGTGTAACGCGGGCGTCGATTCAAATTCAATCT  
CCAAGATCAAAAAGGCATGAGATTCTTTGACCAAGGAACAATCGATTGGTGGAAAAACA  
AGATGTGCAAGCTCAAATGCATCCTAAACCATCGAGCGAAGATGTCAGCGTCCTGGAATT  
TTATGAAAGCTTCTTGATTTTCTTGCAGCACAAGGGTTTGACAAGAATACAGGTCAAGG  
CTGGTGTCCGGCGTCAAAGCTTCGATTTTCCTATCATGATCGATGTTATCCGCAAAATTA  
CAACGCTCGTGAAACATTCAAATACGAACCATTTTTCTTCTGGCAGCAACGTGATGTTCCG  
TACTACTGTAGACGCTACTCTGATGATGCGAGATATGACCATGTGTCCTATGCCGAAGGG  
TGTGTTGGATGGATTTGTAGCTCATAACGCAATTCACGATTGTGCAAAGGCTGCGCTAGA  
ATTGCTTTATTCCAAGCGATATGCTCTCGGTCTCGACGATATTCCCACCGGTGATAATGT  
TGACCCGCGCAGTGTCCGCAAATGATAGTTGCTTTTGAGAGGGGTTGAAAAAACCCCTT  
CTTTTATCGCATATCACCTGGCGAGATGACAAAATTCAAAGTGCTTATTTTATTAACGGG  
GCATGGGAATTTAACAGGGTTAATGGAGTTTTGTGTGTCGAAGGTGATGTTAATTTTGCA  
ATGGAAGAATGACAAATTGCAATAGATGTTCCCTCAGGCATTTGTTAGTGGTGATTCCAAT  
GTAATCCTCGAATGGGCTAAAAATAAGGTATCAGAATGATTTACTAGCATTACAACGCAG  
ATAGCTTCTGGGGTACAACGATCCAAACAGCAATGGAAATCCGAAACCAGTTGAATTCAA  
CGATGGTTCTGCGGTTTGTCAAACGAAAAGATTATAATGCGCGATATGAAGAGTTGATTA  
AATCTACCAGTGAACCTGCTTGGGCAAAGCATCCGACGACCAAAACTTGGGTAGCAAAC  
CAAATCCTTTCAGGGATGGTGTACTAGTGGAGATTCGAGAGTGAAACAAAATTACGCTTG  
GCTAGCATATCACTTCGGCTTGGTTCCAGCAAATGCTTGCAAATATGGCACTCGCGGATG  
TACGTTTGCTAACAAATAACCCGCACTTTGCATAATTCATTTCAACTGAAGATTTTTGTGC  
TATTTTGCGAATCGCACGACACTGCTTCCCTTAAGGGCCGCGAAGTTGCCGTTTCATGATCA  
TGACAGATTGAGTTCGGCCGCTTGTCTGGGGCGGATGAGCGTTTTATCAGAAGTCGAGA  
CACTCGAAAGCTGAAGTTTCAGTTTTGGCTGTCAAATCAGCGACTCATCATGTTTTGAA  
CCGGGTCATCAACACTGATTTCCGATGGATTCAACGAACAAAACGAGGCCCGAAATGGAT  
CAGCAAGTAAATGAAGAAGTAGTTGTTTCTCTGGATATTGACGGTGTCTCAATACGCAG  
GATGATCACATGGAATGGAGAAGTACGAGAACAGTCACCTGTGTGCGTGTTCGCCATAC  
AAGCGTGGCGATATTGTCAGGAACCATAGACTCAGTTGGCTGAGGGAATGGCTAAAGAAA  
CATGATGCTAAAGTGGTTGTAATTCGCTCGTGGGTCGCTTTGCGTGATACTGGAAAAATG  
ATATGTGATTTTCTCGAACTTCCGTATCATTCCGAAGCATACTGACTGGCGGTGGAAAA  
TCTCATGGCACTGGTGTCTTTCGTATGTAGCCGATCATAATATCCATAGATGGGTGGTC  
TTGAATGACGCCAAGTGCATGCATGATCACGATGAGGTCCTACTTAGGCACCTGGGTGCAT  
ATCAAAGCTGGTCTCAATGAATCATACTTATAAGAGGCCGACTTAATTCCGTGACACCTG  
GTGGTCCCGCACCGAGAGTCGCTGGGAAACAGCATAAATAAAAAGTTAGTTGAATAGAT

AAAACAACCTGAGTGACTCACTGGAATAAAAAGAACCGGGCTTCGCCCATCGTGCTTGAC  
GAATCCAGTTTGTCTGTTTCATCTGATTTATATAGGAGCTCTTCGGAGCCCCTTTTTTGT  
TTCAAAACGAGTGTACAAGTTAGTGCTTCATGATAAAATGACTTCAGGTTCAACAACAAG  
GAGTACTCTTATGATTTACGCGATTAACAAATTCGGTGTAGCATTGCGATTGGAGCCAA  
CATTTGTGCTTATTCGATTGCTTCTAGAGGCTGTCAAGTTTTCTCGTGTGCTGACGATAT  
GTATGCTGCCATGGATCCTCAGGTTGTCGGTTAGGAGTATCACTTCAAGCAAGATGGCGA  
TGCTATCATTTGCGAACTCGAACAGACCAACGTTTCGCGTAGAAAAAGATTTTGCTGAATT  
TATCTCTGAGTACGAAGTTTAAAGTATACTGATGTGGCTGTATCATAATGGCCACATC  
AAACAACATGGAGTAATGAAAATCCGCATTTCCAAGGATTTCTTCCTCGACGTAATGTT  
TTCAACAAGGTTTCTGTTGTTGAGAAATCCCTCGAAGAGCATCTCTGCTATACCACTGT  
TCTGTATGTTTTCGAAGGCAATACTCGAATTGCTGTTCCCGAACGTGTTATCACCGCAGA  
ACGTACCAATTGGGTTCTGAAAGAAGGTATCTACGAAGAGCTGAAGGGTAAAATCTGATG  
GGAGCTCCGAATCATAGATTGATCCTATGCGAAGAAAAAGTCATGGAGTTGAAAAGGAA  
TTGTATGACCTTTTCATCGAAATGAACTGTATTGGTGCAAACAATCAAGACACTTGGGGC  
AAAGTCTTTAAGACTAAGGCATACAATGCGTCTCAAGCTCTAATGGCCGAGTATAAAGAG  
AGAATTCGCAAAATCATTGCGACTAATATTCAGCAATCTGTCACGTACGCGTACGAGCTG  
ATTGGTTTGAGGGGAATTGTGGATGTTTCCATGAAACGTGGACAATGACTATTAGTGAAA  
CTGCCATACTAGTAATAAAAATGAGAATTCGTCTTGTGCGATAAGAAAGTTTTCTTAAATG  
CAAACCGCCAAGACAGTCAATCCTACAGATTGGCAAGGACCATTGTTGAATTTGCAGAAT  
GGAGGCAACTCTGTGTTATAGGCAATGATGGTCCCGAATGGCTTCTCAATGTCTACGGTC  
CATGCTGGCGCGGTAGAATGTCTGCAAACACTACAAACAATATTACGAGGTTCAAAAATGAAA  
CTTAAATTGAAAATCCCTCGCTCCGAATATCAACAACGTTTTTTGCAAAAACGGAAAGGCAG  
AGGTTGTGGGCTAGTACGCTTGAACCTGAAATCCAAATCTGGGAGAACTTGAAGTTCTCGAA  
ACAAAGCCGGACGGGACATTGAGAACAATGCTACTTTCCTTGGATAACCACATTGGAATT  
CCACTCGAAGAACAACGATATTTTGAATTTGAGGAGCAAAAATGATTGATGACGTTAAAA  
TCGATATGACTAGCAGCTTTAACGCTAGCATGGCTGTTCCCTCCAAGATCAATGGGTTTTG  
TGCTGGCCAAGCTGATGGAAGAAGTAGGTGAATTAGCAAAGTCGCTGAACCAGCCAGAAC  
GGTGCATGAACGCC

>NewGenomeName\_73

CTCTCTCGCGACTTAATATAATATTCTAAGCAATTGCCTGTTAAATGTGTTTTACGTATC  
AATAAAATAGCTAATTCCTATCAATGGAGGACACTGTGGATGATGTAGTACGAATATGGT  
TAGTTCTTTTACTCGGTGGTTTACTAACAAGGATTTTGGAGAGTTCATAACAATGGCAAAC  
AATACATACGATGTAGTAATCCAAGACACCTACTTGGAGGGTATTCCGGTCTCAACCCCC  
GTGCACAGCGTTTAGGTTGCGTTTGTGTTTCGTCATCGTGCATCACAACATTTGATTAAG  
AAAGCTCTAATGGTAGAAAATAGCGGGCACAAAGAGGTGGTTGAGGACTGCCGAGACATT  
CTTGATTCGGCTGTACGAGCAAAAGCACTATATGCCAGCGGCAATACAGTGAATGGGCA  
CATGCCCGAGATAATGAACTACACATGGCGGCTATCCCAATGGATGAAAACCTAGCAGC  
TGTGTGGATTATGATTATGCTCCTGTTTTTCATAAAAAAGACAGGCCCGAATAAGGCTCT  
AAACATATTCTCGTTTACACCACTTGGGAAGCGGTAATAGCCAGCGAAATATCGCTACTG  
CTGTTTGCAAAAAGAAGCGTACGACTCCCACAATGAACCACGAGGTTGGAAAATTGGTCT  
GGTGTGTTAGTGGGGCGTGATTAGGCACGTTATCCCTACCTTCTACATTCTCAACATTTT  
CAGCTTTCACGTGAAGAATAGAACCCATAGCGTATTCTTTATCTCCTATCTCAGTATCTA  
CTTGTTAAGCAGCATTCTGGTAAGAGAGTAAAACATCCTTAGAAACCTCTACTGGAGTCA  
GAGAACTACACCCATTAATAGATAGGACCAGCAGTAAACCTGTCAAGACGAGTAGAGAAT  
TCATCCTACTTTTTACGTAGCTCATCAATAACCCCCCGGTGATATGTCATCTCAGTCTAG  
ATAATTACTGAGTTCCCATTCCTTTGTTGAAGTTCCTTAACGCCCCTGTTCTATGAT  
TGTTGGCTTTGCAACTGACGGACCTCTGTTTCGAAACTGACCAACCTTTTAAAGATCAAGAT  
AGAGTAGTACCACCAATAGCCACTCCAACCTGAGAGGAACGCATTGATTATAGCAGACTTC  
CAGTCGTTTAGCATAACTACTTCCCAAACCGTCCAAAGATGCTGCAACAATATTTAGGCG  
CATAGCGTAAGTATTGGGATTACCTACAATGCCTGAGCTATAGTAGATCTGACGAATACG  
ATCTAGCGGTATCCCTTTATATTGAAGAGACAAAATAGAAGTGTAGACCTTGTGGTCACA  
ACAGCGGATAAGAGAGAGAGGCCACGGTAGGGCCATCTCTAATGTGGAACGGTGTGAGTAA  
GATCAGAATCATCGTCAAGAGTAATATCCCACGTTTCATACTTAATCTCTATAGTATTGT  
TCATACTTACCTAGCAGATCCGAAGGGTCCATTAATCTGGATCACCTTCGTC AACCTTA  
CGAGATTGTTGCTCGTTGTATCGAAGTCCTGCAAAAACCTGTTTTCAATGCGTCTGAAGTA  
ATAACTCGTTGTCTAAATTCCTCGAAGGCTTACTCTTCTTCCTTAGACAACAACCTGGTC  
CGTAATGGAGCACCACCTCGTACTGGAGCATTTCGCTAGTGCATCTGCCTTCTTGTGTTTA

TCCTCAAGAGGTAGTTTCCAGTCGATAGGACGTTTGATTAAGTGTTCAGTACTGCTCT  
GGAGAAGCAGCAAAGTTCTGCCAATATCAGGATTTTCTTACAATACGTTGTATGTATCA  
ATCAATCGAGACTTACCATAAATATCCTCCAAACCATTAATAACCACTTTCTCTTTACCA  
GCAGAGCGAGTGTACATACCACCACGGGCCCGCTCGGGGCGTTAGTGTGAACCATGCTAG  
AACTTATCGGGCTCAGTATCACTAGAATCTTAATGACATCTAGGTTGTCCATTGTTGCT  
ACCATACGTCCACGTAACGCACACTGGCAACTACCTATAGGCCATGGTTGATAGTGTTC  
ATCCACTCTTTATCTCGTGCAAAAGTAGCTTTGTACTGTGGAGTTAACCATCGAGTCATG  
TTCTCTAGTGAAGATCGCATAGCTCTGTCAATAACAGGTTGCGCAGTAGTAATATTATTA  
CGAAGCATATCTAGGTTATATACCGCCCCGACCTTGCTTGTTGTTAGAGCTAGCGTAGTA  
GGAACAACCTTCTCAGTCTCTCCACCTGTTCACTCTCTTCCGCTTCTTCAGGGTTGTCA  
GTAATACCCACCATTTGGTTAGTAACCGCACCATTAAGCCCGTTGTATACTTTATCCAAAG  
TTCTGAGATTTAGTCATTAGGTTTGACAGGAATGGGTTGCTCTTAATCAGTGCCGTAGCT  
CGTTCGTCACCAGCCATAAGCCGGAAGATGCACTCTTATAGTTGGGTCTGGAATAGGGTTG  
TTCTTGGCGTAGTAAGTTAGGCCACCATGGTTCTGGTTGCCCTCGCTATAATCATTTC  
GCAGGCAAATCATTCTGAGCTTTAACCATTTAATTGCTGTCTGGTCACTAACCAACGTC  
TTAATTTTTTTGTTTGAAGTGTAACTTACACGTCATTAGTTTCAATCGTGTCCCTTAGTA  
ATCGCACCAGGGTTAGTAGCAGTCTGCATTTATGTTTTCTGTAACAGGACAGCACTCCGT  
TCTACTCCAGTCTCTAGGGCACGTTGTTGTTCCAATCCAAATGTACCAGCTGGAGAGTTG  
AACAGGATTCCGAAAATATCATCTTGAGCACGAAAAGTCGAGTCATTAACCGCCCCTGAA  
ATATCATCGGTGAAGTTCTCATCGTTGAGTTTACGAATCTCACTCTGACGCTGTGATCGA  
ATCAAGCTGATTGCAGTTTGTGAGCTACACCGAACTCTAACAGAGTCAGTGTACCTTC  
TCACGATAATCATTACAGGGCTTCCCTTCTGTAGATAGATCCACAACCTACCTACGCAA  
CTCGAACTAGATCAAGCGATGCCAAACAAAGTAGCACCACGTTAACGAGTTTGCATCGCA  
AGGAATGGATATGAGTTGATAGCTTCTGTACGATGGCACGGGCTGTAACCTGTACCTCA  
CGGCGTTGCATAACCAGCTTTAAGATTATCTGCTAAACCACCTACACGGCCTAAGTACGGT  
TGAATCTCACCAGGGATTTCTATATCTAATGGGTTATCTAGAAAGTTTCGAGTCTCGTTA  
ACAACACTCTGAGAACTACATCACCACCAATCTTGTGCCAAGGCTCCCGACGGCCTGA  
ACGAGTCGTGCGAGACTATCATCACGAATACCAGCTTGAATTGGAGTTAGAGTAGAAGCT  
ACTGCTTGGATAGAGTCGCTTGTGTAAGATATTAGTTCTCTTATAACTTTATTCTCCT  
TGTAAGTGAATCAATTACATCTACATTCTAACGGTCTGATGTACTGTGCAAAGAATAGCCT  
GAGCGAACCTGTCTAATAATCATGTTGCGACTGAACTCTTCTTTTGGTTTCGCTACCAGTT  
AGCAGCTAATCAACTCCAGCTTGACGTAATTGGTAGAATCCTTCGGGGCCATCTGCAAGT  
GAGCTATCAATCGATTTCAATAATTAACCAGTTGCTCTCACTCCAGCCGCGTCGTTAATA  
GCTCACCCCATGCCCACTTGTTCAATAAGCTTCACTGATAACTGCAGGTCGGTACGTTTT  
AGGTCGCTACGTGCTATGACCGAATCTTGTGCCTCATAGTATCACTCACAGACTGTGGA  
TTAAAGCCCAATACTTTTGTAAAGGCTAGAGCCACACTGACTTCTTGCTGCCACAAAGGT  
TGTCCTTAGCTTTGATGATTGCATGTACGTTTTACGTCAAACACGCACCGATTAAGTTA  
CGAGTTGATGTAGGAATCTCTAGCAATGATTCGCCCTCAATTGCACCATGTTAACGGCA  
ACTGTAAGTGTTCGTTTATCCGCAGATAACGCCACTTTGCCTGTAAACATCAAGTTCTGC  
AAGAACCAAATCTCGTGAGTACCGGGGCCAAAGACACGTCCGTACACACGGCCTGCAGCA  
CCTTCCGCTAATTCTGGTAGTGAGTAATCCACACTAATGTATCTATTTAGACTCTCCTCT  
ACAGTATTCAGTTTCCGAAGCGAGTAGCCACGTCTGCATGCACAACAAGCCTCTTATA  
GCAAATCAAGTCGAGCCTACTTTCAAAGATACTATCACCATTGGGTTTAGGTCTTGTGGC  
TCTATACCTGCCACGATGAAACAGAATCAACTAACAAAGGTACCGTAAGGAATACCACTA  
GGTACGAAAAGCATTAGTTGGCCCGACACTAGATTAATCTTGTCTTGGGTGGATAGGGTA  
GTGCCTTAAATATCCGCGACAGATTTAGTGGAACCTGTTAGAAATGGAACGGAATTGAT  
TGCCAGACTTGCTGGAACCACGCACGGTTAAATTGTGGCATATTCAAACCGACTGCTTCG  
GTACGAGCAAGCACTTGTTTCAATGTCATATCGTTCGAACTTAGCTGCCATGATACCTGCC  
TTACAGTCGTCTTAAGCTATAACCAAGCGAGATACGTGAAGTCACCTACTCAGCTTGTGCA  
AAGAAGAATCGACCTTTCTCTATGCATCGGCTCAACATGGATTGTGTTACTGGAATGCCA  
ATACTCGAGATACGGTAGTCACCTTGACCACAAACAACAGAGTCGTATAAGCCTGCCTTC  
TTCCATCCTTCGTAGAATTCACGAATATCCGGTAAAGTATTCTCACAACGATGTAAGTGA  
CTCTCAACGATACCTGGATCTTTCGCTAAGACTAAGAAGTGTCTCTTAGTCATTCCATCA  
AACGCTCTCAGTGCGTATTGCTTACTGATTCCAGCTGCTACAGTAGAACCCATAGCGTGT  
ACCAAGAAGTGAGCAGGAGACAACAAACCTAGCAGTAAGATAAACGCAACTCCTTTGCTA  
TGCTGAACTGGGTTCGATTGGTTCATACGATATACACCTTCTGCCATTCCACGCATGTCC  
TTGCGGTCTAGATGCTCTGCTAGAGATTTAGTCGTGTTGACATATCACGTTGGTCCTTA



CTCAGAATACTCATGATCTGAGTTACTTGTTCATGAGCAATCCATAGTTTGTACGAACT  
AGGGCATCTTCAAGTTTTCCAGCGACATTACCGCGAGCAGCTTGGAAATTCTGGGTACCA  
ATATCTTTTATTTAGTGTTTACTAGCTTGGTTCATCCAAGTGTCTGTAGTGCCTGTGTC  
AATACGCTAATCGGAGAACTAGTTACGATGTTACCGAAGTATTGGCGTCCCCTTCGACT  
GTAGAAATGAACTCAGCCTGTACGCCATCTGGACGAAACCTGATACGTTCCCTCAGCACA  
GCGCTACGGAACCTTACCTCCGTACACGTTGATAATCTCTGTATCACCTTCAGCAGCATCC  
TTGTCAGGGACACGTAGAACATTGTTATTCTTGTACAGGGTTACGTGCTTTAATACGCTCA  
GCATATCGTTCAGCATCCACTACAATATCCAAGTAACGCCTTGTCTTGTGTATGCCAGA  
GTCTTACCATGTAAATTGATTGGATCTTCCTCTTTAACAAAGTGGTAAGCCTCCTTGTAC  
ATAAGAGGCATATTGCCCTTACGTCTATTTAGAACCAGTGGGTCAAGGGCACAGATATAT  
CCACGTCTAACGATAGCGAATTTCTAACCCCTGAATACTTGTATCCTGAACTCGTTTGG  
GTATCTAGATAAGTCAGTTGATAACGTGTCTGAAAGAAATCTTCCAACAGTTCACCTGTC  
ATGACAGTGATGATTCGAGCATTAGCGGGGTCATTACACAGTTCTCTTTACGAGCTTGG  
AACTTTGACTAGCACTGGTAGCGACTTCCTTCGCTTTAGAATATGCAGACACTTCAACA  
ATCTGTACAATATTGTTCCCATATCATTTAAGCTGACTATATAACTCGTCATTAAATACC  
GGCCACCCGTAGTCAGCAATCTGGCGCATTGTGTCATATGTTTTGAACTCAGAACCATGA  
CGTGGAGGTAAGTCCGGTCTGACACCTTTCACCACATCACGGTATGAATATACCTGATCA  
TTCGGTATGCCTCTCTTTAGAATCACATCTAGCTATTGTATCCCTCAGTTTTAACACCT  
ATCAAACCTTCATTCATAACTTTTTGCAATCCACTACGACTCTTAGCACGTTCTCCCGAT  
ACGCGAGTGAATGTATCCACATAGAATGCACGGTCGTGGTCTAGGGAAGTGATTGGACTC  
ACTACCTTAGCCATGGTCTTAGCCATTATGCTAATCTTGTCTGTGTAGAAACCACCACGT  
ACTGCATCTTGGTTGTAGTCGATTATCTCTATAGTTACGTTACGTACTTGTGTTGCACCA  
GTCATAGGGCCAACATTGTACACTTGAACATCACACCCGTGTCCGTAGTTTCAAATGTC  
AGGTTAGATACTTCGTGTGCTCCCAAATACGCGCAGCAATGTTCTCAGCAGATGGTTGT  
TGCTCTTGTGGAGTCAGTTAAACGCATTACAGGCTACTTCCTTAGTTTTCAGCACAGATA  
CCATGAACAGTTGACCAACGTTTCTGAACTTCGTGTGCAATCTCTGGAGCAGCACCTTCT  
AGGATAACTCCCATATCTTGAATAGGGGCAGCAGTCGTAGCTTCATCGAAACGAGACATT  
GATACTCCCAAGCGGCATCCTCCGAAGGCGAGGCAACGTCTACAACGGTAGCCGCCACA  
TCTTGATCGTGTACTACATTTTCGAGCAGTAGACGATAGACGGTTTAAAGACGCCACTGCC  
TTGATACCAGTTAATCCTAGAGTAAACGTATCTACCTTATCTAGAATAGAAGCCAGTTGA  
GTGTTGGATTCAGTCTCTACGGCTGTAGCAGAAATTAGGAATACCATCTGTAGGACCTCT  
TTATCTTCTGCTTCTTCTGAAGCTTCACGCAACTCTTTAAACTCACCAACACGTTCTTTA  
GGAGGCGATCCCATTAATGTTTTCTAGGTCTGCTCGGCCACCCTGGAAGCCATAGCC  
TCAGTGAACCAGTAAACGTTTCTCTAGTGACTGCCTGTAGGGACTCAGAAGATGGGGCA  
CTGTGTTAATCCGGTAACAACATAGCAGCTAGGGTATCCATAGAAGTCATAGTTCCTCAC  
AACCGTTCATCGCGCACCCACCGATTTGACGGAGAACCATAATTGAGTTGCAGCATCA  
TCCCGTTATTCTGGAGTTAGTTTGTCTTCAATGAGTCTACGTAGGCCATTTACGACCC  
AGCTCACGGACATAATCTACATACGCATCGTTATCAATCTTAGTTCAGTTCTGCAGCAGAG  
TTAGCCAATACTTATGCATTATCAACCGCAAGCTCATCAATAGCCATTGTTGTACCAGTT  
ATAGCCGCTTCCAAAGCCTCTTGTGAGAGTTAGATAGACGTACAATTGGGTCAGAATTG  
TACGCTTCCATATAAGTTTTATAAGGTCGTGATCACCGTACGGAAGTACTAGTGGAT  
TCAGGAATAGCTACCTCTTTCATAGATCAAATGCGTACAAATTGTTACTCTTGTCCCATT  
TCTAGTGGATTGGAATAGACAAATCCTTCTCCAATTGGCATCTCTTATATCCTTATATAT  
TTCTATAACGGACTGACCAAAGTGAGCATATGGCATTCCAATGTTAGCAATAGATCCAGC  
GGTATTAGTTTGGCGAGAAGCATTAGCAGCAGTTTGTAGCATAACCACTAGCTTCTTTCCA  
TAGCTGACGGGCGTCCGGCTAAGAAACACAGGTTCCGATTAGTGTGTGAGCTAATGGACGC  
TGTAAGAACCTGCTTACCGGAGCTACCGGACGTACCGGATTGAGCAGCAGTATTCTCAAT  
TCTTGTCTTGTGGATTCCGGCTTATTGTAAAGCAAGGTTTCAGTCTACGGGTTTGTCTACC  
ATCTGCACTCCGAGATTGGACATCTTGTCTGTTATCGATGCTCTTTAGATGCTTTGCTAGA  
TTGGGCAATGGATACGGCCGTAATAGCGACAACCGCACCGCAGCATCAACCTGAGCAGC  
AGATACAGCAGCGGCAGTTGCCCTATCATACCTCCAATAGTTTACTGTAAAGGATGATAT  
CTACGTGATACCCAAATCGGTCTATAGAGGATGTAGTGGGATTTAGGCCAATGTGGAGAG  
CTGTTGCACTGTACCCGTGTGCGGAACCTTTCAGCAACATCGAACATTCTCTTGAACACCG  
TACCACCGCGAAAATCTGGTTTTAGGTACAAACAAATAGTAGATGCCACACATTCTTTGC  
TGAATAGGGCTATAGGAAATACACTGTAAATCACGTATACGATTGGAGTTTCCCTCGCCTC  
TGCCCAAATGATTTCCATCATACCCACCGTAAGGAGATTACATCAGCTTTTTAGATTCA  
ACTCGAAGACTGATTTAGTTGAACGTAGGTGTGCCTCAAGAAAATTATCCTCAAACAGAC

CACTAATATACAATTCCCTTACGAATTTCCGGTTTACTTTCCATGTAAATGTTTAAACAGAC  
CTTAGTACCACCACTAACGGTACTACCCAACTTACGACTTACAATCCTTGCTAGGCTT  
TGTTCTGAACACAACTGGAATGCCGTTCCCTGAGCCTCTAAGTCGCGCTGTGGCCGTGAT  
TACTTCATAAGGGTACACAATGATACCCTGTTAAGATTTCATCGCTCTACGTCAACGGTA  
GCACTGACTGTGACGAGTAGTATCAGTCCACTTCTTGCCCGTAGGATAGTCCGTAACGTC  
CCAACGATTACCTAACACATGTTAGATTCTGTTGTCGCTCATATCTTCTCCATCTACAAC  
TTTGCACCAAGTATCTGTTCCGATCATGTGAGTTGCTGGGCTTGTATTTTATGCACGGGC  
TCGAGTATCGTGTGATTTCTGTGGAGCACTTAACAGGTAAGCCTATGGATGCACTAGGCA  
GAAGTCTTTAAAGTAATCTTGGTTAAACGAATAGAATCCAAACGAAGCATCATCACTTTT  
GACTGTTAGTTACTTAGTATCTCTCAACTCTTTATCCCCGATTCTACGTCCCAATGGGAA  
TGTAACATCAGAAGACTCTTGTGGAACCTATCTATAACCAGCAACGGTACAGCAATCACT  
AACTACCTTGTTACCAATAACGTTACGCTCCGCATCATATCCGGTAACTCTTTCTGGTAC  
GGTAATGTCACTCTTGAACCCGTTAATGAAGAATGCAACATAACGTACGCTTAAGGTAAT  
CTTTAGGTCAAAGTTACTTGTATTGGCAATTTCACTGACTAGCCAGCCAACATATTTACC  
TGTCGGTTCTACAGTACCTATCGACTTAACCTTACTGGAAATAGTTATCTCATTATATAA  
CGATTGAATCGTTAGTTCTGTTAGTTTGGCTTCAGACTGTTTTCCAGTTGTTTGGTCTGG  
AGATAGGACAATGATTCCTTCTCTGCCACTAGAAAAGGGTATAACCATATGCCACAAC  
AGGACATGGTGAGACACCACCGTAGACAGTGATCTTGGCTACGTGATAACCAGTAACGAA  
GAACAGACCCTCTGACGTACCACCCAACAACCACACTCCATTTTCAGCAATGATAAACAC  
ACTACTGGAACTTCTTCCATCCCAACAATCTTACGAGTTGCGTTAATTTTTATGAAAAC  
ACCGTCTCAATCAACAGGAGCACTATCTACTTCACTTGTGTGGTCAGTTAACTGATAACA  
CTTGTTAATCTCTGCGTTAGATTTAACTAAATGAGAGAAGAATACGTGGTTACGGAAATC  
AGGACGTACAGCATCGATTTTTGTTGGGGTTGCTTAGAATCCTCCATAGAATACTTAACC  
TGCCAATCTTTGAATGCACGAAAGATTACCACTAGCTAACAGTTATAATGATGCTAACGT  
AGAACCACCAGTTGCAGGAGTGTTTTGACGGTCTTACCGAGACCGGTAGTTGTGCTGAC  
TTTCATGCGAATTGGAGTAACTTTCCGATTGCGTTTGGCTCTGTACCAGAAGTTGTTTT  
AAAGAACCACCAAATCTCGTAGCCACTTGGATATGCACCGATTGTCGCAAAAGTTGAGTT  
AATTTTTTTACTATCCCCACCTTGGTTAATAAGCTCAGACCCATAAGCTGTAGTTAGGGT  
GTTTGGCCGTTCTTTACTTGGAGCAGAACGTCCCCACCCATCACGAGTTTCAACGAACAC  
AACGTTTCTATCTACTACGATTTAACTCCGTGCAGTGATTAAGTCTGTTTGAATATCCAT  
AATCTGGAGTGATATAGGGTCTGCCTCCTGAGTTCCAAATACACTGACACCATAACCCGA  
AGCTCCACTCATAAGATCCCCTGTTGTACCTTCTGTGGATAAAAATTTCTTGGTTGTTCAA  
TTACAATTTCCCTTTAGATAACGGGTCAACAGAAGTACCAGACTATTTTAATTTATCACT  
GAACTGTACTACTTGAACCTTCTGGAATGGCAACATAGTCAGTTTGCCATACGTCAACACT  
CGATAATAAAAATTTAGTCTGAGAAGTCTACGTAGGAAGGATACAAAGTACCTTAATCTTC  
CAAATCCAATCCATTGCGTCTTGCCCAAGCGTTAGCTTTTGAGAGGATGATGTTCTCACC  
CTCTCTGAAAGAATCCATAGGCATATTTAGAATGTTCCCTCCTGTTATTAGACCAGACTG  
AACTGATTGTATACTAGATTAGCCTGTCCGGCTGGCCAGTTGCTTTTGCTCCTCGTATTT  
CAGTGGCTAAGTTTTGTTTGTATGCGTTGCCAGGCGAACGCTCATGAGGGGTTTTGCCCCTT  
TAAGAACTCTGGTACTTGACCTCCGCCGTCAAACCTTAATCTCCTATACAGTACCGTCTT  
TATCTGTAATGTCTAATTTAAAAGCCTTTGTTACTCCCATTTAAAATCTCCTTGATAAGAT  
TTATCTAACTATGGACTACGACGATTTGGGCAAGTTGAAAATGTGGGTCTGCGGTAGTTC  
GGGAATCGAATACCACCGTTGGCTTGCCGACTCTGGCGACTCATATGACGACAATGGATG  
GTAGCCCATTTGTTGCTTTAGCTGAGTCCATTTGTCTAATCTCGGCACTGAATATTGCC  
TTCGTTCACTGATTAGGAATGGGAGCATGGCAGCTGATAAATCAATAATCCAATCATT  
TCTGCTCAAACATAGGACTAATATAAGCGATGCCTTGAGTTTTATTTTTGTGGATTGTA  
AATTGTACGTCTGTGTTGTAGCTATCTAATACAAGATAATCATCATCGAATGAAGCCCAG  
AATTGTGGAGCTTTATCGTTTTGGATGAATTACACAATGCCGTTGTCATCACGGACATTC  
TGGACGTTGGAGTGACCTGAGTTAATAGTATCTTGTGCGAGCTTCGAACTCATCCCGATAC  
ACGTACTTTAACTCAGTGTAAGATACTGGTCCGCTTTTCATAGAGGTATCTTATGGCAAG  
TACCTCATCTCTTGAATGTTGTCAGGTAGCTTTAAGTAGTTTGGTTTATCCACATCACTG  
ACTCCATCAAATTATACTCCACGACGAAAGTAATCAATCGTAGAGTTGGTGCTTAGGTTG  
TTCTAAGAAGAACGCAGGATGTACGCCGCTGTATCGACTCAATGGTATCATCAATAGCG  
TTGACGTTATCACCATCCAAATCACTCAGCATGCCTTGAACAATATGAATAACAGTATAT  
TTCATTATCCTTTACTATATCTACCACCACCAACCTTTCCAGCTCTGTCACCAGATTTAC  
CACCATAGGTTTCGATTGGCGCTTCGAGAACTTTCTCGAAAATTACCATCTCCATTACGGC  
CACCGTGTCCAAAGTTCTTTTGTGATCTACGTCTTTCACGTAACCCTTACGAACTTTTT

CCTCACGTTCCATCTTCCGACGAGCCGCATTCCCTTTTGGCCGATTCTTCGTTTGTCTG  
GTGTTCCCTGGTACTTGTTCGTACCCCTGTCGGTCATTACGCTTCTTTGCCTTTTCTGAAC  
CTACGAGATCTAAAGAATTACTGTCTCATCTTGACTAACAACGCTGAATTGACCGGCTAC  
ATATTTTCAATTTTACCACCAACGGCCAACATGTAGTCAGTACGGACAGGGATGATTGAGCC  
ACGGAAATCCATATTATCATTCTGGTATGCAGACGGCCACGTAAGTACTGAGGACTTGAACAG  
AGTGAAGGTGTATTGACTACCTCCCATTGGGGTATATACAGCAGATTTGCCATAAGGGTC  
AATGGAATTTCTGTTGGAGTAGGAAATGACTCAATGTTGAGTGTGACAAACACAGTAGT  
GCCATCACCTTTGGCACGTAAGAACGTGGTAATTGGAGCATTAAACAGCTCCTTTTCTTC  
ATGTAAGTATTCATCTGGAGTATCCTGATGTTGGATATCGGCCATTGGAATGACTCCTTG  
TTTCGGGATTGTAATGAGATTAAGTAGAATTCCTTAATGTATCATGTTATCCATTCTGA  
ATTAATATACTCGTCTTCGACAATACCTGTCCATTCATCCTAGCCCAATTAGTTGTGAAG  
CAAAGTGTAAACGAAAATATGCAGGTAAGAAAGCCCTCCGCAGAGGGCCTTGAGATTA  
AGGTTGCACTCGGGTTACACCTAAAGTGACACCAGCATTGGTGGGATACCATCAATCGC  
AGGAGGTCTACTGATAATGCCAATCTTTTTGCAGCTGTCGGATGTGTACTGTTTGAATCG  
TACTATCTCACCAGCTACGACACTTATTGGTACAGTGAATTAATGATTTTAAACATCACC  
CGAATCATCACCAGTCAGTATCAGCAATCTTGTAGTTCCAGAGGCGGCCTCCATGAGAT  
ACCATCCATTGATGTGTCTACATACTTCGCCACAATACCTCTCCAGCACCCCTCGTTTC  
TCGAATGACCTGTAGTGACATATTGACCATTGCCTTCGCACTAACGACGAAAGTTAGTAC  
TCAAGATGTGAGGTCTGTGTATACAAAATCAGTGGCAATCTGTGTAACGTTGAAAGTAAT  
TAGAGAACCAACGATTGATGTTCTCAAAAGTTGTTTAAACCGGTATGGAATTAGGAGTAGA  
GTAGCTGATTCTTATAATGTCTTCTTAAACTCCGGTAAGGCTTGGTTTTCCACCGATT  
TTCTGAGAGGTTATAAATCAACACTTCACCATCCGTTTGGATCGAACAACCGATTAGCAC  
ATTAACCAATGACTCTATAGTGTGTGGAATAAAGTCTAAAGCACTCTCAGATTTCGTTACC  
CGCCACTAGTTGATTACCCTCCCCTACGTAAGTGTGGTGGCCAATCTAACAACCTCGAGGAA  
AGTCTGTTTACCTTTTGGCTTTCCGTCAACATACTAAACAGTAGCTAGTTCTTAAATTAC  
CCAAGAACGCATGGATAGAGAGTAGGCTGGGACACCATCACTCCTGTCTTAAACGTACAA  
GTCTGGTCCGATTCCGTAAGCTATTGCAACTAGAACTGCACCTTGTTCGTAATCAAAAGG  
CGTCCGTAGAGTGAAGGTAGTTATTTCTACAGATTGGCTGCTACCCATATCTCCATTAAA  
CAAGATAGAGTTGTTGTACGTTAGTCTGAAATGTAAGTACGAGGAACCTTTCAGTGCAATA  
CAATACCCTTTTAAACACAGTCTCACTGTATGGAACAGTTACGATAAATTCACGGTTGAT  
TAGAACCTCAGACACGTTTGTAGTTCTAACCACGTCTTCGAGTGGGCCATACACTCGCCT  
AACAGCGGTAAGTATCACTGTCAGAAAGTACCGAGACCCTGCCAGATGGGAAATAAGA  
TGTCCCTGGGGCCTTGTTTAAGAAGCAAACGTTCTCTCCGAAACTACCGATTTTATGTAC  
AACCTCTGACACAAAGTAAGATGAAACATCGAGTTCACCCTCGGACTTGGACAATACACC  
AGGGTCCACGAATGTCGAGGTATTCACCTCCCCTTAACCATGTGATTGTAAGAAACTGC  
TCCATCAATTACAGATTGTGTATTATTGTCTATGCTATCTGCAATAACAACTTCGCGTT  
GATAAGACCCACCTTGATACTATCATTGAGTTCATATCTAGGTCCTTGCAATTTGGTT  
TGGTTAACCTTCTGGGTTATCCCTGAATGGAGCCTCGTCATGGTGTGCGTCCTTAACTT  
CTGCAAACTACGATTAATTGGCACAGAAATAGCGGATGTAACATCACTCAGAACTTGCTT  
ATCCATACACCATCACCTTAGTAGTATAATTTTTGACCTATAAAACAAAAGGGAGAGCCT  
AAGCCCTCCCTTGCATTGGTTCCACCTATCTTAGATTGAACCTTGAACCTTTTGCAACAGC  
AACGGCATCAGGATTCATACCTCCTTTCACATAAAGAGCATTACACGAACATTACCTTC  
ATCAGTGACAGTTGGCGAAGTACCAGCGGGGTTGGACGTAACCTTCGCCATCAGTAGTTAT  
AGGACTTGCCCAAGTACATTCTGGAGTTGGTTTAAACAACGCCACTCCTTCGTCTTGTGC  
TTCTATTTGTTGAACACCGTTGGTATCTTCTGAACCTTTGGGACCTACTGCGATAACAGG  
GTCAGTACCACCAAGAGCAAACCTCCTCGGATACGTGAGCATAAGTATCAACAACCTGAAGC  
ACCTTTAGGCAGAAGTCCTTTGTTGTATTTAGCTTAGTCTTCCGAGAAAGAGGATACCCA  
AATATCAAAGGTCATTTCCATAATGGAACCTTCTCACTTAATGCCAATTGTTGCTGAGCG  
TGTACCACGAGAACCTTATAAGTTGTGAGTACCAAGAGCAGCATAACTTTCCAAACCCAT  
AATAGGCTCCTAAGATTAATCTAGCAATGAACCGGAGGAGGGACACTCCCTCGCTCGGG  
TCTTATTAATTAATTGTAAGCAGTCTCAGAAGCGAGCAAGGGAAACAGAGTGTGCTTACG  
TTGGATAACAAAAGCATAACGACGGCGGGCAACGAACTCATTACGGGGAAGGTCTTTGGT  
ACGGTCAGACTCAACACGAGTAGCTTGGCGTTCGGCGTACATTATAGGTTTGGAGTTGTA  
AATTGCAACACACATAACCGATACACGCAACACCGTTGGTGATTGTACACCACCAACCTG  
TTTCCTTACGATACGTGGAAGACGGTTAGAAGTTATAAGGTGCCAGCCGTACAAGTTAGA  
AATGAACTTCTGGTCATAAAGCACGAACGCCTTTATACACATCCATCGAGAATGGGTTAGA  
GTCGATAGCACTTTCAGCGAGTGGGAACTTGGTATTCAGAGTTGCCTCGATGAATCGGTC

AACAATCTGAATACCACCACCTAGTGGAACGTTTCGCCTTGTCCGCAGCAAGTTTCAGGTA  
GATCAAGTCTTCTCGTTTCGATGGTCTTGTAGTACCTGAAGCGATACGCTTGTGAGCAAA  
ACGGTTAATCTCGGTAGCATCAGCAGCACTTAGAAATGCGTAAGCGACTTGCAGATAGCG  
AGTTTCTAAGTTTTCTTGCATCGCACGAGAAGACTCTTGAGCACGCATTGCCATCTGAGA  
TTGCCTTTGAGCAACGTCTTGACGTAATTTGTCAGTAACAGACCTATCATGTCCGGTTGCA  
GTTAGTAAAACGCCTCTGTAGTTACCAGTCTCGATTAGTTTGTAGAGCAGTTGAGTTGC  
TACTTCTACATCCTGAATAGTTACCGTATCAACAGTTTTAATGTTTAGCTCTTTACCCGC  
GAGAAAATCTAAGACGTTACGATACATCATTGTTGGCAAAAAACCATCGTGTAGGTTTTTC  
AACAATGAATTTTGGATATTGTTGAGCCTCAATAAAATGGCGTGAGTTGCCAGTATTTTG  
TGAACCAGTAGCACCAGACATATGTAACCTCGCCTGAAAAGTTAGTAAGCTTGAGACACTT  
CTTTACCACCTTTAGCCGTGAAACCAAATGCACGGAAGGCAGCGACTAAGTCAGAAGTAG  
AACCTGTTGAACCCATTCTGAAGTTGAGTTGTGGCTCTGGCGGGGTCTGACAGTAAGCCG  
TGGTACGGGTACCTGGCGAAGTAACAGTCGAAGTAGTTGGCTTGGATTTCGACATCAAAAT  
AACTTGGCACTGCTTTAGGTGATTTAGCAGCGAGGTCGTTCAAAAAATGGAACCCTACTC  
CTAATCTAGGACCCTTGGACTCTAGAGACTTAGTCGCCCTATTGCTACCGCCAAATTGAC  
CAATGAGGGCATTAGTTACCGCTACTTGGTTACGTTGTGCTTGAAGCTCGGGCATCACGAT  
TCTTAAGTAATTCCAACACCGCCTGTTCAAGTAGACCTGCTTGCACCTTGTGGTGCAGTTG  
GTAGGTGACTTACAGCAAGAGACGCCAGTACGTCCTCCATATTGTTAGCGTTCGCCAGGT  
CAGCCTTCACAGTCTCGTTCTTCTTGTCTTATACGTTGGTTTGCAGCTTCTACATTAGCAA  
ACAGCGAGTGAGCGTGTGGAACACTAGCTAAAGCTGCTTGAAGGTCTGCGTATTTACGAC  
CTTCACCCACATAAGCCGCAAGTTCTGGAGCCAGTTGAGGAGGCCAGGGCGCAGGTCGTT  
GTACGGGTGCTATGGTCTTGTAGCTTGTGGTCTTGTAGCCTGTGCGAAAAAATATGATT  
GGTCAGGCATATAATTCTTCACTCAAATTCCTAAACGTGATTAGGAAATAATTCTAAT  
AACTTAAGGTTACAAGTCAATAACTTCTAGTCAAGTTTTTTCTTTACTATTTTATGCAGG  
CTGTTTGAAGCCCAATTAGGAAAGTCGAAACCATCCATTTTGATTTGTTGTTCTCGATT  
CTCAGCGATTCGCTGTATTAGAATTTCCACGAGCCTAACCTGACTATCTTACTTCAAGC  
GCAATCGTTGGCGAACTGTAACTTTTGTTCAAGTTTTCAATTCCTTGCGTACAGAGAGTTTT  
TATCTTTATCTCCGTATACTAACTGTACCTGTGCTCCTTCCTCGATTTGTGCTTGAGTTT  
GGTTAACAAGTGCAGAGGTTGTCTGTGCTTCCATAACTGCTACGTTAGGTTTGAATAAT  
CCCAACCCCTAAGCTTAAGTTGTGTTCCGACATTTTAGCCAAGTTCTAAGTAGACACAT  
GAGCTTTAATCTTTTGCCAAATTGGAGTATTAGAAAAGCTCATTAGGCTTTGTACTACTA  
GCGCTTGTCTGCAACGTGTCGAGCACCTCCAGGACCTAGTCGACATTTTCGCTGGGATAC  
CGTCTTTGTGAACGTTTCATGTAGTTTGGCACTTTATCATCTGAGTTAAACATACGAATGG  
CATCAGCTACGTCTAAATTACGACGAGAAATCTCTAGCATCGCATTGAGAACCTTAGCCA  
CCAACATTAGTTCAATGTTTATAATCTTCTTGGTACATACGCCAGCGGTGGTTTGAA  
GCTGTTGAGCCTCAAAGGTGTGTCCTTCCGGGGAGCACGAATACCCATAGCTTAACGAG  
GAACTCCTGCAAACCTTGCAGCTTAGCTTCTAGAATCCGAATCTGCATATCTGCTTGTA  
GAGCTTGAGTGTAGGGAGCCATCATCTATACATCACCATCACCATTGATGTAATCTGTT  
CTATAGGTCCTCAAACAACTGCTCAACATCTCCTTTAACATTGATTGAAGGAAATGCGA  
TTAGGTCTACCACGGCAGCTTTCAAGTTCTCAGGGTGGTCGATACTATATTGCATATCTA  
CTAGGTTATCTAGTGTCCCATAGAGTACAGGTCATGTTGACGAATTCGCCAACAAGAAT  
GGAAGATGGGAGCTTGTGCAAACCATGATAGATTCTCTTTATCCTCGATTACAAACATGC  
GGTCAATGATTGTTACTTTCATATTGAGCTTAAATGTACCTGACTGAGCAACGCGGTAGC  
CACCATAGAATGTCAGCACCTAACGTAAAGACTTTGCGTGTAGAAGTAAAGGCTGCCAA  
ATCCGTCCAGTGAGGGCGCTACACCTTTTTAGAGTCTTTCTAGGGTAAGTGTCTAGCC  
CACGACGAATCTCTCGTATAGGAGCGACTGGGGAAGCGGGAGAGGCGTTCTCTGGCTGGT  
CCAGTTCCATTTGTAGTTACGCTCCCTCATTCAACACAGAACTGATGATTTCTGGAGAGA  
GAGCAAAGTCTACAGCTACGGGATTAACACACTATCTTTTGGGTCGTTGAGAACTGGAC  
GAGGAACAAAATACGTATAAAGAGTAGCGCCAGATTCTTGTCTTGGTAGTTTGCTTCT  
CATACTGGTCCGGTGGCAAAACAGTTGCCGTAATCAATCTAGTACAATAGGAGTTGACTGA  
TTATTGTGCGGAAGTCCGATTCTTTAACCTAGTTATCCATGCATTGCTTAATAGCGTCTC  
GTTTGGCCTCATCGCGAAGGATCTTACCTTCCCGCATCAACCACTGTTTCAATTGGGAACGA  
ATTCATAATGTAGCTGCAGTGTAAAGTTATCTCGATTCTGACACAACCTTAGGTAAAGTAG  
TTTTGTTCTTCCACAGTAACGTCTGTAAGTCGTCTTACAGGTATCAGTAGCACAGATGT  
AGTTACGTATTTCACTCTTTTGTAGATAACCACTCATGCCGCTGACTGTTCCAGTTCTGCC  
AAGTATTAGCGATATGTTTAGCCACGTCATCACGAGTGTGCTTTGGCATCTGTTGTAGTT  
CTAGAACCTTACCTTTCATTAATTAATTCGTCAAATCTAGGGTTAAATTGAATGACGTT

GCTTCTCGTTTACGAGAGTTGACAGAGTTGACAGTGTGTTTACCAGCAATCTCGTCAGCAGA  
AGCTAGAGGGTCTTTCAATTCATCATGAGGTGGACGAGCCATCCCAAGTTCTTCTCAAG  
AATTGGAGGGTATCCACCTTTTCTATGCCACATAATACCTTGCTGATCCCGTGGTTCCAA  
TACAGCAGCCGTACGCTCTTCTTAGATCTAAGCGCCTTACTTGATTGAACTAGTCGAT  
TCTAATAGTCATGCCTTCTTGAATAACTTCTCTTTAATATCGTTTACAATGATTTGCGG  
TGCCACAGTAACCTCGGCACGAAGTTTCTATATTCCCATTAACGATGCAAAGCATAGCT  
ATGGTCATAGTAATCATTAACTTAACTGTCTTGAATCGGTCAATATGCGATACGTAGAT  
GTAACCTTTCTGAATCAATCCCAAATACAACGATTGATGTAAAGTTGCCAATGTTAGAGGA  
CCTAACTGCAAAGTCCACAGCAGCTAAGAGATTCAAAGTTCTGTCCTTAAATCTGTGTCT  
ACCTTCCCGATAGGTAACGAATTTCTTATAGTAGTATTGGCAAGTGCTATAGTTCATACG  
TGCTGCTTCCGGGTCGTTTGGATCACTATAGTACTGCGCAAAGAAGTGAACACGGTCAAC  
GTATTTAGCTTTCTTCTTAGCCAGAACACGGTTCTCAAATCCAACTCCTAACCATCAGA  
ACCACGATGAGTCCGAGGCCACAAGCATAACCATCTTCTTCTACTATACGCTAAAAAAT  
CTCCCAAACAGGTCTTACCTCTCCAGTCTCTTCTCCATATTGGTTCGAATACGGGTTGATG  
CTGATTCTTCCATGTGTGCGTAAATAACAGCAGGATGATACCGAGTACCACAAGTATTAAC  
TATACCATCAGAGTTTAGGATAGATTCCATCTGGGAGATAGCAGCAGCTACCTTGGGTCT  
ACCATCGTCCAGATATGTGTTATTTGGAACATAACGTCATTAGAAATAATAACGTCAGC  
GTGCCAAACAGTTGTGTTAGTGGTGAGGCCCGCAGTCTGAATAGTAATGTCATGCATGCC  
TTCCACCGCACGTTTTGGGTGGGCAAATGGGATTACACTGTCAGTCCATTTCTCACGTTT  
ACCTTCTCCTCATTAAATCATATCCGACCAGTACGGCGATAGCTTCTGGAAGTCATGAT  
GTTCTGACTATCCTATAACTGCATTTACAGCAAGTTCAGTGGTAGCAGAGATATACAGAGT  
GGTAGCTCTGGATGCTTAGTTCGCACACCAAGCTACCTGATGCGCCATCATGTGAGATTT  
TATGTGACCACGAGGTGATAGTAGAAGTTGGTTCGTAATTAATCTCCATCCACTTTGC  
CACTTCTTGTGGACAGCACCGTAAACGTAATTTGCAATTAAGCAATCGTCAAACCATCCA  
GAAGTGAGATTCAGCAGCTTCTGTAATTTGTCATCTTACACACTCATACTCGTAATG  
GTCGTTCATAGTCTTTCGTCAGGTGCATTTTAAACCCGTTATGCAAACCATGACTCACGAA  
CTATTTCTTCTGGCTTGGTTCGTCCTGCCCCACGTTTCGTCATATCCCACTTCGGCAAGGC  
AGCTGGCAGCTGCAAAGACATAACCATCTCGTGCCATTTCCATTGCACTGAGTACACCGA  
TAGAGCGATATTGCATCTCTGCATCTTCACTCCATACCTCGAACATAGCGTAAATTTCTT  
GGTAGCCTTAATTATCATCCAGTGTGCTACCCAACTAAGCATTTCCTCCGATATTTAA  
TCTCATTGCTCTTCGATGTACGTCTCGACAAACTGCCGTTTAAATGCTTAGGTACTCCT  
CACTTTGAACATACGGTCTTTCATCCGATATCCTGCAAATTGAGCTTGGCTTCAATACCT  
TCCCTAAACATAACCACTGAGTAATCCATCTACCCGTACAGGCCCTCAATTCCTTCTTCA  
TTGGACCCCTTAGTATGGCTTACTATAGGGGTAATATAAAATATATACTTTACTAATCC  
AGAGGGTATTTAATTTATTGGCCTTAACAGCAACACTCCACGCCATCTACGCGTGGCGA  
GCCGTGTCAATCTGCCACCCCATAAATAATCGGTACCAACTACTCAATATGCCGCTTGT  
ATACGTTTTAGATTATCTTCAATTTATCTTAGTGGAAGATTTTCTCATGTGTTTCCGAGT  
AGGTCTTCTTTATTCACAAATGTAGAACAAGCTTCATCTCATACCCATTTACCGGAGGCA  
AGTTCCTCCGGTGTGATCTTAGTTTACTCCTAGACTCTCCTTTGTTGATTTCGACATCCT  
AACAGTATACCAGTATTGACAGAGTTAACTTTAGACGTACCATCAACGGCAGCCCCAGCA  
GCACATCCTGCGTGCCACCCAGGAGTCCAGGAGTCTGGCTTCTGATGCACCGGTGGCTCCA  
ATTTAACGTGCGACACCCAAAATACCACCATTACCTCCGTTACCAGCTCGATCTTCGTCA  
GTCGCACCGTTAACACCGGCGAGACCGTTTGTGCTGCTTGCAGAGAATCCTTCACCTTT  
CCCACATTACCAGCGGCACCCAGGTAGTGTATTTAGTATTGGGCACTGTTATAGTTTCG  
TTCATTGCGTTAGCCTTCAAAGACCCACAGCGTCACCGTTGAATCTGGATGCATAGTAC  
GTCCACCTCCCACGGCTATAGTGATACCGTAGGTAACAACAGTGCGAAACTCTGCACCA  
GAACAACGATATATCTCGGAGTGACACAAACGGAGTAGACAGTTACGAGCACAACATTCCG  
ATTTGGTTCCCTGGAGCGTATGTCCAAGTTCAGCTGATGGGTACGGCGTGTAGATTCA  
GTAGTAAAGAAACCGTTACCACCTTGTACTCCTTTACGACCACCACAGCTTCCACCTGCG  
ATTGTGCTGTTGTTGGTGAAGTTAATGTTTTATGAAGTCTGTACTCGTGAGGCAGGGCCC  
CCAATTGCCCTACTCCAGTTCTACCAACACCCATTTGTCCATAGATGTTTCCATACTTA  
CTACTGTTCATAGTCTTGTCTACAAAGCCGTCTGGAATCAGAATTGCTGGAGTGCTAACG  
TTGCTTAAGTACACGCTCACACCGGAGTTAATCGCTAGATTAATGATAACCTCTTCTTA  
CCACTTAACGCAGTAGCTAGGTTGACAGCTGCAGTAGTCTTACTGCTTGAGTAAGCAAAT  
TCGGGGTTTTGGAATTTCTTCCATTCCTCCGTTTTTCACGAACCAAACCAAGCGGATATTT  
CAAACCTCCACCAACATTAATTTCTAGCCTGGCTGTAAGTACCAGAAACATTTACT  
CCAACCTGGCTTGGTCCCTGGTTATACGTACCGTAGCCAAATATCTCCATCGGCACCACCA

TAAGGTGCGCCAGAAGATACAGTAATCTGTCGCTGTCTTTGTGTGCTACATCAGGAGAA  
GAAGGCGCATCAGTTGCATCATCATATACGGCTTCTACACCGGCAGTTGCTGCTTAAGTA  
GTGGTACTTGTGTGTTAGTAGAACTACATGCTCCCCATCGTTTTTCATTGCATAAACTA  
ACCTCAGCTGTAGTCGTCCTACGAGTTGCGAACTCCGGAATGGCTGCAATCACCGACGAT  
GCTGGAACCTAACCAATAGGTTGGTATCTCGCCCCACTCTCACCTTTAGAATAGGCAGAA  
CCTGCTAACTCCACTCGAGATCTAGCAACAGCAATAACTTAGACCTTAGTGCTTCCTTCC  
AACATCTTTGAATGTACAACCTTAGGGGTAGCACCCAGAGCATCTCTTTCCGTTGGGGAG  
GGTTTAAACCCTGTGTGGTAGATTTTACGCGATGGCCGAGATTCCCAAGTTGTCCTATGA  
CCAGATTTTCAATATTAATCTCACTATTAAGTCCACACCCAGGTAATAATTGGAATGCC  
TTATCTGCTGGAGGTGATGAAAATGACCGTAAGTTACCGTAATTAGTTCCCTCTAGCATA  
TTTGGACTCTTGTTACCCAGGCGAACGACACCAGTTAGATGTGGATACTGAGTTAAATCG  
AGAGTGTAAGACGACGCAGCTTGCATCACCCGGTTTCACACATCAACAGACGGAACAGCT  
CCAACAACCTGAAGCAGTCGATGTAGAACTTAGGGAGTATACCCTAACCTACCCTCATAT  
TGTGAGGTAGATGACACCCTTGATCTCTCAGTATTGTAACCTGATGAGGTTGCAGCCTCA  
TGTGTTCTTCCAGTTCAAACAACCACCTTATCATCTACAACCTGACCAGCAGTGTTTAAA  
TACACACTGCCTCTATTACCCATCACTGTGTACCCATCGAACTTTGCAACGCCTTGGGTT  
GGAGAGGTATTTACAGAATCGGATTCGATGAGCAACTCATCAATCATTGTAGCGCCAGCT  
ATATTTACGGCTCCTAACTCTGCGTGAGGTGGTTCGTTTCGTATCCGAGTAGAACTTAGTA  
TCCGCGTCTGATTTAGAGTACCCAGTGTTGGCATCGGCTAGGCCGGTTACAATACCTACT  
CGACCATTAACGGACTGTACTCGAGTACCACTCTCTACAATACCCCAAGAGGTACCAGTA  
CAGACAATCTGGTCACTGTAGTTCACTGTTGGTGTGTGTCAGCTGGGATGTGTGTAGACCC  
CCATTTGGGTTGTTAGTAACCTTCAACATAGGCTGCACCCTTAGGTGCTGGGGGAGTTGGA  
GACATACCTTGGTTGATTGTTGGGTCGTCTGGGTCTCCCATCACAAAGATTCTTGTGTTGA  
GTGGTAAATAAGTTGTCCAATTGCGCCTCACCTTAATACTGATAGAACCGGCACTACCG  
GCAAGGAAGTCACTTACCAGACCTTTCTCTAACTCTTTAGAAGAGTCATTTTGAATCATT  
ACGTATTCAAAGTTACTGATATACCCCTTTGCAGGGGCCGAATCCGCGTCGATTACTTTG  
ATTTGAATCTTATCATCCATCGAAATCTCCCTACGAAGTCACAGATACTCCCCTAAATTG  
AGAACCAGCAGCGGTTTCCCTGCTTAGTTTACGTTAATTACCGGAGAAGTTACGTATCC  
ATTCAGGATAAATTCTATAGGGTTTCACTCTCTAGGAGAAGGAATAGTAAATGCCCAAGT  
GACTCCAGAAAATTCATAACAAGTTGTGATATTTCCGCTAACATATGAACGTCTGGAAGA  
GTTATACACTACGGAACCGTCTACTCGAATACTCCAAGTGAGTTGAACATCAGCCAAGAA  
TGACGGACTGAACGATGTCAACAAGACTAGTACATCCTCCAAACTCGCCATTGCAGCAGT  
CGCAAACGGGGTACTAATCACTCTGAGACCTAGATTTAATGAACGTGCGTGGTTAAGTGG  
AGTATCTATTCCAACAACCTTGTACTTGACAGTGCAGTAGCTGACCTAATGTTTAACTT  
GGTACCCCTACACCATTCACTACTTTGTTGGTGAAACCTTGAACGAATTCCACCTGTTCC  
CCACTCCAGAAGCAGCTACACGCGAGATTCTGAATACCCTTGAGATTTGCTGTACTG  
GATGCCAGCATCAGACACTACAGGGTTTGGGTGAATAGCGTTAATCAATGTTTAGCTCCC  
CCTGGTGCCTGTGGCTTCAATATACCTCTCGAGAGAACCACGTTACCTTGGTCCCCTTG  
TGGAACATTGTCACCTGATCGACCCTGTGGTCCCATTGGACCTCGTGGGCCTTCAGGCC  
TTGTGGCCCGATAGGGCATTGGGCACCTGGTAGTCCTAGTGGACCTTGCGGACCAATAAT  
ACCTTGAGGACCCTGTACCCCTTGTGTGCCTGTTAAACCCCTATCCCGTTGAAGGCCTTT  
CACACCCTGTGGGCCACGTTTCCCTTGGGGACCATGGATACCTTGAGGCCATTGACCGCC  
TTGCACTCCCGTCTCGCCTTGCAGGACCGCGAGCACCTTGTGGACTTGTAGAGCCGATGGG  
TCCTTGCTTACCTTGAGGTCCTTGTGGACCTATACCAAACGGAACTGCTGGAGACCAATC  
ACCAGACGCTGCGATCGACTTTCTGAAGATCGCCTCCTTGGTCACAAATGGAGACTGGAG  
ACGTACTGTCAAGCGGACTCCAATTTAGGAGCTTCATCACACGTTAGAACGCTACCCGC  
TATCCAAAAGTATCTAGGGACTTGTATCAGTAGCCTTGCCAAACATATAGGTTACTCGT  
CAAGTTTGGAGTGATCAACAAAGTGAAATTCTTAGCAGAGACATCTCCAACAAATTCCTG  
TTCTTGAAATGTAGAATCAAATGAATAGTCTGTTGCAAAGTAGACAAATCGAGGACCTTC  
ATCATCGTATGCACTCAAATCACTAAACAACCTCGAGCATCGATGAACAGAGAGTCGCC  
CATATCACCTTTCGGGCCAACTCGACGAGGAGCACCGGTAGGGCCTGAGTGACCCGTTAG  
GTCTTCGTAGTTACCCTCCGTACCATCAGGGTTGCGGAATCGTAGATTTGCATCATCCA  
GTCATGCTCTGGAGATAAACCTTGTGGGGCGGCAAGAACGACAACGACCTGCGGACCTTG  
AATGTTTACCCAATGACCCCACTCAATAACTACACCAGTAACTGGGTCAATCTTGTGTC  
GAATCGAATTGATGTCTTAGATTGAGTAATGCTGTTAACAAATTGGTGGATTGGAGTACG  
ACCTACCACGCCGTGTGGTCCCTGCGGACCCAGAATATCTTGTGACATTGAATACGCAG  
TGGACATTGTTATCCAGTAGGGCCTCGCGGACCCTCTGGCCAGCCGGGCCAGCCGGACC

AACTTCTTCAAGTGAAACAAGTGAGTAAATGTACACCTTGTCTGTAGACGTTGGGACCTA  
GTTGATGAATTGTACCTGTGTGCCCACTGTAGTGTATTCCACTTCTGGAAATAGACGGAT  
ACCGTTTTTATGCACATTGGTAGAGAAGGGACCTGCATCTACGTTAGTACCTCTGTGCGAA  
GTTAAAAGAAAACCCATTACCACTATGTGCAATCACCTTGGAAACCATAACCAGATACATC  
ACCTTCTAAGGTTTCAAGGTATTCCACTCGAAGAGGTTTCGCTAGGGTTTATAGGTGCATG  
TAGGTTAATTAGACGGTTGGATTTAACAAGAACTGATGTTCCCTGTTGATTGGAACCATT  
CTTAACTGAGAAAAGATTGGAGTTTAGAGCCTCTCCAAACTTTTCAAACCTTGCAGTTTAG  
TGAGGGGGTGATAAAGCCTCCTCTTTCTTTCAGTATGAGTAATAGTCATAGTTATTA AATT  
TCCATCACATTTATAGAAATAGTTAATATGTCAAGTAACTAGACTATAATAATGATTAAG  
TATTACTACATTCCGATATAGAAACATATCAATGCTTAAAAACACCCCCGTAGGTTACGC  
AACTACGTCGACCGGGTAGGTCGTATACCTTTCATTACTCAGTCTCCATTGGCATCAACT  
ACGCAACTATTCAACATACCCAACCTCTTTAGTGGCTACTCATTTCATGAAAGGTACAATAC  
CAAGAATCTTTCGGGGCTGCGGTGGGGCCGCGACTTGTTTACTATAGAGTATCGCCCCGTC  
GAGTGAAGCCGTATAGACGTCTAGAGCACAAATGTTGTCATATTTCCCTAGGTCTTATAAA  
TGACAAATAAGAAATCTGTAACGCCAGGATTTCTGGGGGAAATTTTTATGTTGCCGTGCT  
AACCATAATAGCACGCCTCGTGTCCCCCTTACCCATCTCCGAGGATGTGCATGTACTCC  
TTTTTATCTTTATGTGCGCATTTAGCTGTACTGACTCATTGTTGATGGATTGGATGGTTG  
AGCATTAACTCAGCAATTTTCTCTACAATTCGGAATCTCCCCACACTTGCACGATTAC  
GTTCCCGCACAGCGATTCCGGTGCGTTAACA AATTGATTTATCTATAATTGGGTTGAGCTG  
AGTGTACTGTATCTAGCTGTACATGATACTGAAAGCTAGCTATCTACGAACTAAGTGATA  
ATAGGTTGTCTATTTGTACCTGATACACGTATATACAGAGCGTATTTCCCGATTCATATCT  
ATGTTGAAAAATGTGATGTATGTCACCTGGAGTCCAGTTAGGCTGGGTGTGAATTTTCAC  
CCCGTCGATCAGGCAACAGAATAACGATATGGAGGTAGATAGTTACAGTGTCTATCACTG  
CTCTTTAAAAATGTGATTCACAATGATTACTCATTTAAGGTAATCTTCACACCGTCAAAA  
GTTTAAGGTGATACGTAGGCCTGGGTTGCTCTGGGTTGATTGAGGTAAGCAGCGTTACCC  
ACTAATAACA AATACCGTTCTAGATGTACCGAACAGGAAGCTTGCCAACAACGCTTGACG  
AGGGGAGGGTGCTTCAGTCAACATGGTCACCACGCTGTGAGTAGCATTTCGAGTTAACCGA  
ACGGTGCTCTAAAGGTTCTCTAATTATTAGGATAATGACACTGATTTAACATCGGTACTG  
TGGTTGATGATGCGACGTCTCGCGTAGCTATGAAGGGTTATACTCTGAAGGGTATAGAGC  
TACGGTGCGCTCGGTTCCGATTCTGTGACGCTTTATCTATAAATCGTCCAGCTAAACTAA  
CGGTTATGTAAATAACTACAGTACGGTAGACGTTGAGATGGTTGAATTTTGAGTGCAGAG  
TGTTGCTAAGCCGAGACGAAAAGCATGTCCACCGTGAAACCAAAATGTATGCTACAGATA  
TAAGCAGCCCGCCAAACAGTCCGCCATGATTAATTTTAGTAGGATTCTATATTTAATGGC  
ATTAGATACCGAATTAATATCAATCTCTGAGTTAATTAGTAATTTCTGGTTGAGCTAAAG  
GTTGTTTAGTGTCTTAAAAAATTTATGGTGAGGGGTTCACTAATCTATAGTGTATAAACG  
ATTAATACTGCTACCCAATGGAATTGAGTTCCTAGCGCTCGGTGTTCAACGTTTACTCAC  
GAGAGGGCTCGTTAAATGTTAACTAGCCTTTATTGTTTTCACTAACACGCGAGGGGCAAC  
AATGCAAACCTCGACTTACA ACTAACGTTTTACCAGACAAGGTCAACCGAATCAATAGCCT  
GTTAGGTATTGGAATTACTGCGGTAGGTGAGTCTGTAGTGAAGCTAACCAACAAGGTTA  
TAAATTGGTTCAAGTTAAGTGTGAAGCATTCTCTATTATTCCACTCTCTGACGACCTGAC  
CAGTAAAGCATTAACTTCTTCTGACTGGACTAACCACTGGTCTAACTCTTCCATCCAA  
CTAATCTCATGGGTGATTATCATGGCCCTACA ACTAACCTAACTTCAAAGCTAAA  
CTAAACAATTGGGTAGAAGGCAGCAAGTTTAAGCGTGATGTACTGCAAGCATTTATTGTG  
TTCGATGTACTACATCCCCACAAAACGACAAGGCCTTTACCAGACTGTCTGAAGTAATT  
TTTGCTTGTGAAGATGTGAAGGCAGTCCCTAACCGAGGATGTATCTGACTACAGCAAGAAA  
GTGATGAAGGTTGTAGAATTGAAGGCTAAGGGTAAAGTGTCAAGAAAGCGAACAAAAA  
GCGTCTATTGAATATAACATTGGCTACCTAGAATCTGAGGCATGCTAAGAGTTTAGCAAG  
GCCACCAAAGCAGCACAAATAATGGTTATTATCAATGAGGCTGCACGTTGGGCTAAACAA  
CTGCGTGAGACCATTGATAACGGTATGTTAAAAGACTATCTACCAGATATCCCCGAAGAC  
CGACTAAATACACTCGTGCAGTTTGTAAAGGTAGCAA ACTAGCAGCCTTTCCAAATGAGTG  
GCTGTTATGATTATTGCCAGATACTTGATGAACGAGACTATTCTGTCTATTAAGATACG  
TCCATGTGCTATGTCCTCAATTA AATTTACTGACACTCCGTTTGCTGGATACGTGGGTGC  
GCACAAATACATTAAGACTGAGGATAAATGGATTGTAAGTTCGATGGTTCTGTGACTCTT  
AGAGGCGGTACTGTGGGTAAATTGTACACTTTGAAAGACGCTGACGGGGTTAAATGCTCA  
TTTGTGCTGTTCAACTAAA ACTGTGAAACATACGTAACCGGTGCGCTAGATCGATTTGTC  
CGTGAGTTCGAGCAGTACGATTTTGAAA ACTTCTGTAACCCACACCAACCATCGACAAT  
ACTCCGGCCAAACTAGGTTAACGCTACCAGCATGTGCTATGACACTGAGTGATTTACTAC

AGGCTATCTCATTAAAGTAGCCATTGTTAGTTTGTTCACGCAACCATTGGAGAATATAAT  
GCGTATTATAAATATTGTAAGCAACGCCGTAGGAACTGACGCAGACGAATTAGCACAGGC  
CGATAGTCTATTGATCAAAGGTAACCTATGTTCCATCTTTGATTCTGGGTCATTGGGT  
TATTGTTTCGTAGCGATAAGGTGGTGGATGCGAAGACAGCAGACGTACCGCCAACCTTCGG  
GATGTTAGCTCTGATCGTGTAATGCTAGGTGCGAAAAGTACTATCATCATCATCCCTCA  
GCGATATGGAGACCGCAACATGAAACAACCCAATCCAACTGGGCCCATAGACCAGTGCG  
TTTGTGTTACACAAGCAAACAGCAGACGATGGACTGATCAAAGTGGACAATATAATCTC  
TCGTGCCACTGGAGGTGCGGTGTATGATGATCGCCTTGGCTTTATCTGGGCGGTTATTAA  
ACAGGCCGGTGCAAACAACCGTAGTCTGTCAACCTGAGAAGCATAAAGTCAAGTGTCTGA  
CTTATCAACCACAATGGCTCAGGTCCACTAATTAATTAGGTATTAATCATGCTCCATAC  
AATTACTCTGAGTGTAGCCGAGCTGGTTTTGGTATTGGCCAGACTCTTAAATAGTCAAGT  
TGTAATCCGCTCTATCTTAAAGCCCAAATCACTAGGCCAATGTGTACGGATTATTACACT  
TATGATTAACACTTCCAGGATTGAGGCGTGGTCTTTACGATGCCAATCGGAGCATGATT  
GTTGCATTTCCGGTATAGTTGTGAACGTAATCCTGCTTATTCACGTACTTTAACGGAGAAA  
ATAAACTATTTGTACTCTAGTTCCTGGTCGTCTGGATGAGCAAGAACGTTTGCAAGAGGC  
TTACGCTGGTGGTACATCTCGTAGCGCTGTTATCTTCCCAAGGAACGTAACCGGATGGG  
TACAAAGCCCCGTGTTAAGTCAGGAAGTACTAAGACTTATCGAACAGGGACACCTCCTCG  
TGGCCTTAAGCACTTAAACTGAATAAATATTAGGAGTCCATTAAGGTACGTACGATCGCA  
TCAGGCGCTTTTTCTTACGTAGCTACTCGTAGCGAAGATGATCTAGCAGTATCAAATATC  
TTTGATGGTTGTGAACAGGACGCGACTCAGTTCAATCCTAAGCGTGACGAGCCTATTGCA  
GACCTTTTGGCTAGACAAATTCGTGAAGTAGAGTCATTTTGGCAGCAAAAACCTGCGG  
GAAACAGAATTTATGTTCCGGTATCTGTTTCAAGTAGTATTGGATGAATCAGTACGTGGCGCC  
TACTTTGAAGCGGCAGAGCAAGCAGTCGAGAAATTGATTGTGCAAGCTGAATCATTCCAA  
GCAACTAAACATTAATTCCGCTAACCAGAAAGAACTACCATCACGTTCTCAATAGAAGGA  
ATCATGATTATGTCTATTATCTCTAAAACCTTTCCAGTATTTGTCTCAACTGCGGTTCAA  
CTAATGAATACTCAAACCCTCGTTGGCTTTACCATTGTAGACGGTCAAGAAACGGTTCGAA  
GGCGCCTTGAGAGGCCCACTCTTGGAAGGGGCAATGCCTGCATTCGAGGAGTTCAGCGAA  
AACCACGCAAAAGCTGAGGATCTACTAATCAAAGAAGCTAAATTCTCCACCAGAAAATG  
ACAACCAAGATATCATCGGACTACTTGGGCGGTAACACGAACGTTGCAATGGTTGCTCCA  
TGGGATTCAAGCCGTGAGGTAGGTGGCGTTGTCCCAAGAGGGCGTGACGAGGATGGTGAT  
TGGGAAGTTGTTACCATGAAATGCTCAACCTAGCAGACGATAGCAGTGTGCGGACACG  
GTGCACAGCTGGAACCAAGGTGCCGCGGAACACTAAGCAGTGTCTCTAGTGCTGACTGGT  
TCGCTAGGCTTTACTAGGTCTAAACAGTAAAATCGGTCCCCTACTGTGGGGGTGGGACCC  
CGTCCAATAACTCAACTTGAAAGAGAGAAATACCATGAAAGGCATTCGTTTAAATCAACA  
AATCCGTTATGGAAGCCTAAGCAACGTGCTGTAAGCTTGGTCTATTGAGAACCCAAAAC  
TGAGTGTGTGGGCAAACCAAGCAAAAACACTTTGTTAGACGCCGCATACGCCCCATGTTA  
GAAAGGCTTCCAACCTGGATATTCAATTTAGTTGTGGTTTGAAGACGAAATACTAAGCAA  
AGAGCGCTACGTAGCTCTACGTATTGATGGTGAACCTCGGCACTGAAATCAGCTACGAAGG  
TATGTACTTCAAAAATGCAGGAGGTAAGAAAGAGCGCCGACCCTTCCTACCAACTTGTGC  
TCTACAGCTGACTACCTCTTACCAGGTGGACATCGCATGGAAGAAGCAACATGATGAGTT  
CACTCTTCAACATAAGTAAGTGATGAAGTGGATACAAGCTCGTGCTGACAGCGCCACTGC  
ACTCCGTGCTGTGCTAGACAGTGTGCACACCACCAAGCAATTGCATGAAGCATGGGCAGA  
GCTTGAATGCTGTATGCCAAATGGTTATGTTGACCCAAGCAAAGTACAACCTACCGGCAAT  
CCATCCAACCTTACCAACTGGAGCGTTAGCTTTGAATTCCTTTCTACTGAGTGCATTATT  
GATTCTAACTTTGTGCGTATCGCTTCCCTCAGAAGCGGAACCATGTTGTAATGTTACAAG  
AGCCACGTCTGTAGAATACTATCGCAGTTCTATCACTAATGCATACATTGCAGCGGCTAC  
GCTTAACGGTAAATTTTATGTAACTTCTTCTTAGCAACTAAGAAGACACAGAGTTATTA  
CGATAGACTAGACTGCACAGAAAATCAATTTGATTTTCACTTCTCTGGGAATGAAAAGC  
TCAATACATTCGTGCAAAAGGTTGCGGACTAGCTCTAGATAACCATGCAATAAGTCTCAGA  
TGAAATGGCTGCCGCTTTGGTTTATTTAGTAGGTTTGTAGTGTATAAGTCAAGGGTATCT  
AATTGGATGCACTTTACTGTGTTCCCTCAATCAGTTTGGCAACTGTTATGAAATAATATATT  
GAATCCCGTTTAAACCACTACCTTCGTGTCTTTCCCTAATGTGGTTGCCGTA TAGAACCT  
TTGTTGGCCGTTCTGGGTAATGGTAAGGATTTGAACAACAAAGTATACATCCGAGGCAAT  
TAGCAATATGGGGAATCGTATAACTTTGGTGTGCTGTCCCCTTACCCATATCTACTCA  
TGGTCAACTACAGACGAAGTTCAACCCTTTCGTAAGTTAACTGGAAGCTGTGATGTTGGC  
TTTAAAGACTCGGGCTAATACTTCATGCATTGTTTAAAGTTATCTGCAGACGAGATTGAA  
GGTCTCAAGTCTTGAAAGATGATCTTGTGTTGTCAAAGTGGTCTACTTAATACGCTA



ACAATGGCTGACGAGTATGAATCTCCGGATGATACCGATAAAATTCTTAAGCAAGTTAGAT  
GGAGCCAAGATTACTAATGAGCATGGCCGATGTGACTGAACACAAATGCAACCAAACCTTA  
GTTAGAAAAGTGTGGTCCCATGATATTCAATGGTCAGGGTTCATGAGTTTGCAGAGAAA  
GAAGTGCCTGAAAGTTGGTCTAGGTTTAGCCTAGGTAATGACCATATCTTCTGCAAAAACA  
GAGGTAGATGATGATCGATTTCGACCGCTACCCAAATATTTACTTGTGTTGAAACACAAA  
GGTGTAAACGGAGCGTGAACAGTTTCTAGCTCATTGGTGGTGGTAATTTTAGTGGATAAGT  
AGACAGCAGTTTCTAGCGCTCTCAATCATGTTTATTGAGTTAATAGGAGAAAATAACATG  
GAACGTATTGCTATTGCTTACACTGCCCAAGAAGGCGGTAACACTAAAGTTAGAGTTTTC  
TGGACGAACGCGGAAGACAATCAGATTGCTATGTTCAATTTCAAAAAGTACCGCGAAGCG  
TAAACCGCCCAACAGACCTCAAATTGGTACTAGATGCGCAAATTCCTAACTAACACCGG  
TACTATCATCATGAGCACTCTGCATAGAAGGCTAACATTGGAAAACGAAACCGATGTTCC  
CAACGGACAAAGCGTCAAAGTAGTGACCCACAACAATAAGGATTATGATGTAGAGGTGTT  
ACCTCACGAATCAGATAGTTGTGGCTCAGAAGCCATCAGTAGACAGATTGAAGACGAATC  
ACACTAGTGTTTTGAAGTCACCCAATCTAGTTCGAGTACGTCGGCTTATGTGCGGTTTCAG  
TGAACGGGAGCTATTCAGTTTGTGTTGAAAAATGGTTAAATAGTACTGGTAAATAACATGC  
ACCTTGTAATAGATGCAGGGCAATTACTTGCCCGTGTTCATTGCTGGAATTTTGGCATCA  
AGCTAGTCATGCGAGAGGACTCTACGGTTCCAATGACTGACGGTAAGGCAATCACAATGC  
CAGTGCTAGCTCCCGATTGGGTGGTTCACAGTGCCAACGTGCAGGGTTTGTGGGCAGGAC  
TTAATCACGAGTGATATAACCATAACAGAACTAGCGCTTTTGATCTTAAGTTACTGCGTG  
AGTTGAATATCGATACCAACTAATTCTTTGGTATGGTACTCAACATGGTTGTTGACCATA  
ACATTGAATACAAAGAGGATGGGAAACTCGCGGGTGTGGTACTGGATGGATGCTTACT  
ATTCTAAAAGTTACATGAAAATCAGCAGTAAGTTTGGTAGTTATCCAGAAGAATTTAACC  
ATGCCTGTGCATTAAGCCCTTGTGCTTTGACCACACAATGCGCTCTCAATGGAGTA  
GCTTTGTAATCTTCACTTAGAGGAGGGACTCACGAGTGAACATGCCCGCGCTATATTCC  
ATACTCTGATGGACAAAGCCCAAGACATAGCCTTAACCAACGTGTTGGTGTTTTGCCTA  
GGCTGCCAGTCTGCAATCAGTTGATGGACGTGTTAGACCTGAAAGAAGAAAAGGTGGGG  
CCAAGTCTAAAGCAGAGGGTTCATCGGACTCTAAATCAGTACAAAGTGAATGTAAGCCCA  
GAGACGGCGAAGGCGAAGTCGATGAGGTACAAGGCGCAGGAAGTGACTCAGGACCTCCTA  
GAGAGGGCGAAGGTGAAGCAGGTGAATGGGAAGTACCTCAAGAACTAATTGAGATGGTCT  
ACGGGGATTACAGGGCGTACTACCGGCGATTAGATCCGCGCTCCTGGTACTAACGTTAAGC  
TAACATACGATTGGGACGCAGGAGATACGTCTGGCTATTGTATGGTAACTGCTGAAGAGT  
TCCACCCTAAACCCGTTGCAGGGCGCCGCGGTAAGAATCGAGTAGATTATGTGGTGTGTC  
ACTTGAATTTGACTCTGCGTGATAAAGGTCAGGCACAACCTCAGAGTTATGTCCCAGTCA  
AAAGTCAGCGTGGACACAAGCGAGGCCAGTTACATAGTAAAGCTGTGGCCGAATTATCGA  
CTGGCAGTGTGGTATCTGCCGTCAAAGGAACAGAAGGTTGTATTGAATACGGCTGTAA  
CTGTTCTGTTAGATAGTTCAGGCTCTATTTCTGGAAATAGACAGTACTTCTCCTCGGTCTGT  
TGGCGTGTGTGTGTTGAATGATTCTTGAAGAAAGTTCGGCGTGCTGATTGAAGTTATAG  
GCTTTACTCAAACCTACGAAGGCGGCAACTAGTACAACCAGCTTCTCATTACAGACTCCGT  
TCGGTCGTCGTGATACGGCTCCTGACTTGTTAGAGTCAATGCATGGAGTTGAATTAGCTA  
ATCTTGAGGATGGTGTGCTATTATCTGGGTACACTCTCGTCTAATTGGCCACAAAGCAG  
AACGTAGAGTCTTATTGTGTTAGTGATGGTAGCCCTGCATGTGTGCAAGCTAACTCTG  
ACGCATGCTCAGAGCAAGTGGTTCGAGGAGATTGAAAAGGAAGCTCCAGTAGAAGTTTATG  
GAATCGGCGTTATGGACGATACCTTTAAACGCATCTACACACAAAGCGAAGTTATCAGAC  
GACCACAGCAACTAGAATAAGCTCTACTTAGTTTTGTTAAATCTTAAATTCTCGGCTAAT  
ACGGAAAACATATCATGGAAACAAGGACAAGAGCTACGTCAGAAGCTCTACGTTCTCGTG  
TAGCGGAGGCACTGGCAGCACGTATGGGAGGTGAGGCTCGTAAAGATGAGTACGTGACTA  
CGGCTACAAAACCAGAACCTCCAAAAAACCTACTGCCTTTGAAGATGAATTTCCACCAC  
CATCAGGTGACGGTGTCAAAGAGTATGCTGAAATCATTGGGCGTCCCATCAAACGGTG  
GGTTTTATTTCCACACCTACAAGAAGGAGGATTGGACGGACGTACCACAATCTCTGATTC  
CAGAAATTGATACCAACATGGAGCTTGATGATGACCTCGCTCTTGCGATTCTTATGGGCA  
TTGAATGCGACAAACCTGTATTTCGCTAATAGCGCAACCGGAGCTGGTAAGTCAGTTACCC  
CACAAACAATCTGTGCGCGTCTCGGGCATCCTTTCATGTTCTGTGCTGGTATGGCTGATA  
CCGAGACTAGCGACTACGTGGGTTCTCCTTAGTAAAGTGACGGCAGTATGGAAGGGGAAAG  
ACGGCCCGATGTCTTATCCTGTTTCGTAAAGATGACTTCTTCTGAACGATGAGCCATTCA  
AAGCGTCTGCACAAAATAACATGTGTATCCAACCACTGCTCGATACTTCTCGTACACTGA  
AATTGTACGGTCACTCACCCTGTTAGGGTAACTAACATGCTAATGGTAGCTACCGTA  
TCATGCGTGCTGGTAACGTCTGTGGTTCTGGGGACCAGATGGAATAGATTGCGGCAGAGA

ATCAAGACCAATCTACTCTGAACCGTATGGTGTACAAAATACATGTTCCGTACCCAACCTG  
AGAAGGCTGAGAAGGAAATTCTACGCCGTAAGTTCCCACAACCTAACTGAGCGTTTGGCTA  
TTAAGATTGTTTCCTTAGCTAACATGAGTCGGAAAGGCTGGGAGCCAGGGACTATCAACA  
TGCCTTACACTGTACGTGGTTCCCAAGATAAAGGCTAAACAATAACTGCGTTTACGTAACC  
CTAGGTATGCTTTCAAATTGACCTACTACGATCATGTCAATACCGAAGTTGAGAAGAAAG  
AGCCTGAGAAAATGTGGATCCTGGTGAAGTTCATCGAGTACAAACCCTAAGGAGTTATCA  
TGGCCTATTGTGGTCGTCCGGTCTTTGTGTTTAGCACAGACCCCACTAAAGTACCCTATC  
CTCGTGATTTCGTTTGGAGAAAGATTATGACCTCAAACACGTCGAAAGAGATAGTGGTACAT  
TTAACTTCGTCATAGGCGGTAGAAAATGTTGCAGAGACACCGTATCCTACGGCCACGAGA  
TGGAAGCAAGTGATGCTCTAGTGTGGATGTTTAAATCAGATTTGTTAAAGGGGCTGTGGGT  
AAGTTTGTACACTATTCATCAACTTAGATGAGGATGTTAGCGATGAGTACTACTTTGTGA  
AGTAGTCGTGGATTAGCACAAATTTTCCACTCTAGTCGTTGATGTGAGCCACCTGTCTGAA  
CAAGTTAAAGCAGAGGCTATTAAGGCTATTCTTGAAGAGTTTGGACTCAATCCACCTCGT  
ACATACAGCTTCACAAAAGACAGCTGTGGATATGGCATCTTACGAGAGATTAATCCATCT  
CACCACCAGTTAACTCAAACCTGCTATGGCAGAGATGGCTCAGTGGAGGAATCATAGAATA  
TGTTGATTCCAACCCACGAACCAGAGACTAGATTATTGTTAAGCTAGAGGAGTTATCAGT  
ATGATTGATTCTCCTTGATTACGCTGTAAAGCCTGTGACGAAGAAATTCAACCACAAAAT  
TATCGTGTCTCTGTGAGCATTAAACAAATTTTTGAGGTTTGGGAAAACCTGTGTCTGAG  
TGTCGTGCTAAAGTCGCACATTGCAACTCTGGCACTGAAGAATGGAACAATGATTCAACA  
GTAATTCGATTCACTAACTCCAGTATGGGAGATTCACCTTTGTGAATTGATGCACTCATT  
CATAACGGAGCTTCTTCTGGTGGCAGTTTTTCATTCCGAATACCGCGATCAAAGCCGACGG  
AGACGACAACCCAGAGTGGGCTCTCGCTGAAACGAGACATGTCTTTAACTGTAACGAAGG  
TCACAACAAGAACCGATGCTATGTTACCCACGTAGAGAACGGTTTTTACCTTGGCTACTG  
TCATGCTGGCGGTGGTCAGGGTATCTACCGCGAGAAGTTTGCCCCTGTTTAGAATGAATT  
AGCAGGTAGTAGTCCTAAGAAAATCCAGCGTGATTAATTTCTTCCAAGGACTATTACCAC  
TAACATGTCAGAGTGGTCGTCACAGGCTAAAGTGGGGATGTGGAAAGCCAGGCCACGGA  
TGAAGAAATTAAGATTGAGGTTTCTGTTACGTTACCGAATCAGGTCGTGTGTTACTTCC  
TACGTATTTTGATGGTGAGTGTCCGGGATACCTCTCTCGAAGAGGGGATGATCACGATGA  
AGCGAAATACTTCGCAAAGTCTAAATACCGAGAAAAGTTCGCGCTGTATTCTGAACCAAGG  
CACTAGCGACTGTATTGTGGTGGAAGATGCTCTATCTTTTATCCCATCAGTAGACACAC  
CACTTGCGTCTGACTTTTTGGAACATTTATATCAGACAAAGTTCTAAATCTTATACGCGG  
TAATCACATTAATTACAACATCTGGTTTGATCATGATAACCGACAGGTCAAAAACAAGCT  
GCTCGAGCTTATAACTAAGTTGGAGTTGTTTGGCTCCGTCGGAATGATTAACAGAGACAA  
AGACCCTGAAGAATATTCTGGCCAGAACTCAAGGAGGTACAATGCCTTAAAAATCTACA  
TTCGGGTATACGGTTAAAGTTGTAGATAAAGGTCCCATCTACACATCTCGTTCTATGTAT  
GGTGCAAGATAACCCTGCGTGGGTGAATGGCGCTACACCGAGACGCCTCACTAAATACGAA  
ATCATTGGAGTGCATCAAGATGCAACTACAAGAATTGGTGTGATAATATCTACCCGGTT  
CAAATGCGAGTGGTCAAGTGTACCTATGCGGTGATCGAGGTCTCGAACTAGATACACCG  
ACTGTCAGTGCTCCAGTATTTGCAATCGCACTAACACCGGTACTGTCTGTTTCAGAGTCA  
TGGATGCGTAATGATGGGTATGAACACGATAACAATGCGTGGTTCGTGTAGTCGCTGCTCGG  
AGGTTAAGCAACAGCATTAAACGGAGAGAGATGGCTTGTGGGTGATGACCACCGTGACGGT  
TTGGGAGGGACCTGCAGTTAAGCATTCCGCAAGTTAGACCCGTTAGATGCGGCAGCAATG  
TACTCAACCTATCAGTCATTACATATGGAGTGTAAATCATGGGTGAAGAGATTAAGGTTG  
GTTTTTGGGTTTCGCTATATTACTTCTGGTGGGCCTTACTTAAACAGACAACAAAGAGGAGC  
AAATTATTGAGGTCTACAGGTCTGATGCCACTTACGGAAAGATTTCGGGTTTTGGATGATG  
TGGGTGGTGTTCGCGACTTGATGGAATATGAGTACGAGTGGTTAGATACTCGTAAGCCTC  
ACTGGATTCTTGTGTTCCAGAAAGGTGATACTACTCCAAACTGAGGAGAGTGGTCAAACC  
TCACACTCTTCGAGAATGAAAGCCAATGGTACTGTATCAGCAATATTTAAGGGAAGCGAA  
GGGTTGTGAGTGACTCAACTGCTACAAAAGATCCGTTAGACGCAGCTCGTGCTGCGGCAC  
TGTTAGTAGTCTTTGCTGATGAGGAGGCTAAATTGTGAGTTTAGACTTACTGAATATTAT  
GGAGAGCCGTGAGAAGTCCGAAAGTTACTCTCCATTAGTTCGTGAACATACGGTAGTACC  
CTCCGTCTGGAAGGGAATCCAAGCGATTAAACTTGGTTTAAAGAGTCTGAAGAACGGGA  
AGAATTTGATGCGGGTTCTTACTCGACGTGGTTCTGTACTATTAATTATGGTAATTTATC  
TAGTGACAAGCTTGAAATATATCGTGCTATCTTTGATAAATTACCGGCTCATGTTGTTCA  
TGCTACCTTGGAAACGCAGTATCGTTGATAACTTTATCACTCGCGGTTACTGTACTGCATT  
GTCGGAAAAAGCTCTCCGAGGTGCGGAAGGCGAGGCGGTCACGGTTTATGACCTCCCAA  
AAGCGTAGATGATTTGAACAACCAGTTAGCTTAAAGTTGAGGTACTTGATTTGGTTGTTCT

CGAAGACTCTATCGAGGATATTGTTAGGTGTATCACCACGGCGGCTACGATTTCGCGTAT  
ACAATTCATAAACAAGTCAGTTGGTCGTCTGCCAGGGCAAGGTAAGCTGGTTGTGACTAT  
ATTTTCGTCCTAAAACCTGGAAAAACATCGTGCCTGGCTTATAACGCTGCTGCTTTTCCTTC  
TAGAATGGCACAAGATAAAGTTGTGTTGCGGTTCAACAACGAGCAAGATGACGGTCACGT  
CAAGTTAGGTACTCTTTAAGCTGCTATCAACTGGGCAAGTGCTGACATTGAAGTTGCTCC  
TTCTCGTGCATTATCCGTTTATGTGGATTATGTTGGAAACAAAGCTAAGAATAAGATTAT  
CAACAAGGCTGACACTAGTGTCCACGATGTAGAACAATACACTGGGAAGTACAATGTCCGG  
CTTATTTGTAATTGACCAGTTGTTCGGAACACCACTGGTTTGAACGTGAGACAGCGATCGA  
AGTAGCTCGTCAAATAAAATCTTTAACTGGGCGCGTGAGATTGCAAAGAAGTATGCCAG  
TGTTATGGGTACTCTCCCAACTGATGCGCTAGCGCAAGGTCAGAAATAGTTGGGTATGGC  
CATGATGTACCGCAGGAAAACCTGCTCCACAACGTGTGGCAGACACATGCGTCATGATGGG  
CCGTAATCATGAGGAGTATGAGAATGCCGTTTCGATTCCCTCACCATAGCTAAAAACATGAA  
TGCAGTAAGTCGTGAAGTAGACCCTGCCCCGACGTGAAGGCCGTGCCGAATTACGTATCGT  
TCGAGATACCGCTAAATTTAAGGAGATCTAAATGTAGTTAGACCATGGCCATGACCCTAC  
TGAGGTTTTTGTCTACAACGGTGTCAATTCGACTGTGAAACAACCATAACGTAATCAGGGTAT  
TGGGAAGTCACAAGCTTCTCCTTTCCATCCTGCAAAGAAGATGTTGTGCTTTGGGTGCAA  
CACGCTAGGCGCTGAACCTGTAGTACTTCGTCCATAACATGCTGACTTCCCAACAATCTC  
TCGTGAGAATGATGTGTTATTTTCGGTAGGCCACAACATTAAGTTCTACTTGTCTGGAT  
GATGCGCACGTATCCTGATTTGTGTGATATGTTACCTAACCTATGTAATTGGGATACCCA  
ACTTGCAGGACTTGTAACTGGACAAGACCACAAGATGGCGTCTCTTAACGGATTGGC  
TCTGAAGTATGGAGGTACATAAAAAGATGACCCTATCGTTCGAATTTTGGGAAGCTGGAGT  
TGATGCTTCTAACATTCGTTTCCCGATGCTCAAAGAGTATTGGAAACATGAAGTAATCAA  
CACTCAGATAGTTTTACTAGAACCAGTGGACCAAATGATGACGGCAGGGCTTCTTAATCT  
TACTATGACTCAGATGGACGCTCTAATGGCTACCACTGAGATCAGATGGCATGTTATGAA  
GTTTCGACAAAGACCTTGCTTTGGATTTTCGATAAACCTCTCCAAGCTGAGATAGAAGTCAT  
CAAGGGTGCTGTATTTTCTGTGCTGGAAGCTGTGAGTTTTCCAAAAGAGTCAACCGACGT  
GGCAGTAACTTACAGATTAGTGCACCTATCCTTGGGGGTGTGGATAAGTACAAACAGAA  
AAATTAATCTTACTACGACGATGGTGCATTGCTACATTCGAAGGGGGTGTCTCGTGTGG  
CCAACCTCAGACCAAATCTTTGAACGCTCCAAGCGACTGGAAGGTATGTGGACACCAAT  
CAATCCGAAAAGTAAGAACAGTTCGGTTCAGAAAGGTGACGACTCTCTATCTAAAGTCAA  
AGCCAAATAGAAAGGGGACGCTGTGGTTGAACAGTTGTTTCGGTGATATTCTTAAATTCCG  
CTAATTGGAAAAGGATGTTAACACTTACGATACTGGCTACGCTTCTCAAATGGTCTCTCGA  
TAGTTGCCTACATGGTAACTATAACCACACTAGAACGGCTACTGGTCGATTGTCTTCTCT  
TTCATAAAATTTCCAAAATATCAGCAACTAATGTTTTGTAAGTTATATGGTTTGTGGTAT  
ATTCGGTGTAATACTATAGGAGGTACATTGTGGGTAATAGTGTGACAATAGATTAAT  
CGAATATACTGGGCGATGAAGGGCCGTTGCGTGTATCTGAAGAATGTCCGCTACTCCCGA  
CATGGTGGGAGGGGTATTTTCAGTAGAGTTCTAATGTTACCGAGAGTTCAGAGAGTGGGCA  
TACCAAATGGGGACTCGCCGACAATAACAAAAGATAGTATAGACAAGGACAAGAGCTCG  
AGCCCCGAAAATTGTAGCTGGATAACTCACTATGATAAGACGCAACTTGGTTCCTTGAAG  
TATAGGAATCACATTGAAAGGGTAGATGGCTCTATAGGGTATGTAATAACAATCATA  
GAATTTTGTAGGGAGCATTCTGAACTAAGAGTTCTTAAAGTAGAGTGGGAGTGACCTAC  
AGAGCAAAAACAACAAAACAATACAAAGGTTTCAGATGTCAGATCTCAAGCGATGTCTAA  
TCTCCCGATTTCCCAATGAAAACCTCATGGTATGTGATTTCTCTCCCCTTGAGGTAGTGC  
GTGGTGCAGGTGTTCACTGGCAAACCAATGCTAATGAAAGATATAATTGAGGGTGTGATA  
CTCACTGTATGTCTGCTTCTTGGGCAAATCCAAAATACTCGTCTAAGGCAATCTTCGCAG  
GGTACAAGGCAGAAGACCCTTTCTTCACCGAACTACGTAAGAATGCCAAGCCTGTAACT  
TTGCTTTGCAATACGGTGCTGGTGTGAGGCTGCTGTGGTGAACGCAGGTATAAAAGTAG  
AACAAAGCTCAAGCAATCATTGATAACTACTACAATCGTTATTGCGTGATGAAGCAGTTCC  
AAGATGATATAATCGAGCAAGTTAACAAGGGTTCGCTACCCCTCTAGTCGTCGTAAGTAAA  
TCTGTAAGCCGGCTGGTGGTGGTACTACCGTAATCCCACAGGACGTATCTTTAGTTTCT  
ATGCGTACTATTCTCCTGAGTTGCTTCGTTCGTGGTGTACAGATGAACTCATTCTCCCCCA  
CACAAAGTAAGAACTACCCGAGTCAATCTTTTGCACATGGTGATATTGATCCTGTGATGT  
TGGGCCATATCTACAACTTCTGATGACAGGCAAACTTTACGTGATAAATGCATCCTAA  
TTGGTACAGTACATGATTCTGTAGTGTGGATGTTTCATCCCGACATTCTGTATCCGGCAG  
CATAGGCCGGTTCGTGGGTTGTTGTTACGTACGCCTGCAAGCGTGGAGCGTTACTTTATAG  
TTCCATTTAATATGCCTTTGGCCTGTGAAGGTGTCATCGGCGACGGCGCATGGTTCAATA  
TGCATGGATACAAGTGTTAGGAGGTTACATGGAACTGTAGCACAGAAAAGATGGTAAGG

TGAAAACGAAGAGAACCACCGTGATAAGGGAAGTAAATGGCTATGGAAACTCCAGAGTAC  
GCTTCTCTAATTAAGCTACGCCTCAGATTAAGGAAGAACTCCCGCATGACATTAGAGGAA  
TACAACCGTATGGGTGAATGCGATAATACCCAATGCTAAATTTGTCGGCTGACTCCTGAT  
GGTAGTAAATTAGACACTCTTCTTTGTATAGACCACAACCATGAAAATGGAGAAGTACGA  
GGATTGATTTGTATACGATGTATCCTAATGTTAGTCTATGCTATAGATGATCCAGAGATA  
CAAATAATGCAATAAAAATACCTGCTAAAATAACTTAGCAAACCTCCGTAATCTTAATA  
ACAATAGGAGATTTTTCTATGACGACTATGACTGGTCCAATCACTTCTAAAGCTAGCACT  
GATAAATCTATTAACCTAGGTGATGGAAATTGGTACTCAGCATTGCTGCTTCGCAGCTT  
CCGGCTGATCTTAAAGCAGGTGACTCAGTAACTTTTGAATATAAAGAGAATGGCCAATAC  
CGTAACATTCAAGGTGACCTTAGGAAAGCAGGTGGTTCTGCTCTAGCCGCGAGAGGACGT  
CAAAGTGCACCAGCTTTCGTTAGTCGCGGTTATCGTGATACCGGTCAACAAGGCGGTTTC  
CCCATCCATCCACTAGCGTATGAACGTGCTCTTGACCGCCGGGACGCGATCGATGCGGCA  
AGAACTATCATCGCTTGTGACGATTGCACATGGCACTGAGTGTGAATATATTGCCGATGCT  
ACACTCTAACTCGCAATGAACTTCGAGGCATAATCATCTCCTGATATGGGACGCCTGGCT  
ATGGATGATATCCCTTCTGGCGACTCTGACTCAGTTTGATTGTAAAACCTTTGGGTCTT  
TCTGGCGCCTTACTATTCTTTGGAGGAAATTTGTTAGAGAAACATGCTCGGTTACTTCGT  
ATGCTTATTGTTTCTGTTACTGTGGCTAATGTTGACCTCTTCTTTGACAAGACCAGTCAA  
TAATACGTTAAGGTTCCACGGAAAGTTTTGAAGGATTACAACAACGAAGATGAGCTGCTT  
CGCCAAGCTCTAGAACGTCAGAAACGTGGAGAAGAACGGCAACGTCTGGCAGAGAACCCC  
ATCGCTAAAGTCAACGACCTGTTAGAGGAATAATGATGAGTTGAGATGGACTATTCAATA  
AGTTTGTAGACGAGAATGCTGAGAAAACAATCCAATTGGCTGGACCAAAATTCAGCGATG  
TAGGGAAGTTAGAAGCCTATCGCAGTGTTTTAGGGTACATCGAACAAGGATGCAGTCAAG  
AAGACCTAACTCAGAACTTGATACGGATATCGACAGGGTGGAAATCTCGTTTAGGGCTAC  
AAAATGAAGATGGAGACAACCTCTCCACCTCCTGAAGTGGCCTCTTGGTTCAAATGGAGT  
AAAGAACAATGCTCCAATAATGGCAACCCTATCACTGTAGCGTAGGCTGCCCATGTTCT  
GAGTGCAGGATACAACCCCTGACTATATAACACACAAATATTTGGAGAATAGAATCATG  
GCTTCAATCAAATTATCTAAAGATCAAACCGCTGAAATCGTTTTTAGTAACACTGTTAAA  
GTTACAACCTCCAACGTGTTTCGCGGTGGTGGTTCTTGTAACCTCATCTGTTGGGCATTA  
ACTGCTTCTAAGTTGGTTTTCAAACCTCTCCTGATTGAGATTAATACATTCGCTTCTTGT  
GATGTTGCAGAAGATATTCGTAAGCAATTCGTAATGATAATCTATTGATTAATCACCTA  
GGTTTAGAGGTACGTCAGGCTTAATATGACAACAGTAGTCGTAATGTTGTTAGACTCC  
AGCGTTCGCTTCCGCAATTAGATTTGAAGATTTTCACTATAAAACACCGGAGGGTGATTG  
CTATCGACGAAAGAGTGATGCTCCTAAGTCACTACAAGATTCTCTAGTTCAAGTACGGGA  
GGCCATAGCGCCTCGACAATTGGCTGTATCTCGTTTTGAGAAATTTATCCAAGATATGAT  
AGATGATGGTCAGTGCTACGATGATGTGTTGTTTGTGATGGCGGGAATAAATACCGATG  
AGATTTTCCACATCCTAAAGGATACACTTATAAGGGCAGTCGCACCGACACGCACAAACC  
GTTCCATCTTGATGAGTGCAAAAACCTATCTAATGGAGTGCCTTCCCACGACTGTTTGTGA  
CGGCTACGAAGCTGACGATGGTTTCGGCATTGTTGCTGAGTGGAGGAATGGAAGGTTACGA  
TGAACCTTCTGTTGTGTCATATTGATAAAGATATGGATATGATGGAAGGTAATCACATGCG  
TTAGAGGCGTAACATCAATGGTAAAGACTTCCTAGCTGATTTCTACACGGTGAAGAAAGC  
AGCAGCTCTACGACACCTCTATCTCCAACCGCTTTTTGGTGGCCCGACTCATACTATTCT  
GGGCTATTATAAGTTCTCTGGTAAGAAATTAGTTTCTGGGATCAAGTGTCGATTGGAATC  
GCTGTCTACTGAATTGGATATGTGGTATAACGTCCGCCAAGTCTATGCTAAAGCAGGTAT  
GCTTGACGAGAACATCTTTATACAAATTGGTCGCTTGTCTTTGGATTCAACGTAAAGAAGG  
TGAAATCTGGAACCTCCTACGAACGTGTTACGGTACTAGCACTATCTGCCGAGTAGCTG  
CAGTACACTATAATCTATAAATTGGTAGCTCATAGAATTGTCAGACTAACCTACAATGAT  
ATGTATGCTGTAGCTCATGTACCTACAGCCCTATTTGAGTCTCTTGAATATGAAGACTTG  
GCAGCATATATCGCTGATAATCCGTTTACAGACCTTAAAGAAGCTTACGGAGTATTTAAA  
GATGCGTAACATTGAACACAAAAATCGTCAAAAAGCAAAAAGCAACTTTCCTAGAAAAAGA  
TCGTCGTCGCCAAAGTGTTGAGTACCATAGTGGCAAAGAGGAGGACAAACTGCGGGAAGA  
TTACGCCGCGTAAGTGTCGGGAGCCTAACGTTACGAGACCCGCCAGTCGGGTTTCCGTA  
GCGGATTCAAGCAAGACTTTGCTTAAAACCTGTCCAGTTCCTTATGAATATGAGACAGAGG  
AATTACCATATCCAGTTACGTTAACTAAGCATGAAATGCCTGCTTATGTCTTTATTAAGA  
AAGACGGAAGTAAGCTGTATCTGTAATTGAAGGGTCGTTGTAAGTGGTTATGGCCGTGTTA  
AAATGAAGCGTATCAAGAATTTTTACCCGACTTCAGATATTCAATTGGCGTTCCAGATGG  
GCACTAACCGGATTACTAAAGGTGCCAAAACAACGTATATCCAATGGTGGCCTAGAGAAG  
ATATCCTTGCATAGGATTGAAAGGGTAAACCAGCACACCTTCATACTGAGTGGTTAGATG

AGTTGAGTTGAGCGAGAATACTGAGCCAGATGCAGTACCTTGGACTGGTAAAGACCTTAA  
AGCTGCTTGGCAATTCACAATCAGAGTTAATTGTGTCCGTTTGTCTCCGGGATGAAGCACG  
AATCCTAATTTGACGTAACGGTAAGCCATTAGATAACTTTAAAAACGTAGGGGAGGAAAT  
CTCCGATGCAGAAATTTATTGTGGGAGTTGGGAAGAGTCTATATCTCACTGTTGCTCCTG  
TGGCACTGCAGTTGGCTCCGTTGATCCTGCTAATGTTTTTGTCTATTTCCTGTTGTTGT  
TAAACGTAAAGATTTAGGTATCGATATCAATACAACCTTCAGAGGAAATTAATACTGCATT  
GCGTCTTGTTTTAGCTGAGGTACACGAGGGTCTAGTTCCCCGTGAAATTAATGGCCAAGG  
TTAACTCTACTACGTGAAACCTAACGAGACTTACTATGTTAAAGTCATTGGTACGGTAGA  
AGGTACGGATAAACATAAAGGGCAGATTGGAGCACTACTTACTCCAATGGGTAACATTGG  
TACTGGATTCACTGATCAAGTACGTGAGTGGTGGTGGTGCACAATATGCAAGGTGTGAAAG  
TACACCACGTAAAATTATTAACCTTGAATGTTGGGAATTGACTAAATCTGGTCAGCTCCG  
TCACCCTCGCAACATTCGTTTACGGGAGGATAAATAATGGCCTTTGGACCTAAAGGAGTG  
GCTCCGGCTTACATAGCAATGAATGACATAAAATAGTACACACTTGGTGATGATAGGGCT  
GCATCTGAACGGAATAAGTCCATCATGTACAGTGTTCCCTCTTGATGATATATTTGTATTA  
CATTGCCTATCACAAGCTGCTTGTATGAAACCAAGAGATTTTATCGGAGTACTGGAAGAT  
GCAATTCTTCCAGTGATGGAGTCGACCACACAATTATGATTAATAACAACAAGCAAAAATG  
ATTACTTACCTTCAACAGTTCAAACATTACGTTATGGCATTATGAAAAAGATTTTGTGTTG  
ACAACGGTGATGAGAACGTCCAGCTTATGACGCTGGAAGAGTAGTTGTATGAGGTTCTCG  
AAGTGTTCCGGTGAGGGTCACAGTCACCAACACTGTCAGGAAGAAATCCGGTGATATGATTG  
TGGTCTTAAACAACCTGTGTGAACGCCCTGGTTACTCCCTTGCTGAATGTGCTAACACTG  
CATTCCAGAAGATTCACAAGCGCAAAGGTACGAGCATTAAATGGTGGTTTTGGTAAGGATG  
AGGATTTGAAGGAATGGGTAGTTCGTACTIONACTAGAACCGGAAATAAACTTGGATGGTAC  
AAACATCATCCTAACTACTCGAGTTATGGGAGCCGGTAAAACGGCTGCCCTAATTAACGC  
AGTAGCACAATTGGAAAAGAAAGGTCCGGCTGACTGTTTGATTATTAACCAGAGATGTA  
TGCTCGTGATGAGGGTGTACGTGCACGGGATCGACGCACTCGACCGTGTACCCCTATTGT  
AACCCAAGAAGAAGTTGTTCCGGGTAATTTCTTTGTCTGGCAGAATTGATTTTTTGTCTCGT  
TGATGAGGCACAATTCTGTAGTCCCGGGTTCAATTAAGCCAATCTGCATTGCAGCAAATCT  
CGACAACCTCCCAACGTAGCATTCTACAGTTTAAAGACTGATTATCTCGACACGACGTT  
TGAGTGATGGAAGGAGATTGCCAAGTACGTAAACCGGATGTATGAGTTACAACACAGTTG  
TGACATGCGTGGAATCAAATCCGGTACACAAAATGCGTATTTCTGGTGGTGATTCTTT  
GATTGCAGTTGGTACTGACAATTATCGAGCTGTTTCGTTCTGTATGTTGGAGTAAGGAGAA  
ACGCGTAAGATGTTTAAATGTGTACACTGTGCTGCGGAGCCTGAAGGTATTAATAATCGTA  
GACAGCCGAAGTGGTTGAGTGAGGTGATGACTATCTCATGCAAATCAAACGTTGTTCT  
GAATGCGGTGGTTGCTCCAAGGCTATCAGAGTAGATGAGGGTAGTAGCGATTATTTGCAA  
GAAGATCCTGATTGAGCACGCGCGCGTGCAACATCTGAGATTATTCCTGTTGTCCAAC  
CCTGTGCGATAAGCGCTGGGTAATGATTACATGACACAGCTTGAGAATGTCTTTCAAAA  
ACAACGAGAAGAAATTGAGATGCTTAGGGCGAGGATTAATGAGTACAATAGTGAGTGGCT  
GTTTACGAGTTATTGGTAGTAAAGTTGTCTCTAACCTACTAAGTAACAACGCGAATAATC  
ATGCCGACTGAATACACGTTATGCAGAAGTTACACACATCTCACGTAAGCAAGAGATATT  
ACTTACCCCTTACAGTGATGTATTGTCCAATATTTCCCAAACGATATGTCTTGCTTGTG  
TGGTATTAAGTGTGAAATCGATTATTCTCATGCCTGTAACCTCTCATTTCGATGCAGTACC  
AACTGACCAAGGCTTTACTTGACCTAACTGTGCCTGTCACGATAGCCGGTGGAAAGTTGAC  
TAAGCGAATCTGGGGTTATCGAGTTAATCCCACAGAACGCGGGTTCGATAAAGGGAAGCA  
GGAGGAGGTGATTTCGGAGAATTAACCTTGTGATTGGATTTATGGACAAGCTCGTCTTA  
TAGCCTCTCCGCTAGCTCTTTGAGCTGATAACATGGAACAAGTAGAGCATGATGCTTTCG  
CAGAAACCATGAAGGAGTTAGATAATGAGAGATGTAATTGGTATCGGAATCGCGGGCGGCC  
AATCCAGATAACGAGTTGGGGATTGACAAATGTAATTATGAATCGGTATTTATTCTTGGT  
TCCTACAAAGATGGTTACTTAGGTGGTCCGCCAGTACTAACCTAACACGCGAGAAAATC  
TTATAGTTGCCTGAGCCATTCAATCACCAATACGTCCTCAATAGCTCGAACGAGGTTGAG  
TGATGGGAGAGAAGTTGAGGGGAGTAGCATTCCGATTTAGGCCAGACTTCTCAGTAGATC  
TTGCTCTAGATATTATGGCTGATGCCGCAGGTGTAGCTATGGCCAGTCCCTACAGTCACCT  
CTGTTGGATTTACCGGACAGACCTTTAGCAAGGGGTGGGGTTTCAGTGAGGATTACTATC  
TCTTATACAACTGTAAAGAAGATGGTTGGTATATGAAGCACCTTGTAGCAGTTGACAGAA  
TGGGTTGAGATGTGTTTGAAGTAGTAGCTATGGAAAACACCACGAGAAGAACCAGTGT  
GGAGTTATCTATGATTGTTTTTCTTGGAAATGAAGTACTCTCTGGAGATGAGGTTAGTTGC  
TATGGAGCGTCTTGGCGAACGTTCCCTAGGAACTAATCAGAGGATTGGTTATTAAGATTAC  
TCCTAAGAGAGTTGAGTTGTATCAACTCCGTATCGGAGAAAGGGTAATTGATATTAGTAC

AATCAATAGTGTGAAAGTAAAGCAAGTAGAACATGAAAGAGTGGTTAAAGTGACTACAGA  
TAAAATTGAAATAGTGTGATCAACGCTCTCTATCTACTGAATATGCTATTCCAAT

>NewGenomeName\_74

ATGTAAC TTTCACTCAAACAACACTTCAGTAAACCAGACTACGATTACTACAAATATAAC  
GGAAAGGTACGTGCGAAAAAAGTCATGTGAGCACAGGGAAGACCGTTATTTTTTTACT  
GAGTTAGCGACAAAACATACAGGAGATAAACTCTGAACTAATTTTGTGCGCTAATTTTGTG  
TACAATCCTAAAGGATATCTCAGATCACTTAGTGAGGATACCTATAATAAATGGAGAATA  
CATCAAGAGTCCTTCCCTTATAAATTTAAACAAGAGGTAATTCTTTTACTCGATGATTAT  
GAGTGTCCATAGCAGGAAGCAGTTTAAAGAATGTTTCATAGTCACGTCTGGTCCGCATCCA  
AAAACATGAGAGAATATCTATCTGGAGAGGTCTCATTAGTAACATTGCTTGTATTTGAA  
ACATGTTTAGGGTTGATTTAAAATTTTGATAAACTTTGTCAGATCCTATCTGGAAAAAT  
ACCTGAATGAAGGTCGTGACGTATAAACTATTTCTAGGATTAATTTCCAACAGTATAAG  
TCGGTAATCTTAGATACTATTA AAAACAAGTTATGAGTAGATTTTTTCGCGTACCAACAAG  
TCCAATAAGATCTAAAATCAATCTTTAATTTTATAAAGACTTTTCAGCAGAGACAGTAC  
GTATACGAATCATGGATAAAGAAGGGAACTAGAACACATTGAAGATTGTA AACCCTTA  
TTGATAAACAAAAGAATTTCTATACAAGGTTGCGTCTAGCATCTAAAGAAGATAAAGAAG  
CAGCAGACATGAAGAACCGAGCCAATGCTTTAACTAGTGCGTTTGGATATGAGGACCTTA  
TCGAGTGTATGGGTGCAATGGTTGCTACACGAGAGGCAGCAGCAAAGAGGGATGATCTAT  
GAAAATTATTATGATATCTGCTGCACTCAAGATAGAATTA AAAAGATCTTATCATTGAGGT  
TTTAGATGAGAGAGA ACTTCATAAAAATACTAGACGGTCTTACGACGTTCCAGAAGATAC  
GGATTGGCAACCAGATGATGATGGTCTTGATTAAGAAGTAAATTA CTAGGGATAAGAAGT  
TAAAAGATTTGATAGAGAAATGGAAGAAGCGTTTACGTTTCCCAA ACTGCCACCACCAC  
GAAGTTGCCCGCTTGACAACACCTATATACTATGCTACGACTACACAGTAGTATACAAA  
CAACTTACACACTAAAACGGAGAATACGATTATGTCTTTCGCATCACTTAAGAAAGCATC  
CAGCACTAGAAATACTTTTCCTAGATTGACTAAGGTGATTGAGAAACCGAACCAACCAGC  
TCATGGTAACAATGGCGCAGACGAGCGTCTTTGGAAACCAGAATTGGACAAGACAGGTAA  
CGGTTCTGCTGTTATTAGATTCTTGCCCGCATCTGATGGAGAGGAACTTCCTATCGCTAA  
CACCTGGTGT CATGCCTTCAA ACTTTTTGGTGGTTTATGGAATATTGAAA ACTCTTTGCC  
ACCTCTTGGTAAACAAGGGCCTGTTTCAGAATATAGTGCTGAAGTCTGGTACGCTGCAGG  
TGAGGGTTCTTCTGAACGTGCACGCACCCGAGCACAGAAGAGAAA ACTTTTTACTCCTC  
TAACATTTACGTTGTGAGTGATCCTGCACACCCTGAGAATGAGGGTAAGGTATTCCTATA  
CAGATACGGTAAAAAGATTTTTGATAAACTCGTTGAAGCAATGCCACCTCCATTTGCAGA  
CGAGACTCCAATCGATCCTTTCAATTTCTGGAAGGGTGCTGACTTCAAATTGAAGATCCG  
GAAGGTCATTGGTTACTGGA ACTGTAATAAGTCTTAATTTGCCCCACCTAATACACTAGG  
TGAATATGATGACAAACGTCTAGAACA AATTAAGAAAGAGGCGTACTCTCTTGCTGAGTT  
TGTAGTCGCTAAGAACTTTAAGTCTTATGAACGACTTAAGGGACGTCGTTGTTTAGTCTT  
GGGTAACACTGCTCCAGTAGCACGTCCTAATGAATCTGTTGAAGATGTTAAACCTCAGAC  
TCCAGATTGCGGAGCAGAAGTTAAA AATTTTCGTGAAAAAGCAGTTGCCTCTGGTCCTGC  
CGAGGATGACGTA AATCTTTACTACTTTGCAAACTTGCTGAAGAGGACTGATTATAAAC  
TGGCACAAGGAGGGTTGTAATGACCCTTCTTTTCTAGTATAATTA AAAACATACACAAGGT  
ATACAATGAAA ACTGCCCTCGCTGCAATCAGTTTACTTG CATCTGTCTCTGTAAATGCTG  
AATGCATTGGCGACAGGAGGTATCCTCAAGCGTAAGAATCCTCTAGAGGATATGCATACG  
AACAAAATTGCTATAGTTATGAATCTCGGGAAGAGTACGTACCTGGCTCTTCTAGATCGC  
CTGGTTACGTCACA ACTTCCCGAGCAAAGATTGCAACGCCATCTTTCTATGGTGATCATA  
GCAGATCTTCAACTGCCCTTCAAGAGTTTACATAACTCCGTCAGCTGATGGTAATGAGT  
GTAGCGAAGGGGCAAGTCTTGGAGCAATCATCGTAGGAGGTGCAGGTGCAGCATGATCAC  
ACGGGGATGGTCGTTGGTGGGCAATACCTTTGGGAATTGTCGGTGAATGTAAGATCAGTT  
GTGATGTTGATGTAGCTTAGTGATGTCAAAA ACTCAA ACTCCTCGAAGCAAAGAAGATGT  
CCAAGCTATGATTGACTTTGCTATAAACAGACACAATCGTAATGCAGGACTCATCAATAT  
GGTCTTAGGATTTCTAATCATCGCACTCTTAGCATAGGGATTCTGTGGAGTTATCGGAGA  
GATACCTCCACTTATGGGTATCGATGCTGATACAATCTAAGGGATAATGGAAAGAACACA  
GGAGGAAGCATTAAAAGCACTTTCAAGTTCATGAACAACATAGGATTAGAAATTGTCTTC  
TGAGAAATATTGTCAGTTGATTTACTAGCAAAAACGGAGTCTTTAAGAATAAATGAAAG  
ATGTAGCATTAGTAATATACTTGATTTTATTTGTTGTGTCATTCGCAGCAACCTTTGCAT  
ACGTGTTTATGTT CATGGGTTCTACGTTGGATTCTTTTACCAAGGCATCAATTGGACATC  
CCGAGTTGCCAGGTGTTAGAGAAGGCGAACAGTTGTTAGGAGGTACTTTCAAGGGATATG  
AAGA ACTATCACTAGATGAAGTAGAAAAATATCCAGTAACTGCACAAAGAGACCATGAGT

CCATGGAACTCTATCCCGATCTACAAGATCGTACGGATGAACTTGATGATGAAGACGGTG  
ATGGTGATGACGATGGTGATATCCCTGCTAAACCGTACGTCGGTTCTGGTATCTGAAATT  
GACTATTAGTTCCCGTGAAACGGCAAAAACTTTCCGCCAAAAAGTTGACCCCTTTAGCT  
TTTTATGAGTGACATACGTTATACAAAAGACCGAGTGTCCCGAAACAAACATGGTGTTAT  
TATTTATGACATACAAGTAGAGGAATCTAACGCTACTGACTTAGTTGTTTCATGAATGTCC  
TGCTGAATCTCCTCCACCTGAGTGTGTACGAGGGAAACGATTCTATATACATTCCTTTCA  
GGATTATTAACAGACTTGTATCAGGCACAAGAATGTCTGAATTAGTTAATTTTGATTG  
GAGATTCACCTATCATCTAGTGCACCTTGATGTGCATAGTGGTAGATCAAGTATTCCTCG  
TGGAACATTCATAGATCTCTATCAGGAGAACATGGATCTATTGTACTCAATCAAGCAA  
GAGATACAATGGATTTGATGCTAGTGCAGAGTTCTATCCTGCATCTTGTGCAGAGAACGT  
CCAACACTACATAATGTATTCAAGAATGAGAAACCAGGAATACATCGCATAGGAGAATGACT  
CAAACCTGATCACATGTATCTTCAAGAAAACTCCTCTTTAAAAATTTGACAAGAGAGGAA  
TTTACATTTAAATGGGTCAAACCTCTATACCTCCTATTGGAAAGATAACATAACGTATTCT  
ATATGTTATGATGAAGCACGTGCTCTAGAACCCTCTTTTTAATTATGATTTAATTTTTAC  
TTACTAGTGCAGCATTTCGTAACGTTGCATTTTATATCTATGCAATCGGATTTGTAGTGG  
CACTCGACTTAGAGCATTATCTCAAGGTCAGACCCATGTCTGCTGACTCATCGATGAATG  
AGATCAATGATTATATAGTGCAGACTAATAGAGATTAATGTTGGCGACAAGGATCGGTAA  
TAAAGCTTTTTTGGTTCGTATGTAATATAGCATTGTTTGTATATCAACGAACATGCAA  
CACCTCAAGATACTTTCTAGAACGGCAAATGAAGAGGGAATCAAAACAAAGGGAGTATGT  
TAAGGATAGAATGGAATACTTCCGAGTGTTCACGAGTCAGTGCACGAGCAGTTGTAAT  
GAAACTGTAGGGTAAAGTTGAATAAAATTTTTGCAACTTGTCTTATTTCGATCAGTTGCCT  
GGCGCACTGCAGCGCAAGCTTGTAGTCTCGTTTGGATGCGAGAGAACTTATTGCCCTT  
CAATTGATGAAGGATGGTTACCATATCAAGACATGAAGAGTGAACCTTGATTTTTACGTTA  
CTATTCACTGGACAGCTATTTAAGGTAAGTTTATCAGAAACCAAAGATGAGAGCAGATAG  
AAGGCAATGCTACTCATTCTACTGACGCAATAGATAAGCTATTATTTCGATTTTTGGAAAG  
AGGACGGAGTATGAAAGACGAGCGGAAGATCCGTGCTGGCAGCATAAACAAAAGTGTAAC  
GCAATGTTCACCCACGATTAACACAGCACTAGCTACTTATATGGTAGAGTCGATGGAACA  
TATTACTGGCAGCATTGTAGAAATGGAGCGGAGGACGACCTCTTCGTAGATGCTGATGGG  
TTGCAACTAGAACTTCTACGTGACCCTGTGCTATCTAGAGAATTTATTTTTAAAGCGACA  
TTTTACCAATATCCGCCACCATATCCAGGTCAAGAAGAGGCGCTAAAACCTAAACGGGAA  
CTGCTAAGGCTAGAGGAGGAACTAGAAGAAGAACTACTACTGGAACCTCGAACTGGTTGAA  
CTGGTCAACTGGTGGATGAGTATGCTGGTTGGTTACTGACATCGGCCACGTTGCTAGTG  
GTGGTTGTAGTAATTCTTGCTGATGTTGTCGAACTCATTACACCTCGGGTTGCACTCGTG  
GCAGAAGGTCGGTTATCGAATGATCTCACTGCAGTATTAACCTGAAGATGAAGAAGCACTA  
CCACAAAGATAACCAACACCATCAAAGCAGCTAGAAGCAATACTGAGAGGTGACTTCTTA  
TTATTTACATCATCTAATTATGAATGAGGAGCGTACGCAATAAGAGTTTCAAACCTTTGA  
CTCATTCTATCTACCATTCTCTGTTGGGAACTTGAATTCTTCTTTTTAATTCATTTAAG  
TAATGCTCATGCTCACAATTAGATACTGGATATATTGAATCGCTCTCACCTTTTGTAGTT  
CCGTCTGGTAAAACCTGTTCTGTAAGTTGAATTCACCTGAATTCCTTCTTTGACTAAGACT  
CTTTCATTGTATAAAACATCTTTTGTTCATAGTGATGCAAACTTCTGGATCGCCATAC  
TTTTTAACAACCATATCTTGTACATCTCCTTCACTTCTTGGCCCCTGCACAAAAAATCA  
GGAATATTGTGTACCATTAATACAACCCAATCTAAAAATGGATCTTCTAAATCTACTTCG  
GCATTCATTGAGAGAGTTTCGCCTTCTACTGACGAATATGATACAGAGAAGGTTGTAAT  
TTCTCTAGGCCTTCTATAACTATAATTCTACATCATATATTTTTTGCTAAACGATATTTG  
AAGCGTTCGTCATTCTTGTACCCTCGACAACATATACGTTTGGTAGAATAATAAAATAT  
GCCATTGGTATCCGTTTATGATGTCTGATTGACTGAGGAGACGAACTCAGTAAATTGTA  
CTTGTAGCTCAACAGCAAGAACCTGAATCTTGCTCCCGTCATTTCTTTTTATTGAAGTAG  
ACTGATTGTCTGGTGTGTAATTAAGATAACCCAGAGCATAACATGTATCCTGTATAA  
AATGTAACACATGTTAGTTTCATGTGCAGCAGTGCTAGAAGTGCCTAATGGAACACTAA  
ATTCACCTGACGTCGGCGGCATTCTCATAAATGCCAGTTCATATTGCTCACGAATACCAA  
AAAATCTCTACCCTGACATCACACCACCATCATCTCTGACAAAATTTTTTAAATGATTCG  
TCGTTTGATCCTTGTACCTGTAGTATTTTCAACTTTTTTAGAATCTTTTATATCTGTTA  
ACTTTAATAAATCACTTTCTTGACTTACATTGGCACCTACCTTATGGTGAGCACCAGCCG  
TTACATATTGAATTACTTATCTGACTTCTTGTGCTTCTTTTTAGTTTCTTGCAAACATTT  
AAAAGGGAAATGAATGTTTTCAAAAATTCATTTGACTAAATATTTGCTCAACATAAGGCT  
TGAATACTTTCCCTTCTGTTAAACCTGTTAGAGACTTCATGTTTAAATTCCTCGTACGC  
CTAGGAAACCTGATAAAGCATTAGCACCTGATGCAATAGGAGAAGCAAAAACTCTGGAA

GCACAGCGCTTCCAGCGTCATTAACCTGAACCTGCCACGTTGTCAAGAAATGTTCCACTTT  
GAATTGCATTGATCGCAGCCGCACCCCAATACCCAAAATTGTCTGATTATATACTGGTC  
AGTGCTGAGCATTAAACACCAACAGGAATCGCAAGATATGCTGTTGAAGAATGTAAGTTTG  
TTCTACCTAAGTTTCTAGGATAATTAATTTTGCCCGTAAGAATCTTATCCTCCATCATGAT  
ATATAGTTTTCTTTCTACGAATTCTTAGGGAAGCTGTCTTTCCAGCAATACCATCAACTG  
AATCTGCATTGAAGTCTGACTCCATTACAGGGCGGCTGTAATGGATAACATAGGGTTGATT  
TACCGTAATCTCCGCCGTCAAAAAAGTCATTTGCCAAGTTTTCTGCCTGTATACTAACAT  
GGTCTCTATGTATTTATGAGGTATCGTGGAATAAATCGACCAAACGTTCCAAGAAAGTAT  
AAAGGTGACCCCAATAACCTTATTTATAGATCGTCGGGGGAGTATAAGTTCATGAAATGA  
TGTGATATAACCTCCACGGTTCAAGAATGGGGTAGTGATGAGATTATTATCCCTATATT  
TTCCCTGTTGATGGTAAAAGGCACAGATACTTCCCAGATTTCTATGTAATGCTAGAAGTT  
AGGACGTATTTGGTTGAAGTGTAACCCTTGAAACAAATATAAAAACTAAAACTCAGAAA  
CGAGTGACAAAACGTTATATTAATGAAGTCGTGACTTGGAGTGCAACCAAGCAAAAAGGG  
AACGCAGCTGCGGAGTTTTGTAAAGATCAAACTGGGAATTCATGTTGTTCCACCGGAAAG  
GAACTTAAAGTATAATGGCAATCCGTAACACAGAACAGGCACAGTAGCCTTCATATAAAG  
AGTTCCTAGCGTTCTCGAAGAACGGAGATAACCATTGAGCTTTACTGACCTGATCTCGG  
TTTATTCTCCTGCAACTAGATTTTTAGAAAGTAATTTGGGACCTTCAGTAGCAGGAAGTA  
AAACAAAAGATTCCAACCAGAGACTCCTCAACTCCGCATTCTCTTAAATTGCTATGCGA  
ATTCTATAAACCTTCCCAGTAAACAGGCTACTACTGGTTCTTTCTAAGTGTAGGAACAG  
CATTTAAGTATGCGACTGATCAAGCGTAAAGTCAGATGACTATATCTTTCATTATGCCAC  
GATCCCATACTATAGCATTTTTTTGAAGTGTGGACCACAAGATCTTCCGCTCAGTCAA  
ATCAATATGTAGAAAGTTATGATGATTATGTTTGTGGATCACTTAGATTATATAAATGGG  
CGAGAGTTGGAGGAAAAGAGGTAGTGCAAGATGAGAAAATGATCAAAGCATTGGAGGATT  
CAGGTGATCCTTATCTAATTGCAAAAACACTATAGAGTCACCGCGGTATGGGAGAAGAGAA  
ATGTATTTCCCTTTAACATTGGATCAATTCATAAAAACAATGACACCTCTAGAGCAATGA  
CTCTGTCAGTTGGACTCTTATAGGCACACTATCGTCTTACAGTTGCGGATGACTTCAGTG  
ATCATGGAACATATCAGTTTCTGTAAAAGTAATCCATTTACAACAAATATTCCTGAAC  
TTGATAGGTATAATAGTGCAGTCTTCTAAAACCAAATCGACTCTTAGTTCCCAGATAAC  
CGCAAAAACAATCCCGCCAAATATTTGACCCCAAGGGTTTTTGCCTAAATAACAATACTG  
AATTGGACTACTATGGAATTACCTACGTTAAATGTACCAAAGAACAACACTGAAACTACCG  
ACAGATGGTAGTACGGTGAATTATAGACCATTTCGTCGTTAAAGAAGAGAAGCTTTTACTT  
CTCGCAACTCAATCTCAAGACCAAGAAGAGTTAATTGTTGCTATTAAGTTATCATTGCT  
GCTAGCACAGATGTGCGGGATATTGATAACTAGGCAACTTTTGACATTGGATACATTTCC  
GTACAGATCAGAATAAATCCGTTGTTGACACTGTAAAGCTCTCTGTGATCTGCCAGAT  
GATGGTGAAACGACTGTTGAAGTAGATATTTCTTTTCGATGAAATCAAAGTCAAAAAGACT  
AGAGGTCCCAAACTGCTCTTCGAATTACACATGAAGTCACGGTCACTATGGGGTAACCA  
AGCTTAGATACTTTTGTTAATATGAACCTTTGTTGGTGGTACTGACGTGGGTGTTGAT  
CAAGTCTTTGAAATGGTAGGAAGTTGTATCAAGACAATTTCTGATCCAGTACAATTTTAT  
GACTGTCAGGACGTACCTAAAAAAGAAATTCCAGCCTTCTTTGAAGGTATGGACACTAAA  
CTGTTTCAAATGGTTCAAGACTTTTTTTGAAACTATGCCGAAACAACACTCACTCCGTTAAG  
GTTACGAATCCAAACACAGGTGTTGAGAGTAATGTAATTTCTGGAGGGATTAGCAAGTTTT  
TGCGAATAGCCTTAATGCAGATGCACTTGACGACATATTATGAGAGCAATTTTGCGTTAA  
TTCACCATCACAAAGTGAATAGTGAATATATTGACAATCTCATGCCATGGGAAGAGGAAG  
TCTATATGAATCTTCTAATTAACCTTCTTAAAAGACGAAAGAAGACGTGTGAAGGAGCAAA  
AGGCGCAAGGTGGCTAAGATAACAAGTCTACAACCTTATTTATCCTGGATTGGCGACTATC  
AAAACCTCAATCGGTTGTTGCTGCGAGACAGACTATTCTTGCTCAAAAATAGTCTTGGTAAG  
TCATTAGAGGGCGTTGGACATAACAGTCCTTGAATTCGAAAAAATCTCCTACTTGGGTCTA  
GGATTACAAAAGAAGACGGATGAAGCGGAAAAAAGACAGGACCAGAGAGAAAGAGATGCT  
GAAGCTGAAGAGTTGACAGACAAAGGTTTATCAAAAATATTTCAATAAAAACGGAAATGTA  
GCTAAAAAATTTAAACCAGATAATAATCCCAAGAGTGCCTTTAGTAAAATGCTTGGGTGG  
GTAGGTCATCTGATATCTCCATTTGTAGATCTAGCAAGAAAAAATATTTGGTTTGTCTTA  
ATTGAAGAATTATTAGAGTATACTGCAGATGAAGTAACTTAAAAAAGAAGCGACCTTC  
CTAATGCAGACAACTTTGTCTTTTGGAAAGATATATGGCTTTCGTAAATGGTTAATTAAG  
GATACTATTGTAGATGGTATTGTCCAATTTTGGTGATGAAACAACATTATTAGGTAGA  
CTAGGTGATATCGGTAAGTTTATGACAGGTATCATTGGGTTGAAATAACTGATGAACCCA  
TTCAGTAGTATTGCTGATATTATCTTTCTAGCAAATCTTATTAGTGCCACTAGATCTTT  
CCAGGTAACGGTGGATCTTTACCGAATATTAATCTTACAGACCTAATTTAAAAGATAAT



AAGGTTAACTTGAGAAGGACAATAAGCGCTGGGAAACGGATGAAACCTGGTCCTCTCAGT  
GGAGTAAGAGAGTGGCTTAGAAAATTCGGGACGACTGCAGGTAATTAATTACTCAAAGC  
ACTAAGACAGGTAAAAACCTTCTTCAAAGACTTACAGATAGGGAAAAGAGAGTTGTTAGA  
CCCAGCGAAGTTTCTCTATCAGGCACTGGTAATATTTTTACAAGAGCAGTTGATAGTATA  
ACGAGTAAATTTACATAAACTAAGGTTTCAGGGAATGTAAAACCGAATCTCAATTTGAAG  
GTAAAACCAAACAATATTAACAACCCAAAACCTATTAAGGTAATACCTAAAGCGGGTGA  
GGACCACTGGGCACCCTGTGAGCGATTGATCTTGATATAGGAAGTCAACCGGGATTTGGT  
TTTATAGAACAGGAAAACCTCTCAAATACCTCATAAAGTTTGTAGCAATGAGTAGGGAG  
GAACAATTAAGAAATTCAAATGAGAACAATAAAGAGACTATGCTAAATCAAAAACCT  
TCTGGTGACTACGGTGTTTTTCAAGAAGTTTTACTGGAGGTGGATGGTTAGCAACGAAT  
TAGGATAGACAAACGTTGGAGAGGGAGACTAATTCTCTGAACGCAATACATTAGCTAATG  
GGAAGTGTGACAGTTCTGCTATGAATATTCACGAGTATAATTAGTTCTATGAAAACATA  
AAACCTGAGAACAAGGATACTACTAAATTTGATGATCTGAATCCAGAAAATGATAAAAAA  
TGGTGAACCCAACAACATGGTCTAAAGCAGATGGTGGTAACTTACCAGAGTTCTTTCTC  
GGTGGTTTATTTAGAGCTGGTAAAAATGTAGTGTGTGGTGTAGTTGACACTGTTACTAGC  
GTTGCAAAGACTGTATGGAATGGTCTTAGTAAAGTTGCTTCAAACCCAATTATATCTACT  
CTAGCGTCAATCATTATGGTGATAACATTATCGTATCTGCTATCTACGCAGTAAATGCA  
CGTAGTTCTGGTGATATCATGGGTACTGCAATGAATGCACTTGGGGGTAACACTAATTTT  
GGTAATATGACTACAGTTAATGCTAACAATCAGCCTACATGGATCCAAAACCTGAGATTG  
AGTATGATTGGACAAAGTGTCTCAAACATGTATCATGGTGCCTCAAGGCAGTATCCAAC  
ATTAGTAGTAGAATTAAGGGTTTCTTTGATATGGCAGGAAATAGCACGATTGGTAAGATT  
GGTATGCAAGTTTTTAATGGTCATACTTGTGGTGCTATTGGAACCTATAGTAGGGCAAATG  
TCTAGTTTATCCCGAGGGATTGAGAATTTTGGTAATAGGTTAAAGAAAAATAAATTAGAG  
CGTATCTTAGGAGCAGTTCCTGGTCTTGGAGGTTAAGCAACTAAAGTTCCTAATATATTG  
TTAATTCAGGCATGGAATCTATCCTAGATAAACCAAGCGAGGGTTTGTAGTGCCTTAGGT  
GCTATTGGTAATATTGCTGACAAAGTAGGTATCAATGGTGTATATCAAGCTATCATGAGT  
GGTGTTCAAACTGGAACTTTATTGAAGGATTACCAGAAGCTTGGTGCAGATATAGGCGTA  
CATCCGAGAGTTTTAGGTGTACTCGACTGAGGACGGGATTTATTACAGAATAATCAGTTC  
GATACAGAGTATGCAATGCAGACGGCTAATGAATTTATACCTGTTCCGATGCTCGTAGAA  
AATATCGTTGTAGCACCTACTCCTGTGCCAATAAATAGCGGTGATACCCACTGAGAAGCA  
CCATCCTCTACAACCTAACAGATAATGGCAACAGATAAAAAAGGTGCGAAACTCGATTTTT  
ATAAGTTTGTGACCCTAAACCGGTAGCAAGCACTACATCTGGAGCTAATGCCAAAGGAG  
GGAATTGAGAATTGACTACTGTTATGAAGCAAAATACAAGAGCAATTAATGGTATGGGTA  
GAGTTGTGACTGCTATTGGCAGCACTATAGTTTCTATCACAGACGTGCAGATGAGGTTGA  
TGTAGATAGATGAAGAGAGATGTAAGACACCATCATTCCATACCCAAATATACGAAAATAC  
AACCTCCTCGTAAAATGGAAGCATTGTTAGTTTATTTAAGGGGAAAATACCAGGTTTCT  
TTCAATCACTTGCAAAAAGCGCAAGTGCCTCGGTAAAGTTTGTCTTAGATCTTCCCTGCTC  
TTAAGTGCTTATCTAATCCTGAGAACCAAGCTTAGGTTGTTAAAGGAGTCGAAGTTCTTG  
CTACAGTTTTTAAATTTATTGCATCTGTTCCCTACCTTTGCCTTTGTTAATTCTATAGAAG  
GCCTGTACGATCTTTTAAAAGAAGATGCTACATGGATGGGCAGAATGGGTGGTTTTACGA  
GCGCACTTGCAGGATTGCGAACCCCACTTGGCATTAAACGTGTTTTACAATCCAAAAG  
GGGCTATCACAACCTTATCAAGCGTGCTATTATTCTTTACCAGGGTCTCCTTGCTGCCT  
TTTCCAAACTTGCTACCCATCCTTTGATTACAGGTGCAGCACGGTTTCTTCTTACAAAAT  
ATTCTGATCAAATTCCTGGTTTAGTCAATAACAATGAGGAAGCGATTGCAGAGGGTTTAG  
AAACAACAACAATTGAATCTGGTGATACCATCATTGCAGAATCTGAGGAAAAAGCACAAA  
GAATCGCAGACCTTAAAAACAATAAAGATCTTTCCCTCATTATAGGTAGGTTGGTA  
AAGGAAAAGGAATTGAAGAGTTAAGTTATCACTTAGAAAATGGTAAAACCTAAAAGTTATG  
GATTTTTTTGAAAATGGAGGTTATCTAGATGGTTTTGCTAAGGGTGGTTGGATCTCTGGAC  
CTCAGTCAGGGTATCCTGTGTCATTAGATGGTTATAAACCTGATTATATTGGACTTGGAA  
CTGATTATGCTGCACAGAAGTCGGATGGGGGTGCATTCAATTGTTCCGTTTGATACTCGTG  
CAGCTAAAGAGGATCCTGATCTAACATCTCGAAGAATGACTGAAGCAACACTACTAGGAT  
TTTTTGAAGAAGGTGGTGGGTGCGATTAGTTTGCTAAGAGAATGATTAAGATTCAGTAGG  
GTGTCAGACCAACAGCAATACCTGAACCTAATGGGGGAATGTCAAGTGGCTATGGTCATT  
ATACTAAACCTTCTGATAATTGCCCTCCCACTATTAGTAGAGCGTTTGCAAAGCAACTGT  
TCAAACAAGATCATAAAGATCATGAAAACGCTGCTACGAAAAACCTGGTTTCGGCAAAT  
CTGGTCTCTACAAACAGCAGCATTGGTTGATCTCACCTATAGTCAAGGTGCAGGTTGGC  
ATACAGGAATCCCCAGGTTTCATGGCAGGGTTCAACAAATGTGAATGTGATATCGCAGGTTG

ATGAATTA AAAAGATAGTCTTTGGTTCGAATAGAGTTGGATGTAGAGGACCTACTATTGTCA  
ATTTGATGAACAATAAAGGTTTGGGAGACGGTATGGGACAATACCTTTTAGAGATAGGTT  
TAGTAGTCCCTATGGACGAGTCGAAATCAAGTAAAGGATTTGATTGGACATTTGGATTTCG  
CACACATTTTTGGTGGAGCACTTGTGCAGCTGCAAAATTAGATTCTAATATCAATGAGA  
ATAGACTTGATGGTTTGGAGACTATTACTAAAGGTGATTCATCTAGAGACGTGCCTAGTC  
CACATGCAGATACAGGTCCTAGATGGGGTATCGAGGGAGTTACCTATAAATTTGCTCGTG  
CTTTGGTATTCTCCCCACCTGCTGCTGAAATGTTTGCTAAGATGATGCAAGCATCAAATG  
GAATGGTCAAAGGACCTGATGTTGCAAGCAGGGGTAGATCACCATCAAAAAATAAAGAAG  
TTGACGGTCAACAACACTCAGTTCATTGATAGGGAGAAGGTATAAACATGTCTGGTTCTT  
CAAATGCATGGATGAAAAACAATGCTTCTAGATTTGGCTGGAGTTCTGGATACAGTCACT  
GACCTCGGAGTGGTCACTATGATTATGAGGGTGAAGGTGCAGGTAAGACTCCGATCTTAG  
GAACAGCTAGATCTCCTTCATATTGGTTCATGGATTTACAGAAAGAAAACGCAGGAAGTA  
AATTACTAGATCCAGGTAGACTATCTAGATTAAGTTTATATGGTAATAATAATGATCAGC  
CAGGTTCTGGAAGACCTTTTCTGACATGTTCTCGGAATGAACATTTGGTAATATGGGAG  
ATTTCTTCAACAACCAAGGGTATCAACCAAACCTTATTGAATTCTCAGAATAGAGCGAGGT  
TTGCACATTATAAGAGTGAACAAATCAGAGCTAAGAAAGTTACTGAACAGAGAAACCAAG  
CAAGAGGAGAAATCAATGCACAGGCTTCGGAGATTGTGCAGATGGCGTTTGCTGATGGTG  
AAGTGCAAAATCGTTCCAATAGGCAATTCATTTGACGGCTGAGTCGCCGATTAGGAGTT  
TATTAGGAGCTCCAGAAGGTGGAGGTACGGTCGCTCATGTTGGTGGAACAACAGGAACAG  
TATTACGGACTTCTGTTCTTACTTCAATTAATAATCCTTTAAGAGGAATTTTCC  
AATGAGTAAAAATTTCTTCTAAATAAGGGACATTAGTTAGAGGACAGCCGGGTGAGATTGA  
GGTGACTCTATCCATTTCCACAAATGGCAAAAGGGTGGAAACTCCAGATGGAGCATATGA  
TTTAGTTACATTTTTAAGAGGTTTTGAAATTTATAAAAGTATTGCAAACCCCTGCATGGA  
GTGCCGTATTAGTTTAGAAGATGCAGGAGGACTTATAGGATCTTTAACAGGAAATGAGAC  
ATTTACTATTCAAGTTAGACCCTCTATCAGATATAGAATTTACAATTTAGATCCTAGCA  
AATTCGATCAAAAAATAAGGACTAGACAACTAATGAATCTTTTTGAATTCAGTGTGTTT  
TGATGAATATCTAATCAACGAACTACAACGTATTTGGTAATTCTGAACACATTTTCAA  
GAATGAAACAGAAGCTGGTGCTATCATAAAATAATTATTAGGGAAAGAATTTTTAAAACC  
TGAGAAAAAATTATATATTGAAAATACTATTAACACACTATCTTTTATATCTGCGAACTG  
GCGAGTATTTGATTTAATTTATTGGATTTACAAAAGTAGTATTCCGAAATCCAGTAAAAA  
GGGTCTTATGTACAACGGGGTTGCTTTTTTTGAAAATGCACTTGGATTTGATTTTAAAAC  
AATTGACTCTATGATTGAGGATAATGTTAATCAAGAAGAAACATCTGAGAGATATAGATC  
ATCAAGTAAAACAAGACTATACCCATATCATTACACACCTAAAGGAACGGGTGAAGCAGC  
TGTTGATCAATTTAATGTGGATCTTAGAGCATTTCCTCATGAGAAAAACTTTTTGATTGG  
TTTAAGACTTGGTTCTTGGTCAGGGTATAGTGTTTCGTTTTGATCCTGTATTCATCACCAG  
ATCTAAAATGGGAACTAGCACAGATTTATATGCAGACGCTTGTCGCTATTCGTACGCTGA  
ATTATAGACAAGAATGGCACATTTGAACGGTGGGAATGCTGTTAATTTCCAGCAGAAATT  
TGATTATTTCTCTAAAAATGCTGCTAAATTTCTAAACGAGTTAGATACTCAATGCTTCC  
TAATCAAATTTTTGATGCTAGGTGTCAAACAAACCGCAAAGAAATTATGACGAGTTAGT  
TGAATTACCAGCATGTCAATGGATGCGTATTGAATCATTACAACAAAATCAACTCACTAT  
CATCTTTCCTGGCAATTGTGATTTATATGTCGGTTCGGGGGTTAACTTAAATATGCCTTC  
GACTAATCAAGAGGGTGACACACCTGAAAGAGATCCTAAGTATAATGGTTGATGATTGAT  
TGCTGCAGTAACACATAAGGCAGTAGGTTTAGACTTTCAAACAGTACTTGCTCTAAGGAA  
AGACTCGGATATGCCGAATCTCTCACAAAACCAAGAGGAAGGCATAGCATAACTTGACAT  
CCACACTCACATTTTTTATAATATAAGTATATAAATTATGTATCAACGGGGTACACAAA  
TGGACACTATAGAACAACACATAAAAAAAGATAAAGATCTAATCGGAAATCCTCTCACAT  
CACCTTCCGCTCGTAGACAGTTTATACAAGA ACTACACGAACTAGAAGAGTATATAGAGC  
ATCACAAAACCTGGAATTGAAGCAGGAGATCATCACGATCTAAAAGAAATTGTACTATATT  
GTGATGAAAGCCCAGAAGAACCAGAATGCCTAGTTTATGACGATTAATTATGACAGCTAA  
TAAACAGGAGTTTTTACTTTTCTTATAGTGATATGAACTCAAAGATTTTCATTTGTAT  
ATGGGAGAAGAAAGTTCCAGATGAATTATGTGATAGAACCGTAGATTATATTGAGTCTCA  
ACCAGTCGATAAAAAATATTGGTAATGATAACGCATTGAGAACCGATCGAAGTACGTTTCT  
TATCGAAATTAAGCCCAGCATAACGCCCGGCTTAGACA ACTTGACAATTGCCTAACCCC  
TGCAGCATCAAAATATGCAAATACATGGGGCGTTTTGAAAGGGTGCCTTTTTAACGAACAG  
TGAGATTA AATTACAAAAACATTGTCTTGTGTCAGCGATATCATGTTTTCGATTCTGAAAG  
AAATGGAATGTCATCTGTAATAATAGAATTGGGATGGACTATCTGCTGAAATGATATGCC  
TGAGGGAGAAGGAGGAACAGAATTTTTATTTCAAAAAATAGATATCAACCACAGAAAGG

GCACACCCTGATCTTTCTGCCTCTCTTAGTCATACTCATAGAGGTACCCCTCCATATAC  
GAGAACCAAATATATTGCAACTGGTTGGTATCTTTTTACACCTCCTGGCGGTATTCATAT  
GCAAGTAACTGCAAAGTAAGCTGGTAGACCACTGACTACCGTTTCTGATCGAGATTGCTA  
TACTTCACCTGGTGGTGTATACATGAAACAGACCTATAAACTTTCAAAGTCTAGAAT  
ATTCTCAAGTCAACGATCAAGGTAGGATACGTTCAAGGCATTTCAAACGCCAACAGGTTAT  
TTCTCTGTCAGTGGAAACAATTAATCGGCTGCCGGCCGACACCCATCTCCTAACACGGAT  
GCAACTTCTGCTGGTGCAGGACGGAACGGTGACTGTAGCAGTTGTTGTTATGACAACCTGCA  
ATCCAAGATTTATCAGGTAATACGCTTGGTGGTAGTCAAGTTTTACAAGTTGTTCAAAGG  
GTTAGTAACTCATATGCTGAGTTTGGTAGCTCAAGTTATGAGAACAACACTAATATCTTA  
ACTGCTATTGGTGTATGGGTAATAATGACATTTGACTACAAAAGCAAACCTCTAAGATTTTG  
TGTCAGAGGAAAACCTAAGATTTATGGTCCTAACACTCAGCACCTATAAGTTTAGTTAAGA  
AGATGAATCGGTAGTGGTGTTTTTAGTTCGTTATTTTCATGCCTATAGATCAAATCGCACT  
ATTGATAGAATGGAAAGAATTCAGTCCAAAATGGCATCGGTGCTATTTAGGGAGAGTAC  
TTCTTAGCATTTCATTCATACGCCAACCAATCTGCAGGGACGTCACTTCGTTACCAGCAA  
TACCTTGGAGGTTGGGCAGGAGGAGCTATCGAGTTTGGTAGTAGGGATGTTAACAACAAC  
CAGAACGCGGGTGGTATGCTTGTATGATCTGCTATGAACTTGCACCTTAATTTTTAATT  
ACAACGACACTTCCAGTTCAAATCGTTAAAAATCCATCTTAGGGTTCTGCAAATTCAAAG  
ATAAGACCTGATTGTGTATGGATTATCGATGAAAATGATCTGTGAACTCTTGAATGGTCT  
TCTGAAAATACATAGCCTAGACCTACTGCCGCTGAAATAATTCCCTAACTTGTGAGTCAA  
ATGACTGCTTTCAATGCTAAGCAATATCAACGTGAGAGACAATCTGAGTAACCAGATTTG  
AAACCACAGGTAGACATGTTGTATCAAGACATCAAGGAAAGGACGTTAGGTAGTGGAATA  
TGGATTGCAGCAGTTGAAGCAGTAAAAGCAAACATCATAAACCTAGATGATTGAAGATT  
ACTTTATAGGACACTGGACAAGTAGATCTCAAGCACAATCAACACCTCCCATTTTTCTA  
CTGTTGTAACCTATATGGGAAAAGGTAGAGGGTGGTTATCATTCAAAGAATTTTTATAGAA  
GAGACGGTGCTAATAAACCATATAGAGAAAGATATCACAAAGTTAAAGTAATATCCTTTG  
GTAAATTTATTTTTGAAAATTATAGACTAGACTGGACAAGATCAGGGAATTGCGATAAGA  
TATTCACATCCAATGGTGAAGCATGGCATGGACACCTAGTAGGGGATAAATGCACTGGTG  
CCAAAGGCTATAAGATTGTATCTGAGATCACTGTTACGGGAATCGAGTGCATAGTATGG  
GTCTAGTATAAGATGATAAAGGTAACATGGTATGGGGTAATGAGGGCATTATAATATCA  
CTAGCTGTATCGACCTTAAAAAACTTGTAGCAATCTCAAAAATATGCAGACCTTTGTTG  
GTATTGTAAATAAACTTACGGTCAATCTTGTGCGAAAAGATGGATTTTTCTGGTGGGTTG  
GTGAAGTAGGACATAACGAAGATCCTATCGAATTAGGTAGGGTCAAAGTTCGTGTCTTTC  
GATACTATACTAACGTACGAGGCGGAACAACCTACAGCTCTACCTACAGAAAATTTACCGT  
GGGCGTCATGTTTACAACATACTGCCCAAGCAGGAACCTGACGGACAAGGTTAAAGTCCGG  
GACAACCTCAACCTGTTGCAATCGTCATGGCATTCTTTATGGATAGCGATCAGGCACAGA  
TCCCTATTGTCATGGGAGTTCTTCGTATTCAGAAATCAAACGATACAAAATTTAACACC  
AATTTGCTTTTAATCGTCAAGAAATGGATCCAGGTCTTCTTGTTAATGCATCTGTATTAC  
ACCCCGCAAACCAAACCTCAACAATGGCAGGAACTAGAGAAGAGGGTTTCCCTGACAAAAG  
GTGCAAACAATACAGCTTGCCTCCTGGCATGAAGACATGTCAGGAACGAGGACGTGTTT  
CTCCTAGGAATCTTGGAACTTCTGTGCGATATGAATGCTAGGGAAAGTAGTACTGTGAAAC  
TGAGAGATCCCGAAAACCAATACACACTGCTAACGGTGTGGTGGTGGTGGATATCAC  
TCGAATATAAACTTTGATATTTAATAGAAGATATTGCTGATTATGCAGGAACCTCTCGTAA  
AAAATGCAGCCGGGGACGTCCTCGATCTGATGACGGGAAAATTTGTAACCTGCTAATGAGT  
TAACTGCTAATGTGCAAAATCTCTTGATTGCTATATTAAGCAAGTCGTTAGTGCTATCA  
GGCGATCTTTGCAAACCTTGCAGAACAAATTAATGTTATAACTATACTTGTAGGTGCAA  
CTGACATTCATTTGTCACCTTTACGCCTGTTATTGCTGCAGTTCAAAGATTTTGAGTG  
CTCTTTGTATTGTTGATAAAGATCATTTAAGTCTCATTCAATCTCCTATTGATAGTCTTC  
TTAGCATTGTTGAAAATTTCTTGGAGGTATCATCTCTCAAGCACAAATGGTCATGAACA  
GTGTTTCAGAGGGTCATTGATGTGATTGTTAGCTCTGTTCAAACCTATTCTTAATAAAGCCC  
TCGGCATTGTAAATGATGAAAATCTATTGTCTCTGGCAGCGAAAAGTACAGGAACTCA  
TTAAACATGGGAACAAGGAACACACATTATCAACGATCTTCAAAGTTTATTCTAAAATG  
CCATAACTAACGTAACCTGGATTGATGGCATTCTCTCTCAAGTTAGCAGGAAGAAAATGTA  
ATCGTAAACTTTCTGGTGTGAATATGATAAAGGTGGGTAGCCTTTATTTGGTACAACCTA  
ATTGCACACCTGAGGAACTCGCTAATATCAATATCATTGGACGAAGACATAGAGGTGATT  
GTGGCGAAAATGTTAAGGGTTGCGGATTACTTGATAAATATTACTTCGCGAGCTGATCGTT  
ATTTGTCTGCTGCTAAAACCTTTGTAAATGGTGCATCTGAATTATATCTTGGCACACCTG  
GTCGTTTAGCAATCATAATCCGTAAAGAAAATGGAACCTACATTTTCATCAGTTATAATAA

GTCAAATAGCGTACGCTGAATATCCTTTCAAAAAAGCATTGCGTAAGGAAAAACCATATA  
TCTCTGATGATGAAATAGGAAAACAATTAGTTGATTACAGTAAGAGACCAACAGAAAACA  
AACATATTGTTTCAGGTTGCAGATCACGCAACGTACGTTATTAACAGCCCTAAAGAAGTCC  
ATGGCGATCAATGCGGAGCAATTGATGGTTCACAGGGTACTTATATTGAAGGTGACTATC  
TATTAGACATTACAGGTGATTGTCATATTTCTGCTGGTGGATCCTTTATGCTTAATGCTC  
AAGGTGCACTTAAACAGGCAAACCAGATGGAACCTCATCTGATGAAAAAGACGTTAAAA  
AACATTCATTAACATTTGGTTCTGATGTTGATATGAATATCTCAGGTGCTGCATTTACTT  
ATGAAGGTTTCAGAATTTAATGTGGGAGCGGTTACTACAAAAATTACTGGATCTAACTTTT  
AAATTTTCATCTACAACAACATAATTGCTAGTGGTGGAAATTTTATTGACTGCTGTAACCT  
CTGTAGATATTACTACACCATCGCTAGTAGAATTAATTAATTCCTCCTTCTCCCATTCT  
CTAAGGTTAAAAACAGGGATTCTTAGAAAAAGTTGGTGGTGGTCTATGGAAACATATATGACAC  
CTGGTTTAGCTGGAGCAGATGCTGTTCTTAGACATATCGTTGCACAGCCTGCAGGATACG  
CCTTTCATCAAACCTGGTTTGGCATAACAAACGTAGCTATGACAGGAGCATGCCTGGCAA  
CGGCTACAGCAGGTGTTGCTAGTCTAACGGCGCGTGCAGTAGTAAATATCACTGCAGGTG  
CTGCGATGAACATCACTGCAACAGGAGCGGTAACATAAAAAGGGTTGACGAAATTCCTAA  
AGTAGTGCTATACTATGTGAGTATTCGCGGGTGCCCGACTTGGTTTGGTGCACAACATCT  
GCGCAGAACGACTGTAGACCCCATGCAAGACCATCAGGTTGAGAAAACCTTTTCTTAATTT  
GTCTAGGTGATCTATAAAAATCCGAGATATTGAAGGGTACCACAAAAAAATAGCATGGGG  
ATGGAATGAAGAGGGAGCGGTAAGTTTTTCAGAAATTATTTCTCACCTTTGTGATGTCCA  
TGACATTGACCTTATTACCTATTGGTTTGCAGAAACACAATGATTTTTCCACATTACAAT  
TTTGATCCCAACATTACATTTCCGATTTCTATCGCAGTACTCACTGTATTGTTTATCTTC  
TATGGTATCTACAGAGGTTTCTTTGCAAATGAAGGTTTGACGGGCCCATGTGACGACCAC  
GACGCCTAAAACCTATGATTGGACCTATTGGCATTACATTAGCTCAAGCAGATCAAACTT  
TCATTTTCATGATTTATCTAACAGCAAACATAAATTTGTTGGAAAATCTCACCACCTAA  
GGGATCTGTTATGTTTGTCTGTAAATGAACTTGCTCCTGTATCTGATGAAATTCAAGA  
TCAAGTAGAGGAGTTTCGTAAAAGTATTTTCGGAGTAATATGCTGCCTGAAACTAGACCTG  
CCATGCAAATGCTTTTTTCATTCAAACCGGAACTTGTCAAAGCAGCAAAGATGCTGATC  
TAACTAATAACGAAATGAAGATTACTTTCAATGAATACTGTAATTTCCATGATACTTCCG  
ACCTGGCAACACCCTCAAAAAATGAGAAAAAGAGGCATTTTAAACCTCAATCACCTCGT  
GCTGCTAAAAAAAGCTTACAAGCATTACAGAAAAAACTGGGAATGTGGAGGAATCGGTAG  
ACGCACCAGACTTAAAATCGGTTGGTTCATGTGCGCGTGAGAGTTCAAGTCTTTCTACTCC  
TACTATCGGGGGAATACAAAAGATCTCTATGTAGATAGAGTGCCTCCCGTCAAGACTTAC  
TAAAATAACATGACAGTATTAATCAGCATAGTTGTACTCATTGAAGTAGCGGGCGCCCTT  
ATAAGGTACTACGATCCTCATTAAATGAAAGTTCCTCTAATACGGAACCTTTCCGTTT  
TTGTTTATTGAGGGTTTGTATACAGACGAAGTATTGCTTCTAGTATGGTGAGATTTAGAT  
TATTATCAATCTAATGGGTATATACTGGATGCAAATACTAATCCTCCCGTGACAGATGAG  
GGAAAACAAAAAACTAGAAAACAAGGAAACCTTGTGATAATGTTTTCCAATTGAGAGAG  
TATTCTCATATATTAATCTTTCTAGAAAAGTATTAGAACCTAGTTTGATATGTCGTAGT  
GATCATCTTTTTCAATGGAAATATTTCCAATCTGATGTATATCACTCTTTACTATCCTAT  
TATGATGATGCTGCATATTATCTACCGCACCACGATAACACCGTAGTCAGTGTGATATGA  
AGCTTATAGAAAGAACCTAAATGTTTTGAAGGTGGGGATTTTGTGTTAGAAGAGTATCTA  
ATGACTCCTAAATGTAGAAACAACAGTGCAGTTGCATTTCTGCACTACCAGACATAGC  
GTCACTCCTATCAAATGGAAGATCAACATAAAGATCTAGGTTTAGGTAGGTATTCATTA  
TCACATTCTCTGAATTTTAGCTAATGGCGTACTTAGTTCATCCCTTACCACCCAGAAAAG  
TTTGGGTCTAAAAAGAATATATTCAGGATTTTGCAGAAGGTCATGGAGAACTTACACCTG  
GCATTTGGGTCTCGGTAAGGAGTATCCAAGCAAAGGCATTATATGTTTCAGACATTGCTAA  
CTGCTTCAGATGCACTCTTCGATAAGTTGCCTCTCAGTTGAGTTGTATGGAAACCAGAAA  
TTGATTGGGATGATCAGTTGCCATTAGATGTATTAAGATTTCGGATTGTTTTGATTATA  
ATATTACAGTTGTAGAAAACCTATACTAGGTAGATGTCAGATCTTTGGTAAGGAGAAGC  
AGATGCTCGCAGTAGAGTTTTCAGTTTACTATTGATACTGCACACCCGGACTTTTCTGTCT  
TAGATGTAACTTTTTCAGAGCATGATCCAGAACATAATACATTTTACAGCATTACTCTAG  
ACAATGGACAGTTTTCGGCACTATTAATAACAGAGGTCAGTTCTTCGATAATAGATCGC  
TATATAATGATAATCTCCACTAGACTGAATTCAAAGTATGCACACAAAACCTATGCAGTAG  
AAACCCTACCTAAGTGGTGGTCTGTAGGACACACAGATGAGTGGGCATATAAGAAAGGAG  
AAGAAGAGGAAGAAGAAATAGACCGCACAGAGGGTTGACTTTCTTTGTAAACAGACTTAT  
ATCAAATAGTGGGATTATCTGTGGGAACCCGTAATAATCTCAGTTGGTTACAATATAAG  
TTGCTAACCTAGCGGTGGAAGCAATTCGACCCATGGTTCGTGTTTGACCCATTGATTCTA

ACCGAAAAGCACAAAGAAAATCAACTCTTTTCGTGAAGTTGTACAAGGAACTAAGGCATCGC  
CTGCTCTTTATTTTGGATTTAGACAGCGATAGTGGGCTATACCAATGAGCGTACGATTAAA  
TCGGTGTTGCATTTGGAGATGGAGGTTTATATTATAGTAGAGGCAGCAATACTGCAACTA  
ATTCTCCGCTATTTGTAAGTGTGTTGATGATAGTGCAGCTAATACGGACATTGTTTTTCG  
CACCGAAAGTAAAGTGAAGTGTCAAAGTTACGGGTCTATTGTCTATCGGTGACGCTTCTT  
TTATCTTAGAAGATGCACAAGGACCTAAGGCAAGATTTTCAGGTAAGTAATGTAAGAACGG  
GAACTAATACTCGTATCGTTACACTACATGCCATTACATCTGGTGTATGGAACAGTCTTGA  
TTGGTGAGGATACACCGAAAACACTACAAAATATAACCATTCTTATTGACGAGGATTATC  
TCGTTATTACTAATGGCACTGAAGGAGCAAACCTTTCAAATTAACGGGGGTGATTCAACAA  
ACTCTAGAAGATCATATTTTCTTCTGATGCGGGCAATGTAATATCTACAGTAGAACCAA  
CTGCAACTGCATCTAAATTGTTAGATACAAAGGCAGAACAAACAGCCTTCAGTAAGACTC  
TTGTTAATCTTCAACTAGCACAAATACGCTGAGGTTGAATCCAACCTGGGCACAGTTCAAGA  
CGACTGCTGTATCTGCTAATTGAAGTCTTCTGGTCTGACTTATCAGGTAAGTCTTCTT  
CGAGTTAAGCTACTCCAGTATGACAGAACAAATACTGTTGATAAATTAATTCTTCAAGATT  
CAACGGTTATTTTCAGTGAAGATTAGATTTTTCATTTGCTAAATCGAATAGTGTTAACAACG  
TAACTGTTCAAATACATTGTACTGCAAACCTAAATAGCACCGGAGCTCCTAATACACTTG  
CTACAGAGGCTGCTACACAGGAGCTTTGAAATAAAACATCGATTAACCCTGTGCGGAAGG  
GTGCAAGATCACAACTGTAGGTAGTGTACTCTTCTATAGATAATATGACAGCAAACA  
GAATTTTCAGATTCCCTGATTCTGATGCAACTCTGTTATCTACAGATAACGTTACATTTG  
ATGACGTCTCATTTGCTGCAGGTATTTGGGCAGCTAACTTAAGTGGTGAACAAGACAAC  
GAAAATTGTTCTACGCAGGATTACAATAAAATGGCTAATCAAGGTTTACCTGCACGAA  
ACGAACCGGCAGCGAACATGAATACGTTGTTCTATCCTGCTCATGTTGATAAATCTGAAA  
GGACGATGATCAACGTGGCTAATGACGGAACAGCATCAGACTTCTCTGCTGCTCTTAATA  
GTTTTGATAAGAAGTTAGTAGTAAATGGTTCCGCAAAGGCTTACAATTTACATGAGCATG  
ACGTGATCACTCCATATAAGATGACAGTTGACTCTGCCTTTGTCCCTGCAACACAGGGTT  
TACTGGCTGTCGTCAAATTAGGAGTGCTGATAATGAATCAAAGTTTAGATATGAATCTG  
CAATTATCCTGATTATGTAGAAGTCTTTTGAATAAACTGTTGCTATCAGAGAGATCACCC  
TTCAAAGTGTTACTGGTAGGTTCTCTGTTGGTAATAGTATTACCAAAGGTTCTGGGAGTG  
ATAAACTACTGAAGTAATCTATAGTATTAAGGGAAGTCTTCTCATGTAGCTCCTTCTA  
CTATTCACGGATCTGGTGCAGGATTTGCTGCAGATGACAGTATTCCATACGCTGCGGGTG  
CATCAGCTACAGTTGCAAGTGGTGGTGTAGGATCAGCATATAATGAATTACTATTCTCTA  
GCACATCAGGCGGAAGTTACGACCTCCGTTTGATTTCTGCAGGAAACGGTTTTGAACTAT  
TCAACGATAGATCATACTGATTTTCATCTTGCTGACTCTACTAACTCAGGTCACGTTTTTG  
CATCATCTACAAGTAAATGGTGAAGTGGGGTACTGACGGATCAACAGGTAATCTGATG  
ATGGAAGTGAATATCCTACTGCTAAAAGTAACTAATGGCACCATTGATACTAGTGGTGCAT  
ACCCTCAAAGTCTTAACTAGCACTTCACATACTTTGTTATACTGGTATAACTCTCTTA  
CTGTACTTGCTTCGAACAGTAGTTTTGGTGGATCAGAGGCGTATCTTACAACAAGTCTA  
CCCCTTCATTCAATGAATTTTATATCTAGGCGGAAAAGGGAAGTGTACTAACTCTACGT  
CTATCTTTGTTTCAAGACAGTCTCACATATACTGTTACTGCTCAATCTTCTGTAGCGTACG  
GTTATGTTTCGTAGTTACAGTGGTAAGAAGTATATGTTATTAAGGACTCAAATCAGCAG  
ACTTTGCAGGTTTACAGATATTATCTTAGATAAACCCTAAGTTATCTATTGCAACAAGATCTA  
CTGTGACTGTAAATAGAGTTGCCTTTGCTACTACTGCTGTGGAAAATAATTACATGATTC  
AACGTTCAAATAACGCTGAGCATGCAGTCGCAAAGAATACTTCTAGTGTTGTTTGACCTG  
GTGATAGATTGATTATCAACAGCACTACACAAAACAAGTCTTCTGAGCTTTATTGGGTTTT  
AATATCCTCAACCGCTTTCAATCCCCGGACATTCGGCAGTTAATTAGAAAACAATCAAAG  
CGGATAGGTAATGTCGCTAACTAGACTTAAGAATATTATTACGTCCTGAACTGGTTGTAT  
CAGATATGTCAACACCGTTCGATTTTCGATGCATCAGATGCTATAGATAACAGGGGAACCTC  
AGCTTTGCGTCCGTTTAAAAGTTTGCAAAGAGCATGCTTAGAAGTAGCAAGATTTTGATA  
AATAGTTGGTTTGAGAAATGACGGGTTTGATGCTTTTAGTATCATGATCTACCCTGATGA  
ATATATTGTAGACAGTAGACCAGGTGATGTTTTATAAACGAACGTTGCGTGTATTGATGC  
AACTCAAAGTACTTAACTTAACTTAACTTAACTTAACTTAACTTAACTTAACTTAACTTAACT  
AGGTGGTATTATCGTTCCTAGAGGTTGTTCTTTAGGTGCAACTGACCTTCGTCGTACAAA  
CATTATTCGTAAATATGTTCCATATCCTACAACGTAAGCTGCAAAAAGGCATTAAGACAGA  
AGATCAAGTTCCTCCAAGAACAGTAATCTTCAAAGTACTGGTGGTACTTATTTCTGGCA  
ATTCTCTTTATTAGACGGTCTGAAGAGGTTGTATTCTTCAAACCCGATTCCACTGAAAC  
ATTAGCACCTTAGTTTTACATCATAGACTGACTTGTTTTGAGTTTGCTGACGGTCTTAA  
TCCATTATCCACTCTTATGTCACAAGGAACAGTTCCCTCTGCTGATTACTCTGCTGTATC

TAATATCCTGCGGAGAGTTGATCTAGAGATTTATTATCAGAGAATGTTCGTAATCTTTTCGC  
CACTATCCCTGATACAGCTGGAGATCCTCCAACCGACCAGATTCAAGCAAGGGTAGAAGA  
AAACCGTATTGTAGGTCCTATCTCCGATGAATACCGCGTCCTTCGGAACACAAGAAATGG  
ACAGACCGCAACGGCTGTCACTGTTGACGAGTTTGATAACCCCAGGGACCACGGATTATC  
TGTTGGTGTAAACAACAACGTTAGTGGTGTACAGAATCAACTGGATCGCAATCCGTTCT  
TGATGCAGGAGTGTATAACGGGTCTTTCCTGTCCTCCGGCATCGGCTTACGTCTTCAC  
TTACCAGATGCAAACATTCCCCTCAGGAAACGCAGTCGGATCAATCATAACTGTTTATAC  
TGAGTTTGATACTTCTGACTCAGCATCACCGTATGTATTTAACCCCTTCACTTCGATCAGT  
GCGGGGTATGAATGGTGTGCACGCAAACGGTGCAAAGAAATTTGTTTTCAAATCAATGGT  
TGTGGCACAGTTTTCTGGACTGTCACTACAGAAAGACGAAATACTATTTGTAAGATATAA  
CGGATCAACTAGTAGCTATGACGTAGCTAGAGCAGTTGATCGTGCACATTTGGATGTTTT  
AGCTAAATATCGAAAAGGATTGGGTCATGATCACATCAAGTGCAGTAACGACTCCTTCAT  
ACAGGCAGTTTACGTGTTTCGCTGTGGGATACCAAGGTCATTTCACTGCACTAAGCGGCGA  
TGACATGTCAATCACCAACTCTAACTCTACATTTGGTAACACTGCTCTCACATCAGCACC  
ACTCTAAGCAAAGCATTTTTTACAAGATAAAGCGAGTAGGATCACACATCTTATTCCCCC  
AAAAGCACTCAAGACAATTTTCATCAATTGCAACAGGAAATATTGGTTCTTTCAATAATAC  
TCTTGCTAATGATGGATCAGTGAATGGTCTGATTCCAGGTATGACTGTATCTGGAACAAA  
TATTCCTACTGGTGCATTCTTCAGTTCAATTATCACAATTACTAGAGTAATCACACTTTC  
TGCTGCAAATACGGGCACTGTTACGGGGAGGTAATCTTTGGTGAAGAGACATTTGTTAA  
CCAGGTAAACATTGATATTCAAAGAACTAAAGTAATTAATACTGCACCTTTCTGGACAAGG  
GGGAACACCCGGCACAAGACTATACTTATAATTGTTATACTGTTGAAGCGTCTCTCCAAC  
CAGTAGAGTTCAAGGTTTTACAGTCGGTGCGAGACCAGACGGGATAAGTAATAGTGCGTT  
AGGAGATAAAATTAACAGCTGGTTAGTTGCACAAGGTGCATCTTCTTCAACTGTACAGTC  
AGCAAGCATATCCCCTTATGCTCCTGCTGTATCTGGTCTTGGAGCTGGTGTGACTGGATC  
TCCATTACAATATGTTAGTAATACATACTAACAATGGTGTTCAGGTTTCAGTCGTTGG  
TTGGTATCTACGTGTATCTTCTACTAATAAAAGTATGTACGAAGCGTTAGTAAATAATAC  
GCACTACAATCCAGTCAGTTTTACTCCTAATACATTCCTCAAGAGAATCCGTGATACGAG  
AGACTTCCAAGATAGAACATATAGTGTACGTTATGTGATAGAGAAGGATAAGTCTAATCC  
GCTCCCGAGAGATCCTATCTCTGGTTTTCGTATTACAACCTCTTAACAGTGATACTACAAC  
ACATAACTTACTACGTGCATTTTATATTTACGATGTTCGAGACTGGTGAAAAGTTGGTAAG  
AGGTGTTAGTGAAGGAATATCTTTTCTCACATTACTCTGCGGTTCTATTACACCTACTAC  
ATCTAAGTTTGATGACAGGAAGTTGTCACAGAACGTTAACGAAGTATATCCTACATTTCGA  
CAGACATAATCCAGTTGCTGCTGGTTCCTGCTTCAGTCTGTGAAACTACGAATGTTGCCAT  
ACGTCTTGTTAACTCTACTGATTGTGCAACTCCAACTGCTGCACTTGACCCCCAGAGATT  
TATTACCAAAGAAGCAATTATAGTCTTACTGATTGATACTGGTTGGCAGAATTCCGGATC  
AACTCCAGAGTACGATTCAGTTAACAGAAGTCCCTCCAGCTATTGAACAGACTGCAGGGGC  
AGGAGACGAAGAAACCCGGAAGATTACTATTAGACAAGATAACACTGGAGTGGTTTTACC  
AATCTACGTAGGGGTTAGACGACACTCAATCATGCGTTCTGGTAACACACCTTTGAATA  
TCTTGGTTTTGGTCCAGGTAACACTCATCTGCCTTCCCTCAAACCTTAGGTAGAAACATT  
ATCACCTGAGCAGATCAGTTTTCCAGACTATTAAGTAGAAGGAGGAGTTGCATTCTA  
CTCTGGTTTAAACAGTAATGGAGATTGACTCATTGGTAACCAGGTGACTAAACCCGTGAC  
GGGTTAGATCACGAACGAAGATACTGCACAGTTGAATGTTGTTGGTTAAGAGAACACACC  
CATTGAAACTTTCTCAAAGCTAGTATAGAATGATAAACTGACTGTTATTGGTGGTGCATC  
TAACGCACCTTGACTCCTTCTTTGCAGGTCATGTACATTCCAAGGTCTATCTACATTTAC  
AAACAACATAACCGCTAAGAAATTAACCTGTAATAACCAAGATGGTACAGTTATTAAGA  
AACCTTACTAGCACCAGAAAATGCAAGTGGACTCCCCGAATTTAGTAATATCTCAGGATA  
CGATACGCCTGGTGTATGGTGTATATTGTTTCAAACATCAATTGGTACCTGGTAAGTCTCA  
TGGTTGGATTTATTAGGGAGCTGCGTGGTATGGGTGTGGTATCACGGATACTGGTCAACT  
CTATGTTATTAATGACTCTCGTGTAAACGAGGATTGGTCTTGGTGTGCTCCTACGGATCC  
TTCCAGGGCAAACATCAACGGTTCAGTAAGTATTTATGGAGACTTATTTGTTACTGGCAC  
TGGCGGTGTAACAGCTGCCAAATATAAAAAGAAGCAATACACAGGAGACGGTAACCAATT  
AACTTTCGCTGTTGGCACATTCACATGTGTCAATTCAACACACTGAGAACTCTTTAATAGT  
ATTCATAAATCGTTTTGTACAAATTCAGGCACTACCTATACTGTCGAGCCAAGTGGTGC  
AAATTTGGTGTTCAGTGGTGGAGACGCACCTCTCTCAACCGATATTTTGCATTTCTCGA  
ATTACCTATCTAAATCACCAGGAGGGTTGCAACAGAGCATGGCTATTACAAGAATTAGTG  
GAAATCAAATTTAAGACACGACAAGTGCAAACATCACTACATTACGTTTCTTAAGCACTA  
ACTCAGTGTGTAGATTACCTGGAGGTTCAACTGCAAACAGACCTACAGGTGTATCTGTTG

GAACCTAACGTTTTAATACTTCATTAGATTCTGCAGAAATTTGTAAGGCAGATGATGGAA  
GTAGATCCGCAGAGTGGTTACCTGTTTCAGGTTGTGTTCCCTCTCTCGGAACGGACAGTA  
GGATCAGAACTAACACTTCACCTATTTTCAGAAAATATTACTGTCGGACTTTCAGAAGGAA  
ATGAGTTTGCAAACGGAACGAGGGAAGGACCATTAACAATAGGAAATGGTTATACACTTA  
CAGTAGAGTCAGGTGGGTGATGGTGTGTAGTATAAATGAAACTCAACGTCGGGGAAATAA  
AAGGATTACTGGCAAATAGTTCTAATATAAGTGTTCCTTCAGAGACTTCAATTAGTCTTG  
AAACGGGAGCTCAAGCAACTCGTACTACTATATGAACCAGTCACATGGTAGTTCCTTGTG  
GCACTACTACAAAGTGGGATCACCAAGTACGAGTTCATCAAAAAGATTTTTTTGAATGGAC  
AAATGCGTTGGAATACAACAGACCATCACCTCCTATTTTTATTATAAAAAGTTGAATGTAGA  
TGGTGTCTGGTACTGCTGTAGGAGATATCAGGAGACAAAGAAGCCCTGCAGTAGATGGAA  
ATGCAATATATAGAGCAGGTAAATCAAGTGGTATAGATTGGATTCAACCAGACGAGCACT  
CCGCATACCGAACGTAGGTTAGTAATGATGATAATGGAGGTGGTTGGGTGTTATGCGTTG  
ATTCAAGGACACCAACCACTCAAGATCATATGACTACAGCATCAGTCATAATTACCGGAA  
CTACAGGTCTAGAACAAAGTAATACATCTACACCTAAGATGGCGAACAGTTGGATTCAAG  
CGGGACGCACTAGTTCAGTTATACTGGCACTACTGCATATCGGATGCACGCATTAGATT  
TCGGTCTAGGAACGTTTTTATATCGAGTCCAGCACCTGTAAATTTGAATAATAGTGCTT  
CTGAAAATAATCCTAGAACTCGAATCTCTACTACATATCAAGGGTGTCTCTCTGCCAGAG  
GTCCTAATACAGGAAGTAGAGGTTTCAGAGATCACCATACTTCTGGTGGAACATATTGTG  
CATACGGTAGCCACCCTGAGTCAGGTAAACACTGTGGATCCAGAGAAGATACTAACGGTG  
CATCAAACCGATACTAATGGGTAAAGTAAATTGAGTAAAGTAACTCTTGGAGCATTGGGT  
GGTATTTCCAACACTATTGGACAGGTAACCTTACCTACAGGAGATACTTTGAGAGTTGAA  
GGAGACTTATATCATCATCACAAGACTGGTGAATCAATGTGCCTACAGGCACGACTCCA  
CAGAGTTCAAATATTCCAACGTAGATGTAGTGAGATTTAATACTGATCAAAGTTACTTA  
GGGGTTTATACTGGTAGTACATGGAATGATCTCAATGGTCCTGATGCTGCTGCTACTTCT  
AATTTAGGAACTCAATTAACCCTGCTATCAGTGGTATGGCACTCAAGTGAGCCGGATTA  
CCTTCTGGTCTTTATTGGATTAAACCTAATGGAAGTGAACTAATTATCACATGTATGTT  
GATAATGATTGTAATGGTGTGGTTGGGTTTTAGTTCTACATGTTAGGACATCAACCTGT  
CAAGATCACATGACTAATAGTGCTGTTTCGTATTGGTAATAGTTTAGTTCCTAAATTTGGT  
AACACAAGCACAACTAAAGTTGAAGACTCATGGATGAACGCTATGAGAACTAAATGCACC  
TACTCTGGTTCGCACTCGATGGTGGTTGGAAGCACATGATTTTGGTAACCCTGATGAGAAT  
AGGTTGATTGATAGTGCTGCTACTGCAGCTTTATCATCAAGTGCTAGAAATCAGAACGCA  
AGAACACCATATTCTTCTACCTATGAAGGTAGTATCTGTGTTAGCGGACCTAACACAGGA  
ACTAGAGCTTTAGGTGATCATCATACTTCTGGTGTACCTATTTTGCTAATGGTAGACCC  
CCAGAACAAGGTAACACTACTGCGGATTGAGGTCTGACAATTTGGGTGCATCAAACGAATAC  
TTATGGTTAAAATAAAAATGAGCATTTTAAACGTCAGCGAATTTAATGTATCTACGGAGAA  
CAACCGAGAGATTAGAATGGAGACCAGTAACAATCTTGTTATCACTTGAACCTTACTCA  
TAATCCTTTAAGTGGATTTACATTTCCATTGGTACGACTGCAGAAACACCAAGTAGTCC  
AGCTGCAGGGCATGTAAGCTGTAGCACAACTTTAGGGTATGCTGAGGTTTATAATGATAG  
TGCATGGTATTGTGCGAGTTCGGGTATTCTTGGAGCTGTAGGACCTGCGGGAAGTCCCGC  
ACAAAATTCTCAACAACCTCGCAGCACTACGTTCTGGTTCATATAGTTTCCACCAGGTGG  
TCGCTCAAAGTATCAAATGTATGTGGATAACAGTATATTTGGTGGAGGTTGGGTCTCGAT  
GGCAAGTGTTACACCATCTACAGGTCAAGAACCTATGGATCAAGCTGCTTTTCGTATTAG  
AGCTACGAATGGGAATAGCCTAGATAAATACATAAACATTTAAGAAGGCAGACGCATGGAT  
TAATGCTTTTCTCTCTGGTGCTAAGTATACAGGGTCTACTAGATATTGGATAGAGGCCAC  
GGGATTCAATAAAAATGTGTTCAATTGATTGTAAGTCTGTTCTGTAGATTTACTCAGTTCGGC  
TAGTAATCAGAACGCACGAACAAGATTATCTAACTGCAATGAAGGAAGTTTAGATGATAG  
AGGTACTAACACAGGAACCTAGAGGTATTGGAGATTACCAAACCTCTGGCGGGACGTA  
CGATTATGGTAGACACCGTGAATCAGGTAAACAACCTGCGGATTTGAGAAGCCTCTCTAGG  
TGCATCTACTGGTTACCTCTTGGTAAAATGCTAAATCGAAACATAACCGGATTTTTAAGAC  
ATGTCTGAAATTAAGTAGATAAAGTTAAAGCAAGACATGCACCCTCAAGTGGTCTGAA  
GTAACCTTTGATTCTGCTGGAAAAATATCTTTTGCACGCAATATTTTCATCTACTGATGAT  
GTCGCTGCTGATGAGGTTACAGTCAACTCCTTACTTCTTATGCCCGGATATGCAACGACT  
GCTTTACCTGGTAGGGCAACTACCGGAGGTACTGGATGGGATACATATGATGAAGTAATT  
AAAGTTTGGGGCGCAACGCAATGGAGGAATCTTGGAAAGGGGCGCAGGAATATCAGCTAGT  
GGTGGATCAGTTTCAACCGCGGGTGGATATACTATCCATACATGTACAAGAGGTGGCGCA  
TTACCTATTGATGGAGATGGAACCTGTTGATGTTCTTTTAGTTGGTTGTGGTGCAGATTGT  
GGAACGAGTGTGCTGGTCTAACTCTGGAGGAACTGACGGAGGTTCTGGTGGAGGAACA

GGTGGTTGGGATCAAGTAGCAGGTCTGCCTCTCACGTCTGGAAGTTATCCAGTTAGTTTT  
CGTGGTGACGGGAATGCTTAGAAGTCTGGACAAAATCCTGGTCAAATGGCTCGCCCTCC  
ACATTCAATAGTATTGTAGCATAACGGTCGAGGATGAGGGGCCTCAGGTCCTGGTAATAGA  
CCAGGTGGTCTGGTGGATCTGGCGGAGGAGCAGGAGGAAGTGGAGGTTACCTTCTCAA  
GGTGGTTCTGCACAGCATCCGTGTGCACCTGGTCAGTCAGGTTCTAATGGACATGGAAT  
CCTGGTGGTCTAATACTAACCAAGCATGTTACTCTGCTTCTGGTGGTGGAGGGGCAGGA  
GGATCTGGTTCGACGGCTGGAAATAGTCGTACGGCACCTGGTGGAAATCGAACATCAAGC  
AGATATTGTGGAAGTAATACACCCTACGTAGGAGGCGGAGGAGGTGGCGGGGGTCAATCA  
GGTCCGGTGGTGGACGTAACGTAGGTTTTGGTGGGGGAGCTCGCGGTGGTTTTGCTTGT  
AACCGTCCGAATAATGGTTATGGTGGTGCAGGTTACCTGGTCAAGGTGGCGGTGGCGGG  
GGAGGTGCAGGAAATCCTTGGCCAAACGAGGCAAGTGGTAATGGCGGTATTGGTATTGTG  
ATTGTTAGATACCAGAAACCCTAATTCTGCAAAGTATATCGCATCAATCTTAGATCGCTT  
CAAAGTTAATTAGCATCAACAGGATATTAACAATGCATTCACCCGCAAGGTTACAGGA  
TATATTGAACAAGATAGGACTTCTGTTTCTTCGTGGAAACATTGAATTAGTTGATAGGA  
ATGATAAGTTTTGATTGGCAGTCAACGTCTGAACTCTACAAGTGTGGTAAACATGAGTGTG  
ACCAGGTATCTCATCTGATGTTACCTTTGCCGCATACATCATATAAGGACTCTCCTCTAA  
TCTTCTGATATCAAAGTAATCATTAGTATATTCTTTCATAACTGTTGCAGAGAAAGGTCT  
AAACTCCCCGAGTATCTTTACCCGGTTGCCTATTTCTTTTGCTGCACCGTTACGAGGGAC  
AAATAAGATGGATCTATCTCCTAATGCTCTAGGGCCTAGTTCGGATTTACCTTGATCGAT  
TGCAATTCCTTTCCATCAGCGATCATATCTGCTACTTCAAATGGTGTAGTAGGTCTAGT  
GCTTTCATATACAACCGAGTTAAGTTATCTTGGACAGGTCCGAGTTATAAACTATACAA  
TGGTCGTTTTGTTTTGTCACCAGGAACTTCATGGTGAAGAAGTTTGGCCGCTCCAATCGA  
CGTACCTGCATCACTTGATACAGGTTCAATGTATAGGTTTACATCACGAAGTAACAAACT  
CAAATAGTAATAGTTTTGGAACGCAATTCAGAAAAACCCCCCAGAGAAACAAACGTTCTT  
ACACCTTGTTTTGTTCAATTTGATTGAGAATATATTGTGCAACGTGTTCTTGTGTTTTGTTT  
TGGTAAGGTGAAAGCAATATCTGCGTTTTGAATTAAGATCACCAAGCAAAAAATTTTATCC  
TGCATTATGTAAATCTTTACCGATATAAAAATAATTGATTGTCTATTCATCCATTTTCATA  
TATTGATAGGGGTAGTTCTCTCCATAAGATGCTAAACCCATAACTTTACCTGCATCTAG  
TTCACGAGACCCAAATGCCATGGATATATTTTGAAATCCCGTACCCTCACCAAGATTGTT  
ATAGATCTGAGTCACACCAAAATTTGAGATAATATTCAAAGGGAACAGCAACTTGTCTATC  
TACAATGGTAAAATCAGTAGGATATGGTGCCCAAAAGGTTGTGCGATAGTTCTCTACCATA  
AGTGCCTGATTGGAACATATCTCCTACTAGAGGTACGCCGGATCCCATTCGGTCTTTTAC  
AATACAGATTGCTTCATCAAATCCAGAGTTGTA AAAAAGCGTATGCTGCATGGAGTTTATG  
ATGTGATAGTGATAGGTGATGAACCTCAGTGTACTACTTATTTACTTTCGTCTTTACAGA  
TAACTATATGGCTCCTCACCAATATAACAGTCAGGAGGTGTCAACTTGCCTACACCTGC  
GATACAAATATTACCAAGGTTTGAGGTTTCAAGGTTAGTCATGCATTGAAATGAAAAGGT  
ACCATACTTTCTATTAGATAATCTTTCATTCCCAAGGTGGTAGACAATTCGCGATTTGG  
TAGTAAAGTAGTAGAGGAATTATGAACTCTACTGATACCTAAATTTCTCATAGGAGTTCT  
TGATTTCTGATACTTCCATTATAACATGATGTTTAAATTATGACATTTACCACAGTGTGG  
TATGAGACCGATATTCCAGAGGAATTTGTAAGTCTCATAGAGAGAGCGGGCACACCGTTT  
GATGATATAGTTAAGGTAGCGACTGTAAGAGAAGGAGAGATATTTGCTACAAGAGATAGT  
CAAACATCTTGGATTCCCTGCAGCTAATTGCGTCAGAGGATTCTGTACGTCTTATGTACTG  
AAGTCGAATAGATACAACCTTTATCTATGATATAGAGGGTATCATTAGCAATGGAATTCAA  
AATACAGCATATGATCAAGGTCTGTATTATAAATTCGCATCAATATGAAGAGCATAATTCT  
GCAGACGAAAATGCTATGTTTCAGAAAACCTGTCATTTATTTTACACCCCTCGTCCCTGAA  
GGCTATCAAGGTGGTAATTTTGAAATGAAAACCAGTGATGATGATGTCTATCTAGAGCCT  
AGACGTAGAGGTACATGTATCGTCTTTGATAGTAGAACTACTCCTTGAGCCATAGAGGTT  
ACTGGTTGTATTTCGTAAGACTCTGGTAAGGTGGGTAATTGGACCGAGGTGGCGATGATTG  
ATTACAAAGATTGAAGTCTGATTCAACTGAAGTATTTGGCACTTGCTCCGCGGATTGTTG  
AAGAACCCCTTTTGAAACGAAGAAAATTTGGATATGATAAAAATGGCAGAATGGAAAATT  
TGTCTGAAGAAGGACGAGTTCAGAATAGTGTTCACGATATAATCACCCGATGTATAAAA  
AATTATACAAAGATGTTCCACCAAATATTGAACCTATCTTAGGGGTAAAGTTATATCCAA  
CATATTACTTTTATAGATTTTATTTCAAGGGTCAAGAATTAAGAAACATCATGATATAC  
CTGCATGTGTGATCAGTGTATCAAGGAATATCAGCACTAGCCCAACTAGACCATGGCCAA  
TATATTTTGAACCTTAACGGAGATGTTAAGGAGCTTCACACAAATCATGGTGATGCTG  
TATTATACAAGGGTATGGAGTTAGACCATTGGCAGGAACCATTAAAAGGTACGCCAAAAG  
TTCACTATCACCAAATTTTCATGCACCTTTGTAGGGGCAGACAGATATCACGCCGACTATG



CTTATGACACCAAGTGCGAACTAACTAAAGCACAAACCTAACAGATCAAGAAGAATGTTAC  
ATTACGCTAGGAAAAATGATGATAATATTGTCGAGAGAGTAGAAACACTTGACGACTTTT  
ATGAATGGACGGACACAGATGAACTCGATGAACAACGTGGGATCATCCCTCTGAGATAGG  
TTTTTGGAGCCACACCTAATTGGGTGAAGACCTCAGACAATGCCAACTATCGTGGTCTGT  
TTGCAGGTGTGGGTGATATATATCGTCCAGATTTAAATAAGTTTGTATCTGCAAAACCTG  
CTGGGTTTGACTCATGAGATTTAAATGAGGAAACCCTACAGTGAGAACCCCCTACACCAA  
GGCCCCCTGCTAACGAAGATCGTACTTGGAGGTGGAATGAAACAACATAAAACATGGGACG  
AAGAACAACAATGAAAAAACAGTATGAATTTGCCTTTTTTGTATGTAGCAATTAATTTATT  
GAGACCTCGTGCTAAATGGACTATAGATCATGACAAGTTTAATTGGAAAGACCCTAGACC  
TTGCCAACTATGGAAGGAGCTGAAGTTTGTGTAAACAAAATAAACGAATTTGAAGCTAG  
TCTTCCTTATATTCTGCTAACAGAACATCAATAAGCAGAAGCAGATACATGTCCAGATCA  
CGAATTTATCGCGTGGGATTATAAGCACGATCTTGAAGAGAGAGGTGTACATGCAGGAGG  
AGGAAATCAGCAAGGAGAAGGGATAGGTGGTAAAGGTGGTGTATTTCCCGAGTAATTTAT  
GAGTGTTTATTTTTATCATTACAGCTGGACTGACATACAAAATTTCCAATCTGATTTTCA  
CAATGCAGTTAATGATTTTGGGTTAGATTGCCTCAACCCTCATATCTTTGATATATCGAC  
CAGTTTACAAGGTAGGCTGTATCATTTGATGGAAGAGATAACACTCCCATATCTTAATGG  
CATCCTAGATCAAGTTAAAGAAATGATTGTAGATGATGTTGATGCACAAAACCTCAAGTA  
AGCATCTGCATGGACAGTCTATGGGGAAGAAGGAACTTATCATACCAAGCATCAACACAA  
CACTAACAATGATATTTGTAGTGTGATACACTTAGATGTAGAGTAAGAAATTTTCCCTGC  
AAAAAATAGATGTTTTTATTATTTCTTGGACTGAGTAAACTATTTCCGCCAGGTGTAGG  
AGACGTTTCGATATTTCCCTGCAACTCTTTGTCATGGTGCATACCCTCAGAAAAGTAAAT  
GAGACATGGATTAATCTTGATTTTACACATGAAAGAAGTTTTTAGTATTCAATTCTACT  
ATCTATATAGAATGCCTGACTTTGATATTCGTAACGAAAGGTTAGATACAGATGAAAAAT  
TTGATGCTTCATATTTACATGGGGAGACCTATGTATGATTGAACGTGGCTCATACAATG  
TAAATGATTCCCTTTGATATTCTAGTCAAACCTCATGGTTAATGACTGGTGTCTCTATTG  
TTAAATTCATGCTAAGTTTTTAAATCCTTGGACGAACGGATATAATCGTGGTGGATGTC  
AAGAGATACATTATCATGTTGATTGTGACATTGCAGGAGTGGTATTTTTAAGAGATGATG  
AAGATTTCTCAAATGTTATTTCTGGGACGCTCACCATACATCATTTAATAAACCTTGG  
TTAAGATACTCACGAAGATGGAGTTGTCTAACATATATTATCCAGAGGTGAAAGCGGGTG  
ATGTATTGTTATTTCCCTGACACATGTTACATGGTAATCCCCTCATAATTATGAAACAA  
TTAGAAAGACATTTTCATTTAATGTGGTAGTGACAAATGTGGAATGAAGTGTATCTAACT  
GATAATTTCTTGAATGATGACATTTATAATGGGTTTCATGTCCTTTTCATCACACTATGTTT  
GCTTTATATGGATCAGAGTTTGAGAATAGAAGGAATATTAATTTAACAGACCTAACTGAT  
GTTCTCTCTAATAATAATTCACCTTATGATGAAACAGACCATCTAAAGATAGTCCACGCA  
AACTTGACTACAGAGGTTAGGAAGAACGACCCTAAAGCATTTCCTAATTATATACATTGC  
ACCGAGTGGACAGCACCATGTAGCTACCAAAAACACACAGATTTTGATGAACACGTTTGG  
ACATCTATTCTATACTTACATGATAACTTCGCAGGTGGTAATCCTATTATTAAGGTGAA  
AAAATACCGCCAAAAAAGGAAGTCTTATCACCTTTAAAGGATAGTTAGCACATCGAGTT  
GAAGAAGTCACAGAGGGTGATCGTTATACTATTTCCGTATGGTCTAAAAATAAAATAGGA  
GTAAACAGATACAGATAATAATAGATTTATTCCAAAAATCAATTTGCATGGATCGTTTTA  
ACTTAGCCCCGAACATCATGCACATTTATCTGAAGTAAACTTATTATAGACAGAGATC  
AATGGGCATGGGTGAGATCACATATACTTTTTCTTGATTGGTAACAAAGTATTCAAGTGG  
AAGTAAGAAAGTACGTTGAATAGTACGTTTATCATGACAGTGGTTTGAGTAGAGGATATA  
ATATGCGATGTCATGGTGCATGGTTGAACAGAAAGGATAAAGGGGATTACACAGAGATAT  
ATCATATTCTAGTTCAATAAAGTGGTGGATATTATTTGTGCTCAGTGAGCTAACAG  
GACGTAATCTGTGATGATAAAGATGGTTTGTCTGCTAGAAATTTACCCGTATTGA  
ATTACACTAAACCTAGCAATAGAAATTCTCATAGAGCAAACGTAGAATGTAAGAATCGAA  
CGATTGTGTTATGTCCCTCACGTCTAAAGCATAGCGTTGCACCCAAACTATTAGAAGAAC  
CAAGATTCTCACTAGCATTTGACTACACATTAGAGGGTGTATTTGATGCAATGGTGAGCA  
AGGTGAACTATGTGCCAGTCAAATGAACGGTCCAGAGGCTCGCCCTTTCAAAAAAATTGT  
GTTATAGTAATGGGGTATCGCAAACTCAAGAATGCCACACAACACTCTCATCTGCACAGA  
CGAAGATGAGACTCTTACACTAAAAGAGTTTGTATGCCGACATTCCTGATGATGTTGTGCA  
TAGAACTTCCGACTTCTACATGCAGTAGGTTATTATTTCCGAGGATCTTTTCATCGCAAGT  
GTATCCAACCTCAGGAAACCTGATACATACTCCACGTAGTTTCCCTATTTTACACACTCAGA  
ATGGGTAAAGCCATTTCCGGCGAGGTGGTAGCGTACAAGGTTACTACTCTCATGGTAAATCA  
ATCCGAGACAAGCGACAAACAAAATAGTAATTAATAAAAAATCGAACATGAAAACAAAAGA  
GAATTAATAAAGTGAAAGATCAACGCGCAATTCGTCTGAATGAAAGCTCTGATGTAACATA

TCAGAGAGCATTGACCTTTTTACCGAGTCAGTTATGAAACCAGACCCAGATTTGCGTGC  
GTGTGCCTATAATCAGGATTGTTTCAATGAACTGATGTACGTAAGAGTACACGTTGTGAA  
ATATCTTTCAACGTTGATATCAACCCAAAACCTTTGCAAACACAGATGAATACGATACAAT  
AGAACAAGAGAAGTTGGAACCTACTTCCCCTTTATCTAAAGGGAGATCAATGTATTTTAA  
ATCTGCTTGGTTAACTAAAATGCAATAAGAACTTTTGAAGAAGCTCTATTGTCATACGT  
TTCAAATTTACAGAAACGATACTATGGGGATAAAATTATTGATGAATCTCGTTATCTAAG  
TAAGATGAGAGAGATTGAGAATATGGATGATCAACTAGATGTACAGGAGTTATACACATA  
ATGTTTCGTAAGAAATTAATCTCTTGAAGCAAGCAATCAAGAACGGTCAGGAATACCAA  
TTTCTATACTGCGAAGAGGAGTTTCATAAACTCAAGAAGAACTTAGGCAATTCAGGCAG  
TGGAGGACATCGACTATTATAGCACAGAAGGGTGGAGTTGGATAGGGAGTGTGACAGTTA  
AGTTAGTGTACACCCCCTATTGACATTACCTCTAATATCGTTTATATTAGGAAGGTTCGCA  
ACAAACCACCGTGAACTTTCAAGATAACGCATATCCAAAAGAATACGTTTTTAAAGTCGA  
ACGTATGTAGTTGAGTTTTGTTTCGACCCACCTATTAATTTTTGACATGGGAGTCCACGC  
ACATGGTAACAAATTTCAAGACATTGTAACCTCGTCAGAGAAGTGGTCTATAAAAGAAGGA  
ATGTGCTGCTATAAATAAGAATTGTTATACCTCATCATTTGAGTTATCAAAGGTCTTAA  
GGTAGAGGAAGATGCGTGTATTAACACTACTGGCAACAATACTACTTGTGTTCTGATAT  
TCTCAGAATGATGAGACATGATGATTATAGACTAATTGTTGGGTGCTTCGATCAAGTCCG  
AGATCAAAAATATTTACACACAATCTGAGTTTTTTATTGAACCAAACACTATCTAAC  
TTTATGCGCAGACATGGATTTTGCAACCGTAGAATTGTTTGTAACCTATGCTAAGAGTAG  
TCCACAGGGAGGAAAAGCAGCAGACGCTTCTAAATTAGTAAGATATAATTTACAAGAATG  
TGTATCATGCTATAAAGCATTATATACTATCAATCCAAAGGTGGATAGTAAGAAACAATG  
AAGAGTTCAATGTTGATTACAACCTGACGGAGTAATTGCAAGTGGTGTAGAATATGAAAA  
GAAAGATATATCGTTAATCCTAGAAATGTGAAAAACGTACGTTTCAGAAATGAGAGCATT  
TACCCACCGAAAACCTACACCTCACAGAGATATTGTGATGGCCCCAGATTATCTCCCTAAG  
GAAATCATAATCATTTCATCCTACTGGTAGAATTCTTGACCCTAGTAGAGGAGAAGGT  
GCGTTTTATGATAATTATGATACGGACAATAAAGATTCGTGTGAACTAGGAGAGGGAAGA  
GATTTGTAACGATATCAAAGAAAGTTGATTGGATTATTACTAATCCGCCTTGGTCTATG  
ATGCAATCATTCTAGTGCATGGCATGGAAGTGGCCGCCAATACTGTATATCCAACAACG  
ATCAATCATGATACTACTAACCTCGAATAAAGATATGAGACCATATAACTTTGCAATT  
AAAGAGATATACTGTTCCCCACCTACAAATCCTTGGACACAACCTAGGGTTTCATCTA  
GCTCCTGTTATGCAAAGAGAGATTA AAAAGGAAATATTGAGTTTTATTGTACTCCTGAT  
CTTTCCTGATACAATATGACTACATACTTGTGTCCATGGTACGAATGATGTTTAGCGCCG  
AATTAGGGCCTTACAGATTA ACTATTATGAATACAAACCAGAGAAGTAAGCTACGTCTAA  
ATATTGCTGATTTATATTATCTTGAGAAAATTATTTCAAAGATGAGAGGCATGATGAGT  
GGGAAGTTTGACCAATACAAAGAGACCAGCAAGGGAGAGCAAGAAAACCAAAGAACAGAG  
ATAAGTTCTCTACACCAAATCTTCACACTTAGAAGTAGATGGTGCAGTATTAACAAAAG  
ATTGTTACGACCAAGAAAGGAAAAAGACATACAAGGCAGGAACCTCGATTTAAAATAACG  
GACATACTAGGGACAGACACTGGTGGTCAGACGATCCTCACGATTGGCAACCCTGACACG  
TTCGTGTAATGTATAAAGTACACGAAACAATTAATCCTTATACAGAGATTACTTAATGT  
AGGACAAACCAGATGACGCTGAAATTGAATATGATAGGGTAGATGGTCCGTTTCGTGCTG  
TATTTGGAGAGAGGAATATTGTTATTGAAGATGGTAAGTTGTGTGAAGTTGTACCATTAG  
AACACGCAGCTTACTATGATTTCTAACAAAGTATAACGTAGCGATGAACACAAATACTG  
TTTACCTTAAGATGTGGGTTTCGTGATTTTGAAGAGGCTGTTTTATGGGTTTCGTAAAATAT  
ATCTTGAATCTGAATTTAATAGTTGGAAGCAAACAACGCTGCCACACTATAACACATTTA  
CTTGGGCGTATTTTGTTCCTTATATGAAGTGTAAAGGAGTTCCAGAAGA ACTCGAAAAAC  
TACAGGAATTGATACTCAGAGGATCTAATTATGAAGTGCTAGTTGACCCCTTAAATGGAC  
GCGAAGATAGATTTAGTACTCTAAATGTATCATGGAGAGAGTGGCAACAACCTCAAAGTGG  
GCACGTCAAGGTTTGTTCAGACCTCAGCAATGAACGGAAGTCAGCCCGCTAACACATGA  
AATCAATTACACTATTGTGTATTGATAAGTTTATTGAAGGTAAGTATTTTAGTAAGGATG  
GTAGCATGAGAGGTGTTTTCTGGAACGTATACTTAGAAGAATTGCAACTTGCTTGGAAG  
TAGTGCATGGTAGGGCAGCACACCGTTGAGTATGCGACATTACCAATAGGGATTTTCT  
TCGAAGACGAAGGCTTGACAAGTTAGGATAGTGTACACCCCTCTGGACAGAGGGGTTTTT  
TTATGCTATACTGATTGTATTCAAAGCTTATTATGCAACTACGTCCACACCAGACAAGGG  
CATCCA ACTCTATGCAAGAGAGGAACAAGGGTCAAATCATTGTTCCCTGCTGGTTGTGGTA  
AAACGTACATCATGATTGCTGATAGTCTTAATAGATTCAAGTTACCAGTTGCACAGACTA  
CAGTTGTAGTTGCACCTCCTATCTTACTTGCTAATCAACTTTGCGCAGATTTCCAGAGC  
ATAATCTAGATGGATATCATAATCAAGATGTTGATGTTGCTCTTGTCTCCAGGAGAGA

CTCACCAGTTCAGCACAACAAACCAATTTCGGATTAAAAACTTGGGGTTAACAACAGCAAGT  
AGCACATTATGATACGTACCACAAATCATTCACTTCGAAACGTCGTGAATGCAGTTTATG  
TAGAAGTTGATAGTATTTTCTTTGATGAAGCACATAAGGGTAGTGGGAAGCACTTCCACA  
TTGCTCTATCTCAAATTGTCCAGTATGAAAAAAGGAGTTACTTCTATACAGCTACACCTC  
GCATGGGTCGAGGTGTATCACTTGACAGAGGTATGAACAACACCTCAATATATGGTGGTC  
TATTGGAGAATGTTCCCGGACAGGAAGTTATCAAGTCAGGTGCTATTGTTCCCCCGAAGA  
TTGTGCCCTTTGAGACTCGTAACTCAACCACTCCTGACAAGTATAATGCTCAGGAGATTG  
ATGCTCATAACCTCAGAGATATTAACGATACATTTGATGATAGTCAGAACCACAAGTTTC  
TGGTTGCATCACCTAGTCCAAGAGTGTGCGCAAAATGCTCGGACATACTAATATTCTTG  
AGTAATTCAAGGACAATGGATATGACGTTATGCACATCACATCAAAGTTTGGTGATATCA  
TCAGTGGCACA AAAAGTTGGTTGACAAGAGTTTTTTGACACACACACACAGTGGGGTCGGG  
ACGATAGTAAAAGATTTCTTATTTTCAATTATACAATACTATCTGAAGGTATCCATGTTT  
CAGGTTTGACTCTTACAGTTTTGTTGAGAAACCTAACTATCATTGAGATGGCACAGACTA  
TTGGTCGTATCATTTCGAGTTCATCCTGATGAACGTAAATCAGTTGGCGATGGTCTCATT  
CTGCAGGTGCATTTCACTTATTCAAAAACACAATATGTACAAGTAAGTGTTCCTACTGGAC  
AAAAACGTGGAGACGCAATTGGTAAACGATTGCAGAATGTAGTCTACCAAATTTTTGTTG  
ATGGTGTTCACCTATCGCTTAAACGCTACTGAGATTAAGACCAGAAAAAGTTACAATATT  
ATATGGGGGTTGTATGAATACATTTACACTATACATGAGAGAGTCAAGATGTGTGTAAC  
TTCCCCCCCCTATTATGGACTAAGGGATTATGGTGGAGAGTCATCACAAATAGGACAAGA  
ACAAACACCCGAAGAACATATTGAAGAACTTGTAAAAGTATCCAGAGAAGTTAAGAATGT  
TTTAGCAGATGATGGCACTCTATAGTTAAACATAGGGGATAGTTATTATAGCTTTAGCCC  
TGGAAAAGGTCTATCATATCCTACACAAACAGTAACTAAAACCGTACAAGATGTAAGTGA  
TCAATCAAACAACTTGGCAACAAGTTATAAGGATTAATCAGAAAGACCTTATTGGTAT  
TCCTTGGTGGTTAGCGCTTGCAGTACGGACAGATGGGTGGTATCTTAGGCAAGTTATTAT  
CTGGTATAAACCTAATCCAATGCCAGAAAGTGTAAAAGATAGATGCGCCAAAGCACATGA  
ATATATTTTCTTATTCTCTAAGAACAAGAAGTATTATTATGACAATGAAGCACTGAAAGA  
ACCGGGAAAAGATTGGGGAGCTAGAGATAGATCTAAATGAAAGTATCATAAGAAAGGAAC  
TCGATTAAGTCCTCATACTGGACTCAATAAGAGTTATCCTACAAGGAATAAAAAGATCAGT  
ATTGTCAGTAACTAACAAACCATATAAGGGAACTCACTTTGCAGGATTTCCCCCTGACTT  
AATTC AACCTGGATCCTACCAGGGAGAAAGAAAGGAGATTTAATTCGTGACCCCTTTAT  
GGATAGTGGCACAACAGCAATGGTATCTAAACAATTAGATAGGCATTATATTAGTTGTGA  
ATTGCATGAAGAATATAAATCGCCGATAGATTCAAGCTTACCAAAGACAGCACTTAGTGA  
CGTGATGGAGTGTGACAGTTAAAGTACTCCACACTATCGGTTGCGTATGACCCTATAGTC  
AATCATAGTATATTCATAACAACAGATTTTTATTATATCAACAAACGCAAGCATCGCACTC  
ACACTTTCCGATAAAAACTTTTGTTTCAGTTTATCATCATTGGGACGGTTATGCTCATTGG  
TTGGATGTAGTCTACCTGGACAGTATAACAAACTAGAGTCAATTATTTAAATGCTCCA  
GGTGGAGGCATGAGTTAACGTTGGTCAGATAATGAGTATGATTTTCGAGTAAAACGAATTT  
GTAAGACGTGACCCTAGACCTACTACTCAGAGACAGGAGAGTCCGGCGCCCCCTAGA  
ATCGTACACTCAAATACAGAGTTCCTAGATCATTGTGGACACTGTAGTGGAGAATTCGGT  
TATGTCTATGATAAGGGTGAGTGGTTCGCTTATGAGACTACAGACTGCACTTTAGTTGGC  
ATTCCAGAGGAGATAGTAGAATGAAATTTATAGTAAAAGACATTGAACTCTATTTAAGTG  
AAGCTGGAGAAAGAGACCCCGATTTACAATTCCAGAACAAAGAAGAGTACGTAATGCACC  
AAAGATGTCTAGGTAATTGGACAGCAAGAAATGAAAAACATTTAAAATAAATGATTTTTG  
ATTCCATAGGTTATCAAGTAGCGTTTATTGACTCCGAGGTAAATGCATGACAAACTACCC  
ACTTCCGAAGGTGCTACAAAGACATGGTATTGAAATTATCCAGATGAATGAAGAGCAAAG  
CACATTCTAGATAGAGGACGTAAAAAAGATACACCCAGATTTTCCGTTTGACAGCATGGT  
GTATGACACTCACACTCGAGGCACATAGCTCCCCACTCCCCTCTATCATATCCTATACT  
AAGAATAGCTGAAGAAACAAGGCAATACATTCATGCTACGAGCTCCCCAAATCCCCCG  
TTCTAATTCTATGGTTTTTTTCGAATTGCAGTCGCGCTCGTCACACTTTACGTGGTTACTG  
TAAAGTATTTCAAGAGTCCATTCAACGAGGATAACAATAATGCTAGATTTTTTTATCAGA  
TGTCTTAGGGTATGTTTGCTCTGAGAATGATCTACCACTCATGAGTGCAGATGACCTATT  
ATATGTACCTGCATGGTCAGACAACAAAATTTCTCAACCTCAAAAAAATTGGTTAACCCA  
TTATATTGATGGCTGGGATATTATCCAACAAAATTTCTTAATGAGATCTTTATCAGGACAA  
CTCAAGAACCTGACATTGAAATTATTCAAATGGGTAAGGACTTGTTAAGTGTGATGCAGA  
CCGGAGTCAAAGAGGACAGGCATCTAGGTGCCCTATCAGTTTGCAGAGGAGTGGGTAGTAA  
ATGGCAAAGACCCTAAGGACGAGGACTCAGAGTTCAATTTTATTACTAACACAACCTTTTG  
GCGATTGGACATGTGAGGTGTGACAGTACGTTTAGTGTCTCATAGGTTCCCTATTCATAT

CCATTACTCACTGTAACAATGACATGACTAAAACAACACCAAGAGAAAAAACCATTATCA  
AATTGATGGAAGCTGGTTATTGACACACTTAAGTATTGTGATGATCTTGATGACCCTGCAT  
TTGCTATGAATGATGTCATGAGACACGCATTTGAAAAAGAAGTTCGCTATCCTATGGAGT  
TTTAAATAATGAATCAAAACGACAAGAACAACCTCGAAAAATTCGGTATGACTCAAATG  
AGTTGAATGAACATAAGATAAATATGTGACAGATATGTTGAAAATATGTCAACTAAGG  
ACTTAGTCAAGTATATCTTTTCATGACTTGTTCAGTATGGTCATAATCAACCAGATGTAG  
ATTTTGGTGATGAAGCGCAAACTATTGCGATGATCACTATGATGATGTTGTTACTGACA  
TGAAAGAGTATGCAAACAGCGATTTTAAAAAACCTTCAGAGGAAATAAGAAAAAATGACT  
AGATCAGGACTATAAAACAACCTTATCACTTTTGTTTTAGAGAATAATCTCTATGCTACA  
TTTTTGCAACAACAGAGGGATTAACCTTATGTTCTCTTGACAGTAAAAGAGGATTTTGAA  
GAATGATAAAAACTGAACTAACAAAAGGACAATTTCAAGAAATCTATGCTGCAGTTAGGG  
ATTTACGTTATGAGATCAGAGAAGACTTAAACTTGATGAGGCAGTACCTGATACAGCAC  
ATTTAGATTTGTTTGTAGTGGAGTTGATGCACTTGCAAGTATTGATAAGACACTCAACAAAT  
AATTTAAGCAAGTAAAACCCAATCCCCAGATTGGGAGTGACTGTTAATTATCTGTCACA  
CACTACTACGCATGGGTTACCAAATACCCTAGAATAAGAATAAGCCTACTAAGAACAAAA  
AATGATTACAGAGACATTGCCAGTCCACATGAGTGGAGATCAACTCAACAATTTGGTAAA  
ACTCTATGATCTACTCAGAGACATGAGTTTTCCACTCACACCCGAACAGATCGAAGTGTT  
CGAGAATATTCAAGATCCAGAAGTTAACGGAGGATTTTTCTAATGAAATCAGTTACATCA  
CAAGTTACGATCGTTTTTGTATTAATAAACCTGAAGCGATCTCTAAAGAAGACCATATC  
CAAATGTGAAAAGATTAGAATGAACTATGTTATGGTATATACCTAATCGATCAAGAGATC  
ACAATTATCGAAGAGGAAGAACCAATTCATCTTTATCAGGGAGCATAAAGCAAACCTTACT  
TACATCTATTTGCGCATATCCCACAGGACGAGCATTACATATTTCTAACACATATGGG  
AAGCACGTGAACGGGCAGGGATTGAACTAAGTCAAGATGCAGAATTATCAATCCGCATTT  
ATGATGATAACTATGATGGACTATATGATGGCGAAGAGTATGACAGTTGAACTAGTGTC  
CGTACGTTTACCATTCCACTCTATTATCCTTAATAATAATGATAATTAACATTTTTTATG  
ATAATACAGTATATAATTGAAATCCCAAATATCCCGATCAGAGAACCAGTGAGCGGACTT  
TGCGATGACATACTATACGATATGACACAACAGAATGGTCATGCGGGATTACTATGCTAT  
GCTAAGAATGGCACTAGATTGATACAGGGCATTAAACAGATAAAGATTAATCAATTCAT  
TCAAAGGAGATTTTTTAAATGGGTGCTAAATCTGACGTGTGCGCTAATTTTGATGAGACT  
TATAAGCAAGAAATGGAATCTCTAAAGATTCCGATCATTAGATTCAAATATCGACCC  
GATCTTTATTACTTTTGGGATAGTGCAATAGAAGAGGATTATAATTGGAGAGACGATTTT  
CCTCATGCTGATTGTATGTACGAAATCTGTTTTGATATTGCATACGCAGAATAGAAAATC  
AAATGGAATTGTGCCAGTTGTTAAAGTGTACATAGTCTCCCTATTCTATACATTTACC  
TTTATAATTTTGTATCTTCAACAACATCATGCACAACCTTTAAAGATTTTCGAGAATAA  
CGTGAATCATTCTACTACGCATCACACCCAGATGTTTTATATCCTATTGATGCATTAATT  
AGTGATGAATTAGCACTAGCTACACTCACATACCTTGAATAATGGGCATGATCTGCGGGT  
CAAGTAACTGGGGAGAGGGAGCTCCTTTAGATCATGAGGGAGTCAGAGATTCTGTTTAC  
GCAAGGAGGTCAGAAGCATGAGGAAATTTAAAATCTAGAGAGATTGTAGGTTATAATG  
ATATAACGATCGAGGCGAATAGCGCAGAGGAAGCGATCCATCTTTATAATCGTGGACAAT  
CTCCCGAGAGTGCGGTAGAGCAATATTATTTGTTTTACGATTTTGAATTTAGAGATACCC  
GTCCAGAATGATGGGAGATTCAACAGAAAAAGAAAAGTGGCTCATTCACTTGACTGAAGT  
TAAAAACCTATTACGCAATTGCCAGCACCTGATGACGAACATAATTGGAATATACCACAA  
TTTTGACCCTATCACCTACGAGGACATTTTTAAACCATTAATGGACAGTTCCAATATTTT  
CACATAGTTTGAACAATCCCAATATTATGAACTATGCTAGTAGTATAAACAAGCGGATT  
TATGAACAACACTGATATAGCCACTGATGCCAGATGAGAGTCATCAATGTAATGCTCAC  
ATATTTGGACAAGTCGGGAAGCAATCCAACATACAAAACCGATTTTGAACTTTTTATGA  
CTATACTCAAACAAGCGGAGAAGTATTCTTAGTAGAGTAAAATGTGAGTATCCCATCAAG  
AGAGCATTGTAGAACTAGAGATCATGAGGCATGGATAGACTACGAAAAGAGCATGGGC  
CTACTTATGATCAATTTACAACACTTGAGCACAATTCGGACTACGGGATTCTACCAGAGA  
TCGAAGCAGAAGCAAGCAAAAGATCTAAGGACTTGAGCCAGTACGAATACGGTCACATAG  
TGCCCCCATTCAACCCACCTCTCCTTTATAATAAGAGTTACAACAACAACAAATCTATGAGA  
CTGACTAAAAAGCAAGCAGTTGAGCAATTTAGATGGGATTGGTCAGACTTCCTAAAATCT  
AACCTATTTGTAGGGGAGACAAAATTGCAAAGAGGTGTGCTTTTAAATGATTTTCTAGAC  
TCTCTCAATAAAGATGATCTAGTCCCAGATTATCAAGCGGATAACTACTCAGACCCATGC  
TAAGGGGATTTTTTAAAATGACAACACTAGTGAACCTGTACAGGAGTCACTAATGCAGTTAA  
AGATCATTCAACTTGAGAATTTGAAGAGGGTACCGAACCCACCCAGCAACAATGTGACT  
ATACCGTTGTAGTGCCAGATACTGATCTAGGTTATCATGCAGACTATAAAATGGATTTAA

AAGCTGCAATTA AAAAGTGCAAGTGAGTGGGCAAACGACTACAGTCGGGCGTCAGTAGAAG  
ATCGTAACCTAAAAACAGTATTCGCAGTTCGGTAGTGTGACAGTTAGATTAGTGGCACAT  
GGTGACCCCATTTGTCAGTGTACCGTCATAATAATTGTATATGAAACGAACTTCTAAG  
AAACATGACAATCTTAGAATACAAAAACGTCAATAAAAACGACACTCTTATGATCGGTCT  
TGTTGTATCTGAAGAGGAAACATACAGAGTAATCAAAGAAGCCTCGAAGTTGACAATTT  
TCAAATGTTTCTTGCTCCTGTGCAGACTTGTGAGAATTTGTAGGAGAGTAGGCAGAGTG  
GGTTTTTGATGGGTGTTCTAAGGTCGATTTGGATGAGCCTGATCTAGACATTGCTTAACC  
AGACAGATTTATCAAACCTGAAAACGGATACATTAGGGGAGTGTAATGGGACTAACCCCT  
AAACAACCTTGAGTATATCATCGAATGTCTCAATTTCCATTATGCAGAGAATGAGCATATT  
AAAAAGGGCATGATCGAACTTAATGCTAGTATATGTAGTCTAGTAGCACACCAACTACAA  
GAGATTTACAAAAATGACTAGAGCGGAATACGAGTTAGTTTTTCAAGCATATAAAAACTA  
TCGACTCTCTATCACAGATGAGCCAGAAGTTCTAAGAGAATAAATTCTAGACGATCTTTT  
GTATCCCGAATCCGGTGAACCTAACAGCAATCGAACCGACCGCAGTAGTTTTACCAGCTTT  
AGAAATTCCGAACGATCCCGATGAGGACACATCTGAAATTAACCCTTAATTTTTGATA  
AGTCAACGTACCTTGTGACACTTTGATTCGGGGCACCGGGTTTTCGCCATTTGTGGGTGCG  
CCGCCCTAAAATCATAGTATAATAAACACCGAAACCTTTTTATTAGGAGATAAGTCGAAG  
CAACAATGAACTCGATGATTCGCAACGCTGTAGCATGGGCATATGGTACTACTTGCCTA  
CTTACGATAATGATGGAATTTGCCTAGTCTACCTACATCGCGAACCTGTGGCAACTATAG  
GCGACTCATTTCATGGCAGTCTTTGACGGTGGTTTTCAATAGAACACAACACTACGTCTAGAC  
TCCACGCATTGCTACACGAATTCAGAACACAAAAGTGGACGATAAAAACCTTCCAAT  
GCTTAATCAACGCACATAGTATAGTAGTTCCATTTATCACAGAGGGTCTAGTTTACTGAC  
AGTATTGAATGGATTTGAACTAAGGTTCAATACCGTCCACTCGCTACACTTTGGGAGAAC  
ATTCTGGATAGATGACGGAAGCAACCTATGTTTCATGACCAACTTATTAATATGGTTCTAC  
ACATTGGGAACGATGGGATTATGTTAGCGAGTGGAGAGACTTAGAAGGGGTTAACCTCGA  
GAAATTACTTTATGTTTCAGAAAACCTTGTCTAGAATGCAATAATTATGGTACGGAGGACTT  
TCCCTAGTGCATCATGTTCTTAACGGGTAGTCGGAAGTAGTTGAAATTGATAAGAACGTT  
ACTCAATTAGAAAAGGGAATCGAAGCTACCAATCATGCAATTAATCCTGTAACCTAACA  
GAGAACAAGATTATATAGAACCCTATATAGAGTTCGATCGGAATTGAATAAAACAACCTC  
AATGACATTCTAGCACAAATCCCCAGATTATTCAGCACAATGCCAAAATGGGATATGACCA  
CATTTAGAGGAGTGGAGGGTTAATCACTTTTAAATATAAGGATTATCTTACCTATTGCA  
TTCACCAGTGCAAAAAGCCCGATGAAGACAGAAAACCCTGCCGAAGAGAATACTTACAGG  
TCAATGTTCTCATTACCGACATGAGTGGGGTATCATTAAAACAACAGTGGATGTATGTA  
AGGATAACGACAAGAGAATTGACGTTAATGTTATGGGATAATTATCGGAATTATTGGATA  
AGACAGCGATGAGATAGAAATGCGGAAAATAAATGAATATTGAAAGAAATCTAAGTGTGC  
GTTTTATCTGTGCGTTAACCTCTCAGAGTCATGCACCCTTAGCACGCATCACAACAGTTG  
TCAATTCATTCGAGGATATCCACATATTTCCAATAAGGGCTTGACATTATTGGGAGTTAT  
GCCTTATAATAACACTGTAAGGGTTAAGAAATCAACTGTATGCCTTCAATTAAGTCTAA  
AATGATCTACTCACTCCATAACGAAGAGCCTGGATTACTAGGACAGTTCTCTAGTATATA  
CGAATGCAGATATATGTTTATGATCTCAGAGTTGAGAGAGACAAATGGTGCGTACGGAA  
GAACCAGGATATAAGCGTATTTGATTATCTCAAATCAATCGGTTATACTTGGGATTGTGT  
CTCTAGGTCTCAGGTAGGAGAGAGTTGACAATGTAATTACCCTATGCTATAATATGAGTA  
AATCGGAGGTTATCCAAATGTCACACGGAGAACAGTTACCGTTCATTAAGAAGGCAGTCT  
TATACGCCCCCTTAATGTTAAAGTCGCCTACTACCCTAACGACCAAAGGTTCCCACGAGT  
ACTTGCTATATAATAACATAATTTCACTTACATCAGTATTAAAAAAACTTTGGATAATAAA  
AATGACCCTAGAGGACGATCTAAAAACAAACAAGAATTTGGTGGTAGACAAGAGCGAAT  
AATATGGGCGATTGATCAACTAATCAGACTGGAAGGGTATCTAGATAACAGATTGTATGA  
ATGTGTAGGTCACGGTGTCTTCTATCTACAATGTAAGAATAAGGATTCACTATCTTCACT  
ATGAACGGATTGGAAAAGGAGTCATCCACTACATATCCCCCTAATTACAGACTATAGAT  
CAAGAATTATGTCCACAAATTTACACAAATACTCGCGGAAGATGATTATAGAGACTAAC  
TACTCACTATCCCCTATGAATTGTGTCAAGAGATGGGTTGGAACGGAGGAACTGTACTAC  
AGTATGAACTGAACGATTATGGAACAGGTTTTATTTAAAGAATGTGAATGACTGGAAAA  
GATCAAGAAGAAATTTCTACAGCATTGAAAGCTAATAATGAATGTTTACTTGCTCTCAAT  
AAACGATTAGAGGCATGAGAGAAGCATTTTTCCGAATTACCAACGCCAGACGAAACATAT  
TTAAAACCTGAAGGTGAAGAAGAGTACCTAAATATCAATGGAACTATGCCCTGATATAT  
AAACGTCTTAAGAACTACAACATGGTATGTAAGATGACTCCTAGAGGACAGAACGATAT  
CTGTAACCTAATCCCCTAACGATACTCTCTGTTAGACTTACGATCCTGAGGCAACAGG  
GCAGGTTTTGATCACTTACAGTGGATATCCTACTGCAACAATTTCGAGATAATAACCCAATA

TTACGTATCTGAAAGAGAAGATAACTGCCTCATGTATAATGTTTCCGAAGTATGTCGGAA  
CACTGGTCAATCATATATTCAAACAGCAGGTGCATGTGGTAGAGTATTTAATGATCATAA  
TTGTGTCAATAATAACTCTTGCAGATTAACCTTTGATCATACCCCTTCAGAACTTTCTTT  
TGACTTTGCATACTCTGACGGCTGTTTCCCATACTTATATGATACGTCTGTAAAGCTGG  
TCATGTATAAACTCCTGCGTATTATGTTGAAGATGAGATCAAAAATACGAGGGGAGGATC  
TGGTTCTGGGTAAAGGTGGTGATAATCATAGCACTTCAACTAATTGTTTCCCTTGCACGTG  
ACAATTTACCTGCACCTCAGCGACCACAGACCTTAAGTATACCGCTCTCATAGATCATAAC  
GGGCGACCCCGACTGCCCTCACCCCACTCTATTCGTGTTTGGAAACCACAGCTCACCAGAT  
CTCGTTCCAGAATGATGCGCTATCCACACAGATACCAAATGGGGCGGTGGACTTTGAGGC  
GGCAGAAATGGGTTTATCTATCTGTACTGATATATAGAATGAGAACCAACCACAAGGAAC  
TCAATTCCTTTCCACTGCAAATAACAACCTGGGTAGTGGATGCTGTAGCAGGTTTCGAGGA  
TTTTGAGATACATGACCAAAATGGAGCACAGATGACCTCTTGTTCCTAACTATATTA  
TAATGCAACTACAGAACATAGGTTAAAGTTTCGTATTGATCCGAATCTTCTTGATGATCG  
CCCATTAACGGAACTAATTGGGAAGTACGGGTGGTTATGAGCAATGGATCAGGATAGCC  
AGTAGTTGATACATTCGAGATATCCTATGCACTTATTCATACAAACGGGAGGACAACACTAC  
ATTTCAATTTCAAGTTAAGGTAAGGTAAGGCTGTAGGATAAATCAATTGAATATGTAGTTCATC  
AGGGTTTGACCTACTGAGAGCGAATGATACTATGAACGGACATACAATTACCCGCGTTTT  
CCACACAGATCAAGAAAACCTTCGACTATCATGTGCGCTACTTAGAAGGAACCGGTAATAA  
TGTTGCTAAAGATACTCAATATCCATCAAATAGGGCGCACCAAATCACCACAATAGCTCA  
AAAAGGCATTCCCGACCGCGAAATCTTGAATGGAAAGTATGAGTTTATCGATAAATCTAT  
GCAATTTGTCACCGCAGACGTAGATCTGGACGCACCTGACATTTATAACTCCATAAAACA  
ACCAGATGTAACACTTACAATCACAATGGGGCGCGTAACAGGCACTACAATTGTCAAGGG  
ATGGACGGGTGGGACCAATTGAAGGAAGAACCTGACCTTGTGGCACTGCACCAGTCAT  
TGAGAGTGGAAAAACGCGGAACCGAAGGGTACGTACTGTAAAGGAGTGCTCACAGCGTT  
AGAAATAACAATTGCAGGTAGCGGATATGACGCAGATAATGCTCCAACGCATGGAAGCG  
CAATAATCCCAGGAAGAACCCAAAACCTCAAGAGCATCATCCCAATGATGACTATACTCC  
CAAACTTCTAAGCACCTAGTTATCCAAATTTTGAATAATTTACCTAAAGCGGGGGTAGT  
TCCAGGCGATGTAGACTAATTTGCGACTGCTCAACCCGAACTTAACAAAGTTTGATTCA  
ATTAGGTCTTACAGATAGTGAGATTAGAGCAGTTCTTACTGATAATGAGGTAACCGCTT  
ACAAATTGACGCTTCTACGTCTCCCAAAGTGACACAAACCGAATTCGCGTCTCTAGATGC  
GATTTTTGACAGCGAAGAAAGGCAAACCTTTCCTGAATAAACAGCTCGTATCAATATTCT  
GTCAGCACCTGTCCGTAGAAGAGTTCAAAAACCTAGGACTATGAGGGTATTCCGCTAGATC  
TTTGGATACTCTTCGTGATGCTACACGAATCGATCAGTATGGTTCGAGCTTCTTGTACGA  
TTCTGAACTTCCCGTCACGGTAAAAACCTTTTTGAAAGATGATAAAGAGCAAAGGCTTGC  
AAACAGAGATGCACTTCTTGATGAACTGACATAAAAAGTGAGTCCTGAGTATACAAACTA  
TAAAGAAAACCTTAGTAGAGACTGTTCAAGGGCCTTTAGTCAATCTTCTGAGGCAGACAC  
TGGGACTAAATATCTGATGACACAGTTTCGTGCGGACCCTACGTCAAAAGTGAACCTAAG  
CGTTAGACTTTCTATGACATCAGTAAAGTCGGATAATTCACCTTTTACTTGTAAACCCTCC  
TACACCTCAACAGGTGGAACAGTCACAGGCGGAAATGGTGAAACTATTGTAACCTTCTTC  
TCAAATGTCAAGTTTACTCGGACCTGGTTGTCAAGCGAGGAGTTGTAGCGGAACATTATC  
TGTTTAAACATGAACTTGGTCGAGCAGGGGATAATGCTGCCCGTGCAGGAGCAGCCTACGG  
AGTTCCTTGCACAATGACCTAATGGCATTAAATCCAACAGCATCAGGAGCACTTGGTTGT  
GCATTATTCACGGGAACATGTACTGGACACGTAGCGGGAACAGGACCTTCACATCATCCT  
GGTCTTGGTGGAGGAGTATTAATGGTTCTCCTTATCCACAAACACCTCTTGATCAAAGA  
ATTTCTCCCAAACAGTAGATGCGATGGATGCTACAGCCATATGGCCTCCGCATCCGCAA  
TTACCTTTTGCTGCATAAGTGCGCAATGTGATTGTTAATGGTATAATGCCTATAAAGGAT  
TTCGCTCTTCTTATTACTCAGCTACTCCAAACACTCATACTCACACAGTTTTTAAACCC  
CTTCCAAATGGTGTATGTGATCATACTACATCTTCTCCTGCGTGGCACTGTACAGTAGGA  
ACTGCGGGTGGTAGAGAAGCAGCACCAAGGTATGCTGGAAAATTACTTGCTACTAGTAAG  
ACCGTATTCCTCAATGGTTCGTCGAGCAGGAAGGTTTGGTGTATCCTCTAGGTGATTATACC  
GTAGCGTTACCGTGCAACTCGCGTGTGCGGGTTGCAGTCCAGATGTATTATTGGAGCT  
TAATTATGGCAATGAGTTTTAACTTGGGTAACACCATTGAGGCAACCCCAAAGAAAACAA  
GAGCAGGTAGAGGACAGCATAGTAAGTATATAGCGACCTCTCGTAACAAAGCAACAAAGA  
GGTTTCTTGGCCAAGGGAAATAGAATTGTAGACGGTAACCGTAATGGACACAATCCTGTA  
GACTTGTGAGATCATTTTTATGATCATAGAAATGAATATTGTCGTAATTTAATTAGTGAT  
CCATGTTCTGTTAGACCCATTAGTAAAAAATCTGAAGAAGACGCCAAATGATACTGGCAC  
TTCTCGTATTAGATGGCGTTAAAGAAGGGATCAAATAAAGAACAAAAGAGATCTTGTTC

TTTACGGATCTCTCACTTGGAATGGTGGGAAATGCGAATACACAGGATGTTGCGGTCGCG  
AAAAATGAAAATGCAATTAACAGGCGAACAAAAATCGAATTATGACCACACTTCGTGAA  
AAACCATTTCAACCTCTGGGAGGATCTATTATATCAAAATTATTATTTGAACGTCTAGAC  
GATTTTACAAGTGATGCTATCAAACAAGAGATAATAAATAAGATTAATCGGTTTGAACCT  
CGCGTACGTTTGACAGGAGTTAGAGTACAACCTCGGCATGTTACAAATACATTCAATGTA  
ACGATTGTGTTCAAAAACAGTTGGAATCCCAATCAACGAAACTATCGAGTTCGAATTACAT  
AGAAGTGAATAGTGCAACGAAATAACCTCACAGCATTAGACTTTGCAGATATCAAAGCAT  
CAATCAAATCCTATCTGAGAAGTTGGAACATAATTTACGGGTTATGACTTTGAAGGATCTT  
CTTAAGCGTATCTTATCGACACATTACCCTATAATTCATATTATACTGCATTTAATGCGA  
ATATGGCGATGAACGAGGCATTTTTGCCTTCTGCTACTATTAGAGATAATGTTGTTCACT  
ATGCAAGACTTTTTAAATTACGTTCCACGTTCAAGTACTTCATCTAGTGCATGCTTAAAC  
AAGATGTACAAACAACACAGTCTGCAGGAGCATATCCTGGCAGTATAACATTAATAAAGAG  
GTGCTGTTGCATCGGGTGGAAATTATATTCTTAACATTTTAGAAGATATTGGTAATACTA  
TCAGACCTAGCACAGGTATTTACACTTTTGACAATGGAAAGATCGTAGAAGGTAGTATAG  
TTACCTTCCAATACATTGTAAACACCTTGGCAACTCTGGTTTATAAAGTCGCTTCCGAAG  
ACGCAGACATATCTAACCTTAGTGTAAGAGTAAAACATATCAAATTATCTAAAACAGCAG  
ACTTCAACAGTTTGACTTATACAATCACTGATTTGACTGCAACTACTCGAGCATACTTCC  
TCATCGAAGGTGGAGATACGCGTTAAGAGGTAAAATTTGGTGGTGATACTGCAGGTAGAG  
CATTAAACGACGGAGAAGTCGTAATTTAGAGTAGTTGGTCCCTTCTGGAACAGAAGCAA  
ATGAAATTACAACATTTTCGTTTCATAGGACAGATTACAGACAATATTGGAGGTCCCTCTA  
GTGGCACCTCAGTCACTTTGAGAATGAAAGAGAAGTCAAACTCGGTGCTGCAGCAACAG  
CTTTAGAATCTAGTAAGTATAATGCACCCAGATACTACTCTGCACAATACAGAGCAGTAA  
CAGCACGAGAGTAAGCATTAAATTGCTGAAAAAGAGTATTCAAAGGCCGTTTCTGTTGTTG  
CATATGGTGCGAGCTCTTTAAATCCCCCAATTTACCGAAAGGTCTTTATTGCAATCCAAA  
CCCATACTGGTTCTTTACTTAACGACGCAACCACAAAGTCAAGTTCTGCGGATTTAAGAA  
AAAATGCTATGCCATCACTTTATACTGTAGTTATTGACCCAGAACAGATGTATTTGTATT  
TGAAAGTCTTTGCACAATACGATAGTGGCACTGCATCCAATACTGCCAATATTTAAACTA  
ATATTCAGAACGGAATTAACGATTGGGCAACACAACCTCAGATTATTAATTTAATTCTA  
CTTTCAGAGTACAAGCCTTTGAAAACGCGGTGACTTTATCCGATAATAGGTTGAGTGATG  
TGTCTTTACAACGTTGTATCTTAAATAACATCTATCCAAACACAAATCAGACTAATACTT  
ACCGTAATGCTACTGGTGCTGATCTATATGATAGTGCTCCGAGGAACTCCGAAGGAAATA  
CTTGTAACAAGGGACCTATATTTCTTTCAGGACTTTTTAGAAGAGCAGACAGACCAGGAA  
TGGATCAACGGTTTGAACATGATGGTTTTGGCATCTTAAGAACATTATATAACTGTTA  
ATAAGAAGGTCTATACAAATAATGTTGCAGGAACTGTAAATTATGCTACACGTCAAATTT  
CCTTTGGTCTGTTAACATAATTGGTTCAGCTGTAGATACACCTCCCACTGGATTTATAA  
CAATAACAGATTCAACAACCTGGTGCAGGTTCCGTAACAAATGCGGACCTACTGCCTACAG  
TTCTTCATATTCTTGTTCTATTTATTCCTGCAAACGTTGCACCTTTTCCTGCGGCAACAC  
CAGGAACTATTACTATAATAAACCCAGAGCTTACCTTTGTCCCAGTATGTACGATTC  
CATCTCCAACGATACGTCTAAATAGTTTGACGCCATCAGTGATTAATATGGTTGCCACAA  
CTAGTCCACTTGCTGATATCTCAGCCGCCGGTGATGTTACATCCTCTTCTTGCTTATAGG  
TGTACATGGACATTAATAAGGTCTCTCAGTCAGTTGATTCACAGACTCCAGATTTTATTG  
GAAACGATTAGCCATTATTCAATAAATTTATTGAATATTACTAACGTTCTCAAGAACAAA  
CTGGTATAGGGCAGAATATTGTCAATGAGTTCTTACAATATCTTGATATTGATAAACTTA  
ACATCGATATTCTTGATGGTGCTACAAAGTTGGGTGAATCGACCACTACAACCTGCTGATT  
AGATATTAGTTGAAAATATTGACAGTTTTTTAACTAAAGATGGTTCTGTTTTAATTGGTA  
ATGAAATAGTTTTCTATGAATCTACTACAGCATCACCAAACATTGCTCTCAGCCCAGGTA  
TTTCTTACGAGCAAGTAATATTAAGTTGACAACCTCATGCAAGTCTTCTAGATTCCTTTG  
ATGGCACTACAGTTAGGTTTACTTAAACATCTCAGAACAGTCCAGTAGCGGCACCTTCTG  
TACTGCACTTAATTGCTTTGCTTTAAGGAAAAAATTATCACCTGGTATTGATTACACAG  
TTGATGGCACTGCTATTGTCTTGACTATTGTTCCCTAGGAAAAGAATTCCTGCAGATCACT  
TCCCTTCAACTTATATTACATATCAAGGTGGTTTTGTTGAGAATAAAATTATTGAAATAG  
ATAATTCATCTGGTCCTTACGGTGAAGGTAAGAGACAGTTTACCACGACAAGAAATGGTT  
CACCTTATGCACCTGTAGTAGGTGAATATGTCTTAGCAATTTACGATCAACGTCTAGTAG  
TTCCTAAAGTGGACATCTTACTGAAAAAGATCGGTTACTTTTCGTTACAGCACCTCTCA  
ATGGAAGATTTATCTCACTATACTCAATTGAAGCACCTATTCCTTCATTTGGATCTGGTG  
CTCTGGGGTACTCTCGTGTGACGATAATGGAACCTTAACTTGCGTTTCTGTAGAAGAAA  
ATGGTAGTAATTATCGTTTTGACTACCCTGCTCAAGTCACTCTCAACTCCCATGCGGGTA

GCGGTGCTCGTTTACCTACACTTGTTAATCGTATTAAGAGTTTATCACTTTTAGAAGGTG  
GTAAAGTATACTGCGATACTAACCCTCCTGTAGTTCAAGAGCAATCACCAACAAAACCTG  
GTTCTGTAGCAGGAAGTTGTAAAGCACCTGTAATAACGGTAGTGTCTTCTGGGATAGAAG  
TTATTAGTTCTGGTAATGGATATACATTCACCCCTACAATCTCTTTCAAGCAACCTGGCG  
GTGCTATTCTAGGCACCTGTCCTATTGTAGGAGGTCAGGTATCAGGAACCTATTCTTATCA  
CTTATGGTGGTTTCGGATATACTACAGTCCTCACAACCTTATATTGATGAACCGACGGGAG  
CTAATCCTCTTAGAGCAACTCTCACTCCTGTCTTGACTGTTGGCGTAATAACTTCTATTT  
CAATTACTAATGCAGGACAGGGTTACATCACTACTCCTAGAATATCTCGAGTTCTTCCAG  
TTGGTGCACAGGCCTTGTCTACAAGTGTGATGCTAATGGTCGTCTTGTAGGAATTTAGT  
TATTAGATGGTGGTAGAGGATAGGATGACGTACGTTCCGTTTATGTCGTAGATATTAAG  
TAGATGCCACAGGAGCGTATCCTTGCAGAACTGGTGCTACTGCAACTGGTGCTATATTCA  
ACGGCAGAATTACTGACATTAATATTAGTGCTTTTGGTTCTGGTTATAGTGCTCCAAACC  
CTCCTGAGATTGATATTCAAGCACCTCCTCAGGCATAAGCTTCTGCAACTATTGGTCTTA  
AAGAAGTTACTGGATTTAAAGTAAATCAGTCATGCGAAGGATATTCAAATCAAATCCAG  
TTGGTAGTGCAAGGGCTACAAGTTGTATGACTTCTTGTAAATGAAGATGGTAATGCTGTGT  
TTACAAAGAACAACACTACAGCAGCAGCACATTGGATTAGTTCGGATGTAAAATCTCTAGATG  
CTTTATTTGTAGAACGTATACTAGACAAAGACACTTAAAAGTTTTTACCTGATGTTCCAG  
AACTATATTATAATAGAATTGATGTTAGAACAGGAATCAAGACAATTAAGAGTTCTATA  
CTGCCAAAGGAACATCGTTCAGTGTTAGTTACCCCTTTACACCGCTATATGGTGAACAGC  
TAATTATTACTTATCCATAAGATCAAATTACCAATCCCTCTGCGGCAACATGGTTTATTG  
ACACTATTTTACGTGCAACTTTGGTAAGAGGAGCTCCTACAAGTATTAGAGACGGTTTAT  
TAACTCAAGATGCTTATATTGCTTATGGTCACGTGGCTGCAGCGAGTGCTTTGATTGAAA  
ACTATATGTCTAATAACTTCTGACGTCGAAATTTTGGAACTTGTCTATCTGACGACA  
ATATTGCAGGTTCTTTTACAGTTCCTTATAAAAACAAAACCTTGCTGAACCTATAGGCCTG  
AACATATTATTATCCCTGGTGCCTCTACAATTGGTTGGCCAGAGCGAGACGGTTAGTTTT  
TAATAGGAAATAGTGAAGTGGTAAGATATCAAGAAAATTCACTCAACCAGTCTATTGCGT  
GTTACGGTCTGTTAATACTATTGTTGAAGATTGGGATTCTGCTACCGAGGGGGCTTCTA  
ACTTCTCTTTTTTCGTTAACAAAGGCACCCCTCAGGAAGTTGTCATGACAATTGGTGGTA  
TTGTTGATGCTCAACAAAAAAGTCTTACTAATACTAGATCATCTTACTTACCTGGTGATA  
AATTAACAGTCTCGAAGTTGGGGGGAATAGGAACTAATGCTGAACTTACAACCTGGTTGT  
ATAACGTAAAAAAATTAGTTAATATCAGTAGTATTACGTTTGGTGGTGTAAATAATCAGT  
CCGCAACTCTTACTTGTGCTAATAATCATGGTCTCTTAGTTGGAGATCAGGTTACCATCT  
ATGGTGCTAACCCAATCATCTATAATGGAACCTTCTTAGATACGTCTAGAGTTAGTAATA  
CAGTATTCCCATATGAATTACCACAACCTGCTACAATCGTACCTCAACGAAATATTCTTG  
TATCGGTTGACCTCAATAAAGGTAAGTCTGATGATACAGCTGTTTTAAATTGTATCGGAC  
GTGACACAACCTAATATTCAAACCTTTTTTCTATAATAACTACGTTTACGTTGCTTTTA  
CAGGTATACCCAACCTTAAAGGACGGTCCGTTCCCTGGTTTTGCTATTTTGCCAGGTAAGC  
AACGTAAACTCAACTTTTTCCATTAGCGGTAACCTACAATTTCTAAAAAGAAATATATTT  
CACCCGGTCTATGGGAACATGGGTAAATGGTGTCTCGATTTGGTCTTATAAGTCTACAA  
TCTAGAAAACCTTTTCGGGGCTTTTACTGATATCTCTACTTCTAACGCAGGTTTCATGATATT  
ATGCTGCTTCTGATCCAAAAACACATTTTCTGGTAATCGAGGAACTGGTGCCACATCTA  
GTGTAACCTGTTAATGGGTCTGTTAATGTAATAACTCGAACCGCAGGTGGATCTGGATGTA  
CTTCTTCTCCTCTAGTTTCTATAGCAGGTGGTGGTGGATCAGGTGATTGTGCAACTGCAA  
TCAACACTAAATGTGTTGTGTCTAGAGTTTTGATTAACGATGGTGGAAACAGAATACACAC  
CTCAACCTACTATTACTATGGTAGGTGGTGGAGGAACTGGTGCTACTGGAACCTGCATCTG  
TTCGAGGTCTTATTCTAGCTGTATCTGTATCCAATGGTGGTGCCTTATACTTCAAATC  
CTACTGTCACACTAAGTTCTGTTAGTCGTGCTGTTGCTCAAGAAATCGTTCAGAATGGTC  
GTATTATCTCTATCGTTATTTTTTCTGGAGGTTCTGCATATACTACTGCGACTACAATTG  
ATATTAAGCAGAAGGTTTCGGTGCTGTTGCTCGTGCAACGATAGATGTTGCTGGAGAAA  
ATGCAGGTAGAGTTACTAGTATCTAAATTGTCAACAGAGGTATCGTATATGTTCAAGGTC  
CGACTTTATCTAGTTTAACTCTGTTGGTTTCGGGTGCTACATCTACAGCAAGCGTATTCC  
AATGGACTTGTAACCTACAAGGAAGATCTACTCTTGATGCAGCAAAGGGCGAAGTATTTG  
AAGGATTTAATAATCAACATGGTGTGAAAATGCTCACTTATCAAAGCCACAAAGACTAA  
GATATCTTCTTGGTGATAATTTATTTGAAAATAATGCAGGATTAGACAAACTGCAAGAAA  
CTCAATTAGCACACTCACCTATTATTGGTTGAGCATTGGATGGTAACACAATTTATGGTC  
CATATCGTACTCAGATCCTACTGGTCTGAACTCTGCTATTGCTAAGCTAAACATATCTT  
ATCAACTAAATGCAGAACTCGTATAAATTGCTGTTGCAAACCAAATCCTGTTAGAACAG



CAGGTCCTCTTCTTTCTGAAGAATCTCGAGGTAGGGATTTTGCAGATTATCAATATGTTT  
TTGGTCAGGGTGA CT CAGATCAATATAATGGGCCTTTGTGTACGACACCTGAATATCATC  
ATGGTAGATGTTGCTATTTTGTAACTATTGATTCTACTGCAGATGGTAACCCTCTATTCC  
CATATGTTCTTGGTGCTCGTTTTAACTCTGCTGTAGATACTTGGAAATTAAGTGCTGATG  
CGTTTCCACAACTATTCCACTGCTGTTGTTAGATATCGTTATCCATATGAGAACGTTG  
ATATAGACGTTGAGAGGGCACCAATGCCTCTCCATACGTTATTACCCTAGAGAAGGGTG  
ATTTACTACTATTTGATGTGGAAGACGAAGATAGAAGTGGTATCAGTGATCAGAAGGAAA  
CTGATGATCCAGATCAGGTTTTTGAAGAACGCCTATTCCAGTTATTTGATTATTTGCCTA  
AAGTAAAACCTTGATTCTAAAGTTGACATTGAAGTTGAGACAACCTGCTAAATTGGAAGTTG  
CATCAGTAACAGGATTTACTATTGAAAATGTAGGGGTTAGTTATCAGGTAAGGACAGAT  
TAGTATTTTATAATACTGATACTGATGGTTCTGGAGTTTCTGCTCGTGTTTCTAGAATCC  
AATGTGAATCAGTATTAACATAAGGTTTTGAGGATACTAGTAGTATAAACTGTGGTCTAC  
TTAAAAC TACA AAT CCTCACAATTTAGTAGCAGGTGATACAGTATTTGTTGATTACTCCC  
CTGTAATCGACAATCCTAATAAGTCATATATCGTACGTCAAATAATGGTATTGAGGAGG  
TACAAATTAATCAAATTGGATCTGGTTACAACACAGATATTCCTCCACCGATTTTTATTG  
TTGGTAATGGAGCTGACGCTAGTCTTGAAGCGGTTGTTACTAGTGTAGGTTCTGTGCGACA  
CTGTTAATTTTCTTAATTATGGTTCTGGATATACTTCCAACCCTAGAGTTACCTTATCTC  
ACCCACAGGTATTCAAAAAGCAGATAACTATGTTTCATTGATTA AAAAAGAAAATTATG  
CATCTGTAAATGATGTATATGTGAATGATAATAAGGACGTCTACATTTGTGGTAAAACAC  
ACGACATATCTGATTATCTTGTGCTTATGTTGCAAACTTTCTGCAACTGGTGTTTAAG  
AATGGGAAGCAACTTTAGAAGTAACTGGTGGTTTGGATAATGCAGAATTCAAAAGTTAT  
ATGTTGATGGTAAGGATATTTGCCTTGCAGGTAGGAACTATCCTAGCTCTCCTCTTTTAA  
ATGCATACAGTCCAGTTATTATCTTAGTTAAGTATGTGCGAGGCAGAAAATAGTCTTAGTG  
CAACACTGAATTTTCAAAGAGCCTATGCAGGTAGTTCTGGATCTACTCGTACAGATGAAA  
GTA CTGCACTTAAAAAATTCTCTGATATTAGATTTTTTATTTGTAGATATACAAATACTA  
ACTCTGCTACTCCTTACGATGTTTTTATTGCTCTAGTTGATACTACTGGA ACTGATGCTA  
TTAAGAGAAAATCTACATCAGCAAATAGGTCTGAAAAGATTACTGATCTTGTAGTTAATG  
GAAGTGATGTATATTTATCTCTGGAGATTGCATCTGGTGTCTGCAACTGCAGTTAATG  
TTGATTTTGGTAAAGCAACTGTTGGA ACTTGTGCAATTACCATTCCCTCATATCAAACGGA  
TTAATAATCCAGGGAATTTTTTCTTAAATTCTAGTCTTGAAATGGATGAATTTGATTAGG  
CATATATTACTGCTGCAACTAGACACATATCTGATAATACA ACTACA ACTGGTTAGTGGG  
TAGGTATATTTAATACAACTAGCGAGGTA ACTTACGATAAGAGATATACTGTTGCAGGTG  
GATCTATTACTGCAGCAAGTAAGAGTGTTATTGTTATGTTTGGTGATCTTCAGGTAGCAG  
TTATTA AAATTGCTACAACAGATTCAGTGCGAACTGCAAAGTGTATTA AAATCGGTTATA  
CTGGTAAAATTAAGTGTCATACAACTCAACATTTTAGTATTCATATTATTGAAGGTATTA  
CTGTA ACTTCTCTTGCTGTTGATAACTCTGGAGATGTTTCATCTATCTGGTCAA ACTTCTT  
GGAATAGGAATGAATTTATTTTCCCATT CATATCTGGATCTACCACTGATACAACTTGTG  
ATTATACTTTAACATGTACATCAACTAATATCTGTATCAGTTATGCTGATAATGTTGCTA  
AGATTTATGGCTACAACCCTGCAGGATTTAACTCTACTTGTGTAAATTAATATCTTAAA  
TTACTTCTGCTCCGTTAGGAACAAATTTAAATTAGAAGCGGACTAGTGAAGTTGGACTTT  
ATAAACAAGCAAGTCCATCTCAAACATTATCTCAAACAAAACAAACATTAGTTTCTAGTG  
GTGATGCTGAATACGCTACTGGGGGATTTGGTTATACTATGATGTTTCTAGTGGAAAAC  
TAGAATTAGTAGTTACAAATGATACTACTAAATTA ACTTACGCAGGATCTGCACTTCAGT  
CTACATTA ACTGCAATGATTGTTGATCATACTGCAATACATTGGACTTAAGAAAGAAAT  
GTAAGCAGTCTACTGCATATGTA AATGGAATTCAAGCTCGTACAGCAAGTGGTCCTTATA  
CATCATTAAACGGTCAAGATCTTCTTGTGGTCAAATTACTGGTAGAGATGGA ACTGCAG  
GAAATAGTCGTAAGAATGAGCACGGTCAATACTTTATTGATCATCTCAGACTTAGAAATA  
GAGCAGTCACTTCTGGCGTACCTACTGATCTCAACTCATTCCCAACTACAGGTGCTTTTG  
CCTTTGCATCTCCTTGGGTTGATAGTGGATGGTTTACTACTAACCTTACTAAGTATGATT  
AAATTTATTACATTGGTTGGGGTCTTAAAGTTTGATAAAATTGCTGAGGCTGCAACAATCG  
GCAGTCAA ACTGTGCAA ACTAATACTTAAAGTTGGATTGGTTCGAACAAGTGTAAGTGCTG  
TAACAGGTGTAGATCTTACTGTTAATAATACTGGTTCTGCTTTAGGTGATTCAGGGTTCC  
AAAATCTAGACTTAGATGACTCAGCAACA ACTATGAATGCAGTCACTGAGTCACTCACTT  
AGAAGCAGAAATATCTGGAGTTCTAGA ACTCCA ACTGTTCCCTTCACGAGGTTCTAGAAAAC  
TTTAGGTTAGTTTTATTGGTAGAGACCGATATTACTTTAAAGTCAATCCAACATCTAAGA  
TTCATAATATCCAAGAACTTACAATTAATCAATGATTTAACTTTACTGTAGGAACAAAAT  
TAAGATTAGTAAATGCAACTTCTGGAGCATTATTAATAGTGGTTACATTATTTCTACTG

ACATTGTTAATAATAACAATATTCCTTCCTGGTAATAATAATGGTTGGTCTGATGATCTGA  
ATCAGGGTCAATTGGTTACAGAGCAAGTTAGTGAACAGACTACTTATGGCATTGTAGATC  
CTATTCCTGCAGATGTTAATGAAGTTGAAGGATATAATTTTGCACAAGTAAATAACACAA  
CACCAGGCACATTTGATATTGATCCTGACAAGTATAATTTAGATGGAAGTTATAATGCTG  
CAGGGGGACGGTAATTAATAGTTTTGTCAAATTCAAACCACATAGTGGTATTGAGTATG  
CGATAAGCATTGATGAAGTTTCTTCATCAGGATCTCCGTTTATTGTTGGATCTGTAGTCA  
CAATCACTTCCTCAGATATTAGTTTTAATTCTGCTTACTCTACAGCACAAAGTACCGACT  
TAACTGGTGTTTTAAAGATCATTGTAATTGCATAATTAAGTTAGATTTTACAAGTTACTG  
AAGTTACAAATCGTGATCAAGTTTATGTAATTACAGTAACTAATCATTATCTATCTACTG  
GATCAATGATTTTTGGAGATGGTAATCCTACTCAAGCTTTTGGTTATACCACATATGATG  
AATATGATGGCTCTTCTCCAGTTTCTCCAATTGTGACTGCCAGAGAATTTGTATATCTAC  
TTCCTAGTGCTGCATTAACGTCATCTGCTACCACAGTAGCATATGTTAGTATCTACGTTA  
AGTCTCCCGTTCTTAAATGTATTATGGGCATCAATGCCTGTTTGATGTCCGTCATTCT  
AAATGAGCGGTTATAATTAATCTTTCTTTAAAGATCCTTTAAACAAACTTGATTATTACT  
TCAACCCTATTGAACGTGTGGGAAAACCTCCTCCTACAGGAACAGGAAATCCTACTCCAA  
CTGTGAAACTTAAAGTTGATGAGGGTATTGTTGCAAATATTTGTTATTACATTGATCTCT  
CTTGATCTGGTGCTAATTGTCCTGTTTCTGATGGAAGTTATCTTGATGTTACTGACTCGC  
CTGACAAGGGTACGTTCTCAGTTCAGTCTGTTACGGTTCACGGTACTCGTGGTGGTG  
ATTTTATTAGATTTCTCTTATCAACGAACCAGAAGCAGCTGCTGAAGTAAACCAAGCAT  
CTTATACTACAGTTTCTGTTAAGGCAGTTGGTCTATTGGTGCTACTCGTGTGTTAATC  
CAGGTGGTTTCTATACAATAGTACCTGTTGTTTCTCGAATGCAATCTACTAGACAAATTG  
AAAGAGTTGCTATTAACGCACCAGGCACAGAATATGCTGTAGGAACCTATAGTGTGTTG  
CTATTGGTGGTGATGGTGAAGGTGAATTTGTAGATATTACTGTTACTGAGGGAGCTGATG  
CTACCGGTGTAAGTATTCTGGTCAAATTCACCAGTTGTTGTTATATCACCTGGTAAAA  
ATTATACTTCAGCAACTATTGATGCTGAGGCAATTACTGGTATTATTGGATCTGGTTTAA  
CTGGTCTGGTGCCGAAGTGAAGTTGTTATTCTTGCTTCTGGCACTGGTGCATCTTTTT  
TCACTCAAGGTGATAAAGTTGGTAAGATTATGAACTTAAGAATAACTTTGGTAATG  
ATTATTCTCATGACTCTACACTACGTCCTGAGATTACATTCCGTAAAAATGTACAGTTAA  
CATCAACCAGTATCCTAGACAGTATTAAGTTACCGATCAAGGTTCTGGATGTTACAGG  
CACGTGCAGTTGTATTTACTGCTGGTGGCGGAACAGGTGTTGTTGCTGAAGCAACAATA  
AGAATTGTCGTTTAGATTTAATTAGTGTAAAGATCCTGGCGGGGGTTATTCTTCTACTC  
CTGCAGTTGCTCTTAGATCTTCTTTCAAATATGTTGTAAACCTTGACTTAGGTCTTTTT  
AGTATGCATTCCCGGTTGGTATTGCTAACGGTCTGCGGATACACTTAATGTTGTTGATG  
CCGCTGAAGGTGCCGAAGTCCCGCTTGCTGCAGCTGCGATCGCTCGTTTGAATGGAATA  
CAACTTATCACGCAATTACTGGTCTGCAAACTCTCTTGAACCAGATCAATTAACACTTG  
CTATGACTGCATCAAACACAACTTAAAGTGATGCCATTTTATATGTCAATGCAGGCTCAG  
GTCTTCAACAATTACTCACAGAATCTTTGGTGGTGCTGCTACAGCATACTTATTACAT  
CTACCTTCTTAGAAGGAGAAGTGTATCAAGGTGATTCTTTAGCAAATTCAACTGCTC  
AGGGTTATGTTTCTACAAATAATGGTTGGCTGATAGGACCTCGAGTTCTAACATGGTAC  
ATGATACTGGTGACTTTATTGAAGGACCAAGAGCAACTGGTGTCTTCTCAAATCTTCGG  
GAACGTTCAAGTACTTGAATATTGCTAAAGGTGTTGTTGAGATTGGTCTCTACTAAGA  
ATACAGGACAGTGTGTTGATGATGTTAGTAAACCTTCTGAAATCATCGAAAATATTCAAG  
ACTCCTACTATAAGCAAGATTTCTCTTATGCTATTAAGAATGCTGGGTCTAGCGGTGAGT  
GGAAAGACATTCTGATCAAAAACGTGCAGCATGCATCCTTCAAGGCATTTAGTGAATTAG  
ATGTTTCTGATTACGGACTGGTTCCTAACAAAGGGACGGATTTCCAAGTTACTACATCTG  
TTGAACTTGCTAGACAAGCGATTGTTTATAATTTCAAAGTTTTGCTTTAGTAGAACCAG  
TTTATTGAGAATTCAAAAAACAGAAATACTTTTCCGTCAGAAGAGACCTACATCTTCAG  
CAAATATGCTGACTTCTGTTGTTCAACGTATTGATTATATTTCTACGTTATTTGATGGTG  
AAAGGATTGCATTCCCACGAACAGTTGGTGGAACTAATATTGATGCTAATGCTAATCAAT  
TGATGATTGTTTTAAATGGCGTTGTTTCAAGATCCTGGCACATGTTTCAATGTTCAAGGTG  
ATTCGGTTGTATTCAACGAACCGCCAGAACCCCTGCAAGAACCAATACGTTAACGTTA  
CTATTCGTAATATGCCTACTAAGAAAATTTTATGTGATAAGATCGGTGGTAATTTCCCAA  
ATCGTGGTAATGAAATGTTTGGAAACAGCATCAGGAAATCGTCTGCCCGTTACCAGTGCTG  
TAGGTAATGATGATTTGGTTTCTTCAGTCAAGGAATTCATTTACTCCTAGTGAACGTTG  
TTACAGTTGGTGCAACAGGGTTTGCTTCTTTCTTGCTGCAAGTAATGGTGTAAACCAATG  
GTCAAACCTTCGGTCTATTTAATTTTGGTGAGAAAATTACTGACTTCCAACGTGATACTG  
CTTGAGTCGAATCAATCAACCGACAGACAGGGCAAGAAACAACCTTTAGCACAAATTAAGAT

ATACTATGGGTCCGTCCTACTACCTCATATGAAGTAGTTGCATATAAGACTTATAATAGTG  
TTGCTGACGCACCTGTTGCTGACGGAACATTTACTACTGGCCAAAACAATCAGTTTGGCT  
CTGTAATTTTCTTCTGAAGAGTATTACACAGTGTTCTCAATCAACTACTTTTGGAGTTA  
CAAGAGCACAGTCTGGAACCTCTGCTGTATCACAACAGGCAGATAATCCTGTTAATCGAA  
CTCAAATTTCTGTCAATTTTCAACTAACTTTAATCAAAAACAACCTGGAACATATCAATCCA  
CACCTGGTCTTTACGACAATCAGTTAAATGAAGTTATTATTGGTGCTCTATCTGGTGTAG  
TTGCTCTTGTTACTACAACCTTCTACATATCAAGAGCCTGTAAATCACGAATTTATTAGTC  
AGGTTAATATTTCTGAGGGTCTTCTTTCTTTGGTCTATTATTCAACAGGATTATATCTC  
AGACCTATCCAATCGTTGATCTTGATCATATTTCAAAAATCTCAGGTAAGAATTGTTGATG  
TTACAGATAGTCAAACAGATCACGATTCTCAATTCCCTGCTAATGAAGAAATTAACAATT  
ATGTTGTTCCCTTACGATAATGCTTCGGGGACTCTACAAAATGAGACTATCAGTAACTACC  
CATTAGAGGATGGTAACGATCATGGTGAATTTGCTACTCGTGAAGGTGCTGTAGTTCTTA  
AATTCACTTCTAGGGATACAGTTGGAATATGTTTAAATCTTTCTGGTCAAATTATCTGAA  
CTCTTGAAACGAAGGAAGAAGTAATTGGTGCAAACCAAGCAGAAAAAACTGCATACGATG  
GTAAGGTTGGTAGATTTCTGAGAAACGGTGGATATTATCATAGATTCGCAAGTAGTAATG  
CGTACCTAAATGCAACCAATCAGAAGTGTGTTGATGAATGTTTAGGTCGTTACCTGGAA  
CTGAAGAACATACTTTTGTAATGGTGTGCTGATTCAAAAACCTGCAGGTGGCGGGGCAA  
CAGGTACGTTTACTGCTGCAACAGGAACTACCCATAATGGGTTGACATTTGATCTAGTAA  
CTGAAATTCGCAATCACTCTTTAACAACAAGTAACACAGTTCTTATCGCTGACAACAGTC  
TTGGTTTTGCTTGTCCACAAGGTGGTAATACCTCTACTAAAGCATATCCTCGTAGCACTG  
ACCCTGCATCAGGATCTGCTCGTAATATAGCTGCAGTTACACCACCGACGATAACAGTTA  
ACGTAGTTGCAACTACAAGTGATGAAAGTTTTGCAGTCGCAGCTTCGGATGAATTTGGGT  
TTGTCACTGCCGCGAGGACAATGGAGTGTGGATCACACCAATTACTGTGGGTGCAGGAA  
CAAGATCTATCTTTGATTTTCAAGACTGCTGCAACTGAAGTGGCTCCTTACTTATATCTTG  
AGGCTGGAAATCTAGAGGATTATGTAATGGCTCAATAGTCATTCAAGGAACAGCAAACA  
TATTTCCAACCTCAATGGACACACGTTGCTATTAGTAACTCAAGTTCTGTAACCTAGAATGG  
TTGTTAATGGTGTTCAGATGGTAGTATTTACAGTGAGACCAATAACTACGGAACAAACA  
AACCCTTAGAATTGGTGTGATACTGCAGGTAATAACTACTTTATTGGATAAATGGATG  
AGTTTAGAGTTTCTGCAAATGGAAAGTTATACAGCGTCATTTCCCTGCACATACAGGTATCT  
TCTTTGGTGATTCAAACGCTGTAATATTCATTCATTTGATGGAGCTGAAGTACTACCGC  
ATACAGATCATTGGTCTGGAACCTGCATCATTACTATGGATGAATGGTTCAATAATGATG  
CAATTCATAAACTTCTAGAAAGAATGCTGCACCTGCAGGGTTGGCGGGTAGATCCAACA  
GATACTATAACGCTGCAGATAATAGCGAAGGTAACATCGACTTTATCAAGAAAAAAGTTG  
TATATCTAATGAGACAGAGATATCCAGAACTTGTTATTATAGGAATTAGTTTCACTCCAA  
CTAAAGCAACGTATGACGCTGTAACCTGGTCTATTGTAAGTGACTGTGACTAGAAACACAC  
TTACTAATGGTGGACAATGTACACCTCTGTGTGCGTCAGACAATCCTTCGACTGGTATAT  
TGACTATAACTCAGATTAATCACGGTGGAACTAATGGTAAGAGAATCAATATTAAGTTC  
GTGATATCACATTTACATGTGCAGAAGATAGTAACCCTACTTATCATCCAGATCCTTGTA  
GTACAGATCCGGTTGCAGGAAGGTTGTTGCCAGTTTCTAAAGCGACTGCAGATACATTTA  
CAGTTGATGTTGCAACCTCATCTCATACTACACCTCATACTTTTCGTATGTGCCTTAACTA  
ATGCAGTTGCTGTTGAGAGAGATAACAATTAAGATTTTAGATCATTCTTTGACATTCACTT  
GTACGATGGATGGGCATACTGCTAATGAAACTTTTACTCGTACAACAGATCCTGCATCTA  
AGGATGTTGCTCTACCAATCGTATCTTCCAGTTCTACAAATTTAACAGGTAATGTAACAC  
CTTCACCTTTAGTTAATTTCCAACCCACTAACGCAACGTACGATCCTGAAACTGGTGCAT  
TCGTATGACGACTGGTAATCATACCATCAATGTTGGAACCTCAAGTTAGATTAACCTGCAA  
ATTCACTAACATTTACTTGCACACAAGATGGTAACAGTACACAGAAAACCTTCTCCTCGAG  
CAACTGCGTGGTATGGTTAGCCTGATCCGGCTTATAATACTGCTCTAGATGTAACCTGTAG  
TCGGAACGTCTACACCAGATATTAGTAGTCTAGCGCATGTTCTTACAACAGGTATTTTCA  
GAGTCAATAACAAGTTGTAACCATGGATTATGTACTCGCAATAGAATTCAAATTGCTGAGA  
ATTCATTAACATTCACATGTGCTTCTGCTTGTAATGCTACAAACCAGACCTATCCAAGGC  
AGACTTAGCCTATCAGCGGTGAGTGGGTTGAAGTTACCCTTGTTGATGCTGATACAATTA  
CTATTGATATTGGAACATCTACGGATACTTCCGGACATTCATTTGTTTCTGCGACTGCAC  
GTGCACTTATTAACCAAACCTGGAACCTGTAACCTATTAACGTTGGTGTCTTCTCCTGAGACGG  
ATCAATATGATCATATTTTTGTATCTGCTGCATCAAACGCAGTTGTTACAGGTGGTAATT  
ACTTACAAACATTTGTCTCAGCTACCAATAATGCAGTGATTATTGACGAAGGTATTAATT  
GTGAAGATAAATTCGTGATACATTAATGCGATCATTCAAGATCTCCGTAATGCTTCTA  
ACAATCATGTTTGGGATGCTGCATCTTACTCTGTTAATAGAACTTTTAACCCAGTTCAGA

TTGCACAGATTTTACCTGCTGTTAAAGAAACATTATTCGCTTATGAAAAAGTTGATGATA  
TGCTTCATCATGTCATTACTAACGCTCTTTGGCCAGTTC AAGGTGATAATGGTTTAACTC  
AATTTACTGACGTTTAAATTACTGATTCTTCTTACCCTACATTGAATCAGTTTACACCTA  
CTAATGCAACTTATAATCCTGCTACTGGTGATATGGTATTGACTATTGGATCTCATTCAA  
AGACCACATCATCAATAGTTAATATTGCAGTCGGTGGTATCACATCTACATGTGCCAAAG  
ATGGCAATGATCGTCTACTGCACATCCAAGAAAGACTGATCCTGCCGCTAAGGCAGTTC  
TAGCTGTCACAGCCGTTGGTGGTGGTATCACA ACTAGCACAGATAACGTAGGTAATCAT  
CTGCATGAGATCAATATACTAATACATGTTTATCTGCAGTAGCCAATTCTGTC ACTGAAT  
TAACTTATACCACTGGTGACTGTGCAGATGCCTATTCAACTGTTGGTAGCTTAATTAACA  
TCATTACAGATAGAATTACAATTGCTTCTGCATCATCACCTGTTGATCATTTGGCAAGTG  
TTGCCAATGTTGAAGCTGCATATGAGTTCATTTCGGGGAACAATTGATGGATATCTAGAAA  
CAACTTGAGCAGTTGATTATCATAACGCAGGAACTGGTTTATCATATAAAAATCAGATTG  
GTCCTGATACGCAATAGCGTGT CAGAGATGCTGTAAACTCAGTCAGACTTAATCGCACAG  
CAATCGTTGATAAAGCACCGTAAGATTTGCTACAATATTTTCCTACGTTGGCACAACAA  
GGCCTAGAAACCACGGTGGTGCAAGCACTGACGGAACCCTTCGTATTAAGACTGACTTAG  
GTAATTACTTTGACGCTATCGCAAATGATTCACAAGAAGGTGGTAATCTTGTA ACTATAA  
CAGGATCTGGATTCGAACTCTGCCAAAATGGGGGACTACGTTATCTTCGTCTACAGGTAT  
TCCAGTCAGTCGATGATCATGGAAGACTTGCTGAGCATATAAAACAAGCAGTTT TAGGAC  
CCTTAACTGACACCAATACTGACAGTATTGTTGTTGGAGACTGGGGAGTTACTGGTTCAG  
GTGTTTCTTGTTACTTTAATGCTGTTACAGCTACAATTAATCAACTCATTGCAAATATTA  
ATACTATTATTGCTCCAACAGGTCCAGCCTTCGAAACTGCTGCTGATAGATTATTCTTTA  
ACAAGCAATTTATAAAGGAAGAAATTAACGGTCTTGGTCTACAGTTTCGTCCATATGTCT  
TAAACGGTCTAACCTATAATGAAGGTGCTTGGACTGATGAATTAGATTTTAAAGATTTAA  
TTGTTGCTCTTATTTCTGATTTACAGGCTGTTGGAAACGATAGCACAAATTCAAGAAGCAA  
GCACTTATCTAACTACTGCTCTCATTATTTATACTATTGACAAAATTCTTCCTGCAGCAT  
TATACGCTATTGGACAAATTGAAATCCTTGGTGAGTATGCGATTGAAAATGGATTATCTC  
CTCAAGCAGAAGCTGGAAGTGCAAACAGATCTACTCAATAAGCCGCGCAATATACTGATG  
AATCAGCATATAGTGATTCTATTTCAACTTCAGCAATCAATGATGTTGTATATGCATGGC  
GATACTTAATTGAGATCGTTAAGGATATGTTCTCACCTGGCGAAATAGAAGCAAGATCTG  
CTGCTAAACAATTAGAGTATAATGCAAATTATTACACTAATGACTTAAATGACGCAGTTA  
CCAGTCAATCTGGATCTGGGGCATGGTCTACTGATTAAGAAA ACTTTATAGAGGGTATGG  
TTGGAGACATTGTTCATGATCTTATTACA ACTGATACTTACGCTAAATCCACCGCATATC  
CAATGACATTAAGTGCAAGTCTGGTAGGTTTGATGATCGAGAACATGTTACTGCCAGTA  
ATGGTGGTGAAGCAACTGTTCTTGAATAGGACGATGTTAATAAAACCCTTTATGTCAGTG  
CATTTAATTGAAATGCATGGGTGGCAACTAATACATTGTCTGCTCCTAGCGGTGATACAG  
GAACCATTGCATCTGGTTGCGTAAGTCTGCTTACCATTTCGTGTAATAATCCA ACTAACG  
TTAAGCTTATTTATAGAGCAAGAACTTAAATATAATATTGAAGGTCTTGTTTCTACTA  
CGAATATTTCCCTGATCCCGAAAATCTTAATGCTACAGGTAGGACTGCATCAGAAACAA  
CATCTTCCGTAGATGTTACTGCTGCTGCTGAGGAGAGTCAATCTGCTGAGAAGTAAACTG  
CTTCAACAAATAATACTGATCACTACAAGGGTATCAATTTCACTCTAAATTCCTTTAAGA  
CTTTTGATAGTGATACTACTAAATTTCACTCTACC ACTGGAACATTCCATACTGGTTCTG  
CAGGTGATCCA ACTACTCAAACATTTACATATCGAATCTTGGTTAAGGCCGCTGTGTATA  
CTAAGACTTGTATATAGCTAGCAATTGATGACTCTCTCGCTACACGTCAAAGAGCATTCT  
TTGATCTTGATTAATCAGAATGAACTAAGGGTTATATCTTTACTCCTGATCTTGCCATAA  
CTGTAGATGCCTTTGGAGTACGTCTCATGGTAATGGATGGTATCGCCGTTATATTACAG  
CAACATTCGGATTTGGATTCTCTGAACTTCGCACACCAGTTTATACTCGAGTTTCTAACG  
GAGTACTAGTACGTACAGGTAATGTATCTCATGGATTATTTGTTTGGGCTCATAAACTCA  
ATAGTGGAGCCCTTGATCCTTATACTGCAGTATCTGGTACATTGTTCTATTCAAACACTG  
TTTATAATATCAAGACATTTGTTTTGGATAACCTTGCAGACCTTATGGGTGAGGCACTTG  
ACAATACTTTAACATCGCCTTCGCTCTTGCATCTTAATATACGTTCTATGATGCTTCTC  
TTGCATCAGATTACTATAAATCTATTATTCAAAGATATATTGGTTATGATCTAAATGAAA  
TAAGAAATCAGTTAGCCCCGTCAACTCATTATACAGCTATTACTAACAACGATGCGATCA  
CTGTTCC TACAATCAAATGTGGTAATCCGGAGGTACCAATTGTACCTAGTGGCGGTGTTA  
ACCATGCTGATTACTTCTATGGTTTGCTTAGTGACGCATCCGCCGAACTTGAAACTGTTA  
CAGAGAATACTTGTGAATAAGTGCAAGTTTATAAGAGATTTAGAATTGATGGTAACATAA  
CTCATGGTCCCTTTCACAATGGGTGAAACTGTTGCTAAACGGGGACCAGGTGGTGTATAG  
GTGTTGTATACGGTTTTTACAATGATGCAA ACTATAAGAATTTTGATGTTCCGGGTAACCG

CAGGGGTTTGGGCAGTTACTGACAATATTGAAGGTGCATCATACTTTGCAACCGCTCAA  
TTAGTGCTCTTGAAGATCGTGTTTCATATTAGCGATCTCCAAGGATTGTTAGAGAATGATT  
TCCCTCTCAAAGGATATACATCTGGACAGACAGCACAACCAACAGGATTCTATCAGAAAA  
ATGCAGCGCTTACAGATGACTCTGAAGGGGCGTTAACAGTTGATACCGCAAGTCTAACTG  
GAACATTTGAAACTACTGCAGTGGTATATCCTCAGACCTCTAGTAAGTTTATTGATATCA  
GGAACAGTGATAGTTTATAGATGTTATGGTGGGTGATTTAGTCCCTTCCATAGGTACTATTC  
GTCACGGTATTAAGATTCTTAAGAACTTTCATGGATTTCCCAGGTAATAGACTGTATT  
CAATTGTGGCAGGTCAGCAGCAAACCAAGTAGGTAGTTAGTTCTGGGATAGATCTTGGA  
ATAATTACCTATACCTCATTCCCTGTGGGTGGATTTACACCTTCAATTAGTGACGTTCTTG  
GTGATTATGGAACAAGAAGTCTGTACCTGTGGGACAAATTCAAGTTACAACCTGTTGTGA  
CAAATACAGGTCGGGCTGCTGCAAGAGTTCAAGATATTGACAATATTGGTTTGAATAAGA  
GATTATATCTCTCGTCTGTTGTTGGTTCATTTAATGGCAATGATGGTAGTAAAGGTCCGG  
ATAATTGTGCTTCAGCGATTCTTAATGTTGATGATGAGAAAGCTCGTGTCAAACGTTCCCT  
TCAGAGGATTTGATGGAACACAAACGTAATTCGAACCTCCCTACAGATAATGGAACCTCAAT  
ATCTGCCTGACCCCGCAGGACACATGGTTCATCTTTGTTAATGGTATCCTACAACCACCTG  
GTCCAATAATGCATCCACAGCGCTCTCTGATACTATTCAGTTCACTGAAGCATCTGACT  
TAGGAGCATCCTTTACAGGAATCTACGTTGGTAAACTAAGACAACCTTGATAATATTAGTT  
TCGAGTTTGATCCATTAAGACAATTATTCAACTTGAGACGTAATCATGTGTGCTAGTCAT  
TACTCTAACTGATCGTGTTTCAGTCAAGCACAATGAGACCCGAAAACCATATATTCGTTT  
CACTTAATGGTTTGATTCAAGAAGCGGGCATCGGTTTTGCGATTGTTGGTTCTAGAATAA  
TCTTTACTGGAGTTCCTCGATTTGGTTCTACATTGGTTGCATTCTCTTATGTTGGTTCTG  
GGGCAGACGTTGATGCTTTGGAGGTTGTTCCCTCCAATTGTATCAAGTGACTTAATTGACA  
TTCAAGGTGAGACTGCAGATAGATAAGTTGCTTTTATTGAATCATCAAACCTGTCTAATTA  
CATTTGATTATATTGGATCTGTATTCGGACTGAACGCTATCGGAACCGCACCTGTAACAA  
CTGGATTTATTAAGTATGTTGAGGTAACCTGTGTTCGTTTCAGGATAGTCTTTCAGACGTA  
CGGTTTCGTTTTGAGGCTATCTCAGGTTTTTAGGGTAATATCCGTGCACGAGTTGGTGTG  
CGAGTGTGGAACCTCAGTGCAACTGGTTCCTGGATACCAAATCCTTCAGTTGCCGTTGAGA  
CCACTGTCGCTGATAATTATGTCGCACCTAATCTTGCAGATTATGGTGAAGAATAATTG  
ATCCTGAGATCCTATAAATAACTAGAAATCGTAGCGAGTAATGGCTAAACAAGCGCTAGG  
GCTAGGTTTCAGCAGCAAATGATAACTCAGGGGACACCCGGAGAGCTGGTGGTGACAAGAT  
CAATGACTACTTTTTCTGCAATGTTTCGGTGCCATTGCTAATGGAACCTACTGACTGTTAG  
TGTTACAAACCCAGCTGTTGGTTCAGGACTTAGATATAACGGAAGTACGTTTTCAACTTC  
TGACTGTACACTACTTACTTCAGATTAAGCTGTAAATGGTAACAATATTGCATCCTCTTC  
TAACGGTTATATCGTTCTTGATCCTAACGGAACCTGGCAACGTAACCTATGTCTAATGGAAG  
TGTCACAAGCACTTTTAATGGCACTACTGGAATAGTAGACTGTCCTACAAACATTCCGTA  
TAAGAATGAGTTGACAACCTGCTGGTGTGCTCCTGCTGCAGCAACAAATACTTGTTGTTT  
CTTTCTGTAGATGGCGATGATAATCCATATGTGAACATTAATAACAGCAGTTGGAGC  
GGGCGCTGTAAGATCAAAGGCGGCAAATGATTATTTGTGTAGTGGATTTCTTTCGGAAC  
TGAGATTACTTCTGCAGCTCCAATAATAGCCAAGACTTAAAATGGAATGGAACCTAGGTT  
CGTTCCAGCTGATGATTTTAAGGGAAGTTCAGGAGGTGCCACTCAAAGCTCTTCGCTAC  
CATCTTTGGTGACAGTGGTAGCACTGCAGTGAATACTACAACAGACTATTTAATAATTGC  
AGGTGGAACCTAACATCACTACTGCAGTTTTTGGGGACACTTTAACAGTGAACCTTCTCTAA  
AACGTTGACAAGCACCTTATCAGCATTAACTGACCCTGATATGTCAGCTCTTACTGAAGG  
TGATACATTATTCTATAATGGAAGTAATTGGGTTCCCTACTAGATCACCTATCACATGGAG  
GGAACCTTGCTGCTACTGGTTATGCACACACCTTTACGTTCAATGGTCCTGGTTTCTCTGC  
AGCAACGAATGAACCTCAGATCTAGTTTCAAAGAGGGGCAACATATGCTTTCGATAACTA  
TACTAATGGTGGCGCACATCCAGTTAGAATTCAGAGTTCAGCAGGTTTAAGAGTACACACC  
ATACATCACTGGTCAAAGTGGTTCGAGGAACTGCAGTCCTTTATTGGACTGTTCTTATGGA  
TGCGCCATGCACACTTTACTATCAATGCACAATCCATTCACAAATGAGTGGGACTATCAC  
CGTTGTAAGTTAATAAATGACAAGAAGTGTTCCTGGAACCTGGTGTGTAATCGAACCAAT  
AGTCGGTGAAATATTAGGTGTTTCGTGCAGTAATCGTATCAAATGGAGGAACTTGGTACGC  
ACCTAATGAGCCGCAACGTCTTACTGTGACTGGTTGCGGAACTCCTGATGAAATAGCGTT  
ATTATATCCAATCATTGATGCTGATTCTGGACGAATCACTCACCTCAGAGTTTTGAATAG  
AGGAAAGGGATATGATCCTCTGAGATTGCAAATTATTCCTTAGCAGGAAACACCACACGC  
CCTTACTTGATTTGATGTCAATAGAGTTTGGCAAAGTTCATCCTAACTCTCCTACAACAGG  
TACGTTTACACCTGATAGTTTTCGATTAGTTAGTCATAATCACCTAAACCAACTCAGCA  
TTTCTTAACTGAAAGGCAACCAGCCGGTTCTACAGTTCTCGTAGATAGAAGTTTTGATCA

TACGATAATCTACCGTGGTGGAAAGGATGGTCCTTATGTTGGTCAAAGAGATTTTCAGAA  
AACTAAAGCACGTGGCATCAAGGCAAATGGTGTCTTACTTCATACTCCAGAATGGGGACC  
AGCAGCATGAACTCGTACAACTTCTCTGCTGATACTTTTAAATACGACTGGGTAAAAAA  
TACTAATACTTATGATGCGGTAAATGATAGAGGTGTTTATTATTATCATCCAAGTAAAT  
CGTAAATGGGTTTGCTCTTGTTAATGGTGTATTTGATGGGGGTGGTAAACAACCTATACAC  
TTGGCATATTAAGGTAGAAACAGGAAACCTTGTAGTTGGTGTATCTAACTTATATGAAAC  
ACTTGGTTCTATTGAAGTTGGTAGAATTGTAGATGGAGTCTCAGGAACTGGTAGAGGTGA  
AATTGGTAAGATTGTTAGAGATGATTAGAATAATGTTGCTAGAGTTTATATTAGAACATT  
ATAAGGTGCTGTTTTCCAAGACAATAATCTTGTGTTAGGTTCTAATGGATTTGTATTTAG  
ATTCCGTGGTGTATCCAATATAAAGCAATCCTTATTAAATTGATTTTGGAACTGGCGCAGC  
AAAGTTCGGTCCTTTCACACATGGTCAAATTTGTATCGGATCCGTAAATATTCAAGTAAC  
AGCAAATTATTTAATTAATATATTAGTCTGACGAACTACTCAGGCAGGTACAGGAAA  
CCCTATCAGAATTATCGCAACTCCTGATGGTACGTTGAATAACGGAACAATACTAGAA  
TAGCACTGGGGTATCTAAAGCACCTGCTACAGATTATGAATCAATTTATGCTCCAGTATT  
CTTGCTGCATAGTGTGAAAAACAAGGATTTATTTCCCTTTGTGCTTATCACAGATATAT  
GGGAGGATATACAGGTGATGAAGCTTACATAACCCTCAATACATCTGCAGAAACATATAC  
TCCTAGTAACGATTATTATGCTAGGGACTTTTATCAAAGTAATCTCAGTGATCCCAACAC  
TAAAGATTGGTCTAGATAGATTGATGGACACTCAAAAATTCGTGGTGTTCCTTTTGATGG  
TTATTCAATTTACTGACCTTGGGGATATAATTGTAGTCGTGGAGTAGCAAGAGTAACCTC  
TCCTTATAGATTTAGAAGCACTGCTGAATTAGCGGGTGGTCGTCCTCAGGTAGATAGAGT  
ATCAACGGTAACCTATCCACTTACCATTCTAATGGACTGTTCCCTTTTTGGAGGTTCTCG  
TCCTAACTTTTTACAGTTTGATCGCGGAAAAACATACATTTTCGATCAATATGACGCATC  
TAACGACAGTCAACACTTATCAACTTCAACTACGGACCATGGTTGGCAACGGCAACATCC  
TGTTATCATTGGGAATACTCCAAATTTGGATTCTGGCAATGGAATCTAATATTATATTGA  
CGGGAGCGAAGTAACCTCTCAAGCATAATTTGTCAGGTTATAACTTGGCAACATCTCGTGA  
GGTACGATTTACAGTGCCTGTGAATGCGCCAATTGGGTTATATTTGTTGCGTATACAAC  
ACCAGGTCATGGAATTAGAAGTGTTCAGAAGGATACGTTCTAGGAGATATGGTAGAAGT  
TTATAAGTACGATTCTTCTGTAGGAACTCATGATCAGTTTAAACGGTAAATTTGCTGTAAC  
AACAGAGTATACTCACGGAACCTATTCATTCTTCATGAGTGAAGAGACTGGTGGTAATCC  
TGCATATCCATATGCTGTGCGTCCTAAGTTTTACTGAACACTATGATTTGAAGGGGAGTT  
TACACCTGCCGAACCAACTGTATTCTAACAGATGCAGAAGGTAAAGACGTTCTTGCTGA  
TGATGGTAGTGTTCCTTATATCAAGATGACGAAGAACGGTGATAATCTCTTCTGACCTGA  
AAAAGCAAAAATTTTTGGTGGGGTAGGATCTGGTGCTGTTGGTACTGCTACTGTTCAACA  
TGTTACTAGTTTAGCACTACTTGTATGGTGGTTGAAGTTATGCTACTCCTCCAACACTTAT  
CTTTCAAGTTGGTGGTGGACAGGGTGCACAAGGTGCTGCTCAAATTAATACTCTAGCAA  
AGTTACATCTATTGCAATTACAAATCCAGCTGAATTCTCCGAAGAACCTACATTAATTTG  
AACATCAGGTGGTGGTGGTATTGGTGCCTTGGCAGAAGCAACTGTCAATCAAGGTGTTAT  
AACAGCAATTAATATTACAGATCCCGGTTATCGATATACTTCAATTCCAAACGTTGTCTT  
TAAAAAATTAGTAACACTGAAGAGAAAATCTAGAGCACGTCAAACATTTAACCATCAA  
CATTTATTTGACTGGTCTTGTTAAAAAAGTTACCTCTAATGATACTGGAATATATGTTGA  
TTCTACAGATGCATTTCTGTTCTTGTCAAATAATTCTTCATTATGAAACACTCACTTA  
TACCTCTGAATCAGCAGCTAAGTTTGGTTCGTTTGACAAGAGGTGTAAACTTTCATTATGG  
TCTACGGGTTATTCTTGACGCCGGTCAAATGACCCAAATGGTGGTTCAACTAACAGTC  
GAAGGTTGGTGTAGAGTGATCCGTAAAGTTGAAAAGGCTAATAACAAAGTTGCAAAAAGT  
ATATGACTGCAATCCGGTTACCAGAGAACTACTAGTTACTTTTGACGTTGATTAGTTAGC  
ATTTATTGACGGTGGTATTACTTCTACTGAAGATGCTATCGTTCAGTTGAATGCAGCAGT  
TGCTTCTAGTGAATCTTCTGGATTCCAACCTCATACTGTTCTTACAACACTACTGGATCTAA  
TATTTTCTTAATGAGAGTTCCTCCTTCTCTTTTTGCAGACAGATCTCTCCAACATATTCT  
AGCAGAAGCAGCAGGTGTTGGAATCGCTGACCTAGATATTACTGGCAATGATCATGCTAA  
TCAAATCAGTTTTGATGGTGGTATCTTTAACACTTTATATGGTATCGAAGAAAATCAAAG  
TGGACAAAATACAACACTATTCCACGTAGGTGATTATGTAAAAGCTAGAACTATTCAATT  
CAAGTATGCAACAATTCTGACTGGATGTGCTTTGAGTGATGGTGTGTAACACAATGCACT  
TCTAACTATTAACACTGCAAGCAGCAAATGGGAATGGTATAAATTATAGCGTTACTGAAGT  
TGTTACCGGAGCAACTTCTGGAGTGAGTGGACCTGTTGTTTCTTATGATCGAACAACGAC  
AACAGTGGTTGTAGGGAGCATTGTCCACTTAATACTGGTAAAATCAATGTTGGTACTGG  
GGGATATCTTTATGCGGTCTCCGATAGTGGAAGTGTAGCTGATGTTATTTTACAAAACC  
TGCGCAAACCTATAGTGCTGCACCAACTGTAACGTTTGAATAATGTTGGTAACATTCTAGC

GACTGGAAGTGAATTTCTCACAGCTGCAGGAGACCAAGTTCCTTCTATTACTATCAATAA  
TGGTGGATATGGTATTCAACAATCTGTTGATAACCCATATAACCTACATCCCACTGTAAC  
ACTCACTTATGCAACTGGTGTACCCTGGTGCAGGTTGCACAAGCAATTCTAGG  
AGGTGAGGACCTCGTAGTGAACCGTGGTGGACGATATAGAATCAAGAGTATTGAATATCA  
AGCAACTGTTCCCGTAACCTCATATATAAACAGGAGGACAATAGTATCCCAAATGT  
CAGCCCTATTAAGTATCAATATAGAATATTTTCTGCAAAGAACTTTATAACAGCACTGG  
AAGGTCTGACGCAACGCACAGTGCAGATGCAGCGGCAACTTCCCGTGATCGTTTGTATC  
TTTTCTTTGGTAGACCCAGATTTGGGATAATGAAAACCTCGCCCCACAGTCAGTAGACT  
CATTCTCCGTCTTTTTGGATCGTACGATGACATGAAAACGATGAAGAGAGTCCCTCGCTT  
CCGACACGATTCAGGTCTTTCGTAGAATTGACTGGGTTTCCCCAGAACAACTACAGGTG  
GACTAGGTTTTACCTATGACATGTATAAACATGACTATTCTCGTACCAAACTGCTGCAT  
CAGGTGCTACCAAATTATATGACTCAGACTTTTATGTTGTGAAATCACAATATCAATGTT  
ATTAAGCCATCTATAATGGAACATCTCCTTCTGATCCAAATGGAAAACCTTCTACAGTTG  
AACCTACTGGTACTTCTACTTCAATTATCGCTATTGGTGAAGGTTGTCATTGGAAATACG  
TGTCTCCAATTCCCGTAGCATCGGTTGTTAAATTTTTCTCAAATGGATAGATGCCTGTCT  
TCACCAAACATCGGTAAAGAAAAATGCAGTTGCAGGTGCAATTGATACGGTTGGTATCA  
ACTCTGCAGGTTCTGGTTACATCAACCGAACTTATGATTATGTTGAAGTTACTGGTGATG  
GAACTGTTTGCCGTGTGTGTATTGTTGTAGAGGGTCGTCAGACTAGTTCTGCAGCTGTTA  
CTTCTGGTGGCACAGGATATACATTTGGTAGAATAAGCGTTGACATAATCACTGGTACTG  
GAACTGGAAGTGGTGCCTACTTGTATGCTTTTCTCCTCCTGGCGGACATAAATCTT  
ACGCAGTTGTTGAACTGGGTGCGTTCCGGGTAAAGGATCACCGCCACACTATCATATGATG  
AAGGTGCAGGTGACGTCCCCATCGATAACGACTAACGTCGTAATGGTATTGTTACTAATC  
ATTTAAATTTCCGGAAGTCTGAAGTGATACCTGATTTAACGGTTTCTGCTCCGAAGCCCG  
CAAGCGTCTCCACTAGATTCCAAGGCAAGTCTGTGCCTGATGAACTATTACTCATAAC  
GAGTCTTTGGTGGACCCACGTTACTGGTCGTGGTCTTGTATTCTTGGAAATGGCACAA  
CTAAAGTTTTGAAATATTATCAGAACGCTATTGATGGTATCTTCCCCGAAGTTACAGGGA  
CATAATGTGAGTTTGACGGATCTAACGGCATCAATGGTGCAACTGCTGGTGCTGGTGGAC  
AAGGTCAACCAGATGTTAATTTCCCTGATGTGCCCAACTCCTCTTCTATGACATTCAACA  
ACTCAGAATATGATTTGGGTACGAAGTTTAAACAATGGTTATTCGAAACCACAGTATCCGT  
CAAATAGCGGTCAGGTAGTTACATAGATATTAGACGAGCATTGAGTCGTGCTAAATACC  
AAGTATAAGATATCAAAATCCTAATCGAATTCTAATGGGACAAAAACCAACCTAACGT  
CACAGAATATCACGCCAACTTTGATACGATTACAAACATCTATCGAGGTTTGTTCGTCA  
TGGTATCCCTATTCAAGCGAGGGAAGTTACTACGATGCAAAGCGTCATGGAAAACCACGT  
GGAGAATGTTGGTGACCCTGTTTAAAGATGGTGCCATCGGTATTCCACGTCAAGTTGG  
TTATGACCTGACTGTTGATTGCATCCTGCTCAATGAATCGTTCTTAGTTGCTAATTTTGA  
AATTTATAGAACTCAATTAATGACAAGATCATCACTGGTCTTGCTACAGGTGAAAAGGC  
TACAGTTCTTTACAGTATTTCTTCTCCAGAACCAGTTAAAGGTTATATCACGCTATATGT  
AATGGATATTGAGTCTCTTGAAGCTAACAGCACGCGAGCAACTTTCGCAATTAATGAACA  
ATTAATTACGGATACTGAAATCACTTTCGGAACCGCTTTGATTTAAGTTGGTTCTCCTTT  
CGCACAACTACTGCCTCCCGGTTCTCTTCAAAAAGGTTCTGTTGCTTATGAGCAATATGG  
TGTATAGCTCATCAGAGGATTCGTTGCTGAGGTCGCATATCAATACATTCTTTTAGATCA  
ATATGGAAGCAACCCCTCCTATCGTATCGGACTGGATATTCAAGAATCAATCGTTACCCC  
AGTAGATGACCTTAGGCTCAACGATAATGCTGCAGGAACATCTAACTATGCTGCTCCTGG  
TGCTTATAGATTTAGAATCACCAAAAACCTTAATTAACAACTTCTTACTGATTATGCCGA  
TAAAAACTTTATCGAACTTCTTCTATCAATGCATCAAAGGTACACACACTTCTGGATTG  
AATTGCGTAGGATGAATTAGACAATATTATTGCACTTGGAAAGTTTTGAGGCGACTGGAGA  
TTACGTTATTAAGACCTTGAGCTCACTGTTAGAGAAGACCTTGATGATGGTTTTAACAC  
TGGCGTATATGCTGCGGGTGCTACAACCTCATATGGTGCAGTTGCTTCAGAATCAAGATA  
CCCTGTTGCATTTGGTGAAGGTGTAGCGTATGTTAGAGGATAAAGACTGAAGAGATTAGC  
ATCAACCTCCGTTGACTCAGACAGACCTCGTGAAGATAAGGCAGCGCAGAACACGATGGT  
TCCACTTGAATGGGCATCTTTACAACCTGTAATCTATGTTTATGGATTCCCTTATCTTGA  
AGGTTCTACAATCACTAATGCATATCAAACCTGTAGAATCAAGAGATGGATTTACAACACTAC  
ACACGGTGGTGCAAATGGTGTGTTATTGGTTTTGCTCGTATTTCCCTATGGGGCACGG  
TGGTGATCCTGATAATTTTTTGGAAAGCGCTTATGATCAATATAAGTTGAGTATCTTCGA  
TGCTCAAATGTTACAGTTTTTGAAGTACTGCAACTGCTCAAACCTATTGCAGCAGGTTCACT  
AGTTATTGGTGGAACTCAGGTTATAGAGCATATCTAGTCAATGCTATTTCTAGTGGTGA  
TTCTCTCATTATATATCAAGTTGAAGGTAGATTTATAGAAGTTGAGATGGTCCCCGTTGA

TGGACAAGCCATTGATACTATCTCTGCATGACATAGTTATACATATTCTGATACTTGTGA  
GTATGTCTCCAGAGATGAAAGCACAAATGCTGTTTAATTTACTGAAGATGCAATCTTAGA  
AGATGTTTTACCTGCTTAGGGTGATGCCTTTACATACAGCACTACTGCAGGTATAGTTTT  
AACTACAGATGCCGTCAGTGCAGCTGATGGGGCTAGAAGTGTAGGAACCTATACTATAGG  
TGCATCTGACTACACTAGTGATGCAAATGTAACAGGAGCAACATTCTCTACCGCAATTGA  
CGTTCTGGTCCTGCAACAATTACTATACTTAAGGGTGGTTTTGGGTACGTTGTAGATGA  
AACATCTACTCTAGCAGATGCTAAACTTGGAGGAGGCGGTGTTGCTGCCCTCACATATGA  
TGTTGCTACAGTTGGTCCTTCTATTGAGGGTTTACAATCAAACCTTTGCTTTAGTTTTAAG  
ACCTGGTGATCAAGTATACGTTAGTTCCCCAGAATTTGTTACTGTTACACTGTAACCTCG  
AACTGCATTCCCTACTACTAATACATCCAACATCTTTAATTATGGAAGACAGCTTGTA  
TGTAACAGCTGGATGTGCCGCTCCTTCTGCAGACACTTATGATGCTGCAGTTCGATTAAG  
AACTAAATTGTATGGCTTCAATAATGCTGATCTTCTTAGCGATATGCCTAAGCTATACGT  
TAAGAGTATTTCTGATGAAGCTTTGATTGTTAGAAGAAATTTTGATGCTCAGACTGATGC  
TTCTGACTCTATCTCTATTACTTTACCTGAGCACGAACAGTTCCAAGCAATTAGTGATGA  
GAACTATAACAATTACAGTTCTTGCAGGATCTAACTCTACTCACCCAGTTGGTGATCAGAT  
CAGTATCAATACTACTAACTCTAGAGCTGATGACTATAACAACACTCTCACGTTCTGAAAG  
AACAACTTTACAGATTGCTAACTTAACAAATATTACTTCTATTAAAGTAACACCGACTAT  
TTCTAATAACGTTACTACTAAGAAAACAAAATCTGGTAATCAGATGTTTGTTTTTAAAGT  
TAATAAAACCACTCAAACCTTTGCTAACCAAAAATGATGATTTAACATATTCAAATCTACA  
CGGAACAAGAATTCTAGATAGAGACATCTCTTTGGTTATTTGACGGCTATCTTCCTCA  
CGTTGATATCAATCTCTAGATGATAATGATCCTGTTAGGCCATCTGTAACCTTTAGTCGA  
ACCTACTCTCTTTGCTACCGGAACCTATCGTAAGTGGTAGAACTTCAACAGCAAGGGCAA  
AGTAGATGCTTGTCTCTTGTACCCTGAAAGTTAATGTTGTTTATTTATCTGGTATATT  
CCAACCTGGTGATATGCTACATGGTATTGACAGTAATAACTGAAATCAATGCAATTAT  
TAATGATCGTGCCGGATCTGTTATTGTTGATTCAAACTTGTAACCTGATAGTTACTTCAA  
TGAATCAAGTCAAACCTGGTTTTATGGAGCAAATTTCTAAAATTGTTTCGGAAGAAAGGTAA  
CGCTGAGCCTGTTAGAAAATTAATAAATTATTATTGTGTACTAAAGGCCTACTCCAACCTC  
ACATTTTTTTGGTGGTCAATCTTACTTCGATACATCATAACAGCGATATTCCTTTTATTAA  
GGTTAAATTCCTGGCTCATTACCTAGACTTTAGACCAGGTGCATAGAACTTGTTTAGTGG  
AACAGGTTCCGGTAGCATCTCCTGCATTTGTAATGATTCTACATTTGACTTTAAGTCAAG  
AGTGTTTAATGTATCTTGTGCACCTAAGGCTACAGTCTTTGATATTCCAAAATTAAGTAG  
TAATTTCCGTTGTGATCTTGATTGGTGTCTACCTAGACTTGACAAATGTTTTGTCACGCC  
TACTGGTTAGTTCCATATTATTAAAGGTAAATCTTCTGAAAGACCAAAGAACCTGATTC  
TCTAGAAGATGGCATGTTTATAGCAACCATATCACATAAACCATATGGATTTCGATCCACT  
TGCAGATGTATTAATTAACGTTCTGAGAATAAACGTTATAACCATGCGTGATATCGGTGG  
TTTAGAACGGAGATTAGATAAGGTTGAATTTTATACATCACTCAACAAGCTTGAGACTGA  
TACAATCAATACTCAAATCTTGAGGCTAGTGGTAAGTATCGTTTGAAGACTGGATTTAT  
TGTTGATGATTTTGGTGATCATAGTTAGTCTGAGGTTGGAGATGACGATGTTTCTGCTTC  
GACTGACGTTAGACGAGGGTATGCTCGTCACTCTCATTACACAACCTAACGTTCTGTCGT  
AATTAATATTACTTTGTCAACGTAGACTCAACAAGCTGGTCCTCTAATTATGTTACAGAA  
TACTGAAGAGGCGATTGTTAAGCAACCATATGATTCTCGTGATAAGAATATTAAGTCAAT  
TAACGTTCTTGCCTATATCGGTGCTATTACTTTAGCACCTGGTTCTGATGATTGTTTGA  
TGCTAATAGCCTTGCTGCATCAGTTCAACAGATTGAAGGTGATTACTTCCAAGTTTCTTC  
TGAATTAATGTTGATCAGAATGGTTTTGCTCCAATTGTATGGGGAGCTTGGGATACTAC  
ATGGACAGATGAACAAGTCATATCATCGGAGGTATCTAGATACTTCCATTGGTTAGTAGA  
AGATATCGGTAGATGACCTAGACCTGATGTTTGGGCTGGTCGTTGCATGCATCGTGTTAA  
TCAGACTGAAACAATCGAAGTTACTGCCGATCAAGTAATATCTGGTGTTTGAACGCAAAT  
TATTCCTAGAATTGATCGTCAATCTATGGGTGATGCTATTCTTTCTAGCACATCTATTCC  
TTGGGTTCTGTTCTAGAAACGTTGTAGCTGAGGTTGCCTGTCTAATAACCGAGAACACGTTT  
CTATTCATTCTTTGATGGATAGGCACCTACTTATTGTAAGATTCCTAACATTATTGAAAT  
GATTAAAGATCCTACAGTTGAGAGTAGTACAACTCTACTCCCTTTGGTATTGGTGAAAG  
CGAAACAGGTGAGATTAGTGTGTTGTAAGTTTACGGTTGCTGCTCGTGATGATTTTTATCA  
GTTGAATTCCTATGATGATACAACACTTCCTACTTCATATGCATCTACAACCTGCATACTT  
GAACATTGATACTACTGAACTTTCTAAGCAAGCAATCGGTGACATCTATGGAAATATGCA  
GGGTCAAGAAGTATTAGTTGGAACCTTCTGGTGCTCGTGTTGTTGTTAAAGATCGTCGTCA  
AATTTCCGATCGTTTTGGTAAATCAAACCATCATTCTTTATTCCCAATCCTGGTGTAGA  
TACAAACCAAGATGGACAACAGGAACTAGAACTTTGAGACTTTCCACATCTGATTTTGA



TTCAGGTATTTCTGGTGCAGTGGCATCCGCTGCTCAAAC TTTATAGGAAGCAAGAGGAAC  
GTTAAACACATTTCAAGAAAATATCTTGGCAATTCGTAACGCAGGAATAGATGATGAAAC  
TGTATCTCAAGAACCAACCATTTCAGACAAC TAGAACTGTGAGTAGACAGATTGGTTGGTA  
TGACCTCTCGCACAATCATTCTTTGTTGATCAAGTCGGTGGTCGTTTCCTTACTTCAGT  
TGATTTGTA CTCTTTAAAAAGGATACAAACATTT CAGTTTCTATGCAAATCAGAACAAT  
GTGAAATGATTATCGTACAACAACCATTCTACCTTGATCTGTGGG TACTCTCGAACCTGA  
TCAGGTT CAGTTATCAGAATCTTCTGCAGTTGCAAATAGATTCCCATTTGAGGCCTCTGT  
ATATATACCTCAATCGCAAGAGTATTGTTTTGTTCTCCTTTCTGACTCTAACTCATATCA  
GTTTTGGATTTCTAAAATGGGTGAGATTGATATCTCTGGCTACAGAACAATTTCCAAACA  
ACCTTATGCAGGTGTTCTACTCCAATCTCAGCACGCTACTACATGGACTGCAGATCAATA  
TGAATATCTTAAGTTTATTATCAACGCTGCATCCTTCTGTAATACTGGACGAACTAACT  
TGAATTGAACAATGCTGTACTCGGTAGAGGAAACGGTGGTAAGTAAAATCTTCGTTCTGA  
TACTATTATCACATGCCAAC CAGAATTAGTTCTTACACTTAATTCACCACATTACCTTA  
CACAGTTGGTTCTCGTATCTATCAAAAAACTACTTTGGCAGAGGCTACGAATACTGCAAG  
AACTGTAACAGCAGGTGGTGTTC AATTAACTATTAATGATATTAGTGGT GACTGTGCAGC  
AGCATCTAATACTGGTGGAGTAATTGCTAACC GTGTTGCTTCTTCTAAGACATTAGCAAC  
TATGGTTGTTACTGGTGCTTATGTTGACTTTACAGTCGGTGAAACAATTACAGGTGACTC  
CTCTACTGCACCTACAGCAGAGGTTGTCAGTTGGACTACTGGAACAATAACACAGACACT  
AAAATAAGTGTCTTCTGCGTTTACTCCATCATCAGAACTATTATAGGTGGA ACTTCAGC  
TAGAACTGAAACAGTCGTCAGTATGACTTGCCTGGGGACCCTGTTGAGTCTGCTGCAAT  
CCAACCTTGCTACCCATCTAGAACACCAACCTATTCGACAAATCAAATAACGATTCGTGT  
TTATCATAGTAGTCACTGTATGCACAGTGCATCTAACAAATGGGATTATTGAAGGCGCTTA  
ATCTGAGGTTTCTGATACTGCTTTGTCTGCATCTACAGCTGCTAAAGATACTAGTATTGC  
TGTAGGAGACGCTACTGCATGCCGCAAGAATATTAACGGTGCTGCTATTGTAACAAGTAA  
CGTTTGTTACATTACGATTAATGATGAAATTATCTCTTATAGTGCAATGTCTAGATATAA  
CAAAC TATTGCTGCTCATGAACGTGGTCATGGAGAAAGAACCGCTGTATCCCATGCAGA  
TGGGTCTGTAGATGAGTGCTGTGACTAAGATTGTATTCCTCTAATCCAATTAATAAAAC  
TCATGCAGGAATTGCAGATGTTACTTTAGATTACGGCGAAATTTCCACAACATCTATTGC  
TAGCTTAGGAAATCTTGCTGGTGGAGAATGTATCATAGCATCACAGAATATTCAATACAG  
CACTCGTGTTCCTCAGATTCAGAAGATGTTGCTTCCTTAGACTGACATTACAGCTAGAAT  
CAACACAATTAGTGGTACGTCTATCCATGATGGCTATACTTTGTTTCAAGCATAATTCTC  
AAATGCTGGAGTAGTCTCTGATATTATTTTAAAGTCAGGATAATGATTTCGATTCTACCTCA  
ATTAGTTTGTTCTGCCATCAATGAATCTTCTGAACCTAGCGGTGCTAGGTCATTACGAAT  
GGAGTTTAAAATGACTAATGAAAAGACTACAATTTCCCATGTTATTGGTACATATAGAAT  
GTCTATCACTTTGGTATCTAACCGTATCAATAGTCCTTCAGATCCTAATACGGCAAACT  
ATCAGCTGGTAATGTACATGATGCAC TTTATATTACTAAGACTGCAACTCTAACTAATCC  
TTCGGGTTCTATCAAGGTTTATTTTGCGGGATATCGCCCACCCAACAGTGAGATTAAGGT  
GCGATATCGGGTGCGTCCCTGTTGGATCTTCTGTTCCCTATAGAACA ACTGGGATTTGACTT  
CTTCCCAGCTGGAGGTTCTAAGGTTCCCTGCAACTACAGAAAGAGAAATATATTCCCTGATA  
TGAATATGAAGTATCTGGTTTGATTATTGATCAATATCAAATCAAAGTAGTGTTCCTTC  
TCCTAATCTGGCATTAGTCCC GCTTATCAAAGATATAAGACCAATTCCTCTTGCTGTATA  
TTGAAAATTCCTGTAAAAGACAATGCAAATTGGTTTCGGGACTCCTATGCGGGTTCCGTC  
CAGTGTGCTGATAAATCTCTGTATGAAAAATATATGGCAGCACATAAAGGAGAATAAGTC  
ATGAAATAGGGATCTCGTACTTTACTAAATGCAGTTTCTTAGTTAAAAATAGATTT CAGT  
GAAATTAATCAGTTTTACTTACGTTAGTCCAAAACAAAACACCATAATGACTGTTGAAA  
AAGTGTCACAAGTAGAGATGCATTCTCAAATCAAGGAGAGATATGCAA ACTTGCAATGAAG  
AAAATCAAAAATTGTCTGCGAAAATTAAGTAAAAGAGGTTACTGCACTGCAACTATTGG  
GTGCTATTGAAACAATAGAATATTTTACAAAGGAATAGGAAAAGACCGCTTCTTCTACTC  
CTGATCCAGTTCCATCAGAAGAATTTGAAGGGGGGACAGTCCCTCCCTCTTTTTATCATA  
AATAATTGATGAAGCATAATATAATCGAGTTGTCGTAACAAATGGCAAATAAAATTCAAT  
TAAGACGAGGTGGCGCACAGGAATGGGCGGACTCTAACCCGACCCTTGACAGGGTTAAT  
TAGGTATCGAACTTGACACGCGTCGTTATAAGATCGGTGATGGAGTTTCTGCATGGACCA  
CCTTAAGGCAAGAACGTCTGTAGAGTCTACATCTAATCCTGCAAATTCATTAGGCCAAA  
GGGATGCTGATGGTAACTTCTCTGCGGATACCATCACTTCAACTGTTAATGGTTACTCGT  
CTATTGCCTCTAGACTTGCTTCATCTATACAAATCCC ACTCTCTAATGAGGTTACTCCTT  
CTGGTGTATATGCAGG TACTCAAATCTTGAACCTATCTGCTGAATTAGCACTTGTTTCTA  
CTTTACCACATTACAATGGTACGTCATCTCCCTCAGCAACTCACAATAAGGTA ACTGTTG

ATGCTAAAGGTAGAGTAACTAACGCACAAGATTTTACTGCTTTTAAACAACCTGTACTCTTG  
CTGATTATGGTCTTGCTGGAGCCAATAGAGGAACATCTGCACAACCATATGATCTAGACT  
TATTTGCTGTTGCAAGTTTGACCACTTCTGGTTTGATCTCTAGAAGCTGCTTATAAATACTG  
TAGCAACTAGAGCAATTACTGGAAGTCCACAAGAATCTCTGTAAGTAAGGGTGCAGGTA  
ATTCGAGTCACCCAAATAATCATATAATTGCCACTGCTGTTACAGCAGGTAAGTATAACA  
CGAATCCTGGACATGTGTATCTGGTGCAGGTGGAAATGCTGAACCCATTGGTACCGCTA  
CAGTTAACGCTACTAAGTTTACTGCTGATGCCATGGTAGATTAACAAGAGCAACAAATG  
TGCCTATCGCTACTGCTGCAGAAGGTAGTAAGTATGCTAGCTATAATTCACGTACTACTT  
ACGTTAAATACGACATCATTGCTAACGTATCAAAAAGTTTACCAAGCCACCACCGACCTTG  
CTGCAGGAGTAGGTCCAAGTTCTCATAGTAGCGGTGACTCTGGCGGGTGGAGATATCTAG  
CTGCCGAAGCACCAGAGCAGAAGGGATTGCCTAGTTTTGCACAAGTAGATTTAGACGTTG  
ACGCGAACGGGCACGTCACCATCACCACCGCAGGAGTAGATGATACATAAATACAAAAGA  
ATAAACTAATTCTCACAAATGGAAATGCTGTTGAAAATTTTGTGGTAGATATCAAACCTA  
CAACTTCTACCGCCAACACTGATTTTGATAAATTGAACCGTATTAAGATCAATAATACTT  
CTGGCGGTTTATTATTTGGTGCTAATAATACTGGTGATTTTGGTGCAGGAAAGATCGATG  
TAAATGTACGTTCTTACTTTAGCGATCCTGCTATTACTTTAGATGGGTCAGTTGCACAAA  
CTCTAAACAAAACCTGGTGATGGTAATCTTACTTTCAAACTTCTCAAACTCATCGTGTG  
CAAGATCTTTAACATTTTACGCATCAAACGCTGGTTCGGAACTAGCACGGTTACAATCA  
CTGCAGAAGATATAGTTGATATTGATGCCTCAGATTCATACGGAAAAGTTCATGTGCAAG  
ATTATAGATACCACGATAACAACATTGCTACGTCTAATGCCACTATGGACCTTAAACCTG  
GTGATGATCGTGCTACCAGTGGGTCACTTCGTGTTAATGCAAGTTTACAGGTAGATGGAA  
TGACTACGACAATTAATTTAACAGTTAAAACAATTGATGATCTCTTGATAACTTTTGGTG  
GCGTACTGCTCCAGGTTGTGATGACAAGAAAGATCGCGGAGTTGAATTCAGATACTACG  
ACAATCAGCCAAGAATTGGATTCTTTGGGTACGATGATTCTGACGCCGAACCCGGAGGAC  
ACGTCGAAGGATTTACATTTTACACAACGCCACAATAAGTTCAGCGGTCTCTAGGGGAA  
CTGCGTCAGGTATAACTGCAGGGAATTTTAAACGGACAACAATACTAACTCAACTGCTA  
ATACTTCAGGAGACTTAGTAGTTACTGGTGGTGTGAAATTGGAGCTGATATTAATATTC  
ATGAATTGCTATATGGCGATGGCACATTAGTGCTAATAGCACATCTAGATTTGATGATA  
ACATTTGATTCGAAGGTGCTTCTAAGATATTATCATAGAATAATGGTAATGGCACAACTA  
AAATACAACCTTCACACTACTACAGGAAATGTAGAATTTGGTGGTATCTTAACAAATACTG  
GTGCTATTGATCCAAAGAGCACTTTAAATGTTGCATCCACAGTACCTTTTGAAGACGCAG  
ATGAACCAACTGTTGCACAGAATAGTGGAAGTGGTATTTATGAAATTCAATCAAATGATT  
ACGGTGCATTTAGATTTGATGGCGGTGGGTATGTGCAAGGTGATGCATTATTCAATTGTG  
ATGTTTTTATTAACGGTGCTCAAACCAAAGAGACAGTCCTACAGAATCAATCGGTAATA  
GAAACTATCAGAACATCAGATATAAAGTACGTTACAGGTTCAAGTGCAGCGTAAACTCCTT  
CACATGCATCTGATCATAATTCTAACTTAAAGAACTTTTCGTGGTGCAGGAATTCAAATTG  
ACCTCCATATTGGTGATGATCTTTATATAGGTAAATTTAACTATGGTGACAGTGATTCAT  
TCCAAGTATTAGGAGAGTCAGGTAATCCAACACTACTCTAGGAACATTAACACTAGTAGGTC  
AAACAATAATAATGACTCTATATTTGTTAATGCTGCGAACGAAAACCTTTGAGATTCAAG  
ATGGATCTGCTGCAGATAAAATTACAGTGGATACTGATAATGGTAATACATTAATTGAAG  
TAACACTTAATGTAAACGGTGTAAGTATGATTTGGCGTAGACTCCGCTGTTAGACACGGAA  
CGACTGATAAGTTCTTTGTCACATCTGCCTCAGGTTTTACTCAAATAAAACGCAATTTGA  
CTGCTGATGGTCATACCGAATTAAATTCAACACTTAATGTTGATAGTAATACAACACTTG  
GTGCACAACCTTACAGTAACTGGTAACTCAGAGTTCAATAGAAGTGTAGCTGTTGATGCAA  
ATTTTGCAGTCAGATCAGGAAGTACTGATAAGATGACAGTTGCATCATCTACAGGTCCA  
TAACAACAGATGGAAGTCTAGTTGTTGCAGGTCTCACAAATATTAATGTTTGTCTAATTG  
GTCAAAGTGATAACGTAGTAGTTAATATAAACAATGGTTCGGGCACATCTAAGTTTAGAA  
ATGATACTGATACTGGTAATACAAGTATTATCGGTACATTGACAGTGGCTGATGCTACTC  
AAATTAATAATCCTCTTGGTGGTTCTAACGTTGTAACCTTAAACAAGAAACGCTCAGCAA  
CTCTGTCTGGATCTTATTCTGCTGATGGTGCATTCAAACCTAACTGGTGGTGCAGGTATCG  
GTAACAACCTTGTGCTGGGGGCAGGTCTAAGAGAATATGGAGGCACTTAACTTACTGGTG  
CTCTTGGTTCGTATTAATAGTGCTGATATATCTGGTGCTTTAGTAACTCATGATAGTGTGA  
CTGTCACTGCAGACAATATGATGTTCAAGGTGCAGATTGAATGTGCAGCGAACAAAGTTA  
CAGTCGATACCGACAATGCTAGCACGGACATTCAAGGAACATTGGATGCTGCAGGTGGTG  
TAACTGCATCATCTGACCTTACAGTCCCTGGAAATCTTACAGTCACTGGAACAACAACCTT  
CTTCCATTCTACGGTCACAACAATCGATGAGCCTGTTATTACTGTTGCACGTGATACAG  
CACGCGCTCTAATGATGAAATGGATCGTGGTATTGAATTATGTTATTACGATGGTTCTG

CTAAATCGGTTTCTTCGGTTTTGATAGATCATCCTCCTAATTCCAATTCTTAACAAGTA  
CAACAAATACTTCTGAAGTTCTCTCAGAAACAGATGGTGCTCTAAGGGCAGGTATTCTAA  
ATCTTACTGGTGCGGGCACATCTCTTGATGTTGATGCGAATGCAAACATTGATGGCACAC  
TGA CTCTAGATGGTCTGATTTTTTCATAAGTATCTTCAGGTTCTGCTCTTGTTATCCCAA  
TAACATATAAGATTAATAATCTTAACTCAGACGTACTAGATGGTGCTACAACCGCAATTT  
CTGCAACTCCATCCCCAGTTTTTCTTCGTGATTCATTTGGTGAATTTGCTGCTCATCAGA  
TCACTGCCGCTAGCGCTGCAAGATCTCGTGCAAGGTTTCTTAGGAAGCGCATTCACTGCCG  
ACGCATGGAAGACTGCAAGAACCCTCAACCCTAGCGGGCGTTGTATCTGGTTTTCGTCGTCA  
TCGATGGAAGTGAAATTGAAACACTTACAATAACTCGTGTTGATGCAGACGTCCCTGCTC  
TCGAAGCGATGAGTGGAAGTGGTTATGTCGTACAGACTGCTGCTAACACTTATGCCCAA  
CAACTCTCCAAGTCACCGCAACGTCTTGAATCACTCTTACTAAGGTTGATGGCGTTTTCTG  
GTCATACTACCCTTAACGTTGCTAGGGTATCTTCTAATTCTGCAAACAATCTCGTCCTAA  
GAGACGGATCTGGTAACTTTGCTGCAGGAACTATTACTGGTTCCTTATCTGGGAATGACA  
CAGGAAATAAACTGGAAGTGTAAGTGGTCACGTAGCTGATATCTCAAACCATGATAGTG  
GTGATCTTACTGAAGGTCCTAACCTCTACTACAAATATGAAAGAGTTGACGATAGAGTCA  
ATGCTCTTATTACTGCTGGAAGTGTATTTCTAAGGTTTAGGATGACGCTGCAAATACAT  
ATACACTGACTGTAAGTCAAGTCAAGTATCTATACTGATATTGTTACAGAGGGATCACCAA  
ATCAATTCACAAGTCTGCTAGAACTAGAACTTGTTCACATATGGAAGTGGTATCACAC  
AAAGTTCTGGAAGTTTATCGGTTACTCAGTCTGATATTAATACTGACAACGTATCTGAAG  
TATCAGCAAACCTTTTTACTACTGCTGCTAGAAACAAGAACACTTTACATACAGAACTG  
GTATTACACACAGTTCTGTAAGTACCAGTTACACAATCAGATATCAACACTGATAATA  
GTACTGATGGTCTACAAAAGTTCATTACTAATGAACGAGTTGATGATAGAGTTAACG  
CTTTAACTCTTGCTGGAAGTGGTGAAGTTAGACATCTGATGACGCTGGAGGAAGTCTAT  
CTTTAGCAGTTGACTCTAGTGAGTTTATTACTGGCATTTTTACAGAGGGTTCTAACCTTT  
ACTATTCAAACACTCGTGCTCATGCAAGGGCAGACTTGAAAGTTGAAGCTGCAACAAGTT  
CAAACCTTGATCTTTCTTCTAAGTCTACTTCCGATCTTTCTGGAGCAACGTCTCAATATT  
ATACAGAAGCAAAAGTTCACGCAAACTTAACACTGATTATGAGCAACCAAGAGCAATGT  
TAACCAACCTCGCAACTAGCACCCTCAAGATCTTAACTTGTCTGGTGATCCTAGACCTG  
GCGCAGTTGTTACCACTGGTGTAGTGTGGCGGTGGCGGTGGATTACACCACTAACTG  
CGGTTGCTTCATCTGGTTCAGCAACTGGATCTGGATTGACTGTCAATACTACGGTTGCTA  
GTGATGGAACATCACTACTGCTGCGGTAATCCAGGTGGTCTGGATGTCTAATTACTG  
ATAGTGCCACAGCCACTAACTCCAACGCAGCTAAGATTCTTACATTGAGCTTGGGAACAA  
TATCAGGTGGAACAGGTTATTCATGTGCTACAGTAGTATCAGTCACTAGGGGTGACGGTT  
CTGCTGCGACTGGTGACATTACTTCATCTGCAGGTGCTTCCACTCACGTAACAGTTAATA  
ACGGTGGAACAGGATTCGCTGCGGGTACTCCTATAAATATTGCTAATGCTAATGCCACTG  
GAGTTAAGATGCTTTGACCTATTAGTGCTGGAGGGTTTGGTTATTCAACAGGAACGGCCA  
TTGCGCCATCAGCGTCCGAAACCGGATCTGGAGCAACATTAATATCACTTCTGTCATTG  
CTAGTGGCGGTATCTCTACTATCGCAATCAACGCTGATGGATCTGGTGACGCTGAATCTG  
GAGTCGTGACAAATACTAATGCTAACGCATCTGATATCGCAACAGTAGGAAGCATTGGTG  
CTGCTTACGCATCAAGATCTGCGGGAACCGATAACCTAGGCACATCTGATTATGGAAGT  
AAGCATCTGGCGCCAACGCAACATCCACTGTTGTTGTTGATTCAAATGGTGCTGCTTCTA  
TCACCGTAACCGATGATTGTAGCGCATTATCGCCAATGAAACTATCAGAGTTGCTGATG  
CTCAAATGGTCGTAGGGGTGGTGCTGCTCCTACATTGATGTAACAGCAATCCATGGTA  
GCACTGCTACAGTTCCAGTATCTGCGATTTATGGAAACCGTGCAGCAGTTAATGTCGCTA  
CCGTTGCAACAAATGCAACTCTAACTATAACTGACAACACAACGATGGAAGTTGGATCAA  
GAATTACAGGTGCTACTTCTGGCACTACAGCTATTAAGACTGATCTGGGAACCTAACCGA  
TCACTGTCAATACCGATGACGGATTCTTCATGAAAGGTGAAGTCGTCAGTGCTAATGGTC  
AAACTAAACTTACTTTCTCCTCATTTCAGTTAATACGTTATGTCTGCCACTAGATCCGTAA  
ATAAACTGAACTACGGGACTTTCCTCTCCGTCGTTTCAGGATTTCTACTATGTCCATTC  
ACGTTGCTACTGAGCAAATAGATGATTTGATAGAAGAAGCGAATGATTTCTATCAAGAGT  
TTCACACTGCAGGTAGTCACACATCCTTCATGTTTACTGAAGTTACAGATGCTATTAATA  
CAGCAGCAAAAAGTTCAACCCAACAAGGATCTACCAATTGGTATGAGAACAATACCTATG  
TTTCATTACGACCTAACATCTTAGGAAGCAATCAGGTATAGCCACAGATGGGTGCTTCTA  
GTATTGTGCCTCGTAACACGTGCAAGATAAAGTATCCAACCTTTTTAAATGATATATACG  
CTATGACCCATGGTCATATTCTTCATTACTTTATGACATTGCAATACCTTGAGACACTTG  
ATTTTGTAACAAAGTCTAGTAGGAGTAGAAGAGTAAGATATAACGAGAAACAAGGTAGCT  
TGATCTCGATCTTGATTGGGATTCATTGGGAACAGGAGACAAAATTTTAGTCGAAGTTC

TCGTACGTCAAGATGCACAAAGTTATATAGCAATATATAATGATAACTCGTTAAAGGACT  
ATGCTTAAGCATTATTTCAACAACATTGGGGTAGAAACCTAAGTAACTATGATGGCATT  
AAAAGTTAGGTGGCGTCATACTTACTGGCCGTCAAATTCAGTGGGACGCAAGTCAATTAA  
AGAAAGACCTTGAAGATAAAATACGTGATACATATGAACTAGCACCTTTAGACTTCGTGG  
GGTAATCTCTATTGGTATTTTCGCAACTCCCCTGCACAAGATTTTGTTC AATCGGATCACT  
CTAACGCAGAACGCTGCAAAGCAACTGGTTC TGC ACTGGAACAAAATTTATTGAAATTC  
TAGTAGTTGAACGCATTGGAATCTATGGGCAAGGTATTTACTTTGTTTCGGAGAACGATTG  
TCAAGAAAGATACGGACTTTGGAGAGGACTCAAATTCGGAATTCGATACTGCGAAACCGA  
TTAGAGCATATGACAATAATGCTGAAGGATTGGAAGGACACGGTGAGTACTTAGGAGGT  
TTGGAGTGCGTATCGAAGAGAAGACAAC TTTTATATTGTCCCCTGAGAAATTTAATGGAC  
CTGTGGTCGATAGTTTCACGCTAATCGTTCGAAGGGAGACCAAACGAACCGGACTTAATCT  
GGTTTCCAACAACAAAGCATT TATTGGAAAAACAATTCGTAGAAGCAGAAAAACCATATT  
ATCAATTAGAAAACGGATGTGTTTGGGTATGTC ACTGTGAACTCTTTGAATGCAGTGACG  
AAGATCTTGCCACAGGAATCGCAGAGATCGATGCAAGCGAAGCTGCCTTTACTAACGCTA  
TTACAGTTAACTTTGCTACTAGAGGGTGTAGCGATTTACAGTTGCTGAAATTGTTGCAG  
GAGATACATGTAAAGTGACTGCTGAAGTCAAAGCATGGGATTGTGCAGCTAGACCGTTAC  
AGGTCTTAATTCATGCTGGTGT TTTTACGATACCTGAAACGGTTACAGGACAGACCTCAG  
GTGCTGCTTGGACA ACTGCATCAGACAAGACACTAAATAATGTTAATACCGCTAACTCTT  
TTCAACAAGACAAAGAATTTGAACTTTGGATAACGATATTATTGCCTTTACCGAACCTA  
ATCCATTCGGTGCAAATGGTTCCTTTACTGACACTACAATCTAATGTTAGGCAATTATTC  
ATATCACGAAATTTT TAGGAAGCCTATCGCTGCTTTTGGAACGTTATTCAATAGTAGTGA  
ATTACCTCGGAATGACGAAGTGATCAAAGTACCTTTAGGGAACGGTACTAAACAAAAT  
CTTAGCAAGGTTAGAACAAAGTTCCTGATCCAACCAACAAAAGAGTGCAACTTACTCTACC  
CAGAATTTTTTTTTGAAATTAACGGGGTTGCATATGATAATGCAAGAAATTGTGCCCCAC  
ACAAAACATCAAGATGGCAAGCAGTTCTACTTCAAATAAGAATGTGTTTATGCCTGTTCC  
TTATATTATTGGTTTGGAGATAGCAATTATCTCTAAAATCAAGAAGATTGTTTACAAAT  
TCTAGACCAGTTACTAACAATATCCAAACCTCATCTCAATATGGCAGTAAA ACTATTGTC  
GGAGATGACTGAGATTAGAGACATTC CCGTAGTCCTCAATGGCGCCGAATACGAAGATGA  
CTATGGGGGAACTTTACTACAATAAGCGCGATCATT TATACCTTACAATACACTGCAAG  
AACTTATCTATACGGTCCTGTATCAGAAGCACAAGTTAACAAAAGGGCATATACAGATTA  
CTATACAGATA CCACTACTACATCTGCATCAAGAGAAGTAAGGTTTACTGTTGTTCCCAA  
TCCTCTCACAGCAGATGCTGATGATGATTTTCGGATTCGGAGAGACTACTGCAGTCTTTAC  
AGATAACAAGAAACGTAAGCCTACTAGAGGTGCTGACGAGGCAATTTAATCCTGTCAACT  
CCTTTTGATGGTCCCCACGATGCTTTTGGAACTGAACCTACAAAGCTTCAAAGCATGTG  
GAAAAAGTAAAACCAATTCTGAAATAAACAGAGACTGAAGATGGGAACCAAGTCTCGGAG  
ATCACTCGTGCTGCTTACATAGTTTAGTGAGGAAAGGAAAAGAAGCAGTGGGTGGTATA  
TTGGAAGTAGCACAAAGCATCCGATCATCCTCGTGCGTAAGAAGTTGCTCCAACAACGAAT  
ATAACGTTGCAGATACTGCTGATAAACTAATTGACGTT CAGAATAAGATGACAGAGTCG  
GTTGCTGATAATAAAAAGAATGCACCTTCTACAGTAAACAATACTATGTTTGTGTTGCTGC  
ACTGCACAGTTACAGAACTGTTAAAGCTGAAAAAGGAAATAACTAAAATGGAAGAGCAA  
TAACAACACACGACATGTCAGTATTAGCTGTGCTTTGCACAAATACAGTTGCCGCAGGTG  
CAACTGAATATCAAGTAGTTCAAACAGGATATTACAGAGTTCGATCTATTCCAGGTGCAC  
CAGCTGTATCACTTCATGGTGGTCCCTGCAATCAA ACTTGTT CAGATTGAGTGCATTCTTC  
TCAAAGGTGGTAAACCTGGTCTGGCAAGAATTGTAGAAGCAGTATCTGATTCTACTGTTA  
ACTATATCCTAGGCCAGCATATTGATTCTACAGGTGATGCACATCCATTCTCATCTGGTG  
ATGTTATCGCAGTTGAAGATGATAGCACATCTCCTGCTATTCATAGCAACTTCCTCTCTG  
CAGTTACTGCAGGAAAAAAAATTACTGCTGTC ACTGGAACCACAATCGCGACGGATATTG  
ATTCATCCGGTGCATCAGCAGATTACACTTATGCCTTCTCAGGTCCTCGACCAGATGTTA  
TAGGATGCATTA AAAATCTTTGCCGCTACAAGTG CAGTAATCATAGAAGAAATTC AAGTGG  
ATGGTGGTCAAGATGCCCGCTGGAAATCAAGAGGCAGAGAGAAGACTTAAAGGGATGAAC  
AAGAATCGTTATCGCTTTAGAAA ACTCCATAGAGATCGAGATAAAGCAGTTATGTACGCT  
ACTGCTGATAAGTTAGCACAGAAAGAACAATTGAATGTTATGTTCTATCAAGATTT CATT  
AACTAGTCCAAGGTAATCTTACGACAAGGATGCTATCGATAGCAAAGTCAAAGATTACG  
GGAGACATTTATGCTGATCTTGGACCTGCCGAAAAGAAGAATAGAGAAAGTAGAATGTCT  
CTTGAAAAAGATCTTGAGAAGTACCGTATAGGTTCTAAAAAAGGTGTAGGGCAGTATAAA  
TATTTCTTAGGTGAGGGAACAGGACGTGAGGATTCATACCAAATAAGTCCTGGCAAAGGA  
ATGTCTAAGAGACGTTTTGGTAAGATCCTGCGTCGTCTAGGAAGATAGCATGGTCAAAA

TAAGTTGTCAC TAAGAAGGCAGGTAACCCTGTTAGACTACATGATACG TAGTTTAAAAA  
CCATCTACGTCAATAAATTTAAGTAAAGCAAAGCAGGTA AAAATCCTGCTGGTTTCGCA  
GAAACTTCTGGA ACTAAAGACAGAAAAGGTGAACTCGGTCAA ACTAGCTAACCCGCGATG  
TTCCATAGCAACTAAGGAAATTATCTCAAAGAACAAATGTGGTTATTGTTCTTTGCACGA  
CTGGATTTCTAAGAATAATTCTTCTGCTGGGTAGCCTGTTAGGGTT CAGCTCGGTGATAA  
ATACGTAGGTA AACCCCTGCGCCAGACAACCGGGACAAACGACCAAACCC CAGAGCGGTT C  
CAGTAAGATGACAAGAAACCTAAATAAAAAAGAGGAAGATGCTGCCTTTCGTCGCAAAAA  
CAAGCAAGATCCTAATCCAATCAGAAAAGGAAAGGCAATCAAAGTGAAAACAGAGTCTAA  
ACAAATACACGAAGGCGAAAAAGTTTCAAGTTAGCATAAGGTAAAATCTCGCTATTCAGT  
TTGGCCAAGTGCTGATGCTAGCGGTGCACTTGTCAAATGCCGAAAAGTTCTGTGCAAAAA  
TTGGGGGAACAAAAGTAAGATAGAAGAAATTGATATGAAGGTAAAAAGATTCCAAAATTA  
TCAATCAGAATGTTGGAAA ACTCATAAAAACGGTGGGATGAAAATGAAGGGTGGTAAGCT  
AGTAAACGATTTTCGCCCAAAGAACGAAGCAAATGAATACACAGGCC CAGGCAAAGCGGA  
CAGAAA ACTTATCCAGAAAATGGATAACCCTAGATATGCTAAACAGTAAGCAGACTAAGA  
AAAGAAGATGGATCCTAAGAATCGTCAAGCGCTTATGGATAAAGCGACTATGGGGATGAA  
GTTTACTCATGAAGAAATAACCAACGACGCAAAGAAGTGTTGGCCAGGTTATGAGAAAAG  
GGGATCCCAAAAAGCATTCCGGCACAACGTACAACCGCTGTGTCAAAAAGGAACACTTCGA  
GTATGTCAGAGAAATAGCAGAAGCATCGACTAGGAAAGCAGGAAAAAACCAATCAGGCGG  
ACCTAACGACAAAGGCAGAAAAAGTTACGAAGGAGAAAATCCAGGATCTGACGTTAAAGC  
ACCTAACAAAAAATTGGAAACCCCGCAGAGCAACCATCAGCGCTAGAATGAAAGAAAT  
GAAGAAGAAATTAAGTTCAAAGGAAACAGCCAGCGATCCTGATTCAAGGATTTACCAAAG  
CTTGCGTGCTTAGAATTGTTGATCTATAATAGACTGTAGTCTGTACTATTAGAATAAAAA  
TCTGACCGATGTGTAGTGCTACATGGATCGGGGAACAGTTATATTGGTCAACAGGATAAG  
GGGGTTGCCCTCATGATCTTGCAGGACTAGTACGTAATAATCCTGGAGATGAGACTTGTA  
TTAATCCATGTAAAGGACCCTCTAGTTGTCAAAGATGAGCATATCGTCATGGAATGATTG  
ATGTTTTGACGGAGGGGTCTGCTTAAAGATTGTTAGTTATGTATGTCATCAATATGTATTA  
GATTTTATATTTGGAACAGCAGCAAGAAGAATAGCGTTGCATAGGAAGTCCCTATGGGA  
GCAGCGTTCGATAAGATGCTTGCAAAAATAAGATGTTGTAGAAAATGGTAAGATCAAAGAT  
GCTTTGCTAGAAGGTCTTGCATCTTCAATTTTGTGCAAGTATGGGAAGCACGTAATCGA  
GGACTATGCATACCTGAGATATTTTATGTGAGTGTGGCACTAAAAGATAAGCATAGACAA  
GATAACGTACATGTAGATGACGCGAACCGAAATGATACCATTAAAATTATGGGCTTCTTG  
AACGGTGACTGGGATTCGAACACAACGGGTGGGGGGTTTATGCATGGTGGTGTAAATAAT  
AAATTGAATACTACCGACTTTTGTATTTGCGATCCAAGGACCCCTCATGCACCAGGGGAT  
ATAATCCGTGCTCACAAAAGTTTTGCCATGGATCTCTCTGTTAAGAAAACGAAACAAGCA  
TGCAACTTCAACAGCGATCAACTATACTATAGTGTAGACTGTAAAAGGAGAACGATATTT  
TTTGCATCACACCCGTCTGTTTATACTTTATCCGGCACATGGGAACCACAAACAGATATC  
TTGTATAACCCGACACTTCTTATTTCTCTTGGATCAACAGCATTGCTATTGGTGTGACT  
GTATCCATTATAGCGGTCAGGAGAAAGAGACAACGCTTCTGATAGATGACAGAGCTAAAC  
TCAATTGTCTTAATCGCAACCGTTGCCATTATTGATTTTTTTGTATAATGATAGAGACTTC  
CAAAGATTTTTGGCGCTTGAGGAGATAGCTCGAGCGCCCTATTTTGCTTTTTTTGAGTGT C  
TTACTTTTCAGAGAATCAATGGGGGTTTCGAGGACCAGAACACATTTATCTAATGGAGGAG  
CACTTTGGACAAACACTTAACGAAACAGAACGTCTTGAATATCTGGAAAGTCGGGGTGT  
AACTCTTATGGGGTTGATCGTCCTTTCGCCAACCCCTCGTCCTAATCTACTATTGGATC  
ATGGTGGTGTATTATGGTTTATACGCTGTATCTGCTTACGACCTAGATCAAAAAGTAGAG  
TGGCATGCTGTACATGCATATGAAGAATACCTAACACGCATTCCAGATGACGAGCTCATC  
ACTCGAATCAAAGATGATGAAATGAAACATGTAATGAATTATCCAAAGCAATGAAGTAA  
AGAAAATGAGAACCCTAACCGAGAAACGAGTATCAATTAGTATTAGATGCTCTTTGGAAAC  
GTCAACGTTGCTTTATTGCAGGTAATAGAATGTTCAAGGAATACGAGAAACCTATTGAGG  
AGTTTGAAAATGCCAGTGTATCGTACTACGAGATTAGGCTTAATGTCAATGAATTAATT  
GAACACAGGATTCACCCCTCTGATTTGCTGCTTCCAGCCGACTGCTAAGCTGAAGCACC A  
GTGGCACAGGTAGCCCATGATATTATTATGGATTTAGACTTGCACCCAATCTATCGTCAG  
ATGGATGATCATATCATTACATATGTAAAGGCAGCAGGTAGTGATCACTCAAATCACTGG  
GTTGAAAAGAACTAAGTGATTTAGATTTATGAAAGGAATGAATACTAAAGAATCTTCTG  
AACAACTGATTCACGTTTTACCAAACGTACGTTGCAGTTGACAGCCAGGAAACAAGAAC  
TTCAATCTGCATATGATGAGTATGTAAAATTAGAAAGAGATCTGACTTGACTTGAAGGTT  
CTAAGTAAGCAATTGAAGATGTTGCTTTCGGCAAATTACCAGGAGATGGTAACCATACTG  
GTATGAAAGACCACTCTCCCAAGTAAAAAATGGCGGCGAGGCACGAACTCGCATGAGTCG

AAATAAGATTTTCGGTGCAATCACCAGATTGCTGCACCCGCAATGGAGTTGAAACTATCAA  
GTCCCATGATACTGTAGGTTATCACGATAAGCAAAGTCAACATTTTGAAATTTGCGAGTA  
CGCTGAAGATGCTTATCATGCTATCAAACAAGCAAGCGAAGATCTAGAAGGATTGAATAA  
TCCACACTCAGCAGAATATAGTATCAAAGAAAATTAATGGTTCGGGTGGGGTGTATATG  
GATGGTGTCTATAATCGTTGTAATCGTCTCTTGGTATATCTACTATCTACTTAGAATGGC  
ATACAAGGAGGCGGTCGATGGGAGCGATTCAACCAGCGAGTAGTAAAAGCTGCTATAACT  
TTAGAGTAACGGAGATTAATCGTGTGTTGACGCCATACTATTGATGTCACCATTGATT  
TGGGGTTTCATATATACATGAAAGTAAGAGTTAGAATTACAGGAGTTGCTACGCAAGAGA  
ATAGAACAAGAGATCTGGACGAGAAGGCATTGGGAATAGATGCTACTAACTGGATGATAA  
AAAATTTGGAGCATGCTATTAATGGGGATGCTGAAGTCACTATACGAACTGAACTTAAAG  
GTGGGCTTGGTATGTATGGTAGGTTGCCTGGATGGTTATACGATGGCGATGTTGATGCAT  
CACTAAGCGGAAAACCTGATTGTGCAAGGATATGCATGGTGGTACGACGGTGGAAACAAAAC  
AAAAAACTTCCATGAACTCCGTGAAATGAGACGTATCTTCGGAACCTTGTCTAGTCTA  
GCATCTCTGGTTAGAATAAGATTTCAAGGTTACCGCATTTAGAAGAACTTGTTTCAGAT  
TATGATGAGGTTTCATACAGGTTATGTATCCATCTATAATTGCGTGTTCGAATTATAAGGGT  
TTGTGAAAGTTACATCTAGAAAAAGCAATTACAGATAAAGGGATTGAGATGCGACACTGT  
GTATTAGTTCCAGATCCAGAGTTACCTCTTCCATCTTTGGATGTGATATCGTAGAGGGA  
GGTGGTAATGCTACTGCTGCTATAGTTGATGTGTCACCAGTGCATAACGTAGATTATAGT  
TTAGTTAACATAACATATAGTTTTAAAAAGAGAAGGCGTCTACCAGAGTAGGGTGAGATA  
TTTTACCATGGTGTAAAGTTTGTAAAGATTCGAAGAGGATGAGTATCATGACATTTTATTA  
TTGTGGAGCGAATACTTAGAGGTATTCTGACACATAGTAAGAACAGCAGAAAGAGAATCA  
GACTTGAGAAATACTAGGAGGAGATATGACGATCAGTGATGGTATTGCACATCGCAGTTG  
AAGAACAATAAACTGAGGCGGTGCTATCCCAATGGTTCGATAACCCGTCGGCATCTAAA  
TATATACATAACATACTATTCGACAAAACCCGACCTATGAGAACAGAAATGTTGGAAGCTC  
TCAAGGGACTTGCCATTGGCACCATCAAGAAAGCAAAGTTGAACGTTGATGTTTACCTTA  
GGAATCCTGTTGGAATTGGTGAACCTCCAGATGTTCTTGGTGCTATTCAAGAACAATTG  
ATTAGATTGCGAAAGAAGAGGAACGTTTGAAGAAATCGATAAGTATTTTGAAGTAGTAA  
TGTAGCTTTATGGTGGATCTGAATGACGGATCAGTATCTCGGCCACCCAAATCTAAAAAA  
AGTAAACACATCGATTGACTTCAAACCAGAGGAAGTTGCTGAGGTATTGAAGTGTCAAGG  
TGATCTCATATAATTTAACAAAATTATATCAAGATCGTTTCTCTAGATGACGGTCTGGT  
TTAACTTAACATGTATCTTTTCGAAGACGAAATGGTATCTAAGTTTCATGTTTCATAGATA  
CAATATCGCTAAACTGCCACGACAGTTTGGTAAGTCTACCATTGTTACTGCATACTTAAT  
TTGGTATGTGTTATTCAATGCAATCGTCATCGTAGCAATCCTTGCAAACAAGCAGCAAC  
TGCTAGGGAGATGCTTAAAAGATTACAATTAAGTTATGAAAACCTCCTAAACGGGATGCA  
ACAAGGCATCCTCCAATGGGACAAAGCTACTCTGGAAATTTAAAACGGCAGTAAAATCAT  
GGCAGCTTATATTTCCGCTGCTGCTGTCAGGGGTAGGTCATTTAACGTTATATTTCTGGA  
TGAATTAGCGTTCATTCGGAATCATTTTCGCTGATCAGTTTTTTAGTTTCGGTTTTTCCAAC  
TATCTCCTCAGGTTAGTCTATGAAAGTTATCATCATATCTACTCGTCACGGAATGAATAC  
GTTCCACACACTCTGGCTTGAGGCATGGCGTGTAACGAATGAATATGTGCCTACGGAAGT  
CCTTTCGTGAGAAGGGCCAGGTACAGATGATGTAAGGAAAGTGCAAACCTATTAAGAACAC  
ATCAGAATCTCAGATTCGTGTTGAATTTGAGTGTGAGCTCTTAGGTTCTGGTGATAAATT  
GATTGCTCCTAGTAAGTAGAGAATCATGTCATATCATGACACACTTACATCTGCTTGTAT  
GCTTGCAGTATATGAACAAGCCTTCCAGATCATAATTATATTTTCACTGTTGACGTATC  
AAGAGGTGTTGGTAATGATTACTCAGCATTTTGTGGGATCGATAACCACAACCTATTCCTTA  
TAATGTCGTTGCCAAATATTAGAACAATGAATTTAAACCCATCGTTCTACCAGATATTAT  
CGTATACATTGCAAACAATTATAATAACGCATACATCTTATGTGAAGTAGATGATATTGG  
TGGACAAGTAGCAGATATTATTCAGTTTGATTTGGAGGATGAGAATTTGTTGATGGCTGC  
AATGAGAGGTCATGCAGGTCAATAACCAGGTCAAGGTTTTTTTTGATAAAGAAAACCCAACT  
TCGTGTTAAGATGTAATCAGCAAAAATAACAACCTGGATGCTCTACCCTTAAAGCATTAAT  
TGAAGAAGATAAATCGCTTATAACTGATTATGACACGGTTGCGGAATTAAGACCGTTCCT  
TGCGAAAGGTCTAACATTCCAAGCGGAAGAAGTTTGTAAATGACGACCTTCCTATCTGTTT  
AGTGATTCTTGGTAGGATGGCAATGCAACCATACTTTACAGAGATGTCCGATAATCTCGT  
ACGTCCACGCATCTATGAACAACACAAGATACGCTTGAACCTAGACATGTCACCATTGTC  
TTTTGTAACCTGCCGAAGGGAAGATGATTATTTTTCGCTACGCACAGGGCTAGGTGTGGAA  
AGTCGCGGGATACAGCGATAAATCCTACACGTGGGAGTTTAGATAAAGGTTTTCAAAAAAAT  
AAATAATCCTAGACATCTGATGTTTGAAGCACCTAAGAGAAAATTCACCATGGCAGCCA  
ATCAATTATCTCCAGGTGTAGCGGTAAAGGAGAGACCTTACGACTATTACCACATTAT

CGACCGCTAACGTTGGTGTGCTCGCTGCACTTTTTAGCTCGGTACTGTTGAAGAGTTCCG  
TCGAAATCTCCAGTGAAAGGGATCTTGCAGAGCAATTTGGATAACCGAATGAGTATAACT  
ACGATAATTGGTATATTGCAGCAAAAATTTCTTCCCTATGGCGGACTACTAACAACAGTTC  
GTGTTGGCTCGCCATCTCTCTAAAACGCAGTTAGTAATGGAAGTGCAGTTAAAGTCACGG  
ATTTAAGTGAGTATGAATCCACTTACGAAGGTGCTACTAACACATGGAGGTGGGCAGCAG  
TAACTTCTGGAACATAGCAAACCCTCACCGTGTATTTGTAAGTACGACAGGTCCAGATC  
ATATCGCTGTTGCTCCTGCTCCTGGTTCAGGAAACGATCGGGAATTCGTTGCTGCTGAAG  
TACTCCCGGCAACATCAGGTCCTGCAGGTAAGTATTCAAATACAGCATCGTATTGTCAG  
TCACATGTGTTGTTTCGCGCCTTCGTTTCTGGCACCCTACAACCTGTTTCAATTTCTGGTT  
CCATCCAGACGGTTACAGTGCTTGCTTGGGATCCTAATAACAAGAACTTGAAATGGGTC  
TTCCTTCTGGTGGTATCACTGGTATCCTTGCTGATGGTCAGACTGTAAGTCAAGGATCTT  
ATACCTGTGAGATTGCACCATCGGGTATTGAAAGAAGAGTATATATTTGATTAATCAAAG  
GAAGTATTGAATTCGCGCTGCTGATAGTATCGCTGATACTAACTCAACTGCTGTATCAA  
GTAGTTATGTTTCGTTCTGAGTATGCAGAGCGTGAGTATCTACCTGGTGCAAAATGGATTA  
GCGTTCCTGCGGGTCCGCTACTTCACTCTTTTCAAATAATGCAGGTGGATTTAGAGATG  
AACTTCACGTTCTAGTTATGGATATCGACGGTGCTATCACTGGAACAACCTCGTGCTGTTT  
TCGAGCGTTTCATTGGTGTTCAAAAGCATCCGACGCTAAGACATCTGTTAGTGGAGCAA  
ACTACTACAAAGAAATAATCAAACAAGTCTGAGTATATCTAATGGGGTTTACATGATA  
CGGGAGTATTGAATGCAACTGCTTCTGCTGCTGCAGGAACTGGGGTTTAGCTGCTGCTT  
CTAGACAGTTTAACTTACTACGCTCTGCAGACGGTCTACTGGTTATCCGGAGGGACGCA  
CCACTGCAGGTTCTAACGACAATGAAAAATACTACTACAGATTAAGTGTGGTGGTTCCT  
ACGGTAGTTCTGGTGGACTTTACGGTGTAAACAACACATCTCTTGCAACTGCATATGGTG  
TACTGAAGATCCTAAGTCAACAACAATTGACTTCATTCTTACTTGTCTTCTTGTGCAG  
ATGATGCTTCTGCAATCGCTAAAGTAACTTCTCTAGTTAACATTGCTGAATAAAGATTAG  
ATTCGTTTCGCAATTCGTTTACCTCGTAGAGGAAACGTTATTGGAGTTACTTACTCTATTA  
CTACAACCTGATAATATCGTTATCTTCTTCGATCTATTACCGTGGACGTTTACATGGTAT  
TTGATTCTGGATACAAGTATATCTACCCTCATTATAACGATGTATATAGATACGTTCCAA  
CCGACGGTGACATCGGAGGTTTATGTTTACAGACATCTGAGGTTGAAGCGCCATGGTTCT  
GAAGTGCAGGTTTTCAACGTGGTGTTTTAAAGAAATGCTATCAAAGTATGCACACGAA  
CTAAGACAAAAGTGATCGCTTGTATGCAAACAGCATAAACCTGTCGTATCATTCCCTG  
GTCAAGGCGTGGTCTCTTTGGTGACAAGACTGCACTCGGATTTTCATCCGCGTTTGATA  
GAATCAAGGGACGTCGTCTAGTCCTCACCATCGAACGTGTGATCTCAGGTGCTGATAAGA  
CACAACCTTTTGGGCGAAACGATGAAGCACAGAGATCACTCTTCTTGAATATCATCGAAC  
CTTATCTAAGGGAAGTTTAAAGTCGTCGAGGTGTAAGTACTGACTACGTAGTTAAGTAGGATT  
CCTCTAACAACCCACCAGAGGTAGTCGATCGTGGAGATCTCTACGCGGAGAGTTTCGTGA  
AACCAACACGCTCCATCAACTACATTACCTTGACATTGGAAGCAACTAGAAGTGGAGTTA  
CCTTCAGCGAAGTAGCAAATTAATAATACACACTTTTTTCAGAGGGTTTCCACATCG  
GTACCCCTGAAAATTTTTATTGGTCTAAATATAACTGACGGAGACACCTAAAAAAAAGG  
GAAAAAGAGGAACGATTGACGATGCTAAGGCAAATGCTGCATCAGACTTTGCTCGTACTA  
ACCTATTCCAAGTTGATTTACCATTCCCCTCTGGAATCAGTAATAACTCTGATCTGCTAA  
ACCTTGGTATCTTCACTGTTTATGGAGCGAATCTTCCCTTCTTCCCAGATTGGTGTATTG  
AAGTTCCTTCAGAGGACATACTCTAATAATCGCAGGAGTCAGGTGCTTTGAACCTTCGA  
CAATCACTTCTATGAATGACAGTAAGTTTGTTCGAAGATCCGCATTTGAATTGTGGACAT  
AAAGCTTTCAGCATAACAACGAACTTCACTTCCGCAGCAGGTCTTAGAGGCGCAGATG  
ATTCAACTGGTACTTTTCTGACTTGAAGCCTCATCAATTAGCAAGAGATATTAATCAG  
GAGAGAAATCAAAGTTCTCAAATCATATAAGTTCTACAACATCTTCCCTAGTGCAATCG  
CAGCCATTGATGTAGATTACGGAAACAACGCTGCCATCGAAGAATTCACCGTTGAGATGC  
AGGTTTCAGTATTGGACTCCTCTAGCAGACGCCAACGACTAACCTCTAAATAGAACAGGA  
CCAATAATTAAGACATTTAATAGTGGCCAATCAGCTCTCCGGTTTTTCACTTGAGAGAGC  
GAAGTAGGTTCTAAAGGACCTTCTTTTGTTCAAAAGGAGAGTATGGATGGATAGCAACC  
TATGGTAGGGGGCGGTGACTTTGCACATTCGGTCGATTATGATGGCACGGTTGGCTATGA  
GTTAGAACTAATTACTCGTTACAGAGAGATGGTTCTACAACGACAATGCGCTAGTGCGGT  
TGAAGACATCCTGAATGAAAATATGTGTGCCTACTTTGACGGCGCTCCCGTCGAAGTCGA  
GTTTTCTCACTTGAAACAACCCGACAACATTATAGAATTAACCAGGGAAGAGTTCCATAC  
AAATCTTCGCTTGCTTGATTACGGTAATAGGTCGCACGAAATTTCCGGCGTTGGTATGT  
CGATGGAAGATTATTTTATCAAAGGTTATCGATCCAGATAACCCTGGAAATGGTCTTAC  
TGAGTTACGTTATTTTGACCCTCGTTAGATTCGAAAGGTTGCCGGGTATGATTTGAAAGG

TCCAAACGAACTGACTGTTCTAGATCTGAATGCTCAACTTACACGAAAACTGCAGATTA  
TTATCTAGATAATGGTAAGGGTTTGAAGAACCCTGGATCTTAGCATGGAATTAACATTGG  
TGCAGCTTCAATCACTTGTGTCATTTTGGTATACAGGCTATCAATGAGAAAATGACATT  
AAGTCATCTCCATATAGCAATCAAAGCGGTTAACCAACTCCGTATGATTGAAGACTGATT  
GGTCATTTATGGATTGTCAAGAGCACCATCAAGAAGAATTGCATAGATCCATGAAGGTAA  
CCTTCCTAAGAACAAGCGGGACAATACCTCCGTGAAGTTATGGGAAGGTAACGTAATAC  
ATTGGTGTATGATGCAAACACTGCTGAGATTAGGGATGACAGGAATCTCCTGTCCATGTT  
GGAAGTCTTATGGTTACCTCGACGTGAAGGCGGTAGAGGAACTGAGATATCCACTCTTCT  
TGGCGGACAAAACCTTGGTGAAGTAAACCGGTAAATATATCCAGAAAAAGTTATACAA  
AATGCTGAACGTACCGTCGTCAAGACTTGAGACTGAGACTACCTTTAACATAGGTCGTGC  
GGCTGAAATTACTAGGGACGAAGCCAAGTTCCAAAAAGTTATTGCACGTCTCCGCAAGAG  
ATTCTCACAATCGTTTGTGTATCTCCTTAAACTCAACTCGTTCTGAAGGGCACAATGGC  
ATTTGAGGATTGGGATGATATCAAAGACAATATTCAATTTGACTTTATTGCTGACAATA  
CTACACTGAACTGAAGGAAATTGAAATCCGCAATGTGCGTCTGAATCAAGTGAACCTCAAT  
GGATCCTTACGTTAGAAAATACTTCTCTATTGAGTATATGCGTTGTCAGGTTCTAAAACA  
AACTGAACAGGAGATTAATGAAATTGAATAACATATGGATTCTTAACGAGAAGCAGGTCT  
TATGCTTGATACAGAGCAAGCAATGGATCCCGCTATGGATCCTGGCGCTGCCCAAATGG  
GGAAGTAGCTCCACAAGACACTCCTCAAGGAGACGCGAGTGAGGGGAAACGGGGAGAGAT  
CTAAACTATAAATAAATAAATGTGAAAGTACAATTATGCCTACTTAAATTGCAAAAACACT  
AGTTCCCAAGTCTTCGGTGCCGACAAAGCGATAGCAGTTGTCTCCGTGAATGATGCATT  
GGCCGCAACTGCATACGGTGCCATTCAAGCAAGAAAGGTTGAGTTCGCTAATAGTATGGG  
GTTTGAACAAGATGATACCGCACAGGTTGCTGCAGATGAAATTCCAGATAACCTATCTTA  
CGAACTGACGAACCCGAAACTGTTGAACTTGTGTCGACACCTGAAGATCCATCAGA  
AGTACCAGAAGCACCCGTTGGTGACGGAACACCTTATTCTGTCTAAGAACCAATCGAGGA  
ACCAACCGATGGGCCTAATAGCTGAAGTACTACAAACGTTGGTTTTATCTGCGAGGATA  
AAGAAGGCAAGAAAAAATACTCCATTGAAGGTGTCTTTCTACAAGCGGAATTA AAAACA  
GCAACCCTAAAAGCTATCCCGTGAAGACTTTTTCCAAAGTAGTCGCTAAAAGTGATGCGA  
ACTACATGCAAAAAGGGCGTGCCCTTGGAGAATTAGGTTACCCTGATGGTCCCTCAATCA  
ACCTTGACCGGCTTTCCCATAGGTTCTTTCTCTACAGGAAGATGGAAACATCTTCATAG  
GTAGAGTAGACGTGCTCGAAACACCTATGGGTGGGATCGCAAAGAACCTCTTAGATGAGG  
GTGTCAAACCAGGTGTTTCATCTAGAGGAATGGGTTCAATTCGTAAAGAAGAGAAGTGT  
ATGTTGTTATCGACGACTTTATACTCGCAACAGCAGAAGTTAAAGCCGGCGTTATTTACG  
GTCCTGATGCTTGTGTCAATGGAATTATGGAAGGAAAGGAGTGGGTTTGTAACAATGGAG  
TCCTAAAGGAAACTGCTGGGGCAGTAATGAAACAACAATTGATCAAGCAACTCTAATTA  
ATCTGCAAGAACGTAAGTTTTTCAGCGTGTGAGGCGTTCTTAAAGAGTTTGTGATCTAAAA  
ATAAATACAGACAACGCTCATCTATAACGGAGTTTAAACAAATGGCTGAGACCCTCGATA  
AATAGATAGATAACATGGAGCAAGTGGACGAAGGCTCCGCTCCTATCACCAAGAACGCAA  
AACCGGGTGAGAAGATGGACACTACCAAAGCAGGAAGTCCAAAAATAGTCGTCATCGTAG  
AAGGACCTGAAGTTGTTCAATGGAAGGCGCAAAGGAACTAAGAACGCGGGTAGCTCTG  
CTGCAGTTGCAGTGAACCTTAAAGGTTATAAGTCTCTGAGCACAAAAACAAGGGCTGCAT  
GCGCAAAAACATGAGGAGGTAGAAACCGAAGATGGCGAAAAAGAAGAAATCGCTGAAACCA  
AGTACGACTTTTCTCAGGATGTTACGTTCTTGTGCGCAGGTGAAGAAGTATCAGAAGAGT  
TCCAAGTAAAAGTAACTCCTATTTCTGAAGCAGCTGATACTGCCAAAGTTAACGACGAAG  
TTAAAGCGTTGCAAGAAGCGTTTGAAGTACTACGCTGACTAAAGAAGTTCGCAAAAAGTGC  
GATAATTGGCCGAGAAGGTTGACGATTACTTGTCTTATGCTGCCGACCAATGGTTGAACG  
AAATCAGATTGCAAATCGAGTATCGCATCAAGACTGAGATGGCACCATCGTTCTTCACAG  
GTCTAAAAGGTCTTTTCTTAGAGCACAAACGTTACAGTGCCTGAGGAGTAGTTCAGCCTGC  
TAGATGTAATCGCAGGTGAGCTTGATGATATGGAATCTAAAGTATACGAGCAAGTGCACA  
CTAATGTTGCTTTGAACAAGCGCATTGGTGAATTTTGTAAATATGGAAGTTGCGAACGTCG  
GAGCTACTGGACTAGCAGAAACACAAAAGGAGAAGTTAGCATCATTAGCAGACGGTGTTG  
AGTTTAAAAATGAACAAGGTTTTTCGCAAGAAGCTCGAAACTTTCAAGGAATCCTACTTTA  
CTAAGAAGGCTGAAGTCGCTACAAATTCAACTGATCCCACAGAAGAAAGTTCCGCTCCTC  
TGGTAGAAGATACTAACAGCAGCAACATGTCAAAGTACGTTGATGCACTCGGTCATTGGT  
CCAAATAATTAATACTAATTCCAAGAGGTAAATTTAAATTTAATTTAAATCGACTTCAG  
GAGAAGTGGCCACCCCTTCTAAATCACGGTTCTTCTCCTGAGATTGATGATGCACATAAG  
CGTGGCGCAGTAGCACAACCTTAGAGAACCAAGAAAAAGCATTACGCGAAGAAGGACTA  
CGCCTTACAGAGACTCTACAAACCGCAGTTAGAGGTGGTTTTCCGGTGGCGGTGCCACTGCT



ACAGGTCCTGTAGCAGGTTTTGGCCCCTTATTGATCATTCTTATGAGACGTTCAATGCCA  
CAATTAATTGCATATGATATTGCTGGTGTCCAGCCAATGACTGGTCTACAGGTCTTATC  
TTTGCAAAGAGAATTCAGTACGGTATTGAAAGAGATCCTTCCAGGGGCGATTACAGAGAA  
GCCTTCTTCAATGAGCCTAACGTAGGTTTCGCTGGGCCTGATGGTAACCGTCTTGCTGAC  
TATGATCCAACCTGCCACTGGTAGGTCTGCCATTAACGATGCTGAAGGTGCTAAGCCAGGT  
CTTCTTAATCATATCCCTGCAGGAACATGTCAGTTGACAGGTGACGCTCAAATAATGAAC  
ACCACTGCTCTTGAAGCAATTACAGATCCAGCTGCAGCAACTGCCTTCAGAACAATGGGT  
TTCTCAATCGAGAAAGTTACTGTTGCTGCTAAAGGTCGCGCTTTAAAGGCAGAGTACAGT  
ATTTGGCTTGATCAAACTTGAGAGCAATTCATGGTCTTGATGCCGAGCATGAGTTAGCA  
AAGATTCCTTCAACTAAAATCCTTGCTGAAACAATCAGGGAAGTTGTGAGAACAATCTAC  
GTTAGCGCTCTTGCAGCTGCTTAAAACCTACACCGCTACCGCAGGTATCTTCGACCTTGAC  
GTTGACTCAAATGGTAGATGGTCTGTTGATAAATTCAAAGTACTTCGGATCCAGATTGAA  
ATAGACGCAAACGCCATCGGTCATCAGACAAGTCGGGCAGCGGGTAATATCATCATCGCA  
TCTGCTGATGCTGCATCCGCTCTTTCTATCACTGGCGTCTTGATTAGGATCCTGGTCTT  
CAAGGTAACAATGGTCTTGTTCGTGTTGACACATCTTAAACTCTTGTGGAACCTTAAAG  
CGACCAATCAAGGTTTACGTTGACCCAGATTACAGCAAACGTAAGTGGCAAGCACTGGTAC  
GTGGAAGGCCACAAAGGGACGTCTTCTTCTGACGCAGGATTAGTCTAGTGCTAATATGTA  
CCTTCTCAGCAGGTCAGAACAATCAACCCTGACACATTCCAGCAAATAATAGCATTTAAG  
ACTAGAAACGGTATGGTTTCTATACCATTCCCTCAAGGTCTTACCCAAGGTTCTTCTGCA  
CTTACTGCTAATACTAACGAGTATTACAGAAGAGTTCAGGTTCTTAACTTAATGTAATAA  
GTCTTATTACTTAACTTTCTAGAGGGTGCTTGACACCCACTTTTTTTATGCTATACTCTA  
TTTGTGGACGCATCACTGGGACTGACTGAATAAACTTACTGGCATATAGCTCGTTAAGG  
TGAAGCGACAGAGATAGTGTCTCGATGTTAGGAAAGGCAGAACTACAAACCAAGTAGGTCG  
TTTTCAGAGTAAGAATTCTCAACTGTAGAAAGGGCCTCCTCTTGTTAGTATACAGGACTA  
CAACCTCCCCGTTTAAATTTTTTTGTAGAAGTGTAAGTACCTAGTGAGATTTTCAGGTTT  
CCCTTATAAGTAGTAAAAGAGTTAGGGTCAACAAGATGCACTCAACTTTCCTTATTATTC  
GCTTCAAAAATGCAGAGAGATTGAAGCACAACCTAGTGTCTATAATCAATTAGCAGGAT  
CTTACCAGGAAGAACACGACACACGGCAAACAGAATACTTCGAGTCTTAAATGGAAGGAG  
ACCACCAACAACAGATCTGACAAAGAATTTGGAGCGAGTTGCTTATGTAACACATATTCG  
GGAAGACTTAGACAGGGGGCAGAGATGCTCCCTCTTTTTTGTGCTACGTAGCTCTATCAC  
AATGGAATTATATACTGAATTATAATCCTTATTCTCCTGCGTGGCATGGAAAAAGGTCTC  
TAAAGGAAGCACTTTTTAAATACCTTGACGATTTTCGTTGAGAAAGATATCATTATAATTG  
GTCCCATAGATAGCCACACAGTAGATCTGATGAAGCGTACAAAGAGTATACTAAACTCA  
ATCAGCTATCCGCCAAACTCAGTTAAGAATAACAATTGCTTTCAACCCAATACCGCCTCC  
GACTTGAGTCTATCTGAGATCAAATCGTAGAGGGTGAAAATGTCAAACCTAGAAGACATGA  
TTTGGGCACAAAACGTAGCAAAAAGAAATACCACTGTTGATCCATGGAAGCGACCAGCAC  
GACAGAATGCAGCAAATCCTGACATGAATAATGGAGGGACTGACGATTTTCTGAATAAGA  
TGGGGTTAGGAGAACACCACCTATGGGATTATAGAAGCGGGTTCAATGGTGCAGATGACA  
TTGGTGTATGGTATAACAGAGTGAAACCTGACGGCCGGAGACAACGAGAGTAATGGCAGA  
CTCGTTCCAAGACCAACTAACAATAGAACTTTCTTTCCCCTATAGGATATCTTTTCT  
CTTAGGTAAGGCAAAGAAGGTGTATTTTTTATGTCAACACGCAGAGATTCCATCAATACA  
TTTAAATGATGTTCTTATTCCCTACTGAAGGTTTAAATCCCTGTACCTAGAGAAGGAAACAT  
AAGCTATAATCATTTGACCACTGAGGTTATCGTAGATGAAGATGTAATAACTAGGTGGA  
ACTCCACAACCTGGCTGCGTGCTTTAGGAACGCCCAATATTATAATGAGCGTGTTGCATG  
GGGAACGAAGTTTCAACACGCACTATCACAAGACGGACGTTACTCTGACGCTACTCTTCA  
AGTATTAAGCAACAATAACTTAGCAAACCTTTGATGTAGTCATCAAAGATTTGTTTCTAC  
AGAACTATCAACACTCTCATTGATGTTTCACAAGTTGATAATTCATTCATGACTGCACG  
GGCAACTTTTTAAATATGCTCTATACAAAATCAGAAACGTATATTCGAGCACTAGACGATT  
AAGAAGTTCAATCTAGTCAAGTTTGAGCATAAATGGGGCGGTAAAGATAACTGGTATACT  
AAAACCTACTAGGTGGGCGATGAAGCAACCATAACCTTTAAACCATTTAATTACAGGTTTT  
ATCGAAGGGTTGCATTTTCAGTGGAAATGATGGCAAATGATTATGGCTATTGACGACGTT  
GATCGAAAGGTAGATAAAAATCCAAACCCAGTGGGAAGATAATGAGCAACACACAAGACAC  
ATAATGGTGGCGACAGGAGTTTTTGGAGATGAAGGCTGGTCTATCGAAATTACAAATCCG  
ATTGTTGAAAGAGGGTCCATCAACTAGCACAGGCATAATTACTCCAAGCGATGCACAA  
CGACTACAAGAAAATGAAGGGGATCAAGGAACGACCTTGTCGTCAGTCAGGATATCAGAT  
ATCAATGAAGGAGAGGTTTGAACGTGAAAAGGATCAGGGTATGTGAATCTTGAGCAATTC  
CAAGAAATGTGGAAAAAGGATAGTCTAATTGACGGAGATTTATACGGCGAAGAATCTACA

AAAATTCCACGACTTCATAAGAAATATTTGGAGTATCTCAACACTTTCTCTCTTATGAAA  
AAAGAAAGACAGTTAGAACTAAACGTCTCATAAAAGAAAAATGGTTATACTATAAAGGT  
AAAGCAACCTCCTGAGTATACAAAGAAACAGCATTGATTTTAACTTACTACAAAAGAA  
GCGAGCAATATGTTTATTGAAGGAGATGATGCTATCTGCAAACACTACAATTAAGATAGAC  
TAAATCAAACAGTTTCTATTAATCTTGATAGTAGCCTACGAATGATAACAATCGTCAA  
TTTCAAATTAAGAATGCAATTGAATGGGAAAACTTTAAGAATGGTTTGTAATGAATGACG  
GATTGACCTAAAACGAAGTTATCGTGAATACAAAGGCACAGGTTATAGTCAACAAGGTAA  
TTTCATATAGACATAATTGGAGTAGAGGGCAAATTCGAAGCGGAGTCGAATCAAATAGCA  
GTTAAGAGAGAGCATGGTTAGGAGATAGAGAACTCCTGTCCATGCTTCTTCGTATGATTA  
AGAAAATAAATGCAGATGCTCGGTGGAATCGAAAGATCACAGGTGTCGAACCAGTTCAGT  
ATGGTTGATATGGTGAAGGTGATTTTCATGATTGGAACATCGATCAAAACCCTCAACCAG  
TAAAGGGATTAGTCCCATAGGTTAGTATGACACTCTTCTAAATGAAAATTACGAAGGAG  
GCGAAGTTGGTATGGAGATATATCAACCAGAGACAGATCCCAGTCATAACTTTCAAGT  
AAAATGCAGGATCTGCTATCTTTTTCCAATGTGATCGATGGCACACGGTACGTCCCTATCG  
CATCTGGAACCTCTCAATCTTTAGTAGCATGGTTTTATGGACCTCCTTAATCGTAAAAAG  
AATGAAGTCTATCTTAAGATTGAAGCACAACCGCACATTAAGTATGAGCTAGCAGATTGA  
TTTACCCTCGAGGTCGAGTCTGCAAAATTAATGCAGCAGACTAGAAGGTATACAGGATGG  
GACGGTAAGAATAGTTTGCTTTCTCCCGCAACATGAGAGATATATTGTGGTCTTGTAGAT  
TACTTAACAGACTTGGCGAAAGAAAAGGGATATGAACATCAAATAAAAGATGGTGAATAC  
TTTGGTCATCCTATCACAGAGCATGAACTATTCCTCCAAGTCGGTTGTACGGTTTGT  
AAATCACTGCGTCTTCCCACGACTCTACCGGTAAGGGATTATCAGTATAAGGCAATTCAC  
GAAGCACTAAAATGCAAGAGACGACTCTTCCCTGTCCACACAGGGTCAGGACTATCTTTG  
ATGATTTATGCACTGGTGAGCTATCATTTAACCGTTGGTCGTAATGTTTTAATTGTAGTC  
CCCAATCTCTACCTTGTGATCAAATGTATAAGGCCATTGAAACATATGGTTGGATGGCG  
AAGAAAGATCACCATAAGATATATGCAGGGCAAGACAAGTATACAGTTCTCAATGTGATA  
ATCACGCCTTAGCAGTCAGTATATAAAGAACCAGAGAATTGGTTTGATAGATTTGACTGC  
GTGATTGGTGATGAAGCACATCAGTTCAAAGCAAAATCTCCAAGTACATCGATGGGTAAG  
TTCCATGATTGTAAATATCGTAGTGGAATTACAGGAACACTACATGCTGGCAATGTCAAT  
CAACTTGTATCAGAAGATTTGTTAGTTGATGTGCTCACTTACTAAAACAAATCAATTG  
ATGAAGGCAAGGCACATTGCTAAATTAAGGTCAGGTTGGTTCTTTTAAACATGAAGAT  
AAACTATTTGAAGGATATCGAGAGGAAATTGATTATCTAGTTGAAGACGAAGGAATGAAC  
AAATTTATCCGTTAACTTGCGGGTGACTCCGAGGAAATGCGCTTGTGCTTTTCAATTAT  
GTAGAATGACATGGTGAACCTCTTTACAAATTGATAAATCGTTACACAGACAGACCCGTG  
TTCTTTGTTTCATGGGGGTGTAGATGTCGATGATCGCGAAGAAATTCGCATGCTAACAGAG  
GCATCTGACAATGCGATCATTATTGCATCGTATGGGACGTTCTCTACTGGCATCAATATT  
AAATTCCTACATAATGTTAATTTTCGCTTCACCTCCTAAATGTGGGATTCGTAATTTAGAG  
TCTATTTGACGAGCCTTGCGGAAAGGTGACAATAAATGAAAAGCCCCTTTATATGATATT  
GCGGATGATATCTCCACAGACAGGGGCAATAACTACACGTTGAATCACCTGATGGAGAGA  
GACAAGAGTTATAATGCAGAGAAATTTAGTATGAGATCATAGATGAAAAAGTAAAAGCT  
TATGATTAACACACAAGACACCACGATGAACTTACCAGTATATTCAAACCTGGTTAGGGG  
GGAGGAGATCCTTGCTAAGGCAATTATGAGAGTAGACCGTGGATAGAGATTAATTTTCAT  
GTCTGATCCTGTTTGCATTGTTGCAACCACTAGGGACGTCGGCGAGCAAAAAACATAATG  
AGGTATGGGTTTCAGTAAATGGATTCCAATGTCTGACTAAGAATTTTTTATGTTATGAGA  
GAAGGATATCATGAACCTGGCAACAATGAGTAGAGCTGTCAAACCTCATGTACGATGCATA  
CATCACCGGCGAAGATGCCAATGGAAAGCAAGTGAAAGAACGTCAAGGTCGCTCTCGAT  
CGCCGAAGGATATCTAGGAAACACAAAAGACATCCGTGCCCTTGCAAGAAAAATTGTATGA  
GAAGGAAGTTTTATTTCTTCGGAACCCTTACAGTGTAAGCATAGTTGTCCTTGACAGGTT  
GGTCAAGTGTTTTTATAATTAACAAAGAAAGATTTGTACGAGGAAATCTTCCCCAAA  
AAGCGGTAGCATTATGTAAATAATCCAGAGATTCATGCTGGTATTATCAAGTATATAGAG  
AGAGTAGAGCATGCAAAATAGAAGGGACTACCAAACCTGGTGTCAATACTTACAATGGT  
GGGTGCTTTTCAAAGATTGCTGCTCATCTATTATATAGACCCAACCTTAAATAATTACATG  
TATAAAGATGATATGGTGTGTGATGGTATCGAGACTTGACGACATTATATTGATAACTTT  
GATCCTGCTAAGAGTAGAAACCCCTTTGCATATTTTACTCAAATCGTATACTATGCTTAC  
CTAAAAGAATTGCTAAAGCGAAAAGACAAATGGGTATTAAGAAAAAATTATAGAAAA  
CCTGGATACGATCATGTATTCAGAGTTGACGGAGACGCAATTCAGAGTAGAGTCAAATT  
AAATCCTGTGTCGAAAAGTATTCTAAACGATTAAGATTCTTTATTAACAGATCAACACT  
TTGGAGTTCGTATTGACAACCAACATTTTATCAATCATTACAGAAAGTTTCACAATGATA

TTGGAATTCTTTTTTCCAGAGCATCTGGCATTAAACAGCTCATTGGCCTTGGTGATACCT  
TTGATCGTCGTAGATTCATTATCTTGCTGTCTCTAAACGAAACAAAAGAAATGTGTTTTG  
ATCCATTGAGAGATCTGGGTATCCCAATGCCCATGCTTATTGGCGACCATGACATATACT  
ACAAACATACTCCTCGAGCTAATGCCCAAATGAATTAATCAGAGGGTACGACAACATCA  
CAGGCATTTATGATCACGATACTGTCACTTTTGATGGTCTACCTAGTCTTCTCCTGTCTT  
GGATTTGTCAAGTCTATCGCGAACGATTTCTCGTAGTTATCCAAGAATCTCGTGCCCTTG  
TCAGTATGGGTCATTTGGAGCTTAACGGTTTTGATGCTCTTCCAGGTCAAGTGATAGAAG  
GTGGGATGGATCGCAATGTTTTTAGTAAATTTAAAAGAGTATTCTCTGGACACTATCATC  
AGAAATCTACTAAAGGTAATATCAGATACTTAGGTAATCCTTATCAAATTTATTGGAGTG  
ACTACGCAGCGAAAAGAGGTTTTACGCTTTTGATACAGACAATCTTAAACTACTTTTT  
ATAGGAATCCGTTTGATCTTGTTTATAAACTGTATTATAATTCTGGTGTGTCTCTCCCGG  
ACGCATCAGAAATCAGAGGATCATGCGTCAAATTAATGGTAGAAGATACAGGAGACTATC  
GGAAGTTCGTCTACAATGTAAAACGCATACAGGATCTGGGTTGCGCAGATCTTAAGATTC  
TTCAGCATCTTAGCGTGGAACCTGGGGAATTGGAGTGAAGCGCTATAAACC GAAGACACTA  
TGACGTTGTTAGACAAAATAGATAGATGAACTAGATTTAAGAGTCAGTAAACCTACTGTTA  
AATTTGTCAGGCGTGC ACTATTTCTAGAGGCATCAGAACGGTAATGTTTGTCTAACTGA  
GAAAACA ACTGGGGGTGTATGTGCTAACTCTAAGTCATACGACTAACAAGGTAAGAAGAA  
CGTGCTTGGTTTGGCAGAGAAAGACTATGCAGAAAGATATATCGTACTTCTAGAGGCAGA  
TGAATTTAATCAGGAACTTGACATTCTGGAAGTAGATGCAGAATTCATTGCCGTGTATTG  
TGGTAATTATGAGTATTCTTCTGCTATGGTAGAACCTAGTGACTTACTCATACCAACAAA  
CACATTTGATAAATGATTGTTTTTGAAAATATTAAGTCTACGAATTTCTTTCCCCTTGT  
GGTCAATGGACAGAAGTTTGTGTTGAATGAATCTCCATCAACTCTAATTGTTGTTGCAAAC  
GGTGCTGGTAAGTCAATTCTCTTAGATGCATTGTGTCTTGTTTTATTCAAAAAACCTTTT  
CGAAAAATGAGTACAGGACAGTTAGTAAATAGTATCAATGAACAAGGTCTGGAGGTTGAA  
GAATTATTCTCTATTACTGTTGATGAGTATCGCGTCTTTTCGGGGAGCGAAACCTAATGTA  
TTCGGGGTCTACAAAACTATAACATGGTGTGTTGTTGCTGCTGCCAAAGACACGCAG  
GAGTATCTCGAACATTCCGGTCTCAA ACTCAACTTTAAATCCTTTTTACAGGTCGTCATC  
TTGGGTTCCATCCACATTAGTCACCTTCATGCAACTCAACGCACCTGTCAGGATAGAAGTT  
ATTTAAGATTTACTTCACATCAACATATTCTCCCAAATGAATACGATCCTAACAGATCGT  
GTTAGAAATGCGATGTAACAACAACGCGATTGTGATCATCTCCTTCAAATCGCAGAGGAA  
CGTGTAACAATCAAGAAAGAATTGTTAGGCCTCTTTCTGATGTGAGTGCACCTCGTCAA  
AAAGATAAGAACAGTCAAATTAACACAATAATGAAAAAATTAATCAGAAGAAAAGCAA  
CTTGATCAACTGATAGAAGAAGTAGAGACTTTTACTACAGGTATGAAGAATGAAGATAAT  
CATAAATCTGTATCAGATGACCTTCGTTAAGAACGATCTGATATCAATTCAGAGTTATAA  
TCTTCTGCAAAAACA ACTTTTCGTTTTTTAAATCACATGCTGAATGTCCTCCGTGTTCTCAG  
CAGAATCAAATGGAAGTTAAGAAAGCAGTGATTGGTAATTTAGGAAATAAAGGTAAGCAT  
CTTACAAAAGATTTACAGGGTTGACTAATAAAAAATGCTGATGCAGTTAGTGTTGCAGAG  
AACATGGAAATTTCTTCCAGAAATATCATAGTTACTAGTAGTAAAGTATCCTCTGCAGAA  
AGAGAGATCGTACGTTGAGAGACAGAGAACGTTAAAATAAATGAAGTGATATTAGA ACTA  
CAAACAAACAGTCTTAAATAAGAGAAGTAAAAGTATCTTTAGTCAAGTTTCAAAAAGAA  
TTAGAAGAGACACCAAAAATACTGTGGAAAGATTCATCAGACTGTTGATGAATCTTAAGTA  
ATAGGTAATTTGTTAAAGGACGCTGGTATTAAGAGTCAAATTATCAAGACGTATGTTACT  
ATTTTTAATAATTTAATCAATAAATATTTACACAGCATGGACTTCTTTCTTAAGTTTACA  
CTTTATTAAGAATTTAAAGAAGCAACTAAAAGTAGATTGAGACATGTATTTTCATATTTA  
TCTTTTTCAGAAGGTGAAGAAGCCAGAATTGATTTAGCGTGGCTATTTACATGAAGAGAA  
GTTGCTCGTATGAAAAATAAGGTCGCTACTAATTTACTCATACTTGATGAAGTATTGGTT  
AGTTCTTTGGACGCAGGTGGAAAAAATGAACTCTGGAAGAATCTTCATGCTTTGGGTATT  
TCAAGTAACATATTTGTTATCTCCACAAGGGTGATGTCTTATTACACAAATTCCTAAGG  
ACAGTTAGATTTGAAAAGAATTATGAAGTCTCGCGCATGTGAGACGACTCGTAAATTTTG  
GAGAGTATGCGCAAAAGCACTTGGAGACA ACTCTGGAAACTCAGATAAAGAAGCGGATCG  
GATTGCTTTAATCCCAACATTTAGTTCCATTCAGTTAGTAGATACTAACTGTTTTATCGT  
AGCAAGTAAGATCAGACACTGGAACGATCATCATGTTCCGCCACTATATCAGCGTGTGCA  
AATTA AAAA ACTGGCCCAATAACTAGCACATTCTTAATTGGTCTGCTATACTAGGTGTAT  
ACGAAACACAGAAACATGATCAACCAAGAAGTAAAAGGAACACTCGGTGAACTACTAGCA  
ACAGAAAACCTCACAGTTGAGCACCGTCAGGTTACAATTGCATACTTCGATTTTGAGAAT  
CGCGTTCTTTGCCTCCCTATCTGGAAGTCTGCCTAACACACTGTTTACGATCTACTTGAA  
GGTCACGAGGTAGGACATGC ACTTTATTCTCCTGCAGATGGATGGGATAAAAGTGTTCCT

AAAGCATTTCATCAATGTAGTCGCAGATGCTCGTAATGAAAACCTAATGAAACATACCTAT  
CCTGGTCTTCGTGAGTCTTTCTTTGACGGATACAACCAACTATGGAATCAAGATTTCTTC  
GGTGTCAAACATAAGGATCATGAGAATCTACCGCTAATTGATCGCATCAATCTTTACTTC  
AAAGGCAATCTTAATATTCCTTCTCAGCTGAAGAGAAAGCATGGGTAAACAGAAGCTGGA  
AATACGGAAACGTTTCAAGTAGTAGAAGACCTTTCCAGAGATCTATACGGCTGGGCTAAA  
GACAAGCAAGCAGAGAACGAGGAAGAAGATATGGAAACTGATGTTGAGATTGGTCATGGC  
GATGGTAATATCAGTGGTGGAGATCCTGATACAGAAAAGGAAGTCAAAGAGAAAGATTAT  
TCTGAAGAAGAAACATCTGCACCTGAGCTTGATCCTAATCAACCATGGGATAGTTCAGAG  
AATCCTCTTGAGAACCTATCAGAAGGTCTCAATAGTTACTTAGAACTTATCGGTGGCGAT  
GGATCTGATACATTGATGACTTTGATCAAGTGCACGAAACTGAGAGTATTACAGATAAA  
GCATTACAAATATCATTAGGAGCCTTATTTGATTATGATGCTAAGGAGTGGGTTTACCTT  
GTTCTTCCTATAGTAGAAATTGACAACTTCTAGTTTCTCCCTCGACAATTCAAAGTGAT  
CTTGAAGGATTATTCTCTTTTTACAAAATAGTGACGAAGATGCGTAAACCTATACGCGA  
GAGTGTGTTTCAAGTATGCAGATGATCATTACAACAAAATCAAGACAGCTGCACAACCATCT  
GTAAACTATCTTGTCAAACAGGTTGAGATGCGAAAGTCTGCTGATGATTACAAACGAGCA  
GCAGTATCAACGACAGGTGTTGTCAACACTGATACTCTTTACAACACTACAACTAAATGAT  
GACATCTTCAAGTAAGTCACAACCTGTTCTGAGTGTAAGAATTATGGTCTTATTCTACAT  
TGTGATTGGTCTCGTTCTAGGCAGTATCAAAGCTTGGATACTGTAAAGCAAGTTTTCAAC  
TTGGTATCGCTCTGTCGTAAGCAGGTATTCTTTTTCTATGTCTAGGCATTCCAGAGTTCA  
TACTATGCTTATAATCATAGTAATTGCAAACAATGGAATCCCGCTTTTGAACCTAAGGAA  
GGTGACATTGGTATTGCAAATGATTTTCATATTTCTTGAATTACTATCTACTATGCAAGAT  
GCTAATTCACTTGAGACTTCACTCAGACAAATTTACAGACAAGTATTTACTATCGGTGGA  
TACCGTAGCTCTACTATGCCCAAATACAGTCTTGGTGGAACTCAACTTGCTGAAGCAGTT  
TTCTGCACTCGTCAGTTGGTAAAAAATCTCAAGTAGGTAGATTATGTGCCGAAAGTAAAT  
GGTGTATGCTTAAAGTATGCCGAAGCAAATCCAATGTCAGACTGGACAAAAAGTCCTTAC  
AGCACTATCATGCAGGAGATTGGTGAGGAAACATTCAGACTTGCTCAAATCTGTCACTCA  
GGAAATAGAGTATTCATTCTTTGTGATTCTGACGCTGGTTATCAGCGCAAACCTTAATGGT  
CGTCCATATGAAACTACAAAAGAGATTGTAAGTTACCTGAGAGAAAGTTAATGATTACAAC  
TGGATTGGTATCAGACTCTGCAGTACAGGCGAGGTATCAAGATTGATTCGTATGCTTGGT  
ATGTACATACAACGTAAAGACGAACCTTGGCAAGCAATGGAAGAAAGATAAATTTGCTTAT  
ATCAATGATGGAGTTGGATTCTCTCAATCTTTGTATATGCCTGACAGGGGCAATGGCGAA  
GGAACCTCAAGACCATACTCTAAAACAGAAAGGCTAAGTTGCTACCAAAGCAGAACTACAA  
CGTGCGTTCAAAAACGCATGGGTTATAAGACCACAAACAAAACCTCGCCTCAAGGCAGTC  
ATTGAACAGCTCGCATCAAGTGTAAACTCACTCTATTTAAAGCGGGAACAATCTTTGAAG  
AAACTGTTATCGCAGTGGATTATGATGATGCAAAAAAAGTTGTATTAGCAAGAAATCCTA  
ATTATACCGTAATGAGTGTGACTGCAGTGTTCGGATAAATAACTGTCCACTTGCTTTAGC  
ACTAAGCAGACATACCTGCTATAATACATCCATAAACAAACATAGACTATGACTTTTGAA  
CCCAACCCTGTGACAACCTGAACAACCTGTTCAACACCTAACTGTTAATGTTGGAACCTGAA  
GGCGAATGCAAAGACATTCGTGAGTCAGCAATGATACTTAAACTATCTTACGCAACTGCG  
TGAAAAGACTTAAAGTCTTATAAATCAGGTTTAGCCAAGTGAATCTATCCATTCAAGAA  
ATTGAACGTGAGTACGACGCACCTGCGGCTAAGAAAAAACCAAGCTATGTTCCCGATAAC  
GATAAGACTTATGTTATAATTGGTAACTTCACTTTTGTAAAGATAGTTATCTCTTTGAAG  
AAGTTCTATCCTCTATTACATTACAGGTCCATCTGGAAACCGTAAGACTCTATCAGTTGAA  
CAGGCATGTGCTGCAACTAATAGGGGGATAATCTTTGTCAACATTAATAATCGAACTGAC  
GAGGACGATCTTATTGGTGGCTTTTCGTCTTTTAAATCGCGACACTGTTTGGCACAGCGGA  
CCTGTGGTTGAGGCTTTGGATAGGGGAGCTGTATTACATCTAGATGAGATCGACCTAGCA  
TCTAACAAAATTTTTTGTGTTGAATGCTGTCCTTAAAGGCAAAGGTGTATTCCATAAGAAG  
ATTGGTAGGTATGTCATACCTGCTCAAGGATATACTGTGTTTCGCTACTGCTAACACTAAC  
GGCAAAGGTTCTGATGATGGTAGATTCGTAGTAACACATTTTCTCAACGAAGCTTTCAGT  
GAACGATTCCCAAATACATTTGAGCAAGAGTATCCTTCTGCTACTATCGAGACTAAGATT  
TTGATCAATCTGGGATGTGACAAAGACTTTGCAGAGAACTTAATGAAGTGGGCAGGTGTA  
ATACATAAGACATTCTTGGATGTCGGTGTGATGAAGTTATCACAACCTCGTCGTTTGGGT  
CACATTGATTCAGCATCCCACATCTTTTCGCGATAAGTTGACAGAAATCACAACTGTGTA  
AACCGTTTTGACGATGATACAAAATCATCCTTCCTAGTTCTTCATACAAAAGTTGACGCA  
GGAGAAGATTCAAGATATACTGATAATCACGAAATTCAAACATCCAGTTAAATATGAAGT  
AGCGTGAAGAGGAGTTCCCTTGAAGTTCTCCGACATTGCGTCGAGAGCACTTACTCTCCAC  
ACTATGCTAGTGATAAGCTTAAAGACTCTTGATGTAATCGATGCATGTGGTAATGCTACAG

CATTTTGTAGAAGTAACATTTTCACAGTCCGCTTCTCGCTAAGATCGGAAAGGTAGTGCTA  
GACAAGATCTCTTAAAGGTGCTACACTATGGAGTCTTAATCATGCACTTTCATAGAAGAG  
ATCAAGCAAACCTACGCAGCAGCAAATTTTGCAGCACAAGAAGACAAATTCAACATCGCAG  
TAATTTCCCAACCCACCATCGCAGCCCTTAAATACTTTTGTTCATCAACAAGTCTATTG  
TCATTAACCTGGCAATAAAGAGGTCTACGCTCACGATTA AAAAGAATATTCTCGCTATTG  
CCCAATTCGCAGAAAATTTGATTGGCAAATTTCTATCTATGATTTGGGAGTTTTCTTG  
GAGGGTTATCTCTGCTTGAGTCACCAAAAATCGATACTCCTGAAACAAACTACGTCACAC  
TAAGCGACCTCCAAGGTAAATCCATGACACGTTATTTCTACGCTGATCCTGATATCATCA  
CTCAGGCACCAGTAAAAGAAATCAACTTGCCATCAGAGAAGGTTGAATTTAAACTTGAAT  
CTATAAATCTTATGCAATTACATTGTGCTGCTATGGTATATCAACTCCCTGATCTTTGTT  
TGTATGGTGATAGAGAAACTATGCAGTTATGTATCACAGGTAGACAGAATGATACTTCCA  
ATAATTATTAGTAGAAGTTGGAACACTACAGATGAGTTTTGTTGTTGTTTCAAAGTTG  
AAAACCTTAAACTTTTATCTGGGGACTATGATGTAGTACTGATTAAGACAAAGGTTGCTT  
TGTTCAAAGATGACGGAATCAAATACTACATTGCTCTAGAACCTTACACATGACATGTTG  
GCACTGTGACACCGATCTAATCTGGGGTGGTGGCAACGATTGACCTTATGCAGAGGAGTA  
TAGTTCAGTAACTATGCTTCACTGCCCTAAGTGCGATTCTACTTTGAAGTTTATTATCC  
TAAAAAAGATGAAAGAATTTGATTATGAACTCGACTATGAGAGACTGGATTTTACAGACG  
AGGAGACTCGTAAGCTGTATCGTATTGGACGAGGCGAGCAAGGGGTTGCACTGGTTCACC  
ATTATACTGACGATATTTGTACTCATTGGAGATTCAAACTCACACTGAGGCAGCAAAT  
CTTCCAACTATTTCTTTGCTATGTATCTTGATTATCTTGATTA AAAAGATTTTCATCGGTA  
TAGATATGTGTCGTAAGTTGCTTGAAGGGGTGTTACCAGATCAAGGAGAAATGCCAATC  
ATAGCGATGGTAAAAGTATTA AAAAGAAGCTTATGTACAACCCCAAGAACCAGATCATG  
CTACCTGTTATTTTCGCAGAGTCTGCTAAAATATTTAAGAAGGTTTCGAGATATTGTTTCGA  
AGAATAAAACATATGTTACAATGGGGAAAGTATGGAGGGCATCTGAATGAACATTTTGT  
AACTGATCCTTCCCAACAAAGTCTGCTCAGGTATTACCTGACATACACATCCTCAAGAT  
GCCACTAGAGACCTGTCAGATGCTTTCTATTGGTGCATCTGATAAATGGGGTACGTTGT  
TGGTTCTCTACTTAACTAGATGGCACACCATACAAAACAGATAAGGGGGCTTTTCGTAA  
TCATCCCTGCACTGTATGGGCACAAGATAATTGGACAGGGTTGATAGTCCATGGTCTTGC  
ATGATGCTTTGAATATACTCTCAGATACGGTAAGATACATAGTTGTCGATCAACTATCGA  
ACATGCTGAAAAAATATTTCTCCACAGGGTACTGATCGAACACGTTTTGGTTTCGCATC  
TCCTGATCACTTAAAGCATGATAAGACTATTGACATTTTTATTGCATACAAGTATTATAT  
CAATAGCAAATCATGGGTATCAGATAATTATGTAGGGTTACCCGATAGTAAACCTAACTG  
TGTTAATTTATTATTAGGAATGAGTTTTTGTAGGTCGAGAAGTATCGGCTTAAAACGTA  
GAACAATCCATCTTGCCGAATCTGTGAAGACTCACTTCAAGAGTCTTATACAGCAGTGT  
GAGATTCCTAATCTTCTTCTATCTGGGACAGCAGGGGTAGGTAAAACA ACTATTGCTAAA  
GCAGTTTGT CATGAACTAGGAGAAGACTATTATGCTTTCAATGGATCCGATGGTGGTTCGA  
TTCCTTCAAACCGTAAGAATCCAGGCAAAAACGTTGTTGCAACTGTATTACTTACAGCA  
GAAGCAAAGCACAAAGTTCTTATCATCGACGAAGCAGACAACACTACACCAGATGTTTAC  
CTTTACTTCGTGCATCGATAGAAGAATTTCAAAGAATTGTAGATTTATATTTACCAGT  
AATTTTAAATACAAAATTAGTGAACCTCTACACCTTAGAACAACTGTCTTAGAGTTCAAC  
GTTTCGTGGTAAAAC TAAACAACA ACTCGCTGCAGAATTCTTTGTTAGATGTAAAGGTATT  
CTGATTGTTGAGGAAGTTACCTTCTCAGAAAAGTTGGAGCAGAAGTTGTTCTGAATTAT  
TTCCAGAGTTCCGAAGGACTCTTAATGAGTTGCAACGATATGCAAGCACAGGATGTTAT  
GATACTGGAATCCGAGCAGCACTAGGAGACGCACATATCGATACTCTAGTTGAATCATTG  
AAAACAGAAAGATTCAATGATGTAATGAAGTGGGTTACCATAGACCTAGATTCTGATCCT  
GTTTCTATCATGACGAACTCTATGATAATGCTTCTAATGGAATGACAGGTA TAGTATT  
GCAGCAGCAGTTTTAATCATTGCTGAATAGCAATACATGTATGCATTCGTTGTAGATCAG  
GCAATCTCTCTACTTGCATGCTTAACTCAATTGACGCTTGAATGCGTATTCAAGTAACAA  
CCAGTGACCTTTACAAAGAGGTAAATGAACCTGTCTTAAAGTCTGATTTTCTTGGCATT  
GGTATGACGAATCATACCGTCATGATGAGGTTTCTGAAGGTAGA ACTAAATTTGGTTGCT  
TCTCACATTTAGTCTTAGAGAGACCTGGTTATACATAGCTAACTCCTAAGATAAATTCTG  
ACCACTTTCCATTGTTTCATGATTTATTTGTTGAGTTCAGTAGAGACAATAACATTGACC  
CTAAAGTAATTTACAGGATCCATGTTAATCTGACTACTGAATCACACCTCAACAAAGATG  
GTCCAGACCACTCAGACCAGGACTTTCCTCATAAGAATATGTTTCATATACTTAAACAGGAA  
CTCATGGAGGTCTTACTAAAGTTAGAAACACCAACTACCCTTGGATGCATAATGAAGCAA  
TTGTTTTTGAAGGTGTTACGCTCACATGGAACATACGTCGGTAAGACGAATAGTTCTAG  
TTAACACCTTTTTATGGTTATGACTAACAAATTTATTAGAAAACGTGAAAAGAATAGAGC

ATAGGTAAAGTCATGATTCTCCTACTGGTTCTGGGGTGCTATGGCAGGTGCTGTTGTAGG  
TGGTCAACTATATGTTGGATCTTCATACAGACAAATGGCCAGATCAATGGACAGATGGTT  
TGAAGAGGACATTGAGATGATACTACTAGAACCTCCAACGGCACGCATGATGGC  
TGTTCCAATGCCTCATCCAGAATTCTATGACGATCCTAGGATTATCAGATGACATCTTTA  
AAGACACCACTGAGAAATCCTGGCGATAAGTCTCGTGCTACTAAAAAGATGGCACAATAT  
TTTCCAGACTATAGAGACCATACTGAATTCCTGTGAACCTATTCTTGTAGGTGGATCTGTA  
GCGTTCTACGCTACTCAGATGTATCCTCATTGGATATCTGGGTCAATGATCTATACGAA  
CATCTGTATACATTTAGGAATCAACTGCAAATGCATCGTGATGATCTTAAGAACTAACTT  
GTTCAACTCAAGCAAAAATATCCAGATCCGTCTTCGGCAAACAATCTTTTCTTACAAACC  
AAAGAGTATCTTACTAGACACCTAAAACATTGCGATTTTAAGGCTGGTGCTGTCGCTTTC  
TCTCTTGTTAACAAGTTCTCTTTTTCTGGTCTCACTGAGTCCTCCTCGTTCAGCGAACAA  
GCGTCTGAGTCAAACCTTTTCGATGCGAGGCATTGAAAACTCCCATACTACGGAAAACCT  
ATTAAAAGGTGGGGAGTCACTAATCTGCAATACGAAAAATTATTTACAGGTGATACTAAT  
GCATTCCTATACTTATATCCTCCGTACGATATCAAGGCAAACCTTGGATGGAAAGAGAGGC  
ACAATGGATATTGGACTCGACCACGATTCTTTTCCAAGAAGGCGTGATAGAGTCGAGTGT  
GATCAAATGCGTTCTTATAATCCTTCTAGTTTAATAAAGCAAAGATTCCAAGTTGGATA  
GCACAAGAATGCGATCAGACCTATAATATGAGATCTGTAGGTGACAACATGAAAGATCAA  
GGACAACGCAAACAACCTTCTCCTTTCAAATTATGGCCTATGATGAGAGATTACTTCTAAA  
GGATTATCTATACTTTATCAACTTCATTAAAGATTATTTGATGGATGAGGATCCTGCAAG  
GGTGAAGAACTATCCTTCATATGTAATCAATAAGTGCATGTTCGCATCATTGGATACGAT  
CATGTATGCTAATTAATGAATATACATGCTCATGTAGATAAACTTTTGCCATATAATTT  
CTTTATAAATGTTCGTGAGACCCCGAACGAAATTTTCTCCTTGGGGTAAGAAACAGAAAGT  
GAAAGATCTTGAGCTTGTTAAAAAATACTATGGTTATAGTAATGATAAAGCATATCAAGC  
CTTCGAGATCTTAACTTCATCCAACTTAGTTACATTAAGGATAAACTGAACAAAGAAGG  
TAAGACCAGATGAATGAAGTTAAAGAAGTCCAGTGGACTAAGAATGGTATGGCTGAAGGG  
AATTTAAAAGTACCAAACGATTTTCTAAAGGTTCTCGAAACACTTACACGTATCGGTGAA  
GCTTCTCCTAAAGAGTAAAAGTTATATCAGTCCTGTCAAATTCGACATAAGAAGGGCCAA  
TACTATATTGTGCATTTCAAAGAGTTATTTGCTCTTCATGGTAATAAAGCAAATCTATCA  
GTGAATGATGTGCAACGTA AAAACAGAATTATTATATTTCTATACGACTGGGGACTAGTT  
GAAATTGTAAATATATCAGCAATCTCCGACGCTGCTCCATTAAGTAAATTGAAAGTAATG  
GCATACAACGAGAAAGGAGTTTAGACGCTTGAGTCCAGATATAACACCGGGAAAAACAT  
CAAGTCACAGAATGATATATAGTTTAGTGCTATTATATCAGCGTGAAGGCAGACGCCAAG  
AAAATAGAGGATTAACCATACGGTGCTCTAGGAAAACCTCAAAGAGTTCAGTGAAGATATA  
GTAGAACGACTTGCTATGCTAAGTACTTTCGTACGCGTGGGTATTTTGATTTGGAGTGCT  
GATATTTTACCTTTGGATTACGTTACGATACCTGGTTGGGAACAAGAAAAAATTGATCCA  
ACTTTTATAATTTTCGGTTCGTCACAGGAGACACAGCTACTTTCTGAGTTCAAGCGGGAGGT  
AAGAAAAAGAATAGAGACAGTGGTGGTGGTGCAAACATCTCTAAGAAAGACATGGAGATG  
CTTATTGGAAAAGTAACTCACGCAGCACCAACACAACTATTAAGTTAGTAGTTCCCTACA  
GTTAAATTTATTAGTGATAATCATGCAAAAATTATCAACGGGATCGCTAGCTTCTCAGC  
TGTTGTGGAACCTTGGTTTAGTAGGACAAGGTGGATATGTATACATCCGTACGGATGCTAT  
CATTGAAGACATCAAAGAGAAAGCAATCAATGGAACACTTCGTCGAGTAAGTGACTCTCT  
ACCTGACATGGTAGATACAACTACCTCCTGTAACCTGGTGCACCAGTTCCTTACCTTC  
ATTACCATGAACGTTAAATGGATATAAATCGGTGTAGTTGGTAGTATGTTTCGTAGTATCC  
CATCTTGGAAATGATGGGTTATATTTCCAGTAAAAAACC GGGAGTCAATTACCTACGATA  
GATGTTCCCTGTAGGTGGCTATACTACATATGTCATCTTAGCTGATAAGGATGGCTATAAA  
ATTCGTTAATCAGCCAACGATCCTAAGACAGCATTATAGTAAGGACATCAAAGAGAAA  
GGTTGTTTCTTAGCACTAGCAAATGCAACTACCAATATCAATGGAGAATAGTTGTTAGAT  
GGTAACATTAATCAAGGCGGTGCTGTAACATAACATGAGATCCTGGACTTATCAACCACCT  
CGCTTACTGCAGAACAAATCAGCAAAAATACTCGCTGCTCGAAAAAGCGAAGCCTGTATC  
AAAGCAATCGGATCAGCAGAGGATACAGGACGTCGCGTTGGCACATATATTTGTGCTGCT  
GCTGCTCCTTCTCTAAGTAGTATCCCTGTGTTAGTTAGTTCGGTGGCTGGGTGGTA  
ATGTTTGGTGGCAATCAGGGAGCTGATATAGGTGGAAATATGGGAGAGTATATCAGTAAG  
GATTGTTAATTTCTTCTTCTTAGGACGATTGAATTGACGTAAACCTTTCTTCTCACGA  
AACTTATTACACTGTAACCTATAACGACTTAAATTAGTTGGTTCTTAGCGAGGTTCTTT  
TGCAAGATCGTAGTGAGTTTTTAAATGAGTGGCTTTAAAACTCGCCACAGGAATGGTGT  
GCAGCTGCAGATGCTGAAGACCCCACTGCGATAGTTGCTGTTACGCTGACTTGATTTGTG  
CTTGGTAGAAGTCTTTGAATTGCTGTAGTATCTTCATACTACATTACACAATGCCCATCT

CTAACTTCATGAGCTATCACTCTTTTTTACCATTGAGGTACATCACCTACTCTAGGT  
TTATTAGGTGGAGGAGACTCAATCTCTTTATCAGTTTTTGGTGTAGGTGGCACCTCTGGT  
GTATATACTTCTTGTGTATGTGGTGGTTAACGTCAGGAGGTGGCGGTGCCTCTATGAAG  
ATCTGTAATTGATGAGGTTGATAATCCATCGCACCATATATTGGCCCACCTGCATCAAAA  
AATACTAATACTTCATATTCCTCGTCTTCAATTATTTTGTATTCTTGTCACTCTGCTGG  
GGTGCTTCCACACAACCAGGCATCTGCATGATGCCTTCACCTATGTTTACGGTAGCAGGA  
GGTACGAACGGTATTGAGTGAAAAGGTTGTTTAGTTAACCAATCTGGGATATCTCTAACA  
AATCTAATCGATGTTTCGTATGTCTCGAACACTTGCCTTATTGACTTGTCTCTTTGGTGTA  
TCCATACATCATGGGTTTCTATTGATATATCTTCTCAGTTATTTGCATATGTGCTGGGG  
ATCTCATGAGCATGAGGATCAATGACATTAACCTTCTGCACAACAACGTCTGCACAAATA  
CTATAGTATGCAGTCTTTGGATGGAATGAAATTCCTCTTTCATCAAATTTCCATAATTT  
TTCAAACGAGCTATTGCAAAGTCAAGTCTCTTATTTGCTACTGTTTGATTTCGTTAATACG  
ATATTTTCTGCAGCTACGTCTTTACATTGCTCTTGTAGTTTCTTATCTAATGGTCTAGAC  
CATGTTGCAGATAAACCAACTGAGAAATTATAATTATCTTTCTTTTCTGTTGTTGGAGGA  
ACATGGTATAAAAATATTACCTGGAGTATCGAATACACCGTAATCATTCAAATCTGACAAG  
GCATACACAGTATCGATATAGTATGGTTCGTATGGTTTTTGTGCTGAAGCATTTCCTGTG  
ATGTACGCAGTAATATTCAAGGTAGCACCTTGATATTGAATGCCATAACCATATGTGTTT  
GTTATATGCGGACCTTATAAAGCTTGTATTGCCTGGTTCGTCACTGAGACTGGTGAGTTG  
CCGATTGGACCTGCAGCCCCACTGACACCATCAACTGTCTCAGCCTTAACACTCGGAACA  
AAGGGAATTAATCCAGTAACGGCAAATAATGCTATTTACTGAAGATACTTGTGTATCTG  
TTACCGAAGTTACCGTTGTTTCTGTTTGTATTACCGTGTGGTTTGAAAGACCTGTTCCA  
TGCAGGTTTTCGGTGTATTGAAACTCTGTGCCTGGCGTCTGTATCGCGAAGTTGCGTTTGT  
CGTTATACCCGTCCAATTCGAATTTACTCCTTCAATAGTAATCACTTGGGTTGAATTAG  
TGGGTGATAAATTAATCATCTGTAGTTACAGAGTGCCCACTGAGCGACCAATGATAGCCTG  
AGTTATCGTCCATCGAAGATATGGTTCGCCACCACAGTGGACGTCGTTTCCGTTTGGGTGT  
TCATCGAGCCCTGTTGGCAATTTGGCACCAAAGGAAGTGTATGTCTGGGTTTGTAGCAC  
CACCCATAGCTATTCTTAGGAATAACTTATATGTATTCTCATGATTATTAGTCAAAAAT  
ACTAATTTTCGCTAACAAATTGACCTGTCAATGAATTACCTTCACCGAGAGTTCCCTGCTGA  
ACTTGTGCCATGATTAACAGTAATAGTATGACCATTTGTGATTGTTCCCTGGTGTACCGAT  
TCCAGCTGTTCCAGCACTTTTTGTGGTGGTATGACCCCAACTAGCAGCTGCTCCAGAAGA  
ATTGTCACTCTGCTGCCATGATTGGGCAAAGGAGAATGATCCTACTCATGCTAGGTCAAC  
ATCTGCAGATGATCCTGAGCTTCGATTTGGAACTCCAGTAATTGTTCCAACCTGTTCCCTAC  
TCCTGTAGTAGGACTATGAGCGTTAACGCCGATACCACCACCTACAGCGCTACCATTGGC  
CGGTGTATGTGTTCTGATCACGTTTTTTCCAGAGATCGAATAGCTATTGCCATTTTCGTGT  
CTGAGTTACGATTTGAGGTTCCACAGTTAGTTGTAACACTAGATTGGTGTCTACTCGGTAG  
TCCGACCGCATATGCTGCTGTGCCGAACGTCGCAAGAATAATGGTAAGAATAAATTTCTT  
CATTATTTTACTCTTAGCGAATCCTGCATATATAGGTCTGCAAACCGTACACATATGT  
GCGGCATGTACCATTTCCTGACATATCAGTCTATGGTTAAATAGTAGTGTGCGCTTCCGGG  
GACAAAAGAAACACACGCTTCTTTAAGGAGCAACATGACTAACTTATCACAGTGGACAT  
CGAAGGAGGTTCGAACCAATTTTTAGCGCTGCAAATCGTTACAGGGTAGTATTCGATGATT  
TGTTTCGTAAGACTACACGCAGACTGAACAGGTTACCTACGGGACAAAACCTCCATACA  
ATAATGTGAAAGAATTTCGCAGAGTAGTGGAGACTAGAACTAGCACTCGAAGGATGGTCAG  
CAGACCAAGACGAAGTACCTATAAAGGAGAACATACTACTAGTCAAATCAAAAAGCAAG  
ATCCAAAGTCAAAGGAAGAACAACAAGTTCATAGAGCTGTAGCATCCAGAACATGTGCTA  
GAGGATTTAATCTATCAGATGCCGTAGAACTTGCCAAAGGTGCCTATGTTAATGCACTTC  
TAACAAGTGACTTACAAAAGGTAATTCCACAACATCAGAAAAGACGAGTCTATGACGTAG  
GTTATCTAAAGCTTTCGCAGTTCTTAACTGTAGGTGAAGATTCAAACCTATGACTTATG  
CTATATCAAGTGGGTTTTATTTTTTTTAAACAAATGAAAGTATTAGCAATTGCATTGCTT  
CCTTTACTATTCCCAAGTGGTTGTGCAAATGCAAGAACAAGGTTGAGTGGTGTGCTGTTGCA  
TCATTACCATCTAAAATCTATACTCGTTGGTTCTCAGACGTATCAAAGCTCGTGGAGAA  
AGAGTAACTATCTGGCAGTTAGTTCTGGTAGTGAAGAAAAGCATTCTTGACGAGACC  
GAAAACCTTCGGTGCCTGATCATCCTATGAACCAAAGGATATAGAAAAGTAAGAAGA  
GGATTAGTTCAGATACCTATGACAGGTGGAACCTATTGCATTTGGATATAACAATCCTGAT  
TGTGAACTAAAACCTACACATCAACAGGTAGTTGAAGTTGCCATGGGTTTCATCACTTAC  
TGAACGAAATTGGATGTGATGATCAGAGGATGACTTTGGCACATCGTTCACATGATTCT  
GGAACAACCAAGGCATTTACAAGTGGTATGCAGGCTTTCTCTCCTTCATGGACGCTAGGC  
ACAGGTTAATCTGCAGCGTGTCTAACAGGTGTGGGAGGTAAGGTAACGCAGGAGTTCGA

TGAGAAATTA AAAAATACACCTGGATCAATTGGTTATGTAAATCAATCTTATATTGAGGAT  
CTTGTAAGACCCCGCAGCACTACAAAACAAGCGCGGTGACTTTGTAAAAAGATCAGTTGAC  
GCAGGATCAAAGGCACTTAACGGTATCACTCTTGATGAGAACCTTGCAGGAACAGATCCA  
AATCCAGAAGCAGGAGCAGCGTATCCGATTGCAACTTTCCTTGGATACTTGCATATGAA  
ACAGGCAACGGTAAGAATACAGCTGCAATCAAGACAACCTTTATCAGCTCTATTGAGTGAT  
GTGTATCAAGATGATGCTGGTAAGTTAGGATTCGTTCCCTCTTAAAGGTGACATTCCTGAG  
ACGGCAAGAGCAGCAGATGACAAGATCGGTACATAGTTTTATAATATAAACGTATCGTAA  
TTATTTTATGAGTGCAAGAATCGTACGAACAAGAAACGGTGAAGATCTTATCTGAGATCT  
TTAGGAGGTCAGACCTTAAGAAGATCCAAGTAATGCAGTAGCATTTCAACTTAGCAATCC  
ATATATTCTACGGTTGCAAGGAAAGAGCACTGAACAACCTCAAATTCTTGTTGATGATGA  
TGCAGGTGACATTGTAAGTAAAAATCAAACATCCCGATCTCTACTTCCAACGTCGTATTCC  
TCTGTCTTCTAACAACCAAATTCTTTTGAAGGTAGAGGAAGTGGTAACCGCATAACGAGAC  
CTATCCAGAGGTCATCTCTACATAACAACATTAATCGAGGCAGATGGAGGAAAACCAA  
GCAAACCCCTGTTTCAATGAATCAACGGAGTGAATACCTTATTGGACAGGTAACAGAGTTAG  
ATGAGGAATCTAGTATCCTTATCGAAAAATGCTATTAAGTGACGGGTGAGGATACCATGA  
TCCCGTTTCCAAAATACAGTTCACAACGTGATGTCTTCTTGACATCTGAAAAAATCTTGA  
GTATACTAGATCCGACTCCAAAACCTGTTTCGATATCTACAATATATTATGACTTCTTTCTT  
CGCCAACCTGCAACTAGCTGGTGACACTATACTTTACAGAGAGTATGAGAATGGAGACGC  
GGTTCAATATCGCACATCCTTTTCTCCTACCATTTATGTTTTGTCTAAAAAAAAGAAAA  
GTTTGCAACAGTAGCTTGGAGATACGTGTCTCCTGTCAAGATTCACAATGCAAGAGAAGC  
AAGAGAGTTTATCAAACAGTATGAAAATGTAGATAATTTTCAAGTCCATGGTCACGAAAG  
ATTTGTCTTTCACTTCATTCGTCAGCAGTATCCAGATGATATTGACTTCCACATTGATCA  
GATGAAATTCTATGCATCGCACATCGAGGTTCAATGTGAGAGTGGATTCCCAGATGTGCA  
AGCAGCAGCAGAAGAAATGCTATCAATCACCATTAAAGATATTGTGACAACAAAATATTA  
CAGTTGGACAACACTAGAGAGTTTGTATGCACTAAATAACAAGAGTTGAATGTCTCTTGGAC  
CGAACAAGAGATGCTTACAAACTTTATTACATGGTGGTCCACAAGCACTCCAGACATTCT  
ATCTGGTTGGAACGATAAATTGTATGACGCCCCATACATTGCTCGTCGAGTCACTCGTAT  
TCTCGGTGAGAAATGGAAGAAGAATTTATCCCCATGGAATCGTCCAGATGATAGGGAAGT  
GTACATCCAAGGTAGGAGGAATTACGCTTATGATATCTCTGGTGTTAATATTCTTGAATA  
CCTCGAACTATATCGTAAGTTTACGTACTCAAATCAGGAGTCTTATAGGCTCGATCACAT  
TACCTGTGTGACAGCGGACAAAGAAAAGTAAATCATGATGAGTATGAAATCTTCAAAGA  
CTTCTATACAGCTGATTGCCAGAAGTTTATGATATACAACATTCACGACGGTGAGTTTAT  
TAACCATCTGGAAGATAAGATGAAGTTGCAACAACACTAGCTATTAGAATGTCTAATGACGA  
CAAGGCAAGCTTAGAAGATGGGTAGCTTCAGGTCCGCTTGTGGGATACGATGATATATAA  
CTATCTTACAGAAAGAAACGTTGTTGTTCCCCCTCGAAAAGGAGCGAAGAAAGATGAAAA  
ATACGCAGGAGCGTATGTCAAAGAACCGAAACCAGGATGCTCTGATAGGGTTGTCAGTTT  
TGACCTCAATAGCCTGGATCCTCACCTTATTATGCAATAGACTATCTCGCCCGTAACACG  
CGGGGAGACTAGACTTCCCATTGCAAGGGTTGAGAGAATCCTCAATCAGGAGTTGGAGAT  
AAAGGAAGACTATTGTCTATGTGCAAACGGTACCATGTATCGAAAAGATATTCATTGTTT  
CGTGCCAGAGATGAAGCAGAAGATCTACGATGAACGAACGATCTAGAAAAAGAAAATGCT  
GGCTGCAACACAGCAACATGAAAACGCACCATCTAGCAAACCTTGATGCTGACATTTCAA  
GTTCAACAAAATCCTGATGGCAAGAAAGATTCCACTTAACTCTGCCTATGGGGCTATCGG  
AAATCAATACTTCCGAAACTACAATCTTGCAAATGCTGAGTAAATTACTTTGTCAGGGCA  
CGTTTCAAGCCGTTGGATCGAAAACAAAATCATCGAGTATCTCAACAAGATACTCTAAAC  
GACAGGAGAAGATTAAGTTATTGCTAGTAATACTTATAGTATCTACCTCAATCTGAGTCC  
GCTGGTTCGAGGCTGTATAAAGGGGAGAGAGGCCACTGATTCGAGCATCGTCGCTCACAT  
TAATAAGGTTTGTGAGGTGGAACCTGAAAAATATATTACTAGTTCTAATGAAGGGTTGGG  
CACATATGTAAACGCAAACGAACAGAAGATGGTAATGAAGCGTGAGAATATTGCCAACAA  
AGGTATCTGGACTGCCAAGAAAACATATAGTCTCAACGTTTGGGATAGTGAGGGTGTTCG  
CTATGAGAAACCTAAACTTAAGCTCATGGGTATCTAAGCAGTTAAGTCTTCTACACATGC  
AGCATGTCGAACATCTATTTCGTGATTGCCTAACAGTTATCATGAATGAAGCTGAAGAGTC  
TGCAGAGTCGTATATTGGTGAATTCAAAAATCATTGTTCTTCTTTACCTAATGGAGACAT  
CTCATTTCTAGAGATGGTAATAATCTAAATTAGAGGTCGAACCCTACAACGATCTATCG  
CAAAGGGACACATATACATGTGAGAGCGGCACTGTTATATCACTTTTATAATAAGAGAAA  
CATGCTTGCTCACAACGATCCCTTAATTCAAGATGGAGAGAAGATCAAATCCGTCTCTTG  
GCATACTCCAAACCAAATCATCGAGAACATTATCAGTTAGCTTAATACGTTCCCGAGATA  
GTTTGGACTTGGTAAAAAGGTGGATTATGAGCTACAATTCAGTAGAGTTACTTAGACCC



CATTACAGTGATTATGGTTCGTCATTGGTTGGCGACCCGAAAGAATCGCATCATTGGAGTT  
GCGATTTTCATGAAATATGTTTTTGAATACCAAAAAGCATTGGTATCCCAGACAAAAGA  
GAACCAGTTTTTCGACGATGAGTCAGAGGCAAAATGGTTTGTACGTGCTTTGAAGTGTACG  
AACTATAACTAAAATTACGGAGGTTTACGAGAGAGTTTACTGAAGACTGTTGTATCAG  
AAATTGGAAATGAATTTCCAGGCCTAGTATCAGACGGAGTTTCTGCAGGTGATAAAAAAG  
ATTTTATTGATACTGGTTCTTATGTCTTTAATGCCTTAGTGTCTGGATCAATTTATGGCG  
GGGTGCCACGAAATAAAATCACAGCGATTGCAGGTGAATGATCAACTGGCAAAACTTTCT  
TTTGCCTTTCGCATGTTGCAACACTTTCAAGATTCTGATCGTGATGCAGGTGTAATTTATT  
TTGAATCTGTGCCGGCTCTTAGCAACCAAAAAGATTGTGGATAGAGGTATTGATGCAGATA  
GAATGATGATCGTTCCTGTGCATACTATCGAAGAGTTTAGAGCTCAATCCTGCAGGATTC  
TTGACAAATATATGGACCAGAATGAGACTGATCGCAAACCTATGATGGTTGTATTACATT  
CTGGTGGTATGCTTGTAGTAATAAAGATGTTGAAGACTTTGCTAATGATAAGAATGTCA  
GGGATGTGACACTCAGTCAACTAATTAAGGTCTTTTCTTGTCTTACGCTAAAATTAG  
ATAACGCAAACGTTCCCTATGCTCGTAATGAATCATACATAGGATGTTATAGGAAGTTTTA  
TTCCAACTCAATACATGAGAGGTGTAAGTGGACTCAAATACACTTCATCAACAATAGTAT  
ATCTATCAAAGAAAAAGGAAAAAGATGGTACGGAGGTTGTTGGAAGTAGTATCGCATGTA  
AAGCCCAAAAATCCCGACTAAGAAAAGAGAATACTATTGAGGAGACGCGGTTATATTACG  
GTCGTGGACTTGATAGGTATTATGGATTACTAGGATTAGGTGAAAAGCGTGGAGTTTTAC  
CACGCAGAGGTATTCGTATTATGGTTGCTGAAACTTCTGTATATCCTAAATTCATCCTTG  
CTGAGCCCGAAAAGTATAGTACTGATGCAGTAATGGAAGCATTAGACGAGGCAGCAAAGA  
AGGAGTTACAATATGGTCACTAATCTTACTGACTACATTAATGCTATGATGTTATGTTT  
CTAGGGAATGTCTATAAATCGGTAATTCAAACATTCACTGAATCATATAGAGATGTGACT  
CGTATAGATAGAGAACAAGAGCAAACCTTTAATGAGTTGAGTATATCACAAAGGTTTAAG  
GCAAAAGATCTTGCATGGTTGTATATCCAGAAACATACATATACAGTCTTTATTGATATT  
GTCAAAGTTTATATGAATGCTTTTTCAGTGATAACCAGATTTTCTGCAAAAAGATTCTTTT  
GGAGCGTTTAGAATTAACCATATTATAATGATGGACTAGATCAATCTAAAGAACATGAA  
GTTGTTCGGAGATTATAATTCTGCTCGTAGATTTTTCTGTGATGTTCTTATATCAGAATGAC  
GTTGATGATCGTGGGCAGACTAATTTTACTAGATTGAGCTACGCAGTTTCACCTAAACGT  
GGTAGAATGCTATAATCCAGCTACATGGCAGAATCGTCACTGAGGATTGCCAGCTGAG  
TATGACAAACAGTACATTGTTGAAAATTATTTACACTACCTATGAATCTCGAAGTCACGA  
TTCTATGTAATCTCTTGTATAATAAGAAGTGTGCAGGGAAGGTTCTTCTTTTATTGAAGG  
TTGATTATTTTACCGAACTTTCTTACCAGATTATTTTTCTTGAACACTACATGAATACATTA  
GTCAGTATGATGCATTCTCATCTCTGAACGCCTTAGTATTGAATGTCAATAAAGAAATG  
ATCTTACAAAACAACAATTTCAAGAAATCGTTGAGGTTTAAAATGTCCTTTCCGTTGATC  
CCAAAGACCACGACTGGCTCGTAGATTCTACAGAAAATTGGTGTGTCAGGAGCGTGCATGT  
ACTTATCGCTTATGGAATCTGTTAATATTGCTGACGGGCATGATACCAAACGCGATAAGG  
GTGCCATTCTGCAGATTGTTTCAGAAGCATTAGGAGTATCGGTTGATCACCATGTCGGTC  
ACGATTATGTTGAGAAGGCTATTGATCGTTTTGAATATTATCATACATAGGAAGCCAAGA  
ATCCTTTTGTATCTGGAGTCTTTTAATAAGATCCCAAAGGGTGGTTTAAGAATTAATCAC  
TAAACATCGTTCTTGCAGGAGCAGGTGTGCGTAAATCTTTGGACATGAGTTACTTTGCTG  
TATCAACTTTATTGCAAGGTAATAATGTTTTCTACATTACTTGTGAAATGGCAGAAGAAA  
AGCTTGCAGCTCCTATTCATGCTAACCTTTTTAATGTTCCCTATTCAAAAGCTCGCTGATC  
TACCACATCCAATCTTTGAAAAGAGGATTAACAACTAGCACAGAAAACCTCAGGGGAAAC  
GTATTATCAAAGAATATTATCCAGCGGCAGCACATGTAGGTCAGTTTAAATCGCTTATCA  
ATGATCTTGCATTGAAGAGAATTATTAGAGCTGATATAGTTTTTGTAGATTATCTAAACA  
TCTATGCTTCCCAGAGATACAAAGGAAGTATTGTGAATTTATATACCTGTGTTAAAGCAA  
TTGCTGTAGAACTTAGAGGACTTGCGGTAGAATGTAACGTCCCATTGTCTCCGCGACAC  
AAACGACTCGCTCTGGTTTTGAGTCTACTGACCTTGATCCCCTGATACGAATGAATCCT  
TTGGTCTCCCTGCTACTTCTGACCTCATGTTGCTCTTATCTCGACTGAAGACCTTGAGG  
GGATGAATAAAATTATGGTCAAACAACATAAAAATCGCTATAAAGTTCCTACTATGAATA  
AAAGATTTAGTGTAGGTAATGACAGAGCGAAGGTTAGGGTGTATGATGTAGAGGGGTCTG  
CTCCACATGGCCTTGTGATACTGGTCAATAAGAAGCGAAGGTTGAGCTTGTACACAGAT  
TGAAATCAAAGTAACTTTAAGTGCATAAAGTATGAGTGATTTTAAAGAAGTATCGTGAA  
TTTGTAACCTGCGGTTATATCTAAAGAGAGTAAGTATAGTGGTCATTTCCAAGATCGTTTA  
ACAGAATTAGATTATAAAGACTTCTCTTACATAGAGCATTAACTGCTGCAGTCCGACTA  
TGCCTGAGTCAGGTGAATTTACTAAGATAGTAAAGAAGATATTATTTCAAGGTAAACCA  
GTTACTGAATAGAGACTATTTTCATATGAAACGTGAACTAGGTGATATCGTTTGGTATTTT

ATACAGGCATATATAGTATTAGATGTATATTCAGAAGAGGTTATAGAAATGAATGTAGAT  
AAGTTAATGAGCAGATATCCCGGTGGAGACTTTGTAGCCACTATTCTGAAAATCGTAAA  
CAAGCAGATGTTTAATGGTAGGACCTGGTGAATACCTGGCATTGTTAGTGATCTTGCTA  
GCGCATACAATACTGTTGAATGGAAAGATGCTACTCCATTTGTGATTTGTATTAATGGAC  
TTTATTGGATTAAAGTCAAATCCATACAAGTTTAGGACTTGATAGAAAGAAATCAAGAG  
CATTAAAAAATTTATTGGTGATTCAATAGTTGAAGGTCATCAGAAAGGACACAGATCCT  
GATGTTAGGTAAACTTGATCCAGATGAAAGGGTCCTATCTGGAAAAAAGGTAGAACCTAT  
GCAATTGACAGCAGAGTTAATTGCTGAGAACAATTGTGCTATGGCACATACAAAGAAAGA  
TGGGACATATAATTGGTTGCCTACTGATGAGTATGAAGTTCAAATAGCAGGTAGGTTTGC  
TGCCGATAGATTTATTCTTATCCAAAACAAAACAAAGAATCCAGTCGTCTCTGCAGAACC  
TCATCCTTACTTTGACTATGAGAAAAAAGTCCTTACCAAAGATGGTAGAGAGGGGTGTAT  
GAAAGAGTTTAAAATAAATAAAGATAAAGATCAAAGCAGATGGCGACAAACGCTAGCG  
AAACTGCGAAACAAGAGGATGGTTCTAGAGTTTTTTTCGAATCTGTAATCACAAGAAACA  
AAGAACCATCCTTAAAAGAAAAGGTAAAAGTCTATGAAGGATCCGGTCCTGAATGGATAT  
CAACATACCTTGAACAGGCTTCAGCATTACAAAAGTTGTTAGGATCTAATGAAGGGTATG  
AATATTCCAGAGATAAAGGACTCAGCCCATACATTGAACACAATGCTAAGAAAGCGTGTG  
GTGTATCAGTAAAGGATCGTTGGAATCCTATGGATATTGTATTGGTTAAGAAGAGTGCAA  
AGAGAGTTGTAGAAGGAACATAAAAAGAAATTACTAACATTGATGGAATGAGTAAAGATG  
CAAACTCGCTCCACTCAATGCGTATCTCCGTGTAGCATTGAACTCTAAAATTCCAATTG  
GTATATCATTTAAAGCAATTGCAGCAAAGAAAAAGACTGCTAACGCAGATCTTGCCAATT  
CAGGTAGAACAACTGGTCAACATACCATGGTTAACATGGTTCCTAACTCTTTGAAGTGTA  
AGTTAACTTTAGGAAAGAAAACGAATTACCTATTTGATACTGGTGAAGTTGGGTGTGATA  
TAGTGACAGCGAAAGCAGGTAAAATACATGGTCAAGCAAGAAATTTTCAGTATTCTAAGG  
AAAGCAATTTAGTTCAAATAGATCCCCTCCAAAAGTAAAGACGCAGGCGCAAACTTG  
GTAAAGTATCTAGGGTTGCGTAATATATATTTCTAGGAGATTTAAGATGAACCCGTCCAA  
CTTCTGCAACAAAACATAATCATCGTCCTAGAGTTGGTGGTTGGAAAGATAGAGATAAAA  
AACACTGGAATGACTTGTAAAAAAATTTGTAACAGCTCGTATGATTGTTTTCGGAGTAG  
TTGCTCTGTATGAAATTATCCAAAAGGTGCTGAAGATATCGAAGCGGTTATTGACTATG  
CAATTACATAAAAACTCGTCAGGCAGATAGAAGTTCTGCAGGTAGATTCTCTCCTAAGT  
TGATTGCTATGGAATGGGCACATATTTGGAAGCAGATTGCTAATATTAAGAAAATGCAAC  
GGTGGTGCAGAGCACTATACTATGGTCCAAAAAAGAATTCGGTGATTCTAACAGTTCGT  
TCCTAAAGATTAAGTACTAGTCCCGTTTACAAAGTGTCCACTATTACTCGCATTACACTCTCA  
GCGTGCTATAACATTGGTATATAGACAGAGGACACCTTGCCTAAAGAACACCTTCAACAC  
CTTGAGGATCTGATCTTTTCTGATCGTAAGCAAGAGTTGGATGCAGTATGGTACGGACTG  
CCCAAACCAGACCTGGGTGTTAAGTGGGATGGTGCATGCTATCCTCTTTGGCACAAC  
CCTGCGAATGGCAAATCTTCGTTGGAACAAAATCCGTTTTTAACAAACACAAGATCAAG  
ACCTGTTATGATCAAACAGATACTGACGAACCTTACTCTGGCAACCTTGCAGGACATTCTG  
CGCTAATGTCTTTGGAAGCTTCCACGTATCAGTGGAATTGTCCAGGATGATTTTCGTCGGT  
TTCGGAGGGGGCAGTGATTATCGCCCTAATAGTTTTTLAGTATCGTCTTCCCTCTCCGATC  
CTTGGCGATATTATCCTTGCTCCGCATTCTTCTAATACCGAAGTTACTCCAAAAGCTGTC  
GGCAGCAGTCGCCACGATCTACCTTCTACATTATCTAATTGTTACTCTGTAGGTAAGAAA  
GAGGCACATGCATCAGTTGCAAAGTCTCCTTTCTTCAATTGGGTCAAGTCTCTCATCAGG  
GTGCCTAAATGTAAAGTGCAGTAGCGAGAATGTACGTGCAGATATTGAGAGACATATCAAC  
AGGTTTTTCCGTTGGGATTTACGAATTCCTTCAGCAGAATTTTTGTATACTACTTTACCT  
GATAAATATAAATATGAAGTTAATGTTACCTCATTAGTGTGTGGCATCCGTTGTTTCGA  
TTGAAGCAGACTTTAATGAAAACATCGTTGTTGATGGAACGTGAAATGCCACATCTAT  
GGAAAACCTTCAGAACAGGAGGGTTTTCTAACTATTTTCAGATTCTCCCGACAAAATTATA  
GATACATTGACATTTAGTAAAGCGAACTTCAACCTTAGTAAAAATTGGACGAATGAACAA  
TTTTAATGATTTTCTAATAGACGCACAGAGTACGTTTGTGCTAAAGCGGCGGAAAAAATT  
AAATCTTACACATGTAGGTTACGGTAAATACGCCGACCGATCTGGGAATGTGACTCACAT  
TTCTAAGGATGGTAAGCTTGTAATAATTTACAGCAAAGATGCAGCGAGGACGCAACAGAA  
TGGAGGAGTGGAACGGAAGGTGGCGAAGGTCCGGTCCGGTCAAGGCTCAATATCTATTAC  
ATTTGGAAGATTTAATCCACCGACTATTGGGCACGAGAACTTCTTAAGAAAGTAGCACA  
AGAATCAAAGTCTGGTGGAGGAGAGTATTGACTATATCCTTCAAGAACTCAAGATGCTAA  
GAAGAAACCTCTTGATTCTGGAACATAAGATCAGGTTTCTAAGACAAGCCTATCCAGACCA  
TGCAAATGCGATCATTGATAATGAGGAGATGAGAACTATCTTTGATGTTCTTACTGCCCT  
TAACAATGATGGGTATAGTTCAGTTAATATTGTCGTGGGTGGTGATAGAGTAAGTGAAC

TAATTTATTAGAAACGTTAGTATAACGGTGACTTATATACATTTGATCCGATTAAGTAAC  
ATCAGCAGGAGGTAGAGACCCTGCCTCTGAAGGTGTAGAGGGTATGTCTGCATCTAAGAT  
GAGAAAGGCAGCGATGGACGGTGATCTAGATTCTTTCAATTAAGGTATAGCTCAAGCGTT  
GTCTAAGGAAGATAAAGAAGCGATGTATCTGACACTCAGACAATCAATGAATGTGCAGGA  
GTCATTTGATGACTTCCCTGAAGCATCATATCATCTTTATGAGACCGCTCCTAAGATAGA  
TCCACAAGGTTTGGAGGGAAGCATAATATGATACTAGAATCTTAGAAGTAGGTACGTTTGT  
TGAAAATATCAGCACAGGTATTGCAGGAAAGGTTGTTAGTCGTGTTAGTAGTTACACCAT  
TTACATTGATGAGCATGATAATCTATTGCGCTAATGATTGAAAAACCTTGTGGAGACTAA  
GAATTCTGCTTATCAATTCGTGTTTACACCTGCAGGTGGGATAGGATCCAACGAATTAGC  
TGCATATTATCGTAGAATGACGCCTGGCGGGTGCTGAAAGAAGATAAATAATAAAGTAAA  
GGTTCCTAAGCAAGATTGATTTAAAGAACTTACCTGTCAAGAGTGCTTCATACAAAGAGG  
TGCAGGAGAAAAGCAAAGACACTAGATCCCGTTGGAAAAGAAGACGGTGATGTAGATAATG  
ACGGTGATAACGATTCATCTGATAAGTATCTTAGGAAGCCTCGTAAGGCAATTGCCAAAG  
ATATGAAGCACGAACATCATCAAAAAGATGAGAATGGTAAAGTCATCGAGCATGATGTGG  
AAGACGAATAAGTAAAAGCAGCATAACCCAGTAACGAATGCTGATAAGTAGGGTGACACCT  
AAGCCTATCAGAACTTTCAAGCAGGTCTGAAGGGTAAAGATGGTTTACCATTATACAAAG  
CAGCAGATCACATGAAAGAGAATCAAGAGAATCATCCTGATGGCAACATTTTGTACCTG  
AAGAAGTAGAGAACTAGCAGATCACACTAGAGACTGGGATGCTAAGATGGAAGAGGGTT  
ATGGAGTGGGGAAAGGGTATTCTAAAGGTGGAGAGGTGAAGGCTCCAAGAATGCAGAAAG  
GCGCTATGACATATGATGGTCCTAACAAGGCAGCAAGTGAAGTAAAGGATAGAATCCGAG  
CTAAACTAAGGCAAAATGCGAAGCGATGATAAAGTAAATGCTATCTTTCAAACACCTATC  
TGAAAAGAAAACCTAAAATTTAACTAAATTCGAAGAAGGACGATGTCATGGAGGGGAGCTAA  
AACTCTCAACCATGGCGAAGATTGCGGGTGCTTGAATACGACACAAAACGTCACATGGA  
TGAAGTTGGCGGCGAAAATCAGTATCTACCGAACAAAATTTTACGGCAGGAACGAAGA  
AGTCGCAGAAGAATGCACAGAAAGCAAGGCTCAAAGCGACAACCTCTGAAAAGAACCTGTT  
AACCTTCGATCAATTTACGATGGATCATCTTATGGACTTTAAAAAGGATCAGGTAAATC  
GCCACGTCCAATGGCTGCCTCTGACAAACCATCTAAACCTAACCTAAAATAAAAAACA  
AAGAGTGAAGAATATCCGTGTAGGTGAACAGACTAAATATGAAGTTATGAGTAAAGAAAC  
GTATAAGAATACTCATAAGGACTTCAAGGGTGGCACTGCGCAAGAACCTAGGGTATCAGT  
TTACGATCCCGAAACGAAAGCAACAGTATCAAGCTCTGTTAAATTCTCTGAAGCGAAGTA  
TGAAAGAGGTGAGTCAAACCTATGGTGCGATGTCTATCAAAAATAAAAGAGTAGAAGGTTA  
CGGTGGGAACGCCACACCTCCAGAGGAGAGAAGCAAGGAACATGATGAGAGAATGAAGAA  
GTATAAAGCATCCCAAATGGAAGAAGAAAAGCATAGAGCTAATGCACTTGATGGTGTAAAT  
GAGATCAACCATGCCCAGTATGGTAAAGGTGCTACCATAAGAACGGGTAGCAAGAAACA  
GAAAGAGGTCAGTGGTGCTAAGTCTATTGCAGGAACTGGTAAATATAAGAAGATGTCAGA  
TCAGAAAAAGCGAACTGCTGCAGTCGCTAAGAAGCGTGGGTTTAAAGGCTTTTCAGAACTA  
CACTGATACCATGGCTCGTTATGGGTGTAAAGATAATTACGACAAGGGTAGAGGATTATG  
GTCATGAGCACACCCCTGAACCTATCTCATTGCCCAGATGCTCAGTATTATTGCTTTGTT  
GATAGTCAATGCAAACCAATAGCCAACGGTATGTCAGTAGGAAATACTGGTATGTTGGCC  
AAAAAACGACAGAGTTAAAGAACGAAATAATTGCGAAGGAACAGAAAAACATAATATG  
CCAAAGTCAAATAATCTCAAGGATGACATGGCATAAAGGAAAAGATGCAAAAAGACAAGTCA  
TATAAGACTACTAGAGCAAAGGGCGTACGTTTCTATGACAAGAACGATTCTGGTTCCATG  
AAGGACGGTAAAAAAAATAACGATTGATAGCCTATTTGCCGTGTTATTACATATTAAGCT  
CATGATGGGAAATTTTTAATGCCAGTGCCATAACGTAATCTATTCTGTGGTCAATAA  
TATCCCTGATGACGCAGGACTTGGCTAGAACTAAGCGATAGTTCTTTATTGGTCATTGG  
CAAGGCAGTGAACTCACCAAGACGACCGCTGCCGACGCTCTATTTGAATAAGTAAAGCA  
AGCACTTGCTGCTCAATAAGTAGCGTTTGGCACCCTGATAGAGAGCTCTCAGAGACCCCT  
TTTTTTATAAATAACTACAGGAAAAAACAGAATTTTAGGAGCATAAACTGGCACTTTAC  
GGGGTAACTGCTGCAGACGATTCTAAGCGCATGTGGGCTGTGAGTGGGAGCGGTGTAGAC  
CCCCAAAATATTTTTGCAACCGCTGATGGTTGGGTTTTTTGGACATTACAAGAATGCCGCG  
AAGACAAAGTTTTGCGATGAAATTTTAGTCTCAGATGATGGGCTTGTACGGGCAGGTTCT  
CGTGGAACCAATACCGTGGGTTGTGCAGATATTACTGCAGTAGTCTTGGAAGAGGCGGGT  
TATGCAGGTTGAGCAACAGGTTCTTTGTTGTGATCTATAACGAGCAGGTTACGTCACA  
AACGCTGCAACTTTTGTGTTAGAAATCTATTGACAGTGCCAACATGACTGCAACTGAT  
GCAGCACAAACAGGCGTAAACCGTGATCAGTTTGCCTTCACTGCTGCTGCAACTGGTAAA  
GCACATGCTATCCAAGCACAAACACTCTCTGGAACAATCGTTGACTCCGCTGGTGGAGTA  
GCATCCATGAAGGTATGTGTTTTCTGGTGATGTAGTTGGCGCAGGTGGAAGTGGTTCCACC

GCAACATTAAGTCAAGTAACTAACATATGAAATTTGACGAACGAAATGAGGATACATT  
TCTCATGTTCCGCTACTAAGCATTATGAAAATCCTCACTGTGTGACTCGAGAGGATTTTGA  
TGAAGATTTAAAACGCTTCAAGAATCTTAAAAGACTCTTGAAGCGTTATGTGAGAAGTGG  
TCCGTTAAGGACTCATCTCGTCATCAATCATATAATCATCTTATATAATGTGGTTGGTGC  
AGCAGCAACTCCTCTTGTCTACCTTAAATTAGAAAGTGAATATTTGAGGTTAATAAAGAC  
TCTACAGCTCTATTTGAAGAAATATCCAGTAGGGATGCTTCCAGACTTGGAAACAAACCC  
CGTTTTAGAGGAAGAAGTAAACAGGTATCGGCTATGATGACAGCAAGAACAAGCGGGTT  
TAGTGGTATCGCAGCTGCCTGAGGTCTTGTGCGGGTTTTGAACCTGTCATGACGATGAG  
AGGTAACCTTAATAAAAATTAAGGCATAAACATCTAGTTGCTGTGAAGAAACACATAGAGT  
AAACCCTCAAGGTCTTCTAGATTATTCCAATACAAAATTAACGTACCTGAGGTTGGTGA  
AACAAATCGTGATTGCTAATATTCTGCTGAACTCAGGATGAAATTAAGGATGGCAATCAT  
GCCTAAGTATAGGTCCGGTATTACTCTTGAAGAATCATGCCTGGTGGTGTGCTGCTAAATT  
CTTCATGGAGAAGAGAATGTAGCACATGAAGAATTTGAAGGAAGAGTCTGGACAAAAGAA  
AGCAAATATAAACGATAAGACTACTAAGAGCGGTGGTAAGATATCTCATCATGTGAATAA  
GAATGACGAGGCAGATGCACAAGCCGCGATGAAGAATGATCCAAAATACATTGTTAGTCA  
GACTAGAGTAAAAGGTGTTAAGAAGCTGCAGGTGATCAGCAGGTGAAGAGTCAAATGAA  
GCAGCAAACGATTCAGAACATGAACAAGAAAGTCCCGTTAAGAAGCGAGAATTACATAA  
ACACTTACAACGAAAACACGACAACCTTAAAAACAAGCAAGGACTGGAGTAGAACAAGA  
CGCAAAAAGGTAATGTCTGACCTTAAACACCGCTATTTTTGAGCGACTCGAAAAAGTTGTC  
GATTCAATGCAGGAGAATTCTGTGAAAATGGGTCTCCTTCTTGTGTGCATATTGAGAAG  
ATAGATAAACAAGACAAGATCGATCAAGTTTTGTTTGACAAGATTGATAGATTGCATGCA  
GATAGTAATAGAGAGACAGAACAGATAAAGAAAGGTTTTGAAAGAGACATCCGTAAGATA  
GATGCTCGTCTAAGATTGATGGAAAGGAACTGTGGACTATATTTGGAGCAGTTTAAACC  
GTAACGTTCCCTTGTTCAGCACGAGGACAGGCAGCTCTGAAGCAGTTGACAAACAATCAA  
AATCCTAGTTTGATATCAACAGAGATTATTAGGTCTATTTGATTGACAATTCCTTTGCGA  
ACCTACTCTCTGATCGTCTTACAGACTTAAACAGGTGAAGAACGGGACGTACAACCTTA  
GGTGTCCCTATTGAGGTGACTCCCAATAACCTAAGAATAAAGCACGAGGTTATTTTCATCA  
CTAAGAATATTGGTCTCGTTTATAAGTGCCATAACTGCCGTGTAGTCAAATCGTTTGGTA  
GCTTTCTAAAGGACCAAGCGAGTGACCTTGGTGAGGAAGACATCATGGAGAGATACAAAG  
CAGGTCTCAGTGGTAAAGGTACGAATGTAGCAGATCCTGAGTTTAAATTATAAAAAACCAA  
ACTTCAAAAAGAAGGGAGAAGTCAAAGTATTTTCAAGACTAAAAACTACGCACCCAGCAT  
TGGCGTGCTTAACCAAACGTGGTATAGCGAGGAAACCTTTATTGAGTTGATACTGTGTAG  
ATGATTTTTGCACATCGGTTAACAACAGAAACCTACCTTCCGAAATGTCACAAAGGATC  
ACCGGAGGATTATTATTCCTTTTATTGACGAAAATGGCGAATCGTTTGGATTTACAGGGGA  
GGTGTGTTGTATCCCAACGATAAACTTAGGTATCTAACTATCATGTTGGATGAAGATCAA  
TTAATGTATCTGGTCTGATCGTATCAGCTTGAACAAGACCGAGTCTATTACTGAAGGTC  
CTCTCGAGAGTCTCTTTATCGACAATGCAATGGATATGGCAGGTGCTGATGTTGATAGGA  
ATTTAATAGATGGGAAAGAGGCAGTCTTTGTTTACGATAATGAAAAGCGAAGTAAGGAAA  
ATGTTTACCGTATTGAAAAGCAATTGATATATGATATAAAGTAGTAATCTGGCCTAGTT  
GTCTGCAAGAGAAAGATCTAAATCACATGTTCTTTTCTGGACACGACGTGCAATCTACGA  
TAGAATTTTATACATACCAGGATTAGAAGCAAAAATTAATTAACCGAATGGAACAAGG  
TATGATTAGTCCAAGGTCACCCAAACCAATCAACGTCACAAAAGAAAAGGAGAGATGAC  
ACCCTTAGACCTTAAGAGGATTCATAAGATAGTAGAAGTACCTGTGAAGGTATTGCAGG  
GGTCTCTGAACCTGCTTTAGAGACTAACAGTGGTCTTCAATTTTTTGACGGAATTAAGAC  
AGCAGACAATCAAGAAATACTTAATCGTAGAGCGAATGATCTGTTCTCTCTTATCATCC  
TAACTATCAGTATGTTGCTGCAAGATTGCTGCTGTTCCGGTCTTAGATAGGCGGTATATAT  
CGGTCACACTGATGGTCAGCCTCCTTTACTTGAGCATGTCAAGCAGTGTATAGACAAAGG  
TGTGTATGATGGCAGTATTGTTTCAAATATATTGAAGAAGAATGGGAAAAACGGAATTG  
ATATATTGATCACGACAGAGACTATTTGTTTACATATGCAGGTATTTCGTCAGGTAGTCGA  
TAAATATCTCGTACAAGATCTTTCATCAGGAGAAGTATAACCAAATTCACAGCTCCAGTA  
TATGATACTGGCGATTATTCTCTCCAAGACTATCATAAGTGTTATCGCTTGGAGTATGT  
ACGAAAATACTATGACGCAATCTCAAAACACAGACTCAACATTCCAACGCTGATTATGGA  
AGCAGTGCCTACGCCACTCAGTCAATTTGCATGCTGTGTTCTTGTGTTGTTGGTGACAC  
CCTCGATAGCATTTTTAGCAGTGACATTGCTATTGGCAAGAATGTTGCACAAAGGGCGGG  
TATCGGTATCAAAGAGGCTAGAATCCGTTCCGTCAACAGCAAAAATCCGTAGTGGAGATGT  
ACAACACAAAGGTGTTGTACCTTCCCTCAAACAGTTTTGAAAGTACTGTCACATGCTGCAC  
TGAGAATGGCATTAGAGGTGGAACAGCTACTGACAACCTTCCAATCTGGCACCAAGAAAT

AGGAGATATTAGTGTACTAAAGGATAATAAAGAGACAGAAGACAATAGAGTGTGGACACT  
AGACTATAGTATTCAGATTAGTGAGTTCCTTAATCAAAGATTCATTGATGACCGCAGCTA  
CCCTTTGGTTAGTCCACATGATGTGCCCGGTTTATTCGAAGTATTTGGAGCTCCTGAGTC  
TCATGATCTATGTGTATAGTATGAAAATAATCGTGCTGTTCCCTAGAAAAGACGATGAACGC  
ACAGAACTCATGCTTGATCTATTGAAGGGGAGAGCAGAAACAGGTTCGCTTTATATCAT  
CAACATTCATCACTGTAATAGTACAGTTCATTTCGAAGATAAAGTAAACATGAGTAACT  
ATGTCAGGGGATTACTCTTCCAACAGACCTTATTCGACATATACATGGTTCAGGTGAGAT  
CGCTTTGTGTATCCTATCTGCTATCAACGTCGGTAGGTCAAAGAACCCTGAAGAAATTGA  
TGAGCTATGTGACCTTGCTCTTCGTGGTCTTGATGCATTGATTGATTATGAACAGTATCA  
TGTCATGCTGCAACGCAAAGCACATTGAATCGTAGATCACTGGGTATTGGTTACATTGG  
ACTAGCATATTATCTTGCTAAGAATGGTGCTAAGTATGATTCGTAGAAAGCATTGATTT  
AGTTCATAGACTTACAGGAATACTCCAGTATGCTATCCTAACGGCATCGAATCCTAGGGG  
AATGGAGAAAGGTCCTCGCGGTCATTCGGTAAGACCAAGTGTACTGATGGAATTCTTCC  
TATCGTTACATATACGAGTGAAGTAGATGAGATTGTTCCGATTGACCTATCATGTGATTG  
GGAGTATCTCAGGGGCAGGATCAAGGAGTATGGACTCAGGCACAGCACTTTGTCCGCCAA  
GATGACTTCGGAGAGCTGTTCCGTTGTGTCAAATGCCACTAACGGAAGCGCGCCTCCTAG  
AGGCTACCTGTCCGTAAATAACTCAAAGAAGGGACCTCTTAAGCAGATTGTACCGTCTTA  
TAACTCTCTAAACGCAAACCTATACCCTGCTATGGGATATGCATAACATTGATGCTTATAT  
CAAAGTAACTGCAGTAATGCAGAATTGCTTCGATCAGGCAAGCAGTGGTAATTCGAGTTA  
TACTCCAGAGAATTCTCCTGACGATGAAGTGCCTGTATCTGTGCTGGCAAAGATCTTTT  
GTCTACATACAAATATGGGTGGAAGACTTGATATTATTAACACATATGATGCCAAAAA  
AGATTGTGACGACGAACCAAACGTCGATAAATATATCAACGACATGCCACCTCGGAGGA  
AGAGGATTGTGACAGTTGCAAGGTCTGATGCAGAATTAAGGAATGACAGTATTTAACA  
AGAACAAAGTAAAGACAAAGTAACAACCAATGTTTTTTGGACAACCATTAGGAGTTCAA  
CATATGATGCATATAAGAATCCAGTATTTGATAGACTTACACAATCACAACCTAGGATATT  
TCTGCAGACCCGACGAGGTGGCTCTCCAGAAAGATAGATCAGACTATCAAACCTATACAC  
CAGAACAGAACCACATCTTTACTTCTTACTTGAAGTATCAAATCATGCTTGACACAGTTA  
ACGGTTGAGGACGAGGTATGGCTCTGATTCCCTACTGCTCGCTTCCTGAGTTCGAAGCAT  
GCTTGTGAGGATGGGAGTTCAGGGAAAAGATCCATAGTAGTTCCTATACAGACGTCATCA  
AGAATGTATATCCACATCTTTCAGAGGTATTTGATACTATCTTAGATGATGATAATGTAC  
TGTCTCGTGCATCATCAATGACTAAATAGTAAGTTGAATTTATTAATTCAGCATAACGAGT  
TTGATAATTGTCAACCATGGGATCTTGCTAGACAAGGAAATTTAACTGGATCACATGAAA  
GAAAAGATGTCAAAGAATACTCTATAGGGCATTGCAAACGTTAACATTCTTGAGGGAA  
TTCGTTTCTATGTCTCCTTTGCGTTTTCTTTTACTTTTGGCGAAAATAAACTTATGGATG  
GCCAGCTAAGATTCTCTCTCTTATCGCTAGAGATAAAACTTAACACGTGTTTATCACAC  
AAAATAGGATCAGGAACTGGGCAAAGCTGACGATTCCGAAATGGCAGAAATCGCAAAG  
AACAAAACCAGTCGTCGTAGATATGTGCAAGAGAACTGTTGAAGTGGAGAAGACTTGGG  
CAAACATTTGTTTAGGGAAGGTAATATGATTGAATTGAATGTTTCGCGTACTAAATAATT  
ATATTGAGTCGAGTGCCAATCGCAGAATGAAAGCAATCAGATTGAATCCTGTGTTGGATC  
ATCTTGATAGAACCAATCCTTTGCCACGGACTCAACACTCATTAACTAGTAAGGGTCAAC  
AGAATGCACCACAAGAAACGCAGATTGAAAGTTATGTCGTAGGAGGAATCAAACAAGACG  
TCCAAGGAGACTCCTTTGCAGGATCCTCTCTCTATCACAGAGTGGTTAGATAAAACTTAT  
AATGATCTAGTGGAGTCAGGAAATCACTAAGGTCCAGAAATTAAGTACAAGACCTGGACT  
GCTGCTAGGGTAGACGCAACTAAGAGTTTGCACAAAGACTTAAGAAAAGATAAAGATAAG  
GATGAGATGTGTTAAAGTGTATCGTAGTGAACCTAACCAATGGCAGGAATCTATGATATAA  
TATAATGTACAAGTAACACTTGTTACCAAACGTTTCATCCAATGCACGGAAACGCACTACT  
GGTAGTAATGTCTGCGGATCACGATGCTTCCCCTGTGTAGTATGATGTTATGAATTGAA  
TCAATAAAGGATTGAGATACTCAGCGATGAGAACCTTAGTTCAGATGTTTCATGAGTAACT  
TATAGATTACTTCTATACGACAGTGTGACAACCAAATTTGTGAAGCTTGGCAACTTGGAGG  
CAAGTTATTCGCGGAACGGAGCGTTCATCCCATGAGCCCTATTTTAATTGCTACTGCAGT  
GACGTGTGCTGATATTCAACCAGTAATCGAGCGTGCTGGAATTTATGAGGGAACCTGTTGA  
ACAAACAAGGCAAGAAATCATTGAAATTTATCAAATAGATTTTACCAATGCTGTAGGTCA  
TGAGTGTGATTGGGACGCATACGATTAAGGAACGGACCTTAAACAAGTCACTAACTTTA  
GGAGTTAATTCTTGACTACAATTACTTACAGAGGCGTCCAGTATGACGCTGAAGCATAA  
AAGCAAAGGTTCTTTCAGAGCAAGCAAGTAGCACCCGTAAGGATCTAAAGTATCGTGGTT  
TGAAGGTCGAGCGTAAAATCGCATCCCCGTCTTACTCATGACAGAACTACAAACCATCGG  
GATCATATCCCTAGGGTCTGCTGTTTGCATGATTATGATCTATCTGGAACCTGCGTCTTCT

GCCTGTCAAGTCACCAACAGTTGCTAATGATCAATTTTGAGAGGGTTTATGGTCTTCCCG  
AATATGATTCCGCTAAACACGATCCAGTCAAGACCTTCGCTTTTTTAACTCATCGTGGAG  
TGCACTATGCTAAGTGGGTTTACCTCAATGTACAATTCGGTCGTACACAACCGTGCAACA  
AACCATCTTAATTATGTTAAAATACCCACTTAAACCGTTGTCCTTTACGACTGTGGTTTT  
CAATGTTAGAAGAAATATTATGAATGATGCGAGGGAGAACCATGAAAATGTTTCTGGATT  
GTGCTGATGCCGAAACGATCTCTATTGCTTTTGAGACAGGTTTAATTGACGGTGTGACTA  
CCAACCTCATCTCTTAAGTTAAAAGCAGGACAAGATACTAGGGAAGCCATAACGGTAATTT  
CAAATAGATTTCCCTTCCATGCTTCAATCTCCGCCGAAGTGCTAGGTGATTCTGCCACTG  
AAATGTTATATATGGCAGAGAACGACATCGACATTGGACCAAACATCAGAACTAAAGTTC  
CATGCACACTAGAAGATCTTAAGGCATGGTGAGACCTCACTAACCAAGAAATTAGTGTA  
ATGTCACAACCTGTATTCTCAACAGCACAATCAATTCTAGCATCTAAAGCAGGTGCAACGT  
AGATTTCTCCTTTTGTGCGGAAGAGTATACGATACGTCATTTCGATGGAATCAAATTTATAG  
AGGAGATTGCAGACGTATTTGCAACTCACGCACGACACACAAAGGTTCTCGCTGCCTCAG  
TTAGGGAAGTTCAACAAGTATCATCTGCCTTTAGAGTAGGAGCAGATATATGCACTCTCC  
CTGGTTCTCTTTTCAAGAAGATGTATAAACACATTCCTACAGATAAAGCATTAGAAGTGT  
ACGATAAAGACTGGCAGGAATTGTAAGGATGTCTGAAGAAATTAATCGTAGATATCCTCC  
CACTGGGAGAGGTCAAAGGAGAAAGAATGATATCGAACCCAGAGTCTTTAGACTCAAACA  
CGAACGCTATAATGAACATGGCGGTGCAAGTAATGCCTGGAAAGCGGGTGCACACTATTC  
ACTCGAAAGATTTCTGCAACTCCTACAAGAATATTATTCATGAAGAAAAGAGATTTACAA  
ACATTGATACATGACCTTGACGTTGACGTAGCAGAGCTAAAATATGCGGTTTATCCAGAC  
TTTGGAGCATATCGTATAAGTAGTGATACTGACATGAACACTAGTTATCGTGACATCAAC  
GTCCAAGACGGACTTTGCGATTGATTATGAAAATCCCTGGCTATGTGAAGGTTCAACTTT  
CACCTCTATCGATATTGGCGATTTCTTCGGTTTCGTCTACCGTATTACAAATAAGGTTAA  
TGAGAGATTCTACAGCCGGAGAAAGTATTTGTATGCCTTTAAAATACAGAGGGGAAATAA  
AAGAAAACAAAACAAGAAACCGATTGGAAGAAATATTTTGGCTCTTGTCCAGAATTAAG  
AGAAGAGATTAACCTTGTATGGAAAGGAGGACTTTAGACGTAAGACTATAAGCCTACAGAA  
CTCGAAGGGTCAATGCAGTTATGAGGAGAGCGGACAACCTATTTTTCAATAATGTACTIONTAA  
GGACCCATCCAAAGATGGAAGCCCTGCAGTTCACAACCTCGAACATACTTGGCAGCTATAT  
GCGTCAAGATTATTTCAATGCTTGACCACTGCTGGTAACTCTTCTGTAATCTCCAGGTAA  
TCAAGGGAGGTCTCTTATGGTTCGAAGAATTCACATTTTCAGATTTCGATGATCTACATCAT  
GATCGATCAGTTGCATAAATGGGCTGAGCTCGAAGAGGAGGAACTTGAAAACCAGTGGGA  
CAGTAGCTCAGCGGACAAAGCAACTGCCTTCTAAGGAGTTCGGTCGTAGATTCAATTCATA  
CCTGGCTCGTTGCCTTCCGGCCAATCGGTATATACAGGTTAAAAAAATTACTIONACAGGATA  
ACGCTTCTCGTCTTGTCTCAATATGCATACGGACTCTGTAGACCGAGAGATTATACTIONTGA  
CACATAACATCCTATCATATATAATGAACTAGTAAAATACTIONTATGAGGATGAAGGTATTCA  
ACTCTTCGGTAATCTAGATGAGGATTACGAAATCCTTTTATCCAACTTGAAATCGATCT  
TTAGTATGAAACTTGAAACCCCTTTTAGAACGGTATCCATACCGTTAGGTGTCAGTTGGAA  
CTGTGCCAAGCAGTCGTCCAGACTACCGGATCCAGAAGGTTTCACGAATGGACACCACGCC  
AGATAGACATCTATCTTCTTACTATTAAGCTCAACAGGATTATGTTATTGAAGACGTTG  
AATATACAAAATCGTTTCGACCGTGATGCTGCGCTCACTGCGTACGGCGGAAAAAGGGATG  
TCGTTTCCGCATCTAATTAATGAATTCGAATTGTTATCGAGGATCTATAGAGCAGTGAC  
TAATAGACCTGTCTCTCCTCAACCAATCCATTTAATATCCTAACATACGGATAAATCCC  
GTCCTTGCCATTAGACTTTGAACTAGATGGTTTTAGGAGCGTAATCAACTCATAGTCCTA  
GTCGTAATCAGCACCCCTTCTGGGTGCTTTTAAATTTTCTTTTATGTTGACTCTGAAATCTT  
AATATTTCAAACGCTTGACAACCTGTTGAAACATTATAGATAATTGTAACAGGTCTTAATA  
AACTACACAAAATGTCAACAACCTCTGAATCAGGCGGAAGACATAACATATTTCCAACT  
GAACATCGGCCTCACATTGATAAGAACTATCGAGGATACGGAAACAACCCTGAACTTCAC  
AGTGGTTCGCTTGGCGATGCTTTGTTTAGTTGCGGGTATTTTCTCTTACGTGACCACAGGT  
AACTTCTTCTTCGGTGGTCTTCTTGGTTTTTAACCATCTAACTTATCGAATCAATTATAT  
ACACACACTCAACACACAACAGGCACACTATCTTACTCCAGAAGCAGAAGGAGTTAATG  
GAAGGGCAGCCATGCTCGGTTTTCGTAGCAGCAGTTGTTGCTTACGTTACAACCTGGTCAA  
TCATTCCAGGTTTATACTAATGTATGCATCAAAAGCAATAGAAGTAGAATTACAAATAGT  
AGTTCCTAAGAACTTAACGGTAAATTAGCAATCCTTGGTATCATCGCAGGAATTGGAGC  
TTACTTAACAACAGGTCAACTCATTCCAGGTTTCGTATAATGAAACATTGGCTTTTCGAA  
AATAAATTAACGCCAGACTAGCTAAGATTGGTCAACTCGAAGCGGTAGTGGACTAAGAT  
TGCACAGGTTGGATCGCACCAAGGTTTTTCTAATGGCGTATCACGACGTCATGGAAGCGT  
ATAAGAGAGCTATATCTGTACGTTACATTCCATTCTTATACTTCATTATCTCCACAGGTT

TAACAGCAACTGTTGGAATACCTGTCTACGCCACGGAGTTATTTAATGTATATTGATCA  
ACCACCGTTGATTCATACAATGTTGTGTCCGTTTATGCCTGTCAAACGCTCTTTATGGT  
TAGTTTTCTCATGCTCGGTGATCCTCCCTGGGACGATGATGACGATGATAATGATGCAGC  
CGGAGGAGTAATGACGCCAATTTATAACTATGACCCTCAACGAGCATAAACACATTATAT  
TATTAGCATCAGGTGTTACGATGCCAAATCCTAAAGCACCCATGAAGATATGGAGAAT  
CCCAACGTGCACTATGCAGAGTTACGATGTGATCCTGATGCAGAATTAGAGTTTAAAGCA  
GATTGCAGTAACAACAAAATAGTTATAACAACCTAAAGAGGAAGCTTGACTTCCTCTTTTT  
TAATAAATAATCTTAGGATAACGTGGAATTGATCATGGCAGCATATACAAACAACACTGC  
CGTATGCGTCGCAACCCGAAGGACTGACGATAAAGAAATTGAATAGTTGGTTTCACCTAC  
TGCATGGAACCCAGACAAAAGACTCGCAAGGATTTTTGACACTCAAGTAGGTGCCAGAAA  
CTTTCTACAAGAAGGGGGTATGAAAGGTACCGTACGAAAACATTCTTGACAATTTCTGCA  
TCAGACAAATTACCTTATGATGGATGGTCTGATGACAACCCTTAAAAAGGAACAAAATAC  
ATAGGCAAACCTGTTTACGAATCAGGTGATATTTCTATACATCAACAGATGTATGGCATC  
TGCACAAGACATCTGAGTAGAATAGGTGCCTCAGAAAATAGGTATTATTACTTATCTTTA  
TCACTCAACTTATTCGTAAAGATATATTACTATAAATAAATGAACTGGGTGAGGAAATCC  
TCACCTTTTCTATGTGGACCCGTTCAACCGAGACCTATGGGTCGGTAAATTACGTCTGTC  
ATATCCATAAGTGAAGGGATTGATGGAAATATGGTATCGCTCTACCCTTTGAGCCCTACC  
GAACAACCTCCTATTGACAAGTCTTTCAAGACAAGGCAGCCAAGGCGGACTCCAACGAGG  
ATGGCCAGAGTTCTGCGAATGGGTAAACAAGCACTAACAACAGACTTCATGTTGGTTGGTT  
CGGTGTCTTAATGATCCCATGTTTATTACAAGCATCAACATGTTTCATTGTTACAATTCA  
TGTTACACCACCTGTGCATATCGACGGAATCAGGGAACCTGTATCAGGTGCTCTAATA  
TGGAACAACATCATCTGAGGTGCAGTGGTTCATCTTCAAACGCAATCGGTCTACACTT  
CGACCAAATTTGGGCAGCAGCTACAATCGACGAGTGGTTATATAATGGCGGTCTTACCA  
GTTGGTACTCTTCCACTTCCTAATCGAAATCTCTGCCTACATGGGTAGACAGTGGGAGTT  
ATCATAACAGACTAGGTATGGGACCTTGGATCTGTGTTGCTTATACAGCACCAGTATCTGG  
ACCATTTTCACTATCCCTTGTATATCCATTTGGTCAGGGTTATCGCTCTGATGGTATTCG  
TTTAGGAATTGCTGGAACATTCAGCTGCATGTTTCGTATTCAAAGCAGAGCACAACATTTT  
TATGCATCTCTCCATATGGCAGGGGTATGAGGTATGTTTCGGTGGATCTATATTCTGCGC  
GCTGCATTGTGCACTTGTAACACCTTCTCTACTCGGAGCGACCACTGAGGAGGAATCTCA  
GAACTATGGTTACAAGTTCGGTCAAGAAGAAGAACCCCATAAATATTGTTGCAGTACAGGG  
ATACCTCCGGAGATTAATCTCCCCGAATGCAAGTTTCAACAACCTGAAGAAGTCTTCACTT  
CTTCCGAGCAGTGTGCCAGCTGTATGTGTATGGTTCCTCTATGGGTAGCTGTACAAT  
AGCATGCAACTTGAACGGATTTAACCATATCCAATCAGTTCTAGATGTAAACGGAAAGAT  
CATTCTACATGGGGTGTGCTGCTTAACAGAGCAAACCTTGGTATGGAAGAAATGCTTGA  
GCGTAACGCTCCCAACTTCCCACTAGACGTAGCATCTGGTGAGACTCCATAGGTTGCTTT  
AAATGCACCAACAATCGGTAAATTAAGTAATCAGGAGCACAAGCACAACGACTAAATTT  
CTCGTAAAATACGGGGGATACTTTTCAATATTTGACTCCATATTCTTTATTGCAATAGGT  
ATAATCTTAAGACCTGTCTAACCTAATCTAAACAGAGGGGTAAGACCCCTCTTTTTTTA  
TGGCATTTTATTATCCATAATGTAGTTTTGGTCCTGTATGAGATCTACCTCACACTGATG  
CTGAGATAGCACAGAGGGCACGAATTGCTGTGTCTGATACTGAGCGTTTAGGAAAAGACT  
CTGAACGTGTTGATACTCTTGATTTGACAGGTTTATATGATAGTATTCAAGAAGTTATTG  
GAGAAGTGCCCTCCTTCTTTAAGCGTCGAAGATGTTAGCAAAGAACGTTACCTGCTGGCA  
CTATAGAAAATTACGATTGTCTATGGGAATATCAAGGTGCCCTTGGAGAGAATTATGATA  
GTGGTTGGAATTCTGCAGACGCAAATAATGAAGTTAGTTTAGCTAATTCTTTTCTCAAC  
CGACATTATCTCCAACATGTAGTTCACAATATCAACGGGACAGTAGTATTAGACCTCTAA  
CTTTCTTCAATGCTAACGGAACTTTAGTTACAAAACCTGCTTCTGAAGGATCGTCGCCAG  
CCACATTAACAGTTGAATCTGAGTAGCTATGGACTTCTGAAGCTAATGAATATGGTGTAT  
GGACGAACACGGGAGAGAGTACGTTACCACCCGCACCTCAAGCAGTAACATATAAAATTC  
ATATCACAGAAGCACAACCTTATGGATTTACTTAGGCTGCTGACGAAACTGGATCTGTAA  
CGATTGGATCAGTGACTACGGCGTTCATCAAAAATAGTAGTGGTATGACAACCACTGGAA  
CTCCCACTACTGCTACACGATCATTGTCAGTGGGTGTCTTATTAGTGACAGTGATATGCA  
CGAATGAAGTTGCTAATCCCCAACGATAACTGATGATTAATATCTTTGGAGAAAAAATC  
CTGGTGGATGGTATCTCAAGATATGTAAGGGTGGAGCACGTGGAAGTGAACCACTGATTT  
CTTGTGTAACCTCAGGTCTCATCTCTATGGTCATCATTCATGAATACTTACGCAGTAT  
TCCGAAGTGATAATGATCCTTTACTAGTTGCCACTCAAACAGCAACTTATAAGATAAATA  
TCCCTTCAGCAGGTAATTATGATTTTGCATGTCAGGCAAATAACACTGCTGCATTCTCAC  
TTGACGGAACACAGATTGCGACGTCGAGTTCATATACAACAAGTAAGACTGCCACACTTT

CTAACGTGAGTGCAGGAATGCATACTTTAGTTGTCTCAGTTACTGAACTACTACATCTG  
GTAACGTAGCTAATACTTGGACAGATAATCCGGGTGGTGCAGCATGGAGAATTTCTCAAT  
CTGGTGCTATAATAGCTTCATCATTAAATCTGTCTGCACCTGGTGACGGAAATCTTTTCT  
GGCACACTAGAAAGGCAACATGATATACATACTCAATCACATAATGGAACCTCCGCGAAAT  
CCCCAACGATCAACAACCTAAAGGGATAAAAGAACATCTAAGTGATGCTGATGCACACTT  
TGATTAAGTTGTTGATCCTACGGAAATCATTGAGGTACCCTTAGACACAGATGAATACTT  
TGAAGGAATATATAAAGTCCAAAAAATGTTAATTGAAAACCGTAAACGAACACACGAATA  
CGACGAATCCAAAAGAAACAATCCAAGAAGCAAAAAGAAACAGCTAGGAACGCAAGATTA  
ATAAAAATTTGTGGATTAGAGAAGATGATCTCTTTGCCAAATCAATCAATAGAAGAGCGA  
AGAAAAAATTGCGAGAAGAAAACCTTTGACAGATCCCAAAGAAAGTGTTAGTATAAATAC  
TCGAAGCGAAGGACGCACCGCGAACAAAGAGTTCCGAAGGGCTCAATTACTCCCGCTACG  
TCTCTACAGCTAAAAACCTAACGAGAACACGTTCGAGTTCTCCAACATCTGCAGGTATAAC  
TCTGCAAGAAAATTAGAACAACAATGATTAATCAACCATCGCTGCAGTCGCTGCAGCC  
CCTCTTCTAGTAGCTGGTGCAGCTTTTGTCTGGTCCATATGTTAACTTAGAAACAACCGGA  
TCATATCCTGATGGAACATACTCATCCGGGGGATTAGAACCAGTTGTAGGATATGAGGGG  
GAAACATCTGGTGGTATCGGTTGGTACATATCTGGTGTCTCTACTGTAACATATACAGAG  
TTAACTGATGAGTTCGGAGACGTTGAATTAGTAGGATCCCCTGGTGGATCTTACGCTAAG  
TGCTACGCAGAAATCTCCGGTGTAACATAAATCTGATGTTCGACATTGACTTCACTGCTAAG  
GCAGGTGTTAAGTTCGTTTTCTAAACGGATATGTATAAGATGAATCCAAGGGACTCTATG  
AGTCTCTTTTTATTCTGTCTAAACTATTATGATTTTTACCGTTTACAAACGAGACGGGTG  
TTCTTACTCCACTGAAATCATAACAAGTTTTAGAACGAAAAAATAAATTACCGGGAATA  
CAGGTTAGGGGTTGACATTCAACGAGAAGCATTCTATAATCAATTTGGAGAGGGATCAAC  
TTCCCCTTAGGGTGTATTAGGTGCCACCAATCTTGGTGTGTTGCACTGATACAGTTTCGAAA  
CTTTCCTGATTACAACCAATCTGATGGAAGAATTTTACGGTCTTGTGCGTCTGCTATT  
GATGCTGCTTTTGAAAAGAATATGTTTCTTCAAACCGTATAAATCTTTGCCTCACAGC  
AAGATTAACGTAAGTAAATACAAGAGTTCGTTGATAGCACAACTGCTAAGGGATTAGCA  
TTGACTCATTCTGATCTAGCTGTATAATTCAAGAGTGCATCTGATTCTTATCATCAGTTA  
CTTCGTGAACCATATGGCCATCTCGGTAAACTAAAAACAAGGAAAATCTCAAAGTACTTG  
TCACAGATTTTGATAGATGTTCTGCAATACGAATGGTATACGAGCCCAGGTTCGTAGGAAA  
ACCTCTAAATAAAAAAAGCTAAGGGGAGTCCATTGATATTGCATTTGTAGTATTATCCA  
CAATCGGTGCTTATATTCGTGGCATAACCGTCTCTTGGCTTGGCGAAAGGGTACGTTGAAG  
ATTACATCGAAAACGCTGCCTATGCAAAAACGGTCCCACTTCTGCGATGTTTGATGAAG  
ACGGTGACATGACTCATGATGAACTAATCTATATTCGACCAGAGTATAGGTTGTTACAAC  
ATGGAGATGACGCTGACGATTATGATTACCAAATTATGCCTAAACGATCAATTGAAAACA  
GTAGCTCTAGGATACTAATTAGTGAGATCCTAAGAAAGGTCTCAAATGCTAAAACATAACA  
AAGAAAAGTTGAATTGCTGAAGACACACCACACTCCCGCACTACGTCAACTGATGATCA  
TCAACTTTGATGAGAGTATTCTATCAGGACTCCCCGCAGGTGAGGTTCCATACACTCCTA  
ACGATGCCCTGTGGGGTCAGATTGTACTAGACTTGAACAAGAATACAGAGGACTATTCA  
GAATCTTCAAAGAGGTTGACAATCGTCTCAAGTATTTGAAGAGAGAGTCCATGTATGTGC  
AGCTTCTAGAAGGAATGTCTGCTGAGGAAGCAGAACTTTGCACTCAATGTAAGGACGGAA  
AGATGGGAGTAAAGTATAAGAGAACCACTAAGGCAATAGTTTCTGAAGCATTGCGATCCA  
TTGAATGGGTAGGCAGAAGTTGAAAGGAGTTCGAGTTTTCAAATGAAAATGCACTCCCGA  
TGATGCAAAAGATAAATCATTACTTTACACCGTCTATTTGGTTGAGTATAAGTTAGATGA  
TAAGCCCAGTTTTGTAATTGCAATCGCAACTAAAGCTGTAGATCTTTTTGGTTATTACTT  
TGATCTTTAAAAAAGAGCTTTGTAAAGTTTACACACTCAGAAGGTAGAATTAAGCCTAA  
ATTATGGAGCCATCCAACACAGAAGAAAGGCAAGCGAAACCAAAGATGAGCGTCCACTTT  
GTGCGTAGAAAAGCACGCGATGCAGAGGAAATGAAAAGACTGAAGAAGCAGCAAAAGCA  
GTTGCTAGATTAGTTCAATTCATTGTCCGACCTGCAATTGTTATGGCACTATGGAATTGG  
TTGATGTCAGGTTTGATTGGTCTTGCCACTATTCGATATCTAAAAGCGTTTCGTTTGTAT  
CTGATGTCTAAAATTTTATGTGGAAAGTGTGAGTAAAGTATGCTTGATATCTGTAACCTCC  
TGTTGCAGAAAAAATATCGTGTGTGTTTCTAGCGTGAGTAATGCTAAAAGCAAGAGAA  
CCCTGATGTCGGGGGTTTACTTAAGAATTGTATTAAGAATGGTCATTGGAGTGTCTTTGA  
GCTAGCGTTCATGACTCGAGAGATTAACACTACTTGTGCTCTTGCAGCTCACGTCCCTAAG  
GCATATGTGGTTCACATATCAACAAATTTACAGAGGTACGCTGACTTTTCTCTAATTGC  
AGATAGCATCTCTTCCAGAACTACGTTCGTCAGACGATAAGTGTAGACATAATAGTAT  
TGATGATGTAGCTCCATTTATCCAACAGGACTACGAGTTAAAAATGCAAAGGCGTTTTGT  
AGATGTAATAATACGCTATAAAGAAATGCTTCACTCAGGTATTGCAAAATAATGTGCTAG



AATGGTATTGCCTCTAGCAACACCAACTTAAATGTATATGAGTGGATCACTTCGCTCATG  
GGTTCATTTTATTGATCTGCGGTCAGCTTATGGAACACAGAAAGAATTTTGA AAAATTGC  
CGAAGCATCCAAACAAAATCTTATATGTCAGATCCCAACCATCTCCAAGGCATTTGATTG  
GTGTCCTCACGATGATTGTAAATTTTCGGATGAAGACAATCGCAATGACCTACCACCATG  
TTCGAGGATAGATTAATGCCTCCTTAACCAGTGATAAACAAAAAACTGAAGAGAACAAA  
AAACTCCACATGACCGTGAAAGAATACGATCAGTGGAGAAAAGATAATCCCGGTAGGGGT  
AAAGACTCGCAAGCAGGTGTGGGAGGTATGACCGATGGTCAACATAAGATGCGGGACGGA  
TTCAAAGAAGTCATGTCTAATGTCCAATCACCACATCCTAAAGCCAATCTATTTTCGTTTC  
GCATAAGGGCAAAGCAAGAATGGGAACCTAACCTCCCTCAAATTTTGCCTAATGGTATGT  
CGGGGTAACATATGAGACGTAAGAAACCTATCGACTCATCATACTTGACAGAGGTTAAAT  
CTCTGACAGATAATCAGACACGAGCATTGCTCAGTATGCGGCAGGTAAGAAGTGGTTAC  
TGCATGTTGCTCCAGGAACCGTGCGAACCTTTTATTACTTTATATCTGGCTTTGCAAGAAG  
TGCTTGAGGAAAAGACTTCGTATGTTAAAATATACACTGTAAGGTCTCTAGTTCATACTA  
GATAGATTGGTTTCCAACCAGGTGACCATGAAGATAAACCTTCACTGTTTCAGATTCCAT  
ACAAAAATATGGTAAGATCTCTGTTTATTATGCCTGATGACGGCTACGTTGAAATATTAT  
ATAATAACTTACGGGCACGAGAAACCATTTTCGCTTTTCGGCTAATTCTTTTATTCGTGGAG  
TCACTCTTGATTATGCTATTGTTATTATCGATGAGTTCAGTAACTTAAGCTTTGATGAGT  
TGGCTTCTATGATTGCTCGCATAGGCGAAGACAGTAAGATTATCTTCTGGGGTGACATTA  
CCCAGACAGATCTTACATGAGAGAATGATAAGTCTGCTATCTCAGACTTTATAAAAATTC  
TACAGCAGAGTAATGAGTTTTCATGCATTGAGTTTGATATCAATGATATGGTTCGCTCAG  
GACTCGTTAGGTCTTATCTCTTGTCAAAATATAATCTTGGTTTTTAATGTTTAAATGCGT  
TGATGGTTGTAATATTTTCAGTTGATGTAGAATCAGTAAGTTAAGATGGATTACGTATGTA  
TCCTATTCGTGATGCGGATAAATATTATCCTAGCGTAACCATAATCACAGCGTTTACGAA  
CGCAGAGTTTTTCAAAGATTCGAGAACCCGAATAGGTGAGGACGAGGCGAATCGCATCAG  
TGCTAGTTCAACTCATCGAGGAAGGGCATTTCATCACATTGCGGAAGATTATGCCAAAGG  
TGAATTAACCTTGACAGATACTTGGAAAATACTCCATTGTCTGTTAGCATGTTTCAATC  
AGCTAAGTCTACACTTAACCGAATCAATCATATTCATTGACTAGAGAAATTTCTCTATTC  
ACACTATCTTGGATTAGCAGTTCGAGTAGATTGCATTGCTGAGTGCATCGCGAGTTAGC  
AGAGATCGATTTTATTACGTCTATTA AAAAAAAAAAAGGAAGATCGTATCGAGAACTAGTG  
GTTTCAAGAAACAGCATAACGACGAGGTTTCTAGAAGGTTTCAGGAATTGAGGTCATGAA  
AATTGTCACTCTTATCGCCACTGAAGAAGGATCTATACAGGTATTTGAGAAGTACAATCT  
TGGTGACTATTTACGGTTTTCGTCAAACCTACATCGAAGAATTTGTTTCGGGCAAGACATGC  
CTCAAGAAGCACTTGAGGATAAATTTTTTACACCTTCAAATTTCCCGCAAGAAATTGAAA  
GGTTATTTAAGAAAAGTAAAGGTCTCATTAGATACCTTGCAGCAGTAGTTATGTACTGCC  
AAGAGAATGAGATTCAGGTAGAGAAAGATCCCAAACCTGATTTCTTAACCGATGAAAGAAA  
GTTTGCATCACGAGGCACAACATTTGAATTATATGAAAGCATCTTCTAAAGGACTATGAC  
AACTGTGACAGGGTTTGAAGTGTAGAAG

>NewGenomeName\_75

ACCGCGGCTTGTA ACTCAAGACTCCGCGGCCAACGGGATAGTAACTGCAATGGCGAAGAGC  
CGAACTACTAATAACAAGAGGTAGATCTTACCCGTAATAACCCTACCGTTCAATACTTT  
GTTTATGTTCTAGATATTAGCGCGCTCGACAGTTGCAAGTTTACTCTCGCCGGCGAGGCG  
AACCGCGTGACGGCTACGCCTCACGTTCTGTGAGTCCTGCACCTTCGAAGTAATGCTCGA  
GCTGCTGCACTTGAGGAGTCGCTCGGAGGACGAGCCTTGCTCTCTCGTGCCCGGGATCT  
GTTGAGGATGATGAAGAGTATTGCGCAAAAGAGTCGACACGCCCTCAAGTTGGTGAGCCA  
TTTTCGAAGGGTGCATCCTCTGATCTAACCGAAGAGACATTCATGTTGATGGCTGGCGTA  
CCGATGACTGAGGTGGCCAGGAAGTTCCCACTACTCATGTCGTCTTTCTGCGTGGCCTG  
GAACGCCACCGGCACCTGTTCTGCTCCTGACGCAACGTGATTGGAAGTCCGAAGTTATCGTT  
CTGCTTGTTCCTCCTGGCAGTGAAAAGACCCGTTATGCATTTGAATTTCCCGCCGAAAGC  
AAGTATTACCAGCATCGCAGGAAGTGGTGGGACGGTCAGTCGGTAAATGACGTACTCGTC  
ATGGACGACTTGA ACTGTTTCGTTTCCGTATGCTGATTTGGTGAGGACTACCGACTTTTAC  
CCGTTACGAGTTGTATTCAAAGTCGGTATGACTCATTTTGTGGCTAAGACTCTGATCATT  
GCAAGCAACCGCTAGCCTCGTGATTGGTATAAGAGCCAGCGTGAGCTTTCAGATCTGTAC  
CGCAGAATTTGCAGGTATCTTGTGTATAGCATTAACTATGCACCCGCCAGTCATGT  
ACCCTCCCGTTCCCAACAACTACTGAGACGAATTTGCCGTGACTCGTTTAGTAAGGTAA  
ACATTTGGCAGGGATTAAACAGTTGGGCAGATCGGTTAAGGTTACGCACTTGGCAGGGAG  
TAAACACTTGGGCAGCTCGGTTAAGATAAGGCACTTGGTAGGTATTAAACACTTGTGCAT  
CTCGGTTAAGGAAAGGAACGTGACAGGGTTTAAACACTTGGGCAGCTCGGTTAAGGTTAA

AACGAGATCTCCTTTTTGCCTAGATGCCCGTGATCTGTCCAGAATTTATGTCAAATGTGT  
ATTGCTCCTCTATGTCTACTGCGCGTTCAACCGTGTTGTGTTGTCCGGTTTTTCGACGAC  
TCATGCCCATGCCGTAACGCTCCACTTCGTCTGGCGTGAAGTTGATCCGTGTAAAGCTAC  
GTCCCCCGAGGAAGAAGGTCGAGTATTTCTAGACTGGCACGCCCTTGTACGATGGGCT  
TAGGCACGAAGTAGCTTCTGTATACTCTGGAGGGTTCCCCAGTTCTCGTGGGGCTCGTTG  
AGCCGTAAGGGTCTATAGACCATCGCGTGGTGGCCGTCTTA ACTATCTGCCCGTATTTGT  
CTATCACGGTTGTTCTCTGTGTCTGCTCTGCTGATATATGATGGACGCTGGTCTGAGAG  
TCATAGCTAAACCCATGATCATGTCTTTACCGTATGGGTAGTTGTAGTTAAGAGTTGAGC  
GCTGCATGTAGCTGATCGTGTCTCCGAACATCGCACATCGCATGTGTAAGCAGCATATAT  
TGTTGCCACGGAACGGTGGGTCTGTGTAATTCTCGCACTCTTCTAAGCTTAAGCTCTGCC  
ATTTGCCTGCCGCTCTCGGCCCTGTTTGTGAGCCGAAAAGGCCGTA CTCTCGGTGTTCTTG  
TGACCCAATATGTCACTACGGAATACCGTCGTCTGGGGGCTTGGCATTCTGAGCCTTCGTC  
TTCTCAGTCTCCTGAGTAGATCCCGCCTCTACCTCCGACCACGAGTTGCCCGCCGATAGG  
AGCGAGCCCGCTTCGGCAACGGCGGCAGTGACTTCCTGTCTGTTATAACTGACCGTACAA  
GCGCCGTTATATTATT

>NewGenomeName\_76

CTGATGATCCAGAGTGCCAAGGAGAAGGTCTAAGTATCCGGTAGTGTACAGCGCTATCAG  
GCTGGGATCGAGATTAAGGCTGACACTTTTCAAGTATTCCTATCGACGGTATTTAGAACGAC  
AAAGTTCTTGCAGCGGTGCGTGAACCGCTGTTCAACGCTGTTGACTCACACACGGAAGCT  
GGTTGCCGTGATAATCCGAATATCATTCACTCCCCAACCGACCTCGAGCCTTTGTTCTCC  
GGCCGGGATGGTGGTTCAGGTATGGACTTCGAGATGGTTGCACAGCCCTTCATGATGTTG  
GGGACCTCCACTGAGCGAGACTCAAAGGACTTGATTGGGGCCAAAGGCATCGCCTCTAAG  
GCTCCGTTACACCGTGACCGACATGTTTACGGTCCCCGCCGTCAATAGCGACATGAAA ACT  
TTTTACTCGATGCATAAGAATGAGGTTATTCAGGGGGTGTTCCTCTGCACGAGTCGAAA  
GTTACAGAGGCAGATGGCGTTGAAATCAAATAAACGTCGATCCTTCTGAGAGCTCCAAA  
TATCGCAAGGCAATCGTGGAGTGCCTGCGGTATGCAAGATTCCCGTATGAGATCAATGAT  
GCTTTTGTGACGTCTGAGATCAAGGACCGAACCTATGCGGATCAGATGCGTTATGAGGAC  
ACAGAAACAGTTTGGATGCTGGACATGTGCGGGTTCGTATCCCGCAATGCAGACAGCGTG  
GTTGTGATGGGCCAGCAACCTTATGGGGCCAACTATCATTCCAGGTATAAGAACTGGTCT  
ATGATGATGCTTCCTATTCCTATCGGGGATTGTGACGTGATCCCAGGTCTGTAATGGACC  
ATCGTAGGTAAGAATGACCCTGGTTTCCGGGAGCGCCTCGAAAAGTGAGTGTAGGAAGCT  
TTTTAAAACGTGGTCCGGAAGTCGTGGGAGAGATTAAGCAGCTACCTACAGTGACAGAA  
GTGCTGGCCACATGACGCGTGTGAGTGGTGGCTTCTCAACCCGATACGGGTCTGGCGGTT  
ATCGCCGACAAGTTCCATGACCACTTTGGGACTTTTCAAGTATTGACAAGTGAATAACTTAT  
GGTGAGTAGGTTACTCGCCGGGAAGCTGACAAGACTTTTCGGTTATGCTGACCTTATGAAC  
GGTTCGACACTGGTTTACA ACTATGAAGGCAAGTGCATCCCTCCCAAATGTACCTGGCTG  
TCTGAAA ACTGTTCAAACGTGTCTACGTTACGGAACGTATTGAGGCGCTGGAGATCCTG  
AAAGACCCGTTCTTCGGTAGAATGGTGCACAAACTTTCCGACCTTGAGAGGGCGTCTCTG  
GTTAGGGGTGAGAAGCAATTCGGTGGATATGGCTTGTACCAACCTAGTCACACAGTGTGG  
GTTATCGACCAAGATGGTTCTATCAAGAGCGGCCGGATTGCTCGCGCGGACTTCGAGGAT  
ATCGAAACCGCCTTGTGTCAGAGTGGTTGACAGGTCACGTATATTTGTGAGTTTGGTGCT  
TTCCTGTATCTGGACCGTAAACAACAGCAAGTGACTTTCCTAAAGAACGTGGGGGTCTGAG  
GGCAAGATGTATATAGTGCCTCTTATTCGCAATGGCTGGCTACCTGATGGAACAAGGATC  
GTTACCAGAGATGACCTTTATGAGCTTGCAAAACAGAACTCATGGAGTATCATCTGAAC  
CAGCGTACCAATTGCACATCTACATAACCGCAATTGGGGAAGGAGCTTGGCATT TTTGGG  
GTTAAAGTTGAAAACGAACCTGAGTATAAACTTAAAGTAATCATGTCTTATCTGCTTTCG  
CACATGAAGGGAAATGCCGATCTGGAGAAAAGGCTGAAAGAATTGTGAATGCACGTATG  
CGTATTGGTATAAAGCTTTGGGTAGTTAAAGAATCTCAATAACCGCTGCTCTGGTATGTT  
GACCTGAAACACTTCAACACACCAGAGATGAATGAGTATCGACA ACTTATCGATAGCAA  
CGAGAAACTAAATGAGTCAGTTATCCGTATCCCCTAGCGCAGCGCGGATGTTTGCAGCAG  
ACTACGGCTTGAAGTTCGCGGGCCGTGGTTTGTCTCCGGCTGTACTCGCAACCAGGCGTT  
GGATGATTGTACCAAAGCCAGCCAAGGGGTTGCTAAGCCCCAGAAGTAGATATGAGTT  
TCATCTCGGAAGCCAAGCCTGCTCCTGATCCCACTTCTTCGCATCCCGTTGTGATATCG  
GTGATTCTGCAAAAGGCAAAAAGAACGCGAAGTTCATTGATCCTGCGAAAACATACGATG  
GTCGTGATAAACACGAGGGTGTGGAGAAAGACCTCGGTAAGCAGGGGACGCGCTGGGCCG  
TCGTCTTTGAGGTTTCCGATCTGTATATCGAGGCCACTGTAACCCTGTTGCCTGGACCTC  
ACTAGGTTCTCTGCGACTTAGGTTATTGAAGAGACCGAGGCTAAGTTGTACTTCGACGAAA

AGACTGTTT TAGAAGCATGAACCAGCGGTCATCATGACTCCACGCAATGTTTGCATCTGGA  
TGCCATATGGTACTCAGCACACCCTCAACCGTGACAACGCTTTCTTCCTTGATGTGGGCC  
TATTGCTCATTGGGGGTGCTAGCGAAGGGGCAATCGCGCGGAACAAAGCAGGTAAAGAAG  
CCATGGCTGAAAAGGCTGTGGTCTCGGCCCTGTCCTTAAATTA CTGATGGCGTTCTGT  
ACTGGCACGGTCAGAAACAGGAATGCACCCGGGCTGATCGCATTCTGAACGACATTATTA  
ATGATACTTTAGATGACAGTGAGGTTAAGTTCATGCAGAAGCTGGTGCACGACCCGCTT  
ATGCGTCTGTGAAGATGCTGTATGACTTTATTCAGCACACCGGTCTTGAGATTCTTGAGA  
ACGGTGATGTGAAGGCATATAAGAATATCACCATCATAACCGAGGAACCTCGCCATAACT  
ACACACCGAAGATTCCTAACTATAAGGGGCAAATCATTTCATGACTCGAAACATGGTGG  
AAGATAACCCTAACCAAACTTGTAGCCAGGGTATGCATATTGCTTCTCTAGAGTAGGATG  
GTGGGCTCGGTGTCAACGGACTGATTGAGGTTGCGGGTAACGCGGCTGATGTGGTTTGTG  
TAACTTACGACTACAACCAACAGACGTGTCGTTCCAGCCGTTATGAAGTCTTGACAGGTG  
CGGAAAACCCAGTTGGTGAGCCGCATGTGCTGGTTATCGGGACGATGGGGGAAGTTCTGG  
AAGAGATTTACCTGGAAGTAGAACTAAGGAGGATTGATGTCAGATTTTGGTGTGGGCGT  
TGAAGCTGCCCTTGGTGCTGTGATGTCGGGGCATAACGTATTCGTTAGGGGACCCGGTGG  
TAGCTGCACGAGTGAAACCATAAAGAGCATAACAATCGGTCTACACATGTTCCGGTCCCCAC  
AGTAGACCCTACGGGGGCTGCTGCCATTAACGTCAGTGGAATGACTGCACAACGTGCGTA  
TGGACTTACAATGGGGGTAGCTACCAAAAAGGATACTGAAGACATTAAGCCGAATGTGAA  
TCGACAATTGAAGAGTAAAGCGCTAAAGATCATCCTCATTGATGAGATCAGTATGTTTCAG  
GGCTGATAAATTGTGGCAAATGGATATGAAATGCCGACGCGCAAGAAATCGATCAAATAA  
ACCGTTTGGAGGTTTGAAGATCTGCCTGTTGGGTGACTACTTCGAAAACCCGCCCGTCT  
CACAGAGACAGAAAAGGAGGCGTATTTCTAGTTCATTACACAGGATTGTCTTATTTCTC  
AGATACCTGGAAGGACAACAATCCGTATCCAATATGACTTGAATAGTTTATCACCAGTG  
CAGTGTCCGTTTCTCCACGATGCTTTACCGTCTGCGTCGTGGACAGCGTATTCCAAAAAT  
TGTTAAATTCATGATCACGCATTGTTATGATCATGGCAAGCTTCTTGATGCCATAACGAA  
CACACCTACAATGCTGCTGAGGATAAAGCAAACAAGAAGCGTTTTTGATGAGGTCTGTGG  
GTTGACTAAGTTATACAGTGCGGAGACATCTGGTGAGTTTACTCAAAAACGTGTTCTCTGA  
TGAGCTTAACCTGAAGGAAGGAGCACAGGTAAACTCCACAGTAACCGACCCTAAAGGCAT  
TGCTGAGCCAGAGTTTGTCAATGGTTCCCGTGGAGACATAATCGAACTCGGTATGGATAG  
TGTGAAGGTGCGTTGGGAATCTGGGAGAAGATTTGATGTTCGATGTCCATGTTTGAGAGAA  
TGTGGAATATAAACCAATCAAGGTCAGGACTTCTGATGGTACAACAGCCAAAGAGATTGA  
GAAGATCACTTTTGGTGAAGACCGTGCTATGTCTATCCGTTTGGGCTAGGCTCTCACAAT  
GTACAAGGCCAGGGCTTGACTTTACCTGAAATGAATATAGACTTTCGATATGGCGCTTT  
TGCACCCGGTATGTCTTATGTTGCTATCGGCAGAGCTACATCAGCTAATGAATTAAGACT  
ATTGAACAAGACCAAAGAATAGCATATTATTGTTGACTAACGTATAGTATGATTTTATGA  
AGAGACTTTCCAGGGAAATAGGAGATAAAATTATGGCATCATACTCTCGAAATGAGTTA  
TTTAAGAATTTCTAAATGGAACCTGAAGAGTAGAACAACCTCCCCAGCCGTACGTGGGGTG  
AAGCCACCGAAGGATACTACACAAATGCAAATGGCCTCTCTTGATGAGATGAGGACAGCA  
TACGGCTATGTGCCTCGTTCGTTTCTCAATATCCGAACATTACATCTGATCGTTTTAGT  
TACCTGTCCCTTTCTGGTAATGATTTTATCTACCTGGAAGATTGGGTGTCATAACCACAAT  
AATGCATTGGTCCGTGGTAACCCTGTCAGAAGGATAACCAGATCGTTGAAGCTTCGCTCTT  
CATAACCGTATTGTGGAGCAGGTGACTGGACAGCATGCTAAATCCCGCTATGCAGGTGGT  
TCAGGTTTTAAATCTGAAAAATTATGGGTGAAATTTTATGACTATTGAAGTTAAAGATTT  
TTCTCATCTGAAGAAAGTTTCAACAGAAAAAATGTTGAAACTTGGTGATGTGGCTAATGA  
TAATTATAACGAGGCCATGGTCCATGACTAAAGCCTTGTGGCATTGGTGGTCAATTGA  
AGACGAACTGGAGTTGCGTAAAAATGCGGAAAAATCTGATTAACCTGGCTGTTTGCAAAGA  
AGGAAGAACCTCATCGTGAAGTTTATGTGTTTCGATTTTCGAAAACGTGAAACAGGGCATG  
ATATTACTTTCGCATGATTGATGTTGGGGAGTATGCAGAGGCACAGGATTTCCCTGCGA  
TTGATCAAGAGGCACCGGGGGTGGCGACTTGTGGTTGTCAATCTTGAACAATCCTCTA  
TGCAGGGGGAGGTTGATAAACACATGTCTTTTGTGGTTGAGTCTGTACCTGAAATGCCG  
TGGGTATTCGCGAGCTAACCTAACCCACTACGAAGGTGCAGAACATGAGTAAGTCCTGT  
AAAGTCGAGGCTGAATTCGAGCGCATGAACACAACCGAAGGTGTGGTTGCAGTAGAAGCA  
CTTTATACTGTCCAGTAGGCGGAGTTTACAGCAAAGAGAACGATTGGGATTACAATAGT  
TTTCAAGGCTTAGAACACTATGCTGTTCTAAAAACGGCACCCAGATCCTCGTCGCCATT  
CCCGATGAACTCATGTACCATCGCCTGCGTGAGCTTCTGAGTAATGCAGAGATCGAAGGT  
TGTTTCCATCGTGAGAAGGAATTCTAATGGAAAAGAGTGAAATAAAACTAGTTAAATTGA  
TTATGAGGCAGACCAAGATAGAAGAGGCTGAAGAAATTCCGGCAGGTCTCAATTATGAAG

GTTCTGTCATCATGGGGCAAACAAAGCGGAAGGTTGGGTGAATATTCCAATGGTACAAT  
CCGATAAGTCACTAATCGTAGTCCTTAATACTGATGGCGGCCTTACAGCTACTCACCAGT  
TCCAGGTAGTCAATGGTGCACCAGAGGGAATTCTTCATTGAGGTTCGGTTTGAATAATGTG  
CTGTGGAGCATTTCGATGGCTGCGGAACCATGGGGTGGGGGTATGCTAAGACTGGTTTT  
AACGCATACTGCTTCAACGTTTATGCTGGGGATTATGGTGGTTATGAGGTGGTCAGGGTT  
AACCATCCTAATATTAAGTATGTAAATTCTTGGATCGCTGAGGGTTTTGATCCAGAGAAA  
GACGGGATCCCTAAGCCAGATGTTATCTTTGCCTTGCCACCATGTACCAAATGGCAGTT  
AGCGGCGCTGATTATTTGCCTCAAAGGCAGGCAAAGACCGTCTGTTTCCAGTCACAGCA  
CGGAATACCGCTAGGGTTGCAGCAATGTTAGGAGATAAGTACGGGTATCCATACATGCTA  
GAGAACCCTGTGAGTGTTCTGACCTCCAAATGGAGGAGTCCGAACCATATGTACCATCCG  
TATGAACATGGGGGATATCTACCCCATGATGGTGTTCATCCTTTCGTCCCTTAGTATAAT  
AATCCGCGGAAGTCATAGCCTAGAAAGCAGTGTCTTTGGACGGGTAATGGTTTTAAACT  
CCACCCGCAAAGCCCGTTCCGGTAGCGAAGGGTACTCAGAAGTGCATAAAAAGATCGGA  
GGAAAGTCTGCCAAAACAATACTGATACGTTCTTTAACACCCCGTGGTTTTGATACTGTG  
ATTTTTTTTTTCCAACCAGCAATTGAGGCTAAGTTAAAGAGTTATTATTAGTTGGTTGTGCG  
ATCAGGGCCATCGGCTTGAGATAAACGTATGCTACTATACGCTGACAAAGTGTGGGGCAT  
CTACCCAGAGATCAAACGATCCCGTCCCGCGCATTAAAAAGTTACGGCACTCCTCTTG  
TCAAAGTACAGTGCAGGCTAAGATCTGTCAATATTCGTTTACTGCTGCAATGGTGGTTC  
TCACATGTCTGGAACAGTAAAACCTGTTCTTGCCTGTGCAAATGGTGATCCTTTCACGAA  
TGACTTTTGGTTCGTACAACACGGCAGTCGATAGTGCAACCTGATGTATGCACTTTAACAC  
AGGAACCTTCTTCTGTTTAAAAACCTATCAGTCAACTATTTATCGGCAGGATAACTCTGC  
CTCGGTACAGCTCGGCCACTGCCACGAATACCGACGAACCAGTGGAAACCACATGGCGAT  
TGTTTACGATGGGACAAATCTCCAGTTCTATGTGAACGGAAACCGCATTGTATCGCAGGG  
ACCTGATGGCGGCTGGAGTACAGCTTCATCATTTGCAAGGGTGTGGGTGGGTTGGGATA  
AGCGAATCGTTTCATGGATCAGTTTCGAAATTCGGGTGTTGTGAGGTATTCAGGTACTTC  
CTTCACTGTACCTACCGCACCTTTGGATATGGATTAGGAGGTAAGTTGATAAATGTGGTG  
ATTGCAAAGCTTCAACCCTACAAAAGTTTGGAGATAATATGAATTTCTTTTTTGATAAG  
GGATATCTCATCAAGGTAGAATTTGCTTCCAGGGTGGACTTTATATTGCTGTTGTTGTT  
AGGCCGTTTTAAGGAGAGAAAGGGGCGAATGGTCCGGATTGGGGCAACATTGTGGACTAC  
CGAGACGGAAAGCGATACTGGAAAGTATACACCTTCTCATGTGCGAAACCACAATTGTCCA  
GCGGCAGTTATTGGCAACGAACCTGGATCGATATCTCGAAAGGGATATTGCTCTATACGC  
ATTCAAGGGTACAGGTGTTATATGCATGCCATTTTGTGGCTGCTTACCACGGGCCAATC  
CCAATATGTTTGCAGGGTGTGAGCATATAAAATCGTTAAGGGAGACAGGGGGTGTTCGGAT  
GACCGAATAACGAATTTACAACCTTACAAGAGGTACAAATAGTCGTGAAGGTGGTGGC  
AACATGCCTAATTCTTCCAACAAGTCTTCTGCAAGAAGAGGTGTTGCTTGGGATAGAGGG  
TATCCATCAAAGCCTTAGATGGCAAGAATACCCGTAGACGGAAAAGTTCCCCTTAAAAAT  
ATTGAGAGTATCAATGAAGCCTCTCAGCAAAGAGAGTTGGGGGAAAAATAGCATTGCTAT  
CGAGGATTAAGAGTAATTTTGATTTTTTCGGCTTACCGATAAGGTGGTTCAGTAAAACCCGA  
AAGCACAAAGATGTGGCAATAACGGCACTCTTGGAGGAAGAGTGAGTGATCAGCAGGGAG  
AAGAAGAGACCCTGGAATCCGTAGTCGATGGCACCCGTATTCTGGTATTTCTAAAATGA  
GTCTCTCGCTTGATGCAGCGAAGTATTTAACTTCGGGTCTGCTGTTTCATCAAGCGACG  
GTGTAACCATTCCACCAACATACTTGCCATATTATCATAAGTACGGTAAGCTTACTGGTT  
ACAACACACGTGGCTGGAACCTACCAAAGCGGACGGAGGGACACTTCTCCGTGGTCGACA  
CTTTAAAGGCAGCATCTCAGTTCTTTGGTCAGAATGAAGCTGCGATGGGCGCTTGTGTA  
AATAGATTTTTGTTCTTGAGGGTGAAGGTGATGTGACTGCAGGGAGGCAGGCGGGTTTCG  
ATTCTGTCATAGCTTTAGCTGCAATTCCTATGCAACGAAAAGGGTGTAGGATTGGGCGG  
CAAGTGTCTGACAGGTATCATTTCCATTCATGACGGTGGCGAAGTTGCAGGTATTCCGA  
CACTGCCTTTTTGTGGGATTACACTGTGGCACAGCTAAGGCAGTTGACACCTTCGCTAACG  
ATGAGATGTTTATCCGTGGCTACGAAAAAGAAGTTCTTGGGTTGGATAACGATGAAGCAA  
CAGGGCTGGAAAAGGAACGTATAATCAAGAAAGGTAAGGTAGCTACAGATGATGTTGCAG  
CATTCTTGATGTCCGACAATATCTTTGTAGTTGGTTACCCTATTAACGTAACGATCCGG  
CTGGTGTAAAGATATTCGAGATATGTACGATGCTGGGAAGGGTCGAGAAACCTTGAACA  
TGTTTTCCAAGGCAGAAGACAGGTATGTCCCTGTCTCACCGATCAGTTTAAAGCAATCTCA  
CCATTGAGAACCTTCGTAAGAAGAAGAAAGATGGTGTTCCAATTCGGGGCATGCCTCGAC  
GTTATGAGGTGACTAATGGCCCACGTGCTGGAGAGCTTTGGACTCTAAGTGGACCAAGTG  
GCGGGGGTTGACACACTGGTCCCTGCAAGCAGTAATATATGAAGAAAAGCTGGTGAATTC  
GGTGAACCCCTAACGTGAAGACGAGGGCAATACCGAGCCAAGCGGACGCTCTCTCCTT

GTATAAGGAGGGATTATGTGGAACAGTATACAAAATTTTGATTGATACGTGGTTTCTGAC  
AAATTTGAAGCAAGAGGGAAGAGAGGCTAGATTATAAACTTGATAAACTGGCAGATAC  
TCGCGTGTAGCCTGTGCCGATAAGGGATACTTACTGGGTCGATGGTTCCTGTCTTGTA  
GCTTTTGCATTTTGGACCCATAGAGGGTTAACCTTATGTGCATCACACAAACGGTGAA  
AAAGGGGATAACCTCAGTTGACAATCTTTAATGGGTACCCCAACGCGAGAATCAAGACCAT  
GTTGTTTTAACAAGCTTGTTCCTCGTAGTGAGGAAATATGCACATCTAAAGTCACAGTG  
AGTGAAGTTCTTCAGATAACAAAACTCTGCAACATGAACTCCCAGTATCAGATGTGGCG  
AGAAGATTCTCCGTTCCTTTTCGGATTGTAAAGAGAATTATATACAGAGAACTTGCGCA  
TCGTGAACGTCTGAATGCTAATTCTTATCAGGAAGACCAAGACTAACCCGGCTTTCCGGA  
GAGCGGCACCAGATATACGAACTGTGCAAGTATGGCTTCCCAGCACATAGGTTGCTAAG  
ATGTTTTGTATTTCTCAACCGACTGTAGTAAACATCAGGAGAGACTTTTCGGAACATGTA  
ACGACCCGCCGTGAAGAAGGTAACGGTGTACATCCAAGTGGTTGGATGAGCAAGTGATCC  
TGAAAGGACGATGATAAACTCAGCTCTGCATGGAAACGTGCAGCAGCCCCGATACGAGA  
TAGGGGTCGAGCACGAAATAACGCACCCTGCGGCACATAAGCACAAAGCACAATTTCTCGC  
AAGATCGGGTATGCAATTGTGGATTCTCTTCGCAATATGGATATCCCTCGACTTCACGGC  
TGGAAGGAGCGAGAGAAGGTCGCAATCATCCGTCTTGATGAGGATGAAGAGGACTCAGTT  
AAGAGCCTGTACGCTGCAGAGTTGCAGGTAGAAGCTAAAGCATCAGTTGCAAATCCTTAG  
CAGCTTCTCACTGGAGAAGAAAACCTTTCCATTGACCAACGGTGGATTACTGAGGGCAAG  
ATTCAGATCTTTGACCACTTCGGTGATACGCCGATTGATCAGTTGAGTCAAAAGCTGAAA  
CAGATGGTGTGCCCTTAAGGTTGTAAGTGGATTATCCTTGACCACCTGTGCATGGTGATC  
TTCGGTTTTACGTCAGACAATGAACTCAGAGATTTGGACAATGCCTTGACCGAGCTTGCT  
CCATTCTGTCAGCAGTATGATGTGTTCAATTCTCAGTATTTGGCATATGAAGCGAAGGGAG  
CTTCAGTTACCGATGTCTCTAGACGGTTATATGTCGCCTTTCAGGTATCATGTACGTAAA  
GAAGACCTGCGTGGTTCTGCTGCACTGCAACAGCATTCTGGATTGTCTTGGGTGTTGAG  
CCAGAAGAACAACCAGACCTATCTCGTGGTCGTGGCCGTGGGGTGTGCAGGAACAACCGC  
CCAAACAATAGACTCGGTGTCTCAGACACCATGAGCATGGTGGACAACGGACAATTCACG  
GACGCGTCTGGTTGGGTATGGGCAGACGGGATGTTCAAGCTGGACGGGGAAGCCACGCTT  
CGTCCAGAAGGTTTGGTTCAACCCCTACAACCCGATACTCCGGTGGGTGAGGACAATGTA  
CCAGCACCTGTCGTTGAGAATCCGGTGCAACTCTGATCTTCAGCAGACATGGAGGAGGCT  
AGACCGTTTTGATGATATATTAACAACCTGCGAGGTGGGTGTCGATGAAGACCAACCCAC  
CACGCATAGGAGGAGCTTGAAAGGTTAGTTTCTAATGGACATCGAAGCTCATGGTCTGTT  
AGAGGCAGTAACAAAGTACCCTGAACCCTTCTTAAGGAATCCAGTGTTAACACGTAGAA  
TCTGTTTCTAGATCCAGCGCACCCAGATTCTGAGAGCGCGGTAAGCTATGCTCGCAGCAA  
GACAGGCGCCACTCTACCATCCGCTCATATGACGAGCTTGAGCCGTTCTGAAAACCTCG  
CCGTGGTATTGCGTGTACACCCTTTTTGGTTATGGTCTACGCCACTGGCAGAAGCTATC  
AGGCATTGAGTACGACATGTGCCAAGACACTAAGTCTCTGGGGACGATTGGGGATACCCA  
AGTTATCCAGTCCAATACTTTGTCTATGAGCCGCGTACTTTATCCGGCCCCGCCCCTACC  
AATTTGCTGTCCCGATTAGTATTGAACCCGGTAACCCGGGAACGAGACCGTGTGGTCC  
ACGTGGCCTTATGGCGTGGGGTTTTTCGAGTGGCGAACTAGAAAGTTCAGATAGATGACTG  
GCATAAGTAGACGCTCTGGTAGTACGTTAACCGTGTGTGGGATGACGTTCTTGGAACGA  
ACTGACGTGGAGAGCATGGATCGATTAATCCACTGTCGCTCGTTAGCCCGATGACAAGCA  
GTTTCATGTACACGGCTAGACCGGAAGGTTTTCGCCAAATGAACTGGAATAACGCTTTTCG  
TCGCCCTATGCTGACGGATTACCTGATGATTGAGCAAGAGATTCAGGGTGTACGTTCAA  
CAAGCATGAGGCGGAATAACTTGGAGATCGCATTGAAGTTATGATGAAAGACATCGACGA  
AGACGTGCAACCGTTATTTGCTATGAAGGAGATAGTAAAATCTGCACAACTAACTTCCC  
GGCTAACGCGTTTGATAGTGATGGTAATAAATCCCACCACGGATAGAAGTGGTTACAGTA  
CAAGCTTGAGTATCTGGTCAACCGCGAGGCGCTGGAGTTTAAGGGCCCTCCAAAACCGC  
TTTCAAAGGATTGGTGAGGTCCTGCGGCAGGAGAAAGATGCTGCATCCAGAACTGTGT  
TGAAGACCCTATGCACTTCGGGGATTTAGTACGGATACAAAGGTATAAATAGAATACCCG  
GGTGCCTCTGTCACCTGACCTGATGGAGAAGGCCAAGGAGGAGTTGAGGAATGGTAAGAT  
GGCTGACCAGATTGTCCCGATGAGGATCGCGAACCAGGACTAGATCAAGAAGTACCTGAT  
CCGCAATGGGGACTGAAAGCCAACCATGTGGCATGTTAAAGATCTGACCAAAGAACCGTG  
CAAAAAGCGAGAGCTGACCCAGAGATTGACGAATCAGTCAGAAAGTGCATTGAGGAGCT  
GGGTGAATCAGAATATAACTCTTTGATTATAATGTAGTTAAGTAACACAGACGACAAAAT  
CTACATCTCAGAGCGCTAGTTTGATCATCGGCACGCGTCTGACAAGGCTTATGCGGACAT  
ATTCAAGAAGTTCCGGCGCAAAGCTCATCAGTTACCATCTTCAACACAGTTGGAGTACAA  
CTTCGAAAAGCTATGTCCGAACCTCGAACGTATTCATATGCACTTGGCAAATATATCGT

TTAGTCGTTGTCACTGCGTAACCGTCGCTCAGTCCTCGACGCGAATGATGATGATAAGAA  
TGAATCATGTTTGGTATAACCATTCTCGCCTTGAGATTGATGGGAAGCTTCCTGCCCATTT  
TTCTGGAATCACCAACACCGGGCGTTGCAACCACACCATTTGTGCACTCATGCCTAAGAC  
AGATCCGAAGGTGCTGCTCGGAAAAGAAATGCGAGGATTGTGGGTGTTACGGACGCGTA  
GGATCAGGCCGGTATCGAGGGCTACAACCTTAGAGGGCATGATCGCCGCACGGGGTGCATA  
CCAGTTCGATGGCGGTGAATACTTCGGGATCATGAAGATCGGAGACGCTCACTCACGAAA  
CCCAGAAGCGTACACCAGAGCGTCAGGAACCCTTGTACACGTAACGGCGGTAAAGGTGT  
AACCTACAGTGTTCATGTTTCGGTGCTAAGGCGGTGGAGATTGCAGCGATGTTCAACATCTC  
CCTTGACAAAGCTCACGCGGTAATTGATGCTTTTTGGGATAGGAACCTCGATTTGAAAGG  
TCGTAAAGAATGGCTGGGAACTTCTTGAAGCCACAGGGAAGCGTTATATTCCTGGATT  
GGAGGATCGTAGGCTTTGGACCAGTTCTAAGCACTCGATAGGGAATGCTTACATGCAGAC  
CGGCGGTGCATCACTGTTTGACCTTGTGGCAGTCTGCTACACTTGGAACTGGTGAGGCG  
TGCCTTGTATGACGAGGATGAACTTCGCTGATCTCCTACCATAACCTAACATTGTGGCTA  
TGTGAGGTAACATCGAATAACTCTTTTATCTGTGCGGGAAGGCTATGGCGGACAGTT  
CTGGTAGACTGTTATAAGATGCACACCAGGACCGAAGCGTGTGAGGAATTTGAGAGACCA  
GAACGTTTAGAGACGAATTCACTTAAAACAAACCAGCTATATGCGCGAAGATAACATGACA  
ACTACCAAAAAGGATCGAGACATGCTAATTGCCGTTACACTAGACGATGGATGGTTATGC  
AAGCATGGTCATCCCGAAGAGTGGCACTCTATCCACAAGAAATAGACCACATTGATGAAA  
TATGATAAGATTAAGCAATTTTGTCCACTTGGAAATTTTAAACCGGAAAACGGCTTGGGT  
AATGAACAGGTGGGTATTAGAACTAAAATATTACCTTTCTAAAATTACTTCGTCGTATT  
TAGTATCCTGCAGGGAAAACAGTCTTCAGAGGGAGATTAATAATGAGACTTGGACCAGAG  
CACTTGGCAATATTGTGCATGGACGATGGAAGTTTAGCGACCCTGACGAATAAGAAGGTT  
GTTAAGTCCTCCTCCCGATATACGTTAAGTCTTTGGACTAGCAGATAGGGTTGATTGCTA  
GTTGCTGACTGGATAGAATGTCTTACTGGCGTATGCCCTTGGACCAGAAGTGTGAGGGGA  
GGCAAAGAGTTCCTCTCTGTATTAGAACAGGGGGGGGGGAGGTTTTTTAGCCAAGTACTA  
CCACCATTGATGTGAAAAGCATGATGTATAAGGTGCGCCAAGGTTAATTCTTGGCGTAAC  
CGAACAAGTGGCGTTGAAAATGAGAGCATCCCTCTGGATGGATAGATAGTCCGATCTTA  
CGTGAAATCGTATGGCAACACGTAATGGTGTGGGCGATATAAATAACCTCGCTAAACTTT  
TGGTTGAACACCAGCTCGAGGTTCTAAGAAAACCTTTAAGAAGTGGGAGTGTGTACCC  
TGGACGAGGCTAAAGCGTTCGTGAAATAATGGGAAGCACAAGGCCGCGTATTTGACGGGC  
ATGAGTGGAGAAAGGCAGTAAAAGACTACAATGGTTAAAATGTCAATAATGCCGAACCTA  
ATCCGTTTTATGAGGGCCTCTTTGGTGAAGATAGGAAGATACACATCCATTAGTGCCCTG  
TTGGTGAGGTGGTTGTGAAATGTGTTTACAGAAAGCTGCTGGTATGATGGGTTCTCCCGTGC  
ATATCACAGGTACTTACTCCATGGGTAAAAGTGGGCTGAGTGTCACTAAATTTAAAGGG  
GCAGTAGCCCCTGTTCTTGGATACTATAAAAGTATGAGTTGATTCTTGCTTCAAGGGAAA  
CAAAGAAATCTATTCATGTTGGTAAAGTGCAATACACCAACATATCTTCTCCCCACTAT  
CATGGACTGTCCCTGCCCATGTCTAGGAGGTCAGTTTACTTCGTGTGGGTCAATGAGATG  
CAGCACAAACGAATCCACTTCCAAGACGTGGAGGTGCGAGTGGCAACTCGGTGTGGAGTC  
ACAACATCCTAGTTTTTCTGGAGAGATTTTCCAAGTGTTCGCAAAATAATGCAGATG  
GGACGACGCTTCTCCGTTTTGTTTCGTGGTTCTGTACCACTAGTGGCTGCTGTTTTCCGGT  
CAGCACCCGACCCGTACACGGGGCTATACCCAGAAGTGCGTGATCCCGTCATAAATAAAG  
GCGGCGCGGGTTGGAATAATACCTCAGCCAATGATATAAAACGTTGTAGTGGCTCAGGTG  
GTGCTCATGGTGTGTGCGGAAAGGTCGTAATGCCGGTCATGCATACCTAGCATCAATAA  
TGTAATTTCTAGGCCAGGGTTGTGAGGGAGGCGGTGGCGGTGGCTCATGTGGTTATTACT  
TCTCTGGTTCCACATCTGGGGGAGAACTACGGTGCCGGTGGCGGTGTCGGAACCAATGGTG  
TTGGGGACAATAGTCATGGAGGTAGAGGTGGATACACACCAACAATAGCAAGCGGCGGGT  
CTGGGAGAGCAGACCCTAGAGCTCGCCGGGGTGATAAATTTGGGGGTGGGGCTGGACACG  
GATCTTCAAGCTCACTTAGTGCTTAAAGCGGGGCGGAAAATCTGGGGAAATGCTGGAAATA  
GGGAATTTCCCAAACAATGTCCGAAAGGTATAAATAACTAAGAGGATCATGTAGGATTA  
GAAGGTGCGTTGGTTACATTGAAACCAGGTGGCACTGACATAGTTGTTGAGCGTATCTTT  
AAAAGACCGCTGACCTCCAACGGGGTAAGCAGAGTCCTTAGATCTGCTGCCTGCGCATGG  
ATGAACGGAAGCAATCTGAAAGAGGTGGATGCCTTTGCTTTACCTTCGCTTTAACTTATC  
GGAGAGTGATATGAAAGTAAAAGGCGGACAAACAACGGTGGAAACCGTGGACGTGGGACT  
ATGCGATGCTGCGTTCAAGTCGGTTGTTTATGGTGAGACGATTGATTATCTTGCAGATGA  
TGTGGAGGAAAACCTTTTGTACCGCTTCTCCACAACCTTGCCACCGAAGTTTTACGTTAA  
AAGGACGAGCAGGGATAGTTGCCGTTCTGGGTCTACAGGTACACTAGCGCTGGTGCAAGT  
GGATGCAGACGGGAATTACGCCAACCATGTTGGACAGGACAAGGAAGTTGGTTTATTGAC

TGAACAGGAATGGGAACGTTTCAAAGAGCTTAGTAATATCTCCAAGGTAATTAATACTT  
GGAAAAATAACAAAAAAGTCCCTTAACCTTCATGGTTGAGGGGCTTTACTTTTGGGCGACA  
TAAATAACCTGGAGGGTGGTTTATGTTTCGAGGCAATCAATTAGTTCAGAATGTCGCTAGG  
GGCCTTGACATGTGTGTGGTGTGGCTTTGGCGCTGTCTATTCAAAAAATGAAACACACCG  
CGCAGTGTACGTGGTTGGTGAAGTAATCAATGCTTCCTTTACGGTGCATATCCAGAGTAT  
CGGCTTATGCAAATCACATGCCTTGCCTTAAACCCTTGGTGATTGGCGGATTTATGGTG  
GTTGCGGTGTTTATTGTTGTTGACATCGCATATACCGTCAGCCACAATTGTAAGCTTAAC  
GGTGAACAACGCCTCGCAAACAGTGCTGAGGCAGTTGTCGGTGAGAACAAGGCGATCTGC  
GGCGGTGATTGCGTGAAGTGGTCATGTTAGTAACCCTGAATAAATACTCACAAAAGGAGA  
TTCAAATGATAAAATTGACGATTGCTCTGCTGGCTATGGAGTTTGTGCAACCGCCCATG  
CGGAAGAAGATGATGATTTCCACATCGTCCCTATGTTATAGGTTGAGGAGTGCTACAAGA  
TCGAGCCTTTCTCTCTGATCATTGGTCTCATAAGAAGGATAGCATTGGAGAGACCTGTA  
TAGACACGGTCATCCCTAAATAGGATGCTCAGGTGGGGAACGTAAGTGTGCGAAGATTCTC  
GCTGGTATCAGGGGCCAGCTATCAACACAAACAAAAAATCTGTGACCCGTGTGGCAATAG  
TCGACCACTGTCAGTAGGGGAGGTCATGAAAAAGATTTTCCGTGCCACCCAGCTCGCACT  
TTCTTGCTCTGTACATGCTACTGAGTGCTATACCGATACCTTGGCAGAAGGGATCGGAGA  
TGCAGGCAATGCTGATGCACTGGATGCTCACAAGCATGGAGTAGAAAGAGCAAAGGCTAA  
GATACCTGTGGGAGAACATGAAATAAACATTTCAAGAATTTCAAGTCGCTCCTTCAAAAAT  
GGAAAACCAGATGATTATCCCCACAAGTGCAGTTGAAGAAATGGAGGATAGAAAATGACT  
ATGACTCGTGGCCTTATCTTCAGAAAACCTTGCGCCGGTGACCAACGGGCATGTAGCATT  
ATTCGCGAGGGGGCTTCTCAGCTGAGTAGGCTGTATCTGTTTCATGTCATATGACCAGAAA  
TTGGTTGACGCAGGACCAGAGTGATTCGTCAAAGTTGGGTCTTGCCGAACGCTTTCGT  
GGCCTGCTGGATGTTAATACCGATGAGGGTCTGGATAACGTGAAGGTTTACTAGGTTTAT  
GAGTCGAATATACCCGGAAACCCTCAAGGAGGATCTGCTTATGCAAACTGATCCGTAAA  
AAGCAGCCTTTCGTTAACTACGACTGTGCCTTCTATTCCGAGCTGGAGTACGAATCTTAC  
TTCAGTGAGGTCTTCCATCAAGCGGAGCTTGTGTTATCGACTAAGAACGTAAACCTGTT  
TCTAACTGTGCTACGACGATTCTTACCGGCCGGTACAACAATTTCTATAACCAGGCTTGG  
CCTCCAAGGAACTCTTCATGTAAAAGGTCGCCGGTGTGGTGTGACAACACTGTTAAA  
ACGACCTTGACACAACACTTGGCTTACAGATACGGATCACCTTGGACTCCTGAGATTGGA  
AGACTGATTTGTGAGTGTGAGTATCACTCGAGTGAGCTTGGCATGCGTCGTGAGGATTAC  
CTACGTGCCGCAATGGAGCATCTCCTGAAAGAGATGAAGGTGGCTGGTTGGGGTGACCGT  
AGGGTAAAGATCTCCGACACCACAAATATGATCACACACTTCTGTGGAGTTCGTGCAGAT  
AAAATCTCCTACTGCGACCTGTAGTTACGGACACTGAGCCGCGATGAGAGCTACAACGTG  
TCCGATGTGTTCCCTGGTCCTCACACCAAGGTTCCGTGGGTTGCTGAGCCTCCACGTTTA  
CAGGATGGACTAGAAAAGGGTAAAGAAACCCATTCTTAGATTTACACAATGATCTGGGCA  
TCTTAGGAGACAAGCAAGGTGGTTGTATGTCCGGCACTGAATACGAACAGCGTACTCAA  
AAAGACGAAGAAGCTGTACGTAAATTCCTGAATGTCCCAGGAGAATAAGATGAACGTAAC  
TAATTC AAGCATGAAGCAGGCTATTGGTTTTCTGAAAATTATTTTAGGAAAGGCCTCCGA  
GTTGGCTCAAGGTCTTCTGGCGAACGCTAAGTGTGTCGTGAGCAAGGCTTCTCTATAACCAA  
GTGGAATCACAAGTGTGATAATGACCTTTCGAGGCGAGTTTCTTTCAGCGAGTGTGCTAA  
CAGTGTTCAGATGAATGTGTACTGGCGCAGACCAGGAACTTGAACCTCCACACGAATGT  
GGCTGACGACGACAGTATCTTTCTCCTCGCAAATACTTTGGTTATGAGGAGTATGACGA  
AGCGGCAGACTGGATCATCGCGCACCTGAAAGGTGATTTAGATGGATCAAAAATAACAGG  
TTTTGGTCTGGAAAAGCCAAGAAGGTAATCTCTTCCGGATCACCTTATGTCTGAAGAGC  
ATTTACTGAATGCAATCATCTGGCTACTGACAGCCTCGTGTCTTGTGGCCAAAACAGAAA  
TTGTGCCGATAACAACGTGGGTAAAAGCAACGGCTGTGGAGTTAAACGGCCAGATGGATG  
GTAATGGCAAAGGTTCTTAACCTTTTACCATTTTGGTAAGGCTATCCCTGAAGGTGCGGTC  
TACGTGGGCCGCACCCTGAAGAAAATTAACCGGGTGGGTCAAATGCTAGCCCACCCATTC  
CCCGTTGAGACACGTGGTGGGAATCGTGATAAGGTGATAAAACACTATCGTGGGTGGTTG  
TGGGAGAAGATCCAGACAGGTGAAATTACTTTGCAATGGCTTGTGACTTGGACGGGAAA  
GTCCTTGTATGCTTTTGTTCAGCGAAGAGAGGACACTGTGATATAATCACGGCCGCAATA  
GAATGGACCGAGGCCAGGATTACAAAATGAGTTTGAAAAAAGATCAGACTTATTTGAGA  
TATATAATAGGAAGGCTGGAGGTAGCTCCCTTGTGATCTCTGATGATGCCGGAGGTTATC  
GTCTGGTAGATTCAAAGATAACTGGTCAACCGATAGCCTCTTTTGAAGTTTCTGTTGAAA  
AGCACATGATCGCAGTAAAAAATCACCAAGGAGAATAACATCGTTTATGGTAGAGGTAGA  
AACGTCTCAGATTCTCCCGGTCAGATTTTCAAGTGGGTAGATGGTAGACAGGCTTTATAA  
TGGAGATTCCTTACTATGAACGTTGGATAGTGATCTTGTTCAGATGTTATTCAAAGCAG

ATGCACATAAGACAGCCTACCTATGCCGGATGCCAAGTGGCGGATGACGGGGTAAGGATT  
ACTGTCATCAAAGAGTGGGTTACTCAACAACCCCCGCACGACCAGTGGCTGAATAAGGCC  
GGTGATCTTCGATCTGACAAAGACATTCTTTTGAAGGAAACAGAAATTACACTCCTGAA  
GCATGTGCGTTCGTTCCATTATACATAAATACCGCATTTCGCCTATTGTAAGAACTGCGGC  
CGTACGATGGCGGTAACCAAAAAGTACAGCAGGAAGGTCTCTGAGGCAGGGTGCCAGGTG  
GACGGGATAAGAAAATACCTGGGCGTGCGAGCAACCCCCCTCACTGCTCATGAATTATGG  
CAAAAGCAAAAGGCTGAAACTCTTCAATCAGTGATCGAGGTAACGCCTCATCTGAATGT  
TATAAGGAGCTTACTGCGAAAGACCTGCAAAAAAGAGTTGACAGATAACTCTGTGACCTC  
CAATATGGAGAGGGAACAACCTTACTTGTGAGGATAAAAATATTACACGATGAATCTATACG  
TGAGAACAACCTGGACCGACTTTTATGGATGGTCGAAAATTGGATATGTGTAGCTGTGCA  
TCCGTTCAACCTCCATCCCTCTCGTGTGATCAACATGAGCGGTGTGGTTATTGCATTTA  
TCTCCTCTGTAACAGGTATTATTGGAGCGATCCTTGTGCAAAACGTAAACTTTCCAATT  
ATTGTTGGGGCTCTGTGGCGACAGTGTGTACGCACACATCTCCTTCACGTACAACTCT  
ACGCTGACACGATTATGTACCCTCTGCCAGTCACTCTGTTGCAGGTGTTAGGTGGGATTA  
TCTGCGGGAACAACCGGACTGTCTTTGGAGACGGTGAAAGTGCGGATGCTATCAAAGAGT  
ACCTCACCACAAAGCAGCGCTGGTTGGTTGGGATTGTATCGTTGGTTGTGATCGCCTTAT  
ACGCAGAATTTTTAAGCCTTCTCAATGAAAGTATGCCTTGACTGGATTCCGTAACAGCGA  
TCCTCTCTGTTCTGGCAACCTATCTGATGATGTTACGTTAACCAGAACACTCATACGTGT  
GGATCATTGTGATTGTAGTCGCCGTCACCTTGTGGATTCCGACAGCACCCCAACTTGAAA  
CTCAGGGGTGGGCGGTAATTTCAATGTGGATCAATTTCCCTTTTAACTTTATTTATGGTG  
CCTACAGATGATGGAAAAACGGAGGAGCTATGTAATGAGTGGATTTTGGGAATGGTTGAC  
GATTCAAAATAAATGGGTGGCGGGTACTGCCCTTTATACGACGATGTTTCGTTTGGGCCAC  
CGTCCTATCTTTCAGGGAACTTGAAGTATAACGTTATGGCATATCTAATGCTGGTTGA  
GGTAGTTGGTACGCTGTTTATAGCCTTGTCAAGTTAGACAGTTGGTTATCGAATGTATAC  
AAATGACTGGACCACTTGCGCACAATCCGACGCTGTGGCATCATTCTATGTGTTTCGATGC  
ACAGAAAGAACGGTGCTTTAAACCACTACTGGGGCTTGCACCCGTAGATGAGATGCAGGT  
GACGACCTTTACACCTAAACAAACATAGACAGGAGAATGGTTATGAAATCTGAGCGTACA  
GGTCAAAAATATGTAGAAATGTACGAAGCCAGTTCAGGCCAGAATGTAAACCTGGAAGAG  
CAGTTGGTGATGGACTACTTCAAGCAGGATTTTGCATATCTTTATCTCGATTCTACTAAT  
GCATCCAGTTTCCATAAAGCCTTCCGTTAGGGCGATTTCTGAGAGTAGGGTTAACCAGAT  
ATCGTTCACCTGGGCTGATCTCAGGTGGTGAATTGAACACCATCTGGTCTTTACTGGAG  
GAGTTTTATGCGTAAAATCTTTAAGTGGCTACTGAGCCTGTTTAGCTCAAACCTCTATAGT  
GACCATTGGCAGTGGTAACACCATCTCAGGGAAACAGACCGTAATTGTGCATGTTCTGAA  
GGGACGTGACCCAGAGGGGGATTATAAGTACGAGCTTAAACCCCTGACTGGAAATGAGAT  
CAGGGATATTGCTAAAAAAGAACTGGCAGATGTAGGAGATAAAAAGCTGCTAACAGAGGC  
CCGAGAAGAGCTGCTACAAGAGATAATGGAAGATTTGGATCGGCACAGTAGGAACCGTAG  
CGCACTCGCGCCTTTGCACTCCGACGTCGCTGCCCGGTTACGGATGATGATTCTCTTGC  
ACGACAGAGACGCAGTGAGACGGGTTGACGTCGTGAAGATGACGATAGCACTGTAATCAG  
CGTTTTTGTAGCGTCTGCTGTTTATCACTCGTCAAGTAGTGACGATTGTGGAAGTTATAG  
CAGGGGCAGATGTGACTCCGGCATTCTTTCAGGAGGATGTGATTGAAAATGACAAAAACG  
TTTTTTTGTTCAAACGGTCATTCCACTACCTCAGTCATAGAACAACCTTTGGACCGACGAGT  
GATCGTGGCAAGTGTGATGTCAAAGCCAAATAAGTAATGGGACTGGAGGACGGTTATATG  
GTCACAGAAACAACATTGTGGAGCTTCCCAACGTGGATGGATGATCCTTTTATTAAGCTT  
TTCTATGTAAAAAAGGAGTTTATATTATGAAAATTTCTTCGGCACTGGCGCTTTTATTCA  
TAGCCTTGAATCTGTGCGGGGATATTGCATGGTCAAGGCGGTGGGTCTTGGCATAACTCT  
ACCTTCCGTTTCGCGAATTGGGTGGCGATCATAATTTTGTTTTTTCGACAGTGTCTTTGGTG  
TTCCAGGGGCGTCTGCTCTTCTGGAGAAAATCAAATTAAGTAAGAAAAGATCACTATAAC  
TTTTAGCATAACATAGTTGAAAGGAGTAATATAACCCCTTCACTCACAAACGGAGGATTGAT  
GACTGATGCAGTAATCCCTATCGAAACACAATCAGGAGAAGAAAAACTTTTCTTCCGCGA  
ACTCGACGAAGGTCAGTGTGCAACGAATGTTCTTCTTACCAGTGCCAGGGCAAAGATGAA  
TCAGTTCATCGGCTCAGAGCGTATGAGTGATGAGATGCTGAAGGTTATCGAAAGCGGCAA  
CATCAGTACTGTGGAAGAAGCTCTTGCATCGGGTCGTGGACACCGCAAGAACCTCCTGCA  
ATTAACGGTTCATCGTCTTTTGCCTGAATGAACTCAGTCAGGTTGAAGATCTAGTGAT  
CGATAGACATTTGGGTGTTTACAGTGATACCCAACAAGATGAAACTACGTAATAGGAGAG  
AGAATGAGCGGAATTAACGAATTCAAAGATCGGATGACGGGCAATGTAAACCACTTCGCA  
TAGCGCAGCACCAATTCAACAGCAGCAAACCTGTTAAGAATACAGATCCTGATAGAGTG  
AAACGTACCCACATCCCAGCACGAAACGGTCCGCCTGCAAAGGTTATTGAATGACCCGAT



ACCCTCAGCTTCTTTATGCAAGAGGTGTACGACAATTACAACGTTATTGATCCTCAAACC  
CAGGGTGAGTGGAAAGGCATGGGGGACAAGAAGCTTCATGCAAGCCACCCCGACAAAATG  
CAAGATAAGCTCGACTGTGGTTATAAAGACATTCTGCCAAGTATGTTTGCATTTTTCCCG  
CTGAAAGTGAGCACTAACGGCGATAAGCGCTATGTCAAAGGCTCCCTGAGTGGCAAGGCT  
TGCAACATTCTGGACGAAAGCAAAGCAGGTCAACATGCACCAAGTCTGCAGCCGCAGGAA  
AGTGACCAAGATCAACAGTCTGGTGGTGGGGTGAAAGTTTACGGCGCGATCACCGCTATT  
GCAGGGGATCTGGCGATTGTAAATGATGAGAGAAACGGCCGTGGTTATGTTGTTCTGTGC  
GATCCGCAACTGGCGCAGCTACCCGTTTCTGGTTGCCTGACAGCCTTTGTAAATCTTGCT  
GATGGCACAATCCTGAACGGCATTAAAGCTTACGCCGCAGGAGGTTCGAGGACCTGGCTCA  
GGTGGTTAGAAGTCTGGTGCCAATTATGAAGCTAGGGATGTAGATTGTGGTGACGGTATC  
ACCGGCCTTAAGGAATCGATGGGTGCAAGATACAAAGTGGAGGATGAACTTGAAACAGTA  
CAAGCCATTAACCGTGCAGCTGTAGACATGAAGGCTTTCGTTGCGGCGCGTACTGGTAAA  
GATGATGAATTAACGCTGTCGGAGCAAGTGCAGGTAGTGCAATCCTTGTTGCATGTAGC  
GGAATTAAGCCAAATCGGAAGTAACTGAGGCAACGATCTTAGAATGCGCCAACAACGTG  
TATGTGACGCTCTCTGAGCCGGTGTATGAGTTCTTGACTACCGAAGGCATGCCTGCGGAT  
GAAACTCAACCTCAGACTTCTCCGCAGGCTCTGAGCGGCACTGGAGAAGTACCACCTATG  
GATGCTTATGTGCCTCCGATGGACTTTCACAACGATATAACCCTTTGCCCAAATCGGTCTG  
CAAGATGGTCACAACCTTGATCCATTGCATTTAATAAATAGAAAGGGAGCCTTTCGGCTCC  
TTCTTGTTTTATTGCGGTTGAGCAGATTGAAATGGTTCGCCTGGGTCCACAGGATCTGGT  
GGGCCTGAGAAGTCTGAAACACAGACACACGAATCGTCAAATGCCTAAACCTCATCCACC  
CAGTAAATAAGACGAACATCACAAGGGGCATCACCAACTGCAATACAGGAAAGGAATGCT  
CCCTCATCAAGCCGCAACATATCCGGATTTGTAGTTCTTCATTCTCCGTCTATGAAGTTA  
GTATGAACAATGTCTGGAGAATTCTCCAATCCGACAACGTTGAGACCTGGTGTATAGTCA  
GGTCTGTTTTTATCTATGAACACGAACACGTCACCAACTTCATTTTGTGGGATGCAATCG  
GTAATCAGACAAGATGAAAACATAACCGCCATACGTATCTGTGAGTGATGCAGCATCC  
GGGGCAGACGCTGTTAAGCAGTCATTGTGATGTCAAAACCACCCCTTAAAGGAAGGTC  
ATGACACCACTTGAGTCTACAGTTGCGATCTTAGGAGTACGCGATGTGAACGAAATTTCA  
TAAATCTCAGCATCTGCTGGCTCAACAGTCCACGTAAGTTGACTTCTCGAGCCATAGATG  
GCGTATTGGATAGACCCTGTGGTGTGTCATCCGCAGTTGTCCCCCAAACGATGCTTCT  
GGGATGTTTGTGAACTCACCAGTGCTATCGGTTGACCCGAAGAACCATAAATGTTGGCA  
GCGTAATGAAGGTTCCCCTCATAACCATCCAAAGGCTGATAGGGGTCCCCTGGTTAAGG  
ACATCTGTCTTCATCTATAACAATTGATGTCAGCTTCGTAAGATCCCAATCCCTTCTGTA  
GGAAGTGTAAACACGGGTTGGTTCTAACACCATTGTTGATGGTGTGCCACGGCCAAGTTGA  
GCACTTAGGTCAACAAGACCGTAAAGCTTGTTATCAAGAATCAGGAAATGCGACTGCCCA  
CCGTCGATTACCCTGATTGTCTCAAAGGACCAATAGCCTCTTTCGTTGAGTATTGAGCT  
GTCCCGATGCCCTCGTGTACAAATAGTGCTGTTTATCATCTACACCTGTAGAGGCGTTA  
GCCATTGAGTTTCTTTCGTTTCGCTAACCTCTCTTGAACATAGACGGTTTCAGTCACAGAG  
GCAAAGCTATCATCGATATAGTTTTGTGTTTGTGGTGTGAAGTACCATCTATCTGATGG  
GTGGCCCCAAAACACGCCGAAGTCTAATATCGTTCAGGTATGTCCCGCAAGCACTCAAG  
CTGTACGCTCTTACAGTCGATGCACTAATACTTCTTGGGATCGATATTCCGGTAGTAGTA  
CCAGAGCCAAGGCATCCATGTGTGTTTGCCTGCACCCATTAAGTCTTCCATCTACCACC  
TGCCAGAGTGTGCTACGGAGAGCACAAGAAACACTGTGTAGATTGGCGAGGGATACTGTG  
CCTGTGATTGATGACGGGAAGCTCGACCAAGATGAATTGATATACCCATTACCAGTGAAT  
TAACAGGAGTCCACACAATACTGCCAGCCACCATTGCTGTCTTTGACAACAAAGGCTCTA  
CCACCACCAAAAACATCAGCAACACCATTAGCCGCCAAGTGCCTATCAGCCTTGAACGGG  
CTTATGGTGCCGTTTTCGCGATTCAAACCACGCGTTATCCCATTGGGAATAGAGTCTCCCG  
TCAATCAGGAGGAGCGCCATTGATCTTTTGGGAGCACCACCAGCCAGATCACGGGTAAAG  
GCCACCCTCTTACTACCGGGTGGGAGGGGTTTTGTCCCTCCTCCAGAAAATGTCAAG  
AAGAGACAAGGATTAGGATACATTCAAACCTCCTAAATCAAAGACTGTCCGAAGACAGCC  
TTGTATCCTTACGGACGACGAACAATTATAATGTGATAACACCGCCTTCACTGCCCTCA  
TAGATCAATTGCAGAATCGTCAACGAATCAACCGTCTAGTTAATTGTTTCGCTGTTTAAA  
ACCAAGTAGTTACGATCTAAAGTCATAGCGTGACGGCCAGTACCATCTTGAGTTAGGTAA  
ATCGCAGCAGAAAAGGATCTGTGCTTTCATGCCAAGCACCAGTGTAAATCCGCATCA  
ACTGTTACGTTGTAGATGTTGGAATCTCCAATTGTGGACCATGCCGCTGTATAGCTATCA  
ATCTCCTCATCAATAAGTGTGAGGAATTCTACACTTGCCTTGGTTAGCATTCCAGAATCT  
TGTAACGTAAGGCTATTGGCACTTACTGAACGTGTAGAGGTTCAGAGATCCCACGTTGATG  
GTATAACCTGTCAACTCATCGGAAACACCTGTAACGGTACCCTGCTTAAACAAGGGTGTAA

ACTGTCGCTGTTCCCTGTAGCGTTGTTAACGTTGACATCACTGTTTACGGTCAGGTTATCC  
TGGACTGGGACAGCGGCAAGCACGCTAAGATCCTCAAAAACTCAGACGTACCTGTAATA  
TAGAGATTTTCGACAATTGTAACCTCTGCTGTTCCGGGTGTAAATCGACCATCTAGACTG  
GTTAACCTACCCAGTGTGAATGGACCAGTGATGTGTACGTTAGCAGCCGAGAAATCTTCG  
AGGGTTGTATTACCTTTTTCGCTCAGATCACTCGTAATATCAAGGCTACCGGTTGTTGCG  
TTTCCAATGTTGCTAACACCCTTGACCTGTCAGTCCCCACCCACAGTGAAACCGTCTGCG  
GTTGAACCAGAGTTCAGTCAAACATCAAGTCCGTCGAAAGTGAAGGTGATACCTGATACG  
TTACGTGCAATATTCAGGTTTTTCTACCTCAGTTGTACCTGAGACCTAAAATCTGGGGGGT  
GTAGGATCTTTACTTCCGTTACCACGTAAATACACGTAACCGCAGAGGTTATTACTTACA  
CCTGTGACAGACACGGTTGGATCATCTTCAGCCGCTGTTCCGTTGACAATAAGGTCCGGC  
TGGATCCTTGGGGCTACTCTCGCATATGGGTCAAGGCGCGTCTTAAAGAATTTTCGGACTA  
TCTGCGTCTGACAATTCGGAGGTAAGACTGGACACCTCTTGTGTGTCAGGATCAGTTTCTGG  
AAAAGACCTGTTGGCTTATCTGCGTTTACAGGGCCACTAGGGTCAATTGTCTCGCCAACC  
ACCAAATATTGAGTGTTGCAGCACCCGTTTCAGACAACCTATGCAAAGGTAAGCCTACCA  
CTAGAGATGCTTGACAAGGCGATAGCAATAGCCGTTGGAACAAAAGGAATTGCGGCAATT  
GTTGGACTGTTGCTGTTACCCGGAGGGGTTCTAGCCTCTGAGTTTCTGTGTCAGGATCTGG  
CTGTTGATAGGTGCAGAGATAGTTGCCATCGCCGAAGCGTCGTTGGACAATCTTCAGTTA  
ACACTGTTGGCTGGGTTCTTTGGTTAACCTAAGCGGCGCGTGTCTGTTGCGCTTGGTACA  
TTACACGATTGAACCCCATATGGGCCATTAAGAATAAAGCTGGTTGAATACGGTGGTC  
TGAGTTCCCGCGACCCACGGCATAGGCGTTGGTTGAAAGAACAGGTTGTTAAGAAGAGCT  
TTAGTAACCGTTGGACTGGTGTACGATCTTCAGTACCAATAGTTTTCGGATGCCGATCCG  
TTGACAACCTCCTGGAGGTGTTGAGAGTCTTCAACAACCTGATCGACAGCCTGTTCAAAT  
TGAGTCATGTCTGGCACAAGAGTCTCCTTGTTCTGCTGACTATAGTTCTGTACGATGGGC  
GTCTGTTACTCCCCAGCGTAGAGGTATTAGCTTACTGACGAGTTGAGGTGCAGCAACCGT  
GAGTCCACAAATCCACATGTACCACACGGTCCACGTACCATTGAACCCCCAGTAAAGGAA  
AATTGCGGTGATTGAAGCCATGCCGATATTGCTCCAAAACCTTTGTGTGAGAAACGCTCTC  
AAGGTCTACTGGTGATCTCACAATATCTTTAATAGATTTTCATCAGTGATTTTAACATATT  
TCCTCAGTATCAACAATAATCTAACATAGGTGCGTACCTTGCAAGAACCACAAGGCTTAC  
CACAGTAGCGGTTTTAGCCACTCTTTAACGGTATTGTCTTTAAATGATGCACCCAGGAT  
CAAAACTTCAAAGCGGTCTGGTATGAAGATTTGATGACATAACTCAATGCAAGAGGGAA  
AAGATATGGCAATGGCATGACTATTACCTGGCAGAAGACTACAGGCACGCATACGGAAAA  
GATCAGCTTCTTCTTGCATCCCGATCATAACACACTGTGGGGAACATGAGGGTTATCTC  
GGGCTACCAACATGATGTCATAAATAGAGACAGGTCAAAGAAGTGGCTATGGACTGAATA  
CTGCCAGTACGAAATGTTCTCCAGAAGGATATGGATCATAACCAAAAATAGACATGATCCC  
TATACCCTTGTCTTCAGTAAGCAGCAGCCCTGCAAAGGATAAGAAATATAGTGCCGAAAT  
TATCATCTACGTTGATTCTCCATGAGTAGCTTGAAGTATGGCTGCGGTGAGCACAAGA  
TCGCCCACGTCTTCTTTAGTTTCTTTCCCAAGTCTGAGACTTCATCACTAACCGTTTTG  
AGTGTCTAATCCAGAATCTCGTCAAGTTTTTCCATAGTGTCCCTCTACGCCTTACTCCTT  
CTGATGTCTCTATGAAGTTCACCCAGGAGCTCGTGCCTTTTTTTGTAATCTGAGACTGTC  
ATTCTCAGGCCAGCAATTAACAACATCGTGAGGACACCCCAATCAGCTCTGAGGATGGCA  
AATAAGTCAATAGACAATATAGATTCCTTTTACTCTTGACTGGTCTTGCAGGCCACTTGA  
TATTAGTCGCATCCTCCGAGTCTGTTGCTAACAAATCAATGCGGTATGTCTTCAGCTTTT  
CGGGCTCCGCTTTCTGGGAATCCAAAGTATATCCTCTGGAAATCAAATCTTCAAGGGCTA  
AAATCTGGTTTGTAGCCCAAGACACTTCACTGTCCAGAAGATCTTCGTCCTGAGCAATAT  
CCTCTTTATTGTAATCTTTAAACTCCACAGAGATGAATTGCACAGCCCCTAAAACGGATT  
CAAGAACGTCAGGAACCTCATCAAGAACAGCAACCCTCATTCGGTCTGGGAGGTATGCTG  
ATGGATCAGAAGAGACACACAACACGACATCACCGGTAGACAGAAGAAGAAAGTTGGTCC  
CCTCTCTCAATTTTGTCTATTCTTTCGCTATGTGCGACCAATCTTCCCCGCCTTTATTTT  
TCAGGAAAAATACACCTGACTCCATGTGTGCGCCATTCGCGTGGTCTATGTTGGGGTGT  
ATAATCAAAATTCACCATATACCGTAATCATAAATCCTCCTTAGTAAAGGTTGGAAACAG  
TTACCCATTGTCCGGTAGTGAGGAACTGTATTGGTCCAGTGTTGTAAGTTGCGCCCCCTCA  
ATTCTTTCTTGTACCGATAGCCCACCCGGTCATGAGGTTACCTGCATAAAAATCTGGATT  
CCCTCAGACCTGTGGCAACCCAATTACCTACACGGATCTGCTGCACAAATCCAGACAGGT  
TTGGTGTGACGTTAGCGTTTCCATCTGCCGTTGCACCATTGATAGCTCTCACAACATTC  
GTCCACCACTTGCAGCGGAGTTGTTGCGGACAACAAGCGAGTTAACGTTACACTGTCCGT  
TTACATTTGTTTATGGGGTTGTTAGACAGCTTGTGCGTCAATGTTGAACCTTGAACGT  
TTCCTGTTGCTGTTAAGGTCCCTGTCTGGTTGTTGAGCTCTGAATAGATGGATCATTC

GCGGACCGCGTACGGTAGTGTCTTCTGCAGTGTGGAGAGGTTGCAGTGACGATTGCACCGC  
TTCTACTTCCGCTTGTGATATTGGTACCATTTACCTACAAAGTGCAGCAGTGCCACTAA  
TCGCATTGAACTGAATCATTATGAAGAATGCGCCACCAGAAGGGACCGAGCGGAAACGCA  
TACAATCCATGATCGACGTACCTCGGTCATTACAGATATTATCACCAACTACAAAATCAA  
AGAATGTGCTGTGTGCTGCTGGGTTGGAGGTCGTGACGTAAGCGTAATCGGATTTCGGATG  
GTTGGAGGTTACAGGCGGGGAACAGATAAATAAGCAGTCATGGTGTGCGCCTGAAAAGTTTCG  
CATATCTGGTATCAGACTGTGTTTTACTCTAACCATCAAGGTTTCTTCTTGTGCTGCCGCT  
TGTCTGCAAGGTCTGCAAGGTTCCGATTACACGTAAGGAAGGACTGTGCGATACCAGGGA  
TGTGCTCACCAATGATATACTTTTACCACGCAGTCGGCATATTTAAAACGTTAGTTAAATT  
CTTCGACTCTTGGCTTTCCCGAAGTACCCAACGTTTGTTCACAGGTCATCGATAGGAG  
GTGCTTAGTTTAATTCATGGGTGAGAGGTAGAACAATATCTCCATAAGCCCAACTCTCAA  
TAGCTACTGTTGGCGATACCATTCTAAGCTCCCTTAAATCAAGGTATTCTCTCCATCAGA  
AACATACGTCAGGTGAGCAAGACCACCTGTCTGTTTCGGCTTCTGAGTGGATAGAACC  
GAATCCGAGTGCAGGTTTATCGCCTTCGAATCCAAAATCCGTACCAGTTGTCTCTCTTAA  
TCTCAGGTGTGTTGGCATAGGCGACATGTCTTGAATCTCCTGGATAGCAGTCTCCAATAT  
GAAACCTGTTTTGGAAGTGTCAATGTCAAACGATAGTTATCACCGTTGTATGTGGTAAA  
GTTATCTTCCCGAACATATGGTTAAGGCTATCGGTAATTCAGGGCATGTCACGTTCTT  
CTCAGCCCTTGCCAAAAGGATGATAATAAGAGCACGATAGTTCTTATCGCTCAAGCCATC  
ACGCTCTATCGCGACATGCTTGCCTATCTCACCAAGTATGATCCGTGTCGCATTTTTTCAG  
CAATCTGTTCTCAGACAAGTTGACCCACATTTTCATCAAGCTTTTTGAGGCGTTCCAGATA  
CACCGTCATAACTTCGACAAGGTATTCTTACTCTTTGAGATAATCACCAGGGATATATTC  
AAAACCTCCCTTAAACGAAATGTGCGCAGAGGATGCACGTGGTTGACATCCTTTAAATAGTC  
TGCCATCCTAGCCTCATTAGATGATTTGTTGGAATGTAAGGTCGTCTGTATCTAAAGCAA  
AGACTTCTGTCAATCCTGCAACAACATCGGTGTTAGTATAAGCATTGTCAGGTTGGTCAG  
TATTCTGAACATCCACCAACAATTGCGTGAAGCCCCCTGCTGAAATGGAGGAACCAACTG  
CGGATACCAACTAGATATTGTAAGTGTATCTGCAATGTTGAGTAGCTCATCGACGGCAT  
TCAGAGCAGCTTTGATAGTGTGTTTGTCTTGGCACGGACAGGAGCTTTCCTTTATACCGAA  
CACGGACTGCAAGATCTCGAGCCTGTGCTGTGCTGTGATAGACCCGTTCCGTCTGATCAT  
CCTCTGTGGCGACATCATAAAAACGTTACCAAGGTAGCGTTGGACAATGTGATTATGA  
TATGCCGTGCTTCACTGATTTCTTCTGTGGAAGCACCGCAAGCTACAACTGAACTTAT  
ATGCCGAAGCACCAAACTGGTCAGTTTCCCCTGTGTTGGTTGAGCATAAACGAACCTTGC  
TGATGCCCTCGACGTTTAAAACGGCACAAAGAACGGCAGGTCTAGTGGCAAAGCACCTG  
CTGCGGTGCTTTGTGAAGCACGAACCTTGTAGTCAGTGTCTGTCTCAACATCGGAACCGT  
CATTAAAGGCAGTCATGTTGGTCATGCTGATAAAACCGCTTGGTGTCCGTGTCATATTCG  
TTACAGTATTTGTATCACGAGAAGTAGCTCCTGCTTCAGTAGCAATTACTTCAATGGTAA  
TTGATCTCTGACCCCTACGGGTGATGAACGGAAATCGACACGACCGTTAAGTGCGCTCA  
TTTTCTTGTAGCATCGTACCAAATCTACACAGCACCCTCGCAGAGTCAATGAAGAACC  
CGTCTTCGTTTAACTGTGTGGTGTGCGACGACAATGAAATCACTAATCGATGATATAAACG  
CATTTAACTGAGAGCTCTTATGCACCTTATTTTCGTTGCGACAAGTTCATAGATCTTGTG  
AACCATAGTTCTGATTAATCATCTAGATCGTATAGTTACCAAGAACCCAATCTTGGTTAA  
GTATTTGTAGCGCCAGGATCTTCCCTGCGACAGGAGTGTCTACGTGGGTACGAAGTTAC  
CACTGTCATTGCGATATGTTGTAGAGGTGTAATCATGCTGTACTGGATGGTATTGTTAA  
CACCCATGTCGATAGTCCCTGATCCTCTGGTTTTAGCACGACGAAAAATACCACGACGAC  
CAGGCAGTTAATCTAAATAAATAATTTCTGCCCTGCAAGTGTCTGTACAGAATAGAGAG  
CCGCAGCCAGAAGTATCAATCGATATTCTCTTTCATTCAAATTTGTGGTAGGTTTGTCAA  
CAACAGTGTGACCTGTGTGTTGAAGTTTTTCATCAACAGTTCGGATCAGCGACTTCTGG  
TATCTGCGATTAAATTATCCAGGCATAGGATCGCAAGGCCGTAGTTATTTAATCCATATT  
GCGCAGCCACGAACGCTCCTATTGCTAGATTTTTGCTCTAAGATGTTGCTAATTTATCA  
TATTGTGATTTAATTATAAAGGCTTATAATAAGAAATGGGCCCGAAGCCCTGGTTATAT  
AAGTCTTTCGCTGTCTACTACGGGATTTGTCCAAACCAGGGCCGTGTTATCAGGTATGG  
CTGTCTGGAATGGATCTGCAATGTCCAGATAGAACGGGGTGATCGAAGCACCTTTTTGAT  
ATGGCCCTCCTATGACCGTTGTCTGGAGATCCCCACCAACTGGGCCGGCGCCTGGGATAG  
TGAGTTGCAACCCAGCAGATTTACATGCACGGGTAGCCAAAGGTTGTGGGATACTTAAAT  
ATGCTGCACACTCAAACGTTTTTGTAGCCAAGCACAGTTGCCTAGGTGAAGTCATTAGGTT  
CAATGTAACAAACCCCTGTCTCAACAACAACATACCAGCGGTCTTCTTCAGGATGATGT  
GCTCTTACCAGAAATTGCTTTCCTTGAGGAAAATCATCTTTATCAGACATGCAGGTCATAC  
CAGAATTAAGCCGTATGGCACCTCTGTTTCCGTTTGTCTCTGAGTGTGAACCAGATCGA

AGTCAAACCGTATGTTGTTAACTGTTCAAAGCCTACCTGCCCGATATTTGCGTTAGCGA  
AACCATTATCATCAAGGCTATTGATATTAATGATCTCAGCAGAACAGCAAGCCCAACGGT  
TCATCGCCTCGCCTGCCTCGCCCTGTCCAGCCCCATATGCGCCAAGACCATCAAACCTGTT  
AACTGCGGATGTCAGAAAGACGAAGTTTTGCGACAAGACCCCGATATTTGAACGTCTTGC  
ACTCAATGTCTAAACGTTACATCGTTGGTCCGGTCGTCCCTAGCTCTAACTGGAATAT  
CTACCAGTCCCGCATGAATACGTACATTTTGCAGGGTAAAGTCACGGCACGGAGCAGCAA  
AGGTTCTCTGGTTAACACCCACCCATAATAAATGAATCGGCTAGCACCGTTGACCAATT  
CGCCACGAACACCACCAATGACATAGTGTGGCAACAATAACATACGACACCACCGGATG  
ACTGCAGTATCCGTTAGAAACGGATGCATAAAGATAAACCCEAAAGCTCTCGACCTTAA  
CGTCCCGGCAAAGCTTGAAGTGGAAACATTGACGAACTCGGCGCATCATAACGTTACGCG  
TGATGATCCCACTCACAATTGGTTATCGGAGGCGTTAGAACCATACGGTCCCTGCCCG  
CAATACCGTTACAGAGACCACAGTTAGGAGCGTTATCTGTATTGTAGATGTTGTCGTTGT  
CTATATCTTCGATTGTCAAGCCACCTCTGTTATAGTGTCTCTGCACAACGTTATACTCAA  
TAACATCGTCTGTCAAATCGATAAAGTTGAGACGGGTAAACCGTGCCCGAGTAACAAGAG  
CGCCTGTACCTTGCTGAAGGATACCATATTTAAAACCTCTGGAATCACTATACAGAACGT  
CAATGGGACCTTCTATAGCGCGGGTATGTAGTACCATCGCCGTGGTGTGTTCTTATTAG  
CCCATGAGGAGTCTGTAAAGATGAGACGCCCTCCATAATGGCGAGTACAAACACTTGGGA  
AGATAGCCCAGCGGAATGTGATGTTTGATAAATACATGTACCTGTTGCCGTCACTCTTGT  
TAACCCTTCCACCATAACCATTCAACACCGTCGATATGCACAATTGTCTCAAGAACCAGGT  
GCCATCACCATGCAGGAACAGCGTGTGGTATCTTTTGCATGTCAGCTGAAGCTGTTA  
CGCCCTCTGTCTTGTAGTATATTTCCCGTAAATTGTGCAGGGGTAACAAAACCATCGA  
GTGAATGAGCCGCTGATCCCGCTGGTCCACCGTTAAAGGTTGAGCCATTAGCACCTACAA  
GGTCTCCACGTACAGATGGCTCGTTGGCTACCACGCCCTTCATCAACACCACCTGTAG  
TCTCCGGTTTGGATTTCGGCAGGAAGACGTTTCGGGTATGCCACTGTCTATTGATCGATAA  
TGTTGGTAGATCCGTCGATCAACTGTTTTTTGGGCGAGACGGGCCTCCCCCTTCTTCGG  
AGGAAAACATTCGCACCAACCCGAAACGGGATAACATATCTGTCCATGTTTATTCACGCG  
TGGCATCCGACAGGTCAATAACCAGGTAGTCTCCCTCGAAAGAGTCCGTCGCAGTCGGTA  
AGTCTGAGAATTTGACGCTAAGTTATAGATCTGCCATTAATCCTCGTATGTTGTAAGCT  
CTCTGTCCATAACCATAACAGACCAAATCCTCTTAACAATTCCCGGCGTCAAAGTCAAAGA  
ACACCCCATTTGTCAGTAACCGCATGATGAGCAACAGACCAATACCAGTCATCGGATTAT  
TCGGAGTCAGAACGATGTAGTTCTTTGGATAAGAACGAAACAACGTTCTGCTACCAGGT  
CGATGTTAGGGATACGATCACGCATTCCTGCCATCCCAAACATATAACTCCCATCCATGA  
ACAAGGCTGACATGTGACTGGTAAAGTCATATTCAGGTGCAAGCACCATTCCATCAGGAT  
TAACGATGGTAGGAGTTCTGCCTTCTTTGTTGTCTTGGAAATCATTGAGATAAACAACCC  
AGTTGTACCCAACAGAGAATAGTTTACTTGGAAATAGCTTCTCCAAGCTGAGACAATCCTT  
AAACGCAACGACATACATAGAAGAATGAACGGACGTCATATCCATCCCAAGCCTTTCCGT  
TCCAGTGCTACATTGTGAAGGTTTTGAGCTCACAGAAGTTCTTCGCATCCCAACGATCTC  
ATACAAATGCCTGCGACATTAGTCCAGGCATGACCCGATTGAAAGAGTCATAAAACCACA  
TCGGGGAATTATAAAGGAAGTCAATGGTGTATTCAATGTCGTCCAGTCAACGTTCTGAC  
CTTTGAAACAATACGGCGTAATGTACCGATACCCAGGGGACGGTAGACCACGCCAAACAT  
CGTACAGTGCCGTGTGCGGGTCACTGATGTTGGAGAACGGGATGAGACCTGGGGTATACT  
GGAGGCTGTTTGTCTTATAATCAATGACCGTACTGTCGCCAAGCTTCGCACTGCATGGGT  
TGTCTCCGTACACAGTGATGCGGAAATACATAGTAAAATCGTCACCATCTGTGGAAGTGA  
ACAACCTCAAGAACAGCATTCACTCAGTACCAATCGGTCCATGCGCTAACACCATCAACAG  
GGTCCGGTGTGAGGTGCCAAGTTAATCTGCTTCAGATTATGTAGACCGATTAGGAATGGTC  
GTGGATCAGTTTCCGGATGATCTGGTTGATATCTACTTACTACAAAACCTGGATGTCGTTA  
GCTGAAGGGTAGTCCGTCGAACGTTTTGTTGCCCGGATCATGGCCCACCCTCTCCAGTTGT  
TTTCATCCGTAATCGTAATGCCGAAGTTAAAAGCGTTAGAGCGATATGTAAACGCAGAAG  
GGTCTGCTGTTTCTCTATCTGTCAACCAGAAAACAATCGTAGAACCTCCATCCGCATGTG  
TGATGAGGGTTCAAGGTTGGTCAATACTCCTTCCAAGAATACCACGCTGGTACCCAAAGT  
ATACAACTGTGTTGTCACCCCAATCCACAACCTATACGGGTGGGTGCAACAATGTCGTAAC  
CACTGCGCGGAGGTGTTAAAAGAACGAAGTTTGACAGGGGGATATCGATTATACAAATCG  
AGTCAGTACCGCAAGGAAGACCACAACGGTATGTCACCTCGCCTGTTTCGGACTTCGTTT  
TATTGAGGTCTAGTTCAGGTCTGAACAATAGCCTATTGCCAAGCTCGTCCCTCCCGGCAA  
ACTTACAACGCTACTTGGATTTACCGTAAGGACGGAACCTAGATCGCCTGCTGTTTCAAGG  
TTGTCTGAGCAGATATTGCCTGATGAATACCAATATACCCTTCCGGGGCACGACTATACT  
CAGGGACCGCCGTTGAGGGGTAAGAGTAACCTCAGCTGATCCCGACAGTGAACGGAGTGA

TGACATATGTGTATTTGCAGAAAACTTATCGAACC GGTCATTGTCAGTATAATTGTCAC  
AAACCATCAAAGACCCCTGCCAGCAAAGCCAGCATT TTTCTTGCTCCGGTGATCTGAGACA  
TAACATAGTAGGCATCACACCACAAAGGTTTAGCTTCAGCGGCGTTGGACTGAAATCCCA  
TCTCAATAGGTAGGTATACTGGTCGGTCATGCCACATCGTGTTCCGGTCCATCTAGTACC  
CACCATGCTCTACCGGGTAGCAAGTTGCATAGTTGTTTTTGA AATTCCTGTTACCGTGG  
TATCTTTGAATTGAACAGTTC CCCCCCTCCGCCTCTGGGAAACCCTCTTCAAGAATAATAC  
CGTCCGAATCAACTTATCTTCCGACTCTGTCAATGATCAAATCGAAATCCC ACTGAGACC  
CATACTGATCGCAATTTGTCATAACCATCAGCGTTAGCAGCATATACTGTGCCGAAAACGC  
AATCCCCTCCAAGATTAACATCAAAGGCGAACCAGCCTTGTCAAGGTATACTCCCCAAT  
GTGTAGTACCATGAGGAATTAACGTCCTACCATTGACCATTACATTACGCTACCCTTAC  
ACCCACCGTGGGTGGGTATTCATCGTATGTGAGTCGGTGATGTCCAAGCCTTGCCTCAT  
TCCCGTTCATGGTCCAGTTCGGACGATATACTGCCGGAGGGTCTGGGATTGGCTGACCAG  
CAGGGTCCGAGCCGATATATGCTGGCCAAAAATCTTCTGCAAGTTC CAGATATTTAAGGT  
CGTTGGTTTTAAAGATATGCATATGCGCAACCGAGGATCAA AACAGACTGACCCTCGGTAA  
TTTCATAACCGTTAGGCTGAGCTTCATGAGGCGTCCAGTTCCTAAAGTGACTGTTGTAAG  
CCAAAACAGGATGTAAC TTCAGGATGTAGTGCTGAACAGTCGGGTCAATGGTGTCTCCCT  
TGTTTCTCTCAATGAACTGTATGTGACCATCGATCAATTGAAAAGCATTATCAATGTTGT  
GCCGTA ACTGCACCACTACTCAACTCCAGCCATAATAATGGAGCCGAACTACTATTCCC  
ACCAGCATCAGTGACGAACTGAAAGATGTCTCGGAACTCGGTGTTACAAGAAAGAACTGG  
AACACTCTCATAATTCCAATTAATCTTACTGGCCCATGAAACCAAATTCGTCCATGTACC  
CTGTGTTAAGGACAAGGTAAACGACGGTGCTACGTCCTCAGCCTTTGATGCAGCGGTAAT  
TATGACAATGCACTGACCTCCTGTCAAGTTGGCAACAAAAGAATCACCCCTGTTAAGGTT  
ACATGATGCTGTCTCTAGAACATTGCCAGGATTGAAAACTTACCTGGTCAACCGCCGCC  
ACCACTGGCACCGAACTCTTGCCAGGCGTTC CATTGGTGCCGCATTTGGTTGACGGGGA  
AGATGACATTGGACTTCTTTTCGGAGAGACACCATTCCATCTGTAAAGACTTACCATCGGT  
ATCAAAGAATGCCAGGTCCTTTTTGGATTCAAGGAACCACCCTCAGAAATGAAGACAAC  
CTTCATAAGACCAATACGAGTCACGATGGTTTCAAGAGAAGAATTCCTGGTTGTGTCTGC  
CTGATCCATGAATACATAGTCACCACCACATAACCGTGACGGCGGAAGGATGGTCAGCCAC  
CTTAACCGTTGGAAAAGAAACATCCGCCATTATTCACCCCAAAGTGGATAGGGATGATGG  
GCTAGCCATCCTCTGTGGTGATGATATTAGTCTTATCATCTAGTATACTACCAAGCGGAA  
TTGGGTTATCCAATCCTCACCAGACCGAGTATTCCATCATGTAGCATCGCCAGTGCGAG  
GAAGACAGAAGTTGATCAAGTAATAAAAATTTGTTAGCCCAGGCGATCAAACCATCGTCAT  
CAAAAAAAGCGGTTGCACCTTCATGAGGGGTTGGGTAATAATTCTCGTCTTGACCTACCA  
AAGAGAGTCTTACCACTTCCTGTTCTTTGGTTGTGACTTCATATAAGGCTTGATAACTAC  
GTGTTGTCCTATCCATAGTTGAATAGCTAGAGGTGATTTCAAGACTGTCAGTGTCAGGAC  
ATGTTACTTCCTTGAGCTTACTGTCAAAGACAGTCGTCATTACTATTTTGCGTAAATAAG  
CTGGCTATCGGAAAACAAATGTCTCATAGTAACACCAGTTACCAGCCCAAATCTTGAATC  
ATAGCCACAGGCGCTGACTAAGGCGGCCCTGGTCTGACTCGATCAGCTTCAGCCCCGAGC  
AGACATCAAGGTCTCCTGTA ACTCCGTCCATAAGGAGATATGAATAACGAGTTGCCATTT  
AAACCTCTTATTGGTTGGGTGGGTGGTATTACGTGAACCACAATCATCTGTCCATGCGT  
AGACGTGATTATGTCGGACAAACCAATCATAGAAATCATT CATATTAACACCACCTGCTG  
TAATTAAGTTTCCATCTGCTGTGACTCTTGCCCCGTTGACATCAATGTTCCCATCCACCT  
TTGCAGTCGGTGTTGCTGCCCAATGGTGAAGGACATTTGACCAGTTTTATCAATAATGT  
ACGGTCCAACCAGACCGGTAAATTTAAAATCACCTTCCCGCGTCATGGAGA ACTGAACTT  
GGTCGTTCCACACTTCAACTTTGTTTGGGTCTATAGTGGTGGCGTTGCCATCACTTTGAA  
AAACGATAATGGACGACCCTCGAAAAGTCCGTGGGTGTTCTTATAATTAGCGTCACCTT  
CATTGCGCTCAGAGAAGGAGATACCGACATCTTACCAGGCTACACAGGAAGCGTCAGGC  
GAGCTTCTACTCCATTACTTGAAGGCATGGCTAGCGGGACACCGAAAACCGCAGGATATG  
CGTCTACGGTGCCATCATCGAAATTCGTTGAAGCAACAAATTGGGCATTGGCAGAAGAGA  
TTGCGTAATCCACATCAACCACTCTTGCCCTTAGTCTGTGTGCATGTCCCGAGGGTGCC  
ATGCGAACCATTGGTTAAGCGCAGCTTCCATACGATGAATTGATTCCATTCTTCCCCAC  
CACTCCACCACGGGTTTCTGCAGGACCGATCTCAACCATCCAATCACCACCCTAAAGTTG  
CCGATTGTGGGTGAGGTACACA ACTAGATAAAAACCTGTGTATTTTTGACTTTTGAGGTA  
ATTCGTGCTTTCAGGAATTATCGCACCCGTAAGCACTGTCACCACAACCAGACGTGCGTC  
TTCTCTCGTCTCGGAACGACTTGGACCTTTGTTGGTTTTTGGTTTTCTTTTTGGGTTTACA  
TTTTTTTTCCAGCCTACCCTTTACTGGTTCAGGGTTTTCCGGGGATGGTGACTCATGCAT  
ACCGCACTCTGCACTGATCTCAAAAACAGCCGTCTTAATCCACATGCTGTGTGTTGTCCA

GTAAACTGTAACATCTTGAACACTGAATGTTGATCCAGTATTCTTCGCCAGGCTTTTAAG  
AGTGTTCGCAGCGTTACCTGTGAAAGCCATTGACTGCTGGATAGTCTGACCACCGAACTT  
AATAACCTCCGCAATTGGTATTTTCAAGTCTGAGATACCGTCGATAACACCTGTATAAAG  
AGGAGTCCACTTCTTTAAGACCTAGCGCTCTTTCGAGTCATATTGCTGGTTGTGGCCTA  
CCCCAGGATCTTCGTTGTTTGTCTTGTATATCCATCCCATTATCCTGGACAAACACAAC  
AGTCCCTGTAAAAATCCTTTGGTTTTACCATCAAACCTCCGCCTCACGAACAATGTCTAT  
AGACTTCCCCTTGTAGATTCAAGATAACTAAGTTCGTCACTCAGTTTATAAAGCGT  
GGCATAAGTCTGATTAGGGTCTATGGTCTTATCCGACTTCCCCTCAAACCTTGATATATCC  
AGTGCCTGTTTCGTTACTGAGAACATACGCATTATTTGTATCTTGGTATGTATGATGAGC  
GATGTTCTTTGGTTTTCTGTTCAATATAAACAGGGTTGCCAATGGTGCGTCTGAATGTACA  
TGATCAGTTAGTCGGCATCTGTTAATCCTCGTCTTCAGTTACCTCGTCTTAAGGAGATGA  
ATAAAGGATTAGCATGTCAGACAAGAACCCGAAATTGTATCTCCCGACACGTTTGGTTCGA  
CGGGGTGAATGAAAAGACACGAAGTTGCCCTGAAGAAATGATTTCCAAATATTTAAACTT  
GGCAAAGATGTCGAGAATTGTTGTTGATTTGAAAGAGATCGTTGGATCAGTTCCAACATC  
CCCCGATGAAACGTTCCGAGATTCGTCACTCTCGTTGCACTAAAACATCATCTCGTATGT  
TTGATTGTGCACTACCTCACGCATATTTGGTCCACAAAACCATCAATATCCGATGAGAA  
TGTGATCTTTGACATTATTTACCTATCGCCTTATCGTAATCAAACATGGAGCCTTCTGGA  
GTCCTATTCTTACCATCTGGGGTTCATCACACCAAGAACTTGGTCTTGCTTTCTAAAGTTA  
CCATTATTCATAGAATCGACAATTGCTTGCTATCGAACTTTGTGTGGGATAGCAAATTTG  
GTTTGAAGAGGAGTGATTTCAACCTCATTGTTGGTAAATGAAGACTGCTCAGAGCCTTTC  
TGCTAGGTTTTACCACGGGACTTTTTAGGGTCCGAATAGATTGTCGCCACCGCAGTTTTG  
CCAAGGATGAAAGTCCGGAACCTCCCTGAAATCAAGCTGGAAAACCAATACGGCGCCATCA  
GGGTGGCTGCTGGAAGCCTCCATCGAGGTTAAAAGGTAGTTCGCGATGACCTTATCTTCA  
GTCACCAAGGTAACGATATTACGATCAGAGGTAAGTCTTTCGAGGACCTAAAGTGCCTTT  
TCTGGGCCGCGTGAGGCAGCCGGGTTAGACCGTCTGTAGCTTCATCAATGTAGTTGTTT  
TGGATATGATAAACAGGAGATGAGTTCACCCTGCAACTGAAAGAAAATTGCCCAACTTCG  
TTGACACCGTGGTCCCTAAACTTTACCTTTTCTTCAGCTGCGTAGGATGGCCTATCCACG  
GTCCATGTGTACAAGTGTGTTGATCAACGTCTAAAATGATTGATAGGTTGTTGGTGTAG  
TTCTTGTCTTGAGTTCTACGGTTCGCCCCGCGTAGTTCAGACCACTGGCGAAGAGCGTA  
TATTGCACCACTCCGCTGGCTTCGTGGGCTGTGTTGAACTTTTTCTCGACGGTAACCGTA  
GTGATATCCTGGTTCGGTTAGGAATAGTTGTTGGATGCAAATGGTATGCGTCCACCCATT  
ATAAATGTTACGATTTTAGCATAAATCTTAAGATAAAAACAATAACTAAGGGGGCGAATCC  
CGGTTAAATTATTGCGGCACACGAATCATTAACTTGATGTTACCCATGTTTGCAGCTTCG  
AGGTGCTTGTGATCATCTTCTTAAACTCACCTGCATCAATCTTGATTGTAATCTCTCAA  
TTGACAGGTTTCGGTTGGAATTACCATTGGCGTATTTCTGTGCGGGCCAGCACCAGGCATC  
ATCGAGTCTGGTTTAGGTAAGTCTATTATGATCAGTCATTCCCCTCTGACCATTA  
ATAAATTCTCAAGTTTTACCAATCCACGAGTTTTTGCAAAGATTACCACCTGCGGTTGTA  
TCTGTGCCGTATCTTGAGTCACGGGACGCTCGAGCTAAGTCGAAGACATAATGCCCCGCA  
AGCATACTTACTCCAGCACTCAACCCATACAGACCAAGCCAACGTGCAGCTTTATCCAGC  
TGACCGTAGAGTGGACCATTTCTTTTCTTACCCAGCCCTCGCCAACATCATCATGC  
CGACCACCGAAGAGCGTTGTTAGGAATTTTTAAGATTCAGATAGTTCAGCAATGTTTCGAA  
AGACCACCGAACCACGGATCAGAAGTGAACCAAGAACAGAGCACCAACACCCACCGT  
ACCCATTTCCATGCAGAGGATAAACCCTCGGCTTTCTTACGGTAGATCGGAATGTAACGT  
TCCATGAGGCCTTGGATCAGCACAAGGATTGTAAACGGTATCGACCATCTCCATGAAC  
GCGGTAGTGAACCCAGCAACGAATTGACCCCGATTTTGGGCCAACACCCCGGTGGAGTCA  
AGCATTTTTGCAAGTTCGTTGTACGCCCTTCTTAACACATCCCCAAATCCGCTCTGTA  
TCTTTGCTCTGAAACTAAATCCAGGTTAAGGTTCGGTCTCTGCATCGCAACACGGTTTCAT  
TACAATGCCTTTTGTAAAGCACCACTTAATTTGCAGCTTCGGAGCAATACTTGGCTAAA  
AAAAGTAGGACCTTCGTTGCTGTCAACTCGCCATTCTGTATCACTTCAAGCAACTTGGTT  
ACGTCGATGGTGAATCATTGAAAGCCTCTTGGGAAGCCTTAAGGAACACCAGTAAACAT  
CCTGGAATACCTTCAGCAAGTTTCTGCTTCATTACTTCCTCCATGATCTGTCTTTTGGC  
GTCATCTGCTGGATTACGGGAATACCACTTTGGTATTTACCGGATCAACCCGTAAGACA  
GTAGAGTAGTCAGCGAACGCCTTGAAAAGTTCATCGTTCTGTGATTTACTAAGAACACGA  
TCCGATGGGATTGCCATTTAGGTGTAACACCGCAATGCAATCTTGAGGTCAAGAACCAAT  
CGGTAACACTGGTTCACGACCAAACTTCATGCGTTTCCCAGCGCCTTTGGAGCTCTCAAGA  
ACCATTAGCATGGTGGCTTACATGCCATGGAAGAACTGACCACCTTTAACAACCCTTACA  
GTGGCATTGAATGCACGGTAGGCTGGGCTAACGCTGATTCGAGTGCTACGAAGCTTTTTTC

AACCCCGCTGTCAGTGTAAGAGTACTCGCATTTGCCATCATGAGTCGAGTCTCCAGTGCG  
GGAAGTTCAGCACGCAAATTTGAAAACCTTCGTAGTATTACTGTCAAGGAAGCGCTCTTTC  
AGAGAATCGTAACCTTTCAGTTTTGAGGCAAAATTGTCACCATATTTAGCACGGAGGCGA  
TGACCTGGGTTTTGCAACCGTAGGTACCTTGCCTGCAAGATCACGGGAATAAAATTTATCC  
TGAGCTTCACTTTTCTTACAGGCCCGTTGTTCGGACACGTAGTTGCTCCTTGGTGACTTCC  
TTTTCAACGCTAGTTCCACGTTGCATTTGACGAACCTGTACAGCGCGTAGTGCTGGGTCG  
ACAACCTTTGTTTGGGTCACCAACCATGCCTGGAGCATGTCGGGCATTTCGGGCGTATTGAA  
AGTTGCTCTTGGAGAGGGGCTGACCTGCAGCGGAAGTTGCCGTAGTTGTGCCGTAACCA  
CAACCTGTCTTCTCCATCCCACGTAGACGAGCCTGTAGGCCATTGTAATCCCCTGGAGAT  
CCTGGAGATGATTTTGCCTTACAGGTGAGCAAAAGCCTGCTCTTACGGGCCTTTTGAATT  
TAGTCGATTGCTTACGGGACCGAGCTTCTTTCTTAGCCTTTGCAATAGAATGGGGTGTC  
GATTTTCGCTTGTCTGCACCTCCGTATGTTGTAACCTTTTGTGTCAGGAAGTGCCAGC  
ATTGCAGAACACCTTAATGTTGCTGTAGGATCCGTCTTACTGGAAGAGAACGCCCTGCCA  
GCTTTTTCCCATTCCTTCAAAGACTTCAAAGCTTTCATTCCGCGACCGAAATTAGTC  
CTGTCCACGCCACATGCGACTTTGTTGACTGTCTGGCTTACGATAATATTCGCCATTGGG  
TCCCTCTCAATAAAAAAGCCAGGCCACGAAAAGGAACCAGGCTTAACATTAACTTCTTC  
TACCACGACGCCTCCAGTTTGCAGCTTGTAGCCCTTGCTTTACTTTCTTCTCTCTTT  
CGTGGGCATGACAAACGAATTCTTCCACAGCGAGGTATTCATTACAGCTTGAGCAGATAGG  
AGACATCAACATATCCAAGGGAGCTACAGGATTCCCCCTTGAAGTTTTTCAGAGCACGCC  
TCCATAAGTAAGGGATCCCAGTCAGTGAGCTATTTTTCTTTCATCATCCATAGCTCTCA  
GGACGAATTCGGAATTTTGGTTCGGTGTTCGCCGAAACCACTTCCATCGCATGGTCCAG  
CGAGTTCACTTGATGGGTCTTCCAGGCGCCTCGGAAGTCCCTAAAGGTCAGCGAAACC  
GTCTTTCGTGAAAGAACAGCCGTAGTTAATCTCAAAAACCTTACGCGACCAGCTGGATGAA  
GTCTAACATTATGTCTTGGAACACAGCGTCAGTATCTACTTGATCCGCCACACCATCAAC  
GGATACATCTTCAAGAAACAATGCGAAACGTTTTTCGAGGTCTCTAGCTCCATCCGTGC  
AAAGAGGTATAGAATAGCTGTAGGGGAGGCATCAGAACGATTCTGGCCTACCGTCATCAT  
GGAACCAGAAATGGGTGCCACTGGGCTGCAACATTACGAGCGCTTTCGGAAGGTTTTT  
CACGATCTTCGTTGGAGACCAGTGCGGGATAATGAAGTTGTGACCTTCGACGTCGGTCTC  
ATTTGTGGGTCTGATATTCTTGTACGCTCCTGCGTCTTGTGGTTCGAGTTATACATGCGT  
GTATAAAGGTCACATCCATGTGGCACACGAAACACTTATACGATACCAGTCAGGCCAGCT  
AGGCCGAAGCATGCGGAAGACAAAGTATCTGGGTTTAAAGAAAGCATCAAGGTCAACACTT  
TCCAGTCCACCTGGCTACCTTATGATCCGTAGGTCCGGTCTTGTGTGTCTGAATCCAA  
CCGATGGTGTGAGTCCCATCCCCTGAGAACCCTTCAAGAAGGACAGGAAAGAAAATCAGC  
GTCGTGATAGAGGCGTGTCTTCTGCCAGTTTACAGAGATTCCGTTCCAAGAAGAAGTGTTT  
TGATGTGAAACCGCAATGACACCAGATTGGTTACGTGACAGCGCGGCGGATAGCTCACCA  
TCAACCCCTGTGGGGGATGATGTTATCTTCGTCTCGGGCAACCACAATTTTAGTATTT  
GCGGCGCCACCAGTCACACGCTGGGTCAACAGGTACAGTTTACTTTTTAGTGTCATAA  
GCATACGGCGTCAGCATAGCTGTATCCATTACCTCCTGCTGATACAGTCTGACCG  
TTCCGCAATTAACCCCTGTTTTATCTAACAGAAAGGTCATCCGGATCTTAACGAAGTAC  
ACTGGCGTGTTCGCGACAAGCTCCACTGTGACGTGGTTCAAATTAAGAGCAGCCAGATAG  
TTAGTCGGTATGATCGCACGATGCGGGATTGTGATCACCGCATCGTAGCACGCTTTGTTA  
TAGTCATGGTATCCAGTGAGGATAGGCCCGTTTGAATAACCAACGTTGATCGGGTCGTTT  
ATTATTACAGATTTACAGATTAGCAAGATCGTCATCTCTCATCTTCATGGAGAGACCCATG  
TTGGAACGGCGAGACAAGTATCCAAACAACTTTCTTCTGTACGGAAATTCAGTCAGTGA  
CCGAAACGGACCAGTCAACGTAGTTAACAGAAGCACACTTACCTTCGTTGAAGCAACCA  
ACACCGTTAATCATAACGGTAGAAGTTCAGATTCTAGTCCCAAATGGTTCATGCGATCACTC  
ACACTCAGACTTGGAGCGAAAACACCTTCCATTGGCTTGGGGTGGATTGAGTCACCATAA  
TAGGGGTCGTTGTAAGCCATGGGACCGATACTTACACCCTCTGGGAATACGCTATCAGCA  
AGAGGCTCGTACATGCCGATGGTACTAACGTACTGCAGCGCTTTAAGTTGCTTAGCAATG  
GAGCTGTACCAACAGTCTTAACCAGTTCGTCAGAAGTTGAATCGACGTGCGGCTTGTTAC  
TTTGCAGCAGCGAAAGGACTAGCACCGAGGAGTGAAGCGTTGGTGTGAGAATCAGTGCCC  
AGGAAGTACCACTTATCAGTTGCAGTTAGCACTTGTGGCAGAACAGACGACACAGTAACA  
ATTGAGGGGTTTGTAAATTGTCATATTACCGCTGTCACGTCCAATACTGCTTGTTCATCA  
TTTTTTGGAGGGATTGTTACGGCGCCTGCTCTTTCCCTAGCAGTCAGAACAGATGTCGGA  
GGTGCACCACCATTACGTGCTGCTGCCAGGGCATATGTCAGAGAGTTTGGGGTGGATTTCG  
CCAGTCACTGAAAGAATATCGCTGGTCTGATAAGCTCCTGAAACTACGTTTCATAGCCACC  
GGGTTTCCGGTCTCAGTGTGTTGGTGTGCTGTGACGTCCACGATGGGATAGATAAACGCT

TGACGACCAATCATCGGGTCTGAGGAAGGAATGTACAAGAAATCGCTTGTGCTGCAAAG  
GTGTAAGCTGGGGAACCTGGAGCGACTCCATCATCTCCAAGCTGATCGAGTTCGGTATAA  
GCCCCAAAACGTTGAGGAAAGGCGCTGTCGATAGCCAGGAACAACGGGGTTTCAAACCCT  
TTCGTGACCATTGGTTGAGTACCAAATGTGACTGTAACGTCAACCAACTCGTCATTATAA  
GCCATCGGTTTCTCTTTATATCTGTACATACAGTTATTTACCAGCACCTCTTTGTG  
CTGTATGCTGGGGGCTTGCGCCCCCTATACGATCACTAATCAGCCAGAGCGTGTCTATAA  
GCGTGTGGTTTGCATTAGCCTTCTGCTGGGTAGTGATAAACGAGTGCATCGTTGATCTTC  
TCTAGTTCTACGAGAGCACCCGTATTTGATTTCGATGAAGGACACGTTAATTGTGATCAAG  
TCTACAGCACGGGTCTCAAATATCTGCATATTCAATGGAACCTTTAAACGAGAAATTGTC  
GAAGATGACGAGTATGCAAAGGAGAGGTACTCGGGAAACATTTGTCACAAATGAACGGT  
AGGTGCCTTGCTTGGAAGACCCGGCTTAAGGCGTTGGGAGCTTTACCACGGTAGGCTGGG  
AAGGTGTAATCAATCTAGTAATTATGCACCGTCATCGCATTGCTCTGAGTATCACCACCT  
ACGTCAGACTGCGAGTCAATCTGGTCAACTGCCTTCTGGTCCACAAGAATGAATTCAGCA  
TCCACCTTGGGAATCTCATCTTCACCTGCCAACACAACGTGTCATCCTGTGGTTTTTTTA  
CAGACTGATCCCCTGTATTCGTAAGGGGGTCAAAGATTTCTCGGAATTGGTGAATCCA  
GCCATTAATTCCTCCGTTTCGTCCTTCGGGGACGGATACTACGAAAGCTATGAAACGGG  
CGACACCTGTAGTCTGATATTCAACAGATTTAATCACAGGTACCCACACCATTTCACCCAC  
GCGAATTAATCGGTTTGTATTTGGTCTGCAAGTTCGTTAGAGCCTTCAACACGACTTTTTTA  
CCATCACAGAGGAATAAAAGGTGTAGGAGTCATACTGTCTACCTTCTTCATGCATCAATT  
GTGATGTATAATCGCTTGCCGCGTTACCAGTTGACCGTTGGACAACACACTCACGAATAT  
CAAACCTTTCATACTCAAGTTCAAGTCCCTGGTTTTTCGTACGGATTGCTTGTGTGAAC  
TTGAACATTCTCTGAGTCGCGCTGTAAAGGTTGAGCGACGTATTAACCTATTTTTTCCAA  
GAAGTCTGTAACCAGCAATTTTGCCTCGACCCTCTGCTGTTGGATACTCTGAATGTCGT  
GGACTCGTTAGGGTCACCAAAGAGGTACATCGCCTCACTAAATCACTTGACATCGGCCCA  
CGCATCGGATACTCTTCTATTAGGAAGCAAACCGGAGTCGATAACGAAGCTTATCTTTCC  
AGCACAAGCTTTGACGGCCTTGTTTCAGCATCTTAGTCGGATTACGCCCGCTGCAAAAAG  
GTATCCGAAAAGTTCCGTCTGGAGTTTTTCCAGTTCCTTATTGAATCCACTTGCGCCGCT  
TATCATAAAGGTACGGGCAGGAAGACCGTTTTAGTGCTCTTTAAGGATTGTAGAGAGCGT  
TGCAGTATTAAGACCAGAGTGGTGAGGGTCGTCATGATAACCATATGAAACCTGACGCGA  
ATCAAGTTGTTGGGTTACTCCGAAAAGTTCTCAAACCTTGCTCAGATCTTGCTTACTTAT  
GAGTTTTGCTCTGATAGCCACATCCGTTTAGTTATTTTACCACATTATCTGAACAAAATC  
AACGACCAAGCGAGGGATAAGTAACGAGTCCAGCGGTAAGGGTATCTCAGAGGAACTCCT  
GGTACACCTGTCTTGGCTACAATGCCTTCAACATCGATGGGACCCCTTGAGTTCGGTCTC  
GCTTTCACACGCCAGTGTTTCATCATGACGGACACGACCAATGATGACTAAACTGGAAACC  
GCGCTGAGACAACCGTCCACATTATCAGGATTGGCCCGAAACCTGCTCAGGAAATGTTTC  
CAATTCTGGTATGGAGAACCACCGTTTACCTGAATGGTTTTCGTCACCGATCTGTTTCAAG  
CGTTCTGTGATAGATGACTCTTCAGAATTTACTTCTTGAAGGATCCAGCAACGTACCACA  
TCAACGAGCGTGTATAAAGTACCCGCCACATGTCGCAGGTAGCTGATTGTGCGTTGGGC  
CAGTTTGCCTTAACCTTCTCAATCGTAACCAATGCCAGAATTGTTTCGTCTGCTTAAAGC  
TCTGGGGTATTGGATCATAGGAGCAGTCGAATATACGCAATAATGTCCTGGACTATCATT  
TTAGCTCCTGTTGGATTGCTCTTGTATGAATCAAATCTTATCATATAAATTTCTTTTTG  
TCATTAACAACACTTGACAAGACGTTAAGTTCTTTTCTCTAAGTCATCAAACAAAAC  
GGAGAACATTTTATGAAACATACTAAGGCCGTTATCATTTC AATTATCGCTGGAGCACTT  
AGCGGGGTAGGAGCTTGTCCGTATGTAATGAAACATCCTGATGTTAATAACATCAAAGCA  
CTTGAATCAAGTTGTTTGTACCTGAAGAGAAGACGGCCAGCGTCCATCGACTTGTTTCGT  
CCCGGTTGCGACCAACGCTACAGGAAAGCATTGAACTGGCCGCCACAGTTGTTTAGTCA  
GGTAAGTTGGATGAGATAACAGAACAGACTGAAGTATACCAGTATTTGAATGATGTGGTG  
ATCCTTTATGGAACCTGAAGGATGCAAAGGGGCGTCCATCTGCACCCATTATAAAGACGGA  
ACAGACCTCGTGGCCAATCTGAATATGAAAGCAGGAGTGTGTAAGCTTCTAAAATAAAAG  
GCCCCGAAGGGCCTTTTGTACGCCATCATCCAGCGGCTTTAAGCTTTGCAAGGAGTCC  
GTTAAAGTCTCTTAGCAAAGCTTCAACATCGGTTGCTACAGAATCTACCTGTCCAGAAGC  
TTTCTTAACACCACGGAACGTGCTAGTTGTTGCTGCGGGAAGTGTGTAAGCTGCACCGCC  
TTCTACGAGATCAGCACCAGAGCTGGAGTTACCGGTACCAACATCGATAAATGTGGCTGC  
ATACAGACGACCAGCTACAGCAGAAGGTGCCATATTTATTTCTCCTGATAGGAATGAGG  
AATGTACTTGCAGAATATTTTCAACAGAGATTGCCTGATCCAAACTATCAATGTAATTC  
AGTAAGACTTCATCAACTCGTAATGAGATCTGGATACGCTGTTGATTAAAGCTGTCATTT  
CGCTATTGGTGAACCAGCGTAGTAACCATCCAGGAACTGGAATGGATAAACATTTGTGG



TTTCAGAACCATCAGCATCCCAAACATTCTTGATGCTTAACAAAGTTGCAAGATCAAAAC  
TCCTGACGCGAACTTGGTACTCCCTGTCATCGTAGGGATAAAGGATACCGATGTTAATGT  
CCCCGCTAAGAACAGTTTGTGCATCTGCCTGTCTCTGATCTTGTGCAGAGACAAGGTTGG  
CCGTACTTTCTCCTTAAGTGAAATCACGCACATCCCAAGTTTGTTCCTACTCTGGGTTT  
GGTCATTGAAATGTGGAGCGCATTTAGCGACCACATCCCGTTCAGGCATTTCTTTCGGAA  
TTACCGGGACGTAAGCTAACTCGACACGGTTTTTCAGAATAGATCCAGGAACCGGTGCTCC  
CGTTGGGATTATTCGTTTCTGAACTCAGAAAGATATACCTGATATTGCCATCAGACGTTT  
TGATTAGAGGGATCTATGCGTAAACCACCATTTCTCTCCTTGAGAAGGGGGCAGATGCC  
CCTATATTAATGGACAGTCAAAGAGGTTATACCTGTCAGGTCGGTACGGTCCCCGAGGAT  
AGGAACAACCGTGCTGGTAGTTCCAAGAGTAACCGCTGTGACGTTTAAACATGCTAGGTT  
GCCAGGCCACGTCAGTGACCCACATGAGGCAGAGAACACGATAACGATGTTTCGGTGCTCT  
GGTTGTACGTAAGTTAGTGAAGCTCATGGTTTTGTTTGGCGTACAATCAATCTTGAAGTC  
TTGAGACACGCCAACATCCATAGCCCCAGTTGTAGAAGTAACCAGAAGAGCGTAACGATC  
CAGTTTCTGCCACGCATTGTCTACACGGACACAATAGCCTGTATCTGCTGGTGCTTCAAG  
TACCGGAACATCAACCGACCCAGCAATTGTTTCGAGCTAGCGGAATGGTAGAGGCTCTATC  
ATAAACGTTCCCTCTACCCATGTTCCCCCGAGAAGCCAAGCCGCTAGCAGATGCTCTCTG  
GAAGAATTCCAATGTGGGTTTATTGATGAAGAAATCACCGATTCGCCCATCAGCTGCACC  
GGGTTACCGGAGAAGTTTGACCAAAGTGCACCTTCGTCTCCTTTAATACCCTGGATACG  
CTGAGTACCTTGTGGACCCTGTGGACATTGTGGTCCGACATCGCCGGGACAACCTTGGAT  
AGGTCCGAAGTTCTCATAAGTGGTTTCCGTCCAACCCAGAAATCTCCGTCAAAGAATTA  
TCCCTGACCAAGCTATCCAGTGGAAGGAAGTTCAGTGATATGGCCGAGTCAGCCGAGGGG  
TTCTACCCAGCACCCATCTGACCCTCCGGTCTTGTGGTCTTGTACGGCCTTCTGGACC  
TGTC AAGTCCCCGATCGGTTCCCATGCGCTCCCGCTGTAAACATAAAAATACTCTTTGTT  
CCCACCGGAAGTTACTGAATACATCCAGCCTTGTCTAGGTTTTGAACATCAAGCAGGTT  
CCCATAAGTCGCAATAACACCTTTTGCAACGATACTTGACCCATCGGTCCTTGGTCACC  
TTGGATACCAGGATCACCTTGTGGGGCCACGCATGACTCCAAGATTTACCCAGTTCGTACC  
ATCGAAAGCAAAAGCTTCTCCAGTGTCCACTGTGGTCTAGAGCTCTTCAGTTGCTGCGCC  
GGACGGCCAAGCTGCTTGATTGGCTACTGTACCTATGGCAGTGAGTGAACGCCCATTTGG  
TCCCTGTGGTCTGTAGCCCTGTGGGGCCTTGAGGTCTTCATCACGCAGATGGCCTTT  
AGCCCCCTGTGGGACATCCGACCAAGTATCACATTTGGGAATGACATCTCCTGTAGCCCC  
GGTGTACACCCTTGTGCGCCTTTTGACGAACGTATGGAGCTACGTTTATCCATTTAGCATC  
AGCCTGACTCCAGTCGTAAAGGTTTGGAACTATAAGCCAAGCTTCGCTGGTGTTCCTGT  
TGCAGGAAGATCTGAAACAGCCCCTTTAGTCCCAAGAACACGGGCACATTTAACAGCCTC  
ACCACGATCACCTTCGGAGCTTGAGTTCTTTGTGGACC GCGAGGGCCAGTTAAAGAAGT  
ATCGCCCTTATCTCCCTTTGGACCGATAGGTCCTTGAATACCCTGTGGTCTTTTGTTC  
GGCGGGACCCTCTGACCTCTGAGGACCCTCTCGGCCTAGGTGCGCCCTTTTGTCTTTAGG  
GCATTTGTGGGCCAACATCACCTTGGTCACCTTTAGGTCTTGGACGGGAACAATTAATTC  
CCTAATGTCGTCAGCTGACCAAACCCCAACGTGAATGCCCGTTTGAACAACCCAGGCATC  
AGACACAGCATTACTAAATTCAGGCGATACGTCAACTGTTGCTTCTGTTCCCTTCAGTTT  
TCCAATAGCGGCATCGTTACCTTTATCGCCGTTGTCACCTTTAGGTCTTGGACGCCCTGA  
TAAGCCCTGAATCCCTTGTATACCTTGGTCACCTTCTATCAACGGTCACCTCTGTGCGC  
CTTAGGCCCTGCGGTTCCGGTGTCAACAGTAGCCCCTTGTGGACAGGCAAGCGCTACTTG  
CCCTACAGGTTGCCATCCGTCTGCCTCGCCAGCCCAAACCCACATCTGGACTTCAATGTT  
GTAGGTATCGCTTTCCGAATTTCCGTGAGTCGGAAGGAGTGATGTATCAGTAACTGTACG  
CCTGATACCAATCGTATACCATTTTGACCTTGAAGTCCAGCGCAATCGTCCAGATGAGC  
CCAAGTTACTGTGCGACCTGTCCAGTAATGAGTTCTATTTGTAAGTATCTCCCTCTTG  
CATGGTTGCCGAGAAAGGAGTTGGGATGGGCCTCCAATAATTCCTTGGTTCGTAATAACC  
AACACCCGGATGACCTTGGTGACCCTTGTCTCCCTTATCGCCTTTTTTACCCGGGAGGGAG  
AATAAAACCTTCTTACCAGGGTCGGTCACTTCAGCACGATCGGTTCCGGTCTTGGTTGA  
AATAGGCACAACGATCTGAGTACTAGCAACATAACAGCTTTCGACCTGCCAATACGAGCAG  
GTTATCACTGAGACGGCTAACCCCGACAGAAAGTTCTCAGGGGCACCTACAGAGGCGTT  
ACCGGAAGAAGGATCAACAGGAACAGCGGCCTTACGCGGAGTAGTGGAGTTACCACCACC  
GAGAAGTGTACTGTGGTCGTATCCTCTGTGTTGAATTGTTAATCGTCCACAAAGGTTCC  
TCCGCCAGTACCTTCCGGAAGGATTGTTTCCGTGTAGACGAACTTATAATTGTAATATGC  
CATCTTTACCCCTTATTTTACAGGCTCTAATTCTGCAAGCGCAGCCTTGAATTCAGGCAT  
CATGTATTCGAAAGACCTGTTTTTTCGCAAGGGTAATGCCTTCGGTGGCGCCGAAGTCAGT  
AAGTTTTTCTTTGCTCGCTTCTTGTGTCAGTTTCTCTCGTTCAGTGCTTCTGCTTCAGCCAG

AATTGCTTCGTAACCCGCGAGACTTCACTTTACCTGTCCAGTCTTGACTTCTTACCAGT  
AGTGCCTACAATTGCCTCCAGTCCCGTACCGGGACGATTCCGGTCTGGAATAGGACTGTT  
GATGAATACGATGTATGTACGCATGCGGTGGGAAGAGTCTTCTGCATCCACATCAGTTCC  
AGAGATCTCAGCAACCGCCTTGAATTACTCAACAGAGATGCGAAAAGCAATTCGTTTATT  
TACGACGCAAACGCCGTTTACAGAGGAAGACGGGCAGAAAATGCCATCATTAGATCGGGTGC  
GAAAGTACCAAAGAGTTTGAACAATTCCACGATGGTAGGGAAAATAAGATAGTTTTGACT  
AGCCATAAAGTCTCCATTTGGTTACCTTCGTAAAAATCATTGACACCGGTGATGAAGTG  
GCTGTTATTAAGGCAGAGGAAGAAAAAGAGAGAGGTGAAAAAGCGCATCCTGCTCTTAGA  
GGTAGCTGTTACGCTGTCTTAGGCGAAACCACAGTGGAGCGAATATCCAGATCCGGTGC  
GGTGTAAACAGTCAGGAAGGAAGTTTCGGACTCAACCTTTTCTTCTCGCAGATATGCAGA  
AGATGAGTACCACAGGTACAGTTCCTGTGCAGGAGAGATTGCTTCACGAACGTCATCTGC  
TGGTGCATAGTGAATCTGGAACATGTTCTAGATTACTTGCGGCAGAAATGTAAGCTTCCC  
ATCTGTGAAGTATTTGGAGATATCCTCGATGTAAGTTACGTTCTTCTGTACGAACATGCG  
GTTGTTGGCTTTCTCTGCTCCCGGACCCAGACGCCGAGGAAGCGGCTCTTGAGTAGAAAA  
GTAGTATTGATAAGCTTTTATTACCATCGGATGAGCGATCATCACCGAGAAGCCCTTACG  
AGAAGCCAGCCCTCCGATACCGTGGTGTGTCATTGGCACCCGCATTGTCCATGATGTA  
AGTACGAGCTTCAGCTTCGAGAACGTCAGAAGTGTGATTGCAACATTTGTGAAGTCAAT  
GTTTGCAGTGTGCTGAGTAACACCCCACTCGGTGAGGTAGTTGTACTGAGCACTCGGGTC  
TTGTGGTGGCCAAGATTTACCCATGATCGCCGAAAGCCTGCTTTTTCTTTCATTTATTC  
GTGAGAGATGCGGCAACGACGAACCACACGAGCAACAACATCTCCTACCGTCTTCGGGGC  
GTCAGTAGTGTAATACTTACGGAAGTTCTGTACGTCTGCCGGAGTGATCTGACGATCAA  
TGGGAAGAACGGGATGTTGAAGTTATTCAGTTGCGCCTTTTCAATCCCAACGTAGTTACG  
TTAACCTGACGACGACGAGCCGGGAAGTAGGTTTCAACTTCGTCAACACGTTTCAAGTATG  
TGCAGAGTTCGAAACACCGTGGTACGCTTTGAACAGGTCCATTTTGGCGATAAGACGGTA  
CTGACGTGGTACGATTTCCAGAGTTGCGCCAAGTTATTCGTTCTGGAAGTCGTCAGAGCG  
TACCACTCCCATTGTTATTCTCCTTGGTGTATATTAGATAGACGTTCCAGGGAGCTCGTC  
AGAGCCGTCCTAATATTTCTCGGTGATCTTCGGACCTTTGGCCTCAAGAGCCGCGTAGC  
AGCAGTGTGTAATGCAGTAGTACCGCCAGCGAAAAACGGTTTGGCTTCGTTTCAAGGTAAG  
ACCACGAACCTGCCCAACTAAGTTGTAAGTACTGCCAACACGAAGTCACGAGGAGGATC  
GTAAGCAGGAGCCAGATTACGGTCCGGGATTACACCTAATGCGTCAGCAGCAGCGGAAGC  
GGCCATTGGTTCGCACGCGGCGTTCACAATCATATCTGCTTACATATCAGCTACGAACTC  
AATCGGCATTTCCAGGAAGCTGTAGCCCTGGTCAAGTATAGCCACTTTACCCTGAAAGAT  
GTCCGATTAGTACCCATAGATTGGATTATCCATTAATTTAAATCTCCTCGATTAGACGTT  
TAGTGCAGCAGCTTCACGAGCGCGATCTTTCGCTTTCTCGATGTTAGCCTGAAGGGTGT  
TTTGGCAAACGTGTTGATGTCGTCGACGGTACGTTTCGCTGTCTTTTCCGTGTTCTGCAGT  
GCCGAACCTTTCTTACGTTTTCAACCTCTGTCTCCAGTTCGCAAAGACGTGCTTGGGC  
TTTGTCTAGAAGAGCTACTTCCGGACCGTTAGAATTTGCGATGATGAAGCCTGCCGGAGA  
AGCCTGGTCAGCTTCATAAGCAAACGTGAAAACCTGAGCTGTAGACAGAGCGTCTTTCTA  
TTCTACTTCAATAGCGGCCTTGATGATTTTCAATCAAAGCAGCAGCTTTAGCTTTGTCTGC  
TTCCAGTTGCGTGACCAGGTCAAGGTATTCCTGAGACTTGGTTACTTCAGTTACATTATC  
GGATACAGAGGTCTCCTTATTTTCTTTGGATGTATCGATTACAGGGCCAGGACCTGCTTC  
TTTGACGACCCGAGTCACCTGGAGATCATCGGACTCACCTTCGGAGATAGTCAGACCTTA  
TTAAATTACTCCCTTTACAAACAGTCGCTGAAGCTTCAGAAGTTTATACTGTTTAAACAAG  
GTCGATTTCTTACCCTATGCGCCGCTTGGCGATAAAGATTGACTCAATACGCCCTTC  
CAGCCATTCCTGATGCTGTGCGTTCCAAGCTTGTGCCACGCATCAGCAGGGTTTTTACG  
GCCCTCATCTTCAAGTTCAGTTTCAAAGCCCAGCAGTTTTTGCACGCAGTTCTGCATCGTC  
GCTTCACATATAGAATATCTTACGCAGGAACCTTTCGAAACTCATTGAACCGGTAACCTG  
TTGCGGCGCCATGATAACGTCTTCGGTAACCCATTCTGGTTTCAGGTCAGAATTGCTCAG  
AAGTGATACTGGACGGAGGTTTGCAGAAAACCTTACTCTCATGGCAGAGTGCAGAGACC  
TTTTTCCATAACGGAATTGGCTTATGCAATTGTCATTCGCCAACTTCCTCAACATACTCT  
ACACGGAATTCAACGATGGAGATTTCTCCCCTGCTTGGCTCGAGTGATCCGGAACACTGA  
ATGCTCAGGCCACCAACAACGTTGGTCTTTTTAAGGTCCCACAATACAGGGTCGTTATAT  
TTATCTTTAGCTACCCAGGTGCTAGCCCTGAGTACGTGCTCGGGCCGGTTAACCACTACA  
TGAAATTATTCCTGAATCCAAGTCTACTCGATTGGGAGAGAGTCACTCTATCACGTGG  
AAGTGATTCTTCAACATTGCCAGCTTCGTTGGCCTTATCAAAGTCTCCTTGGCCTTA  
GCGATTATCTCAGCAGACATCCATTTCGGAGTGAGCGTCTAGTCATCTCTTCCGTAGATG  
ACTTCGTAAGAGATTATCTGATCATCAGCGTCTTTCTCGATGCTCAAACAGAGGTTGAC

TTGTTGATTTTCAGACTTCACCTTCATTTTTGACATTGTCTTTGGAAGCCTTCTCGATAGCG  
ACTTCAGGAGATTGGACTCAAAGAATCAGCCCATTGTGTAATACACAGTACTTTGCTCTTC  
TGAACGAGAGACAGCTTAGATACCGATGCAGGCAGGTCAGCCATACTTGTGTATTTTCATG  
ATTCACCCCGTTGTTAATTAGTTTAAACACCGTTCAGTTTCTTATGCAAGCTGTCTCAGCA  
ACTTCAAATTAATTATCCATATTGACTCCGGAATAGTCTATTTTTGGAGGAGATTTTTCT  
GTTCCATTAGAGTTAGAGCCTGCTGACATAACCATCACTGGAGCGACTGGTATCTTGATCA  
AGTAGTTTCAAAGGTTGATCATTTGATATGTCATCGGAGATCTCTTCGTCAAAGCCACCA  
ACTTCAAAGAATCTTCTTGATAACTGTAGTAGTTTTAGGAAGATACCCAACAGCACCGAGA  
CGCTGACGTAACCTTTGAGAAGCCTTCCATCCCGAATTCTTGGATCAGGCCTGTTCTAAGT  
ATGAGCATGTCTTCGTCAGCAAGACGGAGCTCCTTCAGAGACAGAAGCTGAGGGATCAGG  
TCCGTGTTGAAAGCCTAAACAATGATGTTGATGTCACGCTGAACGAAATGTCCGTTGCTG  
CACTGCTTCTATTCAGATAAGGTGTAAGACCCCTGGCCATCGTTACCATGGCTGATGAAT  
CCAGCGCCAAATCAGTCAAGAATTGCCTTTTTGCGAGAGCTCACCTGTTCCAATGTCCCTG  
TACTGATTACCTGCACCGTCAATACCTCTGTGAGACATCTTGTACTGTTACCACCCTGA  
ACGTTAATGTCTGAAGGCAGGATGAAGTAGGTTTGTCTCACCTGCGTTGGCGTTTGCAGCA  
TCCGCCATCAATCCTTGAACCTATTTCCGATTCTGGTGATTTCCGGTTCAATCGCTGCGTTG  
TTCAAGATCTGAGAACGGATATTGAGTTCGATGATAACCACCAATATCTTTGGAAGCACAA  
ATTGGTTCGAGGTTTTCAACCAGAATCCTTTGACGGAAAGCACCTTGACACCAAACAAGA  
GGCGCAACACCATCAGGGGGTGACTCTGTCCCCCAAGACTCATCACCATCAGTTTATTG  
ATAGGAATGAAACCTTCATACGTAGAGGAGGTCAGATTACTACTCAGGTTTCATAGAAGT  
GAGATTTGCGTCAGACCGTTGTAGAATTTGGCAATGGCTATAGTACTCTGGTCATTCTCA  
TTCAGGGTGCGCCATCCTCATCAAAAACCCAAGGTTTGGAGCGAGAAAGACTTCATTGT  
GGGTTAAAGGGTAGCTTATCACTGGTTATATACCCACCAGATTTAGATCAGGCAGATTCA  
ATACGGTACACCTTCGCAAAGATGGAGAATCCATACTCATTAAATGTTGCGTCACTAATA  
GCCATATCGCGATGAGTTTGTGCTGGGTGGCAAGGTCCTTCAACGCGTATTCTGTAAACTCG  
CCTGCATCTTAGGATGCCTTACTATCACGATTATGCATGACTTTGATATCATTGAACGCT  
TTCGTTACGAAGACATACTTCGTATCAACCGCGGGGGAGAGTGTATCGTCCTGCTTCATA  
GCCTCGACGTGTGCGCGAAACACTGCCAGCGTAACTCCCCCCCCCTTCATCACTGGGAT  
TCAGCCCGAAGCTATGAAAGAGCAACAGAACCTAGTTCCCCGGTACGAAGACGAATACCA  
ACTAGATTTTCGTTTCCTGTTTTACCACCTCCGATGGTTGTGCAAATCCTGTAGACACG  
AGTTATCCCCTCTGCTATATTCTCTTGTACAAGGTCGGAGGAAGAATTTTCGGGATAACT  
ACAGGTTCGGACGATCTCCTTCTTCTCCAAGCAATTAATACCGGAGCCAACGGAACCCGCT  
GAAACATTCTTACAGGTTCTTGTGCTTCGCTCACCATTAAACTTTTTAAGTTCAGTCATT  
AAGGCTTCAACTGTCTTAGCATAGAACTGCTTCTGACAATCCACACCATTCTGACTGA  
GCAAGTATTGCAAAGGAGTGAAGCATGTAAGTTTTGAGTTAGTCCGTGGCGTCGGGGCT  
CTCTCAACCAGAAACCTTTTAGCCAGAATCTCACGAGAGCTGGTTGTGAACTCACTAATG  
CCTGCTTGATCGGGGTCAACGCTGAAGATGATAAATACATTATCCTCATTGTATTGGGCT  
TGCTTTTTAATGGTATCATCACGTTACCCGCTTCTTACAGATACGGCCTTGCGTCTGA  
GTGGAGTATTGACCATCATCAACAAAGTCAGGGCAATAATCACCTGAACGATAATCACAC  
CGATCAGAGGCTTTACTTACATTCACAGATGCGGTAAGTCAGGGTTTCTGTTACCAGAT  
CTTCGTTGTATACCTGCCTTGTGTAATCGTCTAACGGACGTGACGCCCGGTGGTGGGCAA  
GGATCGTCCTTGAGAAAGGATCGCTGGAAATATTTCTCACCTTCTGGACGAACTTGCCAG  
TTTCCGCGGAGTAGCTGTGCCTTTTGAATCCCACAAGACCCTCAAGGAAAGGAAGATAA  
TCTGGGTTGTTGTCAAGCAACGGTGGGTTAGCGAAGATAGTCGCACCCATGAATTAGAAG  
GAAAGTGGTTTTGGCTTGTACGAATGTCCAAACCGTACCAATGCTGCTCAATAAGTTC  
TCTGCTGTATCTCCCCAGAGGAACTACCGTCCCGACGAATGAACCAACGGATAATCCCG  
TCTCGCTCCGCAATAGGCAGACCTTCATCGTCGAGATAACCACTCAATCCACTCTTTAATC  
TTGTGGTCTGGGTCCGGGTTGCGTGTGATGACGATACAGCTTGGGTATATGGATCCAGAA  
CGAGGACGAGACTTGAGGTATACGATCTCAAACCATTCACTGTGTACCTTCGTCAAAG  
ACAACAATGGTGTACTGTAACCCCTGGTGAGAATACTTGTCTTTCTCGTAATCCATGTGG  
ACCCATTTTACTTTAGCACCAGATGGGAAAATTGATTCCAGGTCCTTCTCCCTGAAGCGT  
GGTTTCCATTCCCGATCAAGCTGTGTATAAATGCCACGTGCGGTATTCTGCAGACCACCA  
CCACCCTTCAACTAAGGGGTGTTTCTACGGAACCTGATGCAGTTCGTTTCGTGATCGTCG  
GTGATATTTAACGGTATTAAGTGAAGCAGGTAGGATTTACCTGATCCCGCCGACCCCA  
ATGATCAGGATTTGTGCGTCTTTTTCCACTATCATTTTTCTTGTAGGAGAGCCAGGTCGG  
CATGTTTTAATCAAAGACCTACATATTAAGGCGTAGTTTGGCCTATAGGACGTAGTTG  
ACCGTTAACCTCGATAAAAACAATGCCCTTATGACGAAGTAGGGGCCTTGTCATCACTT

TAGCGTATTA AAAATGTTACGGACGTAGTGTGCGGAGTCCTTAACATGCTGCGGCCGTT  
GGTAGCATT CAGGATGTTGGTCTGCATGACCGCGCTGTTCTCAGAGTTTGATGCAGCATA  
CTTAAGAGGAGTTGGCTCCACATGATCAACCTGTGCAGCAGCAGGTGGTTGTGCAAGAAC  
CTTTGCAGGGTCAAACCTGTCAACTACCGGGACAACATCAGGCTTCCCCTGACAACCGAC  
CCGTAGGGTGATTGCCATCAGCAGTGCCCTTAATGCTTTATTTCATTTACCCCAAAGCTT  
TAGTTGTA AATGTCAACAAACTGGTTGGCAAGCCCTTCTTCTTGGCTGCATCAGACGTG  
ATGTAAACTTCTTGCTTTGAGCTGAGCTGTGCCTGCAATTCTGCAGTTTTTGTCTGCTCT  
TCTGCCGTTTTCTGTCAAGGATATGGGTTGCGATCTGTTTTTACCCTTGTAAGATTGA  
CTTTCATCCGTGGTTTGTGTTGCAGATCCATCCATTTTCGATCTGTATCACTCACCCCT  
AAGTTGTAGGACTGCGTGCTCTGCTCGTTATACCAGTGCTTTGCAAACCTATCCCCCTCCA  
ACGATGCCGGCAAGCAGTATGACCCCTTCGATTGCCTTTAGTTTGCTTTTCATAAACTTC  
AAAGCCATTTCAAGTTGTATCATGAGATTTCCCATTGGAAACAATTACCCGCACGATTT  
TGAGCAGAGTTGTATCCTCATGTTTCGATCTTATAACCGCATCATTGTGCGGCGATCCCGG  
TAGGCTCGCTCACAGACACCTCAAGAAGGACAGCGCCAGGTAAGAGGTTATTTCTCCCC  
ATCTCCCAGTGCTACCTTTCCCACCCCAACACTTGTCTACGTT CAGGGCTTCTGCCCCGT  
CTAGATGAAGGTT CATCTAATCAAGGTAAGCTTGTCCC GGTTTTCTCGGCCGGAATGCCAA  
CTTTGTGCC TTTGCTCTACAGCTTGCATCAAGCACAAGTTGTCAGAAGGACGAACACCCC  
GCAGAGTTTTAGACTCTGGCCTTCTAGTATTCTTTCTGAGACGTTGGCACAGGGTAAGA  
TATTTACCTCTTGAAGACCCGTCCAACCACCTTTACCGACCTTCTGAGAGTCTGTTGCAA  
TAACGCGAATGATTTTATCACTAGCACTATCCAGCTTATCAAATAATAGCTCAAATCAA  
ATGGCCTATCTTCATCGAAAAGCTTTC AACGTTTCGTACCATATATTCCAATCAGGAGGG  
CGTTGGCACCTTCCCAAGTTTCAATACTGAAACTAGAAGCTGCAATGCCAAGCTTCATGT  
TCACCCGGCGAGAGATTGTATAACCCGTGAGCGCGGTACTTATCAGCACGAAGCATACTAA  
TAATAGGGGAATCGGTCTTGGGATTCAATACCAAACCTTGTGAGCGATTTGCTTCATGA  
AACTTTAGTGATACTCCC ACTGCCCTTTTGCAAAGCTGAATGACCGTATATGAAACGTAA  
AGTCAAACCTTGACAAATATCTTCTGTGCATCAGCGAAAACATGAAGTGCGATAGATTGCC  
GAACCGGTAGCTTTTTTATTGGTAGACATGACACTTTTATCGGTCATACCGATGTTGTAA  
ATGTTGTCAATCTTACTCTCTTTAACCGCTTGGGTGAATTCCTTAAAATCCTCAACAGAC  
AAGTCCTTCCAGATTTTTGCCAAGGAATCAACTGACAGGCGTGCCATCGGTTGAACTTCA  
GCTTTGATCACCAGGGGAATGACATAATCATTGAAGCTTCCCAGATCGTCAAGTTCCCTG  
AAATATTTGAATGACCGTTTGGAAATGCCCCAGTTATCAGTCGCCTCTGTACGGCTGAT  
TGACATTGCAAGAGGCTACGATTAGACATGTACGCAAGGAAA ACTCCCAGGTAATCCCAT  
GAAGAGAATTAAGGTCTATCTCGTTTACTTCGCGGATGGAGAATAAGGATGTGGGGGTA  
CCAGCCGCAACACGAATGTCGAGGGC GTTTATGTATTTCCATCAACCCGTTTGGAAATAATG  
CGACGGAGGATCAGGTATTCACGTTGGTATTCTTCTTTTGGAAACATATGTAGCATGGTT  
TTCTCCTTTAGTAATAAAAACCATTTGGAGTATCCCAGTATAATAAAAAGCAGCGCAATAGCG  
GGGCGAGCCATAGGAGACGAGATTGAATATTTATTATTATTAGAGTAAGAAAAGTGGCGA  
ACGATCCTTTGCTCGTTAAGGGTGTCTTATCCTTTCCAGAGCCAAGGGTTTCTTTTGTGT  
CCGCTTAGTTATTTGAATGCGTGATCGGGACTCGTACCCGCAATCTTCCGGCTAATGAGGC  
CAATATGATCTATATAGGCGTTTCACTCCCACGCAATTGTTTGGTGGGGCCGGGTGGACT  
CGAACCACAGACCATATCCTTATCAGGGAGGAAGTCTACAAACTGAGTTCCGACCCCATG  
TAATTGGTATTTCTGATGGGATCGTACCACAGACGCTTGCAGTGTAAGACAACGTTAT  
ACGATTGAACTAAGGAAGCCTTAAATTGGTGGCCGTCAGGGGACTCGAACCCCTAAAATC  
CGACTTCTAAGAGCGGCACGTATACCAATTCCATCAACCGCGCAAATACGTTGAATTCCC  
ACTGTCATCCTGATCAGCCAGGGTCTTATGAAGCATTATCATCGGCCCTGTAGAGGGTA  
TCATGAACCAGGGAGTCAATGCCTTTGTGTGGTGGAGAATAAGAGATTCTCACTCTTCTG  
ATATCCCCGGTGGAACCGAGGTGTCGTCTTACGCAGACCCCTTCCCAGTTGGTGCAAG  
TACCCGGATTGCAACTCCGATCCTCAGCTTCATAGGCTGATGCTCTGTCCAGGTCATCTA  
TACCTGCATTAATAATAAGATGTTCTCTACCCTTAAGTGTAGCCAAGAAGCCAGGCACTT  
TTTGGCTGGCACTCAAAGTCTGAGTAATGACAGACGGCGATGGTCATGGTACCTGATACT  
GCGGCATCAGAACCACGACAATAGAGTTGATCAAGTGGCATGCTTTGTAGTCTTCCAATA  
TCAGATTTTTAAAATGGT CAGACCGGCAGGACTCGAGCCTGCGACCCGAAGCAACCAAGG  
CTCCCACGCTCCCAACTGCGCTACCGACTGTTTGTGTAAGTAATAATTGTCCCAGAAGCT  
TACAACCTGGTATCGCTGGCTAGGTAACAAGTTCGCTCAGAAAAGTTTTAATTTGCAAGGA  
GGTTGTATGGCGAGGCCGAGGGGGATCGAACCCTCATTTCGCGCATAGCCAGTGCGGCCAG  
CTTCCCCTCGTCAGCCAAGGCCCATAAATTTGGCGACGAGTAGAGGATTTGAACCTCCC  
TTGAGTTGTCACTCGCGGCTTAACAGGCAGTCGCCACCCAGTAGGCCAAATCGTAATTT

AACTACATTATCAGCTAAAACAACCTTGCAGCAAGAATAATTTTCTCAAATTTACAAATGG  
TGTCTCTGGAGGGATTTCAGACAACCAACCCTCAGATTAAGTTCGGATACCTTTGGCTTG  
CGTCACCACTTGGATACAGCACCGGTATTGGGAGGAGAGTGGAGGTATCGAACCCCTACC  
AATTCAGCACACAGGCTTCGAGATTGCTCGTCCACCGGGGGACGGCAGTCTCCTTACA  
GGAAGATGTCAGACTGTCAATGATTCACCCCTATCGGGGCTACTGTCTATTTGGCAAGGA  
GATCCCTTGCCTGATTATGGTTACTCTTCCAGATGTGCCCGAGAACCAGGGAATCTAACT  
CTCAAGCCGTTTTTACCATTTCAGCACGTTTCAAGGAGGTTTTCTCAACTGTCTGTTGTCC  
TCTCCAATTTGGAGGGACCTGTGGGTATGGCGCTCACTTCTCAACGTCATGGGTTGAAC  
ATCATCTCATAAATGCTTTGGCCACACGTGAGGACTGTCAAAGAAAATGTTTCAGATTTG  
GGTCGGCGAGGAACATTCGCACCTCCGTTGTCGTGTTTCGAAGCCCTATGCATGAGGCCAC  
CTTTGCCAACCCCTATTGGCGTGAAGGTGAGGAATCGAACACCATAACGGCTGGTTTGGG  
AGGCCAGCTTGCAGCCACTTAAATTATGTTACCCGCACAACGTTTCGCGCCCTATGCGGG  
GATCGAACCCGCAACCCCACTAGAAATGGGTGATGACTTTAACTATATGTCTAACACGA  
CAAATCGAAGCGTCATGCCGGATTCCACCAACGCCACCGACTTGGAAGTACGGGATGCT  
GGACCGCTAACACTAATGACGCATAATTTTGGTGGGAGTACCAAGCTAAACCCCTGCGAG  
ATCACGATTATCGGTTCGAGCGCTCTGCTAACTAACTATACTCCCTTTGTTTTGGTGGCC  
CACCTGGATTTCGAAACAGGAACCCCGAAGGGCACGGATTTTCAATCCGCTGCAAACACC  
ACTCAGGCATTGAGCCAAAATCTTTATAGCGGTGGAAGCCGATTAGCACAGAAGCTGATG  
ATCTAAAACACAATCGCTTCGATAAATAACAATTTAGCAGCGCATGCTGCTGTTCTGCC  
AATGCACCAAATCCCATAACTGCCCGATTAATGCGATAACAAGAAACATCAAACCCCAA  
TTGAAAATATTAGTATCCTCATATTAAGAGGTTTGGGTTAACCATTTTCGTTTGAAGGAA  
CGATGTCGGGGGTGAAAGGTTTTGATGGAGCCTTCAACGAAACCTTATTACCGCCATCAA  
CGTTTGTAGTTTTTTCTTCACTTACATTTTCTTCGTCGAAGTAATCAGACTTTTCTTCTT  
CGCCTTTTTTCGATGAAGAAACGTGCAGTGTACTCTCTGATGTTGACCTTGCTGCTGGAAT  
TCATCATCAGGACACATAAAACCTGGTGTGCGTCAGGAATCATGGGGATCACCTTTGTCT  
TCAGGTAAAGAAGATTCTTCTCAAGCTGAATTGCGTTAGATTCTGTTCTAAAGGAAGCC  
CTTTCCACGACGACGCTTTGTAAGCAGTTGTTTTTCGTGCCATAATTAATCCACCCATT  
CACATTATAAGAGATGATTTTCACGGTCAAGGGTTATGTTAAAATATTTGACTTTGAATT  
AAAAGTTTTTGAGCACTGTGAGGGAATTGAGCCCTCGACATTCGTTTTGAAGACGAAGCT  
GGTACCCTTCAGGAACCGTGCTTTGTCGAGGCCGCGAGGATTCGAGCCCGCGTACAGGAG  
TTTAGCAGACTGCTGGGTACCCGCTTGACTATGCTCCGTCAATTCTGGTGCCCATGACGG  
GACTCCAACCTCGTGACCATTTAAGCGGGAGATTTTCAGTCTCCTGTGTATCTCCATTTTC  
ACCACTCCTGCAATCCTCGTTCTGAAATATGATACATCAAAGTCTTTTCCAATAGAAGG  
TCCTCCGCTTTGTATATGCATAACATATTTCCCTGAGCAAGACCTCGAACAAAAGTGAAC  
AGATTTTTGATCAAATCTCTTCTCGCTCCGTGATTTGGACAATGTAAAGGTATACAGACA  
CAAAGAAAGTTCCAATATATTTCTTTGCTCTTAGAGCGGTCTTTTCTGCGTTAGCCTT  
TCTTGTTAAGAGTTGCAGATTAGAGATGATGTTGTGATTCACATGGCTGTCTGTGTGATC  
AACTGATTCTAAATCTGGAACAAGCTTTCTTCCAAGACGCATCTCCATAAGAACTTTGT  
GTAGGTTCTCGTTATTTGCATACCGTCATAAAGGTAGATGATCACATGTTGCATGCCATG  
ATCCCTAACATGCCGGCTTAAAAGTTTTCTAAGCTTATAGAAATACATATGCCTGTACCA  
GAATGGACCACGGACGCAAAAAATATTTTCAGCTGCATGGTGACTCCACCGACCTCCGTA  
CACCGCGAACGGCGCTCTACGGCCCTAAAGCTTCTGATACAGCAACGTGGCCCTTAGTCCC  
TGAAAGTCGATTGCGTGAGGATCATTCTCCGTACACATGATTAGTCTGTGAATCAAATGA  
TATCAGCTAATAACTTTAGAACACGGTAAACATCTTATGTACGGGCTGAAGTCCCTAAC  
ATCGCCATATCCCATAACAAGTACTACGTGTTTTCGACACACCCCGCCTGGACCATTCT  
GTAATAATCGGCTCTCGCGATAACCAATTTTCGGAAGCACCCCCAGTAGGTGCAGAAAG  
TTTTTAAGATTCTCAAACCCGTACATCAGGTGTTGTGTACCGGATGACGGAAGCGCACCG  
GATTTGTATTCTCCTCCCACTCCACGCTGGAGGGTGTTTTTCTGGTCTGGATGGAACCCGA  
CCTTGCCCAAGGTCGTACCCGACATTGGCTCCTCGTACAGGAATCGTACCGGTGCTTATC  
GCGAATTTTGGGATTACACTACCAACTTGTGCTAAGGGGGAATTCTTAGGTGCTGCCAGT  
AGGTATCGAACCCACGTCTACGGCTTACAAGGCCGCTTCATCGCCACTTTTGCTTTAGGA  
CCGAGAATGCTGTTTCCGATAAACTGCCCGGCGGTGTGGTTAGCCAAAGCCTGTGAGCCA  
ATTACTTTTGACCCAGGATTTTCGATAATCATGCAAAGTTTATCGATGTGTTTTGTAAGTT  
CCAAGATTAACGTTAACCTTTGAACTTTAATCTTTGAGTTTTGAACTTTAACCTATTCT  
ATCTCGCCATTCGATGTTTGTCCGTGCGGAGATGTTGTCCGAAGAACAGACGTAAACGT  
TTCGTCCAATATGGTTAAGTTCGACGGAGTTTAACTCCGGCCTCGCTAAAGGCAAGATT  
TCTTCAACTTCGCTTACCAAAAACAGCATTTAAAGAGTTTACCGGTTGAAAACAGGAATG

ACAAGATCTTTTTTCATAATTCCCGCAATTAATTTTAGAGTAATCCCTCAATCTCTAGTTC  
AGTCTTGGCATTGATCTCAGACAGTGCAACGTCAACGCTGGAAGTGAAGTCTTCGATCTC  
TGCGTCCAGAGAGGGGAGGGTGTCTGCTAGACACAGAGCATCAACGGTAGACGCGGTGCT  
GATCATGCGGGTAGGACCTTCTACGACCTTTAGTTGTTACCATCCGGAGACTTGTACG  
ACGAATGTACGGTGC GCGCTTCAGTTCCAGTTTACGTCGA ACTCCATATGCTCCTTGT  
AGGGCGTGCTGGAGCATGGTTGTACTGGGCTTTCAGCTTAGCAAGCAGAAGCTCTTTGTA  
TGAATGGTGC GTTTGCGTTCAATCGCCTGCGCAACTGTCATCTCCTCGTTATTCACGGC  
AGCCTTGGGGGTTACGTCGCACTGCACAATGGCAGCTTTGAGTTCGTCACGA ACTATCAG  
GAGGTCTTGCAAGCCCTGATAGTCTGCTTTAGCAGCTTCTCAAAGGCATCAACACTGCT  
CAGAGTACCAGGGATCTGACTCTAACCGTCCATTCCCTTAGCTATGTTAACAGCCTTAAG  
CCATAGAACACGTTTCTCGATTTACCCCTGGATCTTGATAAGACTAGCCAAAGCGCGGGT  
CACAGACATCTTAGCAGACATATTATTCACCTCTCATTTAATTTTGAATTTAGTAGTTAC  
TCCAAATTATGTGCCGACTTACTTGTGCGGCGCAGCATATTAGGTTTTGTGAGTGTGACC  
ATCACGCATTGGCGACGAGGACGTGCCTGAGCAATAGCGAGACGGTTTTTACGTTCAGAT  
TTAAGGTCAGCACGAGCAGCTTCAACTTGTTTCAGTAAGTATTGCTATACGATCCTCTTTC  
GCTTTACTATTGCCAGTTAGTTCTGACATTTGAACTTTGTGAGGAGATTCCAGGTTGTGC  
TTCGCTCGGTTAAGGTCGATTGGAGCACGGCGCTTAACATCAGCAACAGCGGCATTGATC  
GCTTCTTCGTTATTGTCTGTGCAACAGCCAGTTCATTATGCAGTTCCTTCAAGAACAGAC  
GGATCCATTGCACCCAGATTGCGCGGATTCAGCACGATTGACATAACGCTATCTGCGTTG  
TCCAGAATCTTGACCATCAGTTTGGATTGTTCTTCAGCCAGCATGTCGTTAAACTTCACT  
TCAATATGACCCAGTTCCTTGTGTTTGA ACTCTATCTCCTGACTGATCTGCTCAGAGGCT  
TCCGCCAGGGCTTGAACATCGGTACCTGCCTTGGATAGGTTAGTTGGATCAGCGGTTACC  
GCGTTGGTGGCACGTTCTGTTACGGAAATTACAGTTTTAGAAAGCAGACATTATGTTCTCA  
TTTGC GTTAAATTAGGTTTTAAATAACCACAAATACTGATTGTGTTTGTGCGAGCGAATCTT  
TGACTATTTCTTCGTTGTGCGGGTTGTTTTCGGACCACGACCAGGAATGCCAAAGAATGA  
TAATCGCTAAACTAACAAGCATTGTCAGAATAATCATGCCGCCGCTCATCGTACAACGTC  
CAATATAGAATCAGAAAATTCACAAACAACGTGCGCGTTCGGAGATACGATCATCTCATC  
GGCAGGGTGAACAACCTCTACTGCGACATCCACAAAGGGTTCGCCACAGTTGCCGAAAC  
AGCAACAGCAGTAACAACAACATCAACATACATGCGTAACAGAGATTCGAAAATTTATTT  
GCTCTTTTGTAAAGTTGCTGGGGCACGAAGGATTCGAACCTTAGACCTTCGGCTTAAGGG  
CCCGCTACACTAACAGCTGTGTTAATACCCCGAATCTGGCCCGTGTTTTTTCAAGAGGTTG  
CCCGGGTTCGTCACGCTTGCTACGGCCCTTAGTTTAAAGAAGCATCGCCGACAGCAGCTT  
CGTCTATCCCATGCCGGATGAATTAATTCTGCTTACCTTTCGGCGCTACAGCGCCTACA  
ACCTTCGCGTCTTTAGCTTTAGCAGCGCGTTCACAGTTCGTCCTGTGAGTGC GAACACTA  
TGTGAGGCAGAAATGAACTGACCACCTTTACGCGGGAAACTGATTCCCGGATAGATACA  
ACGTTGCCATTTTCATCACGACGCTTCTTACGAATTA AAAACCGTCTTTGTTACACCGCCC  
AGACGAGCATCATGAGACGCAGACTGGGTCTGCGTCGACTTGGACTGAAACTGGGACGAG  
TGTTTGAATACGTCGATTACACCAACGTTCTTGTGTTGCGTTTTTGTAGCCATGTTTTAG  
TTCTCCTCTATTTGATAATGTCTCGTTGACGTTAGTAATACTAAACTCTCTCACTTCCTC  
TGTC AATCGTTTTTTTAAATTGTTTTTCACTACTTTATGAAAACCGAGTGAAAGGTCATAA  
CGATCATAGGTAACAACCGAGGTTGCCTAGATAGAGTCAAATCGGCTGTTGCATGATTCT  
GACATATTAGGTTTTTCAATGATACCAAAAACTCATATAGACGTTTCATTGCATCTGCG  
GCTTGGTAGTTGTAGCAGGAATTGAACCAGCCACCCCTTATTTATGGGGGAAGCGCTCTA  
CCCAACTAAGCTACATAACCATTCCGTCTTTGTGGGATGATTACAAATGGTTAAAGAAAC  
CTTTGGCAACACCAACATTGAAAAAAGCGCCAGATTTTTATTTCCAGTGCTTCTGGCAT  
TACTTGCGATCTGAAGTCGCCTGGTTGTCAAGACGCTGGTGAGATCATGCAGCTTCACCG  
CGAACAATCAGAACATCCTGCTTCATCACACCAACGTCAAATTGCAGGTGAACA ACTTTC  
TGTTGAGAGTTGCAACTCAGGCTGACAGTGTTTCATTTGCTGATTTTTGTGTCTAGTG  
CGCCAGTTACTGCCCGTGTCCCTTTTAGAACCGCGCCAAGAATAGCCTTTCTAAAAATT  
TTATTTCTCCTGGGTTATGAGCAGCAGAAGTATCTGCATGATCTATTTTATTGAAAAAGG  
TCCTAATTTAGTTCAGGAAATGTCCGTAACAGAACCATTCTGTTTACTAACATTGCAGGT  
GGTTACCTTCATTGGATCCATGAACGGAAGGCCGACACTCTACAGTCTGTGTAGTAATC  
AAAATTACGGAATGTATCAGTGGGCCAGTCTCTGTGCGTCTTCTCAAAGATTGAGTCAA  
AGTCTGGTCTTTCAACAGAAGCAATACCCTATCCTAAACCTACGAAAATATCTACGTCTG  
CAGACAGGCGAATGCCTTCACTGTAACCAATAAATACGTCAAATTCGTCTTTCATCTTTT  
TACTCCTTTTCGCGGTGGACGTGTAGTCTCCGCTTCAGCACGGCGCCGCTTGC GGTTTTT  
ATACTGTCAGGAAGATTCGAAGAGAGTACTTGAATATGAAGTCACCGGCAACTGGGTAGA

AATAGGATAAGCCGCCTTCTTTTCCGAAGGAAGCCACGTATTGTCATGCTTGATTACCAA  
AGCCAGGCCTAGATAAAGCGATGTCTTTAGCTTTTGCAGTCGCTTCGTCAAGGGTGGGT  
GGTGTGAATCGCGCTCAATGTACTCTCCGTTATCTGATTGAAGAACAAGCTTTAATTGAA  
ACATAATGTCCTACAGTTGAGTTCTTAAGAATGTTCGAGTGGCTTCGATAGCTTCGATCTT  
AGTAGTTGTCACTATATTTGTTCGATCAAACAATCCCTGATGCCTTGACACTATGACGATA  
TTCTCCTAGTGCTAAAGTCTTGGGGTCAAGCTCTTGGTCATCTTCATTTCGGATTATCAAT  
CTCAAGGAAATGTTCCCTCCAGACCATCAAGGTTGTCCGGCTCCCAAGCCTTCTTCTGGTC  
TGTGTGTGCGGAGGCACGATCGAAATCATGACGACTAACTGGCTTTCGCACTCAATATAT  
CCTTTTCTCTATCTCCCAAATTTTGGATCGTCAAGGTTCTAAATGTTTTATTTTCGTT  
TATCAGTCCCCCTTTTATTTTACAACATAATGCTCTCGTTTTTCAACCCACGTTATGT  
TACCATGTCCAGTGTTGGAAGATGCAGTGACATTCCTATTATACATTTTCGCGTGTTGCTT  
TCTTCAGGTTTACCCCGCATTGTTGGTCGTTATCCTGTTCAGTTTGGTCAACAAATTCAG  
GCATTTCTCCAGTCATATAGAGATGAGCAAGTCTATGAGCCAAGTGTAGCTTTCCATCAA  
TACGTATCACAAGACAACCGTGTTTGCAAACCCAAGAACACTCTTTTCCAGCAAGGCAGG  
TAGTGTCTTCTTTCTTAAATAACCCCTCTTTTAAACCACGTGAAACTGCCTGTCTGGGGAT  
CGTAATGCAAACGTGTTACGAGAACTCTTGCCTCAAACACTACGCGCTGGATTCTCTTCC  
AGATCAATATTTCCGGTATTAGTGGGTAAACCACACCGTTTTATCCTAGCTGGCGTTCATG  
TGCTGACCGCAGCCAACGAAAAGGATGCAAACGCCTGGGCCGTGGGGCGTCAAGATCAGCT  
TGGAATTCTTGTTTACAGGCTTTGCACTGCATCATGACTGGTCCTAACCTATTAGGCTCC  
TTAATATGAGACGGGTTTTTGGTGTGTTATTACACGAAGGGCAATCTCGTACTGGGACC  
TGATGCCAGTTGCGTGGTTTTTCCACAGCCTACCCCTCAGAAAAGCCCCGAAGAGGCTC  
ACAATTTAAAGCTGATAAGATGCCCGAACTCGAATCTGTGTCAGGTCTTCGTCAATCTCC  
AACTCACCTTGGCGAAGACACAACGGAGTTCGTTATCACGAGACTGTACCTCATGCACC  
TCCAGACTGACAACCAGTTTTAACTGATTGTTCGTCACCAGGAATAACCTTCAAACCCCT  
TTTGCTGAGATCTTACCGAGGTCAGTCTTCGGCTCTTTCTCAACTATGATAAGCTTGCCG  
TCGATATCTGCACCCGTTGATTTACAGCCATGCCAGTGAATCAAGAGCAGTGTACTGG  
GTTGTGTAAGAACCAAAACAGTACACGATGTTACTCGCTGCAAAGCCACGATCTTTCAGG  
CGTTTTAAAGATAGCCTTTGCACGAGCAACAACGGTAGAGTCACCGGAGACCAGGGCGACA  
TGACAATCAAGAACCTTATACCCTTTGGAATTAATTTCCGCCACCAAAGATTTCCAACAAA  
CATTCTACGGCACCTTTTACCTCATGATCTGCAAGAGCTGTCTCCTGGAATAAAAAGAAAT  
ACATTATCGTCAACCTCTACCAGAAGGCGATAATGTTTACCCTCAATCTGCGCAACTTGA  
GAGCTTGCCTCAGCCTGTAATGCTGTGTTAGTCTCTGACCAGTCGTCGACCACACCCATG  
TAGCGAAACCCGGCAATAACTTGCACAAGGATACCTGAGTCAGGTTCGAAACACAAAACGA  
CATCCACGAGAAAGAATTTTATGTTTCCAGATCTCTGCTTATTTTCGTGATAGTCGATCTG  
AATTCTTAGCTATCTGCAACGTAGGAAACTAAACCGCTGGGAACAGTTTCCGTGATGTAG  
CGTTCTGGAACCTCGACTTCGGCAAGAGAACGTTTATAATCAAGGCTCAGGCATTCTTGA  
TTTACTGTGATTTCTTCAATCTTATTAATGATGACACAAGTATTGGTTGTTGGAACACTG  
TGTTTCAGATGCAGGGATACACCTAGAAGCTATCCTACCTATAATGTTGTAATAACGATTT  
GCATACACAATCGCGGGAATGGGATCAGTACCCATAGAACTGATCAGTTGACTAATTTCA  
CTCTGTGCTGCGTTATGTGACCCACCTTACCACGATATGCAAACAGTGGTTCTGGTAA  
GGAATATGCAGGTCATTATCATATGATTCAGCAGCCGAATTCTCAGACAGTTTACGATAT  
TGCCAGAATGCTGTTGAAGTTGTGATTGATTCCCAGGTTTCTAGTGCCATCACTCCTTCC  
AGGAAGTTCAGCAACCAGTAAAAATCCGGATGGGTATTTTGAATCGTGAACATTGAAACC  
TGACTGGAGCCAGAGTGTCTTCTGGTAATCGACGGAATTTTAGAGGTACATAAAACAAGA  
TCGTCTAGCTTCTCATAAGCCACATTCCCACCACCCCGCACCAATACTCAGTGAGAAA  
ATTTCAATTATAATCTGAAATTGCTTCCCTCTTTTAGCGTTTGAAAAAGTTTTTCATCAAAG  
ATATCGATCAGGAACCTCCGGACGGATCCGTGAAATCTAGCAAACAGCACTCGGAGCTCA  
TTGACTGCGCAGTGGATAAAGTGCTTTGCGTTACCGGCGGTCATACTCTCCTGAACAATT  
TCAGAACGTTTTTTCATACATCGACATATGACGCGGTCTGTACAAATCAGCGAAAGTAATC  
GGGCTTTCTTTATGCCGCATGTTTGTGCTTCACTGTGAAATTATTGGGGGCATAATAGC  
ACCCGTTTTATACTTTGCCAAGAAATTTTAGACGTTTTTCCGTCTAGTCGCTATATGCATA  
AATTTTATCTACACCCCATCAAGAATGACCTGCTTGCCGACTGAGAAAATACCGTGTGT  
TACATAAAGGGTAACATGTGTTAAACCATTCTCCTTCAACGCTGGTTCAAGGGCGATGAA  
TGTGCGCCACCATCATAAATGTCATCAACGATGACACATTCACGACCCGTAACGTCCCC  
AAAGACAGCCGTACCTGTGATCTCGTTAGTTTTTACATCACGGACCTTACCTGCTTCAAC  
AAGCGCAACGCGGAGATGGTCAGCAACCTTCTGCGCTTGTTAACGTGCTCCGTTCATCTGG  
TGAGAAAATCGCAACATCCCTAACAGCCAGTTTAAACGATACGTTGCTGCAAGTTCAAG

TTCGTGACGCATACCAACATTGTCAAGAAGTGGTGCAGAAACCTCTCTGTGCGGGTCATC  
TACGCTAAACGTATCCAACCCAAGTGAAGTAAAGGATGGTTGCAAAAACCTTGATGGAGAA  
TGCCTCGCCAGGCTGCATCCCACGATCTTATCGCGCATAGGGGATGGACGGCAGGTGAAA  
GAAATCCTTTGCATGAAGATCAAGGTTATCAAGTAGAGAGCAAGCATCTGCCCGCAGAGG  
AAGAGCCTTAACATCCGCAGAAGTCTTGAATTTGGCTGTGATGTCAACAAAACCAAAGTG  
ACTTCTGGTGCATAATTTAAATCGATCTTAACCTGTTTTTCACCACTCTTGAATGTAAG  
GTGATCAACATGGAATATCAGGTTGTTTCAGACGAAGTAGTAAACTAATTTGTTTTCTCCT  
CAATTAATTGAATAGCCTTTAAAACTCTTGATTGTGGATCGTCTCTGTGAAGTCGTCTG  
CTAACGAATCTTTTCCACAAACAAATTGTGGGATCGCACTCGACCCAATGTGCTCAACTT  
TGGCAGTTTCAGCATATATTTTTAACAGATTGGAGTGCATCAGTTTGTGCTGAAACAAAC  
TTTTCTTTGATTGTTGGCGCAATCTTTGAAAACATTAAATGCTATAATAACTTTTCAGA  
TTGTGAAGCCGGGGCTGGCAAGCTCTTCCATATTATCGCCGCATGTTCTTTCAAATTTTG  
TATTTGTAGAATAACCAAACGTGTTACTGTACTGAATACTCTCTGCTGCAATGTCAGAGA  
TGATCGTTTTATTCTCGATCCAAACCTTTTCATACAGAGAAGAGAGGGACCTAGCAACAG  
TGGCTCTACTCAACCCTGTGGAGTTTATGAAATCTTGGTAAGCATAACCCCGGACAGCCT  
TCAACCCCGAATCATCAAAAAGAATCTTTTCAGAAGCACTTCTCTAATTCGATTTTATAA  
CTTCACGCATAACATCCCCTATGTAGTAAAAATTATGTAATGCCTGTGTTTTGCATGCC  
TTTTGATTCTTGAAAACCGAAGTATGCTACGATTGTATCGAAGATCCTCTATCTTTGT  
CAAGAGCTCTGATACTTTTCGGTTGAGAGTTCCCACTCAACCCAAAAAGCTGTCACAAAGA  
TTTTTGAGATGGAAACAATACCTCATCCGCACCATCAGGGTTTGAACTTTTGAAGAAATC  
ATACCTCCACCACAATTTTCTCAACGGTTGCTCATGTTGTGGTGAGGGACGGTCTTCTAA  
AAGTCACTGTGATGGGATAGTGACGTAAGAGCCATCCCTTATGTTAACAGTGTTATCACC  
AACTTTTTTCTCCACCACCTTCTTCAATTTATTGCACCGCGTATATAAGTCGATTATACA  
CCAACGTAACGCAGATTCCAACCTAATTATTCCCAATCGGGTATGTCTAATTATTCCTAA  
ATAGGAACACAATGCTAACCTATCAATTAACCTAAATTATGATCTTTCAAATTAACACA  
ATAAACCATAGATCTATATAAAAGATCTTTAAGTGGGATCTATATTTGCTACGGTTATA  
GAGCTAGTGGCTCAGTTGGGTCAGTTGGCTCAGTATGGATGAACATAAATCTGTTGTCAA  
GATTTGACCTCTCGTTTTGTACATGTACCATGCTCCTACCGTTTTAGAAGAGAGTGTTAA  
TGTTGTGAGTTAAACCAGGTAAAGCCTTTGGAGACATGGTGGGTGGTAAGAGGCGTCGTA  
AGCCGATGTCTACAGATGAAGAAAGTACACGATTGATGAAGGTACGTGAAGACTTTCATG  
AATGCAACAAGGATCAGAAAGTTTGTGTCGAGTTAACAGCTGGCCAATCCGCGCCGGCGC  
TGTTTGAAATTAACACTACGACTCTGTTTGCGGTCGTCTACGCAGAGCAAATGTGGTGGTGC  
CTCAGATGAAAGACTTGGCAGTGGAGCACATCGATGATACTAGTACTGTTGTGATCCGA  
GTGAGATTCTCATCACGCACTGAGGGCCTCTCTGAGACGTTTTGTTGGTGTGGTCATAACA  
CTTGGGGTCCCTACATGATTTTTATGCAATTCAGGGCCACTCAGCCCCTCTGACGGCTAT  
TGTGGAGGATTATTTTGAAGCTTAGTCACTTCTGGTGGATAATCTGTATGCAGAGAGG  
CTTTTATGGCTCTCGAGAACATCATAGCTGTGCTAGAAAGCGCTACAAAACGAAAGTGT  
ATCTCGACAGCCGTCTGGGAATTGGTCAGTCGTGGTTGGATTAATGTGTGTACATTCAGG  
GTGATCGAAATGTGCAACTTGTGTGCTCGAAGCTTATTATTTGGCAGCACAAACAGTC  
TGCCCGTGGAACCAATACATTCTGGACGAGTACCCTACGGAGGACATGGACAAATGAA  
AAAAGACATCAGGAAACCTGTAAGGGAAAAATTTCGATACAACGGCTTTTGTTTTCAATAC  
AAAGGTTGCGATCTTCAAATAAGCAATTCACGGTTGCACGATCATGAGGCTGATCCTAA  
CGCAGAACCACTTACAAAAGATGAATTTTACTGGCTGCGTGGGTGGGAACTAAATATGCC  
TGAAGTGGAAAGGCGTGGATTCACCCAGTTTATGACGTTCCGGCCAAGAGAACGCATCTTT  
AAGGCTGTATAAGAAAAGAACCAAAGGAAGAGAAAGAAATGACTAATATCGATCATGTA  
ACATCAGAAACACACTGGTTTCTACCAGTATGATTGGTCTCCCATCCTGTGATAAGTGC  
CGTAAAGGCCTGTACGGACCCAAAGAAGATGCAGCGAGTGTTGTGAAGATTAATGACGAC  
ATGGTAAAACAGCGAACAAACACGTGAAACCTGGTGTGTTGTTGCACATTCTCGTGAT  
TTTGTGATTATGTATGTTAAGCATGTTGAGCCTTAGGTTTCGTGACAGTCTTATCCAAATC  
TACGGAAAGATCTTTTCGGTTGTTAGCAACCACGACCACGACGACAAAGCGGATATTT  
GGTGAGTTTGGTCACGATGTTGTTGACTATAAAAAAATTGATTTTAGCACACACTAAGAA  
AAAGATCGGGTGTGTATGTGCACTACCCGTTTGCATCTTGAATAAGGCACACAACGGA  
TCACTCATGCTCCACGGACATAGCCACGTGTCATATCAAGCACCTGGTGGACGAGTCCTT  
GTTGGGGGTTGGGATGTCCACGGTCGTCCATTGACTATGCTTGAGGCCGTTTCTTAGCGC  
CTTAAGAAGCCTAATTACGATATTAATCACTGAGGAGATGGTAACCACAACCAAGGACGC  
AATTTCTTTCTTAGAAAACATCAAAATCTTTTTACGCCAAATACATATTGCTGGCAGT  
TACAACCAGGCGGAAAATCTTTGCCTACACTGGGTGATGAGCGGAGCTTGAGTCCAGCAT



TCCCGTTGTA CTGATGTTTATACTGGTGGTGGGGAAGTCGGGATGACTGTGCGTATCCTG  
CAGGATCCTCGCATTGAGCGACCAGAACATGAAATTATTGACGTGGCTGTTGAACTTGGG  
ACATACTTGCCTCAGAAATTATGCCAGGTGAGTTTCAGTGTTTCAGACACCGTATAATACA  
GTGTATTATCAGGCAGATGGTTATGAAAAAAGATCTGAGCTTCCCTCATGGTATCATTGA  
CTCTGATATAACTACACAGAGGGTTGTTGATGGAAAAAGTATTTTACATCCTGTATCTCT  
TAAGTGGCGTAAGTTGCTGCGAGGTTGTCTTCCAAAGCACAATAAACACCAATATTATGA  
CAGAGTATGAGTATGTGATAAATGAAATTACCTTTCCAATTTTCATTACGTGGGTTGGTGA  
TACGGATGTTGCTGGCCGCCACTTGGATAAGGATATCCTCGGTGACGGAAAAATATACTC  
GCCAGAGTCTTGTGCATTTCGTAACACGACAGTGTAATGACTCCTTTTAACTGTAAAGAA  
AAATGGCAACTATATGATAGGGGTTTCCATAGAAATCCGCCTTGGCGACACCTATTACAG  
CCACTACAAAGGAAGGTATATTCGTAGTTTCAGAATAGAGACCGATGCTCATAATGCTTG  
TCAAATTAACAAGAGCAATCATGCAAAATCGTTCGCAATCACAGAACAGGATGGTATAAT  
AAGAGAAAAGCTGCACGATATTATTGCATAAATTGAATATGAATTCCTAATGGGACAAGA  
AACATGCTCTTTAACGTAGACGATCTGGCCGCTAAAACGCTGGTTCGACAAGAAGACTTAA  
ACTGAAGGCCCGCTCCCTGGCCTATCCGTTCTGAAGTACATAAAAAATGTCTTCTGGGAT  
AATCTGTGGAACACAGATCCACGTCTCCTCGAATTCCGTGGCATGGTGGTTGAGAAGGAT  
GACAATGTGGTTATGTGCCCTTTCACCAATATTTTCAATTACTTCGAAAATGACACAGCC  
CTTCCGGCAGACAAGGTGGTTGATTCATTTTCGTAATAAATGGATTTATGGCATGCGGT  
GGTGTGTATCAGGGCCAGCTTGTGGTGTGAACTAGAGGAACTCTGGGATCAGACGTTGCG  
GTTCTGTGCAAGAATCACATCATTCTGAATGCAATGATATTGAGCACTTCATTAAGTGG  
ACAGTAAGTGCAGAGGCGACGTACATCTTCGAAATCTGTGATCCATCTGATGCGCGCATT  
GTTGATGAAGAACCTGGGGCGCCCCTGATTGCTGGTTCGATTCCAGAACCGCGACGGCACA  
AGTTTCAGGCTGCCTGAAGGTGGTCTTGACGGAATCGCCAATGTTACTAAATTCAATCGT  
CCTTAAGTTCGCCAGATGCTTAAATTTTCCGATGTTGTTGAAAGGTTCGAGGCATTGCAAC  
CACCAAGGTTATGTTGGGCGTGATCCAAACTATCCGTTTCAGCTTCTGTTGAAAATCACA  
TCCCCTCAGTCTCTGTGCAAGAAGTTCTGGATGCGTGGTTGTAATAACCAGTGGGATCTG  
ATCGGGGATCATCCATAACAACGCAAAGCAGCGTATTGATGAAGAGTATTACGAACTTCTT  
GACCATATTCGTGAGTACTACACCAAAGATGCTTGGTCAGCTATGGAATCACAGCAGCGT  
CGTATGTTAGTTGAAGATTGTTTTGCCATAGAAGATCTTTTTGACCGTGGGACTCGGTGT  
TATGTTGGTGAGGTTTCGATGACTTAAGGGAGCCCTTTCATTACGGCCGTCATATGCCTT  
GTGGATAAAAAATGAGCAGGATTTTATTCCGTTTCTCGACAATCGGTCAAACCATAGCG  
GCGTGTACGTAGCGGCACTTCGATATCGATCTTAGAGAAGCTTCTGATCCTGATGGGTA  
TTGGTGTTTTTCTGGCGCTTGAGGAAAAGATTGTCTTTGGAATGATGCACTATGGCCGGGT  
CAAGCTGTTTCGTTACACATCGACCCCTTCAGCTGGGCCTAGGTTAATGCGTGCAAAAGA  
TAATTTAGCCTGGTATGGTGAAACCATTCCGAGAAAAAATTCCTGACGATAGGGTTTGA  
AAAGATACTAATCAACCTTCGTGGGGTTGCTGGTGCGGGTAAATCAACCGTGGGCGAACT  
CCTGAAGAATGACAGCAATGTACCGCATTTCCGAGCGAATAAGTTCCACTATGTTGATGG  
AGAGTACCGGTGGAAGCAGGAAAACCAGCACAAAGGCGCACTAGTGGTGGCAGAAAAACGT  
TCGCCTGGCAATGAAAATCGGTTATGATCGCGTGATCGTCTCAAATACCTCATCCAGCGA  
GAAGGAGTTTAAACCCTACCTTGAGTTGGCTAAAGGTTATTGATATCAAGTATTTAGCTT  
GGTGGTTGAAGTCCGTCATGGTAGCAATTCAATTCACAGCGTTCGCGAGGAAACACGAGA  
TGCTCAAGAGCGTGGTCTACGTAACCTCGTGGAATTACAATAGGAGCAATAAGTGAGACG  
TTTGATTGTTATTTCTGGTGTGCTGGTTCCCTCTGCAGAGAGTGGTGTTCGAACTTCCGTAC  
TGATGAGTCAACAGGTAAGGCGTTGTGGGATGAATACGATCTGGAAGAGGTTTGAATAA  
CGACGAATTCCTTGAATCTTCGGCCCTAAAACCCACATATTTTACCGTAAGCGTTGTGA  
TGAAGTGCCTACTGTTACCCGAGCCTGGGTACCTTCGCGTTGCATACGGGTTTCAGCG  
TTATCCAGCGCATGGTGTAACTTGACCACAAACGTTGGTGATCTTTTGAACGTGCTGG  
AGTGCCGAAAGAAGATACGGTCTACATTTGTGGATACCTGAGGGAAATCATTGTCAAGGA  
CAACCCGAAACGTAAGACGGACATTATTGATGTCGGCTATAACGTGGTTGATCCTGATCC  
GTATAAGTGGTGTAACCCGAACTTGTGTTCTTTGGTGAATTTGCACCAGAATATATCAG  
CAAGTATGACATCCTAGACACCGTCATCTATGAAGATATGGTGTGTTGTGCGATGCC  
AAATAGAGTCATCAACTTCAACTGGGCGTTGTTTCTTCTGTTTCGTAAGGACCAAAGGT  
GCTTGTGGTAAACCCACGTATTAACCTTCTTGATCATGAACAGTATAATGCTCATGGTGC  
TATGCAATTCATTTGTGGTGTGTTAGAGACTTTCAGCAACAACCATTTTCATCGACAATGT  
GCAAGATCATATTGAATGTAAGACAGCCTTACAAGGTAAGGACATATAAAGTCCATGGCT  
TTCGATACCCCAACACGCGACGCCATTAACGAGGACGGAACCTTATTAGGTCTGGAAAGTT  
ATCACAGCGGGCGATGAGTTAATTGTTGATTTTGGTATCGAAAATGGAAAGGTACAACAT

AAACGTA AAAAATGTGAAATGAAAAATGTTGGTCGTTCTTTTCGAACA AACTGCTGCATTT  
GAGGCAGT GCCGGAAGCGCGATCAA AATGGGAAAAGCAAGTACACCTTGT TTTATCGTGAA  
ACAAAAGAGGCTTTACGGACTGAGGAGAACTTCTCTCCCATGCTTGAACACGATGCAACT  
AACAGTTTAAGCGCATTAA TTTACCCTGCTTATATGCATCTTAAGCTTGATAGGGTAGGC  
GCCCTTGTA ACTCTTGACACCGGTGGTATCCCACTATTTAATAGTCGCGGAAACAAGAAG  
TTCCCTGTTCAAGGAGCATCGTTGCAGCTGAAAAAAGA AACTTGCAGAGCATACTGAGTTT  
GACAAATTGGAAGGTGAGCTATATATTCATGGTCTGGGCTCACAGAAGATTGTTGCTCTG  
TCTAAGAAGTGCCGTACACCTGAGCAGATCGAGGTTTTGATTGAAAAGGACTACCAGTCA  
GGTACAAAACGCTATCAGAAAGCTAGTGACAAGTATGATCAAGTATGTAAAGATTTTGAC  
GGTGATGACTACGATGCAAGTATTGAAGCCGTGAAAGATGCTGGCCGATATGGCGTTTGC  
TCGAGAGTTGACCTTGAATATCACATTTGCGATATTCCTGTAGTCGCAAACAGCCACTGG  
CATA CAGAGGCCATGATAAAAACCGACTATCTGATCGTGGTAGCGTGATGTATTCAAGT  
GATTGTGAGGTCAATGCACCAATCAAAAATGTTGTTCTGGGCTGAGTTTGTCTGACTGAA  
GATGCGGTCACGCGGTTCA TTGGGCGATTTCATGCAAGAGGATTTTGAAGGTGTTATTATC  
CCTAAGTTCAAAGGCGAGTGTGAATTCGGTCAGCGATCTTCTGATCTAGAGAAATGGACA  
CTGTTCCAGGATGGTGAAGCGCAGGTGTTGGACTCTGTGGAGGACAAAAACGGGGAGGGC  
CTACTTCCCTGCGAAGGAAAAACGGAACCAGATTTAACTGCAAGATGAGGGGGACGCGT  
GAAGACCGTTCTCATGCGAGAATGTTACTTCTGGTCCGTTAGTGAATCAAGTTCACATTC  
CAGGCAAGGACTGACGACGGAGTTGCTCAGTTCCCTGTAGGGCAGAGTGTACGCGAAGTT  
AATTCATTGATATGGGACCCTGTATACTGATGGCATT TTTATAAGGGAAAACCACAAGAGG  
TGAAGCACATGTGTTCAATGGTTCTTGCCCAGGAGTTGGTCAAGTGACAAAAGTGGATGT  
AGACTGGTGTCTGTCAAGACTCAGAGATTCACAAATGAGACATCTGTAACATGGATGTGA  
ATGGGACCCAAGCTTTTCTGGTGCTTATATCGTTAAGGTTGGCGACCCATTCCGTACAA  
TCTCAACATAGTAGTTTGGGGACCTGTCTGAGCCTGTTCCCGATGAAGATCTTCTACCTG  
GTGATTACAAGGCTAAGAACGTGGCGATGTGTGATAAGGTTGAGATGTGGGGCAAATAAT  
ATCACGTCATAGGGGACAAGGTAAGTGGTGATGACACCCTTCTTGAAATCGACGATGGGC  
CCAATGTCCAGATCCGTGGTGAAACTGCTGTAAAAGTCACTGAGGTACGTGCATAATGAT  
CTGGTATGGACTGGCGTTGCTTTGTGAAACAGTACTCACGAGTGGCGGGATTTATCTCCC  
CGACCGATTCCGTAAAGATAAGCTCGATGCCTTTATCTACTGGAATCAGGGGAACAATAA  
ACGTTTACTGATTGTCTCGGCGGTAGTATTGGGCCTTATGACGCTGGCCCTTATCGAACC  
GTCGTGGAACGAAATGACATGCCAGATTGAGGGCATGGCATA CAAGATTAATACCTCCTA  
TTGGTGGTTTTAG AATGGGAGTTATGGCGAAAAGTGTCTTTTCGTTGCAAAGAACGGAGT  
GCTGCTGACATTAAGAATTATCCCGATCAGCCTGTTAGTGAGCATGCTACATATGTTGA  
TAATTAATAAGAATAGATGATCTTCGGTATAACTTATGTGACCCTACTGTCAATGACCAA  
CCCGAAAGATATGGTGGAGTATGGTCGTCACGTAGGTCAGTGGACCCACATAACCGCGTGT  
TGTTTCGTCGGGGCAAGTCGACTCCGGTTGATCTGCAATTCTCTTTTCGTTGTTGAAGTGGT  
CAAAGA ACTTAAGAAGGCTCTCATCGCAGGTGACCGAGTTGACGTTGTTGATGGGGCCTG  
GGATCGGTTTCGAGGTCTGATCCAATGCTTTGTGGCGGCCTGATTCTTCCGGTGTTTCGCTG  
GGAGA ACTGTCTGAAGACAGCACGGGGTGCTCAGTCCAACATCGGTGAGATGGTAAAGCT  
TATTTTCGGTACCCCTTGTCTGTGGAATCAGGTGCTGCCATCTTGCAGCAGTGGGTGGC  
ATTATGTTTCCGCTGAGATATCATCTTGGTTTACACCATGCGTCAGGTGTTATTACCCAA  
CGACTCTAAGTATCCGATGATGACACA ACTAACAGAGGCTCACCTTCTCTGACCTTATA  
TAGTGACGTTGAGTTGCTTACTGCCGAATGCAAAGCTATAGACAAAACGATCCAACAGTCG  
CTACTCTTCTGTGGACGTTGGACGTAGTAGTGAAAACCTCGTGTTCCTCGATGGACAGGG  
TAAAATCATGAAGCCAAGCACCGTCGTAGAACCGAAAATTATTGCTTGACAATAAAGAAG  
GGGTCAGTCTAATGGACCCCATCAAGACAGAGAGTAGTAATAAATTGGAAAAGGATTTTG  
ACGAAATTTGCAAGGA ACTGTGAGAATAGTCAAACGTCTTAATGTTCAAATAGTTATCG  
GCAACAGGCCGACATTCAAGCCGAAGCAATATATGTTCCGCTTCAGAATTATGCGTCGTT  
GGGGCGGTGTCAAGAGGTACGCTTCTGAATGCACTCTCGAAAATCTTAAGACGTATGTAG  
AGCAAATCGAGAAAGCCGGCGGTAAGTTTATCGGCCTCCAATAAAAAGTGTCTGACAAAAA  
AATCTAATAGCTATACAGAATTGACTAGACAAACTGAGGAGAAACAAA ACTCTGCCACG  
TATGCCTAAAATCAAAGTAGAACTGAAA ACTACGCAGCCATCTGACGCTGTAGACCGAGA  
CCGCCTGAAATAAATTGTTAAGGTAGGGCCTGCTGCGAAGATCGCACAAAAAATGCGGC  
CTGAGAGCTTAAAGACATCGTTGCATTTGAGAAAGAAAGCCACA ACTAGGACCCGAAGGT  
CATCATGACCCTGATCAATGCAGTATTTGACCTCCAGTATCAGACACGTAAAATGCGTAA  
AGATGTGCGAGAGCGGGTTGAGCAGATGACCGAAGCTGATATTCTGTTGGGTGCGGGGAG  
CAACTGATGACATATTACCTGAATGGTGTGGACTTTTGGTTTTCTTGTGCCTCATCTAA

GGGGTCGCAATACCGACTCTGGTTTTCTACAAGGGATACACTTTTTAGGCATGGGACGTTTC  
GCCTGTGTATTCTCCGCCCGTTGTTGTATGGTACTGGCTCAGAAGGGTGTTTAATAAC  
AGTGGAGGGGTTAATGCTGCTAAATCTTAAAGCGTCCACGTGGGAAAAGTTGCAGGCTCT  
CGCCCGTTACACGAAAAAGTCTGCTGCTTCTAACGTAACAAAGATTGTTGATGAGTACGT  
TGACGAAAACGTAAAAACTGAATACAAAAACGAAGAGAAGAACTCAACTAATGCTCAACG  
ACCTGAAACTTGTACGGTTTGTCTCGCCTGATCGTTCTGGGTGCAAATGGCTTGACTGGTT  
GCGATCGTGCCAACGTGCCTGCGGGTTGCGTTGGCGTAAAGGATGACCCGTATGGTGACT  
AAAAGGGTTTTCGAGCAACAAGAAGTTGGTGTGTTAAGTATAGGTTGACCTGGAACGAAG  
ATCTTTATCAGTTCCCGACATTCAACCAGTTGAATAACTCTAAGCAGGCGTTCAACTTCG  
GGACCAAGGATTCGTTGACGGTATCCGCGAAAATCGGTGTTTAATACTTGGTTGATCGCT  
TCAAGGTCACGATGATTTTCCAGACGCACTGCAAAGGTGTTAAGGAAATCACAGTTGTAA  
TCATTTGACAGAATATCTAGGATGCCTTGATGAAAGAGGCTGGCTCAATGGACTTTGGTA  
CGCTGTCTGGTGATGTTATGAGTCAGTTGCTTGAACGTGTTACCAAGCAGTTTCAGTCCA  
AGCTTGATCCGATTGGTATTGTGATTCTAAAACGTCCGATAACGATTACCCGATTTACC  
CACCGCAGGTTACAGCGTTAATCAACGCCAAGATCGAAGCAACTCAGAAATATCTGCTGC  
ATGAGAATAAATCCAGCATAACCAATGCTGAAGCTCAGGAACAGATCGAAGCCGCGCGAG  
GCGAAGCTGAATCTTAGCGTCTGCAAGCTCAGTGCAGGCAATGCTATAGTGGCACAGG  
CAAATGAGAAGCCGCATCCCTTCGGATTTGAGGGGATGATCTGCGTAAAAACCCGTAGA  
TCGTGCAACTGGAAGCAATGAACTAGTGAATGTCGTTACCCTGGTATGTATGACCAGTG  
GAGCATAAGACTCGTTTCGTTTCTCTGCCAGAAGGTAAGTGACAGTTTAAAAGAGGCCCCG  
TGATGATTATCATCGGGTCTCAACATATCAAAGGAGATACTAAATGATACGTGTAAG  
TCATCATAGCAGTCTTACCGCTCTCTTCCCCGTCGTTCCGACAGCCAACACCCACACCT  
TGGTGGACGAATACACCGATGCAAGCCCCATAGTCTGCATTTACAGTGGTGGTAAGCGCA  
CAGAATCCGTTGTTATGGATGTCGCTGGTTCCCTGTCTTCCCAAAGTCATTCCACTTAG  
TTGACGATGTGAAAGTGTCTTTGGTCTGGTCCTGTTTTATGCTTTTACGATGTTGTTGG  
GGTGGTATACTGGCACCCCTCCTGCTTGCATTTTCCACATGGACGGCCACGGTGTGGAAA  
TCCCCGGTTGAGTTTTAAGGGTTGTATGCTTAAGGGTACTGGGTAGTACCGGGTTTCTGA  
CATCGAGGGGCAGAAATGAGAGTAACGGATGAGCTTGTGCTTTTTACCCAAAGACGAT  
ATCTTTAGTAATCATTATCGCTGTGCCACCCTTTCTGGATAACCAAAGCACCAGCGTT  
AGTTCCACGTTCTGGACTGTAGTAGAGTCCATGATGAATGAAAAGGCTCTGCTGTTAGGC  
GATGCAAATATCGCCCTTGTATTGCTACTGTTTATCACCCCCAAGATGCTAAAAAACTT  
GGTCGGCGGGTGAAGTATTTGACGTCAGCAAATGGGAAGCGTTTCGTGAAAATATCGTA  
GGGAATGGGCTTTATGCCAAGATGTTGGCTAATCCCACCATTAAGGAAGCGGCTATCAAG  
CTTCGTAATAAAGACAGGGTTTTCGTTGAGGCATCTCCCCATGCTCCAATCTGGGGAGTC  
AAGATGGCTGAGAACGACTCAGAATAAGAGGACCCACCCAACCTTGACAGGTCTTAACCTT  
CTCGGAAATTGCTGGCACGAAGCGATGGACCGAGTAATTGGCACTATGGAAGTGCCTTTT  
AATAAGAGATTGAAATGGTTCCCAAACAGCTTGTTTTACTAACTTGCCTCTGACTTCT  
CTAAGTCCAATTGGGATGTCGTAAGGAAGAAATGTTATCCAAAAGGTAATTCTAAATGTG  
AGATTTGGGGGGGAAAAGGAACCAATCACCCCGTAGAATGTCACGAATTCTGGGACTTTG  
TCAATGGCAAGATCAGCCTAAAAGGTCTGATCGCACTTTGCCCTCTTACCGCGAAGTCA  
AACATATTGGTTTGGCGGGTGTAGTGATAGGGGGGAAATAGCTCTTCGCCACTACATGA  
AGGTCCATGGTGTCTCCAGACAAATTGCAAAACAGTACGTGCAAGAGGCTTTCGTTTTAT  
ATCACGAACGTAGTAAACGGTAAAAATGAGAATTGCATGTCCGGTACTTGGACGACTCTT  
TGAGTAACGATTGTGAGGGCTAGTGGGATTTCCGTATGATAAAGATTGGACAGAAAAAGT  
CACGAATGACTGTGTGATCGCTTCAGACCATGACCAGACTTGCTTTGTGTCTGCCGCTGG  
CGCTGGGGACCGTGCAATTACGGCAACTCACATCGCTTCTGTTCCGGTCAAAGATCTTTAT  
AAAAAGACCAGAGTTCTGAGGTTCCACCATGATGGTGGTTGGCGGATGGTTGAAGGACAA  
GAACGGCGATATGCAAGTTAAGGCTAAAGATGAAGGCCGAGAGTTCACCCCTTGGGGAAAG  
CGATGACTTCTTAATCGAAGATATTCAAACCCCTGAAGCAGTGGAACTGCCTGCTTAT  
CCTGAAGACATAGATTAATGCTTTCTTTGAACATGTGGTATTCGACAGAAGAAATGGCCA  
TGGTGTGCTCGACTGGGACAACAACCTACCGCCTGATGTTCCAGTACCGGACCCTTACCA  
AGGAAGCGGTGAAGACACGCTTCGTCCTGTGCCGTTGACGGAATCCGCGAGTATGACTA  
GAAGAAGTATAATGCCAAGGTCATTGATAGTATTGAGGCAGATGTTTACCTGTCTGTTCT  
GATGTATACCGGAACTGAGCACTACCAGGCTACTGGTAAGATCAAAGACATAGTTGCGTC  
GTTTCGACAAGGGCCAGAAAGGAACACCGGGTTTACCTCTTGATACGATGCGTGAATGCCA  
GGTGAAAACGGGACTCACCCGATCCCGATGATGATCGACGATTCTATGGGTGACACCTG  
GATGGAATGAAGCAACGTCGAGGGATGGGGACGTAACCTATTTGACTACCAGATGCTTTG

CCGTCACAGTTCAGTTAATATCAAGCCTGATCAATGCTTCCATAGCTCTGTGCGTGTGG  
AGACACTGCTGCATTCAACCTGATCAGGCCTATTCAGAACGACAAGTAAATCTGGACGGC  
AATCGTTAACCAGTAGATGATATGGTTACCTAATGGGGTTGAGTTCACTTCCCGGGATGG  
TATACAGCGCAAGACGACAGCAGGGCAATGGGCTTCAATCATCTTCCAGATGGTCTGCAT  
GCAGCGAACTGTCAACGACCATACTACGCTCACATCTGAACCTTCGTGCGCTGGGGGTTAT  
TTGATTGATAAGATGATCTTGGATGCTGTAATGAGGGACACCCAGGCCCTCTCCGTGTCC  
TCTATGAAGCCATAATTCATGGTTGCAACAGGGCTGTGTGGACTGCTGAAAAAAGATAAT  
GGGGACTATGTTGTCATCACGGAAGACTTCCTTACCCTGACAAGGTATACAGCCAGCTC  
CGTATGGAGGATTGTGAGCTTCATGAGCGGGAAAGATTACTTCTCCTTACAAGCGCCGCT  
TATGGAGACCTTGAGTGTCTGTGGTGTGTTCAAGGACGAAGCTGTAGGAGACTCCAAT  
GAAGTTGATGTTGGGTCACCAAGGCCTAAGTCACTGTGCTTACGTAATATGCGAACATGG  
AGGTCCCGTTGGCAGGGAAATGATCAGGACAGGATGAACACACAGTTAAGGGAAGAAGCA  
GAAGGATGTTGTTATTTTTACAACGTTTCTGAGCAAAGCTGTTATATTGTGAACAAGAT  
AACAAAGCTTAGCAGAGGAGCACAGAATGGACCACTACGTCTTGGAAAGCCGTCAGTCTTGG  
TTCTCTGGGTAATGCAATTAGTGATGTGGCTGGCCGTTTTTCCAGCATTGTGTACGCATT  
GTCCAGTTTGGTATCTTAGGGTATGGTTCAATCCACACTTTTGTACCAACCTCTGTGAA  
ATCTTTTGAAGAGGTCTTTTACCGAAACAAGAGCGCACTTATGTGAAAGGAGAGTTTGA  
GATAGAGACAGGTAAGAAGGTATACACAACCGGCCAGGTGAAGAGGGAAAAATCGCATAT  
GGTCAGGGCTGTTGAGTCGGACATGCCTGGCTGTTTAAACGGTCTTATGCTCGCGGCTGT  
AAGGGCGGAATATGCTGGTGCATTTTATCGGGAACAAGTTCATGGAGCGAGTATCCGT  
ACGAGAATGGTAAGGGGTCCTGCATCAAAACCAAGGAAAGAAAGAAACCTGTGCTAGTG  
CCATAGACGCCTGGATTTTGGTTAACAGATGCATGTCAAATCGCTACTTTCAGGGAGAAA  
TTAAACTTAGCCAGGGGGGTCTTGATCCTGTGCTTGGGGCGCCACTTCGCAAATCTTGC  
TTGGACCATGACGACTTCGATTGTAATGTCGTGGAGTCTTGAGTCAGTGTGTGAACACC  
CTCGAAGGATATGTGCTGAAGGCATGGATGAAGTCCGGGTCCGCGTACACAGCTACTTCT  
TTGTCCACACCGCTCCGAAGTCTTACTGACTATTTGGATAAGGATTTTGTCCGGTTCCCT  
ATCCATGCTGCGTACAAAGACGATATGCGGATGTTCTTGAGGAGATGTACCAATGACAAG  
ATCATTAAAAGGGCGGAAACTGACCTCAGCATGATCATGACCAAAGGTAATCAGAAGCAT  
GCTAGCATAACGATTTACCAGGCAGAGCTTGTGAGACAAACGGAGGAAAGATTTGCTGGA  
CAATTTGAGCAAGCCCCTTAAGTCTATTACGAGAAGTGGCGGGGTGAATGCGGTGATCG  
AACTCTGATGGACCAGATCATGCGTTTCGGTTCCTGAGTAACCCAAAGAGACGCAGTG  
TATGATCAAAGCATAACGGTGTGAGAGAGATGCCATCCGTGCCTTTGCTGTAATGAAAT  
TCTTGAAGTTTTTCGTAGAGGTGTAATGCTCAGTAGAGAAAAAAGCCTTGCATTCAAAGTG  
AAACGTATGAGCCACCGTGAACCTGCTCGTATCTGGGGGAAAAGAGTAAGGAATCT  
CATATCCGTCTGATCCTGAATGTGCACCAGTATGTTGCAGAGGTTGCTCAGGTGATCACC  
GAGACAATTGTTTCGCAATCCGGGCTCGAAGATCTTCCCTTGGTGACGTAGAGGTATCACC  
AGGCTCGCTTAGGTTTTTAAACCGAGTTAAGGCGTTTGTAACTTCCCACGTAGAACAT  
GAGCCTGATATGTACACATGGGCGGGAAAGTGGTTGGATAACCCTGCGATTATCAGTCTC  
AAGCTGCCGTTTATCAGACGTTCAAACCGATATCCACGACGACCGCGAACTGGTTGAT  
AACTGCGGCATATCCTTGATGAGGGTGTGTCCTCATTGCACACAACGCACGTTTCGAC  
AAAGACTGGGCTAACCAACGGGTTGCTTTCCCAGTAAGAATCCTCCGTAACCGTACATC  
GTGATCGATACGCTTGCAGAACTGAAGTCGGCTTTCTCCCTGCCGTCCAACGCTGTGGAG  
GCCGCGTGAATTAATTCGCTCTGGCTGCCCGTCAGCGCCAACACGAAGGGATCACATTG  
TGGATTATTTGCTTCCAGGGTGTGAGGTTGCAGCATTTCGAGGAATTGGATTTTTACAACATC  
GGGGATATTGCGACACTTGAAGGTATCTACTTGACAGTTAGACCTTTCATGAAGAAACAC  
CCGGACTTGACGCTATATAATGACGATGACGACAACACTGTCCTTCGATGGGTTCGTTGT  
AACTCTGATAATGTACTGCCTATGGAATTTAAGGTGGGGACTAGCTGACTGTGAAATTT  
CAGGCATATCGCTGTGAATGCTTTGGTTCTGTTATGCGTGACCGTCGCAACATCCGTACC  
AAGGAAGAAATGGCGCACACGCTTGTGAATATCATTAAAGGTCTTCGGCCCCTGTGCAAA  
GGTGAGAAGAATGAGTAGAGGTATCAGCATTGAAGTCCCTGACTCGTGTGATAATGACTG  
GTAGATAAGGCATCTTTCGTGATCTTGACATGCGTCTGGAGGAGTTGGTAGAAGCGGAATC  
TGAGGCAGAGGGCTTTAATAAGATCGGGGCCTTTCTGGACATCGTTAACGCTATGCAACA  
ATATGCGAGGAACTGATCGATATTAACGTTCCGAATGGACCTCCGTTGAGCGGTAAAGAT  
GACATCTCGACTTATCTGTGCGATTGTCACCCAAAACCTGCACCACGAGGACGTTAAGGCA  
CGTCTGTTTCAAGTGGCTGTAAGGACCTCTGGCAACTCGACCGGCCTGTGGGATGCTATG  
TAAACTCGTCGTTACTAGGAGGTCCCTCGGTCCCTACCTGCTGACTGATGGTGTCAATCTA  
CCTCCTCGTCAGTCAATGATTTCGATGCGCTCAGAAGGTCATCAAACCACTCTTCGGAAAT

TCTGCGTGTGGCAAGGCTGCGATTGCAAAAATCGAAGTAGATTAATGCGACCGATAAGGTT  
ATTGTTTTTTCTGATGGTGGTTTTCCCGGAAGAAAACCGAGAGCTTTCAGATCTCGCGGAT  
GCAACTGGTGGCGAGTTTTTCCTTGCACGTATTCACCTGAAATGCAACGATTAGGATAAC  
GACAGCAAGAAGTGGTTATACCTTGAAGGTATTCGAGGTTATGAGAACGTCTTCGCTAAC  
AAAGAGGGTACGTTTACGCACTGCGCCGAATCTGTCTTTAGTGGGCGAGATCAAGCAGC  
TATGTATAGGAGTACGCGTAAGCCACTTAAGACCGGTATTGTGGTTCGACCTAACGTTTCG  
AGGTTTCAGGCACACACCGGCTTAAATGGATGGAGCAGGTATACGGTGTAGCGGCAGATTA  
GAACCTGCCGGATATAAACCCGCAGGGGATGGATTATTATAATCTGTCAAAAATACTTCCC  
TCCTGAGATGGTTAATCAGTTACCTCCGTATGAGTTTTGGGAAGATCAGTTCCTGTACGA  
CAAACCTGCGTTCCC GCGCCGGGGCCGTTGATGCAGTTGCAGGTTGAGCGGCTGCTGGACA  
CTTCAACCAGTTCGTGTCTCACTGAACGAAAGGCCATTTCTCGTCCAAGGTAAGATTCT  
GAACCGAGAGACAGAGGAGTTTTTACCATCGAGCCTGGAAGTGGTCACGGCTTTTAGGC  
AACAAAATACAAAGCTGGTATTAATATTCAATTCATCATTGATGAGCGTAATGGGTTCT  
CAACCAGTTTGGCCCATACGTGATTAAGATCAAGTTCAGACACCTTATGACCCACCTGA  
AGAGCTTCGCATCTCTCTGGATCTTGAGAGCGATGACTGGAACGTCATCAAAGATTTTCGG  
GCTGGATACTGTTAATGAAGAGATGCCCCACAGGAGACTTCGTTGTCCACTATGAGTAT  
TGGGTGGAGGTAATCACCGTGGACGGAACCTTCCATCATATGCTTCAAAGCCACAAGTGAC  
ATGTGTCAGGACATTCGGTTCACGATATCTGGTGTTTAATGGCGGGACGGACCCGGAAACA  
CCTTACCGGATCAACAGGAGCGGCAAATGAGTCTTATACCAGAATCTTGCGGTATCATCA  
AAAACGAACCTTCTTAGTCGTGCCTAAAAAATCCCAACAAGTGCTCGGCCTTGATGCTGTAG  
GGATCACTGCAGCAGATCATGCGATCACCGAAGATTTTCGTTTCCCGTCAGCTCACTGAGG  
CGAACCTAGGAATATTCACCACCGACGAGCTTGAGGAAATGCTAGGCTTCCATCAAAAAT  
TCACAGATCGCAATCTCATACTTGAGTAAGTTATTGAACGAGCGCTATCTAGAGTTTTAA  
AACAAAACATAGAGTCGATGTATATGAAACTGAACGGAGCGCAATCATGAATAAAGCTGT  
ATTTGCCCTGTGTCCCGAGTAGTATTTACCAGCAGGGTCAACGTATTACAACCTTCTGA  
GCTTGAGTACCCTCGTATCATTACATCGAACTGATGACTCACCGTCTGTTTAGTCGAAA  
CGCTATGAGTAGCCGTGCAATGCCGGTCAAAAAGATGATGAAGCAGGTTTCAGACAGACCC  
TGCTAGGCCTGTAAAGTTTGGACAGAATCAACCAGGGATGCAGGATGCCGGTGAGCATGA  
CGCACAGCTTGGTGTATGGGTATTCGGCTGAAGATTGGTGGAAACGCGCGGGATTAAGTGC  
GGCACGTTTTGTGCTGCTGAATTCAAAAATGCTGGTTACAACAACAGATCACTACCCGCCT  
GCTTGAGCCTTCCACCAAATGAAATCGGTCTTGACAGCACCTGTCTTTGAGGATTTCCG  
TTGGTTGAGGGTAAATAAGGATGCCGATCCAATCATATACGCTTTAGCAGAGGCCATGAA  
CAAAGCTTTGGACGTATCAGTACCTGAATAAGTGAAGCCAGGGCAAGGTCACACCCCTAA  
CGTTGATCACATAGACACTGTCGGAAAGCAGGCAAGTGATGACACACTTGATTACCGTGT  
TCTTGCCAAGAAAAACAGACCAGTCATCTTCACAGGGGATGAAGCTAAGGCTATTTCTGC  
ATCTTCTTGCTCAGGTGTTTTATCGTGGGCTTAAACAACAGAAAGAGAAAGCTATAGA  
ACTGAATGGGAAACGTTAATCGGTAGGTAGGTTACAGCCTCTCCTTTAGACCATGTGTC  
AACCCCATGCAATGTGAGTCCAGTCAGTACGGTTATGACCCAGGCATCTATTTGACGCA  
AAACCCTGTTTCTTGGGGAGAAGGCATTACCCATATTGTTTCGCTAAGCTCGCCTATGGAG  
TCGGAACCTACCGAGGCTGGACTCAGTTGCGTCAATGACTGCCTAATAACTATGTTGAAGG  
TTGATGCAGATGGATAGGAAGGGATTTATCAGGTAGATACTGATGCCAATGCTTGGTCTC  
TTGAAAGGTGGGCTGAGAGAAGTCGCCACGGAAAAGAACTGCGCCAGAGTTTGTCCCTC  
CAAGGAAAAGAACGTGTTCTGAGCATGGCACAGGCTATCTGAGTGTGAGATTGGCAAACA  
ACGGTGTCTAAAAACCTTCAGGGTGCATAGGTTTATTGCTGAGGTGTTCCCTACCAAACC  
CACTAAACAAGCCATTTATGAAGTATAAAAATGGTGATAAGAGAGACAACAAGGTCAAAG  
ATCTTGAATGGGTAAACGAGGAAGAGAACTGTAAATGAGAGTGTAAAGAGGACTGAAGC  
GGGATAATCTGAGAGAACCCATGCCTGGCCGTTTTGTGAGCGAACAACCTGTAAATAATGT  
AGTTTCTGGTTGACCAGGTTTGCAGCAATAAGTATCTTGGATGGATGAATTGCGGTGAGA  
AAATACTCCACGCTTATAGGCAGAATGGAGACTACATGATTAAGACAAAGAGCAAACCAA  
CCCAACCAATTTTCGGTAAATTTGCACTTTCTGAGAATCGTACCCGCATTTCGCTGTAACCC  
AGGATAGTGAACCTCCGTGCTGGCCTTTATGCAGTAGGCTTCCAAGTCACCGATAGTGTAG  
GGAATCCTAAGCAACTAACAATACTTAACATGAAAAATGTACGATGTACGCACTTGCCT  
ACCTGTACCGTAAAACCAATCTTTGTTGGCGACACGCGTCAGGATAAGCCGTATGCAA  
AAATTTATAACGGTGTGATATCTCCACGTAGGGATTTCCCTCCGATCGCGACATGGAGT  
TCGCGCTTGATCACCCATAAGATATTCCATTGTCTGCGAAGGTTACTAAGCGTAAGTACA  
CCAAACGTGTAGTTCGTCCAGATTTCGTTAATAGTACGTTTCGATAGTGAAAATGACGCAC  
CTCTCAGTGACGCATGTGGTCTGAGCGAATAATGCGTACAGAGGAGACCAAGTGGAAGA

CCGTGGCTTGGTTGATAAGTATCACTACGTCGGGTGGCCCTACTTCAATGATTTAACCGA  
TGACAGCAAGATGTACGACGATGTTTGGATATCCTGAGCATTCTGGTAAATTAGTTATCGT  
CCCTCTTCCGGGTCAGGATGATAAACCAAACCAAGACGTTGACGAAGGTGATAAGCAGAT  
TGCTCGATACGGAGAATAAGAGGGGGATAGCTTGAGCAATACAAGTCAAAAGGGTGATGG  
AACGAAGGTACCGTTTGAACCAGAACGCCTGAACAGGTGAGCGATCTTTGGTGATGAACG  
TAATGGTAACTGGTGACATATCTCTATGGGCATCTACAAGCTCCCGTATGAGGGTTGCAC  
CACTGGTGAAGTAACGCAAGCATTGCTCGATGCCTACGTGAGCCGAACAGACGACGCCCA  
TTCAAGGATGGCTGGGGGAGTTCTGATCGGTGAGATCAACAAAGAAGCTCACGACGGTAT  
CAACAAGATCCCTGCTCTTTATAATTTCTAGCCCGAGATGTTTGGAGCAGGGTTATTGGGA  
AGCCATGGGTATGGTCCGATGGAGATTGTGGAACCTAACAGTGTGATTCATCATTCCAA  
GGCCCTTGACTACGGCGAAACCGTCCTGTAGCAATTACGTGACAAGTCCGGTATCAAAGA  
CGACATCAACGATGTTGTTTTGAGTCACCGTATATGATGTTTATGGGTGTTGCCATGGC  
GGTTATTAAGCGTATGCGTCTTGAGCGTCCTATACAAGATGTCATTAAGATTAATACGTA  
TCTGTGCAAACCTGAAGATCAATGCTCCGAAACCGTAACTGAATGGATTCCGTACGGGACG  
AACTGAATGTGGGTACTGCTGCATTATCAAGGCTAGCGATACAGCGAAATGCATTGGTCT  
TGATCGTAAAGTTACGTATACGATCACCAGTGCACAGTCAGGTATTGGCTATTACTTCTC  
CTCCGGCTCAATTGGTGACGGCGTTCGTGTAATACGAACAAACACCTGGGTAAACTCCC  
ATATTACCGTGGCATTGACGCTGGGGTGAAGAAAACCGTCAGACCCCGTGGTGGTTC  
TGCCTCGATCTCTTTTCTGGCCCTTAACCCGCAGATCGGAGAACTGTTCCGCCTTAAGAA  
CCCGGAAACAGTTTCTACATAACGTATTAGCGCAATGGACTAATCCACTGCTATCAACTA  
GACTTTCATGAACCGTGTGCCGAAGAACCTATACTGGATGCAGGTATCTTACCAGGAAGC  
ACCACAACCTACCCGAAGGTATGTTGAAGATGATCATGCAGGAATTTGATGCAGAAGTTGC  
TCGTGTGGCAGCGGATACAAAGATCACTAAAACCTGGGTGAAGGCTCGCGAGCTAGAAGT  
AGAGGTGCTTACCCAAAGAGCAGAAACAGGTGCGCTGTACGTATACTGGCCTGACGAGAT  
GAACCGGCACACGCCTTTCCTGGAGACTATTTCTTCTCCAACCTATTGCCAAGAAATTTG  
TCTGCCTACCATCGGATACAAAGGTATGCGTAACATCTTAGATATCCGTGCAGACGATGG  
TGAGGTGCTCTTGGCCTGGTGTGATCTCTCGTTGCTGGGCGTTTTTCTCCGGATGCGTA  
CGAGGATGTTGCTTCTACACCGTCTTATGATCGACCACGTTACGGATATCATGGATTA  
TCCGTATGACGATATGGAACACACTGCCAAGGCCCGTCGTTCAATTGGTGTGGTTTGTC  
AAACCTTGCTCATTACATTGCGCTACACAAGGTTGCTTACGGCTCCGCTGAGTCCAAGCA  
ATTGGTTCATGACCTGGTAGAGCTGCACAGCTTCAGCTTACATAAGGCGAGCCTGCATTT  
TGCAAAAGAGCGTTGTTAACTCCGTGGATGACCAAGACCTAGTACCCACAAGGGTGGCT  
TCCAATCGACGACTACAATAACAGAGTTGATGGAGTTGTGAAGAAGGCAAGTCTCAAGCA  
GGATTGGGAACTTTTGCGACAAGATATTATCCAAGTTTGTGGTATCCGGAATAATGTGTC  
GGAAGCTTATATTGCGAACGAAAGTTCTTCTCTGGCGACGAACACTATAGACTCACTTTA  
CACGCTGCGAGATCACATAATCCTCGATAAATCACGGCAAGGGTCTGTGCGGTTTATCGT  
GTCGGAGTATGAAGAACTGAAGTTTATTACACCTCTGCTTGGGATCTTAAACCAACTA  
CCTGATTGACATTTTCGCCGTCATTCAGAGGATCGCAGGGTAGGCGGTTAATGCTGACCT  
CTACTTCGACTATACGCAGTTAAAAGCCGGATAGATCTCAATGATTGACCAGATGGATTA  
CCTGATCCGTGTAAGGAACATGGGGGTGAAGACTGGGTACTACTTGAACGCGAAGGTTGG  
TGCTGGCGAATCACTCACCGCAGAACTTAAAGTCGAGGAAGCAAGCAGAAGAAGTTACCCG  
CAGGGATTATCCACTGATAGCAGACACCTCGGTTGAAGACCTGAACCCTGAAGGTTGTGC  
ATTGTAATTCGTATGGGGCTTTGGGTCCATTTTTCCGGAGGTGAATCTATAGCAGTAGT  
GAACGCTGAGGAGACCTCTCATAAACTTGGTGATTATCTGCTGCTCCTCGGACAGCAAAT  
GGGTCTGTATGACACCATCTACAAAAAATACCCGGTCCTGTTGACCTGTACAAGGCTCA  
AAAGGAATAGTATTGGTCTGAATACGAAGTTGAGCTAAATGAGTCAATCACTGACGATGG  
AACCTGTAGCAAGTCCACGCCTGATGTCATGTTGCAGACGCTGATGTGGTAGTGCGAGGC  
AGATACTGTTGCAGCACAGGCGATCATGTCTGTCTTACCTTTCATCACAAACAGTGA  
ACTTTTCGCCATGATGCAGAAGCAATCTTAGATGGGAGTTCTCCACGCGCTCACTTATTC  
TGATATCATCCGTCAGTGTGTTGCCAAACTCTCTGCTAATTATTCAAGATATTCAAACAA  
TCGGGGAGTTCTCGAACCTTCTGGTGTGAGCGTCAAGTACAGGCGTTAACTTGAAGTTCT  
TGGAGCACTCTATCGTCTCGACCCTGAATCAGTAGACAAAGACCTGGTTCGACGCTGTGT  
CCCATTGCATTGGTTCGCGAGGATCTATCTGGGAGGGATTGACTTTATCTCCAGCTTCGC  
GTGTACCATTGCCTTGGCAGAACACGCTGTGTTTGTCTGTTCCGGTCCGCTTGCCCGGAA  
AATCATTCTGGATGGAATGCTGCGAACCAAGATGGATTTCTACGTTAGTGATATCCTTCT  
GACAGACCCGGTGTGGAAGGCTAGGTTTAAATGCCAGGAAGTACGAGTTCAAGGAAATTC  
TGACGAAGTCCGAACAAAAGAGTATGGTTGGGGTGATTACCTGTTCCAGGGATGGTTCGTGC

AATCATCGGATTGAATGCGCCGCTCCTGAAAAATTGGAGTACCTGGAAGTACCTGCGCTGCGAT  
TTATGGCTTCTAGGGTATTCCAAACGACTTCAAAGCTAGCAAGCGCGATCCTCTGACGTT  
CACGGATATCAGGATGAATCCAAGCCGAAAACAGAACGCAAACGAAGAGCAGACAAACAC  
GGATAGTCGTTTAAATGGGACAGTCACCGATATATACGGTTAAGTCTCGGTCTTTTCAGC  
AGTAACATTGGACAATTCGATTTTTGATATCAGGGTTGCTTCACATCCCACAAAATTCA  
TGTCACTTTCGATGGTGGGCGTGATATGGGCTGGATTGTGATGTCTAGGTCTAGTGCTC  
GCGCCGTCTGAATGGTCTGGACTGTAGTAAGGACTTTATTCAAGGTCAAAGCCTTTGGGC  
TGTCCTACTGAAAATGCTTCTGGGTGAGCAAGGGCGTTAGTAACTTTAGTACACCGGAAG  
TGGACCATTCTAGGACAATTGTTACTATGTGGCTGGTATGGTTGTGAAACGTTATGACGT  
TTATTATACTCGCAAGATCCCAGTTTTTGTGTTTACCTTCGAAACGGAGAAATAATGAGC  
ATCAGAGACAACGTTTTTTATTATGCAAGGGAGGGACCATTGCCAACACTGTGTCCGGGCA  
AGAGAGTCCGCTAGATCCAAAGGTCTGGTGTATTATGTATCTGACCTTGGAATAAACTAC  
ACACAAGACGCACCGGTTGCAAATCCTCTCCAGTACTCCCGACAACCGTACCCCGTATC  
TTTATGGATGATGAAACGAGCACCCGGCACATCGCAACAGCCGAAGAGTTCATTGCATAC  
GTCCATTCAAACATCTGAGGGGGTAGATGAGTGAAAGTAGTAGAACGCTATGGGCGTGTT  
GATGACTTCTCTCTGAAAAAAGTAAAACGAGCGATTGAGGCCGCATTGTTAGAAACAGTC  
ATGGGCCACAAGTCGCCATCATCTGCGGTCCATATCGGTCAGCGGACGTTCAAGTTA  
TTCGTGACGACACCTGTCAGAGATGGCGAAGATATCTATCGTGAAGTGGAAAATCTGTTG  
ATGGAAGGAAGTCCACTCCGTAACGCTGCTAGCGCTCATATTAAGGTTCCGCATGATCGT  
GACAACCCGCGTGAAGGAAATGGAACCTTTATGGAGATAGCACCGGCTTCCCGGACCAT  
TCCGCAGAAGAGTTCACCCATGAGAATGCAAACAACCAAGCACGGTCGTAAACACGAAC  
CGAACCTATTAGCGGGGATTTTGACTTAACACGTGGCAAGGTCTCAGTTACTGCCTAAA  
AACCTCGCGGAAGGGCATAACAGAGCGTTTTTGACATATTCACGACCTTGATTACCTTGTA  
CGACGGCTCACGAACCTTTGCGTGGTAAACTACCGGGACATGCTTGAAAATGGTTTCAAG  
ACCGGCATTGCTAAGATTGAGAAGCCGAAATCAATTGATGTGGCAACCACTGCATTGACA  
CAAATCATCCAGGCCATAGCGTCAAGCTAGTATAATGGACAGACCTGCGCTCACATCGGC  
GAAGGTCCGAAGCAATACTTTGAAATGAGCTGCATGAAGAATGTGAATCAGTTACAGAGC  
CACAGAAACGCGTTGGTCGGACCAACAAAATGGGTCTTGATCCAAACCAGATACTGCTT  
CATCTGGTCAATACCCTGATGGGCGTAAATGGTCAGGCACGTTTCATCACGATCAGCCGT  
TGTTTGGTTAAATCAATCTTCTGTAGGATGCTCAATTGTAATTATCGAATCGTCCACAAA  
GACGGCCTCGGCGCTGATACGGGGACCCCTGTGTTCCCGAAACTTGTTATCTTCCTAAAG  
GAAGGTGTAACATGAATCCAGGCGATGCGAATTATGGTCTGTAGTTGCGTGCTATGGAG  
TGTTATGCTGAGAGAATTTACCCCGACGTCATCTCAGTTCGTTAGACATGCAAGTGACC  
GAATATTCGACCGGCAGGGTGACGAGCCTGGGTTGTGCAAGCTTTTTATCACACTATA  
ACCGAAAATAGAGAAAAGTACGATGGACGTTGCAATCTTGGCGTGGTATCCTTAAACTTA  
CCCATGTTTACCGCCGACGTAAAAGCCGGAAGAGGATTCTTCACACAACCTGCTTGATAAG  
TATATAGAAATGCCTTATGAGACAGAAATGCTTCGTATTGGTCGTCTGATCGAGGTAACG  
CCATCCCAGAACCCGACATTGTTGATGGAAGGTACTCTGGCAAGGCTCGGGCTTGATGAG  
AAGATCAGGAAACTCTTCTATGGAGGACACGCCTCCATTAGTATCCGGTTTGTGCGCCTT  
TATGGGGCTGTGGAAATCCTTTATGATGAGTCCGTACGCAAGGCGATGGCGATAAATATC  
CTGAAGTACATGAAGGAAATCTGTGCAGAGTTCGAGGATCGCAGTGGGTTAGGTTTCAGC  
CGGTATGGAACACCTGCGGAAAGCCAGTGTTATCCCTTTGCAAGCAAATTACAGGAGAAA  
CATCCTGGTTTTGTTTGAAGTGATTCCCTGACAAACTATTCCCACCAACCTGTGTTGCTC  
ACCAGCGACCCGTTCACTGTAGGATTACGAATAAGGTTTTGCAGAGATCAGTAACTGC  
GGTAATTTCCGATACGTGGAAACCCCTAACCTGAGGCATATTATGCAGGCTCTTGAAGCG  
CTTATTCTGTATGGCTGCGAAAAAATTAATTAGTTCGGTATCATTACAGCCAGTGGCTCAG  
TGCTTTAAATGCGGATTCAGCGGTGAGTTGAAGACGACTGCAAAAGGATTCCAATGTCCT  
TCTTGCTGGGAACATGAAGTAGGAACGATTTCTGTGATTCGTCAAGTATCCGGATATCGG  
TCAGCACCAAAGTCACGACCCTCCAACAAAGGTATGATGGAAGAGGTGCTGCAAGGGGTG  
AAACATGTATGCATTGCTGGGTTTATGAGCTAACGGACCTCGTGAACGAAGAAGGGATCA  
GGTGCTCCCTTTGGGTTAGCGGTTGCAGTCACGTATGTCGTGGCTTCATTAACCAAAAAG  
CTTGGACGTATATCTAAGTTCAGCTTTCCACCAATGCGGAAGTTCACAGGCTCATCAAAG  
TTATGGGAAGGCCTTTTATCAAGGGCTTGTGCTTACTTGGAGGTGAACCACTTGACCTGC  
AGAATGTTAATGAGGTCGTAAGTTATTCTGCGTGACCGTGAAGTATTCGGAGATAGCA  
GGGATATCATGGTGTGGACTGGATACACCTTCGTAGAAGTCCAGAAAGGGTTACATTAC  
TTGTAGATATTAGGATGGACGGCAAGTATGATGAGTGCAATGCTAAAACCAAAAGGTTCA  
GTGGTTCTTACAACCAGAGGATGTGGGTAAAGAATAGACGGTGTATGGATAGAGGAGAAGT

AGATGAGTAACAAAACAGTGCTTAACGGATAAGAGAGAGAACAGTCTTTGGAACCTCCGTG  
GCATAGAGCATAAGAACAAGCGCCCCACTGAGTTCGAACGGATGGAACCTGGTATCTGACG  
TTGCTGCCTGTGGCAACGACTGAGGTAAGTCCAAAGACTGAAGTTATTAACGAAGAACAGAC  
CTTCGTGCCACTATCGCAGCTGGAAACGCTGCTGCTCGGAGATTCCGAGGAACTGGCCCG  
TGAGTTTGTGGGCCCTGATTTCCCAAGACTGATCAATCAGATTACGGAACAACTCAGTA  
TCAAATTGAAGCTCGCAAGCAAATGACTGCTGACGCACGTAAGGCCAGGATGCTACGAC  
GGAAAAGGAGCTTAATGCTGCCTAGGTTAAGCTGAAGAAAGCTCTTACTGAAGAGTTTAT  
GCAGTAGGTGATGGATATGATGGTTGACCCTCAGAAAGGAGCGCTGTCACGGTACGAGCT  
TGCTTACGCGATCTATTATGAACATATCACCATCAAGATTTCCGGGGATTGCGGCCCGTCT  
TCAAACGGCTTTTCCAGAGGGCGCTCGGAGAGGGCGAAGACGAAAGGAGGTGTTCAATGAA  
TGCTGCGAGTCCGGAGAGTCAGCGTAAGCTCATCGAAGGTGGGTACAGCGTCGGCAAGTC  
TGATGGTGTGTAATGTGCGGACCCGCTAGAAGATCCGCACCCGCAAAGTGCATTGCACA  
GGCTACCACTGGAAACAATTCCGGAGGTAAGTAAACTCACCCGAGCACAACCTGGACAA  
AACCTTCCCCCTCGGTGCAATTTCTTGGAAAGAATGCAAAAATTCCTGACGCCGCTCAATGA  
CCTGTCTGAAAAGACAGAGATTATTGCTGTGAATCGGATTGCAGGGTGCCAGTCTCAGCT  
TGATGTGGAGTCGGCGGAGTTCGGGTATGTACGTCAACTCGGTAAGGGTGGCTTCTTTGA  
CAAGTACGACACTGGCCCTATTCCAGAAAGTTTTGGAAACACACCCCAAGTACGATGGGGA  
TGGTGCCAACGCCAGGAAGAGGGGGCTGATTCAGGTGAGCGGACTCACAACTGAAAGGC  
TTGCCGTAAAGCGCTTGGTGTGGCCTCGTTTACCACCCTGAGTTGAATGAACAGCTTGA  
GTATGCTGTTGCCAGCCCTGGCTCGTATTGGGACAAGAGCCACATCAACCCCGCTTGCAT  
TGCTGATGATATCGTGAAAATTACCAAGGGGCTAAACAGTGGTACAAATTAACCTTGCCGA  
GCGCACAGCCAATGACAATAAGGCTTAATCTGTTCTAACCTCGTAAGGACAACCTATATC  
GGAAGAAGCACAGAGGCTAGTGCATTAATAACTTTCCGGCTCGCCAGCAACAACGTTTCAGAA  
AGACAATTAAGAACCACCCGCAATTCGACGAGGAACGTAACAGCGCCCAAAATCCGGTT  
TCTCTGAATGTAAAGCAGCAGGATTACCTTACAAGGTGCAGACTTGCAAAAATCATAATT  
GCGAAAGGCATCTTCGGGACAGCCAAAACCTACCAGGCATCCGCCGACGCTTCGGAGTTG  
CTACGTAGAAACGAACTCGACAACATCATTGTGCTCGGCCATGCGTGCAGACGGGTATA  
ACCTCCGGCTTCAAACGCTGTACTTCACTGGTAACGCTGTTACCCTATGTTTCGTAACATG  
TTCGAAACCATCCGCAAGCTCATGGTCGACGGGGCATACTACAATGCTTTGACAGAAGGT  
TTAAATGGGCGTATCGGCTTTCAGGAAATGGCAAGCACCAGTGGTTCGATTATTAGACTAA  
ACCAGCTTCTACTGATCGCCGAAGCCCGGCAGAGTACCCAGACGGAATGCTGACTATC  
AATACTCGTATTTCCGATAACTGTACATTCGGTGTGATGGGTGATGCCAGTCAGATAGAC  
ATTTAAGGTCAGTCTGGCCTGGAGTGGCTCATTGAGTTTAGACAGCGACGCAACCTTGCA  
GGTGTGGATACTGTGTCCTTTCATGACCCGAATGAGGATATCGTTCGTCTTGGTATGATT  
GGCGACATCGCTATTGGCATGATGGATGACCGTGACTCAAACTATAACAAGCCGATGGCT  
TCTTAACAGGAGAAATATGGGAGATTATGCAGGGGTAGGATCAAGAGAAACACCCCCAGA  
GGTTATCAGCGTCATGTAAAACGCAGCTTCCCGTCTAGCACGGCTCGAATTCACTCTTCG  
GAGTGGGAACGCTGGAGGAGCGGATGCTGCATTCAGAGAGGCATGTAGAAATATCACGA  
AATTATTAACAATGGGAAGAAGACAAAGTATCGTACACGCTTGGCAAAGATTTACATCCC  
AGGTGGCGGCTTTGCTTGAGACAATTAAGACCTTTGGGACTTCTGTGGCTATCACTTGAG  
TTACAATGATCATCTCATGCCTGAACAAAAGCATAAAAAGGGGTTCATTCGGTTGAGGAAAG  
CCTTCCGAATTATGAGGCTCTGAAAAAGAAAAGAAGTGCTTTTGCCTCCATTCCCGTAA  
TGTGCAATAAGTTCTGGGGGTAAACATCCTTGATCCGAAGCCCACTGCCTTCTGCCTTTA  
CTATGATTCAGAAGATAAGCATGGCAACCCAAAAGGGGGAACTGCAACGGCCGTTAATCC  
CGCCAAAAGTATGCCATGAAAACGCTTAACTAAACTCCGGAGCGCTTGGCCTTGCT  
TGAGAAGTTCCCTGACCAGTCTTGAGAGCAAACGAGGTGTGCAGGTTTAAAGAGAAGCGAA  
ATCAGTCCTACTGCCTTGTGAAGGTTGAAAGAAAGGGTTGGGTTCTGACCAAAAAGACGG  
GATAACGGATTTAAGTTACGGATGCAGGAGGGGAGATTTCGTTCTGTTTGCACCACAGATG  
ACACGAAACCGTTCAATCATCTGACTGAACCTCTAGGGTACGAGTCCAAGAAAACCTCATG  
TGGTCGGAGATACAGTCCAGCTGGACAATTTCCGCGATGTTTACATTGTGGATGAAGGGT  
ACCGTGGAGCTAACGGTGAAGTTAAGTACCTGTTAGCTCGATAGGAGCAGTATGACACCT  
AGTATTCATGGGGTTGTTTTCGCATCGAAAACCTTATCGATCTGAAGAATTGTGGTGTGTC  
GAGCCTGAATTTTTCGAGGAGGAAGTAACGAAGCTTTTACCTTTTAGCGTAAGGTAATA  
GCACAGAGTTTGTATGGTCTGAATGATGGATTTTCGTACACGTATTATCTACTGCCAAGAG  
GGGGCTGAACGTGTTGCTCACTGGATGTTTCCGGACAGACGTGACCTACTTAATCCTCTG  
ATTTATCTGGATCATCAGGGTTCGTATCTCGAGTTACGTGAATATCAGTCCGAAGGAACTG  
AATCAGTTCCTAATGCTGCACACATCAGCGTTAGTCTCCGAGAGGGCAAGAAAAGTTCTC



GGGACACTCAAGTACAGCAATCAAGTGCTTGTTCGATGACGAGACAGGGTACTGCATTAC  
TGGCGGATGAAGAATGCTTACATTCTGAAAGGCTACATTTCAAACGCTCGCCAGCAGGAG  
TAATAAGGAACAGTACGATAACTTTTTTCGGTATGCTGCCGGGGATGAGTGGGAACATTTA  
TACCCACCCGGACCACTCTCATGATCAAGTCATCTACATTGATGATCTGTTCATGGCTGAA  
AGACCATCAGGATTGTCTGCACGTTATCCGCCCCGCAGGCCGTGATGACACGACCCGGGT  
CGTGATTGACAGTTCTGGTGGGGTAGTGTCTATTGCTTTTTCCGTATGTCAGTGCATCCG  
TGAGAGTCAGGCACAGAGCGTCACCCCTTCCGAATGCAACGTTTGTCTGCCGGGACGGT  
TTTGTGGTTGGCCTTTAAGGACCGCACAGTGGCACCCTGACGGAGTACATGTTCCATGA  
TTATCAGGGCGGGACTTTAGGTGATGGTGCAAACATGTACGCTGAGAGTGCATTTCGAGAT  
GCATTATTTTGAACGTATGATTGACGCCTTCTACACCCGGGCTTCTGACCGATAGTGAGAG  
TGCAACCATCTAAGGTGGTGGTCAGGTGTGGATGGATGAGATCGGGATCGTGAAGCGTAC  
CACTGCCGGTGTCTGTTGGATGAGAGAAGAGTCAAACGGATGCAGCAAGGACAGAACCAAT  
CATTTTCGGCTAGAAGAAGACTTAACAGAAGAAAAAGGTTCGGTTAGAGTGTAGACCTGAA  
CAACCTGCCAGAAGTTGAGCCTGAGAGCGTGTGTCTGGAGAGTGGTGTGACGTGGAAT  
GTTCAAGTTCATCTTTCCACGCTGAGTGCAAAGGATCTTGAGGTCTTCAATGGGGAAGA  
ACTGCAATCCATCCTGTCTCAGATCGGTGCGCTAGCAGCAGGCTCTGAAGAACTTCTGAA  
GATTACCACTCCAAATAGTCAGGAAGTACTGGTGAAATGCTCAAATACTCCGAGGTAAT  
CGTTGCAAGTACTCTGGAGCAAATGGGGAGCTAATGTCTGCAGCTTTAAAAAAGAAGGAA  
GATTGCAGGGCATAACGATGTCCACGAAACCCCAACTTGGGCTCTTGAGGCCATTTTTATG  
GTTTACCCGAATGATTCCACCAAATCTTACTTGGATCTTTGAAGAGGCTCCGGTTGGGAC  
TACAACCTCCTGCCTATGGGAAGCGCGTAGGGTCAAATCCATCAGGGCGTAGGTGATCTT  
AACACGGGTTCCCTACCACGTAGATATGGTTGCGCCCAACCCACCATGTTCTTTGGCGCAC  
AAGTTCGTCCCCCAGGCACCTGGTGAGGCGGATGTTGTGATCATCTTGGTGAGACTAGGA  
TCCCTTGAAGGCATGAAGCGTTGTGAGTGGTGGCAGGAGAACCAATCAGTTCTCTTTTG  
GTACTIONTCTCATAGGCCATCTTTTTCTACCATGGAAGTACCGATGGCAGAGGTTATGCC  
TGGTTTGTGTTGCGACAAGAAAAACAAGTTCGGACTGAAGTCATTTAATCCCTGGTGCGA  
CACAGTGACGAATGTCGCAAACAAGATGTGAGAGATCGCAAACAACGGAGAAAAAGACAC  
ACCGGTGTCATTCAAGGAAGTGTACGATCAGATAGTGAACGGGCTAGCGCAGTGTGCGAG  
GAAGGGGAGGTACGGGATGGGACTTTCTCTCCTGTTCCCGGAGGAGATGAATGATTATCT  
GCCCCATATTGTTAGCGATCTTCGCGGTGAAGGTTTCACAGTCCGGTGTTCATCAGCTACCA  
ACCAACAAAACAAGGCACTGCAATAGCTTTTTGTCTGTAACATTGTCAATCAACCGGGTTCG  
GCGGGTGTGGTTCGGTTTTGTACTTTGCATGGACAAAACACACACTTAATCTGTTTTCCAA  
CAGAGTAGAACAACATGCGATTTTCCATTTACTACCGTCTTTTAGAGACCATGCGCTTCG  
GAAAATACATGGGGGACCTAATCCATATCTCGACAGCGGAGTAGGATTATCCCTGACG  
GGAAGATTTGGAGACTTAAACGTTGCAATCGCCCTGCCAGTGTGTATACTCGATTATTCA  
AGATGGTGAAACACGGCGGATCGAGGACGACAAGGTTTATCCACTCGACGGAAATAGAT  
CACAAGAAGATCTGCTCAAAAACATGAACCAATGGGAGAGAAGCAATGAAACTAAGTCT  
TACCAAAGAACAGGCCATGAACCTGACCCGGTTCACAGGAATCCTTTGATGTTTCGTTCTA  
CCTGATTCACGAAGATGTCGAAAAGCGACTGGGCCAATCCGTATGAACGCACGAGTTCGG  
CAGTAAAGAGTTCTCAGCTGAACTGAAGGGTGATTAACCCGAAGACTTCATGGCGTAGAT  
ATAATAAGGGGAATGATGATGACCGAACTCAATGCCCGTGAAAAACTTTTGGGGATAGAA  
GATTGGCTGGGTTGGCAAACGAAGACCTTTCATGTGGCTTGAAATCTCCAGAGGACGCT  
GTTAAGCTGTAGAACTACGGGCAGGAACACGCACACAGTCTCCCGAATTTGCAGACGAC  
GAGCAGGACGGTGAGGGACGCGGGTTGTTTATGTTCCGTAAGCCAGTACTGGGTTATGAC  
CCGATGGGCGACAACGCTTCTATTGTGGCAACGCTTGCGGAAGAGAAGTACGACGCTGAA  
AATAAAGACACCGACCTCGTCTTTTACTACATCCGACAAACAGTGAGTAAAATGTACAGC  
TCCGATGCAGAATGGAAGTTAAAAAAGCAGTACGGCCTTCTCTAAACTGAAACGAAACAA  
GCGAAAATAATTGATTAATCAAACATAAACCGTAGTAAAAGATCTGTGCAATGAGAACAT  
GGGGCCACCGACCACAGTAGGTGAGGTGGTAACAACAATTGTAGAAGTTCCTGCTCATA  
TGCTGTAGTTGTGTTTCGACCAAGAAGGCCAGTTTTGTTTAAAGCTCTACAGTCCGTAGCGA  
TGTATTTTTTACCAAAGGTGGGAAATCCAGACACAGTGAGGGGGTGGTGGTTCGAATCCT  
AGACCGAATTTTTCGTTTCCGTGTCCACGGTGTTCGGTAGGAAGGGAACTATGCTTTCAC  
CGCAGAAGAAGTGGCGATCATCGAATGAATCTCTATGCAAAAATTGACGGACGCCCAGAAT  
GGTTGGAATGACGACATGGAAAAGGACCGTGAATTTTTAAAACTCTCGATCAGGAAGAA  
ATTCGTCTGGTTTCCTAAGATGCTATTGACAGGTTCGCGCACCGAAGTGGTATCGTCTAAT  
GAAGGGCATGGTTGGTACAGTTTGCAATTTAACTTCGTATTGAGGGTGAGACTGGTGT  
GACAAGTATGTCATCTTCCCAACAATAAATCATTAAAGAGACATTTATAAAGAATATATT

CACGAAGAATTCTAAGGAGAGAAGATGAAGGTATATTTGTTAGGTGGCGCAGTACGTGAC  
GGTTTGCAGGGCCGTGAAGTCCACGACCGTGATTACTTAGTTGTGAGTGCAACACAAGAC  
CAAGTGATTGAAGAAGGGTTCATGCAGTTTGGCGCCTCCTACCTGTTACCCTTCCATCCG  
GAGACTCAGGCAGAAGACTCGCTCGCTCTCACTGAACGTCAGATTGGTAGCTGTCACAAG  
AGTTTTTCAGACCTTTTTTCAGCCCAGATGCAAGACTGGCAAAGACCTGCCTCGTCGGGAT  
CTGACTATTAATGCGATGGCTCAGGATCTGTATACTGGAGAAATCATTGACCCGTCCGGT  
GATCAATATGATATTGTGAGGAAGGTCCAGCGACACACGAAGTTCACAATTCTTGATGAT  
CCTCTGCGTATTCTGAGAGCTTACTGATCCAAAGCGCATTTCGGGTAGGGAATCGGATGTC  
CATCCTGAGACAAAATCTCTTTGTTACCAGAAGTGTACGAACTTGAAAGTACCAGTGGC  
GAGCGTAAATGCAAAGAGATGAAGAAGGCTCTTGGGACTGATGACTTTCGTACCTAAGCT  
GAAGCAATGGCAGAAGTGGGCGAGTTAACAGAAGTGAATCGCTGCGCGATGTAGAGCAA  
CCTCAGGAATACCATCCCTAAGGTCACGCATTCATACACACATCGCTGTGCCTAGATATC  
GCAGACCAGTACGAATCAAACCCATACACGAAGTTTGCAGTCCCTGTGTCCCCTGCTTGGC  
AAGGCCGTGGCATTCTCCAAGTATGGCAACCTACTCGGTCATGTAGAGCCAGGGCGTGCT  
CCGGTTGATGAACTGTGTGAACGTATGCGTGTGCCAAACGATGTCCGTGTGCTTGGCTCGA  
TACGTGACTGAGCACCATATGGGTGTTTATTGCATCACCCCTCGTAGAGAAAACAAGGGT  
GCAAACCCGCCATCACTAGAGAAGCTTTTTCGAAGCTGCTGGTAACGTGAAGAGTACCAAG  
ACAGCTATGAAGGCGAACGCCCTGGCTGACGCATCTTTCTGTGATGCAAAGGCCGTGGC  
CCGACATAGGCAGCGGAACCTTACCCCCAGGGCTAGGTTCTGATGGATGCTTTCCGGTGA  
ATTGTGCTGTTGATACCAAAGTAATCTCCGCTGATGGTTTGAGTAAGGGCAAACAGGC  
ATTGAGATCGAGGAAATGATTAGGGTGGCACGTATCGACGCAATCCGCAGCGGCACACAG  
GGTCAAATGCCTGGTAAGGAGTGCTGTCTTAAGAATTCGGATAAGGAGGAGTAGACATA  
CGAGAATCATCACTATTACGCTGACAAACACGCAGGTCAGCAGGTTTGTGCATGGAACAG  
CCTCGGAGCTATAAGGAATAAGGGTAGCGACTGTTGCGGGGATAAGGGGTGGAATTACGC  
ATTGCATCAATCGTACAGAAGCGCTATGTTTAAGTTCACACAAATTTTCAAGTTGGGGAA  
AAATAATGCCTATTGAGCCTGTAATTTATTTGTGCATTGGTAAATTGGCTATGTTGACGA  
TTCTGTGCGATGAATTAGTTTTCTATGGATAAGATAAGTTCTTCATCCGTCAACATAGGGC  
TACTGGTGATAGTCTTTTGGTCTCTCGGACCTTTCTCTTTGCTGGGTGTCACCGTTGCCA  
CCATTTTTAAAGAAAATTTTGTATTGCAAGGAGAAAGAAATCAAGACACGTATGTCCAG  
CGTGGCAAATGAATACATTACTGGCATTACGCAGGTACCCAGTCAACGCACGCGATGTC  
TGAGATCCTCTTGAATTACTCTCACCGCCGGAACCTCTGCCGGAGATCTCTTGAGGGATTG  
GGCTGACCGCGATAACACCATCCTCGTCTCAATGGTGGATAACCAGTCGACAATGCACGA  
ACTGTGTGAGAAGTTCAAGCCTCTGAGCAGAACGTATCCGTGGGCGTCTTTCTGTGAAGA  
GCAGGATGTACGGAACGGCGCTATGACAGCAGTAGCTGTAGTATTGCCACAGTATATGTA  
AGGGCCGCAGGCTTCGGATGTGGTCAATCTGTACCAACTCGGTAAGTACATCGCCCCAGT  
GAAAATCAACCAGTACTGCGATAAAATGGGCAATGAGATGCATAACTACACAGAATCGGA  
AACAGACCTGATGACAATGATCAAATCTTTCCAACAGAAAGGATTATAAGATGAAAGTAG  
GTGAAGTTTACTGCATTCTGATTATTGATATCATCTTTTCAGCTACGCTGATCGCTACTT  
CCGAGATCCGAACGATCGGGTCAGAGAACAATAAGGATCCGAATTTCTTTGACCTACCCC  
TGCGGGATGTGGTAAACGGTGTGAAAGACAACCTGTTAAAGTCCGCCGAATAATGATCTA  
CACACTTTATACCCTATTCATCCTGCTTGGTGAGATATTACTGACCCGTCCTGATGAT  
CGGGGAAGATTTCAAGTTGGCGGCACGAAGTTGCTCGATGTTTCGTCTTCCTTGCCGTTAA  
CGAGGGCTTGATGATGGTGATAAACAATGATCCCACCTTCTGCTGGGCTGTTTGCAGGACC  
GCTGTTTGGGATTGGGATTTGGAGACATAATTCGTCTGCCCGTGCAATCTTGCCGGAGAA  
GGTAATCAGGAACGAAAAGATTCTGGTAGCCATCGGCCCAAATGGTTTTTTGTTTGTGCA  
TGATATCGTTCAGCTGCTTGAGCTAAGGTGGATAAATGAAAGACGTTGGTGAATAGGATTT  
GAAGATTGGTGTGCAAGGGTATATCTACTGGAGAGGCAATGAATTGCGCCCTGGTAAGGT  
AAAACAAATCACGGTGATTGAGGCGAAAATCCTTGTGATTCTTGGCCTAATCACCCCGA  
TCCAGCACACCGCTATTCCATGTCGAAAATGAAGTCGCGGGAGTGGATGATCAAGGCAGA  
AGAGCCAACAGGCTGGTATCCGAACCAGCACGTTTTTATTGATTTAGGAGATCATTCAACT  
GAGAGACGAGGTGAAATTCTAGGCGGCGAAGCTTGAGTACCAAGAGCTCTTGATATTCTG  
GGATAAAAACCGCAAATCCGATCTTGTCTTCTTAAGGAGATTTTTGGAACTGTAGAC  
TTGTTGGGTTACTACTTTGGCAGCATCGCTTAAAGGACTAACCTCCGATCATCGCATCCC  
GAAATCCAAGGGCTTTTCTGTGCAGAAATGATGTTTTTCTGCACACCAGTCTGCACTATC  
AAGGAGTAAACCCTTGTGACGAAGAAGATGGGAATATTTACGAACTGACAAACGTCATG  
AAGCTCTTCGTGTAGATGCACGCGAACATCATCGCGCTTATGTTTCGTAGATGAGGAGGAT  
ATTCTCCCAAACCTCGGATGCGTATGACTATCTACGTCAAACGGCACCCGAAGGCCTATCG

AGCAACCTGGCCTTTAGCCTCTCAGGCTACGCAATGGCACAGGCTATTCGTATGCGTGGT  
AACTATAAGTGGATCAGCACGCCACAACCTGAAGCAAAGCCAAGCCAGAAGGAGTTCTTC  
CGCTTGGTGTCTAACGACAGCGAGCACCCGTTTCTGAAACGAGAGGATTTTATTTCAGGCT  
CTGGACGGACTATCAACCTTCTGCATACTCGTACCTTACGGTAACAACGTTTACGGTGTG  
ATGGAGAACCTTAATAGTTCTGGACTATTCAATACTTACGGATCGATTGAAATGTTCGAT  
TAACATCAAGTGACCACTGCGGATAAAAAGCGTAACCCTTTGTGGATCGTAAAATATCGG  
GAAGAAGAGCTCAAACCTGGCGAAAGAGAAGCACCCGGAACCTACTGGAAGTGAAGGAAAGT  
CGAAATGAGGCTCGTCATGAACTCGAAGTCCAACCTCGGATACGATACCAAACATGCGATG  
CACCACGTGCGCCTGATGCGTATGGCGGAAGAGATTTTTACTGACGGTAAAGGCCTGGAT  
AAGAGGCCTGAGGGCAAGGAAGTGCCTGTTATCCGTGGTGGCCAGTGGACCCTTGAACAG  
CATCTTGCTCGGGCTGCCGAGAAAGACTGTTATATCCGAGAAGACCTGTACAAAAAGACA  
GCTCTCCAGACACAACCGACCTTGAAGTCGCCGCTCGTGTACTTATGACCGCGCAACAT  
ATCTGCTGGGCCAAGATCGATGCTTGAAGCAGTAATCGGTATACTTAGGGTTGCATATGA  
TGTTATTGCTGTGGTATACTCCATAGAGATGGAGAACGGTAAAGTTGTCCGGCAGATTCA  
CAATGCCAAGACAGACCTTGATTGGTCCGAGGTTTGATTTCGCGTACGGGTTTCGCTGGCG  
GCTTAGGGCACTGGCCCAATATTTGATGAGGAGAAGAAATGAGACAGCATGGATTTATGG  
GAAGAACGATCGAGTTGTTTCGCGGGATGGCAAAATGAATACAAAATGAACCGTAACGGCT  
CTGATGAACCAGCAAACCTCGCCCGTTATTCGGCACCCAGGAGGACGGCCTTGTATGTGT  
TTGTGGGCTTACAATGTAAGGTGTACACATTATGAGTTGAGGTTTCGTAGACGCCAGAGCA  
TGCGTAGACCTTACGTATGCGTATCGTCTTGCAAGAAGCAACAGGCAACGACCTCAAAGA  
TATTTTACAGAATGTTGGAGTTGGTTGTATGCACGATGCATGCCCGAATTGGGGTGGGAC  
AGGTATTCGTGATGATCGCCTGGGTATGTCTGAACACGGTTCCTCCTCCCTGCCCGAA  
GTGTTCTTTACATGTTGATAGGCGGTAATTGCAATCAGTCAGGAGTTTGAACCTTTGTG  
TGATTGTTTCTTCCCCCTATATAATGTTAGCCACGACAATGATAAAATGGCGGTTAATAT  
TATGATAGGAGGTAGTATCTTCCGAAATTGGTTTCGTGAACACCCTACCCTACCAGAACA  
CTGGCGACCTCTGCTGGAAAAGAGTTTTAATCAACAGGGCTGTTAAGAATAGCAGCCATT  
ACACCATTTCGTGTAGGGCGATTGGACGTAACCTCGTGGTGTGACACGCATAACCCTATGC  
CATAACGTTCCATGTTGGAGATATGGGGAAAGCTCCATCGTCTTGGCTTGGAACAGTCTT  
TGAACCAGTGCGAGGGTTTTGAGACGGCGATCCGGGCCATGTATAGAACAATCGAGCTCA  
TCATCAATGTGCACAAGCAGTCTCGGGGATGCGGATACAGAATAAGAGACCAGTTCACGA  
ACCCCCAAACAAGTTTTTTCGTTGCCGTTTTTCATGATCTACGCAATAATCAGCGTGGTTG  
TGTGTTCTTATCCACTTTGAGGAGATTGAATGAGGTACAGAGGAGATTATAACAAAC  
AGTATGCCGCCCGGAGGCTTGAGACAGGCCGTCAGCGTCGATCAACACCAGAAGGTAAAG  
CAAGACAACCTGCAAATCAGCCTTAACAGAATTGAGTCCGAGAAACGTGCAACAATCAGTA  
GTGAGTGGGACATCTTGGACCGTTAAGAGGTCAACCTTCTTTGCAAAGAGAGGACGCGTG  
ACACAGGCAATCCTTGGGAGTCTGACCACATGCTGTCCCTCCGTGCAAAGAGAGTAACTT  
GCCTAAACTGTTGTGATAATATACAAATTATGCCCGTAAAATTGAACCGTAGTAAGAATA  
ACAACCTGATCTAGACGAACCGACTGGAGTGGATTAAGCACTTGGACACCCTATGCCGGA  
AGAATAATAAAGATTTTTGTAAAGGATACGACTCACATCGTGATCGGTAAACTAAAGGG  
AATTTCCAGCGCTGTGGCAAAAGTGAAATCCGTGTGCAAATGGTCAATCGTTTTTCGTTGT  
GAAGGGTAAACACAATGCGTATTCTGATGGAGTGCTTTATCCAAAGCTTACAATAAAGCA  
TACCGCCGTAAAAAACGATCAAATCTTTTTGGTAACAACGAACAAGGATCAGTAAATCTG  
GCTTTATACCGATCGTGTGTGCATCGGTGAGGGCGAGGTATACAACCGAGATATGGTTTT  
AGACTTAACATCCCCAACAGACGATGAAGACCAATTGCCAAGAAAGAGGAAGGGTGC  
TCTTGATATCCTTATGAAACAATTCCGGAAGAGTACCCGGAAGGATCTTGAAAGGGCGGAT  
GTCTGGGATGTTTGTGAGGAGTATGGCTCTGAAAGCGAAGAAAGAATGTTTGGTTCAAT  
ACGTTAACCCCCCTTGGCGGTTTTTTTTTTTATCAGTCTTTTGTCAATTCTTTCAATGACA  
AGATTGTCAGACGTATCAGTCACTGTCAGGTGCTCAATAGGAATGTCCATCTTTGTTGGC  
ATCCCCCGGACATGACCTTCGAATCGAATATGGTCCATCGGGCGAGGTTTTTCGGATTGGA  
CGAATCTTTGATCGTTCAAGAACATAACACTACCTGCCGGTTAGATGGAATGTGAGCGGG  
TTCTTGGGGCTGAATGCGGATAAAGGGCAGGTGGTATCCGGGCGCACACGTTGGTCTGGC  
TCATTTTCGTTCCCGGCGACCGTAACTATCTTCTGTCATCTGCATGGTGTCCCGTAATGG  
TTTGTTTAAGACAACATCTTTGATAATTGTGCGTTAGTCAATGGTTGACGAAATATTTAT  
TTCTGCCATAACGGGGAATAAATTCGGATAGGAGGTTGATTTGTGTGAAAAGTATGGCGA  
TGCATGGGAAGAAGTGGGACAATGATCAAACGGAAGCAGATCCTTGAAGAAATCCTGTG  
TGATATCGACCTGTGTTTCCAAATCAAGAATGGTGTGAGAAAGGCTCCAGGAAAGGGC  
AAACTGCTCGCTTCTTATCGACGCATTGATACACACTGCACAGAACATCATGAAAAGAGG

TCTTCAATGACGTACAGTATCTACAGCACACTGTCTATGGACCCATGCTCCCGCGTGGGA  
GAGTTGTAAGCTGCTGTAAGTAAAGTACCGTTTTACAAAACGGTTGAAGTAATGCAACAT  
TACAGAGAAGCTTGGTGATATGTTTCAGAGGAGACATGAATGTTGGGATGCGGGAAAAGGC  
GCAAGATTTAACTTATCTGAACTTCGACTCAGACGGTCAACTGGACCGACACTGGAGAAA  
GAGATCATGGACAATGGATGTTCTAAGAGTCTGACAGGTCTCACAGGTACTTCGAAAGAA  
CGGATGTACCGCGGTTACCGAGTAAAGAAAACCGACTTCCCGGGTACGCCGGCTGTAAGG  
CGTGTGCCGGTGTGGTTCGACTTCGCTGTACTTTAACACCAGTGGTGGTCACAGAATGAT  
CTACCGAATCGTAAATATAGTGATCCATGCACGTGCGTTTTGCCTAGTGATGTCCGTCGT  
ATATATTGGGCGGGACATGAAGATTTATCCGGTCATGTACGCATGTGCTGCGTGTGCGTT  
GGTTGCATGCTGGTTTATAACTAAGCATATAATGGTAGATGAAAAATTATCAGAAATGCC  
TCTCCGTCTTTCAGCCCTCATCTGGCTGGCATAATGGAAAGCATAACGCTACTAGGAGCTT  
CGACGAGAGATCCCCAAAGACTCACTTTATCAGGGGTCCCATTCTGATGAGCAATACTAA  
CATCACCAGACGAAAGAGATGGGCGGGCATACTCTTAATTTTCATCATGCGGGAAGTG  
TGGCAGGATAGCGATACAGGGAAGTGGCGCTTCAAGAACAAGGAGTTCTAACTAGAGGGG  
CAAGGAAAAAAGGCCGCTGTCTATATTTCAAGAATAAAGACTCTTGATTTTATGGTATA  
ATAGAGTCTTACACAACGAGAAGACAATATGTTTCGAAATGCCCTTGTGCGGTAAAGCCCT  
CATCTCCGTCGGAAGCATCAGAAAGGCAACGGCTGGGGGTGCGTGTGACTTGCCCTATC  
TGCAGTACCAGTGGTAGGATAATTGCGGGACGTACCTAAGTGGCATAGGTGTTGCCAC  
GGCGACTTGGCCATAGATTCTCGATGATGTAGAGGATTTTTGGTCAAGATTCAGGCAATG  
CCTTGCAAACTGGAAGATGGGAGTTGGTTATTTTTGGGGCCAACTCCGAGGGAGCGGT  
CCCTAATGCACGGGCTGGAATGCATCCTTAGAGTTTATCCTGAGCCAGGACAACAACGAA  
GATTCCCCGCACACAAATTGGTAATGCGGGCCGTATATGCTGTTGTTGCGATCATTCTGC  
CTTTCACTCTGACACCGACCTTTACCTGAAGTGACACACCACAATAGTGGGGCCTGAAGG  
GGCTCCTGTATCCCTGCCTGAAGAATCCCATCAATTTAGTCTAAAGAGGCAGATCAAATT  
CCTCTTGACGTAAACTATCATCCGTAATACGATTACCTAAAGCGTCACAGGTTCCGAAGG  
CCTGCACGAAACCAACCAAGGGTGCCTTGCACCTGAGAATTCTATAATTCTCATTCAA  
CAGTCTATACGGACGTTGGTTGTTCTGCTTGTGAACTGTACCCCGCTCCTTCGAGAAA  
GGTTGTACATTTTATTAACACAATCCCCGTAGCACGGGTGAACTCATTTCGTTGCTCTG  
CAACACAACATGTTTAGGGAATTGCATTTCTACGACACATGTAGCCTGAAGTGTGATGC  
TGTAACATATCGCAGGGCGATTAGCCACAGGCTAACCTGTATAGCGGAAAACATATGGA  
AACCCAAACCTCCGCCGCCCGGAGGAAAGAAAAGAGGCCATTCTTGTATCGCTTGGGG  
ACGTACAATATCCGTTGGCTCTATGTTTCGATGTGCTAGAAGGACAATCACAGCCACAGAA  
GGTTGTCAAGGTTCTTTACAGAATATCCGAGTGGTCCGATGTCGGTACCATTGCGAGTTT  
TTGGCTCGACGAGTGCAAGATGATTAGTTGTGTAATTTACGATAGCCTAATCAAACGATG  
ATGATTGGATTGCTTAGCCAGCTTACTGCACGATTTCCCCTTGACTTGCTTACTTTTTCCG  
TCGGTCTGTCTCTTTTATATAATATACGTTATGCGCACACAGATCGGACTGTCGCAAGG  
GTTATAGTTGCACAATGTTCCATTGCATCAATGAGCAATTAATGACGAGGAACGGCC  
TGCAATATGTTATCACTGTGAGAGTTTAAACCCGTTGTTATTCATTTTGAAGGGTGT  
CTAGATAATAATTCTTTTCATAAACAATATAATTTTCGATTTTTCATTTCAATGTCTAAATG  
AAAATCATTCCGCAAATACAAACATTTTGTGAATTTACACAAAAACTTTGACAGGGAGA  
GAAAATTGTGTTTAGCAACACGCTGCTTTTGGAGCCTTTTGGCACATGATAACCATTCCCG  
TTTTGGCCTGTGATGGGCCAAAGACCCAGCAATGCTAATACATTGAAATGGTTACTTATT  
GTAAATAGTTTCTGTATTGCTACAGACGGCATTAAATAGATTTGACGTATCAAGAAAAAGC  
TTGACACATGAGGCATCTTTTATGCTCAAAAAGAAGCCTTTCAGCAGGCCTGCGGCCTGA  
ATTACAGATCGATTAATCATGGTTTGTTCATCCATTAACGGCGATTTATTGCTAAAAAAA  
GGTCTTGGCTTTCATCACCTCGGGACACGATAACACAAAGCCCTTACGGGTTGTCTTCGC  
GACGGTAAACAATGTCCAGATTGACCAAAGAGGTTTTGTGAATCTTCTTTATCTGGACAA  
TATAACACGCGAGCGATCAACTTTACTTGATCGATGTTATCGTGGCGAGTGTGATAATTT  
CATTGTGTAACATTTATTATGAATGAAGTATAATGTAAAGGATTAGCCGTTGCTTAGTC  
AAGTATGTGATTATATCGTAGCGACTCCGAGCCACCATAACGCGAACGAAGATGATAAGT  
ATTATCTTTTACTTACTCTCGTGTTATCGTGTGCTCGTTAAGCTCGCGCCACTCACCA  
CGATCAGGCGGACGATTATTTTATTGGACAAGATCCTATTTTTATGCTCACGCTAGACCG  
TCAACACGATGGATTAGATGAGAACAGTTATCCAATGAAAGTTATTATCCCGATTTTACA  
TGAAACATTTTAAAATGCGTGTTTTATTCAGTCGATAACATGCGGTATCAATATTGAGGT  
GCTAGTGGGTCAAATGCGATAAGCAGTACCCTTTTAAACGCAATTTAACGTGTTTTAAC  
GTGTCTTCTCGTTAGCCATGCCGTTATATTCCTTTCCCTGGGATATCTTTAAAATCCCTTT  
TTTGCATAGTTGCCAACTGGGTTAGTGAGAAAAATTCTCAGTTGCGATATTGCAACTAAC

GTAAAAGCGGGTAAAGATCTGGTGTGTGTTTGGGATGTTTCGTGTGATATGCAAAAAGCCG  
CGACAATTCCCGGTTTCACTTACAACGTGATATCCAGTGGTCCGGCAATGATGAACGGTA  
GATCATAACGATCGATCGGTTTAAAACCTGAGATATGCCACCACCAATAAAAACGCCAATG  
GTAAGGCGTTCGATCATGGTGTACCTGTCCGTGCGGTTGCGTCACTTCGTACAACGCAGG  
CAAGCCAGCCATAAAAAACACTTGACAAAACAGCCATAAATCAAGCCCTGGCTTTGTAAA  
GATTTTGGCAATCACGGTAACGGTGCATTGATGGACTGTAAACCGATCCGCCGTTCGGAGC  
TTTCCGCCTGCCTCATTGCGGCCACCATTTTCGCACATTTTGCGAAGCACATATGCACAAT  
GATCGGTGTAGTCAAGCGCTTTTCTAATCACCTCTTATATAGTCGGCCAGAAGATAATGA  
CCAGGTGCTCAAGGGTGTTCGTAGTGATTGATCCACGCGTTCACCTGCTCACATTCCAGGG  
GGCGATCCGTCTCGCTATAACTTGACGGTCCGAAACATTCAAAGTGGTTACATTGTCCA  
TCAATTCAGTGTAGACGGTGTCTAGCCACTAGCCTAGAACTTTACAGGATCGAATTCAA  
AATCATGTTTCGACCGGATGAATAAAGCATATAGAAACCAGTTGCAGATATTCACGCTTTG  
TAAGGGTTTATCGTGCCTATGCAGGCCGCGCCCTTTCATATCTTCGGGGGTTATTTTCAT  
AATTCATGGTCATTTCTCCTGGTTGTGTGGTTATGCGCCGTAAAGCCCTCACTATTGAA  
ATCCTCGTCAAAAATCGGCCAGGTATTCGAACAATTCAAATTCATAGCTACAACATGCTT  
GACAAGCTCACTGCTTTTTTACTCTTAAGGAAACAGGCGGATCGGGCGCGTCACTATACAG  
ATCCGTTATTTTCGATTTACTCCCCGACCTTTTGAGCGGTAACGGTGTTTTTCTTTTTGGC  
TAAAATAACTTTTTACATGATCTGTGGTTCGACAAGAATGAGAGCTTGGGGGATAGAATCC  
GGTGTAACCTACCAGGGCTTTTGCTTGGCGGATCTTAATGCTTAATTTTCGGTTTGCAAACC  
GTGATGGTCATTTTCCGCATTCCCGGATCGACGTTGTGATCCTTACAATACCACTCCTAT  
TTTGCACCTGCAATGAGGTTGCGTAAAAATTCAGTCGGACCCGTTGCATTATTAATCATT  
TTAGTTTACCTCTCAGATTATGCCGGGGATGTCCCCGGCCTTGTTTTGATTAGTATTCGT  
TAGCATCCTTTGTTACTCGGTCAACGCGCTTTGAGCATCAGCACGATCCCAGAATA  
AGTCTTGAACCTTGTGCTCTTCAATGTCAAACCTGGTTATACACCGCTTGCGCTTAATATT  
CCATAGTCCAACATAAACAACCAGCAACCTCATTAATAACGTTTCAGATAATCAAAATT  
GCATACTATCCTTTAACCTTTCGTGCATGTACGGCCCCGCCCTTTCGTCTTGGTTCGGGGC  
AATATGCAGACCAGATAGCGGGCTTTACATTTTGCAAATGGGCAGCAAGATTTTAAACGA  
TAATCCGCGAACCATCGTTTAAAGATACCAATCAACGCTTGCAGTTTATCATTATTGCTGG  
TAGTGATGAAATTTTCCATTGTCGTTTACCTTTCGGCTTCTGGGGAACCATGCCCCGG  
CCTCAAAAAGATTTTAAACCGATCCCCGCTGGCTTGCAAGCTTTTTTTTTATTCGTCTCTC  
GCCGTAATTATCGCCAACGTTGATAAAGTCCAGCATGTACCAGCAGCGATCCGTAGCAG  
GTACATTTCCCGGGTGTGGCGATGGATATTGTCAATCCACTCTGCCCTTCACGCTCAAT  
CCCTGTTTCGTCCAGGTAATCGCGGATCATTGGTTCGCTGTATGCACTAATCTGTAAGCC  
GTCCCGGATATAAGGCAGGGCCTCCACCGTTGACGCTTCACGTTCTCAGGGTTCGGCCAT  
TGCTTCTACCTGCTCACGTTCCCGAAAGATGAGACAGTGCCGACCGCATGAGGATGACCA  
ATAAACATTTTTGTTTTTCATAATTCTTGTCCATCCTATTATGCCCGGGGGCGATCCCCG  
GCCTTTAAGAATACTTTATCCGATCCGGTTTTTCAGAGTGAAACGGAAACAACCTCATTAC  
CTTCCCAACAACCATGGCGAAGACGTCCACAGATTCACGGATCGGCAAACCTGTCAGCCTC  
CATTACGTTGCCTTTCGCCCTTCAAGCTGATATGAGACGTAATTATCTTTTACTGCCTG  
CTGTGGTGTGTGATCAATTGTTGTATGCGTGCAGTTTCTAATGTCCAGGCGATCCCCGT  
CACAGCGTCATTAACCTGGTAACAATGAATTAAGGTTTTATCATCGAAACGACGAAAATC  
ACACTTTCGATTATCGGAACCGCCCGCCAGGAAAAAGAATCTACTTGCAAGTTCGGGCTT  
TAAAACCTCGCTTTAGATGAAAGATAATAACAGCAGGAAGATCACGAAAGTCCACACAAC  
GCGACACATAAAGCTCGACTATATGTAAAGCGGGTTTTTCATTAGTGTATTCTACTTTGTA  
ACCTTTCATGATCCCCCTCTACCTGGTGACCGGGAACCGTTGCCGCCCGTGTCTGGTAAT  
CATTATAAACGGATCGCCCTTGTCAAATGTTTTTATGGCATTGCTTCCACTTCTTGCGA  
AGGAATACTGCCCGGATCGATTGAATCAGGGTTCACGGCGTAAACCACTAGCGGGCAACTC  
GCAAGACAGCTGATCTTCGTATGATACAACAACAAAATCATCACATTGCATCATCATAGA  
TGCGCCATAAAAGCAGTTACCCGCGAAAACCTCGAACGTTAGATTAAGCTTATTTTTTCT  
GGAAAAGAATGTGGGTTTAGTCGCTTTTTGTAGCGCCATCTTTCGACTCATCAAAAAGGC  
CGAATTGCTCGCCTTTCTGAAGATTATAAGGGTTTTTCGTACACGTTGCAAGCCTTTTCGT  
CTGTAAAAGTTTTCTTTACAATCCAATCACACTCCTATCCCATGGTTCGTAAGGGAAATGT  
GAAAAGCCATTACAATAATTCCGAACATGATCAATTATGCACTAAAATGACATAGATAGC  
AGGAGCGGCAGGCATTGCTACCAAAAAGATACCCGCGCCACCACACCAAGAATTAGT  
TTAATCCAACATTTAGTTTACCCTCGTTTGTTCGTGGCACCGTTGACGCCTATGTAGAATC  
ATAGCATATGCGGCGCGGGTGTCAATCGTTAATTTTTGATCTGGTTTGTGTGGTTGTAAT  
CCTCATAACGTACACGGGGAACCATGACCGCTAGAGGCACGAGGCAACCTACGCAATCCG

CCCGGGGGTTCATATTTTTTTGAGATGCCAGCGGTATTGGGGCGGGTAAACTTAAAACGCA  
AAGGTAATTTAAGCGGATCACAGTCATCGACGCCGCTAACCACACCGAAACCGCTTTGCC  
CGTAATTGTGGTAAAGCATTTTAACCAGGAACTGAGATCCAAGCGGCGCGATGTCAGAGT  
TCACGTTTTGCTTTTTATCATCCTTTGGTTTTGTGTGGTTGGCAACATTGTGCGCCCTACCC  
ATTAAGGATAACGGAACCACAACAGGACGCAAGCACTAATTTAAATTATTTTTGTTGAGA  
CTTGTTTCGCATATGCAGCGATTTTGCATGATTAGCGACAATTGGGCGGATAGTTTCACTG  
CGTTACTATATTTACGGGAGTTTGACCGTGGCGGCATTATGTGATACCCTGCAAAACACT  
CTAAAAGGCTTTCTAAGCTTTTCCAGGGCTGAGCCGGACAAGTGCATCATCTTGC GGAGA  
TGTCTTAAATTCACTTTTCTGCATAGAAAAACCTTGGAATTATCCCGGCCTTTCGATTA  
ATCATCTTGTACGGCTTGCCACTGGATAGCGCGCTTTCTTTCGACTAACCGCTTGTTAAG  
ATATGGATCTTTGCGGTCCGGCGCCAGGTTTTGGCGATGCGCCCCGGCTAGTTGAGTTT  
GTCGTTTCCCTGGCGTCGCTCGTTTACTTCCCATATCCCAGGAGATCATGCTGGCTTGT  
CATCTTTTTCAGTGTAGCGCATAGTTTAAACCCTCGTTTTTTTATCGGTTGTTGTATGCAG  
GTTCAAAGATCCGGCCATGTTACGCGGCTATTTCTTTTGTCTCCATTTTCGATCATCTACG  
CGATCTGCTCATTTGCGCCTTCTTTGTGATACGTGACAACCTCCGCCCCGCTTTTTTCACTT  
CACACAATACGCCGTCAACATCGAGATCATTCAACTTGCCAGATCGCCGGGTGTGGTAGT  
GGTTACCGTGGAATCTGTTTCTTAATAATGGTACACTTTGCCGATCCTGTATTCAATTAT  
AAGCCACAGCAAGCCCCGCCATAACCTGGCAGGGATATACCAGTAGAGAGCAGCCCAAG  
CCACCAAATCAGGATTTTAAACACTTTTAATAATCCTCAAAGATCTCTCGGAGTGTGTC  
CAGGTCTTCAGATCTAAACACTTTCCGGAATGCCTCGCCAGTCTTCTGACACGCGGGATA  
AATCTCCGAACCTTTGCTGGTATCCTCATCATAGTCCATATTAGCCCAAAAATCAGCATG  
AGAATCAGACCCAGATCAATATCTGATAGCAGGCAGTAAAGCACCTTTGCGGGCGGGGG  
TGTTGCAACATAAACACGGGACCCGAAAGACAATGCTTTATTGTCGTTGCGCTTGAAATC  
GTCGCGTGGCCAGTTATTTTGTATCAACGATGGAAACCTTAGTATCAAATTTAGCTATTTT  
TCTTGCCTCGGTTGGGGTTAAGCCAGTGTGTCGGCCTACACGGTGACGCTTTCCCGTTTT  
AACATCGGAGCGGTAAATCTTCCCGCCTTTTTTCGAAACTCACGAACAGCAAATCGGCTTG  
CCATTGTGGATCGTTGTTAACGCCGCCAAATTCCGCTTAAAAATCAATCCCTTGTCTTT  
CACAAAGTTGAACACGGCAACATCTTGATCGTCGAAAGTGATTTTGTATTTCAGGATATT  
TAACCTTGTCTTTGGTTTGGCACTATCGCCGGGTTAGTTCTCACAAATTGGTAGGGCTTTT  
CTTAAAGCCCCACCTATGTAGAGTCAATAATCTTTAATGATTTCTTTCTCTAAATAATC  
GAAGGCGGCGCCCACTTTCAAGCAATCAACTAATAGCTTAAACGGGGATCTTTAGATTGTC  
GATCCGTCGGCGTGCCTCTTGCTTTACGTCCTCAATTGTGCGTTTTTGCAGTGTTAAGGAT  
CGTTAAAACCTTGCCCGTTATCCATGCCTACGACCATATCACACCGCCTTTAAATAATTGT  
TAGTTACCCGCTACACATAGCGATAAGCGCGCTTTTTAGTGTGGGGCGCTTCAGTCCCTA  
TTTCATAAGCCAGATGATATCCCCTTTTTTCAAGCCAGTAAAGCGTTGCATTTTTCCCTT  
AGTTGTGTGATTATTCCC GCCGACGGGGCGACTCCAGGGCCAGCACACCGAAACCTGTGT  
AACCATTTTGGTTCGGATATCAGATCCGCACGGTGAAGCCTGGCGCGATATTCTTGGTCG  
TGTCTCCGTTAACATCATGACTAAAATAAAAGAAAGCGAAAACAACGAAAAAAACCCCGG  
TTGTGCTCGTGCATGATAATGAGCTCAGGCGGTTTACAGCGTCATACAGATTGATAGTTG  
TCTCAACCTGTTCCATTTTGTTTACTTTTTCAATATGGCGGGAACCTCTCCCGCCGTGAT  
TAATAAGGTAACCGATCGGCCGATGGTTAGCCAGCTATTCGTTGAAGTTTATTAATCTT  
TTTTACGCTTGTCTGGTCCCTTGGGTGACGTTGATTTTTAAGCCTTTCTCACTAGCACACC  
GATCCAGGTGGCCCCATCCTGATTTTATCCAGGTCATGGTGTAAAGATATTTGATTGCAA  
CTCGTAAAGCGTAGGAACCGAAACCATAACGCAGCTCGGGCGACTTATACAGCGTCGGCC  
AGGTGTGATCTCCGGGGTAGCGAAAGAAAGCTCATTACGAAATACGTTCTACAGTACA  
AATCCGTAAAGTCAAGACAATGAAAATTCAAAATAGCGGATTTGTTGTGTACTGATTTTT  
TGAAAATATCGATCATGGTTTACATTTGGATTTCTTCTGCTTCTTTTCGTCTGGGTATTAT  
GCTCCAGTCTCCCGGCGCTTGTACATTATTTTTTATCCGGTCATATGCGCCGCTAAACG  
TGCGGCGATGTGGGAAGGCTTTTGGGTTATCTGGATCTGCTTGCCTTTCGCTCCTGTAC  
ATAGGAGACCCGCGCGGCCTTGCCTTACGGTAACCCGCTTGTATTCCCTGAGTAACAAC  
CAGGGCCGGGGCGCCGCTTTCAGCACGCTGGTTCGGCGGTGTCCTGGATCGCTTCCAC  
CATAACGACGGGGATAATCTGCCAGCGTTTACCAAGAGGGCGCGGTGGAGCCGTTGTCGAT  
CACTTTTCCGCCGTTGGCTTGGGAAGCAGTACCGGCAAGGGCGCGAGAATCGAAATAATT  
TTTCAGCGTGTAACCTCGTTTGTGTGGTTGATTTGTCTGGCTTGTCAATGTGTGGAGATT  
ATAACCCACACATTAGCCAGCGTCAACAATAATCTTACAGTTATTTTTTGACCTTTCAC  
ATTTATATAAGTGC GGCCGGCGTTTCTATATTGGTCAACGTATATCCGACGATCACGCGC  
CTGCAAATTAACGTCCATTGTATAGGGATGTTAGTCCCCTACCCTGATCGTGTTTTGGT

TAGACCCTTTTGTGGCCACCCTAAGGCGCGACAATCGCGTTAACTTCCGCCAACAAAGGA  
TCCGGCATTGGCAATAAATCATGTTTCCATTATGTTTACCTCTTGTGGTTGCGGGGGGC  
TTCCCCGGCGTTTTAGTAGGATAACAGATCCGGAGTTGGTGAGCAAGATTATACTAAGAT  
CTTTTTCACGCCGTCAAAGTTTGAGATGAACTCCCCGCCTGCCTTTTTTGCAGCGTCCAG  
TCCTTACCCGTTGATCCCGTTGCCGTTGTAACCTTCTTTTGCCTCGGTATGCGAATCGCG  
TTTGTCTGGTTTGAATCGGTAAATATGCTACCAATAATCTCATTATCCAGGAGGGGGAT  
GACGTTTCGAGTGGCGGTCACACTGACAACATAATCTCTCTCATTCAAGTCTAGTTCCAA  
AGCGTCTGTGGGGCCTCGTACGCGTGGCGCGATGTGTTATCATCCCCTCGAGCGATCAA  
GTCTGCGATCCGCTCTATCACGCTAATTGTAACGGGATAGCACAATTTTAACTATTGGG  
ATCCGCCTTAGGATTCTTTACAGTGACCCCCCCTGGTGATCGACGGTCAAATCCCACAT  
ATCGCCAAATGTATCATCTGTATTACAGCATAACATCGACAACGCTACAATGCATGCTGTT  
TTCGGAAAAATTGAAAGTTTTGATAGTGCCATCTGTTTACCTTTTCAAGTGTGGGGCGT  
CGGTGTGTCGCCCTGATGTGATACCTAGGAAACGGCATACTAACGGCGGTCAATACCCCT  
GGACAAAAATTTTTAAAAAGTTTTTCCTTTATCCTTGTTCATTCTGGGGGGGACCGTG  
TACTATATAACCGACTGAGACACCAACGGCGGGTAAAGAAAAAGGAAAACGTAAACGTGGA  
AACAAAGCGAAACATTGGTGACCCTTTTACCAGGGGAAACATCAGCAAATCTGTGTCAGTC  
TAGAACGGTTCGTTGCCCTCATGTCTCGCGTATGTTAAACGGCGGATTCTACGGGGCGAA  
AGTGGTAGCGGCAAGCGGGGAAGTTTTAGCGGATGCCCTGTATAAAATCTTTTACGTTGG  
GGCTTGCAATCGGCGCGGCCTTGGGTTAGTGTGGTTCATAGAAGAGGAAACGCCACCCC  
ATGGCTATAAGTCCGGGCTAACGTAACGGGCGTGGGTGCCATGTCGGAAGGTGCATCGAC  
CGTAGTTCGACCTGATGACACTTGTATAGATTTGTAAGGAGGCTTGATCCGTGGAGTGT  
TATGCTATTAGTTCACACGCGACGGGTAACGGGAATCGCGAGACAAACACCGAAGCTG  
CCCGCAATTCTGCAAACGAGAATGATTTTCAATCAACAATAGATTTCTGTTGACATCTCG  
TGTGCGTGTGTGGGAAATTTACCACTCCCTAAAAAATTTTTCCGCACTGTAGAAAAAATA  
CGTTTTCAAACACTGCATACTCGTTTCGAGAACAGCGCGGAAATATTTTTTCGATACACAGC  
AAAAAGACGTTTTTCGATTTTGA AAAACCGATCGTGTACCCAGTGAATCGAGAAAAAATT  
TTTTAACGATAAAGAAAAAATACCATTTTGAATCCAAAACCTTCATGGAGTACTCGGACT  
TACATCCCAAAAAACGGGATTTAACATTTCTGGACTTTTGCCACATTTTCGTGTACCGGGG  
CATGGAATTTCCATGCGTAATCATTCTGTTGCATGGGTCCGGTATGAGATAAGGTGCTGT  
AAAATCTAAAATCTTAAATCACACTAAATTGGATATACACCCCGGCTATGAGGGAAAACC  
ATGTTAAAAACCATTGCGCATTTTATGTGGATTTCCCGTTCAAATCCTACGACAAATAG  
CAAGGGCAAACAAATATCATTTTGAAGACCGTGCCGTTTCATAACAAGTTCTTTAAGAG  
AGATAACCATGTGATTTACGGTAGTCATTACATATATTCTCAGACTCCCATGCAGCACGTT  
CCTCTTCTCTATGTCAAATATCCTATATACCTTCCGCTTTGGTCAATTTTTAGATCTCT  
GTGCCTTTAACTTACAAAGTTATTTGTA AAAATGTTACACCTCTTACATGTGTGCCAATTC  
GAGAAATATAGCTATTCAACCACACAGGGATGTAATAACATGTATCAGGGCCGTAAAGCCT  
CGTTCCCTTCTACCAGCTAATCTTTGTCAAGTACATATCCTTTTTCGATAATTATCGCACC  
ACCATGTATGAAAGTTCATAAATTAATGCCACTTATGGACAACAACACCCCATGATAAG  
AGGGCTATTGACCGCTGTAGCATCTGTTTATCATAATGTTCCAATCCTGCCC GGCGGTAT  
GTTGAGGGAGTTTTCCATCTTTCCGCATACACGTGAAAAACGGTGCATCGTTTATGCCAA  
CACCACATACTAACTACTATGTTTTGTAGATGGTTTTCGTTTCCATATCCAAATCTAAAC  
TCATAACTTCCCTCTAAATGAAACACGGTTTTTCATTTTGGCCTCTTCCCGAGAGTATCTC  
TCCACCACCAATAACATACTCTGCGTGGTGCAGACATTTTATACCGCCGGATTACAGCAT  
GAGTTGGATTAATCTCGTCCATGAAAAGATCCTTCAGCTCCGAGAGCCTAAAGCGATAGA  
CCATTTTATCCTTCGTCAAGATGGTGTCAATTCTCCATTGACAGCATCTATTCTTACGG  
TATAATCACCGTACATAATCACAGTATCTTACTGCAAAGAGTCATCCAGTCTTGAACAC  
CAACAACCATATTGTTTGCAGAGCTCACAAGCAGCATAAGCTCAACAGCAGTAGAACCTG  
CGTAGCCAGTTCTGTCTTCTCTGAATGATCCTGAGAACAAAACCACGCTTAGACTTATTCC  
AAACGCGAGACTCAAGCGCGCTGTAAAGGCTGGAGGCTGTGTTAAAGTCCCTTACCGCTT  
CTCGCGACATATAGAAATACTCATCCTAGATGTCTGCAAGAACCATCTTGTTATCAACAG  
ACAAAAAATGTTTACTCAGGGTAACTCCCCGTTTGCCAACAGAGATCAGGGAGTCTGTGA  
GAGTAACGACAAGCGCTTCCAGTTGGGAGACATAATCCTTATAGTCACAAAGCTTTGAAC  
ACTTCGGTATAGCCTTCAGTTAAGAAGGCTCATACTACTTTCCCGTGTCTGTTTGAAC  
GCTCTACCTCCTCATCTTCATCAGTTATAAATTCAAGGTAAGATATCTCGTGCTCTGTGC  
ACTCAAATATCTTGAGTAACTCGGATTTAAGATCCGGGTGCGGGTATTCGTTCTGGGTAT  
GATCGAGAATCTCTATGGTGTGGA AAAACGGGTTAATCTTAAAAGCTCCTGTAACGCTTT  
GTGAGGCGTATTAATAAAGAGCTGTACGTTCTACCTTGGATGGGAAAAACCCCCCG

AAGCGTTTCTACGCAACATACAGGGCTTTGTGTTGTCAGGTCTTACCGACCGTACTTTTG  
GCTCACATTATACTAAATGTATGCCCTATTCATTTTAAGGTTTACATCATAGGGGATTGG  
TAAGTTTCAGAACATGAAGTAGCTGAGGCAATATATCTTCGCTCATAACTTGAAGGTGTA  
GTAAGGGAACATCAACGCAATTCCAAAGGCTCACCGAAGTAGTTCTGGCCCTGCTAC  
GTCTGAAAGAAAGATCCTGTTGATCAAACACCACCCCAACTAGGGTCTGCTTACGCATG  
AGGTCGATCTTGGTCATCTTTTCTTCACGCAGTAGGGCTGCTGGTGCATCGACCAGTTTA  
ATTGGTACGCCAAACCAGCCATCGACATGATATACTTGTGCCCCGTGCTGTCAACAATG  
TCGGTGTGTTGTAGCAGACCGCCAGGACTGAATCCGGTATACTGGATTTC AAGGTGACGG  
ATCAGGTTATGTTCTGATCTTTTCGACTTTACATACATTACCGTAATCGTCCTCATAACCCT  
GTATAGCATAACCAGGTGTCTTTGTTATACTGCGCGGGGTATTTCTCTTTCCGAGCTAC  
GCGATTCAATCTTTCCCATTTTTCTCTATCCCAAGGATAATACCCTGGAGGTATGGTTT  
CATGGGGATGAATATAGGGAAATCATCGATCCAGATATCGGGTATCCTCCCCAGCTTTGC  
TCAGACAGCGGCCTTTTGCCTCCTCCGCAGAAAATGATGCCTATGTCAAGTCCCTCAGC  
CCAGCATTGATATCATCGTTCCTGGTAGTTTCGAAGCGGAGTGTACGAACCTTCACAGA  
CCAGCCTGAATCTCTTGAACAGAAGAGGGTGACGAACCTGCGACCACCTTTCCGGATCCAG  
AGCGAACGTGTCATCCAAATGAAGCGCTATACGCTTTACCTCAAATGATTTCTCTAAGCC  
CCCATCTTCAATCCGATACTGACCCCTTATTGAACTTATTGTCTATAAATTTTCAAGA  
CCACGGTGGACTGTTTCTGCGACCTCGTTCGGATCAGAATCGCGAGGTTTTCTACAGTCC  
TGAAGCTCATGCATGTAAGCGGAGACGATTGCACAGTTGGTCACATCGGCAACCTCTGCG  
ATTGCAGATACATCAACGTTAAGGGCGATTGAGAGTTCGTGCCAGTTATCGAACTTCC  
TCTACCAGGTTACCCATGGCCGAAAAGTAGACCGGGCTTGCAGCCGGACGGAGGACTGG  
AGTACGCGTTCAGCGATTCCGGTCAATTTAGACTCCTTCTCTTTTGCCTTCTCAGCTTCAG  
CGGCGCTTGCAGCAGAATCCAGTTCATCGGCCTACTTCTTGATCCGCTCATCTAGGTAGT  
TGATGGTACGGTGAGCCAGTTGCTGAGTAAGTGGTGTATGCGCCGACATTCTGTCCGACAT  
ACGCCGCCAGCATTGCAAGCTGTTTCTGTCTGAGGCATGAAGTTTGCATTGACAATCC  
CCAGGAAACATAACCACCTTACCGAACACAGCAATCTTAAGACGACCTTTTGTACAGTTCG  
GCTTAGGCAAAGTTTGGCGCTCTGCTCCACGCTGACCAGGTCTGTTACCTCCCCAAAA  
CTTCGAAACGCGGCCAGCCAGAAGTATCCATGAGGATAATGTACCTTCATTGTACTAT  
CATTGTGATCCTGGTGACAACCTCCACATCTCGGGCGCTAGAATTGGACCAGTCTGAT  
TCACGTCAAGGTTCTGCCCAAGAAATCATCCAAACAGTGCCTTTTGACCATCCGTCTTTT  
TGTAACCTCTTCTGAACTGCATACATGATAAAATATGCAACCGTTGAAATGAAGAGCAGGA  
AGCCCCAAGCGCCGTAATTTCCATCAGTAATGAGTACATGAATGGCGTAAATCAAGAAAG  
GCCATGACATCAGTTATTCTCCTATTTATAAAAAATTTGGCACGATTGGCGAAGGACCATC  
TATACAATCAACGCTTGAGCACAGCGCCTCAAATCCATGAAGGAATCAATCTGGAGCTT  
ACCACCACAGAACTCTATCGCCCAGTCACATTTTTTAGCATTATACCTTTTCCCGGGCAT  
ATAACCCCTGTAAAGAATGGGTAACAAATGTGAGGTGAAGACATTTTTTCATTTCTCA  
TTGAGATCCGCAACCAGTGCCCCAGCACGTATGCTGTTGATGCCATTGATATTAGCAGGA  
TGGCCTGCCATACCAAGTCGATTTTCGGAAAGTTTCTCCTGCATCGTCTTCACCCATCACC  
CGAAGTACTCCAGACCAAGGAAAGAACCAGTATGCTTTTTCCCACTAGTCCACCGCT  
TTAGGGCAGCTATCGTCTGTTTAGGTCCGGTGTGGAGCGCCATAACCTGGCAGTCCATCC  
ATAGTCAAGCACAGTCTTGGCATAACAATCGCAACTGTCATCAACATGACAAGAGCAACT  
GAGCTACTGGCCATCCCTCGGTACTTCGGAACCAGACGTTGACTAGATCGTTAATATTA  
ACCATTTTTCGGCCTTCGCGCCGCCACGGAGAAGATGGGGTTAACAACCTTTGGCCCTGTC  
CCAATCGGTTCCATTCGCATTCATCTTCCACCGACATCTGTATGGCTTCGCTATCGCTT  
CATCACTTCTCTTGAAACCAACTATACTTACAAAATCATGATTCACGTCTTCTATTC  
AAGATTTTATGTTTATGCTTTTTAAAGACCTTATGTGTATTAATTCTTATATGTAATCAT  
ATGCAAATTTTGCAGGACACGAGGTGCAAATTTTGCATCACAACATGGTGTACTCGTATG  
TGCTCTTGCCTCTCCTTTTCGAGAGATTAGTAGCCGCGTGTGACCAAGTTTTTTATAGAGG  
TTCTGATGGACCATTAGAAACACCTGTTGCCTCGCTTATCGTAGTGTAACCTTGCGAAAT  
ATTTCTTTGATTTTGTCTCTATGTAACCGGCTTTGTATTTTCATATGTAGCATGGCACGAA  
GATCTGTTTACAACAGGATCTTGTACGTAACCTCGTTTTTCATCACAACCTACCCTCCTCT  
CGCGCTTTCAGGACGACTGTAACCTCCCCACAATAGACAGGTTATAAAAACCCCTCGACA  
ATACCTACAAAGTTTTCAAAGACTCGCTCTCTAAGAACTCTGTGCCACAAGGTATCCCA  
AAATCCATCATTGGAATCTGCCACTTTATCATCGTTTCTAAAGGCCCTGCAACGCCCTA  
ATCGTAAAAGTCTACTTAAATTACAACGTGAAACCCTACCATATTGAGAAAGTTGCTTT  
TCCCCTTCACTAGGGTTTTGCGTAATACCTATTTGACAAGCACCATCACGAAACCGGCCA  
ATATACTAAGACTTATTTTTACCACGAGGGCTATATAAGTAAGCATAATCGGCCATAGTA



ACTGTTTTATTTTCTCGATCAAAAAGCAAGAAACCTCTTCTCTCCAGGTTTCTCAGGCAT  
TGACCGAACAACTCCCATTCCATTTTACTGTCTAAGAAACGAAGTTGTACAGGGTACTTT  
TACTATCTCTCCGAGAACCGTAGCATCTTCTCACCTTGCAGTAGCAAAGAACATCATCC  
CCAGTCAATTGTTTCATCGAGAGTAAACAGATCAGGCAGACACATTTGCTTTGAATGTAAC  
ATTTTCATTGTCACCACTCCAGATAATCTCTTACGAATTCAGTAACATACTAGTTTCGCAT  
ATTCTTCTTCAACATCATTATTCAACATGCGGGTAATAACAACCGCCATAGTGTATAGAG  
ATCTCTCAAATGGTGAAAGTCCAGTTAAAAAATTAACATAAACTCCTCATCTGTGCTCA  
TCTCCAGAGGATTTACCGTGTAATCTGGTGGGATAATGGTCTCCCACTCTCCTATCTTGA  
ACTTGTAAGACTCGAGGCTCTCCTGTTGCCAGGTGGGAGGTGCTTACAATTCTCACACC  
CATCCTTTGTGAAGATTATTCGCACAATTGGCCCAGGTGTACGTGATAACCACATGCACAC  
CGAGACCAACGGCGACGATTTTATTTTGAAGTGTCTCATCTAAGTCTCCCCCCTGCCGAAA  
GCTGGATCAAACCTTAGCACGGTTTCTACCGCAAAGGGCACACAGTGTGGCCATTTACAA  
CCCCAGTCATTTTTGAGATGACTGAATTCATCAATATACCCATCAGTGAAGGGTATCACA  
GCTGTTGCCTTTTGAATGTGATCATGGATCTGCTGGAATGCCACACCTGCCATAGTACCG  
CCTGTGGAGGTGACATTACAGTCCAGCATCTCTTTGAGGTTTCGCCTGTGTGTACTCTTTC  
AAATCACGAACCTTCGTTGACCAGCAAATAACATCACACGAAAAGCGTTATAAAGCAGA  
CACGAACCAATAATCTCGTTGAAGATAGTAGTATTGTCGTCTTAGATATAGAATATGAC  
ACAGCAAACCCATTACGATGTCGATTGTAACCTATTACTTCTTCTGGCCAGATGATA  
CTTTGCTTGTGGTGATTGCACGGTAGTTTCTTAACACTTTCGTAACAGACCCCGATCTA  
CGAGCAGGTTTACGGAACGAAAGATACCCTCTCACACGAGAAATCATTTCGTTGTCTGATC  
ATCTGCATGGAATCAATATATGGTTTACGCATTTTGGCTACCATTTCTCGTGCCTCTTTT  
GGTCTTCAACACCCGCAGCCTTTAATGCTGCCTCTACGAGAGCCGATGACCATGCAAAG  
GTCTCATCTTGAGCTACCGAACCTTGACACGGCTGTGGATCAGTGTACCCAAGAAGGTCA  
CGATCTGGGTAATAATCCCCGATACGAGTACCATTGAGTGACCTGAAACAGCCTTCGCT  
TTGCGAGTGGCGCGGTAATTTCTTCCGCGTCTGTCACGTGGATAGAGAAATCACAGTAA  
CAGTATGCGATATATCAGAATGCATAATTTTTATCAAACACTGTTTGCGCGCCACCAGAG  
TAGAATCGCATAACCCTGAGAGCGTGGTCCAAGATCGATTATCACAATATCTATGTTGATA  
TACTCATCGGCACCAATATTGTACAGTCTTGAATCGAAGACCTTACTACGAGATCTATGT  
TCATGGGTCATGTGGCGTGACTCATGGATGAGAAACCCGCCACTTACGTTGGTGTTTTT  
TTACGATAGAGTACACTGATATATTTTTGTAGTGATACTTCTGTTCTGAGTCATGTGG  
GGGTGTTGATCAATTCGGGAAAACAGCTTCTTCTTCCGCTCTTCCGACAAACCCATAATG  
AACTTAGGGTTATAATACAGGTTGCCGTGGTTCAGTGGCCGCAGTTCGTAATCAACGTCAA  
TCAGGGATGATCGGCATAGAACTCAGAAAAGTCCCATAAAAAGGGCGCCGTTGTAACAAT  
GCAATACGTACAGATTGAATTTCTTGTAGAGCATCTTTCAGAAGCTTTTCAATCATTGG  
CTTTCGTCTTAACGCATATCCCTCTCGAAATAAAAAAGGCCATCCTTCAAGATGGCCTCA  
GAATATGAGATTTTTGAATGCGGATCAACTCTTTTTCGTCAACGAAATAATCTCTTCTT  
CCACCCTGAATCCCCATGCACGTTTTGGCCTTGGCTCATAACGGGGTTGATGGAACAGCAA  
ACAGTACAATTGCATTCACCCCTCCATAACGGGCTTCGTCGATAATCGTTACCCCTCAC  
CAACTACAATTGCAGGCTTGAAACCATGGTCCAGCTTCTTTTGTGCAGGGGCGTTCGCTG  
GTGGGCCAAGATGTGTTAATACATTATACCACCTTGTTCAGCATCGCGGTGATCTTCGG  
CAGACGGAGGACTGCCTGGATCATCAATTGGGTCATTGCTGTTTCTAGTTTCTTGGATAC  
AATGATGAAATTAGCTTTCACAGAGCCAAGTTAAGGTGGAGGATCAGGATTGACTTGGG  
TTTACCTGCCAACTTCTCCCCTGTCATCGAGTTGGTGTACCGGACCCATTTTCTTGA  
CTGTGCAAACGTACACCTGCATTCATGCCTACATCAGAGGAGGTGCTGCAGTAGCTTGC  
TTACGCCAGTGCTACCGGTACGTCATACTGCAGTTATGATGGCTCCGGTGTCTTCTAC  
GACCTCCTCCACAGCCTCGGTTACTTCTCCGTAACCTTCGCCCTTATGCTCATGCTTTTC  
TGCTTCTGGCTCAGTGTGCTTCGATAGCAATGATAACCGTTCTCCTGTTGCGGGATATA  
ATTAGTTTTCAGCATTTCCGTGTGGTCTTTTGGCCTGTTTCGCCATCATTGCCTGAACAAT  
CTCGCGATCAAGCGGTTCACTTATTGTGATGCCACTCTTGTTTTCAACCAAATATCGTG  
CCATTCGTAGGCAGGACGAGTCAGAACACAGACGTTTCGACGCACATAGCCTTTTTTATC  
GTCGGTACGTTCAACTGGATGTTCTTGAAGGTTATAACCCGCAACGGTTCCCATATGAAA  
CAGGATGTTGGTGTAGTTGCAAGCACCCATACCGAGTAACTTCGCACCCATCATGCCCTA  
GTTATCCAGGGTGTGTGAGAACTCGACACCACCTGTTCTTGTAGGCACAGACTTTGTGTG  
GTAACCTCTTTCGAGATTTTTCGTCTCGTTTTGCGTAAATTTTTATTTCCAGTTCGATCGT  
GTTCTACAGCTGGGATGTTGCCGCTCTTGTGGGGTGACCTAGCTGGCATTATTCGCGC  
TGAAACACTTGATTTCAAATTTTACAGTGTATGCTTTGTGTCCTTTTGTCTGCAGGA  
ACGATAAGAATGAACAAATTGAACGTTGATGTTCAACAAGTAAACGCCCCCAAGGTTACA

GCAGATATCGACCGGAGTTTATTACAAAAAGACCAGACCCTTGCAGACCTTATCGAGCAC  
TGGCGAAAAGAGCAGGAGTAGCGTCAAATGGCAATGGTGGGTGTCTGGGATACGCCAAGA  
ATGAATACCGATGATTTTCTTTAAGGGTTGAACCCAAGCGTGATGGCAGACAATCCCCTG  
GCTGAACGACTCAAGGGCCTTCTTGCAAGGGGGGATAGGAGACATAGGCCATTTTCGTGG  
TTCTAGGGTGATGACCGGGATGCTTATCGGGGGGAGAGCCTGAATGAGATGTTTTGGCC  
CGTCAGGTGCTAGATGTCAGAGTCAGGGTCTTTAACTCATGCCCGTTTCGAGCTGGAAGAG  
GTCTCAAGAGGGAATGACTCTGCCAGTATCCGACGGCATGGGCATGGGGATGCCTTAACA  
AAGAGTTCTTCTTGAGGTTTTTCATGTGGTACGACGAAGGTAAGTACTCAGTTGGTTGAAGCCC  
CTGATCAGACAAATGGGGCGTTGTGAACCAAACCTTTTAAATCAATGAAGAGTTGCGCAGA  
TATGGCTTTGGTTCAAAGTCAAGCAGAGGTCATGAAACGATACTCATATTCTTGGGATC  
TACTTATCTAACGGACCCCTTCTTGTATTTTCGCGACTTCAACGATAGGGATCAATTCGAT  
GTGAAGTGCAACCGCATTGGTCAACCGCTTCCACTTGCCTGATCGCGGCGTTAAGGTC  
AAGAATGCCCGGGAAGCCTTGCAGATTTGCAATAAGAATGAGACATTATTCACCTCCGT  
TGGGAATAAAGACTGAAATGTATGGTTGGAGGAGGAACACCCATCCCAGGAGAGATAATG  
ATGATGGCAATGGCTCGATATAAAGATGAGTACTTGCATGACAACATAGATGGTTGTGAT  
ACGCTCAAGAATAAACCTTTTAAATATGCTTGAGCAACAAAGATGGTACGAACTCTCAATT  
CCACGACTCCACTTTTAAACCCCGGCGCAAGAACCTGCTCTGGCTATCAAGATTGGAGCAG  
AGGACCACCTGAATCAGAAAGACCAGTGTGGTAATCCTTACATCCTTCATCCCCTGAAGG  
TAATGCAATACCTGAAGACTGATGAATTTCAACTCTTGGCGATTGCTGTCCTGCACGATG  
TGTTGGAAGATACCGAGGAAACGGCTGCTGTTCTGGACATTCTGGGCTTCTCAAACGTA  
TGAACATGCTGTGGTTCTGATGACAAAGACTCCCAATCAAATACGGGTGTATAATTTCC  
AGGGGATTGCAGGCAACTATGATGCGGTCCGAGTAAATCCTGCAGACCTACGCCATAACT  
CGACTGTTTCGTCGCCTGAAAGGAAGTCCAGGTAAGGATTTGTTGCGTGACCGTAAATACC  
ACGCCATGTATCTTCGTCTGACAAAGATAAAAAGAACATCATGATCCAAATAAGCTTTTGT  
CTCAATGATGGATCTCTTGACACTGCATCGCACAAACTAGTTTACTCAGAAAAAGATGGG  
CTTCCTGATGGGGATGCCCTCGTGGAGAGAGAGTAAGCATGTTATCAAGTTAGAGGAACG  
TGGATATAGTCAGGTAAGTAGCAGATGCCAATTGAGCGGGCCGGTGCCAAGACCCTTTTG  
TGTTTACGATCAAAATGTTTACAAAGTGACCCTTTTCAGGAGCAAAGAATGTCGTGAAAT  
GATGCCTTACCCACAAAGGCACACTCAAAAACCTGCCTCGGCTCGGCGCGGACTGAG  
AAACTACGAGAACTTCTCTTACTGGGTGTCTTACCAGCATTTCAGAGACAGGAAAAGCA  
ATGAATTATTGTACAACCTGAGGAGAAAGTGGCGGGTGGAGATTACTACCTCGACCTTGAA  
TCCATTAATGGGCTTTGATATTAACAAAAATCTACAAGAGGCTATCGAGTTAAGGTGTAG  
TAAAGGGCAGAGCGATTTCGGCGATTGTGGACTTCCTCTTGAAGCTCTCTGATCGCAAAGA  
GGAACACCTTACCTACTATAAAAATGAAGCCTCTGAACCGAATTTAGCATTGATTCAAGC  
ACAGTTTGAAAGTGGTTCGTCGAGTAAAAGTACAGTTGACTACATCATCGAAACATGTTG  
GGGATATTCTTTTATCATTACAAAACGCGTTACGTTTATGATTGTAAATTCAAGGCATG  
GGTTAAAAACCATAACAAAACAGTTTTTTAGTGCACAATATCGAACACCTGCCAGGCAA  
ATTCATGTGGAGGTTATTCTTCTGACCAAGAATTGCCTCGGATAAGCGTGGGGGTTGC  
TGTTGGAATCTGTTTGGTAAACGCCTGTTTGCAGTAGAAAAAGACGCGATGTGGATCAA  
CTGTGGTGATACATTCACTAAGAAGGCGAAGAACAATACGTAAGTGGAGAACCC  
GGTTTAGTTTCCGTGATCTTTGGGGTCAACGTAATGGTGAAGTGTGCGCCCTCAAGAGTGA  
CAGATACGACTGTTTCATGAGCTTACAAAAGCGATCGCACGTCGCAGAAAACGTAAATTTT  
CACAACACATGAACGACGGTACCGACTAGGATCCCCGTTTGACAGAGGTTACGCCATGT  
TAGAATAAGTACCGACTCTTAAAGAGCAGCGTGACATGCTATCCCCGTCTCAGTGCAAACG  
AAAATCTTTGCTATGATGAGATCTGTGAAATATCCAAAGATACCGAGATGGCGCAGATCA  
ACGCGGCGATGGACCTGTTTTATGATGGGTGTGATAGTTGTTCTGTCTGGGTGGATAAGT  
AGGAGGTTTAGATTTTTTCAGATTCGGCAGTCTGCGCTCCCTCGTCACCGCTTGACTCG  
TCGTGCATGGTATGCAGTCTTTGGTGCTCATAATCTAGAGCCAGATTAATATATGTTCTC  
TGAGGATCTTGCAACGAGGATTACAGACGCGATCCAATGGTATTGCCCTGAAGAAATTGA  
GGGGGTAGTTGCAAATCACCTTGAAGCAAGGAATCAAACGCCTCTCGAGTCATAATATTT  
TTAATGATATCCGAATCACCCGACGTGCCATCCCCGGCTTAAATGCGCTTCTGTAACCGCC  
GTCGGCGCGCGCTAATGATCTCCGGTGGTGCTGGCCTAGGGAAAAGTCAGGCAATGAGGC  
AGGTCGGAACTTCCAGTTTCGCGAACGAGACAACAACCTGATCGATTTCCGTCTGAGG  
ATAAAGAGCCATCAGATGTTGTGGGCGTACGTATCCCGGTCTCAGACGACAAGGGTGT  
CGCGCACCGATTATGCGATCCGTAACCTTCTCGCTGGAAGATCCTAGGCGGGAAGGTATCG  
TGGTCTTGATGAGCTTCTACATGCGGAGCCTTACGTTGAGAACCTTGCACACCAGATCA  
TCCTGGATCTGTGTATTGCAACCTACATGTTCCCGAAAGGGGCGGTAGTTGCATATGCAG

GCGACCGTCCCGGCGATGGTAGGGCCGTACGTTTGTCTGGAAGCTCCTCTGGGTAAACGTG  
TGGTCCTGGTTGAACTCGATTACGACCGGACTGTTTGGCTGCAAAATTCTGGCCTGCACA  
ACGATGTTACCTCAACGTTGTTGCGTTTATCGGTGCATACCCAGGTA CTCTGGACA ACT  
ATGAGGAGATGTTGGAATCAACTCCCCTTAATATGCCACGCCTCGTACTTGGGTTACCG  
CAAGTGATACCCTGGACGATTTTGATGCAGGTATCTTATCCACACGGCTGGCACGAGCCG  
CTCGACAAGGATCTGTAGGCCAAAGCATTGTCGGTGGGGTTTTGGTATTATCATAACCCGTA  
GTGCAACCATGATTCTATCGAGGGGGTTATGGACGGATCTTTCAAGAAGCACTCCGGGT  
GAGAGA ACTCAGTCGTGTTAAGGTCCC GCGGCTCTCAGGGTTCAATCTGCTTGAGTAAGG  
CAATTCAGAACAAGAGTACACAGATGATCACGTTATTGACTTTTCTGCGAAGTTCTTGC  
AGTCCCTGTATGACCATTTTGATCAGCATGCTACGACATTGAACCGTGATTTTCGTGAGGT  
CTGTGTCCATGTCATCCACCCAAGAGACCTCTTTTGGTAAAGCAATCCTGTTGTCGGGTG  
ATCGTTAGCGCTTATCTCAGAAATTGTTGGGTAAATAACCGGTAGTAATGCAGATCATCA  
CAGAATACCGCAAGAATTTTGTGGTAGGTGATGATGCACGCGTAAAATAATCTTTGACAA  
CCCCAAGTGGGGCGATAATTCTTTGATCACGCAAACAAAAGCGAGGACAAACTCAATGAC  
TAAGTTATACTGAAAAGAACCTCAGCAGGCGATGCGTCAAGGAAAAAAGGTACGCAACCT  
ATACTGGAACCCAGAGGAGTTCGTCGAGATGAAGTACGGGCAAATCTTGTGCGAAATGGT  
ATACAACATGGCTAGTTGGTATCTTGGCGAGGGATGGCAGGATGATGGATGGAACGTGGT  
TGATGCGCAGACCTTGCTTCGGGCATATTTATACGCTTGATAAACATGGTGATGAACGTT  
TGGTTCGTTTAGGCTCTCTGAACATAGAATATGTGAAGGATCAGAACGGCCCAAACGCAA  
AGACCTGCCACAGGCGGGAAGACAATGGTTTTTGTTCGATCTTCCTGGTCGGCTAGAGAGA  
GTGCTGGGGCTCTCTTGGCCAAGATAGCGGAGCACGACAAAGAATATGGTGACTTTCCCT  
GGGATTGCGAACAACGGAACAGAGTTGTTCTCATGAAGGGGGA ACTATGGTACAAGAGAA  
ACTTCGTCCACTTCCTAATTATGACGATGTGATGGATGTACATTCATGGTATTGATGCGT  
AAAATGCGGTGCCTTCATTCCTGAAGATAAAAATGGGTACCGGTGTCCTGATCAAAATGA  
TGAGTACGACATAAGTCGCTGGAGTCCAGGTCCTGCATGGGCTGCTCACGTAGCATGGTA  
CAATCTCTAATGGCCTAGCTCAATTTGCCGCTGAAAGAGATCAACGAGGCTTGGGGGATT  
GATTACATTGACATGGTGATGGCAGGTCTTACATAACCGCGTCAGTGTATTATTGTTGCC  
TGTGCTAGTCCGAAGGCTGAAGCTCGTGATGACATGGTTCGCTTTTTGAGAGAGGAGTTAT  
GCATGAAAGTAAAAGAACTGCAACTAAAGCGACAGCTTAGACCATCCCCTTCCTGGCG  
ACGTCCTCGGTGTTTTTGAAGACGTGTATCACGGGACTTTCATTGAATACTATCGTTGTG  
AAGGGAAAGGTGCTGACCTTGACGTTTACCCATACGCGTGTGATGAGGTGAAGAAGTAAC  
ATGAAACAGACTGGATTGGCATTGCAGGCGCTTATATCTTCCTTATCATGTTACCCTGAG  
ACATGTTTGTTCAGGTCTATAAACCCCTCTCGCTCGTCGTCATTTTGGCGGGGTTCCCTTG  
ACAAAAAGAAAAGACAGTCAGGTATGGCTTGGTGTTAAAATTGAAGGTAAAGGTTTTTAC  
TCCTTGGCACACAGGGTTGCTTGGGCAAAGTATTCCGGGGTACGGCGCACTTACTTCATT  
GACTACAAGGATCAACAAAAGATAACAACCACAGTACAAACCTGAGAGATGTCCAGTAA  
TTTGAAACCTTTTATAATTATAGCAGGGGTAAAAGAAAGAAACAGGGTTCCGTA CTGTA  
TTCGTAGATAAAAGGTGGACAACACTCAGATACCATTCCGTGCATAGCTAAACCCACCTT  
GTAACATTCGACTCTGCCAAGGAAACCAGTGAATGTTATCAAGCATGGGGAAAAAAGATT  
CGTGACATTGTCATGGAGGACTGATTATTAAGCATAAAGTAGGTGACCTGATTGAGGCTG  
TGAAATCTGGGGAGGTTCGATGTATTTCGCGCTTGGCTGCAATTGTTAATACACGATGAGAA  
GTGGAAACGCGTCTCTAATCAAAGAGGGCCTTCAACAACACTGAACGCTGCCGACCTGAAAA  
CTGAGAGGGGGCGCCAATATCAAGCTGGGAACCTGTACGATGGCGCATTGTATGATAGTA  
CTCTGGCAGGATTTAATCTATACTACAATTCCACTATAATCATCGTAAACAGGGACTCA  
GGAACTCGATTAGAATGCGCTGTACGATTCGATGGTTGAAATTA AAAAGCTCTTACGAA  
GCCATACAAACGACCCTGTGGACATCCATCGAATCGGGTTCCCTTCACTAGGTGCTGGGG  
TTGCAGGGCGTGACTGTAATTACCTCGGAGCAATCATGAAATCAATCTTCCACGATTGTA  
ATGTAACGGTGTATATAGTACCGGAGCAAAAATGATGGTGGGAATTATCTATCTTCTGGT  
AGATATCATTGGAGTGTACATCTTCATTAAGAGGACGCAGAGAGAATTCCGGAGGGTCTGA  
TTGTGTAGATCGCTTTCCTGCTATATGCATGGGATTGCTCTGGCCTGTGTACTTCACTAA  
TCTTGTGATGCTGCGATTTCATGACCTGCGACTGCAAATGATTGAACTATTTTCATGGAATG  
ATGGTCCATACTATAAGTGTGGATGTATCTGCAACAGATGGATGTAGATTTACATGCAGT  
GCTCCTCGTGGCTACACATTATGTACTCATATCGATGACAGATGAAGATCCTAGAGATGA  
TGTTGACAATCTAGTAAAGGCTAATGAGTGGATTGAATCCCTTGGGTGGACACACGAGGG  
GGATGACTGATGGAAGAAATTGGCGTTATAATTGATACCCACAATGCAACCATCTTGAAG  
TCTGGTAACGACAAGACATCATGCCGTTCTGCGGGAACCGCTAAGTCTGCTATTAGTTCA  
AGTCGATACGATCCGCTGCGTTGTCCTACTCCCAGCAGGACCGTTTTACGATCGAGAAG

GTATCCACCGCAGGGGTGATTTTTTAGTAAGGACAGCGTGTACGTCATCCATAATAAAGA  
GAATGGCTGCCTGTGGGACCATAAAGCAAAGATCGGATGGATCAGTTCGTCGCTGCTGA  
AAAGGCCTGGAACCTTGGCAAGCAAATAAAATTTGACAACCAGAATCGTTATGTTATAAT  
CTGTGTTACGAACCTGGTGGTTAAGTCCTTAATTGAGGAGAAGAGAAACGACAATGAGTA  
AATCTGTAGCGGGTATCTGCCAGACCGAACAGGAAGCGGTATACATTGGTGGTAACCGTT  
TTGCTGGCCACTTACCAATGCCCGCCCTTTTTCCGGCTTTGTTGTCACGAAGGTTGTTCC  
GGTGCATCTAAGGCTTTTGTATATCGTGATCTGAAAACCTCGCGGCTTCGAAAATGGCCATA  
TCCGAACCTCTGTTGTAAAAGAAGTCTCCTTCATGAGCGTAACATCTACGCCATCACGA  
TGACCAGTGCTTATTTACTCGCCAACGTGTGCCTGCTGGAATTCGTTGCTTCCGGTGTGG  
CCTGATGACATCCTTAAGCTGCTTGCATATGCAACGAAACATGTTTATCTGGAAGATGGG  
ATTCGGTCCGTAGAGGCTACTCTGAGCTATCGTGTGGCCGCTGAATATTTCCAGGATGCC  
ACGAATCGTTTATCTCCCAGCGAATGGGTTCTGAACCAAGCAGATTCTGTGAAGCTCACC  
CTGCAAGTCGGTAACGAACCTCCATGTGGAGGAGAACTAATTGACTAAAGCTGTCAATTAC  
CCAAGCAATACAAGGCCCGTCCGGTGTATGCGTTCGGTCCACGACCGGCTTAACCTTAAAC  
GGTATTGATCAAACCGTGTGCGAACAACGCAAGCTTGTTGACCCGACGGAGTTTATCCTG  
CCATACGTGGGGACTGTGAAGATGCACTGGACCTAGGTGAGCATTGTGGTTTACTCCGAA  
GATGACGTTGTGTTTACAGTCCAACGAACGTGTACTGTCTCTTGAGCAGGATAACAGCGGC  
TTCATGGCGTTCCTGGTGCCTGAAGATAGTGAAGAAGTCTGGAACAAGTAAAACAAAAG  
TGCGAAAACAACGAAGTCCCGATCGAGTTCCTGGTGTGAGATCGCTGGTGAATGGGCTGGT  
CGCGGTATTCAGAACGGTGTGCGAGTCAAGCAGGTTGAGCAGTTCCTTGCCATCTTCGGT  
GTTGCAATCGGTCAGAAAGAAACCTCACTGAAATGGTTACCACCAAGCGCATTCTTCGGC  
AACGGCCTGACGTAACAGCGGATCTTCGATGTGCTGGATTCCGGTACTGGTGCAGCGCTT  
TTCTCGTTCACGAACCGGAAATGGTACAGAACCTTCCGACAACGCTGACCTCGCAGGTG  
GAAGGTCAATGCCGTGCTGGTAAGTTCCTTCGGTGTGAGCGTGTCCGTGAAGGGCTCATC  
TGGTCTCGAAAGGGCCTTGAAGTGGCACAAGATTCCGGTCTGTGGATCAAAGTGAAAGGC  
GATATACACTCTGTCTCGAAGGTCAAGACGCTGACAGAAGCTCATCCGGTACGCCTACAT  
AATATTCGTGATTTTGTGCGAGTATGCGGTCACTGAAAACCGTCTTGAGCAGGGTCTGGGT  
GAAGTGGGTCTTGACCAGACCAAGATCGGTGAGTTCATCAGTTGGGTAGCCTTGATAGC  
ACAAGCAAGAAGGAGATGTGCTGAAAGCGTATACCCTAACCATGAATGATGTTGCCAAA  
TTTATCAGCAACAAATCGCCTGGTTAATACATGCAACAACCTCAACGAGGGGCTGTGATGT  
CCTTATCGTATCCACAACCCGTGCGGTTAAAGAAAAGCCTTTGAAGGCGCAGTGTGAAA  
CCTTAATCTTCTAGGATCAAGAACAGGGTAGACATTCGGTGGAAAGACATGCTACCTTTG  
TCTTCTCAGTTCAAAAAGCGAGGATTGTGAAGAGTGGAAAAACCGCAACCCAAGTTCGAG  
GTGGGAAAGAAAGTAAGGGATCTTCTTAGCGTCAGGATACTATGCATAACGAGTCGCTGT  
TACTTTAGTGGTTGGGTATCCTCTTTCGATTCTGTGAGTATGTATTTGTAGCCAGAGGAA  
GATTTGGAGGCTGGACAGGGGACTGCGTGAGACGTTAAATGTGTAGACTAGACAAATGGA  
GGATAAGGTGGTAATCTCTATTATTATCACGGGCAATGCCATCATGATCGGTAACCTTTGT  
AGGTGGTGATATGAACTTTACTTCGCATGGTGATAACATTTACATAAAGAGCGAGTTAGT  
TCACACCACATAAGAGAAGAACAACACTGGGGTTATTCATGGTGACAGCAAGGGTATTTCC  
CACGGTTGTTTCGTGATGTTAATGTTGAAGGAGTAAATGCTGGCAATATCAAGACAACCTC  
TGTTGATTTACATGTTGAGAACGGCGCACTGGGGGACGTTACCGCAGTGGCCGGGGATGT  
TTATGCATAAATGATCAAAGGTAATGTGAAAACCTGTCTCAGGGGACATCTCCCGCCGTTCC  
ATTGATAAACCCTTCTTGGGGCGTTTTAATTTGGAGCAAGATTTGAAACTAAAAGCATC  
AATTCTGGCAACCGCCTGTGCATTTTCTCTGACTACAACACCAGTCTTAGCCAAAGAAAA  
CGAAAATAAGCCCAGGTTCAAGTCGCTTTGTAAAAAAGATGCTACACCGGTGAACACCTT  
GGCATGTAATATGTATCGTGAATCCCGTAGTGAAAGCCAGCATGCTCTTACGTGAAAAGC  
TTTTGTACCGCTCAACCGAAAAACAATGATAAGTTTCTTCGTACAGTGCAGAAGATTAT  
CTACCAACCGGGGACGTTTCCCTGGAAATCCTACAGTACAAGCTTCTAAGTGTAAGAGAA  
AGATCCTTGGGTAAAGAGCAAGGAGTTCACAGAGGATTGACCAAGATAACACAACAAGAA  
CAAAATGGTCTATGAAGCCATTGAGATCACCAAGGAATCTACGAATTATCATTCAAAGAA  
GGTTAACCTTACTGGATCAAGGCGATGATTCGCACGGTCAGTATTGATAACCACATCTA  
CTACGAAGAAAAGCCGGACCCCGAGGAGCCGGACCTATTGAAGAATTTTATTGATGCGT  
TGTGTTAGCATAATCCCCATCTTGTGGTACTGTCTATTACTCAATGGATGTTCTGCGAA  
CATTGGTGAGGAGCGTAACTTCACGGCTACCTGGTAGGCATCTACATAGTGCGGAAAGCT  
CTCAAAGAAACCCATAAATAACCGCAAATAGCGGTGAGACTG

>NewGenomeName\_77

AGGACTAGCCATTCGATCGGCCCGTACTCCAGATTGATGTCGTCGGCGGTCCATTTGAC

TCCCACGTACGTCCACACGGTGATGAACACGTTGTCGCCATGGAGGTGACGGGTGCGCGG  
TTCCAGGGCTTCGACGATGCGCCGGCCGGTGACGAGCGGGGAGTACGCCAGATCCTACGG  
GAGCTGCAGTCGGGCAATGCAGTACGCGAGATCCATCGTCATGTCATCCACCCGGTACTC  
GTAGTGCTGCTCGCCGGCAGACGCGTCGTGCACCGTCGACAGGCGGGCGGAGTTCGGCTT  
ACGGCTGATCTCGCTACCGTCGGGGACGGCATGGGTGTCATCCATGGTGACTGTGAAGTC  
CTTCTCGGACATGAGCAATGACCTTTCAAAGGGGCGGTGGTGATGATGGCGAAGTCCAGCA  
TCAACAGGAACATGCCGACCATCATTACCAGCCCCCTACCAACTAGGCGGCCGAGGAACA  
GCCACGGTGACTGGATCGGCGCCCTGCGTAGAGAGTAGGCGTTGTGGGTACCATATCTG  
GGGTCTCCTGTCAGTTCGGCGGCGCGTCGGGGATCTCTTAGACGACCGGCTGGGATTGCA  
GGTGCGGCCGCTGATCCGCTACGTCGCAACGATGCTCGCGGATGATGTACCCAGCTTGG  
GCGCCGGCTCCCTCCGGATCAAGCCGGGGGTGCGGGGCGCGAAGCAGGGCTGGTGACGT  
AGAAGGTGCGGAGGCCCTGCAGAAGGGCGTCTACTTCACCGTCCTGACTGATCTTGTATG  
GGTAGAACTTGGTGTCGAGGACGTGGACCGTGCCTGCCAGCACGACCCGCCCCGACCGAC  
TGCATTCGCCCTTTCGCGGGTAGTTGGTAGAGAGGTGGGAGTCGTGCGGACGCTGCCACT  
TCTGGGCCTTCCC GCGCGGGGATAGGCTACGCCTCTTCGAGCAGGCCGGCGTTCTTCCA  
GTAGGTCACCTCGCGGGCGGTGGTCGACGTGAAACTAGGTGCGCGGTTCTGGTCGGCGAT  
GAGCTGGCGGAGGTCGTAAGAGATGGTTACCGTGTGGACCTTGGTCCCGACTTCGCCCTG  
GTACAGGTACGTCGCCACCTCGTCCTTCAGCAGCTCTGGCCGGACCTCGATGGTAGGCAG  
CAGGCCGACGAAGCCGCCGTCGTA CTGCAGCGGCTGTAGCTACCCAGCCCGAAGTCGGC  
CACGATCACCAGCATGTCCCCGGCTTTCACCTCGAAGTTCTACCCAATCATGGTGTTTCT  
CCGTGTCTCAGTCCCACAATCTCTCTCAACGCCCACTCGGGCTCTGGCTTGTACTGCTC  
CTTGCCGACTACCTCGCGGGTCTGTATATTCACGATTGCCACCCGATCACGGAGCTGTC  
GTAGGAGGTAGCGATGTGCGCCCCGGTGCAATGATAGGCCATGATGGTCCAATTCTCGTG  
GCGCAAGACCATCGGTCCCCCGATTCCCTAGGGGCCTAGTGCGAATACTCGCTTGACCAT  
TCGGTCACTCCTCCTCCCATCTTTCGTCCTCGAGCAGTGGGCGGAGCTTTTCGACCCAGA  
AGATTATTGTGTCTCGACGCCAGGTGCCAGGCCATGGGTGTCGCCCTCATCGTCGGCAC  
CGCCCCGTAGACGACGTGTCTGTACAGCTCTTGTTTCGAGGACGATCTTGGTGACGGCGT  
GGACGATCGCTCCGCCCTTCAGGTTGCGCGCTCGCTCGCCGACCTGGACCTGGCCGTCGT  
CGCCGACCGTGAAATCCTGGGACAGCAGGGCCTCGTCGACGACCCATTGCGTCAAGTTAG  
GTGCGAGCTTGATCGCGTACACCAACGAGCAGGCGATCGCGTCGGACAACGCCCGTAGTG  
GGGCATCTTCGGAGCTTCCGAGGACGATGCGCTCGGTACTGGAGTCGGTCTTCAGCAGGA  
CGCCAGTCGTGTCATGCATCTCTCCTTAGGGAGTTGATCGTCGTAGTCCGCTTGAGTTT  
ATCTACGGGGTCGGACTAGCCTCTGGGTTTGACGCTGACGGCATCATCCTGGTCCGGAAG  
GGTGAAGAGCCAGCTTAGACCAACGGACCGCAGTACGGCCGTAGTCCACCTGTAAGTG  
CCACACCGGGCCGTTGTCGATCAACTGGTGGGAGAGGAAGATGGTCTGTTCGTCGTCCTG  
TTCGTCGTGTTTCGAAGGCGATGATGCGATCGATTCCATCACTCATCGGCCTGTCCTATCA  
GTGTGCGCGTCTGCTTCGGTAGTTTTACCCCCGAAGCGCCAGCAGCCTGGTGACGGCGA  
CCGGAGTGCTGGCGGTGCGGTGCGTCAGGAACAGGGCTTCGGCCTCGTCCTGAGCCTTCT  
CGGGGTAGATGGTGTGCTGGGCTGCGTCCCCCTCGGCCTTGCTCGGCCGAGGGCCGGTGG  
CCTTGCGGCAGCGCCGTAGAGCGGGGTCGTGGGCCAGGTACCAGCGGCGGATGTCGTCGG  
CCGTCTCGAGTGCCTCATTCCGGTTCCGCTTCGCGGACGGGGCCGTGATCTCGTACCCGC  
CCGCGGTGCCATTGGTGACGTGCACGACGATCGGGTGTGGTTCGGAACGACGCCGGACCC  
AGACGGTGCCGTGCAGCGGGCCGGGGGACCATGCCTCGCCTTCTCTATGTGGCCGCGGA  
GCGCGACGTA CTCCATCGCCCCCTCCGCCTACAGGTCGATGGCGGCCTCTCTGGCGAC  
GATCTCTTGGAGCCTCGGACGGTGGCATTGCGGCACGACGGGGATGTGTGCCGGGTCTGTT  
CCAGCCGCCGAGGAACGTCCGACAGGCGATCGGGGTGCCGGACGAGCGGATGACTTAGGT  
GAGCGTGTGCGGGAGTGGGGCATGGAAGTCGGCGTGGTGAGCCTGCGGCACGTGCGCTAA  
TCTCGCCTCACCGATGGCGTAGCCCCCTGCGGGCGCCCGATCCGAATCTTATCTCGGCG  
CTCGATCGCCCCGGGCACCTCCTGGGCACGGATGCGACTCTGGCGAACTCTCATTCCGGTC  
ACCCCCCAGGTGCTGTAGGAGATGGTGTGGCCAACGGCACCCCTGCGGGACGGTGATCT  
TCGTCTGCTAAGTTATGTATGCCGACTCGCCTTAGCACGAGGGGTGATCGGCCACGACC  
TGCGGAACGAGAAGAAACCACCATCGGTGCGCGTCGCGGTGTACGATCCGGGGGCTATGT  
CGGCGGGCACGCGCGGCGTACCGGTGTCGACGTCGAACATCAAGGGCGTGGTGTAGGCGT  
CGCCGGTGTGCTGCAAGGTGCTGAACGGGTGCAACGGCGGGGTGTCGACGCTGGTCTTTG  
CGCCGTCCCCGACCGTCCGGGCCGCGCATCCGGCGAAGGCCAGCGTACCGGGGGCGGCGA  
CCGCTACGAGCGTGTAGGGCCAGAAGCGCTGGGGGGACAAAGTGAATCTCCTTGGGGCTG  
TTCTGGAAGGGGCGTAGAAGTAGCTCGCCAGAAAGCGGTGCAGCACTTCTGCTGCGGGT

CCAATCGGTCTGCTCCACAGATGGCTCCGAAGGTCGGGCCGAGGGAGGATGGGGTGATCA  
GATGGAAGCGATAGAAGTCTCTCTGCGTGGGTTCGGTTCGAAGATGACGCCGGCGCCGTAGA  
TCTGCTGGATGCGCAGGATGCCGTTGGCCAGAAGCTGTGCCACTGGTCTCTCTCTCGGC  
GGAACCAAGATCGCGGGGGTCTCGGTAACCTCCGCGCGGGTGTCTTTCGATGGCGGCCT  
GGCGCTCGCAGGCGTAGTGCCGCTTGACGCGCGTCTAGATGGATCTCAGCTGCGGGCAAC  
GCTTAGCTGCGTGTAGCATGTATACGGCGGGCAGGCTGCTAACGAATCCCATGATCAGAT  
CCACCTCTCGGCGGTTTCGGCTTTGTAGAACACCACGTCGATGTGTACGATCATCTCGCC  
TCGGATGTCGAGGCGGAGTAGGTCTTTCGCGGTGGCCAGCTCATGGCCCTCGTAGAAGTA  
GGCGCGGCGGGTCTCGGACAAGCGGGCATTCTCTGCGCCGATGTCGGACCGGGGCTGGTC  
GTAGGTGTACCCATCGGAATCACTAACAGTTGGTGATCGGATTGGCGGAGAGGATCGGG  
CGGCAGGTGCTGCAGGAGACCACCTTGAGAGACTTGCTGGCGAGCGCTTCTCGATGTTT  
AGGAGGGCCTTTCCTCAGACGCTGCGGGGTACTCCGGACGCGTGGTTGACAGCGTGCGGG  
TCGGCGGGCTTGGCGACGCGGATAGGCGGGCTCATGGGTTCGGTTCGGGCAGTGACTGGT  
CGAGGGCGTTCGCGTTGGTTCGCGCCGGTTCGACGCTGGTGGCCATCAGGGCGGCGCGGGCCG  
CGGGCTCTACGGAGAGTCGCGCCTTGTCCGCCGCGTACACCGCTGAGGGCGATCATCAGGT  
GACCGCTGAACTGGCGGCTGAGCATTTCGATCAGATCCTTCGCGGAACAACGTAGAGTGT  
GGTCAGGCAGTCGGAACAGAATGCCGTGCCGGTGGGTGAGGGGTAGGTCTTCTTGCAGGC  
CTTGCAGTGGTGGTGGCGATCGGCCAGCATTCCGTTCTTCTCGAAGTCGACGAAGGTGTC  
TGCGTCAACGATCGGTGCGGTCATGGCAATCACGTCCAAGATGGAGTTGGAGTAGTTTTC  
GGTGTTCATGCTGCGAGCCTGCGCAGGTCAGGTGTTATCGGGCACCCTCGCTGTCG  
GCCTTGTAGTCGTTCTTGCACCTCGCCGGTACGGTGCAGGCCAGGGTGTTCGACCAGCTCA  
CTCATCAGCGCCGCGATGTGCCGGAAGGGTTCCTCGGTGATGGTCTCGACCGGTTCGCTCG  
CCC GGCTACA ACTGGACGGATCCGGCCGTGGTGCCTGGGTAGACGCCGGTTCGCGCGCTAG  
AGATCGACGACCTCGTAGTGCTCGGGGTCGAGCAACCTTGGCTGGACGCCGAAGCTGGTT  
TCGGTGC GGCTAGACATGACGGCAATCTTCGGTCTGTGGCGGAGGTTTTTGGTGGTGCCT  
GGCACCGGAAGCCGAACCGGGGGCGCGCCCGTTCGGCAGGGTAGTGGGTTCATCAGGCCAG  
CACCGGCCGGAGGACGCTGTGGACTTTGTTGTGTCGAGCGCCGTCAACTTGCCGGTGACGTC  
TCCCCCTGCGTTGCGCTCGGCGCGGGTAGCGCCCTTGACGGTGGACTGGTGTGTCGCGA  
GGTGTTCGCGCCGGGATGACGCCAACGCGGTGCCGTTCCAGGTGTTGGTTCGGGCGTC  
GTGCCGTTACATCTTCGTCAGCTCGTCGCGCTGGCAGGTGTCGATGGCCCCGCGCCCGGCG  
CTTCTCCTCCGGCACCGGCTGCGAGGCGTCCATGAACTGGAACCACTGCCCGTCCGGTGAC  
CGTGGTCTGGCCAAGCTCGTCTAGGGTGGCGGTGAACTCGTCCGCCGTCTCCTCCATCAG  
CTTGTGCGAGGAGCGGACCTCGTCGAAGCGGAGGTTGACTACCGGATGTGGCGCATCGT  
CACCTGTGCATCCATGGCATGCCCGAGAGCGATGGCCATCGTGTGTCGTCGACAGCCGTGGC  
GATGATCGCCGGGTCGTACGTGGTGGAGCGGCTGCCGTCGAGCGCGGTGGCGGCGAGCAG  
GTTGGGCCGGTAGGCGAAACCGGTGGCCTCGTATAGGAGCGTCTCAGGGAAGGACACCTC  
GCCCTGGCCTGGCCGCGGTGCCGGAGGACACCTGCGCCCGTGTCTTCGGGCTGTGCGT  
GTGGGTGGTGTGACCGCTCCGAGCGGACACCCGCGGGACTGGTGGCGCTCGTACCCGTC  
CGTGAAGACCTTGAAGACGTGGTGGTGTGTCGGAGCGGGCGATGGCGGCGAGTCAGGGCAC  
CGCCCGGGCGGCGACGGGGATGCCGTCCGCGTGTGGCCAGTGACCTCGGTTCAGGTTCGGC  
GGGGAACCTCGGCGAGGACGGGGAGCTTGACGGCCAACCAGTCGAAGAGGCGATCACCTAC  
GCAACCGATTGGGATGGCCCCCTCGGGGTGATTCAAGCCCTCGCCTCTGTCTCAGCGCG  
GTAGTCCAGGCGTGGCCCCGTGTTGTGCGGTGATGCCGATCAGGGTGTGGTGTTCAGCCA  
AAGGTAGGTTTCAGCGGGCATTGTTCTCTACCTTTCGGGTAAAGGCTTCATGAGTTCGA  
GTACGAGGGTGAGCTTGTGTCAGGTGGCGTATCCACCCCGGACGATGACCCCGGTGCCGT  
TCGTTGTAGTGATGCCGGCGACGGGGCCGGTGAGGGTGAACACAGACGCTGAGCTGCTTGA  
CGCCGCGATCGAAGCGGATGAGGCTGCTGGGCTCGCTCGGGCGGTGGAGCCTGGACCATC  
CGTGCTTGGTGGCGGCGGTTCGCGACCTGCTGTGTCGTGCGGTTCATGGCGGGGACTCCCTAGT  
AGTCGGATCACTGTGCGAAGCGGGCGTATTGGTCTTCGAGCAAGAGGATGGAGACTTCGG  
TGTTGATGAAGCGTCCAGAGTGGGGGAAGATCCAGGCGATCCCGCGGGTGACGTACTCCT  
GTCGGCGGAAGGCCCCCGAGGTGGTGTGTCGGCCCCGAGGCCCAGAACCAGGGGGGGT  
TCCCCACAATCGCGCCAGGTCGTTGACGTAGTCGTTGTGTCAGAGCCGCTGGCACCTTGGG  
TGGAGGTGAGTCCGAGCGCTCCCGGACTACCGTCCGGTACTCGATCAGGACGGCGAAGG  
CGGCGCGTGTGGCGGAGGTCATATCCGGTGCCTTAAAGATGTCGGAGGTGGCGGTGAGGC  
GGATCCGGCGGGCCTTGACGTACCCGAGGATCAGGATGCTTTCGGGGCCGTTCTTGTGCT  
CGGTGCGCTTCCAGTAGCTGACGTCCATGGACTGGAGGGCGATCGCGAACTCGGTCCAGG  
TGGTCTTGACGGATCGATTGCCGTCGTAGGCGCTCAGCGTGTGAGCATAGTGAACGCTC

AGTATCGGGGTTTCGTGCTGCCTCGCTCCGCCAGCCCCAGGGATGGGAGATGTCGGTGC  
GGCCTTGCGGATTGAGATCGGGGTGTGGTTTGGCTGGCGGTGCCGCCATCCACGGCCGCC  
GAAGTCGTGGCGGTTGTCCCAGGTGCCGCACTCGCAAACCTTCATTGCCAGTTCCTTTGG  
GCTGCAGTGAAGGGAGTGGCGGGCCGATCAGCGGAATCTGCTCTCGCCGGTCGGCCCCG  
ATCGTGTCCCCGCGCGAGCATGCATCTCCGCCGTTCCCGGAGGGTGGGCGATAACGGGGT  
CTAGTAGTTGGCTACTCTGTGGAGTTGTCTGACTGCTTATCCGGAGCCGGGTCCTTGCCG  
ACCATCCGTGCAGTGGTGTCCGCGTCTAATCGCTGTTGCTGGCGGGTCTCCTCGTCACCG  
ACCCTTTCGGGGCAGTAATGGCGCTCTGTGATTCTCTCGGTGGGTTGTGGGGGCTTTCG  
GTGTTGCTGTTGTGATGACAACCTTCCCTGGTCCCCAGCAGTTGGCAAGGGGTTTGGG  
GATTTTCGTTACCAATCCGTTATCGGGTTGGTCGTTCAAGACCTTTGATCAACAGGCCTT  
GGGGCAGGCCAGGCCGTACTTCAGCCGTCAGGAGGCCTTGTGTCCATTGCGGGCCGATTC  
TGGGGAAAGTGACCTTGAGTATCGGTACCTCCTTCTGGCGCTCGTACGTTGGTCGGTATG  
AGTAGCCGTTCTGAGGGCCCGCGGGCGGTACATCTACACCCGAGTGTCGTGGGACCGCGCA  
GGCGGCCGGTTCGGTGACCGACTATGACGCCGAGTACATGATGGTCTGCAAGCGCGGGGG  
TGGTCCGCGGCCGACGTGATGTCCGACTACGACGCGGGAGCATCTCGGTGGTTCGAAGGTG  
GAACGGCCGAACACTACGAGCGGCTGAGCCGGATCCTGCAGCTCGGCGAGGTCCTGGTCACC  
TGGGAGGCTTCGCGCGCGCAGCGCATCTCGCGGCATAACAGCGACGTGCGACGGCTCTGC  
ACCGAGCGCGACGTCCTGTGGTGTAGTCAGGCCCGTCTTCGTCTCTCACACGCTCCGAA  
GATCGGTTTCATGACGCTGCATGACATCCGCCTGGCCGAGAAGGAGGTCGACCAGACCCGG  
GAGCGGATCACGCGGACACGGCGCGCGTACCCGCAGGCCGGGAGGCGCCACGGGTTCCGG  
CCGTACCGATAACCGCTCCTGCCGCGACCCCGACTCCGGCAAGCCCATCGGCCGGTGGCCG  
GACCCTGTGAGGGGCGGGTTCGGGCGCGGCCTCGGGCCCCGCTTCCATGAGGTGTTCCG  
TGGCGGCGCATCGCAAGTGACCTCATCGCGTCCCGCGTCAAGCCGCAGCAGGCCGAGGAA  
TGGACGCCACCTTGCTCGGGAAGATGCTGGAGAAGCCCGCGTACGCGGGTCTGCTGACG  
CACCCCGGGGAAATCGTTCGGCCCCGGCACCTGGCCGCGGTAATTGCCGAGGACGAGCGC  
TACCGTTTCATGGCACCCCTGAAGGACCCGCGCCCCCGGAGGCAGCGCGGCACGTGCGCCG  
AAGTCCCTCGTCACGAACCTCGCGGGCTGCGGGAAGTGCGGCGCGATGGTGGGCCGGAAG  
AAGAAGCCGCGACGGACCGTATACGTCTGCCGGGACATCGGATGCGTGACGCGGCCGACC  
TACCACCTTGACGAGTACGTGAGGTATAGATGGGCAAGATGCTGTCCGACCCGCGCGTA  
CGGAGGCGCGTTAGCCAGCAGGGCGACCCCAAGGCCTCGACGGAAGCCCTGGCTAAGATC  
GGCAGGATCCGTGCCCGGATGGACGAGTACGCCGTCGAGCCCGGCAAGGAGGACGACAGC  
TCGCGGGCCTTCGCTCACATGCAGAACCAGTGGGTGGCCAAGGGCTCGGCGCTGGAACAG  
GTGGCGAACCAAGGCCCTGATCCACCCGAGCCTGGCCGACTTACCAGGCCCGTACTTCGCG  
GCGGTTTGGGCGAATATGGACCTGGACCCGCGAGCGCGACATCTTGCCGTCCACTCAGGAA  
GTCACCCAGTACCCGCACCAGCTGCGACGCGAACGAGCTAAGCCGCAGATCGAAGTTCTT  
TGGGAAGCATCGAAAAGCCCCTGCGTGGCGAGTATGCCGAGAGGGGGCTTTGCTTTTCG  
AGCAAGACGACGGCTGAGAGCGTTGTCTCATAGGCGAGCCTGTTACAGCGCAGAGACGTGG  
TCTAGCACGTCTTCTCGCCGTCGGTCTGTGCTGCGGTGGCGAGCAGGCCCGTGTGAGG  
TTCACGAACTGGCGCAAGTTGAGCGCGGTTCGACGCTGACGTGCGACGGCGTGGAGGGGCG  
GGCCGCGCTCGGCTGCTGCTGTTGCTGGACCGTGTGCGGCGTAGGTCGCAGCGGTGCAAG  
GGCGGTGGGTTCCGGCCTGGCAGTCTCCTCGAGGACCGGGTTCGGCTTCCGCGGTCAATGT  
GTCCCTCAAAGTACCGAGGCCCCACCCTAGCGCGGGGTCGATCGACTCGAGGATGCGCTC  
CGTCCGCCAGTTTCTCCGCGCCCAACTTCGTCCGGTTCGCAAGGTTTCCGAAGATATTCC  
GCCGAGTTGCGCGACTGCTACCTGGGTTAGATCCAGCCCGGCGCGGCGTTGCTGGATGGC  
GTCGCCGAGGAGGCTCTTGCCTTCGGTTACCGTATCCGGGTTCGAGGTTCTTGTAACGGTT  
CATATTGATCATATTTCCGGTTTGCCCAACGTCTTGGTAGGTTGCTTCACTCCTTCCAA  
CTTGCCGTGTGTAACGCCCTGGGTTGGCTGGGGATTCTGCTATGGTGCCGCGCCCAACA  
TGGGTGTTGAGAGTAGGCCTAAAGAATCATGACCGGTTCTGTGTACATCCGGTAACAGAC  
ACGTCAATGTTTGTGTGACCTTCGGGTATGCCACTGGGGACAATTTGCTATGTGTTTGC  
AATGGCCAAGGGCTTGCCCTAACTTCTGGGCTTGGTTTTTGTAGTGGGTTCCAGCAAGCCAG  
CCGTTGAGCATCACTACCGACAACCAGCAGCAACCAACCGAATAGGTGCGCGAGATCACT  
GGACGGTGGTCCAACACGCCCGACATGAAAGTGCTCTTGGTACACATAAAAACCACCAG  
TTCTTACTGAAGTCCCAGAAGTTGCACCAGGTCCTTCATCCGGGGGGAGCCTCGAACCAC  
CTGCCATAACGCAAAGCGACTAGGAGACCTCTGTGATCACCACCGCCGAGCAAACCCATCG  
CCGCGCAACTTCCCCCCCCGAGGCGTGCCTGCGGAGAACGAGAAGGTCCTTCGTGACCT  
GTTCCGAGAGGACAGGCGGATGGCCCGCTCATGGCACATCCACGTCACCTCGAACGAGGC  
CAAGCTGGTGCCCCGCACCGTCTTCGTCCATCACTAGCTCGTAGCCGACGGGGAGGCCGG

GGCCTGCCGGGCGCATGCAGACGAGACCGTGGAGCCGTCCGTCTACCGGGAACCTGCAGGT  
CATCGCGACCGAGCACCGGTCCTAAACCGCCACCCCAACAACCCGCCAGCCCAGCCAC  
CACCTATCGCTAGGTTTCGACCAGTCCGGTACTGCCCTCACGCCTGCCGGGCTGCCGTGCT  
TTTTTACCCCTCCCTGCACCCGCCTTACCAGGAGGGGGGCATTTTCGTCAAGGTCCGCATA  
TAGGCAGGGCTACCCGCTCGAGCATTTCCACGGGGCCGTGATCGACGACGTTCGTCTACTG  
GGAACCTGGCCGGAGGAGGACAGAAACGTGGCTTTTACGGCAACCAGGCGCGGCCGGAAGT  
CTGCAGCCACCCCAAACAACCGCACGCACGCTGGCACCGCTGCCCGGACGACACCCGCAG  
ACGGGTCAACGGGCACCTCGAAGACCAGTGCCCCGGATCGAGGCACTTCCGCCGCGACGG  
TACGCATCGAAATACCTGAACCACCAAGATCTCATAGACCGCCTGTTCCGAAACTACT  
CAGCGGCCAACGCCGCCCATTTCTCCCGAGGAGCTTGATTATCATGGCGCAAAACACCTT  
CAACAAACCCGACGTCCCGAACTAGGACCGCTTGGCCCTCGGTTCAAGCCTGATCGGGGC  
CATAGGCGTCAACCTGGAGTTCGCTGAGGCGACCGGCGAGCCGACCCGCGCCAGCCGGT  
CGCGAGGGACGTTCGCTAGGCGCTGAGCACGTTCGGCTGGCACCGCACTCCCGAGAAGGC  
CACCCGCACGCTCAGCCTGGACAACCGCACCTGCGGCGAAGACCTGGACGACATCGAACA  
CCCGGTGAAGGCCACGCAGCTGGCGTACGACATCGGCGCGATTTCAGACCGCCGTCCAGCT  
CACGCGGATGGTCGAGCGGGTCGCCCCGAGACCGGGTGGGTGATGGCATGAGCCCCGAC  
GAGACCGGCCGAGGGCGCGCGTGGCCCGACCCGGTCGAGTCCAAGGGCTGGACAAGG  
TTCCTCTCAGCAAGCACCCACAGCGAGAACTGCGCGCTCGGAGCGATTTCGGGAGGCCGCC  
GACGGCAGCATCTTCGGGGCCGCCAAGTACGGGGCAGCAACGGCACGTCTCGCCCAGACC  
CTGCGCGATCGGGGCGTCGAGTGCACCCGGAGCGCGACTACTCCTGGATCGGCGCCAGC  
GCCTAACGCGAGGATTCCGAGAACTTGGACCTGGTCGCCGACTGTAACGATGCCACGAC  
CGCTCAGCGGCCGAGGTCCTCCAGGTCCTTCTAGAGGCAGGCGACGGATGGCTGGCATCA  
TGCTCTGCGGGATCGGCATCCCAAGCACCCACGACCAGCCCTGGCGGGAGATGGCGAAGT  
GTTTCGGCCAGGACCGGAAGGGGTACGTGGTCGGGGAGATGCCGCATGTCCGCAGGGCTC  
CCGAGACCAGAGCCATTCTCGTCCAGGCGAAGTGCTCCGCCTGCCCGGTCAAGCGTGAGT  
GCGCAGGCGATACGCTCGACCACCAGGATATAGGCGTCACCCGGGCCGGTGTGGCCATGC  
CCGGAACCTAACGGATCCGAGGAGTACTGGCCGGTCGTCCGCAAGCTCGAGACGGCATCGG  
GCCGGGTGCCCCCAAGAACAAGCTCAGGACGGTATGGCCTAAACAGCGCGAAAGCTGCA  
CCCGGTTCGATGCGCCGACGCCAAACCACCATGTACGTATTCCCTGGGAGAATCACCCAG  
GGTCCGGAAAGCTATGCGGCACAAGCCAAATGTGGCAGTGGCGCGCAGACAAGTAGACCA  
AGGAATCATGAGCGGCACGACCAAGAAGACCCGCCGAAGATCGACATAGATGCGTTCCG  
ACACTCGATCAACATCCTGCAGTTCTTTCGAACAGGAGCGCGCGCAGATCAACGCCCGGT  
CGAGGAGCTGAAGGAGGTTCGAGGGCGACTACCTCGCGATCATCTAGGAGGCCCTGGGCAA  
GTCAGGCGAGGTCTGCCTTCTCGACAACAAGCCGGTCGTCACCTCGCACAAGTAGAACCA  
GAAGCGACTGTTCCAGCAGGTGCTCAAGCAGCGGTACCCGAAGATTCACGAGCAGGGCAA  
GCCTGAGGCGGAGGTCCGGACCTTCAAGGTAGTGGTGTGACCCGGCCGACGCCCTGCTCT  
GACTATATCCAGATCGACGACAATCACATGGGCCGGATGAGAATCGAGTGCCACCGGCTC  
AGGTGAGACAAGAAGTTGCACACGGGATTCCTGTAGGGGCCGTGGAACCGATGGTGAATC  
CCTGCGTCGACAGCAACGAGCGGCTCCGGTACGGCAAGCTGAATCGCTGCAAGGAGTGCA  
TGAGTACGCCGGGAGGCGCAGAGCGAATCATGAACCATGGACGGCGGCCCTGGATACT  
CCCGGGACCCGAGGATCGCCTGCTACAACCGCGAGATGACCAGCGGTTCGGCTCAAGGGCC  
TGCGGCACGAGCTGAAGGTCCAGTACTGCATGCGTGGCGAAGAATGTCGCAGCAAGTGCC  
AGCCGGGACAGAAGCCACGTACGTTCCGGGGCAACCTGTGCCATAACTGCTACACCCGAG  
TCGGGTACCTGCGCATGTCAACCGAGAAGCGGGAAGCCAGACCCGAGGCCAATCGCCGGC  
TCCGCGCCAGAGCTAAATCAGATGCCACGGCGACAAGACAATCGAGCTACAGTAGGAGG  
TGGGGTACTATATTAAGCCAGGGGCAGCGGCAGGGGTTGCGGACCATCTGGGCCAACTTA  
GACCTTGGGACGAGGTTCGAGAAGTGGCAAGCGGTGGATCGTACACCGCAGTGGCTGACG  
GAGTTCCTTGATCGACGTGCTAGTGGGTGGGGAACGAAGCGCCTCGTACCGCCCGTTCGAAG  
ATGTCACGGCCGTCCAGTGGGATCCAGACTGGCAGTCGATGTTTCCAACCGCAGAAGAGC  
TCGGCGAGCGGTGGCGGCGGTTTCGAAAGCCGCTTCGCAACCGATGAAGCCCGTTCGGCGCG  
GCGTCGACAGCTTCCCCGAGCTTCACTTCATGCATACCCGTTGCCGCACACATGTTGTGA  
CGCATGGACTCTGGGTAGTCATCTATCCCGGCTACCCGAAGTTCCTGCTCCTCTCCAGAG  
AGGAACTGGACGGCCAGTACAAGGAAAAGAAGAAGTGACCACCACCCGACACGGAAAGCT  
GATCGCCACCACCGGCGACGGCACCCACCCCAAGCTCGAGTCCGAGGACTTCCCGATCGA  
ACACCCGGTCTGGATCCTCGCGTTCACCGAGGACGGTTCGGCCGCCTCGATGTTCAAGGA  
ATTGCGCTCGTACGAATGGGAGCTCTCCTCTCTCCACCGGATCGGTGCACTCCTCAGGCG  
GCAGGTTCGGATGGTCCGACCGCCTGGAACCTGGACACACCCGACGACGAAGTCCGGGACTG



ATGTTACACCCCGAAACACTAAAGAAGCTCATAACCCATGAGATTCCACGCGTACGGAGGC  
CTCATCTGCCTCGCCTGGGCGCTCTTCCGGTGAAGTCAACACCAGCTCATCCGAACCTAC  
ATCTCTCCTGACCGCAAGCCGAAGTTGTGCCAGTTCGCCTACTTCGTGCCGGGCAAGAGC  
GCTGTAGGCTGCACGTTCCGCAACGTGCACGACGGCGTGCACCTTGTACGAGGTCGCCGAA  
AGCGACGAGTAGGGCGACATGCGGAGCTACGTCGGGACGGACATCTGCAATGGCTACTTC  
CAACACCACGCGTGCAGGGGCTACCAGCGTGAGCAGATCCAGTCCGGGCAAGACCACGTC  
CACCTAGACCGGGAAGGCGCCCTGCGGGACGTACAGCGGGCCGGAAGCCGCATCGCGGCG  
GACTACAGCCCTGACAGCCGGGAGCTCGCGGTCTTCTCGCTGAAGACACTGCAGTACGTC  
GTCCGCCAGTTCGAGGAGCGGGGGATGTTTCATGACCTGCACCGTCTCGAGGGCCGTTCCG  
GACGGCTTCCGGCCGCTGCACTGGTTCGCCGGAGAGCATGGGCGCTCTTCACGCCCAGGAG  
GAGCGCGAGCCGCTGACGAACGGGCAGGCGGCCGAGGAGCTGGTCTCGAAGCTGCCGGCG  
GTATCGGATCCGGACGGCGAGGACTAGGACATGCTCACCGTGGACCGCGAAGCCGTCCAG  
CGCCCGGGCCACTACCGGACGATCCCCGAGACGATCAAGCGCCCGAACGGGATCGCGGCG  
AGTGACGTCACCCGGAGGTTCCCGTTCGCGGAGGGCAACGTCCTGAAGTGCCTTCTCCTC  
GCGGCCATAAGGGCGACCGGCTGGAAGACCTGCGAAAGGCCACGCAGTGCCTGGACTTC  
GCGATTGAATTGGAAGAAGAAGCATTAAACAACTAGGGAGAGAACGATGTCTACAACAA  
GGCCTTGCTCAAGGAGACGCAGGGCGGCAAGGAAGCACCCCGCTGCCCGACGTGATCCG  
CGACGAGTTTGCCGACATCCCGTACGACCCGACATTGTGCGAGTTCATCTCCAACACGCT  
CCAGGTCTGCGTGGAGCTGGGTGTGAGCGTGGACTTCGACACTGCAGCAAGCGCCAACGG  
CCTGCTATATCTGGGGTTCAAGTGGTGAACGCGGAGACGGCCTCGGGAAGGAGGTGATC  
GAAGCCCTGACGCGGACGGAGGTGCCGAAGTACCACTTCTCCGGCTTGTGCCCCGCGCGG  
CCGCTGATGGAGGGGTGGATGCCCGAGCAGGTCGAGATGCGGGGCCCTTGTGGTCCGCATC  
ATCTTCTCGTCCGTGCTCGGCGCGCTGAGCAACGCAAAGGTGGTTCGGGGGAGAGTAGTTC  
GTCTTCGCGAACCCGATCGGCAACACCGTGTGCTCGTGTGCTGGCCGAGAACGGCTGGGCG  
GACTCCGGAGCAAGGAAACAGAACGAAGTATAACTGAGGACTGGGCAAACTATCGGAGC  
ATTTATCGTGCAGCCCGCGCAGCAGATGGCCAAGGGCCTTCTAGGTATGGAGGGGAGCCT  
CCATGAGATAGGCAGGCACATTAACACCGCCGCTCAGCTCAAGTTGCTGGATATGCGCAG  
CAGCGAGAAGGGCATCGCGTACAGCGAAGGCGAACATCTTACCCAGTTCGCCCGCAAGGT  
CCGTACCTTGCGGGACCAGGGAGGATCACAGCTTCTCGACGTCGGCAGTGTGTTCCGGG  
ACTAGCTCCGGCAGACCCTGATCGGCGACGTAAGTGCTTGGGAGCGTGCGGGCCCCGCGCT  
CTCAGCATAAGGAGTTCGGGGCCGACGCAGTCCGGTATGGTGTCTGCCACCGGTTGGCGT  
ACTCGATGACCTCCAATCCCACCTCGAGCTCGAAGAGGGATCCCCATCCGCCGATCGCCG  
GCACGTGATGCCCGGCACGATGGAAGACGTAATGGCGCTCGCCAACGCTGACCGCGGAC  
GGGAACGATGGCTCACGTACACCAGGGTCCCTCGAGCCGCTCGCCGGTACCTGCGACCTCT  
ACGATAAAGACACCCGGTCGGACATCGACTGGAAGTTCCCCGGTCCCAGTGCATTCAAGA  
AGTACAGCACCCAGGGACCAAGCTCCGAGTACCGGCGCCAGGTGCTCACCTACGGTCTCG  
GCTACCGATACCTGGGCTACGAGGTGACAAAGGCCGATCATGTTTCATCCCGCGAGCGG  
GTGAAGTCTGCCAGTACCACCTGTGGATCTAGGACTCCAACCAGCTGCGAGCACTCTACA  
TGGCCGAGCAGCTGAAGAACAACCGCATGGTTGTGACAGCCTCCCGTTCGACAGTTATC  
CCAAAAGGGCACAGCATGTTCCGGCTACACCGGCGTTCCTCGTGGATGTTTAGCTCGTGGT  
GGAACCCAAACCCCGCGGCATCCGTGAATGCCCGGAACAGCGGGTATCCGAACGGGT  
TCCTGCCCGCCACCGGGTGTGCCTGATGCCGTTACAGACCGACCACGCCTCCGTGCTGGT  
CACGGTCAACGGCACTGCCGGCCTGTACGAGTACCCGAAGGGTGGCCGCCGCGACCCGTC  
GCTGGAGTTTGTACCTCGGTGTCCGACCTTATGGGCGTCTACAGACACTACCAGCATT  
ACCATGATGCTCACCTTCTCGTCTAGCCACCTCTCCTTCGCGGCCATCTCCGTCCGG  
CTGCAGAGGTGATGACAATGGGCACAGCAGAGACGATCGTCTGATCCGTTGAATCAAGC  
TCGTCTACTCGCTACAATCGGAGTCTACGGGTCGCTTAAGTAGCTACCCCCAAGTTCT  
TCCCCGACCCTGCCGGGCCACCAACCGATAAGAACAGCTACCAACATGAGCAGCGTCT  
ACGCAAACAACCACCTCATGGGTTCGGCCAAGTCCGCGTCTGTTCCCGACCCCTGCACCA  
CGGTGATGGGCGTCATCTAGCAGGAGCCGGAGGTCACGCAGCTGCGCGGCTTCGACTCCG  
ACGCGCCTGCCTTCTGGGCCAAGGACAAGCCCGGGCCGAATATGCAGTTTGTATACCC  
TGCACACCTAGGAGCCCGACGTCAACGAGCCGCACAGCCATGGCGAGCGCAAGCTCGACG  
TGGCCAGCCACAAGATTCGGAAGGCAATCGCGGCGGCTGTCCGCGCGGCCGGTAACAAGG  
GCCTGGCCGTCGACGGTGCACCTCGCGGCGACGTACACCCAGAACGGCTTCAATACCGGCA  
AGGACAACCCGCCAACGAGTACTCGGCGCATTAGGTCTTCCGACGGGTGTGGTCAACG  
TCGAGACCGGTGCGGCCGTCGCCGGCCGCTGCACCGGCTCCGGCACCTGCTCCTGCCCGG  
CTTCTGCTCCCGCCCCGGCTCCGGCACCGGAGCCGGTTCGGACAGCTGGCACCCCCGTCGG

ATGCTCCGGCAGCGGCCGCGTTGGACTCTCCCCCAGGGCGTGGCGGCTCTCAACGCCC  
TGACGGGTGCCAGGGCGGATCTAGTCCACCGGAGGGGCGGGTTCGGGATTCTTCGGGGTC  
CTGGCTCGCCCCTTAAGGTACCAAAGGCAGAAAAGATCCATGGCAGGTAAGGTAATCT  
GTCGGCTCGCCGTAGAGATCCACGTTCGAGGCGAACGTACGATCGACGGCTACGGGTGGG  
CGACCGTCGACGCCGGTGAGATCGAGGGCGAGACGACGCTCTGGATCGCCGGCGACGTCC  
GGACGATCGTCATCCTCGCCCGGCAGGATCAGCTTGACCCGCCACAGCTCGTCGCCTACG  
AGGTCTGGTTCGGTTCGAGCGCCTGGAGCAGATCCTGATGACTACCGCGTACATCCCCGAG  
GCGACGCAATGGACTCGTCCGAGCTGGACGACGGTGACCAGAACGCCTCCGAGGACGAGA  
ACTATTCAGGACGCACAAGCTAAAGGTCAGCGACCACGAAGTCGTCCGCCGGTGTTCGAGT  
CGAGTGCCAGCTCTGTGGAGGGACACACAATCTCCTCCAATGGACATTGAAGCGGGAGAA  
GGGGGAGGCCACGTTCTCGAGGGACATCTGCGTGCCCCCGTCGGAAGGGTTCGACCGAGGA  
GTAGGGGTCAACGTGCGTAGAAGACAGGAGGAATACCTGCTCAGGAAGAACCGGCACACC  
AGTTCTGGACCGATCAGTGGCGCATCAACGAGCCAATCCCGCACTAATCGTTTCGACGAC  
GCGCGGGTGTCTCCTCAACATGCTGCGCCTCGAAATGATCTGGAACACGAATTCACGT  
GGGGATAGGAGGGTTTGGAGATGGCGACACCGGCACATGCGCTCCGCAAGGCTATCGAAGT  
GCTCAAGGCGGACGGCTCGATCCAGGGAGCGATTACAAAGCCAGGCTGGTACTGCTCGAT  
CGGAGCGATCCGTCAGGGCGTGTGTCACGCTCTCGTCGAGGACTACGTCGAGCGTAATCA  
CCAGGCGTTCAAAGACGAGCTGTTCTGCTGCGAGTGGAGACGGACCGACTCGTCCGGTG  
CGTGATTCGCGACCGCTACAAGCAGACCAGAATCGTCCACTGGAACGACGACGGGCGCCG  
AATGGTGTCCGAGGTGCTCGACGCTTTCGAGACCGCACTGCAGCTGGCCGAACGATTTCG  
GGTTCGCTGCTGTTGTGCGCCGCGGGTCCGCCACTCTGCGCACGTCGATGATGACGGTC  
GGTACCTCACCGCTCTCGACGAGAACGTAGGGGTGCCGTACTTCTTCGCGATCCTGTTT  
GCCAGCTGATCGTCAGCTGGCAGGCGGAGCGGTGGTCTCTGAACGGGATGCGCGAGTAC  
CAGAACTGCCCCGGCCATGGCTGAGCGGCCGAGCTGGAGGTATGCGAGTGTGCCACTA  
CCAGTTCTTCCACTTTGAGCACTGCTACTACGACGCCCTGAAGATGGCCACCGGCAGGCT  
GCAGGGGTAGATAAAGTCCCTACGGATTCCCGTGCGAACGCACACCATTCAAACGAGAGATA  
CGATGGGTGACTACACCCACAGCACGACACCGTACGTGACTTCGGGGAGATCCAGCCGC  
ACGGCAACGGCGCACAGGCCGAGCTCGACAACCACGTGCTGATCCCTGGTATCATCCCCG  
AGAGGGACGTGACCGGCGTCGTAGGCGACTCCGCCCGGGTCTGTCTGCGACGGCAGCC  
GGTGGTTCGCGTACGGGTGCACGCCCCAGGAGACGGTCCCATCGGGCTGTTGCTCAACAT  
CTTCGGCAAGGAGTTCGGGGTTCGTTGTCGGGGAGTTCAGCGGCCCTGCCCGAGGGTTCGA  
CCTCACCGAGATCAACCAGAAGGTCGAACACATCGCCCGAGAGCTGAACGAGCGCGAGCG  
GTGGCAGACCTGGCAGCGCCAACGCGACGCCTCCGGAGGGCAGTTGGAATTCGTGGCCAA  
CTCCAGGCTGATCCAGAAATTACACATACGATGGGAACTGAGATCACACAGCCGTTTCGGA  
GAGCGGGTGAAGAAGACGCCGGAGCAGCGATGGTTCGACTTGATCCGCAACCGGCACTAC  
TGGGACTGCTGCGCCAGGCGCGGACTAGCAGAACGCCAGGACCCCCGAGGAGGACTAC  
GCAAGCAACGAGCACCTGTGCGCCGGTCTCCAACCCTCTCGTCGGCGAGAGCGTCAGCAGC  
GCAGTCCAGCCCACCGGCCTGCCGGGGTCTTCCAGCAGACCGGGGGCTACGGGGCCCCG  
CACAAGCTGAACGTCGACATCGACTACCCGGTGTCTCGAGACCGAGTCATCCACGCCGGGC  
CTCAGCCCCCTATGCATCGACAAAAGGAGCTGTCCGGGGCCGACACGCTCCGGGGGGTCC  
GGCTGCTGGCCTCGGTTCGGCATCTTCGAGACGGGCTACTTGGACGCCAGCGAGTGGCGCG  
GCTGCGCACACCAGCGGGTGGCGTGGGAGAGAAGCACCAGCGCACGGCTCACGCCGA  
ACAAGACGGGCTGATGGCTGTGAAGCTGGCTGCCGGGGTGGCGTGGTTCGACGAGGGCGT  
GCCAGGTGCACCGGCATCGCGGCTGCTGATCCTGAACCAGACCACCGTCAACGGCTGCGT  
CGAGTACGTGGACTCCGACCTGGAGCCGGACAAGGCCGAGGCGCTCGAGTGGTTCGCTGAT  
CAAGAAGTCCATAAATTCAGGGAGATTGGGGAGACGAGATGACCGCCCTGCCCTACCG  
CCCTGTGGGAAATTATGCGTGGAGCACGAGAGGTTCGGAGTTACAGCAAGAGATCGTCCGC  
TTCGTTTCGGCGCACGGGGTTACGGGTCTTCGAGATCGACGTTCGCGTTCGGCGAACGGCTG  
GAGATCGTAACGGTCCCGGCCGACGGCAAGGACCTCGTCTTCGAGAACGGCGAAATCACA  
AGACTGAATTACCAACTGCCGATCCGGGGCGTAACGGAGGTGAGAGATGAAGGGCAACGTG  
CAGATGGTCAAGCTGTGACGACGCGCCACGGCGAATGGCCGAGATGAGTGTGACGAG  
CACGAGGTGCAGTTGGCGATGAAGTACCCGGAGGCCGTCGTCCCGTCGAGCAAGTACGCC  
GGCTACCAGCACTACCGGCGCGGCATGATCGACGTTCGTCGAGGACGGATAGCGACGAG  
CTGGTGGGCATCACGGTCGTCTGGCCGGGCCACGAACTGTGGCAGCAGCACATCGAGGAG  
ACCGGCCACGGTCACGGACGAAAGCTGAAGCCGTGGCTGAACATCTGATCTGGAGCCTGG  
CCCCGGCTCCGGTGTACGTGTCGAGTGGTCTAACGAGGACGGCGCGTGGGTAGGCCTGT  
GGCCGTGCTATTCCCTCGCTCTCCTGGCTCGACGAGACACCGGCCCGCCGCACTACGAG

GCATACTAAACACGGTCTGGGTTCGAAGTGGGCCACTAATTCGAAGGAGCGCATCATGTCA  
GAAATGCGGATCACCCAAGACGTCGTTACGCGGGCACCGTTCCTCGCTGACAGTCGGACCC  
ATCCTGGACTTCGCGACGAACCAGAAGGATAGGCCTCGCGACGAGCGCGTCGACAACGTG  
AAGATGGGCGCACTGGGGGCGCCATTCTGCGCCACCGCCGACCGGCCTCCGAGCTGCTG  
CCAACGTCCGTCCCGCCGAGCGTCGACCCAAGGGACGTCGAACAGCTGCACGTCAGCCTG  
TTCGCCAGCAAGAACCTCCGGCTGGCCCGCGACTCTCATGACGTCCTCGGGCTATTACG  
ACCGAGCAGGCTATGTCCGACAGGGCCGCTACGAGATCCGTGCCCTGGGCGACCATGGC  
GGCAATGAGTTCTGAGTCAACGAGGGGTGCCTGCGCTAATGGACCGTGGAGTTCGCCGAC  
CGGGTGGCCCTGGAGGAGTCCGGCATGGCCGCGCTCGTCGAAGCCGGAGATAACCCACGTG  
GGACAGTACGACAAGGTGCTAACCGATGCCCGATTGCCTTGCCCGTACTGAACAGCTCCT  
TTCCGCGCTGAACGGGAACGGCAACGAGGTCTGTGCTCGACGCCGACCAGGACCCTGAGGG  
TGGACAGGTGCTCTTAAACAAGGGGGCGCCGCGTCTTCGTGCCCCGGCCCGTGGGGTGGGC  
CATGGTGAAGCAACACAACCTGCGGGTGTGCCGGCGACACGACACTCACTGACGGGAGTT  
CTCGAACTCCAAGTTCACCCGAGCCAGCTCGCGGAGCTTACCCGAGAGGTGAATTGACA  
CGCCCGAGTGCAAGATCCAGGAGATCCTGGCGGCACGGAGTGAGACCTGCAACCCGGCCA  
ACGAGAACGACGTGCAAGAGTTCATCGCGCACCTCGATGACGAGGGCTTCTACGTGTCCC  
GGACGGGGGAGTACTCATGAGCGACTTCATCGGATGGCTGGACAGTCTCAGCCTGTTCCA  
GTGGTACGTGCTGTTTCGATCTAGTAGGGCTAGCGGTTCGGCCTCGCAGACACATTTCGTGAA  
GGACACGGGGGCGGAGTACCGCGCCCTGAAGCACGACGCGCCCGGCTGGGCACCCGACTC  
GTCCAACCGGGTTCGTGCGCTGCTGACCATGGTTCATCGTCGCCGTCGCCTGGCCGGTCTGT  
CACCGTTCATCACGCTCGACAAGCTGACCGTGCAGTTCATCGTGTGCGGGCGCAGCCAAGTA  
CCTGAACTGGTCGACGCGCCGGTTCCTGCGGACAGTCGAGCTCACCGACGAGGATCTAGG  
CGGTGCGGTGTTTCAGACCCGCCACTACTCCGACTCGAGTACTGGCATGTTTCGACGCCGA  
AGGCGTTGTGGTGAAGCCTGACGGGACGTGGTACCATGAGTAAGCGCGGCAAGGCCCAGA  
ATGCGGCTCACCCGGTCAACTCGGTGCTCGAGACGACGTCGTACGTCTTCCATGACCCCG  
AGGCGCAGATCTCAAGCGGCATGAGTTCGTGCGATCGAAGCCGCGGTTCAAGCAGGACC  
TTCCGCCGTACAGCCCGCTCGGGCAGCATGAGCTCGACCCGTACGACGCACACGAGTACG  
ACCTGCTCACCCGGCGCATCACGAACCAGCGCCGGGAGCTCCGGCCCTAAACCGCGCAT  
ACCGTTCGGCGCAGCGACGAGCCGGGCTCGAAGGTCACGCTGCTCAAGGACCAGCGCGAGA  
TCTCGATCCATGCGACGCATGCCCGTAACCTGAAGATCAAGCAGCAGCAGGTGGAGATTG  
ACCAACTGCGCCGACGGCTGGCCACCGCGACCGACGGCGACCGACGAAAGAGAGGATAACC  
GATGGGCCGGACAGTGGAGCGGGGTACACAGCCGTACCTCGCGCCGGTTCACGACAGCGGA  
CCAGCGCCCGACCCGGCTCTTGACCGAGGATCAACTCGACGTGTCCCTCGCGAAGATAGA  
CAGCCATCGCTCACCGTGGTAGCGGGATGCGTTGCTGCTGTTTCGGGCATATGCGCTCTCT  
CGGGGTCTGCATCGGCGAGCAAAACCTGCACCACAACGGCCGATCCGCCAGGCAGCACAC  
GGTGCATCGCCCTACTAAGGAACGGGCAGTCGCCCTCGGACATGAGGCGAAGTCCACCGC  
GAACGGGTACGAGGTCTGCTTGGGATTCCGGGACGGCGTGAGGCTGTGAAGCTGGTCGGG  
TTCACCACGGTCAAAGGTAACGAGGTTCGTGCGCAACTCGGAGCTCGTCGTCGCCGTCCAC  
CGCACCGGCTGGACCACAGCGAGATCAACCTGATGAACGGGGACGACGTGCAGGTCTAG  
AACCTCAGTCCCAAGCAGGTAGGCCACCTCCTCGCCGAGGGGAGGCTGTGCTGGAACCTCC  
GTGTCACGCAGGCGAAGCACGCCCGCAGGGGTAAACCCAGGCGATGGCAGCTGCAGTACC  
TGGGCCGGCAGTACGTCTACTCGCCCTGGAACCTGGCCATGCCGGCGTTCGAACACACTGG  
CCACCCTCGGAGGGCACACCCCTGTCCGGGGCCTGCTCCAGGTTCAACACAATAAATGAG  
TGAGGCAGTGACCATGTTGGAGAATGAGATTTGCGGATACGCCGACGCGTTCGAGGAGTA  
CTGGAACAATGGCTGGAAGTCGATCCTATGGCCGCCGAAGGGGAAGAAGTTCCTCGCCGCC  
GTCCGGGTACCCCGGCTACGACGCGGCGATCCCCCTTACCACAACGTTCATGGCGTGGGC  
CGAGGACCATCCCGACGCCAACCTCGGACTGCGGTTCCCGGCCGAGAACGTGGACCTGGA  
CGTAGACCCGTACGGCTAGAAGACCGGGGCGTCGACCATCGCGGAGGCCATGAAGCGGGA  
CAGCCTGCGGCCGCGCCGGTGCCTCCACCTCACGGACGGACTCGACATCGACTATCCG  
CATGTACCGCAAGCCCGCCGACATCCCCCTGCACACGCAGATCAAGATCCCCCGACGCAC  
GATAGGCAATGTCGAGGTTCGTCCAGGACCTCCATCGGTACAGCCTGTCGTGGCCGTCCAT  
GCACCCCGAGTGGCGGATGTACGAGTGGCGGGACGAGAAGGTCAACGTGGTGCCGGTCCG  
TTCGTTTCGACGACTTGCCCGAGCTACCGCGCCCGTGGATAGAGGGACTGCTCAAGGAGGC  
TCACGCTCAGACCACAGTGTCCCGCGATCCGTTTCGAAGCGCTCCGGCAGCACCCCGCAGGG  
GAAGAAGAGCGAGTAGGTCGGCAAGGCGCTGCGGGCGCGCAAAGACCGAACTCGACTGCGA  
GCCGGGGTACGTGCGGACGTCCCAAACGTTAACGTCTGCGGCTGCTGCGTCTGGCGGA  
GAAAGGGGAGTTGGGCTTACCGAGGCGCTGGAGTCCCTGCGGTCCAGTTCGTGATTA

GACGGGGGACCGGAACACGGAGTGCGAAGCCAACGCCGAGTTTAACCGGAAATTGTACGG  
CCAGCGCGGGCACGACCTGCTCGCCAGCGGGCCATCGCAGGAGAACTACTACGCGGTCTT  
AGGCATCGACGACAACGTCCAGGAATCCCAGACCCTGGCGAAGCTGCGGGCGCAGGCCCA  
ACCGGACCCCATCGTCGATTGGTAGCCGCCTCCGTCGGATCCGGCCTAGCCGGTTCGCGCC  
GTTCTGTTCGAGGAGGAGCCGATGATCCGTCAAGCGAGTCAACCTTCTCCCGGGATGCT  
GGACGCCGACGCGTTCCTGTACGGCATGGCAGCGGGGCGGGTTCGCCAGGTTCGAGCCACT  
GACCGGAGCGGGCGGACGTCGCGGAGATCTAGTCCGGCGGGCAGCCACGATGCGGAGCAA  
GCTGCTCACCGTCGCGGGCCTGACCAACGTGCGGCGGTTCGGAGCGGCTGATCGACGGGT  
ACTTACCGGGCGCACCCCTGTAACAGCTCTGCGGCCCGCCGGGATCCTGCAAGACGTTCT  
CTCGCTCGACATAGTCTGCGCTCTGGCGTCGAACCGAACCGTCTGGAACGGCCAGGACAT  
CACGTGGAAGCGCAACGGCAACAGTGGATTTCGTCCTGTACGACGCGGCCGAGGGGGTCTC  
GGCTCTGTACGAACGGATCAATGCGGGGTGCTCATTGAAGGGGACCGGCATCGACTCCCG  
CATCCTCCAGCTCCACATCTACCCGTAGGTGCTACAGGACGGTGCGTAGACGCAGATGGA  
GGCGCAGGCCGAACCTCCCTCGATCGCTCGACTGCGTGCTACGGAAAAATGAGCTGCCAGC  
TCTAACAGCACAGCGCGGACGTATTCCCTCGGCGTGCCGTTCCATATCGCGAGCTACGCGC  
AGGCGAGCCAGTTATTTCGCGGAGCAGCTCGGACTAAAGGTCGGCGAATTGATCTGGACCT  
GCGGGCAGCTCCTTCTATAATTTGAACCACGTGAGCAGGGCGCCCGAACAACTGACGCGCA  
CGCACACTGGATATCAGTGGCTGGCGCTGAATCACCGCCACTTTATCTTAGAGTAAACCG  
CCGACGACGTACAGTCTTCGGCTAGCGCCCGCACCCGATCATGAAGGCCCCCGTGGCAG  
TGTAAGGAGGTAAGGCTTTGGCAGACAACCTGGACAATAGACCCTGACGCCAAGCCAGAC  
TGGCATATCGACTGGATCATCTGGCTCGAGCAGGGCGAGACGATAACCACTTCAACCTTC  
GACGTGACCGTCGGAATCGCAGTCCGGCTCGACGGCGAATACGACGACAAATACTACGGTC  
TGACCTTCCGGCTGACGCCCCGGCCAGAACTACCGGGTCACGAATAATGTCATCACATCA  
GCCGGTTCGCACTGACGAACGCTCCATCACTATCCGCATTCGAGACC GGCAATCTAAGGAG  
CTTAAATGGA AAACTACAACGTGCTCTGGCAACCAAGTATCGCCGTGAAAAAGTACAAGC  
GGTAGTAGGGCGCGGTTCATCACAGCAGCCTCGGCCGCGCGCAGTCTATGGAGGACTACG  
CCAACATCACGCCGGAGGACTTCGTCACCGGGGAGGGCAAAGTACTCGTGTACGCTGTTT  
TCCAGGTCCTGGCCGACCTGATCATCGGTAACGGCAGCGTGACGGCGTTCACCGCGACCA  
AGGACCTCATCGGCGTCGGCAACAGCAATACTGCACTCACCCCGACCCACAGCGTCTTGC  
AGGGCGCGTCCGAGCTGGTACACCCGGAGGGCAGCGCGCCGTCGGCGTCTGCAGTGTC  
TCTCGGCCTCGGCCCGGTCCGCTTCCGCCGACGCCAAATTCGCCAGGGAGGAGTGGTGGC  
TCGCGATCGGCTGCGGCCCGACCGTGAAGAACGCCGTTCTCGCGACCGCTGGTCTGGCT  
CGGCCGTGATGCTGACCCGCAAGGTCCAGTCGATCGGCACGAACGCCTCCTGCGCCGACT  
TGACCCTCTCCGCGACGGCCACCCTGTA CTGATCCAAAACCCAAAGGCACCTGACTTGAT  
CCGAGGCTATCTAGTTGGGAGCCTTTATAGTTCGGCTTACTGACCCGCCAGGCAGTAGG  
AACATAACAACCCTAAGTAGGGGGGCTGACATGGACCACACGGGAAAGGATCGAACGCAA  
ACCAACTCAAACGCGAAGCGTGTGTAACGACAGCAACCGCCCTCGGGGCACTCGTCCGC  
GTCTCCGCTGTCGACGGCACTCCGGCCGCGTTGTGCGACGACTGTTCCGGCGCCGCCAC  
TTCGGGTCTCCGGCAACTGGAGCATGAACACCAGCAACGGCATCTACGGCGGCCTGCAG  
TTCTCGCAGTCCACCTGGGCCGCGTCCAAGCCTGAAGGCGCCGCTGGCGCGCTGATCTG  
GCCACGATGGGGGATCAGATCGTGGCAGCGGAAGCTACCCGGAATGTGCAGGGCATCGGC  
GCGTGGCGAGTGAGTGGGGCGTAGCTCGGCCAGGGTGTAGTCACTGCCGGCGTTGGGACC  
GCGCCCGCCGCGCCGTCGTACGTTGGGCTGCGCACTACCCCGCACCCCTCCGCATCGTGG  
GTGGAGCCGGGCACTGGCACTAAAGCTCAGGGCTTCCACGGTGGCCACAACGGCGTTCGAG  
AACTCTGCCCGATTAGCACCCCTAGCAACGCAGCGGTGTCCGGGTCCATCGACCCGGTT  
GGTTCAAGTGCGACCCCGGCGGCTACGGTACTACCTCCAGCAGGCCGCCGACAATGAC  
GCGAAGATCCAGTACGCCACATCTCCTAGATGTACGTCAGCGCAGGCGACGACGTCACC  
GCCCGATCCCTGCGCGCGACGGTCAGCAACCCTAGCTTCTCGACCGTTCGCGCACCTGCGT  
CTGCTGATCAGCGCCGAGCATCCGGAACGTACCTGATCAACCAGGGTCTCGCGCTGGAC  
TGGTCCGGGCCAGGGGACTGCCCGTCACTCCGGCACCGGCACGTGTGTCCGCCCTGTG  
GAAGAGGTGGCGGTTCGAGGACGTTCCGGTTCATCCTGGCCTCGGATCCCGATGGAGTCGAG  
ACGGTGA ACTGGGTTCCGGCCGACACGCTTTCGCACATCGCTGAGTTGTTCCGGAACTAC  
TCCTGGTAGACCCTCTCGAACCTCAACATGCACGTGGTTCGGGAACCCGCATGTGATCTAC  
CACCGCCAGTTGCTCCACCTGGCCTGAGAGAACGTGAGTCAGCGGCATGGGTAGCCTAAG  
TAACCTCTACTGCAGCACAGCTCGGCCCTGGGCCACCGACTACCGTCGAGAGGAGGGCTG  
GGCACAGCGGTTGAGGAGGAAGCTCGAACGCCCGCGTGTGCTCAGCGTTTACCACGCGCCGT  
GGGATACGACCTGGCCCCACACGCCAGACCTTAGGTACTCAGAGACGGCGGCCCTACTA

GCTGCTCTACGTGCCAACTGATGTCTACACCTCGACCAGTACCTGGACCTGCCCGGCTGG  
CGTCCTATCCGTGGATGTCTGGGTCTGGGGCGGGCGGGGGCACCGGCGCGGGAGCAACCTG  
GTTCTCCGACAACAGCGGGCGGGATTGGGCGGTGCCTTCGCCTTCAACACGGACGCCTG  
CACCCCGGAAACGTCTGCACCGTCTCCGTCGCCACTGGCGGCACCGGACAGGGCTCAA  
CGCTGCAGTTGGCGGGCGGCATCCTGGTTCGGTAGCACAGACACCGTGTACGCCCCGG  
CGGCAAGGGCGGATTGAAGTGCCAGTCCGGGACGGCCGGTGGGGCGGTACCTCTGGGGT  
GATCGGCAGGACGGTCTTCTACGGCGCCCCAGGGTTCGGCCGGTAACCAGTCCGGCAGCAG  
GTCCGGCGCCGGCGGGCGGGCGCAGGCTCGGACGGCGCAGACGGCCTCGGGCGGCACGCT  
CTCTGGCGGTTCTGACGGTAACTGGTCCGGCAGCCAGTTTGGCAGCAACGGCGGGCGGG  
CGTCACCACCGACGCGGACGGAAACCCCGACCGCATCCCCGGCGACGGCGGGCGCTGGTGG  
TCGACGAGCCAGCAGGAAGCCAAACGGCGGTGCCGGCGGTTCGCGGCGAGGCGTGGATGAC  
ATACGTAACCGACATCACGATCAACCCGTCCGACGCCTCCGGGACGAAGGCGGACGCGGC  
GACCGGCAACGCGCATGCCAGCCCGACCGAGACCCTGTGGTTCGACGAAATCGCCCCGAG  
GCTCTAGCCGTTGGCAACGCCAGATAACGGCGGGCGTACGCCACGAATCCGCCGACCCGCC  
AGCGACCATCACCCAGGCGGACACCGGCTCCGGAACCTGACCTTGCCAGTGCATTCAGCGG  
GCTCATCAAGCCTACTGACACCGGTCAAGCCCACGATCTGGTCTCGGTACGTATCACGAT  
CGCCGGCGACACCGAACAGGGTTCGGAGTCGACCAGATCTAACGCCAACGCCACGACGGC  
GAGCGACATCGGGTCCGGCACCGATGCCAGCACACTGACCGCGCAGGTCTCGGCTGCGAT  
GGACAGCGGCACCGCCGACGCCAACGCACACGCCAGCAACAGCGTGGTCGACGGCGACAC  
CGGCTCTACGGCCGACGGCACCGCGACGATTCGAACGGACTCTGGAGACGAAGCCTGCGG  
GTCCGACGAAGCATCCACGACGGCGACCGTACCCATGGCGATAACCGGAGCGGGCGGCTTA  
CACGGTCATCGGTATGCGGCAGCCGTTCGACGAACACCGCGGACGGGGACGATGTCAGCAC  
AATGCGGATAAGCCCGGTTCGGCGACAACGGCACCGGCACGGACTCTGCGCAGATCCACGT  
CACCGTCTTCGACATAGACACCGGAGGCGGGGACAGACCTCGGCGCCGTACGGCTGTTCTC  
GCCCCGACGACGGCGCGACCGATTTCGAACGCGAACTCATCCAAGGCCGTACGCGGCATCCT  
CGGCGCACCCCGCCTGTTACCCGTCTTCCGTTCAAGCGGACGGTGAAGATCGAGCGTGA  
GCGGGAAAGTCGAGTCGTGGACAGGGAAATCCGGCTAGTCATCCTTGGCGAAGGTCTGAC  
GCCACGCACGACCTTCCCGCACCGCAACGGGCGATCGCTGGGCGTCCAGCCACGGAGACG  
CACGTCCGTATAAAGCGAGAGGAGTAACAAGGTCTACGAGATCACCGCCGAGCAGAG  
TGCCCTCGTCCCCGAGGTCAAGTCCCTCGACATGCCGCTGGCGCTGACGGGGATCCGTGG  
CTACGTGGTCCACGAGCTGGACGTCAACGGATGCCCGAAGTGTGCCATGTCCAGCTCAA  
GTACGGCGACTCGGCCTCTCTCGTCCTGCAGCGGGAGAAGATCCTCGAAGAGATCGCAGC  
CCTACCGGAAGGCAAGAAGCCCGGCGAGAAAGTCGCACCGAAGACCCCCACAGCCCGGAT  
CCGCGCCCTTAGCGCCGTTCGGCGACGACGAACCCACGAGCAGCAAGGAATCACCCCGAAC  
TCAAGCGGGTACACGTTCGGATAAAGCTAAGGAAGTGACTAGTGGCAGTCCCTCTTGGCGAA  
CAGAATCCACGGATCCTTCATCAGCCACATCCTGGGCTGGGGTACCTCGGGCGGGCCGA  
GAGGCATTCGAACTCGCGGCCGAGGCTGGCCAGACCCTCGATCCCTCGCAGTAGAACGTG  
CTGCTCGGCGCTCTCGCCTCGCGCGAGAACACCGTCTACAACCCATACACGGATCAGCTC  
GAATACAAATGGGCCGCACACGAAGTCGGCCTGATGATCTCCCCCAGAACGGTAAAGGG  
TCTCTCCTGGAGCCCCGCGAGCAGGCCGGCCTGTCCCTCGTCGGCGAGCCCCTGATCATC  
CACGAGGCGCACCCAGTTCGGTACCTCCAAGGAGGCCTTCCAGGGAATCTTCTTCTGATC  
GAGAACAACCAGGACTTCTTGCAAGGGGTTCATGCGGGTCCACCGGTACAGGCTGGAGAG  
GGCATCGTGATGAAGAAGCCGAAGGGGTCCAACCATCCACCGCAACGAGTTTGGTTCCCT  
ACACGGACCAAGGGCGGTGGCCGAGGCTTCACGGGTGACAACATAATCCTCGACGAGACC  
ATTATCCTCGACGCCGACATGGTCAAGGCGCTGATGCCAACCCCTAACGGCCCCACCGAAC  
TTGCAGATCTGGTACACCCGCTCGGGCGGTGCCCGGAAGTCCACGCAGTTCGGCCCCGTA  
CGTCCCGCGCCATCGCTGGCGGGCAGCCCGCCGCTCGGGTTCGGCGAGTGGGCGGGCGGAT  
CTTTGCACCCCGCTCTGCCCGTCCGCTTGAGACGGGCACCAGAAGCCCGGCAACCCACTT  
ACGAGGGCAAGTGCTAACGTTCGCTTCGGGATCCGCATCCAGGAGCAGGGCATCGCGGGC  
ACCTTCCACTCAATGGACCCCAACTCGTTGGCGATGCAGCACCTCGCCGTTCGGCGACTGG  
CACACCGACGGGCCACGCACGTTGGTGTATCGCCGAGAAGTACCGGAAGAGCCGCGTTCGAC  
AGCAACTCGCTGCTCGGCAACGACTTCGTCCACGGGGTTCGAATTCGCCACGGACCGCAGC  
GAGGCTACGATCCTGGCCGCCTGTCAGAACCTGCTAGGCGTTCGTCCAGCTGAAGATCACC  
GCCTACGAGGACATCGGCTTCTACAACCGGTTCCGGCGTCTAGTGGGTGCGCAGGGCGGTC  
CTACACATCTGGTGTAACTAGCGCCCGAAGGCGGAAGCGATCGACCCCGCCGGCCAGGCC  
GGTGCCTTGTAGCGCCGCTCCAGGACGCGCATGTCAACGTAATCACCCCGACATCGCGC  
GAGTACGGCGTTCGCTCGGGGAGTTCCGCTGCGGCATCGTGCCGCGTAAGGGTAAGAAG

GGCTACCTAACGCACATAAGCCAGGCAGCTCTCACCGCGTCGATCGCGGTCTCCCACATG  
CGGACCGCCGGAGACCTGTGAATGTGGAGCAAGTCGCTCTCGACGGCCGACATCACCCCG  
AAAATCGAGGCCACGCTCGCAGCCTGGGGCTGGGAGAACATGTGCTATACGAAATCCGAA  
ACCCTCGCTACACCATGGGTAATCAAACGATCAGAGGCTGGACCAAATGAGGCGTATCGA  
TCTACAGGTCGTTTTCCCGGTTCGCGATTGTGCTGGGCGTCACAGGCACGGTGCCACCTT  
CGGAGTCTGGACCCAGATGGCCTGAGCGGCCGCAATTCTCGTCGCGGTCTTCTTCGTGGA  
GGTCACTGACTGATGGCAAATTGTGGTACCACGTACGAGGCCTAGGTACCCCCACCGCG  
CAGCGGGTCGGACTAGACGACCTCGCCAGTGTTACCGCCAGGACAACCTGCCCCCGTTG  
GCAAAGCGTCCGGGGTACAGCAACACGGAGGCGATCGACGACGACTTCGCGGGCTATTTG  
CTCGGCGCGGTCAAGGCCAACGGCGCTGTCTTCGCGGGAGCGCTAGACCGCATTTTGGTC  
TTCAACGAGGTGTGCTTCTCGTACCAGCGGTACCCCGAGGCCGGGCGCCCGAGCGACCTG  
TACCGGTGGCCGAGCCTGAACATCATCGACCAGCCCTGGCCGAACGGTGCGACCGGTGAC  
CTGCTGGCCCGAGCGCTACAGGACACCGAACTAGCGGGCAATCACTACGTCGTCTGATAG  
GACTCTGGCCCGAACCCGCGCCTGCGCCGCGATCGAGCGGACTGGGTGAGCATCATCCAC  
ACCTCGCCGCCGGATAAGGCTGTGCAGTCCGACGTTCGTCGGGAACCTGTACGAGCTCGAA  
GGCACCGAGAACGGGGAATTCTGGAAGCTGTACCCGGTCGAGGGATCGAACGGTGCCATC  
GCGCAATGGGCCCGATCCCCGAGCCGGAGGCGGCCTACCGTGGATTGAACTGGCTGCCA  
CTGGTCCTCCGCGCGATCATGCACGACAACGCGGCGACAAAGCACAAGCAGAAGTTCTTC  
CGGAACGAGGCCACGCCGTACCTCACGTAGTCGTTCAAGGAGAAGGTGAAGACTGAGCAG  
TTCAAGGAGTTCATGGAGCAGCTCGACGACAGCCACGGCGACGGTGACAACGACTGCAAG  
ACGCTGTACGTCGGCAGCGGCTCGGACGTGCGCGTGATCGGCTCCAAGATGAAGGAGATC  
AATTTCAAATTGACGCAGTGTATCTACGAGTCGCACATCGCTGCGGCCGGACCGAACCCAC  
CCCGCGCTCTTAGGTCTTTCCGAAGGGCTGCAAGGGAGCTTGCTGCACGAGGGCAATTAC  
AAGACGGCGCGCCACAACCTTCGCCGACGCGACAATGCGGCCCTCTGGCGCTCGTGGCGT  
GCGGCGCTCTCGGTGCTGGTCGAGGAGGTGACGACTCGCCACTCTAGTACGACGCGCGC  
GACGTCTAGTCCCTCCGACCCGACCTGAATGAGATGGACGAGATCACCGCGCAGAACCGG  
TCCAGCATCTCGAAGCTCGTCATCCAGGGATGCACGCCGGAGTCGGTCACCGAGGCGATC  
CTCAAGGACGACCTCCGGGTGCTCAAGCACACCGGCCTCTACTCCGTCCAGCTCCCGCCC  
CCCGGAACCATCGGCAAGGCCGCACTGACCAGACAGACACCAGCTACCCAGACTTGCGAC  
GTC AAGAAGGTCTGAATCATGTGCGAGAACGACCCGAAGGCAGTGGTCGACGGCCGGAAC  
CGAAAACAGCCAACAGTCAGACAGGACAAGGCGAAATGGCCGCGCTCCAAGGGAACGAG  
TGATCGAGAGTGGTTCTGTGTA CTGCTCGGTAGAGTTCCGATCCCATAAGGCCGCTGGA  
TAAGGCGACGGCCGGACCCTCGAAGGGA ACTCCGCGGTTTTTCGAACAGGACACCGAGATC  
AACTCGTGGGAAGGCCGGTTCGCCGAACGGATCGCCAATGGCCC GTTCAATAAGACCCTC  
CGTAGCGCAAGCCGAACATGCAGTACGACGACGGCCCTCACTCCCGCGTAGGGTTCGGGG  
CAGATCGGCGTGTACGAGGACATCCGCGAGGCCGAGCACGGCCTGATCGTGTCCGGCCGC  
GTGTGCGACAACCCCGTCTCGAACC GATTCCGGCAGGTGATCAACTGCGGTGCCGTACC  
GCCATGTGCGGTACGTTCCGCGTCACCCGAGACGGGTGGTTGGACATGAACGGCATGCCA  
GTTGGCGGCGACGAGATCAGCAAGGTCTCTGAGAGGAGGGCCACCGGGGTCCGCTGGCG  
CGCACGATCCGGGAGGTCTCGCTCTTCGAGGCTGGCCGCGGGTCGACTCTAGCGTACGCA  
GGAACCCCATCGGCCTCGGGATGACCCAGCAGGATCGCGACGCTCTCGCCGCCGAGTCT  
CGGCGCACCATGGCCGAGATGGAGGCCGCGCAGGACGCCGTTTCGATGGGTTCGAGGCTGAG  
GACCATCACTAGAACGATATTCGGACATGGCTCCGCGCTTAAACCGTGTACCATAGGGCT  
GTATCCTGCTGGCTCACAGCCGGATTCTGAATACAAGACTTCAACCGAGAGCGACGGCTCC  
CGGACGGGCAGCTCGGGTCCCATCGAGACTCCCGAAGCCGACGCCGCGCGCAGCCGGTGC  
ACCTCCAATCCCGAAGACACCAACACCCCAACCTCAAAGGTGCATTCCCATGACACCC  
GAAGATCTGCGGCCACGTCCGAACGAGATCGACGACCGCCTCTCAGACATCGGTCCCTAA  
TAGCCCGTCCCGAAGTCCCGAATCCGAGCAGGCCCGGTGGGACGGCCTGGAGGCCGAG  
CGCGCCAAGACCGCCAGAGCGCTCGATTGCATGGAAGCCCGCATCAGGCGATTTGCTGGG  
CTGGCCGACACCCGCATACCGAGCGCGTCCGCCACACCCGGCACCCCGGGGTACCATGCC  
CGCCGCGACATCCACGACACCCGACGCCATCCGCCGGCAGGCTCGCAGCGAAGAGGATTTG  
GTCGAGTGCTCCAGGACAACGCCGCTGGGCCACGGAGAAGCTGCACTTCTCGCCGGAG  
GTCTCGCGCCACGCCGCCAGGTGCGCATCGAGCTCCTGCTCATCTACCTCGACTCGAAG  
GGACACCTCGCCAAGCGGATCCTGGTACCGGCACCAGGACGTACGACCGCGCGTTCAGC  
AAGCCTGCTCTAGGGCAGAGCCTGCAGGGTCTGACGGCCGAGGAGGCACGCGCCCTCGCA  
CTCGGTGCCAAAGTCAGTCCGGCAGCAACGGTGGCTTCGCGGTTCGTCATTGAGCTTGAC  
CCGACGATGATCCACACCAGCGCGATCGACATCAAGCCGGTGCGTGGCCTGGCGCGTGTCT

GTCCTGATAACCGGCAAGGAGTGGCAGGGCGTCAACTCCGCAAACGGCATCGTTGTCTCG  
CGTGGCACTCAGGCCCGCGGACCGACGGCTCCAGCCCGATACTCGCACAGGCCAAGGTC  
CGTGCCGAGCGTGTCTCCGCGTACGTTCCGTTCTGGTTCGAGATCGAGCATAAATGGTTG  
GCGATGCGTCAGGAGGTCACCCTGATGATGGGCGAGGCGAAGGACTCGGAGGAGGCCGGT  
TCGTGCCTGACCGGCGACGGCCTGGGCGTCAACCCGCAAGGGCTTGCTCACGGGCGTCGTT  
TCCGGTCAGGACGTCGCTTGCAGCATCTCGCCTGCCCTCACCTCCGGTCACATCTACTCC  
CTGGAGTTGGCGCTGCCGATCCGCTACCGCGCGAACGCCCGGTACCTGAGCGCGAAGGCG  
AACTACAACCGCGTCCCGCAGATCGACACGGCTTGTGGCGCGGACCTGGGGGCGCGTCTC  
GGTGACGAGCTGCCCTCGCAGCTCATCGGCTACCCGCTGGCTGAGGCGAGCAAGATGGAA  
GCCTACCCGAAGACGGCCCGCCGCAAGCGCGTCTGGTCTCGGCGACTTCCGCATCTTC  
CTCATCGTTGATCGCATCGGCAGGAGCATCGAACTGGTCTCCACGCCTTCGCGAACTCG  
GGGGGATCTACCGTGTGATAGGCAAGCGCGGCCTCGTCGCGGTGTGGATCAACAACCTCC  
AAGGTTCAAGTGCCCGCCGCTCCCGCGTCTCAAGACCAAGGTATCCTCATCCACTGAC  
TCTGCCGAAGTGCCGTAGCTCTGTCAAAGGTGTTGCGCCCCCTTCGGCCGTCAGGACGGCG  
GCAGCAATGGCTCTCGGTGATCCATACATACCAAGGACGAGCTGCGCGACTACGTGCAG  
ATCCAGTCGGACGTGATCCAGTTCGACCGGAAGGTGACTGACGCCTGCGCCGCCGACCCT  
GGCGAGGTCGAGTAGCACTGCGGCGGTCAGTTCCACAAGTAGGACAAGGCCACCCTCCGC  
ATATTCAGATCGAGCGGCGGCGCAAGGTACGGTTGAAGACTTCGACACCAGCGCAGCC  
CTTTAATCGAACAGGGTGACGGGCTGGGCAAGTAGGAGCCGGTCGATACGGTGTGCCGG  
CTTCTGGCCCCCTACGAGGCGAACGTGGACGGCCTGCCGTGGCCCTACAACCGGCTCGAG  
TCCCCCGGCTGCCGCTGAGTCCCGCGGAGCGATATCAGGCCCGGTTCTCCGCGTTTCG  
GCGCAGTGGGGCTGGCCGAGCGTTCGGGCGACGGTCAAGCAGTCCGCGTTCAGATCGCC  
GCGCAAACGTACCTCCTCGCTGAAGCGCGCGTGGAGATGACCGGCAACACGCATTACGGC  
GGCGTCGTCCGCGTGGAGGATCTGCCGATCGTCGCGACGAAGCTCTGCCGGTCGGTTATC  
AAACCGATCCTGGTGGGGTGACAGGACCACGCTCAGTGAGATCCGTGACGCGCTCGCGAA  
GACGATCAAGGCGGGCGTCGACAGGCAGCTGCACGCGTACGAGCCGGTCGAGGAGATCGT  
CAACGTGCAGTGCATCTTGATCGAGCCGTTAAACGCCGACTTCGAGGGTGCCTCCAGGC  
CAGTAGGCACACCCGGGAGTTCTACGTCTTCGTGCTCCCTTCTCGTGCAGCAGGTACCAC  
GACGCGCCAGAAGCGGGTCGACCCAGATTGTCTCCGGCACGGTCCCGAACAGCGGGGTCCA  
GATCCTGAACGAGAACTACACGCTCCGCTGAACGGCGTCTGTGGCCAGTGCTACGGCAT  
GAAGGGCTACGGCGGCTCGTTCGACTCTGCCAAGGTTCGCACACGTTCGGCGCAATCCCTCA  
GGTCCGACTAACAGTCGATCCACACGCGTAAGGAGCTTGCGGCAGCATGGCCGCTCTCAC  
ATACAAGGTTCTGTCCGACGATGGGAGCGCGCCTACCCTCGCCACTCCCAATGCCTCGGA  
TCGCTCACAGGTCAGCAACGGCCATAACACATTCCTGTACGTCAGCAACACAGGCGGCTC  
GGCTGCTAGTGCAGGATGACCCCGCCGCGCACGACCAACTACGACGTCGCCTTCTCTGA  
CCAGACGTTTTCCGTCCCCGTGGGTGAGGCGAAGTACATACCGTTCGGGCGCGGGTACGC  
CGACGACTCCGGCCTGTAGACAATCGAGGTCACCGGCACGTTTCGCGTACCTGAAGGTCGC  
CGCCATCCGAGTCACCTAATGGCCCACGCGGACTTCCACAGGCGGCGGAAGAGCAGACC  
CAGGTGGCAGCACGCCACGCAAGCGAGACCGGCTTCTACCAGGTCTGGGCAAGAGCGCC  
ATCCTCGTTCGTGAAGCCATGCAAGGTTCGTCGGCTGTCCGGTAGAGCACGCAGCCCGGCCG  
CTGGCCTCCGGCAACTTCGAAGAGGTCAACCAGCGGAGCAATACCGCTAAAAGCCGACC  
CACTAGAGCCCAAACGCCACAAAGGAGTAAGGGGTATGGCAAAGATCGTTCTCCGGGAAG  
GCTTCGTTGAGGTCGATGGGGTGGACTTCTAGCATCACGTTTCGTCCGTGGCGATTTTCGC  
TTAAGAATGCGGCCGTGACACCACGACCTTCAGCGGCGGCAGCAAGGAGCAGGTCTACG  
GTCTGAAGGATGACGATTTTCGCCGTGAACTTCAGCAGGATTTTCGACGCCGCTCGGTCG  
ACGCGAAGCTTACCCGCTGTACGCCCTGGAAGACGAGTTCGACGGGAAGTAGCACCCCC  
GCGCCGGAGCGGCTGGGCTACCAACCGCGACAACAGCGTGACCTGCATGCTGCTCGAGT  
ACTAGCCCCTCGCAGGCAAGGTTCGGCGACCTCCCCGAGACCAAGGTGAAGTTCCCGACCC  
ACCGAAGCGGGATCACGCGCTGGGTACCCGGCCGAGCTAGCGGCCTATAGCGACCGAACG  
GTACCTGCTCACCTTTTCGATCGGTGTCATAGGCAAGCTCCCGTTCCGCGAGGTCCAGAA  
GGCGCTCACAGCGACGAACCGTTAGCTCCCGCGCGACTTCGAGATCAGCGTCAACGAGTT  
CGCACGCGGGCTGCGCGACGAGGCTCGGGATCAGGCTCTCCAGAAGTTCAAGTCTAAGAA  
CTGCCACCCCGGGCTTCGTGCGGAGGTCGCCGCTGGAGTGCTGATCATCCAGAACGAGAA  
GGGCATCCAGGTCATCAACTCGATGCCTTCATCCGACGAGCCGATCATCCCTCGCGGCCT  
CGAGGGCGTGAAGGGCTGGCAGTACCCCTCTTCGGCAAACCGGAATAGTAGGTGCGGCA  
GCGTCAAGGCTCCGACTCCTGGTTCATCGAGACAATGCGGAAGCGCCACGCGCCGCTGCG  
TAACCGCCTGGTGCTCAACATCAACGACATGAGCCAGAAGAACGACGACGACAGCCACAT

CGGCTGACGCAAAGACCAAAGCTGCGGCCAGGTGTTTTCTGTCGCGGGTCTGCGTGGCCCC  
CCCTCCCCTTTCCCGCTGCCCCCTCGAGAACCCTGCACGACACACGAAAAGGAAGCGCCA  
AATCATGGCACTTCTCTCGAAGAACGACATGCTCTACGTCGAGGTCCGCAAGACCGTCCT  
CGTCTCCGTCCCCGAGTGCGGTGGCGAGGTTCTGGTCCGCACCCTGCCCGGCCGTGAGCG  
GGCCGAGTGGGAGGCATCGACCGTCAAGACGAACAATGGCAAGCAGGAGCAGAACTTCGA  
TAGCATAACGCGCCCGCTTCGTCGCCCTGTGCGTCTTGGGCGAGAAGGGTGAACGCTTTTT  
CGACTCGCGCTAAGGTTTCGGAGCTCGTCAACAATTCCGTCGCCACCCTGCAGCGCGT  
CTTCAACGAGGCGCAGAATCTGAACGGCCTGACCGACGCCAACGTCGAGGAGCTCATCGA  
ATCATTTTAGCAGGATCCCGACGAGGTTTCTACTTCCGCCAGGCCGAGACGCTCGGGATG  
ACCATCGAGCAGATGCTGGCGTTAGTATCCAGTACAGACCTGACGGAGTAGTAGGGCTAG  
GAACGCGCCTTCTGGCCGATCGGGAAGAGCTACGAAGAGCAGGCCCAAGCCAGCATCTCC  
GCCACGGTTGCGATCCTGCTCCGTCTGTACGGCGAGCAGTTCGACCACAACCACCTCTCA  
GTTACTAGCAAGTACCCCCGCTGTCCGAGTGGTACAGGCCTGAGACCGTGGGGGACTCG  
GTAGGTCAGGCCGAGATCGACAGCAGTTTCCGAGACTGACTGATCACCAAAGGCCCGTCCG  
GCCGGGTGCCATTGCCGACGAGTTCGGAGGGCTTCATTTGTTACCAGCCAGTAGCTTT  
CGCATGGCAACGATCACCTCGCTCAACTTCCAGATCAGGATTAGTTGGGACGGGACTCGG  
CTGAACAACGGTTCGTGATGACCTAATGGCTCTGCAGGCTCAGATGCGGACGACCTCGGGT  
GGCTCGCTCCACTTCACGGTCGTCGCCGACACCAAAGAGGAAAAATCATAGATCCCGGAG  
GTGCGCGCACAGGCGCGTGACATCCAGATGGGCTTCTACCTGGACGACGGCCAAGCCGCT  
AGGGCCGAGGCCAAACTCGGAATCCTGGCTCGCGGTTCGAGAAGTCGACGTGCGGGTGGAC  
GACCATGAAGATCCGAACAAGATGGACCCGATCTCTGACTCCTTGGAGAACGCGTCCGTC  
AGCGCGGTGGATTTCCGGCAATTCGATGAACCGTTCGCGGGCTTCATCCCCAAGGTAGGCATC  
GCGGGCTTCGCCGCGGTGTGGTTCGTCGCCGAACACTGATCAAACACTCATCGGTGCATCG  
CTCACCTGCGCGATGGGTGGAGGCATCATAGCTGTCCGCGCGCCGGATCTCAAGGAGAAC  
TAGGAAATGAAGGGGGCTAGGGAGGCGCTGTGGACCGATAACGAAGTCCATGGCCAGTCT  
GCCGCCAGCCGAAGCCGACGCGGTTACTGGAGACCATGTCTATGGCCAAGACGAGGATC  
GCGGAACCCAAGACGGAACTGACTGACCTATTCGCGAGTGCAGCCCCGCGATCCAGCCG  
CTCACGTCCGGCCTGATGGATCTCGCCACTAACGCGATGCCCGCCGTCACGAAGGCGTTA  
GAGCAGTCCGACCCAAGGGTCCAAGGGTTCGCCGATGGCCTCGGTTCCGTCACGCAC  
GTGTCGAACATGTTCCGCCGGGATGGCAGACGGCGTAGCCGGATTCGGTCCGGCTGTGGAAG  
TTCACGTTGGATCTGGTAGGCCTGATCATGGAGCAGATCGGCGTGGCTGCCGGCAGGATG  
TCCGCGACGGGCACCGACCTCTGGGATCGACTGTTGACCGGCTTCAACCAGTTCCTCGGC  
GGCTTCCCTCGACGGCCTCGTCGAATTCACGGACGCCGTCCACAACGGGGTTCAGTGACCTG  
CTCTCGATCTTTGGTCTGCTCGGCGTCGACATGCGCGGCACGCTCGGACCGTTGGGCGAG  
CTGGTTGACGCTATCGCGAACGGCCTCATGCCAGTCTTGGACCGAACCGTGCAGGCGCAC  
AGCCTCGTCAGCGGCGCACTGATGTCCGGCCTCACTCCGGCGATCAACTCGCTCTTCCCG  
TTCAGCGATGCGCTGCAGCCGTTGCTCGTCATGGTCCGGCAGTCGCTGACCCAGGCGATC  
AACCAGCACGCACCGCTCCTGCCCGGATCGTGGACGCGCTCGTCTCCGCGCTCATTCT  
TCGTTAGAGGCGCTCATTCTCGCACTGGATCCGGTTATCGAACAGATCGCAGTAGGACTG  
AAGCCCCTGCTGGAGATGCTGCCCGGCGTGATCAACACGCTCTGCCCGATCGCCGTAGGT  
CTGGCTACCACGTTCCGGCAACATCACGCAGTGGCTGTCCCCGCTGTTCCCGCACCTCATG  
CAGATGTACGTCGCGTGGAAGCTGATCTCGACGACTATGGCTTTCGGGCGCGGCATCAAC  
TTCGCGTACACGGCAGGCCGCACGGCCCCACGGTGGCGACCATCGCTCACACGGAGGCC  
GTCTGGGGGAACAACATCGCGATGAGCGCCAACGCGATCGTCTCGATCATTATCGCCATC  
GGTTCTCTGGTGGCAGCGATCGTATGACACGCGACCAAGACTCAGTTCTCCAGACCGTC  
TGGGGGGCACTGTTGGTGGCGATGGCGGCTGTGTGGACCTGGATGAAGGATGCGCGGGAT  
GCCACGGTCGGATTCTGGCCTTGCGGTGGGAGCTGTACTCCGGCACGATCGTCAACCCG  
TGAACGCCACTCGGAAGGTGATAAAGGTAGCGGCACAGGCTGTCTGGGGATTCTCTACT  
AACCCCTGGAACAAGTTCTCTCGTTCCTCAATGTCACCTGGGATGTCGTCAGCGGCGTA  
ATCAATGCATTCTGGGACTTCTGGTGGTTATAACATCCGTGCGAGTGTCCCGATCATCTTG  
GCGTGGCTCGAAGTAGCCTGGGTTGCACTGTGGTCCACTGTCCGGCGAGTCTGGGATAGC  
TTCGTAACGATCTTCCGACATCTGTGGGATGGTCTCTTGAAGGGCTTCACGGTCTTTGTC  
GAGGCCGTCTGGGGTTCGATCCAGATTCTCTGGGACGGACTGTGGAAGGCCGTGACGTCA  
GGCTGGAACGACTTCATGTTCTGGCTGCGTCCGATATGGTAGTGCTTGTGGAACACCGTA  
ACGCAGTTCGATGAATATATCTGGAACGCCGTTCGAGCTCGCCTGGGAGTTCCCGGGGCAT  
CAGGTCACGCCGAAGGAGGACTGGTGGGTCAACCTGTTTAACTCCGTCCGGCAGCCCTTC  
TGAACGGGATCAAGGCTGCAGCCGAGACCGTCTGGACCGAATGCACTTCTGCGAAGAAC



GCATTCTGGATCGGCATCAAGGCGATGTAGGAGAACTTATACAAGGCCCTGTGTGCCGGT  
AGGGAAGCCTTCTGGAAGTGGGTGCGTGACTTCGCATGTGGCGTCGGAGATGCGATCACC  
AGCAAGTGGGGCGAGTTCGAGCAGAAGTTCGAAGAAGTCTTCAGCACGATGGTTCGACAAG  
GCCCCGAGCACTGGGATAAGACCAGAGAAGCCTTGGCGAAGCCGATCAACTTCGTCATC  
CGCATCTGGAAAGACCAGGTCGCCGGTCAGATCGGCCATCCGGCACTGTTGTAGAGCGGC  
GGTTTCGGTACCGGTTGTGGGGTCGACGGCAAGGTCACGGCAACGTCCGACGACATCCGG  
GCCCCGCTCTCGCGCGGTGAGCAAGTCTGGGCCGAAAGGAGGTCGATGCGGCTGGCGCA  
CACGGCAACGTGACGCCATGGGTGCGACAACGGTCAACGGTGTGCGCCTACTACTGC  
GGCCGTCCGCCCGCGTGGATGATCGGCCAGCAGCAGAAGTGCAGCGCCTTCCCTGCAGGTC  
ACCAAGGCTCAGCTGGAAGTACGACTACCACGGCCAGGGCAACACGCTGCACTTCTCG  
AACGGCGGCGCCTCCGGTCCACCGAAAAGGATGGCCTTCTCGAACTGGATAGAGGACACC  
TGGGGTGCTAACACGCTCGAGCTGATCCACAGCCCCTCGGAGGGAAACATCAAGGACGGT  
AACAGCCTCGGGCAGCGCATGGGGATCTACGGGGCTGGCACGATGGCCCACCACCTAAC  
GATGTCCACTGGACAGTCGACCGCCCCCTCAGCGAGTACCGGGGCGGCCAGAGCCCCTG  
GGCAAGATCTGGGGCGACGTGCGCAAGGACATCGCCTGGCCCTAAGAGTAGCTGACAAAC  
CCGATCCTCGGAGCCATCGCGGATCCATTCTACCGGGCGTGGGTTTCGTCGTTCCGCCAA  
TTCTCGAAGGGAGCGGCAACGAAGGTCCGTGACGCGTACCTTGAAAAGGTGCGCTGCGTT  
GAGGTTGCATTGGGTGGCACTGCCAGTGGAGACATCGGAGGCTTCAGGCACGACGGGGAC  
CGCCTCGGCCTTTTCAACGAGGCGGTTTCAGACCACGAACACGCGCCACCCTCATCGATC  
GAAGCCTGGCAGGGCGGCGGGAATACTCTGATCACGCGAGAGTCGGGCTAGAACGCGGTC  
GCGTTCAACAACTGGGATGCGAACGCTACGGCGGGCAACGCTTCTCGCGGTCTGTCCCTG  
CTGATCCCCACGACGTTGGAGGCTCACAAGGCACCGGGTACACCAACATCGACTCGCCG  
GTCGACAACGTGCGCGGCCAGATCAACTACATCAAGTCGCGCTACGGCCCCATCGTGAAC  
GTCCAGTAGTCGAAAGCCAACATGGCCCCCTGCGGCCTACCGCACGGGTACCTACTGGGCT  
GCGCCAGGGTGGCACCTCGTCGGCGAAGTCGGACCCCATATGGTGAACCTCCGTGGCGGC  
CAGCAGGTCAAGACGTTAGCAGACATCATCTGCGCCCTGACGGACTCCAAGTCCGGACAG  
AGCAAGAAGCTGGAGTCGAAGCTGATGGCCTACTTTAGCAGGCGGGTCGATAAGACCGGG  
TCCTAGATCAACTCCTCCGGGGATCGGTTTCGCGCAGTATGTGAGCAGGCTATTGACCGA  
GTGCTGGCCACGGCCGGTATGCAGCTCAAGCTCTCGATGTGGGTACCGCAGAATGCTGCA  
GAAGCAGCTGTGTACGTGGAGGAAGTCGCCAATCACCTTCTCCCGGAACTGGAGATGCTG  
ATCCGGCAACCTATCTGCACACGGAAATCACAAGGGACGGGCTGGGGTTAACTACGTATC  
CCGGTCCGCCCGCCTTACGCGTAGGGAAACGCAATGGCTCTGTTACCTTTCAGCCGAGC  
GGCGACGGGTTGAACGACGGATGAAAGAACCTCCGCGGCGTCACCGCCCTCTGGCAGGCG  
GTCACCGATCTCAGCGATGCCAAGTACTTTCAGTGCCTGCCGTCGAAAGCAGTCGCAGCC  
GTGTCCTACCCCGTCGACACCACCAGCGTCTCCGACGGCGCGAGCTTCACCTCTGTGACT  
GTGATGATGTGGGTGGGCCATGACACTGGCGCTGCACCGTCCGTCACGTCCCCACCTATC  
ACGGTAGCAGTCGTAGCCCAGGACAACACCTCGTGCTACCTGACGAGCCCCTTCCACCCG  
ACGAGCACCCCCACCAACTACTAGATCGCCACCTACCAGCGTGACGCGCTAGGCCTGGGG  
TTGGATGTACAGCGGCTGTACAACCTTCTGTGCCGGATCTTCTCGTACGTCCGCAACTTA  
GAACGCATCCGTTGCCTCGGACTCTGGTGTGGGATCAAGAACC GGCTGCGGCCCAGCGTC  
TCGATCACCGCCCCGTCGGGCACCCTGACCACGCCGTCGCCGATCATCACGTGGACGTAG  
ACGCTGACCTACGGCGATGCGCAGAAGACCGTGGAATACAAGCTGTTACGGCCAAGCAG  
GTAGCGAAGGTGTGCTTCAACCCGGACAACGCGCCCGCGGTCTTCCAGGACACGCTGCAG  
GGCTACTTGACGAGCGTGCTGCTACCGACGTCGATGAACTCGAACAATAATGGGTCTGC  
ATGCGGGTCAATGACGACGATCGGCGCGCGCACGGTGGGGGTCGGCCGTCAGTTCACGGTG  
TGCGGCCCGTCGCCCGCGTTCGCCGGTGTGACGACCCGACGTACGCACTCGGCAGGCC  
GTGATCAAGGAGGAGCCGGACAGCGAGTCGGGCCGCGCGTCTCTCCACATGAGGCACACC  
TCGGCCATGCTCAGCGCGCAGGAGGCTGACGCGGTGCCGCCGGCCGACGGCCGCACCAGC  
CCCGCCACCAACGCAACGATACCCGCTAGTCCGGCGTCTCCTTACCAGCCGGAACGGCC  
TCGTGGACGGTCACGTGCTCAGCCGGGGCAGCGGCACAGGTCACTACGGACTTCAGCGAA  
AGCGAACAGTCGCTGCCGATGGCCTCGCGCGCTCAGTTGCGGGGCGGCGGACAACGGGCGC  
TACTGCCGGGTGGTGTGATGCGGTTCTACGTCGACGTCTGCGCCGACATCGCGGGATCTGCC  
CTGAACGGCAGCTCGGAGACTGGCTGGTCGAGCACCTGGACCGATGCCTCGGTGTACGGC  
AACGCTCCGGCGAACGGGGTTTAGACGCGGGTCACCTCCGCGCTTCCGTCCGGCGTCGGCC  
AGCGAGGGGCTCAATCGGGACCACCTCGTTCGTTTCGCTACGGCCTGAACACCCCGTGGTCC  
GTGGGCAGCCACGCCAGCCGCAACCTGCCCTCGACGTACGTCTCGACGGCTCAGGGGAGG  
CAGATCGGTGGCGAGTTTTGTGCACCGGAAGCGGCCTTGACGGCGGTCCCTGCGGCAGCC

GCGGGCACCGGGGCTTCTCGTTTCGAAATGCTTCAAGATGACGAACAACGGCCTGTCTCCA  
TCGATCGGGTTCGAGGTGTCTGCTCCGAGTTCCCGCCGCCACGTCCGGCGGGGACATC  
CCGCTGAACAAACCAGCGGGTACGGCGACCGGCGACCTCATGCAGGCCTTCGTCACGACG  
TCGGAGTTCAGCACGATCACGCCCCGGCTGGCTGGACCCTGGTCAACTCGGGCAAGGTC  
GCCGACTGCACCACGGACACCACGAAGTTCGTCTGAAACGCACCGCCACGGCGTCCGAG  
CCAGCATTGTAGACCGATGGCTTTCTGTCTACCAACTCGCTCCGGCGGTTCGGCCGTACG  
GTGGCGTACGGCGGCGCAACGGACGTTCTGACGGACACACAGGCCGCCTCGGGTAACCAC  
ACCCCGCTCGGCCTGCAGACGCGGTCTCTGACCAACACGGACCCGAACCTGCTGGCGCGTG  
TTTGCTTCGCGGTGCCAGGCCACGCCTCCGGCGGTACTCCGACGCCGAACCGGCAGTCC  
CCGTTTACGATCCCGCAGATGAGTTTCGTCTGCTCGGCATCCCGTGTTCACGGCGAAC  
ACCGCAGGCTCGTACACGATCAACAAGTCGGCGGGCACCCAGTCCGGAGACGTGATAGTC  
GCGACGATCGGCTACCTCGGCAACGGCATAACAGTGACCCGGCCTGCGGGCTGGACCCTG  
CGGAACCACACGACGGCGAGCAAAACAAGCGCCCCTCCCTACAGCCTCGCGGTGATCTAA  
CGAGTCGTTGGAGGGTTCGGACCCGTCTCCCTAATCGGGCACTAGCAGGGGTGGCTCGCTG  
TACCGCACGACGTTGACGCAGTATCTCGCGTACCACCTCGTGGACAACGCATCCCGGTAC  
ATCTCCTCGCACATCACCGTGACCCTCAACGCGAGCGTGCTGGTAACCGGGGAGCCGACG  
GACACGAAAGCGCTGGCGTGGCGTGAGACGGCCTTTGGTGGTCTGCCGGAGGCGGCCAAC  
GGCTTCGGCAGCACGAACGAGGTCGTTCGAGCGCATGGACAACACTACGTGAAGTACTAGATC  
CCTTTCGGAAGCCGCGCTGGCAACGTAGTGCTGTTGGACGACTCGAACGGCGATATGGCC  
TCGGGAACGTATGCGCGGTACGCGTACTCGAGCAACGCTCTCAACGGGGCGTCCGGCTTC  
ATCCGCTTCCGTGCGTCCGCTCGGTACGCCTCCGCCCCGGTGGCCGACGAGACGGCACGC  
ATCGCAGCCGGGCCGCTGGGTTTCGGCGAACCCGTGGGACTCCGCCAGGGTCTTCGAGTCC  
TAGGGTGTACGCCGACGGGCACCCAGTGGATTACGGGCATCTGGTCCCCAGGATCCGGC  
ACCGACAAGAGCACGAGGGCTCGCTGGTTCGGCATCCTGAAGCCTGCCAGGGCGAGTCA  
GTCGGGTACCCGACATCCACGATAAACCGCACGGTTGACGTCTCGGTGGTCAAGACCGAC  
CAGTTCCCGGATCCCGACTCTGTGACGGCGACATTATCGTTCACCGGATCGACGGCGGAC  
ACGCCCTACCTGACGGTGAACCTTCTACCGCGTCAAAACGCTGCTCGGCAGCCAGATCGGC  
TTGGGCACGCCGTTTCGCCCCGGAGGGAGGACCAAGTCGTGGGCGACGTTCCGCAACCCG  
AGCTGCACCACGCGCATGTTGGTCTGCGTCTCGGTCTCCGCTCGCAACGTGTCGACATC  
GTCTACTGGGAGCGCGTCTCCCTGGCGTACGGCGTCTATGCAACCTACAAGCCGAGCACC  
TTGCGTGGTGGACACCTGGTCTGGTTCGATGCCGACAGTCCAGTAGGCGGAGGACGACGGG  
ACCTGCTACTCGGACTGGGCGGACTTGCCCTCCTGAAGCCCATCCCGCCTGCGGTTCGAA  
CCGCGCTCCGGCACGGCACTCTACACCGACGACGCTCCGATCACGCTGACCAACCGGAAG  
TACCGCGCTCGCACCATGCCGCTCGGCCTCGCTTGGCAGTTCGTTTCATGTCGGAGTGGGGG  
CCGGCCAGCCCCGAGTTCACCGATGAGGGGAAACACGACTGGCTCAGGGACATCTAGTAC  
CCGAACAACGACCTTCGGCTCAAGGTGGCCTGGAACAAGACGCAGGTGGCTCAGACGAAC  
AGCGCCACAGTGTTCAGCCTCTCGGCGCCGATCTTCCCCGCGTGCTCAGCGAGGGCTAC  
AAGCGCGAGACGTTACCCCTCAAGCTCACGCCGGTCAACCACGAGGAGCTCGCCGTGCTG  
CGAAGCCGTTACGTCCGGCCGGACCATGTTCTGCGGTGGCACATCGACTAGGCCTGG  
TGGGTGCGCCCCGTCGGCGACCTGATCGAGGACGTGCTCACAACCTCCAATCGGCAGACC  
AAGCCGCTGCGCGAGATGACCTGCCAGTTCATGCAGGTAGCGCCGGCAGAGTGACAAGGT  
GATCCAAATGCCCGCGCGACACACCGCATCCTGGACGAGATCCGAGGCAGCCACGCCGT  
CTACAGCTACGTGGACGTAATCGCTACGGACCAAGAAACCCGGCGGCTGGTCTGATGGA  
CGGCGAGATCAACGTGCGCGGAGAGCCCAGTACCGTGCACGGGTCCGATCGGCTGCGT  
AGACCAGGACGGCAGCTTCGTGCCCGTCGGCAACCCGAACATCCTGCCGCCGTTTCGTAC  
CGAGATCTTGCCGTACCGGGGCGTGAAGTACGCGGACGGCACCCCTGGAGGTCTACCCGCT  
GGGCGTCTTCCGGCTGGCGATTGGCTCCTTCTCAAGTTGTGAGCCCGGGCAGCAACGC  
GGAAATCTGCATCTCCCTCAGCATGTTTCGACCTATCCCGTGTGGTGGCGCGGACAACCTA  
CAGGAAGACGTCCGCGATCAACGGGGGCACGAACATGATCACGGCGTTCAAGATGATCCT  
CGGCCGGACGTTCCCGACATAGCGGACGACGCGGTGTCGACGACGATCACGACGACCAT  
CCGGGAGGTCTACGCCGCGCAGGTGGATCCGTCCGGTGGTTCGCTCGGACCTCGCGAAGTC  
GATCGGCTGTGCGCTGTACTTCGACGTCAACGTCTGGGCGGTGATCGCCCCACCGGCCGA  
TATCGTTCGCGATGCCGGACCCGGACTTCACGGACATCGCGGGGCCGGGCTCCACGCTGCT  
CGACCTTGCCGCCGAGTACACGGACGAGCCGTGCTACAACGGCGTTCATCGACGAGGGCGG  
GTCCACGAGCCACGCGCTTCCCCCGGTGGGCGCTTAGGAGTAGGATTACGAACCCAGCTC  
TCCCCCGTACAGCTGCGGCCCATACGGCGAGGAGCCGGATTCCGTGCAGGACACCTAAGG  
GGAGTTTCAGGCCGACGCGCTGAAGTTGGCCGACGCGCTGTTTCATAGGCTACATCGGGTT

CTCGGCCGCGCTGTCTATGTGCTCCTGGACGAACCCGGCGATGGAGGCCGGGGACGTCAT  
CCAGGTGCGAGCGTGACTCCATGAACATTGCCGGCCCCTACACGGTCCACTCGTTCAACAT  
ACCGCTCAAGAAGGACTGCGTACAGTACCTCAAGCGCCGAACACGAAGGGTTGCTACGTG  
ATTCGAACCTACGGGTAACCGCCGGCGACTGTCTGACCTGTGTAAACGCTACTCGTACA  
AGTACTCTCATAGGTGAACGATGAGCGGAGTACCGACACCCGGGCCGGAGACCCCGCAGG  
GGAACATGACCCCGCTGAGCAGACAGCAGCGGCCATCGCAGCCAGGCCAAGGAGCGCC  
TGCAGATCAGCTCGCGGGCCGACGTGCTCTCCCCGACGAGGCAGATCTCCGCGCTCGTAT  
CGCAGGCGACCATCGTCCGCGTCGAGGGGGGCTACCCGTCAACCGTGACTATCCAGGTGCG  
GCGGCGACACCACGGCCTCGATCGCGGCAGGCCGCTACCCGAAAGCTACGTGCCGCCTA  
CCGGAGGCACGGTGTCTGTCGACAAGCAGGGGAGCGATCTGCTCGTCTCGGCCAGATGG  
TGGACAAGCTCGCGGCCGGGGCGAACGGCTGGCCGGCTCCGACGCTGACGACGACGTGGA  
ACGGGAACCCACGTTTCATGCCGATCCTGTACCCGATGGTTCGACGGCGAGGGCGCGCGGA  
AGATCCAGTTCCTGGCCGCGTCTGGCAAACGCTCTCCACACCCGGCACGACACTGTTCA  
CGTACCCGGGCGACTACCCGGCTCCGCGTGCTGCGCGCCTTCGCTCTCACCCGAGAGCACC  
TGACCAGCGGCGTGAACGCGCTGCTGCTCCATCCGGACACGGACGGAACGGTGACCATCT  
CCAGCCCTCAGGTGCGAGATCGTGGGCATGAGCAGCTCGGGCGGCGGCAGGACCCGGCACGA  
AGGAAACCAACCACAAACACAAGACGTGCGGAGATCGACAAACCTGGTGACCCGGAATTCG  
TCCGCTGATGGACGGACTGGGTGCTGTCAGACGGCTGTGGGAACGAAGGGGATCAGCCACA  
ACCACAGCACCCCGAATCACACGCACACCAGGACGAAGGCGTCCCCCCTGGATTGATCT  
AGCTCGACGGCGCGGAGTTGTTCCCTCGAACTAAGAGGTCCGGACGGTGGGGCGACACCAA  
GCATTTTCGACGAGTTCCTGCGTCGCCGCGCCGGGTCCGAACCTAAGACAGTCGCACTGCAG  
TCTGTGTCAGGCTGAGACGGCCACGGAGCGCAGGCTGCGGGTGTGTCGACGGAATCACGGC  
GCGCCAGTAGGTCACCAAGCTCAAGATGTACGGCGGCGTCTGCGCCATCTGTGCCGAGCC  
AACGCCTCCGGGGGGAGTGCTGGACGTCGACGACAACCACAACCGCTGTGAGGCAAGCA  
CACGTGAGGAAAGTGGCTGCGCGGCCTTCTCTGCCACGAATTCAACATGGCTCTCCGCAA  
GGCCCGGAAGTCCAAACAGTTGCTGCACAAAGGGATCGGGTACATCGACGGCGGTCACCT  
CGATTTGTACCTAGTGCTCGGTGAGGATCGGAACTGCCAGAGATAGCCCAGGCCAATATC  
AGCAACAACAGCAGTGGGCGATACGGCGGCCGATTCCGGCTGTTTCGTAATCCACACCCAG  
GAGGACAACGACACCCGCGTGCTCGCTGGCGGGGTACCTCCAGAACCCCCCGTCCGGTGTG  
AGCTATCACGACTCGAGCGACAACACCGACTGCATCGAGGTGGTTCGACAAGGACCGTTCC  
GCGTGGGCCGTACCCGATGCGATCGACAACACGAACAACCTGCGCTCCGCCAGTAGCCAG  
TCCTCTATGTCACGTGAAGAATGGATCGCCAAGTACAGCGACGCGATCGACTTCACTTGC  
TGGCTGATCGCACGCGATGCGAAGCACTAAGGCTTACGCTTATGTCATCAGGCAACCC  
GAGGTCCGCGCGGGAAAGCAGGGCACGACCGACAACCACGGCAACACGAAAGGCCTGGGG  
CTCGGGGGCCTCACCGACGTCGGCGGCAGCTACCAAGTTGGACGTGCAGCGCAAGGCCATC  
GACAACTCCATGGATAACACGGCGCTGTTGCCGCCCGCCCCGCGCCGATCGCCAACCCG  
ATCGACGAGTGCGGGAAGGCGAGGGACTCGCTCCGCGACGCGCTCGCTGGCCAGAACCCA  
TGCCCGGACAAGACGGGCCAGTTCGGTACTTCAAGAACGGCGCGGTCAACTGGACCCCG  
GACACAGGCGCGCTGGGATACGGTCGGAGCTGTTCAAGAAGTTCGCTGACCTGCAGTGT  
GAGACCGTCACGGTCGGCTACCCGACCGTCGACAGCACCATCCTCAACGGGCTGAACGGA  
CGTACGTGGGGCGTCTGGAAGGATTCACCGGCGGCAACCTGGACCGCAATTAAGGGACG  
GACGAGGCTTTCTGGACGCACGGCGAGATCGGCAAGCGGTGCGGGAGTAGCGGATTCGAG  
AACGGTCCGCTCGGCTGGCCCTGTTTCGACGAACCTGCCATTCGACGGCGGAGTCGTTTCAG  
TACTTTGTGCGCGGCCAAATCCCCTGGTCCGGCACGCTCAAGATCATCGCGCTCCTGACC  
GACGACGGCTCGGAGAGACCCCTGGCTGAACAGGGTAAGTAAGAGAAGGAGATCGCAATG  
ACTCTGCGACAGATGACCGATCACTACCGCGAGGCCGTCGGGGCTGGCATTGGATTCTGTG  
CTGGTGATTCTGGCCGCATTTCTCGGGCTGGGCGATGTTCTGCCACTGGCACGGCTGTT  
GTATTCACGACCAGGATCGCGATCCTGACCACGGCTCGCGTGTGGCTGGCGAAGAAGGCC  
GACCTGATCGACCACGCGGCCGACTCGATCGACGGCCGGCAGCGCGACGTCCGGGCCGAC  
GTGCCGAAACGCGGGAAGCACGCTCGGCAGTGAGCGCCGCGTACCTGACACTTGTCTGTC  
CCATGGTTCGGTTCAGCTGATCGTCTCGGACGGCATCACGATGTGGCGCACCGAGCGGCTCC  
TCAAGAGGAGCCAAACGGACACAGGCAAAGGCCATGGCAGTCCAGGCAACAGCGACGGCAC  
ACAGCGAGAACATCGGCGCGGCAGCTCCGCTCTTCCAGACAGTGTCTCGGCCTGCTGGCCC  
GTCTGCAGTCGCAGATCAACGAATACTCGCTGTAGCTCCCCGACGCTGTGACGTACATCG  
CCTACCTGCGATCCGACATGACCCTATCCGGGAAGACGTCACACTACGTTTCCCCAAGTCCC  
TGCAGGCGATCGTGAATGATCGAGACGCCTGACGTTAGGAAGGACAAAGGCCCCCCAGCC  
AAAGTCGCTCAGCGGCTCGGCTGAAGGGCCGTTTCTGCGTAC

>NewGenomeName\_78

CTCGGGGCCAGAACCCACTCGTCGCATAAGTTACCAATGGCCAGAAAGTTGCCACTGGCG  
GCGTTACGTATGAACTGACCCTGGCTGACGGCCACCTGACCGCCATCACCAAAGTAACTG  
CTCCATAAGAGGTTAGTTATGCCTAAGATCCCACAAGTGGGGCCCCTTGCGCGCTCTGCT  
GTGGCTGTCCTTAGTATCTCCGCAGCAGACTTAGGTTATATCCAACACGAAGCGGGAACC  
GTTACCCGGGCATACCTTCAGTCGATTGGCAAGCCTAACATCTACACCGGCCACACTGGC  
CCCAAGGTACGCTGAGGGTTAGTTTACAGTGACGCACAATGAGCTGAGCTGCTTCGCACG  
GACGCCAACTCAAATGCCGCTGCTGTTAAGCGCACGATCAAAGTCCCGCTGTACCAGTAC  
GAGTTCGACGCGCACGCCTCGTTCTACTACAACGTCGGGAACACGAAGTGCACCACAAGC  
ACTATGTTCAAGCTGATCAACCAAGGTCGGTACGACGAGGCTGGGCCGCAACTGCTTCGC  
TGGCGTTATGCTGCTGGGAAGGACTGCTCCTTCCGTGCCAACAACTGCTACGGCGTTTAC  
ACCCGTCATCACAACGAGTACACACTATCGAAAGGACAATACTGATCCGAGTACTGCTCG  
CGCTGGCCCTTCTCAGGCTGGCTGTGGGCCTCTACGCGACGCAAACGTCTCTATCTGAGG  
CAAGGACAAAGCTCGAAGAGTATAGACTCGCTATACGCGACCTCGGGGCTCTAAGGCTG  
GCATACAGGTTTCTGTACGGCTGTGCAGAGGCTTGGCTGGCAGGCTAAAGCGCTCGTCA  
GCGATGCGCTCGACAAGGAACCTCTTACC GCGCTACTCCTGAGCATGGAGGCGTTGCTG  
ACAGCTTGTGTAAGCGACACCGATGCGAGGCTTGAGCCTGACGTACCGTGCCACATCCA  
TTCCTCTCTACGGCGACACAGCCGGGCTGGTGAAGGGGCTGGTGGACTACGCAGACGCG  
CTGGAAAACCTGCAACGGTCCCCGGGGATTTCGTGCCAGAAGCTCAGACCCAAAAGTGATTC  
GCACATGCGCCAGCGCTCCCGGACATAAAGAACGTGCGGTTCCCCCATCTGCCCTGCGCA  
GAATCTCGGGCGCGCTGATTAGGGATGGCTGGACATGGGGGTGTATCGCTGCTGCTGTGG  
ATATTGACGGGGCCAGTATGGGATCGCTGTGACGGGCTGTCAAGCGATGTGTAACGATGG  
CCGTGACAAAGAGACAGGGCACGCCAATACAGGTTGTGTGGCGTTGAGAACGCGCACAGC  
GCGGCAATACGACAAGGGCGGGCAGACACAAGTGACAGATTGTCTTCTTTGGCTGCGCGG  
GTTTGTGAGACCTGGGAGTGGTTATCTAATTGGGCCACTATAGCAAAGGGAAACGCGATA  
CGCTGCGAATGTTTAGGAGACTCGACACGAACGTTTCATATCTGTTTAAGCCGGAGCAACA  
GCACAGCCCAACCACGCAACAGACCACGTTGTCAACACCTGTCTACCATAACCGAATGACA  
GACCGTAACAGCAGACCCGGGCACACGGTATACGCGCATGCCGGACAGCAGGTTAATGACC  
ACGCGACGCCAGGGAGGAACATAGGGCCAACGATAATAAAAGACTAGACAGACAGGAATA  
ACAGTCTACTATGGGCACCCTGAGTCGCCAGACAGCAACACAGACGGAGAGAATCAAAT  
AAGCGTTGACAGAGACGAGAAACACTGTACACTGCGCAACATGTTCAATGAGACGGACT  
AACTGCTAAGGCGACACTCTGCTAAGGCACTGGAACTCTCTAAGCTAAATAGCTAGCTT  
GTGAGAGCGACAGGCACAGCAAGTGAACAAAGCAGGTAGACAAGCTACATGCTTCACGGT  
AACATCCGCAACACAGCAAAAATGCTACACCAGCTTCAACGTCACAAGCTCACACAGCAAG  
TTAAATGTGATGTAGACATGAACGTAGCCACGCTGTAAGATTAACGGCAGCAAGGCATAA  
AGGTAAGTTAGAGCCGGGTAGTGCGGGAACCGTCTAGCATTGGATGGTAGCGGACCCGAA  
TCTAAGTAACGACGGGATCAGCGGCACTTATCGACGCTCCTAAAGGCACGCCGTTCAATC  
CTTAGCTTAACCGCGGGTATTGCGAGAGACTCGAATGCGACCGATATCCCATGGAAATAA  
CTGGGGCGGGCGTAGGCTCAGAGCTGGTCGGAAACGATTACAGCAATACTGACTGTCGGG  
ATGATAGTCAACTAGATTAGGTGCATAGGCGAGAGTGACTGCCGATGCCTGTAGCCTGAT  
AGGAACCAGCCAATACCACGGTGGTTCTAAAGCCCCTTGTGTTTCATAGTAACTGGATG  
GTGTGTTACACACGTTACTAAGACGAGTCGGCCTGAGAACTACCGAGGTGCAATCATG  
GCTAAGGATACATCCACCAGTAAGGTGGAGCGACAGCAGCAACGTGACGACCAGCACTTC  
GGCAAGTAACTTCGCAAGCATATCTGTGACTACAAGTCTCTGTGGTTCAGGACTACCGAT  
CCTCTGTTGGTTGAGGCGCAAGGTCACATCAAGCTGGTGGCTGAGTTGTCCGATGTTAAA  
GGCGATGTCGCAGTGACTGCATGGCGCAAGCTCCGCGAAATGCGGGATGTGCGATACTAA  
ACTGATGCTGAACCAACGAGCAAGAACGCATGGGATACTAAGCAGACCTAGGCTAAGCCG  
GGTCTGCCTAGGCCGGTGCCTGGTAGCACCGCGAAACATCAACGCATTATGAGAGGGCAG  
TGCGCCAGAGACTCACAAGGAATGGGAATCTAATCATCACTAATTAAGTCTGATCGTCG  
GCACCGCAAACATCAGCCAGGCTGTTCCATCCATCGGCAAGCGCGGCGCTAAGCTGGACG  
CTGACATCTATTTGGCCGGTGTGGCCATCCTCGCGCACTTCAATGAGCCCAACAAAGTGA  
CACTGTTGAATGATCAGTATCATTGCTGCCGAATGGTTCCCGCAAGAATGCCTTGGCTG  
AGTGGGCCATCGCTATCGGTAAGGTGAGCATCAACGAAGGCCCGAACCAGTAAGGACATGC  
GTTACTTGTTCGCTAAGGACAAGGTAACGAACATCGACTTTGCATGGGAGAAGCCTTGGT  
ACGTATTCGCGCCGACGTCTTACCTGATCCAAGCGTTCACGTGCAAGCGGCCATCGCTA  
AGATTCTCAAGCAAGAGGGCAAGGCGCGCAAGGATGACACTTACGTGGAAGTCAGGGGCG  
TAGCCCAGCTAGAACCTCTGTCTGGCATGACCAATGCGCCATATCGCCCGCACTCCCGAC

CCAAATCTGGGCGCCGCTATTTTCGCTTGTGCCCAACCTCTGAGGTGCCTATGAAATTCG  
CAATCAACGCTATGGCCCTACTCGCTGTGCTGGCGCTTGCTAGCTGCTGTATCAATCTCG  
TAGGGATACCGGACGCCGCGCTCGCCGTAGACAGCGCCGTGGACAGCCCTGTGGACACGT  
CCGCAGTCATAAAAAACGGCCAGATCGGTGACAACCAATGAGCCGGGCGCCACGGCTGG  
TCATCTTGTGCGGGTGAGCCTGCCGTGGCGCGCAGTGCGTATAACCCGTTGTCTGCCGTT  
CGGTGCCGTTGTGGTACTGGAAGGCGAGCAGGTGCAATACGGTGAGCTGCACGGACCGCT  
GTTTCCCATCAAGGGTCAAGGGAACATCGCAGCGTACCTCTTGCCAGTGTCTGGCTTGAA  
GCTCCCCAAAAAAGCAATGCGTAAACTGGAGGGCTACGCCAACCGCCTAGGTTAATGATG  
GACGACTCCACGATGCACGCAACCGCAGCCAGGCTGGTGGACGCCTTCAACGCTGTGAGT  
GCTGAGTACCTGAGCAGGCTGGAGGTGCAGCCTGGCATCCGTAACGCGGACGACACGCAT  
TCGGTGGCGCCGGAGGACTACTAAACACTGTGCGCCTACTGGGCTGTTGGTCTGCGGATC  
ATCAGCTACCAGCACAACGACACGTTGATCTATGGCGCGGCTGGCAACACCGCCGTCCTG  
CCCTTGACGTCCTCGGGCATCTGGTGCATGGCCTGACGTTCTCGCTGGGTTCATGAAGTC  
TCGCTGTCCATGGCGCAGTGGCCGATGATCCGCAAGCACATTCACAAGACGGAGTTGCGT  
GAGATGTGCCGAGATCTATTCATGGCCAACACGGTGATGATGTCGCTATATAACGAGCGG  
TATGGTGCCTTCCCTTGTGACCAGACCGAGCTTGTGATGCGCCGGCGCGCTGAGCAGTGA  
ACAAGTAATGCCCATCTACTGGGCTGCATTCTGGTTTCTACACCCGGCAAGGCCGGAA  
CTGATAGGAGCTACGACATTGCAAGTTCTACGACTGGAAGATCCGAGTGAAGGCCCTCCGG  
CCTTACCGCTGGCTTCATGGTGGCCGAAGGGGGCAGGTTGACTGGGCACAGCGCGATCCA  
ATGAGCATCACGACTAATAATGGTAGCTCGCCGATGATTGGCATTGACTACCCTTCACAC  
TTCAAGTCCGGCTCTGCTAATCGTCGGCAGGCTCAGAGCTGGTGGTCTGAGAACGCACGG  
CGTGAAGCGGCGGCCAACGCCTAAGCTCTTGCGGTGTACGAAGTGCCCGGGCGCTGATGCG  
ATTCAGTGAACGAGCAGGTGGCATTTCGATCTAGGGGTGCGCAAGCTGGTGGCCCATATC  
CAAGCACCTGAGTGGGTGAGAGGGAACCTCAATATAACCTTGTCTGCGTAGGCCGAGCAA  
TGCGTACAGCAAACGGCGGGGCCCGCCAGCCGGAACCGAACTGTGCACACGAACGACAA  
CCTAAGCCCATCGGGCTGCCACCGCACTTCGTAAGTCAAGGCTCAGTGCCTGGCGTAAGT  
CGCTGCCGAGGAGACGTAAACCAGATTCCCAAAGACCCGGCCCGGTTACGTGGATTTCAGT  
TTTGATGCTGTAGTGTTTCATGCGTGACACGTTTCGATCTGGACGTTGAACGCGCCTAGAAA  
TCCTTCAACGAACTCAGGAGTTCGTCCGGTGGAAAGACTTACTCGTATCGATTGTGACGA  
TGCAGCAATGGCTGAGGCTTGTTCCTTTCCTGCGATGCACTGACGCACGCTGCTCCTCT  
GGAAGTAGTGCATGAGCCTACTCCGTAAGACCTGCTGTACCGCGAAGGCTTGGATGCCTA  
CACTGGTGTGGATACCTCTCTGTCTGGTGCCACGAATCCGCCATGCCTGAGGATAGCTT  
TGCAGTGTGGATTACGAGGACGCATAAGCTGCTCGCTCACGACCCACAGAAGGACGCCG  
CAATTATGGCAACGCTCAATGAATTCCGTGGCATTACTGGCCGCAAAGTAGTGCCTCTC  
GACGTCGTAACGCGGTGCGTGTAGTAGTAGGCATCGAAGCTAGCTTCGTGAGCGTGATAT  
GGGACGCCAGACCTTCCGCACCCGCAACAACCGTGTGTACCTGACTGTTCTGCCCGAGG  
ACGAGACTGTGAAAGCTGCTGACATCAACGACCTGAACAGCGTGCAAAAAGTACATCCTGT  
CCAACCTGCTTCGCCAAGTGCAGGAGACTCCAGTAGGCCAGATCGTTCCCGGCCGTCGCA  
CCGAGACCGCCGCCCGCGCCATCGACGTAGCCAACATCGAGTGCAGCTTTCATGCGCTTG  
CCTTGCCTGAACCTGGCCTGATCGTTTCGCGAGAAGAACAATAACGAAGTCGCCTTGTGGT  
TCCTGACCAGCATCGGGCACGTCAAGGCAGTCGAGCTGACCAACGTGCGCAGCAAATCTC  
AGAAGTGGCTGGTTCGGCTGCCCGACTTCGTCCAAGCCTCCGCAGATTGTTCACTCCTGTG  
AGCAAAAAGCGATGGCCGTTGCTGATAGCATGGCGCGCAACTATCCGGGCCAAGTGTTC  
ACGCTGTGCAGGTACATGCTGGCTCCAGCTCAAGGACGAGAAGGTTCGAGTGAAGAAGA  
TCGGAACCAATCACAACATGGTGCAGCTGTATCATGGCGCGCATCACTCAGATCCTCAGC  
TAGCCTTCCCGTGGTAGTGCAGTGCAGGCGCACCCGAAACAAGGCAAACATCTCGGCGCC  
GACTTAGTTGGCCCGACGTTTGAAGATGCTAAGATCGTCATCAAGGACGGGTTTCGCTCAT  
ATCACTGTGGACAAGGTAAAGTACAGCTACCCGGCCACGTAAGCAACCGTGCCAAATTC  
AAGGCTTAACCCATGCTGATCAAGATCGCCGCTTACCTGATTGCTCTGTCCAAGTACATC  
GCCGAACAGGCTGCTGTGCTGCACGCTTCGGCCCCCTGATCATCTGCTGTCCCTGCATGGC  
CGCGAGATCGTGAAGGCGCGCATCCAGTACAACGCCAAGGTCGCCAGGGTGCATGTCAA  
CTCAAGGGCCGCAAGTGCAGTGGTTCGTTTCAGCTACCAGCAGGCCGCGGAGAAAT  
CGCCGCGACAAGGCAGCCAAGTTGCTGGACGCTCTCAATTGATCCGCCCGTGACCGGGC  
GCATGCCAAGCGAGCCTTAGCCGCTCGTTAGCAGGGCCGACGATCGACTGGATCGTCA  
CTGACGACATGATGACCGTGGAGTTCGCGGAGCTTGAGCGCCGCTTTGCCGACTCTACCT  
ACTTCGCCCTCCATACGGAAGCCAACCTATGAACCGCCTGAACGTAACGTAACGTAACG  
AACGCTCCGCTGTCACCGGCGACATCTTGTCCCTTCTGCGCCGTGCGCCGGGCCCTCGACC

TGCTGGACTACAACGAAGGTCTGGATCAAGGCAAGCGCACCGTGCCAGCGGGTAGGGATG  
ATCAAGAGCTGGGCCGACTGGTAAGCGATGGATTCCAGTTCAGTGGCTTCGATATCAACG  
CCGAGCTGATCATGACCAAGCTTAGCGCCGTCTTCTACCCGGTGCCGTGCTATCGTCGCT  
AAGTTCTTCACGAGATGCATGGCTGGCAACTGTGCATACATCCGCAACGAAGACCATAGC  
CAGTTACGCTTTAAGCGCAAGCACGCCAAGGCTATGCGCACGATGTTGAAGCACTGGCGT  
CGCTGTCACTGAGTACTTAATGCGCATCTGCGGGGTGTGCACTGCGGGAAATTGTGCGCA  
TCCAAAATCCATGTTGGAGATAACCATGTGCGAACGTACAAGCACTGATCACCGTAACCA  
ACGCCAACGATGCCAAAGAAGTCGAGCTTGTTAAGAAGGTGAACAACCTGATCTGGAAGA  
CCACCGATGCAACCGTGGCGCTGGCCAAGTACCTGCAAGAGCGAGCCTACGAAGCTGCC  
GCTTGAACATCTAAGGCGGCACCGAAGGTTGTTTCGTGTTTCGGTTCGTTCTGCCACTGCGC  
AAGAGGTGACCGGCAAGGTCATCGCCCTGGTCGAGCTGGAAGGCGGCGCCAAGCTGCCGA  
AAGTAATGTCCGTTGAAGGCGCAGCGTTGAAGATATACGACGTTGCACCGAACAAAGTTGA  
ATGCTGTGCGGCGAACAGGTGCGAGGGCACTCCAGACCCAATGCAAGGCTCCCAAGTGTGCG  
ACGCTCCGGCTGGCGCAGTCGTTGGCTTGCCGTTTCGATGTTAACAGCATTCTCGGCTGCA  
CCCACGCTGACGCCGAGTCGCTGGCCTGTAACGCTTGATCCTCGGCTGTTTGTGCCGAA  
AGATGACATCTTGCATGAGGACTTGATACGTCAGCTTGAGGCGTTGGGGATCATGGCCGA  
TGGTGCAGCAGGGCGAGGCGGAGTTGATTTCCGGGACTTCCACGATAGGTATTCCCGGTT  
CAATGCCGCAGCCGATCTTATCTGGCGTGAAAGAGACTGCGTGATCTCGATGCCGTTCT  
GCCTCCCAAGACTTGCGCGGCGTTGGTTCGGGCGTCGTCCCTGTTCCGTTACGAGAAGCA  
CGCCAGCGCAGAACAAAGACTGACAAAGCACCGAAGTAGTTCTCAAGCATGAATGCTTAGG  
TCTGCACGCCTCGTTGCCAGTACTGTTTGATCAGGTTATGCTTCCGGTTGCGGAGCGGCT  
GTATGGCATCGAGCTGGAGGTTATGCTGTGCATCCAGCTTGCACAATATCGACATACTGA  
AACAGGCTATGGTCACTGGCATGGCGAGCTTACTCTGGCTTTACTGTGGTTGTGGCCCT  
TAGCAATGAGCAGGCTGGAGGCGGCACAGAGGTTAAGGCACACGCCTTCTCGGAGGCTTT  
CGAGGATCCTCAGTTGGCTACCGGATCGGTTATGATCTTCCGGGTAAGCTGTTCTTCA  
CCGAGGCATGCCGGTTATTAAGAGCGTGCGCAACTTGCTTGTGTTCTGGAGTGAAGTGAA  
ATGAGAAATGAGTGGTTCGCCTTAGCGCAGCAATTGCAGGTGCGTGGCCACGCCATGCAT  
CCGCATTACTGTGGTGATGGCCGTCGATGGTTGTGTTCCACAACGAAACGTAATGGTCG  
GCGTACTGCCACCGGTCCGTGAACATCCCGTCAGTATTCAAACCATGCCGACGTTGCAG  
GAACGCTTCGCGGCAGTGGAACGCGAGCGGCTTCAAGAAAAAGCTGTTGCAACTGAAACC  
CGGCTACCGATGCTAGCGTTGTATGACCTGGCCGAGTGGCCGCTGGAGGCACGGGAATGC  
TCATTCTGGGCTGGGTTATGCAACGCCGAGGTGTACAAGAGTCGCGCCTACTATCATCCG  
CCGACCCGGCGTGTGGTGTTCGCGTATTTGGAAATGCGCGCTTGACTTTCTGGCAGTCC  
CGCAGCATATACGGAACGACGGAAGCAAAGTATCTCAGCCAGCCGGGCGCGCCCGAGTGT  
ACACTCCCGCTGTTCCGGCGGAGGATATGTGATTCCCTTAGTCGAGGACTGGCTGTCTGTG  
TAGAAGATCGGAACGGCGGGTTGCAAATCTTTGTGCCTTATGGGTAAGAAGCTGCTGCCG  
AAAGCACGGGCCTGGTTGACAGCTAACGCGCAGTACACGGTAGCGATCTGGCTTACTCT  
GACGGGCCGGGCCTCAGTTCTGCCGCTGAAAACAAGAACCAACTATAGATGTTCCGGGATT  
GAATCCCAAGACTTCTAACGGAACGTGACCTAAAGTTCACAGCAAGCACGAGATTGCA  
AATGTCTTTGGACGTATCGCCTTTGCAATTGATGCGGGGTGCGAAAGGATTACGACAAGCT  
GCACCGGGTAGTGAACCTCGCGTTCATTGTATCAACTGACCGCCACGAACATCACTGACTT  
GGCAGTTACTTCAAGGCGGATCCCGAGTGTGATCTAATCCCTGCTAGGCGGGAGTTCCA  
CACGTTCTTCAACACGATCTGTTACCCACAGTTAAGACCGGAGCAGGTGGCAGGCGTACCG  
CGCTGTGTTCCAGCAGATCGTGAAGCCAATCGACGACACTGCGAAGTCAATGATCATGGG  
CCTGTTGTTGGAGAACAACTTGGCGCATGACTTGCACCACATCGCCGAGCGCTTTTCCCG  
TGGTGAAGAAATAAACGTGCGCAAGCTGACGGCGGACAGGCTTTCGAAGTTTGAGCAGGA  
CATTGAGCGCAGGGTGAAGCTGCCTTTCGTGACAGATTGACGAGTCGTTGTTTGACGAGCA  
CGATAGCAGCGACGGGTTCAAGTGGCGCTGGGCTTTCGCTTCGCCGAGACGAATCGGCCACT  
GCGCCGCGGCGACTTGGGCATCATGGCGCGGCGACCTGACAAGGGCAAGACGCCTGCGCT  
CACGGACCTCCGCACTTACTGGGCACCGCAGTGCAGGTTAGTCTACCCGGACAACCCGGA  
GAGGCACAGATTCTGTGGCTCAATAACGAAGGGCCGGGCAAGCGCGTCCCTCAAGCGGAT  
TATCCAGTCGGCGTTCGGTTTCGGTACGGCTGAGCTGAACAATAAGCAAACGGCTGGCAC  
GTTGCGGGATGAATACGACGTAGCGATTGCCGGTGGTCGGACTACGATGAACGTCACCGA  
CATCCACGCATTTAGGGCGTGGCAGGTAGAGGAAAACCTTCAAGCAGCGTCCATCCGGCTC  
GCTGATCTTCCGCATGGTGGACAACGTGAGCTACGATGGTGACCTTGCGAAGGGGGACAC  
GATATCAGATCAGGAGTTTACGCTATGTATCAAAGGGCGCGAGACTGCGCTATGCGATT  
CGATTGGCCGGTGCTCGCTACGTCGACAGATCAGGGCGGACGGTGCCGGTGAACCTACCC

AACGCTACCGATGCCCAAGGACAGCAAGACTGGCAATCCAGGTGCAGCCGATTTTATTAT  
CACACTCGGAACGTTAAACGATCCTTCGCTGGAGGCGTTGCGTTTCAATGGGACGACCAA  
GAACAAGCTACGTCTCAAACGCCAGCGACCAAGTCCGCGTGCGAAAAGGGTGATGCACGC  
ATCAGCAGAACGCTATGACCCGCAATGAATACCAGCCGACGCGCATCCGTGCGATTGAAC  
AGGCCGTGTTTGAAGGGATTCGACACTTCTGGCCGGAGGCGCGTGTGCGTGCTACCGCTG  
ACATGACAAGCCCAGGATCGATTGGCATAACACGCGCGTGTGAGCATCTTCCGGGACACCA  
ACGAAGTGCTCACTGATAGCGTGTTCGCGGAGGAACAGTTCTCGCCACCTGTCCATGTGA  
TCGCCAGCAAGATGCGGCGCTCGTTAACGGAGGGCGTACACAAAGCGCTCAAGGAATACG  
GAGTTGAGTTACGCAATCTGTGTCGTTCAAACGTCGATCGAGTCAACCTTCAAGCGGAAG  
GCGAATCCCTTCCAAGAGAAGTGGACGGTGGGGGTAGGTAAAAGACAGCACGGAAAAGAA  
CCTGCGGTCATCAAGCACGATTACAAGGACCGCAGCAAGGGGTGGCTGGCGCGGTTCTTT  
GAACGCAACCCGGAGTGCAAAGTATTCATTTGCTGCAACTTGAAGTTTGACGTGCTGCAC  
GGGATCGCCGATGAGCCCGCTGGTCTGGATGCGTGGGTGGGCTTTGTCAACCGGGTCGGG  
CAAGTTTAGGACTGTCGGCTCGTCGAGTACCTGCTGCACGGTCAAGGCACGTCGGCTCAC  
ATGCTCTCGCTTGACGAGGTGTGAGTGGGTTATGGCGGGCACACGAAACACGATGCGGTC  
AAGGACTTGTGGCCGGCGGGGGTTCGGGACAATCGACATTCCCGATGGCGTGATGATGGAG  
TACCTGCCGGGCGACTTCGTGAACACCAGCAAGACATTCTCGGCCAAGTGGTCAAGACT  
CAGCAGCTCGGGTAATCTCAAAGCATCATGCTGAACATGGGCGCGCTGGACTTCACGATT  
GAGTCCGAACGCAACGGCATGAATGCCGACTACGACTTGGGCTTGAAGCTGGCAGCGGAG  
CTGGAAGAAGAACTGGCCGCGTGTGATGCTGCGGCTTGACGAGTACTTGCTGGCGGCCTT  
CCGTGTGAATTCAACTGGGGCAGTCGCATCCAGTTGCGGTCGATGTTGTTTGGTGCGGCT  
GTTAACTAAAAGGCCCGCGAAGCGATTCTAGATCAAGACTTCAAGCCGACTTCTGCACAG  
AGGGCTGAGGCTCACTACCTCACGTCCGACGGCAGCACTATAGAACAGGACGAGTAGAAC  
GACGCTCTGCTCAGCCGTAAAGCAGTGCCGACACTTGTGTCCTTTAGCAGCGGCAAGAAC  
GTTTCGTGAACCCAGACGAAACACCTTAAGGTTAACGACCTGTCGAAACCGATGTCCCGT  
CGTGAAGACCGCACTTACATCTTCCCCGGCTACACCAAGCCGAGCTACAAGTAGAAGACC  
GCCACTCCGGGATTGTACCACACTGGCTCTGCCATCATCGAAGCTCTCGGCAACCGGGAC  
ATCGAATTCCTCGAGGACTAGGCACGCCGTGCCAGACTCGACTAGCACGTCGGGACGTTG  
ATCATCACGACGAACGACAATGTTGGGCAGACAGGCATGCTCACGCTGGTTCATCCTGAT  
GGTCTGATCCAGCACATGATAAACATGACCAGCACGGTAACGGGTGGTTCAGTTCAGT  
AACCCGAACACGCAGAAGTACCCGAACGCAGGTGCCGGCAAGTGCAACGCCAAGGATAAG  
TTCGTGTCCCGGTTTCGGGCGGGAAGGTGTGAACATGCAGTCCGACTTCTCGTCACTGGAC  
ATCTACATCCAAGCGATCCTCTCGGGTTGCAAGCAGATGATCACGGGCTTGCTGGCGGGT  
GTTGACATGCACGTTGCACGGGTTGTGACGACTGCCGGGATGGACGACGCGGAAGCGTAC  
CGACCGTGCCACAATAAGCTGGCGGAGGGTGCAGGTTGATTTTCGCTGAGTAGGTAGGCAAG  
CGGACGAAGGCTAAGCTCCTCTCGTTCCAGTTGCTTACGGCGCAGGCTCAGCGTAGATC  
AGCGAATCGACTTTCATCCGAATCGAAGAGGTGTACGCACTGATCGAACCGGAGAACACT  
CGTACCCTGAAATCGAACCGTTCTATGCTGACCTGATGGAGAAGGTCACAAACAGCAAG  
AGCGCCTGCCGCACGGTAGTACCACACCCGGACTTCCCGGCGAATCAGGTTGGCTTCGGC  
ACCGGCTCGTATCGCACACCAGACGCTTAGCTCTACACGTACCGTGAGCAGTGCAGTACG  
AAGTGCAGTGGTGGAGAAGCCTGCTCCGTAGTCGTCGTTCTCGCCAACGGAAATCAAGAAC  
TAAATCGTGGAGGGCACTAGCGCTGAGTGGGCGAAGTCAGCATCCTGGTTGTTGGTTCAC  
ATGTTCTACCGCCGCAAGTACTAGGGCCGGCTGGGCCTTCTGATCAATCAGGTACACGAC  
GCCGCTTATGGTGACGCGCATCCGACTCTCCAGAACGAAGTGGCTGCTGTGATCGATGCT  
TACGTGGAAGGTGCATCACCATTCAAGGGGGCGTACTTCAAGTGGGAGATCCCACTGCCA  
GTACCAAGCGACACAACATGGGGCGCGAGCATGGCAGACGACGACCGCTCGAAGGCATT  
GACGAACTGGCTTAACCGTTTCGTGAAGAAATCAAACCGCAATACATCAATCGATATCTC  
TGAGAGGTTACTACTATGCCCGAAGCAATCTTTGAGCAAGCCGCAATCGCAGCAGCCATCG  
CAGGAGCAGCGGATCAAGAACCTGACCTGAAGGAAGCGCAGAAAGCCGGCGGGCGGCTGGG  
TTCCACCAGCGGCTGGCGGCTGCATCGTAACGCTAGTCGGCTACATCCAAACCGGCATCC  
AGATCGTGCTGCCGACCAAATTCGATCCGGTGAAGCTCCCCAGTGGCCCCGGAAGATCAAG  
TCGATCTGATCTACGGAAACAGCGGCAAGGGACACGTACCGAAGGAGCTGGAGAACGGCA  
CCAAGGTTCTGAGTGCGTGACCGTAACGCTCAAGAAGTCGGTGAATGAGATGTCGTGGT  
CCTACAAAATCTTCAACACGCTGAACTATGACAAGACCGCGACGCACTCCGCCCAACTGC  
TGTGCAAGCACTTCATCGCCACCATCAGCCACTCACCGAACAAGAAGTACCCGCAGTCGC  
CGTAGGCTGGCTTCAAGTGCAAGACTGCTGGCTACACCTTCATGGCTCCGACCTACCACC  
CGAACCCGATGGACATGACCGAGATTGCCATCGTACCGAAACCTGCGGTGCTGACTCCGC

TTAAGCTGTTCCCTGTGGACTCACCCGTCCAAACCGATGTGGGACGCGCTGTTCATCCAAA  
CCAAGTGCAGACGCCGCAAGGACGAGAAGGCTGGCGTAGTTACTTCGGGCTGCAGCAAGA  
ACCAGTTGCAGAACAAAGATTCTCGGGGCCAAGA ACTTTGAAGGTTCCGCAATCTTCGACA  
TCGTTGGCGGTCTGGACATCGCCGAAATCGAAGTGCCGCTGGTACACCATAACCCCGCGC  
CGGAGTCGGCTGCTGTTCCGTCTGACGACGCTGCCGCTGCTGCTCTGGGGGCGCTCTAAT  
GGATTGGCTAGAAGCCGCAATAGCTGCTGCTGGCGACGAGCCTAGCCCATGCGCGGCGAT  
CCCGGACCTTGTGCCGGGACGGCTTGTGCAAATTGAGGGTGACTACGCTGCGTACTTCAT  
GACGGGGAACGACGATAACCGATAGCGGTACGGCGCGGCGTAACCTGATGCAGCGGTTTACG  
CACCATCAAGGAAATGACCGGGGCGAGCGGTGTGGTTGTCCACCTGTACGCCGAGGGTTG  
TACCATGGCCGACCGCTTCCCTGATTGACACCGTGCAACGGTATCAGGAACAGCGGACTGG  
CTCTGCCCGGCCTAAGAACTCGCGCAGCTTGC GCGAGTTCATGGATAGCTACAAAGGCC  
GGAGTTCACTCCG CAGATTTGGGGCGACCGCGAGTCCGATGACGGCATGGCTTACATCCA  
GCAGAAGCGGGTAGCCGAAAGCAAAGGCGAGCTGATCGTGACAGCTACCCGTGACATGGA  
CATAACGACAGTAGCCCGCCTGGCACATGGACTGGATGACTTACCTACTCACCTACGTTCC  
GCAAGGGGCTTACGAGGCGATCGGCGTGAACGACTTGATCTATGGTCCCAAGTTGCTATG  
GCTGCAAACCCTGCAAGGCCACGGCGCGGATCACACCAAGGGATTGCCGTTCCACCTCAA  
GCCTAACGGCAAGTGGGAATCGGTGCGCGATGCCCGAGCGTTGGTGCGACTTGCGGGTAT  
AGACAACGACGCCGATGCGTTCGATGCAGTGGTGCGGTTATACTACACGTACAAGACACA  
GATGGCGGGGCTGTTGCGACTCCTTGAGACGTTGCTGCTGGTATGGCTGCGACCTGATCA  
GAAGGCCCGTTCACCGACATGGTGAGCTGGTTGCAACTACGGGATGACCAGAAGGATCG  
CTTGACGGCGGCCCTGCTGGAACATCAGAAACGGGTGGAGGATTTGAAAGCGGAGGCTAC  
GCAAATTGAAGCTAACCAACAGTCAACTTAAACCACTACGGGACAAGATTCGTGCAGACC  
AGATAGGTCGTTGTGGGCATTGCAATCGGCATGTCAGTGTGCTGATGCCGGCTTCGCTC  
ATTGCCACTCTCACGCCTTTATTCGTGGTACGCTCGATCGAAGTAGTAATAGGCTTCTTC  
GAGTGCTGGAGAACAAATCGCAAGCGCTTTGGGGTAGGGCAGCTCGCAGCATTTCGAGGCT  
ACATGCAAGGCGCACTGGCCTAGATCCAGACGCACGCCACACCACAAACCCGGATGATCC  
ATCCGACATTCAAGACCGAAGACGCGAAGCGCTTAGCGCGGAACGCCAAGGCCCTTAAGG  
CTCGCGCCAATGCGAGCAAGGAGAAGAAATAATGCGCCGTTCCCTGATGCGAGTGTTCAG  
TAAGAACGAGCACACCGAAATTCCCG CAGCCTTTGGTTGCAACGTGGGCGCGGCTGGCGA  
GTACAATCGCGTGCTGGGGCCGAAAGGCCGCACTAGGTGACTCGTCAGACCCGTCAAAAA  
CTGGCGTGCGATGTTTCATCGACAACGGCGGCAACATGGCGAAGACGGTCCGCGAGCTGCG  
CGAGAAGCGTGTGCTTCGCAAGCCCGATCCGTTGTATGCTGATCAAGTCTTCGACAACCC  
GCGCGTGTACAAGTCGACTCTGGTTATCCCGGATCAGCATGCGCCGTACCATCACCGAGA  
TGCGCTGGCGTTCCCTGCAAGCCGTGGCTGATACGGTCCAGGCGGA ACTGACCGTCAACCT  
CGGCGACGAGCCGACTACCGTGCGATGTCGTTCCAGGAGAGTGCCCCAAATCTGCCAG  
CACAGGCGTTGAAGTGGAGAAGGGCAGGAGGTGGTTGCAGAAGCGGGCGAAGCTGTTCCC  
GGCCCAACTGCTTTGCGATTCCAGCCACGGTTCATCGCGTTCTGTAAGGCCAAGGACCA  
CGGCTTGCCGGTGCCGTTGATTTCGAGGTTACCGGGAAGTTGTGTTCCCGAACGGCGGTGG  
CGACCACTGACACTGGGCCGAGAGCTGGCGCGACAAGACTCCGCAGGCCGACGTAAAATT  
CAAGCATCAACCGAGCTGCGGAATTCTGGTAGACGTGGCGCACAACCCCTGCAACTTGGC  
TGTGGGCCACCACCACGGCAACTTCTCGGTAGTGTACACGGCAAGCAGCACGCGCCTCTA  
CTACGGGATGTACAGCGGATGCCTGAGCGACAAGGACGTCTATACTTTTCGCTACGGCAA  
ACACGCGCTGCGCAAACCTGTTATTCAGTGCAGCGTCATCCCTCATGGTCGACCAACGTT  
GGTGCCGATGGTTCTTAACAAGAAGGGCCGCTGGAACGGGAGCGTG TAGTATGAGCCTTT  
CTGATATGGCGACTGACTCCCTTTCGCTAACCTGCCTCGTCCCGTGTAACGGACACACCT  
ACAGTGCCGACCCAAAACAGTCGCCGTAATGAGCGAGGTGCCGGGTTGAAATTCGACG  
GTGGCAAAGGGCGCTGGTCCGGTCTTATGGGTGGCATGTGACCGCGCTGGCCGGTGAGG  
TTGCCGTGCTGACCTTCGGCGCCAAGAAATACGCCGCGCACAGTTGGAAGCAGGTGGAGA  
ACAACAAGGAACGCTACCGCGAAGCCTTGTATCGCCACCTCAGCGCAATCGAATCGGGTG  
AGGTACTTGACCCGAAGAGCGGCCTGCCGCACTGGGATGACGAAGCCTGCAACGCCCTAT  
TCCTTTCCGGACGGGAGAACGCTCAATGAGCAATCCGCACCTCGTAACTGAAATGGTGTT  
CAAGGGCTGGAACGACAATCTGCAAGCAGCCATCGACACCGGAAACCAGCCGTAGGCACG  
GGTGATCCTCGGTGCCG CAGTTGACAGCACGATCAGCAAGGTTCACTACGCAGAACTGAG  
TCAGGACTTTGAAACCGCATTAGGCGATCTGGAGCACGAATAACATGGGTATGCCTGACC  
GTAAGATTCTTGTACATAAGCGGAAAGAAACGAGCAACCTTAGCGCTAAGGCGCTGGCAG  
CGCTGCCGGAATTCGACTCCGGCAAGTGGGTGTTCCGGCCGAAGTTCGACGCTTGCTCGC  
TGATCATCATGGTTCGGCCTCAACGTGGAGCGCATCCTCTCCCGTTAGGCCAAGGAACGCG



TGAGCATGCCGGACATCGCCGAACACTTGCAGATCAACTCGGCGCCAAACAGGGTTTACT  
TCGGCGAGGAGTATCACCCGACTATGCTGTTCAAGGATATTTCCGGCACGTTCCGTCGCC  
AGTATCCCCAGTATGAGCTTTAAGCGTGGCTGTTTCGATGCAGTGACCCTGCATGAGTTCC  
GCACCGGCTAGACCAAGCGCCCGTATGAACTGCGTATGAAAGCGTTGTGGCATGTGGCGA  
ACCGCGAGTACGGCGTTATTCGACGATCAAACGTCGGCGCGTGGCCGAAGTGCAGGCCG  
ACATCGACAGCATCCTCCAGTACGGCTACACGCTGGATCTGGACGGCTTGTGGCGAGGC  
TAGTGGACGGCGAGTGCAGTCCCGTTTTGACCAGGAAGGGCGCACCATCAACCTGAACG  
ATCACATCGGCGTTGACCTTCAATTCGTCGGCATCATAGAAAGCGAAGGTAACCTTCAAGG  
ACATGGTAGGCGCGATCGAAGTCCTGTGGCGCGGCAAGCACGAAGTGGTCAGCGGTGGCC  
GACTGACGAACGCCGAGCGATTAGAGCTCTTCAACGAGCTGGGCAAGGTGATCGCCACGA  
TCGCGGAAGTACATGCGTTCGGCATTACGGCTGACGGTAAACTGCCGGCCCGGCCCTACC  
AGCGGATCCACGATGACAAGACAGAAGCCAGCGAGTTATGAAGCAGGCGGACATAGAACG  
GGAGATGGCAGACGGTGGGCGTCCGGCTGCCATGGCGAGGTTTCAAACCGCCGAGGCGGC  
GAATGAGACAGCGAACAATCAGCATGCTGCCGCGATATTCCGACACTTCATCAAACCTCT  
GTCAGAAGGTCAGGGCGGTTATCTGCACAAGGCTGTTTCGAGGTTGTGGCAGCAAAGTCGAA  
AGTGGCGGCTGCGTGGTCAGGATACGCTGGCATTGGCGTGCATCACGGTCCGTGTTGTGAT  
CAACGCAAGCCTCTCCGAAGGGGAGGCCGTATTTACTGGAGTGGCTATGGATATTGGCCA  
CACGGTTTACAGCGAGGTTGCACTCAGGCTATATGAAGACCAGAACCCCGAGCTGTATTA  
CACGTTGGTGCAAGACCTTTAGCGCCGATGACCAGGAGCGAGCGACACAGGTTCAACGT  
GGTGCATCCAGTGCCGAGAAGGACAGGACGCGGCTACCGATTTGGGAGCCTGCGTTGAA  
TATGGACGTGGGCACCTTGTGCTGGGCGCGTCTCTGGACATCGGTCTGTTTCGAGACATT  
CGATTTAAGGTTGAAATGGAAGGCGACCAATCACCTCCGGCTACATCCTGACCTGCTGGC  
GCTGGTTCGAGCAGATCGAGGGATTCGTGTCTGGGGCGTCCCGTTCGACCTGCGATGCGT  
GGAGCCGCCGAAACCATGGGTTACACCGACCGATGGCGGCTAGCATAAGATGGCGATGCG  
CCGAACCTGTATCGTGCATGATGCGAGGGTCTGCAACACCGACCGCCGAGGACGTTGGGCC  
GCGATCGCATAAAGCGCTGAGGAAGGTGCAGAACGTGACGTGTGAAGTTAATGAGCGGAT  
TCTGGAGGCTACAGAGATCGCAAGGGAGCACTTCGACGTACAGCATGTGCTGGTTAGCGA  
TAGGCGCTGCGACATGCCGACAAGCCTCTGTTTATACAGGCTGCTCTTGTCTCAAGAT  
CGTTGACATGAACGAGTTTGAGCTTGCACAATGCACCCAGTGGCGACAGGAGGCACGGGA  
ATGGCACACACAACAGAAGGTTTCGGGTAGCGCATCCGGGCAGCACGAACGAAGCTATCCG  
CGTGGCGAACAAGTACAAGGGGAAGGCCCTGTTTTGTCTATTCTGTGCTCTATCGGAG  
CCGATTCTATGCCTCTGGCCAGGGGCTGTCCCCACAACGGAACGACCTTTAAATAGCGCT  
ATTCCACTTTGCGAGGTCTGCACCTATCAGAACTCCCGCTGGCCTATTCTAGTTCGGGT  
AGCCAGGGCGAACACGTGGGCGGCTAACAACTCGATAAGCAGCCGCTCGAAGACCGGGC  
GGAATGGGTTACAGGCAGTGCTGATTTTATATGCCGCATCGCTGATCACCCGATCAGCCA  
CCGTGAATGGACAGACGCAGATGTAACCTTCCAGTTCGCTGCGTGGTGGCTTTGAGTACGC  
GGCTTGGTTACGGAATCCTGATTCGTTTCGCACTCGAATCCCCCTGGATAAGACGGCTC  
TTGTAATGTTCTTCAACACTTCACAGCGATGATACGAGATCGGGTGGGTGGGCGAGCAAC  
GAACCTCATTCCCGACCGACTGCAGCACGACATTTATAGACTCGTTGCCACCCCAACTGC  
TGGAATCGTGCAGTCAGATATTGACGAACGCGATATTGCCGACGCTGGAAGTCGCACGA  
ACTTTCAAGGTCGCTGGTCAAATGTAGTGTGATGACCCTGCCCTACGGCTCGACACGGCC  
CTCCTGACGGGACTTCATCATGAAGGAGTACATGGACAAGGGCAGCAAGCCAGAGTTCGA  
CAATCGCGAGAATGAGCCCGCTGCGAGATGGCTCTCGTACCGGGTGTGAGATGGCATCGG  
GAAGGTGGTCGTAAAGGGACGGCTGGCGATGGACTGGTCGCAGGCAGCATCGGCCATCAC  
GTGCGCCGGGAACGCCCCACTCATCGAATGGAGGACCCCTGCTGGCTTCTTCTACGTCA  
GCGCTACGACCATCGGGATATGCTCAGGGTGAACGGACTCAGCCTCTCTGGCAAACGTAT  
CCGCATCAAGGTCAGACCTTCAAGGACGAGCGCGATCCACGGCGACACAGGAACGGCTT  
CGTGCCGAACTTCGTACAGAGCTGCGACGCGGCGCACCTCACGTTCTTACGAATGACTG  
GGAGGACGAGGATGGTGGCGATCTCGCAGTAGTCCACGACGACTATTGCGCCTTGGCAGA  
TGAGGTGCCAAACTGCACAGAATCCTGCGTAGGTTCGTTTGTGACATGCACCTATACCA  
TGACGGTCTTAAAGCACTGGCGGCGCAGGTGGACGGGTTGCCGGATCTTCCAGAGGGCGGG  
TGACTTGATCTTGGAGCACGTAACCCGATCGGTTTACTTCTTCTGCTAATTGGGCCACTA  
TAGCGACAGGAACTTTTATGATCCAGAAGGCATTGCAACGATTCGCCCGATTCAATTATG  
GGCAGCGAACTCGCGGTTTCGCTAGAACACGATTCGCCAGCAAGAACAAGTGATAGAGTCC  
ACCACACAAGACCGGACGGCCTCTCTATCTCGCCCACCGGATGTCCAATACCTGGGATCC  
AGACAGGTATTCAATTAGGATATTTCCAACAAGCTGGAACGATAATTCTTGGTTAGTACC  
AGCAGCTCTGAATATTCTGCTTTCTGTTTAGGTATTCAAAGAGCATGCTCTGTTTTGGAG

AAGGAGCTGGTGAATGGTTAAGATCAAACATTGGCTTAACGGGGAGCAGTACGGTGATGT  
CAGTGATGATCACCGCGATTGTTCCGACAGCATGTAAGCCGCTGTAACTTACGCCGGCT  
GAGCTATGTTGAAGCCGGGCAAGAGCCAATCAGCACTTCCGAGGCAGGTAGTAAATTGAT  
TGCCTTGGACATGATCATGGTGCTGGGCGAGACGTTCTGTGGCGTTCTTCGACGTTGCTGA  
GCCGTGGTTCGTGCCCGACAAGTACCTGAGCGAAGAAGTGTGGCCCGCGACCTGGCAA  
GACGGTTGACCTCAGAGACTGCATTGCGGGCTGGCGAAGCTGTTGGCCGCAAAGAGGACTG  
CCGCTATTTTCGAGTTCGGAATGCGAGCCAATCCCCGGCAGCAAGAAGTGGCCCGCATGTG  
TCGTCAATTAGATGTCCGGCTGGGGGCAATCACTCTAGAGAAGGTTAATTGGGATGCGTT  
CTGGTAAAGCACTACGCAAGATCGGCAAGATCATCAAGAAGGATGACACGCTGCGCGGGC  
GTGACGCCATCCTGGAATCGGTGGGCTTGCCCCGCTGACCCGCGAAGGGCGACAAGAACA  
TTATGGACATGGGCCAGACTGCCGCCAATAACGCCGCGAAGCAACGAGCAGAGCAGGCAC  
GACAACAGGCCCAAGCACACAGTCTCTCAGCCGAGCAACAAGCGGAAGCTGTTTCGTCACT  
AAACCGCAGCTCCTAAAGAGTCTGCCAATAAGCAGATGCAACTCCAGGTGCAGCAGCAGA  
ACGATCAGGCCAGCGAGTAAGCTCGTAACGCCGCGCTGGAAGCGAGGCGCGATTTCAGGCG  
AGCCAATCGGCAGCTAAGGGCGCAGCCGAGGAAAGAACGCCGAGGGTAACTACTGCCACC  
GGCACCGCCAGCGCATCGACCCGGCATAAGTACAGCGCCAACGCCGCTGGCTCTTCCAAG  
ACCCCGAGCAACCGCCTGTGATTCTTGGTTTTTCGCTCAGCCGAATCCGAGTCGCAGAACC  
TGCACACCAAGCGTAGAGGCTTAGTGGACAGGGCTGAGCGGCTCGAAGAAATTACCAGTC  
CGAGCGTGTGCCCGGATGACCAGTACGACATTGGGCGCGATGCGCTACTAACCGCGGGA  
CGTCACTGGGCGCGCAATCTGTCACTGCCCTGACCAACAAATTTATGCTGGCGATCGTCC  
CGGCACCCAACCGGTTCTTCCGGCTGGCGATGACTGAATCGGATGCGCAAACATTCGTGG  
ACGAGAACGTCCCTCCCGAAGGACTTGATCACGGAAGTGCTCTCGCAGGGCGGAGCGTGATG  
CTTTGCTGCAACTGGAAATGACCGGTGGCCGCGAAGGTCTGTATGCGGCCATGACGCACT  
TGCAGATTGTTCGTAACGTGGTGACGGACAGTCGCAGCAAGGACAAGCTGGAGTTCATCC  
CGCTCAGGGAGGACGCGCTACGGCGGGCGCGCAACCCTGACGTGTTGACCGTGATCATCA  
AGCAAGAGCTGGCGCACTGCGAGGTGAGCGAAGACGTTCTCGATCAGATCGACCCATGGC  
GCGAAGGCGATACCGATCACACTCGCCATCACTATAACGCCGTTCCGCCGCGTTAAGGGCA  
AGAACCGCATCACAATGCACGTTGACCAGATCGAACTGCCGTAGAGCAGGTTCCGGTTCGA  
CCTACGCTCTGGATTACTGCCCGCTGCACCCGCTCACTTGGCGTCTCCCGCTATGCCAGC  
ATTACGGTGTGGGACGAGTCGAGGTCTACTTCTCGGACTTCGGTACGCATGAAGTGGTCA  
GCGAGTCCCTGAGCGATGCCTCGATCATGGCTACGCAATTTCCGCCGCTCCAGAACCCAA  
CCGGTATCACCAGGCTCGAGGACTTCCAGAACAGCAACAACGGCGACGTTATCCCCGGCG  
CAGCGAACGACCTTCAACTGTTCTTCGAAACGTGGGACATCAACTGAACACCTTGGGGG  
CAGTCAGCAACAAGTTCAGCAGCGACTGGGTCAGGGGCTTCCAGCTCAACTCCGTTGTGA  
CCCGCAAGCTGAGCATGAGACCGCCGAGGAAATGCGGGTGAAAGCGATGTAAGTGGAAAT  
CGACGTTGGGGGGGGTTTACGCCCGAGTTGCCCGCGACCTCCATATCCCTCTAGCTAATT  
GGCTGATGAAGAAAGCCAGCTTGAACATCAAGGGCACGAACTGCGCCTGGTGGTGATCA  
CGGGCCTGGACGGACTTAGCCGTCACGCCGATCTGGAACGCTTGACGATCTTCCTTGCGA  
GCGTGACTCAGTCGGATCAAATCCAGCCGACACTCGCATGAAGCTGCAAGAATCCAACA  
TCATCGCCGACATCGCGGCAGGAGTTGGCGTCGACAACAACGGTACGTTGCATCGGACG  
ATGAAATCCAGCAACGCTTGAACAACGGCAAGCGAAACACGCACAAGGCGTGATGGCC  
CCGCTGTTGATAACCACTGCACAGGCATCCGCACATTGATCTTCAATCTGTTTGGCCGTAG  
CTACATGGAAGAAGCTGGCGCAGAAGGGCGACCCGGCTGGTGGCGCAGTCGCCGCCCCGGG  
AGCGGCCCCGGCGACCACAAGCACTCAAGACCCATAGCAGGCTGCTGCACCCGGGACCGA  
ACCATCCGCCGACGCAATCGCCTACGAGTCCACCGGAAACAGCAATGCTGACAAGCCTTT  
GGCCAGATCACCGCTGCGGGTATCCGCCCGGATCACCTGCCGCGCAGGCTGCGCTGGA  
ACGCACCTTCACCCTGCTGAATCACCCCTGGCGGCCAAGGGAGTGCCGGTCAGCGATCA  
TCTGGTGGATATGCTGACCGCAGCCGGGACCGAGGCCGCCGACGCCGAGGAAGCGTTCAA  
CCATCAAGTGACCGCCGACGTTTCATGCGCTGGCGGGTTTCACAGAGCAGTGGACCGCCGT  
GATGGAGTGGGACCGCGCCAACGCTGACGAGGCCGGGAAGGAAGCACTGAACGATCTGTT  
CGGTAATCTGAAGACCCACAAGATCGCGGCGACCTACCTCCTGTCCATGCCCAACCTCGC  
AGGGGGTGTGCGCGAACCCGCTACTGGCATGGTCAACCCGGATGAGGCTTCGGCCCGTGC  
CGGTGCCCGTGTGTAGAAATCCCGCTGAACCGCGTACAGTTCTCCGCCGAGGCCGAAAGC  
ACGGCGCGAGACGCTGGGCAATGCCTACGTGACCTCGGCTGAGTACCAAGAAGTGGGCCG  
TCGCCTCGTTCGTTAGTGCTAAGCGGCCCGATTCTATGTGGGCCACTTAAGCAACAGGGA  
TCCCAAGTATCTATTTCAAAGGATGACTCTATTTCTCTGGATAGCTTTATCGTAGTTCG  
ACCCAACGCGAAAATGGGCGGGCGCTGACCCGCTTGAGATGATAATCGAAGAATTCGGTGC

TATGGCCGCAGGCACTCTGCAACGTCGTTCCGTCACCGACGCCATGATCACCGTCAAGCA  
GATCAAGGGCACTGCGACCGTCACCAACTACGCCATCGGTGCAACCCAAGTCAACAAT  
TCAACCTGGCAAGACCCCGAATTGTACAGCCGCGCAGTACTCTAGAAAAAGCGGGACCGT  
TGCCCGCACCTTCTGGCCCGCGCCATCCTGCCTTTGCTGGATGTGTTCCAAACCCAGTA  
CGATGCCCGTGAGGAAATCGCGCTGGACCACGGCAAGCGCAATGCCAAGTTCAAAGCCCA  
AGCGTTCCTGATCCAAGCTATCATGACCGCTCGCCTCACCGTGAACCCAAACGGCAAGCT  
GCCGGGCCACGCTGCTGGCATCGTTGTACCTCTGGCCGCTGCCGGTGATGGTGCCGACCC  
AGCGAAGCTATCCCACGGCTTCGGACTGCTGTTGCGCGCAGATGATGGAGAAGCACGTTCA  
CCAAACCGTCAATGACGTGTGGGTATTCGTTCCGCCAACCCTTTCTACGCATTGCGGGG  
AGTGGAACAGGTCATCAACGATGAGTACGTCACCTCCGATGGCACCAACATCAAGGCTCA  
CATCTTCACCGCGTGGGCCGTTCCAGTCGTACCGACTCGGAACTAGCGGAACTGGGTTGA  
AGGAGCAACCGAGCTGCCTGACCGCGTGGATGCACACATGGGCGATGACTACGCTGGCGA  
CTTCACCTAAGTCGTTGCGGTATCGTTCTCGGCCCTCGCCATCGTGGCCGGATCTACCAT  
CAAGCTTGAATTGATGGTCTTCTTCGACGACGTGTCCAGGCACTGGCACGTGGGTAGTTG  
GTTGGCATTTCGCTCGGCTCCAAACCATGCCGAGTACCCTGGCATCATTGTTTCTCCGTA  
ACACCACTCTGGCCCGCAACGGGTTCCCTTAATCGGGAGCCTGTTGTGGGCCATTTTCGT  
AGGTACGCGCCACTGAGTTTTACTGAGCTTGAAGTGGTAAATCGTTGCCTTGGCACG  
ATGGGTAAGCTGCCGATCAACTCGCTTGAAGCAGCTGCAACCCAATTGTGAACAACGCA  
GGGTCAGCAATCAAAGTCGTAACGATTGAAGAACAGGCCGTAGGTTGGTGGTTCATCATC  
GAAGTCGTCAATCTGCAACCACAAGGAGCAACGCCCGGAGATGGCGGCTGCTACCGACCA  
CCTACCAATTGGCTCTCGCTCTCGACGGTGGATGATTACAAACCGGCATGGCTTACCATC  
CGTGACCGAAAACCTGTACGACAACGGGCGTGCCTAAGTCCGCAACGGTACAGATCCGATG  
GAAGTCAATATCGCCCGACCCGGTCCGTTTGACGACCTGCCGGACGACGCTAAACGGTTA  
ATCCGTGACAGCCCCGTGTTCCAGTTCAGATGGACTACGACGGCGACGAGCTAAAGATT  
CAACAGGCAGAGAATTGCTACACGGAAACCTATGCCATCTCCACGGCTGACCACATGCGG  
TCGGTCAAAGCCAAACTGCTTTATAAAGGCTCGGCTGGTTCGCGGTTTGTGCGCTGTCAC  
ATTCCTTTCGGACGGACTGGCCGTTGGAGGTGATATGAGCTAAGTCGCAGGCTCTAACGT  
GTCGTTGATCAAGGGCGAATCCGAGCAGGTCGCCACCAGCGAAATCCCAGGACAGAACTG  
GGAGCAAGTCAACATGGTTTCTGACCCAGTACGCGGCCTTGCCCGTCCCGGGGTTCCGT  
GATGATGTCGGAACAGCAACGACCGGAAATCGCCGTCGAAACGCCTTCCCAGCAAGACGG  
CAAGTCGTTCCGGCCAGGAGTCCCTGTATCTCCGCGTTAACGAGTACAGCATCAAGCACCG  
CAAGTGCCAGTAGCAGGCTCGACCATACTGATTCTGGTTGGGCTGACCAGGATAACCGG  
CAACTTGCTGCCAGTCGTCGCCCATGGCAATCTGTCGGGTTACGCGCCAGACTCATTCAA  
CAGCATCACCCAGTCGGCAATCTGGTACTTCTCGCGCCCAAGGGCGTAGCATCACGGTA  
CTCCCAGTCGATAAATTCACCAGGAGCACAGCCGCTAACTCGGTGGCCGCGAGGGTGAA  
GGGCGGCTCGTGTGCCCGCACCTACATGCTGTTTGTAAAGCGAGCCAGCGATCAGCACGT  
TATCACGGTGCAGTACACCACGCCGACCAGCAACTATCCGGGCATGCTGGACACCTCGGA  
CATCTCCGCAGTCATCCCCGACCCGGGGACGCCAGCCAGACCAAGCCGTCCCCGGACTA  
CCAGAAGCTGGTGAACGCCACGGTGTACGCTTACCAGAAAGACGTGAACTAGTAGATCGG  
TACAACGGCGGGCGGTGGTTCAGCCAGCGGCCATTGCTGCTAAGCGGCAAGCGTTGATCAG  
CCCGAGCTTCCCCGTTAGTTCGGCCTAATGGGTTCCACCATCCTCATCGTCGGCGGGCA  
GAGCGTGAGCTGCGGTGGCGGGGAGCGGCGAGCAGATCATCTGCGTGGCGCGCACACT  
GAAAGCTGCGGCGGATTTGACCACGGGTCACCGGACGGGCAAGGTTCGTTATGATCAAGCC  
AACGAACGGGAGGTTCGTAACCTCAAGACCATCGCCAAGGACGGCACCAACGATGCATG  
GACGCAGGTGATCTGGGAGGAATACCCCGGCGTTCTGATCACGCCAACGGCAGTCACCGC  
AAGCGGTGCGGTACACAACGGAACGTTCTACGTTGCACCGTTGCCAGCGGCACTCGCTGC  
GCTAGCCGGTATCAACGTGCCGCCTTGGGAGCCAGCGTCGCCGGGCGACCTCGACAGTCA  
ATCGCTGCTAGCGTTCCTTGACTGGCAAATCAACACCATCCGCGTGTTCGAAGACCGGCT  
GATCATCGTCGCCGGGGCTACCGTGTTCATGTCTGGCTCTGGTGGTACTTCAACTTCTT  
CAGCACGTCCGACCGGAACATTGAGGAGAACGACCCAATTGAAGTTTATCCAATGGGCCG  
CGAAGACGATGTGATCACGGCAGGCACTTTGTTTGACCGCAATCTGATCTTGTTCAGAA  
GCAGTGGCAATACGCAGTGCCGGGACGTGACGCGATCAGTCCGCTGAATGCGTTCGTTGC  
TGATACATTCGGGCTGCCGCGACAGCAACACCTGCCACCAGAGTCCGGCGGCAACCTGAT  
CTACTTCGCCCAGAAGCGCGAGGGCAAGCTGCCGATTCAACAAATGCAGACCGGGCGCTTA  
CGTTACACTCTGGATACCTTTTAGATCACACAGTCGCTCAACAAAACCTGATCGACGA  
CCCGGTGCAGAATGAGGCGTTAACGTCACCATCCGCGCGGTTTGTTCACGACAGCCGA  
CGCCAACCGCGTTTGGGTATACAGCTACCCCGACTCGCAGAACAACGCGGAGCGGTTGTT

CGATAGCTGAAGCAAGTGGACGTTAAGCAAGACGCTGGGCGTTATGATGGGCATGCAGAC  
GAAAGAAGGCGACCTGTACGTGACAACGCTTCGGCCTCACCTCAATGGGTCGTGGTTTCGT  
TACGGATCGTTTCACGATGAACACGGATGTTCTGACTGTCACCTCGATAGGAAGCGCCG  
TTACAGCGCTGCCGTTCCACGACCATCGGCAACAACGACTATCCCGAGGTGCTGAGCGG  
CCCATACAACTCAACCGCATCGCGGTATGGGTTGCAGGGCGATAACCTTCGGCGAGCGATT  
GGAAGCGTTGCGGGAACAGATCGGGCCAACGTACGATCCAAACCTGCTGATCGGTGCGGG  
CTTCGAGAGTTACGTTGTGCTGACCAACCCATACAGCCGGTAAATGAACGTCAAGGCAAT  
GATTGACGGGCGCCTGACGCTGGGCAAAATGAACGTGACCGTCTTCGAATCGTCCGCGAT  
GGACGTGTGCATCTGCGACTTGGTTAACGCTGACAGCAAAGCCTATGCGGAACCGCTGCG  
CCGGGTTGCGCGGACTGCTAACGATTGGGTAACGCTACAGCAACTGGCCGACACTCC  
GTCGGTTCGTGGTAGGCGTATACAAAGGAGTGCGGGACTGCAAGGTCATGCTGGCTGGACG  
TATTTTGTTCCTCGCACTCTCGGCCATCGAATTGCACGAGCAGCTCTACACAAGTCG  
GAGACAGTAAATGTTCTGGATTCCCATCATTATGGCCACTTCGGCGGTCTTGCACAAAGA  
TAAGCTGAACTGAGACATCAAGAACCAGAACCGCATCACCAAGGGCGAACGCCTTCGCAGC  
GAACCAGCAGCAACAAGTCAAGAGGATTCTGCCGTCTGCGAAGTGTGCACTTAACCGCAT  
GAACCAACCCATCCAAACGCCAGACGCTCTGACGGCCTTCGGGCACCAGCACAGCTCGGT  
GGAAGCACAGCGCGCCAACTCGGCAAGCTGCTGACCAAGGGCAGCTTTGCTAACCGTGT  
GAACGCTGCGGAGCAGCAGGGCATACTGGTGGCGCGGTTCGAGTACGGCGGGCATTAGCGG  
TTCTACCACTTTGATGCTTGAGGCAACAATGGGCCTGCGGCCCGATATCCAGAAGCAGGA  
GATGCACCAGCTGTATTCGTTAACCTGTGGGCAGTCGTCGACGTAGAGAAGAACAACCT  
GTACGACCAGTATGGGGTTGTACAACAACAGAACCGGTTACTTGACGACGTTGGACCGAA  
AGAAATTTATGGCCAGCCGTAGATTCCAACGAACTCCGTTGGTGACATGGCGATTGCCTG  
TGCATGGCATTCTTGGAAGCTGATAACAGGATGCGCATGTTTCAGCAAGGGCCGCGCGAT  
GGATGCGACTAGCGTGGGCAGTAAGCTCGAGTCGTGGTTAAGTCCACAAGGTGGCGGCTG  
TTTGCCGGGCACCCACCCTATGTCGTTCTTCCAACCTCGGAGGCATGCCGTAATGGTAACA  
CAATTGGGCCAGGTCATTGGCGGTGGGCAACAACGGTATCAAGCCGCGTAGGGCGCCCGCA  
CCGCAGAAGGATAGCACCCAGCGAGCTTCTGATTAACATGGCCCAACCCATCTTGCAGAAA  
AACTGGATAAAGTGTAGCAGTCGAAGATCGTGGAGGGCATGCAACGTGTCGCCACGGGC  
GAGGCTTATCAGGAGATCAAGAAGGAAGACTCGGTCCGGCGAACATGTTCCGGGCCATCC  
GCGTCCGTAGCTGGCGCAGCCGCAATGACTAAGGACGAGGGCGTTCATAACTTCAACCCT  
CATATGTATGAGGACACGCAGGGTATGGCGAGCATGTCGCCAGACGAGTTCGGGAAGCAC  
GATGTGCAGGGAATCCAACAGGACTTTACGGGCGATCTCGATGTCGGTAACGTGGTGCAG  
GCCAAGATCGTCGAAGGCCAGGGCCGCTGATGAAAATGCAAGCCGAGGGCGAACCCAGCT  
TCGAAGCAACAGCAAACCAAGACCAGCTGCAACGGTATGCTTGAAACTGCCGGTGACAAG  
CTCCACGGCACTGCGCTGCAGTTCGCACTGGGCATTGTGAGCAAGGACGACTTCGACTTG  
GCCGAGGCAAGTCTGCTGCTATCCAGCAAGCCTAACGCCGGGATGACTCCCGCGACGTCC  
AAGAAGGCGATGATGGACAGCGCCGCGCGGGCTATGAACAAGGACAACCGGTGGGTTGAC  
CGTGTCTTCCAGCAGACCGTGATGTACAACGGGCTTGACGTTGATACCCAGACCAAATG  
ATAAAGGTGCGGAATCAGCGGCCTCAAAGATCTAGAACGTGTACGGTTTCAACAAGTAC  
AGCGCAGCCATCGGCGTGCTGATGCGCGGTGCGGCTGGGCGTAGTCCGGCAAAGAACCAC  
GAAATGGCTAACCCAGATCAACCAGCGCTACTTGGACGAGACAGGGGGCGAGACGGGCTTG  
CTCAATATGAAGGACGTGATCAGCATGGATCGCAGCACGTGCTCCCGCTTGGTCAAGATG  
CAGGACAAGGTGGAAGACCTCGCGAGCAAAGCGTGCATGCACGCACGGGCCGAAGGTCAA  
CTGGCACAGCAGGCAACAGAGTTGGTTTCAGACCCGACAAGGGCAACTACGCTGAGCGCATG  
GGCATTCCGCGCAACGAGATGGACGTAGAGTTCAACGAGGGCTTCACATCCAAGTTAGCA  
ACCGGTAAACTGGAAGACGAGCTGGATCTGGCAAGCCAGAACTAGTCCCACGGTAAGACA  
TACGTTAACCCGCTATTGCAAGGCATGCTTCTGGAGCCATTACGCCAGATCAGTGGCGGG  
GGCGTTCCGGGGCCGGAGTTCTACCGCACGATGCAGTTCATTGACGCATGGCAACAGCAC  
CCGGAATCCGGTAGTTTCGATTGATGAGTACCTCGGTACCTAGAACGTGGTGTAGCTGCAA  
CGCGACCGGGATTTCGCTGGTACGTTACTAGGCGACAAGCTACGGGCAGCCAAGGCAGCA  
TGGGTCACGCCGGTAGTGTGTGGACCTAAGCTCAGCTCGGTAGACAACAACCCGGTGTATG  
CTGGAGGCCATCCGCACTCATATGGAAGGCACGGGCGTAATGATCAAGCTGGAACGCTGG  
TGGATGAACGTGCCCGGCATGTCTGATGCTGCGAAAGTCGTTTTGTTTCAGCGTAATCTCT  
GGCGATGCGCAGGTCTATGTAGATAACCTCGGCATGGCTCCGCAGGGAACATTCACCAGC  
GCACTGGAAGGCTCTGGCCGTGCAACCGTTGACACCGTTGGCGCATATGCGATCCCCAAA  
GAACCGAACCCAGCAGCACCGGGCCGCACTCAATGGAGCCGACGCTCTGACGATGGAGCGA  
CTGTTTCAGAAGAAGTTCAGTCCAGGGCTCGTAAGTAGGGCGTGGCCGTCAACTTGGAC

GTTGCCTACAGCAGCGTGACCAGCAAGAAGGGTGAACAACACCATGGACTAAAGTGACC  
GACCCGACCAACTGGTACGGCGTTGCAGATGCTGACGTGTCCCTGATCCGCATCAAGGAC  
GTTACCGCCAAGGATGGCAAGGTTTACGGAGTCTATTCGGGCCTGCTGCTCCGGGACGAC  
AAGACAGCAACCGTGAATTTACATCCAAAGACCTGACTGCGTTCTACGAGAACAACAATC  
AGGAACCGCAACGACATCACTGACAGCCTCCGCAAAGAGGGGCTTTAATAGGAGGCAGCA  
TGGCTGACAGTCTCGATGCAATCGAAAGCAGGAAACTAACAGTTGGCCCTGCGGCAACTT  
CTGCTTCCGGCTCGCATGCCGACGCCGACCGCGCACATGACTTCGGGTAGGCGAGTACAC  
GCTCGCCGTCTGCCGCAAGGCAATCGCCAACGGCCAGAAGCCCGCAAACCTCAATGCCT  
TTGAGAAGATGTCTGCGTTCCAACAGGCAGCAGCAGGCGCCGAGCCGCAATTGACGCGG  
GCAAGTCCCGGGAGCAAGGCGCGGAAGCCGCAGCCGAGGGATATCAAGAGGTTTCGCTAAG  
ACCCGTTTAAGAATTCGAGCACCAAGGACGTCGGGCACAGCACCGAGCTGACCAATGTAG  
CAGAACCAGCACCGGACGCATACGTACCGGCAATGCTGGACGAAATCAGTTAGAAGGAAG  
CCTACAAGGAATGCGCAGGCCCGGTCGATCAACTGGGCGCCGAGTGCTGGAAATGACTG  
GCACCGGCGCGTGGTACGGATGCTGAGCTACAACCTACCACGGTATGCGCGCCTTCAAGT  
ACGACCCGAAGTTCGAAAGCCGTGAGGGCCGCGAGAATTAGGGCAAAGACTTGAGCCAAG  
AGGACCCCGAGTGGGGGGCTAACGCCCGAAGCGCATAACGACGGCAGAACAAGCTGGCCA  
GTTTGCAGGATACACGCGACCACTACAAGGGTATCGGGGCGCAGGGTGTATGGCGTCTGCA  
ACGTGATCGGGCAGACTGGTGGCGTGCTTGTCTTTCGCGGGCTGAGCAGCTGGTAGGGGCG  
TGGGTAAGGTCGCAAAGTTGACCAAGATAGGCACGGAAGTGGGCGCCGTCCAGCGCTGCC  
TGATCGATGCTGCGGAGGGTGTGTCAGGTAACGTTGTGGTGAAGCCAGTATGCAGGTCC  
CTGTCGAGCATGTGACGCCGGGTGACTACTTCTACTCCGCTGGTTTTCGGTGCCCTGTTCG  
GTGGCGCCCTCAGCAGCATGACCCGGCGAGTGTCCGGAGAGCCGTCTGTGCCTGAGGCTG  
ATGCCGTCTCTGGCTACACCAAGGACATCACAGAGTCCTAAATCGACGGTAGCCTCAAAT  
TCCACGCAGGCCTTGTGGAGGAAGCTCAGTACCGGATTTCCGAGGGTACAACGCCCGAGC  
AGACCGCCGCAGCAGCGCGTGACGTGTTCAACGAGCGCTCCAACGCCAGTGGCAGCAGG  
CCACACGGGCTATGCCAGACATCGAACGCATCCTGCCTGAGGTAGACACCACCAAGCTGT  
AGGCAGACGGCCGATACGAGTTGACAGGCACGCCGACGACGGATCTGGAAGGGCAGTTCA  
GCGCCGTTGTGCGCCGGACGGCGGTGGGCAATCAGCTGGGATTCACCGCTGCGACCATCC  
CGGACAACGCCAAGCGCCTGATCTACACCGAGACGATGCTGCGCAAGCTCGAGAACCAGC  
CAACCGTTCGATCAAGCCAAGCTGGAGAAGTGGTTGGCAAGTGGGTTGCACCGATTGCGG  
ACAGCGCTATGGTAGCAAATTTACGCATGCCGCACTTGATCCTTGCTCGCAGTGAGCTTC  
CGATCATGAACTGGATTGCAGCTAACTTGCTAGACTCGCCGTGCAAGCCGGTAACCCAC  
GCACTACCGCAGCAATAGAGCATGCGATCCCCAACGTGAGTACAACAGCTTCAACGCC  
GGTACAACGAGGCGTATGGTACTTGGCGAGATCAGAACGGCGGCTCGTTTGGCAAAGACA  
TCCTTTTCAAGCAGAAGCACTTCGAGGATTTCAACAAACTGGTAAGCACTGCAGGGCCAA  
ACAGCGCAGCCTGTATCATCGGTAACGCGCATCCGCACGTTTCGTACAACGGCCGACGCAA  
TGGAGGAGGGTTTTCGCCGTCTTGCAGCCGACAGCGCAGCGCCAAGTCACTCGGTTCCG  
AGTTGCTGCCAGATTCCGGCATCGGCTACACGTCGCGCATGCTGAAAACCCAGTTCATCG  
AAGAAAGCCCGAGGCCCGTGAGGCGATCCGTGAGAAAATGCGCAGCCAACGGCACAACG  
CATGGGCATGCATGCCGCAAGGGGCAAGATCGCTCAAGGAGTAGCGGCCACGTACATCA  
ACCGCGCACGCGTTGAAGGCGCAGTCGGTGCAGTAACCACGGGGGATATGTCTGACCCGC  
ACGCAGCAAGCAACCTGCGAGACGCTTTGCCGCAACACGCCATGAGCGAAGCAGACATCT  
AACGGTACATCGGCCGCGTTGGCCGTGGTGGCGCAAAGCACACCAAAGGTCGCCTTGCTC  
TCGAGTTGACCAAGGAAATCAAGCCGCCGATGGCACCTTGTTACCATCGGTGACGCAA  
TCATCAACGATACTCCGTGCTGTTCTGCCACCAATCCCGCTACGTTAACGGCGGCGTTA  
CGCTGAGCCGCGGTGGCATCATGCGCAAGGAAGGTATCGACCAGCTCTGTGAAATGCTGG  
CGTTGTCCCAGCAAGGGCGCATCGGACAAGCGCTGGGCCAACGTGCTGAACGCCTTCGACC  
AAACCATGTTCGGAATTTATGGGCAAGCCTTACGGCACCGCGCACCGACTGGCTGACAACT  
TCTGCATCCTGACCGGCGCCAGCCGCCTGGGCCAAGCTGTGATCCCTCAGCTCTCCGCGA  
CTGGGCGGATCGCCGCGCACTTGGGCACATAGAGGCCAACGGGCTTTGTCAAAGACCTCG  
CACGCCGTGTGGACGAGGTACGGAGGGGCAAGACCAGCGACCTCTTGCACTCGCAGGTGC  
AACAGGGCGGCCCGTTCGGTGACGAAGACCGCACTCTTATGCCTTGTGAGTCGTTTCGAGT  
ACATCCAGTTGGCAGACAAGGACGTTGCTGGTGCCTTACCGCGCAATCCGTGGCGCTG  
CACAGGCACAGTAGACCCCGACCGGGCACCGGTGCTTTCAGGCAGTACAGACCCGAGGCG  
AATCGGAGCACTTTCTGAACAAGGGCATGCGGTATGCGTAGCACAGCACTAACCATTAGG  
CCCGGCGTAGCCTGGGGACGAACGACAAGTTCATCGCCGCCATCAAAAAAGACCTTCGCA  
ACATCGGCGAGTTCGACGACACTGGCGCACTCAAGGCATTCGACATTCGCCAGACTGACA

ACCCGTCCGCGATGCAGGAGCTTCGCCCGGTGATCGAGCGTGCCGCGAGCCCGATCATCC  
ACAACGACTTCATCGGCGAGCGCCAAGCGTTCGTGCATGACTCGTTCATGCCATCCTGA  
CTCAGTTCGGTTCGTAGTCCCTGACCGCGATGTCGAAACAGTGGACTCGTACACGGTTTG  
ACCAACGCACCGTGAAGGCCTTCGGTATGATGTTGGGCCAGATGTCGGTGGCACTGCCGC  
TGCACCTTGCCCGCGTGATGGCTGGATCGGCTCTTATGTCCGATGACCGCGCTGCCGACT  
ACCGCGAGAACAACCTACCCCTGATATGCTGTCCCGCGCCACCCTGAACTATGCCTCTC  
TGGCCGGTTCACAGGGCGATACGCTGTATGCTGGCATGAGTGCGGTGGGCATGCAGATGT  
CCGGCGTCCGCTCCGGCTCTCAGGATGTACTGGGCAACGTCCCGGCACTGGGCTACGTCT  
CCAACACCGCGCAAGCGATGAAGGATAAAGTCGTGTACGGCATTATCAAGGCAATGCCCG  
GCGGCAACAACGTGTCTTTGCTGCCCGCCGGACACCTCTCCCACTGGATGCAGAAGGAGT  
GATCAAACCGCTAAGTGGCTCAATTCTAATTGGGCCACTATAGCAACCCCAATACCATT  
TCGGAGGCATCATGGCAGACTACGTGTCTATCAACGAGTTCGCCGGCAATGGTTCCATCA  
TGCAGATCGAGGTCAACTTGGCTGGCAACCACCCCGATGTAGACTCTGGTGCTGTTACGT  
ATTCCAACCCGCTGACGAGAAGGCTCAGTTCCTTCACTCCCGCGACTGACACCCTCCAC  
AAATCGTGGAGGACGAGACGCTGGGTACGTCCGGCACAAGCATCTTCATCACCGTCGAGC  
CTGTGCCAACC GGCAAGATTCTTCGGGTGTACCGCGAGACTGAAGACCGTACTCGCTGG  
TCAACTTCGTAGCGTTGCAGAACGTGACGTAGCGTGATCTTGATGCACTCGCCCGGCAGA  
CCGTCTTCCCTCGTTGAAGAAGCGAAGGACGCCGTGCAGTTCGCAGTCGACACCGACCGCG  
AGGCAACGCGATACGCCACAGCTGCATCCGGCGTGGCGCGTGAAGCTCTCGCACTGGCAG  
TCGCCGCTTACCGCAACGCTTCGACGGCTGGGGTCACGGCAGACGCTGCTTCTAACGTCG  
CCAAGCAGGCGTTGGTCAACCCCAATAAGGCAGCACAGGACGCCACATCGGCTGGACAGC  
GCGCCACCAACGTGGGGACGCTTGCAGCTGCTGCTCAGACGAAAGCTGACTCGGCTATCG  
TTGCGGCGAACCAGGCAGACGCCAAGGCCAACC GGCCGAAGGCAGCGCCAACGCAATTG  
ATGGCAAGGCAACC GCTGCTGTGGCAACC GCAACGCGGGTACCGCCACTGCCAACC GGG  
CTGAGTCCACTGTAAACGCGATTGACGGCAAAGCTACACAGGCGATCTACACCGCGAACT  
CCGCAACC ACTACCGCGAACCAAGCCAAGGCAACC GCGGAGAACATTGACGCGTATGCAT  
CCAAGCATGGACTACGGCCAACGGGGCCGCTGCTGACGTGGCAAGCGCAAACACCAAAG  
CTGATCAGAAAATCCAGACCTCCA ACTAAGCAAGCTCAAACGCGGCTGGCAAGGTAAACC  
GCTCCGGTGTTCAGATGACCGGGGTTCTAGTGGTTGAGCCGCGTGTGCAGGCTATTGCCA  
AGGCTGACGGCAAAGCGATGTTTGAATGGCACGTTGCTGGGCAGACTGTGCGTATGCCAT  
GGCCGACCTCTGACGGGATACTCCGATTCCGGT CAGACTTGTGGTAACGGTTCAGAAGTGA  
ATCACGCCATGAACATCGCATT CAGCAGCGGGAGCGGTTCTGTGAGAGGCGAATGGCGGG  
CATTTTCGAGGGTATCCGTCGATGGCTACCACAACAACGTCCACCCG CAGTCCGGAGGTT  
ACTTCAGTCTTCGGGCTAACGTGTCCGTGTTCCGGTAACATGACAGTCACC ACTGCTGTCA  
ACGTCACCACCTACACTCCTACCCAAGGCTGTCAGTACATACGGCCAGCTGCGGAAGTTG  
CATAACGCACATCTGCTTCCAGAACCAGCAAGGCGGCGAGCTTGGTCCGATCTACACCG  
ACTCGGGGTGGACCATGCATTTCCGCACAGACGGTGGCCGCGACACCTTGGCGCTCTATG  
CAA ACTAGACCGCAGGCTTCAACGGTAACATCCGTGCTCCATCTGCCGCTATCTCCGGGC  
GAGTCTCTGCTGGTGAGTTGCTGTGAGCTGAACTGTGTAGTAAGGCAACGGCGCTTCGT  
GGCTTGCGAACGACGACAACGTGTACGTTGGGGTTTGGGGCCGCTAACTGTCCA ACTGGG  
GGA ACTCCGACCTCGTCACCCGTGCCGAGATCGGCGGTGCTGTCCGGGTTAAAGTCGCAG  
CATTC ACTGCTGGCCAAGACGGCACCTAAGCCATGCTGAAA ACTCGCGGTATGGTCAACG  
GCGGCCCGGATGAACTCGTCGTCGGTGATCAGCTCGGCTGGGCGACCTGTGCATGCGACT  
TCTCGGAAATCTTCGGGTACGGCACTTGGCGTGTAAGGGCCGTGTGTCCACCGGTATCA  
AGGTTGTTTCTAGCCCTATTAGGATGAGGGTTACCTAATGTAATTTCCGAAGACCTATCG  
GGAAGGGTTCACCGTGTACGGCGTTCGTGCTCCACGGTACGCCTCTGATTCCGGCAAGTT  
CATCCTCTCCGAAGTGA ACTTGGGCGAAATATACGTCCCTTTCGTTATCAGCGAACTCGA  
CACTGGACCTCGGGGCAATGCTTTTTTTGACTATTGCTCGTCGCTTGGTGTGACACCCTA  
CAAGCGTAAGTCCGACGCCGAGCACAAGCAGAGGCCAAAGCCG CAGCCGAGCGACAAGC  
TATGGAAGCTGCGCTATCCGACCTGATGGTTGATTTACATCTTCAGCGTGCGTCCG CAGA  
ACA ACTGGACCGCGCCAAGAGATACAGCTCAA ACTCAAGTAGTAAGACAGTCTCAGCAC  
TGAGGCCG CAGACATGGTGATTTCGCAATACCCCGACTGCGGTAGTCGGCGGCGCCACATT  
CTACGACTCTTTTGCGTGCTTCCGCAACACTCCGGTTGTGCAATGGAAGGCGGGTATCTG  
GATTCTGATTCACGGAGGCTTCAACCTTTTCGACCCAGATAAGAGGCAATTACCATGGCA  
GCTTCTACTGCTCGCCTTGGCAATCTGCAAACGTTGTTACCGCTTACTGGGAGCATCGG  
TTTGAAGCTATCGATCTGCGCTTCGAAGATGAAGGATTCATCCCGCTCACGCCCAACGAC  
CTTGTTGTGACCGGGCGTTCCTTTAGAGACAACAACATCACCGCCGAACCCGGTGGCGAC

AAAGACTTGGCCCGACTGGGCGCACAGCTTGCCCTCCGACCTGAACGGCTCCGTGAACCAA  
GTCGAGCTTGACGGTATACTCAAAGACGTGGTAGGCTGGATGTGAGTTCGAACTGAGGG  
AACACAAGACGCCGCGCCACGCACAGTTGGCGCTACTTCAAATAACAGTCCGAAGCTTCA  
TGCCGTTTTCTGATTATCTGCATGAAGTTTTTGTGGTTTTCGGACAACAGCGATGCAGAAAG  
ACATCGGCCTGTACCTTGAGCATGGCCCCAAAGACCTGATGGTTCAAGCACAGCGCTCTC  
AAGCCAACCTCCACCATTACCGTATTGTTTCGAGGTGTGGACACTGCTTCAAGACGCGCGTT  
CTCGTGTCCGAAATATCTCGGCAGGTGGTAAGCAGGCAAACGAAATCTCGACGCTGACCG  
TCCGAATCATTATGACGATGGAAATTCTGGCGTGCCTCCGAACTGACCAGCAAGCTGGCG  
ACCGTGTATCCATGGAGAAGTTCGACGTTACGCCAGCCTGAAAGGCTTGGATAAGTCGC  
CCTCCGTAGCGTGCACCGTAATTGGGGGTTACACGCAACGTAACGGAGGTGACTTGCTGA  
TTGCGGACGGCGTGGAATCCCTCCAGAACTCCCCACCGCGACCAACCGCGAGCTTTTGC  
AGAAAGAAAACCGTGCCTTCCCGTCCGTCGCAGTCGACCCCGTGGGCGCTAGCGTCGTTA  
TAGAAGGTCGGGGCCGAGTGATCCTACTCGGTACTCCGCAGAGGGACGCTTCGTTGTACA  
ACACACTCCCGACAGCAGGCTTTGGCTTGCGCAACTGGCCCCGGACGGTACCCAACGGTGC  
AGGAAGAACCGGCGTATGGCGAGCATCTGCCGAGTACATCAAAGAGCGCATGACCCGTG  
AGCCGTCTGTGCCGGCAGGCGGGCCAAACCGAACGTTCCGGCCAACCAGTCGCTCATG  
AGCTGCTGGGCGAGGACGCACTGCTCTCAAGGTGAACAGGCAGGGGCCAGCCAACCTCC  
AGCTCCAGCACATGCAGTGTACGCTCCTGAGCGACATCGAGCCCTACCCACGCAAGGCC  
CTCACATCGTCGTTATGAACCACAGCACGCAACGTCCCATGCACTTTGTGCGTGGCATCA  
GCGCTGAGCATCTGCGACAGTATCAGGTCGGCTCTCTCAAGTTCCTGCTCGACGCCTT  
TGGACATCGGCAAGGGGTTGGCTGCTCCTGCATGCCGTGTGCTGGCTATCGACACCGCTG  
GTGGCGGCAAGAACAGTGACGACACCGGTGTGGCCGTAGTTGACCAGCTCCCTGGTAACA  
TCTTCGTCCGCTCGGTAGAGGGTATCCCCGGCGGGTCCGTCGCGTACACGCTCAAGAAGC  
TGGTGGCGTACTGCAAGCGCTGGGAGCCGGGCCATACTCCGATCGAGATGATCATGGGTC  
ATGGTGCCTTTACACAGGTTTTGCTTCCCTGCTACGTTCTGAGGGCGTTCCTGCGCTG  
TGCAAGTGGTGTACAACACCGCCCAGAAAGAAGAGCGTATCGTCGACACCCTGGAGCCAA  
TCGCAGCCAGCTGCGCACTCATCTTCGACGAAAGCGTCGTCACTGACGACTGGGCTTCGA  
CCCACGGCAAGCCCGCTGACCAGCGCGAGTTGTTTCGCCCTCCTGCACCAGTTCATCAGAT  
TCACACGCGACACAGGCGCGCTGGTAATAGACGACCCGGCTCGACGTAAGTGCATCGCCG  
TAGCGTACACCATCAAAGCTGTTGCCAAGACTCCCCACTCGTTGCGCAAGCCCTCCGGG  
CTCAGGAGCTGGTCAAGTTCATGGAAGACCCGCTTAGCCACAACCGCTACATCAAGGCTG  
CTCAAATGGGCTACCGGCAATGCGCCAATCCTACAGCAAGGAAGACAATACGACGAGATT  
CTCGACTCTGCCATCCCCCGTAAACTCCCCGTCGGCCAGAAGCTCCGCCAGATCACTAC  
CACTGCAATCTCCGCAGCCGCAATCCACAAGGGCCAGTCCGGTCTGAACTGTCCCGAACT  
GTTTGCCTTCTTACC GCCACTGAACGCCACTCCCCGGGGCTCCCCGGCCAGAACCCATT  
CGTCGCATCCGTTACCAACGGCCAGAAAGTTTACTGCGGGCGGGACCTACGAACTAAC  
CGTGGCTGATGGCCAACTGAACGCCTTACCGTAGTCGCTGCTCCAGAAGAGGTGATTTA  
TGCCTAAGTTCCCAAGTCCGGGCGCCTTGCCTCTCTGCTGTGGCTGTCCATAGTTTCT  
TCGCACCAGGCTTCGGCTTCTCCAGCACGAAGAAGGAAGTGTGAACCGGGCATACTTG  
ATTCAAGTGGAAGCTTACCATCTGCACCGGGTACTGCTCCGAGGTACGCTTAGGGT  
CACTCCACAGCGCCGCACAATGCGCTGAGCTGCCTCGCACGGACGCCAAGTCCGGCTGCCG  
CCTCTGTTAAGCGGACGATCAAAGTCCCGCTGTACCAG

>NewGenomeName\_79

TGGGGTGACTGATGGGACTTGAACCCAACTATAGGGGATTACAGGGGAATTGCGGGGAC  
TATTGCCTTGGAGTTTGCAGGGTTTTGCGTTATCCTATGCCCGGCATCCCTTTCATTTG  
TCCCAAGATTTGTCCCAAGCTACGCCGTTGCGCGTGGCATTCCCTCAGGCGGATGAGCCC  
CGGTGTGCTGGGCACCGTACGCTCCCGGGCGATTCCCGCAAATGGAGCACCGCGGCAT  
TGCCACGCTGGGTTGCCCGGTGGAGTCGAACAAGAACGCGAGGGTCTGCTTCAACTCGT  
TGAACCGGTAACCGATGACGGTCCCTACTGTCAGGCTGGTGGTGGCGTCCGCGGAGCAGGC  
CGACCGCCAGGGCCGTTGACACGTTATAGACGATGCCAGGGCGCCACCAGCAGCACGC  
CGGTGATCGTCGGTCTCACCGTGTGCTTGGGCTGCTGCGCGGCAAGCGGGTGGGCGCTGT  
CGCGGTTGGATGCCTCGGCAGCATCCTGCGCCGCGGCGGCTTCTAGGCGGCTCTGTTCCG  
CCGTCACCTCGAGTTGTTGTAGTTGCACGCGCAAATTGGTTTCCAGTTCCTTGAGTTTGA  
TGGTCGGCTGCGGGTCCGCCAGCATCGCCGTGAACAGGGCGTCCGGGGTCCGAGTCGGTGC  
CCGAGGTTGTAGCCACCAGGCCGCTACGGCGTCGCCGGTCCGGGCCGCCCCAGATACATG  
CCAGGACAGAGGCGGCTCTGCCGACAACGCGGGCCAGGTCTCTCCAGTCCGTTTAGATGT  
CCTCCGCAGCGTACTTGAGGTTTCCGGCGACGAGCCGCGCCAGCCCTTGGCGAACGTCG

GCCAGGTGGGCAGGTTGGTGTAGAACATCATGCGAGCCGAGTAGAACAGCAGGGCCAGCA  
TGGTGGGGTTAATCCCGGCCGCGCCATTGAGGGTCAAGGGGCTGATCTGTCCGTCTCGC  
AGGTGCCACGGCCGCATGCAGCTACTTGGCCGCTGGCCGGTGCCATGGTTCACCGCAG  
CGTGAACACCTGGAAGGCCACGGACGGCGACAGCCTGTGCCGCGCACCGGTGTCCCGT  
AACGCGCGCGGTAGATTGCCTAGGCCGTGGCGCGCGGCATGTGCGGCATCGGCCCGGTGT  
ACCCGTAAGCTCGCGCTACGGCCACGGTCAAGCCCCGCATCTTACGCCACCGGGGTCCG  
CCGGGTTGTTGGAATAACCGCCTTCATGTCCGATGACCGGGTGAATGCGGTATCGAAGT  
CCATGTCAATGCCCCCAAGTTCGAGGTGATGCCCGCCACACCGTTCGCGACCAGAGCG  
ACGGCTCCAGGCCGACAAGTGCAGGAAGCCGTGGACTGCGGGCTTGCGAATCCGGCGA  
CCGAAGCGCAAGTCTCGCGGAATTCATCGACCTGTTCCGGCACGTCCACGGCCACGCC  
TAGATGGCAAACACCATCTTGACGGCGCGGTGTCGCGCCTCCTAGCAGGCCGGGCTATCG  
CAGTGTGGTTCGACATGGCGACCCCTTATTTCGTCGCCATCAGTTCTGCCTTGGTTAGG  
CCGAACAGCTAGTTGGTGTCAATTCCACGGCCTGCCACACGGGTTCGAGGGTTCGGC  
TCTTCGTAGTAGGGCGTGTTCGTACCCATCGGGGTAGGTCTGCGCATCCTGTTTGGGCGTG  
ATGCTGCCGCGCAGGTAATCGAGAAATTCGCCGTGGGACGGCGTGCCGGCGAGCGCGTCC  
AAGTCTCGCTGGTGTAAATGACAGGCGATCCCATATTGTTCTTCCAACCACTTGAAAAG  
GTTGTGGGTGTCGGCCAGTGCGCATGACCCGACCACGAGGCGATGAACCGTGCAGAGA  
CTCATCCTCGTTGTGCTTGACGAATTTGGCGACCTTTCGCTTCGCACGCCTGACCGAGGA  
ATTGCGCAGCAGCTTTTGTGTGGGCCACATGCGAAAACGCAAGAAGTTGATGCCCCGCGA  
TACGGGCGCCACGTGCCAGTGGCTGATCGTGAGGCCAGGCGCGCGCTGGCGAAGTTGCG  
CAGGCGATAGAGCACGTGCGCAATTCCTCGGGGTTCGTCGCCCAGCACCACAATGTCGTC  
CACGTAGCGCGCCCAATGACGCTGCTTGAATTCATCGTGCAACAGCCGGTCAACCGCGCC  
GCCGTACACGTTTCGCGAACAGTTGCGAGGTGATGCTACCGAAAGGGATGCCGACGCCGT  
GTCGGGTAGCACCACGCGCACAGCCGGCGCGTGGCCGCGCAATGAATCTTCTTGTGAT  
GCTCGCGTACAGAGGCGCGCGGATGATGCTGGGGAAGATCTGACAAAGATCCGACTTGAA  
GACGTGCGTGGCGCGCATTCGCCGCAATTCGGCCTGCACGTGGCAGACGCCCGCGTCCGC  
ACCCTTGTAAGGGCGGCCAGCGTAGGTGTACGGCAGCCGGCCGGCCTCGAACATCGGAGC  
GAGGATGTTGCACAAGGCGTGCTGTACAAGCCGGTCAATTGAATTCGAGCGCCGAGATTAG  
GCGTGGCTTCGGTTGGTAGACCAGGAATTCGCGGTAGGGGCCCGCTCGTAATTGCCAGC  
ATTGAGTTCATCTTGCATGGCCAGCAGGTTGGCGAGGTTCGTAATTCAGATA  
CCCCACGGCCGGCGCTTCCGTGGGACTTCTTGCGGTACGCATTGAGCAGATTTTCCA  
GGTGGTGTGTTGCTTGGGGTTGCGATGTCTTTTCCCATTCAAGAAGTAGGCCCGC  
CTTCCATTTTCAATAGTCGACGTTTTTGCCGAACCGTGTTTGGTTTTCGCCAAAGCAGGA  
CAAACCGGCTGTTACCTATTGAGGAAAGGACAACCCCCAAGCCGGAGAGTTGGCAGA  
GCCATGAATGAAGGTCATGGGGACAGGCGCCTGGCGCCCTGATGTTTCGCGTTCGAGTCCG  
AGGGCCCGTTGTGCCAGTTCGCAGCGCGAGAACCCGAGTTCGACGTGTGGTTCCAGTTGC  
CGCCGTATAGCGCAGCAGCGTTATTTCCAGCCTGTCTGTCCGATTCACACGGGCAATT  
CAGGAGCCGACAATGCGCCCCACTTCGGCGATGTGCACTTGTGCTGTCTCGACCTGATGT  
GACGACAAAGAGTGTGGTTCCTATATGCCCGCGAGAAAGCGCAACCAAAAATCGCAGCATG  
GCAAGCCCGCGTCCGCTGCGTACAGCTTGCTCACCTGATTGGACTTGCCCGCCACGATG  
AATAATCCGACCTGCCCGAGAACGCACTTCAGGATCATTTCTCTCACAACGCCGTGCTT  
CTCGGGATGCTTTGCGCAACGGGATACAGGTACGAAATCACCCCTTCGTACCGTTCCTGA  
ATGAGCAATTGATCGAAGCACTTTGTCGGTTCCTCGATGGGTTCCATAGGTTGCCTTTGC  
CGGGCCTTTCGGCCCAGCTACTACGAATCAGGTGGTCAGAGATAACGGCGCGCCCCGAAG  
AACCGGAACGAGAACGACCGCCCGCTGTAGCAGAGCGCAGCGGAGAACCCTAGTGCAGC  
GTGCTGTTCCAGGCGCCGTGCAATAGCGGAGCAGCGGGCTGGGCGTACACCGATCCGCGG  
CCGGCAGTGTGACCGCGTAGTCGGATGCGCAAGTACACCCGCCGAACCTGGTTACCCAAC  
CTCCACTAGCCACCGGACGCCTGCACAACGCCCCACTTGGACGTGAGGATGTTCTACGCC  
CTCGTGGCGCCCTTGGCGTTCACGCCGGTGGTAGGCACTTCGGTGGCCCGCTGGACGTT  
GCCTCGGTCTTGGCGAAAGCCGGCTCCTCGAATTCGTCGTAGTTGGGCAGGCGCATAACCG  
TGGTGTGACGACCTCGGCGACGTTGTGCCAGGAGCCGTGCTGTAGTCTGAGCTGCCG  
TCGCCGCCGAAATAGATAGATTTTCGTCGGGGACGGGCTGCCGTCCGCGATGGTACGTTG  
TATTTGCTGGTGCCGTAGGTCTGGTGGTTGACGCCTGGCAGATTGATGTTCCGCCAAAAC  
GCGCCGGCCACCAGCGTGTGCGCGGGGGTTCGAGCGCAACCGTGCGGAACCTTGATATGC  
CAGAGGGTGTATTCTTTGATCTGCGCCGTGGTGGTTCGCGGAGCCTGGGCCGAGCGTAG  
CTTCCCGGCGCGTAGGGGAAGCCACCCACATTGCGCGCCGTGATCGAGGTGAAGCCAGTG  
GGCGCCGAAAAGTTGGAATCCGCCCGCCCCATGCCAGCGTCGGAGACGTAGATGGCGTAG



TCGGTGCCGGCCGTCAGCGCAGGCATGGTGTATGGCCGTGTCGGCGGTGAACTGCACCAGC  
GTGCCGCTGACCTCCACGATGGTGCCCGCCTTGATGCTGGCCGTTGCGGTGCGGGTCCGC  
GTGATGGCGACGGCCGACTTGTGAGCCTTGATGCAAGCCGTTTTGAAGAGATCGTGCCGT  
TCCAGGGGGGGCGCCGCTGCGGTGGCACCGTTATGCACAACGACCGTGTTCTTGTCTGTA  
TCGACGGTAATCTCACGAGCGGCGCGCGTGAACGTGGCGTGATGTGCGGTGCGTCCGCCC  
CGAACTGGACTTCGGTACTCATATGGTTGGCTCCAGTTATGAGAAGCCGCCAGGTCA  
GCCAGGCAATGTTGGCCCGGGCTCCCTCAGGGTCCGGGAGATCGGACAGGTTGTTGGAG  
GGCACCATCGCGCCGGATAGCGCGTCGAGAATGGCCGGCAAGTTATTAGCTGCCTCGATG  
ATGACCGCGAAGTTCTCGGCCACGGCCGTGATGTTCTGGGCGTTCGCCACACTGCGCCC  
AGCACGCCGGCTTTCGCTGCGGTATTGCTGGCCGGCGACAGGTCGCCGTAGTCGATGACC  
ATAGGTTGCCCGGTCCAGTCGTTGCCAGCGCGACGACGGTGGCCTCGTTTTCTGCAACG  
GTGGAAACGTCGGCAGCGATGCCCGCGACGGTCTGCATGTCTGCGAGGTAATCGACAACC  
GTGTTGTCGTTTTCTTCGTTTCGCCGCTACCGCATTGATATGCTTGGCATTACCGAGTACT  
GCGTTGATATTTGCCTGGTGGGCGACCGCTGCATTGATATTGGCGGCATTGCCGACCGCT  
GCATTGATGTTTCGATTGGTTAGCAGCGGTTCGATTGATGTTTTCTGCGTTGCCGGCTACG  
ATGTTGATGTTTGCCGGATTGCCTGCCACCGCCTGCACGTCGTCGATATTGCCGGATACC  
GTGCTCACGTCGAGGATGTTGGACGCCACGGTATTGACGTTGGCGTTGGCATCGGCCAAC  
GACTAGATGTTTCGTGGCGTTGTTGGCCATGGCGTCGATATTTTCCAGGTCGCCGGCCACG  
GATACCCCGCTGTCGATGTTGTTGGCGACAGCCAACATGCTCAACAGGTGCGTGATGACA  
GTGCTAACGTCGCCGATGTTTTAGCAACCGTGTCCACGGAGCCGATACTGTTTGCGACC  
ATCATGATGTTTCCTGCCGGGCGGGCAGGTTGTTGCCGATGGGGGGTACGGCCATGCTGCCA  
AAGTCGTAGGACACGCCGGCCGCCAGGTGCCGCCAGGTCACCCGCCACGGCATCGACG  
GCCCCACGCTAGCCGCCACCGTGTTCGATGTCCGCCTCGTTGGTAGCCACGGCGTCGATG  
CTGGCGAGGTGGCCGTACACGGCGGAAACCAGCGGTAGCTGTTTCAGCAAGCTGCTCCAAA  
ATCTCGCTCGATGCCAGACAGCCAGAAATGGGCGCCTGCACGGTTCGGCTAAGTTTAAAG  
TCGGATTGCTGGATATGGATAACCAGCCGGTCAAGCGCGTGTCTCGATGACCTTGCAGAAG  
GAGCCGCCCTGGTTTGTGAGGGTGTGCGGGCTGGGTATTACGGACTTCGCTGGTCAGCGTG  
AACTTGTACCCAGTGGCATAGGTCGCCAGCGTGGTGAGAACGCCGACGGGATTGGAGTCC  
TGGTTGTCATTCAGCGAACCCTGGTAGTCCGGACCCGGGGTAAAGGTGGATTCGACACCG  
TCAGCGTCGCTCGAAATAGCGACGACTTTGCCGGGGTGAACACCTTCAAGTCGAACAGG  
TTTTGTGTGGTCCGGTCATTGCAGGGTTACGGCCGCGCGACCCGATCTGTGCTTTGGATG  
GACATGGAAAAGACCCCTGGGGAAGCATCGCAAGGCTAATTCCCCAGGGGTTAGGCACGG  
GCACTCTTAGCACGCCTCTTGAACCCGAAGCCTATAGCCGCCTAGTTTTGCGTTTGGCG  
TTCGGCCAGGGCCTGCACGCCGGTAACGGTGCGGTTGATCTGTGCGCTGGGCAGGCCGAA  
CAGGTCGCCACGACATTGACGGAAGCTTTCCGGAAGCGTTGCCGAACTCGCCCTCGTG  
CGTCTGGGTGGCGAACCAGGCCACGTCAGCAAACAGTAGCAGGCAGGCCGCCCGGTGTG  
GGCGAGGCCATGTCGTTGGCGCCTGTCACGGTCGGGGCTGCATCCACGAACTCACGCAC  
CACGACCATGAGGCTCATCAGCTAGTCGATCTAGATGGCGTGCAGTTTCTTGGCGCGTTT  
TTCGGGGTTCGTCGTCGCCCGAATCGCCAGGCGTCAGCGCATCCTTGAGGAAGTAGCCAG  
CACGGCCGGCCCCACGTAGAGCATGGTGGAGTCCGACGGCAGCTTCGCGCGCTTGACCGG  
AGCGTCCGAGATCATGGCCTGCGCAACGCCGATGTTAAGCGCCGTGTTTCATGAACGAATA  
GAACACGGTGAAAAGCCGCTGCGCTGGGCCGCCGCGCTCAATAGCGGAAAGGTCTTTAGC  
TCGCCGGCCACCCTGGGGATCTATGACCGCCTAGGCAGCCAGGGAGACGGCGCGGGTTTC  
GTCGTTGCCCCCGGCGACGGCCTATACGGGGGCCCCCCACCACGTGGGCACGTCCACCAT  
CTGATGTAATAGCATGATCAGGAAATAGGCATTGCGGCCGACCCATTCTTTCGTTACAGA  
GCCGTCCTGCGCCTGATTGCGCAACGCTTTGAGTTCGCGGAAGCGCGTGCAGCGCCTGATT  
CGCCATGAACGAGGACGTGGCGTTGCTCTCCCGCCTAAGACCCACCGGGGCGGCCAGCTA  
CTTCTTGACGCCGCGGCCTACCCACGGCGCGCGCACGCGCAGGATGGACTACGTGATGCC  
CAGCGGTTGCATAAGGGCACTCATGACATAGAAGCCCAGGCCCGACGCGCTGACGCCCTG  
ACGCACCCGGGACAGCGCGATGTCCACTGCAGCAACTGCTCCGCGCTCACCCCTGGCGAT  
GTCGGCCGCCAGGTCCTTAAGTGCTGCTTGGCCTCGGGGCCGAAGTGCTAGCGGATGGC  
GCCGTTTATGGTCTGCGAACACCGCAGGCGGTTCGGCGTCGGTCAGCCACTCGTACCACGT  
GAGGTCGTGAATCACGTCATTGACGCCAAATACAGACCGGACAGGGTATAGAGCAGCGG  
GGGCCCGGACACTTACTGGACGCGCGACTTGGTGTGCTGCTCCGCGTAGTTGCGGTGGT  
ATAAGCCCCTTGAACCTGGCAGCGTGCGCTTCCGGCGTCCGAGTGTTCTTCCGCACGCTG  
GCTCGCGGCCGGCTCGTACTTAATCGGATAGTAGCCGCCGCGTAGGGTCAGGGTCTGTCC  
GTCTGCCGTGGTGTGATGGTTCAGGGGGCACGGCTCGACCCACGCCAACTCCTTGCCGTACAA

GCGCCGTTCTTTGGCGTCGATCTGCGGCCGGTAGCCCTCGAATTGATCCCAAACCGCCTG  
CACCGCTTGCCAGTCGTGCGCAGTCAGCGATTGCAGCATCGCCGTGATCTGCGCCGGGGT  
CCGCCCTTCGCCGCCAGCAGGCGTTGGAAGTTGCCCTCGTTGCCATGTTACAGCGCGAT  
GGTGAGGCGAGCTTCGCGGTTACAGGCTTCGGCCGATGGTGGGGAAATGGTCCCCTCTGCC  
TCCCACCTTGCCGAGATCGAGCACCGGCGCGAGGGTTTCCGTCAACTTGCCCGTGGCTTC  
GGCGCGCTCGAGGTTTCCGTGTCGCTGCGCTCGTTTGCCGCACGCACAAAACATTCCCA  
CGTAGGGCCGCGTCCCAGGCCGCGTCCATGACGCGCGCCCTGGTCACCGCCTTGATAGG  
GGAGGCCAAAAGCGTTTGAGGCCCTGCACCGCGCGGCCGTCGTTGGTACTGGGCGTGCG  
GGTGTGGCGCTGCGTCCCAGTGCTTACGCCGAAAGCTGCCGCGATTTCATCGCGGAT  
GGCCTCGTAGTCGGGCTGGTTGGCTGCCTTCAGCAGCTTGCCTTCAAGCGGCCAGGTG  
ATCGATCTGACGCACACTATCGACCAGGCCGCGCAGTTCTGCCACGGTCAAGTTCTTGTA  
GGACGTGCGGTAGGCCTCTTTTCGAGTTCGGTTCGGGATGTCCGGCACGCACCCGGCCTC  
GCGCTGGCTGCGTAGCCAGTCGGCCATGTCGGTACGCTTGTCTACGGACTTTAGGCTTTG  
GCCCGTCCGCAGATCGAACCGTTCATCAGATTGGCGATCTTGTTCGGCATAGGCCACGTC  
GATGCCCTTGATGTCGCCGGAGAACTTGCCAGGGATCGCTGGCCGCGCTCGACCTCATC  
CTGGGCGTCGTAGTCCGCGCGTGCGGCATGCTGCTGGCTAAGCTGGTTGCGCTTCTCGGC  
TGCTGTGGCGGCGAGGTGCGCCGGGCTTCATCGCGCGGTAGGCATTGCGGGCCGCGCGCAC  
CTCGATGTTGGTATAAGTGCCGCGTCCGATGCCGCGCACCTTGAGGCTGGACACCAGGGA  
GCGCGCGTATTCACGCGCCGGTTCGGGCAGCACGCGGCGCGCGATGGGTTCGAGCGCGAGG  
GTCACTGCCGATGTGCTGGGCCGACTAGCCGCAACGCGGGCCATCGCGTTGGCCTCGGT  
CGCCACGTAGCGGGCGCGGGGATCCTTGTGAACCGCGCTATCGGCGGCGCGCTCGATGGC  
TTCGGGCGTGCACAGTTCGCCGAACCTGCTCCGGCATCCGCACGTTCGGTAAGCGCCTTGAT  
TACTCGCCGCGCGTGGGCGCTTCCAGCAGGCGGCGCACTAGTCCGTCACCAGACGTATA  
GCCGAACACTTCGGCCACGGTATCGGGTTGCATCCCCTCACTGGCCGCGGGGCGTTCCT  
GCCGGTGGGCGAGGTATCGCCAGATAGCGTTTTCCCCCTGGCCGTACATTTCTTCATGGC  
CAGTAGCGACGTCCTGGCGCCGTCGACGTTGGCCTGCTCGGCGGCGCGGGCCACGTTCTG  
CAGCGCGCCCCGCGGCAGTTCAGTTCACCATAACCGCAACAAGGGGTTCGGCCCGGTGAAC  
CGGCTGCGCTATGACTTCTCGGCGACCTGGCGGAGCACCTCGTCGGGGCGGACGGCGGG  
TTCCTTCTGCAGTTGCTTGATGATGCGGCCGCGTGCATTGTGCAGACAACGCATGTGCGG  
CAGGACGCGGTCTTGCAGGTCTTAAATAGCGTTCGTTGTTTCGCGTCTACGCCGAGTGCCTG  
ATTGGCAGCGAATTCTTCGGGCGTGATGCAAGCCTCTACCGGCGTTGCGAACAGTGGCAT  
CAAGCTGCGGCCCTGTTTGCAAGTGTGATCTGCTCGCCGGTGGCGAGCATCCGGTCGAA  
CACGTTGCGCACCTCGGGCTTGAGTTGGACCTTCAGGGCCTTCAAGTCGCGGTACACGTT  
GAGCGGGCACGCGCGGATCGGCTGGAAAACGCCGCGCATTTCATGCTGGGCGCCTTGCC  
CTCGAAGAGATACTCCTCGGTGCCGCGGGCGAACTGGTTCGTTGGTGGGCGCGCTTCGCCTC  
GAAGTCCAGATCGTTCACGCGGCTAGGTTCGCGGACGCCGAACAGTCAAGCAGCGTTTG  
CGCATCACGCTGCACCGCGGTTGCGGCGTCAAGAGCGTGGCACCGGCGCGCTGCCTCTC  
GGCCAAGCGCGTGGCGATGTGCGAGCTGAACTTCGAGGAAAAAGTGGCCGGATTGATGCAG  
GAACGTGGACAACCTCCGCATTTTTAATCAGGGAAACGGTACGCGTGGGGAGGTTCGAATGT  
GGAGCGCGCCCGGCCGAGCCCTGGTGGAACTTATCGAATTTCTGATCTAGAATAGCGTC  
CGAGGCGTCGGCGGGGCGTGCCGAGCCATCCTCGACAAAAAGGTTCGGTAGTGCCTGTCT  
CGTACCGGCCACGCCTCCTCTGTTCTGGAAGGCGGTCAGCTGCCAGTGTTGTGATTGATC  
GTCCACGACAAGAGCACGCCGACCGATGGTTCGGAGGATTCCAAATAGACCCGGTTCTC  
GGTGCCTCTCGTGACCTTCTGGCTGACAGGATGCACTGTCCGTGCGCCAGCACCTCGGG  
GTGCCACTTCGCCAGTTTCGCCATGCAGTAGCCGTCGCTGCGGCGTGTGCCTTCTTCTCC  
CCTTACCGAGTCAAAGGCGCCGATGTCCGGGTGATGCAGCTCGCCGATGGCCTCGCCACT  
TTTCATTTCCAATAGCGTGGCAATGGCGCCCTTGGCGCCGCCCTGGAAGTCGCGCAGCAC  
CGGCCCGAACGGGCGGTGCTCTTGATCGAACTGCCGACCACCGGCCACGCTTTCATGGC  
CATGCGCAACGGGCATTGCTGGAACAGCGCCCCGGGCGTAGTACCAGAGGGCGCAGTCTG  
CACCGTGTAGAAATTCGCGACCATCGACGAATAGGCGTCAATCACCTGCGGCGTGAAACG  
CGCCGCGTGTCCAGTAGCGTCTTGACGGCAGCGCGCACGGCCTCTGACGAATGCTGGAA  
TGCCTCGTCGGCTTGCTGCTCGCCAAGTGCGCACTCGACTTCGGCCCGCAGTTCTTCGGC  
CTGGGATTGCATGTACTGCTGCGCCTCGGCGCGGCTGAATCCTTCCGGCTAGGTCTTGAG  
GTGGTCGAGCAGGCCCTGCGTGGCTTCGGCCGGGCGCGATGCACGCGGCGTATTCCTCCAC  
CGGCATGGCGACCTGGACGCCGGTTTGCAAGGACTGGGGCAGTTGCGCGGGCGACAGCCGG  
GGACACTGTGGCCGCCTTTTTCGGCCAGGCTTGATTGCAGGAGCGTAAAGGCGTCGATTAA  
CACCCGATGCACCGGGCAGTCCTCGGCGTCATTAGAGACGAACTGCTCGAACGTGGCCGA

GTCGTGCGCGAGCATCTTGTGCGGCTGCGGCCAGTTGGTTCAAACGTGCGAGCAGTTCGGC  
CAGCGGCTGGGCCACTCCGCGTGTTCGCTGCGCTGGTTCGGCCGTGGTGATGGTGATGTC  
AATGCCGCGCATGACCGCCCCGTTCCAGCCCACGCGCACTACCGTGGCGTTGAGGGTTTG  
CGCTGCGGCGCTGGGACGCACGGCCAGGTAGGCGGAAAATGGTGTCTCCGCGTTCTTGGC  
AAGAACGGCGCATTCGTTCAAGTCTTGACAGTACGGTGGCGGCCTGCTCGCCCCGGCACCCG  
GGAGGCGACCTGATGGGCCAGGGTCTTGAGCAGCGGCGAGCCGGCGTGACAGGTAGCCGAT  
AAGGCGCTACACCGGCGGCTTTTCAGTGGCGTATGCGATGGTTCGCCTGCGACACCGCAA  
GGGACGCGCTGCGCTGGCGTGAGGCCCTGCAAGCGGACATCCTGATAAGACTGCCCGCC  
GGTCATCGAAGCCACGCCGCCAGGGCCGACAGGACGGCCTCCGGGCAGCAGTGCCAGCGG  
AAGCATGAGCAGGTTGACGTGAGGGACTGTAGGCCGGACGAAACACCACAGCCCAAGGA  
GTCAGACAGCAGCGGACTTAGCCGCTTGCGGAGGTCCTAGGACTGCGCTCCCCATCGTGC  
GAACTGATCGGCGACAGGTTGCAGCGGATTTGCCGCTAGAATTATGCCGACCAGATTGTT  
GGTCAATTCACAAACGGACTGGAACAGACCGGCCGCGCCGCGGTTGGCCGGGGCGAAGCC  
CGCGCCAATATCGCACATGAGGGTGTCTTATGGTTCGGGTGAGCTGACCCTATACTTGAC  
CTCCCTGCCATGCTCGACAGTACCGACTCGATGCCGGTCATGTTGTCCGCGTTGACGTG  
CACAAGCTAGGCATTTTCCACGTCGGCCAGCATTGCGGCCGTGGCCGGCGTGGTCTTGGC  
CAGCGTGTGAACTCGATGGCGCCGATGGTGTCTGCGTTCGCTTCCCTTCGGCTGATG  
GAGCGCGGCTTAAATCGGCAGGTTGGCGCGACGCGCCACGCGCTGCGCTTCCGCGCAGGC  
GTCGGGGTCAGTGTCCGATGCGAGTACGAATCCGGCCCCGGGCTTCCCTGCCCGGGACTGG  
ACGTAGCACACCGGCAACAGTGGCATCGAACGGATGGGCGGTAGTGTCTGACCCGGTTG  
CTGGCCCAGCGTGCCGGCTACGGCGGTGTGCAATTCGTTGCTCATTAAAGGGAAACCTTC  
AAATTCAGCACGCATTGGGGCTTTGCGGGTTCGGTTCGGGGGGTTCGATACTGCGCGCTTG  
TATGCGGCCTTGATGCCCTCCTTGGTGGCGCTGTGATCGCGCCACCTTCATGCTCAAG  
ATCGGAACGGACGAGTTCAAGATCCAGCCGCGCACAGTGGCGTTTTTTCATCAACAGCGCG  
TCGAGGTGCTGGTTCGACCTCGGCCGCGGTGAATTCCTTGCCGGACTCGCGCTGCGCGGCA  
AAGAGATAGCCGTCGATGAACATGCGCATGGCGCCGACGCGCCCGGCATCGCCGCTGCCG  
TCCTTTGGCTTCTGATCGTAGGCCATCATGCGCAGGCGCGTGTGGAGGCCCTCCTTGATA  
GCCTGGCTCTTCAAGCAGCCCGGGCCGTTGTTGATGGGTGCCGCTCCAGACGCTTGGCG  
CGCTCCTGGGAAAATGCTTGCAGTTCGGCCTCAGACAGGATGGCGCGAAGTGCGTAGAAC  
ACGTTGTCGCACATGCGCGCCAACCTGGACCGGGCTGTTGGTTCAGCTTGTGTAGAGCCAC  
AGGCTCGTGGTGTGCTGCGCTTGGCGATGCGCTCGTCCGCGCCATAACGCCAGTTCAGC  
TTCTCGGGCGGGATGTTTGCGCGAATGGACACCGGCAGTTCAGGAAACTGCCGGCCGTTTC  
TCGTACAGGCCGCGCTGCGAAGTGGCGACGGCCGCGTCATAGCGTTGCTTGAAGTGTGGCC  
GTCTGCATGTTATATTGGCGCTCGGCCTCCGCGATCGCAATCTTGAGCCGTTCCGGGTTG  
CGGGCCAGGCGTGGGTGCTTCAGCGACTGCGCCTCTATGTCGGCCAGTGTCTGTAGCGAT  
GGGCGCCCTTAGCCGGCGTTGTACGTCTGCATGTTCTTACCACGTAGTCCCTGCGTTTCC  
TCCGGCAGTAGAGCCAGCCACTTCCCACCCTTGGCGTCTTAAAGCGCGGATTGCAGCGCG  
CCGGGGCCGGCGTTGTAGGCGGCGTACGCCTTCGGCAGGTCGCCGCCGAAGTTCGTGCAAT  
TGCTTCTGGGGATAGGCCATGCCAGCGCGCGGTTGTAGGCGGCATCGTTCGGGTAACGG  
TTCTCGTCCACTGGGCGCCCGCCAGCTTGCCGGCCTCGTGCGCGGGGTGGGGCATAAGC  
TGAGCGCTGCCGAGCGCGCCGTCGGGCTCGGTAAGCGGTTTGGCGTCCGCGTGAAGTGT  
CGGCCGACTGAATCGGTGCTCACGACGATGTTGAACGCGCACTCGCCGTTCCCTCACCTGG  
TTGGGAACCTCGCCGACAGCATCGGTAGCGGCAGCATGTCCGGCGCGGCCGCTATCTCA  
TTGGTGATATGACCGCGCACCGTGAGGATGTCATCGGTCTCCATCTGCCCGGAATACTAG  
TTGAGGTAGGCCGAGGCATAGGTTCGGGTTGTTTTGGTCCAGTGCCGACATAAGTGCAATC  
TTGTGCGCGTTGATGGTCAGTTTGGCCGCGGAGCCTCCTGCCACTCGGCGGATTTGCC  
AGCAATTGCGCCTGCCGGAAGGTTTTCGGCCTTGTGCGCTCGAAACCCGAATTGATGGCG  
TCGGGGTTGTTCCAGTTCAGGGCGATGTGCGCGAGGGCCGTGGACTGGACGCCCTCGGAA  
GTGGAAAGCGCGTGGGTCTCGTACTCGCTGGCCTCGTGTGACCTCTTGACCACGGAAC  
GAGGCCACGGTGTGCTTGAATGGAGCGCGAAACGCCGGCCCTGGGCGTCTGTTGCCTAGG  
GTGCCATAAATATCGCCAGTTCGCTTCTTGAGGTTATCGCCGTAAGTTCGTCGACCAAAGGC  
TTGCCTTCTGCCGTTCTAGCGCGTTGATAACCCTTGAAGTTTGCGAAGGCGGTGTCTTG  
TCATAGGGCAGTTCGTAGCGCGGCTTCCCTTGACGCAGTTAAGTCAGTCCCTCCACACGCAAT  
TAGTTAGCCTGCTGCACCATGCTGTTGGCGATGCGGCCCACTTATTGTTGCACTGGCGC  
CCGCCTTGGGGGAACTGCCGGTCCGACTGGTTCGCGGTGTCTGGAAGTCCGGGGGAATCC  
GCGCCGCTGAACGTAGGCGTAGCGAAGCTGGGCGTCCCATGCGCGCCTGCGGCACGGTT  
TTGACCGAAACCTTCCGGGAAACATAAACGGTAACGGGCGGCGTGGTTCTTACCCTTCGT

ACTGAGAATACCGATAACCAGGCATCAGCCACGTCGTCGTCGCCGGACAACAGCGACGATA  
ACCCCGCCCCTATCGGGCTTATGCCGGCGGCCGATCCGCTTTTCAGCAGTGCCTCGGCTT  
CCATTCTTTCGGCGCCTGTGCGCAGATTGATAGCTTGCACCCTGGCCTGGGTGCGGGTGT  
TGAGGGCTTGAAGCGCGGCCCTGCAGTTGCGCCTGAATGCCCGCGCGCTGTAGCCCCAGG  
CAGTACGCGCAGCAATGGCGCGCAGCGTGTGCGTGTGATCTGCATCACGATGTGCTGCTG  
ACACCTGCACCTCGGCCGGCGCTGCGTTCGCCCAAGTCGGTGTGCTGTTGGCGGCCAGCGCCC  
CGCGCGGGGCGCCTTTAAGTTGCGCGGCTTACAGGGTATGCGGGGCGCTCTGCTGCTCGC  
CGGCCTCAAGTGCCGACTGTGCGCCCAACTCCGCGGTGCTCGCGTTGACGTCGCCGGTTCG  
CCAGAATGGCGTCGGCATTGGCGTAGCCAATATACACGATGGTGTCCGTCTTGGTGTGG  
CGATGCCCGCGTTGATGCGGGCAATGTTGACTGCAACTGCAGGCTGCTCTGCTGCGACC  
GCGCGCCGTAATAGCTGCTTACCAGGCCCGGCCCATGCTGGCGGCGGATGCGCCAGGT  
CGACGCCTGATGTTGCTCCTCATATGGCATTTCCTCTATGCGCCGAAGGCGATTTCGCG  
CGACATCGGAACCATAACCAACGGCAGAGGGTCCGGCCTGCCGCAGAAACAGTTGCCCGCT  
GTCGCCCCATTTCCGGCGACAGGACGAGCGGAATTTCCCTCGCTCTTGAGTGCAGGCGCTAA  
GCCGTAGGGCTGGGACGGGCGCTGCTTCACCTCGGTTAGGGCGTCCGCGTGCAGGGCCCGC  
GAAGCTGCCGGACGACCGATGAACGCTCATCCCAGCTAATTCATTATCTTGAGGGCGCCC  
TTGGCCGAGGCTGCCGTCCCATTGCATCGCCACAGGCAGGGTATGCAGTTCTGCGATGAT  
GGCAGGCCGATATGCAGGGTGAAGGCCTCCACGTCCAGGTCAATGGCGCCATCAGTGAC  
GACCAGCTTCGGATGCACCGCGCCGGCGGCCAGGATGCTGACGGTTTTCCGTTTCGAGGTG  
CTCCTGGCCGCCGATATGGCTTACCGGCTCGCCCGAGTCCGTCAGGCCGCTATCGACAAA  
GAAGACGTCCGCCAGGGCATCGAACTGGCGCGAGGCCATGTGCTCGACATACTGCACCTC  
GTTGCCGCCAATGGTGTGACGACGACGCGCTTAGAGCCGGTCCCTCGTTACCCTCGGCCAC  
CACCGCGCAGGACTCGAACACGCCGTCCGTGTGCTGCCGGTGCCACGTGCCGATCTGTTG  
CTCGGGCATGTAGGTGAGGCCAGCAGCCTGGCGCTGCTGGTGTGATGAACCACACGCTAGG  
CTGCGCCCGCCTTCGCGTAGGACATGTCTAGAATGTCGAGATTGTCCAACAGGTGCGACAC  
GCCCAAGGACAGTTCGCTGGTGACGCAACCGCTGGCCGGCCAGTTGTAGGCCAGTTCGCG  
CACGTTGCCGCCGCGCGCGGCCGCGTAGATGGTCTGTGTTGTTGACCACGACCGGCTGCAC  
GTCGATGGCACTGACATAGGACTGCGGCCGATGCGGGTGGTCTGTTGGGCGTTACTGCGTC  
GTAGTCCACCCACGCCATGCGCCATTCGCCCGAAGACGTAACCAGCAGCAACTTGGTGAG  
CGGCACAATCTGGCGGGTGACGTTGGCCTCGCGCGCGGCCACCCGGAAGGAGACCCGGTC  
GTCGTCGCGCACGTGAAGCGATTACGACGTTGCCGATTCGGTGCCACTGCGCGTCATCCA  
AATGTTCTGCGGCTTGTGGTACCAGGCAAAGCATCGGCGTTGCTCGAAGTAGGACAC  
GGCCGCGGGGTAATCGCCGGCGGCTTTGAACACGGCATCGTAGATCGGGGGCGTGACGGA  
CAGGTCGGGCGCGTTATTGTCGTCGACCAGCGAGGTGCCGGTGGTTCGGGCCGATATAGCC  
GTACAGGCCGCCTTGATCCTTATAGACATTGTAGCGCGACGCGCCGGACGAGTCGGACCA  
CGCGATGGTGTGGTGCCGCCGGTGGTGAAGAGGTTGTTGTTGCAGGTGCCGGCCGAAGC  
GGGAGCGGGCGCGGTGTTACCCTCGGCATCCAGGGCCGTCACCACGTAGCGCAAGGTGTA  
GTCGGTGCCCTGGTTCCTCGACGTCGCGGCCGCGCTCGTGGGCGTAGCCACCGGCGACGT  
GAAGGCGATGGTCGCCAGTCGCCAGTTTGTGCGGCCAGGCGGGCGCACTTCACGCGTCGG  
ATAGATTGGATTACGAGCGTGAGGTGCTCAGTCGACTGGACGTAGTGGATGTTGAACCA  
GTCGGCGTCGGCGTAGGGATCGTCGAATTCTTAGGGCATGGCGCCGTCAGCGGGCGTGCC  
GCCGTTGGTATGGACGCGAAAAGACCACGCACCCAATCAATCACCATCGTTTGCCTGAC  
CGAGTAGGTGAACGGGATGAGCAGCACCTTCCTGGCCGAATCCTTCACCTCGCGCACTAA  
GGCGAAGCTTACGCGGTCCTCGGCCGGGCTTGGGGCTTGACCACGGAGTTGCGGCATAT  
GGCGAGGCCGCTTTGGTACTTGACGTCGTCGATGCGCCCGAACATTTCCGGGCTGATTT  
GCCGCCCGGAATGAGCGCTTATAGGACGCGGACGTTGGACATCACCCGCTACAACCGTTC  
GGCAAGCCGGGGCTTTTGCCGTCCACGAAGCCGGCGCCGCGGGGCGCGCAACCCTTCCGGC  
ATATGGACCGGCTTGGTGTGCGTTGGTAGACAGCGCCACCATTGCCTGAGTCAGGTTT  
GCCTGCATCGTGCCGACGCACCGCTTCGGATCAACGGCGCCACGGTCCCTTTGAGCAGT  
GGACCCGCCAGCATGGAGGCCTGGTGCACGCAAGGGCCTGCACATACAGCGGGCGGGAAC  
TTGGGCGTGTCTTACACCAAGCTGATATAGCGCGCCACCGCTTGGACTTGGTTGGTCAGA  
ATGATGTCGGAGCCGGTGTGTCGATTTCCAGCTAAACGGCTGCGCGTTGTCGATAACG  
GCCTCTATGTTTGCCGCATCGTGTGTCAGTACGTCCACGATCTTGATGGGATCGGCGGGC  
TGGGTGTACGCGAAGCGCCACCCGGGCGGTAAGGGCCATCACGGCAAGCTGCGCGCAT  
TTGGTGGGAAACCCAGGTGTGAGTTAGAGCAGCGAGGCGCACGCGAACGGATAGAAG  
CGCGCCAGTATTCCGCTGCAAGGAAGCCTCGGGCGGGTTGGAGCCTTCCACCGAGGCC  
TCGTGGCCAGGTAGGCCACGGCCTGATTGCTGATATCAACCTTGGATGCCATCGAAGCG

CCTCAAGAAAAAGCCGGCGCACGAAGCCCCCGTACGTTTCGAGGGGGTACCCCCACCGAAG  
GGGACTCGTCACACCAAGTCGCCGCCGACTTGTTCGGCCGAACCTTACGCGATCTTGTTCG  
GCGGGCTGCTTGGGGGCCTTACCGGCGCGGAGTACGTGCTGGGCCTCCGAAGCCGGCGCG  
AATCAGGGCGCCTTCGCGCCGTCCGGTACGTCAAACCTTGTTCGCCCGGCTCGCGCAGCTTG  
CCGAAATAGTCCTGTTTCAGTGCGATCACTTCCATGCTGCCTCCTAGTTACGCGATGCGC  
GGTCTGTTCGGGATAAGCCCCCTTCTGCTGGATGACGGTACGACCACCCCCGAGAAGTTG  
CCGGCCGTTAGTGGGCCGGTGGCGACGGTGTAAATAGACACGGCAGTACCGGCGCAGCTTG  
GTGGGCATAGGGATGAACACATGTTTGGCCGGCGGCGAGGTTGGCGTTGCCTATGGCGACG  
TTTGGCGGGCACGTCGGCGAAGGTGGCGTTGCCCGCCGAGTCTGCACCGAAAACGTGACG  
GTCGCGGGCGCCGGCGACGATGGCCGATTCGTCCATCGTGGTGGCCATCTTGTACGGGCA  
TCCATGCCGGTGTGGGATTGGCCTGGCCGAGGACGATAACGTTCGGTGGAGGCCGCGCTC  
GCGGTGACGGCCTGGCGGTCCCAGACTTGGAGCAGTTTGTGGATAATCATGGCTGGGATT  
CGTGTCTGGATTTCTGATCTGGGGCTGTTCGCCCGCCCCCGGCCTGCTACACTACGCGGGT  
CTCCGTACGACAGCAGCGCATCGGTACGGCCGGGACGGGCTGCCGTAGAACACAACCACCTT  
TTTGACGGTGAATTTGTTCCATCGTCAGCGTGGAGGCCGCCACCTTGTGGTGTCTGGCG  
GCGCAGGAAGCTGCGAATTTTGTGCGGCATGTAGAAAAGCCGGGCGGCCCATGGCCACGTT  
CGGGATGGGTTCTACTGTCTGGGGCATCAGGTCGCTGAGGTCGGCGCCCGGGCTGGGTTT  
TCTCGTAAGTTCGGACACGTCCACATTGAGGATGCGGACGACGTAACGCCAGTCGCGCCG  
GCTCAGGCCGATGTCCCACGTGGAGTGGGTGCGGTAGCCGTGGTACCGGCCGACAGGCCGCG  
GTTGACCAGCGTGTCTCGCCGAGCACACGCGATTGCAGGCCGGCCTGCGAACCCCTTCGG  
GGAGATGGCATGCAGGGTGTCTGTCCCCACACCCCCAGCCAGATGGATGCGTTGTTCGCT  
GCCCCAGCCGCGGGCGTCGCTGGTGTCTGGCCGTTCTCCGCGGAAAGGCTGTTCAAGCG  
CGGCGTCAGGCCCTGAACCTTCTCGGCTTCGATGCCGGAATCGCCGTAGAACAGCGTGGG  
CGGTTGGGTTCGGGTTAATGCCTTCGATGAAGGCCCGGTTCGTCGGACAGGCGCGCGGGCGG  
GGAAATGCCGTTGACGTCGGCCAGTGCCTTGTCCACTTCGGCGTAGGTTTCCACCACCCC  
CATGCTGTCCTTGACCTGCACAGTGCGGGACTCCTCGGGCTGCACGCCATAGTTGAGCTT  
GCGCCAGGTGCCGGTGGGCAGGCCACTGCGAACCGTGGTCTTGTGTTAGGTGCAACCGTT  
GGCCTGGATGACGGTCATGTATTCGAGGATTTCTTTGGTCTCGTTCAGCATTTTCGAAGAT  
CTGCGGGTTCGATCTTGGCGTCCCAGGTCATGCTGGCCGCGACATCGGCCAGCGTTCGGGTT  
GGTGGTGGAAAAAGTAGGCATTTGGAACGCTACTGTACCGGTTTCATCTTGGAAAGATTTAT  
AGAGGCGCCGCGCATCGCCCTGCTGGGGCTGGTTGCCCTTGTGCGGCCACGAGACGGT  
CTCCACTGATTGCCAGGCTGGCCCCGGAAGAACACCCAGATGATTTAGGTGTGATTGCCCC  
GGCCGTTTTTGTTCAGCAGCGTGGTGAGATCGGGAGTGCCGAAGGGGTTCGCGCGCCTTCT  
TGGCCGTGGTAAGGTTTTCTTGTCTGCTTGTTCGCCGCGGAACTCCTTGTTCGGCCGTGGACG  
AGGCAACCCAGGTTTCGGTGGAGCCGTCGATCTCCGCGTAGAACCCGCCCCCTTGTTCGG  
CATGGCGCGCCAGCATCACAGGCTGCATCTTCTCGAGCACCAGTTGCGCCTTGTCTTGGG  
GCTTCTCCAGTTCCTTGGCGACTTCAGAAAACGCGCCCAGCACACCGTCGTCGAATGCAA  
CGCCTTCGGGGGCCTGGAATTCGTATTGCTCGGGTGCAGCGGTGCGGCCCTCGCCTTGTCTG  
CGCCTTCGGTTCGTCGACGCGCCCGCAGCCGGCTGTTGGCCTTGGGTGCCTTTCTGTTGGG  
TCCGCTGTTGCTGCTGATGGCCGTCGTTGCGCGCCCCAGCAGCTCGTTGCTCGGCGGCCG  
GTTGCGACGCGGGCTGGCCTTCAGTGATCGTTGCGGGCGTCCGTCATCAGCGTTTCGGTTG  
ACATTGTTCTGTTCCCTCACTATCACGGCATAGAGTTCAGTGCAGAGCGTGTGGATTTC  
GCCAGTAGCCTCAGGCCCTCGTTCCGGTTTCTGCGGAGAAGGCCCTAGCCATCGCGTAG  
GTGTTCAACGAAAGCCGGTACACGCCGCTTCGTCCCAAAAAGCGCCACACGATGCAACGC  
CCCCGCTTGTGCACATCAGCCACTTACAATCCGCTTCCCTCGGTATCCTCCGCCAGGCGG  
CGTCGCAGGGCGGTGTTCGGCCTGCGCTCGTTCCAGTCCCCGAATATCGGTGGGGTTCGTA  
TGGCTCATGCGCGCTCTGTATGGGCTGGACGACGAGGCAGGGGCACCCCATCAGGCCGAC  
ATGCTGCTGACGCCGTAGAGGCGCTGCGCCGCGCTCGACTCATCGCTCTGATGCACGTCC  
ATGACGGTGTCTGCAAATCGACCTTGGGCGAGGGCTTTCGTCATTGCGGGAACTGACC  
CACAGCACGACGGCGCGCGCCGTCAATTTGGCCACGGAACCGACACCGGGCAACGTGACG  
ATGCCTAGCCTTTTCGAGTGCTTCCGGTGTTCAGGTTGATGCACAGGCGATACGGGTATGCG  
GGCGTGTGTTCCGAGGCCGATTACAGCAAAGCATCGTCCCGGATTCCTTCGGGGTCATA  
TTCATGTTGGTGGAGCGGCACGTCGGCCTCCTATCAGGCGTAGCCGGCGAAAGCGCGCGTT  
ACTTAGGGGAGCGGTTTACTTGTCTGGTATCGACGGTGCACGCTTGGCCGCCGTGTCC  
GCGCCCTGGTTCAACAGTGCGGGCCGGCTGCGCGGCCCTGCTCCTGGTCTGCGCGCTGCTTG  
CGGATAAGCGCCACCTGATGGCCCGGCACGATCAACTCGGGGTTCGATGCCAGCATTTTCG  
GCGTAAGTGTTCGGCCAGCGGTTCGGCGTCGAACTTGCCGACCCTTCGGGCTTGTATGCCG

GGCACCGCGCCAGGTTGACAATGAAACGATGAACCGAGTTCGTCGCAATGGCGCGCTGG  
GCCTGAGCGGGTATGGAAACGAACTCCACGTTAAGGTCAAGGCCCTGCATTTCTACGGG  
GGGGGCGGCCGGATGTTGGCTTCCACCATGCGCTGAAACGTCAATTCGAAGAGCGGGTCCG  
AGGATTCCGTTGTGCTTCCGTTCAAGCATCGGCCCCAGCATGTGCAGCTTTTCATCGTGG  
CGCTCTGCCACTTCGGGGGCGGTCATCTGCGGATTGGTGGCGTTGGCTACCATGAGGAAC  
AGGTCGGCGTAGAAACTCGACTTGATGCGCGCGCGAACGTCCACGATGTCAGCCAGAAGG  
TGCCTCAGGTGGAGGTTGACCTCGAACGTGGTACGGATGCCCTGTTGGGCGCGGCCGCT  
TCGACACATGACAGGCCCGCCCGCAAGGTGCTGATGTCGTGGTTCTTTACGGACACCGGC  
CGTTGCAGCGGCGGGTTCGCCCTTGTGGTTCGATGGCGTGCGCCTTGCAGGAGTTGCTCTTGT  
TGTAGCTGGCGCACGTCCCCAAGGCTTCCATTGCGGGGCTGTTGCCGTAGATGTCACCG  
CCGACCAAGGCCAACGCAGGGACAGTGCGCGGAACGACCGATAGACGGATTCGCGCAGC  
GTGCGGGTTTCGTCGGCGCCTGGCTCGCAATAGACCGACTTCCACCCCATGTTGCGGTCCG  
TCCCCTTGGCTCGGGTAGCGGTTCGGCGCGCCGCTCGATGGCGTGATTTAGCGTATCCCGC  
TGTTCCAGCGCCCCGCGGTTCGAACAGGCTTTCACGGTGGGGCTGCACTTGTCAATTGCCG  
AATTCGCGCACCATCTGCGCGACCGTGACCTAGAATTCTCGATACGACGCATTGACGCGG  
CCCTGGTTCTCGACCGCGATAGCTTATTACCAGCGGTGAGCGATTGGTGATCGACCACG  
GCATCGCAGTAGAGCAGCACGATGCTGCTTTCTGTGCCGAATGCGCCGAGTTCTTCGTAC  
ATGGAGTGCAGCTCGCGATTGGTGTTCGATTTGGCGACAATCATCAGCATCAACCGCGTG  
ACGTTCCGACCCACGCCTTGACGGCGGCGGACTCGTCCAGTTCGGGTTTCGAGGTTGTC  
AGGCCGAACCAGGGGCGGGCTGGGCTGGTCATGCCCGCCATCACCCCGCAGCGAGCACG  
CGCAGCGCGCGGTGCCGGTGTGTCGACATTGTTGTTGCCGCTTCTCGCCACGGTTG  
GGATCTTGCACGAAGAAGCGCCCCGCGCTCGCCAGCAGGCGGTGGCTGATTTCCATCAAG  
TGCGACATTCAGCTCTCGGGCTCGTTGCGCAGTTGCCCTGTCGCGAAAGCAGCGGTTTG  
CGCTCGGTTTGCTCGGCCACGTTATTGTCGCAGCAGAGTGGACTTGCCAGGGTGAGGGC  
CTATTGGTCAACGCCGTGCGGACCGACCAGCATGGTTCGGGACAGGCCTGACTTCGCCCG  
GCTCCCGACAGCCGACAGCGCGCGCTGCGAGCTGGGCTGCTTCTGGTGCGCTCGATTAA  
CGACTGCTGCGAGTCGAGCAGTTGCTGCTGCATGATCTTGGCCTGCTGTTGGTAGGCTTC  
GGTCTGCTTCTGGTATTCTCGGGCAGCCTGTTGGATTCCGGCTTTCGGCTGCTCGGCATG  
CTCCTGCGGTTCTGCTGGGCTTGTGCTGCGCGCTGCGTCGAGCCTTTCTGCTTGT  
CGGCATGTACATGCTCGCCTCGACGCCAACGGCGGCGCTCACGACGACAGCGGTTACGGT  
TCCTGACATGATCTATTCTCCCGTGAAGGTGATGGTTTCGGCCTCCTGCTGGTGCCACAG  
TAGCAGGTCCGCTCGTCGGTGAATTCGGCCTAGGCCTCGGCCACCGACCAGCGCCTCGAT  
GGGAAAATCATGGTTAGTTCGTTGGCGGCGTGGGCCACGATTGCCTGTTTGCGGGCCGGT  
ACTGGCTGGGACGACGTGGTGACCGCACCATTCGACGGCCTCCCCGCCGATGAACACGGT  
GGCGTGCCCGCTGAAAATAAGCACGGTGGATACCTTGATGAGCGCGCCGGTCAAGTGC  
GCCGGCCCGGATGCGGATGGTTTCGCGCGTACACGACGGCGTGAAATAGGTGCGCCGTGGG  
TATCTCGGCCTGCGGCAGTTCAGCGAGCGCGCCTTCCAGGCGGAACACGCGGTCGATGGC  
CTCGGCCGACATCGCCGGCAGGTGCTGGAGAGGGGCGACGATTGCAGTCATGCGTGCAGC  
CCCCGTAACACGTGCGGTTAGTTTCGGGGTAGCCGGCGGCTGGCGGCAACTGTACCAGG  
CAACCCTCGGTCGGGCCCGCACACGTAAGTGGTTCGGTAGCGCCAGGTCGCGGGCAAGTGGC  
TCGGTGGCGCGCAGCAGTGACATGCCGGCGCCACCGGGCTGATGCGCGGCGGCTACGAGG  
ATGGATTCCCAGGTGCCGGTCAACTGGCCTTTGAAGTGCGGCACCTGCCTGACCTGCAGG  
CAGTCTAAGCCCACAGTTTCTCTCCCCGGAATACGCTAAGGTAGTGCCTCAAGCGCGCG  
CCTTCCATTAGGCGTAGGCGTGATGGTACGGCGCAGGCCCGGCGAGGTCGGCATTGGCC  
GATTCATGCGCGTATCCGGAGCACAGACTTGCAGGAGGTGGGCCCGTCCGGTCAAAGCAGCG  
AAGTCGACGCGACGGACGATTGCGGATTCATGCCGCGCACAGTAGCGGCGACCACGCTG  
GGTACGGCCGCGCGCTACATGCGCGCGTGGGGGCGTAGTACAGCCGGCTGCGCGTCTG  
GCCACCGCCTCGACGGCTGCGGGCTTCGGCGTGTCCCTGAGCGCGACCACGTAGGCGTT  
GCCACAGTCCGGCGAGGGGCCGATCTTCTCGATGATGTCTCGCGGCTGGCCACGTTGAG  
AGTGGCGCCGGAAGGTGGCCACTTGGGGGCGGTGAGCTCGGCGAGCAGCCGCGGGTCCGGG  
CGGGCGAGCGATGCCCGTGTGGTGGTTCGGGTCGAGGGCCTCGCGCATTCGCCACCACCA  
CTCGCTGCGCAAGTCGGAGAAGCGCAGCCGGCCTGATCTGTCGGTGCCACGCGCGGCCCTC  
GGCGACATTGACGCCGATGACCTGCTGCTTGGCGTCCGGCAGGAAGTCGTAGGGGCTGGC  
GCCCCCGCCGATCACATCCAGGTGGATGACCGCGTGGACGCGCAGCGCGGCGATGGCGGG  
GCAGGCCACGGTCAGGCCATCCGGCGTGTCTTGC CGGGGTAGGTCATCGGCACGTCGAA  
CCACATGGCGTGCCGGCGGGCCAGGATGGTGTGTCACGCCCCCGCGGGCGACGTCCAC  
GCCAGGCTGTCCATCGGTGCCAGTCCGGTTCGGGCCGCTTCCACCGCGCGACGGCGGCCCTC

GATCCATGCTGTCGGAACGACCTGCCACGCGTGGTCCCTCGATGCCCGCGTTGAAGTCGCC  
GGACAACATCTGGCTGCGCAACTGCTCGGGCAACGATTGCAGGGTGACGAGATACTCGCT  
ATTGACGTAGTGCGGGTTATCGGTACGCCCCGCGGAATGAACCTTCGCCACGTGGGCTG  
GATGAGGTCTCGGGGTTGTAGTCCGCGGGGTGCAAGGCGTACTCTACGTGCACACCAAC  
CAGCAGAAAAGGGGCGGACGACAGCGGGATGCCGTGCGAGTCAAAACACGTGTCGCGCAA  
TCTGCCGTTACCATCGGGCGGCATCGCCACCCAGCGCAGCGCGCCCCGGCGCCGTGGGATA  
CAGCAGGTGCTATTTGTCCAGCCATGGAGCGAAGAAGTCGACAACGCACCCGCCATCGCT  
CGTGGTTGGCGGGTTGGATGTCTTGACCACGCGGACTGCTGGCCCCGGCTTGTGGTGC  
GTTCCAGCCCATGACGAACCGCACCTGTTCTCTGGCTGCTCGGTCACTTCTCCGAATGC  
CGTGAGGTGCTGCGGCCGGCCCTGCCACCCGGCGATCGTCCGCCGGGATTGTCCAGGCCGGC  
AGGTTCCGGCTAGCCGTCCACCGGGCAGGCGCCAGAAGCTCTGTTGCGAGTTGTAGCCGTC  
CGTGCCGCCTATGGTTTCCGTGATGCTCTGCACGTAGCGCTCGGTCTGTGCTTCTCGCG  
CATCACGATGAGGGCGCGCTTGTGTTGGTCAACGTCACGCCCGCGATGAGGTCCGGTCT  
GCCGCCGCCGGCAGCGCCCCGCTTAGCCGATGATGTCCGGCGTCGGAGTTCTACACCGCTGT  
CTGCGGCCAGGCGAGTCGCAACCACTGCGGGCGCGGTGCGGAGCAGCGCGTCAACATCGGC  
GAGTTCTGCCGGCGTCAAGTACGTAATCAGCCTGCGGATTTCCGGCAACCCTGCCCATGCC  
AGCCCCGCGGGCGGGTTCGTCGTCCTCAGCGTCGGCAGCACGCTGGGCGCGCTGCTGGGCG  
GCGCCAACGAAGGCCGCGATGCGCGCTGCGCGCTCGGTATCGATGGTCTGCACGGGGCCT  
CCGTTGGCCCCGGTCAGTTCCATGCTGGTCTCTTCGCCGTAATTGGCCGGATAACCACTTT  
GCCAGTAGCATCAGCCGCGTTTCGACTTGTAGGTTGCGGTGGTCCAGCATGTCGCCGCGC  
TTGACCCTGTAGCCCGCGTCCGATTCCACGGTTTCGTCGCCGGTCTGCAGCTTAAGGGCG  
ATTCGAGGGCTTCTCGGGCATGGCACCAAAGGCCGAGCGGGCGGGCGCGCTCCATGCGC  
TCGGCGAACTCGGGGCGGACCCAGTCCATTGGTACACCGTGCGCCATTCCGGCATGTGT  
TCGTCGCGGCAGATTTGGGGTAGCGGCTCGCCGTCTGCGATGCGGTGCGAGATTTCCGGT  
GCGATGGCTTCTGTGTATATCGAGGCGTTTTTTCATGCGCGCGGTTTTGCGCGCGTCCCG  
AAGGCACGGGCACCCGCCGGCCTGCGCGGCTCGCGTATCGCGCGCGATGGATCCCATCAA  
CGTTCAGGCACGGTCTTGACGCCAACCGCGAACGGGCGGGCGCCGCTCATATCGGTAGATT  
TTTGCAATCGCGCCCTTGTACTGCTCGAACTTCTCGGCCAGCACGGCGTAACATCATGCAC  
TCGAGCTCGTGCACCTTCGCGAATGCGATTGACCTCGGGATCCGTCAATTTGGCATTGGG  
TGATCGTCGCCGACTCGCCAGCCGGCATATTCACCGCCACGGTTTTTCAGCATGGAGCCG  
CCCTGCTTGAACGTGCAATTTTTTGTCTTGCCTCGTTTGCCTCCTTCCTCAGGCTTTTTTG  
AGTAACTTTCTCATGTCCACGTATGAGAACTTCTAAAAAATGGGGTAGAAACGGGGCA  
AACGAGGCGAACCTAAGTTTCCCGGGCGGTTTGGAGCACGTAATAAAAATGCGTATTGCAAAG  
CCGAACCACCGCCAGCGCGCCCGCTGCGATTCCATAAGGCGCAAGAAAATGCGAATAAGT  
AAATAATTGCTGATAGCCATAGGCGTGCTGTTTTTTGTCAGGCTGCGCCCTCCCGATGGAG  
GGGGCGAAGTGGGTAATGGTCCGAGGAAGTAAGGCTGACGGCAGTGTGACCTTGGGCATC  
GACGTAATCGCTAAATACCGCGTCACGGAAACCCCTGTCCAGAGGGACATCAACCTCGCC  
AACACCAAGACAACCGACTCTGCAAGAATTGGGGCTACAGCGGCTCGGACATGTACCGT  
GAAGGACAATTCCCGATCCTCAAACGTGTCATGCTCAGGGCGTCAGCCCCTGCAGGTGCG  
AGAACCTGCCGGGTGCGTACCAGTCCCTTAGCCTGCAAAGCTGACGCTGCGCGCATCCC  
TCGAAATACCCACGCGCCGTACGCGATTGCCTCTGCGTCCCTTGCCGCGTATTAGACGC  
GGGCTGCCGATAGAAGAAAATCCTATGCAGTCCAGCCGGCGCCCCAGGCTCTTGGCCGAG  
GCACTGAACCGCAGTTCGCCGCGGGCCTTGGCGAAGGCTTCCCACGACGCCAACAGGCGC  
GCGTTGCTATCCAAGTAGGCTGGGCCGACTTCGCAGCACTCGTCCGGCCCTTCGGCCAGC  
AAATCCATGTCGCTCCTGTGGTCATCGCGCGCCTGGCGCACCGCGCCCGGGCGGCGGCTAGG  
CCCTGGCGCTGGCATGACAACGCGCCGCGCACGCCACCGCGAGTATTCGGTGGCCTCG  
GCCGCCAACTTCTCGGCACGGTCCGGGCTTTTCGTCAAGGTCAAGTCTGGTCAAGTTG  
CGCGTTAAGCGCACTAGCAGCAGGCGGCTCCAGATGCCGTGGTAGGCGCCCTTGACGATG  
GGCCGGTGTTTGGTTCGTGATGAACGCTAACCAAGGTGGGTGCCAATTCACCGCGGGCTTG  
TAATACAGGCCGCGCGCCGGGAGCTGCTCGTAGCCGGTCTTGGAGTTGCTGAGGCTCTCG  
CGAACTCGCTGCCCTCGTCCGGCTCGGACACGTACACGAAGCGCTCGGCGGGCATCCGC  
AGCACGTCCTCGCCGCGCTGCCCGCGATCGCGCCGGCAGCGCCGCTGCTCAAGAACGTG  
TCCGCGCTCGCCATCTTGGCGTGATGGCCAGCACGTGCGGGATGGAACCCAGCACTGTG  
GACTTATCATTGCTGCACGACCCGTAGGCGATGACGAGCACGTCTCGGTGGGCTGGGCC  
ATCAGGCTGTAGCCGATGAGGCGCTGGAACAAGCCGCACATGTTGGCGTCTGCGAAGAAC  
ACGTCGGCGACGGTCTGCTCGAGGAGCGGGCAGGTGGCCGCGGGCGTGCATACCGTCGCG  
GTGATCGTGGCCACGCGGTACGCGTGGTCCGGCGGAAGCTGCTAGCCGGTGGTCAAGTCCG

TCCACCCCGTTGCCTACGCTCAGCATGTGCGGGCGCCTTGTCCAGGTCGGCCACGCTGACG  
ACCACGCGCGGGTTCGGA CTGCGCCAGGCTCACCATGTTGCGCACCATGACCGCGCCCTAG  
GATACGGCGCAGCACTTGAAGAACTCGGCGCGCTCGGCGTTCGACTCGATGGGCTAGGCC  
TCGTGCGGCAGCGCGCGGATGATCTCCTTGGCAAGGTCTTCCAGTTTGACGCCGGCGGGC  
CGGCGCCACTAGATGCCTGTCCAGGTGAACCAGCCGTCGAGTTACGGCACGAAGATGAGG  
CCGTTGCCGTAGTGGTTCGAGCATCCGCTCGGCATTGCCGTACCTGGTTCATCTGCCGGCGC  
TGCTTGTGAGCGGCACGACCTTGC GGGCGCCGGCCATCGGGGCGCGCACGTTCGGCCACC  
GGCAGCATGGTGTGCGTCACTTCCCTTGAACCGGGCGCGTATGAGGCCGGCCAGTTCCGCG  
CGCAGTGCCAGATGGGTGCCGGCGGCCTCGCCAGCGCGGGCGCGCCACGTTCGGTCA CAAGG  
TCGATGCTGCGGGCGCACGCGAGGATGAGCGCCTTGGCATCGTCCAGCGCGGTTCGCTCC  
ACGGCGCGCACGGAGTCGCGCTTACCCTGGGTGCCGATTGTGAGCAGACAGCGCGCCGTC  
GTCGGGTTGCGGCGGGACTTGCCGAACCTGTCCAGCGCCGCGCCACCTCCTGGCTGCTT  
GCGTAGGTGCTGGCCGTCGCCGACCACTCGTGCCGCAAAGCTAGGGCCTTGCCGCTGGCA  
TCGCAGTTATGCTGCAGCGAGATTCTCACTTTCAGCCAGGTGTCGTAGTCCCTCGTTATCG  
ACGTAGGCGAACGGGCTTCGCGCATCGCCCAGGTCGATAACCAACGGCGGGTTCGTAGGCC  
ATCAGCGGGTCACTCCTCGGGCGCCGAGGTCAAGGCCCGTGC GGGACTTGTACCGGTGAGG  
CGCGCGAGGCCGCATTCTCTGCCATCGCCTCGTACTACTGCAAGGCTTCTCGACTTGG  
ACCTCGGTGTCGACCGGTAGGTTCGGACGCGCGCGTGGCGTTCA TTTCCGCCATAAGTCC  
GTCAACTCGTAAGGCCGGTAGCTGTGCGGGTGGACGTGGTAGGCGACGAACTGCTGGCCC  
TTCCCAGCACTTCGAGGCGCTAGCGGTTCGCCGGCCAAGTCTC GAACCACGCGCCGGTG  
GCCTTGCTCCAGCCCTCGGACTCGGCGCGGTAGGCCAGCAA AACCTTGGTTCGCGTTGCC  
AAGCGCCCGCACGTCGCGCCAGGTGCTCATGGCACCATGCGACGAAGCGCGCGGCCCGT  
TCCGCGTCGGTGATGATCTCCTCAATGCCGACGATTGGCTGTGCCCGTGGCCGCAGAGG  
ACTCCCACGCCGTGCTGCGGGTATCGCGTCAGGTTCGGCCGCGCCAGGCGCGCGGTTTGC  
CGGTTGTCCAGCGCCGGGCGCTTGTGGCCGGGTTTGATGGGGATGATTAAGTAGCCGTTG  
CCCAGCAGGGCGCGGCCGTGTGTTTGA AAATCGGAACTCAAGTTGCCGTCTCCCCGGTCA  
GATCAAATCGGCAACGCCGTAGA ACTCGGCATCGGCTACTGCCAGGCGCGTGC GCGAGAT  
TTAGGCATACGCTGTCTCGTGCTCGATGCGGAGGGATCGTCGACCAGAGAGGACTGCAGC  
GACCCCTCTTGTGCCGCTTACTGCGAACGGGTCTAGCACCACCACCCCGGCATCGCAGG  
CCGTATTAGTTCGCGCATCAGTGCCGTGGGATTGCCAGTTAGGTAGTGCTTGTGCTCGCG  
GCGCACGACGATGTGGATACAGCCGTGGAACGGGCCATCATGCTCCAGCTGCAGGGCCG  
GGCCTGTGTGCCCCACACCACCTATTCGCACTGGTGCAGAAAATCTCCTATGTGCGCCGC  
CCAGGCGCCACTGCCTTTGTCCCGGGCGATGAGGCCGCGCCAGAACACGCCGCGGCCGCTG  
CACCGAGTTGGACATCAGCGGCAGTTGGCGCTAGTTCGGAGAAGGCCATGAAGTAGCCGTG  
CGGCTTGAGCACCCGCACGCACTCGGCGATGCCAAGGAACACCAAGTCAGGTAGCTGCG  
CTGCTCGCGCAGTCGCCCCGAAACGTCGGGTAGCGCCCCTACGAGCCGCTTGTGCTGTA  
CTTCGCTTCGGGGTTTTTGCCTTGTGCTCGCGCGAGAAGCAGCCGCTGCTGTAGGGTGG  
GTCGGTGATAACGACGTCCACGCTTTCGCTCGGCATGGCGATGACTTCGGACAGGTCCCTC  
TGCCTGAAGCAGTTACCCGGGGGCGCCGGTCAACGCGTCACCTGCGGAAAGTTCGCTGAGT  
TAGAGCACGAGATGGCGCAGTTTCTCGACCACGCTGTATCGCGGGTCTATGTGCCGGCCA  
CTGTAGCTGCGGCAGATGGTGGGCGGGGTACGTCGGTGGCATCGGCGATCTGTTCTTGC  
GACCAGCCGGCGCGAATGATGGCGCAGACCAATTCGTCGGGGCGCTGGGTGTAGGCCGGCG  
GGAATTGCCGGTGTTGTGGCGGGCATGGCTTACTCTATCGGAATGCGCCAACGCATTATA  
TGCCTAGGCGGATAAAAATTGAATAGACTTGAATAAAAACCCTGCGTTAACGTATATTTCCC  
CGATGAGCCCGCTTGCAGCAGCATAAACGATCTGTTCCGGGTCCGGGACGAAAACGCGA  
CTGCGAAAGCCGAGTAAGTCGGCATATCCCAGCCGATACTCCACCGGATCCAGAGGGTCC  
TCAATCAGCGCCCCAGTGGGGAAAAGCTACGCAAGCTGGCGGACTGCTTCCGGCGTGACGA  
TGGACGAGCTGCTCACGCGCGACCTGTCCACGGGCTTGCCGGCCGAGGCGATCGAGCGAG  
CCAACGTGCGCGAAGGCCGGAACATCAGGGGTCTGGTGCCGATGCTCGCTTCGGTGCAGG  
CGAGCGAGTGGTGCAGATAGCGGGGACTATTCAGCGCGATGATGCTAAGGTAAGGTTGC  
CTTGTCCGGTGAAGCACGGGCCGCGCACGTTATGCCTGACGGTCAAGGCGACAGCATGA  
AGAACCCCGGTGTGCGGCCAGCTGCGAGCCGGGCGACGTAATAGTCGTTGACCCCGACG  
TGGCAACGTAGCTGGCGACCGCCTGATGGCCCGGCTGGAGTCCCAGGTTCGCGGCCCAT  
TGAAGCAGTACCTGGAAGCAGACGGCCGGAAGCTGCTCAAGGCGTTGAACCCCGCCTGGC  
AACCGCGCTTTATACCCATCAACGCCGAAGCAACGATCTGCGACGTGGTTCATCGGAAAGT  
GTGTGCCTGAAGGATGATTTGCTCCCTGACATACTTTGCCGCGGGCGTGTGCTGGGCCT  
CGCTGTGTGGCCGTGGATACAGCGCCTCGGTTCCGCCGAAGGCGAGCTGATTTGGCTGCT



CGGCAGGGCCTGCCTCTGGCCCTACCTGCTGAGTTACGCGGGCGTGGCAGCGCCCCAAAGC  
ATAACGTGCCGCTTGGTGGGCCTATAGGGGCCACAAGCATCAGTAACTGCCGCACCAGCG  
CCTGACGAGCCCGCCGCGCGGGCTTTTACACGCCTAAAAATATGCGCTGACGCATTGA  
CATGGGCAAGTTCCTTTCCGCATAGTGCGCCTACGCATCTAACGAAAGGTGAAGCCCATG  
AACCGGCGCACCATCGCCGACGAAGAATTACTTCGGCACGCCCTCGCCGTGCAAGACCCC  
CTCACCAGTTCGGCCATGGAGGCCGAGCGGCTGCGGGCTTTCGAGGTGCTGCTCGACAAG  
CTCGACTCCGAAGCCTACGAACTGGTCACGGAACGCGAACTCGACGCCAGCGTCTGTGC  
GAACCCCTTGACAAGCTGTACGCCACGACATTGAACCCGGCTCGCTCGCACAAGTAGGC  
GTCGCTATGCTCATCGGCCCGCCAACACAGCCGCGTTGCTCAACGCCCTGGCCGCTGCC  
GACCTCGACGCCACCGAATCCCTCAAGGCCGCACTCGACCTTGCTAAGCAGTTCGCGGAC  
CTCGTTGAGGGCGCAGGGGGTGTTCCTCGCGCCGGTCCGAACTCACCACCACCGCAAAC  
AAGGAGTAATCACCTGTCTCTCGCAGCAGCAATCCAGGAAAACACCAGCTCGTCGCGCT  
ACCACATCGCCGCCATCAAGGCCCTGCGTCCCGACAACCGCCGCCAGGTGCTGCGGTGCG  
CCGCCGAGGCCCGGCCGCCAGCAGCAAGACAGCACCGAAAACAAGCCGCGCGCCACGT  
CTGCCAAAACGACGGCCGGAAGTGCCCTAAGCCCCCTACTGCCGACGTGGGGGGCGGCAG  
ATGCGCCCGAATCCAAGACCGAGGACTCCGCGCCCGTGCAGGCTGGCGATGCCGGCCAGG  
ATGCTGCCGCCGGCGACGCCGCTCCGACTTATCAGGACACTGCCGTGCTGTGACCAAGC  
AGGCTCGCGTCAAGGGTTCGCGACGCCGACGTCGCTTTCCTGTGCAAGTTCGGCGCCCCGA  
AACTACGCGACGTTAAGCCCGAGCAGTCCGCCGACGAGCTCGGCGCGTGCAATCAATCGA  
TGGAGGGCGGATCCCATCACCCCCCACCTAGAAGACCCCAAGAAGGCGGCTAAGTCC  
GGCCTCGGCATCTCGTTGGTGTGCGCGTCTGCCGGTCCAGGCTCCACCAGCCGCAACAGC  
TACGCCTGGCCGCAGAGGGTTCGGCGCCGAGCTTTTTCGCTCCGCCTGGAAGGACAAGTAG  
AACTGGGGCCACGGCCTGCATGGCTGGCTGTTTCGGCCCCGGCGACCACGGCTGCGTCGAT  
TATTGGCTAGACCCTGGTGCCAATTGGTACGTGCTGGGAGTGCCCAGCGACAGCATCAGC  
ATGCTGGGCGGGAAGTGCAAGTTCGCGTACTGTGCTGCGCTTCATCGGGTTCGCGCAGC  
GACGCGGGCCTACATCCTCGCCATAACCCCAAGGCTCTGGATGTCGCCGTGATCGGG  
CCTGAGCGCGAAGTGGACGATGGGGCAGTTGCGGAAGTGGGCGCCATCGGCACGGCCACC  
GCTGGCTATCGCGGCACGTCCACCCTGGCTATCGCGGCACAGCCCCGATGGCTATCGC  
GGCACGGGCACCCCTGGCTATCACGTACGGCCACCGCTGGCTATCGCGGCACGGCCACC  
GCTGGGTATCGCGACACCGTCCACCCTGGCTATTGCGGCACGGCGTCCGCAGGCTATCGC  
GGCACGGCCACCGTTGGCTATCGCGGCACGGCCACCGCTGGCTATCGCAGCACGGCCACC  
GCTGGCGAATCCCCACGGCCACCGCTGGCTGTGCGGCAAGGCCACGGCTGGCGAATCC  
GACACGGCCACCGCTGGCCATAACAGGAGAACTCCTCATCCAGTGATGGGACGCCAAGGCC  
ACACGCTACCTCACCGTCTGGGAAACGTCGGCGAGGACGGTATCAAGGCCGATACCAAG  
TACCGCCTCGACGACAACCACAAGTTCGTGGAGGTACCGGAATTACCGCGCGCAAATTCT  
ATCTGGACGGTAGCGCCGCGCCCGGGCACGTCTTCGTGTGCGGCAACAAGCTGCGCG  
GCGCACACCTGGGCGGCGCAGCAGCCGCTGCACACAGCGAGTACGGCGCGGCCCTGGAGTG  
TTCCGACGGGCGTACCGGACACGCTTACGCCATCCCCACGGTTGCCGTGACCGTCGTGT  
AGCGCCTGTCTTGACCGCCATCGGTGCGGGGGTTCGAGCGTTTCAACGGCTAAGCCACGG  
ACCACCCGCATCTGTATTTTCCTCAGTACTCGCGTTCGGCTGCGGCATCGCAGGCCACCTCG  
ACGGCGAGATCGCGCGGATGTTCCGCGACGGCCCCGCGAACTGCTCTCTGCTCGACACGT  
GACCGGCGATTCTCCAAGGTTCCATCGCGGGCGGCGCAGGAGGTAATGGCATGAGCACGCA  
CGCGCAATTTTCCCCAGCAGAGCGCACCTCTGTCTCCTACTGTCTGGGAGCGTGGCCCT  
GGAAGCAGAATAACCCGATAATTCCAGCGACTTGGCCGACGGGGGAACGGCCGCGCACCA  
ACTAGCCGCCATGTCGCTGGCTAACGGGCAAGACGCCATCGACTTCCTGGTCCGCACCAT  
CGAGGTGAACGGCAAGGGCTGGGAAGTTTCCGATAAAAGGGCCGAGCACGTGGAGAAGTA  
CATCGACTACGGGCTCGCCTTGGGTGGTCAAGTGATTGTGCAACAGCCGTTGAGCGTTCGA  
GGCTGTCACCGGCGAAGCTGGCGCCACGCGCACGTCCGACGCCGTGGTGTGCTGACTGA  
CGAACTCATCCTTGCCGACCTGCAATATGGCCGTGGCGTGAAGGTGGACGCCGAGCGCAA  
CGAGCAGCTGGCGATCTACGCACGCGCCGCCCTGGACGTGTTTCGAGTTCTTGGGTGACTT  
CAAGAGCGGGGGCCTGGTCTGCTGCTGTGCGGCCCTCGACCACATCAGCGAGTGGGACAT  
GCCCATCGCCTCGAAGGGCGAGTGCAGGAGACTGGATTCAATTCATCGCCCCAGCAAGCC  
GGCCGCCGAGCACGCGCTGCAGTTCAGCGGGAAGCCGGCCGCCGAGTTCAAGCCCGACTA  
CCTGACCCCCGGTGAGAAGCAATGTCGATTATGCAAGGCCAAGAACACGTGTCCGGCGCC  
GCCCGACCACGTGCTGTCCACCCTCGCCGGCGACTTCGTGGTTCGAGTCCAAACCGGTGGG  
TCCACGGATGGACATCGCCGCCGATCGCACGGTAGACAACGCTATCCTCGGCTACCTGCT  
GGGCGCGGTTCGATCTGGTTCGATTCTGGTTCGCAAGGTCATCCGCTCGAAGGCCGAAGCCGA

ACTGCTGGCCCGCCATTCGGTAGCCGACTTCAAGCTGGGGGAAGGTCGCCGCGGTGCCCG  
CCGCTGCACGAACGAAGCCGAGGTCGAGGCCGCGCTCAATGCCATGTGTCTCAAAGTCGA  
GCAAATGTACGACCTGTCCCTCAGCGGTCCGACAACAGCCGAGCAGCTGCACAGGGCCGG  
CGACATCGCCCCGCGCCAGTCGCCGGAGTTGCAGAGCTTCTTACGCACTCCCATGGCAA  
TCCCAGCGCCGTCCCCGAATGTGACAAGCGCCCCGCCCCGCGTAATTCAGGCCGCGAGCCGA  
CGACTTCGCGGACGTGAGCGGGGAAACCGTGAAGGACTTGGTGTGGAGAAACGCCCGCCT  
ATTCAAACAACGCTGCCGCTGGAGGCCATGCGCCTTCTGCAACAGGCGGCAGGAACGCC  
ATCGCGCAACCGACCCGCTTGC GCGTGGGACAGCCATCGAGAACGCCACCGACCGTGTG  
AAGCGTCAATACCACCATTTTTGCAAGGAGTGAACACCATGAAGCTGAAACGCAACCATG  
TGCGCCTCGCTGTCCCCATTCTGTTCAAGGCCAATACCGTCAACGGCGAGGGCAAGCCTG  
CTTTCTCCGCATCGTTCCTGATCGACCACAGCGATGCGCAAGTCAAGGCGCTGAACCAGG  
CCATCGAGCAAGTTGCCAAGGAAAAGGGGGGCGCCAAGCCCAGCGAGTGCCCAAGGAGA  
TGGGCGGCCAGGACAAGGTGTGCTGGACGATGGCGACCCCAAGGCCAACTACGAGGGCT  
TCCCCGGCAACTTGTACATGTCCGCGCGCCGCGCCACGCGCCCCGCTGGTCATAGACAGAA  
ACCGCAGCCCCCTTGGCCGAGGCGGATGGCAGGCCCAACGCGGGGCTGCTACGTCAACGCCA  
GCACCGAACTGTGGGCGCACGACAACAACACTACGGCAGGCGCGTGAATGCGGGCCTGCGCG  
GCGTGCAGTTCCTGCGCGACGGCGGGCGCCTTCGCGGGCGGTGGTATCGCGAGCCGGGACG  
AGATCGACGACATCACTGCGGGCACCGCGGGCGGCCGACCTGGTGTAAACCAGCGCCCCGG  
CCCTCGGCCCGGGCGCTTTGGCTGGGGCGGAAAGCCCCGCGTCTTGCACGCACCGGAGAT  
AAGCCCCGGCGGCCAGTCAACGCGAACACACGGAGACAACGCGATGACCTACTTGGACG  
CATACGACCAAGACCAGACCAGGAGCCGCGCGCCGTACCTGCAACCGCTGCGGCAAGA  
CCGGCCTGCGCTGGGAAGATGACGGCGGCCAGTGGGTGCTGATGGAAGGGCACTACAAGA  
TTCACCGTAGCTCCATGCGCAAGTCCGCGCTCGACGACTTCAAGGCGGTCTGATGCGCAC  
TCTATTCTAGACCTAGAGACCTACTGCGAGGTGCCTATCCAGAACGCCACGCACGCTTA  
CGCCAAGACGGCGGAGGTGTTGCGGTTTGGTTACGCGCAGGACCATGGGCCCCTGTAGGT  
CTGGGATGCCGCCAGCGGCGAACAGGTGCCGTACGATCTGCGGTGGGCTTTGATGGACGA  
GAACGTCGCGCTCTGCGCCACAATAGCTACTTCGATCGCACGGTGTGTTGGGGCCCGCCAT  
GCCCCACTACCCGCTGGGGCTGCCGCGATGGCGGGACACGATGTTCAAGGCCAGACACA  
CTCGCTGCCCGGCGGGCTGGGCGATCTGTGCGCCATCTTCAAGGTGCCGACTGACAAGGC  
CAAGAACGAGGCCGGCAAGCAGCTAACCATGCTGTTCTGCAAACCGCGACCAGCCACCAG  
GAAACCCCGCCGCGCAACGCGCAATCGCACCCCGCCGCGTGGGCTAAATTCGTGGGGTA  
TGTTGCCCTCGACATCGAAGGCGTGCGCGTGATTGACCAGAAGCTGCCTGCCTGGAACCTA  
CCTAGGCACCGAGTTGGCGCTATGGGACCCCGACCAGACCACCAACGACCGCGGCGTGAT  
GGTCTATACCGGCCTCGCCCAAGCCGCCATCCGCGCCGTGGAGCGTACGCAGAAGGTGTT  
CGCGGCGCGCACCAAGTGACATAACCGTGGGCGCGGTGCAGGCGGCCACGCAGCGCGATGC  
CATGCTGCGCCACGTGCTCACGGCATCCGGCCTCGACCTGCCAGACATGAAGCAATCGAC  
GCTGGAACGACGCATCGCCGACGCCGACCTGCCGGCCGAACTGCGGTAACCTGCTGGGTCA  
CCTGTTGCACGCCAACACCACCAGCCCCAGCAAATACAAAACGCCCGCCAAGGGCGGGAA  
CAGCGACGACCGCCTGCGCGGCACGATGCAGTTCAACGGCGCCAACCGCACCGGACGCCG  
GGACGGCCGCTGTTCCAACCGCAAAACCTGCCGCGGCCTGTGCTCAAGCAGGACGCCAT  
CGATCGGGGCATCGCGGCGCTGAAAATGGCCGGCGCCGACCTGCTGTCCGCCAACGTCAT  
GGAACGACCCGACGCGGATACGCGGGTGCATCGTGGCGCCCCGAGGGCAAGAAGCTGGT  
CCTCGCCGACCTGTCGAACATCGAAGGACGCATGATTGCGTGCCTCGCTGGCTAGGATGG  
GAAGCTGTCCGCTTCCGCTGGATTTCGACCACGGCGCCGGCCCTCACCTCTACCAGCTGGC  
CTACGCCAAAGCCTTCGCGGTGTCGCTGATTAGGTCGACAAAGACCAACGCCAGATTGG  
CAACGTCATGGAACCTGATCCTGGGCAACGAGGGCGGCGTCCGCTTCTCATTAGGCC  
GGCTACCTACGGCATTGATCTTGACGCTATGGCCGACGCAGCGTGGCCAAGCAACCCCGC  
CGACGTCATCGCCGAGGCCGAGCAGCTCCCCGCCTGGTGC AACGAGTTGTGTCTCGGCCA  
CTTCGGCATAAAGCCCACGACCTACGTGGTCTGCAATGCGCTCAAGCGCCTGTGCGCCG  
CGCGCATCCGGCGGTTTCGTCTTCTGGGAGGTACCGGAAGAAGCCGCACGCCTGGCGGT  
GTTGCGGGCCGGGTACAACCTACGACTGTCGCTCGCTCAAGGCCCGCGCGACGGCGCCAG  
GCTGCGCATCCGCCTGCCGTTCCGGCCGATTCTCTGCTACCCAGCCCGCAACTGGATGA  
CGCCGGCAAGCTGTCATACATGGGCGTCAACCCGTACAGCCGGAATGGTCAGACGTCAA  
AACCTACGGGGGGAAGGTGGCAGAAAACGTTACGCAAGCCGCAAGCGGCGACGTGCACGC  
GGACAACATGCCCCGCCATCGAGGCCGCGGCTTCTAGATCGTGTGCTGTCGGTACACGTGCG  
AAGCATCTCCGAAGCCTACGACCGAGAGGAATTGATCGCCGCCACCTGGCAGGCCTGAT  
GGCTACCAATCCCCCTGGGCCCTGGCCTGCCGCTCGCCGCGGCCGGCTTTGAAGCCTA

TCGCTTTCGGAAGGACTGACCCGTGAAATTGATTCGCCTGTGTGCGCCTCAACCGCGGCTA  
CGTTTTCCGCCGTACGCTGGCTTTCAATCTCGCATAGGGGCGCAGCTATGCGTGAAAGTG  
CCATCGAGAAATACCTCGTAGAACGAGTCAGGAAGCTGGGCGGCGAGGTGCGCAAGTTAC  
GCTGGATTGGACTCAACGGTGCTCCCGACCGTCTGGTCATGCCGCCCCGACCGTCCCGTGT  
GGGTCGAACTCAAGGCCCGGCGAGAAGTACCGCCCTCATCAAATCCGCGAGCATGAGC  
GGATGCGCCGCATGGGGCAGCGCGTCCGCGTGGTGGATTTCGCACGCCGGCGTGGCCGAGG  
CGCTGGCGTGAGTAACCGACAAGCTAGTACCACCGCCAGCGAAGCAAAATGCTCGGTCAA  
GGTTAGGTGCGTGACCCGGCACGTCGCTGAAATTTATTTGGCGCGGTAGGCGGGACTGCG  
CGGTGTGCGGCTGTTTGTCTATGAGTGTGGCACCGCAATAAGTGGCACACAGCAATAA  
GTAGCCATGGGACAACCCTATCGACGATTGCGAGGTGGTGGCATGACCTACCGCGAGAAA  
GACATCGCCTACGAAAATGGCCGCGTCTGCGTGCTCAAGAAATCAGATGGCTACACGGTT  
TTCGTGTCTGCCGTGACGCGTTCACCCGCGACAGCACCCACGAATTGAGCGATGCTGAA  
TCGGACATCGCAAAGGCACGGGCCTCCTACCTGGCGCGGAAGCTGAATCCCGCCGGGGGC  
TTAGTATGACGGTCCTAGACAATATGCTGCTTTTTGAAAATGCCCGCGTGCGTGTGCAGG  
AACAAAGGTATGTGCGCGAGATTCCACGAGGATAGAACGCACTATTTTCGTGCGAGTCCCCAC  
CGGGGTTTCGAGTCGGTGGTTGCCGCGTGTCGAAGGGCATTGGTTCGGCTCGTGCGCTTG  
ACCTGCTGCTAACCAGGATGGAGCAGCACTCGAAGGACGACCAGCTATGACCCGCCGCGC  
CTTCGGCCCCCGTGAGTATCAGCAACCTGTCATCGATCACGTGCTCGACGTGCCGCGCGA  
CGCGGTGTGGGTCTGCAAGGGAATGGGCACGACCGTTTCCGCGCTCACCGCGATGTACAT  
ACTCGAACTGCTCGAACCAGACCCCTCGCTGGTGTGGCGCCGCTGCGAGTGGCAGCGAG  
CACGTGGCCCGACGAATCTACGAAGTGGGCGCACCTGCGCAACTTCGAGGTGTCGGCAGT  
GGTCGGCACGCCCAGCAGAGCCGGGCCGCGCCCAAGCCTCCGGCCAACGTGTTCAACAC  
GAACTACGACAAGCTGCCGTGGCTGATCCAACACCTGGGCGACCGCTGGACCTTCCGCAA  
TGTGGTGGCGGACGAATCGACGAATCTAAAGTCGTTACGGTAGCAACAGGGCGGGGAAGCG  
CGCGCACGCGCTGGGCCGTGTCGCACATGCCAAGGTTGACCACTTCATCGAACTGACCGG  
CACGCCAGCCCGTACGGGTTTCAGGTCTTGAGGGGGCAGGCTTGGTGCATGTACAGAGT  
CGGGCGCCTGTGCCGAAGTTACGGCGCCTTCCAAACGAGGTGGTTTCAGTCCATCCGGGT  
AGGCAGCGCCCGCCATGTCGTGCGCCACGAACCGTTGCGGTCTGCCAACAACAGAACGA  
CCACAGGCTGCGCGATCCGTGCCTGTCGCTGGACGCCCAGCGACTATTCGACATCGGGGA  
GCGCATCGTCAACGTGGTGCAGTTCGAACCGCAGGCAAAGGCTCGGAGTTTATACCGCGA  
CATGGAGCGAGAGGCGTCTATCGCCCTGGAATTGGGCACTGAAATGGAAACACTCAATGC  
CGCCAGCAAGACCATAAAGTGCCTGCAACTCGCCAACGGCGCATTCTATAACGGACGACAT  
GGCGACCACCGTGGCCGATGTCCACGATGTCAAGATACAGACCCTTGAATTCCTGGTTCG  
TGAGCCGGCCAGCATGCCGGTGGCCGTGGCGTACCCTTCAAGGCCGACCTGGCCCCGCT  
ACAGAGTCCCTTCCCCAGGGCCGACGCTCGACCAGAACCAGCATAACGAGCCGCGACTC  
GAACGCAAGAACCATCCCGCTGCTGTTTCGCCACCCGCGCCAGCGCCGGCCACGGGCTGAA  
CCTGCAAGACGGCGGCACCATCCTGGCTTTCTTCGGCCAGTGGTGGGACTTGGAACAGTA  
CCAGCAAATCATCGAACGTATCGGCCCGACGCGCCAGACGCAGGCCGTCATGACTGCC  
GGTGTTAATCCAACCCATTGTCCGGCACCGGCACGATGGACGAATTGGTTCATGGCTAGCCG  
CGAGTCTAGCGCGAGGTGCAAGACCTGCTACTGGAAGCCATGAAAAGGAGAAGAATTTCC  
GCCACGCAAACCAACGCACTCGACCACCAGGAAGGCGGGCCACTACAACGATTTGCC  
ATCCAGCCGTTTCGAATTAATCCACAAGAACGGCATCTGCTAGTTTCGAAGGCAACGTCATC  
AAGTACGTGAGGCGGTAGCGGAAGAAGAACGGCCTCTAGGCCTTGAAAAAATCCCCCAC  
TATAGCGACCTGCTTATCGAACTTGAAGGCGGCGGCCATGAGTGAAACCGTTGTGCCCGT  
AGTCGCGGCGCCCTATCTACCATCCCTTTGGCGTCCGTCATAACAGGCCTGACAGACCA  
AGCCATCAGACGCAAGATCGAGGAAGGGCAGTGCCTGGGGGCCGAGCATAACCGGCGGTC  
GCCGGACGGGGTAATTTTTATATCACTCAAGAGGTATCAGCAATGGGTGCGAAAAGGCGAC  
GGCGTAGAAATTCACGGCAGCGCGATAGGGCTGTCTACACCATCGACGGCGAGCGCAAA  
CGGACGATGCTCATGATCGAGGGCAAGCCTTTGCCACCTACCGCCTCCAACATGAAGTAC  
GCGCACCGGGTCTAACAGGAAATCAGCTAGCGAATACGCCACGGCACGTTTCGGCATGGCC  
GAGTATTTCCCGGCCAGTGGCGCGGGCAGCATGCTGACGGTGAAGAGCTGGCTCGACACG  
TGGTTCGACACGCAGAGCGTGGAGAATTCGACCAAGGCAGGCTACGAAAGCGCGGTCAAG  
TTCTGGAATAACGCGGCGCACCTCGTCGATAGGGAAACGAAAGCCATACAGGCCACGGTC  
GGCTCGCTGTCTCTGCGCGCGCTCAAGCCCAGCCTCCTGCTGACGGCGCTTGCGCAGCGG  
CCCGATCTGACCGGGATGATGGAGAACAACCTATGTCTAGGTCATTCTCCTGGCGCAAGAC  
TTGGCCGTGTCCGACAAGATTATCAAGGAAAACCCAGCCAGCGAGGTACCCCGGCAGAAA  
CACAAAAAGCCCCCGCTGACCGGTTACCCCCGCGAGGCTGAGGACATCGTCGCCGAC

ATGGCGGAGCACCACCCCGAGCAGGACGATAGCATGGTCGAGTCGTGGTTTTTCTGCGGC  
CCCCGGAAGTGCAGAGGTATTCGGCCAGCGATGGCCCAACGTGGACTTGTTCAGCGCGAAA  
CTGGCGATTGTCGAAGCGGTTGTGCGCGGCGAGCAGAAGGGCAGCACTAAGACCAACGTG  
CCCCGCGACGTCTGCTCAACCGTCGCGCGCTGGCGGCGCTCAACCGGCAGGCCAAGCAC  
ACTAGGATGGTCGGCTAGCACGTGCGGCACGACCCCGGTACGGCCCGCCCTGGACGGAA  
GGGCGCGCCTTCCGTCGCAGGTAGCGGACGCGTTGCCTCAAGCGCCTGGAGATTGCTAC  
CGCCGGCCCTATAACATGCGGCACACCTACGCCACCATGATGCTGATAGCGGGGATGACG  
CCGGCATTCTGCCCGGGGAGCTCCGGCACTCGTTTGAATGTTTCTGTGCACCCATTG  
AAATGGTTGGACGGCGCGCAGAACGATCTGGAAATGGCTCGCTTCGAGGCAACCCTTGGC  
GCGCATCAGCACCAATTCGTCCCAAAGCAATAGGCTGAAGCACGTAAGTACTTGAGCCT  
TTAAGAAATTCTT

>NewGenomeName\_80

TGAAGAGAGGTGAGATATTTCCAAGGGAGAACGCGCGATATTTCCGGTATGAGGCGGGAG  
GGAACGGGATTACACGGAACGGCGCTTGCAAACCACTTGCGAAGGTTGACACAGAAATAT  
ATCTCTCGGGGGCAAGGCCCGGAGGGTTCGCGTCAGGCCGAAGGCAAGGCTCGCGAGGAG  
ACAGTGCTCAACGCTGGAGCTACGTAGCGGTTGTCCCCGCCCTTGTGGTAGGGGCAACAC  
CTTTGTCCACTGGCGGACGCGGGATCTACGACGACCCCTGCGGACCGATTCTGCGGCATT  
ACATCGACGGCTGCGGTGAAGTCTCAGGGGCGGTTACCTAGCTGTCAAGGCAGCCTCCTC  
GGGCTCAATCGGTAGAAGTGGAGCTCGCGAACAGGTCGCGTTGGAGAGTGGCGATCTCCT  
CGCGCCGGACCGCCTTGATGATCTTGTAATCCACTGAAGTGGCACGCCGAACCTCCGTG  
CCAGCTCGGCATGGTTGTGCGCCGCGGAATTCGTGCGAAAATCTGCCATCTCGCTGGGACA  
GCTGGTACAACACACCACCGGAAAGTAGATGTCTGTCCGCCCCAGTGGCCGGCCATGC  
GGCCTGCAATCTCGCGCCCGAGCTGCTTCGCTGGTCGTCGCCGATGTCGGCCAGCTCGA  
TCAGTGCCTGGGCGACCTGCAGAGACAAGTCGACCAGAAGCTCCGGACCTTTGCTTTTGA  
ACGTTTCGTCTTCAAACGGCCTCCGTGCTCCTGTCACGCCATTTTTTTGAGGTGCTCAAT  
CACACGGGATGCCTGGGCGGAACTGAGCCATTCGAGCGCTTCGACGTGCGTCATGCGCTT  
TACGAAAGCGCCAAGCGCTTCCTCAGACCGGTTTTGCACGACGCCCGATCCGCCAGCTC  
AAGCCATATGCCGCTAATCATCTGCGATTGCTCGTCGTCCGCCTGACTGCGCGCGCCCTT  
TTTGAAGGCACTTTAAAGCCGCAACGCTTCAGGTGTTCCAGAACCCTGTCCACTTCTGG  
AACGGGCAGGTCGGCCGCGGATTCCCTTCTTTCCAATCTGCATCAGAACAGCGTGGTAGCT  
GTCATCGGGCATCGCAAGATCACGCTTTGCGACGTGAATCAGGCGGATGAGTTTTTGGCG  
AGCCTGAGGCCCGCGATTAGATTTTCGAGTAAATCGCTGTGTCGTCCGCTTCGAAGGATAATT  
CGTCGTATTCAACGACGCGCAGGCAGCTCGATCCATATAACGGCGGGAACCCCTCGCTGC  
GGCCGGCGTTAAACGCATCCTGCGGAGAAATCTCCTCAACGGAGGCCGCGAGCAAGCGAG  
CAGCAAACAGCTTCACAAACGCCTGGAGCGGGCCATGCCGCTCGATGTCTGCATCACCCCT  
CAGACCAGAATCAAACCAGCTCGCAGAGCTTCTCTTCGGTCAGGATGTTGTGATCGACAT  
CCAACACGATTTTCGTAGCTGAAGTCGTGCGTCAGCACGTATTTAATATGTTTCGTCATGT  
CGTCCCTCGCAGTGCATTGCCCTTCGTGTCCTGGTCGATCGCCGCACGAGTCGACGCCCA  
TCGCATCGGGCGTCGCCGCGCAGCTCGACGGTTACTTGACGGCGTCCTGCAGCCCTTGT  
CGGCCTTGAACCTTCTGGGCTTTTCGACGCTGGAACCTTGATTTCTTCGCCTGTGTGTCGTGAT  
TCCGTCCGGTAAGGGCGGCCCGCGCGCCACGCTGAATACGCCGAATCCCGTCAGCCTCA  
CCATGTGCCCTTGCAGCAGCGACTTCGTGATACCTTCGAGAACGGCTTCCAGCGCCAAGC  
CGGAGTCGGTTTTTCGTCATGCCCGTTTCTGACGCCACGTGATTGATCAGGTCCGATTCTG  
TCATAAATGCTCCGTATGGTGGATAACCGCGAGACGCTCGCGGCCAGCTAAAGTGCTCCAT  
GTCGCAGTTACGCGTTGGCGATGTCGAGCGGAATCTGTACGTATTGGTCCGTGTCGCCGA  
CGCGCTCGTAGACGCCGACGAACGACTTGCTACCGATCACCTGCAGTGCTTCGCCGATGG  
CACGCATTGCCTCCGGCCAGCGCGGATCGGAGATGTCCAATCGGCGCAGCGCGAGCACGC  
GGCCGGTGTGATCTGGCCTTCCCTTGTGCGTCGCAAACGCCTGCGTGACGATCGCCTGGA  
TTTCGGGGCGTGCGTCCGTGCTCCAATCGCGAAGGCACTCGTCGATCATCGACTTCGCGG  
CCTGCATGCGTTCATCGAACGCGATGCGGGCTTGGATGGCACGCTGGATGCGGTAGCGGC  
CGTCGAACGAGTCCAAGGTGACGTTGACGTTCTTGCCGCCAACCTTCGAGCCATACTCCT  
CGGCCGAAAGGTCGATGAAGGCCGAGATATCACCGAAAATTCGGGCTTTCAGCTCGACCA  
GCCCTTCGATCTCGTTTTGGCTTCGTCCGCCAGCTCGCGAACGAGGCGATCGCGCTCAC  
GGTCGATCGGCTTGATCATGGTTTTCCGTAATCAGGCAGCCTTTCGCGTCTTGCCAGTAAC  
CATTCGGAATCTGTTTTGTGTTCCATGTGGTGTCTCCACTCGATGAGGTATTGCAAGCTCGT  
TAGCGGGTCCACCAGCGGCGTATTTCTTTCGACAGAGGCAGACGAGAAAGACGATTCCG  
ATGGCGATAACAACGGCGTCGCTCATATCAAAGGCTCTGCCGCCTTCAGTGAGTCGGTT

TTCGGGCTTGTGGTCCGGACGCTGCGCATTGAAGGCCAGTTTCTCAACGATCGCGCCAGC  
TACGTCCTTATTGCTACGCGCTGGCCAGGTCGAATATCCGAATCACCGCGTCCGCGAGTTC  
GACTTCGATCATCGCGCGATGGGGAAGCTTGTTCGTCATCAAACCCCTTTCGATGACCTTC  
CATTGCCTCGGCAATTTTCGGTAACGATCAACATCAGCATCTCTGGTACGTTGTTTCGCGGC  
TCGCAGGGCGGTGCCGGTCTTCAGGTCCGTCCACCCCCAGACTGAAACGATGCGCCGAA  
GCAGCAATCCGTAAGTGCCTGAGCTGCGTGCAGATGGTGTTCGTTACTCGCTCCCATGTT  
GTGCTCCTTGAAAATCGGTGGGTAAGGCATGAGTCGTTGAGTCAGGAACCATCCCAGAAA  
CCGACTTATCCAGCTACCCCCCATGTCACTCTGACGCTCATGAAAACGACGTAGGCAAAC  
TGACGATTGCCTTGCCGCTGGACAGGGACGCCGGCCGCACGCTCGCGCAGCACGTGCGCC  
GACTTCGCGAGGTACGGGCCGAGCTGGATCGTCGACCCGGCCGCCGTAGCGCGGCCGAGATC  
TCTTCGGCGAGAACGCGGTAGCCCAGGCCGCGCAGCGCCCGCGCGCAAGCGTTAAGCAAC  
GTGAGATGCGAGACGCACTCCGCGTAGAAAACCCGCGTGCCGTACGGCAGCAGACTTCGC  
GGTGCGGGCAGGTTCAATTTGCACGATGGCGCCCATGTCAGACTCCCTTGATCACGTCCGC  
GGTGATGACCCGGCACGCCAGGCCCGCGGCAAGATTCATCGCGGCCGTCAGGAGGTTTCC  
GACCCGAGCGGGCACAGCAGCGATACCGTTTAAGCACGATCGCGTGGCGTGCTGGTCAT  
CGTGAGCCGAGTGCGCAGCGCGTCGACGCCGCTTGCCTCGATCACGTCGCCGACCCGGCTT  
GTCGAGACGGCCGAACCTTGAATCGGAGGTATTTCGTCAGGCGTGGGCCGTCGAGCGGGGC  
CAGCTCGAGCAATTCGCATCGCTGCACGACTTCCCCAACGTCCCTGGTTGCGCTCGGACAG  
CTTGACCTTCAGCTCCGGCTGGCCGATCAGGATGATGGACAGCAGCTTCTTAAATCCCAT  
CTTCCACTCTAAGAAGCGGTTTCAGGTGCTTGAAGCGTCGCGATCGGCAACGCGTGCGCTTC  
GTCGATCACGAGGCAATGCTGGTAGCCCGCCGCGTGGCTTTCCTTCAGGGCGTTGTGGAG  
CTGCGCGAAGCGGGCTTCTGGGCTGCTCCTGACATTCCTCCAGCGGGGCCACGGCGGCCAT  
GATTGCTTACGCGATGTGCGTCGCCCTCAGCGTCTTGTCTTTATGGACGTAGTCCTCCAT  
CGACAGCACGTACGGCTTATGAAGATGATCGGATGACTATCGCGCATCACGCGGTCTTC  
GAGGTCGCGCGTCTGCGTCGCCCTTGGCGCCGCCGATTCCGCGACGACGGCCAGGAGCCC  
GCCATGCTTCGCAGACTGGAATGTAGCCTCGCGCACGTAGCGAATAACGGGGCTGACGAA  
CATGTCCTTCGTGCGACTGGATGTCATCCGCGACAGGGTCACGGAACAGGCCCAAGTGCTT  
ACGGGTGGCTGGTTCGAGAACCTGTTTGCAGTAACATGGATTCTCCTAGTTGAGATC  
GGTATTGCTGTTCCGGCTGGGAGAGCGAGTGGCCCGTCTTATCCGCCAAGACATCGGTTCAG  
GCCACCCACCTTTTGCACCTTCATCAAAAACACCTGGGCCTGAGTCCGACACCCCGTTGTT  
TTCCAGGTAGTCGAGAATTCGCTCCCGCAGGTCGAGGTCGTCGAGGCTGCGCGGACATAC  
GCCGTGATTACGATATGATCGACCCGCCGCTGCGACAGATTCAGGTGTTCCGCAAGTTC  
GGCCTGCTTGATATAGGCGCGGTGCAGAACGCTTTTCAGGACCAACATCATTGACCTCCT  
GCCGCTGCGGGAACGAGCGGCAGCGGTTGCTGTTGACCCGCTCGCGGGCCGGTAAACTCG  
GCGACGATCACGTCGAGCTGCTCTTGCGGTACGCCGTCCGGATGGCGCTGTTACAGCCAG  
CGGAACCGGTCCGCGCTCCAGTCGACGCCGGAATCTTCGAGAGCGGCCTTGATCTGCTTT  
GCCGCTCGATCAGCGAGAGCGGCGCGAGTTCGACGCGCGGCGCAACGAGGTCGTGTTCC  
GTGCCGCGGCGCGGCAGGTACGTCGGAAGATCGGCTTTGTTGAGGTGCTTGTACGGGTTCG  
AGACGGCCGTCCAACGGCAGTGACTTGCCCTAGCGAGCTGCTTCAGCGTCGGCAGGAGTC  
GACGTACCTGTCACGAGCTGCTCGATGTCTCGAAGCGCATGCTGCGCTGGCGTATCGGCG  
TGCCGCCGGTAGCTTTTCGCCGATCACTGCGGCAGTCTCGGCATAGCCGAAATCGCCACGT  
ATGATGAGCGGAACGACGAAGTACGTCTCGCGCCCGTCCCTCGCCAGTCAGGACCACCTGG  
GCGTCATCGTCACGCCACGGATTGCGCGTGATCATCAACTTCTCGCCGACCATGACGCC  
GGCACCGACGACAGTCGATTCGTCGTCACGGAACGACACGCGCAGCTTCGGCGTGACC  
TTCCGACTGTCCGGCGAGGCAACCGCCAATTCGCGGCACACATCGATCGACGGCGCCTTC  
ATGAGTTGCTGGGGGGTAATGCGCATCCATGCCTCACTACGCGTCGCACCATGCCGGCCG  
TGCCTTTCAGTGGCGTTGAAGTGCATACGCCAGCGTTTCGCAAGCGCGTTCAGCTCGTCG  
AGGCTGTTACCCGGGTGAAACTTGAGGCCCGCTTCGAACTTGCCTCGATGAGGTTCCGC  
GCGTTCTCAACCTGTCTGGAGGCACGGGCGTTGCCAACCTTGTGGACAATCAGCTCGATT  
CCGAGCGACCCGGCACAGGTTGCGCGTCATGGACGCCGTGTTTCGCCGATCCGGCGTCCAGC  
AGTCGAATGCGTGCCACACCGTGCAGCAGGTCGGCCCCGCCGCGCTCCTGCATAGGGTTG  
ATGAGCGTCGAGCAGAGGTTCTCGCCCGATTCCGCACCCATGACGTACTIONCGGTGTTTCATC  
CAGTCGCTCGCGTGGTGGGAGATTTTCGTAGCTCCACACACGATCGGCCGCGATCCGGGCG  
GGGTTCTTTGGCTTGTCTTGTAGAACTCTGCGTGATCCATCACGCGCAGACCGTTTCGCA  
CGGGCATCGGCTACCGGTTTCAGGTAGTACAGCACGCACAGGCTCGCGTCGATCTGCCAC  
ACGTGATTCCGGATGCAGGCGTGCCAGTTCAGTCACTGGGGCCGGTGCAGCAGTTGGTTCG  
GGATGGACGACATACATGCGTAGCGCGCGTTGAATCGCGCTATCTGACAAGGGCCCGCAGC

TCGCCGGCGGACTCGTCGAGAAATTCAGCCCCGATGATGCCATTTCGCGCGCAAAATCTCC  
GCCACGTCACCGACCGTATACAGGGCGCTTGCCGTTCTTACGCGTGCAGCTCCTTGAGCGTT  
GCTGAAATTAGCATCGCTTCGTGCGCGTCAACGAGCTTTGACCGGCGTCGACACGTCGT  
TTGCGTTTCGTGGTCACGGTGGCTTCTCCAGTTTGCGCATCAGGGTGGTGACATACAGT  
CCCAGCTGGCGGCAGGCCGCGTCGTAGATCGCACCTTTATTGCCGTGGCCGGCCGCGCGC  
GCTGCGTGGGCGACAGCAACAATGCGTTCGTTCAAGACGGCACTCATCGTCGCGAGGCC  
CGAATCAGTTTGCGGCGCGTGAGAAGTCGGCATACTCTGACGCGGCCGACGTATCACGCA  
GCCATTGGGCGACGGCGTCTCCGTCCGACGCGCCTTGACGCCGAAATCGTTTCAAGCT  
GGTTGAGCGACAACCTGGATTTGCCGGAGGACGCCAGCCATGAAGTCCGCGTGCGGCGCGC  
CGTGCGTCTCGGCGTGCTGCGCCAAGGTTTCGCAGGGCGGCACGCAGGTTGCCGGAATAA  
CCGACTCCGCCTCGAAGGTGATCGCGCTGGGTTCTTGCGGATTTCCGGTCTTCTTCGT  
CCGGCGTGACCTTCTTGACGCGCATCTTCTTCGCGGCCAGCTCGTCGATCTTCGCGTTCT  
CGTCGGACAGCAGACGCGTTTGCGCGGGCGGCTTGTTACGTGCTTCCCGAAGCGCACCCAC  
GCAGTTCCTTACGCTCATGGGGGCGATTTTCGTTCGAGTTTCAGCTCGCCGGTTTGGCCGG  
TCAGCTCCAGCTCATCGATCTGTTTCGGCGTCGAGGACCAGCATTTCAAAAAGCTTGGTCT  
GATTTCCGGCCGCCTCCAAAAGCGGCGTTAACGCCGCTTTTGAAAACCTTGGTCGCCGACG  
CCATTAACCGTTGAGCTACAGGGCGGCTGAATCCCCAGAACATCAAGATGCGCACCAAAAT  
GGCCGTGCTCACATGCCTCATTGAGAACTCGAAGGCCACGAACAACCTCGAGGCTCGCTT  
CCACACTACGACGCATGTTTCGCCGCAATGTCGCGTTGAATCAGGTCCAGGTCCGGTGCAAT  
CGGCCGTCAACTGGTACCCGAGCTGTGTAGCGAAAGCTCGGATTGTCGAGTCTCGTTCTT  
GAGCAAGCACGGCCAGCTGATTCGCTGCGTCGACCAATTGCGGGCATGCCCGAATATCGG  
CGTCGGTACGGTTCGTCGCGATGTTGTTGGTGCTGCTCGGCTTTCGACCTCTCGTCATGA  
TTTCGCTCTCAGAAATCGGTTACTTCGGCACAGTCCAGAATGTGAACGCGCTAGGACTCG  
GCGGGCACCGCCTGGAGAGCGCGCAACGATTTCTCTGCGTACTCTTTGGCGGTTGCTATG  
ACTTCGTGCTCGGCGCACTCCAGGCCGGTGAGTAGCACGCGGTTGAAGGAATCCCCAGAC  
GGGTACACGCAAGCGGTGTCCTGTTGAAATTGGCTGACACGGTTGCTCCTTTACTGATT  
CGTCAGGCGGGTTTGAATGCTGTCGACGCGCTCGCGGGCGGTATCGAGGCTACGGAGGAT  
GGCGACGGCGTGGGGCCCCAGCTTCAAGGATGGACGGATGTGGCCCGTTTCGGGAATACG  
CTCCGCGAACCCCATCGCTCAAGCGTCGCGACATAACCGCGTGATGTTTCGACGGCGAGAG  
GTTTCGTTGCCTTGGTGAGTTCGCCGGGCGTCAGGCCATGCGCGGAATGACCGAGCAGAAC  
GTTGAGAACCTCGAGGACCTTCTCAGCGGACTTCGTGGTTGCGTTCGCGGTCATTCCGGCT  
GCTCCAAGGTCGAGTTCAGGCTGGCCATGGCGCTCGACGTTGCCGCGATGCCATGCAAGC  
CCTTGCATTGCTTGTGGATCGTCGCGATCGTTTGGTCTGCATTGGCCGAGCCACCGTAG  
AAGTCGAGCAATTGCCCGACTGCGGCGTTGAGCGTGCATTGCAAGATCTGCATGTCTTCG  
GCCGTCGCGTCCCGGCCGGTTCGGGATGTCGATGATCAGCCGACCGGCGCTTGCCGCCACC  
CAGCGAGTGACGAAATCGGCACCGCACGCGTCTCGAACGTCCGGATCAGAGAGGTCCGGC  
ATTCGGCCTGACTGGAACCATTTGTAGAGAGTCCAGTGATCGGCGAGCCCCATGTGTTCC  
GAGATGCGTTCGACGCTGAGATTGCGCCGCTCGCTCGCATGCTCTTACAGAGTTCAAGA  
GCGTGCCGACGGCTATGCGGCTGAATACGTTTCCAATTGCGGGGGGCTCATTGGCAAGCCC  
CATTCAAAACGGTTACCGGCCGATTCCAAACAATTCCCGTTTTGCGCCTGTGCAACAAC  
GTTGCGACTCGTAGAATGAAAAGCGGTTACTCCGACGGGGACAATGTTCCATGACGGATT  
CGGATTTAGTGAGTTAGCGGCACGTGTGGACGCTGTCGGGCAAACGATACTTCGACTTA  
TCGGCCACCTGGAGGAACAGGGCTGCGTCGACGGCGTACGCTTTTCGAGGCGCTGCGTC  
GTGTCGGCGCTGCTCGTCGCCAAGTGCCCGATCCGATACAGGCACGGGGCGGCGAAGTTG  
TCTGCAGATGGTGAGATGCTTAACGAAGCGAGGTCTCGCCGATGACCGGGCTGTCAAC  
GTGTTGGCCTAAACCGTTCCAGCGCATGAGGGCTTTCACGCTGCGACGCGGTGTGAGGC  
AATGCGAGCGCTTTTGCCGGCTCGGCGCAGATTTCCGCCAGCCTTGAGCCCCAGCTTGACG  
GCGATTTTCGTGCGCCTGGCCGCGGACACATTTTTTCCGGCCGCCAGAACCTCGAATACG  
AGATTGGGAGAGAATTTGTTTCGCTATCGCCCACTGGGTGATCGAGATACCTTTCGATTGA  
AGCTCCGCGCGGGCTTCAGCGGCGGTACGCAGTTTCATTGAGGCTCGTGTTAAGGGGCTG  
TCGGCACCGTGGAAGTGCTGACTAGGTTGGCGGTCGTGGTGCGACGGTGTGAATGAAGT  
AGGGTATGCGTTTGATTTCTGTCAAGCGCCATTTGGGTAATCGTATGGATTCAATAGGC  
GGGCGCCTGCGCGAGGAGCGTGAGCGGTTGGGGTATATCCAGACGGCATTCCGGGGCGCTG  
GCGGAGGTGACCACGCAATCACAGATCAAGTACGAGAAAGGCGAGCGTTCGCCGGACGCC  
AGCTACCTCGCGGCAATCATGCGTGTGCGGCGCGGACGTCCAGTACATCGTCGGGGCGATA  
CGATCGTCGATGGCGTTGTACCCGATGTACAAGAACTCGTTTCGCGGTACCGGTCCGCG  
TCGCTTGAGGTGAAAGCCGCTGCGATTGGCGCGCTGGCGGCCGCAAGCACGACGCGCCAG

GAGCAGGTCTTGCACGGATCCGTAGGACCGGCCGTAAAGGTCGAGGGTAACCGCGATCAG  
CAGGGGACTAGTTTTTTCGGTAAAGGCAAGAAAAGAAAATGACCTACGACGCTAACGGGA  
AACAGGAGTTCAACAGGCCGGTCGGGCAAACCATAACAGGCCGATGAAGCAAACATCGCTG  
ATCGCTCGGTGAATATCCGGGCCGGCTCAATCGGGAGCGTTGCTGGTCGCGACATCGTCA  
ACGTCAACCACGGCGTACCGTTCTCGGACAGCAATGTCGTGAACCTCCAGTTCGGCCCGA  
AGGAGCCCGAAGAAGTCCAGTTCGTGACCAACCATCAGAAGGGTGTGATCATGGAGCTGG  
TCGGGCGGATCGCCGACGCGACGGGAAATGATGTTCTCAAGATTTCCCGGGCCGATTTGG  
CTCGCGCCGGTGCCAAGCGGGTACACATGGATTTCGACGATAGATACGTGATATCGAGC  
AATACCTGGCGTCTGGCTGAACCGCGTAGCGATCAAGTCCACCGCACCAAGCGCCGCC  
AATCTACGCCCCCTCGGGACAACGTTTGCGAAGACTCACTCCCTGACATGACGACGCAAC  
TCCAGCTCACCCAGGAGCGGCTCGCATCCACCCGGACTATGCTGAAAGTCACGTTGTTTCG  
CGGCACTCTTGGGCGGGCTCATCCTCGGCTACTACGGCTGGTCCAGTCATCAAACAATCG  
ACCAACTCCAGGCAGCATTTCGGCGGCTGCCAGTATGCGGGGAAAACGTACGCGGTCCGCA  
GCATCATCGACCACTCCGAAGCGCCCGATATTGAGTATGTTGTGATGTCGGACGGCAAGC  
CCGGTGCATGGCGCGATCTCAGCGCACGACGCAAGCACTGACGAGCCGGCCGGCGATTCA  
GTCGCGCAGGCTTGAACGAGCATTAAATTTCTTACCGTAACGGCAGGCAGCAAATGACCA  
ATCCGAAGAACAATTCGAATTGCGACTCCACCAACAAGGGCGTGCCGACGCGTGTGAGCG  
TCGGCTACGGTGAGCGGGCGGACTACAACGATATCAACAAGGGTTTGGAAGTGGTCAACA  
CCCTGCCGCCGCTCCGCCGCTGCCGACACGAGATAACAGCAATGGGAACGACCAATCTT  
GACCTGCAGTGGATCAACCAGGTCTTCGACATTCGCCGCGCGATCCGTTATCACAACCGC  
CGGCGTGCCTTCTTCGATCGCCGCGACCAAGTTGCCTAACACGCTGTCTGTGATCTTCGTG  
TCGACGGCGGTCTACGGGGTTCTTGAGCACCAATGCATGTCGGTTCGCGCTCGTCGCTGCG  
CGGCTCGTGACGGTGTGTCCGCGATCAGCCTGGTTCGTGGGTTTCGTGCGAGTGCGCGCGG  
GCGCATGCGGATTTTCGACGCGCCAGTTCATCGGCTTGAAAAGCGCATGGCACTTTTCGGTG  
CCGGACGAAAGCGTGTGCTGGCTGTGCGCAGCGAACGTCTGACGATCGAGGCCGAGGAA  
CCGCCGGTCTACACGTGCTCAACGTGATGTGCCACAACGAGCAAATGCGGGAGATGGGA  
TACGCGGACCATCAGCTCGCAAAGGTTCGGCTTCTGGCAGCGGATGTTCTCACAGCTCTTC  
GATTTTCAGGAGCACGCGCTGCGCTCATCGAAGCCGTAGAATTCGGCTTGTGTAGGCGG  
TGCTTGTGCCTATGCTGGATGGTTCGCGACTTGGCGTCATACCATGAACATTCACCTCGT  
CATGGCGTCATTTCGAACATCAGGCCAAGATCCTCGACGTGACTGGCGACCAGGAGAACTC  
CGACGATGCAATCGTGGTGTCTCGCTGGTGTATCGACCTGTGCTGCTAGAACGCCTTAACGA  
ATTTCGATGTCAGTACGCTCATAAGGATCGGTGGGCTGTTGTATCGCGATGGTCTGAATCG  
GAGGAACGCCGCGCAAGCCGACGGCTGAAGCCGATTAAGACCTACCCGTACATGCCGT  
TCAAGTTAACGGCATATCCACTACGGGAGGTCATATGTCCTTCATCAAGCGCTTCCCACG  
GCTGACGAGCTGGCTCGTCGCCGCGATCATCCTCGTTGCAGCGAACGCGCTTTTCTCGCC  
GCAGCAACTTCTCGTCGCCGCTTACAAGCTGCGTCTCGTCAGCCCCGCGGCCGTCGTCGC  
GTAATGGTTCGATCGCGGGCTTTCGCGTACGCGCGGCCGGAGATCTATCTCGAAACCGA  
CTGGCCGCAAGGACCGTACGGACTGACGCCCAAGCCGACTATCGAGTCGCCAAGGGCGA  
TGAGCTGGTGTTCGCCGCGGCCATGCTTCGCCGCGCGGTGATCGTCCTCGGCGTCGTAGT  
CGGCGTCGCGCTGGGTCTCTGACCTTGCGCGTCTGATCGCCTCTGTGTCGCGTTCGCTC  
GGCGCCGCCGCGCCCGTGGCCGCGCAAGTGCCCGCCGAGGGCGCTGCCGTACCGCGCCGAG  
CTGACGAGCAACGCACGTGCCCTCTGGGGCATGGATGCGCCAGTCTCGACGTTTCGACGCG  
CAAATCCAGCAGGAGAGCAGCGGGCGCGCGGACGCCGTCAGCGTTCGTTGGCGCGCGCGGG  
ATGTCTCATTTTCATGCCCTCGACCGTTCGACTAGATCGCGGGCGCCTATCCGGCCGAGCTA  
GGCGAGGGGCGAGCCGTTCAACCCGTCCTGGTTCGATTCGTGCGCTCGTGCGGTACGACCGG  
CACCTCTGGGAGCGCATCACGGCGGCCGGTGCATGCGAGCGCATGGCGATGACGCTGTTCG  
GCCTATAACAGCGGCCTGGGCTGGGGCTATCGCGATCAGCGCGTGACGGCTGCCGGCGGGC  
GCCGATCGGCAACGCTGGTCCGGACATGTGCGAGCGGTTCAACGCATGCCGGCACGCGGCC  
GCTTTACGCGAGAACCAGCGGCTACCCGCGCGTGATTCTGCGCACGTTTCGAGCCGCGTTAC  
GACAAAGCCGGATTCGGGCCGGGAGCGTGCTCATGAACTTTCCTGCCCCGCTTTTCGCGCG  
GTCAGTGTGTCGCGGGCGGCGGCCGCGCTGCGGCGATCGGGCTACTGGCGGCTGGCGCGG  
TCGCTTTCTTCGGCGGCTATCACGCCGGTGTGCTTGGCGGCGACGCGAAGGTCGCCAAGC  
TCGAACGCCAATCCGCAGACGGCGCGCGGATGCCGTGCAACAAGCGCGCATCAAGGAAT  
GCGCGGAGACGCAGCGCGCGGGCGGCTCGCCGGCGACCTGTTCCGCCGAGAAAGCCCGGC  
ACGCGCTCGAATCCGACGAACTGAAACGGGAGAATTGCCAGTGTACGAGCCAATACCGCC  
CGGCGCCGGATGCGCCTCTTCAGGATTTGCCTCGCTGCGTGTTCCTGCGCGCTTTGTCC  
GCGTGTAGAACGCCGCCCGCCGGCGCCGATGGTGTGCCCGCGACCAAGTGTGCCCGCGGAG

CTGTTGCGCCGGCCCGCGCCGATGACGCCCGTTATTCGGGGGTACGCCAGGACGACATCC  
TCGCCCACCACGTTCGACGCCAGCCGCCGACCGCGACATCGAATCGCAACTGAACAAGC  
TGATCGACTACATCGAGGGAGAAATGCAGTGACGTTTCAGGTGGAATTCTGGCAATTGGT  
GTCGATGCTCGCGACGTTTCATCGGCCTTCTGTGCGGGGCCGGCACGGCGTTGCTCGTGCA  
GATCGAGCGCCACCAGTCCGACCGCGATCAGAACCAGGAAAAACAGATCAAGGCGGTGCT  
CGAGCAGATCAGCCGGCAGGCGGACAACACGGCGCGCCTGGAGCGCGATTTTCTGCGATT  
TCAGGCGGACCTACCGCTGCAGTACCTGAGCCGCGAAGACTACGGGCGCAGCCAGACTGT  
CATTGAAGCCAAGCTCGTCGCGATCGCGCTCAGATTCGAAAACACTGACAACCTCCGGGGAAA  
TCAATGACGCCACCAATCCGCTGGGAAACGACCACGCCAAGGTGCCCGCGACACGCTG  
CGCTGGTATCTGATTCTGGCGCTGTACAACGCGCGGCCCGAGGAAGTAGTCGAGGACGTG  
AACCAGATGACGATGCGCTCGATCTTCGCCGACATCACGGCGCTTGAGGTGCGCAAGGAA  
CTGGACTACCTCGCCGATCGCGTGTGGTGAAGCTGCGCAAGGAACCGTCCGGCCGCTAG  
TGGGGCGATCTCACGCGATACGGCGTGCACATCGCCGAGTACACGATCGATTGCGAGCCG  
GGCATCGCGCGGCCGGCAAAGTACTGGAGCCAGTGACATGGGGCGCAGCAGCGGCGTGTA  
ACGCCTGCAGAAGCCCGTGCAGAAATGGCTCGAAAGCGCGCTCGTCGAGGGCAACTTCAC  
GGGCTATCAGGAGCTGGAGCAAACGCTTCGCAACAAGGGCTACCAGATCAGCAAGTCGTC  
GATCCGTCGGTACGGGCAGCGTATCGAGCGCCGCTTCGCCGCGATCAAGGCGAGCACGGA  
AGCCGCACGCATCCTGACTGAAGGCGCCGCGGACGATCAGGACGCCCGCTCCGAGGCTGT  
GATCGCGCTCGTGCCGACCGAGATGTTTCGAGTCCATCGTCAACCTGCAGGAAGCGACCGA  
AGAAGACGCCGATCCTGGCGAACGTATCGCGCTGCTGTCCAAGGCCGCGAAGATCATCGC  
GACGCTGGTCCGCGCGCGGTGAACCAGAAGAAATTCGCCTGGAGCTGCACGCACGCC  
GGAAGCGGCCCGCCGCGGCCGCGACAAGGTTCGTC AAGAGCAGATGCCTGTCCGATGACGC  
GGCCGACGCGATCCGTCGTCAGATTCTCGGGATTGCAGGATGACGACCGTCGAAACCCGT  
GCGGATCGTGCGCCCGCCGTCTGCTGCCGTATCAGCAGAAATGGTGCGCCGACACGTCG  
CCCGTCAAGGTCTGCGAGAAGTCGCGCCGCGATGGCTTGTCTGGGGCGAAGCAGCCGAT  
TCAGCGTTGCTCGCAGCCAGCCAGCGCGGCATGGACGTTTGGTACGTCGGTTACACCAA  
GACATGGCGCAGGAGTTCATCCGGGACTGCGCCGACTGGGCCAAGTTTTACAGCCTCTCG  
GCCGACGAGATCGAAGAAACCGAAGAGGTCTTTTCAGGACAAGGATGGCGACAAGTCGATC  
CTCGCGTTCGTGATCCGATTCGTGTCGGCCTTTTCGCGTACGGCACTGTGCTAGCGACCG  
TCCTACGTGCGCGGCAAGCAAGGCCGCGTGATCATCGAAGAGGCAGCGTTCCACGAGCAG  
CTCGCCGAGCTGCCCTAGGCCGCGATGGCGCTGCTGATGTGGGGCGTTCAGGTTACATC  
ATTTTCGACGCACGACGGCGTCGACAACGCGTTCAATGAGCTGGTCACGGACGTCCGTTCC  
GTCAAGAAGCCCTACAGCCTGCATCGCATCACGTTTCGCCGACGCAGTCCAGGACGGGCTC  
TACCAGTGCAATTTGCCTGCGCAAGGGCGAACCCTGGACGGCCGAAGGCGAAGGCAAGTGG  
GACAAGGATATTCGCGCGTTCGTACGGCGCGAATGCTGAGGAAGAGCTGGACTGCGTGCCG  
AATAACAGCGGCGGCGCATGGCTGTCGCGCGCGCTGATCGAGTCGCGCATGTCCGGCTTAC  
ACGCCGGTGTGCGCTGGGCCTGCAAACAGGGTTTCGAGGTGCTTCTGACCACAGCCGC  
GCAGCCGAATGCCGCGATTGGATCGAAGCTACGCTCGGCCCGGTGCTCACGGCGCTCCCG  
GTCGACGCCCGCTCGTACAACGGCGAGGACTTCGGACGGACTGGCGACCTGACGGTCCAC  
ATGCCGCTGATCGAACAACAGAACCTGGTTCGCCGCGATGCCGTTTCATCTTCGAGCTGCGC  
AACGTGCCGTTCCGGCAGCAGAAGCAGATCGCCTTCTACCTGCTTGATCGGCTCCCGCGC  
TTCACGGGCGGCGCCTTCGACGCGCGGGGCAACGGCCAATACCTCGCAGAAGTCGCGATG  
CAGCGCTAAGGCGCATCGAGCATTAGCAAGTGATGCTGTCCGAGTCGTGATATCGCGAG  
CACATGCCGCCCGTGAAGGCCGCGTACGAAGACGGCACGATCGACGGCCTCCCGAAGGAT  
GCCGACGTGCTCGCCGACCTGCGCGCCGTACAGGTTCGTC AAGGGTGTGCCGCGCATCCCG  
GACGTCCGCGCGACCGGCCAGGACGACCGAAGCGCCACGGCGACGCCGCCGCGACGGTT  
GCTCTGGCGTATTACGCGAGCCGTGATCTGAACAAGGGACCGGTGACCGCCAAGGCGCGG  
CGGCCCGCTCCAGCGTCCAAATGACAGAGGGTTACGCATGAGCAAGGGTTTGTGGGTCA  
GCCTTACCGAGTTTGTACGTTTCGGCGAGCCGGACGAGTCGCTTTCGTCGCGAGATCGGTA  
CGCGGGCGCGAAGCACTGATTTCTTCGCGCTCGGCATGTACCTGCCGAAACCGGACCCGG  
TGCTCAAGGCACTCGGTAAGGACATCAGTGTCTACCGCGAGCTGCGCGCGGACGCGCACG  
TCGGCGGGTGCCTGCGCCGCCGCAAGGCGGCATTGAAAGCGCTCGAATGGCGCCTCGCC  
GTGGCAAGGCGAAAAGTCGTGTCGCGAAGTCGATCGCCGACGTGTTTCGCGGGCCTCGACC  
TGTCTCGGATCGTGACCGAGGTGCTGGACGCCGGCCTGTACGGCTATCAGCCGATGGAGA  
TTACCTGGGGCAAGGTTCGGCAACTACATCGTGGCGATCGACGTCGTCGGCAAGCCGGCAG  
ACTGGTTCGTGTATGACCCGGAGACCCAGCTCCGCTTTCGCGAGCAAGGATCACTGGATGC  
AAGGTGAAGAGCTGTCGGCACGGAAGTTCATGGTGC CGCGCCCGCAGGCGACGTATTTGA



ACCCGTACGGCTTTCGGGACCAGTCGATGTGCTTCTGGCCGACGACGTTCAATAAAGGCG  
GCCTCAAATTCTGGGTGCACTTCACCGAAAAGTACGGTTAGCCGATGCTGGTCGGCAAGC  
ATCCGCGCAGCGCATCCGAAGGCGAATAGAACCTGCTGCTCAACTGCCGTGAGGACATGG  
TGCAGGATGCTGTCGCCGTGGTCCCAGGACCTCCAGTATCGTGATTAAGGAAGGAGCCG  
GCAAGACCGGTAGCGCCGACGCTACGAGCGCCTGATGCACTTCTTTCGCGGGCGCGGTAT  
CGATTGCCTTGCTCTGGCAGAACCAACCACCGAGGCTACGTCGACGCGCGCTCCGCGC  
AGGCCGGGCTTGAGGTGAAGGACGACATTAGCGCCGGCGACAAGGCGGTCTGCTCCGAAG  
CGATGAACATGCTGATCCGCTGGATTCGCGACCTGAACTTCGACGGCGCCGATCTACCCG  
TCTTCGACATGTGGGAACAGGAACAGGTCGACGAGATCCAGGCCGGCCGCGACCAAAAAGC  
TGACGCAAGCCGGCGCGCGTTCACGCCGGCATATTTCAAGCGTGCGTTCAACCTGCAGG  
ATGGCGACCTGGACGAGCGGCCGCTACCGGTGTCCGACGTTGATACGGTGGGTGCCGCAT  
CCCTCGCAGAGTTCGAAGCGCCCAGCAGGACGCGCTCGACGCCGCACTGAACACCTTGT  
CCGCGCGCGACCTGAATGCCGACGCGCAGGAGCTGGTCGCGCCGTTTTTAAAGCGGATTG  
CGAACGGTGCAGTGCAGGACGGGCTGCTCGGCATGCTGGCCAAGCTGTATCCGAGCCTCG  
ACGCGGACGCGCTGCAGGAACGGCTTGCCCGCGCGATCTACGTCCCGAACCTCTGGGCGC  
GTCTCCATGCCTGAAGCGGTGAGCTCGGCTACTGCATGAAGCTGCCGCCGAAGAAGGCA  
ATCGAGTACTTGCAGCAAGGGCTACGAGATCACCGGGGATTGGGAGGAGCTTTCGCAG  
GATGCCACGCGAAGGCATTTACGGTTGCCAAGGTCACGCGCCTGGACGTCCTGCATGAC  
ATTCGCAACGCGGTGCAAAACCGCAATCAGCGAAGGCAAGACGTTGCGATGGTTCACGAAA  
GAGCTGACGCCCGTACTCCAATCCAAGGGCTCGTGGGAAAGCAGGAGCACGTGACCCAG  
GATACCGGCGAAGTCAACCAGGTTCAACTCGGCAGCCCGTGTGCGCTGCTGACCATCTAC  
CGAACGAACCTGCAGTCGGCCTACATGGCGGGCCGCTACGCCGATCAAATGGCGAACGTC  
GAAGATCGGCCGTAAGTGGATGTGCGTGCCGATCCTCGACAGCCGCACGCGCCCGAGCCAT  
CGGGCAACGAACGTCAAGGTGTTCCGTTACGACGATCCGTTCTGGAACCTATTCTACCCG  
CCGAACGGCTGGGGCTGCCGGTGCGGCGTGGTGGCGCTGTCGCACGACGAGATCATCGTG  
CGAGGCATCAAGGTCGAGGCGGCCGGCGACCCGCTCGGCACGCCGCTCAACCAGGTCAAC  
GAGAAGACCGGCGAGCTGCGCGAGGTCGGGACGTTCCGCACCGTCGACCCAGTCACGCGC  
CGCGAAATCGTCGTGTCGCCGACCTCGGCTGGAGCTACAACCCCGATGCCGCGGGCGTGG  
CAGCCTGACGTGTCTCGAGACACGGGTGATCTCGGCACGATCGCCAGGGGTAAATTGCAG  
TGAGCGATTTCTGTAATTTCCAGATCGACGACTCGGGCGCTGCGCACGCGCTTGCTGCACT  
TCGAACAAGCCTGCAATCAGAAGGCTGGCGCGATGCGCAAGATCCCGCAGCCGCTGGTGC  
TGGTCACCGAGGACAACCTTCGCCGCGCAAGGCCGGCCGCGGGCGGCAGGCATTGTCGGATG  
CGACGATTCACATGCGCGTCCGGCGCAAGAAGGCGTACAAGAAAAACGGCGAGCTGACCG  
CGGCCGCGTCCGTCGCAAGGCCGGTCTGATGATCCTGCTGGACAGCGGGCAAATGGCCG  
CGAGCGTCTCGACGGATCACGACGTGAATTCGGCCGTCATCGGCAGCAACAAGGAATACG  
CCGCGATTCACAGTTCGGCGGGCAAGCCGGTCCGCGATTGAAGGTCACGATCCCCGCCC  
GTCCGAGGTTGCCCGTTACGGCTGATGGCGAGCTGCAACCTGAAGCGGTGAGCCGGTGC  
TCAACACGATCATGCGCCCCTTGATGGACGCCGCGAACCCGCCGCTAACCTGTCGACGAGC  
TGATCGCGCTCTGCGCGCCTCCGGACCACCCGAGCCGCGCAATGATAGCCACAGCGCCCT  
GACGCTGCCCCGTAAAGTTTTATTAAGGCTTTACGGGTTTGGCTCGAACTTGCTGCGCTC  
CCTGCATCACGCGGATCTCGCCGGCGCAATCGTAAGGCCGAATAACAGACCCGTTACGTT  
CGTCGCCCGCTGATGAGCGCCATGTACGCGAAACCACTCCACATTTTCCGGGCAGGCACG  
CAGACCGACATGAACGGTCGCGTGGTTGATTTCCGGCGTAACGGACCTCGCCGCGACGGCT  
GCTGCATACGGTCCGAAAGTCCACGAAACGCCGATCGTCATCTGCCATCCCCGCGACAAC  
GCCCGGGCGTGGGGCTGGGTGCTTCTCTCTCGGCGTCCGGCCGGCAACCTGCAGGCCGAA  
CCCACCCAGGACGATCCCGCATTCGCCGAACTCGTCCGGCGCCGGGCGCGACAAGAAGATC  
AGCGCCAGCTTCTACCACCCCGATTCCGCCGACATCCCGGTGCCGGGCGTGTACTACCTC  
CGTCACGTCGGGTTCTCTCGGTGCGCAGCCGCCGGCCCTCAAGGGCCTGCGCGACGTCAAT  
TTCAGCGACGGCAACAAAGGCGTTCGTCGAGTTCAACGACTGGGGCCAAGAACTCAATGCG  
GGCCTCTGGCGCAGCCTGCGCGAATGCCTGCTGACGCAATTCGGCCGGGACACGGCTGAT  
CAGGTCATCCCCGATTGGCAAATCGAGTCGATTCGCGAAGTCGCGCGACTAGACGATGCG  
CCGACCAGCGCATTCCGCCAACGCGGGGCGGCAACCGTACCCACCTCCACTGAGCAGGAG  
AAAGACGCGAGTACCCCTGAGCAAAAGGCCGCACTGGAGGCCGAAAACACCCAGCTCAAG  
CAGCAGCTCGCCGACGCGCAGGCGCGTGAGCGCAAGGCGGGCAGCACCGCCGCCACAGC  
GAGCATGTGTCGTATGCCGAGCAGCTCGTCAAGGGCGGCACGCTCGCCCCGAAGCATAAG  
GATGCAGTCGTGCAATTTCTCGACTTCACGGCACGTGAGCCGTTTCGAGTTCGGCGAAGGC  
GATGCCAAGCAACCGCTGGCGAGCGCATTCCGTTCTGTTCTCGGCGAGCTGCCGAAGGTC

GTCGAATTTGGCGAGCACGCCACGCGCGAGCGCGCCGCGTGAAGACGACGGCCCGCCGAC  
ACCGTCGAGTACGGCGAGAACGTCGATCCGAAGCGCGCCGAGCTAGACGGCCGCATTCGT  
GCAAACATGCGCGAACACCAGGTCGATTACGCGGCGGCCGCGAACGCGGTGATCCGTTAA  
TAACCGGCGCAAGCCACAGATAAAGGCCATTGAGCCAGGACAAATGATGGGACGTCTCTCC  
AAACTGCGAATCGTCGATCCGGTGCTGACGAATCTCGCGATCGGTTACACGAACGGCGAA  
TTCATCGGCCAGAGCCTGATAGCGGTCGTCGAAGTGGAAAAGGAAGGGCGACAAGATTCCG  
AAGTTCGGCAGGGAATCGTTCCGCCTCTACAAGACGGAACGCGCGTTGCGCGCCCGGTGCG  
AATCGAATGAACCCTGAAGACCTCGGCATCATCGATATCGTCCTCGACGAACACGATCTC  
GAGTATCCGATCGACTACCGCGAAGACCAGTAATCGGGCGTTCCCCCTGGAGCAAGCCGCC  
TTCAGACAGCGACCGAAGCGATCCAGTTGCGCCGCGAAAAAATGGTCGCGGACCTCGCG  
CAGAACCCGAACAGCTACGCCTGGGGCAACAAGAAGCAACTCAGCGCGACCGAGAAGTTC  
AACGCGGCCGGCAGCGATCCGGTTCGGCGTCATCGAAGACGGCAAGGAAGCGATCCGCACG  
AAGATCGGCCCGCCGGCCGCACACGATGGTGATCAGTGCGTCGGCCTACAAGACGCTGAAG  
GCCACCCGCAGCTCATCGAGAAGATCAAGTACTCGATGAAGGGCATCGTGACCGTCGAC  
CTGCTGAAGGAAATCTTCGAGGTCGAGAACATCGCGGTCTGCGAAGCCATCTATGCCGAC  
GACAAGGACCGCTTCACGGTCATCTGGGGCGCCAACATCGTGCTCGCCTACGTTCCGCTG  
CAGCGCGGGCGCCAACAGCGTACGCCGTATGAGCCGTCTACGGCTTCACGCTGCGCAAG  
AAAGGCAATACGGTCGTCGACACGCGCATCGAAGACGGCAAGCTCGAACTGGTGCGCAGC  
ACGGACATTCTCCGCCCGCACCTGCTCGGCGCGGACGCCGGCTACCTGATCTCGGGCATC  
AACGGCTGATCGCTCGCGCACCGAATCCCGTACTGACCACGTCTCGCCTTCGGGCGAGA  
CCCACCCGAACGGAACATGACTCATGAAAACGCATCAACCGATCCTTACCACGTCCGTTA  
CCGCTGCCGCCGTTCTGAACCGCTTCCAGTTCGTTCGGCTTCGATGGTGCGGTGTGCGCAG  
CCGGCGCGAAGGCGCTCGGCGTTGCCGAAACGACCGCCGATGTCGGCGAGCAGGCGCCGG  
TCATCCTGCTCGGCGTCATCCTGGTCATGGCCGGCGCACCGGCCGACGAGCATGCCGAGG  
TCGAGTCCGACGCGGACGGCCAGCCCTTCCGAAGGCAACCGGGCGCATCGAACGGCTACG  
CCCTCCATGTGGCGACGGCGGCCGTGACGTCATCCGCATCCCGTGGGGTATTTGACGTG  
CCTTATTGCACGTTCCGCCGACCTGAAGTTGGCGGTGCCGGAACGGACGCTCATTGAGCTG  
ACGAACGACACGACCACCGACTACGGCGCGCCGCCGCCGACGACGATCAATACCGACATC  
GTCGAAAGCTCGGTGCGCCAGGCGGAGGAAATCGTCGACGCGCACTTGC GCGGCCGCTAC  
AACCTGCCGCTGACGCCGGTTCGACGGTCATCAAGGATGTCACGGTCAATCTGGCCCGG  
CACTGGCTGTATACCCGTCGACCGGAAGGCGCCGCGCTCCCGGACACCGTGTGCGCAGACC  
TTCAAGGGGTGATGTACATGCTCGAAACGATCCGCGACAACAAGCTGTGATCGGCGAG  
CCGAGTGGCCCGGCGACGCCGGAGCCGGGAGAAATGAAGGTCGGCGCGCGCCGTGCGCAG  
TTCGACGCGGACCTGTTGGAGCGCTTCTGATGGCGACGACGCTTGAAATGGTCGATGCCA  
TCGGCGCCCGGCTGCGCGTCAAGCTGCCAGCGCTGGTGACCGAGTACTTCCCGGAGCGCC  
CGGACGAATACCGGCTCCACCATGCGACCGGCGCGTTGCTGGTCAGCTATCCGGGCAGCC  
AGTACGAAACGACCGTTCGACACCGACATGGTTGTTTACGCCGCGGCGAGTGAAGTTTCCG  
TCGCGATCGTGCTGCGCCAGCTCAACGGCCCGCGGCGGTGCCATCGACGTTCTCGATCACG  
TTCGCACCGCCCTGGTGGGCTTCCGCCCGCCGGACTGCAAAAAGATCGCGGCGGTGACGG  
ACAAGTTCCTCGGCGATTTCGGCCGGCCTGTGGCAGTACGTGATCGAGTTGACGGCGGGCG  
CCGTGATTGTGCAAGACGCGAAGCCGAACGACGGACCGCTGTTGACGCAAGTTACCTACA  
AGGAGGAATCGTGAATAACCAGTACAGCGGACCGACTAGCGGCGTACGCTGAAGGACGG  
CGAAGACGTCCAGGAAGTGAGGCTTCATACGGGCGCAGACGTCGAGCTGCGCGAAGAGCA  
CGAGTACACAGCGACTCTGCTCGCGATGGGGTACCTGAAGCCGGCCGACGACCGTTCGAC  
CAAGCCC GCGCGCCCAGCGTGACGGAAGACCAACCGAAGACCTCCACGAACGCGGTTCG  
CTTGAAGGGAGACTGAGCGATGGCGGCAAACTATTTGCATGGCGACGAGACCATTGAAAG  
GGAAACCGGCTCGCGGCCCGTCAAGGTCGTGAAGTCGGCGGTGATCGGCTTGATCGGCAC  
CGCACCGATCCGTCCGGTCAATACGCCGGTGCAGTCGCTGTCCGACGTCGACGCGGCGCA  
GTTTCGGCCCGCAGCTCGCCGGCTTCACGATCCCGCAAGCGCTCGACGCGGTCTACGACTA  
CGACAGCGGGACGGTGATCGTGATCAACGTTCTCGACCCGGCCGTA TCAAGAGCAACGC  
GGCGAACGAGCCCGTACGTTTGACGCGGCAACGGGCCGTGCAAACTCGCGCATCCGGC  
CGCGACGAATCTCGTGCTGGAGAACCACTCGGGCGGCTCGACGTATGCCGAAGGCACCGA  
TTACGCAGTCGAGCTGATCAACGGCGTTATCACCCGTAGCAAAACCGGCACGATTGCGCC  
GCGTGCGACGGCGGTCAAGGCGACCTACGACTACGTGGAACCGACGAAGGTCACGGCCGC  
GGACATCATCGGCCCGGTGAACGCGAGCTGGAATGAGCACGGGGATGAAGGCGCTGAAGGA  
CACGTACAACCTGTACGGTACTTCTCGAAGATTCTGATCGTGCCGGCGTACTGGACGCA  
GAACTCGGTCTCGGTGAGCTGGAGGCGACGGCCGTCCAGCTCGGGGCGATCGCGTACAT

CGATGCGCCGATCGGCACGACGCTCGCGCAGGCGCTGGCTGGGCGCGGGCCGGCGGGGCAC  
GATCAACTTCAAGACGTCCAGCGACCGCGTACGCCTCTGCTACCCACACGTGAAGGTCTA  
CGACACCGCGACCAACGCCGAACGCCTGGAGCCGCTCTCATCGCGTGC GGCGGGCCCTCA  
CGCACGTGTGACCTGGACAAGGGCTACTGGTGGTCCAGCTCGAATCAGCAGCTCGTCGG  
CGTCACGGGCGTCGAGCGGCCGCTGGCGGGCGATGATCGACGATCCGCTATAGGACGTGAA  
CATGCTCAACGAACAGGGCATCACGACCGTGTTCAGCTCGTACGGCTCGGGCCTGCGCCT  
GTGGGGCAACCGCACGGCGGCATGGCCGACCGTGACGCACATGCTCAACTTCGAGAACGT  
GCGCCGTACGGGGGACGTCATCCACGAATCGCTGCGCTACTTCAGCCAGCAGTTCGTGCA  
CGCGCCGATAGACCAAGGGCTGATCGTCTCGCTCGTCGAGTCGGTGAACGGGTTCCGGGCG  
CAAGCTGATCGGGGACGGCGCGCAGCTCGGCTTCAAGGCATGGTTCGATCCGGTCCGCAA  
CCCGAAAGAGGAGCTGGCGGCCGGCCACCTGCTCATCAACTACAAGTATACGGTGCCGCC  
ACCGCTCGAACGCCTGACGTACCAGACCGAGATCACCTCGGAGTAATTGCTGACCCTGAA  
GGGAGGTAAGTATTATGGCGGGTGGCGTCCAAATCAACCGGATCACGAACGCCAACGTG  
TATCTGATCAACATTTCCATGCTCGGCAAGGCTGAGGAAATCAAGCTGCCGCACATCCAG  
GCGATCATGGCCGAGCAAAAGGCGCTCGGCATGATCGCCACGGTCGAGCTGCCGGGCGGC  
CTGGACAAGCTCGAAGGCGAGATCGAGTGGAACTCGCTCTACGCCGACGTGGCGAAGGCG  
ATGGCGAACCCGTTCCAGGCCGTTCCGCCGCAATGCCGATCGAACATCGAGACGTATGGC  
GCACAAGGCCGCGTGC GGGAATCAGTCTCCGGACGTACCTGACTGTGATGTTCAAGAAG  
AACCCGCCCGGTACGTACAAGCAACATGAGAACGCCGATTTTCAGCTCCGCGTTCGGCGCG  
ACCTAAATCAAGCAGGTCATCGACGGCGAGGAAGTGCTGGAGCTGGACTATCTGGCAAAC  
ATCTTCCGCGTCGGCGGGCAAGTCATGCTGGCTGACTTCCGCGCCAACACCGGCCGGCTAA  
CCCCACACCGGCGCAGTCGTTGTCGTCTTGGCCAGCTTCGGCGGGCCCTTTTTTAATCTGC  
GCTGAAAGTGCGAACGCGCGCGAGAATCGACAATGTGTGCTCTACTACCACGGAGCGCGT  
CGTGAAAATCGCCCTCAAATTTGCCGTCAAACCTTGCTACCGGCCAGACGCTCACGGAAC  
GACGTTGCGTCGCGGCAAGCGCAAGGAAATGGCCCTTGC GGCCAAATACAGCGACGTCCC  
GGGGGAACAGGAAGATTTCCCTCCTCGCCATGCTGAGCAACCTGACCGTCGAAGACATCGG  
CGAACTCGACCTCGCCGACTCGACGCGGCTGATGGAGTCCTTTCGCAGCATGGTTGAGGG  
ACGGGATACCGCCGAAATGCTGGGGCCCGGCGATCAGCCGCCGAGCAAGGAAACGAAGG  
CGCTGGACTCGGCGCTGCGACCGCTGGATGAGGTGTTGCTACTGGTGCTGAAGATTCAGC  
CGTCCGAGATCGATGAACTGGATATGGAACACTACTGGCACTGGGTGGAAGCCGCGGAGC  
GGGAAATCAAGCGGCGCGTCGACGCGACAAAGCAATCCTGATGTCAGGCGGCCCGGCGCC  
CGAGCCGGCCGCAAGGCCACACGATGGCCTTGATCGCCGACGCGATGAGGTAGGAGCCGG  
CCACGACGGCCGGCCCGAGGAAGGCGAGGCCGAAAAACGCGACGATGCCGAGCACGCTCG  
GCAGGGACCACCAGGGCAACTCGATGAACGGCCAGACGGCGAGCACGACGCCGGCAATCG  
GGATCACGGTGTAGGTAATGCGTTCGGCGATGGACTGGATGTTTCATGATCGGCCTCGTCA  
CTTTCCGGTAAGGGTATGGCAAGCGAATTCTATATTGGCGAAAAGATCGGCCCGACGCTA  
CTCGGTAGCTTCGGCGCCGCGCTTTCCGGCACGCGTACGATGCTGAATGGCCTCGGCCGC  
GTCGCCGACGAGCTGCGCGCGAGGCATACCCGCCTGGGGGACGCGATGGCGCGGGCCGTT  
GCGCATCCGATGCGCACCCCTCGCCGAGCTGCGCGGCCAGTACGACCGCCTCGGCCGCACA  
TTCGATCCGGTCCAGTCGAAGCAAACGGCCCTTGCGACCCGGCTGGCGCGCGGGCGCCGCG  
ATGCGTGAGCAACGCGAGGCGCTCGGCGCCGACATGCTCGGCAGATACGCGACGGCGGCT  
GCCACGGCGGGCGCCGTAATCGGCGCTGTTCCGGCAGGCCGTCACCTTCGGAGCCGGCCCG  
CGCGACATCGCGATTACCGTCAAACCTGACCCGTGATGAAGAGTTCGGGATCGGCGAGACG  
ATGCGCCGTGCGGCCCTTGCCACGAGCCAAGGTCACAACTCCATTCTCGAAGGCGTCGGC  
ACACTTCTCGCTGCCGGCAGGGACGCGAAGGAAGCTGGCCAGAAATCGTACCTGCTCGGG  
CGCGTGGCGACGGCCACGAACGACCACATGAAAGACCTCGCCGGCATGGTGTACTCCTTC  
TCCGAGACGCTCGGGATCAAGGGCGACGCGGCCGCTGAAGGAGGCGTTCAACCGCGCGGCC  
TACGGCGGCAAGCTCGGACGGTTCGAGCTGAAGGATATGGCCAGGGCTGTGCCGGAATG  
ACCGCGGCGTTTGC GGCCAAGGGCATCAAGGGCCAGGACGCGCTGACGTAGATCATCGCC  
AGCCTCGAAGTCGGCCGCGAAGGCGCCGGCAGTGGCGACGAAGCCGTGACGAATCTGCGC  
AACTGGCTGTGCGACATGAACGCGAAGGCGACCATCGACGCCTACAAGAAGGCCGGCGTC  
GACTACCAGAAATCGAAGTCCATCCTTGTCGCCGGCGGCTATGCGAGCTACGAAGGCTCG  
CTGCAGATCGCACAGAAGTTCATCGCTTCTCGCGGCGACGCGTTCATGAAGCAGTGGAAA  
GCCGCGGGCGCCAAGGGCGATGAGGAAGCACAGCGCAAGCTGATTGAGAGCTTCGGCCTG  
AATGAGGTGTTCCAGGACATCCAGACCATCAACCACCTGCTCGCGAAGCGTCAGGGGCTGG  
GACAAGTATCAGCAGAACAAGAAAGACATGGGTAGGGCGCAGGCGCTGAATACCATCGAC  
CAGGACTACGTGCGCCACGCGGAGCTGGCGACCGTCGCGTGGGGCCGCTTTCAGACGCAG

ATTGCGGACCTCGGGATGACGGTTGGCCGCGCGCTGCTGCCGGCGCTCACGGACCTGATG  
AACACGGTCACGCCGCTGCTCCAGCGCACCGCGCAGTTCGGGGCCGCCCATCCCGTCTTG  
ATCCGCGGCGTGGTCGGCTTCGCAACGGCCGTGATCGACATGAAGGGCGCGACGCTCGCT  
GCCGGCTGGGGCCTGAATTCCTTCGTCAAGTCGCCGCTGAACATGGTCAGCACGGCATTG  
ACGACGGTTGGGGCGAAGTGGACGCTGTTTCGCGCGCTATGGGGCGGGTGGCGGCTCCCGC  
CTGTCCACCGTGTTTCAGATTTTCGGCATGGGGCGCGGGCGCGGCCGCAAGTACCCGGCC  
GTGATCGGGCGTGCCGGGAGCCTGTTTATGGGATTTCGGGAGCGGCGCGCTCGTTCGTCG  
CGCGCGCTGCTCCATTTTCGGGCAGGGCATGCTGATGACATTTATCGGCCCGCTGCGGCTG  
CTCGCCAGGGCGGGATGCTGCTGGCCCGCGTCTGGGCGTCCAACCTCGTGAACGGCCTT  
ATGCTGGCCGCGCGCGCGGTGCTCTGGCTCGTGC GCGCGCTGATGCTCCATCCGATCGGG  
ATGGCCTTCACCGCGATCGCGGTTCGGCGCGTACCTCATCTACCGCTACTGGACGCCGATC  
AAGCAGTTCCTTCGGGGGCATCTGGGCTTCGATTTCGTACCGCGTTCGCGGGTGTGCTGGGG  
TGGTTCGCCGCTGGGCTCCCGAAAACCTTCACCGATTTTCGGCCCCCAACGGATCGACAGT  
CTGGTCAACGGTATTTCGCAATCGCTTCACGGCTGCGAAAAACACGCTGATCGAGTTCGGC  
AGCAACGTGAAAGCGTGGTTCGCGAACTCGCTGGGGATCAAGTCGCCGTCCCCTGTATTTC  
ATGGGCTTCGGCGACAACATCGCCAGGGCGCCGCAATCGGCATCGGGCTCTCGTTCGGCG  
GTCGCCGCGCGCGCGGCCGCGGCATGGCGACGACAGGCCGCGGCCGCGGGCTCCCTGCAG  
CGCATCAACGACGCTCGGGGCGGATCGCCGGCTGGCGCATCGGTAGCTGGCTCTGGGATC  
ACAGTTCACCTCTCGCAGACGATTACGGTCCAGGGCGGCTCACCGGACGGCGTCAAGGAT  
CAGGTCAAGCAAGGGTTCAACCTGTCGTTGCGCGACCTGGAGCACATGCTCGAAGACCTG  
CTCGCAAGTGCAGGCGCCGCGCGTACAGGAGCTGACGTGTTTCGCAATTCCTTGGAGATAT  
CGAATTCGACCAGATCGGATACTTCGACGGGTTTCGATGCGACCTACGGTGCCGACTACGC  
CGAACACGCGCTGCTGCAGAGCAAGCCGCGGCTGCAACGCATGGGCGACAAGCTCGACGA  
GATTCTGATCGCGCTGTCGTTTACTACTGGTATTGCGATCCGGAAGCCGAGCTGGCGAA  
GCTTCGCGCGGGCGGTGAGCGCAAAACAGGCGATGGCGCCCGTCTTTGGCAACGGCGACTA  
CAAGGGCTGGATTGTAAGTACCGAGGTTTCAGTTCGACCAGCAAACAACCGACACGTCGGG  
AACCGTGCTGTCCCTCGACGCCAAGATCACCTGCGCGAGTTCGTCGGAGACAAGAAAA  
CGCGTTCAAGCCGCCGCGCCGTACAGCCCAAGGTGACGCCGCGGCCCTCGCAGGCGGTCTC  
CAGCGTCACATCGGCGGTGCCACCGCGCGAGCCACGATTCAGCTGGCAGTGACCTGGGC  
CAAACAGGCGCAGTCCGCGAGGCGCGTGGCCGTGACGCGGTCAAGGTTCGTCAGAAAGT  
GAACGACGATCCGTTTCGACGATTGAGTTCGCTCGTTCGAGCCTGCTGACCAACATCAAGCA  
AGCCGCTGATCCACTGACGAAGCTGTCTCCAGCGCTTGCCTCCCTGACCGACAGCTTCC  
CGAGGCGGCCGCGCATCCTATGCGCCAGCAATACTGCTCTGTATGCGGTCCGCTCGGCGCA  
AGGCGGCTTGGCGAACGCGACGATCGGGACGATTACCGGCGCAATCGACCGGGCCGCGGG  
CCAGCTCTCGACGGCGAGCATCGCGCTAAGATCCGCGGCCGCGAGTCTTCGCAAACTGGC  
CGCGAAAGTCGCGACGCGGAGGATTTGATGTTTCTGACCCACATCACAACCGAGGGCGAA  
CGGTGGGATCAAATCGCCTACCGGTATTAAGGCGACCCGCTTGCTATGAGCGGATCATT  
GCCGCGAACCCAGCGTGCCGATTACGGCGGTTCTCGCGAGCGGCATTGCGCTTTCGATA  
CCGGTTCGTTGCGGCCGACGACGTAGACGATGAGGAGCTTCCGCCGGGGATGCGATGATCG  
ACACCCCAACGTCGGTTGCCGGCGTCTTGAACCCGTTTTTCACGCTCGTGTACGAGCAGA  
AGAACATCACCAACGACATCGAGCCCTACGTGCTGTGCGGTGGCGTATAACCGACTTCTTGT  
CAGGCGAGGCCGACCAGTTCGAGGTCGTGCTCGAAGACACGGATGGACGAGGGCTCGATG  
CGTGGTATCCGGGCAAAGGCGACGCGCTGACGCTGAAGCTCGGCTACGCCGGCGCGCAGT  
TGCTCGCGTGTGACCGCTTCGAGATCGACGAGATTGGCTTCGACGAACCGCCGTCGACCG  
TGACAATCCGCGGACTCGGTACTGGCGTGAAGGCATCGGTCCGAAGCCGCAAGGCCAAAG  
CGTACGAGCACACCACGCTGGCGACGATCGCGGCTCGCGCGGCGAAGCGGAACCACCTGA  
CGTTCACCGGCCGATTCGGGATATTTCGCATCGACCGAGTACGACGATATCAGGAGCAGG  
ACGTAGCGTTCCTGACGCGGCTCGCGCGCGAGTACGGCTATGCGTTCAAGATTTTCGGGCA  
GCAAGATGACCTTCAGCGAACTCGCCGACCTGCGAGGATCGGACGCGGTCCAGCAGTTCA  
AGCGCGCCGACTTGAAGTCGATTCGCCTGCGCGGGAAGATCAAAGACATCTACGCGCAGG  
CCAAGGTAGGCTACCACAACCCGAAAACGAAGAAGCTCGTCTGCTACGGCGTGACGGGTG  
ACTCCGTGGGCGTCTGTCGGCCAGTCTGAAGTGGCAGCGGGAAAGCGGAAGCAGTCCGGTC  
AGTCGACGAGCGGCGACACGCTGCGGCTCTCCGCACGGGCCGGCTCCAAGGCAACGCTGC  
AGACGATGGCACGCGCGGCGCTTGACCGGACGAACCTCAAGCAGACTGGCGGCTCGGTTCG  
AGATGCGGGGTGACACGAAGCTGGCCGCCGGTGCCTCGATCGAGCTGCTCGAACTCGGGA  
AACTGTCCGGCACATACTCATAGAGTCGGCGCGACATCGTCTCGATCGCGGCGGCGGCT  
ACCAAACCGAAGTCGAGCTGAAGCGCTCGGCCCTCGCCGTCCAGGCCGGCAAAGGCGGCG

GCACCGCGAAAAAGTCAACGAAAGGGCTGCAGGTCTACGGCGTCACCGCGAAAGGCGACG  
TCGTGGTTGTTGGAACAAAGCCCGTAGAGGGCGAAAGGCAAGAAAAAATCAGCGAGACCCT  
CGACGAGTTCGGCACGACGATCAAGTTCGGCACGGTCAGTGCCTCGAAGCCCGGCTTCGC  
GCGCGAACGGGTGACCGACCTCGGCAACATGAGGACCATGTGGCTGCTGATCGCGTACCC  
GGAGACCCTGGCCGATCAGGCTTGCTGGACCTACGATAACGGCGAACAGGTTCGCGGTGCT  
CCTGGACGGCCGGTGCGAAGACGGTGTGATTCTCGGCGCCATCTACTCCGATGCCGATCG  
CTCGCCCGTCACGGACCCGAACAAGTTCATCGTCCGCTTCAAGGATGCCACGGTGTCTCGA  
GTACGATCGCGCGACCCACACGCTGACGTGCTTGGGCATGCAGATCGTGATCGTCGATTC  
GAAGTCGGAAATCATGCTGCGCGCTCCGACAAGTTGACGGTCGACGTGCCGGAGACCGA  
GTTACGCGTAACGTGACAGTCAAGGGCAAGCTGACATAACAGGGCGGCATAGCCGGATC  
GGGCGGCGATGGCGCTGCACTGACGGGCAACGTGAACGTCGACGGCACCGTGAAGGCAGC  
TGGCACCATCATGGATGCCGGCGGCAACTCGAATCACCCTCCACTGAGCTTTCAGCCG  
GCTTTAAGATCCCCCTGACTGGACGCGCGGCAACATGACCTCATGACCCAGCTCTCCGAC  
ATTACCTCCGTTCACTGGCAGCCGGCCCTTAACTGCGAAGGCGTTTTTTGAGGGCGTGGAT  
GGCATCGATCAGGCGATTTCGCCTGATGCTCGGGACGCCCCAGGGTAGCGTTCGCGATCGC  
CCCGAGTTCGGCTCCAAGCTCTATCTGTATCTCGACATGCCGATCGACCGCGCCACGCCG  
CATGTTGTGCGCGAGTCGGTCGACGCGATTTCGCCGGTGGGAGCCGCGCTGCGAGGTCGTG  
CGTGTCATTCCGTCGATCGCTGAGTCGCGTGAAACGATCCGCGTGCAGTGGCGCCTTGCT  
GACGGCGTCATTAGTGAGACGGAGGAGCCGCGATGACGATTGGTGAACCGGATTCTATCG  
CCCGTAATCCAGAGGCCATTACGGCCGGGATAGTGACCGACTACGAGCCGCGCACTGGCA  
AGACGCTGTATCCGGCGCAGGTTCGAACGCGTCTGGTTCGACATCATTGCCTACCGTGAAA  
CCCCCGTACACGACGGCATCCAGGAGGCCCTCGAAACAGAACCTTGTGCGGTTCCGCCGCG  
CTCCCATGATCGATTACCTTGGCGAGCTGGTTCGGCGTGACGCGGCTGACGGCGCAGCCCG  
CGAAGACTACGCTGCTCTTCTCGATCTAAGAAGGGTTGCCGTCGAACCTGCTGATTGCAG  
CCGGCACGCATGTCGAGACGAGCGAGGGCGCTGTGTTCGTTTCGCGACCGACACCGACGTGA  
CGCTCGTCTCGGGCCAGTTGTTCGATCGACGTGGCCGCGACGTGCGAAACCGCAGGGTTCGA  
TCGGCAACGGCTGGCAGCCGGGGCAACTCGGCTCGTTCGTCGACGACCTGGGCGACATCG  
ACGTAACGGTCGCTAACACCAAGGTCAGCGCGGACGGGTACGAGGAGGATGCGGACGATC  
GTCTGCGTGAGCGTATCCGGCTCGCACCAACAAGCATTTCGGCACGGCGGGCTCCCGGCTCG  
CGTACGTGTTCCACGCCAAGAGCGCGCACCAAGTCGATCGTTCGACGTCGGCGTAATCGGTC  
CGGAAATCGAAATCCGCGACGGCCGGCTGGTTTTCCGTCAACGGCGTTCAGCCAGGCAGCG  
TCCAGGTCTACCCGCTCGACGACACGGGGCTGCCTAGCGAAGCGATTCTCCAGCTCGTAC  
GCGACAACCTGACCGACGAGTGTGCGCGGCTGCTGACCGATTACGTCGACGTCCGAACGC  
CAACGCCGGTTCGACTACGCGATCGACGTGCGTTTTGACGCTGTACAAGGATGCCGGCGCCG  
ACACAACGATCGCGAACGCACGTACGGCGGCAGAAAGCCTACCGAACCGATCGTGCAGCCG  
GCCTGGGGCGCGATATCGTCCCAGCGCAAGCTCAGTCGCGCCGTGCAGGTTTCAGGGCGTGT  
ACGACGTTGCCCTGCCGGGACTCGCACTGCGCGTGCTGACCGCCAGCGCATGTGCGCGGT  
GTACGGGGGTGAGTGTTCATCCCCATCGGGGTGGCGAATGGCTGATCTGCTCTTGCCGCCA  
GCGCTGGCGAAAGACCCTCGTTTTCAAGGCCTTCGCACAGTTGGCCGAGCGCCTCGACCAC  
ATCGACATGTGCCCGTCTCTGGTCTACATGATCGCTGGCGTCGATGCATCCGCACTGCCG  
TTCCTCGCAGACCAGTTTTTCGGTGTGGGCGAGGACGGCTGTAGTCCCAGCGAGTCGGAT  
GAGGCCAAGCGTGCCTTGATCAATGGGGCACCCGAGCTGCACCGCTACAAGGGCACGCAC  
TGGGCGGTTCAGAGAAGCGATTTCGGTGCCTAGGCTTTGGCGGAGTTGAGCTTATCGAGGGC  
ATCGGTGGCGCCTACTACAATGGGAAAAGCCGCCATGACAGCGTAATGGTGTATGGCGGC  
AATGGATTGTGGGCGGCCTATCGGGTCATCCTGCTCGATCGCGCGATCACCACGATCAA  
GCGGCGTTGCTGCGCACGACATTGGCTGCGCACGCGCCGGCTCGATGCGTACTCGCGAAT  
CTCGAATACCGTTCGTGTGCCGATGCGCTACAACGGCGCCGCCACTATGCCGGACAGTAC  
AACCACGGGAGCAGTTAATCCGCAAACTCGTCGAATCTTCCCAAAGGGAGGAAGATCTTT  
ACCAAGTCGAAACCGTTCGATCCGGTTCGAAGGTGGTCCGGACGGGGTTTTGAAACAAGCAGG  
CGAAGCAACTGGGCGGCCGACGCGCTACCTGAAGGCGCAGGTTCGAGCAGTCGCAGACCC  
GGCTTGCAGCATATCGCCGCGCCCGACCCGCATTTCGACGTACGCGACGAAGTCGGACC  
TCGCGGCAAGGCTTGCCGAACTGGTTCGGCCAAGTGCCCGGCATGCTCGATACATTGAAGG  
AATTGGCGGAGGCGCTCGGAAATGATCCGAATTTTCGCGACGACGATTACATATCAACTCG  
GGCTGAAGGCGCCCATCAGCTCGCCCGTCTTCCCTGGTACTCCGAAGGCGCCGACGCAAG  
TACAGGGGGATAACTCGACGGCGCTGGCGACGACTGAATTCGTGAAGCAGACTGGAGAGT  
CGTATTCCAGCATCCAGGGTATTGCCACGACGGCAACGTTGAACAGCGGACATGTGGGGG  
CGTTTATTTGGGCGTGCGGCGTAGGGATCACCCCTACGCTGCCACCGGTGGCTGGCGTTC

CTAAAGGTGCGACGATCACAATCGGAGCGCCGGTCACCGTGACTCTCAAGGGCAATGCAT  
CGGAGAACATCAACAGCCAGCTTGGAGTAACGTGGAACACGTTTCGCTCTGAATGCGGGCG  
AGCAAGCGCAGTTCATCAGCAACGGTGGCGCGTGGTACTTGTGAGGTACACGACGATTC  
TTGGGGTGACGCCGCCGAATTCGACAACACGACGAAACTCGCGACGACCGGATTCGTGC  
AGCGAGCAGTCAGTAAGTAACGATCCGCCAACGGATACGTAGGAAGCGCCACTCTCAGCA  
CATCCGACGTTGGCTGCCTTATCACTTGGGACGGACACGGCACGTTGACGCTGCCGGATG  
CCACTACCGTTTCAGGAGGCTCTGCAATCCGCGTGGTCAAGTATGCTGGCCCGATTGCTT  
CCGTACTAGCGGCTAACAAACCTGGGCTATTGAAAGTGCCTGCCAGCGGAGCTGACACTT  
ACACATTCGCTGTTGGTGCTTTCGGGTTCTTCGACCTGATTAACGAAAGCGGTATCAAGT  
GGGACGTGGCCGGTGAGTTGTTTAGCCAGTACGGCACGACTACCGCGCAGTTCGATAACA  
GCTCGAAACTTGCAGACGACGGCATTCAATTCAAGGTGCGCTTGGGAATTCCTGAAACAGA  
TCGGGCTTAGTGCGGGAACGACGCTGAATGCCAATGCTTGGAGCAACGCGTATACGCTCT  
TCGGAGTTTCGCCGTATAACGTGAACTTGCCGTTGCTTTCATCTGGCGTTAATGGTGCGG  
CGATCCGTTTCTCGAACATCGGCTCGACCGCATAACAGTTGGTTGGGTCTGGGTCCGATG  
CGATCTTCAACGGCACTACGTGGAACACGCTCGTACTCAATCCGGGAGACACCGTACAT  
TGGCTTCGTCAGGTGTGTGGGTTCATGTTGGCGGATCGATGTCGATTCCTGCAACGGGCG  
TGATGAGCGGTCTGGATGGAAGGCGCAGCCGCCATTCGACAACAGCACGAAGCTCGAAA  
CGACGGCGTTTGTGCAGCGGGCCGTCGGCTCGGTCGTCGGATCGATGCGCAACGCCAGTA  
TGTCGGTTCCGACGGTGAGCGCATCCGCGACGTTTACGGCAGATGAGATCGTTGTCGAGA  
CGGTGCTCGGCGGTGCCGTTTCCGAATCGAAACTTCAATGCAACGATCAATCTCGGGA  
CTACAGACGCGGGCGGGATGGATACTGTTACTGCACCGGCATCCGGTTTTGCTGCTATCT  
ATCCAATTTACAACCCTACGAATGGGACGACGGCTCTTGTGTCACCAATGCGACTTCAA  
GCGTTGCTCCGAACTTGTACAGCGGCGCCAACATCCCCGACGGCTATGCGGCCAGTGCGC  
TTGTATCGGTATGGTCAACCTACTCTAGTCGCCAGTTTGGCTTAGGCTTTCAGGTTCGATC  
GGACCGTGAACCTGACTAGCTTTCGGTTCTGAGGCCAAGTGTCCATCAGTCTATTTACG  
CGCCGTTTCTCGGTGGCAAGCTACATTCCTCCGAACGCGAAGCTTGTATCGGGGTACACGA  
ACTGTGGATCGACCGCCGCACCGATCAGGGGTAGCGCTGTCAGTGGATCGTCAACAGGTA  
TCGGATCGGCCGGCACGAATGGGCAGTCGATCCTAACCTTGGCGCACCGTTTAGCGATG  
TGCCGATGGTTACCCCGCAGACGATGTTCTATGTTTCAACGGCATGCGCTGGAACGATGA  
CCTTCTCGTGTTTTATATCGAGTTACAATTTCTGAGGAACAGCATGGAGTTGCTAAACGT  
TCAATTCAGTGAGGATACTGAAACATCGATTATTTCCGGGCTTCAACTGTCCAACGGACCC  
GTTGGCGTGGCCCCATCAAGGACAGGTATCACTTACGATCCTCGTTACCACGCGTATGT  
CTCAAGCGTCCCGGAGGCGCTGCTGGCAGGCCTACTGGAGCCGATCGAAGGGCAATCAGC  
GTAACCTCGGGGTGTTGCTGATGAATATATTCGCTGCGGAGCGCCCAAGATTCACCCCGG  
GGCGCTCGACATATCGATGGATGAGAATTCGAGCAGGGCTGATCCAGGTAGTGCAATGG  
CGCACAGTACGGCACTTCGATATTGGCCGTTACGCTGCAGCAGGCCCGCGTCGCCAAATA  
GTGTTGAGCCGAAAGTGCAATGAAGAAGCCGTGAAACAAATATATGCCGTACGCTGCAT  
CGGAAAGCGCATATGCCATACGGCTTCCCAGCACTTTGATCGCGACCGTTGCCCTAGACG  
AGTCTTTCGTTTCTGTGACTGAGAGCACGTGCAACATAATGGATAGTATCGTCAACAACC  
ACCATTCGCCGTGGTAAGTCGAATCCTGTTCAAAGGGAGTGTTGCGGTCAGCGTCGTGA  
TCGCTGCCTTCTGCCGAAAGTACGCCGAATGGAATCTCAGCGATCAGCATGCCGACCA  
AGAAAAGGGAAAGTTTGAAGTGGCAAGAAACCGGGCTCGGGGAACACGCCGGTGAGTGTGC  
GAGCGATCGCGAATGCCGATACGCCTAATAGGATAGCAGTGGTGACGGAGTCCGCTTTCC  
GCATCAGAAATATGGAGGAAAGGAAAGGCAAGATAAACTGCATTTTCGAGACTCAAGATCC  
AGTCATGAGGTATGGTGGAGAACGTATAACGCGGCAGCAGGCCAAAAGCGAACGTGACGT  
GGGCTGCTAGGTTGTCTGCCGTGTAAGTGATGGTTCGAAGGATCATAGATACCACACTCC  
CCCAAAAATCCGGGTTCAATAGCTGCAGTACCTTGTAGCCCTTGGAGTACGTTGTGCAAG  
TGACAACCGCGAATACGAGAGAAACGTATTACACTGGCGCAATACGGTAGTATCGTCGGA  
TATAGAAGCGTAGCCATGAAGACGGTTCGTGTCATCGGCTCGACCGAATCTCGCAGTCGGG  
CGATGTAAGCCATGAGATAGCCTGAGATCATAATGAACAGATCTACTGCAAGCTTCGGAT  
CAGGTATAGGCGTGAGAGTCCATCCACCTCACATCATGCAATGGGCGACCACTACCCAGA  
TCGCGGCGTAAGCGCGCAGACCGTGCAGGTACGGAACGTCCTTGGTCATCGTAAGCTCAC  
AGTAGATTGAAGGGCGCAGTTTAGCACCCGCAAGTTTTGACCGACAGCCTACTGCCGGCA  
ACAGCTGCAATTTCTTTCTACGTATCGCAAGACATCCGCTCCCGAATTTATCGCGCGTGC  
ATGTGCTGAAATAACGCGCCGCGCTTCA

>NewGenomeName\_81

ACCGGCGCTAATACTCAGTACTCCATCAATCTACGGCGAGCCCTGCAATGACTAAGAGTC

GCAACTACTCCTACAAACGGTGGGTCTTTACAATTAATAGCCCTACCTTTGAAGATTATG  
TTCATAGTTCAGAGTTAAGCACGCTCGACAATTCCAAGTTCGCAATCGTCGGAGACGTAA  
AGGGCGCAAACGGTACAACCTCACCTTGAAGGATTCCTGAATCCCCGAAGAAATCCGAGAG  
CCGCCGCCCTCGAAGAGTCGCTGGGAGGAACAGCCTGGCTCTCTCGTGGCCCTGGCTCGG  
ACGAAGATAACAAACAATATTGCTCCACAGTGTGACATCCCTGAGATTTGGTGAACCAG  
GCGGTAAGGGTCGATCCTCTCAGCTCTCCGATGCGACATCCGCTGCGCTCGCTGGTCTCC  
CGCTGATTGAGGTTGCCCGGAAGTATTCGACGACTTATGTTATCTTTGGGCGCGGCCTCG  
AATGTCCTAGTCCCCTGATCGTTGAAACGCAACGTGATTGAAAGACAGCAGTCATGGCCT  
TGATTGGTCCGCCAGGGACCGCAAAGAGCCGTTATGCGTTTGAACTTCCCGCCGAAAACG  
AGTACTACAAATCACGCGGGAAGTGGGGTGACGGTACTCGGGAAATGACGTAGTCATCA  
TGAACGACTTGTATGGTTGGGTACCTTACGACGACCTGCTTCGGCTTACTAACCGTTATC  
CGTTACGCGATGAGTTTACAGGTGGTATGACCCAGTTTGTGCTAAGACGTTTATAACAA  
CTCGCTTCAAAGAGCCCCGTGATTGGTATAGAAGTGATCTCGATCTCTCCGCCTTATATC  
GGCGCATTATAAGTATCTTGTCTATAATGTTGACAAGTATGCACCTGCTGCCGCTTCTT  
CCCTCCCCTTTCCAATAATCTACTGAGACTAAGTTGTCGTTTTATGTTTCTATTAAGGTG  
AACAAATCGAAAGGGAGATCCACTTGGGCAGCTGGTATGGTTAACACTTGAGAGGGGATAC  
ACCCTTAGGCAGCCCGTTATGGTGAACACACGTAAGGGATAAACACTTGGGCAGATGGTT  
AAGGTGAACACTCGAAAGGGATATAGACTTGGGCAGCTGGGTTAAGGTTAGGACAGGACC  
ACGTTTATGTCTAGAACCCTGTGAAATGACCAAACCTTGATGTAGAACTTAAATTCAGCTT  
CTATATCATATTTCCCCTCGTCGCCGGTCGGATTATCTGGTGTCTGAGGCGCATGCCCA  
TGCCGAAAAGTACTACTTGGTCCCTGACTGCAATTTATCCAGGTGAAGTTTTTACCTCCTA  
GGAACAATGTAGTATACTTGGTGCCTTCTCCTGTCCCTTGAAGTGTGGTTTCCGGTACTG  
AGCACCGTCTGTGAATTCTCGATGGGTACCATGGCCGCCTGCTGGTTGTTGCTCCGTATG  
GGTCAATGGGCCCTCCTGTAGTTGATGTCCTCAGGATTTGCCCGTCTTCAATGATCG  
TTGAGCCTTGTGTTTTCCATTTGTGGCAAATGTTGTAGGCTGGTCTCAGGGTCACAGCAA  
CCCCTTTTATTACGTAATAGTAGTAAGGGTAGTGTTAATGTGGCTAACCCCTTGCATGT  
AAGTATTTGTCTCTCCATACATTGCCCATCTCATGTTCCCTTCAAAGATGTTGTTTTCGT  
GTGCTGGTGCTTCTGTGATTGAGCCCCATCTTATAGACTTAAGCTCTGCCTTCTCCCCG  
ATGCCGTTGGTGCAGTCCCGGATCCGAAAATTCAAAACCGGTATGTCTGGAGCCGTTGA  
ACGTCAATACTGAAAATCTTCGTATTGGTTCGTCGGATACGTATCCTTCGTCTTCTGAATC  
TCCTACGTAGACCCCGCCTCCTCCTCCCATCACGATATGCACGCCGATAGGAGCTGCGTC  
GCATCTGCAGTGTGGGTAGTGAGTTCCTGTAAGGTATAAGAAGACCGCACAAAGTGCCGTT  
ATATTATT

>NewGenomeName\_82

ACCGGCGCTTGTACTCCGTAATCCGGGCGGAGGGGATAGCAACTGCAATGGCGAAGAGCG  
GCAACTACTCATAAAGAGGTGGGTCTTTACCATTAATAACCCTACCTTTGAAGACTATG  
TTCATGTTCTAGAGTTTTGCACGCTCCACAATTGCAAGTTTGTATCGTCGGCGAGGAGA  
AGGGCGCGAACGGCACGCCTCACCTCAGGGATTCCTGAACCTCCGAAGTAATGCGCGAG  
CTGCCGCCCTTGAAGGAGTCGCTGGGAGGAAGAGCCTGGCTCTCTCGTGCCGGGGGATCTG  
ACGAAGACAATGAAGAATATTGCGCCAAAGAGTCGACATACCTTCGAGTTGGTGAACGAG  
TCTCCAAGGGTCGATCCTCTGATCTGGCCGAAGCGACATGCGCTGTGATGGCTGGTGTGC  
CGCTAACTGAGGTGGCCCGGAAGTTCCCACGACTTATGTTATCTTTGGGCGTGGCCCTCG  
AACGCCTCCGTGACCTGATCATCGAGACGCAACGTGATTGGAAGACCGAAGTCATCGTTC  
TGATTGGTCCGCCCTGCACCGGAAAGAGCCATTATGCATTTGAATTTCCCGCCGAAAACA  
AGTATTACAAACCACGCGGGAAGTGGTGGGACGGTACTCGGGAAATGACGCAGTCGTCA  
TGGACGACTTTTATGGTTGGTTGCCGATGATGATTTGCTGAGAATTACCGACCGTTACC  
CGTTGCCGGGATGAATTTAAAGGCGGTATGACTCAGCTTGTGGCTAAAACATCGATCATAA  
CAAGTACCCGCGAGCCTCGTGATTGGTACAAGTGCAGTTTTGACCATTACGCTCTGTACC  
GCAGAATTTACAAGTATCTTGTGTATAATATCGACAAGTATGATCCCGCCAGGCATGTA  
CCCTCCCGTTCCCGATAATCTACTGATACGAAATTGCCGTTAGTCGTTTCTTAAGGTAAA  
CACTTGGCAGGGTATTACACTTGGGCAGCTAGGTTAAGGTTAGTCACTTGGCCGGGTATT  
ACACTTGGGCAGCTCATTTAAGGTTAGGCACTTGGCCGGGTATTACACTTGGGCAGCTCG  
GTTAAGGTTAGGCACTTGGCAGGGTATTACACTTGGCCAGCTCGGTTAAGGTTAGAACAA  
GATCTCGTTTATGCCTAGAGTCCAGTGAACCTGTCCAAATTTGATATAAGATGTGAACTGG  
GCCTCTATGTCGTATTGTGCATTCACACCTGCTGTGTTTTCCGGCTTCCGTAGACTTATG  
CCCATGCCGTAATGCACTACTTGATCTTGAGTGCAGTTGATCCAGGTGAAATTTTTGCCT  
CCGAGAAAGAAGGTAGAGTGCTACGTACCTTACCCGCTCCTTGGTTGATGGGTTTAGGT

ATGAAGTACCGTCTGTGCACTCTGGAGGGGTTCCACGTTCTCCTGCTGCTGGTTGAGCCG  
TACGGGTCTATGGACCATCCCGTCGTGGATGTCTTCCCTACTTGCCCGTCCTTGTCTATC  
ACCGTTGAGCCTTGAGTCTTGCTCTTCTGGTAAATGTTGTATGCCGGTCTGAGAGTTATG  
GCTACCCTCTTGATCATGTAGTAATCGTTAGGGTAGTGGTAGAACGGTGTGAGCCGGTC  
ATGTAGCTGTTTCGTGTCCCCGAACATCGCCCATCTCATGTTAAGCCGCATATATTGTTG  
CCACGGACCGGTGGTTCGGTGTATTATGCGTCATCTTCTAAGCTTAAGGTTTGCCATTTG  
CCTGCTGCAGTCGGTTCGTGTGGTGGAGCCGAACAAGCCAAATACGGTGTTCCTCGTGACC  
TTATAAGTCACTACGGAAAACCGTCGTCGGGGTCTTGCATTTCGTAGCCTTCGTCTTGTG  
AATCTCCTACGTAGACCCCGCTCTTCCCTCCGACCGCGATATGCACGCCGATAGGTGCGG  
CCGCGCATCGGCAACGTGGGCAGTGACTTCCTGTAAGATATAAAAGACCGCACAAAGCGCC  
GTTATATTATT

>NewGenomeName\_83

ATTTTAACTTGCATGTTCTTTGAGGTTTATATCGCTAGGGTGAATAAGGCATTGGTTTCC  
TTAGTCAATTAAGGAGGATATGCGCTATGCTGGCGATACTAGACGAGAGTCTTGAGTAG  
GCTAAACGTTTCGATAACGTGATGGCCTGCATAGATAATTCAATGGGTTTTGATCCCGAA  
TGGAGGAGCTCAGGGGACATATACGAGGGTGTGTAGGACTTCAACTTCAGTGGTTAAG  
GTCTTTAAAGCACTGGATCCTAAAACAGGTCGTTGTCTTATTTTGATCGGTACGGACTGT  
GGTACCGTGGTGTCTTCGAACATAACGGTCGTGTCAAGAGCGCATCCAAGTTTGCCTTG  
GCGTATAACGCTGACCCTGCCTTAGACTTTATGTTGGGAGTAAGTCGGCTCGCAATCGCC  
CAATTTAGTCTGGTGATTACGGATTATGATATCGAAGAGAACATCGGTATCAGTCTCCGT  
CGTTGATTCAACAGGTGAACCGGAGCACGCACGATAAGAACAAGGAAGAGAAGATCATA  
AAAACCCCAAAGGGAATACCCCGTCTAAAGTACCGTCAGGGTTATTTGGTTGGGGGGAG  
TCTGCTTAACACCTAAACGAATGAAACCCAACATCCACAAGGCTGTACTTTCGCGCACAT  
GAGGATCGTCCATGAAAACGTTTTTCTGTCTATTTCAACCGGCTTCACTTTCCTGGTCT  
TGCAACTGGACAATGCGTCGGGTAATGAAGAAATCATGTTCAACTGCACCTTGAAGGACG  
GTGCTGTGGTCAAGCTGACCCAGATTACTCAAGGTGACCTGTGGACCCTTACCATCGGGT  
ACCCGGAAAAAGTGCAAGTCAGTTTTACCATGCCTGGGAATGACATCGGTTCGGCAGTTCT  
CCTACCATCGCGATAGCAATCTCGCTACCCGTGAAGCCTTCATAACCAACACGACGGGTA  
ACTGGTTCTATACCCTCGGGGTGGATGATAACGGTAAGGCTAAAAGAGGTTATATCCAAG  
TTATGAACAGCGGAACAGAAACAGCCTACGAACATTGTGTGACAGGAAGCCTTCGTGAGA  
AGTTGAAAAAGAAGGTGCCTTTGTCAACATGACGGTTGTGGATTGAACCTGTTGGGGGA  
GTGAGCGTTTGCCCCCTGTTCCAATCTTTGTTTTTTTTTCTAGAAGGGCTACCGCCA  
GTGGAAGCCGATGGGAAAACCCTTGGAGAAATCAAATTACTGTCTGACATCACACTTATC  
CTAAACGGCAGAATTCACCGGATTTAGTACACAAGGTCTTTAATCACTTGAAGCATGAT  
CATCAGGGTAGGTATAACCCCTACTACTTGCTGGATTCCCTCAACGTCGCTAAGCGTCTA  
ATAGACCACCAGGATAATCTAACATAACATCATGTTTTGCTTATCTACACTATTATCCTG  
TACTTGAGACGGGTTCGCTATTACGAAACGTCATCCCTATGAAGTCTCTCCAGGAGTA  
GGGTGGATGTTTCTTCGGTATTATGCGGACGGGATCATTACACCTGAGGACGAACGTTTC  
ATTTACATTCCTGTTCGGCCTATCAAAGCAGATACTATTTCGAATGTCTTCTACACCTTC  
GTTGAGTTGGTCATTCACACCACTAAGCGCTTAACGGATGTCGTTAATCAGAAGTATCAA  
AAGCTGTACGACGAGTTTGCTGTACTACTGGATTACCCCATTTGTTCTATGAAATTGAAT  
AAGGCCTTTTTGGAGGAATATGGTCCTAAACGTAACCCCTGGGATGGGCTCACCACTTCA  
ACTAAGGACATTTTCGCTTTAGGAATATCCAACCTTCAAGAAGAAAGTCGGTCCATTCGTG  
GTCGAACTTAACGTTTCGATGAGAGGATAAACCTATGTACAGCGTTATAGCAAATGCGGTG  
CTTTTGACCACATATGCTGCAGTCATGCTGTAGTTGTTTCAGCGCTATCTAGAAGCTAAG  
GGTATGCGTTACTCCATTAAGCGGATAGAGAACGGCCGATTTTTAGCTTCTCGTAAGGA  
GTATACGCAGGGAAGATACGGATCCTGCATTCTCCGGACTGTACAGTCCCGATCTTACA  
CGCCGTTATGATGGATGGGAAGTGACCTTTCCTGAACACTTTACGGAAGAGCAGATGGAT  
CATTACATCATAACACCACGAACCCTTTGGGGAACACAATGCGTCTCATTTCGAAGGGTTTT  
GTTGTCTTCAGAGAAGTCATGATTCGCAACACCAATGAGGTTTCGTGCGTAGATGGGAAT  
ATCTCCTGCCAAGCGTAATGAACCCATAAAGTACCCTCCCTACCCCGCAAAGGGTAGGGA  
GGGTATGCAGTACACCTTTTTTTGTTTAAACCATGTACAACCTGACCGGCAGTGCCGTCCAC  
TTGGGCTTACTGTTTCGATCATCCGTTTCGATGGTACCGGATGGCGACGAGGTGACAGCCGC  
AGAACGCTGTTTGAAGCCCGGAGGGGCGGCAATGGCATCCGGGTTGTACAGCGGAAGGAG  
TTTTAACATCTGACGAGCAATCTGTTTACCAGCCAGGGTGTGAAATTCACCAACGATT  
GAGCACCATGATGATCTGACGGATTGCGCCTTCTTCGCCCTTGTTACGTTTGATTTCAT  
CGGAACAGAGGTACGGGGCATCATAACCAACCATCAAGGCGGCGTGAGCAATGTCCTTCAT



GGTCTGGGTGGGTTCGAAGTAGATGCACGAGACCGATACTTCATCGATCAGCATGTCACC  
TGGATTATCCAGGATGACAATCTTGGCGTTCAGGACTTCCGAATCCATGACCAGCCATTG  
TTGCCAGACCTTGAACATCTTGGTGAACACTTCACCGATGCAATCGTAACCAGTATGCGT  
GACTTGACCCATCGACCGGGTAGCGCCCGACGGAATGGCGAGTACGTGACCCGTCATT  
CATTTGGGCGAACTGAACTTCAGTCATGTCACGGAGACCTTCGAACGACTCAGAACGGTT  
TTCAAACCACGCCTTACACAGCGAATGCAACGCAGTGCCACTCGGCAGTCGGGAGAAGGC  
AGCAGGAGTCGAGAGGACAATACACCACCCAGTTGACGGACGCGAGGTTGTGCGCTGAC  
ATACTCGTAGACGTTACCAGCCCAACCGTACATACCCCCGAATTGGGCGTTAATAACCGG  
ACGGTTTTGTCAGGTCCAGAGCCCGTACGAAGGGATCGGACTTCGCGAGTAGTGTCGTACT  
GGACCGAGGAGGGAAGTTCGTTTTATTAGCCATCTTTCATTCTCAGGCCGCAGTAGTGG  
CCAGATCCTGTTGGTTGTAAGCGGAGAGATCGAATTCCATCATGTACTIONTGGCTTCGTTAA  
ACCAAGCGTGGAGAATCTCACGCAGTTTCGCACGGGATCCGAGCGTTCAGTTTTCGTAGA  
ACGTTTTCTGCGACGATGTTGGAGAGTTCACCCCTACTGCGTTACGGCACGCGCTCGCGA  
TCTCGTCTTTCATGATGGAGGCGTAGTTATCAGCAGAGATGGTACGGTCACCACAAACGA  
TGCGCCATTGATCCGCGGAGATCTTCTCCATCGCCACGCACAGGAACGGGTTAGCCAGGT  
CCTTGAGGACCGAGTCGGGGTTCGTGTGAATGGTGGGGAGGCCCGACGGTACGTTTTGAA  
CGTCCCAGTCCCAAGGCTTCAGGGAGATATGGCCGTTGCCGAAGTTCAGCCGCCACTT  
CATCTTCTTCGAAGACGATGTTGGGGGAGTGCATCAGACGGAGTTAACGGTTATCCGCAT  
GATCCGGTGCCTTCGGAGTGACGATCAAACGGTCGATGTTACCTGTCCACAGCGCAAAGG  
CATAGGCCAGGTCGATGTTACCCGAGAAGTACCAGCCGGTCGGTTCAGCGATGACTTTCG  
CTTCGATGAGGTTACAGCTGCACGGCAGGCTGCGGTACCCCACTTCTCAGACGCGACCG  
TCATGCGCAGTCGATTGGTGATCATTGCAGCCCGAGAATAGATCTCTTCGAGGGCTGTTCT  
TCTCACCCGGTGTCTAGACACAGGCGTCTGCCACAACCAGAATGTCCTAACGGGAACCCA  
GGAAGTGTTCGGCTATATCTTTTACTTCTTGGGAATAACCAATATCCAGAAAATCGATT  
GACGGTTACGGGTGGTGTCTTTCATTTCCACACCATTACGTAACCTGGTCAGATCCGCCA  
CCATCAGTTTGTAGGTGATGTCCACGCCTGAAGGAGAGTGAGAGGACGCTCGGTGTTAG  
TCAGCAGACCAAAGAGATCGTTGACTGTCCGCTTGGTGACGTAATCCGGTACCTTACCGT  
CCTTATCCAGGAACGGCGAAATACCGGCCGAGGATTTAATAGCGCCGCTCAGGTCCCCT  
TGATTACACCCGAGGTGGTGATGGCGTAGTAAGGCGCGCCGTTGTGGTGGGTGCAGGTGA  
ACGGGTTTCATCTGCTTGTAGTACACACCCGGGAACCCCGATTCTACCAGGGTGTCAATTT  
CGGGCTGTTCCACCACATAGATCTTCTGACACAGGGTGTGATGTTGTCTGTTAAACGA  
CCAGGTGCTTGAACGGAGCCGGAACCCGGGTTACCCGGGGCGTTCCTTGTACGACCGGTGA  
AGGAGCCGAAACCCGTTTGCAGGCTGTACTGAACGCCGTTGAGGGACACCCGGGAACAGGG  
TGAAGTGGCACTTTCCTGTTGGAGGGTGGTTTTTCGAATAAACACGAGTCCCATCGACTC  
CATCGGTGAACAGACGGACGTCGTAAGGGAAAGTCCCCGTGGACCGAACGAATTCGGAAA  
TGGAACGCCAATTCAGCGCGTCCGCACGGACACCCAGGTTAAGGCCCGACTTGTGTTATT  
CGTCACCGACACCAGCCACCCCTTCGAACAGGAGGAGTACCAGGGTTTCAGGGGTATCAC  
CTCTGGCGGCGATGGCGCGGACTTCGAGCGCGCCGGGTTCTTTGCCCGCTGCGGCATCAT  
TGATTTTGATTTTCGATGTTTCAGACCGTTCGGGTAGGTTTTTACCCGGGATCGGAATACGCT  
CGCCGTTTTCTGTTATACTTGAACGGCCGTTGGCAACTCGTTCGTAGGCCTGAACTTCCA  
CTTTCTGAACAAACGCAGAGAGCGAGCTTTTCGAGACCACTTCGTTGACCGAGAGGCGGC  
GAATGCCGCTGGTATTCTGGCGACCCAGGGCGAACGCCTGGATCAGGACCGAAGTTGGGT  
CGTAGTAGGGCGACTCCTCGTCGAAAATGTCTCCAAGATCTTTTTGACGTCTTGGGGGG  
CTACCCATTGGGTGCCTGCTTTAGACGCCAGTTTTCTGTGGGGAAGATAACCGTGGATAA  
CAGGAAGGTGGAGCGGGGTGGTTGGCGGGGACGTGTCATATTCTGGAATAGAGTTGTCC  
GAATCCGACTAATGTCCACCTTCCGGGGACGATTCTGTTGAAAACACTCATGGCAACCT  
CGTGGGGGAAAAGTTTGAAGCAATCGTATGAACCCATTCTCAGGGCCGTACAGTGTAATA  
AGGCACTGTCCCATAACATGTTATTTTAAAGGAATATCTACCATGCTGCTCAATGCCTATG  
ACACCACGGTTCGGTAAAATGATCCGGGCGTCTCACCACGCGGACGAAGTCATTAACCC  
TTCATCTGACCAATAATCTGTCTCCACTAAGAAAGACAAGGTGTACGTTATTACGCACG  
CCACCTGCGTTCGATTTTTCAACCATTGCTTTTTCCGATTACCTTACAGACCCATACCCGCC  
AAACCATTACGGTGTATGACGAACGTCCGTACCCGGGATAAACAGAACCGAGTCACGAACC  
AGAATGACCTGACCATTAATGCGATTGGCGGCGTTTCTACAGCAGGATGTTGCCGAGTTGA  
TCCTCAGCCCGGTTAAGCTGAGTCGCAATATGGTAACCAAAGGCTTTAGTGACGCGTTAA  
CCCATCGGTTAACGATGCGGGGTGGTTTTGAATATCGTAGAGTCTTCGACCCTGAAGGTGT  
TGATTGGGTATTATGTGGTTAGTCTTCAAGAGAACCCGAACAATGACCTGGTCTTTGTGG  
TTGAGAATGTCCTTCGTAATGTGTACGGGAGGGAAAAAGACTTTGTATTGGGGGTCATTG

CTGATCTCCCCATCTGAGTAAGCTGGGAGACCTCCTCAGTGAGATTTCGTAAGAATGCTA  
TGTTGTATAAACTCAAAGGGATGGGTCTTAAGGACTTCATTGCTGTGGTGGGTGGATTGG  
CCTTTACGGAGCTGGGGAAACAGGTCTTTAAGCTGCGTCTGAAGCACCTTGCTTGTTGA  
CGGCCTTTGTCTATGGCGCAGCACGTTTCAGGGCGCTGAATAAAACACCGGTGGGTATGG  
CATTGGATCCTAAATAACAACAAGGGATCCTGGATACCTTCCTTAAGAACGTCGATTACA  
CGTATGATCTCAACGGGTAACAGTTATGACCATGAAAGGGTTTGATACGGATAACCCATT  
GCTGGCCTACGCGACAGACCACCTGTGGGGTAACCCGGAAGAGAATAACCAGTACCAGGT  
GCGTACAGCACGGCTCAGTGATTACTACGGAGATGTGGACAACCTTCTCCTTTATGGGCAC  
ATGGCGGAGTTTGCCTAAGCGGGATACGTTTTATTACGTCTTCTCTGTAGGGGGGTTGGA  
TGCAGACTATTGGAACCTCCATAACCACTTACTGAAACGGAATCCCCTAGACCGGTGGAT  
GAACCTGGCCGAGCTGTGTAATCGCCGGGGTGTTCAGCTGGATATCTACAACACCAAAGG  
GGACCAGTACAGCCGGAATAAAGCTTGGGTATGATGACGTACGATAAGCTTACGTTTAT  
TGCCCTGGAGAAGTATAATACCTACCCTACGCCAACGGGTCAGGAAATGTTCTTTTGATG  
CTACACCGCTTCCAGTGAGGTGGCGAAGAATGAACAACCGCGAATGCTGCCAGTAACCC  
GTACGTTTATGAAACCATGGTGTACGAGAGTCAGGCTGAACTAGCGGTCTTTAATAACCG  
CTACTTAGCCTGTAAAAGCAAACCTGAGTTTACGGGGGTGACGGTGAATGGGGTTTATTG  
GCACAGTAGTCCAGGGTCGATTCTAACTTGGTCTTAGGGGATGTAGTGGAGTTCTTCCA  
TGACCCCACTGTGATCCGTACGGAGCTGTACGCGTACAACACCCTGCAAGACTTCTATTC  
CACCTTGGATAACAAACGGAAACTGATCCTGCACCCTACTAAACGCCAGGTGACTTTAC  
CCTTCGGTATTTTGATGACAACGATTACTACCTGTTGGGTAAAGGGTCGACAGGTCTGTA  
TTCCATCGGAATGCGGTGAGTACGATTTCGTCAGTTGATCCATGTGGATGTTGCCATTGC  
GGATGACCAGATCCAAGCCGCCAGTAATTACCACAAGGACCTCAGTGAGGTGAAGGATAT  
TCGTTTCCTGGTATTGGTTCGTA AAAACGGGTTGGAAATACTCTTGGCCGCATGATAAGCA  
ACGGATCCGTTACTTCTACCTCATGACTGATGAAAACATCCTTAAAGCTATGACAGGTGT  
TCGAGCAACGGTGCCGGACTGGACCGCTCCTAATCTGGAAGCCGGGGTGGTGATGAGTTT  
TACCCGGAGTCAAATGAAAGCGCTGACCGTAGGGGGTGCTCGTAAAGCGGTGGGGTACAA  
TGCGGCAACTCGGGTCCTCAGTGAAACCCCGTTAAAGCGGTATACGAGGCGGGTGGTTCG  
AGGGGTTGAGATCCCATCAGTTACCGAGTCATTTGTACCGCTTGGGAACATGATGAGAA  
CGGGTGCCTGTTGGAATACCACAATGTCAATAATATTCGGTTCTACGCACCTCGGAATCC  
GAAGTGTCAACTCGTTGAGTTCACCTGTGGTCAATACGGGGGAACATTGGACTATGTGGT  
ATCCAATACCGATTTACCCTTAGACCCCTTTAATGGGTTTCAGGGTGTACACTGCTCACTT  
CAACGTGGATCGAGGTGAAATCACCGGTGCGTTAACGGATGTCACTGGGTATAAGAAGAT  
CTACTAAGTGGTTAATGAGGTCTTAGTCTGGAAAGGATTGGATCCCGTTAACCAACGTGG  
GGTGGTAGACTTCAATACCCGGACCTTGACCTATGGGTTTCAACTGGATCACATTGCTCA  
TAGCTTGAGCTTTGCCATTACCCTCATTTATGAACCGGGTGGATTGGCGGTGCCTCTGAT  
TCCTGCTCAAATCGATATTTGGATGAACGGTCACCCATTGATTGATAATGTCGATTGGAG  
CTTTGACAACGGGTACTGCTACATCAACAAACAGTTCATCCGACCGGGTGTCAACA  
GTTTGTGGTACGGTGCCATGACCTGTGGGAGGATAAGGAACGTCCTAAGGTAGAAACCGA  
ACTCGGGCTCGTGGACGGTGGGGTGATTGGAAGGTATAAACGGTATAACCTGAGGGAAGA  
CCGGGTAACACGTACCGTCATTGGAGGTTCGTTTGGTGGTAACGGACGACGTGCCTACGGC  
CGAGCTGTCTTCTCCAGATAACCTCTGGAATCACCTCAATGGGTTACCGTACATGGTCAA  
ACATGTCTTCCAACCCATTAAGTATGTTCGTACCCTATGACAACCTTCCCAGGGTGTAAAGA  
GAGTCGGGAGATTGATCAACGGGTGAGTGACTACTTGACGGAGTACTGCCCTAAGCCGTT  
GGTGGATCCTGTGAAACCGACCCTTGAGGATAAGTACCGGTTGTTACGCCCTTCTGAA  
TGTGGTGGTGAATGCGATTAACAACCGGTTGTTGGTGGTTGCGAATCGAGTAGACGGTGA  
AGAGACGTACAGTCCCTCAGATCATTGAGGAACAGGTACGTCCTAAGGTGGTGGTTGAA  
GTACGACTCGGTGACCCGGGACTACGACATCCGCTATTTTGCCGTTATGCCCTACGCGAA  
TGATGAACTGCTCTCGGTAACACCCAACCAGTTTGTGTTCAATTAAGCAAGTGAACGACCT  
TACTTGAAGTCTGTCTGTGTCATTGAAGGCCACTTTGAAGTAAGTAACAGTGACTAAAG  
GGGATATTCATGTTTACGACAAACCCAGCACGAGTGCTGAGCGAGCGGTGGCGGGTACT  
GATTTGGCTCCTGCGAATGACGGCCAACGGTACAGGATCCATTATCTGCTTGACATCTAT  
TAACCGGACAAGCATCCGCCGGAGGACATTGTTAAGTACGTGGTTCGCCGGGAACGGGAA  
TTGGTGATCGATGTTCCCAATAAACAGTTCCTGGAGGTGATTCATCTGGATTACCAGGGG  
AAGACCTTGAAGTCTAACTTGGTTCGGTGGGAACCTCGGACCAGTGAGGACGGTACCACA  
ACTGAACAAGACTGGATCTTCGGTCTACGAGGAGGTCTCTGTTGGGTGATGCCTTGCTG  
AGTGTGGACAACAGCCAACGACCTAACGTAGCGCGTGTGACAGCACCATCTTGCGACCC  
GGCGCAGCGTACCCTAAACTCTACCTAGGTAACGACGCCAGTGACAACGGTCCGGATGATC

AGTGCCCAGTATGACAAGTCGGCGAATATGATCAGCAACAAGGTACCTACCAAGTTGGCT  
GAGATCGTAGACCGTACGAACCTGGAGATTATGACCACGGGTCTTTCTGTGTCACGGAG  
AACGAGGAGGCCCTGAAAGACGGTACGCGTTGTACGTTGGTGTCTATGAAGAGGGGGGT  
AACTGCATTCCCCGGTTCAACCTCTAATGGTCCAACATTGTGCATACATGCGGGATCAC  
CAGATTGGTACCAAGTATGTCACGGAGATTGAACTGCTCACACGGTGGTTTACCAATGCA  
GTTAATGCGGAGAAGATTATCATGCCGGTGAACGTATTGGTAACGGCTATTGAGTTCAGG  
GCGGTGATTACTCGGATGGCAGCACCAGTGCGCCATTCCGGTGAACGGTGAACGG  
TTCAACCTGTATGGGTTGAATGAATGGCGCCCCACATGGCCGGGTCAAGAGGGTGAGATC  
GTTCTGACCCGTAAACTGGCAGCGAATGAACAGCTTTACATTGCCAAACCCGGGAGTCGC  
GATCACATCAGTCGAACATATTCCGGTAGAAGCCGGTCTGTAAAGGCGCGTACTCGCCG  
AAGATCTACACCTTCCCGCAATGGGATCCGAGTATTTCCGGGGATCGACTCCAACATTGG  
CCGTTGGAACCTGGATCGGAAAACGCCATTGATGTGACCGCTCAAGTGAAGTTCAATGAG  
AAGAGTGAAGTCTGGCGGGCTTCTGCCTACGGGGTTGCTCAATCGTTGATCTTAACTTG  
AACCTGAGGGATGTATCGAGTCAGTACGAGAGTGTGATCTTCTGGCAGTACACCACCATT  
CTGTTGTATAAAGACATCAATGGGCCGGGTAAACGCTTTGACGTGTCCTTCTGGCAGAAT  
AAACCGTCGTACGAAGCGAAGTTCATTGTGGCTAAGAAAGCCGGAGCTGCTACCACGGTC  
AATGTGGCCAGCGGGTACGGTAATTAACGGATTGTCTGAAAGCGTTGTATTGGGGGGTC  
GAACCCAGCTTCAATCGGTTGATGAACAGAAAGCTCCTTTACCCACTCATTCTACATG  
GTTTCATGAAGACGGGCATTCTGGCGGTATCCGATCTCGGATTGGAATAAGAACAACGCC  
GTCAACATTGAACTTCAGAAGGGTAAGACCTGTTTCTTCCGTTGGGTGGAACGCCAAACG  
TCTGGTGATCAGAAGCAACTGGCCGTTCTGGTGTAACGGTTGAATTTCTTAAGGAGGA  
AACGAAATGACCAGTACGGTTAACGTAACCGCTCATTTTACCGAAGATAAGGAAGTAGTG  
GTTCCGGGGTCAGACGCCTGAAGATATCTCGCAAGAGGTTATTCTTCAGAACGGTAAGAAG  
ACGGAAGTGGTGGTGTTCGGCGCTAAGCACGTCATTCACGAACGGACTCGTTTGAA  
CCCGAAGGTTAACGGCGGTTGATCCTATAGATAAAGAGTTACCCTGGGCGGGCGCCAGGG  
TACTTGATTGTTATAGGGTTTTCTGTGGAGTTGATGTATGACAGACGAACAAGACACATC  
CCTTTCCCATGCTAAATGGTTGGTTAAGTACCTGAGATGCAACAACCTGCCCAAAGAACT  
GATAGATGTTAAACGCATCCGATTGATTGGGAAGCTCGCACAGACGATGAAACCCTTTT  
AGCTCACTTCAATGAAGACAGCTTAAGTGGTATTAAGACTGTTTCGCTTTCTCAAGGACTT  
TTTCAACTACCAAGCGGGTTATGATCGGGAGACCCGGAATGCCAGTTTCTCAGAACTAC  
CGAAGTGTTTCAGGCAACAGGGGATCAATAACTTTTACTTCATCCTCCAATTGAACAATCC  
CCTGTTGAAAGGGGTGGAACCCTTTGATCCTAACCCACTCCTGAGCAATAGGTGTGGGT  
CCTGGAGGAGTGTTCGGAGTAACCTTTGGTACTTCTACGGGAAGTTTGCCGGTTAAAGCC  
GAATCAGCCCTTCTTAGCGAACGGGGGAATATCAGCTTTATTTGGTTCGTATATGAATCA  
CATTACCACCTACATGATCATGCCCCGGCAACAGGGTAAGCAGCAGCGGAACAGTTCTAA  
GGTTCGTATTGTGCCTAAGGATACCCTGAAGACTATTACCCTCAGGATACTTGGAACG  
GATTGAACACCTACGGGTGGGGGATCAAGTCCTGGACCGTTACGGGAAGCCGTGTCAGGT  
GATTGGCATTTCATCCCCAGGGTAAACGCCGGTTATATCGCGTCTTACCAGTGACGGACC  
AGCCACGGATGTAGGGACTGAACATCTGTGGACCTTGAAGGATTATTCCAACCTCCCTCAA  
TGGACGTGCACTCTGGAATGACTATTCGACCGTTGATGTCAATTAACCTGTTGAAGAAGAA  
GGTTAAAATTCACTTGCCGTTACCGGCTCCGGTACCCGGGAGTGAACAGGTCCTACCTAT  
TGACCCGTACGTTCTCGGGTTGATCTATGGCGGACAAGATCAAGACGGTAAGGTTATTAT  
CCCACCGGTACGGATGCGGTTAAACAGTTCGTAGTGGATCATCTCCCTCGGGGGGTGAA  
AGTTATTCAGGGAGTGGCTAACAGTTGCTTAGAACGGACTGATAACCAACCTTATTTATT  
CAACAGGGTACACGGTATACCGGATCAATACCTAGAAGCCCTTTAAACGCCCGGAGAGA  
CCTCTTACAGGCGTTTTTAAACGTTAGGGGTAAGGTTGGTAGGGGTAAGGTCTTTATAGC  
CTTAAATCGCGTCTTAGGAGGTCAACTGGCGAATCTAGCCCGTAGTCTAGGTGGAACCGG  
TAAAGTCACCAAGAACGGAGTAGAGATTACCCTACCGGAAGAGGTGCCTCCGTTCAAGTT  
CAGGGAAGAGAATGTCGCCTTTGATAATCGGTTGCTGATCGAGCGGGTGACTTTTCGTAGG  
GGATGACGATTGTACCTGTATTGTAGTCGATAACCGTGAACAGTTGTATTGACCGATGA  
CTTCATTGTGACCCACAACGCGGTATCTGTTACGGTGATTGACTTCTGGTTAACGTACAT  
CATGGGCCGGGGGTATACGAGCCACTTGATGACCTTGAAGTCGAATAACCGCGCTCACTT  
CATTGCGGCTATTAAGCAGATAACAGAGTTCCATTCCCTCGTATTTGATTAACCTCGACCTA  
CAAGGACTAGGATGCTGGTACAAGTCTGACCTACAAGGCCTTTGGGGCAGATAACGTTAA  
TACGCTGTACATTAACGTCCCTCAGATCAGTCAGGATGCAGCAGGGGATCTCGGTCGGGG  
GTTACGGGTAGGGACGACCAACTACGATGTGTCCGGGTATATTCGGTTCATCGACACCAT  
CATTGACGGGTGTTCCAGTCTCGCTAACGGAAATGGCGGTGTGCAGTGAGCAGGGGTT

GCCGTATGGGATTACGCACATTACCACCCCAATACCACGCTCCATCCCAGCGGGGAGTT  
TATGTTCAATAAACTCATGAGTGCAACGGAGTGGCGGGACAAGATCTTTGATTGCTTCAG  
TGAGAGTCACTTGAGGCAGATGTTACTCAGGGCTTCCCCTACGAAGACAACCTCTCCGTC  
AGTCTCCATGGTGTACAATTACCTTCAACTGGCTAAGGACAAAGCCTGGGTGCGGGCAAC  
CATTGACCTGCCGGGCTTGAGTTTGGCGAATGCCAAGATCGACTTATTGCTCATGTGGGT  
GGAAGATGGGGAGAATCGGTTGATTGACGATGTGACCCGGGAAGCCATTAACAACATGAA  
GCGGGACGTGGTTTGGAGTAGGGAGTATCTGGACTGTAAGCTGTACGTGGACTTCTTTGT  
GACCAAACAGGAATTGTTGGAGATGGCAAAGAAGGAGTACAATGACCATTTCTTGATTGG  
TGTGGATACGTCCTCAGCCATTCACAAGGATGCGTGCACCATTGTGATTTCGCAGTATGAA  
GACGGGTAAGGTCATAGGGGTGGGACGATATCCCTTAACCTTCTTGGATGATGTCACAGC  
GATTGTTGTTGATTTGCTGGCCCTGATTCACAACGGCACCTTGATCATAGAGCGTAACTA  
CGCACATCATATGATCGACAGTCTGTTGATTATGCTGCCAGCTAAGAGTATGGATCCCAT  
TAAACGGGTCTTTAACCAAATCTACCAAGACACCGTCAATAACGCCAAGGAGTTTGAGGT  
AGTCCAGAACACCAAATTTGCTTACCGGAATCAAGCGTTCTACCTGAAGTATAACAATA  
CTTCGGGTTTCGTGACGTCCAAGACCACTCGGGACGTCCTGTACGGCCTCATCCAAGAGGC  
GGTTGGGAATACCGGGTACGGCCTTTGTTGTGCGAAGCCCGCGGATGAATTGATCAACCT  
GAACTTAATGGGGATCGAATCGACCACGATGCGAAGCAGCACGATGACTTGGTCATTGC  
GCGGCTACTGAGCTACTGGTTCATTAAGCTCGGGGAGAACAAGTCCTTGTACGGGATCCC  
TCCGGGGATTGCCTTAACGGACACCCGTAACCTACTGAACTCTGCTCAGAACCAAGGACG  
AACGGAGTATGAGCCGTACGTTCTTCAACTCATCGATAAAGTCCGGAGTAAGGTTACAG  
CCTAACTGAAGAAGTATGAGCACCAGGACAATATCTTAGCACTTCGTCTAGAGGTTGT  
GATTCGGGAGTTAGCCAAGATGTTGCCTCCGGAACAGAATCGCATGATGACCATTGACGT  
GCTGTTGGAGAACGCTAAAGTGGAACGCGACAAACGCCTACTGCAACAACGCAGAACAGC  
ATAAGACCTGACCCTCCTGGAGCCTGGGTGGGGCTCCAGGAGGTATCGGGTTATTTCTGC  
TTCAGAAAGGGCGGTATAACCCACTTAGTTACAAGGGTTACGCTACAGCAAGCAGTGCAT  
GTTCCAGTTCTTGCAGAGTGTGACCTTTAGCCGGCTTGCCGTTGGCCAATAGGTTGAAGG  
CTTCAGAGGCGGTGGTATGATCCAGATACCAACGGTAGTTCGGCGAGCTTTCGTGCAACA  
TCGGGAATCGGGAGGGTTCACCTGGTGGTGTAGGGATCCAAGGGAAGATCATGAACACCC  
GGATTGACGCTGAACCACATTCACCATCACACTAACCATGGTGGGCGTATGGCACGAAC  
AGAGAAGCTTTTGGGTCAAGGGCAGTGCCTGCATAGTGTCTGCTCCTACGCAGCCTGCAT  
GAATAAATTCCTTGTAACTGGTTATTCGAAATACTCATTGGACAGTACGCGCAGTACAAT  
GAACAAGCACAACGCCGTACGAGTGGTAAATACCAACTGAGGGGTTTTACGGCCGGTAAT  
GGCAATCACGATCTGGTCACCTAATTCCCGAATCGTCTTAACCATGTCATTCCGACTCCG  
ACTCGCCCCGTAAGCACCGCGCATCTTGATCAACACGTTGTAGACTTTACTGCGTTTGAT  
GTTGTTGGCGTGGAGGTAATCAAACAGGTGCAATACGACCGTTTCAGCAAACCTGTTTGTA  
CTCAGGGGTTTTGGGGTTGTTGTACCGCTTAGGGAACCTTTCAGGGGTATACGTCAGCAT  
GTCCATCCGAACATCCTCCAGTACACTGGCTGCATAGTTCATTAACCTTTCCTTGATGAA  
CGAGGTTTCTCTGTGTCAGGATACCGCCAGGTAAGCTGTTGATTACGTCCTTTCGC  
TATCGACTTAATGGTCAGTTCATCTCCGAGGTTAAACTTAGAGTTCCTCAGTTTAAACGAT  
GTTGGTCTTGTCTTGTGTCATCATGGAAGACTTTCTTAATGTCCTTAATCACCTTCTAAG  
CCTGTTCTGAATATCTCCTACCATGTAAACGATTTTCTTATCATCGTTCATCTGGGTAAA  
GGCTTCGTAGTGGATACCGGTCTTAGGGTTCAGGATAAGCTCCGCCCCGAGCCTCAATCAA  
CGACATCCAGCTTCCATAACCGTTTAAATGTCATACTTCAAGCTCAACCGGTTACAGGTCTC  
CAAGACCACGTCCTTACGGGCGGTAAAGTGGTAGTCGTTGTGAATGATCGAAGTGAGGCA  
TTTGTGCTGGTACATGCACACCACATCTTTCATGGCTTGATGTTTAACTTTCTCCGGTAA  
CTTAGAATGATGAATCCGGTACAGCAAGTAAGGAATGGTCATATTGAACGCATCCCCTAC  
GACCGCCACTCTTTCTTGATGGCTGCCACGTTGTGGAGGTTCTCTTTGAGTTCCTCTTC  
ATCCAGGTCAATGATGTCATTGAACCATTGGTTACGGTCTGCGGTGGTAAAGGGGATCTT  
CTGCAACCCTAGGTACGGGCTCCCAAAGAACTCCATGTGGTCCACCACACCATAACGGCG  
GGTAATGAACGCATACACGTACTTCTGAAGATTACTCGCCCACCGAGGGGTAATCTCCAA  
GTACGTCGCCAGTCGGGGAAAGATCTCCTGAATGGCATGGTACTCTGGAATTCACCCCC  
TGACAGTAAAGCTTCATTCCCTTCCACGACTCAGAGCTCACTATCAGGAGTCTTTGGCTC  
TTCAAAGAGACTAAAGATATCCTGGTCCCCTACGAGGTCTTCCGTTCCGTCTAATACTAA  
CATTGAAAACCCCTCTTGGTTAATTCCGACGTGGTGTGCCATCCGTATTTCTTCAATAC  
CGGCTTGTTTATCCGACCACGTCATGCAGTTGATCCATGTGGTCTTGAATACTCTTTGC  
ATTGGGTCCACGCTTCACTGTAGGCCTGTATATCGTCCCGTATGGCGTCCAGGGGAACGC  
CTGAGCGATAAACCGCCTCTTGGGTAGGTCGCCTACCGGTTTTGTAAATATACGCCTTAA

CGGCCAATTCAACGAGCTCTGCGAACTGCCGGTAATGACGAGGGTGAATACTGCTCATT  
CTTCATCGTATTCCAAGATTACTTTAGCAGTCATGGAATACGTTCCCGCATTAAACCCAA  
AGATCACAAAGCAGTTATTACCGGTCATATGGACATTGGTGAACGGGACTGGCATACTTC  
GGTTATAACTCAAGCCCCCAGTAAGTCATCCATCATGTCAATTTCGCTACTCCGGACCCAC  
ACATCGTGTTCATTACCCGGGCTCCTAACTGACCAACTGCGGAACTCATACTCCCA  
GGGAGACTTCTGTCTCACTGATGATTTTAGCACCCCGAGTCGTTCGCTTCCGGTATATTCA  
CCTCTACACACCCATTCCCCGATCACGAATCATGGATCCTCCCAGATCCAACAACCTCCG  
TCTTCCACCCCTACGTTACACTCCGGTAGAACAATACGGTGAATCACTTTCTCCCGTA  
TACCCTGTTCCACGGTTGCCTGGTTAACCAGGTTATGCCAATTCCCCGCAGAGTTCGCAT  
TGGGGGTTTCAAGAGCGAGCTTCAACAAGTACTCATCGATATCAGTGCCACTTACGACAC  
GATTTATAGCATGGTCTACTGGATTCATTTAAGGTGACCTCGTCTAACAAACCTGAACGG  
GTTTATATAAACCCGTTAACTAGTATTAGGGAATCATAACATCTTCCAGTAATTTATTAT  
TCGGTTTCCATTATATGTTCCACTTACCCAATTATCATTTTTGGAGGAGGGGGTAAGATTG  
TTTAGGACTGAGCGACATGAGCCTACGGCGAGTGGAGTGAAGGAGTAAAGAATCTTGGGG  
GAGGAGGCCCTACCGAAGGTAGAGTCCAGAGAAGCGAAAAGAGAAAATCCGAAGGAAAAA  
CCTATTGCTCCGTAATAGCTTTTGTCTTTTATATAAGCCGCGGATGGCCTTATAAGGCAA  
TAAAATTTAACTTTAGTATTTATTATTATTATAGGAAATTGCTTTTTTTATTTAAAAAAGG  
AAAAATGAAGAGGAAATGAAATTGGGAAAAATACCTTTTAAATATTCCCTAAATTTTCATT  
TGCTATTAAGAAGTACCCCTTTCAAAGTCAATTACCCCGACCGGCATTCCCGAACAGGG  
AAGCCGGCGTACAGGGTTTATAATGCAATACTGAAATAGGGTTAATGGATTTTCAGTTCTA  
CATTATCATTGGGTAAATAAAGGATACAGTTATTCGTATTGATGTGTTTTGATAAACCCA  
GAAGAGGAAGATTGTGTAATGACAACGATTGCTTATCGTGACGGTGTAAATGGCGGCGGAT  
ACTCGTGTGGTCAACGGGGCCGATATGATCAACCTCGGAGAGCAACGTCAGATCCACGAC  
CCGGGGGAAGGACAGTACTGGAGTGTCAATGGTGACCGTATTATCTGTTTTGGTTTTGTCG  
AGGAGTCTATCGGATCTGTTTGCCTTTAAGAAGTGTAGTGAAGGGATTACCTTTAAG  
ACCAAGCACCTGACCACCTCCTTGGGGACTCGAATATGCTCTGCGTGGGAGAACAGGGT  
AATGTTTTGGCTGGTCCAGCATTAAACAACGAGACCGGAGTATGGTGTTCACGGTGTCA  
TGCGTACAACCCCGTTTTGCAATTGGATCGGGGGGTATTTACGCCAGTTCGGTGTATGGTG  
GTCGGTAAAAGTGCGGTGGATGCAGTTAAAGTGGCGTGTAAAGTTGGATATCTTTTCTGGC  
GGTCGTATCGATACCTGGGAACTCCCCCTATTCCAGAAACCCCCAGTAAGCGCCCTGAC  
CTGGCCGCCGATAAGACGTCAAATAATCCCGAGGGGGTAAGACCCTCAGAATGTAGGCG  
GTGGAAGACTAGAGTGTGTAGGTATTTTATGCCGATGACCTGCATTCCTCCATCGCCGGA  
CGTGGTGGGAAGGTTAGGAGTGTAGACACCCACCACCCTCTACTGCCCAAGACTATTC  
TGTCAGGCTTGAGAGGGTTGCCTACAAAACGCTCCGCGCCTCCAGCTCTATGTCACTATG  
ATGTAGAGCTGGAGGTCTTACTTCTTTTGTTTTTTTATTTACCCATGAGGGTATATCTTAT  
ACCGTTAAAGTGACCTGTTCCACGCCATGGTTCCTAGGTCACTGTAAGGGTACAACGT  
TATTGATCCTCTTGGATGCGCTAACGCGTGGTGTATGGTTCATATCGGCGGTTGCCACC  
CGTTCGTCTTTTTTTTCGATTACGCTAGATAATTTGAAACCTAAATTATTAGCAGGCTATT  
GGAGAATAGTCCTTTTTAATGACTTCCCTGTAAACCAAGAGAGCGATTTCGATATGGCTC  
AGATTCAATACTACCTCATGGGCGGCGCGGGCATCAACATTGGTGCGGGTTTGAAGAAT  
ATTCCCGTACGCGTGTGAACAGTGATCCGGGGATGGTAGGTTTCGATACCAGTGATAAGA  
ACTTCACGGCCGCGTTCCCCATTGAGCAACTCGAAGGGGTGAACGGGAGTAGTAAGGCTT  
CCACCAAGCACTATGACAAACTCCTCCCCTTCGTAGCGGCTAACCTGAAGAAACACCGTC  
CCGGTGTTCACAACATCATCGTAGCTAGTACCGCTGGTGGTACTGGGCGTGTTATGGCGT  
TGATTGCGTTGCGCCTGCTGGTCGAGTCGGGTAAAACGTCATTCTCTGCCTGATCTCGG  
AACACACTTCCCTGGTGGATAAAGAAAACGCAGTCAATGCCGTCCGTTCCTTTGCTAACCC  
AGTGCCAACCAATCAGCTGAACCGTCCGGTGTGCTACATGGAGTTCCTCAATACGCCGG  
ACCTGACCCGTAAGGAAGTCAACCCTTCAGGCGATGGATTCCTGAATCTCCTGAGTCTCC  
TCTTTGATCCCGGTAATACGGAAATTGATGAGGAAGACATTAACGCTTCTACAATTACT  
CGGCGGGGGGTAAAACCAGGCCGGCGTAGAGTCGTATTCATTTCTACGTCCAGGATGGTG  
CAGCGGACTATACCGGTAAGGTACCGTTCCTCGGTCGCCAGCCTGTACCCGAACAACGATG  
ACGTGGTTCCTCGGTTTATGGGATCGGTTTACCGGACGACGGGTATTGTCTCCGCCAACA  
GTGATCGTCCGGAGGACATCAAGGAGCTGCACGTGACCCTCGATCACGGTGAAGCCCTGG  
AAGAAGTGGAGAAAGAGATCGAAGGGCTGGAAACGGTTCAGCTCAAGCTGCCGTTGACT  
TCTCTAACAGAACGACATTTCCGGAAGGATCGAAAGATCTGGGCTTCACGGTGTAAAGACA  
GAGAGTGAATCGCTAAGGTAGGGAGCTCACGCTCCCTACCTTAGCCTTTATTACGCTTTG  
GGGTATTTTTTATAATTAGTTTTTACTAAAATGGGCATTATTATACAGGCCTAATTAAT

ATAGGGGTTAGAAGGTGTCTATAAGCATCTCTGTTGATTTATCAAGGGGTTACCTATAACC  
GATCTACCGGTTTCAGGTA AAAACGTCGTGTCAAGGAAAATAGACGAGTATGACGTGGTAC  
ACTGTTTACAGGCATTAGGGTACCACAACCTGAACGAACGCAGTCTGAATCGTCGAGCTA  
TGGTCTTTATTCCGTCTCTGGAGGAGGACATCACGAAATTTACGAGCGGTGTACCGAGTG  
ATGCACAGGTTTCGTCTTCGTGGGATTGGGAAGTGCTCCCAACGGTTATTGATTTCAATTC  
TTAATTAAGGAGACCTTGTCCCATGGTACTGTTCAATGTGAAGGAGATGGAGAATGGTAT  
CCGCATGCCATCTGAATTGTCTCGGGTAGAACGGGAGACCATTATTAAGGACTTGATTGA  
AACGGCCTTGAGTATCTACAATAACCCTTCTTTGTGCGACGGGATCCTGGATGACCTGTT  
GGAGCATTATGAGTTTAAACGTAGGGATACTGAATACCGACCGTATCGTTCTGGATCTCGT  
AAAGGTCATTTAACACACCCGCCCTAAGCTGGGGTGGGACAGTCGTTTGAAGGCGAAGGT  
GGAGTTCAAGCAGGTCGGGAGTGGGTATCATAAAGCCCGTATTGTAATGGATTTGGATGA  
AACCTCCAAGCGTTGACTTCGAATGTAACAGAACCGGTTTCGTCTCAACGACGTTATTAG  
TGACCATCCAGAAGTGGAGATGCTCAATGAAATCATTTCACTACGATCTAGCACAGCCCC  
AAGGAGAGTTCCGGTACTACCAGATCGACGTCCAGTGGTTGTTAAAGGAAATCAGGAGTC  
TGGGTGGGTACCTGGTTACCGGGAGCATTACCGGAAAATCGGTTACTGAACATTACGACG  
AAGTAGCCTTAGGGGTCCTACAGAAAGCCCTTGATGAGTGTTTAGTCTTTAACC GCGGCG  
TTGAGTTGGAAGAGTCTCCTAACGTCTTTCCTCGTAGGCAAGCGGATAAGTATCTACTAC  
CGGACGATCGAAATGAGTTGGTGATTGATGCAGTAGCTCATTAAAGCCGTTTAAATAACCC  
TCCCCAGGCCCTACACTGCGTTTAGTCATCCGGTGGTGTACCGGGTGTGCCGAATGGCA  
ATCTCTTAGTTGGGATCAATAAGAGGGATTAATTATGATTACGAAAACCATTCCTCGC  
GTTGGTGAACCGTTGTTTTACGAACGCTGGCTTAAAGCCTGAGCAAACCGATTCCGGTGAT  
AGCGACCCTGGTACATATCTGGCAAGTGAATGATCATAACGGGGGAATGACCCGGGAGTT  
GATTTTCAATGAATTGGAATTGGATGAACTGACCGCTCAAACCCTGTGGAACACTCTTCA  
AAAGCCATTACTGGCGATTAGTCAGCAAATTCGTAAGTTAGCACTGGCTGGGCGATTGGT  
TAGCTGGAAAGTTCTCCCCCTCACCATTATCTTGGGCATAGAAGATGAAAACCTTGTCCT  
ACTCAGTACCTATACCCCGTTGACCGATCATAAGGAATTCCTGGGGGCGTATAAAGCGT  
TGTTGAACGCTTTACAGATACAAGAGAACATCCCTTTCCCGTTGTCTGCCGGTTTTACGC  
ATCCGGTTGAAAAAGAGAACCAGGCGCTCACCACCCGCTTCTTTCACGATAAGAGCTTGT  
TCCAACA ACTCAAGTTGAACCATCCTTTACCTCCGTTACTGGAAGTGAAGGTTCCACAACC  
ACATGGCCACCTTTAATTTCCGTTACCCAGAGTCCGGTCAAGATGAAATAGCGTTTCCCTC  
CGAGTTGATTATGAGCGGATAGCTGAATACGTGTTAGACCGTTCGTTGAAA ACTGACGAC  
CTGCTGGTGGATACACCCTCGAATGTCATTGACCTGTACCTACCCACGCCTTACTTGCA  
CGTCATTTAAAGCACTTGGAGGCGCCCTCCAACCATCAATAGGAACGGTGAAAGGGCG  
TTTGCCCTGGAGATTGAGGGTGAAGACGAGGATCTCCCACTGACCGAAGTGTGTTTTCC  
GATCAAGGGGAAGACATCGTCCACACCTTCCAGGTGAGCTTACGACCGCGTGCCGGTGGTT  
CACCTTCAGGGTAGAGTCGTGGTGTACCCCTGATCAAATAGAAAGTGTACACGAGGT  
CAATATGGCAGTTACTCCCAGACTCAATGACATTGTGGATTTTCAATAGGTACGTAATGG  
CATCCTTGGGGATGAAAGGGTGGGGGTGTTGGGCATCTCAGCCTCTATGACGTATCAAGC  
GGCTAAGGCCCTGGATCCTCAGATCAATGTAAAACACAGTAACCTGTTTCAATACTTCCA  
GAATAAAGTGGGTGGGGTGGACGATCCTTCCAAGTATGCGTACTTCGCGGTACA ACTCAG  
CAATGGGCAATTTGAGGTCATTGGTGTCCCTGGGTGAACGATGCGACCTTTAAGACTAT  
CGAAGGGCGTATTTCGCAGCTACACGATACCAATTACCAGGAATCCATGGCAGGCCCTAC  
TGCCAACATGCTGCGTAACCTGGGTGCGAGTTATACCGTGCATGATACCACCACGACCAA  
GAATTAATTCACTACCACATCCTCTATTTAAACGGGGGACGTGGTAGAACCTTTATTTTT  
TGGTCGCGTGTCTTTTTTACTAGACGTTTTGAACAGAGAGAAAGTCGTATGAATGTTCCA  
GCGACTCAAGAGACTGAACCTTATCAGTACCCCTATATAGCGAAAACGTATGTAAGTAAT  
TGTAATTTCCCTGAAAGCGTACCACTACTTAGCGGCCCGTTACCTCTCCATTGTGTACGGG  
TGGGACTATGAGAACCTGCTAGAGATTTGTGAGAAGGTCTTCGTACCGAATGAGAATGGG  
TTAAAAGAAGCCAAGTTCGGGGTCTTTAAGAAAGACAAGTACGGAGACCGTGTCCCGACG  
GTAATGGGAACCCGGCAGCTCTTTAACGCAGTCCAAGAGAACA ACTGGCACCTCTCCCCA  
TCCTTGGTTCGCGTATACCAATACAGAGGAAGAACAATCTGTTAACGCGGGCGGGCACCGAA  
GAGTTTATTGAGTTTCGTTCGGTTGTACAAAGGTAAGAAACAAGCCGCCAAATACGTCCGG  
GACGAGGAAGCGGAGAAGGCGTTCCATGAAATTCAGAATGCCTTAAAGATCTTTAATAAT  
TCTCAATCCGGCGGGATGTCGTTATCCGGTACCCCTTGTTCAATAAGTCCGGTCATACG  
ACAATCACCAGAACCTGCCGAGCCCTCACCAGTACGGCTAACCTGATCAATGAACGGATA  
ATTACCGGTAACCGCTTGTGTTAACTTACAACAAGACGATGGA ACTGTTTCGTACGTCAG  
CTCCAGTTCGCCGGCCGTGATTTAATCCAATGGGTGATTGATGAGTACGGGATGACGTAC

CCCACGGTCGACCAGGTCATGGACATGGTGAGACGGTGTACCGCGTACTACTGGGATAAC  
CCTGTTAAACTCAGGGCTATTGAACAGTTCTTGAGGGATCTCAGCCCCTTAGAACTGACC  
ATTATCCTCTGTACCCAGGATTTGAGAGGGCTGTATACCACCAACCCAGATCTGATTA  
CGGTTCTTTAAGGAATGGTGTGATATCCCGGAGTTTCCGGAAGGGGTTAAGGAAGAGGAT  
TATCCTACACCCTTGAATGGGGATTATTACATCCTGTGTTTAACCAACCTTGGGGAAAAG  
TCCAGTAAAGCCCAAATCAACTTCTTGAATGGTTATCACATGGAGGTTGAGAAACGCTGG  
GGAACTTCATTACTGCGTTCCTCAAATCTTCTATCCCGCCCACCGACATTTACAGCGTC  
AAAGAGTTGGTTAGTGAAAACGTAATGACCTCTGATACAGACGCCGGTATTTACAGCATG  
GATCAACTGATCCAAGAGTTCTCGACTGACCCTACGGTTTCGTTGAGGTTCAATGGCGTT  
CTAACCTTCTGCATTTCGCAACATTGCGATTGACCAGCACGCTATACTTAGTCGCGACATG  
AAGGTGGCTAAGAAGTACGAGCGTCGGTTGAACATGAAGAATGAGTACGTGTATGCGTCT  
TATGTCACGACATCCATGTCGAAACACTACTTCGCGTTGCAACTCATGGTGGAAAGGGGTC  
TTGAATAAGAAACCGAAGTTGGATTTGAAGGGCGTTCACCTACGAGGGGGTAAAATTGCG  
GAATTGGTGAGGAAATTCACCGGGAAACTCAGGCGGAAAATCTTGAATGCACTGTACAGC  
CGTGAGAAGCTGGAAGCGCCTAAGATTTTGAGGGAAAGTGGCTGACATCGAGCGTGAGCTG  
TTTGCCAACTGGGAGAAGGGGGTTGGGCGTGGTTAACGATTAAGGGGTTAAGGACCCC  
TCAGCCTATACAGACCCAGAGAGTAACGAACGGTACATCAACCATTTGTTCTGGGACAAG  
GTATTGGCTCCTAAGTATGGAGATACCCCCCTTCCCATATAAAGCCTACAAGATCAAC  
CTGACCTAAACCGGTAAGAAAAACCGGAGGGTTTCTTTAACAGCATCGAGGACCCGAAT  
TATAAAGCCCTGTTGATGGATCACCTTAAAGGACGAGATAAGCTGAGTTCATCTATATC  
CCGACCGATCAGATTGATTAATGGGAGGAATCCCTACAGATTTTATTCCGTTTATTGAC  
AAACGCCAAATCGTTAGTCATAACCTAAAATCCATTTATGCGATTCTAGAAGCGTTAGGG  
CTCTTTATCTTAAATACTAAGGTAACCAGGCTGGTTTCTGATGAACATTGAGGGTGGGTT  
TACGCTCAGAAACGAGGCGAATCAATAACACTGACATACCGAGAGAGGAAGCCCTAAGCC  
TGCCCTCTCGGTAGTTTTTATTTAACTTTTTCAATAAGCTTATTGGGTAAGTCAATTT  
TTGACCTCCACAAGATGGCAGCGTGCTATTTCTTGAGATTAATACGGTTTAGCGTATTC  
AACTCGTCTGCCAGTTCCAAGAACCATCCTTTGAAGTACGTTTCAGGGATACGTTGGTAG  
TTATTCACCCGTTTCAAATGACTTCGTTCCACCACACTGTTAATGTCAGCCGCGGGGAA  
TTCCCGTGGTTGCAAATACTCAACTAGATGGAATCCAGCTTCTTTAAAGCCGTTCCCAA  
ACCCAACTGGTTTGCGGAAACAACGCGTTCCTACCCGCCGGAACGTAGTTGAAGTAGGGT  
TGTTTATAAATCGACTCAAGGGTAACGAGGAGGTGTTCAAGGTTAAAGAGTCTGCGTCT  
GTTAAGGCCTCTCCAGGAAAGCCAGGTATAGGTCCATTAACCGTTGTTCACTGACCGTA  
TTAACACCACCTTATCCGAGTTCATCGCACCCCTTCAGTGGTTCGTTGGTGCACGAAGTGG  
TCGTAGAGGGTGTAAATGACCGTAAGTTGGTTATGAATCAACTGGGCGTTGGGTAAGGGG  
ATGTGGGCGACAAAGGCTCGTATACCCGTATCCCGCTCGTTGGCCATTTGCTGGTACGCC  
CACGACGCAACAGCCAACCTCCACCCGGTCCATGCCTATAATGGCCAAGTCATTGATCTGT  
CCGTTAACCGTCTTATCCCGGTTGAGTGGGTGGGAATAACATCGTTCCGTAACCGTAGAA  
CACAACGGTACCACAGGACACAGGGATACAAAGTCAATAGAAGCACTGTATTGCTTGGTA  
TTCTCAATCAGACACGTGTGTTCCCGTACACTATTCGGTAGAACCATTGGTGATTGCT  
TCACCCACATGACCCAACGAGGTAATATTAACAACGTACATAATGAATACGCCCGGAAC  
CTCGTATAACTGACCACGTAGGAGACATCCCAATCCTTATTGATGCTTAACTGTTGAAGT  
AATCCTACCAGGACGTGTTTCGTTCTCGGTATGGAATGGCTGCGCCCTGACGTAGTGAAA  
ATGGCTTTACGGTTAAACGCTGTTTGCCGTTGCAGGTTACCCAAATCACCGAACCGTAAC  
CGGGCATAAACCGTGTTAGACGGTTTAGGGAAATGACAAGGTTAGTATGTGAGTATTTTC  
CAGTGATGAACTATTATATAGCACACCACGGTCTCCCGGTTTCGTTCCGGGAGTCGTTGGAG  
TGCAATTTGAAAATGGTATGAGTTTGAACAAGTACCTAAAGCATTTCAGCCTAAAAGC  
CGAATGTGACCAAGTGCTAGCATTTTTCCAACCCATATTACCAGTGTGAATCGGCACAA  
TGATACTTGTGTGTAGGCAAACACTACGCGATTCCGTTATAGCGAAGCAAACCCTTTC  
TTAAGAAAACGATGGAGTTTACCCCATGGCTGTGAATAAAGGTCGTTTCGCCCGAATGCAC  
CACTCCGAACTCTTCTGGACCGGTGAAGAAGCGGGCGATAACGGGTTGAGCGCCAGCGT  
ACGTCAAGACACCACCGTCTGTCTAGCCTCTTCAGCCTGACCTCGATGACTTCGGACAA  
CCGCAATATGGTGGAAGTCTCCGAAGTCGCCAAGATCATCAAGGAACGTTTCACCCGTAT  
CGCGGAGGCTACCCTCCGGAAGCTCAGCGCAACATCGTTCCGAACGTGGATGAAATGAC  
CGCCGGCATCTCCAGCATCCTCCCGGGCCTGGTACTGCACAAAGTCATCAACAACAACT  
CTGGGTAATGGGTGTCCTGTTCTCCAACAAGGACCTGACCATTTCTCCTCGGAACCGATCCG  
TATCAACACCCTCAACGGTATCCAACAGCAAATCTCGGTGCCGCTGAGCCCGACCAACTA  
CGCCAACGATGCGGTCATGAAGAACTTGGTGTCTTAATACACCCGTGTGGCGGAACAACA

AGGTGCGAAAGGGGTTGAAGTAATCAACATGGTTCGTGGTGGTACCAGGAGATGCTGAACCA  
CCCGGAAGCCGGCGATCCCAAGGACCGTCCGGCCAAGGTGGCGGGTTACCTCACCAACCA  
GTGGGAAACCGGTGTTCTGGTCCGTGCGACCATCGAGATCGCCAGCGCTGGCGTTCCGCT  
GCCGTCCCGTTCGCGGATCCGAAGCCTCCCTTCGGTAAAGACTGTTGTGCGGAAGCGCG  
GATTACCGCTATCCAAAAACGTGTTACCAAGGCGTTCACCCTGAGCGCTTCGAACAGGGA  
AGCGGTGGCGGCTACCATCAGCGACCTCATCCGTAGTGGTGGTGTCTCTTCCCAGAACAA  
CAGCAAGGAGATCGCACGCGCTACGGCTATCGTCAGCCTGGCAGGTATCACCATGCAGGC  
ACACCAAGCCAACCTGGCTGCCAGCCGCGGTGCCGCTCAGCACAATGACCTGATCAATCA  
GTTCTGAACTGACCGGTGGTGTTTACCGGCACGGCTACCGTCCGCTGCACCCGGTGAT  
CACCATGGAAACCGCGTACGCCGGTGAAATGATGAACTTCAACCAGGGTCTGTTCCCGTT  
CTTCTTCGGGCTGTACCTCCTGATGACCACCAACACCGACTACGTCTTCTCTGAAGCCCT  
GCGTAAGGCGAGCGTGGGTCAACGGGGTAACCTGAGTGCCTGGTACCGCGTATCGACAG  
TCTGCTGGGTGGTGTGAACCCGCGCAACCGTCTGAAACTGAATGACAAAAACGTCACGGA  
TATCGATGTTGTTAACCAATGGATTTCGTCAGAACGTTTCGCAACACGCGATCTTCCGTT  
GAACATCGTCCTGAATGGTCCGGATTCCGCGATCAACAACCTTCCCTCAGCCGGCTGAGCCA  
GCAAAACCGTTCTAAGGAAGTGGGGATTGTGGTATCGGTGATCGATGCGATGACCAAGAA  
CAAGTTCTCTCAGTTCATCGAGCACAACCGTTCGGCGCGCACCGGTTTGACTCCGGAAAA  
ACCGGTACTGCACCGCACCCCGATCCTGGTGGTCAACGGCTTCGCTGAAGCGCCCAAGGG  
TAAGCAACTGAATACCTAGGAAGTGGATGAAATGCTGCTGGGCCACTACAAAGGTGCGAA  
CGATGCCCAGGCGATGATGAACTACCTGGCGGTTCATGTACGGTATTACCAACGAAGACCC  
CAAAGCCCGTTGCCAGAAGCTCAACCTAGAGCTGAACCAATCGCTGTTCAACGGCGCGGT  
TCACATCAACAGCTACTCGCAAGCGGCGGTCTGGGATCCGAACTTCATGGCAGCCCTGGC  
GCAAGCTATGGAAAGCCTGGGTAGCATGAACGCAGCGAATTCCGCGGCCAGCTTCCGTCC  
GAATCAGGGTGTATGTGCGGGGGTGGGTCTGGCTACTACTGCCTTTGCAGGTGATAG  
TTCCCTGTCCATCCCGAACCTCATGAACGCCTTCCCTGGGCGGTTTTGCGTTCGGCTGATA  
GGAGAGTGTGCTGAAAGAGTGACGGTTAGGGGGCTTTCCTGCTCCCTAACCTTTATTCCG  
CTTTAGTCTTTTTGGAGTTTATTCGATGGAACCTGAACTAACTCCGAGTCTTTCGTT  
GGCCATTAAACGGTTAACGGAATACGGTGAAGAAGTGCTGGATCCCCTTAAGGACTTTGT  
CGGCTACGCCAGTAAGCTGGATTTTTCCCTGGAGGATGATCCTCGGTTCTCGATGCCGGC  
CTATCCCGATTTTGAAGACTACGGATACCTGCATGATACCAGCCGACTTAAGCAAGTCTA  
CCTGAATGACGTCGGTTTCAATCTGGAAGAAGACCGAGAAGCCCTCAGTCGCTTAACCCG  
GATGGAGTTTGAAGGTAATTCGTTTGATACCGTTGCGCGGTGTTTGTGTAAGGACGGCAA  
GGGACTCCGGGGTAACTACCTCCTGGGTACCGAACGGGTGTGTCCACGGTGTGGGAGTAA  
AGCTGAACTCTTCTTGATCAGGGGGAAGACACCCGGATGTGGCTCAAATGTCCCAGAGT  
GGTGAAGAAGTTCGTTAATATCGGGTCTTTACGACCTTCTTTAACAATATCAGCATAGG  
AAACCCGTCCCCAAGATCAATGTACCGCGTTACTTCATTGATCCTCTGTATCGAACCAA  
GGTTAAGAAGCAACGGAATGGAACCCCTCATTGCCATTACCCAGATGCTCGGTGACTTGA  
GCTCCACTATGTGACCTGAACACGTTCTATGATCACTGTGATCGGATCATGGAATACAT  
TCTGGTAGGTCCAGGTGAGCGCTGGTTCGAAGTACCGGGGAGGGGAACGTGCTGAGATCCT  
GGAAGTGTATCATCGGTATAAACACATCGCGTTCGTGTAATTACATGAAGGTACCCAGTCG  
GTAAGTGCATGGTGTGGAACGGGTGGGTAAAGAAGTCCGGAGTTATGAGCATCAGCCTGA  
AACAGCAAAGCTCTATAACGCCATTGCGGATACCATGAATTCAGCAATTGTTATCAGCT  
CACTGAAAAGGACTTGCAACGCAATGTGGACATTGTGGGTAAGAACCTGGTGGCGTTGGC  
TGATCAATTCAGGAGTGTCAATAACCCCAAACCGTGTTTAATATAACACGGGATCAACCG  
TAAGCAAGTGTGCGCCGGTCCGGAGCCATTAACGGGACGGTCCGGTATTACCTCTCAAAC  
GGGTATTATTAATCACTCTGAAGTGATTATGCCGTGGAAGAAGGTCGTTACCATCCTGGA  
ACAGCCCATTACGAATAACCTCTATCGTTTTGCGCATAACCCCGGAGTGCCCGTAAGAT  
GATCTATAACGCGGCCTATCGGATCGTTCAGAAATCGATGCGTTCCTTACGGCGTGCGGA  
GGAGAGTCGTAACCTCCTGGTTCAAATGGGGCGTAACCCCTCGATTGAGTACCTCAGTCG  
ACGCATCAATTACCTGAGGGTGAACCGGGATCTGGAAGATGAGACTATTAAGATCCCAT  
TACTTCAGTCCGTCCTTACAATGCTTAAACAATGATTACCCTATTCCCTCTACCAGGAGGAA  
TTCGTGCAGATAGAAAGGATATACACAACCTCCGATTAAACATCCAGAGGAAGTTGGGTTT  
TATAAACATCCAACATTGCCGATTTGGTTGTCTAAAGACGACGACCGGATCCTCACAGAA  
ACAGGTTTCGTGGAACCAAGCATAGGCGGCGAATAACAAGTACTACATTTCGTCAGCACCCCT  
CAAGTGTGAAACTAGAGACATTTCTTGAGAAGCCAGCTCAACTATCAAGTTGTGGGGG  
AATCACAGGGATGGCGACAAGCGCAATAATCACCTGGAAAACCTGGAGTGGTGTACTCCG  
TCAAGGAATTTGATCCATGCGTTTTAAGACCGGTCTTAGGTCCGATAAACTTCCCGGTTTA



CTCACCGATCTAGAAACAGGTGAGGTCTAATCATTTACGAGTTTAAGGGAATGCGCTACC  
TACTTAGGCATCAATCCTGGTACACTACTGTTTTTCATGAAATCTGATAAAAAGTATCCG  
CGCAAGTTTAAGTACTCTGTCCGTCTAATATCGGAAGAGCCTAGCAAACCTGACTGCTGAC  
GATATTGGTAAAGTAAGGATGGGTGGACCCAAACCTTGCAAGATCGTCAATAAACTCACT  
AGCGAAATAAAGCATCTGGCCTTTGAGAAAAGCATTGAGGAACTGTTCCGGTTTATCTGAG  
AGACGTTAACCCCGTGCTTTGAAAGAACGTGGATACGAAGACTGGATTTTCGAAGCAGTG  
AAGACGTATGAAGAATACGTGAGTGTCAAAGATGATAAGGCGAAGACTGTAAAGTCT  
AACCGACATCTTTCTTTAGTCAAGGAAAAACAGTTGGCTACAGCTAAGAAGATTGTGGTT  
ACTAACAATCTGACAGGCGAAATAACTGAATTTCGACAATCTTAGTGACTTCTCAATGGCG  
AAGGGTTTCATGATAAGCGAGATCAACCGCGCTTCGAAAACCAAAGCTTAATGGAGAGAA  
TTCACATTTTAATATCTGGAATAGGGTAATTGTTAAAGGCTCACCAGGCACGAAAGTCCT  
GAATGAGAATCTCTTTAATTGCTGGAACCTCCACAAAAGTGAACCACCTTACGTAACCGT  
AAGGGGACGAAAGTCGGAAAAAACAGTTAACCGGGCCTACGCTAACTAATAACGCTAAGG  
GATACTGACAAGGGGCAACCAGCAGCGAAGCCTGTTGTTATTCAACAGGAACGTTCAACG  
GCCATTCGATGACCCGTAATCTGATTACGGCGAGATGTAGGGTAGCAAGCTAATGGCACC  
CGAAACAGGAGACACCTAATCCCTAACCGGGAATGGTGATGATATGGTCTGACTACGGTT  
CAATAGACCGTGCAGGTGTCTGTGCACACCGGGTAATGAGTAGCGTCATTACTGGACAAG  
TGGATTTTGATGGTGATTCCATGTATGCCATCTTATTGGTTGACTTGGAGTCTAAAGCGA  
AAGCCTACGGGGGATTAGGTCATCATCAGGTCTTGGATAACAACGTTACCTTCAAGATCA  
GCAAGTATGCGGGACAAACCGCTACCAACCTGATGAACTTCAATACCCTCATGCTACAGT  
AACCGATTGAGTATGGCGGTGAAGTGTGATGCGAAGAGCTAATGCCTTCAGTGACGCGC  
TCTGAGGCAGTTTTACCGAAGAGTCCATAGCCAAGTACGCCGACTACGTAACAACCTCTA  
CAGCGCTCCTACAGATAGCTGGAGGCTGGTTGGGGGAACAAGCCAAGAAGACCCTGGATT  
GTTTTACCAGCTTCGTAAACTCCCGCGCGTGGGAAATGGGTAAACGCCTGTTGAATAAGA  
ACGACGGGGAGTACGTGCGTCCGTAATCCATTGGCTACCTGGGGAAATATTGAAGCCTTCC  
AAGGTGCTGAGGGATATATACGGGACTACATCATGGCCAATCCACCATGATGCAGCTGT  
ACCTGGACGGTGAAATTGAAGGGTATGGTGGGGAGTTCAGTAAGTTCTGTTTCAGGTGTTG  
GGGAGGAAAACCTTTTCTATCGCCGACGATGAATGGGTTACTGAATTTACCACCTGTGG  
ATGATAAACCGCATCTACGCCATACCATTACCACGACAGCCTAGGTGCTAAGATCTCCT  
TCAGGGAACGGTGTGATGTCCAGAAAACCTGGGCGGCCATCGATCACCATCGGGCTAAAT  
CCCTGTTTCGACCTCACCAGTCATGCCGGGAATAAGCTGAAGAGCGCTGAAGAAGAAACCA  
CCGAGGAGTAAGGTGTCTAAACCAAGCAGGGGTGGTTCCCTACTTGGTTTATTATGACCT  
TTTATTTTGTCTTTCTATAGAGAGCCTTCTTTCTTTAGGGAGTTAACAGTATGGCGCGGT  
TTTGCGTAGGGACAATGGACACTAAGTTAGGGTGGGAGACTCAGTCTCCTGATACCGCTA  
TTTGACGTCATGTGACCTGTTGGATTACCAGTCGAGAGAACCAAGGTAAACTGATTGGAG  
GTGTGCCTAGTTTCTACATGATCTTCAAAGACTTCGCTCAATACCCCGATCCAGTGGTGG  
AACAAAGTCCAGGACAAATTCAAGGCGTACCTGGAGGAATTGTTTCGACGAAGCCATGGTGG  
GTGTAAGTCGACAAAATGTTACTGGGAGAATCAATAATTACAGGCTCATACTGACCGCTC  
GTGTCGTAGTGGATAAATATGAAGTATGACTTGGCGCAAACCATTCTGATCACCAGGTGAAC  
TGTACAAAGTTCTGGACTTAGAGAGACTTAAACGATGACTGACAAACACAACGAGGACTT  
CCGGGGTAAAGTTCCTGATCATATCCAAGAGATGCACCTGGAGAATGACCTTGGTTGGTT  
GAAGGACTTGAAAGTCCACGAACCTGGATGGTAAACTCCTGCTGGGTGAGCCGGGGGAAGA  
ACTCCCCTTTAACGTGAGTCGTGTGATTGAATAGAAGGAATTCGTTTCAGAAATGGTTGAT  
TCCCTTTGCGCTGGGGAATTCACCTGAGTGAACACTTCTCCTTCCAGGAATGGGGCTC  
CTTTACCTTTAACGGAACCCGGTCTGTGTTGTTGGTTGCCCGGATGCTGAAACCGGTAG  
ATACGAACCGACTCTTGGTTCCGCGGATTATTTCCAACCTCCCTGACTGCGGATTACCC  
CTACAAGCTCCGGATGGCCTCGCTGGCTATTTACAATATCAGTGAAGACAACCGCCAGAA  
AAAGAATCTGAACGCCAGCTTGAAGGTTGCGAATGCCTTGGCGGATAGCAAAAATAGGTCT  
GGAAGCTATAACCCACGACCTTGACGGATTTGATTACTCTGGCCTTCTTTGAGAATATCTC  
GGTCGTTCCGGAAGTGGAGCGTAAGGTTTACTGGATCCAGGATGTAATCCGGAAAGGAAC  
TGAAACCAATCCCGCCGACCTGACTCGTACCCGGGAGTTGTTCTTTAAAGAACACAAAGG  
TGAAACCCTGACTCAGGAAGAGTTGAAATTCGTAAACCAACTGAGTTTAGGGGATTATGA  
GATTGAAGACCGTCTGGCTGACGCACCGGGTGAACAGTCGGATAGCGAATCGCCAGACGA  
TCCCAACATCGATCCGTTGGCGTGTTAAGGTCGTAAAGGGGAACATTATTCATGCGGATTC  
TTTGGACTTCCGACCACCATAAGCTGCACCAGACAACCCCACTACTCATGTACTGGGGA  
CTATGTCGACGTTTTGCTTTAAAGATCACGATCTGATCAATATTGATCTGTGATCTTTG  
GTGGGGACCTCACAGAACGCATGGGAGAGGCCCTAATCCTGATTTCAATTAACCTCAAGG

AATGGGCCAAGGTTTACCTGAAGGCGTGTGACAAGGCCTATACAGCCGTTCTAGTACTGG  
AAGGGACCCACTCCCACGACAGGGGTCAGCCTAAACACTTGGAGACGCAGGCTCCCGAGG  
GAATGGATTTCCGGTATGTGGATGCCATGTTTCATTTCAGTATTACCCCAATGCAACAATC  
TCAGGATTCTCTGTGTTTCTGACAAGATGGGAACCCTGACACCTGATGAGATTTGGGACA  
AGACTGTCGCATTGCTCAATGAACACAACTGAAGCAAGTGGACTTGATTGTTTTTCATG  
GTGCGTGGGAGCATCAATTGCCGGTGCAAGTACGTCACAAGGCTCACCAGTTAGCCCGAT  
CGAATCCATTGTTAAGTACTTTCATTCTGTGCGGTCATATCAACGTCCCCTCTGAAGTGG  
GTAAGATGCGGTGTTTCGGGTTTCTTTGACCGTACAGCCACGGGGAAGAACACCCAAAAG  
GGGGGTATTTGGTTGAGCTTGACCTGGAGAAGGAAACCGCCACTTCAACCTTCCAGGAAA  
ATAAGAACGCCCTTCCGTATTTAACGCTGAAAGTCAAGGAAGACATTACGACGGAACAAT  
TGGTCTTGGACCTCCAGCAGTTCATCCGCCGGAAGAACTCCCCTACCACAGCCAAATCC  
GGGTCATGGGTGGTGCAGCGGATATCGTTAAACCGGTTATACGTATCTTTGAGAAAAGAA  
TCCCCTACTTTGGCCTTAAAGCGGAGAATGCGATAGCCAAAGCACAGCATGTCCAAGACG  
ACCTGTTCAATAACCAACATACGACTACCCTCAGTTAACGAAAAAGAACTTGGCATCAG  
CCCTGTTACCTGAATGTCAACGTGTCTTCGAGAAGGAAGGGATCTCTGATGAAGAAGCCT  
TGAAAGTCCTGGAGGAATTCCTATGAGAAGTACAGGTGCTTTGGGAATCTCCGTAGGGAC  
ATCGTTGGTGTGTTGAGAGTGATCCGGGTTCTCTAATACGTAATCCGGATAACCATCCTGCT  
TAACCTTATGACGCGAATACGGAATGCGTATGGCGCGTATGAGAACAAGAGGAAAAGGA  
TTAACTGACATCAGATCAACTGGTAGAGGCGGTTACCAGTGATCTGAAGATCCTGGCAAA  
ATGGATGGAAGAGACGCGTAAAAGTAAACCGGTTGAACTGGTGGTGTGTTATCCCACCTA  
TACGGGTCTTAATACCCGTTTCCGTCATGCGGATCTTAACTCCCTACGACGAAGAATCA  
AATCCGGTACGATACCCTCTCGAAAGAGGCAGCAAAGAAGCAGTATACGAAATACGAGAA  
ACTGTCCTCTAAGACAGACATCGGTATGCCTAAATTAAGGGGCGGGGAATTGTATTGAC  
GCACCACATGGTGGACCTCACGGTATCGAACAGTGTGGACGTTTAATACTGTTTGAGTC  
GTTTACGGGTAAAACCAAACCCTTTACCCAGTGGTACACTAACTGACGGTAGGGGAGGA  
TCTGTTTTACATGCCGTTTAAACCGGTTACCATCCAGATCTTTGGTGACCGTTCAACCAA  
TGTCATGTCGTCCTCAACAGGGATTAACGAGCTGGTGAAGAACTGGCGCTGGATAATAA  
GTGGACGTCTGCCACAACACTGGGACGAATCAGAAGTCATATCAACAACCTGCCACAAGG  
GGTAGATCGAGCCGGTCTACAACCTGATGCTGAACGGTTAGTCTCCCATCTATTCTCACTG  
AAAATTCTATCTTTATTGGTTAGGAATTTTCGAATTTAAGGTAACCTCTCTTGAGTGACAA  
TCAACATCGCAAGTTTACCCCGCGTACTAAAACCCGCTGAATGACTGGAAACAGCCTCA  
TCCGACGACCTTGGAACCTTTGCCGGGAGCAAAGTACCCGGCGCAGCGGATGTTTCGAGTG  
CAAGAACAGTGGGGCGTTTCCCATTTGCTTCAAGTTCACGACGGCATCTTTGAGAAAGG  
TTCAAACACTAACCACAAAGAAGTCGAACTGAACAATTCGGATCGGGGCGCGCTCTTCGA  
AGCGATTATTGAGGCCTCGAATGATGCGAACTTTGGGTTCCGTCAGATCCCGATATCGAG  
GAAGCAGATGATCTTCTCGGGTGGGAGCGCGTGTCAATCGGAGAACCCGATTGTTACGC  
GACCTTTACCATCATCCGGGATAAGAACGATGTTATCGACCTGGGCTACACCAAAGGGGA  
TTACAAAGTCCTGCTGGTTTTCCGTGGTTCCAACCTTACGACGGTATACGACAAGAATGA  
AGCCGGTGAACGCGATGAAGACCAGGGTCTGATGTCCCGTTGGGTAGCTCGGGGCTGGGT  
GCGTTTCTACCAGGATCTACTGAATGAGATAGAGCAGGCGGCTTGGGAACCCCGAAACC  
GCGTGACGGTGGGGTAAATAACAACCGGCAGCCTTCCAATGACACCAGTTCGGCCACACA  
CGATGACTTCGATGACCTGGAATACTAATTAGACCAAAAAGGGTAGGAGGGGTTGCCGCT  
CCTACCCGGTCTATTTCGTTTGGTTAGAATACTTTAAACCTACATTATCTTCCCGTAATCC  
TGGACTATTCTGTTTGTAGTGAACCATGTTTAAACATCGAGGTTAAGCGGAAATCCAAGAA  
GACGATTAAGCCATCATTGTTTCGTTGAATGAGAAGAGCCTCCGCTTTAACGGTGATGC  
AACAACTAAACTTGAACGGGTAATTAACAACAAGGATGCGGGTGATCCTAATCTCTTAAG  
TTGTTTCAACGAGTATGTGGAGAACATCTTCGATACGGATAAGAAGATTGAACTCTTTAA  
GTTGTATGAAAGGGCGTATCGGATTGCCGAAAGTCTACGTATAAGGACTACCGGGTTGA  
AATCGCTGAAATTAACCGATTACCAATGCTATTCTAAACCTCATAGATGTTTCTAAGTA  
CTGTAGCTTCATCCAGTATTCCGAACACATGGTAGTTTCTCCTGACCTGAGCGTGGCCTC  
CAGTAAGGGGGATTACCCGGAACAACAACCATTACGGATTAGGATTATAAAGAGTTGGT  
TATGCTGACCTTTGTGATCCGTTTCGGTTTATCCGATCATCTTCTCGTTAATTGCTCGCTT  
TGATGCGGCAATGGGAACAGGGTACAGTGAGCAGGAGTGTGTGGGTCTGATTAAAGATAA  
CGCCACATTGTTAACCTGTATGGGTGGAAGAAGCTTCAGACCTATGTGAACTTTGCCAT  
TGGTAAACGAGGCATACCCGACGAAGCAGACAGCATTGGGCGTGTAGAGTATTTCGTGGA  
GCGGGTTCTGTATCATAACCTCTTCTCCCGGCTGTGCTGTGCGGTCATCCCCGAAACCGA  
AGAAGGGAAGCACCTGGGCACCGGCATTAACGCTTCGGTAGGCCATCATGGATCGATTGG

GGGTGGGTTTAAAGCCAAGGGTGCCGAGGAAGGTGAGGATGATAAGCGGTCCCTGTTGGA  
TCGGTATCATATCAACGAAGAGATCAAGGCGGTAAATGAAACCGTAGACGCTGAGTATTT  
CAGTTTAGGGTTGTATGACGAGAATGATAATGAACGGTACGTGGATCGGTTCAAGATCCC  
GTGTCTGGGCCTAGGTATAAAGAATCCCCAGCTGGTGGAACAGGTCTACGACAAAATGCC  
CCCGAACTGGGACATCACGTTGAACAATCATGTCAATTACATTTCTTCAACTGACGTTCTG  
CGATGCGATCTCTCCTATGATCTTCTGGAGTTGGGACGGGCATCGACTGCGGGCAGCCAT  
TGCCTGGGCTCAGGTCCGTTTGGAGCGAACAAGGGTATCATTACCTTCCGTCGGTACTGGG  
AGCGAGTAATAATCCCGGAGGCATGCAATCCCTTTCGGATGGTTTTCGGTTGAACACCGA  
AGATAATGAATTCCTGGTCAGTATTAGTGACATCCAAAGTCGTAATGACAAAGGACGGTC  
CTTAATGAAGCCGTGGAGGTCGCAACGGAGTTCTTGAAACCTTTGGGTATGGTCAATG  
GAAATCGAACCTGTAATATGGGGTATTGGATGATCCTGAAGTCTATCAACGGGTAGAACG  
CGCTGCGTTATTCGACCCGGAGGTTGATTTGGAAACGAAGAATGAGTTCATGCGGTTAGT  
TAGACAAGTCAATACCTGGAAGTATCATCCGTAAGTACAGAGGAAACAAACATGTCCG  
AAATGTTGGTGACATTGACCCGAGCCATTTTTGGTATGGGGAATAGCAACCACGATCACG  
TTCATTGTCATAACCAACTCAACCTGAACAGCACTGAGGTGGGTGACCTCATCATGGGAC  
AGGTCAATGGAGGTGTTACCGCGGGTACCCTGAATCGCATTGCTCCCTCCAGCGGTAAC  
TGTCCCAGCTTCCCTCAAGGCTACGTCTCCGTCGAAGAAGGCTTCGGCGTACGGCGTGGAA  
TTGGACAACACACGTTTCGTCATTGAAAGCCATTCACACTTCCATTCGGAAATGTGTGTGG  
TGGGGTTCCTCTTTGGAGGCACTGCGTCGGAACAAGGTATCTCGCATGACACCATGTTTCG  
TTCGGGAACGGACTTGGTCAACCTTGACGACCAATACCCATGACAGTCAAGGCTTCCCGA  
TGACCAAGCGGATGATCGACAGTTCATCAGTTCCTCATGGGATCGGTGGATCAGAACA  
ACGACCTGAAAGCCGTACGTCCGTTGGATGTCGGGAATGAAGCCTTGGGGTTCGCCGCT  
GTGTAGAAGATGGTTCTGAGATGATGTATGCCGGGACGGTGGGGAGCGACCTCAAGCACA  
AAACCTTGATGTCGAAGACCCTCAACCTCAACCCCACGCATTATCCCGGGAGTTGCTCA  
ACCTGGCCACCGATGCAGGGTTCCTCACTCCCAATGGCAGTTCGTTTGAAGTGAACCGT  
CCAACGGATAGATTGGCGAATCGATTGGAGAACTTCCCCGCTCGAAAACCTTTCATGC  
GGGCAATGATGCAATCCACCGGTCAGTACATGTTGGGTGGGTTCAGGGGTTTCAGTATTG  
GGGAAACGTATCAGGACTTCGATAACCTGTTGGATGTCATCAACCTCAACCTGTTGAATC  
CCAGTTCCTTTGCGGAAGACAACACCCTGCTCACCAGCAGTGAATATGGGTCTGCGGGTA  
ACCATGAGGTGATTGCTACGGAACCTGGCGATGATGTCGGTTCCTTGTATGTTGCAGTGTG  
GTCTCTCCCGCCTACGGTTCCTCCGCCAGCAATAACCTCATGGAATATAGCACGAACATGG  
ATGATGGTGTGGGTGTCGCTTTAGTCATCGGTGAAGCCATGTCCATGTTCAACAATGACA  
TGTTCTGTGAAAACCGGGTGGAGGACTTCAAGCGTCTGATTGACCAACACTTCTTCTCGA  
AATACTCGGGACCTCATGTTCAATTTGAGAACCTTGATGAATATTGAAGTGGAGTGTACA  
TGATTGGTGAGATCGTTATTACGATTTTCGTTCAATGGGGAAGCCAACGAGAAAACCTGCA  
CCAACGCTACCTACTACATTAATCATACCAGCAGCAGCATTGCCGGTAATGAAAACGGCC  
TGTTGGAAGCCAAGAACTTCCCTGACCGGTATTCGTGAATACTTCAGCTAAGAGGATAACC  
GCTCATGCACGAAACCAATGAACTGAACAAACTGTACGCAGCGATGTGTTTGTGCGTGGGG  
CGCGCAGGTTAAGGAACAGGGACGACTCGTCTTTATGATCGATGGGGAAGAATCCCACT  
CCGTATTGATGGGATGAGCCTCCACCTTCCGCTGAGCGGAGTCTTGGATGGGAACTGCGT  
GGATACGGTCTTCTTCCACCTCGCCTGTGAAAACATCGTGTGAAAGAAACGGAAGTCTT  
CAAGATCAACCGGCGGATGACCTGTATGAACTGCTGGATACCTTCCGGCGTATTCCGAT  
GGTGTATTACCGTTGCAGGCCATAAGCCCAAGAGTACCTGGAACCAACGTATCCACGA  
CATGCTGGAGCCCCTGAAAGGTGCCAAGCGTGCGGTACGGGATGAACTCAACGCATTGTT  
CAACCGTATACATGTGGAAGTGAAGAGAATGGGTTGGATAACCGTTTCATTCACTTTAG  
GGTATCTAAAGGCGGTGGTACCTGTAAGACCACGGCTCAACGGATCTATTACAAGACCCG  
TCCGGAGTTTCCGTTCTATACGGAAATCTTTCGTCGCCTGGCACGTTCCGGATGGTCAATC  
GGATAACCAGACCATTGAAATCAATAACCACACGGTCTCCCGAGCGGCACTTCGTCTGGC  
CGCCATATCTTCCAGAACGTCCTTCCGGCGGTAACAGTCCCAGTGACTATGTGTTTGA  
ATCGACTTCCCCGGTGGCGTCTCGTCTAGTGTCTACATGGGGTGCTATGCGGAAATAGC  
AGATCAATTGAATAGGATTCAGAATGCCCTCCGATCTGATTTTCGATAAAGTTGGGTTGTA  
CCCGATTGATCTGAGCTGGACTGAACGCCTGGAAGAACTACCGGATATTTATCGCCAAGT  
CCCAGTACTGGATTACAACAGCCACAACCCCATGATGAAGTCCAGCATCAAGCAGTGAG  
TCGGAATGACATGGGTGGTATGCTGTGCGTTACCAGTAACAACCAACAGGGTGTTCCTCA  
ACATCAATCCCAACCGCAGCACGTTGCAGGAATGAGCGGGGACTATGACGTATCACCTCC  
GCAGATGCAAGCGTGAGACCGGTATGTCCGTAAGTACTGAGATCGATTACGTGCGTCAACGGT  
TCTCCACCATGCGGTTAACCAAACTACCAATAACCCGGTCTGCTACATCTGTAGCCGTAA

AGGGAACCTCCTGCATCGCTCTGAAACCAACATGATGCTCCAGCAAATGGGTATGTTGGG  
TGGGATGGGTGGTATGATGGGGGGAACGATGCTGACCAACGGGATGGTTCAACTGCCGAA  
CGGTATGATTGAGAATCCGCATATGATGGGGGGTGTTCGATGCCACACCTACCGCCGC  
ACCGAGTGCATACCCGGACGCCGGTATGGGGTTTGACCTGGGAGCCCCAGCTATTTTCTA  
AGCAACAATAACCTTACCAGTACCTAGAGGGCTATCCCGCTAGGTACTGTGTTTTCTCTA  
ATGTATTCCAGTATTTTTACGCTTGGGTCGTATTACTACGTGCAACGGCCTGGGTCAAAT  
GGGTCTCGTCAATTATCTTGTAACTTTGCATGCCCGCACAATCGATAAAGGGATCTTCAA  
TCCATTTCAGATAGGCTGTGACCCACAGCATATGGTTTTCAACCCCTTGAACCCTCAGGA  
ACCGATAGAGGTCATACCGATAGGCATACAGTTGTGCGTGAGAGATGATTGGAATCTCCT  
GGTTTTGACGGAGAAGTATTTCCCGTTCGGACCGTACCAAGACTTTGAACCGTTCAGTAA  
AGAAGAAATCACGTCCTTCACTGAAGTTAATAATAGACAGTGGCATGGAGAAGATCCTTA  
TCGATGCAGCTAACCATTTTTGAACCTATATTATTTCTCTGACCCGACATAAAGGAATTAT  
CCCAATGGAATACTTAAAGACCCAACGAAGTCGATTGTATCCGAACCTGGATACTCGTCT  
GGTATTAACAGAACCATAGGGTGTTCACGTTTCATATGGAACGCTCTACTGGGTAATCA  
TAAGGAAGAATACGGTTTTTCGGGTAGAGGATCCTGAAACTCATCCTAAGCCGAGTTGTTT  
TTAAGTTCCTTTAATCAAAAGCTGAACGAACCTAAAGTTGAATACCCCTGGTTCAATGA  
GGTCAGTTCTGTTGCTTTACAACAATCAGTTCTTCATTTTACCAAGGCTTTCAGTGTGTT  
CTTCCGGGGTATTAATGGTTATCCAAAATTTAAATCTAAACGAGATCCCGGCCGGATTAA  
CCTCAGTAGTGCAGCGGGAACTTTTGCCAATGACGGCAAGATGCGAATCCCGAAGATAAA  
CGGACACACCACCTGTGACCTAAACTCGCGTTGGATTAGGAAATTAGGAACTACAGCAT  
TGTCAAAGATCGGGTTGGGAATTACTTTGGCAATTGCTTAGTAACTAAACCTTGTCTACC  
GAATACGGCTAAAGGTCAAGGACTGGTGGGGGTTGATCTGGGGATCAAATCCTTAGCGGT  
GGCGAAGCGGTCTACAGGTGAAATCTTTACCTTGGAGAATCCTCGAACCTACATGAAGAA  
CCACCGTAGGCGTGTACGACTTCAACGGCGATTAGCCAAGAAACCGAAAGGTAGTCAAAA  
CCGTAACACAGCTAGAATTAACCTGGCCAAACTAGCACGTAAGGTTCGGCAATTTTCGCAA  
GAACACCCTGGATACCTTACCTCTAAACTGATTAGCGAAAACCAAGTAATCAGTATTAA  
GGATTTGAATGTTAAAGGGATGCTGAGAAACAGCCGGTTGGCTAAGCATAACCAAGACTG  
TGGATTTAGCACCTCCGGAGGAAGTTGGAACACAAGGCTATACGGTATGAATCACCGGT  
TATTATTAGCCTGGTCCATCGATTTTACCCAGCACCCAGTGTGTTTCAGCGTGTGGTAT  
TAAACGTGAGATCAAACCTGACCCTTAAATGCCCAGGAATGGACCTGCGCTGAATGCGGGAC  
CTCTCACGACAGAGACATCAATGCTGCAACGATTATCCTGTATGAAGGACTTCGGTTAAT  
GGTCTGATAGAAAATTTACTCTTTGGAGTAACTACCGAAGCCTACTCGGGATGTTAAGGC  
TGTGGAGCATCAGTGCGGTTAAGCTGGGCAATGAAGCAGGAAGTTTGAGGTTAAAACATT  
GAGATAAAGACACTCTTATCTCATTAGTGAAAAGAATGCTGTTGACTGTGATGGAGCCGT  
TATGAGTAAACAAAAATTGAATCAGGACCTGAAAGGTGTAAGTAGTGAGACCCGTGCCGC  
ACTGGTTGCAGAGGATACGGATCTAACCCCTGACAGTGCAGCGGGTCAATTCCTCCAGGA  
AGTCCGTTACAAGTATCCCTGCGGGGAGAATCAAATCCATGCTGCTTTAGTGGGTGTGAG  
CAGTAACCTGATTCTCTTCCCGCACGAAGCCTCCGCGGGTTCGTTCTATATGGCGGGTAA  
CATGATCCCTAAATCCGTGCCGACCAAAGGAGCGGGTGAACGGATGATGGTAAGCGGGTA  
CGAATTGGAGGAACATTACGGTGGAACGGCTCATAAGGTTCGAAGCCCCTGAGAATATGCT  
GGTGGAAAGAGATCTTCTTCGTTTCAGAGTCTTGTTCGGGTAAAGGATACGGATGACTGGAA  
TTCGATTTACGTGGTCTTTAAGAACGACGATCAGAACGCCTACGAGTTTCTGGAGCTACC  
TGGGTATAACACCATAACCTCTACGTTGGGTTTCGAATATAAATACGATAAAGAGAACT  
CCGTAAGCTCCGTAAAGGTGCCACTTTCGCTAAAAGGACCGTCTTCGCTAAGAGTCCCCG  
TATCAGTGAGAATGGGGAATGGTGTGTTTGCATGCCACCTTGGTAGCCGCCTATTCCGA  
CCAAAGGACTGAGGAGGATGGCGTGCTTATACCCGTTCCCTATGCGGAACGTTCCGGCTTG  
TATGTTCAAGCACGAGTTCAGCTGTGAATGGTATGAGGATGAATGGATTCTCTGATGCT  
ATACGGAACGGACGAGAACCCCAACCGCTCCCTGAGTCGGGTGATAACATCCGTGAGGA  
TGGGTTTCGTCATGGGCATCCGTCGCCGCATCAAAGAGAACGCGCTGGTTTCCCTGACCAA  
GAAGTCCCTACGAGAACCGGGTCTGGTGTACGACAAGTTGTTCTGTGCGCCGTTTCGATGC  
GGTTGTGATGTCAGTACCCGTTTGGTTCGGATCGGATGGCGAACCGGTCCAAGAACCGGGG  
AACGGATTAGATCGAACAACACCACAATGCCATGGTGTACCGCTATGAGAAGCGCCACAA  
TGCAATGTGGAACAATGTGATCCGGTGGTACGAAGGGAAGATCGCTGCCAACCGCGGGGA  
AGACATTCCATTACCTTTGACCTCGATACCTTCATTCGGAACGCGTATGGTAACTCTAC  
CCGCAATGGGTTGGGTTCGTATTAACCCGTTGGCCCAGTGGAACGGGGGGATAAACTGAA  
AGATTGGAACGTGACCATCGAACTGAAGGAACGGGTCAAAGGTTCGTGTTAAATTCAAGTA  
CGCGGGTTTGAACGGTGACAAAGGGGTGTGTGTACGGGTCAATTGAAGACGACGAAGCTCC

CACCTATCCGGATGGGACTCGGGCGGAGTTCATTAAGATAACGTACCGGCGTTCCGTCG  
CCAGAACTTTTCCTTGCTCATGGAAGTACTGAGTATCAACTATGTGAACATGAACGTTCAACG  
GGAAGTCAGACACCTACGGCTAGAAGGGGATTATGAAGGCGCTTCCAGGCGTTGATGAC  
GTTCTATGAAACCGGTTTCCCTGAATTCAGTGAATTGGTTGCTCATGCGTTGGTTACGGA  
GGAGGAGAAACGTGAGCACGTCGACGATGTCTGTCGCCGGAAGAATTCGGTGCATGTGGT  
CAGTAACGCGAAGTTGTATGGCGTGAACCTGATCAACGCCCTGCGTCGTCAATTGCCGTA  
TAAGCCGCAGAAAGGCATTGTCTGTAACGCCTGGGAGAACGGGTGGAAATCGAGAACCC  
TAACCTTATCAGCTGTCAGGACATTATGCTCCTGGATAAGTTTGGTACGGACATGAGTGC  
GCAGAGTATGCCGAAGGCTAACCTCTTTGGTTTGCCAGCGAAGATGAACGAAGGCAGTAA  
GTACGCCACCCCATGAAAGACAGTAATAACAAGAATACCGGTGAAACCGAAGGCCGGTT  
GCCAGTCAGTCACGCGGGCGGGCAGGAAATGATCAAGCAACTGGCTCTGGCGTATTCCCC  
CGAGAACCAGAATAAAGCGTCCCAACGGGTTATTCGTGCGGATGATCCGTTTGAGATTCC  
TCGGTTGATTTAACCGGATGAGTACTTGGGGAGTCGGGCGTTGACAATGGCCGGTGGGAAT  
GTTGTCGGATTCCGGTTATCGGCTGCGAGCTGAAATACCCAGTGATCGTCGGGAATATCC  
AACCTTTAACATGGATGAAATCCCAGGGTTAGATGACGAGACCTTGAAGCAGCTTCAGTC  
GTCCGAGAAACCCACTCAAGAACGTTAACCCCATGATAGACTCACGGTATGGAGAGGAAT  
GTAACCTCATGGTAAGGAAGATCAAACCTCCGTGAATTGGCTAATTTACCAGAAGAACTGT  
TCTCCGTTGGTTAAACACCCGCCGCTGGATGGAGGTCACGGATGACCTGGACCCAGTCGC  
TCTAACGGAAACCTAAGCCCTCATTGTTACCTGGCATGGAATGATCATCCACCGGCATTA  
TAAGGATGTCCCCTATTCCATTAAGGAGATGGTACCCAGTAACAAGGTGGAAGGGGGTGA  
AGACACCGTCTATAACGATGGAACCAACGCGACGCCTTTTAACAGTTCTTAAAGGTCAT  
TCTTCTACGATTATTGACCCGGTGGAAAGTGGACGGGATTAACCGGCTTATTCATATCTG  
GCAGTATAAGCTGAATAACCTGCTGGTGGTGTGAGTGAACGTTACCTTATTTACGCCAC  
CGCTGAATCCGTAGCGGAGTTCATGGAAGATGAAGGGATCTCTGGAATACGGGACCGTGT  
ACTGAGCAAGGAGATTTCAATTCATGAGAGTGAGCGGGAGTTTGCGGATTATGTCCGGAC  
CGCTCATTCCCTTGCCAACAACACCCTCACCCCTGCTGTCGCGTACGGGGGGGGTGGCCAT  
TAACCACGCGAATCAGTAGACGATCATCCGGGGTAAAGTCTTTGACCTGAACAACCTCGAT  
CATGCCGAAGGCGATTACGGTTCTGTATGCGCATGGGATTACCAACCTGGCTGATATGCT  
GGGTGTACGGAATGCAGCAGGTAAGCCGGGGTTTTGTCTTCAAAGATAAAAATCCCTGG  
TGGATGGAAGACCATGGGTAACATCCGGGTGGGTGATGAAGTCGTTACACCCGATGGAGG  
TCCCGCTTAGGTGCTGGCAGTTCACCCACAAGGTGTAACCAAGGTTGTACGGGTGCACTT  
CAAAGACGGTGCATATACTGCCGTCAGTCCAGATCACCTGTGGAAGGTTAGACGTCATCA  
TTGGTGCAACGATAAAGCCATGGCTAAACTCACTCGGGAGGAAGTGGAAGAACGTGTATG  
GCGAGTCATCACCACCAATGAGTTGAAAGACTATGTTGGTCTGTCAACTAAGGTATACGT  
CCAACCTGATTGAACATGAAAGAAATACCGATAAACCCCTTCAAATTCACCCGTATGTGCT  
CGGTGTCTTGTGGGGGTTGGATGCATTAGTCAAAGGGTGTGGATATCACCAAACCTTA  
TCAACAGCTATTGATAAGGTCCGATCGCTATTGCCAGAACATTTGGAATGTGTTTGGCG  
ACCCAACCGTTAAGGTGATGGAGAACCTAAAACGTTTGGGATCCGTTTTAAAATCGTCG  
GTCCGACCAGCACTTCAACTGGCATATCCGTGATGGCCTGAAGGAACCTGGGCATGTATGG  
TATGCGGTGCTGGGGAAAAGTCATTCCCGAAGAATATCTTCACGGATCGGCTAAACAACG  
TTTGGAGCCCCTCCAAGGACTGTCGGACACAGACGGAACCTGTGGACAAACACAAATCGGT  
TAGCTTTAGCTCTTCGTCTAAGTTACTCTCCCTCGGAGTGCAATACTTGGTCAGAAGCCT  
AGGGGGGATGGCACGTCTCCAAGAACGTACTCCCCACTACACCAACAATGGAGAAAAAAG  
GGAATGTCGTACGGACTATCCGGTTTATATCCGATACCCTCGACCAGAAGAACTCTTCAC  
CCTAGACCACAAACGGGAACGTGCGGTCTCGCACCAGAGTACTGAAACCCTGAGACTGCA  
AGTAACTCATATTGAAGAACGTCCTGATGAGGAGACACAATGCATTACGATCGATCATCC  
TGATCATCTGTACATTACAGACGACTTCATTGTCACCCACAACAGCCTAACCAATAACGG  
CAAGGACCTGAAATCATCGGAATGGTGCCACCGGAAGGTCCACATCCTGTCCGCTGTGGT  
GGCGGATATCGATCATTTTCATGGACTGTGGAACGACCACTACAGTGCCGATCCGTATTCC  
CACTATGCAAGCGGCAATGGCACCGATGGGTAAATTCAGGGTAACCGATACAGGAGAATT  
AGAACTCATTGATCAAACCACGGTGTGGTCAATTAAGCCAGGGGAGTGGGTTAATATTCA  
TAGTGTGCCCGTCTGTAATCCCTACAATAGTGCTCCACCCTGCCGGGTATGCTACGGGAT  
GATGGCGAGCTCTATCCCGTATAACGTGATGATGAAGAACGGGGCTGATGTCCGGATGTG  
GTGCACCACCTCGATCTGTAACCCCATAGGCCAGGGCATGCTCTCCACCAAGCATTTCAT  
TAGTAATGCAACGACCCGTAAGTTCGTTCCCTCCGACTAAGGAGAAGAACGTTATCAATTC  
CAATGGTGACGATATATTCTGACTAAGAACTCTGTGCACCGGGCACTGAATTGGTGCT  
CAAAGCCGATACTGTAAACATCCTCTCGGATATCCGTTCTTGGATGTTCTGGACAACCT

GTGCCTGGATAAACTCCCGTACTTCTCTGAAGTCACATTCGCTATAAAGTCGAAGACAT  
CATGATGGGGGGTAAAACCTCCATCAGCATGCGGCTTGTACCTCGATGTCGCTCTCGCAA  
TTCCCGGTTCTCGTTGGAGTTCCTGAACTATCTTCTGAGTAAAGGTTGGGCGAACGAAGG  
TAAGAAACATATTACCGTTGATTTGAGTGAATGGAATACGCTCAGTCTATCTTCACACT  
GCCGTATATTCGTGAAGACTTGACATGCACCGGGCTCTGGTAGAGAAGTTCATCACGTT  
CAATAAACGCAATAAGGCCTGGAGACAGCAGATCGTTACACCCCGTCTCTTTGGTGAGGT  
CTTCGCGGAATACTAGGGATTGATCAACCAGGAAACGAAAGGGATTAACATCATCCATCC  
TGAGGTCTTGCTCTATTCGCGGTTGTGTGCGGGATCCCATGCGCGGGGATTATCCCTGGC  
GAATGGTTAAGGACCTAAGTATTTTCGTGAACTTCCAGGAGTGTATCAAAGGCAGGGGGGG  
GGGTATGCTCATGATCTACGAGACCCAGCAAAATGTGCTAAGTGGTCCTAAGACATTTTCG  
TGTGGTAAACCGTCAGGGGAGTCCGCTGGAGTGCTTCTTTATCTTAGCGGTGAGTTGAGT  
GGGTGACCCCGTTCGTTAGTGTGGACCTCTTAAGGGGGTCCCTCGGAATCCCCCTTAAGAG  
GTTGATTATGCGAGCAACAGCAACTATCAGCAAAGCGAATCATTACTTCAGAATCAACGG  
GTACTATGAGGAATTCGCGGTTTCGGGTAATCCTACCGTTTTGTAAACTGAATCTCTGCAA  
GATAGCTAAGAAGCCAATACCGGGTACCCGGAAGCAGGCGTGGTTTGTTC AACACGTTGT  
TGCTCGGTCGAATTATGACAAGAGTGAATACCGGCTACCCATTGAAACCCCTTAAGACTT  
TGTGGAATTTGCGGGCTACCGGGGATATAAAGAATCCCGCTAGAAGATTCAGGCTGAACC  
GGAGATCGAAGGTAAGGATGTTGTATTGCAATTC AATCCAGGGTTTGATTAGTTCAGGGA  
AGGTCAAGGTGAATGGATTGAGTACATGTTGAGCGATGGGCACCTGAAGGTCCATAACGC  
CTCCACAGGCTTTGGGAAGATGCAACCGCTGTACGCGAAGATCAAAGACCCGGGTGGTTG  
GAAGACAATGAAGGAGATGACCGTCCGTACCGAGGTCATTGCAGCGGATTGTACGGTCGC  
TCAGGTGACTGGTGTTACCCACACGGTAAACAACCCATGTACCGTTTGC ACTTCGAAGA  
CGGGCGTTATACCGATGCAGGACTGGATCTCCTGTGGAAAGTGTTACAGAGGAGACTCA  
GGCATGGACAGTCGTTAATACCCGTTCCGTACAGACCCTGTTGGCGAAAGAGCCGGATGG  
GGTATTTATCCCTTTGTGTGAGCCTGAAGACGGTCCGGAGAAGCCCTTTGTAACGCACCA  
ATTGGAAGGTTCCCGCCAACAACGGTTGGAACACCTACGACGACTCATCGATGAGAAAGG  
GTATGTGCGTGGTGACGGTAGTCTGACTGTTTCCAGTGAGGATGAGGTGGAAAGCACTAC  
GGTTCAATACCTCGTTAGGAGTCTAGGGGGTATTGCCCCGAAAGGTACCGTCTACAGGACT  
GTACCGCCGACAGGCAATACCGGGTGTACATCAAGCACCCCTCGTCTGAGGAACTCTTAC  
CCTGACGAATAAGGGTGGCTCCCTGACATCAAAGTCGGGAAACCAGTCCCTTAAGCTCCG  
GGTGAACCGCATTGAATTCATTGGGGAACATGATGCCAGTG CATCTCTGTAGCACACCC  
GGATCGTCTGTACATCACGGATGAATTCATCGTCACCCACAACGCCTATATGGCCATCCA  
CAGCATGGTTAAGACTGGTAAACGGACCTTAATCACCATGCAACCCCGTTACCCAATCAA  
TTGGGTACGGGAACTCAACAAGATCCTTAAACTCATTCCAGGGGATCTCTTACTCTGGGA  
GAATACCCTGGGATCGTTGTATGAGTGTTTAGAAGACGGGAAGTTTGATCCTAAGGTCAT  
TATTATCCGATGTCACGTATTGAGGTCTTCCCTCCCTAAAGGGAAAGAGACCCGAGACGG  
GTTACACACGGATGATTTGATCAAACGGATCAATCCGGGATTAAGGATGATTAATGAAGG  
GTATGAAGCGATTTCATCAGATCTTCTTGTCCTTAATGTTTGGGAATAGCAAGAACTCAT  
CCTGCTCGCAGCCACCTTGAAAGCAGACGATCCCTTTACGAACAAGATGTACCAGTACTT  
GTTCCCTCAACGGTTACGGTTAAAGGAGGCGGAACCCGAGCATTAGATCGATATAGTGGC  
GTACCTGTATCGCCTCAACACCCGTCGTTACCATCTCAAGACGGAGCAGTTTGGCGCGTA  
TAACGATAAGACGGTTGAAAAGAGCATCTTAAAGTCGGGTGTACTCCTGGCATTCTACTT  
TAAATTGGTCAATAAGGCCTTTAAGGAGTATTACCTCAATGTGAGGCGTGAAGGAACGAA  
GTGTTTGTCTTCTTCTCCAGGGTCAGTATGTGCGATGCCATGTTGGAAGTGTTCAGGAA  
AGAATATCCCGGCTGGGATTTGAAACCTTTACTGGGGACGATTCCAAGCTGAAAGATAA  
GAAGGACAAGTCTTAAAGCACGAGATCATCATTACAACCTCCGAACAGTAGTGGACCACG  
TAAGGATATCGGGGGGTTGGTGACGATGATCTGCGCCACACGGTTGCGTCTGACTCAGGC  
TAATAAGCAGATCATTGGACGACTCAGGGCGTTGTGCGGGTAAGTTCAATAATGAGAGCGA  
CCCTGCCTTTGTGTTCTTGGTGTGTTTGGACTTAGCGAAGCACGTGGAATATTTAGCCAA  
ACGGGAACAGGTGTTGTTTGGAGAAACAGAAGACCTTCAAGCGTATCAATTCGGAATGCTC  
CCTGGACTGAGGTCCGAGGGGGTTTCCCTTTATGTCGGGGTACCGCTACTATGCCGCTAT  
TCAAACGTCAGCCCATGCTGATCATTTCATGCCCTAACATGGGACAGATCAGCTGGGTAG  
CCACCCAGTTGGTCGAGGATTCCTTTACCACATCTTTGCGGATGGGTCACTCGTTGAAG  
ATGATTTTCTGGAAGAATGGTTAGATACCGAGACCGAAAACATCCATGTTGATGAAGAGG  
GACAGGTTAAAATGTCCCCCTACTGCACGAGCAGGAATATTGGAACCTGGTTAAGGATC  
CTCACGCCATGAACGAGTTTTACATGGACGATGCCCTCGGTACTCGGGATCACCTTTTCC  
AGTTAAATAAGGACAAGCTCGCAGAGGTGTCAAATACGCTATCTGTTGAACGTTAGTGGG

TAACCTGACATCTCCCTAACCAATTGGCTTATAAACTCTATGGAGACCCTAGATGACCTA  
TTCCTGCAGCCCTCACAGCCGTAAGTCCCAGAACATCAGAACCCCGGAATGGA  
GTTTTGCGTCAGAAATTCATCCTGAAGATTCTGGTAACCGAACGGGTTTCGATGCTTCAT  
GGATGAAGTGACCTTTGATATGTCGGGTGAATTTATCCGTAAGTTCATTACAGTGCCTCC  
GGAGTATACGGAACCTGAAACCATCGAACAGTACATCCAAACCGAGGTCCTGGACATCAT  
GGAAGCGTTTAAGCAGTATGAGGAAAACGCAGTGTACCAGGAGGATTTAAAAGCCCTGTT  
GCCGTATAAAGGCCATCGGTGGCATCTGGTATCCTCAACAGACTCCGGAGTCTGATTAC  
AGTCGAGGCGTAGGGTGTATGAAGTCTGTTATCATTAACTCGATCCAGATACACGAGCG  
GAGCTGTATGCGTATGTTTCCAATTCATCTCATGGATTTTCATCCTGATAGAAGCCTTAAACG  
ATCGCTTTAAAGGACTATTCGTCATCCGTAGAAACGCTCCAAGACGCAATAGCGGATCCT  
GAATACTACAAAATGATCCGGATACGAACATTGAACAGTCAATTGAATTACTGCTCGAT  
CTACTGAAAGAGCTAGACCGACAGGACGGAGAAGATGTTGAGGCTCCCTTCTACGACGTG  
TCCAGTTATTCGGATTGGCTCAGGGATAAACTGTGTTTAGCCATTAGCTCCATAACAGAT  
GCTAATAGCCCCTTGGATTTTCATGCTGTTGAATGATGTCCTCACTCTTCCCTGAACTCAGT  
AAACAGTTTATCTTCCAAGGGAAACACCTGAATAACCGTGTGTCATGTTGCTAACCGTA  
GTCGATGACCATCTCTAGACAGTACACATATACTAGCTCCCTCCCGCAAGGAAGGGAGGT  
AGTAGTCGTTTATTTATTTATTTCCAATGCCATCTCCAAGTCTAAGAGGTTTCGTACGGCTG  
CCCGCTCTGTGGTGTGCCTTCATGCGCTGCAATTAATAATGCAATAGGAATCAAGACCACC  
TCAGAGCTGAGACGATGCCCTAAAGCCCCTAGACCTTCCCCACAACAGGTCTGACAATAG  
TAACCGTCTTTAGGGTACAGAACTGAGGGACTCTGGCTTGTACGGGTTTATTAACGTAA  
CGATCCTGATTTTCAGCGGTGAGCCGTATCATGACTTTCGGATCCTGGATCCACGTTCTT  
ACCCAGTATCCTTTATTGGTTGGGAGGATCGTAACGGTTCGGTCCACGGGCTACCGCAA  
TCCACGACATCCTCGCTAACGGCCGTACGGCCTATTGGACGCAACGTTTCTTAACCCTA  
GCCCCACCTTCTCCGGTGGACATAGAACGGCTGTAAGAGCCCTCTACAGCCGTGTTAATG  
TAGTCTGCCAAGAAGTTCGGATCCCAACCCTCCGCCAGGGAGTTAGGGAGCAGTATCCAA  
CCGTCTCCTGAGGCATTGGATTCAATACCGAAGGAATGAACAACCGTTCACGCGAGTTG  
TCAATAAACTTCTTTGCAATAAAGA ACTTACGGCTAGGAGCAGACATTACGATCTTCATG  
TCCAGCGCCACACTGATCAATAATCGAGGTAGCAACAACCGGATCATTGAGTTCGTCT  
CTATGCTCTTTGAAGAGACGATCCCTGTCTTTAATGACTTCAGGACTTACCGTTAGGGCA  
TCTAATCCACCCGGTTAATGAAGTGACACCCTAACCCCTCCAGGAACTGCCAGTTATGG  
GAGA ACTTCAAACACTGGTCTACACTGGCCTTCCCTGCAGGTACCGTTCACCCCGGTGGG  
GGATTATACACCATGACAGTTTCCAAGATATTCAAGATAACCGGTTTGGTGGACTCCTGG  
TTAAGGTAGAGTTGGGTCTTCCCGAAGCATTCCAGAAAAGGATAACGTTGAAGAGTAAG  
AGTTCAAAGGTAGTCGTGACCGCTTTAACTTGCAACACTGGATGGAAGTCTCCCGGGGGT  
ACCAGGATTTTCATCCATGTAGAACAGGGGTTTATTACCTCCCATTTACGGTATGGGTA  
GAACCCTCTACCTCGACATTGAACCGATTATCCTCCACAAGACAGCATAGGGGTATTTT  
TTGAACTGTCCAGAGGAATCATCGTCTTCAA ACTGGCTAGTAATAATCGATTGAATAGCC  
GCCTTTTCGTTATAGGCTCGGTTATTCAGAAAAGAGTTAAGGTAGTCGAGTTTAGTCATG  
GGAGTTTCACTCGCTGAATAAGGTCTTCAATACGGGTCAACGCCAGAGGGTCTTCAATGA  
CCGAATAGAGGTATTGGGTCTCTTATCCTTAAGCCGTTTCGATATTGAGTGCAGACACCA  
GGAAGAACCGAATAACCTCCTTGGCATACTGAAGGGTACTGTCTTCCGTTTGTGAGCCA  
GGAGA ACTTCCAAGTTACGACTGTAGAACTCAGGAAGCTCTTACACGCCCTCCAGTT  
GTCCGTTCTTCTTAACTGTTCAAAGGCCAGAGTTCCTTCAATAAGGGTTGCATTTCGCC  
GAATACGCTGTTCAATAGGGGTGCGAACGTTCTCAATCTCTTCGGGGTTAAAGAGAGCGT  
CCTTACTGGCTTTAAGGGTACTCCTGAAACATCCTCAATAAAGTTTTCTTAGTCTGACA  
GATCGAGGTCTTACCCAGGTAGAGTTCATCACCAGGAACAGTCGATTCACAGGGGGGA  
TGTCATACGCCTCCAAGACGTGTCGAAGACCAATCAGGTCTTCGTACTCCGGCAACTCCA  
TAAAGAACGACAACAACCGAGTTAAAGCAGGGAGGTTGTCTTTACCCAGGAAATCGTGAT  
TGATAACGAACCCAAGCTGTTTCGAGCACATCCATAATATTGGTCGTTAGGATCAAATACA  
CCTGATGCTTCTTAGCCGGGATTTCCAAGCTTCATTAATCAACGGATCAGTCAGTTGAC  
TGGGCATCAAGGACTCAGGTTGACTGAGCCTAATTAATAAATTAACGATTCATCCAATTCTT  
TAGCCTCATTGGCGGGTATGGCGTTCCGGAGTTCTGACCAGAGACCCCTACCAGGGTGT  
CAGCCAGGTATGCTCCCTCTTCCAGGGTAACAGATTCTTACGCTCAATAATCATTGGGT  
TAACTCTCGTGAAGTGCGTTTCCAGAGGGCATCAAAGCAGATGTCGACTAAAACCAACA  
GCGTCGGGTTAAGAACTCAATAAACGCAAGCAAGTGAGTGAGCAAAGACAACGGGCTAA  
AAACATCCAGGACGCTTACCTCCGACAGGACTGTGGTAAAGGCTACCAGGGGGAGGCCCT  
GAGTCAGGATGCCTTGTACGATAAGGTCAGGGGTGAAAACAAGGCCTTCTCGGTACGCGA

CCTTACTAATAACCGTCAACGTCTGGCTGAGCTGGCTGAACAGATGAAGCTGACTTCAGA  
TTCGGACCTCCCTCAGCTCTTTAGTGGGGAAGAAGCTCCTCAACGCTATCAACGACATGAT  
TACCGTCACCATTAAGCTCCACAGTGGGGTGATCGTGTACAACCGTCTGGTTGAAGAACG  
CCGCTTTGATATCAGTGAGGCTGACCGTGCCGTAAGTGGAGAAGTACGAACGCAAAGTGGT  
GGAGTTAGTGGAAGATGTCACAGTCGTAACGACCCTGCATGAAGCAGGTCAACAACCCGA  
GGATTACTTTGAAGTCGTCCTTAACCTGGCCGATGTCATGGCAGCCCTCTGTGAGGAGTT  
TGGGGAACCGGTTCTGGATCTCATTACCCAACAGGGTGTATCTGATCGAAGCCTATGCCGT  
TGAACACAAACCTGAAGGACTGTCTGTCTACGATTACATGTGTCAACTTCATAGTGAACG  
TTAACGGTTATCCAACAGTTGTACGGTGAGAGCCGGCCGAATGACGGCTTTAACGAATT  
GCACACCCTGGAGCAGGAAGTCCCAGATTCCCCTGAAGAGATCCCAGGTGATAACCTCCC  
CTTCCCTGAGAAGGAAGACGTTGGCGAATTCATCGCTATGTCCAAGGATCCTGTCATTAA  
TCCCCAGTAAGGGACTGTTTGTATGTCTGAGAATGTAACCCCGAACGAAAACCTGAACT  
GACTCCCCCTTCGGAGTTGAGCAAAGCTGTTGAACAAACGATTCCCAAACGGAGCCTTG  
CAGCCACTTTGGCTTCATGGATACCCACACGCCTCAGTATACACCCATGAAGGAGGTTCGT  
GGAACCGCTCAACCCATTACCAAAGAAGTGGTTGAAGACGGTCGAGCTAAGGGGTTTAC  
CAGTATCTTCTGGGGGTTGGTAAAGAAGAGAATGAGAAAGCGGCTGAACTGATTACCAA  
CTGGAATGCGTGGAACACGTTCAAAGAATTGAATAAGGTAGCGGAGGTGCCCCCAACAGT  
CTTTCATCAGCTAAGCAAGACTGGGATGCCTTTGTTCAAGAGAAGTACCCGGATGTGAA  
TCCCTATGAGTTGGAGAAGACCGCTAGTGATCTGTTCAAGTTCATGAACAGTCTTCAGGA  
GAACGTCCAACCTTCGTACCCGCATGCTGCGGGAAGAGAATATTACCAACGCCTCGCGCCG  
GTTTGATAAACTCACCACGACCGATATCGTTGGTAAAACCCCGTCAGTGAATAAGAAAGG  
GTTGAGTATTGCAGATCGCATGATTTCGCTCGACCATTTCGTTTCGTCGGGGGGTGTATACCA  
GTATAACCAACAGCTGCGTAATTCGTTCCCTGAGTATTCCGTGGGAACGTCCTCAGAAGCT  
GGAAGTCGCCGATCTCATCAACAACATTAACCGCCGTAATTCGGGGGTATGTACGACGGGT  
CAGTGCGCACGCCATGGCGTTGTCTTACATCGCGGGATATATTGAGATCTGGGATTGGTT  
GAAGCCCCCTTGGTCAGTAGCAGTGTCAAAGGCCTAGCGGATTTTCGATGACCTCAGCAA  
GGTGATCCGTATTACGGACATGCCGGTGATCAGTGGAGGTCTCTTGGCGTCGATCACGGA  
TGACGGCGTCCAAATGGACATCCGCTGCATGAACCCAGCTGTGACTGGTATCAGTTTCA  
TCTCATTGATCCGACTAAGTTGGTGCAGCGTTCGTCGATTGAAACCGATGAAGAAGC  
CGCCTTCTTTGGTAAAATCTTCAGTGGGCGTGAACAACACACCGTCGATGAAATCCTCAA  
GATGATCGAACAGTGCACCTACGGGATGGACAATCGGCACGTGCACAACGAGGATCAATC  
CATTCTGCTGAAAGTATGACCTCCCAGTCTGTTCGGATGCCTTCGCTACCTTCGACTATTA  
CGTAGGACGTGTAGATAAGCAGTTGGCGGATATTAGCAACAGAGTCAACACGGAACAAGA  
CCTGGAAGAGCAACGTCTCCTTCTGCTTAACAGCTTGGCGTGGGGCGGAGTACATGCACTG  
GGTGAAGAGTTCGCTATTATGCCACCTCCGGGTGAGGACAGTGAACCCAGGTCATTAA  
GCGAGCCAAGGAAGAGCCTAACTAGTTCAATCCAGGTCTTATGGCCTCCCTGCTGACCGA  
TGAGGTGATTAATAAGAACTTGGTGTGTTTCGCTAAAATAGAGCGCCTTATCTGACCCG  
GACCTTTATTGGTGTCCGTAACCTTCGTGTGTCCGAAGTGCGGTACGGAGTCGGATGCTCA  
CCAAGAGGATCGTAAACTCGGGTATACCCCGATCGATGCCTTTATGAGTTTTTTTATCCA  
GTCCCAGCTGATGTTGATGAATCTGGCGATGGAGCGTCAAAGGTAAACAACGAAGCCCT  
CTCCTGAATGGCGGTAAAGCGATTTCGCAATCCGGAGTTCTCGGCGGTTTACTTACTCCTC  
CAGAAGCAAGATCTCACTGGTCTCAAGGAAGAGACTATCCTGTTGAACAACCAAGCGTTG  
CATGACATCAACATGGGATATGTCTCACCCCGTAATCTCCCCCTCACCAGTCGATGAAG  
TTCTTTCCGTCTGAAGTCAGGTATTACCACCCCTTCTCGTATGAGAGTATAGGGGAGTAT  
TACGGGACTTTTCGGCTGGATGAATACTGCCCTTAAGGGATTACTTCGAATTGCCCGCT  
AACAGTGCAGACACGTTGGTTAAGGCCGTTCCAAAGGGACGGGAAAACCGGTTGGTAATG  
GGGAAAGAGCATCTGAAGGAAGAGGAAGAGAAACAGGCGAGGAATGGGGGTAAACGAACC  
GCCTCGGAGTCGGTTTCTATGGATGCATTACTGGATCAATTGTCTAAACTTCGTTAAGAG  
AATGGGTAACCTGGGGGCCTAGAGCCCCAAGGTTATCTTATGACATACATGGTGACACCT  
CGTATCTATAACCGCTGTCTAACTGAAAAGGGCCCTCCTAACGTCCAACGATTACAAAGCA  
CCTGAGGTTACTGACCTCGGTAAGAAAGAAGAAAGTCCGAAGACCCAACCTACGCCTTCC  
ATCCCCACTACGGTGGCTAAGGCTCAGGGTGCTAAATTCGAACCCGTACCTCTCCGTATT  
GGCATTGGCCAAATGGTCAATGGCAAAGGTAATGCGGTCACGGATATCATGAAAGAACGG  
ATTGTCCGTCACCTGACCGACCTGGCCGGTAAGAATGGCTTCACCAGTGATAGTGAACCTG  
GAGGATGAACAAACCTCCTTTATCGAGATCATTGGTTCTACACTTACCCTTCCGTTTCCC  
CAGTACGTCATCGTTACTTACTACCTGTTGGCGGTTATCCGGGAGAACCGGGAAATCTTT  
GCCAACGGTACGGCATTCCGCTTTACCTACAAGCTCCGTAAGGAGTACCCGATAGAGAAC



GTAAACTCCATCACACCTACCTGACCTTCCTGACGTTTCATCGCGGGTAAGTGCAGGCT  
CGTCATCGCCTTAACCGCATCATTGGTCTGGGAACGCCTATCCGCGATCTTCCCTCGTAAG  
GGCAAAGAGAACGCCACCCAGTACTTCAATAAGGTGCAAAACGTTTGATTTCCCTTTAGA  
CTCTTTATCCAAGGAACGCTTCCAATGGACAGTGTAGTACTTACCGAAGAAGACGGTAAT  
GGTTATGAAATCCCGGATCTCCCTCATATCGGGATTGTGTATGATTTCGCTTAACGATACC  
CTGGATCAAGTGGATTGGGGTGTTCAGGTACGGAAAGCCTGACCGCCTCCCAACAGTAC  
CTGATGGGTGCACTCGCTGCGAACCGACCTGGCTACTCGGTGACCGGTAACGACGTCTTT  
ATGGCCAATATCGGTGCAGGTTTTAAAGCCGCGAATGACTACGTGGTGAAGATGTTCAAG  
AGCCTCTGGGACTTCTTCTCAAGCGTGATGTCTCTCAGAAGACCTCGGATGCTAAGAAG  
GAGATTGATGACCTCCAGACAAAACCTGGAGGTCGTTACAGACCGGGGGTAAGACGGAAGCG  
GAAACCCAGGAAGCCCTGCACTCCATGAAGGTCCAGGTAAAGGAACAGGCACAATCTGGC  
TCTAACATCGACGGGGTAGACGCAGAAGAATGGGTGGAGAAAGAGACGAAGGCCTCCGCT  
ATCCATGAGGAGAAGAAAGTCGCGGTTAAGACCCTGGCCAGAGAGCTTCTAAGGTCAAC  
ACCCGGGGCAAGAAACGCCTCCAAGGTGTCATTGAGCGGATGATGAAAACCTCAGCAACAT  
TTGGTGAGGGTGATTGATATCGCCGATAAAGCAGCTCGGGAAACCCTGAATGAAAACCTC  
ATGCGGGTAACGGACTCTATGAAACTCCTCCGCACCAATGTTTCATCAGTCTACTGAGGAA  
CTCAGTCGAGTGCAAGACGTCAAAGACCTGACGGCTGTACACAACGTCATGAACGGTGT  
ATTAAAGAGATCGATACCTTTTAGAATACTGCTCAGGCCGTGCAGAGTGTTCGCGGCAA  
ATGGCTGAAAAGATTAAGATCGTTGAACAGCAATTGGCCGAGGTGGCTAAAGGTGGAGGT  
GACACCAAAGCGACTCAATCAGCGCTGGATGAACTCCGCAAGATCATGAACTTCTGGTT  
AAATGCGGTAAATGTACTAATCATTGAAGACAGTGTGAAGCTCCAGAAGGACTTT  
AATGGTGTCTTCGGGCTGTAACCCTGGTAGCCCTTACTACCCCTCTCCCCGTGAAGGGAG  
AGGGGTAGTAAGGTCTATTATGCGGTGTCTTGCACGGGTTCTTGCGTATCGATGTTAATA  
CGGGATTTACGGTTACGAGCGGTGCTTGCATCTCCTTAAGCAGTTCCTCTCGACCTGTT  
TCCACCATTAACCGTTCAAACCTCATCCTTCAATTGATCGAATTGAGGGAATCTAAACGAA  
TCATGGCATAATCCAATGGCGTTCGCTTCTGCACTGCTCGCGAAGTTCACCCCAATCTGC  
CTGAACTTATTGCCGTCAGCGCCTTGAATCCGAAACACTTCCATTTGTGTGGTACGATTC  
CCGACGTTTATTGCCAAGGTGCGGTGAGGGTACGCACCTTCAACATCGATATCGGAACAA  
TCTGTACGCCAGTGCTGTATACATCAGCGAGTCCATGGAAGAGCTGAGCGCCGACATCC  
GCATTCCTTTTCGGTATCGAGTAACGCAATCCAGTTTGACAACGGAGTCAGTTTATCAATA  
ATGGATTGATCGCGTTTAGGAGGGGTACTCCCCACACAAACCCATACCGGCGTGCAAAG  
AAACTCAAGGTATCACTGACCAACTTGGGTTGAGAGACGTAGTTAAAATACTCCGAATAC  
TTCAACAACATAGGAAGTGACAATGACAAGTCATTGGTCTTCTCATTGATCTCTTCAATA  
ACGAAGTCATCCCCAATGTTGTACATGCAATACAGATACGGCCACTTCCGTTGCATGTAA  
CGGTGCCACTGAGGCGTACCCGGTCGGTCATGAGCACCTTCTTCGGTATACAGTTTACCC  
GGTACGTTTACATGCTTCGCTGCTCCTTCTAACGAAACATCAGGAACTTACCTTCGGAC  
GGTTGACGTTAATGCAGAAGAACGACATCGCGTCTAACCATGGCCAGGTAGCCATGGTT  
CGAACAATGGGCCATTTCTGTTGAGGTTCCAAGGGCATTTTAGAACCGTCTTCTTGACT  
TTGTGGGTTGTCCTGAGTTCAGCTCGTAATACCGAAATTCCTTAGGAATACTGGGATCG  
CAATACACATCCTCCAATCGGTACCCTTCAATCCTAAGGGCTTCTCATTCTTGGTCATG  
TCGTATTCAGCATTCCAACCTGGCCACCCAGTCCGGTTGCCACTCGTGCATCTTGTGATA  
CACGCCACCACCCTAGACCTGGGGTATCAAAGGGTGGTATTGAACCACACACAGACCG  
CGTTTAAAGGTGTTCACTCAACCACTTGCCTTTCAGCTTCTTTGAGGTGCTTAAGAATCGTC  
GCGTCATCCGGTTCTTTAAACCAACTCCGTACGGCTTCAAATAACGCCTTACGCTTCATG  
GTAACCGAGACCATCCTAATGGGGTTACCGGGAGCATCCATGTCGGTTTCAACGTCGTAC  
GCAGCTACGGTAAAGGGTTCCTTCTCCTGATGTTCTCCATATTTCTTAAAGAACTGGTGT  
TTAATGTGCACCGGAGGGGTTTGGTCTAAGCCGAAGACGTAAGGACTTTCTTTAGCTTCC  
GCTACACTGGCTTTATAATCTGCTCGCCATCGAGCTGTTAAATCACATTAAGGCAATC  
TGTGCCAGGGGAGCCTTGTACTCCCGACACCAGGATTCTTCAATGTAATCTTTATGCTCT  
TTGTACTTCCGTTTGTCTCTTTAAACAATGTAGTAGGGTTGCTTATAATCCTTAATCGAA  
ATAAACGATTGACTTCGACCACCATCTTCATGAATACTGGTGATCTTTACACACGTTAAA  
TCACTGCCCCTGTTGAACCTGCTGACCGAGTAATTAAGTGTGTTTGCAGACTTTAGCGACA  
ATGGGTGAAGTATTCTCGACCATTCCTTTACCCTGCATTTTATGATAGCTTTGGAGACTA  
TACCAATAGGGGTATAGGTTCGGTATTTACAGTAGGAGTAACCCGTTAATGTTGGACATGA  
GTTTTATTACCCGAAAGGTAGCGGGTACGGAGTTCATAGAGTTCAGAAATGCCACCTTTA  
AAGACGAATTTACCGCTTGTGGATCAGTACATAACGATTACTGATAAGCGTGTGGTAT  
TATCCCCTGAAAACCAAGTGGACGTAAGGACTCATTAAAGAAACACACCGGCTTTAGCA

AAATAAAGCTGGAGTTGAACGACAGTGGTAACCTGTACCTCGACGCGGGGTATTTCTCCC  
CGTACCATGTGCTGAACAACACGGGTACTGATGTGTTGAGTCCAGCCTCTAAGACTACCC  
TGTATCGGTGGTTTGTGGAGAACAAGAACAAGATCTTTAAAGGAGGTGTTGATTACCGCT  
CCGGTAAAGTGCCTGGTTCGTTCCAAGACGTCCTCTTGACTATTGGGATCAATGTCAACG  
TGCATCGGTTCTTCCCGTTGGATAAGATCACCAAATGGAAAGTCTCCATGGGGGGGCGCG  
TAGCGGGTGGTATTGCTCACGAAGTGGGACATGCCTTTGGGGGGGGTGGAGCTCCTGCTGA  
CTCACCTGGAAGACAACCTGCGAGCCCGAGCGGGCTTGGATCAGTACCGTAAAGCCACCA  
AAGCAGAAGAACGGGTGATTATCCGGAAAGACATCGCTGCTATTCTGGATGTCCCAGAAG  
CCACGTTGGAGGAACCTGAAGAGCTTTGCCGCCCAAGAAGATGGAGAGAACTACCTCCTCT  
ACTACACCGAACTTCTCTCTCAACGGAATAACCGTCTGTCTGTCAGTTGTGGTTCCGG  
AGATGACCAGTGAAGTGATTGCGGATATGTACGCCATTTCGTATGGGCTTCAGTAAGGAAG  
TGATTGCTGGGATCAGCGCTTTGGTGGACCTTGTGTTTTTACCATCGCGACGGAGACCT  
TCCTGTTCCGGTGCCGTTGCAACACTCTTCTTGTTTTGGCCTACAGCCGCTGTCACTATCA  
TTGTTACCGGGGGAACGACGGCGCTGGGGGGTATGTTGTGGGGGGTCTTTGCCCTTAGTT  
CGGCCTTCGCGTATTTCCAAGCCGGGTATTCGGGGGTCTACAATTCCGACCACCGCCGTA  
TGGAAGATGCTCTGCGTCAATTGATTGCTAAACTGAAAGCCAGTAAACTGTTTCCAGTG  
AGGATCGGGTACGGTTGATAGACGAGTTCACCAAAGCCCTGCAAGCGGTTAAGAACTTA  
ACACCTGGTACGACAACACTGTCTCTACCGCTTTATTGGTTGGGTTTTCTCAGGCAGCG  
ATTTCCGGTAAACAAGAAACCGAACACTTTACTCAATCCCTTAATAACCTTGAGCTAGCAG  
TCTTGTCTGTCAACTGAAAACGCTCGAAGGAGTTTATAATGTCTCACCTCGCCCATGTA  
AACGATTACCGGGCTTACCTGATCAGTCAAGGGGTTACGTGCCCGTATGCGCTGACCACG  
GCCTGCCAGGAAGCCTACATCCGCGCCATTCTCAAACGCCATGCTCGTTCCAGGACAGT  
TTCACCCTGGCAGAAGACGAAGAGAATAGCATCTGGGAGCAGCTCGATAACTGGAAATCG  
GTGTATCCGATCCATGCTTCCCTTCATCGTGGAATCGGTGAAACTCCGTCTGACCCGTATT  
CGCGGCTGTCTGATGAAAGAAGGTAAAACACCCGGTAATGCGGAATTCGTTGTGTATCTG  
GATGTGAAGCGAACCTGTCCCAGTCCGGGTGACACCACGGTGGATAAACTCGATGCCACA  
GACAATGATCTGTTCTGTTAGCAGGTTCAATTCCTCTTCAATGAATTGGTGAAAGGCAAT  
GAGTAATCCAGTGAGTTGGTATTTCCAATTGAGTGATCCGGTTTACGGCGTGCTCCAGG  
TGATGATAAACAACCTCATTGACCTGGATGACTACTACGCAGAAACCGGTCAACCCGTGGT  
GGATGCGATGGTCCAAGGGAGTGAGAGCCTCGCGCTCAATCGCTTCTCTCGGGACATTGC  
TATCCAACCTCAAACCTGAAGAATGCGTATGAAATGGATCCTTTCCCAACGGAACGTAATGC  
CGTGATGGGAGCGGAAGGGTTTATCTCTAGCATTACGGAAGGGTTCAAGAAGTTCATTGA  
AGGGATCATCAAGTACATCAAGATGGCCTTTAAAGGGGTTATGGAACACATTAAGGTCT  
CCTGGGCTTCCGTAAGAGCGCGCGTATTAACCAGGCGATTAATGACTCCTTAGAGAACCA  
CCGGGAGGAGTTCCGTTAGACTTTTAAACGGTCTAGGCTTCCCAAGTGCGAATTACAACCT  
GTAGAAGATCATTGGGGAGTTCCCAATGCCACCGACCGCATTGGTCAACTGACGATCCT  
CCGTACAAAGTTCGAAACCGATGAAGAGAGTATCGAGGCTCTTCGTAAATTCTTCCCCT  
CTTCGAACAAATCATTGGTAAACTAACGGAGGCTTCTGACAAGGCAATGCGTGCGTCAGA  
AAACCTTAAAAGGAACATCCGTAACGAATACAACGCTACCCGGGGTTCGGGCTTGTCTCCG  
AGAGTGCGTTGACGGTGCGAACCTCCCCTGAGGTTATCCGAGTCCAGAAAGCGGTGTTGGA  
AACCTGACCTTCGTTAAACCGGATGGTTTAGTTGAACAGATGGGTCAGTTCCTGGAAAC  
CCTCTACAGGGTGAAGTTCGAAAACGAGGGCGTTGAATGAAGGGTTCATACCGTCCGAGA  
GACCCTTATAGAGAACATTCAGGCTCAACGGGTGAAGTTGACTCGGGTGAACACTCCGGT  
GATCATGGATCTCGTTCAGCAGCTCAATGCAGCGTATCTGACGATCTCGGATAAAGGCGAT  
CGACATGTCTCGGATTCGTCTGAGTGAGTTGGGTAATCTGGTAGATGTAACCGATGCTGA  
GAAGGTCAAGTGCATAGCGGGATACTACGAAGTCCCTGGACTCCTCGGTGATTACCAGGG  
CGTCGCGGTTGCCATGCGTAACCTCAGCCAATATTGCCAATCGGTAGCCACTCTGCTGTT  
GGCGGTTGAAAACCAAGTAGCAGCGTTGGTGGGTTGGTATCACCGTTTTTACATGTGGTA  
TTACCATGGTCTGCTTGATGACATTGAAAAGCTTCGTGAAATCAATATCCAAGCTCGCGA  
GCCGGGGCACTCTCCTGTGGCGAATGCGGAGGGTTACCCGACATTGACGTTGGATTTTAT  
TCCGGAAGCGGATGCAAAGCCCTTCCCTGGAGAATATGAGTGGGACGATGAGAATCGTGAT  
TGAAAACGGCATTGGTGAGCTTCGTTCCCTAGTACAATGCCTTGGCACGACAACTGGATG  
GGGGAGACCCGTATGAGTCGTGAAGTGTCTGAACTGGGTATTAAGCCCTGCACGAACTG  
GATTTGATCCGTAAGACCAGTGAGGACGACCTCGCTCTGCTGAAAGAAGGGATAGGACCT  
GAAGCCGCTTATGTCATCATCGACCCGGTACTGGTCCGGTGAACAGGCGGAAAAAATGAAG  
GTTTCGTGTTACGGCTCAGTTCCTAAGGACAACGGGAGTATTATCGTCAGCACGTCGTTG  
GGTGAACAGGCTGGTTATATCCTGGCTCTGGGGGCTACCAAAGCCTTCTTTGCAGTGGCG

TTGCCAGGATAGGGGCTCGACTGGAATAGGTGGTCTTGTCCATTAACCAAGCAGACCTG  
AGTGACCCGGTCGCCCTGGAGAAGTACAACGAACCTCCGTAAGGAACCAGCCCGGTTCTTT  
GAGTACTTTGCTAACGGGTTTTTCGAAGGGAAAGAAAAGGTTGCAGACGGTGAGATTACC  
TGTTGGACTCAACTGCGTGATCACGCCCGTTGTGTGGTTGACGGATATTACCTCTTCCTG  
GATGACTATGACTTCAATTTGAAGCAGGTTAAGGAGAATTCTACCAGTAGTACCTCTCA  
CCCTCTTCGATCAAAGAGTCATCTCTGGCCGGTATCGATTACTACACCCAACAACCTTGGT  
GTTCCGGGTGCGGTTGGCTAAGTTGTTCTCGTGTTCCTTGGACGAGTTGATTGAGGGTAAT  
CTTCCCTCTAAAGACACCGAGTAACGTAAGGTTGCTCCTACCCACTCCCTTAACGGGGAG  
TGGGTAGGGGTATACGTCTTAAATGGTGGTCGTAATTCTGACCTCATGGGGTTGGAAGAT  
GATATCAATGGCTTCTGTATCGATACCAATCCATCGCTGGTTAGGGCGAGTCGTTTACG  
GATGCTGAACCCAGTGAGGTCATCCAAGTTACTGATGACATCCACGGTACTGTCGCCCCG  
AAACGCACTCAACTTAACACTCACCACTCTTCACTCACATTCTCCTTTAAGGCTTCTGC  
AAGGTCTAAGGTACTGACTGTTGTATTATCAAACAACGCCATATTGAGTTGGCGAGGAGT  
GCTCTCCTCCAAGGCGGCGCGGAGGTTGGGGTTACGGTCCGCAATTTTCGCGAGGTAGAA  
GGTGACCGAGAATGCCAGATCATGCCGAAGGGTGGATTCATAGTTACTGTTGATCACCAC  
TCGCTGATACCCAGCTTACTACGAGGTTGATAGAACAGGTCAGTTTGGTCAATCGCTTC  
CGAGCTAAAGGCCAGCATGTCTTGGTTAATACCGTTGACAAAGAAGTCCTTCGTGTATTT  
AGCAAATTGGATATCTTATTCGTCTTTGCTGAACTGATAGTTCGCATCGAAGGCAATGAA  
GTCCAATAGTACTTCAGTTTACGGGGTTCCAACCTCAACGGGAACACCATTCTCGTAAAC  
GATATCAATCCCCCTCCGGTACAACAACCGCATTGTACCATCCCGGTTATAGACGATGTC  
ACCCGCCTTATGTTCAATCACTGGTTTCCCTTCACTGTCGAACACAATCTGTCCATTATC  
ACGTTTCACCTGGGTAGTATCATACCGTTCGCGGACATCCGCTTCGTAGTGGTTGTACTG  
GGCTTACCAACCAGGGGACGAATCCGACTGTACAGGTTACCCAACCGACGACCGAACTC  
AACTTTGTAATGGGTTTTAATCACCCCCAACATCGGGATATCAAAGATGGTCTCATCAAT  
CTTGTTCATCGATTTGAGACTAAGTCACCTCTTTATCCCCCGCTCGGGTAAAGATAAAGGT  
GACATCTGTGGTCAGTTCACTACCGGTCCTTACTCTGCTGACTTCCAAACTGCCAGAAGTT  
AGTAAAGTACAAAACGTCTGCCACATCCACATCAAACCTGGGTGTTTAAGGTGAACTCCA  
GACCCGTTCTTATTGGGCAACACTCCCACATGTTTACCTGCTACACTGGCCAGGCTGTT  
ACTGTCCCGTGGGTTAATGGACAGTTGGACCCCTACACTGGTATTCGTCAATTCCCTTATA  
CGAATCCCCCGATTGAGTCACCAAAGTGATGAGATACCCGGTTTCTCGGTGTTCAATGGT  
GATTTGTCTACGCCAGTTCAGACCCAACGCCGCGTTATCGTCCACAAAGGTTTGAAA  
CCGAATGATCGGAGAGTCCAAATGATAGGTCCTGAGGACGGCTGGCTGGTTCGTGGTATC  
CAGTACGTAATAGAAAGGGGTATAGACCAAGGTTTCTCCGCCACCATGTCCACCTGCTG  
TTCAGGGGTCATGTTGAAATAGGCATCCCGTGTCAACTTGTTCACCAGAACACTGGTGGG  
TTTATTGATGTTGGACAAGACAGTGTGGGGAACAGTCAACCGTTCGCCGTTGTCCAATAC  
CACCCACCTAGCCACCAGGTCTTCGACTGACGCTAAATAGCTCCCGACGTAACACGCCAT  
CGGTGCGTAGAAGCCTTTGTTATCATGAATAGGCAATTCCTTCGTTAATGTAAAGGAACG  
CTACGTTCATGTAGTCAATGACCTTAACCGAACTGTACCCGCGTTCCTCCGCCGCCCTTT  
CAGGTTGTTTTCGGTAATCGGGAGGGTGCCTTGTGGCGACCGTCGATCACCCGTTGTTT  
AATTTCCGGAAAGGGAATGGCATCTGTACCGCCCGAGACAATCGCATCCATCTTCCAGGC  
AACACCCACGCATTCACCAGAGGGACTGAATAGGGATCCAACTTATCAGACCCATACCG  
ATAGTCCCGGTAGGCGGGTTTAAATGTCCATCGGGGACACCGTGGTAAGGTCTTTGGTTAA  
CGCCCCTTTGGTGGTATATGTGTAGATGTTGATAATCCCCCGCCAATGTCATTGCCTGA  
CGTGATGTACACATCTGGGATCTCATACGAGAACCGTTCCTTACGGTATCGAGACTGAG  
GCCTAGGGTTACATTCAACGGATCAACGACATCTTGGTTCGTAGGACACCCGGATCTCTTT  
CAGTCCCCCATTCGTTGCAACATCGCACGAACCCATAACAGGTTGTCCGTGTACTCAAT  
AATCCCCCGACAGCCAGAGGCTTCGTTAGACGTGAGGTTCTCCGTGGCCTTACAGCTCAA  
TTGAGCTACGGGAATCGATACCAACACATAACGACGGTCATCCACTTGGTTGAAGGTACG  
GTCCAAGAGGTTTCGTGGAAATAGGCATAAAGGGGTTAGGCGAGCTTTCGTCTGTAACGAT  
CTTCAGCCCATTCCGTTTCGTTGTACTGGATCCGTATCCCATTGACGACCCAGAAGTCCTA  
TCCGTGGACATTCAAATGGGATCCTTTAGTACGAGGATCTCTTTATACACCACGGTTTT  
CTTACCGACGGTTTTCCGACGGTCCACAGTAACTTCAGGAAGTTCTCAATATCCATGGT  
GAGAATCATCACTGAAGTCGAGGGATTCGCAAACAACCCAAACCGCTCTTTATCCGACAT  
GTTTCATGCTCAGCTCACTGACATTCCGAGCGTGCAGCAGGAACCTTACGGCTGTTGACATC  
CAAGAGGCGGTTACTGAAGCCATGCGACGTACCCAGGATTAATCCATGGCCAAAACAAA  
GGGGTACTCTTACTGTTGCGTTTTACGGTCCCGTTGAACCAGTTATTCTCGACCTCATT  
CACAAATGTGGTTAATACCCCGAATGGGGTTGTTTGCAATACGTTCCAATTCATCTTGAGT

AATAGCCATTGGCGTTAACCCCAACAATTCCAGTTCCTAGTCGCCAGATTTCATCCAGGGA  
TACGAGCCGTAACCCGACAAGTACCTTTCCCTGAACGGACGTTGGTAGTAATACTGATTG  
CGGACCCGAGGGTGCAGGTTAGGGTTGACCCTCAACGTGGTACGGTTAAAGGCATCTGCA  
ATTTGGATATTGTTAAACCGGAATCCCTGACAATCAAAGGAGATATCCAGTTCATCAAGC  
CCTTGACCCCTCAGACTGTTCTGAGTACGGTCAATGGTACTGTACGCCCCGACGGGACG  
GTCGGAGGCCACCCACCCCCACGGCAGAAAACCCATTCAATATTCCGCATGTTCTAGTTC  
ATGATGAGGTGGTAAATACGGGTGGTGTAGTCCTTATAGTTCTGGAACAACGCATTGGGG  
TACGGTTCATCCCTTCATCCCCAAGGGTCACCGCTTCTATGTAGTGAACCCACACTTCG  
TACATTTACGCCATAACGTTGTGTTAATGCCTTGATAGGTTTGTCTCAGGGTGCATTTCG  
TAGTTGGCTTTCAATACCCCATCGACCCCGCATACTTCTTTACGGAACCCAGGCTCA  
CTTTTGCCCGACGGTAACGAGAGTTCAGGAAACCCTGAACTGACTTTAAGAAAGTTCGTT  
GCGGGTGGGATCCAAGGGTTCAAGGGAACCAGGGGAGTAATATCGTTCGCATTCGCCGCT  
CCCGAAACCGGATCCAGTAACCTTTTACGTACGCGTTCAAACCTGTTCCGATGAGGACGG  
TACCATGAGACCAATTGAGGATGAAGGATTACATTCTCATCCGACAGATTCAGCATGGGA  
CGCGACATAAACGCTAAGCCTATGGTGTCTGCTGGGATGGGCGCTGACTGATTGCCAGGC  
CCTAGAAGACGAAATCCACGTAACAGGTTTGTCAAGGCGTTATAAAATCCAGGACCGCCA  
TTCTCACGGAACGCGTAATTCCACCATTCCAGGATTGTTTCTTTTCGTGACTTCTCTGCTG  
GGTGGCGTATTCCAGGTGTTCTGTCCAACCAAGCGTCGTAATTATTCCGGGTCTTCAGCC  
ATTGTTTATCACCTTAAAGTGATCAGGGGTTTATCATGATAGGACAAGTACTGTGTCTAG  
GTTCTTCTTCTGGACATCGCCAAGAAGCTGTATCCTGAGAGCAAGGATATCCCCTCGG  
CAGCCCAAGTAACGGACCGGGCCAAACATTCATAACAATGTGATTTCCACGAGCTCGGTAC  
AACGTAGTGCAGCCGGCACTCTTTTGAATCCGATGGTTCGCCATTGAGGGGTCCCTTATCC  
ATCAGGAATACACCCCGGATCTCATGACGGTGGTGACCCTACGGGATATTGCCGCATAAC  
TGACTCAGCTGGCGTTGCAGAATTTTCGTAGAAGTGGGGGTTAAGCTGGAGAACCTAATCG  
GGAGAATCAGTCCCAACCGCGGTGGGATGATGAGTCTCTTCTCGGGACTGCAAGCGATGG  
ATAACAACATCAAACCAAACACCCAGCTACCCCGAACCAAGTTCAGGTCAATAGCAAGA  
CCTACAGTGAACCTGAAGGAGTTCACCCACCTGGCGGTGGGTAAAGTGGTGACCGCCACGC  
TCTACGGAGCGAATGGTAACAAGAGCGAAGTTCCTCACCATTTCGTCAGATCCCGATTC  
CGGTGGCCCATGAGAACCTGGTGCCCCTTCTCTGCGCTAAACCCGATGAAGGGTTGA  
AGATGCGATGGATCATGACGAAGAATGGTGAGATCACCACGCCTCAGTGGTTGGTTGGCA  
GTGACGTCGTTAAAGCCCGTTTTAAAGCGAAAACGGGTGATACCTCCGGGTATTACAAGG  
AAGCCATGAAACGGGATACCCAGAATAAACTGGACGCGATTAGTACGGGGATCATTAGCA  
TGAACCTCATGGCGAACACGGTTCATCCTCAAGATACGGCGACTCAGCTCGTACTGG  
AAATCGGTTCGTAAGTTTGCAGCAAGGTTAGCCGTGAGATAATCTTCGAGAGTGTTCGG  
CGAATACCCTCGTTATCGTGAATGATGACCGGGGTATTTTACGTTCTACACCGATGGTC  
AAACCATGCCGGAAGTTTACACTCGTCGAGACTTGTCCGTTAAGTCCAAGAAAGAAGGCT  
CTGCGAACACGCTACCAGATCTCGTTAACTGCTCAACGGGGGTCTTTAATGACTATCTT  
TGAATACGTGAAGGGTGTAAAGACGTTCAAGAAGAACGAACTGATAACCAAGCTCACTAC  
CCTCACGGTGGCCAGTGACGACATGATTTTCAACCTCGAACGAACGGTAGCGAATAAGGT  
GGATTTGAGCCATGAAATCAATCAGTGGGTGATTACCAAGAGTATTGTTTCGTGATCTGGA  
CAATAACGGGTACCGGGGTGTAGGCTTGGCGGGTGTACCCGGGGATCGTGTGATACGAT  
TATCAGTTTGGTCCCCGGGCTAACGAAAGGGGTGAATGGGTATAAAGACGAAGTCTGGGA  
CGGTAAGCTCCTGACCTTGCCTCAAGTCAATATCCAGAACCTGATGGAACACGTGGAGTA  
TTGGTTGAAATACACCAATATGGTCTAGAGTGTTTTGTGGACTTGAACAACCAGTCAGT  
CACCACCCCTGAGAAGGCCTTGGATAAGGCCGACTTGAAACTGGTGAATGGGAACCTGGA  
GTTCTACAAGTCGGTTACCTTGGACCTCCTGAAAGTGTCTCGTTCGTTCTCTGGAGGGTCT  
CGATGATTTTCCGGATGTGGAAGTCAGTGAACCTCGTTGGCTGTTCTGGAAGCCAATGA  
TCCTAAAGCCGCTCCGGATTACCTGAAGCGAGGCTTTGGGGTCCATCTGCTGAATCCGAA  
GGATTGGATCGGTTTGGCGAACATGAACCTGAACATTGCACGTATCGAGAAGAGGCGTCCG  
GGACAACGAACTCTTCGCCATGAAGATCTCGAAAGATGTGAACATGACGAACGGTGTCAA  
CGACGCCGAAATCGATCGTCAGTTCGAGGTGCTTCAGGACGAGATCATCAAGAACGTTAA  
CACCATTGAAACCATCGAGAGACGCTATGAATAGTTTTTCGTTCGCTCCCCAATGTGTTTG  
TGAACGCAAAGCTGACGGATGCGGAGATGACAGAGGCCTTTACCAACCTCAATCTCCTCC  
GGAAGGATGCGTACAGTGAATTTGGATCAAAAGGTCATGTGGCCATTCAAACCA  
TTCTGGATGTCAGTCGGCTGGTGGGTCCCTGTTTCCGTCAGTTTATGGAAGCCAACCTACG  
ACAGTGGCCGTGGACCTATTGCAGGGTTGAACAAAGACATTGTTTCATTACCTCAATGGGC  
GTATGGTTCACCACTCGCTGATTACGTTCGCTCCGTATTGAAGAGCGTAAACTCCTGAGTG

CGTCGAAAGTGC GTACAGCGACCTACCGTCAAACCCAAACCACGGGCCGTCCGCTTCCGC  
TCCTGGAAGACGGCTACATCGTCCACGACTACGATCTCTATCGCCTAATGTCCGGTATCA  
GTCCTTCCAATGTAGGGTGGACCTTGTACTACTGGGAGGTGAGAATTACTACAGCTGAC  
CCTTAGGTGGAGAAGAGAGCAATGAATGATGATGAAAAGACGTTGGCTGCTGAAATGGCT  
GCGGTCAGTGCAGTCAAATCCCAGGAGATCGTGGAAGCCGCCCGTTCCACGGCGGAAGT  
TCGGAGAAGCAGAACACCCTCGATGATCTCTTCGATCGCGTGATTCAAGTCCAACGCACG  
TTGATCACTCTGGAGGCCACGAGGTGACACCGGAGTTGGCTGAACAGCTCGATAAAGAA  
CTGATTGCGGCAGAAGCCCTCCCAGAGGCCGTAGAAGGGGCGGAAGCCTTGGGGATTGCC  
CTTCTCCCTAAGTCATTCCCTTGGCAGCGCTTAGCGGGCTGAGAGAGCTTCCCTGAGCGAC  
TTCTTTAAGAGCTACCGGGAAGTAGTCAGTTTGATTGGAACCTTCTTCCGGGATTTCGTAC  
GTCATCTTTATGGAATCCCAGGAGAGTCTGAGTAAGCAGATTCACCTGCTGGCAACTCGG  
CTGTCTCTGTGCGAGAAGTTTGGCAGTCAAGGTACCTTTATCCTGGGTACCGTCTCTTT  
AACCGTTTTAAGATCAACGGTAAAGTGGATGAGAGCTGGACCGGTAACCTGACCAAGCTC  
AACCAAACCCTGTCCGGTCTGAGTAATAACTATTACCTCAATAGCAAGAATGCGTTGGCG  
TCATCATTAGTACTTCCGGTGGGTTTTTCAGGTCTGACCCAAGTGGAAAGTGGATGAACGC  
CCCTGCATGATGCCGGTGAAGTCTACCATCAACGCTGTTAAGGAATGTACTTATCCGGAC  
GAACGCCGTTCCGGGACCTAACGTGCTGGCTAAACGGTCGGTCGAGCTGATGGGTGGTGCG  
TACTCCTACGATGTTTCGAGTACCGTTAAACCGGTGATCCTGAAGAACCCTGACGACATT  
CAAGACTTTGTGATCCGTTACACTGAAATTGATCACACCGGTTTCGATAACGACGAAGAG  
TATAACCCTTCCGGATGTTGGGGCTGAAATGAAGGCGTTGTCGAGTGAAGACATTAAGACT  
GTCATCAAACCTCTGCGTCACCTCTTGCAAGACTGGGGTAAGGTCTTTGAAATGGCGGAG  
ACCCACCGCGTAACGGATTAGGATTACACCGACATCATTAAGGTTTCCCTGGAAGCCGAT  
ATCAGTGATGAGGCGAAGACGTTGTTGTCGAAGACGTTTCGCTAAAGTCGTTTCGTAAGAAC  
CAAACCGAGCTCTTGGGTAGGCGCGCTGAGGTCTCGAACTACCTGACTCTGATTGTCAAC  
GGGATGGTGTCTATCTGCAACGATTCCATTGGGCTTTACGGAGAAAGCCCGGACTAAGCG  
GGGTGAGGGTATGAGCGCGGGTTATAAAAGCCAATACGTTGAAGCCCTCGAACTACACCA  
GGACCTGATGCAGGCTCACTCAGAACTCCTTGAGGTGGGCAGTATCATGGGAATGGATGA  
TGTCGAGGGCAGTGAGGCGTTGAAAGAAGCCGCCATGGACAGTTTGTCTTCGGTAGGTGCG  
GGGTTTGTTCAGTGTGAGTAAATGGGTCCGGCGGTAAGCGATTGATCGCTTTATTCGTGG  
TATGACGACCGCAGGTAATCAACTGAACAAGAGTTTCAATGACAACCAAGGACTTATTA  
AAATGTCCTTAAAGACGCTGGTAAGGTGGCTGACAAAGATATTCAGGTTACTGGCCAGAA  
GATTGGACTGATTACCGCGACCGGTAATCCTGACTGTATTCTCCACGACATGGAACCTCCT  
GGTTAAGGACCTCGAATTCGTTGAATAGCACGCCAAAGACCTGATGGGGTTCTTGGACCG  
TGAGTTGGTGACCTTGAGGCAGTTGAAATCGGCTAAGAAGTCCGAAGACAGTCAACAAGGT  
CATTGACGCGTTCAACGCGTTGGAATACCCGGTTATGAAGTTCGCGGACCGGTTGGATAA  
GGCGTATAAGTCTGAGGTGCTACCGGGTGGTCGTTTCTTCTCTTCAAACAGGAAGAAGA  
CGATAAACCTGCGGTGGATTCCATTGGGGGTGAACCGCATGAAGGGGAAGGGGTGACGCT  
GTACCTGTCTAAAACCGAGGTCACCTGACATTCTGAATAAACTCGGGAAGGTCAATGCGTT  
GCACTTGCGGGTTAAGGTATCGTATGAGTGTTATCTCGGATTCATCAAATATTGGGCAGA  
AATGGTCAAAGGTGTTGATGGTAACCTTGAGTCAATTGGAGCAAGTGAGTAAGACGGTAAT  
AGGCGAAGGTGAGAAGCTATTGGCCGGGAACATCGGGGCTCTCGAATTTGATAGCGGATT  
CACTCCTCGTGTGTTCCGGTTATACCGATAAGTACATTCATGGTGTACTTGGGGTATTCCG  
TTGATTTGTTTATAACAATCATTACCTTTCGTTAACGAAACAAAGGAAACAACCTCATGA  
CTATTCTCGATCGCTACACTGGCATGGAAGAGCTTCTGGAGAACGGCGCGGCCAACCCAG  
AAGATGGTGTGACCGAAGCCGCTGTCGAAGAAGTTCGTGCTGACATCGCCGAGGTAGTGA  
CAGAGGTAGCACAGGTCCGCGGCTGCAGTCGAAGAAGTTCGTGATGACCTGGAAGAGCACG  
AAGAAGTTCGTGGAAGAACAGGCTGAAGAAGTTCGAAGGCCTGGATAGCATGCTGAGCTCGG  
GTCAGTTCAGCTCCGTTGGTTTCGCTCACAGCTACAACAAGGCCCTGCGCCTGAACGCCA  
AGCTGGGCGGCCAATCCTTTCGAACGCCGGGGTGCAGGAATCCATCTCCGACGCTGCCACCG  
TCAAGTTCGCTTCCGGTACTGGCGTTGAAGCCTTCATGGACACCGTGAAGAACGCTGGTA  
AGAAAGCCGCCGAGTTCATCAAGGCCATCTTCAACACCGTCATCAACTTCTTCGTGGGTC  
TGTCACGACCGCAGCCGGTATCGACCGTCACCTCGCACAGATCGCCGACAAACCCGGTA  
AAGCCGACAAGCTGAAAGAGAAAATCAAGCTGGGCAAATGGAACATCGGTGTCGACTCGG  
CCAAGAACGGCGCGGACATCCTGGACAAAGGTCCGTTACCAAAGCCCTGAGCGATTCCC  
TGCAGGCCTTCATCGACATCGGCAAGAACCTCGACGGCGTCAACGCCTCCCAGTTCAAGA  
CTGCGTGCAACAGCCTGGTCGCTAACGTAAGCCGTGGTGAAGAAACCCGCGGAATG  
CTACTGAGAAAGGTTCCGGTGACAAGCGTCAAGTACTGGCTGCACGTGCCGGCTTCGGCA

TCTATCTCACCTTCGAAGAGAAGGTTCGATACCGATGAAGAAGTCCTGGCTGCCGCGCGTT  
CCATCAAACCTGTCCTTCGCCAAGAACAAGGACGCCTCCGAGTTCGCCAAAGGTGAAGCGG  
CTGTCGAGGCAACCAAAGCACAACCTGGAAAGCCTGCTGAAAACCTGTGAGCAGTACCGTAT  
CCGTTCTGAAAGACAGAAAGATCAGCCAGAAGTTCTCCAAGGCTGAACGTGTCCGTGTGC  
TCGGTACCCTGAACGCCAAAGGTGGTGACCAGGACAGCAAGGCAGGCACCGACAAGGCGA  
TCAAACCTGGTGCCTCGCTGTTACGACCCGGTGCAGCCTGACCCAGGCGGTCAACCGTC  
TGCTGGCTTACCAAGCGAAGCAATCGCTGGATCTGGTTGCGGCTCACCTGTAAGGTCGAG  
TGTTCCGATCTATTCTAGAGGTACTACAGGTAGGGGGATCTCCCCCTACCAGTACCCTT  
CATGTGGCAATACTGTAATTTTCGATGCTATGTACTCAACTTGACTATTAGGTTGTTATCG  
ATGAATACGCATCCTGTAGCGCCCCTCCGATACGTGAATTCACTGACGGTGTATGAAGAG  
TATGAGGAGGATAGTGAGGGTTATAATCTAGGCCACGACGAAACGACTATGGTTGCACTC  
TCCAGAGAGTACGACAAGATCAGTGGATTAGAGAGTGTCTACAACCTACGTTCTCCACCGA  
CATCAGAATCAGTTGACTGCTTCGACCGGTACTGAGGGGTTTATTGATTGCGTTAAACAC  
GGTATCGGTAAACTCATTCAAGTGGTTTAGGACTTCTTTAAGTGGATTTGGAGTTTCTTT  
GGGACCAAAGGGAAAGCCCTGAAAGACAAAGGAGATGAACTGGAAGTCGCTCTTAAAGCC  
AATGGTGTACGGGAGGATGACATTTTCGTATCCCAAAGCCGCCTTTTATATCTTCCCTAAA  
ACGACCAAGTTACCGTTCGAATGTGGCGTGGGTGGGTGCGTCATCGGGGATATTGAGCGT  
GGGATTAAGACGATTGAACGGTACAGTGCAAGTGTGGGGAACCTTCTGTAAGGAATCAGGT  
CGTCTGATTGACCATTCGAAATACGCAGAATTCACCACCAAACAGAAGGCCTTCTACCAA  
GAGGTTAAGGGTCTGTTAGGAGTGAACCTCGAAGCAGGAAGCCACCCTGGTGGTTAAAGAT  
GACCTGGTCGTGGGTAAGAACATCGTGGAAAGTACGATTAACCTGACGCGGGCGCTGGGT  
GTCCTGTCGGCTGATCGAGTGAAGAACGCGACCTTTAAGACTAATGATTCGCAGGTGCGC  
GAACTCCTGGTCAAGCACAATCGTCTAACAGAATCCCTCAAGGACATGATCACTAAAGTC  
CATTCTGTTGAGAATGACTTTGTAACGGCGCTAATGGCAAGTTTGGACGTTAAAGAGGCG  
TCTCCTGAAGCTCAGGCTGCCATTAAGGAGATGAACGCCATGATTCGTAAAGCCATGGCG  
AGTCTAAAAGTCATGGAGACGGAAGTGTATCGGAGTGCAAACGCTGTTTACGCGGTTTGTG  
GAAGCCGCTGTGAAGAGAAGGAGCTAAAGGTCATGCATCGTAGCTTATTGAATCAATCTG  
TTGTGGTGAAGCCGCGCTGGGTGGTTACACGGACATTAACCCTCGGTTTGGGATTACCA  
CGAGGATTAACCTATACCGTGTTTAAATACGCCCTCATTGAGAAGTGCATCAGAGTGTTC  
TGATTGAGCTATTGGATCTTGGAGAATTCCTGAAGGGGAATCGCCAGGACATTAGCCAGG  
TGCCGTATAAGGAGACCCCTCAGATCGTTGTGAGTCTTCTCCAGGAAAAGCTGGGGGTGT  
TCCAGAGGAACAGGAACCAATTGTTCAACCCAGCACCCCTCGTCTCAAGGAGGATG  
ATCCTCATAACCACGTACTTTGAATTTCTGGCGGAGTTTTGTAGGGTTACCCGGTCTCTACC  
GTCACGAAGTCGACTTGGGCCTGGTTAACGACACTCTCATAATTGACGCACGTTACTCGA  
CGATTTACAAGGGTAATGTCACCGTTAAGGTTAAGTAAGGGGACGATGATGAACGCAGCC  
TATCGTTTAGGGTTGCTGGGGTTGATCCTGGGGGAGGTGGGTAAGGACGTTCTCTCCGAG  
GAGAAGACCCCGAATTGGTTAACTACCTGGAAAAACATGGGGTTAGTCAATTAAGTAA  
GAACACATCATGGGTCAGATTGTCAACACACTGAATATTATCAGTCGGGAGTTTGACTAT  
TACGACGCCAGTGAGTTGAAAGTGAATACTGTACTGAACCGTTACCTGAAGGAAACCCTG  
AGCAGTATTGAGAATGGAATCCATCAATTCCCTCGGGATATTTCCATGCTGATTTGTTTCG  
TTGGGGAATAAGGGTGGGGCGTTTACGGAGACGGAAGGAGTAGGTGAACAGATCAGCACG  
GGTAAAGGGTTGGTCAATTACCTGCTGGACCAGTATGAGGGTAGTTTGAGGACTACCCCA  
GCTGAGGTATATTCTGCTACCGCTCGTACACTGGAATACATTGACAAGGTTCTGAGTTAG  
GTGGACATCTTTGTACCATCTCGTCAGGGGCTGTTGGCGGGCTTGGGAAGAATACGCGCCG  
ATGGACTACAACCTCCATCCGATTGAGGTCAATCATTGGGGGGTTCCTGGGTTGGAG  
TGTGCGGGAGATGATACCTGTGAATGCGGGTGTGTGCTCGACCACCCATTGCATGTTCTG  
CAGGGCTTGGAAAGATTACCTGGATGGTATTCAAAGGACCGACCGTGATTATTTCTGACC  
GTTGCTGAAATGAACGGGGTTAAACTCCGTTCCATTGAAGGGAGTGAGGGTCAAGTTTTC  
GACTTCATTAAGCGGTTGCGCGGAATGCGTACCAAGCGGCTTTCAGTGGTTGGGAACAA  
CTGAAAGCCTGGTACGACTCGTCTGAGAAAGAGAAAGCTGACAACGACGCGGTAGCAAAG  
ACTGGGGAGGACAATAAGAAAGCAGTCCAAACCATGCCAACTAAGTATGTCACTATCAAT  
GACAAGGCGCCTGAGGGGATTAAGACCCTGGCGGAGCAGGTGGATGTCTCTGAGACAATG  
TCTCAGGTTGTGAATCGGCTTCGGACACCCGCGGACGTAGGGGGTGTGATCGATGGATTG  
TTGGGTCTTCTTAAGAAAGAAGAAGTCAACGGTGAGAACTCCGGGCTGATAAGAAAGCG  
GTTGATACGGCCCTGGCTCAATCGAGAAAAGGGTCACAGAAGACCAGTGGGAATGATGAA  
GACAAAGAAGCAGTTAGTGC GGCTAAGGCAGCGGTGCAGGACACGGTTAAAGCTGATAAA  
GAAGCCGTCGCGGAGGCCAAGAAGAAGATTGTTGAACACGATAAGTTGGTTAAAGGTCTT

CGTAAAGCCATTAAGGTATTACAACCCACATCTTTATTTAAGGGGGTGGGAACAGTGGG  
GGGACGAACACATGAAGACACTTCATCCACGTGTCTTGGAACAGATTAACGCACAATTGC  
CAAAGACAGCGATATCCTGGGTACTCAGCCTGGTGATGAAGACGTTGGGTATGTGGTGG  
TTCTGTTGAATAACGACGAAACCATGCTCCCTATCCCGAAGAAGAATATTGGAGATTACA  
TGGGGGTCAGTATCCTGAACTCCCGGTGGGTGCCCTGGAGCCGTTGGCTCAGGTGTTA  
AACGGATCAGTAATGCCTTTAACTCTTCCTCGTGGAAGGGGTGGACTACACGGTTCAG  
AAGGGAAGGTAGACCTGCCAAGAACGCACCCTCCCCTTTCCAGATAGTCACCATGGAGA  
TCGCTCCGACCAGTATCCTGTGGAAAGGACGCCTGGTCCTTAACTGCTCAATAAAGCCC  
GCTTAGGACCTTCAGGGGTTCTTAAAGCCACCGTTTTGGATTCCCCTCGTCTCCCGATGG  
CGTTAAGTTCTAAAATCTTCCAGGGGAATGGGAACCTCTTACGGAGAACCGGTCTCGGT  
TGTCTGACACCTTCTGTCAGCAGGTGGTTGCTTACCTGAACATCGTTAAGATCCAGTCGG  
TTACGCTGGATCGGCTGAAAGGGGGAGAAGTGCATAACGTATCGGATTGTTTCTCAG  
GCTTGGTGATCATTAAAGCTTGAGGAGGGTCCTCCACTGTTTATTCGGTACAGTTCGGATG  
GGGAAGAAGATCCTCAACCATCGCCCAGTACGCTAGACCCGGAATAACCAACGTCTGATC  
CTGGGGAAGGAGAAGGGGGGAACCCCTCTCCCTCCTAGACCACATCGTGCAGGCAGTGAA  
TATGCTCAAGACTTTTGTGTAATGCGAAGAAAACACTACGACGCTTATTTGCGTCTGCGAT  
TTATGTTTCCATTAAGGCTGAATTGAACTTCTACGGGCTAGACTCCGCGGCCGCCATTTA  
CTACAACGGTGAGAATGAGATTGCGAATAACGGAGGGAGCAATATTAGTGACGGTCCCTCA  
TTCAGATCGGTATACGGATGGAATTTTCAGGAACAAGATCTTTATTGTTCCCTGAGGTGAA  
CCGTAGTGAAGCTTGGACGAACCGTCGTCAGTTGGTGGAGGGTCCCGAACTGTACAACAA  
GGAAGTGGGTATCCTGTTGTGCCCTACGTTTGACAACAAACGGTTTGATGTCAAAGTCGT  
CTCGATGTTCAACTCAGAGAACACCGCCCAGCAATGAAAGACCGTATGAATCGGCTCAA  
GGAGAACCAAGTCGTTGACTTCACCTTCTCCCAACGACCCATATGGTCATTAATCATCC  
TATTCTGGAATCCTAGAGGTGATTTACGACCTCTTGGCGAAGAACAACCCGTCGGTACC  
CGACCCGTCTGAATGGTTGGGTAAGATGTGTCAATTTCCGGTGCGTGTGTTACAGTAACGT  
AGCGGGTAACCACAAACGGGTAGTTATCCCGCGTAAACAGAACCGGGTCCGGCATTACAGTT  
CACCGAACCCTTTGTAGCGAAGACGAATAAGAGCGCGACTTATGGTCCGTGGGAAGTGG  
GTTTACTTACAGCTTCTCTTCAATGATTTTATTGGGTGGGAGTTTGAGTTTCCCCTGAA  
CATTTATCAGGATGAAATATCCACTCAGCATATTCCGAGGGTCTAACCTCAACATGAATT  
ACCGGAGTTCATTAAGCCGCTCCTGAAGTAGAAGCCGGACGGGAGATTATGTTCCCGGA  
AGGGTTCAGACACACCCCTTCTATTTGAAGCTGTCTAAGCATAACCCTTGGGCGTGGCC  
TAACTTCGATTGGATGCAACCGGTGATCCAAGCAAGACTCAAAGTCGAGGATGAACCCAC  
TCAGGTACTTTGTAACCTTATTTGATATTCCTGACTTTGTTGGGTACGACAATGCTAAGGC  
GTATTTAGTTCGTCGTCATGCGATTGCCTTCCAGCATTTTGAAACCCCTTTTCTGATTCC  
AGTCTTTGAAAATGACCAGTTAATTGCTCCTGAACACCTGACCCTCGATGAGGAGGGGTC  
TATAACGCTTCACAGCAAGCCTGTTTTAAACAAAACATCGCGAGTAGTGGTAACCCTCGA  
CTATGCGATAAGAGACTATTCTGACGCATTCTGGAGCGATTTAATCGATCATCCTGAAGA  
CTGGGGTATTTTGCCTCAAATCTTTGATTGGTTTCGATTTACAGTGAAGTGCCTGAACCGTG  
GTAATTACACATCAACTACCTCCGGAACACATCCATAGGCGATGGGGTTCGTCGGACCGA  
GCGCTTTAACCGATATGAGATGGGCTTTGGTTTGGCGGCCTACCAGAACGATTGAGAAGG  
AAATGAAACCATGCCTCTGGATAGTAACCCTATCGGAAGGGCTATTCCGATTGAACCTGA  
AACGCCCCGGATCTACAGTGAGACGTATCGACGTTCCATCGTGGATTCCGTTTGGCAACC  
CGAACAGAGCCTGCTCTCTGAAGTTGAAGGTCGTCCTCGTCTCTGTCAGTACTTCCGTCA  
ATTCCTGAATCCAGGTGAAGAACCCTAAACCCTTCTCCCCTGGAAACACCGATACGTATCC  
GAGTTACGTGCATATTGACCGGATACCCCTCAAGATCGATGGGGATGAGACGTTTAACTT  
TGATCCTCAGACCGGTGAATCCACCAAGATCTTTAACTTCTGGTTTGCCACCGATGCCAA  
CCCTATTCGTCATGATGTGTTTATTGTGGATATTGGGGATGGTTCGAGCAGGGCTCTTTGC  
GTGTACGGAGCAACCGGAAATTCGGAATTTTACCGCAAATAAGGTGTACTTCGTTACCGC  
GGTATTGAGGGGTATCCTCGACCAGGAGACGGATGCCATTCTCCAAGGACGGGTGGTCCA  
ACACCGGGTGTATTCCAAAGATTGTGTACTCCATGGAGGGGCTTCCCTGATTACTAAAGG  
GGAAGAGGAGGTTGGACAGCAACTCTTCCAGTGGAATCAAACCATCACAGTCATATCCT  
GAAACGGTTCTGCTCGAACCCCTGAACGCACCATCGTGTTTCGATAAGAAGGGGACCAATGA  
GAAGGATACGGTGTAAGACCCTTATCTGGTGAACCTTCTGTCTGCGTTCATTACCCAGGA  
CATGCGACAGAACTACCCACCCATTAACCAGTTCTCGGTTTCAGTACGGGGGATTGGAGTA  
CAGCCGGTAGGGAACGACCAACATTTGTGAAGTGTTATTTAGGGGGGATTGAACTCTT  
GAAGGTGTGCGACAACACAGCCGCCTTGGTGGAAAGTGACGCGGTTAATGAACAGCCGGCT  
GTACGGTAACCTGGCGTCGAGTAAGATCCGGTGGTTCGTGACCACCAACCCTAAGGACTT

CATTGCGTATCGGGTTCATTTCAATATGGATGGGTTTCCCATTGTTTTTCCCGGGAAACA  
AGAGGACATTACGTACCTCTTTAGTCAAGGCTTTTACCAAGGGAAACCCGAAGGCGCCCT  
TGAGAACCTACTGTACCGAACCCCTCACCACGAAAATCACGGATCATAAAGAACTCTTAGC  
CTATTGCGAAGGGCACTTTGATAAGGAACCGGTGGAACAACGTGTACGAAGGGGCTATTCT  
GCTGATGCTTCTGAAGGACGCGCGTAAATTCGGAGGTCCGCTATGAGCATGCCCTTAAGT  
CGGTATAACACCATAACGCACCCGACTAATCGAACTGTACCACATTCTGATTAATCGGTCC  
TTCGATGTGTGGGTAACGTCCGCAAAGCTCATGAGTTTGGGAAGAACTACGGGATCGGGAA  
GAATACTCCCAGGAGGGGTTTCGTTGGAGATCCGAATTACTACAACGAATACCAAGTTCGA  
CGGATGAGTGTTCCAGGATCATTGATATCCTACCTAACTTGTCCAGTGAGAAGGATTTG  
GGATTCAGGGAACATCAGATTGTGATTCCGTTGATCTACGAATCCATTCAGGAGTACATT  
TGCCTCTGGTGTGAACTCTTTAAGAAAGCACCCGGAGTTTCCAACACCCGCCATTCATGAA  
CTCCGTAGGCTGGAACCTCTGGCGTATACCCTCTTTAATTTCTACAAACGGATTAACCA  
TATCTGGATAAGAATAAACTACGGGAACTGGGGGGTGTATGTTCAAGAGACCGATAAACGG  
AACCTAATGCAGTTGTCAGCGCTGTTTAGTATCAACGCCATGGGAACCCCAAAGCTTAG  
ATCAGTGTTCGTCAGTCATTTGGATGAACTCTTCGGGGACGATACGTTGAACCCGGGTCTC  
TCACTCAGTGAACAGCCGTATATCACGAACAAAGCTGTAGCGGATAGTTTAGCCACGCAT  
GATACACCAGAGGATCTCGGTCTTAGGTTGTTCAATAAACCGACAGGATTACCGTGAGTA  
TGGAATTAGCACGTCCATTAGCTAACTTAATCGCCTTAGCAAACCTCGGTGAATACGCAAC  
GGTCGGATAAGAAGATCCGACTGTTTGCAACGATCATTACTCCTGTGGAACAGAGTGAAC  
TGATTATCCCCACGGGGATGGCTCGGGTGTGATGATTACAGCGAACTGTTCCGATGGCT  
GGCGTATTCAGGGCAACTTGCAACCCGGGGTTACGTGAACCGAATCCTGCCCTATAAGG  
ACAATCTCTTTATTGAAGTGGTTCGAACGTCAGGACTTCATCAAACCATGAGTCGGTTCC  
GGTGTATCCCCTTGAGTGACCCGAACCCTGAGATGGCCGGTAACAGTGTCCATTTGGCTC  
ACCTGGAAGGTAAGGACAGTATTAACCTGATAACGGTTAAGTTCCAGATGATTGAACTGG  
GGTACGCTTTGCTGAAGAATGAGATGGTGTCTGACAAGCACTTAATGACCACCTTGGACG  
ATGCACTCCACTACCAACTTACCAAATACGGTAAGCAACTTCAGTTGACGGGTAAGGATG  
CCTTTAGAGGGGTGGACATTGAGCGTCCTATCGATAACCCTCGGGTCTTTAAGTTGATTG  
ATATACCGTCTGCGGCGCCTTTACCCAGTTAGGGATGTGGATGCAGACCCATGAGGAGT  
TTGGGATCTATAACCAAGGCTTTGGGATGTATCCAGAAAGGCCCTTTGGATGATTTACC  
CGCTCTTCAAGATCGGTTCGGTATGAGAACGGTAAACGGGTACTGAGTATTTATCCACTAC  
CGCCTGATGCAGTCCCTACCCTCCACGCCACGTACTTTACCCAGGACCCGGGTTACAACGA  
TTCTGGCAACCGGTACAGGCCGTAATGTAGACGGAGCAGACATTGATCGTCAGAATGAGT  
GTACGGGTAACCGGTTGATCAGTTCGGATGCGGTCATGGGTGAAGTGGGTAACACTACTACG  
GTAAGGGTCAGTCAGCATCAACCCGTCCTGATTCCATCTCCGAATACCAAACCGCTAAGC  
GGAGCAGTGGGGAGGAGATTATACCCTTTGAACCGACCCCTACCAATAATCTCTGTAAGC  
AATTATCTGTGAACTTTTACAACGATGGGTTCGTTGGAAACGATTTCAGTGGAAATAACGA  
ACAGGGACTTACTAGAACCAGGTATGCCTGTACGGTCTTCTTTATGAGTGGAGTTGATC  
GCTTGAACACTACAAGGAGGGGAGTCTGATTGGTGTTCGTAAGTACTGACCTCATGAAGGATACGG  
AAAATCCAGCTATTATCTTTAGGGAACATTCTGCTTTAACCCTCTTCTTGAATGATAAGG  
TGTTTGTGCTCCTTAGGTAATTTATCACTTAATGTATTTATTGTATTGTAAACTGGCTG  
ACAAGCGGGTGGGGAAAGGGGTTTATTTCTAATAAAGAGTGGAGTAGTTACCGAGTAAC  
TACGCCTTCTTTGTTCTATCTTTGATCTTTCTCTATTCTCTTTAGATCTTTCTTTTCAT  
TTATACGGAATACAGAGAGGGAAGAGAGGGAAAACCCCTTATACCCCGAAAAAAGGGG  
GGATGAGGAATAAGGTGAGAGAACCGTAGGTTTATCAGTATTCTAACACGTTCTGATTAA  
TACATTCAGCAAGAAGAGCTGAGAAGATTGCACTGCCATTACCGATTCACTACCGGAGTA  
ACTACCATGACTGGGGATTTGACCATCTCAGTAACCGCAACTGGCAGACTTACTGGCG  
GGTTACCATTTGTACGGCACTAAGCGGACGAGCGACAGACCGGGGCTGAAATGCTGATA  
CTCATTGAAAACGCCTCCGGGCATCTGAACCTCTACCTGATATCATTCCCTGTCTCGAC  
GACGGCAAAGACGAACGTGTGCTCTGTCTGTTTGGTGAACGCATCACGGTTAAAGGAAAA  
GAAAACCAATGACACATCGTGGGAATAATGAAATTAATAATACATTTGATCTCTTACACG  
TGCCTGTAGAGGATCAAACGAATGCGGGAATATTAATACGGTTATTGGAAAGGGAGGCGA  
AGATTACCTTTGCTAAGGCGGATACGTTGTTTGTGATGCTGGTAAGGCGTCTAGCAGCGC  
TTAGGCGAGGCGATCAGGTAGAAAGGAGTACCGTAGAGGCGGGTAAGGGCAATCGGCTCT  
ATTGGAAGCTGACAGAAGCGTATAAAGTACTTCAAGATAAATGCACTATTGATCCTCCGT  
TGGGAAAAGTCCCTGACGGGTTGGAAGAGGTCTTCTTAGCCTTACGAAGACAGAACCGT  
TGTATCAAGAAGGCCCGGGTATTACGGGGCGGTGTATGCAGGTGACCGCTTACTGACCG  
CACCACCGCCTGTAGACTTTGAGTCATGAAAACAGTAAATGTTTACGGATATACCCACTC



ACTACCCCTTACTGACCTCCCTACCTAAGCCGAGCTCAGGTAGGGGGTGTATACCGCA  
TTTGAGCTAAAGGGGAACCTCAAACCTATATTACCGGCGTGATTATACCCAATGGATCATT  
TAGGAGATTTCGGTTTATGCATTACCAAATGGTGTGTTGAACAAGACCTATTGGGTAAAACC  
CATACACATGACACCGGTCTTTTCATTAACGGTGAATCCAAACGGTTTATACCACGTTGT  
TGGATCATAACGAATCGGTGTTGTATGACGTGTACGACGGACACCTGGTGATTATCCGTG  
AAAGCAGCGAGGGGGAAGTGGACGAATACCTAAGCGCTCGGTTCGTATGATTACCAGACGT  
TACCTTTGTTGGTGGCGATTGCGTGCTATAAGCACAATAAGCGGGTGGTGAAGATGGGGC  
GGAGTACACATACCCTGATGTTGCACGACAACAAGGACGGGCGGTTTGAAGCCGTATTAG  
AAGCCGTAAAGTCACCCTCCACGATAAGGAGGGGTTAGTCTTTACCCAAGACGGGGATT  
ATTACCTGTCTTACCCTGAAGAACACGTGGCGAATATCATGCTGGAACGGTTGAATCACA  
GCTTGAAGTTCTTTGGCGAGAAATACAAGGTTTCGGTTTAAAATAGGACGGATCTATGCGT  
ATTTCCCGCTAACGGAAGTCTTTGCAGACACTGAGGTTTCGGAGTATCCGACTGCGGTTGG  
ATAACCTAACGATTACTCAACAGAGCCGGGATCGTATTTCGGGATCAGCTCATGGACCTGT  
TGAAGATTACACCCAACCTACTCGAACTGTTTCGTATGGATCTACCCATTAAGGGGGACT  
AATGGCGTGTACGGAATATGGATCTACGTTTCGTTTCACGACGGTAAAGTCAACCACCTCAA  
TGACTTCCTCCGTGCAAGGGAAACACTCCCCGTTAAAACGGTTCCCTCAAAGGACTTTGA  
ATGGCGCCTGGCGTATGTCGTTGAAGAGGATAAGGACAGGATTAAGCGAGCGGACTATTC  
CTTCCGTTGTTGATTACGGAATGGGAAGGGGAGTGGGTGATCATTGATGGCTGGCACCG  
GTTCTTAAAGCCATTGGGATGGGCAATCCGCCTTGAACGTTACGGTCAGTCCAACGGA  
CTGGTTTAAAGGTAAAGGAAGGCCCTTTAAACTAAAGGGTTACCGTAATCGCGTTACATA  
ACGTGACATACCCCTACCCCTAGCGCTCAGCCTAGGGGGTAGGGGGTCTATTATTCATT  
TTGTCTTACATGGCGTCTTATTCTTTCACGACATCACCATTCTCATTAAAGCGTTCTTG  
CAAAGACCGTCTAAAGGTGGGTTTACGATTAATGTCATGGACAAGCCCTAACCCGGGATC  
AAGATCATAGATAAAGAACCGCTTCTCAGGTGAACACCCTTACCCCGTTGTTTACCAAT  
GTAACACGTAAAGTCATTCTTCATTGACGTCTTCGCCACATGAATGGTAATGACACCATC  
CACTTCGTTGATAATCTTCGTAGACGTTTCTGTTCATGGACTTACCAGAGACTCCCCGAGC  
GAAGTAGACCTCAGACTCATCATCCAGTTCTTTTAGTAGTTCCTTAGCTTCAGAGCTCAA  
CTGGTGAGGTGTTTCAGAAAGAAATACCCCGCGCAATCATAAATGACCCGACAGTGCGGAA  
CAGTAATTGAAGTTTATCGGACTTATTCTCCCCAGGGAGTTTATCGAAATTCTGCAACGC  
CAAGTAATAATACCCGTACAGAATCATCTAGTGACCTTTAAGTTCCAATTGCCGTACCCG  
AGCGAACATCTTATCCCGGTTGTCTTATGGGCTTCAATCTGGTTAATCACCAGGTACCA  
CCCATTCTTCCGGAAGCAGTCTCAATAGCGGTTACAATGTCTATGCTTTCAGTCACATG  
AAAGTCCCGGTCTTCTTTGTACTTGGTGGTTACCGCCAGCTTGTAGATCCGACGAATCAC  
CAGCTCCATGGCATCCTCAGCCGATTCATACAGGATCGTTGGAACTTAGCCTTATTCCG  
CAGCATGGGTTTGTCTAAATCCCCGCTGAAGCAATCAGGTGAGCCATACCGAAAGACTT  
ACCTCGGTTTCGTCATGGCTTCTAGGAGGTACATCTTACCTCGACGTAATCCTCCATCTGG  
TTCCAATCCTTGATTGTGACCTTGAATACCGGTTTAAATGATCCCATCTACACTGTTCTC  
CGTCTTCGCCATCTCGATGAGATCGGCCATACTTCCGGCGTGCTGTATTGACGGAAT  
CACCACCTCGGATTGGCGTTCCTCATAACGCGTTATTCACCCGCTCTTGGATCAAATCAAT  
CAATTTAGCAAAGTCTTCGGGTTTGGTATCAACGAGGTCCTTTCACAGGACTTCTATCAT  
AGCCTTCTTGAAGTCTTCTCGAAGTCTCATCTTCCATACTGGAACGAATCTCTGTGAT  
CTGTTTATACACCAGACGACGAGACAGTTCCTCTGTTTCCAGGTCTTCCAATCCAACATT  
CACCGCATCCCTGAGACTGTCATCATTCTTGCAGAAGATCGCTACCCGCTGCATCAGGAA  
CGATTTTATAAGTGGATCGTCATTGGACTGGTCCAGCAGCCAGCTGATTGAAGACCGGAT  
GCTGTCCCTGACACGTCGGTCTTGTGACATCACATCGGGTTTTGGGGCTGGGAGTTCTTC  
CAGTAAGTCTGTCAGTCTTCGATCAGGTTAGTGACTTTTAGTTTTTGGCCTGATAAAT  
TGCTGATAACAGTTTTACTAACACCAGCAAATCGTTCATGCTAACCTCTGAGAGTGTA  
GTAGATAATTTCTAAATACCCTAACGGCTTACCGTACGAGTTGTATGTGGTAACCGGGGA  
GTTGGTTGACACCCTTGTGGCTCAATCCATCCCGCTCTGTGGATTGAAAGAAATTTCTGC  
ATACCATGACAAGATCACCTTTGGTGAATGGCTAACTTTGTAGCTTTGCAGTATGCGGC  
GGCAAAGCCTTTGGTGTAGAAATGCCTGACCCTATGGCGTACTTTGGTCATGGGTATAA  
CGCGGCGATGGTAGCCGAAGCATTTAATGGGGTGGACAGTGATGCAATAGCCACCCTCCT  
TCGGACCGCAATCATTTCCGATCGACGGTGAATGGTCAAGTGATTCTCATTGGAGTCGA  
GGTAGGGGACCATAAAGCCACCGGTAGCTGGGAGAACTTCAAGCCAAAACAGTCTCAAC  
CGCCGTATTGGAAACACTTTATGCAAGGGTCGGTTATTTGGAAAGTCATTTCCGGTCCCGT  
ACCGAAAGCAGGTTTAGGGGAATTGACTCTGGCTGAAGTGTTCAAGCTGATCCACCTTCA  
AAACCCCTGATTAAGGCGCATGCATTTTATGTGCAGTTCTATTGCGCAACAAACATG

TTTGCTACTCATCTCGATCAGGATTTAAATCCATGGCAAAGCAACTACGACCCTCCATTA  
ATGGAGACTACAATCTTTTCAGCGATGTCTGTAAGTCCCTCGTAGCCGGTAGTCTTTCCA  
TCATCACCGGTAACGAGAGCTTCGCAGACTTCCGTAGCACTCTTCAGAGCGCGGGCGGTC  
AGGAAGGTTTTCTGGTCAACCGTCTGATGGACCGTTCGCTCCCGAACGTCAGTAGTCACG  
AGAGCGCTGAACTGCACACGCGCTACAACCTCGGCTACTTACGACATCGTCCAAGCTATCT  
TGGAACGCAAGAGCCGTGACCTGATCCCCATGGACTGCGTTCGTATCTTCCAAGAGGCCG  
GTGATAACTTCGCCAAGGTGGAAGGTGCTGAAGGCTTCTCGATGCAGAACTTCGAGGGTC  
GTGAGCAAGAGATCCGTGCCTCCAGCCTGACTCTGAACGCCAGAGCCACCTTCAAACCG  
AAGGCGGTGAAGCCCTGTTCCGCCACCGTCGGTGTGCGTTATCAAGACGAAGGCGCTGAGC  
TGATCGTTCGTGCAGCAGGTCTGGGTACCTATGCGTACGGCAACACCCCGTGGCAATCGG  
CTTCTGAACTGCGTCCGATCTTCGGCCTGCTCCGCAATGGCGATATGTTCAAAGACGAAG  
CCCTGGCCGTCTACCCGGTATACCCGGACGTTAACGCGAGCGACGCCCTTGCGTTCCTCG  
TGGCTGAGAGCGTCATCGCCTCGCGTCTGTGAAATGCGCGCAAGGTGATGCCTACGGTC  
GTGGTGAGCACGAAACCCAAATTTTGGCGGTTCCGGTATCGATTCCGAACCTGCTCGCCC  
TGACCCAAGCGCCGGGCCAACGTCCGTGGAATTCCACCGACGAACCTCGAATCCAACCTCCA  
TCTCCGTGTCTCTCATCGCCGCAAGCGGTAAGCTGGACGGTACTGATATTTCTGTTCTTCA  
TCAAACCGGTGTGATGTCGAACAACACCTTCGCACCAGCCAACAACGCCAGACGAGCG  
ATGAGCGCCAACCTGAACCTGCAAGTCATGCAACTGCCGGGCTTCTCGGTGAGCGACAAAG  
ACGGCAAAGTGGTGGGTGAAACCATTTTCGCCAGTTTCAAGTCCGCAGGTTACGAACCGC  
TGCTGGCCTTCCGCTGACTGGTAGCTGCCAACGCCAGCCCAAAGAGTTCAACCTGCAAC  
CGGGAACGTGACCATCACCCCTGTTCCGCAACATCACTACCCGGTGTGGTCACCAAGATCG  
GCTTCGCTGACAGCACGGTTCAGCCCTGATGCGCTCCTTCTCCAAGGTAAACTGATCG  
GTCCTATTACCACCAGAACGTATCGAACACCAACCGCGGTAACCTTCGGTTATCGGATTG  
AAGTGTACGATGCCAAGAAACACTTGTCCGGTGAACGCCGTTCTCCGATCTCGGTGAAAT  
GCTCGATCTCGGCTGATGACGTGAACCAGGCCAGCCTGGACTTCACACTGAGCCCGATGT  
CGGTGGTGATTAACAACCAATGCTCCGCTCAAGCTTTCCAAGCGGCTGAGCAGCACCTAG  
AGTACGTCACCTAGATTACCGGTCAACCGGTGGTGGCCAACGACCAAGGTTCCGGAAGTGC  
TCGCGGGTCAGCACTTTGTAAGCCCGATCGCCAGCAACCGTAGCTTCAAGCTGGTTGATG  
TGATCTCGGCTAACAGTTCTTCGGATGTGTTTCGTGTCCGGTGGCATCCGCCATTACCAACG  
AGATCCCTGATATCGTTGCGGCCCTGAACACCAAGTCCGTCTTGGCATCCATTGCGGAAT  
ACAGCACTGGTAATACCAAGAACGCCTGGACGGTGGTTCGTCCATCAGAACCTGAACCGTT  
TCATCTTCCGTTCCGGTGACGCACGGACCATTGGTCCGATCACCACCTGAAAGTGGTTG  
AAACCAAGTTCGACAGCATGATCGGTTAGATCTACATCGTTCCGACCAACCATTTCCAACA  
ACGAAACCATTAACCCACTGGCGGGTATTGGTGTCTGGTATCGAAGGAGAACGTCGTTG  
TACAGGGTAACATCACGCGTTACACCAGCGACTTCGTTGTAGTGATGACCCTGCCGAGCT  
ACAAACACTGGCCGCTCAACGTGGTCAATTGGTCTCTGGTTCATCGAAGATGCTGATGACC  
TGCTGAGCGACAAAGGTCTTATCAACCAACTGGCCGTCAAACGTGTCAAGGTTGAGAACA  
TCGAGGATGCGAAACCCCTACCCAAACGCCAGTCCGTGAGTCCCTGCAAATTACGGGCGGCG  
TGAGTATCCCGAGTTGCCCTAGTAAGTACCTCACGGAAATTGCGTGTACCATTAGCCCTA  
CCCCTCCCCTAACCGGGAGTGGGTAGGGTTATATTTGCAGTTATACCGTTTATTGGAAT  
ATTTTGAACCTACATTATCCTTGGGTACAAGACAATAGGTTATCTGACAGCGCACCCAGAT  
GATCTTGACACAAACGTGAGGATCCTCACCATGAATGACGTTTCACCCCTACCGGCATTT  
CGGCTGACTTATGATATCACCAATATGAGCAGCAAACAGATTATTGTCAAGGCGAAAGGA  
GGGTTGAATTACCTTATTCGCAAACCACTAGAGGCTTCGTGGTATCCCGGGGCGATGATC  
GTAATCAAATTCGATCGTCTGTATGTCGGTGATTTTCAGTTTTGATAAGTTCAGCAGCGCGG  
AGTAAATTCGATCGTCTGTTGATTGATAAGATCCAAGCTCACCTGAGCTTTGTGTGCGAGC  
AAAGCGTTCGCACGTGGACGTTCCGGCAGTATCATGAGTTCGGCGTCACGATCAAACCTGAAC  
AGGGATGTGGTTGAACACCTGGAAGGTGAACCGATCCACAGTGATATCCTCGGTATCACG  
TTGTATAACCGGGAAGAGAATACCCGCGATCTTTATCCCCTGAATACGCCAGACTACACC  
CTCACTGACCAGATGAAATGGGGAATCGGTGAGAGTGATGAGCCGGGAGGTCTTCATTAA  
TACGTGTATCTGAACGATCCCCTGAGTGTTCAAACCCGTTGTCCACCAATGTCATGGGT  
AACGCGGTAATGGTCCCTACGGTCAGGGAGATGAATAATGATCATGGGTTGTATGTGGGA  
TGGGTCTGCCGTAATTCACAACCGAAGAAGCTATTCTACACCTTTGACGATCTCTGCGAT  
GAAACCTGGGTTTCTGGGTATCTTTAAGACCAAAGCAGAATGTGAGATGGGAGGGAAC  
ACGAAACCGGCAATTACTGGCGAGAAGAAAGTGGTTGAACTGAATAAACAACCTGAGTTCA  
GCCAACAACGAGATTTCCAAACTGAAGGACTTGGTAGACGAGAATGTCCGTAAGAGTGT  
GAGTTGGGTATCGAGCTGACCCACCTCAAAGTGCTCATCGGTTGTAACCTTATGCCAGCG

AGATATGAACGTGAACTGGAGGTGAATCGGCTGCAAATCAACAATGATGCGACCAAAGTA  
CGGGGTGAAATGGACAAGACCTTGAGCAAGGCCAATCTGGAGTTCACCCGCCAGAGGGCC  
AGCGCTAAAAACTGTGGAGAACTGGCTAAGGCAGTTGGGGCTAATGCAACCGTGTCTGCT  
GCGGGGTAGAAACTATGTACTTCTGATATGGTAGGTAGGTAGGATGGACCGGCTACTCA  
TTAAACACATTGAAAATTCATGCCGAAGTTCAATAAGTTACTGGTGGATGGATTTTCATC  
AGAAGGAGTTTAGTCATGCGTTAGGAGTGTTCGATCATTCCACGAGGGCCATTCTGAAAA  
GTGTTGAGAAACGGGGTGTCTTTTACAAGAAAACCGTACGAGCTTCACCTCGGGAGTTCA  
TTGACTACTTGATCAACAGCAGTCGTAAGTCTTCGATGTGCATAAGGAAAGCTTGTATC  
CGGTTAAGATCTGGATCCAGTATAAGGACCGAGGGGGTAAGTTAACGGACTTTTACACCT  
ACACGATGCTCCCGTATACGGATAAGTACGGGGATCTGTGGTTGAGGGGATCGTTGTGTA  
ACCCTCAGATCGTACTCGCTCAACAGGGTCTACCCGTAACGAAAGAGAACGCCTTGTTTCG  
TGAAAGTGCTGGATTTCAAGTTTAAGATTGGAAACGAGCGTTTCAATTTCTGTCAAGTCT  
TTACCGACACAGGGGTTGAGACCCATCGTCAAACGGATATCAACCTGGCGGGCTAACCGGT  
TCTACAGTCCACCGAATCCCGGAAGATCAAGGACAGTAAGACCCCTGTTCCGTTGTTGC  
CGTGGTATATCTTTGCGGACATGGGCTTCAGTACGCCCATGGAGGAATATGCGGAGTGTG  
ACTTCCGTATAGGCTCTCTGGATGCGCTGCTTAACGAATGCAAGGCAGAAGAGCGGTGGG  
AAGTCTTTACCGGTCCTAAGCGTGCTTCGGATAATAAACCTTCGTTAGGTGATTATGTCA  
GTTTGGACATCGGTATAGCGGTACGGAACAAGTCTAGCTGTGTAAGGAACTGAGCGCAG  
TCGGGTTACAGTACAGCTGTGCTTTATTGTTTCATTGCGAACTGTTGTTTCGTCGTA  
ACTTTG  
ATATTGAACGGTTGGATGATCCGGAATATTGGAAGCTGATCATAGGGCGGTGTTCCGTTA  
AGGCGGGTGACAGTGACGAGTACATCATGCGTTTGATGTATGAGCACTTCGATTCCATTC  
GGGAGTACCTGGATGAAGATTCGAGTAAGAAGTTCGCTGCTAAATCGATCGTAGTGACCA  
ATATGTTTGATCTGTTCAACTAGATCATTGCGAACAGCAGTGAGATTGTCCAGACCGCCG  
ACCGTGCGTCAGCGTTCAGTAAAGACTTGGCCAGTTTGGAAATTCACGCTGGACAGTCTGC  
TGACGTCTGCCAATAACTTCAAGCGCGATATCAAGAACAACCTCGGAAATCAACCAGAAAA  
AGGTGGCGAGGTTCTTGACTCACAATTTCCCTATTAAGGAGATCGACAATGCACAATACG  
CCAACCTTATCCTGGATTACACCCCTACGGATGATCCGTTTCGTAGACTACAGGTTGGGCT  
GCATGCCCCAACCAAGGTCTATACCGGTGGTGGTAAGCGCAAACGGGGTGACTTCGACA  
CGTCAGATAGCTCAACCTTTACCCAAGCGTCGCTTCCCTTTGTTTCATAGTTTTTTACGGG  
TTACGAATCCTAAGCCTGATGCACGGGGATGCCTTAATCCAAGCATTATCTGATCATT  
ATCGTACAACGGGATTAGACCCTCTACTTAAAGAACTCTACGAACTAACAGATAAACGCC  
TCAAGAAAAGAGAACCATGGCCATGTCAAACATCCTCCGTCCATCCGGCCAAGTCAACCG  
AGGAACCGTCTCAATAGATCCTAATGCGCCCATCCCCGGGGCTTCTGGTACGACGATGGG  
CCTCGGCGCCCGTCAAGGTATGTACAACCAGATGTCACCCTCCATGCAACTCCGTGGTGT  
TCTCGAACACGGCCTCCAAGGGAATAGTCAGGGTGGGGGTGGGGGTTCCATCCATTGGGA  
ACGCTACGGTAACTCCCACTATGAAGACGCTGCACTCCGGGAGATCCGGGAGAATGCGAA  
TTCTGAAATCGACAGTAACCAACTCTTCTTGAGAAATTTTCCCGTGCTGGGGTGGAATT  
GATTCAGCAGCTAGGAAGACGACAAGGGGCGTTTCGATAACGAATACCGGGAGACCTTAGA  
AACTTTTCGTTTTGTTCCAAAACCCCGGTTAAATGTCACATTCCGGGATGAATTCGTTAA  
CAACCTGAACAAGTACCCTGAAACCTCCGCTTTATCTCAACGGCCTCTGTGCCGATGTT  
TGTCAGCGACTGATTGTCCTGGGTAAACAAGGGTTTTTCGGAGTTGACGACGTCGGACTA  
TATGGGATCGGCAGTCTTTGCCATCGGTCTGTTTTAACCATGGAGATGATCTGCTGGTT  
GTGCAAGAGTCCGGCAGGTGGACAGTTCACGTATAGGTTGACTCCTGAAATCCAGAAAAT  
GATCACGAACCTGGAGCATTTC AAGGATACGTTTAGCCTCGCCTGTAACACGTTAGGTTG  
TACGAATCCTTATGCGTCCCTGGTGTATGAGGTGAAGACGTCAACCACGACGGAGAGCCA  
TCTCATCCACGAAGCACAAACCGCCTTCCCTTATTCTAACTTTGGAGCCAACAACCGCGC  
GGAATCCAGAACGATCCAACCACTGAAGACATCATTGAAATGTTGAGGAAACGGGCTGA  
GCTGGCCAGACGGGACAACCAGGTGTATACTCGCCCTGAAGATCCTCGGTTCCAACCCCC  
AGAAGTCCAACGCTGGAATAAGGTCCGGAAGGATCTTGAAAACCTGACCGTTAAGAACAA  
GGATGAGTCTGATCTCACAAGTTATTTCCAGTACATCGGTAAACCCAAGCATTATCTGAT  
TCCGGAACCGGATTGGAAGCGGATAAAGAAGGTTTATAAACGCCACCCTGAACAGTCTCC  
TCAAGAAGAGAGTATCCTCCCGGGTTGTTTCCGTATTGTGCTTATTGACCTGGAAAAGGA  
TAACGGCTGGTTACGACTGTTGTAAGGAATCGTACACTCGATATGGTGTCTGCTCTGTC  
TAGCCCTGAAAAGCTGTTGCCGATGCTGGAAGCTACGGAAGACGCTAATGTCGTGGTGGT  
CCTGCCGGTGGAGAAGGTGGTAGAAGATACCACGTCCCTGGAGATCACGCTGGAGACCTG  
TGAAGAATTGGAAGGGATCCAGTGTTACGGTGTCTGAAGGCATCGTCAGCGCGACCTC  
TAAGAAGCTGATGGCGGCTGTGGTGACGACCAACACCGCCCTGAGTAAGAACATGCCAGG

GACCAACGCCACGTCGGTCTCTGCTACGATCTGGGATACCTTCACCTGTTCCGATGATCG  
GGATAAAGTACGACTCAAGGACTATCTCCCGTTCCTGTTTAAAGACTTTAAGGAGGGCGA  
TCACTCCCTGTCGTATTACCACCGGATGACAGCGGTTAAGGAGTACTTGGATGAAGGGAT  
TCTGGATGAGGAGCTGGGTGAGTTCATTCCGACTCGTCTCACCGCTACGGTGAATGCGTG  
GTTCTTCAGTTCCTGGGGTACGAACGCCTACCAAGCTCACGGAACCATCTGTCCGTAAC  
CGACATCGTCGAAGACTTCGACGAGCTGGATAAGATCCTGGAAGCAGATCATCCTGAAGG  
GTACCGACGGTTCAATGAACCGGGAGGGCCGGCTAACTACCTGACGGAACAAATGAAACT  
GTTTCGTTCCCTATGGGAAATACGATGGTGTGGAAAGTGAAGAGGGTGGTCTAATGCAAGA  
AGCTCAGATGAAGTTGGAGTTACCGTTGGAACGCTGCTTCCACATCACGGTGATCAATAA  
GCGCAATGGCCCGTTGCCGGATCCATCGGGACAACCCTTGATCATTAAAGCGCAGTCGATT  
CCCGGAGTACTTCGATCTCATAGAGAAAGGATTCAAGGGAACGATGAAAGAGACGGATAA  
CCTGGACGTTATTGATAAACTGATTCAACTCTCCGGAGGTGATCAACTCTGGTTATTCAG  
TACTCAGCCGTCGATAAGAATGTCGCCACTCTTCACGTGGTCAGTCGGAGAAGCCCCTT  
GGTCTGTTGGATCTCTTCTGAATACTTTATTTAGTCGCGATTGAATTAACACTAGTAAC  
CTACCCTAGTGGATCTCCACTAGGGTAGGTATTCTTATTGGTTTATTTATTTAACTTAC  
AGTTATTTTCCGATCCAAATAATCAGGGTGAATAGCAACAATCCTATTACTTGTAACTG  
TTATACTTCCCATTTCTACACACGAACGAGCATTACACATGAGCACTTCCAATGACAA  
AGCCAGAACCACCAACAAGTCCTTCAGCGGTGAGCGCAAGGAAGCTTTCGCAGCCACAAC  
TGTCGCCGGGATCGACGGAGGCGTCTGGGTGCCGCCGCCATTTCAATGGCACCAAAAA  
CATCGGTTACCCCTGATCGCCGGTGCGGCCGGTGTGACCGTCGGATGGGCGGCGGGTGC  
TCTGGTGTCCCTGTTCAACACCTCGGTACGCCAGCTACCATCTGGGTAGTGCCTAGTC  
GGGTCTGCTCGGTGCGTCGATCGCTATCACCCCGGGTGAACCTGGGTGGTTCGGTAATGGG  
TGCTGCCCAAGAAGCCCTGCCGAGCGCCGGCGAGTAAGTTCTGCCCAAGGAGAAGGATA  
TCCCTTCTCCTCTTCTTTTTCAGTAACCCGCTCAGCCAGGAAGGTGTTAATTAGGAAATCC  
AGCGGCCTGCTTCTTCTGTGCGTTGGTGTATGTTTCGGCTTCTTGTTTCGTGAACGCGAAC  
TACGGCCAAGAGACTCAGGAAGATGAATCCCAAGAAGTGATCTTGGGACATCGTATTGCT  
CCTAACGGGCAAGAAATCCTGGTCTACCAACACTGAAGAACCACCCCCCGCTTCCTTGT  
CCTGTTTAAAGAGGGATGAGGAGGCGGGTCTTTACGTCTCTTTCAATTTTACATAGGGA  
AATACCATGCTCTCGCCAGATGAAGCGAAGAAACGTCCGGTAAGAGTGGCTGAAATCTTT  
AGTCTGATTTCCGAGGCTAATCAGCTTCTGGTTAAGGTCTCAGCCTCCGCGAATGCTAAC  
AGGAGTGAGGAGATGTTTGCCTTATCCATGTCTCTTCTGGAAGAGGTGGACACCAAGGTG  
AATGCGTACAAAAAGGAATTCCCAATTGTCTCTCCTTGAAGTATAACCGTTGGATGCAA  
GACGGGGTGAATTCTGAGGGTGAAGTGAATATAACAAGGGCTTCCCAACCCCTCTC  
TTGAGTGAAGACAATCAGCTCCCCCTGAGTGGGTGACCTGGTACAGTCAGGTTATGGGG  
TAGTCCCATTCCCAGGCCTTGGAGGTGGGTGAACTTCTGTTGAATGCGTATCAGGACCTT  
CCTCCCTCCGAAGTGTAAGGATTAACGGCAAACAGTCTCCCCCTTAGGGGAGACTTTC  
TTGAGAAAGACGTATGTTTAGAATGAATAAGGGTTGTTACCCTACCGGAATAAATCCTAG  
TGGAAGTTTCTGAGTCAAGAGGAATTGTGGAAACTCCCAATGGGACTTATGTAACCTC  
CCCTTCGCACCATCATCACGTCTATCAACACGCCCGTTCGTGTTGAAGTTCGAGATGGTCA  
ATGCTGGCTGGTCACTGATCCCAGGTATATCTATTCGCTTGAAGACTTCTTTAAATTCAA  
CCTGCTCTACAGGAAAACCGCGTGAAAAAGACCTGGATGTTGATGTCTCGTAGGAGACAT  
TCACAGAGCAGTATGGGCTTGACCTAGCGAGAAAACCTCGGCTCATTCATCGTTGATTA  
AACCTTTTGTCAATTAATCCACGTATAGGACACCGTTATGTGGAAGAAAATGCCGCCGGAC  
TTCCGTAAACTGCACCTGGAAGCCTTGTACACCTACCTGAATGAAACCACGGCCGCGTGT  
GTCATCCTGGTTAACACCGACGCCGGCCCTGTAGTGAAAGAAATCGGTCAAGGGAACCC  
AGCGTCTTCTCAACATCGGAGGGTTCGCGGTGAAGTACCTTTATTTCCATGAGGAATAC  
GTTCAATTCGAATGCCGTTGCCAGGGGAAGGTCTACGAGCTTTCATCAAGTATGAAGAT  
ATCTTGGGTGTGCGGTATAACAGAGACTTGATTTACCTGGGTGGGGTGTGCCGAATAGTA  
GGTCAGGATGAAGACGGTCGGTTGATGCTCGCACCTGGTGAATCGCTCCGCCAGAACAG  
AATGATAAGAAAGAATCCTCCGTCCCAAAACCTCAGAACGGACACACCTCTCCGTTCAAC  
GTCATTGAAGGCGGTAAAGACTAACCCCTCACTATCAATACCCAGGTAGGGATAACCTA  
CCGGTGGTTAAATTATTCTGTTGAGAGTATCTAATACGTACATTGACCAGAATCATTTAG  
AGTTTCATAAACACCTGAGGTAATCCAAAATGCTACCGATTAAATCACGGCTACAAGAAA  
TGATCATCAACGCCCAACCCCTCCCCGGCGTTGTGGATGACATTTACAAAGGCTACGAGG  
AAGTTAGGGTGTCTTCTCCAACCTTCGATCGGGTAATCACTCAACTCCCTTTCGATAAGG  
ATATTCTCAATCACCTGCCACGGGGTGAAGCCAAGACGGAGGACTTCTTCTTTCTCCACA  
CCATCTACCAGGAGCAGAACAAAGGCGCCATCCATGGCTTCGGAGAAGGGTATTCAGGGA

ACATTCGTTTCCGGATTAAGATCGTACGCAACACTAAAGGGGCCATTGCAGGGCTGACCG  
TATGGACTCTGGGCTGGGGGAAGAAAGATCTGGAACGGGATATCAAGAACAAACACCTGT  
TGCATGGGGGTGTGGATTACAAAGACGAACGCCTGGGTAAAGTGATTCGTCATATTGAAT  
TGGTCAAACCTTCTACATCGAAGACATTTAACATCTTTCATAAGGAGTAACCCGCCATG  
GTATCAGTTCGTAAGGAAGGCAAAGAACGGTCTCCTCTGTCGAGTCCCATCGTAGGCGAA  
CGGGATTCCGTTGATTTCCATAACAACAAGAACACCTGGAGAATGGGACATATCGAGTT  
ATCGAGTAAGACGGGGAAATCAATTATTGTGTGTTTGACTATCTCGTTGAATCTTGGTAC  
AGCGAGGAAGAACACATGGAATTCCTCTATAATCTACACATGGACCATCTGGCCGAGAGA  
ATAGGCGAGCCATACTGTGAAGACTTGGGAGAACCGTACACCCAAGTCTACATGACAAT  
TTCAGTGACCTTGTGACTTAACAACACGAGGGGGTGGTATGAACACGTTTTACATCATT  
AAGTCGACCAACGTTCCACTTCCCACCCGGGAACAATCACTGAGTATTACGCCGAGGATC  
CCTCTTCTCGTCGTTATCGCGATTTAGCAAGTCTGTATGGACTGTAGCACTTTCCACA  
GCCTCGGAAGTGCTACTGAAGTCATTAACCGGATGCTCACTGATAAGAACACTCCCTTCG  
GTGATGGTTCGGTCTATCCTCCCCTCACAGTCCGGATACTGCGTCGTGATTACAACGCAC  
CTGTTCCCGGTACGAAATACGAGTTCGATCTCTCCATTGTGCGAATTCTCCTACACCGATC  
CCTCCGACTTGAAAGTCAAAACAGTTGATCGCTGGGGAGTCAACTTCATATGGGGTGGAG  
GAGATAAACTCGCCAGGACTTTCTACAGCGTCGAAACGAATACCTATCAACCCAACATGC  
CCCCTGGCCGGGTAATAATGAACTAAGTCTTCTACCCCAAGGCATTGAAGGGCGCTC  
ACCCGTGGGTGTCCTGGTATATCCGCAGTCATGAACTTGAGTTCACTTCCGCATCAGTTA  
AAACTGCTTTGGAAGAGAAAGACAAGGTCATCGGTCAAATCAGTAACCAAGTTCCAATG  
TGGAGCTTTACGACGAGATGTTTCTGAAGCAAGCGACCGGGTTCGTGGTGGATCTAG  
TACTCCTGGGGGATGTTCTAGCGCTTCGTAATAAGAAGTACGATCTCACCTGGAAGAAA  
TCCACCAACAAAATTATCCCGTCTCGTTTTCGAATAAACAATAAAGACAGTCAAGTCAACA  
GAGGCCCTGTGAGGCCTCTGTTGGTATTTATTTAGTAGTCAAGGAATTTGTAATGGCTC  
GAAAAATCCTGTGTATGTTGATTCGCCATCACCAGTACGCGCTGGTAACCAATGACATCC  
AAAAGAGCGACTTCTTTTACACCTGTCCGTTTGAATCGACCGTTGAAGGCCAACCGATTC  
TCTGTGCGGTGTTCTACAAGAAACCCAACCCCGAACGCATTAAAGCTGCGTATTGCTGA  
CGTCTCTCCCCTGTCATTTGACACTTGAAGGTTGGCAGAGCCTGATTGAGGATGCAGAAC  
AACACGCTATCCTCGTTACTCCCAGGCGGATCTATGATTTCCGTGGGGAGGAAATCAACG  
TGTGTAATGGAGAGAATAAGGGGTTTACCTTTGGAGCGGATGAATTCGTTACCTTTTA  
GTAAGTACCTCCACGTTAACGTTCCGTTGGGCGCTCTCTACGCCGACCAGCAAATTGGTG  
AAGCATTTGAAGTTATCGCTGTAACCCCGTAACTGGGAGGAGTGTATGGGTACCCAA  
ACGATCAGTTCGGCGAGTAACCCACAACCTTCCATTTTCGTATTTCGGGTGATTTATCGAAA  
GAGCGATCAAAGAAGTATTTGAATCGATGGCGAAGAATCTACAAGATATCCAGCGCCTGA  
AGGGTCCTAACGCAAGGGTGTGTATTACCTTAGAGATTGACGGCGAAATAGTCGATTTCA  
TCCTGCATCAGGGATATAAACATCAACCCACCCTTTAACTGCGATTATTATCTCAATCC  
GTATTCAAAATGTTGAAGGTATCCATCCCCAGGGAGTCATCATGATGATGATGAGGCG  
AATTGTGATGGGAATCTACAAAGATGCTAAGTACGGCTGCCAAACGTTGGAAGGTGTGC  
TTCGTGTCGCCGAAGAATACATGAGTGAAGCCGAAGAAACCCCGCACCTCCATTGAT  
GGAACCCTTACCCCGCGTCTACTCCCTACTCCCTTAAACGGAAGTCATCATGTCTAT  
TTCCTACATCATCCGGATTGATTCCTGCTCAATAACCAACGAGATGCCGTTACACGCTT  
GTATAACGTTTATGGTGGGGCGTTTGACCATCCCCGTTATATGACCCACTGGTACGACGC  
AAAAGCATTACAACGTTCCAGAAAGCCGTTAAAGTGGTTAAACGGATCATTGATGAGGA  
ACCGGGGTTGTATTCAAAGATCCTTACCGGGCGTTCTACGACCTCTGCACCGCAGGGTT  
GGATCGCCGTATAGACCCGGATGGGTCTTACCTTCGTGATTTACATTATCCGTTGCAA  
TTCGGAGGATCCTTCGGACCCTCGAATGGAAGTGGTGGATCGTTGGGATGTGGAGTTCTA  
TCGGAATAAAACCCTACCCGATGGTTCAGTTCAGTTCTATCGTATACCACGCGTAGGATGA  
CCCCGAGGAGAGTGACCCCGGACGCTTCTACGTCCCAGGGGCCAACGAACCCAGTGTCTT  
CTACTGTCACCGATTGGGTGGCGCGCATCCTTGGATCCATTGGTACATCATTACCCATGA  
GCTCGAATTCACCCACGAGAACATCGAATTCGCTAAGGATGAGAAAACCCGGGTAATCGA  
ACAACGCTGGAACAACAGAGGTGGGTGGCGTACTACAGTGAGAAATTTCTCTCACTTC  
CCGTGAAATCGTTGTTACCAACCCCTGCTGTTGGGGTATGTGTTGAGTAATCGTAATTA  
CAATCCTTCCCTGTCGTGGGAAGAGGTCCATTACCAAGAAATCACCTGGCGCAACACCAA  
ACCGTCTGCTCATCACTGAGCATTCCGTTAATCCTTATTCCACCGATGGAGAATGAACAT  
GAGAATGGTCCATTGGGCTCGATTGGTTAAAGAGTGCCTCCAACCTCAAGCCGTCCGCGA  
TGATCTTACCTGGGGGTCTGCTCAGGGTTGAGTTTGTGTTACCACAAGTACTTCTGGC  
CAACGATCTCCCCCTCGAAGCCAACTACCCGGTGCTTACAGCCGCCTTTAAGGAACGGGC

AGACCTGGGCCACCGGCTAAGGAATCGGTTATGAGCGCTGAACACGCCCAAGAACTGGT  
TGAAACGGTGGAGGAGACCCTTCGTTACTACGTCAAGTTCTATGCGTGGGGTTGTAACCT  
GAAGGCTTCCTTCTGGGCGGAGGTAAAGGGTCAGCATTAAATGTTCCACATCCGTTACAAT  
CTATGTCGGGCACAATTTTTCTAGAAGAGGTAACCCTATGCCAAGTGTATCACGTAAACA  
AACCAACCTGATGCGAGACGCCGCCACAGCGCTGAGTTCGCTAACAAAGGTGGGTATCGA  
TCACGAGGTGGCTAAGCATTGGTACGAGGAAGACAAGAAGGTGGGGTGGTTCGACCCAG  
TTCTAATAAAGCGGAATCTTCGAAAAAGAGCCCTACCAAGTCCAGTTAGTCGTTTCCATA  
ATCTTTCCCTTGTAAGGGGTGCTCTCGTAACAGTAACCCTTAGCGGATACTCGCAGTCGT  
CCGAGGCCGAGAGTATAAACAGTACAGCTCTATCTATTCTTGTGATGGGGTGAATAGGT  
ATGACAATGGCGAACGGACCCCTTTCGATTCAAGTGTAACTGGAAGAAAACCTCAATG  
AATAAATATTATGATCTTTATGACGTGTTGGAACGGTTTGTGGGCTGGTTAAACCTGTT  
GAATTTGGACTCCAACCTGGATTTTAAAGGACCATCAGATTATCGGGAAGTTGAGATCTGTT  
GGTCTGCACTTGCCGCGTCAATCGGGTAAAACGACCCTGTTGTCCAAGTGGTGTTCGAAA  
CACCTGACGAAGTGTTCATCGTACACGGGTCTTCTCGATGGTTAGAGGCTTTCAAAAGA  
CTTTCAAACCTGCCCGAACCTCCCTCCTTGGGTTTCGATCTCCAAAATACGAGCCAAGCGA  
CCCTTGCGTACGGATCACTCGACCCTGAAGCAGATTAAATACGTGGTTCGTCTATGGTTCG  
TCGGTTGTTTTCTCTACTGTGGACTCAAGCGTAAAGACTGCAACCAATGGGTGGCTGAC  
ACCTTTGGAACCTGAAATCGTGGTGTATCCATTTAGGTTAAGTTTACTCCGTGATAGCTCAG  
TAGGTAGAGCAACTGCTTCGTAAACAGTAGGTCCCAGGTTTCGAACCCTGGACACGGAACC  
AAACATCGTTACCCCAAAGACTGGGACACACATGATCGGCACCACCCTCCCCAGATGCC  
CTGCGCCGTTCCCGCTCCGCGGCCATCCTGTTCTTCTTCTTCCAGGGTGGACCGCGG  
CTTCTTGACAGCGGTGACGGTGTACCTGTTCCCTTCTTCTCAGAGGGGTGGGGAACAG  
GACCTTTTCTGTATCCGCTATGTGCAGAGGATAACGTCATGTCGTTTATTATAAAGGTCA  
TGCAGAGGGGTGTGGGAATGGCACCTCCCGTGACTATTAAGGCATTATTGTGGGTCAGG  
GGGATCGATTTGCTATCTCTTGGGATCCGCATAAAGAACAGCGGGAGCTTACGGTTCGAGT  
TTGCTAATGGGAGAACCTTGCTCCGGGTGATTGATGGGGATCTTTACGTGGTGAATGCGG  
CCGGTAAGACCATTTCCGGTACCCTCAAGAATAAGCCCTTGATCCCCGGTACTTCCCCT  
CGAACCCCGAGACAACTCTCTTCTAAGCTCTAACCCGTAAACACCGTGTAACACCCCT  
CCTACCTCCTTTACAGGGAGGTAGGACGATTTATTACGGTATAGCGTATTTTAAACTTAG  
ATTATTGATGCGTTAAGCGACGAGGAATAAATCAATGTTTACTGAAAAACAAATGTAAGA  
ACTTAGCAGTGCTCGTAGAGAGGATGTGTGGAGTTATGACATATTTGAAATAACACTATT  
CCTGATGGAAACAGAGTGTGATGTTGGCGTCCCCCTCTTGAACATATCACCATGTACAG  
TTTCAACAAGATGCTCTCTGGAGAATCACTAGATCGTTATGCGATTGGACTGATGAATAA  
AATGACCTACGATACTGAAGGCCATGACGCCAAGGGAATCGTAGAAAGGGTTGTCTTACA  
ACGATTGACTGAAAGCGAGATCCTGGAAGCCCACGCCTCCCTCATGATTTACATCACCAA  
AGCTAAGGAATTCCTGGAAGACCTCAGTCAACGCTTCCCCGATCACTTCCAGAGTGTGAG  
CCGAGAAGAAACACCCAAAAGTTCTGCTTTGCGAATAAACCGTCTCCGGAAGGGACGGT  
CAGGGAACCTCGCCGCTAAATACGGTAAGTTCGATCAGTGAATCCGTAAACTCAAAGCAGC  
CGGTCGTCTTCATGAACTAGCACAGGGGTAATTGGTCATGTTTTGGAATTCACGTGTTA  
CAACAAGGACACTTGGGAAGCCCCAACCAAAATGACCTTGATAGAAGCGGTCGAACTCTT  
TATACGGGAAACCAATACAGCCAGTGGGATATCACTTCGTGGAGAATCTCCACTAAAC  
TGTTGTGAAACAATCTGTTAAACAGAAGGATAGCATTATGAAACCCTTTCGAGTACCTGT  
TGGACGTCTCAGGAACGAACGACTGGAATAGTTCATCCGTCATCGTAAAGAAAATAAAGC  
TGAATGTCCCTTTGGTGAAGGCTCACTTCCCCAAAGGAACGATCGCGGGATTTCGAGTCCCC  
AACCCAGCGTTTTCTGATAGAGGACGAACGTGAGTTTCTGGTCAGCGGTACGCAACGTT  
CGAAGCGGAAGTGGAGGGTGTAGTCCCCAACGGCCCCGAACAGTTGGGTGGCTGTTCTAAA  
GGACCGTACGGCGATTAAAATCGACTGGGCGCGCAAGATCATTAAACGGGGGGATGGTCC  
TCTCCGCGCCGCGGAGAATGACGTGGAGGACAGTCTGTGGAACCAGAGCCAGCCACC  
CCTGGATCCTGACACCCTCCTTCCGATTAACAAACACCCCAAACACTACTACATCGACTC  
GATCTATCATGTTATCTACGGAAAATTGGAAGAGGTTAATAAAAAATAACTTCGCCACCCA  
TCTGAACGATGTGGATAAGTTGATTTGCTGATGTGCGGTGATATCATTTCGTCAGTCAAC  
CTCCTGTGGTGTGTTACTGCCATTATCTCATCAGTAATAAGAATTTCCGCAAGAT  
CTTCAACCGTTGTCTGCCGCGTGCAGCCAGCCGGCGTAAAGAAGCTGAACGTCAGGC  
CAGCATCGAAGCATTTCGAAAACAACAGGACTTTTGTGACCGTTATGAAGACGATTACGA  
CGACCCGGGGGTGTGAAGAAGTGTTCGAAGCCTCTTAACCTGAAGACCGCCCCACTCCGT  
CTTTAAAGGAATAACTCCTACGTGGAGGAGGGGATTCACGGAAATGCCGTTAAATCACAC  
GTGTAGTCCCCAAGCCGTCTCTAACGGATCTTCGGTAGAAGCCGAACGGTTTACTTAAT

GGACCGTTAGCCGTTAAGCTACCGAGAGTGACAGATTAGATACGCCATCACTGTATTTT  
GGAGAAGGTTGCGAAACATAACGAAACACCCTTTCAACGAGCCAGCAGCGGGCATGCCCT  
TCAGGTTCGGTGACAACGGGTTCATGCCATGTGGGGGATCACGGGACCGCCATCGCTGGAAA  
AAATAGCGTCGCCACCGCTGCGAACAATGGACACGCTGTTTCTGGAGCCCATGGGACAGC  
CATCGTTGAACGCTTTGGTATCGCCTCTGCCGAAATAAAGGCAGGGATATCGCCGGAGA  
TTGCGGCAGTGCCACCGCTGGAGATCATGGTATGGCCACCGCGGGAAATTACAGTACGGC  
TACTGTTCGAGTACTTAGGTACTGCCACCGCCGAAAGAAAGGGAAATCTACCGCTGGATA  
TTGGGGGACTGCTATCGTTGGACTCGATCGCGTTGCGTCTGCTGGAAAGAATGGAAAGAT  
CCACATCCAGTACTTCGACAGTGTAGCCAATCGTTACCGCACAGCAGTTGGATATATCGG  
TGAGGACGGTCTCGAACCTGGCGTTCCTTACCAATTGGATGAAAACCAGGAGTTCGTAAA  
GGGAGACGTTGCCATGACAAAATTCTCTACAGAGGGCCACTTGACTATACTCTTCCGAGG  
ATTGGGTGTAGGTCTTATCAACGTCCAGGTCGTCAGGCTCACTAAGGGTATAGGACATCC  
CAAACCTTTTTGCTTATCGAGGGATCTGACGACAAGGGTAACCGTTTGCTTCATAACGG  
GAGTGAATGGATTGATCAGATCTTTGAGGCTAAGAAAGCTGTACTCTTCATTGAGTCCCT  
CTACCCCTGTGACACCCGATAAAGAGACCGTGAAACTTACAGTGCCCCGAGGATCAGCA  
AATCCTGGTTAAAGTACGTCGAGTGAATATGCTGGCCTTGATGCTGTTGTGTTCCACAT  
TGACAACCTGGGGGGTGCCTAACAGGTATCCTATACCGAGCAACTGACCCCGATCTCAA  
TCAGTTGACTCATGTTGAGTTAGTGGTCATTTGAGGACGTCAATCATGGCTAAAAAGAAC  
CTTAAGGTGTTCAAGACCCACGGGGAATTCGATACGGAGGTGATTCGTCGTGCTCGACTT  
ATCCTCGACGCCAGGGGTTACCGGGGGAAGATATGTGTGAACGCACTCGGTGAAAGTTCT  
ACGTGGAATAAAGCAGATCGCAATGAGGACGGTCATCGTCTGATCGACGACGACACTATC  
GCCGAAGTGGCTCGCTCGATGGTTTACGACACTCTCGATTACGGAGAGTAAGTTTTAACA  
CGTTGACCGTATTATATACGGACAACATGTCGTTTTAATCCGCGTCTGCGGGCCCCGCCT  
GAACTTAAGGGTGATAAGGTGCGGTACTCGTCGAGTATGTGCTTGCCAAAATCATACTC  
CGAACCTATGGACGGTTTAGCCGCTATCGTCAAGTCACACGGTTGAGCTATTGACCTGG  
ACTTCAGTGTCTTTTCGGTGCTGTCGGCGGGGAGGTTCTCGGACGGTGAGGCGGCTTGT  
GAAGGTGCTAAACTAGCGCTGGATGAACACCTAGTAAGTTAAGGGGAGGAGGGAGAGCCA  
TCTGTTCTAAGCAGATGGGTTCCCTCCTCCCCTCGCTCCTTTGATTTTTTTTTGTCTTAATA  
CCGTGTTACTCGACCGGTTTCTAAAGGATACAGACTGTACGGATATTATGTCTTATCCCC  
CGACTTACCAAGAGGTTAAAGCGATGTCGAAAAGCAACGATCAGAAGAACCCCTCCACTC  
CTGAGGACGAGAAGGCTAAAGCGGTAACCACCCCTCCGGTGACTCCTCCCCTCAGCCAG  
CTCCCCTACCCCTCAAACGTCTCCCAAAGCCTCGAAAGACGAGAGTGAAGAGGATAACC  
AGAACTTCGACAACATTCTGATCAATGTACTGTCGCTCTAGGACAATGGGGAAATTCAATA  
AGGAACTCCTTATTGAGATGGTAGAAGAAGTCCGTAAGGGTACCCGTCCGGGTCTTATCC  
CCGAAGCATACTACATCGAGATCGCCGTTACGCGTTATGTGGAATTCGCCAAACGCAAGA  
AGATTGACCTGAAAAACCTGACGATCCAGGTGGGTAATCCTGAAACCTCGGTAGAACTGC  
GCTCGCTGAACTTCTGCAGTGCAATGGAGGGCCTGGGTCCGACCTTCTTCATGCCGTACA  
TCATTTAGAGGAAAGAGTAACACTGAATAAACCCCTAACCCCTAGCCCCATTACCAGGGC  
TAGGGGTTAGGGGGTATAACATTTATTTTTGATTAAGCAAAGAGATTGGTATCGGGACTG  
TTTTCTTCAGGATTGGTCCCATCCTCATTGCCTTCTTACCCTCAGGAGAGGCTTCTTCT  
TCCTCCTCCTTCAGTACCTGCTTCAGAACCTTCTCCTCCTCTATACTTCCGGTTCT  
TCCTCTTCCCCGGGAGGGGTATTCTCTCAGGCGTTCTGATCCCCTTACGGGAGATTCCGCC  
TTATCCCCGGCTTCTTGAAGGTCTTTATCAGCCTTATCGATCTTCTTGGCGTGTGCCTTA  
ATGACCTTAGAGTCCGCATCACGAGTCCCCGCAATCAGGGCTGCCAGGAACTCCCCGACA  
TTCTGACGCTGACTCACACCGGCGTTCACCAAGGAAGCAAGACCACCACCCTTACCATCG  
TTAAGGATGACGTCTAATGGCATCGGGAGATTATAGCGCCTGAAGGCTTCAACCGTGAGG  
ACTGACTTCACTTGCTCGTTAATCGCTGTCACGATCTTGTATTCCCTTCTCCATCATCG  
GATTCTGGAATACCCAAGAGCTCAGCAATCTGTTTCAGGTTACCCGAATTACCTGCCATA  
GCGACCCACGACTCCACCAGCTGACTCACCGTATCCAAACTGTCCTTGAGCTTAGCAGTC  
GGTTCAACAGAACTGGGGATCGGGAAAGTGGGCTTTAAGGTTAGTCATGAAGTCAACGAGA  
ATCATTTAATGAACTCTTCGTCATACCCTTCTGTTTCTCATTACTTTCGGGTGACCAG  
AGTTTCTTATTCTCCGAGATCTTGGTCACCAACTTCTTCATTAAAGGCACGTTACGTTGA  
GCATGCTTACGTTCAAAGTCAATAATGAAGTCTGCCAGGCGTTCTTGCCAGTTAACGATT  
TGGTTCAGGAGCATCTGGTGTTCAGCCAGGGCCTCAATCTGGAAGTTGTTCTGATCGTCA  
CTGTTATCCAACCAACTCCGAGACAGGTGGAAGTAGTTGGCGATCTTGTTCGACAGCTCC  
GTATGACTATTCTGATCGACCGGACGGAAGATGTTCTTTTCTTATTGATCGAGCTGAATA  
TCCGAGGCGGGGAAGTAAGCGTTCCTCGCCCGCATTGACTTTAACCATTAAGGAGTTCTCC

CTCATGGTATCCAAAATCATGGGGACTGACAGTAGAGATGTTGAGAGAATACTGTGCAAC  
CGTGGGTTTCGCTTCAAAGAACGCCGCACTGATCGCCGCAATCCCCGCAAAGGCTCTGCG  
TCGTTCTCCTGGAGGTTAATCGTCATTTGGGTGTGGGGTGTAGCCGCCTCCAGGTTCCGC  
AACGCGTCAGCGAGGTCTAAGGCCGCTAAACGGGCAATGTGCATTTAAGCCATTTGAGTC  
AACGACTGACCAATCCCTAAAGGGTTATAGTGCAGGGCCATATAGGTCATCGCTTCCCA  
GGCACATTCAAACACCGAATCCCCTGTCTCCGGAAAATGCGTTGCAGGAAGATCTTGTG  
GCTTCTCATCGATCTCAATACTGATGTTCTTCCCACGACCACTGAGGACTGACTGCATG  
TACCGTTCGAATGATATTCGATTTTCGAGATCTCAATGAACTCGATCATATCGAAATCACAT  
TCTTTCCCTTCTTGGATTTGACGAAGCTATTGAACCAGGTTGTTTCGTACTACCGTTTTTA  
GGGCGGTTAGCAATCATTTTGGCATTGCTTCGGTTACTCTGGTAGTACTCGAAGTCATTC  
GTATTCTTCAGGAAACTCCCATCCCGAGGATCTGTGAGGAGGATAAAGTCCGTTTGAGTT  
CCATTACTCCCGTTGATGTGAATCGGAATCACCGCTTCACTGAGAACCTTGTAGGTAATC  
CACCGTCCATAGGGTGCAATCTTCAAGGCATCGACGGGTTTACTGAATTGAAGGATCTGA  
CCCACCGGATTCCGTTGAGGGAACAAACGGTTACTCAACTCGTTCAATTCACCTGCCGTT  
AAGTTAACGGTAGTGGCTTGAGGATCAGCAGCCTTCCCTACGTTTGCGTTTCCCTACCTTCC  
GCATCCGAATAGTGATGTTGATCATCTCCAGGGTTCGTACGGGCCACCAGAGCGGGTTGG  
ATAATAAGGTCCAACCCTTCCGCTCCCGCTACCGCGGCAACATTCGACCGACGTTTAATT  
TCCTCGAACTTCTGGAGGTACAAGACCGCTGGTTTATCGCTCAGGGTAATATCAATCAGG  
TGAGCCACTTCCCTCGAGACAGAGTCTTTATCGTCTTCAAAGATATTGAATTCAACTTCA  
GCATTCTGAGAAGAAGGGTTCAGGAATAGGGATTCTAGATCACTGACGGTGTTATTTGTA  
TTATGACTGGCTCTATTAACGACAAAGACACCTTTGTTCTTACCAGGGACTTTACCGTTG  
ACGACTACGAATTCATGACTTAGCATCTCTTAGCCTGGGTCATGAACTGTTTCGTTACCG  
GCAACATCACCGGATTGCTCCGCACCGTTGATCAAATAATCGAGACCTGGGCGACTCAAG  
TTAAACAGCACATAACTCCCGGTATTGAAGAGAATCTCCGCTATCCTTTCCCTCAAATCT  
TTCTCGATCTTATAATTCATTGGTATAGTAGCCATCCCAGATGGTGAGGAGTTCATCTTGC  
AATTTTGCATTTTAAATGGGGGACGGTTCGGTGTTCGTAGGTGAGGATTTTGTCTTGCTTC  
CCATTGGGGTAGAGTAGACACATCTGCCAGATCTAGGTGGCTTTGTTCGATATACGGCGTG  
ATTAACCGCAAATCAGTAGCCGCGTTAATGTTGTTGTTAATGATATTTCTCAGCTTTACC  
AGTTTGTAAAGGGTTAACCTTCCGATGACCGTTGATCTCATCCCCTCAGGGGATGAACCG  
TTACGAGGCGTTGCATTACGCAGGGTCGCTGCAACCACTGGGTTTTGAGTCGTC AACGAT  
TTACGCAAAGCAGCCAAATCCAACCTGCGTGTTCCTTGGACTGTCTACGAGTTGTATCT  
ACCATTCTTAACCTCTTCGATCGTACTATGGATAATATTGAAGTTAATGCTTATCTGACT  
GACGTGTTTTCGTATAGTCAGAACCATGGTCATCAAATAAGAAGCCATTGCCTTACGTGAT  
AACAAAGTCCTGGAGGAAGCGGGATATCCTGTCCGGTTGGATAAAAGGACCTGGCGGTAC  
TACATGAACCTGAATGAGGACTACCACCCCAATGATCAGAGCATTACCACTACGTCGCTT  
GATACCGGTGTCGAAATTGTCTTCAATAAAGACAACCTGGTGACCCATTTAGCGACGGCC  
ACGGAGTATGCCACCGGTGGCTATTGGTTCAATCGCTTGGTTGAACGGTACCCGGGACAA  
GCTGAATTGATTTCGCGGCATTATTGCACCGATCCCCTACGAGGAGACCATAGAGGCCGAG  
GACTATAAGATCTTCAAATAACAATAAGGCTTTCGTGCAGTGGCTTGAGGACCAATCGATC  
CCTCAACTCCAAGCTTGGATCTACAGTGGAGTGGAACAAGTCTTCCGCCACGCATACCGG  
TTAACAGATGACTTGATGCTCCCTTTCGGGATTATGTTGCTGTATGCTGATCTGTTCAA  
ACCAATTGTACCGTTCGGCATGAAGCCATTGGGACGCGGTACGCCCATGATTTCTATATT  
TGGAGTAACATTGATTCCTACGGGGCGTTATCCAAGTACAAGGAAAGTTTAGATCGGTAT  
CAAACCATGTGGTTGTACCGCAACATTGCGTGGATTGATAACAACCCCGGTCAGCAGTAT  
ACCTTCGGGAAGTTGATGGACAACCTCCTGACCCACGCACGTATTGCCCTGGCCAAGTTT  
GATATGGTGGAGAATACAGCGAATCAGTTGTAAGAATTGGTTCCCAATCCCTTGTACCGT  
AGGCTCCAGCCTAACTTGCAGGAAGACTACGGTCGAGAATCCACGTTTATCGATAGCCAA  
CAAATGATCGATAAACAACAACCCTCGGCAAAGAGAACCCTAATCAAGCGTCCATGTAC  
TATCATGACGCGTTGCAGAAAGGGAAACACAGTAACCATTCTGAACTGCCACGAAGACG  
TTGGAATCCATAATGATGGATTACACCAACCGTCACATCGATACCAAGATGTCGGTAGTC  
TTAATGAATGGATTTACTTAACCGCTATGGGGTATTTAAGGGGCGTATTCTGGTTACC  
GATCCTAAATCCGGTAAACAGGTCAGACTCCCGGTTGGGGATGCCTACTACGTGTGGCGG  
TACTTGGTGGACTTCGCAAGGGATCAAAAACCGGTCAACATCTGGCCGGCGTATTACCAC  
AATGTATTGAAAGCGGTTCCCTCCACCCTGGAAGCCTTGATTGATATTGGGGGTGCTTCG  
TTCATTACGCCGATTATGGCGTATGACGTCCGTAACGTGTGGATTCCGGTGAACACCTTT  
ATTGCACCGGAATACCTCACGGCGTATTCTGAAGAAGTCTACGCACTCATGTGGAAACAC  
AAGAAGATGTCAAGTCAGTTCTACGACTTGAACATGCGGGCGCGGATGGAGCACACCACG



AAGTTCATGTACGAGTCTGGAATCGCTACGATCACGGACCTGACTACCTACCAACAACCTC  
CTGGACCGGTATGAGTTCGACTTTGCGGAATACACTCCGGAAGAAGCCCGTAACTTTGCC  
TGGGAGATCTTCAAACGCAACACGGGTTGGGACAGCAACAATAACCCGTCCTTGACGATA  
AAACAGTCAAACCTCATTGATATCATGATGTAGCTGTCTTCTTACACCATCCAGGTCGTT  
AAGGAAATCGATGACGGTACGGACTTAACAGAGCTCCCCAGTGAGATCTTTATTGGGGAT  
CTCCGGTGGATTGGGAAGGGAAATGGCGCCTTCGGGGATTCCACCCATGTTTCAGATGGAT  
ATTCCCCTCATTTCGATGGTATTCGCACCGTTGAAGAGGTTTCATCCCCTGGTTGAACCT  
ATGATCCCTGAGGTGGCAGCGATTGCGGAAGGATATGGGGTGGCGCGTAGCGATGATATC  
TTTGAACGGGTGGATTTACAGCACCACCTGTTGGACTACGCGGTACGGAAAATCGATGAC  
TCCTATTTACAGGCTGTTACCAGCAGATCGTATGGGCCTCCCTGAAACTAATTACGGGGCT  
CTGGTATTTAAAGAGCTGCACAAGGAAACCCCTGTAGGTCCAGCGGACTATGGGCGCCTG  
GTGTTTAAAGGAGCTGAGTCCCCTGACGGTGAATGACCCAGCTAACTACGGCAGACTGGTC  
TTAAGAGGGCCGGTTAAGGCGATCACTCCTAGTGGAAGACTTCAATTTAAAGACGTTATT  
AAGGACTAAAGGAGAAGAGTCTAATGACCAACCAGTTGAGACTCATTAAAGGCGTCTTTTT  
GTCGTCTTCACGGGTTAGATAAAGGCAACGGCCTTGAACATTGAATATCAAGGCCGTAATC  
CCACCCCTCAATGCGATGTTATCCTTCACGGGGACGGCATCCCTTGCACACGGTATG  
AGCACGAACGCATGAGATTGACGACCCACACCCTGAATCGTTCCCTGGACCTTGACAGCA  
GTCCTTAAACTCCACCGTTCTGATAATAACGCTGAGATGATCAGCGCTTGATGTAATACC  
AGACGAACGAATCCCTGCTGCCCCAGGACGTGGGTAAACTCATTATTGGAGACCGCGTGA  
CAGTGATCTGTTCCACGGATTCTATGCGCTTTAAGCACTCCTTTTCGATGGCTTTTAAAT  
AGGAATCACCATGGCACTTTCTGCTAAAGAACTCGAGGATCAGAATCGATCTGAGGTTCC  
CGCTCAGACGACCACGAATACCTCCATGGGTAAATCTGATCGCGAAATGTATCGTCACTGG  
TCAACCGATTACAATTCCCAAGTACACCACGCTCAATGAGCATTATGGTATTCTGGCTGA  
AGAATACCTGGTAAGTAAGAATTCCCGAAATTTCTACTTGAAGTATTTTCGCGATTGGTGT  
AAGGGTATCCAACCTGTGATGGTAAAGACAGTCGGCGGGTCAGTCGATTGAAGGTTAACCA  
ACACCAACCCATTGACATGAACTTGTTACCCGACGTTCCCTTTATTGCACTTCCCTTTGGA  
CGCCCTCTGGACATCCTTAACCGCGAGAAGTTTCGGCTGAGGACCGAGGAGGCTAGAAA  
CGGTATTCCTTAGGAGTTCTATTGGTTGAAGTTGGTTAATTTTCGATAGCTATAATCCAAC  
CGAAAACAAGATCACTCGTAATCCTGTAACCGGTCTGGAGGATGTTAGACCTTACATTCA  
CCGTAAAGACGTCCTGGACAACCCATAACCGGTTGACTTTACCTGTGAGGGTAACATTCC  
TGTCAGCAATGAGTACATTACCAGTTCGGCTATTTTGGACAGTTCGTTGACTCAATCTGA  
TTTTCGCTGAGATTTACAAGCCTGCAAAATTTACTACGGGGATGCGGGATACGCATCCAT  
TAACGAAGTGGGTGTTGCCTATGGGATTGATACTCAATTCCGTGGGGAGATTGCTGGAGG  
CGGACTATCCAGTATACCGAGGTCATGAGTGCAGTCTGTGCTCACTACATGCCCCGAGCG  
TGACGCTCGCAATGCGCTCTCTACCATCAAGATCCAGCTTTCGCTTTGACCACGGTCCAAG  
CGCGCCCATGCTCTTGATACCAACTCAACTCAACCCCCAGCTGGATAAGGAAACCGACC  
CATGTAATCCCAGCTCTACTAAAAGGAGAAGTTCACCTTCCACTGGTTGAGAATATGAC  
GGCAGGTCAGGCAATTGAGATAGCCAACGCCTCCTATCAAACCACCCTGAAACCGGAAGA  
CTTCAAGGAAGCCCAAGCCATCGTTGATGGTGATAAAGTCAATTCTGGACCGGCTCGACCT  
TGTGAAGGGTGAGGTTGTGGTGCATTTTCGTCACAAAGCGGGTGTACACGTAAGCCGCT  
GGACGATAACCACCCTGGTCAATCCCATGGCGGCGGTCGTGAATGCCGATGAGAACATCAT  
CTGGGCGGGTCCACCGGAGTTTGTGGGGAGTGTCACGGAGCTGGATTGGCTGAGGTATTT  
TACCGACGCGCCACCACCCATGACCCCTGATCCGATGGACTATGCCAAACGGATGGCCAC  
CCTGCTGAATCAGTACAACATTGCGGGTAGTCGGTGGACCAATAACTGGAGTGCGGCCCT  
TCCACGCTCTGTGACGGCATTCCACGTGGCATATCGTGGTGACGCCCCATGGGCTCCGTC  
CAAGTTCATGTTGAATGATCTTGTGTCTGAGTTCATCGTGGTGATTTACCTACCCTACGC  
CCACCCCGCCTGTTACCTGTGCTTTGCGTCCTAAAGCCATCTGCTAGTGTACGGGTCTTA  
GCCATAGATCCGTCCACTACCAGTATGGGGGTGAGTGTCTTCGACATCAATATTGCTAAA  
GCTGGACCGTTTTAAGTTGATTTACGCGAACACGATCTTTGGTAATTAGTTGTTGTTGAC  
ATTCCAGCACAATTTGATGATCGCGCGGACACTGGTATTGCGGCAAGAAGTTGCGGTATG  
GCGCGCAGTTTAAAGTCAACTGTTAGCTATCTTCGAACCCGACAGTGGGATCTGTGAGGTT  
AACTTCCTCGGTATGTCTCCGCTTACATTCAATCAGTTGATTCAAGTGGTCTCCTTGTTA  
GGTGAAACCTTCGTTACCCAGGGTATTCATTTGTCGTATCTCCTCCCTCGTTTAGCTAAA  
GCCGTGGTGGGCGCAGATTTACGTGGGAGTAAGAAGGAGGATGTTAATAAAGGGGTGATG  
GACTATCCGTGGATAGACGCCGGCGAGATTGATTTGACGGTCTGGATGAACACTCCGCT  
GCCAGTGTGCTATCGGCCTCTATCGGTGTGAGCAGATCGCCCGGCATTACGGTGTCTCA  
GAGAGGTTAACGTATGACTGAAACAACCTCAAGACAATGACCCAGAGCTACCAGCCAATTC

TCCTCCTGTTGAAGGAGGAGTGGAACGGGAGATCTTTGGTAAATGGAAAGTATTGTTGAT  
TAACCTCGGTGGTATCCATTCCGTGTGGGTGGTGTGTTAACGGCACTGATTAACCTCGTT  
TACTATTTACCTGTTAGTAACCACCAATGGTAAATGGCCCAGTGAGATGAGTATGTTTCAT  
CATGATGGTGGGGCCGGTGATCTGTGCATGGGGGTGGATGAAGGTTAACGGTACCTTAAA  
GACTATTATGTCTCAATCGCGGTTTAGTAACAAAATGAGAACCAAGGTGGCTGAGATCAT  
TGCGCCTAAGCCCAAGACAGAATAAACCCACTAGGAATCCTACCTGTAGCCTTTGCGGGC  
TACAGGTAGGATTTATCACGCGTCTGTCAATTTAGGTAGAGCTAAACTCTCAATTTACACA  
TTGATGTTAGCAATCAACTGTGAGATGGTACGCTGGCTGGCGTATAACTTCATGTTGCCG  
TCATCCAACGCCCGGGTCGTATTGATCAGCAGTACCCGGGTAACCTCGATAACAGAGCTCT  
CGTGCCTCCCGAGAGGGTTTCTCCAAGCAGTCATACTCCAGCAGAAAGGTCGTTAAACTA  
CTTAACTGACTAGGAGGCATCTCCGCGGGTGGGTCTTGAGTTGATGGAACACTTGGGTC  
AGCCTTTCTGAGCTGCCAACACTTGCTTCCGGTACGTGTTGATCCCTACTTGCTCCGCG  
TGAACCTGGAGGATTGAGTTGGTCTCGGACAGTTTGGGATTGTTGCTGCATCCCCTAGG  
ATCAGGGCTACTAGACAGATTAACATCCACCCATACTTTTCAAGTAGTTTTGCATAGCC  
TGAGTTGTCCTTTCAGTTCGCTGTTCCAACCTGACGGGCGAGGGTTTGAGTCAAGGCGGC  
TGTGGCATTGGAATTGTTTTCAATGTTGTCAGCCACCCGTTGCAACTGGTTGGTAACGCG  
CTGAATCCCATTAACCGCTTCTACACTGATAGTGGGGTTACGTGGCACAATAGCCTGCCA  
CGCGACGTCCGCCAGATTCAATAGTAGAACCACGTCTCTAATCCAGGTCAAATGGATCC  
TCCTAACGGTATTGGGTTTATAACCGGTCAATCCTCTTGAATAATACTTCGAATGTAAAG  
GTGGTAACCGTTGTACAACGAACCTGGGTTTCAAGCGATTGGTATAACCCGTGAGAAAGGGT  
TCCACCGTTGGTAATAACCGGTGGTCTTGTTGAGTAATATACGTTGTATGCCTAGGTCGAT  
GGCTAAAAGTCTCCTGTTGATGATTTTGGCAGTGAAGTACATGGGAATAAGGCCATTACT  
GACCATTAAGGGAATAGAACGGGTTTCATGGGTGTGGTAGGTGAAGGGATACTGGTACGT  
GGTGATGGGCTCCACGGACACATACAGGTTGGGATTATCCAGTACGATGAGGATGGTACT  
GGGATCGGTTAACAGAGTCTTCCAGAAGCTCTCTGTACTGATGACCCGTTTATCCACGAC  
TTCACGTTCTGGATCAATGATCCGACTGAGGTCGATCATCGATTTTCGAAAAAAGAGGGC  
GGAAAACCAATCCACCTTCTCCTTACGCAGCGTTAAGGTACGGTCTCTCATTACCTGTAC  
CACGTCATTACGGTACAACCGACCTCCAAGACTCAACCAGACTGTCTTATTCCTTAGCCT  
GACCGGAGACCGTACGTGCAGGAAGTCGTAATTGTCGTCATCCTCAAAGTCGATATCCGA  
CTCTTGGAAGGTGTAGTTCTTGAGTTTAGAGAGGGTATTGAAGTTAAGGTAGTTCACATG  
AATGTTGTCATTACATTGAAGTGCTTCCCACCGTTCAACAGGTACACCGCCTGGTCATC  
CGCCACTGCTAGTACCTAATGCCCTCCATTGTTTCGTCACAACCCCCGTTTATCCAAGGC  
GTTATAATCCACCGCCGTTTCGATCGGTCTTGATGACCCGAATATCCGGCGCGCTTGCCAC  
GTCGAGGTGCTCCTGGCGATCTTTGGCGATCTTAGCGTCACCAGGATACAGGGTAAACCA  
TGTGTATTGGATGTCCTTGAGCCGTTACGTACCGGTACTCATTGCCGAGGAGGGTATTACG  
GGTCTTAATGGGGACATGGATCTGGGTGTTTAAACCACTGTTGGATCACCCCATCGAACAA  
CAGGAACCTGGTTATGATAGTCCGCCAGGTCAATGACCACATCCCGGCCGTACAACCCATC  
TTTACCACAATCTCTAATTCACAAAACGTAGCCACCAGTTCCTTTGGTGGTCATCTCACT  
GATATCCACCAATTCCTCTACTCGGGGGAAGATTTGGCTGATCCCAACCGCCCTTTTATA  
GATGTACATCGGGGTTCAACTCCTTAAGGATTCTATTAATCTACCCTACACGCCCCATG  
GGTACTATACTCTCTAGGGGATTAATCATAAAATGCCTTATTCATTGACTTGGGAGAAAT  
TCTAATGGCAGACATCGTCTATGGTTGGAACCCCTTCCAGGAACGCGTCGATTGCATAGT  
GACGAACGAAATCATTAAAACCTCTGGTAATCTCAACCGCGTCGAGTTCGTTCCCCGAGC  
AGCTCCTTTCTTTGCTCACACCTTCAAACCTGTACCGTCAAGGGAGTAACCAGCCACTCCT  
CCCGGGACAAGACCTCATCTTTGGTCATCCTTTCCAACGGTTTATTAAGACCTATCAGAA  
GAACGTGTACAGTTGCGTGATTCTCCTGAAACCGGTTGAAGTGGTCCTGATGGGGGAATA  
TGACTCCATTGGCGGACCATTTCGTGTTGGATGATGTGGCGCACGCGACCTTGGTAGCCTA  
CATCAGTAACAGCCCCCGGAAGCCCTCTGGGAGAACCTGGTCAATGTCCCGACCGAGTT  
CCCTTCGGATCCTCATGAACATCCGGCTGCCAGGTGTATGATTTTGTCAAATGATGGA  
TTCCCTGCGTGACCTGATCTTGGCGGTTACTCAAACCATCTCCGATTCCCCATCGACCTT  
GAAGACCCTGTTGGAACAACACCTCGCGGTTGACTTGGCGCAAGCCACAGGGCAGATAA  
GGGAGTGCTGGGTCTCGACCATGTAGAGAACCTGGGCAGAGCCACGGTCAATGATATTAC  
GGGACGTTCCGACAACCTCGTCGTCACTGTAGCCGTTATGAAGGGAGCCCTCCGTAGACT  
GGCTGCGGGTACGCTGAACCTTAATTAAGGAGCCGTTATGCATTTTCCAAGCGTCCGGG  
AATACAAAACCGATATTGTTGACAATAACCTGGAGAACCAAATTCGAGGTGAACCGTTTA  
AAGTCGATCCAGGAATCTGGTCCCGGATTATTGTGCCTATCCACAGTCCGTTCTTTGTGCG  
ACAGCCGGATAGTGACGTTCCCGAACGGTCAACCGGTGGACGACTCCAGTACCGTATTT

ATCGCTTGATGCCTCGGTTGACGGAACCTACCGCTCAGAAAGTTGCGTGTATGATCGAAC  
TGCTGGACCCACGATTGCCGAAGGGAAGTTGGAGTACGATGTGGTAGGTGAATGCAGCC  
TGTTTGATAACCACCTGCTCCACATGGTGATTGCTGCCTCTGAAGATGACAGTCCGGTCT  
GGTGGGAGAACATCAAGAACAAACCCGTGGTCTTCCCACCGCAGTGGCATACTCACAGCC  
TACTCTACGACATCATGGCCTTTGGTGACTTTGTTGAAGTCTTGGGGATGATCTCTGACG  
CGTTGAAACGCATGGGAAACCGTACCTTCAGATTAAGATTGACCATGCCTTTGAACTGT  
TCAATCATTACCTCGGGATTTACAAGAAGTCACTGGCTGATTGCCTGGCACGTCATAAAG  
CGAGTTATAACAGCCACGGACTGACGGACTTGCAAGTGGGATTGGAGAAAGTAGACAACT  
TCCCAACACTACCGCTTCCGGTGCCTTGGAAGGTAGACGTGACCGTCACCTCACGGTAT  
CGGGACTTCAAGCCATTATTGACCACTATGGCTTTAATCCCAAGGACTTCATTGAGAACG  
GTAAACTTCCATTGCTCAATTCGGTTATACGAACTTCATTCCCCCGTCTATTGATGGAT  
CCTTTGAAGGCTTGGGGGGTAAGAGAGAATGTGCAGCCATTACCATGGAGGCGGATGGCA  
GCATCGTCTTTCTGGCTAACCGAATGGATGGGCGTGTGACGGACTTAATTACTCGGTTT  
TGGCAGATCCCTATACCAACCCCGGTTAATCTACACCAGTTACCGCTATTCCCACCCTC  
TGCTCTTAGCGGAGAATGCGGAATGTGATCGGATTGTCCAAGGGGGTGGACGTGAAGTCA  
TTATGCTGGGGGGTATTCGTAAGAAGTGTGTTTACATTGGATTGACCAATGGTACCCTGG  
ATCCCACTAAACACATTCTCACACCCATTAAGTGGATGCGCTAAAGGCTCCCTGGAATG  
GCAATCCGAACTCCTCCTGTAATACTTGGTTCAGAAGTTTGAGCGTGGAGTATCTGGGGA  
ACTGGATCTACATCTTCCACGCCACAACGTGGAGAATGGAGAACAAGCTGATGGTGTAA  
CGGATTACCGGTATCGGTACCTGTACCGGGTTATAACCAGTGATGTCAACGCCAGATCC  
CGGTAACCGTTTCGTTGGTCTCCCCACCTTTAAAGACGGTGACGGGGTTCAATGGAATA  
ACGCACCGTTCTTCCGGTGGTGTACCCCTCAGGGGTATCAGAGGGTGAATAACAATGATA  
CCTGGGAACGGTATTACTTTACGTTTTAACAAAGTGATAACCTCGCCTTTACGGAGATTT  
ACCATTCAGCAACCGGTGGTGTGCCCTATTCCGAACAAGCCGGGTAAATACCTGGTAC  
GCATTATGGCGGCCTGGTGGGGCCGGTACGTGGTTCCTGGACTAATAGGAACCTGGGACC  
TCCCGCTAGAGATGGTGTATGAGATGGACCCTGAAACCGGTGTGATGACCCTCCTCCAGC  
AAACACCTCGACGGGAAATCGATTTCTGAACATTCCGTCCTCTGGCGACCCAAAAAACC  
GCCGCCTTAACCAATTGGTGTTCACGATTCGGAACAAGGCATGGAAGTGCTGGATGATG  
AGACGATTGGGGCGTCGTACGGGGCCTATCAGTCGTTCCCGGTCAGCCTTCTACGTTG  
TACCCAGGTCGTTCAAGTACCGGTATGACGTCATGAACCGGACGTGGATGACCGACTTAG  
GGGATATTGAAAACCAGCAACTCATTGCGGAGAAAATTACCAGACCGATTGCTTCCTCGA  
TCAAACCACGTTCTTCTTGTGGGCAATGGCGGGGATGTGTAGACCGCGGGGACCAATA  
CCCTACCGAGTGTACCAACGAACTGTGGTACCGGCAGTCCCCTGGGAAGTTAGCGG  
AGCGTCTGAGGTCTTAACCTCTTCTTCAACAAGTTGTTTCTCGTCTCTGAGTAACG  
CGGTCTTCCGGGTGGAAGGTCCTCTTACGGTGGGTGGAGCCTATGTGACTGTCCCTACTA  
ACCTGTTGGATCAGTACAACACGGTCTTGGGGGAATTCACCTTCTGTATGGGAAAGCAGA  
AAGCGAACCTCGACCTGTGCGAAAACAGAAGGGGAGTGGCCCGCTGGTAATTTCTCAAG  
ACATCAAGGTTATGTCAGGACATACTCAGCAGATCAATCCGGATGGTTCGATGACCATGG  
TACCTACGGGGACTATTCTTACCCATCGTCCATTACGGCTCGGTTTGTAAACCATGTGCG  
CGCATCCGACTGCCTGTAGAACTCCCGCGGATGTTTATCGGGCTGTGTGATCCCCTG  
GTTTCTGACCGGTAAGTTCGGTTGGTTACCGGTGATTATGATCATCAACTACGGCGAAC  
CTGGCACACGTCTCGTCACTGGACACTTTTGGTTCATCGACCCGGTTTATACCGGACCCG  
TCAATGCCCAGGTGGTCAAGTATTATACCGTGTGATGTGGTGCACAATGTCCATCTAC  
AGGGTGCTACTGGGTTGACACCTGCCAGCTGGGATGCCTTCTAGGCGGGGGAGCTAACA  
CATCGGGTGGGGGTGCGATGAGGGTAGGGTATTACCCCAAGAGCGCGACCGAGTTGGAAG  
GCTTTATTGACACTGGGGTCATTGCAGCAGGTCCAGGAGACTCACTCACCTCTTTTGGGA  
CATTCCGGTATACGAACCGTAGTACGAAACGGTGGACTGAATGTATACCTAGTATTACCG  
GTCAAAGTGGGGGTGCTTACCACAAGACCGTTACACCGGATAACGGGGTAGCTAACCAAA  
TGGCGTACAATGTTTCCACAGGGGGAGCCGCTACGATCTTTGAAGGGTTCGGTGAAGTACA  
CCTTGATGGGATCGGTTTACCCCGCTACCGGTTGGTACTTGTCTTCCAATCGGGACTCA  
GGGTGGTCTTCAACGGACAGAACTACACGTTGAAGTCCATCTACGTGGATTTGTGCGCAA  
TAGCTCCTAATCCCGCTAATAAGACGTTCTATTTGTACGCAGTTCTTAAGAACGGGAATG  
CGAGCTACGAAGTGACTTTGGAGAAACGCGCTGAGACACCGTTTATTATGTGGGTCGGAC  
GAGCGGTTACGAATGACAGTCAGATCCTCACCATTTAACGGGTTAATGTCTTTACGATTA  
ACGGGAACCGGATCTCCGAGACGAAATGGGGGAACTGCATCCCAGGCGTGTGACGGCTTGG  
TGAATGCCGAAGGTCAACTCCCGTGGTTACGTTCTTCTGAAATGCTTCCGTAGACCCAAG  
GAGGGAGAGGGTTAACGCCCTCCCTCCTTCTTTTCAATGTTTTCGTCCATGGATCCGTTT

AAAATCGTTCAATTTGATATTCGTCGAACGCGCCCGGAGAATAAGATCACCGGGAAGAAA  
ATGCTGATCAAGGATAAGACCTGTCCTTGGTTGATCCCGAATGGGTCCCCGTTCTTTGCT  
GACCCTGGCCTGTTACGTTGTATGACGAACGGGGTGCCGAAATGACGCTCAACCGGGAT  
TACTGGTTGGAGGAAGCCTTTATCCCGTTCTGTCAGATCAGTGGTCGAAATGTTTGTGT  
TTCATTCGGTTAACCGAGAGTATTCGTCAGAACAACGCTTTCGTAACCGGAGACTACCAA  
ACCATGGGGCGTGGTTCGTACCGCGTAATGACCTGGACGAATGGCTGGAAAAAATGCGG  
GAAGGGAAGATTCCCATGAGTGGGAGAATGTCTTCGTTGTTCCACCCACCCTACCGCCC  
GAATACCATTTGCATAAAGCTGATACCGAAATTGGTGATTGGTATGAGCTGACGTTCTTC  
CTGGATACCATGGCGAACATTTACCGGAGCCGAGATCCAGAGTTGGAGGATCAATCGGAA  
GTTGTGATCAATGAGGCGTTTACGAAGCTCAGGAACTTCCGTGACGCCAGATGCGTTCGT  
CTTGTGCAACACGACAACAATTACAACGCCCTCACCTCCAAACGAAGACCAACGTTAAC  
CTGGGCAATCTGAATAACTTTGCTACAGCTACTCCCGAACAGGATAAGGCGGGTACGGCT  
GATATCCTCTTCAGTACCCCGCTGGGTGTTAAGGAACTGGTCAGGGGGTATACGCCGGAT  
ACGTCGGCTTCCATGCGTTCAGGGATTATTGCCATTAGTAGATTAGGAGGAACGGATTAT  
ATCCCTCCGGGTATTAGTGGTTCGTTTGAAGGTCGGGGGGGTTTTACCCCGGAGTGTGCA  
GCGGTATTGGAACCTGAATGATAACCTGGTCCATACTCGGGCTCATTACGACGGACGGACG  
GAAGGGTTGTATTACACTGTGGTTCGAAATCACTTGAGCCTGAAGCCCGACGTGTCCTTC  
ACCGGGTATAAATACCAGCCCCCGTCTTTAACGGCCATTGGGTTCGTACACAACCGGGTC  
TTTACAGGGAGTGATCGCACTATCATCATGGTAACCCGTGATGGGACGAACCAGGTGGAC  
GCTGCGCTGACCAATCGTACATTGGATCCTTCTGCGCATGTTTTTGTCAAATGTAACATT  
GATTTGGCTATCCAAGATCTGGGGACGTCAGTTAGTCTAACGGAGTGGAGCCAAATACAC  
CCGTTGGGTAATTGGGTCTACTTGTTTGTCACGGCGATGACTGAAGGGCAATGGGGTGGT  
TGGGGGCATAGTCGAACACGGGCCTACAGAGCCCCTCTCAGCGCGATTAAAAATGGTCAG  
CCTCTTACCTTCAGTCGGGTAAAGTCTCACGGACGAACGTCCCAGGGGCCTTACAGAGC  
AATGGTGACTACAGTGAGTTCACCCCTGCTCCTCCAGACGGGGAATTCAGTACTTACGGC  
CCCATGACCTTTGCGCCTTATAAGGCCAACAAAAGTGTTAAGGGCTCCCAACGACGTCCC  
CTGATGTTCTTCTCTGAATCCAGTGACATAGGACCTCAATATTGTTCCATGCATTACTTC  
GGGATGATGTTCTTTACTCGGAACATCAACGGGGTGGACGGTGTAAACCGGGGTGTACATC  
GATTGCAGTTACGATTTCAACCCTGAAACAGCGCCCTTCGTAGTGGTTAAACAACCCCC  
GTACAGACCGTTGACCTGAGCAAGATCATCAGCAAAAATTC AACGGCCTCTGTGCATTAT  
GCAGGTATTAGTGACGTCTTCTTCAACATCTCTGATCACTCCAGTCAACTCCTGTTGGAG  
AATAAGGTGATTGTTGGGACGTCTCGTCTAGGGTTGAGGGTCTCTTTCCCGGGGTTGTTT  
AGCCGTTTGCAATACAACAAAACCCGAATGTAACCGCCAGTGGGATGTTGCGGGATTAC  
ATGCGCGCGGACAATGCGAAGTTCTCGGGGATGGGGGTGTGGGAAACGCCAGTTACCCT  
ATTAAGAACGGAGGGCGAATCAGTGCAGTGGGGTATGAACTTGCCGGGGAGTATGTCTGG  
GCAGACAGCGCTGGTGATCATAACCGGTACTTCTTCTACCGGAAGGTCAGCGGTGAATAC  
GCCGTCCGTCTGGGATTACCAACAGCAACTACCCACCTTATTGGCCCGACCGATCAGC  
GCAGAGGTGTACGAGAACCGGTTAGACCGTAATACTTCACTGCTCAGTGTAACCGGGAGT  
GCGGCGTTCCTGACCGCTGAAGGGATTGAAATGGGGAACAGTTGTTTCTCTGTAATGGGA  
ATGAACCATTTCTACGACCTGGCCTCAGGGGTTGAATCCGATACCACATGCCCTCGGGAG  
TTTACTTTTAAAGCCCCTAACGGAAATGGCATCGTGTTATCCTGCCCCAGAACCTTCAGT  
CGGGTAATGGACACTGGGGATCAAACCTTTACCATGAAGGGTGCAAGCCATTGGGGCTGTT  
AAGCGTAACGACATCGATAAACTGATCCAGTTGATCACCGCTACCCTCAGGGAGAAATGG  
GCGGTTGAGTTGATGGTGATCAATCCCATCAGTGGTAAAGGGTTCAGTCGGATGAACTAC  
GCGCTGGCGTTGGTGCATACCCGGGACATGGAAGGGGGTTCGGTATGTGGTCAAGAGTAAA  
CTGTTAGCCTGTGCACCGGTGATTGGTAATCCAGTCTCGGGGGTCTACCCGATTGATGAC  
CTTACGATTCTCGATCAAACAGCATTATCACCACGGTGAACAACAGTGGGGATTGGGAT  
GAGTGGAGCGACACAGAAGCGGATGTTGTGGCGTGTCTCAGCTGTCGCTTTATGTGGAT  
GAAGCGACGAATAACCCTCTCCGGGCGTATTTTCGTCGTTGTACAACGTCCGAGGCGAAGCC  
TTGGGGTTCTACATAGCAGTCTCACCTTCAGCCTTAATAAAACCACTCAGAAATTCTCC  
AGTGTTACACCTTTTAAACAACGAGGTAGGGATGTCGCGGGCGTGGTGTGTGCAGAACCAC  
GCCAATCCTAACGCCGGGTTAATTACCCAACAGCAAGGCTACGTCTTTGAGGACACTGAC  
GGTGCAGGGTATGTAGGGAAGATCGGCACGAACACGTATTTGATTGGCTCCTGTTACCCG  
GAAGTGGGTGGACGATTTTCTTCCAAGAAGAAGTCGAGATGATGATAAACGGTACCGTG  
TACAAAATGCCCGTTGGGTCTATCGACGTTAGGAATGTGTCCTCGACTCCTCGTAACAAA  
ACGTTCTACATCTATGCGACGGTTGAAGAGTCGGAAGGACGGTATATTGTCTCCGATGTA  
AAACTGCGGCGTTCCAGTGAGTTGCTGCAAGTCGCAACCGCCGTGACGAACGCCAACCCAG

ATTGCCAGTATTATTAGGCACAAAATCTTTACCATCTGAGAGTTCCTATTAAGTTACACA  
CGGACGGGAGGGATTATTCCGGTGGGTTCTGGTTTACCGCAGGATGAAGGTACGTTTACG  
TTCTTGAATGCCTCGGAACGTTTACCTTAATGTAAAGGGGGAGTAAATCTCCCCCTGATC  
TTTTAAATGGAGTAGCTGTATGATTATCCTTGGCGGGGAACCCCCTTTCATCGAAAACCC  
TGAACCCAAGTTCGGTGGAGTGATCTCCAAGCTCAATGAGATGACCTACAAACTGGAACC  
GTGTGTTACAGCTACAATGAGGGGACTAAAGAAAAGATCCGGTTGTTCAACGCAAACCT  
GAATGATTTCAATTAACCAAGCCATTGTCCACATTGACGCCACATCAATTCCCAGGGGGC  
AGTCCACGGTGAACCAAACGGACCATTGGGTTGGGCCTGAAGGACAACACTACCGGTCCGC  
TACCCTGGCGGAACAACAGTCGTAACGCCTGTGTTGGCGTATGTGACCCCTCACGGTGC  
TCGCGCTGCGGTTGTAGCCAACAACGTCGGTTATAATTGCGCGGATTATCAACCCAATGA  
CGTGTTTCAAATCTCGTCGTTCTACAACCCGGATGAAAACCCCGTAGTTCCTCCAACGGT  
GGTTCAACCCATTCGTTATTTTGGGTAATCCTTGAATGTGCGGGATGATGATCAACAACGA  
CCGTCGTTGTTGTTCTCCGGTTACCGATCCGTCCTCGTTAACAACGGTACACCGCCTTCTT  
GTCTGGTTCTCTGGCGAACGCAGGGGGAACACAGTTCTCGGAGATTCAAACCTCAACGC  
GTATTACACCGGACGAAATTGGAAGGCGGTAGGAGGGTTTACCAGTTCGGGCAAAGTGGC  
CTTCTTTAAACCCCTGGCTGAGAAGAAGATCTACGAGTTCAAGAGCACCCCTCCCATTAAC  
CCCCTAGTGATAACTTCCCTGCTGTATCAAGGGTATAGCACGTCGGTCTATAAAGGACT  
GGGGTTAGTTGGGAACGAGTCGGTCCGGTTATGACCCTAAAGCACTATTTCTTCAACGT  
GAACTTCATGGAAACCAATCCCCTTTGGTGGAGCAGGTGACTGCGTAGTACACCGCCCG  
GTTTACTCAAATCAATAAAACACCGTATACCGGACCGGCTAACGGGAGTCATTCGTCCGA  
CATTAAATGACTTTGTGACCCTGAGTGCAGGTCAGACCCTGGAGATGAATGGAGGACTGCA  
ACCCACCACAGCCCTCATCTGGAACATTCAAGACCCGGGAAATCTACCTCTTTGTGCTTAT  
TCCGGTGAATGTGGTCCAAGGGGGTATTTCGTCGGCCGTATAACCTCTCCTTCGTGGAATC  
CAATGTCCCGGGTACCTTGGAGAATGGAGGCACGGCAAGCTTTACCCAACCTGGGTAATTT  
GGTCAAGGACATTCTTCAACCGAATCTGCTACCCCTGCTGACGCTAAATGGTTGCGGTA  
CGCGAACACCTGGGATTTCAATAATCCGACCTGGTATCCTGGGATCGTTCTGAAGTTAGG  
GGAAGTGTTTAAAGCGGTCGCCACGAAGAACGGTCTACGGGTTAAGCGATGTACCACAGC  
CCATAAAGGCTTGAGGAAATGGGTGTTGGGAGAACGGGCTGAAGTGGGGATGAATGAAGT  
TCTTACAGACTTTTATCCTCCGTCACGCCATAGTCCTTTTGGGCCGGTTCCTGATCGCTT  
ATTCCCATTGAACACACCCGCTGGTACCACGCGGTATCTGGCTTATTCCGTTGACAGTGA  
AACTGTGTTGTATGAGTGGAGTGAGTTGACCTGGTTCGAATACCTCCATTGTGGGTGTAAC  
CACGGGAATAAGTTTGTATTGTTCCAGCGGATGTTGGGATTATTAATAGGGAGTTGAC  
CCGTATCCCTAGGGCCTTGGCGTCGTTTGTAGCCTGCTGGTGGATGGAGTCAGTATCAA  
CGCCCTGTGTTTACACCCGGGTACCAGTATACCGGGTATGCTTCAATCGCCATGGCGAA  
TGGACGAGTCCAGGTGGGCGCTGAGGTCAAACCTCTCCCCAACCCAGCTTGATTACCCTGCA  
AGCCGCCAGTGGGGGATTCTGGCTCGAGCAGCCATTGCGAACCCCTCAAGTCAACAGCGC  
CCTCGGGGAAAGTGTGATCAACGTCTTTGCTGTCGCCGATAACTTCGCGTTGGTGGTGT  
TACCCATGGGATGTGTTACGCAGAGGCTGCTGTGGTTCGGTATACGGTGAGTGGTGGGGT  
CTTAGGCCGAACCTCCCCTCCGCTACGGGCTTCGTTACTAACCCGGTTACCCAGCCGG  
TATGGTTCGTACCGGGCACGTACCGCTATACCAATTCCGGTGATAACCCGTATATGACCTA  
CGTGGATGTCCAAGTACTGAAACCAACGGTATGTATGGGCGGTTGTGGTTCAGTCCACC  
CTTTGGGGACCTCTACGGGCATATCAGTTTCAAATCACGGATTACCCGTTTACACCCAC  
CTACACCGTAGGACGGCTCAATCCAGCGAACTGTATACGGCGTCATCACCCCTTGATAC  
GGTGAACGAAGATCACCCGCATGTCTTGATCCCTCGGAAGGGAATCTACCAGTACGACCC  
TGCTAATACCGGCTACTCCACGAATCTGTTGGCGGTCGGAGGAGCGGGCGTGGTGGATCC  
GTACGACGTAATGAAAGATGCTGGGTGAGTATCCTGCTCGATCCAGGGTGGTTATAAG  
GGGACGTGCGTCTATCCTGGATACGGAATACCCCATTAAGGTCAACCCTACCGGAACGAC  
GTAATGTTATTTGGTACGCCAAGGGGATGCGTTGGTAGGGTTGGGGTCTCCCCTACGCCG  
AGAGGTCAATAACTCGGAAGTCTCTTTGGGACTGCAACGAACGGGATTCTTACCATCGA  
TCATTTCGTACATCGTGATGGGTAGTCATGTGGTGAGTTCTACCCGTCGGGGTACGGCTAT  
TCCCACCTTTGCGGATCACGGGAACCTTGAGGGTTAACACCTTCTTTACCCGACGTGGCAT  
CATTGATTAACCCTTAATGAATCCCCCTACCTCCCCGTTAAGGGAGGTAGGGGAGGTCCA  
GTGGATTAAGCCACGGGTGGCGAGGTGGTTCATTGCCAGGGTCTGCACCTCCGTGAATA  
TGGAGGATCAGAGACTCTCACGGTCCCTCACATCGGTTTGTCCAATAACAAGACCTGTA  
CTCACACTGTTACCGGTACGAGTGGTACTCCCGTTTTGGGTATAATTACCCTCTTGAGTA  
TAGTTCCTTCTTGTTCGGTATTGCCCGGATGGGTAAATGTGCCCTTCCCAGTTCGTCTGA  
CCAATGGCGATGTTCCGCAAATGGGCTTTCCTGCTAAGAGTGTCCGACTGAAGGTTAAAG

GTCTTCGTTAAGACATTGATTTCTTCTCCGCATGAAAGCTAATACTGTCTTTGGTGTAA  
AAGGCCATCTTCTCCTTATTGACGGCAAGGGTGGACCTTCCCTTGTTGGTATAGGTGAAC  
TGATGTTTGTAAATCATCGAAACTGGAGATACTCCCATCAGTTCCTCGAATATCCATGCGG  
CCTTCTTTGGAATTGACTTGGATATCAAAGCCCGTCCGTTCCCCGTTGGACTGAGGGGTC  
CGTAGTACCACTAACCCGTCGTGGGTAAGTACTGACCCCTGGCTGTATAGAAGTTATCCAGGTTA  
AAGGCCACGTCTGAGCCAATCCAGGGTAGCCCCCAGCCCCACTAAACCGTCTCTAAG  
CGAAACGATCCGTATTGTCCCAAAGATGTCCAGTAATACTGGTCTGACCTGTGATT  
TGAAACACCCACACCTTAGCCCCTTCCCGGACATCCGGTGAAGTAAGTCGGTTCACATTC  
CCAATGGATCGCCAGACCGATGGTACGGTGTGTTGACACCAGGGTTTTAGTGGTAATCATC  
TCCCCTTCTTTATTCTGGCTGGTTTCTTCTTCTGTTCTGTTTTAGGCAGGGTTCTCCCA  
TCGGCGGTAGGAGAATGCGATGGAAGGTGGATCATTGCTTCGTGGGTATTGGTGTCTTC  
GTGGCGGCAACCGTCCCTACACCCAACCATTTAACCACGTTCACTAAACTCATACTCGCG  
TACTCATTATCTGCACACTCACTTTACTTAAAGAATTCATACCATGTTTTATATTAAGTAG  
ATTGATCCTAGAGAATTACATTCCTCTGTTAAGCAGCGGAATCATAACGGGTAGAATTGGA  
TCTGAATCATTGTTAACTGTTGTTGCTCAGAACGGTGTGCGGAAAACAGTATCCT  
CCGAGAAGCCAATCCCCTGGCTCCTGAAAATGCCAACTACCGCGGTATTGGACGTAAGTA  
CGTGGAGATTAACGGGGATTGGACAATTCGTTTTGGATTCTAAAACAGACTTAGGCAA  
TGGTCACAGTTTCAAGTTTAAACGGGAAAGAGTTAAACAAGAATGGAACCTTCACGGAACA  
GAAGGACTTGGTATGGATCCATTTCCGGTTAGACAGTACTATCAGCCGTATTCTGTCCCG  
GCTTAAACCCAACAGTCTGTTTTACAGCGATGCCAGTGGCTCATCGTAAAGACTTCTTTAT  
GTTTACCTACCCGAATGACACGAGTTACGCCTTAGGGGTCTTTAACAAGCTTAAAGACAGA  
ACGTCCTGAACTGTCGGCTGCAATTAAGAACCAAGTCATGCGGTATACGGAAGAGAGTGC  
TAAACTCAAGCAGATCACCGAAGGTGGTCCGGAAGAGCTGGAACGTGAGTTAAGACGAT  
TGAGACTGAACTGAGGGAGTCTTGTGGTACGAGGGGGTTTTGGAGCAGGTGAAAGCAGA  
CCCTGAGCTCCAAAGTAAGATTGCTACCTTCAAACGTCTGGCTGAGCAGATGACATTGAA  
CCGAGTCAATGGGTTCTTTGAGACTGAGGCTGAACTCAGACAGTGAATCGAAACAGTTCA  
AGCTATCTTGAGTGTTCACGAAGGCCAAGCCACTGCCATTCAAATGGTTATCAGTGAGCA  
CGTAGGGGTTTTGGAAGGAATGGAGGAGATCAAAGAAGATCCCTTTGTCTTCCATCATCA  
AGCCGAACAACCTCAAGGTGGAACCTACTGCTCTCCGGGAAGAATACAAACAACATGGGGT  
GCTATTGGGTAATTACCCTTTGTTCAACGATGACGCCTATGACTTTACCGGTTTTGAATT  
GGTGTACGAGGCCTTGGTCGCTCAATTGCGTTCGCGTGGTGAATTCCAGTACTCCTGAGTT  
AACCGGTGGGCGGTATAAAGAGTATACTGTCAAACCTGGAGCAAACCCGTAATCAACTGAG  
GGCCTCTAAGAATGAGCTGGACATTCTCACCCACCAGTTCAAACATTATGATGCCACGGA  
GCTGGTACTTGTCCGGAATGTACCCATGAATCAAGGTGCGGAATACCGCGAATGAACT  
GCGTGCAGCACGGGTAAAGCGGAAGCCCTTAAGTTGAGTGTGACTAACTTGAGCAGGA  
TGTTGAAACCCTGGAAAGATTAGTCGAACAGGACAGTGAGTGGTACCACAGCATGTTAGC  
CCTACATCAGTCTGTGCGATGAATGGTGTGTTAAGTGCCTTGCTGAAGTGATTAAGC  
ATACGACATGGGTAAGTCGGATACCAACATCCTTTCAAACGCCCTCAGGGCCTTCATGGG  
GCGTTTTAACTGTAAGAGACGTATCGAGGCCCTACTGGAAGAAGAAAAGCTCTTCAACAC  
GCGCATAGGGCTGTTACAGAAGGATTCGGTATTAGACATCGCTACCTACTTAAAGAGTCT  
GGAACACGACCTGGATGTGGAGAACAGTCGTATTGGTTTTCTACCGTCGGCGTGTGAAACA  
GCTTATAAGGAACTAAAGACCATCCACACCTACACCCGAGACCTGGAGAGCCTCCGCTG  
TCTTAAAGACGAGATCTTCAAAGGGTTGGAACAGCAAGGGTTGGTGGAACTGCGTAAACG  
GGTTGATGAACGGATTCAATTTGCTAACGGATGAGAAGGATGAATACCTCGCCTCCATTAT  
CGAAAGCCGTTAGTTGAGTGCAGGTTGTCACGTCTATTTCCGGAAGACATTCATCGTTTTAA  
GCGCCGTCTGAAGATTGTGGATGGGTTAATGAACGGTCTGAGTCCGAATAAGGGGTTGAT  
CCGTAAGCTGATGACGGATTTCAATCAAGACCTATTGTGCCAATATGAATGCGGTGACTCA  
ATCAGTGTGGAACACCATCCTGTTTGTAAACCCTGCCATAAAGACAACGGGGATTTGAA  
CTGGAAGTTCCCGGTGGTTACCGGTGATGATGAGTCTCGCCAGAGGTCAGTGATTGCAG  
TTTGGGTGAAGCAGGTATCATTGTCTTTGCGTTCGTCATGTGGCCATTTCGTTACCACGG  
TAACTTCCCTCGGACGCTGGATGAGGTGGGTACCACCTTCGATGATATCAAACGCGGTGCG  
CTTCTTCAATTTGATTCACGAGTTAACCACCCAGAAGGACGCTAAACAACCTTTCATGAT  
TAGCCATTTCACTCAATACGGAATGTTACCAACCCGAATGTAATTGCGATGTATTA  
TGAAGGGTTGAGTTTAAACGGGTGAAGTCAATCAACACTGTGTTATCAATTAATTTTAAAC  
CTACATTATTCATTTGCAAGGCATACCTCTAATGAACGTTCAACTCCCACGATCGGTTAC  
CCTGGATGCCTATCTTCAACCGGACGGTACACTTAGGCTGGGGCCGAGTCAGGCTAAAGT  
AACCATTAACCTACCATTCGGATCCTCAAGAATCCATTAATGCGTGCATTGTCTTTGGAGG

GGCAATGCAAGGGATTGTGACTTTTTGATGAAACCGGTCAGACCCCCGTGAGTTATACGCT  
GTTGAATCCAGGGGGTATTACACCGTTGAGCAGTCGGTTTTTAACATCTTCTCCTATTT  
CGGAGTCAGTGCTCCGATGAACTAGGAGGCATGAGTCATGAACAAAGCTGAAGTGATAGA  
ACGGTACCGCGAACTGGTCGCAGACCTCACCTCCCGCCGCATCAGGTGATCCTGTCGGC  
GGGTGCCGCTTGGTGTTAATGGGCATCCGAGAGGAAACAAGTGACCTCGATGTGGATGT  
CCCTACCAGCGTGTTCAACTGGGCGAGTAATAAGTTTGGGGTTATCGAGAACGAAACCGT  
GAATAAACGGGTTCAATACACCCCCCTGGTCGATCTCCATGAATACGACGAGAACACGGG  
AGTGGTGTGTCTTGAAGGGGTGTGGTTGTACAGCCCTACGGAGTTCCTGAAACAGAAACA  
CTGGCTCACGAAGCTGGATGATCGAACGGACGTTAAGACCCAACAGGATCACCGTGATAT  
CCGCCAACTGGAAATTCTCACTCAGTCTCAACCATTCACTGCACGCGCATTGTTGTAAGG  
TTAGGTTACGGTATGTTTTACAGTCAATTGGAAGTGTTAGAAGCCGTTCAACGGTTCTCT  
TAGGCTCATAACACCCCATTGGATAAGATCGCTATTGGCGGAGGTGGGGCTATCATGCAC  
ATGGGGGGTTCGTGAAACCACATATGATTTGAACATATGGGGGGAGAGTCCGTTCTTTGAA  
CTCATTGCTGAAACCCAGAACGCTCTCCTCAGTCTAGGAGAGGCAATGTGTTCCACGTT  
GAAACGGTTATTAATTCCATGGATCAAACCGATCACTTCACCACACGTCGCCATTACTCG  
GTGCGTAAACATAACCTGTATTTCCCACTGTTCTTGTAAAGCTGGACCAATGTCCTGAA  
GTCTCCATCTTCGATGCGATGTCACTGGTGATTACAGAAACGAGGGAGCTACAGTCGCCAT  
GAACGAGGAGTCCGTCGTAAAAAGGATTACAGCGACATCTGTTTCTTGAATGCGTTGCTT  
AAGGAAGAACACAAAGTCAGGGCTTAACCTTAGGACAGTACCAGGGGATCACTCCCCTGG  
TACGTCTTCCCCTTATACGGTCTAGGAGATTACAATGGGTAAACACTCACCTGTTGAAC  
GGATTAATACTCCATGAACAACACTGACGTATCACGACCATCTTTATTTTCGTCGAGAACG  
GGAACGAGCTCTCTGATGAAGCGTATGATGTGTTGGAGCAAGAACTCAATGTGTTGTACG  
ACCGATACCCTGAGATAGCGGCTAAGTTCGATTTCTATAATCGTCCCCTTCTATTTCATG  
AACCTCGGGGGAAACCATTCAACCCGTACGGTTCGAGGAACCCATGCTCAGCTTGAAGA  
AAGCCTTGAGTGTGGAGGAGGCGGATACATTCCTGTAAAGTACCCGGATGGTACAACT  
TCTTTTACGAAGAGAATCTGGATGGGTTGGCCCTGGAGTTGGTGTATGCACAGGGACAAA  
TGGTCAGTATGAGTACCCGGGGGTCTGGATTAGTCGGGGAAGATGTGACGCATTCCATAG  
TTCTCTTCGATGAAGCTACACTTCCTCGCACCTTAAGGACACCCCCTGACCGCCATAAAC  
CCCAGGGGGATCGATTGGTTATTGGGGGTGAAGGGTACATCAGTCTGGAACGCTTCGATT  
CTCTTAATGAAACAGGGGGAAAACGGTCCAATCCCCGTAATTCCGTGAGTGGGTGGGTGC  
GGTACCTCCCTCAGAACCAACGGGAGGATATCCGAGGAACGCTGTACTTCACGGCGTATT  
ACGCCAGTGATCGATTGGGGACGAAAGCCTATTCCAAATTGAGGCAGGTTCTCTTAGGCC  
TAGGGTTTGGTGTTCTCTGAATACAGGGATTGGATTGCGGTCTCAGAGAACCGGAGGGGGA  
ACATTCGTCGAGGATGGGATTGTGATTAAGTTCGACAAGTTCAAGGAACAAGACGCCA  
GTGGAAATGGGAGTAAATTCCCTCACTGGGCGATTGCTTACAAGGTCCCTGCGGAAGAGG  
CTTTGGCCCAGGTTGAGTGCTGTATCTGGAATACCTCTCGGTTTGGTCCGGTAGTACCGG  
CGCTCCAGTATACCCCTGTAACGGTCCAAGGGGTTATCTGTGTCAGTCTGCGTCGTTACGTA  
ACTACGGTTCGTTTATGGACTTAGGGTTATCAATCGGGAATCGGATTGTTATTACCCGTA  
ACAACGATGTGATCCCTCGGTTGAACCGGGTGGAGGAGTGTGGGGAAGGAGACCTGCTAG  
AAGCGCTACAAGCGGCCCTAGCTGCGATTCTCTCCTAGAGGTAGTGGTGGGTAGGGACA  
GTTCCGAACCTCGTCTGTAATAACGTCGCAGAGTGCCCTGCGCAGATCGTTATGCGGTGCG  
TAACGACGTTTCGATAAGTTTGGACTGGATGTAGACGGTTTAGGACCCGTTAAGGTCAGTG  
AATTGTTAAGAAAGGATGGGCTAAGCAACCAGCTGATATACTTACCCTCCGGAAGGCA  
TTAAGGATCAATGCCTCACCCCGACGACTCGAAGAGGTTTGGAGCGTGTCCCTCACGAAC  
CCGTTCCCTTACATCGTTCTTAAACGGCGTTGGGTATCCCGGATATTGGGATCACTTTGG  
CTAAATGCCTAGCCAACGCCATCCCTGAAGGGAAGATCGAAGAATCCCTTAGCAATCCTA  
AGTTCCTACAAAGTGTACGAGGGTTTTAGTGGGGATTGCCTACCGGGTCGTGAACGCGT  
TCGACTCCCCGGTCTTTAAGGACAACCTCCACACCCTAAAAGGTTTGTCAACTCTGCAGT  
ACACCGGAACGCAGGACGACTGCATTAAGTCTGTATTACCGGCAACATTGGACCTTCCC  
GAGGAGAACTCTGTAACCTGTTTCGCGAAGGAAGGGATTGAATTCAGTGATCGGCTTACCC  
AGGACTGTGCCTTCCCTCATTGTGGGTGATCTTCCCTGGTAAATGGAAACTGTTAATTGCAA  
CCGAATCGGGTATACCTATGCTAATTGCAAAGGATTATTCGAGCATTGGCTCCCTCATT  
AGTTCATTAAGGACACTGAGAATGACTGTTCAAACACTGACACCAACGACCAACAACACAC  
TACCACCGACCCGGTAGTAGCAATGAAACTCAAGAAGGCCGAGAAGGCTCTGAAACACTC  
CAAGGAACCTGGGTAAGAAGATGAAACACCAAAAAGGAACAGTTTGTAAAGAAATCCATTAC  
CCAACCCACTGAGAATAACGAGTACCGTTCCGCCCCTGAGCCTTCTAAGCTCAAGGTGGT  
GCTTGACGCTAAGGAACTGGTGGCTCTCGATACCAAGCCGTACGGCGACTGGATCCGTT

CAAAGAAGGACACGATATTTTTGGGAATACATTCTGGTCAGTCGGTGTAAACCGCGGAAAT  
CGGCCTCTTCTCTAATTTCAAGACAACCTTTTTGCGGAGTTGAACTCGATCTCTAGGTCTGA  
CTCCTATTCTGAAGTTACGCTGGAAACCCGTAAGTACTGACGTTCCCTTGCCTAACGTCAGTAA  
GCGTAAGGGGAGTGCTGTGGGAGTCAACTTGGTGGTTAATCGTTGTGAGTTTGAAGGGGA  
GAATTGTCTTCTGAATGTGCGAGATTAACGACTGTGTGGTTAACAAGAGCAAGGTCGTTCCG  
TACACGATCGACCGAATTGCGACCAATCAACGAACCTGATCGACTTCCCAAAAGAGCGGA  
TGTATTTAGACGAGGGGTCGATCAACGCGCCCGGTACCACGACTGCCGTTTCATCGAATC  
CGAGATTAAGATTCTCCCATCAATGGCAAGGGCTTAGTGAAAGAGTCGTATGTGGATCG  
TACGCATATTACCGCTGGGAAGTTTGCCATCGTTAGATCGCATCTTACCACCACCACCCT  
CACCGCATCCATGCTGTATCTCTCGAAAGCTTACCTTCATGGTTGTTACTTGAGCGTTTC  
TGATACGCTGTTCCCTTCGCAACTTCACCCTCCGCAATAAGACGCTTTACATGAGGTCACT  
CTACGCGCCTAATAAACTGGGTCTTACGGTGATCGGACTTCCGTTCCATCCTCAAATCT  
TATTCTGCACCGCACCTCAAAAACACAGTATGTAATCTCCATCCGCTCGGGTGGTTTCGTC  
CGCCCTTGAACCTGGGGAGCGACGTAAGTTGGGAAGAACTCAGTGAAAAATTGGGTAAACT  
CTTGATAGAAACCCCGATGGTCAATAACGAGATCTCTGAAGACGGACTCCTCTTCAAAG  
CATCTTGAATTATGTCCTGAAATCGGTGATTTCTCGGATGAAGATCATCAAGTTGATGGA  
CGATCTGATGGCTGTTAACCGTAGAATCACATCAGATTTGAGGATCCTGAGTCCGTTCC  
GTATTCTTAGTACACAACACCTTACTCCCCAGGTAATCCTGGGGAGTAAGGGTTTAATTG  
CCTACTTACCTGTAAAAGGGAGGTTAACGAATGTCCAAAACAAGAGGAATGACCGATAT  
GTCATTTATACCGATGGGAGCGCGTTAGGGAATCCAGGTCCGGGCGGTTACGGTGTTTAC  
GCTAAATACAAAGGGGAAGATTTCTCCCTGAGTAAAGGGTATTACAAAACCACTCAAAC  
CGTCAAGAACTCATGATTCTAATTGCAGCACTGGAAGAGTTTGGTCCTAATATCAAAGGG  
GACATCTTCACTGACTCCCAATACGTCATTAAGTGTGCTACTCAATGGATGAGAAGATGG  
ATACGGAACAACCTGGATGGGGTATAACTCTGGGCTACCGGTTAAGAACCGCGATCTGTTG  
GAAGTCCCTCACTGAACTCTTGAAGAAGAATAAGGTAAAGTTCCATTGGGTTAAAGGTCAC  
TCTGGGGATGAAGGGAATGAAATGGCAGACCAATTAGCCAAGGATGCTGCCAATAATCCG  
GAAGCCCACAATATGGAATACATGAAAGTCTTAGGGTTCTAAGCAATCAACCGTGGAGAT  
TAACACTATGAAAAGCTTTGTTGATGTATCAGTAGTAGACGATGGGGGTAAACAGTTCT  
CTTCGGTATTACTGCGAATCAAAGACGGGACGACCCGAAGTCGTAGGATATACCGATCC  
TGATTATTTAGAGAGGGTGTGACCTTGTGTTTGAACAGCTTATCAGGGCAGAACAACG  
AAAGGAAGCGGATAGTAAACTCCAGTTAGCCTTTATTCAGGTGGTCAAGGAACAGCCCG  
TAAACAACCTGCAACTCACGCTTTGCGACTGCGTAAATGGACCGTCAGCTGGAGAATTTTA  
TTGGGTGGAGGATCGGTGTTATACGGCTGACGGAGTGTCTTCTTATCGAATGCTCCGGT  
GTGTATCTATCATAAGAAGTGTCTGGGTGGTACTGCGGCAGCTTGGGGGATAAGACGTGC  
ACCCCCCTTGATTGAATTGGTGGCTATGCGCTATCATGATGATACGTACGAACTCTTTGG  
CCCGAGGTTGGAATATCTACAAGGGAGAATGGTCTATTGTGTTGATTTAGTTTAAATAA  
AGCAGTTGTAGAAGCGATTGCTAATTTACCGGATACAGGCTTGTGATCTTGGAACATCA  
CGTGAGTGCTCAACGGGAACCTGGGTGAACTCGTCGTTGGTTATTCGGGTAAATCAACGCT  
GGGTGATCGGGTTGAGATTATCATCGATATGACACGTTACAGGCGCTAAGTTGACGTTCTGA  
CTACTTCCACCCTCAACAACCGACGCTCCGGGTTATTCTGGCGGTACAAGATCGGGATCT  
GTGGAAATGGGGGTACGAAGGCAGTAAGGAATGGACCGCAGCTACCTTTGGGTATCCCT  
CACCTTGAGAGTTTCGATAAACTGATTCATCGGGATTACCAAGACCTGGTAGAAGAAG  
TCGTACCGTCCCTTCGTAAGCAGGAATTGGATGTCGAGAAACTGCTCCCGAGTGCAGCGGCC  
TTACACGTTGGAGGGGTACAACCTCCTGATTGTTAATGCCAGTTCTTTCCACGCCACTGA  
TGTATGGGATGAACTGAAGGGTGGAGATGGTATTGACTTTGTAGTCACTTACATGGATGG  
TAAGGATAGCCGGATCTTCTATCTACGGGGTAAGGATAAAGTGGACCTAGCGGAAGTGGC  
TGAACGTTTTGGAGGAGGCGGCCACCCTAACGCAGCAGGGTTCACCTTCAGCTTCAACGA  
TCCTCGTTTCTCCAGTCACACCTGTTTCTATATTCCGGTACTTAAATGGACACTCACAC  
ACTGTTTCGTAATCATTGACCTGGTAGCTAAATCCGTTTTTATTGGTGACTTAGTGACTCG  
CGGGGTGACCATCGACTTATGAAGTCTATCCGATATTTGGAGAATCGGTAGGTGATCAA  
AACAGTTACGGTGACCCAATGTTTACGTAACCTAACAGGTATTCCATTTGATGGGGGGTGG  
TTAGTATACAGGCTATTCACCCTGTTCTCTCTATTTTTTTTTTTCGGGATAAGTGGAATGA  
ATAATTACGGGTATGTGGATGTGTCCTTGGTAGGACCTGAAGTAGAGGAAATCTTTGTCT  
TGCTCTTGGAGTGTGGTATTGCACCGGCTGCGGAGTATAACCTGCATTGTAACCTGATGT  
ACGATGAACAGGCAGAAGAACCCTGGTGAACCTGAATCCTGATGCGAAATTCACCGCCT  
ACGTGACAGGTATTGATGTACTGGGAGATGGATAGGTGTTAACCTTACCAGTAAAGACC  
TCGCTGATGAACACCGCAGTTTGAAGACGGTGGATATACGCACTCCTTTGATGCCTTCT



TACCGCACATGTCTGTCACCTATGACTTCGATGAATACGACATGTTGAAAGTGAAGCAAG  
CTTTCGCAACCTGGGGTGGTCGACAACCTCACCTTCAGTAAAGAATCGTTCGGAACCAAT  
AAGACCCGATACTACTCCTACCCTTGACCGGGTAGGGGTAGGTTTATGGGAGTAAAAAAT  
TAAGTTAAGGAATGAAACAAACCTACATTACCAGGGTGAATAGACAACGGGGTGTGTTGC  
GGGTAAGTGACTTTCCCTTCTAAAGACAGAAAAGGGTTATAAAGATGAGCGTGACTACTG  
ACTTCAATGTCGCCCTGGCGAATGTCTTGAGTGACATCGGTGAAAAGACAGATCGTGAGG  
AGATCCTGTGATCATCTACCACCACCTCTTCGACGAGACGCGTTTCAATAAATCAAAGC  
GTCCGTCTGCGCTGAAGAAGATCAACGAGGGCGACTCGTTCGCGGTTTACGATGAACGACG  
TTCGTCACGCCGGTAAGAAACCGGAAAAGTTGATCGTAACGGATAGACTGTTCCGGTCATG  
TTGACATTCGCGTCCGTGTGATGGGTGAAGTGAATGAACAGGCCTCGCAGGCAGAGACTG  
TACAGGCAACCCCCACTGAAACTGATGCAATGACCCACATGGAGAACACCATGAAAGAAG  
AAAACCAACCGCTCGCCAACAACCTCCTGGAACGCTCCCAAGGTACCCGCGCCGCCTATG  
AAGAACAGGCGGGGGCTTCCAGCTGGTCCGACAGCAATGACAGCGACGAGGTCGTCGAGG  
TACTGGGGGTGACCTTCAAGGCCGATAACATCCTGTCTACACCATCGAAGCCTGGCTGA  
TCAACGGCGGTCTCCCGACTCACCTGAAGGCCGAACCTGGAAGAGCGCGTCAAGAGCCAAG  
ACCACTCGTCCCGGCGGGTGCCTCCGTGCCTTCTGGACGACCACCCCGGACTCAGCC  
AGGAGTTCATCAATCAGTACAGCAAGGCGGTAAAAGACATCATCGCCACCGGCGTGGAAG  
GTGAAAAGGCGCGCCGTGATGCGGCTAAAGCCCAACGGCAAGCGCCGGTTACCTTCAAGG  
AACGGGTGCTCTACACCCTCCGGGGCGGTGCTGAAGAAGGCTTCGGTTCGGGCGCGGTGG  
CGGCTGCTGCGGCGATCATCGGCGGTGGTGTGCAACTGGCATCACGTGGGAATGTGAGCA  
TCGGTTCGGTTGTGGGTACGGGGCTGGGTGCGGCGGGCGGTAACCTTCGCGGCTGAGAAAG  
CAGAAGGCCTCATGAAGAGCGAACC GGCTCGTTCATCGTGAGTGGTTCGATCGGTCTGA  
TCCTGGGTGGGGCGGGTTC AACCTCGGACGTACCACTCAAGGCCTTCTGGGATACGGTC  
CTCAGCAGCCCCAAGGCGAGCCCGTAGCGACGGTTTCCGTTTCGGGAGCAGGTCACGGCAC  
ATCCGGAACCGGTTCTCAATCCCAGGGCGTTCTGGCCACGGTAGCTGCCCTGTTCTAAG  
CAATATGGAATAACAGCGAACATGATTA AACTCAGTTAATCGACTGACAGTGCTCGAATA  
CGAGGGGTTATCCCCTCGTAGTTGGGTATTCGTTCTCTATTTGTAAATACACCTACATCA  
TTCGTGCGTGATGAGAGTGTATTTTTGTTAGAGGTAAGGTTGTAAACACATCCAACAC  
ACCACATAAATCCCTCCAGTTCAGCCATCAGTTCTTCTACACCATGGTGTATAAGGCTGG  
GTACTACGGAGCTCCACTCGAATTC AAGGATTCCTCCTTGTCTTCGTCGCAATTC AATTG  
CCTCTACTTAGGGTATATCCACCGGTATTCTGAGACGAGAAAGAAAGGGATTTGGAATTT  
CCTTAAGAATGTCTACCTTAAAGTGCGGTATAAAAAGAACCCTTATTGGGGATTCCCAAGC  
CCAGTTTGAGAAGGACTACGGGCATATCCCCCAAATTCGTTATCACCTTAATTCATCTGA  
ATAAGCGAGGTTGATATTAATGGACGAATATGTCAACGATCCAACGCTCCCTAACTTCGA  
TCAACAGATCCGAGCGCTCCAATACCTTAAAGACCATTTTACCCGTAATCCAAGAAGAT  
GATGAAGATGTGTCTGAGGATGTTGCCGGAACCTCCCTGGTTTCATTAGGGACGCCTTTAT  
TACCAACATTATGCTGGGGAAAGATCCTATTC ACTGGCTGGAACACGCATTCGCTGAAAT  
GGACCAGTATCCTGTCTTAATGGAACAGTTTATTGAGGAAGGGAACCAAGGGACGATCTT  
TGATAAGGGAACCCGCTATGGTTTCAGCCTAAAGACCAACCCGAAGTGGTTGAGTAACCA  
AGATGGGGAATGGGGCCCAGAGGAAGAACAGGCGATTATCGATCAGGCGCTGAATGCATG  
GCTGGTTAAGGAGCGTCGTCGAACCTTCCGAGGGCGTATTGTGCTCATCCAAGACTTTGG  
GTTCTCCGGGATTACGTTGCTGGTTCGAGCACGCTTTTACGGATGAATACTGGGAGGAATG  
TCAGAAACAATGGGAACCTGGAGGATAAACGCCAGTTGGATCAAGAACTTAGGGCACTTCT  
TTCTAAGGCAGGTTGTTGAGCATCACGGTCTGCGGAACAACATCTTCTCGCAGGGCGAGG  
ATTACCTCAAAGCCCGCAAATCCACCACTCAGGCTCTTGTTACCTCGAACATCAGCTGTA  
AGGAGCTTAAGTAATGCAATACACCAAGAGCGTTTGGCCGAGACTCCAATGGAACAACG  
TATCGAAGCGATGCTGTTCCGACTCCAAACCTGACCTTCCAAATGAACACCTCGATCGT  
CGAGTTCTACATCGGCGCGGTCAAGCTGAAAGCGCAGCCGTGTGCTCTGGTTCGCTGACAT  
CGTCGTCGAGCGCGATGGTGAACCGCTGGTGCATTACCGCGCCCGTTCCGAAGGCACCAC  
CATTTGATAACCGAAGTCCAGTGTCAGTGAGCAGAAACTCGTCGAGTACCTCGAGAAGTT  
CTCGGTCATGGTGGTCTACGCTATTCACCGTGCGTTTATCAAAGAACATTGCGATAACCG  
CACTACCCTCATCCCTCCCAAGAGTAATCTTACTTAGGGGTAGGCAACTACCCCTTCCC  
CGATCCTGGGTTATTCTCTGCTGGATCGGAATAATCAAACGGTCAGGATCCCATGAAACCT  
AAAGTCGAACACCCCAAGGTTCCCTATACCCCTTCTTAACCTTTCCCGAATACCTTGT  
GCTACCGATCTCAAGCTGCAGGTTAAGGTGTTTAAAGAAGGAATTGGAACGGATTAAGGAC  
GATCCCACTCACGAACTGAATACCTTGGTCTGTAAACCCGATTAACCACCCCACTCTGT  
AAAAGGAGTTGGGGTGGCGGGTATTTATTTCTTTTAGTTTTAAAACGTATTTATTCTCAA

CCTACATTATTCATATGAATTGCGCAATATGATTATTGTTTAACCCAAAGGAGGAACACT  
TCATGACAGACCGTTTCGTTGAAAACACTGACCGAGATGATGAATGCGGGGGGGGCCCGCTCA  
CGCAGTTTGTGCGACTACGTTACGAACAAAGACCATATACGGAATCACGAGAAATACTTGA  
TGGGTCGGTATGCTCGGGGGACGGAATCGCGACTGGAAGCGTGGATTAAATTCCAGTACG  
TCTTCGGGAGACCGTTCGGTGAACGGTACGTTGGGGATCTCAAGTTCAGGGTCTATTACG  
ATTCGATACAGGTTTCGAGTTGTTTTTCGTTCCCTTTGCGTCCGGTCTCCGTCTGGAAA  
GACAGGGGGATGCACCTATGGTGTTCAGCCCAGATCCCAATCAACCGGGTAATGAGAAGG  
TGTTTCATCAAAGTCTTGTTGAACATCAGGCTAATCGTCAGAAATAAGAACGGGTATTAC  
GATGACCAAATCCCCTGGGAGTCTGAGGAAGAAGTTCCTATGATTCTTCTAACGGAGA  
GTTCAATCCTAAATGGAGAACGTGGTACGGTAACCAATACGGCCTGAAACCTAAGGAGGT  
CAGTTATCATCAGGTTGAACGGGTAAAGATGATGCCTGAACCAGATCTGGTGACGAGGTC  
AGGTAAACTGAATCCTGTTTGATCACCTGATACCGGGTTATCAACAAGTTCACTACACC  
CACCGCTCGCAATACAGGTAAAGCGATTCTTGCTTTACGAGCTAAACAGACTAAGGAGGA  
AACGGCATGAGCACACGACGTTTAATGAACCGTCCGCCCCTAAAGCCACTGGGTCTCCAG  
TTTGATCGGGAAGCGTTGTGGTTGGCTCGTATCAGCTTCATGATGACGATGGAGATAGGG  
ACATCTCAAGGGGATGAATTCCTAGATGCTGAACGTCGGTTTTGCAAGGATGCCATTGAA  
CTCACTACTCTTTTCTCTCGGGTAATAAGAAGTGAATGTCAACTCTACGTGAAATAGCT  
GAATGGGTACGTGAGCAATCCTTTAAGACCCATGAGAGTCAACAAAATGTCCCTGTGCGA  
CCAATTCAAGAAATACCCGTTGGCAACGAGCTTTCGTCATACAGAAGTTCGGTGTTCAA  
GACGAAGATGTACGACTTGCTCAAGTTAACGCTTCGTGTGGGAAATCCCATGTCATACA  
GTTCTTGCTCAGACGGGCGCTGTTGAATAAAACGAAGTAACGTTCTGGACTAAAGAGAAT  
AAAGAGTTCGCGTTCATGAAACACTTTATCTTTGCAATTCTGCTGTTCCCCGTGGTAGC  
GTTTCGGTTCGGTTAACCGTGAGAGCGCGCTCAACCGTCTAGAGACCTACACCTGTGAAGG  
GTACACTGACAACGTTGTTGATACCGTTGAGGGGAGAATTGAAATCATGACGGACAATCC  
CATCCAGTGGGAGAGGACCGTAGTGCTACGAACGACTCGGGGATATGTAATCAAAGCGAA  
TTCACTCTTCAAGGAAGATCAAATCCTGATGGCAGAACCTTTGATAACGAAGAAGGCTGA  
CTATGCCGACAATGATTCATCATGTTGTTTAAGAAGTTCAACGATGTAGGAACCCCTA  
TTTCCTCTCTTCGTTACTGCTGATCCCACCGCCAGCAGTGACGATGAAGATGAGAACC  
CATTGTCCGGGTCGTCACCATAGCACCTGTGCTGTGAGTTAACTTCCGGTGCAGAACAG  
GAGGGACATCCCTCCTGTTTCATCCACATTAAGATAGGACACGCCCTATGACAGTTCGTTT  
AGACATTCTCCCCCGTTTCATCAGATTGAGGGGATACGGGAGACCATCATCGACTTCTC  
TACCCGACTGTTGCGACTACGAGTTTGCTTGTGCGGGAATACCCGCCACCTCAAAGACCA  
ATACGAAGTCCCAAACCTCGGCAAACGCTTATGATGATCTCTTCGCGGATACGGATCTCTG  
TATTCTGGCCTTGGATGAGGATACGCCCATCGGGATGCTGCTGTCCGCCTACGAACGCC  
CAATGCCATCGAAGTCTTGTGTTGTTAGACAAGTACCGGAATAAGCACGTCGGTAAGGT  
TCTGGTTGAACAATTCCACCGCATTAAAGCTGGGTTCATCCGATCTTTGGCACCGTAATGGC  
GTGGAATCCCTCCGCGCGTCTCTACGAACGGAATGGTTTTATCTTTAAGGAAGATAG  
CCAACATGGGAGAACACGCCTTAAAGGGTGTAGGTTCTCTCCTGGATTAAACCCTTACTTC  
CTACTCACTTCTAGCAACAATGTTGGAGTCTAAGATGACTACGATTGTGTTTCAGTCACC  
GCGTCTCCTCCTGTCTTCCGTTCCGTCCACGGGTTTATGAATCCACTGCGATTAAAA  
CCAAGGACGGACGACTCAAGTTGATAACGGGTTTCAGTTTCGGGCAAATGGGTGAAATCA  
TTCGCGTAGGGTACATCGACCCCCAGAACTAACTGATCCCCGGGAACTGAAAGCTTACC  
ACGATCAGGTCTTGGAAGTCATTAAACTGTTTCGAGAACTTACAGTTCTGGGTAAACAAC  
AGATTCGAGAGTACGAAAGAGGTGGGTATAAGAGCTTACCCGAATACGGCTCTTTTCGTAC  
TCCAACAAGAATACCCCATCCTGATCCACGGTAAGATTAAGGGCGCGGCGTTGAAAGTCC  
AGTTATTTGGTAGAGACATCAATGAAATGGTTTTCTCGAGCACGCTGAATATCACTGATC  
TCGAACGTATCTTCCCTCGATGAGTTGACCGTTCATCGTTGACGGTTTCCGGAATCACCTTT  
GTGACGTGGATAAATAACGTCCTCTGGATCAATTGTTTTAAGGAGAACGGTATGAAATGG  
ATTGCTTTGATCACCACGCTCCTGGTTTCTCTGGTTGTAAAGGCCAACGAAGATAGCTTT  
GTCTGTCACCAATACGGGTTTACCCAAGACCCTGAGCGTTTCCATTCCCTGTCCATGAGA  
CCCAGGTTAATACGTTTCGACCTCACCGACGACCGAGTAATCTAACAAGGGCGTTTGT  
ATCGGGGTGGAACCCCGAGACGACGACTTTGATGACACGCTCGTCACCTACTTACTGCGG  
GAACGCAATGAGATTTTGTACTTCTACTTAGTGGGCGAGCAACCTGAAATAGGGATCAGT  
CGTTGGTAGAAGACTCAGATACGTTTTTCAGCGATAAAGCGCTGTTTACGCACTGTTCA  
TACATCCCTAAAGGAGGAAGCGACGTTAACGATGCTTCCCAACATTCATCTCGTGTTAAC  
ACCGGAGGAATTAGCGGACTTATCCCGTACGACATTTTTAAAGTAAAGACAGACAAAGA  
CACGGGGATTGTTATCGCCACGGCGCCCTTTGCTCTTTCATTAAAGGTATCCTTCCGGG

TATTAAGACAGGGGACACTTTGTTCTTGTACAAGGACATGCTAATTCCGAAAGAACAACC  
TCTTTACATTTAAGGTGACGTATGACAGTCGAGTTTATTCCACACCTTTGATGATGCAA  
CACATTACCTCAGGGTATAGTGAAATCAACCAACAGGGACGAACGACTCTAGCGATCCAA  
GAGAAATCGAGTGGTGTACTGGAGATAATACTGTTTCAAGTATGCAGCGCGTGAGCGATGCC  
TCGCGGACCTAGGGGTACAGGTCAAAGACTACCGAGAGGTCTCGGTCCGAGAAGAACAG  
TACCAGGCAGGCCTGGAGCTGCTCTATAAAGACCTTCTCCAGGCATTTCGAAGCGAGGGTC  
GAAAACACCACCTCCACGCTCAAGAGTTTCAAGGACGAAAATGGGCTATGGTAAAGGTTG  
AGGTTAAACACGACTCTCAGACTCCAGCGAGCGGTGTTCAAAACCCAATGGCTGGATG  
TGGGGGTCAGTGTGTAACCTCTGACGCGGGGAGGTGACGGCACCTAATAGGGTACGTGT  
ATATTTTCAGTGGTAATAACCCTATTGGGTTCCAGCTTCGTTTACAGGATCCGTCACCTT  
CCCTGACGCCACAACAGCTAGCCAGTTTTAAGTTTTCGATACGGAAGGGGCGGTTTGTTC  
TAAAGACACGCGATAAGAAGAGGTGAATAGTGAATGTGTGCACACAGTGGATTAACCGTG  
TCTTCAAACGTCACCATGACCCTCTCTTGAGTCAAGAGAAGACCAACGCCCTCATTAAAG  
ATGTAACCACGGACTACCTCCAAACTGCGGTATCGATCGTGTGAGAAGTGTCCCCATA  
CCACGTGGGATGGTAAACCGAACCGTTCGCTGGATTCTGGGTGTCGCTCCAGGGTTCCCGG  
ATTATGATATCGAAGCACTGATCGGGGTTAATAACGGACTGCGTAAGGAAGAAGACGACG  
TCATCGATGAATGTGTCTTCCACCGGAATGAGTCGGCTAATTACCGGAATCTGGATGAAG  
AACTTCAACCGTTTATTAAGCCCGCTGCACGGTTCAATGAGAATAACAAAATAGAAATCA  
AGTTACTGGGCGGTTGGAAACCTTTTAACCCCGCTCTGTTCGGTTTCTGTACGGAGAAAA  
TGAATGAAGACAGACTTACCCGCTGAGTACATCATCAGTGAGAACGGTGACTGGTTC  
CATTTCAAGTGGGTATTGTGGGGTGTCTCCCGGTGCTTGTGTTCGGATGGGTGGGAAGTTC  
CATGAGGCTATCTATGTCTCGTTAACCCCGATTAATGTCTGGCAGTGGGAAAACCTGAAA  
CAGGTCCGTATTCGTAAACACCGCACCGATGAGACCAATCCCTTTGCCTTTGCCAATCG  
TTCCCAAAGTGCCTTACGACCACCTGGTAGAAAAAGTGGGGGAGACGGTTGCGCACCTG  
CTGGTTCACGAGGATCTCTTGGCTGAGATAGACATGTTCGCTGTTTCGCCACATGGATCGT  
GTGTAGGGATGGGGTGGTGTCTGTCCCTTTTATCCTGGTGTGTAAAGAGCGAGACCGTTAC  
CCTGAGGTCCTGGAACATTGGTTCACTGTATTGGATAACGAATCCGCCTACTTGAAAAGC  
ATGAATGAGGACATGCTGCAACGATATCTCATCCATACTGAAAGCTGTTCGGGCTAAAGCC  
CACTCTACTAATTCCGAAGACCCGCTCCTATTCTTTACCTCGGAAGGACAACCTCAATCG  
TTAATGACCTATAAGGAACCTGAATGACCACCATGAAAGTCCAACAAAACCTGGGTCTGG  
CTGCTTTTGTATCCTGTTCGACCAACTGAAAGCAGAAGGTATGCACGTGATTAATCCGG  
TAGAGGGCGAGGTGGTTTCCGCTGACGATGTGGTTGGTAAAGTCTGGCTGCCTTCAACC  
TGGGCAACAAGATTGAAGTGAACGCGGACGTCCCGCTAGCAATAAAGGGGTGAATTACC  
GGTTCGAACGGATTGGGGGAGCGTACTACCTGGTCCGGAAGTAGCTAACGACTCGCCCTC  
CTGCCTCATTGGCAGGAGGGTGTATGTCCTTTATTTGTTATGAGGTGGTTATGTCAACAC  
AATCGTTGTTGGAATATGGAAGAGGGTGGTGTATGCGACCAGAGTGGTGAGGGTATAGAGG  
AATGGACCGGGGGTACCCGGTGTCTACTCCATGAGTGTTCAGTTCCTTTAGCTTATCCCG  
CCACCACCTTTTGGACGGGTCGTTTCAATATCCACATGGAGAACCTCACTGTTTCGCTTC  
ATTCACACGATAATGATCCTGAATTGGTGTGTTCTTCAATAAGCTCAATCCACTGGAGC  
AGGGCGTACGGGAGTATTGCAAGGCGTTCAGAAAGGCCCTCAATAACCCGAAGAAACCCC  
TAAAGGACCCCGTCTATAAGCGACAGTGGCACAACCCTGAGAACATTGAGGCGCCCTTTA  
CGGGGTATTATTTCTATTGCGTCGATCAGGATAAGGCAGGCCGTTCTGCGTTGGGGATT  
GCCACCGGACCATTTGTGATGTGGATGGACATTCACCACAATTACGGGAGGGTGTTTAACA  
AAGCGTTGTTAGAAGTTCAACTCAGCTCTCTCCAATGCCTGGTGACCTATTTGAAGGAGG  
CTCAGGTTAAGATCGAGAGTCTTCGTAAGCAATAAAGGTCTTAGGTTGGGACAAACCTC  
AGGAGCTCCAGAGTGACACGTCTCTGAGGACGTTCTTCCCGATCCCAGTAGAAATTAT  
TAAACCTATATTAATCAGGTGTAATGCGATTAGGTATGGGTTAACAGGAGTACGAAGATG  
TCTCAAACGCTACTGGTACATGGTAAAGATGCCCTAGGAATCATTAAACAGGTCTTGAGT  
GGGGTGTATGACGCCGTCACCTCGACCATGGGTCCGAATGGTTCAGTTGGTGTATGATCAAG  
AATGGGGTCTCCACCAAGACCACCAAGGATGGGGTGACGGTAGCCCGTTCCATTTCGCTTT  
GCAGATGAAGCCCATGAATTGGTGAACCGGGTATTACCGAGCCGGCTACGAAAACCGAG  
GAGGAATGCGGGGATGGCACTACCACCACCATCATGCTGACCCATGCGCTCTATCACCTG  
TTCAAGTACTTCCAGGTTTGAACACCACCGGAACATTGAAGACATGGTAGAGCGGGTT  
ATCCAACGTTGGGATTCCATGGCGATTCCGGGTGGAAGTGGATGACCTCGGTTGTATCAA  
GTGGCCTTGACCTCATCTAACCAGGATGAAAAGCTCGCCCGACTGGTTAGTGAGCTCTAT  
GCGAATAACAAAGGGAGTTATCCGGATATTGCACTCAAGGAAGGGGTCAACTTCGAAGAC  
GAGGTGCAACAACTTACAGGGCGCACTATCCGTATGTTCTACGCGAATCCCTGGTTTTCG

AAAGGCCACGAAGGGGGTGTGACAGAATTGACGGGGTTTACGGCGTTCGTTATCGATCGT  
CAGATTGACAAGGAAGACACCCAGAAGTAGATTGATGGGGTGAATCACCTTGTGAAACT  
CACAAACAACACCTGGCCCTTCCATCCTGGTGATTGCACGATGTTTCGAAGAAGCCGCT  
AACTCGACCCTGATGCAATTGAATGCGGGCACCACAACCCTGGTAGAAGACGGACGTCT  
TGGTTAATCCCGTTGCGTACGCCGGTAGGTGGTGCAGTTGGGGCGTCTGAACTGCAAGAC  
ATCGCGGTCAATGCTGAACGCCCTATGCTCAGTGACGTAGCGGACCTGACCAAGTTGGAT  
ACCCATTCGATCAACGGCCAACACGGCCAACCTGGAACCTGGGGGGCAATCGGTCTAACCTG  
AAGAGTACCACACCTAAGGATGAAGACCGGATCGAACAACATGCTCGGGGTATTGAGGAA  
CTGTTGGAAGGGTTTAGCCTCAGCGATAAGTTCTCTGTACGCGCCCGGTACAACGAACGG  
CGTATTCCGGGCCCTACGGGGTAAGTTGATCACTATTTCCGTAGGCGGGCGAAACCTATTCT  
GAAGTCAAGGAACCGGTAGACCGGTACGAGGATGCGCTGAAAGCCCTTCGTTCCGACTTG  
GAGGACGGCATCCTTCCCTGGCGGTGGCGTATCGCTGGTTAAGGCGGTCTTCGGTACGATC  
AAGGAAGGCCTCGAAGATAACGCCAGAGCGCTGAGTTTGCTAAGCAGGTATATCAACTCA  
GGCATTGCCAATGAGTTGATGCGACTGTCCACTATTCAGCATAAGCTGTTGTTACGGAC  
ACGGCGCTGTATAAAGAAAATGGGTGTTTCCATTTCAATGATGATTGGCCCAATACACCG  
ACCGTCATGAATCTGGCAACTGGTGAGATTGATACCCCGGAGGGATTGGGTATTTATGAC  
ACCGCGTCTGCCTCTATCACCGCGCCAAAGGCGGACGCCAGACCGCTAAGATCTTGGCC  
ACTAAGAAGACACTGATACTAGGGGAGAACCTTGTCGGCGGTTAAGGTTCCGGTAAGGGGTT  
TGTAAGGAGTAGGGGGAAGACCCCGACTCCTTTATTTTTTTTTTAAGGAAATCGATGGG  
TGACGAAGGATTTGAAGGAGATAGACATCCTATGCAGTGAGTCTTGTAACCTCTTTTGAC  
TTACTCCCTTTAGACCACCTTTAAGAGGATTAAGCAATGGATTCAAACCTGCCAATCCAA  
ACGAACCTCCTCGACAAATACGTCGAGTTCAACAAAGACCGCTACAAAGACCAGGCGGAA  
ATCCTCGCGCTCTTTGATAGCCTGACCCTCGCGGACATCACGATCTCCGACATCACCGCC  
GACGGCGCCAACCTCCGAGCTGCAAAGCGCCACGGTCACCTCTGTGAGCCGCAACTTCAA  
GGTGTGCAACAAAATGGCTCCCGGGGAACATCAACACTCTGTTTCGCCTTCGTGGTGGTG  
AACAAAGGCGCTCCCCTGACCGGCGAAGACCAACTGGCCGAGCAGACCACACCGGGTGCC  
TACGTTTACGTGGTCCGTGAACGCGAAGAAGCGGTTCAACGGGTGGGCCCGGTGCTGGCT  
TCCACCACCACACTGAAACCAAGCCGCCAACGCCCTGGCGCTGTTACAGGGCCAACCTC  
GAATACGTCTGGACGACGCCTATGTCGATACTGCCACCGGCAAGGTGCTCAAGGTCACC  
ACCAACCCGTTACCCCGCGGCGAGCTCGTGTACGAAATTGGTAAGGCTCCGATCATCGAG  
ATACCGGAAACTGACTACGGTCGTCTGGAATTCAAAGAAATCATTCAACCCGAATCCCAA  
CCGTAAGCTAGATAACCACCAAGTGGGCTAGCCCACTTGGTAGTTTACCTCTCTTCGTAC  
GTCATTTCAATACCAATGAATTTCAAATCTACATCAACAGTGTGAGCCAGGGGCAATAAA  
AGTTCATGGATGAATGAATTCTCTTGCAACTGGTGCTTTAAATGTCATTAGGAATATTCA  
CCCTGAGTATGAGTGCAGCTAAAAGGGGTAACCTTTTCTATGTCCCCCGGCAAGGAATACG  
ATTATCTTCTCTGCACGAGATCCGGGATGCCTTTAATCCCCCGTTTATGAAAACGTTTG  
ACTAACTGGGCCTCGACCCACAATGGATCAAAGAGTTTATTAACGCGCTTGATCTGCTCG  
ACAAAATCGTTAAGTCCCCCAACTTCGTATCGGGCAGAATTCTGAATAACCGAGATATCG  
AAGCGTACGGCGAAGACGCGGTCTTCGCGTTCAACCGGAATATCAATATCCCGTACTACT  
GCGTGCGGTCCGGTATTACCGTGTCTGAAACGGTGGACAAATTGCAGGACCAGTTTCTGG  
AACGTGATTATCCCAAACGATCCTGAGTATTCTCCGCCCATGCGCACGCCCGGTATTG  
ACGTGACCGTAGACGGCCATCCTTACAACGTTGGGATTACCTTCAAACGCCTCATCCTT  
TGTTCCGGTTTGGTGAATTACCAAGATCTCCGGACTGGGATGAACACTTCAGTCACCTTCC  
TACTCACTCGGGTGGGACTTTGATCCTCTACCTGCTCCACTGGGCTTAACGCTCCTGTGG  
AGCGGGGTAGGGGTTATTACCGCTTTAAATTTTTCAATACACCAGCCCAAAAAGGTAATA  
ACCATGCCGAAGAATGAGAACAATCCTGATAAACAAGGTCTTACGTCTATCGCTGATGAA  
GACTTGGTTAAGGCACTCAACGTACTGGACAACGCAGGGGTAGACGTAACCTCCGGTGTCC  
GCAGAGACCACAACGCGGCATCCGGGTACGTCGGATATCATCAACCGCTATTCACATCCC  
GCCCTTACGCCGAAGAAGGGAACCCCTGAATACATCGAGTGGAAAGCCGCTCTCAAACAG  
AAGGAGGACCGATTAGTGGAATCCTTGAAGACTTTGGAGACCCGGGAAAATGAAGAGAAT  
GTCCTGATAGGGAATAGCCTGGGTACTAAACCGAAGACCTAGCAGGCAGAAGGTCTGTGG  
GAGATGGTGGTTCGTCAGAGGGCCGGACTCACCAAGAAGACACCGTTGACGCCGCAGAA  
CGCGCATTGGCAGCGCTGAAGCCGGTGCGGGAATATAACCGTAAGAAACGTATTCGACTG  
TGGTGTATTGTGGTCCGGCTCTGGGTGGTTGTGGGAAGTGGTCTCTATGTGGGGTGGTTG  
TTCGTCCACAACTTATGCTCACCGGTCATTCCAACGTGGTCCGCGGAGTGTAAGTCCCT  
TACGGGGATTTTGAATTAACCGGTAAGCAGGTACCACCGCTACGCGTATCAAGCGATTCTG  
GGTTACCACCGCGTGGATGAGGGCACGGTTCGAAGATGTCACCTAAGTCAGACTCCCTGGG

GATAAAATCATTATCCTGGGATTCGATGCGAGTAAAGGGAACCTGGTGGCGGATGAACTAT  
GACCGGGGAGAATTCGGTACCGTTAAACTCAAACCTACAGATAAGTGCTGGTTCGTCCGGC  
GAGAAAGACCGTACAACGCTGGTAGCTTATCGCTCGTTCTGCCATTAACGGTAACCTTA  
CCGAGGGAGTCAATCCCATGCTGAATAGTTCAGACCAACCTGTGGGTCTCTAGTCCTGTC  
GATTGTACATCGCTCCCAACGATGGTTCCTTTCTTTACCGGTCATTTGGAAAACCTCCACA  
AGAAACGGTGTCACCTAGTACGCCACAAGCTCCAATACGCGATCCGGTATTATTCATCCG  
TTAAAATGCCCGAGGGGTGGTTGGTGGGGATCAGTGACCGGGATGCAAGCCGGTATTACT  
TCTTCCCTACCCAGGGAAAACGGAGGAGTATTCTGGTTCCTTAACCCAGTACAGCGTACC  
GAGAGATCTGGTTAACTGTTTAAAGGGATCTGGAGGACTAGTACCCGGGAGGCTATCT  
ACCTGCACAGTGTGGCGTATCCCCATCTCATGGAGCTCTTGAACGAATCCTGAGTCCCCA  
GTGTGATTTCTGTTGAAGGTGAATGGAAAGGGGAAGGGTATATTGCGTCGCTGGAATGGA  
AGCCTGAAAAACCCGGTCGGTTGATCGTAACAACGACCTTGGATAATGCTATAAACCACA  
GTGTTCCGATCCAATGGCATCCCCACGATGCTTTGGTTCGTCTAATCCGAAAGTAAGCGG  
AGTACATCATGAAAGAAGAAAACCAGAAGAAGACCAACAGTTTCCAAGGTGGCGATGTTT  
GGGTAGTGTCTTCTAAGAAGCATCCCGGTAATCGAAATTCCTCCCGGTAACCTCATGG  
TACCGGATGCGATCGAGAACCGTGACCGACTGGTCTCCAAGTTCATCACCGTCTGACCG  
AAGGCGAGAAAGCGTTCACACACGCTGGAAACCTACAGGCTGTGTAAGGCCTACAGTT  
CGTACCCGATCCCCGTACGTTGGTGATCAACATCGCTACCGGTCTTCCCCACACCAAGG  
AAGAGAAAGACGCTCCTCGCCGAGCATCGAGCTGGACGCCGGCATTAACTCTATGCGG  
TTATCAGCGAACGGGAGGCTGGGGCCTTCAAATCGTCATCGTGGGAACCGCTACCCATA  
CGTCTTATTTGGTGATCCGTGAGGACGTTGCCTTCTCGCTTATCATCGATAAAGGTGTCTT  
TGTCGGTTCAGGATGCGGTAGTCACCCTGTACGCCAGCAACCTCAGCAAAGGTGCGAGGGC  
TCTTCGAGAACCTCGCTAAACACCTTCCGGACTTCTTCTACAAGCTGTTTAAAGCGGTCT  
TCCCGGAAATGGTTCGTCTGGAAGTCACGCTCACTCACATTCATGAAGACAGTGTTCGCG  
TTGCGCTGTACTGGGATCCTAGGGGACCTAACAAGAATCTCATTGCCTGCAATGGGTTTG  
TCTTCCCGTTGGACATTTCCCAGTTCCCGGGTAAACAATCTCCCGGGGGTATAAACTCC  
AGAAGAAAGAAGCCCGTCATGTCGCTCACAAACAAAAGACATCTGACCGGTCAGTGAAGA  
CCCAGCGTCTGTTGGAAAAGTTCTCGAAATTGTCTGTGAGTACGAGGTGGGGGGTAAACAC  
CCCTACCTCTACCTATGCTGTAACGCGCTGTAACACCCTTTAAAGAGTTTTTAAGATGAA  
AGGTACCCTACCCATTACCAGATCAGAATTATCGCTAGAAGTGCCTTTACAAACGATTT  
AAAGGAGAGACTCAAACCCCTGTATGAAAACCTCTTTCACCACGAACCTCCATCTCGTCAT  
TGGGACTAAAACAACCCGTAAGCTGTTTAAACCCCTCCGCCCGTAAAAATCCCCACCCCTC  
CGTTATTGAGAAACGGTACGAAGACTTCTTCAAAGTAACCGACAAGATAGTACTCGTTAC  
TCACTTGGGTGAAGCCGTAGGCTATCTGGCGGTGGTTAAGATCAAGATCACCTCACTCTT  
TGTTGAACAGGACTTCCGGAAGCTAGGCTTAGGGCGTATCATGGTGTCCAAGTTACAACG  
GGGTGGACATCCTGTGAACCGATTCTCTACGTTCAATGCTTTACCCCAAATACAGCTGG  
TATCAACTTCTACCGGAAAGTTGGGTTTAAAGGAAATTGACAGAGGAGAGATCTACACGGA  
TTTGTTAATGGAATAAACACCGTACTAGGAGTAGCCCAAAGGGCTACTCCTAGGGGTGT  
ATTTTATTTTTGTTTCAAAGAAGCGGTAGAGATCACGGTAACGTCCTGCTTGGTAGTAA  
TCTCCTGATCCAATGGTGGAGGAATTAACACCCCTACCTGCTAAATCCCCTGTCATCC  
GAGAGCATCTCAAAGGCATAACGTTTGGTTACCGTGGTCAATTTGCTTGTACCAACGGTCG  
TTCAGTATGTCGTAATATGGAACACGATGTAACCGGTTTCAACACCACTGGGGATCAGG  
AACTGTTTCCACGAAGTCCCCCAGTCCAACCTACTGGCAAGAGGTGCTTCTGTTACCGTT  
CTCCAGGTGTTGGTAACGGGATCGTATTCCCTGACCAATCTTGACGTACCCGCGGTGTCG  
TTCCATCCCCGAATACATAGATCTTTGCATTGAACTGTCCGATGTAATGCCATTGAGC  
GCCATCGGCATATCCGCTTTACGGGTCCAGACGTTGGTGGTGGTGTACTACTGGTGGTTG  
AGGGCTGTGGGTTTATTGGTACTCCCCATGTAACCCCGCATGCAGAAGATCGTCTTGTCA  
TCCAGGGTAATACACCGACCTTGTCTCGGGCTCCATCCGGGAGGTTATTCAAGTTCGTT  
GAAGACCCTGTTGAAGGATTCAATTTCCACACGCGTCTCACATCGTTCCCATTTTTACC  
GTAATACCCCAAGGAAGTGTGAGTAAACCCCGCCACTCCAGGCCCATACTGAGATC  
TTCCCGGGAGTGGCCCCCGTACGGGTGGTAAAGTCATAACGGGTATACGTCTGTTGTTGA  
CCCCACCGGCACACTGACCTCCGAAGATATGAATCTTCCCTCCACCGCTACCCACACTG  
AAGTTAGCAATACCGTTTAAAGGAACTTGAGTCACCCATTCCATTGGTCCCAGAATGTAG  
GGGTTATCATCAGAAGGGGTAAATAGTTGACTCTTAACATAAAGCCGCTCCTAAAGAGA  
GGGAGTTAATCCCTCACTTACTGATTTCAAGTTCACACAAACAAAGGACCCGGAACGGAA  
GGGAGTTCCTCTGCGACGGTGGCTGCTTCGGCTCTATCCATAAGCGACAATATCGTTTCC  
AGTCCTTCTTGGATACGAGAAGTCACTTCATTGGACAAGTCAATGGTTTCTTCGGCGGTC

AGAAACAGCGTTACACCTTCTTGGTACGAATAGAAGCGGAGAAGGGTTCCTCACGC  
AATGCTTCTTTCGCTGGATACTCAAGGCCACAAATGGATTCGGTGGGTGGATTCGATC  
AAGAGGGTGTGGGCCGTCTCCCCGAATCGCACTTCCATGCCTGTGTAGAACGCCGCTGCA  
ATCACATTCTGGATTTCACTTACGAATATCCTTAGCGGATCGGAGGCGTTCTGCGACT  
TCCCCAGGGGAAATCCCGAGTGGTCCACTGCTGGGTCCAATACCCATCAATCTGTTA  
GGGGCAAGTTCAACCGGTACATCCCCGGCGGGTGGCTGGGTCAATTGAACGACAGCCATC  
AGGAAGGGTTCCTTCCAAGGCACTGGCTTGTATCTTACTGGGAATGGGCCAGTAAGGG  
AAATTCTTGCGAACATCCTCAATGTAAAGATGATATTCCCCCGTACGCGTGTCAATCAAG  
GCGGTGCTTTCATACACCACAGTTACCCTGTCCATACTTATTCTCCTCATTACGTGATTT  
TACTCCAATACCCTTGGGAACCGCCAAAGAGGGGAGAGGGCTTGGTTGTAGTTCACCCCC  
ACGCACTCGTAGCAACACCCGACCCCAAACCTTCCAATAGCACCCACTTGTTC AACCGAG  
GTTCAAATACTGAATAGGTTGATCATTAACTCCCCGCAATCCCGGAGAGTTCTCCAT  
TGTTCCCCCGTACAAAGGCTGCAGCAACTGGGATAACCAGGAAGAGTCACCGTTGTCCAGG  
TGTTCTGTAGACGGGTTATACTGATACATCCCATGGTTGTTTCGCCCCCGCCACTACCCAC  
CAATAACACTCACCTTCCCTTGGTAAACCATTACCGAAAAGTCAGAACAAATCTCCACTCT  
CAGCGAAGGCCTTAAGGACAGTGCGGGTATTGGCAACAGGATCGTACGCGTTCAAGAAGC  
CTTATTCTGGTGGGTGTTCCCTGACTGTACCCCGCAGATGTACACCTTCCCATTGAGAT  
AAACCGCTGCTCCTGTGAGCGGAGTCAGGGGCATATTAGGTAAACGGGTAAACGATGTTTCG  
TAGTAGGATTATACCCGTACGCATCATTTCGACGCGCCTCCTAGGAAGTAAAGAACATCCT  
TACCATCAGAAAGCAGGATGGAGTTCTTCGGGGGGGATTGGTAGGCCCTGTTGGACTCA  
GGTTTTCAAGTACCCGTGTTTCAAAGTTAACCCGACGGAACCTTTGGTAGCGGTCTCTA  
CCCCACCGTAGTAGTACATCTGGTTTCCATGGACACATCCCCATCCGGTATTGAATAACA  
ATGAACCCGGCCAGATATCCTTCGCCTCAACCTGACCTTCAATAAACGGGTACGTCCCCT  
TGGCATAACGGAATAGGGCGCCATCCCTTGGTAGGGACATAAGAATCACTGGCAGAGTACG  
TGACATTCTAATGGTGTACCACCCCGGATACGCTTGAGTGGTACCGGGTTCATTACCCG  
TAATGTCTTACCCAGTTGGTACTCCCGTAAGTATTCCCACCACTGGCCGCTTGATTCA  
TCCCCAGTTCTGCATCCGTGAACCGAGTGGGCCAGTTGAATCCATTGGGATCCGATACAT  
GGACCTTATAACAACCGGTCCCATTCAGACGTTGCTGTATTGCCATCACTCCCCATGG  
TCAAGAGACCTACGGTGTAAATAACCCCCGGCACCGTAGCTCATAGCTCCCTGTCCGTA  
GACCGGCTTGGGTCAACAGAATACGCCGAACATTATTCCGGATCGGCATTTGAGGAATGT  
AACAGGTTTTATTGTGGTTCGAAAACCTCAACCACGGTTTGGCTTCATTGATCACTTTCC  
CAAAGGCAATACCAGTGAGTTTCGATAAATCCTCGTAACCAAACACTTCCGTTGCAGGAG  
TAATCCCGTACCATCCTTGGGCAGGACTACCTGCTTTGAGTTTAGAAGGCCCCCGGATTAG  
GACCGTCCGGAAAGGCATTTCGCGGTCGATGTAAAGAGTAAACGCTTCTATCATGATGACTT  
ATACCCCAAAAAGAATACCAGGGAGACCCCGTAGTGCCCCCTGGTAGTCATACTGTAA  
GGTACAACAGGCCCAACGCACCAATCCATTTTGTTCATTCCAGGTAAAGACGTAGACC  
AGTTTACAGATTCAGTACGGATGGGGGAGTTCCGTTATGCCACACCAAGGGTGTTCGCATCC  
TTACCAGCGAAGGTCACAACACACCCCTCCGCCGGTGACACTAACCGTCAGGACCATCCCA  
CGTACCGGGGCTTTAGGTCCATCAGCAATCACCATTTGCTTACCCCCCGCCGCGGTGTTA  
TTGATCTGGATGTACTGATCCACCAACGGATTGGTTTCCCCACTGGTCGTATAGACCTTA  
ATCGGCAAATCATAGCGGTCAAAGGTGAGATCCAACCTCCTTCCATTACAGGAATATCCGTA  
CCGGCACGGAAGACCCGAACGTACTGTTTACCATCCTTGGCTTGGAGGTCTTCAATACCC  
TTCGGAAACTCAATAGCTCTCCATTCCGTACCGTCACCTTCTGCATTGACAGCCTGGGCG  
TAATACGACCCTGGAACCGCATTCCGTACGGGACCAATAGGGAGGGGGACCCAACGGTTA  
CCCAACCGGACAACCCGGCCTTACAGACTCCATGGGGGAATTGACATCACCCGCCACCAAA  
CGCCCCACAGGACCAACCACGATCAACGGTCTTGTAGAACACATTGACGGTCTCAGAG  
ACTGCCCAGTCACCGACTCGACCACTGAAGGCATCCGAAGGTGCGTCTTACCCGGCGGC  
AACGTAAGCCACCGGCTGCCTTTCTCACCCCTGAATACAGGGTTTCCCTTGGAGTCCGGGA  
GGACCGTCACCCCGGTCTTACCGGTTTGACCGCGCCATTACCGGTTTACGCCAGGCG  
TTAGTCGACGTACTCCAGATGGCTAGGGTGTGGACTCCGCCAGGTAATACGCATCCCC  
GCAACCCCGCAGGAATAGCCGCTTGTAAAGCTGCCAGGGTCCGATAATCCCCTTTAATG  
GGTACCGTAGGACCTTCGGGTCCTTGTTCACCCCGTCCCCATTCTACCCGGTTCACCC  
CGGAAAACAAACCCAGGACTCCACGCGCGCTCATCATTACGAAATACGTTAAATGATGC  
TCCAGAACGAGGATAGCGTCATCTTGTCTAACGACCTGAGGCAGGCAGTCCCGCCAAG  
GTGGGTACCCATCCACCATGTTCAACCCAGCACCGGGAGCGTCATCACTCCCTGGCATG  
GACACCGGACCCAGGTTATCCAACGAGTTCCGGTATTACCCAGAGGTCTTCATTACAGG  
TCAACGTAGGCTTTACCTTGAGTTTCTCTCGTTAATCGGAGGAGGATCGGCATCCGCAGGT

GTCAGGACCTTAATGATGTCCAAGGACTTACCATTTCAGGCCATCTTTACCGTCCACTCCA  
TCCTTCCCTTTAAAGACACCCAGATTTCGCCCATGCATTTCGAAATGAATCCATAGATCGCG  
TTTGCATCACGAACAGCATAGACCCATTGATCTTCAGGATTCGCAGGAAGATCCGCTACT  
GTGTCAACCACACCCCGAAGAACAATGTTGGTACCGTACGACCATGGAGGCTGGCTAGG  
AACTGTTCTTCACTGCCGGTGTTCCTTTGGAAATCCAGAGATCGTACGTGGACTGGCCA  
TTGATACCATCTTCGCCTTTAAAGGGACCCAGGTCCAACCAGGTTCGAACTCGCTGCACTC  
CATACTACAACCGAAGGGTGTCTCGTGTACATAACCCATCGTGGTTAGCCGGAGGGTTG  
GGTAAGTTGTCCAGATCAACACGAGTCCCTACAGTCCCCAAGACAGTCAGGTTCTCACCG  
GTTTCTCCTATCATGGCCGCCAGAAATCATCTTCCGTCTTACCTTGGTTCTCGGGTTTA  
TTCAACCAGACCTGTACACTTTTCAGACCACCCGGTCTGCATCACCCGTTTCCCCTTTA  
ATCCCCCCCAGCTTCCGCCACGCGCTGGTCAGGTAGATGTACAGGGTATTCTCATCCTGA  
ACCGAATAAACATCCTGTTCTACACCGGGGTTGGTGAGGTCATCTATGGTTCGCTACGGTG  
TCTTTAACGAGCAAATTACGACCTTCAACACCGTTTCTACCATCTTCTCCCTTGAAGTGA  
CCCAGAATTACCCAGTTATTCTCAATCCACATACGGACTGTATTGTCCGCACGAACCGAC  
CAGGCATCCTGTTCAACCGCGTTACTCGCGAGTTCCTGACCAGGTCTACCGCCCCTTTC  
ACCACGATACTGTTACCGTCCGGTACCGTCCCTTACCGTCCCTTGCCCTTACACCGGCCGGTA  
TTAACCAATCCGTACAGTCTTCAATGTAGATCCACAGGTGGCCCGTATCCAACGTCACC  
CAGCCATGTTGATTAACCGGGTCTTTTGCATTCAGCGCATTACTGTCAGCCACCGTTCCC  
TGTA ACTCAAGGTTAGCCCCGCGTTCACCCCGAATGGCTTCCCTGCCACTCTGTAATGGTT  
TTGTTCTCGTTGCCGGGAATCTTCTTCCAGGTTTCGAACGCTTCATCTCCCTGAGCATCT  
TTATCTCCTCGTTGGGAAGCCATCAATTCCTGAAGGGTCTTTTCTTCATTCCAGGAATC  
TCTTTCCACAGCTTGAAGGTA CTCTGCCGTCAGGACCTCGAATGTTCAA ACTTTCCCAG  
ACAACTCAACCGCTGTTTTACCCGGAACCAAAACATGAAAATCATTCCGCCACAGGTAG  
GCATCTCCGGGTTTATTCCCTTTCAGGCCGTGCGAGATCGAGGTTGTCAGGCCAAACGCC  
AACAGGTTTATCCCCCGTTCCCCTTGCAAGGAACCCGAAGACGCCCATTCGTTACCGTTC  
CATACCCGTAGGGCAAAGTTAACGAAGTACGCGGTACCGATCGGAAGCTCTTTGGTATCA  
ATAGCTTCCAGTTCAGCTTCCGAATTCAGTTTACCTTTAAGGACGAGCGCTCGAGTTGAG  
AGGGATACTAGATTCTCCTTCAACCACCGGGTACGCGCATCCAACACCCGAGCTTGGAAAG  
TTAGCCGCACCCTCGCCGTTGTCTCCCCGAGAATTCGTACGTCAATACCAAAGCCGGG  
AGGTGTTCTTCCCATCGAGACTCCTCGACAATCGCTGGTAGTTCACCCTGTGTTACTGTT  
TCATCGCCAATAGCCATTTAAGAACTTCTCTGATTAAGGGGTAAAAACAAGATGGGTGT  
TCAATTGACCCACCCGCACGGTGGTTCGTTTGGAGCGACCCCTATCTTCAACCCAATCACGA  
CCCGGAGTTTCAAGGTCTTAGGTGCGCTGGCCAATTCAAGGATTTGGGTATCCAAGATTC  
CCGAGAGATCCCCTTGACGCAGAGGGTAATTAGTGTCTGACCCGAGCGCACAG  
TTTGGACTTTATCGTTCTGGTAGGTTACTTCCAGTTCCAACCCTACTTGCAAGACTGCTT  
GCGCATCGGTTGTAATCGCCCAACGACCCTGAGCTACCAATTTTCATCACTACGGTCAGGT  
TTGTAATAGGGAGATCCTGTTCCATTCCCAGGGTTCGGTTGATCACCGGTAGGCGTGCCCG  
TAAAGGACATTACCTGGTATTCACCCCCCTAAGGGTTGGTTCCCTGGTAATAGCGACGG  
TCAAACCAATCAGTCGATTACCCCAATACCGGTATTCGAGGGCGATCTCAACCGTGGTAG  
TGGTAGCTCCTCCGAATCCCAGCACTACCATCATTACCGATCAACAAAGGGTTGGGGT  
TAATGCTCCCGAAGTAGTGGGCGGTCTCCGGCGGTGTAGTGCTGAACGGGATGTAAGTGC  
TTGGCAAGGTAATGGTATTCTGGA ACTTCTTGATCACCGCAGTGGCGACATGGTTACCGA  
TGATCTCGGCTCCTTTGGGGCTTGGGTGTACACCGTCCCCCAGCATGCCCGCCAGCGGCT  
CATTGACATTACCCGGCTCTACCATGTCATCCCAGGGGTTAACCACGATAACACCCCGTT  
TAGGCAGCTCAGAGAGCATCCACAGGTCCACTTGGTAATGAATAGCCAATTGTTTCATCAC  
TGAGCCCAATAGCGGCTTGTCTACCGGTGTTTCAGCGATCACAATGACGGTTTTGCCAT  
TGGCCAGCAATGTGGCGTAAATCTCGGAGAGGTTATTGATCGTTTTATTGAACGTCTGGT  
TACGCAGACGGTCATTCCCCGAACCCAAATGGATAATGACATCGAACTTATCCAAGGAAG  
CCAGCAGTTGGGGAAGACGTTGGGCTTGTGGGTGGTAGTATTCCCATCGACACCGGCGT  
TCATGGCATCCGGGAAGGCTACGGCTCCCTCGGTCTTCGCACTGGTCCAGAAGGCCAGAC  
CAATGTTACCCATCACGCACTGGTAAGCCC GGCTATCACCGTATACCACGATATTGCGGT  
TAACCAGCAACCGGTCTTCACTTACCGCATTGACTTTGGTGGTCAGGGTGTTCAGTTCTT  
CTTTCAAATAACGGCTACGAGAGTCCAGCACACGTGCTTGCCTGTTTCGCATTGCCGGTGC  
CTTCTTCGGTGGCTTCAACCTTATCATCCGGCATCAGAGCCAGCAAAGGTTCAACCCATC  
TCGGTTGTTCTTTAATCTCTACGGGAATGTCAGCCATGAGAATAAGTCTGTTTAATACG  
TGAGGGTGCCGTCGTAACGGTATTGTCCGTTAAAACGAGGAATGGCGTCGTAATGGCTTT  
CTACGACAGCGAGAGTACCGGTAACCGTGTGGAAATCAATGATAGCCTGAGTGA ACTCCA

CGTCGAGGGTAATTTGATCATCCGTCAGGTCGTAGTAGCATTGCTTTGATCAGGGCTT  
TAATGTGTTACAGGGTTACGACTCCCTTTGAACACCAATACCGCACCTTCAATGATATCTT  
CGTCTCGTTTGACTTGGTAAATACCTTCCACCCCCTGGGTTTGTAACCGTCCTAATCAA  
CCGGATCAGGGGTTTCCAGCATGGAGACCTTATTCTTACATAATCCGCAGGGAGGTACC  
GTTGGTTCTTACCGGTCAGTTTACGTTCCGAATCGACGTTGACCACCCGAGCAAATTCAC  
CACCTTCTACCTCAACTTTCCTGAGGGCAGAGAGGGTAGTATTGTCCAGGGTGAGTTGTT  
CTAATACTAACAATGTTTCGGTTCATCGGAATAACGTTCTTTATTAAGCTATAAACC  
GTTCCAGCAACAGTACATGGTTTGGAAAGGCCATAGGCGTGTCCACAGAAGTAGACAGAG  
GGTTCGGTCATTAGACCATAAAATTGGTAAAGAAAATAGTCCCCAAACCCATATTCGTCA  
CTTACCTCGTTATTTAACTTGAGGTTCTTTTCAAAGCTACATAATCAGGGTGAAGCACAG  
ACAGAGACCGTTTAACTGTCAAGAAGCCTTGTCAATGAATACCCATCAGGCCAAACAGGG  
GTTAGGCCAGCGTGTTTAAACCCTGCGTCAAAAAGCTCGTTCGTTCTGCCCCTCAGGAGAT  
GTGTTCCCTAGAACCGTCTTACCGGCATCATAACCGTCCACTGAGCTACGAAGCCAGCCG  
TATGGCAGATCGCCTTCAACGTCAACTGTGATTGGTGTTCACCCCTTCCGCCACACAC  
AGGTCTGAGATGAGCAACGTTATCGATATGTTTCAGCTGGCGGGACTCGAAGAATAAGCGT  
TCGAGTCAGTTCTCAGTGCTTCATCGTGAAATCGAAGCACTGTACGTCATTCAGAACCGC  
GCGCTTCAGGAGATCGCTTCAGCGGATACGGTCTTGGCGTATGAACAAGCTAAACTCTTC  
CTGATGGATGTCAGGATTGAAATCTACAGCAAGAGCATTGCGTTGAGTCAGTGTATCTAA  
GGACATTTAACGTCCATTGGTAATCAAGGCTATAGTACTTGGGTGATTAGGTACACAACA  
TTCATTCCTTTTTAGCGCTTACACCATGGCTAAAAGTTCGAACTTCACTATCGATAACT  
ACAACGCCGTCCTGGAAGCTGTTAAAGCCAATAACGGTTACGTGATCGACACCCACGGTG  
GTACCCGTGGACCTTATCGTGCTGCTGGTATCGCCGCACTGGTGAAGGACGAAAGGGTTA  
CCCCGGTGCTGCTGTGCCATGGTTCCTACTTCTGCCCGAACTCGCTGCACAAGGAAGCCG  
ATGGTTCGGTGACCCTCTCCAGCTGCTCGGTCCGGTGTACAATCTTCACCCACCAACACG  
GTGGGCTGGAAGAAGCGATCCAAGCCTACAACAAGGAGCAATCCGAGTGGGCGTTGTCCG  
GTGGTCAACTGATGCACGTATGCATCTTCGACTACACCGACGAAACCGCAACTGTGTTCC  
GCGAGCCAGTTCATCTGGCAGGCGAAGTCGTGGGTGCGCTGGCAGCACAAGAGCCGATCG  
GCAAGGTGAACATCCCTGCTCAATAACGAGCAGTTTTGTGTTTCGTAATCTGACTTCATTA  
GGAGCAATGCCATGAGTAATGTAATGCACGTTAGCACCATCGCCGGTCGTACCGCCCTGA  
CGGTGATCACACCCGACGACCTGCCGGTTTCCAACCTGGATGGAAAATGTGCTTGCTGCAC  
AGATCCAGAAAGTGGTTGACGGAGGTAAGGGTTGGCACAACGACGCCGGGTTCAAGGTGG  
AGGTTACCTACCACACTTGGCCATAGGGTTGGGACCGGGAAGTGTACACGCACTTGTTTA  
CCAACCGCGCCTAGCTGGACTCCTACATCAAGGACCAGCAGAGTGGGCCCGTTGTGAGG  
ACAACATGGTGAAGATCAAGATCTACAACCTGGGACCTCGGTCCGAACTTCATGTAAACTC  
GTGAGTTCGGTGGTCCCTGCGTGTGGAACAGCCCTCTGAGCCGTCCTTAGTTGACGTAAG  
GCTAGCGCTACCTCCCTGCCAGTGGCAGGGAGGTAAGTACTACTCTTTTTATTTTTGCTTCAT  
TTCCATTTTTATAGTTCACTCAACACAACCTAGCAAAGTAATGCCTGACACTAACACGGT  
CCTGTGGAAATAAAGATGGAACGTGTGCAGTTCAAAGAATAAAAGTAAGGGGTCTTCGT  
AAATTCTGGTTACTCATCAAACGCTTACTGAGTGAGGACACCGATTATAAGAACACTTGA  
CGAACGCATGGCTAAGTCAATGGAACCTAAGGGTAATTAACCTTCTAGTTCTAATCAGGTCT  
ATATTACCTTTGTGTATATTAATGCGTGGTGGCCTTCTATTTTTAAGACCGAATAAACA  
CAAAGGATGTTATCTATGAGTCAAGTCAAGAAAGCGACGAAAGGTGTTCTGAAAGGTCAC  
AGTCGAACGGCCGATAAGTTTGTATTATGGATGCCAGTTGAGCTACGCGTAAAGGTTAGC  
GAACGCGCAACGGCCAATGGGCGGAGTATGAATGCGGAATTTATCATGCTCATAACAGGCT  
GCGATAAGCAGTGGGAACACAGGTGGAACCCAAATAAGGACTATTCCATCGGTAGGTGAC  
CCTGATCGGGTTGAAGGGCTCCAGGTGTGGTGACTGAATTGATACCGACACCGACTGGA  
TTAAAGATCCGGGCAAAAACCTGTGAGGGAGAGGATATTTATTCGTTATGGGAGATTGTT  
TCATATGACTCGTTTCGAGAACTCGGATAAGGAAAAGAAACCCAGTGTTCTTTGCAGAA  
CAAATCGGGTTTGCGGGGATAGGGCCTGACGATGAGCCCATGTCGTGGACACTCACCTT  
CCCCGGTGAAAACCTCGGTGGGTTACGCAGAACCCTTTCGACCTGAGAAAGAAGACCTGAT  
CCCCCAACCGGTCTCTTCCGATTGAAAGCGTTGTATACCCCTACCCAGCCCTTTTCGGCT  
GGGTAGGGGTTAATCTCTTTATTATTGTTTACTTCACTTTTGTAAACACACGACGATCTGA  
CCAGTTCGGTTATGTCGATCCTCGTAGCTGCCACCGTACGGTGGTCTTATCCACCTCGA  
CCACCCCACTCAGCAATCCTTTCAGCTCATCGAGTCGCTTATTGAGGGCTTCTTATGGG  
TGTCGTTACTGTAGTGGTTAATTTGACCTTCCACCTTGGCAATCGTGCTCTCCTGTGCTC  
GGCGGGTCTCAAGGATGCTCACCAACTGTTGGACTTTGCTCCTTACAACGACCGATTT  
TGCGGTCAAATTCCTTAGCGAAATTGAGGTCTTTGATCGTTGTAACCTTAGGCAGGCCGA



TAAGTCCATTACGTATTGCTGGATACAAATAACCATGCCGTCCGCTACGCCAGAATCCT  
CACCTCCATCCGCCAGTTTCTGGTACTTCGCTTTACGCTCATTCAAACGACCCACCGCGG  
CTTCCAGTTTGGCGACCTGGCTGCGCATTAGACTGCTCTGAATGACTCTGGAATCAAAGA  
CTTCCTTGATCACCTTTTTAACCTGATCAGTTTGGTGTTCACCGGTAGGGCTTTAATGT  
CGTCAAGTTTCTTAACTACGGTCTCCTTAGCACTTTGGTCTCGATCTAGTTGGCGATCT  
GAGTGGCTTCTTGGAGAACAGGACCCACGTTGGTCTGTTATCACCTTAGGACTCGCTACGG  
CGTCTATCGCCTTTTCAGCGGCCTTAGCGGATTCATCTACCTTATCCTGTTTGTCTTTAA  
CGTTCTTCTTGAAGAGACCCCGAAGATCGACTTGAACAGGTTCTTGATGTATTCCCAGG  
CTTTCTTAAATCCCTTCGCCAATCGACGACAGGAACCCCTCACTCCCGCCACTTCATTAC  
GGGTCAGGTAACGCGCGGTATGGAGAACGGACAGAGGGTAACGCTGATTCGCAGTCAGGT  
CCATTCCTTCAGTTCCCATGACCGAATCCGAAAGACCATCGAGTACTTGCTCAATATGTT  
CCATTTCTGGAACACTGTCCATCAGTTCGTTTTCGTATGCAACCGTGTGGCTTGCTGTT  
CCATTATTTGCACCTTAAAGCGTTAAAAGTTTGAGAGAACACTCCGGGAGGTATACAAGAA  
ATGGTTTTTCAGTTTCATCCCCATATCAAACATTTCTTGGCCGGGGATATTACCCAACAA  
CTCATGGCCCTGTTCTTTACTCATAAGAATGTCCACTTGTTCCTTAGGCCATTCCATGAT  
GTTAATACTGCGGGTCATAATGTTGAGTTTATCCCCGGTGTCCATATCCCAGAGTTTAGA  
GTAACATGGAGCATCCTGACCGGTACGCCAGGTCCGGGCTTGGACCTGTTTCACTTCATA  
CGCTCGGAAAGGGGCATTCAACAGAATGGTTCAGGTTCCGCATAATCAAGGGATACCCTTC  
CTTCAGGGAATCAAAGATAGCAATCAACGCACGGAGAGTGGGGTCTTTCTCAAAGCGTTT  
GATATTGGTGTCTCGTTTCGTTGCTAATTTACCGTTTACTGTACATTCGGATACCCGAC  
CTTCGTGAGGTATTCCTCGCAGAGTTTAAAGGGCATCCACGAAGGAGGTAAAGATCAGTGT  
CTTCTTCTCCACGTTATCGATGAGCTCAGGGAGACCTGCGTGCGCAATGGTGTCTTTAAT  
AGCGTTAATACGGGCTCGTCCTAAAACGTTCCCGAAAGCCTCTCCACGCAGTTTITAGACC  
CAAGTCCTTAAACCGCGGACTTAAATGTTTCTGAAATCCTTCAGGGTGGTCCCTTTAAGGCC  
CTTCTCGATGTCTTCTTCCACCAGCTTACAGAACTGACCGTCTTGGTTATCCGTAAAAC  
GTTGTACCCCGGGTCTGAACCGGTGAACAATCTGTTTGTACTACACCAGATTCTCAAC  
CGCTTTGGCATTCCCCTGGATAGACAATTCATACGACGTCATAACATCGTTGTAGAATTC  
CAGGAAGCTCGGAATATGCTTCGGATAGAACGCAATCCGTTCTCCAATGCAAATCTGCAT  
TTGGAGGCGAATAGCATCCAAGGTGCATTGATCCGAATTCGGGATCTTCACCTTAAACCAG  
TTCCATAGGAGGAGGATCGCCCCATCCCACCAGTTCAGGAATGGTGAACCTTCATACGTCC  
AATACGTCTACTCAGCAAATCCATTAACGAGGGACGGTTACGTCAATAGGACGCCATAAA  
GAACTCCCGAGCCTTCTTATCGAAGTAGGGATCGATCATAACAGGTCGTTGGGAAGATTC  
ACTCCCCTGAGCCTTTAGCGGCGTCCCTGATATCGTTAGGTGATGCCCGAACAGTTCCAT  
GTCGCACCATTTCGATCAACTTCCGTGTACGGGCTGCTGTAGGGTCATTGAAGTTCTGGGT  
TTCATCCAGAATCATCTTCAAAGCGCCTTCATGCTTCTTACTCAGCGCAATGAGGAAGTT  
CTCCAAGTATTTCCCATAACCACTGGTCATGTAATCGTAATGGACGATGTAGAACTCATA  
CCCTTCTTCTAAGACCTTACCGCTGATACTGGTCCAGATACGGGGTGGAACTTAAAGTG  
CTGGAGGGGTTGTTCTACCCAGACTGTATCCACAATGTTTCATAGGGCAAAGACAACCGT  
CGTAGCCGTATTGATCAATTGAGACCACGCCAAGGACGTAAAGGTATTGGGGGTCACGAT  
GTAGTCATCCACCACATAACAGCTTCTCGTCATTATCCTAGGCAATGCAGCAAGTCTCTTG  
GTTCTCCACTTTCTCCGCGTACCCAGCTTCAGTTGCAGGTCTTCATACTGGGAGATGTT  
ATACATTCTTGAAGACGGGGATTGTCTCCAATTAACCCAGTCATCATCTTGCCGACGTC  
TCGGTGCTTAAAGTCAACCTTATACAAACCGTTAACCAACACTGGCTCCGTAGCTGTTCC  
TCCAATGGACCACATCAACCGACGGAAGTTCTCCATCCCAATCCGGTTCTCGTGATACGC  
GGATAAGACGGATTCACTGATTAACACCCACGTTCAATCACCGATGTGACTAAATT  
CAAGCGGTCCCGATACCGGAGCACCATAACGTTGTCCCCTATTACAACGTCGGTATCGAC  
GAGCTCCCTTGCAGCGACTACAGAAGAGGTATCGCAATGGGGGTTGCATCCATTGATCTC  
ACCCACTAAGGGGAAGTACACATACTCTTTACTGGCTTTATGGAGTACTTCCAACGTGGT  
TAAGATTTAATCGAACCCATTCACCGTGGTTTTCCACAAATGATACAGATGAGAGACAGC  
CGTTCTACCGTCTTCGAAATAGAAGCGATAAACTTCCGTGTTCCCCTGGGGGTAAATACT  
CTCCACACACGCGCTATCACCCCGGGGGTCACGACGATATCCTTGACCTTTAGGTCACC  
CAAGGCTTTCCACCCATTTGGGAGTTTAAACCCGGGTTGGGAGAGGCATGGCTTTTCTGA  
ACCCGGATTACCATCTAACACATCCCTTTCAAGTGATAACTGTTTACAATGATGGGGTA  
TTGCTGAAGAAAGTCCAACCTGGTGAGGAAAGGAACTGTGTTGAACGGATTCAAGTTCTT  
AAGATCAAAGGTTTACCTCCTGGATTAACCGTATCTTTGATCCAGGTCGCGGTTTCAAT  
GAGTTCCTTCAATTCCTCAACGCTCGTCTGCGGGTACGGAGGTTCCGTATTTTGAGGAG  
TTCCCCACAATGTGGTGCGATTATACCAGGAAGAAGTTATGCACCATAATGGTGTCCCA

GGATGCGCGTCGAATCTGATGTTTCGTTAAGAGAGAAGTGCTGTAGAACTTCTCAATGTC  
TTTGGCGAAATCGGAATAGGACACACCCGTAATGTGTACGTGGTCTCCCGTTTGTGGAT  
CTTAACTGAAAACAGTCCTACCATTGAAGTCGTCCTTAAAGAGGGGGTTTAAAATGCGTC  
AAGTTGAAGTAGGATCCGCGGTCTATAACAACCTGGCTCGTGTATACGACAACCTGAGGG  
GTGGAGAATTGGTTGAGGTAGGCCAACGGGTAGAAGGGGAAACGGAATATCGAGATGTGC  
TGACCCTCGGAGATGTGAGATGCATTACTTCTTTACCCTCATTAAAGAAGGTAAAGAAG  
AAGCCTACGTGCGGTATACCCGTGACAACGGTACCCTCACGTTCCGACTGAACGAGAAGT  
GGACCCAATACCCCTTCAATGACGACATCTTCACCATTCCAGAAGAGATCGTAGAGGGTA  
TGGGGAGGGTCTCTATAGAGTTCCCCAGTAGTTGGTTACAGGTCGCGGCTAAACACCCCA  
CTGATGATGTGCTTCAAGATGACCTGAAAACCACGGAAAAACTGGTGATTAAGCTCTCCA  
ATAAACTCCGTCATGCCGAGGATGTTATCACCAAGAAAAGCAACCATATGGTTGAATGGG  
TGGGTAACCGTGACCACGACCTCTACCTCACGTTCAAACCAAGAAAAGACGACCTTTCTT  
ACTTTACGGTTCGGTTTGATAAAGTCTACCCCGAAGTCCCTAAAGAGGGGGATTACCCTCG  
GAGAAGGGGAAACGTTGGAGATTGATAACCCCGATAACCGTCAGGAAGTTAAGGACCTTA  
TTAAGACTATCGGTGAACTGGAACACCAAGTGAACCGACAGATTCAATATTACCGCAAGC  
ATGCAAACCTGACTGACGCGGGTAAACCACTCTTCGAGCAGGAAGTCCGTACCCTTCTAT  
TTGCCGCCAGTCACTTCAGCAAACGCATTTATCCTTTCAACAGTGTGCATGGTGTGGAAT  
GGTTGGATAAAGGCGGCTAACGAGATCCTGGAGCGCCTGTACGCCTACAAAGCCCCACAG  
ACGTTCCCTTTGGGTTGGATGTGAACAGTTGGTTCGTGTGGAGTTATCCACTGGATGGAA  
TTGAGCAGGATAAAGTACGGATGAATCGGTTGACTTTATTGAGTGCCTACTTAATCGGT  
ACTCGGAGAGTTTTGTTGATATCCTGACGGGTTTCTGATGGATTTGAACCACACTGGAG  
TCATCCGTCCGTATCACTACGTCGTGCCTGCTGACCTCAGTGACGGATACTCGATCGGCT  
CGATTCATCGGGTAAAATAACGAAAGCGACTGTAGTCCAGAAGAGCCGTTGGGCTCTCCT  
GGAGTAGTCGGTATTACGGTACACCCAATCGAGACTCTAGATCCTTAATGTATTCATCCC  
TGGCCACTAAGGCCGCTGCCAGATCTCGAATCCGAGACAAATCATTACTGTCATCCGTAA  
TCGTGTTCTTGCGGGTGGTTTCAAACACATCATGCTCATTCTTCGAGACATACCCAATGA  
CCGGTCCAGTTCCCAAAGTGGATTTCCCTTCCACTCCGAAATGGGCTTTGATGTGGGTAT  
CGAAATGTAATATCGCCCAGACAAGGTTATCCTTCGTCTCAGGGGGTAACGCACCACAGT  
CGGTGACAATAGACATGCGTTCGTACGAATACCCATCTAACAACGGGTAACCTATTCAGGT  
AGGTAGTCAGCACATAGACCAGAGGACCACTCCGCGGTATTAACGACACCACCACGGCGT  
TTTACTGATCGCCTTTTCCAGTACCGCGGGGAAATCTGCTTCGCTGAGTCCAATGGGTT  
TAAAGACCCGCTCGTAGATCTTAATCTTCAATCCCTGCATTTTCAGGGATCGTTCGAGTGG  
CCTCTACGGTGTAGAACGTATTGGGATTACCCACGGTTGAGTAGGGTGCGATAGTTTCAA  
ACCGTCCGGCTGCACCAATGGCTGGAATGATGTTTTGCTCAGCCATTCATTAATCCTCTT  
CTACAATCCCGTCTTGAATCATTGTCACCGGGTGAACATCACGTATTTCACTTGACCAA  
TACGCTTGGCCACACAGACCTTATCCAAGTGAGTCAGACGGCTGACCCCGGGAGGCAGCC  
AAGAGAACGGCGTAGCCACTTCAGCGGCTGCTACCAGGTCTCCATTCCACGGATAAACG  
CCATAGTAGCCTCACCCATGGATCCATAATCAGGATCCAGGGCGGGGATCAATTGGTACT  
GGGGAACAATTGAACGAATCTTCTGCATCCCTTGACGGTTGTTCTTTTTAGCTACAAACC  
CAATCTGAACCGATTAATACAGCATGGGTAGGGTTTGAAGGATTTTATGATGAAGTCTT  
CTGGTATTGTTGGGACCAAGTACTGCTTGGTAATATCGATTTTCAGTCTCACGATCGCCAA  
TGGGGGAGAACGAGCTAGCACGGGTGGTGCGGTCTACAATCCCAATCATGTCGAAACGGG  
GGATGGCAGAGAAGTCCAGCGGGTTGAAGAGATCGGGGATCTTTCCTTCCCAATCTTCAC  
GAGGATACTTCGAATCTTTCAAGATTTTCATCTTGAATCTGTTTCGTAGAGCGGATCTTCCG  
CCTCGGTACCATTACCCAGGACAGGATAGACCAGTACCCCATGTTCAACTTGCCGCTGT  
TAATCGCGTCAAGTATCTGGAATTTTCGACGTTGCGCTCTGTATAGTGCCAGACTGCAT  
TCCGAGTCGCTTCATGTTACGTTGCGCGATGACCGTCCGGGTGTCCCGTGCGAACCGCT  
CAGCAATCTGCTGATAGTTCATGGTCATCAGCTTGGCCATCTCGTTTAAACGGGATGGGGT  
GGATAATCGCAAACCTGAACACGGGGATATTGGATCAGGAAGTACGCGTCAACCATCCACA  
AGTAGAACGGCTGCTTATCACCAACCACGCCATGATGGCCACGAACAAAGCCCGGTAGCC  
AGATCCTGTTATTGGTGACCATATCACCAACGTCTTCAATCACAACATTGGTGGTGAATT  
GGGCTTTGAGTAGCACAAGGGTGTAGGACGACTGTCAGTGATTTTCCCGCAGAGAGCTT  
GTTCATAACAACAGTTGGACACACCGCTTTGAGCTTCAGCAATCGCTTGCGGCATAACAA  
TCTCTGTTCCATCGGCTTCGGAATAGAAATTGACCAATACGGTTGCACTGGGAATGTTCCG  
CCGCCAGGGTAAACTTACCCGTGTCTTTGGCATAAAGTGTGGACTTGTTTCGACAGCTCGC  
CAATAGGGGAGGTTGTGAGTAGACTGTAGTCATGAAGCTTTGCTATAAATGCGAAAGAAA  
GGAACGTGGTACTCATGATTGGCTCACCGTTGATGTAAGGAATACGCCCATGGTTTTAGG

TATTGCAAAGGAGATGGCGGATAGATTGATAGAATTCGTTCTTAAATTCCTTCAAAGGGGA  
GTCTGCTGAAGAACAACCTGAGCAAAGCCCTTAAAGTTTGAGTACTTACTATTGCCCTGCT  
ACTGTTTGGTTTGTTCATTGTTGAGTAACAACCTCAACCTGCGCATGGATCTGGTGGA  
TGCTGAAATTGGTCTAGTTAAGATTAATATGCTCTTCGACCCGACTGTGGGTGAAGGGGG  
ACCTTAAAAGAGTTCGTTTCGTATCAACGATGCGTTGAGTCGACAACTAGACAGTGTTAA  
GAATCAAATATAATCTTGTGAAACGAACCATTACTGCAACGGCTGACAACAAGGTACT  
TAAGGAACACCTACTTATGGTCCTTGAAGAGAACAAGATTCTACAAAATAATAACCATAT  
GCGGTTGAGAAAATGAACACAATAGGGACCGGTTAAATTCCACATGGATGTGTATCCCAT  
GTACACGCACCTACTAGAATGAGTTAACGTAATGGAAGCCATCACACCGTCTATCAACTG  
GGTTATGTACCTCCTGGTAGGACATAACAGCAAGTTAAAGAAAAACGGCTACTTCCCTGGG  
TGATCATGGGTATTCTTACGATATCCAACAAGAAGGTAAGCGTAAGCTAACCAAGGATGT  
CCCGACGTCGGCGGGGTATTATACCGGTAATCCTCAGAAGACCAATACGGCTGTAACGAT  
TCGGGATATTGTGTCGTTGAACGTAGTGAATGCGGAGAGTGAGCTGGAAGCCCTCTTGAA  
GGGATATTGGGAAGACCTGAATACCCTTACCACCGATCCGATCCTGAAGAACCTGTGTGT  
CATTACCGAACACAAAGTCTTGAAGCCTTGAGCAAGGTGGACATGAAGAAAGTCGAAGA  
CGCTGAAGGGTTCAAACCTCGGAAGACTGGTTTTAAGCGCAACGGAGCGAGCGGTGTGT  
AGACATCCTCACCTGCTTGGAAATAGCCAGTCAAACAGACTGTCGGGTGGTCTTCGATGT  
CCCAGTTTTGCGAAGGGGCTGAAGGGTATAAGGAAGCTGCCAAACAATGGGACCTTGC  
TGAAGCGATCAGACTGTTTGGGTTTATGAAGGAAACCAACCTGGAAGTGGTTTCCCGTAA  
GGAGTATGAAAACCCAGAGGTGGAATTCAACAAGATCGTCAGTGCCTCTCGGTGGTATTT  
CAATACCTTGGATCCTGAAGCGTCTATAAAGAACAATACGGGTATCGAGTGTACGGGTT  
TGGTAAAGTTCGAACGGGATAAAACGTAATACGGTAAGCTCACCACGGATGTGACCTACTC  
CACACTCTACACCAAACGACCCCTTCGTTTACTGGATAAGTTGTTTGACTTTACGGTAGA  
ACGGATTGCCAATCCCGAGGGGTATTTGTCAGCAGGGGACCTGAACCACATTGTTACCAA  
GGATGTGGCCCTGTTAATGGATCATTTCCAGGGGTTCTAAGGAAAAGGAACCGATCTC  
CCTTTCACCAAACAGAACACGAAACCGGTTCTGATGGAGCTTATATCCCGGTCTTGAT  
GTCGTATCGGATCGGGGATTTCTTAATTGGGATGGATATTCTGTTTGAAGGGTTTATGAA  
CAAGGATACCGAGAACAGATATGGGTATCCGACGTCCTACATTATCACGGATTTGATTTA  
CCAGAAGGAAGTCAATGGAAAAGGGGTGGAGAAGCTTAAGCTGGATCCAGCCTTTAACCA  
GACTCGGGAAACGGTCAGTTTAAAGGCCACTCATCCAGCGCAATTAACCGGTAACCAT  
CAAGCTGTCCATTGGGTACGACACTCCGGATTGGAACGCTTTTAATTTCGATTACGGACCC  
TAAGGTTAAGGTCTGGTGTGTGACAGACACCCGGAAGTGGAGGTTTGCAGTACGCGAC  
GATTGTGGAGCCGGATGAGTTTATCTATATCCATACGTCGGCGATTGCTAAACTTCGGGT  
GTTAACCTTGGCGGAGTTAGGACGAAGTACTGATAAAGCGTGAACATTATACCTACTGGG  
AGGTGTGTACCTCCAGTAGGTATACGTATGGTACTATTTTGCTTTGGTTACAATCGTCT  
CGGTCTGATCACGGAAGACGGCCGCCAGTTAATTCGGGAGGGTCATCATCGCTCCGCAGA  
TGTCGGTAAACTGCACAAAACGATTAACCACCAACTCCATTTCCGGTCAGAATCTTCTCAT  
CCACGACGAGATCATTGGTTTAGATCTTCTCAACCAAGAGTTGTCCCAGTTCATAGATCC  
GAGACAATTCCTGACTGGCCATTTCAACATCCCGAGCGCCAGTACCTTGGCCGACACGT  
TGTAGGTTTCCAGTAAGTTGTACAGTTCTTCGCAATTGACGTAAACTTCACCCAGGGTAC  
ACGTCTTGCAGTGGGGGTTGGATGGGAGACCTTTAAGGAACTTTTCGGAACGGTCCAGTA  
CCGTATCAAAGTTGGTAATGGTCCAACGGAACGGGTGTCAGGATGACCGGTCTTAATCA  
GTGGTTTAAAGCCAATCGTATAGTCGAATTGCTTCTGTTTACATTCTACTGACCAGATAGA  
CCCCATCCGTGGGTACGAATTGCGTATAAGCCATCATATTACCGAGGCCGGGTGTGTAGG  
TCTCCGGGACGATGAATGGCAACCCAGCGTCTTAACAAAGAGAATCTCTTTCCGCTGGA  
TCGTTTAAACGGAACCTTTCAACGTCCACAGTGATAACCGACTTTTCGAAGGCGGCCAGAG  
GGCGGTCTATAGAGGCACCGAACTCAGAGCAGAAAAGACCCACACTTTCCCTTACACTGA  
GTTTTTCAGCCCCAAGACTAAGAGAAGCTGGGGATTCTTGATCCGTTTCGATGAAGACTT  
TCGATGTAAAGGCATGTTCCATAAGTGAAATTCTCATGAGTATAGTTTGGAGAATGGGTT  
TTACGCACACCCATCTAAAACAGGGCGTTGCCCTTTCAGCTAAAGTTCATAAAAATACGA  
GGAATAAGAGGAACATGAGTACGCCTCCTCTGTTTACCCAAGAGTTGGAATCGGCCGATA  
CGTTAATTGTAAATCATCCGTTTTCCCTATTTTCGATATGTTAAACACCGAGATCTTGA  
TGAGTGCATCATGGGTGGCGTATAACAACGGGGGCTTTGTGCGTAACCATGTTATCGTCG  
GTGGGAACAACACCCAGAAGACCGGGATGACCGTACTGGGTATGGCACGGGTCTTGATTC  
GGTTTAAAGGGTCTGTTGTCTTCTTCTTTGATATTGAGGCCACCTTCTCCGTAGACCGTC  
TGGCGGAAATGATAGACCGAGAGATCGGTATTCACGGGTACTTCAACGAACAGATACTGG  
GCAAGCGCTTCTTCTGCTTCTCTCGGAATGATTTGGTAAATCCCTGTGATGGCACCTTTG

TTCATGATAAGTTCAAATGGTTGAAGGGGAAGATCGCTGAACAGATTAAGGCCAAAGCCG  
ATATCTTCATGAAGACCCCGTTTACGGACAGCAAAGGCAACCCCGTTAAGATCATTACCC  
CTATTCTGTGCCTGGTCGACTCTATCTCTGAATTGCCCTTCCATCGGGTAGCGGAACATT  
TCCAAGAAGGGGATGTTGATCAGGGCGGAGAGAAGAAGACGCGCGATCTGGTGATTGGGA  
ACCTCCGTCGTATCGTCTATGAAGACGCCGATATCTTGGGTGGGGTATCGGGTTGTTACC  
AGATTCGGGTTGCTCAGGTTGTTGATAAGATCAACATGACTGGGCGTCCTGAGGAGAAGG  
AATCTATTTTCATCCGTCCGGGTAATAAGCTGAAAGGTCCTAAGGCCATGATGCGTATTC  
CGCAGATCGGTCACGACATCCTTAAAGGTTCAAGTGCCTAAAGGGGGAAGTAATGGTCAAG  
AGTGGTTGTACCCGAATCCCTTTGGTAAAGATGTTATTGTGACTCCTGATGCCAAAGAAA  
TGCCTGACTTGATGATTTATAATAATCAACCCTGTCGGAATAAGGCGGGGATGTCAGGTA  
TTAACGCGTTCTTCATTGGTTCCAGTCCATGGGAATTCATTAAGGTCTGACCATGTACC  
ATGTACTGAAGACAGCTAAGTACTTCGGCCTGGAAGGGAGTGACCGCAGTCATCACCGCA  
TTCTGTACCCTGATGTGAAGGTGGGACGTACCACTGTATCGGAAAATACCATTCAAGGCC  
GTAAATTCCTGCGAGCACTGACCATCATTTACCACTTGTGGTTCATGCAAACCTTCTGGC  
TGACACTTCCCACAAATACCGTCTGACTCCTCAGGCAGTGTACGACGGTATTATTGCTC  
AAGGACTGGAATGGAACGATATTCTGGAGAACACAGTAGACTACTGGTACACGAATCCAG  
ATATTGACAAGTACACTGTTACAACGTATGAACTCATTTCGCATTGCACTGGGTGAACGTA  
AACCTTACTGGAAAGAGAAAGGTGCACCTAAGGCTATTATTTAAATAAAGGGTGTGAGGG  
TAGCCTGAGTCATCCCACCCCGACTTGGTAAAGGACCCCTCATGGAAACAGCACCGTGC  
CCTACCACCATTCATTACGGCGGACAGTAACTTTATTAATCTTTGCCTGGATCCGTTT  
GACTACATCAGGCGCTTGAAGAACGAGTTTCTGCCGTGCGGGAGGATAACCCGTTGTTG  
TATACCGTCAGCGGTCGCTATGGTGTGAGCGAGATTGACAGCGAAATCCCGGTGATTGAA  
GTGAATGACCGGAATAAGACACTCTTCAGTCAAACCTTGGAGAACTGCTCCATGTTGTTT  
GACGAAGTCCAGGCGATCAGTACGGTTCGAAAGTGATCCCTTTATTAACCTCCGCCAAAGGA  
GTGATTACATTGGCCAACAAGCCGTTTACACATTGCAAATATCCGAGGAAAGTGTAATGG  
CTGGCAACCGGAAGGCATTTGAAGAACAAGTGTATAAAGCCTTTGGTCTCTGACCCAAG  
GGGGTGGCAATAAGAAGATTTATGTGAAACTCTTTGCCACCATGGACGATGACGCTTTTG  
AAGACTTCGTCCAGTGGTTGGAAAAAGGGAATCCGTTAGCGATTTGGGCCTGTAACCTTG  
TTCCTGAAGAGAACTGAATTTTCGATAACCTGATGAGACTCTGTCAACAGTTCGGTATTG  
AAGTTGAACACCATCTGGTTATTTACGACGAAGACACTGGGATCAAGTCACTGACCGATT  
ATAAGGCGATTGTAGGACGTGCTGAAGTCCGTAAACAACGGCAGATGTTGGCCAAGAAGT  
TCAGTGCGGCTAAGAACGACTACGAAATTGATGACCTCACCGGTGAACCCAAGGGGGACA  
GCCGGAGTGCGGGGATCAGCGGTCCTGAGGTTACCGTACTGCATAACCTGGGTTTGAACA  
TCATGGCGAATCAACTGTACACCGTTAAAGGCGGCGACCAAGAGGCCTTTAAGGCGTACA  
AGAACGATTTGTTGACCATCGGTAAGACCACCAATGGGAGCCTGCGTAAAGGCTCAG  
GTATCAAGGTGTTGAGCACGGTCCACCACCTCATGCGTGGTTCGTCATATCGTCACTCACG  
TTAACGAGAAGTATCTCTCCCATGGATACACTCATTGATGTGTGCAATACCATTAAAG  
AAGTATGGTTGGACCTGTCAACCGGAGAAGCTCCTCCTCCCATTCCTCAGACCTTCTCAT  
CGCCTATCAACCGTGCTTTGATCTGTTTTAATGAAGCCTATTCAGTCTTCATAAACCAAG  
TGGGAAGTAGTAGTGATCTCATCGACAGTTGGGTCTGTATTCAAATGCTGGTTATCACCC  
GCTTGGGCGAGCATCAGGTGGCGTTCAGTCAAGTTCAGTCAAATGTTCAAGGAAGTCTTTA  
AGACCATTGAAGGGGGTAATGGACTGGATATTTCCGACGAGAATGAATATAAACGCTGGA  
GTTTCTTGATTGCTTTAGCGTTTAGGGTGTATAACCACTCATTTCATTGTACCCCCGCTA  
CAGGACCTAAGGCATGAATCGGTTATTAACCGCCTACGCGGATGTGGACAGTCTCTTCGA  
TTGTAGGAGGGGATTGATTCAGAAGTGGTTAACACGAGACATGGATGTTAGTGATGAAAA  
CAGCTTGAGTGATGAAGCCTTTGCAGCGTAATATGAGAAACGCCGGCTTCAAGGGGACAC  
CCTGTGGGAACCTTCATATTGAGAAGAACTACAGGGAGAGTAGGATCGATACGTTTAACTA  
TCCGTTCTTTGGGTTACCCGACAGATATTCAGGGAACCTATCAGAAACGGAGTTTACG  
GAATTGGGGGTACGGGTATTACCCACAGGGTTCCTGTCTAATTTTCGTCAAGGTGATTAT  
CGAGCATGAACAACGGACCGATAAACCTATCGAGATCAAAGGGGTGACCCTAACGAACAA  
CTGTTTCCTTTATGTCATGGATACAGCCCTTAAGGAGGAGTTGATCGAGCACGTTAAGAC  
TCGGTTAGGCTACCGGATAGAGGTGAAGACCGTTGATGACGACATTATCAATGCAACACC  
CTCCTACTATCGACAGTTCGATTATGTCTTCAAATAACGACTTCTGTTGAATGCAGACTA  
TAAGTCTTCTTTGAGAACGTCGGTAAACCGCTTATTCCTGATACGGCGTTTTTGGTTCC  
AGATCTCCTGGTTCAAGAAACCGAGTATTTGGAAGGGAGTATTTAAGACCGTATCTTCG  
CCAATTCATTGCGCTGGCTCCTGTATTGAAACTGATTCCGATCTACAAAGGTTTCTATGA  
TACTTGACGGAATAACTCCTTTATTAACCTGGGTGGGGATCTCCCCACCCAGTTATGTTT

GCTTGGTTAAATTTCCCTCCCCATCGATATCCACTAGCTGAATCCCCTGCAGCAGCACTTC  
TTCCGTAATGGGAATCAAGGTAGGATCCAGAGGCAGGGGTTTAGAGAGATCCAGTACGAA  
CTGCGAGAACTCAAAGGTGGGGAGTTTAATCCCTCCACTTTGAATACGCTCCATAGCCTC  
CAGCATGTGGTTAAGGGCCAGTCGGTTGCCTGTATTCTCTTTCTTTAGCCCGCTCTTT  
ACGGTCATCCCGTACGGTCTTCTCAATCTCCGCAATAATCTGGGTGACCCCTTCCAGCAG  
ATGCGCGTTCCTTCGGATTATCCAAATACGCAGACATAGCGTATTCCAGAATGAAAGCAGC  
GTTACGTTGTACTACCTTAACCAGTTCTTCTGTTTCGATATCCTCCAGATTACCAGTCAT  
TGCCTTACGGAGATCTTCCACAACCGTTTGCATTTTATCCGTATCCAAAGGTCTGGCTTT  
CTTCTTTTCTTTTCTGGGGTGTCTGTCAGGGCTTTCCATGATTTTTTCAGACCTACATTAT  
TCGTTTGAGTGGTTAGGAGTATGTGTAATGGCACTAACTAAACGGGCTCGATTACAGGTG  
GTTAAGCTGGATACCTGGTATAGGTAACCTGTTTAACCGAAAACCTGGATTCCCTCACGAT  
CGAGCGGCCGACTGAGATTAATCAACGGTCTCTTAGGCTTCAGTACGGTTCGCAGCTCA  
GATCCAGGATCTATACGATTGCTTAAAGCCCCTAAATACATCATTTGACATCTATCCGAG  
GGTCTACCTACCCTTACCTATTGAACTGTCAACAAAGTCCTCTAAGGACGCTCACAGGCT  
GGTAGAGACGGTACTGTCAGGTTACTCGTGGAACCGTGACGAACACTTCGTGAGAATCAT  
GATCGAACACTACCCAGTTTCTTAGACTGGTACAGTAACGGTTACAGTCTCGACGGGTA  
TTACCAGGGAATGGTGAAACTCATCGAACTGTATTGTACCTTATTCCACGTTATATCGAA  
TGAGGACGATCCTGTTGAATGTCATCCTGTCGTAGAGAACTTCTTAACCAGCCGGTGGTT  
TAGGCTGATGGTTATAGACTTGATCGAAATACTGACTCTGGTACTTATCCAACGTCGGGG  
AGGTTAAATGGAAGAAAACAGAGAGAGACCCAAAGCCAGCCGGTTGGAGAGTATCTCCA  
CAAGTTTTTACGGGATGAAGAACTCAGAGATCCCCCGCCCGGTAATTCCGGGCACTTCT  
GAACAAAGTGGTTCCTACCCTCACAAGTGGAACAACACTACTTACGGGATTATCTGGAGTA  
TATGGTGACCACCCGAGATCCCCAACGGGCTAAGACCGAACGCATTGCCCGCAAGGTAA  
CATTAAAGCAACCTATTTCCAAAGCTATACGTTAACCTTCCAGAATCTCTTGAAGGGTT  
GTCTATCCTACGGATGAAATCTTGCAGAATCATCATCGAGGTTGTTGAAGAACACGGTGA  
AATACTCACTGTGGAAGAACTATTTCGCATCGTAGAGAAGAAGCGTTTGGAGAAACCCAT  
TGTGGATGAACCGGAAGAGTGAATGCAGGAGTAGGTGCGCTAACGCACCTAGTCCCCTTC  
CCCCTTTATTCTTTAATTTTTGGAGTGCCGCTATAGGTATCATTGACGGGTTCAATCTGT  
CTTCGGGTATTAATGCCTTTAAGAAAGAAACCGCAACCGCAATGCGGGGGGTTAAAAGTG  
AAACCCTAACCCTATTGATCTCACCGCGAGTCGCCTTAAAGAAGGGGTGGCTCTTACTA  
ACCCGAATGACACCACACTCACGTCAACCATCACCGCGTACCGGAGTTCGGTTGTAGAAG  
CACTAGACGGTGTATTGGAGCCCCGTCAGGCGGTTTACTCAATACGAAGGACATTACCC  
GAGCCATTTCGTATTGATAGCAATGGGGTTCAGTTTTCAGTGATGATGACTTGATTACCGCGG  
CTGGGAGTCAAATGGGCGTTAACGTCTGGGGTAAATACGGCGGGAACCAACTCATCGCAG  
ACACTCTCACCGCAGAATTCAATCGGCTCACTGGATGGAATGTGGGTCAAATTATCCAGG  
TCGGTTATGGTGACAAAAGTTCAGCCTGCCGTATCAATGACAGTTGGAGAGCTCAGCTCG  
GTAGTGCCACCATCGATATGCTCAGGGATTATACCGGTATTGATGAGTTTGTAGACGTCA  
GTGTTCAATCGGCGTTTTACAACGCCATGCTGTACAACACTCAGCGATGTACGGGATGAGTG  
ACAGTTATAAAACCCAATGGGATAACTACCCGTATCTCTCTCTGATACAAGATGCCTTTA  
TTGAAGCCATTTCAGTACATGATTACGAATGGGGATGTTGAGAGTATCAGTAAGGTCTTTG  
AACTCATTAATAACCGAAGGGAAGGATACCTTACTGAGTAAATACCCGGATTTCTTTGAAA  
CCCTCTTTACGAAGTTCTCTTTCGACAGTCAAGTCCACAGTGAAGAGCACCCCGCCATTC  
GTACGAAACTCTTAAACGTTTTAGAAACGGTAGCGGGTAAAGAGTGGTATTACCGGGAGA  
CCCAATTCGGTAAAGCGTACAACCTGGGGTTGGTATCGAACATCAGTGACGACATGGTAA  
CCCTGTTACGCCTGTTGAAGAGTTGATTCCCCTCTTAACCACTGGGGGGATCTTTCAGA  
CTGAACGGGCAACGGATGTATTGAATCAATCCTTCCCGAATGCCCTATTTCGCACTAAAT  
AACCTAACGAAGACTCCCCTACCCCAATTAAGGGGTAGGGGAGTTATTACTGAATAAGT  
TCGTTTTGTATTGATTAATAGAGGGTGTGATTTCCGCTTAGTAGACTCGGGGGCGTGAAA  
CCCCCGAGTTTACTGGCTTTCTATCTTGCAAGAGGGCGTGTGCGGAGCGAAGCAGATCT  
GCCGCTATCGAGTCGTTTATCTTAGCCGCGATGTAGTCAGAACGAATACTGGTCTTAATA  
TCCGTGACCACACCCGTCTTTGACAGTACAAACGCGACCACCGCATAATGGTATCCAGG  
TAGTCCATCCCTGTGATACGACTGGCAAAGTTGCTGAACGCACTGTCATCCGAGAGAATA  
CGACTGACCACCGCATTTCGGATTAGTAAGAGCCAGGATACTACTGGACCGATCAATGGGA  
AGGGTGACCAGGGGTTCCAGATCGGGAATCTGTAACCTGGCCGTCATATTC AACGGTTA  
CGATCACGCGTCCACCCCGCATCTCCTTCCCCAGGGTCATATCCAATTGAGTCACCAGA  
CGGGTACGGATGATTCCACGAGAGTTACAGAAAGCTTTCACGTAGAAGGGGGAGGTATGG  
GTTCCACCGCCTGAGGTATTACCGGCCACTAAGGGCAGTAGGAGGGAAATCAATACCCAG

ATCTTAACAATCTGCTCATACGGGTGTGCGTAGTTACACACTGACTTAATGGTGTAGGTC  
TCCGTATGGAGATTGCAGGTGGATTAGTCCAGTGGTCAGGGATCTTGACGTAAGTGTTA  
TTGGCAACAGCCAGGGGGATATTTCCAATAACAGATCCTGAAAGGTCTCCCATAGCCGCG  
TCTTTAACAATGTTAATCAGTCCATCGACAATGGCTAAGCCAGTTTGACCTTTAGCCACA  
TCGAAGGTGAAGTCATTGGTAGTGAGAACAAATGGAATTGAACTTTTCCGCCATAGGCGAT  
TGCCAGTGCTATTAGAGAAGGAATCCCGAGTAGCTCCCCCGTTCCCCTCTACGCCGAAG  
GTGATCCCATCCATAACCACGGCTACAGCGGTTTTAACGAGGTCGTAATATCTCCCATC  
CAGGTACGATCGTTAGGGTTGTCTTCGTAGTAGAACTGATCCTCATTGTTAATAGCGGGA  
TTAGCGGTTACTGAGGGGGTAGCGGGAGAGGCGCGTTGAGGCCGTTTCGTTGGGGTTTACA  
AGAGGAGCTGAAGTACCATATGACTCACCCGTTCCCATAGGCTGCATGGTGGAGGTGGGT  
TGTCCGTCAGGTCCGGTTGGGGGTTGTTCCAGTTCAAGGTCGGCAATTCCATATTGCTTA  
TTACGTGCAGGGCCGATGTCTTGATAAGAGCCTCGGTTGAGGTAGGCACTGTCTTCTTCA  
ACGTAGTTGGGTTTCGTTATCACCCCTGCGTTTACCGACTGTGCTCATTTCCTTTTCAATA  
TACTCTTGACAAGGTCTGCCAGCGGTTACTGAACGATAGAAGGTGACTTCTTGAAGGATT  
TGTTTGGCTCGTTCCAATTTCTGTTGGGGGGAGTTAATTGGAGTGTTCGTTGTCCATAGAG  
GCCAGACGCTCCAACCTTACCCGGTGTTCACGCAGCCCTTTATTGACCAACCGCATGAGG  
TCAATAGTCCCATCCTGGTTGACGCAATTAGGAACGAGGGTAGACAACTGGATACGACT  
TCACTGTTGTCGTAAGTTCGGGTTTAAAGACCGTACAGGGGATCGGTCTGTTGCTGGTTCATC  
TTAGGTAGGATGGGATCGATGTACCGCAGTTTCACCATGAAGTCAATCAGTACACCGGTA  
GCCACCAGGGTGTAAAGCCCCAACCGCAGGCCTAACAGTCCAGAACTGATACTTGGGAGAA  
TCTGCTAAGAATGCCAGGAATTGGGTGCTGATACTCAACAGCTGCATAGGCCAAAAGGCA  
ATAGAACCGATGGCTTGTCCCATGTAGAACGACAGACTGGGCGCCCGCCCTTTGTTCCGA  
ATGATAGCCGCTGCGGGAGAGAACATGTTTGTAAATGAATGACAACAGACCAGCGAACTGA  
GCCACGCCTGGGGTAATGGTTAAGAGGCTGGCGTTGTTGTCGTAGATCTCTTTATACTTG  
GAGCCGAATCCCCCTGCTGAGGTGACCATTAACCGACCGTAACGAGGATCGGTTCGAGGG  
CTCCATTCAGGCACAGGGTTCACAAAGCGGTTATCCCTGTTGCACTACTGAAAACGTTG  
AAATATTTGTCCCAATCGAGGATGTCTAATACTTCACTCGGTGGGATACCGCGGGTTAAC  
AGACGGATCTATTTGGTGAGAAATGTACCGGTCGCGTGTTCGTCACCTGAGCCATCGTGAAT  
AAATTCCTAAGGGTAGCTAAAAGAGGCGAGGAGTACATCAGTACTCCCCTATTAAGATGG  
ATCTATTCAAACGGACGGTTTTATCGGTTCCCTGATTCACCTGTTTGTCTTGCATCTCCG  
CCATGCGACCCAGTACCTTGTAGATCTCAGCCAGAATACTGTTTCGTATCCGAACCTGCTAT  
AAACCAGTTTACCCAACGAGGCCTTAAGCTCAGCCACCAACGCAGAGTCATCACTACGGG  
TGGTCGTAAGTGCCTCGGTACCCCGAGGGGACTGAAGAACAGGTTTCAGACGGCGCAGGGC  
GAACGGGTTGAAGTACAGAGGGAGGTGGAGAACCCTCATTAGACCTCGGAGTCGAGATCG  
GAACATCCGTAGCCGGGTTACCAAAGGTGGGAGTAGACGTAGGTGGAACGTTCCGTTGCA  
TCGGTCCATACCACACCACCGCCAGTCAGGTGGTATCCTGTCTTTACGGACTGCCCGC  
TTTGACACAGCGTTAAGGAACTTGTTCGCTGCTTCAGGGGACTTAGAGGCCGCGTGGATAT  
GCCAGCCCGTACCGAGTGCCGTTTCGACTGCGGTATTCATTGATGACTTGGAAATTCCTGAG  
GGCTTAACCCTGCCCGACGAAGAATATCCGTTTCAATGGCAACCGCTTGGTCACTTCCCT  
GTGCACCATTCACCAGGGTGAAGTCTAACGCCAGGCCTTTAGGATGAGCGCCTTTAGACC  
CATTAGTGACGTGGTAGGCGTCATTAGTGCAGAGAAGCACCGGAAACCCGGAACCTGTCT  
CTTGAATGATTTTACCCAGTTCTTCCACAGCAGGATGGTGTTTACCCCCAGCAATGGCTT  
CAGGGGATTTACAGGAGCAATCCACTGCTTCCCCTGTTTGGTGTAAACGATCATCCAAC  
CGTTATCACCTGACCCGATTGTCCCCCTCCGGCTCCCATGGTTCCATTCAGGGACAGCA  
GACTACCACCCACAACGCCCGGAGCCGGTCTACTGACTTGAGGACGCTGGGGTTTCGCTGG  
GGCTTCTCGACCGTACAGGTCGGACCCGGTTTGGCTCTTAACCCACTCCCAGCCGTTT  
TATCAGCTGTGGTCAGTTCACCACTTTGTAGTTTCTTCAGGTAATTCAGATGGAGCGCAT  
AGCGCTGAGGCATTTACAGGTAACGAATTACCTCCAGTCAACCCTGTTGCCCTCTACCGA  
AGTACCCGTTTGGCTAATACTTCTCAAGAGCTTAGAGTTCCTGAAGAAGTTCAGCGCAT  
TGGCTGCAATGACGTTTCGGATTGTTACTGGCCAGCTCTGGTCTGTTCTCCAGATCAATAC  
CCAGCTCTTGGCCACCCCTCCGGTAATTAGCGCGACGCGTCAGCTGAATGAACCCACGCC  
TTCGGTAACGGTACCCATCACCGGCTTCCCTGTTCCCTAAGGAAGCACCTTTACCCCCAC  
CGTACACGGTATTGGCGATGGCCACTTACCGGCTTGTACGAGCGCTCTCGCTTGTCCA  
TGCTCTTCACTTCCCTGAAGAGTTGTACCAAGCGTTCGGGACTGCTGTACTTCAGGTTCT  
CAGTGGTCCGGGAATAGCCTGAAGACTCGTAGTTGGTAAGGGCGAGCATTTACAGCGATTT  
CACGAGGGTCCGTAAGGCCTTGTTCAGCATCTCACGGATGATCAACTGCTCCGCCAACG  
GCTTAGGCACACTACCCCTCGATCCGTTCCCTGGTTCGTACGTACACGGGTCATATCCA

AATGACTGGTGTCCGGATCACCCGTAATAGGCGTGAAACCAAAGGCATTCTCAGGGGGTTC  
TGAACCGACCGTCGCTGCTGTACGTATTCCCAGGCGTCTCCGCCAGAGGTACCGTACATCC  
CTCCTAGAGCAGAATCTCTCCGAGACCGGAATTATCCTGGGGTAGAAACATTCGCTTGTT  
GGTCCGGTGAACCTACCCCTACCCGGTGAGGACTGATCTTCTCAGCCTGGGTTTGGGCGT  
CGGTCTTAACCACTTCCAATTCAGGGTCTTTGAGTTTGGCTTGTACCGACGCTTCCCCA  
AGAGGTTAAACATCCTGTCAACTTTATCCGACAGTCCGCGAGAGGTTTCCCAGGCGAAGG  
GTGCTGCTCTCACATTCCACACCGAGATGGTAAAGCCAAAGACGTCATTGACTTGGGCTT  
GAGTCAGTTCCTTGCGATCTCATAACCGTGCGGTAGCGGAAAGGGTTCTCAAACACAC  
CCTGTAGCCCCGACAGTATTTCCCTCATCAGGGTTCATGTAGTTGGTCAGCACCGGCAGGA  
ACCGATCCCTGAACCACTTGCACCAGGCATCCGCGTACCGATCATCGTCCCAGGAAAGGCGT  
CCTTGAACCGAGCGAAGAGTTCCCCTATGTGGCCCTTGAACACCATGTTCATCCCCTTTCG  
CCATAAAGAGGGATTACAATGACGTTCCAATTGAGGACGGCTTCGACGCGCCAGGGGA  
CATCCTTTTCGTTCCCGTAGGTAGCCACCCGGATCGCGGTAAGCATATCCAAGGCGTTAC  
CATCTGGCATCAGGTCTTGGATATAGATCTGGCCGACAACCGCATTGGCGGTATACGCTT  
TCCCTAACCGATCGATTTACCTTTAACTTCCCTTCAGGCGATCGGTGGCCTCCATCTTCT  
CCCAGTAGTCTTTCCGCTGGGTACTCCGGTCTTCCAGCTTCCGTTCCAGTTGAACCCGTT  
CCTTCTGAAGGGACTCCAGACTTTGGCCTTTAACCGTAGAGACCGCAAAGGGGATCAATGG  
TGGTATCTTTAGGCCCGACGTAATCTTAAAGGGCATCCAAAAGGTTACCCACCCGGATGA  
ACGCCATTTGTTGATCAAGGAGAGGAGTCTCTTTGTCAATCTTAGCTACGATCTGGTACG  
GGGCAGGCACCAACCGACTGAGGGCACTGTGGGCTTGTGGCCAATTTGTACAAGATTA  
AGTCAGACGGATCGTCATAGTCCGCAACGATCGCAGTTTAAACGGCATCCAAACAGGCCA  
GGTAGGTCAAGTAAACGGGTTTGAACCGTCCATTGAACCAGGTAAAGACTTCACCAATTT  
CATTACGGTCTTGAGGATTGCCTACGAAGAGACGAAGGACTTCCTCAATAGGCGCTTGCT  
TAGACCGCGACGCGCGCCCATTTCCAATCACCACATGGTCTTTGAGCAGGGTCTCAACGT  
TGAGGATTTTAGCCGCCAGGGGACCGTGAGGATCTGAGACACCGTACTGAACCATCCGTA  
TATGAATTTGCTTCCCTTTACCTGAACCAAACAGGGAATCCCCTCCCCATTTAGAAGTCC  
CCAACATCACCCCAAAGGGACTGTACATCGAAGACCCAGGGCATCCGTAGTAGGACTCT  
TTCCTTTGACCTTTTCGAAAATCCATTACGCAATGGTCTGTCCACCCTGTAAGCCCGCGG  
TGGCACCCACTTGTGGTAAAGACTATTACCGGCTTTACCCACTTTAAGGATTTGGTCGG  
TGGTTCCGAGTCTCTTCGTTTCTTAGTCAATAGCGACCTGGTATATTTAGTACGCAGACA  
ATCCACCTGCGCCAATCTAACCGGCGCGTCTGCACCCAGTTTACCCAAGTGTCCGAGTC  
CACCCAGACCATTAATAACCCACCGAGTCCACCAGCGACGCCCTTAGCGATAATCGTCA  
ACAGTTTAAAGTCCATACGACCGAACTTAAACAATGCACTGAACCCGCTCCAGAGGACCT  
CAGAACCCAGGAAGCTGGTCAGCCACTCGAAGCCTTTCTTAAACACCCCTACCAAACCTGC  
TCAGGAGACCGAAGATAACCGAACTTCTTCTTACCGAGTCTTTCTCATCCTTCATAC  
CGAAACCGAAGTTTTAGCAATCGAGATGATGGCGTTTTTACGGTGTGTCTTTCTCTT  
CCTGGAGTTTATGCGCACAGTCGGCCAGGGAGTTAGCTCGGGTGGCATCATTGGACGACG  
CTGACCGACGGAACCGGTCCGGTGTGTCCCTTCCCCCGCATTTCCTTTAGCGGCTCGAA  
AGCTCTCCAGGGCGTGTAAAGCGCTGGATTCTTATCCATAAGGGCTTCGGTAAGGGTAA  
GATCGTTTTGCTCTCGTAGGGACCCTGGAGGGCCTTCTGGGCCATCTTGGGAACCTGGTG  
CCGGGGGAGTGAAGGGACTGGGGTACCATCCGGTGAGTTATACCCCCCATGTTTCAAGA  
GGAGGTAATAGATCCGATCCATGGAAGTGACCATTGGAGAGCGATCCGTAAGGAT  
TCTTAAACCCGACCCGCCATGCCTTTTCGCACACCCACCTGCGCGGTCTTTCAATTTACCGA  
AGAGGTCCAACCCGAACGTCCGGCTTGTCTAAGGCACGCGCCAGCTTGTTGATACTGG  
TCCCCATGGAGGTTTTAAGTCCACGGTCGATTTCTTCCGCGTGATCAGGGTATTCCCTT  
CCTTGTACATACCCGGGCCATCGATCTCATCCCATCCCTGGAGTTCAACAACCCGCTCTC  
CACTCCGTTTGAAGTATGGACCTTTACTAAAGCGACTCCCAGCAATACCGGTTCTGTCTT  
CACCTTCAATGTAAATATCCATCCGGTACAGACGGGTACGAGCTTTATCCCAAACCCCTT  
CAATGCAGTTAACAGGATCCAGCCAGTTAAAGGCTTTCATAATGAGATCCCAGAACCTTAT  
TCAGGCCTTCAAGGAATACTTCCCTTGTGTCTTCCGGTAAAGAGTTTAGCCGCTAAGCGGC  
TAGCGCCAATAGCGGGTCCATTGGCCAGGTCTTTAATACTCCAGTAATCTGATCCCACC  
CCTGAATGATCTTCGCGTTGAGCATATCCAGATACTCACCTTAAAGAGTTTCAAGGATT  
CAAGGATCGGGGTATCAGACCTTCTTCGTACAGGTCTTCCGTGTTCTCGGCTCGATGAG  
CAGCCGCTCGGGCACGCAACTTGTTATATGCCATCCCTAGCGCCAAGCCACCTCCTACCA  
ATGCAGCACCTTTCGGGTTGTAGATCGCCATAACCGCCAATCCACCCAGTAAGCAACCCA  
GTACAAACGGTTGGTTATCCAGGAGTTTGTCTATTCCCTTATTAACAGATCCCCAAACG  
ACGTACTCTTAATCCGTTCCAGAAGACTCCGTTTTTGTACTGGAGGGTTTCTTCAGCTT

CAGGAGTGGGTTTCTCGAAGGGTTGACGTTCCAAGATGTTGGTGAGGATATCGTTCGGT  
TCCCTCCCAGTTCTACCAGTTTACGCAGCAGGCTGTTCCCTTGAGTCACCTGGTCGTTCA  
GAGCGGTGAACATCGAAGACGGATCCGTATGACCCGAACGACTTACACCTCCCTGTTCTGA  
TATGTGCCCCGAGTTTATCCAAAGTTTCCCGTACACCCTGAAGGGTTTCATTCAACTGAG  
CGTTCTCAGCTGCAATCATAACCACCGGAGTCTCGCCGCCCTTTCACCGTCTGCCAAAGG  
AACGGGTCTTACGCACCGCTTCTTCCAGAGGGTGTGCATACACCATAGCACGGTAAGGGT  
TATCAATGAAGGACTGGAGGACGTTCCGGAAGGTGTCCATATTGACTTCATCGTGGCCAT  
TTTCAGACTTGATGATGCCAGCTTCTTTTCATGACGTTGTAATACCCAGACGAACGCAGCA  
TATCGACGCGCTCGGCAATGTCCGGCATAAACCGACCCAGGAGGTTGGATTGTTCCGTTA  
ACTTGGCGGGCGGTTCTCGGGCTCGTTCTGTAGGAAGACGAGCAAAGCGCTCGCTCGGT  
CCAGGGTACTGCCCTCCTTAAAGGCCGTAATGGCTTCCGGGGTAATGTCAAATTCGGT  
GGAACAATTCCCGGATTTTCATCCGCTACCTGACGGTTTACCCCTTTGGTCTCCAAGTTCA  
TGTACAGGTACGGACTGAACCCTTTCCGTTTATCCGCATTCTGATCCAGTTGCATCGCCA  
ATACACGGCGGGCTTCGTTGGACAATTCCTTATTGGGGTCAATGAAATCCACCAATCGAA  
GGGACGTACCCGCTTGGGACATGACTTGGTCTTTATCCATTACCCGGTTAAAGGTATCCG  
CTACCTTTTGGTTATGGCTGACCAACTTACCCCGTACGTAGTCATAACTCGACGCTTTAA  
GGGTATCATCCCCGTACGGATCTTTTCAATCGACATGTGAATGTGGCTGAGCAGTTCCG  
GGATCACTTCATTCAGGGTACCGGAGGACTGTTTGTTCAGATCTCCGGTTCGTGGGCAT  
CCATTGACCCCCGACGTTTTAGGCAGTAACGACTCCCGGTGGGTTGGTACAACCTCATCCA  
ACAACGCCGCCATGCCTTTATTCGCACCTTCCTTCAGCGTATTAATAACCGTCCATTCCA  
CTTTAGCCAAGGGCTTTTGTCTGAACGGAGCGTACTTAGGTATTGTTTCGTAGTCCCCGT  
CCTCGTCAAACGAGGATCCCCAGTTGTGGTATTCCGAAAGGGTATAGACCATTCCCTCCG  
CATTACTGAGGTTATACGACGCTACGTTACCCAAATCCGTGAGTTGCGCGTACGCGTTAT  
CCGCCACTTCCCCAGTTGCGGGAATTGTTTCTTGAACCTTAGCAACGTATTCTTTCCCT  
TACGGCAATTGATCATCCGGGGGAGGTTGCTAATGAACATTTGGGCGCAACGTTACCCA  
CCATGGTCCCTACGTTGAGCGGAATGCCTTCCGACATCTCCGCCGCCATGCGCATGGCGC  
CAATCAGGTCACCTGCACCTCGGATTCCGTCCCCTCGCGCGTCTTACCGAACCGCTCGT  
TAATAAACTCACGTATTCTCAAAGGAGCCTTTAACCGTATTGCAGACCGATCCCCGAA  
TGCTATTACGCATCGCTTGACTGTGGGTGGGCTTTTCGTAATCACTCTTAGCGGAGTTCA  
GGGCAATCGTCTTCAGTTCAGCAATCATCCGGTGATTACTGGCTTCCATGAACTTGTAGG  
ACTTCGCCCTGGTCAAATAGGAACGGGCCAACAGGTTACCTTGAGGGTATCATTCTCTCA  
ATTGAACTTTACGTTGGTAACTACCATTTGTTCCAGCAGTTGGTTGCTCCGCCAATAC  
TCAGGTTACGGGATTTCAACCCCCCTATGGTGGCGCCACCTACTTCGGTAATCATGGCGG  
TAATACTTTCACCCACCCCAATGACCGTTTCCCGCTCTAACAGGGAGTTAGCGTCTTCAC  
TCCCCAGTAGGTCTTTCACATCATTTTCGCCACATTTTCCACGGACGGGGTGTCACTCG  
CCGACGACGTATATGGCTTCCAACCTGCTGAAGTCATTTGGACTGAACCGAGTCAGCGCAC  
TGGCTACACCCCTGGTGATCTTATTAGGAGCTATTTTACCTGACTTATCACCACCCGTT  
TATCCAAGTTTGGAGGTCCACGACTGCATCGTAGCTTTCACGTTTAAAGTTCGTCTACGA  
TCCCCCTCCGACGACGGTTAATGTCCGACGCCGTAGTAAAGGCAGTCCCCAGGTCTGAG  
GGAGGACTATCTTCAGGGTGTTC AACCGAGCATCGGAGTCCCCTACTGTCTGATTCACTA  
CACCTGACAAAAACCCGGATGCTACCGAACGAGTGAACACCGGTTTCTTCCCGTTCGAAAT  
CGGTATCGAAATCAATATCCCCAGTGAAGGGATCCTCTCCCCAATCGAAATCATCGAATG  
TATTATCCGCCATTGTTAATGCACTCCCGCATAAGGAAACCGTAAGAAACTGACTAACAT  
TACCCTCTTAGACCCCCGGACGATTGTTCCGGGTGTCTTTAAACCTATTACGTCTACAGA  
CTCATTTGAAGGGATGACCCAGAACCTCAGTGGTGACGGTCTCTTCTCCCTTGACATCTT  
CGGTAAACTGGGCAGTAAACAACGTGATAACACGGAAGCGTATCTCGACGTTAAACTTAC  
CATCTTCAATCCCACCTTACCTAAAAGCCATATACCGATCAAAGTCTGTATCATTCAAT  
TTTGAAAGGGTCGGAAAACGCGGTATGCGATCCCGAAGTGAAGGATTTATAAAAATCGAA  
CATCCTGGAAGGGGAAAAGGGTTTCGCCTTCTTCTGAAACACTTCGATGAAACCGTCTT  
CTCCCTGACCCCCTCTCATAAACGCAAACAACGGGTGGAACCTGGCGAACCAATTCCGTAA  
CACGGCGTTAACGGCTAAGGTCTGGTCATCCCCGCGGGTCTCACGGATATCCAATTCAA  
TCCAGATGGTTCCACACCGAACCTGAAATCACTGAATTCTACCGCGCCTTAATGTTCCG  
GGTGAGAGTGATCCTCGGGAATAAGGAAGATGCCCTGAACCCCTTTACGATATCGTTCG  
GTGGGGGGTACAGAATGCTTTCATGGAATTGGATAATTAACCTTTTGGTTTACTCCAGGG  
GAAAGGGGGTGTCTCCAGCGTCGTATGTGCACCCGAGGGGTTCAACAACAGCACCCGGAA  
CGTCATTACCGCCCGTAAAGTCTCCAGGACACGTTTAGACTTCGACGACGGTGTAGGTCC  
TAACTCTGCGGACATGGGACTCTACCAAGCCCTGCTGAACTTCCCTTATGTCTGCATCAA



TGCGTTAACCAACGGCTACCTTTCCAACATCTTCACCCCCAGCTCTCAAACCGCTAAGCT  
GGTGAATAGCAAGACCCTGAAATACGAATACGCTGAAGTCTCCCCTGAGGTGGTAGAGAA  
ATGGACCACCGCCACCGGGTTAATGAAACTCTTCAACGGGTTTGCCGATCCCTCCTTACG  
GAGAAAACCCATTGTCATTGAGTGGAAATACTTAGTCCTCATTTATGATGATGGGACTGA  
TGTCTGTGTTCTCCATGACATCCACGATCTCCCGCAAGGGAAAGACCGTAAATGGGTGAA  
ACCTATCACCTACATGGAACCTTCTACTTGAGATGCCACAGTGTCATCGAAGAACAGAT  
TACAGGACAAACCCGGTATCCCTTTACGGGGTTTGGCTCTATCTTCCCGGCTAAGGTTAA  
CCGACGTACCACCACCAATGCGAGCCGGCGGGTCATTCGTAATCCGATTGATTGGAGTGT  
GCGGGAAACCTGTAAACGGTTCCTAAACGTGAAGCTCACCCCGATCACTTCGATGCCAG  
GTCCGTAGACCCCTCTAGAGAAGCTTTGCTCGACAGTGACAATGAATAGATAGTGATGCA  
TGATTTAAACTCACTATACAACTCCTATTGTATGCGGAAGTGTTTCGCATTTGACCATAAG  
GAGTTTTAAAGATACTAACGTGTTTTGGAAAGAAATACGTGTTGTCTAAATCCAACACGG  
TTTACAATGTCACCGATAAGACATATGTTCCAGTCCATCGGATGACAGACGGGAATACGT  
TCTTCATCGCACGGGGCGATGAAAACCAACTGGTTAAGATCAAACCTGGGGTTAATGATCC  
TCCATGGAGAAGGAAAGTTCATCTTCTCTCTCTGAATGCGAACAGGTGATAGTAGGTT  
TTCAGGATGACGATACAGGAAACTTTGCAGCGGATAACCTTTACTTGGTCTATCCTGAAG  
AGGGCAACCCTTAGCCTGAACTTTCTGGGTACTACTACATCCCTGGGCTTGAACCTCAACG  
CAATCAACCGAAACGGTGTGGTATACCGAACAGTTAGAAAGAATCTTTACCTACCGTATC  
TGGGAGGTAACACCGTTCATAACAGTTTTTACCCCTTTGTTTGACTGGATGTGGTCAGTG  
GGGATGAACGCAAGTATGTCCACCGGCTACTGGCGGAGACCTTCGGTAAGCCGCCAAAGG  
GCTACCCCAAGCTATTGGTTCGACCATAATGACGGTAACAAGATGAACTTCAAGCTCTTTA  
ACTTGATTTGGGTTACCGCTAAGGACAACCTCCTCAGTGCGGACATCAATCAAGAAGCGA  
GAGCGGACAATAATCCCTTGGAGATTTTTGACAGGGAATTAGGTCAAGTCTTTAAGTACG  
TCAGTCAAATGAGTTTGCAGAGAACCATGGAGGTGGATTCTTGGTGCATTAGTCTGGTAC  
TCAAACGTCCTCGTTCAGTGTACAAGAACATGTACGGTCTTCGTCGGAAGGGAGATACAC  
GTGACTTCCAAGAGATCTGGGACTATAAACCCCTGTGGGTAAAGAAGATCCTTGCCCGGA  
ATGTCTTCACCGGTGAAATCACGGTCTATAATTCATTGGCGGAGGCCTCTAGAGCAACAC  
TGGTAGGGAAAACAGGCATCCTGACGTCCCTGAGTAACACCAACCCGAGACCCGCCTTTA  
AAGACCTTCAATTCACGCGGGAGTCTGACGAGACCCCTTGGCCTGATTTGAATGAATACG  
AACTGGAATGCATCCGGCGCAAGATGCACCCTGCTACAAGTGTGTATGAAATGTTTGATT  
CGGTAACCCAGGAGACGTCGATTGTGTATGGCGTTGATGCAGTTACCCGAATCACCGGAG  
CCAATCCCGTACCGTTATCGTTTGCACGAGAGAAGGTAAGTTGCTCCATTCACGTTATC  
GTTTCAAGAACTTACACGTTAACGAGTTTATATCTATAACTTAGTCCGGCTAGGCACGA  
AAGTCCTAGACCGTATTCCTCTGAATTGCCGGGAGTTCACAAAATTCTGTTGGCTACAAC  
GTAACCTGGAACAGTAAGCGTGAATGCGACCGAAAGGTAGAAAGAACAACAGACCTGACC  
TACGCTAACCAATAACGCTAAGGGTCGTAACAAGGGACAATCAGCCGCTAAGACGCTAC  
CGAGTATTAACCCCTATGCGTAAAGTTCAACGACTAAGGGAGTTATGACCCTGAACACCT  
ACCAAGGATGGGGGTGGAATTGGAGGAGGCCTAAGGGGGAATAGACCTATTCCTACGGT  
CAAGATATAGTCTGGCCCTGTTTAATAAACAGGCAGGCACCTGAGTGTGCCGGGTGCTAG  
TACGGACTGACCACCGCGGGCGATCAATTGTGCGAGTCATTCTGTTGTAGCGGAAGACAGC  
AAACACCAGGCCTACGAACTCTTTGGGAAACGGTACTATTACATCAATGGTACGGGTCCG  
TTTTTGTACGATCCGATCAGTGAACCGATTCTCTTTATGTTTAAAGCAGCGACGAGCGGC  
TTAGAGGATATTGAGGTATGAGCAATCCAATTACGTACTCCGAGTTCCTTAAAGCACTATG  
TGCTGCGTAAGAAACAAGACGTTGTTACCTTAAACTCCTGGGTATTGGTGAAGTGATTC  
TTCCTAAGGGGAGTTTACTGCCCTTCGTATCGAATACGATTAACGAAAAGGGACCGGGTA  
GTAGTGAAGCGTTTATCAGTAACTTCCCTAAAGAGGTCTTATTGAGTTTGTAAAGGGACG  
GGTATAAGACGGTGTATGGGGCATCGGCGGATAGTCGCCTATGCCTACCCTAAGGCGGTAA  
AGGCGTACCGGGCGAGTCACTACATGTACAGCCGGGTGCGAGAGATCAGCACGGTGTACA  
CCAAACAGAACGTGTTGGTCCCTAAGTACTACGGGATAAATCCTCAGGGGTTCGTTTACC  
GTCCGAGTATTATCGTGAATTATGAAAATACTACAGCATGATGCACCTGCTCATTGAGA  
ACATCAATGCAGAAGCCGAGAAAGGGGTGCGTCGGCGGTATATGCGGATTGACTTGCCCT  
TGAACCTGCCGTCCATCGTTCAGCTTGAGAAAGACTACGGACGGTTTATTGATGGGTTTA  
ATGATGGGCATCCTGTCCTGATGCGCAATATGTTGGAGAGTACGAAGGCTGAGAAGTCTGCT  
ATTGGCTGTTGGCCGTAAGGTTTGGCCAGTATTCGTGCAGTTTGTAGGTA  
AACTCACCGACCAGGCGTGAAGGATTTGCATATCCTCTTTACGTCACAAAGTAAAGTCA  
TTGTAGTACATCTGGGGCTGTTGAAGGTTGGGTAGATGAAACAAATCCTAAAGACGAGA  
ACACCTACCCCTCTGCTCGGAAAGAGTTTGAAGTCTGAAGACATTGACCCGCCATAATG

CGGTTACACGTTTCTATTTGGCTTTGATGAATCTTTCTCGTTGAGGCTTTCCTGAGAATG  
TACTCATTAAAGAGGAAACGAAAAAAGTCATCCCAATTGCCCGAGAGAAAGGTACCGTTG  
ACCAAGTGGTTGCGGGAACGTCACGAGAAGAAGAAGAAGAAACATCCCATCTTCCAGAAA  
CCCGAGACCATACTGGCACGGGCACGGTTCCCGTACCCATCGTCCTGCTGGTTCTATCC  
TTGATGTTTTTCAGCCGAAGTGAAGGATCTGGCGAGGCACATGACGAAGACCAAGACACAG  
CGGGAGAACGAGGTGCTGATTCAAATCTTGAAGAGTGCACATCGCCGGTAGATGATGAAC  
TGCTGGAGGTGGAGAAAGTCCAAACCGAGATCAGTACCGACAAGAATGTGTTTAAGACGC  
CTGAGAGTGGTGTAAAGCGGGCGTTGGAGGAGCGGGGTAAGGAAGGTACGCTGACGGTGG  
CTGAACATGATTTCTTCATGCGTAAAGCGACCCGTTATCAGCACATTGAGATGGAAAACG  
GTCAAACGTTTCGAAAAGTGCATTCAGATCAAACCCGAAGAGGTTAAAGACCTGGGTGGAG  
AGATTGAAGCTGAGTTTCTCCCCGTAAGTGGATGAGAGCATGTTGCGGAGTCGCGCCAAAT  
CCATCAAGATCGAATATCCTCAGAAGTTCTTACACCGAGATATTGGTTCGAATGGTGTGG  
GTCTTCAGAACGCTGGCTTTGCGATGAACGACTACCGGCGTGAGAAGGTCGTCAGCGTAG  
AAGGCAGTTACGAGGTCCACAGCATTACAGTTACACGAAGTCAATGGTGTACAGGTCAGTG  
TACATAGTCGGTTGCCTACGGTGCTGAAACACGGCACCTACGTCATTGGTGGTGGGAAGC  
AACACATGCAACTGCAACGTCGGGAGAAACCTTTGCGGAAGATCAGTTCTCGGGAAGTGG  
TGCTGTCGAGCTAATACGACCGTAAGCTCATGGTGAGTCGTAGTCCGAAGATGGTGGATA  
ACCTCTCTGCGTTCATGGTGAAGCAAATCTGCCTCCAGAGTAAGCGGAAAGGGTATACGG  
TCACTAAAGGCAGTACGTGGGATCGCTCCCTAAAAGCCCCCGGATTTACAGCATTCTGG  
CTCGTCAGTACAAGTACACTAGCGACGGGTTGGTATTGGACTTCCGGTTGAAGGATC  
TCTTGGAACTCCACCCTGAGTTCAAAGCCTATACCCGCCCTGATCGGTTCTTGATTGGGG  
TAAAAGACGGATTACCTTTGATCATTGATGATTACGGTAACCTGTACAAAGGGGACGAGG  
AACTCGGTACTGTTGAAGACTTGCTCGGTATTGATGTTTCGTAAAGCGCCTTTGGTACACG  
TGGTGATTAACATCAGCGGGTTTTCTTTCCGTTGGGAGTGGTCTGTGCTTCTACTTCG  
GTATTGATGAACTGTTGCGGGTGATTAAGTACACGACGCGTTCGTTACCCGTAGTGACTC  
GCCCTCAATTGACGGAGGATGAATACACGATTCAGTTGAATGACGAATACTTGATCTTTA  
ACCGTCGAGAGAAGCTCACCACGTTGATCTTCGGTGGAATGCCGAAGTTGAACAACATCA  
GTAACCTTCAGGCGGAGTGATTTGAATAATAACAGTATTGGGAGTGCGTTAATGGGAGAGC  
CTCGGGTTCGCCCATCTCAGTTCCAGGAAATGAAGAACCTCTCCGATCTCTATATCGATC  
CCATTACGAGAGAGCTCTTGAAAGAGATGAAGCTGTCTGAAGACTTCCATTACTTGCTGA  
TTGATGCGGCTAAGGCATTGGAACGTATTATAGTCGACACGAGGTGGAGATTTAAGTGC  
AACGCAGTGTAGGGTATGAACGCTTCGCGGGTTCATCTCTACACGGAATTTGTAAAGTCCA  
TTCGTCAATAACGGAATAAGGGGAAAGGACGTAAACACAAACTGGACTTTAATCCGGACG  
CGGTTATTATTGCCATTGGTACTGACCGGTCTATGAACTAGGTGGAGGATGTGAAGCCAG  
TTCACCAAGTGAAGGACCAAGAGGAAGTAACGTTTGGGGGTACGGGTGGTTCGTAGTGAAA  
TCACCATGGTCAAACGCGCACGGACTCAGATGGAGAGTTACAAAGGGGTTCATCAGTGAAG  
CCAACATGGACAGTGGTAGAGTGGGTTATGTGACCTACACCACCTCTGATCCGGGTATCG  
CTGATTTCCGAGGCAATGTTGATCCCAAGTACAAACGTAACCTACTCCTACCGGTGACGGTTCGG  
TAACTATGAACCTGATGTACGGTGAACGCATGACGATTGAGCTGTTGGGAAAACAATAG  
ATCACTCAGTCCAACCAGGGAGTAATCCCTTGTTACCATTACATTTAATTGCGGGAACT  
ACTGAGAGCCTTATCTACCAAACCCGAGCAGGAAACCAACGGGTGGCCAACCATAACGGG  
TTCGGGACGGTAATAACGATAAGGATTGGGGAACCCTACGCAGCGAAGCACCTACGTATT  
GTCGAGAGGACAAGATAGGGTGAACGTTCAACGACTACGGATGAAATATCCGGTAGAGGT  
GTCGGGATGATACTTCCATAAGTAAGGTTGCCTTGATGCTGGAGGTGTGAATAACACTG  
AGTAGAGGGATGAAATATAGTCTCGTGATATAAGTGAAAACCTTAGAGCGTGGTGCTACG  
CGCATCGGCGGATAGGATATCCGTGAAGAAACAGTCAAAGGAGCAGTATTCACATCGACT  
CAGGCCTCTCAAGCAGTGATGGCTAAGAAGTACGAGATCGTTACCCTGAGAACGGGTTAC  
GAGAATGTACTGGCTCACCGGACCTCTGACCTCTACAGCAAAGTAGCCGCTGAAGATGGT  
AAGGTCATAAAGTGGAGAACGATCGCTTACTCGTCCAATACAAGGACGGAACAACGGAC  
TCGTCTCCCTTGGGGTTGGTGATTGGGGAAGCCAGAGGGGAATATCATCCCCACAGCCGT  
ACCACAGATCTGAAGGTCGGAGATACCTTCCGTAAGGGAGGTGTCATCGGTTGGGATCAA  
AACTGGTTCGGTCGCGATCCCTTGTGCCAGGGCAAGTCGGGGTTAAGATCGGTAAAATG  
TGCCAGATCGTTATGGCGGAAGATCAGGATGTGTACGAGGACTCTATTGCAATTTGCAAT  
GAATTGGCGATGGAAGCACGTACCCCATTCATTAAACCCAGTCGGTTTGCCGAGGACGTG  
TCGAACAACCTGGTAATGCGGGTTAAGGTAGGAGATTACGTCGAATAGGACACGATTTTA  
TGTGATATCGAAGAGCCTCACTTGGTGGATGGCGAGGAGCTTCTGAGCTCGAAGCAGAC  
ATCAACAACCTCGGTATCAAACAGATCCGTTGGAAGCATCATGGAAAGATCGTACACATC

GATGTCGGGTACAACCTCCCTTAGACAACATGTCTGACTCGTTCGGTTCGTTTCATTGTT  
CAGAAGGATAAGGAAACGAAAGGGAAAGGGTTGGTGGAAAGGAACCGGTGTCGAGAACAAT  
GCCATTTCCACGAAGTTCAATCTTAATCGTCCCATGTTAGGTCCAGGTAAGGCGTTCATT  
ACGTTCTACATCGAGTCGTTAGACCCGAGTACCAATGCGGATAAGTATGTCATTGGGAAC  
CAGATGAAAGCCACTGTTGGTCGGATCATGGAAACACCGCTTAAGACCGCCAGTGGGATT  
GTCATTGATGTGAAGTCGAGCTTTAAAGGGAAAGTTAAACCGAATGGTGCTCAGTTTGAGG  
AACAAAGCTGGTTGCTAACGAGTATGGTTACCGAATCACTCGCCAGGCCCTTAAACTCTAC  
AGAGGTAATGACGATGAACTTCCGGACGAAGAACGGTTACCGAGACCTGCAAGCGTTGG  
TTAAGGAACTGGGTCTTTATTCCGGGCAGATTGACGGTGTGTGGGTGAAGGGAACTTCCT  
CCTCCACTGAAACCCTGCTCCGGGGGTATGCCGAGGTGGTGGGTAAATAATACCGGAGGTA  
TCGGTCTCCCCACCTCCTCGGATGCCAGTGGTTATAACGTCATTACAGCGCTCCAGCGTA  
ATCTGGCCTTCTTGGGTCTCTATCCCTGACTGTGGATGGTATTTGGGGGAATGGGACCT  
TGAGTGGCTTGGATAAAGGCATTTCGAGGGGTACAAGGAGCGTTACCGCACGCCGACCTACG  
ACATTGCGTGGAGCGGTAAAGTCAGTCCTGCCTTTACGGCGAAAGTGAAGGATTGGTGCG  
GCGTTCATGTGCCGAATCACCGAGGTCCCCATTGGCTGATGGCATGTATGGCTTTTGAGA  
CCGGCCAGACCTACAGCCCGTCTATTAAGAATGCGGGCGGGTCTGAAGCGTATGGGTGA  
TTCAATTCATGAGCCAGCCGCCAATGATTTGCATGTTCCGTTGAGTGTGATCCGATCTA  
TGGATCAGCTGACTCAATTGGACCTGGTCTTTAAGTACTTCGAAATGTGGATGAAACGGG  
GTAAGCGTTATACCCAGCTGGAAGATTTCTATTTGACGATCTTCCATCCAGCTTCAGTAG  
GTAAGAAGACTGATGAAGTCCTTTCCTTCAGGGGAGTCAAGCGTATCTCCGGAACAAGG  
GGTTCGATGTAGATAAAGGATGGTAAGATCACCTGGGTGAAATTTCTTCTACAATGTACA  
CCACGTATTACAAAGGTCCGTTGCCTGAAAATCGTCACGTTATTTTCGTATTGATTCACCT  
TCTTTGCCGTAGGAGAGTTTCCCTGTGAAAGCAGAATAATCAACAATATCATTGCACTG  
ACGAATACCGCGGAGTTCGAGAAACAGACGATCCGTAAGGTAGGGCTGGAGTACATTGCG  
CCGCTGGATCCCAGTATTCAGGCTGAGAAGATCAGCAAGGCCCTCACGAAGCGTGTTGTT  
AAACAAGGAGCGAACCAATGATCAGTAAGGACAGCCTGGCGTTGGCAGAGAACATCGCCG  
TCGCGCTCCCTGAAGGCACTGTAGTCCCATCCATCCCGATCCTTCAGGGGTTGAATACCC  
TGAGTTATGGGGCGTTCCCGTACGAGGGGGACTTCCGGGATAAGGTGGTTAAAGTTACTT  
CCGAGATCACCGAGCATTCCGGCAGCGATTGAGGGCGGGGAGTGACAAAGCCGCTGAGACCA  
TCCGCGGTGCGTTCGAGATGGTGAAGTCCTACGGCGTCCCGCTGTCGGACGCCATCCAGG  
AGAAAGTGGGTCTGCTGTACAGCCGAGGTGATCTGAACTGGTCGTCGTTGTGTCATTTCA  
ATGTCACGTACATCAATATCTCTGATCCGTTCTTTGACTCGGCTCTTTATCCAACCTGAAG  
TCAAGAACAAGGCGTTGTCGTTTGACAGTGTGGGTCTCGATGTCCTGAAACGGTTGGTAT  
GTGAATTCGCAACGAAACGGGATATCCGGGATTACGTGGCAACGTCCTCACCCAGAGACTA  
ATGCCATCCTGGATTCCAGACTCTAAGACAACGTGTACGCGTTCTACGCGATTAAGATGC  
TGCCGATCTCAAATGCCTTTTCCACTACAAGGGTGAGACGACCTTTTACTTCACGCGTG  
TGAAATTGGTACGCCTTAACCTGCTGCTGAAGACCTACGTGATCTTGACGAAGATGTACA  
GTCAGGAAGACCCGGCGTTCCTGGTTAAGGGGTCGTTGGAGGATTACCGGCAGTATATCA  
ACCTGCTGTGGAATGGAATGACCCATTACCTCATCGCGTTGAAGAACAGGGTTCAACTTT  
ACCGTAACCGTAAAGCGGCTATCTACGAGGCTGAAGCCTCAAAGTTGGTGGACTTTAAAC  
CAGTTGATGCCCTGGACGTTACCGTTAAGGGATTGAGTGGTAATGTCGTCGTTGATTACT  
GTGATGAGTTCCTCAAGACAGTAACCGGTAATGGGGGAGTTTGAACGACTGTGTGATCG  
CCTCGATCTATGGGCGTCTCACCGGTCGACCGAATGGCTTCTGGACCTCATCAATAACC  
CTGACGTGGTTAAAGACTTGACGGCTAACTACTTCGAGGGTGTTCACCGTCCACTGAACC  
AAGATGCCCGTAAACATTTCAATAACAACAGTGTGGGGCTATTGTTACGTTTCTGAATG  
AACGGGAAGAAGCTCGGGCCGCGTTGTATGAGCATTGGATGCAGAAGGGTCTTCGGTCC  
GTACCCTCATTGAAGAGAACTGAGCGGTGACCTGGACGTTCTCTACACCCTCTACGAGA  
ACGACGTCCGCAAGAGCAGTGGCGTTGAACCTGTGAGCATGGAGATTGAGGCGCAACGGG  
CGAAAGAGGTATCTTCCAAACCAAACCTCGTCCCTAACTTCTTGAAGTTGTTGGGGTGGG  
AACTGGCGGGCGGAGATCATTGAGCTGACCTTTGTTAAGCTCGGTGAGGAAGACAACCTCA  
ACAGCAAGCGTGAACGCCTCCATGGGGCGTTGATTGAACTGCTGGTGGGTGAACTGCTGG  
GAGTTTAAATGAATGGACGTTACTTCTCTCGAGCGATAACGAAGTAAGATCCGTAAGGCGT  
ACACCCTGCACCACGATCACAGTGTCACTGCAATTTGTCCTCTGGAAGTTCATATTCCCA  
AATGTTTTACTGAACATGGGTAGCGTTTATTGGGGATAAGGTCACCACTACGTTAGTGG  
CGGGTGTGTCATCCCGGGGGAGTGTACTCCCTTGGGTGGCGTTGACGGATGTCACGA  
TGATCCCTATGAACGTTCCGGGAGACGGGTATTGACGGCGTTCAGTACTTAATCCTGGAGT  
TTGAATAAGGGGATACCCTTATTGAGAACCTTCGGTATAGCCAAGACCCCAATAAGCCCT

ACTTCTATTTCACTGAGTTTGACATCTACGCGAAGATTCCTTGGTACTTATCAGACAATG  
ATGGCACCTCCTTGTTTGATAACGCTAAGATACAAACAGGCAGTGAAGTTGGTCAAACGC  
CGAACACATGCGGATCTTTAATTCCGTTATGATGCGGGATCCGGATAACTTGGACAATC  
CGTATCGCAACAGTCAAGCCATGCTAGACGGTCGCCCTCCGGTATGGGTAGGGTTGAATA  
ACAGCTCAATGCTAATTGACGGCACCTACTTTAACTCACCGGAGGTTACCTCCAAGACA  
ACACGGTGGCTGCTATTATCAAGCAAGACACCAAAGTAACCGATCTGGAAATGATCGTTA  
AAGGGTCCCAGATGAGTAATACTTTAACCTTTGAGAATTCCTGCTGGCAAACAGTGGT  
AAACGGGGTATTCTCAAACCCATGGACAGTTCGGGGTACTACCGGATCAATGCGGGAGGG  
TTCAATATCCCTAACCGTTCGGTATTACCTACCGGTTGAATGACTACATTCGTGAGTGT  
GCTCGTCCAGGCAGTGATTTTAACCGTCGGGCGATCGAAGGCCAGATGAATTGTGACATC  
GGCCAGCCACCTCAGTATGACAAGATCTTGGTCAATGGCGAAGTGGTTCGCAAGCAGATC  
ACGGATCTGTTCCAATGGATTAACCGCCTTCGGACCATTGACTTTGATAATGTCTGTGAT  
CATATTCGTAAAGTCCATTGGATCTTTACGGGTGGACCGAACGATCCGGTTTACAATGAC  
ATTGAAGTGATTCCGTGGGCGAAGAACCCACATCATAAGCAACTGCTGCAAGAAAGTCTG  
GATAATCCGGATATCAATCCGGCGTTTAGTATCCGTACGGTAACCACGCCTGAGAACTTT  
GGCGATAAAACGCGCGAGGTGGACTACTGGAGCACGTATGACGCTGTCATAGAGCAGGGT  
ATACTCCGTGCGTGTAAACCCCTCACAGTGGGCTTGGAGAGCCTTCTGGACGACTATTGC  
GCTGAGGGTGGTGAATGGAGATCACCCTACCATGGAAGAGCTCTTATTTCTCTGCGAT  
CAGAAGAGGCGTTCACCTGAAGTGGCGGAACGTGAAGCGGGTACGGAAAGCTTTGTTTGA  
GTACAGGACATGCTGGATGATCTCCGGAGACGAACACCTGCTCAATCCAAACCTGCGCGG  
TTGTTTGTGTCCAGTTCGTTGGATGTGTTCCGGTAAGCCTGGGCCAGCATGCCTAGCCTT  
GGGGTAGACCCCAAGGCTAGGTTATTAATTTAGCTGTTTGTATTCCTATAGTCCGTT  
GCGGCTAACCATTTAAACCAGAAAGAATTCCTTACGTTGATTGAAAAGCTTAATTTCCA  
AACCTGGTGTCTCATCTGCGTGAGGTGAAGGGAGGGTTAATGTTCTCCAGGGATTGTG  
GGAAACCACCCAGAAGGAATGGGAACGTTCCAAGAATGCTGATACAGACATCCATTTTCA  
CAAAGCGTGTTTACTTCCACTCAGAAAACCGATGCGGTCCGGATCTATGTGGCGAAGCT  
GGCTACGCTGTACATGAACACCGTGGGGTACTGCCGGGGATGTGGTCCAAACATACTCT  
GACCCATGAGCATATCCTGACCAACGCCACTGTGGACAAGATTTGCACCATGGAAGTGAA  
CAGTTCGACCAGTTGTTTGAATTTGGTTGCCACCCGTTGATTTGGGAGTTGATAAAACCT  
GGTGGAGTATATCCTGACCGATGAAGTCAAACCCCGGGTTCGCGCCCGTACCCTGATTAA  
CTACCTGGGGTAGCGTGTGGATGAACCGGGTGTCCCGGAAGAGGACTACCCTGACCTCAT  
CAGTAGCCTGAGTGAATTGATCGGTAACAATGGGTTTACAGATGAGTTCTTTGAGAACCT  
GTTGAAGGAAGCAGAAACCTACTTCGATAGCGGATCGGTTGACTTCCAACAAACCCCGTT  
GGATGTGTTGGAGAACTTCTGCACCAACCCTGCAAGCAATAAGGGGTTTTGCCCAAAG  
AATTCAAGTCTATATTACTTGGGTGAGCGACATCAGGACCTACCTGACGAGGGCAGTACA  
CCTCTTCCCTTGCTTTGTCTTGTCTGTCGTCACCCACCCTTTTCGACAGGAAGAGGTTT  
TTATGTGCGATAAATAAAGAATACGGCGAATGGATGGAAAAGGGTGTAAAGGGTCTGGTAG  
ACTCGTACGACTACAACAAGGCCACCAACCACATCAAGTTCGAGTTCGGAGAAGGTGGAAC  
TGCCTAAGGGTGTACCCAAGACAGTATTCTCCAGCACGTCAATTTCTTCAACGATATCA  
GCGCGCAGGTTTACACCGCCACCTCCCTGATCGCCCGGAGTCAATTCGAAGACAACAAGG  
AACTGACCACCGTCGACGGCACCCCTGAACGTCGGGGGACTGAACATCAATTTCCAGGATC  
ACCTGAAACAGAAGGTGGCTGAAGATTATTTGTGGGGGTAAAGCCCCACCGCAGTCGATT  
ACACGCATACCGAAGAACAAGCCGGTGTGTTTGGATAACCAACGTACGGCCAGCCAGGAAC  
AGGCCGCAAGCTGTTTCGAGGAAGCATTCTTCAATAAAGCTAGTGACCGTTAGTGTCAC  
TAGCTTTATAGGGACTAGTTTTTATTGATTAAGAAACGGACCCCTGTTGACCGTTACCATCC  
TCAGACCTCAATGGAGACAGAGAAGGAAGTGGTTTAAAGCGTTGCTTGACCTTCTCTTTG  
GGAGTGGGGAAGATCAGCGTGAACGAGGGACGTGACGTTGGAGAACCTCCGCGAAACCT  
TGTTACCTCGGGTTAGATTCCCTTTGGAAAGTCACCACGAAGACGATTATAAACCCCTCT  
TACTCCCAGAGTCTTCTAAAGTGATTGGAGAGAAGGAGCAGAAATGGAATGAAAGATAAC  
TTCACGTCGGTAGGTAAACGAATATGAGTCATGAACGGTGGAAACACGGCTCGTTTTGAAG  
CCACCAATTGGGAGGACAATCAACGCGGTATCCCTATTGGTATTAAGAACAAGCTGTATT  
TCCGGTTTACTATAACCCGTAAGGGTGAAGGCTGGGAGGTTACCCTCTGAAATACAGAAG  
GGACGATTGCCCGGATTGAAGATAGCCCGACCGGGTCTCATTCTCCAGTTACCGAGTGG  
ATCTCGTAGATGCCGAGTAGATGGCTGAGATCCATAACCAATTGAAAGATCAGATCAATA  
AGGTTAAACCCACAGAACTGATCGAGGGAGGGGGGTTAAAGCATCTGAATCACACCGTCT  
TTACGGAACCAGATGCGGAAGAAGGGTCTCTCGGGCCTTATGATCCAGCCGAACCGATTT  
CAAGACCACGAGGGGTACCTATGCTAAGTAAACACATCATTACGTTTCGAGATGGCACTGG

AAGCTGAACCTTCGGTGATTTCGGACATTTGAATATAAAACCTTGAGGGTTATGATTGGAC  
AGCTTGAAACCTTCATTGTCATTGAACAGGGGAAGGAGAATGTGGTGTATGCCACGATCG  
AAATCCGTAGTGACGGTGATAGCAGTGTGCATATTGAAGGGAGTCCGTTTAGCCGTAAAG  
ACACTGGAAAAGCCCTCTCGCTGAGCTTTGAACAGATCTCAGAGAACTCAAAGCTACAA  
CACCCCATCTTCCACTCTCAACTAAGAGGTTTATTCCATGATCATCCCTAAACCAGTGG  
CTAAAGACCCGCACGAATTCAAGAAGTACGGCGAATTCACCTACGGGGTTCATTCTCCCA  
GTGTTGAAGCCTTGATGCCTGTTTACGAGGCCACGATCTTGGGCCAAGAAGCCACCCTCA  
AGATCCTGAACGAAGTGGATAGTGCAGTCATGGGTTCTGTTTCGTTCCCTCAACAACCAGT  
ATGAAGTCTTCCGTCAAGGGATTGCCTACGGTCTCCCGTACCGTATCAGTACCGACGGGA  
ATATCGAGTTCGGAGTGTACCAACGTACCAAGAAAGCTGGGGATCAACGCCTGAGTAGCT  
GCTTGTCCCTGGCCCCGGGGTTCATATCGAGAAGGAAGAAATTTCCGACTACCCGCACG  
CTGATAAGTTCTACGGGGAACTTCGGTGATCGTTTGGGCTTATACCGTGGAGGCTAAC  
TCCGGCGTGAATTCCTGGAGGAGATCGCCTTCTACTCATTACCTGGGGTGATATCACCG  
AAGAAGTTACGCAGAAGGCGTTTCTATTGGGTTTCGTGATGGCTAAGGGTGAACGCGGGT  
ACGTTGGGAATATCCCTCGGTGTCATCTGTCTAGATCCAGTTGTGGAATACAACGCCA  
CGTTTCGATATGTCCAACGAAGTGAACAACAAAGAAATTTGGGTGGTTTACGGTCAAAGAGT  
TGGGCGCCCAACATACCGGCGAAGACGCCACATCAAGTCGGATGACGGTGAAGTTCGTT  
GCTTCGAACCCTGGTTCAGGTTTGATCATCAACCGGATTGACCAGATTGTGGATATCATCA  
AGGGGCAGGGTTCAGTGAGAGGGGATTCCTTCTGTACCAAAGCAACCAGTAAGACACTTTT  
GGACACGTTGTTCCAAGTGTGGAGGTTCTTAAAGAACAGGGGAAGGATCAAGCGACCAC  
AGTATACCAGACCGAAAGTCGTCACGGGTTGACCGCTGTTATCAGTCCGAATGGGCTTTG  
GTTCTACCATTTCCTATCCCGGGAAACACCGGTGGCTAAACTGACCTCTACGGGTGAGTA  
TGTCTCTTTGGGCATTATCAGTCTGTCCACGCGAGAACGGATCGCTTTCACGAGGAAGA  
TCTCACCGTGGTACTTAAAGAGATCATTGCTCACTATCAACCGCGATAACCAGACGCTCA  
GTAGGTAGGGGTATCCCTACCTACTTGTCTTTATTTATTTGGAGGAGAGAGGATGGC  
TGTTATTAATTTGCCTTGGAGTGGTGGGGTGGAATCTGTGGCGGTGTCTCATAAAGCCAT  
GAAAGCCGGCCATACGGTGAATCCATGCTTGGTGAATGCCACGGGCAGTGCATGCGTGAC  
CTTGGTGGAAATTAATGGCACTCGCTAAAGTGGAAGTTTATTTTCAGAGATCACACGAATGA  
CTATCCAGGGTCCATTGGAAAGACCTTCGTGATGATGGACACGAGTATGGCCGTTCCCTC  
CATTTACACCATTGATAGCAACAGACAGAGTCCATTCGTTTCATATTGCTAATGAATTCCT  
GAATGTGGTATTGGGGATGATGCAAGCGTCTCGGAGTAACATTCACCTATTCCCAGTAC  
GTGGGTAGGGTTCATACAAGAAGATGGCTCAGAACACACATTAGATATCAATGAATGGAG  
CGAAGCAGATTACCAGGTGCTGCTGAATATTCCCGCCACACTCGGTAAATTGGCGGGCAC  
GGACTTAGGTTGTCGGCCATTCATAGCCCCATTGTGGGATGTTCCCTAAGCGAATCCTTTA  
TAACGATCTTCCCGGGGAATTTAAATAGCTAGTACTACCCAATCTCATTTCACATTGGTA  
TACTCTAAAAGAGAATGATGAAGTGGTCCCTACGGCCTCTAAGGAGAAGGAAGTAGAGTG  
GGAAAGGGCGGGTATCCCTTACCGACACGACGCTTTGTCTTTACTTTGAAAGACTCCAC  
CGGTGCGATGAGGTTATTGGTAGGGTTGCCACCCCTAAAGACCTAGAGATAGAAGAGGA  
TCTTGGTGGAACTGCATGAGTTCACCCAGGGTATCATCAGGAGGAAATCCGGTACTG  
GATGAACGATTATGAAGAAGTTAGGGGGGTTTATCTGGATTTTATTAATGATATCTTACG  
GAGTAGAGAATAGCCTTTAAACTGGAGTATTCGTTATGGCTAACAACGACGTTAAAATC  
GACCGTAAACTACTGGAATCCCTCGGTAAGGTTTACGATCATATTCCTGAAGAACGCCGT  
CCGTACGACCCAGCAGACCTGAAGGGGATGCGGGTATCCTCAAGACGTAAGAGAAACCC  
AAGCGATTCAACTTTGTAATAAAAATCGGGAAATGACTAGGAATTTTCGCTAGTCTCTACT  
CCGGAATGTTTTGTGTGGTGGAGGCGTTGGATGGAACGGATAAGACCACTGTTGTTAATC  
GCATGACGGACTGGTTAGTAGAACGTGGTGTGGTTGTGGTTAAGATCCGAGAACCGCGTG  
GGACCCCGTACTGTAACCGGATCAGGGATTTGCTCCTGTCTGCTGGATGAAGGTGGAGAAG  
GTCCTTGCCAAATGACGGAACCTCCTGTTGTTCAATGCGGCTCGGGTACAACACCTTGAAA  
CCTTGGTTAAACCCAGCTTGCAAGCCGGGAAGTTTGTACGCTGTGATCGGTATGTGCATA  
CGACCATAGCGTACCAAGGGGAAGCCCGGAATTGGGGGTAGGGAAGATCCTGGAGTTAC  
ACCGCTTGCTGACCCAAGACTTTTGGCCTCAATTTACGTTTCATGCTGGATGCTCCGGTTG  
AGGTGGTGTGGACCGAGTCCATCAACGGGGTGGTATGAACCGTCTGGATTCTCAAACGG  
TTGAATTCTATGAAAAGGCCCGTACAGCGTATCGTTCGATGGGGCAGACAGGCCGTGCTT  
GCGCACTCATTGACGCCACTGTGAGTGAAGACGAGGTGTTCAATCAAATGACCACCTATC  
TGAACGCCTGTGTAATAAATATTAGAACACATCGCTACTGCCTAGCCGTAATGGGCTAT  
GCAGTAGGTTGGCGT

>NewGenomeName\_84

CCAGGGCTTGTGAATGAACGAACAACAATAATTTAACATAGCCGTCGAAATTATCGGAGC  
GTTGGGCAGTTGGTGGATGCGCGTAATGTGGCAGTCGCTAAAGA ACTTCACCAGCAAGA  
TTCTAAGCTCGCGGATAAGGTCGGCAAGAGCGAAGTTCTTGCACCCCGGCCCTAGGTGAA  
GCGCGACGATATGAACCGCGAGATTTTCGCGAATATTCCTCAAAGGTTGACCGCATCGAAGA  
CTAACGAGACTAGAAGGCCGACTGATGATGAAGCCCGAACTAATCCAAGAAGGGCTCGAT  
TTCGGGCGCTTTTAGTCGGCTCGACTTGCCG CAGTACGCACCGAAATTACTGGAATTCTT  
GTTGCGTTTCCCGACGCAGCGTTGACGGCTTTGGCAATCATTCCGCACGTATTGGAGTCG  
TCGATGCCGCCG CAGTCTATGTAGCTTATCGGGCGTTGTTGTTTTTCGCGCTTTCCATCGCT  
GCCCCCTTGTCAAGCAAGAGA ACTTGCACAAGGGTCCGAAAGATGAATTCCGGACTTAA  
TTGGGTAGCCAAAGTCCGACAGTATATCGGCCCTTCTCGATGACACTTCGAAGACTTCGCT  
TAACCCGAAACTTCTTGCCATGCTTGACCGCATTGGCGAATTTTCCAGCGAATCCGGCGC  
TTGGTTCGCACGTCTACGCAACACCTTGGTGC GGATTGTTCTCAGCTATTGCGTGGGCGT  
TGCCGAGCTCTACGTTCGTCGCGAATGGAGCAGGGCGCATGCATGGGAAGCCAGCAGCT  
TACGAAGGTTGACCGGCCCGCCTACGGGGCGCTTGTGACCTGCACGCGAAGCGCCGGCAG  
CCACGCCGTTTTTATTGTGGGCGAGGATGCGCGCGGAAATATCATGGTTCTTGGAGCTAA  
TCAGTCGAACCACGTAAAGTATCCCCCGGTTTCGCAGTAACCCGCGTAACCGACTGTATCTG  
ACCGTCGTTCTGGCGAAACAAGACAGTAGTTAAAATCGTTCCGTTTGAAAAACGTTATTC  
GCTGCTGCGGGCTGAAGTCGACTGGCGTACTTACGACGAAAGAAGGGTAAAAGGGTATCGC  
AGGTCTTCCGTAATTTGGGCCAAGTTTGGCAAATGGCTTTCCGCAATCGGCGAGGGCATC  
GTCACGCGGGCAAGTATCTTTTATGCCGGTCGCAAGTGGGGCGCAGCCAAGACCGAAGCA  
AAAGCAGCAAACGTACGGGCAAACGGCGGGCAAGCAATCGCAGGTCGCAAAGTTCACGAA  
GACCGCTAAGCTTCCGAAGAACAGGTAAAGGCGGTTCAAATGCGAACGAAGTTGCTTCC  
GATAATTATACTGTTGACGACGACGAAGTTACTAAGCGGCTGCGCGACGAATGCGCGCGT  
ATCCGAACCGCAAAGTATCCCCGACGCAGTTCAACCAAAGCCCGTTGTAGTCGACACGGA  
TTGTAAATGGGTTGCGCCATTTGGGATTTTCGATGGCCGACGGCGTGACCGCGGGCGCGCC  
CCGGCAAATTCAGAACC AAAAGGTAGCCGTCGAACGC ACTTGTGGCCG CAGTCACCGCG  
GAAATCTGCGGCCAAGCCTTAACAGTACGCGGGTGTGCGGGTACAGTGAAGCCAACGACG  
ATTA AACTACGCCGACACCATGTCTACAGACTGAAGGACATCGAAGAAAAGGCCGCATA  
CGCGGGCCTTCTTTTGCAAGAAGGCGACCCGTTTGAGGCTGCCCTTTCGCAGTTTCCGAA  
CAACACAAATCGCCGGCTATGGGTTGCGAACCATTGGTTCGGACGACGACAAAGCCAATGC  
CAAACAAAAGCGCCTTACCAACTGAGACGCTGTTAGGGCATTTTTTTCCGGACAAAGGCGA  
CCTTGCGCCCGGCATGAGGCCGCGTATGCAAGGGATGACGCTTTCGGACGGCGTAACCAT  
TACACTGACGCCCAAAGATTACGCGAAGCATGCGATGATTTATGCCTACGTTTGCGGGTT  
CATCGGAAAACCGCAAACGAACGTTAACGTAAGGACGAACGTA AACCGCGTCGTCGGAAT  
GTCCGTATTCGCTAACGAAAGCGAATGGGAAGCGGAACCCGCACGGCAACAGCGCGAATT  
CTTAGAAAATGCACGTACACGCCATTGTTACGACCGGGGCGAAGCATGTTCCGTATGAAG  
TCGTCTTTAGGCCCTTTCGCGGGTTCG CAGACTATTGCCCTTTGTTTGATGGCAGCGCATA  
CGCTGTACGAAGGCGCACGCCGGCCCGGCAAGACTCTTACGCAGCTTAGGCGCTTTTATC  
GTAACGTCGGCAAAGGTTACGGCAGGTTGTGGCGCGGCCTTATCTTCGATTTGGAAGTAG  
TCCATTTGGACGGCCTTGTGCCGAATCGAGAAAATGGTTCGGAGATTGCGGCAAGCTAA  
AAGACGACGGCAAGTTTTACGAATCAACATCTGCTTATAACTCGGTTTGGCCGACTGGCG  
AAGA ACTGTGGTTTCGGCACGTT CAGAAGCTGTCGGAGTACGAAGGCTTCCTACTCCCG  
CAGATACGTTTATCGGTTTCGACCGAACTTACGAAGCATCCAAGCGGGCGCCCTTACGCCA  
GATTTATGTCGGTCAACCGCTGTACGTTTCGACCCGTTAAAGACACGCCGAAAGTCCCGA  
AAACCGAGCGCTATTTGACGCCGGAAGGGGAACCGCTGCGGCCTGTAAAGTGCTAAGTAT  
TAAGCACGACGAACCTAAGCGGACCCGGTCACATGTCAGTAAAACGTCGCTTTACCACGG  
TTTCCCCGCGCGGGCGCCGTTCTTAGTCGAGAAATTCAGATTTACAGCACGGCGACCGAAA  
AAGACTAAATGCGCGTCACTAACCCAATTGCTATCTTCGGTTCGTATAAGGAAATCCTAT  
ACCTTCCGGCGTCGTATATCGCCGAACTGGAGAGAATCAAAGAACCGAAATTGCGGACGT  
CTTGGCGATACGGCGATTGGGACGTTACAGTAGGCGGGCGCAATTGACGACCATTGGTAGT  
CGCATATACATGTTTTACGGCGCTTCGTCGTTCCGCAAAGATGGCGTCTCGACAGAACAT  
ACGACGACGGGTCTTCTCATCTTTTATTGTAGGCTGGTGGGCGGCAGCGGACGGCTCCG  
ACGCGTCCATAGTTGTTTCTGATGGCTCCGAATTACAGTTTTACCCGCAACCCGGTTCCG  
TTATTCAGATGTTCGAATCGTACGGATGCGCGAAACACAAAAGGGCGAATATATACCCA  
ATAAAGCTTTGAAACTTTCCGGCGTCGAGTATTGTACGAGGCATAAGCTACCGCGAAATTT  
CGCTACAGGCGAATGGCTGGATTTTATCGCAGCCTTGGCCC GGCCAGCCGACAACCGAC  
TACGCCCAGTGATAGACAGCGAACTAGACACGGCCTAAAAGCTTATGTCTAAGATGGTTG

TGCGCTGTAAGTACGCGACAAGTCGCTGGGTTTCGCGCGTAATCGGGTTCAGCTTTTCG  
GCGACCGGCTATATGCGTCTGATGATCGCCAAGGGCCGGGTATATACCTTATGTCAAGTG  
GCGTTGAAAGTAGTGATTTGCTGCCACGCTGCCGCGCGACGAAAAGACGATAGACGACA  
TAGACACGAACGCCGAGGACCATTGTTACGATATGGTGCCTTACCAAGTATTGAAAGGCG  
CGAAGAAAGCGGCAGCGAAATTCAGACTAGTAATGCCACCATAGAGGAACCGAAATCATA  
CCTAACGTTACATTTATTTCGCCCCGAACATGGTAACCTGCTGCCGCTGTTTTACCTGATT  
CGCGACGGAATCGCGGGGTAAACCAACGGGAAAGGGGGTGCGGACGACTTATATTCCTATG  
CCGACCGCGGAAGACCAATCGAAAGGAAATTAGGCGCGTACCAAGCGTACTTGACGCGG  
GCGGGTTTCTATAACGTAGCCCGTCGAACCCTATACGGATTGGTTCGGTAAACTGTTCAAG  
CGCGACCCGGTTGTAAAGGTGCCCGCACTGTTGAACCCGGTTGTTCGCGACCCGCGACGAGT  
TCGAGTATCCACCTTACGCAGCTTGCAAAGCGCGGAGTGTTCGCTCAACCCTGCTTATACC  
CCCGCCGGGCTGTTTCGTCGATCACTCGAGAAGCGCAGCCGGAGGCGGACCCGCGTTGGCC  
GACCTTGAAGCCGGTCCCTTTTCGTCGACCCTGTACGTATGTGCGCCGACTGAAATTATC  
TATATGCGAACGACCGAGCGGGGCGGGGAGAAAGTTTTATCGTTGGTTCGTAAGTTCGAA  
ACTTGTTCGACTGCCGATGATGGTTTTAAAATGAAAACGTCGGTGCAACACCGCTGTCTG  
CGTTTTGACGATGAAGGTTATTACGTCCATGAAATTTTTCGCGTAACCCGACCCGACCAA  
GCCTACGGGACGGAGATTTGAAACGGCAATGACCAACAATACTCCGTTTATAAGCCTCAC  
GACGCACAAGGTAAGCGCCTTACCGAAATACCATTGATGTTTCATCGGTTTCGGAAAAAAC  
GATTCCAACCCGGACAATCCGGACTTTTACGACCTTGTGTCTCTGAATATGGCGCATTAT  
CGCAATGCGGCGGATCACGAAGAAAGTTGTTATATCGTTGGACAGCCGCGACTAATCTA  
AACGGACTAACCAAGAATGGATTACGCACGTTCTTAAAGGTGCGGTTAACTTCAGTTTCG  
GGAGGCGGTATTCGCGTCCGGTTCGGGGCCGACGCGAAGTTTCTTCACTCATCCGAAAC  
ACCATACTTAAAGAAGCAATGGATACCAAAGAACGCCCGATGGTTCGCACTAGGCGTAAAG  
CTTGTGAGCTAAAGGAAGTGCACCCGACGGCAACGGAAGCCGAATCAGAAGCCGCTTCG  
GAAGGTATGACGTTTTCCAGCGCAACGAAGAAGTTTCGGCGGCATTTGAATTGGCGTTA  
AAGTGGGCGGCCCGTAAGGGCGGTCAAGCCGACAGCGGCGTTAAGTTGGAAGTCAATACC  
GATTTGACATTGCCCGCATGACGCCGACGATCGCCGTTTGTGTTGAAGAATCGCAG  
ACAGGCGCAATTACTTTCGAAGAAATGCGAACCCGGCTGGCGTAAAGCTGGCATCGCAACC  
GAAGACGACAGCGGGCGAAAGAAAAATCGCCACGGATACCCCGGAGCATTGGCCCTT  
GCGACTCCGGCCAACGCGCCGGGCGATGGCAGCGGTGGCGATAATGTGGGCAACAGTGTA  
TAAGGGGCGAGATCATGGCACTATCGGACGACAAGCCACTGTACGATATTGCGACGACCC  
TCACTGTTTACGTGAAAGATGTGAAAGTTTGGCAGTCCCGTCGATTTCGGGTTTCGTA  
CCGAAGTAAAGTTGGAATTAACACGCCATCTTGGCCGTGTTTCGTTATAAGACCCTTGACG  
GTCTTTTCGGAGGCGCAGTAGAACAAGTTTGTGTTAGGAATTACGGGAATTGCAATCAAAGA  
TTTACAGCGGATACACGCAAACGCTACTTGAACAGTGAAATGAGTGCATTTCGGGCCGATT  
TGGAAGTAAACCGCCGCGCATGGGTTACGGCTGATGTCGAACATGACGGCGAAGAAAGTG  
CCGGCATTATTTGGGACGAAAACTGGTACTGTTTCATGTAGAAGTACCCAACGCCGACT  
CGAACCTTTGTATGGTTTGGCCGACGTTACGGGAAGCGACGAACGCATTTTCGTCGCAAG  
TTACGAATACGGCAATTCCGGCAAAGGTTTGTAGTTGCTGCCGTTTATCAAGACGTTTA  
GGAATTCCCCACAAGCTTTCGTCGAAAGCATGATTCGTAAGCTTGACCGAACCGTTGGA  
CCTTCGAAGGAACTTTAAACAGCACTTGTGGGCGGTGTAACCCGACGCGCAAGGCACGCCGT  
CGCAGTTGCACCGGGTCAACGGGCAAGCCGCGTCCGTAATCCATACGGCAACCGCGCATG  
TTGAGGCGTTTCGCTGCGGCTGGCGTTGTGTCGGAGACATTCGGTTCATTACGTTTGGTATT  
CGGTAATCGACGGAAAGACAACGGACATTTCCATACGTCGAAACCGGCGACTCTATCGCT  
TCCGAGATGCGCCGTAGCCGCCCGCGCATATCCGTTGCCGGGGGCCCGTGGCCCCGGCAA  
ATACCGCTAGAGACTTGGCCGAAGAAACGTTTTATACTTGGGTTGCCCGTGAACCTGCC  
AAGTGCAAGTCGACATATTAGGCGACGGCGGTGGCGAATCTTTGCTCGATGGTTCGCTTAA  
AGGCGACGGATACTCCGAAGTACGATGCGGCCAGGCCGCTAACTTACGACGAATTCCGAC  
TCAAGATGAAAGAAATTCCTTACGCTGATTCGGGGAATGGGCAGAACCACGACGGAGTCC  
TTGAAATGGCACTGAAAAAGAACTTACCGAAGAAGAACACGCGAAGCTTTCGGACGCAC  
TGCAGGCCGAATATATCGTAGACGGCGACGGCTTCCGCCCTGAAGATGCCGGCGACGAAG  
ATACGGACGCTTTGAAGGGCGCCAAAGTCTGCGACGCGGAGTTGCGGCAGGACGGTTAAA  
AGGCGACAAAGGAAATTAGCGAACGGCTTGAATCTATCGAAGGCGCCGACGCCCGCACGA  
AAGGCGACATTGCGACGCTTGAAGGCTTGGCAATTGAAGCTTGAAGAAACAGGGCAAAA  
AATACGAAGCCAAGGTTTCCAAGCTTAAAGTCGCATAAGACCAAAACGGTTGTGCGATAATG  
TCGCTTCGAAGTGTGTTACAAGATTTTCGAACGCCACCGAAGTCAACATCCCGCATATCA  
GGTTCGCGGCTTATCGCAGACTTTCGAAGCCACACGCGGTTACGCGGTTCCGGACAAGG

ACGGCAATCCGTCGTGCCTTACAACCGACGAACTTGCAAAAGCATTTCGTTGCAAACAAGG  
ATCTTTCTGCTATTATCAGGGCTAGTAAGGCGTCCGGCGGTGCCGGTAAGCCTTCGTAGA  
ACGGTGGCGGTGCCCCGAAATTTAACGGCCAATCCGACTAACCCACCGACCTTTCGAAGA  
TGAATCCCGCAGAACTTGCGGCGCATCTTCAAGAAGATAAGGCTAAGGAAAATAAGGACG  
TTAATCTTAGCACATACCGACCTTGCTGTTACTCCGAATACGCTCTTTCGGCTTTCTT  
CGAAACCCTGCGCCAGCAGGATGATTTGTTCAACACGGCGACGGGCGGGTCTCTCTTGCT  
GCAGTACGCATCGCACCATGGCAACTCTTCCGACGTTGCCTTTGTCGGTATGGAAACAGG  
CGGCCTTGTTGCGCGTCGTAACGCCTAGGGTTCGGAACTTCGCCGGAATGGTCTTTAA  
ACACCTTGTCGACAAGTCGTCTAAGGTCGAAGACGGTACGCCTCCTGTTGCGCTTGACCC  
CGCCAAGTCCGTTGGATTACAGCAGTACCCGGAATTGGCAGGGGCGGCAATTGGGCAACA  
ACTCGCCGTCGCAAGGATGGGGGATATCCTGAACGTTGGTCTTGGTTTGGGACGTTTCGAC  
ACTGTCACCGATTTCCGAGGTTGTATACGACGCTACCGCGAACACCGAAGCCGCCGACAA  
GCTTCCGACTGGGATCAACCCTAACAAACGGCCAAGCCTAGTTCGGCGAACAAAGCGTCGCA  
GATTGCCGCATGGATTATGTACAGTACGCCACACACAAGCTGTACGGTTCCAACTTGAC  
CAACGGCGAACGCCTGTTAACTTACGGCACCGTGAACGTTGTTAGCGACCGGTTTCGGCAA  
GCTTCATGTAATGACCGATTCACCGAACCTGGTTGTCGCAGGTACGCCGAACGTTTATCA  
TATTCTTCGCCTTGTTGCCGGCCGGAGAGCGGTTTTGTCAAAACTACGACTTCGACTCTAG  
CCAAGAACAAGAACGGGCACGACAACATTAATCGGAGCTAGCAAGCCGAATGGTTCGTA  
CAACATAGGCGTTCGGGATTTTCGCATGGGACAAGGCAAACGGCGGCAAGTCGCCGCCCGG  
TGCCTCGTTGTTCACTTAGACATTTGGGACAGGTGCGTAATTTGGCATAAAGACCTTGC  
GCCCGTTGTCGTCAAGACCTACTCACCGACGGCAGACGGACGGGCTCCGGTACCGTACT  
TCCAGTCCCTCACAAATGCAAAGCAGTTTCGAAGATGAAACGGGCAAAAATTCTGTTATA  
CCAGGACGGCAACGCGCAGACCCCGGAAGAGTGCGCAGCCGCCACCGAACCGTACGCGCG  
AGTTCTGTTACGGCACGCCCGCGCTGTTCTGTCCGAACCGCAGTCCCTGGCCGTCTGCGA  
CGGTGTAGCCGGCAAGGTTCCGAAGCTGTACGCCGACGCTCGGCCGCAAGCGGGCGAAGC  
ACTCAAAAAGTAGGGCCGCGAGCTTAAAGCCTTACTTTCTAGGTCGCCGACGCCCTGGC  
ACCGAAGGCCATCGTCAAGGCCGCGACAAGTCCCAGCCGCTACGCAGGGCCAGACCCT  
GCCGCAGGGTCAGAAAACCCCGTCCCGGTACCGGAGGCCGGCATCGCCCCGGCTTAGAA  
CGCCAACCCGGCGCAGTAACCACCGGATTACCTGTGCCTAATGTGGGCAGGCCGTTTCA  
ACAGCGAACTCAGGGGTCTTCGCAATGGCGACTAAAAAGGTTGTTTATTTACGGCATGC  
ATTAACGCAACAGCTGGCGATCTTGCCGACATTACGCTGCTCAACGCAGCCGCCGAACCG  
CAATACTAAGTTTTTCGTAGCCAACGACGCACCAAAAGCCCTAACGGCTCAACCGACCGA  
ATCATTTTCGTCGGATTTTCATCGCGGGTACTGCGCCTTCTGCTTCGTCCGTAGTAGACGTG  
ATCCACCACGACGCACTCCCGAAACAGGGGCTTCCGGCAACGCAAGCAATCGTTAACGAC  
GGGAAGCCTTGATCGTTATGGTCACTGTCGCTTACACGACGACGGCACCCGTTAGCGTT  
GCGAACGGCGTTGTGAGCGGCATCGTACTATCGAAAGGACGTTGAAGCATGGGAATTACG  
ACCAATGTCGAGGACGGAAGCGGCATAACAAACGCGAACTGTTACGTAAGCTTCGCAGCC  
GTGCGCATTACGATTCGAATCGCGGGCGTGGAATTCGTTGGACGACTACGCATTGGCG  
GCTATCCGGATTCGTTCAACGGATGATTTAGAAGCGCCGGCTTGCCGGTTCCAAGGGACG  
CCAATTCGAAGACGAAGGCCTAGCATTGGGCCCCGAACTTGCCTGCTGCTGAACGAAGAC  
GAAGTACCGTCGAACGTGAATTCGAAGTTGATTATTGCCGCGCAATCTCAACTGACGATA  
GCGATTAATGCAAGCTTTGACCCTCCGCCGACCGTTTCTCCGCAAAACTACCTTACTCGC  
GACAAGGACGGGCCGATTGAAACGGAATGCGCAGTCCCGCTGTCGGTTGGTATCCTACCC  
ATCTTTACCGCAGCGAACGCGCTTCTTGCGCCGCTGTTAGGAGGTTACGCTTCTAACAAG  
TCTGCGCTTCGAGCAAAAAGGGTTTTACGAATGGGACAATTTCGATGGAGCAATTAATACG  
GACCAACGGCTTATCGCGACCAACGGCGAAAAAGTAAAGTGGCGCGTTATCGAAGACGTT  
ACGCCAACCGGCCGGAAGAAGCCCTGGGCACCAAGCCCGGCTTTGCCCAAGTCAAAGAC  
GTTACCATTTTTCTTGTCGCCAGTTGACTGGCAGACGCGAGAGACCCTAAACTTCACGCAA  
GGCACCTAAGTTCCGAAATATGCAGGAATGGGGCTTATTAGCAATGTTCCCTTTGCCCCG  
AATTTGAAAAACGTTGTAATTCGCAACTGGGTTGAACTTCGCTTGGCTTATATCGACGTA  
TTTACGCTGAACGGGCAAAAGGCACTTTATACGATGGAATTTCAAGCATGATGGAATTCG  
ACCAATTTGAGGACGTAGTAAACGCGCTTTTTCTTGCAACTAGGAATGCAGGAAGCGCGG  
CAATTTGTGGGCTATGTTCCCGAGATTTCTTTGACAGGGCGTGCAATACCGCGACTTGCCGG  
ACGGTTCGAAGTATTGCGTTCGGCTGTCGAAGCAAACCGTGGTTGAAGAACAAGCGACCC  
TCTCACCTGCGAAGGAGTACCGGGGCAACGAAAATACACGGCGTCGGGTTTTGTCTTCA  
TATAGATCTATTGCCCGACATCGCATAACGTAAGCGTTTCGAACTTGGACAGAAATTTGGGG  
GGCTTGCCCGCAAGGCTTTTACGAGACATCAACGCCGGGTAAGGTTTTGGTTTGGCACTA



GGGTTGTAAACGAACATCAGCCCGAAGAACTTTACGAACGGCTTAAACGTCGTTACCGAAT  
TATAATACGACAAAATAGGGTAAGGAGATCTTAAACATGGTGTGCGAAATTGCCGGAATCT  
GCAGCAACAGCACCGGACTTGCCTTCGCCAAGAAGTATGCTTGAAGCAACTCCCGACGA  
CGCCCGTCTGGTATGGACTGGAATCCAACACCTATTCTGACTTCGGTGGCGAATTTTCGA  
CCGTTGGACGCACGCCTCTCGGCCCGTCGCGCCAGAACAAGAAAGGCACGACAACCGACC  
TTGACGCATGGGGCGGCTTCGACGCCGACTTTACGAAGACAAACCTTGCGAGAATTCTCC  
AAGGCTTCTTTTTCCAGACGCGCGCAACGTCCTTCGTGGCAGCCGCTTAAACGGCGCAT  
GGGTCGCGCTTACCGACGTTGCCGCAATCGACAGGACTTACGCCGAGATTCCGAGCTGG  
GTGTGTTTGGTGCCAATAAGCTGGTATATGCGACCTGGCTTGCCAAGGCGGCGAACATCG  
GCCTTAAACCGTCTACAGTCTACCGCTGCAGTCGTCGTTGTTGCTGAAACCTTGTTTG  
ACGAAACTCCGCCCTAGGCGCGAAGCTGGACCGCGTCGGTCGCCAGCTTGCCGCCGTAG  
ACGCGAACAAATGCCGTAAGCGGCAACGTAAGTTCCCTTGTCGTTACCGCTGGCGACTTGA  
CGACCATGCCCGAAGTTCGCCGGTCGTTACGTCTATATGGGCGGTGATCTGACGGCGG  
ACCGATTTCCCTCATAATTTGGGCTATCCCCGCATGATGTAGGGTGCAGCTAAGGCGCTTG  
TTTTCGACGACGTATCTTGGCAGGCCATCAACGACATCGGAACCGGCCAGTCGATTCGGC  
TTTACGTCGGAAGTGTATCAAGAACGAAAAGACCCCGCGCTTATTAAGCGTCCTTCGT  
ATCAAATCGAGTGCACCTTGGGCGAAGGTTTGAACGGTACGCAGTGCGAACATGTGGAAT  
GCGCAGTACCGAACGAATTTACGTTGAGCGTTCGGCCGGCCGACAAGCTGAACGCCGACC  
TTTTGTATGTTGCGTGCGATAACACTTATCGCAGCGGCAACCCCGGCGACGATCAGAAAA  
GCGAAACCCGCGTGCTGCCCGCGGAGAAATGCTTACAACACTTCTTAGAACGTTTAAAC  
GAATCAAGGTGGCCGCTCACGACGCCGAGTCGTACAACCCCTCCGCCCTGTTCCGCTACG  
TTCCGAAGCGAACGTTTCGATTAACAACAACGTTACGCCGACCACGGCGGTCGCCGTGT  
TGGACGCCTTCGATACTTCGGCGGGTAACGTGCAAGTCGCAGGTTTCGATTACCGCTTACG  
ATACGACCGTCGCAGCGGTTAAGGATATTCGCTCGAACGCCGACGTTGGTTTGTGGTAA  
TCAGAGCGTCCAAGAACGCCGGTATCGTTCTCGATAATCCGTTGCTTGGTTTGGGCGGCG  
GTCGTCTGAACGTCGAAAAGACGTGCCGAGTAACGTTCCGCTGGTACGCGCCGGGGCAA  
AGGACGAGATCGGCTATACGATGCTGAACGGAGTGTTTTTTTGTCTGCCGAATCTGGGTA  
TGCCGGATTACTTGCGGTAGACTCGAAGGCCCGGGTAATACCGGCCCTTTCTTCATTCAA  
TCGGAGTAAATCAAATGTCTGGACTGTTTAAAGCAATTCAAAACGAATTCGACAAAGGAAG  
TCGAAGGCGTCAAAGCGAATTTCTCCAAGCCAGATGGACGAAGCCATCGTTACGACTT  
ACGTTATTTTCGCGCATGGTCAAATCGAACACAGTGCATCCAAATGCGCTTGAAGCCGCGA  
CCCGTCTGATCGCCGTCTAGACAAACTCGGCACGCTGTAAAGCGAAGTCCCGAATCGC  
TGATTGTGGGCGTGTTCGTCGATAACCGTATTGCGTGGCTGCAGGAGAGTTCAGGGCGCAG  
AGGGCAAGGAAATTGCGTAGTCGACAGACGCCGAAATTTCCCTTCTTTCCTAACTGCCGA  
ACGTTTTTCGAACGTTTGCAGGAGGAAGCCAAGTTGGCTTCGAACCTCCGCGAAAACGCTT  
TGGAATTCGAAGCTAAAACTAACCGAATTTTTGGCGCACCTGTTGGAACCTGGCCCGCA  
CGAACAGGCGATAGCAATCCAAGCGATGCGCGGGGGGCAACCGTTACCCTAAAGCATCGC  
TCACGCACCAGAAGTGAAGTGGTCTTGCAGTTGTATTTGCACGCCTTCTTCGACCCATA  
TAGCAAAAGGTCGCACTGCAAAGGTTTAACTCCATTCTTGGACAAATATTGCGGCTTA  
CGAAGGTCTTTCCTGTTTGACGAGGAACAACCCGATGACTTGTATCAGTCGATGCGAAA  
GCTCGCTTCGGAAGTCTTTAAGTAACTAGCGGAAAAACGGAAAGGGGCGGCATCGAATGG  
AAATAAGCCTGCTAGGCCTAGCCGATACGCTGGAAAAAAAAGCGAAGGCAATAGACGAGG  
CGGCCTCGAAAACGCCGTCGACATCGCTCTGGCTATTTTGGGTGACGTGGCCTACAAGT  
CGCCCGTAGCTACTTCGCACGCTTTGTCTAACTGGATTGAAACGCTAGTAAGTCCGTCGG  
GTCAATACATCAAGCAGGATGTGCCAGTTTCGCGAGGGTACAACGCAACGCGCTTCGGCGG  
CGTAAACGTTGAATTTCTGCGAAGCGGGTTTTACGGAACAAGAAGCCGGGGCAAGGAATTT  
TTATTACGAAAATTTTACGTATATCCGCCGTCTGAACGACGGTATTTCAGCACAAAGCTC  
CAGCGGGGTTTCGTGCAACGCGCGGTTCTAATTGGCCACTATAAGCGTAAGAATTGCAAGA  
TTGCGGATATGAAGAAATGGCCTACGAAATGATAGAAATTAAGGTTCAAGACAAAGTTTC  
GCCGTCCATGTCGACGAAGCTTCGAACAATCGCCAGCGAAGCTCGTAACGCCGATGCCAC  
AGTTAAGAACTTTCACGCGCAGCTTTCGGCAATCAGAGTCGGCAATTATTTCGTAGCTTAT  
CAGCGCATCGGCCGGCGCAACGCGCTAGCTTCTACAAGGGGAACTTGCCGCGCAACGACT  
GGCAACCGAACAGTAGCGCACCGCACGCGTCGCAGCGCACGCCGAGCCGCCAAACGCG  
AGACGCCACGGCTGCAACCCAAGGTGCCACGGCGCAGGCCATCCTTGCCACGGCAACGCA  
CCGCACGCAGACGGCCCAACAGCAGACGGACAACGAAGCGCAGCGCCTAGCGACAAAACA  
GGAGCGGACAGCTGTTACAGACGGCCACGCGGCGTCAACAAACTACCGGGCCGCCCTTGC  
GAGCCTGACTCTGCAACAGGCGCAAGTCCGGGCCGCTAATTCACCCGCAACGCGACGTC

GGCTCTTGGCGGATACAATCGAACCGCTGCCGGAATTCTTAGCTTAACGATCTCTGCGAA  
CGCAATTGTTGCAATCACCGACGCATAGGTTAAGCTTCAAACAAATCGAAGAACTAAAC  
GAAGTCGCAAGAAAATGTTAACACGGTTCGGTACAAACTTTTCGAACTTTCGTTCCGCAC  
GCGCGCGGGAATTGAAGAAACGGCGACGGCGTTTACGCGCTTCGACCGCGCTTTGGCGTT  
TATGGGCAAGTCGCAAGAAGATTCGTTGCGAATAACCGAAACCATTAACATAGCTTTGAT  
TTTTTCCGCGGCAACAGCGCAAGAAGCGTTCGTCGGCTTTGTGGCAGCATTTCGGCGGGCTT  
CAACGCCGTAAGCTTCCAGGCGACGAATTCCGCGCGATTCCGGAAAATATGCCAATCGT  
TTTGGCCGCGGTAGCGAAGGCGCTGAAAGTTCCAAGTAACCGCGTTAAGAACTTTCGAC  
CGAAGGTAAGATTACCTCTGGAGTTCTGTTTGAAGACTTTAAACTTAAACGAGACCACGT  
ACCCGCAAATTTAACACGACGACGCCAGAATCGGCCAAAGCTTGACGGTGCTTCGCAA  
TAACGCACTTCAGTTCTTCAGGGAAGTGA AAAAGGCGGCCGGCTTTACTGCCGGGCTTTC  
GCGCGTGATTATTTGACTTGGCGAAAACCTTGA AAAACGGCTGCCGTAATCGTTCGCCGGACT  
TTGCGTTCGCGTTGCTTGTTCCTTCGGTGCCCCGTCGGTTGCTGCGCTGTCCGGTGCGAC  
GGCTGCGGTTAAAGCCTTTAATCTGGAGCTTGATTTCGAACCCGCTTGACCTTATCGTTCGT  
CCCGCTTTCGGCGGGCATTGCTTACCTTGCCTTTTACGCGACGAAATTA ACTTAGGAAT  
CGACGACGTTACGACGTTGGGCGATTTCTTCCGCGCGGCCTTCGAAGGCATGGGCCAAGC  
AACCGACGACGTTAAAACCATCGCGTGGAAATTGTGGGCAGA ACTGCGCGACTTCGCAAG  
TGCCGCACTTGACGCAAGTTCCTCGAACATTGACGATTTCGAGTTCTTCTTGGACGGACAG  
CTACGCCGCACTTCTTCAAAGCAACCGTACAGGTTGGCCCGGTGCGCTCGAAAACGCCCC  
CAAAGTTCTTGACGCAATCGCCGGGCTTTTGTCCGGGGCCGGAACGTTTCGACGGTTCGTGC  
ATTGGCCGAAGTTGTTATTTTCGTGTCAA AACCGGAATCGCAAACGTCTACAACGTTGTTGC  
GGTTGGAGTGAAAATGTACTGAATAAAGCTATTCAGGCCGCGACCAGGCTTCGCGCGAG  
GGTTCGGTAAGTCGGCTTACGAAATTGTGCACTTTGAACGAATGGGCAGCTCAGGCCGAAG  
CGAATTCGAATCTTGGAGCAAGCTCTGGGCGCAATCGCTGGAAGACGGAAGTAACAGCCA  
ATGCGGAGCGATAAAAAACCTGTTAAACGGCCTTTTTCGACCGTTTCGACGCAAAATCGGCGC  
CCGGCGCAGGGCCGACGGAAGTGGGCATCTTCGCGGGGGCCGGTACGTCGCATCTTGCCCCG  
GGCAACCGGCCCGAACGGGGCGAAGGCTACGGAACGTCGCTCGCTGGCACTCGAAAAAAT  
CAATACGCAGCTTGATAACGAATTGGCGCGTACGTCCCAGCATCAACCGCTGCGCGTAGC  
GCAAGCCAAGTTCGACCAAAGGGGAGAAAGCTTGATTCTGAAAATCTATAGGATTA CTTC  
GGAAGAAGCCGAAGCGATCAAGGCGCCGATTAAGGGCGTTAAAGACGCTATCGAAGTTCA  
ACTCCGATGCTACGCAAATTCGCGGAAGCTGTGAACCCGTTGAAGGTATACAATGCTTC  
TCAGGAACCGGCGAACAAGCTTGTGCAAATGGGCGCAATTACGTAGGAACAGCACGCCCCG  
CGAAGAACGAAGGCGTCGGAAGCTTACGCAAATTTCTACGACCCGTTGCGGCAATATAA  
CCGCGACCTTGAACGGCAATTGCATCTTTTTCGCAAATGCTGCCGAAGCGAGGAGAAATTGT  
ACAGCAGATTATGCAAGTTCAGGTCGATTTGCTTATAACGCGCATCGTTCTAAACGGGCC  
CGAATTGGCGCAGGTTTCGCTAAAAGGTGTTTCTTTTTCAGCAAGTAAACGCCGATTCTTG  
GCAACAAGCGGACTTGTGGACGCCAGCGTAAACAAGCGCCAAAAGTTTATCGACCATCC  
TAAAGCGATTCTGAACTAGCGCAACAATAGCGGAAGCAGTTTCAACTCAGGCGACCCAGC  
TGAAGCAACTAACAGTATGTTGCACGGCATGGGTATTGATAGGATGGAGTTTCATACGCA  
GCTTAACCCGCAACGGGCGCAATATCAA ACTAACGTCAAACAGCTTAATATGCAGAACGA  
AAAACGTTTGTATTAGCGACCAAGAATACGCCGCCGCAAGGATGCAACTTGTATTGCAGCG  
ACAAAACCGGTACTTGAATCCGGCAAGTAGTTTCTTCGGTATCTTGGCCGCGCTTCAACA  
GTCGCGAAATGAGAAAATGGCGGCGGTTCGGAAGGCCCGCACCAATCGCGCAAGCGATGTT  
TAATGCGCATCAATCGGCAACATCGGCGTATTCTGGGATCGCGTCGAATACTCAGGCCGG  
CCCAGCGTTGGTTCGCGGCTGCGGCAGCGGCTGCAATTGCCGACAGGCTTGGCGAGCGTGCA  
GTAAATCCAGTCGCAGAATACCGGCTTTCAAATGGGTGGTTATACCGGGTCAATGGGCGT  
GAGCGAAATCACGGTCTCTCGTACACGGCCAAGAATTTCGTTATGAACGCATTGGCAACCAA  
TCACATGGGCCTTGCCGATCTTTAACCCCTGCTAACGGGCGCGCCAGTGTACAGCGAAA  
CGACGAAAAGGCAATGACGGCTAGTGTGGGTAGGGCAGGCAATTCCGAACCCGGGCCCGC  
GCCGGGTGTCAATGCACCTTTAAGCGCCGTTCTTGGACCATCGATATAAAAAGCCTTGGC  
CGCGCTTTAATCTTCGGAAGCCGGGCTTTCATTCTGGAAACAATCGAACAAAACGACAG  
CACCGTCGAAAAATCGTCAGATTTAAATAAATGGGTTATGCAATTGGAACAGTTAAGAA  
AGGCGGCGACGACAATTGCAATTCTCAGGTTTTTTCAGTTATCAAACGCTGGCGGAGGC  
TAGCGGATGGACAACCCATCGTCACGTGTCAACGGGACTTGACCGCTAAATAATATTGAA  
AGGCATTCGTTTGTCCGGTAGTGAAGAATTCTTTGTAGGGTTCAAGTGTACCTAAGCGT  
CGGCGGCGATTATTACAATATTAATTGTGGATCTTTCGTCGGTTACGTAAGCCGAAACAG  
TTTAGAAACCCAATCGGGCGCGCAGTTTAGCGCAATACCGGCCACAATTAAGGGATTAC

GTATTTTCATATCGGACAACGCCCCACGATTCGTCGGATGTAAAAAAGTGGGTACGCCGGT  
TTATGAACATTTTTACGTCCGGCTATTCGGTTCCGTATGCGCGGCCAGGTGAATATCCGTC  
GCCGCTAGTTTCTGGTAGCATGTTTAGCGGGTCAGAAGCAAAGCGTTTTTTAGACGTCTA  
CCAGCAAGTCCCAAATCCGGGCGAATATTATTCAATGGCCTGTTATATGTGGGTTCGTTA  
TCAGAGCGGCCTTTCGTCAAAAAGTTTGGTCTTATCCTAACACAAAATGCACATACCGTAAC  
CGTTTCGCCCTTGCCGGGCGCAGGGTTCTAACACGCTTGTTCCCGCTGGCGATTATTA  
CCAACCTTGAACCTATAATCCTTTCCCAATTAGAAACAATCGCCGGAATTGGCAACGTTTG  
GGGGGAATTGGTCTGCGTTCATTGTAGTTCGGTTTCAACAATGGCCCCGAAAACGCGGT  
TCAAATGGGCGGAAATTCTGTTGTAGAACAACAGGACTGACGGTACTTCAAGCCGTAGC  
CGCAATTATATCAGTTGGCCTACGCGCATGTGCAATGTGACAGCACGTCAACCGTACAAC  
TTGGCGCGTTTTTGTGCTTTGCAAATGAAACAATGGCATACTATAACCGAAGTGCCGAT  
CCTTTCGCGGAGTTGAAAACCGCTATTGAAAATGCTTGCGTTCGCTAACGGATAGACGCTT  
CCTAACGGCATTCTTTCGAAGACCTGTTGTTTTTCCAACTTGACGGCACTCCGCCCCAA  
CTTACGTTGCAAGGCGGAACCGGCCAACCTGGTTCGACACTGGACTGGGGCCCCGACGAAC  
CTTGTA AAAAGTTATATCGCCA ACTGGAACGCCTAGCGTTTTTCCAAATCAATTACGAAATT  
CAAGTAATGACTTCGCTGGAAGAAGCAGTTTACTGCGCGATGAACTAATATCATGATTTT  
TACCAACAACGGTGGTTCGGAAAGTCGTTGATTTCCGGCATTGGTGGAAACCGGCCATGG  
TTTACCGGCATTTAGGATCGTCGCAGATAGCAAGGCGCAAGCGAAGACACTGTTTATATG  
AATTCTGGTAGTGACATGAATTCTGGCGGAACGCTCGCTTTTTGGGGAATCGCAGGCGGA  
GTTTTCTTCGACGCACTTGGAAAGCGAGAACGGATATACTGTCAATTATTTTCATTCAGGG  
ATTGACGCTGTAAAAAGGCAGAACCCAGGGGGTTCGATTTTAGGATACCCGCATTGAGCG  
TGAATCTTAAATAGTTTGCCGAATTCATCAAACATAGCAACAGTTCCTGTGCCAGTCAA  
GGCATTAAAGTCAAGAAGTAGCGGCGGCCTTACCCTAATGGCAAACCCGCCAAGCTTTAGT  
GTTTGTGCAATTGATAATTTAGAACC GGGAAGTTTTGCCGCTAACGGTGCCTATCAATGA  
AAAATTTACCCATTCTACATACAGAACCTGGCCCAAAGGCAAGGTTCTTCAAATGCTGGA  
CTGAGCGGA ACTTTCGGATACGCTATAAAGTACAATGAAAGTTAAAGAGTGGCCGGAAGA  
ATTGACGCATTTACCCAACAGTTTATATATGGCCGAGATAACCCCGATTATTCTTCCGAA  
CTTGACAGATATTCGGAAGATTAATATTTTCAGGTCCGGCATTGCCGTAATCGTGCGCCCC  
ATTTTCGGCCATTATTCGGTCTTGCGGATATATGCGGCTAACCGCTGGCCTATTGACGGT  
AAGGAACAGTGGACCTTCGTTTCGCGATTTTTATTTTCTCGTTACCTTTTCGCCGCATCTT  
GTGCATTTACAAACAGTTGTGTGTCGTCACAATCGCTCGGATAAAAACGATGGGAACGCATGG  
CCCGACCTAGAGGGCGAATCTGGACGACATTTTGGTGTGTAATCGGTTTCGATATTGAAATT  
ACAGGCCAGGGGACGCCGTATGCAAGGCCGTCACGTCAAGAGCTTACTTACGAAATAACC  
GCAGGCTTTTCGGGGCAGCCGAATATCAATGTTGAAGTGCAATTTGATTTTTCAAAGTC  
GGCGACCCTTTGCCGATTTTACTACTGGCGTTCGTGCTTTAAAATTCGACATTGTGCC  
GAAGTTCCGTTGCACGGACCTTGGGAAAGGTTAAGCGACAATATTGTAGGAATAGACGGA  
ACACAACAGCGCAAAGCACTTCGCGGCGACGTTCCGCGTATTGCTGAACGTTTGAAAGCA  
ATTTTGTATTCTGTGCAAGCCCTGAGCCATTTTACGGGAACGTTATGTTCGGCAGTCCGGT  
CGGCTTAGGATTCCCGATTTTACGTACGCTTTCCGTATTACTGCCGGAAGCAGTAGCGGC  
GCGCTTGAACATCATCTCGACCCGACGAAGACCCACGTTTCGCGATAGCGAATCCGCTTTC  
GTTCATAACGCGCTTGTGCTCCGCTTTTTGAAATTGACATATTGACAGCCGACGGGCCT  
ACGCTTCGTTCCGATTTGCTGTTTCGACATTCCCGCAGGGTTCGTTAATCTTTCCGGGTCA  
CCTGCGCTTATTGGCAACAATACAGCACGTGCACGGTATTCCGTCGATACCGACGGCGAC  
GTGGAATTAACGCAAAGATGATTCGCCAGCGTTCGGA ACTTTCCAGTCCCAGCGCAACC  
GTCCTACTTGAACAGGGCGGGCGGGGTGCCGGTATTGACTAAGCGCCCGCTTGCGCACGAC  
CTTATACGCGACGAAGTTACACCCGGCCAAATTTCAACCGACAATCAAACCGGACCTGCC  
GACATTCTTTCGCGTTCGGACTATAGCCGACTCGCCGGGCCGGAAGCTTCAAAGTAATT  
CGTATTTTCGCATCCCAGCAAATGGATTATTGGAAAGCAATTCTTTCGATATGCACGCGGA  
CAGGCGCGCAAGTTCTGGATGCCCCACATCGACCCGATTTGGCCTGGGCCGTGCAACCG  
TCCGACGCGCCTTCCGTCTATAGCGTAGAAGGGTTCGGAGTACGCCGAAAAAATCTGGCAA  
ATTGTAACGCTTCTCTGTCTTGAATAGAAACA ACTTCCGGCATTTCATAGACCTGAAATA  
CCAGGCGCGTCGAAAAGGGAAGAAGACTTTTATATCATTGTTTTAAATCGGCCGCTTCCG  
AGCGGGACCGAATGGACGGAAGTTAGGCGAATTTAGTACTTGTGGCGGTACACCTTAGC  
GGCGATAAAGTAGAATTGGAGCCTTGCGGTCTTGATCAATCTTGAATCTGTCAATTCGA  
ACGGCGGAATCCTAAGGTCTGATTACGACGGCCAAGAACCAAGCGTAGGCGTTAACGCGG  
CATTTGAACTTTCCGAATTCGTGGGTTCGTACCGCAATTATTTCTTGACTTCCCAAGCCC  
TGTCCCACGTCTTCAACGGTGCACATAAAAACCCCGTTCCGGGTGGAAAGAGCAGTACGC

TGAATGTCGGAACGCACCAAGACGACAACGTTAGATAAAGACGGTTAGGCTTCCGCATACGG  
AACAAATTGTTACAGACTATGCGTTTCAAACACTACCCCGCCATCTTTGGTTTTGACGATTT  
ACCGTCACCAGCGCTACGACGCAGCTTGGGGTGCGTACTGGAAAGTGCCGGGGGCTTCGC  
TTTCGGCAGTCGACGAATTTGTAACGTTTCAAGACGCAAGCCAGTTCGGTTCGATGCTGT  
CGGCAATATAACCAACCGTGTACTTACAGCCAGCTTGAATAACGTTTTGTTTCGACGAAC  
ATTGCAAGGTAAGCCGCGTGACCAATTCGCTAAATACGCAGGTTTGGGCGGTGGAAGGTC  
GTAATATTTTCGATTCCGTCGCTTGGCGGTCTTCCCGACTGTTGGTTTATCGCCGGCGACA  
TGGCAATACCTGCCCAGCAACGAACCTTCGAATCATTTCGCCCAACCCGAGGCAATTCTAA  
CGGTAAATTACGAATTCGCGCGTATTTGTGTTCGGCGTTTCGGTTCGTTACGGGTGTA  
GCGACCATTCTTACAATGAGGCCTACGGTTGCCCAAGTTCAACAATCCGACGAAATGCG  
GCGCTTGCCCATATGATCCGGGCGAATCGAATAACGTATTTCAAACCGGGTCCCATTAAC  
AAATGTGGATTGCAATGGTCTAGGTCTTTCGCTTCTTGCTAATAGCGGCGCTTATGCCGA  
AACCGAACATCGAAAACGCACGCTCGGCGAAACTTGGCGACAACCAATTTCCGCGTTCTA  
AGTACGGCGACCCGATGCCGCTAGTGTGGGCAACAGTCCGCCAGAAATCGCCGATAACGG  
CTTGGTTTTGGGGACTTCCGTCCGGTGCCAATTCGTAATAAATAAGACCGGGCTGTTTA  
GTTTCGAAGAAAGTTACGGTTCGGTCATAAAAATTATGTGGGCCTTGATTGCATTTTGTGCC  
TTGGCCGCGGCGTTCGACTTCGTATTTTGTGACCGATACTTACCTTGTGGGGAGGCT  
ACTTAACGTCGTCCGGCGATATTTACATTAACAAGACGAACTTGTGGGGGCAAAGATG  
AACGCTGCGGCCTGCAAGGTACGATTTTCGATTGATCACGGTTCGTATTGAGCCGCCGACG  
ATTCTGACTTGGTTTTGACGCTTGGCCCGAATGTTCCAGCTTACAACGGCTTGGCGCATT  
CGTTGTTCAAAGCCTTTTATATCTGAACAGGTACGAGGCCGGAACCTCTCAGCTTCGAAA  
TTCATCCCATCACTTCCGGTTTGCACGCGACTTATTGAATATTCCCAAACGTGTTGCTCG  
TTAACCCGATGGAAATGGTTTACGACGAAATGACGCAAAAACGGGGACGCTTCGGCAACC  
TTGAAAGCGAAATTGATATGCCTTCGTTAACGGCCTGCGCGCAAATGCTGTACGATGAAG  
GTTTGGGTATGTCGCTGATAGTCCGATCTGCGATTATCGGAAAAGACTTGTTCGAGGAAG  
TCATGCGTGTGCGCCGACGGCGTGTGTATCAAGGCCGGGCAAAGTCGAAAATTGTTGCGA  
AACTTCCTCGCCAAAATTACACGGGTTCCGAACTTCTAGTTCTTGACGACTCGTCGGTGA  
AAGAATTTTCGCAACTTGCAGAAAACAACATGGGAAAACACTTTTAAGCAAAGTGGCGTGG  
CGTTCAAGAATCGCGCCAGTAGTTACGACGACCCGCGTAACCATTACCCAAGAGTTTGTA  
ATATCAACTCTCGAACACGTGTTAAGTACACGGAAAGTATCGACGCCCGGGCGTGAGCGACG  
CAACGCTAGCAAGTAATACTGCGGTGCGCCAACCTTGCATTTTCAGCGTTACGCTTTGCC  
AGGGCGACTTGACCGTTAACCACAAGGCGCAGAACTTGCGCCCCGGAAGGGTGTATGTTG  
TGTATTGGTTCGCCCTTCGGCATTTCGAATATGGTTATGCGTGGTACGAAAATTGATTTG  
GCGAACTTAGGACTAACCACATCAAGCTTCTTGAGATCAAGAGTGCTTTTCGCTTTCGA  
TGCTTACGTTTCGCACCACCCCAAGGTTTCAGGATCGACGCCGATTAGTTTCGTCACCCCGC  
CTGTTACAACGCGGCTTTTTTTTCCGCGGCCATAGTTTCTTACAGGATACGACGACAGCG  
AAACCAAGGCTGCGTTTGAGTCTGCCGGGTGTCTGTACCTTGTTCGATTAGCGCCGGGT  
CTACGTTCAATTTCGTACGACGCAATGACGACCCCGGACGATTACAGTTCCTCGCCTATAC  
TGTCGCTTGAAAGCACCTCGTACAAAGGCGGCGGCGTGTGCTGAACGCCTACGTTTCGA  
CAATCGCCAGCGAGACCCGCAACGATACAAGCCGTAGCCGTAGCGTGACCGACGTGTCGC  
AAGCAAGCGGCGCAGGTTTGTAGCAATACCAGGTGCTCGAACAAGCGCGCGACGCTTCGA  
CCTTCCGGCTGAATAAGAATGAACTATTTGTTTATGAGGGCTTCGTTGCCGATGGCGGCG  
GTCAAATTGCGTTCCCGAACGTATAGCCTGTGTATCTTGATAACAACGTCCGGTAATCATG  
CGGCGAACGACCGCGTTTGGTTCATGCGCGGTACGAAGGGACTGTTGCCGGATCTTGTG  
CGGGCTCAACGGCGAGATACGTTAAGGTTTGGGATGCGACTTCTGGCTGGAACCTTGATA  
TTTCGGTTGCTCCGTCGTTACGCGGGCCGTTTGCCAACCGGGTTCGGATTCCCGCTGCCGC  
CTCAGTCCCTAACGGTAGCAGAAAGCCGCACGCCAAGCCACAAGTAGGGCGCAACGTCGA  
TTGCAGTTGCATGGTGAACCCGACCCGGGACGATACCCTGTTGCGCGTGTATGACGACT  
CGGTGAACGCGCGGGAAGCTAGGACCGAAACCCTCATTTCGCTGTCGCGTAGTCGGCGGCG  
GTTTCACGACCGTTACGAGGGCCGTAAGTTCAACTACCCGTGACGTAACGGGCAAGTCCG  
GTACGCTCAAAGTTATTGTTGATTGTTTATGAAGTCGAATTTCGAATTATTCAACGTACA  
GCGATTTCGCTAACAATGAACCTAACGGCACCCGGCGCGCGTAATCAATAGAACGACAGC  
GCTGCGGATTTGGCCTTCGTCAACCCGCCGAGTCGTAAGTTCGACTGCGTTTCGACCACTTCGTTA  
ATATAACACTCGTATTTTACATCATCGGGAAATTCGGTGGGCAAGTCCATTACAAGGCCT  
GCGCCGTTGCTTTTGGCGACTGTGTTCCAGCTGGATACGTAAGCAACTTACCGGGCTTCG  
TTCTTCGGGTAATACCAACGAACAACCTTACCAAGATAACGACCCCTCTTTTCGCCGCG  
CCGCGCCCGTTCTTTACTGCAAAGAGGCGCGGGAAGTCGCGGCTCTCTAAAATCGTCTTG

TAGCACGGCGTTCCCTCAACAAGGTAGCGAACTACGGCGTCGGAACAAATCATGGTTTCG  
GGTTCCCGAAAGAATCGAAATCAAGGCCGACCTACGTTGCAATAAGCGCCCTTGGTC  
TTTGGCCCAATTGTTGCGCAATAGAGCGCGCATCGGGGTCGCCGAAGTCATCCTTGATT  
GCGACATAACTGTAAACGTTGCGGCTGAATACGGCTTTAAACCGCCCTTGTACGGTCTTG  
TATCCTGTAGATTTGTCCCAAGAAGAAATAAGCGCCCTGACTTCGTCGTGGCGCGATTG  
CGATACTTCGATATAATGCCGTCCGGTATTGCCGAAATAACTTCGACGCCGATTTATTGC  
AAAGCTTCCCGAAGCGTAAGCAACACAAGTTGCCAGTATTTCGTTAGTTGCAACATAAGT  
TGAGGCGCGTAATGCAGGTAATACTTGTGGCAAGTTTGGCGCAGCTTCCGATAGTGGTA  
ATCGTCAAGCTGTCCGTACGGTCTTCCCTTTCCTCGCGGCTAGGGGGTCGCCCGCGTCC  
TTCGCCCTTGGCCGCTTACCTTTGGTGAGAATTCGCGTATTTACGATTTTTTCGTAAATG  
GTCAAAAATGCGTCGTCCAAGTGCGGCGGGCATAGTCTTAGATTAAGGAGTGTTGCGCAT  
TTCAACTATCCTACCCCGTTTTCTGCCAAGATTATTTTCGTGAGTCGCAGAGTGCGCCGTT  
TTCTTTTCGGTAAAATGCAAACCGCCCATGCCTAGTTTAAACGTCTAACAGCCGATGGAT  
ACTTTCAGCTCTTATAGTTTCGGCCGGCACGGTTGGCGAGCCCAAGCCGTCAAGATAGAAG  
CGGGCGTGTGGCACCCTTCCAGCATCTCGCGAAGCTGCGTTCGTTTATAGCAAACGAAG  
TCGGGCACGTCGTCAACCAACACCTTATCGGCGGATAGTGTGGCTACTGTGGATCATAG  
CCAAGAACTTTTTGAAGTTCGGAGTAAATACCCGCGTCGGCTAGTTGCGCGTCTGATGTC  
GACCGAAGGTCTACGCCGTCTTCTTCCCACATTTCCGGCCCGCAATTTCAATTCGGGCGCA  
AGTTCGTTTAAACAGAAGTTAGGTATTCGAGCGGTCCGGTGCAGCAATAAGTCCGCACTCAA  
TCGGCGTGTTCCTGCGTCAATCCATGGTCTTCGGGAATGGGCAAGTCTGGAAAACGTTTCG  
CAACGCAAGCTCCCTTCGGAAAGCTTCATTGAACCTAGCAGCGCCGCGAATTCGATATAA  
TCTATTTGGTTCTATCAGCCAGTTTAGACACCGTCTTGTTTTGAACCGCGAATGGCGTT  
ACTTTTTCAGCTCGATAGTTTCGGCCCGCTCTTACGGATGGAATTCGGACGCTTCTTTAAAC  
ATCTTGCAATCTGGGCCGCGAGCGGATAGTTAAATCGTTCGGCATATCATTATTGCGGGTA  
TTGAAGCCCACAATACAGAAGTCCAAAGCATCCTAAGAAGCGTCGTCGGGTTAAAATCC  
TGGTCGCCGCTGCGCTCGAAGGCGACGAACTTCCGTTATCAAGCGACTTTAACGCCACG  
CTATAGAAATTTACCTAAGTTTCAACGTCGAAGACGAAGACACTTCCGGCAGTGATTGCC  
GTTACTTCTTCGTCCGACATAAATTCGAGAGGCCGCAAAGCATGCAGAATGCTTGCGGCC  
AGCTTATCAACGACGCGGCGTTTCTTTGCAACAATAACTGCTTTTTTCGTTAATCATGCGG  
ACGCCCTTAAAACGGTATGTCGTCTTCGTATTTGTCCCACGGAATATGCGTCGCTTTGC  
TGCCTAGGTCAAGACCAATAAGAACGCCGGCCTGGTTTTTCGCCGAAAATAACGACTTTGT  
TTGCGTCCGGAGCGGAATGCGCTTTCTTAAACGCATGTGCGACGGAAAGAAGCTACTTTT  
CAGACAAGCCAATTTGTACCGGCAAGCCTTAGATTTTTTTCTCCGCAAGTTCTTATTTGT  
GCATCTTCGACAAAACCGCCCCCTCGTCGAATAATCCGTTCCCGTTCGGGCTGTACGACT  
GAATAGCGCGAAAGCCTTGTTAAACATCGTCGGGCACCGGACATGGGTTCAAGCCGTCAA  
CTTCGGAAACGATTTAGTAATTCGGGTAACGTTTCGCCGTAAACTTGCGTTTTGATAAACG  
CCCCGTTTTTCGAAATAGAACGTTGCGGACGTCGCCGAAAAGCCGAAGCCGGTAAGGGCCG  
GGCAGGCTTGCCGTCACCGACCGCCGCGCACTTGAGTAGCATCATGCCGGGGGGAGGGC  
CGTAGCGTGCCACGCTCCAAGCAAGGCCGCCGCGGTGGGCGAGACGGCGCTCGCGGCAT  
GCAGCAACACGGCTGCATGGTTTCGCAATTCGGTGCCCTGTCTGTTGCAAGCCTTGCAACCG  
TAGCGAAGGCCGCATTAATACCGTCGTCGATTATCGCGCACCGCGGGTAGGGGGCGGAAA  
TCGGGACGCCGTCGAAACCCACACAAGGAACTAACGCCCGGACCCCGCCAGACGAAACGG  
CAACGGCGTTTCGCGGTATGCTGCGTACTCGACAGTTCTTCCCTGACCTTCGACAGCGCAT  
CGATAAAATGCAACATATGCGGACACGCAACCAAGTCTTCTTTGATAGGATGCGCGACGG  
TCTCACCTCTTGGGAAGCCGCCACCCAATTTTGGGCAATATTGCCGAACCTGAACCTTCG  
TCGGCCCATCCTTTTTCTGCGCGATGTCTTCGAACGCTAACGCCCCCAAACGCGAGGCCG  
CAGGGCTTGGCCCCTTGGCTTTGTTTCGTTCCGGCTGCGACTGGCATTTCGCGCCCTTACCG  
TGCCCTTTGTCGCAACTGCGGCTGGCGCTGCGTCCGCGGGCGTAAGCGTTATATTACTGT  
CGATTTTCATTTTTCGGCCCTTGTTCGTCAAGTATTGGAATTGCCGCTCGAGTACAGTTC  
GCCAAGTCTAGCGTTTCGATTAGCGCGTGTGCAACAAATCGCCACGCGGCAACGGGTTA  
TTCTCCGTCGGTACGCCGTGCTCTGCTAGTCCAACGAATGAACGTTGCAACAGTAATTCG  
CGTTCTTTTCGACGTTAGAATCCTGTGAAATGATGCCAGTCCGCCCAATTTCAAAGGCG  
ATTCTTGCCGACCCAAAGAGCTTTTGAAGTTCGAAGCGTTCGCGCAGTTGCGTCGCAT  
CCCGCGGCTGGTTCGTTTTTCGAATCGTGAAAGCTTTCATAATGTTGCATGACTTCACCA  
TTCAGCGGAAAGAAGTACGAGATACTTTTGGTTCACCCATACGCGAACCCGGCGCGGCGT  
GAGCAGTGCTGATCCGCGCTGCAAAGCTTGATAAGTCTTCGGCGGGCGTTCTTCGGCTTA  
ACGCTGCCGTCACCAATCGCGCGAACGTTTCGCGAGCAAGCCCCGGATGTTCAAGCATTAT

AAAGTCGTTGAACATTTGGAAGCCGCATATATATCTAACTTTAGTCATTCGCGGTTTCGT  
CAAATTTCCGTTTGCCTTTCGTTGCGCTTTTCGTGCGAGATTGTAAAGTACCTTTTGAACGTCGAA  
TTTTTCGACTATCGGCGCGTCGCTGCGCAGCGGCTCCACAGTTCCGGCAGTCGACAACAG  
CTTCGTTGCTAAAATAAATGCGGTGCCGACGTTGAAACAATGCCGGGCCGACGCGTGAAT  
ATATCCTCCGGATACGTCGCAAATACGAACGGGCGCGTCGACGTAGACTTCGCCCGGTCT  
GCTCGGGATTTCGCGTGTTCATTGATTGGGCCTAGCCTTCGAACGTTTTCCTGCGAACTCCGC  
GTTTCAGACACTTTTGTTCGAGTATCCGGAGACGGTTCGCGTTCCGCGTCCCAACTTTTG  
ATCGTGTTCGCCGCGGATAGCGTCCGGTTCAGATCGCCGCTCGGGCCAATGGGCAGATG  
GTCGAAACCCCTTGTAAGTTTCTGCCCGGATACCAAGCCGGGAAATTGGCTAGCTTTGGA  
AGCACGCAAACGTTCCGGTATTTGTCATCGAAGGCAACTTGGAATGAGACGGCCGGAACCTC  
CAGGCCGTAAGACTGAATTACCTTTGCGGCGTGTTCGGTATTATCAATACGTGTTGCGAA  
GCTAAGCAAAGTCGAACAGGCGTGAGCTATATCAGTCATTTCCCGAAAAGCGTTAAAAAC  
AACTTCGTCGGTATCTACGGCGGCTTCTAGGTGCTTGATGTTGAAGTGGCCAGCCGTTAC  
GCCTACTTACGACAAGTCGATATAGGTTTCGCGTCCGGCCTTTCGATGAGCGGCTAGAAGTA  
GCCTTCGGCGATAAGTTGGTTAAACGATTCAACACGGGTTGTATCGTAAGAAATGGCGGA  
AAAGATTCCGTTGACGGTAATTAGCCCCATTTTCCTTCGATAGGGCGTTGCGGTTGCTTC  
GAAAACCTTAAAGAGGCAGGTTAATCTTGCAGGTTTCGGCGATAATATTTTGGGAATGCGA  
ATCTTCCTTGACTCCCAACAAATGTCATTCATCGAGTAACAGCAACTTGCGCCAACCGAA  
ATCGAGCAGATGCGCCGGCAGAGCGTCGTCATCTTCAATCCCGCGTTTAATCGCAGGCGC  
TACCGACTGAACGCCCGCAATACGATTGGGATAATCATATCGCGGCAGTTCAAGCCTAC  
CGAATAAATGCCCATCGGAGCTGTAGACCAAATCCACACAAGTTTTTCGGCGTTCTGTTT  
GATCAGTTCTTAAACATGCGTAAGCATCATTATTCGTTGCTTCGGCCAGTAACCGAAAAT  
TCGGCGAAGAAAATTTGCAATTACGTCCGGCTTTCCGGATTTCAGTCGGCATAGCGGCGAC  
GGGGTGGTCGCCCGCGCAGCGCTGGAATAATCGAATATGGAATATTCGCTTCGTCGTA  
AGACCAATGCGCTACATAAATGTTAGACTTCTTCGCGACGGCGGTAATTGAACAATAAG  
TATCGCAACCCGTAGCGATGAAAGCGCCCGGAATTAGGCCGTTTTGAACTGAGCAAACCC  
ATTCGTCGTTTTTCGACCGGGTTTGCAGCCTTCGCGCAGTTGATTTCCGGAATCG  
CGCCCTTGTGGCAACTATCCTTCGCCGCGGATTATTCGGTCTTGTGAAAAGTCGGATTGT  
CCGACAAGCGCAGCGGCGCTTTCCGCGACAGAATGATTTCTTCGGCCTTTTCCATCATT  
GTTGGCCTAGGCGATGGTCTAGCTTTACAACGTCGCAATGCACGTCGTCCTCGTTATTGT  
TAATGTTTCAGGTAACAACATATCGAAAACGATATTCGTTGCCACAGGTCGAAGTTTGGG  
CGAAATATTGCGGCTTGCATACTGCCATTCCTTTCTACATGCAGTCCGAAACGCCCTTGT  
CTGTTCCGTTGCTCTTCAATTCCAGCAAACGGGGTTCGTCGTTACCGTCGCGGTCTGGAG  
GCAAGGCGTAAACGTCAAGCGACCCGCCGAAATGCCCCATTACGCCGGAATGCGGTCTT  
GTCGGAGTACCAAGCCGTCGGCTTTTCGCGCGTGGGACGTGATGGGCGTAATAGGGATTTT  
CGTGCGTTATAAGGTCGCAATCCAACGCCAGTTCTTCGCCTTCTTTAATACGCCTTAA  
TGTCGTTTTTCGGGTTGGTAGTGGAAATCCGTCGCGTTTTTCGTACCAATATTGGACGCCGA  
CGCCGTCCAGGCATTTCGATAAAGGGCGCTTCTTCACGGTGCCACGATGAAACAAGCGTT  
GCTTGCAGCCTTCCGTCTTCTGCTGAAAACACCAACGGAAGATATACCAAAGTCTCCGCT  
TTCATACCTCGCCAATCAACGACGCGCCGCGGTTCCGACGTCTCCCGGCGTCAAACGCGC  
GAACGCTAAATTCGTCGATATCTTCTTGGATGCCCTTGAAGGGCAGTTCCAATGTCGT  
GCGCGTCAAGGTCACACTCTGTGTTCTTGCCTGCGTCCGTTTTTCGTCGGCTGCGCGTCGTGCA  
GCGGTAATGATGCATTCTTCGCGTCTTTGCTGTTTTGCATCGTTCTTAACCTAGCTCCGG  
ATAAGGGCTTCGTAATTGCTCGCTAGATAATCCGACGAAAATGTCGCAACGTCTTCAAGA  
TGGTCTTTCGACAGCTAAGATATATGGCAATCCGACGGGTCGATTAATAATTCGTTTCGCA  
GGCCAATTGTAAGCCTTCGCGCGTGACATTAGGCCAGTTTACCCTAGGCGGTCAAGTTTCG  
TAATGGGGTTCTGGACGAAGCTGGCGCGTGGCTCGGTCCGCCGAACGACCCATCGGAATG  
AACGTGCCAGGATGGCAACCAACAGCGTCGCGACCATCATAGCTATAATAAACGTTTCAGC  
CAATTACCATAAGTTTCGCACGTA AAACTTATCGTCCGTAGATTGCTCAATGTTAACGGAA  
CAACAAGTATCGCATTGTTCCGGGCGTCGGCAATTCGTCTTTTTTTTTCGACATATGCTCG  
CATCCTCGTTAAACGACATGCCGGGGCTGGTTAAGACCCCGGCGAATCAACGCCGCTAC  
GGTGCTACGCCTTAAGGCTGGCCCTAGGTTCCGCGCCAGCGGGTGCGCCGCCCTGCGCG  
GTCTAGCCGCCCTGTTGCCAGCCGCGGGCGTGGGCGGGCTTCTGTTGGGCGGGCTGTTGT  
GCAGGCTGGCCGCCCATGCTGCGCTATGTGGCTGTTGGGCCCTTTCCTGCGCGGGCTGT  
TGTCGGCCTCGCCAAGCGGCCCGCCTGCGGCCTGCTGCGCGGGTAGCTGCTGCGGTTGA  
CCGACCAAAGCCCCGCCGTTCTGGCCCTACGGCTGCTGCGGCTGCTGTCCGCAGCCTGCG  
TCGCGCTGCGGCTGCTGTTGATGCGGCTGCGCTGGCGGCGCGCCTGCCACAGCCGTGCC

GGTCCGTCGTCGTTCCCTATCGAAGACCGTTATAACTACGGTGTACTGCGGGGTCGTTTTTC  
TCCGGCCCGACTCCGATAACAACCGGGCTGTTGTGAAGCTGACACGAATCGGTGACTTGG  
AACACGCCCATTAATTGGCAGATTGCCGACAGCTGCCGATGCGTGAATTCGACGGTCAGT  
TGGTTGTAATGTGACAGGTTCAAGGCTATAGGCGCCGGTCTTGCAATGCTGCGGGCCGTCG  
ATAATCCGCAAGTTCAGCTGCAGATAACCGCCGTCGTTGCGCTTGTGGCCTTGACTCCG  
GCAGATTCGACTATAGCCGGGTGCTTGCCAATCGGCAGGCGTCCGACGCCTTGGGTCCGGC  
TCGAACTGTTCCGGCCTTGAACGCTTAGATAAAGTTGCCTGATGTTTCACCTTTTCGAAAAG  
ACTTCGCCATTGTTTACGGCGGGCAAGTAAACCGTTTTCTTGCATCGCTTTAGCGAACAA  
AGCGGTAAGGTCGGGCTGTTCAAGTCCGTAAAGATTGCCAAAGCGGTCGCGCGCGAAAAC  
ATCGGGAATTCCTTCGTTCCCATCGCCTGAACCGGCATCGGCGTTCGGGTACGCTCGC  
TTCACCCAAGTGCCTAACGTTATCACACAAATGCGGAACTTTAACGTAAAGGTCTTTGCC  
CGGAGCTAACGGGTGTTTTGCATAATCGGTTCTGATAGGTAACCTTCGCCGTTCTGCAAAAT  
TGTTCCGCGTCCGTTCTCATTAAAGGGCTTTTTTCGCAATCATTACGATGTGTGTTGGCGG  
CATGTAATAAAAGTCGTTCCGCGATTTTGAATACACGTTCCGGACATATTGCCGTAAGCCTT  
CATAACCGTGTGTTGACCGTGCCCACTTCGTAGGCCAAAATAATTTTGGCGATGTTTCGAAAT  
AGTGCCAATAGCCAACGTATCAAACACGCAGCTGCGCGCGATTTTCATCAACCATTCTGTA  
CAATTCGACCATCAGCGAGGGTGTATACGCTTCTCATGCGAGAACGTTTCGAACCGCGCAT  
GGACAGCATAACCGGGTTCGGTTACAAGCAAACCGGTCGCGACGCAGTATTGATAAGCGG  
CGTTTTGACGGAACCGGGCGCACCGAATACGACGGAATTTACGCCGTCGCGGCCGGCCAG  
TTGCCACGCCGTTTTTAATTGCGACATTTGCCCAACTTGCGCCTTCGGAATTGGCCCCGG  
CGTTGTGGGCAACCGGGGCGGGGTGTTACTTCGACTTCGGCTCGGAAAGTTCAAGCGC  
CTGCGTTGCTTCCTTCGACGTTACAACATCGTGGATATGCATACGCACCTTGCCGGGTAG  
TTTCTCGTATTCGTAACGGAAAGCACGGGCTTCGATTTTACCAAACGTTTCGGCGATAAA  
TTCGCCTATGTGGCCGGTCTTTTCGATTTTCTGCAAAGCCTCTTCGACGGCTTCTTGCC  
GCCTGCGAAGCCGCGGTTAATCTTAAAAACGGCTTGCAGGAGGGTAGCCTTCGCCAAGTTC  
AACTTTTTCGGTTCCCTGCGCGCAACGCTTCGGGGTTCAAGTTGAAAGCGTTTATCAGAAT  
TTCGACGCGCAATGCGGATTCGGCTTCTTTCGCTGCCGCAAGCGCCGTCGTTGCTTCCTG  
CCATTTCCGAATAAAAGCGTCGCGGTTTGAGTCTCCGTTGAAAGACATTGTTGTTCTTC  
TTCGGTTGGGCCTTCGCACAATTGCGCCGTTATGTACGAACGTACGACGGCACTTCGTT  
GCTGTCCAGTCGCCTTTTCAAGGATTTTTCGGTCTTCGAACAAGCCGCGATTGTTGGGGT  
CGAATTCGGTAAAGGCGCTCGGGAAGCGACTACGAAGCTTCGCGATGTTGACCGACAGCA  
CATCGCTGAATTTGAAACCCATGGCGTGCACCAAAAGCCATCGTACCAAAGCCGTCGG  
CGACTGCTTCAACCGAGTTAACAGCGGGGAAAGGTTTCGCGTACGGCTGCGGCGCTTGGGA  
CTTCCAACAGTTCGTTCCGCTTCGGCCGCTTTGCCATAAGTGCATGACTGACGTTAATGG  
CTGCGGCGTCGTGTTTCGAGATGGTTCGGAATCCAAGCGGGAAGGTTTCGCCAGCGTTGCCA  
CGTTAGCTTCCGGGGCCGGAACGCCTGTGTTCGCGACCCAAGAGCATGGCTTTCTTGATTG  
CGTCAAGCTTCTCAGGGGCTTCGACGGCATCGGCGATGGTTTAGCGGAACCTATGCAAGCG  
GCACGCGGTCGCCGTAATACTTGATGGACGCCGTTTCGTGCGCTTCTTCGTCATAGTCGA  
AGGGGTCTGCGGATTCGTCCATACGTTACCTATTAGAAGGGCCGGGCATCATGCGCCCG  
CGTTCCAGCATTTTATCCGACCGTGCCTTTCTGTCAACAACAATTGAAAGCAAGCAAGA  
AGCCGGGTAAGCGGCCCAACAATTGCTAGAAGGTGGCGTTATGGCCATTGCAGAACTTACA  
TATCGGGTAAAGAAGGCAGACGTTCGAGCGTTCGCTGTGGGCACGGGCAGCGCAATGCAAC  
GTTTCGCACGAACTTATAAGAAAGCTTTTGCTAGCCAATTCTGCGCCGAAAATAATGGAG  
ACGACTTGTAACCAGATTGACGCAGGGTTGGCAAAGAATAGACTGAAAGAAGATACGGCA  
CGGGATGCGGATTTACCCGCAATTGGTGGTTTGGCTATACGAAGACATGGACTCAACCAA  
ACCGACGAAGGTTACGTATTCAGCTAAAACCGGGCACCTTGCCGGCGTAATCGACCCGAA  
CACTTGGGCCGGGTTTCGACGAATGCTTCAACGAATTGTTCGTTCCGGTTGGTATGCCGGAAT  
CTGTTTTCGATTTGACTTAAAACGACCCGTTATTCCTTTATCGACCCTGACGACACAAAAGG  
CGACCAAACGGTGCTTGAACCCCAAATAAAGATTTTTAATGAATCCAACAGCTACGCCTA  
ACGGTCGCCTTCCGGTTCGTGGTTGTATATCAGCGTTAAAGGAGCGGTTTCGGTTCGGGCCA  
CCGTCGTTCCCTTTATCGAAGCTTACTCGGCGTTTCGTTAAAGGACAATCACCGCCGATAA  
TTACCGTAACGCGCCCTTAACGATTGCAACGAACGATTAACGTTCTTTGGGGCCAAAT  
GGGGCAAGGTTCCGGTCGCCGGTGCGCATTATGCCGGACTTGCCGGATCGAAGGACACGGT  
CGAACAGGTTTATAACAGCACATTCGCCGACGGCAATAGCGACGACTTCGCAGAACCGTC  
CGCGGGCAAATGGTAAGGTATGCACGCTTCGCAGTCCGAATCCGACTTAACTTTTCGTCGA  
TATTATGGCGGATTATACGCAGATTCGGGGGCGAGCATTTCGTGACTGTTTCGCGCGTCGGG  
CTTGGGGCAGCGTGACAAAGGAGAACGCGACGACTACGTTTCGTACATGCTTAACCAGTG

TTTCGAGCGCATGTTGCCGCCCGTTGACGTTGAAGGATTGCGCAACAAGGTAGACGAAGC  
AATAGCAAAGAAAGAAGCCGCCGACAGGGCCGGCGCGTTGTTCGCATGGCACCGAAGCAAC  
GCCGCGTCCGAAAGGCCCGGCCCGAACCTTAACGAAGCTAAGAAGGTATACAGCGGCC  
GCCCGGATTAGTTGGAGAAATCGATCAATACATTTAAGCACAGGCGCCGCGCCCCGTCCC  
CGAAAGCCGGTTGGGCGGTGCCCTTGGCTTGGTCGCCAATCTTGTAAGCAGGGCCTACAA  
CATGTACTGCACTGGCCTGAATCAACACGTTAAATTGCTGGCACCGAGCAGAACAGGTAA  
AGCAGCCATCGCAAGGGGCATTGATAAGCTTATGACTCGGGTTCGCCTAACCGATCCCAC  
GGCGTCGTACTTTACCTGCCCGGCGAAATTGCTTCGCCGCAAGCGATTATTATGTATCT  
GTGGCGCGGGCGCACGTCGGTTGTTTCTGTGGTTGGCGAATTTGGCATTATCTTCAACA  
AATGGCAAGCTTCAACGCACCGCCGAACCTTTTCCAGCTTCGTCGCTTCCTGTTGGATGC  
TTACAACACGTTGAGCGAAGGGAAGGTACTTCGGCCTTCGATTTATTAGACAAGGACAA  
GAACACCGGTGCAGTATTGGCCCCGTCTATACTTTGCTTGGCGAATCGACGCCCGAAAA  
GTTTTACGAGGGTTTAGAACAAAGGTTTGATTTCGGAAGTTCTGTGCGCCGCGTTTTGCGCT  
GATTGAATATCACGGCGACCGCCCTGCGTTGAATCCCGGGCACCTGTGCGGCCAACCTTC  
CTTCGAACTTAAAGACGGGCGTTCGATCTTGTGCGTCCATGCGCTTATGTTGAATTCGCA  
GCATAGGGCGATTTCGAGTTCAAGACTACGCTTCCGCCCGCGAACTGTTGCAGCATTTTGA  
CGAGCATTGCGACGCGGACATTAGCACAAGCGACCGCGTAGTTCGGCGGCTCCTTTGGGA  
CCGGGCGCAAGTAAAGGACTTGAAGTAGGCCGGAATTATAGCCGTCGGGCGCAACACTCA  
GGACCCGACCTCTACCGCCGACTCTGCGTGTTGGGCGACTAACCTTGTGCTAGCCGACCT  
TCGAAAATTGCTTGGCCGCTTCGTTGCTGGCGAAAGTGGCATAGACAACGACGAAACAAA  
ATCGCTTACGAAGGTTTGTGCATCCGTTACAGATTTAATCTTTTACCTTGGCCGGACGT  
TGCGAAGTACGCCGGCGAACGAATGTCCAACCTTCAATCGAACCGAGTTGTTCCGTACAG  
CTACGTTCAACCAAGCGTTGCCGCTCTTGCCGCTTTTCGTAAGACCGCATCGTCGCAAC  
CGGGGCAATCAAGCGCGCCTTGAAGACCCTTTGCGAGCCCGGCGATTTGCATGAAGCAAG  
CCGGTCCACACTGCCGACGATTACGGAACATGGGCCGTTGCATACATGGTTCGCGCATCC  
GGGCGTTTTTCAGCAGGTAACGCGCGCCCGCCAGAGTGGGTGCAACGGGCCGTATTTCGGGA  
GGCTTTTTTCGTGCCTGTTTAAAAAGTTCGTGCGACCTTTTGACGTAGAATCGAAGGTATC  
GGCTATTTGAACCATCGAAGGAAACAATGAAGGCCTGACGCACATGAACAACCATGAAAC  
TATTTAAGCAGAAGTGCACGCATTGCGGAAATTCGCCAAGGTAACGCAGTTCTTACCAA  
ATACCGCGAAAGCTTCCATTTCCGCAACGTCCGCAATCTGATTGCGAAGTTCCGTACGA  
CTCGTCAGCCACGGCAGCACCGAACGTCACCAAGTGCATTGGAACGGGTTTTTCGTCAA  
GCTGCGCGCAGCGCACGCAGCTTAAGCCCGTAGGCCAGCCCCGGCTCTTGGCACGCGCTC  
GGGGCCGCACCACCTGCCACAAACAAGGGAAGACGCAGCCATGAACCTAACCCCCGCAG  
ACCTTCGAAGACACACGTTCCGCAAGCCCGGCGCTTCAGCATGGGCTGGCACAGACGCAG  
CCTGCGTTTCGCATTATCCATATTCCGACCGGCGTTTTTGTGCAACGCTGTGACCTTGTT  
CGGCGCAAGCTAACATCTCCGCCGTAATGCCGGACCTTCGAAAGAAGCTTGACGAAATGC  
CTAGGGCCAAGCCCCGCATGTATTGGACGTATTACCCGAAACACCGTCGTGGGTACTGGC  
GCGGTTGTGCATAGCCGAAGCGTTGGAAGACGAAAGACTCGCCAGCAGCGGACAAGGCGA  
AAGAATTCGGCCGTCGCTTGAATGATGCGATAACTTCGAAGATTGAACAGGAACTCGCAC  
GACTGCCGTTGGTGATACAGTCAAACGTTTGAAGACCTTCCGCCCGGTTTGTACATCG  
TTTCGGGTGAAGGTGCGGCAGAATTGGACCGACAGTTCGCAAAGCGTTTCGATGACTTCT  
TGATAGTTTCGAAGGTTCTTCGCGTATAATAGCCGACAGGACGTATAATTGCCCGTCATA  
ACGCTTAAACCCTTGATACATAAGGCTTTTAAACGGATCTATAGCAAGTATAACGTCTAAC  
GCGGTTACACCTGAAACGGCGGGACGCTTTATTAAGACACTATTGATTAAGGCTATA  
TTTTAGCTATGATATTGATTATATTATTTTCAATTTATTCTCTAGAAGTTGCGGAC  
TATACAGACCCTTAAACCCGATCACGTTTCTCAATTGATTAATTGCTGGCCACTTGATA  
AATAGTTGCCTATGCTGCTGCTATTTATCAAGGGGCTTCCCATGCCGAAACCGACGTCGT  
AGAAAGGCCGACCGACGGGCTATATTCCGAAGCCTGCGCACTGCCGCTATTTCGGGAGCG  
AAGCTGCACCGACTATGAAGGTTTGGCCGTAATGCTTGAAGTTGTCCGGGCGAGTATCTA  
CTGCGAAGGAGTTAAAGAAATGACTGAAGCCACAAAGAAGGTTCAAAAATCTACCGTCATC  
GCCGAAGGCGCTCGCGCTTGTGCAAGTTTCCGCCGACAGTCAACTGGAACGAATGCCCGA  
CGAAAATGACGCCAATTATCGGTTTCGATTGTTGCAAGTCGGAAAATCGTTCGCGATACC  
GTTTGCAGACGTGTACGCCGGAACGTTGGCGTTGCTGCGTTCGTGCGCCAGATCTTACGG  
CAAGGGCCTAACAGGAAGAAGAGCGTATTCATTCACGACGATTATAAGTGGGTTGAAAT  
GGTCCGGCTGAAATGAACAACGACGCGCGGCCAACGTGGGCAAACCTGGTTAATGTGTTT  
GGATCGTCGTGTCTTGCCCTTCGGTCGGAGTGTCCGAACGCATATTGCATACGACCAACA  
CCGTCAGGCCATAGGGCCGCCGTGATCATTGAAGAAAGGGCAAGGCATGTACGAATTCCA



AACCGGCCATAAAATGCCGAACCAACGTCGCAAGGCTTGGAGCGAGCCGACGGCCGTTCA  
ACGGACCTTCAACCACTCCGCCGACGCATAAAACGCCGTTTATGGCGGGCGCCCGCTGTC  
GTTACGTATGACCGCCAAAGCGCCTTTATCCGCGTCGAATGCAGCGGCGGCGTAAGCGG  
GTGAAGTCTGCGCGAAATTACGTAACAGCTTCGTTGCCGAAAAGGATAAAAAAAAAATTAC  
TTCAATGGGTTACGTACTIONGGCGAAGCCGTCATCCCATATACCCACACCAGCGAACACAA  
AGGACCGGCCAAATGCAAAATCTTCTACAAACGAACCCGAATGCGGGAACCTTACAAGCT  
GGATTCTGACGCAATATGCTTTTAAGGGGCTGGTGCAAAGAGATTTAGGCTATCAGCGAA  
TGAGGTTCTACTATTTGAACGAAGACGTTTCGCGCCATAGGCAAGCATTTTATTTCAAC  
ATGAACGACATTTAATAAACAATCGCGCCAGGCGCATCCCATCATTTCAAAGGAGTTATA  
ACAATGTGCGTCGTATGCGGAGAAAAACACGCCGTCGAAGTTTCCGACTCGAACAAACAA  
GACCGCGCCAACATCCTTGGCTTGGCCGAAAAGCTGGCCGAAGCCCTGGGCGATGTTCTG  
CCATTGCTCCTGAGGTACACGAAGCCAACCCTGAAGCGTTCCAGCCGGGACACCTGGCA  
AGCTGTCAGAGCACCGCCGACTTGCTTAACGACCGGGGGCGAAATGTCCGACGCCTCGTTG  
GCCCTGCTGTTGGCCGCTCTTGAGCGCGGGCGTGAAGGTGCAAACAATCCGCGGAGAATC  
CGCGAAGACGAAACGACAGAACAGGCCCCCGCGCGTGCCTGGCCGAAGACGAAGGCGGG  
GCAGGAACGAAATACTAACCAAAGCGCCCCGGCTGTTTTAAAGCTCGGGCTTCTTTCTAT  
CATGGGGAACGAACGAACATGGCGGGCGAAGTAGACAAAACAGCTGACCGAATAGAAAAC  
GAAATAAGCTTTACGGTCGGCGAACTATGGCGAAAGGCCGACGCAAAACCCGACGGCCGT  
CCCGGTGAATGTGATTTTTGCGGCGAATACTTCGCGCGCGTGTGTCGAGGTTACCAACCCG  
GGAACGGGCGAAGTCGTCGAAAGCTGCGGTGGCTGTGTCGACCGTAGGGGTATCGAATAC  
CGCCCGCATCCCGTGCTAAGTCTGGAACAGAACACGCGCACCAAACGACGCGTTTTGTCT  
ATGCTGCTGTCGACACTAGCATGGCTTGGACGTGGCCGAGCATTAGTCAAGAACGGCA  
AGTTACCGAAGCGCGACCCGAATGCACCGCCGAAGGCGCCCGTCTTGAATGATTCCACG  
CCACACCAAACGGCGGCAGTGGCGGGGACGAAGACAAGTCCCGCAAGATACACGGCGCGC  
AGTTGGGGACGGGAGGCGTGCGGGGGGGCGTAAACGATACGTTCTTGCCTTGGCCTGTTT  
ACGAACGGTGCCCCACACATTCGCAAAAAATGATGATGAAATGGGCCGGTTCGATATATCA  
AAATGCAGAAGTCGTCCTAACGTCCGATGTGGGAAACCGCAAAACGCGGCGTATCGGACG  
AACAAACGAAGTTCGGCAAATATGCATAGCGCGTCGCAAAATGGTTGGGTCTTCTGCTATG  
AGTGCGAATACCCGACGTGGTATCTTCGTTCTTATGTGCAATGGGGTTCGCACTGAACT  
ATCTGTTGACGATATGACCCGGCAAGACCCGGAAAAATCCGCGCTTTGTAGGCGCGCATT  
AATCACACTTGACTGAAAGAACGACGAACGCGGGGTAAGAGCTTACGAAGAAGGGCGTTA  
CGTCTCGCATATATTTGCAAGAGCACCCCGGTTTTAAGGCCAAAGTAATTGAGCAAGA  
TCGCGGCTGTTGACGGGTCAAACGTTGGTACGCGGTTGTGCGCATCGTTGATCCGCACGC  
GAATTCGTGAATCGTCTTCGTTGAGAATTGGCCCCGGGCCCGGTTCAAAGCGCTAGCGCTG  
GCCCTTGTGGGCTGGCCCCGTTCCCGCATCGCCGGGCATTAGGCTCTTTGCTATGGCGAA  
CGGTATTACGTCTAAGGCGGCAAGCTGTATCGCTCCTCGAAGTTGCCGCCATATCAACCG  
CAGTTGATAAGTGGCGAAGAATGAAAAAGACCGACGAAGAATCGAGAGACGAAGCCCGCA  
AGATTGCGCCTTCGATACGCTGTTTCGTCATAAGGAAGCCGGGTTATTTGCTGCTGTACC  
GCGAATGCACGCCGCGTAACGTATGCGTCGGCAAACGGACGTGACTTCGGCGCTTCTAC  
AACTTGCGAAAAAGGCTTGACGCAGCGTCGAAGCTGTCTTACACTTCTTCGTAAGTTGAT  
CGAACCAAAGAGAACTACGATACCCGCATATAAAGTCAACCGAATTTCAAATGACAG  
ACGGCCCCGTTCTGTGCTGCGAATATGGCGTATTGTATACGCCCGCTTACATTAGTGACC  
CACCCGCAGATTGCTACCCGGAAGAAAGTGACGCGGGCGAACCGACGTACTTTATCGACG  
GCGCAGAAGTCGATTACAAAGAATTGCCAAAAGGCTTGGACGGAATCCGCGACAAGCTTT  
ATTAAGCGGAGCCGGGCGAATATTCATATTCGCAATCGGACGTAGACACCGAACCGGATT  
ACGAACCGGATTGCGATTACTATTTACGAAGGAGTAAGGAAAATGTCTTGGTTTATTGGT  
TGGGGCATACTTTCCGTCCGCGTCGTTGTGCGGCTTCTTTCTTGCCGCCTTGCTGCGGGG  
AATGGGCGCGTCGTGCCGTTACATCGGCTATCGCTACCGCCGTGTCAGCGCAGGGACCT  
GTCCGCAAGGGCTACGCGCTGCAAAGGGCTGGCGACTTGCTGGTCAGCGGCGACCTTGAC  
TACGTGTCGGGCGGCTTTATGGTGCAAGACGACGGGCACGGCATCGTAACTATCCAAGGC  
GATATGTCGTTGCGGGTTGCCGAAGAGGAGTAAGTACGAAGCACGCGAAATGTCCGAAGC  
TGTAACGGCCAACCGGGCGAAGATTGACGGTTGCGCCCGCCATCGCTTCGAAATAGCCGA  
CCCGACGGAACGGTCGGGCAAAAGTTCACTTGTTTCGAACGGCGGCGGGACAATGGAAGC  
CGTACAGGCGTTCCGATACTGTCAAGTCTTCAAGGCAGCAGGCGGCGACTCGTACGAAGT  
TATACCGGTTACGAATAACGTTTGAAGAGCGGGCAAGATTCAACGAACTTAGACGTAA  
CGAAGATACCCTGGTAAGGAGTTGCCGAAATGACCGTTCTAATTTTGTCTTTTGCACCG  
TTGCCGCTTAGTTCACTTCTCATGCGGGTTCGTCCGATATTGGATTGGTTCAATAAT

GAGAATACGCCGAACGTATGCGCCAAGCTGAACAGCGCGCGGCGCTGTGAAAGGGCGAGGC  
GGGCTAAGCGTCGATGATCTACGTACCGCGGGAAGCCATGTCCAATTGGGACGCGCGAGT  
TATTGAACTTGCCGAACACGCCCGCGGATGGTAGAAAGGGCCGCGTAGGGCGCAACTGCGC  
GGCAATCGCGAGCCCGAATCGGTCTATTACGTGCTTGGGTACAACGGCCCACCGCGAGG  
CTTCGACGACGCCGCTGTGCTGACCGTGACAGGCGGGCGCACAACACGCGGTCATAATTCC  
AGCCGAAGCCAACGCAATTAGACAGGCTGCGCCGGGCAAGGACTTGTCCGCGTGTACGCT  
GTACGTTGCGCCTCTGTTTCCTTGCGCCATTTGCGCCGACCGCATCGTTCGGGCGGTTT  
CAGCCGCGTGTGCTCACTGCGGGCATATATCTCCAGACTTGCCCGCGTGTGCCGACGA  
AGCCGAACGCATCTTTACTAAGCGGGAGCCGAATGCCTGTTTCCAATGGGTTAACGCAC  
TGAAACCGCTAGACCATTGCAAAATCGAAGGCTTGTGTTGTATCAATACCCGACGACG  
CAAACTATATCGGAGCACGGAAGGCCGATCGGTTCAACAAAGCCGGAAGCTTCGTTGTA  
TTCGGGCGGAGTGTTACCGTTGACCAGGCGTTGGATAACTTGCATGCCGCAGCGCAGACA  
ATGTACCAAGCCTTATCGCTGCAATCCGCTTACCTTCAATCGCAAATCGAAGTTATTGAA  
CACTTGCCCTAGGCGGGAGAAGTGGATACGCTGTTATCGTCGTTAAGCAAAGCGCCGAAC  
GCTTGCCTAATGGCACAACGTACCGCGCAAGTCGTTACGAAAATCTCGCCAATTCAATT  
GACAAAGGTTTGAAGCGGTCTTAAGCTCGAACCACGAAACCAAGAAAGGTGCCAAAAAT  
GAACCGTAAGCTCCTTGTATCGCTGTAAGCGTCGCCTCCGTCTCGTTGCTCGGCATGGC  
CGGGCAAGCCGACTTCGAAAACGAAGTCCGCGCGCGCCTGTTGTATTGTTACAACGTAAT  
GACCGGCGTTTGGCCTGATTACGACAAAAGTTAGGATTCTGAATGCACCCGCGAACGCAT  
CGCAGAAATGTAAGAAATTTCCGTTGCGGGCTTGACACAAAGAAAGGACGGCATAAAAA  
CAACCCGGCGCACCAACGCGACATAACCTACACGTTAAGGAGTTACACAAAGTGGCTACC  
AAGAAATCGAGCTCGAAGAACAACACCCGACGCCCCGGGTCTCGGCCCTGGCCGAAGTTGTT  
GCAGCCGGGCGGAGTGGCCCGTATACTTCGCCTGCCGTTGATGGCCCGCTTATCGTAGCG  
GGTTCGTTGGTAATCAACCCGGCTGTTACCAACTGAGCGGGATAAGTCGCAACCCGGGCA  
ACACAAAAGCAACCCGACGAAATGAACCAGAAGGCCGAAACGGGCATGGCCGCAGCTTCC  
GCCCCGGTCGCCCTTTCTTCGCCATAGAAGGCCACGCACCCATGGCGACCGTCAGCGTT  
CGCGGTGCGGGCGGCAACTTCTTTCCGTTGACGCGCTAGAAGTCGGCCAAAGCTTGATC  
GTTCCGAACACCGAAGACCAGCCGAACGCCGCGATGTCGGTTGCTTAGATCGTTTCCAGC  
GCAGCCGCCCGTGTGGCCGTGCCTTCCGAAGAAGGCGCTACCATGACCAAAAAGAAGGGC  
GAAACCGTGCCCGTTATGGTCGAAACCCGCAAGTTCGTTGTGCGATCGGTTCGAAGGCGGC  
GTTGCGGACTGCCGTACCAAGTAAGCAACGGCGCGGGCTACGGCCCGCCAACGACTACG  
CTTCAACGAAACCTCGGAAATTGCTCCGGGGTTTTCTTTTGCCTTTCTTGTGAGTTTGT  
GCTTATCCGTTCTACTCTTCGGCTAAATCGATCTCGGGG

>NewGenomeName\_85

TTTTTTACTAACGATCTCTTCACTTAACATGCCTCCAATCAACGGATGCTTTTCTACGT  
GCAACAACACTCAACCGCTTCGGACTTCTAGCGCAAACCAATAATCGACGCTATTAAGC  
TCTTGTGCAAACTGCTGGCATGCCTGTGCTAGCTCAATCTCTTAACTCCGAATCTGGGA  
ACAGTGCAACGATCGCGTAAACTGCTGGAAGAAATTCTAAATCATTACAATATCGGTAT  
TCGCCGTGAGGATAATGGTGACTCCTTTCTCAACCCTGAATGCCAACTCGCCACTACAAT  
TGCATATCGTTCTCAGAAAAAGGGTTATGACCGTCGCTTGAACGATAACCTGAGTCATT  
CACTCTGGACGATATTTTTACTGGCAAACCCATTCTCAGACTGCACCTTCTGAGCTTCA  
ACTTACTGGTGAAGTCTGCGAGGATTACCGCCTTACTGTACTCTCCATAAACGAGGAGTT  
AGACGGATGGTACAACCTGCTCGGACAACGTGATATTAATAACACTATAGACCAGACACC  
TATCGGTAACGCCAAATCGGACTTAATGAATGAAACACCTGTCTATAAACTGGTATGA  
ACTGGTAACACAACGACCCGTTAAATCAATCAGAGAGGGCTACAACCTATGCTAAGGCCAA  
GGTACTAAGGCTGAGTGCTTGAATATCCTTGAGGAATCCACCATGAAATCCCGCCTTGG  
CATTACCGTTCAGAGATTGATGAATGCTATGCGTACTGCCCCACTGAAGGCTGGTATGT  
TGTATTGATACTCTCACCTTAGATGATGATCGTACTAAGGACTTCTATGCTGACCCCAA  
TGCTCGTCGTGACTATTACCGTGTTATTGGCCGTATGGTTCTCACTCCCGAGGGTTCGGTC  
GGTCCATCATTCACTTCGGACTGCTATCAGTAATTTTATATGCCTGAGTATGGCACCGA  
GCATGGCCCTTTACACTTTCTCGCAGAGCATCTTATAACCCACACTTCTTTGGGTTCTCT  
CGACTCTATCTTTAGTGATCTGGTGTGTAATAATCGGCAAAAAAATCGCTTGCAAAACAA  
ATCGCCTTATCGTTACTCTATGGCCATCGCAGTCCAGTATTCTCAGGATGCTCTCTATCG  
CGCTGGTTGGCTCTGGCCTGTCGATCCGAACGATGAACCGCTTAAATTCACCTCGTACAT  
GGCTGTAGGCTTCTACGTTGCTAAATACGTTTATAAAAAATCTGATGTTGACATAGCCGC  
AAAAGGCTTAGGGAATCGAAAATGTAACGCTACATTA AAAACGCAGATGGCTCTTTGAAC  
AAAGAAATTATCTCGAATTCGAATGACCCGCAACTTCGGGATGAACCTACTCCCAATGAC

GACGCTGACCGCGGAGCGTTTAAACCAACTTACCCAAGTGGGTTACCACGTGACCCCGTT  
CAAGGACATCTTGAAGCAGAACGGCAAGAATGAACTGCGATTGAGGCTGGCAATGCAATC  
AGTAGCCGACGTGTTGGAGGCGCAACCTGTGACGACTAATCCGCTAAAATTCATGCGCAA  
TTTGACTCGATCAATAGGAGCGTCCATCCTACAGAGTTTTATCGCTTCAATGACGCAGAA  
ATTAGCAAATACGGGTATTTCTGGTGTGACTAAAACTACGATACTAAAGCAGGAATGGC  
TGTTGCTGACTTCCGACTTAAATCGAAGTGGACTGCTGGTGGAAAATGAAGAGCTCCAAT  
CCCAACATAAAGAAGCTCGAGGGCGTCTTCTGCGCACCCCTTTCGCCATCATCTCAACGTC  
GTAGCAAAGACTGACGCGCTTGTGAAGAAATATGGCTCAATATGATCGGCGCTCTTCTT  
AAGGACTGGTTCGCTATGAAGAACATTTTCGTACATGGCAAAGAATCAATGCTTGACATT  
CTAAATGAACGTGGCGTATTATCCACCTTGCCAAATGGCTGAACTTACCAAGGAATCAA  
AATGACAGCAAATGAGGATGCAGTAGCCTTTCAAACGATTATCGTCTCCATCAAACCTTAT  
TCAGGCAACTTCTGTTCTTGCCCTGACTGAGGACGATTTTCGAATTGTTAACTCCTGAAAG  
TGTATGGATTGCAACTGACCGCTCACGTGCTCGCCGCACTATTGAGGCTTGCGGCTATGG  
TCCTCTGGACTTTGTGGGATACCCTCGCTTTCCTACTCCTATTGAGGTTACTGCTTCCGA  
CATTTCTTATTATGGTCATGCCATTAACATTCAAACGGCATGGCTTATTATGGAAGGCGC  
TCAACTCACCGAAAACATCATTAGTGGTGTGCTGCCCCGGTTAAAGCCGGTTCACTCTT  
CGCCTTACCTTGCGTGTACGCGCCGGAACACCGAGTTTATTACCCAAGCAGAAAACAA  
TGCGCGTGAAAACTGCGCGCTCAAGGAGTGATGGAAGTCTAAAAAATCTGTTGCGCTCT  
CTGGTGGCAAATCTAAAGGTGCTCGCCTCTGGTATGTTGGCGGCACACAATTCTAATCTC  
TAAGGGGCTTCGGCTCCTCTATTTAATTATACAATATGTTCGATCGTACAAACTTCCGCTG  
AACGTATTGCCATGCCATCTCACGTCTGGTATTCGAAGGTGCTAGAATCGGAGGGCTTA  
AAACGATCTCCTGAACTCCTGTTGTCGCTGGTGAATCTAACGAAACTGAAATGTTAGGCG  
CTATTCGTCTTGCTCCTCTCCGGCGTGGTCTGGCTGTCTACTCTCGAGTCGACGTCTTTA  
CTTTGTGTATCCCTCAGCGTCATGTCTATGGTCAACAAGGGATTGACTATAGGAAGATTG  
GCGTTAACGCAACTCCTCTGGCTCCGGTAACTTGTTCGGGAGGCTGTGATTCTGCTGCCT  
ATCTTGTCACTATCCCGTCAACTGATTTGAGGGTTCCTAAATCCCTTCATCAATCTTATC  
TCAATATTTACAAAACTACTTTATGCCGCCGTGGTCTAATGACCCACCTTTGCTAACC  
CATCTAATATGCACGCTGAGGATTACAAATGGGGCGTTCGTGTGCTAACTTAAAATCTA  
TCTGGACCGCGCCCCTGCCTCCAGCTTCATTAAGGATAGGATATGACTACTGGCGCTA  
CCACTATCGATATTATTGGCTTACAAGCTGCCTTTGCCAATCTCCACACTTAATAGGAAC  
GTGACTATTTTCATGACTCGCTACCGCGATATTTTGAAAGACTTTGGCGGGCATAACGTCCT  
ATGACGGTGATAACCGTCCCTCTGCTCCTGATGCGCTCTGAATTTTGGGCTCCGGCTATG  
ACGTCGACGGTACTGACCAAACCTTCATTGGGTGAGTTCCTGCTGCGTCCAACAAACCT  
TTATTCATAAAGTGCCTCGCTTCTTTGTTCCCTGAGCATGGCGCACCTTTGTCTTTATCTG  
TACTCGCTTCCCCGCTACTCACGAAAGTGAATGCACTATCTCGTGGGTAAGGAATCTC  
TGACTTATACTGACATTGCCTGTGACCCTGCTCGTATGGCTAACCTGCCTCCCCGTGAAA  
TTGAGATAAAAGACCTCTGTCACTCTGCTGGTACTTGTAAATTCAAATTTGCCGAAGGTC  
GATGGTATCGTACTCAGCCTGACCGCGTGCCTTCCCTTATAACTCTCATCACAGCTTCT  
CATACTATTCAGAACTGCCGTCTAAGGATATTCTCGAACGTGTACTCTTTTGAACCGATA  
ACTATGAGGAAATCTTCCAGTCTATGCAACTTGCACACTGGAACATGCGAATTAAGGTTA  
ACTCTACTGTATAACGTCATATGCCTACTACGCGTGATGGCATCATGACGTAATAAAACA  
AAACGTTGTACGGGTACAAATCTTCATTTGTGAATGTTCAAGGTTGAACAAGCGAAGCGA  
GTTAGCTAACTTACTTAAGGAAATTCTCATGTTTCAAATTTATCTCTCTAAACATAATTC  
TCCGTTAACTTCTCAGTCTTTAACTGCTATAGAAACACCTACGGCTGCTGGTCCGACTAT  
TCCATACCGGAGCTTAGCAGCTCTACTATTTTCGCTGGTTAATTCTGACTGCTGTCAC  
TACTCATTCTGGTGTGCGCCATGTGCTTCGTTAGTGACGACTCCAATCCTACTGACAATCA  
GGTCTTATCGGTCTCCGCTTCTTTATCTGGCGTACCATCTGATGCTATTGCTATTGGTAT  
TCGCTTTGAGGTCGCTGGCGGTACCGTCCCTACTGCTCTCCCTGCTCTTGACTCTGCTTA  
TCCGGTGGAAATCTTCACTTCTGGCGCTGCTCTGGCATGTGAAGACGCCGTATCCATTCC  
GACGCAACCTGTTACTGCTGTAAATGCTGTATAGCCTTATATCCTTATCAGGGCCAAATC  
TTGGTCCGCTGGCGTCTGTTTCGGCCTCTTATCTGTTAATCAGGTAACCGGGAAACTAC  
TGTAATCCAACCTCTTAAATCAGGTCTAAGCTATGTTTCGGGGCAATCGCTGGAGGTATTG  
CCTCCTCTCTTGCTGGTGGACTACTGAACAAAGCATTCCGGTGGCGGTTCTTCCGCTCCCC  
AATCTGGCGTACAAGGTAATGTCCCTCGCTACTGACAATAATGTAATGGGTGCTAATGATG  
CTGGTATCAAATCCCCTATTAGGGTTCCTAATCCTTCCATTGGTCAACGAGCTGCTCGCG  
TACCTATATCGGGCCTTCTGCCGATACTGGCACAGACGCCCTATCTTCAATCACTGGTG  
CTTGCGTTGATAAACTTATGGAAAAGAACGGAATGTCTAAAGCTGTTGCTGCTAAAGGTA

TGGATACGAAAGATTATCTTGCTTCTGCGTTCCCCGAACTCAACCCGTTGGAACGTTCTG  
GCGCTCGTGCTTCTTCTGCTTCAATGGTTGATGCTGGATTCCAGAACCAAAAGGAATTA  
CTCGAATGCAGCTTGACAATCAAAATGAAATCGCTAAGATGCAGCACGACACTCTAAAGG  
ATATCGCGGGTGTTCAGTCTGTTACTTCTCGGCAAAATACTAAGGACTTTGTGTTTGCTC  
AAAACGAAATGCACCAATACAAACATAAAGAATCAATGTCACGCGTTGGCGCTATTCTCG  
AAAACACAAGCCTCACCACACAACCACAAAATACTGACATTATGCGGCAAATGCTTACTC  
AGGCTCAAACCTCAGGTCAACACTTTACAAATGACCAAATCCAAGATTTTATTTCGAAGGG  
TCGGCGCTGATATTGATGCTGTTCTGTGATAAACTGATCGAACACCTGTAGAAAAGGACC  
GCTCTAAGCAGGAGGTCCAAAACCTCTCGTTACGCTTCGTCACAAGTCGGTAAAAGCGCCA  
AGGATGTATCAAATGTCATTAGTGACGCATCTTCTGGAATTCTTGATTATTTTCGTGGTG  
TTGATAGAGCTGTCGAGGATACTTGGAAACAATTATTTCAAAGATGGCAAGTCGGATGGGA  
TAATCTCAAACCAACGTACCAAATAA

>NewGenomeName\_86

ACCTTGACATAACCATAACTACATATCTATCATGCCTCCAAATTATCGGAGGCTTTCTTA  
CATGCAACAAGCTAGTGACTTCTACAACAACCACATATCGACGCTATCAAACCACTCGT  
TGAAACCGCTGGTATGTCTGTGCTTTGTCAATCTCCACACCTCCGTATCTGGAAACAGGT  
AAATTCCTCGTATCAAACCTATTGGAAGAAATCCTTGCTCATTACACCAATGGCATCCGCCG  
TGATGACAACGGCGACTTCTGGATGAATCCCAATTCTCAACTCGCAACCACAATTGCCTA  
TCGTGCCCATCAAAAAGGACACAACCCAAAAGTCATTCAATACCCTGATACATTCAATCT  
GGATGACATCATCCGTAAAAGCCATTACCACAAAACGCTCCTGACGAATTAACACTCTC  
CGATGAAATCGGGGAAGACTATCGCCTTACAATCATCTCTCTAATCGAAGAAATGCAAGA  
AATCTACGACGTGCTCGGACAACCTTGATATTAATAACCCTATAGACCACAAACCTATCGG  
TAACGCCACTGGAATCTACTCTATGAAAAACATGTATATAAACACTGGTATGAGCTGGT  
ATCAAAAACGACCCCTTAAATCAATCAGAGACGACTACAACCTATGCAAAGGCTAAGGGTAT  
TAAGGATGAATGCTCGAAAATCCTTGAGGAATCCACCATCAAATCACGTAGAGGCTTTAC  
CGTACAAAGACTAATGAATGCTATGCGCACTGCCACACAGAGGGCTGGTACGTTGTATT  
CGATACTCTTACTCTCGCCGATGACCGCCTTAAGGATTTCTCTGACAATCCCAATGCTCT  
CCGTGACTATTTCCGTGATATTCGTGCTATGGTTCTCACTGCCGAGGGTCTGTTCTGTCCA  
TGATTCATGTTCCGACTGCTATCAGTATTTTTGTGTGCGTGAGTATGGCACCCAGCACGG  
CCGTTTACATTTTACGCAGTGCACCTTATGCGCACACTTCCTCTGGGTTCTATCGACCC  
TAACTTTGGCAAGCTGGTGCGTACTAATCGGCAAATAAATAGCTTGCAAATACATGGCC  
CTATGGTTACTCTATGCCCGTCCGCGTCCGGTACTCCCAAGACGCATTTTTCGCGCGCTGG  
CTGGCTATGGCCCGTTCATACAAAGGGCGAACCTCTTAAAGCTACCTCGTATATGGCTGT  
CGGCTTCTACGTGATAAATACGTTAACAAAAAATCAGATATTGACATGGCCTCTAAAGG  
TCTAGGGCATAAAGAATGGAACAATCACTCAAACCAAATCAACCTGCTGCCAAGAA  
AATTTTTCGCATCAGGATGTCTCGCAACTTCGGAATGAAGCTGCACACAATGAGTCACCT  
CTCAGCGGAAACTCTAGTCCAACCTGACCCAAGTGGGTTACGACGTGACCCCGTTCAACAA  
CATCTTGAAGCAGAACGCCAAGAAAGAGCTACGATTGAGGCTGGCAAAGAAATCTGTGCGC  
CGACGTTTTGGAGGCGCAACCTGTGACGACCAATCTGCTAAAATTCATGCGCAATTTGAC  
CCGACAAATCGGAGTGTCCAATCTGCAAAGTTTTATCGCTTCAATGGCAACGAAATTAAC  
AAGTATGGATATTTCTGATGAAACCAAAAACCTACGTTGATACTGCAGGAATTACTGCTAC  
TCACTTACGAATTAATCGAAGTGGACTGCTGGTGGAAAATGAAGAAATTCATCTGAAC  
TTAAAAAATTCGAGAAGCTCTTACTTCGCCACCTTTCGCCATCACCTGAACGTACTGGCA  
AAGACTGACGCTCTCGACGAGGAAAAATACCTAAATATGCTAGGTGCTCTCCTCAAGGAC  
TGGTTCCGTTACGAAGAACATTTCTGTACATGGTAAACAATCAATGCTTGACTTATTAAT  
AAACGTGGACTATTATCCACATCAACAACCAACCCAAAAGGAAATACAAAATGAACTCTA  
ACGAATCTGCTGTTGCCTTCGCTACTGCTCTCGCATCTATCAAGCTCATTAAAGGCTTCAT  
CTGTGCTGGACCTGACCGAAGACAACCTTCGATTTCTTAACCCGTGACCTTGTACGGATTG  
CCACTGACCGCTCCCGTGTCTCGCCGCGCTATTGAGGCTGCGTATATGGTACATTGGACT  
TTGTGCGGATACCCTCGCTTTCCTGCTCCTGTTGAGTATATTGCTGCCGTCATTGCTCATT  
ATGTTTCATCCCGTTAACATCCAAACAGCATGTCTTATTATGGAAGGCGCCGAGTTCACCG  
AAAATATTATCAATGGTATTGACCAGCCAGTTAAGGCCGCTGAACTATTCGCTTTTACCC  
TGC GTGTACGCTCCGGAAACACTGACCATGTTACACATGCAGAACTAACGTACGTGAAC  
AATTACGTGCTCAAGGAGTAATGTAATGGCTAAAGGCTCTCGTCGGCGTTCCGCCGTC  
CTCTAAAGGTGCTCGCCTCTGGTATGTTGGCGGCACACAATTCTAATCTTCTAGGGGCTT  
CGGCCCTCTATTTAAGGATATAAAAATGTCTAACGTTCAAACCTCCGCTGACCGCATTCC  
TAACGACCTTCTCACCTCGTCTTCGAGGCTGGTAAAATCGGCCGTTTAAAAACTATCTC

CTGGACTCCACTTGTGCTGGCGACTCATTGAAACTGAGATGGTAGGCGCTATTCGCCT  
TTCTCCACTCCGTCGCGGCCTTGCCGTCGACTCTCGCGTGGATATCTTCTCTTTCTATAT  
TCCGCATCGTCATATCTATGGTCAAGAATTCATTGAATTCAGGAAAACCTGGCGTTAATGC  
CACTCCTCTCGCACCTGTTACTACTGCCTCTGGCTGGGATGCTTCTGCCTATCTTGGCAC  
TATCCATCCTCAAACCTCAAGGTTCTAAATTCTTACATCAAGGATACCTTAATATTA  
CAACAACACTTTAAGCCACCGTCGGATGCTGACCTTACATACGCTAACCCATCTAACAT  
GCCTGAACAGGATTATAAATGGGGCGTTCGTGTCGCTAACTTAAAATCTATCTGGACCGC  
CCCCTTACCTCCTAACTCTAAAACATCAGAGACTATGACCACTGGCGCTAAGTCTATTGA  
TATTATGGGCCTGCAAGCTGCTTATGCTAAATTGCACACCCAACAAGAACGTGACTACTT  
CATGACTCGCTATCGCGATATTATGACAGACTTCGGAGGTCACACCTCCTATGACGGTGA  
TAACCGTCCTCTGCTGCTTATGCGCTCTGAATTTGGGCCTCTGGCTATGACGTCGACGG  
TACTGACCAATCCTCTTTAGGTCAGTTCTCCGGTCGCGTCCAACAAACCTTCAATCACAA  
AGTACCTCGCTTCTATGTACCTGAACACGGCGTCATTATGAATCTCGCCGTTACTCGCTT  
CCCTCCAACCTCATGAAATGGAGATGCACTATCTTGTGCGTAAAGAATCTTTAACCTATAC  
CGACCTCGCCAGCGACCCTGCCCTAATGGCTAACCTGCCGCCGCGCGAAGTATCCCTTAA  
GGAATTCTTCCACTCCTCGCCGGACTCCGCTAAGTTCAGAATTGCCGAGGGCCAATGGTA  
TCGCACGCAGCCTGACCGCGTCGCATTCCCTTATAACGCACTTGACGGCTTTCCTTTCTA  
CTCTGCTCTGCCGCTACTGACTTAAAACAACGTATCCTAGTTAACACTGATAAATACGA  
CGAAATCTTTCAGTCTATGCAACTCGCACACTGGAATATGCAAACCTAAATTTAATACTAC  
CGTCTATAGACATAAGCCTACGACTCGTGATTCAATCATGACGTCATAAAGCCTATAACG  
TGACAGGGGGAAAAATTTAATTTTTCGCCCCCTGTCAGGTTGAACAAGCGCAAGCGCGT  
TAGCTGCCTAACTTAAAAGGAAATTCAAATGTTTCAGAAATTCATCAAAAAACATAACGC  
TCCGTTAACTTCTCAGCCCGCTATCTCTAAGGCTGTTACTCCATCTATGACCGCCGCCCC  
TCTTGTACTACACCTCTCGGCGTGTCTTCTACTCAATTATTCTTGGAGCTTACAACCAC  
TGCCGCCGCTGGCGGCTTCGCTGACGCTATCCGCGTAGACAATTCTAACCTACTGATAA  
TCAGATCTTCTCCGTCTGTGCTCACATCACATCTGACGTGGACCCTAAATATATTGCGTG  
CCTCGTTCGCTTTGAGGTCAGTCTGCTGGTACCACTCCTACCGCTATGCCTCCTGTCTATGA  
TGCTTACCCTATCGCTGGTACTATGACGCTGGCTCTTATACTGTTGAAGACTGCGCTAC  
TATTCCTACTCACGCTGTCTTCTGGCAACGATGTATATGTGCGCCTTATGCTTTTCTC  
TCGCATGTGGCCCGTTGCAAAACTATCCGGTATCGCTTCCCTAATCAGGTAACAAGGA  
AGTAACCGTTCTCCAACCTCTTAAATAAGGTATTCTCTATGTTTGGTGAATCGCTGGCG  
GTATCGCCTCATCTCTTGCTGGCGGACTCGTCAACAAAGCCTTTGGGGGCGGTCAATCCG  
CCTCCTCTACTGGCGTTCAAGGTGATGTCCTCCCTTCTGACAATAACGTAATCGGTGCTA  
ATGCTGCTGGTATCAAATCCGTTTTCAAGGCTCTAATCCACCCAATGGCCAACAAGCTG  
CTCCAATGCTATTTCCGGCGTTCCTCGCTGACACTGGCAAAGACGCCCTATCTTCAATCA  
CTGGCGCTGGCGTTAATAAACTTATGGAAAAAATCGGACTATCTAAAACCTGCTGCTGATA  
AAGGCAAGGACATAAAGGATTATCTTGCTTCTGCATTCCCCGACCTCAACTCGTGGGAAC  
GTGCTGGCGCTGGTGTCTCGTCTGCTGGCATGGTTGACGCTGGCTTCCAAAACCAAAAAG  
AATTAACCCGCATGCAGCTTGACAATCAAAAAGAAATCGCTAAGATGCAAAACGACACAC  
AAAAGGATATCGCTGGTATCCAATCTGTACATCCCGGCAAAATACTAAGGATGCTGTCT  
ATGCTCAAAACGAGATGCTCGAATATAACCAAAAAGAATCTATGTCACGCGTTGGCTCTA  
TTCTCGAAAACACAAGCCTCACCAACAAGAACAACCTTCTGAAATTATGCGGCAGATGC  
TACTCAAGCTCAAACCGCACGTCAACATTTTACAAATGACCAAATCAAAGAACTTACAC  
GCAAAGTTGGTGTGATATTGATTCTGTCCGCGCAACACTGACCGTACACATGTAGAAA  
CTCAACGCTCAAAACAGGAAGTTCAAAACTCTCGTTATGCTTCCCTCACAAGTCGGTAAAA  
CCGCTAAGGATGTCTCTAATGCAGTTACTGATACAGCTAGTTCTATTGTTGATTATTTTC  
GTGGTATTGATAACAAAGTGGCAGACGCTTATATCAACTGTTTCAAAGATGGTAAATCCG  
ACGGAATCGGGTCAACATCAAATAA

>NewGenomeName\_87

TTGTTGACATTCCCTAAACCCTTATGAGACTCTTGCTTCAACGATTGAAGTAGGAGTCTT  
TATTATTAACCCGCTTACCGCTTGACTCATCCGATTCTCGGCTCTTGGTTGTTTAAAGTG  
CCCCATTTATATCCTTTATGAGCATCTTCATCACGGTCGTCTTATCAAGGTTTCGCGCTGC  
TCGTGATTTGTCCCGCGTCAGCAGCTTATTGCTAACCCCTAAAACCTGCTTTGACGTTGT  
TATTGCTGAGATTGACGTTACTTATTGTTCTGTCACTTATTTGATTATGAGGCTGAGGA  
ATATACCGAGTGTGATTCAGAAACTATGGATAATATCCTTGCTTATATTAACCTCTCCTCA  
TTCCCTTCGCTCTGAGGAGGATTATCCGTTGATGTTGACGATATGGCGTGGCTTTATGA  
AATTGCGGAGTAAGTTATGGAAACTGTTGTGCGAAATTTATTACGTTGGCTGTTGTTGC

TCTTATGCTGTATGGAATTGCCCGCTTAATTCGGAGGTTCCCGTGAAGTATTTTAGTCTT  
GTGGATGAACATTATGCTTAGTGCCCTGATACGAGGATTTTGCAGATTACTCGTAGCCGT  
GTTTCTGACCCTCGTTATGAGCTTCGCTTTCTTACTGATGAGGAACATTTTGCACTTT  
GATTGGTTGAAAAATCGCCCACTTATATTAAGGCTTGACAGGCCTTTAAAATACCCTCT  
ATATTGCCCTCATAGGTTCACTCCGAGGGCTTTTTTGCATGGCTTCTGAAAGCTTCTCTG  
ATGTTGTTAAGTCTGTTTGGTTCGCACGCTACGGCTAAGCACGCTCATCTTCGTATGGCTG  
TTCAGGTTGATAATCGTAGTCGCCTTCTTTCTGCTTTGGTTTACCAGTGGGTAAAGCGCC  
TTTCCGAAGAGACTCATTGGATGATGAGACTTATGCCCTTATGAATCTCAGACTGGCC  
TTTTGGAAGATCATATGGCACTGTTTCGGAAGTGTGCAGCCCACTTGATAATACGAACA  
CTATAGACCACCGTACCCCTTTGGATGCCGAATGTGTTTTCCCGTTTAAAATGATTTGCC  
CAGGCGTTCGCTACGGTAAAACGTTGAATTCTCTTTGGACTAAGTATGTTGTTCAATGGC  
CTGAGAAGTTAATTCGTCAAGAGTTAGACATGGTTAAGCCTTATCATTAAAGGATGAGG  
TTGCTAAGTAGATGGAGAAGATGCAGGAAAAACACGCAAAAATCGCATGACTCAAAAAG  
TAATTAATGAGATGCGTATTGCTCACCAAAGCGCTGGTTTTTCGTATTTGATACGTTGA  
CACTTGCTGATGATCGTTTGCAGGCTTTTAAATGAAAACCCCAATGCTCTTCGTGACTATT  
TCAGGACTGTTGGTCGAGCTGTTCTGCGCGCTGAAGGTCGTTCCGGTTAAGGATTCCTTCA  
ACGATTGCTATCGCTATCTTTGTGTGCCGGAGTTTGGAGGTCAGCACGTTTCGTCTTCATT  
GGCATGTTGTGCATATGGTTCGGACGCTTCCTTTGGGAAGTTACGACCATAATTTCCGGTC  
GCAAGGTACGTAATTATCGCCAGATTAACCTGTTCCGTGGCATGTGGCCTTATGGCTTTA  
CGCAACCGATAGCTGTACGCTATAAACGTGTTGCTTATTCTCGCAAATGTTGGTTGTGAC  
CTGTTGACAAATCAGGTAAAGCAATGCAGAGTAAGCCCTATCAGGCGGTTCGCATGGTATG  
TGACCAAATATGTAGCTAAGCAATCTGACCAGCGTCAGAAAGCTATTACTGAGAGACAAA  
AAAAATGTAAGAATCGACTTATGGCAATCTATCTGAAAAAGGAATTCAGAGTTCGCAGCA  
GCCGGCAACTCGGAATGGAGTTACCGTCGATGGCGCATCTCAGCAACAAAGTGCTTCTGG  
AGCTGAGCCGAATCAGCTTCGATTCCAGCCCTCTGTATCAGATAGTGAAAGAGAACGCCA  
AAAAGCAATTGACCTTGAACATCGGCCGCGCTGCCTTTGCACGTCATTTTAGATGTGCGCC  
CGGAAGTGAGAAGTATGTTGAAAAATATCCGTCGTTTGTATGAAAAAGACACCCGAGTTCA  
ATTGGCAGAGTTCTATCGCTTCAATGACGGTCACCTTAAAAAATGGGGATATTTCTGATG  
AAGCACGTCAATACATTATTGATGCAGGAATTACGACTTTTGATTTGCGAGCTAAAGCGA  
CTCAAACCTTAGGTGGTAAGTGACCCGTATTTTTTTCAGGAGAAGATTCATGCTGAGCTC  
GACTCGTTACTACGCAAGTTATCGCGCTACTTTGACTAAGCAGCTGATGTATTTGACTAC  
AGCTGACTTTACCAATGATGATGAAAAATGGCTTAAATGCCTTTGGTAATTTGCTCCGTCA  
GTGGTTTCAGATTGAGGATTGGAAGGGCAAGCATAAAAAATTGCTTGACGATTTAAAAAA  
ACGTGATTACATTTGAGCTGTTTCAAGGTTTCTTACCATTAAATGTTAGGAGAATGTTA  
TGTCTAATCTTGTTGCTACTGATGTTAACTTTGCTAGTTCTTTTGTGCTCTGAAGATGC  
TTCAGGCTTCCGCTGTTCTGGATATTACCGAGGAGGATTTTGATTTCTGACTGGTGATA  
AAATTTGGATTGCTACTGACCGCAACCGTGCAGCGTCCGGTTAAAGCCGCTGAGCTCT  
TGCGGTACACCTTGCAGTGTAAAGGCCGATTCAAAGAAACGGCTCTGAGCGCTGAAGACA  
ATGCTCGTCAGAACTTCCCTGCAAGTGGAGTAATGTAATATGAAGAAAGCTCGTCCGTTCC  
CCTTCTCGTAAGACAGGCGCTCCTCACTGGTATGTAGGGGGTTCTCAATTTTAAATTAACG  
GGGCTTCGGCCCCTATAAGGATTCTTAAATGTCAAACGTGCAAATTTCCGCTGAACGTAT  
TCCTCAGGACGTTTCTCATCTGGTTTTTGTATGCAGGCAAAATTGGTCTTTTAAAGGTTGT  
TTCTTGGACTCCTGTTGTTGCAGGTGATTGTTTTGACCTTGATATGATTGGCGCTATTCG  
CCTTTCCCGCTTCGTTCGTGGCCTTGTGTGGACTCTCGTGTGACCTGTCCACGTTTTA  
TGTCCCTCATCGTCGTGTATATGGTGTGAGCAGTGGATTGCTTTTATGAAGCAAGGTGTTGA  
TGCTGCTCCTTTGCCCCCTGTTCAAGTGTCTCGCGGTAGGTATAGTGCTCAGTATCTTGC  
TACTATTCCGTCTAGTAACTTAAAGGTTCCCTAAGTTTCTTCATCAAGGTTACCTGAACAC  
TTACAATAATTACTTTAAAGCTCCGTGGATGGATGCCCTGACTTATGCCAGCCCGTCTAA  
TATGGAGGGTGAAGGTGTTTCGTTTTGGTGTTCGTGCATGTAACCTTGAAAATTTGGAC  
TGCTCCGCTTCTCCGGATACTGAAACCTCTCATTCTATGGAGACTGAAACCAACTCCAT  
TGACATTATGGGTTTGCAGGCCGCTTATGCACAATTACATACTGAGCAGGAGCGTGATTA  
ATTCATGACTCGTTATCGTGATATTGTTAACGAATTTGGAGGTAGTACTTCTTATGATGC  
GGATAATCGTCTTTGCTTGTATGCATTCTGAGTTCTGGGCCTCAGGCTATGATGTTGA  
CGGCACCGACCAAAGCTCGCTCGGTAAAGTTCTCCGGTTCGTGTCCAGCAGACGTTTAAAGCA

TTCAGTACCGCGATTCTTCTGCCCTGAGCATGGCACTATGTTTCACACTCGCATTGGTCCG  
CTTCCCGCCGACTAATGAAATGGAGATGCATTCTTAGTTTGTAAAGAAGATTTGACTTA  
GACTGATTTGGCTTGTGAACCTGCTTTGATGGCTAACTTGCCTCCTCGTGAGGTTAATAT  
GTCTCAGTTCTTCCATTCTGGAAGTGCTAGTGCTAAGTTTAAGATCGCTGAAGGTCAGTG  
GTATCGCATGCAGCCTGATCGCGTTGCATTGCCGTATAACTATCTTGATGGTTTTCCGTT  
CTATAGCGCCATTGCGTCTGATGATATTAAGCAGCGCGTTCTGGTTATTACTGATAACTA  
CGATGAGGCTTTCCAGTCTATGCAGCTTGCAGCACTGGCATATGCAGACTAAGTTTAATTG  
CACCATTTATCGTAATATGCCGCCACTCGCGACTCTATTATGACCTCTTGATTATGTGG  
GGCTTCGGCCCCCTTAGGGATATTGATTATGTTTCAAGTTTATGTATCTAAACATGTTG  
CTCTGTTACCTCTGTGAATCGTGCCTTTTCTATTGCCCTGCCGCCAATCCCGAAGTTG  
TTAATTCTGGTGAGATTGTTGCAGGTCGTTCTACTTTTCGCATTGCTTCTTCTATTGCTT  
CTGCTTCCAATGGAAGTGGTTTTGCTTTTGTTCAGATGATGGATCCGAATTCCTGATT  
CTCAGCAGGTTTTCTCTGTTGCTGCTTCGTTGTCCTTTAGTGTTGATTCGAATTATATTC  
CTTGTGTTGTTGTTTTGAGAGCACTGTTGCTCAGCCTACCAGCTTTGATATTGCAACCG  
CTGATTTTATTCCGGTTCAGGCTTCTGCCCTTTCTCCTTGTGCGCTTAGCCTTCGCGATT  
GTGTTACCGTTGATGTTAAGCCTCGTACTGAAGGCAATAATGTTTATGTTGGTGTGGTTT  
TCTTCTGCTGCCGCTAATGCTGGTAATGTCACTGGTGTGTTTTCGAAGGCTCCGGTTT  
ACCACGAAGTTACAGTTTTGCAGCCGCTTAAATAAAAGGCTGCCGCACTCCCGGTTAGAT  
GCCTGCCTAGTGTAGGGCAGACCGAGCCGTACGGAGATACCCGATAAACTAGGAACGTGG  
AAGGCGCAAGCCGCGTTCCCTCCTGCTAAGCCCCAAAAGGAGTTACAGCGATGTTAGGTG  
CCGTTGTAGGTGGTATTGCTTCAGCCTTAGCTGGTGGAGCCGCTTCTAAGCTGTTTGGTG  
GTAAACCTGCCGCTCAAGCCGCTACCGAGTCCACTGGCCTTTGTAATGGTCAAGGCGTTA  
TTGGTATGGATCAAGATGCAGGTATTCAGTCAGCTATTCAGGGCTGTAATGTTCCCAATG  
GCCAGATTCCTGCCCCACGCAGACTGGTGGCGTTATGTCTGATGCTAAAAATATGATTA  
AGAATGCTGGTAAAGATTTGCTTAATGGCGTTATGACCGCTGGAAGTGATCGCATTAAGC  
AGGCATTGGTTGATAAGTTGAGTGGTAACGATGCAAGGAAACAAGGACAAGCAACCCGTG  
ATTACTTGGCTGCGGCCTTCCCTGAGCTCAATGCATGGGAACGTGCTGGAGCTGGTGCTT  
CCGGTGCCGGATTGGAGTCTTCCGGCCAGAATCAGCAAAAGGAGTTGATGCGTATGCAGC  
TGGATACTCAGAAGGATGTTGCTAAGATGCAAATGCATAATAATTTGCAGATTGCTGGTA  
TTCAGTCCGCTACTTCTCGCGAGAATACGAAGGATTCAGTTTATGCTCAGAATGAGATGC  
TTAAATTTAATCAACAGGAGTCACAGGCACGCGCTGAGTCTATCCTCGCCAACACTTACC  
GTACGGCTAAGCAGGCTGCCCATGAAATTAGGAGAATGGCCCTTACTCGTGCTCAGGAGA  
CTGGTCAGCATTAACTAATAGTCAGATTATGGCATTGGAGAAAAAAGTTTATGCAGAAA  
TCGGGAAAATTCATCAAGATACTCAAACGCTCTTCATGGTAGCTCTCAAGTTACTGCTG  
CGGCGAAAGATGTTACGAAGATGTTTACCGATGCCACTTCTGGTGCTGCCGGTTGGGTCT  
CTCAACAGTGGAATTCCTTTCTTTAAAGATGGCAAGTCTAATGGTATTCCCCTCAATACCA  
GAAAATAA

>NewGenomeName\_88

CGATTGCCAGTGCTTACTAGTCCATCACCAGTTTAGCCTATACACAGAATGTCAAGATGG  
ACCAATCGCTCGACTTCGCCCACGATTCGTTGAAGGCGGGGGCCGGAGGCCAGCGGTT  
GGCACCATCCCACGAGTGGCGCCCTTACAGGTGGGCACGTCATCCGTACAGGGGGGGACG  
TCATGCTTACAGGGGGGTAGGTCTTAAAGGGGCGTCCCGGTACGGGGAGTTGCGTCACGC  
GTACAGTGGGGTACGTCACTGCCAATCACAAGCTGCTACGTTGCGAAAGTGACGTTTCCA  
AAATAGGGGGCGCCCGCTCTCTGAATATTTAGCCACATATCGGTCCGGCAGTAGCTATA  
CGCATGGAGATTCGGTTTATGACGCGGGAACGGCCAACAATCGGCCGCTGGGGCCACTGA  
ATTGGTGCTTAGCGGAGAGGGGCAAGCTGGGCCAGGTGAGCCGGGCAGGGGCAAGTAAT  
TTCAAAGAACGCTCTCCGATAAGATACTCCACTCGGACCATCGAGGGTGCTCAGGGCAC  
CAAGAAGATCACGGGCGATCGAAACCCCTCACTGCAGCGGGATCCGGATTGGTATCATTC  
GAATTACAATCACTCTATCGCTGTGTGGCTACACGAGTGCTCACGCTCCCAGCTAAAAT  
ATGGAACCTGCGGACGATTCGAAAGTACTGGTTTCAAGAATGTGCCGGGCTTGAGGATCG  
ATCAACCCAGGCCTCCCTCGCAGATGCGATCGTGCAGACACTCCGAGGACAGGGTACTCG  
GGCGAAAAGACACCTTGATAACCACTACTCCCACCCGACCCCGGACCGCAAAAAGGCGTA  
AAAGATTGTAAGACGGCTAGACTAGCTCGGAGACCGAGAGGCAGAAGTTACTCCTTCAGA  
AGAAGACGATGGCACCACCTCAGGCGACTTCGACGAAGATATAAATTTGAGATCGGAGT  
AGTCAGCGGTATCGTAGACGAGGTTTGGGGAATGCCTTTCAGAACCCCGCCCCGGTACG  
TATACTGCGACGCTGCCGAACCCCGATCAACTATCACTATCGGCTTCCAAGGGCTCTTC  
TGCTCACGGAAGGACTCATTGTGCTTAAAAACAGCACAGCAGGGGGCTATGTAGACCAC

ATGTACCGGGAGAGTGTGCGCAATATATTCGAGAACCTTAAAGCGTTCGTGCTAGCCTCA  
ATGAACCTGACATAAGGGAGCAAGATCGGAGGCCAATCACCGGTGAGTTGATTACGGAC  
GGGTCTAGATATCAAGCCGCCGATAATGGGACTAATTGCTGGCTGTCGCTAGATAATAAC  
GAGTCTCCGTTACACCATCGGCATTGTGGAGACGGGCCTTTATGAGGTTGCCGCCTACG  
GACTCTTGACGGTTCTTTTATCACTCAAAGCAGATGACACTGCAAGACATGGGGTCGCCGG  
TGTGGGGGCTGGCGCCAGTTCCGACACATTA AAAACCCGGTTTCCGCTCCTTGCCACTAAA  
ACTTAGGGATCTTTCAGCCCTGCGGCGAGTCTTCTCTTTCAGGGATAGTAACTCCC GCGT  
AGAGATAATGTTATGTACAGCAGCGATCACCCGAACCGGGTGCAATAAGGCGGACAACCG  
ATGAAGGGGGGCATTGCTTATGCGACCGGGAAAGCGAGACCCGACGTGCAGCATTACCT  
GCTATGCCCCCAGACCCACTGATCATCACCGCTACTACAGCGTAGGGCGCGCAAGTTTGC  
GGCATGATTAACAAGCAAGCTTTGTGATCATGTGTGTCGCGGATATGCGCTTTGCTATACTC  
ACAGTACACGGTGCACAATCGTCTTTTCTCAAGCGCAACGTTCTTTTTCTAGACTGTAC  
TTCAACCACCGTAAGGCGAGAGGAGCCGGGGTACCCAGGGCAAGAGATGGCACATGCTG  
GTGCCGGACGGCACGGAGGCCATCGCCGACAGCTTCATGTCCACACCCGCATCAGAGGTG  
GACACTAATTGCGTTACGTTCTACGCATCGCCAGGCACAAATAAGTAGCAACAGTACAAG  
TCCGGCACAGATCCCTACGCGCTAACCGAGCCGGTAATGATCAGCGAAGCAAGGGAAATA  
CTACGCTTCCCGTATTTCTGGGAGCTTGGTAACAGAGAGAGGCCATAACCCATGGGAATTC  
AACTGGGCGACGACCACCAGGTA CTGGGAGAGCCAGCCCTGAAGAGTTGGGCGGTCTAAC  
GCCCCCCCCCTTAAACCCCCCTGGGGGCGAATCCCCCCCAGGATTCCGTTTCATATT  
GCACACAATAAACGCGGAAATTAGATTAATAGCACTCTA

>NewGenomeName\_89

CTCTACCTACTATACTTGCAAATTATCGGCATCAAATGTTGCCATTAACAGCATATAATT  
TGTTATTTGATGAGTATTTTGGTGATGAGAATCTCCAGGAGTCTTTACCTGTGTGGACAG  
GAGATGCTGAGCCTAAGGCTGATCCGACTACTGGAGAAGAATCTCAAGAGGATGATGCAG  
TTCCTGATGTATATACTTAATGCGTCGCAATTAGCGAAATGATTAGTTTCCTTCTGCTC  
TTGCGGGTTTGCAGAAAGGTCCGTCTATTGGAATAGGTATTACAGATGGAGATTCGGGAC  
GTTTTCCAGTTCATGGTTTAGCGATTAGATGTTAATTGGATGATTCTTCTGAGGATCAGT  
GTAGTTTTGGCGTTTCTAATGTAAACGGGTCATAGAGATGGGTTTGTGCAGAAGGTCGTT  
TGACTTTTGCAATGGGTAGTGTTCCTGTTGGTACTACTGGTAATTTTCTTATTCATAATG  
TTGTGTCTCCATCCTATTTTAGTACGACCGTTGCCCAAACCTGGTAGGCCATCCGTTCTT  
CGTCTCCGCCTTTTGTACGGGTTATTTTCTGTTTATGTTGATTTTTCGGCTTCATCCT  
CCGATACTATTTATTCGCTTCGTAATGCGATTACTTCGCAACAGTGGTTTGTGAAGAGTG  
CTCGTTATGGAAGTAGATATGTTGAATCTGTTCAAGGTCATTTTGGCCTTCATCTTGGTG  
ACTATTTTGTCTCAGCGACCAACCTAGTTAGGTGGATCTTAGCCTTAAGTTTATGTTAATC  
CTGTGGTACAGA ACTCATCTACAGATTCAGTTACTCCTCAAGGAAATCTATCTGCTTATG  
CATTATCTTCAGATACTAAACATTTGTTTACGAAGTCTTTTGTGAGCAGGGTTATGTTA  
TAGATCCTCTTTCCGCTACAGCGGATATACTTATCAGCAACGTTTAAAGCGTCAGTGGT  
CAAGATTTAGTCGTT CAGACTATTATTGGCCTACTTTTGTCTGATTTTGGAGCGCAGCCTG  
TTTATAATAAAGAGTTTTATTGCCAAGGAGATACTGCTATGGATCCTACTGCTTCTGAAG  
TAAATGATATGCCTTTTGGTTATCCAGTGC GTTATGCGGAGTATTGTTATATGTCTTCGA  
ATGTTACTCGACTATTTAGATCTAACGCTACAGGTTCTCTAGATTCTGGGCATTTGTCTC  
AGAATTTTGTGTATTAACCACTTTGTATGAGACTTTTCGTCGGAATAATACGCCGAGAG  
ATAGAGCGTTAGCAGTTCCTGATTAGCCTGAATTTATTTGTGACTACTACTTCAATTATC  
TTTGTATTAGGCCTATGCCTTTGTATTCTGTACTAGGTTTAAAGAAGGATTTAATATGCCA  
ACGAGAGTAACCCAGTGAATGCTAGAAGATCAGCGAAAAGAAAATAGTGGTCAATGTAACG  
TAGTGGAAATTGAATAACTGTTCTGAAGCGAAAAGAATACATTGGGTCAGGTAAGTTAC  
ATAATTTAAGAGGCATTAAGAGTTTTCGCGGTCAATGTTGTTAGATTCAAAGGAAATGCTG  
CGAATTCGTCGGAAGTGTTAGAGGAGATGGTCTTCAAGGTTCTAATTCCACTCAATCTA  
TTGCCAGTGCTAAGCTGGCAAGGCTTCTAAATAATTTGCCTGTGCCTTCTTTAAGTAAGG  
GTTTATTTATTGGAATGTTTGGCGGTCTTGCTTCAGGCCTTCTTTCTTATAGAGCTCTTA  
AAAAGAACAATAAAGTTATGCAGGATATTGCTAACGGCCAAATGGCTTTTCAGGAGCGAA  
TGTGTAGTACCGGTGTTTCGACGGCATGAAGAGGACTTAAATATGGCAGGTTGGAGTCCGC  
TTTTAGCATGTGGGGGATCTACTTCTACTCCTCAAGCTCCTTTTTATTCTCCTGTTAATC  
CTATGGAGAGAGGACGTAATTCTGCGATATCGTTTTCGGCTAAATTTTTTTAATATCAGG  
GTTTAGCTCATGCTGATCTTCAGGGTCGTTTGTAGTTCTGCTATGAGTGTGGTTCAGTTGG  
CTTATGCTGTTGAGAATTATAAAAGGAACTATGGACAGTGTGGTGAATTTGCATATTGGT  
CTGAGCGACATGCTGGCGGGTGGTTGCCTGCTAGGCTTTTCTATTTGTTAAGAAAGTAGC



TCGTTGGAATAGCGGTTTCAGCTGGTAATTCTGTTTATGCTGTTGCTAAGGTTGCTAAAG  
GTGGTAATTTTATGGTTGCGAATTTGTCTAGTACGGCTGTTACGCGTCATATTTCTAGAT  
ACGAAGTTTCGATGGGATGGACAAGTTTATCAAGTTTAGAACGATTTACGATGAGGAGCG  
TCCTGCTCCTGATTTGGAGTCTAGGGATGAATGTCTATGTATAGCTTTTCAAAGTACAGA  
GACGACTCTTACAAAATTGGTTAAGGTCGAGAATCAGAACCGTTCTTATTTACATGCCTT  
TGCATGTGATTATACTCGTCAACCTGAATATGGAGAGGGTCCTTCGCGTTTGGATTATCA  
AGCTGATTTAGAGATTGTTGCTCGTAGTGAAGAGGCTTTTTATTCTTTACCTGAGAGTCT  
TCGAGTTAATCTTTTCAATCCAATGGAGTTTTTGTTCATGATTGGATGACCCTGCTAATTA  
TGATGAAGTTGAGAAGGTAGGTTTATTGGATCATGAGAAAGTTCATATAAGAGAATCTAA  
GTGACAAAAAGATCACAAAGAAGACGTTTGTACTGAGGAAAAATAGCGAGCGCTATCTCC  
ACTTGGCTATATAGCCCGAGCGACACAAAATATATAAAATCTTAATGGAAGGATGTAATT  
CGATGGTTGGTAGAACACGTTTGGAGCAGAGGAATAAGTAGAAGAATTTTTAGAAGAACAG  
AAGCTAGAGTTGAAAAAGGCGTAGATCATTTGGTGGTGGTTGTAGATTGTAAGGCAAAA  
AAAATGGGGTATCTTTTTAATGAGTTACTCCCTCGACCCATATCTAATATCCGTTTATAT  
CCGTTCAACATAAAGGACATCAGATAATATGTGTACTGATCCTATTATACCTATAGTTCA  
ATATATAGTCCCAGTGAAATCTTCGTTACGTGCTGTGGATTGGTCTAATTTTAGGTCTAA  
GTTTAAGGCTTCTCGTTTTTTTTTCGAGAAGCATGTTGTTTCGTCGTGCTGTAAGTAATGA  
AGACGAACCTTTTAGATTTACTGAGCAAGTGAAGACAGTTAGTTATTTATCTACTTTTGA  
TCTCGATGGTTAACAGCACGTGAAGCAGTTTTCTTTTCCGAATCTCTGTAGGAAAAGTTC  
TGAGTGGTTCTAGTAGAGTTCTAAGGATTTTCGCGTTCAAGCTCCTATGGAAGCGCGTTT  
TAATGAGGAGAATCCGTTTTGATTCATTCCTATGATAATGATCATGTAGGCAACCATCT  
TTAAATTATGATCATATTCGAGTTGTTTCAAGCGTTTGGGTCGTTATGTGGATTATCA  
CTAGAGCAAAATGATTAAGTTTTTACTGTAGGAGAATATGCTGATAAAGAAAGATCGTCT  
GCAATGGCGTGTGATTGTTTTTGGTTGGAAGCCGTAATATGACTCACAATTAGTGCCTTA  
TTTAGGATGAAGGTATCGAACGGATGTTTCGGTGTTCGTTCTCGAAACATTAAGGAACATG  
GAAATTCGGTTATGTGGACGTAGATGAAGCTACAGATGGTAATATTTTCAATGTGGCCCG  
TTATGTGCTGAAAACGAATGTTGTTGGATGTGACTTAGATTCTTATAAGGCTTGTCTAG  
GACTGAGAAGACGACAACCTCCTGAAGCTTAGGTTTTGCTTCTTTTTTTTCATATTTAAG  
GCAATCTCGTACGACTCAGAGGATAGTTTTAAATTGTTGCAAAAACCTGATTTGCGCGTTA  
TCTTAAGGGTTTATTGAGGATGTTGGTTTCTGCGGATCCCGACTTTGATACCGAGTATTA  
TAATGGTTTTAGGACAAGGTTCCCTTAGTGTATGTTGTCATTCGTTGGCAAATAAATATTA  
TACATATTGAGAATGCTTAGTTGAAGTTTTGCGAGTTTTGAATATGCATGATTTATACCA  
GGGTGCGCTTAGGTGTATGGATCAATCTTTTCTATGCCGCAAGCTGGTGATCATGATGG  
TGAATATAATACGAGTTAGTAGATCCGATGCATAAGTTTTCTTATTCAATTTATGATCGA  
AAGGCTCGGGCTTAGGGAGATTTGATCTATTTGCCTTCAGGTGGGAAAGGGGCCGCTATT  
CGATGTTTTAACTATGTTGTGATCGATTCAGTTTCTACGAATATTTTGCATCGATATCCC  
GAGGATTTTGATAATTTGCTTTATTGGTTATTTGATAAGGATAAAGGACGCCGTTATCCT  
GTTGATGCTGGGATACGTACGATTATTAATGCAGGAGAGTTTTTTTTTAGATTCTGAGTAT  
ATACAAGAAGAGGTTTAAATATGCCAAAAGGACGAAAGCTTTCGTCGATTATGAATAATCG  
TACTCAGTGGTACCGACAGCCACGATTAGTCGTTCTTGTTTTGTATCGGTTTACCGGTTA  
TAAGAGCACGTTTGATATGGATTATTTAGTTCCATTTCTTGGTGATGAAGTTCTTCCAGG  
AGATACTTTTTCTCTATCGGATACGCATCTTAGTCGTTTACTACGTTAGTTAAACCGAT  
CATGGATAATATTCAGCCAACCTACCCAGTTTTTCTTGGTTCCCAATCGTTTGTGTA  
TTATTCGGAATTGTTTATTACAGTAGGTGATGAGCCTGTAGCATGGACATGCACTAATCC  
TGCTAATGAGTATTTGTTCTCAAGTAACTTCTCCGCACGGAGGTTAGGTAGAGAATTG  
TATTTAGGACAACCTTG

>NewGenomeName\_90

AAAGCATGTAACCCACCCCTTTTACAAAATTTCCCAATGGAAATTTGAAAAGGAA  
ATGAAAGAGAAAAGCCATTTCCAACACTAGCCATTCTAAACATCAATCATCTATTATCTT  
CTAAAATCCTTTCATCTGTTTGTATTATCATTATATCAAATTTAGAAAAATGTCAAGAC  
ATAAATCACTAAATAAATAAAAAATAATTTGAAAATCTCTTGACAATCATTTTAGTAA  
ATGCTATAATGGTTATAGTTAGAAATGAGATAAAAAATATTACTAAAAATAAATTAATAA  
AATTTCAAAAAACACTTGACAAGCATTTTGGAGAAATGCTATAATAGTATCAGTTAAACA  
AAGGAGAAAAGAAAACATGAAAATGAAAGCCTTATATGTAAATCACAACGATGAAACTTTT  
GCAGAACTTACACACGGGCAAGCGCTAGATGTAATCTTTAATCCTGATAACGCTGAAATG  
TATGGCGACCATGTAATCCAGATTGTAGACCTAGGAAATGAGATTAACTTGAATTATAT  
AGAAATAATGAATACATTCATTTGCTGGTTACTATGAACGAGTGAAAAGACTGTCTGAA

CTATACACAAATATTTTCGGACTGGTTTGGAGAAGTTGAGTAAAGGAGATAATAAAAAATGG  
AATTAAGACAATTATCAGTAAACAACATTGAAAATCTTACTGAAAAGATTATTGACCTTA  
AAACGCTAACGTTTAAGTCAGATGAATTTATAGAAAGCTCAATGGTATGTAGCGAGGAAC  
TTATAACCAGCACACTTAAAGTTATGTATGAGTTTAGTGTAAAGTGGGATTTAAAAGATT  
AATTCACATAGATTTTTTCTATAAAATTTTAAATAATAGAAACGATGAATTACACATTA  
AACGGTTAAAATTTATTTGCTATTGTTGGTTAAATACAGAAAAATAATTTACTTTCTTAT  
TAAGTTTATCACTTGCTTGCTATTTGAAAATGTGGTAAACTTAAATAAGAAAAATAATAA  
TATTTATTTTCTTAAATGTAAAAAGCAAATTTTAAAGAAAGGAGTAAAAGCACTAGACAG  
ATTTACCTATCAAATGTAGCTTTAACGCTACGCAGGTAACCTTTCAATCTTTACAAAAATG  
AAGATGGGAATGTGACTATCACTACTAAACAAGTGACGATAAACCAACGTCGCCAGCTTC  
CTTACATTGAACGTTATCTGAAGGAGCGTTTCAAGGGTTATCTCACTATTGAGGTAGTAT  
ATTATGAATATAAACTTATTCGGCTTCTATCCCTTTAGCAACCGCCTTAGAATACGCAG  
AGGAACAACAAGCGGAAGGGGTGTAATTAATGGCTTTAACACCAAAACAAAGGAAGGTA  
AGACGGGACTATTTAACCAGAAAAGAAAAGCACGCTACAACAGCAGGGCGCCTCTAGTGCT  
GAATTAAGCTATTATGTGCGGTCGGAGGAATTTTGCAGGAATGAGTGATAAGGCGCTA  
GAACGTGCCTATGATGGGTTTAAAAGCAAAGGTCGTAAGCATTGGAATCATGTT  
TACACTAGTGACTATGTAAAAAAGCTATGGCATGGTACGGGGATAAGTTTTCTGTAGAA  
AAGCTGATTCAAGGCTTTCGCTCTTCTAACGATCAGAGTTGAACCGCTTTTATTCAGTT  
AAGGAAGTCAAAGAATACCACTCAGAACGTGACAGAGAAGCCAAAGAACGCTATATACAA  
GCGGTGGAAGAGATGCACTATAATTCAAGAGACGCAGGCAACAAGGCGCAAGAAAAAGAC  
ATTAAGTCTATGATTTACGCATAAAGCGAATGAGTGCCAGCAACTTTGGTGCATTTCTA  
ACAGGCGGACGGTCTGACAAGGTTTCATTTGATAATGTCATGGTTTTTGTAGACACGGAC  
GGTAAGGAAGCGGCTTTTGAATTTCAAGGACAGTCTAGCCCGTGAAATCCTTGATAATGTA  
GATAAGTTTTCCAAGCAATTTGTTTCTGATATGAGAAGACGAAAGAAGCGAGGGAAGAAG  
TGACTTGCTACTATGCAGGCGACTTTGAGACAACACTACAACGAGGAAGACACAGAGGTAT  
GGCTAGCTTGCTTTGCTAAAGTTATTGACAATGACAACCTTAAACACATTCAGGTAAAGA  
CTAGCCTAGAGGATTTTCTAAAATCGCCCTATCTTGACCTAGACAAGACTTATACGGAGA  
CGGGAGAAAATGAATTTATCATATTCTATCATAATCCCAAGTTTGACGGCTCTTTCTTGT  
TATCTTTCTTTCTAAATAATGATATAGAATGTACTTACTTTATTAGCGATATGGGGGTAT  
GGTATTCTATTACGCAAGAATTTCCAGACTTTACGCTAACTTTTATAGATTCTTTAAAAA  
TCCTTAATTTCTCAATCGCTACGATGGCTGGACTGTTTAAAATGCCAATTGCTAAAGGGA  
CTACACCTTTCTAAAACATAAGCCAGAAGTGATTAAGCCAGAATGGATTGACTACATTC  
ATGAAGACGTTGCAATACTAGCCCGTGGTATCTTTGCAATGTACTATGAAGAAAATTTTA  
CAAAGTACACATCAGCAAGTGAAGCGCTGACCGAGTTTAAACGGATTTTCAGGAAGTCTA  
AACGAAAATTCAGAGCCTTTTTCCCGATCTTAGATGTAAAGGTGGACGACTTTTGCCGTA  
AGCATATCGTGGGGGCTGGACGTTTGCCAACCCTAAAACACAAGGGGCGAACCTTGAACC  
CGTTGATAGATATTTATGAAATTAACAGTATGTATCCTGCTACTATGCTACAGAACGGTT  
TGCCAATCGGAATACCGAAACGATACAAAAGCAAGCCAAAGAGATAAAGGAAGACCACT  
ATTATATCTACCACATTAAGCCGATTTTGACTTAAAACGTGGCTACCTCCCAACTATCC  
AGATTAAGAAAAAACTCGACGGTTTAAAGAATCGGAGTCCGCACTAGCGACTATGTGCCTA  
CATCGAAGAACGAGGTTATAGATTTAGATTTGGCTAATTTTGACCTTGATTTATTCTTAA  
AGCACTATGACGCAACTATCATGTATGTTGAAACACTTGAATTTAGACAGAATCGGACT  
TGTTTGATGATTATATCACAACCTACAGATACAAGAAAGATTGCGCACAAAGCCCAGCAG  
AACAAACAATAGGCTAAGATTATGCTAAATAGCTTATACGGGAAGTTTGGCGCTAAAATCA  
TATCTGTTAAGAAACTAGCCTATCTGGACGATAAAGGTATATTACACTTTAAAAATGACG  
ATGAAGATGAAGTACAGCCCGTTATGCACCCGTGGCGCTTTTTGTAACATCTATTGCC  
GTCACTTTATCATCTCAAACGCACAAGAAAACCTATGATAATTTCTTATATGCTGATACAG  
ACAGCTTGCACTTGTTCCATTCTGACAGCCTTGTCTTGACAATGACCCGTCAGAGTTTCG  
GCAAGTGGGCGCATGAGAGGTGAGCCGTTAAGGCAAAATATTTACGCTCTAACTGTATA  
TAGAGGAAGTATAAAAAGAACGGCACAAACGGACCTACACGTTTAGGGCGCAGGTTTGA  
CCCAGAAATCAAGGAAAAAATCACTTCTGAAAACCTTTGTTATCGGGGCAACCTTTGAGG  
GTAAGCGTGCCAGTAAGCAGATTAAGAGGGTACGCTGATTTATGAAACAACCTTTAAAA  
TCAGAGACACAGACTATCTTGTGTTGATGGCCTTATACTCTCGGTATACCGCTCATTTTTT  
AAAAATTTATTACATAAACAACAGGTTAAAGATAAAAAAGGGTACTACTACCAGAAATCG  
AACAAACGCACGTAAAAAAACTATTTTTCTAAAGTCCTTGCTAAAAGAACATTATGCCTAT  
GAAAATTTTGACTATATCATGGAATTATACAAATTTGTTTCACAAGGATTTGATAAAATT  
TCAATCAATGCTTTTTACAATCTTTGCAACTATTTAGAAGAAAATAAAATCTATTATCTG

TCTTCTAAGGCTCTTTATGATGGTTACGAGAAATCCAAAAATCGTCAAAACGATTTAGAA  
AAGCACAAGACAATCATCACACCATTAAGATTTTTAAAATCATCAAACGGAGATAAACAA  
AATGTCTAAACAAACACAAAAACATGAAAACCTTTGATACAGTTGTGGCTCAGGCTACAAT  
CACAGCAACGTCTAACAAATCAGACGGCAAGCATAAGCAAAAAGAAAGCGACTAAAGCCGT  
TTACCTTGTCCCAGCGACAGAAGAAGACACTAAAAAGCTCGTAGACTTTGGCATGACTTT  
ATACACACCAGACACGGAGAAGGACCCAGACGCAAAACCTTACTTTATTGTTAAGGCAAC  
CGAAAATGTGAAAATTTTACAAGTGAAACGGACTTTGAAGAGGTCAACTTTGGGGTATC  
TTATGAAGACGTAAACCCAGAGACAGGGGAAATCACAGTCAAGAAGACCCCGAACTACAA  
AACAGAAGAACCCGTAAACGTTGCGATTATGTTTGTGAGGGTGACGACAAAGGAAACGA  
CTTTTTCCGTCTTAATGCTCTTATGATGGCTGACACGTTGACCCTTGAAGAAGTGCAACC  
CGTGAACCCGTTTCGCTGGATTGTTTGGAAAATAAAAAAGAGCCTTCCCAATCGGGAACGC  
TCCAATTATAAAGCGTTTTTTCATGGCTTGAGAAGTCAGTTGGTTACAATGACTCGCACCA  
TCAAGCACCCCTTGAGGTGTAACCAACTTGCCAGCACTAGACAAGCCTTGAAAAGCCTTA  
CAGGTTTATCATATCATACTTGCTTTATTTTGTCAAGTATGATATACTTTTGTAAAAAT  
TGAAAGGAGAGGGCTATGACCTCACAGGAATGCCTCGCAGTGCTAGACGCTGCAATGGCA  
ATAGTCGGAAATGATGTAGAAATTGAGAGCCTAACGCCTGACTTGATTGACATCAAGGCT  
TTCGTGCAAGAGATTGACACAGTTGTCTCAGTCTTGAATGATGACGTTGAGCGCCCAAAT  
CTTAAAAACGGTAACTTACGTTTCGGCTAATAACGAACATTACCGCCGTTTAGGGCAACAA  
GATGAAATCATGAAACCAACACAAGAAGACATGAGCGTAGTATCAGCAATCAATGTTGTT  
ATTTAAAGAAAGGAAGAAAAGAAGATGAAACCACTTTTACAAAGCATGAACTGGTATCCT  
ACAAGGCACTAGATGCACTCAAGCACTAACCGAAACAGTCGCTGAAGTTACTCCACCC  
GCAGTTATGCCTGCCGACACACCAGCGCAGGAAGTGCCAAACTACCCAGCGCAAGCCAG  
CCAGCGAAGTTGAGGGCGTAGAAATGAACATCGACCACGAAAACATTGTAGAAGAGGGAG  
AAGAATAAAATGGCTAATAAAAATTACGACTTTCTTATCAGGACAAACTGGGAAACAAATT  
TCAAACATTGACCTATTGAACTCTATCCGCACCCGTGCAAGTGGTGACTATCAGGGAGAT  
ATTACAGTTCTTGAGGGCGCACGCATTAGCCAAGCAACAGTTCCGTATGAGGATTTTCTA  
AAGCACCCCTGATGAGTTTTTTCACAGCCTTGGTCAATCGTATCGGGTCAACCCTTATCAAG  
GCGCTTACTTATGAAAATCCGCTTGCTATTTTCAAGTCTGAAACCTTTGAGTTTTGGGAC  
ACATTCOAAGTAATCTATGTACACCAGCGGAAAAGAAAACCTATGACGCTAAGTCAGAC  
GTAAGCCCGTTAAAAGTCGCTGATACAGACATCGAAGCCTTTTATCACACTTTGAACTAT  
GAAAAGTACTATGAGCGTACCTTTGAACGTGCTTGGATTCAGAAAGCCTTTGTTTCTGAC  
ATGGCTTTTGACGAGTTTGTGGACAAAATGTTTACTTCATTGCTATCATCTGACACGCTG  
GACGATTACCAAGCAGTTAGGGTGTACTTGAGAAATTACTTGCGGAAGTCTCTTATACAG  
ACCTTGAAAGGTAACGATAAAGACAATTGCCGTGGCAGGTACGAAGATTGGCGAAACAAAA  
CAGGACTATGTCGTAGACTTTAACCAATCTCTAATTACCTTGTCTAAACGTTTCAAAT  
CCAAGCCGTACAACGTTTAAACAACCCTGTATGCGTGCCAAACATGACGGCGATTGAAGAC  
CAATATCTGGTTATCTCAGCAGAAATTTTCTACACATCTTGACATGTTACTTGCTAACGCC  
TTTAAACATGGATAAAGCAAGCGTACTCGCTCGCACAATCGTAGTAGATGATTTGGAAAAA  
TTCACGGGAGAGGGCGCAAACAATGGACGCAAGCCAGTTGCTTTCCTTATTTCTGCTAAG  
TCTATCATTAACAAAGATAAACTGGTACACATGGAAGCAATCCGCAACCCCGCAACATG  
ACCTACAACATTTTCTACCATCACCCTACATGACCAGCCTTTCACTTTTTGAAAACATT  
CATTTCTGGTATGTTTAGGAAGCCTAAAGGCTGACCAAGGGCGGGCAATAGGCCGCCTAT  
TTTATTAAGTGAAAGGGGACTAAATGAGTTACAAGAATTACAAGCGACATCTTGGTAAGA  
TTGAGGTAAACAAAGAAACCGTAGAGCGTAACCGTCTAGCCTTTTTTGGAGTTTTCTTTCA  
ATTATTGCTATAATATCGTGGTAAACTATTTCACTTGGGGTGGGTTTGCTTAATGACTTTG  
ACGAGTTGGTTATAGGAAAGAAGCTGATAGAAAATGGGCATGTAGCTTTTTTTTTATGATC  
ACACTTTTGGCTATATCGCACAAGGTGGACCACGAGGGGAACGCTTAAACCCTTATGACC  
AGCCTTTGACCTATCAACCCGTCAACGCTAGCTGTATGAACTATTTTAAACAAATAGAAA  
TCGCTAATACTGAAAATGATTTTAGAGTTATTGAAGAATTACACAAGAATAATCCAGACA  
AGATTAAGACCTTGTATTGTGATTCTTAACAATAATTTCTATGAGCCGTTTATAGGCT  
ATTTAGAGTTATTTTTCGAAAAGTTGGCAGATATTGAGCTTACAATTCAATTAATAGAA  
ATGCACAAATTACACCGTATTTTCATCTTTGCGGATAATACAAACGTGCTATCTATGAAA  
ACATCTTTATTGAGATTGCCAATTTTGAACCCGTTGTGTATCTCAACAAGCAGATAGACC  
AAGACGGACAAGACAGCTTTAAACAGTTGTCAGACTATTTCCAAGTATCCGAACGGACG  
CACCGTTTTTACTTGACAAGTTGCACGATGAGAAATTACGAGTGATGAACCAGTTGCTGA  
CTTTCATTGGGATAAATAACAACCCATCAAATAAAAAAGAGCGTCTGGTAGTCTCAGAAG  
CCATTTCTAATAATGGGGTTATGTCAGCGAATATTGAGGTAGGCTGGAAGTCCGGAAGAA

AAATCGTTGAGCTTATCAATAAATGTTACGGGCTAGAAATCAGCGTAAAACCAGAGGAAA  
CGATTCAGCAGTTTAACCTTGACAAAGTGGCGCTAGACTTGGCAGAAAAGGAGGTGACAA  
TCATTGACCCAGAATAACACAACAGCAACGATTGCCACCTTTTTAAAATCCAGATATAGA  
AATCCCGTGACGGGACGGCTGGAAGGCTTGGCAGTAGATGAAAACGGCGAGTTTCTGCAT  
TACACCACGATTATAGACCAGACCTATAACGAGTTATTTAAGGACATGGAGCTAGTCAAT  
GGAGTTTCAGACAATTTCAAGAAAGAGTTTTGCAAACACTTTTACAACAGGGGAGATAGGA  
CTTGAGACTTTCGCACGTTTCCAGAGAGCCCTTGAGGAAGTTCTAAACAACGAGTGTTC  
AATCTGTTTAAATATCTCGCTGAAAGCAGAAAACAAGGCTATCAAGGACTTAAATCAGTCT  
ATGAATATTGACACGGTTGGAAACCAGAAAGCAGACGGGCAAGCCTTGCAAATCGCAAAC  
ACCACACCCCAAGAGCGGAAAGAAATCGTCTTTACTGAGCGCTACGGCGTGATAGAGCAC  
GCTGACAACTTGGTAGAATACCACCTGAAAGACATCCCTGACACAAAAAGCAACGTCTCA  
AGGTGGAGCGGTTCAAGCCTTGCCGAACGCTTACAACCTAACGCAGAATTAAGGATATA  
CAGTTTCAGATATTTAATATATGTGATAAGCTGTTTTTACAAGTCTTTTAGAAAGGTGTA  
TAGATGAAAGATTTATCCAGCGCTAAAATCCTAGAAGATGATAGTATGTTAGAAGAAATC  
ACGCTTTTCAGCTTTCAAGAATTTGCTTATAGTGATGATGGATTATATTATATCCAGTCA  
AATAGCAGACGGTTAGGCGACTAGTCTAAATTGTGGATAGAATTAAGCCTATCTGTTAT  
CATTATGAAAGCATTGAAAATGAAACTTTCTGGACTATCCGTAAAAGCTACCAGCCGATA  
CAATCCATTAATGCGTTGTTATCCATTTCGCTTTAAAATTGTGGGAGCGTACTATAGCTTT  
GCAAAACTGACCAGCAAAAAGCAAGTTGAACGGCTTTGGCAGAGTGATAGACGATGACAGC  
TATTTTTACGCATACCCCTTGTAATGAGGTGGTACATTGGGATACCGGGGGTATCGTA  
ACACCTAACTATCAAATGAACATCACAGGACTAAAAGAAACCCGAGTAGAGGTTGACGGT  
CAGCAACTCTTTGAAGATTGGTCAACCTTTAAAATCAATGTTACCAACGATAGAAAGGGA  
GTACCTCGCACAGTTATGACAGCAGAAAAAGGACATGAAAACCTATGATAATTATCAACT  
TGTCCGAGACAACGGACACGCAACAAATCGAAGTCACGGGACACGGAGACGATATAGACC  
AGTCTTGCGCCCGTATATCAACCGTTTGCATTGTATTTACTTATTCTTAAAATCTAACA  
TAGATGATTGTGTTAAACAAGATGGTTATACATTGCTACGGATTTTTAAAAAACGTACTG  
CGGTACAAACTTTAAAAGCTATTCTAAGTTACATCGTAACGCTTGAGCAACTTTATAAAA  
ATTCAATTAAGGTTATAAATAAAGAAAAAGAGGTAGAAACAACTGGCGAAGACAACATAA  
CTTTTACGAGGTATTCATCATGGATTAAGTTCCAAAGACACCAAGGAGTGGAGAGCCTT  
TCTCTTGAGGGTAAGCAGGCGCTTTCTGACTTGTACAGGATAAAAACGGGGACACAACC  
CTTATTTTAAATGCAGATGTTGATAAATTAATACTATTCAATTAAGCTATACCTTTTTCTT  
TCTGTTTCAGAAGAATTTTCAGGAGTTGACCCTAATCAAATGAAAACAGCAACCGTCAGC  
CAAGATTTAACAGAATTACCTCTAATTAATGGGGAACCTGGTTAAATTTAACAAAGAAAA  
GATGGTATTTCTGTAATGATGAAGAATTGAAAGCAGAAATTTCTCAACATATTGAAGCT  
TAATTGACAGGATTACCAGTTGTATTAAATTATGAACATATTTTACTTGATAATTTTTCA  
AAAATTGAAACATCTATCCATATTTCCACTTATCAACCGTTAATGATTTTGTGGAAGTA  
ACTTTGAGCAATACAGCTACACATGAACAAGACACTGTTATTATTTCAACAAATGAGTTA  
TACCATGGAAAAATGAGTTTAAATAGATTTGTTTGCAGTGTTATAGTTGAAAAAGATGAT  
AGACATATTATTGATATAACTGTAAATTCTCATAAAGAAGCTGACAGAATCCATGTTACC  
ATAAAATGGTTTACACAATACAGAGGACAAAAAATCCTTGACGTAAATGAAATTGGTCAA  
GACGCACACTTTGAGGGATATGAAAACCCTAAAGTATAATTGACTAATAGTCCTATTCCA  
CCAGCTGTAAGCACACCAACCGAAACACCAGGCCAACCCCTGAAACAACCTGGAATCACA  
CAGCAACCAACTGCAGAAGAATCTCACTAAAATAAGAAAGGATTTTAAAACATGAATCCG  
GAAGAATTTAAAGATGAATGTTTTAGGGCTTACCGTGGACGCTATTCGTCTTACTGGGTA  
GAACGTTGGGGGCTTATCCCTCAATCCCTACCAGCTTTGAAAACGCCAATTCTATCTAC  
GAGCTGTTGGCGTGGCTACAGCGTGCCTTTAAGCAGTTGCTTGACGACTTTGTGGCGATG  
GAAAGCTAACTGGAAGACTATAAGAACGCTTTAACTGAACTCATAGAGCAACTTATACCT  
TTGCTTATCCGTAGATACATGAAGAGCAAGGAAGCGGACGACTGGTTTAAATAAAAAAGCG  
GCCATCTACTATAACAAGCTTATCAAGCCTTATATTGACGCAGAAATAGCTAAAGTCAAT  
AGGAAAATCGGTGACCTTGAAAAGAAAGTAGATGATGAAGTTAAGCGACTAGATGGACGG  
ATTGACGCTTTAAACGATAAGCTAGAAAAAGAAATCAAGAACTTGTGACAGAATCACA  
CAGGAAGTCACTAAGTTAAACGAGCGTATAACAGCAGAAAACAACGCACTCAAGGAGAGA  
ATAGAAGCGCTAGAAAATCTAACGCGGGCCTGCAAATGCCTTGTGTAAAATCATTGAAA  
ACCTTGAGGGGTCAGGCGCATGGACTGGTGGGCTTAGTGATCGCTTTATCCAAGGGCGCA  
GCATCGCAACAGGTAATATTAACCTGTTTGGTGGTACACCAGACGGTTCAGCTTTATCC  
GAACCAACAGCGGAAGCACAGAAAACGACCTCGCAGGAGGTATCTAATGCCTTTAGAAAC  
ACGCTTTCTGACCTCTACTACAGCCAACGTAGAAAACCTTTGGTACAGGTGTTGCCCTTG

GACGGAAGCCTATGCTAATGCTTGGCAGTTCTCAGGGGACACAGACTACGGCTACATGAC  
CAACGGGAACACGACCTATATACAGTACGGGCAAATGACCCGTCTGTATGGGCGTCCAT  
GCGTTTCTGGGGCGAATCCGTTGAAATCCTAGAAGAGACAAAAACGATGTTAATTCTAT  
CACGGCTAAAATCAGAGTTAAAGTCTCTTTTGGTGGTCAAACGGGTACAGCTGAAACGC  
TGGGTATCGGGTAGAATATGATATTACAATCAATGGGCGCACCGTTTGGACGTTTAGCGG  
ATATACAACCGATGAAGTCATTA AAAATGATGAAGTTGCCAAGACTTTCCCGTAACCAT  
ACCAGCCGAAGAAAGTTCAGCAGCCAATGCCTTAAATATAAATGTATCTTATCCAGACGG  
GCAATATTCGGACAATTCTTTCTATGTTGGTGTGTACCGATATAATACCAACAAGAAAA  
GCCTAAAACGTTAAAGCCGTGGGCAATCCGTAAGAGCGGAATCTTTAAGACCTTAAACCG  
TCCCTCTGGAATCTTCCAACAGCGCAAAGCAGTTGGCAAGACATCAGGGAACAGCCAGC  
AAACGCAGTCGGGCAAGCAGTCACAGCACCCACAGCGTGAGAAAGTCGGGTCAATGGAT  
AGGACAAGGACAGATAGGACAAGAATAAGGGAGGGTTTCAGCCCAACTATTTTTAAAGGA  
GAAGACATGCAAGAATCAACCAAGATATGGCTTTATGCCAAAAGCCCTTTTAAAAACGAT  
TATGCCAATGTGATTAAC TTTGAGACAAGGGAAAGTATGGAAGACTTTTTACAAAGAAG  
AATCCGCATATAGAAATTGTGTACGAGTATGACAAGTTTCAATATACCCAAAGAAACGGC  
TCAATCGTAGTTTCTGGACGGGTAGAGAATTATGAAAATGTGACTTATATGCGCTTTATC  
AACAAACGGAAGAACCTACTATGCCTTTGTTTTGACGTTCTCCATATTCATGAAGCTGCT  
ACACGCATTATTTACGAGGTGGACGTTTGGAACACCTACCAGCACGAACTAAAGGCGCTT  
AATGTTATTGGTCAAGTGGAACAGCAAACCGTACCTAATGTGTTGTCGGCGCTGAAAGAC  
AGTCAGCAAGGTTTTTCAGTTGGGGCTAAATACGCTACACGGGCTGGCGAAGTTGGAATC  
GATACGGAGTGGCTTGTAGTAGTCGCAAAAAGCTACGATTATAATGACCACCAAGGCAAAC  
CGCCCCGTCAATATGAGTTATTCAGGCATGCAAAAACCTTTAAATACTTTTTTATTCCT  
GTAAATTTGAAAAGCGGAGCGTCCAGCCTCGTATTTTTTCAGGGCAAAGATATGATAGCT  
TTTACCTTGAGAACCTGTATAAGCACCTTTTCGGCTTGAATCAAGACGGCCGTGGCACCG  
TAAACCAGATTGTGAACCTGTATTTAAGCCGTGACATCTGGGTAAAATACATAGAGACAA  
CCGAGGGCGACAAGACATCTATAGAAATCTTGTCTAATATCACGGGAAGCGTTGCAGAGA  
TTGGCAGAAAGAACAGCCGAAACTATCGGACATCTGGAAGTTCATCAGCCGGAGACAGTG  
GAAGCACCAACGAAAGCGGAGGCATTTCAACCGAGGAAAGCCGTGTTAGACTGGTTACTA  
GAATCATTA AAAAGCTAGTACCAGACGCAACAGCGGAGAGTATCACTGGA ACTATCGGGA  
ACTTTTCAGCAGAAAGCAACGTCACAGCCAAGAAATACGAGGCAGACTATGCTACTGGGT  
ACGAGTACGAGATAATGGAATCAGAGCCAACAGCCCAGAACCTTATGGGAAGCTGGGGCG  
CTTTTGCGAGTCTCTACTCTATGAGCTTAAGTGAAGCTGGATATAGAGGGTCAGACGGCA  
ATCACTGGATAGGTATTGGGATAGGACAGTGGCCGGTACCAAGGGCGGAGGAGCTTTTGA  
ACTTTGCAAGAAGTGAAGGGAAATCATTATGGGAATCTAACCTACAATTTCAATTTATGA  
ACGAAGAGAGCCGAGCCGATACGTTTAGACGGGTAGCCAGTTCAGAGCAAGCGCCAGCA  
ACAATCCAAGGGACAATATGAACA ACTGGGATGGGGTAGCATATAAGAAGCGGAACGCA  
TAGAGCACTAACGCCTGGTTATCTAAGATACAAGACGAACTACAGAAAGGGTAAACAAGG  
GCAGAACCAACAGAAACGCTAAAAGCACTAAATGAAATCAAGTCACGGGTAGGAACAAAC  
GTCGGAAGTGGGCAATGTTACGGCTAGTCGGCTTGTATTCTCAACTCTTGGGCGGATCCG  
ACATAGGGGGAGGTATTAACACCCCCCATCCCAACGGCAACGGCCGACGAGCCAGTGGAA  
GCGATACACAACGGGGTATGAGTGCCAGCAACATTGGGGGCGACTATGACTGGGAAGCGC  
TGGGCTGGGAAGTCCGATTTGACCCGTCTTGGGCTGATTTACGGGTAGGGTGCATTGTCT  
GCTATATCCCAAGCGGTAGCAATATCTGGGGGCATACGTCTGTTATTTACGCGGTCAACG  
GCTCAAGCTATGCCGTTATAGAGCAAATTATGCTTGAATGGCTACACCACAGAACGCA  
CGGGTATAGATACGATTGTCAATATTGAAAGTATTATCTACCCTCCCGAAGTTGTCGCAG  
GTGGCGATATTGGAGAGATAACAGGTAACACAGGAGATAGACAGTTAGGAAACGGGGACT  
ACTCAAAAACCGCCTTTGTGCTTGAAGCCTTACTAATTGAGGTGGACGCATTTTTTACT  
ATCGCCCTAATGTATATGAAATCCCGCACCTCCTCAAGATAGCTTATGACCAGATACAAG  
AGGGGCTACCCTCACACATGGGTAAAGACGACCTAGAAATAGAAGTACA ACTATTAATA  
GTGAGTTTACGGAGCTAGAGCTTTATGATATTTACGGTAACAGTTATGTGTATCAACCGC  
AGTATTTACCGAGAACCATAGACGAAGCACACGAGTATAAAGTTATTGTAAGCGGAAGCC  
TTGGGGATAGCAATCAGGTT CATATCAATTTTCTTGAGTATAACAACGCTCACTATGTGA  
GCTATGCTGATAAGAATATTCTGGATAGATTGGAAAGTGGCGACTGGGCGGAACACAATC  
CAGAGCATTTTAAATACGGTTTGAATGACGTGACAGGGAAAAGCGTGGCTATTTTGAATG  
ACGCAGAAGCCAGCTATATCCAGAGCCATAAGAATCAACTGGAACATACACAGCTTACGT  
TTAAAGAGAATCGGGACATGCTGAAAAAGAGCGTAGACCTATCTGATAACCAAGTCGCTA  
CAGCGAACTACAAGCCAGCTATAACGCACAATTTGCCGTAGATAGCGCCAATATCAACC

AATGGCCGGAGGGCGGTAGTGGTATCTTAAACGTAGCTGGAAATCTCTTAAACAGGGAACT  
TTGGGGGCGCACTTGGTGGGCTTGCCTCTGTCGTTATGAAAGTCTTTAACGCTAACCGTG  
ATTATAATGATAAAGCGGTGCAACAAGGTTTCACAAGCGAAAACAACGCTTTGAAATCTC  
AGTCAATCGCACTCGCAAACATCAAATCTAAGATAGCACTTGACCAGTCTATCAGAGCTT  
ACAACGCAACGATGGCAGACCTACAGAACCAGCCTATCAGCGTGCAACAAATCGGGAAATG  
ACCTTGCTTTCCAGAGTGGGAACAAACTGACAGACGTTTATTGGAAAGTCTCCCTAGCTC  
GAAAAGAAATCATGGGACGGGCAAACGAGTACATAAAAATGCTATGGGGTGCTTGTCAACT  
GGTTCACTAATGACGCTCTAAGTGGAAATGAGGTCAAGAAAACGTTTTAATTATATCAAGA  
TGATTAACGTAAACCTTGGAACACTAAGGGCCAACCAGTCGCACATGAACGCTATTCAGG  
CTATTTTTCAGTCAGGTGTCAGAATATGCAATTATTCAGCCAATAAAGAAGACGGCATT  
TGTTTGATAATCAGAAATACAACCCGAATTTTTAAACGTGTGATATTATGAAATAGAAAG  
GAGTGATTTTTCTATGGAAGCAACTGAAAAATGGTACAATCCGCAGAAAATGCTATTTTTAT  
AACCAGTATTTAAACTTTGTTATGGGTGGTCGTGGAATTGGTAAGACCTTTGCACCCAAG  
ATATATCTGTTTAAAAGGTTTCATTGAGAAAGGGGAACGCTTTATCTACGTAAGGCGGAAC  
AAGTCAGAGCTTGACCGTATCGACAAGGACAAGTTTTTTACTACCGAGTTATTAAGCAA  
GTTTTCAATAACTTTGAAGTGCTTGACTGCGACGCCAGCAAATCCATACTCCGATTATT  
TTCAAAGCCGACAACATGGAGGAAGAGGAAAATATACTTGTTTTATCTTCTACTAAAATT  
ATTCCTAACGGGAAAATCGTTTTGCTATCGCAAGAGCCTTTCTACATGGGTAGACTTGAAA  
GGGTCAGAGTATGATGATGTAATGAGTATTCTATACGATGAAGTATTGATAGACGTTACC  
AGTAAAAAGAGGTATCTCGATAACGAGGTGGAGGCGTTACTAAATTTTCATCTTCTCAGTA  
TTCCGAAGACGGGACGGGTGTCATGCTTATCTACTCTCAAATGCAAGTAATTTCAACAAC  
CCTATTTTTGGCTTTCTCAAGTTCTATGACGACAACGGCAAGCGCTTTTACAATCTGAAA  
CAATATGCAACCTTGATAGAGATCCCCCTCATTACGCCTTTCAAACAGAGGAAGAAAAA  
GAGAGCGGATTCTTTAAGCTATTGAGTAAGTCAAGTATTTATGAAAGCGTTGCTAATAAT  
GAATTTTCAGAGTAAGAACGACAATAATATAGCAAAAATTACAGGCTCGAAGTCTAGGCTA  
TATAGTTTCTATTGTGACGGTACTTTCTAACGGGGTACTATATCGACTATATGGTATAT  
AGTGCTAAAGGCTTTGACAAAAATTTGACCGCTTATTGTTTAGAAGTGGAATAGGTGGAA  
GACGGGTTTGTGTACTTGAATAAAGCCAGCGCGCTAGGTAATACTTTACGGAGTTTGTAC  
TTAAAAAATACGTTAATTTATGAAGATTTAGAACTAAAAACAAATTTATAGAGGTTATC  
AATCATGTTATATAATATTAGGCTGGAAGTTGCTAATTGCGACGATATCACACTTCTTTT  
TGCATTGATTCTGTTTGACTTTATCCCAGGCTTTTTAAAGCCTTGGAAGTGGAAGTGAC  
CGATAGCTGGACAGGGTTAAAAGGAGTTATCAAAAATACCCTAACATTTATTTTTTACTA  
TTCTGTTGCGGTATTCTTAACATATATTCACGCTATGGCAGTCGGTCAGATTTTGCTTGT  
TATCATTAACTTCTACTATGCACTTTCAATTATGGAAAGTCTTTCTGTTATGGGTGTCCT  
TATCCCTAAATTTATGACGGATAGAGTACAGGAAGAATTGCAGAAATACACCGCACAACT  
AGACGCAGGAAAAGACCTGCTAGAAGAATTTAAAGGAGAAATGAAATAATGGTTAAAAAT  
AATGATTTATTTGTAGATGTTTCAAGTCACAACGGTTACGATATAACAGGTATCTTGGAG  
CAAATGGGAACAACCTAACACCATCATTCAAATTTCTGAAAGAACGACCTATTTAAACCCT  
TGCTTGTCTGCTCAAGTGGAGCAGTCAAACCCTATTGGCTTTTATCACTTCGCACGCTTT  
GGCGGAGACGTAGCAGAAGCCGAAAGAGAAGCGCAGTTTTTCCTTGACAACGTGCATATG  
CAAGTTAAAGACCTTGTATTGGACTACGAGGACGACCCAAACGGAGACGCACTAGCGAAC  
ACTAACGCATGCTTAGGCTTTATGCAGATGATTGCTGACGCTGGATATAAACCTATTTAT  
TATAGTTATAAACCGTTTACACATGATTATGTGGACTATCAGCAAATCCTTGAACAGATC  
CCTAATTCTCTATGGATTGCAGGCTATGGCTTAAACGATGGTACAGCTAACTTTGAATAC  
TTCCCAAGCATTGACGGGATAAGATGGTGGCAGTGTCTAGTAACGCGTTTACTAGAAAT  
ATTGTAAGTTAGACGATGAAGAAGATGACAAGCCAAAGACCGCTGGAACGTGGAAACAA  
GACAGCAAGGGGTGGTGGTTCAGACGAAAGACTGGCAGATTCCGTTATAATAAATGGGAA  
AAAATCGGTGGTGTGTGGTACTACTTCGATTGGAAGGGATATTCTTTAACGAGCGAATGG  
CTCAAAGATAATGAAAAATGGTACTACCTCTAGGACAACGGCGCAGTGTGCGACTGGCTGG  
GTGCTAGTCGGGTCAGAGTGGTATTATATGGACGATTCAGGCGCTATGGTTACTGGTTGG  
GTC AAGTATAACAATAACTGGTACTATATGACAAATGAACGTGGTAACATGGTTTCTAAT  
GAATTTATTAGGTTTGGAAAAGCTTGGTATTTTCATGCACACAAACGGAGAGCTTGCAGAC  
AATCCAAGTTTACGAAAGAACCAGACGGGCTTATAACCGTAGCATAAAAAAGAAAAGCT  
AGAAGGATTTTCTACTAGCTGTTTTTGTAGTCTGCTATAATTTTATAGGCATCTTCGTC  
TGGATTATCCAGAGCGATGGAACAGATTGCAGACAGGACGCTGTTTCATCTGATTGTATTT  
CTGTAAGTAGTGATTTTCTAGCTGTTTGTAAATTGCTGATATGCTTTTTCATATCCGGCCAG  
AGAAAAGGAGTGGTGTAGGTTTATGAGTTGCTGGGTTCATTCATGCCTTGTCTAGCCCGTC

AGGTATGCTTTCATCCTTTCTGAGAGCGTTTCTAAATAGCTTGTAATGAATGTATAACA  
AGTTCATCAAGCGTTACCATTCCCCGAACGCTGGAAGCGTTAGGCTTGCAATCTTTTGAC  
GGTGTAACGTTATACTGTTTTCAAATTGTAAGGCTATTTCTTGCTGTTCAAAGCTTGTT  
TGGCTTCCATAGTATTAACCCCTACGTTTTCAAGATAAGCGACTAGACGCAAAAAAGAA  
GCCGTGTTACTATCGTTATCTCGCTTAGCTTCGTGATGGTGCTTTGTTGTTGCTCAAGT  
TGTTTTGTTGCTTGAAAATGGTATAGGTCAAGAGTGACATAATCACTAGAAAAACCAAG  
ATGGCAAGGTCACCAGAAGCGAACCACCAAAAACCAGAAACGACCTTTTTTGTTTAAATTG  
TTATATGAATTTTTCATTTTTCTTAATACCTCAATTTGAATAATTCTCTTTCTACTGATAA  
ATAAGTAACCTCTAATATACTTTGTAAGCTGTAGACCCAGTCTGGTTGGTAATGTTGTT  
CTACATCATATAAGTTATAAGTAGTGGCTCAAATGCCCTCTATATCGGCCATTATAGGCT  
TTATATGAGTAATAGCATAATCTAAGGAAATGATAGGAAAGCCATAAAAATAATATTGCT  
TGACGACCTTTCTAACCGGTTCTATTTAAGTTGGAGAAATCTTGTTTAAATCGTTTATCT  
AGTAACCGTCCCTTCTTGACATAGCGCTCAAACGCTGTTTTTAAACAATAATGTGAAT  
ATTTTGAGTATTTCAAGTTTTTCACTTCCTCAAAGATAATAAGCGTGTTTACGCGCTCAT  
TTTTAAAATAGTTCTCATGGACTTCTTTATATCCACGATTTCTATATACCTCTTTTTCTG  
TTACCAGTTTATCGTCTGCAAACCTTATCAATACATTGTATTTTAAAGAGGAGTTACCCCT  
CAAGAATAATCTGAAATTGTGCTATAATCTTTACCCTCCTATTTGTACAAATACACGTTT  
TCGTTTCCACAATATCCAACATATTCTGAACCAAATAAGATAGGAACTTTCAAATTT  
TCGACGCTCCAAGGCTTCATTTGAACCCTCTACATAAGAGTATAACCCTTTTTCTTCTAG  
GTTTGCTTTCCCTACAAAATAACAGGTGTTTCTATCTGTAAAACCTTGCCTATTAGCAAG  
TTTACTAATTTATCTTTCATGTTTCATGCCTGCTTGCATAGTCATCACATACTGGTTATT  
GATAATCATTTTGTATAGCTATTTATCTTTCTGATACCATTATAGCATTCTCAAATG  
CTTGTCTAGTGTTTTTGAAATTATTTTAAATTTATTTTTAGAAATGTTTTTATCTCATT  
TCTAACTATATACATTGTATCATTTTATAAAAATGATTGTCAAGAGAGTTTTGAATTTAGT  
TTTTATTTATTTAGTGATTTTCAATTTCTTGACATTTTTCTAAGTTGTGGTATAATGGTAAT  
AGAAACAGATGAAAGGATTTTAGAAGATGATAGATGATTGATTTTTAGAATGGCTAGTGT  
TGAAATGGATTTTCTCTTTCATTTTCAAACTTCCATTGGGGGAATTTTTGAAAA  
AGGGGTGGGGGAGTACATGCTTT

>NewGenomeName\_91

ATACAGCTTTATCGGTTTTTTAAGATACTTACTACTTTTCTTAGTGGAACCTATTAGTGG  
CTGTGAGGTCAAAAATGAAATTAACCTTAGGATAGGGGTTATTTCTAATTGAGCTGGTA  
TAGGCCCTTTTCTTTTTTGTGTCAGGTTAACAATAACATCTTTTAAAGACCATCCTTAATA  
GCTCGTTCTTTTTCTCTGAGCTTGATTCAATGTGATACTGGTCAATTTATTTATTTATGT  
TGTTTATCGCTGTATTACTGTCTATTTCTGATTGTGTAGCTTGTAATCCATTGAGCTCAT  
TCTTTGCATTCTGGAGCTCTTTAAATTCTTCATCTAAAGCAGCTTTTCTCTTCAAAAAA  
GTTTACTGTAATGCCACTTTTATATTCGAAGATGAAGTTCTTTTGTTTTTTA  
GCTCTTTCTTTTTGTGAAAGGTGTTTCAAGACATTTGCTTTTTTGTCTCATGTTACTGT  
TGTCGTCTTCGACTTTGAAAGCATCGAATTGATGTGTTTTGTTAAAGTACTATCATTTA  
AGTCATTTAAGGAAGAGAGGTAATCCAGAATTGCATTTTCAACATCGTTATATCTCACAT  
ACGTACACTTATTTTTCTTACATGTGAGCGATTTAACGTGATAAACGCTTTCAGTTCCAT  
CTTTGTTTTTTCGATGCGTTTAGATTCGTATTTAGATAAAGGCTCACGACATTTGAGC  
AAGTAAAACACCGGCCAGTTCACTTAATTCAAATTCATCTTTATTTGGCAAAGGGGAA  
TTTAGTTTGCATTTTTAATTGTGATTGTTGAAATTGTTTCGTTCTCAATTATAGGAGCAT  
GCGCATCTTGTACTTCAATTTGTTCTTTTTTCAAGGGCTAATTGTTCTCTTGGCGTCTTTT  
TTTTTCTCTAACCTTATATTTAACACTTCCTATATAAACTTCATTTTGGAGAATTGCTT  
TGATTGTGATTGATTCCAACGTTTTTTCGCTGACGGTGTAGGGATTTGTAAATTTGTTA  
GATGTGAAGCAATTGCTGTATACCTATAATCTTTTCCATTCAACCCATTACAAAGATGT  
TAAAATTAATTGAACTACTTTTGTGTCATCCTCAACTGGATCTAGTTTAGACGTCTTTT  
TGTTTAAATTGGTATCCATAAGGTGCCAGTCCAGATATCCATTTTCCCTGTGCTGCATAAG  
TGATTTAGCGCCTGTCTACGCTCCCTAGTCATTTCAAATTTCTTCTAGCCATAAATA  
ACTCAAACGATCTGGCGCTTGTCAACAGGGTTTCTAGGGTCATAAACCTTATATGGTG  
TAATTATGATCAATCGTTTGCTTTGAAGGAGGTTAACAGTTGGTCCTGCATCGCTATAAC  
TCGCACGACTAAGTCTTGTTATTTATTTAACAGCAATCCCTGATATTTGCCCTTCTCAA  
GATCTCTAAGACATTTTAAAACAGGTGACCATCATTTGCTTTCTCCTGATCCAATCT  
CCGTTTTTAAATTCATAAGGGATCTCAATGGCCGTAAGTATTTTATTCATAAGTTCTTTTT  
GTTCTGTGAGTGTGCTTACCTGTTCTATTTTTTTCGTTCCATGTCATGACGAGAACGTC  
TAAGATACCCTCAAATATTTGTGATGTTGTAAGAATTAACAATGTTTTTTAACTCGAAAA

ATTTAGCACCTCTTAATTTGTGTTTAATGTCAAAAACAGAACTTAATTAAGAATATTTTA  
TCTGACATTGAATACGAAAACAATAACAATAATTTGAAGGAATTGAATTGATTGAAATTTT  
ATGAAAAGCCTTCTTGAACATGGGTTATCATTAGTTCATCTAAAATCGTTGTAAAGACTT  
TATAAATCCAGGAGGGCTTTATGAATATTCGCTTTTCATTGTTAGTTTGTGTATCTTTTA  
TTTTCTTCACTGGTGGGTGTGCTGACAGTAGTGCGAATGCAAAAAGATGGTTCTAAAAATA  
AAAAGGAGTCTAAAGAGGAATCCTCCGAAGAAGGTGTAAAGGAAAATGATAATAAACTCG  
CGGATACTCCAAATATGGATGATTGTATTGAAGTGTACGGAAAAGAAGAGTGTGAACAGA  
TCACTGAGTACTATAAAAGTGAAGAAGGGCAAAAGGAGTTGGATGCAAGCGAATCAGATA  
AATATTTTGCAAAGTCTCAAACAAGTACTACACATAAAGATATCTATGAAAAAGTATCCT  
GGCTTGTTAAAGAAATGTTCCGGAGTACCAGAAAGAACAATTCAGCTGATTCTGAAAAA  
GTTTGGTAGAAAAAAGTGATGATGGTTTATATTACATTCATTCTTCTTATGAAATAAAAG  
GAACTGGAAACCAAGCGGATACTGACTATGAGTTTGAAATGTTGATGGATAATAAATACA  
ACTTGATGGACGCATATTTCCCGGCAGCACAGGAAGATATTCACGCCCTATGGTGTATG  
ACAACTTAAAAACATGGAAATACCAGAAGTAAAGACAGTATCTCCATAGGAAGAGAAAA  
GGGAAGAGAAAAACGTGAAGAAACAATTAAGAGTATTTATGGGGAAGAGCATATAAAGG  
ACAATAAATAAGTAGCAGTAAAAATAAGTGTACGTTAAGTATTTTAAATAAAATTCACAT  
TTTATTTAAACTTGAAAGCTGCTTGAATACATCACAATAATAAAGTATCCTGTATATGTA  
TCATAGTTGGTGTATCAACCACTATAGGTCAGAGAGTTCCCTCACATACTCTCTGGCTTC  
TTTTATTAACCTTACATTATTATTTTTGGTGGATAGTATGGACAATCGAAAAATGCTTCT  
TAGACAGAAGTTGAAAAATAACAACAAAAAAGCCTCCGAGTAACATTGATGTCAACACT  
GCCTCGTGATATGGCAACTACTATTGAGGATTGTAGTCTAATCACATCTCCTGAATTAGA  
AAGAATCCTAGATAAAGTTCAGAAAAAATGGAACTTTGAGTTACATAAAAAATGATTTTGC  
AATTAATAACAATGAGCATAGAAAAGAATACAGTTGGGAATATGAAGTGATCAATCATGT  
GCAATAAACTAAGCTTCTGATGAACAAGTTTACTTATATTTAGGGATAGAGGATAGCCC  
AATTTTCTGATTAACGGTAACTGGATAATAGATAACTTTAATTTTCTGTGGGAACAAAT  
AAATAACAGCGATTTATGGAGTATTGACTTTCATTTTAAATATGGGCTTCTAGTGTCTCG  
ATATGGCGGATATTTAGGTCATGATCCTAACCCAATTGAAATTATTTATGCAGTCACTGA  
ATGGGGGATACAAAATTGATTTATACAACAGAGAGTTGCAAAGGGCTTTGAATCCGCATT  
TTTGGTGGATTTGTAAAGTGATTTACTTAGTGAAGGAAATTAAGAAGGAAGGGGCGAGC  
CGCATTGTATAAAGCATAAGTTAATTCGTGGATTATGTGGTATGATAATCTCAAAGACGA  
AGGAGGATAAGCATGTTTAAAGAAGTAGACTATTGCACTTGTCAAGTGTCCAAAGTTTAT  
ACCGAACAAAATGATATGCGACATTGGGAAGTATGTGATATCTGCGAGAAAGTCTTTGAA  
GATACTTTTGAGTACTTTAATTACAATTCAGATGATTATTATGGATGAAATGATTTGACA  
TAATTTTGTAGTCAACGTGACACTCTGTTTTGCTTTACATCGGCTAATACGATAATAAGG  
TAATAAATAGCCAGGCGTATTTCCGAAGGGGAGAGCGCTTATTTTGATAACGAGTTAAGC  
CCTCCCATTGTTAACCGAGGATCAAAAGAGTGGGAGGCCTTCTCAGTGAAGGCTAAAC  
AGGTGGAACCTAAAAATAAGCTTCAAAAATTTCTTCCAAGCTCAATGATTTAACTGTCA  
ATTTTAAACCTAAAGAACCCGATAGTTTAAAAAAGTGTTACTAAACTCATTTGGTAGACC  
AAGCTATTTTTTTATATTTTTACTATCATTATAAATACACCCTTTCTCAGCAAAATCCAC  
TGCTTCTGTAAGTGAAAAAAGGCGGCAATTAGCAGAACCCACTTTGCCAACTTTCTTATT  
ATGTTCTGCTTCAAACGCTTGACCGACTTCTTGAATAGTTCTTCTCTAAATTCAGTTC  
TTTATATTCTTTCCATACTCTTTTACCTTCTACTATTATAGGTGCACCCCTGTTTATAAT  
TTTTTGATAAGGAATTCTGTACTCAGCAAGATGGAAGCAGGTAATAATCAAGATCAGC  
ACCTAATAATAACATATGATTCCCGTATATAAAGTTTCCCAGAGGTGATTGTTCCC  
CAGTCCGAATTCTAAAGGATGTTGATTAAGGATTTGTTTTTATGTTTTCCCAAGCTAC  
AAAGGAGTAGTTTGGGTGATTACCTTTTTAACTTCTGGATAAGACCTGAATAACTCTTC  
TATTTGTCCATCCCTCTAGTAGTGGGGGTATAGTTAGAATTATAGGCTGGCAAAGTTTC  
TCTAATAATATCCCAACACTCCTCTGGTACGGGAGGGTTTCCCATTCTTTGGGTGAGA  
TAATTCACGGATTGAGAAGGCATCACGATGGTACCTTCTTACAGTAACAACATCTATTAA  
TGCTCGAATCACAGCAACAGCTCCACCATTCACCCATCCTAAAGAAGATAAAGAGGAATG  
TACAAGTACGGTCAGCCCTTTCTTTAATCCGAAGCTTTCAAATCTTCTGTTAGAGACTG  
TTTTGTTCTTGAAAACTTGTCTTTCAACTATTTTTTTTCAATTTAGTTCATCTCCTATCT  
ATAACCCCTTATTAGATACTCTGTAAGTTTGCAACAATAAATTTGCAAGACCCCTTGAT  
GAAAGGTGTTGTTTTTTTATTCATCTTCATAAACTAACTGACCCGTTAATTTAAGTGGAA  
GTTATTACAATCTCTTTATATTTTGTTTAACTTAAATAACCAAGTAACTTAGAAATCCA  
TTTTAACTACATAAAATATAAGAACTCCGTTATCCATAATATTAAGCAACCTTTATC  
TTAACTTAGCCATATAAAAAAAGAAAAGCCCAAAAACGGGCTTTTTATTTGTTGCTC



TCTTAGGATAGCTACTATTTTTATCAAGGGAATGTTTCATCAATATTTCTAATGGTACGCTT  
GCTACTCATTCCAAGCTTACCTTTGAATTTTAAATGGAGGATACCCAATTGCATCGTGGC  
CATTCCCAAGGGATTTGGAGCAATATCGAAGTCAACTTCTTTGATACTTTTATATTCAAC  
AACTTCAGTATCTTACCCCCAAAAAACC GCCTTTCATAGTGACAAATAGAAGTTTCTT  
TTCAGTGATAACCATAAAACCAAATTTAGTAAGCTTTGGATCTGCAGAAGTCATATGTAA  
AATCTTTTCTTTTCCCAACTTCTTTGTTAAAGCTTTAATTGCATACTCATAAAACTT  
TCTTTCTGATTTGGGGAATTCGTGAATGATGGACTCAAGATCTTTTAAAAGTATTGGATA  
ATCTATGATTCCATACTTAGAGTTTAAATTTATGAAATTTTGTCCCATCACTTATCTCCT  
TTCATCGTTCACAAGCATAGTTGTCATGATCCCTGGCCATTTTAGATTGGTAAGCAGGGT  
GGGAGCTAGGCACTCCATTCGGATATTTCTTTCTTAACTCTGTGCCATTTTAAATGTTT  
CTGTTCTCCAGTTGTCTCTGAAGAAGCTTCTTTTTCAGTTGTAGTCGAAGTTTCACTTG  
TTGCCTTTGGAGTTGTAGGTTGTGTTGCTGCCGTTTACATGTTGTTGCTTTTTTAACTG  
CAGTGGTTTTCTTTTACACAGCCATTCAATCCTCGGTCAGTCATATATCCATTCTTGC  
TCCAGATTGAAAGCTTCTCTGATTTTGTCTTCTGCTCGTCTTTCTTAAATTGATCTATGT  
ATTTTGTATTTGGCTCATATACATACGCTACTCTGGCCAATCCTTCTTTTAGCAATGTTT  
CCTGAACAGATTTGCCATCCACATAAACATAAAGCTACTAGTCTTCCGTATTTATCTCTGC  
GATCACCTTTGTCAAATTCAGCTGCAGCTTACCGCTGTTGACCAATCTTTAGTTCGTT  
TTGACGCATCCTCACCATATGGTTGAACACAAGAATTTGGTTTCTTTGTTTCAGGTGTGT  
CTATGAGCAAGTAGCTTACTGTGTCTACATTTCCGTTGTAGGTAACTTTAAATTGTGTCAC  
CATCAACAGCTCTATCTAGAGTAACATCGACCAATTCCTTTTTGTCTTTTTCTTAGACT  
TGTCAGCAATTTTTCTTTAGTAGATTCCTTTTGTCTGTGTTTTCTTTCCACATCCGTAG  
ACGCTTGTGGTGTGTTTTCTTTTCTGTGCTTACTTCTTCAGAATCATTGAGCTGCAGGCTG  
GTAACGATAAAGCTCAAAGTGAACGCTGCAAAACCTAATAATAATTTCTTCAACTTCATTT  
CCCCTTTTAGAATGTTTGTCTCTATTTATATCGCTAAACCATCAATAATTATAATCCTG  
TATCCAATTTTTGTGAAGTAAATTATCCTTAAATTTTGTCTTGTGATGAAATAAAACTG  
GCGACTGTCATTGTAATTAGTTAGCTGCATTTTCATTTTCGATCTGCTATACAAAACGA  
TTCCCGTCTTACTTTTTTATCGAATAAAAAAATTGAAAAATAAAAATAATTTGGTAGGTTT  
TTTGTATATTAATATATAAACTCTAGATGATATGAAAGGGCGGGTCAAGAAATGAAAC  
ATGATAGTCTTTTAGATGCAACATCCCAATATGGACCACAGGATCTTTTATTAGGAAGAG  
ATGGGATAATATCTACTGGATTTTGGGCAAAAACCTCAAGCTAATATTCTTACTGGAACGG  
GTTTGGCTGTGAGCAATGATGAGATGAAAACCTTATTTGAACTTACTGAAAAACGTTGAAA  
AACCTCAAGATTTTCAGAAATTATATGATGTTTATAACGAATATAACAAGTTGTGGGACT  
GGTGGTTGGAGAAATTATTAAGCTATGTTAATAAAATGGCTAATGATATATACAATGTTG  
GGTCTACCACTTCGGAATTGATAAACGAAGCATTACAACCAGGTTTAAAGGGCAAGTCCAA  
CTGCAAGCAATGATCAAGATAGACAAGATGCTATTCAAGATTTTCATGAGGTCTGTCTTA  
TACTTATGAGAGAGCTCCATGAAAATCAACAATCTATGAAAGAGGTTCAAAGTCTAGTAA  
ATTCCTTTCTTCAAGGAGGTAACAACCTTGATAGGTGTTACACAATTGAACAATTCCTTTG  
AAGAAGTAATGACTTATTTAGATCCACAATACAATGATGAGAGCGAGATACATGATTTAT  
TGAATATATTAATGCAATTTAAAAAATTGTTGGGTGATAGTCTTGAAGAGCATGAGATAA  
ATGCGAAAGTAAAATTCAGCTCTGAGTTAGGCCCTTTAATCGGGTATATAGTATCCGACA  
TGTTAGAGTATTCTGATGTTCAACTGTTTAAACAACGAATTGATAATTTTCAGAATTTCA  
ACGGTGTAGATGCACAAGTTGCATTAGTTGTAAAAGTTTTAAGTCTGTTTCACGGCATCA  
ATATAGACTTGCATAATGTAGTATAACCAGGCAGAAAGGTCTCTGGAGTTTATAGAACAAA  
CTGAAGGAACTGGCATTCTATAGCAAATCAATTTTATTCACTCGCACAAAGGGTTTGAGA  
ATGAGGATATCAATAAGCTTTCTACGGATCTTGTTAATGCTGCGGCCACTTGGGAAGCTG  
TTGCTAATAACGCAAAAGAGTTTGTAAACAATTCATACCAAGGATAAAAAATGGGTCATC  
TGAAAAAGTGTA AAAAGAGGGTTAAAAATAACCATCCTCCATTGCTTTAGTCAGTAGGGA  
AAAGTCAGCACCATAGTTTTCTTCATAAACCCATTCATAGCCTATTTGACCCCAATTTGG  
GACTTGATCAGGTCACAATTTTCCGAAAGTAGCTTCAACTTCTTTGAATTTCTTTTTTAC  
TTTACGATAACCTTGTGTAAACAATATTTTTGCTCTAAGAGCTTCAAATGAATAACCACG  
GCTAATATTGGCTCCTTGTCTTAATCGAACAATTCAAGGATTCAGTATAGGCGTTTGTAC  
TGGGAGAATTGAAATAGTTGAATAACTCATCTTCCCAATTATTCATTGACTTAATCAGCT  
TTTTAAAATAAGTCATTA ACTCTTTCCGAAACCTTTGAAAGCCAGTTTTGAATCATATTTG  
TTAACATTACTTTTACCAATATGAATAGAAAGAAATCCAAAAAGAGATGCCGAAACA  
TCACTTTGATGTAAAAAAGGGGTGATTTATTTGTCTAACTTTGTTTCATAAGACGGTAAAT  
GGCTTGAAAGGTCTTTTAGATGAAAAAGGAGCCATTCAATTGTTTTGTTTCAGAAGGTGAT  
ATCATGGAGTTCCTTGTACATTTTACCGGACAAAGCAACCCTGAATGACATTCAAAGC

TTTGAGGCTAAACACCAGCTTTCCCTTCCAGAGGATTATCAGATGTGCATCAGACTACAT  
AACGGTGCGAAAGTTTTTTGAGATTCTTTCTGATGGGGAGAATATAGGTGGAGGACTTCAG  
CTATTTAGCCTTGAAGAGATTGAAGTGGAATAAATATGAGGATTTGTTTGAAGGTCTC  
AATGGTATCCCAATTGCCTACTTATTGGAAGAATGCCATTTAATGATCGATAAAGATAAA  
ATTAATCAAGGTGATCCTAATTATCTCTATAAATTTGAAAGTGGTTTAGAATATAATCCA  
TTAAATTTAACTTTCAAATATTTTTAGGCCGGTATATATTGGCTAATGGGGAACCTTTT  
TGGGATTGGCGCTACTATAACCGCAGAAAATTATTATAGAACAAGATAGTGTGATGTATAA  
GACAGTCAGTTCTGGCTGTCTTTTTCTGTTATTCAAGCAAATGATTGTGGTAAAATCTAC  
ATAGAGTAGGCTTGAAAGGAGAATGAAATGAAGGTGTTTGAAGCTGATTCATTGCTCTCT  
GAAGCGGATAAGAGAACCAAAGAGTATAAGGAACTAAGGTCGCAAATGGTGAAGCTCAA  
AAAGCGTTTTAAAGCTGTAGCTGACCTAGACGACAGCAAGTTTTTCAGGTAAGAGTGCAGAC  
AACATTAAGCATTATCATGACCATGTCGGCGTTACAGATCAATGGATTGATCTTATC  
GATATGAAAATTTCTTAAAGCAGCATTGCTGCAAACTTGAAGACGCTAAGATGTCT  
GATGCATACATAGAAGAATCCTTCTTAGAACATGACCTTGTAAATGCATACACAAAATCC  
AAATCCATTATGTCTGAACAGAAAAAAGCAATGAAAGACATTTTAGACGACATCGATGAT  
ATTCCTCCACTTGAAATCTTCTCAACAGAAGACTTGAAAGACAACTTTCCTCTGCAGAT  
GACAAACGTGAAAAACAATCGATAAGATAAACAAGCTTGATGAGGATTTAAGAACAGAG  
TACGCTGAGACTGAACAAAATGAACAATTCATCCAGCAAGATTTTAAAAAGCTGCAGGAA  
TCAACAGGCAAAGGGAAGAACGCCACACCGATTCACTATAGCGCCAAAGCGTATAGAGAA  
AGTGACATACATAAGAAAAAAGGCTATATTGAGCAGCATTCAGAATCTTTTTTAAACCGTG  
AAGCAAGAAGAAGCAAAGGAACGTGAAATCAAGGAATTAAGAAAAAACTTAATGACGGT  
GTGTCTGATCCTGATGAATATTTAGAGATTGCTTAGATAGTATGGTACGAGTATCTGGAG  
CCAGCTCAAGTACAGCTTGCAGTGCAAATTGAACAAGCAAAGCAGCTAGAAGGAGCAGGA  
GAACTCACCTCGGACATCGTAAAAGGTGTAGGGGTAGGCTTATATGACGTTGGCAAAGAC  
ACTGTAACCGGCTCATCGGACTTCATCACCGATCCAGGAGAAACATTGTCAGCGCTTGGT  
AATGCAGTAATTCATCCAGTTAAACATATGATGCAATATCTGCTGCAATTGAAGAGTCA  
TATCAAAGGATATGGTGAATGGAGATGCCTATTCAAGGTCAAGATGGGTAACGTATGCA  
ATTGGCTCAGTGGCTGCAGCTGCTATCGGAACAAAAGGTGCAGGAGCCATTAAGAAAGCT  
GATGCAGCAGGCAAGGTAATAAATAAAGCTAGTCAAGCAGGGAAGAAAATTAAGGACGTC  
AAGATTCCAGATTTGCTGCCTTATAACCCTAAGTACTATCTTGCTATGGCAGGGGACGTG  
CCATACAATGTAGTGGATGGAGAAAACCTTAAAAAATCAGCTAATGAGTTTTGCTAAAGGG  
TCAGATAAAGAAGTAAAACCTTTTCGATGTCGTTGATTATAGACCAAGTAACAGTCCTTTA  
GAGAATCATCACGGTGTAAATGGACGTATGGGCTAAACACAATGTTCCGAATTATGTGCGT  
AGAGGGAGTAACACACCAACAGTAGCTTTAACTAAGGAACAACACAACGCTACCAAGAAA  
GTATATAGAGAATGGTTGTTTCGAAAAAACAGGGAAGAAAGTTGGCGGCCAAGTAAACTGG  
AAAGCAGTATCCCCAGAGAAATACAAGAACTTACTGAGAAGATGTTTGATGCTGCTAAT  
GTTCTTAAAAAAGCTAGACAGCAATATTATAACGCATTTAATCAATACAACCTTTAGAAAG  
TAGGTGCGGATTTGAGCATTAAACATGTTAATCAAGAAGATTGCTTCTACATCAGACTGTC  
GGCTGTTTGAAGCTGATGGTCTCCAGGAATAGACGAGAAGCATCAACTACCAAAGATA  
TTAGTGAATTTTATGAACAATGTGGTGGAGCAGTTTTTATATGAAACTGCGGATTATCCAA  
TATACATAGTACGACCAGCTGGGTTTGAATTAGCTAATCCCCTATTGTAGGGGAGCTCT  
GTGAAGAAGACATTTTCATCCGAGTGGTATATTGTATGCACGGATGGAAAAGGAAAATACC  
TAACAATTGACTTAAACGATCAGCGAAAAGGAAAATGCTATGACAGTTTTTTTTGATCGAC  
ATGGAATAGTCGGCGAAACACAGGTGATAGCAAGTTCATTTATAGATTTAATACAGCGAC  
TGCTTGAAAATAAGGGTAAACATTGGTGTGGTCAAGGGATGATAATGTATCACTAGGCG  
ATGCATATGATGGCATAGAAATTGAATAATCTATTAACAAAAGTATTGCAATTGTTTCAT  
TGCTAAAGATGTGCAATGCGGAGGGTATTAATAATGAGCTTCACTAAGATCGAACAAAAGT  
TGAAAGAGTTTACGATTGATGCTGGCAGATATCCTAGCATTAATACAAATGAACAACTCA  
AAGAGCTTGAATGAACATAGGCAATCAATAACCTTCAGATTATAAGGACTTTTTGAAGA  
AATATGGAGGATGTTATTTAGAAAGTAAAAAACAACAGATGAGATTAAGTATGACGTTT  
GCTATAAACCTTAGAGAAACATCCATGGGTGGGCAAGGGCGATGATACACAATTGTTAG  
AAGGTATTTATGGTTTAGCGAATGATCATAACAGTCTTCAGAAAGCACTCGATACATATT  
CTGATCGCTTTCCTAGAAATATTATTCCTATCGCAAGCTCTGCAGGCGGGAATGAAATAT  
GGATGGATATCGATAATGGAAAGATATTGTTTTGTGATCCTGAATTAAGTCATCCCGACA  
AAGACTTTTTCTTAATTGCCAATTCGTTTGAAGGAGTTTGTCTTCAGTTTAGTTGATGAAC  
CAATTGAAGCTGATAAAGAAGATGATGGAATTCTGTATCTTGTATTAGATGATGACTTAC  
TAAGCAGTTAAAAAATCGTATGGAAATAACTGGAGGGAAAGTTAAAATGGCAGTTACTTA

TTGGACAGGGGAGAATCTTACACTGCGAGCAATTGAACCTGAAGATATCGTTATATTTGA  
TTCGTTAGATGATGAAATTCTGCGAAATATGGACTCGCTACATTTTCTCGTTCAGCTAA  
TAACATGAGAGAATGGGTAGAAGAACAATTAGAAAAAGATGAATTCCGTTTTATTGCAGT  
TGAAAGTGATAATAATATAGTAGGTATGATTCAAACCTTTGACTGTGATAAGAAAAATGG  
TACTTTCGGTTATTATTTGGCTGTATTCGAGCCATATAGGGGGCAAAGGATTTGCCAAAGA  
AATGATCTTGATGGTTCCTTCGCTTTTTTCATCTTGGAACCTTGCTTATTA AAAAGTAAATAC  
AACTGTTTATTCTTATAGTAATCCATCCATACGATTACATGAAAAATTAGGTTTCATGAA  
AGAGGGACAACCTAAGAAAGATCATTTTCTACTAAAGTTGCCTATTATGATGGTATTTGCTT  
TGGGATGACAAGAGAAGAATTTGAACTGAATGATGGATAATCACTTGTGCATCGATAA  
AGTACTGGGTTCCAATAAAAATAATGGTTTTATTACCAAGCAATAGTATTGCAAATACCA  
TTTTTATATGGTTATAATTAGGGTAATGATACAATTATATAATTATTTTTTGCATTTTGT  
TTAATTAATGCATAAAAATAAAAAGACCAGGGTGTGGCAGCACCCCTGGCTCTGTACAAA  
AGCTGCCCTCAAAGGGCTTGCTCCTTGTCATATCTGCGTAGGCCTAACCCCTCAGGTGT  
CCAACTCAAGGGAAGGTCTATTTTTCTTTTGGCTTGACGTTACAATCATCATTATATT  
GAATATCAACAAGACGGTATTTAATAACAATCCGCCAAAATTGATCATTATCATTAAATGA  
TTCGTAAACAGTCATTTTCCCACCCCTTTCATAGGGGATGAGCAACACTCCCTTGAGTGA  
GCAAACCTTATGTACAGGAAATATTATACTATACATAAATGTCCTTGTCGTTAAAAATTC  
ACAATAAATTGACAATATGAAAAGAACTTGCTTAATGCAGGTTCTTTTTTTATTTCAAAT  
ATTAAACAATCCCTTCAAATGACGGTATTTAACATGTAAACTTGTACCAAGGAGGATTT  
AGGCAATGAAGAAGAGAATTACATATTCCTGCTTGTGTTATAGCAGTTGTTGCTTTTCG  
CTTTCCTGATTCATCAAAGCAAAGCGGCAGAAGCATTACCACTCTTCTATCTACAAC  
TTACAGGGATTACATCAGACGGAAACGATTTTGCTTGGGATAACCTCACTGCTAGTCAA  
CCTAGGCGCCAAACGTTTTGAAGGGGAATAAACTATATGTGATAGCTCGTTTTATGGGTT  
ATACCAAGTTAACAGTTATCACAGGCAAAGACGGTAAGAATCTGTTGTATAACGGTACAG  
CTAAAATGTTTAAATCTGATGCTATCCTTGGTCAAATAAAGGTGGTAATAGGCTGTGATA  
GATATTTGAGATTCCTATGGACGCACTTCAAGAAAAATCTATACAGATTAAAGCATTGA  
GCTCAGGCACCACTTTTGTTTACAGTCAAAAATTTGATTTTGAAGAGAGTGAACCAGGT  
GATTAGTACTTCTAGTTATGATGTAACATAAGATCCAAAATTCTTAGCTTTTTGTAGCTT  
AGGAACAGAAGGGTATGGACGGAAACAATACTGAGCACTTCAATAGGTTTTAACGAGAT  
TTGCGAACCACTTGCGAAAAATGCGATCGTTAAACCCGAGAATAAAAAAATCACGCTTGA  
TTTGAATAATTCTTTAGAAGACTAGAAATTGAGATTTACTGCAGGCGGAAACCTTTCTAC  
AATGGATTCGCAGGTATTAGATGTTATCAAAAAAGCTTATAACTTAGGCATGGTTAATAA  
AGATAACATGCTATTACGAAATGAAGCAATTAATGCTTATAGAAATTCTATTTAAATAAT  
GAAAACAATGCCAGCTCAAATAAAGAGCTGGGCATTTTACTTATTGGGGTTATTTGCTT  
TCATATACTCTCGATGTTCTTTCTCCAATTTATTAATATCATCTTTTAATATATAGATCT  
TATATTTTTCTTTGCTTCTCTAGACAGATTATCTTTTAAATACTCACGGAGCTTTGCTT  
CACTTTTGGTTTGATCCATGCCAATTGTAATTGCCGGATCTGTTTGACCAATTTGCACAC  
TGGATATACCAAATTCATCCCGAATATTATCAATTACTTCAAAGGGGACTTTTTATTG  
CTTTGATAAAAGTAATACCTGACATAATCAAAGCAGGAACTAAGACCAAAAATCCGATTA  
GCCTCTTCTTCAATTAACCATTACTCTCTCCTTCGTGGAAAATAATCCCTCCTTTATTAAT  
ACTACGCAAATCATCATTGACCTTTATATTTTATTACCAACATTTACATCGAACTTTTGT  
TCTGGTTTATCTTGAATGAAGAACGTTGGTTCTGTTAATATTAGAACAATAAAGGAGTGG  
GGCGATATGCTTAGAGATCGAGGAAGAATCAAATGGACATCAATGATGCTTCCAGAACAT  
TTGACACAGCTTAATCAAGATTTGATTGATGTATCAAAAATTGAAAAGCCATCATTAGAT  
GTTTATCAAATGAAGAGATGGATATCTCGTCTCTGAGGCACTAGAATTTAACAAAGAG  
TTGCAATTTAACTTGTTCACAATGGATTCGTTGAAAATGTCACCGGCAGCGTCCATTAC  
ATAAATTTTGAACAACAAAAGCTTCACGTAAAAGACCAGAATGACAATACAGCTTATATC  
AACATGAATAACATCATAGGAGTTACATATAATGATTGATTACTCACAATTAGCACGTAA  
GAATATACTTTGTGTCGATATGAAGTCCTTTTATGCTTCTGTATCGGCTGTAACAATGGG  
GCTGCACCCTTTAACATGCTATCTTCTGTTGTAGGGAATACGGATAGACAGGGAAGTGT  
AGTATTAGCTGCATGTCCTGCACTTAAAAAAGATTTTGGAAATCAAACAGGATCGAGACT  
ATTTGAAATACCTGAAGATCCAAGGATACACATTGTAATCCACAAATGTAGCTTTTCAT  
CAGAGTTTCAACTGAAATTACAAAGCTGTTTTACAGATTTGTTTCTGAGAAATGTGTCCA  
TACGTATTCAATTGATGAATCTTTTTTAGATGCAGGAAAAGAAGATCCTGAAGAAATGGC  
CAAAGCAATCCAAAGAAGCATGTGGAGAGAATTTGGGTTGATGTGCACAGTTCGTATTGG  
AGACAATATGCTACTCAGTAAGCTTGCACTTGACCTGGAGAGTAAGAAAACAAAGAGTGG  
CATTGCACGTTGGACATATGAAGATGTACCGAATAAACTCTGGAAGGTTCCGCCCTTTGTC

TAAAATGTGGGGGATAGGAGGGAGGATGGAAAGAAACCTAAATCGGATGGGAATATCGAC  
TATAGGTCAGTTAGCCAAATTTCTTTAGAGCTGCTTGAAAAGAAGTTCAGAATAATGGG  
AAACCAGTTGTACTACCATGCTCACGGAATTAATTTATCAGAAATAGGTGCTCCGTTTAT  
GCAAGGTCAGATTAGTTTCGGTAAGAGTCTGATTTTACTGAGGGATTACACAAGGAGTGA  
AGAGATTAAGGCGGTACTTCTGGAGATTTGTGAAGAAGTCGCAAGAAGGGCACGTACACA  
TAATAAAGTTGGTTCGAACAATCAGTCTGGGAATTGGGTACAGTAAGGATGAGCTTGGTGG  
TGGTTTTTCATCGTTCCAAAACAATTGATCTTCTACATGTATCACGATGGATATTTATAG  
ATGCTGCTTGATGCTTTTTAATAAGTCTTACTCGGGTAAGACTGTGAGAAGTGTCTCAGT  
CACGTTATCGAATATTGAGAATGATGTTAATCAGCAGCTGAGTTTATTTGAAGTGGATAA  
TGAAAAGAGAAGGAAACTCGGTTTTGTAATGGATGGGATTAGAAGTAAATACGGCTCTAA  
AGCGATTCTGAGAGCAGTTTCTTATACACCAGCAGGAACTGCACTTCAACGAGCTGGATT  
AACAGGTGTGCATAGGAGTTAAGATAAATTTAAACTTATATAACACATCGTTAAAGTTT  
TTTTGTTTTAAAACTTAAAAAACATGGTAAAATTATATAAAAGCATAAGAAAGAGTGAT  
TATATGGAATATGTAGTTATGATAATCATTTTATTAGCACTTTTCTTTATTTTTACTGTT  
TTCCTAAACACACGTTATAGTTTTGATGAAAAATGCTTAGTCTTAGAATTTGGTTTTATCT  
AAAACAGAAATTTCCAATTAATCAAATAGTTAGCATTAAAGAGTCAGACAAGTATGGAGTT  
GCAGATAATATCGATTATAAAATTGGTATGCCATATGCTCAACCAGATAGAATTGTTAGT  
GAAACTACAAATAAGCGTTTTCTAGTTTTTTTTAAATGGAGCTCAACAATTTATTTCAAAG  
TATAAAAGGGTTAGTGTTTGAACATAAAAAAGTACCTTCTTACAATAGAAGGTACTTTTT  
TGTATCTATAATTATTAATAAATTTACCTAAATTTTTATCATTATTAATTTCAAATAAATC  
CATAAGAGTCAATTTTATTTAGTGTATTACAAGCAATTTCTGTTTATTGATAGGTAATAAA  
GTTTTTTTTCTATGATTTATGAACAAGTTTCCTTATAATTTTCAAAAAAAAATAAAAAAT  
ATGGTTGAATTTAGAATTATCTTCTTTATATTAATAAATGTAATCCGGATTGCAAACAA  
ATGGGGAGGTTTTACAAATGGAAAAGCTATTTAAAGAAGTTAAACTAAAGGAACTCGAAA  
ACGAAAAGGTTAGTGGATTAGCAAAGCTCAGTGTGCTACGTTGTGGCCACAATGTGCTA  
GTGGCGGTACAATTGGTTGTGGTGGCGGAGCTGTTTCTTGTCAAACCTATCGTCAATTCT  
GCAGATAAAAGATTTGTAGAGGGAATATTTTAAATATTCCACATATTTAAAGCGGGGAT  
TGAAATTGAGTAAGAAAAAGAAATATGTTTACTAAACAGTTTAAATAGTCATGATTGTG  
GACTAGCTTGTATCTCGTCAATTTTAAAGTTTATAACCTTAACTATGGAATGGATTTCT  
TACTAGACCTAATTGGGGATAAGGAAGGCTATAGTTTTAGAGACTTAATTGTTATTTTTA  
AGAAGATGGGGATAAAAACCTAGGCCACTTGAATGGCAGAAAAATAAGACATTCGAAGCCC  
TAAAACAAATAAAGCTCCCTTGTATAGCTTTGTTAGTAGGGGAGGAATATGGACATTACA  
TAACAATATACGAAATTAGAAATAACAATTTACTTGTAGTATCCTGATAAAGACAAAA  
TAACTAAAATAATAAAGAGGATTTTGAAGTAAATTCACAACTTTATATTAGCAATTG  
ACAAAGAGTCAATTCCTTAAAAAGAAAAAGATCAAAACCAACATTCTTACTTTTTTAAGG  
ACATACTTTTTAGAAATAAATTGATCGTTTTTTGTGATTTTATTGACTTCTTGTTCGTTG  
TGGGTCTTGCTGTAGCTGGGTCGTTTTATATAAAGTTTCTAGTTGACCTAATTATCCCAA  
GAAGCTTAAGAGAATCTTTAATCACTATCACTTTAATATTCATAAGTATGGTCTTAATAA  
GGTGCATCTTCGATTTTGTAAAGATCATATTCGATAATAAAATTGTCTTACAAAGTTGATA  
AAGAGATGTCAAATGTTTATTTAATAAAGTAACAAAATTACCTATTAATTTTTTTGAAA  
ACAGAGCAGATGGAGAGGTAATTTCTCGATTCAATGATGGTATATATTTAAAGACTTTT  
TTAGTGATAACTTTGTTACTGCAATAATTGATAAATTTAATACTGGGATTAGGAGTTA  
TTTTATATAGAACAAATAACATTCTTTTCTTAAACAATTATTCTCCCGATTTTGCTACTTT  
CATGTCTAGCGATTTTGTGTTGTTGATCATCTTAAAAAGAAAAATCAAAAACCTGGTGGAGG  
ATAAGGCTAAATCTACCTCTTTTTAATTAATTTCTGAAGAATATGACAACTGTTTATT  
GTTTAAACAAAACCTCGTTTTTTTTAGAAAAATTTTATCTCACATATGATAACAATTA  
ATTCAACCTTTAGTGTAGCAAAGGCAGTTATTAGCAATGAAAAACTGAAAGGATTAATTC  
AAAACCTTTTTACCATAATTATTCTATGGGTTGGGACAAGACAAGTTCTAAATGATTCTA  
TGAGTTTGGGTACACTGCTACTTATAAACACATTAGCAGCCTTTTTGCTAAGTTCACTAG  
ATCGTATATTGAGTATTCATCAGATCTTCAGCAGGCACATGTTGCTTCCATAAGATTTT  
TTGACGTAGTAAGCTATCCGGTTCAGCAAGATAGCAATGAGAATTTAACTGAACTTGATT  
TTATTCAGAATATCAAAACAGTTAACCTTAATATTGGGGCAGACCCAATGCGTTATATAG  
TTGAAGATATTAATTTAATATTAGACAGAAAGGATAAAGTCTTATTATTAGAGAAAGTG  
GTAAGTGGAAAAAGTACGTTTGCAAAAAGTTTGTCTAAAGTGTATAAAGTACCCGATAAGT  
CAATTTATTTAAATGGATTAGATATTAATCGATACGATCGTTTATCAATAAGAAAAAGGA  
TTGTGTATACTGACGAAAATCCTTTTTCTTTTTAAGGGAACCATTAAAGAGAATCTTTGCA  
TGGGAGAGATTTTTGATCAGAACGAAATTGAAAACGCGTGTATAATGTCCCAATGCCATG

AATTCATTTGTAACCTTGGACAGGCAGTACAGTTATAAATTGTCTGAAAACGTTTCCTATC  
TATCTACAGTACAAAAACAACGGTTAGCATTAGCAAGAGCAATTTTACATCAACCACAAG  
TATTAATTTGAGATGAGTCATTATCTAACAGTGATCCGGATAACACAAAATTGATTTATG  
AAACCTTTCACAGGCTGAGTTGTTTAATTATTCTTATAACTCATAATGACCCAAGTAACT  
TCAAAGACAATAAAAAATTAGTATTCAGAAACAATAGGATTATAGAGTCGAGCTACTCGG  
AAAATAAGGAGTATTCTATATGAAAAGTGGATTGTTTTATTTCTTGTTCTAATAGCAGC  
AGCCATTAGTATTTTCGTTTATGTTTCTACAGGTAGCGAAAAACCTTTTTATAATGATAT  
AAATTTAACTCAATATCAAAAAGAAGTAGACTCTAAAAAACCTAAATTTATTTATGTCTA  
TGAGACAAGTTGTCCTCATTGTCAAGAAATAAACCTGAGTTAAATGAAGTAGTTAAGAA  
AGAAAAGTTAAAAGTACAGGCTTTAAATATTGAAGAAAAGGAAAATTATAACACTGAATT  
TTAGATAAATATAATTTGAAGAAAACCTCCAACGATTCTCTATAACAAAGATGGCAAAGA  
AAAAGATCGGTTAGAGGACTATAGAAGTGCAAGCCAAATAGAAAAGTTCTTTCATAAAAA  
TGGTTATAGACATTGAAACTGAGTGATTTTATTTGGAATTAAGAAAGGCTATGCCGAT  
TCTTTATTGTATTCAGAGTTGTCATTGTTGGTTAATATAATGGAATATGAAAAGTTATT  
GATGTGATGTCAATTCAATCTTTGGTTGCAGGTTATGTAAAATCAGATACTCCTACAATA  
ACATGCGGTATTATAGTTTATTACGAAAGCAAGAGAATTA AAAAGTGTTTAAATAGTGTT  
AAAGATGATTTTAAACGAGATTATTGTTCTAGATTCATACCCACTGATGATACCGTTGAT  
ATTATTA AAAAGTGATTTTCCTGATGTTGAAATTAATATGAACAGTGGAAGAATGATTTT  
TCCTATGCTAGAAATAAAAATTATAGAGTATGCTACTTCCGAATGGATTTATTTTATTGAT  
GCAGATAATTTATACACTAAAGAAAACAAAGGGAAAATAGCTAAAGTAGCTAGAGTTTAA  
GAGTTTTTTTTCTATTGATTGTGTAGTTAGTCCATATATAGAAGAATAACTGGACATCTA  
TATTCTGATACACGAAGAATGGTTCGGCTCAATGGTAAAGTTAAATTTTCATGGGAAAGTG  
TATGAAGAACCTATGAATTATAATCATAGTCTACCTTTTAATTTTCATTGTGAACCTTAAG  
GTTTACCATAAAGGATATAATCCTTCAGAGAATAATTTAAAATCAAAAACACGAAGGAAT  
ATAAATCTCACAAAAGAAATGTTAAGATTGGAGCCCGAAAACCCAAAATGGTTGTTCTTT  
TTCGGCAGAGAACTATATTTACTTGATAAAGATGAAGAAGCAATTGATTATCTGAAAAAA  
TCAATAAACAACCTATAAAAAATTTAATGATCAAAGACATTATATAGATGCTTTAGTGTTA  
TTATGTACTTTATTATTGCAGAGAAATAATTATGTTGACTTAACTCTATATTTGGATATA  
TTGGAAACTGAATATCCAAGATGTGTTGATGTTGATTACTTTAGATCTGCAATTTTGTTA  
GTAGATATGCTAAATAAACTTACTTCTTTAAGCAATATGATTGATGAAGCTCTTACAGAC  
GAGAGATACAGTGCTATAAATACAACAAAAGATCACTTTAAAAGAATTTTAATAAGCCTT  
AATATTCAACTCGAAAATTGGGAAAGAGTAAAAGAATATCAGGGGAAATTA AAAATGAT  
AAGATGAAAAAAGAAATTAACAATATCTTGCCAACTCACTCCACAATATTGAACACGTC  
CTGTAAGGAATTGAAGTATGAATACAAGATATGTAAAATCATTTTTTTTTATTACTGTTTT  
TTCTCTCTTTCTTTGGCACAATGGCTAGTTTATTCTACAGTGAGATCATGCATTTCAAC  
CATGTGTTCTATGTTTGTATCAAAGAATAGTTCTATATCCTATACCTATTATCTTACTAA  
TAGGCTTATTA AAAAGAAGATCTTAATTCGATATTTTATGTTGTTTTCTTTTCATAAATTG  
GATTGATTATTGCGTTTTATCATTATATTATCCAACCTTACACAAAGCAAAGTGTCGTAT  
GTGAAATTGGAACCAACAGCTGCGCAAAAATTGAAGTAGAGTATCTAGGCTTTATTACAT  
TACCCTTAATGAGTTCAGTATGTTTTGCATTGATATTTGGTATAGGACTGAAATTAATTA  
TCAAAAGCAAGAAATTA AAAACAAAATCAAAATGTATTTAATTGAATAAGAAGTAACCCGC  
CTTGTAAGAGGGAGGGTTACACAGGTAATCCGAAAAAAGCTATTTAACAAGTTCTCTTT  
ATTTAGA ACTTGTTTTTGTTCCTTTTGCAGTTATGTAGTTGTTTTTGAACCATGC  
TGCGGTAGTAGTACTGGTTGTGAAGACGATAGTGAATATTGTATATAACAATCATATAA  
ATGATTTATGTCCTTTCGTTAATGATGAATGCTGCTTTATCCAGCATCACCATTATTTG  
ATTGAGTAAAGCTATAGCGAGCAAAGAGTCCTAACAATTGTGCCTTTATCAATAGTCTC  
AAACATTGAATTCCTCCTACTTAAAATTTTGTTCGATTTTATCGAGCTTTTCAATTACAA  
CATCGTACCTTTCACTGAATTTACCCAGTACTTCGTTTTGAGAATCGATTTGATTACAAA  
GTTTCGACTCTTTTCATTACTAGTTTTTCATTACGTAGAAAAGTAGCCAACAAAATAAAA  
CAGCATATGGCCCCTGGGTACTTAAATATTGTGTTATATCCATTTCCATAAAAATGTTTAC  
CACCTTAGTACCATAGAAAAGGATATTTACTGTAACATATTTATGAATAAACATCCTCCG  
AGATAATTGAATATAATTAGATTGTTGATCCAAACTGTCCCGGGATATATCCACTTTTAC  
CTTTATAAATAACTTCTCAGTAGCCATTGGAATTGTTTTTACCTTCAACTGAACCAGAAA  
TTGAAATAGTGCTTCCAAGCTTAACTGTGCCAATATTTTAGA ACTATTTGATCAGGCT  
TGTCATTACGATTGCAGCGCTTGATACACCCGACAATTTTGATTTTTCTACGGATTCAA  
TAGATGAGGAACTTGAAGAAGGTGATGTTGTTTTTGGGGCAGAGGAAGAGGTTTTAACTG  
ATCCTGTAACATCAACATATTTGTGAGAAGCAGTGATGTAATATGTAGTGCCTTTTGAGT

TCTTAAC TTTGTATTGATAGGCAGATCCAAC TTTAACTTTCTCTACAAC TGTAGGAAATC  
CGATGCCTTTATTTACTGTGCCGACAACATCTTTATCTTCCCAAGATGGTTTTGAATAGA  
AGCGTAGTCCGTCAACTTTTGATTTTGGTGAACCACTTACTGCTGATGAAGAGGAAGGGG  
AGGAGGTTGTTGGTTTAGTTGGAGAAGCTTTTGAACATATTTGCCTGACATTTTGCCT  
TTTCTCGATTTTAAAGTCTACAAATTTTGGCTGTTAGATAACCCATGGTGCAGGGCAAT  
TCTTATGGGTGATGTCATAATGACGAACAATATCATCAATAGGATCTAAACCAAAC TTTAT  
TACATAATTCAGCGAACACATCATCAGTTCTTTCAACTGTATCTGAATGGAATGAACCGT  
CTCTTTCAAGGCACATTTCAACTCCAATAGAAAGAAAGCTAGCGTTAGGTTTCAGCGCAG  
CAACTCCTCGATAAGGATTTCCGGCACTATCTCTTTGCTGAATTTCAATTTGCATGGTAAG  
CTACTTCAATTAATGGAATGATACAAATTGCTTCAGCCTTATCTACGAAAATGTGAGCTT  
ATTCATAAACTTGTGCATTACTGAAGTATCTTCGATTATTGTCTGCACCTGCACCCGGAT  
TGGCTGTATAGTGTAGGACGCATTTTTTACACCCTGTAATTTCAAACCTGGTCTAGTAT  
ACTTATTGACTGGAATGTAGCTATTAGTGAAAAC TGCATAAAAACATCTCCTTAATTTT  
TAATTA AAAAGAGTCTCGAATGGACCATTTTCATAGCGATTTTCGAAACTCGTTGAATTGA  
ATCTCATTATTGTTGGATGATCCATAAATTTTCATGGAAAAGATTGTGGATTTTCTTAGTT  
AGAGGGATTCCGAGTCCATAATTTAAATGAAGTCTTACACATTCTTTTTTAATTTGCTCA  
AGCTCATTGACAGTAAAGTCGCCAATTTTACAATTCATGACTTAAATTGCTCAGTGCTTC  
TTAACTACCTCGCTAAAATTTCTTTTTATAGTGGTGCACATGAAGGTCTTTTGTAGAGTT  
TGTTATTGCACATTTAAATGAATATTTCTCTAATGAGGGCTTCGTCCAAACTTCATAAAC  
AGCTTCTCTAAAGTTTTATGTAACGAAGAAATACCGCCTTTCCATCTAGAGCTATTTTC  
GCCTGTGAAAAGAAGTAAATAACACTTTCCGCAGTTTGCTAAACCTCTTACCCTGTTATG  
AAGTGGAGCGTATTGAACTCCTAAGTCTATATGTTCCCTTGCATAGAAAAGGGAGATTTTC  
TTTATTGTGATGGTATGTATCGAATAAAGGGATATACGCTCGATCAGAAGAAGCTACTTG  
TGCACATTGAACAGAGTATTTTTTAGCACCTTTACATTGAAAACACTCTTAACCTTTAAA  
GAAGTTGCAGGGAAGGTGCTCCCATATATGTCCTTCAGTGCACCTTAGCATTTAGTTTAGA  
ATGACAGTTTTTATAGGTGCTTAAAATCTAATAGCCTTTAAGGGCATATCTACTTTTCAC  
AGTACTTATGTTAAGCCTTTTTTTAAGGGAGCCTTCAATTATCCTGCATTCTGGACATCG  
AGTACCTTTTTTAAAGTGTTCGTAGTTTACTGGCCATGTGTGATTATGTGACATCTGAC  
TCTCTCCTTTGTTTTCGAATTTACCATGTCTCCAGAAATGTGCATGTAGTTATTCTGAGC  
TAATAAATCAATAAATTTCTTTGAGCTTCTTCACGTGTTTTTAAATGATAATCTGATAT  
CTTTCTTGCCATCTATCCACCTAATAAATTTGAGCACAAAAAAGAGAGAAGGGGAC  
TAAACCAATCTCTCTTTATCTCACGAATGCTCTTGTTATCTCTGTTTTTCAAGAATGTA  
TTTTGAATAAAATCTATATTTTATCTAGAACGTAACCACCACCTTTATTGTTCTTTATT  
CTTAATCCAAGTTCAAGCTAGGTATATTACCTACGTTACCCGACACTCGTCTTCTATCTA  
TATCTGATGGAGTTCTAATGAAAGCTGTTCCCTTCAACATCACTATAAACTAAGTTTCCAG  
TTACAATTAATCGTTAGTTCCAGCGTCTTCTTGAATAAAGTAAAGGTGATAATCAGAGT  
GGCATTGCTTGAAAACATTATCAGAGAAAACAGCTTCTCTTACAGATCCCCAAATTGCGC  
GATCAATATGATTAGTGATAATGTTTCCCTGAACAAATTGCATTTGGAGAGGTTTTGTACC  
GGACGAAGGTTTTTAAAGATTTTGCAGAGGTTATTCTTAGTGAAGATATTTGCAGCATTAC  
CCACCCAAAGGGCAGTACCGCTAATTGTGATCTCAGAGTCACTTAGTTAATAATTTCTC  
CTTCAGCAACGTTGATGCACTCATTGGCTATATTGGAAATATACATTCCTTCAATCGTTA  
TAGACTTGCCGATCCCGTGCATACTCACTCCTCGGTCTGTTGCATTAACCAAGCTGCAGT  
CTTTCATTTTAAATGATTTTATATTCCACCGGCGCTCAATCGGCAGCTACTCTTATTTA  
CACTGCTGTTGCCATCAATTTCAATGCCTTCTATATAATTGTGATCTGTGATTTCGCAACA  
ATTCATCAAGTGAGTGATTTGGATTTTCAAGGAGTTTAGTGTAGGATCGTCTTTACCAA  
CAATTGACAAATTTGAAGGGAGTTCAATTTTTTCACTAGCCCTAGTTGTAGCCTGCTTAC  
CGATTAATATGTACCTTTGAAAATGTTGGGTTTCCCTCCACCTTTTTTCAGATAAATCAG  
TAAGGGCTTTTTTAAACTTGGCTGTATTATCGATTGAGCCATCTGGTGAGGAGCCTAAAT  
CTAATACATTCCAAGTAGGCTTGGATTCAATAAACTCTACACGTCTGTTTAGACTTGTTG  
CCAAACCTCTTCTTCTTGAAC TTTCAAAAAATCCGCTATCTGTATCGTGATAAGGATATG  
AAATTGTTAAGGTATCGACCACTGCACGTTCAATGCCATCACTAATGTTATTAATATATT  
TTCCTTCAACAGCAGTTTGTGAGCTTCCACCACCATATAAAAAGAAATGCATTAATACCGC  
CTTCAGATAAAAATAAAGATGGCATATCATAAGCTGTAATACCACTGGATCGAAGTGAGC  
GGCCATCTACAGTAATGATAACTAGTGTACCATCAGATCTTTCCCAATGGCTTGTCGAG  
GATGCTTAACAGTTAAATGTGCCATGTAGTCATTTGAGCCGTTCTTTGCTTAGAATCTT  
TAACTAGCCAAATGCCAAAAGCAAAGAGTTTCGTGCGCCTTTAGAAATTAGGATGTCCG  
CATCAACTTCTCTGTTCCGTAAACCTTTATAGTTCCATCATCAAAAAATACACAAGCCT

CAGCGCCTGTGTATCCAGCAGCGTCATAATCTTTGTAGAGA ACTCCGTCTTGAATTTGAA  
GCCCCATGACTTCACCATTTGATCGCCAACCACAAGCGTTTATTGCAACAACAGATCTTC  
TTCGTTTTGCCGTACTTAAAAGTGTTCACGATTTGTTGTACCAAATAAGAAGATGTGG  
GATCTATGGATTTTTCAAAGTCATATGCAAACGTTTTTTGCACCTTACTTTTTTAGCTT  
CGTTGTTTTAGGAGTAACCTTTGTAACATAGTACTCAATACCAAGTGTGGCTTCTGT  
TAAAAGA ACTTGTACTGTAAAATATCGGTCATCAGTTAATACCTTGTTTAAAATTTCTG  
TTGTGTTTCGTTTCTACTTCATTA AACTTCTGAGTAATCTTAGGAGCGGTGTATTCTTCTC  
CTTCTGAAGATAGTAGTTCAACAGGCATCGGAACATATTTATCTAAATTTTGATCATATC  
TATAAAAACCAGCCATAACTTTCTCCAATAAAAAAGATCCCGGAGGGGATCTTAGTCAG  
TTTTGTACCATACTTGTCTGAATCTGGTGCTGTATCTGAAACAACA ACTCGTTTTTTCT  
CAGGTGAAAAAGAGGCATCCTTATAACCAGATATAATTCGCATTAAATGGTTCTGTTGCGC  
TTAGGAGTATATTA AACCTTCATATACTTCGGAAGTTCCAATGTCTACCCACTCAAATC  
CATCCCATCGATAAACGATTTTTGTTTTCTTTAACGGTCACCGTCCAACCAATCAGTGGGG  
TTGGGTAATAGGTGAAAATATCTGAATAGGTATAGACAGATGGTTTATAAATTTTTCTTG  
TGTTTTCTACA ACTTCTTCATAATTTGATGTAGCCTGTCTACACCAGGCTGTCACTTCTT  
GGCATCGTTTTGTA ACTCGTTCACATTCAGCTATACGTTCAATTCATTGGAATTATTGTAT  
CTTCAGCTTAATCGATATGTCCTTGAAGAGTTTCAATAACCATATTCCTTGTCGTTTGA  
TCCA AATTCGAGAGGCAGGGAAGAAGGAAGCTCCTTACC ACTATAATTAAGGTTAGCG  
ATTTTCTTCATTTGAAGCATTAAAGAAGACA ACTCCCATAAGGTAATCAACCTTAAAAT  
AGTTGTCGTCAAGTTCTCCATCTTCAATCTCTCGCCATTCTTGGTGTCCCCAGTAACTT  
CAACACGAAATTCCTGTTCGGAATCTCAGTTAGGAGTGCTCTTCCATTAAATATTGTCA  
ATGTTTCATTGTAAGTTAGATAGGGGTCTTCAACAGAAGCGATTCTCTTTTTACTTAATA  
TTGGATCATTATATAATTTAGCAAATCAGCCAGTTTAGTTACCTCCGTTAATTCTGTT  
GGTAGGCTTCCCAGATATCTTTAACGTGTTATTTATTTCTCTACAGTTCCTATCTGAGC  
CTGTGACAAATAGATTGTTTCCCAAAGCACCGTATCCGAAATCTCCTCCAATAAGGGAAA  
GTCCAGTTGAAGTAACTTGATAGGCATAGCCCCCAATTGGCTTTC AATTACTAGTTGAC  
TGTCTTCAGGTGAGATCGGAGTTATTTTGACTAAATGAGGAGAAAAGGTAAGGGGGATTT  
GCTGACTGAGAGTGCCGTCTCTGTATAAATACCTTTTGCAA ACTTGGGAGGAATGGGGA  
TGTTTTCAGCTAATGCATAATCAGATGCTGCTCGTCCACCTAGCATCTCTGCATTACCGT  
CTATTGAACCACTAATGATCCCTTATTCATTAAACACTGGTATAGAGTTTGGAGAAGTCG  
TTGTTGAAGCTGTAAAACCATTCAAGGAGTCTGCTGAACCTGCAGATGACACAACCCATT  
CTTCTCCGTTTAAATAGTTCTCTGTTTATTGTGCTTTGGATTGATCCAGATTGTCCCTTTTT  
CCGGATCTTCTGGCTTAGCTTCCGTGGAGATTGTATAGAGGCCATTA ACTCTTCCACTAA  
GACTTCTTTAACTTCAACCGAATTAGAGGGGAGGTAGGGGTTCTCTCAAGGAAATTGGG  
GTTGAATAATGTCGGAAGTATACGTCCGCTGCTATCAATAGACGCTTCAACAGTCCGGT  
AGGCTTGACTTCAAACGTATAACTTATTTGAAACCTGGCCTGTAAGGGTTGCGATTC  
TCTTATCATAGCTTACCGAGAGATACTGTT CAGATGACATCTTTGATCCAAATATATAGG  
TGTCTGAAGATGTATCTGAGTAACAGTGGACAAGGGATCCGTCAATATTGTACTTATCCT  
CTTTAGAATTTGGGA ACTGCCATTCAATGGAGATATCAACCGGTCCATTATCGTTGACAA  
CATGTGTTATTGCAGTTCCGTTATTAAGAATAGTTGGGTTTGCCACAGGAGATGAGATAC  
GATCATTTTCGTGCATTGTAATTAACAAGAAGTGTATCATAATCAATTTTTTTCTTATTAT  
ACTCTGTGGATGCTTTCTTAGTTGTATACAAAGTATTAGCAAATTCCTGTTCAAATGACC  
TGGCTCTTTTACCGTTTGAGAGTGTAACCTGTATACTCTGTTGATCAA AATCGAAAGTCA  
TCCCTGAAAGGGTTGCTTTGACATCGGTTCTGAAATTCTTATTA ACTACCCTGATTATAT  
CTCCGAGATATATTCTATCCCAAATGCCTTTTCGCTATTAACATTAAATAGGTTTACGA  
TGTTCTGTTCTGATATCAACAGGGCGAGCGTTTCTATTGCTCAGTTCCTCTAACCCTTTTT  
CGTAAAGCTCTGTCTCATCAAAAATATTATCATTAGTCCAATCATCTTCAAATATAAAAT  
AAGACAGTTGTTTCTTAAGCTCCTCACCAAGAAAGTTGTCCATCGATCAACGGTCTTTTA  
GTTTTTCTATTTCTGAGAAATGTTTGTGATTTGCGAGTTTATTCTGGATATTTAGCTT  
TTCTGGCGATAACTTCTAATAGTTTTGCATCTCTTTGTTTAAATAAGATCTTTTGTGTCGT  
CACCGGCTTTTTTCGCTACGGTTATCTCATCTAAAATTTGCTGTAGCTCAATGTTTTCAA  
GAGTGAAGAGTTTATTTTCTTGAGTCGTTTTTTGGGTTTCTAAATCCCTTTTTTGGTTTA  
AAAGGAGGTGGAAAGAAGAGCCTTCTTTATTGACAAGTTCAATTATAATCCAAAATCGCAA  
GACATAAATCATCATCCATGTAATCACTGTGTGTTATTACATTTCTGTTTTTATCACGTT  
TAAAAGGATATAAAAAATAAGAAAAATCGTCCAAGTAACTCTGTCCAGTAGGGTTTACCG  
AATTAATCACCATTCCGTCTTTACCTGTGATGGTTAAACGTGTTACGACTTCATCAATAT  
CAATGGTATCTTCCATATCAATCATAAATCGTTCAGGGGAGAATTGGACACCTTTGTACT

TGGATACTGTGTCTTTCTTATAAAAAAGAGACAGTGTCTTTACAGTGTCTCGAAGACTGGGA  
CTGCCTCAAAGTTTCCCATATCGTTTTTAAAACTCATATCTTGTGGAAGTGACATCAA  
ATGATCGTCTTTTTTCATTAATGAAGGATCAATATAACCGATATTGAGTCTTGTGCCTT  
TAAGACAATCAGTGGCCACTTCTGTAGATTCTTTGAACTCCTTGATACGACCTTATTT  
TGTTTTTATGAAGGATGTACGGTAGTCTTGACATCTAACTTGTATTGTTTGCTCCTCAT  
TTTCTGATGTTGTTAAACCGGTTACCACAAACCATTCAACTCTGTTTAAGGATTCTGCCT  
TGATAAGATACCACTCACGCATTAGTTTTGCCACATGATTTGGCTTCATCAAAAAATTAT  
ACCTGGCTTTGAGTGGAATATTAAGATAGGTCATTTAAATCAGCAAAGCTTAGATTAA  
GAGATACATTTGAGAAATCCGCAATATTAGCGATTTTCTTTTTATTTGGTTTTTGCTAAAG  
AAAGGAGGATATCGCCTGGTTTAACTTATTTAACAAAATACATCCTCCTATAGATATTT  
GTATCGGTATTTAATCGAATATAGCACTCACGATTTATTTAATTCTGTTTTTACCTCT  
TGTTAAAATCACATACTCTTCATTTACTTGGTCATAACATTCATAACCCGAAATACTTGA  
AGTGATCAATTTTTTATTGGAATCAACATTGATAACTTCATGATGTATTATCCCGTAAA  
CTTCAGAGGTGTTATATATAAAGTTAAGTTCTCAACAGTTATGTCACCGTCCGCTATCTT  
CTTAAATTCAAGAGATAACGGAATGTGCACATCTCCTATGTTTTCAATTTCAAATTCTT  
AACACCTGATGTGACATCACACCAATGAGTTGTTGTTTCTTGTCCATATTTATAGGTGAA  
TACCTTCATTGTGAGCTTCACATATCCATCGTTATAACAGTTATGAACTAAATCTGTAGC  
GTTTATTGGCAAGGCAAATAAATTATGGCTAAATTTCTACTAAAGGAGAGAGGTTTATA  
ATCATCTACATTTAACCAACGAGCAAATCTACGAACATTTTTTTCATCTAGATGATTTTC  
TATGTAAAAATTCAATGGGATCTCATATGGCTCAAGTTTGACATTGTCTACATATGGTTC  
TGAAGATAGCCTAGTGTATGTTTCATTTACTGTTCTATTTGCTATAAACGAATCCTCTAA  
AAGTCCCTCTTCTGTATTTACATTTACGGCTCCTAATTCATAAGAAGGGAAATTATTGAA  
CATAAAGTATTGACTTTCTCTAATCATGAGTTTCCACCTCAAGTTAAGTTAAATAAAGAG  
TCTGCTTTTGCAGACTCTTACATGCTACCATTTAGTTTTACAACCTTCGTTTTTAATGCTT  
TCAAACATCGATCTCGCTCCCGATTCTCCTCCTACTAGCTTATCAATGTGGAAAGTAGTC  
GTGAAATTAATTGTTTTATCTCCAGAAGAAGCAATTGTTTTTGAGGGGATCTCAATCTTC  
TTTAAATTTGGAATTAACCTGTTTGTTAACATTGATTGATTAACGTTAGGAACTAAGGAA  
GGAATAGAAGTAATCCGTTTTTAATAAGGTCTGCTAATTTTACTCCTTGGCCCCATTTT  
GGGGAATCGTCCACAGCGGTTTACGAAACAGCTTTTACCGTATCAAGGATGTTGGATGTG  
TCAGTTTTATTTAGGATCAGTTCTTTGTCATGTAGGAATGTAAGTTTAGCAGCACCTAAT  
CCTGTTCCAGTGTACCCTCTAGAAGCGAAAGAGGATACTTTTTTACCTGTCGTGTTGCCT  
TTGACAGCAGTATTCAGTGCATTAGATGTTTCTTTGAGTTTATCAATCAGGTTGTTTGA  
ATACTTTTTCCAATGGACTCCATATTGGTATTAATCAACTTAGAAAACCTCATTAAAGCTGC  
TTAGCGATATCGGCGTTTTTTCCATTCATAATCGTATCCTCAAGCTTTTTTAAAGCTCGT  
TCATCATTTACAAGATTATCGTATTTATTGTTGATAGACTCCTCATCTTTTTTCGAGCTGA  
TCTTGGAGCGCTTCTTTCCGTTTGTTACTTTTCGCGATCCTTTAGAAAATCATCAAGGTCT  
AACTGCTCTTTTTGAAGCTGTTCAAGTTAGTTCTTTGACTTTTGACTTTCCGAATTCAGAA  
TCATCAAGAGATTATTGATTAATTTGGTCAAGTCAACTTTTGAATACTGTCTTGTCTTTCT  
TTTTAATCTTTTTGAAATTTAGCCTCGTCATCAGTCTTGTCTATCTCAGCGATCAAGTCT  
TGAGTCGCTTTCTGATGAGCTTCCAACCTCAATATCACGCTTTTTTTTCGTACATCTCGTTG  
TAGATGGAAACAACCTGCATCAGCCAATGATTTATAGATATCCTTGATCGACTTCTTGGTG  
TTATAAAGCTCAAGGTTAAAATCTTTCTGTTTATCTTTCCAGATTTGCATTTCTTCAGTG  
ATATGTTCCCTGGATGTCAGGAAAACCTTTTCGAGCTTTCTTTTGTCTTCAAGCTGCTTA  
ATGATTTCTTCGCTTCTTTTGTGTTGTTGAATGAGCTTTATTTGCTTGCTATAGTAT  
TTAACCTTGTCTTCATCTTCTTCAGGCATTGACATTTTGTATGGACATCTTTAATTTTC  
CCTTGGGTTTTAGAAGATGACTTTTCAATTGACTTAAGTGTCTTATCAACTATAGATTGA  
ACAAGTTGTATCTGTAGCTCACGAACCTGGTCTTGAACAGAAATTAATCTTGCTTGGCC  
TGTTAAGCTCTTCTTGAAGCTGTGCACATTGAGCGGAGTTCAATGCTTTATTTGTTTTA  
ATTTCTTTTTGAATCCAATTAACCTTTTTGTTGTTGGATTTTAGCTTGCTCTGCCACAGCT  
TTTTTCTGATCAGAGGTGATTTTTCGGAATTCCTTGCTGTCAGAAGTGTATCTGTTAGCC  
ATAGACTCATCTTTTGTATCCGAACATCAAATCTCCAATCTTTTATCAAACCTCATCG  
AGTTTAGATTGAACTAGTTTACTGAAGTTCTTGAATCTGATCACTGACTGAACTGATA  
TCTCCTTGGAGGGAGCGAAGATCAGATTTAGCCTGAGCTATACCTTGTGTCGTTCTGCC  
TCAGCTTGTGACGCATCTGAAATAGAAGTTCCAATACCTCGCATGACTTTTCAGGATCG  
ATTGTTTTTCCATTTTGTTCGATCTGTAAATGAAGGTGGTTCCAGTCGAGTTCCTGTA  
CTACCAACTTTACCAATAGTTTGACCGGCTTTAACTGAATGACCTGCTTTAACAGAAGGA  
GTGTTAAGCATGTACATGTACTTGGCAACTTTCATCATCCTGTTTAAATAACAACCCAG



TTACCTGCAGTTTTACTGTGGCCAGCAATTGGGACTTTACCACTTTGAAGAGATTTAATT  
GCTGTACCTGCTTTTGCAGCAAATCAGCTCCTTTGTGTGGGGAGGAGCGGAGACCAGAT  
TCCTGTTGGCCATATTTGGAGCTTACCCTAAAAGCGCTATTATTTGTATAATAGCTGACG  
ATTGAAGAAGTGGCAGATGAGAGCGATTTGCTATAGTTGGCCATAATCTTCTTGACGTAA  
TTCTGTGTTTCTTTAAAAGGAGGGATACCACATTATTTAATTACGTTACCAGGCCCGCA  
TTATATGCAGCCAATGCTTTTTCAACATTACCGCCACATTTTTCAAGTTGTTGGGCGACG  
TACTTTGTTCCACCCATAACACTTTGATAAGGATCGTAAGCGTTATTTACTTCTAAGCTT  
TTTGCTGTTGCTGGCATCAGTTGCATTAATCCCATGGCACCTACACCAGATCATGCTTTA  
GCATTA AACCTGTTTCTTGCTGAATTACAGCTGCAATAAGGGCAGGGTGAACATTGTAT  
TACTAGCTGCTGAATTTATGAAGCTTGAATACTTGCCTGAATATGATCCACCAGTTGAG  
GAGGGGGTTCCACCAGAAGAAGTTGTAGAGGTTACAATACCGTATTGAGTAATGTTACCG  
GATTTGATTTGATCTTTAAGCAGCTTATCTTGTTCCTGCATAAGCTTTTTCTTTACTGA  
AGTGCTTTAATTTCTTTCTTGATTGCATCTCGAAATTTCTGAGAGTATTTAGGATAATCA  
TTGACCTGCTTGTTGTAGTTGTCAATCTCAGCATTAACTTTTTCTAATGCTTCCTTGTAT  
TTATCAACAACATTCATGGAAGTCTTGGTTTCTTCATTGGCTTTTTCTTGTGATCTGTC  
CAATTTCTACAATGATGTTCCCTGCTTCAACAAGTGCCTGTTTATTCATTTCTTGTGTACTG  
GAGGCTTCTTCAGATGCAGAAATATAAGATTCTAAGGCTGATTTAACGCTTTTTCATTGCT  
TCAATTTGACTATTCGAGTATCCACCAGCTTGAAGCATTTTCTCTTCAAGCTTTTTAAGT  
TCTTTTTTTGCATCTGCAACATTATTAATTGACTTAACTTCTAGGTCTGACAGTTCGGCC  
TCAGACATATCAAGCTTTCGTCCTTTTCGTAGCTTTTTCGGGCTGTCAATCTGTAAGGTA  
TCAGCGTTTAAAGTTTTGATAGCGTTGTCAACTTCTGTTTTCATCAATTTATTGCTGTAG  
GTAACAACGTCGTTATAAGCATCAAGTTTAACTTTTTCTTTGTTTGATAACTTCATCACGG  
TTAATTTTACCACGCCATTTTCGATGCTAATAGCCTGGGCAAGTTCCTTATCTTTTTGA  
ATAAGGGTATTAGCTTCATTTGCAGAAATACTTTTACCTTCAGCCATTTTTTCCAGACTA  
TCATTGAGAGGAGCTCCTTGATCTTTGGTGTACTAAAAATATCCCCATTTAAGACATCT  
TGAACGGAATCGAACTGCATAGCATCTGACATTTCTTTAATAGCTGCCTTAATATCATCA  
ACACTATTTGCATCCAGAGCTTCTTTTAGCTTCTTACCAAATCTTCTGCCTCGTAACCT  
GCTTCTACCAGCGTCTCACCTAAATCACCAACTTCAGATATGACGGAAGATAAGCTCTTA  
TCCCCATCTTTTATGTTCTTCTGTGCTTTGTGCGAAGCTCCTTTTAAAAACATCAATAGAA  
GAATCGGATTTGGAGTATGTTTCCAAGAGACTTTGAAGATCTTTTTTTGCGTTATCGAAA  
GCTTTTTCTCGCCTGGATGTAAAGCTTTTTGGATTTTTTCTTGAAGCTTTCCTAAAGAA  
GAGGAGAATTTTTTAAATTCTTCAGGATCTAAATCTTCTTTTAAAGTTAAGGTTGTTGATA  
ACATCACTAATACTCGTCTTTAAAGTATTACTGAGATCAATTGAACTATAAGCATTGCA  
ATTGAAACGACGCTCTCTTTAACTTTAGCATTTCCTACTCTCAATGTCAGATTGAGCTTTG  
AGCATACTTTGTTTAGCTTTCTCAGCTACAACCTTAGAGTCATCGTCATCTGCAATGACA  
TCCCATTTAGGTCTACCTTTATCGTTGTAGTCAGCTATTTGTTTGTACTGCTTTAATTCA  
GCCTTAGACTTTTTAATTTCCCTTAGAAGCGTCTTCGAATGTTATCTTTGCGCTGTCTCTT  
GTTTCTTGTCTTTTAAAGGCAAATACTCCTTAGTATTCTCACTCGCTTTTTCAAGCTCT  
TTATTTGTCTTAAGAATTGCATTTCCCTTGAGTAACATAGCCTTTAACTAATGCAGGGAAA  
GTTTGTGCTAATTGCGGAGTGACTTGAAGGTATTCTGGCTCTTCATCTGAAGTTAAAGAT  
CTTGACTCTTTAACTTTTTGAAGCTCTTTATATTGCTGTATTAATTTATCAGTGGAGTCT  
TTATTGGTTCGTAATTGCTTCGACATTGGTTTGCTGGCTCTGCTCAAAATCATCTTTAGCT  
TCTTTAGCTTCTGCAAAAGAAGAAATTAATGATTCTAGCGCCATCCCAAAGCAGCAAAT  
GCACGGCCAACTAAAGTTGAAACAAGCAACCCTCGAAGAGCAGTTTTTGAAGCTCTTGAG  
GCGACTGCTGCACGAGTCATAACCAGCTTCTAGCCCAGCAGTCGCTAAAGTTTCTTGCCCC  
ATTGCACGTGTGCCAAAATTAGGCTGCTGGCTAATGTGCGGGTATTCTTACTGAGCAA  
AGGGTTGCAGTGCTTACTGCAGCTAAAAGGGGAGGTCGGAACCCAACTGATTTGATTACT  
CCTGTAGAAGCGTTAAGCAAAGAACCAGCGGCTTGAGTAAATTCAATTAATACGTCGCTA  
ATAAAAGCATCAGAAGCTGCACTAGCAAATTCAGTGAAGTTATTTTGAAGCTTATTTACC  
CTAGCTTGTAGACTATCTGCATACTTTTGCTGCTCACTCCAAGCACTTCTGTTGAGTTA  
GCCGCAGTTTTAGCCGCATTCTGAGCAATAGAGAAGTTGTTTCATCATTGCATTAAAACGG  
GATAATTGATAAATACCAGCTACTCCAATTGACGTATTTTGTCTGAGCATCAGAAAGC  
GTATCCCACTTACCAGCAACTTCACTAATTAAGTCACTTGTGATTTAGCTTACCACCA  
GCTGTTTTGACTGAGATAACCAATCTGTTCTAACGCTTTAATTGAGCTTTGATTATTTCCA  
ATCCGCGCGAAAATTTCTTTAAGCAGTTCCCGACGATATTCCCTGATTCACGTGTTCTA  
CTAGCAATTGCAGTTGTATAACCAATAAGATCATTAGCTCTACCCCGAATGTAGAAGCA  
GTTGAACCAGATTTACGGATAGAATTGGCCAGACCTAGAGTTGTAACAGCATAGTTATTA

TCAACCTCATTAAATTTATCTGCAATTGATATTGAATCATTTGCTCCAATATTAAGTTG  
AGCATTGCTGCCGTTAGAGTGTTAACTGTATCATCGGGAGTTAAATCAGAGACATTTTGA  
AGAAGTTGGGCAGTTTTTCATTAACGTGGAGAGCTCACTTTCATCGAAACCTATTCTCCCA  
AAATCGCCTGTCATTTGAAGAATATCTGTGATTTTATTTGAAAGTGTATCACCTAAGTCA  
ATAGATTCTTGGAGAAGTTCATTATATTTATAATCCGGCTCATTCATAACACGGCCAATA  
TTTGTGCATGAGAGTATCAATTTCTATTGCCTGGGATACCATTCTTTAAGTCCATAGATA  
GCGCCGTAGAATAAAGAACCGGAGATTAATAGGTGGACATGCTTTTGAAGGTTTGGGTT  
AGTTCTGCTCCAAAAGCAGAAGCTTGATTAGCAGCTGTTTGGAGCGTTGGAGGCTAATTCT  
CTAAATTGCATATTCATCTTTGAATTTGTGATCTGATATTATTGCTTCCAGTGCTTACA  
TTAAGACTAAATACTGCATTCAAATAATCTTGAACAGCTTGTCTATTACTAGATACCATA  
GAACTGCCATACAGTGTATTTAGGTTTTGAACATTTACTTGTGGCTGTCGCTGAAATAAT  
TCAATGGTTTTCTTTAATTCATGGTTCTTCGCAACTGCCGCAGATTTATCAGCTAACATC  
CTTATCCTATTTTGCAGTGCTTCAATTTGTTGAGCGGATTGAGCTGTGTTTTATTTTCGG  
CCAAGAGATGAGATGGTTCGCATCAGTAACAATACCCTGCTGTCTAAGCTTCTCTAAATCT  
TGCTTAAGCTGCTCAATTGCTCTCCTTTGTTGGTCATAATTAGTTGTAGGTTTTGAGGAG  
GTCGAATTAGTTTTAGGATCAGTTGTATAACAATATCATCGAACCCGTGGCGGTTTTTC  
TGCTCTACCTTTGTTGGCTGTCCTTGCAGATTTCTCTGCACAGTCTTTTTTTGCACCTAT  
CCTAGTTTCTCAGTGGCCTGTGTTAGCTTGTAACTCTTGAGTTTCTGGCTTTAATGCT  
GTATTACGATTGTAGATTATTTTTGTTTCACGTTGAAGTATCTCACCATTTTTCTTATAC  
TGCTGGGTGAGCTTTTCAACTGATCCGTCAGCATTCTTAATTAAGTGTGAGGTTTCTTTA  
GCTTTTTGATTATAGGATTTTAGGTGTTTCTGATATGTGTCGATAGCAGAGGAGAATTCT  
TGCAGAGCTTTTAAGGTTGTAGTATCAATGTTTGTATTGAGCTTGAGGGAGTTGAGTTTC  
TTGTGCAGGGATTTAATTTGCTGATTTAACTGTTTCGACAGTTTTGGATGAGGTATCAGCT  
TGCGGGGTTAGTATAAATTCTGAGGTTTTGACTCTAGTAAGAATCACTTCCTTTCAGTAGG  
GGAGAGGACAAACAAAAAAGCCACTTAGTTATTGAGCGACTTTGTTTGCCTTCTTAATAA  
TTACATCCATAACAACATGCCAATATTCTGCATTTCGTAAGTGCTTGTGAATGACATTGC  
TATCTTTTTTATACCCCTGAATATTATACCCCTTCAACTTCTTGTCTGGGGAGAACTCGA  
TAAAATGGATAGGCGTACCGAGGTCTTCAACAGTAATCTCTACCGTGACAGATTTGACCG  
TTTCATTTTGTATTGAAGAGGCAGACAACCCCTCCAATTGAAGCTCCAATTCCTCCAGCTA  
ACAGGCCACCAGCTACGATTCCTGTTTTTGATACTTTAGAAATTATTTGATTGTCTAAAA  
CAATTTTCGGATACTATAACATTGGAAGAAGGGATTGTGTATGCTTCAATATGTTTCATCTT  
TATTAAGCTGATATATTTTACAAAGGGAATCAGATTCCTTAGATGCAATTGTAGTTTTGT  
AAGTATTAAGAAATTGTCTGGATTAACCACCGTCGAAGTGCTTAAGTGTTTCCGCAT  
TTTCTGTTAGTTTATCTATATTTTTTTGGGCTTTAATTTTATAGGGCTCAAGTGCTAACA  
GGGCTAAACCTACAATTATTAAGCAAATTCCCATGCCTCTCCAGCCGTCCATTAGCAAAA  
AGAAAAGACAGAATAAAAAATAGCCACCATAAGCCATGAACTTATATCCCATTCACCAC  
CGCCGGTATCATTTTCTTTCATTATACCATTGTTTCCAGTCATGGAGAAGTGTATAAGTA  
GAAAGTGAAATCATTAGTTCTTTTCTGATTTTATCTGAATGAGCAGTTCTTTGAGATAAT  
CTGCAGTTGTAGCATTTTCTTTATCTTTTAAAATATTACGAAGCGTCCATACGCAAATTA  
TGATTGTGATTAATACGTAAATTAATGCATTCAATCGGTTTCCCTCAGTAATTTTTGATA  
TATTCACACCAAATAACTTGAATCCTATAAACGACGTTCCCAAAAATCAAACCTCCAA  
TCCCCAAGTTTTAGATGGATCATATTGCGATTTTATTCCTTCCATCCTTGCAATGGCAG  
ATGATAAATCAGACGGGCTTAAAGATTTTATTATTTGGACTTTCCTTGCATGTGTATGAT  
AATCTTGTCCATTAATAGGAAATTCATGCTTGATAAACTTAATTAAGTCTTTAAGATTCA  
TTTCAGCCAGATTGTGCTTGAATACTTTTTTATTGAACATTTTCATCACCTCTCCATATT  
ATCGACAAATACGCAAAGGATTTAATGGAAATTAGGTTTCTGAGAGTACGTTTCTCTAA  
TTTTCAACATGAATGAATAGTCCTTTTTAAGATTTATACACAGTCATTCTCCAAGGAAA  
ATGACTCAATTTTTTCGATTTTCTATGTAAATCAAAAAAGAATCATGTTAGAGTGGGTGTG  
CTGAAATAATTCAAAAAATTATTTTGAATATGATTAAGTAATGTTGCCAGAGAGTTTCG  
GTTTGGACAAAATTGTAAGTATTTAATACACTGGGGCTGCAATCAAATATGCACCTGGAA  
ACAATTTCTACACGGGGGAGTTTAAATGAACAACAAGAAAAATATCTTTGATATCGTAAT  
GTACATTATTTTCGGTGTTCAGTCTTTTTCTAGTTGCAAAAAGTATTATGGCACTGG  
AGTTTTAGTGTGTTGTTGCAATTTTATACCTCGCTGTAATTGCTTATATAATTAAGCAAGT  
ATTTAGTAATTCAGATTCCTAAGGTGTAACACAAGGAGGATTTCAATTGCGAAAGAAAAG  
AGTTATTACTTGTGTTATGGCTGCATCATTGACTTTAGGCTCACTTTTTCTGCAGGTTA  
CGCTACTGCAAAGGAGGACTCTAAGACAACCCCTTCTTACGAAGAAGTACTCTACACTA  
CAAATGAAAAGTGAAAAGATTTAATCGAACGGGAAATTAGTTGAAATTGAGTATGTGAG

TGGAATGAACTCACATAGTTCAGATGAACGGAAATGATCATACTGGAAAAGTCGATGG  
CATAGAACAAAAAGGCTTAACTTTGAGTATGATGAAAATGCTGCTAACAGAACAAATTA  
TGAAAACAATAATTAGAAATTAATGAATTCACGACACAGGCTGCAAAACCTAAAAAGGG  
ATACCATTATGTGGGGACTTTATCTAGGCATACAAAAGCAGCTAAAAATGCGTTATCAGT  
TACAATGTCATTAGTCGGTATTGTCCCTGGCTTGGGATGGGGGAGTAAGGCTGCCACTAT  
TTTATTCTTTTATTGGGCAAACGAACAAATCCCTGATGCGTATTATAAATATGATTTATA  
CGAAAAGGAGCAATGACTGATAGTTGGTATCAGTATGCTACAGTTCAATTTTTTTGAAGA  
TAAAGCCATAAAAAAGAAAATGGGCAAACCGTGGACTAGTACTCCTGCAAAAGAAGATTT  
ACCTAAGAGCTAATTTTAAAATCACTTTGTCTTTATCGGGGGACAAAGTGATTCTTTGTT  
TTATACATAAGCAAACCTCCCTCAAACGAGGAATCTTGACTCTGAATAAAAGAGGGATTTT  
ATGCTGAATTGAATAGAATCTCTCTGATGGTTAGCACTAAGCTCAAATTATCAATTGGAG  
GAGATATCGTGAAAGTAATCCATGGAATCAGAGTATATGAAAAAGGAGAAAAAGTCTTTT  
TTGAAACTGAAATGCCATCCATTGCAGAAAACATGTATTCTAAATTCGGGTGGAAAATTA  
TCGAAATAGATGGTAAGAAGTATTGTGCCCGATGGAGGAGGAAGAATATATACATATTG  
TTGCAAAATATTTAGGGATTTACCCGAGTGAAGTTGATTTAACTTAGTTCAATGTGGAA  
CGATGGGGGACAATGGTTGTTTTGGAGATTGTACCGGAAATAGACTTTGTACAAGGTGGA  
GTAAGTGGAGATTCAACAGGATGCATTTGTGGTGCTTAAACTAAACAAATATTTGATTTT  
TTTCTTCTTCAAATCCCGTAAATCATAATGTTTGATTGTTGTTGAGACATCTTCATGAT  
GAGCTACATATTTGCTTATCAATTCAATTTTGATTTTCTTAACTTCTAGGAGATAAGTGA  
TGCACGAAGCTTTAAAGAGGTGGGGGTTTATCCGTCGACCAAGGATATTTGATAACACAT  
CAGAGCAAAAATAATCAGCCCAAGACTCTGACATCCGTTTAGGCTCTCCGCCATACTGAG  
TAGTGAAGAGGTATTCATGATCATAGCCACGTTTTTCATGCCATAAGCGAAGATACTCCA  
GTGCTTCTGTGTTAATCATGTACTCAAGAGGTTTGCCTTCACCTTTACCTTCTCCAAATA  
CCTTATGACTAATCACGTATGACTGACCCTCTGGAACAGGGTAACCTAATATCTCTGTTT  
TTAACTGTATGAGTTCTGCTCTTCGCCCGCCAAACATTAAGGCAGTAGCAAGCCATGCCA  
TCGCCAAATAATTATCGTCCTCTTTTAGGGCGTCCATCATCTGTTTATAATCATCATATG  
CAACTTTAACTTTTTTCATAGGCAGTGGTGTAGGAATAGCTTGAAGCCCGCGGGTGAAT  
TTCTGAATTTCTCATAATTATGATCATCTTCTGCAACAACATTTTCGATATAATTATTTA  
ACGATGATACACCGGCTTTTTTTAAAGCAATCCCAATTGAAGACAACCCACGATTCTTTA  
AGAACTTTGATACCTAATGAAAGCACGCTTTGAGATCTTATAAAGTTTTTTCCCGTTAA  
GAGAGGTATGTACCCACCAAAAGAATTGGCGAACGGAGGAGTAATACTGCTTTCGTGTTT  
TATCTCTAAATGAATGAGCATCTAAAACTCTCGAACCAAGTTTCTATGCTCTTCATCTA  
CTTGCTCCCGCATTGATTCCGTGATCTCGGGGAGTCTTATTGCTCGAGGTCTGAGCATAT  
TCTTTTCAATTGATTTGGTCATTAACTCACCACCATTAGTCTGTTTTAATACCATTTGCT  
TTTAAATCTTTTTTTAGCGCTGCGGTTAATCGTCCATCTCTTAAGGTCTCAGAGGTATTC  
TTCATAAAAGGACGAGGGTTACCGTATCCATATCCATATGAATCAGGGTATGTATACCCC  
TGCCCGGTTTCAATAACTGTAGCAATGTCTTTTCCATCATCTTCTCTAATATTGTCCAAT  
GACACCCCGTTGCTTTCGTTGGTGGTTATAAAGGCATCTTAACTTGTCCCTGTGCGTTCA  
TAAAGTAGGGGATCATATGCACCGTAAACATCTTCAACAATATGCTCTTGTCCCTGTTTTT  
ACCATAATTTGTTTACATGAGAGGAAGACTTATGAAGTGATTGAATTGCAGCTTGTTC  
ACCATAGCTTTGATATCTTTAATTGTTTTCGCCACTAACTTCACCAGAACCAGTCTCTAT  
TTCTTCTACCTTTTCTAGAATAAGCTTGTTGATTTCTGTTGGCTCATAGTTAACAAGTC  
TTCAGTGATTTTTTCTAAAGCTTTTGTGTCATCCTTAAGCTTCTTCATACTTTCTTTTGG  
AAAAGTGAAGTGAATCATAGGGAAGAATTCGGAATCTACAAGCTTAAAGGTACCATTTAAC  
TTTATTCTTGATGTCATTCGGAATCCCAAATCTGAAAATCTTTGACAATTGAAAAGAA  
TACCCTTTGAACAGTGTTGATTTTACTAAAATCAATACCTTTATCTTCAGCTTTTTGTTG  
ATAAGAGATCATTTAGTTCAGTATTTTGTGCTAACCGAGAAGGAGAAAAGTATGGGTAGAT  
GAATACATGTACATCATCGGTTAATTGGACTTTTTCTGTCTTGTGCTACTTATTGACT  
TTCCTCAATTAAGTAAATTTCAATTTTTTTGATGCCATTTAATATCCTCCTTAATATCC  
TCGTTTTGAGCAAACAATGATAACGTGTTTATTCTGTAGATAAGGTAAGTGAAGTATAGG  
CTTCCCAACAATTTCTTGATATTGTTTCAAGGAGTAATTAAGTATTGTCTACTCATTCTT  
TGAGTTCTTCTTAGTTACATCAACGTAATAGTAAGCTTCTTTAACCTGATCAAGAGTTG  
CCCAGTTTTTGTAGGGCTATAACCCAAAAATTGCTCATGCTGTTGTCCCAACTTTCAT  
GTTTTTAACTTCATTTTGTAATTTCAAGATTATGCGATTTTGTTTTTAAAATTAATTTCT  
GGCTTCAGCTAGTGATTGTCCAAGGAATTCACATCAGAAGGTTCTTCAGGGGGCGGTGA  
GAGGCTGTCTATATATTCTTGAGAGGCTGTTTCTATCCAACTTGTTTTTGATAAATCAA  
TCGTGGAAGGTAATAGGAGGGAGAGTCAGGTAATGGAACAGAAGTGCAATTATCGGGAAC

AAAATAATCTCCCTTTTCATCGATTTTCAGTTACAACACTAGGGGTTCAACGAACATAACATT  
TTCGTCATATTTATAGCCTTGTATCAAGACTTACCTCCTAAGTCAACGGAACAACACTACAC  
CTATGTAGTAACCCGTTATTGCAGCACTGTTGTCAGCTGATACCCCACTTAGCTGAAGGT  
CACCATTAGAGTTTACAAATAATTTACTTCTGCCGAAAGTTGCACTCACTTCAACAGACT  
TAAGAGCACCTTGTGTTGGAGAAAATTCAGTTGGAATAGAAGCAAATACTACATTTTCGGT  
TTGTTACTACGTGCCACTAAGCTGCAAAGTCCCAGCTACTTTACGATATTGAAGTGGCC  
TTGAGCCTGTCTTTGCGCCATTTTATAGATGTAACGCTTAACCAAGGCACGTTATCAATTT  
CACTGCTACTTATCAATCGTTCCCAACTTGACCGTGCTCCGTTTATCAATGATTTTCTGT  
AAGTCTTATTATCATTAGTCAGAACAATACCTTGACCATAAAGTTTATTAGCACTACAAG  
ACCAAAATCCCCGCCCCGTTAATTGGAGGTGCTTCTAAGGCAGCCATATCATATCCGAAAT  
ATCTTAAAGTAGAAGAATTCAAAAGTTCAGAATGAAAGTCGCTTGTATAGAACTAGTG  
GTTGACCATCATCGCTTGATACTTTAGTTAAGTGAGCAGAATTGCATTTACTTCTTTCAG  
TGCTAGTGATATGACGCTCATTATCTTTATGTGAGCATCAAATTTCTAATTTTGTGCGCTT  
GTTTATCATTTCGTAAGGTTTCCCTAACCCGACCTGAATTGCAGTTACTTTATGGGGACTGT  
TTGTGTTCTGCGAATGTGCGTCAGTATACTTTTTAGAAATTGCTTTCCGCGGCATTCCAAG  
TAGTTCTCTCTTGAGCTGTAATATGAATAATTGTATCTTGAGCATGTTGATCAAATTCAG  
TTTTAGTTGCTTGTTTTTTCAATTCAGGACATTTGCTAAACCAACTTGGCTTTTAGTTACTG  
AATGGGGATTGAGAGTATCGTTTATAGATGTTTCGTCAAATTCCTCTTTGGTTGCTTGGACAT  
TATTTAAAACATTGCCCAATGCAACCTGCTCTTTGGTGACTAAATGAGGATTAGACTTAT  
CATCAGTATGTTTCTTGAGCTCATTCTGTTGATATTCCATAAACAAATTTGTTTTTCTG  
TTAATGCTTGTTCATGCTCAAGCATATGTTTTTCAGCCCGGTCATTGGATCCTCTTAATG  
AATTGATCTGACTATTGTTTTGTTTGAGTTGACCGTCGTATTTACTGCTGCTCATCTGCA  
CTCACCACAATCCCTTTAACAGTTACATCACCAGTAACAGAACTACTTCGAACATAACT  
TTAAACAATCCAGCAATGTGCAATTCCCAATACTCATTAGTATTTAAAGTACTGCTCCCA  
AGTTGGAAGTCTGTTTTATTGATGCCACTAAGTGCAGTTTTTTTCGCCATTTTCAACA  
GCGTAAAACCTTTATTTCTCGTGAAGTTGAGGAACCAGAGATCTTAACAGTAAGTTCCCGA  
AAATGACCCACTACAAATTCTTGACCTTCAGATGGGATAGTTGCGGCTTCGTGAAATGTA  
AATGAAGTTTTGTCTGGAATCGTGATTTTCGACATTTTCAGTCGTTTCTGTCAACA  
ACTCCACCTCCTTAATTTGAATAAAAACCTGCTTTTTATGTAGAAAAACAAGAGGGGAGGACTTTG  
TCAAAAAGCCCATCCTCTTTTAGCTTATCCATATACCTTCCCAAGCTGGGGTAGAGGAA  
GGGGATGACTGAAGCGACCTTAAAGGTTTCGTACTCATTGAAGTCGGCTTCAAAGCGTTGC  
TTGAAATCATCAACACTGAAATAGGATCCATCTGATAGTAATAGGAATTTTTGTTCCATA  
CCATCAAATTTGTTTGAACAGACCACATACTTCATCAAATGTCATTATCCATCCCCCAA  
CAACGATTTTTAACCCAGTTAGATCAACTGTACCGGCTGCTTTAACTGTCAGATGTATTT  
TTGGAGCAGTGAAAGTTAATTGTTTTTGTAAAGGGTAATTCTGAACAAAAACAATGCTGT  
TGAATACAACAGAATTATCATTACCTGATGTAGTTGCAGAATAAAATGGGATGTTTTTCT  
GTACGGAATAAATACTTGCTAAAACCTTGCTGTATGAGCTGTCTGTTTGAGTTGTGTACA  
TAGCAACACCGTAAGTTCTGAAAATACCAAGTGAATCGATTAGATGAACTGTATAAGACT  
TAGTTGCACCTGTAGCTACGGTATCAGCCTCAGTAACCACAAATTCAGATTAGGATTTTT  
GAACTTGGGTTTTTAATTGCTGCAGTGTTTTTAACCAAAACAGGGACAGAAGCCGTATTAG  
TTATATTTACATCAAGTGCAGTGTTGGCCACATTAACATTAAGAGGCTGGTCATTATTGA  
GACCAACCTCCAAGGGGACAGTCGAACGTTCAATTGATACAGCTGTTATGGGATTACCTG  
TCCATCATCTTTTGCAGAGGTGTATTTATCACCGTCCTGGTTTAAAAAAGCAATAATAA  
ACGCCTCCTTAATTATTCAGTTGTTCCGCCAAGATCTGAGCTTTGAGATGAGCCAGTTCC  
TTCATCACTCGTGACAACGCCCTTTGTCCCATCAGCTTTACGTTTTACCCGAGCAAAGTT  
ACCGATTTTTCCGTTATTATCAGCAAGGGCTCGATAGCCGATTTCCGGAGTGAATGCATT  
TCCTTCTTCAAACGACATATCTGCTTACCAGCGAAGTTTACTTTAGAGAGCTGAATATA  
AAGGTCAGTGTAGATTTTTGAAGTCTTAGGATCGTATTCAATTGTGTGAATTTCAAAGTT  
GTAATTCTCAGAGAATTTTTACCCGTTAATTTCAACAGTCTCGGCTTCAACTTCAATTTG  
ATAATGAACTGCTAAATCTTCACCCTTGGTTGCAAAGGTATCAGGCACAGTAACTGTTTT  
AGATGCAGCGTCAACTTCAATTTGATCTCCATCTGCGTTAGTTAAAGCAACTTTAGACAA  
TGGGAGATATGAAAGGATAACCGTACCAGTATCACTAACTGTTAAGCTTTCAGCTTCCCA  
CACAGAAATTTGTTTCGTTTTCAATTTTTACACCTTGCTGCATTGCCATGAAATCAAGATC  
AAAGAAAGCATTTCGGACATTACCCGATACTTCTTTACTTGAATTAATAACATCCAGGTC  
TCGGTTACCCCATCCGCCTTTTAAAATGTCTTGTGAACTTGTGGGAAAACCTGAGTCAT  
TTGTGTAACACCTGAAGCAATAACCTTATGATCGCTCAGACGTTTAGCTGTAATTTTTCC  
AACTTCATGGATTACTGTTTGTATGCCAAATTGTTTCGTCCTAAATAAAAAATAAAAAGC

GACTAAAGTTAAGTAGCCTCCAAATAATTCCTCGATATTTTTAGCATCTTTAGTGCTCAG  
GTGATAAGACTCTTCCTTGTAAAGATTAATGTGACTACTCCAATCACTTACTTTGACATC  
AGGAGAGACGGTAGCAAAAAGTGTGGTTGTGTTATAATTCATAACTTCAGCCTTCCTGTA  
GAACGACAAAGATAGTTGATACATCGTCATTTTCAGATATTTCTTCATACGTGTATCCGTT  
AAATGCAGCAACACAGCTTACTATATCCTTTAAAACAATTTGAGAATCTTGTTGCTTGAG  
TGATTTACTTATATCATGGAACCTCTGATGTTTCATCATTGTCAACGACCTTGTCTTCAGT  
GATACAATGCATGTCCAGTATTAGTTTTTCGGAGACGGGGAAAATTATGTTTTCCAATCAA  
CGATAGGGAATCCTTGTTTATCAATACTTTTGAAAAAACTTTGAAATAAGCCTCGTGGA  
ATCAGGGAGTACCGAATGTACAATTCATAAAGATCTCTCTTTTTTCATTTCAATAATAAA  
TGGGTCAAGCGAGCCATCCTCATTAACCTTGAATATTCTTTAATAAGACTTTTCTTATT  
CATCCCCAACATGCTTAGTTGTTTGGTCTAGAGAGGATAATCTATTAAGCGGATGAAATC  
AATCTCTCCTATTTTCAGTCTGGATCGGTTTTCTTAAGAAAAAGAAATCCTTTAACTCATT  
CATTCACTTGCACCAAAAAGTAAGGATCATCTTGGAGCCCAAATATCCGTCAGGGGGATTA  
CTAATAAGCAAACGTTTATAGTCTACTGTTACACCAAACCAGCAATATTTTTATTGAAA  
AATAATTTTGAAACCCTGTTCGATGATTTTCAAACCTTCGATACTCAGATATCTCAAATGTA  
TTAATGTGTGTGTATACATCGATCATCAATTCCTTGATTTAACAACATAAAGCTTTTGT  
GTCGGGTTAGGCAATGCATTCCCTAAATAAATACACATCCTACATAATGGTGAATCCGAT  
AGATCATCTGTTTTAGGTGCTCGCTTGAATATGGTATTGATTATAACGGGAGAGTCATTT  
GAGGAGGCATAATAATTTTCGAGTGATTGAACATCTGGATGAGAAGGGGAGAGAGGATCA  
GTTTTTTAATAACAAGAGACGATTCAGTTCAACATCATCCATAACTAATCTGAAGACTTTT  
GTCATCTGTTCAACAGTCATGCTCATGCTTTTTACCAACTTTCTTTTTGGCAACCAATT  
TTTTTGTCCGTTGCTCCATAAACTTTAGAATAGTCTATATCATCTACTTGATAATCTT  
CGCCAAAGAAGGTGAGGGTAAGTCCGATTTTCAATTTTTCATGAACAAGATAAGGAATTG  
TAATGTTTGCTTGACCATCCGGAAGGTTTACCGCCAATTCAGTGCCATTTATTGAAGTTG  
TCCGTTTCGAATATGCTGGGGACTTCAGTTGTTTCGCCAGGTACTTTTTTCATAAATTGGCT  
TACCAGTGATTTTCGTTAATTTTGCCAGTATCGATTAGCTTGTCTTCTGAAGTAAGAAAA  
ATGATGTTCCACATATTTTTATCTCAGCCTTTTTGTAAATCTGATTACTGAGAGGGTGGG  
AGGTGATGAGCCATGTTTCATCCTTAACTTAACTCCGCCACGATAAATGTCAGCAA  
TTTCACCTAATATATATCTTGCAGAACCATCGCCACTAGAGTACTTAGAAGTGATCATT  
CTGTTTTTTTCGATTCCATCAATTGTGACTTTTTTCAGATTCAGACCCCTTAAGGGCTTGT  
GGAAAATAAGCTTACCATCATGAAGAAGTTTATTATTAATGTTAACCTTGTGGTAATTAC  
TGTAGTCCTTCATTTCGAATCACCGTCTGTGACCAAGTTATCCCTAAGTCTGCTTAATTCA  
CCACTAACTGTAAAAATAGTGTCCCTGATTTCTGTGAGTTCAGGGTCACTTAGCAGCTTT  
TTATTAAGTTATTTCTCCAATTCGAAGAGGACTGAATTGCTTCTTTTACACAGTTTATTG  
CAAACAACATCTAAGTCCTCAAGCTTTATTTGTCCATCTTTAAGTGCCGATTTAACTTTA  
ATTGTAATCATAGATAATCCACCGCAGCGTTCAATATCAAGCGCTCGATTTTCGTCTTTCT  
GATCTATTACACTTTGTTAAGTGAATTGAGTTGCGTACCAAAGTTCTTGATCCCCACGT  
CATTCTGAGGGGCTGCCACGTATTCTCAAACAAGGTCTTTTTATTAAACAAAACATGT  
ATCTCAAGAAGTGTGCAAGAATAAGAAGATCATCCTCAGATAAATTCTCGATTAACAGTTT  
CAGTTGAATTATCAGCTTTTAAATTGTCTCTAAGCCGGCTATTGAAATGAAGGATTGCAT  
TTCGAATTGATTTATAAATGTCCTATTCTTGTGAGGAACATCAAATCGGACGTCTCGC  
AGTTGTTTAAAAGGTTTCCCATATTTGATCATAAGATGTCATAAAAATCCCTCCTCTTA  
GTCAAAGAGAAGGAAGGATCAGCGACTCCCATCCAATCAGCCAAAACCTTTAATTTGCC  
TGCAGCAATGTCATCACTCAATTCTGAAGCAACGTCAATAATAAATTGCTTCTCAGAATC  
CACTGTGATTTTATCGAGCTTATTTTTTAGTTGAGCAATATTTCCCGATTTAATCATCTT  
TTCAATTTCTTCTTTGGTATGAATGTTATTTTCATAAGCCTCCGACTCAACAATAGAATC  
TTAATCTCTTTGGTTGTCGCGTTATCTTCAACAATAAGTAATTCACCTTTATCGAAACA  
AACGCTGTTCAATTGTGAGCCATTCAACAACCTTCTTTTGGACCTTCTTTAATATCAGCCTT  
CCCATTTTTACTACCAGACCAAGTGTATTGTTTATGTCCACCATCGCCGGTATAACCAAC  
AAAATAAGACGTAATCTGTATCGTGCTAACTTAATTTTTTCAGTCAAATTTACATCCTC  
CTAAAAAATCCTCATATTTTGAATTTAGATAGATACTGCAGCTTGTCTTCAATAATTCCG  
ATTGCTTCTCCAAAAGAAGGTTAACAGAAGCATCTTGAACAATTTTCATTTTGATTCTT  
TCATCTTCGATATCTTGTCTGTCAATTGACGCAGTCCGCCATACTCAATAACAGAAAAT  
GGTTTTTGAGAAACGCCGCCGCAAACATATAGCCTTTGTTGATAGGAAGTTTCGACTTTA  
CTATTTGTATCATCTGTAAATGGGTTAGTGAGGTTAACAGCAGTTGTTCTCCGATAGTT  
GTTAGATTTAGAGCAGTAAGGAGCTCTCCTTTTACTTCTTCTGTTAAGAAGTTCTTAAAC  
GTAGAGACTGTTCCCTTGTGGAATACGCAGTAGCCAATGAGAAGGGTGTGAGCGACGAAG

ATTGGTTTTCCACCATAACGTTGAAGCACGGAAGCGACTTTGTTGTATTGTTGAAGAGTA  
AGTTTTGAGCCTGTTTTGAACATTTTTTGCAGGGATTTTACCAGCTGTAATTGCGCTTGCA  
GTTAATTGATGAATTTTATCGAGGTACAAACGGACTTTAGCATCTGCGATATCATTACC  
AATTTATTGAAGTAAACAATTGAATCTGGTATGAGATCTAGAGGTTAATAATAGAAACCT  
GTTGACATAGTTTTTCGGAACAGCAGGAACCTGTTTCTTGTCTTCAACACGAACTAAATCA  
ACACCAGAGCCTGTAGCAGACCAAATGACTTTTGCTTTATTCTTTTTTTGGAATTTTAATT  
TCTTTAATATTGCCTCGTTTTTCTTGTGGACATTGGCCAGAAGGGAGAGGAGCTGTGTT  
ACTTTTGGTTTTCGCAATTTTCATCAGCTTGTTCACGACAACGTTATTAATTTGATGGAGC  
ATGGAAGGGTGAGGTGTAGTACCGCCATCACCAACACTTTCTTAATGTAATTTTGGATA  
TCAGGTTTGTCTGTACCGTCCATTTTGTCTTTAATACACGGCTAAACAAGCCTTTGATT  
TTCACAGTATCTAATTTCAATTTAAAATACTCCTTTTATTGAACTTTATTTGTTATGTATT  
AGGCCTCGATTACTTCAAGGCGAACAAGTTTTTGTCCCATTGTGTAAACAAGGTCATCTT  
CATTATTTACAACCTAGGAACCTGAGCAGAAGAAACAGCATAACCCTCATGAGGTGAAGTAG  
GATCACTAAGAATATACTTCTGAGTAGCAATATCAAAGTGAGCCACTTCACGTTGTTTAA  
CCTCAGTCACTCCTGTATCAAATGAATATGCAGAAACATCAAACGAGTATAAGCTGGCT  
CAAGGATAACAATTCGAGCATGTTCTCCTACACCGTTATAAAAATCTCTCATTGATTCAC  
CAAGGTAGCGTGCTTCAGGAGATGCAATTAATATGCTTATTTTGTTCATCTGATAGTT  
TCGAAGCTGTACGGTTCCCCTCAGCATCAAACCAAGTTCAACAAGCAGAAAGTTATTAA  
TGTCTGAACCAGTCACTTTTGCACCGTGAGCAACTGTTTTGATTTTTAAAGAATTCAAGT  
TTCGGGTAGTATGATTACCTACTTCAGTAAGGGCTTTTTGTAATCTTGTAGCCATATTTT  
ATTCCTCCAAGTTTAAAATTTATTGTGAAAAGCGTGATTCAAAAGAGTCATCGGTAGGGA  
TTAAATTTTCCCGTTTACTTGAAAATTCTCTAATGGTTGTATTTGTTTCAGCAGGAACAC  
TAACTAAATCAACTAACATTGTGTTAAGTTGTAATACAGCTTTTTCTCCTTCTTCATCTT  
GTTTAAACCGAAGCATGGATAAGGTTTTGTACTTCTTCTGTACTGAATTTTTCTCAGCAT  
TTAAAGCTTCAAATTTTCGCTTTATAGAATTCATTTTTCTCACTTAGTTTTTGCTCTAATA  
AAGTTTTCTCGTGTTTTTCTTTATAAGGCTTCAATTGTTCCACTTCAGAATTTAATTGCA  
CAAGCTTTTCAATGGCAGTGTGGAATTGCTGTTCTATTCTACCTTATCCTTATTGATTT  
GATTTACTTGTTCGTTAAATCTTTGATTTGTTTCATCTTTCTGGTTAAGTTGTGCTTGAA  
TAGGCTCAGGAACAACCTTCCCTCCAGTTGCGCGTCATGAATACCTCAGTTTTACTGTCAA  
AATCAATTGAAACAGTATCGCCTGTTCTTGTGTAATTGAACTAAAAGTATTTGTCATAGC  
TATTTTCATCTGACCAGCTATACACGTTTACGATGAAATACGTATCATATAGATCTGCAA  
TAAATGAATCTGATTCTTTATCAAGGGTTGGATCTAATTGGCTATATAGAAGCGTCCGCA  
CGTCAGAGTGAGACTATTCAAACCCTTTTCTAAACTTATTCATTTTTTTCACCTTCCCTCAT  
TATTTTGTCTTGTAGCTGCTTGAGCCACTAGTCTTCAAATCGTTGCAGTTCATTAAAGC  
TTAGAAGTTTGAAGAATTATAGGCGGGGAGGACAATGTCATGCTCTCGACGTTTCTCTG  
AATTTAAAATTGCATGACCTTCGAAGTAGATGGGGGACTGTAGGTGTTTCGATACCATCTT  
GCACAGTGTAATTTGAATAAAGGATCTTACAACCTTGATTAATGTTGATGCCTCTACCAT  
ACCATCAAGTAAAAGTACACATGCATCTTAAATCGAGAGCTCCAAAGTATTGCATCTG  
CTGCCAATACTTCTTTTTTCCATCTGGGGTTTCAATTTCACTTATGTATCCCTCGGATG  
TAAAGACACCGATTGGGGCAGCATTTCTTTTTACTTCAAGTTCTCCGTGCTTATCTGTGT  
CTAGATAAGCTTCATGAGTTCCTCAATGCATCTGTAGAAGTATTTAATTCATCAACCTCGT  
AATATTTTGCAGCAATCGGTTTATTAATAATTGTTGAAGCAGCTTCAAGAGCAACATCCT  
TAGAAATTACTGTATTATTGTGAGCGACATCGAAATCAAAAATGACAAAGTTACATGACA  
ACTTTGTTGGGTCACTGATGTTTTAATCTCATTCAATTGAAGTTGGCAGTAGTTTTTCT  
TTTGCTTCTTTGTCAAATAATTTACCTCCCTTCAAAGTGAAGTTTTAAATAGGATTGT  
CGTTACCGTTGGATGTAGCTGACTTCACTGTGTTGTCGTTGTTTTATTACCTTCATTTG  
GGCGGCCAACTTCATTCCCAGTGAAGGTATATGAGGTTTGATAAGGTCTAATTTTTTCTT  
GGAGTTTCAGCTCTTCAAGTTTCATATAGAGTTTGTTCATGGTAACTTACCCAAGACACTC  
TTGCCAAATTGTCAACTACGTGCTTAATAGACCAGCCCTTATCGTTTAAATTTAATTAAGA  
TGTCCATTTTTTCTTTAAGAGTGAGCGGCTTGTCTTTATCGTAATTCATATAGTAATTGT  
CTTTTTGGGAAGCAGGCAAACAAGGTTGAATAACTTTTTGATAACCATCTTGTTCATAT  
CCTCCATTAACGCAATACGCTTATCAGATGTATCCAAGTTTAAATGACGAAGTTGCGT  
AGTTACCGCCATCACCATTTAAAAGAGAACCGGATAATCCGTAAGCAGATTGAATGTCGC  
TATTGATATGATCAAATTTGCTCCATCTAATCCATCTGCTTTAACATCTGGAAAATTGA  
TATCAGCAAAGTCAGGGATTGATACTACAGTCACTCCATCTTTATGGTTTTTTTTCCAAAG  
GCGTTTTAACGCCACCATGAATTTTTTGTTTAACTGCTTTAGGCAGCTTCATGTTTGTGT  
ATTCGGCATTACCTTTATCTGTTCCAATCGTTAGAACGGCATCAGCGTTAATAATTTTAT

TTGCAATCGATCTTTCAACATCTTTAAGTTTCTTTTTATGGAGAACCCCATATAGATCTG  
GTGTAACCCAAGATGTTCCCAATTCTTGATTTCTTTTTAGGGTCCCTGTGCGTAGTGAA  
AAGTTCTTTCTTGTGGCAATTCCTTAAACCGATATTTCTCTCGATCTTTCATGATGTTTT  
CATAATCGCTTTGTTAATAAAGGGGAGAGGCTTTTTAAACAATTCGTTTCTTTGATCAT  
CTTTATACTTAGTGAACAGCTCCATGTCAACTACACATACCCAGTCACCGTTTCTTCTAA  
AGGAGGGGAATACATATTTAATTTTCATCAAAAATAAACGGATACGGGCTCTTAGCATCCC  
CACGCCATATAACCAACAAGAGTACCAGCTGTAGCTACCTGTTTTAACAGATCCCTAGTAA  
GTCTTTTGTGCGTAACCTTATGTAAGGATTTATTCGAAAGGGAAATATGCTTATCTGAAG  
ACTTAACTTTATTAAGGCGTCAATTTTATAGTTGGGGGTAGGGAGGGCTTCAATCAATT  
CAAACAATTGGTGAATCTCAGCAGTCGAAATGTAAAAATACTGAGCAAGATGTTCAATTT  
CTTCTTGAAATTCATCGGGGTTAGAAAAGTAAATCTTTACTTGTTCGGCCTCAATTTCCG  
TAACAATGCCATTGGAACACATATTTGAGATAAAGCCGGAAGCAAATGTAGAAGTATAAG  
TTGAATAGTCATTCAGAATTTGCTTATACTCTTCAGACTCACTGTCAACTTTATTTAAAG  
TTACCATGTTTCACCTCATTGCTTATAAAAATAGACTAATTCATCTTCAACGTCATATTC  
AGTTTGTGTTTAACTGTCTTTCTAATACAGTAGCAATATAGTTGCCATAAAGCCACTGA  
GCTATATCTGTCTTTTCGTTTACTCTTTGGCTCTTTAAGCTTAACTTGTCCGTTATCGCT  
ATATTCAGCTTCTAAGTTGATCATTTCATTTATTAGAAGGGTAATCTGAGCATAGCTTGA  
AAGGAATTTTCCTTTAACTTCAGGAGATAGCCCTTCATAGCCTTTAAATCTTTTCAGGTA  
TTCTTTTCCTTCATTTTCGTTAATAGGAATTCTGATTTTTCTCGTTTGAATCCATCTTT  
TAGTAATACCGCAATTTTCGCTGATCAATTGTGCATTACCTTTAATGCTATAAATTACTTT  
TTCAGCATTGATAAGTACAACGCGCAGCCATTCTTTCATCGTTAATACATGAAAATGG  
CTCATATTTCTTTGCACGTTCTTTATCATAAAACGGCTGGCATAATGCATCATAACACC  
AAGTCCGATACTTTGAGTATCTAATACAATATAATCGCAATCATAATCTTCGTATATTTG  
TCTAATTCTTGTGCTTGAGTTCCTGTGTGACCACCTACGATGCTCTCCACGTACACAAT  
ATGACGATCATGTCCATTGGAGTGTGGAATCAGTCTGAATACAGTGTAAACACTGGCATC  
ATTATCCTTACCGTCCATTCCAGCGATATCATTGCTTACCAGTCTAATTTTCGCCTGGTTT  
CTTGCCTTTATATTTGAAGTTGGAATCCTTGATTAGACTGTAATAGTCAGGAGGGAAGAG  
GGGAGAAGCAAGCTTGCAGTTCTTTTCAATGTCTTCGGATTTAAAATAGGCTTTTTTCA  
TTCACCAACCAGAGAGCTTCCATTTCCATAGACCAACCGATAGGATCAAAGTCTTCTTC  
GGCATTTCATCTCTAACTTATCTTTATCCAAAAGACCTTCTTTAATTGCGATCTGATA  
AGGGAGACCACACAGAATATTTGATCTTTTCATCATGGCATTGTAGTAAGTTATGAA  
TCTGTAAATGACCAATGAACCTTGTACCAGCAGGAAGACAAGTAAATTTCTTTGTTTCG  
TTCTTTAAGTGAGCGTATTCTTCTTTTTTCGAGATATTTAGGAGAACGGGGAGCAGTCAG  
GAATATTCGAAGTACTTTACTGATGATTTCAAAATCAACCATTCTGAATTCATCTGCAAT  
AAGGAGGTTTACACGCTTGGAGCGAGCGCCATCATTGAGGCTACGATTTTAAATCCAGCT  
GCCATTATGAACTCCACTTTAGCATCATTGTTGAGGTTTTCAAATCTTCAATTTCTCG  
CCTTAAATTAGGTGATTCTTTGCGTCAGTCATCAATTTTCTCTATGACTTCACGAGCTTG  
TCTCTTTGTGCCCGATGCGATAACTATTTTAGTACCTGGGTAGAGTATGGCTTGCACACA  
GCAGTCTACAGGGATTAGCCAAGTTTTACCCTGCCACGACTGGCCAGGTACATAAAGTA  
ATGGTTATGTACCATCATGTAAATTAATAACATTGAAACAATTTAAGGGTAATACCCAA  
GTATTTCTTTACAAAACGATGTGGGTTTGCTCTATAGAAAGAAGTCCATGCGCCGATACC  
ATCCATTAATCTTTCAGAATTTGATTTCTTTTTACAGTTGTTTCCCTTTTTAAAATATT  
GATTCCTCGACTGTGCTTGTGCGATCAGTTGTAAAATTTTTATGTGAGGTCATTTTCTC  
GATCCTCTTCTTCTGCAATAGGTTCTTCAACAGTATGCTTATTCATTTCTTCGCAATATT  
TCTCTGAATATTGATTTTTCAAACCAAGCATTTCGAGACAGATGCCCAAGGAAAAATACCT  
TAATGATTTCCCGATTTTATCAGGATCTTCCATCTAGGCTGTGGCTCAGGAGTAGGTC  
TCTGATTCTCATATTTTTGATCAGAGTGCCAAAAGACTCTTGTTTCATCTCCACTTGCTC  
CAGTTTCTTGAACGGGTTTTCAATTACTTGACCCAAGTAAATCTTGAAGAGTTATTTGCT  
GCTGATTGACTTTTTACCATTTTCACGCCGTTTGCATATCTAGCCGAGTCAGACATA  
TTTCATTTATAAGAAGTCCATTCCCTTAGAGTCGCATTACATACCTATTCGTGAAGTCAA  
TGTACTCATTCTGAAGCCAAATAAAATCTTCAACATCAAGACCACGACCCCAAGATTGCA  
TTAATTCATCCATGTCTTCCCTTAGATATATCTTCTGTACTTTTAGCTAGTAACAATTGTG  
TTGTAATTTCTTGTCTTCTTCAAAGTCAAACACTCACTGTCTGCCCTAGTTTTTTACTTGT  
AATCTTTCATTCGGATATTTTTCATATAAGTACCTAACACATTTCCAGCTGATTTTTTCT  
TGGACTCTGATTCATTAACAGCGGAAACCCACAAGTCGTAAACAAAAGGACGGTCAATCA  
TTCTTAAGATGTTTTGAACATTTCTTTAAGTTATCTTTGTCTTTTTTGAATTCATTTTGA  
GACAGCTCTTACATACTGACAGTTTGCCTGTTGCAGAATTGAAAGGAGATTCCGATATAT

AATATTGATTGGCATTGTTCTTTGCCGCAGCATGAGCATTTTATTTTTTCAGCAGACA  
TATTTACCTCCATAAAGTTTATGTAAACACATTTTACGAAACGCCAGCAATAGAGCGA  
AAGGGGAGTACCGCAATCTTCGCTGGGCGTTCTAAAAAGGTGCTTAACTATAGGTCAAAT  
CACCCTGGGAGACATTTTCGATATCTTGTGTTTTAACTTTTCTATCACCATGTCCATTA  
ACCCTTTACCAATTCACATGTATCAATCAACAGTATGTCAGGGCGTTTTTCTTTTAAAA  
TCTGAACCAATAGGTCTGCTTGATATCCGAATGTCTGAGAAGCTATTCTTCTTTAATAT  
TTTCAAATTTGGAGTCTTTAACATTAACAAGTAAAAGTGTGTACAATCTGTCCGGGGAT  
CAACGATTAACAACCCATTTCAATTTGGAGAATCTACGCCTATTTTATAATCAGCAATGT  
TTTCGTTTTCAACATTGCTACCTAAGGTGTAATAAATAAATTTGATTTTGATGCAAGTC  
CCATTAGTTTATGTAATTTACTAATAACAGTAGGTATCTCTTTATCACATTTGTATCCAG  
ACTGCTTGAGTTGGGCAAGTGTCTAAGTGCTTATTCATATATATAAAGACTTCATTTCG  
TCATTTTCATCTTCATCTTCAATCGTTATTTTGTATTAATTTAATAAACCTTTTTGCAGT  
CAACCATTAATGCGCCTCCAATCTAACTAAAATTAAGTTTTATCAAAAAAAGATTAATA  
GTTCAACTTTAGGTTTAAAAATCCACTATTGGATGTTGACATCTGATAAAAAAGTGGATT  
ACACTATTTATGTATTACGATATCTAAAGGGGAGTTCACGTTATGGAAAACAAAGTTACA  
TTATCAGATCTAGTACGTAATAATATGCCAGTGATTTTAAAGGGTTCAAAAACCCATCTT  
ACAGAAAAAGAAGTGCCTGAAGAAGTACAAAAAAGATACCTGAAGTTGTTAAGAATGGT  
GAATATAGAAATGGAGTCTTCGAGGTGTATTAATAAATTTTACACAGCCAGTTGAT  
CGATTAGGAATTTACGTTGAGGGTAATCGAGTTAAGTATTATTTTATTACAGATAAAAA  
ACTGAGCTTCAAAATGTTATTAGAAATCTCATTAGTGAGATTAAAGAAAAGGAATTATTG  
ACAGTTGATTACTTGAATGATTCGCCTGAAACAATTGACTTTATAAAAAGATGTATCTACT  
CACGTTAAGTACTTAGAGGGATTTACAAGATAAACATAATTAAGAAGGCCTAATAGGAG  
CCTTCTTTAATTTAATATGTAATCGTATTGAATAATCCGACCTTTACCGGACTCATAAAT  
TGAAAGGTTTGCTCCAGCTTTGGCACCTGTCATTAAGCTGTCACTGTATTCATCGGAACC  
CATTACAGAAGGGAGTTGTATAACTTGGATATTATGAGTGGCTGCTTAACCTACAGTGAG  
CATGTTCCCGTGGTGGAAGTGGGAGATGTACATGTAATCGTAGAATTTTCGTTTCATCTG  
TGAGATGTCACGAATGGCATTCTTTTTGTTTTTAATCTGGTGTCCGTGACATGCGACAAT  
TTCAAATTCAGTAATTTAAAATCCACAATTCCTTCGTCGTATAAAGGAACTTCAATTCG  
CTCATTGTCTTTGAGTACGTCATGGATATAAGTAGCTATAATACGCTCTACATCGTCTTT  
AGGCATTTCCGAGCGATTTGTATTATGTAATCTTAGTTCAGTATGATTTGCAGAAGGGAT  
ATGTATGTAATTTTACGTTGCTTTGAAAGTCTAAAAGCCATTCAGCTTTGTACCT  
AGAGTATTTTATCACCTGGTCAATAAACCCGTAAGGAGGAGTTTATTGCGATACGCG  
CAATGCCATACCTTCCACACTGTCAGCACCATTTAACACGACCAGCTCATCTAAATTTTT  
TTTTGAATGTCCTCAACAGTTTCAGAAAGAATCTGATTCATACGCTGCAAATAAATCTG  
TTGGTTGTATTCAATTGTTGTTGCTTTTAAATTGCTTCCCGAAGTGTTTCATCTCAAACCC  
TAGAACAGGAGCTCTTTTCTTTCGTTCTTATTTAATGGATAGAAGGAAGGGGGAGGGAG  
AGTACCTACTTTCTCCATTGCTTCAGTTACAGTTTCATATAGCAGCTCTGTTCCGGCCTTT  
GACGCGTGTGTTTTTATGTATATCATGCTTTACGGCTTGAAGCTTTTTTCTCTCTCCAT  
GATTTCAACCTTTTTTCGTTCCAATTCAAGGAGAGAATTATTTAATTCATCTGACCTTTC  
TCGTTGGTATTCAAGTCCTTCAATAAAGTTGTTGAACCATTTTCTATAAGCTGATTCACC  
TTTCGATTCACCAATTTCTTGTGTTGATTAACTCTTTGATTTCTTCCCAGTTTAGATTATA  
AATGCTTTTATTGGAGCAGATTCTTGTTTTTCCATTCTTTAAGGTTTTTCATCTGAGTGACT  
CTTAGTTTAAAAGGATCGATCATTAGTTAGTCATCTCCTTACTCAACGCCTTTAACAG  
GAAGTTCAATTTCTTCTTTTACAGTAATTGAAACATTTTTTCCATTAACCTCTGAAAGAA  
TTTCTTTGAAATCATATGTGTATTAGCTTCTTTAGTTTGTTCAGTAACTTCCATTACGT  
CCATATCAAAAAAGCCTTTAACATTAATTTGATGTACTTTTTTGCTTGCCATTTAAATTC  
CTCCAATAATTTTCTATTTACGTACAATAAGCTTCTTCGGAAGCCCGATGATCCGAAGCA  
TCGGTAACTTCCGAGAAGGGGATATAAAGGAGATGAAAGATAAGTCAGATAGGCGTTGGG  
GAAACGCCCGAAGGAGGTTATTGATAACTTGCGAACCGGAAGGCTCGTAAACACATTCCG  
GCTGATCAGTAAAACGCAAGCACAAAAGGCCTTCTAACGATTTAGAAGACCTTGTCTG  
ATTACATTCTAACCCCGTTTACCTACGTCATTAGCTCACGTTGGGACTCAAGCCTTCAG  
ATCGACAGGGATTACGCTGATTTCCGGTTCAGCGACTGAAACCTTTGAAGTTGACAAACT  
ATAAGTAAGTCGAAATATCAAAAAGATGCCAAAATAACGTCTTCAGGATCTCCTTGTACAT  
CATGGTACATGAGCATATAAACCGGTAATCGCTGTGAGAAAAGTATTCTCCTTCTGCAC  
GTGGCAGATGAGCTAATTCATTTAAGAAGTGTGTAATAATCTCTGAATTCACAGTGAAGCC  
TTGATTAGTAACGGCAATGAAAGGAATCCCAAAGCTGGACGTATCGCGGTATCTTTAGTG  
TCCCCACGCGGGATTAATCGGCTACTCTCGATCAGACAATGAAATACTAACTCTAAACC



TCGACACATTATGGTGGCGAAACACCAATAATGAGAAGGAAAGACCCATTACAAGCCTTC  
TCAATGGCGTTTTTCAGTCGCTCTTGTTCAGGTTAAACGCCTTATTGAGAAACAAAGCGTCT  
CAAACCTCTCGCCAGCTATTTTGCACAGTTTTCTCCGACCCGTGTAAGGAGGTATATGCAT  
GGGAAAGGTAAAGTTTTCTTGAAGGAAAAGTAACGAATATGTTACTAAGTGAAAGGAAAAGG  
CAAGACCGAAAATAATCCTTTTTCTGTGAAATGACAGCGGTGATCAAGCGCCCAAAACCAT  
ATCACTTATTTTACGAGGGTATGTAATTTCAAAGCGTTCGTTTACCCGGAAAAATTTTGT  
GACCGCATAATAAGCATCGAATCTTACAAGGTCATTATTTAAAGGGAAGGGAGACGCATC  
TACATTCCCTCAGTGTAAGCCGAAGCAGTACACCGCAATTAATATTCAGGGATACATGTC  
ACCCATAGTAAGACTGTGATGGGATTCACCCTGCATAAAAACTTGAGTAGCAAAGGTCT  
TACCGACATGTTTACCCGATAATAGCCATTTATCTGTCTTCTGAAGATACAGACATCCG  
AGTTAAACTCGCACCCCTCATAAATGACTATTATCCGACTAACTGCAATGACCAGCCGCAG  
TTTTGTGTGAGAATGATACAGAAAAGAAGGGAGTAGATATTGTTTAAATCGAGAAAAGCTA  
GTTACACTGGAGAGGAATCTCCACTAATATCCATTTAGATTAGTCTTTACCTTCATAAA  
TGAACATTAGTCGCGAACTGATATCCCAAATATCAGTAATCAACTAATTATTGACGGCAC  
CCCCATGCCATAAATAAATAACTATAATTAATTAACCCGGAGTTGAAGATGAAAAGCGAA  
AAGAGGGGAGGTCGACAATTTCTCCATAACTTCCAACCTCTGCCACTTTTAGGAGCAGAA  
GCTCTTTGTGACAAAGCGTGCAGGTAGCCTTTCTGTGTCCTCATGAACTGATTATTTA  
GCTTTGACTGTGTCTTTAAGTGCTTTTGTGCTGGCTTAAAGTGTAGGTACTTTTGTAGCCGGA  
ATATCAATTTCTCTCTGTCTGGGGATTTCTCCCTTTACTAGCTGCGCGTTCACTAACT  
TCAACTGTTCCGAAACCAGGAATACTTACTTTTTCTCCACTTTTTAATGCCTCTGAAATA  
GTGCCAAAGACTTTTTTCGACACTGGGAGCTCCTTCTTTTTTAGATACCCCTCGTTTTTCT  
GCCACTTTAGCGATTAGTTCTGTTTTATTCACAATCAATTTCTCCTAAGTATTATTACA  
TTTATTCTAAATGAACAATAAAGATTGTCTTTTATATAGACGGGTGCAACGTACTAGTCC  
TTTTATGTGGAAATTAGCTTTCTGTCTCCCTTATGACGATTATCTCCAAATGTGCTCTCA  
ACCCAGTAGCACAAGGGATAAAGACACTTTTTTGTGAAAGTTTTTTTCGGTAAAATCGC  
TGTACACCTTGGGGGAGTAAGGCTCAAGGCACCTTCTAACGGTGGTTAATTCTCTTTTTG  
TTATATTTTTGTATTTGTCACGTTCTTTTTCTTTCCACAAGACTGACAGTACTTCGCT  
TTGTTAGATGTTGGCTTAAAAGCTTTTCCACAAATACAGCATCCTTTAAAGGTCTTTAAA  
TTATACTTAATGTTCTCCAGTACAATATCGCCAAAGCACTCCCACAGTGTGCTGATTGTAT  
TTACTTTTTTCTTATATAGATGTTTTACCAATACATCGGTAATAAATCCGTCATCATT  
TGTATTTCCAATAGTTTTGTTTGATAATCTTATAGACATAAAGTTTTTGTCTGTTTA  
GCTACTTCATCATTGAGCCATTCTTTATTTTCGATCAAGACGTTTATATTCATTTATT  
ACGGCTTCATTAAGTTAATCTCTTTGTTTTTGTGAGTAAGAAGCGGTAATCAAATTTTCT  
GCAACTGCAGCAGAGTTGATTCGGTCTGAAGGGATAATGGAGTCTAACTTATTTACTGTA  
CTTAAATTAATCGATTCTACGCTATTTTCTTCTTTATCCTTTGCATTGATGAAGAAGTGG  
GGCACTTTATTTATGTAATCTTTGATTTTCTCATCAGCGTGATCAGGGCGGGTGGGC  
ATGAATAAGGTTTTTGCAAATGGATAGTAAAGTTATTCTCCCTGCATAACCATTTGATC  
ACGTCCAGGTTTATATTGTCACTGTTCCATATCTTAGTGATGTTGTTACTGTACTCCCCG  
ATATTGATTCCATAAGCAAGAGTTAGTGCTTCATAGATGTTTCTGCTATTAATCTGTTGT  
TTCTGGGCTACAGGCATTTTATAATAACAAGGAACGATGTCCGCCATATTACGCTTCGCA  
ATATTGACGATTAGCTCATCAGAACTAATTAAGGCCTTATCCCTTCATTGTCAAACCTGC  
AGCAGCTTGGATATCGGATCATGAGTGCTGGTATAAACACCTGGGGTAATGAACCACTTT  
TCATATTCCTCATTTTTCTGGATCCACCTAACACCCTGCTCTCTGAATAGGTGAGGGGAG  
CGGAGGATATCAATATACCCTTCATCATATAAAGAACAATGGACATCGCTTCTGAAAGT  
AGTCTTTTTGGACTCTCAATTCCAAGAAACAATTTTCAAAAAAGCATATAGGTCAGGA  
CATAAATTTGTATACCGGGCGTCACTGACAAGTAATTTCTGATTTCGGCGTCTTAATC  
ATACTCTTCTTCTCATTCTTAATGATTTCTTTGGTGTGATCATCATTTAGTAGCTCAGGA  
TATATTAGTAGAGCTTCTTGAAGACTTGTCTTATGTTTATTTTTCTCGGTAGCCCTAAA  
ACTTTCATCATTGTTTCTTTATCAGTGACTAATCGAGTAATCTCACTAACAGTCTTTGAG  
CTGATTTGTTTCAATTCCTCATCTGTGATATCCGTGAGTGTGTTGTAGCATCTGGTAAGTC  
AGTTTTCCCTCAACAGATGGATCTTCTTCATTTACTTTAGCTCCTAAACATCCATAATTT  
TTAAATTTTTAGCGATAACCATCCCAAGAATCATAGTACTTCCACATCTTAAACTGGCTT  
TTCGTAATAAATTTGGATATCATCATTAAATAATGTGCCATTCTTTACCGTAGACGTCT  
TTAACTATAAATGAACTGTGTTTTTCAGCAAACCTTTCTAAAGTCAAATGGAACAAGTAGA  
CCCTTAACCAAGGTAATCTGCCTATAAAGCTTTTCTGACTCAAACCTAGGGAGCGTCATT  
CCACAACCATCTGTATGTTCTATAGGAATATCCATAATCATAACGTGTGATTTTCATATGTA  
TCCCGGTCAATGTAATCAACTAGGCTGGAAACATTTGTTTCTAAGTCATTTACGACAATT

GCTTTATCAATATCAATTTCCCATGGACTGCTGGCGCTACTCGATAAGGCCATGTAGATA  
TTCCATTTGTTTATGCTGCTTCCACCTTGAGCATTGATATGCTCCACACTAAGACCACAA  
GTTAAAGCATTGATACTTATCTAAGGTGCTTTGTTTGATAAAACAAGATTTTTTTGTT  
CTCATTTGACCGGCACTGCTAGTGAAATAAACGTATTTCTCATTGTTATGTATGAATCCT  
TTATCAATAATGTCCCTTAAAATTTGAAAGTGATAAGTTTGGACAACCATGATCTCTTCA  
GAGAGAGAGTTTTCTTTGAATCCCAGCGTTCGAGTTAAGACTGAATCAAATAATGAAATC  
ACATTATTATCTTTCAGAGAATCTGTTCTAAGTGTCTTATTTGGTTATGATCGTTAAAG  
GCGTTATAAAGCTTTTCTTTAAGGAAATAATCCTTTGCGTTATGTACTTCTTATGTCTT  
TTCTCAACATGTTCAAGTTTTCTGAGATGATCTCTGTACCTATATGATTTTAAAGTCTTG  
TTATGAAATTTGTTTTCTTGTTCATTATAAAAAGCAGAGGTGTCAATACTGTAAATATGT  
ACTTGTATTTAGGCCCTCTTTTTTCTTTCAATAAATTCTCCCCTTATTACTTTTAT  
GCATATTTTTGTTTTAATAATCGCTTTTLAGAACTTATGTACAAGATTTCTATATGTA  
TAGCTCTTTTTATCGATTGTTCCAAATAGTTTATAGTCCCTCATAAAGGGTGTTTTCTTCT  
TGTGAAGCAGTTCCTTCAATAATAGCAGTCTCTAAAATCCAATTAATTAATAACATG  
AACGTTACTTTCTCTGAATCTTTTTGCATTATCTCACCTCCTCACTTATGGCTTTATTAT  
ATACATATTATTTGTATTTGTCTATTGTTTTTTCGCTAGTGTGTTAATAGCTCCAGGTTA  
AGAGGTGAATTCTTAAGCATTAGAGAAGGGGGGATTATCGTAATCTAAAACATGCTTA  
TCGTAAAAAATATTAAGAGTTTAAAAAGCCAGTAAACATAAGGAGATTTGCTGTATCGA  
ATGGTGATTAGGGGATAAACGATCGTAAGACATAAGTGAGAGTAGGGGAAAGTGGTCGCT  
TTATCTAAATATTGAAGAAATCGAGTAAATTTGAAGAGGGGAAAATGTTGATTTAAGG  
CTTTTACGATAGCGATTACGATGTGAAAAAGCGTGATTTTGAAGGTGGAATTAGGAAAACG  
AAAATTTGGATAGGGTGTGGAAATGGAAGTGCTATGGGTACATCTGTTCCCTTAATTTA  
CCATCAGATGTAAATATACCCCATATATTGGTATTGTGATGCGTGTATAAGGAACATTA  
TACGTGCATTTAATGACTTGGGCAGGTCTGCACCAATGCTATCATAATTCAGGTCAAAC  
ACAAGAATTAATTTTTTAAAAATAAATTGTTTTTCAATTTAAAAATGAATAACCATTCAT  
TAAAAATAATCGTATTTATAACGCATCCGAGGGAATCGAAGACATAATTTATTCTTATCC  
ACTTACATTACTATATCATATCTTCATATATAGCCCTTGTATTTACTTACCATCTCAGCC  
TTGAAAGGTAGTCGGCAACTTGTCTTTAACTAAGGTTCTCTTTTTCAACTCAACGTCTCC  
TTCTGTAAACAGTTTGTCTTACTACTGTTAACCATTAAGAAACCTTTAGTTTCTCCCGA  
TATATTTTATGAAACTTTTTGCTTCTTTTTGTTTACGAAACTATTTGCTTATATAATAAT  
TGTCAAAGTGAGGAACCTACTATGTTTGGAAAACGTTTAAAAAAATGCCGTACCTCCAAA  
GGATATAGCCAGCAACGGATGGCGGATTTCTTACGAATTACGCGACAGGGATATGGGAAA  
TATGAAATTGGTAAGGCTGAACCTGATTTAAAAACCCTTACTAAATTAAGCAATATATTA  
GGAGTATCTACTGACTTTCTTCTAAAAGGCACACATGCACAATTTGATCTCGATGAGATA  
TTAAATGATCCAGAGACTGTAATTGCTGGATATAATGGCACGTTCTCGGAAGAGCAAGCT  
AAAGAGTTACAGTATTATCTTTTAAACAAAAGAGTTTGAAGAACATTAGTAGCTATTCTTA  
ATTCTTCTGGTAAACACTTGTTTAATAAAAAGAAAACAACTGTTTAAACACCATTAAGT  
TAAATGAAAGAAAAGAAAAAAACTGGAGTAAAAGGGGAAATGAAATTGTTTAAAAAA  
TTGGGGATTTTACTATTAATCACTTCACTGATATTGCTCGCAGCTTGCAAAAATAGTGAA  
GAGTCTTCTTCATCATCAGAAGACACAAACAATGTAAGTATACCAACACATCAGAAAGC  
CAAGACATCTCAGTTACTGGTCTGAAAAAGTTGGGGATGTTTATGAAATTGATGGTGGT  
ACAGCTAAAGTAATGGCCATCTGCAATAAAGAAACCACTGTGAAAACCTGGCCCGATCCAA  
TTTACTGTAAAAAAGTAATTGCCGCTGTTGCCAACGAACAACCTTTTATTGATGTT  
CAAATTGAATCAGAAAATACATCTGATGAAGTAGTTCGTTTTCAGACCAAGTCTAGCACAA  
TTAGCAACAAGCGCTGGGGTACAGATCGATGAGCCATCATTGTTGGACAGTGACAGGCTT  
CTCGACGAGTACGTAGGAAAAGTAAACGATAGTAGATCCATCATATATGTTTTTGATAAC  
GAAGAGGATCTAAAAGATTTAGAATCAATTCGGCTGAGAATCTCTTCTCCATGTAATGAG  
GACTTAAAGAATTTAGGGGACAAGCTAGACTTAAAAATTAACCTTAGAGCATTAAAAACAA  
GCCCTATTTTGGGGCTTTTCTTTAGAAAATAAAGTCGAACATAAGTTTTTTATTTTGTGG  
TAGGAGGCTTTACCTTGCATCATATTTCACTTCTTGGAGGAAAAAAGACGAAAAATTTGCA  
CCGGATCCCATCATACATTCCACCTAATCTCACTCATAACATTAACACGCTCTCAGAGCCA  
ATATAACACATCTCTAAGCATCCTTAATCAATTCCCAAACCAATTGTATTCTGGTTCATT  
CAAACAGCACACAAGGCATCTTAATACCATCCATCAACACACAGATAGCTTACCACAAAT  
ATAAAAAATATGTATATAAAAATCATGAATTATGTTATAATAGAGTCATAGGAAAGGATG  
TGTACATAGTGCTTGAGAAAACGGGTATCGTAGTTGCTTTCCTCATATCTTTAACGGTTC  
TTACAATCAACAGTCTAACAAGAGTTGAAAAGGTAAGACACCTGAAGAATGGGACAAGCA  
TGAAGAAAAAGTGTATACACAAGCGGCTCCGACCAAAGAGACAACGCCAACGTATACGCC

GATGAGAGCTAAGCTAAAGGGGAATGAACTTCTCCTTTAGTTACTACCCATATTATAACA  
TGATCAATGACATTGCAAACATGAAACGATTCTCATTATGGTTTACCCATACCCATTCA  
TTGGCTTATTCTTAATGTTTCAACTCATCAAAGATTACTTCAGCAGCGAAGGACAGGGCGC  
TAATCAACAGAATTTTTGTTGTCACATGTATCATTGCCATATTGTTATGGATCATCTTTT  
GTGTATTCTTAAACTAAGAAACAAGTCACACTAATCATATAGGCCTCATGGTATAATTA  
AATCATTGAGGTGAGATGATTGGAGAAAAAACTCCTGGATGCTATTCAGCAGCTAACAAA  
GGAATTGGAAATGCTCAAGAAAGATATTGACTCCATCAAAGAAGCAACTGTCAGAATTGA  
TAAAGACCTTTTAGAGTACAGAGAAGAGATAAGCAAAGTAAAACAAGATAATTCAGTATT  
AATCTTGCAGCAACACAAGGATAATTAATATGCGTTATAAATAAGGGAGCGGTAAGGCA  
ATTATCGTTCCTTATTTTTTCGATACAAAATTAATAATAAAGGAGGATATATGGAAAGAGT  
TAAAGTTATCGATTCTATTATGGAATCTGGTAAAACAACCTTACATTATTAAGATAATGAA  
TGAGGCACCAAAGAATGAGCATTTTATCTTTATCACACCATATCTTGATGAGGTAACAAG  
AATAAAGAGGGGCATGTACGAATAGAAAGTTTTACGAACCAAAAATACATAGTGAGGAAGG  
GGAAGCGCTCTATAAACTGGATTCATTACATAAACATTTAGCAGATAACAATGACATTGT  
AACAACTCATGCTTTATTCAGTATGGCAAATGAAACAACCTAAAGAATTGATCTACTCAG  
CAATTATACTCTTATCCTGGATGAGACTGTGGAAGTGGTTAAGAAATTAATATATCCAA  
GGATGATCTGGATATGCTGTTCCAAAATGAATGGATTACGAACAATAATGGCACTACCAT  
TTGGGATGATGAACAAGAACGAAATCTTAATAGGGAATATAAAGGAGAGTTCCAAACACT  
TAAACACTTGGCCAAGAGAAAAAACATAATTTTGCATAATGAGTCTGTATTGTTTTGGCA  
GTTTCTGCAGACATCTTTGCCCAATTTAAACAGGTCTATAATCTTACATATTTGTTTGA  
TGCTCAGATTCAGAAATATTATTATGACATTAACGGAATAGAATATGAACTTTATGCAGT  
AGTCAAAGACAATAACAATTATAAATTAATGCAGCACAGTAGGCAATTTGATTAAGCAA  
GAAGGATGTCCTAAGACGTAATAATTATAATATATGAAGGTGACTTGAATAAAATTGGTGA  
TGATTATTATGCATTATCAAAAAACTGGTTTGA AAAACGTTTACATAAACGGCT  
TAAGAATAATATTCTGAATTACTACCAGAATATACTTAGATCAAAGTCTAAGAGTAATCT  
TGGGACAACCTTTAAATCACATAAAAGTAACTAAGTGGGAAAGGTTATACGAAAGGCTT  
TTAGCCTGTAACATAAAAGCAACGAACGAATACAGTCACAAAAGATCTTTGGTTTATTC  
AATAAACAGATTCGTTAATCCTGCAATTGATGATTATTTTAGATCCAAGGGAATAATCAT  
AAACGAGGACAACCTTTGCTTTATCTGAGATGATTCAATGGATTTGGAGATCAGCTATAGG  
AAATGGACAGGATAGTAATATATATGTCCCATCATCACGAATGAGAAAGCTGTTAATGGA  
TTGGTTAGAGAACCAGAGATAAGAATAGCGTATGAAAAAAAAGTAATAAAGCGTTTTTG  
AAACCCTTGGTACATAAGGGTGTATAGGGGTCTCTCGTAGAAGAAAAGAAGTAAATAAA  
TTAATAATAAAAATAAGGGAATGGGGGTGCTGATAATTGTTCAAACGGTTCGTTCTCA  
CCTGAACAATTTTTGCTCACACCACCCCAAACCCCTCGTGAGCAATTAATATTAACGC  
TATATCAAATACCAAAAATATGTATTTAATTATTGATTATTATAGATTAGCAAGTTATAA  
TATAAATAACAAATACAAATAATATGTATAAAAACAGGAGGTAGTTAAAATGAATGCGCA  
ACTTTTTAATCTGGAGTCTAGACTTGATGAATTGGAAAATGAAATTAATACACAATACTG  
TGAGTTAGATACTCATATTGATGCTCTTAAATCCTATCGTATTGAGCTGGAATCACAGCT  
TGAAAAATTTGAGTCTAGTCTTACCAATAGATTACAAGGAAGCATTTCAAATAACTGCCG  
AAATGACCTCCTTAATCTGGCATAACGCTTTTACAAGTTGATTGCATGTCTGACGAAGA  
AGTTTACGCTGCACTCGATAAAAATTGATGAAGAAATTCATAATACTGATCAAGATTATTC  
TACGGGATTTGAAGATCTTGCAAAACAAATCATTGAGATGCAGAGGGACTATTTCAATTGA  
TCGAAAAGAAAGAGGGTCAGGGAAGTTCGATGAGGCATGGGAAGGAGAAATCCTTGATTT  
AGAATTTGAGTACACGGTCTTTGTTTAGAAAAGGGGTTAGAACCACTCAATTACATTAT  
TACCTGGGAGGGATAGGAATTAGCTTTAACAAGTGATTATACCCTTTTAAATGAGTCACA  
ATAGTTCAAAGCAGCGATTCTTTTCTCGAATAAAGAATGTTTAGCTTCAGATATATATTA  
AAATAAAATGCATATTTTAAATAGAATATGGATAGGGAAAGTTGTACAGAACAAAATTGG  
AGATGGTCATGATTAATCTTCAAGAAGACAGGTTCTTTAATAATCGCATAGAATTGGGG  
ACAGAGAATTA AAAAGAAAAGAAGCGGGTTTGGAACTCTATGAGGAATGACCTCCTTAGTG  
AAGGAATTGCAAAAGAAATGAAGA ACTTAAATAATAGACTTTAAAATTTGAGAAAATAAT  
TAGGTGATATATTTGGAAAATATAGCTCTTGAATCCTCCTTTTTAGAGTACGATATTAAT  
GAACCGATAAAAATCTATACCGGCCACTTAACACTTGAAGTTGCTGATGATTTTTTTGAA  
ATCTTGGGCGAAGTTAACTTGCATTTTTACCAAAAAGCTAGACTATTATTTGAAGGAGCC  
ATCTCAGGCAATCTTAGCAAGCTTTTCGAATTTGAAAAGGCAATGAAAAGTAATAATAG  
ATGATTAATGTACCTGGATTTATGAAATCTGAATTTCTTATTTTCAAGGTATAACAGACGGA  
AGTAAAGGGAACAAAGTACCAGGGATACTAAAACGATCTATTTTAACTCAGCTGAAACT  
AAAGTGAATAGAATGGAATTCACGGTGGTTAACTTCGTGAATGATTTAGGTAGAAGGATT

GTGCATGGAAGGTTTAAATTTTCAGGGAGAACAAAATTAATAATATAAAGATTGGGAAATA  
ATTTTGGATAAGCAATATGACTATTCAAACAAAAAATCTTTGATAGATTAAAAAATTCG  
GGTCGATACTTAATAACACATGTGGGATATTTAAAAAGAGTGGATGATAAATTATTTGAT  
ACTAAAGAAGTAGAACCACTTATTTTCAGGGCTTTATTGGTTATTATCCTTTTCAGCAGGT  
AGACATCTTGCTATCCATACATTGGAAGGATACCACAACGAGGAGGTAATAAGGAGTAAA  
TACCAAGTTCCATTAATAGATGGCTGGACTAATAATATTACTTGGTTTCCAAAACAAAA  
TCTCCATCCTTAGAACATTTATTACCAAAGGTGATTGAGAAGCAAGAAGATACTTTTTGG  
AATAAAGTTTTATGGGAAGTGTGAGTTGGTACTCCCAAGCACATTCATCAAGTATAGTA  
GAAAACAAGGTGGTATCTGTTTCAGGTTGCATTGGAAACTTTGGCGTGGGTGTTTCTTATT  
GTAGACAGAAAATCCAATATTAGTAAATCGAAATACAAGTATATGAATGCAGCAGAGAAA  
TTTAGAGAAATATTATCTAGATTTTCAATTGACTTATCAATACCAAACCTCTTTATTGAC  
ATTAAGGATAATTATGACGATGGCCCACACCTTTTTACTGTATTTAGGAATAAGATAGTC  
CATCCTACAAGGGAAGTTGATTTTGACAATCCGATAGATAAGCTCCATGTACTTTATCTT  
GGTGTTTGGTATCTTGAATTACTAACACTTGGAAATATTGGGATATGAAGGAAGTTATGTA  
AACCGTTTAAAGTTACCTATAATAGAAGGATTATATGAATTTGTCCCTTGGAAAACAAGA  
GACAATTAATAAATGTCTTTATAAGGATTTACAGTCAGTTGGCGATAAAAAATTTCTCAGAG  
TTGCCATACAAAAACATTTGCTTTTGACTAAGTATCAATGTTGTAAGAAGTTAAAAAGG  
TTTAAACGGTTTTTCGATTTAGATCACGAATAAGAACGATAAAAACGAACTTAGATTTATGC  
ATTATTGACCAAGTCTTATCTGGGTCTTTTTTATGTATCAGTTGATTACTATAAGGTATC  
AGTAAAAGACAAAGGAAAAGAGTGGAAATTATGATTAGATCAAATTTAAAGTCCATAATAG  
ACGAAAGAAAGCTCAGTATCCGGAAGCTATCTAGAGATATTGATCATGAGTATCCAAGT  
TCAGAAAGCATTATAATAACGAAGTGGAGCGGTATCCAAGAGATCTGTTAGATAAAGTCT  
GTACATACCTAAACATCGAGCTGCAGGAAATGCTGATATTCGAAAAAAGCCATAACCATA  
TCGATCACTCACGATGAAAATGGCATACTAAAGTTACAAGCATAGGAAGGAATTACAACC  
TGTCCAGGTCTACATAAAATCGTTGTTATATGGAAAAGGTGAAAAATTAATAAGGAGAGC  
ATAAATGGATTTGTATAGAAAAGCTAAAAGGCTAAAAAAGAATTATCGAAACATGAGGA  
AATTAATGATTCTTTGAAAGAGCTTGCATTTGATATTTTTTAAAGAGTTAACAGTAAAACC  
TGAATTTATAGACAAAAACACCAATGATGTTATTGGGGAGGAAAAAATTAACACCAGCAA  
ATTTTCAAATAAAGAAAGGTTAGACATTTTAATTGAATGGACTATTGAAATAGATCCAAG  
ATTAAGTTTTATTATTGATAAATGCGATATTCCAATAGAAAGAACGGGTGGGGATGATTT  
AGACGCTTTTATGGAGAATGTTTATACAGAATATATAGAAGAATTGCATAAGCTACCAA  
TAGAAAATCATTTCGGTTCATCAAAAATCACAAAGATAGAATCTTTTGCGCAACAAATTAC  
TAAAACAATTGAACTTTACTTAGATGCTTATGTGCATTTAGCATATGCAGAATTTGATAT  
AGGAATGAATATCTTTTCTGAAGAGGTTAACATTGAAAAGCTGCTCTTATATAACATTGA  
TAGTATTCGTATTCATTGTAAATTTTTTTGAATGAGAACCAGTAGCACAGAGGTTTTTTC  
TAAAGATGATATGTTTCATATACCATTTGAGAAGAGAGGAATAATACGCACAAATCGTTT  
TAGTATACCAGGATTTCCATGTTTTTACCTTGGAAAGTTCATCACTTGTTTGTTGGGAAGA  
ACTAGGAAGGCCTGACTTAAATACTACCTACACTTCGGTTTTTTCACCTTGAGGATGAAGA  
TATAAAAATTCTGGATTTAAGTGTTCACCTACGGAAGTGGCAGATAATCTAAAGAAATT  
TTTTGAAATAACATTTAGAAGAAAAATATATACTTTAATGCATACTGTATGACAAGGAA  
TTAATATCTGCATGCCTAATGAGAGTAAAAAAGAAAAAGACATTTTTTAAACCAGAATA  
TATCATTCCCTCAATTTTTGCTTCAATGGGTAAACAGACAGAGTCTTCGGAATACTGGGG  
AATCTGTTATTTGTCTTCTAAGATTAACAGACAACCAATTGAAAATTTCAAGCTATATGA  
GAATTATGCTATTCCTGTTAGGCAAAGAAAAGACAGTGGACATTTTTTCGTTATTGGGCGA  
GACATTCCAAATATCTGACCCCGTAGCTTGGGAAACGTTCCAAAGTCATTAGGACTCACC  
AGAATCGCTTCCTATCAAAAATCCATTATTTCCAGAAACCGAAGGGACTCATCATGATTA  
CCATAAAACAGAGTTGGGGAGACTAGAGGTCTTTTTAATGAGATATAGATCAGTTGTTAA  
AGACCAACTGTAACGAAATCTAAAAACTACGATTTTATAGGGAAATGTGAAACAAGCGG  
ATGTGCTGATTTGAGCCTCAATCAAAAAGCGTTAAACAGTTATGTTTATACTCTGGCGTT  
TTCAAGTTTGTCAATTTGGTCTAATTTTTGGTCTGTATCTGTTTGTACTCTGGATTGAT  
GGCAATAGCATTAGTCACAATTGCCATCATTGCATTTTACGCTTTAATCACTTACTTGGT  
GTTTGTGCTGCCCTCTGCAAGTGTGGCTAAGAAGAAGGCGCAGAAAATTCAGTTTGATCAA  
TTTTTTAATTTATATTGCAGTGGCCTTTTCAGCTGTGTTTTTGTCTGGTTTGCTGATTA  
TCCGCCAAATCCTCTTACCATGTTTCCAGAAAGCTTTGAGTATAACATTATGAGTATTGTAGC  
TGCGTTTATTTATTGGTTTTGGGATTCAATATTCCTACGAACTTAACATATTAATTATG  
ACTTTCACACCGTTTACAACAAGTAAGAAGGCTGCTGATCCAAACAGTAAATATTCGGAC  
GGTTTTTGTGTTGCTTAATATCGCTTCAACTCCTACTAATGATAAAAAGGGCGGTAACAAAT

AATTGCACAACAATCAACAACAATTCATTTTTGATTGAACAATGAGTATACGCACAAGACT  
AATACAATGCAAGAAACCGAATTTTTTGAACCTTTAGCAAGGTATCACTCCTTATGCTA  
ACCTTAACACGATTACGCGTCTTAATCCGAAAGCATAAAGAATCAAGATAAAAAGAAGTGT  
TTTAAACAAAAAGAGCACTAACTAAATGCTCTTTTTTCGTGCCACACCTTCTGCAGTCAC  
GTAAAAATATCCACTCTTCACACAGCTTTTAAACAAAGTGTAATCACAATTGTCGCAGC  
GGCCGTATTTACATCAGGATTTTCTTTGTAATCATATACGATTGAAGTGTGCATATCCGT  
TTGTTTCGTATTTCTCTTTTACAAGATCACCTACATAAATTATTCAACATACTCAAGAAT  
ACCAAATTTTCGTTTCGATATAGGGATGGAACAAATGATTGGATTAGCTTATTTTTTAATTA  
TTTGGCTTGGAGCTGGATTATTGACTGGCTTTAAGTATATTTTTGTTGATCAGGTCTATG  
ATGAAGAGTTTAAAGAACTCATGGATAAAGAAACAGCAGCGGGCATGGAAAGGAATTTGG  
CCAGCCTGTTTTTCAAAAATAAGCTTAATGTGATTGCTTTTTTTATGTTAATTGGTTTAC  
TGCCATTGGCAATGAGGATTACAAAATAATTTAAAAGAGGTTGATTTATGCCTTTGATTT  
ATTATTTTTATGTA CTGCAGTTTGAAAACAAGGAATACTTTAAAGCATTTAAATTAGGTG  
AGAGTGGTTATTTGACATCTAGCGACCTCCCTGAAGCTTCTAAAATACATAATATGTTAG  
AGGTCAACGAGGTAGCAAGTGAGCTTAAAACGAAGTGTAATGTGCAATGTGGGGTAAGGG  
AAATTC AAGTCGTAAAGCGTTAGGAGTGTT CAGGTGTATTGGATAGAGTGGATTGAGAAT  
GGAGAAAAGAAAGACATTGTTGCAGAAGGTTGGATTGAATGGGCTGCTATACTTGAAGAC  
TTGTATCAGAAGCGGTTTCGAGGATGTTGAATGGAAGCGGCTATAACATCTTCACTATTCT  
ATAAATATGAGGTGGTTGATTATATGTGTGACCAAAATGAAAAAAGTCCTTCATGGGTAG  
GTGACATTATTAAGCTGAGCCCTAAATATTTATTGGGACTAGCAGTTTTTTCTGGAATTG  
GGCTTTGGTTAGGGAATGTTGGATTAGGAAAAACACTTGGTATAAAAGATGCTATAAATA  
GCTATAAACTTTACCTAGGGCTGGTTTTCTTAGCATCAACCAGTTTCATTTTATCTCGCT  
TTATTTGGTGGATGAGTTTGGGGATAAAAAATAAAATTGACCAAAAATACGCTTATAAAG  
TGCAAAAAGAAAGACTCCGAAATCTTAATAGGAGGGAAAAACAAATATTAAGCCCCTACA  
TCTTTGACGATGTTTCGGTCTGTGGAATTAAGTATAACTGATGGGACAGCTCAGGAATTAG  
AACATTTAAAGATTATTTATAGAAATTCTAATATTAGTAATCGTGGTTCTTATTTTGCAT  
ACAACATACAGCCATGGGCGAGGAGATATTTAACAAAAACAAGCATTTATTACATGAGT  
CAATAGATCACATCTTATAAGACATACAGAAAGGAAATATTCAAATTTGAATAATATAGG  
AGAAATAATTTCTAATTTTGAAGGTATCATTGGGGCTTTATTGGGAGTAATACTCACTTT  
AATTCTTACTCACATATTAAGCACTTTGGGGCAAATTAATTTTATATAGTTGACTTTGC  
AATATATTTTAAAACCGATAATGATGGTTGGGGAACTAATGTTAAGCCATCTAAAGATGA  
AGCAAAGCAAATAGAAATACACTCCCAGATTGAAATATACAATGGCGCTGAGATCCCCAA  
GGTTCTACGGGAAATTAATTTTGTCTTTTACAAAAACACAAATTTAATTGTTTCTGTTTC  
CCCTGATGATAAAGCAACA ACTGAAGAGTTTGTGAGTTTGGCTATTACAGGGATAAGTT  
ATTTAATATTAATTTGCCTTCTAAGCAAAGCATCGCTATTAATATAATAAAAATTTTTAAA  
CGAAAAGGAACTAAACAAGTGAAAAAATGCAATAGGGTTTATCTTGAGGCAAAGATCA  
TAACGGGAAAATGTACAAAGTATTCTTAGGGGAGTTTTAAAATGAAAACCATATTTAT  
ACTTTAGATGGGAAGACCTCCATGGTGA ACTAGGTGTTGATTCCTTTAATTTATTGAGAG  
CAAGTTATTCTAATTTGAGTGAGCAGCAATTAGTAGAGTTAATTAAGAGTTGATATCTA  
TAGAGCGGGAGGATATCGCTGCAAAATTTGATATACACCTATCTGAGAACGCCCCAGTTT  
TCGATGCACGGCAAGATGTGGTTTATAAAGGCGTTGCCGGAGATATGAACGACAAAGACA  
TGTTGCTTTCTTTGGTAACGGCATTAGATTTGACTAATACACTTGACCATGTGCAAAATA  
TCCTGTCCTTAGCTAAATGCTTAAGAAGTTTTGATAGAGAAATTTTCGCTAGGTTTGCAA  
AGGATATTGCGGAACAGGTGTATTATAGCCTTAAGTAGGACCTTTTGTCTTAGAAGAACA  
CAATGAGGTTTAGTCTCATTGTGTCTAGTTAAAATAGGAATTTTAAAGAGATTACAAAT  
ACAAAAAATATGTATAAAATAATTGACTCGTAATGTGATGTATTGTATTATTAAGTTAAC  
CAATAAAGAGAACAAAAAGAAATGAGGGGAAATAAATGGAGTTAATAAGGATAGCTATGAA  
GAAAGGCTTGGATAATGACA ACTCTTTAATGAATAAAAGGGCAACAGTAGCTGGCCTTAA  
AAACCCCAATCCTCTTTATGACTTCTTAAACCATGATGGGAAAACATTTAATGAATTTTC  
TTCAATAGTCAACATTGTTAAGAGTCAGTATCCAGACCGTGAATATGAATTAATGAAAGA  
TTACTGTTTTAAACTAGATGTTAAGACAAAGGCAGCAAGAAGTCCATTGGAGTATGCTGA  
TGCAAATATGTTTTTTGAAATAGAAGATGTTTTAATAGATTCAATGATTTCTTGCAGCAA  
TATGAAAAGTAGAGAATATGGAAAAGTGATAAAATACATAGAGA ACTGTCTAACAGTGT  
TATTACTGAATTTGAGGCAGTGAAAAGACTCGGCAAATTAATATAAAAACACCTGAAAT  
CAATTCCTTCTCAAGACTCTTGCTGCTTTATCATTATTT CAGCACTGGTAACGTTTCTCC  
GATGGCCCAACTTATAAAACAAATTGACCTAAGTGAGATTTCTGAGAACATGTACATTAG  
AAATACATATCAAACAAGAGTTCATGTTCTAATGTCTAATATAAAGTTAATGAAAATTC

ATTAGAGGATTGCAGAGAGTACTCTAAAAAGGCATTGGAAAGTACACATATCCTGAGATT  
TCAGGTTTTTCAGCTACTTAACTATTGGCAACTCTGTATTATTTTCGAATTATGAATTGGC  
TCAAGAAAACTTTTTAAAAGGGCTAAGCATTCTGTTCAAAATGAATATTACAACATGAT  
TTTCCAGCAGGCTTTGTGCTTCTTAAATAATGTATGGCGCAAAGAAAATAAGTGGAGTAA  
TTTTGAATCTGATTCAATTATGGATTTGTAGGAGCAAGATCATTGTTTTATCAACTTTAA  
CGAAAATCCAAAGCAAAGAAGTTTTGGATTAAGTACTAGTCTTTTAGTTTACAACGATAA  
TGAGCTTGCAATGCATTATCATTGAAAGGAAGACTCGAACAAAATAAAGCATGTTTCTA  
TTCTTCAATCGAGTATTTTAAAAAGTCTAATGACAAATTCCTTATTAGGCTGCCACTGTT  
AGAGCTGCAAGAGATGGGTGAAAATCAAAAACCTTTTAGAATTACTTTTACTTTAAAGGAG  
GTGAGACAATGAAAAAAGTATTATGGCTTTAGTTATCTTGGGCGCACTAGGCACTTCTT  
ACATAAGTGCAGATTCTTCAATCCAACAAGCTTCAGGTGATTATGAGGTTGCTGGAATGC  
CACGTGGAGCATAAAAATCCATTGACACATAAAGTTATTAGTATTATTATTTAATTA  
AATTAACAGAGAAAAGGAAGACGTTTGGCTCTTTTTAGCTAAGCGCCTTTTGTAGTGTT  
AAGGCCATCACTTAAATATTAGGTTCTAATAGCATCTAGTGATCAACTTCAAATACATAC  
ACCCTAATTAATGAAATGCATTACAAAGCAGAACATTTCGCAAAAAAATTGCGTAGAATG  
TGCTATTTGTCGTTAAAAACATCTTACTTCCCTTTTGTAAATGCATAACAATTGCTATAG  
ATGCAAGAGATAAAAAATCTGTATATAGGAGGTTGGTGGTATGTCGCAATTAGTTACTT  
AAAAAACAGTATGACAATGCTTAAACCATTACCAAAGAAAGTTGAAAGCTTAGTTAA  
AAATGATTTGTTTTTTCATGAAAAAAGCATTGAAAAGTCAAAAATAATGAAGAATGAAAA  
TGTTTGAAGACAATAACTAAAGGATACATGAAATTGCTAAGCGAATACAAGGAGAATTA  
ATGATGCATGTTGTAGAACATAGGTCTACAACATCAAAAGATATTGATGCCGATTTTGTA  
TTAAATGCTAAACAAGTACATAGAGAGTGTACTAAACATTAGGAAAATGATTGTTAAT  
GCAAAAAGTCAAGATGATTTACATGGTGCAAAATAGAGATAGCAGCATTATTAAGAGAT  
CAAAATTGAGTATTATTAGGTGGAGATTGATTAAGGAAGCATTGAAAATAATCCGCAT  
TTTAGATCCCTAATACATTTTGTGAAGAATTTAAAACGACACATTGCACTTGAATTTGAA  
CAGCTTATTTATCAACCGTAACATATACGCACTACAGTCTATAGTATACATAAAAAATAGG  
AGGTTACATGTCAGAGCGAATAAAACAGCTAATGGTCAAACGTGGCATCACAATAGAGG  
AATTGTCGAGGGAGACAATGATTGATATGCAGACATTAACAACAATCATTGAAATGCCAG  
ATGAATCAGATGTTAAACTATAAAGCTTATCGCTCTCGTGTTGAATGTGTCTATTGATG  
AGTTATTAGATGAGAAAGGAGGAGAAGATAATGCAAAAATAAAATTAACAATGAAAAAAT  
TATGCGGTTTACGATGATATCGAGGGCTTTTTAATCAATAAAGATATAAGAAGTAGCTCA  
GGGAATTCTCACTATATGATGCCTTCATCATGTAGAAGGGTGTGCAACACCAGAAAGAAT  
GATGAAGGGGATATTAAGCAGTTCTTTAGTGTGATTAAAGGTAAAGATGTCGAAAGTTTA  
GTTCCCGATGATTTAGTTGTAAGTAAAAGCGAATTAAGCAACTATGTGATGTATCTTCAG  
GCAAAGGGATTAGTTAATAAGAGTATTAACAGAAAAATGACCGCCTTGAAGATGCTCTCT  
ACATATTTGGAGCATGATTATAAGGACTATATTCCTTGTGCGGTGTTAATACTGTGCGAA  
AGGCTTAAAACAGTAATTAAAAAGTGGGATAAAACAACCCAGACAGAAGCCGAAAGAATC  
GCTCAGGATATGTATATAAATGAAAGACAGAAACCTTTAATGAAAAAGCTGTTTGTTAAA  
TTCGCCATTAGAAGTCTTTTTCGTGTAAGTGCATTTTTCGAGTAAGATGGAAAAACATA  
CAGCTTGATGAAGGTACAGGCCATTATATAGTAACAGTTATTGAAAAAGGATCTCAGGTT  
GTGTCTACAGGCATTAACCAGGTATTTTATTAGGAATTGTTGCAGCTGAAGAAAGAGGAT  
GACAGCGAAACTGAATTGGTTATTCAGGGGCTTTCGCAACAATCTTTGCGCACTCCTAA  
AAAAGGTGCAAAAAAAGGTTAGTAATACCTCCTGAAAGAAAATTAGTCTTACACTCATT  
AAGGGTGTAGGAATTGACTATGTTTACGAGAATTCTGGTCACGATTTACTCGCAGCACAA  
GTACAAGGAAATGATAAAAACACATTAACAACAGAGAGATATATGAGCAGAAAGATTAAC  
ATAGCGAACTCTGCTGGTGTAACAATGGATGAAAAAATCGATTTAAATCCACTATATGAT  
GCAACCAAGAGGATTTTATTAGTTTTTTTTGAAAACGCTGATCTTGTTACATTAAAAATG  
TTTATAAAGCATGTAATGAGCGATAATCATTCTTCGGTATATTACTCGGTTCAAATGA  
TAATTTCTCATGATTTACCAGATTGCCTTTGGTAACTTTAAATTTAGCAACATGACATGA  
GGTGAAAGGCTATATGACAGTGATCTTTGATCAGTCTGCAAATCAGAAACTGCTTTCAGA  
AATGAAAGATGCTATCTCGAAAAATAAACAGGTAAGATCTTTTATTAACGATATTCAATT  
AGAGATGGCTAAAAATAAAATTAATCCAGGGACAACACAAAAATTAATTTATGATATAGA  
AAATCCAGAAGTCGAAATTTCTAAAAAACATATGTACTTTTTAGCCAACCTCCTATACTC  
AGCCCTTGAAAGTGAAAGGTTAATCCACGAAATTAATCACAGAAACGGATATGAGAGA  
AATTGTAACGTTATGGGAAGGATCTGTGGAGGAAAACATAAAAATTTCCGTATACATTCAA  
ACAAGTGGTTAAGTATTCGGATGATAATTATTTCTCCCCCATCACTGCTAAAGAGTTGTT  
TATGCTATTTGAAAATAAGTTATTGCATTATAATCCTCGTGCTCAAAGCACGATCAAAC

GAAAAAACTAGAGGGCTCAGATATTGAGATACCTGTACCGCAGCTCAATAAACAATCGGT  
TGAAGAAATACAGGAAGTCTTCTTAGATGGGAAATTAATTAATCAGTTTTTACGTTTAA  
TGCACGTGTTGGAAGCGCAAGTTGTGGCGAAGAATTAATAATGATGACGACACTATGTC  
TCTTACAGTGAAGACACCATTTTAGACGTTTTAGACGGGTATCACCGGCTAAGAGG  
CATTACTATGGCTATAAGACAACATCCTGAGTTAGATCATTGTGTTGAAGAAACCTTTAA  
ATTGGACATCTATAACTACACTCAAAAAAGGGCAAGAGAGCATTGTTGGGCAACAAAACAC  
AATAAACCCAGTTAAAAAATCTAAAGTGGCTGAGATGAGTCCAAATGTTTATTCAAATAA  
AATTGTTAAGTTTATTCAGGACAATAGCATAATTTCGAGATTATATAAAGACAAATGGAGA  
CTGGATAAATCAGAATCAAAACTTACTTATAACTTTTTCTGACTTCAAAAAGGGCAATTGA  
AAGAAGCTATTCTAAAAAAGATTTTTCTACTCAAGCCGACATCTTGCAAACCTGGAAGATA  
CCTTACATCTTTCTTTGATGCTTTAGCTACACAAGATGTAGATGAGTTCTTAGGTGATAT  
AGCAAAAAGAACGGAAGAGAAGTTTTGTAAACAACGATTTGTTTCATTAATGGTTATGTGGG  
ATTAGCTAAGAAATTGCAATTAGATGGTGTAAGCCTACACGAGTTGGAAAGTAAGATTAC  
TGATGTTTTAGGCTCTATAGATTTTAGTAAGAAAAATAAGGTGTGGGATGAATTAGGTGT  
AGTAGACAATAATGGAAATGCTAAATCACCACAAAAGATGTGGAATTTCTTCAATAATTT  
AAAAATAGACGAGTAATTACTTAGGAGTTGTTTGTGCAATGTTCAATAGTGAGATTAAG  
GACAAATATTTAGATACCTTATCTGAGGTTATGGTTATGCAGATGAGGCCTTTTTTGCA  
AAAGCAGAGATTACTGAGACTTTATATAATAAAGACATATATGATTTACATCAATGCAA  
ATTTTAGAATTTATACGATCATTTCGATCAAACCACTATCGGTAGTGTTTCGAAGAATCTTA  
GCATTATTGCCATTGTATGTTTATTGGGCAATTCATATAAGTTAAGTAAAGGATTAACA  
AATTAGCAAGAACTATTTCTGAAGAAGAGCTTTATGAATGTCTCGGGGACAAAAAATTA  
TATATGACGTACAGTGAAGTAGAGGAAATGGAAAATCAATTAGTTAATTATAAATCTAGG  
GCTGTGTTAAGACTACTTTTTGAAGAAGTTTCTGGTTTAGCTCATTCTGAATTGCTAAGT  
TTAACGAAGAAGCAAGTTGAGGATGCAATGCTTAACGGTAACGTTTTAACCCTTTATGAT  
TCAAAGCACGGTGAACGAAAACCTAAAAGTTAGTAGTGAATGTCTTGTTATTGCCTTAAAT  
CCAGCTCTGGAAACTAAATATAAATTAAGAATGGGAAGGCAAAAGGCCAAACAAAAGAA  
GTCTTTTTAGTCGAAAATGATTATGTAGTTAAAACAAAAGGACGTCCAACAAAGGAGAC  
GGCCAAGCAAGTAAATTTGCATAACTAATCTAATTACTGATATATCTGAGTTCTTTAAA  
ATTAACTTTTAACACCAAATACGATTGTTAGATCTGGTCATTTGTATAGAGCATATCAG  
CTTTATAAAGAAAAAGGGGTTATTGATATCTCTGTAAGGTATCAGATTATAGATGACTTT  
AATTTAATGGTAAAATCCAATATCGAGCAGTTTATTCAATGCAAGAATATATTAATGAG  
GAAGAAGTTAATAAATATTACGCAGAAGAAGTCTTAAAGAGACGACCATTTAAATA  
TGAAATCCATTTGACTATTTTGGTTAAATGGATTTTTCTTTTATCTCAAAAAATTGAGAA  
AACTTCGCTTTTCGACAAAAATAGACAAAATAATCACTTTAAATACATGTTTAAATGTA  
GTAAGATGGTCATGTA AACCATATGGTTTACTAAGGAGGAGACCAAGAGCAAAGTCTTAG  
TCGTTTCAATGCCTTTCAACCTTGTATTCATAGAGGTCTTCTACATTACAATCTAAAGCA  
GCAGCAATTCTTTTTGCAGTTTCGAATAGACATATCTACTTTAACTAATCGATTATAGTCG  
CTCAGCTGCTGTTTCTTAATCCCAGTTATCTCTGAAAGTTCATTGATTGTAATGTCTTTC  
TTTCTACATAATTCAGGTTTCAAGCATTGCCCGATCTCAACTTTAATCATAATCGGACAT  
CCTCCTGCGTTCTGTTATTGAAAGACATAATACATATCATAACCATAACGAAGCCGATAAAT  
AACCCTAGCATAACACCTACTTTCTATGTATAATGATTATACAAGACAGAAAGCACGTT  
CCCTTAACACCTCAAGGGTTTATCACAGAAAATTGAACATAGGAGAATGAGGATGGCAGG  
TTATTTAAACAATATTGCACTGAATCTGGAGATTGTTCTCAAAAACAAAGCAGATAGTCC  
AGAGGTATCTGAAACATTAGTAACCAGGATTTGTGAAAATTTACTTTTATCTAAAGAAGT  
CTCGTTTTTAAAGCTGACGGATCAGTTGAAAATTTTAAATAAAGTGATATGGAATATGA  
AATAACAAATACAGAAGAATTGCCTGAGTAAAAATAAAAAAAGAAAGACTCCATTAAC  
ATAATGTAATAAGCAGCAAGAGGAGAATGAAGGTATTGTTCTGAATATATTTGTTGATCA  
AGATAATTACAAAGAGGTTAGCCTGACACTTACAAAAAAATTGCTGACTTCACAACATTA  
TCAATTCCTACTTTGTTTCAAGGGAGAGAAATTAGATATTACAATTCAGTTACACCACT  
AAGCCTCCTTAAGCTTAGGGCTGACATCAATGAATTGATCTTTATGTTACAGATTA AAA  
TTAGATTCGGTCACATAAATTGGCCGAATCTAATTGACAGATATTAATGATGGGTTATC  
GTTTATTCAAATACAAATAATATGTATATGGGAGATGGTAAAGAGAGCTATGTTGCTTGA  
TGAAAAGCTCGATAAATTAATGAAAACGATTCTGCGATTA AAAAGCATACAAAGAAGAGGA  
AAATTTACGAAGAGTCATCGGAGAATTCATTCAATAATTGATTATGCTTACGAGGGGAT  
GTATATAGCTGAAGATATGTTAAGAGCAGAAGAAAATAAGGGCAAAGAAGTAAGTACATA  
TTGAATTGTGTAATTTTCACTAAGGTAAACAAAATTA AAAATTAGTGGATAACATGTAAGTT  
TCATCGAGATTCGAATTGGAGTGGGATATCACTTGGAATTATCATTAGATGAATTGAAGC

TCTGTCCTAAACCATTAGTGTTTTTTCGGTGAGTTAAAACCTTGAAATCACTGATTATGAAG  
AAGGTAATAAAAATTTAAGTGCTGGATCATGATGAAGGGTCTTTCATTAAGTTAGCAGACC  
AAACGATCAACGAAAATTATGTGTGTACTACATGTAATTGTACTTTATATAACCAATGAAA  
ATAATGAAGTATGTTTCATAGAGCATCCGTATCGTGCAATCACACCTGTAATAAAGATC  
AAGTGATTCATTGAACTAAGCTAATTGGAGCAATCATAAATACGGACGACGAGGATCCAA  
TTGAATGAACACAGCATAACAGAGTTTGGGACGGCGAGCAGATGCATTATTGGGATGATGA  
AGGTTTGAGCCTTATCATCAAAGCAACGGCGATTGGACTTTGAATCGTTTATACACAGA  
TGTTTCCGCTCCGGTTGTAGACAGCACGAATAGAAACGCGGCTCTCATGTGGGGAGCAAA  
GGTAAGAGGCAAATTTATTTATGATAGGTCTATAGTAAAAATAACGAGTGATGATAAAGA  
ATCATCAGATGTTTGCGAAGTTAAGTTTTCAGATGGCGTATACCAACTAGATGTATCAAG  
AATTTCCGCTGATTATGACGTGACTGCCGTCGGGTGGGTGGAATATGCAACTATTGAAGT  
AATCGGAGACGTTTATCAAATCCTGAGTTATTGGAGGGTGTGAAATGACAATCAATTTG  
AAAGAAAAACACGAGAATCGCAAAGGGTTATCATTTAATGATATCCAAGATGGATACTTC  
ATTTAAGAAATGACGATGTTAAGATTGTGAAAATGGCTGTTACAAATAGAAATAAGATA  
CATTTAATCGATTTAGAGACGTTCCATGTTAAAACCTGTATCAACAAAGAACGACTTGAAA  
AGTTTGTGTTGAAGATTGGAGCCGAATTAAGAGGTTAAGTCCGAAACAGGTGAATTTAATA  
ATCGGGTTATAATGGAAAGGGTAAAGGAGGGGGCCGAGTGACATGTGAAATGCAATTACA  
GGCACAGATCGACGTTATCGAAAAAGAAAATAAGGAATTGCGTTCGCAGGAATGAGGAATT  
AGGGCAGACGGTCGAATGTCAGAACAACAGATCGTCTCTCAAATTTGGAGACTGTTGTT  
TTTCGCTTCATCCTGGATCGTTTATGGAATTGTTAGTGCTATAAAACACCTTTGGGGATA  
AGGAGGGCGTTGAGTGATGGAGGAAATAGATAACAACGAATTGAAGTTCGGAATGATTAC  
GCCGGATGGAGAATCATTGCTGGTTAATTCTGCACCTATTGAAGGCTGCCAAAATGATAG  
TTGGAAGACGTTTGTATGAACAGAAACGGGTTTTTCGATGCAGAGATTAATAAAAGCATTTGA  
ACACTGTAACGTACCGTTGGAGGAAACAATTGAACGGGCTGAATTCGTCCTCGATAAGGA  
CGACAACACTGTTCTGACCATAGACAAACTACCGGTTTTAATCTTATATAAACTTGAATT  
TTTATATTTCGAAAGGAAAAGCAGTTCAAAGATACAAACGACTTTATGAGGAGGACGTGGA  
AGGAAGGAATTTCAATTTGCACAAATATCTTGTGACATCAGTTGAAGGGAATGAGTATGCC  
GTTAGCATTTATAACGATAGACACTCAAAGGTTTTGTCAATGTATCTTTATATAAAAAG  
GTGCGCGGTTATTTTCAGGAAAGAAAAATTCAAGTGTCTTACAAGAGAAGGTGACTTCGCT  
CCGAGTTATTTTCGAGGAAAATTTGGGATTACGATTACATACAGATGGCAATCAATGAAGTT  
ATTAACATGAAAACCTCCATAAAGGAGCAAATTAGTCATGAAAATAAACAAAAGGCTGCA  
ATAGAAAAATTTGAAGCGTGGAGTGGCCAGGAGGTGTATCTGTTATTGGAGGTTAATGTG  
AAAACAACCCAAAGAGAAAAATTCATCCGAAATGGTATCCCATATGATGAACTTGATACA  
CAAATGATTCATTTAATTGATATTTTAAATTTCAAATTTGGATTAAAAACACGCCACTGT  
TGTTTTGGGCATAAACCATACGAAGAAATTCAAGTGATGTTTGAAGACGAAGTGAACATA  
AAAGAAGATCAGATTCTAGAATTAGCAGAACTAGCGGGTAGGGAATGGAAAGGCCTATAG  
TTAAGCTTTAGCATATGGGCAAGAGTTTCCCCATTGATGTTTAAATTGGTCATTGGTGTTA  
TCGAAGAGATTCAGAAACCCAGAAGATCCAAATAAATACCGTTATCTAAGATCAGTTGAA  
GAATTCCTTGAGAGCTATGCTGCAAAGAAGTGGTAAAAGATGCATTTTAAATTAATGAG  
ACGGAGGTATTTAATGGAAAGTTACCTAACAGTAATTCAACAGAATGGACTGCTTTTGGT  
TGACATCCGTGAAGTGGCAGAGATGGTAGGTAAGAGACATACAGATTTACTTAGACGTAT  
TGATGGATATGTAGCGATCTTACTAACGCAAAGTTGCGGTCAGTGGAATTTTCTTAGA  
AAGTACATATAAAGATGCAACTGGTCGCTCATTGAAGCATTTCATTTACCCCGAAAAGG  
ATGCGATATGGTTGCGAATTAGATGACTGGTGCTAAAGGGGTATTCTTCACAGCTCAATA  
TGTTTCTAAATTTGAAGAAATGGAGAAGGCGTTAAAGCAAGACCGTCCCTAATTGATAC  
ATATCTAGATACGAATGAAGATGAACGTGCCATTGCTGATTTCACTGAAAGAAAAGCAAA  
ACGAGAATTGCAGGAGCAATTAACATTGGCTGAACCACAAGTGGAGGAATATGATCGCTT  
TCTTAATACAGCTGGATTAATGAAAATAAGACAAGTGGCAAAGCAATTGGCATAAAAGG  
AATGGGCCAAAACAATTTATTTTCGCTTTTTGAGGGAAAATAAAGTTCTTATTGATGGAAC  
AAACAAAACGCCCCATATCAAATAATGTAGAAAGAGGATTCTTTCAAGTGAAGACCCA  
GGAGACAAGTGTGGAATTAACAATTACTCTTGTACTCCTAAAGGTGCCGATTTTAT  
TGTTGATCTTCTAAAGAAACATGGGCACAAAAGAGAAATAGCATCATAGATTTGAAAAC  
TTAGATAAAAGTAAAATTTTAAAGAGAATCGGAGGATTGAAGATGGAGAATAATGTTTAA  
TACGGAGTTTACAGTACTAGATCACGAAAGTTTTGCTTTGGAATTGAGGAGCCTTCAAAA  
ACAAAAGCAAGAAAAGAGCTATTCAATCTAATTGGTACAGACGCTTACAAATGGCGTTTT  
GAAATAAGAAAAATTAAGAAAGTAGATGGAAAAATGAAATTTGCACCAATGGATAAAG  
TTAAATTAGAACAGATAGTCATCTCAACAAACCTCGAACTTTAAAAAAAAGAGTTCCTG



AATTAGACGATCCTTTACTGGGCGAATGCTGGGAATTTGAAGAAGATGGTTTGAGACAAT  
TTGATCGGGAGGAGA ACTACGAATTTGTCGCTAGACCCAAACATTATAATTGGGAGTAAA  
AACAGAGTCTAATTGAAGTTTAATGAGAAGCGGGGGAATAAAAATGGAGAAAATGAACCT  
GCTAAAAGAAATAACAATATTTGATTTAAATAAAAATCAAACCTGGCACAAAAGTTCAAGT  
AACTTGGTATAAAGGAACAGAGATGGAGTATACACATAATGGCGAAGTTATCATTATAA  
TGGGGAAAAGTTTTATTATAATTACGTTGATAAAGAAGGATATGTAGGTCACTGCCATGT  
AAACGCAGTTGATTTGAAAAACTATCCTGACAGTCTAATTGTTGAGATTAATCAAATA  
AAATTGAAGTTTTAATCAAATACAAATGAATAATCAATCCAGAAATAAGGGAAATTA  
AATAAAATTGTGATGAATTTTCAATGAAACGATTTATTTGAGTTGTATCCTTTTTAAGTA  
TTATTGTTGCCTATCCCATTCAAACAAACGCCAGTCCAATGCCTTGCAGTGTAACTACTGG  
AGCCGGTAGATAAAAAGTCTTAAAAATGCTAAAGGTGTAGCAATAATCTATAAGGTGCAAT  
TGAACCCACCGAGTGCTGCCAGAACCAATATAAGTATTCTTGCTGTCCATCTTCCTGCAC  
CTTGTCTTTTTGGAAATTACGACAGTTACGAAGGATTTGCTACTAAACCAGGTGAGATTA  
GTTGGCGGTTTTAACTTTATCCTACTCCTGAGGAAGAGAGTCTTAGTTGGGCGGGAAGAA  
TTGACACAATTTTCGGCCGAAATGAAGAATGTTAAAGTGCAAGTGCCTGTCAAATTCTA  
GCACACAAAAGTTGGGGCCAAGTATATTAAGGAAAAATATCGAGTCGTGTTATTGAATGT  
CTTGGGGCAACAGTGTAAAACAACTTGGATTGGATTGATGTAAATAATTGAATCGATTA  
TTTTACCTGAAGAAAACACAAAATAACTGTAGGTAAACCGATAAATGATGAATCAAATA  
CAAAGGTAATTGCTAATTGTGACTATAGAGAAGAACCAGAAGAAGCTTTCTGGGTACACT  
GATCAAAGGGGAATGATCTATTTGTAGATAACCATGAAGTCATTGTTGAGTATGAATAGG  
TCTGTAAATAATGGTTGAATAAAAAGACTGTTTTAAAGACAGGGTGAGAACCAGATAGTCA  
ATTTCAAAAACCTTAGTGATCCAGAGTATATTAAGCAGATGGAAATTGAGAGAAATGAAC  
GTGAGCGGATATATCAAGAAAAGGAGTCTATAAGAAAAGAAAACCTGTGTGCTTCACTGGTC  
ATAGGCCGAACAACCTTGGGTGGATACGATATGAAAAATCCAACAATGCTTAACTCAAAG  
ATAAGCTGCTTGCAGTAATTGAAGAATTAATCACTAAGGAAAACAAGTATAGGTTTATAA  
CTGGAGGAGCGTTAGGAACTGATCAGGCTGCTTGTGTTGGTGTGTGCATATGCTAAAGAAGT  
AACACCCTCATATCAAAAACATAATTGCCACACCTTTCAAAGAACAAGATAAAGTTTGGT  
CTGCAGACCAAAAATAGGGTACAAACGTATGCTTAATGTAGCAGATGAGATTATTAATG  
TTGAAGAATTAGATAAATAAAGTTAGTGGAGAGAAACCAGGAGAGTTTTTCGCCAGCTC  
AGATGCAAAAGCGAAATGAATACATGATTGATCACAGTGAGGCAATAGTAGCTGTTTATG  
ATGGAAGTAAAAGTGGTACAAGAACTGCTTAAATTACGCCAAGAAAACCTTACTTAGGAC  
ATCAGCTATGGAGACTTCATCCTGTTTTTAATTTGAATTAGATATTACGTATTTTGTG  
GATAATAAGGAGAGGTGAACTTTTCTGAACTAATAGAAGAAAGAACATATGAAGAATA  
TTGTACATATATTCTGATGATATTGAAGCCAGAAAGCATTTCGTAAGTGAATTAACCA  
AAAGGGTGGATGGTGGACAATTGCTGGGTGGGCTTGATCTAAATCAAATAAACAGTTT  
TATCGATTCAAGAGGCAATTAACCTGATGATTTTGTGTTAACAGATAGACTAAAGAGCAG  
GGAGCAATTAATATAGGTGAAAAATTAATTGATAGTAAAAAGCATAAAAATAAACAAGGA  
TATTATCACAAGAATTGTATAAGTTGTAAAAGCCGGTACCAGCAATGAAGAGAATTTT  
TACTCTGTGAAGAAAATAAAGGATGGACTTCATTCATACTCTAAATCTTGTGTGTTAAA  
AAGGCTAAAGAAAGCTTGTGGAAGAATTATGACAAACAGCTTGAACGAATGAGGGAAAGA  
AATCTTCTCCAGGGATGAAAGAGGCCAAAAAGAAATACAACCTCAAGTTTGAGAAAGAAA  
AAAACACAACAATCTGGCAAGAAAAGAACAAGCTAAAATTAAAAAACAACCGTTTACAA  
AGAGATGCTCACAAGAAACATAACATTACAGATGTGCAGTGGCAAAAGTGCAAAGACTAT  
TTAACAACAAGTGTTCTATTGCGGGCTGAAAATTGAAGATCATAAGATATTATTCAA  
GGGACCTATATACAAAGTGATTTTCATAAAGAGCATGTATATCACAAGGGGCTAATGAT  
ATAAGCAACTGCATACCTGCTTGTAAATCTTGCAATAGCTCAAAGCACGACTTTGCATTT  
GAAGAGTGGTACAACCTCATCAAACAAAACCTTTTCATCCGAAAGATTACTAAAGATCAA  
AAGTAGCCAAATCGTTTTAAAGAGGAACGACAAGATTCAGAATGGAGGACAAAAGGATAG  
TCTGCAACAAATACATAATTGATACTGTAATGATACTTGCACAAGTAAGTAGAGGGGAAT  
TTGAAAACATTGAGCGCAAAAATCTCCTAAAAATGAAAGAGGGGGGAACACCCCTCGA  
TAAATCAATAATTTGCTTGGTACTTCCCTACATACCATCCATCTTTATAATCAATGCCTT  
TTAAGTACCAGTTTCTACCGTTTTCTGCTTTTCTCAATATTTTTAAATCATTAAATATTGT  
GATGGTAAATATACTTTGTATGCAATTTCTTCTCACTTATTTCTGCTTGAACAATGTTAT  
TCTCTTTAACCCGAGCAGATGGGCTAGTAGCGAATGCAGGAGAAGCAGAAACGAGTATTC  
CAAGAGATAAAACAGAACAGTCAATACTTTTCTTAATTTCAATTTGAAGCATCTCCATTT  
CCTTTTAATGTATTGCAATTACATTATACGGTTTTTAAAGTAGGCAATATAGCGAAATTA  
CTCCATACATATGGAAATTGTGTGTCGGTTAATGTCGTGATAGATGCGAAGGCAATGG

AGAGATGGATTATAGGATGGAATCAGAAACAACTGTAGAATAAAAAATAAAATAAGTGGAG  
GTTAAGTTGGTGATAAAGAGGAATCTGCTTAGCAACCACGTTGATGAGATTATCGGAGAA  
TATTACGCTGCTAAAGGATATTCAGTCCATAGCATTGACCGCCAGGAAAATGGACAACTA  
ATCGTTGTTACGGAGCGAGTAGCAGAGGAGAAGGAAAATGCACAAATTGATATAGCATT  
GATTTTGTACATGGAAGACCACATAAGGAGAAGTATGTAGCATAAAAAAGGCAAAGAGGA  
ATTAACACTCTTTACCGTTAGGTTTCTTTTTTAGACGATCACAGATGAATTCATTATAC  
TGATAGCTATTGCAACAGATCCAATTATAAAGGTAATTTGGAGGAGGAATATTACTCCGG  
AATTTATATTCACATTGTCAAATAAGTCACTCGAAAAGGAAAGAACCCTTATGAATACCCA  
AGGCAAGTACGAAAAGGTGAGGCATATTACGACAAGGGATGCTTTGGAATAATCTTTAG  
TGTGGTCAAGATTATAAATTGCTATTGATACAAATAATAAACCCGTAGCGATCTTGTCCG  
ATAGCGAATTATGCGCCGAAAATGATTGCACTACTATGCTTAAGAAAAATCCAGTAATAC  
CGATTGTTTTACTCAAGGAATCACCTACTCTTATGTAAGTTAAGTATGAGTTTACCAATT  
AAAGGGGATTTTCTCAAGATGATACACATTAAGTTAAATTA AAAATCGTGATTTAAAGGA  
GCGGAGATAATGAACACTTATGTAGTTCGATGACGGCAAGTATAAATGTATTTATGCGGGA  
ACTGAGAAAGCAGCTGCTTTTAATAATGAATTTGAAAACGGAACCAGAGTAAGCGGTTGG  
TTTGAAGGCCATCACATAAAAAACGTTTGAGAAAGAACAAAGAGAAGTCTGTGGAGTAGGA  
GAATGGATCGTTAAGTATCATGTTGCTACTGAATTGCAAAAAGGAAGTAAATCGTTTGGAA  
AAGACCTATTTCAAGAAGAAAGAGTTGCTAGACACTATTAGACAAGCTGATGGGGTCCGA  
AGGGAAATCAATGATAAAAAGAAATCAATACTCAATTACAGTGGATGTTAATGGAGGAGA  
ATATAATCAGGAGTTTGTATTTTAGCGGATTCGCTGAGTAAAGTTGGGCGAGATAAGAT  
AATTGCTGTTGGTGTGACAATTC AATTTAATGACCAGATTCTTGAATTGAATAGTAATAA  
AGGGGATTCGAATGATTATTATAAGGGTCAAACATTA ACTGTTAAAGAAGATTGCCTAAA  
TAACTTCTGGAAAGGCGGAACCGTTACTGTTGAAGATGTAGATATACATAGAGGCATATT  
GATAGACGGTGTCTGTTTACTTAGAAAAACAAGTGGTAGACAAGTATTATTCCAAAGAAGA  
AGAATGACATGTCCAGGAAGATTTTCGATATGGTTAACGGTAGTGAAGAGCAATCAAAAA  
TAACTGATTGGCTATCTAAATTAATGATTGAGGACGAAAATTC ACTTTACAAAATCGACA  
TTAAAGTTTCGAAAAGGAGGATTTCTGAACAAGGAGATATTTATAGAGAGGAGGGAGAAT  
ACATAGAGAACGCAGATCTTGAAACTTTACCAATCGGGACAAAATCCTTTGTGCAAAACG  
GTTGTTGGAAGGGTGA AATTTGTTTCTAATGAAAAGAAACATTTATATATGCCACAGATTG  
GAGAGATGAGGGAAATCAAAGTTGGATCAACTGGGTTGAATATAGAGATTGAATGAAAGA  
TAGTTTTTA ACTAAACATATTAGGATGGATCGTTATCGAAAAGCACACGTATCGATCAC  
GATCATAAAGTATTAATTTCTATGCCGGCGTTTTTCTTCGAAGTGATCAGGATAATTCTG  
TTTAGATTTTCGATTTGAACACAAAATAAAGTCTGCAATTAATATGTAGTCCATGATTTT  
GTC AATGACCAATTCACGAAACAATCTGAGATTAATTCCATTTATTTACCTTCGAGAC  
AAAAATGTCCAGTCTCTTTTATATGGCAAGCGTATGACAACCTGCTTGCAGTAATAAAGG  
TGAAATGAAGCTTGGAATTTAAAAAGGTTTAAAGAAAAATAGCATTTAAAAATAAAATAT  
TTATTTTAAATGGAAGGAGGTAACCGTGGTGCCAAATCAAGCGCAAATAAAACGCATGAAC  
GATATTAATGATCTGATAAAGCTTATTGCAAGCATTGATCATCGTCCATTCTAACGCAAG  
TCAAAGAATCGTATAGCGTATTT CAGGTTAAGAAAAAACTGTTCTTCGTTGATGATTAC  
ACGGTTGATGACGTTTTTCCGTATGAAATGGGATACGGGAGACCAAACGGCTTTACGCAT  
GGAGGCAACAAGTGGCAACTGGTGAACAGTTTTTAGAAAGTTCATCATAACAGGGAAATGC  
GGCGAGCTGAGGGATTATAAAGAAATATGGGCTTACAGCTATGAATGATGTATGAAAATC  
CGTCGGAAGGCAAAGA AATAGGGTTTATAGAGACTGTTGATTATCCTTATAGCTTCGAT  
GAATGGATGAATACTAATTGATCCATGTACTAAATTTTCATTGAATTTTAAAAGGCTAGG  
GTCTAAGAAGTTATGTAACGGAGAGATACTCTCCAGGATTC AAAGGAAGGTATGCGG  
AGTTTAAACGTGCTTAGTCTTAAATCTGTGCTTAAACGTTACATAAGATCGGTTTCGATAAAT  
ACATATTCATCAGATTCAGACGTAATTTGTTTCATAGAGTGGACCTTAGTTCGTTCTGCA  
TGTGGCATAAATTCATAAATCCAGCTGAAGTTCATCAGGATAAGACAGCAGGAATTTT  
ATATCCTTTTTTGGAGTAGCCAGTTATGAGAACCTCATTGTAATGGTAATAAATCACTTTA  
AGCCAGTTATGCGAACGTTTATTGATCTCATAAGGGGAGTAAGCTTTCTTGATTACGATT  
CCCTCTAAATTC TTTTCTTTGGCCAGGTTGAAGTAAGCAAGACCGTTACCTTGAGTTCCC  
TCTATAACAAGGACATTAGGATGATCCAGTTCAAGTGAATTCAGA ACTGTCTTACGCTCA  
GTGAGTGGCTTAGCTGCAATTGATTGGCCGTCTTTGTAGATAACATCAAAGACACAGTAA  
ACAATATTATGAGCTGAATTTTTGGACATAAAACGTTCCATTA AAGCCTCAAAGTCAGGA  
GCACCACCTGAGGCAGCTACAATAACTTCACCATCGAGCACTGTTCCATCTGGAATATCT  
AAGTCCATGAGTTCTGGGA ACTTACTTGATACTTCGTTGTTGTGACGAGTGTATAGCATA  
ATCTGATTATCAAATTTAGAAAGGATGAGTCTGATTCCATCAAATTTGAGCTCAGTGATA

TAGTTCTCGTCGTTAAAAGGCTCTTTAATTGAATGCAAGAGCATTGGCGATACAAACAAA  
GTATCACCTCCTACTTAGAACATATTAGCTAAGCGAAGGTGATATATAAAGCGATATGGC  
AGTGGTACTTAATGGGATTCAATGAGCTCAGGTGAATTGTTTTAGGTGAATTCCTAAA  
GATGAAACCTGGTATGCTTCCATGTCATCAGCATCATATGGCTGCAGTAACTTTGTAGA  
TAATCAGGATCTGTATTTTTAGGGTTGAGCCATTCCTTTGCGTTCTCATCAGTAAGGATA  
ACCGGCATCCGATCATGGATGTCTTCTTGAGCTCATTAGGCTTTGTTGTAAGGATTGTG  
CAAGTGTATAAAGGATTGCCTTCTGGTGTGTTCCACTTTTCGTATAAGCCTGCAAATGCG  
AAGAGATTGGACGATTTAAGTTCAATCCGCATAGGAATCTTAGTCTTTGGATCAAGGCGT  
TTCCATTCATAAAAAGTGCAGCCGGTATGATACAACGTTTGCTTATGGGCGGCTTTGCGA  
AAGCTGGGTTCTCGGACAATGTTTCAGCACGGGCATTAATCATTTTTATAGCCGATCTTT  
TCGTCTTTAGTCCATGGAGGGATAAAGACCCCATCTAAGTTTGCCAGACGGTTATTGGAT  
CCATCGTTGATGACTGTCAGGATGTTTTGTGAAGGAGCGATATTATAGCTAGGGGGATAT  
TCACCTTCAGGTAAGAATTGATCTATATTAATTGCTCAATGATGTCATCAAACCTCAGAA  
AATAAAGTGAACCTGCCACACATGTTTCATCATCCTTTAGGGTTTTTGAATATTGTACAGG  
CTTGATACACGAAAATCAAAAAGGAGGAATGTGATGCCGCAGCACACAGTTGAGGTTAAA  
GACGTTGATGTGTTGATTAGGGGAATATGGGGAAAGAAAAAGTTCACCGATATTCAAAAG  
GGCAAACCTTTAAGATTGAGGAGAACGGAAGAACAAGAAATACATAGCGAGAACAGAT  
CCTTATTGGGATGACATCTTTGAACTTACATTATTGATTAGTTGGATAAAAAATAAATT  
AGAAGAAATAAGTAAACAGAAATCTAGATAAAAACGATATTTTAACCAGAATGCAGGGAG  
GTAATTGTAATGAACCTATTTGAAATAATGGTAGAGCACTTTGCACCCAGGGGAAGTGAG  
CGGGGTATCTTTACATATTTGCTTGCACAATCTGATGAAGAGGTATATGAATGGTTGAAA  
ACTGATCCGGGCTTGTCTGACGGCAGGGCAGTCTATACCCCATCTCAAGACAACGACGCA  
AACGGTAAAACATATGCAATATATAATCAGAGCTTTGATATTGTTGGTCATGAAAAATAT  
AAAGATCGAATGATTCGATTAAGAGGTGAGCTGAATGATGAAGGTGAACCTAACCGATCTT  
TATTACGGAATGACCTTAGTCGGGTGGAGTATGGTGAATCGGATATTCCATCGGAACAA  
ATTGAATTGTTAAAAGATACTGGCATCAGTATTGAGTCTGCATAAAAGTAATTTTTTATT  
CGGAGAAGGGGGTGGTACTAATGTGATTGCTTATAAGACGAAAGTAAAAAATAAAAAATA  
TCCTATTTAAGGAGAGTTGTTGATTGTTAAAGTTTCAAACAGAATAGTAGAAAAAAGAG  
TTAAGGTGGCAGAGAAGGCAAGCTTTGGCGGGCCAGTCCTTCTCTACCGCACACTTCGCA  
AGGTTACGAAGCTATATAAGTATATCACAGACAAGAAGTCTTTTCCAATCCTAGTTACTT  
CATTGTTTGCATTGTCTAATCCCAATTCAGTTCTAGCTGCAGATAAAGTAAAGTAATTTTG  
AAGAGTTGAAAGAAAATGAGTCACCTTTGAGCTATAACATTCTAACTACCGATGTTGACA  
GGAGAGTGCTTATTCTGGCACCCCATGGTGGAGGTATTCAAGGAGGGACTAGTGCGCTTG  
CAAGAGAATTAAGTAAGTCTTACTCTGCCTATCTATTTGAAGGTTTAAGGATCCCAGGAG  
CTTCTGAGTTGCATATTACAAGTCCGAATTTTCGATGAACCTCAAGCTTTAGATTTATTGA  
GTAAGCATGATTTAACAATCTCAATTCATGGGTATGCATCAAGTAAGAAACACACTTTAG  
TTGGTGGGACAGAAAGAGAAAAAGCAGCAAAGATCACATCATTGCTTACCGATGCAGGCT  
TTTCTGCAGAATTACTGTCTGAAGATTCCCGTTTAGCAGGCACAAATGAGCAGAACATTG  
CTAATAAAAAATAGCACTGGTATGAGTATTCAACTTGAAATAGGCACTGAACAACGAAGAG  
AAATGTTTAATACTTTTACACTTGCTGGAGGCCATGGAACGCAGAATCAAGTTTTCTGTG  
ACTATATTGCTGTTCTGACTAAATTCATAATGAAAATGTGTATTGTATGGCGGGTGTAG  
CACCATGACATTGTTGAATAAATCCATACGATACTATGTTGACTTTGATCAGTGGGGAAT  
AAATGCATTTAACTCGAATCCAATTGATACAACCTAAAGGATTTAATGAAGCTCTTATGTA  
TGCATCAGAGAACAACTTTCTTATTGTTGAAGTTCCAAAAGGGAATTTTATTATTGATTC  
AGTAAATACTTTACAGCAACGAAATCCTGAAATTTGGTGGGGGAATTTAAATCCCATCAA  
TATGGAGCTCCGTTTGGATCCAGAAGCAGTGCTTCAAGTTATCCCTAAAGGGTATCAGGG  
CTCTTCTGGTTTTTATATTCGGCTTGTAGAGAACGTAATAATTAGAGGAGGTCGTATTAT  
AGGTGACCGGTATCAACATGATTATTCTCTAATTGATACCGATAGAAAAACACATGAATG  
GGGATTTGGAATACATGTTTCGTGGAAGCAAAAATGTTTTGATTGAAAATGTACAAATCTC  
AGATTGTATTGGAGACAACATTTGGATTGCAGCTCACGGAATGATGAATTTCCAGGGAT  
GGTTTATACGCCTTCCAAGAGAGTTACCGTAAGAAAATGCGAACTAGAAAGAGGGAGAAA  
GAACAATTTAGCTACTAACGGTTGTGAAGGATTATTGGTTGAAGACTGTGATATAGAGGA  
AGCTGGAGGAGATACAATTGGCCCTCAACTAGGTATTGATTTAGAGGGCTACGGAGAAAA  
CGGAAGAAAGTATGATCATCCTTATGAGTTAACGATATCGGATTGCAGGTTTAGAAAAA  
GGGTCGTGGTTCGGTTACTGCTCATAACAAGCGGTAAGTTTCCATCAAAGATAACGACTG  
TGACAATGTTATTTCTTATGGCTACAGTACAGATGTTAGTATTAAGGGTAACAAGATAAT  
AAGTGAAGGGGGTCTAAAGAGTACGGAGTAGACTCTGTAGATGTTTCGAGCACTGAGAC

TGGCAACAGAATTCAAATAACTGATAACAATATTCAAGTATTTAAAATAGGCATGATGAT  
TAGAGGGAAAGGGGTATCGATTGATAATAATACCGTAAAGAACGCTTCAAATTGTGCAAT  
ATCAACACATATGGCCGAAGATGTTTCCATTACAAACAACAGAATACACGACAGCGATTG  
TATTCAGATCCAGGTGAGAAATTCATCAGATATTAAGTAAGGAATAATAAAGGGAAAGG  
TACAACTTCAGCATATGCAATTAAGTGATGGATTCTGAATGACGTTAAATTCTTAAATAA  
TACGTTCTCAATCTTTACGGAGGTCTATATTGTGAGAGATCTCAGGCAGTCAGAATTAA  
GCTAAACGATTTCTTATTGCGTGAAAAGGTTACGGGATATATTGGGATAAAGATTCAGA  
AGTCTTCCTAACAAAGGAATGAGATATTTGAACCAAGAAATGTTGCAATTATGGGGGCAGC  
TGATATGTACAATTTGAGAATAAGTGGTAACCAGGTCTATAATTGCAAAGCAATCATTGC  
GATTCACTTAATAGGCGGTTCTGAGCATATGGTTAGACGAAATGAACTTATGTTAACAG  
AGATTCAGATCAAAGCTATGGAATATATTTAAACGGGACAAAAAATGTTTCGATTAATAAG  
GAATGATGTTCAAGGTATTGGTGCAAGAGTGCTTTCGCATCCATTTGCAACGTTAATGC  
TTCCAGTACAAGTTTAATACATAATACATACGACAGCGGCACACTTAGATTAGCCTTAGA  
TGATACAGTAATAGATTATAAATAAAAAATTCTTAACGAGAACAACCTTGTTCCCTTTATGG  
GTTTTGGTATATAATTTAGTAGTACCAAAAATTTGAAAACAGGGGATAAGAGTATGAGTG  
AGCAGAAGCTTAGAATCGGAGAAATACGGTATGAGGTTTTTCGATGATTATGATCCATTAA  
CAGAGGAGTATTTAGGAAAGAACCTAGCAAATGCTTAGTTTATGGCTCAAATTAGAAAGG  
AAAATGTAGTTCAGTAGGGAATAGGAAAATTAATTACTCAAGCGTTGTTAAAATTGGTT  
TTGATGCATTCGGGGAAGAACTAAATAGAAAATCAAAGAGTATCTTCTGGCTGCCTTTA  
GTCTCATAGCAGAAGGGGCTAAAGACGATGGTCTATTAGAATAGTTATAAGGCAATGCTG  
GGCTAGTCTCTAAGATTAGCCTAGTTATCATAACGAATAAAGGGGTTAACTGAATGTCAA  
CATCATTTCTAAAGAGCAAGATGATGCAATTAATACTTTAGAAACAAATTAATTTATC  
AGCCAAAGACTTATACATACCGTTGATTAATTTTGGACTACTTAGAGACAAGAACGAGCT  
ATATGCGAACATTCTTTATAAGCTGTATAAAAATGATCCCTATTTGTTTATTAGTGCTTT  
ATAGGAAGGTTATGCGGTTAATCAGCCAATTGCATTTGATGAGGCCATTGTGCGATTCTT  
TAATGGAGAAGAACTCGCTATTGTACATAAAGCAACAGGCAGAAGATACAATGTAAATGT  
GAAAATGAAGCAGCTGCCTGATGGCTTTTCATTGCAAACAATGGATATGTTGTTGTGGCG  
TGAGCTTGTTTGAAAATAGCAAACCTTTGAGCTATATAATGAAAATATGATAGAATATAG  
AAGAAATAGATAATTGAGGAGATGTTTTTGTGGAGTTTAAAGTTGGACAAGACGTATCAG  
AAATTTGGAATATCCATGGATCAATACTTCCGGAAGTTTTAATGTATATGTTCCCTCGTT  
CAGACGAATCTTATGATTGGGAATTTGCAAATGACAACGGAAGACATATCTTTACTGCAT  
GGAGAAAAAGTGAACCTATTCCTACATTAGAGGAAATTGAAAAAGCAGCAATTGAGCTTG  
AAGAGAAGAAACATGCACCTAAGCCAAAACTCTCGAAGAAAGAGTTGCTGATTTAGAAA  
ACAAGTAGCTTACTTGACGAGTAAGGTTGAAGGAACAACTAACAAGAGTCCCTTATTG  
GGCTTTTTAAATTTAAATAATATGATATTTTTATTTCGAATTA AAAAGATCGCAAATGAAA  
TACAAAAATAAAAAATATAAAAGTTTATAAAACATGTAGACAAAGATAAAAAATATGTAT  
ATAATAAAACCGAGTTAAAGGGAAGGAGGCGAATTACTTGGAGGTACTTGGGATAACAGA  
GAAAGCGTTAAACTATTACAGAGAAAACGTTAAAGACAACAAGACCATTACTCCTGATCA  
GGCACTGTTAAAGATGATAATCAATGTCCTACTTGTCAAAGAACTCATCCTGAGCGAGT  
AAAAAACGTTTATTTTGCACAGAGTACGCTTCCGGAAACATGATAATCAAAGTTAACAG  
AAAAAAGCAGGTATTTGAAATTGTAAATAAATCAGGATGCTTTTTCTGACCAAAATGATTG  
GAAGTTCCACAAAGAAGGTACATAGAGCTTAGTAAAGAACTTGGAATCAAAGACTGCAA  
GTTTAGAAAAATTACATATTCAAAGAAAAATCACAATAAACAAAAATAAAAAATAGAGGAT  
CATTAAAAATATGACAGAAAACAAAACGGTATTACGTGAAGCATCAAACGTTGTAACAAT  
TGAAGGAACTTTAGCTGAAGTACGACACACTGAAAGGAAAAATGGAAATGGACTAAATAT  
TGAATTAGACATTGAGGTTGCACCTAACGAAGTACATACAGTTAGAGGCTTTTCCCGGTA  
TAAGAAAGATGATGGTACTGATAATGCAGTTGCAAAGGGGTACCAGACAATTGTAAGCGA  
GTATAAGTCAATCGCAAACACGGTAGAGATGAAGCTGACAAAGTAAGAATTACTCAAGG  
TCAAATTAGCTTAAATGAGTATTATTCACACGGGATTTTTAAATCATATCCACAATTGAT  
GGCTAACTTTGTGAACAGACTGGATGGTAATGAAGAATCCATCCCAGAGCAGAATTTGA  
TGTTGAGGTGTTTGTAAAGAACGTAACCGAAGAAAAAGTAAAAGGGGAAGAAACAGGTAG  
AGTTAATTTAATGGCTTTATTCCTGTGTACAACGGAAAAGTAATTCCTTTTACATTTGT  
AGTCACAAAAGAAGACTCACAATATGTTGAAAATAATTATGAAAAGGGAACTACCGTTAA  
CCTTTTTGGGAAGTTCATTAATTATAAAGAACAAAAGTAACAATCAAAGTAGCGGCATT  
TGGAGAAGATAAGAAAGAAATTACTTCAATTACAAGAAGAGAGTATCTAATTACAGGTGG  
TATTGATCCTTATGATGAGGATAGTAAGAATGCTTTTTAATGCAGATGCAATTA AAAAAGC  
GTTGACTGAAAGAGAGATTTATCTAGACGAGCTTAAGAAAGAAGGAATAAAGAAAACCA

TAAAAAGTCTGGGTTTGGTGGAAAGTGCTCCTAATACCAAGCCTTCAAAGCCGGTTGAAAT  
TTCAGATGATGATCTCCCTTTCTAAAATAAAATAGATGATTAATCTAATACATAACTGGG  
GTGAGCTCCTACTCACCTAACAAATTCAAATAAAAAGGAGAAGTAAATGGCAACCGATA  
TTTTCAACCCACAAGTTTCTGTACTAGCAAAAAGGATTAGAAGGAAAAGTTATCACAATCT  
ACGGTTCTAACAACTTAGGTA AAACTGAGCAAAGCACTCGGATGAAGAAACCGTTATATC  
TGCCATTCGAAAAAGGATTAATGCTATTGCCGGTGTCTATTTCATGCCTATCAATAGTT  
GGGCTGATTTTAAAAAGGTAAACAAGCAGTTAACCAAAAATGCTGAAAAGGCCAAAGACA  
TGTATCACACAATCATTGTTGATGAAGTAGACGCTTTTGCTAAATATGCGACTAGATATG  
TCTGCGAGCAATATGATGTAGAACGGATTAAGATGGTAATGATGGGTTTGGCCTTTGGA  
AAGAGTATGAACTGAAGTATGGGAAGAAATCAATAAATTAATTGGCGTAGGATTTACGG  
TTATCTTTATTGCTCATGCTGCTGAAGATAAAAAAGGCCAAAGTATATCCGAAGGGGGTA  
AACGAGTTTTGGCTCCAGTAATTGATTGCAGCGATATTGTTCTCTATCTAAGTTCTAATG  
GTGTTGATGAAGATAGAAAATTAATCAACTCAAGTGCTTGGTTAGCTGAACTGAAGGGC  
ATTTTGCTCGTAGCCGATTTGATTACATTTACACGTATCTTCCTGAATTTACTGCAGAAA  
ACTTAGAAAAAGCAATTATTGAGGCAGTCGAAAGACAGGAGCAAGCAGAAGGAATTGTTG  
CTGTTACATACGAAGAGCAAAAACAACACGCTTCAGAAGAAGTTGATTTCAACTCAT  
TAATGGATCAAATTAAGAAATTGGCATGAAGCTTAATGAAGAAGGCCGTTTAGACGAAG  
TTAATGAGAGTACAGAGAAGCATTAGGTAAGGGTGTAAAAGTTACTGAGTGCAGCCGTA  
AGCAAGTAGGTGTCATGTCTGTAATTCTAGATGATCTAAAAGACCTTCTAGCAGAATAAA  
AGAGGAGAGATTATTCTCTCCTCCTTATTAGGAGTGATTATTTGGGGAGACAAGTTAAT  
GTCCTTATTGCGAGACCAAGTTAGACAAAGACTCAGCCATTCTTATAAAAAAAGATATT  
ACCATGAAAAGTGTTTTAATACCTGGAAGCAAGAATCAGATCACAGAAAAGAGTTATTT  
AAAACATATGCAATTTATATGGTCTTACATCTCCAAGTGCATGATGTTGAAACAAATTA  
AAGATTTTCAAGAGGAATATGGGTATAACCTTAAAGGCATTGAACAAGCGCTTAGGTACT  
TTTATGAACTTTGGATAATCAACCAAGAGAAGGTGATGGCATTGGAATCTTTCTATTTG  
TTTATGATGAAGCAAAGCGGCATTACATTAGACAAAAGCCATCCGAAAATCAGCTGAAG  
ATCCAAAGAATCATAAAAAGAGAAGAAATTACTTTGGTCATAAAAAAAGGAATGAGAAAGA  
AAAGAGGGCTAGTTGATATCTCAATGCTATAGGAAGGAGAGTACATTGGCTACAAGACAA  
ACAGGCAATAATTCAAGTTTTAGGGAGCATTTTAAAAGGTCCCAATCTTGTGAGTGAAG  
CAATAAATATAAGATAACTTCGGATGATTTTCTTCAAGGTTTCATTCAATATTATTTTT  
TGCCACGAGCAACCTATTTCAACAAGGAACTGAAGTATTGAATGACGTTGAAATAGAAGT  
ATATCTAAAGGATTACGATATTCAATATAAAAAATTTCCATGATAATGAGGGTCTTGAATA  
TATAGAAAAAATACAAGAGTTGGCAGTTGTCGAAAAGTTGATTACCACTATAAAAGATT  
AAAAGAGTTTAGGCTGCTTAGAGAAATGGATGGCTTGGGATTTCGATATTCAGGAAATACA  
TGATGAATATCTGATTGACCCAAAAGAACAAGAAAAGATGCAAGAACAGTTTGATAAGAA  
GTCGATTGATGAAATTTTGACAGCTTATGAAATGAAGATTGTAGTCATAAAAGAAAAATT  
CAGAACTTCATCTGAAAGTGTGGGAATCCAGGGTGGAGAAGGTATTAATGAATTATTGGA  
TTCATTCGAAGAGTCCCCGGATATTGGAGTTCATGAAATAGCGAAATGCTTACTTCAAT  
TTTTCGGGGATCACGGAAGAAAAGTTCTATCTGCGCTCAAGTATTACAGGTGGCGGTAA  
AACAAAGAACATGGTCGCTGACGCTTGTCTCTTAAAGTGCAACTGAACTTTATGATCCTAA  
AAAGAAGGAATGGGTATCAAACCCATGGAGTGAAAGTTCTACAGTTATTTCAACAGAAAT  
GATGGCCGAAGAATTGCAAAGTTTAGCACTTGCCTACATTAGTAGTGTAGAAGAGAAAA  
AATCCTTAGAAACACAATCAATGAAAAAGAAAAACAAGTTGTTTCGTAAGTCTGCTAAGGT  
TCTCCAAGAGTCTAACATATGGTTCGAACATCTGCCTAATTTAATATTACAGGAGATTGA  
CAGAACAAATTGAAAAGAACGTCATTA AAAACAATGTAGAGTACGTTTATTTTCGCTTATAT  
TCACTCATCAGTAACCATTTTTTCAGAGATGAGCAAATAAGCGGGGTCAACTTGAGGGA  
AGACCAAAGTCTTTTACTTATGTCAGATAAGTTAAAAGGCGTATGTATCAAATACGATGT  
CTATATGATGAGTGCAACTCAGCTAAATGGTGATTGGAAAGAAACATGGTTAAAAGGACA  
AGTAATAGATGCTTCTTACTTGAGACGAAGTAAGGCCATCGCAGATAAAACAGATGCTGC  
AATGATAAATCTTCCTTTAAGTAAAAAAGAGAAGGATGCAATTGATCCAATTTTAAAAGA  
AGGATATTATCCAGAGCCAAGTTTGTACACATGTATTTAAGAATAGGGGAAATGAGTA  
TGACAAAGTTAATGTCTTCTCCATATCAATATGGGCAACATGCGGATAAAGGACTGTTT  
CACAAACAATCTTGACAATGAACTAATCACAGTTGAGAAATGGAATATAAAAGCAGGATG  
AAGGGTGTAGCGCCCTTTGAAGTATGATAAAGACAGAGTAAAAGAAAGCCTAACCATTGA  
GGATATACGTAAGATTTTAAAAGATTTAGGTAGAGAGAACAAATCTGTGGGATCAACAAGG  
AAATCCAATTTACAGAACCGTTTGTACAAATGCTTCTGGTGGGAGCTATAAGTTGTATTA  
CTATCATGAAGCAGAACAGTTTCACTGTTATACAGAGTGTGGGGATAATTTTGATGTATT

CGAACTTGTTATAAGAGCAAAAAGCCAAAAAGGAATTAATATCTCTTTTAATCAGACTAT  
CGAATATGTTGCCAAAATAGCAGGAAGAACATTTGGATTTGGGAATAGAGAGACATACAT  
AAACAATGATTTGATTGATGACTGGGAATGGATGGGGAAGTTCAAAAAGAAGAAAAAAT  
ACATATTGAGCTCCCCAGCTTTAATGAAACGGTTCTAGATGTATTTGTGCCTTATCCTCA  
CCAATTGTGGTTAGGTGAGGGAATAAGTCACAAGACATTAAGGGTTTGAGATTGGGTA  
TTATTTAGACCTCATAACAGAATGGATTACCATTCTCATCGAGATTTAAATAATAGGTT  
GATTGTTATACGTAGGCACTCAATGATTAAGAAGAAGTTGATGCAGGCTATAAATATAT  
GCCTTTAAAAGTGGGCAATATCTTATATAACCATCAAACAACGATGAATCTATATGGATT  
ACATAAAACAAAAAATTCGATAGAAGGGTTGAAGAAAGTATTGATTTTCGAAGCAGAAAA  
ATCAGTATTAATAATGCCAAGACTTTTACGTTGAATCAAACCTTCACCTGTGCTGTTTGTTC  
AAGTAATATTTCTAAATTTACCGCGACATTTTATTGTCTCTCGGTGTTGAAGAAGTTTT  
TATTGCTCTTGATAAATATCGACCACAAAAGAACATGAAACAGAGGAGAAATATCAAGA  
AAAAGTGGTTGAATACCAGAAGAAAATTTCTAAAGCTCGCAGCAAAAATTTACTCCTTATGT  
TCGTGTATATGTTTTGTGGGATTATGAAGGCTTACTGGATTATAAGGACAGCCCAGCGGA  
CAAGGGAAAGGACACTCTAGAGGAGCTAATGAGAAGGAAAATTGAGATTGGCACAGATGA  
AGGGGGAATTTAATGGAGTATAGACTAATTGGCGACAATGATTATAATTTTCGATCCGTTA  
GCTACTATCTTAAAAAATAGAGGCATAGAAGATCCAAAGTTATTTGTTAATGTTGATCAA  
AGTTCAGTTATGCATTATTCAAAGCTTAATAATATTGATAAAGCTGCAGATTGTCTTATC  
AGGCATTTAAATAATAAAAAATAAATTGTTTGTTCAGGTAGACAGTGATGTTGATGGATAC  
ACATCCAGCTCAATCATTATAAATTACATAAAGAAGATTTGTCCGAAAGCTAATATACAC  
TACAGAATTCAGGATGGGAAAGAGCATGGGATTTTATTGATACAATTCCTGATGATGTT  
GACTTAGTCATAATCCCAGATGCAGGATCAAGTCAATTTGAGGAACATGAGGCTCTTAAT  
AAGAGAGGCACAGAAATAATTGTTATTGATCACTATGAATGTGAACGAGTGTCTGAACAT  
GCGATCGTAGTAAATAATCAACTTTTCGCTAATTATTTCGAATAAAACTCTGACAGGTGCA  
GGAAGGGCCTATAAATTTTGCCAGGCAATTGATGAAAAGCTAAATAAAAAATGAAGCCGAA  
CAATTCCTAGAGCTTGTATCTATTGGTAACATTGCTGATTCGGCTGATTCAAGAAACCTT  
GAGACCAGGTATTTTATGAATGAAGGCTTGAAGAAAATAAAACATCCATTATTAATGAAG  
CTTTTTAAGAAGCAAGAGTTTTCAACCAAGGGTGACAAGAGCATAACAGAATACACAGTTC  
TTTATTAACCCTTTAATTAACGGTGCCATTAGGGTTGGAAGCAGTGAAAAAAAAGATCAA  
ATGATGAGAGCATTCTCTCTTCTAAAGAAAAGGTTCCCAACAAAAAACGTGGGCCAAAGT  
GAAACTGAGCTTGTATCAATACATGAAGACACAGTTAGGATTCTAGGAAATCTAAAAGCA  
TAGCAGAAACGGATTGTAGATGCAGCTGGAGTGGAAATTAATAAATAAGAATAGAAGAGAAA  
AGTTTAACAGCGAATAAAGTACTCATTGTGTACATTGAAGGAATTCTAGATAAAAGCCTA  
ACTGGAATGGTGGCCAATCAGCTTGCAGAAGAATATAAAAAGCCGGTCTTGTTAGGCAGA  
AACGATCCCGAAAAAGGGAAAGATATCTTGAGTGGCTCTATACGAGGATATGATAAAGGG  
TTTATAAAGGATATTAATAAAGAGCTTATAGATACTGGATTATTTGAGTTTGTGAAAGT  
CACCCAAATGCAGCGGGCTTTGCAATTAACGACAGAACTTAATCCTGGTGAACAAAGTG  
CTGAATGAAAAATTTAAAGACATAAATATCGAAGAAGATATTCAGAATGTTGATTTGAG  
ATCCAGCAAAACGATTGAGAAAAGAATTTATCCTTCAACTTGATGGTTCCAAAGACTAT  
TGGGGTTACAACGTTGAAGAACCCTTACTAGCTATAACTGATCTTGAAATTGAAGTCGTA  
CAAATTGAGCATTAGGGAAAAAGAATAAGACAACCTGTTAAATTTATGCATGGCGATATT  
GAATACATAAGGTTTAAAGTGATGAGAATTACTTTAATCAGCTTACTGCATCATATGGA  
ACGTTAGTCATTAATGTAAATGGCAAAGCAAAGGCAAATGAATACAAACGCAAGAAAACA  
CCTCAAATCGAGATTTATGAATTGGAGGTGGTTCGCACAAAACAAAAAGAAGCTTGTGTTT  
TAAGGGGGAGAAAAGTGGATAGGATGTCACTGTACACACATAGGAGTAACATAAGGCTT  
CTAGACTCCACAAAATCAGTTAAAGAACTGCTCAAAACTGCAGTAAAGATGGAATATAAG  
GGATTGGCCATAACAGACTATGAAGTCCTCTCAGCACATTTAGATGCTATTCGAACAGTT  
AGAGAAATGAAATAGAAGGGGGATATGCCAGAAGATTTTAAACTGAGATTGGGCAATGAA  
GCGTACCTAGTCGATTCTTTAGAGGAAGTTCGAGATAACTATAAATCGGGAGTGACAAAA  
TTTCCGCATTTCTTGATGTTGGCAATGGATCCAAAAGGACATGAGCAGTTAAGAATACTG  
TCTTCTCAAGCCTGGGAAAACCTCATTTTATACAGGAACAATGGAAAGAGTGCCGACAGTA  
AAAAAGTCTGTAGAGGAGCTATTAAGTAAAGATCCAGGCCACATCATTGCTACCACAGTT  
TGCTTGGGGTCTGGGGTAAACATTCACCTGTTAAAGATAAAGGCTTTTGAAGAACTGGT  
GATTCTCAATCAACTAAGCAGCACAACTAAAGATTCATGAGTTTATAACTTGGTGTATA  
GAGGTTTTTGGGAAGGATAAGTTTTTTATCGAGCTTCAACCTGCACTGAGTGAAGAACAG  
ATTTACTGTAACAAGAAGCTGATAGATATAGCCAACGGGTATGACTTGCAAATGATTGTT  
ACAACAGATGCTCACTATCTAAGAGCAGAGGATAGAGCAATGCATCAAGCCTTTTTAAAC

GCTAAGGATGGAGAAAGAGAAGTTGATTCCTTTTATGAAGGCTTTTTTCGTTCAAACGTT  
GATGAAATTCACGAGAGAATGGACTACATTGATAAAGAAGTCATCGATCAGGCCATAAAA  
AATACAATGCTCATTGGTGAGATGATTGAAGAATATACTATAGAGCACGAACCAATTATC  
CCTAAGATGGAGCTTCCTAACATTA AATTAAGACATTTATTTAAACCAGCATATGATCAA  
TATGAATATGTAAAAAAGATGTCTGAATCAGCAGATGAACAAGATAGATATCTCCTTAAG  
TTAATTAAGGACGGATTTAAAGAGAAATTA AAAACAAGCGAACTAACGACAGAAGCTTTT  
CATAAAATATTGAACAGGATTAACGTTGAACTGGGTGAACTTTGGGAAATCAGCCAAAAG  
CTGAATCAGTCTATGTCTTCTTATTACTTAACAGTTAGAGAAATCATTAAATATTATTTGG  
GATGATGAGTGTGGAGGTGATAGTTTAGTTGGGGCAGCCAGGGGAAGTGCTGCAGGCTAC  
TTAGTTAATTATCTACTCGACAATACTCAAATTAATCCAATGCAATATGATTTACCAGAT  
TGGAGACATATACATAAATCGAGACCTGACATACCAGATATCGATATTGATACTGAAGGA  
TCAAAAAGACAAAGAATTCTTAAGGCACTAAGAGAAAGGTTTGGAGACAAGCGTGTCTT  
CAAATGCTACTTTTGGAACTGAGGGTTCAAATCAGCGCTTCAGACCGTATGTAGAGGC  
TTAGGAATCGATAATGATATCTCCCAGTATTTAAGTGAATGATTCCATTTGAAAGAGGA  
TCTAACTGGCCTTTGAAGCATTGTTTTTATGGTGACAAAGAAATTGGCAGGAAGCCAATT  
AAAGAGTTTATTAGGGAGGTTGAACGATACCCTAATCTTAAAGAAACA ACTTTAAAAATT  
GAAGGGTTAACTAATAAGCGCTCTTCTCATGCAGCCGGAGTAATTAGCTTTAACGATGAA  
TATACAAAGTCGAATGCAATGCTGAAA ACTCCTAAAGAAGCTTATATTACACAGTTTAAAT  
ATGGGTGACAGTGAAGCCATGGGCTCAGTAAAATTTGACCTTCTTACAATTGAAGCTTTA  
GATAAGATTAGAGTAACATTAGACCAATTAAGCGAATATAATGAAATTGAATGGCAAGGA  
AGCTTGAAGGAAACATACAACAATAACATCCATCCAGACGTAATTGAGTATGAAGATGAT  
AAGCTATGGGAAATCGCTGGTAATGGGGAAATCATGGATTTATTCCAGTTCTCAACAGAA  
GTCGGTCATCAATCAGTTGTCAAAGTAGAACCTAAGA ACTTACTTGAAGCAGCAGTAACC  
AATTCTTTAATGAGGCTTATGTCAGACGGTGAAGAACAGCCTGAAGATACATATGTTAAA  
TACAAAATAACCTTAATAAATGGTATGAAGAAATGACACGGTACGGTCTAAGCGAACAG  
GAAATCACAGTAATGGAAGGCACCTTAAGGTCATTTATGGTGTGCTGATAATCAAGAA  
GTGGTTATGCAGATGGTTATGGATAAAGATATAGCTAACTTTGACATTAAGAATCAAAT  
TTTCTTAGGAAATCCATAGCAAAAGAGAAAGAGATGTACTAAAAGAAGTGGAAAGAAATTG  
TTTTTTAAACAAGAAAAGGAGATTGGCACTTCTGATAACCTGTTGAATTATGTCCGGAAT  
GTTCAATTTAAAAGACAGTTTTTGCTACAGTTTTAGTTAACTTCATACCTTGGCATAATCA  
ATTATTGCATTATAGGAATTGAACTTAAACTATCGTTATAATCCTTTATACTGGAATACT  
GCTGGTTTAAACGGTAAACAGCGGAGGAATAGATACCGAGGATACAAAAGACAACAAAAG  
ACAGCTGCTACATACTACGGAAAAGTTGCTTCAGCCATCGGAAACAATAGACAAAGAGGG  
ATTA AAATAGACCTCCCAGATATAAATAAGGCTGATTTTGGTTTTAGGACTGATATTAAC  
AACAAATTCAATTTTATTTGGACTTAAAGGAATGAGTTGAATTGGAGACGATGTTATTCAT  
CATATAGTTCTAAATAGACCATATAGTGACTTTAACGACTTTATTGAAAGAATGTTTAAAG  
AGCGGCATTATTAAGAAAGGACAAGTAATCCAATTAATAAAAGGAGGCTGCTTTGATTCT  
TTTGGAACAGGCAAGAAATCATGAAGGCCTTTATTAGCTTAATATCAGAACCAAGAAGT  
AAGCTTACGTTGTCTAATTTAAA AATGCTAATTGAAAACAACATTGTTCCCTCAGAATTT  
GCACAAGAAGTGAGATTCTTTCGTTTTAAAGATTACATCAGCAAAAAGGTGTACAAAACA  
TTAAAGTCGCCAAAAGATAAACTTTTTTTATTGGACGATGTATCAGCTTCGTTTTATAAC  
CAGCATTT CAGTGAGGATAGTGTAGGTGACATGTTAAACGGGCAGCTTGTCATTTCTGAA  
AAAGCTTTTAAAAAAGAATATGATAACAAGATGTCTAATATAAAGTCCTGGATAACAACA  
GAAGAACCACTGAAGAAATTGAATGATTGTTTATTAATAAAAGAGTGGGAAAAATACACC  
GATGGGTCATTAGGAAAGTGGGGAATGGATTCATTGAGCTATTATTATAATGACCATGAG  
CTTCTGGTGTAAACTTTGCCAAGTATGATATTGCTGACTTTTATAAACTGCCAGCAGAG  
CCGTTCAAAGGTAAACCTTATCAATGGAGAGGGAAA ACTCTCAATGAATATGAGACTACA  
CGGATTATAGGCACTGTTTTAGATAGGGATAAAAACAACATGCAATTAATCTTCTAACA  
CCTACAGGGGTGGTTATAGTTAAACAGTGGTTCGGGCAGCTTTAGTGATTACGATAAACAG  
ATTTCTAGATCCATTGGTGGCGGAAAGAAAGAGGTAATCGAGAAATCTTGGTATACCAGA  
GGAACATTGCTCATGTGTACTGGTTTCAGAAGAGGTAACAATTTTATTCCGAAGGTCTAT  
AAAGATAGCATATATAATCACACAGTCTGCAGAATAGATTTTGTGCTAATGAAGGAAGT  
ATGAGTTTGACGACTAAAAGGGCAGAAATATAAATCTTAACTGATATAGGAGAGATAAAA  
ATTTTCAAAA ACTTATAGACAAACATAAAAAATATGTATATCATAGAATTATCAAAATG  
GCACTTTTTGCTACAATTGGTTTTGTTAGGAGTAGGGCTCGTATATAGCGCTAAA AACTTG  
GATACACATCAAGATAATCAAGTCTCAATAAAAAAGTCATTTTATTTAAATAAAAAAGAG  
GTGAGGCAAAA ACTTATTCACGAAATTGACGTTCCAAGAATCCTTCCTAGGCTAAAGACT

GAGGAAGAAAAGCAGGCTGAAAGTAGAAAAAAGGATCTTAATGCGACAATTACGTATCTA  
ACAGAAGAAAATAAAAAAGCAGCAAAACATACAAAAACAAAAAAGCGCAAAAAACCAAT  
ACAAAGAGAAATCTTGATAAAGCAGTTTCAAAGGTACAAATGCAAAGGCAGTGAAGAGT  
CATGACGTTGTTGCTACTGCTTATAGTGCCTTTGCTCGACAGGGTGCACAGGGAAAAACA  
AGAACCTGCTACGATGTCTCAAACACATCCTATGACAATGGAAAAAAAATAATTGCTGTT  
GATCCAGAAGTAATTCCTTTGTATTTCATTAGTGAAGTTTCATATGAAGGAAATAGCTTT  
CAAGCATATGCAATAAATACAGGAGGGGACATCAAAAACAATCGTATTGATATTCTAATG  
GACAGTCAGCAAGAAGCAAATGCATTTGGTAGTAAAAATGTAAGAGTAAGCTGGTAAATC  
GATCCAAATGACTGAAAGGTATAATCATTTCACAATTCGTTTCGATGCAATACATAACAT  
GAAATTTTTCCCAAGGAAAACACTATTACATAGAGAGTGAAGAGGATGTTTCATTTTGGATAA  
AGAGGCTAAGGTAAAATCAACTGGAGAGCGTGGGATTGTTGAAGCGATCTATCCTGAAAC  
AGAAACAGTAGAACTCTGTTATTATGATGGAACCTTATGATGAAAGACGTTTTGATGATGT  
TGTTATGGCAACAAGCAGTTAAAATGCATGACAAAAATAAAAAATAGGGTGAGTTAATTG  
AAGTGTATTCAGATTGAAATGTCATTCACAGACGTATATGGACAGGTGACCCGATTAAT  
AAGACTTATAAACCGTCGATTAATGAAGAACATAAAGGGGAAATCCCTAGATTGTTGCTA  
GATGATTTTAAGAGGTTCTTGTGTTGCCCTTGGGTTTAAATGAAAAACAGGTTTCGAGAATA  
GTAACAGAAGATTAAGAGGTTTTTTTATTGAGGGGAGGTGGTATTAAATTGCCTAAATTCT  
GGAGTTATCCTGTTGGACTAGCTGTAGAAACTAACAATAATGCACGATATGGATGCCAC  
AGCATGTGTGGCGAAAAGGAAAGATTATCGAGCATTACATTCAGCTACATATGACTATG  
CAGTTAGCGATGAAACAGGTGACATTACTTTAAAGAACATGAATTAACCCCACTAA  
AGGGAGGTTTAACTTATGTTTTAAAAGGTCCAAAGGTAATTGTTGATTTTAAAGATGAG  
ATTGGAGCTGTTTCGAAAGTTGATTATCAAGACAACCAGATAGAAGTAAAGTCTCCTGAT  
GGCACTTACCAGGTTGTTGGATTTTCATAAAGTTAGGAAGGTGGAGGATTCATGACATTA  
TTATCTTGGAGGGGCTGATTGCTGCTTTAAATCAACAATTGCAGCAAAGCTAACTAAAG  
TACTGAAGTATCCAATTATCAAAGGTTCAACCTTTGAGTTGGCCAAAAGCGGAAATGAGA  
AGTTATTTGAACACTTTAATAAACTAGCTGATGAAGACAACGTGATTGTTGACAGGTTTG  
TTTATTCTAACTTGGTATATGCAAAGAAATTCAAAGATTACTCGCTCCTTATAGAGCAAC  
AGCTTAGATTTATTGAGGATAGAATTAAGCAAAAGCGAAGGTTGTATACTTACACGCTG  
ATCAAAGCGTTATTACGAAAAGGTTGAGGGTACGTGGAGATGAGTAGATACAGGTAAGG  
ACATTGATTCAATTTTGGAGTTGTACAGAGCAGTTATGAGCAATGCGGGATTACATAAAT  
CTTCATGGGATACTGGAAAATGGTCAAGTGACGAAATTGCTAAAGACATAATCTTTTTAG  
TGGAACAGGGGAATTTATGAAAAAAGTAATTGCGATTGACATGGATCAGGACTTAGCTGA  
TTTACTACGTGATTGGGTAGCTTACATTAACACATACGATGATGCTTTTCTCAAAGAGAA  
AGACATCCTATGTTGGGATATAAAAAAATATACAAATACCAACAATAATGTTTATAGACA  
TTTAGATTACGATTTGTTTCAGAAATCTAAATGTTATAGAAGGGAGCCAAAGAGTGACAAA  
AGAGCTGATGAAGAAATATGAAGTGTATGTTGTGACTACAGCAACAAACCATCCAGATTC  
CCTTAAAGCAAAGCTTGAATGGCTTACAGAATATTTTCCATTTATTCTCATATCAATGT  
TGTGCTTTGTGGCAATAAAAACATAATTAAGCAGACATCATGATCGATGATGGAATACA  
TAACTTAGTATCATTGGAAGGAATGAAGATACTATTTGATGCTCCCATAACAGGAATGA  
AAATAGATTTATTCGTGTTATGAATTGGGAAGAGATTGAACGAAAATTACTTTAAAATAT  
CTCATTTATCAAGAAAGGTGAAACCAGTGGAACGTTTTTATTAAGAACTGTCAGGTTCTT  
GTGAGTCAACAATTCATCACAAGGTATATCAAATTATGAACGAAGCAAAAACAGAGTTTG  
AAAAAGTGCTAAAGAAATTAATAAACGATCAATTTTATTTAGAGTAAAAATAAAATAT  
ATGGAGGTTGTTTGTGAGTAACTACGTGTAATAAGCCTTTTTAGTGGAATTCGTGCAT  
TTGAAGCTGCATTAAGAAACCTATGCGTTGATTATGAACTGATTGGCTTTAGTGAAATAG  
ATAAATATGCAATCAAATCTTATTGTGCAATTCATAATGTAAGTGAAACATTGAATGTTG  
GAGACATATGTAAAGCTAAGAAGGATAATATCCATATTTTGATTTGTTTACAAGTGGAT  
TTCCTTGTCCCCTTTTTTCAGTAGCCGGCGGCCGTGATGGTATGGAATATAAGTGTAGCA  
ATTGTTTCGCACGAGCATTAAATTACTTATGAGGATTATAAGAAGGGAGTCAAATGCCCGA  
AGTGTGAAACTGTTTCTAAGGCTAAAGATGAACGGGGAACGCTCTTTTTTGAACAGCTT  
TGTTAGCAGAAGAGAAGAAGCCGAAATTTGTGATATTAGAAAATGTAAAAGGGCTAATTA  
ATAGTGGCAATGGACAAGTGTGAAGAATAATTAGTGAGACTATGAACAATATAGGCTATA  
GGATTGACCTAGAGCTACTTAATTCAAAGTTTTTCAATGTTCCACAGAATCGGGAACGGG  
TATACATAATTGGCATTAGAGAAGATTTGGTTGAAAATGAACAATGGGTTGTAGGTCAGA  
AGCTAAACGATGTTCTGAGTAAAGGTAAAAAGAGATTGCTAGAAATAAATATAAAGAGTT  
TTAATTTTAAATGGCCTTTACAAGACACTGTCACAAAGAGGCTGAGAGAAATTCTTGAGG  
ATTTTGTGATGAGAAGTATTACTTAAATGAAGAAAAGACGAAGAAACTTGTGAGCAAC



TAGGAACCGCACCGCTACAAAAACAAGAAGTAAGGGAGCCGTTAATGGTGGGACACGTGG  
ATTTAAAAGGTCACGATCCCATCAAAAGAGTTTACTCGCCTGAAGGACTTTTACCGACAT  
TAACTACAATGGGCTGCGGTCACAGAGAACCTAAAATCGCAGAAAAGCAGAAAGAAGTCA  
GGGCAGTGTTAACGCCAGAAAAGAGAAGAGAAAAGACAGAATGGAAGACGTTTTAAAGAAA  
ACTGAGAGCCGGCTTTCACGGTTAATACAATTGATCGACATGGTGTAGCAATCGGAGAAT  
ACCCAAAATATAAAATTAGAAAGCTCTCTCCATTAGATTGTTGGAGACTCCAAGCATTG  
ATGACGAAGATATTGAAAAAGCTTTTGCAGCAGGAATAAGTAACTCACAATTTTACAAGC  
AAGCCGTAATTCAATTACAGTTAGTGTGCTTGAGTCTATATTTTCAGGAATTAATACATA  
CATATGTTAATAAAGAATCTGAATAAAATTTGTCTTTTAAACAAATATAAAATAAGAGTT  
GTGGATCAATTGGATAGTTACCCAGAGTCCCTAAAAATAGAGACAGAGGAGATCAAAGAG  
CGTGTTAGGAATGGAAATATCAAAGAAGACAAGATTAAGAAATTGCAGAAACGACAGTT  
GAGTTTTTGAATCAGAGGAGAAAAGACATAAATACTTTTCTGAAGTTGCTGCAGCTATG  
GCTGATAACTTAAGCGAGTTTTTCAAGTCGTATTTAAAAGGAGAGTGAATATGCTAACTG  
ATCAAGAAAAAATTGACTTGGTAAACGCTCTTGATTTTGTAGTTATTGAACCACATACAC  
AAAGCATTACGTACATAACGTAGAAAAGACTAATGGAGTATTAGCTAAGGTTTTGCACA  
CTATTACAGTAGATGAGTATATTGAGAGCTTGAAGAAAGGTAGTCTAATTGATATCTTTC  
CAGCAGCAATGCGAGAAGCCGGTGCGGAAGGATTTAAAGATGGCCAGTTTGTGATTATGC  
CAAAGAAATTTTATGTTGATCAATGTTATGCGATGAGCAAGGAAATCGAGCGGTTAACTA  
ACCTAAACAATCTACACAGTATTAACCAAATACATATCAAGGTTTGATTCATTAATTG  
TTTCGATAAAAAATTAAGGATAAAGGGATGTTTATTGAGAAAGTATTATGTAAGTTGTA  
AAGACAGCAAAGGTGAAAATGCGTCTCTAGTTATTGAGGCGCTGTCACCTGAGCATGCAA  
AAGAACAAGCATAACGAAGTTTATGAGGTAGGGGATATTTATAATGTAAGCCTGGGAGAAG  
GAAAGTCGAAGAATTGCCTAGACCGAAAATATTCCCACATACATAAAAAATGACAATGGAA  
AAGCAATAACCATATTTTCATAGGGAGAGGGTATCATTAAAGGATATTGTTAGGGATCTTG  
TAATTGATGATATAGATGCTGCTGAAGGAGTATTGGATAAGCTAAATGTTTATTTAGAAA  
ACACTTTAAGGCCTGAAGAAAAGCGTGTGTTGGGAGCGGTGTGATAAAGATATGATGTCTG  
TTTTTGCAAAGCTGAAAAATAGTAAGCAAATTATTTAAAAACCGATAGACAAAAACAAT  
AATATGTATAAAAATAAATTTACGTTGAGGCGAAGGAGAGTGTAAATGAATCATATATGTG  
ACATCTGTAAGGAGTACATAAGCGTAAAAACAATTTGTCTTAGGTTTCAGCGATGAAAAAA  
CTTATGTAGACTTCAACTGCTGTGAAAGTTGTGCAAAGGGTTATTCCAATAAAGTGAAAA  
ATGAATGCAGCATTTTAAGTGTTAAGAAGACAGTAGAACATTTAGGATTAATATCAAAT  
AGAAAATAAGAGGATAAAAATATTCTTTTATACAAATGTAAAAATAAAAAACGCCATAAG  
AAGTTTTATGGCGTCTATCGAACAGGGAGGTGATTCAAAGGCTCTGGATTTACTCTGAGA  
TTAGTATAGGAATGTAGCACCAACAATGATCAATAGGATGAATAACACAACGATCAAGAC  
GAAGCTGCTTCGGTATCCGCCGCCAGAGTATTCACCAGAATCTCCGCTGTAGAATCCCAT  
ATTGCCACCTCCTTTAGTAAGGATAGTATATGGTATGGCAAAGGTTAAAAATTCGACATA  
GATTTTCAGTCTAAAAAAGAAAAAATGAAGACTTTGTCTAAATTTAAGAGTTGAATAAGGA  
GAGTTGATGAATGAACATGTTTGTAAATTGCTGCAAAGAGTGAAGGGTAATATCTCTATGG  
TCACCACCCACATATTTACTCAAATCTTAAACAAGCAGAAAATGCATTGAAGACAATGAG  
AAAAAACGGAAAGTTAACTGAAAGAGACAAGGTATATGGACTAGACGGTCTGATGTTGGT  
GGATTTATAAAAAGGAAAGATATAGATGGGGAAATATGATCAAAGGAAATACTAATGATT  
CCCCGGGCAAGCGCAGTATACGACAAATTAACAAGCAGATAGAAATATTAGGGGAGAT  
GAGAGTATGCAAACTTAGATGCACCGATTTACGAAGTTAAACAGGAAAGTGACTGGTAT  
AAATCTGAGAAGAAACGCAAAGAGGATATAAACTCTTTCTTTGATAAATTCGAAGAAAAG  
TCTGGAGTCAAGGAAAGCTTCTCGTTTTATCACTCTGGGTACTTTGGAGTCTACGAAGGA  
ACAGAAGCGTATGAAATATTTAAAAATGACATCGTTAAAAATCATGTGCGACGGATTCTAT  
GCTTTCAAAAAACGATCAAATACTTTAAAGAAATAAAAGCTATGATTGAGCAAATTGAA  
GAAGTGTATCCATTTAGGGCTCATGACGAGCTGGGGTAAACAACATGACTGGTTCGTCAA  
TGGATAGGTGTCAGGTGGTTCTTTGGAGTTAAACTGAACAGCTTGTTAATGGAGACAGT  
GTGGTTGCTACTGACTATACAGATTATCTATAAATTGTAATGGATCATTGACATTAATAAT  
TCAATTTTTAAAGAGACTTATAAGGCGGTGAATAAGTGGGACGCCATAAAGCAACGATTG  
AAGGAATGGTTATGAAAGAAAGGTATTACTCACACCGTGCCCCAGGCACAGAGAGGTGGA  
TTACTCAGCCAGTGTGTAAGGTAACCTCGTACTGAACCAATCTTCGAGGGCTATATAGATA  
TTGAGCCTCTAGAAAATGGAGGTAAGTTTATATCCCTGGACTTAATGAATATGTCATAG  
CAACTGACAGGCAGCGAAACATAACGAGTGGACATAACCAAACAGACAGAGTTATTA  
AGACAATTATAGATGAAAAAAGCTTGAAGGAATGCGAAGAACACAATAATAGGAAAGCAA  
AGAACAATGATACTCAAATCAAAGACAGATAAAAACTTCTGGTTGCAAAGGCTAACTA

AAAAGACTATAGGAGAGATATTTATTGAATAAGGAGACAAAAGATATTTGGAGCGGATT  
CTCTATGGGGTCAGGTTTCGTTAATTGTAGTTGGATTACTTATTTTTGTTGAAGCGTTGAC  
TATGTCACTAATTGTTTATTACGGATTGAATCATGTGTTAAATCCTTTGCTTATTGATAA  
ATACAGTATTCTAAATGTCCATGTCACCTTACCTCATGCATTTGTTATTGGTGTTTTACT  
CAATGTATTTGTCAAAGGTGTACAACGGTCAGATCAGGAAAAAGATGAGAACATTTTCAA  
GAAAGCCGGTAAGTCTTTATTTTCACTTTTCGCATTGATTGTTCTATAGGTTAGCAC  
ATTGTTTATCTAAGGATGCACTCAAGATGAGTGATGATAAGGCTGCAAAGATTATTTTCA  
AAAACAAATCAACTGATAAAATTGTCGGCGAAATGAAAGCTACATCTTTAGTTGCTGACA  
CCATTTTCGCAAACGACAATAAGTCTAAATAAAAAGTTTTATTTTAAAGCCGAAATTTTAA  
AAGGAGAGTTAGATATGATCTTAAAAGAAATTGCCGAATATGAAGAAACACTGAATAAAC  
ATTTACCAAATGAAACAAGAATGGTTCTTCATTACAAAAATGTAGTGGCAACTGAAAACG  
AAGATAAAATCACAGTAAGGATTAGTTATGATTTATTGGTTTATAAATGGGTTGAACTAG  
GCGTTGTATCTAAGGGCACTTATAAAATGAAAATGACTAGTCTAGAAGATGAAACAAGCG  
TAGTTAATGTGAAAAGCGAAAGAATTCAAAGAAGCTCAGACAGAGATTTGGCGGTAGAAA  
TAGAATTTAATGCGCTCAATGCATTCCAGAGCGTTGTGGGTGTACCTGGTATTCATTCGT  
TCTCCATAAAAGGATGATTTTTAAGGGATTAGTGGACTCTAAATCTAAACAATAAATATT  
AAGAGGAGCATTGTGCTATGGGAATTAAGCAGCAGTTTTTTGAAATAAAAGCAACTTGTT  
ACGCTCATGAAGGATTTAATGACGAAAGTCCATCTGTTCAAGGAGCAGCGTTAGAACAAC  
TAGGCAAGGATATGGTAGATCATTGCTCGAAAACGGAGTTGATGATGTGAAAATTAAG  
GCGATTACGTTGAGGAATTGGAAGTGGAAAAACCCATTATGAAGTATTTGAAAGTGTTTG  
ACCCCTATTATGCATTGATTAAGGCTTATACAAAAGAAAAGGCAACCGAACTGTATACAG  
ATACTGTTACAGATGATGATGATGGAGTGTTAAGTGATGAAATGACAGAAGTTGGGCAAG  
TTTATGCGGCGATACAACATGGAAGGGCGCCAGGAGAAGATAAAGAGCACATGCCGTTTA  
AACAGGTTCTTGAGGAGATTTCTAATGACGAAGAGATGGTATTGCTTATTGATGGCAGTT  
TTCTTTAAAGAATAAAAATAAATTAAGAGGATGATGAAGATGAAAATGAAATATGGACTT  
TATTGTATGGGATCACTTGTTAATACTTATGATGATGCGATTGAGGCTCATAATGATGCT  
GTATATGCTCAAGAAGAAAGCGGAGTACCGCATGAAGTAAGAGAAATTCATAAAAATAA  
GAGGAGGATATTATATGATTCAAGGGTTTTATAAAGATCAGAACTTCACCTTCTAGAAG  
ATCCTATACAGCAGTACACCGTCATGAAAGTTGAAGAAAATGCAGTATGTGTATACCGGT  
GGATCGATGATTATAGACACAAGATTGAAAGATCCACAGATGCTGAAGAAACAAAAAAC  
TCCTTGGAGAAGGGTGGCCGAAACAATAGAAGACACAATGAAATTTATACAGAAACAATT  
GGAGGACGAATAAATGTCGCAAAGTAATTATAGGCCGTCAGTTCCTAGATGGGTGGCGA  
TATACTAGAGCTAGACAAGAAAAGAAGACAAAATCAGTACAGAGGCTCACTAACGTCAGG  
TCAAGAGAAGAAGGACTGGGACGAGTGGAAAGCGTAGATATTCAAGAAAATTAAGTACCC  
AAGATTAAACGGATGGACGATCGAAGAAGAGTGACAATTCCTAAGGAGGACGAATAGGTA  
CTGCTTGAATCTAGATAAAATCACAGCTTTATTCAAATAACAAAAATAAGGAGATTTAA  
AATGGGGGCAGCTGGACGTATTGATCAAACCTCAACCATATGTAAAAAAGAAGAACATTAT  
TAACTTTACAGTAGCCACTGAGAACACTCATATTCATTTAGCTGATGGGCAATCTTTCCC  
TGTATTAAGGAGATATTATTGCAACTGACCAACAAGGAAATCAATTTGTTGAATTAGA  
AAAGAATCTAGATGATTACGTTCCAGTTAAGAAAAGTTCCCTTATATGAATGTATGGCACA  
GGGCTACATGGAAATGGGCGACATTAATCATCAGATATCAGAAGCATTCAATTACGCTGA  
AAATGAAGCTGAAACAGTGACTACAAAATTAATTACAGGGGCTTATCACGGTTAGTGATC  
ATTACATATGAGAGTAAAACAGGAAATGTAAAAGGCTTGTCAAAGCGCTGCAACAAGAG  
TTTGACGTTGAGGCAATTGAAATCGCTGATGATACGATCATCAATCAAGGATTCGTACAT  
ATTACATATAAGATAGGCTTTGGGGAAGTACCTGAAAGGATTTTGAGTTTTATCAATAAG  
AATAAAAATAAAATTAGAGGAGTTGCTGTTAGTGGTAACAAGGTTTGGGGTGATAACTAT  
GGTTTAGCTGGAGACAAGCTTTCAGCTAAGTTCCACACACCATTGTTATTAAGTTTGAA  
CTTAGTGGAACGAAACAAGATGTACAGAAAATCATTGAGGAGGTACAACCTTATTGACAAA  
CACAATACCAAATTGGATCAAGCTCAATAATGAAATCATGATCCAGAAAGATGGGAAGTA  
TCAATTTGAAAAGGATAAGGTGGCCGTACATAGTACTTTGTTCGATTACATAAATCAAAA  
CACAGTCTGTTTCCATGATCTGAAAGATAAGCTGGACTATCTTATTTAAAATGATTATTA  
CGAGGAAGAATTCTTAAGCAAATATACATTCGAACAGATTAAATCAATCTATAAGATTGC  
TTACAGTTACAAAATCAGATTCCTTCTTCTATGAGTGCCTTTAAGAACTACAATGACTA  
CGCATTGAAGACAAACGATAAAACAAAGATCCTGGAAAGGTATGTGGATCGTGTCACAAT  
TGTGGCTTTATATTGCGCTGATGGCGATTACGAGAAGGCTGTTGAGGAAGTACATACTAT  
GCTGAAACAAGAGTATCAGCCAGCAACACCTACTTTCCTTAATGCTGGACGTAAGCGAAG  
AGGTGAAATGGTGAGCTGCTTCTTACTTGAAGTAGGCGACAGTTTGTATGATATTTACG

TGCTATTGATCTTTCCATGCAGCTTTCTAAGCTAGGTGGAGGAGTAGCATTAAATCTAAA  
CAAATAAGAGCCAAAGGTGAAGCGATTAAAGACGTAGACAATGCGACTAAAGGTGTCTG  
AGGTGTTATGAACTTCTAGATAATGCCTTCAGATATGCCGACCAAATGGGTTGATTTGG  
CCCCTTTCATCAGCAATGGTGATCGAAAACCTCTTTAATTCATGGGAACTCGTACAGGGA  
CAATCATGAGCGAAGCAAGACTAAGTCTTGAACGTGCAACGACTAGCCGACAGGCGTAGG  
CTGCAAGCTATTGGCAGTCGAGACAGGAGGCACCCTTAGAGCGTGAAGATATAGTCTAAC  
CTTCATGTTAACATGAAGCAGCCATATGGCGGGACGTGCTTAGCGAACACGTTTGAATGG  
TCTGCAAAGACAAGGATCAGGAGCAGTTTATCTAAGTGCATTCCATCCAGACATTACAGA  
CTTCCTTGATACCAAAAAAATAAGTGCTGATGAAGGTGTCCGAGTTAAACCACTGGCTAT  
TGGCGTAGTTGTTCCAGGCAAATTTATTGAATTGGCAAGGGAAGACAAGGATTATTACAT  
GTTCTATCCGCATTCAGTATACAAGGAGTATGGGCAGTATCTAGATGAGCTAGACATTAA  
TGAAATGTATGATGAGCTTATTGAAAATCCAAGAGTTAGAAAAGCAAAGGGAAATGCTCG  
AAAGTTGTTGAAGCAATTGGCTATTCTAAGAAACGAATCTGGCTATCCGTATATTATGTT  
CGCTGACAATGTAAACAAAGTGCATCCGAATGAACATATTTCAAAGTGAAGTTTTCAA  
TTTGTGCGTTACTGGAGAAACACTTCTTTAACTGAGAATGGATATGAAAAAGCAGCCGA  
TCTTTATGAAAAGCAGAATGATCTTAAAGTGGTCATTGATAATAGAACAAAAGATTTTGC  
AGTTGGTAGAAAAGGTACCACAATTGTAGATGCAATTCCAATGCAACTGACTTAAAAAGA  
TGGCGAAATATTTAAAGTCAAACGAAGCAAGGATATGAAATTAGGGCATCTGAGTGGCA  
CAAATGCTATGTGAAAAGAGATGGTGTAAATCAAAGCTCCATTTGAATCAACTGAAAAC  
AGGCGATAAATTATTAGTCCAATCATCTGAAGGAGCCTACGGGAAAATTAATGAACCCGA  
TCTTGCATACATTATGGGCATTATAGCTGGTGTGGAACCATTACTGAAAAAAGTCCAA  
GATTTATTTATACGATACTAAAAAAGTTCTTGAGCAGAAAGTTACTGATGCAGTTCACCG  
TATTATTCAAAAACACAAGGTTGATCGTGCTTATAAGCACAATACATCACTTCTCCCAAC  
ATTTAATATGGCCAACCCAGAAAAACAAGATTTGCTATACATGAATAGTACTGTCTTATT  
TGACATCTTGAAGAAGTTCGGTATTAACAAAGAAACAAAAACAAGAGTCCAGAAATTCAG  
TTTTCAAGATAATAAGGAAACGCAAGCAGCTTATTTATCGGGTTTATTCCAGACTGATGG  
GTGTGTAATGCAAATCATAAAGCCAAAGCATTAACTATTGAGTTAACATCCATCCACTA  
TGAGAGCCTTCAGGACGTTCAGAAGCTGTTACTGAGCATGGGTGTTTAGACAACGATTTA  
TTCTAACACAAGCGCTCACAAGAACTCCTTCTGATGGAAAAGGTGGTTCTAAGCTTTA  
CAATGTAAAACCAGCACACAAAATCTGTATTTAAGATAGAACTCAAGAGAGTTGTTTAT  
GAGTATTGTTGAAATGAAAGAATACGATGTTTATAAATTCATTTGTTAACTGAGACATT  
GCAACCTAAGTCAAGAAAGCCAAAGCATGATTTTACAGCTGAAATTATTAGTATTGAAGA  
AGATGGTGTGAGGATGTTTATGATACAACACAAGAAGACTATCACTCCCTGATTTTCAA  
TCGAATTGTTACTGGGAACTGTTTCAGAGGTACTTCAATCGTGACAAGTATCAGTTTATAC  
GGATTACGATAAAGAGGATGAAATTGGCTTAGCTATCTCATGTAATCTTGGCTCAATGAA  
CATTGTAATGTAATGAGTAATCAATCAATTGCTTCAACAGTCAGAATAGCAATTGACTC  
ACTGAAAAGTGCACAAGGAAAACAAACATTGTAATGGTCCAGCAGTTGCGAGAGCAAA  
TACATTAATGAGATCAATTGGTCTAAGGCAGATGCACCTCCATGGATTTCTAGCTTAAAA  
TAATATTGCTTATGAAAGGGTAGAAGCTAAGGATTTTGCAAATACATACTTTATGATGGT  
TAACTTCTACTCACTGCAGCGTGCTATCGAAATTCACGGGAAACATGGGAGACATACTA  
CAAGTTTGATGGTTCGACGTATAAATCCGGCGAGTATTTGAAAAGTACGGAACAAATGA  
TTATAGCCCTCAGTATTAAGGTTAAAAAGCTATGTGGACATCAACATCTTCCATAATAT  
TCAGGATTGGATGAACTTAAAGGCGATGTAATGAAATATGGTCCTTATAATTCCGATAG  
ACAAGCTATTGCGCCTACGGGAAGCATCTCATATGTTCAATCATCTACAGCAGGTGTAAT  
GCCAATTATGGAGAGAATTCTGGAACATACATACGGAAACAGTAAGACATATTATCCGAT  
GCCAGGTTTATCGGCTCAGAATTGGAGCTTCTATAAGGAAGCATAACGACATGGATATGTT  
TAAGGTAGTTGATCTTATTGCAACAATTCAGCAGCACGTCGACCAAGGGAGTTCATTTAC  
GTTGTTCTTAAAGGATACGATGACGACCAGAGACCTAAATAGAATAGACCTCTACGCACA  
TCATCGAGGAATTAAGACTTTATATTATGCCAGAATAAGAGACGACCCAAGAGGGATG  
CTTGTCTGTGTAGTTAATAGGTACGTTTACGTTTTGGTTCAAATAACAGGATCTCC  
CGGACGTCGTTTGCACCTAATTTTGTAAATTTTCTCATAAGAGCATTACAAAGTAAACC  
TAATATAAGCTTCAAATATATTCGATTAAACATGATAAAAGCCTATCACACAACCAGCC  
AGTTGAAATGACTGTACTCTAACAAAGATATAAGGTTATCTAAAAAATTCAGTGTCTT  
TCATTCCTTTCGAATGTTTGACAGTCATATAGGAGTCTGTCAATTCAGCTTTTAAATTCA  
CTGCATTTTTTTCGGAAAAAATAATTTCAATTGAAAGGACATGATTGATTGACTAAAATT  
TATGACGCAGCAAACCTGGTCAAAGCATGAAGACGATTTTACCCAAATGTTCTATAACCAA  
AACGTGAAATAGTTCTGGCTTCCGGAAGTGATTGCTTTAAACGGCGATCTCCTCACATGG

AAGTACCTCGGAAAAAATGAGCAGGACACTTATATGAAGGTACTGGCCGGACTTACGCTT  
CTTGATACAGAGCAGGGGAATACGGGGATGCCGCTCGTGGCTGAACGCGTAGATGGACAT  
CAAAGAAAGGCAGTTTTTAAATTTTCATGGCCATGATGGAAAATGCTGTTTCATGCAAAGTCT  
TACAGCAACATCTTTCTAACATTGGCTCCAACCGCGCAGATCAATGAAGTCTTTGAATGG  
GTGAAAAACAATAGGTTTCTACAAAAGAAAGCTAGAACAATTGTTTCAGTCTATAAAACA  
ATCAAGAAAACGATGAAATTTCTTTGTTTAAAGGAATGGTTGCATCTGTGTTTCTGGAG  
AGTTTTCTTTTCTACTCAGGGTTTTATTACCCACTTTATTTTTTTGGACAAGGAAAGTTA  
ATGCAAAGTGGAGAGATCATTAACTGATTATTTAATAGTCCCTTTTGTGCGCAACGGCA  
AATGTGAACCTCTCTAATTGCTGGAAAATCCTTATTTGGACAATCAGCAGCGAAGCTATG  
CGAACCCAAAGGAGGTGAAAATGATAAGGAAACAAGTCGAAGAAGCACCTTGGTGGATAA  
CGGAAACGGGAATTATCATATCAAAAAAATTAAGAAACCAGGAACGACATTTATTACTC  
CACATGGCTATGAAATGATAGGATACACGCATCCGAAAAAAGGAGCACAGAACTATTTAG  
TACATAGGTTAGTCGCAAAAATATTTTATTTATGATATACCAAAAAGTAATGTTTGTAACC  
ACATAGATGGAAATAAACTTGACAACCACGTTCCGGAACTTAGAAATAGTTACACCTAAAG  
AAAATACTCTACATGCAATGAAAATTGGATTAATGTCAGGACAACCTGGAGAAAGTAATT  
CAATGTCAAAGCTCACTAATATGGAGGCAACAAATTTAATCTATGATTTGATTGCTGGAA  
TGAACACTGTTGAAGCTAGTGAAAAATACAGCCTTCATCCTCGTTACGTTAGTCTAATTC  
GACATAAAGAAGATGGAAGACTTTATGGGATCGCATAGAACGTTCAACGACTATCGCAT  
AGGCGGCGAAATTCGCAAAACGAGTAGGGCGCAAGCTATTGGGGTGGGTGAGAACCCCT  
TAAATCGAAACGGGAGGCATCCTACAGAGATGATGATATAGTCTGCTCCTTACGGTAACG  
TAAGGCGGTTGCGAGAGGGCAACGAACCGAAAGTAGCGAACTCGGTTGAACTAAGGGTAT  
TAGAGACGAAGCGATACATGGCGTATATGTAGGATTGTTAGCTCAAGAGATTTATAAGAA  
GCAAACGCCACAGAAGCAAAAAGAAGTGTACGCATGGGCTTTAAACTTACTGCACGAACT  
TTACGAAAATGAATTGGAGTATACAGAAGATGTCTATGATCAGGTTGGATTAGCTCCAGA  
TGTAAGAAGTTCATCAGATACAACGCAAATAAAGCTTTAATCAATCTGGGCTTTGATCA  
TTGGTTTGAAGAAGAGGATGTTAATCCAATTGTTATCAATGGTTTGAACACTAAGACTAA  
ATCCCATGACTGCTTTTCAACTAAAGGGAATGGATACAAAAAAGCAACAGTGGAGCCTTT  
AAAGGATTCAGATTTTCATTTTTACCGAGAAAGGATGTATTCATTGAGATTAATTAATTA  
GAGCAGCCTAATTGCAATCCATGTAAAATGGTGTCCAATTAAGTGAACAAGTAAATATT  
CAATTTGAGACTGTTGACGTTACACAGGAACCAGAAGTAGCAGCAAGATTTGGTGTCTATG  
GGAGTACCGGTAACCATTCTGCTGAGTGTATCAGGGAGAAGAAGTAAACCGAAGTGTTTGT  
TTAAGCCTAATGAACTTGATCAGTTACTAAAGGAATTACGATAAAAGGGTAATTTTAAA  
CAAAGTTGAATTAAGGAGCTAATACATAATGCAAATTAAGTGAATAACGTAGATGAA  
ACACAAACAAGAATTAACAAAATGGAGCAAGGTGATTGGATTGATCTGCGTGCAGCTGAA  
GATGTAGCGATCAAAAAAGATGAATTTAACTTGTTCATTGGGAGTGGCCATGGAATTG  
CCTGAAGGTTACGAAGCACATGTCGTTCCCTCGTTCGAGTACGTATAAGAAGTGGTGTG  
ATTCAAACAACTCAATGGGTGTTATCGATGAGTCTTATAAGGGTGACAACGATTTTGG  
TTCTTTCTGCTTATGCGTTACGTGACACAAAGATTAAGAATGGGGATCGAATCTGCCAG  
TTCAGAATTATGAAGAAGATGCCGGCAGTTGACTTGATCGAGGTAGACCGTCTAGGCAAC  
GGTGACCGAGGTGGGCATGGATCAACTGGAACGAAGTAATTGGCTTCTCTATTTGAAATA  
TAGATTATTTTAAAAGTCATCTTGAAAAACATTTTTAATCATATTACCTTTTTCTAGGCA  
AGGCGATTAAAATATGATAATACTCTTGAAGAATTACCTGAATTAAGGATTGCTTATTT  
CCGAAACTTTGGAGAGTATGGTGGTAAGCAAAACAAGAAGTAAATGGAATCTTTTAAAAA  
GTGGGCACAGTTGAATGGTGTATTTTATAACTCTGTAATTTTAGGAATTCCACAAGATGA  
CCCAAGTATTACTCCTAAAGTGGAAATGCCGTTATGATGTTGGTGTGTTAATGAAGA  
TTTTAATGTGCTGCAACCAGCTGAAGTTGGTAAGTTACCTGGAGGGAAATACGCTGTTTT  
CTTGCTTGACCATAAAAAGAGGCAGTTAGTGAATTTTGGGGCAATATTTTCTCTGAAAT  
AGAAAAAATAGTCTAACTATGATAGGAGAACCAATTATAGAGAGATATACTTCACAAAT  
GATTGATAATCACTTATGTGAAGTATTAGTTCCTATCCAATAAAGAAGGTGGGTAATTTT  
CCACCTCCTATATATGTATAAGTTAAATGCTCTGACTTAACTCGTTTATTTTATCAAGAT  
TAATGGTAATGTTGCATATTGCATTTACGAAGTATAGAGTCCCTTGGTATCGTTCCTTTGT  
TAACAAAACAGTTAATTCCAAAACCAATCAAAAATGCAATTATGATTAGCTGAACGAACA  
CACATAATTGTGAATTAGGACTGAAGAAAGAATAAACCAATAATAACAATAGAATCAGTA  
AGCTAACGATTTTAAATTTTTTCGCAAAGTCACTCCTTTAAATACATTGTTTTTAAAT  
TTACCATAAAAGATTTTTGTTGGAAATATTTCCGAATAAAGAATACTTTTATCTAATAT  
TTCAGGAGGAAGAGATTATTAACAGCAAAGAAAGAGATTTACAAGCGAAATATGACGACA  
TGCTTTATAGGAACAGTCTTTGCTTTGAGTTTCTTCAGTTACAAGGACTTGAAGATGAAT

TTATTTAACATATGAGACAATTTGCTGAGTACGAGAAAGAACTGAGATACAAGAAGGCAG  
CAGCTAACTTCATGAAGATGCATGACCACAACCTGGGTGGGGGATTAATTTTTAAAGGATA  
AAAATAAAATAATCAAGAGTGTTGCAAACATCAACAACTTGAAGAAGGGTTGTCGCTAA  
TTGAAGAAGGTGACGAACAATTTAAGTGTATTAGTGAAAATTCAGGGGCTATATGATG  
AAACCTCAGATACTGCCTTAGAGTGTTTTAAAGAGATGGCTACAAAAATTAGGTAACTG  
GTCAGAAACGGATTATAAAAGGGATTGATCAGTTGCCACAGACAATTAAGAAAACATTG  
CTGATCAAGTGAATGATTTTTAAAGGGGGAGCTATTTGAATAAAAGCAAATATTAACAGTA  
TAGAGTTTGAGGGTGAGTAAAAGCCAACCCAACACAAATATAAAATTAGGAGATGTTTAC  
TATAACATATGTAACCTTTATGTCTATCAGCTTATCTAATTGTATTAAACATTAATGAGGT  
CAGGTTGATTAGGCGAGGGGAAAGCAATACGTATATAAAAGTAAAGAGTGTGCTTGATAA  
TTCAAATCCAGAGGATGCGAAACGAGATAAGAATTTCAATTTACCTGTTTACTTTGCTTAA  
GGGGAGTTCTTTAATCATCCCCTTGGCATATAACGGTTTAATTATGCATGAAAATATCCT  
GATACTCTTTTGGATAGCATTTTAAGTTATATACACAGTCCTAAGCATGTTTAAGGTTTT  
AGACGTGTTGGAGGCCGAAACAGTGAGCCATAGTAGGTATATTTATTTGGCTTATGTCTT  
TGGGAATCTTATCTTTGCTTTGAGTATTATTTTTTCATATAATGTGAAATTGTGTTTAGCT  
GCACTCATTATGCGGCTCAAGCCCTTTTAGCATTGTGTCAGGGCTAAGTAAATGGATTTAA  
GAATGAAAATAAAATAACTATAGACAAATACAAATAATATGTATAATATAATAATAGAAG  
ATGATGAAATGACAGTTTTTTTTATCTAATATACAAAAACAAAAAATATACATTTTTTAAA  
ACTAATATTTTATTCAAACCTTAAGGATGTGATTCATTGGAAGTAGGAGACAAAATACAT  
AACACCAACGAACAGATAACAGCCTTAGAGAAAAAGAAATACCAAATTGAAACAACCTTTA  
CTTGAAAAACAAAGCGATCTGTTAAAACCTCGAAACACAGCAAAACAAAGCTAAGCTTGAA  
TTGTTATTCGAGCTAAGTGAAGTCTTAACCCAATTGGAACGTGAAGAGTGGGTAAAGTGCC  
ACTATTACTTTACGAATTATTAAGAAATAAAAGAAAGTACTTAGATCTCTTTGATCTT  
ATTGATGACAAAGCATAACGTAATAAAGGATAAATTTAAATTTCTTCATGATGAATGCTTT  
GAGCTGAAACAACAATTAATGTGATCTGAGGAGTTGTCAGTTGACGGTAGCGAAATTGG  
AGGTGACAAATATATGTGTACATGTGAAGAGGGTAGTGCCAAATGTTCTTATTGTGACGG  
AGCGCTGGATATATTCTACTTGAAGAGAACGAAATTTATAGCGTGGCTAATCAAAGGAGG  
CAATAAAATGGTACAGACATTACACAGTGCAAGTCGAGGAGCTTATCAATAGAAGTTAGT  
GACATAAAAGAGGTGGAAACAATACCATTAGTTCTGTATGGATATAGAGAAGACTTAAA  
AAAGAGAGGGGAATTATCCCCCTCATAAATTAATAAAATTGACCGCCCATGTTTTGTTGA  
GCTAAGCGAACTAAACGTTTAGTGATTTCTCCACCAACTGAACCGTTTGCACGAGATGTA  
GTCTCAGCGCCTAATTGAACATCCAACCTCAGAAGCTATTTCAAGTTTCATTTGTTCAATA  
GCTGAAGCTGCTTGAGGAATTAGTAAATCATTATTGTTGTTTGAAGCTTGATCTACTTTGT  
TGAGCCATCTTATTCATCTCCTAAAGTGTAATGAAAACACTCTTGTTTGAATCATATTAT  
GGAGAGATTATTTAATTTATACACGCCAAAGAAATAAATTTTTTCATTAAGAAAGGTGGA  
GACAAATTGAAAATTGATTATGTTTCAGATCTCCATATAAATCATTGGATTCCTTGGAAT  
GTAAATCAGATTAAGTGAGAGAAGCGAACTAGAAAAATTGTAAATAGGTTAATCTCAAAC  
GGTAATGGGGACGTAAGTACTGGTCACTGCCGGCGGTTTTACTGAATGGAATTAACAACTTTA  
TGGGTTTTAGATGAGGCAGCAAACCAATACGAGAAGGTTTACTTTACATATGGTAATCAT  
GATCTTTATTTACTTAGCAAGAGCCAAAAAAGGAAATACTCAGACTCGTTAGGCAGGTTG  
AATGATCTAATTCAAAAAGCTGCTGACATGAAAAATGTAACCTCATTAAATTAAGACAAC  
GAAACATACAAAGGAAAAGTCTTTGCAGGAGATGTAATGTGGTACCCTCCATAAGGAATC  
GAAGGATGGGACATCTGTAAAAGAGTATCTAACGATTCTAATTACATTTGGCTTAATGGT  
TATAACAAAGTAGATGGTGTAAGAGCGATGTGGAAAGAAATCAATGGATTGGTATGAAACG  
CTTGAAAATACACAAGTTGATGAATTTGTCTCACATGTTCCACCTGTTTACAATCCAAAT  
TCTCCATTTGAGCCTAATACATGCTACATGGTTGATGTCCCGTTTCAATTAACGCAAAACAC  
TGGGTTTGTGGACATGATCATTACAAGCTGAGTTTTACAAAGATGGAACGAGCTTTTAC  
ATGAATTGTATCGGATACCCGATGACTATGATAATTATCCGAGTGTCAATGTGATACCT  
GGTGAAGAAGTAGATTCATATAAAACGTTTGAGCTTAAAACATTCGAGATTTAGATTTAA  
TTAAAATTCTAATTTTATACAGAAGGGAAGGGGGGACATGGAGAATGAAGTTGTGTTTTT  
TTGTAGAAAATGCAATCATCACTTGTGTTGCTAAAAATCCTATGATAAACACATTAAGGT  
TATATCTGAAATGGATTGCCCTAATTGTGGAGAAGAGGGTTATCATAATTGGATTATGGC  
GCATATAGGTGACCCAGAGAAAAAAAAGGAGAACTACAATTGGAAGTAGATAAAATGTTG  
AATTTATTAAGAAAGAGGTGTAGCTATAATGGACAGTAGAGAACAAATGATTGGACTTG  
TAATGAATGCAATTTTAGTTGGATAGGTGACAATTCAGATTTTTTCATGTCTTCTTGTGA  
TGAAATCGATATAAAGCCAAAAAATAAGATACTTGATTGATTAAGACGTTGATTTCAAT  
AGTGGGATAAACTCAATGAAAGAGATTGAATTTGAAGAAGTTAAAAAATTTGTTGAAGTA

ATGTCTCGGCGACTTAGATCAACCAAGGTGATCAAAAATTCATATCAGTTATGCAGAATGG  
TTAGTTGCAGAAGTCGAACGCTTAAGGGGGTAGTCAAGTGAGTAATAGTTTAGATGTAC  
AAGGAGGGATTGAACGGAGAACGTAATGTCCTGGTTAATATAGACTTTGAAATTAATC  
AGACAATAACAATGATAAACTTTGTTGTGATTATTTGATCTTATGAAGGAAAGTCTCAT  
GATTTATTTCAATATTGAAAACCTTCTGATATTCATGAGTTTATAAAAATCGCGGTAGC  
AAAGAATGATGATGATTATCCCTTCTTGAATGGATAAAGGAAAAAGGTATTCCAAGATT  
TAAGAATATTGATTTTAATAAGCTACCCAATGACTATCGCTTTCTTGCCATGATTGAGTT  
TGATGAATTTGTTCTGCAAAAATGAAATGGATTTTCAAGATCCTGAAGAGGTTTCGAGGGTG  
TATTATTTCAACAGTTAATAGCCTGAAGGAATATATTAATATCTGCCACAATAAAACATG  
ATTGGAGGAAAGATACCTGATTGTTACAGCCTGGATATTGTTAATTGTGTTTGGTTTATT  
CGCTTTATCAGATTTTACTGACTTAACTGAGAACGAAACAAAGCATATTAAGTTTTTCATTTT  
AATGAAATTTGTTTCTGTCTTTATAGCTGCTATTGCAGCAGGAGTGATTTGGGGAGGATT  
ATTCCAATGATTGAAATTTTAAAGATACAGGAGCTACCCATGATTTAGTTTATCATGCT  
AAGATGAACACGTTTGGTTTGGGATGTGGAATTTGACATTGTTTTATCAGACAGTAAGGAA  
TTAAATAAATGTTATTTTGTGAAATGCTTTAATCCGTATCGAATAAATGGAAAGTGTGAT  
TTTGCGGTTAGTTCAAAAGATATATTTTCCGAAGGTTAACGTCTCTTTATTGAGAATGAA  
TTCAATTTTAAAATTACAAAGGCAGTCCACGTGGCAACATCAAAAGACGTAACCTGAAATA  
GTTTTGCTTTTAAAGTGAGAGAACCAGTAGTCCATTCCCAGTTGTAAAAGAAGTTGTTTAT  
CTAGATTAAGGTAATGGGAACAGGATAAAAATCGGTCTTTTATTTAGAATAAAAATAAAA  
TTAGTGGAGGTATTATGTGTAATCGAAATGTTATTACAATTCCATATGAAGAGGATATGT  
CAAAGTATTCAATACTACACCAGGTAGGGGGGCGAATTGAGTATTTTCAAAAAGCGTATT  
CACAAATATCCAATGTTTCGAATTTGATAGTGAAGAGTATTACAACGAATATAAATGCTTAA  
TAATGCACCTTAAAAGAATAAAAAAGTCTCTAGTTTCTCTTTTTAAAAGAGTATGGTAT  
TGCAAACAACAGTTAATATGCAAAAAGTAATGAACTAAATATTGCACATATGGGAAAGA  
GGCGAGAAAAATTAACGAGGCTTATCATTCAACCCAAACACTGTTAAACAAGATGGATAG  
ACAAATGAAGACAGTGAAGGAGGCCATTGAAGAGAAAGATTTGCAAAGAGCACATCGTAA  
CCTAATTAACCTGGCTGACATTAATAAGGAATTAATGCAGGAAATAAGGTGGGTCAAAA  
GGGAACCATATTATAAGTTATTTGGTTAATTGTCTGCGCTCTTTAAAGTTCCATACATA  
AGCTCTTCTATAGAGCAACCTATGGCATTAGCAAATGTCATTGCTGTTCCAATATTCATA  
TTTGATTTAAAACCACCTACATAATCATTAAACGTTGATTTGATAATCCAGTACAACCA  
ACAAGATCTTCAATTGAAACGCTATATTCATGCATGAGCTCATTGAGTCTTGAACCAATT  
GGTTTCCATTGTTTTTCACTATGCACACCTCTTTCAGCAACGATTTTAGCACATACATA  
ATTTACCTACAATATAGAATCGGAGAGTGATTGATTGGGAGCAAACAATCAAGGGAAAGT  
TTTTGAAGCGAACATTGAACAATCTGCAGCAGATCAAAAGTTATTCTTTTACCGGATTAA  
AGATGTTAACCCAATGTTCTTGAAAAGAGGGGCATCAGTATCAAAAATAAATATGATTG  
CTTTCTGTTCTTTAAGGGGACTTGTTCCTTTGAGCTTAAAGTCGACAAAAGCAAGTC  
CATTTCTTCAGCGAGAAAATCATAAAGCCGCAGCAGATTAATATTTAAGGGAAAGCAAC  
ACAATACCCAAACATAATCCCTGGTTTTCTGTTTCAATTTAGAGAGCCGGAAAACAAAGT  
TTATTTCTGACATATTAATGATTTTCTTACATATAAGAACATAGCTGAAAAACAGTTGAA  
ACATACATATAAAAATCAAGTAGACAAAGCCAGTATCCCGATTGCGATTTGTGAAGAAAT  
CGGTACTGAAGTGCGCTCGATGAAAAAGAAAGTGAATTATACATATTATTTAAACAAGCT  
GTGCGGTGAACTAATAAAGAAAGAACAGTCAAGAGACAAACCATTACATACATATAATAC  
TCCTGTGAAAACGGGGGTGTAGCCTTGGAACCTTACCAACCTTATGAGGAATTAAGAAA  
AAAACAATAAAGGTAGTCCAGAAAGAAAATTACAGTATTCGATAAATAACTCAGGATGAA  
GCAAGTAATGACTTAGATGAGTTTATAAACAATTTGCGCAACATTTATTAGCAGCTGCT  
CTGGAAAGGAAGGCAGAGTAAGCTTCTTTTTTTCGTTAGATATGTAGTAAGTATCTTAAT  
ATACAGCATTATCTGT

>NewGenomeName\_92

TTAGTAATAACCCGCCGCTGGGGCACCGGGCACCGCAGCTATTGGCTGCCTTGCGGAGG  
TGCCCGCCCCTAGGGAGGAGTAAATGGCGCCGTTAGGCGCCCGTTAATCTCCGGAGGATC  
ACACTCGTCCGGGAACCATCCCGTCCAAGGAGGGCTCTGGCTGCCGCCGTTGGTGTTTCA  
CTCTTAACAACCCTACAGACGGCGAAATCGAATTCGTCCGTTCTCTCGGGCCTGACGAAT  
TCTACTATGCCATCGTTGGACGGGAATAGGGTGAGCAAGGCACTCCCATTTGCAAGGCT  
ACTTTCCTTTTAAAATAAGAAGCGACTCAGCGCGCTTAAGAAAATGCGGCCGCGAGGTC  
ATTTTGAGGGCGCTAAAGGGAGCGACCGGATAACGAGAAGTATTGCAGTAAAGAGGGGG  
ACGTCATACTTACCCTGGGCATTGTGGGGAGAGACGGTACCCGCGCTTTCGATGGAGCTG  
TTGCTGCCGTGATGTCCGGACCCTAAATGAAGGAAGTCGCGCGAGAGTTCCAGATATCT

ACGTCAGCCATGGGCGGGGCTTGCATAGCCTCTCGCTATTGGTTGGTTCCCGCCCGCGTG  
ATTTAAGACTGAGGTTGACATCATTTACGGGCCACCGGGGTGTGGCAAGAGGCGATGGG  
CGAATGAGCAGCCTGGTACCAAATATTATAAAAATGCCCGGTGAATGGTGGGATGGATATG  
ATGGGGAAGATGTCGTCATCTTGGACGACTTTTGTGGGTGGCTTCCTTATTGCTAGATGC  
TCCGCTCTGCGACCGTTACCCACATAAAGTGCCAGTTAAGGGCGCTTTTGTGGTGTTTA  
CGATCAAGAGGATCATTATCACGAGCAATAAGGCCCGTAGACCTGGTACAAGGAGGACT  
GTGACCCGAAGCCACTGTTCCGGAGATTCCTCGTGTGGTGGTACATCATTGACAAGT  
TGGAACAAGTCCGGCCTGATTTCCCTCGCCCTCCCCATCAATTTTTGATAGTCTCGGTGAT  
GTTTAATAAAGATAGGCGTCGAGCCGAAGGCCCGATGCCGCAGGGGGGGACCCCTGCCG  
GAGGGTTCGCAGGGCCGTCACGCCGAGAACCCGACCAGCCGGAGGGCCTAGTCAGTAT  
CGGGGGGGGGGGCCCCGGGGGGTCCCCGCGACACGACGAACACGGTAGCGACGAAGGCGCC  
AATAAACACTCAAAAAGGTATTTGCTGCCTGAGTCTTTATTAAGTACTGGGATTGTTAGG  
GGCAAACCTGACGGAATTGAACATATATATTGAGCTTGGTTTTATAAGTGATCGTTTTGTT  
GGGCTGAGGGAAGCTGAAGCCAATGCCGTAGTGCCTGACTTTCGCTCCTGCTGCGTTGGG  
TCCTCCTTGTAGTGGGATCCAGCCGGTCTGGCGCTATTTAGCCACAATGCTGCAGACTG  
GTTTCGCTATGGTGAGGTCGTTTATCGTTATTTCTGGTTTTGGTTTTGAGGAGACGTTTGA  
TCCCCTGCTAAAATAACATTTTCTGGCACCGTCGAAACGTGCCAGTGGGTCTTGTGTTTTG  
GTCTGCAACAGTTTTAAATTTACTTATCCTGGAGTCTTGGATTACGGCCGTGTGGCCGAA  
TCCGTCTCCTTGTATGGTGTAGTGTCCCATGTGGGCCTCATTTCATTTTAGCTAGCTT  
AATCCGGTAGTTTTCGAAATTCAGTGTGTTGGTTGGTGTGTTTGTATGAAGTCTGA  
AAATGCATAGGTTACAAAGTCGGAGCTAAAATTAGGTTGCCAGTACTGGTGGTTTTGTT  
TTGAATTTGGAATTTGAATGGGCGTGTGAGTCTGAGAGTGTAAACCCTATTGGTTGAGAA  
ACGGCGTCTGCGGAAGTGTCTACGTCGCCGGCGGTATCGCCTGATGTGACGTCTGCGGTA  
GTATGGGCGGGCATAACCGTCGTCTAACCTGAAATATAGCGCATGCGTAGTTAGAGGTGCC  
CCATAGGCGGGCGG

>NewGenomeName\_93

ACCAAACCTGACAAATATTGTCAACGCTCCTATGCGTGGGGGTATACGTTTCTAACGTGTG  
TACTGCTTTATGGACGCATCCTACTCATGGTCCGCCAAAATGCGGTCAATGTATAGAGTG  
CCGTCTTGCATATTCGAGAGAGTGGGCTATCAGGATAACCCACGAGCAAATGATGCACGA  
GAGATCTTGTATGCTCAACCTTACATATGATGATGATCATTACCTTTGCACGGCTAGCT  
GGTTAAAGCTGACATGCAAAAAGTGTGTTTAAACGTCTTCGTAAGGCAGTATACAAATTCG  
CTATGTTGCTTCTGGTGAGTATGGAGACGCTAGTAGGCGTCCCCATTTTACATTGCACT  
GTTTGGTCAAGGCTTTGAATTTGATCGGCAGCAATTCGGCAGCTCTAATGGAGATAAAAC  
TTACACAAGTCAAACCTGTTTTTAGATACTGGCCACAGGGTAATCACCTAATTGGTACTCT  
TAATTTTGAAGCGCAGCGTATATCGCAAGATATATACTTAAGAAAATTAAGGCTTATGA  
AAAGGTCTCACCTTTGCCGTTACACGTAGAAAAAGAGGATGGGGAAAGAATATTTCTAA  
TCCTGAGTTCTTAACAACGTCGAAGGGCATTAGTAAAGGGTGGTTTAAAGATTACTTCAT  
GTCGGATGTTTCTCCGTCTGCAAGTGTGTAACCATCCAAGGCACTAGGGCACCAGTCCC  
TAGGTAATAAAACTTTATTAAGGAGTTGGGTCATGATTTGAGTTTAGATATGCAGTT  
TCGCTCTTCAGCTCGAGCTGATTTGGAAGAAGAGCAGAATAGATACGAAAAATCTTCCTG  
TTCGAAAGATCGCAAGACAAAATGTCAGCGAATCTAGAGTTCAATTATCAAAACGTACAA  
TTTAAAGGTCAAATAATGTTGCGATATATAGTTTCTGTTAAGGATAGGGCTGCTGAAGTTT  
TCAATCGCCCGTTTATTGTTCCACATCGTAATGTGGCTGTTCTGATTTTACTGATGAGA  
ATCATCGTGCTAGTGCCGATAATCCATTGAATAAACATCCTGATGATTTTGTATTGATT  
TGTTGGGACAATTTGACGATACCGTCGGCTCCTTCATTCGTGAAGGTGCCCAACTGTT  
TCGTCCGTGGTAAGGACTTTGTTCAAAGCTCTGTTGACCCTTGACCCCTTAGGGGGTG  
CTTTTTTATTTTTAGGAGTAATTATGTTTTCTAATAAATCTGCCAGTGCTCATGATCTCG  
CAATGGTTTCTAGAGCGGATATCCCGCTTCTAAGTTTTCTATGCAGAAAACGCTTAAGA  
CTACTTTTGTAGTGGTTTTTTAGTTCTTTTATGTGTGAGGAGCTTTTACCCCGTGATA  
CGTTCAACACTAAAGTTACTATGTTCCGGTCGTCTCGCGACCCCATTTTCCCAGTCATGG  
ATAATCTCCATTTGGAAGTCTGTTCTTTTTCTTTGTTTCTAATCGTCTCATATGGTCAAATT  
GGGTTGAATTTCCGGGGCAGCAGGATAATCCTGCCGATTCTATGTCCTACTCTATACCTC  
ACAAGTTTCCCAGCTGGGGGTTAAGCTGTTGGGTCTTTGCAAGACTATTTTGGCTTGC  
CAACTCTCGGGCAAGTTGGCTCTGGTCTTACGGTTTCACATTCTGCGTTACCTACCAGAG  
CTTACAACCTGATTTATAACCAATGGTTCCGAGATCAGAATTTACAAAATTTTGTGCTAG  
TTGATACTGGTGATCGTCTGATACATCACCTAGTACTAACAACTTTATTACGTCGTG  
GTAAACGACACGATTATTTACTTCCGCTCTACCTTGGCCTCAAAAAGGTGGTAATGCTG

TTACTATCCCTTTGGGTACTAGAGCTCCTGTATATGGTGTGGTGTAGCTACAGCAACTT  
CTGGTAATGGTTCTACCGCTGGTATTAAGATCCAGCCGGTCTTAATCAAACATGGACTA  
ATTCTACAACAGCAGACCCATATATTAATAATGACAGCACCTGTAGGTGCATCAGCATTGC  
CTGATATTTATGCAGATTTATCTGGAGCTACAGCTGCTACTATTAATCAGCTTCGTCAAT  
CTTTTCAGATTCAAAAGTTGCTTGAGCGTGACGCCCTTGGCCGTACTIONCGGTATACCGAGA  
TTATTTCGCTCACATTTTGGCGTTGCTTCACCTGATGCACTCCTTCAACGCCCTGAATATT  
TGGGCGGTGCTTCTACTAATATTAATATTTACCTATTGTTCAAATAAGTGCTACTGGTT  
TATCTGGTTCTACTACCCCTATCGGCAATGTTGCCGCTTTTGGTACTTTTTTAGGGAAAG  
AACATGGTTTTACACAATCCTTCGTCGGGCACGGTTATGTTATTGGTCTTGTCTGTTC  
GTGCTGACCTTACTTATCAGCAGGGTCTTAGAAGACACTGGTCTCGTAGTACTCGATATG  
ATTATTATATTCCTGCTTTCGCTACTCTTGGTGAGCAGTCTGTTTTAAATAAGGAAATTT  
ATGTTACTGGTAATACAACTCAAGATAAGTCGGTTTTTGGTTATCAAGAACGTTGGGCCG  
AGTATCGTTATAACCCGTCGGAGATTACCGGCTTATTTAAGTCTACTTCCCTCGGGTACTA  
TTGACCCATGGCATTATGCGCAAAAATTGACATCTTGCCTACATTGAATAGAACTTTTA  
TTCAGGATAATCCGCTTTAGCACGCAACCTTGCTGTTGGTGCTTCTCCTAATGGATAGC  
AGTTTCTTCTCGATTCTTTTTTTACTACTACTGCTGCTCGTCCTATGCCTATGTACTCTG  
TACCCGGCTTGATCGATCATTCTAATATGCTCGATTGGCTTACTTCACCTATTGCTTCT  
ACTGTTTCTGGTATTGCGGGTGTCTTGGTCAACAAGGTACTIONAATGCTGCAAACCAAGCA  
AACGCACAAGCACAAATTGATTTTCAAGAAAGAATGTCCAATTCTGCTTATCAACGACAA  
GTTAAGGATATGGAAGCTTCTGGTTTAAATCCTATGCTTGTATATTAAGGTGGGGGC  
GCAAGTTCCCCAGCTGGTTCTACGGCTACTTATCAAAAACACAGCTGCAGCTGGTATTTCT  
TCTGCTTTAGGATCTGCACAAGTTTCACAACTCATGCTAGTACACGGCAGACTTCTGCA  
CAAACAGATTATCTTACCGGTCCTCAAACCTGAGATGACTAATCAACAGATTAACAATCTA  
AAAACCTGATAACGTAAAGACTACTCAAATTATTCGTAATCTTAATGAAGAATTTCAAAC  
TTGATGAATCAAGGTTTGAATTTAACTGAAGTTGGTAATCAATTACGTGAAAGCGTTAGT  
TTGATGAAGTCTCAAATTAATAATTTGGAGCTCTAACTCCTTCTACACAGTTTCAAGCT  
AAGATTAATGATTTTAAATCAGCAGTTGTTAAAAATGGATCTAGATGCTGCTAAACCACCT  
GGTAATATTGGTCGTGAATATAACCAATATAGACCTCTAATTGAATTTCTCAAATCGTTT  
GTAAAAGCCAGATAATGGCTAGATTTTTTTTTAAAGGAAATGAAAATGAAGACTGTTTTTT  
GGCGTTCTCCATATAACTATGATAGGGATCTAGCCAGCGATAAAGCTGGCCTTTCTTGTA  
ATGATCCTTCTTTAACGCAACAGCAGTTTAAAGAAGAGTCTGATATAACTACGATTGTTG  
ATCGTTTTATGAAGTCTGGAGTTTTGCCTAATCCAATTAATATGCCTCAATATATTGATT  
ATGAAGGCGTTTTTACTTTCAATCTGCTATGAACACTATCCGTCAAGCAGATGAGAATT  
TTATGCGTATGGACGCTAAAGTTCGTGCTAGATTTAATAATAGTCCCCAAGAGTTCCTCG  
AGTTTTTCGGTAATCCCGAATATCAAGAAGAGGGGATTGCTTGGTGTGGCTACGCCTC  
AAGCCGTTGTAGAAACGAAAGTTTCTGCTGCGGAACCGACGTCTAAGTCCGAATAATGGT  
ACAGTTCGCTACTTGATGTAACCTGTACCTAGTGACACCAACTTCTAGGGAGAATGAAATG  
AAACCTTTGCACAGATCCTTTGTAATAAAAACAGTTCTGCTAAACAATTTAAATCTAAT  
GTTGGCAA

>NewGenomeName\_94

TAGACAGAACGCAAATCGAACTAAGTCAGCAAATTAGCAAAAAGGCACCGCAACGTGGGGG  
CTGGAGACTCAAACCAGCTCTCTGCCCCGCACATTCCTTCTTTTCACCTATTAAGCGCT  
AATCAATGCGCAGACGTACACATTGTCTTTCACGAGAGTAGACGACAAGGCACTGTAAGG  
TCATTATCTTTAGCCTGCGGCCATTGCATTGGCTGCAGATTAGCACGCTCACGCCTGTGG  
GCTATTAGATGTATGCATGACGCACAAATGCATACACAAAACCTGCTTGATAAATCTCTCA  
TACAATGCTGACGATCTCCAAAGAGATAAATCTTTATGCGACCGGCACTATCAACTCTTT  
ATTCAAAAATTACGAAAACGGTACTTTGGACTCAAACGCTTTATTACATGCTTGGTGTG  
TATGGCGAAATTTTTGGTTCGACCTCAAGTCCACGCCTCCCTCTTCGAAATCGATTTTCGAT  
GCTAAGAAGCTATGGAAAAGGACTTCCGCTAATTCTATGTTAGAAACATCCTAGGACCTT  
GAAATACTCTGCCATTTGGTTAATCCTCCGTAGGAAACGTTACTTTTCAATCGGCCGGCC  
TATGTCGCGGATACATTATGACCAAGGTGACAGGGAATAACGCTAAGGATCATTACACA  
CCAATAAACCCCGAAACAGGGAAAATACTTACACGTAAACCCGAGTTTATGAAAATGTCT  
CTTAATCCTGGTATGGGTTGCTAATGGTATCAAAAATCCTCTTCCGATGTGTATCCCAAG  
GTTAAGTGGTAATTCGTGGAAAGAAAGTCAAACCTCGAAAATATCATGACACAAATTAC  
ATAATTGCCAATTCATATGAGTTTGACAAACTATTTTACCTCCGGAAAAAGTGTACAAAT  
CTACATTTTGAAGACTATACGCCTGGACGCTTGCTTGTAAGAAGAGCAGGTTACAAAGGCA  
AAACTTCAAAAACCTAAACGTAACCTCACTTAAAGGACAAAACCTCATGAACTAGTACTA



TGTTCTGTACACGACCGACCGACTGATTCGTTCCGGTCGAGCTATGTTAGTACCCACTGTT  
GGTGTGCTATTAGGAGATTTAGCGACGAAGTCTATCGCCAGTCTGATCATAATCAGCTA  
CATAATCAGCCCGATGATTTTGAATTTATAAGAATTGGGCCAGTTTGACGACAACTCAGGT  
ACTTTTTCTTTACATGTCTAACCAAACTGTTATCTTTAGGAAAACAGGACAAAATACCT  
AAGTAATGATTTTAAATAAACCGACTCAAAGGGTGTATGTTTGGGTCGGAACGATAAGGG  
GTTTAAAAACATGCATCCTAACATTCGGTAGATGTCCATCAGTTTACTATGATTCCAA  
GGCCGGTAGACCTTGGTCTTCGGTTGATCGCCAGTCAATACACAAAACAACCTTCGATGC  
AGGCTATCTCGTACCCGTGTACGTGGACGAGATGATCGCAGGCGATACATTCGCTTAAA  
TAGGACTCCGAGTGC GCGATTTCGGATCGCCACTATATCCAATTCTAGCTAATATGCAGTT  
AGATTC AATCTTGTATTTGGACCCAATCGATTGATTTGGGACTATTGGCAAGAATTTAT  
GGGAGAACAATCGAATCCAGGGGATTCAATTAGTTACGCAGTACCCCAACAAATAAGCAC  
AACTGGTGGATACGCTATATGATCACTACAATATTACATGTGACTACCGACTATTGGTCA  
AGTCGGAAATTCAGCACTGTGTCTCATTATCTTTCTGGCCACGTGCTTATAACTTCAT  
ATATAACGAATGGTTTAGAGATGAAATCCGAGAAAATACTGTTCTTGTGATAGTGTTGA  
TGGCCTTGAAACTGTTACTGATTACGTATCACGTCCGGCCTGGACAGCGCAAAGATTATTT  
TACTACCGCGCTTACATGGCCTCCAAAAGGTGATGCCGTTACACTTCCATCAGGTACTTC  
TGCACCAGTTAAGTTCCAAAATATTAGTGGTAGTGGTAATACCTTAACTGGTAGTGTGAT  
TGAGTTTTAGGTTAGTGTGATAACGATGCTCCGGGAATAATTTACGCACCAAACACTACGGATG  
TAGTACAGGGAATGCAAATCTACCTATCGCTAATAGCGCAAATCTTTGTGCTGATTTAAG  
CGCAGCAACACCTGCAACTATCAATCGATTACGACAATGTTTGCAGAGTCAAAAACAGTT  
AGAAAGGGATGCGCGTATTGGTACTCGTTATACTGAAATTAATTCGTTAACACTTTGGTGT  
TATTTCTCTGATGCTCGCTTACAGCGTCTGAGGACTTCGCGGGTGGACCGACATGTAT  
TGATCATAATCTGATCGCTCAAATATCAGGTACGTGGGCTATTGGAACCAATACCCCTTT  
GGGTACACTTGCTTCCATGGGTACTGCCTTGGCTCCTAACCGTGGCTTTAGTTAGTCGTC  
TACTGAACATGGCGTAATAATCGGCATGGTTTCAGTTTCGTGCTGACTAGCCTTATCAGCG  
AGCTCTGCAACCTATCTGGTCTAGATAAAAACAATACGATTCTTACTTCCCAGCTTTTGC  
TGCTTTAGGTGAGCAAGCTATTCTTAATAAGGAAATATATGTTACAGGTCCGGTCTGGGGA  
GAACGCTGTGTTTGGCTATCGAGAACGCTAGGCAGAATACAGATACTATCCTAGCCGCAT  
TTCAAATTTACTCCGTTCTACTGCTCCTGGAACCTATTGATGCCTGACATCTTGCCCAAAA  
GTTTCCAAGTGC ACTAACGTTAAATACTACGCTTTTACAAGACACACCTCCGGTTAGCCG  
AGTGGTGGCAGTTGGAGCATCTGCTAACGGCCAACGATTTACTTTGGATCGCCTTTTCGA  
TGTTAAAAAAGCACGACAAACGCCAATGTAGAGCGTACCGGGCTTAATCGATCATTCTA  
GTATTATTGATGCCCGAGCTGTGTTTAGTGGTGTGAGTTGGGCTTTTTAGGCCAACAGCAA  
CCAACCCAAAAAATTGGGATATAGGTCTGGCAGCTAATCAACCTGGTGTGAGAAAGCTG  
AACGTCAAATGGATTTCTGTCGGACGTAAGCTCATAACTCAATATCAAATGCTAGAGAGG  
ATGTCCAAAGAGATGGAAAAAACCCCATGCTAGCATATACACCAGGTGGAGCGGGTACCA  
CATCGGGAGCGATAGGGCAGGTATCGACCGCAAAGTAGGTAATGCTAATGGATCTGCAT  
TGCAAGGTTCTCAGACTATGGGAAAGACTCATGCGGATTTAGACTTAAAAGATAAAACTA  
TAAAAGGTACAACCGCTCTAACTATTA AAAACAGAAGCCGATAAGATAAAAATCGGCTGCGG  
ATATAGTACACCCGCTAGAAAATAAGAAGTTAAACCAGCAACAGCAAATAACTCGACCG  
AAGCTTTATCTCAAATTACGGCTGAATTAGCCAATGTGAAGCCAAGTACTGCGCAAACCT  
CAGCGCTACAAAAAACTTAGAAGAATGACAAACCCCATCAGCTTACCCTTTCTGGTATC  
GTGATATTA AAAAAGGCGTTAGAGAGATTCACGAAGGTTTTAAAATAACACTTAAGTGG  
TTGTTCCCTCGTTACACAGCTGAAATTATATAAAGGCAGGTAAAGACTCGGCAACACATA  
ACTATCGACAATAGTTAGGCAAATAATGAGTCAAAAATACTATGTTTTTGC GTACACCATA  
CAACAACGACAAAGATGCTGCGTCAAGTGAGTCATGCTGGCATTGTGAGGTTGCTTCACT  
AACTCAGCAGCATTTTAAAGTCGAATGCGATATTATTAATATCCTGCGTCAATTCGACAT  
TACGGGCCAAACGCCC GGACAGGCATTAACGCCTCGTTATGGCGGCTTTAGCGGAATTGG  
TGAATACCATAACCGCATTGAGCCGCGTTATCGGGGCTGACGATGAATTTGACCGCTTGCC  
GGCTCGAATCGGTGCTATGTTTCGATAACGAACCACCTAATTTAATACAATTTTTAGAAAA  
TTCAGACAATGGACCCAAGGCTGTAGAGCTCGGCTTTGTTGAAAAAGCTGTGGATACGGG  
GCAAAGCACAGTTACTCCACCCGATGTAACCGTGCTAGGTGACACCAAACCACAAATGC  
TCATTAAGAAGTCTTAGATAATCATGTATAGCAAACCAGTAAATAAACGTCATTCCGC  
TCATTCCTT

>NewGenomeName\_95

ATTGCACACCTAATTTGAAAATGGCATGTGATACACCTTTTTATGTCAATAACCCACGC  
TACCCTATCAACAGCAACTACCGGCAAGTTCGGTTCCTTGTGGAAAGTGTTCAGCATGT

TTGTCCAGACGCACTAGCGTCTGGACATTTTCGTTTAAAAACTCACGCAAAAAATGCTATA  
TCTTCTTACTTCATTACTCTTACTTACGATACCAGATATGTACCTTTATCAAGTAGGGGT  
TTCCTTACACTCCATAAACGAGACGTTCAACTCTATTTTAAAAGGCTTAGGAACTTCAT  
TCAAAAGATCACGAACCCCTAAAATATTATTTAGCAGGAGAATGTGGAAGCAAAACATTT  
AGACCCCATATCATATCATACTATTTAATGCCAACATCGACCTAATTCATAAAGCATGG  
GACAAAGGAGAAGTCCACCTAGGGGAATTAACAGAGCCTTTCGGCCGCATACACTGCAAAA  
TATATAAACATAGGAAAAGTTATACCAGTGCACAAAAATGATGATAGACTGCCAGAATTT  
AGTGTAATGAGTAAGAACTAGGACTTAACTATTTATCAGAAAAAATAATTTCGATATCAT  
AGAAGCGATATTGAAAGAAATTTTCATAACATTGGAAGACGGAAAGAAAATAAGCTTACCT  
AGGTACTTTAGAGCAAAAATTTGGACAGAGCGAGAAAGAATAACAAGCAGATAAACTA  
GCACAAAAATTCAAAGAGTTAGAGCAACAAAAAGAAACAGAGTACTACACAAAAAATCAA  
ACATTGGAAGGATATGTACAACCTTAAAGCAAGTGGAAAAGCCCATAGAATTATTACACAC  
GAAAAACGAGCCCGAGAAGGGCGCAATAAAATTTAGATCAAGCTTCAGTTATCAAGAAAA  
AACAGAGGAGCAGGAGGAGAATTCATCAATGGAACCAAGCCAAACAGTTACAGACATGAC  
TTTGTCAATTATCAGAAGTACTAGTACAACGATACACCAGAGGACAATCAGTGGCAACCTTTAC  
ACCCGTTTATTACGGAGAAGAGGAAGAATTCGCAGACGCTAGCAGAATGGATCCTATTGA  
GCGCATAGAGTATGCTCGATTATTAGAGAAAAAACTCAGAAACCAGACACTCCCTAGC  
GGAGCAGCAAGCTGGCGACGAATGAGCAGCCGAGCCGCAATGAGCGGTGGGCAACAAAA  
AATTGAACAAACAACCACCCACATGTATAATAACAAAAGAGTAAAAAAGGGAAGTTTA  
ACGGTACTACCGCTAAACTTCCCGATACGTGGCGCTATGGCAAAAAAACAAGCGCAAT  
TGCAAAAGGCCTTCGAAGAGGAGGCCAAACACTAATAATCCTTGATATATTAGTGCTAAT  
TGACACCAAGTAAAAACGAGAGCCTGCGAGAGTAAAAACGCAGATAGAAAATTAACCCA  
AGAAACAAAAAAGTTAATGGATCTAGTAACTACAGCCGGAGCAATCACAGCCGGCGTCAG  
TCCGCTATCGGGCGGAGCCCAAGCATAACGCCACAGGAAAACAAAAAATAATCTCGTGC  
ATTCTCCAGGGAGATGTACGAAAAAACAAGCAGACAATTTGATGTTTTGCTATATGCA  
AAACCAGTATAATTCACCAGAGCATCAAATGGCAAGATTAATAATCTGCAGGATTAACCC  
AAATATGGTATACGACAAAGGCGGGGCTATTCAATCTGCTGGAAATATACCAACACCAGA  
TGTTCAAGGAGGACAATTCAGAAGTCCCGACTTTGCGCCAATATCAGGAGCTGTACAAGG  
ATATTTTGATACCAAAATAAAATAGGCTCAGTACGATAACTTAATGGCTGCAATACATC  
AATTCACGAGAAGCTATTTTAAAAGCTGCACAAACATTGGCAGCAACAGAAAGTACAAA  
AGGTCAATCTATAGCCTATGCATTGGCACAACAAACTTTCAATATTCAGTAGAAGGAGC  
GAGATTAGCAAACGAGCAAACCAGAGCAAACACACAATATACAGTTTCTGAAAATGAAAG  
AAAGTCAGCCTTACAGGCACCTTCTTTAGCAGCAGCAGTAGAAAATGTATGAAGAATCAA  
AGCAGAACTGCTAATACAAATGCTGCAAGAGGAAAAATAAACCAACAATTAAGACCT  
CCAACAAGATTATAGATTAAGAATTTGAAGAAGATTTAGCAAAACAAGGGATATACAA  
AAATGACCCTTTATGGTCAAGGGCATTAGCTCAATTTATTGAAGGTCTCACTGGAGGTAT  
GTCTATGAAAGATTTAGGAACAATGACAGGAGGATTGTTTAAACCAATCAGGATTTAAAA  
TGCAACTAAATCAACAATGTCATGGTGGATTCCCAAATAAAACATTACAAAAAACGTCT  
GAAGAAATAAAAAAAGATGTAATGATTTGATAGATCAAATAAATAAATTAGTTTTAGAA  
AATGAATCAAATGATGCGGTAGCATTAAAGCAGATTAGATTCTGTATGTTCTTTACTACAA  
ACTACCCTTATTCATATTAATAACTTAAACAGCAAAACCCAATGCGCTACAGAAGAGGCG  
GAAGATCCCGCAGAAAAGGCTACGGCCGCAGAAAAACAACACTTACTTGGTTAAAAGAG  
GAGGCATAAGACTATAATGGCAAATGCAAACCTTATTTAACTCGGTTTACGCTACCTAAAGT  
AGCTAGCAATGTATTTCGACCTTTGACATGATGTGAAAATCTCGTTGAAAATGGGTGGACT  
TTACCCAACATGTGTAATGGAATGCGTACCAGGTGACAAAGTAAAAATAGGCACTGAAAC  
GATGCTTCGATTTGCACCACTTATCGCACCAAGTAAATGTTACAACCTCA  
TTACTTCTTTGTGCCAAACAGAATATTATGGCCAAACTGGGAACAATGTTTTACAGGAAA  
CTTAGATGTACAAGCACAAGGTTTACTACTATTTTCTTACCAGCTTCAGAAGGATTTCA  
TGTTAAATCTTTAGCGGATTATTTAGGATATCCAACCTTTGTTAACGCCAAACGCTATACC  
ATATCCTGAGCCTGGAGCTCAAGTAGGAAGCCCTTACCCTGTAGCAGCTTACAACAAAAT  
TTATAATGAATACTACAGGGACCAAGTCTTCAATCTCCAGTTTTAGATTCATTAACAGA  
TGGAGAAAATGATCCATTTAGGAACCTAGCAGCAGGACCTGTTAAAAAAGAGCGTGGCA  
GCATGACTATTTTACATCATGTTTACCATGGGCACAAAAAGGTGACGCTGTAACATAATCC  
AATAGAAGATGTAACATCAACTATAATGCAGCTGCTGGAGGAACTGTTATGCGACAGGT  
AGATAGCACACCATATATAAACCAACAGATCTTAATTATTTCAGATGCTGGAGGACAACC  
TAGAGCAAGAGGAGTAACAGGGACACGTTACATTATTGATAACTCCAGCCAACATCAGG  
AACTGTAGAAGCAGCAGATATTTACTCACTTAGAAGAGCATTTAGACTTCAAGAATGGTT

AGAAAGAAATCCTAGAGGAGGAACAAGCTACATTGAAAGCATACTTGCTCACTTCGGTGT  
AAAGTCTTCAGATGCTAGACTTCAACGTCCAGAATACTTAGGTGGTTCAAAGGTTAAAAC  
GGTAATTAGCGAGGTATTATCTACCGCAGAAACAACACTCCCAGTAGGTAACATGGCAGG  
ACATGGTATATCCGTATCTGGAGGTAATGAATTCAGTACAATGTTGAAGAACACGGGTG  
GATTATTGGAATAATTTCTGTAACACCAGAACCAGCATATCAGCAAGGAATTCATAGATC  
ACTCAGCAAATTAGATAGACTAGATTATTTCTGGCCAACCTTTGCAAAGATTGGAGAACA  
AGAAGTATTAGGGAAAGAAATTTATGCAAATGGTATTAACATTGGAGAAACATTCGGTTA  
TGTTCCCCGGTATGCAGAATATAAATTTCTTAAAGAGCAGAGTAGCAGGAGAAATGCGAAC  
TTCACTTGATTACTGGCACTTAGGAAGAAAATTCACTGCAGCACCAAATTAATGGAGC  
ATTTATTGAATGCGACCCTAGTACGCGAATCTTCGCAGTTGAAGACGCAGAAGTTGACAA  
CATCTACGGACATATCTTTAACAAAATTAAGGCGATTAGAAAAATGCCGAAAT

>NewGenomeName\_96

GTGTGCACATCTCTATGGACACATCCCACCCATAGCCATAAGAAGTGTGGTCAGCGTATA  
GAGTTCGGTGTGGCTTATTCGATCGAATGGTCTATTCGTTTAAGTCACGAGCTACAAATG  
CACAGGGTGTCTTGTATGCTGGACCTCACGTATGACGATGATTGGTTATCTCAACATGGT  
CAACGTTTTAAACATGACATAACAACGGTTTTTCAACCGTTTTCGTTAGGCTGGTTTTAAC  
TTTCGTTATGTTGCCCTCAGGTGAGTATCGTGATCTTTCTTGAAGGCCTAAATATCAGTTT  
GGTTATTTGGTTTTGGATTTTGTCTCATGACCGTTGACGGTTTAGCAGTTTTAATGGTGAT  
TTTAGTTTTACTTCTGCAAGCATCTCGAAGTTATGGCTCAGGTGTAATCCTCTGATTGGT  
TCCCTTAAATTTGAATCCTCTGCATACACTGCCCGATAGATCTTGTAAGAAAGATTAAGGGC  
TTGCAAAGCCTGAACCGATTTACGTTGAGGATTCAACTGCTGAAGTTGTTTTGCCTAAT  
CCCGAATTTTTGGTTCTGTGTAAGGCATTGGCCGTTCTTGGTTTAGGGATGGCTTTATG  
TCGGATGAATTTCCGCCTGCTTCTGTTATTACTGCCCAGGGCTCTAAAGCACCAGTTCCT  
CGTTTTTACAAAACCTTTGTTAAAGGAGGTTGGATCCGATCTTGCAATGGATATGCAGTAT  
AGGTCTTGAGTTCGTGCCGAGTCAGACCTCGAGCGTAAAGCTTATGAGGACCTTCCGTTT  
CGTAAGCGTTCCCGTTCTCTTGTAGCTCTTCTAGAGCTTCTCTTTCAAACGTATAAAT  
AAAAGGATTTGTCATGATTGTATTTGTTGTTTGTGGTAAAGACCGCGCCGCGATGTTTT  
TAACCGCCCCATTTTTGTTCTTCATCGTGATGTTGCTATTCGTGATTTCACTGATGAAGT  
GAATCGCGCATCTGGTGATAACCAGTTGAATATGGATCCCGATGTTTTTGATTTTTATTT  
CTTGGGCGAGTTTTATGATGCCCGCGGCATTTGTAAATGATGAGCCTCAGGTTCTTGT  
TCGTGCAAAGACGTTTTGCAGTCGTAATGACCCTTGTGGGCCTTCGGGGCCACTTTATT  
TTATTTCATTTTGGAGATTTTTATGTTTTACAATAAATCGGTTGAAGCACAGAATTTTGCA  
ATGGTCCTTCGAGCTGACATCCCCGTTCTCGATATTCTCTGCAGAAAACCTTAAAGACT  
ACTTATGATGGTGGTCTTCTAGTTCCCTAGTATGTGCGAAGAGGTTTCACCCGGAGACACA  
TTAATGTTAATGTCACTATGTTTCGGGCGTTTGTCTACACCCAGTTTTATGGTTATGGAT  
AATTGCCATTTGGACTCGTTCTTTTTCTTTGTTCCCTAAACGTATGGTTTGGACGAATTGG  
GTTATGTTTATGGGGGAGAAGGATAACCCTGCAGATTCTATTTCTTACTCTATCCCTCAA  
CAAGTGTCCCCAGCTGGTGGATGCTCTATCGGGTCCCTACAGGACTACCGTTGTTTACCG  
ACTGTGGGTCAAGTTACCCCTGGTGCTAAGGTTTACAATCGGCGTTACCTACCCGCGCA  
TATAATTTGATTTATAACCAATGGTTCGAGGGGTGAGAAGCTACAGAATTCGTGTGTTGTT  
AATAAAGGTCATGGCCCTGAGTCTACAAGTTCTACGGTTTATGCTTTGCAAAGACGCGGT  
AAGCGTCATGATTGTTTTACTTCTTTTATCAGCTCCACGGCAAGGTGGTCCTGCTGTA  
TCTCTTCTTTAGGCACTTCTGAGCCTGTTTATGGTACTGGAAGACTCTTGGCCTTTTT  
GCTGGTGTACTAATTTAGGTTTGCATGCTGAACTCCTAATAACAATGCGTAAAGCTTCT  
TCTCTTACAATAACCAATACTGGTTCTACTCCTACTGGTGTAGGTGGTGTTATTAGTAAG  
AATATTGGTGTGTTACTTCTGGTTTTTCAGGTATATCTGCTGATTTGTTGGCTGGTACG  
TCTGCGAGTATTAATCAGCTTCGTCAATCTTCTCAGATTCCAAAGTTGCTTGCACGTGAT  
GCTCGAAGGGGGACTCGTTACACTGAGATTTTTCGTTTCTCATTTTCGGCGTTACATCGCCG  
GAAGCTCGCTTGCGGCGTCTGAGTATTTATGTGGTGGCTCTACTCTTATTAATATTTAT  
CCTATTGCCCAAACGACTGGTACTGGTATTTCTGGCCAGACTACGCCTCAGGGACATTTA  
GCTGCTATGGGTGTTTATCAGGCACACAACCATGGGTTTACCCAGTCGTTTGTGGAAGAT  
GGTTGTGTTATTGGTGTATTGCTGTTCTGTTGATTAGACTTATCCGGAAGGTTTACGG  
CGTCATTGGAGCCGTTCTACTACTTATGATTGTTATGTTCTGCTTTTTGCGATGCTTGGT  
GCTCAAGCTATTTAAATAAGGAAATTAATGTTACTGGTGGTTCGTCTGATTCTAATGTT  
TTTGGTTATCGGGAGCGTTGGGCTGAATATCGCTGAAACCCTTCTGAGAGTACTGGTCTT  
TTTTGTTCTATTGCCGCGGGTACTGTTGACCCGTGGCATTATGCGCCGAAATTTACTGGG  
GTGCCTACTTTGAATTCAACTTTTTATTGAACATACTCCGCCTCTTGCTTGCAATTTGGCG

GTTGGTTCTGCTGCAAATGGTAAGCAGTTTTTGGCTTGATGCGTTTTTTAATGGTAAAGCT  
GCTCCTCCTCTTCCTATGTTCTCTGTACCTGGGCTTATCGCTCATTTTTAAGCCTCTAAC  
ATTCCCTTCGGGGTATGATTGAGGGTAATGTTTTATGTGTATGTTTGAAACTCTTAAGA  
GTGGTTTTGATTCTGTTAGTTCAGTTGTTAATGCCATTCCCTCTCATATTATCTCTGCTG  
GCGCTTCTCTTCTTGACTTTTAGGATCAAACCTGATACCAATGCTGCTAATCTTGCATTGG  
GTAATCGCCAGATGGATTTTCAAGAGCGTATGTCTAATACTGCTTATCAACGGCAAGTTG  
AGGTTACGAAGGCTGCTGGCCTTAATCCTCTGCTTGCCTATTTGAAAGGTGGTCGCGCTA  
CTACGCCTTCTGGTGCTATGCCTTAGGTTGAGAACCCTTATGCTGCCGGTGCTGCAACCG  
GATATCAGTCTGCCCAATCCTCAGTTGTCAATAAGCAAGTTGGTAAGGCGGGTGCTGAGA  
TGGAGAATGCGGATGCTCATACTATTAAGAAGCGTGCTGATACTCTTTTATATCTTGCTA  
ATAACGAATTGTCTTTTGGCTTCTACTGAGGAGAAGCGTTCTTCTTTAATCTTCTGTCTT  
TTCAAGGTAAGAAGATTGCTGCCGAGACTAAGAATATTCCTATTGAGGGTGATCGGTTAA  
TTGATGGTATTAACAGCTTGAATCGTCTGTAAAGCTTATTGAAGCGCAGACGTTGACTG  
AAGAGCAGCGTAAGCAGCAAATTTTTGCTCTTGCATTGAAGACTTTGAATGAATCGGATT  
TGGTGGCTGCTGATTTAAAAGCTATTATGCAAGCAAACAATTTGGGTCACCATTTTAGAC  
AGTACAAACCTTTCGTTGATGCTGTTATGAACACTTTTCGTATGTGGAGACGTTAAGGAA  
TTTGATGTTATTTGCTTCCGCTTATGATAATTTTGATGCTCGTTCTGACGAGTTTGT  
TCAAGTGTTTAGACGATTCTTGGACTCAGTAGCAATTACGCGAGGAATCTGATATCAACA  
ATATTGTTGATCTTTGTACGAAGACTCCTCATTACCTGATCCAGTCTCTATTCCCCAGT  
AGGTTGATTAGTAGGGCGTCTTTGCTTTTCAGTATGCTATGAATGTAGTTCGTCAGGATG  
ATGCGACCTTATGCGGATGCACGCAAAAGTTCGTGCTAGATTCCCTAATTCCCGTCAAG  
AATTTTTGGAGTTGTTGCTGATCCAGCGGATTCTAAGGAGATGGTTCGCCTTGGTTTGG  
ATTCGCTAATACCTAAGTAGACTCCTCCTGTGCTGATGCCGATCCTGTTGCTTAATCGTCTT  
TGGGCACTGTTTCGCTACTTGTGTAAGTGTGCTGTTGACAACCTTATGTCTTTCTGTTC  
TACTGTAGTAACTATGAAGCCGATGCACCGTCACAATGCCAATGAACGCTCAAGCGCTTC  
TTCTTTAAGCGTAACATATCAACGACTAAGTTGATTAATATCACTGCTGGCCCTATGCG  
CGGTGGTATACGCCTCTAAGGTTCT

>NewGenomeName\_97

ACCGGCCACTTGGAGCCACGGAGCCCCTTGCAGCTATCCCTCCGCTAAAGGGGGGAAGCAG  
CGGCTAAGAGGTTTTGCTTCACGCTGAATAACTACACAGATGAAGAGGTGTCCGCCGTGA  
AGGCCTGGAACGCGAGTGAGTACCATTACGCTGTCGTTGGACGCGACAAGGGTGAGAATG  
GTACGCAGCATTTCGAGGGCTACATTCATCTAAAGAAGAAGGCTCGGCTAAGCACTCTGA  
AAAAAATACTTAGCCGTGCCATTGGGAGAAAGCTCGCGGTTCCGGACAGCGACAACGAGG  
CGTACTGTACGAAAGATGGGGACGTGATACTTACCCTTGGCATGCCGGTGGAAGGGAACC  
GTAGCGATATCCCCGGAGCTGATGCCGCCGTGAAAGCCGGAAGTCGAATGGTGGATATCG  
CGCGAGAGTTCAGTGAAGCCTACGTCAAGTATGGGCGTGGCTTACGTGAACTGGCGCTTC  
TGATTGGAAAGAAACGGCGAGATTTCAAACCGAATTTATCGTTGTCACCGGTCCGTCGG  
GCGGGGGCAAGAGCCGTTTTGCTAATTAGTATCCAGGCACTAAGTTTTATAAGATGAAAG  
GGGACTGGTGGGACGGCTACTTAACGAGGATGTTGTCGTTATTGGCGACTTATATGGAT  
GGATACCTTTTTGTGAGTTACTGCGTCTCACTGATAGGTATCCACATAAGGTTCCCCTGA  
AAGGATCCTATGTGGAGTTTACGTGCAAGGTCGTCACACTGACCAGCAATACGCACACCG  
ACTCGTGGTACAATGAAGAGAAGTGCTATCTACCCGCGTTGTATCGGCGGATAAATAAGT  
GGCTGACGTGGAATGCCATCCGTTTCGAGGATGCACCGGATTGTATGAAGAACTACCCTA  
TAAACTATTGATTACGCCCCCTCCCTCATAGTGCCTTTCGAGGAAAGAGCAATCGAGGCC  
AGCCAAGGCGGCCGCTTACGGGTAATTCGCGAGCGCACCGGCGCGAGCGAAGTTCCCT  
AGTGAAGTTCCCGAGGAAAACACTTGAGATGAGGCGATTTATAATTTTTACTTAATA  
AATAAAGACAGGAACCAGTATTGTGTGTCTATACTTTATTTAGGGTTTGGGAGGTGGGTT  
AGGTTCAATTTGTCTGCACTCAACATGTATCGTCACTTTTGCATGGAATAGTAAAGCATCG  
TGGGGCTGGGGCCAACTGATGCCGAGGCCGTAGTGCTTTACTCTAGAGCCCAGCTGGGT  
GAGTTTTGGTCTCCTTTCTTCATCATAGGTATCCATGCGGATCTGGGGTTGGTTAGCCAT  
TGCCTGCAGTAACGTTTTCCCGCGTCCGGTGTCCGGAATGGTAATTTGGGGTCCGGGTCGG  
AAAAGACGCTTGAATCCTTTGCGGAGGCCCGCTGTCTGGCGCCGTCCAGTTTGCTAGC  
GGGTCTGTCTCCAGGACTGGCTTCTTGTAGAAGTCTTCAAGGTGGTTGTCTTGAATGGGC  
ACACTGTGCCCTATAACCATGCCATGATCCCCAGTTCTCGTTTGTGGACGCATTTCGAAT  
TTTGCCAGCCGATCCTGTAGTCTTCAATGGTAGCCTCCAATTAATTGTTCCCGAGTCG  
AGGAAGTCGTCCAGCATGATGATGAGGCCGTCGGGAGCCATTTCAAGGTAGTGTACCT  
GAGCCGCGCGTTCGTGTCTGTACATGCGGACAACTTGAATCGGTATACTCTGTTAGTT

CTGTGACCACGCCTATTGGTGTAGTCTGCGTCTGCGCCAGTAACGTAGTCGCCATCGCCGT  
CCAATCGCCTGTGTCTGTGCGGCGTCTCCTAGCAACCTGTATGAAAGAGCCAAACACGAGG  
TGTCACGTAACCGTGGCTCCAAGTGGCCGTTGAGTGTT

>NewGenomeName\_98

ACCGGCGGGCCGGCGCCATGGGGCCATCTGGCCCCTGGCCAAGCATGCGCACTAGTGGTG  
CATGCTCGATGGCCGCGCAGCGGCCTTTATTTGCGGAGCATGCGCAGAAGGCCGCGCAGC  
GGCCGCTATCTGCGAAACATCACGGCAGCACGGCGAGACAGCGGAGCCCGTCGCTGGTGC  
TTTACTCTGAATAACTACACTCCCGAGGAAGAGGAGACCGCTCGCAATCTGATTCAAGAT  
GCAGATAAGGACGCGTGTGCGATAATCGGCAAAGAAGTTGGCGAAAGCGGTACTCCTCAT  
CTGCAAGGCTTCATGCATTTTAAGCAAAGCAGCGGCATACCGCTCTAAAGAACTTATT  
CCTCGCGCGCATTTTGAGAAAGCTCGCGGCAGTGATCAGCAGAATGCTGATTATTGTGGT  
AAAGGCGGCGAAATACTTACCATGATCGGTACTCCGAGTGATACGAATTCGAGTGATCTT  
GCGGGAGCTGTTGCCGCTGTGAAACGCGGAAGTCAAATGAGTGAAATCGCGCGAGAGTTC  
AGTGAAGTCTACGTCAAGTATGGGCGGGGCCTCCGTGATCTCCAGTTGCTGATTGGTTGC  
CCGCCCCGCGATTTCAAACAGAAAGTCATCGTTCTAATTGGCCCAGCTGGCTGTGGCAAG  
TCAAATTTGGCCAATGAGATGGAAGGGTCTAAGTGCTACAAGATGAAAGGTGATTGGTGG  
GATGGTTATGACAATCAAATAATTGTCATAATCGATGACTTCTACGGTTGGCTCCCGTAC  
TGTGAGTGTCTACCTCTGTGTGACCGTTACCCTCACCGTGTGCTGGTGAAAGGTGACTAC  
GTGGAATTCACCAGCAAGAAGATTGTGTTTACCAGCAATCGCCATGTGGATGGGTGGTGG  
ACAGGTGAAATTGAGAAGAGTGCCTTCTACCGACGGATGAATGTGTACAAGTTTTATGAG  
ACAGGCGAATTCAGGACATGCCCGGACACATGCTCCCGCACCCAATCAATTATTCGCCG  
CGAGATGAAAACACCCCCCTCGGGATGACAGTCGTTTTCATCTCGCGCCCCCGAGTCGCG  
GAGTTCGCGAAGCGAACGGAGCGCGAGTGGCGCGCGAGATTATCGACGACCGACGCGCGT  
AGCGCGGAGGGAGGAGACCACTTGCTTAGAATTTAATATGCTATCTTTATTAAGAGATC  
CAACAACATTCCTGTCTATGTCTTTTTTCATTGTGTCAGTAATTGTTAAGCAGTCCCCGAACC  
TTGACAGGTCTTCTTCAAGATTTCTTCAACATTATCTGAGCGAACTGCCTGAATGTTACAT  
ATATAGTTATTTCTGCATTATATCTCAGTTGCTGCCAGGTGAAGGCCTAGAGAATGCCA  
GCCCGTAGTGCCTACTCTTGTACCGTCCCTCTGGGGCCCTGCTGGCATTTTTATAGGTA  
ACCAGCTCATCTACTGCTATTCAGCCACATTGATGCTGAAAAGTTAGAGGCTGTCATAT  
CTGATATGGTTAGTTGAGGCTTTGGGCGTACCAGCCTCTTAAACCCTCTGACCAATTTCC  
ACGCCCTCGCCCCGTCCCAGTTATCCAGTGGGTCTTGCCTTTCATCCTGTAATTTTATAT  
CTTTAACTCCGGCGTCCAGAACTGGGACTGTGTACCGCCAGCCCCTTGCAATTTTGTAG  
TGACACCTTCAGGCCTCAGCACCACTTTTGCTAAATTAATCCTGTAATCCTCGAACGGCC  
ATTCTGCCGGTATTCCTCTTGACCTATAAAGTCATTCAGGTTGAAGGTGAAGAAATCTG  
AGGCCACTTTTGTGGGTGAGTCTTGGATGGGAAGTCCACTGTGACTTGCCGTCTAAATC  
TGAACAAGTATATTCTGTTGAGTCTGTGCGCTCTTCGGTTCCTGGGCAACCTGTGACGTC  
TGCGCAGTCGTCTGTGAAACCGCCTTCTCCGGAAACCGCGAGTAACACGCCTCCTTCTGG  
TTGCTGTGCGACGTACCTAAAAAAGAATGGCCCCACGGCCCCGCGTATAGTATT

>NewGenomeName\_99

TTCCCCTACCGGGAACACCGGCGCGCCCTCATGCCCTGCCTCGGGGTGCCTTCGGAAT  
CTAGGGGTGGGGCATAACGCGTGCTCCATTCCTGCGTAGCGAATTTGCTTGTTCGCGCCT  
TCATTGTGAGGTTAGGGCGTACAGCAGGACAATATGTTCTAGATAGGTTGCTCCTTCTAA  
AGATCAGGCATGTTGTAGGCGCCAGGTAGATTTCTGGTGCCTCCGCTCTTCACGTCTCG  
GTTAGGGGTTTCGAGTCTTTGATTACTCTTGCTAAATCGACGACTCCATAGGGCGGGCTGA  
CCCCGTTTGCCCTGCCCGCCTGTGCGCTGTACCCGCCTACTACGAAAGTTTCACTGTTT  
CCCTCCGGCTCTCTTCCCCGCTTTTCTTCGTCGCCGGTGAGCTCCAGTTACCGCGGGGTC  
TCGGTGGCTACGTCTGACCCCGCCGCCCTCACTTTTCTTACTGGTGCCTCAATTCATA  
TAAATATTGCTACCACTGCGTTATATAGTGAATGGTTACAGAAGGGGCTACAATAGGTCT  
TTTGAGTCCGCACTCATAATCAGGGCGTGAGGCATACGCACTAGCTAATGCAAAGCGATG  
TGGAGGTTCTCGGATAATGAATAGGCGCGGGGGGGAACGGTACTCCCGAACTAGTCCTCC  
TCCATCAAGGCACGGTGAAAGCTGGCCATGCCGGGCACGTTCAACTTATGCAGTAAAACG  
CGAGTCGATACTCAACATAGACGCACGGAACCGGGTTCAGGCTGAGTATTAACATGCGAC  
TTTGTCTCCCTTGGCTCTATGCGTGCCGCCGGTGCCAGGCATTGGTCAAGGAAACGCC  
TGGTCGAAGCTTCCAGGCATCGCTACGTACAAGTCGCGATGCTGAGGAGAGACATTGTAC  
GGTCTCGCGAGATTACGTTGGTCCAGTCCCTCACAACCTCTTTGACTATTGCGGTCTCCCG  
TCGAACGCCATTTAACCAACGTGTGCGGATATACGTCTCGCAGGCTAAGGTAAAATAGTCC  
TTAACAAGAACTCTAATGACCGTACGATAAAGTCCAAGCTAGTATGTCAACGCGGGAGC

CTTTTGCCTTTTCGTATCGCTGGCCTTCCCGTCATCTACAGTAATGCGGGTATTGTATGGG  
AAACCAACCTCCGTGGGGATGCCTACACAGCCAAACTAACAACCGAACGCCTATTTGAA  
CGACCGTCACCAAGCAGGCCGCTAAAAGTGACGCGCAGTAATGGGCGGGGCACTTGCTAA  
CGAATGAGGTGTAAGCCGACGGAGGTGACGACTAGTTGCTATACATATATACTGAGC  
GGAGATTTATCTTTCACGATTACCCGGCTCGAACCTGCAGTGGCACTATGACACTAAACC  
TTTTGCACCTACGGGGTTAGTGGTCCCTCGCCATAAATGCGGATAGTGCTAGTCACGAGTG  
GGTTCCTAACCATTTTTGCGAACTTGGAGACGGCAGGATTATCCTACATTGGATCTAG  
GCAGTCGGGCCGTAATGCTCCGCCGAGGATGACGGCGCAGCCTGCACTATGTGCAATGGG  
TGGCTAAGCAATGCAAGTTAATAATCCCGTGTTTAATCTCCAGCTGACACCTAAAGCGCA  
TCGTCAGCAGCGTCGACCCGCCACCCTCCCTCCTGACCTGGGCCATACACAGACGCGAGC  
CGACCAGGCCCTGCGCTGGCGAGTGCAGCTCATTCCCCACTCTAACACTGCTGGCATGTT  
GAATCAGTGAGCATTGGCGCTGGAGGATGAGCGCCAGCCTAACGGCGTGTCCAGACATCG  
TCAGTGCCGGAAACTGACCGGTGCGCAGGAATTAGGAATGATGATAGCCGACCGTCCGGCGC  
CATCCGCCTCCAAGTCACAGTGTCTCCCATTGTGCCTTAACGCGTATCCTGGCCTAACTG  
CTCTAAAAGGAGATGTCAAGGGTACACCCTTCGCAGTAACGGCATCTTACAACCTGGGAA  
CTGTGGCCTTACTACCACAAAACCGTGCGACTCGCTGCGGAGTAGGACACCCACCTGGCG  
TACTCAATATTACGTTCTCAAGGCCATGAACCAGTAGGAATTCGTAATAAAGCGCAGTGA  
CCTAGCCGTGTAACCTATCGGGTAGGGTATGCGATTTTACTATAAGTGCCACGGAGGAGT  
CAGTGTACCGGACTAGCCCCGGAAGATGGTGCCATAGGCGCTCGCTGAAAAGCGTTGGC  
CGGTTGATTCTAGAACTACGGCCAGCTCACTGAGAGCGCAGTAATGTCCTACGCGCGGAT  
AATCCCGCTTGTCTACATCGAGGGAGGCAACAGCGACCTAGACCGCGCGGAAGCCTCGAA  
AAGGTACAAGTGTTTGCGAGTCGGCACGCTGGCTGTGGGGGTTGATGTCCTTTGTCCGTT  
AGCGTCACTGCTGAACCATTCCGCCGAAGAGGAAGCGACGGGTCTTACCGTCAAGGCTGC  
CGACTCGCTGTAGATATGCAAGGACTAGTGGGGGTCTGACACCACTCACGGCTAAGTCCG  
ACGTGGCCAGTACCTTCCGAAAATTGGAGATCGGGCAACCGATTACGGTGAGCAAACAGA  
ATATGCACAAGCGCCTCAAGCGCAATTGCGAAAATGATTTTTTGGGTGCTTGGCTGTTTCG  
TAGGCCGAGGGGGTATAGTCCATATAAGCACGTAAGCGCGTTCGCTCCCCC  
CATCGCCGCGCAGCCTGGCTAGCGGAAGGTAACGACCTACCACCGAGACGACACCGCAG  
CTTAGCGGTTGTGCTCGGGGCTCGAACAGCGTAAAACGAGGTGAGCATGCGTGCTGTAA  
TCGGGAACATCCGGTAAGGCGCCCGCCTGGCAACGGTTTGCAGTTGGGTGTGAGGAACGG  
GCGGGAACGGAACCGGGTAGTTCTAGGTCCACACTGCCGCACTCCTTAGGACGCAATC  
CGAAACGCTAACGTTCTCATGACATGACCCGCAAGGTGTCCCATCAAGCATAGCGTGTAT  
AACATTTTCAGCGCGTGTATCGAGAATGAGCAACACGCCGTTAGCAAGGAGCGGATGGAG  
TTCATGTGCTGGGCGATTTGCTTCTCATTTCGTGGCAGCAGATTTCTGCCATGACGAAATT  
ATCGCGATGGGTCCTGCCGTTTAGGAATACGTTGATAGGTTGGGTGCTCCGTCAGTGAGT  
TACCTGATCAACTCGTTGAAGCGTGTCCGCGCTTGTCTGAGCATGTGCGTGCTTACTAG  
TCCGGGCATGAGGCCGGTAAACCGTTCAGCTAATTCAGGCCAGAGTACTGACGAATTGGG  
TACCTGCATGTCCGACAGCCTCACGAAGTAGTCCACAAAGGCATCTATGCCTGCTAGTA  
GTGGTCCGGGTAGGCCTGCGATAATATCATGTGCCACGCTGTATGCCCGGGATTTTATGT  
GCACCTCAGCAACTGAGACGATCGCTAGCCTGCCAGGGAAGCTATTGGGGGATACGTGCC  
TCGCACCCTCCACTTAGCGCACGCAATAGTTGTGGCACTGAGCAGGAAGCGTCGACGGAC  
CCTTCTCACGGCTGCCATCCCTGCTGGCATTCTAATGGAACCGTACCGGGGGGGCGACGA  
CCGCGGGACGGCTTAAGTCCTGGACTTCCTTTCCGTGACTCTTTTTGATAGGGATAACCC  
GAGGGACTAGGAACATATACGAATTCTCGTAGATGGCGGGGATGCTACGAGCAAGCGCTA  
ATTAGGAATGCCGGAAAGTAAGCGAGTTTGCATTTAGACCGTAGATCTGCTATCCCAGGT  
CCCTCAGACTTTACACGCCCTCCCGGATAGCGTCAAGTATCACTGTGGACGCGACGTCGA  
AATGGAGCACGGGAAGAACAGCACGGGCAGCGATTCCACGGCCAACCCAAGGGTCCGGCG  
CCTCAGCCGCTCAGCGGCGCTCTCCTAGTGCCGATCGAATAACTACGAGGAGGAATTGCC  
CCCGGCGGTGACTAAGGTCAGAGATCTTCTTGTAAATTTTCGAAGAAGAGGGATCCCCAA  
GAGGCTGTTGGAACACATGTATGGTCTCGTTTCGTGCGCCGATCTTGGTAAGAGCCACTT  
CGAGTTGCCGTCCGTGTTTTCGCCGAACGTGCCGCTGGTTTTTTGTCAGAACTTTCTCCGT  
AGCACAGGACTGGCAAGCAGACGGTGCTGATGTGGTACCACCCGTGATTAGAAATGTGAA  
GTATGGCCTGTCACGGCGGTCTGCGGCATCTGTCTGTTCTCGCAAATGTTGAGC  
CTCTTACATAGGCGCTAATCGTGCTCCGTACAGCTGCGCGGCTAATACATCAACGTGTC  
CACAGCGATATATGGAGATGTAGACTCGACAGGAGGCTGGTTCGTAAGTGGGACGTA  
AAACTAAGACTCATCTACATGGAATACTGCTCTTAGTAAACCAGTGTGAAGCGTAGGCCA  
GCGCTTACGTACCATGCCCGGCCACGGTAACGCGTTTAAATGCAGTACCCCTCTGCCTTGA

GCAAGACGATGCGGAAGTCAGGTCAAAGGGCTGCCGGTCTGCCATCCTATATATGTACA  
GGAATTTGGGGCACTGGTAGAGGATTTGGTTGGGGCGATACGACTTGATGCACCGTGATC  
TGTACCTTCTCGGTCTCCCCCTTCAGGCGGGATGGTTTGAATGGCGGGGAGCGGCTGAC  
CTATCCGGGCACATACCAATCCTGTGCGTCAGTTCACGCGCGACGTAACGAGTAGTCGA  
TTGTTATATAGTCCGCTACCTGAGGAGCTATCAACCCGGTCATCAGAAGTACCCGGACGG  
AGAACGGACATTTAGAGAGGTTAGTGCTTATCCGATACCTATGCCGCCATGTAGTGGGTGCG  
GTATATACGTACGACCGTATCGAGTTGCCACCGTGTGGTGATTGGCGCCACGCTATATGT  
AGTTCCTCCTAGCGTTGTGCGCGGCCGAACCACCTGTGCAACCCAGTGCAAGACGCCTCGT  
CCGGCGTATCTTTGTATGAGACTTGGCTGCGAACAGTTTAAGAAGACCCCTAAGCGACT  
TGGGCATGGCTGCCATTGCCCTAAGTTGACATAGAGCATTTCGAGCGCATTGGGGTGTGG  
TGCATTATACTGTCTCACGAGTTCTTACCACTAGAGAGCGCAACTATGACATCAATGCTT  
ACGGTTGACGGTATAGTACTCTGGGCTTATGAATCAGGCGGTTACATGAGCGAGGCAGAC  
TCTCACCTGGAACGTTCCAGACTTGCGGGGGACTTCACAAGCGGGGTGCGCTTCAAGAGG  
CCCGGCAGTTAGCGATGGGTGGCCACCAAGGTGCACCAGTATCACGATTCCGAGGGCACTC  
GAGGGAGGGCAGTAGGAGGCGGGTATAAACTGCGGTAGGTGCCAAGACGGTAGTGGATGG  
AGGTTTGTGTGGTACAGAGAATACACTATTCCTGCTCCTGGCGCTACCGTGAGGGGCGTGGG  
TTGTCTTCGGGCCTGCTCTTGACGACCTCTGCTGAGATAGAGATCGCCCCCTGCGCGAGGA  
AATGTATCACGATCAGGGACTACCCGGATGTCGCGAAGCGAATCTGTGAAAAGATCTGG  
ACCGGGGTACCTTCGACTCAGTGTGGTTCTTGGGTACCCAACGGACTGATGGCCGCACCT  
TTACCCGCTACATGAATGAGAGAAGAGCTGGCGCGACGTCGTTCCAAGTGGACCGTGTAT  
CCAACGAGATGCCGTGATACGTGAACCGCTTCAAACGGACGAACACACCAACCCAGGCGG  
CCCTATCGGAACGCATCGTCTAGCAACTGTAAAGATCGCGTACGCTTACGTTTTTGAAGT  
AGTGTATCCGGATGACGCAACGCGCGGTGATCTCCACGCAGTACACGCTACACCTACGT  
TTGATGTCGTCTCCGATAACCCACCAACATAGTCAGAGGATCTGTGGTTCAAGTAGCTCG  
GGATGGGAGTAGAGCAATTTCTGTGTGCGAAGTCATGAACGTGACCCGTAGCCTGCCCTA  
AGAAGTCGGTTTCGAGCTGTGCGCCGCCCTCAGATCTGTACTTGAGGAACTGTAGTGGGG  
AAAGCATGCCGTAAGAGCAACCGCGGCAACACAGTTAACCGTCGCGTGGTTTTCTACCCT  
GGCAGCGCTTCTCGTGAGAACCAGATGTGAGTTCCTCATGCCCTCGCTGGGATACCGA  
ACTGGTGTGGTGCAAGCGTAGGACTACACCCTGAGTTCACAGTAGGGAGTATTTGAGGCC  
AGAGGAACACTGGAGAACCAGTCTACGGTTCGCGTATCCTCGCAGAGTAGGGTAGGGCTTA  
TGAAATGCCGCGGGCAAGTGAAGTTCAAGCTCGTGCGTAAGATGACCGCGGTCATAACG  
TCGACCGTGACCCGGCCGCTGCGTGATAGAGAGGAGATATCCTGGCGATTTACGATGAGC  
TCGGGGAGTGGTAGCAAATAACAGTTTCTGAATTGAGTCCGGCTAAAGATGCCGCCCCCT  
CCCCGACTACCCCCGGATCTTCCGCGAGGGAACGCCACCATCAGCAACCATATCCAATA  
AGTTAACGACCAGGCGCTTACCGTGGATCCCAAGGCTGCCGAGCTGATAGCTAAACCCAC  
TACCCTACGCATGTAGGCGGTTGCCATCGAACGTATCCAGAGGACCGCCTAGCGGGATGC  
CGTGCCATTCGCCATCGGCCCCAGCACGTTAAGAGGATCATCAGCCGCGCCGTGCCGGG  
CGAGGCTAAGAAGGAGGCCGGGCGGCAGCGACGGGTCTTCGTTGAGGTCTCGTACGACAG  
CGCTACGGAAATTATCAAGTCTAGGCATATCACGTACGAGCGGTGTCCCCAGCCTCGCAA  
CATTTCTGAGGTCGCTGATCCTCCTGGTGAGTCGCATCGGGTCTTAGTGCACGAGGTTGG  
CTGCATAATCCGCCCCCTTGGCGTGTAGGAGTAACCGCGACACACGGTACTCAATTACGG  
CACCAACTAATTTGGACCATGGATGTTGTTAAGAATCTGAAAGGCGCTGGACGCTTGGTG  
GTCGAAGGTAAGGCGGATGCGGATGACATGGAGCCGCGCATGACCTTTCAGCAGGTGAAA  
CAGGATACCGAGGAGCTGGCTCGGGTGCTATAGTCTGTGCAACGGTAGCCCGGGGAATAC  
GAGGGCTCGGGCCCCGACTTTGAGCAGGCAACTACAAGATCTCATAGCTGGATGGGACC  
GGGAATAACCAGCGCTACACATTCCACGTCTAGAGGACCCGAAAGTGAACCAAGATGAG  
CTCTCGAAGAAGCGGGAACGGATCAGGACGATGACGCTGTACCGCTTCAGAACCACAAG  
AAGCCAATCACTACTTTGCAACGGATAACCTACTCTCTGGCCGGAGCTGTTGTATGATAG  
GACTAGGAGCGATCCCAGCAAAACCGTTAGTTTGAAGTAGAACTGTGAGAATCAACCCGG  
GGTGTAAGTCACGTTGAGTAGAAAAGAGAGTCTAAGCCATATGATCCGTGACGTCATTCA  
CACGCGTAGATACAGCGCAAAGCTTTTCGCACCTCTATCGGCCCCCTGGTTTAATAGGGGC  
CCTCGATGGTTCAATCGCCAAACACGCCGAGGCCGAGGCCCTGGGGCCTTAGGATCCAAA  
ATGGTAAAGAAGTCATAAACATGGCCAAGAGCCAGCATTATGTGCAGCCAAAGCGTTAAT  
CCTGGCAGTAACCACAGAGATGCTGGAGGCGCGCGGAGAGCTGCGGAATCTGCACCACGC  
CGCGCGTAGTAACCCCTCTCCCAACTGAGGGTGTTAACTCCTTGCGGCAGTAGCTATTA  
CGCCGATAGCTGAAGTCACCCATACATGACCTCCGCCACACGCCGTTAGGCCGGAGCTC  
CATTATGCGTCAGGTCACAATGTCCGACCGAAGGGAACAGCAGGAGGGAGTGGAGAGGGA

TTTGGCGAATTATGCCTAGCAAATTTTCATCTACGCGCCAATTTATGAGATTCTAGAGAG  
CACCATCAGTTGTCAAAGGGGAGGATGCTTTGCTCTATAGAGACGACCCCTCAGACAGGC  
CGGTGCGTGCCGGTGTGGTACAGACAATGGAAGGCTTACTTGAGTATGTACCCTTGGGC  
AATGCGGACGGCGAGTACCTCTGTATCGTAAAGCCCACGGAAGCTCTATGCGACCAAAGC  
AAACCGCAATTCGTACGGGCATCCCCAGCACGAGTTTTAGCAAACGGGCGCAGCCTCTGG  
CCCGCGGGTAAACCGCGCGCACTTAGCACCGCGAGAAGAAACGTGAAAGCTGCGTAACCG  
GCAAAGCCATCGAGTGTGCTGGGCGATCAGCCTCCGCTGACGCGAGGTCCCAGGAGA  
CGAAGAAACCACTTCTCGTGGGGGCGAGACGACCAGCCCCAGGAACACCTTAGACCACAGA  
CCAACGATCCAAAACGCACAGTTAGCGAATCGCTGCCGCGGGCCGTGGACTTATATCTCT  
TGGTCAAAGGCATTAACCTATTTGCTGTACTGCATAAGGCCCTCGTTTAGATTAACCGCG  
TCCACGGTAACCTGATAAACGCCATTGCCAGGGGTTGTGGGGGCTCGCCAAAGGCCAAG  
TCCGGCCGAAGTAGTCTTCGGCCTGAAAGCCAGGTCAGCCCCCGTATGTCTTCCGACCTG  
ATCAGTACGATCAACGTAGGAGGCAGTGCCTGCTCACCGATGACTACCTCGCAGCGTTCG  
AGCTGAGACGGGCTTTAAAAGATCCGGAAAATACGTGCAATGCGGAGCTCGGGACTCGTT  
AGGCTAAACGCCAGTGGCCGCTCACCTAGAAGCAGATAAAGGTGTGCTACGCCTGCGACG  
GGGATCCATCCAGGGTGGACGCGCCGCCAGCTGCCCCCCCCGCTTACGTGGCCTCCGCC  
AGACAGTTCTAATCTGCCCCGCTCCACTGCGTTTAGTCCTAACGTTATCCAGTAGCAAC  
GGTTGAGGAGTTGAATCATGGATCGCCCCCAAGTGCGGAAGCATAGGGGGGTATCGAT  
CGCTACAACGCTCGCGGTGTGAAGGCCAGCGCGGGTGCCGACTGTACAACGGTCCCAGC  
GGCTTCTGGCTCTGGATCAGGACGCTGTGTGTTATTTAGAAATATCATTGCGGCTGGAAG  
TACATTCGGGATGTGAAATAAGCAACCGTAACGAACCCCTCCGCATGTGCCGGTCCTAGA  
TCAGAGATAATGGTAACGAGAGGCGATCGGGCCAATAACGGAAGAGCACCTAGGTGGACC  
GCGCGTAACGTGTGGTCTAGGACCAACATGCCCTGGACGAGCGTGCCTAACTTTTGGGG  
GCGATGACTTGCTGGTCCTATCTGGCGACGGTGAAGGAGTCTGGGCTTGGATATTATGACC  
CCTCAAGCGCTGTGCGAGACGTAGCCGGAACGAACGCTGATAGGAAAGGAAGCCTTCGGT  
AAGGTTGGCACCGAGGGGCAATTCCCATTGGACAGAGAGCCGTTATCCCACCACGGGTAC  
CTTGCTAACGAGTACCCGTGCTTCGGTGCAATCGGCTGCCAGGTGAACGTCCTGTGCGTT  
CATATCCGTGTCCAGATCGTGCTGGAACGCACCGCATTGCTTAAGCTGCGCCAGCACGTT  
GACCATAGTCCCATTGCGATCGTCATGAACAATCTGCGTGGGCGGCATTTATCCATTAGT  
GCCGGTGTCCGCTGGCCCAGCATAAGACCCGGAGCACGTGTTGATCTAATGTTTCGACCAC  
CGTTCGATTATCCATGAGTTGGTGCACGCGTTGACCCAGTGTGGCAGCTCCAAGTGGTCA  
AGTACGAGCACCGACCTCAGTCCGAGAATGCCGGAGAATACTAGGTTTCGACTGCTCCCG  
CTTAATGTCTTGCATGCGCTTATATACGGCCTTCTGCGAGGAGCCTCAGTGATTTTAAACG  
GGGCGCCCAGAGAATGGCAAGACACGCCTCATAGTATCCATCCTTGCGCGCTTTGCGGGA  
TAGAACGGCCGATACTTCGGCACGGAGCGACCTACCCTTGGGCCGAACCCCGAGGGCCTG  
TGTCATCGATTCTTGCCACCGATCTACCGGCTGGACATAGGGGCTTGCTCGGACGCGTAG  
ATGGCCTTGGGCAACGCCGTCATGCGGCGGGAAGCAAACCTCCTTCTGGGTAGCCAGTAGG  
GATCGTGTCCGCTTACTGTATATGCGCGGGCGCGTGCTAGGATTCTATCGAGCAAGGAACC  
CCAACAATAAGACCCGTTATGGTCTGCTTGCATCAGACCTCGAACTTCCCAGCGGGGGCAA  
CGGCCAGGCGTATGTCCATGGTTCGATGACGTGGACGAGAAGACGACCCGCGGCCATGCT  
CTGTGCTGCGCCATGCCGGCGGGTTCCAAGGGACTGTACACATGGGCATATAGGGTGGT  
ATGATGCTGTAGCCGGCATAAGTCCGCGAACGAGGACAGCAAGCCCGGTAGCCACGGCGCT  
CTCGATCTCATGGTGACCGTTGGATCGCTCGTTGAGCCCGCAGTGCCGTCGCTTCGTGAT  
ATCACCACGCAGAAATCGCGGCTCCAGATGGACAATGAACAAAGCCAGATTACATCAGAA  
TTATTGTTGGATGGAGACAGATGTGGCTTCGACCACGGTTCCTTAAACAGTGGAGAGGGTG  
CGTCTCAGACCTTGCCTTATAAGCCCGGCCCGGTCGTTTCTTATTACAAGCGAGGCACAA  
TTGCTACCACGCGTCATTCTACTTATGTGACGCAAGCACCGCACATATCGAAAAGTTGCA  
CGAGCGCACTAAAATCCACATCAACAATGTTCTGTAGGAACTGAGCAGCATAGGTGTATG  
GCGCAAGACATTAGCCTCGAGTGCACCTGTTTAGAGGCTGACGAGGTGGGGTTCGCATTT  
GATGACGCATTACTCCTTCCACAGCGGTCTCGTAGTGGGATTTGGTTACTCGAACTGCTC  
ATCAATGCCGATGTCGCCCCGCCGCTGAGCACATCATCATCCACAATCCTGCCATCAA  
ACGAAAGAACACGGAACCTTACGATACCTAGGTCCCTCGCGCTTAATTTTCCACACGGT  
GAAATGCATCGAACTCGACATCATGTTGCTCTAGTCTGACTCAAAGGTCTGTACGTACGC  
CCAATAACTCGCCGAACGTTGCGTCTTGGCCATGTTGCTGAGTACCCGGCTTGGCA  
GGAGTACGTGTGGGTGCCTTTCACAAGGGAGAGTCAACCTTATCCTGTCCTGGTACGC  
GACGCAAAACCTACGTTGGTATCTGTCTACCCGAATGCCAAAGCTATCTATCGTCACGCC  
AGAGGCGGAGCTGGTCTTCAAGCTTCGGCCAAAAGGCTATGGAGTACCGGAACAGGTGTG



CTCGATGATGGGGCATCCCCGTACCACAGATGAAGCATAGTATCAGTAAACTATGTGTTA  
GACTAAGGTCCGTCCCATCTGGCATGCGCCCGCGCACCACCCGGTGGCCGGGCACCAGG  
AGGGACACTACAGGCATATCTGCCAAAGCACGCTCGCTGCATGTGAGAAGGTAGATGGGT  
ACATCGCACCCGGTCCGACTTCCCTGACAAGGCGATGTGGAGTAGAAAACACGCGAGGGCA  
TCCAATGCAGGAGCATGAATGGTATTTCCGGCTCTCCTATCTCTGACCCTGTTCTCCGCCG  
TTACACGACCGACGAGAGATAACGACGGGCTGCTTTCGATAACCGCCGTGTGCAACGGGG  
AGATGGCCCTACTAGTACGCCTGCTTACGCGGCTGGACGGCAAATACCAGAAAAATGTGC  
AGGTCATGATGCTCGACCCGCTAATACTAGGGGGTTAAGAATGCCGGGCCGAGGTTCCCA  
TTAGTAATGTGGTGCCGTTAGAGGACCGTCGTCGCTACAGAGGTTCCTAGGGCGCGGACGC  
TTTTCATCCCAGGTACGAGTGCCAGTGGCCCTGTCCACCTAAAAGCAGAGTTGGACCG  
CCTACACATTCGCTATTATCACGCGGCTTTCCAGCGCGTCCGGGCTGCCGAGTTCGGAG  
GCTTGATACTCGAGGACCGCCTCCGCTTACTGTGCTATGGCATGCACTCGGGGTTCTGGA  
AAGTGAGTCTGGATTCTGAACCCCGTAGGCGACTATGAATTAGCCGACTAGGGCTGTGT  
TCGATGCCAAGTGGGCAGGCCCGCTTAGGTCGTCCGCGGATTAGATAGTGAGGTGCACAG  
TCCTGATTGAGCACAGTGGTGAAGTAGATGTACGCGGGTCGACGCCTTACCACAGGGCCT  
AGTACAACCACAGTTAGCACCTTCGCGCGTATGAGGGCGGCCTGTCCAAAACGCCCTATT  
ATTGCCGCCCTGGTAGCGTCCCCTATATGGAGGCAACTAAGGTTGGCAGTATGCGCGACC  
CAGCGTTCGAGCGGCTTTGAGATATCTACTGGGCAGTTGGATTGAAAGCGGCACATACAC  
TCTTTTGTGTGGCTTGAACACACGGCAAAGTGCGGGCTGGGACTGGGGCTTGTCTGGC  
TACTTCACGACCATCAAAGCAAGGAGCGGCCCGCCATGATGGTGGGAAGTTGGGATCCGG  
GTGCCTCGGTGTGCGCGAGGTGTGGTTAGTCTACTCGTGCAAGAGTAGAAGGTTCCGACA  
ATAGTTGTCGCGGACGATACCAACCGCTCACACTGGCAGCTTGCCTCCCGCCGCTCCCT  
GAGCTCAACCTTGCCATGCCCGATGGATGTTTCCGCGGCCACTGGCAAGTCCGTAGCCGG  
GTAATGCATCCGTACATCAGCTCCCTGGGGCATCAACCCACCTAAGATTTGATCATAACC  
GATCCGGTATTCCTCCACGTATCAGCCATCGCTGGGAACGAGGTGTCATGGATCGTGACG  
CGCTACCGCAACGACTTCCAGATGTCTGACAACGTAATGGCTGGGTGAATTGGACCCAG  
TTCGCTGAGAACCTCCGGTCTAACGCCCCCAAACGTACACCAGGTTCGAAGTGACAGCG  
ACGAAGATCCGTGGTTTTCCCTAGGTCCATGCTGTCAAACGAAGACTCCAGGGAGTGGCGC  
CATAAGGATGATGGTAGCGGACCTCCGTGCCGAATACTTCGCCTTTCCTAACGGTAGG  
GTTACAGGGCACCGGCCGCATCTTGTACAGGCTTACGACGCTGATCGATGACAACGTTCTG  
TGGGGGAAGTTGGTGGAGCGCTGCGAGTACTCCCTGGATTCCGATTCTGCGAGCTCTAC  
TGCTGGTTCTGAACACCGAGGGTGCAGTTGTCAAACGATCCGCTCAGGCACCTGAACTG  
CACCAGCAGCGAGTCTCCGTACGGCAGTCGCTGACGGATCTGACTACTAAGTTAACCTTC  
CACATGCGTACTGATTACCATCGCTGCGCCTTGCTGTTAGGCGCTGGGCAGAGATGCCAG  
ACCCGCATGCCCCGAACCCATGCTCGTGGCCACTTGATGTACGAGAAATCTTAGTTGGCC  
ATGCTCGTTGAAGCACTCACCCTTTCATCTGACCCACGCCCCAGTCGAGACGGAGGTC  
ACACACCTGAGCCGGGAGCATTGGAACCCCTCTGGCTAGAAGGCCGGCCAGAGCAAGACC  
CAGGTGACGGTTCATAAGGTGGAATATGGTCACCCATAAATGCAGTATATTGACCCGGTA  
TTGGTGTCCACCGACACCAACTGTACGCAGCAACTGACCCAGGCGTCGGGGAGGAGTAC  
GCGTACTGCGCAACAGACTCTCACTGGACCAGGGTATGGACCGGCGTCTGCCCCGGTGC  
GACGTGATGTCCTCGGTGTATAAAACAAGCTAGGAGCTGCCGGGGCTACTGGCCTAACCC  
ACCATCTAACCCGATGAAAAGCTTAAACCCACAGTAATCCGGGGCAAGGCTCGCGGCACT  
TAGTACAGCTCTGAGGCCCTCGACAAGGAGCGCGAGGTCATGAAGGTCATTGGGTTGGTA  
CAGGACGTCCACCGAACGGGATCGACCTCCACAGATTCAAGCTTCACGCAACGGACTGA  
GATTGCCCGACTATCCCGTACCGGCGTTTCCGGAACATACTCGAGCCGGCATACTTTGG  
CTGATGGTGAGTGTGAGTCCCTCCTTGCCTGAGGGGGCGGCGGACGGCGGACGACTAA  
ACAGTCTGAAGAGAGTGTCTTTTGGCTGCGCCAGCGTCAGCCACGACTTGGTCTGTGTAC  
AACGGCCCTGAGTCACAATCTCAATACCTGCGTCTGGCCGGAAGGACCTTTGAACCCGAA  
GACCTGGTGTGACTAGGCAGTCTATGACAAGCCTGAAACTCACCGAAAACGGAACAAG  
TAGACGCGAACGTAAGTACTAGCAGCAAGTGGAAATCGCTGTCCGGTAAGTGTCCGGGGCCGAG  
GGGATCGCAAGTGCAGGTGTGTTATCTCTCGAGAACGCCAAGGATTTCCCTGGAAACGGAC  
AGGGGCCCATCCGCGGTAAGCATCCTGTTCCGTAGGAGAATGCGCGCACAGGTCGAGCAT  
AGGGACGGCATGACTAAGGGCCGGCAACGAGATAAGGAAGACGCCACTGGGGCGCGACGG  
TTCAACAGCGGTGGCTACCAGCAGGCGTCATCTAGTCCACGTAACAGCTACCGGTAGTGC  
AGGCACATGCACATTGAGTTTCGCCAACGGTACCTAGAGTGAAGGGACGGTCTGATCGCT  
AATTCCTGTAACAAGAGCGAGGCTTTCTCACCCATGATGGTAACGGCAGTACGAGTTCCA  
CGTTGGGTCTGTTTCGGGACGCCCTTCTGCACACTGAGTTGCCGCAAGGTAACGTGCGC

CTCATAAACAAAGCCCAGGAATTGCCTATGGCGCGAGGTAGACGAATTGCGCGAACGGGTG  
GTGGCGTTCCAGGGTCCGAGCAGCGTTCAAGACTAGTAGACGTAGAAGCCCAGCCTT  
CAATCCAAAAGTGCGCATTTCACGTTCCCAACACCGGCTTACGGAGGGGTCATCATGGCA  
GGCGAGGAGAGCTTGCCTGGGCGACTCCAATATCTACACCAATCACTGGACCTCACCGC  
TGAATGGCTGCAGGAAGTACGCCAGGACGCTCGCCACGCTTTGGCCAGCCAGACCTGTAA  
TCGGGAAGGCGCAGGATTGGGTTACCGTCTTGACCCAGTCAGCGGGCGGTCCGCTCTGTCA  
CGGGGGCCAGCCTTCATCTGGGGTTCGCGGCATCCACATAGCCACGTATTTTCGTGCCGAT  
GGTATGGGGCGATGCACTCGCCTCCCCTCCACTGCAGAGCGAGGTGGCGACGAGATTTGG  
CTGATGCTACCAAACGCCGGTGAATCCGCTGACTACCCCGATCCCATGGGGGACGCCAT  
GTTTGGGAGACTCTACTCGTCCAACCTTAACGTCGTCGAGTGCTTTGACGCGTCCCCTGT  
ACCTGATATGGTATAATCCGGAAACCTCCAGAACAACCTGCCCCATCCCACCATGGGGCGCC  
GCACCCACGTATGTAGACCTATGCCAACGCTTCAACGGAAGAGACGGTGGTAAGGCCTAC  
GCCAGAGTTTACGTCTCGGCCAGCTCGTGGGGCACGACTCTCTCGGTATGCACGCATCG  
GGGACGCAAGAAATGTCCGCGGACCGTTCCCATCCTTACCAATACCGCTCCACTATCTTC  
TGTTGGGGCTGTCAGACTTTATACGGCACGCCAGCCCGCGTGTCCGGCTTATCATATGGTG  
AATTGAAAGAATTCGCATCGGGCCACTAGCATCATCTCCGGCAAGATGACCGCGTTGGGG  
AGGGCCAAGCCCTTCGTGTAAATGCTACCCGACGCCCGCGTGTGGATATAATGCTGAAC  
GACCTGCACCAATAGCCAGGCAGCAACGCAGAGTTATGAGCCTAAGCGTGAGCCAGCGG  
GTCCTCGACATGGCCAGCAAGAACTCGTACAAGACTCCCGAGATTCGCGACTACGCTTTC  
GCCCTCCTCGTGCGACGACATCCGACCAAGTAAGCCTCGCACGCCATCTACATGGAGGGC  
AAACACGAGACCACGAGAACGTACAAGAAGTGCCTCAAAGATAGGAACGCGCTGACTATG  
GTCTCGCCTCCCTCGGCCACCGAGCAGTGCCAGTGCGGAACGACGAACCTGACCTCGCCA  
GAGCAGCTCGACGCTTCTCCTCCTGCGACGTCCGAGTTATCCCAAACGCCGACCCCGCTT  
AAGATCCCGACAACCCCGACTATCTCTTCAACCAAATGAACATGGCGCCTACGGCGCCG  
CCGGTCCAGTACTCCCTCATGTGGGCGCTGTGCTCCTGGTAACGGTACCGGGAGTCATC  
CTGGACTAGCCCTATAAGGCAGTGATCGAGGAAGGGCCGGCCCTACCGCTGAATTGGGGC  
TTATCCGAGACGGGGTTGTAACCGCGCACGGTGACAAGGTCGACCTGATGGTGCCTAATC  
GACAACCGCTGTTTCGATGTGCTTGGGGTGGCGTAACGCGTTGGCGCCAATGTGAAGACTC  
TTAACTGAAGATCTAAGGGTTGACAAGGAGCCGCTGCCCGACCAAGTGAGGCACTGGTC  
CCTAGTATTCCACACAGAACCTGCTCGCCCCGGGGGTCCGTATACCCTGGACTGACTGT  
CTCCGACGCGGAAGCCATACTAGTGCCTCGTAAGGCTAGGCTTACGTTGGCGGACTTGG  
AGCTGCAAAGATATATCCGGGCTACGGGCAGGCTAATCAATGATGGATTCCTCGAGACCA  
TCGTGATTCACCTGAACCGATTGAGGGCAGACGGCGCGGCCCTGATCCTGGACTGGGTGC  
CCTACGGCGTGCGGTCCGTCCGCACGGCCGATTGCAAGGACCTCCAGTCGACCCCGACC  
CCGTGTATGAGGAGGATAAGGGAATGGTCGATGTCCGCAACGAGGGCCAATGCATTGTTT  
GCATCAACGCCGGGTTACGTGTTGCCTATCGCTCCGAGCCACGAGGCATAGGGGGAGGT  
TCATCAGGGCGTTGATTCTCACCGGGGAGACAGTCGATGACGTCCGAGGCCTGGCGCGAG  
GTGGGCTGAAGAGTGTGCGCAGACGCCGGTTGCCGGGAGACGCTAGATGGTATCTTTAACA  
AGAAAGAGGTGGAGAAGTGACACTTTAGGGATAAAGCCAACATCGGCCAGGATACGCTCA  
CCGAAGCCCATTTCTGTTAATGAACCGCCCCGACCAGGAGTGAGCCTTCTGCCACCGCT  
TTGAACTGGACCTTAACTCACACCTGCGGAAGTCGTTGTACTGCATGAACTGTAATCACC  
CACGAATCTACAAGCAGAGGCTCGACGAGCCTGATCCGTTTGCAGAATAAGAAGGATCTC  
AGCGGCGTGCGGTTACCTATCTAATCACAGCGTTGGCATGCCTCTGTGAGTCCTGTGTT  
ATAATGATTGAGTAGAGCATTGCACGCGTAGCGGTCGTTTATAACCACCGTTACCGGC  
GAAATCAGCTGCGGCAAGTACCTGTCATGTAATGCGGGCGGGAAGCCTGGTCGGCATGACA  
GCAGGTAGGTAGGGTACCAAGAGCACTAGCTATGCGGCAAACATTTTCGTTCTGGAGAAT  
GCATCCAAGGACCTTAAACAGCCACGGGCCTGAGTTACTGTATCTAGGCCACTAGCCATCC  
GACCAAGCCGACAGAGGCAAAGGGGATAAAGAGGCCGTCAAGCAGCACCAGTACGCCTGGAA  
TCCTCCGAGGGCCGCAAGTACGCTCGTCATAATCCCTGTCCGGTATCTGCGTCCGATAACAG  
GAATTACTTACTTGAAGCGGCCCTACCCGATGCATTGTTGGTTGGCGATGGTAACACGC  
CAGACACTGCACATTCGCTCAGCTTTATGGGACGAGGGGTGGTAAGTCGAAGACTCTTAC  
AAAAGTGAGCACGACAGGTTCCACACAAGTCTCGCACTAGCGAGAGTGAAGCGACGGCCG  
GGCGTGCCGGAGGTCCACGAGATCTGCGGGTTAGGGGACGCGCACCTTGGAAAGGCGGCC  
CATATATTTGAGCTCCGACAGCGCGTCCCATCCCAAATAAGGGCAGTCAGGGGACTCC  
GGGAGCACACGCCAGGTCTTAAACAGTTAAGCAAGGTATGGAACATCCGCTGTTAGCGGT  
CGCACGACTTGTACGTTCTATAGAGGTGCACTCGGATCTCGACTGGGGATAGAGCATTG  
GGCAGGTCAGGAAGCCAGTAGCTGCTCTGTTTCGAGCGGCTATCCCGAGGAGGAGAAGCAG

TGGAACAGAACGGTACCGTATTCGAACGACCCACGTTTTAAGCCTGTTTTCTGATCGATT  
TCTATATGACAGCACGCCCGCACCGGGAAATGTGAAGACTGTTGATCGCGAAGCGCCCGT  
ACGCTTTCACGAGACAAAATCTGGAATGGTTGACCGTCTTACAGTTGACCACAAAGACGC  
CGAACCTGTGCAGTGCGCCGGTATGTCATTGTGGAACCACTATTTTGCGGGCAAACGCG  
GATCCTGGGAGGAGACGCGGCACTATAAGATTGACGACTGAATCTTGGCCCCGGGGTTAT  
AGTAGAGCATGGACCCCGGGTACCATAGTTAGAGGGACCTGCGTGTCTCAATGATGAGC  
AGGGGAACTGCTTTCCCAAATGCTCCTCTCGCGGCCTGAAGGTCGTATTGAGGACTCTCC  
TCTAGACCTGTTAGCACGAGTGGTGTCAATCCGACGGCTTAGGCGTTTACTACTTCAGGC  
GCAAACATTACGCAGGAAGCAGCTGCGTTAAGCACACGCATGCCAGTTATTGCCCCAGA  
GAATACGTGCGCTTGTCTACACAGTACCTAACAACTAGGCCGAGGGTTCTATGATAAG  
TACTGGAGGGAGGTGGGTTCTGCAGCCGAAGATAAGTACGGTCGAGCTATATAACCGCAT  
CTTGTGGGCGGAGAAAGGAGCGACATTGCTGAAATGGCCGACAGCAGCAAGTCTGGCCGG  
GTCGTCCTTCTAAGCTCCGCCAGTGGTGGTCGCCGGGCCTAGCTGGCCGTGCTTCGAGTA  
CTGAATATCGCTGTTTCGCCCTATCCGTGAAGGTGGAAAGCGGAACATCCCCCATTGCTAA  
CGAAAGAACTGAACGTTTGAACGTGCTACGAGTCTGGCCTGGCACGCCGGATCGCCCAA  
AACCGCGACTGAATGGATCACAGTGGAGAGCACCGCTAGTGGGTCATAGAAAACGTGGCC  
ACGCCTGCAGTGATAGTCATCGTACTGGAGAATCCGCATGGGAACACTGATGAGTGAGCG  
CATGTGATTAGAGCGCGGCAATGGCAGCTGCAAACCGGGGCCACGGAGATACGGGAATCC  
AGCATTCCGCGTCAACAACGCGCTGGGCCCGTACCACGCCAGGCGGCTAGATCTTCCATG  
TGCCAGCGCGGATCAGGAGGTCAGGGAAAACAATATTGGTCGGCAGTACCACAGGCGCTT  
AGGCCCGTGAGGACTGACCCTCTCGAAACTCAAGTCCAGCGTGCGAAACGCCACTTCGC  
TGATCCTAAAATCCACCAGCGTCGCGAAGTTCAGAACGCCCCCGCTCGGCGGCAGGCTCTA  
TGAATTCCCTGCTTCCCGTCACTTGCTCGCCAGAACTCACTATCAATTGCGGGAAGCAAT  
GGCTCTAATTGTGCTGAGCAAGGCACGCGGCCAGGAAGCGTTGTGCGTTCCTGGCAATG  
CCGGGGCACACCAGACACGCGCGTTCGGTTTGTGAGCATCGGGGACGTAAGTGGCGCACTTCAT  
GCGGGACACCGCCACGTCACCAGCCACCCTAAGCTGCATCCCCACGTCTCTCGTGCGGAC  
CATCGCGCAGGATGCATGTGTATTGGATAGCGACCGTACGACCGCACTATACTTCGACCT  
GAGTTGCTTGTGTTGTGCGTAGATCGGACACGCCAGGAAAGGGCGAACCCCTGACTACGAT  
TGGTCTGTGCTAAAGAAAGCCAGGTCGGTCAGTTAGGCAGGAACATAAGGATCAGTTG  
CTACATCCACGTTCGGAGAGGATTGCCGCGCCGCGAAGATAGCTACAGGGCGGTGTAAGCT  
GCGCCAAGTGGCCAGGGTGTCAAGTAGCATGCGAATCGCGTGTGTCATGGCTGAGGTGCG  
TAAAGTCGGGGCTTATGTGTCGTTTTAGGTTAGGGATGACTCACCCATGGTAGGAACTGT  
GCCGACCCCTTGGGAAGCGATCTCAGGCGGTGGCCCCTGCACTGGGGGTATTCAGCTCTA  
CTTCACTCTGAGCCGTTAGGCCTGCCGTATTCGCGCGCCGTTTCCCCCGAGTTACAGCA  
CAACCCGTGGAGGTGCACCGGTGTGTTTCGCCTGTGCGAACCAGATTCGGGCCGCGCCTTT  
CAGCATAAACTCCCCCGCGCGGTAGCTGCTCGAGTTGGAGAGACGCAGAGGGCCCCGGTGT  
CAGGGGGATGGCTCAGTGCCAACCGCATCCCGAGCTGGCTTCCGCATTCCAAGACACCTT  
GGACTTCGACTAGGATCCCTAAATGTCCCTGAAGCGGTTTACGGCTTGAGGGCGTCATTA  
GCCGGTCTCGCCGCTGGACAAGATGCACGGCCACCATGCTGACCATCCTCTAGGCAATGC  
CCCGAAAGTCGCAGGCCGCCCTTACCTCGAAAACGGGTGCCACGTTACCTACAGCAG  
TGGCGGGGACGAGTAGCGTACGGTTTACAACAGGGGCGAGGCCAGCCTTAAAGGGAGCT  
GTTGCACGTGGACGAGATCCTCCCGATGGGTGAAAGACGCCTCGATCGTATCAACGTGTT  
TGTACCGTGTGTTTCCCGGCTCTCACATGACCCGCGTCGATCAAAGATCAAGATTGTTTCT  
TGTGCGCAAGGCTGATTTGTTTCGGCGCCCTGTAAGCACAGCCAGACACGTGCCAGGCCA  
GGCCTACTCGACGCTAGGGTCATTCGCCTCATAGTTGCACTAGCGCGTGGACCAGCCGTC  
CGGATAGCGATCTACTTACGGGCGTCGACCCCGGATGAACAAAGAAGCGATCGGCTCTGT  
CATCCCGTACTTATCCTCGAGGCTTACGAACCGATGGGTTGCAAGTAAGTTCCCTCAA  
GGAGGGTGGTGGCGAATCCAAGCTGCACTCCTACCCCTAGATTGCCGAGCCAGAGGGCGC  
CCGGTTCGACCTCGCCACAGCAATCATGGCATTAAAGGAGCGCCACCTTGCCTGCTTTT  
GCAAAGAGGGACTCTCCCTTTGCCCGACTAACGAGCCCGTCATCAACTACGTCTTTGG  
AGACAAATCGCGCGGTGTACCGGAGGGCACTTCCAAATGCCTGGGAGAGCAAGAGGGCGCT  
GTTACCCGGTTGTGTTAGTATCTTGCCCCCTTAGTCAACTCCCGCTATTTGCTGGTCTC  
GGCTAACGAGCATCCTATGCCGGGCGGCGCCGACAGATCGGTGGGGTGCGGGGGCAGAA  
ACGCAGCGCCTCTGTGCTCTCAACTATGTTGAGGTGGAGGCCGGCTGGGGTACTCTGCGA  
CCACGATGACGGTGTGCGCCGCGAAGTACCAGGTTAAGATCAGGCCGTAGGGTATCACGGA  
GAATGTGGTGGTAGAGGCGCGGTACCTTACGCGAGCCAATAAGCGGCACGCTGCCGCGGA  
GTAGAACTTCGGACACGCCCTAGGCGCACCCCGTCTAACCTACACCGCCCGACTTATAGA

GGACAATGGACATACAGTGCTGGCGATCACCGAGAAGCTTTGGTCACAAACCTCTATAGC  
CAATGAAATGCCACGGTTTTTCCGCTAGCGTTCGTGCCGCTTTAATCGGAGATTGATTT  
TATCCCGCTGTGTCTAGGGGGACGGGTGCAGGAGAGTGTCCGACCACGGGGGTAAGGA  
CCCGGACATGACATTGTTCCGCAGATCGCCATTTAGGTTCTTAGTACGGTCTCACGTCAA  
AGACGAGGAGGAAATCGTCCCCAAATCAAGCGAGGCAGAGGTTGTGAGCCCATCGGACCA  
GATCTTGTGTTGTTAAGGACCTTGGACTCCCAGGAAAACGGCCTCGGTTTGAACGGGGA  
CACCGTCATTTACACGGCGGGTGTATGGGTGCGATATCGCTGCCTTTATAGCCACTTGCCT  
AACCCCGTAACGTTTCACCGTGCCATTTTGAGATAACACTGGCGGCAGCCATCTGGAC  
GCGCTAACGGACCCTGAAACATGGATTAGTCGCAGGGAGTGTATTACTAGCAGCACTATA  
AACCACTTTGGCTTTTTAAGGCTCGTGGCCTGGACGGGGAGTGGTCACTGGAGCACCTCG  
TGTCTTGGTCACCAATTGGTCGAATGGCAACCGCGATCGCTGTAGTCGCCTCTGAATATG  
TTCTGCCGATAGCCGACGGCCTCGGGGTGCAGTGGCCATACATCCTGTCTGAGTTCACGA  
ACGCGTGGGTGTTCCAACCGTCCGTTCCGGACAAAAGAGACGTGCCCGGCAACCAAACA  
CCACGCCGAGATCACATTCTCCAGA ACTGATCCGAGGGCTTAACAGACAAGCTCCAGGA  
GGTTAAATGCCCGAGTCGATTAACAAGGAAGGGGGTAGTGTCTCAGGGGCCCAATTGTC  
GCTGGGCATAAGAGCGGTGGCGGCGTGGTTGTTGTCGGTGAGAAGGACTCCTCGAAGCGA  
CCTCTGGCAGAGTCGCTGAAGGAGCAGCGCTTTGTAGCCAGAATCTATGGATGATCCTG  
AGCGAATATAACATACCCACGATTGACACCGGTTGCAATGGCGAGGCGCAGGATGAAGCC  
GACGCCAAGGACCGCGGTACACGTTATGTAGTTCACGCACGATCGCTTGCCGTTAACATC  
GGACACCGCAGTGACAGCAAAACCCTTCAACGTGGGCGGCAAAGGGAGATACGATTACTA  
GCCCGATGGCCGAGGGCTTCATACATACGTCCATTGCCCTCGCTGCTGGTGCCACGATCG  
AGAACAAGAGCGAGTCGGAAGTATTAGAGTACGTCTTGCCCTCTGCCGGCGCCTTCCTCA  
TAAACA ACTTGCCGCACTAGTTGGCGGTTGCCTCTTTCCGCTTGGCTGTGTTAGCTCGT  
AGATCGAGCTATACGGGACGGGAGAGGGACTCGCCGCCACTAATCCCACCGAAGACTCCC  
TACGGCACAGTCGCCCTGCCGATCTGGAGCTCCTCGTTGCTCCGCTCCACTTCGTAAACG  
GCGGCCAGGCATTGCTGCACCGTCGCCTCATGCTTCTGGTAGACCCAGTCCACGCCC GCC  
AATAGCGCGACCATGGCCAGTTAAGGAACCCTGCTGGCCCATGCAGCCGTACACGGTGC  
GCCGACGCTCTTACTGCCACACCGCACGCAATGTCGTCGGACGGCAGATGGCGCTCCCTA  
ATCTGACACCCGCGACACATGCAGACCTACAGTACCACCTCATTGTCAACCGCGACTCAG  
GCAAGACCGCCTAGAAACGGTTGATCGAGGCGATACCTACCCCGGGAGGGAGATGCATCA  
CAGCATGGGACGAGCAAGTAGGTTAGTGAGTCGGCCCGGGCTCTAGCTTATTTGCGCAGC  
TATGTCGGTGTGTTACGATGTTCCGATCGCACCCGTACGTCCAACAATTTGCTGCCGGCA  
ACGTAGAGCAGTACAGGGGACAATCCTCTAGTCTGCTCTCCCCGACGGGCAACTTGTCT  
TGGGAGAGTTGGAGGAGGGGAGTATGGTCAGGCTCTCGGGCGTTGCCAAGGGCGGCGGGG  
TGGACGTCTCTGGTGAGATTAATACCGGTTGCTTCGTTTTGGGCCATGTTACCACA ACTG  
AGACGAAAGAGCAAAGCGATTTCAAACCCATCGGCCAGGCCTTCGCAATTTTCGGGAGTT  
TCGAGATACGCTGGAGTCGTTGGTACATGTACACCGAGTAAGTTCTACACACTGTGCTCG  
CTATCTGAGATGTGCGTCGGACCGTTGCTCCGGCGTCACCGAACTTCCTGGGCGGCGCGT  
ATAATCGGCCGGCTGAAACGTTCCCGTAGCCAGTGCCGTACCTGAGCACCCCGGGGCAT  
CGCGTAGTAACGGCGGGTTTTCTTCCCTGGATGCCCAAGAGCGTGTACCGTCTTAGCATT  
GCACCGGAATCCCGGCGCGGACCAGTACCATGGAGTCCACGAACTTCCTCAGCGGACGAC  
AGTAGACCAGAGCTAGCGACAAAACGCATGACCAACTCACTAACATATTCGGTCTTGACA  
TTTTCTAATGGGTATGGTAACCTGCATCCGTGTTAGCCTCTCTAAGTTGTCTTAAGACA  
CACGCGTTATGGCTCAGGAGACCGACCACGAATCTAACTTTGCATAACAACCACTGGCTG  
CAATTCTCGGGGCGCTGGTCGCCGTGAGATTAGTAGGTGTCCTAACCTCATATGTGACGA  
GCCCAAGCTGTAGTATCTGCCCCGGGCCCAACGGTGAAGCGACGCCTACCTCGACGCA  
TGCGCCTGTAGCTGGCCCGCCAGCTTAGGTAGCTGCAGCTGTCAAAGTTGCTCGTTAGGC  
GTCGAACCAAAGAGATGAGTCCACGGACGCCACCTCCGAGCCTGGTCGCCACGTGCAACA  
CACGGGGTAGCACGGGTTCCGGCGAGCTGGCTGCAACCCTGAGTCTCGGCCTGGTAAATCT  
CATTTTCCATAGTTAGCACCCGGGCATCGGACAGGCGTGGATTGAGCCTATCGGGGAGAA  
TGA ACTATGCTTCTTCGACGCTTTGGAGCTGACCGAGGTGTTCCGGCACCAGCTGATTAA  
GTTGCTTACGGGGATGCTTGTAGGCTGCCTAAGCCAGCACCTTTAGTGGTGATCGCCG  
GCGTCATGCGTTGCTCAAGGAAATCGCTGTCAGTAATTAGGCCGTAGCGGAATGGGTATA  
TGTGTTTTTCTCTGTTGCGGACGAATGAAATCGGGACGCGAAAGTCTCCGATAGCGTCAT  
TGGGAAACTCAAGAGAACCACGTTGGCCGGCAAGCAAATTATGGAGATCGCGAGGTCTCTG  
CGAGCTAGTGGGTATGTATAACATATGACCTAGGGGCAACCCACGCACCATGATGATACT  
TCTCCACGCGTTTTATAATACGGACGTGGATCTGCACCCACTCTCCGCGCACAGGAATCA

GGTTGTGCGT GCCCTGCTTAAGACCAGTATGGAGAGATTTCCGTATGGGGATTGAGCCAG  
GACGTATTGCACTGCCACTACCCACAATCGTTCGGGTCTCGGTGGTGCGCACGCGGATGT  
TAACTAGCACCCCGAGGACCCCTAGCCGTACTAGATGCTAGCTCTATGTCCAAATCAAT  
GCTCTCCTCCCAGATGATAGGCCGCTCTGGGCACGGCACCCCTCTAACGGGACGTAGACCA  
CGTATGGGCAGGCGACGTTGCAGCCTGGA ACTCCAGGGAGGTTCGAGGTAGGCGGGATTAA  
CACCAACGACTACCCGAACCGTACCACGGGACACTGTTGTA ACTACCGGATACTAATTTCGA  
GAAGTCAGTCGGCAGGTAATCAAACCTGGATGTCCGCTAGTAAACCTCTTGGGCGTACGA  
AAGCGGTTTGGCCGGCCATTTTCGAGCAAGCCTGCACAGTACGGCTCCTGAAATGCGGCGA  
ATTAGGAGTCCGCGCTCATCACGCGCCAGCCTTTGACTATAGTATAGTGCTGCCGCTCTC  
CTGATCTGGGGCTGCACTTCGAGGCAACCGCTTTGCAGACGTCCTGATAGCCACTCACAA  
GAAAGGATCAGATGCCCTGGTCTTCCGGCCCTAGGACCACCAGTTTATGTTTCGTGGCTGT  
CACCTTCTGTGCTTTGTAATCTACTAGATCGTATGAGAGAATGTTTCGCGAGCTCAATGT  
GGACTTTGCCAGCATCCCTGGGGACA ACTCCATAGGCGTTGGACGCATCCTAAGGTTGAA  
CGGCGCGCGTCCGTCCAGCCCGCCTCTTCTAGCAGTCCGAGATCAAATCGAACGCCCT  
CGGTGCCAACGTGACCGTCACCGCCGAAGACGTTTCGAAGTAAGAAGTTCAAATACCTCAC  
GAGGAAGGGCGATCACGCGGCCCGCGTATACGCGGTAGCCGCCCAGCACGTGTAGGAGAA  
TAGGATCTGGTACCGCTACCGGTACACCTGCCTGGCGTAGATCTTCTAGCATCGTAGCCT  
CTAACTTGCAGGGTTACACAACCGCACGGACCCAATCCAACAAGGTCTGCCGTAATAGCT  
CTGCCAGGTCACTCGGCGAGGGACGTTGTTTTGGTACTGCTAGCCGAGGAGGCCCAACAA  
AAGGAAAACCTTTTCGTA CTTACTTTTCTAGAGGCGGTGAATCAAGCCCTATTAGTTTTT  
CGCGCGATCCCCGTGCTATAGGAAGATGAGACGTACACGATACGAGCCCAGAGTCTAACC  
CCTGAGGCTCACGCTCGCCAACAATCTAAAGCTGAGGGATGGCGATTGAGCATCTTGGAC  
GCGTTCACCCTAATTCCC GCCCGGACGCGTGTAGTTCTGCTATCCGCAGTTTCCTTCATG  
TTGTATGCAGACGATGAGGCTATGTTGGCCTGCGCCGGGCGTCACATCCGTCGGATTCTT  
ACAGGGTCTAAGATAGCTGTTGCCCGACTGTAGGTGCCTGAATTAGTGCATCCTCCTGAC  
AACGAGATCCTATAGTGTGACCGCCTTCCGGTAGTGTACAGCTGCGCCTAGGCGGGCGTAC  
GTAGCCGACCTAGGAGCCTACACTACCGCAGAGAGCATTGTGATGAATCTGACACGAGGA  
TCCGAGCATGTGCCTCCGGTCCAGAACAGTCAGTGGGAGCTCCCCCTACGCTAGCATGCT  
ACAGCCACCCGAGTCTTAAAGCGAGCTACA ACTGGTGAGATGCTTTTGAGGAGTGTTCCG  
GCGGCTACTCGTTGGCGTCCGGTCAACAGATTGCCGAAATTGGCGTTTATGGGCTGGTGGA  
GTCGCACTTGAAAATCCTCCGTGTTATGCAGACAGAACGTCGCGACCGTAATCCGTTGAA  
CCTGAACAGTGACGCCATAGCCCCTACAGACCCCAACCGAGACGGGTACGTCCTTCCCAG  
ATTGTCCGGGAAGGAGAACCTGATCATGGGGGGTAGTCAGGACGCGACGCTGGTTTTCT  
GCGCGGTCCATACGGGGAAGGACTGTTCAATGGGTCACACTGCGACCGTGCGGCACAGAC  
TGGAAGAAGCTTCGTACGTACCACACTGCACGTTTCGCTTGTTTCGTGGTGCTTATCTATGT  
TATCTCCCGCACATTCTAACGGTCAGGGACGAGTGCGTACCCGGACTAGA ACCGAGCTGA  
CTATCCGTTCTTAGACCACGGCGCCTTCTCGAGGCAAATAAGCCTCACCGTCAACAACCA  
AGGCACGTGGCTCAGGAAGCCTGGAAAAGTGTCGACATCTGCAACA AATTCCTGTCAGGG  
CGCCGGTGGCTTCCCTGGTCACTCCGCTCCCACCGGAATCAAACACTGGTGCAACATTTGG  
TACTTCTGCATGTATTTTGTGCTTCGACGACAGTGCTGAACTGTACGTTAACCCCTAGA  
GGAAATCGTGGTAACTGCTGACTGACGCAGTAACTTCCCTAGTGCAAGTAATGCAGACAG  
TATCAGTGACGCAGGTGAGCTGCGTGTAAGCTCCCTTTAAATGGGGACGGGATGATCAT  
CGCTATCGGCGCCCGTAAGAACGTGTCACACGGACGCTGAGTCGATCTTCCGCGTTAGTG  
GGACGAGGTTGCGACTTAGGGAGTACAAGCAGAGCTTGTGTACATGCCGCGAAATGTCAC  
TTACCCTGCCCAACCTACAGACCCACGGCGTTGTA CTACTAGCGGTGCGCCTCATCGTA  
CGATGGGGCGAACCTGCCTCGGAGTGCAGTGAGAAGGGTGACTTTGAATTCACCAGCAT  
TGAGTGTCAGTTGCTATTGCGGGCTCGCGCTTACATGTGCGCATCGTCTGGGGGGTACCC  
GCTGCTGGGGTTCCTAGCCTATGTTAGGGGCCGAAGTAACAACGATACCATCAAGGTGGG  
TGCTCCTACAAAAGTGACGTTCCACAAAGAGGATGCTGCGGCCGACA ACTACGAAGTGCT  
ACTCGCGGGCCAAACCCACAAGGGCCAGTTGGCGGAGAACTAACTTACTTACGAGTCTCC  
CGGGACACTGCGGGTGACCAAATGCACCTGCTATCACGGCTCGTGCCCGCATCAGGTCTG  
TGCGCCCTCAGTTTGCTTGGCCAACCGCCGTAACCCTTCAGCGAGCAAGGAGTCGGAGCT  
GCTTGCCCCCTAGTATTCTGGTGGTCCAATGTATCCGCGCGACAGTAAGTTGTCACTGCC  
GAAGTTTGCTTCGAGGCGCATACGTTTCTAGTCGCCCCCAGTACACTGAACGTCGGGGT  
CGTCGGCACGTCATATCCACGAGGTGGATCGCCACCGTTACCTCGGGCATATTCTGGA  
GTAGTTTGACGGTGAGTTGTACAAGTGAAGATTCTGACAGGTCAGCACGGGTGCGTTCGT  
CTGTGCCAACAGCCTCAGCTTGCGATAGTAGGTTACGGTTCGGGTCAATCTCGGTGAGCT

AAACAATGAACGACTGCCGACTGCGGACACGATCATAAGGGGACTCCTGAATCTGTACCG  
AGTCCGCGGTTCAGTATGCGGACTAAGAGGGGGCAATCCGAAAGTGTAGTGAGGACGTTTA  
ACGGGTGGATAACAGCTTCGCGTACAAGCGCCCCGGGTGGTGTACACGGCCTACA  
CTGTGAGGATGCTCTAGCAGCCCGTTGCCGGTGGACACCAAAGCTGTTGGGACACAGGT  
GAGCGATCAATACTGCATTGGCTATCGCCAACTCTCGGAGCCGGGGCCGAACCGCCCCAA  
CCTCCGGGCCCTTGCCGTTGTCACGAAATCAACAACACGGACGCATATGCACCGGAAAAC  
GTTGTGCTCGATAATACCCCTGTAGTAGCCCTGCGTGTGCCCGATCACGCACCCAGGCC  
GCCAGCGTAGACGAGCACGTTCGATTTCCATCCAACTCGGGACCTCGCTGTGCGTATGCC  
ATAATACCCAGCGGGAACCTCCGGCACCCATGCCATGTTACATATGTAGACGACGCACTT  
CTGGCTAGCAAAGACCACCACTGCGATTTGGCAATCACCAGCCTGAAGTACGGTTTCCG  
TTACAACCATCGCATAACGGAGGCAGTAAAGGCATTACCAGCGCGACTCGCGTACGGCAGG  
TTTTTGCCAGCGTAATGAATCTGCGGCGTAGTGCAACTAGGCGAACAGACTAAGGCGACA  
CATATACGCAACGAGCAGGCCCCAGCTGGAACTAGCACTGTACTTCCCGGGGATGTGC  
GCTATCGACGTGCCTCGCGGGGACCTTCGCCCAATGACCGTCAACAAGTTTCAGGGCCAG  
GGACCTGATGCGATTGAATTGCTTATTAGCGGACCCCCGGCTAGGCCCCGTCAGCTGTT  
AAGGTGGGAAGCGTTGGATCAACCCCCAGGGAGATGGGCTTTCAGCAGGCCGATGTCTCT  
CTCGGCCACATGGAGCTGAACCGCGCGCAGAGGGTAGACTGAAGCTATTTTATCCAGTAG  
GTGTGGCTCGGCACCCGCGCACCCCTTGTGCCGGCTCCGGGCAGGTCGGTGTTCCTGACG  
TATTTTCTAGATGTGCTGAGCAGGGAAGGCTGTCATAAGGCGCCGCATAAGGCCCTGTG  
ACAGTCTCGTTCGGCAGTGTGCGCAGCCCATCAAGCGCCTGAGGCACGTATGTCCGTAGC  
TGCCTAGCTATCTCGGCTCAGGGTAGTTTCCACCAGCGAGGGGGGCTTTTCCCATAGAAG  
AGCCATATGGCCGATCGTGCTCCGCGACGCTCGGGTCAAGTCAATGGCTACCTCGGACAA  
GTGGTTCTCTATAAACC GCGTTCGACTACAGGCTAAGTTGACACAGAGCCAGGTTGACCGC  
ACTGCCCCGAAACGGACTTTCCTGCTCCACATTCCCGGGATGATCGGTCATGCGATCTTC  
GCTTCTGGCGGGATGGAATTGTACATGCAGGGGCAGCTGGAACGGATCCTCGCGCAGGCC  
CACGAGGATTAGGAGGGATATTACCATACCCGTCACGTAAGTTCGGGTCGTCTCTCTAAAT  
TTAAACGATGGTATCCGCCAGGCTGAACTGGGCAGCGCGTGCAGGCTTTCAGCCGAATC  
CACGGTCCGTCCTTGCCGCTTAAGTAGTTCATACGGGAGTCGTGGTTAGAGTGCCGGGGG  
ATCCTAGAGGGCACGGTTTAAAGGCGATCTAACGTGGGCTCTGTCAATGCCCTCACCAAC  
CAAACCTCTGTAGAAAGGCCTCGACGTTGCCATCCTAAGATCTCTGAGGTGATGGGT  
ATTGAGCAGGATGCTATGCGCATCGCTGCCCTAGGGCGCACTATTCTTCAAAGATCAGGA  
GACGCCAAGCGCGGCTGTGACTTGGAGGGGCAGAAGCAGAACGACGTGCAGATGGAACAT  
TTCCACAGCGACGGCGGTGTCTTCGATTTCGACAGCCCCAGGACGGGCACCAGCTGCTTGT  
GAGCAGAGCTTGATGCATCCGCTTAGCGAAGATCACCTTGAGGTGCCCGCATCTTTTAAAG  
TGCTTGGGTGTACTGTACACCCGTGGTTTCCAAAGCCGGATAAAGGTGATAGAGGCCAGT  
CCGGTCTCGGCGGGTTGTACCCGCGCCATGGAGCCCGTAGCGAAAAACGGCAGCACGACT  
GACTTCGAAGCCGTAGATGAGCAAAGGGCCATTCCGTCCGTGCCGATGCCCTGTATACG  
CCGCGGCTTTTTACTGTGGGGCGCGTGACGGCTAATCCGCAGACGCCCTGAGGTACAAG  
TCGTTGGCGGACAGGTTGAGTAGGGACGCATTTGTGGGTGTTATGCCGGCACATTAAGGG  
GGTGCTGAGTCGTCCCTGAACATTTCTCAGTTTTTCGGGGCCCTAGCCCCTTGTGCTCGGG  
GGGTTGCTGGCTTAACTCCACCGAATAACAGGGCCTACTATTGCCGGCATGCCCTGTGG  
ATCGGGGCGCTCGTCCGGCTCCATCGGGGAAAGCGCCGGAATGAGCTTACCGTCGTCGTC  
CGAAAGTTCACCCCTGCACCCAAATACTGCAGCTTCATCGCCGTTCTAGCTTGATCGGGTC  
CGAGTGAGGGGCGCTGAACTAAAGTCCCCACGTGCCCGGAAACGGAGTCAACACTCCTG  
AGCGGCCTGGAACAAGAGCTTCCACCTAGGTTCAACCGGACCGCCGGGTACGTGCCGAAC  
GGCGCGGTAGCGGTGCATGAGCTACGAACACCGCCTCTGACCCAGCTAGCCTATGAACCG  
CAGGATTAACGTTCCCGCAAGCTCAGTCCCGCAAGCTGGGCGAGGCTGTCAGGGATGAA  
ATGCAAACAGGCAGCTTGTCCAGACACTGGGGGCTGGCCACATCGGGAAGCACGCCCCGG  
GACGAGAGTCAACCATTGGTGCCACTGCGAGCTCAGCCGGCGGCTGAGGTCCATACTCCG  
ACGAGACAAGAGCAGTAATCCGAATCGCCGCGGAGTGAGATTGCCTTACCGGCTGCCGCC  
AGAGACTAGGAATGCAGAAGCCAAGTTACGCCGGAGGGAGGCGAGACCACGCTGGGAGAG  
CTTCCAAGAACTTCCACAAAAACGCCTAATAGATAACCCTACAGCCACAAAAGTACGG  
CTGTCGCCTGCTGCGGTGACGTCATACTAGTAAACAGCAAAGTGATCCCTAGGGGACCCA  
CACTGGGTCGGCGTAAGCGTATGGACGTTGGGAGGGTACGTCGTTTGCTGACCCGTCGAG  
CTGGAGCTAGTGAATGGCCAGCTCGTTAGTCTGCCGAACAACAGGGAGATCGACTAGAAC  
GCCGCTTAGGCGATTCTCTGTGTCGTGGGTGCTCTCGTGGCGCACTGCGAGGTGAGCTG  
TAAATCAAAGGCTAGAAAATCACGAGTAACCGACGGGATGATGAGTTGGGCTGTCGACTT

GGTCTTGCGCAGCAAGAGCATAATCTTCTGCCGTCCTATGCGGATAGCAACGGCCAAGCC  
ATAGGGGTTCGGAGAGTGAGTTATACGGCGCATGACGTACGCCAGAACGATAATCGGCGAA  
TCAGCCGGGTTGGTATTCATGGGAAGTTTTAACAGGTCCCAGCTCGACGGCAAGAGCATT  
GCGCAAGAGTTAGTCGTAAGTACTAGTATGGGTTTCAGAGGTTCGCACTCTGACGTGCACTGTGA  
GAGGCCCGCACGTAAAGTGCCCGTGAGATTCACGAGACCTCGGATGTAAAGCGCAACAGC  
AACTTCGCCACCAGCTCGACGTATGAGCGGTACTCCACGTTGTACTAGCCAACCCAGTT  
CGCGCTGAAAACCTTACTACCAAGAAAGAGGGCCACTGCGTCGTAAACTTAGCGCGGCTA  
GATAAACTACCCAACAAAATCAGATATTCATCTCTCCCCGGGGGAAATGATACTATCGCC  
CGCGTGTGCTGCCGTTCCCGGTTGCCCAAGAAAAGCCCCCTGTCAGCCCCGTACGCGCTGG  
ACAGTGAACAAAGAAGAATCATCTTGTCTAGCAACACCCGGTGAGATTCGAGCGTATAGA  
GGCAAGTCGCAACTCTTGGGATACCTGGGAAGACGGTCAACCTGAGACCTAGACTTATTA  
CTTGCAACGACTACACCAGGAGCAACGGCACGACATGTTCTCGGTCCGCGACCCCTAGTT  
CGACTTCAAGTGGCAGTCCGGCGACAGCCTCCTTGCCCAGCATGGTACGTTACCTAAGA  
GATTTTTACCGCCACGACGGATCTCAGGCTACGTGATGAAGCGAGCTGGATGGGCAGGTG  
CATCAAGATCACCGTGGCACGCCCGCCGTTTCATGGACGGCCACATATTCCTCGCCTTGAC  
GACAGGCAGGGGCGAACCCTGACTGCCGTTGTGTCCAGCGCAATCTTCGGCGTGACCAT  
TCCGCGGCAGATGGGCTGCCTGTCGTGCGCCCTCGCTGGCAGGAGTCTATTCTCGGGT  
GTCCGCCATGGCAGACGACTTGCCTAAGGATTATGAGGCCCTGGACTAGGCTATCAACTT  
CCGCGGGACCGGCGGGAACCTCTGCCCGGTGCATGGTTGTGGCCTGGCCGGTTCGCTTTC  
AAGCGCCGATCCTCCTGACGCTTCGGGGTGCATGTTTTGGGATCTGACGAAGTTCCTACC  
TGCCATCGATAAGCGTATCTGCCAGTACAGGAGTCCGCGTTAGTGCTGGCCGGTCTGGT  
CGACGATCCGGAGAATGGTTCGGGTATCGAACTACTGACGCGGAGGATCGCACCTTTTG  
TTAGGACTGAATCAATCTCGACGGCTCCTTTTCCATTGTAACGGTGGGTCACGAGAGTAC  
TGTCACCCCGGTTTATCGTCCCCACAGGTGGAGTATAAAAGTGGATGACAGTCGTTCTCA  
CGGACTCGCGAGGGATGTGCCGGAGCGCAAGTTGCATGGGGTGCTTGACCTCCCGCTTGC  
GGGCCGACCCGTGTCGGTGCATTCTCGGTCTTGCGCCCTTTTCCGGACATGAAGCGCGA  
TGCCGGCGTGCACTTTGCGGTGATTTACAGTTGGCGGTTTCAGGACATACGCCACTGGGG  
TGCTGGCCAAGCCACTGCACACCCAGCCCCGCTCTGGCCGCGCGCCTGGTTCCTGTT  
GAGACCGCGCGGCTTTGAGAACCCTACGGTGTCAAGAACGAAGAGAAACCGCTAACCGA  
GAGCAACCTGCCAGCCTAATCCTGACCTAGGAGCAGGCTGGGCCGCACTGTAGCGCGAT  
TCTGACAGGTATCCAAGACAAGGCGGCGGGTGTCCGGCCCGATTTTCATGGATCGCCCGG  
CAAGACAGACACGGATGCAATCAGCGCCGGGGCCTTGGAGGCCACAACAGCCGAGGCGAA  
AGTCAAGAGTATCACGAGGAGGTCCAAGGAGAAAGTTGATGAGGCAGGCATTTCCCATAC  
CAGTGAGTCTAGCGCACCACTTTAAATGACCATCCTGATGATCACGCCGGACGGTGGCGC  
ACTCACCGTGGCCACATGATTCACACTGTTCAACACGGCTTTGAAGATACCTACAAACA  
AGGGCAGGGGGATCGGTTCGGCAACCTCGGCAGGCGGAGTAGACGGAGACGACGCAATTA  
CCTTGCCTTCCGCTTCTGCTACTTAGGCACCTTGGTGTAGGAAAAGCGCAGCGTTCCAAA  
CAATCATGATCTTATGCTCCAGTTCAACCTCCTAATGTCAGACTTGGCGGGCTAATTCCC  
ACGTGCCTGTATGTGTTGTACAACAGCCGAACGTCCTAGAAGCCTGTTCGACGACACTAA  
GCTGACATCATCTGTGCTGTGGTAGGTAGCTGGAGTATGCACACTACCGTCCCTCCACGG  
GATCGCTGGTACAATGGTAGTGCTCTTCAAACAGTCGCCATGCGAAGACGGGGTGGACCT  
TCCGTCGGATCGTGAGCCTGATATGTACTACGGGTGTCTTTCCCGGGTTCGTGCCGCCCT  
CGTTCGCGAGGTCCGGTTAAATAGTGGTCTTTGTGTCAGTACGAGGCGATCGTACGCTCAGG  
GGAAAACCTCCTGGACGCTGTCCATTACATGGGCATTCAGGCCGCCCGACCTGGATAGT  
GATTAGCTACGTCCACGCGCAACGGTACGGCCCGTACACCGACCTAGCCATGTAGAAGAG  
CGTAGTGTGTGGGGACGTGTACACAACGCGTTGCAGATGCTGTGCTGCTACAGCCTGAA  
AGACCTTTCGGGGGGTAAGATGAAGGAAGATGAGGATGACAACCCCGAGTTCTACGGTCA  
AAGCGTCAGGAGTAGGCGCGGGCGCCGACTTGGCCGACAATGCAGTCGGTTCACGCGAAAG  
ATTAGATTCACGCCTGATGGTCTACAGGTGCCTGTGCGGTCCGTACGTTTCAGGGCACTAG  
CTTAGGGCGAAGCCCCCTCGGTAAAAGTCTGAACCAGTTCCAGAGGTCCGTACATCTTCGG  
GCTCAACAAACTGCTACGGGGAGCGATCCAGAACTCACCCAAACTGGATTATTGCTCCC  
TCTACCGGAACATGACTCATTAACTACTATGGATGGAGCTGGAAACGAACGGCGCAAATG  
CGATCATGGGCACCAGGAGACAGAGGCGGGAGTACAGGGGGTGGATAGCAAAGTCTTTAG  
CTAAACTGTTCGGTTTTGGGTTGATAGATGACGATGCATTATTTGTCGGACAGACTGGTGG  
ACGTAGAGGGCAATCTTGCCTGTTTCACCCCTGGGCAACTTCCACGCTAGTAGTGTTC  
GGTTCGCGGGGCGATGACTCCAAGCGTAGGGCACAATGCGCGATGTCGATTAGTTTCAGGC  
TGCGCGAACCCCAATCTCATTTCGTGCGAGTGAAGGCGACTACTCCACAACGAAAGACCTG

ATTGAAGCCGAAACAACCATGGGGCAAACACCTAGGACCTGGTTAGACTACCTAGGAGAC  
GGAGTTAAGGATACGGTCCACGACATATTCCTGTACAGGTCCTGCAAATGGCGTTTGGAG  
ACTGCGAGTGGTGATCCCCGCACGTGGACATTCAGCCCTGCAGATTGCACCGAACAGGCC  
GGTGGCCAGGTAAAGGGAGCCGGAATCCGTGTGCGGCGTAACGCCGAGACAGACCAGCCC  
CGGAGCGTCGCCTACGACAGCGTGCCCTTACTCGGCTTTCCATAGAAGAGGATAATACG  
CAGTCGTCGTACCCGATAGACAAGGCTATTAATGAGACACAGGCCACTTATCGCGAATCT  
CTGGTTCTCGCAGAATATGCCAGGGGCAGTGGTTAGGTGTGATCGTACTAAGCGCGGTCT  
GCCACCATTTGAAGATGTGCGCCTGTTGGGTCTAGACCCTGACGGCCCGGATAAGGGGGCAA  
AGGGTAGTACGCTTCGACCTCCGTATAAGTTACCTCAAAGGGTCCGCTGATCATAGCGTA  
CGGCTTCTGGATATGAGCCGGGACGCAGCAGCGCGCGTTCGCGTGGTAGGTGAAGTCGCG  
AGGCACGCCCTTTCGTACAATAACACGACACAATCGGAGGCTAAAATTGTTACCGTTCAT  
GCTGTGCCGCTCTAGGGCCAACTGGATTCTGCCGCCGTGCACGCCGTGCTGGATTACAGG  
TCACCTCTTACATGCCATTTGGTAATTATCCGTGAAAGAGATTAATTAGCCGCACTTCC  
TCACTTCAGATTTACGCTGAGGGCGCTAAAGCTATTTTGTACCGTTTGCTGCTTTCACA  
GATATACCGGCTCGCAGTGGTTGGCTGGACGCAAACGCCTCACGGAAAATAGCGTTCCTG  
TCGGCTTGGTGCCAAACACCGGACTATGTCAACAACCCTACTTTTGTAAAGCAGAATTA  
TCGATTTTCTATAACACGCGACACAGCCCCTTGACGTGTTTTTCGTGCTAGCTCCCGCGTA  
GGATAGTTGTGTGCGGACAGGGGGCTGACAGGGACCACGGCGCTTTTTTCGTTAAGCACCC  
TCTGCCGTGAAAGACAGGGAAACGGACCCGAGCTTAAACGTAGTCTTTGGTACAGTTGTC  
ATCGCGCTCAGCCACATCCTTTGCCGCACAGTACCACTGAAGGGGCTGGTAGTAAAGGGA  
GTCGATTTACCCCGTGTGATTGACGTGAAGGAGATCAATGTAAACAAAGCCAGTGTCTCT  
TTCGCCACCGCTGTGACCCTAGGAGCAGAATCGGTATACCATCGACGCTCCGCGTCCGC  
AGTGGCGACGTTGGCTTTAGGGTGGAGGACTCTTACCGACGTTTCGTCTGACATCTCCAAA  
GTTTTTTCTTGTACCCATGGCCTCGAAAGTATTGCCGTGGCGGAATTAGGGCGCCTCCCG  
GACGGGAGACTGCAATTGTGTGATACGCACTTTGGAGTGTTATTGCTTGGCGTAAACAC  
GGCGCGCGTTCGACGGTAATGCCGAGCACGGCAGCAAGGACACCTGCAGGGTCTAAGGG  
AAGCCGTTTTTGGCAGGGAGCGCTTTTACCGCACACCCACTGTACAATGACAATCTCGTCG  
GATGGCCGGATGCTTACTTCCGCAGAGATCCTTAGTGCTACATGCGTTTCAGAGCACGGC  
AGTGTGTACACTACCTGCTATCCCGTATCTGTTTCGTGTGCGTCAATCGAAGAAGAATTA  
AGCTATCAAGGGCTGACTCCCAAATCAAGGCAACCCTAGGAGTTCCTTAACCAAGGCGTC  
TGTCGGCGGTTCGGCCCGATTAAGTAAGAATCGTTATGTTCTGAGCGGCCGTGTTGAAGGG  
AGGCCCGTACCCCTAAAGATACAGTCAAGCGCGCAGTCTATTGATGCATGACGTGTGGCC  
AAGGTGGAACAACGGCATCTCACTTCGGTCAGTAAATCACGGGGGTACTTTTTAGGGATT  
ATCCTAGCCGGGATGGCACGCTGCAGCACGACCCCGTCTACAACCTGTCCGTTTCGCAAGT  
GCCCCATTTCGGTTGTGTGTGCTCCGTGGTGAGGGCTGAGTATCTACGGCATCGGATGCG  
TGTGCCGTTGCTCCTCCACACAGGTGCAGGTCTATTAATACCAGGGACAGAACCGGCCAC  
GCAAATACGGCGGACGGGACTGACCGCGGTGGAAAGATCGTCGTTTCGTATCGCAAATACC  
ATCGATGCGTCTGAATCGACGTTGGGACTGTTAATGAATCTCACTAAAAGTTGAGCACA  
GGCGTTCCGAAGCAGTTCAACTGGATAGTGGGGAATTATCAGGTAACACTGTGCAAGCAA  
CGAGTGCTATTCTCGGGGAACTACTCAGCGACCGTGGGCAGCTTGTGGTTCACGAGCTGC  
GCTTGTCTGTGAACGGAAGCCACCGGGTCTTTGCCGATGGCTGTTATTGCTGCTATCC  
TCGGATTCTATTAGGATAACACGAGTATGTGCGATCATAAGGGAGGGCCGCCAAGTGG  
GGTTGCCCTTTCTGCGCCAGGTTTAACTGATGGAAGCATCACCCGCTCACTGGACCAGA  
TAGAGATTGCAAGGGACTACGTGGGAACACTGTACGGACGATATACAGTGAAAGTCCACG  
AGCGTTTTGAAAGGGCGCGACGTGTGCGGAGGATGTATACGTAGCTCGTGGACTGCTCGC  
TCGGCGTCCGGGCGCGGCTCAATTACAGCAAGACGTGAATCCATGAAGACGTAGCAAAGT  
TGATGAAGTAAGGTCATCAACCCCTATTGTGCGCCACCAACGGGGAAAGTCCTATGACG  
CCAATACATGTTTTTTCGTCTCCTCGGGGACCTGAAAAGTACGCCACACATCTCGTTGTCC  
CCTTCTGTAGCGCCAGCATAAAGGCACAGGAGCAGGGGAATTACAGGCCCCGGCTGATCC  
ACAGTAGCCAGCTGGTGACTGCCCTGGAACGGTGACAGTCCACCGGGGACCGAACCCTG  
TGCGGGAGTTCTCCGTTCACTAGGCCTGGATGGGTGTGACAAGTCCGCTTCCCTAACTT  
ATTTGGGTCTAGCATGGTCCCTATCAGACTCTCCTTGATCCTGGTGAGCCCCGGCGATC  
GCGAGGTCATTAGAAACCGGTCCATTGCCACCGGGCGTGCTAAGAACAACATGCTGGCGA  
AGGCGTTTATCTCCGTTGCGGTCGATAGGTACGGTGGTACCTTGTACCGGGTCCCACCGC  
AAGAGCGGAAGTCTCTTGAGGGCACTCGGGCTGTAGGTGGCCTCATTGTCCGCGTACGGC  
CGGGCCGATAGCCTCCCGAAAGCGAGCTTCAGAAGTACAACGATTGGCCCCGGAGCCGGCT  
CGCACGATAGGATGGCGGTACCCGGCGATTCCGGCGAGCCTAGTGTTGGCCCCGGACATTA



CCCGATTGTGAAGTTCGAGGGCGCGAGACGGGCACTTCAGAGGCACATTGTGCCAAGGAGA  
TGAGCCAGGCGGGATAACCAGCGCGACCCCCGGTTCATGTGGAATTCGTCCCTGTAAAACC  
CTGCAGGTCTGCTTTTTTTGCTACGCGAGCTGATAGTGGCCACCCTCTCACCTGAATTAG  
GACTCCGGCCAGGTTCTGGGCCGAGGCCAGGAATCATGGGGGAGTTGCTCCTAGGGT  
TACCGATTAAGTCAGTTGGGATAGGCCGACCTGGATGGGGTCATGAACGTTTCGCGCAGC  
TCAGGACGATCATATTTTCCCAACCCGGGCGGAAACTGCGGGGATGGGCCAGCGTGTT  
CCAACGACATTGTAGTTTTTGGTGTACATCCACTTTGCAGCCTGGGGCGTAGCCAAGGAAT  
GCATGTCTAAAGCGTAGCTCGAAAGGTTGGGTCAATTTATGTGCGGAAAACGGGGATAAGG  
GCGTGCTCAGAGTGTAAGACAAGTGCGCGTGTATTGTGACCGAGCTCACCTTGAGGGTT  
TCCAGGGCGTTGCGGCTTATGGTAACCATAGTCCACTTGGCGTAGCCGTAGACGAGAGGC  
ATAACAACGAGCTGAAGGATCTACTAACCCGCGACACAACCTGTCCAGTCGTGCGGAAGT  
GCCACCTCGCGTAGCTCGCACCGCCGTCCACGAGAACCCCGAGTTTATCTTGCAGAATC  
CGATGGAGTTCCGCGATATGCGATCCGCACTCTCCCGGCGGAACAACATCATCTCTGCTG  
CATGCCCCATGAGCATTGAGGCCTTAATGGCTGCTCTTGCCTGTGTGGGTTTCAGAACTCC  
GTGTAATCCTTGTGACCGTGGCGATGCGGGACCAAGCGGGCCACGGTGTCAAGTAGTGG  
AGGAGTGACAACGTAGACTATCGGTCAAGGCGCCGGATGTACTCCAGGGACTCCCCTCGT  
GCCAGCGAGCTCGTTGAAAGAGGTTGGGAACATGATATAGATAGTTCACTTCACGGCCAA  
CTCCGAGCTGCAGCCTGGAATTCCCTTTCTATCACCCGAGGAGTCACAGCTCCCATTCT  
AGACTAACCCGTGAGCGTGGGTGAGGTTTTTCGTGCTGTCCACTTTCTAGAACAGCAGCT  
GGTGTGGAACGTGCCAAGTAGCTCCTGCTAGCGAGTGGTCACGGGGCCGCGGACGATCA  
AGCGTTCAACGACCTCGGCCGCCCTTGCCCTCGCGTTGAGATGCGGAGGCGTATAACA  
AATCGGTGTCCTTAGGTCCAGCGGCCGTCCCTCCGCACCCTACTTTACAGGGGCCATCGGTT  
ACGTCACTACTTGCTCAGATGTTCAGTCTGTAGGCACCCCTAACGCCCGGTGCACATTAC  
AGGAGTGCGCGGAGGCCCGCCTGAGCGCGGTCCATGTGTACTGGGACGGCATCACCTTGT  
CCGTCACCCTGGCGGAGATTGAGAGCGGCGAAGCCGCTACGGTAGCAGTCCCATAACA  
TGGGTATCTACCGCCGTGCCTGGGTGTTAAACGAGCGGTCTGGCAAGGTGCCCCCTAGGC  
TCCGGGCAGCCCGAGCGTCGAGCGACTGTTAATCGACCAACAACGCCGTCCAAGCCACGT  
AGCAAGGTAAACCCGGGGTAGCCTAAGGGTCCAAAGTAACGGTGCAGTGTCTTCCTTTAC  
GGGTCTCGATCACCGTTGACCGGTAGATGACCGACGGTGTACCGAGGAGTTGCGATGAG  
TATAACGGTAGTGCTGAGTGTGGCCCTCGTTCTACTGGCGCTACTGGGCCTATAGGCAAC  
GCCGAAGGCGTGGCAGTACCATCGCAATCCCAGACCCCTCGCGAAGAAGCTAGATGCCGC  
GGAAGCCCGACCCGGGCATATTCAACGCGGGGTACCACCTGTGCGGGCCAGGGCCACAGT  
AGTAAAACGACACGAGCGGGATGGGTTCAATGGACCAACAGCTTTGGGAGATACTCCGCT  
GCCTGCTGCCGTTCCCTAGCGAAATGCGCACGCATCCCAGGGGCTGAGCCTGTCCGCTGCC  
AGCATCGCACTCTGCAAGCGATGCCTACCATTGGATTGGTCTCCGACTTCCATCGTAGC  
TACCGACTGTAGGAGGGCGTAATGCGCTCCACTGATTGGCTGACTTAAAGATAAACAGCT  
GGGCATTAGTTCGCAACTGTTGGACCCTTCCGTACCGCCTGCGAGAATGCAGCGATGGG  
AGCACCATATCCCAAGGTGTCTCTCAGGGGGAGTAGGACCCGCTGAGTCTTGCCCATGT  
GGCATCCTTGGTACCAAATGTTCACTGCTGCCCTGGCTCTCGTTTGGTGTACTAAGCTCAG  
AGCCAGACATGTACTGCCGACCCGCGGCACGCCGTAGTTGGAGGCCTGTTCCCTGAACGG  
TGACTCCCCACCGACTACTAAAGCAAAACATTGACGGTCACATTATTCTTTGGCGCAAT  
CACCGCTGGAGCGTAGAATTAATGGTCCGGAGTGCCAGAGGTCTGTTGTCTTCGCCGAC  
CCCTTGGATGCCGGTCTGTCACAAGGCGGTGGTATCTCACTAGCGCCTGGAATTACCAGCC  
CCCATCCGCCACTGCTCCCAATCATTTCTATTCTGCGAGCCAGAACGATCGTGCGTGCC  
GTTTGTGTCGTTCAAGCTTTGGGGGTACTGTTCTCGGGCTATATGCGTGCGTAATTGCCG  
CGAGGATACACACTTCCCGCGTCCGGTTTCGGGCCACGGCGCGTGGTCATGTTCTAATGC  
GCCTCTCCCTTCGCTCACCTCGTGACTTTGTACGCGGTCTAGCCGTTCACTGGTACGTT  
ACTATAACCTCCCCCGGAGCGTTATAACTTGCAAGGCGCGTTCGTCGTACCTCGCCTCCTC  
CATCGGCCTGCC

>NewGenomeName\_100

AGCAGGGGGGTTTACTATTACCCCCCTGCTGGGCCGGGAGATCCGAATAGTAATGGGCT  
TAATACATAAATCGGCCCGCGAGTAAGCGTACAGTTCAGTATCTTCGTTATGGGCCACGG  
CCCAAATTAAGCGAACGTGGGTGCTTGTGGGTTGGACCGTAGGTCCAGTTAGAAAGC  
GATATATTCCTTGCTTCTATACGGAGGTGCAGCGAAATCAAAAATATCGCTGTTGCACGT  
GTAAGACGACTATTAGTTCGCAGAGTTTAAACAATACGTTCAAGTTGGAGGGTGTGGTGC  
TATCTCTCTTCTGTCATACCGTGTGCCATGATGAAGCGCTCCGGGATGAAAGAAGGGCGG  
AGGTGGTAGTGCGGCCCCCGCCGTCCTCCGCCGAAATATACGAAGTCGTAGGTATGTCA

GGGCATTTATAGAAGGCTCGTATTCGAAACGCGCTTGTATCATCTTTGTATTTGAGTATA  
AAAACACTACAATACCAAACCTTAACGAATAAAATATATGATTAATAAACTAAGACATGA  
CAATAAAAAAAAAACTATTATATAATAATAAACTCTATTATGCCAACGTTGTATAATTAT  
GGTCTGTTTAGTATACATATGTAAATGAATATTACAGTAATGTTTAAAATAAATGACTTG  
GAAGGAAATAAAATATTAATGATAAGATATAAAATATACCGAATACATAAAAAGAGGAA  
AATGCAATCAAGCCCTGTCACGTTTACACGTTTCGAATATATTAAGGGCCGAAGCCCCCT  
CAATCTGTAGGTAAATCGGTGATTCCCTTCGTGACGAAGCAAACGTATTATTGTAAACAAG  
AAAGCATCTGACAACCTTAAATAGAGGTCTCTATACAGCTATCATATGATAGCTGGCTAT  
GGACCATCGGGCGGACTCCAAATATATATTAATAATAACAGATTAAATATATAAGATATA  
GATATTAATATTAATTAAGGAGGCGGGAAAGAGAACCCGTGCGCCGCACACCATTGTGG  
TGGTGGGACAGATGTCCCGAGTTAGTGCGCTTACGTC

>NewGenomeName\_101

AGCGGCCACTTGGAGCCAGGGAGCCACCACAAAGGCACCTGTGAGAGCTGCTGCTGCAAA  
GAACTGGTGTCTACGTTGAATGACTATAAGGCCGACGAAGAAGCTAAAGTGAGGCCCCCT  
GCTCCCTGGTGAGTTCCACTTTGCAATATGTGGGAAAGAACGGGTGGAGCAGGGATCTCC  
TCCTTTGCAGCGCTTTCTACATTTTACAAACAACCAGCGACTTAGTACCCTAAAGAAATT  
AATTGCCCGAACTCACTAGGAAAAGGCCCGTGGCTCAGATCATGATAGCGAGGAGTATTG  
TAGTAAGGATAACGAAGTGATAGTCACCATTGGGGAGCCAGTTCCAGGGAACCGGAGTGA  
CCATGCCGGAGCTCTTGCCGCCGTGAAGGCCGAAAGGGGAATGGTGGAATAGCGTGAGA  
GTTTAGCGAGAGCAACGTCAAGTATGCGCATGGTCTGAGGGATTGTGCCCTGATGATTGG  
TCAGACATCCCGTGACTTCAAGACGCAAGTCGTCGTTATCACGGGTCCCTCCAGGGTGGG  
CAACTCGAGACTTGCCCTGTAAATGGAAGGATCGGAGCTCTATCGGATTAAGGTGACTG  
GTGGGATGGGGATTCCAATGAGGATATAGTCATCATGGATGACTTCTATGGGTCCGTGTT  
TATCTGTGAAATGTGGAGATTGATTGACAGGTGTCCACATAAAGTTCCCGTGAAGGGAAC  
TTATGTGGAGTTCACGTATACGAAGATTGTCATAACGAGCAACACGCACCCCGCAAAGTTG  
TACTGTCCGGATAAGTGTTATCTGTCAGCTTTGTTTCAGGAGGATCATTAAAGTGGATGTA  
GTGGGTTGGACTGCGATTTGAGGATGTGCCCGATGCTATGAAGAAGCACCTGATCAGATA  
TTAACTCAGCCCCGAGCAAAAAGAGCGTCGCGGAGGAGATTAATCAAAAATACACGGGC  
AGCGCGCGGCGAAGGCCGAAGGCAAAAGCCGCCTGAGACCGCGCGAAGCGCGGCCAGGGC  
CGAGCGATAGCGAGCGGGCGGCCCCCGGGTCCGCTCGGGGTGCGCCCGCCTCTAAGGGCCG  
AAGGCCCGAAGCAAGCTATTTTGTACCCCCACAAATGAAAAGGCTTCAAACACTACTAA  
ATGTTTGGTGTCTTTATTTTGGAGTATCCAAGTGAGTTAAGTTCACTTGCCGGAATTCAG  
AGTAGATGGTGACCTTGAGCTGGTAGTCCATCTGGTGGGGGGTGGGTCTGGCCAACCTGA  
AGGCTAACCCGTAGTGTGTTGACCCTGCTTTCGGAGCTCGGAAGGTGCTGATCTCTTTCT  
GCATGATCGAATTCCTAAGGGGATTGGGATTGTAGAGCCACAGGGGCGCCGTTCCGTTGG  
AAGCATCAGTGGCGGTCACGCTTAGTTGTGGTTTTGGTTTTATATGGCCTTTTGAAGTCTT  
TTCGCAGATCCCAATTACGAGCCCCGTCCAAGTTCGCTAGGGGGTCAGCATCAAGTCTCG  
TCTTTCTGAAGATGTGCTCTAGGTGATTGTCTTGGATAGGTAGCTTGTGCATGAACGCTT  
TCGACTCCTCCAGGTTGAATTGAGCTGTCGCATTTCCACTTTTCTAACCTGACTCTAT  
AAAGTTTAAAAGTAATCTCCAGTTGATAGTACCCCAATCCAGAGAGTCATCCAGTATAA  
TGTTGCTTCAATCAGTTCCAAATTACAGCTGAGACCCTCCTGTCCCTGTTTGTAGTATCT  
GACCGAAAACCCTAACAAATCTGACTCTATAGACCCTGTTGGTTCTGTGACCCCTCCTGC  
TGGCCTGTATCCTTCTCCTCCTCCYCCAGTAACGACTTCTCCATCTTCTCCTCCTGGGAG  
CCAAAAGTCGTCGTCTCCTACCAGCCTGGTTAAAGGTTAACCAGATCGGGGTTAATAAAT  
AACCAGTGGCYACAAGTGGCCGTGRCAGTAGA

>NewGenomeName\_102

TCGTTTTGAATACTTATTTTAGGCTTGTTATTACGCATTTTATAAACTCCTTAATTGTTA  
TTTGATACCAATTTGATACCGTTTAAATCAAATATGCTCATAGCTTGATGTTTTTTATCAG  
TATAAAAATGTGAGTACGTTTGAATCGTTTCTGTAATGTTAGAATGCCTCATTAATTCCA  
TTAATAAATACATATCGACACCATTATTAATTAATTTGCTAGCGTACGAGTGTCTTAAAT  
GGTGTATTTTTAGATTCTGGGAATGCAGATTTAAAATGATACGTATAAGTAACGTATCTAA  
TAGGTTCTAAACCCCGAATATAAAAATAGTTTTCGTCAAAAATTTTATATCTTTTAGAAC  
ATTCATTATACATGTTTTTAAGCATCTCTCTAATTAATTTGGTACAGGTATTATCCCTT  
TAGAGCTTTCTTTTTTAGATTATATTCAATTTTCTATTACTTGAATTGATTTCCCTTAT  
TTACGCCAATTTGCGCTTTTATTTTATCGTAATCTTTCCACTGCAAACCTAAAGCTTCTC  
CTATTCTAAGACCAGAATAAAAATAACAGTTTAGTCAGCTAACGAGAAGTATCATTTGTGA  
TTTGTCTACTTTTTTTCATCAAATCTTCACGAGTGATAAATTTAGCTTGTGGTCTTGTTT

TGGGCATAGGAGTTACCGATAATGTGGGGTCGTATAAGAGCTTGTAATGCTTTTTGGCGT  
AATTGATAACTGCTTTAAAACCTGCCACACAGATCGTGCATAGTCAACAGGAAGACCTG  
CATCGTTTAAACAAATAATTCCTGAAAGCAGTACATTACGTAGTAGTGATTTTGCCAATAG  
GGATATTTCCGAACCTTTCTTTTATGTGAGTATTATATTCTGTAGTTCGCTTTTCTATTG  
AGCGTGCAGAAAGATTTTCATTTTTTAAACGCTCAAAAAATATATATTCAAAGGGTGGAT  
TGCCCGAGTATCCATATTTAACATTTTGTATAAATTCGCTTTCAGCTAGTTTGGCATCTT  
TCTTACGTTCAAACCCACGCTTCATTTTTCGTTTGTATTACCGTATACATCTTTATATC  
TAATGGAAAAATACCATTTACCTGTATTACCATCCATATACTGGCATTTTACTTCTCC  
CTCCTCAAAATTGGCAAAAAATAATAAGGGTAGGCGGGCTACCCGTGAAAATTGTATAAC  
AAAAGAGAGAGCGCAGATGCACCCTCTCATGTCGCAAATATCTCAGCGACTTGTCTAATT  
TGAAGCTTGCCGCAAATATTTACAGCAGCTTGTTTTGTATATATGTAATATAACCATCAAAG  
AGAGTGTAGTTCAAGCGATTTAATTAAGAAATCTAATTTTTATACTATTTTCAATTTTAT  
CTACTGTTTCTTTTGAATATGATAATTTCTCCGGCAGGGTCATAACTATTAATTTTCGATA  
TTCTATCCTTGCTGATTGTACTGATATTTAGAACGTTAGCATAGGTCTTTTTTATACTAGA  
ATCGCTCATATCTTTTGCGAACCTTCGAAGGTTTTTTGAAGTCGTCATTCAGCGATTTGT  
TTTCATCAAGTAATTTCTGATCGTATGGGTTTGTGCTTTTGTACACCTTTTCAAGATTGT  
TCATGATTTTTTTAGCTAAATCCTTACCCTTACGTCCATTTTTTACAATACTAAAGGTA  
ACAAATCTTCTTCGATATGCACATTGAATTTGCTTCTGGAAGATGTAAGTGGCACTACCG  
TTAATATTGGATTTTTATTTGAATCGTGATTATTGAGTACCATATAAAAATGGTTTCCAG  
AAGACTCTTGCCAACATTAACACCTAACTTTACATAAATTATAGTGCCTTTTTTATATC  
TGGCGTAACTTTTGTTTTCTTTTAAACGATCTAACTTCATGCAATAAAAATCTGGATATT  
CAAGACACCATGAATTCATATATTTAAATTTGCAAATCTCGCTATTTTGAATCTTTTTAA  
AATTATTAAGTCTGTTTCCAAAGGTGCGCTTCTTCCATCCCTCATCCTCCTCACGCTA  
CACAAGCGCTATTAATCAATACCCAGTAATTGTTGTTTTTTCTTATCGAACTCCTCCTGA  
GAAATTACTCCGACATCTAATAATTTCTTTATATTTTATTAATTCATCAGCAACAGATAAA  
CTCATTTTTTTCAGAATTGGATGGTCCCATAGAACTTCTCGAATAGAGATTTGTTCTTGT  
CTCGTTTCCGCCATTCTAGATACAGTGTTTTTTGTATATGCTTCTATAGCGATACTTGAT  
GAACCGTGATGTATAATTTTCGCAAAAAAGAAGTCCTTTTTTATACGAAACAGAATTG  
ATTTTCTCGAATGGAAATTCATGAAATTTCAAACCATATATCATACCTTTATCTAAGAAT  
ACAATCTCAGACCAGTACATACTATTAAGTAGGTATTATTATTGTACAATCCCGAAGTT  
ACATACATTATGTTTTTCAATTATCTTTTAAAATCATAGGTAGTTCTTTCACTTCTTTTTTT  
GTACCAAAACAATCCTCTACACCTATTTTCGCTAAATCTTTGGTAGATTTTAGATAAGTTT  
TCGTCAGATTTATTGATTTCACTTTCAAATTTCACTGCTTTTCTAGGTTTTCTTTGGTAT  
TCTTTTAAAATTTCTCTTTTGTCTTCAACAGAGAGTTGCTTGTATTGCTTCTTTTCTTCT  
TTTGTTTTAGTTGCTAAATATTGACTCTCAATCATAGTTTCTTTGAACTTCAATCTGCTC  
TTAGGTAATACTTTCATGTTTCACTTTACTTTATTTATATTTCTTTATGTTTAAAAACTT  
TCAACGGCTCAAATGTAATCGAATATTCGCCATCGTGAGTTCCAATACCATATATCTTTT  
TAGATAGTTCTATTGCTTCTAATATGTATTCTTCGCTTAAATTGTAGATACTCAGACAAC  
CATAACAAGTTGCGTACGCCATCATTATAAGCTTCTACAATTTTCGCGTAGCGGTACAGCTG  
ATATAAAGCCGTGCCGTCTTGCCTAATTTTCGAACTTGCCTGATTGTTGAATTTTCGATTGAT  
CTAAAAGGTTGCCATACGGCAACTTGTGGTGGGCAAGTTCCTCATATAATACTTTTAAAT  
TGTTCCTTTCGGATAAGGTAGGTCTAATAAAAATTACCCCTTCTTGATAACCAACCATCGA  
AGCCTCGAGGTACTCTTTGTGTCTCTTTCACTTCAACTTCACATTTCATAAGCAATTCTT  
CGTATTTTCCCATGCGCCAAATCCCTTTGGCGTCTTATTTCTTTCTATCTGTAACCCATT  
GCATAAAATTTTCGATTTCTTCCATTCTTCGGGAGTAAATTCATTTTTATTTGCATGAC  
CGGCTATAGTTTCTTGATTAATACTTCTTCTTCTGTAATCCTCGATTTAGGTACATTAA  
ATTAATCTGCTAATTGTTGGACTTTTGTATATTCTAGGATATTTAAGTTCTTGAAGCCAGT  
TAGAGATTGTTGATTGACTTACCCCGATTGCTTTCAGACAATTCTACTTGAGTAATGTCGT  
TCACTTTCATAAGTTGCTCTAAGTTCTCAGATAAAAATTTTTCTAGCACTCTTATATTCCA  
TAATTTTCTCCTTTAGTATTACTTAATGTAATACTAATTTACCATAAGTAATATCACTTT  
TCATTACAAAATATTACCTTTTTGAAATAAATATCACTTTAGGTGTTGATATATTACTTT  
AAGTAATAGTATAGTTGTAATGTCAACGGGAGGTGATACGAAATGCCAGAAAATTTAAA  
AGAGTTCCCTGTAAAGGTCTGGATCACTAATTCGAATATGACACAACAAGATGTGCTGTA  
TACATTAGGCGTTACTAAACAATCTGTAATAAGATGGGAAACAGATGACGCAGAATTTAAA  
AGGCTTACAATTGTATGCTTTAGCCAAATTTTTCAAGACAGAAGTTGATTATATAAAGGC  
TAAAAAAATTTAACATTAATATCACTTTAAGTGATAAAGGAGGAAGTCAAGATGCAAGCAT  
TACAAACATTTAATTTTGAAGAATTACCAGTAAGAACATTAACAGTAAGTGAGGAACCGT

ATTTTGTAGGGAAAGATGTAGCAGATATTCTAGGTTACAAAACCTGGCAATCGTGATATTA  
ACGCTCATGTTGATGTCGAAGATAACCTGACGTACCAAATCAGTAGCGCAGGTCAAAGAC  
GAAATCAAACAATCATCAACGAATCGGGTTCATACAGCCTAATCTTCTGATCAAAAACCTCG  
AATCAACTAAACGATTCAAACGTTGGGTAAATTCAGACGTCCTACCCGCTATTTCGAAAAC  
ACGATATCCACGCAACAGACAATGTAATTGAACAAACATTAAGATCCAGACTACATCA  
TTACAGTGTGACTGAGTATAAGAAAGAAAAGAGCGAAACTTACTTTTACAACAAGAAA  
TTGGAGAGCTAAAACCCAAAGCAGACTATGTAGATGAAATCTTAAAGTCAACTGGTACAT  
TAGCCACAACCCAAATCGCGTCATACTACGGTATATCAGCACAAAAGTTAAACAAACTAC  
TACACGAAGCTAGATTACAACGAAAAGTGAATAAACAGTGGGTGCTCTACTGAGACCACA  
TGGGCAAGAGTTACACAGAATCAGACTCTATACCAATTGTACGCTCTGACGGTAGAGAAG  
ACACAGTTTTTACAACTAGATGGACACAAAAATGCTGATTGAAAATACATGAAATCATGA  
CTGAATTCGGTTATGAAGCTAATTTAGGGGGAGCGTAAATGACACCACAACAAAAGAAT  
AGCTAAACAATATAGTATTAGCACTTTATGCAGTTAGAGAAAACAAAATTCAAACATACT  
CACACAAAGATACTCTTACTGTAACATATGCAGGCGAGATTGAGCACACTTACGAGGTGCG  
ACAGAGAGACACACCTTGAATCAATGATTGAGTGGGCAATTGACCAAATCGAACAGCACC  
TTGATTTAGACGAAGAAGAATAACACACAATTGAACAAACAACCTTAATAGGAGGAATTAC  
AAATGAGCGCACTATACAAAAACAACCATCCTCACCGCAAGGGCAGTTCTGACGTCGAAGG  
TTGTAAGATTGAGAAAATCACAAGATTTAAATTTAGAAAATTTGATTATCCAAAATTA  
ATAATGCTCAGAGCAAATCATTGTTGGATAGTGCCAGTGACGATCTAAAAGATATTTAAC  
TGTATTCAAATTTTCATATCTTGTTGAGCTTTTAAAGCTTTGGTATAAAGCTATTGAATA  
AATAATTCGTAAGATACGTTTTTCAGGAGCATCTTCTTTCAACTTATTTATTCTATCTCT  
AAAAAAGTCACGGTCACCACCGAATCTTTTTTCGGCTTGATTACTAAGTTCACCAAAGAT  
ATTTTGAAAATCATTAAATTCATACTTATCACCTCCTTTCCTACTAGGAGATAACTAAAT  
ATACACAACACAAAATAAAAAGGAGGAATAGATATGAGAAAAAATAGTTTGCAAGCTAT  
AGAAGTTGAAGTAATTTTATCTGTTTCGAAATCCAAAGCAGGACAAATAAAGAGAACT  
GAATAAAGTGCTTGAAGACGAACGTTACATTGCGATTGAGGCGAGAATACCAGTCCAATA  
AGCTAGAAAAAATTCCTTATCACTGCTTGTGACGAGAGAGAATAATGGAGGCGTTGAA  
AAAAGAAAATGAGTAACATTTATAAAAAGCTACCTATTATCAGTATTGTGCTTCACAGTCT  
TGGCGATTGTAATCATGCCGCTTCTATTCTTCAATACAGCATGGTCAATTGCGGGATTGCG  
CAAGTATAGCAACATTCATATTTTATAAAGAACAACCTTTTATGACAACAAAGGAGAATGAA  
AAGATGTCAGATAAAGTCTTGATGGAAAAAGTTGACAAGAGAAGGAAAGACAAAGATTTA  
ACGGTGAGAGAACTAGGATATTTGCTAGGTTTCTCTGATACTTATTTTATTAAGTTAAGA  
AATGGTTCAAGAAGAATTATCGATCGGAAGAGAGATAGAATTAATCGTTATTTAAACGGT  
GAATACGACAATGTAAAAATTCCTAAATATTCACGAGATTCTGAACAAGTAGCATATGAC  
AAGGTATAAAAACAAGCTTTAAAAGATTTAGAAGAATTTGTAATAATAAAAAAACTGCT  
ACATGCGACAACAAGTAACAGTGACAAACACTTTAGAAAAATTTTCATGGTCAATATAAAA  
CGAAATAAAGGAAGTGTCAACAATGTACTACAAAATAGGCGATGTATGTCAAAAAGTAAT  
TAATGTAGACGGATTTCGATTTTAAATTAGCAGTTAAGAAAGAAGATTACAGCATTCTAGT  
GAATGTCTTAGATTTAGAAGATAGATTTATCGACGGTATAAATATAACCGATGAGAATGA  
TCTATACACAGCATAAGACATATTAATCAATTTCTTTCTGAATGGATTGAAGAGAACAC  
AGACGAAAGAGACAGGCTAATTAAGTACTAGTACATAAGATGGTAGGAGGTCTCTATGAAGCA  
GACTGAAACTTACATCATCCGTCATAGGGATATGCCAATTTATATAACTAACAAACCATC  
TGATAATAACTCAGATGTTAGTTACTCCACAATAGAAATAGAGCTAGGGGATTTAACGG  
TATGGAAGAAGCGAGTATCAATATGGATTATCACAAAGCAATCAAGAAAACAGTGACAGA  
AACTATTGAGTACGAGGAGGTAGAACATGACTGGACAAACATTATTTGAACAGTTGAACA  
GTAAAACGTTGAATGATCATAACAGAAAATGGATTAAGTAACTTATCTAGCATGGTCAT  
ATGCACACCAAGAGCTGAAAAAGATTGACCCAAACTACACAGTAAAAGTATACGAGTTTC  
CACATCCAGATATTAACACAGAAAATTTATTTTGTACCTTATTTGGCTACACCAGAAGGCT  
ATTTTGTACAGGTATGTGTGACTGTGAAAGAGAGTACAGAGTCTGAGTGGCTTCCAGTAT  
TGGACTTTAGAAATAAATCGCTTCTTAAAGGTAGTGCAACAACCTTTCGATATTAACAAAG  
CGAAAAACGATGTTTTGTTAAAGCTACGGCTGTAGACGGTTAAGGCTTATATATCTACA  
ACGGCGAGGAACTACCAAGTGCAAGTGACAACGATATTACAGAATTAGAAGAGCGTATCA  
ATCAGTTCGAGAACTTATCTCAAGAAAAAGGGCGAGATGCAACTATCGATAAAAACGATGA  
GATGGCTAAAAATATCTAACATTAATAAATTAAGTCAAAAACAAATCGCAGAAGCACACC  
AAAATTAGATGCGGGATTAACAACAAATTGGATAGTGCGGAGAAACAATAATGTTAAACAG  
AGCAGTATTAGTAGTACGCTTAACAAAAGACCCAGAATTAAGAAGCGCGCCAAATGGCGT  
AAATGTAGGTACATTCACATTGGCAGTCAACAGAGCATTACGAATGCTCTGGCCGAGCG

TGAAGCAGATTTTATAAACGTAGTAGTGTTCAAGAAACAAGCTGAAAATGTTAAAACTA  
CCTTTCTAAAGGGTCGCTGGCAGGTGTAGACGGGCGACTACAAACACGTAGCTACGAAAA  
TAAGGTCTGGGCAACGTGTATTTGTGACAGAAGTAGTAGCGGACAGTGTTCAATTCTTAGA  
ACCGAAGAATAACAACCAACAACCAACATCAATTATCATCAACAAAGACAAGCTCAAAC  
TGGTAATAATCCTTTTGATAATACCACTGCGATTACTGATGATGACTTACCGTCCTGATT  
GGAATGATTAATGCCGAAAATTACTAGTTATATCACTCAAGACGACGGCACAACAACAG  
TTGTCATATCTGATGTTGAATTAGGTAATAAAGAAACATTACTACTTGATAACGGATTTG  
ATGTAGAAGTCGATGTAAGCGTCATAGATCCATTTTCGAATTACCGGCAAGCAACGCAAAT  
TGATATTCGCATTGTGTAACGATATAGAAGCTCATACAGGACAAGCTCGAGATTATATGA  
GGCAAATGTTCCAAGATTATGGGAAGTTTCTGTATGGCCATGAAGAACGCATGTCTTTAT  
CAAATTGTTCTCGAACTATAGCTAAGCAAATTATAGAAGCGATGTTTGAGTTGATTTTTA  
CAAATGCGATTCCATTAAATTATAAATCAAGCAAATTAATGAAAGAAGATAACAATTATC  
TTTATTGGGCAAATGTTACGCGTCATTGCATTAGATGCGGAAACCCCTCACGCTGACTTAG  
CACATTATGAAGCAGTCGGCAGTGGCATGAACAGAAACAAGATGAATCACTATGACAAAC  
ATGTATTAGCGTTATGTCTCGCAACATCACAACGAGCAACATGCAATTGGTGTTAAGTCGT  
TTGATGATAAATATCACTTGCATGACTCGTGGATAAAAAGTTGAAGAGAGGCTCAATAAAA  
TGTGGCAAGGAGAGAAAAAGGAATGAATAGACTAAGAATAATAAAAATAGCACTCCTAAT  
CGTCATCATGGCGGAAGAGATTAGAAATGATATGCACGCTGTAAAAGTGGAGAAAATTTT  
AAAATCTCCGTTTAGTTAATACAGGTTTTTACAAAAGCTTTACCATAGGCGGACAACTA  
ATTGAGCCTTTTTTGATGTCTATTACCCAGGGGCTGTAATGTAACTTTAATACTTTAACT  
TCAATGCCAGAAAGTTTACTTATTGTTTCTACGTTGTGTCCTGACTTTAACATTCTTTA  
ACAAATTCTAACCCCGAAACAATCTTTGTTATTCTATAATCTTATTAAAGTGATTTAAA  
AACTGAGGAGCATAAAAAGTTATTATAAATTCGTTGTTTTGTTAAGTAAGACATGTCAAAA  
GTTTCATTTAAAACCACTAACCTTACTAGGTTATTAATTGAAATTTTCGGTTGATTCTATA  
TCTAACGGAGAGTTTTTTATTAACGTGTCCGATATATTCATACCGTCATTCTTTGGGTTT  
AAAACCGCTCTATATTTAACGGCAGGATCTACTTGGTGATTCTTTAAATGTTTTAAAAGA  
ATAGCATCATTTGGGGATAATTGTTTAATTGTTTCAACAAATGAATGGTGGGTTAATGAG  
TTTTTTCTGTCATCCATAGATGATGCTATTAGTTTTGCGAACATATTACTTAAAGTTTTT  
TAACTAAAGTAAAACCTTTGAAGCTTCTAGAGCAGGAAGCTAGAAGAGAAAATTGTGGTTCT  
TATAAATTATTTTCAGGTACAGAAGATATTTCTTTTTGAAATTGTTCTATGAATTTTTCA  
AATTCTACTTCTCTTTGATAAATACTTTATCCACATAAAGGGGGAATTTGCCAAAGACA  
AGTTCCCAAATTTTAGAGAATGTTTCTACAGGCCCTTTGGATGCGCCTTCGATAATTTTA  
TCAATACCTTTACCTAAAATAGCATCCATAATTATTCACCCCAATCTAACCCAATAGCG  
ATAATAAAATTATACCAGAAAGGAGTTAACGAAATGGCAACATTTAGACCTATAAAAGAA  
AGTGGCGATTTTGTAAGTGTGCATAAATCGTTTGTGTTTCGATAGTAATTTAAGTGCTAAA  
GCTAAAGGGATATTATTGTATTTCCCTAAGTCGTCCTGACAATTGGCAAATATACACGTCA  
GAAGTAGTTAAACATATGACTGATGGACAAAATTCATCAATGGTGGCGTTCATGAACTT  
ATGGATAATAAATATGTTTCACAGAATACAAAAAAGAGCTGAAAACGGTGTGTTAAAAGGT  
TTTGAATACTTAGTTTAGGAAAACCAACCGAAATGCCATTTTCTGAAAACGGATTAGCG  
GCACACGGGTTTTTCGAAAACGGAAAACGGAAAACCGAAAAGGGCCTACTACTAATAAT  
AATAGTACTAATAATGATTTAACTAATAATAACAATACTAATAATGATGGAAGTACATTG  
TCGGGCGGCCCGACTGTGTATTCCATTCCCTATAAAGAAATTATCGAATACTTAAACAAA  
AAAGCAGGAAAGCATTTTAAACAAAATAGAGCTAAAACAAAAGATTTTATTAAAGCAAGA  
TGGAATCAAGATTTTAGGTTGGAGGATTTTAAAAGGTGATGGATATCAAAACAGCTAAA  
TGGTTAAACACGGATAGCGATAAATACCTTAGACCAGAAACACTTTTTGGCAGTAAATTT  
GAGGGGTACCTCAATCAAAAATACAAGCAACTGGCACGAATCAATTGAAACGCATGAAG  
TACGACGAAAGTTATTGGGATTAGGGGGATATTATGAAACCACTATTCTGCGAAAAGATA  
AACGAAAGCTTGAAAAAATATCAACCTACTCATGTGCGAAAAGGATTGAAATGTGAGAGA  
TGTGGAAGTGAATACGACTTATATAAGTTTGCTCCTACTAAAAAACACCCGAATGGTTAC  
TAGTATAAAGACGGTTGCAAATGTGAAATCTAAGAGGAATATAAGCGAAACAAGCAACGG  
AAGATAAACAACATATTCAATCAATCAAACGTTAATCCGTCTTTAAGAGATGCAACAGTC  
AAAACTAACAGCCACACAATGAAAAACAAGTACACGCTAAACAAACAGCAATAGAGCAC  
GTTCAAGGCTTCTCTACAAAAGAGCCAAAATGGTCAATATTGCTAGGTTTCATACGGAAT  
GGTAAAAGCCACCTAGCATGCGCTATCGCAAAAGCAGTTAAAGCTAAAGGGCATAACGGTT  
GCTTTTATGCACATAGCAATGTTGATGGATCGTAACAAAGAGACATACAACAAAATGCA  
GTATAGACTACAGACGAGCTAGTCAGATTGCTAAGTGATATTGATTTACTTGTACTAGAT  
GATATGGGTGTAGAAAACACATAGCACACTTTAAATAAACTTTTCAGCATTATTGATAAC

AGAGTAGGTAAAAAAACATCTTTACAACAACTTTAGTGATAAAGAAGCTAAATCAAAAT  
CTGAACTGGCAACGTATCAATTCAAGAATGAAACACAATGCAAGAAATGTAAGAGTAATC  
GGAGACGATTTACAGGGAGCGAGACGCATGGTAACCAAAGAATTTTTGAAAATTAACCTTG  
AGTGTTACAGATATGTACGCTCACAACTCATAGACGAGGCACAGGGCGATGAAAATAAGT  
TATATGACCTATTTATCCAAAACTTGCAGAACGTCATACACGCCCCCGCTATCGTCGAAC  
ATTAAGGAGTGTTAAAAATGCCGAAAGAAAAATATTACTTATACCGATAAGATGGCACAG  
AGGATATTAAGGTCAACAAGTATAAAAAGAATGAGAATGAAGTTTATTCGCTCACAGGAG  
CCCATTTACAGCGACGAAAAGAAAATTATGACTGATAGTGACCTAAAACGATTTAAAGGCG  
CTCACGGACTTCTATATGAGCAAGAGCTAGGTTTACAAGCAACAATTTTGATATTTAGA  
GGTGGAAAATGAGTAAATACAACGCTAAGAAAGTTGAGTACAAAGGAATTGTATTTGATA  
GCAAAGTAGAGTGTGAATATTACCAATATTTAGACAGTAATATGAATGGCACTAACTATG  
ATCGTATCGAACTACAACCTAAATTCGAACTGCAACCTAAATTTGGGAAGCAAAGACCGA  
TTACGTATATAGCCGATTTCTCTTTCTGGAACGAAGGGAACTGGTTGCAGTTATAGACG  
TTAAAGGTAAGGCGACTGAAGTTGCCAACATCAAAGCGAAGATATTCAGATATCAGTATA  
GAGATGTGAATTTAACGTGGATATGTACAGCGCCTAAATACACAGGTCAAGAATGGATGG  
TATATGAGGACTTAGTGAAAGTCAGACGTAAAAGAAAAAGAGAAATAAAGTGATCTAATG  
CAACAACAAGCATATATAAACGCAACGATTGATATAAGAATACATACCGTAGTTGAATTT  
CAGCATTTTGATGATGTGGATAAAGAAAAACAACGCTGGCAAAGCGCTTAGATAACAAT  
CCGGACGAATTACTAAAATATGACAGCATAACAATAAGACATGAATATATAGAGGTGGAA  
TAAATGAGTATCCTAAAGATGAACGGTAAACCGTATAAATTTACCGAACATGAAAATGAA  
TTGATAAAAAAGAACGGTTTAACTGCAGGACTGGTTGCAAAAAGAGCACGAGGTGGCTGG  
GCGTTGTTAGAAGCCTTAAACGCACCTTATGGCATGCGATTAGCTGAGTATAAAGAAATT  
GTGTTATCCAGAATTATGCAACGAGAGGCTTGAGAACGTGAAATAGCTAGACAACAACCTT  
AAAGAGGCTGAATTACGTGAGAAGAAGCCACATTTGTTTAGTGTACCTCAGAAACATTCA  
CGTGATCCGTACTGGTTTGATAATACTTATAACCAAAATGTTCAAGAAACGGAGTGACGCA  
TAATGAGCATAATCAGTAACAGAAAAGTAGATATGAACAAAACGCAAGACAATGTTAAGC  
AACCGGCGCATTAAACATACGGCAACATTGAAATTATAGATTTTATTGAACAAGTTACGT  
CGCAGTACCGACCACAATTAGCATTTCGCAATAGGTATTGCAATCAAATACTTGTCTAGAG  
CACCGTTAAAGAATAGTCATGAGGATTTACCAAAGCGAAGTTTATGTCCATAGAGTAT  
TTGATTTGTGGGAGGGGTAACGATGGCAACGCAAAAACAAGATGATTACGTAATGTCATT  
AGAGGAGCAATTGGATTTAGAAAACCTGCGAATAATATACAGACGAACAAGTTGAAGCAAT  
GAGTCATAAGGAAGTTAGCAATGTGATTGAAAACCTATAAGGCAAGCATAAGTAATGAAGA  
GCTATACGACGAATGCATGTCGTTTGGTCTGCCTAATTGTTAAAAGGAGTGATGACCATG  
ACAGATAGCGCGCGTAAAGAATACCTAAATCAATTCCTTTGGATCTAAGAGATATCTGTAT  
CAGGATAACGAGCGAGGGGCACATATCCATGTAGTAAACGGCACTTATTACTTTCACGGT  
CATATCGTGCCAGGTTGGCAATGCGTGCAAAAGACATTTGATACCGCGGAAGAGCTTGAA  
ACATATATAAAGCAAAATGGTTTGGAAATACGAGGAACAGAAGCAATTAAGTTTATTTTAA  
AAGGGCGGAAACAATGAAAATCAAATTTGAAAAGAAATGAATTTACCTGAACTTTTCCA  
ATGGGCTTGGGATAACCCCAAGTTATCAGGTAATAAAAGATTCTATTCAAATGATGCTGA  
ACGCAACTGTTGTGTGACTTCTGATGTTGATAGCATCTTACGTAATGTGACTGGATACGT  
ATCAATTAACGATAAATTTACTGTTCAAGAGGAGATATAACAATGAAAATCAAAGTTAAA  
AAAGAAAAGAGATTAGATGAATTAATTAGATGGGCGCGAGAAAATCCGGATCTATCACAA  
GGGAAAATATTCTTTTCAACAGGACTTAGTGATGGATTTCGCTCGTTTTTCATCCAAATACA  
AATAAGTGTTTCGACGTCCAGTTTTATTCTAATTGATATCCCCTTCATAGTTGATATTGAA  
AAAGAAGTAACGGAAGAGACTAAGGTTGATAGGTTGATTGAATTATTCGAGATTCAAGAA  
GGAGACTATAACTCTACACTATATGAGAACACGAGTATAAAGAATGTTTATATGGCAGA  
TGTGTGCCTACCAAAGCATTCCACATCTTTAACAATGACCTAACTATGACGTTAATGTGG  
AAAGATGGGGAGTTGCTAGTATGATGTTGAAATTTAAAGCTTGGGATAAAGATAAAAAAG  
TTATGAGTATTATTGACGAAATCGATTTTATTAGTGGGTACATTTTGTATTTCAACAGGTT  
ATAAAAGTTTCAATGAAGTAAAACCTATTACAATAAAAAGGATTTAAAGATGTGCACGGTG  
TGGATATTTATGAAGGGGATATTGTTCAAGATTGTTATTCGAGAGAAAGTAAGTTTTATCG  
AGTTTAAAGAAGGAGCTTTTTATATAACTTTTAGCAATGTAAATGAATTAAGTAAA  
AGGACGATATTATTGAAATTGTTGGAAATATTTTTGACAATGAGATGCTATTGGAGGTGA  
TGAGATGACGTTACCTTATCCGATGAACAATATAAAAATCTTTGTAATACTTAACAA  
GTTATTAGATAAACTTCACAAACCATTAAGACCGTGAAGAGTACAAGAGGCGACGAGA  
TGAGCTTATTGGGGATATAGCGAAGGTACGAGATTGTAACAAAGAAGCTGGAGAAGAAAGC  
AAGCGCGTGGGATAGGTATTGCAAGAGCGTTGAAAAGATTTAATAAACGAATTCGGTAT

CGATGATGAAAGAGTTAAATTCGGAATGGAATTAACAATAAAAATTGTTATGGAGGATGA  
CACTAATGAATAACCGAGAACAATAGAACAATCCGTTATAAGTGCTAGTGCGTATCACG  
GCAATGACACAGAGGGATTACTAAAAGAGATTGTGGACGTTTATAAGAATGCGCAAGAGT  
TTGATGAAATCCTTAAGGGTTTACCTAATGCTATGCAAGATGCACTCAAAGAAGATATTG  
GTCTTGATGAGGCAGTAGGGATTGTGACGGGTTCGAGTGGTATATAAATATGAGCAGGAGC  
AGGAAAATGACTAACACATTAACAATTGATCAGGTAAGAGAGTTATTACAAATACAAAA  
GACTTTGACGATAGAATACCAACACCAAATTTACGAGATAGCAAGATTGCGTATGCGGTT  
GAATTCCTTGAATGGTTTAAACACATAGGAAACGTTCAAGAATTGGAAGACGCAACCAGGT  
AAATCGTTAGACCAACAGCTAGACGAGTGAGCAGACATGTTAGCGTTTGGATTGAGTATT  
GCTAATCAACAAGCAGATAACATGGAAGAAATTTTTGGTTATTTAGATGAGGGAGATTTT  
AACGACTATATAGAACGAGTTGAAATCGATTATAACGATAGTGATGTGGTAGATGAATTT  
ATGTCAACTATAGATGAAATGTATTAAGTCCATATAGTAGCAACTTATTTTTACCGTTT  
GCATTAGCGAACAACACTACTACACTATCGATCAACTCATTGACGCATACAAAAGGAAAATG  
AAAAGGAACCACGAAAGACAAGATGGAACAGCAGACGCAGGGAAAGGATACTTATAAAGA  
CATATTAGATCGGGTCAAGGAGGATTTGGGGAAGTGACACAATACTTAGTCACAACATTC  
AAAGATTCAACAGGACAACCACATGAACATTTTACTACTGCTAGAGATAATCAGACGTTT  
ACAGTTGTTGAGGCAGAGAGTAAAGAAGAAGCGAAAGAAAAGTACGAGGCACTAGTTAAA  
AGAGATGCAATTATTTAATTAGGTCAGTTGTTTAAAATATAAGGGAGTGTCTGAAATGA  
CGGATGTTAAAATTA AAACTATTT CAGGTGGAGTTTATTTTGTAAAAACAGCTGAACCTT  
TTGAAAAATATGTTGAAAGAATGACGTGTTGTAATGGTTATATTTACGCAAGTAGTATAA  
TCAAGCAACCAACGTATATTA AAAACAGATACGATTGAATCAATCACACTTATTGAGGAAC  
GTGGGAAATGAATCAGCTGAGAATTTTATTACATGACGGTCGTAGTTTGGTACTACATGA  
AGATGAATTATTTAACGCAATAGTATTTCTTTTGGATGATTTTAGAAATGATGATCACTA  
TTTAACGATAGAAAAAGATTATGGCAGAGA ACTAGTATTGAACAAAGGTTATATAGTTGG  
GATTAATGTTGAGGAGGCAGACGATGACTAAACAAATATTAAGACTAGTATTCTTACTAG  
CGATGCATGAGCTAGGAAAGTATGTAACGGAGCAAGTATATATTATGATGACGGCGAATG  
GTGATGTAGAGATGCCGAGTGACTTCGCAAAGTTGAGCGATCAGTCTGATTTGATGAGGG  
CGGAGGTGTCAGAGTAGATGATGTGGTTAGTCGTAGCAATTATATTACTAGGCATCTTAT  
TATTTGGTGTGATGTTGCAAACTGAACAGTTAAGAGGCGATGTGAAAGTTAAAGAGCGGG  
AGATAGAGATATTAAGAAGTAGATTGAGACATTTTGGAGATTAACATATTTGTACGGAG  
GGTATTCATGACTAAAAAGAAAGACGGATTA AAAATCATCAACAGTTCGGAAATTAGAAGA  
CGAGTGGTGCGATTATCCTAATTATCATAAAACA ACTTGAAGTTTTAAGATGTGAAATAAT  
GACACCGTGGATTCCAACAGATACAAATATAGGCGGGGAGTTTGTACCATCTAATACATC  
AAAAACAGAAATGGCAGTAACTAAGTATCTTTGTAGTATAAGAAGAGGTAAAATACATGA  
GTTTAAGAGTGCGATTGAACGTATAATCAACACCTCAAGTAGGAAAGAACGCGAATTCAT  
TCAAGAGTATTATTTAATAAAAAGACTTTGATTGCGGTTTGTATGACATACACATCTC  
TGAAAGTACAGCGCATAGTATCAAGAAGAAAATCGTGTCTAATCTAGCCGAAGAATTAGG  
AGAATACTAAACTTAACAGTAAAATGCCAGTTTTTGGACACCTCTAACGAGATATTATGAT  
AGTGTAGGATATAGACTATCTTACTGCGTTTCCCTTATCGCAATTAGGAATAAAGGATCT  
ATATGGGTTGGCTGATTATAGCCAATCCCTTTTTTAATTTTAAAAGCGTATAGCGCGAG  
AGTTGGTATTAATGAAATGAACAAATTA ACTAAAAAGCGACGTTTGTCTGCAGAAGTAT  
ATACAATACCTGGTACTGAATGTTATGGCAATGCTACTAAGTCAGCTGTGGATGCCGGAT  
ATAGCGAAAAGACCGCTACTCACAAGGACAGCGTATGTTAAAGCATGGTGAAATTCAGA  
ATTATATCAAGGAGGTTGAAACAAA ACTCTTTGACGAGAATATTATGTCAGGTCAATAAG  
TGGTGTATAGGCTAACTAGAACAGCTAGAGGAGAACACACGGAAGTTAAAGCTGTCGTAA  
CAAAA ACTGTAGACTATAAATAGAATCCGTATACTGGCAAAATGCAATTAGTATACGATG  
AACACATACAACTTGTACTAAGTCACCTAAAATAAGTGACCTAAACAAAGCCTTAGAGA  
TGTTAGGCAGACACCACAAGTTCTTTACAGACAAACAAGAAGTCGACCACAAATTACCGA  
TGTTTGTGATAATATCCGGAAGATGATTAGTCATGTATGAAATACTTGATCTCAAAAA  
TAAAATCGGTGGTGGCTACAATAAGTTTTGGCACAACAAA ACTTTTACCGTGTGTTAA  
AGTTCAAGGGGTAGCAAGAAAAGTAAA ACTACCGCTATTAATCTCATTATCGAATAAT  
GAAATATGATTGGGCAAATATACTTGTAGTCAGAAGATTGAGCAACACTAACAAACAATC  
AACGTATACAGATTTAAAGTGGGCAACTAACCAATTAGGCGTTGCTCACTTATTTAAATT  
CAACGAAAGTTTGCCTTATATAACGTATAAACCTACTGGATAAAAAATACTGTTTAAAGG  
TTTAGACGACCCATTGAAAATAACATCGTTTACTGTTGATACAGGCATTTTGTGTAGGGC  
TTGGTTTGAAGAGGCTTATCAAATAGAAACATTCGCTAAGTTTGGCACTGTTGTTGAGTC  
AATATGTGGTAGCCACGATAGTCCGGAATTTTTCAAGCAAATCACAGTCACTTTTAACCC

GTGGTCGGAAAGACATTCGTTGAAGCCTACATTTTTTGGATGAAGAAACAAAATTAGACAA  
TACTTTTTTCAGATCCAACCACTTATAGTGTTAATGAATGGTTAGATAAAGTCGATATTGA  
ACGATATGAAGATTTGTATCTAAAGAGTCCTAGAGGTGCAAGCATCGTTTGTGATGGAGA  
TTGGGGTGTTCAGAGGGGCTTGTATTCGAAAATTTTAAAGTAGAAGACTTTGATTGTTT  
TGAGGAGTCTAAAAGAACGCAAGAAATATCTCACGGAATGGATTTAGGATTTAGTCAAGA  
CCCTACACCAGTAGTTAGTACGGTGTAGATTTAAAAAACAAAAGTTATTCATCTATGA  
TGAACACTATAAAAAAGCGATGTTAACTGATGATATAAAACAAATGCTTATTAAAAAAGG  
ATTAGGTGATGTACATATTGCAGCTGATTATGGGGCTGGTGGAGATAGAGTGATCAGTGA  
ATTGAAATCTAAAGGGATTAAGGGATAAAAAAGCGTTGAAAGGCGCCAATACTATTTT  
ACCAGGCATTCAATTCATTCAAGGCTCTGAAGTTATTATACACCCTTCATGTGAACACGC  
TATTGAAGAGTTCAACACTTATACATTTGACCAAGATAATGATGGTAAGTGGTTGATCAA  
GCCTATATATGATAATAACCATATTATCGATGCATTGCGTTATACTCTTGAGAAATATCA  
TATCGTACGTAAAAACGTAAAAAGAACATAGAAAGCAAAACAAAAGTAGTTAAATATCT  
AGGATTATAGGAGGGAACAAATGTTAAAGGCAAACGAATTTGAAACGGATACTGATTTCC  
GAGAAAACAGAAATTACTTGTTTAAACGATGAAGCTAATGTTGTTTACACATATGACGGGA  
CAGAGTCTGATTTATTACAAAACATTAATGAAGTAAGTAAATACATTGAACATCACATGG  
ATTACCAACGACCTAGATTAAGAGTGTTAAGTGATTATTACGAAGGTAAACTAAGAATC  
TGTGTGAGTTAACACGACGCAAAGAAGAGTACATGGCAGACAACCGTGTAGCGCATGATT  
ACGCATCTTATATTAGCGATATTATGAACGGTATTTTCATAGGTAATCCGATTCAATGTC  
AAGATGATGATAAAGATGTATTAGAAGCTATTGAGGCGTTCAATGATTTAAATGATGTTA  
AGTCACACAATAGATCTTTAGGATTAGATTTGTCAATTTATGGCAAAGCTTATGAGTTAA  
TGATTAGAAACCATGATGATGAATCGCGTTTATACAAGAGTGAGGCAACGAGTACTTTTG  
TCATATACGACAATAACAATTGAACGTAATAGTATCGCAGGCGTTAGATATTTAAGAACTA  
AACCAATAGACAAGACAGACGAAGATGAAGTGTTTACAGTTGATATATTTACTTCTCACG  
GTGTTTATAGATATCTTACCCTAGAACAAATGGATTGAATCTCACACCACGTGAAAACG  
GTTTTGAATCACACTCTTTCGAACGTATGCCTATTACAGAATTTAGCAACAACGAAAGAA  
GAAAAGGAGATTATGAGAAAGTAATCACTTTGATTGATTTGTATGATAATGCAGAATCAG  
ATACTGCTAACTATATGAGTGATTTAAACGACGATATGTTATTGATTAAGGTAACCTTAT  
CATTAGATCCAGATGAAGTAAAAAACAAAAGAAGCTAACGTGTTATTTTLAGGGCCAA  
CCGTTTATGAGAATAGGGATACAGGTATCGAAACAGAAGGTTTCAGTTGACGGCGGTTATA  
TTTATAAGCAATACGATGTACAAGGTACCGAAGCTTATAAAGACCGTTTGAACAGTGATA  
TACACATGTTTACCAACACGCCTAACATGAAAGATGATAACTTTAGTGGCACTCAATCGG  
GCGAGGCAATGAAACATAAATTGTTCTGATTAGAACAACGTAATAAACTAAAGAAGGAT  
TGTTTTCTGAAGGGTTAAGACGTCGTGCTAAGTTGTTAGAGACAATAATTCAAATACAC  
GGTCGATTGACGCTAACAAAGATTTCAATACTGTGAGATACGTATACAACAGAACTTAC  
CTAAATCATTAAATGGAAGAATTAAGCTTAGATTGATTCTGGCGGAAAGATTAGTCAAA  
CACTTTAATGTCTCGATTCTCGTTCTTCCGAGGCCCTGAATTGGAAGTCAAGAAAATAG  
AAGAAGATGAGAAAGAATCTATTAAAAAAGCGCAAAAAGGTATTTATAAAGAACCTAGAG  
ACATCAATGATGAACAACAAGATGATGATACAAAAGATACTGATGATAAAAAGGAATGAT  
TGAAATGGCCTAACAAAACACTCAAGAATATTGGGAAGAACGCAGACGCAAAGCAATCG  
AGAATGAGTTGAAGCGTTATAAACTAAAGCTGACGTAATAGAACGTATATTGAATATGA  
TGATTAGGCGCATTGAAGAAGAAATCAATGCGTTTATTGTTAAGTACGGAGATTTCCAG  
GCGTTACACTACAAGAAGCACAAAAGATTATTGATGAGTGCGATGTAAAAGCGTTTCAAG  
AAGAAGCAAAAAGATTGGTCGAAAACAAGGACTTAAGCGATAGAGCAAATGAAGAATTA  
AGAAGTATAACACTAAGATGTATGTATCTAGAGAACAGATGTTAAAGATTCAAATAGAAT  
TCTTATATGCTTATGCAACAGCTCAAACAGAATTATCGATGAGGGAATATTTCGAATCAA  
CAGCTTATCGTGTGTTTCAGTGATCAAGCGGGTATTTTTGGTGAAGGTGTACAAGTAGCTA  
AAGAAGTTATAGATACAGTCGTTGATACACAATTTTCATGGTGTGCGTTTGGTCAGAGCGAT  
TATGGACTAATACGGAAGCGATGAAACAAGAAGTAGAAGAAATAATTGCTAATGTGGTAA  
TTAGAGGTCGACATCCTAATGAATATGTTAAAGATATGCGCAAGCACCTAAACAAATTCG  
AAGGCACAGCAAGACAAAAGACTGCAGCAATTAATCATTGCTTTATACGGAATCGGCAC  
GTGTTTCGCGCATAATCAAGTATTGACAGCATAAAAGAAATTTACCGGAAGGATATTATA  
TGTATATTGCAAAAATTGATAGAAGAACAATAAAGTATGCGAGGGGGTTAATGGTGAAA  
TATTCAAAGTTAAAGACGCTAAAATTGGTGTAAATTTCTACCCTATGCATATCAATTGTC  
GTTTCAGATTGTGCATTACTACCTAAATCTATGTGGCCGAAAAACCAACCAAGAAACGAA  
AAACATAATACTTCGGAGGAACAGAGAAAAGCGATGATTGATTTAAAGTAAAGTTTTT  
AAATGCAAGTGAGCATTGTATGATAGTAAATTAAGAGTTTGGAGGATATTGGTATGAGCA



ATACTGACAGATACTTTAGAGACATAGCAAGAGAGTTAAAAGGTATACGTAAAGAGTTAC  
AAAAGCGAAACGATACAGTTATTATTGATTCAAACCTTAGCCAGCGTAAGGTTCGGCAGTAT  
TAGCCAATAACGAAAAACCGAAATATAACGTACCACTCTTTTTATAGCTAGCACTTAATT  
GTGTTGGCTATTTTTTATGTCCAAAACGTGCTGATGACATAAAAAGCGCGCATGGAAAA  
CAGTCGACAGACTATAGATGGAGGTATATCTCATGGAAGAAAATAAACTTAAGTTTAATT  
TGCAATTTTTTGCAGACCAATCAGATGACCCGGACGAACCAGGCGGAGATGGTAAAAAAG  
GAAATCCTGATAAGAAAGAACATGACGAAGGTACTGAAATAACTTTACGCCAGAGCAAC  
AAAAGGAAATTCATGAAATACTTGAACGTCGTGTAGCCCACGAAAAGACAAAAGCTGATG  
AGTATGCAAAAAGAAAAGCAGAAGAAGCCGCTAAAGAAGCTGCTAAATTAGCGAAAATGA  
ACAAGGATCAAAAAGATGAATATGAACGTAAACAATTGGAAAAGAGCTGGAGCACGTTT  
GCTCAGAAAAACAATTAATGAAATGCGTTCAGAAGCAAGGAAAATGTTTAGTGAAGCAG  
AAGTAGATTCATCAGATGAGGCTGTTAATTTAGTTGTACCAGATACTGCTGAACAACTA  
AATTGAATGTTGAAGCTTTTTCTAATGCAGTAAAAAAGCGGTTAATGAAGCGGTTAAGA  
TGAACGCTAGACAATCGCCATTGACTGGTGGAGATTCATTGAATCACTCGACTGAAAATA  
AATCGCAAACTTAGCTGAAATAGCTAGACAAAAAGAATTATTAATAAATTAACGGAGGC  
ATTTAAATGCAACAAGCACAAAAATTAATAAATTTGCAACATTTTGCAGTAACAAT  
GTTAAACCGCAAGTATTGAACCCTGATAATGTAATGATGGACGAAAAGAAAGATGGCAG  
TTGATGAATGAATTCACAACCTCCATCTTACAAGAGGTTATGGAAAACCTCTAAAATTATG  
CAATTAGGTAAGTACGAACCAATGGAAGGTACTGAGAAGAAGTTTACTTTTTGGGCTGAT  
AAACCAGGTGCTTACTGGGTAGGTGGAGGTCAAGAAATCGAAACATCTAAAGCTACATGG  
GTTAATGCTACTATGAGAGCGTTTAAATTAGGGGTTATCTTACCTGTAACAAAAGAGTTT  
TTGAATTACAATTATTCACAATCTTTGAAGAAATGAAGCCTATGATTGCTGAAGCATT  
TATAAAAAGTTTGATGAAGCGGCTATTTAGAATCACGGTAACAATCCATTTCGGTAATTCA  
ATTGCACAATCCATTGAAAAAACTAATAAGGTTAGTAAAGGTGACTTCACACTAGATAAC  
ATTATTGATTTAGAGGCATTACTTGAATATGACGAATTAGAAGCAAATGCGTTTATCTCA  
AAAACGCCAAACAGGAGCTTGTACGTAAAATTGTAGATCCTGAAACAAAAGAACGCATT  
TATGACCGTAACAATGATGCATTCGACGGTCTACTTGTGGTTAATCTTAAATCAAGTAAC  
TTAAAACGTGATGAACTAATCACTGGTGATTTTCGATAAGTTGATTTACGATATCCCTCAA  
TTAATTGAATACAAAATCGATGAAACAGAGCAATTATCTACAGTTAAAACGAAGATGGC  
ACACCTGTAAACTTATTCGAACAAGATATGGTGGGCATTACGTGCAACTATGCATGTAGC  
ATTGCATATCGCTGATGATAAAGCATTGCTTAGTTAGTCCGTGCTGATGCAAAACCATC  
GTCAAATCCAGGCGAAGTTTAATAAATAATTAGGAGTGAACATGCCCAGAAATCATTGG  
AATTGTTAAGTAGATTTTACAGATTTAGAAGATAACAGACATGTCTATATGATAGGGCA  
TGGCTACCCTCGCAAAGGTTATGATCCTACGAATGAACGTGTAATACTTTAGCCAGCGT  
TGAAAATAAACGCTATTAGCAAATGATTGACATAGTAAATGACAAATTAACCAAAAAAGA  
ACTTGTGCAAAATAGCTAGTGTGTTGCCTTACAAGTTGATGAAAACAAAACAAAAGCTGA  
AATTATCAACACTTTTGAGTCGCTAGAGTAGGTGGTTTTATGACTACGCTAGCTGATGTA  
AAAAACGTATTGGTCTTAAAGATGAAAAGCAAGATGAACAATTAGAGGAAATTATAAAA  
AGTTGTGAAAGCCAGTTGTTATCAATGTTACCTATTGAAGTTGAACAATTACCGGAAAGG  
TTTCGTTACATGATTAAGAAGTTGCAGTTAAACGCTACAACAGTATTGGTGTGTAAGGT  
ATGACATCAGAAGCGGTTGACGGACGTAGCAATGCGTATGAATTGAACGATTTCAAGGAG  
TATGAAGCTATTCTTGATAATTACTTTAATGCTAGAACGAGAAATAAAAAAGGACGGGCT  
GTGTTCTTTTGAAGATATGAAGATAGAGTAATTTTTCAATTAGGACAAGTAGCAAATTACA  
ATCCTAAAACCTAGCAAAAAAGAAAACGCACTAATCACTTATGATGCGATACCATGCAATA  
TAAACCCCTTTTCTAGAGCAAGAAAGCAACTTGAATTTGGCGATGTAAAAACGAAGTAA  
CTGTCTGAGGGTCAAAGAATCAATATCTTACCCTGTTAGCCACGTGTTGGTTAATGGCA  
TTCGCTACAAGAGAGTTGGTACAAGGATATACAGACACGAAACGTCATATTATATCGAAG  
AGGTCAATTGATGAATATAGATGGATTAGACGCACTGTTAAACCAATTTACGATATGAA  
AAACAACATCGATGATGATGTAGATAATACTTGAACAAGAAAACGCCAAAGAATAGGTAGT  
CCGAGCTAAATTGAAAGCTAGAGAAGTAATGAATAAGGGTCATTGAACTGGTAATTTATC  
ACGCAATATTAGATATTAAGAATCTGGCAATTTGCAATACACTATCACATCGCATGCAGC  
TTATAGTAGTTTCTTAGAGTTTGGTACTCGATACATGGAGGCATAACCTTTTATGTGGCC  
AGTATATGAGGTAATAAGAAAATCGACTGTAGAAGAGTTGAAAGCGTTGTTTGAATAGGA  
GATAAAAGCATGACACCAAACTTACAACCTTATAATAATGCGTTTGAACGCTACAAGGA  
TATGGATTCCCTGTTATTTCTCGTAAAGAGATGCAACAAGAGGTTCCGTATCCTTTTTTT  
TTAATAAAAATGCCGGAGTCAAACAGAAGTAAATCCACGTTTGATAGTTATTCTGGTGAC  
ACGAATTGAGTTCTTGATACTTGGTGTGTAAGTGATGATTTAGGACATCATGACGGACTT

GTAAAAGATGTATTGATGATTTAACACCTAGCGTTAAAACAAATGTTTATGACTTTGAA  
GTAGATGATACTAACATCACACAGTTAGTTGATGATACTACCAATCAAGAATTGCTACAC  
ACATCAGTAACGATATCTTACAAAACATTTTAAAAAACGGAGGAATATTGAATGGCAAAT  
ATGAAAAATAGTAATGATCGTATTATTTTATTTATAAAAAGATAGCGAAAAAGTAGATGCT  
ACTAAAATGCTTTTTTTAACTGAATACGGCTTATCACATGAAGCTGATACAGATACAGAG  
GATACGATGGACGGTCTTATAACACAGGTGGTCTGTTGAGTCAACACTGTCTGGTACT  
GCTAAAATGTTTTATGGTGACGGTTTTGCAGATGAAATTGAAGATGCAGTTGTAGATCGC  
GTATTGTATGAGGCTTGGGAAGATGAAAGTAGAATACCTAGCAAAAATGGAGATGCCACT  
AAATTTAAAGCGAAATATTTCCATGGTTTCCACAATAAATTTGAATTA AAAAGCAGAAGCT  
AACGGTATTGATGAATATGAATGTGAATATGGAGTGAATGGTCGTTTCCACCGTGGATTT  
GCAACACTACCTGAGGCTGTAACAAAGAACTTAAGCCGACTGGATACAGATTCCATGAC  
ACTACAAAAGCAGATGCGTTATCTGGCGAAGATTTAACAGCAATTCCAGAACCTAAGGTA  
GATTCATCAACGGTTACACTAGGAGAGGTATAAAAAATAGGGCGTTAAGCCCTATTTATTT  
TGTTTAAATTAATCATGAATGGAGATTTTAAAGTTATGAATGTAGAAATTAACGGAAAGTC  
ATTAGAATTAAGTCTTGGTTTTTAAATTTTTTAAAGAGAAATCGATAACCGATTAGGTTCAA  
AGTTGAGCAAGCTTCTATCGGTCAAGGTGTATCAATGTTGCCTGTAAGTTTGGAGAGTGA  
AAATCCTGTTGTGATTGGCGAACTTTAAATTGCAGCTACATCTCACTTAAAAAACAAGC  
AATTACTATTAATAACCTTGCTGAAGCGCTAGATGAAATCGCAGAAAATATCGGACTAGA  
AGAATTCGGTTCAGATATTTTAAACGGAGTTGGGAAAGCGACCTATGACCCGAAACCTAGT  
CGGAGTAATGGAAGCGGAGGAGAAACCAGCGGAAGCGTAATAACTTACGACAGCATCGTT  
ATAACTTGTATGTCAACACTTGGTATCACAGATTTGAACGTTATTGAGAAAATGACATTA  
ACAGAATATAACTATCGAATGTATGCGAAAGAGTATGAAATTCTAACCCAAGAATTCGAA  
CGTTTCAAACCTTGCGTTTTGCTATTCGTGATGCTGCAGCTACAAAAAATGTTGGGACAGAA  
AATAAACCTAAAGAGGAATATGTTTTTAAACCACGCAAACGACGTATTGCCTTATGAAGAA  
AATATCCAACCTGCTTAAACGAAGAGAAAGATCTAAGATTTAGTAGCGAACGTGATGAATAC  
GAACCACAAAACAATGAATTTCTTAAAGTTATAGCAGAATTTAACAAGCAATAGAAAGAG  
AGGCGTTAATGTCACGGAATATAAAATTAAGCGACTATTGAAGCTAGAGTAGCCAAATT  
CAAAGGCAAATCGATAGTGCGGTTAAGTCTGTGCAAAGATTTAAACGAGTAGCAGATCA  
AACTAAAGATGTCGAATTAATGCTGATGATAAAAAATTACAAAAACTATCAAAGTTGC  
TAAAAAGTCTTTAGATGCCTTTAGTAACAAAAAAGTAAAAGCTAAATTAGATGCTAGTAT  
ACAAGGCTTGCAACAAAAGGTACTAGAATCGAATTTTGAACCTGGACAAACTAACTATAA  
AGAAGTTACTCCAGAGATTAGATTACAAAAACAGAAATTGACTAAAGATATTGCTGAAGC  
AGAAGCTAAGTTATCCGAACCTAGAAAAGAAGCGTGTCAATATTGACATCAATGCTGATAA  
CATTAAATTC AATCGAGTGTTAAAAGTATCTAAAGCTAGTCTGGAACCTTTAAATAGGTC  
TAAAGCCAAAGCTATTTTAGATGTAGACAACAGTGTTGCTAATTCTAAAATCAACCGTAC  
TAAAGAAGAGCTTAAAAGTATTCCAAATAAAACTAGATCTAGACTTGATGTAGATTCAAG  
GCTTTCTATGCCAACTATTTATGCGTTTAAAAAATCATTAGACGCATTGCCAAACAAAA  
AACAAACAAGGTAGATGTCGATACTAATGGTTTAAAGAAAGCTCATGCCTACATAATAAA  
CGGAAACGACAATTTCCAAAGACAGATGAGGAATTTAGCTAATATGTTCCGTGTGTCCGG  
TACCGTAGGTTCTAATATGGTTGGTGGATTACTA ACTTCATCTCTTAGCATTTTAATACC  
TGTAATAGCGAGCGTAGTACCTGTAGTGTGTTGCACTATTAACGTTATCAAAGTGTTAAC  
GGGTGGTGTACTTGTCTTAGGTGGTGTGCTGTAGCCATAGATGGTGCAGTCTTTGTAGCATT  
TGGCGCAACGGCTACCAGCGCTATAAAAAATGCTTAGTGACGGCACTTTACAAGCTAGCAC  
AGCAACAAACGAATACAAAAAAGCTTTAGATGGCGTAAAGTCAGCATGGACTGATTTTAT  
AAAGCAAATCAATCCGCTATCTTTACAACCTTTGCAAATGGTTTAAATACTGTTAAGAC  
AGCAATGCAGCGCTTACAACCGATTTTTAGTGGTATTTCAAGAGGAACGGAAGAGGGCGTC  
TCAAAGTGTA CTTAAATGGGCTCAA AATAGCGGTGTAGCATCAAGGTTCTTCAACATGAT  
GAATACA ACTGGTGTTC CGTATTTAACAAGCTATTAAGTGCTGCAGGCGGTTTCGGTGA  
CGGTTT TAGTCAATGCATTACACAATTAGCACCCTGTTTCAATGGTCGGCTGATTGGTT  
GGATAGATTAGGTCAATCTTTATCTAACTGGGCTAATAGTGCAGCTGGAGAAAATTCGAT  
CACTCGTTTTATTGAATAAACA AAAACA AATTTGCCTATCATTGGTAATATTTTTAAAA  
TGTGTTTCGCTGGAATTAACAATTTGACGAATGCCTTAAGTGGATCGTCAACTGGTATATT  
CCAGTCTCTCGCACAGATGACAGCTAAATTTAGGGAATGGTCTGAACAAGTAGGACAATC  
TCAAGGGTTCAAAGACTTTGTCAGTTACATACAAACA AATGGACCACTAATAATGCAATT  
AATTGGGAACATTGCAA AAGGATTAGTTGCATTCGCAACAGCGATGGCTCCTATAGCTAG  
TGCAGTATTACGCGTTGCAGTAGCAATAACTGATTGGATAGCCA ACTTGT TTGAGGGCGCA  
TCCAGCTACACCACAATTAGTTGGCGTCATTATAACTTGAGTTGGTGCATTTAGATTTTT

AATTGCTCCAATATTAGCGGTAATGGATTTGCGGGGGCCATTAGCAGCAAGATTAGGGCGC  
ATTAGTAACTAAGTTTGGTTGGGCTAAAACAGGACCTTTAGTATTGAGTAACGCAGTGAC  
ACCGTTAAAAGGTCCAATAAAATTAGTTACAGCTATATTCCAATTGTTAGTCGGTAAGAT  
TGGATTAATTAGAAATGCTATCACAGGACCAGTAACTGTGTTTAGTATTTTAGGCCGTCC  
AATAACAATAGTAATTGGTGTAATTGCTGCATTAATATCTATATTCGTTTTATTGTGGAA  
TAAATATGAAGGATTCAGAAACTTTATTATAAATGCTTGGAAATGCGATAAAAGCGTTTAC  
GGTTAATGTTTGAATGTATTA AAAAGCTGTAGCTTCGGGTGTATGGAATGCTATTTTAAAC  
AGCTATCACTACAGCAGTATCGAATGTTTACAATTTTGTAAATGATTGTTTGAATCAAAT  
AGTCGCTTATTTACAAGGGCTATGGAATGGAATTATCGCTATTGCACCAACAGTATGGAA  
CCTTTTAGTTACAATCATTACAACCTGTTTTACGACGATAATGACAATAGTTATGACGAT  
ATGGACAGCTATTTGGACGTTCTTAAGTACAATGTGGAATACGATAATTACAATCGCTAC  
AACGACTTGGAAATTTGTTGGTTCGCTGTAATAAGTACTGTGTTTACAACAATCATGACTAT  
CGCAATGACAATTTGGAACGCTATTTGGACGTTCTTACAGACGTTGTGGAACACTATAGT  
AACTGTGGCAACTAAGGTTTGGAAACGCTATCACTACAGCTATCTCTACTACGTTACAAGC  
GGCATGGAATTTCAATTTCTAATATCTGGAATACGATTTGGAGTTTCTTATCTGGTATATT  
AACGACGATTTGGAATAAAGTTGTAAGTATATTCACACAAGTTGTATCAACTATATCAGA  
CAAAATGTCTCGAGCTTGGAAACGTCATTGTCACTAAAGGTATGCAATGGGTATCTACTAT  
GACAAGTACGCTAATTAACCTTTGTTAATAGAGTTATTCAAGGATTCGTTAATGTTGTAAA  
CAAAGTTAGTCAAGGTATGACAAATGCAGTAATTA AAAATTA AAAAGTTTTATAGGAGATTT  
TGTGTCTGCAGGTGCTGATATGATCCGTGGTTTAATTAGAGTTAATGGACAAATGGCTGG  
CCAATTAGTAGATGCAGCTAAAAATGTTGCTAAGAAAGCTTTAGATGCAGCTAAAAGTGC  
TTTGGGTATTCACTCACCTTCACGTGAATTCATGGATGTTGGTATGTATTCAATGCTAGG  
TTTCGTTAAAGGTATAGATAATCATTCAACTAAAGTTATCCTTAATGTTTCTAATGTTGC  
ATATAAAGTAGTTGATGCATTTCAACCTACATTA AACCGCACCTGACATTTCTAGTATTAC  
AGGTAACCTAAGTAATTTAGGAGGAAATATAAATGCGCAAGTACAACACACACATTCTAT  
TGAAACATCACCGAACATGGAAACTGTTAAAGTTGACTTCGATGTTAATAACGATGCGCT  
TACTAGTATTGTTAACGGCAGAAATGCTAAACGCAATTCTGAGTATTACTTATAAAGGAC  
GTTACAAATGGACATAGAATTAACAAAAAAGATGGTACTGTCAACAAATTAAGTGAATA  
CGGGTTTATCGTTAACGATATAGTAATTGATAGCTTGCAAATCATCAAAAAGTATCAAGA  
CAAAGAAAATACGAACGGTCGCGTATTAATGTGGACCAATTATATCAGTAGAGATATAGT  
TGTTCCCTGTTTTTGTAAAGTAAAAAATCGTTCAGACATTGCTTATATGCGAGATATGTT  
GTATTCGTTAACTACTGATAAAGAACCAATGTATTTACGTGAAATCAGAAGAAACGAAGA  
GTTGAATTACAGGTTTACTCAACCAACTTCTGATGATTACGAGAAATTAGATAAAAACAA  
CTTCCCGGATTATGAATATTCAAGACACGAGCAACAAATTTATGTAAACGGTAAACAGTA  
TAAAGTTATTTTGAGCGGAGTTATAAATCCTAAACACAAAGATAACAACGTTGCTTTCGA  
AATGAAGTTTGAACTACAGAATTACCATACGGCGAAAGTATTGGAACAAGCCTAGAGTT  
AGAAGAAAACAAAAGGTTGGACTGTGGTCGTTTGATTTAATATTGATTGGCACGCAGG  
TGGGGATAAGCGCCAGTATACATTTGAAAATGTTAGTAAAGATACAGTTTACTATCATGG  
TAGTGCTCCTAACCACCAATTCAACATGTATAAAAAGATAGCAATTATTTTGGGCGAAGA  
TACAGAATCGTTTGTATGGAATTTAACGCATGCTGATATAATGAAAATCGAAGGTATCAA  
ACTAAAAGCTGGAGACAAAATTTGTTTATGATAGCTTCCGGGTTTATAAAAACGGTGTGGA  
AAGAAGTACCGAAACCAATATAGCCCAACCAAAAATCTAAATACGGAGCTAATAAATTTGA  
GTTAATCAAACGGTACAAAAGTTTCAGTTTGATTTGAAATTTTATTATAAGTAGGTGTC  
AGAACGACAATAATTGTAAGACCACCTAAAGGTAATGGCGCACCTGTACCAGTAGATCCA  
ACTTTAGTGA AAAAAGTTAATGCTGATGGTGTATTAACTTTTGATATTCTAGAAAATCAA  
TATACTTATGAAGTTATTAACGCTATAGGGAAAAGATGGATTATTAGTCATGTGCAAGGT  
GAAAACGACAAGAAAGAATATGTAATAACTATCATTGATAGGAAATCAGAAGGCGACAGA  
CAACTGGTTGAAGGTACTGCTAGAGAGATTCCCATAGACAAGTTAATGATTGATAGAATT  
TATTTAATGTAGCAGGATCTTTTACAGTAGAAAGATATTTTAAACATTGTGTTTCAAGGT  
ACTGGAATCCTTTTTGAAAGTCGAGGGCAAAGTTAAATCTTCAAAGTTTGAAAACGGCGGT  
GAAGGCGACACAAGGTTAGAAATGATAAAAAAAGGTTTGGAACATTTTGGATTAGAATAT  
AAGATCACATATGCTAAAAGAAAGACAGATATAAGTTTGTATTGACGCCTTTTGCAAAT  
CAAAAAGCGTCTTATTTTATTTCCGACGAAGTGAAAGCCAACGCTATAATACTCGAGGAA  
GATGCAAGTCCTTTCGCCACCTTATTAGAGGATATGGTAATTATTCAGGAGAAGAAACA  
TTCGAACACGCTGGGCTCGTAATGGAAGCTAGAAGTGCATTAGCTGAAATATACGGCGAC  
AGCCACGCAGAACCATTTAAAGATGGTAAAGTGACTGACCAAGAACTATGGATAAAGAA  
TTACAATCCAGATTGAAAAGTTCGTTAATACAATCTTCTCTTTGGACTTTTTGGTGTTA

ACAGGATCATATCCAGAAACAGACCCACAACCCGGAGACATAGTACAAATAAAATCTACC  
AATCTAGGTTTGAATGATTTATTCGGTATAGTACAAGTTAACACGATTAGGGGTATAAAC  
AATGTAATTGTTAAGCAAGATGTAACGCTTGGTGAGTTAATCGAGGACAACGATATATG  
AAAAAAGTTAATACTGCAGCTAACTATGTTTCTGGTTTAAATGATGTTAACCTTTCTAAT  
CCTAGTAAAGCGACAGAAAACCTTGAAGGCTAAAGTAGCGTCAATAGCTAAATCAACACCC  
GATTTGATGAGTAGAACTGATTTAATTGAAGACAAACAACGGAAAGTGAGTTCTAAGACT  
GTAAGTGCATCAGATGGCACTATCGTACATGATTTGATAGATAAATCAAACATTAAGAT  
GAAAAACAATTGGAACGATTGGCGATTCTGTAGCTCGAGGATCACATTCGAAAGCTAGT  
TTCACAGAAATGTTAGGCAAGAAGTTAAAAGCTAAAACGACCAACCTGGCAAGAGGTGGC  
GCAACAATGGCAACAGTTCCAATAGGTAAAGAAGCGGTAGAAAACAGCATTATAGACAA  
GCAGAGCAAATAAGAGGAGACCTAATCATATTACCAGGGACAGATGATGACTGGTTACAT  
GGTTATTGGGCAGGCGTACCGATAGGCACTGATAAAACCGACACTAAAACGTTTTACGGC  
GCTTTTGTTCTGCAATTGAAGTTATCAGGAAAAATAATCCAGCTTCAAAAATACTTGTA  
ATGACAGCTACTAGGCAATACCGTATGAGTGGTACAACGATACGTCGTAAAGATACGGAC  
AAAAACAACCTAGGGTTAACTTTAGAGGATTATGTCAATGCTCAGATATTGGCGTGTAGT  
GAATTGGATGTACCAGTATATGATGCCTATCATAACAGATTATTTAAGCCATATAATCCA  
GCGTTCAGAAAATCAAGTATGCCAGACGAATTGCATCCGAACCAGAGGGGTCATGGAGTT  
ATTATGTACGAACTTATTAATAAATTATTGCCAGTTTTACGGATAGAAAAGGAGGAAGACA  
TGGATAACAAATTAATTACAGACTTAAGTAGAGTCTTTGACTACAGATATGTAGATGAAA  
ATGAGTATAACTTAAAACCTATTTTCAGACATGCTGACGGATTTAATTTCTCTCTTGAAT  
ACCATAGAAATAAAGAGGTATTTGCACATAATGGAGAGCAAATAAAGTATGAGCATATAA  
ATGTCACAAGTAGCGTCTCTGATTTTTTAACGTATCTAAACGGCCATTTTCAGCAATATGG  
TACTCGGTCATAACGGCGACGGTATCAACGAAGTAAAAGAAGCGCGCGTTGATAATACAG  
GTTATGGTTATAAGACATTGCAAGTACGTTTGAATCATGATTATTCAACATTAGATGCTT  
TCACTAAAAAAGTTGAGAAAGCTGGAGATGAACACTATAAAGAATATCGAGCGACAGAAT  
ACCGATTCGAACCAAAGAGAAAGAACCGGAATTCATCACATATTTATCGCCATATACTA  
ACGCCGTAATGCAATCATTGTTGGGAAGACCCTAGAACGAAAATTATTTATATGACGCAAG  
CTAGTCCAGGTAATCATTACATGTTATCTAGATTGAATCCCAACGGACAATTTATTGATA  
GATTGGTTGTTAAAACGCCGGTACGGTACACACAATGCGTATGGATACATTGATGGAG  
AATTATGGATTTATTTCAGCTGTTTTGGACAGTAACAAAAACAACCTAGTCTGTACGTTCC  
AATATAGAAGTGGAGAAATAACTTATGGTAATGAAATGCAAGATGTCATGCCGAATATAA  
TTAACGACAGATATACGTCAGCGATTTATACTCCGGTAGAAAATTTAAGGATTTTTAGAC  
GTGAATATAAAACCACTGAAAGACAACCTAAGAATTCGTTGAACTTTGTTGAGGTTAGAA  
GTGCTGACGATATTGATAAAGGTGTAGACAAAGTATTGTATCAAATGGATATACCTATGG  
TATACACTTCAGATACACAACCTATGCAAGGTATCACTTATGATGCAGGTATCTTGTATT  
GATATACAGGTGATTCGAATACAGCCAACCCTAACTACTTACAAGGTTTCGATATAAAAA  
CAAAGAATTGTTTTTTAAACGACGTATCGATATTGGCGGTGTGAATAATAACTATAAAG  
GAGACTTCCAAGAAGCTAAGGGTCTAGATATGTATTACGATCTAGAAACAGGACGCAAAG  
CGTTTTAATAGGGGTAACCTGTTGTACCTGGTAACAACAGACATCACTCAATTTATTCCA  
TAGGCCAACGAGGTGTTAACCAATTTTTAAAAAACATTGCACCTCAAGTATCGATGACTG  
ATTAAGGCGGACGTGTTAAACCTTACCAATAGAGAACCAGCATATCTAAGTGATATTA  
CGGAAGTTGGTCATTACTATATCTATACGCAAGACACACAGAAGGCATTAGATTTCCCGT  
TTCCGAAAGCGTTTAGAGATGCAGGTTGGTTCTTTGATGTACTGCCTGGACACTATAATG  
CTGCTCTAAGACAAGTCCTTACCAGAAATAGCACAGGTAGAAATATGCTTAAATTCGAAC  
GTGTCATTCACATTTTCAATAAGAAAAACAACGGAGCATGGAATTTCTGTCCGAAAACG  
CCGGTTTTTGGGAACATATCCCTAAGAGTATTACAAAATTATCAGATTTAAAAATCGTTG  
GTTTAGATTTCCCTTACTACTGAAGAATCACAAGATTTACCGATTTTCGTAAAGACT  
TTAGACGTATTGCAGGTTGGATATTAGAAGTAAAATCGAATACACCAGGTAACACAACAC  
AAGTATTAAGACGTAATAACTTCCCGTCTGCACATAAATTTTTAGTTAGAAGCTTTGGTA  
CTGGTGGCGCTGGTAAATGGAGTTTATTTCGAAGGAAAGGTGGTTGAATAATGGTAGTAGA  
TAATTTTTCGAAACATGATAACTTAATCGAGTTACAAACAACATCACAATATAACCCGGT  
TATTGACACAACCATCGGTTTCTATGAATCAGATAGAGGAACTGGTGTTTTAAATTTTGC  
AGTTACTAAGAATAACAGACCGTTATCTATAAGTTCTGAACATGTTAAAACATCTATCGT  
GTTAAAACCGACGATTAGAACGTAGATAGAGTCGTTATATTTTCAGACGAATTAACAAT  
AGTAGATGCAATCAATGGGCGTTTGCAGTATGTGATACCGAATGAATTTTTAAAACATTC  
AGGCAAGGTGCATGCTCAGGCATTCTTGACACAAAACGGGAGTAATAAGGTTGTTGTTGA  
ACGCCAATTTAGCTTCAATATTGAAAATGATTTAGTTAGTGGGTTTGATGGTTTAAACAA

GCTTGTTTATATCAAATCTATTCAAGATACTATCGAAGCTGTCGGTAAACACTTTAACCA  
ATTCAAGCAAATATGGCTGATACACAGACGTTAATAGCAAAGTGAATGATAGTGCGAC  
AAAAGGCATTCATCAAATAGAAATCAAGGAAAACGAAGTTATACAAGCTATTACTGCGAC  
GCAAAGTAGTGCAACACAAGCTGTTACAGCTGAATTCGATATAATAGGTGATAAAGAGCA  
AGCGATTTATGAACGTGTTAACGAAGTTGAACAACAAATCAATGGCGCTGACCTGGTTAA  
AGGTAATCAACAACAAATTGGCAAAGTCCAACTTACTGATGATTACGGTAAAGCAAT  
TGAATCGTCTGAGCAGTCCATAGATAGCGTTTTAAGCGCAATTAACCCATCTAGGATTAT  
TCATATCACTAGCGCAACAGAGGCGCCAACATTTAAAGATATCGGCACCTTTAGAGATGCC  
AAAAGAAGATGGCGTTGATGATGGTTCTGAAGTTTCAGCAACTACGAATAATTTAGTGAA  
ATCAGGCTTGTAGTTGTTTATGTTGTTGATTACAGTAGAGCTAGTGCTACATGGTATCC  
AAACGATTCAAAAGATGAGTACACAAAATATAAAATCGGTGGCACATGGTATCAGTTCTA  
TAAAAAAGTTGACGAAGAATTAACGAAGAAATTTGTTGAATAAACGGCTAACAAACGCTTT  
GAATCAAGCTAAGCAGTATGTAGATGATAAATTCGGAACAACGAGCTGGCATCAACATAA  
GATGACAGAGGGCAATGGTCAATCAATCAAGTTAACTAAAATAATGCGCAAGGCGATTT  
GGGATATTTAACTGCTGGTAATTACTATCCAACAAGAGTGCCGGATTTACCAGGTAGCGT  
TGAAAGTTATGAGGGTTATTTATCGGTATTCGTTAAAGATGATACAAACAAGCTATTTAA  
CTTCACTCCTTATAACTCTAAAACGATTTACACACGATCAATCGCAAACGGCAGACTTGA  
GCAACAGTGGACAGTTCCTAATGAACATAAATCAACGGTATTTTTTCGACGGTTGCGCAA  
TGGTGTAGGTACAACAATCAATCTAACTGAACCGTTCACAAACTATTCTATTTTGTGGT  
AAGTGGAACCTTATCCAGGTGGCGTTATTGAGGGCGTCCGACTAACCGCATTACCTAACGC  
GATTC AATTGAGTAAAGCGAATGTAGTTGACTCAGACGGCAACGGTGGCGATATTTATGA  
GTACTTACTATCCAAGCCAAGTAGCACTACTTTAAGAATAGATAACGATGTGTACTTTGA  
TTTAGGTAAAACATCAGGTTCTGGAGCGAATGTCAACAAAGTTACTATAACTAAAATTAT  
GGGGTGGAAATAATGAAAATCACAGTAAACGATAATAACGAAGTTATCGGATTCGTTAAT  
ACTGGCGGTTTACGCAATAGTTTAGATGTAGATGATAACAATGTGCCTATTAATTTTAAA  
GAAGAGTTCGAACCTAGAACGTTTGTTTTCTACTAACGGCGAAATTAATACAATAGCAAT  
TTCGAAAAAGAAGACGTAATGCATCAAACCAACAAAGTGCCTCAGATTTAAGTGAT  
GAGGAACTTCGCGGAATGGTTGCGAGTATGCAAATGCAGGTGGCACAAGTAAACGTATTA  
ACAATGGAATTAGCTCAACAAAGCGCTATATTAACACAACAGTTGACTGACCTGAAAAC  
AACAAAACAAGTACTGAGGGGGACGTTAACTAATGAAGATGATTTATCCAACCTTCAAG  
GACATTA AAACTTTTTATGTGTGGGGTTGCTATAAACTGACCAAATTAAGTGGTACATA  
GACATGGGTGTAATCGACAAAGAAGAATATGCATTGATCACTGGAGAAAAATATCCAGAA  
ACAAAAGATGAAAAGTCACAGGTGTAATGCTTGTGGCTTTTTAATTTAACACAAAGTAGG  
TGGCGTAATGTTTGGATTTGCCAAACGGCACGATCATGAATGGCGAATTAGAAGATTAGA  
AGAGAATGATAAAACAATGCTTAGCACTCTCAATGAGATCAAATTAGGTCAAAAAACTCA  
AGAGCAAGTTAACATTA AATTAGATAAACTTTAGATGATATCCAGAGGGAAAGACAGAT  
AGACGAAAAAATAAGAAAGAAAACGACAAAAATATACGCCATATGAAAATGTGGATTCT  
CGGTTTGATAGGGACTATCTTCAGTACGATTGTCATAGCTTTACTAAGA ACTATTTTTGG  
TATTC AAAGGAGGTGATTACCATCCTTAAAGGGATTTTAGGATATAGCTTCTGGGCGTGC  
TTCTGGTTTGGTAAATGTAAATAAGAGTTAAGAGTCAGTGATTCGGCACTGGCTTCTTAT  
TTTGATTGAAATGAGGTT CATA CATGGGATTACCCAATCCAAGACTCGAAAACCTACAG  
CAAGTGAAGTAGTAGAGTGGGCGTTGTATATTGCTATAAAGAAAATAGCTATTGGTGTAC  
CTGGTTCTGGAATGGGGGCGCAATGTAGGGACTTGCCTAATTACTTGCTTGATAAATATT  
GGGGGTTTAGAACATGGGGAAATGCTGATGCTATGGCTCAGAAATCTAATTATAGAGGTA  
GAGATTTCAAGATAATTAGAAATACAAAAGATTTTGTACCACAACCAGGCGACTGGGGTG  
TTTGGACTGGTGGTTGGGCAGGACATGTAACATTGTAGTGGGACCATGCAGAAAAGACT  
ATTGGTATGGTGTGGATCAAACCTGGTATACAAATAATGCAACAGGAAGTCCGCCGTATA  
AAATCAAACACTCTTATCATGATCGACCAGGTGGAGGAGCTAAATATTTTGTGGTACCAC  
CATATCATCCGGAGAAATCTACGCCGGCACCTAAACCCGAAGACGACAGTGATAATAACG  
AAAAAAATAATAAAAAAGTTCCGATTTGGAAAGATGTAACA ACTATAAAGTACAATATTT  
CTAGCCAAGAGGTTGATTATCGAGAATAAATTTATCACTGTATAGTAGAAGGTAATCGAC  
GACTCGAACAACTAAAGGAATAATGATTAGCAACGCACAAACGATGAGCTCGGTAGAAA  
GTTTATATAACAGTAGGAAGAAATACAAACAGGATGTAGAATATCCCAACTTTTATGTTG  
ATAGACATAATATTTGGGCACCTAGCAGACCTGTATTTCAAGTTTCTAATGAACCTGATT  
CTATACTTATAGACGTATGTGAAGATTATAGTGCAGTAGAAATGAATTTATTTTTAATG  
AGAATCACGCAATGGCTGTAGCTGTAGATATGATGGCCAAATATGAGATACCTCTAAGTA  
TTGAAAATTTAAAAGTAGACGACAGCATTTGCCGTTTCGATGTTGGAACATGTTAATTGGA

ATATGATTGATAACGGTGTTCCTCCCTAAAGATAAATACGAATCAGTAGAAAAGGCATTAC  
TTAATATATTTAAAAACAGAGAATAATTATTAAATTCTATAACCAAACCAACATTAACAA  
AATCTAGAATAAAAAGTTATGGTAGATAATAAAAAACGCTGATATAGCGAATGTAAGAGACT  
CATCAACAACAGCTAATAATGGCTCGGCATCTAAACAACCGCAGATCATAACAGAAACGA  
GTCCTTATACATTCAAACAAGCACTGGATAAACAGATGGCAAGAGGTAACCCCAAAAAAT  
CTAATGCTTGGGGTGGGCTAACGCTACACGAGCACAACGAGTTCAGCAATGAATGTTA  
AACGAATATGGGAAAGTAACACGCAGTGCTACCAAATGCTTAATTTAGGCAAGTATCAAG  
GCGTTTCAGTTAGTTCGCTTAATAAGATACTTAAAGGTAAGGGGACTTTGAAGAATCAAG  
GTAAAGCGTTCGCAGAAGCTTGTA AAAAAGCACAACATTAATGAAATTTATTTAATCGCGC  
ATGCTTTCTTAGAACGTGGATATGGAACAAGAACTTCGCTAACGGAAAAGATGGGGTAT  
ACA ACTACTTCGGCATCGGCGCTTACAACAACAATCCTAACTACGCAAGGACGTTTGCTA  
GGAATAAAGGTTGGACATCTCCAGCAAAGCAATCATGGGCGGTGCTAGCTCCGTAAGAA  
AGGATTACATCAATAAAGGTCAA AACACGTTGTACCGAATTAGATGGAATCCTAAGAATC  
TAGCTACCCACCAATACACTACTGCTATAGAGTGGTGCCAACATCAAGCAAGTACAATTG  
CTAAGTTATATAACCAAATCGGCTTAAAAGGTATCTACTTCACAAGGGATAAATATAAAT  
AAAGAGGTGTATAAATGTACAAAATAAAAGACGTTGAAACGAGAATAAAAAATGATGGTG  
TTGACTTAGGTGACATTGGCTGTCGATTTTACACAGAAGATGAAAAAACAGCATCTATAA  
GAATAGGTATCAATGACAAACAAGGTCGTATCGATCTAAAAGCACATGGCTTAACACCTA  
GATTACATTTGTTTATGGAAGATGGCTCTATATTCAAAAATGATCCCCTAAGTATCGACG  
ATGATGTAAAACGGTTCCTTACCTACAAAATACCTAAAAGGCTATCAAACACGCTGGTT  
ATGTTTCGATGTAAGCTGTTTTTAGAGAAAGAAGAAGAAAAATACATATCGCAAACCTTT  
CTTCAATATCGTTGATAGTGGTATTGAGTCTGCTGTAGCAAAGAAATCGATGTTAAAT  
TGGTAGATGATGCTATTACGAGAATTTTAAAAGATAACGCGACAGATTTATTGAGCAAAG  
ACATTAAGAGAAAATAGATAAAGACGTCATTTCTAACATCGAAAAGAATGAAAGTAGAT  
TTAAAGGTGCGAAAGGGGATAAAGGCGAACCGGGACAACCTGGTGCGAAAGGTGATACAG  
GTAAAAAAGGACGACAAGGATCACCCGGTAAAACGGTACTGTAGTATCAATCAATCCTG  
ACACTAAAATGTGGCAAATTGACGGTAAAGATACAGATATCAAAGAAGAACCTGAGTTAT  
TGGATAAAAACAATATCGCAAATGTTGAAGGGTTAGAAGATAAATTGCAAGAAGTTAAAA  
ACATCAAAGATACAACTCTCAACGACTCTAAAACGTGTACGGATTCAAAGATTGCTGAAC  
TAGTTGATAGCGCGCCTGAATCTATGAATCCATTAAGAGAATTAGCAGAAGCAATACAAA  
AAA ACTCTATTT CAGAATGTGTATTGCAACAGATTGGCTCAAACGGTAGTACAGAAGATT  
TTGAGGAATCCAATCAAACACTGACTGATTCATACGCTTCAAAAAATCATTTTTCATGACG  
AGCGGTATGTTTTGT CATCTCAAGCTTTTACTAAACAACAAGCGGATAAGATATATCAAC  
TAAAACCGCATCTCTACCGACGGTTAAAATTTGGACAGGAAGATAAATGAATATAGCT  
ATATATATCAAAAAGACCCTAATACACTTTACTTAGTTAAGGGGTGATATTTATGGAAGG  
TAATATGAAACATGTAAAGAAGTTTATTTACGAAGGTGAAGAATATACAAAAGTATATGC  
TGGAAATATCCAAGTATGGA AAAAGCCCTCATCTTTTGCAATAAAAACCTTACCTAAAA  
TAAATATCCGGACAGCATAGAAGATTCAACAGCAA AATGGACAAAAAATGGAGTTGAACC  
TAATAAAAGTTATCAGGTGACAATAGAAAATGCACGTAGCGGTATAATGAGGATTTTCGCA  
AACTAATTTAGTGTCAAGTGATTTAGGAATATCAGGAGTCAATAGCGGAGTGGCAAGTAA  
AAATATCAACTTTAGTAATCCTTCAGGGATGTGGTATGTCACTATAAGTGATGTTTATTC  
AGGATCTCCGACATTGACCATTGAAAAATTTTAAACGACTAATTTTTTAGTCGTTTTTTA  
TTTTGGATAAAAACGAGCAAACA AATGGATATTAACAGGAAATTGAGATTTAAAAATAAAG  
CAGTATTAACAGGTATAGTTGGTGCATTGTTGTTATTTATCAAACA AATCACAGATTTTT  
TCGGATTCGATTTATCAACTCAATTAATCAAGCCAGCGCATCATAGGTGCTTTCCTCA  
CGCTACTTACAGGGATTGGCGTTACTGAGCCAACGTCAA AAGGCGTCTCAGATTCAT  
CTATAGCACAGACATATCAAGCGCCTAGAGATAGCAATAAAGTAGAACAACAAGTTACGA  
GGAAATCATCACAAGACAGTAGTTTAAACGCCGAATTAAGCGCGAAAGCACCAA AAGAAA  
ATGATACATCACAACCTTTCACAGACCCCTTAACGATGTTGGCTTGCATGTGAATGAGT  
ATCATCATGGAGGTGGACACAATGCAAGCAA AATTA ACTAAAAAAGAGTTCATAGAGTGG  
TTGCAAAGTTCTGAATGAAGACAATTCAATGTGGACTTATGGTATGGATTGCAATGCTTT  
GATTATGGCAATGCTGCTTGGAAAGTTTTGTTGGGATTACTTCTGAAAGGTTTAGGTGCA  
AAAGATATACCATGTGCAAACAATGTTGATGGACTAGCCACTGTATACCAA AATACGCCG  
CACTTTTTGACAAAACCGGCCATATGGTTGTGTTCCGGTAGTAATTACGGTGCAGGATAC  
GGACACGTAGCATGGGTAATTGAAGCAACTTTAGATTATATCATTGTATATAAGCAGAAT  
TGGCTAGGCGGTTGCGGGACTGACGGAATCGAACAACCCGGCTGGGGTTGGGAAAAGCT  
ACAAGACGACAACATGCTAATGACTTCCCTATGTGGTTAATCCGTCCGAATTTTAAAAGT

GAGACAGCGCCAGGATCAGTTCAATCTCCTACACAAGCACCTAAAAAAGAAACAGCTAAG  
CCACAACCTAAAGCAGTAGAACTTAAAATCATCAAAGATGTGGTTAAAGGTTATGACCTA  
CCTAAGCGTGGTAGTAGCCCTAAAGGGATAGGTATACACAACAACGCAGGGAGCAAAGGG  
GCGACTGCTGAAGCATACCGTAACGGATTAGTAAATACACCTTTATAAAGATTAGAAGCG  
GGCATTGCGCATAGTCACGTATCAGGCAACACAGTTTGGCAAGCGTTAGATGAATCACAA  
GAAGGTTGGCATAACCCCTAATCAAATAGGTAATAAATATTATTACGGTATTGAAGTATGT  
CAATCAATGGGCGCAGATAACGCGACATTCTTAAGAAATGAACAGACAACCTTTCCAAGAA  
TGCCTAGATTGTTGAAAAAATGGGGATTACAAGCAAACAGAAATACAATCAGATTACAC  
AATGAATTTACTTCAACATCATGTGCTCATAGAAGTTCGGTTTTACACACTGGTTTTGAT  
CCAGTAACTCGCGGTCTATTGCCGGAAGATAAACAATTACAACCTAAAGACTACTTTATC  
AAGCAAATCAGAGTGTATATGGACGGTAAGATAACCAGTTGTCACTGTCTCTAAGGAGTCA  
AGCGCTTCAAGAAATACAGTTAAACCAGTTGCGAGGGCCTGGATACGTAATAAATATGGT  
ACTTACTACATGGAAGAAAGTGCTAGATTCCCAAACGGTAATCAACCAATCACTGTAAGA  
AAAATAGGACCATTCTTATCATGCCCGGTAGCTTACCAATTCCAACCTGGTGGATATTGT  
GATTATACAGAAGTGATGTTACAAGATGGTCATGTTTGGGTAGGATATACATGGGAGGGG  
CAACGTTATTACTTGCCTATTAGAACATGGAATTGTTCTGCCCCACCTAATCAGATATTA  
GGTGACTTATGGGTAGAAATCAGTGAGAATGACATAGTCATGTCTATTTAAGCAGGTGCG  
TTACATACCTGCATTCTATTTACATTTAAAGATAAATGTGCTATTATTTTACTAGAACT  
TTTTAACATTTCTCTCAAGATTTAAATGTCGATAACCGGCAGGTAACGTTACTTGCCT  
ATTTTTTATGCTATAATGTAATTACATTACCAGTATCCAATCTGGCTTAAATCCACATTT  
CCGGTCGCCAATCCGGCTATGCAGAGGACTTACTTGCGTAAAGTAGTAAGAAGCTGGCTG  
CATATTTAAACCACGCATACTAGTTACTGGGTGGTTGTTTTTGTTCGCCATTCTGTTCTG  
TCTACATCTTTTTGCGCAAGTTGTGTATTATGTATATATAGTATAAATAAGGGATATTTT  
AAATGGAAGATAATAAAAATTTAGGAAAAATGTATTCATTCAAAGCTTTATATTTTTTTA  
CTGCAGCTTTTGTAAATATATTGACTATTATAACAACAAAAAATTTTGAGGTCGCTATGT  
TAGGTGTAACACTTTATTTTATGCCTATTGTTCTAGATAATTACATGAAGAATGTTTACA  
ATAAAGCAACTAAGATTTTGAGAAGAATAGGATATATATTTCTACTTTATTCATATTTA  
TAAACATTTTACTATTTATTTTATGTTATTATATGCCTACATATAAGTTTATGATTAGTA  
CGAATTGGTATGTTGGTGCTATTAGAATAACAACAATACCATTAGTTTTTATTATGATAT  
TAGATATTTTTCTTTATGGACTTAACAACGAGGAAATCAAAGCTAGTAATGATACTAAAG  
AGTATTTGAGAAAGAACAGAGAACAAGTAAAGAACTAAAGATAAAGCAAGAGAAAGTAC  
TGAAAGAGAAAGAACGTCAATTTAAAATAGAAGGTTCTAAAAGAAAGGCATGATAGTAAT  
GGTTATAACAATTATAAGCGTTTTTGTATAAGTGCTATCTTATTATTTTATTTGTCAGC  
GGTAACTTTCACCGCAGTTAGATCTTCTGATTATAATGTTAAATTTAGTGTACCAACGCT  
ATTTGCAATACCATTAATTTTCGGTCAGTACACATCTAAAAATTTACAAGACTTACAAATT  
TTCTGACTGTAAAAAAGACTTCAGAATGCTTTTTATTTATTTAAAAAATATCCGGTAGC  
AATAGCTATGTTTTTAACTATTATTGCCACAAATATCGCTGAACAAAATGTTAAATAATC  
AAATGGTGCAACTTATAAGAAAAGTGAAAATTTAAAGCAGCAGAAACGTAAAAAATGAT  
TAACAAGGTTCTTCAAAGTAATACTTATGGAGAAATGCTTTTGGGAATATAAAGAAGTTA  
CTTAGTATTTCTTGTGATTTTAAATATAATAGGTTTATTATCTTTTCTGATGAAATTATA  
ACCGTACCCTTAAAGATGCGGTTATTTTTATTCCTATACAATCAACAAAACCAACACC  
TATTAATTTAGCAGTGTGGTTTTTTTATATGTGAAGCTAAAATAACTACCAATGATACCAT  
TTTTGATACCATTTTTTTGTAAAAGAGAAAAACAAGGAAAATAAAAAAGGCAAAAAACG  
CATTAAATCAACGTCTATTGTCTCATGAAATTTAAATGTAATAAATTTCACTTAGCATT  
CG

>NewGenomeName\_103

ACGTAGGGGCGGGGCTTAGTATTACCCCCGCCCCAGGATCAGCGGAGTAATTTACCCTCG  
CTATAGGCCGTTAGATGTGTATACACGTGGACGATCACGATCTGTGATTCGTGAAGCGAA  
TCTGACGGAAGATCGTCCGAAGCTTCGTGGTAGGGCCCCCATGTTGCTTTATCTTCACTG  
TAATAAAGTAAAGTAAGATGCTGTCCCTTGCTTTATTCGTTGGCTAGTTGTTTACACCTG  
TCTGTGCTTCGCCGCGAAGCAAAGGACATTCTCATCGTCTATAAAAGCTGTGTACTCCGT  
GTGTAATTCGTCGGAATTATCGAGCGAAAGTCTCGTTCTTGTCTATGGAGGATTTCAAT  
CAACCAAAGCTCTCTTATGGAGAGATAGTTCAAATGAAGGAAGAACAAGATGCTTTCTGG  
AGTTGTTATCATGAGTTTCTCCGTCGCAATGAAGATGTTCTTGGAGAGATGTGCAGACGC  
CATGGAAGGAAATTGCCTGCATATCCAAAGCTCCCTACATATGCCCCGATACGGTTGGTT  
CTTAAGACTAAGGCAAGTTATGATGTCAGAGTAGATGAATGTAAGTCATGTTTCGCATGAG  
CAAATTAGTAGAAGGGATTATAATCCATTAAGAAAGAAGGTTTAAAGACCTGTATGAT

TCAGGTAATTATAGATATCAAGTGTATTATTCTTCATCGTGTAATTGAGATAAATCAGAT  
TAATAGATCAATAATTACAATTGTATTGTTTCTGCTATTGTTTATGTTTCATTAATAATT  
TATGGTTTGCAAACCAGAGCTATTCAGAGGCAGAAGACAACACTACAATTGATACCATATA  
CATTACAATGATATTTGAGAAATATATTATTTTAAATAACTCTGCGAAGCTATATGTCTT  
GGCCAATAGGCCCAAATGCTCTGAAGCCCAATGAAATTAACGCTGAAGTCAGTCAGCTG  
ACGTCAGCTGACTCCTTGATG

>NewGenomeName\_104

TGGTATTACCCCCGTGCCGGGGTCAGAGACATTTGACCAGTAGTTGACTAGTATAATAGC  
CCTTGGATTAATGACACGTGGCCGCTCAGGGTCCGTGAGGCTAGTGAAGCGCTTAAGCT  
GAACGAATCTGACGGAAGAGCGTTCACACTTAGATCTAGTTAGCGTACTTAGTACGCGTT  
GTCTTGGGTTGATAAATAGAGTGCTTCTGAACAGATTGTTTCAGAATTCATAGCGAGATG  
GATTCTGGTGATGGTTTCAATACATACTCATATGAAGAAGGTGCTGGAGATTCGAAGAAG  
GAAGTTTTATATAAAAATAGGTATTATTATGTTATGTATTGTAGGGATTGTAGTTTTATGG  
GTTTTAATTATATTATGTTGTGCTGTTCCCTCGCTATGCTAAATCAACGATGGACGCTTGG  
TTATCTTCGTCTTCTATTATGAAGAGGAAGATGGTTTCAAGGAATACTGGTACTCCGTTT  
GAAGAACTGGTCCTCATCGTGAAAGAAGATGGGCTGAAAGAAGAACTGAAGCGACGAAC  
CAGAATAATAATGATAATGTAATAGATTTAGTTGATATGTTGTAATTTTATATGGAGTA  
ATGAGAATTATTATTATTCTGTTCTTCGTCTGTGTTTTTTAAGCTTTTTCTGTGTTTTAA  
TGGCGTCTGGAGAGAGAAAGGAATAATTGTAAGGTAGACGACGATGTAGTGGATTATAGT  
TGTCTTTACTTCGCCTCGAAGAAAGACACATTTCAAGTTGTCAGTGTTATTGCTTTTTGAG  
GAAGCTTGCTCGAAGCAGCGTATAACTTTAATTTGAATTTGGTTTTGGCGCGTTAGTGAA  
ATTGCGGCTGTAAATGTGTCAAGTTGTGAGTGGCTGAAATAAGATAATAGATATATTATT  
ATTGTTTTAATTTAATTCCGCGAAGAGATATGTTAAGTGATATATGGAACGAAGCGTTTT  
GATGACGTCATATGTCTCCGTGCTTACGTCAGCACGGGGCT

>NewGenomeName\_105

ATGACTGAGCCTGGAGCATCGGAGTTCAGTTGGGGACCGGGAATGCATACGCATCCTGAC  
TTGGACTACGACGCGGGGAAGTCTCTCGCGCCCAACAATGTGGAGACGCTGCACGATCAG  
ATGCGCGATCTGCATGCGAGCAAGCGGACCAACGCCGCACGCGCTGGAGAGACGATGCGG  
GACATGTACTTTGCACTCGGGAATCCGGATCGCTACGGGCCCAAGCCC GCGCTTGTGCAA  
GGCGATGGCAAGGCGGAGCCTAGGCCACGCCCCGAGGAGTCACCGGAGACATTGGAACGC  
AAGCCGTAATCGTTTGTGCAATAACAGATGTGCAGTCGGTCGGATTCGTGGCTAGGGAGG  
CCACTGCCGGCCGACAGGATTATTGAGGGACGAATCCGGGCCTGACAGAAGGGAATTGCA  
ATGCCACGAGGTGATACCACCAAGGAGCTGACCGACCGCACCGTGGGGAAGCCCCGACGGG  
CTAGAGGAGTTCCGCCCCGAGTTTGGAAATCAAGGTCGGAACGTTTACAATGCGTTCGCAAG  
GATTCGGACCATCCCAACTATCGCAGCATGCCGTGTCTGATGTTCCATGTGCCGTTGCAG  
TTCCGCGGACACTATCGTGTGGAACGTCTCGCGAACTTCTCGGGCGACCCGGACGACTAT  
CGAATCGACAACCACGGCTACCGGCTGTGTGAGGCTGAGACGCCGCGACGGCCACGGGT  
TGCCTCAAGCGTGCAAGCAACCGACAGCCGTA CTTCGAGCAGCATGTCGCGCGCCTACAC  
CCGCTGGACAAGCTGCGAGTTGATCCCAAGGATCCCAGCACCATGACGCGCATGGAGCTG  
TTGACGACGCGGTACATTGATGTGGAAGACCTCACCGACGACGAACTCAAAAATGGGCTT  
GTGGCTCCGGGGCGTGGTGGTAAGGCAATGATCCACTTGCCCAAGGACGTGTACACCAAG  
ATCGTCAACAGCCACTTTGACCGTGTCAAGGAGCTGATTGTTGATGGGATGATCCCGGCC  
ATCAAGGTGCTCAGAGACATTGCAGAGAACAAGCACGACATCTACGAAGCCAAAGACCGC  
GTCAAGGCCGCCACCTACATTGTGGACAGAGTCCTTGGTAAGCAACCAGATACGGCACTG  
GTGCTGGGTGGTGTGATGGCGGGGCCAGGAGCCCTGGCAGCAGATTGTGGCCGGGATC  
ATGGACAACACGCGTGCGGAATCCCGTGCGGCGCGCGCTCCCCTCTGGCGGAGAAGGC  
GCTACGCTCAACCACAACGGTGAGGCCGAGGAGGTTCTCGATGTTGAGGTTGTGGAAGAG  
TCTGCGGCAGATCATGATTCAGCGACGCCGCGAACGCCAGGCGACACGGGACCTCATGCG  
AGCGCTCTCATCGCAGCCGTAGCTCCCAATGCAAAGCCCAAGCGCGCCAAGGCCAAGGCG  
TCTGCTGGCACGAGTGGCACTAGTGAACGAGTGGCACGACTGGAAAGCCTGCCAAGCTG  
CGGGTCAACCGGCCGAAGCGCGACGCCAGGTAAGCTTCGCGGTGCGGGGTGGACGCGAGG  
CCGCCAAGCAACCGGAGTGGACCCGGGATTCGCGCAGATTCCCTTCTGTCCCGGGTTCAC  
TCCCAAGAACTGCAGGACTGGCAAGGAGCTGAGAATGGCGAAGCAGGGTGTGCGTCCGGGA  
CATCAACGGTCCGACCAAGCAGGCACAGTCTGTACCAAGGCTGTGCAGCCC GCGCCGAA  
GACCAAGCTGCACCGGCCCAAGACAGCCTAGGAGGGCACCATGGCCAAGGGCGTGAAGAA  
GCTTCCAAAGCGCAAGGGCACCAACCCCATCCCGCGTGACAAGTGGAACTCTGACGACAT  
CGCTCGGCGTCAGCTCGAGCAGGACCAGAAGCTCCGCCTACCACCAAGGGTCCGCACAC



CGGGACCAACGACAGCTTCAAGTATCACCTCGCCACGGACAAGCTTCCCCTGACCGGTTAC  
CCGGAGTGGCACTGTCCAGGTGGCTGGGCGCGGTCCCCTGCGGAGGCTGTGGTGCTAGA  
GACGACGCTCCAGCTCTGGCGGGCAGCCAACAATAAGTCGAGCGCGTGGCCCATGCCCT  
CGGGTTACCGGCGCGAACCGACCCGACAGAGTAGGATCACGTGCATGCCCAAGAAGAAGG  
TCACCGGAGCCAAGCTCAAATGGGGTAGCTCTGCCCAGAAGCGAGCTCAGCGAAAGGCTG  
CAGAAGCCAGTGCCCGGAAACGGCGCAAACGAGGCCAACAGGACATTCTGAAGCGCTAAA  
GGCGCGCAGCCGGTAGCTTCTCCGAGGTTTCGAAGAGCTCGGTCAAGGTGGCCAGGGAGC  
ACGACCTGTTCGGGTACCGGGCACGGGGCCAACAAGGAGGCCTACCGTGCCAGTGCAGCCG  
AGAGCCGCAAGATCAAGGCCGCTGGCGGGACGAGCTCGGCCGACCGCGTCTACAGCACTG  
CCCGCAAGCTCAAGTACACCGCGCCACGCGGTAAGGCAGGCAACCAAGGCAAGGTGGGCC  
TGAGCTCGCGTAGCAAGGGTTCAGGCTCGTCGTCGGACAAGTTCAAGCAATGCGATACTG  
TCTATGCGGACGGCAAGTCCTGGACAATCAGGAGTTTCTGCGAGGCCAATGGCAATACCT  
ATGTCGATGCCAAGGCCGACAACGGAACCGATCTCTCCCTCGTCATCAAGGGCAGCGGTC  
TGGACAAGAAGACCATCCGGACGGCTGTGGGCGATCGCTCGCGTTCAGAGTCCAAGACTG  
TCAAGCCTGGCGACAGCGCTGCTGCACATCGCACCAAGAGCTTCTCTCAGAATGCGCGTG  
GTGTGTCGATGGGTGGCCGGGGATCGAGCTCCAGAGCGCCAAGGACATGAGCAGCATGT  
CCGACCGCGACTTGCAGAACGCCATTCTGAACGCTCGGACCGCAGCCGACAAGAAGGCGT  
ACTCCAACGAGTTGGCCAAGCGCAATCTCGACAATCACTTTCCCAAGGGCAGCAAGAACG  
CCTCGACAGAAGAGCTGCAGAACAAAGGTGAAGGACGGCACCACTCCGTCTCGGTAAAGA  
CCGCCATCGACGCCGAGCTGGACTGCCGAGCCAAGGCGAAGGCACCCGCGAAGGCCCGTG  
GTGGGCGTCGACCTGAGAAGCCGATCGCCAGGTGATGAAGCCGCCCAAGGACGCGGTGC  
CGCTGGTTGACAAGAATGGTAATACGACCCCTGAGGCGATCCGCCGATACGGGAACGACA  
AGAAGGAGTCTGGCTATCCCAACGCCGATGATCGTGCGGCCTGGAACAAGCTCGTGGGTC  
GCGAAACATAACCGCGACTTGAGAGACGACATGACACCGCGCCAGCGCGCCAATAACCGCA  
AGGAGCTGCAGCGTAAGCTGGACAACCCGCGCATCAGCGACAGTGTCAAGAAGCAGGCC  
GCGATGAGATGGATCTGCTGGATGCGCTCGACAAGGGGTCTGGCAGAGGATCCGCGAATT  
CGGGGGATGCCAGGGCACAGCGCGTACTTGATCTGCACGACCACGAGCTGCAGGACCGGG  
CCAGCGTGATGGGTCTGACTTGTAACAAGCGGGATCTCAAGGGCGAAGGACACTTCG  
ACCGCAAGCATTCCGAAATCTCCAAGGAAGAGCGGTTTCGCAATGCCATTCAGGGTCTGA  
TGCGTTACGTGCAAGAAGATCTTGGGTACGAGGTCGATTGGGACGAACAGCGGCTCGACA  
ACGCCCTCATCAACGACCCGCGCATGAAGCAGTTGCGAGCCATCCTGGCCAAGCTGGGAA  
AAATGACAGGGCCGACCGAATCCCGGTTCGGCCAATCGCACAGAAATCAAGGGTAAGACTT  
CGGACGATGTGGATACGGCCATTGATGACCTCAAGGCTGCACAAGACAGCAACAATTCCG  
ACGCCAAGGCTAAGGTTCGCTCTGGAACGTAACGCACTACGACAGCCCCGCGATTTC  
GGCTTCTCGATCTGCACAAGACCACAAACGCCAGAGTCTAGCCTCGTACCGGGATGTGT  
CCTCGGCGAACAAACGGCTCACTGCGCTCTGGCGAGAATATCTCCAGGAACGCCTGGAAGC  
GTGGCGTTGTTGAGGATCTGGACAGCATGATCAGCGAGTCCACCCTCAAGCGGCCGATCA  
CCGTGCGCCGCTTCATCGGTCAGAGCGCTGGCGGAAGTGGTATTTCGTGGCGACTATGCAA  
GGGTCAAGAAGCAGCTAGAGTCTGGCACCTTCAAGGACAAAGGCTTTACGTCCACAGAGG  
CCGTTACGCCGGGATACTCGGTTCGGCCAGATGGGACGGCTGTGGTCCGACCGAGAGAAGC  
CCGGTGAGAACGATTTTCGTGCTGGAAATGGATCTTCCCAAAGGTTTTAATGCGCTTGATC  
TCAGGAGGGAAGACCTCAACGACAAGCATCTCAGCGAGATCCTCCTGCCTCGGAACAACG  
AGTGGGAGGTGACCGGTACGCGCACCGAGGAGGGCATCACCGTCTACAAGGTCCGGCCCA  
GCACTAAGCCCACGTATGACGAGGTTCCGTCCAAGCGACGCAAGAAGTCATGACCAGCAC  
AGCCAATCCTGCTGCTGCACAACCTTGATCGCTGGCAGATTTACGACACCGAGATCGAGGT  
CACCACCGGGCGCGGCCGAGAGCGCCGCAAGGTCTGGGACCCACACGCTGGTCAGCTCGC  
CATTGAGGAAAGCCCTGCGCGTAACAAGGTGGCCTCCTGTGGGCGACGCTTCGGCAAATC  
GGACCTGGGTGGCAAGCGGCTGGTTCGCCCGCATTCCTGGCGTACTACCGACAGGACCT  
GCTCCGCACCACCAACAAGGCGATGATCTACTGGCTTATGGGGCCGGTGTACTCGGACGC  
CGAGAAGGAGTTCGCGTACTGTGGAACACCTTGGTACCATTGGGTGTACCCTTCGACAA  
GCCTGGCAGCTACTACGATGCCGTTGGCGGAAACATGCACCTGAGCCTTTGGCAGGGCGC  
ATACCAGGTGCATGCCAGGAGCGCCAAGTATCCCGATACGCTCGTGGGTGAGGGCTTGAG  
TGGCGTGATCATGGCCGAGGCCGCGAGGCAAAAGCCGTCGGTGTGGACTAAGCATGTGCG  
TCCGACGCTGGGAGACTTCACGGGCTGGTTCGCTTCATACGTCAACTCCTGAGGGCAAGAA  
CCACTTCCACGACAAGTTCAGATGGGCCAGGAGCCTAACAAATCCGGAGTGGGAGAGCTG  
GCGCATGCCAGCTAGGCGAATCCGTACGTGTACACGCGCACGGGCGGTCTGGTTCGCGCT  
GGGCAAGCTTCTCCCGAGACGCCCATACCCGACCACGAGTACACGCGCGACCGACATGT

CACCATCATGCAGCAGCTGATGCGCGAGAACCCGACGGTGTTCGCCATTCAAAATCGTTGC  
GGACCATAAGCTTCGGGTTGACCAAGAGCTGATTGAGCTCGCAGCCGACATGAGCATCCA  
GAGCTTGAACCAGGAGATCGGCGCGGACTTCACCGACTACGTGGGCAAGGTGTTCAAGGA  
CTGGGACGAGGAATACCATGTTGCAGACCTGGTGGACTACAACGTCAAGCAATTCGTAAC  
CTACTTCAACCCCAATTACGAGACCTATGCAGCTGCGGACTACGGTTACACAAACCCAAA  
TGTGTGGCTAGTCATACAGATTGGCAAATGGGGCGAGGTCAACGTCTCCGCGAGATCTA  
CATGCCGGGGCTGAGGGCCGATGCGTTCGCTGATGAGATTCGGCGTCAGATGCGCAACCC  
GCCAAACCTTCGAATCGTCTATCCGGACCCCGCTGACCCTATGTCGACAGAGACGTTGCG  
CCAAAAGCTCGGCATCCGCGCCGCTGGCGGAACAGGTGGTGAGAAGCGCATAACGCCTGAA  
CCTGATTCGACAGTTCCTGAAGCGTGGGCGTAACGACCCACCGACCTCACGGGTATGGG  
ATGGCGTCAGCAGCTGCTGTTTGATCGGAGCTGTGCGAATGCGCGCCGTGAGATGGAGGC  
GTACCGCTACCCTGACAGCACGGACAAGCCGAATCCAACCTCGCTGGTCTATGAGGAGCC  
GCTCAAGAAGGATGACCATGTGCCCGAGGGCGCTGGGTGCGATTCTTCGTGGGGCACTACGG  
CGAGAAGGCGCTGGTGAACGAGCGTGCCGGAACACGCATTTCCAAGGCCAACATCGAACA  
CCAGCGGACACACCGCGAGCGCCGTACCACCAACGCGCCCAAGGACATCAAGTACCAGCG  
CCTAACGGATGGTGGACCTGATGCATACCAGTACAAGAATCCCGACGTGGGTTGGAGTAA  
AGAGCTGCTCGACTGATTCGGAGTAGGATAAACACCCATGGGCCAGGACAAACGCCAATA  
CGGCAGTACGCAGCAGCCGCGTGCAGGAGAAGCCATTTTCCCAACGCCGGAACGGATTT  
CGACAAGGCGCGGCTGGCCAGTTACCGGCTGTACGAGGACATGTACCTCACCAACACGTC  
CGACTACCAGGTGATCTTGCGTGGTGGCGACGAAGGTGACCAGCGCCCCATCTACGTGCC  
CAGCGGCGAGAAGCTCATCGAGGGCGAAGATGCGTTTTCTCGGACAGGGGCTGAAGTGGGA  
GTTCTCCAAGAAGGATGCCAAAGTCGACGACGCCATCAGAGTCTGTTCGACCCGGGAGAA  
CCGGGAGCAGAAGTTCGAAAGTCTCAAGCGCTGGACCGAAATCCGCGGTGACTATGTGCT  
GCTGCTGATCGGCGACGACGAGAAGGACGAGGGATCCAGGCTCTCCTTGCACGAGGTGGA  
CACGAGCACGTATTCCCCGTACGAGGATCCGCGCTACCCTGGCCAGGTGCTGGGCGGGTA  
CTTGGTGGATGAGTATCCGCACCCGCATTCCGAGAAGAAGAACGAGAAGTGTGCGCGCGT  
CCAGAAGTACATGAAGACGCTCGACGACGACGGAAGCCAGTCCCCGGTGGCGCGATCAA  
ATACACAGAGGAGCTGTACGAGCCAGGCAAGTGGGACGACCGTCCCGAGTCACCTCTCGA  
GCCCGACCACATCAAGAAGCTGAGCACCCCTACTGAGGAAGAGCCTCTGCCCCAACATAT  
CACGACACTGCCGGTGTTCATTTCCGCGGACACACCATTATGAACGCGATGTTCCGGACG  
CTCTCGCCTGGCGGGGCTCGAGTCGTTGATTGCATCTGTCAACCAGACCATGACGGACGA  
GGATCTGATCATGGTGTGTTGGGGGACTGGGCTTCTACGTAACAGGCTCAGCTCCGCCGCG  
TGATTCACGCGGCAATATGGTGCCGTGGACAATCAGCCCGCTGGGCATGGTTCGAGCATGG  
CCAGACCAACAAGATCTACCGAGTCAATGGTGTGCAAGCCTTGAGCCTAGCCAGACTCA  
CATGAACAAGGCCGAAGAGGCCATGCAACAAACCAAGGGCATCCCCGACAACGCTGTAGG  
CGTGGTGGACGCTGCGGTCGCCGAGAGCGGCATTGCCCTGGATCTCAAGCTCAGCGCAAT  
CCTCAGCAGTTGCGCAGAGCAGGAGCTAGAGCTGAAGTCAGTGCTCAAGCAATTCCTGTA  
TAATCTGGTGACGCAAGTGGCTTCCGGCGTATGAGGGTGTGGGGATTGACGACGCTGACAA  
GAAGCTCACCGTCACCATCACCTCCGAGATCCCAAGCCGGTCAACAACGAGAAGCGATT  
CGCACAACTGTTGGAGTTGTGGGAGGCTGGGCTGATCCCTGCGAAGAAGCTCAGCGAGGA  
GCTCAGCAAGATCATGGGCTTCGAGCTGACCGAGGAAGCCTTCAGGCAGGCCACCGAGGA  
CAAGAAGACCCAGGGCATTGCCCAAGCGGAAGCCGCCGACCCGTTCCGGGGCGCAAGTGGC  
AGCAGAACAGGGTATCCCCGACGAGGAGGACGACCAAGCCCTGAACGGACAACCGTTGTG  
AGGAGCTAGCCATGGCCAAGGGTAGGCGCAGCAGCAAGAAGCGCAAGACATATGCCGGCT  
TCAAGTCAAAGAGGTCGTGGCGCTGGGCTTTTTCGACCAAGCAGCCCTGGGCACGCGAGA  
AGTCCCACAAGACCGAGGGCGGACCCAAGGACCGTTACCGTCGACTTCAGAGAGCAAAC  
ACTCTGGTGCAGGCAAGAAGGTCTACAGAAGGAAGAAGCGTTGACGATCGAGCTGGAACG  
TCCTGAGGACGAGCAGGTTTGGACACGAGTTCGCGATGAGCTTCCCCAGGACGCGGTGGT  
TTGCCTGGTGCATATGTGTCAGCAGAGCCCCAAGGCCGAGATCTGCGGCTTTATCACCGC  
GAGCCATGGCATCACCCCGATTCCAAATGTATCATCAACGCCGGAACGCGAACTCGTCAT  
GGACCAGGGTCAGATGATGCAGGCGCTGTTTCGAGAGAAGGTGATCGGCACCTACCATT  
CCACCCGACGGGTCGACCCTGGCCAAGCGCTTACGATACTGATCACATTGGTTACCTGTA  
CCAGCAGGGCTGCCCGTGGGATTACTACATCGTGACGAATGCCGGAGTGTTCCGATATGA  
GCACAGGGACAGGGCGGTGGCGGACGTCGTTGAATCCAGAGATGATGATAGATCATGTGT  
TGCCGGTGGACGACCTGATTGAGCATGTAGAATCGCCGACTGCCCGTGCGATCCGGACC  
TCGAGCTGATCGAGCGTACCGACGACCATTTTGGACAGATGTACAGCCGCAATGCCGCCG  
ATGGTCGGAATGATGAGGCTGAGGAAGAGGATCTGGTTTGACCTCTCCACTCGAAGAGCC

GACAGGATCACCTCAGCGGCCTCGCAAAAACCTGGCTCCTGAGATACCTTGGAGTACAGGA  
GAAATACGATGCAATCATCGCAATAGCCCTGCTTGACGCTGCGGAAGATGCGGAACACGG  
CATA CGCCAAAGGCTTGGCGACGACCGACCTGGATCGTCGACTCGAAGATATCAACTGCA  
GCTCGCGCAGTCTGCTGCACGTGACTACTCAAGCTGCTTTCCGAAACGTGCATT CAGC  
GATCACAGCGGGTCAATCGGAGGCAGCGGTGCGGGCGTTTCGAAGCAGGATCCACGACGA  
TCGCCG CATTCTGAATCGGCTGTTCCCGAACCGCGCTCGGGCGGCCAAGTACGAAGACTC  
CATGCGGCAGAGCGCATCCCCTGGCGTTCAGGCCATGATGACGCGTTTGCTACAGAGCAA  
CCGACCCCTTAGCCCGCGAGTTTACCACACGCAAGCCCTGGCCAACGGCACGGTTCGACCG  
AGTGATCAACCCAGCACTGGTGAAGGGTGATGGTGCGGCCGCAATCGCCAAGGCCGTGCG  
CCAGAGTATCCGCCCGGACGTGCCTGGCGGAGTCAGCTACGCTCCAATGCGCTTGGGGCG  
CACCGAGATTAACAATGCATTCCATGCTCAGGCGATTAACGACATCAACACCAAGCCATG  
GGTGGATCATGTGAGTGGCACCTGAGCAAAACACACAAGGAGCAGGGCTGTCGGTGC GA  
AGTGTATGCTCGCATCAAACGCTTTCCAAAGGAGGCGATTCCAGACAAGCCCCATCCGCA  
ATGCCTCTGCTATATCACGGCTTCGCTGACACCCCTGGGAGGAATTCGAAAACAAC TTTCT  
GATGGGCATGTACGACAGCTACATCGACAACAATTTGCGGTAATAGGGTATGGTAATCCG  
CAGGAAGGAACTCTCATGACTGACACATTCCTCGCATGGCTCGCCGCTACCGGCTTGACG  
CTGTCTGGCCACGACGACGATGGCGATGGTGACCTCGATGGTTACGACGACGATCCGGAT  
GATTCGGACGACGCTGCATCGGATCGAGGATCGTCTCGACAGTCCGACGACGGTGATGAT  
CGCGACAGTGGCGATGACGCCAATGATGCTGACGACGACGATCTTCGAGCAGATCTCAAG  
GCGTAGGACAAGAAGATCGCCAAGCTCGAGCGGGACCTCGAAGACGCCCTCGAGATGATC  
GAGGAGGCAGAAACCAAGCGCCGCAGGCAAGGTGACGATGACTACGATGACGACGACACC  
AAGTACCACGAGCTGCGCGACGAGAACTACAAGCTCCGCGCTCTGCTCAATGGTCCGTAC  
ATCCGTTTCGAGATCTCGAGCTTCCGCGCCGAGGACGGGAATCCCAAATGGGACTGGGAG  
GACCCGGTAACCGTGTTTCGCGCTTCTGAAGACGGCAGACCTCGAGGTCGACGTCGAGACG  
GGCGAGATCGACGCTCTGGAGGAGCAGCTGCGAGATCTTGCACGGAACAAGCGGTTCTTG  
TTGCGGCAGTGCAGCTCTCGTCGTGGCGCTTCGGGTAAAGTTCCCGGTGGCTACAGCGAC  
AAGAAGAAACACAGTCGGGAAGACCTCGCGTCCGACTTCTCCGCATTCAACACCATGATC  
TGACTGAGAGGTTGACCAATGGCGAGGTATGACAAGTACAACGCCTACGGCGGAGGCTTT  
CGAGCCCCGCTGTCAGCCGACTGGACTGACGCCTACGCTGGCAAGCTGTATGCCGCTGGC  
CTCAACAACGTCGGGGCTGTCGTGAAGGGCGCAGGCCAGTCCGGCGTGGCTGGCGTGCTG  
GTGCTACCAAGGGGGCCAAGGCCGATCCATCGTGGACGTCATGAAGTTTGGCGAGGTC  
GTCGAATTCGGTCCCACCTCGGGCACTCCCGGCACTGCCTTCGGCGCTGATGGTACGGCG  
AACTACGCCGACACCAGCACC GGCGCAATCAACTCCACGTCCGGCGAGGCCAAGGTCAAG  
ATCGGACACACCGTCGGAGCGCAGCGACTGATCGTCGCCGTGGCCGATGGCGTTGTCGAA  
CCTTCGCTGAACGAGGAGTGAGGCAGCCGATGAAAACCTGCAACAGAAGGAAGGGTCATT  
AGGGAGAGTTTCTCGAGATCATCGCTGCGGTGGGCCTCTCTGGTCATGACAACCAGGGT  
GGCTTCAACACTGCCGGTGACATCAAGTACAAGACCGCGGATGGCGTGTCGTACGACAGC  
CTGTGGAACCTGTT CAGCAAGGTCACGGACGAGTGGAACAAGCACAAGTCCAAGATGGTT  
CAGCTGATGACGTTCCCGTCACCAACCAGACCGAGAAGGTGCCGCGCATCGGCCAGTTC  
GGCTTCGAGAAGGCCTCGGAGTTCGGCGTCCCCGAGAGCAAGCGGACCGAGCTGAGCTTC  
TAACAGCTCGCGTACGACTTCGAGGACTACGACCTGGCCTTCCGATCCACCTGGAAGTTC  
CTGCGTGACGCTCCGTCGTCGAGATCAAGGCGTACCACAACCAGGCTCTCCAGGCCGAC  
GCCAAGCTCATCCACCGCAAGGTGATGGAGGCGATCATCGACAACCGCGAGCGCGAAGCG  
GACATCGAAGGCCTGCCCTACAAGGTCTATCCACTCTACAACGGCGACAACATGATCCCG  
CCGGAGTACAACGGCACGACCTACACCACCGGCCACAACCACTACCTGGTCTCCGGTGGT  
ACGAAGATCGACTCCGCCGATGTGGAGATGGCTGCCGACCACATCCGTGAACACGGCTAC  
ACGGAGGAAAACGGCACCCAGCTCATGGCCTTCGCACACAAGGCCGAGATCCAGGAAGTC  
CGTCAGATCCGCTTCGGGCAGACGAACAACAACCTCGGCCGTGGCGA ACTACGACTTCGTG  
CAGTCGCAGGGCGAATCGCCCCTGTACCTGCCGAACGCGGACGGCCTGATCGGCAAGCAG  
CCGCAGTCGATGTGGAAGGGCTTGC GCGTCAAGGGCTCCTACGACGACGTGCTCTGGATT  
GAAGAGCCGACCATGCCGGCAGGCTCCGTTCTGTTCCCTGGCCACTGGCGGAACGCTCGCC  
CAGCAGAACCTCGTCGGCTTGC GCGAGCACGAGGACGCGGCGTGGCGCTGTCTGCGTCAT  
ATCCCCGGCAACCAGACCCGGTACCCCTGATCGACAGCTTCTACCAGCGGTCTCCGC  
ACCGGTATCCGTCAGCGTGGTGGTG CAGTTGTCCTGCAGGTAAAGGCCTCTGGCACTTAC  
GACATCCCGACCTAGTGGACGAACGGTGGTGGATTTCGAATGAGCCGTGTAATCCCAGAGG  
ACCGTCCGCTGTCCGATGTGGACCGCGCATGGCTCAACGAGCGCAGCATGGGGTGGAAGT  
TCGAGCTGATCGACCGCGCCTACCCTCCGGGGTCGGACAAGGTTCGAGGATGACACCTCGA

CCAAACCGTCTGAGCCGCAGGGCGATGACGACGCGGAGGTGGAGGTCGACGAGGACATCT  
CGAACTACGTTCGAAGACATCCCCAACAAGGACGCCGTCAAGGAGCGCCTGATCCAGGAGG  
AGGTGGAGTTCGAATACGATGCGAAGGGTGAGGAACTCAATGGCCTCCTCGCGATCCACC  
TGCAGCAACAGCGGAACGCCGGCAAGGACGTCGAGCTCGGAGACGGATTGTGGCCTCCGA  
AGCAGATGTCCAGCTGTTTAAGACGCATCTGTTCGGGCGTCGATGGTATTTGGGAAGATTA  
CGAGATCTCAGATACCATCGACGCCCTCGGGTCTGTTCAGCAAGGCAGTGCAGCGCTTACTG  
GTCCAAGGTGGTCAACACCACATACTGTGACCGATGTGAGCGAGAGTGGCAGCTCGCG  
TAACGCAACCATCATCTACCGCAATGCCATGGAGCAGTTGCAACGGTGGGATGAGATCAT  
CAAGGAAGAGGACGCCAAACAGGAAGCCGAGACCGTCGGTAATGTGAGGTTCAACCGAAT  
TTCGAGGAATTTCTCGTCATGACCGTGTTCAGCCAGTGCAGCAAGGGGATTGGAATTCCTG  
CGTGCTGGCACACGCGCATTTCATCGACGATGATCCGACCACGATCGTCCTCAATCGTGGC  
CAAGCAACCCGCGTGGAGAAGCCTGGCGGCGGATACGATTTACCCCAGGGGCTCCACGA  
ACTGCACAGATCTTAAAGGTCATCAACCAAACCTGGCGACGGGTCGGCACTAACCGAGGCC  
CAAGACAGCATCCAGACGCTGGTACGCGAGTACATCCTGCTGGGGGCTCATGATTCTGTG  
GCCGAGGTTGGCGACTGGTGGGTTCGACGGCAACAATCGGTAAACAGTGACCGAATTGCTC  
GTGGCAATTGGCTACGAGCTCAAATGGCGTGTCCGCAGCGTGGGGCTGGAGCCCAATTAT  
GGCTAAGATCGAGTTCAAGTTCAAGGACTTCGAGCTACGCCAGGGGGTGGAAAGATATGGA  
AGCCAAGGTCGACCGCGCCATGAAAGCCACCTGCAATTACCATGCGGTTCGAGGGCACGGC  
CCACATGAAGGAGCATGCTCGCTGGACTGACCGGACGGGTGCTGCGCGAGCTGGTTTGCC  
CGCTGTGGCCAGCACTCCACAGCCCGACCGCTACGAAATCGTGTTTGCCACACGGTGCA  
CTATGGGATCTGGCTCAAGATCGCAAACAGCGGTCGGTACGAGATCATCATGCCACAGT  
CCATCTTGAGGGCAAGCTCATGGCTCAGCGTCTTCGCGGCCCTCCTCGGGAGACTCCGATG  
AGCAGAGCCGCAGTGCTAGATGCGCTCCGGGCCGATGTTGCGCTCGGGCAAATGCTCGTT  
CCGGGCAACATTATGACGAACTACTCAAAGAGGGTCCGGCTAACCATTTGGCTCCAGGG  
CCATTTGCAGTGATTTCGTTGGGGTGGCCAAACGATTGACCTGCGGTGAATCGCGGAACC  
AGAGACGTGAACATCTGGGTTACATCCCAGCAACGTCAAAGCACTGACTACACGCGGATC  
GATCGAATCCTCAAGCGCACCAAAGAGATCATGCTGTCTCTGGAAGACGTTGCTGGCGCT  
GATGGGGCCCACTTGGTCAGCGCGCCCTTCCTAGCGGAGAGCGATGATCTCGTTGACCCG  
GGATTCGAAACGATCACGCGCTACGCGACATTCAGCGTGCTCAGCAGAAGCACCTGAAGT  
CAAGTACGATAACCAAACAGGAAAGGATGCTCTCATGGCGAACAGATCTCCCCAACGCC  
TCGGATGTCAAGCCCGCAGAGGCCTCTGCACCCGAGGCCAGGATTCGTCTCCTCGGGCAAG  
CGGAAATCTCTCAAGTTCGTTGGCACGAAGAAGATCTCACCTTCGCATCGCGCCGGCAGT  
CACTACCACATCACCGAGGCACAGCTGGTGGTAGCCGGTGTGCCGCGCGAAAGGTGCTTC  
AAGTCCAAGGGCTCTGGCAAGGATGCGCTCGCGGTGACCGAGGTCACCTTCGGCCCCGAG  
ACTCAGCACAAGGTGCCGCTCGACGCCTTCTACAAGGAGGCCGCAGACCGGCTGTTGCAG  
GAGCCGGACATCATCCTCGTTGAGGAGTAGGGAACGCGTGAGTGCAATAACCGATGCAAGG  
GCAAGGTTACGGGGAGCTGTGGAAGACGGACTCCTCGTGTCCATGTGCTCCACATCA  
CTTGACAGGAGGGAAGAAGCGATCGTTCGTCTTCACTACATGGACCCGAACACCGGCA  
CCATCAAATACACCTCGCGACCATAACCGGAACCCTTTGAAAGGTAAGGAAAATAGCAATT  
GACACCGCATTGCCCTATGGTCTGAGGGACGTGAAGATCACACCCTATGCAGACGAGGGT  
GGCACCGTTCTCGGCGATACGAGCTAGGACCTGCCGGACGCACAGACGTTTCAGCTTCAAC  
GAAACTGAGGAGTTCGCCGAGCTTCGTGGCGATGACCGGCTGGTAGCGACGCACGGCAAT  
GGCGCACAGGTCGACTGGTTCGCTGGAGGCCGGTGGCATCAGTCTGGTCATCTGGACGATC  
CTGACGGGTGGCCAGTTGATCCAGTCCGGGCTGACCCCGAATCGAAAGGAGATCATGCGG  
AAGCGCGGCACCGACGTGCGTCCGCACTTCCGCGTGGACGGCCATGTCATGTCGGAGTCC  
GGCGGCGACATTGTGGCGCGCGTGTACCGCTGCCGCTGCAATGACAACATCGGCGGTGAC  
TTCGGCGACGGTACTTTCCACATCACAGCTGCTCGGGTGTTCGGTCTGCCCTGCTGGAT  
GAGGCGAACGACCTGCTGTACAACATCATCCGTAACGAGACCAAGACGTCTTTGACGCTC  
ACCCCTGAGCCCAACCCGCTGCAGTCGCCGAGAACCTGTCGTCCGGCACGACCACCGCC  
ACCAGCGTCGTCTGTCGTGGACGGAAGTCGTTGGCGCGGACGAGTATCGGGTGCAGAAT  
TCTCCGGACGCCGGTGTACCTGGAGCCTCGTCGACGACGTGGAGGACCCACCATCACA  
GTGAGCGATCTCACCGCCAGCACGGCTTACCAGTTCCGTGTGGCGACCAAGGTCGGCAGT  
GCGCTGCCGGTGTCTCGGCTCCTTTGCCGGTACCACGCCTGCCCAAACCTGACCCAAG  
GCTCTCTGGGGCGCTGGGTGTGGCAACTCGACTGCGCCCCAGAGAATTCCATCTAGAGCC  
CAAGGAGGCCATGATATGCCCGAAATCAGCGAGCAAGAGTTCGAAGAGCTCAGACGGATC  
GGAGAACAGACTCTGGCACAGGAGAATGCCCGCAAGTCTTCAGAAATCGAAGAACAGGCC  
AAAAGGCGCTCTTGATGCCCTGGCAGAGGCCGAGGAAGACAAGTTCCTCGTCAAGGGC

TGGGGCAAGGATGTCGTCCCTAAGACATTCGACATCCAATGTCCCAGCGGACAGTGGTGC  
CACGCCAAGACTTTGACCATCGAGGACGCGATGTCGCTCGGTTTGTGGACAGCCTTGAT  
CTGTTACACAGTACGCTCATGGCTCCGATCATGGCCAACGACGAGGACAAGAAGCGCGCC  
GAAGAAGAGCGGAATGGTGGTCTCCTCAACAGCCTCAAGGATTCTGGCAAGCGTGCCAGC  
GTCTTCGGCACGGTGAACCGTGTGACGGCGCATTACGTGCTGAAGCCGCGCGTGGTCCCTC  
GAGGACGACGGCAACCTCCCCGAAGGCACTGTCTTCGCCGACGACATCCCCTTCGCTGAC  
AAGATGCACATCTTCCGGAATGTGTTCCGGGGGAATGGGGAATTCCACGATGAACACGTTT  
CGCGAAGGACCGGAAGGCAGCGTGGCAGCTGTACCATATGGTGCTCCTGTACAGGACGCG  
TCCGAGTGACCTAGTCGGTTTGGAGGATCCGTTGCTGCGATACTCCTCTGATCGAGGGCT  
GCGGATCTACGGCGTAACGGTGCAGAACAGGGTTCGATGATGCTGGCCATGCTGCGGGCCA  
TGTCGCCAAGAACAACCGGAATAGGGAAGCGCTTCAAACGGTGCGCGCAAGCGCACCTT  
GGCCAAGCTGCTGGGCGAGGACGTGGTGAAGTACGCTCAGCTGGCTTCCGAGATCCGGCGAA  
GGCGGTGTGACGTGCCAGATTACGACCTTGGGCGTGCCCATGGCAAGATCGACTTCGACG  
TTGACAAGAGTGGTGTTCGACGCGCCGAAGGCGCGATGGACCGCATGGAGGAGTCGGCCC  
ACAGGGTAGCCGAAGGATTCGACGAGGCTGAGAAGTCAACCTCTGCTTGGGAGAAGACCA  
ATCGCAAGGCTGTGGGCACCACTGAGGCTCAGGCGCGTGCGGTTCGATTGGTACAGCCGCA  
TTCAGGAGGAAGCCGAGCGCGCTGCAATTTAGCGTCGCAAGGCCGAGAAGGAGCTCAAGG  
AAATCCTCGATGCCGGTAAGGCTACCGAGGAGGAGATCCAGAAGGCCATCGAGAAAACCA  
ACAAGGCCAAGGGCAAAGCGCTACAGGTCGCCAAGGAGCGCAAGAAGGCTGAGCGCGATG  
TCGAGCGAGCTGCAGCTGGCCTGCCACCGAGCACGAGACCAAGCTCAAGATCAACACCA  
AGGACGCCGATCGGGACGTCGATCGTTTCTTCGACAATGTTGATCGCCATGCTGAACGTA  
GTGCGCTCGTCATCGCCAAGCAGGGCACAGGAACCATCAAGGCTGGTGC CGCGACGGCTG  
GCGTAGGTGCGCTGGGCGGGTTGCTGGGGGTACCGGGTTCGGGTGCTACCGGCGTCGCAA  
GCATCGGCATCTTTCAGCTTGGCGCGGCGATCGCTGATCTGTCTGGTGC ACTGGGTGTCC  
TGCCCGGCGTCGTGGGTGCAGGTGCCATCGCGATGGTCACGATGCAGCTCGCCACCAACC  
GAGTCGGCGAGGCTCTTAAGGACCTCGGAACCGACGACTTCGCCGACGCGATCAAGGAGC  
TAGCTCCGGCTGCACAGTATGTGTCCGTTGAGCTCAACACGCTTCTGCCCGTGTTTAAGA  
ACTTCCAGAAGAACGCCGAACAGGCGCTCTTCGTGCCGCTCAAGGGTGTGACCACTGAGC  
TGACGACGACCTTCCTGCCGACGATCCAGGGTGCAACTAACAGATCGCCAACATGTTTCG  
GTCGCACCGGCGCTCGCCTGGC GGAATGGCTCATGGAGCCAGAAAAGCAGCGCGACATCC  
AGA ACTTCCTGTGCAACACCGTTCGAGGGCTTCGAGCGTCTGTTCGGATGCTGCTCAGCCAC  
TGTTGCAGGCATTCACCGACATCATGACGGTGAGCGGCGAGTTCCTGCCCCAGATCGGTTG  
GTGAGATCGCTGAGGCTGCAAAGGAATTCGCTGGCTGGATCCACACCATGCGGGAGAATG  
GCGAACCCCGCCGCGTGGATCCGCGATGGCATCGAGGAGCTTAAGACCTTCCTTTGTGCGC  
TCAAGA ACTTTGGGCTGGGCCTGGTGTACATCGGCCGCATCGCCAACGAGTTCAGCAGCG  
GTTTCATCGCTCTGTTTCGAGAAACATAGCCAGACTTTCCTTTCTGGACGCAAAGTGTTG  
AGGGACAGGAAACCCTACCAAGTTCATCGCCACGAGTGAGGCCGCGCATGTGCTCA  
TGCTGCTGCTTGAGAAGCTGGGCACGCTGTTGTTTCGGCACCATCGGAGCAGGATTGGCGC  
GCTTGGGAGGAGAGCTCGCTCCGGCGTTCAACTTCCTGTTTCGAGACGCTGAATGTCGGCT  
TCCATTATCTGATCCAGGTGCTGATCAACAGCGCACCCAGATCACCCAGTTCCTCACGA  
CTGTGGGAAGTCTTTTCGTAGACATCATCAGACAAGTCGGACCGCACTTGCAGGCATTGC  
TCGGGACTATTGCAGATTTGTTCTACAAGCTCGGGCTGGCCATTAGTCCGCTAGCGAGCG  
CGCTGGTTCAGGGTGTCAACCTGATCATCAATGCTTTCAATGATAAGTGGGACACAATCG  
CCAACAGCCTCATTGGCTTTGGGGCTTCTGTTGCGAAGGCGATTGAGACTGGTGATTGGT  
CTGATGTCGTTGATCGCATCACGAACCTGTTCCAGCCCTAGGGCGATGCTGCGATGCAGG  
CTGTGCTCGACGCTATCAATCGTTGGACCGAGGATATCGCGGAAGCCGGTCTCAAAGTCA  
TGATCGCCTTGGCCGACGAGATCACCCCTGGATCGACATCAATGCCCCGACATGGGGCG  
AGAAGATCGTCAAGGGGCTGCTCGACGGCTTGGTCGGAGCTATCCCGGTCATCGGACCGG  
TGTTCCAAGAAGGTCCTTGGGGCGCTGAGCGATTGGTTCCTCGAGTTCCTCCGGCCAAGAAG  
GGCCGTTTTTCGGGTACGGGCTGGACGCCGTACCGTGGCAAGGCGTTGATGGAGGGCGTCCG  
CCGAAGGCATCCTGGCTGGCGGAGCATGCGCCCGGAAGGCCGTGGGATCGGCCGTGGGAG  
GCGCGAGCGCCGGGATGAACTCCGGCATCAGCGACCTCGTCAAGGACCTCACCGAGGTCA  
CGAGCTTTGGTTCGGAGTCTGCTCAGCTTTGTCCAGGGCATCAGCGACGTCGTGTTCCAGA  
CGATTAAGTTCGCCACCACAGACTTCAAGACGGGCGAGAGCACCCAGCCAAAGCGCTTCG  
TGCGCAATGTGAGCGATGAAGAGCTCGCCAAGCGTTCGTGAGGACAAGGCGTATCGCGACA  
GCCTCAAGGAGCAGAAGGAGACCGGCACCGGTCCACGGGCGCTCTGTAGCCGGA ACTTA  
AGCGCCTGCTTGAGCAGACGAATCCTGGTGGAAACAGGTGAAGCCGCAGTTCCTGTTGATCC

AGAAGGAAGACGGCACCTGGACTTCTCCGAAGAAGGAGTGGGCCAAGCTCATTACAGCGTG  
AGTCGGGTGGCAACGCCACAATCACCCAAGGCATTCAGGGCGCCAACCTCCGGCGGGGAATG  
ATGCCGAGGGGCTGTTCCAGATCACGCTTAGCACTTGAAGGCGTACGGGGCCATAGACT  
TTGCTCCGAACGCGATGGCCGCCTCTCCGCAGCAGCAGGCGATCATCGTTGCGCGGATCA  
TCCAAAAGAATCCGAGCGGGTCTGACTGGGGTGCGAACCTTCCGGGGCGTGAGGACCCCG  
AAGAGCTGCTGAGAGGCTTGACGACTGCCAGCGCAACTAGCACGACGAGCAATCCATCGG  
CCAAGTCGAAGGCCAAGGCTGCAGGCAGCGAGGAAACGCTCAAGCCTGCGACTGGCCTCC  
AGATGGAGGAGTTCGGAGACGGTTTCTTCAAGGACAAGAAGACCGAGGCCGTCTATCGAG  
AGATCGATGGATCTTATTACAACGTCACCGATTTGGCCGTCGGCAAGGACGGCAAGCCGC  
TCCTCAACTAGGACGGCAAGCCCATCGCCCGCACGAGCGCCAACAAGAGCGCGTCTCGGC  
CTTCTGCGCCAAGGCACGGGAGCCGTATGGCCTCAAGCCTGGCACCGATACGCATGGCT  
ACGGGAATGGCAATGCCGATGTGTTCCCGGAGTGGGTTCATGGATCTAGACGATCAGTTCCG  
GCATCAAGGCCAGCACCTACAAGGGTTCATCAGGAGTCTGACCGCAACGAGCCTGCCTATG  
CACCAAATCCGCAGCGCCTCAACCGAGGGATTGACTGGGTCCGGTCCGACTAAGAACCTGC  
AGGCGTTCGCCGAATATCTCGAGACGATAACGGACGCCCTGGAGCAGGAGATCTGGAAGA  
ACCCCGACACCGGCCGCAAGACCGGTACCGCTGGCGGAAAGATCAACCCGGGATACTATC  
CGCAGGACCCCTATGATGTCCACGGCGGCAATGATCCTAGCAACATCCACGTTACACCC  
GGCAGTCGATGTCGATCCCGTTGCCGGGCGAGGATTATGTGCCTGGTGAGACGCCGACCA  
GCACGGGTGATTCGATCCTGGACGAACTCCAGAAGATCACGGCGAACACCGAGGAAAGCA  
GCAGCACCGAGGACAAGACGCTGCGCCAATTCCTCGATCAGAATCCGATCCTGAACGAAC  
TCGTCACGGCCGCACAGGATCCCAGCAGCTCGGATGAACAGGTACAGGCTGCCCTGGGCG  
GGCTGCAGACAGCCATCGACGCTCAAACCAAATGGACACGCCTGCCAGTCGGTATCTTG  
CCGATCAGCTGAGTGGCATGCAGAGCCAGATCATGACAGATCGTGGCTTCGGCGTGGCCG  
ACAATCCTGTTGATGCGGCTTAGGCCATCGCCAATGGGGCGATGGCGCTGGTTGCCGACG  
TCTTCAAGATCATCGACGACACGCTCAAGTCCATTGAGTCGGCAAGCGAGATCAGCTCCA  
CTCATGTTCCGCGGTATTGAGAATACCGAGGACATCATGAAGATCATCGACAACGTTTCA  
GCTTCATCCAGCTGGCGGGAACCATCGCCAGACGGAGACAGACGGCCCGAACTTCGCGA  
GCTCGATCGCGAGCATTGCCGGCGGAGCACTCCGGTGGCCAGGGTGCCGTGGGCGGTCTTC  
AGGCGGCAGCGGCGATCTCGGGAATCATGACGTCGGTGATCCAATCAGTCAATGCCGCAA  
TTGATCTGGGCCAGGAAGCGTACCGTATCACAGCAAATACTACGGCAAGTTCCTCAGCT  
ACCTGCTGGGTGCTGGCGAAGGTTCTCTGATGGGCGACATCAGATTCCTTCTGGTCAAGA  
ACGAGTGGACGCTCAAGGCGTGGTCCGAGGACAATCCCAGGACAAGCGCAGCCATCAGG  
TTCCGGCCTGGCTGCGGGATGAGCGGAGCGTCGCGGAGCAGGGCGGCAAGATCCGAGACC  
TCAACATGTACATCGGGCCTGGCACAGACGCGAATGAGGCCATGAACGAGGGCATGTGTC  
GCGTGATGACTGACCAGGGAGGGGTGTTACCAGTGAGTACTAATCTCGAACCTGGCCAG  
TACCAGATCGCAGATCTGGTGTTCGGCCGTGGCACCATGTATCCTGTGACAAGCATTACG  
ATCCAGAGCTCCCAAGTGCAGGCACAGGATTTCCAGGTGATTCGCAGCGACGAGGTGCAA  
TTCGGGCAGGACAGCCTGCTGCCCGGCCCAATCGTGTTCGAGCTCGGTGTGTATGATTC  
AAACGAATCGCCAATGTGGAGCCGTACACAGGCCGTGTCTTCAACGAGGAGCCCTTCAAG  
AAGCTCCTCAACAAGCTCGCAGCCGAGTGGCGGGGTGACGACGTCCGCCAGAACTGGGGT  
GCGATGAAGGCGCTGAAATGCTGCGAGCGTGATGGTAAGGTACTTGTGTGGTACGGACGT  
CCCGGCAAGTTTCAAGACCACCAAGCGATCTCGGAAATCGTCTTCTTACGGTGACTGCA  
GAGTTTGGTTCGTGCAGACACGCTCATGTACTCCGACAAGGAGTCTGGCGTCGAGGTGCTC  
AAGGGTGTATGTCGACAATCATCAATCGGGCTGACGGCGAGGCCAAGAGATGGTTGCGC  
GTGGTGGGCTATGGGCCGCTGACGCACCCGGTTCATCACCATCGGAGACCAGCAGGTGCGA  
CATGACTTTGAGTTGGCAGATGGAGAAGCCTTCGAGGTTCAGCTCGTATCCGTGGAAGCGT  
CGTGCTATCAACAATTCTGGACAGAACATCAGTTCGAAGCTGATCGGCGACACCCAGTAC  
CTCGACCGGATGCAACTCCTTCCAGCCGGAGTTCGACGCCGGTACGGTGGACCTCCGAC  
GAGATCAACACATGGGTCCCCGAGCTGGGCAATCAGTCTTGGATGGAGACGATAGAAGGG  
GTGAACAACCTTCAATCTTCCATCACCTTCAAGACGATCCATGGCCGGGTGGTTCGTGCGA  
TTTGATCTGTTCAATCCGGAGTTCGACGAGTAGTTCATCGGCTCGGGCATGCTTGGCGGA  
ATCAGCGCCTGCCTGTACACTAAGAAGACCTTCGCCACGCGGAGCCAGTACTGCGACGCC  
AAAATCGTTGAGCCGTGGGGTGTTCGGAGCGGCATCGTCATCATGAGTAATGCCACGATG  
ACCAACTTCGCACTGCTCAAGGTGACTTCAGGACCCAACAACGACTACCTCAAGATCCGT  
ACTGGCAGCGCCTACAACACATACTCGACAGTCCGGGACAGGTGGAAGAATCCGAATAGC  
TGGAAAGAGACGGACGTGGTGGGAATCGGCTCCGCGTACGATGAGGACACCGAGAACC  
ACCTACACAGCGTATTTCAATGGCGATCCCGTCCGTGAGTGGTCCGACGAGGAAAATGTC

GTCAGCACAGCTGCGACCAATCGGTCACAGGGATTTCATCTTCGACATGGAAAGTCAGCTT  
CTGACCATCGGCACAGGGTTCAAGGACATTCTGGCTTACGACACTGGGACGGTGCAGGCT  
CCTACCGGCAGAGTGTTCTGTCTGGCGTTATGCATACACGGTGGCCTCATGAAAGCCC  
ATGACCGCAACCGATTTCAGCATCGAGGAAGCGCGCACGAGCCGAATCCTCACCCGCGATC  
TTCACGTACAGAATCCGGATATCCTCAAGAAGCTCAGTGGCCCTTGCGTTATTGAGTTTG  
ATGTCGATCACCGACACCCCTCGGTCCAACACCCCGACGGCACAGGCCCCATCCTGTTCA  
AGCCCTGGGGCCACTGGTGCCATGTTGAGCGCGAGATTTCGGGGCAAGCGCGTCATCATCG  
CCTCAGCCCTATTCCAGCCAGTGAGGTGACAGGAGACAGACCTGCTGAAGGCGCAGT  
GGCAGGGCTTCTCGGGATATCCCAAAGACCTTCCCTGGCTACAGAAGTGAATCCGATCG  
CGGTGATGCATTCGGGATCGTGCACGGCATCTGGACGCACCTCCAGAGCTATAGCAATG  
GCAATCTCGGCGTACAGGTGTACTCTCCTGGCCCTGGCGGAACACGCGTCACTCCGCCAA  
ACAGCAACACCGAGCTGCTTCCCTGGATTCTCCTTCGATAGCCAGCAGTTCATCCAAGACT  
TCTTCGCCATCTTCATTTCGGCGCGTTGACTTCACCGACTGCGGGCGATTACATCAACAAGC  
TGGCTCGCGACATTCAGTTCGACTACTTCGAGGAGTCGGAATGGAACGAGGATCACACAG  
CCATCAACAAGTTCATTTCGGCTCGAGTATCCGCACGGGGGTGTATTCTAAGATAATCTGA  
GCTTCCGGATGAACGAGAATGTGATCCGGGGCAAGAGATAGATCGAGACAGAGATTGAGT  
GGACCAGCGACATTGGCATTTCGGGCTGGTTCGCCGCAAGGTCTACAGCTCTCAGATCA  
GCAACGCCGACCCAAACCGCGACAGACGCTTCATCCTTGAAGAAGATGCTCGCAACAACA  
GCACCGAGCGGTCTGAAGCCTGGACGCATCGGCAGCTGACCAGACGTCAATTCCCCTCGT  
AGTGGGAAACAATCCCATTAAATATGCATCATCCGAATGCTCCGTTTCGGTACGTGGGATG  
ACGGCGACCAGATCAGAGTACAGGGGCTGATGCCGTGGGTTCGGATATGTTGTCCAGGCC  
ACAAGATCATTGCGTGGTCCCTTGACGAGACGTCGGCGACATGCGAATTGACACTGCGAG  
CAGAAGGCTCATTACGCTACGATCCGATCTTCTTCGAAGGCAAGCTTCCGAACCTTCTGG  
CGAATCCGAGTTTCACCGCCAGCATGTTCAACTGGACTGCCGCTCTGGGCAGCTGGTTCG  
GTGACAGCCTGCGAGGCAAGGATTCTCTCGGAGCGGCTCGTGTACGTGTAACGGCCAAG  
AGAAGCTGCTCCTGAGCGAAGCCGTACCAGTTGCGGCAGGGCGATGATGTAACGCTGAGCA  
CGTGGGTGTATTGGCAGAATCTCGTGGCCACCGGCGAGCCGCTCGAGGTGATCCTCAACA  
CCTACAACCTCGGATGGCGAACTGCTCAACACCTTTGTGTTTCGATCGCACATCGGGCTCTG  
GAGAGTCGCCGGGCTGGGTACAGCTCAGCAACGCATATACGATTCCTCAGGAGTTCGCGT  
CGATGCGGGCTGGTGCACGAGTACCCGAGGACGCCATGACCGGGTCTGTATGGTATGACG  
AGTTCTACTTCACGAACGACGACTGATGGCCTACGAGTGCAGAGCAAGGAATCTCGGGC  
TCTGCGGTCTATCCAGAGCAAGAACTACCCTGACACCAACAAGGATTTTCGTC AAGCATCT  
GAGTCGGCTCAACAGTTCTGTTGACTACATCTCGTCTACATGATCATGCAAAAAGGG  
CATTGCTGACGCCAATAAGA ACTTCATCGAGCAGATCCAAAGTTTCATCAATGATCTGAT  
CGTTCTGTTTGTGCTGGCGGAGAGCCCACGGGCATCGAGCTCGGCGACCTCAAGTACATCAT  
CCAGGCTCTGGGCGCGCTGTTTCGGCTTCAACGGGACATTCCCGATGAGCTTGATCAACGC  
GGTGCAGCACTTCTTCCCTCGGGTATGTTGTTCCGCTGCCACAGTTTACAGACGTCATCAC  
CGACACCATCATCGCTGGGCCGAAGAGCGCGGGCTGGACCCAGAGTTCGTTGATGCGCT  
GCGCGAGCGCGCCGACGCCATCAATGATCTTGGCATGAGCATTGGCGATTTGTTTCGCCAA  
TATCATGAGTAGCTTCAACATCTTTTCAGATTCCAGAGCTCGCTACAGGACCGCTCGCCGA  
ATTATGGGATCTGCTGGCAGGCATTTTCGATGGAACCAACGGGAATGCGCTGCGGCCGGT  
ATTCCTCGCCATCAGCAACTGGACCATTCCGTTTCATCGAAGGTCTCGCTTCACTGGTCAA  
CTATCCGGACGACCTGGTCGACGGCCTTGCCAACGGAAAGTTCCTCAAGATAAACTCACC  
GCTGAATGCGGCAAATCTGTTTCGGGGCTATCGAATCTAATCTTATCAAGGTCGTTCTCTGC  
TGGTGC ACTGACCAATCGTTCGCGTTGAGCTAATCGACAATCCGCACTTCACCGAGGATGC  
CATCGCTCCGGGCAGCGGGTGGGCCGTGGGCATGCTGTCTCGTCCCGCACCGACAATGATGG  
CACAGGTAGCGCGACGGT GATCGCCAACGTTTCAGCCGCACGCACTCAACACCGGGGCAAA  
CAAGGACGACAAGATTTCCTGTCGGCCCTGGACAGCGTGTTCCTTGGGCATCTACATAAG  
CCATGACGGCGCTGTCGCTACAGGACCGGCGATCATTCCGCAGGTTTCAGCGATTCAATGG  
CAACATCCCTATCGTCTGCCTGTACGAAATTGGATCTTACACTCCTCCTGTGGAAGACCT  
GCCGTGGCCTGGCCACAAGCTCGAGGGTGTCTACACAGTTCGAGGAAGATGTCACCCACAT  
CCAGGTCCGCGTGTACGTCACCGAAGCCGCCCTGGCGGGTTCGGTATCGCATTGACGATGT  
GGATTTAGCCAACGTCACCGACCTGGCCTTGATCCCTGGTCTGTACAAGCCTTGGAGGC  
GCTCGAGTCTCGCCAGCGTGTCTGTCAGCACGCAATCGCCAACGCGGTTCAGCAACATCCC  
GATCATCGGCGAAGGGCTCGAGGATCTGATCAATGCGCTACAGA ACTTCAATCCGGCCAA  
TATCGCTGGAGCTCTGGGCAGTTCCTGCTGAAGGGCGAACTGTTTCGGGATCATCGGACA  
CATGATCGCTGCGGCGCGTGGTGTTCGGGTGTCGGCGGTAGCCGAGGATGCCACGCTCGT

AGACCTGGACAACGCGATGAATGCGGGCTCAACAATGTCGCCGGATCCGACGAGACAAC  
CTTCGTCGATAACCACGACATTCGTTCCGGTGAATGCGGCTTGGACCAACTACATTGATGT  
CATCGGCGTGGGCAAGGGCCAGGACGGCATGGACGGCCCGACGGTGCCGCCGATCCCCGG  
TGTGTTCCGACAGGGTGGGCACCTGGGAAAGGTGCTTGCCACCACATGGGTCAAGGGTGT  
CCACTACGACAATGATCTCACCGGCTTCCAGGTCACCTTCAACAGCAATGGCTCTGTGAC  
CTTCTGGATTCCCGGTTACAGCCTCACCTGTCCTCCTGCAAGCGGACCTCCGCGCCAATT  
TCAAATCGGAACAGGCTGGCACGGCAAGGGTCCGGGCACATATGTCTACAACGACCGCCC  
ATACGCTGCCGGCGGAACACAAAACCAGCCTGGAGGCAACGGAATTGGACCGGGTGGCTC  
TGGCGCTGGTGGTGGCGTGCTTCAGAGTGGTGGCCGAGGCGGACCTGCCGGCGGATGGGT  
GCGTCGGCGTGCTGCTGAAGCAGAGAATCCGTCTACTGGATCAGACAAGACGCCTCCGAC  
GCCTCCGAAAGTTAGCGTTGTCAATGCGACGAATGACACTCTGTATCTGCTCCCGAGCGG  
AAGCGTGGACCAGTCATGGCTAATCATGTGACGACTTGGCCGGATATCTGTTCTACCTT  
GATGACTCAACGGCACCCCTCAACCCAGAGCCGTTTCTGCCGAGCTCTGGTCTGCCGTAT  
CCCATACGAGGCCTTGACGCAAACACTGACTATAGCAATCGCATCTACGTCACGGAGATC  
GACAATGCTGGCAATGAGACCGACCCCATCCCGCTGGAGGAAGCTCTCAACGAGCTGAGC  
CCATTCACGCCAGCAAGCTCAGCCCCACGCCAGAACAATCGCCCATGAGCTCAACTCGC  
ACCACTGCCATCGACAACATCATCAAGGGATGCATCGCGGCTGGTTCGGGTCTTGGTGTG  
ACGGTGGGGATTACGAGCCCCTGGGGATACTACCTTGGCAGCTTCGGTGAGGGGCACCGGC  
GTCGACCGACACTTCTCATGGTCAGCCAAACCAAGAGCTTACTCATCTGGGCTGTGATG  
ATGGCCATTGACGAAGGCCGTCTCTCCCTCGACACCACAATCAAAGACATTCTCGACACG  
CCGTGGATCACCAGTACGACCATTAGCAGCGGATGAGGATGCGGTCGGGTATGTACAAC  
TACCAATCGGACTCGGCATTCGGTCTGCAGGTGGCGATGAACCCTGCGATGTCGTACAGC  
CTGCAACACATGATCGTCAAGAGTCGCAACGGCGCCAAGCAGTTTGAGCCTGGCGAGAAG  
TATGACTACAACAACGGAACTCGGTGCTCTAGCATTGATGCTCGAGGAAACGGACCCC  
AAAGGCCGCAAGATCCATGAAATCATCAAGCAGGACATCCTTGATCCGCTGGATCTCGTC  
AACACGAATTTCCCTACTGTCACCAGAGGACCTCCGGCACCCCTCTGCCATCCTGTTCTCG  
TGGAACTTCTTGTGTCGCTCATCGGCATCAAGCTCCGCCAGAACGTGACCGTGCAGAAC  
CCCAACATCATATGGGCGGCTGGCTGTATGACCAGTGTGCTTGGCGACATGCTGAAGTGG  
GGCAAGGAGCTTCGCGACTGCACGCTGCTGTCACCAGAATCAGCCGATCTGCTCCACACG  
ACTCACATCATGTATCCGAGTGCACCCTGTGGCCTCATCAAGGACGGTGCAACAGAATTC  
GGATACGGATTGCACGGCCATATCAAAGTTGGCTCCTGGCGGGGATCCGACGGCAGTTGG  
ATCGGCTGCGACTCTGCGACAATGTACGAGCCCACCACCGGCACCATCATCAGGTGTAC  
TGGAATTTTCAGACACCGGGATTGCTTTCCTTGGCCACAGTTTGGCACGAATGCGCGGAG  
TATGTGATGCCGGGGTTCGGCGACGTATCCGGGCTACCAGACCGGCGAGAATGCGGCAGGT  
ACGGCCGGCACATCGGTGAAGAAGCTTGGCCCTTGTCCGTTGGTGCGGTGTGTTGCTCCT  
GGCACCGAACGCGTTGAATTCGACAATGCGAGTGCGGTCAGCACGACTCGGTACGAAACC  
GCAGCATTCAACATCGCGTCCGATGCAAAGGCATTGGTGGCCTGGGTTTCTGCACAAGGT  
AGCACGGACTGGGGAGGCGCAGCCGTCAAGGCCAAGATTGATGGCATTGAAATGGAGAAG  
GTTGTGTCGACAACCGATGGCACCACCTCCGGGAATGGCCTGGTGTGCTTCCGCCTCCTC  
AATCCGCCGACCGGGGCGAACAAGAAGGTGACATTCGAAGGGATGGGATCTCTTGCACAC  
TATTATGCCAATGGCGCAGCCTCGTACAAGAATGTCCGGGTCCTTCCGAGCGCCTGTGAAG  
AACAGGGGTTCCGGGTCGCTGTCAGCCTTACTGTCCGGCGGCACAACATCTTTGGATATG  
GTTGTGGGCGGATACTATTTCCAGGGTGCGCACAACGCCTTCGACAAGAATGTTTCGTGGT  
GTCAGAGGTCAGGCAGCATTGTAACCAGGGCCTGTTGTTCCGAGACTCTGCCGCTGGC  
GGAGACGTCACCTTGACCGAGACATTCACGAGCTCGATTAGTGGTCAGGGACGGCGTTC  
GTTCTTCCGGGCTGAGGAGGGCTGATGGCTGTCGCATGGAGGGCTGAGAGCTTCTCGATAA  
TACAGACCGAGCTTAACCAGCTCGTCAATGAATCTGTCCGGTGACCAGAGCCAGTATGGCC  
TTGTTACCGTTGAACTCCAGAAGCTTCGAACTCAAATGGAGGCTATCGCTTACGACTATC  
TAGTGTGTCGTCGGCGACTGAGTTCAAGAACTCTCCACGAGCGCCTCTGCTGGACAAGTGT  
ACTTCGCGAACATCCAGACAGCCGTGAAGAAGCTCGTGACCCAAGGGCTTGC CGGAGTCA  
CAGCTCCGGTAACATGGCAGGGGACAGGCCCGCTCCCGACAGGCGTCGGCATCCCTGTCC  
AGAACA ACTGGACAGCATCGGCTGGAACCGATGTGTACATCGCAGCCGTCATGGACCGCT  
CGGGCAGGTTACCGGCGCGACATTCGGTGGCGAAGCGGGCACTCTTATGGCAGAAGTGT  
TGCACAACAACAACGCTAGCACAGGACGTACGGCGTTGTGGCGTTTCGCAGGCAAGGGCG  
ACGGCACCAACAAGACCTTCTCCATCACAGGTAGCGGCTATGGTTGGTTCGGTGTGTGCA  
TCTTTGCCTTCTCTGGCGTTGTGTCCGTCGGAACACCCGTGACCACGTACGGATCGGGCA  
CTTCGCCTTAGCAGGTGGTCACGGAACAGGGGTGCAGATACTCGGACGAGGCGCTGGCG



GAGCTGGTGTTCGGCACACCGAGTGCCTTCTCTGGTGGCACCACAGAGTCAACCAGAAAA  
TCAACGGTTCGAGCCTCGCAGTCAATCAAGTTGAGGTGCCAGGAACAACAGGGGCAACCA  
CGCAGAATTACCCTTATGGCTACATCTTCTGCCCTCCGGAATACATAGGAGTGCAGT  
TGTATACACAGTTGCAGGCGATCAAGGACGCAATGAATACCCTTGACTTCGATACTGCGC  
GTGATCTGGCCAAGTTGTATGTCGAGAACCATCCGGAGGAGTTCGTCGACTATTACCAGA  
TTGTGGAGGAGTCCGGCAACGAGGAAGAAGCGATCGCCAAGGTTCGTGAAGTCCATTGAGG  
TGTTGCGAGCTGCAGGCCTCACCCAGCAGCAGTATCGTGGTGGAGACCTTCCATCTGTTCC  
GCTGGGACCCGCAGAACATTGGCGCCACAACGGATCCTGTGGTGGCAGCAATCCAATCCCGC  
TGACTGTGAGGAATGACTGAACATGGCGAAGGCATATTCTGTACGCTGGATGCGGCCCA  
GGGAATGCTCGGTGGTAGCACCAGCTACGCCGAAGCTCTTGGGTCCTCGCCAAAGATCAA  
GATTTACTCAGGCAACCCACCGGCAATGCTGGGGCCGCGCTGAGCGGCAACACGCTACT  
GGCCACTCTCACATCCGCAAGCACGCCTATCGCCAGCCAGAGCGATACTGGCACTGCCGC  
GCGTGCAGCTGGGCCACGTTCCGCGTCTGCGGTGGCCGCAGCCGCAGGTACGGCCACCTT  
CTTCCGCACAACCACGTCTTCCGACGCAGTGAGCGACCAGGGTACCATCGATACTACTGG  
TGCAGTCTCAACATGTCTACGACGTCGTTCCACCGCTGGGGCCACCATCGCAGTGAGCTC  
GCGGACTACAGACTTTCCGTACGGCCATAAGAGACAGCATGGCATTATCCAAAAGCAG  
GGCTACTGGAATCCGAGAATGTCTTGGCGCATGTGTGACACAGCCGAATTGGACTACAGG  
CCTGTGCCGGGGACCAGCTTCAAGCTCGGCGTCTCAAGGGATCACCCAACATCACTCTC  
AAGGCACTGATCTGGCGTCTTGACAAGATCGAACCCATGATCACGTCGCAAATCGGTTGG  
TACACAGCCGAAAACCTCGATGGCGAACAGCAACCACAACCTCTGCGACGGCGATCGACTAC  
AACTGGAACAAGCACCCCTACCAGAAATGGGGGACATGGCCGAATCGTGCGCTCGACGAT  
AAGATCGTCGACGATTTCCGCGGAATCATCGAATTCCGGCGGTGACTGGACCTCGCCGCGT  
GACGAGATTCACTTTGAGCTGCACTTCGCCGAGGGGCATGCTGGCACCCGAGGCGCTCGCC  
AGGGATTTGGCCAATGGCCTATGGGGTATCTGGAAGCCCGGAGCAGCCCCATCCCCAAC  
CCCGCGCCTGGCGGAGGGAACGACGGCATTCTGCGGATCGGCTCCGAGGGGGCCGGAGGTG  
CTCAAGATGCAGCGCGGTATGAACTCTGTGTTCAAGAATTACCGCGCCATGCCGCTGTTG  
GAAGACGGCATCCTCGGGGCAAGACCAAGGAAGCTGTCGTCGAGTTCCAGCAGCGTTCA  
CTCATTGATGTGGACGGTGAAGTTGGCCCGCAGACCAAGGCGAAGCTCGCCGAGTACGGC  
ATCGTGCTGACAGGAGCGACTGCTCCGACCGCTCCGCCAGCCATCGTGCCGCAGAAGGTC  
TGGCCTCAGACCCGCGGTGACCGTGGGCTTCTCGAGTACATTGCGGCGCAGCTCGGGCCT  
GGCGACCCGTCGTGGCCGATCAAGCTCGGCAACAACGAGAAGGGCGATCCGCTCACGGTT  
CGCGATCGACTTGGCTTGACGGCCAAGGACATTGAAGAGATCAAGGGAAGGCTGTGCGAG  
TGCAGAATCTGTGCAATTACTGGAAGGCTGGCATTGCGCTGGTAGGTACGGCTGGCACGG  
CCGTGGCTAACCTCGCAGCCGACGAGAATGTTTCGACCCGCGTGGGGGAATCCGGTGTCA  
CCTGGCTGGCTGTTGCCGGTGTGCCCCTCACGACCGCGCTGACCTGGCTCAAGCGTAACG  
AGCCACGGTAACTGAAGCAGAAGAGATCCTGCGCCGTGCAAAGGAACGCGCATCCTCGT  
CCTCCTCTGCATAGGAGGCAGGGCGCAGTGGCTATGGTGTGTTAATCGTATTGACCTGT  
GTGTCGTGTCCGCAGGCTGAGAGCTCAGGCGACGGCAATGACCAGCACCATAGCCAGCTG  
TGCTGGGATGAGGAATACGCAAAAAAGCATGCGGTCGAGTGTGGACGGGTGCAGAGTGGC  
CCCATATCAATCACGCCTCCGACTGGCGGACACGGTGGGGGAGCTCCGCGGCGAGGTTTG  
ATCGGGAGGATCCTGGACAAAGTAGGGCTGGGAGGGCTCCTCCGATGTTCCGTCCAACAG  
ACTCTCGACGCTTGCAGCAGCATATTCCGCAAGCCTCGTCGGATTACCACGGCAGAATGT  
ACGTGTGCGGTATGATGGCGCTCTGGGTGTGGTCTCTGTCAATTGCTGGTGTGACGCTA  
TTCCGAACCTCAACCATCGACGAGCTCAAAGACTATGTCCAAAACATCCTTGCTTCATGTA  
TCTTCATCGGCTCGTTCGTGTGTCTGTTCCGGCATCGCCCTCGGCACTAAGTACGTCTCC  
CCAAAGCGGATATCCGCTTGTGCTACCGCTTCTCGTTGTGGGGGAATCCCCGCCTTGGCAG  
GGAGCGTCGGAACGTACGCATGGGCCATCGCCCACAATACTGGCTCATTGTTGGGTATTGG  
CGTATGCAGCTTCCATCGGAACATTCATCTGCCTCGGAATCGTCAGGAATGGGCTAGATT  
TGCTCTTCGAGATTGCTCGACTAAATGAGGAGATCAATTACCTCAAATACGGTTCGGGCT  
CTGAAGAGCGGCTAGAGGACAGGGACGATGAACGGAAATGTTGATGTTGGCTGGGTCTC  
ACATACCTGGCCATCGTGTCTGCTAGCGGGCCAGTGCTTTCCGGTGTCTTACTATCGC  
AGCCGCAAGCGTCAGGCAGAGGCAGAGGCGAGCAACAAAGATGCCGATACCGGAATAAAG  
AAGGTTTCTGAGCAGGAACTTTCCGCAACGCGTCTGTCAATGAATGATGAGCGCTGGATC  
ACGCGTGAGAAGCGCTGGCAGGAGCGCGAAGACGCTCTCGAGCGCAAAAATCAAGAGCTG  
CGAAAAGAGATGGATAATTTGCACTCTGACATGAATGCCTAGCTTGAATTCATCGCCAAT  
GATGAGCAGTGGCATTGTTTATGACCGGATGCAACGCATCCAGAACGATCTCCCTGCGCCA  
CAGGATCGGATCACATTCCAGCAGTTCATGGAGTCGCGCCGAGAGGCAGCGGGGAGGATG

TAACATGGAACTCAAGGTTGGCTCAAGCGACGCGAACACTGATGGTGAGGTAACCTCGCTG  
GCAGAACTGGGTAAAGCGGTATGCCGCAAGCTATTCCGACATCATGGGCCCCATCGATGG  
GTACTATGGCTGCTCGGATGCCGACTTCACCCGTGAGCTACAGCGCCGTCTGGGGCTGCC  
CATCACCGGCGTGTTCGATGATGTGACAGCCCTGCACCCAAAGGTCAATTACCGCTGGAA  
GGGGCAAGGCGCCGGGCAACCAGCCGCACGCCGAAGATCTCGTTCTACTCCAATCCCGG  
TTCGGGCGCAAACGAATTCGTCCGCCATCGTTCGAGATCGGCGAATTCTGCAAGAACGT  
CCGGAAAATCAACCACCAGCCGGTGCATTCGGCCATCGGCGGATATCTCGGACTGATGGG  
TCGCGACCCCAAGGTCAGCTACAACGACGTCATCTATGACCAGTACAAGTCGCTGGAGTG  
GTTGCTGGACAACAATCCTGACACCAAGGACCCAGACGTCGAGTTCTGGTTCTCGGGCTA  
CTCGCAGAAAGCCGACGGCCTCGAAGACGCACTCGAGATCTTGTTCGGCGATGGGAGATT  
CACCATCCCCAAGACGGGCGAAACCGTGGGTCCGGGGAAGTACCGGCACCTGCGGCCAAG  
AATCAACGGCACCATAACAGTTTGGCAGTCCCAGCACGCAACACGGCCCCACGCGCGTCTG  
GAATCGCCCACCCGGAAGCGGCATCTCCCAGAAAGCGGCCGCGAGTGGCTCAGCATGCT  
CACCTGGGACATCGTCACCCTTGCCAGGGGCACCGGACTTTTACGCTGCCTGCGACCA  
TGACATCCGACAGTTGTTCTACGCGTGGTTCATCAAGGCCGACACCGAACTGCCCTTCGT  
GGTGTACACGGCGCAGATCATCATCCCGGCGCTCCTGAATCTTCTGGCTCCATTCTTGGG  
AGGCTTCGGAGGGGTGACGAGCCCGCTGGCTGACGGGATTCTGGCGAGCGCTACCGTCTT  
GCCGATGAACCTGCTCCACGGCCTGCTCAGCGGGGTGGCAGCAGCCGACAATGCTCCGAA  
CCCCAAGCTCATCGAACTCCTCAGCGTGCCTGGTGTCTGACGAACATCCCGCAGCTCAT  
CAAGCTGCTGACCAACATCTCCGGCGTCCAGACGCACGGCGAATAACCACCTTCCGAAGCC  
AGAGTTCAACGGCCCGCCGCGGAATCCAGGTCGGCTGCGACATCGTTGCGGGCTTCTGGCG  
GTAAGGAACACTCATGGAACCGGTGACAGTTTCCCAAGACAGCAACAACGAATGGCGCTG  
GCGGTTCAAAGCCAACAATGGCCGGGTGATGGCTGACAGCGGCAAGGGTTACCAGAACAA  
GCAGGACGCCCTCACAGCGATCGATGCTGTGTTTGGCGGGCTTCCGCCAGAGGTGGTGA  
TGAGGCTGGCTCGCAGCTCCGGGTAGTGCCGAACGACCCAGCGCTCGAGGCCGCGCTGAC  
GCTCTTGACGCTGATGACAGGGGACGACTGGGACCGCCCGAAGCTCGTGAAGTGCTCAGC  
GAGCTTGCGCCAGCACGCTTGCGCAACGCTCGTGAAGCAAGGTGTTGGCGTCGCACAAGC  
AGAGGCTATCGTGGGCGAGCGGTGGGCCGAATAAGGGAGCCCCGAATCAGCTGAGCATA  
GCCTGTAGCTGCAACGGCCGATCGCTCTGCAGAAGCCAAGGTAGCACCCAAAATGGATCT  
GTCTCCGGGAACGCCTCCCACCGGCGAGGAGCTTTGGCTCAAGGCGCGCAGCCGTATCGA  
CAGATGGCGCAAAGAAAGAGCCGGAGCTCCTGAGGACTCCGGCTCCGATACTTAGCCAGA  
CTAGATTTCCAGCGCGGGCTGCTCGTCTCCTTCTTGGAGTCTTGAGTCTCTTGCGAGC  
TGCCTTGACGGTGAACCTGAAGGCTTCGCCGAACCTCGCGATTTCCGTAGACCGGGCCGAT  
GCCAGGTAGACGCTCAGCTCCTCGGTCAACGTACGGGTGCAGACGCAGCAGCTTCCGTA  
GATTGCGCCGAACCTCCTTCATCTCCTCGTAGCTCATCCGCTGCTCGTCGGTCAGGCCTCG  
GAGCGGCCGCTTGCCCTCGTACTCGAAGTGAGCGGTGAAGACCGTGCCAGCAGTCTCGCC  
GTGGCGGTTTTGCTCGACGACGACCAAGCGCTTGGCGACCTGGTGGCCGGGCTGGGTTTT  
GTAACCTTGTAGATGGTACCGTCGGCGACGCGGTACATGCCATCTTCCAATTCGTCCGGT  
GGCAGGCTTCGCTTCTCGGCGACCGGGGTGATGTTGGTTCCTGGATTCGACCGTCTC  
ACCAGCCATCTCCGTGGTCCCGATGACCGGATCTGCGCCCTTGATGGGCAGGCTCTTACG  
CCAATCGATAAGGTTGCTGGCATCCTTCGAGCTGAAGGACTTGTAGCAGAACTCGTAGCC  
GTCCGATGCACCGTGGTTGTCGACGACGTAAGCCAGCGCAGCGTTGACGCGTTCGCCGAG  
CAGGTCGCAACTCATGGCCTTCTGATCTCATCCATGACATAACGGGTGCCGTCGACACC  
GTTGTCGTCGCGCTTGATGGCCAGTCGATCATCAGGCGGATGGTTCGAAGCGCGAGACAC  
AGCCTTGTGGCGGTAGTCGCTGGCCACGCACGCTGCTCGAGCAGGTCCTTGATCCAGTT  
GATCTGCTTGTGGTTCGCGGGCTTGACGGTTCGCGGTCGCGTTCATTTGGATTCCCTTCT  
CCGGTGTCCGAGGCGCTCTGGGTAGCCTCGCTGACAATACGAACGTTACGGCAGAAATTG  
CAGTTTTCGCTACTCCTTTCAAAGTACGCGCTCACGGCGCGTGGGTCCGGCTCGCCTACC  
AGGACAAACCTACTGCAGTTGCACAAGACGCCCTCGGCGTCTCCAGCAAGCCGCATGG  
CCGCCACCGCGCGGGCTGGTAGTGCGAGGACCACGGGAGTCCGCCGGCGCACTGGTCTACG  
GCGTACCGGGTGTGTCGGAGAAGCTGCATTCGCCGCATCACCCACTGCCAACGCTCCATC  
AGGCGATGGCCCGGATCAGCGCCAGCACCGCGCGGCGCATGTCGTTCTACGGCATGCCGG  
TGATGACCACGACAGTCTTGCCGTCGCGATTGACGACCCACTTGGCGCTATCGTCTTCGC  
CGACTGCGAGGGCGTCTGCCACCTGGCTGTCGTCACGGTATGCCGTCACGCTATCGCGCA  
GCGTACGGACGGTGAGACCGTCTCATCGGCGTCATTGCCGGCCAACCCGGGAACGCTCA  
GCGCTTTCACGATGCTGTCCACCTTGTACATGAAGTTCGGCTGTGGTCCGCGCTGCGGA  
CTGCCCCGTCAACCACCTTGTCCAGGTAGTTGTAGCGGACCAGAACTTGCTCGGCCTGCC

CGCGCTCGAAGGTGATCGCACAGGCCACCGTTTTGTGCGGCGATCTCCTGCTCGCGGGACG  
TCCATCCGAACCTTAGCGGCAACTTCGGTGTATCTGCATACGCTGGTTGACGTTGGTGTATGG  
GCATGAGGCCTCCTGGGCTCGTGGGGATGATTGCGCCCCGAACGTTACGCCACCGCGCCG  
ATTCGGGCTACTGCCTTCTACATGCGTTCGTCGAAGGGGTGGCAACAATATTCGGCCCCGA  
GCAGCGCAATCGGGTTCGACTAGAGTAACGTTCCCTCCTGTCCGCTCCCCACATCCCCAG  
GAGCCCCAATGAGCATCACATTCCAGCCCCGGTCAGCAGGTCGAGGTTACTCCGGCGACA  
ACGTGCTGCACCCCGAGACGCTGAAGCCCTTCTGGTATCGCATGGTCGTCACAGCCGGAC  
CCTTCGAGCTGAATACCGGCCACGAGGGATACCGCGTCCCTCGGTCCGGGGAAGCCTGAGC  
CGTCATTCGACCAGTATTGCAAGGCTGCGAATGGGATGCGTCCCGTCGCCGACGTCGATC  
CCGAGCTCGCTGCCCGGTACGACGCGCTCCGGAAGTGGGTGCGCAAGTGATCCGGCTGGC  
ACGCCGCGCAGGCTACTGGGTCTGCAAGCGGTGCTGGCATGGCAACCTTGGCGGAGAGAA  
GTGCCTGTTCTGCGGGAGGGCCAAGTGAGCGAGCTGTGCGCCCTCTGCGGGCACGAGTTC  
GAGGAGCACTACTCGCAGGGGAGACTCGAGCGGAAGGCTGGTGCAGGGTTGTGAGGCCGAT  
ATCAGGACACCCTGCACAGCCTACAACCTCCTCCACCCGGAGCGTTGCGAGTGCGACTAC  
GTTCCCTGCGATTGCCCGGGATTTCGAGAGCAAACCCGGCACCCGACCCCGACATCACCGAA  
ATCGACATGTGCGACCCGGAAGGACGCTGATGGAGTACATCGACGTGCTAATCACACGC  
ATAGCACAGACGAAAGCAAGGATCTGGACCAGATCATCATGCCGACTCATATCGCCAAAG  
ATCTTAAGGCTGCTGGCTGGACTGTCCGCAGCACAATCGTTCTGGATCACAAGACGGGGC  
TGACGGGCAACTTTCGCAACGAGAAGGTTTCAGCACCCGCATCGAGAAGGAAGCAGGACACT  
GAAATGGCCAAGGAAAGCGTCATCAACCGAGTGCAGAAGCTGCTGAACCTCGCGATGGAC  
CAGAGCGCCACCGAGGACGAGCGCAAGCTCGCCCAGGAAAGCGCGGACGCGCTGATGGCG  
CAGCACATGTTTGGCCAGATGGACCTCAAGCCCAGGAGCCCCGGTCCGGTCCGCGCTCACC  
AGCACAAAGTGGGAGTTCTTCTTCGAGTTGGAGTTTCGCAGTGCAGCTAAAGGACTTGCTC  
GCAGCCGTCGTCCGGCACGCTACCTGCCGTGCCACGAGCACGCGCAGGATCGCCAAGGTC  
GGCGAGCCCAACATGGTGGTGACCAATTGTTGGTACGCCTGAGAACATCGTCTACGTCGAG  
CGCTGTGGATGGTCGTTTTACCGAGCTCACCAGGAACATGTTCCCGAAGGTGGACCCC  
AACGAGAGCTTCGACAGAAATGTGTACAACCTTCGTGAAGGCTGGCTTTAAGTGGCAGGAG  
ATCCATGAGCTGCTCTGGCGGCACAAGGACGATCCGCATTGGATGGAATCCCGTTGAAC  
GACCCGGATCCGCCAGAGAAGCAGAGCGAATATAGCTGGCATGCCAAGGTGTATGGTGGC  
GACGGCGGACGTCTGAAGCGTGCCTACACTCGTGAGGTCAAGCGTCTCGGGCAAAGCAGC  
GCGCACACACAACACGACATGGCGTGTACCGCCGGAGCTATGTGCAGAGCTACGCGAGC  
ACAATCTCATTGCGGCTGCACGACATGCGGAGCAAGAGCGAGGACGCTGTGAGCGATCGC  
GACAAGTTCGCCCTGGCGGTGGGCAGCTCGCCGCACGAAGCTGGCGCCGTGTTCTATCCG  
CTGTTCCCGCAGTTCGACCCGGAGAACATCCGCAAGCAGCGTGAGGAGATGCTCCGCCAG  
GAGCAGATCCGTTGGCAGAACAGGACTCCCAGGAGCGGGCTCGCGCTGAGAAGGAGCGC  
CTCAAGCGTGAAGAGCGCGCTCGCAAGCACTGGGAGAAGACGCGGGACACGAGCTACGAC  
CAGGCTGGCTGGGCGCGCGGCAGTGATGTGGCCAAGAAGGTCAATCTCAACGACGACACG  
CAGATCCACCACAGCAAGAAGGAGATTGGGTGATGTGGATTGGCGACTGGCTCGAGGCAG  
CCTACGAGGAGCGCACCGAAGCTCCCAGCAGTCTGGACAACGACGAGTGGTGGCCGGAGG  
ACGATGGTGTGAGTGACCAAACGCTCAAGCTCGCAAGCGAACTCCACGAGGCAGTGATC  
GCCTTCCGGTACGGCTACGTCTACGGCAAGAGCCTCACCCGAGCTCTCGACAAGGCCATC  
CTCATGGCCGATGCGGGCCGACCGGCTGAACGGCCATCTCCTCGAAGTCATCAACGATCAG  
CAGTAGCAACACACCTGACCATCAGCAGCTAGGCTACGCCTTACCTTGTCTCAGAAGGGA  
ATCTGACACATGAGCAAGACCACCTCAGCCATCGCCACAGGCAAGACCGCCGACGTCTCC  
GCTCTGGCGGAGAAGCACGACTGGACGGCCGAAACCAAGGAAGACGTCAAGAACGACATC  
CCCACGCTCAAGCTTACACGCGGCGATGAGTGGGTTGAGATCCGCTGGGACGGGAACTCC  
TGCAAGGAGATGCCGACGGTCTGCCACGAATGGCAGCTCAGGTACGTCCGGAACGTTGCA  
GCTGCGAAGCGCGTCCCTCGAGGCTACTGCCGAGCAGAATGCTGAGCCTTTCAGAAAGCGG  
CCTGTGGCCAAGCAAACCTGCGCGCAAGACCACGCCTGCCAAGCGGCCTCGCCGGAAGGAC  
AAGCTCGTGGAGGCGCTTCCCGACAGCGACGACTAGCAGATCAAGGAACCCCTCCTCGGC  
CGGAAGATCCTCTGGCGTAACAGCCCAGCGGCGAATTTGAGGAGGATGTGGTGTGGCC  
GGCAAGAATACGAATGGCCACTACTTTGTGTCCACGAGGGTGAGAAACGCCAGATCATC  
TGCATCGGCGCATATGTTTTTCGAGCGGTGAAGATTTCTGCGATTACGCAGGTGAGATAG  
GCAAAACGAGTAGCCCGAATCGGATCGAATAAGGTACGATTGTCTTATCCAATCGGAAGC  
AAGAAGTGAATCTCAAATGGACGTTTCGTACCCTAACCTCCAGGGATCGCAAGGTTGCCG  
CCCCGCTGGCCAGCTGGCCTCTGACGACCAGCTGACCTACCGGATAGCAGAAGGTGCTC  
GTCGGGCCAAGATCGGCCGTACCGTGTGGTACGAGATGGCTGCAACTCGTGTGTCTGACG

GTAGGCAGTACCCCTATTGGCTTGCCAAAGACTCGGGTAGCTTCCGTGGCTCATTCTGA  
ACGGCTTCGACCTGTAGTAGCGGAATCGGGCCGATGGGGTAACGTTCCGGTCTGTCAACG  
AGGAAGGGAATCCAATGAGCGAGCTCAATGTAGGCGATCGAGCGGAATCATCAAGGTCA  
GCGATCTGGACAACGACCGCAAGGTCATCACCGACCCCGCCGGGGCAGCTGCGCTGTTCCG  
GAGGGTACGGACCTGGAATTGGCGATGTCGTGGGCATCACCGCGAAGACCCCGGCGAAC  
TGTACGACTACGAAGCCGAATGGGAGATGGAGAAGGGCTACGAGACCTTCAGCTTTCTGG  
CGAAGAGCTGGAGCCAGTCAAGTGAGTAAGCGCGAGTGGAAGATATGGTTGGAGGACGG  
CAAGATCGTCCTGCTAACCGACGGGTACGATACGGCGGTTCGTCGAGAACATCAAGCTGTA  
CTTGCCGACGCCGCGCTCGTTCCGGCGTACCACCAAGACGTGGCACGTCCCCCAGATGTG  
GGAGACTTGTGTCCGCTCCGCCAGCTCGCCAATCGGCATCGAGCCGACGTGAAGATGAG  
CGACGAGGTCCGGATGTGGGCTAGGGCCGAGAAGCTCCGGCTGGCGAGCATCCCCGACGT  
CAACGACCACAACGTATTGCAGCCCATCGCGAACATTGAGCGCGAGCTGACAGCCATGGC  
GGAGGCGCTGAAGGCACGCCCTTCCAGACAGTGGGCGTTCGGTTCCGGCGCCACAGCGCG  
GAACGTTCTGATCGCCGACCACCCAGGTCTGGGCAAGACGCTGCAAACGATCGGCGCTGT  
GGCCGAGTGCGGCCTGAAAGGACCCGTCCCGGTAGTTGCCGCGCCGAAGTCGGCTGCCGT  
CATTACCTGGCCCAACGAGCTGCGGCAGTGGGTGCCGGACGACGTTCGTGATCCCGATCTC  
GGGAGCATGAAGCCTGCAGAACGCGCGGAAGCTGTCGAGCGCGCCAAGGCTTACGCCGA  
GCACGGCGACATGCGCGTCTGGGTCGTACGAGCCCCAACTACGTTCCGCATGCGGGGCTGA  
GCTCGACACCTACGGCAACTATGTGTACGAGGGTGGCCAGAAGATTGTGCAGCCGGTACG  
CGAGGCTCTGCAAGGGCTGGTCGACTTCGAGTGGTCAGCGATCGTCGTGGACGAGTCGCA  
CAAGACGCTCGCTGTGTACGGGTAACCGCAAGAAGAGGTCTGCACAGCGCCTGGGCTT  
AGAGCTGCTCCGGGTGAAGAAGGATGGGCTGCGGATAGCCCTGAGCGGCACACCCTTCCG  
GGGCAAGGAAGACAACGCCTACGGCACCTTGCAGTGGCTGCGACCCGACCTGTACACCGG  
ATTCTGGAAGTGGGCTGAGAAGCCCTTCCAGATTTACGGCGATGGTTCCGGACAGATCGT  
GGGTGAGGTCAATGACTCAGAGGAGTTCTACAACAGCCTCAAGCCAGTCATGATGCGGGC  
CACCAAGGCCGAGGTCGTCAAGGACCTGCCTCCGAAGATCTATGCCGGTGAGCATCTGGA  
CCCCGGGACCCGCATTCCGGAGTGGCAATTTGGCTTCCGATGGAGGGGAAGCAGCTCAA  
GGCGTATCAGGCTATGGTCAAGGATGCAGCCGTCAAGCTGGAGAGCGGTGTCCTTCCCTC  
CAACGGCGTCCGCGGAGATGACGCGTCTGAAGCAGATGGCCTGCTCCTATGGCGATCT  
GGCTATTGCTCCGACAGGCGAGCAGACGTTCCGTCCGTTCGTTGCCGAGCAACAAGTTTGA  
TTACCTTGTAGACCTTCTGAGCGATCGTGGCATCGGTAGTGGCGAGTTCCACCCTACCGG  
GAAGGTGATTGTCCGAGCCAGTTCACCAGGCTACTGAATCTGTTCTACGCCGAGCTGAA  
CAAGCTGGGCATCAAGTGGCACCTGCTCACCGGCGCGACTTCGGAGAAGGAGAGGGTCCG  
TATGGCAGACGCCTTCTAGAACACCAAGATTGGCGACGTCACGCCGCACGTGTTCCCTGCT  
CAATACCATCGCTGGTGGCGCGTCTATCACTCTGGACGCTGCGGATGATGTTGTGACGCG  
TGACGAAACCTGGATCAAGGATGACCAGGAGCAGGTTCGAAGATCGGGCTCACCGCATCAG  
CCGTACCGACCACCCGTAACCATCCACAACCTTCGCAGTATGGGCAGCATCGAGGAGCC  
CATCGCCACGAGTGCCTTTGCTCAGGATCGAAACATCAAGTCCATCATCGACGGAGCGCG  
CGGTGTCGAGTTCGCACTCGAGCTCCTGGAAGGAGTCAAGGCATGAGCACCCCTCACCGCA  
TGCTTCATCACGGCCATGCTCAGCGGGTCATCAATGTACTTGCTGGCCTGGCGGACTCAC  
GGCAAGCCTCTCACAGAGAGGAGATGCGGGATTACATGGAGCGGTATGTACACCGGGAG  
AAGGCAGAGCTGGCAGAGCGCCGTCTACAGGCTCAGCTCTACAACGCTCGGCGTAGGGCT  
GTCCGCATCCGGACGCGGTTGCACCCGTGCGGATCACGAGGTTGCACGTGTCTAGAAAG  
GGGAGAGGCGAGCGAAAGGAGTAAAGTTAAATAAAAGTCGGAAAAATTACCCATTCCGAC  
CAAGAACCAGTAAGCTTCATTTACGCCCAAAAACCTTCATAATCCCAACGAACAGAAGGA  
AAAACGATGTCCCCGAAGACCGCGTCCAAAGAGACCAGCACCCCGCGAAGGCAAGGTG  
CGTTTCGATCCGTTCCGCAATCCGGGCACCCTGGCCGAGCAGGAGGCCGCGTGGCTGAAC  
GAGCAGTTCCCCGGCCTGAACGTCAAGGCCAGCCACGTCCGTGCGGTCATCAGCAACCAC  
ACGCGCTTCCAGAAGTCCGACCTTCGCCGCCAAGCGCGGGACGCCGAGCGAGCCAAGCTC  
GCCAGGATCGCGAGGCGCGGAAGGCTGCCGCCGAGCAGCGCAAGGCCGACGCCGAACAG  
CGAAGGCAGAGCGTGAGCAGCGCAAGGCAGAGCGTGCGGCCGAGGCAGCAGCCAAGGCT  
GCCGAGAAGCCCGAAGCCAAGCCTGCTGCCAAGAAGGCCACTCCGGCCAAAGCCGCGCCC  
ACGCCTGCTCCCAAGAAGCGCGTCTCGCGTCCCCGGAAGCGCACCCGGTGACGTGCCCGCG  
GAGGACGCATTCTGATCCACCCACCCCTCGGGGTGGCTGAGCCTCTGGGACATGGGGA  
GGGCGCAAAGTCTCGGTGGAGGTGAGCAAGTGCACCTCTGAGCATCGGATCTCCATCAC  
AGGACTCCGGTCAAGTCCCGGAATTAATCAGCCTCCTCCAAGACAAAAGCTCACTGAGAG  
AAGGGAATCTGCAAAGTGAAACGCATCAAGAAAGCCGCGATCGCCGGTGTGCTGGTGACG

CAAGTCGGCCTCGGAATCCTCAGCGCCGACCCGGCGAACGCCGACTATGTGATGGGGTGT  
GAGCGAGTCCGCTGGGGCTTCCTGTTCAAGTGGCTATCGCACAATCTGCGACGGCCCCAAG  
CGTCCGGACGGCAGCTGGGACCGGACGCGTCGTGAATGGCCCCAAGCGCACATGGCTGGC  
GGATACTGCTCGGGCAGCAGGTATTACGTCAGCTGCACCCCGAGCTACTGGTTCAACGAG  
AGCACACAACGCCTCGAGACCTATCCGGTCACTGATGCCACTGTGTTGCCTGGCGAACCC  
GGCTGGCTCCCTCCGGGCACGAACAGGATCCTCTGATCCATGGCACCCAAAAGCCCACGA  
ACATAAGGGAATCCATGAAACCCAAGGTCTTGACATTCATTGCCTGCGAGCAGTGCGGCA  
CCCCTTCGGTGGGCCAGAAGCTGGCGAATACGACTACCGAAATCTTTCTGGCAAGATGA  
CGATTGCCGAATATCTCGTCGAAGAAGCTCTGGCGAGTATGGGGCGTCGTGTCATCTGGG  
GAGCCGACGACGTAATTCTGTGTGACCCTGATTGCGTCAAGAGCTGGCTTGATGAGGTGG  
TGTCGCGTGGCAACTAGAATCCCGCTGCCCCTGCTACGCACGAGCGAACGCACCGTGTAC  
AAGAGGTGCCCGTGGAAAGTGGTACCAGAGCGTTGTGCGCGGCCCTCGTGCCGAACAATCCC  
CGCCAGGACGCGCGGTGGTTCGGTACTGGCATTACCTGTGCAAGGTCGAGTGGTACGTC  
CCCGGACGCAAGCGTGGCCGCGACATGCACGAGACCTGGGACGAGTTCTCACAGGGTACA  
TTCACCACAGTAAGCTCGCAAGGGCTGGTGAACGACGAATGGGAGAGCGAGTGGGTTGAC  
GCAAACACGCTGGCGCACGCCATGATTGACACCCACCTACAGCCGTATGGGAACGACGAC  
AACTGGGAGGTGATCGCTGCTGAGCATCCATTTTCGGTCTGATCCCGCTCCCCGACAAG  
ACAAACAACCGTGGCGGTGTGCCGGTGCCTCGGCACCATCGACCTGATCATCCGCGAGCTG  
GACACCGGCGAGATTTGGCTGGACGACTCCAAGACCGCCGCGCGCATCTATAACCACCAC  
CTGAGACTGTTGGAGGAGCCTGCTGCGTACGTAGCTGTGGGCACGCACGTCCTCCGGGAG  
CAGGAGATGATTGGCCCCAAGGAGCAGGTTAAAGGCATCATCTTCGACTTCATGCGGAAG  
GGCTGTCCGGACGATCGACATCGCAACGAGCGCGGCGAGTATTGCAACAAGCCGGTCAAG  
AAGCACTTTGTGCGAAGCCATCCTGAATTGTGCGGGGTTATCAAGGTCCTCTGAACACCGGG  
CGAGATCTGCTTCGGCTTAAGATCGACGAACGCAACACATCTCCGATGAGCTCAACCTG  
ACGGTTCGGGCGATGTCTCAGCCAACCAGGGTGCGCCCTCCTGTTGCGAGAGAAGATC  
GTGAAGAGCCCGAAGGAGTGCACATGGCAGCTCCGCCGGATCGGCGAGGAGGTGCTACAC  
AGGAACGCTGTGCGCGCCGGTAAGCTCCCGATCCTCAAGACGCCGCAGGACGACTGCAAC  
TTCTGCGATTACTTCGATCTCTGCGAGCTCGACGAGTCTGGCGGAGACACGGAGTATCTC  
GAGTCGCAGGCATTTGTGGTTCGTGATGCCTACGCGGATCATCGCGAAGGCGCCGAGAAT  
TCGAAGATCAGCGTCAAGAACAACAAACAAGACAGGAGTGCAGTATGAGGTGGCCGGTAGCCT  
GAAAGATATGGGCCTCAAGGAGGTTGCAGCCCTCAAGAAACGCGTGAACAGCCAGTACGC  
CTTCAATCGCATCAACGGTGGTGACCGAGACAACCTAATCGAGCTCATCAACGAGGTTGC  
GGCGTACATCATCAAAATGCCTGAAGGCGAACGAAGCATCCCCGATTTCTACTGAGAAAG  
GAAGGCTGATGGTCCAATCCAAGATCATCAAAGTCGCCGACGACGAGGACTACGTGAATC  
TCCTCGTGTACGGTACTCCGGGGTGGGCAAGACGGTGTCTGCGGGCGGTGACGACAAGG  
TGTTGTTTCGTTGCGCCGGAAGACAAATCAGACGGCCTGCTCTCCGCCAAGCTGGCGGGTA  
CCACGGCGGACAAGTGGCCCATCCGGGACTGGGGTGATCTCGTTGAGGCGTACAACCTATC  
TCGACGCGCCCGAAGAAATTCATACTGATCGTGGTTCGACTCGCTGACCAAGATGC  
AGCTCATGGCCATGCGGGACATCCTCGATCGTGCCGTCGAGGAGAATCCGAGCCGTGATC  
CGGACATCCCGCAGATCCAGGACTGGCAGAAGTGTTAAGAAATGGTGAAGCGGATGATCA  
AGTGCTTCAACGCTTTGCCGGTCAACTTTCTGTACACGGCGCTGTCGCGGCAGACCGAGG  
ACCAGGAAGGTACCGAGTACCTTCTCCCCGATCTGCAGGGCAAGAAGGACAACCTACGCCA  
AGCAGGTGGTTCAGCTGGATGACCAGCTTCGGTTCATGCAGATCAAGCGCGACCGTGTCA  
AGACGGACGACTCCATCGCCAAGAAGGTGAAGGAGGTGCGCCGAATCACCTGGAAGGACA  
CAGGTTTGGTACTGCCAAGGACCGCACCAACGCTCTCACCTGTACACCGACATCCGCG  
ATGTCACCGATCCTGAGGATGATGGACTCACCTCAAGGACATCAGGCTCCGCATCGATC  
GGAAGAAGTCCGGCTCTGCCAAGTCGGCAACCACCAACGTCGCCGCCAGAAAACTGCGT  
CGGCTCGTACTCAGAAGGAGAGTGCATAAATGCCCAAGCTCAAGCCATTCTGCATCGGCG  
ATGTCGAGGACATGACCAACGCCGAGAACTCCTTCAACACGGAGGTGTCGCCCAAGGGCG  
TGTACCAGGCGAAGGTCAAGCTCCTGAAGCACGCCACCATCCAGAAGGAAGGTCCGAACA  
AGGACAAGAGCCGCTTCTGGATCTTGATGGAGGTGTCGCGGCCCGAAGTTCGACGCCGTAGA  
AGTACATCGGTGCCTCAATCTCGCCCAATTTCAACGTGATCGAGTCCGGCGCTGGCTTCT  
GCAACGACTTCCTCAACGCGCTGGCGGGACCGGACCCCGCCAAGCAGGCCGCGCTGAAGC  
GTGCGTTCTGGGCAGACGACATCGTCGTCGATTCGGTTCGGGCACGTCATGAAGATCGGCA  
AGAAGCGTGTGAGTGGCGCCGGCAATGGCGAGCTCGTTGTCACCGTCAAGTCCAAGCTCG  
GCAAGGACACTCGTTTGGGCGATCCGCAGGCACAGGATGACAAGTACCTGGTCCCGCAGG  
CTAACGACGACGACGATGACGACGACCTCGATGCGGACCTGGAGGACGACAATGATCTCG

CCGATGTCGACGACGAGGCTTCGGACGACGATGATTCGGAAGCCGAGGATTCGGACGACG  
AAGACGACGAAGACGACGAAGACGACGAAGACGACGAGGACGACGAAGACGACGAAGACG  
ACGAGGACGACGAGGACGAGGACGAGGACGAAGACGACGAGGACGACGAGGACGAGGACG  
AGGCCGAGCATGGTGAATCCGACTCGCGCCGTGCGGAACTCGAAGCCCTGACCATCGCCA  
AGCTCCGCGTCGAGGCCAAGAGGGTCTGGTGTGCCGCCAGCAACGATCAAGTGCCAGTCCA  
AGGACGAGCTCATCGATAACCATTATCGACGCCGAGGCTGACTCGGACGGCGAGGACGACC  
CGTTCTGATCGGGTAGCACATCGGGTACCTGACAGACGAAACCGTCAGGCTAAGTCGTGG  
TAGGGTTCGTCCACAGTCCGACCCCAATAACTTTCAGCAAAGGAGCCATCATGGCCGATGA  
GCGTCGGTGCCTGCGGATGTATCATGGTCTGGTTCGAATGAAAACCACACATGGCTCTG  
CATCCACTGCGACCTAACATCGAACCTGAGGAGTACGCCTCGTGAAATCTGTTGCCATC  
CTTGGTTGTGGGCCTTCTGGGCTCCTCGTGGCTCATGACGCCGCCATGCTCGGCTGGGAC  
TTCCGAATCTACAGCAAGAAGCGCAAGAGCTTCTCGTTTGGCAGCCAATACCTACACGAG  
GCCATCCCCGGCATGACAGACCCAGTTGCGGCGATCGTGGCATAACAACCTTGTGGGTACG  
CCAGAAGGCTATCGGCAGAAGGTGTATGGCGCTGGCTACGATGGCAGCGTGTGCCACAA  
GACCTCGAGCACGATCACTACCCAGGAACATCCGCACCACCTGCGACAAGCTGTGGGAT  
GCCTATCACGACGAGATTGTCGACGTGGTGTGATCGACAAGCGCTGGGATTCGGCCGAATTC  
ATCCGGAATGGCAGCACTGACTTCCGCCCCGACCTTATCATCAGCACGGTGCCTCGCAAG  
ATCTGGGCCAATATTGGCGATGTGTTTCGCAAGCCAGAAGGTGTGGGCGATCGGGGATGCG  
CCCGAGCTAGGACAGACGGTTCGGTTCGAGCCAAACAGGACAACACGATAATCTGCGAC  
GGCACAGCCGATGTCGGCTGGTACCGGCTGAGAAAGGTGTCCGCCTACACCACCATCGAG  
TGGCCACACGACCGCAAACCTCGTATCCCGAACATGGCTGAGGTCGAGAAGCCGCTCTGG  
CACAACAGTTCTGGAGCCAGCGACTTCATTCACATCGTTCGGTACGGCGCATGGGAGAAG  
GGCGTGTGACGACAGACGCCTTCAACCAGGCCATGAAGTACCTCGGACAGGACAAGTTG  
GGCTGACCGATGATGGGCAAACCTGTTGTTGGACTTAACATTGATGGGACACTATTCGAC  
TACCATGGGCACTTCTTGCCTTTGCAGATGATTGGTATGGCCGACCAATGCCGGACCCG  
CAGGACATCAACCCAGGCCTGCACCTTCAACAAGTTTATGCGCACGTCGAAAGCTACGTAC  
CGGCAGTGTAAGCTGGCCTATCGCCAGGGAGGCCTTGAGCGCAGCATGCCGGTGTATGAT  
GGGGCGTCGGAGCTGACCCGAGCTATCCGCCGCGGTGGCGGAGAAATGTGGATCTGTACG  
ACCCGTCCATATCTCAAGCTCGACACCCAAAGCGCCAAACACCATACACTTGTTCGGGCGC  
AACAGAATCCAATTCGATCACATGCTCAGCGGGCCACACAAGTATCGCGACCTCGTGAAA  
CAGGTGGGTGCGGACCGAATTGTTCGGAGTGCTTGACGACCTGTCAGAGATGTACGAGCAA  
GCAGAAATGTTGGGGTCAACCCCATCCTTCGGGACCAGCCGTACAACAGACACATCACC  
GCAAACCGCATCAAACATCTGTACCTCGCACAGATCTCATTCCTCGCGAGGATCGAAGTG  
TACAAAGAGAAACAGAAGGGAAACTGATGGGCTCGACATATTCATCAGACAATCCGTTGA  
GCTTCGCGCTGTTTCGGGCTGTCCCGCCAGGCAGAGTGGCCTGTCTGGCGGAGGCTAGACT  
GGGATACCCCATCCTGCACCTTGGTCTTGCGACAAGATTGTCCGGGGCGCTGAGGAAC  
TGGACTACCCCGCATTCGATTCGATGACCCAGAGATCAGCTTGCCGTACGATGACGGGT  
CAGTCGGCGGTGTCATCGCCACGCATGTGCTGGAGCATCTGGCTGACCCACGCCACTCA  
TCCGGGAGGTGGCGCGTGTGTTGAACTTCGGGTGCCATTCAACATCCTGGTGCCACACG  
GTCAGTCGCCGACGTATTTGCAGGACCTCGACCATAAGACACCGTTCGTGCTTGACACGT  
GGCAGAACTTCCTGCACAACGGATTCCATGGCAACAATTACGGCGAGGGCGGATTGCCGC  
TCAGTATCGGCGCCATCTTCAAGTTTGCCCTCAAGGAGGGCAACGAAACCATCATCACC  
AGCTCATCAAGGAGTGACAGTGTCCAACGAAAACAAGGGTGTTCAGTCATTCTGTAAGA  
GCTCACCTCCAAGTACGCCAGTCCGGTGGATGACTTGATCGCCAAACAGCTTCCGCGCGT  
GCCAGAGCTGTTCCGGAGCCAGGCGCGGACTACAGCGACCGCTCCGGCATCTCCTCGGC  
CGAGGTGCTCGGTGCGCCGGGGCAGTTCGCCCCAGATCTGGCGCAAGAGTCCCAAGCTCAA  
AAAGGGCATGTGAGACCAGGACGCGCTCGAGAACGAGACCGTCGAAGAGATCCTGTTTCA  
TCTGATCGGGCATTGCCTGCTCGCGTTGGACATGATCCAGACAGAATGCGGATCGGCCA  
GGCTCCCAGCGGACACTCATGGATAACGAGGGTACGAGATCGGCGAAGTCAGGCGCGTTCC  
TTCTGGCACCGAACGCTTCACTGAATCAGACAAGGGTCCGATCACGGGCAAGCGCGATGG  
TAACGGTGGCGACTTCCGTGTCTAGGGCGTGGGTGCTCGGTGGCACGTCCGGTATCGGGA  
AGGCTTGCGCCGAGCGGCTCGGCAAATACATGGTGGCCACGAGCACCGGTCTACGAGAAG  
GGGATTGGGACGTCCGCAGCGATTTGCGATCCATCTTCATACACGATGAGGTCGATACTC  
CGACCCACATCGTGTCTGCTGCAGGCATCAACCATCTCGACTGGATCGGGAATGGTGC  
GGAGCCATGTGCAAGTTATCGCCACCAACCTGAATGGAGTCATTTCGTCTGATGGACGGCC  
TGGTGCCTTTGGCTACTACAGCACTGGCTAGCTGGGTGGGTATCCGTACCACATAAAGC  
CCAGCATCGTCGTGATCAGCAGTGTGCGGCTGAGCGACCGCTCCGAACCTCTATCGGGT

ACTGCGCAAGCAAGGAAGGGCTCACCATGGCCGTCAAGGTGGCTGCCCGAGAAGCTCGGTC  
TGCACGGCTGGCGGATCAATGCCGACTCGCCGGGGATGACTGCGCCCACGGGCATGAGTG  
ATTACACCGACAAACGTGTTCCGGAAGCGCGAGGTTGGACTCCGATCGAAGCTGCGCAGT  
ACGAGGCACAGCAGGAGGTCGTCCCTGGACGCATCGATCCTCGAGAGGTGGCAGAAGTGG  
TGTTTCGATGTACTACCCGACCTGAGCACCTCAACGGGTCCATCATCACCATCAATGGCG  
GGCGCTGGCCAGTAGGAATTCGGCCTCCCCGAGACGCGAGGCTGAATTTTCTCCGAAAC  
AACCCGATTTCGCGCCGGTGTAGTAGGCTTCGGCCCAGTGTCTAGAGGGGAATATTGAGTT  
GAAGGACCTTGAGCTCAGCCAGCCAGACCCGATCCGCGAGAAGCGAATTGGTGAGGAGCT  
CTTTTTTCCAAAACCAGCAATGGCTTGTGCGGTGAAACCGATGAAGTTCGTATCGCCTCA  
CACCCACTCAACCTTCTCCTACGGCGATGGCTACCGACCAGTCAAGGAGCACGTCCAGCG  
AGTTGCGGAGCTGGGCATGGGCGCTCTGGCGCTACCGAGCACGGCATCCTGAGCAGCCA  
CGCACAACCTCGAGAAGGCCTGCAACGAAATTGGAATCAAGCCCATCTTCGGGTGCGAGCT  
GTACGTTGCTCCGCCAGGCGAGAACCGCAAGTGCCATCAGACGGTCCCTGGCGATGAACGA  
CGTCCGGGCTCCAGAATCTGAACCGCATCGTACCAAGAGCTGGAAGAACTTCTACCGCAG  
GCCACGACCAGCTGGAAGATGTTGGAGGAACAGAATGAGGGGCTCATCGTACTTTCAGG  
ATGCGCTGATAACGTGCTATCATGCACGCTGCTGGGTGGTAAGTTTTACGGTGACAAGCG  
ACTCACTGCAAGCAAGCGCGACATCGCTCGTGCCGCTGGGCTTATTGGACGGTACCAAGA  
GGTATTTGGAGAGCGGTACTACCTTGAAGCCCAGAGATTTCCAGGACTTGATCGCACTTG  
CGTCTCAATCCGCTGCTCGCACGGCTATCGGAACTACCGGAGCTCGTCTTGTGGAAC  
GGCTGATGTTCAATATCCACGTGGATCCGACAATGATATGCAGAAGATTCTTCACGCGGC  
TCATCGCGGGTCTACTGTGGAGGCTACTGAGGCGTCCCTGGGAGTATGACATTCTCCTCAC  
TTACCCGGAATACGACCGAGAAATCTATATGGACCTGGTGGGTACGGGGCTGTCCAAAGC  
CCAAGCGCGCAAGCGGTTCTGGAGTCTGGCCGAATCGCTGAGCGCTGTAACGTGCTTCT  
GCCGAAGAACCAGCCGATCCGTTTCCGCAAGCCTACCAAGGAAGTTGACGGCACGCAGGT  
GCCGATGAGCGCCAACGAGCTGACCCGTAAGTGGCTCAACGAGGGCTGGCACTTCCGTAT  
GGCGACCAACCCGAACATGCGGAAGAACCGCCAGGCATACAAGGCACGCGTCGAGCATGA  
GCTTGGCATGATGGAGGAGAAGGACTTCCTTGATTACTTCTTGGTACTCAGCGATGCGGT  
CCGTTGGGCCAAAGACCACAAGATTCGGGTTGGGCCCGCTCGTGGTAGTGCTGCGGCGTC  
GCTTGTGTGCTACGTGCTTCGGATCATTGAAGTCGATCCGATGCTCTTCCCGCACATGCT  
GTTTGAACGTTTCATTGAACCGACACGTACAGAGCTGCCCGACGTCGACCTTGACTTCTC  
AGACGGCCGACGAATCGAAGTCAAGCGCTACCTAGAAGAGAAGTACGGTGCGGACCGTGT  
TGTAACATCGGAAACTTCACGCGTTATCGTGGCAAGAACTCGCTCGACGACGTGGCTCG  
CGTGTACAACATCCCCGTCTGGGAAACGGAAATCGTCAAGAACCTCATCATCGAGCGCTC  
TGGCGGTGACAGTCTATCAGTGACTCTCTCGAGGATACATTCAACATGTTCCCCAAGGC  
CGCAGCAGTTCTGGAGCGTCACCCAGAGCTCGCCAACGCGATTCCGCCGGAGGGAAATTA  
CCGGGGGATGGGAGTTCATGCTGCGCGCATCGTCAATAGTAACACTCCCATCACCGATAC  
CTGCGCAGTGTACGAGCGCAATCGGCCGGCAAGACGACGCGAGGTCATCGCATAACGCAA  
GAAGGACGGCGAGTATGTGGGCATGATCAAGGCAGACTTCCCTCGGTCTCTAGACGATGGG  
CATGATCGGTATCGCCCTTGACATGATTGGGATGGACCTTGAAGACCTATATCGAATCCC  
TCTTGATGACCAGAAGGTGCTGCAGGCATTCCGTCGTGGAGACGTCACCTGCATCTTTCA  
GTTTGAAGGACTAGCTACTCGGATCGTGTGCAGTGACGTTGTGCCAGACCACTTCCAACA  
CCTGGCGGATATCAACGCACTCAGCCGCCCGGGTCCGCTCTTCTCAGGAATGAATGCGGC  
TACTGCGAGGTCAAGCACGGCCGCAAGACTCCTGAGCGGTACCATCCCATTCTGGACAA  
TCTGACTGACTGGACATATGGTCAGGTGGGGTACCAGGAGCAGGTTCTCAGCACCATCAG  
GGAGCTCGGAGGCTTCCAATGAGCGAGGTCCACAATATCAGTAAGATCATCTCCCAAAA  
GCTCGGCGAGGCCAGTTCGAGGCCAAATACAAGATTTTCGAGGACAATGCTTGCCAGAA  
GCATGGCTGGACCCCGGAGCAGGCGCAGAAGATCTGGCGCTTCCCTGGCGACATCAGCCAC  
CTACTCATTCAACATCGCGCACTGCATCAGCTACAGCATGCTCGCCTACTGGCTGATGTG  
GATCAAGCAGCACCACCCACCGCGTTCTATGCGGCCAGCTGCGCAAGGTCAACGACGA  
GAAGCTCTACAAGTTGATGCGGGATGCGGGTGCAGGACAACATATCTATCCTCCCGCCAAG  
CATCAACGAGTCGATGGCGAGCTGGTCCGGCTCTCATGGAAGGTGTTGTGCGAGCAGGATT  
CCTGCTGATACCGGGAGTGGGTCCCAAGACACCGGAGGTGATAGTCGAATGGCGCAATCA  
GAAGATCAGGAAGGGACAGAAGGCAATCGCAGCCAGTGCCCCGGCCCTCATGTGGTCCGA  
CCTGCTTGAGGTAAAGGGGATTGGCCCCAAGTCCATCGAGAAGATCGTTGCATTCTGCGA  
GGCAGAGGACCCGTTCCGGCTCAACAGGGTTCAAGACCTGTTCAAGTCTCTGCGGCGGAT  
CATCAAGCCCGCAATGGGTATGGGGTGCCAGCGCCTACGCATAACAGCGAGAGCCTCTC  
GCGGACCGTCCGACCACGACGGCATTGTCTGGATGGGCATCCCCAAGGCCAAGAACTATTA

GGACTATATCGAGAACCAGCGGTCTCGGTACGGCAAGGAAGAGGCCGAGATTCTCGCTGA  
GAAGAAGGATCCGCTTCTGGTCAAGAGCTGTGTGGTGCAGTGCTTTGACGACTATGACGA  
CGACGTGTACTGCCGGTGAATCGCTGGCAGTTCCCCAAGTTTGAGAAGATGCGGGAATC  
GCTGGCCGTTGATGGCAGCAACGTCCTCATTGTGCGCGGTTCGCAAGCGTGAGGACTTCGG  
AGTGTCACTCCACGTGACGGATGCGTGGGTGCTTGAGTGGGACGATGACGATAGGCTGAA  
GTATGGGCAAGAAGAAGAAGCGTGTGGGCAAGCCCCGCCCAAGCACAAACCCGCTGAAGC  
TGGTGGGTGGTGCCAAGGACTCGGACGCACGCGTACCAAGGTCATCCAGAACATGCTCA  
AGCCGCCAGAGACGGTGCTCGCGCACATCCAGCGCGTAGGGGCTCCGTTCTGGGTAGCAC  
CATTTGGAGTTTCGCAGGAGGGCGAGCAGTACGCGCGTCCGTGCCTGGTGGTGCGGTACG  
TCGACCTGATTTCCGGCCGAGCTGGCCATCTGGCTGCTGGCGGGGAGCTTGCCGAGACGT  
ACACGGAGGAAGCCCCGAATGCGAGCCGCGCAGCGGCGCGTAGTGTGCGAGGCGCACAGC  
CCAAGAGCGACCTGGACCCCACAGCCATTTTGGCCAGGTCTAGGAGTTGCTGCAGCAGG  
TTCACGGCGCACAGTCGCGGGTTGCTGACACAGCATCAAAGATCGAACCACCGAGCCTT  
CCGACGAGGATCGCGACGAGCTCCTCCGCAAGCTGCGCGGTTAATTCCAACAACAAGAAG  
GGAATCACATCATGACCCGGGAAAGAGATCGCCAACACTACGCCGACGTGGCGATGTTCAAGG  
CCGAGGAGATCGACCCGACCAAGGGACCGCAGGTGTTCTGCTGAGCTGCAACAACAATC  
CGTTGGGAGCATCGCGGCTGCTGCCAAGGCGTACAAGGGCGAGTTCGTTGAGTCACTGG  
CCCAGATCACCGACGACGAGCGCCGCTACTACCGTAAGGAGGTGCAGAAGTCGGTGCTTG  
AAATGCTTCTGGAGGCTGTCCAGTTCCTACTCCGCATCCCCGGTGTGACTCGCGGGTTCA  
CCCACCAGATGGTCCGGCAGCGCAACGCAGCCTACTCCCAGGAGAGCACGCGCTTCGCCG  
TCACGGAAGACGTCCAAGACGGATTGCCACCCAGCCTGCAAGACACGATGCCATGGAACG  
AATGGGTTCGAGGAATGTGCGATGGAGATCTATCCAGTTCGCAGCCAACGGCGTGAGTATC  
TTCAGGACAGGCGTGACCAGGCTGAAGAGTTCGCCGATACGATGGCCGACAAGGATCAGC  
TCTGGCGTCGTCGGTGGGATAGGGATATCGGCGTCATCGAGGAGGAGTACAACGCTCTGG  
TCAACAAGGGCATGCCAGCCGAGGACGCGCGTGGATAGCTGCCGACGAACCTTCTGACCC  
AGATGAACTACATCACCGATCTGCGTGGCCTCAAAGGCCATGCAGGCGTGCGGCTCTGCA  
CGCATGCGCAGTTCGAGTGGCGTCAGGTCTGGGCCAGATCGTCCGGGCGATCCGTGAGT  
ACGGGAAGACCCAGACGTACATGACGAACGACAATGTCCATGACATTCCGGAGAACCAGA  
AGTCGTGCGCAGTGGCAGTTCGATGCCTTGGCGGACATCTTCAGGCCGATCTGCTACTACC  
GGGGGAGCTGCCAGTTCAGGTAGACTTCGACCCGGCACTGCATAATCCGTGATCGCGTCCG  
AGGAGAATGCCGGTATCAATCGGCCGAGCACCGACTGGGACAAGGAATGGGTCCGACCGA  
ATCCTCTAAGCCCCACTGGCGCTGAGGGTTACATCGGACCGATCTTCCCGGCTGAGTGGC  
TCCTGGATCCCTCAGCGGCAAGGACGAAGTGACCAAGGAGACCCGGGCATGCCGACTGTG  
TGGGAGGGTGGTCGATCGGGCCGCCCTCACCCAACACTGGCTACACAGCTTCATCTGCGC  
GCGATGCAGTGAAGGATTGAAACGATTGAGCGCGAACCTCTTCCACGACAGGAGGGGA  
TCCAGTTAGGAATCATCGTCATTGATTTGGCCGAAGGGAGGTCCCACCGTGCGGCTATGC  
GTAAGAAGAAGCGCAACAGAGACGGCGAATCCGGAATCAACTATTCCACAGCACCGGTCA  
TCGCTGTTGATCCGGGGCGGAACGACCCGGCTGGTCTTCATGTGTGTGGAGCCATTGGCTC  
TGCACGACCCGACAGGAAATGGTACTCGAGAACATCATCACTCATCAGCACGGCGAGCTCA  
GCAGCACTGTTCGGATGCAATGTGCGGGAAGGCGAAAACCTCTGCGTTCGACAGCCTGTAGG  
AATTCATCTCGGCTCGGCCCCAGGCCGCTGTCTTGGTGGAGGACTTCGTTATCCGAAGCA  
ACAATCGGAGTCGCGAATTCTTTCGCCCGTGGCGATTACCGCCTCACTCAAGCACCTGC  
GATGGGCCGACAACCGATAACATCATCCGACAGACACCAGCAGACGCCAAGATCACTGAGA  
GCGATGACCGACTGAAGAGCTGGGGCTTATTCGACAAGCATGGCAGTCTTGGGCACGCAC  
GCGATGCCGATCGGCACGCAATTACATTCTGCGCAAGGCCAAAAGCAACCCGAAGCTCC  
GGGCGATGGCTTGGCCGTACCTATTCGGAGCGGAGGGTATTTATGACAGACGAAGGCGACG  
GACAAAGCTGGGGCTGATGTGCCGCCAGCGTGGCTGGTTCGGGTGCTGGGCGAACACCAG  
CCGCAGATGACTGGGCTGTGGTCCACATGCTCTAGGAAGAGCACGGACGCCTTCGGCGCT  
CCGAAGCACTACTCAACCTGCTCTGAGGAACATCAAGGGGCCGAAGTACATCGCGCTCTG  
AGTGATGGCGTCGCAGCTTTTTTCGAGGACGTTCCGGTGGAGCAATTCGGACGAGTTCTATG  
CCAAGGCGATGGTTCGCGCTAGGTAATGCAGAAGCTGCGCAAGCTCACCTCAAGGAAAGCT  
TCGACGACAATCACAACACCTTCTGGTCTCAGCGCGTACTTGCGCACTGTGCCTTGGCGA  
ATGCATATCTCAAGGTCGCAGAGTGGGAGCTCGGCGTCGAGGCCTGGAACAGGAAGGAAG  
AGGACCAGGTCTCGGTGCTCACCTTCGGCACAGACGAGGTGGTCGCGACGTTCCCCGACG  
ACATCGAGGAGCGCCGATGAGGCGCGCGGGCATGAACGACCTCAATCCGACAGTCGTCAA  
GAGCCAGAACGACGACCAATAACAAGAATAACAATCCAAGGACGCCTTCACATTCGGGCG  
CACGTGCCCGGACTGCGCTGGCGGGCTACAGTTCAAGTGGGACCGGATGAAGTTCGGCGC



CAAGCGCAAGGTATGGATCTGTCCCGCCTGCTACGAGCTTGAAGTGGAAAGGGCTGCCACA  
AATCAACACGGTCCGGCCCCGCATCGGAGGAGGAAGAATGCCCCGTGGAGTAGCGATGACT  
AAGGAGCAAATCGCAAGGGCGGAGGAGCCTTTGAACGAAGGCTGCTCTTACCTCGACGTC  
TCCCGAACCATCGGCATCGCCGAGTTCAGCATTGCGCTCAAGTTCCCCGGTCCGGGGCTGG  
ACACAAGAGCAAAAAGCCGAGCACAAACGTCTCAATGATTTGTTCAAGCGTCTCGACACC  
ATCTGGGGCTTGGAGAGGGCACAGAGAGGCGAGAGGCGCGCATCATAGGTTTCAGTAGCCA  
GCATCGGCCCCGAACCAGTACGATCAAACCGTAACAAGGAGGAACCATGAAGTCCACAGG  
AACTGCCCCGCGAACGTCGCGGGGTGAGCGGGTGGGTTCGAGCCAGAAGTTCGACTAAGCGCT  
CAAGGAGTATGCCCGCGAGCTCGGCATCAAGACCTCACCAGCCTTGCGCCGCGTCATCAT  
CCTTGGCTTTCGCGCAAGAGGGCTTCCAGATCGACAGCGAAATAGTTCCGCTGCCCGACAG  
ACCATCACACAGGAAGGATTGACCGATGAGCCGAGTGGAGGTGGCCCTCGCGAGCGTAGC  
GCTGTCTGCGGCGATGCTCCTGAGCCAGGCCGCTACTGTGGGCGCAGAGCCCCGAGCAGCT  
GTCCGGGAAGGACCAGTTGTACCTCACACGCCTAGTCATTGGCGAGGTGCCATACGGATC  
GGCTGCAAAGCCCTCTCCATTGCACGTCGTGTAGGCCAGGCTACCACTGGCGGAGACTG  
GGACGCCACCTCTCTCGGGAAGCTCGGCCAAGAGATCATCCGCAACAACCCGAAGTTCGA  
CGCCGACTCGGCAGAGAACATCATGGTGTGAGCATGACACTGTACTGCCCCGAGAACAT  
CCCCGACTGGTTCCACGCCGAGACGGCCAAGTATCTCGCCGAGGACGCCGGTGTGGCTGT  
CCCTGTGGCGAAGAATCCTGTTCCCTACAAACCCCTCCCACGCTAGGAGCGTCTGCCATG  
GACACAGCGCCTTTTGGCGTATCTACCGCTGACTTCATCGTCTGGGGGATCACCTTCGCG  
CTCACGGCTCTCACAGCTTGGCTGCTGAAGCATGGTTGACGCGTGAAGAGTCCGCTAGAG  
CTTGTGCATCGCACCTTCAACAAGCACGGCATGCCCCCAGCGGTATCTGCCACATGGC  
TTTTATCGTACGGCGCACCACTACGCGCTCCGAGGCCATGAGCAGGTTCGAAACCCGGGGG  
TGCGGCGAATGCCTGAGGGAGCTGACCCCAACTCAGTTTACCCACATCACTAGCTGTCCC  
AGCTGCTGGTTTCGTCGGGGCGCTACCGTTCGGCCCCGATAGAAGAATACTTCAATCTCCA  
CCCGAGCAGACGATCTGGGTTCGAGAATAACGATGGCAGCGTCCATCTCCGCAAAGCCTTG  
GAAGAGAACGGGGCCGAGATCAAATACAGGGTCTGGGGAGAATGGCAGCGAGAATGCAAG  
ACCAAGGACCTGAATCTGATCCGGGAATTTCCGGTGAAGCCTGTGGTGTACCGCATATGC  
CCGAGTTGCGCGTACACATGGTTTGGAGCACTAACAGAAGGGAATACATCATGATAATGAA  
AAACAGTTCGGAGGACGCACTGCGGAAGGCTGCAGCTGCATTTGCTCTGCGTCAAATTCG  
TGAGGTCAAGGAGCGCGCTGACTACATGCTCGTGCACGCCCTGACCGAGGCCGACGTGTA  
CGAAAGCATGCTCGTGAGGGCTGGGTGCAGCGGGAGAATCTTGGTTCGCTGGATAATCAC  
GCCCAAAGGACTCAAGAGGGTAGTCCCAGACCCGGACGACGTCGTCGGCTGCGTGCCGGT  
TCTCGTCCGAGACCCGGACGACATTGGCGAGCACCGAGAGCGTAACGAAACGTTCCGCCG  
GTACTIONGATCCGCGCTTCGGCAAGGATTGGTTCGGGCTACGTCGGCAAAGTTCCCTACCA  
GCCGAGGTTTCGGGAACACAAGGAGCCACAGCATCTACGGCACAAGCCCTATGGGTATCC  
GAACCCGGCCTGGGAGCTGAACTACTTCCGCGTCAACACCGTCCGGCTGGACGCACTATGT  
CTGCCGAACCAAGCATGACGAAAGCTGCTGGTGCACGAAGAGCCCAGAGGAGGTGATGGA  
CTGATGGACTGGAATCTCCTGATCCGCGTTGCGATGGGCGCTGCGATGGGCGCGACGATC  
TATTTGGTTCGGATGCATCGTCCGATAACATCGTCCGATAACAGAGCAGACAAAAGGAGGCC  
CACCTATGAGAGGCGTGAAGGGCACTGGCCAGGGCACATGGGCAGCGCGCTACGACAGCG  
TGTGCTCGGTGTGCCCGCACTCAATCTTCATGGGTGATCCAGTTCACAAGGTGCACAACA  
AGGTAGGCCACGAGGAGTGCCATGCGCTTGATGAGCGTGGCGGGTTCGGCCTTGATGTCA  
GCGGCATTGAGCAAGAGCGCATCGACGGCCGATACGGCAAGTGTACGAGGACCGGCCGA  
GCCACACAGTCCGGGGCAGACGCTAGCACGAACGCAAATGTGGCGAGTGTTCAGATAAC  
TTGCAGGAGAATGCCCATGAACTCGAAGACACACCGGCGGATACGCCGGTAAGAGCTT  
GGTCGAGAAGATGCAGGACAAGCTCGACTCTGCTTACAAGGCGTGGCGCGATGCCGGTGG  
CTGTGATCATCGACAGAACTCGCAACAGGGACGGCACAACCCGAACTTCGACCGGGTTGA  
GGGCTGTGCGGCGCAACTCGGAGTCCCTCAGGGGCACAGGTACAAAACATGAGATCGAGGA  
AGCGGAAAGGCGATAACAGATGAGGAATCCCTTCAAGTACGGTAGCCCGCAGCGGGTTGTG  
TTGGCGTACTGGATGATGCGGTGGGCGAACCCGATCGTTGAGAGCATTGATCGCGGTCCC  
GCCCCGAAGATCAGCATGTGGACCTTCACCTTTGAGCGTGGGAATGGTGCGGTTCGTTCCG  
TAGGACGATCGGGCAGAGCCCAAGGGTTGCAGACTCGTGTACCTCAATGATCGTGAGTAT  
GACCGTGCCTGGTTCGGAGAGTGCCTCGTTCGGCAAAGACGAGGACGAGGACCAAGACGCC  
TTCTCACCCCTGGATCTGCCCGATGAGCGGTACAGCCAAGTACGACAAGAAGATCGGCAT  
CAATGCCGACTGGCGGAAGACCACGACGCGCGGGCCACGAGGAGCGTACGGCAGGCGCCC  
AGACAGTCCAGGAGACCTAGAAGCACCCAGTTGTAAGGGCTTCGGGTTCAGGCTGGCTGCC  
AGACGGCACTTCCCCGGCTGCGGCAGGCACTGGACCTCCGTGTACCAGACGCGCGACGC

AAAACGAAAGCCCTTCGGCACCAACGGAAAACCTACCATACCTTCTCACAAGACCAAACC  
ATTGGAGGGACAATGAACGATCCAGTCGCCGAAGCTGGACAACGGGCGATGAGGAAGGTG  
CACGACTACCCAGGGCCCAACCATGACCTGATCGTCGCCGCCCGTTAGGCGTTGAAGCCG  
ATCCGCGAACTGCACTACCCAGAACCTGATGACCGAGCCCCCTTCTGCCCGGAATGCCTT  
GTCGAGTGGCCCTGCGACACCGCCAAGCTGGTCTACACCACCGAGGAGCTGGAGCGATGA  
TCTTATGGCATGCTCGGCGTGAACCTCGAGCGCTCTCGGAGCCATCGTTTCTACAATCTGC  
CGGTGGACAAGAGTGTCCAAGCTATGTACACCTGGTGGGAGTACATGGACGAGATCGACT  
TGGTGAATGGCGAGAACGACACCATAACGCATCACGGTCATGGAGGAAGACACTCGCCCTC  
CTCCAGGAGATCTGCTCCCTGAAAAGCCCAAGGTCATTTCGCGCACTTCATCAGAGGTTGA  
CACCGAAAATTAGCCTCGAGTACCAGATCAACACAGCGTACTTAGCCCAAGCACCATCA  
GCCCCGCTCGAGGAGATCAGGGCCGACGGGTGGATGGCGCTCGGCCACTACAAGATCCAGC  
GGTACTGCATCCGAGTCCGCATCAGGCCTGGCGGAGACGGTTACGAGCCATATCGCATTG  
TCATCGTGGCTGGTGAGGTCAGCCCTCCGGGCATATGGTATCCGTGGTCACGACAGCCCG  
AGGACGTGCCGAACGAGGTACTTGACAGAACTTACCACGGGATGTTTATGGCAGATAAAT  
AGGCCATCCCCAGAACCAAATACCATCCCCTCACAGAAAGACAGCATATATGTTTCTGTGC  
TAGGAATCGCGCGGCCGCAAAGAGAACGCGCGCATGTACAATCTCGGCAAGGTCTATGG  
CTACCTCGATGCTCTCAAGGAGCTACCACAGCCATCCAAGTGGAACCTCAACTGCGCGA  
AGAGAAGGGCGCTTCTGGTGTCTCCGAGCGAGCCGCCGTGGACCCTCCACAGTTTTACTG  
CTGGTTAGAGGGCGAGGTGCTTCCAATGAGCAAGACAAAACAGATTCCGCCAGACGAGTG  
GGTCAAGGAGGTCGAGCGCGTACAGTCCCGCCTAGACCGTCTCACGCGTCGTCGGAGGTG  
AACGACATGGATGTCGAACTCATGATGGCAGTACGTAAACAGCGGGCCACATGGCCTCGA  
CGAGGTGGGTGGAAGCCGCACCCACCGACAAGCCCAAGGCTGAGCCTGAAAACGGTAA  
GCTATCTAGCTGCGGTAATAGGTCGACCTTGCGGGTCTAGGCCAGAGAAGAAGGGACACA  
TCGTATCATGTCAACAGCTGGAATATCAACAGCGCCAAGCCATTCCGACGCGCGGTAGA  
AGGCTACCGTGAACGGGGATGGGCGGGAACGCTACCGCTGCCGCCTCGGAGCAAGAAGAA  
GCCTCCAACAGTTTACACCGGGCACACAGCGCCGTACCCGAGCGACGATGACATCGCGAG  
GTGGCTGCGAATTCCCAAGTACGCCCAGGGCAATATCTGTCCGCACCTGGGTCCGGTAGC  
GACGCGTGGGCCGGACGGAGAACGCCTGGAGCTCATCGGGATTGACGTCGATGACTTTGA  
GGAAGGTGGCAAGGACAAGGAGGGCGGCAAGTAGCTCGCCGCGCTCGAAGCCGAACCTCG  
GCCACTCCCCAAGACGTATACCAGCAGCTCGCGCACAGGCGTGAGCGGGATCCGCTTCTT  
CCTGGTCCCCCCCCAGCACGCATGGATGGGGAAGGCCGCGCCGCACATCGACTTTGTCTG  
CAAGACATACCGTTACGCCATCGTATTCCAAGTTGCCACCCAGGCGAGGTGATGAGGA  
GACGGGGAAGGTCATCACCGAAGGTGGCCAGTACAAGTGGCGCGATCCGCAGGGGCAGTT  
GCTGGATGGGCTAGAGGACATCCCTGACGTTAATGATCTGCCCTCCTGCCCGATGAGTG  
GGTAGAGCGGCTGAGCCGTGGCGGCATGAAGCTCTCGGACGAGGACGCCGAGATCGACAT  
GGATCTGAACGTTGACGAGATGTTCCGGTGGGCCGTGGGTACGTTGCCGGGCAGTGACGA  
GGACGGCCAGCCCTGCTCCAAAATGAAAGCGGCAGTTAAGTACTGGCAGGGGCAGATTGA  
GGAGGACGCCTCTACCCACGACAAGATCACCGGCTCGCACTGGAATCTGGCCTGCTTGGC  
CACCGAGGGGCACACCGGCTGGCGGCAGGCCATGGCAGCTGTGGATGCGAGCATCGCCGA  
AGACACCATCGAGAACCGTGGGAAGCGCGCAATCAGCGAGCTGCGCTCAGAAATCATGCG  
TAGCAAGGTGAATGCACTCCGAAAGCTCAAAGCCCAGATAGACAAGGGCAGGCGCAACGT  
GCTCACGGTGTGCACGTGCTACGAGCCCAGCACAGACGAGCTCGACGCGTTCACCGCCAG  
CCTCAACAGCGCAAAGGCAGCTGCCAGCGTGCTTACCAGGGAGCGCGCGGTGCGCAGCGG  
CGAGGGGCGAGACGGATATTGGCGCGATGGCATGCCCAATGGCACCCCGCTGAACCCCGG  
CGACTACGAGCAAAGCGACCACGGCAACGGCGATCACTGGATCAAACCTGCACAAGGACAA  
TGCATTCTACGTTCCGGCGCTGGGACAGTGGATCTTGTGGACAGGGAAGAGCTGGATCGT  
GGGGGAAGGCTGTGCCGAGCGGAGCTACGGACGCGTGAAGGCTCGCCAGAAGCGGTATGC  
CGAACTGCTTATGCGGCGCGCGGCTAAGCTCAAGGCTGCGCAGGATCCTACGGCCAACGC  
GGCTGTGGCGATGGCGAAGAGCTGTTCGTAGCTGGGCCACCCGACGCGGCGATGTGGGGTC  
GATTGAGCGTGCCCTCAAGGCCGCCAGCATGGAGCTCGGCATCGAAGAAGGCGAGCTCAA  
CTCTAATCCGGCGCTGATCTGCTGCGGGAATGGCGTGCTCGAACTCGATCTGTCCCGCT  
CGACTCCCTGGCGGACGACTCCCAGAGCGCTGGGCGCAACGGGGATAGAGGTAGGCGCAA  
CGGACGGAACGGCACTGCAAATGTGGCTAGCTTGGCCGAGGACGACGAAGAGTTTGATCT  
TGACTACGAGGCTGAGGCTCGCAATAGCCATGTGCGCCTGCGAGAGATCCGGCGCGAAGA  
CTTGCTGACGCTGAGTACTGGGACGAACTACCTGCCCTGGCAGGAGCTGGTGGCCGGTGA  
GTTCCGGCACACAGGAAGCGCTGTATGCGAGCACGTGGGCCCGAGCAGTTGAGATGTATCT  
GCCTGATGAGGAGGTGCGGATGTTCTGCAGAAACTGCTAGGGGTACAGCCTGCTCGTCGA

CAACCGAGAGCGCATCGTCGTGTTTCCGCACGGGCCAAAGGGCAGTGGTAAATCCACCTT  
CCTCAGCGCCACGCTCAACGCGCTCGGGCAATATGCGGATGTGGTTGATCTGGACATCTT  
CAAGGGCGACCGGCAGACCAACCCAGATCTGGCTTACGCCCTCCCAAGCGCATTGTGAC  
GTGCTCCGAGGCTAGCCAGCTGAACGTGCTGCACGCCGACATGTTCAAGCGAATTACGGG  
CGGTGACCCGTTGAGTGCAGAACTGAAGTATAGCAACGAATCTGTCAAGCGGAAGCCCGC  
ATTTGTGCCGTTGATCGCCACCAACACCCACCCAGCATCCCTGGGGCCGATGCTGCGGT  
GGTTGATCGGACGGTGGTGGTGGGATTCAATGAGCAGATCCGTAACAAGACGTCGGCAT  
GAATGCGATGCTGTCTAGTCCGAGGGCCAAAACGGCTGTGCTCGCGTGGGCGGTGAGGG  
CTGGGAATGAACCGGCGGAGGGGCTGAGGCGCGCTGATTTCCCGGCTGCAGTGAAGGC  
TGAGAGCTTTGAATTCACCAACCAGATCTCCGATGTGAGCGAGTTCCTGAGTGAAGTGC  
GGAGGAGGCTCTGATGAGCCTCCGGCGGAAGGCTGAGAGGCGAGCGTGGCGCGTGTGCGA  
CTGGCCCGAGGAATGGCACATAACGGTCAGCGAGTTGTACGACGTGTACGTCACCTGGTG  
CCAGGACAACCGCGTTGCGGATCGTAACATCATGAAGAAAAATGGGTTCTCGGCCAACT  
GAAGGACTATGGATATCGGGCCGAAGTTGTCAAGAAATATGGCGTCACTTCGAGAACTTA  
CGCTGGCTTCAAGCTCAACTCTCCAAATGCACGCGTTTTGAAATTGCAAAAAGACAGCTG  
ATTATTGGACAAGAAAGGCTCTGAGACGGGGCTGTTACGCAATGCGTATCCCAATCAGTA  
ACTACATTTGACCAGCGGAAACACATCATTTTGGTTACTGGTTGGGGTTCGTTTTCACT  
AGGGCTATACCTACTCTCGTTCTTATACTTCTACCCTGTTTTCCCTACTATCTATTATCT  
AAAAAAGCGAAACGGGTAACCTCAGGAGGGTATAAAAATGTTGGTAGAGCAATGGATTTCG  
ATTTTTGAGAGACCCGGAATGCGCTACCGAATAGGTAACCCGAACACAGGCTACATGCGG  
AAACATGTTTCGTTCCATAATTTTCGGTGTGACGGATAGCCTGGGAGGGTATCTAGGAGC  
GTAAATTTGTGGGATCAGAGATGGTTTGGACAGCAGCAATCAAGACTGATGGAATTGGAG  
GAATGGC

>NewGenomeName\_106

TCCCGACTCTGATCAGCCCACCCTACCCCGTAGGCCCTCCGCTGGTGGGCCATCCTCG  
CCTTGCCTGGGTGCTGCCTGGGTCAATCCCTGGGAGCTTCCGGCTTCGCCGGTGGTGCGGT  
GGGCTTCCCTGCCCTGTCGCCAGCCCTTCTGCACGGCTCAGCGGGAGTGCCAACCCTTGG  
GCTAGCGCTGTCGCTCTACCGGGCTTGGCCGTAGTACCTGGAGCGCTCCAGCTCGTCGCG  
GTGCATGGCCCTGGCTACCTCGTACTCCTGGGATGCTTGCCGCTTCCGCCAGGGTGGTGC  
GTAGTGCCGGTGGTCTGCGCTGCCACTGTGCTAGCTGCCTCTGCCATGCCGCGTCCTG  
CTGGTACCGGGCACGCTCACCTCTGTTCTGTCTGCTCAGCATCCTCTGTGCCTCCTGTGG  
TCCTGTCCGGTGGTGGTGCGGGAGTGGCTGGCCTTGCCTCTCAGCGTAGCCTTGCCTTTT  
GTCTTGCCATGGCTCTACCTGGCTGCTCCCTGGGTATTCCCTGGGGTTGCCTGGGTGGTC  
CTGGCCACTCCCTCTAGGCCACGTACTCCACTCGCCTCTACCTGTCCTGTATAGTCCTGC  
TCCCTGTCGCTCCCTGGGTGCTGGTCTGTCTCCCTGGCGCTGCACTGGTCCAGCTGTCTT  
TCCTCGCCGCTCCCTCGCCTGCTCGGTGCGACCTGCGGCGCTGATGGACTCCTATTTGTC  
CATTGTGTGTGACATAACCGCAGCCTTAGTGCCATGCGGGTTCAGGGCGATGGCCTAGC  
TGGCTTGGTGGACCCTGGCTTTTACCTGGGAACGATAATCCTGGCTAGCTAGACTAAGCC  
TCGCATGCGGGGGTCTCTTTACGTGCGTAGAGGCTCCAGGCAGGGCCTAGGCGGGGTGTT  
GACACGACAGGTAGGCGTCTGTACTCTGCGCCCTGTCTCAACGCAACACCGCCTCTACAG  
CCAGCCTGGAGACAGGGTTGACACACTACCGGGACATCGGTAGAGTGCGCAGCCAGAGGG  
ACGGAGCAACGCAACCTTCCAAGCGCGGCACATGCCATAGGCGCAAGGGACACGGCGAGG  
TTCCAGGGCAAGACCGACTACGTGTAAGGCCGGCAGGCATCGCAGAGGGGATTGACAGTA  
ATACGCGCAGTCGGTACGATGGGCACCACTCGGCAAGCAACGCAACATCAGCTACCGGGT  
TGACACGACAAGGCCGAGTCGCTAACATGGCCACCAGCAACAAAGCGGACCGGCGGATAA  
CATGGTCCGGTAAGCTCCAGCAAACCTGGCTGGGCTGGACGGGTAAGACGAGTGAAGCTGA  
CAGCGAAGGCCCTTCGTAGAAGGCATCCGAGGTGGATCACGCACCAGAAGGTGAAGTGA  
GGAATCGGGCAGCGCCTTAGGACTGCCAGGGGGTCAAGGCTAACCCCGCAAAAAGAAACAG  
CCGAGCGTTAGGATCACGTCCCAGGAGCAGTGTCCCAGGGGAGTATCTTGTACAACCGACAG  
TAGTCGGATGCCTGCAAGCCGAATCAACGGCTGGCCTCCGGGCTGGGCATCCCCTCGCAA  
GTCGGTTGTATCTGGCAAGAACCATCGGGTTGGCGGATGGGCTGCGAATGGGCAGCGATG  
GCTCTTGAGCAGATACAACCAACCGGAGTAACCATGAGCAAGAACGCCTCTGGTGCAGCC  
AAGGCCGCAAGCTACGGGCCGATATGAAACGCTATCTCGCTGGCCACCAGCGCCACGAAA  
GTAGCCGAACCTGATCGCCATCGGCGACAGCTCCGCACGGGCTGAACTGCGCAAGATGCGC  
GATGTTTCGGTACAGCACGGACAAGGCAACCACTCCCGGACACTTCTTCAATCCCAAGGGC  
AAGCACTTTGCCCGTGGTTCCGAAGGCAAGGCACGCAACATCCTCAAGGGCTTCAATGCC  
CGCAACTCTCAAGCAAAAAGGACTCTGACCATGACCAACCAACTGACCAAAAACCGTCATCG

CTTTCGTCGGTACCGCTGCCATCACCAACGCCATCGAAGCCAGCCGCGTTCGTGGCAAGG  
AACTCGACGAGGCCATCCAACCTGACCGGCCTGTCCATCCTGAACCACGTGATCTCCACG  
GCGACGTGACCGTAGTCAAGGCGCTGTACGAAGCCATGCCGCAGGGTAGCCGCCGCAATG  
AGCCGGTCGAGTGGCTGACCATGTTTCGGCAAGGTACAGGTGAACACCGACAAGAAAACCA  
ACAAGGAGCATCCGTTCTGTACAACAAGTTTGGCAAGACCGATCTCGTCGGCGCCACCA  
ACGAACCGTGGTACGGGTTCAAGCCGGAGAAATCGCTCGATCAGGAATTCAACCTCGCCG  
CCGCACTCGCCGCTGTCCGCAAGCAAGTGCTCCAGGGCGCAGACTAAAGGCAAGGTGATCG  
TCGGCGCTGAACTGCTGGCCGACCTGGAAGTCTGGCCGCCAAGGCCGCACCCATGGTTCG  
AGAAAGCCAAGCGCGCTACTGCCGACTAACTAGCTCAAGTCGAGCGCCTGCGAGGGCGGGC  
GCTCCGCTGGACCTAGTACAACCTGGAGATACCACGATGACTTTCGAGCAACGTCTGCAAC  
GTCAAATCGCCCTGGCTCAGTACAGCCGGCCCGCCACTATCCCTACGGCGAGCAGGCCG  
TTCAGGAGGCAAAGTAATGGATATCTGGATCGCTCTTCCCTTCTTCGAATTCGGCCTGAA  
CGTTAGCGAGTGGGCCGTGCAATTCACGCTGGGCATGATCGCACCCCGCCCTGTTTCATCCA  
TCTGCTGCTGAATCGGTGACTCAAGTCATGGCCCTGGCGGGCGACCCCTACCTACTCCGG  
GGCCATCGCTGGACCCATCACAAAGCCAGAATAAACCATGCAAGCTTTGAATACTCTGTT  
GATGGCAATTCCCAAGGACCCGGCAGGCCGATTCAACGCAGCCGACAAGGCCGCTGTGCGC  
CAATGGCTTCCGTATGGGTGACCTGAACAGCTCCCACGTCTTGACCCCTGGCGGGTTCAC  
CGTGGTAGGGCGCCGGCGTGACCGTCAACCGCTACGACGAAGCGTATCGCTTGAGCCGCGA  
TATCGACTCCGCTGGCTTCGACGTGCTGATGGTCCAGGGCAGCCCGCTGTCCGGGCACGT  
CACATGCCAGGCGTACGGCTGGATCAACGCTGAGTACCACAAGGGCTGTGCAAACGGGGC  
CCCGATCTTCGACATTGCAGGAACCACGTACCATGTCTCGCGGGATCCCTACCGTATCG  
GCCACCGCGTGGGGCTGGTGAACACAGCGACCGCTACCTGCGTGCCGACGCGGCAGGCA  
CCCGGGGCATCATTGGAGCCATAACCCGACCGACCCGCTGTATGACGATCTACCACGTAC  
GCTGCGAGCGGACCCTGCGCCTTATCGAAGCCGAGGCCCGTAACGTGGGGTTCATCAGAC  
AGCTACCGACCCGCAAATGACGTGGCTCATCATCGCTGTCAGCCCGTCGGGCGGTTGCGC  
CTTCGTGTGGAGTCGCTAGCGACCGGTGCGTCCCTTGCATTTTACCCACGCAAGGCAGC  
TAAACGCTGGCTTCGCAAGCATCGCCGCACGGCCTTGCTTGGGAGCCGATTCTCATAGT  
GAATTGGAGCAAACGCATATGAATCCTACTTACGTGCTCCGTCTCAAGGACGGAACCACC  
CGCCAGGTGGCCGCGACAGCATCATCGCCGGCCACAACCTTCGTGCAACTCTGGTTCCTC  
GGTGGCGTGGTTCGCTATCTACCCGGCCTGTGAAGTACAATAGTTGCATCGCATTGACCTC  
GTGAAGGAGGGCGAGTAATGACCGACAAGGCCGTGTATGTCAAGCCTGAAGACCCGGCGC  
CACCAGTCTTGTCCGTAGGACGCCTGTCACCAGGTGAACTCTACAAGATGGTGACGCCTA  
GCTCGGCAGAGGGCGCCGTTATGCTGGCGACCAAGCAGACGCCTGCCCTCGCTCAGGCAG  
TCATCGTACTGCACAGCATGAACCCCTCGCAGTACGCGGTGGGCACGGCCATACTAGACA  
TAGACTGGCGGTGCCGCCGCTGGGTGCCGGCGAGTACATCAAGCTCGTTCAAGGGGAGG  
CCGACCAATGATCGCTGCCCTGTTTCGTACTCGACCTGTACTACTGCCCCGGCCTGCTTGC  
AGGCGACTGCTACTGCATCGCAGTGGCGCCGCGTTCGAGAACCCTACGGAAGTGACGTT  
CCAGGACGCCTGCCTGATCGGGTGCCTCTGGCCCTTCGTGCTCGTAATCATGGTCTACCT  
AGGGATGCGATCCTTCTTCTGTGGCGCTCTGGGTGGCTTGCGCCGCCATCGGCAACGTCT  
TCACAACAAGCGATAAGGAACTGCGATGATCCGTACCCATATCCACAGCACCAACCGTGA  
GCAACCCCGTCTTCACAAGCACACTGAATTAGAGGGCGGGCGATCTGTACCGAGTCGTGCA  
GCCCGAGTCCCGTCGGGGCATGCTGGTACTCGGGCGTGGGGAGCACGACCGACCGTGGCGT  
CCGCTCGGTGGTGCCTGTAGTCATCCACGATGAAGTTGAGGGGAACCTGTCTACTCCGAG  
TCCTACCGTGCTGCGTAACGACACCTGGCGCATGGTGTCTCGTGAGCAAGGGCACCCAACG  
GACACTACCGCCGAGTGACCAAGGCGAAGGCTGGCGCGCCAGCCTTCCACCGTGGCCAT  
TACTTGCCGCGAACCAACTCAACTGAGGAGCTACAGCATGACCAACGTCAACACCACCAC  
CGAGACCACCACCGCTGCCGTCTGGGGCGCCAAGATCATCAAGAAGCCGGCTACCGTGGG  
AGACTTCCGCAACAACGTGGTCTTCCACTACACCGCCCTGGCCAAGCTGACCGAGACCTA  
CAACGCGGCGGTTCGCTGCCCTGCAAACCGCCGTGCGCCTGTCCAGCCTCGTCGCCGGTGA  
CGTTATCACCTTCGACCACGGCAAGGGCGAGAAGGCCGAAGTGCTGAGCGGCGAAGTCAT  
CAGCGTGGTTCGCCGGCGTCTATCAGGTGCTGGTGCCTTTCAGCGACAGCGCCCCGGCCAA  
GCTGCTGGACGTGAAGGCTGGCGCCATCCGCGCCGTCCAAGCTCCGGCTGCTCCGGCTGA  
ATCCCTGGACGAAGCCATCGCCCAGGGCGAGAAAGGCCCGCACGTAATAGGTCTGGCCCT  
GCCGAGCCTATTGCGAGCTAGCCATACCATAGGAGGAGTCAACGTGAGCAAGCACAAACC  
CGAACACATCAGCGGCCCGGTACGCAGCGTGAGCGTAGCAAAGTCTCCCGTCTCGTCCAGGA  
CCTGGAAGACCGCCTGCAATCCTCCCTGCGCGTGTGCCAGGAACGCGCCAGGATATCGA  
CACCTGAGCCGCCGGCTCCAGGCTGCCGAGCGGGCACGCCGCTGGGACATCGACGAGAT

TCTCACCCATCAGGCTAGGATCCGTCTACTCCAGAACGACTTGAACGCAGCGCATGATGC  
CCACGAGGCACAAGAGCGCCGCGCTCGCAAGGCAACCATCATGGCCTGGGTATGCCTGCT  
GACCGCAGGTTTGGCCGTCACCCTGAAGCTGGCAGGAGTCTGACCATGCAGTGCAAAGAC  
CTTTACACGAACCTCGCACCGGACATGTTACGCGTACCGTGCTCCCAGGTGACCCCGGAG  
ATGCGCCGCGTGGCCAAGAGCCGGGCATTGCCCCACGCTATAACGCCAAGAAACAGGCT  
TCGGGCGGGACTTACACCGCCCCTGTGTGAGCGGCGTCCCCTGTGACGGTGGCAAGGTGGAG  
GTGCGCCTGGATAACGTGGAGCGCGTCAGCACCTGTGACTATGCCGATCTAGAGGCGCTG  
GTAGCGGCCAGCTTGTGCCAGGCCGACGCGAAGCGCGCCGACGAGTACGAAAAGCTGCTG  
CTCAAGGCATTCTGCTGGTATCGAAGAAGGTGCGCCCGCTGTCCGCCAAGGACTTCGAG  
GTACGTCTGCACGATCTGCTCGTAACCAAGCTGGCGGTAAACCGTGCCCTGCGCGATGCC  
GGAATAGAGATGGACGGACCGCTGCGCAGCCGGGTACGGAAGCTTGCAGCCGGAATAAC  
GAGATGGGCGCTAAACTGTTACGCTCCAGCAGGGCTTGACCCGGCTGGTGGAGGTAGGT  
CAACGGGCCGGCCTGTATTGGGACGACGCGGAGACTCAGCGATTGCTGACGGAGGCCCG  
ACCAAGGCCGTCTGTCCGCTCATCAGCAAGCTGACCGGCGTGTGGGATGCCTCCCAGCGCT  
TCCGTGGCGAAGGCTGAGGCCGAGGCTCGTGAGCGGGCGAAGGCGGCGGCTAAGCACACC  
TGGCAGTCAGCAACCTTCGCATCCACCATACCGGCGGCGTGTGGGAGCGTGTGCTGACG  
TACCTGCTCGTCTAAGCGACCGGGGCTACTCCGGGGTCAAATCCGAGGGCGTTCCCTAGA  
GCGCCCTCTCGTGTGAGTCTGGAGGATCAGGAACATGCAATACCACTTCACGCATTACAA  
CGGATGCTGCTTCGGCGTCGAGCTGGATGACGAAGCCGTCTTCCCCTGCATCAACGGAAA  
GCGGGCGACCTGGGACAAGGTGGCGCCGTGTGCCGGTAGCCTTGTGCATTACATGGCGCA  
GGACCTGATTGACTTCGGCCAGCGCAAGTTCAGGGAGATCGAAGATACCAAGACGAGTC  
TGTACCCGCTGAACCTGAAACCCGGCCTGATACAGATCAAGACGATCCACGTATTCAGCA  
TCCAGGCGTCGAAGGACGAGCCGAACCTGGTGGCAGTGGTTCCTGTGGCGGCGGAAGTACC  
ACCCACTCCGCGACAGCCTGGACACGGCGGGGGAACCTGAGTGCAGTATCGCAGAGTATG  
TCCACCGCCTCCGCCGGAATGGCTGTGAGATAGGGACATCTGGCGCAACAAGGGCGGCG  
TGCTGGCCCTCGGTGCCTTCAGCATCGCCGGCGAGATGAATGGCTCCTGCCTCGTGGTGG  
ACAACGAACTGCGCGCCCTGTGCGTGGACGACCGGGACAAGGGGCATGGTATCGGCGCTG  
AGCAGGTGCGCGCTGCCGAGCTTGCAGGTGCCGAGCGCCTGAGTTGCTTCGAGTTCCTGG  
AACCGTTCTACGCCGGCTTGGGCTGGCGCACCGAGCGCCGCGCGGCAAACCTGGACTGATG  
GTGAGCCGGACGTGCTGCACATGAGGGCGCCCGGTTATGACGCATGAGGTGATGACATGG  
CTTATCGGAACAAACCCCTGGTCATCGGAGCCGCCTTCAGTCTGGTGGCCCTGGGCGTT  
CTGATAACGCGGGACAACGGCAGCCCGCCTACGGCACCCGCATGACCCGGGACCTTCAGG  
ACATGTTTCGAGGCCCGAGGCGGGCTGCGTCCCCTGTGGGAGGAGTGGTATCAATGGCACT  
GAGCCGCGACTCCTGGGTGAAGCAGGCGCAGGCGCTCGCCGTAGGCCAGACTGGCAGGGT  
CCGGCACGTCTGGGATGCAAGAGCATGAGCCGGGGCGGGACCAACATGTCCGTCAAGAA  
TCTGCCGACCGTTGGGTAGCGTATTGCTACCCATGCGAGGAAGGTGGCGTGGTTCGAGAA  
AACGCATGTGCGGAGGGTGAATGCGCGGATCAAGAACGCTTTATGCCCTGGCCCGAAGA  
TGCCTCGGACTGGACGCGGGCCGACTGCTATCAGGCGCTCTAGGGTTTGCTGCTGTCCAA  
GGGCATCGACTACAACGTGATGACCCAGGGCTGCCGCTGCTGTACAGCGGAAGGCAGCA  
TCGGCTTATCTGCCCTACCGACGCGGGCTGGATTGGGCGCGCTACTGCCGACCAAAATCC  
CAAGTGGGTGGGCTACGGGTATCCTGCCCCGATTACCATGGATGGCCCCAGGAATTATC  
AATGGGCAGGGCATGGGTGCTGACGGAAGACTACTTGTGCGGCGCTGAAGGTGCGGTGGGC  
CTGTCTCGAAGTCTCTGCTGTGCGTCTGAACGGTACAAGGCTGCGCGACAGGCGGGCGGC  
GATCATGTTGCAGCAGACCTGCAAGCGCGCCTTCATCTTCTTGGATGGCAACCCGGCAGG  
TGTCCTGGTAGTGCACGCGTTATGCGTCCGGTCCCGTCCCTGCTTATCGAAGGCCAAGT  
AATACCTACGCCGGGCGGGTTCGACCCCAAGGACCTGACCCGCGAGCAGATAAGGAGCCT  
AGTAATTGGACGTATTGACGCTACACGCACTGAGTGACAGGGACCGCTTCCGCACGTTGC  
GGTGTGTGGTGCCTTAAGGGATGATGGGGCCGGAGACCTGCTTTTGTATCGACTGGATCG  
AGCAATACTGGAAGGTCTACGCCGCGCATCAGAAGGTGGACCCGACGGCGCTGCGCGAAC  
TGATCAAGCTGCGAGGTGGCTACCAAGCGGAACAACCTGGCGGTAGTCCCTGAACCTCGTCA  
ACCAACTGGACAAGCCGGTAGACCCGGACACGCTACAGGGCCTCGTGTCCAGCTCAACG  
AGCTGTATTTTTTCAGGGCGGGTGGATGCCCTCCTGGCGCAGTACAACCAGGGCGAGGACA  
TCGACCTAGCGTATGAGCCGCGCCGGCTGAGCGACGAGGCCCTGCGCCGCGAAGGGGTCA  
GCAAGCCGACTGACTACGTGACGGACGACGTGTTTCGATATCCTGGCCGAGGAGCAGGGTG  
AGCACGGCATCAAGCTGCCGGGGCTGGTGTACCAGCGTATATGAAGGGCCTCCACGCCG  
GGCCTCAGTGCTGGTGGCTGCGCCACGGGATGCCGGCAAGACCTCGTGATGGCCTGGA  
TCGCCGTACACATTGCACCCAGCTCAAGCGGTACTTCGACCCGGGCCCGCCATCCTAT

GGCTGAATAACGAGGGCAAGGGGCGGCGGATCAAGCCGCGCCTGTACTCGGGCGGCCTTGG  
GCATGACCGTGGGCGGGATTCTTGCCATGGACCCGGAAGAGTTACGCAAGCAGTACGCCG  
ACATGATCGCCGGCGACTCCGAGCTGATTCGCATCAAGGACGTCCCTGGTGGGTCCCTGG  
CCCAGGCCGAGCAGGTCATTGACGCGATGAAGCCGGCGGTGGTGTTTTGGGACATGATGG  
GTCACGTCAAGGGTGGCCCGCGCAAGGACCAGAACCGCACCGACGAGATGGAGTATAAGG  
TGGCCGAGGTCCGCGAGATGGCGGTGCGTCACGACTTCATCAGCTTTATGACGTGGCAGG  
TCAGTAACGATGGCCACGACCAGTTGTTCCCGCCGACGTCCTGCCTCATGGATTCTGAAGA  
CAGCGGTACAGGGCGCCGTGGATGTGCAAATCCACCTGGGCCGTCTCAACGGTGCGGATC  
AACAGGTCATGCGTGGCCTGTCCCTGCCGAAGAACAAGTTCCAGATGGACGGGAAGCCGT  
CGAACGTGGAGGCGATGATTAACCTTCGACACCGCTCGGTGTCGTTTCTTTGAGAGTGTA  
ACCATGCAAGCTAAGCATAGCCGGGTGCTCGAAGGCACCAAAGAAATTCCACTGTGTTCC  
ATTGCACTGCCGACCGGGGTCAAGGCCCTGTTGCTGCGCCTGTACTCTGATGCACGGCCC  
AACGAGGGCGACGCCCTAGCCGGTGGGTTCCTCGCGACCTCATGCATGGCGCCACTCCA  
AAGGACGTGGACATCGCCCTGTACGGCATGACGACGATATCAGGCTGAAGTGCTCATCAAC  
AGCGTGCTTCCCTACCCTGGACCCACGCTTCGTCCGGGACGGTGGCTGGAGTACCGAGTAC  
GCCGACGCAGGTGAGGGCCGTATCTGCAAGGGCGTGCTGACCCTCGTAGGCCCCCGTGGC  
CTGGAGGGCATGGACGTGGATTTAACTACTACGTCGCCGACAGCCTTGGCCGGGTTCATG  
GAGCCCTTCGACTTCACCATCAACCAGGTAGGCATTGCGTACAACCGGCCCGACCCCGAC  
GGCGGCCCGCGCCTGGGTGCGTACCTGCACAAGGACGTTACCTGGGGCGTGAACAAGGAA  
GTCGGTGCAGGCTCACGTCTGCCGGAACGATGCGAGAAAATGCGAGCCAAGGCCGCGTAC  
TACGGATGGGGTAAACGTGTGATGTGCAAGCGCGACGGGGTACTGGATATCGAGAAAGGCA  
TCTGGCGTGGTGTGACCAGAACGACAAGGCAGTCGAGGCCATCATCAAGAAGAACGGGT  
ACGTGATCGTCGAGCCTAAGATCGACGGGTGCCGTGCCATCGTCGGTGCATGGCGTGG  
TGTCCCGCAGCGGGCGCCGCTTCCCTGCCCTGGACGGCCTGGAGGATCGCATCATCGCGA  
AACTGTCCCAGTCCGGCCTGGACTCCGGTCTGGTGTGACTGTGAGATGTACCTGGAAG  
GCATGCCCTTCAGTGAGGCGACCGGGAGTATGGCCCGCAAGACCCCGCTGACCGAGGCCG  
AGCTGAAGTGCCTGCATTTCCGCGGTATTCGACGCCACCCATATCGGCGTGCTCCGCAAGT  
CGCGCTAGTCCCAGCTCGTGTACGTTGAGGGCCGCGCCATGGTCCGCAGCCTCATGGAAG  
ATTGCCGGCGGGGCGACACCACGTACTTCTTCCAGTTAGCCGGACAATCCTGCCGTTCTA  
TGGAGGCGATACTACGCTGGTACTGCTACCACCGCTCTATGGGCTTCGAGGGGTTCGATGG  
AGAAAGACCCGAGCCTGACCTACCGGAACGGCAAGGTTGCTGGCTGCTACAAGCGCAAGC  
CGGAGATCACCGTGGACGGGCGTATCGTCGGGTACGTGATGGGAAAGACTGGCAAGAACG  
TGGGCCGGGTGGTGGGGTACCGTGTGAGCTGGAAGATGGTTCCGGCACCGTGGCCGCCA  
CCGGCCTGAGCGAGGAGCACAGCCAGCTCCTCACCTGCTCCACCTCAACGCCCACTTCG  
ACGAGGCCATGCCGAACACTACGGTTCGTATCGTCGAGGTCTCCGCGATGGAGCGCTCGGCCA  
ACACCCTCCGCCATCCAGCTTCAGTCGCTTCCGCGACCTGGCCAGTAACCCTGGAGTGA  
AGGTATGAAGATTCGAAAGTCCCATAACCGCAACTACCCGGAAGATATGGTATACCACGC  
CACCAACCGGGACTCGCTGCTGTATCCGAAGTAGGTCATGGGTTCCTGTTCATCAGCCA  
GGACGGAAAATTCCGCATCTGCGTCATGGCAGGGACTTGGGACCACGTTGGGTCCGAAGT  
TCGGCATCAGGCGCGGGACATCCAATCCCTCGGCGCCGGTCCCGCAAGTTGCACCGCGT  
CATGCGACGGCTGCGTCGCAATCTGCGACAGGTAGCAGTCAAAGTATGAGAATGCCCCCC  
GCGGAAGAACGTATGATCCGCTGCTTGCTGGCGGACATCCACGAACCCCGGGGCCTGCTG  
TTCCCGGCCTCCGCACCAAGGCCACATGGACCCTCAAGCGGAAGAGCTGTGATTGCA  
ATTGACTACGACCATTCGAAGCTGGGCCGTATGGGATTCTGCTACGCGGTCTCCCTGTAC  
CAACTGACCAGATGGGGACGTGAAGGAATGGTCCGCTACCTGATGCAGGAGATTCCCCCG  
CTTGTGCTGGAAGGTCTGCTGGTCAAGTCGACGAGTACAGTCACATCAACTGGTATAGC  
AAATGACGACTATCCGAATCCTCGAGCTCGAAACCGAGAGCTACGAGCACAGGGGGCGCA  
AGGCGTCGCTCTTTGAACCCCGCAACTACATCGTCATGGCCGGCTGGCGGGACGATGTTG  
ACGGCATGGTCCGCCAGAAGGTGGAACATCGCTTCCGCAGCCGGGCCGAAGCCGAAGACC  
CGAACAACCGCTGGTTCAACGTGACGGCGTGACGTCGATCGTAGCTACAATGCCATGT  
TCGAATCGAACTGGTTCTTACCCGCTACCGGGGCGAGTACCTGGCCTTCTGCGACGCG  
GGGGCCGGGTCTGGTGTACCCAGCAGGCCGATTATCTGCTGAGTCATCAGGCGTGGCTGA  
ACCCATCACTCGACGAGCTGGCTCCGAAGTACGGCGTCACCCACAAGGTGGACGGCATCA  
AGATGGTGAGAGACCAGGGCGTGCTCACCTCGGAGATGGGCCAGGACCTGCTGAGCGAGT  
ACCTGTCCGGCCCTGCGGTGATATCGAGAACACCGCCCTCGTATTCTACGGCCAGTTGA  
TGAAGCTTCAGGCCCGTGGTATGTGCGGTGGTTACCTGGATCGCTGCGAGGCCCTGATCG  
GTTTCTCGGCGATGGAGTGCGCCGGCCTGAAGGTGGACCTCGAAGTCGCCAAGGTCAACC

ACGCCAAGCAACTGGAAGAGGTGGCCGGGATCGAGGCTGAGCTGAAGAAGCTGATGCCCG  
ACTTCCCAGGAATACTTCGAGTTCAAGTATAACCAGCCTGTATCACATGAGCGCATGGCTCT  
ACGGCGGCGAAGTGCGGTACAAGGGCCGGGTGCCCTACGAAGATGGCCGGATGGAGAAAG  
CCGACTTCGTGCGCTTCGGTACGGCCAAGCGGGGGACACCGATCGAGAGTACCTCGGTGC  
GGGTCCCCTCAGCGAGGTGATCCTGGACGACGACCAATGGAAGTGGCCGGCCATCACCG  
AGCTGGCGACCAAGTACGGCCCCGGTTATCACGTTCTCCGCCGGCAAGATCAAGGGCAGCA  
TCAAGGTGCTCCGCGAGGACACGGACATTCCGGCGACCAAGTGGGATGACGACCAGCGAT  
TCCGGTTCCCCGGCCTGATCAACCTGCCAACCTGCCGGAAGTAGTGCGTGAGAAATTCC  
TGGGCAAACGCCCGGAGTTCAGTGCGCCCTCACCTGCCGGATGGATCGCCCGTGTTCA  
GCACCAGCGGTGACGCCCTCAAGACTCTGGAGAAACAGGGCTTCGAGGCGGCCAAGCTGT  
TGATGCGCCTGGCCGAGCTCCACAAGGACAACTCCTTGTTCTACATCACCCATACCTACA  
ACAAGGATGGGACGATTAAGGACACGAAGGGGATGCTCCAGTACGTGGACGACGACGGTA  
TCATCCACCATTTCGTGAATACGACGGCGACGGCGACAACGCGCCTGTTCGTCCAGCCGCC  
CGAACCTCCAGCAGGTCCCCTCGAAGGACGAGGACGACCCGGAAGCCGGCAGCCGCGTGA  
AGGAGATGTTTCGTGTCTCGCTTCGGCGCGGACGGGATGATCGGCGAGACCGACTATACCG  
CCCTGGAGGTGGTGATATTGGCGGCCCTGTCGAAGGATCGGAACCTCCTGGCGAAACTCA  
TGGCCGGCACTGACATGCACTTGTACCGCCTGGCAGGGAAACACAACAACCTGGAACGGGT  
TCGACTACGACCAGCTCGTGGCCATCAAGAAGGACCCCATCCAACCGTGGCACGGTTCGCA  
TGATGCAGGCTCGAAAGAACATCAAGCCCAAGGCATTCTCGGCGCAGTACGGCGCGAGTG  
CGGCTGGTATCGCATTCAACACCGGCTGTACCGTGGAAGAGGCCAGGAATTCCTGGACA  
ACGAGGCGGCCCTGTTCCCCGAGTCCATCGCATTCCGGCAGATCGTCCGCGACAGTGCAG  
AGGCCACCAGCCTCGTCATGTACAAGGCCGAGGACCAGATGCCGGCAGGGCGCCTTCAGCG  
AGATGGGGCCGGATGGCAACTGGCGCCAGTACCGCCGGGGATTCTGGCAAGCGCCGGGTG  
GTACCTGCTACAGCTTCGCCAACAGGAGCGCTGGGACAAGGAACAGCGCAAGATGGTCA  
TGGACTTCAAGGACACGCAGATCGCCAACACTGGAACCAGGGCGAGGCTGGGTTTCATGA  
TGACCGTGAGCGTAGGGCGCATCTTCCGTTGAATGCTGCATGGCCAGGATGCATGGTTA  
CCGAGTTCCTGATCAACAACGTACACGATGCCGTGTACACCGACTGGCACAAGGACACCG  
CCGCCGAGGTCAACAATGGCGTGCGCGACATCATGGCCGACGCCGCCCGCTACATGAGCG  
AGCGCCTGGGCTACGACATCGCCGACGTTCCCTTCCCGGCAGTGGCTGAGTTGGGGCCGA  
ACATGTTCAATATGGAGGTGATCCAGTGAAAGAAGTGCACCCGCTGCACACGCCTGAGTT  
CATCAAGACATTTCCTGGACCAGACCGGGTGCCTGCCGGGAGTACGCCGTACGGGCCGCAC  
CACCGGCATTGCTCTACAGGCCATTGGCATGGCGCTGTCCCATCCGAGGGAAACCCTGAC  
GTTTCGTGGACCACCCGGACGGCAGCGCGGCAGCACTGGTGGCCAGCATTGAAACCATACT  
GGCGACCTTAGGCTACAAGAACGTCCCTCGTTTCGACCCACAACCCGTGCCGATGGGCGCAG  
CGTGAGCATCGTCTTCAAGACGCTGCCGAGCGCCTGATGACCCTTCTCTACTCCGGCCTT  
CAATCTTCATCCGACACGAGAGAGACCACGCATGACTCAACGACTCAACGCTCTGGAAGC  
CGCCCTCGCCCTGGCCAACAAGGCTGCCGAGACCGCAACCATCGAAATGTCCGAAACCTC  
CACCGGGGGTGGCCGGCGGTTCGCATCTTCTCGGCGGGCACCGCCCTGGGCCGCTTCTGCAT  
CTACATCGAGCTGGGGGGCCACGCCAAGGAATTCCAGGGCAAGCTCAAGAATACGGCCCC  
TCAAATCCGCCTGGGCTTCGAATTGTGGGGCGACGTGAACCCGCAGGCCGGTAACCCGCA  
GAGCCGCCCGGACGACCTGTTCCACACCTACGAGGCCGACGGCTCGATCAAGCCCGGCT  
GTTCCGTACCTTCGAGATGACCCTCGGCAACAACGAAAAGTCCAAGACCAAGCTGGCCTT  
CGACAAGATGAACTGGAGCGGGCAGCATACCCACTTCGCTCAGATGCTCGGCCAGGCGTT  
CATCATCCCGATCAAGCGCACCAAGATCACCAACGGCAACAACGCCGGTAAGGAACGCCA  
CGACATCGATTGGGGCGGCATCATGAAGCCCTATAACCCGGTTCGATGGCAGCCCGTATAA  
CGTGCTGGAAGTCCGATGGACCTGTTGCAGTATTTCTTCTTCCACGCGCCGACCGAGGA  
GACCTCGGACGCCCTGTATATCGAGGACACCTCGGACAACGGCAAGTCCAAGAAGTTCCT  
GCAAGAGACCATTCGCTCGGCCACCAACTTCCCTGGCTCGGCCCTGCACATCATGTTGGG  
CGGCGGCGACGATCTGATCATCAAGCCAACGAGCCAGGCCGACGGCAGCAACCTGCCGGC  
AGGGCCCAACGTGGCCGGCGATGCAGGCGTAGCAGCAGCCCCCGCCGTCCCGGCAGTCCC  
GCAGGCAGTGGCTCAGGCGGCCCCAGCGTGCCCCAGGTGGCGAATGTGGCTGCCCTGT  
GGTAGGTAAGTCCGAGGCGCAGAACGTGCTGCCTGACGTCCCAGGTTGGCCAGGTGGC  
GGCTCCGGCAGCAGTCGAAGTGCCGTTCGGTCCCGGTAGTCCCAGGTAACCGCAGGTTTA  
ATGCGGCTGCCATCGGAAGAGTTCCTGTCAGGACTATCCGAGCAGTTCGACCGTTCCATG  
GCAGGCGGGACGTTGGTGTGTGACGCCGACGGTCCCCTTACGTGGCTTCGGCTACTGCA  
AAGACCCTGGACACTGCGCTCCGGCGATTCTGGAAGATCATACTGGAGCAGCAGTTCCTG  
GCGCACTGGACAGGGACACGGGTCCACCTCACGGCAGCAGGTGGGGCTAAGGCGTACCGC

GACGTGTATCCCACCATGAAACCCTACCAGGGCCAGCGCAAGGGGAAGGCAAAGCCCCGCG  
CTGCTGGAGCCGCTGCGGCGGGCTGTGGCCGACGTGCATGAACGAGGCGGGGCGCCTGAA  
GGGATCGACGTTATCCTGCACACGTTCTTCGAGGCGGATGACGGCATGATGATGGATGCC  
TACGCCATGCAGGACAAGGCCATCATCCAATCCGACGACAAGGACTTGCGGATGACGATC  
TACCCGTATTGGGAGATCGATAACAGCGTGTGTGAGCAGGATCGACGGGGGCTTCGGCTAC  
CACAAGGAGGCGTATACGCCGTCGGGTCAGTTCAAGCTCAAAGGGCACGGACGCAAGTTC  
TTCCTGGCGCAGTGGCTCGGCGGGGATACCGCTGACAACATCCGAGGAATCGATCGATCC  
AACGGTAAGCTCAGCGGGATGAAGACGGCCTTCGATATCCTCCACCCGATCACGGACGAG  
GACGAGGCCATCGACATGATCCTGGAGGCGTACGCCAAGTTCAAGCAAACCCGCCGGCA  
GAGGCCGAGGTGCTGTGGATGCGCCGAAGGCCTAGCGACAATGCAGCGCAGTACCTGTTA  
AGCCGAGACCTTCGTCCGGCCTTCCGCCAGAGGATCATCGAGCTGGACGCCTACCGCGAG  
GCGCTGCTCCAGAAGCGGAGGGAGAGTGACTATGACGAGTGAGCCGAAGGTCTACCAGAT  
ACCGCGCAGCCAACAGTGCACCTTACCCTGAAGCTGTGGGCGGAGCAGGGCAAGCTGTG  
CCCCTCTGCGGTAAGCCCATCGATATCAACGCGAAGGGCGAGGCGGTGATGGACCACGA  
CCACGAGACGGGGCTGGTGCGGGGCGTCTGATCGATCCTGTAACACCGCAGAAGGCAA  
GATCACGAACGCGGGCGGGTTCCTGGGGATGCAAGTCGATGAAATACACCGACATCATCC  
CTACCTTCGTGCCCTCCTGACGTACCTGGAGGGGGCCGAAGCATCCGCTGATCTACCCCT  
GCACAAGACCGACGAGGAGAACTCGAAGCGAAGCTGGCCAAGCGCCGGCAGGCAGCCGC  
CAAACGCAAGGCGGCGATGGCCGTCGCAAAGCACAACGCGAGGAACATATGAGCAAATC  
CGCAAGCAATTCACCAATCGGTACCTGCGCAACGTCTATGTGCGAGCTGGGTCTAAGACG  
GGCGCCGAGCATCTGACCAGGCATTCGCGCTTCGGCGAAGTGAGCCGCCAGTGCTTCCGC  
AACTGGTGCATCAAGCTGGCCTTCCACGACAGCAGGACACGCGGCACGTACGCCAAGAAG  
GGCGCTCTGCACTGGCTGGGTGCGAAAGGCCCGCCGAGGTAGTGCGCAAGTTCCTGGCGCC  
GTGGGCAACGTGGTTGGCAAGGGTCCGAAGGTACTGAGCCTGGACATCGAGACCTCGCCT  
ATCGAGGGTTGGGTCAGGTCGCTCTGGAAGCAGAACGTTGGCCTCAACCAGATCAAGCGG  
GACTGGACTATTCTGGCGTTCGCGCGAAGTGGATGCACAGTGACGAGGTGATCTACATG  
GAATGCCAAGGTGATCCCTTGGACGACATGCACCTGCTGGTTCGCCCTGCATTAGCTGCTG  
GACGAGGCCGACATCATCATCGTCCAGAACGGCAAGCGCTTCGACGTGCCAAGATCAAC  
GCCCGTTCCTTCTGAACAAAATGCCGCCCGCCGCGACCGTTCAAGGTGATCGACACCTTG  
ATCATCGCCAAGCAGCAATTCGCGTTCCTCCAGCCGCAAGCTGGAGTACATGACCCACAAG  
GCGTGCACCATCAAGAAACGCCTCCACGGCAAGTTACCCGGATTCGACCTGTGGGCAGCC  
GGCCTCCAGGACAACCCGGAAGCCTGGAAGGAGATGCGCCTGTACAACATTGACGACGTA  
CGGTGATGGAAGAGCTGTACATCCTGATGCACCCCTGGTTCGTTCGGCCATCCCAACGTG  
GCCGTGTACTTCAACGACGCCGAGCCGACCATCCGATGCCCGAAGTGTGGCGACACGGAT  
GTCAAGAAAGAAGGCTGGGTGCATACGCAGACCCGGCAAGTACGAGCACTAGCACAGCGGC  
GGCTGCGGTGGCTGGAGCCGAGGGCGGTACACCCGCCACACCTCGGAACGGCGCAAGGCC  
CTGCTGAGCAACTAAGGAGACACCATGATCGTTCGACAAGTTGTATGAGGTCGCGCTAGCT  
GAGCGCTACAAGAAGGGCGCCGCCCTGGACGAACGCAAGGTCGGTAAACTCCCGATGCAC  
CTGGTGGTCGATGGCTTCCCCTGCTCAAGCGGGAGCTTGCCCGCATGATGCAGTGGGCC  
GCCGAGGTCAAGGGCTACAAGCCGCACTACTGGAAGAAGATGTTCGGTTGGCGAGTTCAAG  
GCCGCACAGCATCGGCACGAGTCCAAGCGCCTGCTTGAAGGGCCGCTGGATTACGAGTCG  
GGCCTGATGCACCTCGGGCATGAGGAATTCAACACAATGGCTGCCGCGCGGTGGCCCTC  
ATGGATCGGGAGAAAGGCAATGAGTAAAATCTGGTGGTGTACCCGACCGCACGAGACCGA  
TGAAGGTGTTCCGGTTCATCTGGGCCTTCAACGAGCGGGGCATCGGGGTCAACTACGTCAC  
AGCGTACATCACGCCGGCGATGGTCAGCCATCGGGACTGGAGCGATGTCATACTCCCGGA  
CATTCTCCGGGTGATGGCGGAGCGCTGGAGCGGGAAGTGAAGCTGGTGGAAGTGGCGCTG  
GTTCCGCGCAGAGATTCTGAGCTGCGGGGAATGGCGTACTACCGAGCGATGACGCTGGA  
TGGGGCGGTTAGCCTGGCCGAGGCTGAGTGGGGTCCCAGGATATCGGGCGCGTAATCGA  
AAGACGATAGGAGACGGAATGGACCTGATACAGCAGCAGATCGCCACGAAGAGGCCCTG  
GTCGGGGCGGCGCAGAATGACGCCCGCATTCCTTGGATAAGGCGATTGCCCAAGGGTCC  
ATCGACCGCATCCCAGGGCGCGCATCATGTTGATGCGGATGCTCCCCATCGTGACCGAA  
GCGATCTACGCCACCAGGAAGCGAAGGCGGCGGGGCCGAGCGAAGCTACGGCACCTG  
CTGCGGATCATCGACGCCAGGACCTCGCGGTTCATGGCGCTGCGGGCTGGGCTGTTCGATG  
CTCATCAACTACCAACGATCACTGCGACGAAGTATTACCCACATGGGCAAGATGATC  
TGTAGCGAGATCGAAATGCGGTTGGCCTTCAAGGTCAACCAACCCTATTACGACCGGACG  
CTGGACTACCTCAAGACCAGCAGGACTCGTAGCGCCCGGCACATCCAGTAGACGATGGAC  
GCTCTTCTGGACGCGGTGCTGCCCGAAGAGGCGCGCATCGACCTGCCCGATGGCGACTAT



CTGCGCCTGGGCATGTTTCATCGGGGATCCGCTCATCCAGTGCGGCCTATTCGAGCCGAAC  
CGTTTTGTAGGGCGAGGGCGGCACGAGTGTCCACCTGGAGCCGTCGCCGGAGGCCAAGGAG  
TTCCTACAGGACCCCTCGGGCGCAATGACCTGGGGCGGCCAGGGCGTAGCGTGATGCTG  
GCCCCGCCGAGACCCTGGCAGGACTGGTGCATGGAGGCTACTACAGCGCCAAGGCGCAG  
AAGCACCACGTACTGGTGCACGACCAAGCACCAGACCAAGCGGGCACGGCAGATGCAG  
CTCCGCCACCTGGGCCGGGACAAGATGACCCGAGTCTACGAGGCGGTCAACGTGCTGCAA  
TCGGTAGCCTACGAGCTCAACCACGACGTGTACGAGATCATCGAGCGCGTCTTCACCTCC  
GGTGGCGGGCGTGCTGGGCATCCCCAGCGCACGTACCCGGACAAGCCTGAGCTCCCGCTC  
GGCGACGAGTGGGCCAAGGAGAATGCCAGTGAGCAAGAGCTGGAGGCCCTTCAACCGTTGG  
AAACGCTCCGTCCACCGGTAGTACACCGGGGAGCGAGAGCATAACCGCGAAGCTTCGCGAA  
TTTGCTGCACTCTACCTAGTTGTTTCGAGAGCATCATGGCAAGGCAGTGTACTTCCCGATG  
CACGTTGACTCCCGTGGCCGCATGTACTATTGGGGCACACCGAATCCCCAAGGGTCCGAC  
ATCGCCAAGGCCGGCCTGCGCTTCCACGAGAAGCGAGTGCTCGGCAAGCGCGGACTGTAC  
TGGCTCAAGATCCACGTGCGCAACTCCCTCGGATGCGATAAGGTGTACTTCGACGACCGG  
GCAGCCTGGGTCGATGAGCGATGGCATGACTTCCAGCGAGCGCTCGACGAGGGGGCCGGAG  
AACTATCCGAGGCTCTTTCCCGAAGCCGAGTGCACCCCGTGCGCCATCGCAGGTCTGCTG  
GAACTGCGGGCGACTTACGCCTCCGGCAACCCCGATGGGTACGCCAGCGGCTTCATCGTC  
CACATGGACGCCACCTGCTCCGGTCTCCAGCACTACTCGGCTATTCTCCGAGATGAGAGC  
GGCGGAGCCTACGTCAACCTCCTACCTCCGGGACTTGCCAAAGCTGACATCAACTCCCGA  
GTGCTCGGACTCGATAATGAGGCTCTGGAGAGAGACCGAGCGGAAGGCGCGGATGGCGAG  
GCGTGGGGTTATGCCCTTCTATGGGATAAAGCTGGTCTGACGTGGAACCTGACCAAGAAG  
CCCTGCATGACGCTGGTGTACGGCACACGTTCAAGGGCGTTCGTGGACCACTGCCTGGAC  
TACCTCGACGAGTCCGGCGTGGAGATTCCCGAGGGCGCCCCGTCATAACCGGCTGGGAAGC  
TACATGGCGACGCTCAGACTGGACGCAATCCGCGAGACAGTACCATCGGCAGTCTTCGCC  
ATGGAGTGGCTCCAGCGGCTTGCTAAGGCCCTTCTGACGCATCCAAGGGTTTGCAGTGG  
ACAACGCCGCTCGGCATGCAGGTCTTCCAGTCCACCCGAAGACCGAGGAGGTGCGGCTA  
CGGCTGCGAGGGCGAGGCTGTGAGTACGTGACCCTGTACGAGGCCAACGACGAGCTAGAC  
CCGCTGCGCAACGCCACCGGCATCGCTCCGAACTTCTTGATGGCCTGGACAGCAGCCAC  
CTGGGACAGACGGCCCTGACCTGTGCGGCAGAGGGAATCCCGATCCAAGCCATCCACGAC  
AGCATGGGGACCTACGCTGGCGACGTGGACCGGATGCACGTCCACATCAGGGAGCAGTTC  
GTCACCATGTACAGCGGGCGCTTGCCTGCTCGTAGAGCTGGCTCGACAGCTTGGGGTAGAG  
GCTACCCCGGCCCGTTCGGGGATCGTTGAATCTGGAGGCTGTGCGGGACTCTTGGGGCTTC  
TTCTGCTGAGTAGATTATGTACCCACATAGGAGCAAGTGCATCCGTCCAGAGGCCTCGT  
AGAGGAAGAGGGCTCAGGGAAGTCCCAAGAGGAGCAGAAGTGAGAGAAGACGACTACCAA  
GGATTCTAGATAGAGTAGAATAACCAGCATAGGAGATATGATAGATGGTTACTATGAAGA  
GTAAAGGGCCAAGGATTATGTACCCACAGTGGAAAGGATCGAAAACAGGCAAGGGTAAGG  
CCCACCCTGTACGTTACCTCTCAGCAGATCGAGTGGCTAGAACAGACCTTCTCCGAAC  
ATCAGATCAGTGCTGGAACCACGATGGAAGACATCCAGTTTCAGGCTGGCCGCGCGATG  
TGGTGCGGGCTATCCGCCTGCGTCGCCGCGATGCAATCGCAGTGGAGCTTACAGGATGAA  
CAAGTCACTCTGGCGAGTCCACGCAAAAGCCGGCGTCCCTTCCGAAGTATGGGGCTGTG  
CTGGCTGGCAGTACAGGAGCTGGAAGAGTTCACCCCTTCCGCTCGAAGGATGAAGCCCT  
GGAAGCGATGCTCGTCAGTATCGAGGGCAATAATCGGACCGAGCTGCTGGTCTTCCGTGA  
TTGCCAACTGGCCGGCGGAGCCTGCATTGTGTTTCGAGGACGATCCCCACATCGGCCCGTG  
CGTACCCGCGCAGTGGCAGTACGTTTTGCCACGCTACCGCAATACAGGCGTGGCGCGAGA  
GTTTCATCCGCGAACTGCACCTACAGGCCGGCTGGGGTAAAATCCCCCTCGGGTGCTGGAG  
CCATCGCGAGAGCGATAGCCGGTATATGATCCACTACCGGAGAGCAAAGCCTTATGGGCA  
AGAAAGTGAAAAGGTGCTGGGCAAGACGATCATCGGCAAATTCGCTGATGGCCTGCTCG  
GCACTGACCTGAGCGGCGCACAATCCGATGCCCGCAAGATGGAAGAGCCGAACCGCCTCA  
TGCAACAGCAGGCGGTCCAGCTCGCAAGAAACCAGCAGGTTGACCTCACCACCGAGAACG  
TGGCGCAGGTAACTAGGAGCGATGGCCGATGCCACTGGCACCGGCAATCGAAGACGCC  
GGAATCAGGCAGGCACTGGCGTATCGCAAACCCCTCGTTATCAACTACTGACGAGGTACGC  
CATGAAGTCTACCGCGGCAATGCTGTGGGAGAAGCTTCGGGATGGGAGAGTGGAGCAGCG  
AGCTATCGAGTTCGCCAAGACCACGCTACCCCTCATGATGGTCGATCCCATGTCCGGCAG  
CCGAGGAGTCGTAGAGCACGACTTCCAAGCTGCCGGTGCCTGCTCGTGAACAACCTCGT  
CGCAAAGCTCGCACCGTCTGTTCCCGACGGGGATTCCGTTCTTACGTTCCGAACCTTAC  
CGATGCGTTCCGGCGCGAAGCCGACATCCGGGACACTGACATCACCGAAGTGAGTGCTTC  
CCTGGCCCGCGTGGATCGCAAAGCAACACAGCGCCTGTTCCAGAACGCCTCCCTGGCGGT

CCTGACGCAGGTGATCAAGCTACTGATCGTGACTGGCAACGCCCGCTATACCGCAACAG  
CGACGAGGCCACGGTAGTCGCATGGTCGCTCCGCTCCTACGCGGTGCGCCGAGATGCGAC  
CGGCCGATGGATGGACATCGTGCTCAAGCAGCGCTACAAGTCCAAGGATCTGGACGAGGC  
GTACAAGCAGGACCTGATGCGTCCGGGTCGCAACCTGTCCGGTTCGGGCAGTGTGACCT  
CTACACGCATGTTACGCGCAAGAAGGGCACGGCGATGGAATACGCCGAGCTGTACCACGA  
GATCGACGGCGTGCGTGTGGGCGAGGAAGGCCGCTGGCCTATTCACCACTGCCCGTACAT  
CGTACCGACCTGGAACCTCGCCCCGGCGAGCACTACGGTCGAGGCCACGTCGAGGACTA  
CATCGGGGTCTACGCCAAGCTGTCCCTGCTGAGCGAGAAGCTCGGCCTGTACGAGCTGGA  
GTCGCTGGAGGTCCTGAACCTCGTGGACGAGGCCAAGGGCGCGGTGGTCGATGACTACCA  
GGACGCTGAGATGGGCGACTACGTGCCGGGTGGCGCGGAGGCCGTCCGGGCCTATGAGCG  
AGGCGACTACAACAAGATGGCTGCTATCCAGCAGGGTCTCCAGGATGTAGTCGTCCGGCT  
GAACCATGCGTTCATGTACGGCGCCAACCAGCGCGACGCCGAGGACGTCACCGCCGAAGA  
GGTCCGCATCACTGCGGAGGAGGGCGGAGAACACGCTGGGTGGCACCTACTCGCTGCTCGC  
CGAGAATCTCCAGTCGCCCTGGCGTACGTCTGCCTCTCGGAGGTGGATGATGCGCCGGG  
CCAGGGCATGATCACTAAGCACCACAAGCCGGCTATCGAGACGGGCCTCCAGCCCTGTC  
CCGGTACGCCGCCGTGCTGAGCATGCTCAACGCATCCCAGGTCATCGCAGGCTTGGCCCC  
GATTGCTCACCTCGACCCACTCATCTCGCTACCGAAGATGATGGACACGATTTGGGCCGC  
TTTCAGCGTCGACACCTCGCAGTTCTACAAGAACGAGGAAGAGATACAAGCCGACGCAGA  
ACAGCGGCGCCAGCAGGCCGCGCAGGCCAGGCCGCACAGGAGACCTTGCTGGAAGGCGC  
TTCCGACATGACCAACGCACTCGCAGGCGTCTGATAGATGCAACAGAACGAACAGCAACT  
GCCACCGGGCCTCGCTAACCTGGTTGCCAACGTCCCGCCCGCCGCCACCGACCCCGAG  
TCATGTGCAGGTGATGCCGAATCCCGTCATCCAGCCGCAGCCCCCGTATGCGGCCGACGCC  
GGGACAGGCAGGGTCGCCGCGGCAACTGGCTATCCCGACCCTGCAGCCGCAACCCGTTCC  
GACCAGCGCCATGACGCCGCACTACCAGCCTGTAGCGGTGCCCGCCGCTGGCCAACCCGT  
TGTACCGCAAGCGCCCGCACAGCCGGCTCCGGTAGCTCCTCCGGCTCCGGGCGCAGTTCC  
TCCTGAGAACCTGGAGGTTCCGCCCGCCGCCCGCATTCACTCCCAACGGAGAGATCGTAGG  
CACCTGGCGGGGAATCTGGAAGGCGACCCGCAACTGGCGCCGTCCATCAGCTATCTGGA  
AGCGTTCACCGACAAGATCGACACCGTTCGGGCCTTCGGTAAGGCCGCCGAGCACCGCGT  
TTCCCGCTTCATCGACGAGCACTATCTGAAAGAAGCCCTGGGCGAGGCCCTAGCGCAGCA  
CGTCATCAACGTGGCGAAGGGCGTTCGACCTATGTGGATGCTCAGACCCAGGCAGTCCT  
GAAGCAGACCTATGCCGCCGTCCGGCGGTTAGGCTCTGCTCAAGTAGGCCGCCAGCGTCTT  
CAACCAACACGCTGACCCGGCTACCAAGGCCGCCATCGGTGCTGCTGACTCGGGCGA  
TGCTCAGTCCATGCAATACGCCGCGAAGCTGATCGTTGCCTTCGCTCAAGGCTCCGGTGC  
CGTGGTTAAGGCAACCGGCCGACCCCTTGGCGCAGCGGCCGCTGCCCTGGCGGCCCTGTA  
CGCTGAGCAGTACCGTGCCGAGGTCTCGAAGCTCCCGTTGAACGCATCGGAAGCCGACAT  
AGCCGCTCTGCGTGAGCGCCGCAAGGCAGGTATGGCGCATGGTCTCTAACGACCCCTGCC  
TACTCCGGCCTTAAACCAACAACCAAAAGAGAGAGAATCTCATGAGCTTTCTGAACGACT  
TGACCCGTCCGAACCTACGCTGGCAAGAACGCGGACGTTGACATCCACCTGGAAGAGCACC  
TCGGCATCGTCGACAAGCACTTCGCCTACACCTCCAAGTTCGCGCCGCTGATGAACATCC  
GCGACCTGCGCGGCTCCGACGTGCTCCGCCTGGATCGCCTGGGTACGAGCAAGTCAAGG  
GCCGTCGTGCCGGCGAAGAGCTGGAGCGCAGCCGAGTCGTGAACGACAAGTGGAACCTGA  
CCGTCGACACCCTGCTGTACCCCGCCACCAGTTCGATCACCAGGACGAGTGGACCCAAT  
CCTTCGACATGCGCAAGGAAGTCGCCGAGCTGGCCGGCCAAGAAGTGGCCCGTAAGTTCG  
ACCAAGCCTGCCTGATCCAGGTGATCAAGGCCGACGCGATGGATGCTCCGGTGGACCGGG  
AAGATTCTTCTCGCCGGGCGTGTGGAGAAGCTGGACCTCACCGGCGTCACCTCCTCCA  
AGGAAGCCGGCAACAAGATCGTCCGCATGCACCGCAAGGTGGTTCGAGTCCCTCATCAACC  
GCGACCTCGGCGATGCCGTCTACTCCGAGGGCCTGACTCCGATGTCGCCTCGTGTGTTCA  
GCCTCCTGGAGGAGCACGACAAGCTGATGAACGTCGAGAATCAAGCCACCGGCCGCGACCA  
ACGCCTACGTGAAGTCGCGTGTGGCCATCCTCAATGGCGTGAAGGTGCTGGAGACTCCGC  
GCTTCGCCACCGAGGCCATCGCAGCACATCCGCTGGGCCGCCACTTCAACGTGAGGGCCG  
AGGAAGCCGAACGCCAGATCGCCCTGTTCTCCCGAGCAAGACCCTGATCACCGCCAGG  
TGGCGCCGGTTCAGGCCAAGCTGTGGGAAGACCACGATCAGTTCTCGTGGGTGCTGGATA  
CCTTCGGATGTACAACATAGGTGCCCGTCGCCCGGATACCGCTGGCGCCATCGAACTGA  
AAGGCATCAACGCCTTCGCCATCACCGAGTGATGCCGCGAAACCCCGCACTTCGGTGTGG  
GGTTTCTTCAAAGCCTAACGACCCGCGCAGATTCCTGCGTGGGTTTTTTCGCTTTAGGA  
GAAACCCTATGCTACTACTCGACGAGTGAATGTCATCCTGGGCAAGATCGGCGAGTTGC  
CGATCCCGAGCATGGGTGAAACGTACCCAACCAGGGCCATCGCCCTCCCCGAGTTGGAGG

ACCAGCGCATCCAGTTGCTGACGCAAGGCTAGTGGTTCAACACCCGGTGGAAAGCACAAGC  
TGACACCCGACCCGCAGGGCCGTATCAACCTGCCAAGGACACCTTGCGTCTTACCCGG  
ATTCCCCGATCTCCAGTGGGACGGCCTGGGAGTGC GCGACGCCAACACCCGGCGACGACC  
GTATCGGCAAGGTAGTAGAGGGCTGGCTCGTGCTGTCCCCTGAGTGGGACCGTATCCCCG  
AGATTGCCAGCGCGTCATAGCGCACCAAGCCGCCCTGGCCGTGTACACCCACGAGATCG  
GGCCGGACGAGACGGAGCAGGTCATCGCCCAGGAGTTGCAGGCGTACCAGAACGAAGTGA  
GCCGCATGCACACCCGATCCCGCCCGCTAACACCCAGGCCAAGCGCAGCTTTAGCCGAT  
GGCGGCGCAGCTTGAGGACCTGACCATGAGCTCCAAGCAATCCGCGTACCCCAACCTGCT  
GATGGGCGTGAGCCAGCAGGTGCCGTTTCGAGCGCCTGCCAGGGCAGCTCAGCGAGCAGAT  
CAACATCGTGTCCGACCCCGTGTCTTCCGCGCCGTAGCGGTATCGAGCTGATGGC  
GCACCTGCTGCAAACCTGACCAGCCTTGCCCGAGGCGTTCCTGTACCACACCAACCTGGG  
CGGTCGCAGCATTGCGATGCTGGTGGCGCAGCACCCGGGGCGAGCTATACCTGTTCCGGCGA  
GCGGGATGGCCGCATGCTGATGGGGCAGCCCCTGGTCCACGACTACCTCAAAGCCGCCGA  
CTTCCGGCAGCTTCGCGCCGCCACGGTGGCTGATGACCTGTTCATCGCCAACCTGAGCGT  
GAAGCCGGAAGCCGACCGCACTGACGTGAAGGGCGTGGACCCCAATAAGGCGGGCTGGCT  
CTACATCAAGGCGGGTCAAGTATTCGAAGGCGTTCCTCATGACGATCCTGGTCAAGGACAA  
TGCCACCCGGTACGACCTACAGCCACAGGGCCACCTACGTGACGCCGGACAACGCCAGCAC  
CAACCCCAACCTCGCCGAGGTCCCCTTCAGACGAGCGTGGGCTACATCGCGTGGCAGCT  
CTACGGCAAGTTCTTCGCGCCCCGGAGTACACCGTGCCCGACTCCACGAAGAAGTACCC  
CAAGGTTGACCCCAACCGGCTGCGGCTACGGTAGCCGGCTATCTCAACCAGCGGGGCGT  
GCAGGACGGCTACATCGCCTTCGGGGCGACGGGGACATCGTGGTTCGAGGTGTCTACCGA  
TATGGGCAACAACCTACGGCATCGCCTCGGGTGGCATGAGCCTCAATGCCACCCGCAGACCT  
ACCGGCCCTACTGCCGGGTGCGGGTACGCCGGGCACTGGCGTGCAGTTCATGGACGGGGC  
CGTCATGGCCAGTGGCTCGACCAAGGCGCCAGTCTACTTCGAGTGGGATTCGGCGAACCG  
CCGCTGGGCGGAGCGCGCAGCCTACGGGACCGATTGGGTCTTGAAGAAGTTGCCCTTGGC  
CATACTGGGACGAGGCGACCCACACCTACAGCTTGAACGAGCTGGACTACGACCCGGAG  
CGGCTCCGGCGACGAGCACACGAGCCCCACGTTCAACTTCGTCACCCGGGGCATCACCGG  
CATGACGACCTTCCAGGGCCGGCTGGTCCCTGTCTCAGGAGTACGTCTGTATGTCCGGC  
GAGCAACAACCCGCACCGCTGGTTCAAGAAGTCGGCGGGCGGCGCTAACGACGATGACCC  
CATCGAGATCGCGGCCAGGGCAGCCTGACCGACCCGTACGAGCACGCAGTCACCTTCAA  
CAAGGACTTGATCGTCTTCGCCAAGAAGTATGAGGCCGTGGTCCCTGGCGGCGGTATCGT  
GACCCCGCGAACGGCGGTATCAGCATTACCACGCAGAACGATCTCGATAACCCGAGCGGC  
ACCCGCCGTACAGGCCGTAGCGTGTACTTCGCCGCTGAGCGTGCCCTGGGCTTCATGGG  
CCTGCACGAGATGGCCCCGTCGCCATCCACGGACAGCCACTACGTCCCGAGGACGTTGC  
CAGCCACATCCCGAGCTACATGCCAGGGCCGGCAGAGTACATCCAAGCGGCGGCCTCAAG  
CGCCTACCTCGTGTTCGGCACCAGTACGTCCGACGAGATGATTTGCGACCAGTACCTGTG  
GCAGGGCAACGAGAAAGTGCAGAACGCATTCCACCGCTGGACGCTACGGCACCAGAGCAT  
CGGGACCTACTTCATCGGGGACAACCTGATGGTCCCTGATCCAGAAGGGTCATGAGATAGC  
CCTGGGCGGATGCACCTGAACAGCCTGCCTGCACGGGAGGGCCTGCAATATCCGAAGTA  
CGACTACTGGCGGCGTATCGAAGCGACTGTCGAGGGCGAGCTGGAGCTGACCAAGCAGCA  
TTGGGACCTGATCAAGGACGCCCTGCCGTGTACCGGCTACAGCCCCTGGCCGGCGCATT  
CATGGAGCGTACCAGCTCGGCGTGAGGCGCGAGACCAACCAATGTGTTCCCTCGACGT  
TCCCGAGGCCGTTGTCCGGCTCGGTCTACGTGGTTGGCTGCGAGTTCTGGTCCAAGGTGGA  
GTTACCCCGCCAGTGC GGCGGGACCACAACGGCCTGCCGATGGCCGCGGCCCGAGCAGT  
GCTGCACCGCTACAACGTCAACTTCGGATGGACCGGAGAGTTCCCTGTGGCGCATCAGCGA  
CACGGCCCGGCCAACCAGCCGTGGTACGACACGACGCCTCTACGGCTGTTCAACCGGCA  
ACTCAACGCCGGCGAGCCGCTGGTGGACAGCGCCGTTGGTGCCGCTGCCGGCCCCGGGTCCG  
TATGGCGACCTCCAGTTTCGAGTTGAGCTGCCATAGCCCCTACGATATGAACGTGCGGGC  
CGTGGAGTACAACCTCAAGTCCAACCAACCTACAGGAGCGTGTGATGGCATTCTGGCTA  
CCACTACTGGCCGCTGGCGGCATGTCCGGCTCTCCAGCAGGGCCTATCCAACAAGGAAGAA  
CGCCGCACGATCAAGGCCGAGAACAAGGCCCGCCTCAAGACGGACCTCGACAAACTGGGC  
GCCGCTGCCTGCGACATCGCCAACCTGGGCGTATGGCTGCAAGCTACCGCAAGCAGGCC  
GTGGCCTCCAGGTCGAGGCCAAGCTGCAGGGCATGCTCGCCGGCGGGTGC GCCTCGGCA  
CAGGCAGGGGCTTCGGGGTCAAGGGTGCATCCGTAGATGCGGTGGCCCTGGACATCGAG  
CGCGAGGTGGGCGAGGCCCTGATCCAGATTGACGATAACCTGGACAACCAGATGTGGAAG  
CTCGCAGAGGAGGCACACTCCAGCCAGGCCAGGCTAAGGCCGGCCTGCTGGGGCAGAAG  
AGCACACAGCGGGGCAACGCTCCCCGCTGGTCCCGGCCTGATGTCTGCGGGTTCCCTA

TACGCAAGCCAATACTTCAAGTTCGGCGCCACGCCTAAACGAGGCAACTGGTGGCGGAAT  
CGAACGTGCTTCCCAGGAGCTTGGGATCAACGGCGGACAGACTCAACTCCAGCCGGGCC  
AGAGCGCCCGGCGCGGGGTGCGAGAATCCGAGGTCAACCATAGCGGCCCAATCGTGGGT  
CGCAGATTCTCGACGGCATACTTGGTGCCGGTCATCAGATTGCTGGCAAGTGGTTCGAGC  
ACAACGTGCAGCAGGAAGTGCTTCGCGGGCAGCGTGCCCGCATGGCCGGGGAGGCCGAGG  
ACGCCGAAGACAGCAACATCCTGGGCAAGCCCTTCGTGAAGGGCGGCTGACGCAAGCAGG  
ACTACCGCATCGCCAGGCTGACTTCAGTATCAAGATGCAGCAGTTTATCGCCACCAAGG  
GCCGGGAGCTGACTCCCGAGTAGTTCGAAAGCACCTGTCGCAGGAAGCGTCCCACGTGC  
TTGACTCCACCGAGGGCATGAACCCCAACGACGCCCTACAGGCGCTGGCCAGCAGCAGA  
AGGCCGAAGAACAACCTCTTCGGCATGCAGGCCTAGGCCTACATGGACTGGTCCATCGACC  
AAGCCGCCCGAGGCTTCCGCACCCAGGATAACAGCATCCAGGCCAAGGCCGTGCAGGCC  
AGGCCACAGGCGAAGAGCTGTCCCGGCAGTTGAGCCTGGAAGTGGCCGGCCTGTTCTACA  
CCAACATCATGACCTCCGAGGACATCCCGCTGGAGGTGCGCGACAAGGTGGGCATGCAGT  
TCCTGGCGGCCAGCCTGGATATGAACCAGCGGGGAATCTACGAGAGTCTGCGCGACGCCG  
GCTTCTCGACGGCATGGCCTTCGACGACCGACGTGCGCTCAATGGCCTCTACGAGAAGT  
CGAAGGCACAGACCCTGGCCAAGGACTCGATGGCCACGCTACGGGCAGACGCGGACTTCC  
AGCAGCGGGTGGCCAACGGCGCCATCACCGACCTTGCCGAGGTCGAGGCGTATTCTCGGG  
GCATGGTGGGGGAAGGCCGGTGGAGCGACGCACAGGCCATCTCCTTCATGACCAAGGCTA  
TGACCGGCCTGGGCAACGCACAGAGCATGCAGGGCATCATGGCGGCCCTGGAGGACCGCG  
ACATCAACGCACTGCACACCCTCGGGACCGACGTTACCGAGGCCCTGGAGCAGTGGTATA  
AGATGCAGGCGGGCAACGGCTCCAGTCTCACCGATCGGTTGGTACAGGGCACGCAACTCG  
GCCTACGCCTGGGGACCTTCCCAGAACCTACGGCGAGTCCGTTGGCAGCGCGGTCCGCA  
TGGTCCAGGCCGCCAAGGAAGGCGAGGCCAACCCGGAGTTGGTCTACACGCTGAACAGCA  
TCTTCGAGCAGGTGGCCTCCGCGCAGGAGATCAACCCATCTGCCGGCAACGTGATGCTCT  
CGGGTATCCCGGAGGCCGAGCAAGGCGCCGTAGCCTGGGCACTCACGCAGATGAAGATGG  
TCATCGCCCCGGGGCAGGCCCTGCGGGAGTTCAGCGCCAACGCGGAAGTCCTCAAGCAGA  
TGGACGAGTTTGAGAAGGGCCAGAACACCAAGGCCTTCAAGGACCACCTCGGTAAGCAGG  
TCAACGACAAGTTCGTGAACAACATCTTCGGTTCGGGCCTGGAACATGCTGACCGGAGAGA  
GCGACCTCAGCAACAACGAGGCCGTCCTAAGCATGTACCGCCGTGCAACCATCGACGAGG  
CCAACTGGCTGGCAAGCGACCGCAAGCACGACGAGGACTCCTCTGCAGCGACACAGGCCGGG  
AGGCTCTGCTGGAGATCGCCGCCGCCAACGTCCGCAACCCGGACTATCCAGGTCGGTGAGT  
CCCGTAACCTCAAGGAGGGGGAGCTGTTTCAGCCGCCGCGACAGCGCGCCGCTGATCCTGC  
CGAGAGGCACTACCGACGAGCAGCTATTTCGGCACCAACGACACCGAGACCATCGCCGCAG  
GCCTGGCCGAGCAGCAGGACCGCAGGTTGAGGGCCTCCTGGGCTACAAGTCCGTAGTGG  
CGTTTGAGTTCGACCGCACCAAGTGGCAGCTTACTCGGCGTCGAGTACGACGAGAGCGGGG  
TGGCCCTGGACCGTACGCGGGTCGATCCACAGGCCGTGGGTAACGTAGTGTCTAGCGCA  
ACTTCGATAAGCTGAACGCTATACGGGGCGCCGAGTATGGGGCCAACGTCAAGGTCAGCG  
GCACGGACATTCGCATGAACGGCGGCAACAGCGCCGGCATGTTGAAGCAGGATGTGTTCA  
ACTGGCGTAAGGAGCTGGCACAGTTCGAGGCCTATCGAGGGGAGGCGTACAAGGATGCCG  
ACGGTTATAGCGTGGGCCTGGGTCACTACCTGGGCAGTGGCAATGCTGGGGCAGGAACTA  
CGGTCACGCCTGAGCAGGCCGCGCAGTGGTTCGCCGAGGACACCGACCGAGCGCTCGACC  
AGGGCGTGAGGCTGGCCGACGAGCTGGGCGTTACGAACAATGCTTCGATCCTGGGCTTGG  
CCGGTATGGCCTTCCAGATGGGTGAAGGACGTGCCCGGCAGTTCCGCAACACCTTCCTGG  
CGATCCGGGATCGCAACAAGGAGGCCTTCGAGGCCGGTGTGAGGAACAGCAAGTGGTACA  
CGCAGACGCCCAACCGGGCAGAGGCATTCATCAAGCGCATGGCGCCCCACTTCGATACCC  
CGAGTCAAGTCGGAGTCGACTGGTACAGCGCCGCAACAGCGGAGTAAGACATGGCAAAGC  
AATTCAGGGCCGTATGACGCCCAAGTATCCCCTCGACCAAGCAGAGCTCGACGAGGCCA  
AAGTACAGGGTCAGCCCGATGCAGTGTCCACCGTGGAGTTCGACGCCCTGACGGGCCGCG  
AGATCGGAGAACGGAACGTGGCGGGAGGCCAACGTGCCAACGCTCGGGAACCTGGAGCGCA  
TCGTCGCAGACCAGAACCTGCCGGCCCTTGACCTTGCTTCTGCACTCTGGAACCAGTCCA  
CTCTCGTCGGACGCTGGGACGATTCGCTCCAACCTCGACGCAGCCCTTGCGGCGAACACCA  
CCGGCGAGGTGGACCCCAACTTCGACGCCGGGACCTACGGGGTCCAGGCGCTCCAGGCGG  
CTGGCCTCCAGCCGACTGACAACCTCCAGATCATGGCCCGCGCCGGCAACGCCGAGG  
ACGCGGCCTTCCTACTGTGAGGATTCACCGGTATGAGCAAGACGAGCATATCGTGCGGG  
ACAACCCGTAAGTGGAACTTCGCAGCGGGCATGCTGGACCCGGCTGCGCCGGCAGTTCGATG  
CGGTTATTTTCGGTGTGTCGGCGGCTTCTACGGCTCGGTCGTGCTGGCATGGCTGCTGCTG  
GCGGCGCTGGCCAAGTCCGGGTAAGTTGCTGGGCTGGATGCCGCAGGTGCCGACGTGGATG

CCGGAACCTACATCTTCGCTGGCGCTCTCGGTGCTGGCGTGGGTGTTCTGCTGTGGTCTG  
GTGCTGGACGCAGTGCCGCCGAAGCCCCAACGCAACCGCATGTGCTCGAAGTAACGGCGC  
CTACTGTCGGGCTGCCAGAAGTAGCGATGACCGCCGAGGAAGCCGTCGCTCGTGCCTTCA  
AGGCAGGCGATGTTGTGGACCTGCTGGACGAGGGCACTGTCCAGTCCCAGGGTAAGCTCCC  
GAGTGGAGCAGGCCGAGATAACCGCCAGCCCGCGCCGGGACACTGCCTTCGGTGACGAGC  
TGCACGGCCTGTGCGGGCCGCAAGTTGTGCGGAGGTGGTGGACCACCTCAAGACCCACGCCG  
AGGTGCCCAAGCCGTTTCACGGCGTGGCCGCCAAGGTGGCCGAGACGTTGAAGACCCTGG  
AGGGCCTGGGGCAGCGCACCATGTTCCGCGTGGTGCAGGGCGGGGATAACCGTAGCTCCG  
CCTTCTCAAGCCAAGCACGGCTGGTCTGCATTCGACGCAGGGATTGGACACTCTGGTCC  
ACGTGCGTGGCAGCACGGCGCCGGGCCGCGTGGGAACCAACCCGGTCACGGTCCCTCCACG  
AGGCGGTTACGCCGCCACGGTAGGAGTGATGAATACCGCCCTGCGGAATCCTGGCGCGA  
TGAATCCCAAGGTGGCCAGGCCATGCAGACCCTGGAGAACGTCAGGGGTAACGTGCTCA  
ACGCCTTGAAGCAGGACCGGGCCGCCGGACGGCAACTTTCGAGTTCGAGGAAACCCTGC  
TGGCGGGCAACTCCAATACCCTGGCGAACGTCAAGGAGCTGGTGGCCTGGGGCCTGACGG  
ACACCCGCTGCCAGAAGACCCTGAACCGGCAGCCCTACGGCAACGGCGGGAAAGGGCCTCT  
GGTCCCAGTTCGTCGAGGGCATCCGCAGCCTGCTGGACCTGCGGCCTGATGCGGACACGG  
CGCGGAGCCGCGTCCGGGCGGCCTCAGAGACTATCATGGACGCCATGCCGGGGTACACCA  
AGGCCAGGCCAAGTGGGTCAACAAGGTCCCAGGAGTACCAGGAGGGCCAGCCTGGAGA  
CCATCGTGCATCCACCCGGGAACGTGCCCGAGAGGGTGGCGGCTTCGTGAACCGATTCT  
ATAGCGAGGCCGACCTCCTGGCACAGCCGGGAGAGGGTGGCGGGCGACTCCTGAGCCGTC  
TTATCGACGACCCGGTACGTCGGGATGGGTAGAGCACCAAATAACAACGCAGCGAGCTATT  
TGGCCCGCTACCGCTACGAGTTCGAGGGCTACGTCAAGTCCAACGACGAGATGATGGCGA  
AGGCGATGGCTGAGCAGGGCGTGGCCCTGACCGCTCGGGCACTCAACTCCCGCCGCGCTA  
TGGCCGTCCGGGATCAGCTCAACGAGCAGGTCACGCGGGAGCTGCTGCGCTGGGACCGGG  
AGTGGACCGCCTATGGCAGCGTCCGCGTAGACCCGAACCTACCGGCCACCATCAAGGCC  
TGGCTGACCACTCCGACGAGATTCACGGACTGATGGGCCAGCGTGCACGGGAGGCCGGCG  
TGGGTGGGTTCGAGAACTTCGCACCACGCCCCGGTACTTCCACCGCTCGTGGAACCTGGT  
CGAAGATGGCGCAGATGGCCGAGGCCGCCCCAGGCTTGGCTCGCCGCGCTATCAGCGACG  
CCGTATTCGGGGCATCCCTGGATTGGAACGTGCGGATGCTGACACCATCGCACAGGCCA  
TCGTACAGCGGGCACGAGACCGGGCGACCGGTATCCGCTCCGACTTCATGGGCGCGATGG  
GCGTGGCTGATACGGCCTTCATCCGGCAGGCGCTGGAAGAGGCCAACGTGTCCAGGCCA  
AGTTCGACAGCATCATGGCGAAGATCGAGCAGAAGCAGTCCGACCAGGGCACCGTCGAGT  
ACGGCAAGGGCCGGCTGTCGCTGGACATGACCGCCGAGATCAACCACAACGGCACCGTGT  
ACCGCGTACAGGACCTGATCGACCGGGACCTCGACCGACTGATGGAGAGCTATTCAGGCA  
GTATGTCGGGCCACTCGGCGCTTGCTCGGGCAGGTATGCCGGGCGACTCCGAGGTCGAGG  
CGTTCATCCGTGAGTACCAGCGGGAGGCCGCGCACCTGGGCACCGACAAGGTGCAGGAGC  
TGACGGGCCAACTGCGGGGCGTCTTCGGGGACTTCACCGGCAACGTGCCGCGCGGGCACC  
AGCTCGGCCCCGTCGCTCAGCGGGCCAGCGGGCTGACCAGCGCCACCATGCTGGGGTCT  
CCGGCGTGTACCAGCTTGCAGAGCTGGCCACGATGGCCCACCGCCATGGCGTCTTCAACG  
TCATGAAGGCCCTGATGAACTCCCGCCTCGGGGACTTCGTAGGCGCCATGCACCGTAACC  
CGGACCTTGGCGACGAGATGCAGACCGTCCCTCGGCCTGAACCTCGCCAACGACATCCGCA  
TGAAGCCCTGTAAGCGGCAGTTCGACACCTTCCCCGCCAGCCAGGATACTTCATGGATC  
GCTTCTGACAGCAGGTGAGCAGGCTGTCCCTGTCCTCAACGGCATGAAGTTTATCCACA  
ACTGGCAATCCCGCATGAACGCCAACCTCACCTTGAACAAGGTGGCGCGGGCCGCGCAGG  
GGGATGAAGCAGCCCTTCGAGTGCTCCAGCAGTACGGGAACGACGTGGACTGGACGCCAG  
TGCTGGCGAGGGTTCGCGGTTATGTACATACAGAGGAAGCAACGCCAGTCCATGAATT  
GGGGCGCCTGGAGCCAAGCAGACGTGAACACCGTCATGAACACCGCACTGCGGATCATGG  
ACGACCCGCGCTGTATGGTAGGGTTCGGTCCAGAACTCGGGCTTTACCCGGTCCACTGACG  
GTCAAATCCTGGGCCAGTTCGCGAGCTTCGTGGCCTTCGCGCACAACAAGCTCCTCCGGG  
GAACCTACGAGAACTCCGGCGAGCTTGGCGTGGCCTCGCTCCTCGCATTCCAGTATCCGC  
TCACAGCGCTGATGATGGGTGCCAAGGCAGCGATCAACGGCAAGTTCGACACCTCTGATT  
AAGGCATCCGCAAGATGGCCATCGACGTCATCGGCTACACTGCCGGCCTCGGCTTCACCG  
CCGACATGTGGGGCGTAGTCACCGGGCACTCCCGGATGTCCGCCCCGGTCTGCGGGCTGG  
CGGAGCACTACAACGAGGTGTTCCGTGGCGTCAAGGACCTAGTAACCGGGCGACGACCCCG  
CAGCCGCCACCGGCGATATCGTAAGCGGCGGGCGCAGGGGCACTGCCTTTCGTCAACGTAT  
TCCCGGCGACCAAGTTGCTGCTGGAATCCATCAAAGGGGAATAACGTGGGTGCGTTCAAG  
TATCCCGAGACCATCCACGTTGCAGATGGGGTTCGAGGCTGTTTTAGTCTCGACTTCCCG

TTCCTGCGGCGTGAGGACGTATTCGTCCAGGTCGATAAAGATACTCGTCACAGACTATAACG  
TGGGTAGACGACACCTACATCCAATTGGCCGTGGTGACGAAGAAGGACCAAGAGGTCCGC  
ATCTTCCGCGACGCGCCCCCAGGTCCCGGACACACAGTTCAGGCAGGGCATCCCGTTC  
CTGCCTCGATAACAACGACGCGAACAACAAGCAGCTCCTGTACGCTGTGCAGGAAGGCATC  
AACACCGCGAACCTCGCTCTCGATGGCGTACACGACGCGATCCGTATCGCCGAGGAGGCT  
CGTCGCCTGGCGCAGGACGGACTCGACGCCGCCAATGCGGGCGCTTTGCCGTGCCCTGGGC  
TTCGCTGAGATTTCGCACCGTGACCGAGGACTCGGCTATTGATCCGAGCTGGCGGGGTTAC  
TGGAACCGCTGCATCACTGCCGACAAGCCTCTGACCTTGACCATGCAGATGGCAGACCCG  
GATGCACCGTGGGTCGAGTTCAGCGAGGTTCACTTCGAGCAGGCCGGTGTGCGTGACCTA  
AACATCGTAGCCGGTCCCTGGCTTTACCATCAACCGTTTGCAGAACACCACCATGCAGCTC  
TACGGTGAGAATGGCGTGTCTACTCTCAAGCGGCTGGGCGCTAACCACTGGATCGTGTTT  
GGGGCCATGGGGGACGAATAAAGCGCGGCATTATCGCGGGCATCATGGCCTCCCAAATTC  
GGCGGCCAAGCCCATCCTGGCGACCTACCCGTATCCCATCATGGAGGGCGGATAATCGCT  
GGGCTGCTCGGCCCAATATCGTGGCAGCTCTGACCAGGGACACTCTGAAGGGGGTCCGGC  
CAGAAGACACGCTGGAGCACTACAGGGCAACCATCGCTGTACTGGCCGACAGCATGCGCA  
GCCTGAGACAAACGGGCTACGGCGGGGCTGGCCGTACCAGCTTCTAACAGGTGTAGCAG  
ATACCACCCTCCGGTTCGCTGGTGAAGTCTACTACGGTTCGAGGCTCAGCCCTATCTAGCCA  
CGCCGGCGATCCACTCGGCGGACCTGAGGGTAGTGCTCATTATCGCGAATTACGAGGTAG  
AGCCGTTCCATTACACCCTGACCAACAGCCTTGTACAGGCGGAGCTGAAAAATGTTTAAG  
ACCGAAGTAAAGAGACGTTACACCCTGATTCGCCGCAAGGCGGACGGCACTCGTGTGGAG  
ACTCTGGAGTTCGACAACATCATTACGAATGCGGGCCTGGATTGGATCGCCGCTATGGAT  
ACCGACCTCATGGGCGAACCCGTAGCCGGTTCAGCACTTCTACAGCCGATCCCAACCCGAGC  
GCACCCGCCATCCCGGAGGTTGTGCAACGCACGTCCGCATCTGCTCCTGGTGGAGGTA  
ACATCGGGCCTGGATGGCGAGTGGCTGTTCTGGCGGAAGCGTTGGAGATTCCCGCAGGGC  
ACCCTAGCTGGTCAAGTCTGGCCACCGTAGGCCTCATCTGCAACTCGGATCGTTCGCTTC  
GAGAATAACACGCGTGAGCTGATCCCGAAGGATACCAGCTGTTCGTACACTCGCATCAAG  
GACGCCGCGGGCAGCCTACTACTCTGGTGGTGGCCGCTGACGAGATTCTGGACGTCCAG  
TACGTGTTCCGCAGCCGGCCCGTAGGAACGGCTGAGGCCAAGTTCGTGATCTCCGGCGTG  
GAACGCACCTTCCGGCTGATCCACAGCCTTTTGCGAACCGTGCTAATCTCTCCGGGGAA  
CGCTACATCTTCTACAACACCAACCCCTACATCAACGGCAAGGACGCCTCCGGCGGCCAT  
GTCCTAGACGGTTCAGTGGCAGAAGAAATATCCCAAGTACGTGCGCGCCTCTTACAAGGCG  
CAGATCACGCTGCTGACCCCGTCCAAAACGGCAATATGGCTGGCGGCATCACCGGCACC  
GAGGAACTCAAGATTTACAATGGACGTAACCTATGTGCTCGATATCAACCCCCCTGTTGTG  
AAGAACAATACCCAGGAGTTCACCGTGACCCCGGAGTTTACGGTGGCGAGGGCATAACCT  
ATGGCACTGATCTACGACTTCAACCCGGACCTTGTATCCGAAGGCTAAGTCCAAGTTCGTA  
GGTGC GCGAGGCCTTAGGGACATCAGCGACGTGCTGGACTTCTGCGACGGGGGTCTGGCT  
ATCCAGGACCCGTTCGAGGGCATGATGGTCCGCGTGTGGCGAACAGAGCTTCGCCAGGGC  
GGGACCTACCTGGGTCACGAGGACGGCTCGAACGAGATTTCGCATCGGCGGAGGTATCGAA  
GAAGGTATCTCCCCGATGTCCCTCGACTTCGACAGCAACATGAACTACGTGTGTGCTTTC  
GTACGAGCCGACCGGACTGGTGAATCTCCTACTTCAACGTGCAGCAGGGCCCGCCGGCTC  
CTCGTGCAGCTTGGGCAGGTTGACTATGCCAAGGTGGCTCTGGACGACAAACGTCCGGGG  
GCTACCGCCTGGGCGCAGGTTATCGTGCCCTACACACGCAACGGGAACCTCTACGTCCCC  
ACGCAAAATGAGAATAACACCGAAGAGCACCTGGAGGTGGATAACGGCAAGTTATTCCGG  
CCTCTGGTGAAATGCGGCATGGGCACCAACCTCCGCTTCCAAGTCCAATTCAGAGGGCAC  
ATGTAATGAGTATAAAGCAGACCGCGAGTGCTGAGCGGCTGGGCCTGCTTCACGAGCTGG  
TCTGCACCGCTATCGAGCGCAACTTCAAGTGGTACATGGACAACGACATCCCGATCCCG  
GATCGGATATCGCTGCCGCCACCAAGTTCCCTCAAGGACAACGAGATCACCTGTGATCCGT  
CCGACACCATCAACATCCACCGTCTGCGCGAGGAGATGCGGCAGGCGCAGGCGGAGAATC  
GCCGAATTGCCTTGGAGGGCTTCATCGCTGGCGAGACCGACGACGAGATGGAACGCCTGT  
ACACCCACCAAGGAGGCAGCATGACGCCGCAAGAACGATTCCAGATAGCCCACGAAGTGC  
GGGATATGTACCCGCGCTTCCGGGACTTCTGCCTGGACGCCATGCTGTTCCCTCGGCTTCA  
AGATGACCTGGATGCAGCTCGACATCGCCGACTTCATGCAGGACTCGCCCAACAAGGCGA  
TGGTTGCTGCCAGCGTGGCGAAGCTAAGTCCACCATCGCCTGTATCTACGTGGTCTGGT  
GCATCGCGCAGAACCCGGCCACCCGTGTCATGCTGGTCTCCGGCTCCGGGGACAAGGCCG  
AAGAGAACGGCCAGTTGATCACGAAGCTGATCATGCATTGGGACCTGTTGGCGTACCTGC  
GCCCGGTGGCCCGCATGGGCGACCGGACCTCGGCTACCAGCTTCGATGAGAATAAGGGCGT  
TGAAGGGCGTCGAGAAGTCGGCCTCCATCAACTGCATCGGGATCAGCGCCGCCCTCCAGG

GCTACAGGGCTGACGTCCTGATCCCTGACGACATCGAGACCACGAAGAACGGTCTGACCG  
CAACCGAGCGGGCCAAGCTGACGCGGCAGTCGCGAGGAGTACACCTCCATCTGTACCCACG  
GTAAGATTCTGCCCCTGGGCACTCCGCAGTCGCGGGAATCCATCTACAACGGCCTGCCAG  
CGCGGCGCTTTCTCATGCGCATCTCGCCGGGCCGTTCCCGACCCTGGACGAGCAGAAGC  
GCTACGGAGAGTGGCTGGCCCCCTCTATCGTGGACCGTATCGCCCCGCTGGAAGAGAAGG  
GCCACAACCCCCGCAAAGGCAAGGGCCTGGACGGCACCCGTGGCTGGGCCGCCGACCCGC  
AGCGCTCCAACGAAGAGGACCTGCTCGACAAGGAACTGGACCAGGGTGCAGAGGGCTTCC  
AGCTCCAGTACAGGCTGGACACCAGCCTCGCCGACGAGCAGCGCATGCAGCTGAAGCTTC  
GTGACCTGCTGTTTCATCGACGCGACGCACGAGAGCGTACCCGAGCAGGTGGCATGGGCTG  
CCGACGAGCGCTTCAAGCTCAAGTTCGACGCCACAGATTCCCGGTCATCAAGCCTGAGC  
TGTACCTGCCGGCGCTGATGGCTGGCGGCTGGGCATCGCTCCAGCAAATGACGATGTGCG  
TGGACCCTGCCGGCGACGGTGGCGACGAGCTGTCGTATGCCGTGGGCGGGACTCTTGCC  
CGTACATCCACGTCGTGAGCATCGGCGGCTGGAAGGGCGGCTTTTCCGAGGAGAACCTGG  
AGAAATGTATTGCCCTGGCTGCGCGCTATGGCGTCAAGGTGATCTGTGTCGAGAAAAACC  
TCGGCGCTGGTTCTGTTGGCCAGCTCTTCCGCAACCACATGCGATCCATCGACCCGGACA  
CCAACAAGCCCCGCTATGAGGCCATCGGCGTAGAAGACCGCCAGAAGTCCGGTCAGAAAG  
AGCGTCGCATCATCGACACCCTGCGGCCCATCATGCAGCGGCACCCGTCTGATCTTCCACG  
TATCGGCGATGGATTCCGACCACGTGGCCTGTAAGCAGTACCCAGAGGACAAGCGCAATG  
AGCGCTCCGTGTTCCACCAGATTCAACAACACCACCACCGACCGAGGCTCACTGCCTACGG  
ACGACCGGATCGATGCCCTTGAGAGACTTGTCCGCGAGCTGACACCCTCGCTCGTAAAGG  
ACGACGAAGCCGCAACCCGCGCTCGTGAAGAGGCTGCCAAGAAGGGATGGCTGAACAACC  
CGATGGGTTACTAATTCTGTCATTCGGTCTCTCGGCATGGGGCGGGAGCGTCGCAAGG  
GCCGCCAAAAGGACGAAGACTATGATGATTGATACCGCCACCGCGGGCGGGCAAAGGCAC  
CCTCGCCGTCACCGGCGTGGGGATCGCCGTTTACTCGCCCTATGAGATCGCCAGCCCCTG  
TGCTGCGGTCTCACCGCGCTCTACGTAGGCGCCCTGCTCATCACCTGCTCCCGAAGAT  
GTTTCGATAGCATCTCGGAGCTACGCCGGAGGTTCAAGAAGTGAACAAGCCCCCTGCGCGGC  
GCAGCCCTTGCGGCTGCCCTCGGCGGCCTTGTGCCCCTGGAAGGCAGTGAGACCACCGCC  
TACCGAGACATCGCCGGCGTCCCCACCATCTGCTCCGGAACACTGCCGGGGTCAAGATG  
GGCGACAAAGCCACACCAGAGCAGTGCTACCAGATGACGCTCAAGGACTACCAGCGCTTC  
GAGTGCATCGTCTGGACGCCATCAAGGTGTCGCTCAACGTCAACGAGCAGACCGCCCCG  
ATGTTCTTCTGCTAAAACGTGGTTCTAGTCTGTACAACCAGCACAGCGTTCAAGCGCTTC  
AACCAAGGACGCGCCACTGAGGGCTGCCAAGCCCTGGCCATGTGGAGCATGGTCACGATC  
AACGGCCAGAAGGTCGTATCCAAGGGCCTCGTGAATCGCCGCAACGCGGAGATCAAACAA  
TGCCTCGAACCATCGTCGCAATAGTCGTCCTTGCTGTGGTAGCCCTGGGAGCCTCGTACG  
GCTTCGTCCAGAGCTACCGGGCCTTGGGTATCGCCCAGGAGGAGATCAAGCGGCAGACGG  
CCCGTGCGGAGGCCCTGGAGGTGCGCTACGCCACCTTGCAGCGCCACGTCTTGAGGTCT  
CTGCCAGGACAAACACCCAGCGCCAGGAGGTTGACCATGCCCTGGACCAGAACCGCCCCG  
GGGCTGACCGGCCTGTGCCTGCTGCTGTCGGTGGCAGCCTGTGTAACCGCCCCGGCGCCC  
GCTGTGCAGTGCGAACACCCACTGATTGACCCTACCACCCAGGCTGGCCTGATCCGCGCT  
GTAGCGGCCTATCAGGACGCCCTGGACCTATGCAACGCCCTGAATCAAGGAGATTGACAT  
GGCGAACACCCGCGAGCAGTACCTCGCTGGCCGTAACACCGGCCTGACCTTCTACCAGGT  
GTGCCAGCCCGGCACCGACAACCGCATCGCCCTACACGACAAGGACGAGGCCGATGTCAG  
GGCCAAGGCCACCGCTGTGATCGCAGCAGCCACTGCCCTGGGCGGCGAGGGCGGGCGCTAC  
CCCACCGACCCGCTCACCGCCTACAAGGTGACGAACGGTGACACCCTGCCCGTGGACGG  
CGGTGGTTCCGTGAAGGTGACCATAGCCAACGGCGCCATACCAAGGTGCTGTACACCGC  
ACCGGCGGGCTGAGCTTCAGCCCCTCAACCTGACTACATCCGTAACACAAGGAACTGAA  
CCATGGCAACCTTCGCCGGTGAACCTCAGAAAGCCCTCCGCGCCTTCGCCGGCACCATCA  
AGAACCTGATCCGTCCGCTGGAAGGAGCGGCCCTGGGTTCTGGCTACAACGAGACCAAGC  
TGCAGACTGAGCTGGTGCACACCTCGACGAGCTGATGGCTGCTGTCGAGACCGCCAAGG  
TCAAGGTCTACGCGTAGTAGTTCAGCCGAGCACCTGCATAGTCGGGTGCTCCACTGGAA  
CTACTGGAATTTTTATTGAGGGTGTGTGTCGGCTGGGTTGGCTGGTGTGGGCGGGAGTAG  
TACTCCGGGTCTAATTTTGGTATCGTTCGTGTGAGAACCCTCCCGACTCTGATCAGCCCA  
CCCTTCCCCCGTAGGCCCTCGGCCTGGTGGGCCATCCTCGCCTTGCCTGGGTGTTGCCTG  
GGTCATCCCTGGGAGCTTCCGGCTTCGCCGGTGGTGGCGGTGGGCTTCCCTGCCCTGTCGC  
CAGCCATTCTACCCGGCTGAGCGGGAGTGTCAACCCGTGGGCTAGCGCTGTGCTCTACC  
GGGCTAGGCCGTAGTACCTGGTGCCTCCAGCGCGTCCGCGGTGCATGGCCCTGGCTACCT  
CGTACTCCTGGGATCCCTGCCGCTTCCGCCAGGGTGTGCGTAGTGCCGGTGGTCTGCG

CTGCCCACTGTGCTAGCTGCCTCTGCCATGCCGCGTCCTGCTGGTACCAGGCACGCTGAC  
CTCTGTTCTGTCTGCTCAGCATCCTCTGTGCCTCCTGTGGTCCTGTCGGGTGGTGGAGCC  
GGAGTGGCTGGC

>NewGenomeName\_107

TTAAATTTAACATTCTTAACCAGTTTCATAAAGTCTTGTGCGAGTTTGTGCGTTATGCAG  
AATACGATAACCAGTTATCTACAATATCATCCAGTAACGGGCTATTCTCTTTAAACTACGC  
ACAAACTGCTTTAATTCGTTTCGTTTGCTGCCGTGAAATTTTCATCACAGATCTTTTTAGT  
TGCTTCGTCCATAATCCAACGAGTATGAAGGAGTAACTTGAAACCTCGTTATTGTAATG  
ACCACGGGACAGTCTGTCAATAAATTCTGGAATACAGCGTTCTAGTTCATCGCCATGAAA  
CAACATAGTGATCACACCCAGATATTCGCCATACCCAGATGATTGGTCTTAACCTTCTT  
CGCCAGACCAGTCAGCTTACCGCGAACAATTCTAGCGCACATTCCAATTGTTCTTCAAC  
GAGATATTTTTGTGTCTCGTTTCGAGTAATAATACTTTGTTACCCCGACGTAGTCAAG  
CGCCGTATGTAATGTATTTTCACTATAGATCGATTTACGACTACGGCTTTCGAATGCATC  
ACCTACGCGGAACATGTGCAAGCCTGATAACTCGCGAATCTCCGCCGCTTTCATGTGATG  
GCTGGTTTTATGCCAACTGTCACCAATCTTTTCCATGATATAAACGTTAGCCAGCATGGG  
AGTCGCTTACGTTGTGTAAGCTCGGTCTTCTCCGGCTTAACGGCTTTAGCACGCATATC  
ATCGGCCTCAGAACTTTAATCACGGTCATTTCAGAATAATCAAAATACTGTTTGATGTA  
CTCGATATTCTCCATATGTTTTTTCGTTGCGCTGACGGAACACAAGTACTTTTTTATTGAT  
GCCGTATTCCTGGACCATGCCGTTAATAGTCAGTGCACGCAGTTTCGGTTTATCGGTATC  
ATCAATAAGACACATAATATCTTCTTTATGCATCCATACAAAATGCGCAATATTGTACTG  
ACTGCTAACGAAAGCAGGGCGCAATTTGCTGATTGTGAGACAAGTACGATACAGAGTATA  
CACCTGGCCTTCTACCTCATTAGGCGAATCTTTACTCGCATTCAAACTTATTATAGAT  
TGCTACCGGATCGTCCATTGTCCGATCTTACCGATCTTGCTAATAATATTGCGTTGCGT  
CGATGAATACTCGCTCATAAATTGAGAATGATTACGCTCTGTTTTAATGTTGGCGATCTG  
TTCTTTAACCTTTTCCAACCTTCACTTCAATTGATTTCTGCAATGCGTTTCTCGATGTTCCG  
TTTAGTCTCAATTGACAAGTGAACCTTCTTACGCGATGGCATCAGGTCCAGATCACCCAA  
CTCAAAATTAATGTAATTGGTCTGGTGTGGCGGATTATAGCTTCTAACCATGTTCCGCG  
AACATATTCATACGGGATCGGATACTGGATCTTACTCATGATTGCATATACTATATAGGA  
ATCGTTATCACGCCATTACAAACATAATAATTATCAAAGCCAGGGAAATAACTAATTCC  
GATTGCATTGATATTCGGTTTGTGTTCCCCAAAATGACGCAGTACAAATTCCGCTTGTCG  
ATGCCATGTCTAAATGTCTTTTTCTTTCACCGGAATAGTGATTTTCAGACCAATGTCTTC  
ACAGTTCGGTACGTCGACAATCTGCACCAATTTTCGGCATAGAGTTTTGCACAAATGCCGT  
AAAGCCATAAGCGCGACCATTCTAATAGTTTACGATTGTAAAGGTGTCGGTATAGCTATA  
AGCAGACTTCGCACCTAAACCAAAAGATCCGATATAATCATTAGTCTGGTCTTTTGTGTA  
TTCAAAGTAAACCGTAAACAGTTGTTCTAATTCTTTCTTAGACGGAATACCAGTACCATA  
ATCACGCACAGAGAAATACGGTTCGATTGCAGTCGGTAAATGAATATCAAACGGACGATC  
TAATGTTCCGGCTTCTTTGTGAGTGTGGGTAGCATTACATGAATACTCCCGGACGCAAGC  
ACGCTCACATTATTGATAAGTGTTCTTAGAAAGCACCATAAAAGCCTTGCTACTTGCTTT  
CAATGAAAAATCAACCGCACTGCTCATGTCACTGCCAAATACTTCTTCAATTATCAATAAG  
CATTTTCATAATATAATCCTCACTTAATTAATAATCTTCTTAGTCCATATCTGCGTAGATT  
ACATCCCACGCCATAAATCAATAAACGCATTATATGTCACGGTGCAATCGTTGTCAATT  
ACTTCTTTCGCATATTTCTTGATGTTTTTCGTAGGAACTTGCGGATCAATTTTGTGTTA  
CGAAGGAGTGCATCTTCATACCTCAAACATTTTCATAAACAGGTACATCGAATTCTTTTCT  
CGATGGCACTTGGCGATCAGAAAATCAAACTTCGACTCATTTTCTATTCTTATAACATG  
TTCAATACCCATTGCAGATGGGCTTCTGCGTCAACCAGTTCAGCGCGGCTTTTCTCTAA  
GCACTTGCTGTATTCTTTACGTTCCCACTCCGCAATTTTCGGTTTTTCAGGACGTCTTCATA  
GTAAGCAATTACGCCTTTCAGGTCTGAAACTTTACGGCTTGCCAATTCGATGTAATGGTT  
ACGCATTTTGTATTCTCCTTAGTGGTATCTCCTTTCGATGGGGACATTATGATATATCCCC  
GATACAGCGTCAACAGATTTTTAATCTTTTTTCAATGCATCCATTACTCGCTCTGCGATC  
AGTTCTCGTAAGCACTGATAACCATGATATTTGATGGCAATGTCACGCAGATCATTAAACC  
AGTTGCCGTACTTTATGGTCATTCAGATCGTCTCTGTATTTTCGATTTAAACCGTGTCTTTA  
GGTGGATTGTGGATAACCTGAAATCCTTGTTCGGCAATCACTGCGGCTTCGCGCTGGCGT  
TCATGCTGTACTGGATTTTTGATCAGGTCTGCTTCCATGAAGTTTGCCATACTCAACATC  
ATGTTATTCTTTTTGCTCATTATTAATCCTCAGAATAGAAAAGGGAGACTCCCATTATA  
GAGAATCTCCCTTGTATGTCAACTAAAATTTAAAGATGCAAACCTCCCGTGGTGAATTTT  
TGCATATGCATCATATGCTCTAGCGGCTTCTCCGGAGTAGCAAACGAACCTATGTATTT  
TCTGTATCCGTTTATCCTTATTTGTGCTTGCCACGGTCTTTTGCTCGATCCTTTGCGATG



AGTAACACCGTTATATATGCTCGTGCACCCGTCCATTTTCTTTTTATTGTACATGTTTTG  
TTGTTGTGTTGCCTCCCGTAAATTTGGTGGATTGTTGTTTTCTGGATTCCCGTCTATGTG  
GTCTATTACCTCAACCTGTGTTTCGATATTCATGAAACCAGACAATTCTATGTACAAGATA  
TGTAGATGTTCTCTTTTTAACATTATTGTAAACATCTATTGCCAAATGACCGTAATTTAA  
ATTTTTGTTTTTACTTTATCCCCGACTTGGTAGAAATATCCCTCTGGTAGACCATTA  
AGACGGACTATTTATTTTGTGATATAGTACACCTTGCCTGTGTCCAAATCTTCGTTTTAA  
TTCGTCTTGAATTTCTCAATTCCAAAATTTTCGCACTTTTCATATTATGACGCCATCTATG  
TCTTCCTCATGTCTGAATCTTCACTATAGAGCAAATCGAATAGCTCTTTATAGTTTTCCG  
GTAACGTGATGATCTCCATGACAGGTTTCGTTGATCACGCGATGATAGTCTGATTCTGTGA  
GCGATGCTAAACCTTTGATATATCGATTGTTGTAACCTTTGATATTATCTCGGTCCTTCT  
CGAAATCTTCTAGGTCATAATACCATCGAACATCATCACCTATCTTTGGCTCAGCAATGA  
TAATAGGTGTTTTGATAAAGCGGATTCGTCCATCTTCGAACAATTCAGGCTAACGTGCAA  
AGAAAGACATCAGACTAGGTTAATAGACCCGATCCCGTCAAGTACCAGCGTCGGTCAAAA  
TCGCAATATTTTTGTATTACGTAACCTTCCAATGCATCAACACCTAATTGCAAGCCAGTGA  
TCGCCATGGTGTAAAAATTTTCGGCGTTCTTAACAATCATTGCCTCCGGTTGTTCCACG  
TTGTAAGAGTTTTGCCTCGCAACGGAAAACCTCCATGAAATCTTGATCACGTACAGAGA  
TCAGATAGATGATCGCGGAATCACCTTCCGTCAAAAACAGGGTAGTTTTCTGCGACACTTC  
CAATAAGTTTAGCTTTAACGTGTTTTACTCCCTTAGCCCGTTTTGCTGCCTTTGCTGCCT  
TAGTCGCTGCCGCTTTATCTGCTGCCTCTTTGCGTGCCAGGACTACAGCAATAATAGGCA  
TGATAATGTTTTCTTTCTCCCAATGACTTTAGCCAGCTTTTTAAAATCAAGATCAATAT  
GACGCATGATATCACCAGTTGGGTTAGTCAAGCGTCTTTTTGTCTGTGGATCAAAACGAA  
GGTTAGGCAATTCACGAACAATCAAATAACAGGTCAATCCAGACTTAACCCGAGCTTCAG  
TAACATCAACCTTATATTCTTTCTTGATTTCGCTTTACAATCTCTTCACAAAGATCATCTG  
CCACGTAGTCTAAGTGTGTTCCCCCGTTTTTGGTAAACAGACCGTTAGCAAAGGATACTG  
ATTTAAAACCTTCTCCCTCAACCGCCGGGACTAGGGCAAGTGAAAAGTTTTTATCTTCAA  
TGACGAACAGATCATCGTTGTATAGGTTAGCATAATCCTTGAACCTACTAACAATACGTT  
TACCGTTAAACTTAAACGTGATCTTAGGAAATATTACGCTCAATGATTGCAGACGATCAT  
GAACCATATCTAAAACAGAGTTGTCCATCATATAACCTTCGAAGTGGTCAAGTCTGGGC  
AAAATGTAACCTTTGTTCCCTTCACTTTTGATGGTGACGATGACCATGTGATATTTTTAG  
CACCGTTTGTACATAGAAAGGTCATTTCTGTTTCGCCGTCACAGGTACACACCAGTAACT  
AATCGATAAAGAAATTTGATAACGACGACCCAACACCGTTCATCCCGTGCCTTAATCGAT  
TGGTATCATCAGAGTTAGACCCTGCTTGCCTTCGTGTCCATGCGGCTACTGGTTGCGGAA  
TCTGCGTACCCTCTGGGGTAGTAACCATATGTTGAGGAATACCGCGACCGTTGTCTGTTA  
CCGTAACAATATTGTTTTGGATATCGACGCTAATCATATTGGCAAAGTCAAAATTAGTGC  
GAATCGCCTCGTCTACAGAGTTGTCGATGATCTCATCAATGATTTTCACCCGTCCAGGAA  
CACATGATATTTTTGTCCATTTACCGAACAGGAAACGTTGATGTTCTTCGTAAGTTGTTG  
ATCCTATATACATTCCTGCTCGCTTAAGGACATGCTCACGATCCGATAACATGCGAACT  
CACTCATTATTAACCTCTTCAATAACATAACCATAACTTACGGCAACCGCCACGAAGACG  
GCTGCAACATTCATATTAATAAATTGAGTGATTGTCAAGTATATGACTCATGACACGGGCA  
CATTTTTATCATAGTACCCGCCATTAATTCGCGCGGGGGAGTTAATCCCTGTTTGCATT  
CTTTACCACATTCAGGGCATTTCGGCCTTTTCACGTTTCGGAAATTTTGCGGATTTTCTGAA  
ATTGACCGTGTCTTTCACAAGAATAATCATATAATGGCATATTATCCCCTTTGTTTCTTA  
ACTGAATTCGGATCTGGATTTTCTGGCAAGTCTTCCAGACCCATAGCATAACGTTGTGCA  
TAGATTGTCATAAGAATATCGCGAGCGCAATCATGCATTCCGTCATGCGCGATAAATGCG  
TCTAGCGTACTCATTGGGAACGGGCATTACACATAACAACGATGCATCAATGTACGCTCA  
ATGGCGGTGCGAACATCTCGGATATTCCAGAATCGCACAGGTTCAAGGCTGAACGTCTCT  
CGTGTATTGTGTGCACGGCGGATCATATCAACTAGTAACGGAATATCAAACGCATCACCG  
CGTGAGCACATTACGGATTTAACAGTATCTACTCCTACGGCTTCACAGAATGCGTTAAAA  
CGCGCGAAACCTTCTTTAGTTGATACTTCCGTACCATTTGTGATTAATTGCTTTCTCATG  
CCTTCTGAGGCGGTATTCTTCCACCATTCAACCACCATGATCAAACACCCTTACACCT  
TTCTGGGAAGGAATATCAAATTTTACCAGAAAGGAATTGTCAACCAGATATTTAAGTGTA  
GGTGCATTGTGCGGATTTTCTTTAAATCCGGTTGCCGCCATATTGATAACCGCCCCATCA  
GCCGATAACCTAATCTTTCAAAGTCAATCATTAAATCCACTCGAAGCATTTTAAATAAC  
GTCCGGGATATGCCGGAACAACCTCCAGATCGTTTTTATCCAGAATGAAACCGCTACAATC  
AATAATGCCGTTACCGTATTTATCGGTTAACAGTCGTTTCAGTTGCCATGTATGCGCGTAC  
TTTGTGTTAAATTCATTACATGTTGTGCGTAATCACAATGAATCTTTTGACGGTTCCA  
CGCGACAATTGATTCTAGATTTATTACATTGCCACACTATTAATAACAACCATTTCAA

AACCTCGCTTAGTGAAATGCTCGATCATTTTATTGATACATGCAGCTTCACTATCGCCGG  
ACACGTTCCAGCCGTATAGACCCCATCTAAAGCACATGGTAACAGTTCATTGTGACGGC  
TTTCCGTCACATCATTAAATTCTCGGATACTTCGCATAATCATAATAATTTCTCAAATA  
TAGTCTACTCGATACCGGGCACGGGTAACACCAACATATAATAACTGCATTGCCAATTCA  
AAGTCAACATTGTCTGTACACATGCAAGGAGTATACAGGAACACGCGGTCTACGCTGATC  
CCTTGTGACTTATGAATGGTGAAGCTTGTAAATGCATTTACATTTCAAGAACATACGGTTC  
ATCGTCAAGAATGAATCCCAATCTGGTTTAAATTTTGGATTCTCTTTCTTCATTTTCGCGA  
TATTGTCCGGCGACCGTATTCAGATAGATAGAGAAAATTTTCTTCTGACGTTGTTCTATC  
AGAATGTTCAATTTCTACTAAATCCGGTTTATCTGTAGAGATTCCGACTGCATCTAAACCG  
ACTTTCTGATTTAGGATCTCTTTGTCTTCGTCATCATCGACGCTTCCACTGTCAGAGTA  
TATCCTAAAACCTGGTTGCGGATCTACCCCGTACAACGTAATGTAAATTCGCGCGGTATA  
ACCTCATTAACCTCGGATCATCTCACCATTGTTAAAAATAACACTAGGAATCTTCTTCCC  
CGTTCATCTCGCAGATATTCGATCAATGGTTCCTGAGTAACCAGAATGTCATCTACAATC  
ACTGGTTCATCGGTGTTATAAACGCGCTTACGGATAATTTCAATTGAGTTTTTCGACGCTC  
TTGTTAGTGTCGGCCAGAATACGGTTTTCTAGAAGGTCTTCCAGCGTTTTAACGGTTTTCG  
AATTAATGGTTCATAAACTCCGGCAGAGTTGAGCTATGGAATACACCCTCGTTACCGCAC  
TACTTTTCGAATCCCCATTTACCATTACAGACTGCGGTTCGCCACATCAATTAATGGCGCA  
TTAGATCGTTTAAATCTCTGTAAAGTTCTACATTCTGAAACCTTTCATCCGTGAAGAAAGGA  
GAGATCGACGTTGCACCGCTCGGATAAACTGGTCGTAACCTGGAGCGGATCGCCAACCTGCA  
ATAATAACGATTTCGACCGTTGATACTCTTCATGAGAATATCAAATAGTTCCTTCTCGACC  
ATACTCGCCTCATCAACAATGATGAGCTGAACATCATCTAGCTTAGGAGTATGTTTTTGC  
TCAAATAGTTGAGTATCTTCATAGTTGGTTCGGGTTTAGTTCGCAGTAGTGCATGTAAAGTA  
AATGCTTGACGACCTACAGCTTTACTCAAACCTTTTTTAGCCTGGTGGGTAGGCGTTGCC  
AAAACCACACCAGTTACACCACGGCGGACCATTTCTGAACAATGAATTTTCATCATTGCG  
TTTTTACCAGTACCCGTCGCACCACGGACAGTTGTCTGCTTCTTTTGTTCATGCGTTTC  
ATTAGAACATCAAAGCATGTTTTTGGCCGTCTGTTAACATATCGAAAGTTAATACTCTG  
CTCATTATCCTAAAACCCTCACCTTGCGAACACAGATAGTATTGAGTTCTCGCCGTACCC  
TTTCTTTTTCATATTCAGGAATTTATATTCGATACCATCCCGAACAAATTTCAGAAGACC  
GGATTGTGCCAAATTTTCGTTTAGGTACAACCTTGTATCACGGTTCACCCGCCAATAGAC  
TCTACAATAATCTATCTGATCACACATTGACGCTAACGCAGCATCATCTGTTTCGCAAG  
TTAGGACGCGACCCTTCGCGTCCACTGAGTATTGAGAGAATCCGTCTTATCACGATAAC  
ATACAGCAAATACATGCATTATAAACCTACCTTCGCTTTCATCAATTCAATCCACGACGC  
ATCAATCGGAGGCCCGTATGTAACGCGTTCTTTTTGTGCTGGCGGTAAGTTCTCATACTT  
AGAAAGAGATTCAATCAAACGCTGGTATATTTTAGCACGACTTCGGTATTGTTTGAAT  
AGCCTTAAGTTTTTCTTCTTCTTGTGATTTTCGCTAAGGGCTTGCTTGAGATCTGCAAT  
TTTCTGATAACGTTCTTCCATACGGAAGAGAGTATTTCTAATAGCTCGCTCGACTGCCTA  
TGCTTTCTACGGTTCGTTGTGTTTTTGTGGCGCTCGATTGCCAATTTCTTTTCTTCGAT  
CGTATTTCTGATTTTTGATGCGATTCTCGTTAAGTTCGATCCACTCTATGTAATTCGG  
ACGTAGGGCAATTTTCATCATCAGAAAGTTTACCGTTAGTTCCTAGTTCATGGATCTCTTT  
AAGAGATTCGATAGTGTGATTGCCAGGGAAAGAATTGTATTTAGTTTAAACCGGCATTAC  
ATTGCCATCAACATATCCCAGATTGCAATCAATGCGCTCTAAGGAGAGTCCATCATCACC  
TTCACCGAGAGCCTCACCGGAATAGGCGTAATGAGTCTGTCGGTAAATGTTACGCACAGT  
GACTAAGCTCATAGAGAAGTCTTTGTTGCGACTTGAGGCACCAGCCATGATAGAGTTCAG  
ACGTAAAACAACCAGCGCCAATTTCTCGTTAGATTTAAAAGCAAACAGTTTCATAATTGA  
GTCTCCTTAGTTGGTGTGTGTATTATTGTCTATCTGGTTTGTGCTGTCAACACTTAAA  
TTAAAGAAAATTTGTCAATCTCAATCAGATCGCCATTACACGCGTAAACTTCCTCGATCT  
CATCAAGGATCATTGTGCTCCCTGTCTTGTATATGCATTCGCGCTCATCTGCCAACATAG  
CATACAAAGACAGTCGCGTAGTCGGATTGTCATACTCTTTAGACACCACTCGGTCAATAG  
CATGTTTCGTAATAATTCATGCAAGGCTTGGTAGGATTTATTGCAATAATCTTTGCTGTTG  
CATAAACATCTGTTGCAAAGTCTCTGCTGTTGATTGCAGTGGCGTAAAGTTCATAGGAC  
GCTCTACAACGACAGAATCACCTACAATTAAGGTATCCAGCTTACGGCCTTCTCATTTC  
TCATACCGCGATAACAAGGCTTCATGATGCACTAACCGCTCAGTCTTTTCAATCAATCCAT  
TAAGGATCGACTTATCGATATTTTCTTTAGAGTTCATCACCTCATCAATGATGTTAAGTT  
CTTCTGGTGTAAATTCGATAATAAAAAAGCCTCCAATCTTTCGACGGGCGGCATAATTAA  
ACCATTGATTGAGTTTGTCAATCACATAGTGTATGTGATCTATAAATAAGTTTGTAGAA  
CTAAAGGAGATCACAAAATGAACTATAAAAAGTATTTATGATAACCTGATTGAACGTGCTA  
AGACTAGAAATCTCGACGGATACACAGAAAAGCATCACTTCATACCACGTTGTATGCATG

GAAGCGATGACCCACCAACCTAGTAAGACTTACACCTGAAGAACATTTTATGGCACATC  
TTTTGTTAGGTAAGATATAACCAGATAATAAGAACTGATATATGCCGCTTACATGATGT  
GCGTTTCTTGTTCATGGACAAAGACAAACAATAAGCGTCACGGATGGTTGCGTAGAAAAA  
CGACGGAAGCGCATAGTAAAAGAATACGAGATAGTAAGGAGAACGATCCAGAATATAGAT  
CTAAGGTTTCGGAATGGACTAGAAAAATGGGTAAAGCCATGAAAAGCGTTAAGCGAGGAC  
CGGAATTTAGCAGAAAGTTGGCAGTAACAAACAGAAATACCGTGAGGAGAGAAGATACTA  
AACGTAAGATAGGGGAAGCCAACAAGGAAAGAAACGTACAGAAGAATATAAAAAGAAAAC  
ATAGTGAAAGGTATAACGGTGAAGGTAATCCGATGTATGGTAAACGAGGAACGGACCATC  
CCGCATATGGTACTAAACCGTGGAACAACCAAACATCATTGTTGAACAGAAAGCATGGT  
GCCGGTTTGCTGGCATGTTTTATGACTGGTATCGGAGAGATAATGACCGTGGAACACATA  
AACGCCACGGTCATAAGAGAATGTTGGATGAGTTAGGTATCGTTGGTTGGCGAGAAAAAG  
AGCCAGCCGCGGCAAGAAGATCAATTGAGATGTTTCGCTAAAGGCTGGAATCCTTATGATG  
ACCAAGCATGGTTAGATTATGTTAATACCCGCTTTCCAAACGACGAGAGTTTTCCCGTT  
CTTCAACATATAACAAGACAAACAGATCCTTCGCAGTAAGCCCCAAGGCCAAGAAATTACA  
CATAATGAAATGGAGTTGGTCGACGGCTTCTAGGTATGTTTCCAAACGATCCGCCACAGA  
TAAATCACTAAAGAGGCGGTTTCGTGCTTCCATATGATTGGCTTTCCAGTGTTCACAC  
CGCGCTAGCGTCTTTCCCGTTAGACATAACCACCAACGCAGTGTACAGTTCTCGCGTTTC  
GTCGTCAAGCGCATTATCATTAGCTCGAATAGAATCTAAAATCTCTCCACATGTTTTCAA  
TTCATCAATTTTTGCGACCCACGGACGGTCATTCGATACCTGGTCTTGTAGTGCTTTCTG  
CATGTCCATCATGTGTTGAAATGGGTTATCACCGTTGGCGATAATCTCTTTATATTTTTC  
TTGTGCAAAATTCAGAGTTTCCGCCTTACTAAGTGTGCACAAGAATTAATTTCTGACAT  
ATTCACCTCATTAATTAATTTACAATATTTTCATAAACCGCATTTTAGCCATCAGACTT  
TGTACGGTGTCTCTTTGATAAATTCATGATCTGGTCGCGTGTGGCTCCCTCGTCCTGA  
ATCATGGCATTAAACGTCTTTAGAAAGCCGTGGGCAACGATCGCACAATAACAATCTTTTCC  
CCTGCATTGATAAACTTTTCCAGTCGGCGCATTGTATCGGCCGATCGTGGATCCGCATCA  
AGTACTAACTCTCGCTGGTCTGGGAAAGGTATTTTCATCTAATCCCAAAGTACCGCCAGTA  
ATTGCACACCCGTTATCAATAACAATGAATCGATCGGACCTTCTAAGAAATACACTGGT  
TACTCAGATCGGCGCGTTCATGACCAGAGACCTTACTCGCTCACTCATGAGTTTAAATC  
GTCATATATTTGGTCTTTCCGTAAGTCCTTTCTCAATGCTCGCCCTGAATGGATTCTATC  
TTGTTCTCTCGGTTAAAGATAGCAATCACTAAACGCGGCCAGGTTGTGGATTCTTGAAA  
GTATCAGCCTTAATGTGATTTGCTACCTTTTGCCATTTTCTCGTGAAATACAGAAGATCC  
CATTTATCGTGGGGAATGCAACGATCACTGACATACTTTCTTATAGGATGATTAGTCGGA  
AGAGTATCTAATCTCTCGCAGAAAGGCAATGTTTGCATTTCTTAATCTCCGGCTTTTCT  
ACTTTTTTTATTGGCTTATACGTGGTGTCTTGTGGTTCGCTTGTTCCTTCCGTCGTTCC  
ATAAGCCATTCCCTGAATAAGGCCGGCTAATACTGTTTGAGAAATTCACCTCACGGCTGA  
TTGTAGTTACAGTTGAAACAACCACAACGCAAACCTATCCTTTTGGGTATAGATACGGAAT  
CGCGCTTGAGTATGATTTTTCTTTGAGTCACCGCAGATCGGACAACACTACAGACCACCGTA  
AATGAGCTAGTATGCAACCGTTTAAAATTTTCGTTTCGCCGTATATGGCTTTTTCCGCTATT  
TCATAATCTACGTAGTAAATCATACTAACCTATTATAGCTCAAATTTTCATGAAAGTTCCC  
ACACTTTTCATTTGCATTCTCTTCGTTTTTCATCTAAGCCAAATTTGTAGACACTACCATCT  
GGCGATATGTAAGAGAATACTCGAATACGCCCTACTGGGTCAAGTTCTATAAATTCATAT  
TCTTTTTTCGGCTTCAAAAAGTGCATATGCGCTTTTAAAGACATTTTCATCGTAATCATTTAA  
GCGCCACCGATGAGAACATGATAATAATACCAGAATACATAACAGTCTCAGAAATTTTTT  
CTGTTTTTGTCTATTATCCAGACAACCCGAAAAAGACAACACCCTAAATAGCCGTCACAA  
GCACGATAATGAATATAAAAAAACTAACCAATTGTCTTTCTCCTTTTTGCGTTTATCTTTA  
CCCGCTACACTAGGTCCACGATTGGTAATAGATCCGCTCGTTTCCCTGCTGCGATCTTC  
TCAGGATTGCCGCCAGCATCGCCAGCGGTTCATATCTTCTTTGAGTTTATTTTTCTTCAACC  
AACTGTTTAAAACCAATCATAGAATAATCTCTTTCAGTAAGTCAACAATCTGGTCTTTTCG  
TCAGTTTATCCTGATTTTCTACAATCTTGATAACCCAATCGTTAACATCTTTGCGAGTCA  
CGCGGGACATCGTTTTAATACGATGAAACTGTTCGTAGAAATATACTGCTTCATTATCAG  
GCGCAGCAATTTTTTGACGCATTTGATCTTTATCGGCCATAAAAACAATTGCAATTTTCG  
GATCTACACCAGCCACATCATAAAGTTCGGCGACTCCCCAGCGTCCTCCCGGTTCAATCA  
TCCCAGGGTGTTTACCGTTAATAAAGATAAGAATGTCTCCGTTATTTGCGGTTTAAAATG  
CTACATCTTCCGGCGTAATCATATTCTTCATGATATCGTCTCCTTAGAGTCTCATCATAG  
ATCGAGAGAACGTAGAAAGCAAATGTTTTATTTCTTTCAGTTGTTCGTTAAAGGTCTTTGC  
GTTTCTCTTTCAACTGTCGTTTCAGCATTGTTTCGTTGTTTTTCAACATCTTTATCAATGT  
GCTTAGTACAATTACCAATATCAGCATAAGTTGGCATAACCAATTCTAGACCTAATGCGG

TTGGATGCAGGGTAACAGTCCATAAACCGCTAATCTTCTTAAATACGACTGGGTGTAGTG  
TACTATCTACATCGTCCGGTGTCAACTTTTTGTCTTCTTTCAGTGGTGGGATCTCGTCAT  
ATGGTTCCAATGCATTTACTTTAATATCAGATACTTCATCAAAGGATCCGCGTACATACG  
CAGGAAATACACGAGCTATTTCCCAACCGTGATTACGCAGAGAAGTAATATTTTTCTACTC  
CCCCACCATGTGTGATGATTGATGTGACATTGCCATCGAGGTCCACAGAATTTACGAGAA  
ATGGCTTATCGTCTGTCAGATCGTTATAAACTGTGCTTCGGCTGTAGTCATCTCCAGAA  
ACAGATCTCGGATCGGACGACCATCAGGTGCGTTACTTTCCTTGAGAGTATAGAAGCGAC  
TTACGATCCATTTTGTGCGGTAAAGCATTAGCGATCATGTTATATCTCCTATCAGATCATT  
CACCAGCGCCCCGCAGGGCGCATTGTATTAGAAAGTCATGTTGTTTGCAAGCTCGTCGAG  
TTTTTCTCGTTTCTCGGCTTGCTGTGCGCTTTGTGGTTAACTTGTGCATTCTCCTGATC  
TGCGATCTGGTTTGGTACTTCATACCAACGCTGATTGCCTTTGTTCTCACCCACGTTAAA  
CCGTGAATAAATAGTTTTTGTACCCGTAAAGAGACTTGATCTGCTTCATGAGTTGGACGCC  
CATTTTAGCCGGGTCTTCCGTTTCGATCACACCCAACACAAAGTCGGCAGTAGCTGGAAG  
ACCTGCTGATTCAGCGGTATCACTCATGTTAAGGTCGGAAGCATCCCAACCCGCGCGGGT  
AGTCTGTGCCGAGTCCACCCACAGCCTCCCACTTAACAAAGAATCCTCGCAGTTCTTC  
CGAATCGCCTTAACTAGTGTGTAACATTTTCAGAGTATACTCAAGCGAGACGATGC  
GCAAATCCCAGATAGTCAACAATCACAACATCAGTTTTAACTGTTTCTTGAGTCGCAA  
TTCATTCATTAACGCCTCAAAGTCATTGGAGTTCGCGCCACCAGTAGGATACTGCTTGAT  
CATCAATTTTCCAACCGGAGGATCTCCGATCTTCTTCTTCTTAAACACGCTTCATGCGTGC  
GGAATATTCGGAAAAGAAACATTACCATTATCCACTTCATCTAATGTAATGTAAAGCAA  
GTTTGCGGCGATGCGTTTGGCTACGACATGCTCTGCCATCTCCATTGAGATATAAAGAC  
ATCATAACCACATTCCATATAAACCAGCATGAGAACACAAGCCAAGCGATTTACCAAC  
GTTTACACCAGCAAGCAACACATTTAGCGTTTTTCTTCCGCCCTCCTTTCGTGATTTT  
ATTCAACATCGGCATCTTAAACGGGATCGTATTCGCCTTAGTCTGATATAGCAAGAATCG  
TTTTTCAAAGTCATTAACCAGTCATGACCTACATCAGAATCAAACGTAATGGATAGTGC  
TTCCTGCATGATCTCAGGAATAGCACCCCTACTAGGCAATTTCTTATTCTGGTTCTCTTT  
TGCTAGTTGTGCGTTCGCTGAACCTCTAGCGCCCGTGACATTGCATTATACACGGCAGG  
GTCACGAATAAATTTTTCGGTTTCTTTCATTAACCAATCAAGGTCTTCCGGTGTATTCTC  
AAGCGAATCAAAAAGAGTTTTAGCCCCTTCATATGTTGTCTGATTGCCTCTCTCCTTGTC  
TAAAGCAATCTGTAATGCAGTTGGTGTAGGAATATTGGAATATTCGTCTACGTGCTTTTT  
AATCAGCCTATAAATCAGTTTTTCTTCGTCTTCGGTGAAGTAGTCAACTTTAAGGTGAGG  
CCATACATTCGTAAAGAATGCGCCATTGTAATCAACTGTGTAAGATAGTTTTAATCAT  
ACATATCCCAGCAACTACACGCATAACAAAGGTCTTGAGTTTATACCAGAAAGTTTCTTTT  
TTCAACTTGTTTTCTGCCTCTTTGATCTGCGCTGTTAACGCCTTAAATGACGTGTGGATAT  
ACCACATCACGATCTGACGGCGTGGAGTAGTCGACCACAATACCTTTAGTGTCTGGATCG  
TATTCAAGATTATGAATATAGACAATATGATGTTCTCCCTCTTCATCAACAAATATCAAT  
TCCTGAATAACTGTCTTCATTGCTTCTTGAATCAAGCCGTGTGCTTCTTCTAAACTTGTT  
GGTTTCTTATCCATAATATAATCCTCTCTAGATATGAAAAAGGGGCACGTAGCCCCTTA  
CTACCATTGTTATGCTAACATATCTTAGATTTCTTTGTCAACTGCTTCGTCACTGATCAC  
TGGCCCCAGCTTATAATGATCGTTGATTGCTTCGTTAACCTGATCGTTTGTGAGAAGTGG  
TTCCAGAACTCAATGCTATTGGTTTCTTTAGCACAGTACTTGCGTTCTTCGGTTTCCAT  
CTCTCCGGTCTCTGGATTGAGGATTGAACGAGGATACCAGCCGTTTGACGGTTTCACTAC  
CCAGCCTAAATCTAAAGCCAACCTCCAGCAAACCGGAATAAGGATCGATACCTCCGCTATA  
TGTTACGCTAATCGGGATCTTAGATTTTTCTTTAACGGTTCGTGATTTTTCCGCATACAG  
GATAAAATCATAACCAGTAATTTCCGGTTCCTCTTTCTGCTGACGACGACCAATAATGAA  
AACTTCATTGGCTGAATACATCGCGCCCGTACCGCCGGACATAACGGTCTTACTAAACAT  
TTCTTGCGTTTTCGTAACCTGTAGTTAATAGCGATGCACGGGATATCATTATAGTCAGATA  
CGGCGTCACTATACGGAACAAGCCTTTAAGTACTTTCGCTCGCGTCATATCCTGTGCGGA  
TGTCTCATTAATCTCGTCTTCAACTTCTTTGTTACTTGCTAAGTTACCGATTGAGTCAAT  
AAAGATGATCACTTTATCTTCACGGGTAATTTGCTCAAGCTGGTTCATGATTTCAAATGT  
AAGTTCTTCGATGTTCTTGATTGGAACATGCACCACGCGATCAGGATCTACACCCATAGA  
TTAAAGATAAGTGGGTGTAATACCGAACTCAGAATCAAAGAACAACACGCCGCATCAGC  
ATTCTGTTTCATGTATGACTAACACAAGTTAATCCCATGTTTGATTTAAAGTGCTTAGA  
CGGACCAGCTAGAAAAATCAAACCAGATTGAAAGCCTTTCTTAAAGATCACCTGAAAACGC  
AATATTCAGCATCGGGATCTTAGTGCGAGTATTTGGTTTTTCGTTAAAGAGGCTGGATTT  
AGACAGTACCGCAGTAGTTTTAGGGTAGAGTTCTTTTTTCAGTTTTTCCAGTACAGACAT  
TATTAATACCTCTATTCAGTTAATCCGTAATACTTTTATAGCTTCATTGTTATTAGATCT

TTGTAGTGCTCTTGAATTTACTTTTTTCATGGCATCAACATTGATCCTCTCAAATACTTCG  
TTGCTGTGATTTCCGTGAACTTTCTTGAAATGCTCTATGCCTTCCTCACGTTACGTTA  
ATCTTTTCAATGTCTCTAATAGTATATTTCTCACGTTGGCGGGTATCGTCACCAAACACC  
CGCCATTATACGCACTTTATCTTAAATGTCAAACCTGTCCGTCAATGAAGTAACTTTTTTC  
ATATTGCAGCTTCGCAGCCGTGGTAATGTTCTCCAGTGGTTTGACGAAAGTCTTATTA  
CAACAAAGGCCAGTCCAACCCCTTCAACACCTCTGATTCAAATTTCTCGCGGAATACGCGT  
ACCCGACAACCAACGAAAACCTGATTTCTCAAACGGATTTTCGGTCTTTAAGCGGTACAAT  
CATAACCTTCTCGCCTTACGAATCGGATCTAGTCCGAATTTTCCAGCATTACGATTATA  
ACACAATACACTCTTAAACCGCATAACGGACAACCCTTAATCGGATACCCGTTTGAATCGCT  
GTATTTCCGTAGGTTGTTTGCAGATGATACCGCAGCAACATCAAGATAGTCAAGTTTTTT  
AAATTCTAGCTCAAAAATACCGTAGTATTCCTGCAATGACTCTTCACCTTCCTGCAACAT  
ACGGCGAATACATTCTTTACGTGATTTCTGGCATGCTTTAGCGGTGGAGCTACGTTGCGT  
TTCCAAGCCCATGAATTTTAGCTTAGGTTACAGCAAAGCGCGTTCCCTTGCATGTACCAAAC  
ATTAAGAGCATAACGCTTTTTAGCAGTCCAGAATCCACCGATACCCACAGATTTCAACGG  
AGGACCAGCAATTGCCTCACGGTCCATCAACATCAAGTGCTCATAGTTGTTTATGTACTC  
GCATAACTCGCGATATCCCTTGTGATAATAGGTTCCATTTCGATGTTTACCGAAATTATC  
AAGGAAGTCAACAAGTTTTTCGGTATCGTCGAAACGGTCTTCCCCGCCAACCTTATCAAT  
AACTTTGTTAACCAGCACATAAACGGAGTCAAGTATCACAATAACGAACATATGCAAAATC  
AGTCGTTCCGCAAAGATCGTTTAAAGTATTCGTTAATCTTACGCTCAATCCACTGAACTGC  
AATCTGACCGAACAGTGTGATCGCACTATCGTTACGGGGATCATAAAAACGGAATTTAGG  
ATTCGCCAACGCACCATTAAGGGAGTTGATCAAACTTTACGAGCAAGCTGGTTTGTATT  
GCACAAGATCGACTCGTCTTTACATTCTTCCAGTAATTTCTCTAATGCATCTTTACTCAA  
TTCAGAAAGCATCGATTTAAACGCTTCATCGAAGTCGTGACGCACTTCAACGCTATAGCT  
AATGGTTCCCCCATAAACATGATTTTCATCGTGTAGAATCGCTTTACAGAGTTCAGCATT  
GCGGTCACATGCCAACATCATGTTTTTGTACTGCTTACGCTGATCGAATACCTTTTTAAT  
CTCAATCGGTACGATACCGTGAACATCCTTTCTATACATCCATCCGTTAGGCGAGCAAGA  
ATACTCATCACTCGGACGTGGTGTAGTTTTATTGATATACTCGTGCATCGGTGCAGCATC  
AAAAGATCCGGCGATTGTTGCCGGCTAAATTTTAACTGACGGATGATTGATGGATACCA  
TTATGTTACAGCGTGGTTCGCTACTCCCAGCGCCCGTTCTCTTGCGTACTGCTACATGTCAC  
CATGTAGATCAGACTATATCACATTCTCATAGAGAATCCTGCCATTTCGAATCGTTTGAT  
TCTACTCTACTCGGTTTCAATACCCTTTTCGATAGTCGTTGAACAACCTGCATCTTTAAGCTC  
ATTTTGGTCAAACGGAGTTCTCTTACAGTATCCGCTATAATTCTTACCCTGATACGGAT  
TAGACACCAGTTAAATGTAGTCGTTTAAATGCTTCCCTCGTTATGTATCTCGTACTTTCTTA  
AAATGTCTTTCATCTCGCGCCTCCAATGTATATCAATATCTATATACATTATAAGACACG  
TTAGCTCAAAATGCAACTGCTGCTGATTGTCTCCTTAGAGATTTGCCAGCAATTAAGCAG  
GTTATTCGATCACTGTCACCAGTGAAAGCCCCATATCGGTTACGGGAAGTAAGGTCAAAG  
CTCATCATCCAACGGTAAGCATTCCGCACAGGTTCTTTACGAATTCACCCGGATAAGTC  
TGCTTAGGCTGTATCTTGTTCTCTGGTACTACTTTACCCTCACCTTTCAGAGATCCGAAG  
ATAATAGCATCCCATACTTTCATCGGGTTATATACATGGTTAAATTTAATCTTTGCATAG  
AAACATGTGCTATACACCAGATCGATAAATCCGCGCTTTTTATCAATCGCCAACACACGG  
TCAACGTCACCGATGTTATAATCGATGTAAAGTTGATGGTTGTCATCACGCAATTTGTTT  
AACGGACCATCGTAATCAACCATAACCGATTCTGTCTCCTATTCAGCAACATAATCTAAC  
GCATATCTTGGTTGAGTCGTAAAGCTAAGTTTCTTGTACAGGTCAATATAATCAAGGCTT  
TCGATCCCATGATCGTAAATGCTTACGATAGTTGCCAAAATCATCCTGTGAGATTCGG  
GATTTAATCTTACCGCACGGGCTTAGACGGTTAGCGGTTCTACTTCCGAACCTTATTACTG  
ATACGTTTAAATGATATATGGAATATCGAATGTTTCTGTGTTCCAGCCAGTGAAACCAACG  
GGTCGGTTTTCTCAAAGAATCGGATGTATTCTAACAGCAATTCGTCTTCTGTTTCATAG  
ACGTTATAAACAACGCGCTCTACAATGACAGGTGCAAGAATTGACTTGCTAGATTCCCAG  
ATTTACCGTTTTTTTCTTTAAAATGAAATACAAAGAAACGATCATGTACGGAAACATAA  
TGAGTAATTGCATCGATAGGATATGTCGCTTCTTCTGGTTTAGGAAATTCTGGGGCAGTG  
ACCTCGATATCAACCCATGCTACACGGATTGTATTTTGTCTCATGTCGAATCTCGCCTTTA  
TACGTAGCAGACAGATAGGAGGTGATAAAGTCATCCATCCCTAGCGCCTCCTGCCCCATT  
TCTCCTATCTTTTTACGCCGTTTGTGGCCTCGTTCATAGATGGGAATTTTTTAGCAATT  
CAAGGCTTGGCATAGATATCTTTATAATTCGTAACCATAACAGGCGCGGCATGATGAAAT  
AAAGTTGGCGTATATTACGCGTAACGCTCTTGTCTTATCCAGCATCAACAATATAACGC  
TCGTAGATCTTACAACCCATTTCGCACACCTGACAGAAAATACATAATATAAACTCCTTCA  
CTTATGAAAGACACTCATTATAGGGGAATCGACTTAGTTTGTCAACACCCCTATCCCATC

AGTATCTTAGCGTCCGATCTGATATTTCTCTATCAGCGGCCACTCTTCCTTCGGTTTGAA  
AGACAGTACACGGAAATTATTAACCTTCGGTAGTTTCAAATCACTATCAATCAGGGTACG  
CAGATCCACTGCGCAAGAAGTTTTGCAATGTTATTACGGCGTAATTCATCTTCCCACGG  
CATTTTAACACTACGACCATCTAATTGCAACAACCTCTTGAAATGAACGATGTAATAGCG  
CCGTTTCTTTTGGAGCATATGACAAGACTGATTCAGTGTTTTGTCTCGATTGTTGGCAAT  
GCCGTAGCGGGTTAAAGTTTCCTTAATTTAAGGAAGTTTTCAGGACTAATCAAATTAAT  
TTCAATCATTTTACCACCTTTCTATAATCTTTTTAAGTCGTTTCCTTTCTGTCTGATTCT  
TAGTAACACCCGCCAAAAGGTCATCGGTCGCATACGGTTTATTGTTCTTCAATAACTTGT  
CCATATCTCCCTTTTCATTAGCCAAATCGAGATAAAACCGGGCGTCATCCATATTTACAC  
AATATGCGTTCGCCACTGCCATTAACCAATTTTTGGTCCAGTTCTTCTGTTAGTTTAG  
CCCGTTTACTGTATCGTTTCCCCTTAGAAATACTCTGTAAAAGATAATCAAATGCATTT  
GATATGGGAGGCCAGGACCGATTAATTCATCACATACGCGCTTTATAGGCAATCTGCGT  
GCTGGGCAAGAGCGGTGTTAATCCATCTCTGATTATATGGAGAATTGTTTCCCACATTAA  
CACGCTGTTTATCTAAGGTGATATGATTCATGAGAGCAAATTATGCATTGTGGGTTTTCT  
CGGTGAATGTGACAGCTAATTCAGACACCTTTTCCAATCACGAGAGCGCCATGCAATTT  
CATGCTCGTCTAATTGTGTATCATCTTCACCGAAAAATTGACCTAACCTTATACGAACTC  
CAATTC AACCATTAATTGCATTAACAAACAGACAATGTGAATCTCTTGATAAGCCGCGTG  
CGAAGCATCTGATTATTTTACCGATAATCTCAGTGAGACGAATCATAGAAGCTGGCTT  
AACTTGAGTATACAACTCAGTATAAAGTTTCTTGACAAATTGAGCATATGTATTGGTATA  
GCGTGGTGCGAGTTTACGCACATTAGCAAACCTGTTTAGTTTTAAGTGCTTCCACCACATC  
GGTACTTCAGTATTGCTACTTTCGATAACCATGCTCAATACGCAAGCATCAATTTTAGC  
ATGTTTAGCGTAGCGGTCCAAAAGTTTCATTACGCGCCGGAAGTCAGGGAAGTTCTGCTT  
AACCAGTTCGCTAATACGCGCATTCTTCTACTGGCACACCTTCTTTATCAAGAATTGC  
GTTACACCGGACGATCATTCTTTCAACATGCGAAGCTGATCATCTCTAGTCGGAGATCC  
AAACGTGATGGGGTCAAACGAGAGCGTAACGCTGGGATAAATACCTTCTAGATCGTTTGC  
TGTGTTAATGAATCTCAAATTGTTTGAGTATGCCTCAGAGAAGCTACGCAAGAGTCTTTG  
AGCGTCAGCCAACCCCGCTCGGTCATACTCATCGATAATAACAACCTTTGCCCTTCTCTCG  
TTTTTCTTCATCGAGTGATACCCTCTGTGCAAAGCGTGTAATCTCATCGCGGATAAAATC  
AATCTTACAATCTGCGCCGTTAACAACAGATAATCAACACCCACATCTTCGCAAAGCGC  
CTTAGCAACGGTTGTTTTACCAGTACCCGGCGAGGGGCTATGCAGGATCATAGAAGGGAT  
TCGGCCTTGCTTAACAATCTGCGCGAAGATCTTATTATCTGCTTCCGGCAGAATACATTC  
AGAAATTGATTTCCGACGGTATTTCTGTTCCCACTGAAACTCATTTTCATTAACACTCAG  
CATGTAATCACCTCTCACAAATTGCATCATTAAAATGGGGAGCATTTACTCCCCACAA  
ACATTATAATAGTCGGTGTAGCTGGCGTCAAGGTCACACTCGATCATATAAGATATGGTT  
TCGCTTGACAGCCATACAGCCTTACGGCGAGTGAGGCTCAGTTTGTAATCGCCGAAGTCC  
GTATCAACCAGTTTCATTTTATCTTTACGAATAAAGAATTGGAAGTCTGCGTTTCCGGTA  
TATTTGCCCATATCAAGACAAAACATCTCATTAGGATTGTTTTTGTCAATCTCTTCCCAA  
CCTTTGATCATCAGACGACCATCAATCGGTAGAAGTTCAAGGCGATCCACTTTAAGCTGA  
TTGCTCATTTTCATAAGCTGTTTCAGATCGTCGTTCCCTCAGTTCGTAATCGACATCGCTT  
GCAGGTGGAGTAACTCGGCCTTTTCGGTGATACGATAGTAGCAGCACTAGCACCAGGATAA  
TTAATTTTGGAGACGATCATTAGACACACGAATGTTTTTCGGTGCGGTTATCAACCGTAATA  
TCTGCTTCATCGCCCACCAGATTCAGAATGCCAGGAAAGAGTTAAGGTCATAGATCCCG  
ATTCGTGTTCCAGTTCCTTGATTACAGAGTCGCTTACCATATAACAACGTTTGTGATGTTT  
TTGGTGATTAGGACGTTTCTTTTGTACGATGATACCTGGGTTGATAGCGGTAAGTTT  
TTCAGGGTAGCAATGGTTTCTTTAGTCAGTTTCATCAAAGCACCTTTATCATGTTAATCA  
ATTAATTACGGGTTTACTTCGTGCTCATTTTGAATCTTTAGCATTCTTTGATAAATTTT  
TTCTCGGCTTCTTATCGGATGATTGAGTATACTTCAATCCAACGTAAGCTGTCAAGTAT  
TGTTGCAGAGCATAGACAGTAACAGGATGCTTTGCGGTCTTTTTTCCGTCGAGATATACA  
TGATCACCACGAACATCAAACGCAAGTTTACGACGAATCACATCATCAACAAATTTATCT  
AGGACCAAACACCACTCAATACACTCTATCCCGTGACGGTAGTTCATTACATGATTATCT  
TTGATATAGTCAAACGGAATATGACAAAATTTACTATTTTGTAAAGATGAATAGCATTGT  
TCTTTTAAGCTCATAAGTTTCACTTCTATCACTTCCCATCAGCAATTGCGATCAGACGAGT  
TACTACTACGCTAGCGGCTTCAATCAGCAGTTCATCAGTGTCAATTTGATAACCTTTTC  
GAGAATATCTTTACCTCGAATAGTATTAGCGCCTTTAGCAATTGAATCATCGTAATACTT  
GCGCATGGCCGCGATCCATTCTTTTTGCACCATATCATCAATATGTGCGTACAGTTCAA  
GCGTGCGTGCGGCGGATAACCTTCATTGTAGGTTTCTCGCTTTCTGGCATTGGTAGTAC  
GCAAGCTTACGGATCTTGCTCATTGCTCGGTCAAATTCGAGACTGGTTTTCTTGTTCTG

AATGTCTGCTACATTAATTTTTAGCCAGGTTTGGCGGAAGCAGTCATAATATTAATCTCCAA  
AATAAAATCAGTATATTACGTTCTAAAGTTAGTTGCAACTCCAGCATCAGGGTAATCAAG  
TTTATCAAAGTTGGGGACCAGCATAAACTCATGATGACGACAAGACAACATTTTTGTTAT  
GTCCGGATCGCTGTATATGCTGTTTTTCATATCCCCATACTAACTACATATTCTTCACC  
GGAATATAGATTGATTAATGTATAACAATTCTAACTCCGGCTGCGTACTCCGTCAAATGT  
TAACTTTCATTTTCAGTGAATCGACCACGTTTAAACCATCTTGAGATGACGGCTGAAATCAT  
CAGGGTTATGGTCACGATGGCAGATAACATACACGTTATCATCTAACTTGTCAATGATGG  
AATCAGGTTCTTTTGGCCCTGAACGTCCGTAGCCCCATCATAAATTTTCGTTGAGTACCA  
ACAAAGAAATATTAGTACCAGATACTTTACCAGCAACATCACGCCATGTAAAGAGCATCG  
CAAGGTCAATACGTGCCTTTTTCGCCTTGACTGAATGATGTATACGAAAACGATTCACGCC  
CCCGTGATTTGATTGTTTCGATAAACTCTTCATCTAGCGTAAAGATATCATCCGCTTCCA  
TGTGATCAAGATAATACGAAATCCGATCATTGAAATATGGAATATATTTCTTGACGATAG  
ACGCCTTAACACCGGAATCCTTCAACATTTCTGTTACAAATCCACGGTGTTATTTTTCAA  
GAACTAGCTTTGATTTTTACGAGTAATCTCTACCAGTTCGTGTTCCAGTTTAGCAAGTT  
CTTCGGAAATGTCAACCCTTCCTTTTTGACGTTCCCTGCTTTGCTTTCTGGATCTGTTTAG  
CCCGACCAACAGATGCCGTTAAATTCGCTCTCGGTGACTCTATAGCGCGTTTAAATTTCCA  
AGACCTTAGTTTGTGCTGTCTGGAAAGAATTGGCCTTCTCTGCGTATTCTACGCGTTTCT  
CGTCAATCAGAGACAGTTTATGTTCTGCTTGTGCTTTTTGTTTCGCGTACAGCTTGATCAA  
TGCCTTGAATGATAGGTTGTGTGCACGTAGGACAGGTCCCGCTTACTCGTGCATAGGGA  
TAACACGGTTAAAGTTCTGGATCTGCGCACCAATGTGTGCGATAGCCGTATTAATTTTAG  
CCAATGCCGCGCTAGGATCTTCCGGCATAACAAAAGCCAATAGCTCATCGGTCAAGCGCG  
TTTCTTCGGCTTTAACTGCTTTAGCCGATTCTACCTCTTATCATAACATATTCTGCAAAC  
GCTGTAGATTCTCGGCACTAGCCTTGCTCGCGTCTCTATGTACTTTTTCTGAGTGTTGA  
TTTGTGATGAACGTGATTAACTTTCATTTCTGCATCTGGATATTCTGGGTAATCTCGC  
GTACATACGCTTTATTCAGTTTATCCATTTTCGCTAACGTAGCAATATCAAGCAAATCCT  
CGACCAGTTTACGGCGACCCGCTGCCGGACGACTCATAAAAGGAACATAACCAGCAGTGC  
CTAAAACAACGATCTGTTTAAAGCTGGCTAGGTTCAATCCTAGGATACCTTCAAATAAT  
ACTGAAAGTCTTTGGTGCTTGCCTCTCGTGCATCTTTTGACCGTCTCGATGCACTTCGA  
ATACTTCCGGTTTTTGACCACGTTTGATATAAACTCCTTCGCGGCCAGTTCAAACCAGA  
CTTCGACTAACAGTTTCTTTTTGTTGACGCTGTTAATCAATTGGCCTTTCTTGATACTAC  
GAAACGGTTTACCGAACAACACAAAGCAAAGCGCCTCGATCATGGTTCGATTTACCAGCAC  
CGTTAACACCAGTGATTACTGTCTTTTTGAATCCGTCTAGGTGAATCTCAACAGGGTCAG  
CACCCACTCTCATTATATTTTGATAGCGCAAGGTTTTAAAATTTAACTTTGCCATTAAGC  
CACTCCGCAATCACACATTCCATAATATTAAGTCTAAGACATCTTCATCAATGTTGTAA  
ACACATGCTGCCTTCACTTTAACTAAGGTGTCTCTGCGATCAGGCAGCATGATCATATAA  
TCCAGTGTGCGCAGGATCATATGTCATAAAGGGATCAACATAAATCCCTTTATTCAATGCC  
AGATATTCGCGAAGACCTTCCATAACCCTGTGTCTAAGGTAGGTTCATCGATAGAATCATT  
GTAGTGTATGTTCTCTAAAATTTCTTCAATTTACCTTGCAGGTCTTCCGCTTGCTTTT  
CCAGAATATCGCGAAATTAACACTACAGTCAAGCGGTAATCACATTTACCAGTCGTTGCG  
GGAGAATATAACCCTTTATACATTGACTCTGACGTTCTAGGAATACCCCACTATGCATGA  
CAGAGGTCCAACCTGTTAACGTCAATGGAGTATTCGGAAAATAATACTTGCTGGATTGTT  
TCCACTGGACGAAAGCACCATATAACAATCGGATTATATTCACCAACCACACTCTTAATAA  
TGGATTCTACTTCGTCTTTAACAAAGTCGCCAATGCCCATAGTCACCATCAATTCTTGTG  
GGTGAATCACTTTAAGGTAACGACGGTAGCCGTCATCATAACCACAGCTTAAACCCTGGCT  
GACCCACATTTTAGCAATACGCGCTTTCAGATAACCATAGATCGGATTCTTGTAATATG  
ATTGTTTTACTGTGTACGCGTGCATCAATTCAATAAAATATTCATTGCTATCGAATCAG  
GATCAGCCGCGACCATAGTCGTATTCAATAATATGTTCTCTCGTTCAATTTCATATTGTTTC  
AGGTCTTCTAAAAGTTCATCCACTGCTTGTTCAGCACATGACGCAGCGTAAAGTAATAG  
CTTTCATAAAATTTCTATTTCCGCGCGAGGAATAGATCGAATCTTACACTCAGCAGTAGTA  
TCGGTGAGTAGCTTTTCGACCATCATCCGAACCTTCTTCATGCTCTTTGGAAAACCATAA  
TCAACGGAGATTCCCTTGCCTGCGAGCAAACATAGGCAATGCCGCATTAATTTCCATTACC  
TTTTGTGCAAGTGTTTTTCATCATAACAGACTCCATAGACCCACGAGCAATAATATTCTGGG  
TGATATCAGCAACTTTACTGGATACGATATTTGTTAGCCCCTTTTGGTGATATTTTAC  
GATCAAATGGGATTTTCGTCATGAGTCCACAAACCATAGTTAGACCGATATGATAGCATAT  
ACTGACCATCTCGCACAACTCAAATACATGGATCCTAGTGAATTTTCGACAAACCTTCGT  
TGATTTCTTTCAGTGTCTTAGCAATCTTAAACAACCTCCAATCAATTTTTAGAGAGTATAA  
CGGGGATTTCTCCCCGCGTCAACTAACTTTTTGCGTTATTTACTTCGGCTAAAAGTTCAT

CAGAAATACGCTTGACCGCCGCAAGTTCTTCCGGTTCTAGGTTTTGTTCTTCCAGATATT  
CATAGACCATCTGAATAGTGCTTTTAACTTCAATAACACCAATTTCTGTGATGCGCTAC  
TCTCCAGTTTATGGACCACCTTTAGCTTGTGTAAAACGGCCTCTAACGCGCTTTCTAACT  
TAGTTAACCCATTATCAGCGACCGTTGCGATAAGACGCACACTAAGCCCTAACAGCGTT  
CAACATCGATTTTATCGTCTGACGGGTAAGTGCTACGCACATGATAAGTTTTGTCATTCT  
GAATAAACTCTTTTTTGTGTGTATCGGTATAGAATACCCAAAGAGCACGCGGATCGTTTA  
CGTACCCCGCGTTAGTGTGTATGGTGGACCAATATACGTTACGTTACCGCTATCACTGA  
GAGTATCAGAGTGTCCCGAAAACACCTCACGGTATTTCTTGAGGAAGTCCGCGCTATAAC  
CTTCGGATTTTAGCCCTTTATAGACATAGTAGCCAGACAATTTCCAATGGCCTACACAAT  
ATTCGCTGAATGAGTTTTGAATAAACTCTAAAATCTCTGATTTATTGTCATCACAAAACC  
ACGGGAACAGGTCAAATGATACACCATCAAAGGTAAGTGGTTCCGGTTTATCGATATCCT  
TAATGCAATCATATTGGCTTAACTTTCACGCGGTGCGTTAGGCTGGATCTTATGACGTT  
TGAATAGATCAAGGTTCCCTACGGTACATAACAGGTGATTCCAGATTCTTCCAGTAACG  
GGATGACCTTACTACGGTTACAACCTCATCGTTCGCATGAGTAATAGCTTTTCCGGCAATCAA  
ACCAATCCCCTGTTTGAATCCATGTCTTAATATTATGCTCTTTGGAGTATTCAACCGCTT  
TCTTGATGGTATCAAGAATACTCGTGCACCCACGGATCATCGCCACCGATACCAGTAT  
GCAGATCACCTAAAAGCAAAATTTTACAGTCTCTTCTCTCTGCGTTTTTCGATGCTCTC  
ACTATATCACAGAAAATAACAAGGGAAACCCCTTTCAGAGTCTCCCGTATAAAAGCCAT  
TACAGCATACTTAATATCGTTTGCCGTGTAATGACCCACATAGCAGAAGTTAGTTCTGGC  
GTGTGTGACTGTTTGTAGATATCACGTAATTTTCCGATAGCGTAGATCTACGCATCACGA  
TTATCATCGATGGTAGCTTGTTACGCCACCGCTTAAGTCGTGAAATCTCTCTCGAGTTC  
TTACGCAAGATATTTTCCGCTTCTTAGCGGCTTAGCCTCTAGTTCTGCTTGTCTTTG  
TCTACTTCACTTCACTGCAATCTTGTCTATGCTGTTTCATCGTAAGTCATGTTATTTTACCTC  
TGGGATATAATCAATTATTAAGAAAATTCATCTTCTGATACATTATAGCTATGTGAGAT  
TGGACCCGTCAAGACCTCAAGATCCGGTGATTTGATATTGCACGGATAGATAACCACCGG  
AACGCCCCAGTCTCTTAAAATAATTTGGCCAGATACGGCACGAGGTCAGTTACAACTC  
TGCTTATTCAGCAAACGGGAAACGTTAATTTTCAATCTCATAAAATTGGTCCAGGCTAG  
GCAATTCCTCAGTCAATACATCTTCAACCTTTGGCGCTTTCGGTATATTGACCGATTCT  
CGTAGTTGTTGAATTTATCGCAAATGTCCTGTATGAATGCCTCATCAGCAATCTGGCACA  
TATCAGCGTCGCGTTCGTCATATACATGATGCACAAAATATTTGTATTTTGGGGCTGTCTG  
CTGTTCTCTCTTTTTTAATGCGCTGTACAAATGCATTAAGCACGCTTGGCAGATGTAAG  
CATCAGGATTTTTATACTTTGTCTCGTCAAATTAATTCAAACCCTTGACCGCCGCTTCGA  
TTCCGTCGTCGATCATTTTCGTCGCGCCATGTTTACTATAACCAGAAAAGTTAAAACGAC  
GTGATAGATTTTTAGACATTTGCATAATTGCTAGGCCGATTTGATCGCATATTGGAACCT  
GCCGACCTTCTGCTGCAATTTGTTGTTTCCAACGGCAAATTTCTTCGTAAAGCCCTTTAT  
TGTTTACATAATCTGACACTTCGCACCGTCGCTATTATTTAGGAAATAACCCTTTCCGGC  
TATTTCCCATTTGCCATTATACTTTCTTTGCTTGGTTATCCACACTCTAACCATCTCTACT  
GATTCACCCTCAGACGGATCAAGAGTTTTCCCTTTTTACTTTCATGCGATACTTGAATCCG  
TTAAATCTTGCATTCTCTTACTCGTTAAAGTCGAACATCTTTTTAAATGATTTTCCGCCCT  
TTACGCTCACCACATTCTAGCGGATTCATTCGGTCTGTTATTACATTGGCATTAGGTAGA  
AACGTATTTAGATAAACTACCGACGCCAATCAGGAACATATAGATTAACATTCTCCTTG  
CTCTCGTTGTCTCTCAGGTTCAAACGCAAAGATAATTGAAATGCTGGTTCCAGATAATCA  
GACACATGACGCGCTTTGACAAACTCGTTTCTCGGGAGATCGCAACTATTAGCAAGACCG  
TTTTAAAATTTCAATCTCCCATCGTTGAGGGTTAAAGATGAACATCACAGCAACATTTTTA  
TGATGAATGTAAGAGTTAAGACCATAAGAACCGTAAGGTATCCGCTACCAATACCATTT  
GTGCACGCTTCTCGGTCCCGATTCCCGGTATAAATGAAGTCATCGCCACATTCATTTTTA  
ACCAAATCAACAAGACGTTCAAAGGTATTGTTTGTCTGACTGGTGACGCGACCAGCGT  
TCGGAGTCAGTCATTAGGATGATGTTAACTATATCTGTATTTTTATACTCTTTGCAATAT  
AGTCTGGATTCTAGCGCACTCGGAACAAAATCGCAATTTGCATAGTATCGTAGATACTTC  
CCGCTATATGTATCAAAGAGATTTGCACATGCTATCGTAACCTTTTTAAAGTCTCCCCAC  
GTGCCGTGTTTGTATCGTTCAAGAAAACAATATTCGACCCATTCTTCCGGTGTCTCTCG  
TTATTTTTTACCATAACGTTGATTTTCTTCTCTAATAACGCCTCATAAAGCCCTCGAAGA  
GAAGAATCGATCATATCAGTACCATCCTTTGCACTTTCTATCTTTTCTTTGATAGCAGGC  
CTCTCAGAGTCTTTTAGAGCTAAGTTCTGTAGGCATTCCGATTTCGTCGGCGATTGGTTCC  
CAATGCTTCGTGATAAGTTCAAGATTAGACTTAAACGGATACTCATTAAATTCACCAAT  
TGAGGAAATTCATCAACGTAAAGAGCATAATCACCAAACATTTTTGAACGTTCCATCTTA  
GATAACGCTGTATGTGTAATGAATACCACATCAGCACCGTCTTTAACTGATTGCATTATC



GACGCTTGCACTGTCTTAAGGCTTCTTAGTCTTGTGCTATCGATCACGACAGCACGACCG  
CCCATTCTTTTAACTTATTGTAAGATTGTTCACTTAAAACACGAGATGGCGAAGCAATA  
ACCGCTTTTTCTTTTGTCTCTAGGACGTGGGAAAGTATAGCATCAGTTTTCCCGCCACT  
GGCAATGCGATTAATGTTTTCAATCTTCATTAGAAAACCTTACGTCGTGCTTTCTGGCATT  
TCTTGATCATTTTATCAGAAATTGCGCGCTTAGGTGCAATCTCTTTCACACCGAAAGCAC  
TAATGCCAAATTCAGAGAGAATATATTCAACTAACAAATTCACGCACACGCGCTTTACCGA  
TATTCACGCCGTTATTTTTTCAGATATGTCTGGCCTTCGACTTGCATCACATCTAAATCTG  
CGTCGGCAATATTGATGTCTTCCATGCGCCCAAATCGAGAATAAACCATGTGTGCGATTG  
CATTGTGTACTAACATAATATAATCCTCACTCAAGAATTACTTAATGATACTTCCTTTAC  
CAGATCCGTGACAATGAGCACAACACCTATCACCCTCAATCCTGTTCCGTTACAGTGTT  
TACAGTTCTCCAACGGTAAAGCCATTATAGCAAACAAAGCAATAATGATCACCGAAACTA  
AATTCTCAATAAGCATAATTCTCCCGAAGTTCTTTATAGCCTCCAATGTGCTCGTTGTCA  
ATGAATATCTGGGGGTATACAAATCGGAGGCTCTTTGAGTTCAGCCTCCGCGCCAGTTCT  
TCAATCATATCACGGTCGGGAATAATGTGAACCCCAACCTGCTTGAATACTGGTTTAAAGT  
GTATACGGAATACCCAGATCATCCAGTAGCGTCATTGCACTAATACAACCATAACAATGA  
TAAGCCTCTTTCGGTATGCCGTATATCTCGATCATTCTCAGCCTTTAATCGTTCTAGTT  
CTTCTTCCAGTTCCTTGATCCGTGGGTCACGTTCAAAGTCACACTGCAACTTAGTGGCGA  
ATACTCGTTTAAACTGATTGTAATCATCGATTTTACACACTTCATCTTCGCCATAGCGAC  
GTACAGAACTTCGTAGTTATTGAAGAATTGTTGCATCATTGCTTCGGATGATAGTTCTG  
CCGATACTACTTTAAAATATTGATCTTCTGTAGGCGAAAACCACTTGCAAGCATAAAGAT  
AAACCTATTCATTGTCTGGACACTGGTAAGCCTTACCATCGATTTCAATCACAGAAACAT  
AATCAGGTTTAGTAGATGAATCAATAGCTAAGACTGTAAACGAACGGTCCCGATAAACT  
CGGTGATCACACGATTTCGCATCACTGGTTGCAAATGCTTTACGCGCTTGTTTCGCTTTACC  
ACTGATAGGTCATACCAACAACAACATATTACTAACCTCGCTCCTTACCAATCAAAAAT  
TCAACTTCACGACGTTTAAATGTCTTCTGGAAGGTCTTTAATCTTCTGGCGATCTTGCATT  
ATTTTCGTCCATCTTGTCAAGTGCTGCGATGAAATCATCGAAACGTTTCGAAGGTTTACCT  
TCATTTGCTTCGCCAAATTTAACCATTGTCAGGCCGTAACGACTACTAAACAGACGTTT  
AACTGTACAACGAATTTAGAATCAGTGGTTATAACTTCCAATTTCTTACTTCACGAAAG  
AATTTTCTATCAGAATCAATAAACAGCTAGTTCCCTTATGGTTCGCTATCTTCTGTTGCG  
CTCATTAGAGTATGGTCTTTACCATCAATTTCAATTACATCAATTTGCCACATGGACTA  
ACATTTTTAACAGTAAAAGGTCTATAATTTATTGCTCGAGCAATAACATAATTAAGGTTA  
GATACGTTTTTCAGCATAATGGCAGAAGTCTGTATAGCATTTCGCATCTTTCCAAGTATAA  
GTTTTACCAACTTCCCATTTCTGGGGAAGTCTTCAACTTCACGAAAGAATTTTCTATCA  
AATGGACTAAAGAAATATGTTGCAGTCCAATGTCTTTTCCCTGTAGCCGTTTTTCGCCGTA  
TGATAAACACCGTCTAGCTCTATTGCATCAATCCAACCGTTACCCTCGATCTCGATGATG  
GTAATGGCTTGTACCGATAGCTGGACTAATATCGCTGTTAAGTGGAGAAAGAACACCT  
TCTCCGTTAGTAATAAACTCAGTTTTAGCGTTTTTCGTCTTTCCAGGTGTAAGTTTTACCC  
ATTTCCCATTTTATAATATATCCCTTAAACCGATTTTATCAAGTTCGTTTAAATGCTTTC  
TCTGCTTCTGCCTAGCTTGCACCCTTTCGGCATTTTTGTCAAGAAAATCTTTAAACTCT  
TCAAACTGGAGATATGACGCAAGGCGTTAGCACCGATGGCCGCATGTGATTTGGATTCA  
AAGCGGATTTTATAATTATCCATCGCCAATTTGAGAAGATCAATTAATTTAGATTCTGCT  
GGAATAATAATTTCTTCAAATCTGCTACGGTCATGATCCAGAAACCAACAAGATAGACCT  
ACATCGGTTGAACTCATATAAGTTGCATCATGAAGATAAACAGACCGCACGTATCCTTTT  
TTCGCATCAACAGACGCAACTTTAAACGGTAATCTCAGATATTTCAAATAATCAACATCA  
TACCATTTTAAAAATTGGTTTGCATCTTTTACATCTTTCCACGTATAGGTCTTACCAACT  
TCCCATTTTATAATATCATCTCTCATTTTTGATACGTGCTTCTAATTGGATCATATGGTC  
GCGCGTTTTGCTTGTATTTCGCGGATAGCACCGATCCGGCTAGGCATACCATCAAGCACGCT  
CTTAATACCTTCTAGGGTAGTAATTTTGGCAATGCTATTATGTTACCCCATCTTATCGAT  
CAACTCAATGTCGTAGGCTTCCATAAGCAGACCCAGGCGTTCTAAAGTTAGGTCTTCTTC  
TGTTTCTTCCGATTCTGGAGTCTTAGGTTCAATCGTAACTTCGGTAAAGAAACGTCGCTC  
ACCCGACCAAACACACTCCGGAACAGCCAATAGGGGATTCTTTTAAACGTCATAGAGTC  
GAAATTACTACCAATAATAGTAATTTCTCTAACATCACCATCATCGTCAACGTCTTCTAC  
CCTAAACGGGCGACCAGCCACCAAGTCCACAATACATCTGTTAATAGACGACGAAAATTT  
AGTCAGTTCGGCTTTTCGTTGCTTCGCATTTCAATCTTGTAAGTTTTACCAACTTCCATTC  
CATATTAATCACCTCAAATAATTTTCACTGGAATACTATTAACAATCTTGTATTGTACTT  
GATTGTCAGACCCCCGCCACGGCTTCTTCGTTGGCATATCTTTAATATAACGCCCATCGA  
TGAACATGTCAACTGATTCTACAATTTTTCTTTGCTCATCATTCAATTGGTCAAGAGTAT

AACCGGACCATAGCCAAATATCTTTATTTGGCGTCCATGATTTTACTTCATCGATGATCC  
GCTGTACACCCTTTAAATTGCGTTTATACAACGGATCACCACCTAAGAATGTTAGCCCCT  
GCATAAAATCAGGTCTAAGCAGATCCAGAATCAATCCCATTGTATCATCGGTGAATGGTT  
CCCCGTTCTTAGGATTGAGTAGGCTAGCATTAAAGCAACCATCACATGCGTGTGAACATC  
CGGTAACGTAAAGGGAGACTCTCACTCCCTCACCGTTAACCATTTCCACAATCTTTAATAT  
CGGCATCGCGTAGTTTGCCGTATGTATCAGAACTCATAGTCAATTACCCCGAACTCGTTT  
ACAATCTGGGCTTTATAGTAACCACCGCGAGATGCGAATTGAGAAGCTGGGCTTAGGTAT  
TCGTATTCACGGATTTCTACTTGTGCGTTTTTCAGTTTCCCAAATCAGTAAAGTCCACATA  
TTTGATTCTCCTGTAAAGTTGTATCTCGTCTTGATGAATATAGTATAGGGGATCTCGCGA  
TCCCCGTCAAGCATTATTTAAATTTTTCGAGAGATTTCTACCACAGGCGGCCTGGTAGG  
TACTCTCCGGCAAACATGAAGTGGTCCTCTGGATAAGAACGCAGCATACTCAAATAAAC  
TTCCGGCACTCTTCGTAATCTTTACGTTTAAAGATAAATGACATTCTCGCCAGTACCGATC  
ACACCTTATCTGGATCCATGCTCTTTACGCACAAACCATTGTACAGTATCTTTTTTAACC  
CGACTCACAAACAGGTTCCCAATACCCAGCGCATCCGGCTACACCACACGAACAGGTGAGG  
CAGTATTGACCTTTTGCTTTGTTTTCTCCACCCGATATTAACCGGATGCCATTCGTGA  
TACTAGGCTAAAGCATCGTGTGTCGCTTCGATCTGTTTATTGTCAATTCTTACCGTAACC  
AGCCATACAGGGATCTAATTTGTTGGTTCATCATTATAACAAGAATCATCATCAATGTGT  
TCTAATGTCATGTCAACATTAATTGATTTTGCCTGTTCCATGTATCGTTGTGCTTTACGC  
TTACGATAACAATAATTTAGACATATTCACCTCACATTATAAACGAAATTGTACGCCATCA  
AAATGAGAACTTGCATTACAGCTATTATAGATAATAAATCCTGTATCTGGCGCTTGTACT  
ACAAATTGACTTGCCTAACAGCGGCAACAGTAAAAATACGATTCGTGAGACTATGTTTA  
ATTTCTGTCCCAACTTCCAATGGGGTGTACTCTTCTCTTCGGCCCCAACACCAAACAG  
CCTTCTTCATGGTACGCCTTAATCTTTTTATCACAATTACACGGTTCAGCAAAATCAAGC  
GTATACAATTCACGAGAGTTGTCAGTATAAACCAACACAGATTGATTATGATAGCGAATC  
ACATACAGGTTATTATCTTCGTCAACGACACAAAACTACGGATTCGTGTGCCTTCGCTT  
TACTCCAGCAGATATTAACAACCGTTCCTCATAATAAAGAACTTTCTTTTGTACCAAAG  
CTAGCCAGTGTGCTAGCGTGCATTTTAACAACACTACCCATCACCATTACTAECTTGCGA  
ATTTTAATTTCTTTATTCAATATACAAAACATAATGTTGTCTCTCTTGTTTTCGATGTG  
AGCATTATAGACGAGCTAATCCGGTTGTCAACACCCCAAACGAAATAGCCGGGCCTTTC  
GGATCGACAAAAAATTCCATGTGCTTAACGCGGTTTACCATGACGGAGTGTTCCCGTGG  
TTAAATGGACGCAGATCAACAGATCCAAGATATCCACTAACGCGACGGATAACATTCATC  
TTTTCCAGATAGTCATTTCCGCAATGAGGGCAAACAAAACCAGACTCGGTTCGCTCTCATT  
TCCTTATTAGATCCGAATACATGACATACATCAGAAGGAGTATTAACACCGAAGTACTGC  
AATTTATCCATTGCATAGTCTACTACAGTTTCAAGACCTTTCAGGTTGTTTTTCATGTCT  
GGGAACTCAACATAAGAGATCATGCCACCGGACGCCAGCCAGTGATAATCTTTCTCAAAG  
TCGATTTTCTCAAATGGTGTAACCTTTCCGGTCTACGTCAAGGTGGAATGAGTTGGTGTAC  
CAGTCTTTATCGGTAGCCCCCTTAAACAATTCCAAATTGCTCTCTGTCCAGTCGATTAECT  
CGATAGCAAAGGCTCTCGGCTGACGTACCGTAAAGACTAAACCCAGGTTCCGGTTTCGTCC  
TTCCATTTTTTCAGTATAATGACGCGTGATGTTAAGAATATGTTTACCGTATCGCTGCGCA  
TCTTCCGAATCACACGGATGTACTCCAAACAGGACGCTCAGTACCTCATGTAAACCAATA  
TATCCAAGAGAGATCCTAGCGCGACCATCATCCAGCACTTCCAAAATTTTCATCGTTTTGA  
TGAATACGCAAAAATGCACCTTCTGTATACGGTACAGGAGCAACATTGGCTTTAGCGCCT  
TTAAAGCGCCTACGCGACTCATAAGCGCATCAAAGCAAATAGGCATACGATTAGCTAGC  
TCTTGTTCGAATAGCTCAATTCTGCGCATAATAGACGCGTTCAGTACGACGCGCGGCA  
ATAAGAGCAATACGCGGAAGATTGAGAGTCAACAGCCAAGTTATTACGGCCGTCTAAT  
ACTTCTCGCCTTTGTGCTTATGCCACACACCCATGAAACTTCTACACATTATTTGTTGA  
GGGTAGGTCGCTAATCTACCCCCGCCTTTCCGGCTGCTACATGTGCGCCATGCAGATCAGAC  
TATATCTTCTATCTTTTCGATAGTCTACCATTTCCGGATCACTTGATCCTACGCCGCTACCT  
TCATCACGGCTAGTCGTTAGGCATTTTCATAGCGGAACTCATATTCATAAGTATTGGTTTT  
TTTACCATCAAGAATTGCAGATACATTTTTCCGATGCAAGCCCTATGTTTCAGAAAGACT  
TCTCACGCTTTTGAATGTCTGCTCTTGTCCGGTTTCTTTATGGATCGCAGTAACCTCATA  
TGAGCGACGTTTGAACCTTATAGCACCCGTGTTTCGTAACCTTCTTTTCGTGTTTTTCGCTGTT  
AGTCCCCACTCAAGGTTAGATGCATCGTTTATAGTTTTATCGTCTGTTTTTATGTTTTCAC  
ATATCGATAGCCGTTAGGATTCGGAATCCAACATTCAGCCACAATAACATGAACACGCAA  
ACATAAAGGTTTTCTTGTCTCTCCTTACCCTTACTATTGTATATCCGGTATTGTTTTCTAT  
CCAGGTACTCAACTGTTTACCTTTAGGAGAAAACACCCGTCATCTTTCGCTACCATATA  
TTCGGTATCACGAATTTTTCTAAGTTCCATAATATATCCTCTTATACACATTGGCGTAAA

GAGAATATGACCGCTATGTTTAGCACGGGATTGTCTTCTAGAGAGTTCCCCCGTTTAGGC  
AGCTTTTAGATGAGCTGTTTAAAGTTTACCCATCGGGCTATCCGTAACACTACATCCAGT  
GATGCTACGGTTATTCTACGCAGAGATATAATCAGGGTAAAGTCGCTTACTAGAACATTC  
CAATGCAAGTTGCTTAATGTCGTAGTTCCGGATCTTCCGGTTTAAAGTTTAAATCCTTCTTC  
TAAGAACATCACCAGCTTAGGAAACACCGGAGTTATACCGGCTTTACCTAAACCTTTAGT  
TCGAACTTTCAGGATCGCTTCTAAATCAGTTTTTCTCCCCAGCTAGTACCCATACCAA  
GGTTAAAGTCACAAAAGTTGTTTGACCGTTGGTAGAGAACAAAGTGTTGATCTCATATTC  
CAACGCCTGATATCCGTCTAACGTTTCTTTTTCTGGTTTCTCTTGTGCATAGAGAGTATC  
AGCTTTGATTCCGCAGGTTTCGGCATCAGCAAGGTATTTATCATATGTTTTTTTAAACATA  
CGGCGCTAACACCTGGTCGATGTTTGCAATTGTGGTCCCGCCATATTGATGACTTACCAC  
CTGTGCGATAATTTGAGCGGTTACAGCACATGCAACACCGGTCGATTTAGGACTTTCGAT  
TTGTGCGCTACCCAATTTAAAACCATTTCTAACATGTCTTTGAGATTAACAAGACAGCA  
GTTAGTAAAAGGCATAGCTGGTGCATAATCCATATCATAATAATGAATATCACCGTCTAC  
ATGCGCTTTATAGATGTGCTCAGGTAACCCGGTTTTAGCAATATGTGTAGACACAGCGCC  
AGCAATCAGATCTCGACGTGTCGGGAATGTTTCGCGCGTCTTTGTTTCGCGTCTCTTTGCT  
TACTTCGTTTTCTTTACCCGTTGCGATCTCTGTAATGTCTTTTATTAGTTTTTCCATTGT  
ATCACCCATGAAAAAGCGGGATTTCTCACGCTCGTTGATAGTTATTTTACCAGTTCAGCT  
AATCCTTTTTCTTTAGCTTCTAGTTCAGCTTTAAGCTGTTTAAATCTCTTGTGCTTCTTA  
TTAGCGGCTTCCTGCTTACTATTTTCGGATAACCTGCTCTAGATAGAACTCCCAATCCTGA  
ATATTTTTGATAATGTATCCGTCAACATTAATTGGTTCGGAGATTCTGTACAGCTTCCTGT  
TTAGTTGCAAAAACCTTTCATTGCTGGGGTGAAGTATTCATTTTCGTTATCTTCAAACCAA  
TAACCTAGACTTGCATTCTCAATACGAAGATGAAGTATAAGATCAAGGTCTTTATCATCG  
GTATATAGGTCTTTTACACACCCCATAGAATTAACAACAACCTTTAAAACGAATTTTATCT  
ACACAACCAAAAACATCTTCAAGAATATCAGCAATTGAGCGATTAGCGCAAGAATGGTGC  
CTGAATGAGTCAAGGTTTTCGTTAGTTACAGTATACCAAACATCTTGTACCCACATAATA  
TAATCCTCTCGTTGTTAAGTGGGAGTATTATAGCATACTCCCTTCGCATGTCAAGCAATA  
ACTATTTTCTTTACTGCTTTCACCTTCTGGAGAATTACTCGAATCTCTTCGATCTCTTTT  
TCAGTCTCTTTAACAATTTCTTTGCGATTCTGAATATCTGTATCGAGATTAGCATCAAGT  
TTAGGCAGCATGTCAAGCAAGAACTTTTTAAAGTCTTTCAGGTTTCGGATAACAGCACCT  
TCACCCATTACCACCACACCAACACCGTCCGGCATATCACCAAACAGTTTAAACCAGTTCA  
GACAGATGATCATGGTCTTTTAAATGCTTCTCCTCCGTTTCAGATGGCAGTTCAACAAAGTTA  
TGACGTTTCATCATTGCTGATCAAGTGTTACCAGCAAAGCCCGAAAGATTTCCGGTGTATAT  
TCTACACCATCAATTTCAACCGCGTCAACACTTCCATAATCATCTACTTTAGTTACCTTA  
AATCCTTGTCCCAGCTTTTGAACAATTTCAACAACATGACTTGATACAGTTTCAGCGGTA  
AACCAATATGGCAAATTATGCTGATTTGGCTTGTAGCGTTCACCTACTTTAAATCTCTGA  
CCATCCGCTTGCATAGCATGAAATTGTTGTTTCGTGATTTCCGCGAAGTATTCAAGTTTCG  
CCACCATCAAACACACAAGCCATTGATCACAAAAACGATCTGCCTTAAACAGTTTCACCT  
TTCGAGGTGATCATGGTAGCTGATCCGTGCAATTCTTCTTCAACTAAATAGCCATATTCG  
ACAAAAACAACAAGTTTCATAGCTTCTTTGTGATCTGGATCATGCTCTCCCCAGAATCGC  
TTAAATTCTTGCAAACCTTCTGGTGTAACGAATAACATTTACCTTATTCAAAGTAAGTC  
GGCATTGCATCCTCTTTCTTGTTCATCGCTTCGTATGCCTCTTTTGGAGATGCGTTTAAAG  
TATTTACGCTCATTGTGCATAATCATAGTCGCCCAATAATAAACGATATCCTCAGCGGAA  
TAAACTACCTCTCCAGCTTCAATAGTAATAACATGACCGTTGTCATCTTTTTCTAATACT  
TTAAAGCCCTTTTCGCCGATTTACAGCAACCCGAATATGACCACGGCGCGAAGCATTGGTC  
AGAATAATTGAATAGCGAGAAAAGTCTAGAAACTCATCTTTACCACCTTCACGGAATGCA  
TAGTAATCACCTTCAAAGAATTTAGCCATAATATAATCCTCTCGTTGTTTAAATGGGAGT  
ATCTTACTACTCCCGTTTCATCATGTCAAGCGTTAAATGACTTTTTGGATCTCTTTTCAGT  
TCAGCTACTTTATTGGCGCTGAATTTAGCGTAGGTATCATGTGCAATAATTTCACTTTCA  
AGAAAGGTTTCCAGCCGAGATCTATTTTCAATAATGAACTCTGTGATGATCTTCCGCGTTC  
TTGATAAAGATTTTATTGTCAGTAATGTCATCTTCAATCGCAAAGGAGATAGAGCGAACT  
TTACCAAACAAGTTCATCAGATCTTCCAGCGATTCTTCTTTCTTAAAGTGGTTTCATTTCT  
TCAAACCTGCTTTTTAGTGATGCGTTTTAAAGTATTTACGCTCGCTTGCATGAATCATGATT  
AACGCACCCTCATAATCATGAGTTACTTCCAAATACACTTTACCATAACATTAACCGTA  
AGAACTTTAAAGCCCTCTGAAGCACACCATAACAGGAACTTGTTATTTTGTGGATAGCGT  
TTAACCAATTCCTCTGCGGACTCAGCATTACGGAAAGTGTAATAACGACCTCGTTCAAAA  
ACAGCATCATTTGAAGACTTAGCTGGTTACAATTTATACGTTTTCTGTACCATAATATAA  
TCCTCTATCATTTCACTAATTGCACTGCACGAGACAGAATGCGGTCACACGGAAGAAACA

TAAATTCCAAACTCGGATCAAAGTCTTTAGCGGTATATGTTTTCCCATCAACCGAGATTT  
CACTTACATAACCATTAGGTGAAACTTTAAGAACAGTAAACCCATTCTTGATGACTTCGT  
AGGTATCTTTCAATCCTTCGTAGTCATCCTCTAGGAAGTCTTGACGTGCTTGCTCAGATT  
TAAAAACATAGGCCACACCGGATTTAAACATCTTACGCATTGTTGATTCTCCTTCTTGAT  
TAGATGGGAGTATTTACTACTCCCATTTCTTATTGTCAACTGCTATCTTAATCTTTGTA  
TAAATTGTTTCTTATACTTCTTCGTGATCTCTTGTCTTGTATCAGCGTCACAGTAATCGA  
AACCTTCTTCGTCCATAACAGCAACCATTTCCGCGCGTGTCAAGCGTGAAAATCGTTTTC  
CTTTATCAACAGCATATTGAGGGTGTAAATGATTGTTGGTGTAGTCTCCTTTGATGTAAT  
TAACATAGTTTGTAGCCCAAACAACGAAATCAGCTCCTAAAGCACCAACACCAAACCGTT  
TAAAGTCTCCGGTCAACGATCCTTCTAGGGCGTTGCAACACGAATGAAGCAAACCCCTTA  
CACGGCCTTGCCCTTTCCCATCTAGATCGTGGTTCGTGGGCAAGATGGTTTTTGCTCATAT  
CCTCAAAAAGTGGAAATTGACAAAGGGGGCAAATACCCCCCTGTTTTTCGAATAGTTCTT  
GTTTGTACTCTTTAGCACTCTTAGCAGTCAGTAACATAAATTCATCCTCCAAAGAAGGTA  
TTTAACCATGAATCTTGTTTTGACTACAAAGGATCGGAACTCATCAAAGGCACCAATAT  
AATCACCATCATAGAAAATCTGCGGCATGGTGGCAATATCTTCTACCCCTGCGCGATCCT  
GAATGTCGGCAATGATAGAATCAATCTTTACAGGGCGACCGTTTTGGTGGACACCATCAT  
TGACAGGAATATAGATGTAAGGGATCTTACGCGACTCATAAAGGCGCTTTGCATTCTGGC  
AATACTTACAGTTGTAACCCTCAAACCAAATAATTTCTACCATGATGTACCTCAATCTAA  
GTTAGTTCCATAAACTTCTTGATATATCAGAAGACTTACCACCTGAACGATCTAGGCAAGA  
GGTCTTATTCAACAGGACCCAGTTTAAATCATTCCCCTGGTAAAGTCCAGGAGATGATC  
ATTTACCTTTCCCTTATGATGTGTGACATTACTGAAACCAGACCGAAAACCACGTTCCAT  
AATAGATTCTACCCACTGATAGAATTTAATCTCTTCCCTCGTCACTCCAGAATTTATTGTA  
TTCCGCAGAAGTGATAAGGTCAGGCGGGTCCAAATAAACGAAATCACCTGGCAAGATCTC  
GATCTCGTCATAGCGACAAGACGTAAAACCTGATTCGACCGTCTTTGTTTTCTTCCTTAAA  
ATTCAGGACACGCTCAACCGCGTTTTTCGCTAAAAGTCCGGCGACCAAATAATAGCATTAAA  
TTCTCCCTTCCTGTTATGGCGGTTAATGTTGCTATAACTGTGCTGAATCAGAAGAAACAG  
AGATAGCGGATCTGGATTCTCATTATACTTCTTACGGAACGCCATGTAAGCGTCTTTATC  
TTTGGGAGACAAACCATTCTCGGCAATAATCCGCTTGATCGTACAAACCGGGTCAGGACA  
CTCGTCAATCGCTTTGTACGCGTCAATTAAGCGGTGATCATAGTAATGAGCCAGCACATC  
CCCTTCGACGTAGAGAGACACGCTCAAGCCGCCACAAAAGGCATCAACAAAGCGGTTATA  
GTGCTCAGGGAAATACTTACTAACACCAGGCTATAACTTTTCCTTATTGCCAGTATAGGT  
AATAAAACCTAATGCTTTCTTCAATTATCCCTTCCTCAATTGAGTTCTCTCGATCTCTACC  
AGTTCGAAAAATTCTTGCCAATCACACGGAAAACCTGCAGTTTCCGAAACGATCCTCTTTC  
TAAAGTTCTTTACCGGATGGCAGCTTAATATCTGTTACGCTATAGTATCCGCAACAATCG  
CAATCACCATCTGTATATTCTGTTTTAGTCGGAATATCCATCATTGCCAGATACAAAGGT  
ACATCGTCTTGCTCAAAGTTCTTGTAACCTTCATGGTCGCATGAAACATAGTTCTCATCA  
CCACCGAAAGGCATATAATGGCCATAATCGGTTACAGGGTGACCGGGTAATTCCCATACT  
ACAATTTTAACATTACCACTAAACTTTATACACATAATTTCAACAAGAAAATGAGTATCG  
TCATTGTAATCTTACTAGGGGTTGAATAAACCATTATATAATCCACATACTCAGAGAA  
TAGAATCTCTCTTAGCTTCACTGACTGCTCTCAGAATGTTAGCGTATACTCGAAAGGAAA  
GTCAATACCAACTTCAAAGAGAATAGCCTACCGCCTCTTTGTGCTTATCGGTTAGGGC  
GATCCTAACCAATTCCCGTTGAATCTCTTTAGGCGGTGAATGGATAGTAACACGTGTATC  
ATGCAATGTCGAGTCACCATTACGAATCAGGATTAACGGTTTATCGTCATTGAAGATCGC  
CGACCCATTAAGGTCGGTGAGTGTTTTATACTAACCATCAAATTCTAAGTAATATTCTG  
GAAAGATATAACCGTTAAAGTCGTTACTTATAAAAATGGGGTGCATTTAAGGCTGGAG  
GAGCATTAGTAATGAGTTTACCCTCTAGAAACAGAATGTAATTAATAGGTCTAATCCCTA  
CAGAATCAGGGTCTAAACCTTATTCTTTAGTTTACGCCAGCGGTAACACTCGTCCAGATC  
GTAACCTTAGCCATGATTTACCCCAATTCATCAAGGTTATGTCGCAGCATTTTCAGAGTAT  
TTTTCTAGTTCTTAATCTTAGTGTGGATCTCCACGATCTCATCTTCACTATGAGAAAGT  
TTAATGGCAATAGCGGTACTTCCCTTGACCCGTCTTGATCGCTTCTTTCAGTTCAACCAAC  
ATTTCCGCGTGTTCATAGCAATTCTTTCACGTGCAACATAAGCGACGGTCAAAGCCTCA  
TCAGCGATTTCTAAAGCATTTTCAGCACCAACAACCAATTTTACGAGTAGACAGCATA  
AATTCACCTCACATTATTTACGTTAAAACCGTCATCAATCCAGCCGACACTATTTGGTT  
TAACAGTTTTACCATAGGATGCATACTTAATCAAGCAGGGTTAACATCATTTTCAAATC  
TTCTAAACGTACTCCGAAATCAGGAATATCCATGTATGCGGCTTTATATCCCCATGTAC  
CGTGTTACGATCAATCTCAACCGGACGACCTTTACAAGCATACTACTACACCGTGACGGT  
CAACGATAACATAGCGATAGCCAGCCGGAAGATACAGAGTATCGCCGTAACCTTTAACTG

GAGTAGCAGAAGAGATAAACATCATATAATCCTCACATCGTTCATATGATGCGGTCATTA  
TATGATAACCGCATTNTTATGTGAACAGTTTTTTAAAAATCTTCTTCCGGTTTATATCGA  
CCGTCATCGACTGGTTTTGGACTGAATCCTTTATGCGTGCGCGGCTTCGCTTCCGGTTA  
CCAGCAGTCATCAAACCAAAACATTTAGCCCCTTATAACACATAACATTATCAACCACG  
GTCCAAGTTATAGGCCATACGATTGCGGCAATAAAAATGCTCCTGTATCGACCTCTTTG  
GTGTCCTTGTCCAATCTGGCGTACAAGCAGAATACTAGATACGAGCTCATTGCACCAGTA  
GTCCAGATATAAAGCACATTAACAATATCTTGTGTTGTCACATTATCCTCCTTACATGTC  
TTGCAGTGCACAAAAGCATTNTTCTTCATAGTCATAGAAAATGTCTAAGTATGCTTTTTTC  
CACATACGCGCCATTAATCCAAGCGGCAGTAACAATCAGAGTGGTCCAGTTAGATCCGCT  
CTAACGGTAAAGGTTTTAATACCCAGCTTCGCTGCCAAGTCGAACGCAAACCGGACGCA  
ACCACGGCAGGAAGTGATATTGGAAGTTTTGATTTTAAAGCCACCGCGAGTTTTAGAAAT  
TTCTACTTTAGCGAAAGACAGGTTGCTCATTNTTATTCTCCTTAAGAAAGTGTGTTTCGT  
TTTGATGTGTGTAGTATAGGGGTTACGTGATCCCCTGTCAACAAATTTTTTATGATTTA  
GTTAATCAACCACTACATCAAATGATGGACAGAGCACACCTTATTAACCACATACTCAT  
CGTGTTTAGGAATAGCGCCTAACCGCTTTATTTTCGCTCGCTGACACGATAAACCGCTTAT  
CCGGTGCATTTACCTTACATGCTTCAACAACGCACGGGAAACGCGTTTCAGAGAGTTCTG  
GACGGTTTTGTGAATCCATCAGGACAATGAATACCCTGTTACATTGATTGTAGAATCCTG  
TTTTGATTTTCATCAAGTTTTCTTCTCTGTACAATTCGTGCAATCTTCTTTTTATGATTT  
CGTTGGTTCTTGTCTTACAGTTTACCCATTCAACAAGATCTTACCCAATTGGAAAGCC  
CATTCTCGGTCTTCTTTACGTTTTGTAGGTAGGGACTTTCTGACACTCTACGAAGAGAT  
GTTGTCGTAACAAGAATGATCCCAGGAATGGTGGGATGTTCCTTCCATATACAATAGGA  
CGCGAGTCACTATCAATACCTTGTAAGAAGGTGTATCCTGAATCACTTAGAATCATATAC  
TTTTTCATTTACACATCACAGTTTCTCAACCAGTTATTAACCGACCAAACCATGACG  
CTTTTCGTGCTTCTTTTACTTTATGTGCACGAAAACCACTGAAACACCATTTCATAATCAT  
CACCGAATCATGATTCAACAGGAACACCCGCATTTTCGTAGTTCTCTGGTCTTGATCATAA  
ATCCTTGACATAAGGGTCGACCTTCAACAATGATAGGAAGTTAACTTTTTCTATGAAAG  
TATACCCAGCACGGTCATTAATTTCAATTTTCATTTTACATTATCTCCATAGATCTTTCC  
AGCAATATCAATTTACCCAGCGCGAACATCTAGGATAAGATGCGGTTAGGTGTATGCAGTT  
TTCCCACCCACTCGCTTCATTTCTGAAACGGTGACGTAAGCCCATCCGTTCCGCTGTAAT  
AACGTCTACTTGAACGTTGAGAGGAAAGCAAGACTTTTCTACGTCTTCAAATCCGATAAC  
GTGTTTTGTGCTTGAATATGGAATATATCCGCTGATCATTNTTGTGATCTCCTTATACTCA  
ACAGACCATAAGCAGGTTCGCACATGATAAACGCTCAAAAACGCTGGCAGATATGGGACAAT  
AGATATTGTGCACTGTTCCGGCATAATTTGAAATATGCGATTTCTCTCCAACCTTTCACGAAA  
TAAGTAATCGATTTTGCCTTCTCGACCGGAGTATATCCGAAAGCGGGTTCCAACCTCAACA  
TCTGAACTAAATGCCAATTTAACAGAATTTGTTTTCCGGACCGCTGTCCGGTTTCTTCT  
GGGTACAGCACAGCAGGTTTAGCGCCTAAGGGGATAAACTCAGTATTTTTAATGAACAGA  
ATAGCATGATAACCGTTATATTCCGACACTTCCATAGTAACAGGAAAATCGATATGGGAT  
AAACCTGGTAGATCTCGCATATCATGAAAGGTCCCATCAACTTTTTCTTCTATATTCC  
TCACTCTTCTGTTTCATGTCTTTTATATGGTAATATAACAGGATTAATACAGCAAGCACC  
AATTACGTTATGAGCCCCACAAGTTAAACATTTATAGTCATGGAACCTTATTAAGGAATCG  
ACCAAACCTCATAACCGACTAGCGCCGCGTGTACTTGAGTCTCGATCTCATCCATATCAGC  
CAATGTTTTAACCTTCATAGTATAATCCTCCAATGGTAGTTTTGCGAAGATGGTCATTAC  
ATGCTTTTAAACGCATCACTCGCGGTGTCATAGCGAGTATTATCATAGCACCAGTAACCAT  
CTGTCAACTGATAAGTCAATCCGTCCTTTTTAGCTTCAATGAAAGACAATTCTTTGAAAG  
TTTCTACTTTCTTTGCTGATACTCCACGGTAACGGCTTTTAGAGAGTTTAGCCAAAATGC  
GTTTCATCTTGTTCCTCTTTATTGCCAGACAGAGCCCAGATGATGTTTCTTATATGCTTGA  
TTAATTGTTCAAGTGCTCATCTTTGATTCTCCTTAGTTGGTATGCGTGCATTATAGCATTG  
TGATTATCTTTGTCAACACCCAAAAACAAAAAAGGCTAGCCCAGGATAGCCAATAAAAA  
TTATACGCGTGCACCGTAGATCGCGCCTACGTGATCCCAGCGTGGAGCATTACCAGAAAC  
GGCTTTACCAGCAGCACCACCGTTATATTCTGTACCGTTCCCTGAGTATTACATCTTCC  
TCCAACAGCACCAACGTTACCGCCCGCACCGCCGGTATATGCACTAAGAGACCCCTCACC  
AACAGATCCTTTACCAGGAGCGGAAATATTACCAGCAGTTGCACCGGAACTCATATGAGA  
GGAAGACCCTCCAGCAACGAATGGGCGACCACCCACCACCAATACTAGTCGACCCCT  
GTTACCGCCGCCACCGCCGCCACCGCCGCCAGCGATAGCACCAGTTATTTGTAATTCGTAG  
ACGTGTACCGATAGCGTTATGGATTGCGTTTCCACCAGCAGCGCAAGCAGCGTTACTACC  
ACCATTACCCCCACGTCCGTAGACAGTCACACCAGACTTAATGATCAATGTTACATATTC  
GTTTCGTTAACGAGCGAGGGAAGTCAAGACAAGCAATGCCAGTAGATTGGGAAACAATATC

ACCAGTGATAGTAATGACTACAGGAGTAGATCCTTGTGCTTTCATCCAGTTAATAAGAGT  
GTCTTGATTGTAAGAGTTACTAGCACCAATGCTATAATGAATCTCTTTAGAGCGTCCGAC  
CATTGCCGACATATACGCCGGACGACTTAAGCGTACAGCTTCCATTGCGGCACTCATCCA  
CCGTTGACCAGTCTCGGACACAGCAGATGATCCCACCCTTCCATAAGATATTGCCATAAA  
ATTTGTCACAAGAAAAGCCCCATTTAAGGTGCATTGATTGATAATTAAGTTAGTTGAT  
CTCTGCTTACCATCCGAGAAGAAAGACTATGTTTTGTTAGGATAGCGAAGCGCCCATGA  
TTCGGCAGTTTTAACACCAGTTTCGAACAAGTGACGGCTGGTCACTTTAGCCATAACCATC  
TTCGATGGCAACGCTTTCAATAATGATCGGGTACTTATCGCCACGCATGAAACCGCAGCC  
AGCGGAAGATTCGATAATTTAACAGGTGCCATTTTTGATTCTCCTAGAAAGTGTCTGTGT  
TTCGATGGGTGTATTACGCAATAACACCCGGATCGCTGTCAACACTTTCTAAGAAAAATTT  
TTAAACTAATCGAATATAGCCCAGAATTTAGCACCTTTAGCCAGTCCTAAAACCTTCCCA  
TTCAAAGTCGCCGTAGTCATAATTTGCAACCATCAACTGACCATTTTTTCATGCACCAATC  
ATGACAGAAAATTTGCCCGCATAAACTACGATAGTAATAAGCTTTCCTCATTCTGGCGG  
TGTGGAAGACAAAGCGACCATATGACCATTGAGCTTAGTAACCAGTGATGGACCAATAAA  
ATTCGGGCTAACCTTAATACCGTTAAATTCGTTTTGTGTCTTTCATGCCAGACCTCGCAA  
ATACTAATAGCATAATCATGCTGGTTATTCATAATATCAATTGCATTGTGATAACGAGCT  
AAACCATCAAGGACAAGTTCTTGTTTATCCTGTTTCAGTTTGGTATCACGCGCAGCCATA  
AGAGCATCAAGAACAGGTCCAAAGTGATTATCTAAATCATCTTCGGTTGCAATGTTTCTT  
ATTACCTCGTCTATCCGTGATTCTAATGCTTGCTTTTAGTTGATCACATGCTGGGTATAT  
TCCAACACACCAAGACTATCGCGGGTAGCGTCGCCATGTTAAGGTATTCCCAGCATGAAGA  
TGATCAATTAGGCGTTGAATGTCAATCTTCATTTGTAACCCTCCTCTGAAAGCACATCCC  
AGATCGTTGATTCAAGCTGCATTAATTTCCATATAATAGAGTCATAACTACCGAAGCCAG  
AAGTAAAAATTACATCACACAGGCGATATGTCTTATGAAAATCGGTGGCTGTCTCTGCAT  
CAATAGGCATATCGTTACCTGAAAGCACCAGACATTTTAGAATCATAACTCTGTTAGCCG  
GTGGCGCTTGCTTAGTCTTACAGCATAATTTTTCGATGATCCGTATTGCCTTTTCTTCTT  
TGATACGTCCAGACCAACTCCGGTTTCGGTATTGATTGATAATAATTTCAATCACATCAT  
TTCGCATGCTTCACGGTCTCCATAATGGTTTTGTAAGCCAGTTTAAGACGATCACCGAAA  
AACTTTGCGGTGTTACCCTTCGGATCGCGGAGCATGGTTTCTACAATCTCATCGGCAGTA  
ACAATTTCTCCTTTGTTGCTGCATGTTCTACCATATACTTCAAAGATTCTACGGAAGCA  
AGTGCTGCGGCTACTGGATTAATCATTTTTTGACTCTCCTTTGTTGTCGATGTGTGCATTA  
TGCTATACCCTATTCCGGTTGTCAACACCTAAAAACGAAAAAGCCACCCTTTCGGATGGC  
TTTTTGATCATATTTTATTCAGGTCCATTTGTATAGTAGCGTTTGAATCGACCTATGCTA  
AACTAGTTAAACATAGTAACCAATTCACCATCCCTTTCCAATGATAACCCTTCCCTCGTCT  
TAGACGGGTCTTCCGATTCGGTAGTAATTGAACACGCGAAAGTATGAGGAAGCCAAATAG  
TTGTGTTAATGCTAGTATTCTGTTACTTCTGGTATGCATCCCACGGTGACTAACATTAAG  
CCAGTCGAGTGAGTTTATAAATTGTTTTAAAGCATAGAGCTTTGGTATCGTCTAAAACGC  
TCTGTGACGAGCTATCAACATCATTATAAATCTCACTAGCAATTTGCGTTAACTCTTGCA  
AATAGGCAATTTGCTAATCTCCTTGCGGACGACCAACTGTGCCTGATAACGACCAGTGA  
TCCCAATATTGGTTTCAGTGAAATTATCAACCAATTCCTTGCACTTCAAGATAGAAGTGT  
CTTGAGCCTTATGTTTTGCATAAGTTCCAGGACCAGTTACCCCAAATGCGCAGCATGCG  
TATAAGCAACACTTATCAGACATTTCCCGATAAAGCGGTCAACTTTATTAGCCTTTCCCT  
CTTCGGACGTCTTTAGAAAACACTGAATTTTCATGTTCTAGATTCTCCATATTATGCGAC  
AGCACAAATTGTTGTGCGGCATATCCCCCATAATAAAACACTGCCTAGAATCCATACAT  
TTACTACGAGCATAACATCTTCTAATATGGGCATGAAATTTCTAGCTGGTTTCAATGGAA  
GGAGATATGTTGTTTACATATACTATCATTGTGCGCGTCGTAATAATCAGTAAAGTCACCA  
GTTGGATCATATTGATCAGTACCGACACTTCCGACCGCAGTCAAGCATATTGGCGCTGTT  
AGAGTTTTACGAATATATGACATAAGTCATTCCCCAGAGTGAAAATATTAGTTATATT  
TATAATCTGGGACTTTATTTATGATTAACTCTTATTTGGTAGTACCTTCAATAAAAATGTT  
TACTACACACAGAAACATATTTATCCTCTGCACCAATTTCTATTTGAGCACCATCGCGAA  
TAACATTACCCTCTTTATCTACACGAAGGACCATTGTTGCTTTCTTGCCACAATGACAAA  
TACCCTTCATTTGACAGTTTATCAGCAAATGCCATTAATGCCGCAGATCCTTCAAATA  
GCTTGCCCTGAAAGTCAGTGCGAAGCCCATATCACAGTACGGGGATATTAGCATCATCAA  
CAAGCGCACACAAGCCTAAAACATGCTCTCTAGTCATAAATTGCGCTTCATCTACAAATA  
CAGCATCAGGACGCCAGCGATCCGGTCTACGTTACCTAACGACTCACGAGAAACCAAAT  
CGAAAAGATCATCCGATTTAGTGAAGGTGATCGCTGGGGCACTTAGGCCAATTCGGGAAA  
CGACTTCACTTTATGAATCTCGATTATCAATCACTGGCTTAAGAATTAATACTCGCATAT  
CACGTTCTGTACAGTTATAAGCACTTTGTAACAGATAAGTTGATTTGCCAGCGTTCATAG

ATGCATAGTAGAAATATAATTGCGCCATTAATTAATCTACAAAAATCCAACAAGACCTAA  
ACCGATATAAGTCCAGATACCAATAAAAAAGAAGTTAATGCACATGGCAAGGATAAACCC  
TTTCAGCCTTTTGGGATACCCGACCCAATATCCCTACCATCTTCAAACCGGATCAGTTT  
ATTGCCTTGAGAGTCCATATCAACCACAACATGTTAATTTTCGAGATTGCAATAGATATTG  
TTTTACAATCTCTACACCCGCCATAATAACAATAACGAAAAATAAAGACCACACAACAAG  
ATTAATGATAGTCTCAAGCATTCTATCACCTCCACCCAATCAGGTGTTCCCTGAAAGA  
CTCCTTCTCCTTCATGATGGTCGCAACCTTTATTGCTACAATACATCCACCAATCCCACA  
TTCCCCACGGAAAACGCTGCATATCGTAGTTACAGCAAGTGAAGATAATAGGCCAACCCAC  
ATCTAACACATCGGAAGTTTTCTTTCATGTGAGCGGTATTCGGCTTCTTCATAGATGACT  
CCAATATAATCGACATTTACATTTAGGGCAATGCGGTTCTTTAATAATAATACCCGTCTTT  
CTTTGGAACACTAACAGGAGCGGTTTTTATATTGTATTTCAGTGAAACAACGAAAACAGGC  
TACGTTTTCTACAGACTGACGTTTTACCCAATCACCGGAATATAGATCATTTTTTATTTGT  
CATATTCACCCACCACAATGTTAATGTGTGGAGTTGCAATATTAATGATCTCCTCTACAC  
ATTCCCCTCAAGGCCACCGATACCGCAACCGATTTTAGGAATATAGCAAGGCTGTATAG  
CACCTTCAAAAACGTCATTGATAGTCTCAAATCCTTTCAGGATAGCACCATATTCTGCTT  
TTGGACCCGGTCGGAATTGGCTATATAGATTCTCCCCGCATCAGTTATAACCATTAACTT  
GATGCGTCCAGACACTAAACCCACCCAGCTTTTCTACCTAACCGCGAGAAGTTTGTGTTGT  
CAATCTCTAACGCCTGCGGGAACCTCTGTGCGGATCTTTGCTGCAATACCAGCACCCATAG  
TATGAAAACGATGACAACCATGAATTAATGATCGTTTCCTTGTTTAAACAGGGCGATGA  
GTTTCGCGCTTTACAGTATCACTAATCATAATAAACCTCTCATTAGTCACGGGAAGACA  
AACCGGCCATAAAACGGCTTAACAGAGTGTGCGGATAAGCAAAGCATAATTGCTTATCAG  
GGGCAGTATCACAAGGTTGCGTTTTGTTTTAGCAAACCTGGCAATACGCAGATCCCACG  
CTGGATTTTTTCGTTTTTCGTCTCGACCTTGTTGGATGCTTCGTGAGTTCAAGTGCGG  
TAAAATCCCCACACATGTTATCATCATCACAGAAAGTTTTAATGATCTTTTTGTTGATCT  
CAAATCCTTTGTATTCGAACTTTGGATAAGGGGCGCTCATTACTAGCAAGCACACCAGCCG  
AGAACATCATAGCAATCACAGCAATTATGGTCAACTTCTTCATATATTCCTTAATAGCGT  
TTAGTCTTAAGGATGCCTTTACTCTTTAGATGGTTAGCCTTTTTTAGTACACCATCAGCA  
TAACCTAACCCAGCTTTATAGTTCCATCCAGCATTGTAAGAAGCTAGCGCGAGTCGGATA  
TTACCGTTTCGAACATCCAGCCAGTATGCTAACACATCCATCGCGTAGAAGGCAGAAACC  
TCGCAATTCATGATGAAGTTGATAGTCTGGCGATCACTCATTTTAACACCCGCGCTTTGCT  
TTTTTCGCTTTCACCGTTTTTAGGTAATTTTGAAATAATCCATAAGCATGATGATTTTTTC  
TTTGGTTCTAAGTTTGCACCCGCGCTTGATTCTAGCCATGCGATACCCGCCAGGATGTCA  
CCTAAACCCTTTCGTTTTTCGCGATTATTCGGATGGTCCTTTTTCAACTTACCGCTTTTT  
TTGACTTGGTCGCCGTGTTGATAGGCGAAATGTAAATAATCTAGTTGGTATGCTGTAAAG  
TTGTCTATCGGCCCTTTTTGATCGGTGCGCTAGTCGATGCGTGTGTAGCATCAACGGCT  
AGTGACAGACTCAATACTATCGCTTTTAGAACTTTTAAACATTAATTTCTCCTGTTTGTCT  
TAACTTTCTGATTCCATAATATCGCCCTATCACCGAAAGTCAAGCATTATTTTTAACCA  
ATTTCCATTATTGGTCTACCTGCAAAACAGCCGCCGACATTTGACCCGCCAGTTGTTTTG  
GATTCTCTATAATCATTTCGGCAGCATAGACCGTGATATGGCTTACCCTCTTCGAGTAGAT  
CTACTGTCATCCCGATCAACATGTTACCGTCAGTAATTTCTAATCGATTTCGGTCGGTCTT  
CCATTTTCAGGAAGTTCGAAGACCTCCGGCAAACGAGTTTCTATCTTATTGAATAGTTCCA  
TTGTCTTATGTTTCATCGAAAAGACGATCGGTTAGACGGTCGATCATATGCGGACTAAAGC  
AAATGAAAATATACTACCGTAACCATCATTCAAGCACTTTTCTTTGATCGGCGCTTTGG  
TTTTGCGCATTTCGGTTTTCGAAGAATCTACGCAGCTTACTACGGCGAACATGTACGTTAA  
TTGTTTTCCATTATATTCCTTTCTTAAACAAATTGCGTATCCAGTATACAAACGGGATT  
TCTTTAAACTTGAATTTCTCTATAGTTAATCTTTAGTAGCAAGATGAATACCATAAGCA  
TCATGTGTAACTATATGCCATTTTCTATAGCCCAAATGTGAACAACCGTCTGGATCTAGG  
TTAATAAGAGTTTCTCGCTCACTAGGATTATTTTTCCACAATTTTGTAATAGGTTTCGCAC  
ATAATTTCGACCTAGCGTACCATGAATAATCTCACAACGGTAAAGTTTTCCAGCAGTGAGA  
TAGGCGCACCCGTCATACTCGGGCTAAACACACACTTCTTTAACACTCATTTTAATACTC  
CTTTGTTTTTACGCTGGGGGTATATTGCTACCCCGCATCATGTGTGTCAACTACTTTTTTC  
AAGATTTTTTTTGGATTGCATTCCAAGACCTTTATTTCCAGGTTGTTTTGGTTCTTCGAT  
CAGTGTCCATGTCCGACCTTCTAAGTGTGCACAATGTTTAAAGGCAAATAAAAATCTGGTG  
TCCCTTATCAGCACGGCTATAACCACTATTCGCAAATCTTTCATGTGGTGTATATTCATA  
CAGTGTATTAGGTGTAATATACTTGCGGTTACTATAAGGCGTCATCACGTACATCATGGT  
ACTAACTCCCAACGATCACCTCGAAGATTAGAACATCCACCATCAAGAAGTATCGTAATA  
CGATAACCTATATCATCTATGATGTAACCGATTGTGCGGTGGATTTTTCGTCGGCTAGGGCC

GGGGTAAGATCATACTTTCCGGGCGTAATATCTTGTCCCTTTATTGGTATTGGTTTAA  
ACTTGCATTTTCTTAATCTCCTATATTAACCTAACCGGGTATAGTGTTCAGAACAAACG  
GTCAGATGAATATATTCTAATAGATCTTTCCAAAAGTCAACATCTGGATCGTCCGGCATA  
CCGTTTTTCTTTGCCTCTTCACGCGCGAGTTTAAACACGCTCGTAGAGATCTTTCAATTCT  
TCCCGCACATTATCAAAGGTTCTTTCCCCTAACCTTACACGCTAAAATAGAAGAACTTCGC  
GCGAGCGGGAATTGTAGATCACCTGTCTGACAGATTTCAAGTAGCTGATAACCAACATGC  
AGAGCATGAGAAAGATCTTTCCAGTTACTGAAATACTTTTAAGCATTGGCTACCTGCTTT  
TTGAGATAGCCAGACAAACCCACATACGAACATGTTAGAATTTATCTCGATGTGTTCCG  
ATGTATTCCCATTCTCTGGAGGATTCAACCAACATGTTACTAGGCGCCTCCACCATATCA  
ATAGCGCCGATATCGCCTTTACATGCCAGATTGATAAACCGTTTTAGACTGAAGATATTA  
ACGTCAATATCGTCTTTGGTGTCTTTGATCCCTTGACCGCTAGTGCTTTGATCATAGTGT  
TCTTTTCATCGATCCTAAGATAATTTCTTTTCGCAGTCGGAACAAAGGTACCACGATAATCT  
TTATCGGAATTTTCAGTATCAAGGCCGTATAAGTGAGATCCGAAGACCATTTTAACCATC  
GTATGCATAATTAACCCCTCATTAGTATTTTACGTTACGTCGAACGCCTTTTTCGAATCTG  
ACAAATAGCAGACGGTGAAACATTATATTTTCTTGCAAGTTCTATACCCTTCATATGGGG  
AGAAGATAAAATCTCTTCCACTTGGTCGCCGGTAAGTTGTGCGTTTTCCGTGGTTCTCTCC  
CCAATTTTGTTTAATCCTTCTTTCTTCGTATGGACAAGATTTCCGGGTAGCTGTCTGCCA  
TTCAAGATTATAAAGGTCCTAGTTTTGTTTGTTCATCCTTATGATTAACCTACACGGTA  
GTTATTTGGATTCGGAATAAACGCAACCGCCATAGCTTTATGCATGTTACGGTTTTTCT  
AAATCCATCCGGCTTATAACATACTGTAAATTTAGAATAACCAGTTTTACCATAAACACT  
AATATAATTTCCGATCTCCGTATTTCTAACCCATCCATGAGAGCTAATCTCAAATTTGAGT  
GTAGGGCAACAGCGCAACAATTACTTTCCATTCTTCTACAGGATGGTCATCACAATATCT  
TTAATCATCATAACCACCTCATTAAAATAAAGCCAACCCTTTCGGATTGCCTTAAAAATT  
TACATTGCTTCCGTAAAGGTGCGCGAAATAACGTCACGTTGTTGGTCTGGAGTCAGACTA  
TTGAATCTTACGGCATATCCGCTAACGCGAATGGTTAGTTGCGGATACTTATCAGGATTA  
GCAACCGCATCGAGAAGAAGATCGCGACTCGTAACACTGAAATTAGCGTGCTGACCACCT  
TCGACAACCGGAGCACCATTATCTACAATCACCGGACGGAAGCTAGTTGTGTGCAGTGCC  
AGAGAATCGACGTCTTCTGCGTCGATCACATGGTCTTCTGCGAATGTTTTACAAACAAC  
ACTTTATCGCCGATCAGTGCTTTCGGTTCGGATACCAGAATCTTAGGGCGCGAAGTGTTCA  
CCAATAATAGTACCTTTATGCTCACCTTTCATGATTTGAATTGCTTTAAATTCATAATT  
CACCTTTATAGATCAGGACGTTTCGTCGTTAATTTTACCAACCAAAACACCATAGAGTTT  
ATCAGGTTGGACGTTACGCTTCTTTTTAATGGTGGCACGGAATCGACGAGCTACGCTAGC  
TTTATTTTTTCATTAGTTGATACCTAAGCCAATGACAATAGGTTGGTCTTCTACCTTACCC  
ATCCCAACACTAAGTCGATTCAATTCTAAAACACTGCAATACGCTGTCAGTAAATCCGCGC  
ATGGTAGTATCTAGGCTAAAATTTGTTTTGTCAAGACTACGACTTCGCCATGTGATCGGA  
TTCAGGAAAGTTTCGGATAGATGTACAATCTACATCTGAAATATTTACATTTTGACCGCGA  
CCGCGATCTCGGATCGTTTTGGCATGTTCCCGCGTCGTTGAAACGATAAAGACACTATAG  
CCTTTTCGCGTATAATGGTCATATAACTTGATTGTAGCGTCTGTATGCCCTGTCTGACGG  
CCTAAATTGATTGAGACGATGGAATCAAGGTCATCAGCAAATTTGCGTCGCTCACGGCGT  
TCTATGATGCCATTTACGGCAGATTCACACGCGAGCATAAATCAAATCTTTACTTTCTAAT  
TTTACATCAGTATTCATGGTAAAGTCTCCAGTGAACGGGGAGAGATCCTTAGATTGTCTC  
CCCGTTGATGGTTAATATTTTTATTTTGGATCTGGGAAATTCAATAGAGCATAATTGTCCAT  
AAAATTTCTAGCTGGATTATCATAAGCGATTGCAGCTTCGATTTCTGTGTCAGATTGTC  
CAAGAACATGTCTTTGTAGGTTGACCATTATACTAGCTCTCCATTTCTTACGCAAATCCT  
TCTGTACACTACTAACACCCTTATACACACTAGAAAACTTTTTTGACTTTTTCTTTT  
TATTATGTGGATTTTTCGCGCTCGGTTGCCTCCCTAAGATTTGGAGGATTGTTATTAGCAG  
GATTACCGTCGATATGATCAATTAATCTAACCTTGCCTGCCATGTTCTAGATACCAAACAA  
CCCTATGCACGAATAGATGAACTCTAGGAAGACCGCCATCTCTACTATAACAAAATCAA  
GATGACCATCTTTATTGGTTCTGACTTTAACTAAATCACCGTGTATATCTACTCCCTA  
ATGGTCGCTTTTTGATAGCTTTACTATCGACTCTATAATATAAGATAACCCTCTATATGAG  
CATATCTAAGTTTCATCTCGTTTTGTAGGGATTTCATCCCAATATTTAAAAGCCATTTTAT  
AAGCCTCACAAAGCCAGCGATTAAGCTGGCTTTATTTTAGTTATACCGGGTCTGGATATA  
CCTTTTTATCGAGTTCCATATGCGGTCCGTCTTTAAAAGTAACCCAATCAACACCGCAGA  
TAACAGGAACACCCAATTCGACCAGCTTGTCTTATGCATCAGCGATCATAACGGTAGT  
ATTCATGTTCCATGTATCCTTATCTTTCCGATTCCGCTACAACGTCAACCGCGAAACCGT  
GAAGATGACGAGATGTCATAGTCTTAGATTTACCTTCCGCAACATATTTCTTTTGCCTTT  
CTAGACTACGTACACCTTCCGTAATACGAAAGTCGACCGGAGTCAGTTCTAACGCACGAT



GAACTACTTTTACCAGGTCTGGATGCACACCAACAAGCCGATCTTTGCTTCTTTGAGATA  
ATTTAAACATTATTCACCCCCCTTTGTGAGTGATAATATTTAGATCCCGACGATCCTGCAT  
AGAGTTCTTGGATTAGCACCAATAAGGATAGCATTAAACGACAACCATTCCCCAATCAACC  
CACTGATTATTAGAAATGCTAAATCCGTTTGCTAGGCCAAATACAAGCATTCCGGTACAC  
ATACTCAGAGCAGTAATCAACATCACTGTAAAACCAAATGCAAATCTCATTTTATTTTCA  
TTTTCACTGTATACGTTTATAAAAGTAATACATTACCTGATCGCGTCCGGTGATCCAACA  
TGCTAGGGCGGTAAACAGGTTTACAATTCCCAACACACCTACTGACGCAGCGCTGTCAAC  
ATACATAGGAACAGTAAAGGCCATAGCTAACATAGCAACGCCACAAATGACATTAAGCAC  
AATTATAATAAGCCGAAGAAAACCATTTGTCAATCCTCCGACACAAGAAAACCAACAATC  
ACGCCAGTGATAAGACATGATGCGCCGCTAATCAGACAACCCGCACCACGTGATTCCAC  
CAGATCAGAGAAGCGACAATAACACAGAATCCCCATACTACCGCAATCACAACATAGGCA  
AGGGTCGCCAAAACATATATTTGTTTATAATAATCCCATTCACCAAACAATAAGAAA  
AAAGCCATATCAACAGATACGAGGCAATTGACGCGGCAAGCAAAGGATATTAGAGAATC  
CGCCGTCTATCCAGGCGACAAAACAGAATACGCCAGTATAGAAGCATAAACCAATTACAA  
AGCTTATTATAAGCAACCATAGATAAAAACGCCATAGAAAGCCCTCCATCGAGATAAATTA  
GTGCGGGTAGCACATTACCCTACCCGCATTGTTAGCCATCGCAGAGCGGGTACTAGAACG  
ATTCCAAACCAACCGCTAACCACACCCAAACACACAGCAACAAGCAGATTCATTCCGGTCT  
TTTGGAATCATCGCAAACAGAACACACCCACACAGAAAGCCATTACCATTGAAGTTAAC  
ATTTGTTCAACGATTATCACACCTTTAAAGTCATAGACGCATAAACATTAATGTCAGGCC  
AGTTAGGTTTCGAAATTATACTCAACATCCCAAAATATAGCGGTTTAGATGTATCAGCCA  
AGTTTTTAAAATCTTCTACCCACTTTTCAAGGCTATATGATGGATAAACAAAGGCCATCAT  
ATCCGCCGTAACGTTGGCTTACTGGTCCGGTCAGTAAAAACTACCTCAAGATCCGGTAATT  
CTTTTTCAAGGATAACCGCCAGCGCATAAATCAGACGGTCTTCCATGTTACGCTGCCGAA  
GGACCGTTGTAAGTGGGTTTATCTGGTTCCTAGCAAGCACCTCCTCATTTTTACAGAAAT  
GAAATTTTACAGATACAATTTTACCATAAGTGAAGAATGAATATACATTATCGAGATAT  
TCAACGTCACCTACAATCACATCAAACCTGCGGATCAGCAACCGTAGCTACATATTCTACC  
AGTTCATCAAGAGAATGCAACTTAATTTTATCAATTCGGCTGTATTTGGTGGCATCTTTG  
ATTTTAAAACACGTTCTTTTACGTTATCCTTTAGAATTTACGCGGAGTTTCAAACAGT  
TTTCTCATAATATAATCCTCACATAGTTAATCACTGGTCAATAATCTTGTACATTATAAC  
AGAAAGAACAAGACCGCAACCCACATATAGATCCCAGCTATCAATGCAATTTCAATAAC  
ACAATATCCAAGATATAACAACAGGAATAAAAACAAACATACAGACCAGCGCAAAGAAACT  
AGCAAACACGCTAGAAAATCCGATAGCAGTATTAGTAATATTCATATTAACACTCCACGC  
GGCTTAACTCAACAGAAGTTGCATACAGCATAATGAATATGCTAGCCGATCCGAGGATCA  
ATGCACCCTCACATTTTGAAAGTCGCTCATCAAATGTAACATTATCCATCCGAGGATGT  
TAAAGGCGCAGACCGCACCTATGTTTCGCTAACCAATTAATCTTTTTTACATAATATATGTTA  
GAAAGAAACACTTTTCAAGAAATCCAGATTTTGTAGTACCGAAAACAGAAAAGTAGTGT  
ACTTTTTTCGGTTTTAGAGAAAGCGATTGTCTTCTACATGGTGACGGAAGCCAGACCG  
ACGATCACCCAGGTCAAGGCGGCAAGCGTAAGTAGTGCCGTTTTTCGAAAGTAACCTCGAT  
TTGAGTTTTGCCATATTTCGTTTTATAGGCTTTTGTCTGCCGTTTCTGTGCTTTACGCTC  
GAAGTCTTCGAAGTGAATACTTTGTTTTCGTTATCGAATACAGAAGATTTCAGAGAAGAT  
AACTTTAACAGATACTGGTTACATTTTGTACTCCTTAGTAGTTCGTGTTTCGTTTCGAT  
GGGTGATTATGCAATACACCCTCTCTCGTGTCAACAACCTTTTTAGTCTTTTTTCAAAT  
TTCTAGAGCAGTTTCTACAGCAGCTTTCCAACCTTCCATATAATGGACATAGTAAGGAA  
GTAAAGCACCCGCAGGCATCAACCTTTTTAGAGATAAACCATTTCTACAAACGCTTCGCT  
CATACCATGCTCTTTAGCGGATTCGCGTAATTGTTCAATTTGGTCTTCCATAGTATCACC  
TCAACACTTAACGTTATTCAAACCTCAAACGGTCTATTTCATCCTATTGTAAGTACATAT  
AACAAAGCGTAGTTATGTTTTGGTTGTACCGTATCAGATAGACACGCTTTTACAGCCTCAC  
GGTCCGCTGGGTCTACACCCTCAGCTTTAAGTAATGCTAAAATCTGGTTATAGCGTACTC  
TTATTTGTACTAATGGTTTAGCCCCCATATTACCCCCTTATAGTTGATCAGCGATGTAAG  
CGTGACAAGCGCGGAGTTTCATTAATGCACTACGTTTCACTTCGCCTACGATGTTTATAA  
CTTCTAAGCGGTTGGATGGATTTCATCTTAGAGCACCAGATCTGGTTAGCCAATTCCGGTT  
TACTCATATTTGGTTCCATCTCAAAGAGTTCACGCTCAAAGTCAATAGTTTCTTTTGCTG  
CGTCTTTAAAGTTAATCATGTTGATTCTCCCGTTTCGTTGATGGTTGTATTGTAGGGGAG  
TTATCCTCCCCTGTCAACACGTTTATCAGAAATATGCAATATAGTTTGCCGGTCCGACAG  
AGTCATCATTCGGCATTGCTTTTACTGCCAGTTCCAACCCCTGCTTCAACTTTCTATTTAG  
CGGATTCTTCGTTATAACCCAGATTACCAGAATAGCTACTACGTTTTCTTTGCTTACTG  
CTTTCAGTGCTTTAATGATGCGACGTGCCATAATTTGATTCTCCGTTTAAAGAAAGTATGT

TTCTTTTCGATGGGTGAATTATGCTATAGGCCGGATCTGGTGTAAATAACTTTTTTCAA  
AAAAATTTTTAGGCAATAAAAAAGCCACTCCGAAGAGTGGCTTATAGGGAAGGTAGCGAA  
TCTTCCTTGTCTCCAACCTGCTAGCGGCCTAGCAAGTGAATGCTTTAGCGTACCGGATCG  
CCCATACGCTGCAATAAATGCAGCTAGGTGACGTCCAAATCATTCTAACCGCGCTGTCTT  
TAGTTCACTATTATTTATATCGCTTTCTCTCGTGACGTATTTGATTCTCTTCCTTGATAG  
AGTTAAATGCATCAAAAAGACACTTGACACTAATAATAAACATAACCGTATTTTTCTACGA  
TATCCCAGTGCTTCGCATCAGTACAGATACCCCAAACGGTAAGAAGTGCGAATAGTGCAG  
AAGAGATCACAAGCATGATACTTGCTAAGATATAAAAAAGTCATTTTCATGGTTTTACCTC  
AATTCTTCGATATTCATCACACATCCACGCCGTAAGCAAGAATCCTACCACATAAGCAAC  
AACATACGTTAATGCTGCTTCTGGTTCTGTGCTGTGTATCATCATTAACAGCTAGAAC  
GGTCTTAACAAATACATTTAAAATAATTAGCCACGCAAATAATTTTCATCGTTTGCCCAT  
TTCGGTCGAGTCTTTTCAAACCTTGACATTCCGTAACAATCTCGAATTATCCACGTAACA  
AGAGCACCAGTCAACACAGACAATACACAGAAGATGTCAAACGGTCCAGTTGCATTATGA  
ACATGAGCAAGCCATGTACAGAAAACACATGCTAAGAATGTAAAGAACACCATAAAACAC  
AAGAAAGCAAAATATTTTTATGCTACTCATAGCGCCACCCTACAACAGATCATAAGAAAAC  
CCTACGCAATAAGAATTGCATCAAATTTAGTGAAGTCCAGGTCCACCTATCAACGTCCTC  
GTTCTGTTTCATTCATAGATCACAGAGCCATCTTACAGCACCACATAAAGCGATCAAAAG  
ACTAGGTATAAACGAGATTACACCAAATTTACAAAAATCATCTAAGGTAACACCGGAATA  
GCTACCTACTGTAACAACACCGATCATCAGCCACAGAAAGAAAACAATGCAATCAGAAA  
CAAAGTATTGCTAAACGGTTTATTGATCATTAGACACCCCCACGACGATCACTTTCAAAA  
ACTTTTTTACCATCAACGAAGCATGTCACAAGTGCCTCGTTGACTTCCGCAAATTTGTTGT  
ATCACCCACTTAAGGTCAGAGCGAAACAATGTTTCGATTAATAACAATTTTTTATCGCTC  
TTATCCTTATCCACAAATTTTGCTTTAACCATCTCCAATACCATATTATCACCTTATTTG  
CTAATCGCTAAACCCAATCCGAGGAGAGCACTCGATGCTACAGTATACCTGAAAGTCTCA  
AATGCAGTAAAGATATCTAAGCCACCAGCTAACAGAGTTGCAGGAAACAGAGTACCATCT  
ACGAACATAAAAGTTTTACCGATAAGTTTCATTTTGATTCTCCTTTCGTTTATTTGTGGG  
GGTATCTTACTACTCCCGTTTCATGTTGTCAACTGTTTTTAAGAAAATTTTACTTCGTCT  
ACAACGTTTTTTCATGACATCGATTTCCATTCCAGTCAGAACACGTTGGAAAATATGCTGC  
ACATACGCTTTCAGGTATTCATTTGATGGCTTGCTATCGAAAGTCTTTTTAGTGTAGTAG  
TCATCACCGAAAGGTACTGTAATTACATTTTCGTGCTCGGTCCAAGCGATATAAGCAAAT  
TTCCCGTTATCCAGAAGCGAGCACTAATTGCTACTTTTGTTGAATCGAATCCTACTTCG  
CTGTGAGATTCAAGAATACTTGCGTACCAGTTTCTTTATGAATGTAGTAGCGGGATACT  
AAGGCAAATTTACGGGTGTAGTGACATTCGAATTTATCTTTAAACATCATCATTTTGATT  
CTCCTAAGTGTGTTTCGTTTCGATATGTGCAGCATGCCATAGTCGTTTATGGTTGTCAAC  
ACCTAACAACAAAAAACC CGGAAAAATTTTCGGGGTATAAAATTACAGTTTGGTCGTCCA  
CTCCAGGTCTAGATCTTCGACATATTCATGAGATCGGACAATCTCTAAATCGAACTCTAG  
GTCAGTGCCAAATTTCCGCGCACCAACATCATAAGAAGGCGTGATATGCGGTACATATTC  
AGGATAATCCCACGTTGCGCCTAAAGCAGTGCCGATATCGTGTCTGAATTGCATGTAGTC  
GCTTTCAAGTGCCAACACAAGCGCATTAGTACCGGATTGAGTTTCAAACACTTTCAGATG  
GCATAGAGAGCCAAAAAACTTTTACCCTCTTCTGGGATAAACGGAACGTAGACACGAGA  
ATATAAGATAGTGCTATGCAGTTTATCACGAGGAACGGCATTAGGCAGATCGTAGAACTC  
CTGCAATTTTTCAATGCGGTCTACGGTATCCTCAGTGCATTCAAGAGCCGCATATCTACC  
TTTAACGGATTCTCGAAACGGGGTCATAATCAAGCCTCCGGGATCAGCTCTACTCCCTCT  
TCTGCCTCTTCCGCTTCTTCGTCTTTAGGGAGAAATGCTTTCACTTCTTCGACACTAGCA  
TCAAGGGAACGGTCCCCTTTTCGTCTGGCTGAATACCCAGTATGCGTACCAGTTCATC  
AATACACGCTCACGATCTTTCAGTTGGCCTTCTAAGAATGCGGCCTTTTCTTGAGTGTC  
AACAGACGTACTTTCAGGACATTAATCATTTTTTTCATGCTGATTGGACATATTCACATCT  
CCTACTTGTGATAACTTTTTATTATATGTTTCGCGTGAATCGCGCTTTCAAATTCTTCTA  
ATGTACAATTATGTATGATAATGGTTTAAACCGTCAATAGGCAAAATTCCTTTTTCGGTGG  
AGTGAGTCGATAACAATACCAGTATCACGCTGAATATGCAACACCTTAGCACCCATAGCAC  
GCACGAGAGCAATTTCAATAGGCTGAAGCACATCAACCACTACAATTAACCTTCTTCAT  
TTTTGCGCTTCATAAACTCATTACGAATAGATTACACCAGTAAAGCGGATTGATCAAGT  
TAACCATTATATCAGTACCGAGAGTGGTTAACATGAGACGAATAGACCAGACGTTATTAT  
GTTGTTCCGCAATCTCATTAAACGACCTGGTAAATCTCAGCCAGACGATCACAAGTAAAGG  
AACTACCGCCATACTTCGAATCTAGCATAAGCTGACACTGAATAAACGACTTTTTCGCGCG  
TATAGGTATCAATACCTAGCTCGGCTTCTCTGTCTCGCCCTAACCCGTCAAAGTCAAGAT  
AAGTCAGACCTTAGTCTGGTTAACATTCGCACAATATTTCTTTGATGGGTGCTGCCAGTT

GATAACTATGTCCATGAATGATTAACGCGGCAGTAACTTTTCCTACTCGCTTTTTACTAC  
AAAGTGAATCAATTTTCATGATATAAGCCTCTTAGTACTTTCTAAAAGCAGGGTGCATCG  
CTGTAATACCTTGCACCCTCTGACGATCCGCCGCTGAATTGCTGGGCGAGGAACGATCA  
GTTGACCAGCACGTTCAATGCTCATTGTTTTAAAGGGAAGAATTGTAGTACACACCAGAG  
TATCATGCATATAATCGGTGTATGTTAACTCTAGTTCGCCAATCGTGAACACCAACAAC  
CATAAAAGTTAAAAGTGCAAACAATGTTACGTTCGTTGTTGCCATCATGTGAGCTTGAA  
CGGCTTCCGGGATTGAATCCTTCCACGCAGTGGAGTTACCGTTATTGTAGTCTACTATAG  
AAAGCCTCCATGTGTAAAGGTTTAGATAGCTTTCTAAATGCTCATCGACAATAAACCGGA  
CTACCCACGGGTCAAACCTCCACATGACTAGACGGATAATCACCGACCGCCAAACCATTTT  
GACCAGCAACTTGCTTAGTTCGATGGCATGGTTATAGCCCCGAAGTGTAACACCTTGAGCAT  
TTAAAGTAAAGCCTTTTTGTTGGTTGCCATCTCGAATATTGATGTGCCAGGTGCTGGGGG  
TAGCATAGCTAAAGAGATTAGACATTACTGATTCCTCAAATGAAAATATTTTTTAACAAT  
TGTCGCTTTGCGACGTGCCGGAGGCACTGACTACTTTTTAACCGAAACAAATTTTCTATC  
ATTCTAAAGATCTTTCTTCGTTTTGGTTATGTTTTAACCAATAACTATCTTTTTTATACAG  
TTATAAATAAAAACGGGTACTATACGAGGACTTCTTATGACAGAAGACATTTTGTTAACAC  
TCTATGCTCGTCTGGATAACGAATTAGCAACATTGCGGGGTGAAGTTCTCTATTTGTCTA  
AATGCAATACAGATCTGCTTAAGCAGATTGCAGAAAAGGATGATCAAATAAAAATCCCTTT  
CAGGGGCATTACGTGATCTCGACAAGGCATTAGAGATTATACAGCGTGTACCAATAAAG  
AAGAATTAAGACTTCCTACATGGTTATGCTCGTGCCATCGATCTATAATAAAAAACCC  
CGTTATTGACGGGCTTAATGTTAACTATTGATCATATCAATGACGTTTTGTAGCTCTGAT  
ATGGATAGCCTTTCTGTATATCCATCTGGCATACTACTTTACTAACATAGAAACCTTTA  
TACTTTTTCTTTATTGCACATTCATAGAACGAGCATCATCACCGTTATCGTATTTTTTA  
TAAAATGTCAACTCATGACGAAATATAGGTTTTGAAGATTGGTTTTGTCTTCTTTTTATT  
AATCTGTTGTTGGTTATACCAAATTTTATAGCAACCGCAACATTTTCTTTGTATAAAGTT  
TGTACATAAATGTATGCAGGTTTATTCCTCTTAAAGCCATGATTGCTACACATAGGGCAA  
CCGCTATTTTTTGATACGCAGTCTCCTAAGTTTGGCGCAAATTCATGTCCGCTACTACAA  
CGCATTACCAACTTTGTTTTTAGGATTCCTCTATACTCACCGCCAAACAAATCAACAAT  
GTATCACCTTTATCAATCGCCTTATCAGTTATTTCTTAACTACTTGTCTCAGTTGACTTC  
TTGTTTTACCTGAACATATTTTACATCCAGATCCATTAATAAAAACGAGTGACCGGAT  
GCAGTATATTCATGTTCTTTAGGGCATTAACTAAGAGATTTCTTTCATAAAAATCTTTA  
TAATCAGACACATAGCCAATGACTTCGGGGTCTTTTTGGTTCTTCCTCATCTCTGTTAGC  
AACTCTTCGCTATCCCAGCGTTTACCCTTAAACGCAGAGACAACCATGACCTTGATAAAGA  
TATATAAATTTCTAGTAAAGTTTTTGGTTGCAATCAGGACAAAGCATTAGTAATTCGGTC  
ATTTGACCTGTATATCCTTTAGGAATACCGATCAATGTGCATTTTCCGCATATTGTCGTT  
AATGCATCATCTATTCTTTCATTGGTCCAGCGTAAGCGACCAGTGCATTCATGACATTTT  
ACACCCAGTCTAAGAGTATCTAAACTAAATATAGTTGACGTATGTCCTTTATCACATTTT  
AACTTAAATCTAGTATCCTTTGCGTTGGTGTATTCTCCGATTAGACCATAACCATCATT  
CAAGATCGGATATGTTCTTTTACCTTCTCTGGATATACACCGAACGGTCTGGGAACTGAA  
TTGGGTTTTCTTTCTTTAGTCATATTTTTATATCCTGTAAATTAAGCGCCGTCACCAGC  
GGCGCTATTTTTATAATCATTAAAACAATTTCCACACCTTACGAACATCATATTTCTGT  
CTTTGCTCATAAACTGGTAGAGCGGAAGATACACAGCCGTGCTCAAATCTCTGGTGCGA  
TCTGAATCAGTTTTGTTTGGATGTGTCCAGGCAAATATGCTTTGATCATGTGGCCTCCGC  
CTCTCATATCTTTAACATCACTCCATTTAATTTTTAAACGAGTTTTTATTAAGAGTAG  
GTGTACTCGCGGATTGTCGCAACAACGCTTCTAAGAACTGCTGGCGAGCTTTAGGTGGCG  
CAAAGTGCAAGTTCAAACCTAGCATAATCTCGTTTCCCGCTTTAGATGTACCAAATGCTA  
GACAGATGATCAAGGGGTATCGGTCAAAGAATGGCAAAGAATCCCGATGTTTTGGGTTAT  
ACGCATAAGTCTAGATCCGTCCCACTTGTGGTATTACTACCTGATGACCTTTTACACCAT  
CCTTGATGGTCTTCATAAAACACTCCTGTGATTTTTCTTTAGGACGACGCTTCGATACAG  
GACGCATAGACGCACGAAAATCATTAACTACTATCATTTCGCGTTGCTGCTTATTGAGAC  
CCTTTGCACCTTTCCCTTTTAGTTTTCAACTTCTATTGCTGTTTTAATTTGCTGGTAT  
AACGAGACATACTTTTAGTGAAAGTAGCATAGGCTATTCCCTTAGAATCTGCAAATGCTT  
GAGCTGTCATGCCTTTGGCTTTTGTCTTCGCAAATTCTACACCAATTCGACCCACTGTT  
TAGACTTTCGTTTTTGGGGTAGACGGCTTTTCGTGTTCTGTGATAATTTCAAATACGCTC  
ATAATATTATCCTCTATTTGTTAAGCCCTTTAAAGCCAAACACTTCTTTAATGCATGTT  
CGGTGATGATCTTAAACTCCATGTTATGCTTTTGGCATAATTTACGGCAGCTAACCAT  
TTTCAGTATTTTTGTGTATGTTTACTTTCATGCATATATCGTTGCTTTGTCTTCGCGG  
TCATTCTTTTTGGCTTTTCCGGTGGCCTTGTCTCTTTAGCTGCTTTAACTTCCATAAAG

GCTCCTTGCCACCAACAATCTTAATGTAAAAATCCATAAAGTATATGTGTCTTTTTCCGT  
CTGTTGATGGCTCATAAGGAATTACTACGGTCTCAGATCCCCATTTTGCAAGTCTAGGAG  
TGCGGTCCAGCCACTGCATGATCCATCTTTCCAGCTTGAACGGTATGTGATCTTACGTA  
TATCCCCTTTATACTTTTCTTATTCTCAGGAACATACTTGCCCTTATAAGTGTTAGATT  
CTCCCATTTTAGCACCTTTATTATAAATACATAATACTATTTATCAATTGAGGGTGATA  
AAATGCTCTTTTCTTTCTTCCCTGACATTGAATACAACGGCAAGATGATTACTGACATTG  
TGGGCAATTACCGCGCATATTTCAACGCTATAATTTCTGATTATAACATAACAATCATATT  
ACATTCAAGGTAGTCCACGACCGGAACAAGGTGCATATGAAGTAGCCGGAAACCAACAAC  
TTTACTGGATCTTGCTGATGCTTAATGACGTATACGATCCGTTCCATGACTGGATCACC  
ATCAAGAGACAGCATATGAATCAGCCGAACAACGATATGCAAATGTCGGAGGAAATCAAG  
TATTATACCACATTGATATTGACGGAAACAAGTATCGGAATCTTACCGAATATCCGAAAG  
GATCAAGCAATTGGTATGATAAAGAGGATATCCATCCCCGTCATTTGCAGTTTCATGGTG  
CATTGTCGGCAGTGGACACACTGGAAGATGCCATCCTCCGTAATGAGGAACCACGCAAGA  
TCAGGATCATAGCTCCTACACCAATTAACAATTTATTAACGCAGTCATTTCGAGAAATGG  
AAAAGGCTGATGTGTAAGGTGATTAATTATGCTGATGTTTAATAACTCCGTTAAATGGTT  
TACCGGAATTGTAGAAAACAGGGAAGACCCATTAATGCTGGGGCGTGTTTCAGGTTAGGAT  
TCATGGTATACATCCCTCGCTATCCGCGCACGGTGACTTTCAAGCTCTTCCAACAGAAGA  
TCTATTATTGATTACGCCAGTACAAGATATTACAAGGGCGGCGATCTCCGGTAGAGGTCA  
AAGCCCTAATGGTATTGTTGAAGGTTCAATGGTATTTGGTTTGGCTTTAGATGAACGTTA  
TTTATACTGCGTTATTCGGGGTACTATTGCCGGACAATATACAGAGAAACCACACACTAC  
AGAAGGTTTTTGCACCCCTCTGGTGCATATCCTCGTTATATTGGTAATGATGTTAATAT  
TCTTGCTCGTGGCGGTATTAACCCAGAAACCGGACAAACAACAAAACCTGACAGTGTCTA  
TATTCGAGGTGCAAACACTGGAGTTGCAGTAAATCCAGACGACGAGCCGTTAGACCAAAT  
TCCGGTTGATGATAATCCTGATTTTACATTAGAGAAAATGCTGAGGTGCGATGAGGGATA  
TCGCGAGAAATGGTATCTTGATTCAGAAGGATATCTGACCATAGGCATCGGGCATTGAT  
AATTTATAAGAAAACAGTGATCTGGGTATTATCAATAATGAACGTTCTAAGCTGGTAGG  
GCGTGAAGTTACAAACGGAAGACTCACCGCCGAAGAAGTTAGTAAGGTATTTGCTGACGA  
TATAGAAAGGACTCGTCGTGATATGCGCAAACATCCACGAATTGCACCTGTCTGTTATAA  
ATGTAACGCCTCTCGTCGTTGGGCATTAGAAAACATCGCGCTTCAAATGGGTGTTGGTGG  
ATTCGGTAAATTTAAGAATAGTCTTGCTGCGATCTTAGCGGAAGAATGGAAACAAGCCTA  
TGATGGATTACGTCAATCTGTATGGGCTAATCAAACCTCCAGGACGGTCAAGCCGTGTTTC  
TAAAATTATTCTTACTCGTAACTTAGAATCATATGGCGTAATTGCTCCAAAGAAAGAGGA  
ATCTGTTTCTGATGATCCGCGAGCACGTTGGAGAAATGCCCGTATTGCAGCCTATAAGAC  
GCAGAGAGCAGAAGAAGACCCAGAAGCACCGTTTACCCACAGGACACACGAATCATTTT  
TAAAGAGCCTATGAGTTCGTATTCTGCGAGGTATCCTTATAACCATGTGCACGAGTCAGA  
GAGCGGTCATATTATCGAGATTGATGACACTCCTTCTCATCAGCGTTATGACCGCAAACA  
TCCTTCTGGTACATTTGTAGAAACCAGACCGGACGGAACGAGGGTAGAAAAGATTGCAGG  
TGATGATTATCTAATCGTTAAACTAGGCCGGAAGTAAACGTTAAGGGTAATTTGCAAGT  
TGTTGTTGAAGGTGACGCGCAAGTTTATTCTATGGGTAATGTGATGCAAACCATCGATGG  
TAACGTCACTGAATTTATTCGTGGCCATGTTAATCAGACCGTTGAAGGTACGGCTAACAT  
GCATGTTGTAGGTGATGTTACCGCTCAACTTGACGCTACTTTAACGGCTAATGTCAAGGG  
TAATGCTGAATTAATGATCGAGGGTAACACTACCGAAACAATTAAGGGTAACTATGATTT  
AACCGTTGAGGGTAATTTAATATGACCGTCAATGGCACTAAATCAGATCAGGTTAATGG  
TGACTGGTCCCGTAATTGTGGTGCAAGCGTTAAAGATATTGCATCTGGTACAGTTCAAAT  
TGATGGTAGCCGATTTGATTTTGGGTGAGGGAACCTATTGGTTGAAATTTCTCCGATGAAT  
TCAAATTTGGAGGATATCAGCGAGCGAGAAATCTTTCAGGTGGTGTTCTCTTATAAAGCA  
ACGCCACCGGATGCAAATACCACATACACAATTAAGAGTTTAAGATCAGCGAGTATCGC  
CCTAACAAGGGCGTTACCGATGAAGAACTGAAATATCTGGTGAGTATCGGCATAGTTTT  
TCGCTTGGCGCGGATTCTCTTAAATATAGAACGAAAGATAGAATTAATAAATCTGCTGGA  
AGTTTTGATGAGTTACCAGATCCAACCTACCGCAGATCTATATTTTTTTAACGCTCCTACA  
CGTCTACAGGAGGTTTATACTTATAAAGTAACCCTAACCTATATCCGATCTGCTTCAGAG  
TCTTCTGGTGGTTCTGGTGAAGGAAATAGTGGTGGTTCCAATAGCCGAGAGGGTGCTGGA  
GATACTAATCCTCCTCCGGTAGTAACCGAACACAGAATAGAGAAAGTTTATACACAAACC  
GTTTTTGGAAATTGGGATGTGTGGGAGCAGCAACTAAGAGTTTATGTACATAGGGGTGTT  
TAATGGCTGGATTATCCTACGATAAAGTTAAAACCTACAGGGCACGGAAACTACCCACCTA  
CGGTAATTAATGCAACTCAATCAAAGGTATTTGTTGAGGGTATCCTGTATTAGTCGAAG  
GGGACTCAATTACACCACACACAAAACAACAAGCCTTATGATACACACGGGGGAACTA

CGGTCGCCAGTACCCCGAAAGTATTTGTTACCGGAAAGAAAGCAATTCAAATCGCAGATC  
GTATTAGCTGTGGAGATACCGTTCGCTATGGCATCACCGAAGGTATTCATAAAATGACAAA  
GCAAAAGACTACACAAATCCCTGATATTTTTAATGCTGCTCCATTCGATGAAATTAAG  
CGCATTAACAGACTGGATGAGAAACCAGAAAAAATTTAAAGATTTTGATTTAATGGTGC  
TGGTATTAACGTATTGATGGACTAGATCGCATATAACACTCTGTATATTCAGCAATTCGC  
TAACGCCGCGCTATATGAATCTTTTATCAGAACGGCAATTACGCGTAGTTCAGTTGTTCA  
AGCCGCGCAAGATTTAGGATATTTGCCAGCAAGTAAACTAGTGCATCGACTACAATTAT  
GTTGCACGTAACACATGCTCGAAATCCGGCAAGTATTCGAATCCCACGAGGAACTAAATT  
TATTGCAAGTGTGATCGCCAGACGTCTTATCCGTTTGTGACTACAGAAGACGTTTTGAG  
CGTTTTAGGTTCAAATGGTTTATATACGCCTATGCTTAAAGTCGCACACGGTTCGTATTGT  
TCGTAAGTAAATGTTATTTAATCCGAAGAAACAAATTCTGATCCGCGATCCTGATATTGA  
CCGCGCTCAGGGTAAATTGTGGGTAGACGGTGTGAATGGAAAGACTGGACACGAGAAAG  
CATTGTAAACGCACCTGGTGCAAGCAATATTTCTATATGCGTGAAACCGTAGACGGTCT  
TACAGAAATCTTCTTTGGTAAAGGTGAATCAACTTTATCTACTGCTGGCGGTGCACTGGA  
AGCAAATTATATTGGTGGACTTAAGCCGTCAACTGGTGCAAATATTGTTATCGAATATAT  
CAGCACCAAAGGCGCGGAAGCTAACGGATCTGTCAATTTTACATACGCGGATACATTGGC  
ATCTATCTCTATTGTTTAAATTAATGAGAAACCGACAAATGATCGTGATTATGTCCGGTGC  
AGATGGTGGTGGTGTGATCCTGAATCAATCGAACGTATGCGTGAACCTTGTCCGGTAAATGCG  
TGAGTCTCAGCGTCGTTGTGTTACTGCTTCTGACTATGAGGCTTTTGTATCTAGCCGTTT  
TGGTAGTATTGTTTACGGCGGTACAATGTTTACCAGCCGAGAAAAACCGGGTAAGGCTTT  
TGTTGCTGTTAAGCCTAAATCTGGATTGCGTTAGACAACCTGCTCAAAAAGAAGATATGCG  
CGTTATCTGGCAAAATATAATCTTGCCCTATCACGCTGAGCATCATTGACCCAAACTA  
TCTGTATATTAACAGAATATTAAGTTTCTTATTCAATCAATGACTTGTGAGAATCACT  
GCAGTGGTTGCGCGGTGCGGTTATTGATCAGATTGATGCATACTATAACCGACGTAGTGG  
AATTTTAAACCAGACCTTTAGTAAGTCTAAAATGCTTGCTCGTATTGACAAAGCTGATGT  
ATCTTTGATAGGTTCTAGTGCAGAAATCGAGATGGTGGGAGAGATCGACAACCTTCTATAA  
AGCACCTATGGCTGGAATCAAGTTTTTAAACCAGTATAAGAGCGGAATCAAGTCTAGTTC  
ATCCAACCTAGAAAAGGACGACAAGCAATATCCGATCCATTATGTAAGTACAGAAATGAA  
CAAAGAATTCGGTTTAGCTAAATTGCTGGTTGGACCTTTCCCTGTTGGATCTGCAATCGC  
TTTACCAGCACTTTTCCGGCACTGATTTTGATAACGAGGTTATCGACGGTGGCGACCTATA  
CTTTGAGGTTGGAGAGGTTTACGATTATGACGACCTTATTTTATGCGGATCTGGGTAAACT  
GAATATCAATAGCGATCGCTTTACTGGTTCATATATTGAGTTGACAGCTAAACCGATTGC  
TGATAACATCTTTACTAAAGACGGTCTTTGATCGTGTTTGAAAAGGATCTCCGTCCTCA  
GTACACAACCTATTAGTCTGGAGGCAATTGCTCAATGATTAAAGCGCCTAGTGTAACTAGC  
TTGACAATAGAAAAATTGTCTGCTAATCAGGCGTATATCACATGGGATGACGTAGGCGAA  
AACTGCTTTTATTTTGTGTAGTTAGCCGAAACCAGAACACGAGACGGGGAGATCATCCCC  
GTCGATGAGTTAAGCTGGGTAAACCTGGGATATACTGCCGAACAAAACCTGGTTTGGAGGAT  
AAAACCTTTTCCAGAATATTATTACAAATTTTCGTGTAGCAGTAGCCGCAGAAGGATTT  
GAACACAGTAAATGGATTGAAACCGAAGAGTTTCAGACATTTAAAACAAACGCATATAAT  
TTTTCTATGATGCCAGAGTTCAACCCTGCAAACGAGTTTGTAAACAAAAGTGTACATAT  
GATAATCGTGATTATATTAATTCATAGTGATTAAATTCAGCATCTTTGATGAAGGAA  
GATTTTGTCTTTAGTCTGAATATAACAACATGACAAATAACTCAAACCTACATTGTAGTT  
GATGAGAACTTACATGAAATACAGGATCACATAGAAAACGTTTGAATTGATATAAACCGC  
ACCATGTTAGCGGAAATGAACGGTGTTTTGTAGCTTTTCGAACGGTCCACCCGATTGTG  
AAAGTGTCAAATGATAACGGTCAATCATGGAAAGCATAAAGGCTGTTAATGACCGTGTA  
GGCAATCCGGTTTCCAGTACGTGCGTTTATCAGTCTAAAACCACTACTTACGTTTTAGGA  
TATGACCGAATCCTTACAGACGACAAGCTAGAGATACTCGATCGAGCGCGGACGATGTT  
CGATTTAGTGATGATACGATCATTTTCGCAAAGGTTTGTGACGAGAACGATTCAGGCTTT  
GCCGTTGAGGTCTTTGGTGTATTCTCCAGATTGGCAGGTGACACCACAAAATACGCCGAA  
GCTATGGCGTGCAGTGCCGATTATTTGTGGGTTGGTGCTAAAGATGTTATTCGCCGGATT  
CGTCTTAAGAATGCTCCTGTTGATACGGTACATGGTTCGCCTACGTTTGGAGAAAAATA  
TTCGATCCTGATGTTATCCGAGTAACAGGAAATGAAAAAGCTGTCATTCAGAAGATGGAT  
GTGATCGACGGTAAATTGCTTGTATTTGTTACGGGTGAAGTTAAACAGCGTTATCAAGAT  
CCAACCTAAACCAGAAAACGTTGTTCCGTCGGATGAGACGGGTGTATACTTAATAGGGAGA  
GATGGTCTGTCTTTTACAGAGAGGATTTGGCAACACTCCGCAGGAAAGGGAATATATTCAG  
CATGGGTTTCAAGTAATATGTCAACCAATGGGGATGAGGTGTTTATAAGCAATTATAATCAT  
CACTTTGAAAGCATTTTACCTGATCCAGAAACTGCCGCGAAATATCATTTAGGCGAAGCT

GTGAAATATTCTCAGGAGCCAACTTATCTAACTGATAAAGAAAATACATCAAACACTACTTTC  
AGAGCAATTTGTGATGATTTGCGTATTTGGGAGTTGGGACCGCAAGCGTATTATAATGAG  
GCTGATTATTCATGGATGCGTCGAAACGGTGTCCGTGTGTGGATCACAAATGATAATCGC  
CCGTTGGTTGTTTATCCAGAGGTTATCTATACTCAGGAAGTTGATACATCTGGCATTCTA  
GACCAAAAATTGGGTCAACCGAGAAGTTTATGGTAAGGGGACCGTGACCTGTTATCTTAAC  
AATGTTAAATTTGAAGGATTCAAACAATATGCATCCGGTGTAAATGTTCCATAAAAACACG  
GGAGAGATCATAGAATTCTAGCAATTTAATTATCCTGTTGGTGACCAAGTTGGTGTATAT  
TGGCAACCTACATATGTCGCATTTGTTGGTGAATTGCAAAAATCAGGTTCTGGGAGGTTCCC  
TGGGTTCCCTGTTTATTATGACAGTGAGCAAGATCCAGAAAATTCGGCCTTTACTGAATAAG  
ATGACGCCTGATAGCTTTTTACTTGAGAACGAAAATTTAGAAAATTTCTCTGAATATTAT  
CTGCAATTTCTAAGTGATGGTTCAGGAACATATTATAATAAACTAAAAAATCTGATTAAA  
AACAAATATCCACGCGAGCAAGATGCATGTGAGTATCTTTGGTCAGAAAATCAACAAACGA  
AACATCTATGCAGATAAAAACAAGCGAGATGCGGTCGTAATATTCTTTGAATCTCGCAA  
TCAGATTTTTATTCCACTAAGGGCGTGGAGGCTTCTTACAAGTTCTTGTTTAAGTTACTT  
TATAATGAAGGTGTGGAAATTGAGGTTGAATCACAAGCCGGATTAGAGTATGATATTGTT  
GTTAGTTCAACGAACATTGACGAGGATATCGTAGGACGCACGATCTATACTCCAACCGGA  
CGGGCTAACGTGACTTATCTTGAAAGGGAATATGAAGGTGGACGTCAACGCTGGCGAGTA  
ACCATTACATAACCTGATCGGGCGGTTTGTGCAAGGTCAAGTGATCAAAATCAGAGAAAACA  
GCGTTTGAGGGGATGATCCTTGTGGTGTACGTGGTAAAGAGTTGTTGAGTAGTTCAATC  
GACTATATCAACCGCTCACGAAGCCAATACACCGTGAAGATTAAGAGTGCATTGCCAGTT  
TCGCGCTATGAAAATGATGTAATGCGATACGTTTATCCTGTGCGGCTTTGGTTTCATAGGT  
GTTACTCTTCTTACAATGTTTATTAATAGCGGGATATGTATGAGACACGTAGAAAATATA  
ATTCAATCTCTGAAAAATTATAAGGTTGACAGAGGATTGCCTAGCGTGTATCCTGATCGG  
GTTGCTGATCTTGATGTTGATGGAAATATTAAGATTGACCCACTAACAGGGAAACCATTA  
TACTTAACGTAACCGACAATTGGCGAAGAGTTCCCTGTTCCCTCTGAATATGATCACGAG  
AACAGCGAATTGTTCCACGGACTTAAAGCAAGCGAACGAAGATTTGCAATGAGTCCACTG  
TTTGACCAGTCGGCGGTAACATTCTATATGTTCCGTCAACTTGTAGATAAACGGTTGAAG  
GATAATATAGGGAATCCACGCGATCCGAAGAATCCGACACAGAGGAAAATTAATGGCTAA  
TGAAAATAGTGTGATCTATCGCTCAATCATTACTAGCAAATTCAGAACAGAAAACTTCT  
GAACTTCTATAATTGTGTAGGCGATGGAGCAAATCAAATTACAATTTATGGAACATTTGG  
ACGTTCCGGAGCCGTGGTCAGAAAACGAAAAGAGGTGGGCTTTGCCCCACCTTATCCGAC  
CGATTCTACGGCTGGTGTGTTGACATGTGGACCCATATGATGGGGGCGGTTAAGATTAA  
CAAATCACTTCTTGATGCGGTTATCCCTCGTAAAGATTGGGGTGATACCGGACAGGATAA  
CCCGCGCACATTCTTTATCAATTACATTGTTGTTGTCAACTCAGCACCATATAACCGAAC  
TGATGTTGGTAGCGGCTGGATGGTGTATCGCGTACCCGATGTTCCCTGAACGCGGTTACTG  
CTCGATTTCAAGCATTGACGCTTATGTAGAGTGTTTGAAGTTGTGCGGAATGTGGACCCA  
CACTCATGAATCAATTGCGCCACCTGTAGGAAAGGGCGATTCAATTGATATGGGTGATGG  
GTATCGTTGGGAATATCTGTACACAATTCCACCTGATCCGGCGATCAACCGTTGCACCAA  
TGAACATATTGTTGTACCGTTCCCGATGAACTGCGACAAGCTCCGGAGCGTTGGGGCTA  
TGACAATGTGATGACGTGGTATAATGACTATAATCTTCTTTATCGGCTCAAAGTAGTAAC  
TTTGCGTTTTTCAGGCTTATATGGACTCTGCGCAATTCCCAACTACCGCGTTAGTGGGTAA  
TACTGGCTTCCGTCAGTTAGGCATTATCCTTAACCCATTGGAAATGAAAGCACGCCCTAG  
CGATCCAGATGTTAAAGCGGTCAAAGATAAGTACCGACCGCAAGACTTAGAGCCCACTC  
AGGCGAAATGATCTACATGGAAAACCGACAACCTATCGCTCGGTCATTAGATCAAACAGA  
ACTTGTCTCTGATTTGTTGAGTTCTAAGTGTATGATTTTAAAAGCCAATTCGAGAGAGT  
TGGCTTTTCCCATTTTTGGAGTTGACGATCTTATTTGGTAAGGTACAATACACACATCTA  
AACAACTGAGGATAAATTATGGCACGTCGTAAATTTACAGATACTTGTGAAGATATTAG  
GTATCCCCTTGCAGTTGGGATGTGATCGCGAACGGTGAAGATCGGCGAGATCATCGAT  
CATACTCATTCACTAGCCGATTACACCGATGAACTATGGGAGGGTATCAACTTCATG  
AATGACACTAAACCATTCAAGACTATCGACGAAGCTATCTAGTTTCGAGTATAATCCA  
TTCGGTATGTGGGGAAGTAAAGTAAATGAAATTTACAGATACTTGTGAAGATATTAG  
ATAAAGCTAAGTTCCCAATGCAAAAGCATTACTATGGTCTAAGTGCACAAGATCCTAAAC  
TCTATGGTACTCATTGGTTTTGTAAACATGATAACCAATGGCACACATGCGAAGAAATGC  
ATGAGATGATGAAACAGGGTATTGAATTTAGTTGTTCTAATTATGACCATCGTATAACTT  
GCATTTCGAAAATTGAAACGATGGATTTCGTAAGAATCCGCAATTTAAAACCTTTGTGTTCT  
TTATGTATCATGTTTATTTGGTACATAGCGTTACCGTCACAGCAAAGGTTAAATAATGGC  
ACGACTTTCTACACAAGAACAATAAATTACACGATCGGATGATGGAGTGGATTTATTCAGA

TCGCCATTAACATATGAAGAAAAGAATTTTGCTATAATAACTATCATGGCGATGGTCT  
AGGCGGTTTCAGTTGCATTCTTTACCCCTGAAGGGCTTGCATGGGATTTTACCATCGATGC  
ACATTGCACAGGAAAAGTATTAGATCTTTGTGCTGGGAACGGTCGCTTATCTTTTTGTAT  
GTTACATCGTTGTAAGCCAGAAAAGATAGTATGCGTCGAACTCAATCCAGAATTTGCGCG  
GATTGGCAAGATACTCTTACCGGAGGCAGAATGGATCACCAGCGATGTATTTCGAATTTGA  
GTCAAACGAAAATTCGATGTGGTGTATCAGCAATCCACCTTTCGGGAAAATCAATACAAC  
CGACACAAAGGATGTATTTGAGTACACTGGCGGCGAATTTGAATTTAAGGTTATGACATT  
AGGCCAGAAGTTTGCCGATGTAGGTTATTTTATTGTTCTGCTGGTTCGCTGGTTTTGC  
TTATTCCGGCAGACCTTATTATGACGTGAGCATGAAGTATAATAAATATCTAAAATGGAG  
CAAACAACTGGTTTTGGTGACTIONTACGCCGGATGTGGGATCGATACATCAATCTATCGCGA  
TGAATGGCATAGTACCAACGTTTTAACGGAAGTGGTTGAGGTTTCGGTATTACGAGAAAGA  
AGCTGTAGAACCGCCTAAATCACGTCCTAACGAACAAATAGAAGAAAGTAAGGTGATTAC  
CTTACCGAAACAGGAAAGCGAGTCTGCGACGCTCTCAGATTTGTTTGACATTTAATTATA  
AGCCGTCCTTGTGGGCGGCTTTTTTGTATGTATTCTATAAATAATACATCATAACATGAG  
GAATTAACAATGGCACAAGTTGCAAAGAAAAGAATAGACACAGGTACTIONTGTCCGCAATCC  
CAGCACCGGGGACAACCTCTATGACGGCGGTAATAAAATTAACGATAACTTTGATTCAAT  
ATATGACGCATTTGCTGATCAACGTTTTAAAGACGTAGACCACGGCGTAGGAAGAACGGT  
TATTCATGAAACCGGATACTIONTATCAGAAACATCCACGTCAAAGCTACTIONTGTTCGCTGT  
TGAGATTGGTAGTCTACACGATATCGATCCAAATCAAGGCGCACTIONTATTGCTATTCTACC  
CAAAGCAAAGGTCGGTGAGGGTGTGTATTCATAAATAGTAACGGTAGCCTTTCAAAGAC  
TACACCGGTCAATATTCGAACTCAAGCAGGTGTTTCTATTAGCGGGTATTCCGGTTATGC  
TACAATAACACCACCATTTTCAAAGTCACTIONTGTGGTGTACTGCCGTTGAAGGTAGTCG  
CGTAACATGGCCATTGGGTATCGAAAGTATGTTTACCGATACAACAACGCCATTAGATAA  
AACAGTTAACGTACTIONTGGAGTAGCAACAACGTTGCTATTGCCGCAAAAACAGAATACGT  
TTCCATCAAATTATTACTIONTACCGCTAGCAATACATCCGGTTCAAAAATGCGTTCAAGTGA  
AACGCTAATGATGATCGATTCTAAAGCCGGAAAAGTTTATGCGACGGAATATGCAGTTTT  
GCCGAAGACAGAAGACGAATTATATACCGTTCGTTATTTTCATCGGTTCCGGCGATAAAGT  
ATATGCAGAGTATAAGGCTACTIONTGGCGAAAATATTCGTTTAGCAGTTAAAGCCCTAGACAC  
TATTAATAATCGGGGTTGCGACATGAAACAATTAATTAATATCGGTAACGTTGTTGATGAC  
GGTACAGGTGATTATGTAAGAAAAGGCGGTCAAAGATTAATGACACTIONTTCCTGACTIONT  
TATACTAAGCTGGGGGATGGTGTATCCCTCATGCATGCGGCGCGTGGAAACTIONTCAACA  
CAACCAGTATTAGAACCAAATTTTGGTGTATGCATGGGCGATTAATACAACGAACAACACT  
GTTTCTGTTGAATTGCCTAAAGGTGGAGTTGGTGTATTATAACAAGACAATTAACTIONTTCGT  
GATGTTTGGCGCTCGTGGGCGTCTCATAACGTAACACTAAAGCCAGCACAAAGGTGATACC  
ATTAAGGGATCTCTCATCGACCGTGAGTTGTATAAAGATTTTATGGATGTTGGACTGGTT  
TATTGTGCGCCTTGACGCTGGGAATATATCGAAAACAAGCGAGTTGACACGATCACCACG  
TCTGAGCTAAGCACAGTAGCTAAGGAGGTTTATATTGCCACAGAAGGGCAAACAGATTTCC  
CCTAATGTATTTGGTTCTAACACATATAACACTCGAAATGTTGAAGTATATTACTGAGGA  
AACCTTTTATATTATGGCAAGTCTGTTAGTAATGACTCTACTIONTACGGTTCAATTGGTGTAG  
GATGGATCACTIONTGTGAACTIONTGAAGGCAAAGCATTAAACTIONTTCGTTTTCTAGTTCCGGCT  
GGGGATACCGTCCAAATTATTACATACATGGACGGAATTGCATCATTCCGATCTAGTTAC  
ATCACACACAAATTAGAGTGTATGATACCGGAATGACAGCACTIONTAGAACTIONTATTCCTGGT  
GAAGTGTGGGTAGGTGATTTATCGACGAAAAAGAATCTACCAATGCTGATTTGGGAGTT  
AGTAAACGTGATATAATTAACCAAATTCATTTGAGTTATTAATAAATGGTACTCAAATG  
ATTAAGCTGGTGTATTCTTATCTTCCCTTCGTTTTGTTGTGAAGGTGATGACTGAGAAACC  
GAAGAGAGTTGCGCACTIONTGCTGGCGGTAAGTGGGTACAGTCTGGAGCAGATTATCACTIONT  
GTATTTGATGAGAATAGCATTGTAACAGGGATTAATTAATCTAAAGGGTTGCACAATAGA  
GATACTIONTATAACAATTCGTTGGTTTAAATAACGATATCGGAACTIONTCTTTTAGAATGGGATGGT  
GTCGGCGGAATTACAGAAAAGCAGACAAGATTTATCTCTATAACGAAGACGAAGTTAAT  
TTAACAAAACAATTTGAATATACCGACTIONTCCAGAATCCTAGCCAGAAAACACTCGTCCG  
GAGGAAGAGTATTCAGGTGCAATTATGGATATATATGCACTIONTGTGATATTTTCCATCCG  
ATCGGCACTIONTATATATGAAAACGCACATAACCAAGCTAACCCAGCGATATATATGGGTATT  
GGTATCTGGGTTCCGGTAGGCGGAAGGAGAATTTCTTGCTGGTTGGTCTTCCGATGCCACC  
GACCAGAAATTTGCATTAACAATATCGATCTTGATATTCATGGACAACCTACACACACC  
GCTGGTGGTACTGGTGGTGAAGTTGCCTATCAATTCAAGAAAGATATGATTCCTGAATTA  
CAATCCAGCGATCGTGTTTTTGGTGAAGACGATACAGGGTCAATTATCATTGGTGGTTGT  
CAAGTTGACCCTGATGCGGCAGGTCCAGCGTTTACGAAATATAGAGAGGATATCGTAAAA

GTAAATACTGGAAATGCTGATCCATCAATGGTGGGTATTCTTCTCCATATCGCACCGTT  
CATCGCTGGTGAAGGGGAGGTTAATATGATTTCTCAAACGCGTTCTAAAGCAAGCGTATT  
TTCTAGCGACGCAGCATTTCATTTACATACGATCCAGGGTCTAAAGACCCCATTATTGGTGA  
CATTCGCCCAATTGGTGGATTAAACGTAGACCAATCTCGCAAAGGTTCTTTTATTAACAA  
CGTACAATCAGCCATTGATGATTTGTATAGCATTCTATGCTTAATGTCGGTGATGTATT  
GGTAACTACAAATTCAACTCCACCGGAAGCGGGCGGACAAATAGAAACTCTTTCTTTTAC  
TGGAACGGTAACAAATAAACACGATCCAGCCGCGAAAAAAGTTGTGATTGAAGTTTTGGG  
TTATCCATTTGTTGTTAATGTTGGAACATCGAATGTTGCATTATGCGAAATGGTCACAAC  
AAAATTTACTGAATTGGGAGACAAAAGCATCCTGTTCTTTAAAGTTCAGAGGAAAGGCAC  
TGGCAACGATCAAATAGAGATTCAGTATATTGATTCAAACGCACACGACGCAACGGTCTG  
AGAAAAATATGGTATTAGCGTTCGTGGGGAAATAAATCCCCCTGCTTGTATGGTTATGG  
TGCATGGGCCAGATTGGGAACGGGAGAAAAATTTGATTCAACACTAGTCTATTTTAAGCG  
TATTGCGTAAGGTCTAAAATTATGAATAACACTATTAATCACGTAAGAGACGATGCACAG  
TATGTTAAGTTTGACCCTACCGGAAATTGGCCTAGCAATATAAAAAACGTACAAGCGGCA  
TTAGCCGCTATTCAGGGATTTGCTATTGCAGGTCTTCCAACGGCAACCGAAGATACAGCG  
GGTATTGCTGAAATTGCTACTCAACAAGAAGTAGATGATGGGTTGGATGGAACATAAATT  
GTTACCCCAAAACATTGGCTGTTAAGCTGTCAAGAACGGACGCAACAAAACCTTGTCAAA  
GGGATCACTAGCTATGCTAATAACGATGAAGCTATGGGCGATACTCCAATATTGCAATT  
GGTCTGATACATTAACCCATGTTTTTCGAGAATAAGAAAGCAACGGAAACTGTACAGGGT  
ACAATTAATAATCTGTTCTATGGATACGGCAAAAATCGGTAGTAATGACACTATGGCGGTC  
ACGCCTAAAAAGATGCACGCTGCTATTGCTCAGAATGTTACTGGATTGATTCCAGAACAA  
AACACGGCGACCGAGTCCCGTCAGGGTTTAGTTCGACTGGCGACAAGCCACCAAACGCTT  
GCTGGTACTATCAGAGAAGGATTTGCCGCTAGCCCATATACATTTTCCAACGCAAGAGCC  
AATGAAAATCAGGCGGGTACTGTTAAAATTGCGTCATCCCAACAAATGATTGACGGTAAT  
GACAACACAGTAGTAGTATCAGCACAAAAATTTGCGAACACTAAAGCAACCACTGGACAA  
TTCGGTGTGTTAAGCTAACAGATAACCCAGGATCAGGCGAGGCAAACACAGCACTGTGCG  
GCAAACGCTCGTGTATCGCCTCTAAGTGATGGTATCGTTACTTGTGATGTGTATCGTCAT  
AGTGGAGGCGACGGAAACCAGTTTATCATTAAAAATGAACTGGATGGTCTTTGTATGCC  
ATTGGTGGCATCATGCTTACAGCATTTAACAGTTCCGACCACGCACACTTCAAATCTGC  
AACGGTCAATGGTTAAATAAAAACCAGTATCCAGTATTATTTTCACGAATCGGTTTCACT  
TACGGCGGAGATGGCGGTGACAACCTTTGCTCTACCCGATATGCGAGGGCTTGTGCTAGA  
GGTTGCAACCACGGTCGAGGACTAGACCCAGGTCTGGATTGTTGTTACTTATCAAGACGAC  
ACCATGCAACATATGACAGGTAACCTCCCTGTAACCAACCGTTGGCGAGGTTGGACTGGT  
GGTGTATATGCCATCACAGGCGGTCAATGGAGCACGAACTATCAAACGGTGGTGGTGTAT  
GATTGGGGTAGTATCGTTAACTCTGACAGCGCAAGACAGGTTAGAACGTCTGGCGAAACT  
CGCGTTAAGAGCCTTGCAATTAACACTACATGAAAAGGGTACAATAAGGATCGAACAGTTAA  
ACATTCGACAGATACCTAACGTCGATGGTGTCCCTGGAGAGGGACAGCATTCTATTAGCT  
GGATTAATAAATGGTGACTGTCTAAGCGCAGGAACCACAGAAACAGGACACGAGGGGACGC  
TTAACCGCGCTCCTTATGCGATTCAACAAAATATTGTTCTGCTAGATGAAAATTCTAAGA  
CAACGATAACAAAAGTTATCGAAGTTGATACAGCAGTTAATGATATTAATAACTACTTTAG  
GCGCGGTTGCTGATGGTAGTATTATTGATATTGTCAATCAAACACTATTGCAAAGGTTGATC  
CTGTAGAAGAAAATATAGGAGAACTTCAAAGATATTACAAACCACAGTAGATGAACTGG  
CAGAGGCAGGAAAGAAAATTGGTGTTTCGTCCGGCAGCAGCTCCGAGTACACGGACAATAT  
ATGATGATATTTCTTTCATCAAACAAGAATTGGGCGCTTTCCCTAACTTCAATATCAACG  
GTTCTCCAGATCCGGGTACTTCCGGTTCGGTATCAAATATCGAGTTATCCAGAATACGG  
AAGCATTAACAACACGGTCAGCGAATCCGCCGACTAGAAAACGACCGGCAAGATTCTG  
AAGTTGGAGAGCTAACAAACCAAGTTAACAAAATGCGAAGCGAGCTAGGAGATACATCAC  
TAGCAACACAGGACAATGTTTATCCTCGTCTTCGCACAAATACTCGCAATATCGCTAGTA  
TATCAAACGAAGTTAAGGAAGTAAAGAAAGCGATTCTATTTGATTAAATTCCTGATATCG  
GGACTAAAGTGACTAAGCTACAATTTGATTATACACAGCTAAATGATGAAGTCAACGGCG  
TTGACGCTGGTATCCGTCCCTCGTTTAACTCTTCTGGAAAATAATAATGGCAGTCTCTAAG  
CCGCTGGAAGTATTGATTATCGATTGACTAATCAAGAACGGGAATTTGTAGATCTTAAAT  
CTGTTGTCGGTGTTAGTGGTGTGCTGCTACGTGGTGAGGTGGCACGAATCTCTAACA  
CAGTTGGTACTGATAGTGAGCGTCATACTATCGCAGGTCTGCTAAAAATTGTCGAAAACA  
CACAGGGACGACTAGAAGCTAGCGTAAAGGTTATCGAGCAAATGATCGGGCAGTACGAGATT  
CCGGTCTAACCGCCGGGGTTATTAAGCTGTCAAGCGCCATGTACGGCAATCCAGAAGGAA  
GCACGCAGCTTGAAAAGATGGGATCGTGAAAACCTGTTAAGGAATTGAGCACATCAGATG



CAACCAAGGTAGCAGACGTTCTGATGATGGTTTCCATTATCTACGTAAGCACGGGGAAT  
GGTTTCAGGTCGGATGGGCGTCTGGTGCATTTAAAAACACCGCTCAGATTGATATTACTC  
TCGACGGTCAAGATCAATACAAAGGAATCCCCTAAACGATATGACCGAAGAAGTTCCTG  
CACGTGCAATGGTTAAGAGCGAATCTCTTGTACGGTTAACGACAAAGGCTTATTCCGTT  
GTGATTTCCGTTGTTCTGTAAATGCGGCACATAACGCTACTTTCGTAGTCGTTAGTCCTA  
AAAATGGTCTGATTGTACATGAGGTACGGAATGGTCATTATGGACCTGATGCTTTAATTA  
GCTATTCTACCAGTGTTCCTAAATATTGAAAAGGGCGACCGGATCGATATTTCGCATTA  
AGGGCGTATCCGAAGAAGCATTAGCGCAACAGCTACAAATTATATAGTTCCTCTTTGGAA  
TTTCCCCGGTATAGGAAATTAAGGGGGCGTTAAGCCCCTTTTTTCGTTTATAGGTGATATT  
ATGTCAGGATATGTAACCAATAACCCAAGAGAATTATAAGACGCTATTCTGCGTCGTTTA  
GGCGCACCAAGTAATTAACGTAGAAGAAACAGAAGACCTGATTTACGATTGTATTCAGAGA  
GCATTAGAACTCTATGGGGAATATCACTTCGATGGTGTGAATAAAGGATATAAAGTATTT  
CGTGTTAGTGCAGAGCAAGCGCAACACGGGGTATTTGATTTAAGCGATTCTGGAGTATTC  
GCAGTAACTAAAATAATTCGTACAAACGTAGGTAGCGCGGCTACGATGGATGGTACTGCC  
GTTTATCCGTGGTTTACTGACTTTCAGTTGGGTTTAGCGGGTGTAAATGGCGGATTAGTA  
TCTGGCTGTAGTAAATTTTATAGACCAAATGCAATGGGCGGTGATCTAGGATATTTTCGAA  
CAGCTTATGAGCTATCGAGCCGCTATGCAAAATATGCTTAATCCGCTGCCAGATTATTGG  
TATAATAGCGCAAACGGACAACCTTAAGATAACAGGAAACTTCCGAGAAGGTGATCTCATT  
GTTGTTGAATTATATGTTAAAAGTTATGTTGATGTACCTGATATGATCGGCGCGGTTGCT  
GGTTATGCTCATGCGGGAGGATGTTCTACCGCTGGCGGGATTAGCGCCGTTTATGATGAC  
CCAATGCTGGTTTAAAGCCGATTGTTGCTGCCATGGGACCGACCCGTGATAACAAGCAG  
GGCGCACATAATGACCGTTGGGTTAAAGACTGCGAGATTGCGTTTACTCGGTAGCTATGG  
GGCAGATCTTAGCTAAACATCAAGGGTTGCAATTACCAGGTGGTGGCACTGTTGATGGG  
GTCGGAATCATCGAAGAAGCACGCGCGGATATTGAGAAATTGCGACAAGAACTACTTGAC  
TTAGATCCTCCGTTCCGGCATCCTCATGATTTGATTTATTGGGGGAGTATCCCTATTTG  
GAGTAACATATGTTTAAACAAGACTCTTTTTGCTCGCCCTGAATCGCAAAGGTTTATGAG  
AATACACTACAAACGGAGATTTTCAATCCTTACGTAATTTCAACCGTCATACAAACACC  
CAGACGTTAGCCGACGTTATGGTCGCCGAAGCTATTCAGATGCGAGGTGTAGAATTATAT  
TACATCCCTCGTGAATTTTTCATACCAGATATGATCTTTGGTGAGGATGTTCAAAGCAA  
TTTACTAAAGCACGGAATTTGCTGCGTATATAACCTCTTTCGACGGGTAGGAAGGTGCA  
GGAAACTTTTTTCAATCTATGGGTTATACGGCAAACGACGAATTAACATATGCGGTGAAT  
CCTAACCTATTCAAGCATCAAGTAGATGATCAAGATCCAAAATCAGGTGACTTGATTTAT  
ATTCCAATGAGTAATGATCTCTTTGAAATTAATTACGTCGAGCCATATCAGCCGTTTTTT  
CAGGCTGGCAAAAATGCCATGCGTAAAATTATTGCAGAGAAATTTGTGTATAGCGGTGAG  
GAATTGCGACCAGAATTACAACGCAATGAGGGAATTAATGTTGATGAGTTTGCGGATTG  
GATCTTGACCGATCACTAATCTGGACGCGTTAACAGATATCAACTTAGATCAGTACAAA  
GAAGATAAGCAATTCAGAAGCGAAGGACAAGATTTTATTGATCCGTTTGATCCTATTAAT  
GGCAAGGGTTCACCTTCTCCGATTTTTGATAAATACTTGTATTGAAATAATATTCGGAT  
CTAATGACTTAAGAAAACCTATTTTCTATACGAAATAAAGAACAATATAAATGGTAAGAT  
ATATGTTGGCATTTCGTGGGTATGATGGTGACATAAGTCAAGATCCTTATATGGGTAGTGG  
ATTGACTCTTAAGAGGTCTATTA AAAAGACCGGGATAGAAA ACTTCACAAAAACAATTCT  
CAAAACGTTTGACTCATGGAAAGAGGCAAGGAAAGCAGAAAGAGAAATGGTTACAGAGGA  
ATTTGTAATAAGAGAAGATACCTATAATGTTTTCGTTGGTGGACAAGGTGGAAATACTCA  
CGCTGGGATCAGCGAAGAACGAAGAAA ACTTGCAAGCGAAAGACACGCTGAAGCAAATCG  
AAATAGAGTACGGAAGCAAGAATCTAGAGATAAGGTTAGCGCAAGATTC AAAGGTCATAA  
GCTATAACAGAAGCAGATAGACGCGCTAAAGAAGGCAAACACAGGAAGAAAGTTCACAGA  
AGAAAACAAGCTCAA AATAGGTA AAACGTGGCGAGGATAGAAACGACCAGATATAGGAGA  
GAAGGCTGCGGCAACATTAACAGGGAGAAA ACTACCCCCAGAACATGTGGCAGCAATAAC  
GCAAAATACACCGAGAGGAAAACAACACTTTAGGGCCAAAAGATTCTTCGTCGACTATAT  
GGAATTTTATATTTTGAGTAATGCAGCTAAAATGTTTGGTATAAGTTATAAAACGGTTAG  
AGCTAGACTTCTCTCAGATAACTTTCCTACATGGAGATATGAATAAATGTTTTACATTT  
TTACAATTCGTCAATTCGAAGGTATATTGTATTGCTGGGTAATTTAGTCACGGGCGTACA  
AATTA AAAGGGTGCGTAGTGACGGCGAGCGTTTTATTAAGTTCTTATCACCTACGCAA  
GAAAGAAAATTCATGATGAGTCCGGACAAATATAACAATATCTTAAGCGAGGAAGACGT  
CGCAAAGGTAGAACTATTTGAGCTCGTATGTGCTTTCTTTAATTGATATGACGTACGC  
CCAGAACTTTAAAACCAATATTGCAAAAAAGACAGTACC AAAATATACGGCTGATGGAAT  
CAGGAGCGTAACACAATATAAACCTGTACCATATAAGTTTACTTTCGAGTTAGGGATTTC

TACGCGTAACGAAGATGATATGTTTCAGATAATTGAACAGATTCTTCCTTACTTCCAGCC  
TCATTTTAACTGTAAGATTAAGAAGTGCACGGTAATGATGTATTGATTGATCGAGATAT  
TCAGGTCACAATTAGTTCTATTACTCCAGATGAACAGGTAGGCGAAGATAAGTTATCTCG  
TCGTCGTCTTGAGTGGACCATTATGTTTGAGTTCATCGGGTTTATCTATCCTCCAGCCAC  
CGACGTTAAGGGGGAAATGAGAACGATTTATCTTGATTTTCATGCTAATCCTCGTGAATT  
AAATCCTAGCGGTAAAATTGAATCAGTGGATCATGAAGTTGTTAAACGTGATGTTGAGCA  
AGAAGAATGGGACGGAACATTAAGAATCATATTCTAGTGATATTCCTATAACCAGTTGC  
ACCGACTCCACCGGGTCCACGTATTGTAAGAGAATTTGATGAGGTAATTTATTATGTGAG  
ATGTAGGCTTAGAAATGAATCAATTAATGAATTTTCGAAAGTCTAGGTCTTCCGGGGTTCAT  
TCGACGAGGAAGAAGGTGAGTGTGAGCTATGATCCGATCGTCTTGACTCCGGTTCGAAAGCC  
ATCCAGAAGATCGTAATATTGACTTACAGCGAGCTTATAAGGAGGCACGTCAGAATATTC  
ATTTTCATAATCAGATGATGATGGACGCCGAAAAGATTTATCTTGAACCTGGTAAAAATA  
GTGAGTCTCCGAGGTTCTACAGGCATTTAACGGCCTCATGCAGCCAATGAACAACAACA  
ATATAGAATTGCTGAACATCCATAAGGATATGAAGAAAATCACCGAGCAAGCTGGAGAGA  
AAAAGAAAGATAATACCCAGCTGCACCAGTTAATAACCAGAATGCGACCGTCTTTATGG  
GTTCTCCTAGTGATTTAATGGATGAAATCGCAGACGAGGAAGCGCGAGTTATTGAAGGCG  
AGACAGTATGAGCGTGATTGAAGGGATTAACGCAATGGCGACGAATGAACACCCGCTACA  
TTAGCTCATCCGTCTCCACTAGAACTGAAATTGATTCTAATGGTATCGAATGGATTTT  
ATCAAAGCATGATGATAAATGGTATCCTAAAAAGTTTTCTGACTATCTGAAATTAACAG  
ACCGCAGAAAATAAGGATGCAAAGCACTGATCCAACAATTATAAGTTCCATAAAGATAG  
TGACAATATTCGCACGCGGTATATGCGGTTAAAGAATTTGCGAAGGGCGAATATTA AAC  
TCAGTATACCCCGAAATGATCGCGGAGTGGAAACTATGCCGTAAAGATATTGTATATTT  
CGCAGAAACCTATTGCGCAATTACACACATCGACTACGGTACAATCAAAGTACAATTGCG  
TGATAATCAGAAAGATATGCTTAAGATCATGGATGAAAACCGCATGAGCGCCATAAACT  
CAGTCGTCAGCTAGGGAAAACCTACCGCTGTAGCAATATTCCTTGCTCACTACGTTTGCTT  
TAATAAAGACAAAGCGGTAGGTATACTGGCACACACAGGATCAATGGCAGCTGAGGTTCT  
AGAACGTAATAATCAAGCAATTGAACTATTGCCGGACTTCTTACAGCCTGGTATTGTAGA  
ATGGAACAAGAAATCTATTGTGTAAGAAAACGGGTCTAGTACGGGCGCTTATGCATCGTC  
ACCAGATGCTGTTTCGCGGAAACTCCTTTAGTTTCATATACATAGACGAGGCAGCCTTTCT  
TAGTGCGTGGCAAGACGCATGGTTAGCTATTCACCCAGTTATCTCATCCGGTTCGTGAATC  
TAAACTGCACATGCCAACAACTCCGAACGGGCTTAATCACTTTTATGACATTTGGCAATC  
AGCCATTGATGGTAAAAGCGGTTCTGCACCTTATGAGGCGGTTTGGCATTCTGTAAAGA  
ACGTCTTTACAATAAAGCTGATTTATTCGAAGATGGTTATGAGTGGTCTCTCAGGCGAT  
GTCCGGATCTAGTCTTGAGCAATCCTTGCAGGAACATAACGCTGAATTGTTCCGGTAGTTC  
CGTACTCTGATCAGGGCAACCACACTATCTAGATTATCATTCAATTGACGTTGTTAATGA  
CAACGGGTTTAAATCAGTTTGAGAAACCGAAAGAAGGTAGAAAATATGTTGCTACACTAGA  
TTGCTCAGAAGGTCGACGACGGGACCATCATGCAGTGCAAATCATTGATATTACTGAATT  
TCCTTATAAGCAGGTTGCAGTATATCAAAGCAATACTACGTCCCATTTTATGTTACCGGA  
TATTGTCTTTAAATATCTAATGATGTATAACGAATGTCCAGTTTATATCGACCTAAATAG  
TACGGGTGTATCTATTGCTAAGTCTCTTGCATGGATCTTGAATATGATAATATTATTTG  
CGACTCATTATAGATCTAGGGATGAAACAATCCAAAAGATCTAAAGCATTGGGATGTTT  
GGCAATAAAAGACTTAATAGAAAAGATAAGCTGATCATTAGCCATAAAGGAACTATTCA  
GGAGTTGCGCACATTCTCCGAGAAGGGAGTAGGCTGGGCGGCAGAAGAAAGTTTTACGA  
TGATTTGGTCATGAGTCAGGTAATATTTGTTGGTTAACAACCTCAAGAAAAATTCGCCGA  
ATACGCAGGAAAAGACGAAATGCGGATCGCCTCCGAAATATTCGAAAGAAATTAGATGA  
ATTGGGGGAAGAATACGCGCCCGTGGTAATATATGACGGTGCAAACGGCATCGAAGCATA  
TAGGCCGCGTGAAGGTCTAACAATGATATAAATACGATAATGGATAAAAGGATGAGGAAA  
TTCTGATGACTCTATTATCACCGGGTTTCGAAACGAAAGAACTACTCTCTCCACTACCA  
TTGTGCAATCTGCGACTGGTCGCGCGGCGCTGGTAGGTAATTTCAATGGGGTCCAGCTT  
TCCAGATTGTTCAAGTAACTAATGAAGTTGAATTAGTTAATAAACTTGGTCAGCCGGATA  
ATAACACCGCAGACTATTTTATGAGCGGGGCTAACTTCTTCCAATATGGCAATGACCTGC  
GTGTTGTTTCGTGTACTCAATCAAGAAAAAGCAAAAAACGCAACTGCCCTAGCTGGTAACG  
TAGAGTATGAAATCACAAACGAAGGTTCAAACCTATGAAGTATGCGATACCATAAAGATTA  
AACATAACCGTCAAGATATAGAAACGGCAGGTAAGTAACCAAAGTTGATCGTGATGGTA  
AAGTTAAGGGCGTATTTATCGCAACTGGTAAAATTATCGCTCACGCTAAAGCAATCGGCG  
TATATCCAGAACTTGTGAGGCGTTGGACGGCAGAGTTCACCTTCTTCGTCAGGTAACGGTA  
GTGCGGCGTGTGAGTAACTAAAATTGTTACCGATTCCGGTCTTCTCTTAAACGGATCTGG

AAACTTCCTGAGCCAATATCACCAATCAAGATTTTTTTGACAAAGCTCAAAAAGTATGATA  
TGCCAGCGGTAATGCAATCTATGCTGGTGGAGCTGGGCAACTCTCTGGAAGTTGAAATTC  
TGGCACGTAGCTCGTTCAGTGGCGCGGTAGCACCTGAATTAAGTATCCGTTCCGGCG  
GAACTCGTGCCGCAGCACGCAACCTAATTCCATATGCACCGCAGAATGATAATCAATATG  
CGTTTATTGTTTCGTCGAGATGGTGTGTGGTAGAATCCTATGTACTGTTTACTCTGAAAG  
GGGATAAAGACGTATACGGCAATTCTATCTACATGGACGACTTCTTTGGTTCGTGGTTCTA  
GCCAGTACATCTATGCAACCGCTCAAGGGTGGGTAGATGGTTTCAGTGGTATTATCTCTC  
TTGCTGGGGGTGTGTCTGCTAACGAAGCCAGTACGGGCGACCGTGGAATGATCCGTTCA  
TTGGTGCGATGATGCAAGGTTGGGATCTGTTTGCTCAACGAGAATCTATTACGTA AAC  
TGTTGATTGCTGGTGCATGTGCTGGCGAAGACGTTGCGTCTCTACCGTACAGAAACATG  
CTGTTTCCATCGGTTATGAGCGTCAGGATTGCTTAGTAAGGGTTTCTCCGCCGCGTAGCA  
CTGTTGTCAATATCCGGTCACTACCGCGATCGATAATCTGATCGCTTGGCGAGAAGGAA  
ATAGCAATTATCAGACAACAACATGAACATTAATAACCACTTACGCGGTTATTGATGGTA  
ACTACAAATATCAGTATGACAAATAGAACGACGTACACCGATGGGTTCCGTTGGCTGCTG  
ATATTGCTGGTTTGTGCGCTCGTAATGATGCTGTATCCCAGCCGTGGATGAGTCCGCCAG  
GTTCTAACCGTGGTCAGCTCATGAACGTGGTTAAGCTGGCTATTGAGCCTCGCAAGGCAC  
ACCGTGATCGTCTGTATCAGGCTGCAATTAACCCGGTGATCGGTGCTGGTGGTGAAGGGT  
TTATCCTGATGGGTGATAAAACCGCTAGGACTGTTCCCTAGCCCGTTTGACCGCATTAAACG  
TTCGTCGTCTGTTTAAACATGCTGAAAAAGAATATCGGCGATTCAAGCAAATACAAACTGT  
TTGAAAAACAACGATAACTTTACTCGCGCTTCCCTCCGTATGGAGGTTTCGCCATATCTCA  
GCACGATTCGCTCTCTGGTGGCATTATGACTTCCTAGTACAATGCGTCACCACGAACA  
ACACGTCGGATGTAATTGATCGCAACGAATTTGTTGCTGGTATGTTTCATCAAACCAGCAA  
AATCGATCAGCTATATCATGCTCAATTTCACTGCTGTGGCAACTGGTGTGATTTTGGACG  
AAATTATCGGTCCAGCTAACAGGCATAATCAGTAAATTAGCATGGATTA AAAAGTTAAAT  
CAAGCGGGGATTTTCTCCCCGCTCTATTAAGGAATATCAATTATGGCACTCGATTTGAAT  
GATATTACACGCGGTTTAGAGTCTGGCGATTTTGTCTCGTCTACCCTGTTTGAAGTTGAG  
ATCCCGTATCAGGGGCAAAACTTTAAGCTGATGTGTGAGGCTGCGACTGTCTCGGCTGCT  
ACCGTAAAAATAAGTGCTGTAGGCTATCAAAACCGTAAAATTAACGTGCTGGCGACCGT  
GTATACGACGACTGGACCATCACTGTATTCAACGATGACGCACACAAGATCCGTGATGCT  
ATCGTTGCATGGAGCGATCAGACACATGGCACATGTGCGGGCGATCACTGGTGCAACTCCT  
GCACAGTATAAGAAACAAGCTATTGTTCTGCAACTTAACCGTAACACCGAATCAACTAGC  
GAAAAAACATTGTACGGTATTTTCCCGACCAACGTTGGTGAAGTAACCCCGATTGGGAA  
CAAAACAACGCAGTTGAAACGTTTGAAGTTACTTTTGCTATCGATTGGGTAGAATAAATA  
TATTATCATGCGGGGAGAAGTTCCCCGCTTAATTTCTCCCAATTCGAGGGGAATAATGTT  
TAGTAGATTA AAAATGCTTGC GCGT TGGGCTGATTTT GACAACGACAAATACGAAGATCA  
AATTAAGATAAAGCAGCGTCTATCGCCGCACCTAAAAACAATGATGGTGCTACGGAAGT  
AGAAATTAATGATAATTCACCTGCTAGCGCGTGGAAACCTATTACCCAGCAATTTTCCAG  
CACCGACCAGAAAATCAGCACA ACTAAGCAATTAGTTAACACATATCGCGGGTTGATGAG  
TAACAATGAAGTCGAAAAAGCTGTACAAAATATCGTTAATGATGCGATTGTATTTGAAGA  
AGGTCATGAAGTTGTTTCATTAAATCTTGAGGCGACTGGCTTTAGTGAATCAGTAAAAGA  
GCGCATTATGAAGAATTTACAGATCTTTTAGACACTATCCATTTTGATAAGCGTGGTCA  
GGATATGTTCCGTCGCTGGTAGGTCGATTCGCGTATTTTCTTCCAAAAAATCATCGGCAC  
AAATCGAAAAGATGGTATCGTAGAATTACGCCAGCTTGACCCACGAAATCTTGAATACGT  
TCGAGAGATCGTTACAGAAGACACACCGGAAGCTAAAATTTATAAAGCAACAAAAGAATA  
TTTCATTTACTGTAGGCAATAGCTCTTATTGCGCAGGTGGTCAAGTATTCTCTCTTAA  
TAGTCGAGTTACTATCCCGCGTAGTGCTATTCCATACGCTCACAGCGGCTTGATGGATTG  
CGATGATAAATATATCATTGGTCAATTTGCATCGGGCTGTTAAGCCAGCAAACCAGCTTAA  
ATTGTTGGAGGACGCAATGGTCGTTTATCGTATCACGCGTGCACCGGAACGCCGAGTGTT  
CTGTATTGATACCGGAAACATGAACAACCGCAAGGCTTACAGCACATGAACTCAGTGGC  
ACAGTCTTTTAAAAACCGCGTGTTCATGATTCATCGACTGGTAAACTTACAAACCAGCA  
AGCAAATCTATCAATGACAGAGGACTACTGGTTACAGCGTAGAAATGGTAAAGCAATCAC  
CGACGTTACTACTTTACCGAGTGCATCCGGTATGAGTGATATCGATGTTATTCGCTACTT  
TAACCGTAAATTGTATGAAGCGTTGCGTGAGCCATTGTGACGTAGCAATCTCTCCGATGC  
TAATATGGTGATCGGTGGTGTGGTTCAAAAATTA CTGCGGAGGAGTTGGAATTTTCGAA  
ATTCATTA AAACTCTGCAATCACAGTTTTTCGGAAGCAATGCGCGATCCTCTGAAATATAA  
TCTGATTCTCAAAAATGTACTTACGGAAGATGATTGGGATCGTGAAATAAATAATATCAA  
GGTGGTTTTCCATCGGGACTCTTACTATACAGAAGTTAAAGACGCGGAATTTTAGAACG

TCGAATCGGTCTAATCGAACGTATTACACCTTACATTGGTAAATATTTCTCTAACCAGAC  
AGTGATGCGTGACATTCTGAAATATACCGATGACCAGATGGACGCCGAGAAGAAACAGAT  
AGAAGTAGAAGCGAACGATCCGCGCTTTAAACAAACCCCGATGAAATAGAGGATTTTAA  
AATGAAACAATTTATCGAAGCAATTAATACTCGCGATCTAACGCTGATCGAAAAAAGATT  
TGATAAGATCATGCAGGCTAAAAAAGCCCAGATCATCGAATCCCAGCGTATCGAAATCGC  
ATCAAGTATCATGATCAAAGGTGAAGAAGAAAAAGTCCGCGATGATGAAGAAGATATGGA  
AGATGAAGATCAGGACGACGAAGATCGCAAAGACGATAAAAAAGACAAAGAAGACGACGA  
ATAATAGGAAGCTAACATGATTAAGATTTTACACCTAAAGCTGACTTAGAAACTTTTCT  
GCCGGAAGCACAGGAAAAATTGGACATGTGGGCTATGTTTGAGTCAGAAGAAGTATTGAA  
AATCGTTGAAGGTATTTCTAGGATGAGCCGGAAGTGGCTGTAGCAATGCTGTCTATCAT  
CGACGGAATTACTGTAAATGAAGCAATGGTTAAACATGTAAACGCACGCGGGGAAGTTGA  
ACGTAAGAAAGATCGCAAACCCGTGAGCGGAATGCTTACATGACTACCGGCCTAAGCAA  
AGCTAAACGCCGTCAAATTGCCCGTTCGTGCTGCACAAAGCAAACGTGCAAATCCACCTAT  
CGAACGTCATGCGGAACGTAAGCGCAAAAAAGCAATGCGTAAACGCAAGGCGTTAGGATT  
CTAACAGGAAACAACATGGAAAAGAACGAATTACTGATCGAGCAATGGGGCGTTCCTCGT  
GCTCGCGGTGGTTCGTCATTGCTTGAATCATTTGATGATAAGGCTACAGGAAATCTCTAT  
ATTCAACGGATTTTCTGCAAGCCGAAACGGTAAAACGTAATAAACGCTGGTATCTTCGC  
AGTGTTCTAGAAAATGCGGTTACTAAATTCATACACGAACAAGTTGAGACACATCAAGCT  
CTAGGCGCACTTAATCACCCAGCAAGAGCAATGCCAGATCCATCTATTGCTTGCATCATG  
ATTGAAAAATTGTGGTGGGAAGGTAATAACGTGATGGGTAAAGCCCGTGTATTGATGGG  
GATAAAGGCGCAGGTGATAAACTTGCTGCACTGATTCGCGCTGGCTGGATTCTGGCGTT  
TCCTCCCGTGGATTGGGGCGGTTGAAAGACTCTGGTCGCGGATACAATATTGTACAGAAA  
GGTTTTGTGTTGACGGTTGGTGTGATGTTGTTTGGGGTCCGAGCGCACCCGGATGCGTGG  
GTGACTCCTGTGTTTGTGAGTCAACGGATAGCGGTTCTAGCGCGTAAGACGCACCAGAAAGC  
GATAAAACCGAAAAAGTGACTAACCTACAGCCTCACAAACAAACATCGTTCGAATCGAAT  
AATATCCCGTTTATGGCGCTCGCAGAAGCGTTATCTAAACTCTATAAATAATAACGTCGT  
TATCAACAAGAAGGTTATAACCATGCTTAAAGTAATGATGCTCGAAGAAGCAAACAGAT  
CACCGTAGACGTTGCTCTCGATGACCAGTTTGAATCCGTCGTAAGTGTGCGCCGGAAGTAAA  
AGAAAATTTTGGTACTATCTACGCTCAGGCGGTAAGGCTAATGCTGTTGCTCTGGCAGA  
AAGCCACATTGAAAAAATCGCCGCTAAAGCCGATGAACTGGTTGAATCAAAGGTCGAAGA  
AGCACGCTCCGAGATTGATACCAAACGTACGAAGATGCAGATAAATTCCTGAATCACTT  
AGGCGCTCAATGGCTGGCAGAAAATAAAGAAGCCATAACCCCGTAATATTAAGCGGATCT  
GTGCGAATCCCTGATTGGTTCTCTGAAAGATGTTTTCGTTACTACAATGTTGTAGTGCC  
GGAAGAATCTGTAGACGTTGTAGCTGCACTTGACGGAGCACTCAAAGAAGAAACAGAAAA  
AACCTCCGAACTCTTTGATGCCAAACTGCAACTTGAAAGCGAAATTCGTGGTATGAAGCG  
CGAACAAGCGATCAATGAAAGCACTCGTGATCTTTCCGATACTCAAAAAGAAAAAGTAAAC  
CGAGCTGATTGAAGGTCTGGAATAGAGCGAAACTTTCGATAAGAAAGTAACTGCAATCGT  
CGAAATGGTGGCTAAGAAAGAAGACAAACCAGCTAAGATTGAAGAATCACTAAATAATGA  
TGCCGACAAGCTGAATGTTATTGCAGAAGCTGTGCAAGAATCAGAGAAAAAAGAATCTGT  
AGATTCGGCGTATCTCGCTACCTGAATTTTCATCTAATGCGATTCAAATCTACTAATAAAA  
TACTTTAGGTTAACAAGAAACAAGGTTTAAAGAACATGAAAACCTACCAAAAAACTGATGG  
AAAAATGGTCCCCGCTGCTGGAGAACGAAAAACAGCCGGAATTCGCAACTGCGTTTAAAGC  
AGAAACTGGTTGCTAAAATTCTGGAATCTCAGGAAGCGGAATTTGCGGTAGATCCGATCT  
ATAAGGATGCAAAGTTGTTGAAGCATTTCGGTGGCTTTATCGCAGAAGCCGAAGTTGCTG  
GCGTCCACGGTTATAACGCATCTAATATCGCGCCTGGACAGACTACTGGTGCAATCACCA  
ACGTAGGTCCGGCTGTTAGCGGCATGGTTCGCCGTGCTATTCTAACCTGATCGTATTTG  
ATATTTGTGCTGTTTCAGCCGATGAGCACTCCGACTAGCCAGATCTTTGCAATCCGTTCTG  
TATACGGTGGCGACCCGCTGGCTGAACACGCTAAAGAAGCATTCCATCCGATGTACTCTC  
CAGATGCGTTCCTAGCTGTCTGGCTGCTAAAGATGCAACGACTGTTTCTCCTACTGGCA  
CTGCGTTCCGGAACGCACTCTCAGTACTCCTATTGCCGAGGTGATATTGTACACCACA  
CCTTCGCAGAAACTGGCACCCGATATCTGCAAAACGTTACCCAGAACAAAGTAACCCCGA  
CCAAAGCTGACAGCGAGTCAGATTATGAAGTTGTCATGAAGCTGCTGGAAGAATGTAAC  
TGGCTGAAATCGCTGTCGGTATGGCTACTTCCATCGCTGAATTGCAGCAAGGGTTAATG  
GTTCTCAGAATAACCCGTGGAACGAAATTTCAAGGCGTATTGACAAACAGGTTGTTGAAG  
CGAAATCTCGCCAACCTGAAAGCCCGTTATTCTATCGAAGTTGCGCAGGATCTGCGTGCTG  
TTCACGGTATGGGTGCTGATGCTGAACTGAATGCTATCCTGGCTAACGAAGTTCTGCTGG  
AAATCAACCGTGATATCGTTGATGTGTTCAACTTTACCGCTCAGGTTGAGAAAACTGGTA

TGACTCAGACCGTTGGTTCTAAACCTGGTGTATTTGACCTGCAAGACCCGATTGATACTC  
GCGGTGCTCGTGGGGCTGGTGAATCCTTCAAGTCTCTGATCTTTCAGATCGACAAAGAAG  
CTGCTGAAATCGCTCGTCAGACTGGTCGGGGTGTGGTAACTATGTTTTCGCTTCCCGTA  
ACGTTGTAAACATTCTGGCTTCTGCTGCTCAGGGTATCAGTCTTGCTATGCAGGGTGTG  
CACAGGGTCTGAATACCGACACCACTAAAGCTGTTTTCGCTGGTGTCTGGCTGGTAAAGT  
ACAAAGTATTCATCGACCAGTATGCTCGTCAGGACTACTTCACCGTAGGTTACAAAGGCG  
ATAACGAAATGGATGCTGGTATCTACTATGCTCCGTATGTTGCTCTGACTCCGCTGCGTG  
CAACTGATCCTCAGTCTGTCCACCCGGTTCTGGGCTTCAAGACTCGCTACGGCATCGGCA  
TCAACCCGCTTGCTGACAGCCAATCCCAGGCGCCGTCCGAACGCATCACCTCCCGTATGT  
TGAGCACAGACAGCGTAGGTA AAAACGCATGCTTCCGTCGTGTATGGGTTAAAGGTTGCT  
AATATAAGCCATTCCTGAAAACCTCCGGGCGGGTGAATACCCGACTTATCATAAACCTTA  
TGACAGTGTAAAGTGTTAATTCCAACGGGAAGACTCGAAAGGGTCTTCCCTTTTTGCGTA  
TTATAACCCGTCATAAATTAGGTTGAAAGCCTATACTCTATTGGGAGCTAAAATAGATAT  
ACACAACAAACAATTCGACCAGTTTTTCGTAGTAACTGCATGGCAAAGGGACCAATGACTG  
AAATGAACGTTTATGTACATATTGGGTCGGATAGATTTAGGAGATAGACAGATCTGGTGT  
ATGCCGCCCTTGTTATGACATTCCAGCGTGACGCTAGCGGTACTTTTTGGTTTTGGTACGC  
TGTTCCCTGAATTAACCCCAAATTCTCCATAAGGAGGAAATGCATGAGTAAGAAAGAAA  
CAGCTATGTTATGACTCGTAAGGAATACAACGAATTGAAGTTAGCATTAGCTTATGCTAT  
TATTCGTTCTGATCATGCAATTAATCTGGTAAACAAAGTTAACCGTAGCGTTGATAATGT  
TTCTAGGAAGAGGTAAGTTTATTCTGGAATCCCTCGGATTCCTTTTTCTTTTTGTATAAA  
TATGATATATCCATTAAGGCAAATACAGGATTCATAAACATGACTCAAATTTTTACAGAA  
CTGTTGCGGGAATCTACTTCCTCAGTAGCTAACCCAGCCAGCGCGACCGCAACTATTATCA  
ATAACTCGCGCGGTAAACAACCTGATTTTCTCTGATCTGGTAGCAATCCAGCCAACGGAT  
CAACCAGTACCTGCATTGTACGGCCTACGTTATCTTAATCGTGATGGTTAGATGGCTTTC  
CGAAATGCTACAACCTACGGTGGCCCGGCTGGTGTATCGCGCAGAGATTGAAGAGTTTTCA  
AAAGAAAATCTTATGACGAAGGCGCACTGTTCAAATCAGACAATGTTGTATGCGAAGTT  
GTGACCGCTGGTGCAGTCGGTGCAGGTTCCGAAACTCCAGAAGCTGCAATCTTTAAAGGC  
ATGATGACAAACAAAATTCGTTTATAAAGCGATCGTGCATCGGTAGAATACTTTGAAGAT  
AAAAACACCGAAATTTTCGTCTACCTCAATGCAGTTTGATAAATGGCAGGTTAACGTAGGT  
TCTCGTAAACTGAATACCTCATTGACGACCGAATTGATGCAGGATCTTGAGGCAAGCCTA  
ATCAACTCTGAAAACCTCTGTAATTGATCTTCTGGCTACGATCGCTACAGAAGAGATCAAC  
AAAGATATTATTACAGAAGTTGATCACTGTATCATCTCGCTATAAAATTAAGGGATCACC  
CCTGACGGCGTACTTTCTCTCGTTAGCGTTCAGGATGCACCAGCACAAGCGCGTGAACCT  
TACCGCTATGCTGACGAACTGAGCTATCATATGTTGCGGACTTCCTCCTTTTTCTGGTACA  
TACGTTTTGGCGTCTTCTCGCGTGGTTGGCCTCCTACAATCTACCGGATGGATGGAAGAA  
ACCGACAATGCTCTAAGCGAAGTTCGTCTACGTTGCGGTCTGGAAGTGTACGCAGACACG  
ACAGCACCTTTCGATTATATGCTCGTTGGTTGTAAGCACATGATCGGTGATATGGAGTGT  
GTAGGTTCTCTGTTCTACTCCCCATATACAGAAGCCGACGGCGCTGGCGCGTATAAGAGT  
GTCATTGACCCTAATAGCTTCCAGCATCATGTAGCTATTATGAATCGTGATACACTCTCT  
GTCAACCCATATACATCAAAGTTGATCAGGAAGAACCAGGTCATCAAGGGTGACGAT  
TGGGGTAAAATGGCTGGACGTTTCAAGAAATGTCCTACATTTTAGGAATCGAACTGCCACCG  
CTTGAGATTGACAACGCTTCACTAAATATCTAACCAAGATAAGTCAGATCCGCCCTAGAT  
TTTTTCGACGGCGGATCTATTTTCTTGATGATATAAGTTAAAACATGGTATCCCATATCT  
ACGGGCAACATAAACAGCAATTATAGTTCCCTCCCGCAATGATTCATTAACCTTCTTTCGC  
CCAGAATATCACACAATCTACAGGATCATCAAGGGTCTCACCTAAGACTTGAGCAACATT  
TCTAGAAAACAGATTTTGCATGTATAACGATATAGAACGAGGATTATCATAAACGTGTTC  
TAATTCATCGATCTCCTAATTTTTTTGTTCTAAGGTTTGCCATGCAATAATATCATGACC  
GTTTTGCTTGTGGTCATAAAACTTCCAGTTTGAATCAAATTTTTCTATAATCTGGATC  
GTAATACTTCATGAAAGCATGGTCCATACCGTAAGCCCCTCCAGAATCCGCTACAACGCG  
TTTTTCTGACAATACCCTCCCAATGGTACAAGCCATTATCAAATGTCGCTAGGCCCTTT  
TCTAGAGCCTATTAAGCACATCTACGAAGTGGTTTTACTCCAAATACATCATGTAACCTG  
GTCAAAGATAATATTTCTCCATAGAAAGCCATATCATACTACAAGTTAATAACAAATAC  
AAGTATCCGCGTAGCGGAAGCGAGCACAGGGAGCAATAAAACACTTCCAGTAATTGATTA  
ATAAATGTTTCGAAACAAATTTTTATTATTCTATAAGATAAGTCTTCGTTTTGATCATTAT  
TTAATCACACATGTAAAACACTACACAAAAGGATATCGCTTCGCGAACTCCTACGGAGTAT  
AACATTTGTGTTACCATATGTAGTGATTAATAATTAACCAACATACATTTTCTATGTTC  
TAAAGATCTTCTTCGTTTTGATCATAATGTAATCAAACAGTATTAGTATTGTGCACTTG

TAAACTAAAATAATGTTAATAACAGAGAACAAAAACGCCGACCCGAAGGACGGCTAATG  
TTAATTATTTGTTGATAACGATCTGATTTTCGGCGAATGGTAACATTACTCTTAGAGATGA  
TCAGATCATCCGGCACTACGTTAGTCTTGTATGGCTGGAAGCGAACAAAGCATCTGATTGC  
GTCTAGACCCTTCTTTAATCTTGATTTCTATCTGGATATTGTTGCCTACGTGAGCAACCG  
CAATTTACCTTTATTCTCATAGACCCACTTGTGGTAACGTCTCCTGCAAAAAGCCTTAG  
TAACTTGCAATGCTTTGTGCGTATGCGTTAGAGCTGTGAACTTTCAGAAGGCCAGCCGTAG  
CAATACGGGAGAAGGTGATCGCCGGAGATTGCCAAACATCAACATTAATTTGCTCAATCA  
GAGTAACACCCGCCCTGATGAACTGCTTTTAATGCTTCGAACCTTGCCTTTTTCATTGCTA  
CGTGGTTGTTACGGAATTCATAATTAGTCACCTCTATTGATTAGTTATTCAGAATATTA  
GATACAAATCAGGACATTGCCCGTTTGAATGCGTCCATTATAACAGTGTTATTTGGCTTG  
TCGACACGTTTTTGAACTTTATTTTTAAATTTTTTGTGATGTGGTTTTTACGATAAACA  
ACTTTTTACGGCTGGCGTAAGCCTCGCCTGCATCTTTTACCATCAATCATGCCTTAGCC  
GCATCTTGTCCGCTGATCCCGCCAATCTTCTTAGCAATATCAACAAAGTTAAGACCGTGG  
TCTTCGCGTAGCATGTAAACCGTTAACGCTGTTTTCTTGTCCATCACTTCGCCCCATTGA  
CGATTAACAGGATAGTTATCAGTACCGGAAACTTGGTCATGACAGTACAAATAAACCGGA  
TAAACGCATTTTCTGACTTCCACACATGACATGCGACTAGCTGATAGCCATTGTTGCAA  
CCAAAGCCAGAAAATACATCTCGATTGGTGCTTCTTTGATCAATCGTACAATCTCATTCA  
TACTACAACCTACATATTACATAAACACAACAACGAATAATACAGTAACAGTTATCAACGC  
CATATTCAACCCCATATTCATAATATTTTCTTCGCTTCACTATTGACAGTAGCATGTGCA  
TGCCTGCCATTATAGGCATCTAAATCGCTCTGTCAAGCACAAAAACAAAAAGCCACCCC  
GAAGGATGGCTGATAGATTTCTTTAAGCAGGATGCGTTTCACGAATGCGTAGAACTCGCT  
CTGACGTATCTCGGTCCGGTTTATGTAAATCTTTGGAATGATACATGAAACCATGGCGTG  
ATTCCATGCACGTGCAATCACTATATTGTTCTTCCGCTGCCGCGATTGTTTCCAGATCTT  
TGGCGTACTTGCTGGTTGAATAAACTTCTTGATCACGCCAATCTAACCCAGCCTCATTGA  
ATTTGACAATCTCGTCAAATACCCACCATCCAATGTAGATAAATGAAGTTTTGCGCCACG  
GGATCGGGTGTACGTAGCGAAACATTTCAACAACCTTCCATTGTACATTTTTCGGCTTGTAC  
TAGCTGCAACTCGTACTGTTTCATCTTCGATCTGCTGATATAGTTTAGCAACACACCAGA  
ATTTGGCTGTGTCATCGTAAGTAGCACTCTCTTTGAACAGATGACCGTCTGGCATGATAG  
AAAATCCTTCCAGTGCTTCGCCGTCCTCACTACCGATTAGAGTCGGTGACAGATGCCATT  
CGCGCTGCAAATACCAGTTATGTTTGTTCGTCAATTCAGGCATACCGCTAGAATCGCCTA  
CAATGTCTCTGACACAACATAATTAAGTAAGATCTCATTACCTAGTGCCACGGTCTTTG  
ATTCCACCACATCCTGTTCTACGTTCAATGTTGCCAGCATGATTTTAGTCGATGCGCTAT  
CGGCTGAATTTTCCGACTCACCCGACCCTTTTACAGTATACACGCCGTTTTTATCTGCTG  
TAAATTTTTTGATTGTATTATTCTGTTTTGAGTCTATAACTTCTTCGCCCTTACTCCAAC  
TATAATATAGTTCATAGTTGTCTGCTGGAGTCTTCCCACCCGAAAAATTTACTGTTGCAT  
GTAATTCTACATCTTTTTGTGATGATACGTAGAATTGCGGGCGTTTCGGTGATATTTATGA  
TTAATTCGCTTCTTCCATGAGGAAAACCTCAGATTCTACTGATTCCATCGTATCAGTAT  
CTTGTACCTTGACTTTATAGCTACCCGCATCTTCACTTGTGCGCCTTCTACAGTTAGCG  
TAGCTGTGTTAGTTTGTATGCTGTTGGTTCGCTTTTTGTCCATGTATATGTCAAATTGCTTG  
GTAATGGTTCGTCACCCGCTAAAGTCGCCATTAAGGTGAAACCATCTCCAGCAAGAAAAC  
ATCTTTTGTAGAGTGTATGGAGAGTGTGAAAGCCATATAAAGCCACTCCCATAGAAAAT  
CCGAATTTAATTGATTGAAATAGTTGATTGCCACCAAACAGATAACCATTGCGATATTCC  
AATACATGAGTATTAGAATAATGAGGCAACGAGGCCGAAATAGTCTCGATCTCGTCTGGG  
TATTTGTTCTGTTTGTATGTAATACATTGATTTTGTAGGCATGTAGTATCCTCTTTTTAA  
TTGCATAACGGAATAAATAATTATAACAAATATTTCACTTTTATCACCCAAA  
AATTACTTGAGTGTGTGGAATTGACTATGTTTAGTCTCTTGCACCTTGACAGACCCATCG  
CTTTTGATATTATAGATCAGTGACTTGAGGGTGTGCGGTACATACGCGTGCGGGCAACGT  
TCTGGATTCTTCTTCCAATCTGGACTATTAACGATCCAGTCGAAAATCCACCACGGGCAG  
GAGTAGTAACCACGACCGCCACCGATCAAGCAAATGGTTTGACGGAAGCCAGTAAGATCG  
CAAAATGAATCAGTGTGCTAGGGAACGATGCTCTGCATCATCAAAGAAAATGTTT  
GCTACCGGAGATTTCACTTTAACTTCCGGTACTTCTTCAACATCTGACTTAACTTCTTCG  
ACCACTGTTTCAACTGCTGGAGATTCTTCTTTTGTTCCTTCAATGACGATCTCAGGTTCT  
TTCATTGCTTCAACGAGAGACGGATCAAATTCGTGCAATACTATTTTATCATCTGCGGTG  
TCTGCTGCCTGAATAAGATCGTTAATACTGGTTCCTTCTGCCGGAGTTTCTTCTTCCATT  
TCGGAAGCCAGTTTAGTTAATTCGGTCTCTACGAACTCGATCATGTTCTCTAGTGATAAA  
GTCTTTTTGACCTTAATATCAAATTGTTTTGCGCAGTCAGCTAATTCTGTTTTAGCTGTC  
TTCTGTGCTTCTTTGTGCTCGGATGCCGCGATAGCGCGGAGTTCTTCGAAATATTCTTTA

TCAAACATGTTATTCTCCTGATTGGGGGTGTTTGTAAATATTTGTATAATGTATTTAT  
TGAGTGAGGCTATTCGCTATGCAAGACATTA AAAATTCAC TTTCTGA ACTATTCCCATGTT  
CAAATTGAATGTAGCGATTCAATTTTATTAGAAAATGCGAGATTATTTTAGTTTTGAAGTC  
GAGGAAGCGCGGTTTCAAAAACGAGTAAAATACGGAGGCTGGGATGGGGGTATTCGTCTT  
TTAGTGTGCAACGGAAAACCTGCCAATCGGCCTAACTAAAACCGTGGGAATCTTCGCTAAA  
AATATGGGCTAAGGTGTATGGGTAGATCCTCGCGTATTCGAAAAAGAACAACTTACAGAA  
GAAGGAATTGCAAAAATGGTGT CATGCCTTAGAATTATATTCCGGTGCTAACAGGATCACC  
CCGCATTGATATCAATCTTAGGCTGTCTTTGAAGGTATCCATCATAAACGCCGTATGTTA  
GTTTTGCCTACGTCCGCTGGAAAATCTGCGATTGCTTGTATGTTGTCTCGCTGGTACTTA  
GAGAACTACGAAGGGAAAGTGCTGATCATCGTTTCTATCACGTTGCTAGTGGTGCAAATG  
CGTGATGACTTTGTTGATTATCGCAAGTTTCCTTCTGAAGCAATTCATACTATCATGAGC  
GGTACTAGTAAACACGTAGGTGATCGCCTGATCGTTGTTAGTACGTGGCAACCTGCATGT  
AAACAACCTCGTGAGTGGTTCAGCAATTTGGGATGGTTATTGTTGACGAATGTCACAAA  
GCCACTGCTAAAACCTGCTAAGCATCGTTACTGATATGGCTCATTGCCAGTTTAAGATC  
GGCATGACTGGTTCCCCTCGTGACGGGAAAGCTAACAGGATGCCGTATGTCGGGGCTTTTC  
GGTGATATTTCTAAGATCGTGAGTATTGACCGCCTGATGGAAGAAGGGCAGGTGACAAAA  
CAGAAAATTA ACTGTCTTTGCCCTTCGTTATACCGATGAGGCATGTAGCGCGGTTAAGGGG  
CGAGAATATGCGGAAGAGATCAAGTATATTACATCTAACCCACGACGAAATAAGTTTGCT  
TGTAATTTGGCGCTAAAACCTCGCTAGGAAGGGCGAAAACGTATTCCTGATGTTCCGCAAC  
ACTAAGCACGGAAAACCTTATGTATGACGCGTTACAGAAGGTACACGACAAGGTTTATTAT  
ATTGACGGTGGAGTTAAGACAGAAGAACGAGACGAGTTCAAAAAATTAGCGGAAGGGGAA  
ACAGGGATCATGTGTGTTGCGTCTTATGGTGTATTCTCTACTGGTGTTTCAATTAAGAAT  
TTGCATCATGTTATTTTCGGTCATCCAGTGAAGGAATCAACTATCGTTCGTCAGAGCATC  
GGTCGTGCATTGCGTAAACATGGTTCTAAGGATATTGCAACGGACTGGGATGTTATCTAT  
CTTTTGGCAGCTAAGACAAAGAGCAAGAATGCTAAGAAACAGTTTAGCCACCTTAATTAT  
GCTCTTAAACATGCGCTTGAAAGAATAAAAATTTACAACACCGATCAATTCGAATATGTC  
ACGAAAACAATCGAGATCTAATAAACAGGGGCTTTACTGTCCCTTTATTCTACGGAGATT  
AAAAATGATTAGCCTTAAACATTTTTTTGGTTGAGGCGGCTATTGACGGTTTCATGAGTAA  
GATTTATTCTTGTAATACTATCGAGGGATTCAATGAACTTGAGGCATATCATGAGAAGTG  
CAAGAAAGAAAAGAATTGAAACCTGCTCATGACATTTTCGATCCGTGATGCTATCGCTGG  
ACGCCGTAAGCAACTGGAAGCGGACAACGAGCCAGAAGAGGAGCCGGAAGAGGATTTTTTA  
AGATATAAAAAAGCCCCATCTATGATGGGGCAAAAATAAACCAATTA AAAATCGGTTATCAA  
CAAATTACATTAACAGCAGTGTGTTGCTCTACGAGTTGTTCTTGTCTTCG CAGTTCGCAT  
CTTCACTAATCGAACGTTCTTTTATTAGCTGTAAGCAGTAGCCAGTGTGCACAACGCCGT  
TTTCTGTCTGGACGGATAACGCATCCTCGACAGGTTGTTTACAACAAATACAGATTTTCA  
TAAAAATTCCTCCTGCATGTAGTTAGCGACCAGATACCAGCATA CGCAATTCAATCGCAT  
TCTTGATCGCAAATCCACGAGATTTAACGATATCAAGTGCGGGACCAGCAAAAATCGATTA  
CCATCTGGTAATATGCAATTTTTGTATCAAGCGGTAAGATCTCGTCGTCTGCCGCCATGA  
CAACTTTCAATTCTGATTTCTCAGATTCAGCACGACACCAGTCATCACTACGGTTAGTGT  
AAAAGTCAAGACGATTTTTTCATAGCCTTTTTCTTTTTAGCCTGAAGAGCAATCGTCTCTC  
TTTTCGCCTCGCTGTA AATCCTTAACCACTTTGAGTATACTACCGGATTATTCACCGCCT  
CCCATTGCAACTTAGTCGCATCGATCTTCGTGTCAGCTTCTAATTGTTCTTTCAAATCGT  
TTAGGTCCATTATATCCCCTTATTACACTAAGACCTATATTATATCACACACAAAATCA  
CTTTGCAAGTCTTATGCGTAGTTGTTCAAGATCATCTGGGTTATCTATTACTGAAAAGTA  
GATTGATACTATGATTGAGTTATCGTCGTA CTGCGGAGTTACTTCTACTGTCAGGTTTCG  
GACCCGTGGTTCATAGTTTCGGGTCGCCTCATTGATGTTTTTTGATACGGTATCCACTGT  
CATTGGGTT CATGTTCTCAAACAGTGATTTATTGAGATCGCATCCAAACAGTGGATCAA  
TGGACGAGATCCCTTGCGAGTAGTCACGATCAGTAGAATAGAATCTTTAACCGCTTGAAT  
CCCTATGTTCTTTTTAACGTGCTGATTCCACGATCTGGATATATTGACATCCGAATCAGT  
ATACATCTGATTAATAGTTGCCATGTTATAGCTCAAATAATTTTAAGGAACTCGATAGA  
CCTGATAATGAATATACACCAGATTCCCAGCATTTCGCACTTGATCGGTA CTGCCAGCGTG  
ATTTGATTTCTTGTTAGCTCGTCGATCACTTCTTCCACTTTATCCGTGGTAAGCATATCC  
AGCACGCAGTCAAAGTCCTGTGCGCTCAGGTCGTCTATATTGAATTGCTGATCGCCGATC  
ACGATATATTCGATACTTGCAATTACCATCTGCATAATATCAGCCTCTTCTGTAAACTTA  
GGTTGACGAACTTGATTTTTACTTGTCTAACTCCAGAATATACGGTTCAACTTCTGGT  
ATCTGTGTGATGAAACATCAAGAGGGTATACTTTCTCTTTATTGCATACACCACACACC  
CAAGTAGCATCAATTTTCATCTTATTGGGGCTGTGACACCATAAGAGAAGAAAAATATAT

TCTGCTTCGCATTTCTCTAGCTCTAATGCATTGATCCCCGTACATTCATGTATGATCTCT  
ATAACAACCTCTGACAGGTTGCCAGTCTCTTTTGGCTGCTACCAGTTATTGAAATTCGCCG  
AAGGTGAAAGCATGGGCGTGTATAAACTTTTCGCCTAATTGGATCTTGAAAAAGTATTGC  
ATAATAAACACCCTTTATAAACACATAGAATCATTAGTATTCTATAAATACCCGAAAG  
GGGATTATACCATGAATATTATCCGAATAAACTGCCGGAAGATGTGCAGAGGTTTAAA  
CCATTCAAGGTAAGATTATAGAGATTTCCCTACTGGTGTCAACTTAAATTAAGATGAAT  
CCAGAAGAAGAACAAACGATTCTGGAAGAGCTATTAAGAAATATATCGAGAAGTAGAT  
CCGTCATTTTCGTGAAAATATTTTCTGAATGTCTTTTCTAGCTCAATTGGTAAAACAAAG  
CTACCGCTTTTTTTTAGTTGCACGACTTGCAACAAAGCAAGAAAAATGTTGCTTAACTTA  
CAGGTTGAAGCACTAAAACCAATCGTTCTAGAGGCCGCAGGGCTCAAATAACTTTCCGA  
TATGTTAAACCATCAACCGACTATGCAAAAACGTTTCTGGATGCGATAGAGCGTGTATCT  
GATGGTATTAATGATTATCTATGGACTGAATTACCGGCAGAAGTTAGAGAACAGGTTATC  
GATTCAATCTCATTGCTGATGTTGAAGAAGTTGTTAAGTAGATGCACACAATCCAGATC  
GAACAAAAGATATGTTGTTGAGAAAGTCATGACCTGAAATACATAGGTCTTCTTCCATTA  
TTCAAATTGTTGTTGAATCCAGATGAGTTATTCATCTTTTATCGAGTAAACCATCTATTG  
GCAAAATCAAATTATTCTATCATTGTTCTTATGGATATTTTACCGATTGAGAGAAACATT  
GCACTGACACTGGTCGAGAAAGACGTAAAAGAGGCCAAATAATGCCGAGAACGGGGGTTCC  
TAATGTCTAAATAAACTTTATCAGGATTATGAGGCATGTCTAAATCATCGCTTTATAGA  
GTTGGGTGCTACCTTTGTTACAATGACTCTGCGTGATTCGATTCGTGGGGTGAATGAAGG  
ATTGTTGCAATTCTATGATAATAAGGCGATGAATACAAAATTAACGGGAGAGAGATCAT  
TCAGATTTTCGGTATCCACTGCTAATACAGCTGAAGTGTAAACGGAGTATATTGGATCTC  
TCATAGTAATGTAACAATTGACCAAAAATCCGTCAACATTTTAAACATACCAGTTAAAGAG  
CTATCACGAAACCCTAAACCTTAAGTTTTCTCGCTCATTGACAAATAACGCGGCTAATAA  
CGTAACTAGCATGATTGATGCCATCTATAAGTAAGTTCCTTTATGGAAACCTACTATAAA  
GGGTGATAACGTTGTTATTCCTTGTGTCCGTGGGTTAGTACCATAAATAACTATATGTA  
TTTTGTTAGGGCATAACGGGCAAAGCGTAGAAACCGAGTCTTTCGTGTATTGCTGGGAAGC  
TTTTGATAGTATAACGATTGCTGGATACGATACAATATTAATAAATGAGCCAATACCAGC  
TATAATCTGTGAGCTAAGACTCATGGGGCAATTTATTGATATGTCGCCTAATCTGATCGT  
TTTTAATTTGAGTGGCAGACTAAGCGCAATGCTAAAGTTAAAAAATTCATTTAGCAATG  
TGACATACACCACTATTGATTTTGTACTAAGCAGTATAATAAAATTATTGGTGGTAATG  
GGGATAATATTGCACACTTTGCTCATGGTGGCGCTTATGGCGATTTAACTTATAAGAATG  
CGTTTTTGGAAAGTCGTAAACTTGCCACATTAGAACAATATGATTCATATGCTACCGCCG  
TGTGTCACGGTAATTTTTCATTGCGCCCCGGTATGGTTATTCGATTCTTTGATGAGAAGC  
AACAAAGCTCGCAATGATTTTATTGTTGACGAAGTGGTGCATGAAATTAGCCGAGAGCAAG  
CAATAACTCACCTGTATATGATCGGTAACAGCGAAGAATAACAGGAAGTCAAATTTGAGG  
GTAAGATATAATGACAGAAAGTAAACCTATGTTAAAATTGCTTGTGCCTGTAAAAAATT  
AGAGCTAAACGGGAAACATATCAAGATCCCAAAAATGGGGATTAAGCAACATCGATTATT  
AAAAGATGTTGGTAGCAGTGATGAAACATTAAGAGTCTGCTTGATTCAATCTGTCCTGT  
GTTAAACGCAGCCGAGACTGCGTTGATTATGCTTAACTTTATGCGTTTAAATTGTAAGTG  
TCTGGAAGAAAAAGATGGTCTTAAAGTTGTCTGATGTATATTTGTATAGAGACTGAATT  
TACTTTAAATGGTAAAGCCTTTAAATTTAAAAATCCAATGTATACATCTGACCCCATCT  
CGATGACGCTGATTTCTTGAGTCATCATTATCTCGATCCTAGCGTAGACTTCCATGATTT  
CCCAGCTTTTATTATGGATGGGGCTACAGGATTAAGAAAACTCTTGCCTGGACACACC  
GGAAGGTAATCTATGGTGGAAATTGACATATTGGGTGCGCTATCATGAATGACGCATTA  
ACATCATTTTCGCGGGATGCGGAAGGAAGCGGAAGAAAACCCGATTGATAAACTTAACAAA  
TTAGATAAACTTAATTCTATTGATAATTTGCAAGCCGCTACCGAATTGGTGGCAGAGACA  
GTAGAGCAAAAATCTAATGAAGTTGTTGGTGCAGGATAACACCGCAGCCAATGAA  
TTGACGGAAGAAAATACACAATCTACCGCTGGCAATACCCAAAAAACTTATGAAGAATTG  
CAAAATCTCAATAATTACTCTTCTCAGATGAATGAGAAATTACGTTGTTTTGGTGTTTTG  
ATGGAACGTAGATTTGGTGTGTCAGTAAAATGGCTAGCGGTTTTGGTGGCATTGAAGAA  
GCATTGAAAAAACCGGAACAACCGCAAAAATGCCATCACCTCAGCCAGTTTTGCCTACT  
GTACCGGAACAGCCTAACAATGACAATCAAGGTCTTCCAAGAACAACACAGATGCA  
GATGACCGAAAGAAAAAGATCGCCACAGATAAGCGTAATGCCGATTCTATGGAAAATCTT  
CTTAAAGTTGTTTCGTGGAGGATTTAAAGAAACCATAGGTATCTTAATAAGGTCTTAGGG  
ATGTTATTTAAGATCACTTTGACCGCTATGGCAGAAGCCGCAAAAATGGGGTGTCTTTTG  
ATGGGTATTGTTTTTGTGATTGATACCCTGATGGTTCATTTTCAGAAATTGGAGTGATTTA  
TTCGAAACAAAATTCAATGAATTTATGGGTAAGGCCGAGGATGGGCTGGTCTATTAGC



GATATTTTAACTACTGTTTCGTCAGGTTTCGAGATTATTGGTCTAAAGGCGAATATGGAGAG  
TTAATTAATCTCTTGTATGGGTATTGGTGATGCATTCTATAAAACCTTTATCCAACCT  
GATCGAATTATCACTACGGGTATTGCTAAAATTCTTCGTATGATCCCTGGCATGGGTGAA  
TATGCCGATAAGTTAGAATATGGTCCTTTAAAATCTGCTGTCGCTCAAGGCTATACGCCA  
AATGAAAGAGAACTCGAATTAATGGATAAGGTCGAGTCTGAACACGAAGAAGACAAATAT  
GGAGAGCGCACAGGGTGCACCGGAAAAGCCCGGGATATTGGCGAGGCCATAGGCCAATCT  
ATTAAGGTTAAAGTTAACGAAGGTCTTGTAGTCTGGGCTGGAGAGAACAAGGATGTT  
GACGCAGAGAAACGACAAGAAGAATTAACGCGGAGAATATAAGTCTGTTTCTGCTGAA  
CAACGATCTACTAGTCGTAACCTTAGAATTAAGCGAGGGCGCGATCAATAATATTACT  
GAAGTTATGGAGAATTTGATCGGTGACTATGACAAAGAAAGACTGGGAGAGTTGAAAAAG  
GATATTGAGGTTTACCGTGAGCAAGTTCAAGATCCTACATTAGTTGTAAGTGATGCTTCT  
CAGTTAGAGCATCTTATTGAAAAATTTGATGAGATGTATGCTGATAAAACTAAGGGTGTG  
GTTCCAACATAATCTGTTCCGGCAACTGAAACGGAAACAGCAAAACAAGCGGAACGTACT  
GAACAAATGCAGAAACAAGCTACAATCCAGCAACAAACGACAAATCAGACCTCAAACGTA  
AATAATACACAAATTGTAACGAACAATAGAATTAACAGGGTGCACCAACAACCTAGA  
ATTGATGCCCCAGGTACAATTAATATGGGGAACTTTTAATGAAAATTAGTGTTATCAATG  
ATGCCGTTGATAGCTTTAATGCGCGGGTTAAACCTCCGCTGGTTTTACCTCAAAAAATA  
AAGGGAAAACATTAACCGCTCAATTCGCCGCTGAACGTGCTAGAGGTAATGATGCTAGCG  
GTAATTATATCAACTACTTATATAACAATGGTCTGTTATTCACTGCATACGATTACACAT  
CCCGTACTACTGGATCGTTGCGTGATTTACGGAAAAAGAAAAATGTTGCTAGCGGTTTTG  
GCGGTAGCGTTAATATCGCTGGTTTTGATTTAAATTTGGGTGGGAGTAATGCTGCATTTG  
ACCGAGAGGCAATTGCTAATATTCTTCTTCTCGTAGTCAATCTGACGTTGACGCTGCCA  
TCCACAAGTTAATGATGTTGGTGAATCTGTTATTTCTCGCGGCGGTGGTACTTTAGGCG  
GTGCTCTTTCTAATATGCAATCTCCTGCTGTTTTTGGTGGTATCGAAAGTATTACTGGTG  
GATACCTTGCAGATCACGGTGAACAGATTTCTAATACTGCGCGAAGCATGTATGCGGGTG  
CTGACGCACGAACGAAAACTACGTATGGCATCTAACCCACGTAGTATTGAAGACCTTC  
TCAATCTTCTGATCATATACGAATCGTTTTAGAGTTGTCTTATGGTTCTAGTGGTATTT  
CCAGCACCGCAAAAGAATTAAGCGGAAGTTGATGCGTGGTATAAAAATACACTATTGA  
GCAATCCACTCCAGCTGAGGCAAGAGAAATGATACGCTGTTGGAAGGAATCACCGATT  
TTCTATCCAAGGTAATTACTCTATCTAACCCGACAATATGGATGATCTCTAACCTCGGCA  
AGCGTACATGGTTTGAAGGGAGTAGCGATGCATTTGGTCCCGCTCAGATCTCAAGTGTAC  
GTCTGGACAAGTCGCTTGATGGTAAGTTAATGGCCTTGCTATTTCTCCTAACTTGCCGA  
GTACCTTTCTTCTGGAAGTATCATTTAGAGAGATCTTGACACTTCCCGTGGTACTATAT  
TTGGGCGGGCGGCAAAATGTTTGAATTAATGACTTTAACTAACAAGCCGCTAACCTTGA  
CTTTCAGCGATCTAACTTATTCTGCGTGGCATTGTCACCCTCCAAGTAATAAGACACA  
AGCGGTCCTAGAAAGTATGGGTGGTGCGGTATATGATATTATACCTAATGCATTAATGA  
CTATTTCCGGGTTACTCGTGGTGATTATACATACGCATTAACAAATCTTGCTGTACAGGG  
TGTTAGGCGTGCTGTTGATTCATCTGGTGTCAAAAAGTATCTTTAGGTGCAATGTCATC  
CCGCGTAGTTCAATCTCTACTGGGGCAATTTGATGTTGGTACATATACGCTTGACTGGTT  
CAATATGGCTTAGAAGACAAGCGGTCTTCTGGTGTATGCTGATAAGGTTCCAGAAAACAG  
ATTGAATTATGAAATGGACCGAAACCACAATGCGCCAAACATTCGAATTACCGGACGTGA  
TTTTGATCCGCTTGTATTGAGCTTTAGAATGGACTCTAGCGGATCAAACCTATAGAGCAAT  
GCAGGATTGGGTTAACTCAGTAGAAGACCCCGTTACAGGGCTTCGTGCGCTTCTGTTGA  
CGTTGAAGCATATATTCAGGTCAACTTACATAACCGAATGGGAGGTCCTCACACGATCAT  
GATGTTAATGGTTGTGTTCTGTTGGTGTGAGTGCACCGGAATTAACCTATGAAAACAA  
CAACGAAATCACAACATTCGATGTTACTTTCGCATATCGTTCAATGCAAACTGGTGCTGT  
AGGACAGCATGCCCGCGAGAATGGATTGAGGATAAGGCAATAAACGCAATAACAAACAC  
TTTCGGTAATAATTTACTTGATAGTGGGTTATCTGCTGCTGGTAATGCTTTATCGCGTCT  
AAATGGCGTTGGTGGGCGTGTGGTGAATACTGTCACTAACTGGTTCTGATAATCGAAAGG  
CGGGGATAATCCCCGCCTTTTTATTTTGCTAAATCATTGCAATATTTTAGTGCTTACTT  
TGAAATTCTGCGCTGTTAAGTTCTTCATAACGGTCAACATCACCGTTAATGCTGCCTTT  
CTTGCTTCTTCTCCATCTGCATGTCAGACATGATAATACAGCGATCCCTTGCTTTCATC  
TTCTCCAGTTGTATAGACTCTTCTTTCTGTTTGGAGCAATCTTCTTAAACGCTTCTTTCT  
TCTCGTGCTTTCTTCCCGCGCTTCTTTGATTGCATCCTTGAACATCTGCGTTTGTGGT  
GCTAAACCAACTTTAACGCGATCCACGTCTGGACGTTTCATTTTAGAAATAAAGCATGAA  
TCGATCTGATCATCACTTGCATATGCTGCTTTCATTCACGAAGCAAGAAAACCGGATCT  
GATTTAGCATTATCATAGCTTCCATGTTAGCACAAACCAGTAAGAATGAATTCAGCCGCA

AGACCAATCAGTTTAATCATTTCATTTAGTCACCTCACCGAAAATTGTAAATTGTCTAC  
GATTCTCATCGCCGAAAGATTCTACTACGTCGTTTACCTTGACGCAAGTCCCGCGCTGTA  
AAATTACTTCACATTCGCAAGGGTTCATGCAATGGACCCAACAACAAAACCTTTATGAT  
CTTTTACATCAATCAACCATGATACACTACAAGAATGTTGCATCTTTCCGGTAATTGATT  
AATATCGATTCTCACAATAAAGGCTAGTGCTGTTTGATAGCCATTCTCCAAGATGATCG  
GTGTCATGCTGGTCGATAAAAAGTTTTTAAAGGTAAACTGCTTATCTTCAATGATGCGCT  
CTATTGTCTGAATGTCAAGATGTGGACCGCGATAAAGAGTACCGTTTAACTTTTCGGTTT  
TATCCATGACGCAATCCGTCAAATCAACAATCTCTGATATCTCATCGGTCATGTCTTCTT  
CGCCTAAGAGAGCACCATTTACCCATTCGTATTGTTTCAGACACATAATCACACATTGCCG  
TATATTCGTCTGGGGTTATGTTGTCATGTTTGAATGTTTGAATACATTATCTCCAAGT  
CTTCGGAGTGTACTTCATACATCACATTAATGATTTTCTTGACAAATCCATAATCTTGTG  
TCTCACGCTCAAGGAAGCGGATAACCTTCACATAATCATCAAAGTTAATCTGATCGCTGA  
TCATATCATTGATCATTAAACCATTATTCTCCTCAATGTCATATGTTTCGATGTAATTAT  
CCATACGTTCCATCATTGATTTCGCGTGATTCTTCCGAAAGACGAAAATCCTGTAATTGTT  
TGAACATTTTAAACCTCCCATATAACAGAGAACGGGGCTAGTATAAACTAGTCCCCGTT  
TGAGTCAACCATTATTTCTTAAAAATTACATTTTAAATTTATCTGGCATTGCGTCTACAG  
ATACCAGATCAGCGATAAGCTGACGTAGAGATGCCTTATCTGCTTTCTTACGTTCCGGTTT  
TAGCTTCGCTAATGAAGCTGGAGAAAGACAGGTCAGAAGCAGGTTTAAACAACACCTTCAC  
GGATGAATGCATCACCGTCTGCGATCATCTCGCCAGATTCTTGTAAATGCTGCCAGTTCAT  
TTTTGTTTATAATATGCCTCAATGTAATGAGTTTCTTGTGAATCCGTCGATGCCGTAG  
CACGAGTTATCGTATGAAAGGATAACACAACACCGCGAGGAAGTAAAATCTCGCATTCTT  
TGTAAGTAAATGCTTTGTTACCTACTGGCAATAGAGGGATGTTTTCCGCGCCAGCAATGG  
ACAAAGCAACATTAGCGCGACCTTCAACGCGAGAGCCAGCCATAGAATCAACAACAGCAA  
CGGCACTAGCCACGTTTGCATTCCAGCCGCCAAAATGTTAGGTGCAAGGGAAGTGCTCA  
CATAGTTTTTAAAGTAAAACGTTTTTTGCTTACGTGCAGTTTCCACATTTGCGACCGGA  
AGTCCATACCACGATACAGAATAGTACCCGGATCAAGTTTAAACGCCACAGTTGTAGAAGG  
CATTATCCAGTGCATCGCACATCTTGACCAATTCTTCTGGATCTGAGATTCCTTCAAACCT  
CTTCCAGCTTACGGTTCGGGTAGGAAGTTGTTTCAATTTGATGTATGCTGCATCGGCATATT  
CGCTCAACACAATACCTTCCGCGCCTGGCAGATCAAGATCAATATTTGCCATCATTTCAC  
CCATGTTACTAGCAATTGCTGCAAACATACCGGAATCAACATTACGTAGGGCATCGGTTT  
TAATCTGGGTGATATTACTACGCATCATTTTCAGCTTTTACATCTGCTGCCATAGACTGGT  
CTACTCGATCCATTGCCAGTGCAGTGCAGTCTTGTCTTTCGAATACTTCTCCTCGCGCATGATTT  
CTATTAAGCGTTTGTGTTGATGCTGCGATAACTTCCGCGAGACAACGGATCATATTGATCCT  
GAACTTTTACCAGTTCGCTTACTGCGTATTTTGCATCGGCTTCGCTTTCAAAAATAGTAC  
GCATGAAACCATAGCAAGTGATAATATCACTTGTCCAGTCATTCAGAGAATGGGCGGTTG  
AACGTTCTAAGGCTTGACGATCAATCAGAGTATTAATCTGTTTCTTAGGTTCTGCTCCGG  
TGATATCTCCTTCCGGTTTAAAGATTAATTTTTTCTGGATGATTCACGTAGTTCGCTTTTAT  
AGGTCGCTTGAGTTTTTCAGCATTCTTCTTTAGTCGTACGAGATTGAGCCGCTACGCGTT  
GTTCCGCTTCCGCGTTTTCGTTCTTCTTCTGACACAAGACTAGCCGCATACGCTTCATCTT  
TTGTCAGAGATTCACCAGTAGCCTTAGATACCCAGCGATCAGCTAAATCATTTTCTACTT  
TAGTGAACAAGGAATCATCAAGTTTAAATCCCTTTAATCTTATCAATCGCCATACCGCGAC  
GATTGACAACAATAAAGCGATCTTTGTGCTCGTCATTACTTCTGCTGGAATACTTCAA  
ACTTCGGTGTACGACGCACCAAACGCTCTATAACGCGCCTAACCCAGTTCGGTCTTTCCTT  
TCATGCGGGATGCGTTAAAACGGAACATAACAGCATCTAGTTGCACTTTACGGGCTGTTT  
CCATAACCACGTCAAAGCACTTAACATAACTGCAATCGGGATATCGCCTAGACCATTTT  
TAAGCTGTACAATACGACCGCTTTTGTTCATTTTCGCACAGTACAACATGTGCGCTCTTGT  
CACCCATACGAATGATTTTAGGTGTTTTGTTTGTGAAGTTACAAAGACGCACAATCACAT  
CTTTATCGCGTGTCTGTACTGCAAAAAGCTGTTTAGGATTCTGCTTAGGCTTTCAACACT  
GTACCGGGGCAATACTACCAAAGTTTTCTTCTTCTTCGTC AACAGCCATTTCTCCAAG  
ATTCAATCATTAGATCGTCGATTTCTAAGTTAAACATTTTATATCCTCTAGTTGATAACC  
TATAAACCTATATTTATGAAAACGGGGCTTAAACGCCCTTTTTATTATAATGCACCATTG  
AGCAATTGCTCTAAGCTGTATCCTGAATAGTCTTTTTCAATCAGGATATACTTTCCTACT  
CGTTTAAATACAACCGCGCATTTC AACGTATTCTGCGTGGTTGATGGTAGGAGTTGTTCAA  
TCTTCCAGTAATGCAGTACCGATTTTCGTTAATGCGGTCATAAGTTACGTCCGTAATGATG  
ATTTGATGTTAGCCATTTGATACTCCTGAGTAGTTCGTTTCTGTCTGGGTGTATTACGA  
TCTACCCCTCTGTTATGTCAACAACCTTTTAGAACATTTTTGAAATTAATTCTGCTTTTA  
TTTCGCAGAGGACATCTAAAGATTTCTCGTCCCCCGTTTTGCTGCTTCTGCTTGTATTT

TTGAAATTGCTTCAATGTCAGAGCAATTATAAGCCGCTTGAACCTTTAGCGATTGCGATGA  
TTGCCGATTTCGATGGTTAAGTGTTTCATGTTTGATCCTCCTTTTCGTTTCGGTATGTGTGT  
ATTATAGGGGATCGATGATCTCCTTTCAACAACGTTTTTATGTTATTTTTTAATTGCTCAT  
CTTGCAATAGGTCAATCACATTCTGGCGATGTTCTTCCGATTGAGGCACACCGAAAAAGT  
TTGTTTTGTAGAAATACTCTAATCGGTATTCTCGTGAGCTCTCTTCCATCATGATCGCGG  
GTAGTCCGAGATTTTCGGAAACGTCGCTTTTCTGCTGGCGTTAAATCACTGTAATACAACA  
TAGAATCATCATTACCCGCAATGCTAAACTCGTCGTTTCATAAAGGAGAATATTGCGTTTA  
AACGCTGTTTACCGTCCACGATTTTCGATCTCATAGCGAGAGCCATCATCAATCTTAGCGA  
TTGCGATAGCACCAACCGGAAAAATCATTAAATCAGGTTTTTCGATAAACATACGTTTGTTTT  
CTGTGTCCCATACTAAAGGACGCTGATAAATCTGGGTTTCATGTTGATATAGCCTTTTTTCTA  
ACCATCCATCATAAACAGAGATGACAACGTTTTTATGATTGGTATAGTAACGGCGTTTAG  
GCGTTAAAGGGTTCATGTTATAGTCTCCTGAATGGATCACCACGTAAATCAATATCTTTT  
AAGAATTCATCCCATGAATGCCGGATATTGTTCTTAATTCTCCAGATAAGCGCAGGGATT  
GAACGCTCTCCCATCTGGAAGTAAGGATCATATGATCCGTATGCCAATTTGCTACTACA  
ATTCCACAATCAGCGCAATAGTATTCTATTTCACTTGCTGGCGACCAAAGTTCATCAATA  
TGATCGGTGATCTTGCTTTTCGATTTTACGGCTATGACAATCAGGGCAACGGATGCAATGA  
CCTTGTTTATCGTAATTTGACGTTAGCGAATACTTAAACAATCTCATTATAGATCCTTAT  
TTGCTTCAAATGCTGCCTTTTTCGAATCCTCGCGGGGTGAGTGACCTTATAGTCTTTTTTT  
TCGTTCTTTCCCGCCTCGCTTAGAATGCTGTTTACTGTACCCTTTATTAATCTGCAACG  
GTTTCTTTTCTGGCATTATAAAGCCTTGCCCGGACCATAAGCAAGTCTTTTTCGGGTACA  
TATCACGGGCGGCAATATACTCAGGAAACGTAGGCTGCTTATCATCTTCCGGCAAATAAC  
CGCCATATTCCCACGGATGGAACACATAATCAGGGTTACGCCACATGCTAGAGATAACGC  
TTACAGGATTCTCTATCATGTAGGGAACCTCCTAGCTATTCACCAAATATGCGGTTATTT  
TTGCTGCCCGTACATCATGAACTTGAATCAATGGTCATTGCTCTCGTTTTCTTTCGTTCAA  
AGTGTGCAGCGCAATAACAGCTAAATTTGGTGCACGGTGGGACTGAAAAGATAATATCCG  
GTTTCCCCCATTCGAGGTCCATTGCTCTTCCAGCCAGTTCAGTCAATCCAGGTGTTTA  
CATAGGTAATGTTTGGATGTTCAAATCTGGTATTATACTTTTTGTATGTACCCTGGTCCG  
CGTCATCCGCATTAAGCAGACTACCTGATGACCTGCTTTAGCCGATTCTAGCCCCATTA  
TCCCCGATCCGTCAAAGATGCAGAATATTAATTTTTGTTTACGCTGCCCGCATTGGTTT  
GATAGTAACAGAATCAAAAAGACCTTTGTTAGCCAGTTCGCGGCAAGTTTTTCAGATCCGC  
AACTTCCCAGCCAGCCGCAATCAGGTTATCAATGAGGCTGTTAGCAACTTCTTCGCTCAT  
GAAAGAGCACTGTTTGGCGATGGTGTAGCGTACACGCTGTAATTTACGTTTACGGAAGCC  
TCTAACGTTACAGGTCTTTAGCGATTTTCTTTGCGGTTTCGATGTTAGCCATTGTTTGATT  
CTCCTAAGTGCTATCTAGTCTTGATGGTTGTATTGTAGGGGAGTTATCCTCCCCTGTCAA  
CACTTTTTATAAAATTATTGGTTAATTTCTTATGCGTTGCTAGGATAGTAACCTTCTTTA  
ACTCCGAGATATTTTCGCAACCATCCCTACAATCTTCTGTGCTGCTACAAAGCCAAATTTG  
AGATAATCCTCGCCGTGGGTTTCAATGATATATGCTTACATGCTGCTTTAGTCTCGAAC  
ATTTTGATTCTCCTATTTTCGTTTTCGGTATGTGTGTATTATAGGGGATCGGTGATCCCCTG  
TCAACGACTTTTAGCGACGGCGACGATGTCTTTTTCGAGTTGCCTTTTTGTACGCTTTAT  
ATGCCTTTTTACCGTTTTTATATGCTTTTTTGGTATAGGATTGATTTATCTTATTGTTTT  
TGTATGTTTCCCGGTGAGTATTAATTTTCGTTACATTCCACGAACCGGTGTCGATGTTCTT  
GTGGTATGATCAAACATTTATCATAATTAACCATTTTCGTTTTTCGTTGTTTGTGGTTTCT  
TTGGTGTGTTGTTTGCACCTAACAGACCCAGCAAAGAGAATGAGTATAGCTCTCATTAAACG  
AAAACATTGTTTTCTTAATCATAATATTCTCCTTTAGTTCCTGCGGCAGTGTGAATATAA  
AACTCCCTTAAGATTTTGTATTATTAGTACTAGTTTCGATGTTGTGCATTTTGCACCAG  
TTCAGCCAATCGCGCAGATCTTGGTAGTTAATGCTTTTATCTGCTGCCATCGATTTTGT  
TTGATAACCATATGTGCGTTATGAGTAAGCATTGTTACAGTGAGCTCGATTTTATCGTCT  
TTCGCTTTAACATCAACCCGTTTGGTCCACTGGCTACCAGCAACGCGAATGTTTCATACCA  
ACGATGTTTCCGATGAATGCTTCTTTGTTCTTTCAGGATTTTCGGTTGCTTTGATGAATTT  
ATTTTTGATTCTTCAGTTCGTTTTCGGTATGGGTGTATTATGCTATGTTCTTACTTTTCGTG  
TAAACAACTTTTTTTAGATATTTTTCGGAAATAAATTTTAAACTTGACGTAATGTTTCT  
CATCTTTGATGGTATCCGGAAGTTCTTCTTTTACTTCTGTGCAAGATAGATATTTCCGT  
TCCAAGTGAAAGATCCGTCTTCGTTTACTCGATAGATGATCATCCACTCGCAATCATTTT  
CGATTTTATATACACAGAGAAGGGTGTAAGCGTGAAAGCTATTGATTTCAAGGTCAAAGC  
CGTGACGTTTTGCAATGTTGGTAGTGGTTTTAGTCACTACCATTGTTTGGTTCTCCTAAG  
TGGTATCTCGTCTCGATGGGTGTATTATGCTATACACAGGATCTGGTGTCAATGCCTTTT  
TTAAAATTTTATGCAATAAGAAAGCCGACGCTAAGGTCCGGCTAATAAAAATCATTTAGACA

AATAATCATTCAGTGCAATCCGGTCGGCGTATGCTGGTGTACGTCAAGCGCAATCACTT  
TCACGCGTGCTTTCTCGCGACCTGGGTATTCTCGTAACCAGTGCTCATGACCTTGAACAT  
TTTATACTGCGATGCTTCTTCGAAAGTACGGACCGGACAAGGGTAATCAGCGTAAAGGAT  
CTCTAGCTCTTCGGTGATGTAACATATTCATCATGATTACTGGTCTCTAGTTTAAAGCAG  
AGACTTTCGGAACATTGGGAGATTTTCGCGGGTAAATTCAAAGATATTATCTTTCATACT  
ATTATCCTCAATAGTTGGATGAAAAGGGGGGCTTAATGCCCCGTATATTA AAAACAGTCCT  
TCCTGTACACCGTAGTAGAGTTCATCGATGATAATTCATTAATGAGACGGTGTGCATAT  
TCCTGATTTCGCGAAGTTGTCAGCAAGTTCTACCTTAGTTTCGCCATCATGAGTGCATTTA  
GTGATAACTTTACCATCGGCAAATCTGAAGTTGAACTCTTTAGCTACCGCATCGCGTACC  
AGACGTGCAGACTTATTGTTGCGGACTGCATTGTTCGGTTCGTGTGCAGCGTGAGCGTAT  
TTGTTAACTTTCAGAGTGATAGTAATGTATGCCATAATTTGATTCTCCTAGTTGGAAAGT  
GTATCTCGTTTTCGACGGGTGTATTATGCTATACACCCGCTCCATTGTCAACGCCTTTTTA  
TAAAATAATTTTCGATATCTTTATGATGTTTTTCTCGTACTTGATCTGCCTCGGCTGGCG  
ATACGTAGGAAGCGATAATCTTCACTACTGTTGCACCTTTTTTCGGTGTACGACACCCAAA  
GATTATGGAAACCGCTATTATTA AACACTTGATAATAAAAATGATTTAATGTTAGGGAAAT  
TATAAGTGTAATAACGTACCCTTAATTCTGAATCTACGTTTAGATAGATCAACGCACCTA  
GATAGACCGTCTCGCTCGTTCGTCAACTAACAGTAGAGTATTTTCGAAATCTTCTAATT  
TGTCTTTTGTAAAGGAAAATCATAGTATAATCCTCAATTA AACCAAAGTAACTTTGGTGT  
GTGGTGCTTTTTCTCGTGCGTCGTCCGCTTCTTCCGGTGTACGTTACGAGCGACGACAAT  
AACCTTGCTGCCTCTCCGTGATGATAGATCTCTACCCAATGGTTATGATTTGCGGATCC  
GTGGTTTATTGCGTAAGCGAACGGCTTAGACGTCCAGTAGAACTATAATATCGTACATT  
AAGATCGCTATCAATGTACAAATATGTGCTGTCTTACATTGCCACTAACAAACAAAAC  
AAGACAATTGCGAAGATCTGATAATATTTTGTGAGTCAATTTTATAATGTGACTGTTAAT  
AATTAACACCACTCAAGAGTATTTGAAAACACATCTATCTATTGTTGAGTATATGCGGTT  
TCTTTCCATGACACAATAACCAGTCGAATAATGGTTTTTGTTCAGAAAAGGACGGGCAT  
TTTGATGCATCTTCCATCATCTTTTCGGCGAATTCTGGTTCGTATACCCGCGAATCTGT  
GGATATCCTTTGTATTCTTTAAATTTGCTCATAATCATTCACTACCTTATCAGCTTCTTT  
TGTGTTTTTACATCAACTGCGATAACCCGTAAAGCTTCGTCATGATTCCACCAATAATC  
GTGAATATCGGCTTGTGATTTATCACCAAAGGAATCACGAATATCATTTGTACATTTATA  
GTTAATGTGACCGTCATAGTCAACATAAAGGTAATTATCGAAAATCGGCGTTTTTAAGAT  
CATACCGAAAAATCTTTCTTCGTGTCTCTTATCCAGTGTTGCAGTAATTCGCCTCATAAT  
CTATTCCTCTTAGAAAAGGGATGGTCATTTCTTGAGCTTGAACATTCTCGTTAGGATTA  
CTTCATCCAACCGATATTGTCTACCAGCATATTCATATGTTTATGATATCCTACGTGGGT  
AGTCAATACTGTATGTGCTTTACCTTCTACGATGATTTCCATGTACTTCTGAACTACGAT  
AGCTTTCATATTGATTCTCCGTTTGTGTTCTTTATGGGAGTATCTTACTACTCCCTTAA  
TCATTGTCAACTATTATTTGGGAATTTCCGGTGCGTTGCTCGGATAGTAGCCTTCTTTAA  
CACCCAGATATTTTGCAACCATTCGGGTGATCTTCTGTGCTACTACGATATCGAATTTCA  
GGTAGTCTTCACCGTGGTTTGCCACAATGTATGCTTCGCATTCTGCTTTAGTCTGGAACA  
TTTTTGATTCTCCTATATCTCGTTGGTATGTGTGCATTATAGGGGATCACCGGTCCCCTG  
TCAACAACCTTTATAATGCTTTATATGCGTATTTCATAAATTTGTCTGCCACTTCATTGGG  
ATGTTTCAGATTCTACGCCTGATTCGAGAACAATAGCTAGGTTCGGTTTCGTCAATCCAGCC  
GTACCAATGATTTGATGTTTCGATTTTTTTCAATTGGAAATTGGTCACTTTTTATCTGTGCG  
ACAAAATACATCTAACTGCTCATCGATGTA AAAAGATCCAATCTTCATAAAGAATAACGGG  
TATTAGCAAGATTTTTATTGCCTTCAACGAAAGTTTCGGCTACAAACAAATTAGGATGTT  
CCATAGTAATTTCTCAAATTAACAGCTTCGTAAACTTCCCAATGTCCAACACCAGCA  
CGCTTAACGAAAAGGTTTTCTTTGATGTTATTCATAAACGTCTGGATGGATTTAATGCGG  
TTTGAAGTTTTCCATTGTTTCGATGGCATTGCCGCGATACATAATAACATTACCAGTTCGC  
TTATATTCAGCAACCATTTTTAAGACAACACATAATAATATCCTCAATTTGTGGGAGAGTA  
TTTCCCCTCCCGATGTTCTTAGATTACATTACACAAAATGGCGTGTCAATGCTTCTTTTG  
CGGTTCCGCTCAGACTTTCGATCTCGCTGGCATAACATCAACCGCCAGA ACTTGTACAA  
CATCCTCGGACCCTAACCAAGTGAGTATGGCCTCTGTAGA ACTTGATAACCAAGACTACCTT  
CCTCGTCCCCTTTAACGCTATCGCTAGCCCACCACACATCACCGTCGATAAAGTTGACGT  
AAAGCACACTACGCCACATTGAATTAATTACTTTCAATACTGCGACTTTCATCTCTTCCA  
CGGTATGGTCTTCCATTTTGAAGACCTCACCTACCTGAACTTTTGCCATGTTACATGCTC  
CGAATATGTTGAGCTGCATCTTCCAGTTCGTGATAATGACACTGTGTGCCAGTAAGTGT  
ACTGTTTGTGGTTCTTACCTTCCATAGTATTGATCAGTTGACCGTTTCTGGGTGGAAT  
GTATCGTTGCCGTTCCAAATAGGATACACATCATCTTCTGTTACGTAGATAATAAGTTCA

ATCGGTGATTCTGGAAATTGAAAAAGTTTACCCACTGCATCTTTGCGATTGTTTACGATA  
TCTTTTATTGTCTTCATTTAGTTACCTCTCGTTAAATTACATCACAATCACGCCATCCGT  
TGAAAGTTGTCGTTTCAACTGGGCATTTTCTGCTACTGTCAAATCAATGATTTCTTGTGA  
CGCGGCAATCATATAGCCATTGGTGACATTGTTTTGCATCAGTTAAATGGTTTCTTCGTT  
GTAGCGGATTTTAGCGATGATTTTCGTTGAAGTTCATGATTGATTCTCCTAGTTCGTTGTCG  
GTATGTGTGTATTATAGGGGAGTTTAAACCTCCCCTGTCAACAACTTTTTTAAAGTTTTTC  
CTTGATAACGGTCATAATTACATCTTCTGTGCGAGCGGTCAGATTATCAGCGTCAGCATG  
TGGGCGGTTGGTTGTTACAGAGATAACACCGCTGCGCACTGGTTTGATATTGATATCAAG  
ATGATCCGCGAAACGTTCCGCCAGTTACAGAATGAATTTTGGTGTAAATTCTTTTGCCAG  
TCCCTTGCGAACTTCACGAATCAGGATAGCGTTTTTCAGTTGGTTCTCCGCGCTCATGGT  
CTTCTGGGTGTGCATGGTTCCGTTGAAGTCAATCATTGGCAGCATTACGATGTGTTTCAT  
TTTTGATTCTCCGTTTAAAGAAAGTGAGTTTCGTTTTGATGTGTCTAGTATAGGGGATACG  
TGAGCCCCTGTCAGCAACTTTTTTGAATTATTGTTTCATGTGTTTAAATGGCTTCTCCAT  
AGCCAGCACGTTTCGATAGTTAGGGTATCGTGTTAGATCGTCATACATTCCGCTTAAGGGT  
GGAAACTTCTCAAACCTCTGGGTTTTCTATATACAGTTGAACAAATTGTTTCTCTACCAT  
CTCGGCTCTTAGTTTGTCTGCTTGTTCCTGTTTCATATGATTTTCGTTGGACCCAACACCAA  
CAAATGATAAAGGTGATCAACGGGCTAATGATCAATGATAGGATAACATAACCGATAAC  
GCTACGGTTTAAACGGCTTTCGTACATGCCTACCAGGAAAACAGAAAGGACATAGATAAA  
GAGAAAGAACATATAATAGTGACTCCTTATTTTCGCGCTCGTACTTTTCGAAATAAAATT  
CTACTGGCTGGTCATGAATTGACAGCAAGCCAAAGCGTTTAGCCGCTCGCAATCCCATAT  
TGCGCTGAATATACTTCTGGAAGTTCTCGCGTATACTTACGCCAGTATTCTAAGCCCA  
TACAGCTTTTATAAAGATTGCATTGTACACACGCCGGATTTCATGTTATCAAGTATATCAT  
GTTCCGGTTTATGCATTCCTACGACCTTATACTTCCCCGATCCATCATCATTACGGGCAA  
TTCGTCCATTTTCATCATAGACTACCTTTGAGCGTCTCAGTACTGGTTTGATGTGGTCTG  
CGTGCCAGCGATCCCCTAGTTCCCTCGCCACAATAGGCACAACCTCCACCATATTTTCATT  
TCAGTATCTGGCGATGCTCTTTCTTTGACAATTTTTTAGGTTTAGGGGCTTTCGCCCCCT  
CATTACCACACATCGGATACCTCTTTTACTGTATTGGCAGTGGGCTTGTTCGTAGCGCATA  
CGTTTGATGATTGGGCGAAATAAAGAGACCTCCGGTTCATCTTCTTACCAGATTTGCTG  
CGGATATACCCGTTGCATGTCATCTCAATGACTTCTCCAATCAGGTTATGACGGTCAGCC  
CATAACATTTCTCGGTCGAGTTCATTTTCGACGATCGAACGGAATTACACGTTTCAGTACCA  
TCATCACCTTTTTGGGTTGTAGTGTCCGTAATCCCGATCCGGTGTAGTCATCATTTCGT  
CCGCACGCACTACGGACAGTAAAACCGCCTACCTTATTGGGGTCTTTACTATGCGGATAT  
ACATCAACAATTTCCGCGGCGAAGTCAATCACTTCTTTAAATTTAACCTGATCTTTACTA  
CGGCGATCTTCAAATACACCATGTAAATTTTTAAGGATAATACCTTCCAAGCCCATGTTT  
ACATAGCGATGTTATACTTCGCGAGCTTCATCTATATTGTTAACTACAGTGTTTTTCGATT  
ATCTGAACACGAGGATCGTTAAGTTCTTCAACAATCTGTTTTAGTTCTTCGAATCGATCT  
TTATATTGCTTCGTTGCTTCTCGTTTCCGTAATACACATCACGGTCGATAACATCCCAG  
ACAGTGTAACAATACATTGGGCTTCTTATTTTGAATTGTTCCCTTCCAGTGATTTGTTG  
AGGATAACATTTCCGGTCTGACGATCTGCAACAACCGATTCTTTTACTGCTTCCGCTACT  
GGCGTTAATGGCATTTCCTCTTCTTCAAATATCCATGAGAGAGTACCATCATAAACGCTT  
TCAACGAAGTTCTGCGCTGGTGTGTTGCGAAAGGGTAGGCATATATACCAATTCCCCATCT  
AGAACAATCCCCCGCCTCGCAGACGCTCTAAAACAGCATTCAAATCATCCAGCCCCTGA  
TAGGTATTACCTGAACGGGTATAGATTGCTAATGTTTCCCGTCAATATCAGCCATCCCA  
CCAGCGCCATCGCTTTTAAAGTTGTGCATACGCCAGATACTTGATATTAGCAATAGTCTTA  
TCAGAACATGACGATGCAAGGTGACACGGTTGCTGGGGGATCAGTTTCTTCCATAGCTTG  
TTTGCAGGGGTAGCTGAGCAACCGAATTCAGATCACGATTCAGGACAATCATTGCACCT  
TTAGCATCATCCTCTGACAAGCAAGTCAGAGTATCGGTAACCTAGCTGTAATGCTGCATTA  
CCAGTACTTGACGCGTGGCAAGTTTATTTTTAAAGACCTGTAATGCACCGGATAAAGAC  
AATACAGACGAATAACGCTATGGTTTATCGTATTTCTTTACGCCAAACGTAACCTGTTTG  
CAATATGCCAGATAAAAACATTTCTTTCAGTGTTTCATTGCCTGCAGATTCTTTCAGGATC  
TTTTCTTGCAGCGATGTTTTGTCTGTTGCTGCAAACCTGGTTAATGATATTAAGAATTGAC  
ATTTTCACCTCGTTTTGTTAAGCGTTCACGAATATCATTGAGGATACTACAAAATTCCGA  
TTCAGTCGATATGGTCTTTAACGGATCAGTTCCACCTATGCTATGACGTAATTTCTTATT  
TCTGTAGCGAGTAATGCTTTACAAAATTCTGGGTTATTCCGTGCCATCGTAACAAATGC  
CAGATGTACCAGTCTGTAATAATGCTCACTCATACGAGGAATCGGGCGAATCTTAAAATA  
TAACATGTGAGTCTCAATCTTATCAGTTCTTCCGGATCTTTTTGCTTTGCCACCGTGCAT  
CAAAAAGATTTCTCTTTGTCTCTGAGGCTTCTTAAATCTTAGCCCCTGTAAAAATCCTTC

TGTGCTGTTAATATCGCAACCAATAGACGGAATGGTCTTTTATTAATATTACTCAATTC  
ACCCGATGGATAAGGTCCACCCGCATAGAGATTAATTTTCAGAACTCATTGAACTAATCT  
CGCTAATCAGAGAGAACGGATCACAATCGTCATTAGGAATATCGATAGTAATCGAATGAG  
GATTTACCCATAGACCAAACCTGGTCTTGTTCGGTGAATACTTCGGTATGGATTTTCGTGGA  
TGTTTACATTCATAGTTTTTCAGACTAATATTCCTTAATAATCAATAACTTACAAAATCAT  
ATAGCCAAAATATAGGCGGGATTATTTCCC GCCGTTTTAAATCATTAAACCGTAAACTACC  
ACAATATTCTGTTTGTGTGTTACAGTCCATGTCAGGTTCGATCTCTTCTTACTTATTAACG  
CCGTTAATAACGTCTGGGTGAGGAACTTTATTCATCTTGCCATGTGGCAGTAGAACAGTT  
TTACCCAGCAATTCTTTATCTACAGTCTCGCCAATATCAATAATCTTACCTACCAGCGGA  
ATCTCGCCCATAGTGCCTTTTGCTCAATAATGATCCCCATAGAGCTTTTTACTTTCGGTC  
CCTGCGCTTTCTGCTTTAGCTTCGATAATTACATAATCACCAAGTGCTTTAGGAGTTTTA  
ACGGTCTTAATTTTATTACCTCTTCAAATCAATACAGTTTAATGATGAATTATTTATAAA  
TTTCGACGATCTGCGCGGGAGTACGCCATCTTCATTAATCAGACCATCAAGCCCAAAC  
TACGGAAACCTTCAACTGCAATTTTCATATACTGGCAAAGATGTTTCTGATTCTTTACGCG  
GTTTTTCAACATTCGGAACCTAACCACTTTTCGTATGTTTCGAACGGCATCAGTGCCGGAT  
CTCGCGTGGCGATCAACTCAGGGACAGTACCATCTTTCTTAATAAACTGCAAAGAGTAAG  
TACCGACCGAAAACATTTTCTTTAGTGCTTCGCGAAATGCGATATTATCAACTTGTTTCAG  
TCATTATCAATACCCTTCAAATCAGTCAATAATGCTTTTGGAAATACGCGCGATCCTAATA  
TCTGCATTATTCAGAATATCAGCCCAATCACGCCAACAGTTCGATCGTATGTGTCGCAA  
TACTATAGATGTTTAAATTCACCTTTTGGCAATTGCTTTAGCGCAATCTGGACACGGTGAA  
GCAGTACACCACATACTAGCGCCTTCAATCGATATACCGCTACGGGCAGCAAACAAAATA  
GCATTTAATTCAGCGTGGATCTCGTTTTTCTGTGACCATGCACTATACTCTGATCGTTTT  
TCTGGGATCATTTTGGCGTCAGCATCCAGCCAACCGTTTTTATGGGCATGACAGCTACAA  
TTTACTTGCCCTGCTGGAGTTCCGTTAAATACAGTAGAAATGATTCGCCCGTCTTTTTTCG  
ATCAGTGCGCATACCTTCCACGAAACACATTTAGAGTTCTTTACGAATAGATAGTCGATC  
TGCATGTAAGTTTGTGACAACATAATATAACCATCACATATTAATTAACCGTATACGCGA  
AAGTATTCGACCGATCCGTCGCTATACTGTTGTACATTGAATGTATTACACCATGATCA  
TTGCTCATAATGACATATACTCCGACGCTCATCAGCAAACGGGTTAACTAGTGCGGGT  
TCAATTTCAACATTAACCAACCGTTTAGCAAGTGCTTCGCCTAATTGCTTGAGTTTATCG  
GTAACATTAACAGTCTCCGTAGTTAACCTGAAAACATTCTACACCAATTGAGCGGTACA  
TGTCAACCACTTGATCACGGTCATCTACTGCCAAAACAACATGATAACGCGGTGCACTTT  
CCGAGAACAAGATCTCTTTCTTCACTTCATGGTCTGGACGTCGATCATTAGTTTCACGCT  
GGAAGTGATCGCTAGGTTCAATACCCTGTTACGCAGCCATTGCAGAGTATCTTCTTCGC  
AAACATCCTCACGCCCTGAGCATGTAATGATACGATAACCATTATCACGATACAGTTTAA  
GCATTTTCGATCACTTGCGGACGCGGTTTATCTTCTTTGACCTTTGTCCAGTCAAACGGAT  
GACGACCGCCCTTATCCGCTAATGTCCGATCAATTTCAAAGATCACCGCTTTCGGGAGCA  
TGGTATTCGGTTTGTATACTTCTTGACCCATATAATCCTGCATAAAGATATAATTGGTTGC  
CCAGATGAGAAAGTGGAGTTGCTTTCTCGCCGCGATAGAAATTACGTTTCTTTAGTGTCT  
CAAATGATTGATTGAACACTTGTTTCAGTATACACCGCGTTAAATTCTTTTGCAAGTTCTT  
TGTAGAATACACGATGTTTTTTCGTTTCAGGTTGGTATCAGAGATAATGATACTCAATCCGC  
GTGATGGAGTCACGCGAGCAATCATTCTCTGAATAGACTCTACCAGCTTTTCTTTTTCT  
TAGTATACTTGTGTTTCAAAGTGAGTCCACACCAAACAACATAAGACGAAGATCATCAC  
GATTCACATTACGATAAATACTAAACCGTTTACATGTTTCCGTAGCCATCTAGTTTTAC  
CGGACACAGAACAACCAACGGTTAAAATCACTTCACATTTCCGGCATTATTTCTCCTTCGG  
TGTGCACCGTTGCTCATTAAGTTCTTTGCGATAATAACACATGATCAACTTACTTTCAAG  
TGTATATCTCTTAATATCAGCCAACCAGACTCTAAATTTTTGGGAGTCCCTCCACGCCAT  
AGAAACTCTAGGTTTACCGTATTTTGTATCCACTTTCAGGTCAATGTCAACTTTTTCTAT  
TGGTGCTGGAAGTGGAAAGATGTAATGTCGGTTCCTGTGAATAATGGTCCATTGTACACGA  
AGAAAGAGCAAATACAATAGGTACAGCGAAGACATGGATTATGGCGGTGTGAAAATTCTT  
ATGTGCTTTCTTAAACAACCAGTGTTTCACGAAAATTGACAACACCATAATGATAATAAT  
GCTTGCACCTATCCCCAGATAATCACCCAGATTAATAATTGCTTATCTGCTCTTGCGTAGG  
CAATATTTCTATGCTCATTACAGTAGCCTCCTTTAATTCTTCGGTAAACTCCTTAAATGAA  
TCATTAAGCTGTTTCTTACCAACTTGGCTTTTTGTGCTGCTACATAGCCTCGTGTAGCG  
TCTTTCATTGCTTTGGTGTGTTCTTCTGCAAACCTTAGGTCATATTCGTACATCTCCTTT  
TGTAGTGAGTCTACGACCTTCATCTTTTCATCTGTCTTTTTCTTATACTCTGTAAATTCC  
TGATTGAATCGGTCCACCTCCTTTTTATTTTCCACCACATATTGCCTCCTACCCCCAGC  
AACACAGATATGATAACAATGTATATCAGCTTTGACATATTACCCCCAACGACAAAAGGC

GGTGAAGTACGCCCCGCTTATTATTACCAATCAATCTTATCAGCCGGAATCAGTTTCTTAT  
AATTCCGTAAGTAAAGTATGTAAGTTTTCATTGAAGCCAGAATACGGTCATCATCAAGGCCATCAA  
ATGCAATCATCAGACACATGAAAATATATGATTGTGCATCACCATGTTACGTGATTCTGA  
TAGTCGCATTGGATGCATGTGTCTTTCTGTCTTCTCCCGCGTGCAGCGTTACAAAATTCTG  
TTGCTGTGTAAGGCATTGCGAAGAATGGACCTGAATGCTTCCTCGAATAGCTCAATTC  
GGTCCAGTGTCTCCGGTTCGCCTTCATATGCAGCACACAAATCATCGGTTTAGCCTTCTA  
CGACATAGTAGATCAGGTTATTAGGAAACATCGATGTGTTTTTAATGTTATGCACACCAA  
TATACCATTCACTCTTCACCTTGAACATTTGACCGTCTTTAGTGCAGTGCACAATTCCTT  
CGATACCTTCTGCGGTCCGAACCTTCATCAAGAATATTGCTAAAACGCGCTGAATCAAGCT  
GTAACGCATTTACCAGATGAGGACGTAGGATTGCGTCAGCAAATAGCATTGATGCAGTA  
CGTACTCTCCTGTGACGTTATGGCGTACATTCAGAAGTGTTAGCGACGGTTCAGGATATT  
CTACAACAATTCGGTTGCTGGGTGCTGTATTTCAAAGTTGAAATTATATTCAGACCCAA  
TATCGGCGATCTTAGCGCGTAGATCCGCATACTTCTCTGAATACAGAAGACCGTTTGCTC  
TCTCTGCCTGGCTTGAGGACAAGGCCGCTTTAGACTTCAACTGAACATAGCCGTTATCAA  
TGTATGTGCTTACTAGACTACCCTCCATTTTGTCCATGACAATTTCCACATCTTCCGGCT  
TAAAGCGAACGCGATCATTCTGACCCAAATTAATAAACTTCTCCATAGGACGAGATGCAA  
TGCGGACAGGTCGGTCTTTATCATCGATTTCAAACATGATCCCGCGACACTCTAAAGCAT  
CTGGTTTATTCCACATATCCGGTTTGTCTCAAGTACAGATAAGTAAAAATGCGCATAACGGG  
TTTGATCGCCGTAATTTTCATCTTTGTAATAGAACGTATCAGATCCGTCACATAGTGCCA  
TCAGATTTTTGAACAATGCTAAAACTTTTTTTGTGTTTTCTTTTGTGACATAATTTGT  
GTTCCATTCTGGTTTAAATTTGGTGATCAAACAGGTTCTTCGATATCGGCAGTGCTTAT  
AATATCTTACCCGTTGGATTCTCGATGTACAACCTCAAAGCATTGGCGGTAATAGAATGT  
TACTGCCTTACCTTCCCTCTAGCGCCTTATGAATATTCTTACTCTGACGAGTAACCGCTGT  
TGGTGTGTTGCTGTTATTGCTCGTCCGGTAATAATTGATCCGCTTTCTGAGATTAACAGT  
GTTACCAATGTATACCAATTCATCATCAACCAGAATAGCGTAAAGAACATTTAAACGGTC  
TTTCTGAGGCGGTAGAATCACATCACCATCTTTACACTCTAAACGTGAATATTTAACGAA  
TCCATAGTTTTTTTATTAGCTCATTAAATCATTATCCTTTCCTCACGTCACAACAAAGGCGG  
GATTTCTCCCGCCACCTTATTAACCTTCCAGAATATCGCGAGCTTCGTTACGCTCCTTG  
ATGATTTTCAGGACAAATTCAGTTTCTCTTTGTTTCAGTGGTCCGTTTTCCATTGCTTCT  
TTGACGGTAAACACTCCGCCACCTTGCCCGTATACAGTGACAGTGATTTACCTAACATC  
GTGGTATGACAACCGCCAATTTTCGGTGATTTCGAAAGAAACAATCACCTCACGGATAGTA  
TTGCCATCGTTGATTTCTTCCAGCGTAATATCGCTATTGTAAGCGGTTGCGTTAACCATA  
CGGATCAGCATAGTCTGATCTGGGGGGATGGTCAATTTTGTCCATTGCATGTTGCAATGCA  
GCGTAACCGAAAACCTTAAACGACGTCCAGACCGTCTTTGCGAGTTTGAACCTTTGATCATC  
TTGATACTCCTTAGTACGTTAGTTTCGTGTGATGGGGTATCTTACTAACCCCGTTTGAG  
GCCGTCAACTACTTTTTAATGTAAAGTTTCGAATTTTGTACCTTACGTCCTCGTTTATTG  
AAAGAACCCACGGACGGTTTTCAATGTAGAACAATCTTTCGCCTATAATGAATACTGAC  
TGATTGTAAAGGCGACCCATCAGGTCAAGCTGGCGAATGCTAGTAGATTCTGATACGTCG  
CCTACTACAAAGTGTTTGTGATAGAGTCGGTGCAAGTAAATTTCAATTTGATTCTCCTG  
TGTTTCGTTTCGATGGGGGTATCTTACTACCCCGCTATTTCAGTGTCAACTACTTTTTTA  
CTTGCTGTATTCAATCCACCATTGAGTGAGCTTATCAATTAATTTTGTGTTTCTATCCAA  
CTTATCCACCGTATCTGAGGGTTTATCAACCGGAATAGGTAAGGGGTACGTGTTAAGTG  
AACTCGGTCACTGTAGTAATTGATGTACTGCTTTTCAATTCTAAGTTTCATCTTTTTACG  
ATGAAAATAGGCAATGACTTGTCTTCTGTTTCCATATGTTCCCTCCGTTTCGATGTGCGT  
AATATGCTATGGTAAGGTCCGATTGTCAACACCCAATAACAAAAAAGTCGCCACTATTG  
GCGACTTTGAACAAACATTAATCATGACCGTGATTTGCAAAAATCCGCTCGTGTGCTGTCT  
TTGTGATAACCTACGTCAAAGACACGATAACCATTTTCACGAAGAATTTAAACCCCTTCT  
GGGTTATCCTCAAAGACTCCGACAACCTTTCAGCTTTTATCAAAGGATTTAATTACCTCTAAT  
TTGATGTGATAGTCTTTACGGGAATCATTGCGACCTCTCATAAAGATTTTATCGAAACAC  
ACATCATTAGCGATCAACCATCCACCGTTTCCATGTAAGCATGTGAACTTCGTCCGGTG  
AGGATGTAATCAAATGCCCGTTGTGCGAAAGAGCATTGATAACACGGATTACATCGTAA  
ATGGGGGCATCTCACCCACATGCGTGGTTATATTCGATCCACGACTCGACTTTATCAAGA  
TTTTTCGGTTGGCATCTTTGCTAGTCGTTGTGTTGGATCTGTGATCGTAAAATCTAAATCG  
ACAAAATATATCATAGATATTTCCCGAATCGGTTGTAGTCATCGTCTGTAAATCGGTAT  
TAACCTGAGACACCAGATACATAATCTCTACTTCTGCGCTGCATTCTGCACTTCGTCAA  
AGTTGAACCACTTACGCATCCACGGTGAAGGATGACGACGAACACTAAACGGGCTTTTCA  
GTCCGGCAGGACGCATACGGGAATGTGCCAGGATTCTACATAGGTTTTTCAGAATTTCCG

GTTAGAGGTTAGGAATTGCCCCCATTTGCGAGTAGGGTGGTCTACCCATCCTTTTTCTTGCT  
CGACAACATCCAGAAAGATTTTCGTTGCTTCGCTTTC AAGTTCCTCCGCAATCTGTTTCC  
ACTCATCACCATCAACCCCCGTTTGCCATTGACGAATAATGTATTGTGTGCCATTTAAGT  
GAAGTTGTGCATCACGCGCAATAAATTTTCATGATCTTCGCGTTACGTTCCAGTAAACCAC  
GTTCCGGCAAAGCTGAACGTACATGCAAAGGCCACATAAAAACTAATTGCATCCAGTGCGT  
TGACGCAGTGTGCACACAGATAAATCGAAGCCATCAGATCTCATTTTGTATCTTCAAAAA  
ATCTTCTTGATAAATCTAATGCTGTCTGGTTCGTCTAGTTCCTTCCCAATAGCGGAGATCTT  
CTTTTGCATTCTCATACTTACGAATCCAATAAAGAACATCATCATAAATTTCCCGATAG  
ATTCCGCTCGCTTCATGATAGCAGGGTTATCGATGATCTGGTTCGAACTCACTAGCCGGAT  
CAATGAAACAGTTACGCATAATGTGTGTCTAGCTTCGGCTATGAATCGTTTCGCTGAATG  
TCCATGTTTGCAACCATGTATCGAGAGTTGGATCAGATAACAATTGGACCAAATGCTGCGG  
ACGGTGC GCGATCTTGAATTGAATCAAGTAATGTCTGATACTTCAAGTTTTTCAGTAAGCA  
AACGCTTTTCAACGTCACCCATATTAAGATATTGAATGCGGTGGGTGCAAGTGAAATTT  
CTTCTGGACGCCAGAAAAACGACAGAGATTTTTCAATTAATTCTTCAAATACTTGATGAC  
GCTGAATGTCATAACGAGCGATACTAAACCGCTACCCAGAAACATCGGTTTCATTCTATA  
TATCAACGTGTTCTCGATTAAATACCGTATTACCCATTCACATATTCCTCATTTTACAGT  
TATCAAAGTGGCATCGTAGAGCATTGCCTTTATTAGTAATTTTACCGCAATGCGGACAAG  
GATGTGCCATTGTTGCTTCCCTTTGTCCGTTGTGAAATCAGCTTCTCATTTCCTCGCTAT  
TTGGTATTCCTTTAGTTGGCGATGGTTTCCCAAACATAGGATTTTTACTTCCCATCTAG  
CTTTTGAAATGTTTAAACGCGTGCTCCTTTGTTTTTGGCTTACGCATTTTAGCTTTTGTCT  
CTTCTGATTTTCAATACACCTTTCGAAGCTTCGCTAATCTTCTTCGCGTTTCTTCTTTCA  
TCGGCTTGCCCTTTCTTTGTTTCAGAGATAAGTACCCTAGCTTGTTTCATGTACCCTAGACG  
AAACAATATACTCTCTTTTATTGGTCTTCGCATTTTTTGGTAAACACATCATAACCAAATG  
CTTGTGCCATAGGTCCACCATGAATTTTGGCCAGCAGATGATGAATCACGAAATGTTCTT  
TTGCTGTCAACTCAATCAGGATATCAACTTCATCACCGCCACCCATAGATCGCGGTA AAA  
TATGATGTGTTGCCTTATATCCTTCAACGGTGCCTCTGATCTTTTCTTTTTCTATGATTG  
CGTCATGTAGTTTTTGTAGGTTTCATGAATTAATCCTCTTTTCTGTATAACCATTATTTATC  
AGGTATCCAGAAGAAGGATTAATTCACCTCACTATTATCCGACAACCTCAA AACATTTAT  
CATCAGGAAGAATAGCCCATCTACGCCGTATTAATCCTCAACGTAGTAGCAAGTCCCAT  
CATGTCGAGCATCATATTCATCACCGACAACAAGCTATCAGCTAGCTCAA AATCTACAG  
CAACACATTTTAATTTGGGCATAATAACATCCTCACTTGTTTTTGTATGGTTGACTTATAG  
CAGGGATTTCTCCCCGCGTCAACACTTATTTTACAGCTTGCATGCTGAGCACTCGCTAGC  
GTCTTCCGTACCATCTGCACCGTCGCGAACGTTTCGCATAATAGATGGTTTTCTGACCGAA  
ATATTGAGCAAACAACATATCATCTAACACATCAGCAATATCGACGTTTCCAGTCTTATA  
AGTGCTTGGATCGTATGATGTATTGGA ACTAATCGCCTGATCCACAAACTTCTGCATGAT  
CGCTGCCGGTGTGAGATAAGGCTTGTTACCTTTCTTGATCAGTGTCCAAAGCAGGTCAAT  
AACATCAGCATTATTCTCCACGTTTCGGAATAACCTGATTA AATTGCCCTTCTTTCGATCC  
TTTAACCGATACAATCCCGCGAGGCGGTTCAATACCGTTGGTCCCTGTTAGATACCTGCCA  
AGACGACTCACAAGGCATCAGCGCCGACAGTGTACTGTTACGATGGCCATATTTTTTTCAG  
GTCTTCGCGCAGTTCTTCCCAATCCATCTCATAACCGCATCCACCAGTTCAGCTACTGT  
CATTTTGTACCAGTCGATAGGAAGTTCACCGCGACCATAGCGTGTTTTCGTGCATCAGTTC  
GCAAGCACCTTCTCTTTAGCCAGTCGCACGCTAGCCTTAATCAGAGCATATTGCAAGCG  
TTCAAACGTTTTATGCGTAAACTCGTTAGCGTCTTCATATGTGAAGAAATTATCTGCTAG  
ATATGATGCAAAGTTAGTCACACCAACACCCAGAGAGCGACGTTTTTTTGGCTGTCAGCGC  
TTGTTCTACAGGATAAACCTGATAATCTCGCAGGTTGTCAAGAGCACGCACCATAACCAG  
AGCAATGCGATCTACTTCGTCCATATTTTCGATATCGAAATTACCTAAAACATATGCTGC  
CAAAGTACATAGGCTAATTTCTGAATCATCACGACCCATCGGTCTTGTAGGCAGAGCAAT  
TTCACAACACAGGTTAGATTGTTTAATCGGTGCTCCATTACGAATAAAGGCCCCCGTGATT  
GTTTCATGTTGTCTGTGAACGTTGGGTAGATTTCGACCAGTGTTAAAACGTTCAATTGCCAC  
CGCTAAAACATGTCTTCAGCTTTAACACGAGTTTTACGAACCTTCGGATCTTTTTCCAG  
TTTTTCGCAAAGCTCGCGGAAACCTTCCCTCGTCTCGGAAGTAGAGATCCCAACAAGCC  
AGCCGCAACGTCTGGACTAAACAGAGTAATGTAATCCCGTTTAAGGAATCGCTCTACCAT  
CAGGTTATTAATCTGTACGCCGTAATCAAGATGACGTATGCGGTTATTTTCCACCCCTT  
ATTGTTCTTTCACACAATCAGACTTTCAAACTCTAAATACCATATTGGGTAATAGAGAGT  
CCCCGCCACGCCACGAATGCCGCCTTGTGAGCATGACTTAACGGCCGTCTGAAAATGTTT  
CCAGAATGGGATAACGCCAATATGACGAACTTCCCCATGCCCAATCTTAGATCCTTCCGC  
GCGAATCATGCCAGCGTCGATACCGATACCAGCACGCTTGCTAGTATACTTGATGATTGC



ATTTGCTGTTTCGTTGATGCCCTGCAATGAGTCATCACTTTTCGATCACCACACACGAACT  
GAATTGGCGTGTGGGGTACGCACACCTGCCATACTCGCAGTAGGTAGAGAGATTTGCTT  
ATTCGCAACAGCATTATAAAAAATCAATCACATTTTCAAGTCGATTTTCTGTCTCTTCTTG  
AGGCAGTCACATACCGATCAGCATATACGCAAATTGTGGTGTTCGATGATTTTCTTAGT  
GCTGCGATCCTGAACAAGATATTTCTATTTAACTGCATCGCACCAGCATTGGTCATTTT  
AAAATCAAGTTTATGGTCGATGAATTTCTCCAGATATTCCACTTCTTCATGGGAATACTT  
TTGCAGAATTTTCGCGATCATATTTTCCGGTTGCAATATTACGCTCAATATGGCTGTAAAA  
ATCAATCGGTTGGAATTGACCGTATAGTGATTTGCGAAGCGCGAACATTGCAAGGTTACT  
TGCTACATATTGATAATCGGGTGTTCCTATAGTAATGTTATGTGCTGCGACCTTAATCAA  
TTCTTTCTGGATATCGTTGGTGGACATACCTTCTGTGAGAAGTGGTTCAACCATATCAA  
CAATTTATATGGATCAACGTTATGACCTTCGGCTGCCGCTTCCAGAATTTTCATTACTTT  
TTCTTTTCAAACGGAACAGTCAGACCGGAAGACTTAACAACATTTTAAATCATATTACC  
TCACTTTAAATTTTAGCAGGAACAAGTTTATCCTCCATATTGGGGGCCTTCGCCGCCTTT  
GTTATACTGCCATTTGAGCGGTGATCGCTGGATGGCTTTGATAGTTGTGCATTTCAAAT  
CTTGCGGAGTCTTTGTCAATACCTCATCTAAAGATTTAAAATCCGGCAACTCAATTATTG  
GTTTAGCAAACGGAACACGGCTTAACTGGTCCATAACTTGATCAAATGGTTTTTGTAAA  
TGTGGCAATCCCCACACTGATAAATCAGTTCGCCAACTTCTAATCCGCAAATCTTCGCGA  
TGATATGCGTTAACAGTGCATAGCTCGCTACGTTGAACGGATTCCCTAAAAAGGGATCAT  
CCGAACGCATGAAAAATAACAACCTCAATTTGTTGTCGTTGGAAACATAAAACTGTACAA  
TCCGATGACATACACCTAACACAGCATTATGCGTTTCTGTACGTTCCATGAATCAATGA  
ACATTCGACGACCATATGGATCATTCTTGATCATGTCACCTTTTTGTAACCTGGTCTT  
CCCAAATCTTCGGGCGATAGACATATTCTTCATCGTCTTTAGTGCTTGATGTGTCTGCGT  
CCATACTAACAAACATCGTGGTTTCAGGTGCTATAATATCCCCACCCAGATAATCACTAT  
CAAGCAGATAACGGAAATAACCATCATCTACCCATTCCTGCAATCCCCGCAAGCAATATG  
CATCATTAAACAAAATTAGATTGAGTCTTCCAGTGGTCTGCTCCGAGAATATAATCAAACC  
CTTCATAACGCATACCACGCCAGATAGCACATAAACGGTCTTCTGTTTCATTGGTTGGTG  
TAAAGTATTCTACCCACGGGTGCTTAAATGTATGTGTATATTTGCTCTTAACGCGCTTAA  
TTTTGATTTACCGTGTGGATAAATCGGTTTTTCGTCGCCATGCCATGCCATACCTATTAC  
CGACATTATAATCATTGAATCGCAAGGAATTCCTTTCTTTCATATCAGGACAGTTGCCGA  
GCCAAATATCAAAGGCTTCTCGTCAAACCTTGCCGCGTGTAATTTCCCGTAAGCGACGGC  
GGTCAAGTGATCGCTCCATAAACCATAGCAATTCGCCAATTACAGAGGCTGTAGCCATCT  
TTTTAGTGGTCAGTAAGGGGAACCCCTTGCTTAAATCAATTCGCATTTCTGCACCGAATT  
TAGAGAGCGTACCTACCCAGTTCGGTCTTACAGATGCCAGCCATTTTCAAGAACATCAC  
GCAATAGTTTCAAATGTTCTTTCATCCCACACCAACTTTTTCTTAGTGATTGCTTTCATA  
CGCAGTTTTGCTACTGTCTCGTCAATGTCTATAAAGATAACACCACGGTCAATACAGTT  
GCAGGTCTTGAGATATCGCTATTTTCTTGCACAGGAGGCCATGATGCGCTCGTTCATCA  
TAGAGATATTGTAAACTGTAATAATCTACGGTACTGCGTTGTTTTCACTAGGAGCCGTC  
CATAATTGAATAATACCGACTTTCATTATTGTTCCCGTCCACAATGTAAACACCGACTAC  
CAGCAAACATCCAAGATTCAGCACAAATGTTTTCACTCATAATCTGTCAGGATTTTCCAGT  
TACGCCTTCTTACGTTCTAAAATTTGTTGCTGATCAGGTAATCATCAAGGAAGTAATTA  
TGTGCTTCTTTTGTACAAAATCAAAAATATAATTCCTGAATGATTTCTTAGAGATACCA  
ACATCATATTCGAACGGAACATTAATTCCTGCTCGTTGAACATATGTTAACACAATACGG  
TCCGCAAAGTCCACCGCTTTTTCAATCAGGGAAGGTCCACCAATAACGCTTACCAAACCT  
TGCAATTTCTCTATGACTTCTACAAATTCCTTCAATCCACCATCATCAGTAATCGCGGTA  
TACACATCTGGTTGGTCGCCGTTACTTGCTTTCGGTGGTGGTACTGGTATCGGTGCTA  
ACAACCACATTCACGCGACCTTCCAGTGCTTTAGGAAGACTTTCAAAGGTATTACGTCCC  
ATTACCTCCGCCGCAAGATCAACATCTCCCATAGTGCGCATTTTAAAGTTTTCCATGTCC  
TTTTTGATTGGACGACCCACGCTAAACCGCCTTTAAAACCAAAGGCCAATTTTCATCT  
GACATGTTAGTGTACCAATCGCAACTACACATTGAATCATAATATTAATCTCCTATCAA  
ACCAGCTTGAGATAGTTTTTCGTTAACGTTTTCTTCTGTGATGTCGGTTTTAAACTCAATA  
CCAACATCAGGAGAAACATAATAGCGTTCGGAATATTCACGCCACATTTACAGTAGGCTG  
ACACCAACATTAACACCATTTTCCAGAAACGGAAGATAATTTTATTTGCGGTGTGGCGG  
TAATGGCTTTGAATCAAACCTGCCATCACGGCGACGTGATTCATAAACCGTAATACAGTCT  
CGGTTAGCGGCTTTAAGACATTCTTCAATAGTGCCGCATGAGATAATTCGTTTGAGTCG  
TTTACGATTTGTTCTACAGTCCAGATAATATAATCCTCTCTTTGTTTCGATGTGTGATT  
ATACAGTACCACATAAGCATGTCAACACCTTTTTTCATAAATTTTTAGGCAATAAAAAAGC  
CTCCCCGAAGGAAGGCTTTAAAATTCATTACATCCCTAACAGAGCGTCAAGATCAGCCAG

ATCAGAAGCGGAGGAAGTACCGCCACCCAGATCCAGCGATGCCATCAGGACAACAGCGGA  
AGAATCTAACGCCGTGCTAGCTGCGTTAATAACCAACTACAGTGCTAGCTGCGTTAATACC  
AGCATCGAATGGATTCATTTGTGCGTCAAAAACGTCAAGCTGGCTGTTAATCGCTGCCGC  
AGCACTGGAAGCCGCAGCACCAGCTACCATAGAAACGCCCATAGTTTTCTTAAATTTGGT  
TTCCCGTTCATCGAACGGTTTAAACTGGATAGGCGCAACAATCTCACTCAGGTCAACCAT  
GTTTTCCATCAGATATTTCTGATATGCTTCGTCTTCAATTTTCGAAAGCTGTGATTGCTG  
CATGAAACGAGAATCATCATAGTTCTGGTGTATTATCAACCTGCTTAGCTTTCAGGCGGAA  
TTTAGCACC GGAGAACACACAAGTTACATCTACCGGAACCTTCGTCCATATCGGTATTAC  
GTTACCAATTGCAACGATCTTATCATAAATTTTCTGACCGAAGCGGAATTTGAATACCTT  
ACCTTCATTTTCTCGTGCTTGAGGATCTTTCAGTACCAGAATATTTGCGTAATAAGAGGC  
TTTACGCTTAATCAGTTGCCGTTTCGGTTTTATCGGTATTATACAGATCTTTTTTCGTTAAT  
ATACTTGCACACAGGGCAAGAATCAAATCACCGTGGGTGCTGGAGCAGTTTTCCACAATA  
CCATTTGCCATTAACTTTGAAGGAATGGATTACCAGTTTCAACAATCGGCAGACCGTCTTC  
TGTCATAGACGGCAGGAAGCGAATCAGGGCTTACCCTTACCCTGTCATCAGTCTTAAT  
CTTCCACTCTTTTCGGATCTTCTTTGGAGAAACCGTTGCCACCTTTCAGTGCGGCCAGTTG  
GGCTTGCAGTTTGGAGAATCTTGGCGTTTAAACATATTCATCTTCTTTTGATGA  
ATTAAGTACTATTATACAGATTTATAATTTACTTGTCAACTATTTGTTTCAGTATTTAA  
TTGAGATATTTCTTTACACTCTTTAACTACTTTAATAAATAATGCTCTTGCTTTTGCGGC  
TTCAATAACAAGTAGTTTCTTGCACGCCTGCATTTTAACTATAAGTTTTCCAAATCAA  
GTCTTTGGCTACATTGTCGTGTTTCGACGGTTATATTTAGAAAGCTATCTAACACATAAAA  
CGACTCAAACGATATCATCCGATTTTGCAGTAGTTTAAAGATACCGCTAGTTTTCGGTTGC  
GGGATTGTATGTAATTAGCTTTTTAAGAGTAACCCCGCGTTTCTCGGAGAAGTATACCAG  
ACTTTTAATGTCATCGTCAAATCGTGTAGCTGCATCGGTTATCTTTCCTATGTATTCCTG  
ATAAAAGCCGTATGCGTCAACATCAGTGATTTACCTACCCATGCATCGGTATTAGCTAC  
CAGATTGCTTAGGAATAGGAAGTATAATTCTCTTAGATTGTACTTTTCCGCTAATTTTGC  
GAAATAATACGTATCTCTGCGTTTATTGCATGCGGCATCAGACAACCGCATCCTCCAATT  
GTATTTTACGCAATCATAACGTCCGTTTCATGTGAGCTTTCATCATGCAATATAACATATA  
CACAGATTTAGCATTAAATTCGCATATCTGGATCTGGAGGAAGACGGTTTCTGATCATA  
TACCCCTTAAATATCGAGAGTGCTGGTTCGGTTCGTCGATCACTCCCTTCTGAGCGTTCT  
ATTTACTATACATTCTTGTGTGATCTTGTCAATAATGGACATCGGAATATACTTCTGATA  
GTGACCATATTCGATAGAGTTTTCTCTACAACTGCGTTGTCGCTTCAAGATAAGACAA  
ACCTTCTTCAACAACCAGTTTTTTCGACTGCAAGACCGTTTGTGTTTTGTTTCGCGGTTTT  
TACCGCATGTTTCATTAAGCATTGAACACCCGATAATAGAGTTCTACCGCTTCGTCGCGTT  
CTGCTTTCGAACGTTTTCGCGCGGTTGCTGGTGATACAGTTTAAACAGAATGCCCCACATT  
TACCATCGACGCCTAATTCTTCTTTAGCACGCTGTTTGATCTCTTTGATCTTATCGCCGT  
ATGCTTCTGAATGGTTTTCTCATCGCTGGCTTCTTTAATCAGTTGTGCCAGGGTATTTTC  
CGTGCATGCTTCGTCAAATACTACTTTTTCTTTTTCTGTTTCAGTGAAAATATGAACCC  
TCTTTCGTCAATTAATTGAAAACCACGTTTCAGCTTTTGAATTTTCGCTAGGACTTAAATCG  
TCACCAACATATTCTACCATCATATCTCGGAGAATGTCTAGTGCTTTTTTCATCACCTGAT  
TTTAACTCGAACTCAAGTTTCATTGTGAGCCTCTCCCAATCTTTCGCCGACTTTGCAATAA  
TAGAAAGTGTCTTTGCACATTTCCACTATAGCACCCCTCAAGGTCAAGTGTCAATGACTTG  
CGGTATGTCATTACTTGAATAAAGGAACGATAAGGCCGGAGTTTACGCCAAGACTATCA  
ACATAATGATAGAAATCATAATTGTTGAAAAAGTGATTTCTTCTCGGTTGAATAGTCCA  
GATTCTCTAACACCTATTTTGACCATAATCAATGATCTATTAACGTCAAGTCGAGCATAA  
ATTCCTTTTCTACGCATTCCATGATCTTCGGTAGCATAATAAAAATCGTGTTTTAGCGTG  
TTAGCACGATCTACTAGAGTGTACCCGTCATACATTGCTATCCACAAATCTCAGTTTGT  
TCGACGCCAATTTGTGAGTGTGCATAGTATCTTAATTCAAGTTATTTTCATATGTCAACCC  
TTATAATTCACTAATTTTCTGCAACATTTTAACTAACGCATTGGTTACAAAATAGTTATA  
AATTTTACCGCGTGGTGCTGCTTTTGATTTCTCCCATGCTAACAAAATTTTCATATTCGAT  
GTTATCAGGAATAAATTCAAATCAATAAGTTCGCGGTTTTTCGTTCAGAGCGTCGTGCTTC  
TTCCTCTGTCATCAAAGACTTTGGATCTTCGGCATCCAAAATTTGCTCTATCCATTTGGT  
TGCAATTGGTTTAGCTCGTTCCCTTCCAGTCGTGAGATCATGAAATCACTAGGGCACTT  
GACAGGAGCTACACCGTCTTTGCGTCACCCTTAAACATTTTACCATAAAGGTCTTTGTA  
AGGGCTAGCATATTTGCATTTCTTCCATGCTTTCTGTACTGGCGCCCACTGTTTCACGTT  
TTTGTATTTGTGCAACTGTGTGTAGTACCATCGCCGGAGTTGATTAGCACCTGGCGACC  
TTCTACAGAAAACCTTTTAGTTAACACAGCGATTATATCATCTGTTTCGACTTTGTCAAC  
CTTAATAACGTGATAAGGCATGTGCTCTTTAATCTCTTCGGTGATCTTATTGATCGCAGC

AAAGATCATCTCCCAATCACGTGGATCTGCGTCTCGTTTTTCCTTACGGTTGCGTTTTATA  
GTAAGGGGCGAAATCACGTCCAGTAACCTTTACTTGAATCAATGGCAAGTACCGTAAT  
TGGGTATTGCTCTTTGAATTTTGTTCATATTATAACGCATGGTCTCAAGGATAAGATGACG  
AATCAAGCCTTCATTAATAGGATCTTCCGGTTTAAAGGTATGCGAGATAGTAGCAATCAT  
AAGCTGCGACACATCAATCAAATGCACACCTTCCGGCAGTTTATCATCTGGATCATCGAA  
GAAGTCATTAAGTGTAGCGGTAGTTTTTGTAAACGGGTTATACGTCATAATTAAGTTCAC  
TCCACTCTCACAACAACATATTTGCCAAACGAGTTAGATACTTCGCTATCATAACCCGTAT  
TTCTCCATAACTCGCAGAATTGCATTGTTTAAATTCGGCACGGAAACAATTATAATCCTTA  
TCAGGGATTCTGTCAACTACCCACTTTGCACCTTCTGACAAATCAACTTTAACCATAATA  
TATCATCCTCTTTTGTCTTATCAAGCCTCATTTTATAAATATGAACATACTATAAAAGG  
AGACCCACTAATGGCAGATTTTTCTCAACATTTCAAGGCCACATTTGGCTTTGACGCTGG  
TAATGAAAAGGTTCGTCATGTAGCATAACGAGATTAAGCACATCAACGGATGCGGTCAA  
CGTTGAATTTTTCAATTACCATAATGGTATTACTCAGTATGACACAACCTCGCGGTTATGA  
TCTATACGGAACACTACAATCTATCAAACCGTCCGTATTATGCAAAGAAGATATCACAAA  
GCCAGCAGGTGATTTTGACCCGACTAAATGGCAAGCACTGCGCACGGACCCACCTTGGGA  
TTATATTGCAGCAACTTCCAGTGATACTCCTTTAAAGTCTGGTGATTATATCGCAGCAGA  
TGGTCAATTTGTAAACTTGACATTCTCTATGCCAACTATCCCAGCAGAGGGAGACTAT  
AACAGTAAAAGATATCGGTGGCAAGTGTGGTGTAAACGACTTATCGTTCTTGAGTTCATG  
ACATGAGTTTTACTATAACGGCAATGTGTACAACCGAAAATGGTATTGCGCTACCCCGTA  
TGCAATGAACTATTTTCATCTTTGTTGCGGAATCGTTGGCATGTTTATCATAACGGGAACAGA  
GCCGCGCGGTGTATACGCACAGCCAGCGATTGATGCTATTCAAATGCGGAATGGTGATCA  
GGTATTTGCGTCGTAGTTAGTTGGGTAATATTACCTTAGTGCTTCCTAAGTTTGCCAACAA  
TGGCGACTTGATCCAGACTACAGACCTTGACGGATTAACCGCAACCAACCACGTTACGGT  
TAAAGGTCATGCGCACGCAGAAGAACAATCAATTGGCACGTTCCGGTCTAAAAGAGATTAT  
CGGTAATCGTAGCGGTTCATGGTGTATTCATCTTTGACAAGACGGAAAAATTATGGCGTTT  
GTGGGATGGTGATCAGGCTGTTTCGTCTTAAACCGATCATCGATGGCACTCGCTTGCGACC  
TAATAGATATGTTGCTGTATTTGGTGGTTCGTGATGGTACTCTGACGCTCCCGACCAATGT  
CGAGCCGGGTGATCGTATTCAAGTTTCTACGCAGTATATGCAAGGAAACCAGAATTGCTG  
TATTATCACCGCCACAGAGGATACAAAAATCCTTATGCAGAAAAACATGGTTCAGTTTCC  
TAAGCGTAGCGAGTACCCATTCAATGTGACCGATACATGGACTGGAGTCTCTGAATTGTC  
TTTCAACGCTGCAAATGATTATGTACCTTATCTGGAGTTCTCTTATTTCAGAAGGTGATGA  
TGGTAAGAAATACTGGTTGGTGGCACATGCTCACCCGATTGTAGAACGAGTAGATCCGAC  
TCGTAAAGATCGTGTGGTGTAAATTGCACTGGCTGCCCAAACCTGAAACGAATAAAAACCA  
TGAAGAGAATCCTACCGACGAAGTTGCAGTAACACCAAAAATGCTGGCTAATAATACCGC  
CAACGAAACTCGACGCGGTATTGCTCGCATTGCGACTCAAGCGGAAACGCATCAAGATAC  
TGGTTCCAACCTTCTGGATGATGTTATCGATACGCCTAAAAAGTTAAATGACTGTGTTCC  
TACAGAAGCCCGTCGTTGTGTGATGGAAATTGCAACCCAGCACGAAACCAATGAAGTTTT  
AGACGATACCCGCGCTATTACTCCTAAGAAATTAGAAGAACGTCGCGCTTCCGAAGATCT  
CGCTGGTATTGCTGAAAGTGTTCAGGCTGGCGGCAGTGCTGCCGCTCGACGTGGCGAAGC  
TGGTACAGGGATCTATAACATCAATGACCATGCTAAAATTGTTACGTCTAAAACATCAA  
CGAAGTCAAGGCGACCGAACCTTCCCGTGGTGTGGCTATCTGGCAACTGACGCGGATGT  
GCAAGGGGCTACAGAATCAACCCCGCAAGATGCTTTACTCATCACGACTCGCACGCTAAC  
GAAACGTAAGTACTGCTACCGAATCGCGCACTGGTATCGCTGAAACTGCAACTCAGGAAGAAC  
AACTTAGGTCAATGTGATAACGATATCATCACGCCTAAAAAGTTGCATACTCGCCGCGC  
AACGGATACTTTACACGGTTTAGCCGAAATTGCAACTCAGCCGGAATTTGACGCAGGTCT  
TAACGATGCTCGCATTTCTACCCATTGAAGATTAACCTTCTGTGAGCATGCACAGCG  
TTTGAAAGTTCGATCCGACTGTGGGGCTTAAACCCTACTGGTGATTTGTGGCAAGGTATCAC  
GATTCGCGGTTTGGATGCAACCGAAGATACAAAAGGCGTCGCTAAAAGTTGCTACTACTCA  
GCTTACGGATGTTGGTCAAGATGATACTACAATCATTACGCCTAAAAGCTGCAAGCCAA  
AAAGGCCACCGAAGGTAAAGAAGGTATTATCCGAGTTGGTACTCAAGCCGAAACCGTGGC  
TGGTGCACACTGACTAATGTAGCAATGTCTCCGACGAACTTCAAATATGATGTTTCAGACAGA  
GGATACACGGAAAGCAACCGAAGCGCGTCGTGGTTTCTTGAAAGTTGCTACTCAGGAAAA  
GTGTTTTGTTGTTGATAATCTGCAAGGTTCTACTCAAGAACTAGGAACTACTAGCATGA  
AGGAATTGCTGTTACCCCTAAAGGATTGAACTACGCACCTTGCTAATTTCTTACCTAAGAT  
GGCAACCGCTCAGAATAGTTTCGAATTGGGTAAACGTAGAGGCCGCTAAATGGGCGCGTAG  
AGACATTGACCAGACCATAGAGAGCAATTACACGTTTAAATAAAAACGTTAACGTGAAGGG  
CGATTTAGAGTGCTTAAAATCAGGTTTCTTTGAAACTCTGTCTGTGACTAAGAAATCAAC

CGACGATCCGAGTAATGGTCATCTGGTGTGGGTGAGCGTGGAGTTGACGGTCACACCGG  
AATTACTCTGCATGGCACAACCGCATCGGAAGGCATGAAAACTCGTGGTCTATTATCGT  
GGGTGGGACTGGAACAGCGCAAGTTGTTGATAGTGATGCTATCGCTTTCGGCAAATCAA  
TGATGGTGGAGTCGTCGAGCATTACGCCTTTGCTATGGAACACAATGGCGACGCGACAGC  
ATATAAAGACTTTATTGCAAGGTCGTAACCTGTATGCGAAACAAGGCGGTTTATACATTGT  
TGACCAGTCTAATCCGGCAATGACTAGTTTCCCAGATGCTATGCTGAATATCGGTCACGG  
TGCAAGTGTTAACATCAAAGCAGGTCATCAAACGTTAACTACAGAGATCGCCGGACAGAA  
ATATCAGATCGTACACGCAGGAAACGCTGATGAAGTTCTTAACCGTCAGTTTGTAAAGAA  
TGCTGGCGATAACAATGGTCGGTAAGCTGACTATGGATAATGCGCCTATTGGTTCTGTAA  
GCATGAAGCTAGCGCGGCAACCGCTCCGGCAATCAGCAACATCGGTTTCTGGAATATGGG  
CGTTACTACTCAGAACATCAAAGAACTTATCCAGAGAAGAAAAACGGTACTCTGATGCA  
ATGGGGTACTGACGCGGACGGGCTTACCCAGCTTTGGTCCCCAGATGGTACTCATAAAAA  
TTATATCCGTTCCGGTACTGGTGGTCCATGGACCGCATGGGGTGAAATTTACACCATA  
GAATAAGCCTACCGCTCAGGAAATCGGGGCAGTAGTTGCAGAAGGTGGTTTAAATGAACTC  
TATGACGGTGCCTGACTGGATCAAAGTTGGTAATGTTAAAATCATCGCCAATAATCTAAC  
TCGTACCGTAGACTTTATCTGGGAAGACTAATTAAGGGGGCGAAGGCCCCCTATGGGGT  
TATTATGACACAAGATATAGAACTACGCAACACTGGAATGAGGTTTGCGCATTTTCGACGA  
AGACTCTGCGACCTTTACCAGCATTTCAGAAAATAACTCTGTGATGTATAAGCTGGAAGT  
GCGCGGATCTAATGCGGATTCGACCAAACCAGCAAGGATTAGAATTAATGGAGTGGCGAT  
CGTTGGCACTGGCTATGAAAATGGCCTAAATTTTAAAGTTTCGTACTCCAACCTGGACA  
ACTACACGAAGAAAAGGTGTTCTATGGTCGCGGTGCTGTTTTGGCAATGCGTGATTATCTTGA  
TTTGCTGAAAGGTGACTATATCATTGCGATGGCAACACATTGAGAATTGTTTGCACATCC  
GATAAGTGATGATATATTTTCTAAGCTGGGATCTGTATCATTCCCGAATCACATTTTGT  
TCAGCAAATGCCTCGTGTATCCTATGCAGCAATTTATTCTACTAAAATGGGTAAAATTGT  
GTGCGAAGGGATGCAAGCAACGCACGGAGAAGGTCAAGATTCGTCTATACAAATTGAAAA  
AGTTTATGATACTATAGACGATCTTGCAATAACAGGAACACCACAACGATTTTTAGATTA  
TCCGGTTGAATATGTTATCGAAGATGCCGAACTTTTAGAGCTAATACAATGGCCTCATGA  
TGAGATCAGCGCACGCCTTGAATATTTTAGCATAAAGGCAGGTGACAACTATCAATATC  
CTTTGAATTGTTCCATGATAGTGCCGCAGCCGCAGCCAACGTAACAGCGCGTTTCTATCA  
CAACTACTTCACTGGTGGACAATATCAAACCTGGCGTTCGTTATAATACCAGCCAGAAGGA  
TCAATGGGAAAAGTTTGAAGCCGTCTATACCGTACTGGGATGAGTTGCTAGTGTTACCAC  
TGTTTGTATCAGATATCCAACCAACTCAAATGAAGGTATTGTTAAAACCTAGAAACATACT  
AATAACGCCGATCAGCGGAGTCGTCAAACCTACTGGTCCGACTTCATTTGGTGTAAATGG  
TGTTAAAAAACTCAAATTCAGGATAACGGTGATTTTACTAACCTCTAATGAGTATTCT  
TAAACTGCCTAGAGTTAATAAACACATCACATCCAACAACCTTAAAGAGTTCGATGTTGA  
TTAACATTTTTAACAAAGCCGATCCTCGTGGTCCGCTTTATTTTTATACAGTTGGTTAAAA  
CATAACCGAAACGAAGAAAGACCTTTAGAATAATAGAAAAGTTGTTTCGGTTAAAAAATA  
GTCAGTGCCCTCCGGCACGTCGCGAAGCGATATTTTGTTAACATTCTATAAATACTCGGAA  
CTATAACTAATTTTTGAGGGTGCTTTATGGCAGATTTGAAACATGGATCTACTGTAGGCG  
GATCTCCCATTTGGACGCAAGGAACTTGACGAGCCAGCCAGCGGGGGATCAGCTTTTCT  
ACAAAGGTCATAAAATCTATACCGCTTTTGATACACCTTCGCCTGCCGATTTTGATGCTG  
TTAGTGCTAACGACGGTGGCACATTTTCATAAGCAGGTCCATTTTGAGGAAGGTTAAGCG  
TAGGTAGCGCATCGGCTAGAGAAACCAAAAAGAACCGGATCTTTAAAGGAAATAGATATG  
CGGCTAACTTTGATGGTGTAAGTTGGGGTTTGCATTCGTGGAAATCTATTGGTTTTGTAA  
ATGCCCCTGATGGCGTTATCATGGCTTATATTGACACAACCACAGGTGATCTTAAAAC  
AAGGGACTATCGAAGGGACAACCATTAAGACACAGGTCAACGCGTCTATAGCCCTGTTA  
ATAAACCAACGAATAATGATTTAGATTTGATATCTCGTCGCGGTGATACCCACAAAGGAA  
CATATAATTTAAACACTGTCACTGTAAACTATCGGTTGATTCGAAATTAATTGCAAGGG  
AACGTGATTTAAGTAATTTTGATGCGACTAAGATCTATTATGGTAGCGTTCTTGATACGT  
TGGTCTTCCGAAGTAAAGATGAGCCTGCCATTTTTGTAAATGGCAGAGAAGGTTCGTTTT  
ATCACTCCAACAATAAACCAACTAAAGCCGATGTTGGGCTAGCCAATGTCACCGATGACG  
CACAGGTTAAACGTGCTGGTGATATTATTGAAGGTAACCTGCAAGCGCCTAGAATGTTGG  
CAACAAACGATCCGGCTGGTCCTAATGAATTGGTTTCGTTTGGAGCTACTTAGAGAGAAA  
CAATGGTAGCAAATCCAAACATCTTTGGCAACGTTGTTTGGAACTCTTATTAATAGCG  
GCATCTATCGTGTGAAAATGCTGGGTCAGGTAATAAACCGTCTGATAGGTATTATA  
ACGGTGTTTTGATGGTATATCGCCAGAAGATGCGGTCCGTACTCGTCGAATTGTTTCAGG  
TGATTATCCTGAATCTATTGACCATCCGATGTGCTGGCGTTCGTGTTCTGATGAATCAT

GGACTGCATGGAACACTATGTAGATCACCGTAAATTAGCCGATATACGCTATGTTAACGTAA  
CTGGCGATACCATGACAGGACCGTTAACTGTTCCGGCTGCAAACGGTGTTAGAACAGCTA  
GAGGTGCACATAATGGTGATAACTACTATGCTGCGTTAAATAGTGCCGATGGCACGACTA  
TGATTCACCGTATCAGCGATATTAAGCCACTGAAAAATTGGGTATTTACATGATTCGA  
AAGCTGTTTTTCGTTAACTCGCGTGGAAATACTAAAGCCACAGACCGCTATAAAGTTTACC  
ACGAAGGGCATCAACCTACCCCTGCCGAAGTTGGCGCGGTTCCACGTAATGCGGTGATTG  
ATTTTGGTACTTTCTAATTTTAGCGGGGATTATCTCCCGGCCTTTCTAAATAATATTATT  
CTAATAACCGTTTAGGGATTTTATAAAATGGCAGATTTAAACAGAATCCAATTTAAACGT  
ACTAGCACGAAAGGTTGTAAACCTGATGCTACTACAATGACGCAAGGTGAACCTTGCTATC  
AACCTGCATGATTATTATTGTTTACAAAAAATGACTCTGGTTCTATTATTTACTTAAGC  
CGTCCTCCGATCTATGACCGCGATGTTACCATGGCTGGTAAAGTAAAGGGAGATTATTAC  
ATTTTAGGTAACCGCCAATTATCATGAAGCGCAGACAGCGGGAGACCTTAACCGCTTT  
GGAGCATTCCGTACCAACGGTCTAGATGGATTTTAGATTGACCTTGCATGTTCCCTCAT  
TCTGCTGGCGTTCAACATGGTTCGAGGATTTACTTTCCATTATGCGACTGGCGGATCTCGT  
GTTGAAACATATGGGTATAATACACAGGGACAAAAAGCATTTAGCTAGAAAATGTATCAT  
GAAGGTGATAAACCAACTCCAGGAGAACTGAACGTTTCATAGCAAACAAGAAGTAGATAAA  
ATGTGTGTTAAAAACGTTATACTTTCTACAGGTTCTGGTGATATCGTTGACGGTTATTTT  
AAATTAGCGACTGCGATGATTCACAAGACGGTTCGTAGTGTATTTTTCCGTATTCGTGGT  
GGTAACGGATATAACATTACTCCATACGATCAAGTTGATATTGTAAAAATTGTTATTCGC  
AGTGGAAATAATCGTCCTAAAGGTGTTAACGTTATTGCATACCGCCGAAATACAAACAAA  
GCATTTGATGTTTTGGCTGTTAATACTTCTGGTGATAACTATCATATCTACGTGAAATAT  
CAGCGTTACACTTATAACGTTATTGTTGAATTTGGTAAAGTGGTGACGTTAATCTGGTA  
GTCCATGACGTTCCAGACTTTGTTGTTGATCGTCCTGTTGGCGATAATGTTATTGGCGGT  
CGCGCGGTAACCTTTTTCAACACCGAAAAACAAACGAGGTGTGTTGAGTTTTGACGACAAT  
ACACAAAACAGCTATGATATTGTTTCACATGAGTAATGATAAAGGTACTGGACGAAAATAT  
ATTCGTAAATTCGTAGTAACTATAATGAAATGATCTGGCATGAGACGGTTCAAGGTAAC  
GTATATCGTATAGCTGCTGGAACCTACCGACGCAAACGAAGTTCTCAAATTACCTACCGC  
ACGTTGCAAACCTGGCAATGCTGTTTTTACGGTGGTAATAATAATGTTTCGTTTACATCGT  
AAACCCGGAAAAAGTAACTATCTGGAATATTATGATGCCCGTGACGGAGCAAATAAACGT  
CAGGGATATATTGCGTATGGCGATGCCACAACCTAACAGTTGTCAATTATTAACGAACTC  
TCCGAAGGTAATAACCCGATTTTCTTTAACGAGACAGGTCAAATTTCACTTAACGAAGGA  
AAGACAAAAATTGTTTCATAGCAAGGGACAATATATTTCTACCAACGCCGATAACTATCGC  
ATAATTTCTGGTAATTATGGAACATTCTGACGAAATGATAGCGTTAAACGTTATCTCATG  
TCCACTGCCGAAAATGATAAATGGGGTACTTGGAAATAGCTATCGACCATTCAATTTACAAC  
CTAACAGCGGCGATGTTCAATTAGGTGGTGTGATGGTAGCGAATCTGCATTAACGTTAGAA  
TGTGCTTCTCGTGCCGCTCGCTTCAGTAATGACGTTTACATTAAGAAAGGGCTTTTGACT  
TTCGACGCTGGGCGATTAGGATCTCGCGATTATATTAGATTTAACCAATTGGGGCGATAGC  
ACTAACGGTTCGCGAAAACATCCTACAGAGTCAAGACAGTCAAGGGCGCACATTTTACCCT  
GAACGTGCTATGGGTATTGGGAACATAACAGCACGTTTTAAAGGCTTTGTTTCGTGTTGAC  
TCTGGTGAGATTGCATTTGATGCTAATCGGGGGTTCGAGTCTCAATTTTCTTACACACC  
TGGGGTAACGAGCAACGCAAACACGTTTTTGAATGTAAGGATGCTACAAGTTATACCTGG  
TATACTGAATGTACTCAGGGTGGCACTGGACATATTCTGTTTCGTTATGGCGGGTAGTCTA  
AACGTTGGTAGCAATCTCACAACAACCTGGTCCGGATATTACGTTTAAACCGCGCTGGCAAT  
AAGCACATCTGGTTTAGAGATCCAAACGGCTTAGAGTTAGGCCTGATGACTGCGATGAT  
GCTGGTGCTATTTCGCTGACGTGGTTCAGAAACAAGCCAGGCGTGGAATTTGCAGATAAA  
ATGATCCAGTTGGAAACTGGCTCTGTATCCGGTGCCGGTAATGGCCTGATTCGTGGTGAA  
GTTGCTGGCGGTAGTTGGGCTAGCTGGCGTGATCGTGCTGCTGGCCTTATGGTTGGGTCT  
CCTCAATCAACCAATTCCGCTCATAACATCTGGAAAGCTACTCATTGGGTACGATATCAC  
ATTGCAGCAATGGGTGTACATGTTCCCTAACGGTTCTATCGGTGATGCTATAGCTCGCCTA  
AACGTTTCATGACGCCAACTTTGACTTTAGCGCCTCCGGTGACATGTCGGCAGGGCGTAAC  
GGTTCGTTTAAACGATGTTTGGATTTCGTTCTGATGCTCGCCTTAAATCAATAAGGAAGAG  
TATAAGGAGAATGCCACTGGTAAAGTTAATCGCTTGACTGTGTACACCTACGATAAGGTT  
AAATCTTTAACTGACCGTAGTGTTATCGCCAATGAAGTTGCTATTATTGCTCAGGATCTT  
GAGAAAGAATTGCCGGGAGCAGTAACAACCTTCTAAGGTCGGCGACCCAGATAAACCGGAA  
GAGATCTTAAACAATTTCTAACTCTGCTGTCAACGCTCTTTTAATTAAGGCGTTTCAGGAA  
ATGAGCGAAGAAATGAAAGCCGTTAAAGCTGAACTAGCGGAACTTAAAAAGAATTAAGGA  
AACTCCAGGGAAGGGAACCTACTAAGGAGAAACGGCTATGGTCTATAATATCGTCATTGG

TGCTTTGTCTAATTCGGAGTCAAATTATTGTCAAAGTTAATTAGTGAACAGATGCTCAC  
TAAACTTTTCTTCCATTGCGCTCTTCGTCTTGGCGCTTATACCAATACGCCAATTGATGA  
TCGTTTTGTGGAAGAACATTATAAGGAGTTTAATAAAGATCAGTCAGAAGATAGTAACGA  
GCAAGATAAACCTAGTGATAGTCAACTACCTAAATAAGAGTACACGGTCATAGTTATCAT  
AGGGCATTATATGAAAGTTTCTGAAAAAGGGAAAGCCTTTGCTATCTCAAACGTCCTGCG  
CGTATTTTCACTAAAGCACGGAGTTGCCCGTACTTCGTGGTTTTGCTGCCGTCGT  
GTTGTCCATAGTGGCATTGTGCTTTATAGTAAAAACGAGATATTTGCGCTTTATAAAGA  
GCCTCGTTATGAGACTTATGCTCACCTTCTCCAGGTAGAGAAAGACCGCAATTTTGATAA  
TGCAGCACAGGAGCAGTTACAGATAGTTCATGTATCGGCTGATGACGATTTTTCTGCTGT  
TTTTGTTCGTCGAAAAACCTAAACTATTTTGTGATTTGGTGGCATATGAAGGAAA  
GCTGCCGCATACAATCGATGAAAAGAATTTAGGCGGATTCCCTATCAATAAAACGAGTGA  
AGTATATCGTAGGCATCTTTTAGGTAATCATATTTTACCGATAAAGATTTCCAGTACAT  
TCCATCAAAAGAAAAGAAATTAGAGAGTATCGATATAGGGGTTATGTATTCTTGTCTAT  
ATTCAATTTTCGACAATGTCTATGCTGGTAGTATCTCCATTGCATGGAAGAAAAAACCGGA  
TATTGACATTGAGAATTTAGACACTCTTTGCAATCAATCTGCCAGAATCCTCGGAAGGAT  
CAGATACCTTACAGGGGAAGGCTTTAGGCCTCCCCTTCTATTTATTGGCGCATAGAAGCC  
CCTGAATCACATTTTGTGCTGTATGATGAAAACAGGTAGCGTACCAGTCATCGGCTTGT  
TCGTCTTCGTCAGAAAACGCGTAATTGCGTTGTATACCGCTTCTACTTTGACCAGTGCA  
ATAGGTGTTTCTGGAAGATCAATCAATCGGACAAAATCACTATCTTCCCCTCTACACGA  
GCAATATCATAGCCCATCTCAAAGTATACAATCGCTGGTTCTAATTTGATTCTGGAAACT  
TCCCGTAAACATTCTCTGCCAACTTACGTGCATCTTTTACAATATCTTACATGTAATGAC  
TATAATTTTGTAGCTAGATCAATCATGCAATCAACAAAGAGGTAATAGCGTCCGAGTGCTA  
CCAGCACAAACATCTTCAAGACGACCATTTTCTCCAATCGCTGAAATGTGTTAAATTCCT  
TTCGGATCGCGTCCATCGCTACATTAACCTCTTTTATAGTATCTTTCGTATTATATGCAC  
CACGGCTAATCAAAATTTTGGTTAGGTCTTCTGCTTTTTCTTGAAAGTTGTCAATTTCAA  
ACTCAATCATAATCACCTCTCATAATTGCACGCAGTTGTTTCAACATTTTTTTCGTCGTTT  
GCTAATTCTATACTTGTAAATAGCAAAACCAGTGCAATTTTCATTGATTCATCATCTTTC  
ATAATCAAAATTTACCGAAAATATTCTCTGTCATAATTCCTGCTTCGTCGATAATTTTCG  
TCATGTTGATGGTGTAGTTATGATCATTAGTGCTTTAATAACAACGAGCAAGGAATCTA  
AAAACACTCGATACAGGGTATATTTTACGCTATTTGTGAATACCGATGTTCTCTCCACTT  
TATCCATCAGATAGCCTAAAACCGATAGCGCCTCGTTTACTTCCCTTGTTACTTGATCGG  
CGCTAAACAACACCGGATAAATACGCGGTGTGATTAACCGCGCTGCCTCCTTCAATTGCA  
TCGCTTTCCATGATTCATATTTATCATAGTTAAACATTATATAATCATCTTACAGATGAA  
AACCTGTTACGATCACCGCATCGATCATAACCGCTAGGAGTAAACGGTTCGCCCTCTTTTA  
TTTCAACTTTGAATTGACACCCTTTCGCTAATACTTCTTCCGGTACACCCAGCGATTTCGG  
CGTCTGCATTAGTTTCATCCATAATCCAACCTAGGCTGCATGAGCGCATAGTTTACATAGT  
CCATGTCTGGGGTCATGTCTTCAATGTTAATATAATTTGCAGTTGACGCGTTGACGAATTT  
CAAATCTTTATTATCAACCTGTACCATGTATAATTCAGTAGTTTCTGGGATTAGTTCCC  
ACACAATCAGTACATTTTTTCATAGTTCACCTCACTTAACAAAGATTTTCTTTAATGCTTT  
CAGGATCGTTTCTTCCGGTGCTTCTTCCGGTGGAGGAAGCAGTTCTACCACTTCTCTTC  
CAACTCGATATAGTCTACCAAATATTCTACATAGAATGCAAGTGCTTCCATGAAATTAGA  
TGCTACATCCGATTCACCACAAGCGTCTACACGCATTGTATCAACATCACTGCGATCAAG  
TTTGTGGATGCTTCCCAGATAGTTTCGGTCTACCAGACTTCCCACACTATCAGCTTTC  
GGTTTTGGTTGCTGTTTTATAGTCGGTTTTCGTAATGATGCAATTGACGTTGAAAATAATT  
GATAATAACACATTTTTTCGTAATTGTTTTGAATTTCCATGATGTAATCCTCACTTATCGT  
TAAGAAGTTCTAAACTTTCTGTACATACTTTGTCAATATTAGTTGATTCAAAAACTGTAC  
GGTATCCCAGCTTTGACCGTATGATCGCGAGCAATCCCCATATCCCAGTGTTCAACCT  
GATAGTAATCAACGAATGGGTGCTGCCGAATATCACACCATCGCGATTAATAAATTACCA  
TAATATAATCCTCACGTCAACAACCTATTTTTCGGCTGTACTTCTGCCACTTTCGGTAATA  
CTGTTTTGTAAAATTGTTTTACGTTTTGACCATCTTTACTATACGTGTTATCTACCATCAA  
GTCAAAAAGAGCTCCCAGTGTGCGGGTAGTTCCCTCGCGCGGATAAGTTCGTTAATTAAGT  
GCCCTGATGATCTTTGTATACTACGTTAATGATGGTCTTTTCTGCTTCTTCGTCCCAGC  
CATCCGGTGATTAGCTTTCATCGCATCCCACCAATCTTTTGTGATCTTCATGTTATTA  
TTTCATCACTTAACCTCTTCGCAAGTAGATCTCCACTCAATACGTTTTTCGTTTTCCACCG  
CGCTCAGCATCTAAGATATGACGGAATGTCAATTTGTTTTCATCATCAACAAGTTTATTT  
CCTTCGAATTTAGCGCCATGTTTTGCAGAAAATATCAATCCGATTTTATAATCTTCGCTG  
TTGATCATAGTTCCGTTATCTGTGATTTCAAAATCCCTAACTACAGGGTCTTGCATTGTG

CTGGAGATCATGATTTTAGCAATGTCAACTCTCGTAGAAACTTTGATCTTTGCATTTTCGT  
TTCATAATATCATCATCTTCTACACTCATGCCATTGATTGTAGTAATTTAACAACCTTC  
GGGCAAATGTAGGAAAACGTGGTTTTCTACCGATTGAATACTTCCGGCTGTTTCTCTTCA  
ACCTTCGGTTCTTCCACCCTTTTTCTTCTGTTTCGGTAGTTCTTCTTCAACCTTCGCA  
GAAGTCTCTGAATCGCTTTCTGGTGCTGTTTCTTCTTTATGTAATACATTCATCCTGTTT  
TGAATTTGAGCGTTACATACAGCCTCCAGCGGCTGAATCTGCCCCGATATTGATCATTGTA  
TCACGAACAGTTTCATTCCAGTTGCGTTACTGATGCTTCAGAGACGGATCAATCTTAACA  
GCCTTAACATACACCTCATGAAGTTTAGCGTCCAGTGCGGAGATTGACTCAATAGCCCAA  
ATAAACTTCTCTGATTTGTTAGTAGCTTTAGCGCAATCAAAGGACGCAGCGTTAGCACCG  
AAAGCAGTAGCAGAAAGAACGATAGCAGCGATAATGTTTTTCATAATATATTCCTCAGTG  
TTTTGTCCTGATGGGAGTATCTTACTACTCCCATAATCCGGTGTCAACTACTTTTTGTAAA  
TTTCTTCTACAGTAAAATCCTCAATGTTGTTGTGCTCGGCGAACGTTGCAAGACCAGCAT  
TCCATGCATCATCCTCAGAGAAGAATACACCGTAAACGTTTCATATCCTTTAGCGCCTTCAC  
ACTTAACCATTAATTTGTGAGTATGTTTCATTTTGATTCTCCTTCGTTGTCTTGATGAGT  
TTAGTATAGGGGATCGCCGATCCCCTGTCAACAACCTATTTTTTAATTTTTACCCGCTCGT  
GCATTAATACGCATTTTCTGCATAGCCATGATCTGGCTTACTACTTCTTCTTTACGTTCT  
TGCGTGATAACGTGACCAGATTCCGCAAACCTCTCCCGCAATTTCTTCTACGATCTCACGA  
ACTTGAGAACGTCCAAAGATGCGGTTTCCCTCGAAGCTCATAAATTCTGTTACTACTTGC  
TCGATAGACTTCATGTGATTCTCGTTTCGTACGGTATGGGAGTATACTACTACTCCCATT  
TCTTTACGTCAACAACCTATTTTAAATTATTTTCGACCTTCACCCATTCCGCGTATTCTTG  
CGCGGCTACTTTTCGGATTTACGCCGTCTTCGTACATTGCTTCAAGTAATTCTTCGTCCGT  
GAGCTTATACCCTAGGTAAGCCTCCACCTGATTTTTCCAAATTTTATACCAGTTCATATT  
ATCACTAATCAAGAGCGCGTGTCTCTGCATCTTCCCATGCTTGATCCATAACAGCCTTGA  
AAACATATTCTAGAGTCTCATCTTTATGGAATCCGAAGACTTTAGACGGAATATCTTCAA  
TTGCTCCTCCAGCAACTTCTGCATTACGAGCTTGGCAATAATGCAACTCTAAGATATCGA  
GATAGCGACCGCCTAATTTACCATATCAGCCCAGCAATTCAGTAACCTACTTTATTTG  
CAATTACTAACACTTTGCTGTTTTCGTTGCTAATCTTTGATTCTCCTTTTTGTTTGGTATG  
TGTGTATTATGAGAGTCTTTATTCGTGAAGTCAATAACTTTTTAAAATAAAAAAGCCGAC  
CACAAAGATCGGCTTAATAATCAGTTACTTACTAAATTTCAATTTGGCTTCGTCTACCGC  
ATGAGATGCCAGTACCGCAGCCGCATGTGCACTTTTATTTGTGTTGCAGAGAACGCCAG  
ATAAACATCACGCCAAAGGTTAATCATCTCGTAGATCATAGCAATATCATTTTCTTGTTT  
GTTGGCGATGCTATTCGTGCTTATCTGGTAAGGTAACGGCTTGATCTGTACTGGTTCCGC  
CATCGGGCTAATCGGTTTCGGATCAGTCAAAATAGGTGCTGTTGTGGGTGGTGTCTCCA  
TACCCCATTAATCCACGGTTTAATCGTTGTGTCGTAAAGTTTATAAGGATTTTTGTCTGG  
GTCAACCATCCATGCATGATGTGTACCCAAACCATTTGAAGTGATGCGTCGTTTCAGTCAC  
AATTTATTTCTCTCTGAAAATTCTTTTCATCAAGCTGTCAATCTGTGCTCTGGGTTCTGG  
TGTGTTTGTATCTCTGCTAATTTGCTCAGAGATTCAGTGGTATCCGGTTGGATTCTTC  
CAGTGTTC AACGACCATTGGCACAATCTTTTTATTTTTGTACACAAATGCAATATAACC  
GCCTTCTGGATATTCTTTTCATAATCAACCCTTCTTAAGTTCTTTAAGATCTTCCTTATAT  
TCCTTCATTGCGGTCGTCTTTGTCCAATACTCATATTCATATGCTGTTTATCGGGATCT  
TTGACCAGTCGATCATACTCTTCTTGAGTAACGCTATAACAATGGCATAGAACTAGCTTA  
TCGGCGTATGGACGCAGTTTTTCATGTCCATTGATGGATTGCATTACCTCGGCCTTTTTTC  
TTGCCCTGTAGCTCGATTTCCGCCCTTAATTACGCGATCGATATACTCGGCTTTAGCCATT  
GCATAATTGTATGCTTCCAGCGTTTCGGCTTGCATCAATTCAATGCGTTTATCGACATAC  
CCTAATCGGATTTTCGACGAATCGACGGATCAGATCGCTCGCTTTCTCGAATACTTCTACT  
AAACCACGTTCAATTAACCACTACTATATTCTGGGCTACTAACTGTGTTAGTTTAAAATCC  
TTCATGATTTGCTCATGTGCGAGCGGATTTCATCTTCGCTTTTTGAAATAATCGCGTTTCAGT  
GTTACTTCAAATCTGAATCCATCCTTAGAGCAACGGTCATTATACGATACAATCAGATCT  
TTGCCTTCCAGTGCAACCAGTACCGCTACCTATTCTTCGCGGTCGAACTTATAAGGAACT  
TCTGATATTGTCAGCTTAGTCTTGCCGTTTAGTTTCATATGTACCCTCAAGAATCACACCA  
TCGCGGTCATCACGAGGGACAACCTTTCCCCGCGAATTTTCGAGAATTGAACACTAGGTTCT  
TTATCCAGTTTTCCGGCAAGTGCTAGCTCTGTGCATTCATTAAGGCTTTCCAGTGAATGC  
GGTAAAAGGTCAGTTTTATAACCATGTAGCAATACCACTAATACCATTAGCCAATAGCATA  
GGCACAACCTGGCAAGTAGAACGCTGACGGGATGTGTTCCAGATCTTCTTGCTTAGGTGCG  
CAATTCATATCTTTATAGATTTTAAAGAAGTTTTTCATGCACACGAGCAAAGATATAACGT  
GTCGCACCTGCTTTCTGGACTAAACGCGATCCGAAGTTACCATGACCGTCAAGCAGTGGA  
GTATTATTGATCCATGTATTCGCCATGAGTGATCCGGCTTCTACGGCATTAGTTTCCCCG

TGGTGATAACCCAACTCAGCAACGCCACATCCAATATCTGCCATCTTACGGAATTTCTTA  
CGGTGCGCTTTACTCTTTTGAAGTGCGCACTCCAGAACAAAGCGTTGCGCTGGTTTAAAT  
CCATCCACCAATTGAGGAATCCCGCGTTCCTCGGCAAAATAGATCGGATATTCCTTAGCT  
TCAATATGCACAATGCTTTCAAGGCTGCGGTAAGTAAATGTGTTTACAATTTGACTAATT  
ATATCCATCTTCACCTCATAACGCTTACAAATCACATTCCTTACTTTATCAGACTTATC  
AGCCCAATCCAATAGCCATTCTAACGGAACGATTGACACAATAAACGGGGCAGCAATCAA  
AGCAAACATGATACACCTGATAATCAGGAAAACGCAAGTGACAAATCTAGCGATAGTGAT  
CCCGACAAAACAAAATACCATAGAAAACAGAGTAATGAGATAGAAAGGCCAGAATACCCA  
CTCCCGCAGCTTAACGCCTTTGTATGCTCTGAATTGCTTAAAGTATACAAACAACCTCTCG  
CATAGACGCGTACAGGACCGAAAAATCATCTTTCATTGCTCGGCATGAGCAATCTTCTAT  
TTTAGAATGACCTAGCATTATTAACCGCCTTTCATCATTGATACAGGAATTGTTTTCTGA  
TTTGTGTATAATTGGCCTACTTCAATTTTTTCTTGAATCACCACGACGTTACAATATCCA  
CTGTCTTTAAGTCTTCTGACAATGACTCGCTTGTGTTGTCGGTGATAGCATTGACTGTT  
CTACCAATTCACCGCCAATAATAGCACCACCTTTACAATTGCCAGTAACTTTTCATGCTA  
CGACCGTGAACAACAACCACATCACCGTAAATCACATTTTCGTCGTCGATTTTGGTAATA  
ACCGTGACCCTCATAATGTCTTCCCTCTAAGAAAGGCCGCGCAGAGCGGCCTATGTTGAT  
TATTGTTCTACAGTATAACCGATGTTTTCAAGCCATGTAATAACAATCTTTTCGCCAATT  
TCACCGAGAATTCATCAGCGCCGTATTCTTTAATGAAAGTAGATGGACCATTATTTCTT  
ACTACGTGCTGGATCACAATATGTTTCAGGAATTGCGTCTAGCAGTTCACTATGATCATT  
TCATTAACGATATCTTCGACACTAACATTATTAACCAAATCAACATCATCCATCGTCACA  
GTAACGCGACCGGACGGACGCAACGAATATTGGCTACTTTCAACTTCAACATGTGCACTT  
TCGCAAGTAACTTTCATATCAATCATAATTAATTCCTATGTTAGTAATGGCTAAACCCTT  
CGGTCACATCTTCAACCACATAGTAACGATGACAGCGCATTTTGGCATTTCGCATAATCTT  
TCGGGATACTAACAACGTGACGCGGATCAACTTTACATTTAATGATGCGGCCTCGCCCAC  
CGCCATAGTGCGGAATATAGTGTTCGATGCAACGTGGAGGCCATTAGAGCAAGTGAGAT  
CATCATCTGGGTCCACGTCTTTACGATTCATTTTAACCGTGCGCCCTGGGCTATTATCAA  
ACGTATGAGTAAAGAAATCTTTATAATCAACATCAACACGATTCCATGCATAGAAACAAC  
CATCTTCCCCGATCTCAATGTGCGTTGTGCTCTAAGAAGTCAAATAGACGATCTACCGCCT  
TACGGCTAGGGTTTTTCTTGCACCTATCAAAGAAATACAGATAGTGCATATATGGCTTAT  
TCTCTTTAATCGACTCAACAACCTCGACGAGTCAGATTAATATCAATAACAATATTATGAT  
AATACACAATACCATTTTCGAAACGGAAAGCACCATGATGATATACTTCAATCGCTTTCT  
TAATGTCCATCAGCGTAATAGCTTTGATGAAATCATTATGTTTAATCGCTTCCAGTGCTT  
CATTAAAGTTAACATGCGACGGATCAGCAGTATAAACGATGTCACCACATGTAATAGTAA  
TAACTTAGTTGAGGCTATTGCTACGATTTTTGAGTAAGTAGTCACGGTCTCTTTTGCGC  
GTTACCCCCCTTTTCTTTACTGGTTTTACGGCGTGCTTTACCTTTTTCTAGTGCCTTGC  
GACCTTCCGCTACAGCGTCTTTCTGAATGAGTAATACGCGGGAGGCAGTACTACGAGATA  
CCCCAAATGCTGCCGCAAGTGCTTCGCGGGTAGTAACTTACCTTCGCCCAGCTGTATAG  
CCAGTTTGATTTGTTTCGCAGAATCCAGGCATTGAACGTCTCGGTCAGAGACGGTAATTT  
TGGCTATAGACATAGTATTCATTCCTCTATTAGTTGGGCGACTATCGCTGCCCGATTAC  
ATCATTATACCTGAATTTTGTCTTCTACAATCTTGCAGGATTGTGCGGTCTGATACATT  
ATAGATTCGTGCCAGTTCGCCATTAGTCAAGCCACGAGCGTATTGTTTACGGATGGTTTC  
TTTCTGGATAGCGGTCAGTTTAGTCATAACATCAACGC

>NewGenomeName\_108

ACCCCCGCCCCAGATTCAGCGGAGTCATTGAGACCCCATCGCATCCGTTTATTGAATAGA  
CACGTGCGCAATGAGGATCTGTAATTCATGACCGCAATCTGACGTAAGATTGTACACGCT  
AACGTTGGTGGCCGACAATAATTTTTTGTACTTTTTTAAAAGTAAAGAATGATTCTTTTTA  
TTATTATATCATATGTAATATATTGTATCATTGCTTCGTCATGAAGCACAGATCTTTATC  
TCTCTCTAAATACCGGTTCTGTTTTCGTTGTTTCGTACAACGTATAATGGTCAGCAATTGG  
AGTTGGTCAGGCATGAAGGGTAGAAGAACACCTAGTCGTGGTTACACCAGGCCTTTGAAG  
TCAGCTGTCCCTACAACCAGAGTCGTCGTTTCATCAGTCAGCTATATTGAAGAAAATGAC  
GTGTCTTGTAGTGAAATTAAGCCTGATGGTGGTGTGCGCGTTACAAAAGTCGTAAGGTG  
TTGTTGAGTTGTACCCTGAGGATGTGTCCGGGAGAGTTGGTCCATGATCTGATCGTCAAG  
TGTGGTTCAACTATGGTTAATTGGTCTGAAGCTTTCACAGCACCTGCTCCAATGGTGAAA  
GAGAGTTGTCAAGATATGATTACTATCATATGCAAAGGTAAAGAAGAATCGAATGGTGTA  
GCAGGATCAGATTGTACTAAATCATTTCAGTAAGTTCATCAGATTAAGAGCGGGTATTAGT  
CTATCACAACCTTTTGTACGTTGTAATGTATACCAGTGGAGCTGTTAAGACCGTATTATAA  
CATAGAGTCTTTATTGAAGTTTAATACCAGTGTGTAACGAATAACATATGGATAAAGAAT



AACTACTGCATTGGATCTCTTTACTCCGCGTAGCGGTATGTTTTGTTGTCTTTGTTTCCA  
TAGATTCCCTACGTTAATGAACGGGAAATGTCTATTTTGCCCTTATGTGACGTCATTTGA  
TCCCGTGCTGAGCTGGGGCGCGGCTTGGTATT

>NewGenomeName\_109

TTCCCGCGAAGCCGCTGTGCGGTGCGGTGGTGGAAAGAAACCGGATAAAACAACCGAATT  
GTGCAGATATCAATTGAATTTGGTGCTGCTCTGTGATATCTGAACAATCACAGCCGTCAG  
TATACATCAGTTTTTTACTCGGGGCCCCAGAACGTGACATGGCAAAGCTGGAATGGTAAA  
AGCGGGAGCAGGCATTCCGGTGCCAACGTGCGGAAACGGGAATAACGTTACTAGAATGGT  
GCCGGAAGAAAAGATTAATTGCAGCACCGCCAACACCCGTAGAGAAATGGGGCGCAATCG  
ATCATGAATGACATCCTAAGGCCGCACATGAAATAGATCATGACATCTCAGATGAAGGAC  
CCATCAATGACGCGGGTTCCGGCGATGAAAAATGTTCAAAAACTCTGAAAAAACAGCG  
CAAATTCGGCAGAAACGAAACGGATTGGTGGTTCCCGGCTTTTGCCACCTTCAAACGCTT  
TATCTCAGAGAAACCCCACTCCGTAAGAAACCAAGGATATGCGAAGTATCTTGAGGCAG  
AAAATCTGATGGCTGGTGCCTCCGACAAGCCACTATTCGATGGACTGGTGTTCACCGGGG  
CCCGCGCACTTTCAGTAGCCAAGGCCCTTAAAGGGATGGGCCCCGACTTGGAAGAGGCAA  
ATGACGTCTAAACCCGTGTTGCTCTTTACCGCAAATTTCTCCAAGCTGAACAACCCCTTG  
ACCGAAATATTGAACGTATCGAGTCAACTGTACGCTGACTGCTGACGCAGGACGTCGTGG  
GTGAGACAGCAGCATAACTTCGTGATTACCGGGAAGGAATGCACGCTGCCATAGATAAAC  
TCACGGTTGATACCAATATTCTGACCAACCAGCGTCGGGGCGTTGTTACGCCTCTCCGAG  
ACACCGTGTACCGCTGCCTGAAATGAGTAATTCGGGGCGACTGTACGACATTCGGGAAG  
AATGAACCGCGATGTGATGAGCGGTCAGAAATTACCGAGGCTGAACTTCGTCGGTTCATC  
ATGACCATACTGAACATTCACAGGTGGCAGCTCAATCACCTCTACAACATACTGAAGGGA  
AAAGGTGAACTGGTCACCTTCAGTATGCGATCGAGGCAGCGCCAGTTGTTTCGGAGCATG  
CACAATAAAAATATTATCATGAAAGCACGCCGGCCGGGATTCGCCACGGCCAATGATATA  
AATCTTCTCTCCAGCCATTATGCATCCCGCTTCTCAAATGCGGGATCGTCGCTCAGGAT  
AAACAGGCTGCCAATGAAATTCTCCGCACAAACATTGAAGTACCCATTGATCTTCTCCGT  
GATTGGCTAACAGCCTCATTACCATCGTTGGACGTCGCAGAGGTGCCAGCGGTGGCTAT  
AGCCTGATTGGTAACGGCTCGTGTATCCAGTGGGCAACCTCATTCCATTCAAGAACGATG  
CAGCGCCTGCATATCTCAGATCAAGGTAATAATTTGAGCGAACTATCCGGCTAAGGCGGAA  
TAACTGCGAGTCAGTACACTTAAATCCGTCTCTGTTGAAGTCATTATTTTTGATGGGTCA  
ATGGCTGAAGGCGTAGGTTGTGATATTTACGGGATGATTAACCAAGCACAGGAGATCACT  
GCATCAGGCTTATTGTTGTGCGCACGGAATTATATATTCCACGTATACATCTGGTGGCAG  
GGTCTCATTACAGCACCAAAGTTCGGGATAGCGGGCTGAAGCTGTCACGCGAACAAAGG  
ACGTTCTTTGCTGCGGTTGAGAACGCAATGAACATCAAGCTCACAGACGAACCGAAGCAT  
TGGAACATCAATAAAGAAACGGAATAACCGGAGGAAACGAAGCAGGCGATTCCCTCAAGG  
CCACAGGACGCGTGCCTAACGTCCGGACTACGTGTTTTAGTGGGGAAAGTATATTGCAG  
GCCGAATCATTCTGATCGCCACCGATGTTTGTAAATGACATTGACAAATGTGACAGGAACG  
AAGACTAATGCTCAGTCGCCACGTGAAGGAAATATAAACGAGTTGCAGCGTACGCTGATG  
AATGATCTGCTGATATGGGAACTCCCGGATGCTAAGGAAGCGTTTGTGTTGTGGAGCAGAA  
ACTGCCGAAGGGCTGGAACACTGAGACCGCTCTTCGCTGTATGTTGTGAAACGCAGTAAT  
TGCGAGGAGGTTGCTCACCGGTTCCGGCATTTCGATGTTTGACTTTTTCTCATCTCATT  
TCGCCGGTCAGTGGTATGTTTATCAAAGCGTCTTTGGGGGCGGAGCGCAATAATCCCGGT  
TAAGCAGTTATCCTGAAACGCCGGGAGCTCTAACCGACACGTCATATATAACAACGAATTG  
TATCTTGAGCCGCCTGATGACGACGATACGCCCCGCCCTGGCCGGCTGCCAGCCTATCAG  
AGGAAACTTGTCTGACCGAAATAAGGAAAACGCTTCTGAATAATGGAATAGCAGGGATC  
CGTTGTCAGGCACATTATCGGAAATGAACATGTACGTTAATGACGCGAAATACTGCAGG  
AATGCACAAGACGGATGCTTCGATGGTCAGCTCATGACGCTCATAATTGCCCCGGTGATG  
CGCGACAGAATGCCGAGGGCGGTAACCAACAACGGATAAACGCAGTACCAAACACTGG  
ATGCGTCTGCTGATGTAATAATGAACCTAACCCCAAGGCGCCCAAAAACGACAATGGGGCCA  
CGCCGCGCTTTTCTCAGCGCCAGTTTCAGACGCTTTGTTCTGCCATCGACCGCCAGCCTA  
AATGGTGTGATGCCCAACAAGGTCTGTCCGTATTGCGATGGCTATCAGCTGCTACGGG  
AAGTTCTCCAGGTATTGAAGGATGGCGGGCGGCCGATGACTATCCATAACCTGATCGCGC  
GTACCGACAATGGCGTTCTCCGAATGGAGGCCAACACACGGACTGATCGGGCGCTTATGA  
CAAACGAGCCAGACGATGACAATGAAAAATTGGCTGAACCTATGAATGCTGAAGTTGCTG  
AGGCATGCTGCCTTGGCCGTATGCATAAAGCCCGCTCTCATGCCTATGCGGAACTAACGA  
AAACGGGCCTCAGTTGTATGGAGGTCTGACGAAACAGCGATCCGGCAGAGCCTGAATTTT  
TGGTGCCTACTGTCAGCCGGAATGGGCTTTTCTGGGACGGGCTGAGCGGTGAGGCGGATT

TAAATGACTGCCGATGGCTGATGCGTTGCGTCTGGATGGATACCGTTGAGGCAGAAGCAA  
CAGTCCTTGAATGGCACAGGTTATCGATTAAGCCATTGACGAACGGCGTGGTGTGTCT  
ATACCACGGGTGCTGAAGCCCAGCCCAGGCCGTTTATGAGTGCATAACACGAGTATAATT  
CATGGGATCGAAAACCGAACGAATGTCCTCAGCGTGAACCTCCGATGTGTGCGGCTTGATG  
TACTTTATTACCGTACATTCTAGCGTCTTTCGGTGATTGCTCTCAGTAAGGGACGGGTGG  
TGGCCTTGGCTAAAGCACACCTGTCGGAGGGCGGCAGCCGTGGGGTCCGGGTGGGTGCAGG  
TGAAAGCTGGGGGGGAAAGACGTATTTCGTGAAGCCTGGTTTATCGGCCACACTTTATTG  
GGTGTGCGCTCTGTAGTGCTCCGCATGGGATGTTTCCGCTGTCTCCTTTCGGGGGCTACC  
GAAAGGATAAAACCGGGGAGCCAGACGGGCAAATTTCCCGCGCCATTCCGGCACAGGACG  
TGGTGGACTTTCGTTGGGTCCAGCTGACCCGGTTGCTTCAGGCCAAATGCGCGAATATGG  
ACGAGGATGCCACCCCGTTGTCAGACAATCACCCGATGGAGGATATCGAACGTCCGGATG  
GCACACTTAAACCGAACCCGGTCCAAAAAATCACCAAAGTGTTCCAGATGTTTTACGGA  
TTGAGCACGATTTTCAGGTTGCCAACCAGCAGTTTCAGGTCATGCATGAATCGTAATAAC  
TTGTCCACGATACCCCGCGAGTTTATTCCACATTTCTTGGGCAGGATTCATGTGAGACGT  
CAGGCATTGATATCAGTAAACAGGTGAAACAGGGGGCGACTACCCTTTCGCAAATCAACG  
CTGACTACCAGTTTGCCTGCCAGCAGGTGGATCGACAGTTGCTGCCTTATTTTCTCGATG  
ACCTGCAAATACGCCGTAATCATGCAGTAGTGATTCCCTCGCAAGGATCGCAAGCGTCGCC  
AGACAATTGTCCACAATGGTGAAGGTGATAATGGTGAACCTGACCAATGATAGAGGTAGCT  
TATATATACATATTGACTTGGAGCGTGTTTCAGCAGACACCAGCGTTTAAGGCATAGCATG  
CACCGCGCATGTCAGAGGGTATTCAGGGGCAGACGCCCCGGTGCAGGCTATTGTGCTCG  
ACCGGGGGGTTAATCTTCTGGTTGTGCCCCAGAAACAGGAGTTTTTTGAGCGTATTCGTG  
CCGCGCTGGCGACGGCATAAGCACCGGAGGAAATGACGCAGGAAGAACAGGAATTAGCGG  
CCCAACAACAGACACTTCAGCTACAACACGCGGAACTCCAGATGCGCGAGATGCCTAGGA  
TAATGGCTAAACAGGAAGCTGACGCCGCGGGGCACATGGCGCTGCACACCGGGATAATG  
CGAGTGTCCAGCTGGAAATCGCACTGAAACAGGGGGCACCGTTACGTGGATGGGCTTAAGC  
AGGCACATGCCCGAGAAATTATTACGGGCGTAAAGCATATGGAACAGCAGCAGTACGATC  
CTCAGTTCCGGAAGCTGTATACGTTACAACAGCGGCCGACGGAAATTTTCGCTCTGAAAAT  
TCTGGCTTCAATTGCACCCCGTCATAGTACGGGGTTTTTTGTTTACGGAGGTAAGAGTTC  
CGGGAGCGGTTTCGCTTCTTCGCGGGGGCGGCTATAAGCCTTATTTACTCAATCATCCCGA  
TCTGTCTGATACATCGGTCATGCGCAGTTATTTATGGATTTTGAACCTACGGGGCAAGAA  
AGCCCGGAACAACACTAGAAACACTGCTGGCAGGACTTAGGGCTGTCGATATAGGCACTCCC  
GCACAGGACGTCGTCACGGAAGCTACCACGGACAACGTTGCGGATGAGGAACCTCAGACT  
CAGACGGGCGATAAACTGTTGCACCGACGCCCCGATGGCAAAGTGGAGCACACGCAGGAC  
GTGAAGGTGCCGGAAGTGAAGGGGGGGCTCAGCCGCGACGGTAAACACGTCATTCCTTAT  
GATACCCTAGAGGCTCAACGTGCCGATAAGCAACAGGACGAACAGGAAGCCGCACTTCTC  
CGTGGGCAGACAGCTGGAGTAAAACGCAGGGCGGATCTGCTGACGTCTCGGATCCACCAT  
GCCGGTATGCACTCCACTCCGTTATCGGAAAACGAAAAAATTTCCGATGAGCAGATTGCC  
CGTGGCAGGGTGATGTATCGGGAAATTTGTGATGCGATAGCTTCTCTCATCCATAAGAAC  
ATCTATCTCAGGCCCGTGTTCATATTCAGCCCCGTCTGCAACAGGGAATGGTGTGAG  
GATTGATTAGCGGTTCTTAATTCGATGCATGCCGTGCGGGTGCTAAAACGTGGCAGGAG  
TCCGATCCATATCGCTTACGGTTGCTGTATTTATCGACGGGCAGCTCTAGAATGCCAC  
GCATGGAAAGACAATACGCTCACTGGAAGTGTGCTGAAGTGGCCGGCAATACGCATGTG  
GCTTTCGGAGGAACCAGTGAGTCGTCAGCTCACAATAAGGAAAGCAAAGGGATATCCGG  
AAAACGGCGGAAGAGAATGTGAAGACCGCTGGAGAGGTGCAGGCAGTACCTGCTTCCCC  
TCAGATTTAGGCACCACGGCTTCCGCGCAACCGGTAATAATTTTGAACGGTTACTTTGC  
GATTCGCATTCAGAGGCAGAGGCGATTATGCGCGGTGTGACGAATGCTGAGATAGACGCG  
CTTGGGGAGAAGCTCGGGTATCTTTCTGAAGAGGATCTGAGATAGGGATGACCGTAACAT  
CAGCCCAGTTCGAATAAGCAGAATCAGGTGGCGTTTTTACCCTGGAAACCGCAACCGAT  
TGATGGTAAATTTCTCATTGAACAGCTGGACGCGCCAGAAGCGGTTTCGCCGGACAAGA  
CAATCACGAAACAGTCCGGCGGGAGTGCGCGGGTTGTACGTGTCACACACCCTAACAAAC  
TGGCCCGTGATGAAGTGACCATCAGCATCATGTGCCAACTCTTAAAACGTCCGACTATGG  
GAGATGAGCGCGTTGAAGGTGCTGGTGCAGGATCCCAACTATGCCGACTACCCCTGAAAA  
TCAATCACGTACGTAACCTGGTGTATGCAGCCGAACATATGATTCAGCAACGCTCGAAGT  
TTAACCTGGCATCCTCAGCCAGAACGTTTCTGGGGACGTACTTTAATGAACTGCAGGAAC  
ATCGTGCGATAGTGCATCTTGTGTAGCTCGTGCGAATTATGATGCTGGCTCATAATCCT  
GCCTACGGCGGATCACGCTGAAATCAAAAAGAGCTTGATTAACGATGTACTGCCACCGTC  
ACATGATCGTCACTCTTTTGGCGGCGATGCGACAAGCTTTGAGCATATTGAAGCGGCAGA

TATTTTTTCTATTGGCCTGGTAGGCAATCTCACCCCTCTTCATTGACGAAATGCCGCGTGC  
GCAAAGACGGTTCCTTTGTCCGGTGATGAACTTTCGGTAGAAGAGCCATATTACGTCTCT  
GTCCGTACGCCGCGTCAGGGGCATAAGTGGTACACCTCGTGGTCCGGTAAGGACTGGGG  
CGTAGGATGGTTCGTGCCGGAAGCGTGCAAAGGTTTTAATCATCCGCTGTTGGAAGG  
TGAATGTGCTATGAGGTGCTAAATCCTGGATCGTAAGCGAGCGGCAATGCCGAACCATT  
CTTTCAGGGGTCAAAGCTTCTGGTATCCAAGACTAACC GGACAGCAACC GCGTAAGAGGT  
CGCTGTTGCAACCAATCTTGACGGGGCCATGTTAATGGGGGCTCACGTGCTCGCCAATAC  
TTACGTTGAGACGGCGGGCGGTTGCTTCAGCATGGTTGAGAAGAAAGCGGATATGGATAT  
CCGTACTGAGATAGCAACCATCTTGATCAACAGTCTGAAAAAAATCCGTTTGCCCGAGCA  
GAGCAACAAGAGGCAGGGTCCC GGCGTAATTGCCGTTGATTCAGTCGTGAAGATCTGATT  
ACTTACTTTCCCTTTGCCGGGTTTTACGCTGCTTTTTAAGGAGACATTAATTATGGCAA  
AGACTATCCTTTCCCGGCCCTGAATGCACGTGTGTATACGGGTACACAAGGTAATGATT  
CAGTGTGAGAAGGCGTATTTACGGTGAATGCTGCGGAATCGGTAAGTGTTATTCATCTTC  
TGTCACTGCCAGTGGGCATCCGTATCAACCCGCTCCA ACTGGTCTCGACGGGTGGTCTGG  
CTCCTGCAACCTTCAGCATTCTGTCCGGTGAACATGCTCTCATAACATAACCAGCGATGCTA  
TTTCTGCACAATTTGCGAGATATGTGCGGGGGGAGCCGAACACCACACTGCGTGACGGGG  
AGCTGGTTACTGTCACGCTTAAACTGCCGCCTTAAACCGACATCCTGAATGTTGTGCTGC  
GTTATACCGTAGGGCGATACTGATTA AAACCGACCCGGCCGCTTCATGCGCGCTTTTTGT  
CTGGGAACTATATGAGTGAGACAATTGCCGTTTTCTATATCGGCCAAAACCCGTGGCA  
AAGGACACCATTACCGGAAGTCGCACGCTATTCCCACGTCTCGAGCCCGTG CATGTTGAC  
AGCGCGATAGGCTCGCTACAGCCGCGGTTCCGGATTTCTGCTTTCGTCGTGAAGAGCTT  
GGTGATGCTGTGAAAAGCAACAAAATAATGATCAGTGGCGACAGGCACACCAGGCGCAT  
GAAAGAGTGCTTGCTGCGCTGGCAGAAGCTCAGAACAGTTTTGTGTTTCAGTTAACGGC  
CAGGAGGTGGATTATAGTCAGATCACCTCAGCACGGCTGGCGACGTAGTGTGAGGCAAAA  
GAGCTGCATATTCACACAGCCC GGAAAGAAACCGCAGAGGCTTTTTGTATCCGTGTGCAT  
GAGGCATTTGCTGTGCTGTTGCGGAGACTGACCAGCATGGCGGAACAGAATGACATTTT  
ACCGTATGTGCGTCGGCAGATGAACGGTCCACTGAACATTATGATGACGGATGCTCTGTC  
AATGTCTGGCGTGGCATGCAGCAGCCAGTCGTTGGTGTGCCGTAGGGTGATTACTCTTGT  
ACCAGTAGCAGAAAAGAACTCGTGGTCCGTATGACAAAGACGCTGAGGAGTGCGGTCA  
TAGCATCCGCATCTCTAGAGATAATCATGAGCATTTTGTGGCTGGGGATGTGTATATCAT  
CACCGGGCGCTCCCTGCTATTTGCCTGTTCTCCCGGTGAGGTGAGCGTGCTTGATGGCCT  
CGTCCCAAAGCCGGACGCAGCCATATACCTGATGAACTCCTCACATGGCCGCAAGGAGT  
GGCTGCGGGGGCGCTAGGGCGTTTTTTTCATGCAGTCTGGTGTTCATGGTCACATCCGTA  
ACGCGCAGAGCATTCTCTGTGCAGTTTTCTTAGGGGATTTGTGCGGCATTTGCTCATA  
AATGGAGCCAAGCCCGTACTCTTCATAACCGCAGGCCTGTAATCAGGCATAGGTTGTTCTG  
ATGACGTCCGTTACAGAAACCATCGGACGTGTAAATACACAGCTTGTGACCCGGTGCTG  
GTTTACTGGCCCCTGCACGAATTGTCCGATTGTTACAATGATGCTGTGAGGACAGGGATT  
ATGGCGAGACTGGATGCTGGCGGAAGCCTGACAACCATTAGTTGTGTTCCGTGCGCCCGT  
CTCGTTGTGCCCGATGGTGTAAATACACCGTCTTGACGTGATATGCCTCAGCGACGGTAGA  
GCAGTGAGACCAACATCCC GGATGTGCTGGATGAGCTGTATCGTGAGTGGCCAACAAATC  
AAGGGTATTCCTGAATGTTTTACCAGCAAGCACTAGTCCCCGCGCACATTCAGGCTGATT  
CCTGCGCCTGACAAAAAAATAAGTGATGCTGCTGTGGTGAGCCGGAAACGGGAGGCAGTG  
TATGTTCTGACGCAGGAAGATGATACGCCAGTACC ACTGGAAGAAGCTTATTTAGACCCA  
CTGGTGGATTGGGGGTTGTTTCGTGCTTTCGGTTATGAAGCGGCCGGTGGCGCAGAATCG  
GGGCTGGCTGCGCTGCGTTTTTCAGAGTTTTGTTGAGGAAATTGGGATCCAGCAGGGGGCA  
GACAGTGCAATGTATGTCGGTAAAAAAGTGTTAACGTAGGGTCAGAGTGAGTGTGCTG  
TTCCGGGGACGCTAAAATCTCCTGCTAGTGTGGCGATATCGGGAGCAACTACTACCCTGA  
CGGCGCTGACAGTTTTACCCGGGTACGCTCCGCGGCACCAGTGCGTTCGCAGCGCCTAGTG  
AAGGTGGATATTACGGAATGTCGATGGATCCGGGGGAGTATGCTGTTTCGGTGACGGTCA  
AAGGGAAGACTACTGTCTACGGACGTGTGCGTATTGAGGACCCCGAAAGCACAGCGACGC  
TGGATATGCTGTCACGTGCGCAGTATTGTTGAGGTTAGCATAACCCGGAGA ACTGGCGACAG  
ATTTCCGGCAGATACAGAATAACGTGGCGGATGACCTTGCCACTATTCTTCGCTTGAATG  
AAGACACGGGGACGAAAAAGACAGAGGACACACAGGAAAAAAGAAGTGAAGCAGACAGTG  
CGAAGTATGCATTTGGCAGTTCACAGAGGGCAACCAGCAGGGCGGCTGAAGCAGGACAAA  
AGCCCACTGATGTCACCGAGGCTGGGACCCGTGCAGTGACAGCAACGGCGAATGCAGATG  
AGATCTCGACCCGAGCCGATAGTCTAATAAAGCTGCCGTGCTGATGCATAAAAAGCCA  
GACAGGCTGCTCAAAGGCCAGGCTGGCGCAGGAGAGCGCCGGAGAGATCCCTAAGCGGG

CAGAGCCTGGCACTGTCAGGGCTGAAGAGGACAGACGTATAGCTGAGAATGCACGGGGGC  
CTCGGGGGCCTCAGGGAGAACTGGTCCGTAGGCGGATGTAGGTCCTAAAGGCGAAAACG  
GTCCAGAGGGCCCTAAAGGGCCCGCAGGGCCGAAGGGCGAGCGTGGTAACGGTGGTGCTT  
AGCGGGCTGTAGGGCCTGCTGGTCCGCATGGTGAAGCGGGCAACATGGGGGGTGAGGAC  
CGCAGGGAATCTCAGGCTTGAAGGGGCATACCGGAGAGCGGGGGCCTAAAGGGGACCCGG  
GGTATATGGAGCCAAAAGGCGAGAAAGGTGATCCGGGGGGTCTGCAGGCCCGCAAGGTC  
CTAAAGGGGAACGAGCAGAAGTCGGACCACAGGGACCGATGTAAGCACGAGGTCAGGGTG  
GGGAGACTGGCCCCGAGGTGAACCTGGTCTACTGTTCCGGGAGGGCGAAGGCTGAGAGA  
CCCGACCTCTGGGACCACGTGGAGAGCCATGTCCGGCAGGCAGCGCTGCATATGTGTGTG  
ATGCAACGACGGTACAGAAGGGAATTGTGGAGTTAAGCCGCGGACCGGTCCGGTGATCATG  
ACAACAAGGCTACCACCCCGAAAGCGGTGCATGCGGCAATGGATGTGGCATATTAAGCGA  
AAACAAAGGCAGAAGAGGCTGCAGCAGGAGGTGGAGTTCCCGGTCCGAGAGGAGATAAAG  
GGGACAGGGGGCCAGCATGTCCGGCTGGGTCCGGAGGGTGATAAGGGGGAGCGCGGTGCCA  
CCGGCCCTGTCCGGGGACCCGGCAAACGGGGAGCGGCAGATCTTACTGGTCCGGCAGGCG  
CGCAGGGCCCGCATGGTGACAGGGGAGAGTGGGGAGACACCGGTCTGACTGGAAATGCTG  
GTCCACAGGGTCCAAAGGGAAATACCGGTGCGGCAGTCCGGGCAGACTCACCTGGACTGC  
AAAGAGAAACAGATGCGGCAGGCCCGGTGGGGGCGACCCGACCCAGGGGGCCGAAGGGCG  
ACCCGGGGGATACGCAAAGACGGTTCGCTCTGGGGCCGGGAAACATTATTGGGACAAAA  
GCCATATCTGGTTCCAGGATAAAGATGGCGCACTCATTACGTGACTGACCTTTCTTGACC  
CCCAAGATGCCACCCGGTTTCAGGGTTTTTCCAGCATTGCAAGTCATGTTTTCGTGACG  
GGCCGGGGCAAGATGCCAGGGGGGTGGGTGAAGTGGCCAGAGATACGGGCAGAACAGGAG  
AAAGACATGAATATTTTGAGAAAGCTTATGAAGAGTCTGTGTGCTTGCAGATAGGATGAG  
GACTGTGAGAACAGGCAGGCGCTTACAGCAGAAGTGCATTGTGACCTGGAGAGATTCTG  
GCGTCAGATGAGAAGGGCATAAGTTCCGGAGCGGGTCCGGGTAAACGCTGAGGTGCTGACA  
CTGAGTTCTGATAAAAATCAGACTCAGTGTGTGGTAAGACCGCTGCAAATCTTGCGTGCT  
AACGGGACGTGGGAAAGTAGTGGGGGGATAAAAATAGCCGACAGCTGGAGAAAAACCGTAG  
CCCGGCTCGGGTTTGTGTTGTCATGTATAGGCGGGGGTACTAAAGCGTGATGTAATAAA  
TATATTAATAGGAAGGAGTGAAGGATGCCGTGTAATTCTGGTTCATGAGATTTTTATGCC  
GGGAAATCGCATGACTATTCTGGATAGTATAGAATCCTGGTTAAGAATCTGTGATAGTCA  
CTTGGGCCATTAATGCGCAGTATGTAGCAGGGACGCCGTTTTATCCAGCTGAATCTTGA  
AACCTTGAAAGGGCTACATTGTGTGGACTTGCAGCGCAATTGGGCATTACACGAACACG  
GTGAATAGCCTTGTATATACGGGAAAGGCGAAAAATGGACGGTATGGTGTGAGTTTGTAC  
CATCTCGCGTGTGCGGAGTGATGCGTCTCGTTGCCACAGTGGCAAAGATAATGCTAGGTA  
ACGCGGGGAGGAATATTCTCACCCAAACCGAAAGAAAATTGCAATGATCAATGAAGTTAT  
ATAGTCATCATCAGAATTTTCATGCAAGACATATTGTTTAAGTGATTCTGACCGCGAGTTG  
AGCGAAGTCCCTTTATATCCCGCGATGTAAGGCCTGAAGCAATCAAATGACTTTCTAT  
GCGCTATATCGATATCACCAGATGCGTGGGATGATGCCCGCGCTTGTGACATCCATGCT  
GCTCGAGCATTCCGCTGTACTGGCGGAAGACTGCCATTTCCGGTTTTGGTGGTATTACACC  
AGACTGTCAGATATTCGGGGTAGAGAAAACATTCACAAATAAGCCACTAACCATTTTTCA  
TTAGCGTGTGATTTCTGGTATGCATGGCCGGATGTGGTGGATGAGATCCGCAGAACGAT  
CGCTCAGGACCCACACGACCGTATTTACGACACTGACGGGCGTATTCCTAAACTGACTGA  
TACGACTATTGCCACAAAAGGAGAGGTGAATCACCCGATATCAGAGTATGGTATGGGGCT  
CTCGGCCTACGACAACCTCTGTCTGAACTGTTCCGGCAGGGCGTCCATGTTTCCGACGA  
TAACCCGGATGATGGTCAAGCCCGGTCTTATACGGAAGCCTATGTCCAGATTAAGGTGA  
AGAAGGTACGCCAAGTCTGGCGTCTCTGGCGGTAGCACTCCGTAATCGAGCTACTGCGGT  
TCACATGACGATGGCTCCGGTGCCATTGGTGAATTCCAGTATTAACGTCGCCGGATTTA  
TCGCTCTGCATCAGGTTGGGGGCAGGCGGGTTTTTTAATTGTGCCTGAGTTGTATGCATC  
AGTGTTAAGTTACACGGACGACGTACCGGCGATAAACCTCGCACCTTCCCTGGTGACATC  
GGATCACCTTCCGCCACAGAGAATATGACAGGCCTTTGACTGATGGCTAACGGTATCGT  
CGCCGGGTTTTGCCGGTAATGAAGTGACGTTTTTCGGAAGCGTATCTGCCGTATCCACCGCC  
GTAAGTGAATGGAGACACAACCGCAGACGATATTGTAGCTATCTGTAAGCTGGGAACGTC  
ACTGGTGGTGGCGACAAATGGGGAGCCTTATCAGTTCAGTGAGGTATCGCTTTCCACAAT  
TTCTGCTTCGAAGATCCCTTCAATGCAGGTGTGTGTGAGCAGGCGGAGTATGGTTGCGAT  
GGAGGGGTTTTGTGCTGTATGAAGTAACATATGGCCTGGTGTCTGTTAAAGCAAACGGGAA  
TGTCGCGCTGGCGAAGGAACAGATAGTAGCCCCGGAACAATGGCAGAGTCAGTTTAATCC  
GGCCTCCATTCTGGCTTATCCCTGGCGTGGTGAATACGTTACCTGTTCCAGAAACCTGA  
TGTTACAGCAAGATGTGGTTCGATTTCCGTCCGGTGTACATGGATATCCGTTATCACAGTAC

CCCGTTTGAGTGCGCAGGCCTTAATCTCGCGAAATATATAATTCGTTTGGTGACAGGAGA  
CAAAAAGTCAGTGCTTGCCGGGGAGGCTCTGCCCGCCAGCATAAGGTGGAATCCAAAAAT  
TTTTTTATCCCCTGAAAGAATCTCTTCTTCGAACTTCAGGGTGAAATCTCCAGCGCCTGA  
ACGGCTCTGGATCATCATTAGGGCTGATGATGTTCTGTGATTCAATTTGCGCCGGGTAC  
GTTTAAGGGAAGTGTGGTGAGAAGACCGGCAGCAACCGGGCAAACCTGGCAGGTGCTAGC  
ATCCGGATTTCGGGCAGCTGCAACAAATAACCCTGACTACATCAATGTCGGAGATGCCGAC  
ATGTCCGGAAAACGGTGGCGTGCGGGGAAGGATTTATCCACTGTTGTGGAGAATATGGAA  
ATTGGCACCGGGCAGCGCGGTGAAGGACGTCATGCATTAGTGACCCGTGGGGAACCTGATA  
GGTCTTAAACTCGCCCGGCAGAACATTGGGTGGTGGCTCATATGCACCGAATCCGCGT  
TTAAGATTGACAGTGCTTTAATCACTATTGATTTTCTGAGAAAACCGCTGTATTTAAG  
GCGACCGGTGGATTTGCCTTGGTTCGTCTTGTATAGGATATGCCTAACTAGCGCGGACAT  
TCACTGACTGAAATCTGGCGGGGTACGGAGCATGTCCTTCTGACGCAGTGCTCGTTCCC  
ACGACGCCGGGGCAGGTTTACGGCGATCCGATTGAAGCTGGCTGGTCGGGATTTTGCTGG  
AGACGTTTTGTTAACCGCGGCAGAAGTGAAAGGGCCATGGAATACGGAAAAAGGCAGTCCG  
GCACAAACACAGATGGGCGTGAAGGCCATTAGTGACCCGATCCGAGATGAGGCTGCAGAG  
TCGACGATTGTGTCCGAGCGGCGTAAAGCAATAACAAATGCGCAGGAGCAGGCGGTTTAG  
GATGCTGCAATTGAGACAACCTAAATTATAGGAACTCTAAGGCAAGAAACCACAAGACCG  
ATTGGTGGTATTGAAACCCGCTTAGCACACTGGATTCTACAACCAGTGGACAGATAAAT  
GAGGTCCACAAGCGCAACACAAGATTGGATAAAGAACGCTGTGAAGCTTTTCTCGCAATG  
TGGTCTGACAAAGCCGGATTTGATGGTAGCACACCGGGAATCGGGATTGTCGCCGGAAAA  
GACAGTGAAGGGAGACCGCTAAGTCAGGTTACACTTTCTGCGTCGAAGCTATTTGTCATT  
CATCCGAACCATCAGGATAACAGAGCCTATCTGTTTCCGGTATCAGGTCGAAAGGTAGTG  
ATCCCGAAAGCGATGATCTACGACGCGGTGTTTGAACGCTGGTGTGCGGGAAGGTTGTG  
GCATATCAGGTAAGCCGGGGTAAAGTATCACTTACCCGCTAGGCGGTGTGCCATTATA  
CAGAACGGGAACCTTTCAGGTTGATTCTCAGGGTAACATTAATATTAGAGGCCTTTTATGT  
GCTACGTCACAAGGGTAACTGCCCATTCGTTACTCTAATCAGAGCGTAGGATTGGTGATC  
CGCAATGATAAACTTGTGCTTTAGGTCCAGAAGGGAGGACTTGCTGTACGAACAGTCAA  
TTAAGCTGATCAGTAGGTGAGTATTGGAATGCGGTTGTGCCATTTATAATAGAAATAATG  
TCAATGTTACGGGCCTGCTGACTCCAGTGATTTTCTGACAGATTTACAGCAGAGGCTG  
GCTCAAAGCCGTACGCTAATAAACCAGACCGGAAACCATTGTTGGCTGTATGTTGTTTAT  
TTCCCTGGAATAATGTATTTACGGATCGGAAAGTTCCCAAGATGACCAATAAGGACAATA  
CGGTGACGTGGTTCGAATCTTGAGCAGGGTTTAGGATCTGGCATCTATACATTTCCGGGAT  
AAGTGTCTATACGGTTTGAGGTTTATGAAGGCGGGTGGCAGCGAATGGTAAAGTCCAGG  
TTTTGCGCCGAGTGTCTGATCAACAATGGCACCTTGCCCGGGACTGAAAAGTCCTTCTT  
GAAGACAGTAATCACGTTAAGCAAAAGTTGTTTCTTCTTTATCAAAACAGAGAAGAAGGC  
GGAAGTCATGTAGAAGTATGGACAGATCGAAGGATATCATGCACTAAGGTTTCATGTACT  
TATCAGGGGAACGAACCCTGGTTTCCCGACGTCTTATGTGTACTCGGATATGGTTACTCC  
CCCTACTGAGTAGGAGATCGACATGTAGAACC CGGACGGTGAGCTGATTTATCAAGGCGA  
ACTGATGCAGCTGGACGCGAAGTAAATACCCGTTGGTAGCAGTTTTGAAAGGGACCTTGG  
ATATCAATACGCAACCATGCCTGCACTAGTGGCGTATTATAACTGGAGAAGA ACTCCTTA  
AGAGCGACCGAAAGATATGTCATCCTCTGGTGATGCAAGAACTAGTTTATATTCCTGTGT  
GCAATGTTCCGGTGGCGCAACATGGTATATTCGAAAGCCGTATATAGATAAGGTCCTGGT  
TATTA AACGTCAGTATATGATTAGTTGCAGTGAGTCATTAATGTTTCATTGAAAATGTCT  
ATACAGATGTATTATTA AAAAGCTTAGCGTGCTAACTGAATACAGGATGTCTTAAATCAA  
GAGTATAGCAACACTGGTTGATTGTGCGATCTCCGGGCTGGCCAGTGTA AATTTACCTGC  
ACATGCGTCAGAAGGAGTGCATACAATTTCTCTGGACTATGTGCACTTGCGGTGTCCGGG  
ACTAGAAGATTTGGTAGATGATGCGGCTGCCATAAGAGGGAGATTTTTAGTCATCTCGT  
CAACAGAACTACCTTTTCATCATTGGGCGAATATACAGATGGTAATGTCAATAGATATGA  
AGGCTAGGATATAAGTCCACCGGGCATTGACATCAGGTCTAGCTACGAACTAACGGATGA  
TTTTGGCGTTAGCTGCTTTTTACACCGACGCGTTCTCTCACTTACTCACAGACATATAT  
TGGTGTTCAGTCAGCGGATGATTCCAGGAAGATTAAGAACC CGGACGCTCCTGCCAGCAC  
GGATATCAGGGCGAATTACACGAGTCTGTTAGCGGGGCCTTCATGCCATGTTAATCAGTA  
CCTGAGTTTATATGCGATGGCATGGATGGGCGTTGCTAAAGTTAGAGCTTACCTGAAAAT  
TAAGGACGATACTTCCAGTACAGGCGGATTTTCTGAAAGGAACAGGACGAAGAAAACCTC  
CCTTGCGTGTGCTGCAGGTGCACGTTTAACTCAATGAGAGTGTGACAGCGGATCTGGC  
TACTATGATTGCGGCTCTAGAGACTGGCGCACGCGCGGCGTAACAGCTGGCATTCCGCT  
GAACTTCTGACCTGTATCCGTTACCGTTTACTCCCCGCTGTGAAGGCGCGTTTTTTATT

GCCCGAACAGGGAAACAACCGTATATTATGTGTGGGGGCTTTTCGGCTGTTGGATGGAGG  
GTGAGCCTGATGGCCTGATCTGAAAGGGCCCCGATCCGAGTTAACATTGACCCTAGCCCC  
CAACCCTTATTACCTTTAGCAAGTAGATTGTTAGCGGCTCTCTGTAAAAGGAGTCAAGCG  
CTATGTCGCAAAAAGCGCGTATGACCGTCTCGAGTTGTATGACGGTTATCTTCACCATCT  
GGATCTTGCCCTGTTACAGTGTGAGTTCCGGCTGAATTCGACGGGAGCGGAGGTTGCGG  
GGTTCTTACAGAGTAAGCAGTAGGAAAAGCGCGACGGGGACGAGAGTCCCCGGCAACTCG  
TTGCTGAGGTTTCAGCCGATATGCGACCCGTTTCCTGTGAGAGAATGAACGATAAAAATTCT  
CTGGTATATGTATCGTGTGTTGTGAGCTATCCCACTATGAATTTATGAATGAACTGAA  
AGAGGCCGCTTAAAAAGCTGGCAGTTTGTGTTGAGGTAGCTGATGGCTCTTAGGCGCT  
GCGTTCTGTGGACAGTTCTGAGCGTATTCTTATGTTCTGTGTTGTTGGGCGTGTGTAC  
GGGAGAAACAGCGTTGGCCGTTACCAGCCGGAGGTGAAGACATTAACCCGTCTGGCTGG  
CGGACACTGGGATGAGTTCCATACCGCAAGCCTGGGATTTATCCGTCTGGGAAACCGAGT  
GGGCTTTGATCGAATGCCGGATGAAGACGATGGCTTTATGATCTTCTGGATAGCGGTCTA  
ACGGCTAAGGTTTTCTTCATTGTGTTTAATCCAACATTGTACTTCACATTCAGACCCTTC  
TACGGCAGGCTTTTTTTGATATCCAGGGGGCGATGATGGGTGGAAGGAAAGGCGGTGGAGA  
TACTAAAGTAAAGCCAACACTGCAGCGCAAATATCACAGGAAGAGGTGGCTTCAAGAGGGTG  
GCTGGATTTAAAAAATAGCCTCCGCCGACTGCAGATAACTACATGGTAAAGGTGGATGA  
CCTGAACACTGAGCAGCATTACGACAATACCGCGGGCACCACAAAGCTGGGGTATCAGAA  
ACAGTTTGGAGAGGAACGGTAGTTTCTTGCGAGTAATCTGGCTCAGTCCGGCGTTGACCC  
ATCGAGTTGTCGTTTTAATGCGTTAATCCATCCGAACACAGTGACCAGGTGACCGTGCA  
GATTGAACCACCCACATTGGGGCAGATATCGCAGGCGGATAAGTATGTTGCACGTCTACG  
GGATGGTGCTGCTCTCGGTGCCGGTCAGCAGGCGGATGCGTTACAGAGTTCTAACTCTCT  
GACAGACAGCCGTCTAGCAAAAAGCTAAGTGGGATGCACAGGCGACGTTTACACAACAGCA  
GCGGCGAGCCTCTCTCGTTGGCGCTGGTCTGGGTGCTACAGATGCATCTGCGATGCATGA  
GGCTTGCGGTAGTGGAGTAAGTGGCGGTCCTTAGCCACCCGGCACCAGCGCTAATGCCTG  
TCATTATCAGGCTCAGAATTGGAGACTGTAATTATGGAGTATGGCAAATACGAAACTCTC  
GCATGGGCAGGTTAGTCAGGAGCAGCCCGCACACAGCGGGACTGGCTGACGTCAGCAACG  
CTTACACCCTAACAACTACGAATGGCGAACGAGATATTTGCCCGCGTCGCAAGGCAG  
GATGACCTTGGGGGGAACAACAGCCTGATGAATGCACAGCTTGCACGGGTGGGAGGACTT  
GCAACTTCCGGTCTCCGGACAGCTCAGATGGCAGGAGGATTACCACATCGTGAGAAATGGG  
GTAAACCGCCCGGATAATCCCGACAGGAGAACACTGGGGTTACGTAAGGCACTGACAATT  
GCTGGCGCAATCATGGCATACTGTAAGCCGAACATGATCGACAGATGACTCTTCTGACC  
GGGGCCTCTGCACAGGCAGGGCAGAACTGAGTGTGTTGGCGGCAACTGGTGGAAAGCGTAA  
GGCGGCGATATGGGATACGCAGTCGTGGATATTGCAAATCTGTCGCCGCGAGAGGCATTA  
GAAGGAATAAGTGACGGAGACAGACGACGTGAAGAAATTGAGGCTGCGTACAAAAGATT  
GCGACGCAACACATAGCGCAGAACAAGCACAATATCGGTACTGGCATTACTACGGGGGCG  
GCTATTGGCGCATCCGGTGTGTTGTTGTTGTTGTTGTTGTTGTTGTTGTTGTTGTTGTTG  
GTTGCTGGTTTCATAGTTTTAAGGAGTGGTGAATGTTCCGGATTAGCACAGGGGTTACTTGC  
CGAATCAGCAGAGTCCATTATGCAACGACCCTTCGTAAGGAGCTTGATCTGAGTGACGC  
ACAGCTTGCCCGGCTCCAGAAAAATGACGAACGCGATTTTTCTTGGCGGAATCTCAGTT  
TGAAGACAATAAAAAAGGTGATCAGCGGAACCTTTGATTACAGAGCAAACTTGACGATCG  
TAATCATGCACGAAGGAGAGGGAGTTTAACGCTAACCAGGATTACCGGCACGCGTCACT  
GCGTATGGCGCAGCAGCGACTCCAGTTGCAGAAACACAACACTAGCGACGGCTTGAGCATAA  
CGATATAATTGCCATAGCGAGCCAGTAATGGAAGCGATAAGAAAAGCAATTGAGGATGT  
CGATCAGCACGCTGTAACGCTTCAGTTAGGGCAGCTGCCAAAGGGACATCCATTAATTCT  
TATGTCGAACGGAACTACGCATCTAAAGCGGGTGAGGCCGTGTTCAACCTGCAAAAAAT  
GTTTGGTGATATAACAGACATGGAGATCGATTAGTGGGATAGCCCTGAAAATCTCGATGT  
GCTTTCAGGCGTGTGTTGCCCGCGAGTACAACAGCGTATCGGCATGCCTGATCCAACCGG  
TGAGCAAACGATAACAAGAGGCCACGATTGGCCGTATCGTACCAGCACAGCGGTAAGCGAA  
CGTACCTATCGGCCTAGATTTGCAAACTGCAATGCCTCCAGCGCGCATAAAGCTGTAAC  
AGAGTACGGCAGTGCGCGACCTGATGATCAAACCGTCTTGGCGCTGCGAGTTGATAAGGC  
TATCGCTCTGGTCAGAGATGGCAGCAAATTGGCAGGGATATCGAAGAATTATGGGTATCT  
TATGCCGACGCAGCAGCGACTTCATCTGAAAGAGCTTGAGAAGGGCGCCATCAACGTAGC  
GTCGGACTCGATCAAGAACGGCGAGCCTACCCCGGCTTCGGCGGATTACTATTATGCTGC  
GCCGGGTCTCAACCGCATCAACAGAAAATTGAGCCACAACAACACTGCAGCAGCAGATTAT  
CAGCTGGGCGTGAGATGATACCGATAAGGTGTCATTGGCCAGTAATGTAGCGGCCCGTCA  
GACTTAAATGCTGGAACCTAAGAGTAAGAGATTGCTGGGGAACGGGTATAAGAATCTTCT

CCGA ACTCAA AAGGCCAGGGGGGAACAGGCCAGAGATGAAATAGCTTCATCTGCATCTCA  
GTTTATACGTGGACTGAAACAGAATTACGCCAGTAATTCACGATATTCCATTAATTCCA  
ATTCGTGAAGACCGGCAATGTGCCGGGTTTTTTTATGGGGTCTGTATGGTCGATGCAAC  
GGAACAGATTCTGAGTCGCAACTCGGTAACAAGAATCTTAAAATCCAGAACATTCTGCA  
ACCCGCCGAAAGTAACAGCAATAAAGCATTTTACTCTGACCCGAATCGCTGGAACGATAA  
TAGTACGTCTGCAGCCTGGGTGAAGCATAACCAACAAGGGGTAAAGATTTCCGCCAGTC  
CGTCCCGGGAATATAGGAAATAACCCGTGGACTCGGTAATGCGATTATTCAGAGCTCGGT  
ATAAACAGGGGCGCGGATTGTAAATGAGTTCAGCCGCATGGGCAAGCCGCGTGTTCGGAC  
TATGAAGGAAATTTTTGCCTGTGGCAGCAGGGGGACCGATGATGTCATCGATACCCTCCG  
TAATGGCAAAAACGCGGTTACTGATACTATCGGTAAGGTCTGAGGGCAAACGGTCAGGC  
TGTCAGTGCTGGTGCCAATGCCACTGATCAATGGCTGAATGGTAGAAAGGCGCCGGGTGC  
GGTTCGTGCGATGAATGCGCCGATGACCGAAGGCTCTAATGAATCTGTGGTATGGGTGGC  
GAAGGCTGTAAACCTGATTGGTGCGCTTTTACCTGATATGATTGCTGGCGGTGTGACTAG  
AAAGGTGGGTGAGGGCCCACTGCGATAAGTGCTAACCGCAGGGCTGGAGGAAAAATGCCT  
CGCGGAAGGGATGCAGCTGGCAAGAGCCACCGTACTGTGTCAGCAGAACCAGCCGAGAAAA  
AATGCCGGATTTATTCAAGGCGGGACTGATCACCCATTCAACTGTGAGTGCATAGGGTCA  
GCGTGCAATAGGGGCAGCAGATGCTGTTCTTAATGCAGAGTGGTCTTAGTTGGCGCAGTC  
ACGGAAAATTCAGCAGACGTTTATGTCCATTGAAGCCGACCCGCAGCAGGCACATCTTAC  
CGAACTCCACAACCTGGATCTAGCAAAAAGAGCGTTTTTGCCGATAAGGAGCGTACGCCGCT  
GGCAACCGATCCTGAATAGAGCGCTGTGAGTCCATAGCGGGACAACCTGTTCCGGCGCACT  
ACTGTTAATCTGGTGACACGAGGCACAGCGAAGACCGGTAAATGTCGCAGTGGCAGAAA  
TGCCACGGAATAGGGGCCTATTAGTGCGGCGCAGATCGGCTATTCACGCTATCAAGAAAA  
CACGGCATTGCAAAGGACCGCCCGAAAGGGTGTGCCACCGCGGGAATGCGTGGCTGATGC  
AACGAGCGAAGGTGCAGCCTTTGGAGCAGCCATACGGGCTCCGTTTCGATGAGCTTGCTG  
ATATCGTGGCTAACGTCAGGCCGCAAGCAACCGCCATGCGTGATACTGAAACCGTGCC  
GCAGGACGTCGCAGCCTCCAACCGAATCTGTGACTTCGGTTGCGCAGCAGCGTGAATG  
CATCAAGGGCATGAAAAGCTAGCAGCTTCTGGTGCAGTGTGCTGACCCGGATGTGGGGAC  
AGTGGCTGACGTATCTGCGGCTTAGCGCCAGGACGTTACCAACCAAGTGGTGCCATGAACT  
GGACGACCAGACGAAGCGACAGGCTCGGATGAATGAGCTCAAGGCTAGGCCGCGGTCTGA  
ACTGCGTGAGGCATACGGCAGACTCATCCAGAAAGAGGGGGCGCACCCAGACTAAACAAAA  
ACAGTTTCCGGGAATAGGCGGAGTCATTCGCCACAACATGAAGTAACGGCGGAAGCACA  
GTCACAGCCTGGACATGCGGAGGATCGTAGCGGGAGAATTTACCCGACGGTGCGGGAACG  
GGATCCGGAGGATGTCCGCAATGGAATTAACGGGCATGGAGCGTCCAGACCAGCCAATCG  
CATTGCCAAGGTGCGCCCGGACAACCGTTGTTTCACGGATGACAGAATCGCCATGGGGAG  
TGATGTTTTCCCTATTGCCACGGCCACCGGCCTGAAAGCGTCTATAGTGAAGAAAGGCGA  
GAATCAGTGTGCCGTTGAATTGGATGAGCCTGCGTTCCTCTGAAGATGTGGCACCCGGAAC  
CTTAAACTCCCTTGCTGACGACAAGCGTATTGCTGATGGTGACCCGATGGAGCGGCCTGC  
GTTGAGGCGTACACAGCGATTCCGGAAGCTTCACGGGGGATGATACGGAGGTACAGGCATG  
TCTTGTGCGTGGCTACGCGCGGACGGCAGAGGAGCTTGAAGGTTTCGAATATGGTTGAAGA  
TGTTGCCGGTCCGCAAGCACATGTGTTAACAGAGAGTCCACGCCTGCCCGCTCAAGGCGA  
TATGCCTTCCGGACAGGGATATCCTTTCCCGGCATAAGTGGCGCATAACGCCGATTAAAA  
TCAAGCCGGACGTGCTGGTCCATTTATCACAAACCGGTGCGGCTCAGGGCCAGAGATTCCA  
GAAAGGACAAGCTCCGGCCCCGAAAAGGTCCCTAGTCGACAGGGGGAAACATTTCGAGAG  
TGACCTGGTTTTGTCAGGGTCTGCCGTCACCGGATTCGCAGAACGCGACAGCACCGGTACG  
TGAAGGGCTAACGGCTCCGGAGATTGCGCGTAATGTTTCGTATGCCTCATTACGCATCGCT  
TCCCCGCACTGTACTGGACTCACTTCCTCAGCTTGACACAGCAGGCAGAAGTAAGCCGACA  
GGCCTGAGGAAAACGTGACATCCCGCAGCCGTAGCCAATCGCGCCTGTATCTAAATCAAC  
TGCTCTACTGATAGGGAAACTACAGTACGCGGAAGTGACGTTAGGGGGCAAAAAAATTTA  
AGTCTTTGTTGAAGATATTAAGGGCGCGGCAAAAACACCGTTATGCCAGCTTGCTGAAAC  
ACTGGGTAAAACGCTGGAAGACAGGGATTATGTCACGCAGCCGCACAGCAAACCTGTTCCC  
GAAACCGGACTGCGTAAAACCTGGCGAACAAAGGTGCTGATGCTCCTACCCTGGGCCTGAT  
ACCGCTGTATCGTAACGATATTGCGACGAAGAGGAAACAGAATACGGTAGGATGGGGGGC  
GAGCACA AAAAGAGTACGACACAGTATATCGGGAATTATGAACGTAAGGGTCAAGGCGAA  
ACGGCTCGCAGAATGGATTGAAGGCAGAAGCCCATCCCGTTGCGCGGATACCTGGCAACT  
GTTGGGCACTGGGCAGCTCTCACAGATAGAGCGGGCTTTTACTTTTCTGGTGGGAACGGG  
TGTGTAACAGGCGGGACGAGGACAGCGTTTCGATTTCGACACAGACCTTTTATTGATTGCG  
CGTTAAGGACAGTAAGGGGAGTAACCTCTTCTCCCGGAATGTAGGGATGAATTACTAGC

AAAGGCGAGATTCTGGTTTGTATGAGCAGGAGGAAAAATCAAAGGCGAAAGGTGGTGA AAA  
AACAGCATCGTCACTGGGTGACAAAATCAGCTTTAACGTTTTCCCGAATACCCG CAGTGG  
CGACATTTTTATCGCTTAAGTTAAATAGAGAATGAGGGCGAGAGGTGGCTTTAAGTCAGC  
CAGTGAGGCCCGTAAGCACATTGATCCACAACGTGATGAGCTTGTTTCGTGATGTTAAGGA  
GATGCGGGAGATTCACGAGAGGAGCAGCGAAACCCCCGAACAGCTACCGAACCCGACC  
AGAACGCTGGAAGGGGTATGTTTTACCCGGAGCAGTTCAGTGTTCGCTTCGGTTTTCCGTGC  
TTTGCAGTTTTGTAACACTACGGGATAGGTTTCGCGACGTTAGACTGATTTTAACCCGGCATT  
TACTCGCTGCATAAACTTGCGGGAGTACTGAATGTACTCACAAAAGCGTTTTCCCTGAT  
CGGTCGGCTTGGACTGGCCTTTGGTGCCAGTGGTAAGGGCAAGGATTAGCAACACTAGGA  
ATCAGGTGACGTGGCAATCCACCTGACAAAACGTAACGGACCCGGGTGCGCTGGCGCATAA  
AAGGTTCTATTCTCTTGATAATTATTTGGCCGTTATGACGTTTCCGCTTTCGGGAAAAT  
TACGTCAGGTGGCCACTTGATGACCCGACGACAGCGTCTCCGGCGCATATCGAAAGACGG  
CAAGTATGTTTGTGCTGAATAGCCGGTGCGTTAGAAGGTTTAGGACGCCTTTAAAGGTGT  
GAATCAGGCCAATAAAAAGAGCGACATGTCGGCTCGTTCAGCGGTTCTCGATGAGGTGCC  
CACAGAACCGTTCTGGTCAACGGAGATTGAAATCGCGGCACGTTCCCTTTAAGCGTTATGT  
TCAGGAACAGGCGCGTATGGCTTGCCTGGAGAATGATTATCTGGTCTATATGCGTAACGG  
ACCTGAGTACAACACAGAGAACCTCGACGCTTATACGACGAATCCGGAACCTGGAGGGCGG  
TAGTCGTGAGGCATTTCGATCACCTGTTGCGCACCTGAAAATCCCTGAGCGGGACAAGGG  
CGTTGCCGATTATTCACGAAAGGGCGTTACCCGCACACATGGATGTAATCTCATTACGGA  
TATTAACCGTAGTGCAGGAGCCGAAGGCAGCCCCGTGCCGCAGGCTGAATAGGCTGCCCG  
TGGCGTGAAGAGCAGCATTGTGGACAGTCACCTGACAGTCCGTGTGGTGAAGTCGCAGAA  
AGAGGCTGACGCGCTGGCGGCTGAATTGTTCCATGATTACGGCAGGGGGCGTTCATTTCGA  
CCTTCCGGATAAACGAGAAATTGTCCTGGTGGCGGATAATATCCCTGCCGGGCCGACCCG  
TCGCGTAAAGCTGCGTCAGGAGGTCATTTCGTCAAGCCGTGGAGCATACTGTCACAGCATC  
GGAACATCGGACGATTTGGAATACCGTGCTTAAAACCCGCGACAGTGTTAACGTCGCCCT  
GCGTGAAGCCTGGCGTAAGGTTGATGATTCCCTCAGGTCAGGTATCACCCGGAGGTACAGGT  
GGCGAATTTCTGGCACATATGGCGGAGATACTGCCGAAAAATTCGTTGCGGCATGGGA  
GCGTGTGTTACCCTGGTTAATGAGGTTGTGCGTCGCACGGGCTTACTTAAGCCAACTAA  
ACTGAACGATATAGGACTTGTTACGCGGCCATGCGTACATTAGGCCAGCGTGTGAGGCA  
AGGTTAAACGCCGCGTGAGGATGGCGCGCGCGCATCCTTTAAATCCTACTGTCGTTGTAA  
ACGTGATTCGTTCAAAGTGGCGGTAGGTGAGGGCGAGCGTTACCGTGATGAGCTTACAAG  
AATGAGAGAATCTCAGCGCACACAGATTTACGGTCAACATCGGGCGTATGCCACCGTT  
ATTGCGTGACCTTAGTGTACCGGTCTTGAGACCTGTAATTTCCCGCGATACTGTTCTGAG  
GGTCACCAATGGTGTGAAACATGGGGTGCCGATGGATTCTATCGAGAGAGTACCCGGAGCT  
AATGCACGAGCCGTATGCAATTCGCAGCGCAGCGCCAAAAAGCAATGCAGTTGTGAGGCT  
GCTTGATGTCGTGGAGAAAAATGGTGATACGGTGGAGTCAGTGCCACAGATGTAGGCTGT  
CCGGTCTCGACTGTAAAGCAACTAGGTAGCTTTTGTTCGGTACAGAAATATGGCTAAAA  
ACTGAAGAGTATAGATATGACAGGGTCAACGTTGTACCCGGAGCAAAGAATTAAGCTGCGA  
TAACCGTCTGCACAGAGGGCTCAAATTGCCCAAAGGGGCGACATTCGTATAGCGGCTCTGC  
GGATAAGATACTCTATCCAGAAGATATTCGGAAGGGGCCGTATTGCTCCCGAACCCAGCTG  
TCTGACACAGAAAGAGAAAATTGCCTCGCGGTTAGTACGCCAGAACCAGGATAAAGTCCA  
GGCGCCGAGTGCAGAACAGGGTAAGATCCGAAAAACTTGCGGCAGAGTGGTTCGATACTAA  
CAAAGCTTAGATGGCGGTAAACTCTTCCACGGAAAGGCGGAAAACGACCTGAACGTGAT  
GAAGGTGCGCTACGTTACGCCACTGGCTAAACTTCTGGCGGAGGACAAAATTGCGCAGGC  
CGATCTTGATGGGTACCTTACCCCGTCACGCGCCGCAACGTAACGCGCATAACGCGAA  
TTTCAACCCGAAAATGCCGGACGGCACTTCCGAGATGCCAGCGCCGACGCGGGCGGAAAT  
CATGCAGCGTGGATGTAACAGTGGCAAACCCGGCAAAGTATGTCCGTCCGGGCAGGGATTAT  
TGACGATATGCTGGCCCATCGCCGTGAGCTTATCCGTTAGCAGGGACTTGAAGAGCCCGT  
TGTGGTGGATGACTGTCGAAAGCCTACCGTTACTACGCTCCCTGTAAGGTCAGGATGT  
TGACGGTGTGGTGTCACTGCCACACACAGGTAAGGTCGTCAGCATCTGCATACGTGAAAG  
GAGGAAGGCGCCGTGGCGTGCATCCCTGGCACTGTCTCCGTCCAGCCAGGCGATACAGGA  
CCTGAATGAATCGGTGAACCGTTATCGCAAAAACGAAGTGGGGGACGCCTTCTGATACC  
GGTGCAGGATAATCACGACAAGGATTTCTGGCAGGTATTCACCGATGACAGACCCGATAA  
TATCCGAAGGGTTCTAGAGCGCAACGAGCAGGCAACTGGTGAAAACATTTCGCTATGTTGT  
AGGACGACCTGTACCGATGGCAATGATGGCAGACCCCTACTTCACCACTGAAAAGAACGG  
CAAAATGTACTACATCAAACCTCATGATCCGCGCCTGATCCGTTTCGATGAAGAGAATGGG  
ACCGGAGACCATCAATGCCTTTGGTAGTACGCGGGGGAAAGATAGCCGCTGCCTGGCAAT



GGTAAACACGTCGTATAACCCGGAAACGCTGGTCAGTAACTTCGTCCGTGACGTACTGAA  
GCCCCTGATGAACCATAATGCGGTGCAGGGAATGAGCGACGGTAAACTGAAATGGCTGGA  
TAACTTATCCGCCCGGGCTGAGGTGAAAGACAGCCGTTCTTCCAAGTCAACCATATAAGC  
CAGTCTGCGTAGTAAAACCCTCACGTGAACAGGTGCACAGTGGCACAAAGTGTGAAAGGA  
GTTTGTGAGGACGGAGGGAAAACCGGCTGGTTTTACACGGGTGGCCTTGAAGGCCATAA  
GAAGGAAATGGATCACCTTGTCTCGCTGCCGAAGGGGGGATTGAAAGGCCAGAGAATCGG  
GGCCTGGAAGTCGTTCTTAACCGTGACGCAGATGCCAACGGTGCGTTTAAAAACGCTCT  
GCCTCTTTCTGCCTATAAGAACGCGCGTGATGCCTCATTGTTACGGTACCAGGCGGTGTC  
CCTTGTACAAACATGACGGAGGTCTTTAACCGTAGTGGTGAGCAGGGGGGGCTGATGAA  
TTCGCTGCACATGTTCCGCCAGGCGACCATTCAGGCAACGGCAAGTCTGGTGAGAACGCT  
CGGACACCCTAATGGTGAGGGACCTTTACTGGAGCCCCTCCCTTGAAGTATCTGAATGT  
TCTGGAGAGAATCGGGCTTGCCGCTCTGGGAGCAGGTTACCTGTTTAGCTCGCTGCACCG  
AAGCATGGCCGGTGAGGATGCCGATAGGATTAAGTGAATGAAAAGGTGCCCACTCATGT  
CAAAGAGCGTAACCTCGTCATTATGAAATCGTAGTTCGGGGGAAATGCCGGAGAGAACTA  
GAGTATTCCTCTAGCTTACGGGTACAACGTTTTCTACCTGCTCGGGGATGCTACTGAAGG  
CGTGGAGGCGGTTGACCTGACGGCGTCCCGTGTTGCCTGTAATGTTGGTCGTGGTGTCT  
CGGTGCACTCAGCCGACTGGCAGTGAGAGGGCGGAAACACTGTCCGGGACACTGCTGAA  
AATGCAGCGCCGAACCTTTCTGAGTCACTTGGCTAACCTTGCCATGAATGAAATTGTCAT  
GCGGACGTAGTTTTAACTGGAGAACATGGCTTTTGGTATATCAAAATCTGGCAACCAGCT  
GGGAGAAAGTTCAACGCCAGAAGCATAACATGGCCTTTGCATCCTGGCTGAATGCGTTCTC  
CGGTGGCAGCCAGTACCGTCCCGGGGCGGTGGATATCACACCGGAATGGCTGAAATTCTG  
CATTGATTACACCTCCGGCGGGACAGAGCGCATCATTGCCATAACTACTGTTGCGGCGGC  
AAAAGCGCTGAATGGTATTGATATAGCGGAGCAGCAGGTGCCCTCCCTGATGGAACCCTG  
GCTAGAGGTGATGCCGTATGCAGACCGGGAGATTATGTACGACCGTAGGGCGGAGCTTGC  
GCCGTCACACGCAGAGCTGAGAAGTATGACCGTTGCAGAAAGAACAGCGTGCCTTGCCTA  
GTGCAACCGAAAATTGTCAATGAGCAGGCTTATGTATGATACCCGGCAGAGTCTGAAGGA  
TTTTCGTTATCACCGTGATGGTATTTACGCCGACCGAACGCTAAGTCTGTGCAACAGTC  
GGCGAAGGTGATATCGCTAGTGCCGGATATGCAAATTGCCGTGCATCGGTTTAAACCGCGA  
GTACACCACAAAAGTGTGACTGGATTAACAGAAATGGCCCCGGAGGGAAAGTGCGGGGCTG  
ATTAAGAAATCAACACTCATTGACGTGTAATTACCGAAGGGATTAACTCATAGTCAGATG  
AGCATTGATGTGATGCAGAGGGCCGATTTATTTTTTCATGAAGAAAAAGTTGCGGAAATG  
GCAGTATATTTGCTCAAAGAGCATGGCGGATGTATGCGTTTGATTAAGTTGAAGCAGGAG  
CGGTATTGGCGAATGGCAGTTATGAGTTTAAATAATCTTGATATGTTAGTAAGCAATCTGA  
TGCAGGCGAAATGATGTTACCCCTTATCGCCAGGAATGAATACCCTCAAGCAGAATTGC  
AGATGGAAGTGTGAGGCCCACGATGAGATCGATGACGGGTAGTTTACCCAGTATGGGT  
TGGCATTCTTATATCCAAAGATAGGCCATTTGACATCCTCCACGCCATGAATCACGGAGA  
TTTACACCGCAGTGGATAAGACTCGGTGTTTTGTTGGAAAAACCTGTGATAACTCACAGA  
AACCACGTCAGTAAGACGGGCTTAAACAAGCTGGGACGGTTACTTTACTAATTTCAAGTCC  
TTTACGTCTCTTTAACAATGCTCAAGCCTTTAGCAATTTACCCCTCGATTCTTACTTTG  
TTTTTCGGAGAGACATTGTGTGCCGCCATATGCTGTCATCGAAATCAGTGACATTTGTA  
CCGCTATTGTCGCGGAACTCATCACGTTTACCTACTTTATTAATGATGCTCCCTTTA  
AGGATACCCCATGGATCATCCTTCAGTTCTTTTGCCTGCGCTACTGTTGAACGCTCTGCT  
TCAGGCCCTTGGAACCGCCCTGCCGTGCAAAGCGCCAAAAGAGACAGAACAATAGGT  
GCTGCAACCCATTTCTTTTTTCATTCATAGTCTCTTTCTGAGATGCACATTCAAACAGCA  
TTTTCAAGTACGGTAATGCGCGGGGGCGTTGGCGATGCCTGAAACATCAGTGGTGATGGGA  
GATTACTCCTCTGCTAGGGCTCTTAGTTGTCAGAGTCGGAGTCTACGAAGACAGCGACCT  
CCGTCCGACCGGTCCGGACTCGCACCTCACAGACGTCATTCTCTTTACCAGTGCCGTCG  
ATTTGACGGTCAACCAGATGACAAGCAGGGCGATTACCATCGCCATTGCTGCTACATCG  
CCTGCTGCTCCTTCCCTTTCGGCACGAAAGAGACTAATCTACCTATGATCAGCATGGATT  
GAGCCTCAGATTAATGTTAAACGTCCTTGCCGTACCCGTAATGTAAACTAGGGCTTTTCTA  
TACCTGCCCTAGGTGTTTCATGCCCGAGGCAGATGGCCACAAGCACCCGCAGCAATTCTCC  
TGAAGTCTTTTTTCCGGCAAGCCGTTTTTATTTCCAGCGAAAAAGCGAATAAACAACAA  
GCACCTCTGCCATTAAGTGTTCCTACTTCTGCGAATCCTACAGGCCGGGTTATTGATTCAC  
CATCTTGTGAAGATTTTTTCATGGCATTGTCCGCATACCGTATTGCAGATCTTCCATCCCG  
CAACCGTGCTTTGGTGTTCGTTCTTACGCCCCTAGACTGGCAACAGATTCTCGGCGCTG  
ATCGTGTCTGTTAAGAAGATGTCGACCGTCTCTACCACGGCCTACCACAGTTTCGAACA  
CCGCAGAACTTACCCAAATGGTGCCACAGCACATCCACACTGGAAGCACTGGAAATCGCG

ATCCTGTTCTCGAACCTCATTGGCGAGATCTTTAAAGCTCTGTTGTGTGTAGTTTATTCT  
GCCATATATTGCAAAGTTCAGCAGCTTCTCTTCATCGCGCTTCGGCTGCATCAGTGTGAT  
GATAGTAGCGCCTTCATTTTCGATGAGTTCACGTCCTGCGGCGGGTGTGATAGCGGCATT  
CAGACTTACGGTTTCCACGTCGCACCCGGAATTCATCCCCCGTCATTAGCGTCAGGATGC  
CCCGGCTTGAAGGTGGCCCCCTTCACGCGCCAGTCACCTTTCATGACACACTCCACGGCT  
ACAAGAACGGCTGTCATGCTATTCGACATTCGCTCACTTCGACTTATCCAACCATCCCCA  
GTTTCGCGGAGAGTTGTCAGACACCGCGTTCTGCAAGCGTTACAGGTAACGTATTCTTGA  
AACCTGTTTCCGTCGCACGCCTGAAGCCACTGCTCAGCCTTACC GCATCAATGTGAAAG  
GCACAAGCTCCTCCGCCATGAAATTGCATTTTCGAGAGGTCGGCAATCTGTTACAGTGC  
GGGTGTGGCAACTTGTAAAGTTTGGCTTACGGGTTTCGGCTTCAGCTCTGATATGCGCTTC  
TCTGATGCTCCAATAACGCATGCTTATCGCGTAGCGCATCTTGCAGTTCGCCAAGATGG  
CATTCACTACCAATAAGGTCGTTCTGTTCTGCTCCCACCTCACCTCTCAGCTTCGCATAC  
GTAAGCGCAATCTCCTCGTTGTCCTGGTCGTGGCGTTCGATGTATTGATGCTTCTTTCC  
CGTTCCTCCAGCAGTTCAGCAGCCTAGCGGGGTTAGTGTCTGCTATGAATTCAGCGTTA  
CATAAGCCTGCGCATCTCTTTCAATCATGCTATTAACATGACATTCTGCAATCACACCAC  
CGTGTCTCGTTTCCATTTTGGGAAACAAACTCCTGTAAATAGCCGTGCTGGTTAA  
CAGATGTACGCCCTACGATGTAGCTTCTTTAGTTGCTTCTCTGCCCCTATAACGGAGTG  
CCTGATAGCGAATCTTGGTCATTTTACTCTTCACTCGGGTATACATGGATTACTACGCC  
CCTCATCTAATTGCGCAAGCTGGATACCCCGGTTCCATGCCGTAAAAACCTAAGGTTTCG  
AAAAATGCATTTATTTACTTACGGCGTTGCTCCTGCTCTCGGCGTTTCGTCCATTTTTC  
AGGGACAACAGTGACAGCCCTCCTCCTCTGCAGAACATGATGTAGAAAGAACCAGGAGA  
ACTAGGCCGGTGTTCAGGGCTGTAGTGATCGTTGTCGTTGTGTTTATGTTACGTCACAC  
CTCTCTGTTTTTTGATAAGTTCAATATCCTGCTAGCAACTGGCGCAAGCTCTGCATCCAC  
GAACAGCCAGGGGCCCGCTCATCTAGCGGAGCCCCACACTCGCAAAAACGAATAGCAG  
ATGGGGCATTCTGCGGATTTCGTATTTGCGTGGGGAGAGATTGCGCTGAGATTCTTCGA  
TTTCATCGGCGTTGTGCGACGAAATCGTCTGATTTGCTTTCCTTCAGGCGTGAACAAGGT  
GCCGAAGCTCGTTTTTTTTTAGTATGCGAATTGCCTTGCCTCAGGCTTTTCAACTTTGG  
TCTGGCCCGCAGAAGTACGAAACTCGACAGGCCAAGCCGTACAGCCTCTCTCAGTATCAT  
ATATCTGTTTCGTCGTCACCATGTAGAGGGTCTCGTACCCAATGTCATACAACCTTGTTCTG  
GTAGGAGGCGTTCAGCTCTTTCAAGATCGCATAACAGGTAATGCTGAGGTCCTGGGCTTT  
TTCCACACAGACTTGTGTAGCAGAGGAGGATCATTTCCTCGTCCGTGAATTGTTGCTG  
TAATTATGATTGTGCTGACTCCATGTGGCGCAGTTTGTGTTTGGCATTTCGATGAAGTATCT  
GCGTATCTGTTGGCCTATTTTCGTTACGATCTAACGCCGACGTTTGTGTTGACTGTAAGGAG  
GGTAAGGTGATGACCATTTTCCCTCGCTCATAACCTTTTTCCCGGTTCTGGGAAATAGC  
TATATAGTCCTGGTTTCCGACTCATCCGTAATCAATACGTAATCCGGGTTAC  
CAAGCGTTTTCTACACCAAGAAAAGTATGTAATCACGGGCATTAACCAGAAGGGAGTT  
TTAATTGGCGATAGTGTGCTTGAATACGGGGATTAGTTGCCTGCTCATGATGATCTCTTG  
ATATGTTTACTTTATAACCTCCCGTTAGAAGCTGGCTGTGCGGGTGTCAACTGAGCCAAAT  
AAGAAGCTCAGGGCATACTCCCCTTGCCGGGATTGTATTACGCCTTTCACCGGACCTTT  
GTAGGGATGTAACCTATGCCAAATGCCAGGCATAAAAAGGACGCAAGGCTACAGGGTGC  
AGCCCGCTTATTTGTTCACTGCGGTAAGTATGCGATAGCTGTCGAGGATTTGTCAATCGG  
CGGAATATGGATGCACGCGTAACGGTAAACGCCCTCATCCAGTAAATTAACGCAATTCGC  
ATCGCAAACTTGCCTGAAATATCGGAAATATAAAGTTAATTACCTTAAAGGTATGGGGC  
AATAGTGGGACTAAATTTGGTGGTTTGGGGCATATTGTGGGCAAAAAACAACGTATAACG  
AACGGTTTAAACATTGATTTGTTTCATGGTCAAATGACCTGTAACAGATTGAATAAGATAT  
GCTCTTGGACGAGGTTCCGTAATTCTGTGTTTTAATGCTTCTTGGTTTCAGCACATCTA  
AGGCTATGGTTTATCATTTTGA AAAATATATTTTTATTTTCATGCTCCTGGTCACTTAGGG  
TCACCTCTGGGGCACGGGCATTACGGACATTAACCAGCCTGGCATCTTTAGTCACGCTCC  
GCTCAGGGATCCATGCACCATAAACCTTGTGACCATGTCAGCGCTGGAGTGCCTCATCT  
GTCTTTCAATAAACGTCGGGTCTGCTCGGAAAGATAAAGCCCAACACGCATAGGTATGCC  
GTGTCAGCCATGCTTTGCGGGATTAGATAACCCGCTCTTTTTATTGATGAATCCCATGTGG  
CTTCGATGGGGCTTATCGCGTAGGTAATAACCCGACGTGTGACTCTTGCGAACGATTTGCG  
GAAAGAAAACAATAGTGCCTCGTGCCTAAATCGTTTCATCCGTAATCGCGTAATTGAACAG  
TTATCTGATGCTGCCTGCTACGACGAGCAGGATTTGCCTGGCTTTTAAAGCGCTTCACTTG  
CTGTTGCCAGAAGGTGTATGCCCCGGTTGGTGCCTGAGTCGGTCTTTGGTATGGTAAAAT  
GGCCTATTCTTGTA AAAATTTAGTCGCACTGTTATCGGGACAGCTTTCAGGTCCGTAGCCT  
CCCATGTCAGTCCGGCAATTTACCGTGTGCAACCTTGTAAAAACAGCCACTGCCCAGC

GGTTTTGGTCTGTAGATGATGGCAGGCATGAATGAAACGGCTAAACTCATCTCTGGTCA  
GTGGTGCCGGCCCTGGTTTTAATTCCTCAGCGGTGTTCTTGAAGTAAACGAGTTTTTCT  
CCGCATGCCCGTTTTTCGGGAGCAACGCTGAACATTCCGGCTGTTGTTTTCGTGTAACAGT  
TCACTGTGGGTACGGTTCATCCTTTTCGGGACGTGCTGGTTTGCCAGGTTCCCTCTTCGC  
CGGGCAGTAAATCTTTCCTGATACACAATAGCTCTTCTTATGTAATCTATGACGCCAGCC  
TCCCAGGACCCAGCCTCGGTAGCATATTTTTTCATCACTGGTTGGTAATGACTTAAGGCGT  
TACTACTGATTTCCATTCCCTTTGAGAGTAAGCCATTTCTGTGCCAGTTCGCCGACGGTGA  
TCTCTTTTTTCTCCAGTCCAGATGTCTTCCGGTTAGGTGACACGGGGAATCGATCTGCAT  
AATCAAACGGGCTTGTCTGATTCCAGAGTAGACCCTGGCCCTTAACTCACCAGCGATCT  
TTCTGTTTTGCAGTGTAGCCGGCATGCGAAGATTTTCGCGCACTCGTTTACCCTGTACT  
TAAACGTTATGTGGATTTTTTCTCCGTGATTTTCATCGCCGGTTGGATAAGATGAATTTT  
CCATTGTTCCCTTCTGGGACCAAGAGAACGCTCAGGTTACTCTGATGGACAAGATTTAA  
TCACCAGAGATAGTAAGCGTTAGTTTTTGATCCAAGTGTGGGGGTACGAAGATGTCAG  
AGAGATTCGCAGGTTTTCTTTGTCGTTCCGTCTGGGGCTATTTGTTTTTATTCTCTGCCG  
TTCATCCTCGCACTGTCCCTGACGCACGATATTGCCCTTTTCTCAGGCCTGATACCGAG  
ACTATGAGGTCCAGTGTACCCAATCATCCGCATTTATCCGTACAACAGGTGTGATGACT  
AGCTGGATGACATGGTTCTGTAGGTTTCATCACTCACCATAAGTTGCCTCTGCATGTGT  
AAGAAAACCCGCCCTCGGGGGGCTTGGTGTCTTTTAGTCTTCAATTGCAATCTTGGT  
TACGTCTTCTTCGATACGAAATCCTTGTTTTTCGTCTTTTGATTTTGCTAAGTCATAAAT  
TTGCGCGGCACTGTACCCATCTCGTATCCATGAATCTAAGGCGCGAACAGCCTCGCTACG  
CTTTTTATCTTCTCTCATTTTTGATATCGACGAGGACATCAACGCAAGTATGGAAAAT  
GTGGATTTTGACTTTACATTTGATCAGGACGGCTTCGCCATCATTTCCCCCATACAGTGA  
GGACAAATCTTAAGCGTCTGGCTGGTATTTCTATAACGTTAGAGGGTTGAATGTTGAACA  
CGCTATAATCCTCTCCATAAAAACAAAACCTCGCCGGAGCGAGTTCAGATAAAAAGAAATCCT  
CGCGAGTGCAGGAATGTTATACAGTCGCGATATTCAACTCGAATGCGATTCCATTTGCC  
GGTTTAAACCCGAAGTGAGGATGTGTGATTGTCTTGATTTCAATTCCTCTTACGGAACA  
TTAATTCTTCGGCTGGAATCGTCGCGCGTCGGGTATCCCTTTCTGGTTATCATGCGCTTA  
TACTCGGAATCATAACATCGCTTATCCACTAGTTCTTAAACAGGCGATACTATTAGGT  
TCCTGTCTGGGAGTAATGGCATCGACGAATTCACGTTTAACTGCAAGAGGCAGGTTAGCC  
CCGGTTAGCCTCCTGCGGCGGTTCTGGTAGCGGCTTCCCCTGAGTCGCTTGCTCAATACC  
ATCACCCGGCTTAGCGGTTGCAACTCACCGCCGAAAGGTGCTTGCGGAGTACCGTGCGGA  
CCATCTTAGCGCTTCAACCAGTCAGCTATCGAGATTCACCGAAATAAGCACGTTCTGACG  
TTTTTTAGGGAAGCGACCACTACAGCTTATCAAACCTATTCGGAATTACCGGAGATTTACC  
TGCCTCATCAACGGCTTTCATCCAGTGCCTGAGCGTTGAGTTGCTTACACATGCCCAATC  
CTCGTTTATGTATTCTTTTTTTTTCTGACAACCATTCTTGTAATGAACGATTGGCAGTCCG  
GCTTTGTGCATCAATTCGTGGTAGGCGGATAAATAATGGTACATTTCCCGGCTTCATCGT  
ATTCTCGCGGCAAATAAATGTGATACAACCATATTGAACGACGTCAACTGCCACTGTGTC  
AGCAGGGTCGAATGGTTCAGTGGTCAATGCAGTCAACGCCATTTTCGTAACACGGCGCTC  
ACTATTATCTCGCAAGTCCAGGCTGCCGATACGCTCTCTGGTTTCTTTAGTCATTTCTTT  
CTAGGTGAACATTGTCATGTCTTAGTGAATCTCTACTTCGACGCCATCTTTCATCGTGAA  
GCAGTGCTAATCATCAGCCAAACTGGTTAACCCAGGCGCATGAAGGCTAGGAATATAGAC  
GCTTGAATGGGGTAGCCCTTATCGTTATTAATGCTGGAAACGTGCTCGCCGTTGTATAC  
GCTCAGAGTGTCTAGGACAAAATAAAAATTTCTACGGCTGCCCTAAAACGCTTTACTGC  
CTTCACAAGTCGGTTCCACGCATTTTCTCTTCTGGCGTCAGGACAATTAATTCCTCCAA  
AGATGCCATTTAGTTGTCTTATTATGGGTTGCTTTTATTGTGCTTTGTGTTGAGCAACG  
CCCATAACCCTAATTATACAACTCACTTACAAGATCAATTATTTCCGGTTTGCCAGA  
CAAAAATTTGGGGGGATATCGGTGTCAGCAGCCCGATAAACAGACTGAGAAAGAAAATTT  
CGGTCGCACTACCTTTTCCCGGATACTCTTTTCAGGATAATGTAAGCACATCATCCTCCT  
TTGTTGCTCCGCATAATTTTTTGGCCTGGCGCAAAGCACGCGTTTTGTCTTTGCTTATT  
CGACAGCGATCCTTGCACGCCTCTTTTGGACATCCAGCCCATTACCGATCGATATAGTCA  
CCGAAGCCTGGCCACTTATCCTTGCCATCTGTGCAGTGGAGGCAAACACTATAGAGATGC  
ATGGTTTAACTTGCCGCAAAGCCATATCACTCACTTTTAGTGCGCAAGTGGTTTTACCT  
GCGGTTTAGCTCCGCGCTGGTCTTTTTGCAAAAACCACAATCCATCATCCCGAAATATTG  
CATCAACCCCAACCGTCGTTTGATGAGTCAACCCACTGTCATACGCCAGGAGCGTTTCT  
ACGAACATAACAGAATCTCTGCTTTACGGTATTTTCATCGGATTACTCTCCTGCATCTCTTT  
GGTGCTCGGCGTGCCCATGTAAACCCGGAAGGGCGGCACTTTGATGTCGGGATGATGTTCC  
TTTGCCAGAAGCGCAGAAGCGCGAAAACGAGACGGATAACAGTAACAAGCAGATACATGCC

ACACGCACTATTCACCTCTTTTCGATGGTACTGTGATCGGCCGCGCTCGACTACTCTGTGT  
CCCAGAACGACTTGTGAAGCGCCATAAGCTTGTGTCGAATCGATGCATATTTGCGATCAG  
AATAGGCCTGAGCTTCATTCTCACATTCGCCAGGTAATTCGCCAGGGCCAAACAGTTTGT  
TATAAATCCATATTAGTCCGTTCTTAGCGTCGCCAGTAAGCTGCCATTCGGTAATCGCAG  
CATGCATGACCAGAATGCTATGCCCGATTAATAGGTTTCAGATTTATATACCGTGTGCGGA  
TGTTTCGCATTCTCGCTTTGTACTTTTACGTTGCGCTTTTCTGAGCCTTCATGTAACGCCT  
GCTTATCGCGTAGAGCTTCTACCAGTTCAGCAACATGGCATTACTCTCAATTAGGTTGT  
TCTCTGCTGCTTCAAGCTCAACACGCAGCTTCCCAACCGTACGCGCAATCCCCGCTTTCT  
CCTGGTTCGCTGCGTCTGATGTATGGCAGGTGTCCTCCAGTTCATCGCGCAGTACCAGAT  
TGGAAGCCGGGTTAGTCTATACTATGAATCCAGCGTTAGCGTAAGCGTGATATTCTGTGT  
CAGTCCGGCGTTTAAACATGACATTCGGCAATTACGCCACCGGGTTCTCCTTTCCATTTAT  
GGCAAGCAACGACTACTGTTAAATTGCCGCGCTGGTTAACGGATGCATGCCCTACGTGGT  
TGCTTCCTTTGGATGGTTTTTCTGCCTTCTCACGCAGTCCCTGATAATTAATTGCGCTCA  
CTTGGAACCTCTCTGTTTACTGATCAGCCTCAGTTCCTTCTAACAATTGCTCAAGTCCG  
ACAACCCTAAACGGACAGGCGTCTCTGCTCCTCGAGGGAAGTCCCAACTCACAACATTG  
ATTGGCAGAAATTGCCTGGTGGTTCAGGAGGCGCAATTTTATTGCCGTGTTGCGCTGTAA  
TTCTTCAGTTTCTCATGTTGAATCAATGACGCTGCGATCTTTCATTAATCCCTAAATTG  
TTAGTGAAGACGCTTGAGGGTGAACGCGAATAATAAAAAAGGAGCCTGTAGCTCCATGGT  
GATTTTGCTTTTCATCTACTCGGTTTCTTAGAGACGCCGTTTAAAATGCCGATCGCCAGA  
CGTAAATGAGTCGCATTGAATCCCATTAGCGTGACCGACTCGCGGAGGTTCTTCAACA  
CTTCGGCAAACGTGATCGTAGTTATTATCTGGGAACAGCTGTCTGGCTTTTTTGATTTCA  
CTATTTGCCTGACGAGCAATGCTGCGACGGGCGTTTTCTGCTCATGTGTCATTGAACAA  
GTTCCGTGTCGGCAAACACTAAGCCAACAGAATAAGAAGCCTGCTGCCAGAAAAATTCATT  
CGGTTGTTGTCAAGCCGGCTCTCTCTAGTTTGTCTTCTGCTTTCGCCGCCCTCATTTTTAG  
CTTTTGTAAGGGTTGTAAGTACGATGAATTCGCCGTCTGTTTCTACTGGTATTGG  
CACGAACCTGACTCCAATTATAGCGAGGCTATGTGCCACGAGAACTCGTTGTTAACTC  
AACGGGAGATGCTGTGTGCAGACAGAGGCCCGTTTATTATATATCTCCTAAGACAGCTGT  
TGTGTTTTCAGGTTATTTCTGATAACACAAAGGCCGGGAAATACCCCGCCTAGCTTTGTA  
ACGGAGTCGGCGAAAGCGCTCTAACCTACCCGGATATTATCGTGAGGATGCTTCATCGCA  
ATTCCTCACCAAATACAAACCCACTTTCAGCCAGTGCCTCGTCCAATTTGTCAATGAACT  
ACGGCACCATCTCGTCAAAACTCGCCATGTACATTTTCATCCCGCTCAACCACGACATAAT  
CCAGGCCTACAGGCTTTATACCTGGGTAATAGTTGGCAAAAACCCAGACATCTTTTCGTG  
TCACCCACATGCTGGACTTCACCTGGGCCCTGTGAGCCGGCTTTATGGCCTCGAAACCAC  
CGTGTCGGAACACTACAGAAATCCCGGTAGTTAATCGGGCATTTCAGTTCAATGCCATGTG  
AGGCACCGCGTAAAGCATCGGGAGAGCAGGCGTAACGCATACTTTCCTCGCGGTAGATGA  
TCGGGGATTTCGATAACAGACACTCCGGAGGTGAACTCAAACATGGTTCTGACGTCGTTCT  
CGTACTGTTTTCCCGAGGGCAGTTCTTTAGCGTTAGCTTCCGCAGCCACTCCGGTCCAAA  
CTGCGGCAAGCAGGTTGTGGAAGTAGTAGATTTTCATGTCAGGCCACATCTTTCCTGAGC  
GGGGAAGTGCTGTCACGTTGTACACTTCTCACGCGGTGATGACTCCGAGCCGTAATTTGT  
GCCGTGTATCACCCCGCTTTCGACAGCTCTGACGTCGGTTCCGGTAAGCTGCAGGATAA  
TGGCCGGTGTGATGCTGCCAGCTTCTGCTCAGAGGCTTTCTGTTTCAGGAATCCAAGAAC  
TTCCCTGCTTCGGCCTGTGTCAGTTCTGACGATGCGCGAATGTGGAAGCGAAATAGCTG  
GTAACAGAGCGACAATAAGTTCGTGATCCCCTGTTTTATCCTGGGCGAACAGCAGAATGTT  
AATCTCCTGCACGGTTTCATCGATCACCGGAGTGATGTGGCGTTCCGGCTGGCGTGCTGC  
AGTGTAGGCAGTATTTGCGACAAGGCGATCGGCTTCATCCTAGTCAGAGATACGATCCAA  
TCCGAAGGCTAGACGGGCACACTGAATCATGGTTTTATGCCGTAACATCCGGTTGAGATG  
CGACTGCCACGGGCCGGTGATTTCTCTGGCTTCTCGGGTTTTGAATCGTTCGGTGCGGTA  
TTCATCCATCCACTCCGTAACGCAGATCCGATGATTACGGTCCATGCGATAAATCCGGGA  
TGTACAGCATTCAATTGTGCTGCTCACAGCCCTTGCTATCAAACCTGCCGGTTCTAATTGAT  
GACGCGGGGCCAGCCATCAAAGCCATCACCGGAACGATGCCGTTCTGCTTATCAGGGAA  
GGCGTAAAATACTTTCGTCCACGCATTATGGCCGTAAGTTGGCGACGATCAACAAGGC  
GGAGAAGTGCAGGATCTATGGCATCACCTACAAATGCCGTCTGGCGAGGAGTGGTGAACAG  
TTCCTCTCGCTCGACTGAATCCATGCAGACAGTTCAGCCAGCTTCCCTGCCAGCGTTTC  
GAGTACTGTACTCTTCCGGTTTAGACCTCAGAATCAATATCAACCTGCTGGCGACCACTT  
GTTTCAACCATGTCTGGTACGTGTTCTACCGTGCCTTCTTAAACTCAAGATCGACATCA  
AACGCACGGGTAATAGCTTTTTTTCGCCGCCCGAGGCGTAGCCAATGATCCCTCGAGAGT  
GATTCAAACAGTTGCTGGGACAGACCTATTACCAACTCGGCTGCCAGCTCTGCGTCTTTA

TTTTAACGGGCGACCTGCTGGTAGAGTTTCGTCCAGCGCTGAGCCTCAAGACAATCCTGA  
AAGGTATTAGCGTTCATGGTTGAACCTCTGATATAGCGCAGAAAATATCGCCGGCGAAAG  
GCCGGGCTGATTGGGAAAACAGGAAAGGGGTTTAGTGTCTGCTTTAGCTTGATCTCAGTT  
CCAGTATTACTGTCCATGTTTTGTGAGCGTCGACGGCCTCACGAAACATCTTTTCATCGT  
TAATAAAAGTGCCGGTAGTTAATTTAGTCTGGATAGCCATAAGTGTTGGATCCATTTTTG  
GGACTCTTGGCCGATTTAGGCTGTGATAAGGCGTTTCCATCATTACGTCATTTACGG  
CTGATTTCGTACAAATAAGGATTCGGAAGGGGAGCCAGCAACATGCTACCTCGGAATGGCT  
CAGTACATGGTGTGCTCATTATTTATTCGTGAAGAAAACCGCCTCGAGTAAAGCGTTATG  
GGTATGCGGTAACGCCGCGCTCAGACGGCTTTGCTTGTACATCATCTGAATCAAATAGA  
AATGATGTATCGATATCGGTAATTCTAATTCCTTCGCTCCCATCCATTGGAGGCCATGCT  
TCCTGACCATTTCCATCATTCCAGCCGAACTCACACAAAACACCATATGCAAGTAAGTAG  
CTTGAAAAAGCCATAAGCAGGGCACCTCGCGCAAGCCTGATTAATACAGCATCTAACAAA  
GAGCCGTGGTTATTGAGTTGGTATTCAGAGTCTGACCAGAAATTAATAATCTGCTGAAGT  
ATTCCTCTGTCATTACGTCATGGTCGTTTGAAATTTCTATAGATTCTTTTCAGTCGTAA  
TCAATGATTTATTTTTTGTATGTCTGACATCTGTTTCATATCCTCCCTGATAAAAATTCGCC  
CTCACATTGCAGGGCGAAGAAGATTACTAATAATCGGAACGTGTCGGCTAGTGTTTAGTT  
ACGAGCGTGATTGCTCCGTGTTTTCACTCGTTGGAATCAATACACAATGCTGGGTTTATA  
CTGTTGTTTATGTTAGAAATAAAGGCCACCATTAGCTAGCCTTGTTGTAATTGTAGCAGG  
TACCAAGTAAGTGATTAGATGGAGCGCCATAAATTATCAATTCATCGTATGCCGGGTTCA  
TCTCCACCTCTTGTGCTATGGGCTTTCTTGCCTTAGTGTCTGTCAGCGGAGGAGCATAAAA  
CAGCACAGGCACCGATTGTTTTAAAAAGAAGTCTATGGGCTGTGGTTTTGCTGCAAGTG  
CGTTAACGCGACAATCTCGAATCGTGGTTTCATGAAATTCATATATCACCTAAAATTAC  
TGCTTTGCTGCCTAATTTTCGCTTTCTGGCAACCAACAAGTAAGCTTGTGCGCAGTTGT  
TTGGATTTCCGGCAGCCAGCCGCGTAAAGAGCTACATTTGGAAGGCGAGTTGAGTCTTCA  
TATTTTCTGATCAAAGTTGACGGTGTCAATTTCTTCTGCTCTGATCGCTGGGTTGCGTTCG  
CATCGTCAGACCACTCGTGATGTGTTTGGCCTGTGTGGTTTGAGGGAGATAATCGCCACG  
TGATTTTGCATGTCTGCGCGACGAGCTCTACGGCGAAAACCGGCGGCGCCTTTACATTCT  
GTTTTTCGGGCCATAGACTCATCTCGAATAATCGTTCTCGATGCCATCTCGAACCTCTTC  
CTGAGTCGGGTGCTCCTGCATGGCCCTGCACAGCTTATGTGGTTGGGTGATTTGGCTTCT  
CAGCCACGTAGTCGAGAATCCACGTGGCTTAAAAAGCCTGCCACTATGTTCCGCTTGGCT  
TGCAGCGTCTGCTGATGGTAAAAGTGTAAGATATGCAATTCAGTTGGTTAATACAATTT  
GTTCTAAAACGGGGCGTTTTTTTTGCAACGCTTTGTATTTAATAGTTTTGTTTTTTATCGT  
GTGTGATTGCGTCGGCGATCTAAGGAAAGATCAGAAATGCGTTGTTGAGTGAGATGTAT  
CACTTTAGTTGCCAATAAAGATATTTGTCTAAGTGTTTTTTTGGGCGCAAAGAAGAGAAA  
ACCCTCCCTGGAGGCCGGCTTGATGATTACCCGTGTGGCCTTGAGCGAGAATGCTCAGAC  
ACATGTTACGACCTCCATGCCTTAATCGTTCACAGGCATTCGCATGAACTGCTCGATTG  
AATTGGTCTTTCAGTTTGTATGTAGATATCTGTATTTTCTTATAATGGCCCCAGGGCAAC  
AACCGCTTGAAAAAATGTACCCGACTCACTAAGGGTACATCGCAAATATTGTGTACCTTT  
AAAATGAATCCATTTGGAGGCTCTGGTTAAGCTGCATCAATGGCGGACTTGGGAGTTGGA  
CATTGTGCAGAATGCTTTTTCGTTATTGAGGCCCTACGTAAACTGTCAGCATTGAAGAGT  
TGCCTTCGGCTTCTTCGTTTGTGATATGGCTAGGAATGCCGTTAATCGTAACTGTAACCG  
CTCATTCGGATTGAAGAAGTACTGGAAGATCATGGCTATGATCTGCATTAGCCTCGCCTT  
CGACTTTTGTGGTTTCGCCAGTCAAATCTTTTTCTCACTGGATGCTTTGTTAATCGGAG  
CGACTGGGATTTCTTACCACCGTGGTCAGCTTTAACTTTTTGATTTCTTTTGAATGC  
GGCTTTTGTAGGCAGTCATGCTGCTGTGGGTAGTCTCCTGCTCAGTTCCTTTGATGAATC  
GCTCGGCACGCTCATTACATCAAGTTGAGTAACATTAATTCCTCTCCTTGGACTA  
CCGTTAAGAGGGGATCGAATGAGTTTTTTAAATTTTCGAGCGGTCTCATCCTTCATTATGT  
TCAGTGACAGAAGATCTTCAAGAAATTCCTTGAATGCCTGCACGCTAACGTTTGAATTTAG  
CCATATGCTCTCTCTGAGTTATTGACTCAGATCGTGTAAATCCAGGAATTAATTTGCA  
TGCAAGACTCAAGTCTTCCGAGTTTCACTTCCAGATCCCCTCTCAGTAAAAAAGGCAGCA  
GCACTGCGACCTTTCATCTCCAAAATCTCTTTTCTCCTACCTATAGAAACAGCAGGCTCG  
GTAAGCCCTAACAACTTCAAGCACATCGTTCAGAGAAAGCTCCTTGCTATATAGGTGTTA  
TTTCATATCTTTTTGCAACGAATAAATTTTCCCTCTGTGCAGAGAGCGTATGCCCTTGT  
TCTGGTTGATGGCAAGACGCTGTTTCCCCAGCCTCACCTGCCATACAGCACGCTGCTCA  
CCGATATTTGTCGGCCGGTCATTGATCTTATAGACAGTATCAAGCTCACAACGGGTGTAC  
TCAGATGGCTTTCTGGTTTCGATGAATAGGTCAACTTCTTTTTTACCGCTTGCTACTCAT  
AGCCATAAAAGTCCAGCTTTCTTCTTACCATAACGTCTTTCAGGGCATTGGCTGACGA

TAAC TTTCCCCCAACGGAACA ACTCTCAGTGCATGGGATCCTTGGATATTGCGGGTTTA  
GTGGTTGAAGAATGAGCTGACCGCTATCCCTGATCAGTTTCTTGACGGTAAATCCATCAC  
CACCAAGTCTGGCCATGTAGAAACCGCGGGGCTCAACAGCTTCTCAGGGTCAGCCAGAA  
TTAGTATTCCGTCATGAAATGGAGTTTGGAAACAGTAGGTGCGGTCATTGACTTACCTT  
CAACCCCAAGCTGGACGACAGAGTCAATGGCCCTTCTGGTTGTGCTTACTAATCTCTCCG  
CATCACCTTTGGTGAAGGTGCCGAGTTCTGGAGAAAACATCCCAGGCAAACATGAGAAA  
AGACAGTGTAGTCATATTGTTTCTTAGCTGGGGCCGTCGACTATTCGCCACCATGTGAAA  
AGGTCCCGTCGCGGTTAAATGTTATGTGATCAATACCTAAGTATGTGACACCCGCACCAA  
AATCACTAAGAGATGGATGACGAGACCCTCGCAACAACACTCCTATTCCGGCGTGCGGCA  
AACCTAGCCTCTCGGCTCACTTCGCTTGTGCTATGCCGAGCGATCTAATTCCGAATCTAG  
CCAGTGCATACCATATCATTTTTATGCACTTATTATTACGCTCTGTACAGGAACCACCCA  
TGCACAATGTGTATTTTTACGTTTATTAGAGAAGTATTTATTGTATTATTTTTATTAGTGG  
TTACTATGGAGGGCATAAGAGCAACCTACGAAAGTATCCAGGGCCACCGAATATCTCTCC  
TACAACACTTTCTAAGGCACTTGGATGCACACAGGGA ACTATCGGTCCCTGGGAAGCTGG  
TCGTCACTTCCCATACTTAACACATGCCGTGCCCTTCTTGCTGTCTAAAAA ACTTAGG  
CGAAAAGAAGGTCTTGATGCCGTGTTCTCGCTGGAGCAAAAAACGGCGTAATAAGCAGT  
GCAGCCCTTTGTAACAATGTACATTCGAAGTAAGTCGCTGGCAGCCGAGTCCAAGATAT  
CTGACCAACTAAGGACATATGCGTTTCCACGTATACCTCTCAACTAGCTATTCACTATCT  
GAAATCTTCACAAATGGAACCAGCAAGTTACAGACA ACTATCACAGCCAGGGATTGAACG  
TACTGAAACTGGTTTCTCATCAACCTGTCAACGCTTACACGGCGCGGTGTGGCAAAGAT  
GATTGGGCGACAGGAAGCGAAGATATAGAGATCGGACTGGAGATTGATTGCTTCGGTCTT  
GTGTGGTTTTCGGACAGGCAGCAGACACCAGTCCGATTAGCAGTGCTTTGAAGTACGCGCT  
TGATGAAATCACAAGGAAAAAACC CGCCCGCCACCGAGGTTTTTAAGAAAATTAATAG  
CCAATTCTGAGGGAATTACTGGATCAATCCCCCGGAGCAATTAACACAAAACA ACTCAGT  
GCTGGCCAGGACAAAAGTCACAAAACATCCTACGTGTTTCGCTTAATGTCCAGCTTCAAT  
CAGCCTGGTCGATTCCGGGCTTAGTTAGAAACAGTGAAGCTGAAACAGCATGAGCAGGGT  
CATTGGTGACTCATCTAATCTAGCGGACGCATGAGAGGCAAGAACGCTGCAACAACCGCA  
TCAAAACAGCGGTAAGGGGTATGCCTTGCAGCGCCGTAAAATCATGGATGTGCCGGTTTA  
CCAGTACGCAGAAACAGCGCATTTGTGGGTCCGCTTAATCCTCATCGCAAAACATACGCC  
CGAGTATGTAATGACTGGCGCAGGAGAAATCTGGTAGGCAGAGGGAAGCTACGTGGCGG  
TAGAAACTCTCTGGCGCTTGGAAACAGGCCTCAAACCAGACCGCTTTCAGTGCCTGCGCAG  
AAAGGTCAAAAAACTCGCCGTGATTGGCTGGGTTTACATGGTAATTTCTCAGCTTTCTC  
GGTATAGAAATATGTGCGATGATCATTTCATATTTTATAACCAGCAGATTACCTGCAAATTA  
CACCTCAAAGCCAGCAATATCAATGCCTGCAAGCAATACTGTACCAGCAGATTACCAGCA  
GATTATCACATATACAGAATATGAGCATATTATCTATAAGACTGACGTATTAGAGAGTGC  
CACAAAAGACACAAAGTCTGTCAAGAAAAACCTTCCGTTAGCTGTCAGGATCTTGGCGT  
GTCATACCACGAGATACTACCTGAAGCCCCAAACAGCCGCGCATTGAATGACAAGCGGAA  
AATCGCGATCCGTACGTTCTGGCGCAAAGCCCAAGATATAACCCGCCGGCTTGATTGGCA  
TGGGCTCACGATACATGACTGGATAAATTATTCGA ACTACATAGGCGAACATTGCCGATG  
AACGTTCCAAGAGCGCCCAAACAATCACCCCGGAACCAGCTGGCACAGAAAGGAGTTTTA  
GTTCTGCTTGACGATAATACCGACTTGAACGTTTCGTGAGGGTGAAAACGATGACCGATA  
ATTTTTATGTGCCGCCCATAGCATCGAGGCAGAGCAGGCAGTGATTGGTGGATTCTCTGC  
TCGAAGCTGACAGTGGTGAGCCCTTCCACAAAGTTCGCGCGATGCTGCAGCCGGATTCTAT  
TATACAGCCGAACACACAAACTCATTTTCGACGAAATAACCAGAATGCACCCGGGAGTCAA  
ACATAGTCAATGGCCTGAAGCTTTTCGATGAACTGGGGCATAAATCCTTATCGGCGACTG  
TTGGCGGTATAGCGTATATCGCTGAGATCGCTAAGAACACGCCAAGCGCAGCAAACCTAG  
TTGCCTATGCGATGGCGCTTTGTGAAACCGTAATGGAACGCTACGCCATCAACCCGGAAGA  
CTGAAGCGAGGGAATTGCATTATCCCCGTAACAGATTGAGTGCAACGCAGAACTAGGAAG  
CTATCCAGGCGATTTTCACACA ACTGAGAGACCATCCAACAAATCGATCACGCCGTGGCT  
TGCGCTCATGTGGCGAGGTCTTGGAGGCCTGGGTTAGGGACCTTGAGCAGTGATTTGACC  
CGTCAGGCGAACAAACGAGAAATGACCACAGTGATCCCATCGCTGGACAGGATGCTATCAC  
CGAAAGGACTGGTGACAGACTCTATCTGTGTCATGGGCTCTCGCCCTAAGATACGGAAAA  
TGACGCTATACCCAGATGGCAATCTTTTTGGCTGCGCATGGGCAAAGCCCTCTCAGA  
CATTACGCCGTGAAATGCCAGGTGATTAGAACTGGAAAAACTGGTATGACAGAAGTCAC  
GTGTTACCCCGAATTTTGGTTACCTTCCGGCGACGAACAACGACGATAACGGCTGCCAGG  
GTGCTAAAGATCGCTACTACAACAGGGCGATCTAAACAGCTAATCGCTTGAGTGAAATCG  
ACTTGCTTTACATCGACGACACTTCGGGATTATCTCTGGACCAAATCGCCCGCGAAAGCA

GTCGAATCATAACGAGAAAAAGGATGCGTTGGCATGATGCTGGTTCGATTAAGTAACCCTAG  
TCACCGCTGAGACAGCAGATCGCAAGAGCCTTGGTTACGGCGTGATACCAAAGGACTGA  
AGAACCTTGCCACAGAGCTTGATCGCGTTGTTGAGCTTCTGACGCATCTTGACTACCTAC  
TGCAAAGCCGACGCAATAATCCCCACTACCAAGTGACTGAGGAGATACAGGCGAGATTG  
AACGCGATTGGGATTATTAGGCGAGGATCCATCGTGAAGGTGCTTATTATGACAGTGTTT  
CACCTTGTTAAACCGAACTAATCCTACGTCTCAATCGTCATTGAAATTCGGGCACTATGT  
ATTGGATTTCAGGCACGTGGCGCTATTTGTTACCCAGACCAGGAGTCTGCTGAAATTCGCC  
GTGGTCAACGCGAGGAACCGCCGGCCGAGAAGATAGAAGGATTCTGATGACTAAAAAAA  
ATTAGCCATTCTGGAAAAGGCATGGGGTGCACAAATATCCTTAGCTATGAAAGAACAGGC  
AATACAAGTAATCCAGACCGAATCGAAAGTCACCAGGCAGTTATGCGATGGCGGATTCCA  
GGACGATATTTAAATAACGCGCCAGATGATAACGTTTAAAGGGAATGGTATAGATCATCA  
TGGTAGAGCGGCGTATTGCTCCCATCTGCCCCGATGACGTTGACGTTGATGAAATGGTTAG  
GGAGACCAAGCATTGACCATCTACATCCCTGAGCTAATAACAGGCCTGCCGGTAATCGCA  
GGCCTCTTTACTTGGGGGAGAGGGAAGTGAACGATAGCTCCCGTCAGTTTGAAAACGGGG  
GGTTCGAAAGACAAAGGCCATTTACGGGAGATTATGAATTAACAGATTTTATTTGGGTGA  
GATGGAAGGCATCGAGCTCTGCTATTGAACTGCATATCGACTGCCCCGAATCGAATGTCG  
ACTTTTGGTAGCATAGTGAGGAAGTTGCTTATGCGATGGGCTATGAGTATCGGCGCGACA  
AAACGGTAATTGCAGTAATCAAAGCCATCAGCGCCGAGGAATCAAAGAAAAGAATTTG  
ATTAGGCAAATAACAATTCAAAAATCACTTGTAGGGATCACAATCGCTCTGTGCGCAAG  
GTAACCTCGGGCGAGTAATGCCAATAAGCAGCGAGAATGCAAGAGGCGGGAGAATGTGTG  
TGAGGAGGTGTAAGGAAGTGAGTACGAGAGCTGAGCTTGTGAGGGCTAAGTTTCGCTAAG  
AGTAGGTGCGTACGTAGCAGTATAGTTCATCGTCCAGTTTGCCGTAAGATGAGTGTTATG  
AGCATTATCCTGGCGCACGACGCTATCCGCGTGACAGTGTTTTTCGACGGTTGTTCAAAC  
TCAACATTGAGTTTAAAGCGCAACACGATTATCCGGAGTCAGGATTAAGAGAGACGGAGTT  
AGCTATAGCGACCGATCCTTAACCCATCCAACGCTAAAACAATTTCCGTTTTGCGGCGGT  
AATGCTGGTCTGTGGATTGAGCCCGGAATAAATAATGAGGTGTCGAGCTATGCCGAATAT  
GAGCTCTGTGAAGGCTGAGTGTCAAGGGCACCAACAGTTGCTTCGGCGGCTGAAAAAAGT  
AACCGGAGAGCCAGAGATGAAGCAGACCTTTCTGCTTCGAAACGAATGAATCAGAAATAA  
CGCCATAGACGCCATTCTGTGAGTACCCATAGACGACAAGTCACCCCGCGAAGTCCCCGT  
TAAAGAACCAAGCGCAGCAACGCCAAAATGCCCGTATGGGGCCGATGCTGAACGGTGT  
CTCTAGTCAGGTGCTGTGGCATGGTCAACGGCAGGCGCCGGAATACTGGAAAGACCTGTT  
CACTGCCCTGTGCTTAAATACCAAAAAACTGGAGGAACGAAGTGTACCTGGTCTCGACTG  
TGGCGTTGTGATGCTTGGCGTGCATCAGCAAAATGCGCAAGGCCAGCATGACGGAGCT  
TATCGAAGTCATGTTCTGGCTCGGCTCATAGCACACGTGCGGTGGATTGACTACCG  
ACGAAAGTATGAATGGTCACAACGAAAAAGTAGGGCTGCACGACTAGCAAACCAAATACT  
CCAGCAGACGACGAGGACTGCTGGCTAACGCCGCTTTGGCTTTTTGATTCACTGGATATT  
GGGATTGGATTCTGGCTGGATACTGCTGCGAGCGACAAAACGATCTGTGTGCGCCCTGG  
CGAACTGGGGCTCACGACGGATTAATGCTACGGGGATAAGTTCACGGTGCTGTTTGGAAAT  
AACCCATCGTCCAGCAATATCAGGCCGTGGGTGGAAAAAGCCGCAGAGCAGTGCATACAA  
CACCCACAGACGGTAGTGATGAATCTGCCAGAGGATATGTCAGTCGGATGGTTTCAGCATG  
GCTCTGGAGAGTCTGGACGACGTTTCGCATCATCGCTGATGGACGGATTAATTCTCTGGAC  
CCGTCGACAGGGCGGCACATGAAGGGAAACAGCTAAGGCTGAATCTCGCTTATTTGTCGA  
CCGTCCATCAGTTCTCGGCGGACGTTTACTTTCTGATACAAAGCGGCATTGAGTGCGAGC  
GGGCTGGGCGTAAGCAGGGCCGCATGAGGCCACAGCGACGAAGTATCACAGACATCATCT  
CCGAAAACCTGCAAATACCTTCCAACGAAACGACCCGGCATTAAACCGCAGGGCAAACCCAA  
AAGAATCTGACATAAATACCTTCAATTACACCGCTCACCTGTGCGGATATCCGGTGTCTAA  
GACATCGTTCGACATAATGACAATGCTTTCAATGTAACCTGGATTTGGAGTTAAAATCAA  
AAAAGGCCACATGTATGTCGAGTAAGAGTCACAACGAAAAATGGCGTCTATCCGATTGCG  
CTTTGTGAGTCTTTGCTGGCTAAATATGGAGGCAACAAATTATTGGTATACATGCGCCAG  
AGCCGCTTTAATGACCCAGACTGGTTTGTGATAAACCACCGCTCGGTTGGTTAGGCAAA  
GAGAATCGCCAATATAACCTACATGAAGGCGTAGAAAAAAGCATGGAAAGGACACCGCGA  
TCGATACCATCACGACGTGGGAAAACCTTAAATCGGATCACACGGCAGAAAGATGAAACGT  
CGGTGAAGGAATACGAGACATTGTTGCCTACAATCGACGTGTAAGGTTGACAGCCATGC  
TTAGCCCATCCCAATCACTTCAATACCAGAAAGAAGGCGTCGAGCGGGCTTTAATGTGCG  
CTAACAGCGGTCAGAAGGTGCATGTGCTTGAAGTTCACAGGTCTTGGTACTGCTGTGCTG  
ACCTGAGGAGCGATCAGGTTACCACAATGTACGAGAAAGAAGACGATCGATAAACCTGCG  
CGATGGAAATCAAATATATGCAAGGAGTGGTTTGACCCGGCATTATCAAATTAGCAGTGG

TACTGCCCGGAGCACGGAACCTCAGTTAGCACTCAACCTAGAAAGTAAACAGCGAGAAAAA  
GTGGAAAAACGGCAGCGGAGAAACGCCGACGAGAGGACCAGAAACAGAAAGATAGAATG  
GAGATTCGAAAACCTCGCCCTAAAGCCCCGCAGTTACAGGATTAACCAGCCAAACTAGCC  
GGAAACGCACGAATCAGAGAATGAGACCACGACTTACGATGTATCGCGTGCAGGAATGCTA  
ATGTCTGCTCAGTGTGATGTCGGACATTACCGGACAACTGCTGCGGGCCTCAACTCTGA  
TTAATGAAGGCAACATTCACAAGCAGTGCGTGGAGTGAACCAGCATAAAAGCGGAATT  
CTCATTCCATATCGCGTTCGAACTGATGAACCGATTCTGAGAGGAAGCTGTATACGAAATC  
GAAGCAAACCACAACCTCCACCCTGGACTATCGAAGAGTGCCGGGCCATCACGGCCAAG  
TAACAGCAGAACTCAAAGACCTTCGGATCAGCAGAATTGATGCGGCATTACGTTCTCAG  
GAAAAACCATTCTGACATGCTCGTTGAGGCATATGAAAAGCAGATCGAGGTCCCCAGAA  
TACTGAACTTTAGTCGCAACACTGCCAGTAAATACACGGGCGATAAAGAAGAAAAAAGAC  
TCGCTATGGCCATCGGTGTTCTTATAGTTGATCTCGGATAGGGAAAAGCTACCGATGCCT  
GATATCCGGCAGGTTCTTGAGTGCTGGGGGGTACGAGCGGCAAATCACCATGAGGCTATG  
ACCTGGTCACCCATTGCCGCGGATTTAAGCTACTGATCCCCGAAAACGTAAAATCTCGC  
CCGCAGTGCTTTAAAAATGATGATATGGTGATATGCGGCTGTATAGCACGCCTTTGCCGG  
ACAACCGCGATCCGCATGTCTTGCTGCTTGATTATTACAGGCTGGGGATGACGTTTCATG  
TCGCTGGCACCAGGCAAGGGTGCTCTGACACCAGGATAGGTAAACGCCTTCACAAAGCG  
TAGGGGATCGTACAAGATCTGCATATGATGCTGGGAGTTAGGCTTGTCTGGAACGGTAT  
GTTGAGTGTGTATAGTCGTGAAGGATAACCACTGTATTTTTTTGAGCGAAAAAATAGTGAA  
CGTTCGTAACAGTCTGCATATCATGATAAGAGTGGTAACATTGCCCGCTGCTTCACCCC  
CCAATGCGCGGGTTTTTTGGTAATCACAATGCTGTCAGCTAGGCGAAAAGTATACAGAAA  
GGAAGGTGCGACCACAATTAATACCAAAGCTTAAAAATTGCGCATGGCACTATTTGTTT  
TCTAGATAATGTGTCTTTTTTTGTATTGCACCATGATCGTGTAACGAATTTTCCGTAAAAG  
CTTTTTTCTCCACGTGTTTGCCAGCCTCCCCAATGGATGGCTTTTTTATGCCCGTAGCA  
CCCTGGGTATCAATAGATATCGTCGTCTACGTACGTCAAGCCGTCGCATTAGATCTCACC  
AGATATGTTAAGGTTGCAGCGCACCTTGAGTCGACTTATCATTTCATTCCGTTACTGTT  
ACATTTATCCGCCCCGCGTAAAACGCCCTCCTTCAGCGGATGAAGGATGTCAAGAATAT  
AGGTATTGTATGGTTCACAAAGAGTATCGTGTATCATTAAAATAATTATTTTGAGAGTGC  
TCGATTTTTCGTTTGTATCTTTTCTGTTAATGTGGTTGCGAAGGAATTTACCTTAGACT  
TCTCGACGGCACAGACGTATGTAGATTCGCTGTAGGTCATTTCGCTCCGCAATAGGAACAC  
CATTACAGGCTAGTATATCAGGAGATACGTCTTTACGGATGATTGATCGTGGCTCAAGGG  
ATAATTTGTTTGCAGTTCGTGTCAGAGGGTTAAATCCAGAGGAAGGGCGGTTTAAACAATC  
AATAGCTTATTGTGGATCGAAATAATTTATATGTGGCACGGTATGTAAACAGGGCTAATA  
GTGGTTTTTCTGGGTTTGATGATGTTTTACAGCTTACCTTTCCAGGTACAACAGCGGTTA  
CAATGGCTGGTGACAGCAACTAAACCACTTTACAGCGTGTTGCAGGTATCAGGCGTACGG  
GGATACAGATTAATTGCCTTTTCGTAGACAACATCATATGTGGTTTTTTATGTCAAATATTG  
GAACCTCTCTGAAGCAGTCTGCGACAAGGGCGATGTCAACGTCTGTTACTGTGACCGCCG  
AACTTTAGGTTTTGGGCAAATACAGAGGGGTTTTTCGTACAACACTGGAGGATCTCAGTG  
GGCGGTCTTATGTACTGACTGCTAAACATGTTGAGCTTACATGTAACGGGCGAAGGTTGA  
GTAGTGTCTGCTTATTTTATGATGGACAAGACTCTGTTCTGTGTAGGAAGAATTACTTTTTG  
GAAGCATTAAATGCAATTCCGGGAAGCGTGGCATTAAACTGAATCGTCATCATCAGGCAT  
CGCGAGTTGCCGAATGGAATCTGATGAGTTTCTTCTACGTGGCCGGCAGATGGAAGAG  
TCCGTGAGATTACGCACAATAATATATTGTTGGATGCATACGCTCTGGGGGCAATTCTGA  
TGCGCAGTACCATTAGCAGCTGAGGGGGTTAAATGCGAAAAACATTATTAATAGCCGCAT  
CGTTTTCAATATTTTCAGCAAGTGCCTGGCGGCACCTGTTTGCCTCACTGGAAAGCTCG  
AGTATATAAAATATAATGATGACGATACCGTTACATTCAACGTGGGTGTTAAAGAAATGT  
ATACCAAAGATGGAATCTTCGGTCTCTTCTTCTCGGCCCGCAAATTACGGGTCTGATTG  
TAGCGATTAATGCTGATGCCTGTCATAATAGAGGGGGATTTAGCGAAGTTATTTTTCGTT  
GACTTACAATAGCTCAGTGAATAAACAGGGTGAGATTCAAAAATGTTAAAGCCATCTCA  
AGTCAGACCGTTCTTACCGTTCTGTTAATGGATGTCTTAGAAATTTTCTGCATGCGGAAT  
CCCCCTGTGCGGAGGGGCGACAGATGAACGGTAAGATCTCTTTAATGATCATAACGCGAGA  
ATACGCGGGTTTTGGCGGCCCCAGGCCGTAATCGCCGGGAGGCACCCAGGTCTTTGAAATG  
GCACAGAGGGTCACTCTCGAGCCCCTCTCCGGAGGGGCTTTCTTTTGTACAGAAGAAGCC  
CGCGCAGGTATACGCTGCCGGCGACGAATAAACAACCAAACGTGAGTTAGTATTTTCAGCT  
TGCGAATAATATGCGACAGTAATCACTCCGCGCAATACCGCGGCCGATTTGGTATTGCGA  
GTTGTCTGCTATCTTCTCCCGTTGTCGTGTAGCTTCCGCATTTTCAGCACGCTCATCATTT  
TACACGCAATATTATCTCGGCCGGGACGATTCTCGGCATTGCCACACTGCGATGCGGTCA



GGGTGGCATGGTCGTCAGACCGTGCTGATGCCCTTGCGCAAAAACCCTGTCAAGGATGGC  
ACCCATTCCGTGTGCCGTTTTCTTCGTATACGGATGATTGCGCGCCACTGATTCAGGCGA  
TTGGCCCAGAAGGTGATGTGAGCACACCTGTTGTGGTGCAGCTGAGAGGTGGAGAAGCTG  
CAGTAATCGGCGCCACCAGTGACCCCATGTATTACTTTGTTCGTCGTTCTGGCAGGGCAGT  
CACACGCCCTGTCTATGGGGAAGGGCTTCTGTTTACGGAGACTTACGACGGTCCGGACC  
CGCCAGGAAAGTAGTTGGCGCGTTCGATTACGACGGCACCTGCCGGCGTTCGCCTGTAAAT  
ATAACGACATCATTCCGGCGGACCATTATCTGCATGATATGCAGGTCATTATCCGCCTTA  
GCCATCCGAAAGCGGACCTGTTAAAGGGGCAGTAAGGTACCGTGGGGACGGGGCTACATA  
TCGCCAAAAAATCGCAGCGGTTTATAACGGCGAATCCGGGGCTTCTGTTGGGTCCGTA  
GTAGGGGTGGTTAACCGTTCACCACCGGAGGCGAGGGCACATACAGTGCCGCGAGCGGTG  
CCTCGGAGAATTCAACCCGCTGAGGTGTGGACAAGCGGCTGCATAAGGACCTTATCGGTC  
TCACAAAAGCCGCGATCAATAATTATCCAAAATATGTTGTGATTGCAATGGTGAGGACGC  
AGGGGGAATTTTATTATGGCGGTACGCCGGCAAATCACGCAGCATAGCTTGGTGAGGTGC  
ATGAAAAATTCCGTGTAGACCTTGGAGCATTGCCAGGTGAGTGCCTCGTCCGGCTCTCCTG  
AGGTTGTTCCCTGGATATGCGGGTACACTACGTATTTCTGGAAGCAGAACAACGAATCCT  
CGTACCAGATTGCTTACGGCAGCTGCTAAAACAAAACGGAAAAGCATATCCATTTTCGTAC  
CGTCCGTGACGGATCAGTTTTGGGTTAACGTGCCGGCGAGAAAAACGGATTTTGACCCGG  
ACATTCGGGGTTTAGGATTTTGCGGTTCGAAATGGCGTGACAGCTCAGCCACCTGGAAGT  
CACAGGACAGTGCGAGCCATTTCTGCGCCTAGGCTCGCAGTCGGAATATTTCCCACCGTC  
TGGCAACGGCGACTTTGCGCCATTCCAAAAGATTAGCGCTAAACGCGGGGGCATCATCGA  
CAGTATCAGAGCTTGGCCCGACATCGCCTTCCGGTGCAGAACCCACAGCGGTCACAACAC  
TGCTCTCTTACGTTGGCCGCGAGTCAGAGGGAAGCTTGAAAGTACAGGGATGGTCAGCAC  
GTGGCGGGAGGTGTCCAGTCGTCGGCCAGACTGACGGAACCGGAGGTTAGGCAGGGACGC  
TGACCAAGAGAGCCGGTAGCAGGAGCTGGGTGTTGGTGTACGCCGAGGGCACTGGTGCGG  
ATCTGTTCCAGATAGGGGGGCAGATTGGCTGCCAGTTTTAGGTTTCTGGAGTGCTAGCTG  
CGAACAGTATGTTTTGCCGTTTTACTGGACGGTATCCTCGCTGCCACAGGGGGTTGCGC  
TTACCAGAGACGGGTCGAATAACCAGGTGGCAGCGTTCTACATCTAGAAAGATTCAATAG  
AACTGAACGTGATGTACCAGAATGCGAAAGTGGCGACAAACAAAATGATACAGGCAACCT  
TTGGTGCATTTGCTATCGTATGGCATTCCGTTGCCTTCGGCGTCCCGGGAATAACAGCC  
TTCAGGTGACGCCGGTTTTCTGTTGTTTACAGGATGGCATTCCGTTACGCTGACGCAGTCAC  
CGGTCAGTCCAATTGTGGCGGATAAACCAGCATGTGACAAAACATAACCAAAGGTGCTTCTT  
TCCCGGTGCTGAGACACAGCATTGGGGTTGAATTGAACAACACGGACACCCCGGCATGAT  
AAAAAAAACCGTCAGGAACAGGAATCCAAGCTTGCGGTGGTAATACCTATGGAGAAAAAA  
TAAAGGAGCGATACATTCGTGTTATCGACTCTAAAATCAACACAGTTCTTAGTGTCACC  
CTAACGGAAAGAAATTTTAGCATTTTTGTACCAGTTAAAGCTGTACTTCTGTAGGGTGGT  
CTGTGGGCTTTATCTCCTGTGAGGTGGGTACTCGGCCATGCGTGACTTGTGGCACAGACG  
GATTGCCAAAATGGCCGCTGAGAACAGCGGAGCCAGTAACTCAGCCGTAACAAGCCCGA  
AGAGCCGCCCATTTAGCGGCAACTTTCGTAATCACATCTATCGACGAGAAAATCCCCTGT  
CAGGTATTAGATCCCTGGTGACTGCTGAGGCACGGAAGGAAGACCTGGGCTCTGAAGAAG  
TCCGGAGGGCCCTGAAACAGATACTTCGGCAAAACCTGGAAACGCGTCTAGATGCAGAGG  
TTGATGCCATTCTGCCTGAGCTCCTGGCCGCACCGGCAGCTCCGGAACCCGAAGGCATCT  
CGCGTGAGGGGTGTGCGTCCGATTGCGGTGACCCACACCGGCCAGCGACATGATGATGC  
GTGCATACGTCATGGAACATCGGTGTGTGCCGGTGGTCTTTTTTCTTGCTGTGTCCCTCC  
GGTTTGCGGTAAAGGGGGTATGTAAGGTGGAAAAAATCCCAACCGATGTGGCGTACAT  
CACGTAAGCGGAGGGAATGAGCTACTGGTTCCTGAAGTTGCTGGACAGGGGTGCCCGTC  
TCAGTGGGCGACCATAGGCGTGCTGGGGATTCTGCTGTTGGGCTGCCGACATATCTGAC  
GACTCTGTGTTTTAAAGATTAATGAGACCGGAATATGGAGGATTCGGGAGAATTAGCTGA  
TGAGCAGGAAACGCCGCTATGGTTTATCGGCTGCCGTTCTGGCGCTGATTGCCGAGGTG  
CTTCTCCGCCTGCAATCCTTGACCAGTATCTGGACGAAAAGCATGGTAACCACACCCAG  
CATCCCGTTATGGTGCGGGTAACTAGACCATCTGGCGGGGAGCGACCCGAGTGTTGCTA  
AGCGTATAATTCTAAAATGAAGCTCTCGAAGGATAAAAGCGACCGGGTTAACGCCATTA  
ACCGCGATAAAGCGCTGGCATCGGGGGTCAACAACACCAAAGTGTCGCTGACAGAACACC  
ACAAAGCGGGGATCGCGTCATTCTGGCCGTACAACATTGGACCCGGTAAGTGATTCCCTT  
CCACTTTATACAGACGAATTAAGGGAGGTGATCGAAATGGTGCATCCGAAACCATTCGTT  
GGTGAATTAAGGACGGTAGCAGAGACTGCCGCTTTCGTTCAAACAATGTTACGGTCAGG  
TATCCCATCGTGACCAGCAGAGCGCGCCAGCGTGCTCGGGATTCGACAGATGAGATGAAT  
ATTCTGCTGGGAAATGATGATTGTTTACACGTACTGTTAAGACGAATTGCCGCAACTTGG

CAAAATGTACGTGCATAAAGTCAAAACAGTAGTATAATACTTTGGCAACGTACGCAAGCC  
TTTGTCAATTCAGCGTATCTCACGCGCATCTCCCAACACAGAATCTTTCAGGTTGACACA  
TCTGGATAACCGTTTAGCTGTTCGGCGTCTGTCTGTGGGCTGGATTCCAGTAGGACGAGGT  
TCGTGACTAAAAGGAAGTAACCGATGAATACGATGGCCCTGCCGTTTCACGGCAACTCTC  
TTTATGTACTTAACCATAATGACCAACCATAACATCCCATAAAGTTTCTTGTGGCGGGGA  
TAGGGGTAGCCTCGAAATTCAGTTGTGTAAGTTAAGATTGCGTTTTTTCGTCACCTAGAA  
CGGAAATCGTTATGGCTGCTGAGGATGAGAAACAACGCCATAGGGTGTCCATGCCAATTC  
GCACACTTGCCAGCTGCCTACAAACCAAAAATCTCAATAGAGTAAAAGCCGACATTCGCG  
ATAAGGTCGTCCAGTATCAGGAAGAGTGCAACGTTGTTTCATTACGCGTACTGGACGTCGG  
GTTTTGTCGTTACTCACCGTAAAATGAGCGTGATGGAAGAACTCAACCAGCCTTGTATGG  
ACATGAAACGGGATAAAAAGCATGGCCAGTGTGTGTGCTGCCGGGCTGAATGAGTAGAAAC  
AGGTAATTGCCTCGCATGTATCAAACTCCGTAAGCTGGTAGTTGAAGCCAATATGCTGA  
TTGATTTTGTCTGGGTGCTCCAGGCAAAGGGAAAATAAAAAAGGGAGATTGATGGGGTG  
GCCAATGATCTCACATAAACTCATAACGAGGGTGAAGAGCCTCTATCTAGTTATCTGCAT  
ATCATACTTAGTCCTGCAGGTTGCCATTTTCTTTTCCACCGCCTGTCGCGTCTGACGTT  
ATCGGGACTGGTGGGGTCAAACCGAGATGAACCGTGTTTCGCTGGGCGGCGGCTCTTGTCC  
TGGCGGTTGGGTATGGTGCCTATGGCTGGCAACAAACCATTACGGTGACCACGCGCTCA  
CCTATAGAGCTCAGCGCGATAAAAAAGCAAGACAGCTGGAACATGCGAATGCCAGGATTA  
CTGACATGAAGGTGCGCCAACGTGCGGTGGCTGCCCTCGATGAAAAATAATCGAGCGAGT  
TAGTCGATGCGAGTGTGAAAATGAACTCTGCGCGCTGAAGTTGCCTCTGTTCTTAAGC  
GCCTGCGGATCAACGCCAACTGCGCCGGTAACGTACTTGTAGCCACCCGCACCCACTGCG  
CGGATAATGCAACCGGGCCACGACGGGCAGAAAACGCTGAACGGGATTATTGGGTCTTCG  
GAGAGAGGGTGGTCACTATGCGAAAACCACTGGAAGGAACCCAGAAGTGTATTAATGAGC  
AGTTCAGATAGAGTTGCCCATATAGATGGGCAATTCGTGCAATTATTGTCAGCAATAGAC  
TCGCGCATTACGCGGAGTATAAATTACTATAGTAATAATACCGTGCAATCCATATAAGAT  
TATTTGCGGGGTTTTTGTCTTAACAACCTTTTTAGTGCCGCGACAATGTTTGGCTGCACC  
TACAGTTTTCTGCTGCCTATTTCCAGAATCGATGAACGGATGGGTGATGGTTGTCTTGGG  
TGCAATTGCTGTCTGTTTCTTTTGAACAGTAAGCGTCTGTTGAGCACGTAATGTAATAAG  
AAGGGCCAGCCAGTAGTGAGTCGCATTTTCTCGATGGCGATAATCACGATGCTTTTTGA  
AGTTCGCAAAATGGTATGTGTGGAACATTAATGAACCCTAAACAATGAATTGAAATCGT  
ATATTGTTAATAATTCGTTATGTATGTGAGGTGCGATGAAAAGACATTGTATCGCCGGGT  
TAACTATTTCCACAGCCCTAACGGGGCACTTCCCTGCGGGAGTGTGCGGGGATAATCAA  
ACCGATGCACACCGTGTTTTCTCAATTTTCACGAGGTGGGAGCGAT

>NewGenomeName\_110

CAGTCGGTGAAGCTGCAGATATTATGAACTGTGTTTGTGACATCCTGTATTTGCAATACA  
AGGCAGATTATCCTGAACTCAGTGAAACTCAGATTGTGGATTTGATTAAAACCGAATTGA  
ATTTCCAACCTCAATTTGAAAGCTGAAAAATGGATGATGAAAGCATGTACCAAGTAATTTT  
TATCGAAATTGTCATAGTCGTCCTTTTTGCGTGTCACATGTCCATGTGGGATGACTATTG  
GAACGGTAAATGCAAACACGAAATCACTGAAATTGACGCATGGCTCAAAAAGTATGATAT  
GACACTGTGGCCAAAAGACCGGAAAGCTGGTCCATTTTCAAAGTGGGTAAATTTGTTAGAT  
GACACTCTAAAAGACATCAAATAAGCCAATGCCAGGGTATCAGTATCCGAAAATTGTAT  
AAAGCTCTAGCTGAAATTCGCAAAGACGATATTGCTAATCCTGATTTTCGATCAAACCTGGA  
AATTTGATGTCTTTCTTTACAGATCGCAAACGAAAGATGTTAAAAAAAATCCATTTGGG  
AGGACTAAATCTCAACTGCAGCTGTCATTGCGAGTATTGTGCTGATGTTTCGCAAAAACAC  
AAAGTAGTGATATAATGGCAACTACTCTATCAATTCATTTTGAGGAATATTAATGTCCGA  
TGAATTCAAAGTTCTAACTCCTCGCGAACACGTAATTCTTCGCCAAATATGTATGTAGG  
TTCTGTCGCATATGAACCACATGAGCGATTCTTGTGGTAAGTATCAATCCGTTTCCTA  
TGTTCCGGGCCTGGTAAAAATCATCGATGAAATCATCGATAACTCGGTTGACGCAGGTAT  
TCGTACCGATTTTAAATTTGCAAATAAGATTGATATTCGCTTTGATTTCTTGAAGGTTCT  
TCTGACGGTAGCGGATAACGGCCGAGGGATTCCGCAACCACTGGTAAACACTCCAGACGA  
AGAAATCCCAAGCCTGTCGCTGCCTGGACACAACTATGGCAGGCTCAAACCTAATGA  
TACCAACCGCGTATCAATGGGGATGAATGTCGTAGGTTCTTCTCTGACAACTTCTGCTC  
CAAGACTTTTATCGGTGAAACGTGCGATGGCAAAAACCTTCTCACTGTCAATTGTTCTGA  
TGGTGCATCTCAAGTCAATTGGGAAACCAAGCCGGGTAATATCAAAGGAACGTCGGTATA  
TTGCATCCCTGATGAAAAGCACTTTGAAGGAAAAACGAACGATCCGCAGATAGTAGATAT  
CATTTAGATCGAATCACGGCATTGTCTGTGGTGTTCCTGAAGCTTAAATTCACCATCAA  
CGGTGAAGTGGGTTCAATGAAGTTCGCAGAATACGCTAAAATGTTCCGGTGTGATGATCTCT

CATTCTCGAAAATGATAATTTTAGCATCGCATTCTGCAATTCTCCTGAAGGATTCCGTC  
AGTCAGTTATGTCAATGGTTTGAATATCAAGAATGGTGGTTCCCACATCGATTACTTGAT  
AGATGGCATTGCCGACGAACTTATTCCATCAATCAAACGAAATTATAAAATTGAAATAAG  
CAAAGCTCGAATTAAGAATGCTTGACAATGATTGTGGTTGTTTCGTGGAATTACTAATCA  
TCGGTTTGATTCTCAGACAAAGGAACGTTTGACCAATCCGCTTGGCGAAGTGAAATCACA  
CATTGAGCTGGATTCCAAAAGTTAGGAAAGCAAATCATGAACAATGATGCTATCCTGAT  
GTCAATCATCGAGGCTGCTCTTGCTCGTCATCTGGCTTCAGAAAAAGCAGCATTGACGAA  
AGCCACAAAGCAGCAGCAAAAACCAAAGTCGCTAAGCATATAAAGGCCCGTTCCTGGGG  
TGACATTTCCAAAGAAAAACTCTGTTCTGATAGAAGGTGATTTCGGCCATTGGATATTT  
GCTGAGTGTTCGTGACAGCGAGTTGCATGGTGGATATGCTCTTCGAGGAAAGGTTATGAA  
TACTTGGGGAATGAAAGGTTTCGGACGTGCTAAAGAACCGAGAATTGGCTGATATTTGTGC  
AATCATGGGTCTCGATTTAGCCAATCCGGATGATGTGCGAAAATCGCAAAGACAAAAAAGT  
TGCAATGATGACCGACGCGGATCCAGATGGCCAAGGCTCAATTTACCCATGTCTACTCGC  
GTTCTTTAGCCGTTGGTCAAAGTTGTATGATCTCGGTTGCGTACGATTTGTAATTCTCC  
GGTAGTCATCCTTTCTAAAGGAAAGCAGACCACGTGGTTTTATACCATAACTGAATTTGA  
TGCGCAAAAGTAAAAGTACAAAGGTTGGGAACTTCGATATATCAAAGGATTGGGTTTACA  
TCGCGAACACGGATATTCCGAAGTTGTTAATAACCCTCAGTATGATTTTCGTGATCTTGG  
ACCCGATTGGGAAGAATTGTTTCGAAATGCCGTTGGCGGTGAAGCAGAAGTTTCGAAAACA  
AGGGATGTCACAATGAAAAGGGCTCTTCGGAGCCCCCTTGTGTTTTTGA AAAACAGTGTA  
CAACGCTTAATGTGAATGGTATTATGGCTGCATCAAATCAACAAAGGAGTACATCATGAA  
ATTCGTTTCGAGTTAAATTCAAATCCCCGGAACATCGTAAAGCTTTTGCTAAATCTGCCTC  
GTACAAAGCCGAATTTGAGAAATTCATGCCAGACGAATTTTGGCTAGGCTTGACCCACA  
CAAAAATGTTCAATGCCGTTTGGTCGATTCTGATGGTGTGATGAGCGAGCTGCCGGAATC  
AACTGGTGGTGGCGGAATCATCTTCGACGACGAAGAAGTTTATTATTCATGGAAATTAT  
TGAATAATTTACAAACAAAGCAGTTGACAATCGTGAGGCTATGGGATACTATAGCCCCAA  
GTTAAACGAACTAGCAAAAACATGGAGTATTTTAAAATCATCAACTTCACCGAAGCATT  
GGCAACGTTAAATCCCATGCGATGTTCTTCCCCCGTATCTTGATACCTTGATCAGTGTT  
TACGGTGTGAAACTGATTCATCGTCAGTCTTCATGTACAACAAAGGCACAAAGCAAGCA  
TAGCGTCTCGGCGGCAAGAAAGCTGCTTCATACATCGAATACGTACAAATTGAATTGGCG  
ATAGGAGAATAAAATGAAAGCACGTGTCAAATCTGAAGAAGCACGTCAGGAGTTCATAGA  
CTACGGCGAAAAGCGTTGGGCAATTGGCCCTCTGGGCGACACAAATAACAAACGTGCGAT  
CGCTCGTCATTGAGGAATGAAAGAGTTCGATGTTGTCTAAATCGATTTTCCATTTGCTGG  
CTGGTTCGACATCGTCATTGATGACATGGTGTTCGAGTCTATCGCTAGTGACGAAGTTTG  
CTTCTTCGAGTTCATTGATTGATTAAGTGGCCGGGAAGCCGCCCGGCTTTTTTGTATCAA  
AACAGTTTGAGGCTTTACCTCTTCGAGCGAAGCTCGAATTTATCCTTTTAGTTATAATAT  
CTATTAAGCCATAAAGGATAAAAATATCTAGTTCGACTGGGTGGAACCAGGTAAACGTGG  
CTGAACTCAATAGTTTAGTCAATAACACATTCACATAAGAATAAGGTATTATCCAGGTT  
AACCCAGTTAATCCAAAATTTAATTTAACTTTAACTGTGTGTCATTGAAATGTTTACTGTGT  
TAGGATGACACCAGTAGAAAAAGAAAGGAGGTCATTATGACCCTGCATGAAGAAATATCT  
GAAGCTCTGGTTCGAATTTGTGCGCATCAACGTACGATTCATGGGTGATGAAGAAACAGCC  
GATGAACTGAGCGACGAAGTTAACCCAATTATAGCTAATATCAAAGCTGGTATTGCAACC  
CGCAAAGAACTCGGCCGGCTGTGTCATTTGGGTCTGTGCACGAATCTAATCTTTATGGT  
TCCGATTGGGGCAAAATTGTTTCCAAAATGGAACACCGCATGAAAAGGAACATAGTTAT  
GCAAATCACCTTAAAATCCGAAGAACATCGCAAAGCATTTGCACGTATTGCCAAATGCAA  
TGAATGGATTGCTAACACTCTCGGTATGGACACATGGGAACGCCGAGAAGAACC GGCGA  
TGAATATGACAAAACCCAGTATTCGCAGTTCCTGACGGTTTCGGTAATCAGGTCGCCGG  
AGTGTGTTGTGTATCACGGCGGTGAGTGTGAAGATCATGCATGGATTTTCTGGGGTGAGCG  
CAAATATTTTCGATATTTCTGAATAAAGGAAACACATAATGATTATCGGTTCTAACGAACA  
AGATGTGATGATTGGTAACGCACCTTCTAAACGGACCGGGTTTAAAATCAAGGCTGGGCG  
GAAGGCCTTCCAAGTACTTTCTGAAAAGCTTTATAAAGACAAAGCTGAAGCAGTTTACG  
TAAGCTTTCGTGCAACGCGGTTGATATCCATTGCGAACTTGGAAGGACATATTCCGTT  
CAACGTCACTCTCCCCACTTCAATTTACCCATGGTTCGTAATCCGTGGTTTTTGGAACTGG  
GCTGACGGAAGAGCAAGTTGATGAAATTTTCACTGTCTATTTTGTCTCCACCAAAGATGG  
TTCCGATGATTC AACCGGCGGTTTCGGCCTTGGTTGCAAGTCTCCAGTTGCATACAGCGA  
GTCGGGTGGCGGTTTCACTGTAAAAGCTATCAAATGGCCTGTGTACTGTCTACAACAT  
GTATATGGATAATGGAGAACCATTTGCTACACCGATGTGCGACTACTCCGACGCCCGAAGA  
AGATGGTCTCGAGATTCTCGTTCCTATCTCTGAGCACGAACATGCTCGCTGGAAAGTTCT

AGCTCGCAAAGCGTACCGGGAATTTGATCGCTGCTAACCTTACATCACAAATATGGATGC  
AAGCAGCATTGAAGAGTTTCCGAATCAAGATTCGTTCTTCAATACTGACGAATTCGCCCG  
TCCAGGAGAAGTGTATGCTGTAATCGGTGGAGTAGTGTACCCGATCCCTCAACGTCTCCT  
GGAATCCGATATGGTATTCGATATGCTGGTAAAGCTGCATATACCAAGTGCCCTATTGG  
CTCAGTAGACATTGCTCCTTCTCGGGAAGAAGTGTGCTGACCAAGAAGGCGAAGATTA  
CATTATTGGTCGACTTCGTGATGTTTCTGATAACTTTGCCGAATCGATAAAGAAGGAATT  
TGACGGAATAACCGACAAACGAAAAGCCGTAATTAAGCCAGTGAATACAACAACACTATGT  
TCGTCAAGCTATTTTAGATTTGACCATTGATGGCGAGCGAATTAACGATCTTATTGATCG  
ATATACCGATATGTCAAAGCTTAGTGACATTACCGTTTGCGCATATCGTGGCGGTAGTTT  
GCGCCAGCATATTACGCGTTCGGGATATTCGTTGAGAAGTTCCAATATAGATGCAAAAAGA  
AGTCTTTGGCATCAGTCGGCGTAAAGTGCATGTTCTCATCAAAGATACAGGTGAAGGTAT  
TCCGAATATGGTTCAGGCGTATTATCCTGATATTGGCGATACCATTCCAGTCGTTGTGT  
GAACAAAACCTCGCAAACCTAAAGAAGAGTGAGTACGCCCGATATGGACGAACCATGAAAGC  
TATTTGCGAAAAGTTTAGCGTTGACGAACGCTCAATTCTCAAATTTAGCGAAATGAATGA  
TATTCGAAAAGCATTACCATAACATAAGCGCAAACGCTACTTCTCGCGATGCTAAACC  
AAACGTTCAACGTCATTACAACAATGACTCCGACCTTCGTGACGTTGAAAAAATTTACAT  
GACATCCGGTGAAATAAAAGCTCTTGAAGGAACTGCGGTTATTTTCGTATAGCGATACATT  
TGACAGAATTGCGCTTAAAGCTTCGCAGTATACAATGCGTAGTGCCCTAGCAAATTGAT  
AGAGCTTGGAGCAAGCGAAGTTTACGTCATCGATAATGGAAAGCGTTCTACCCGCTGTGA  
AGGCTCCTGGTTTGAATGCGGTTTTAAGTGGGCATATGACCAGTACAAAGTGCCGAAAG  
ATGCTTTTGCTATTCTTAGTGCCGAGTGCCCTAATATCGGAGACTATGAAGAAGCAACTC  
GTCTTAAGCAAATGGGCATACTTGGAAATTGATATAACCGAAAAGTTTGACGAAATCAATG  
ATGATTTCTGAATGATGCATCCCAATGGGTTGAAATCGGAAATCCCGATTATGCCGATT  
TTGCTTAAATCAAAGAATATGTTGATGAACAGAATATAAAGTATTCCGAAATGTTCTATG  
ATTATAGGGAGTCATTGAAAATTAACGCCCGCTATTGTTTGCAGTTGCCGTTAGTGGTA  
TAGAATTAAGTCCTGAAATCATGAAAGATATCGAAATTCTCCGGGCTCAGTAAGAGCCCT  
TAAAACAAAGAGGTATGATATGGCTAAGGTTAAAATTGTTAAGTGTTTTGATAATGAAAC  
CAAGCAACAGATTTTTGACAAATACTCTCTTGGCAATGTGTCTCAAGCTTATTTGGCAAG  
TGAATACTGCGTATCGGTAGATACAATTGCTCGGGTTCTGAAAGAAGTCCGAAATTGGAA  
TATCTCTGCTGCAACGTCAGAGGATTCACCTGCGGAGGAAGAAATTGCTGATAAGCTGGA  
ATGTACCTGGATGGCCAATTCCAAGTTCCTTTCTGTGACCATCGGCGCCGAAACTTATAA  
CGCATCTGGCGATACCCACAGTTCATGGAAATCATCAGTCTTCTGCGCGAAGAAAAATA  
CGATGAAGCAATGGAAATGTTGAATATCAAGCGTGGTCTTGAGCGATATGTCTCTGGCGA  
TCTGGTTATCGAAGGCGGCACACTGAAATGCAAGGATCTGATCATTGATTCTGGTCTTAC  
TCGTGCGATCGTCGGAAAGATGCAAAACGGCGAACCTTTCGAGCCGCTCGTTCCATTCTT  
TGAAATCTGATGGCTAACCCGAGTCGTGAGCCGTATATCAGCTGTACGACTTCCTGGA  
ACATAACGACATTGAAATCACCGATGATGGTTATTTCAATTGCTTGAAGCGTGTAACAG  
CAATTTCAAAGACCTGGACACTGGCAAATTCGATAACTCTCCTGGAACAGTGTTGAAGGT  
TAATCGCTTCCAGATTGACGAAAACCCTCACGTTACCTGCTCTCACGGTCTTCACGTTGC  
TGCCAAGTCTTATGTCCCTCATTATGGTGGTGGTTCTGGAAAAGTGATTGCATGCAAGGT  
CAACCCAGCAGATGTGGTCGCTATTCCAACCGACTACAACAATGCCAAAATGCGTTGAGC  
CGGGTATGAAGTTCATTACAAAGTAACTTCTAACTTCAAACAAATGAAGCACTACTAATT  
TTCATAAGCCCTCTTCGGAGGGCTTGTTTGTAAAGGGGTTGTATGAGCTCACCATTTAGCA  
TTTTATTTTACAAAGACGATGACATTGTTGGTTTCGCGTTATGGAAATCATAGTTGGATTT  
CGCCGAATGACGTACAGTAAGCGAAGAACATAATTGCAGTTGTTGAAGGAACATCTTGGC  
AGTTAGGACCATTGAAAAAGAATGGACTCATTTCATTGCTGCTGGCCGAGTGTTTTATG  
CTCAAGATTACGAGAAAATGAAACAAAGCCTTCTCTTATAGAAAGCTTGGATTTATCCG  
ATTTTTTCATTGTCATATTCTGAAATTGTGAGGAAATTGTAATGACGGTACCGATGAACGT  
ATCCCATGATGAATTTATCTCCCTTAGTCATATGCAGCCGTTTGATGCGGATATTATTCG  
TCTTCGGATCTGCGACCAACTCAAAAAGCATCCTGACACGAGGGATGAGCTTTTTGAAAA  
ACGGAAAAGGAGATATGATGATACCGTCCAATACGCTCTCGATGAAGCGGCTGGGAATGA  
TATTCCTCGGCAAGAGGTCATTGATAGAACGGTTCATTCACTGAATGCCGAAATGGGTGT  
CGCATATATCCTGGGTGGTGTCTGGGGAGTGTGTTGACTGGTTAGACAATGACAATATCAC  
CTTTGATGTGCCAACACCTGGGTTCAATCTGGTAATAAAGACTTATTTTGGCAAATGGCC  
AACAAATGCATACCGCTGGTGCTAAACCGTATGGCAAATCAGAAGGGCTGTGCTTGTACGC  
TGGTTTGCGCGGAGATGCTGATGTTTACTTGGTATTGAACATCAATGAATATGCTGGCGG  
TATCACATATAGTCCGAAATACTTCTTCAAAAGCGAGCTATGGAAAATTATCCGTATGT

GATCTACGTTCCCAAGCGCGGCGGTGGAGCATAACATCAATAGACAGCAGAACAATTTGT  
TTATTTTTATAACAAGTGGTGTACACTCTGATTGTACGTGATAAAATGCTCCTACCCACA  
ACACTGGAGCATTGTCATCTAGGAAATGAAAATGAGAACTCACGATTTTCTGAAAAGAC  
GCGCCAGGCCAGGCTGTGCCGAGTAAAAGAAAAGAGCTGAGAGCTGAGCACAGAATGCTTT  
GCTCATTGATAGATCATCACATCATCATGTGCTATGACCGCGAAGACTCACCTGATCTCA  
TTCAAGCCAAGAAAGACCGCGATGCAATCGAAAACTCCTAATGGAGATTACTAAATGAA  
AACTAATACACATCACGTCACAGCTATTGATGCCAGTGTGTTGGCACTTTTGAACCTTGA  
ACCGGCAAACTTGCAGGATTCAAAGTACACTTTTGAAGAAGTGATGCATAGAATCGGTTA  
TACGATGATTGATTCGTTTCGCAACGCTTGAAAGCTCCCTGGAAGGTTTTGAAGCACTTGT  
TTATGAAAACGTGATCACCTTCCCCTGCTGGGTAAAACGGGTTGGGAATCACTTCGATGA  
AATGTATGACGTGAACTGGATTTTCTTTGATTTTGTTCCTTTCTGAATAAAACAAGTT  
AACAACTCGTGGCTATAGGTTACTATAGCCTCAAGCTAAACAAATAGATAAACACGGAG  
TAATTTTATGATCAACTACACTTTCAAATGCGAAACTTCTACCGAAGCCTTCAATTATGT  
TGTCGGCACCAAGCGTGGTAAAGCCTGGGCAAATAAACTCTTCGCGATTATCTGGATGA  
AACTGGCGTTAAAGATGCCACTATCACCTCATGAAAGAAGAAAAACAGTAAATTGAGCA  
AGTTATGAAAGGCCGTAAAACATTCGACAGCCAATTCAGGCCTCGCGGCGGTTTTGCGTA  
AGACATCAGTAACGGCGAAATCAAGAACGAGCCAATGGTTTTCTACTCAGACTTGGAATT  
CCCGTCCGAGAACGGCGGCCCTATCACTCGCAATTTTATCGAGAATCTCCCGCTCGATAG  
GAAAAGCATTGTGATTTTCGATTCGCGTGTTCACATGCTTATGCCTGGGTGGTACCCCGC  
GATTCCCGGATATCACCATGATGACGTGCCGCGCCCGCGATTCCGGTAGGCCAGCACTT  
TGCAACTGCAGGACAGCCAGACTATGACAATCCCCGTTATCTGTCTCGCCATATCCTTGG  
TTTGGTTAACGGCGATATCTGTCCTACTCATTTTCCAGTAGGACGATCGGAATTCAGCCA  
AATTCCTGATGGTGAACCTTATCTATCGGCCATGGTATCAGGAAGTCATGGCTAAACTCGA  
AACTGGCGAGTTAAGTAAGCATATTGCTCCTGATCGAACTCTTGTAGAGTTTACTGGCA  
AACCTGGCACACTGGGTCAAAGCAGTTAGAAACGGCTGGCGTTGGTTTTGGTTCGAGTTTC  
TCGCGACACTGATCGAGTTCTGGCACCGTTGAATGAAATTCGACGTCAAATTCAGTTTA  
CGTGGAATCCCCGATGGAGGGTTGGTGTGTTAAGTATCGTTTTGTTAGTGAAGAGCAA  
TTCAACGCATGGGCCAAGCAAATATGCACAGGAATTCGCATTTGCTTTTGATTCATGG  
GATAAATCTTCAAATGGAAGACACCGGGCGTAAAGTTTGTCTGACACCACCGAAATC  
GACGGCGAAATTTACATGAGTACTCAATGGTACCCATTCAATATAACAGACCGTGGCAAT  
CGCATCATCGAGGTGAAAGAATGAAACTCTACTTCTTGCAGCACATTGAAATCAAATAGC  
TGGCACGACTTCTGCGAATTTGAAATCGGAAATATGGTACAAAAGATTATCACGTCATT  
TGCTTAACAGCTGTGTTAGTTTAAAATACAAGTCAACGAATTGAATAGAGAAAAATATCA  
TGAAAACATAATTTACTGCTCAACATATTGTATTTACTGGTGCCCAACGTGTTGGTGCTT  
TTGAAGTTGACGCAGGAAAATTCCTGGATGCGAAATTCCTTTTGCCTGGCAAAAATC  
GTGAAAGCATTAGCAAGCCCGCATTTATGTTATCGCTAAAGATGATGTTGCTGTAGCTC  
CTACTTTTGTGTTGGAATAAAGAAAAGAGTGTGGTTTTAACGAGACTATTTCCGCGAGTAA  
TTAGCTGCTGTTGGAAATATACTGACGGTCTTCCGCGGAAGATTTACCGCTAAGTCACAG  
GTCAAAACAAGACACATACGGTTTACCATATCCCGATGTCCTTGGTGCCAAGACTGTTGA  
ATATGCAACAACCTTGAGCTGTTTGAAGATAACACCACCAAATATCAGTCGCTCACTGCTG  
TTTCGCATCAACTGTTAAGGTATATAATTTGAATATCGAAAACGATAAAGGAATACCCA  
TGGCATTAGTTTAGATGATTTTTTTGATCAAGAGCCGATTTTGCCGGTTCCAAAACCGG  
CATCTAATCCCGAAACTACGCCTTGCAATGAAAGCAAAGATGATGAATTGTTTCCCTCCGC  
CAGGAATTACCATCAACCAGGTCACCGTTGAAACGGTAATCGAACTGAAGTACTCGATT  
CTTCGGTTGTTAAGAAGTCGATGAACTGAAGTACTTGAAGAGCAAATTCGGCAATGCC  
AATCTGAAATTGATTCAGATATTCGGCATGGAAGAAAACCGTTTTGCAAAGTCATTTAA  
CTAATCTGCATAATCGACATCTGCAATCGATCATCAACAATGAAGCTCTTGAATTTGCCA  
TGTAACAACCTTGAAGAACGTGCAATCCCGTCTATCATCGATGGCTTTAAACCGGTTCAAC  
GCTTTTTCATGTATCGCGCATTGGAATATGCCAATCAAATAAAGACCAAGTTTAAACAAG  
TAGCAGCGCTTGCAGGCGGTGTTTCTGAGGCAGGTTATCACCATGGCGAAGGTTCTGCCG  
CAAGTGCTGGACAACCTTATTGCAAATACATGGAACAACAACATTCCAGTATTGGTAGGAG  
AGGGAAACCTTGGTTCTCGTCTTGTTCACAAGCAGCTGCACCACGAAATGTGTTTTGTC  
GTGTCCATCAGAATTTCTGGGGCATCTTTAAAGACATTTCTCTTTCTCCGGTGCATCCAG  
ACCCTGAGCATTGCGCCCGCGTTTTTATCTGCCTGTTATTCCTATGGTTCTCGCGAATG  
GCGTAAAAGGTATTGCCACTGGCTATGCTACTACAATTTCCCGCATCTTACGTGAGTC  
TAGTGAAGTGCACACTGGCTGCAGTAAAAGGCGAAGAAATCCCCGAGCCGGAAGTGCAGT  
TCCCATGCTTTAAGGTATTGTTTCGTCGAATCAATTCAAATCTATCGAAATCGAAGGTC

TATTTGAGCTAGTTAGACAAACCAAACCTCATTATTACCGAAGTTCAGTTCGATTTGATC  
GCTTTGAGCACGTCAATATTCTCGACAAGCTCGAAGAAAAGGGAAACATCGTAGGTTACA  
AGGAAAAACAAGTGATGGAATCCGGTTGGAGGTAACCTCTCAAACGTCAGGATAAACTTG  
GCGAATTGATGTAAAAAATCCGGAAGTTGCACATGAGCGTATCATCATAATGTTCAACC  
TTCGCCAAAATCTTTGGCAAAACATCACCGTTCTCCGCGAGAATGGAAAATTGGCAGAGT  
ATCAATGTGGCGCCGGTCTGATTCGAGACTTTGTGGAGTATCGCAAAAATACACCAATC  
AGCGTGTGGTCTTCGAAAAAGAAAAGGCAGAATATTCCCCTGATTTGGCTTGGGCCAAAT  
TTGCCTTTGTTAATGAAGTGATTGAAGCAAAAATTGTTCTTCGTGGAGAATCAAAGCGC  
AACTTATTGCCGAAGTAAAGTCAAAGCCGAATATGGCAGGATTTGAAAACGAGCTAGTTG  
GCATGAGCATTAGCGTCTAACTGAAGACGAACTCATAAACTTCAGGAAGAAGCTCTGA  
AACAGACCAAAGAATACGACAACCTGGTTCGAGCACTACTCCAGAAAACGAATATGTTAAAG  
ACCTCGAAACTTTAATAAAAACAAAACAAAGGTCTCTTCGGAGGCCTTTGTTGTTTCTAG  
ACAAAAGTGTGTACAAATGCTTTAGATTGTATAGCATAGCCTCAAGCTAAACTAACTGTC  
ATGGAGCATATTATGATTTACAAAGCGCTGATAAACAAAAGCAGCAGGTATTATGAGGAA  
CGCGTACAGTGGATGCGCGAAAATCATATCGTTGACGTTCCCACTCCAAATTATACTCTC  
AAGTTTACAAATCACAAGGGTTATATTGGTCAATGTCATTACTCTAACCGTGAAAACAGT  
ATTTAGAAAAACATAATCAATATGCAACATGGGAGTCTTTATAGACACAATCAACCAT  
GAGCTGGCTCACTGGGCAACCATAGGTCATGGCCACGATGAAGCATGGCAGGCAATGGCC  
GTTTCGTCTTGGAGCAACTCCTGCGAAAACCTTGCAACCCTTGGCCAACTGCCAAAACCGTAT  
GTCATAATGTGCAAAGACAAAGTTGTAGGATATTCTGAGGAATTGCGAGTTGGTTCAGAC  
GCTGCCACACGATACATCAAAGGAAAAAAGAAACAAACTCTTGGATTTTTGGAGTATAAG  
GTAAATCCAGAATTCATCGATAACTCCCCTGGTGCGAACCAAGTGTCGAAATGCCAACA  
CGAATCAAAGACAAACAGAATTATCGCAGATTTTCTCAGCGATCTTTGAGGAAAAGCA  
TGAAATTTTCAAATAGTACAAAACCTAGTGTACTCCGTTTGGTATGGTGATACTATAGC  
ATCATACCAAGCAACCTGATTAAAAACAACGGAGTATATTAATGTTCAAATCACCAAA  
ATCCAAGTAATGCAGATCAACCTCATGAAGAAAGCTGTTGAAAATTTCCAAGGTTTTGAA  
ATCAACGCAGTAATCATGAATCCGCTCAACAAAATGATGAACAACGAAGTTCGCGATAAG  
CGCGAAATGAATCGCTGCGAACAGTTCTTCAACGACATTATTCAAGACGATCTGATGTGG  
CAAATGCTGATTGCGCTAAACTCGCAAAATCCATGAAGCGTAAACTTGCTGCAGCGATG  
AAAAAAGCTTAAGTTATCTCACCAAAGAGGTTTACAACGCTAAACCGCTTGATTAATA  
GCTACAAGTTAAACAAACTACCACAAAGCAAACGGAGTATTTAAAATGACCATGACCAAA  
ATCGAAGCTATCGCAAAAGTTCTGAACAACCTCCAGCATCTCTGAAAACGCTACTTCTGTC  
TTCATTCAAGTTGCCAAGAACGCTTTCGTTACTGCTGTTGAAATTGCGGAAGCCACTAAA  
ATGAACAAAACGCAGTTTACTCCAATATCGGCGTGATGATGAAAAGGGTTTGATCGAA  
AAATCTGGCGACGGCCACGTAACCACCGAAAGTGGTGATGCCATTTTCATCGAAGCTGCC  
GAAATGTGGAAAGCTGCCAACCTGAAGTTGAAGCTCCTATAGTAGAAAAGAAAAAGGA  
ACTGGTAAAGCTCGCGAAATCACAGTCGAAATGACTAAAAATATCGAGCTCGTCGAGCGG  
CTGCTGGCTAACCTCGGCATCGAGCACAAAGCAAGCAGTCATCAATCGCCAAAACCTACTAA  
ATCACTCTGAACAAACGCCACGCTGATGGATAACCGCAAATTCGAAATTCTCAACCGCGGC  
ATCTTCCGTATCGTTGGTTACAAAGTATCTGAAGAAATCATCAACAACCTCAAACCTTTG  
GGTTGTGAAATCAAGCAAGGTCCGGCAAACCTGCTACATCGACATCACCGCGAATGAAAAC  
AACATCTTTCGTCTGATGGAAGAAATTGAAGCCGCTAACTAATGCGACTAATTACAAGCA  
ACTAAGAAAACCTATCAGCCATCGCATGTTATAATATGATGGTTGATTTCAATTTGAGCAA  
AATATGAAAATTTAATTGTTGATGCTGGTTTACTGGAGCAACTATTGCGCGTTGTCTC  
GCTGAACAATGGCATGACATCACAGTCATTGACAAACGGAAACACATCGGCGGAAACTGC  
TATGACGAAGTTCGAAATGGTAAACTAGTACATAAGTACGGACCACATCTTTTGCAT  
AGCGACTTGGGTGTGCACAATTTCTTTACGCTGGACTTCTGGATTCCCTATGAGCAC  
AAGGTAAAAGTCAATATAGAGATACATTAATCTCATTCCCCGTGAATCTGAAAACACTC  
CAAGAGCTCTATGGTATTGAAACGGAGCAAGAGGCCATCAAGAATTTAGAAAAGGTTGCA  
GACACGAATTTCTCCACCAAGTGTGATGAACTTTTCGATCATTCCGTAGGAAAAGACCTT  
GCCGATAATTTCTTTAGACCATAGACGAAGAAAATGTGGGGCACTGATCCTAAAACATT  
GAGTTTGCTGTTGGCGCAAGGATTTCCGTTGAGCAACTCTGATGATGACCGATATTTTAGT  
CATAAGTACCAATATATGCCCGAAGGCGGTTACTCTAAGATGTTTGAAGAATGCTTGAC  
CATGAACGAATTGAGGTCAAATTCGCACGCCATTCCAAAAGGAAATGGAAGCTCAATAT  
GACTTCATTTTCAACTCGATGCCTATCGATGCGTACTATGACTTCAAATTTGGCAAATTG  
CCGTACCGTTCTTTGCGCATGGAAGTAAAAGAAGAGAAGCATGATCATGGAAATACTACC  
GTGAATAACTCTGCTTCTGAAGAAGGTCATACTCGTTACACCGTTTGAAGAATATTCCA

GGCCGTGGCGATGGTGACATGGTGACTTACGAGTACCCGTGCGACTACGATGGCAGAAAC  
GAGCCGTATTATCCAGTGACTCACGGAAACGAACTCTATGCTAAGTATGCTGAGCATGCA  
AAGAGTGATAAAATGATGTTTATCGGCCGTATGGGTGCATATCAGTATATTGATATGTGG  
AAAGCAGTTCGCACTGGCCTCGATATCGTTTCAGATTTCAAAGCATAACTCATAGCCGGC  
CGTTGGCCGGCTTTTTAAAAGGAAATAAAATGAAAATTCTTGTAAGTGGGACTAATAACT  
ATCATGCTCGACCCAACGGGCAGCTGGAAAAACGTTCTCGGTATCGTCTCGTGACTGCGA  
CTACCGGTCTCGTCGAAGCTCTCAAAGATATGGGCCACGATGTTGATCAACGCTTCGTTA  
CCCCAGGTGAAGACCTTAGTGGCTACGACAAAGGCTTCACTGCTTATTTGAGTCTACTG  
GCGGTATGCAACCAGGTGGTTATTGCGTTTACTGGCTTCTGGCAAATCGTCCCGACGCGA  
TTATTGTCATTGATGACTGGCACACTCCCGAACGTCTGATGACAGGTTTCAAAAAGTCTG  
CCACTCGCACCCGTGAACAATTTGAAGAAGTTCTGTTCCGCGAATTTATGCTGAACGACC  
AGCACAAAGAAGCTACTGATGCAATCACTGCTGATCCTTCGCTGAGAGAAGATATCGGCC  
GCGGTTATGCTAAGAACGTCGTCGATTCTCACCGAATTCTGCATGTTGCATTTCGACAAGT  
TCGAAGTTTCCAAGGTTTTTCGATTATCCACATGAATCCTTATTCGTTCTGTCCCGAATCCT  
ATGTTCCTAGCCCAGATGATCGGCTGCGCGAAATGGGTCTGGCACGTCAAGATATTTTGC  
GCGAACGTAAATGGATTTTCGCCGGTATCGATGGTCTTTCTACAAAGAAAGCACGTAAGT  
TCATAGACAACCTTCACTTGGGATGTAGAAGTATTTGGTTCGTGCAACTATCGACGTTGATG  
CCAAACTTACAAAAGAGCCCGATGTAATTCAAGCTTACTCGGGTGCCCGCGCTGTTTTCT  
ACCCAGACCAAACGACTTCGGCTCCAACCTGGTGGCGCAATCGACCACGCCAATGCGCTG  
ATATGGGTGCTGTTCTCTTTATGATGTCTGATGAAGAAGCTTCATTGTTTGGCCCATCTT  
ATATGGGGCTTTCGATCGAGAAGTTAGAAGCCATGACTGACGAAGAGCTCGATGATCTTG  
CTGCTCGTCAGAAGGCCGATTATTACAAGTCAAATCCTCTGGACAAAGAAAAAGTTAAAT  
CTTGTCTTGATTTGATTATGGCGTGATGAGTTTTACCAAAGCGGCTTCGGCCGCTTTTTTC  
GGGAATTTTATGAAGCAAATTATCGTAAGGCTGTTTACGCCGATTTTCACGCAACAAGAAA  
TCACACAAAACGGCCTGGGCACGAGTGTGGCAAGCTGCTATCGAACACCACACTGGGTTT  
CCATGTGAGTTGGTGCATGAGGCTAAACCATGGTCAGAACATGATCGGGTCTATGGCTAT  
TTCAATCTTGCGCCGTATGACAGATTGAGTTAGTTTGGCGGTCCTCAGCCACAATACGCT  
GAGTTTATTAATGTACTGAAGGATTCACCGGTGAAGTTGTTGCATTAGACAAACCTTTG  
GCCCGTTTTGGTGAATTCTGCAAAGCACGTTGTTTCAACAAACATAGTGAACCCAACATG  
AAAGTTCCCGAGCTCTCGAGAGGAATTGATTGGGGTTCCATTCAAGCGCAATTTGACTAA  
GCCACCTGTTTAACGATGGCTTCTTTGCCGCTTGAAGATGTTACACTCGGTGATTCTCAC  
AGTATTTTCAAGTGTGGCAGCCAGGCTATACGGCTTATCGCTGCGACGCGCAAACATTACGT  
GGAGCTTTGAAAAGGGGATTGTCAAGTATCCTTCCTGATAAAGTTTCGGAATTTGACAATT  
TATTTTGGAAACATCGACGTTTCGGTATCGTTTCGGTTTACAAAATAACCCGATTTTCGGAT  
GTACTTGAAAAGCTCGACGAGTATGAAAAACAACCTAGGCGGACTAAAGGAGTCTGGACAA  
TTTACCGGAGAAATCGAACTTGTGCACCTGCTTTCGATTGATGATGAGTCAAGAAAAATC  
CCAACAAACAATATGCTTAACGGAAAATCGTTTAAACGGCAGTTGGGCTGAAAGAAATTCA  
TGGATGAGCATTTCATAAATGGATTATCGGAAATAGCATTCAAACACGGTTTCAAGGTT  
CATACTTGCCAAACAGCTGGTATGTTGAAACGTATAGAGATCCAAAATCATTCTTTACT  
CGTTTGAAGCCAGGAAAGGTTTGCATCTTGCCTTACCATTCTATCGGTATGAAGGGTTT  
AAAGATAGCAACACTCTAGAGTTGTTTGCATCTAAAGGCCTTCGGGCCTTTTTTTGGGAT  
AAAAGTGTGTACATGTGTTTTTTTTGCTTGATATTATGGCATTGCTTGATAAAGGAGAATT  
GAAAATGTCAAACGACCAACATGTTATAGCGACAATTAACGGCTCGAGTACGAAAGTGC  
GCTGTATCGCTGTCGTGCCATGGGGCTAAAGTTTCCGGGAACCGAAATTTGTGAACTTAT  
CAGTGTGAAAGCATAACGACTGGCTGAATCGTGAAGATGACGATGGCCTGATGAAATA  
TGAAGGCAAATTCGATCGGACCCACCCGTTTCGTCGTAACAGTCAAGCAGGCTGGTTCTCG  
GAAAATCTATGTTGATATCATCGGCGAAGAAGCTCAACCTTTGGTAGATTGCGAGTACTA  
TGCCATTGTTCCGGAAGATTTTCAAGCCTCATTTCGAAAAGTATAAGGACATAGCAGGCTTCA  
GAAAAAGCGATAAAGAGTGAAAATAAATGTGTACTCACAATGAGGCTATTGATACTATAG  
CCTCATCAAATAAACGAATACACAAACACGGAGTATATAAAATGCAAGTAACCATCAAAA  
ACGGTCTTTACTTTTCGTAATGTTGTTAACGGTACTTCTGAAACTAACGGAAACACCTGGT  
GGGATGCCAGCGAGAACGATCCCCGCGAAGGTAAAGTTAACGCCGTTCTGAAAGGCAAAT  
CTCGGATGGTTTGGGTAAATCGCAATGACATCGTGATTACCGAAAGTTTTGATGGTGTTG  
CTCAAACCTGATGTCGCTGAAAAACTGTTGACGAAATGCGTTCTCGAGTCGCAAAACGCT  
TCGATGTAATGGACAAAATGACCTTAGGACTTGTTAAAGGCACCATTTCGTTCTCTGATTA  
TCTCTGGTGCTCCTGGAATCGGCAAGACCATCAGCTTGGAGAAAATGCTGAAACATGCTG  
ATGAAATTGGCGGCATCTCTTCTCTTCCATAAAAGGAAAGTGCTCTCCCATCGGCCTCT

ACATCCACCTCTGGGAAAACCGTGATGAAGACTGTGTTGTGCTGCTGGATGACGTCGATG  
TGTTCTCCAACGAAGACACTCTCAACGTAAGAACTCCTCTTGACACTGGCGAAGAAC  
GCATCATCACATGGGGTACTGCCAGCAACTCCTTGGCAGAACGCGATATCCCCAACAACT  
TCGAGTTCAAAGGTTCCATCGTCTTCATCACTAACGCAGATATCGACGCTGATATCGATC  
GTGGCACTAAACTTGCACCCGACCTCGATGATCTGCAGTCTCGCTCCATCTACCTACACC  
TTGGGGTTCACACTAGTCGCGAAATCATGGTTCGAGTGGAATACGTAATCACTAAAACCTG  
ATATGATGCAAAAACGCGGACTGTCTGAAGCACAATTTGTCAATGCGTTGGAATTGATGA  
AAGAGAACGTGGATCGCCTCCGCTCTGTATCTCTGCTAACTGCCCTCTACCTCGGCGATT  
TCATCAACACTGATAGTGATTGGGCCGATGTTGCTGAAGTTACACTCCTGAAGTAATACG  
GATGAGCTGGAGGAATTCCTCCAGCTCCTTAATATTGTTATTCATCTTTGTCAAAAACAT  
CAAGCTGGTTCACACTGGTTAACCCAAATGGAGAAATGAAATGAATCCGTAAAAATGGTC  
TTATCATGAAATATTTTGGGAGTGCAGAAGCAAAGCCCCAAATTCCTACGGTTGAAGGTA  
TTCGAGCAAATGCTCTTGAATTTTTCAAATAACTCGAAGATCGGTTTCGCTGCTGATTTCGC  
AGACTCTTGACCAAATTTGCTACTCGCCGGCAATACGAACTGCAAGCGCATGAACTTGCCA  
TCAAGAATTTGAATGAACGTCATTCGGCCATAATGAACAATTTGTCTGCTGAGCAAACCTC  
AAGTGAGTGACTCCATCAAAACTGCTCAAGTTATGAAGGCTAATATTGCTCAAATTTGCT  
AATAACCAGAGGGCTCCTGAGGAGCCCTCGTTTTTTTGAATCAATATGCAATACAGTTTT  
GGCGAAATCACGATTTTGGTATTTGCTCTAATATTCATTATGTGGCTTTTGTATAAGGCT  
CGACATTTTCATATTAGATAATTTGGATGCTGTTTGTGGCACGTTTGATTAGGAGAGATTT  
TGAATCCAGTTGCTAAACATGACTTCAAGAAAGGTGGAGCTCATGTAGACAAGAAACGAC  
GCTTAAATGAAAAGCGCAAACAACATAAGAAAGGTGTACAATGATGGAACATAATTATT  
GATGATTGAAAATTTGTAAGCGTCGCAATCGGCGCATTATCATCATGCGATTGATCGTA  
ATAGCTTCAGCTAGCAAAGGCTTAATTTCTGCAAGCGACCAAATCAACGAAATTTTAGAC  
AAATGGCCAAGTTTGAATCTTCGGGTCAAGAGTTGTTTGGTAATTACAGCATTGTTGTC  
ACCCCTTTGGTCATTGCTCTCCTTCTTGTTTTGTACTCTTTTTTTGGCCAATTGTGTTG  
CTGTATATTATCGTAAAATAAAAAGGTATGTACTTTTTGAAAAGTTTTTTGTAAAATGAT  
ACATGTCAAATTTTGCCGTATTGATAAGAGAAACAACATGGCATAACAATGAAACAATAAA  
GGAAACCATTTCAATTGCGTCAGTTCTGATCAAATTTGGCTGTGAAGACATTCGGAACAA  
TCAAGAATTTTCGTATCGTTCTTGAACGAATTGGGTTTAAAATCACCAAGTGGGGGAAGA  
GTTCACTCTAGCTGGTATTAGGACAAATGATGAAGCGTCTACCAGCTGAACAGCGTGAAG  
AATTAGTAGAAATGTTCAACCAAGGTCATCGCGACATCAATCACCAAATTATCATGTATC  
CAAACAGCAACTAGGGAAATATTATGGAAATCGAAATCGAGAAAAAGTACCGTGTAATCG  
ACGCCTCTCGTTTTTAAAACGAGCACGGCATCAAAAATGGCCATGAATTCCTTCGTGGAAT  
CGCTAGATGAGGATGGAGATATTAGGTCTCGCGGAATTGCTTGGAAATGGAATAGACGGCG  
ACAGCAACGATGCTCCATACGCCGTTGGGCATTGCTGATGAAAGGCTATCAAGATCATT  
GTCCATAAACACCAGCGGATTACTCAGGCGCTATTGAACAAGTATGAAAAAAGGGAAACCG  
TAAGGTTCCCTTTGTTTTATCTAGCTCTACTCTAAAAGTCTTTCGGCTTGATTGCAAATA  
ACGAAAAGATTGTTTTTCATTAATTAAGTGGCTTTTTACGCCAAAACATCGATACTGCCCA  
GCATAAACGTTGTCTAAGTTCACAAGCGGGCAACTGTACATGTATTCAAACCTCATTGTGC  
CCCGCAGGAAGAAACGCAAAATCCTTGTAATTGCTAAAATGTCTTCCTGAAAAATGGACC  
ATATATTCATTAGATGTTTTGTTTATTGGATACCCGCCCTTTCCATATCTACAAGTTCC  
AACGGCGTTTTCCCTTCCGTGGCGACCATTTC AACGAAATAGTTCAAGTATCTAGGTCTA  
AAAGAAAATATAACTGAAAATCTGCTCGACTTGAAACATATGCTATATCAAGCTGTTCT  
TGTGTCGCTACCTCAAATTTTCTATCGCGTTCGGCTTGAAGAATTCCTGGTAATTTTGA  
AAACGAGTATCTCGATAAACATTGAAGATTCGTCCTTGTGGTACCAATTGAAACCAAGT  
ATGAATACAAGGATCAGCAAATTTGCCCGATAAAATACAACCTTCGCCGGTGATAGCGTCT  
TTGAACAATCGGTCCAGAATTTCCAGCAGAATCCCCGCACGACCAGGGGGTTGTGTTCCC  
TGCCTTTGGTTTCCTGTACTCATAACGTTGTTACTCCTGTATAACAGCTCTATTTTCATGC  
TTTCGGCACCTAACGGTGCCGAAATGTCATTTATAACCATCCACTGTGCCAGTTAGTACA  
TCTTTTGCAACTCGCATTGCCCTGTTGGGGGTTTGCTTTGCCCAAGATGAATTAAGCAAT  
TCAGAGTATGCTTTAGACCAGTCCTTATTGGCTATGAATGCGAGTGATATTTTGAATCCA  
GATAGACGAGGACCTCCATTTAGAACATGAAGTTACAAATAGCATTTTTTTCTAATAGGG  
TCACAAGGATCATATCCTAATTTGATATTAGGATATTTCTTGATTTCACTTTTACTGTT  
TGAACATCAGAGATAAACAGTGCATTCAGTCTCAGAGATAACCCCGTTCACCTGG  
CAACCAACTTGTTTACTCAATGTATGGTTTATCAAGGCCATATCGGTTGTCTTCTGAGGT  
ATAATCAGGTGACCTTTCCAACAGTAGGGTACCCTAGATGGTCACAATACACTTTCAA  
ACTCTTCCCTCATCGTAGATGAGCATGTCTTCTAACGTCATATGCATTTCTCTTAATTAT



TTTCCGAATATTGACGGGTTTGGTGGCCAGAAAATGATTTAAACAGCTCGCCGTTATACG  
CCGCAAGATGCCCCGGCACCCGGCAAAGCCATATTCAAATATGGCGACCATGACGAATTTT  
GACCTCAATAACCCACATCATGTTGATCAAAATCTCCATACTTTCCAACACTTCAAATT  
GTATTCGGCCTCGGCCCGTTGGATGCGTGAAGTTGAAAGTACGTGAGCCATACCAATCGG  
AAACATATTGAGCTGGTGGCGTGTATACTCGAGTTTCTTGCCACGGCTGGTTATCCCATC  
TCCATCGTAGATTAACGTATCCGAGATCTCCGCCGCAATGAGACGCCCGGCCAGTTCGGA  
TGTATCCGATTTTTATGGTTGCACGTTGTAAGTGAATTCCGTGGAGTAAGTAAAT  
TCTGACTTCTGTTGTACGGATATCTAGAGCCAAACCTCATGTAGCACCAGCGATGGCGATC  
TGCTTGTATTGAAGAACTCGATACCCACCAATTTATAGGTGACGCACATTGTCCATTAT  
AAAACGCCGAAAGTTGTGGGTCTGCCGCGTTGCCTGCGGAAGATAGTCCGGCAAAGCGCC  
GGACGTTGGTAATCCAATTTGGCTTTTTGCTATCACCGGTATAACCAATCGCGTTATACC  
CAATGCTCCAAAATCGCCCATGGCGTTGAGACATTTTGCCTCCTAATGTTATATAAAGTT  
CAACGCAGCGTTCACAGTATAAACTATTGTTCCGCCTTCAGTGGCAGCGAACTCGTAAGT  
TTGAGATCGAACTGTTCCCTTGTGGATTTAATACCCCGCGGTGCAGACCATCTACTTG  
ATACCATCGAGCCTCTGTGCAGTTGATATATGTGATGCCACCATTTTCGTATACGCACCCA  
TGCCCTGCCGTCCAAAATAGGGTAAGATTTAACGGTTGTGCCATCTATATAAGTGTAGAT  
TGTCTGACGGGTTGATGCATTATAGCTAAACGTCGCATATGGCGGTGTATTGTTCCAGT  
GACAACGGATTGTGTAGATGCAATCTGCTTAAGACTGGCCATTCCAGCCAACTGCCCGAG  
TAAACCTGTTGTTCCAAGACCGGCTTTACTCAGAATGTTAGAGGCCCATCCATTGGCCTG  
GAACTCGGTGTTTGCCTGAGACAACCAGAAGGGAACGTTAGGTACGGCCATATTCAACT  
CCTGCACCTTCTCGGAGAGTTCCCTTGACTGCCCCACCAGTAGCGCAATCAATGCCGAGT  
TTGATAGCGTCAGGATTTCCGGTCCCCTTTCGTTCCCTTGAATCCACTACTCGAGTAACAG  
CTTCGGGTAGCACCTGCTCGACGTCTTGTGCAATCAATCCGACCTCTTTTTTGTGCTACT  
CAGTGGCTTCAAGCGTCTGCTTCTTGTGCTAGGAGTAGGCGGTCAGTGCTGACACTTTCC  
GTAGCGCGTCACGTACTTCCACAACGTTCTTCTTAAGTCGCCGGTATGACCGGATGTAAA  
CGTCATTCGCGTTCACATTCCTTGTGATAATCCCTGCATACGAAGCGTGTCTTGTGTGT  
GGAAGAGGAAGTCCCCTCCCTCCACAAGTGTAACGTAAGTACTGGCAAAGCGGCCTGCCATGT  
GGAACCCGACGCCCGGGCGACTGTCGATAGCGGGGTTACCCTTCACCTCGATAGCGCACT  
GGAAGTAGTCGTTTCCACGGCATTATTTACCACAAACCTGTCGCATTGTTTACCAGCT  
CGAAAGGCCCTTCTGGGCACCGGCCTCCTGTCCGCCAATCCACGCTTTAGTTCCAGCAA  
AGTTGATAGCCAAGTATCCGAAGAATCCTACTGCGTTTCCGTGAGCTTGGTTGAAGAGAT  
AGGTCCATTAGTATTCGGAATGCCCGCAATGTTGGGTCTTGGGAAGAATCCAGCTTGAG  
GACGGAGATTACAATCGCCCAAACTGTGGAAATGCCAGTTCGGTACGTCCCAAGAGCAA  
AACCTGCCGGAGCCGCACCAACATCCGAGGCAGGCGGCTTGTTCCTTAATGGTAAATAT  
TGCAGATAGCCCCACGTGCGCCACTACGCCATGTGAGAGAGTTATCAGCCCCTATCGTGC  
CCCCAATCCACAGGCGTCTCGCTCAGAGCCATCAGGTGCGCTCCACACGATGTCTGCCA  
TGTCACTAGCAGAGTGCCCTACAAGGTCAAGTATCCCTGTGACTCCTAGCATCCCGGATA  
CAGTCCCACCAGCAACAGGCAGAGCCCCAATTTAGACAGCGACCAACACACGTCACCCG  
CGCCGTTAACGGACTTAGCAGCGTTGCCGATAGTCAGGGTGCAGGGCTGTACCCAGTTTCG  
CCGTGGTCATGTTGCCGGAACCGTCAAAGTTGGTGCCGTTAATCTGGCGAGCCGTAGCCA  
CCTTGGTTGCCGTGGCCGCATTGCCAGCAAGAGCGCCCGTGAAGGTCGGAGCGGTCACCC  
CAGCAGCCACGACAAGCCCTGTAGGCTTTAGTGACATCCAATCGGTAGTGTTCGCTGCGT  
TTACTACTGCCACTTCAAGTATTCGTTACCGTTATCCCCGGTTTTTGAACCACATGTAGC  
TGTCGGTGTGTCGTCAGAGGCATTCTTGAACCAAGCTTCGCGGAATGAGAATTGAAGA  
CCCAGCCCAGCTCGCAGGCAGCATCGACGAACGTAAGCCCACCGGTCATTGCATCGCCAG  
CTTTAGCAACCGCACCAACGTTAGTTGCAGAAATCGAAATATTCGATGTGCCATCAAAG  
GAACACCTGCAATACGTCTAGCTGTCTGTAATCTAGAAGCCGTAACGGCATTTCATTGA  
CTCGTAGAGCTCCTACTGCTTCTGGAGTTGGGTTATATCCGTTATCGTAAACACGATTGC  
TTCCGTTATAAGTACCAGAGCCTTTATCAAATTCGCAAGAACAATGGTTTTTGTATTTT  
CAATTAATTGGCCATTAACCGCAAAGATAGATGTTCCATATGTAACATCAGTTGCACAGG  
CGGTAACGGCTGTTTCGATATCGACATTAACCTCATATCGGGAAAGCACGTGTTTCAACGT  
AAACAACAAACCCATCTACGGCCTCAGATGGTCCGTGGATTGAGTAAATTGCTCTTTCTG  
ATGTAGAATAAATCGTAAACTGGCCTACGGCATAACTTGCACCGTCACCCCATCCACTGG  
CGCGAACATTACCGGTAAATGAACAATTGTTTCATTGGAAGTGTGTATGGCCAGATAAAG  
TATCGATAAAGACAAATGAGTTGGATACACCATTTGTTTCAAAAAGAACTGGAATATATC  
CGGAAGCAGGTGCTCCAGCAAGAAGTGTGATCGTCAGATCTTTCACACCTTTACCTGAAG  
CAGTAACAGTCGATTCAACCAAAATCGCGACGTGCCACAGAATTAGCTTCGGTGCCTTGCT

CGGCAGACAAAAGATCTTTTGGAAACAGTCAAATTGACAGACATAGTGTGCGCCGATTTTT  
TAACGTATTTCGGAGCGTGTATGGATGTCGTTTGTACTGTCACTGCTAGAGAAGCATTG  
CACTGCCGTCGAACGATACTGAGCCAGTTGCGCCTCCGGTCAAACCTCATAGTTCTTGCGA  
TTTGCAACTTTGATGCAGATACAGCATTGACCCGGCAGCTAATGCACCAATTTCTGCAG  
GAGTAGGTTTATCAGCTTCGGTATAAATCTTTTGGTTTGTACTTTAGTGCCTGCCGAGT  
CGTATGCGTATGTGTACATAACCATTACCGATACTTCCGTATTCGAAAGTAATACTACGGG  
CATTCGCACCGTTACTAGCCGATGGATGAGAAACGTTAATAGTCAATCCACTGAATCCGC  
CCAGACTGTTATGTCTGAAGAATCCGGAATAGCCATTGACTAGTTATGAGGTGTTCCCA  
TATCAGACGATTTGCTCACCAAGTGTCCATTTTTTCGCAGTATAGGTGTTCACTGTGATA  
AATCGTGCATCAGCCTCGCTCTGGTTATAGTATGGATTATCCATAGCAGATCGTCCGATA  
AGACCGGTGTCGCTAATCAAAAGTCCGCCCGTCATATTGTATACGGCGGAATCAAAGCGA  
ATTTTAAATGGTAGTCATTCCATCTTGGGCATAACCGAGTACTAAATCAGTTCCACCAGGT  
GCGCCAATATACAGGTTTTTAGACGAGTTTCCCTCGAATGAACTGAACACCTCCATACTTT  
ATATCAAAGTTTCCAGTATTAGCGGACACCAACGCTCCTATCAGAGAAACATCACCATT  
AGATTTAGCGTTATTAAGTCCTTCAAATGCCCATGCGCCGTTGGTGTGAGTCAATGCCAC  
TTTAAAGTCACCAGCCGCATCAGTTCCAACATATGACTGAGGCGTATTTCCCTTTGAAAA  
ACGAATATAAGCAGGACCACTAACGCTTACTTAAGCGCTAATGAGTAATCCGTGGAAGT  
TTCGATGTACAGAACACCCGAGATAGTATCGCCAGCACGAGATACTACTTGGAGTTCATT  
TGCACTTGGTTTATCGTTTTCCGAATAAATTCTTGGACCCTTGTACAGGATAGCATTACC  
GCTTGGTACCAGCGCAAGATTGCCTTGGTGCCAAACAGGTGAACCAACGATCGTGGTTCC  
AACTCTTAAATCTGCCATATGGGCTCCCTTGTTTAACGAATGATTGGTGAATTTCTTATTA  
TATTTAAAGCACTCAAATTAAGCAATCCTGGCTCCAGGTTCAAGCTTGCTTGAACCTTA  
TCTTTTTATCCTTTTAGGTATAATATCTATTAAGCCATAAAGCATAAGTTTTTGGCAGGGC  
CAAACCTGGAAGCCAGGAGTTGATATTCTATTTAAAGCAAACAAAGGGCCAAGAGGCC  
TTATCTTTCGTTAAAATCGTTTGAGGTTATGATATTCTTTTGTTCAGATTCAAAGCTG  
TAATACAGGATTTGTGTAATTACCGGTATTGCTTATGATATTAGCTCTAATACCATTAC  
ACCAATTGCTGCATCCGCCACTTTATCATCATCGTCCCTTGTAAACCCGCGTTATAGTGAC  
ATTTGACACACCTGCTGTTCCAGCACTGACGCTTACGGATATCGGTATGCTGCAGAAGA  
AAAATCTTCGCCCTGAGCTTTGCGTTGGCAGTTTGAATAACCTTCAAATTTTGTCCA  
CACACCTGGGGCCCGGTGTGTGCGTTCCCTAGCCATATACTGGTTTTGCATATGCCTGAAGA  
GTCTTGAGTCCATACATAAAAAAACATCTTCGACCCGGCGGTAAGTACTAGTTTCTAGTCGCT  
GTGCAGCTCGCATTGGATATGATACATTGATTCCCATTGCGTTGTTATATTTTCAGACAA  
ATAACGCTTAAATTCGTATTGATTCCCCACTGAGAAATATTCATTTATGTCATCGACATG  
TCTTGACGGTAATCCACACGCTCCAATATCGACACCGTTCGTCAAAAACAACCTTGCAAATA  
GGCATTGTGTCTTCTGCGAAACTGTCAGGATTATTCACAACAACCTTCTCGTAACAAAA  
GCGCTTTAATGTTGTATTGAAAATTGCAACGTACGAACTTCTATATGCTCTCGGAGTAAA  
AAGAGCAACGGATTGTGATTTAGATAACTAGAAACAGGCCACGACATAGCTCCAGATTG  
TTTCATGAATGTGACAAAATCCTCTGACGATCTGATAGCATCATGCGAACTACTACTAC  
TATATTGTCAGATGGTGCAGACATTAGATATGTTCTTAAAGTGTCAAGATGCTCGCGTCT  
AGAATATATGTCCAACGTCGCAAATTAGATGCTGCTCCGTTGGAGAAATAGTGATAGC  
GTTACACCCCTCCCGTGCGAAGGCAAACCGAAACAACATTGATTTTAAACATACGGCAC  
TCTGACTCTGGAGTCATCATTGACTCCAAGTGGCTTTATCATATGCTTTATTGCGTTATT  
TTCACCTAAGTGATTTGATTCAACGTAAGATGGCCCAAGATGGGCCATAAATTGTTCTGT  
CATAACGATTCTTATACTTCCAGATAAACTCAACTGTCTTGGTCAAGTTGTTGGCAAC  
GATTTTACATTACCAATTTTGTTCGAATCTCTAATCGTTATATTATTGGAAGATGAACC  
TGTAATGTCAACTGGACGTACGTCTTGAGCAGTAGGTTTGTACCCTTGTGATAAATCTC  
GTACTCAAAGTTTCCGATCCTTACGATTGGATTCTGATTTCGTATCAAGACACACACGGCC  
ACTCGCTGTATCGGTATTTCCGAAAACGAAGTCATCTCCACGAGAGGTAATGTAACGATG  
TGAGTTGTTGAAATGCAAATACTTAAACATAGTCACCAGTGTGTTGACAGAAGCATTGCTTC  
AGTCATAGTCGATGTACCATCACGACGAAGATATGTTGGGTTGAGCTTTGTCTGAGCGTT  
GGCAGTATGAATTACCGGTGATCCATTAATTGTGAAGGCATCAGTAGAGCTTGCCAATAC  
AGCCATTGTTGAACTAGCATTACCAACTATGAATCCGCCTGCAACAGATTGTGCATATTG  
AGTCGCCGCTAATTCGGTTTACCCAGATAGATTCTCGCACCTATGTTTTCCATAACAAG  
GAAACCAGCAGTAGATTTTTTATGATGTGCAATTCGTACATCACCGGCTCTATTAACCTT  
CAGCTTACAAGAGAAAGTTGAACCGTCTTTAGTTGCAATAGCAATATCACTGCCAGAAAC  
TTCAGAACCACCAACGCCACCTGCAATAAATGCCCAATCGTTTATTGCAGCATCACTTCC  
AGCCATTATGGTGATACCATTGGTTCCATCAGCAGCTCTAGTTTTACCTATTTGAACAGA

GTTTGTTCGACATATTATCGTTAATCACTCTAGCGCTGGTTGTCGTAGCATTGGTAATATC  
TGCAGCTACCATTGCGGCAGTAAAAGTCATTCCGCCTGTTACGGTTTGAGCACCAGTTTCG  
ACGGACCCAATCGTTAGCAACAACAACCAAGTTTCAGTGAGTGCTGGGCGGTTGCCAT  
TTTCGGCATATAGATTTGCAACGCATAGTTCAGACTCAGTGGACTAACGGCCAGCCCATC  
ATTTGAATATGATGTGTACGCTTGGGTTGAACCGACAATATCGTGTCCAACGAAAATTGA  
CTCTACTGTTGCTGCTTTGACAAACCCACTGCGTGTTTCATTTCTGACCATGTTCGGTTC  
AGTTTTCGCTATATATATGAAGTCTTCTGGACTAACAGCCAAATTAGTTGCTGTTCCAGT  
TCTAACTTCAGCGGTTGTCGCAACCCGGATAATACCGTCCAGAGTTCTTGTGCTTTTTCT  
TCCATCGAGTTTCTTTGGAGTTACGATGGTATTGTCTGAACTAGATCCATTCGCCTCAAG  
TTGGGTTGAAACACGCAATGTCCAACATTGAGCTTCTGTAGCAAGACTTATTCCAACAGA  
GACAGTGCTCCAACCGGTTCCAGATTGGGTCAAACCATCAGTCGTGTTTACCGAAATTCT  
TCCCGTATTGTTGAAACGATTCTTCTATTTCAATGGAGTGACAATAGTTTAATCGTTTGT  
CGCAGTGTCTATTTAGATGTGTCGTGGCAATACGGGCACTACCTGCGAGTGTTTCTGTTGA  
AGTGCGATCATTCAACTTTTTGGGAGTAATAGCACGGGTATCATCAGTTCGGGCATTTGT  
TTCAGTCTGGGTTGCAATCTCAATCAGACCATGATTTGATTCTGTGCTCGACGTGCTCC  
CAATCTTTCGGCTGTTACAAGCAAAGGCCAAGCGGATCAGATGATCCCCCGTCCGACTTC  
CGCCTGTGTGACAATATAACCTATCCCCTTAGCTGTTTCAGTAGCCTTGAATACATCCAG  
GGTTAACGGTGTGACAGCTTTCGACTGATCGGCTTTGTTATAAACAACAGTCCCAGCAGC  
TGACCGAGTTGTACCAGCTGTTCCATTTTTAGAAACCACGGCTAAGATAACCGGTCAGAGT  
TTCTGACGCAATACGATTATGCAACTTTTTGGGAGTCACAATTGTTATGTGCGCCAGTTGA  
GCCGTTTGCTTCTGCTTGAGTTGCAATCTCCGCTAAACCACACCGAGGTTCCGGTAGCAGT  
TCTGTCATTTAAGTTTTTCGGAGTGACGATAATGTCATCCAAATAAGTTGAAGTTCTTAA  
CCGATTGACTTCAGCGGCTGTTGCCAAACGGGCAATGCCACGACGAGTTTCAGTAGCAGT  
CTTATTAGATAATGTTTTTGGAGTGACAATAGTTTCGTCATTCAGGTTATCTTCGTGATT  
TTTGTTTACTTCTGCTTGATCCGCGAGAGAAGCCACGCCAAGACGTTACGACGAGTTGT  
ATCAACACGTTCAACTTTTGGTTGAACATCTCCGATCGTCCATCCGTATTGCGAAGAAGT  
AACACCCACCAGGGACGGGTCTAAGTGTGCGTACATTAGCTCGACATATGGAACGTAATC  
TGTGTCAGCACTTATAGAAATAGATGAAACCAATTCCCACCCATTTGTCATCCGGTATTC  
CGAACGACGCTGGAACCTGCATTTGACCTGTCGACCAAACAATCAGCTCATTGAACTGG  
ATTTACTCTGATTGTACAAGTATGACCTTTTCTCAGATGATCCATAGTGATTTGAACACG  
GTCACCTATGGCTACTTCTCTGGAAGTGTGAGCAGCGTGGTCTGACTTGGCAAATTACT  
GTTGCCAGTCACCAGAATGTGTTCAATCGGCAGCAGTGCTGTGTGAGTTATGGTAACACG  
AATGCGTGTCTTTGGTTTCCATCCCATACTTTCCGAGTCAAAGAAGGAAAATCCACTAC  
GAATGATCCGTAACCAGAAGTGCGCGATTTCGATTTTTGTAACACCGGTTTCATTAATATT  
GGGACCTGAACCTGGGCAAGTCTCAAGAGTCGAGTGGTTAATCGGGTTCATCCCATCAAT  
ATCATGGGTTGTAATTACATCGCCATGCCTAGTATGATTTGGCAGAACAAAGACTAATTGT  
TCTTGCCGACGTACGTCTCCCGGTAACCATCCCTGACTGCAACTGGAATCCTTGAATCCA  
TGGCTCAACAAAATACCTGTTTATTGCTGTAGCTGCTACATCTACTTGCCATCTGTTTCC  
AGCTGCTTTATAGACGAACATATATTGGCAGAATGGGACAGTTGCCCGGAAGCGAGCGCC  
GACTGCTGCTTATATTCGGTGACTGCTGTTCTATAGATACAACTTCCAGATCGTT  
AACACTTGGCTGACCGCCTACGTCCTTTATTACTAAAGTATCACCATCGACTGGTGATGT  
TGGCATGTTGAAAACCAGATTGTTGAATCTATTGTCAGCAGTGATCTATTGACCAGAACT  
CAACTGAAGTGAGGGCCAGTCGAGTTAATGAACTGCCATGTTGGGTCAACACGGAGACC  
AGTCCATTTTGTGACGTCGAAAGCTCGAGCCGGGGAAGCAATATCTGCTTTTGCFTAATA  
AATTCGACGCTCGAAAATTACAGCATGTTTTGCATCATACCCACTGGTGCTGTATATTC  
GTAAATTGTGTTATATTTGTGGAAAATCCAACGCTAACGCCATCGGACAAAATTGTCTT  
GTCGGCCATTGCAACGTTGATCAGTTTTTCGCCAGCTGCATCAAGGCCGCTTGTGGCGCG  
AAAGGGTTGTCCTAACATTTTTGAAGTCTCCTGTTTCTAACTTAGTTATTTATGTTAGT  
ATGTCTAGGTGTTCAATAAGAGAAATTGAAATGAACTTAAATGATTTTCATGGGTGAAACC  
ACAAAGGATGCTGTCAATATTATTGACGCATCTCAATTAATTATCGCGACAATAATGGCT  
AACTTTACTCCTGAAGATGTAAATGAGCTAATGCTCAGACATGTAATTCTGGATACGGTT  
CGAAACAACGTCAAAAAGTTCAAAAACGAATATCCCGAACTATTATCACATTTGACGAT  
TCTGCCAATGGTTATTGGAGACGTGACATTGCTTGGTATTACAAATTAACCGAAAGGCT  
AATAAAGAAGAATCTGCAGCGGATTCGGAACCTTCTCTTTAGTATTATCAATAAAGTGGTC  
AACGAAATGCTTAATATCTACCTAGGTGTTAAGATGTTCAAACCTTGATAAAACTGAGGCT  
GACGATATTATTGCAGTTTTGGTCAAAAAGTTCACCGAAGAAGGTCGATGTGTTATGATT  
TCATCTTCTGACTCTGACTTTACTCAATTGCACAAATACAAGGGTGTCAAGCAATAATCA

CCTTCTCAGAAGAAAACAGTATAGCCAAAATATGGTAGTCCAAAGCATGACCTGTTTGT  
AAGCTGATTAAGGGTGATGCAAAGATGGTGTTCGGGAATAAAAGTTCGTGATACATTT  
GTCCTTGATCGTTTCGAAGGAGAACGTGCTCCACCTTGTTCTACCAAGTCGATTAATTCA  
ATCGTTGAATCTGAAGACCCTCGAGCTGCATTAGAAAATGAAGAATGGCAAAGCGTTGG  
GATATGAATGTTTCGGTACTTGATTTGGATAAAATTCCAGCACATGTTTCGGATCGAATC  
ATTCAAGCTTATAATTCTTCAGTAGTCAATCCTCGTGGTAAATTGTACAGCTATTTTGT  
AAAAATGGCTTGGTTAAACTTCTCCATAAAGTAAATCAATTCTAAGGAAATAACATGAAA  
GAACAGAAGCAAAGAAAGAAAGAGAACGAATTCAACCCGGCAGTTCATGGCGAACGTCT  
CCAAGAAATTATTACCGAAGCATTAAATCTGCGCACCATGCAAGAATCTTATGCTGAAAA  
GGTAAAAGAGCAGCTCAACATTGCCATTACTGAATGCGGTGTTGACGGCAAACCTGTTCAA  
TCAGCTGTTCCGGATTTACCACAAGCAGCAACGAGAGCAGTTTGAAGATGCTGCCGATGA  
AGTTACTTCAGTGTATTACCAAACCTTTAAAGGCCAATGATGTCAAATCCGAACAATCTG  
AATGATAAAACCGCAAACGGGATAGAGATAGAAAATCTGGTTAAAACCTGGATTGACATAT  
CTGGAAGCATGTGTTTCAGTGGTTGGAAGAAAATCTTTAGAAAATTAACCTCGTGCCACAAA  
TATATCCCGCGAGCGGTAATTGACTAACTTTCCAAAGAATGTGTTCGATTCCGCCATGCTT  
AGACCTTCCATTGCAAATCGATGACACGAAATAGTTTGGACTTTTTGATGTGAGATTTG  
TATGATCGCTCTCCGATATCCGCCTAGACCTGATAGATTTATTAGTGCAAAGGGCGCGTT  
TATGCTTTATTTGATGATGAAACAACATATGGCTGGAAAATATGACATAATCAAATATAG  
TTGGAATATGAAAGTTATTGATGCTGCGTTTAATAAACGCAGAGATAAGTACTTCTTTGA  
TAAGACGAGCGATAAATTTACCTTAAAGACTTGACAGAGATAATTTCTGGCAACGTTTTT  
GGAAAATTCAAATGGCTGTGCCGGAGATCTTGTCTGAAGATGCAATGGCAGCCCATCG  
AGAATTGTTGGGAAGATACATCAGATTCCCTGACAGATACAGGGAAGACCTGAAAAGCCA  
GGTGTATTTTTTCCAATAAAATCAATGTTCCGATAGGTAAACTATTGGAGTATAATGAAA  
AACAAACAACGAGCCCAATTTCAAATTAACCTCAATCTGGCCTGATCAAAACAGAAACAT  
TTTTGGTTATTGATTCATTCCTTCGTAGAATCGACAAAATCGATGAGAAAATGTCAGCTG  
ATATAATCTTGCAGAACTGGCATAACCAAATTGGTCAATTACCGGAAATTGGTAGTAATAA  
ATAATGATATAGCTAAAGCCAAGTCTATTCAACACGTAAAAGAGTTTAAAGCTGAAGTTT  
AGCTATATCAAAATTGATGAAAAATGTAAAAACGCAAAAACAACCTGTCAAAAATAAGATA  
GGAAAATAAATATGTTCAAGCGCAGCAATCCTTCTCAACTTCAAGCTCAACTGGCCGCAC  
TGAAAGGTAATGCAGGTGGTTTCGGTGGAGATAAGAATGAATTGAAACTGAAAACCTGATG  
CAGCTGGTAATGATCAAGCAGTAATTCGTTTCCATCGCGGTAAAGGTGATGAAGGTCTTC  
CGTTTGTTAAGCTGATTAACCACGGTTTCAAGAAAAATAACAAAGGGTATATCGAAAATG  
GTTCTTCTACCCGCGGTGATTTTACAACCTGCCCGGTTTGCCAACCTCTCAGCCGCGATG  
ATTCTTACAACACCAACGTTGAAGAATATAAGCTGCTGAAGCGTAAGACTTCCTATTGGG  
AAAACATTCTGGAAATCAAAGACCCTGCCACTCCTGAAAATGAAGGCAAGGTGATGAAGA  
TTCGCATTGGCGCAAAGGCAATGGAAAAAATTACGGCCATGATCAACGTGACCCCGGAAA  
TGGGCGAAACCCAGTAGACGTAACCTGGCGTTTTTCGAAGGTGCAAACCTTCGTTTACAAA  
CCAAGAAAGTTTTCGGTTTTACCAACTATGATGACTGCAAAGTCTTGGCTCAATCCGAAA  
TTTCAAAAATCAACGATCCCGAATTCCAAAAGTTCTCCTCACTGATGGCATGGAAGATTTGA  
GCAAAAATCCTTGCTCCTTCCGAATTCAAGCCTCTTGAAGAAGTGGAGAAGAAATTCAG  
CAAGTAATGGGTACTTCCATCGCTGCTGGCTCTGCCGTTTCTGCCGCATCTTCTGTCT  
AGCGAACTTAATGACTTCGACGACCAGCTAACCTCGTTCGACACTGATGTAGTTCAGCCA  
TCCGTGCCTAATGCTTCTTCTGATCTCGATGACGATCTGGATGCTCTTCGCGGCTAATAT  
AGAAAAGCAACCTTCAGGTCCTTTTTTGCATCACAATCTTTCAAAAAGAAGTGTACAAC  
TATGCCATACAGTGTAGAATGTCTCCATCAAATCAACCAAGGAGTAATAAAAATGAAAGA  
CATTCTCGATTATCCAGTTGACACCAAGGGTTCGGATTTGCCACAAGAATTTCTCGCTTT  
GCACGTAAGTCGTTGTGAAAAGACGGTTGCCGCGTTTGGAGGTCAAGATGAATTTTTCGA  
ACTCATCAACACTAAAGCATGTGGCGGTTGGGGTTTGGACTATAAGGCCAAGTTTGAAGA  
AGTAAATGGCGTCAAATTCGCCAGCAATATCAGCTTCGAATTATAAGGAAAATTGAAATG  
TCAACGAACAAAGTTCTCATCAAATTCAAATCTCCTAAAGCTCGTGCTAAATTTGCAGCT  
TCCTCTGCAGCTAATAGCGCAATTGCTGAATATATGCAGCATTACGAGCTGATTGCTGTC  
AATAAAGGGAATGGCGATATTGTCATTCTCGAAGATGGCAAAGAATTTGAGCTCGACGGA  
TACTGGACTCCCGCGATTTTTATGTCAGAGCGTCGATATTTGACATCGAAGTGATTTAA  
CTCAAAAACATTGTTCAAAAAGGAAATATTATGAATGTTAACTAAATGTTGGCACTATCG  
TTTACTGAATTTCTCACAACACAAATATCCCGAATTCTTTATGCCCGTATTTCTGGAAAGT  
CGTGTTTACGATCGCATGGATCACCGGCTCGATTTTACTGCTCATTGCTCTTTTACATC  
TATTGGTGCCAGAATCTTCGAACGACTTGGCTTTGCCACGATAATATGGTATTGTACTG

GAGCCTTGCCGCTGTAGTAGGTAAGTACTGTCACCGTCACATCTGCTATTGTGCTGGTTGTCGC  
AGTAATATTCGAATTTGTTGGGCCAAAGAAAATTTCAAGCCACCATACAAAGAAGAACC  
GGTGATTATCACCTTTGTCAAGCACAAAAAGTCTAAAATTTGCCCGCGTCTGGAATTTGA  
AGACAAGAGCAAAAAGACTGAAGAATTAGTTCGCAACCAGTGAGGTCATGATAAAATGAC  
CTACTAAAATAAAACAATCTCCGGCTTATAATGTTTCACTAAGTAAGGAAAGACTAATA  
TGATTATTAATAATGAACGTCAACTGGCTTCTATTCGCAAAAATTCGCGATCTTCAGCCGA  
TCCCGGGTGCTGATGCTATCGAATGCGCAACCATCGACGGCTGGGAAATAGTCCTGAAGA  
AAGGCGAATTCGCAATTGATGAGGATTGCGTATATTTGCAAATTGATTCCATGCTACCGA  
CACATAATCCTGCTTTCAAATTTCTTGGAAATCCCGTGCCAGGATGTACGAAGGCAAAATGC  
GAGCTCAAGTGAAGACCATTAACTTCGCGGCCAACTTTGTCAAGGTATAGCTTTGTGCGG  
TTAACGCGTTTACCATCGGAGAAGTGGTTCGGTGTATGAAATGGACCAAAGTCTGGACC  
AAGTTCTCGGTATTATCAAATATGAGCCGGCTCAAGACGGTCTGGCTGTAACCCGGCCG  
GTACTTTCCCTGTTTTCAATCCGAAAAGTGAAGAACGCTGCCAAAACATTTTCAGCA  
AATACAGCGCTCGTTACAAAGATGCTGTGTTCCAAAAGTCTCTGAAGCTGGATGGTAGTT  
CTATCACCATGGCATGGGTAACAGATCCTGACCTGTCCCTCGCGCTTGGAACCGAAGATG  
AACCATATGCTCACGATTACGACGATGCTCACTTTATCCTAGCTTCTCGTAATCCGGTTC  
TCCGCTATAACCCCGAAAGCAAGTGGTGGATGGGTGTTGAAAAGTACCAAATCATCGAGC  
AACTGAAGAAGATGGGCAAACTCTGTCGCAATTCAGGGTGAAGTACGGGTCCTGGTATCC  
AGAAAACCCGCGAAAACCTTCGACAAGTACCGGATTTTCGCATTCCGTGCCTGGTTTATCG  
AAGAGCAACGTTTTGCTACCGAAGAAGAGTTCACGACCTGTGCCGTGCTCTCGGCATGG  
AAATGGTGCCGACGCTTGGTTCGTTGCAAGCCGTTTGAACAAATTGAAACTGTCAAAGAAA  
TGTTGGCTGATGCGGATATCCGTCATCAACCACACGATTGCTGACGGTCTCGTTTATA  
AGTCTGTTGACCTCGTAGATGGCGAGATGAATCACTTCAAAGCAATCAACAATAAATTCT  
TGTTGAAATGTGAGGACTAACATGAAAATTAAGAAATTGCAACCTTTACAAGTCTTGTGT  
CCGAAATGCTGGATAATTGAAGATTATTGCTACTGCTATTGAGAATTCTATGTCTAATAG  
ATTGGGGCTGAAATGCCCTATTCTCTTGAAGAGATGAAACATATATCAAGTCATTTAAC  
CGAATCCAACACGGAGGTCCCGTGTGATTAAAGCCGTATTTGCTTTAGGTGTACCGTCCG  
ATTTTCATAAGCATGGAGTTTTTGTATTTGGTAAAGATGGCGATTTACCATGGCCATCGA  
TCCCGAAGACTTTAAACTTTTCAGGGAAAAACCGATTGGACTATATGTGTTATGGGTG  
CAAATACATTCCAGTCGCTCCCAAAGAATCTTCAGGGAAAGGTAATGGTTGTTATTGGCC  
ATCCTAAGCGTGAGTGCCGGAACAAATCAGGTGAACCTCCTCATAATTTGTCATATCTTG  
ATATTGACTGGATTTCTCTGGTAAAAGAAGTATATCCAGCAAATGATATATCGATTATCG  
GTGGCCTTGGTCTGATTCTGTGTCAGTCGCCACAAGTGTGATGAACTCCATATCAATTTTC  
ATATGCTTACTTCTGACTATGATAACAATTAACCCAAGAGTTTATATCACTGATACCGCAC  
TAGGAGTTTTCTGTGTAACCGGAAAATGAATACTATCGCGTATCGAGATGAACGTGAAC  
ATTGCACCAACATTAAGCAGAAATTTGGAAATGATTCAATACGCCGATTTAGTATGCGA  
TATTATACCAATGGGCGAAAGAAGACAGATCGCACTGGAGTAGGCACCCGTTCCGGTATA  
CGGTCGAATGCTTCGCTTTGACCTCAGCAAAGGCTTCCCGGCCACCACATGCAAACGTCT  
AGCATTGTTCCAGTCGTGGTTAAATCGCTGTGGTTTATGCAAGGTTCAACCAATGTCGA  
ACATCTGCGCAAATGACCTATGGCGAAAACCTCTGATCGTTAAACCATCTGGGATGATAA  
CTATAACAAGCAAGCCTTTGATCGTGGATATTCTGATGGATACCTTGGTCCCGTTTATGG  
CACGCAATGGCGTATGTTTCGGTAATAAAAACCCGGTCGATCAACTGCAAATGTGATCGA  
TCAAATCAAAGCAAACCCCGACAGTCGTCGTCTTTGGGTCGCTGCATGGAATCCTGAAGA  
TATCGAAAATGGCTTTGCCTCCATGTCACCTTTGCGCTCCAGTTTGAAATATATGAAGAC  
AACTCAGTTTGGTGTGGAGCCAACGTTCCGTCGATGTTGGTCTTGGTCTGCCATTCAAT  
ATTGCGTCCATGCGCTTCTTGTCATATTTTAGCTCTAATTTGCAATTTGGAAGTTGGT  
TAATTGGTATTCTCTGGTGCAGATCTCAAATTTACGAAAACCACCTGAGTCATCACGGC  
GGTAGGCTTTCTCGTGAAGAACGCCCTTTGCCTACGTTGAGTTTCCCGGATATTGACAGT  
TTGAGTGATCTGCGTTTACTGGAAGCAGCCGATTTCCGTCGACGGGATGACCCACAT  
CCAACAATTAACCTACCGAAGGCTGTGTAATGACTATATGCACCGTTGTAACGTCAAG  
CATTAAAGATGTGACGTTTCGTATACAGCGAGGCACTATATGGGGTAATCCAGACGGAGAA  
CCCATTGAAAACGGCAGGATTATCTTGACAATTACAAAAGCATTTAAAACACCAAATA  
AAAAGTGGGGTAATTAATCTTGGCGATTTACAATTAATACGAGGCAAGAAATTTGGGGTGT  
GGTTGCAAACCATGCCATGCCACGGAGATATCTTTCTGATCTAGTTAATCTCATGTTT  
AAGGATGTGTCAAGCGTAGATGATTTTCATATGACATTAAGAAGACACGGATTCATTCAGA  
TAGCAGAATTGACCATAGGTAAAAACGGACGTATATCCAGAGATTTTGTAAAGACCCA  
TCACTAAAAGACATCATTTATTTGTTTACAATTGATGATGAAGTTGTGTATATTGGTCAA

ACTAAGAAGTTGCACAAACGAATGGACTCATATGCTAATGGCAAGTATTGGAAAAATACG  
AACAGTACATATCCAAAAATCCAAGTTTCTGGAAGAAGCAGTAAACTCGGGTAAGAGA  
GTTTGTGTTTGGATAAAGCATTGCTTCCAAATCGTTATAACCACTCCTGCTGGGTAAAAC  
GTTATAGCTGACCTAGACGCGGAAGAGAAAAATTTATCGGGATTTTTAATCCTGTTCTAA  
ATTCAAAACTGAAGGTTAAATTATGAGCAGAACAACCTGAACTTTTTAATAACTTGATGTC  
TGTTGTTGAAAAATCCGAAAAGGGCAATTTCTACTTCAAGGACGTCATTACGAGTATTGG  
GACAAAAGCTCGAATTGTCAGCTATTTTATCGCTTCATATACCGATTGGGTGCAAGATGA  
TGCTTTGGAATGTCAAGGCATTATGTTTGAGCTAAATGATAAAAACGAGGCAGTTCGAAT  
CATGGCTCGCCCAATGCAGAAGTTCTTCAATCAGAAAAGAACACCCCATGACCATTGGGCT  
CGATTAAGCTAAGATGATCGGTTTGATGGAAAATCCGGATGGGTGCTGATTAGCAGTTA  
TCATGATCGAGGCTACGTTTAACTGAGATCTACAGCTGCGGTTTTCTCCGATCAAGCCAA  
TAAAGCAATGGTGATGTTGAATTCGCCTGCTTATGAAAAATTGCGCGATGCAATTGTACG  
AGCCGGTCCCGATTCTACTTTCAATATGGAATATGTTGGACCAAGCAATCGGGTTGTCCT  
TCCGTACGAGGAAGAAGAATTGATTGTTCTCAACGTACGTCACAATGAAGCAGGTCAATA  
TGTAGAATTTTCTACTCTGCTGGATGACCCATTGATTTCGTCATCGTATGATCGGGGTTTA  
TCCTTGCCCGAATTGGAGTAACTTACTCCCGAAGAATTAGAAGCTGAGACTCGTGCCGA  
GACCAATGTTGAAGGAGTTATCGGTATTATGCCAGATGGCCAGCTGTTCAAACCTGAAGAC  
CGACTGGTACTCCTCTTTGCATCGTACCAAAGACTCGATCAATAACAATAAGGCATTGTT  
CCAAGCCATCAAAGAACGTGCTTCCAACGATTTTCGTGGCCTGTTTTCCGATGATAATGT  
CGTTTTGGCAAAAATCGAGGCCTTTGAATCCGCTTATATTGATACGGTTGCTAAATACCA  
CAAAATTTGCGCAGAACTGTTTTACGATTTGCGAGGTTTTGACCGTCGAAGTTTTGCTAT  
CGAAGCACAAGCGAGAAAGAAGAATGTCCGGTATCTATTTAACGTAGTTATGCAACAGTA  
CCGCCGCGATTGGGACGGCGAACGCGCTGTCGAGAAAATCGAAGAACACATCATCAAAGA  
ATACGCAACATACGTTCCAATGGCGTACCGTTAAATAAAGTTGCAAAAACCTGTGTACATT  
TGACGTTGTAATGCTTAGAATAAATCGATAATCAACATGGAGTTAACCGAATGAATCATT  
ACAATTACACCGTCGAAATTCTCATCAACACGTACGCTATCGGCGGCAGTTCGGATGGAA  
TTCGAATTTTCGACAAAAACGGTAAAGTTGTAGGGTATATTACTGATTTGCGCAAAGCTG  
CTCATTCTGCAGCCGAAAAGAATGAAAAATCCTAATCGGACTCTCGGGAATACTATCAAC  
AAGCTAAAACCTAACATTGGCCCAATGGTCAATGAAGTTGTGAACGAGTTGAAAAATGTTT  
TTGCAGGGACACCCGCAAAGGTGTTTATTAACGAAACGATGCCGAATGTCAATTTTCATGG  
GAGCCAAGTTCTATTTTATCTTGTATCCACTGACTGACAAAATTCGTGTATACATCACTC  
ATAAAGATCCATGCCGCATGAAGTTTGTTTTCCCAGCAACATGCCAAACTTGATATACGTC  
AAAGCGGAAAAAGCATTTTGATTGATGGTTTTACACAGAGCGAAGGCATCGCTCTTGTC  
AAGGATTCTGCGGAAATGTTGTTAACTTTGAGTTCTCTGCTCGGTTGGCTAAAAAGAAAT  
GCGTTATATGTCATCATAATGGTCTTAATGGCCAGTATGTTGAAAAATCAACACGACGAA  
TTCTCTACGATAAAAAATAGTTTAGAATCGATGAAATCATTCCAAACTAAGTCGTATGAG  
AATGCAAAACCCGTCCTGAGGCCCCTGCAGAAATCTCCAAAAGCTTCAAAGCAAATGGAA  
AAAATTGCGGAAAAGAAACCGCAACTATTAGAAAACGAATGAATATGGGCTTCCAGAAG  
TTAGCTGATCAACTTCAGGAGAGTACGAAATGAGGTATATCGTCATTCTACTGGGATGTC  
TCCTGATCACATCCTGTGCATCTAAGCCCATGTTGCCAAAACCATCGCCGATACACAAAC  
TCGATATAACATGGAAAGCAACCGAAAATGGAGCTTTACTAAGTTTTGAGGATTACAATA  
AGTTGGGTGTATGGTTAACCCATGTCAACAGATATATCAAAGATCAAAAACAAATAATTC  
AAATATGTGAGGATAACAATTAATGACCGAACGTTTCGCATCTCAACAACCTCATTGACT  
GTTGGTCTACTTGTCCGAAAAGGCATCTGGGCAAATGAGCAAGTTAGGACAAATCCT  
ACGAAATACGTTAATTTGACTCGTGATGATTTTCGTTTTAGCCTTTTTGGCTGCCGGACT  
TGATCTGACTACAAGTTCAATAAGCATAATGAGCAACTGGTAACGAATGCTATCCAAAGA  
GCAGCGATTGAAGCTATTGCCATGAGCAAGACTATCATTATTTCCGACACCAATCTGAAT  
AATACGACACAAGGAACCTTGAAAATTTTCGCAGATACACATAACGTTGAGTTTGTGCTGA  
AATATTTTGCGCCGGCCTTCTGTATACTCTCATGGAGCGTAATCGCTAGAGGCGAGCGG  
GCTTTGCCTGAATTCGTTGTGAAGCGTCAATATGTCCAATATATGGTTGATTTTGGAGGC  
CAGCGGGTTTATACACCTGACTTTGCAAAACCTCGGGCAATCATTGTTTGAACCTGGATGGC  
ACCCTGATTGATAACAGCCAACGGCATGCCTTGGATTGGTCGAAAGTTCTGGATGACACT  
CCCCGTGACTCTGTCGTAGAATTTTCAAACGTCACGTTTCATCGCGGTTATGCTTGCATT  
ACCGTTTCTGGCCGTGATGGTGTTTCTGCAGCAGATTCTATCAAGGCTCTGAATAACGCC  
GATCTTTTCCCTGCTGCCATTACCAACGCGCTGCAGGCGATTCTCGTTCTGACGATATC  
GTAAGAGAAGAAATTTTCTGGCAACAGATCCAGCCCAATTGGTGTGCTGTTTCGTGCAATC  
GATGATCGTCAAAGGTTGTTGATATGTGGCGTCGTATCGGGCTGGAATGCTGGCAAGTT

CAACCTGCTGATTTCGATTCAAAGGCCCTCTTCGGAGCGCATTTTTGTAAAGAAATCAAT  
AAAAAGTAGTGTACAGGTCGGTTTAGTGTGATAATATAGTCACATGAACAAAATGGAGTA  
AAAAAATGTTTTTTGACACCTACGACACTGCGCTGGCAGAGTTGGAAAAGAGCTGCGGCG  
AATCCAGAACAAGTTAAAGCTCGCGACAAAATGCGATGGTTTCAATAGGTCAAATTA  
GCATCAACGAATTTGAGTTGATCGTTCGCAATGGTGCAGGCGGGCGTGACAATTATTTGT  
TTGCAATTTTCGTTGACCCAACCTCCTGTGCCGAAGTTTATCATCAGCTGCTCTCGGGTAA  
TCGGATCAAAGATACAAGTGTATTACAACATGCCTATATCGTTGCACAAGAATCTCATTG  
TGTTTCGTGGAAAGTAGGTGCTATCATTTCGAAAGATGGTTCGAATTATTTTCGACCGGTTA  
TAACGGAACCTCCAGCTGGTTGCAACCATGCCAATTGTGATGACCATGCGAAGAAAAGTAG  
TTGGCTTGATTCTTACGGTAAGCTGCGAGGAATGTATCGGCAAGCACACAGTGAATGGTC  
AAAGGCAAATGAAATTCACGCAGAATTGAACGCCATTCTGTATGCCGCGAAAACCGGGCA  
AAGTATCGATGGTGTGAAATGCACGTTACTGTTTCTCCGTGTGCAGATTGTGCAAAAAGC  
CATAGCTCATCCGGGGATTAAGCGAGTCGTCTATAATGGGTTATATGATCGTAATCCGCC  
TGGCTGGGATGACATACTCATTAAAGTCAGGAGTAGAAGTAGTGAAAACGAACAGCCTCC  
CAACATTATCAAGAAAATTTACACCACCAGCAACCAAATTTGAGGAATTTATTATGATCG  
TTGAAGTATCTCCTAACGCCGAAGCACTTGAAGTCAAATTTCTTTGAAGTTAATAGCGTCG  
CAGAAGCTGCCGTTCTGGGAATCGATCCCGAATGGGTTGACGATGTCAAAGCCGTCGTCC  
AAGTTTAGAAAAACCAACCGCTGTTTGGTTATTATCCGTGCCTTATCGGTTTTGTCACTG  
GTCATCCGGATTTTTCGGATGGTAAAGTGATTTCGCACTTCTACTGTAGATATGGTAATTC  
ATACTCGTGGTGAGTTCGAAGAACGTACTATCGTTTTCACTCGTAATTTCTCGTTATGCGG  
TGATTAATGAAAATTCAGCTTGATCCTAAAGCACTCGAATCACTTTTCCCGAAGGTTT  
GGAGGCTCGTGTAGAAGTGCAAAATGCAGTTATTGCTAACTTCGCAAAGAAAATGCAAGA  
AAAGCATCTTGAAGATGTAACACGGGACCAGATTCGTAGAGCTGTTCAAGAGGCTGGTGT  
TTCGATGGATTCATTTTCCATTGGTTCGTGACATGCTGAACAAAACGATCACCAACAACGG  
TTGGGATGCATCAAGTGCGCAATTGAAGACCAATTCCAGTTTGGCTCGTGCTATCCATAT  
CTATGCCATTCAGCAAGACCTGAAATTGATGAAGGGTATGGAAGTATGGGCCAATGAAAT  
GGTTAATAAAGAACTTGGAAAGCGCGAAGAAGCTGGCAAAGGTTTCGTTGAGCATTACAT  
CCAAGAAGCTGAAATGAATAGCGCAAAGCAAAGAACCAAGCTTTTTCGGAAAGCGAATC  
TCGGATTGTTGCTGCCTGTAAGCAAATATGCCGGAACCTATTCGTCGTGAATTGGTGAA  
TTATCTGAGCAAACCAATACACTGTAAGGAAATAAAATATCTAAGCAATATGTAATCA  
ACAAATGCTGTTCTCTATTTTGGCTGACGGCGAACATGAACTGATTTTTTCGAAAAGCAGA  
CGATTCGCATCGGGTAATGCTTGCTACTCGTGACACTGTCCTGATTGAGGTTGCTGAAAA  
AGGTGATGAAGCTTTTACGGCAACAGAACCTGAAGAAAAGAAAGAAAGCAAAGAATGTAA  
TATTTTGAACGTCGTCTGTTTACGATTTGGAAGCAAGAGCTTGGCGATCGTTCCGAGTCGA  
TCGACTCGTATCTATCAACGGTACTGGTATGGCCACGCTGGCATCTCTTATTGGTGCTCA  
ACATCGCAATCAACTGAATATGGGCCACATCGAAGAGCGTTACGTTTCTACCGAAAGCAA  
GGGTTATGTGAATTTTAAATCCGTTGACCCCGATGAGTTGAGCGATTTGGTCGAAAACCTC  
TTCGCGATTTGAGCTTTTGTCCGACGAACACGGTACCAATACATGGTTCCTTGTAGAAGA  
CGAATCCAATTTTTAATCTCTGCTGAAGTTTGCAATACGATGGGATAACTTATAATTATC  
CCATCAATAAAACAGTTAAAGAGAACATCATGACTAACGTAACACCTATTGCTCAATTTG  
AAAGGACTATTCTTGAATCAAAAAATTAGGCATCCGCAGGTGATGAAATCATTTTCAGATT  
CTGAATTTGTTCTTGGAAAACGCGATCTTCTGAAAGTTGCTCTCACTGCAGAGCTTATCT  
CAGTCGGTAAAGACGTACCGAACCATTTGAAAGTAGGTATGCAAGTTTTGATTCCAATG  
GCCGTATGCACTATTTACCCGATCCTCGTTATCTGTCCGGCGAAATCAGTGCGAACAATA  
GTCGAAAGCTGTCAGCAGGCCACGGGAAAGATATCAAGTCCTGTATGCTTAATTGATTG  
TCAATATAAGATTAACAATAAACAAGGAAATGAGAAGGGCTAAGAAAAAGAAAGC  
AGTTGAGAAAAAAGTAGAAGCTCCGAAAACCTGGCCGTCAAGGTTAAAAGCGTAAATCCAA  
CAGCCGTGTTGATCAAGTTGGTGTGCTCTGGCAGCTCGTGTTAAGCGCCAAGTCATACA  
TGTTGATAAGTTTGGTCAGCCTAAGCACGAAGGTCGCAAGCGCCAGAAGTGATTAGTGGG  
ACCTTCGGGCCCCATTTTATTTTGAAGCGGTTTAAAAGGAAATATAATGCAATACGA  
AAGACCGATTATTTTACTGAAGTCGACGGGGTTTTGGTTCAATGGACATCTGGCCTCGC  
ATATTTTCGCTCAGAAAAACGGCATTTCGGACCGACGAATTTTTGAAAACCTCTGATCGACGA  
ACGGTTCCGCACTGGTGAAGAATTGTTTCGGTGTCAACGCGCGAATTGCAAATATCTTGAT  
GCGCGAGTATAACAACACAGATTTTCGTCAAATATCTTTCTGGATATATCGATGCAATCGA  
TGTTGTAAATCGAATGAAAGAACCATATGACTTTATTGCCATTACTGCGCTAGGTGATTC  
TAACCAAGCTCTGCTCAACCGGTGTTGCAACCGGAACACACTTTTCCCGGGCGCGTTCAA  
AGATATTCTGTGTGTTGACATCGGCGAAACCAAATTGCCGCATTACATTTCCGTAAGCA

AAAATATAAAAATCGTTTGGTTTGTGGTTCGATGATTTGGTAAGTAATCTCCAAGATTG  
TCATGATGCGATGTCGCAAGTGCCTCAAATTCATATGCTTCGAACTGAAGGCGGGCGTGA  
AGTAAAACATGATATCAACAACCTACCACACTGCTAAGAATTGGTACGATGTTGAAAAGCT  
ATTAGATCAACTTGATCCAAAACCAAATACAATCAATTTGTACATCATTTCGACTTGGCA  
AGATAAACCTGCCGTCTCTGAGGTAATAATGAAATGCATATTTTAGACATTCTGAACGAAA  
TTTCCTCAACTGATTCGTCAAAGATAAAGAAAAAAATCCTGAATCGCAACAAAGAAAAT  
AACCTTCTCAAACCTGTTTTACCCCTTGCCTATAACCGTCAGTTAACGTACGGCATTACA  
CCAAAAGGTTTGAATTTCCGGCGGTTCCGGTGGGACCTATGAGTTTGTAAAATTTCTGCTTG  
GAGCTTGTCAAAAAATATTCCACCCGAAATTTGACAGGAAACGCGGGTATTCACTACATG  
CAACAGATGCTTGATAGTATGTCAAGTTCTAGTTGTGAAGTTGCCAGACGTATTCTTTCA  
AGGGACCTCAACTGTGGAGCATCTGTTGCTCTTGGAAACAAAACATGGCCCGGCATCATT  
CCTGAACAACCTCAGTTTCTTGCAGCACCATAACAGGGAAAAGAATTTGAAGAAAATCCGT  
TGGCCTGCTATTCTCAATTGAAAGCCGATGGTGCCCGTTGCATGCCTCTCGTATCTGCG  
GATGGCTCACAGGTATCAATGGTGTACGGAACGGTAATGAATATCTGAAGTTGTATGAC  
ATTACATCACAGTTGAAGGAACTCGCTCAGGTTGTGAGAGAGACTCTGCAACATTATGGT  
GATTTTGTATAGACAGCGAATTGATTCATCGAGCTCCATTCTCTGCCTCCATTAACG  
GCTAAACAACATACTGGATGATCTGTTTGAATTCCTGAGACAAATGATGAAGAAGAA  
ATCGAATCAGATCGACACAAGTCCTATGGTTTAAGTAATAAAGCTCTAAATGGAACAATT  
AGCGACGTTGAACAATCCGAAATGATTTTTAACGTATGGGTTATTATTCCGCAGGAAGTT  
TATTACGAGCGCGAAAAGAGCACATTGTACTACGAGAATCGATTTGCTACTCTTGCTTGC  
CTGACTGAAGCTTTCGATGGTACCCAAAAATATCAAAACATTTAACTCATTGAATCCGAA  
GAAGTTGAGACATGCGAGCAAGCTATAAAAATTTATCAGAGATATGTTGATCGCGATCGA  
GAAGGTATCATTCTTAAAAATAAAGATGGCCTGTGGGCAAACGCTAGAACAACCTGACCAA  
ATCAAGTTCAAGGTAGAAGTAGAAATTGATTTGAAGATTGTGCAAGCTTATCCTCATGGA  
AAAGATGCGTTCGAAGGTAGGTGGCTTTGTTCTGGAAGATTCTTCAGGTCAAATCAGGGTT  
CGTTGCGGTTCCGGCTTAAAAGACACAACCCATAAAAAGGTAATGACTCTAAAGTCGAG  
ATTCTATCAGCGAAATGCATAAATATGACCGCGAAGCGCTTATGCCGATAAAAAATGAG  
TTGATCGGCCAGATTGTTCAATGCAAATGCAATGGATTGCAAGAGAGGCAGGGGCGTAAG  
CCGAATGAACCAAAATTCAGCTGTTTCTTCTTTTCCAACTCATCCGACGTGACAAA  
TCAAAACCAAAATCATACCCATGATGTTTCCACATGCTATTCTGGACTGAAAAAGGCCT  
TCGGGCCTTTTTTCGTTTCTGTTGTGTACATGTAGATTTCGGCTTTGATAGTATGAATACG  
TACACAACCTATTGGAGAAATTCACATGATTGTTAAAGTTCCATATAATTTTGAAGAACAC  
ACTGGCGAAGCCGACGACGCTCAAACCGCTTTTGAGAAAACCACTGAAGTTATGCTGTCA  
CAGCTTCCCCAAAACAGAAAACACGTTTTACGCCACTGTTCCAAATGAAAGCCGTTTT  
GGCAGCGGTGATATTCGTGCAATGACAGTTATCCGTATGACCCGTGTTGACCTCATGGCT  
GTTCCGGGCGGACGACTTCGAATTTCCGTTCTTTGTAAAAGTATGTGAATAAGCTCCTTCG  
GGAGCTTATTGGAGACAATTATGCTAAACCTTCAACTGTTGTACCTGTGGCTATTGAAA  
AGCCCATATTTTTCAGATCACATCCGTCATTCGGCGGATCTACCGCGGACACAATAAATT  
CCCCAATAACTTTTTGAAGAATTCGAGTGGGCATGTAAAACGTCGAATACGCTCATGATG  
TTAGCAGCCACAGAAACATGCCATGGATGAATTTGGGATTGGGGTCATATGAGCAAGTGC  
GGCTAAATTTTGAATCATGTTAAAACCTCCCCAGATATAATCAGAATGTGCAATCGTA  
TAGCGGAGCAACGATACACCGACAGTGGCATGTGTATTTTGAAAAAATATGACGACTACG  
TGTCTAGCTATTGCGATGAAGAATTTCAAACGTTTCTGCTGCTTTGCGGTCTGGAATAT  
TCGACGATGCAAATAAAAGATTTCGTAACCGAGTGCATACGACGGATGGATTACATATAG  
CAGAATCTGAAAATTTAATAAATCTGTATGGAGAGGAATGTCTCTCAATAAGGCAGATT  
GTATTAATTTAAAGATAGTGGGTCTATTCTTTAAAATTCGGTATCGACATCATTTT  
GCCCGCTTTTTTCAATTACGGCATTGCGCAATGCAGATATCTCGATTTTAAACGAAATCA  
CACGCGAAATTGTTATCGATGGCGACCCACATCGACCTGTCATAAAACCTGCACATTT  
ACTGTCATAATGTGAAACACCTGATTCCGGGAAACCTTAGTCCCTACCCGGAGGAGTGCG  
GAGTAATTTTGGAGAAAATGACTGTACTCGTAATAGATGAGATTTTTCGAATATGTGTCTC  
ACGTCGACAGTTTTTGTGTTTAAAGCGAAAGCGGTTCCGTTAAGTCAATTCCTGGA  
CAACATTAGTAGTGTAATAAACATTTTAGACCTATAAGGGAAACAAAATGATGTTAGTTG  
AGATGACAAATGAGCAATTGGACGAGGTATTCGACGGTGGAGTTGGAAAATACCGTGTGG  
TCAATCTTTTGCGAAAGACAAAAGTTCCGTATGTATTAACATCCAAGTTCCCTGGTTCAG  
AAAATCTGGCTTTGCGATTCTGTAATTTACTTCAAAGGGTGATTCCGCGAAGCAGGTCA  
AACCTGGCGACAAATTCATGCAAACACAGGTCATCCAGATTTTCAGCAAAGGGACACCAC  
AGGTTCTGAGAGATGCTCTCGGTAGTGACCCAATTGGCGCATTGAATATGATGACTGACA



AAATCGTTAATATGCTTGTGTCAGGTATAGAATGGAAGCAACGCTTCTGATGTTTCCGACAA  
AGGAACTGAAAGGCCAAGCTAAAAATATTGCGCGAATTTTCATTACGGCTTTTGCAAAAAC  
GATCTGGTGGAAAGTTTATTGTTTTGCCAGAATTGTTGAAAAGAGGCCAAAAAATATACAT  
ACATTATGATTTACCGAAAATCATCAGGAAGCACTAGTGTCAATGGATTGGAACTGATC  
CTGAGCTTTATACGGTTTCATCTACCAGTGTAGGCGATGTCGTGATTGATGTGAAAACCTG  
GTGAAAAGTCACAAAGGCAGAAGCTATTGCTGGGTCAATTGACAAGAGAGAAGAAAAAC  
GCTCTACTAAGTCAATGACAACTTCAAAATTCCACGTGGATATTTGATCAAGGCATTCA  
CAACCTGTATTGCCTCTTCGGACAAGGAAAACAACACTACTACGACCCTTTGGTGTGGCC  
CAGTCGACAAAAAACCGCCAACACTAGCGACGCTGAGGAAGTAGATATCAATGCTTCTAACA  
CGATAACCAGAGAACAATAACGGAAATCGCATTATTACAAATTCTCTAATTTAGCCGCTG  
CTAATTGTCTTGACAAAATTGACTTCGACAAATATGATGCGTCAAGCCATGAATTGCTTG  
CTCTCTATGCGGAGACGGTTCGGCAAACGTCAGAGAAAAGCCGCACAGAAAATGGGTAGATG  
AAAAGATTCCGGATGAACATCGGGGTGTGAAGAAAAGGAAAAGTCGATTTTCATGGTTTATA  
AGGAGGTGAGACGCGCTATTATGGAATGGGCGAATTATCTTGGTAACAAATTTGATGATA  
CTGTGCGCAGTGTTAATATGAGAAAAAGATTGCCACCTGAATGTGTTGATGCTATACAAA  
CTTACACTTCGATTGACTATCGTAAGATTAATAATGTTTTTCATCGCCAAGGTAAAACCAT  
CAGCTAAAACCGTAAATGATATACAGAATCTGGACAGAGCTTTTGACATTGCAGGAATTA  
AACTTCTGAGAATCTCACCTTAGGCGGGGTATAACATGCCCAAATTATCCAGCTAAAG  
TTGCTTTGGAAAATAAAAATGTATTATTTTTCTAACTACGTGTCTTGTCTGCTGTTCTTA  
TTGTATTTTTAGGTGGGTCTATTGCCCAGCATGACATTGACATACTTAATGCTAAAGAGA  
ATGATGACGCGCAGGTGCAAACAGCCAAAAAACACGGGGCTCATTTCGCATTTGCTATC  
AAAAATGTCCAGGTCCCAGCTCTTATAGTTAACGGGATGTCGAATTATACGAAAGAACGC  
GAAATTGTTCTTCCACGCGGAACAATTTTTGAATTTAAAAAAGTCAGTAATGTTGGTGAA  
TTTACTTCAGGAAAAAGGAAATATCTGATAGATTGTTCTGCCGTTTTTCAAAGTCAAATC  
GACGAATCCACAGAGATTTACGACGGTGATTTGCTAATGCAAACAGGCGAAGTCAAACCTG  
ATTGAAGGTTTTTCTGGATTCATGAAATCTCGCGAAGATGAAGAAAAAGAAAGACTAAAA  
GCTGAAAGGATACAAAGAGACAATTATTTGTCAACTCTCATCGACTTAGGTGGAGAAAGT  
AAATTTGTCCAGGTAGTAGAATAAAAAAGGGAGCCGTATGGCTCCCTTTTTGTTACCCAA  
ATGAACCAAATTTTGACAACCATCCACCAGCTTGTGTTGCCGAGTTCAGGTAATAAATCAC  
CCTTAAGCCAGTCTTTAAGCATTGCTTGATTAACCGCACCTGTGTTTCATGACTCGATACG  
CGAATGTAACGTCAAACGTTGTAATAGCATTGTTATCCTCGTAGCTAAGTTCAGGTGCTG  
ATACGCTAACAGGTATGCATCCATTAACATCGTTACAGTGTGGGGTATACCGGCTCTCG  
AGTGCAAATTCATTTGTATAGCTTCTTCAACATCAGCAGGCAGCCAACGCAGGCCGGTGA  
CAGGGTCTTCGACCCGATTTACCCAATCCTGCATAGCCCGGTCATTGGCAGCCTGCTGGT  
CCATTCTGAAACTAATTATGAGAGGATCATACTCGCGCCCATCAATTTGATGTTTGGAG  
CGTTGTGAAATTTGTCCATTTTATAATTTAGCCGGTTTTCTGGTATTTTTACAGAATAAA  
CCGTTAAACCAGTATGTGTATTGCCAGCAATGAAAAAGTCAAGCAAACACGTAGCGACTT  
CAAATGACCAAGTAGGGACTGTATAGTTCGAAACGTCATTGCGCGGATCAAGTATCTCG  
TAATACCTGATTTGCGTATGATACTTTTGTGTGCTTTGAACTATGACTTTGTTCAAAGTG  
CTCGAAAGCATACTTGTGTCAACCCGGCAAATCTTTCCCAAATGGAAGATTGTTATAG  
AGATATGCACCGAATCCATCAAGCAAATCGGGTGTGTTTTAGATGATGGGGTGTGTTGCGAA  
AACAAACAGAGAACATATTTGTTCTCTGAAAGTCTTTATTCCATTCTTGTGAAATTCATC  
TAATGTATACATGATTATTCCTCATCATATAGATTAGATCGATTGCCGGCAAGAATCTCT  
CTGAAAGTGACTTCAAGTACAAAACCTTGAAGGCAAATTATGTGCTATTGCTAAACCGCCG  
AAGAGACCGTCAGGGCACTTATCGAACCGTATACTTTGAATTTGCGCTGGCCCAAATAAA  
TCAGATCGCATATCAAATGAACTTGTGACCGAAATTTCTAATTGTCCAAATAATTGGA  
TTGGAACAACGTTAACACTCAAAAATGATGTTATTCTTTCAAACATCGTAGTTTAA  
CCATGAGTTGCTTCTGGTGTGAGTGCGTTAATGAATGTTCCCATGTATGCTTCATCAAGA  
GTGCTTTTTATTTGACTCTCCGTTTTTGACTTTTTCTACTGCTCCGTACGAGTAATACGAG  
AGCATTTCGTACATTATCAAAAATTTGCATTAGGTGCTATACATTACGAGGCGTTAATTGC  
CAGGTATATGTTTTTGTACGATTCTCTGCGCCAGCGTACAGTGCCCTCGATGCGATGTAT  
ACTTGCTCACCACGGTCAGCAAATGCTCCCTGGGTAATAGACTCCAATCCGCCATACAAT  
GCATGAGAAGCCATCGAGCTCAGTGCCCCGGTCTCAGAACTGTCGCCTCGTTCAACCGGT  
GATTGCTGGACATCATTGAATTTATGGCTAATTGTATCTACATCTGTCTGTCCCCGAGGC  
ATCAGGATGTTAGCTATGGCTTCTTGACAACACCCTTACGATAATCGCCAATGTTATTT  
TGACCTGATCTGAACGAACGCAAATCCCCAGTCTGTCTGCCGGCATAGTTAAATGCTGAC  
AATGTCAAACCGTTTTTATACGGATCATTAAACATTGAAATCTTACGCAGAGTCATTGCT

CAATTTCTCTCGGCAGGGAATTGGGCTATCGCAATTTTGCTAATAGGCCCGCGAGGTGAA  
GAACCCGTTGCCAGGTTCTCTCCTTTCAATATTAGGCCTACAACCTGCCTGAACCCCGCCG  
TCTAAAAGTTCAGTACTCTAATAAGATGTTATTTCTATACCAGGTCCAGGCGAAGATG  
TTCTTGGAGCCTGGACAAATGTTTGATTCTGATTTTTGACAATGTTAGCCTTTGTGTGAT  
CGTTGTTTTACTGGCCGCTCTTGCTTCTTGCTTTCAACTCTCTTCACTTCTTTGTGCGA  
TAGTTTGAACAGTCAAAGGCTCTGGTTCAGGAGCAGGTTTTATTGCTGCTGTCGGCACAA  
CCAATGTGTTCTCATGCTCGGCCAAGAATTTAGTCTGTTTGTATTATTTCCACTCTAAGTT  
GTTTATAAGATTCTTAGTCAAATTACCTTCTTGATAAGACTGTTCAACTTCATTTCGAAC  
GATCATCGAGCAACTCGCGGTGTTTGTTCATAAATTCAGGCGAAGTTTCATTCTTTTTAG  
CAGTAACGCCAACATGGTTTATTTTCCCGCTCAGAACGTCATATCTGCCAAATTGCTCTA  
CTGTAGCTTTTTTGGCGATTACCATGCGTTTTTACGCTTTTTCTTTCTCGTCAGGGGTCT  
CTTCATCTTCCCCATTCACTTTACCCCATGCTTCGTAACCAATTAACCTTCGGTGTTAT  
TTGCGTCTTCAGCTTCGCGTCTTCTAACCCGGCCGATTACTTCTTCTCTTTTGAAG  
GAGTATATCCGACTTCTTATGTAGCAACTGATCTTGCAGGAGCTTCGAGCGAATCGGCTT  
TTTCATCTGCACCGAGAGCTCTTAATATAGTTGCGCCAAGTTTGGCCAAACCGAGCTTCA  
TCATATTGACCATATATTTCAATTTGGTCAAAGGCACCTTCGGCAAGACGAACAAACATTT  
TTGTATATTCATCACTCTTGAAATAAGTCATAAGGTCGGTTATATCTCCATGAACATTTT  
CAAATGGTGTGCTAAAGAGCCCAATTGATTTTTAAATTCGGGGTAATTCTCTTCAAACA  
TTTTAATGCAATGAGTAAAATGACGAGATAAAAACGTCAAATGTCATAATCAAGGAAAGCA  
CGAGTGTAGCCATTTTGGCAAATGAGAACGGCAGTCAAATGTATTTGAACAACATTG  
AACTTATTGAATCGGCAACGCTAATAGTTTCTTAAAACCATATTCGGCTGATGACACCA  
TACGATCTCCGATTCGGTCAATCGCACGTTCAACATTTTCTTCTTTGTCTGGTTAACTT  
TATCCTCTTTTTCTTCTTCTTCTTGGGTTATCGTTGTTTAGGAATTTGATATCTTCAGAAA  
TAGTTTTCAAATACCCTAAAACCTGGGTTATTTTTGGGTGTTTGTCTTCTTGCTCTACTA  
TCTTTTTAGCTGTTTGGTCACTAGTGTGTTGCGGTAATTGGATTTTTTTTACCATCCG  
CTAAGAAATTATTTTTAGCTTTTTCAGCAAATTCAGTTGCTAAATGTTTTTCATGG  
AAGTATCTGAACCTCTTTTCAAGTGTTGATTAGAAATTTCAAGTGGCTTCGCGGAAAGTT  
CTGTTGCAGCAGCATTAGTTTCGGTTTTCAGAAGTGTGCTAACTATTTTACGAAGTTCTA  
AATTACCTTGTTCAACTGTTTTCAGCTCTAAGCTCAGATGAAGCTAAAAGATCGCCAGTGA  
TGTCTGGCGGATTTTCCAAGCAGTTTGTATATTAGATTGCTCAGAATCTCTTTGCCTAT  
CTCTTCTCAAGTCTCTTAGTGTCTTTTGTAGTAGCCATTAATTTCTTCGAATAATGTTTGA  
GCCACCATTTATTTTGGCAAATGGTGTATCAAGTGAAATAGTAGAAACTATAAAATCTGC  
CCAATCCAATACAAGCGCAGTTGCATCTTCGAAATTAAGTCAAACCCGCTTTTTTCTTT  
GTCGTATTGCTTGGTCACTGTCCTCAATTTTCGATACAAACGTATCAGTTATCATGGGAGG  
TTTGAATAACAGAATATTGCCGTTTGTCTCGAATTCATATTTTGTGCTAATAAAGCTTT  
GTCAATATCAACGTCAAAGCCGTTAATGGTTTGAACGGTCGGCAACTTTTTGTTGAATGC  
CAGCAGATGCAAATACCATATCTGGTTCAGCGGCAGTCAAACCCGAGCGAATAGAATC  
AAGCAAGTCGATCATACATGAGTCTACACCCTCCATATCTTTCAGCAATTTGATATGCCT  
GAAACCCAGTTTTTGGAAATTGTGATCTCTTTTCCATTGACTTTTATTGTCTTAACTGCAGG  
GATAATGTTCAATTTGGGTTTTCATGTTATTTGCCTTTTCGTTAAAATCTGTATGAGATTT  
GAGTTGTTGAAAAGATAACATATTTGTTATAGATTGCTCTCTGCTTATTTTCATATATAACT  
GCATCAACGAAATACTCGCCTCTAAATTGATTCTTTTGTATCGGAGAATTTCAAACGCATG  
CCTGGTACGAGACCAAATTTCTCCGATGTTTTTGTGCTGTGCAATACGCATCGGATTCTGAA  
AATATTAGAGACCTATTGTACTCTTCGGCACCAGGGCGGCTTATTTGGTCATAATATGCA  
CCAGAACGGCTAATAAACTGAATTTAGCCCTTCGCCAGTAACAACCCGAGTTTGCATT  
TTGTTTGTGAAGGAGTGAGCATAAAACGAGGTATTCTCGTATGGGTTACGGGTATACGCG  
TTTGCTTTTGTCAACCATTCAAATCACAGCATATTTTTTTTATCTACCATCGCAATAGTT  
TCACCAAACAACCGCGGCTCCGTCACGACGGATTGAATTGGATCATTTTTTGTCTAATAGAT  
TCAAAAACCTGACATATGAATGCCTAACATATCTTCCCAGACGAATGGAACACTTTCGTAT  
CCAGTCGTTTGGCCATGTGACTAACTAACTTGTAGTATGCATTTATGTCCAACACCCAA  
TTTGTCAATTGGCACTCTAGTGCCGATCGAATTGATTGCCGGCGCGAGTTTGGGAGTTCCA  
GAATACCAATAATCTATCATCTCGTTAACGGATGCTACAGCATCATTTGTAAACATTCTG  
CAAACCTTGAGATTACGTACCGAATGTAATGAACCAACTGGAGTGTTATGATGTTGTGCG  
CCTTTCATATCTACGTTTGGAGAAAGATGTTTGTATGCCATAACAACCGGTTATAAGTTATT  
TCAGTGTTTCGCTGTTTTGAGAGATCTTTGGCTTATTTTCATCACCAGTCAAACGTGTCTGT  
AAACCGTTTGTGATCATAAATTTGCAGCAGCCCTTCATTTATAACCATTGGTTAGACCATCT  
CTCATGGTCATGGTAATAAAAGTTGCTGCAAATTCATAAACCTATTCTCCATCCAGGCA

TCATAATTCTGGTAAAGTTTTATAGAGACGTTGGGATAACCAGCGCGTTGCAACATTAAT  
TTTTCTCCTTTAATTCTTTTTCCACCACGCTGAGAACAATGGACCTTTCGACTGGTAGCA  
TATTAATATGTTCGGCCAGAGAATAGTCATGTCTTACTAGCGCTCTGTTTATCTTGTCAA  
AAATGAAAATTTTCATCAGGACTAACCAACACCTCAAACAAATGGAGCATATTAGTAAATT  
TGATGTCATAATCTTTACAACATTTGATTTTTGATTTACTAAAATCGGGTTGAATGATT  
TTGATAGTTCAACAAATTCTTCGTTTGAAATCATATCAACCAATTGACTGCGCTCACCTT  
CACCCAGTTCATCCCAGGTGTATTTCGTTGTGCCCGACATATATCCTATCAACAGTCTCAT  
AGAAGAGTTCGTCGGGTGAACCTGATTTACGAGGCATACGAAATTTGAACGTTATGTTGT  
TTACCTGCAACTCTGGAGTTTTTAGTGGCTCTTGTGTCAGCTTCAATCTAAGATTGTGCA  
TCGACTTGGAGTGCGGGCATGTGAAAGTTGCGTCCACAAGTGATTTGCCCAAACCTCCAG  
AAAAAACTATCAGAAAAATATGTTACGTTCAAACGGCGTATAATCCGGATACATTTCTT  
CGAGCAAATCGAAAAATATCTCAGATTTCTCTAAAGGCTTACTTCTCATCTCATTCTGA  
TCAATAATAAATCACGATATACTGAAGCTGTTATCGGTTTAAATCTGTGTGTGCCGCTCG  
GAAGCTTTATGCGGATTATATTCATTATAGATACACTCCTTTTAGGTTATTTAAATACAT  
TTAGGAGGACTGTATGGACATTAATAATCCCAGTTGGAAATAAGCAAGTCGAAACTACCAT  
GTTGTTCGGTGC GCGAATATCTGTCTATCGTAAATGATGCAGATGAAATGATTCCGAAAAT  
CATTTTCAATAAAAATAGGTCAGCCGTTACCGAAACATCTAACTGAGCAAGCTCTCATCAA  
ATTGATAGCAATCTAAAAGAAAGAAGTCATCAAATGACATCAGAGTGCACGCTATGTCA  
AAAAGAAAATAAGTTTGAAGTGCATCCCGATAATGTCTGTGTTTCTGACGGATTGGGGCT  
ATCGCATGGCGCTGGCGGAATGGTTATCAATATGAGATACCCGATGATGTTTCGAAGATCG  
GGATATGTTTGAGATGATAGACAGATGTATCGTGTCAATTTGAATATGCAGATCAGCTATT  
CAAGTGGGAACATTCAACAGAAAACGAAAAAGACACTTTAGTTAAGCATTGACGTTTTC  
AGATATTGAAGCTATCGTAGAAAACTTCAATCTCCACAGGTATATGCTGCAGTTCCAAT  
CGAGTGTGAATGTGGAATCAATACCCAGCGGTTATAAATGGTGCTAGTAAATTGTTAGA  
TTCACTGGGGGTAAAATGAATATAAATCTGCTTTATTCAGATCTTGACCCAGATTTGAAC  
AAATCGTGGGACAATGATGTGTTAATGACACGAGGAGCTCGTGCCGTAAAAAATTCTATC  
ATAGGGATTGTTTCTACTCCCATTGGTGCAGACCATTTAACCATACTTTGGCTGCGAC  
TTACCAGACCAGCTATTTGAAAACATTACGCCGTTGGTGATAGACACGGTTAGACGAAAT  
ATTCATACGGCTATACGAAACTTTGAGCCACGTGTATACAATCTTCAAGTCGACTCAACT  
GGAAATTACGATAATAACGAACTAATTGTCACAATTCGATTTTCAATTATCGATAATCCA  
GCAGTAATAGACGAAATAAAAATGAACTTTCAAATTAATTTAGCCCTCTTCGGAGGGCT  
TTTTTGTACGAAAATGCAACAAAAACGTCACTTGGGAAACAGCATAAATAAAAAGTCAGT  
TGAATTGCTGAAAAGAATAAGATACTCCAGGGAACGGGATGTAAAAGCAATACTGGAGC  
CCATGGCTCCAACGAGCTTGCTCGTTAATTCTTATCCTTTTAGTTATAAATATCTATTAAG  
CCAAAAGGATAAGTTTTGGCAAGGCCAAAACCTGGAAGCCAGATTTTACTGTTCAACTA  
TCGATTTATAGTGTATACTGGCCTCAACACTAAAGGAGAGTAAAACATGATCATCAATA  
AAATTCAAGAAGTTCGTATGTCTTGACGGAAGCTTGGCTCTGATGGCGCTAACGCTGCAA  
CTCTTCTCGGTCTAGTAATTGGCCAGATCCAGCAAACCTCGAGATAATTCCGACGCTGCAG  
TTATCAAAGTAATCAATTCCCTCTTGAAGGGAATTCGCGAGCGTATTGCTCCAAAACACA  
ATCAGCACGACCTCGGCAATGCATATCGAGAAGAAGCACTTCTTCTCAGTTTATTCTC  
AAGCCATTACTGACGAACAATAAATCGGTCGTCAATGGTAAAGCTGTGCTAGACCTTT  
ATCGGGTGCATGGCCAAATACCAATCTTATCACTGGAAAACCTTATGGCACAGCTGTCAG  
CCGGTGTGAAAGATGGAATTTGGTCTATCCCTGACGCTGCTTCGTTGAAAAACATATCG  
AAGTATACATCCCTATCGCTTTGGACGTAATTGGAGAATAAAAATGAACGATGAAATTTGC  
GTAGTATGTAAACAGTTAGTTCCTAAAGCACTTGCTGTTTACACATCTTATGGACCAGCG  
CATCCTGGTCCATGTTCCATTATGTTGAACTTTACCTCTTTCAGAATCTACCGGAATT  
ATTGAAGAGACCGAACTTCTGGTGTAAAATAAAAAGGCCTGCATACGCAGGCCTTTGTTT  
TATCAGAAGTCTTCAGGCGGTTTCGTTTTCTTCTCTGGCATTTCGAATTCATTCTACGG  
CCAGCGATAGCATCTCGCACCAGAAATATCATCGGTGGGTGTCAATTCAACTTCTTTAACT  
CGTTGTTGTAATTTTTTCTAGCTCATCTAGTCCTTCTGCTGTTTGACACGCGGCAATT  
TTAGACATAAATGAATCCACTGTTGATTCTGCTATAAATTTGCTGAAACATTCCCATTGCA  
TCCCTCCTATAACGAAATTTTATGCAATGTGTAATTGCATTTTTTCTGACACATATCTTTA  
AATACGTTCTATTGCGTGTGTCAGGGCGTAATTTTTCTTTGTTTATTTCCCATGAACATT  
GATTATGCCAATATCGTCAAAAATGTCCATACTGTAGCAATACTCTTGGATGAATGCTT  
TCTCAAAACTCGCCCAATAGTTTGGAGAACAGTTACCTTTGATTTAACAGGATGTGCAAA  
AATGATATGATGCAAATTTTTGATTGACACACCAGTAGAGAAAACAGCATATGAAGCTAC  
GAAAACATGACCAGTTCCACCTTCGGCGATGATTTTCATTTGATCACGGATTTTCGGTGTG

TGTATCTCCAGATATAAAAGGAACTTTACCTGGGGTATGAATCTTTCTAAGCGTATTGTA  
CAAAGCCATACCATGCGCTTTCAGGCGAAACATAACAAATGCATTTTCATTTTTGTCTGC  
CATTTTTTTAGCCATCGAACATAACCACTTTATTTCTTTTCGTATGATTCGTGATAAATTT  
TATTTCTCCATCAGAAGAAAATTTTCTGGCAGAAGTTCGATCTTCGCTCGAATAACCAAG  
CTGAATTGCTTTAACTTGTAATCACATACTTGGCCCTCTTCCATTAGCTGTTTTGATGT  
TACTGGTCTAAATACATCCCCAAACATGGCCACATATTGCAAAATGTTTGCTCTTCCATC  
TCGCAGAGAACCAGACAAACCGTATTTAAACGGTATATGATCGACGGATTCGATGATTTT  
CTTTATTGATGCCCCAGTTGATAGATGACACTAGTCGTTTCATAACACAACCGAATTGGTC  
AAACCATTCTTTTTTAGGCTTAATGGCAGATTGCCAAGTAGAAACATAGATCAAAGCATT  
CGACTCTTTTACGGTCCCCTTTTTATCCCAAGCATAGCTTCTCGAGGGAAAAGACGGTA  
ATCGACAAAGTCATCAATCATTGGTTGACAAGAGATGTCGTTGGAACATTGACAAGAAC  
TTTGCCTTTCTAATTTTCCAAATACCACAGAGACAGCAATCCTTGAATCAGCGATTTACC  
AGCAGATGTAGGCAAATTTAGCAATTTTCTTCTTGGCCTATCCCCTCATACACAGCATC  
AGCCTGATACCAGTGAGGAGTGATTTTGTGTTACCAGAATAAATATCTTTGCTGTTTAC  
CCATGCATCAAATTCGGAACGTGAAATACTTTGTCTTTCCCTGATCTACGGGTGACAAAC  
TATTTTATAATCGTTCAGCTCGGCAAACCTTTATTGCTTGAGTGACTAGTCCATAAGGAAG  
CAAATGATCATATCCTAGCAGGAATAGGTCACCAGATCAACCTCCCACTTGAAACGCCG  
AGAAAATTGATAGCCATCTGCTTTAAATGAAAAATACTCCCGCATTTTCATGGAAGATCGA  
GTCTTCGCAAAACAACCCTGGCAAAACTGTAGTATTCAAATACAATATTTATCATTAAACG  
TCTCTTAAATAAGTCATATAGTTTTATTTATACAAAGGAATCACCATGAAACAGAAACTT  
TTAGTCGCTCTGATAGCGAATCTCAGATTTGTTCTCTTTCTGCCGAGAAAGGCAAGAAA  
AAACTAGCAGTTTATGCTCACAAGAATTACGACATTAAACTCGTCAGAAAAAAGTCGTTT  
GAAAATATGATGAACGAATTTGAATCTGCTGTCAATCCCAATTCGAGGCCGATCGTGCG  
GAAGCTAGAGATGCTGAAGAACTATCGATATGGGAGCACGTGTTGACATATCAAAGGGG  
ATTGAGCTTGACCCTGATAAACTGGATATTGAAGATGAAACATCTGAAACAACAGAGCAG  
CCTGTTGTTGCTGAACCATCGGTTCGAGATTGTCGATCAAGACCAAGTAGAAGAAAAACCG  
GCCATCCCATTTTCTGAGTTGAAAATTGAGGCCCTACAGCAACTGAGACAACCTACCCAA  
GTAGAAGAAAAACCGGTTTCTGATTTTGTGTTTGTTCATTCCCTGAAGACTATCCGCCAAA  
TATCGGCTGGTCGGACCAGAAGGCCGCGCATTATTAATGTTCCGTATTGGATACACGAT  
TGGATGCAGGGAAGAAATTGGAAAATTGAAATTGCAGAATGTCAATATGACAAAGAGCTG  
TTGAAGTCATTGGCATTTTACATTGAGCGAGATGGTTCTGTTGCCATTCGCGAATCACGA  
AATAGCAAGTTCATCGTTATTTTATAAACCAGGGGTCTATGACCCCTTCTTTTGTGTTAAGG  
AAAAACAATATGGCAATTACTGCTTCTATCTCTCCACTTGATCCATCCGTTTCGGAAGG  
TAGTATTGTTGACTTTACCGTTACTTTTACGCGGGATGACACGGTTAAGGAAGTTGTTGG  
TTACGAATGGCTTATTGACGGCGTTGCTCAAAGCGGAGAAACATCAACTACTTTTAGCAA  
AACCTTTGATTCGGCCGTTTCGTTTACTGTAAAATGCAATGTGACAGATGCTCTTGTTGC  
TGACGACGGTGCTGAGCCAGTTGTTCTTGGAGCCGAGAGTGCTGTGACCGTTCGAAGAAGT  
ACCCGCACTTGATGGAAAGCATTGGTTCGTTACCCCTTGGCTTTCAAAAAGTAGAGTTT  
CTCGTGGGTTCCGTACTGGGTGCACTACTGGATGGCAGCGAATCCAACAGGGCGTCCAGC  
ACCGGCAGAAAGTCCTTGGCTAATCATTACTTTCTCGATTGACCAAGCGGTGGAGGAATA  
CGGCGAATGCTTGATGCAAGAATCCCGTAATGGGTACATTTACAAAGCATCTGCTTATAC  
CAAGTAAAAGGAGCCTCCGGGCTCCTTTTTTGTTCACAATTCTAGAAAAACGAATTATGA  
TGGCTTTGCCAACTTTGGGCAATTCACAAGTTCCGAATAATTAAGGAATCTTCCCTAATC  
GAAAGTGAGGAAATTATGCTGAAATCGGCATTAGAAAATGTGATTTTGGAAAATAGTCAA  
GCCATCGAAGGCAAAGTGCTTGTACCGATGCCAAGAAAATGTTCACTGACCCGGATTTCG  
CCAATTCATCACAGAGCCAAGAACCGTGATGAGCGGTTTCAAATCCAATTTTCGTGATTTG  
ATGTACACTGCAACAACCTTATCCAGTTGCAATTGACGGCCCGATATGGGAATCGTCGTAT  
TCCATGATGTCTCCGATGATTCTGCGTAACCATTTTGGTGATGTTAACCTCAATGGCCAT  
AATTTACGTGACGTTATTGATACTCTGCTTGAACCTCAGGCTTGAATTCAAAAAGAAAATG  
GCTCTTGGCGCATCTGGCAAACCTGCGTGACTGTCCAGATGACCGTGTTCGATTACAACAAA  
GCACAGTGGTCCACTAAAGCTATTTTATGTTTGGTGTATGCTCGATTTGCTGATGATCGA  
GAATTCGACATCGAAAAAGTTGTAAAAATTGCAAAAAGCGAATAGAATCGAGCCGCAATT  
TCCATAATCTCATCCGGTGGGATTTTGTCAATGCCTCAGTCGATTCATATGTTTATGCT  
TCCGCATTACCGATTACTTTTTCTGAGACACAACATAACGACAAATATTCAAAGATAGTG  
ATTTCTGAACACGGATACGTCGCTGACCCGGGCAAAATGCATCGAGTTCGTCTGCTAACA  
GAAAAAATCAAAGATCGGCTGATCAAAAACCAGCGTCAACAATTCATGAAATAGTTGTAC  
AGTGACGGGTTATGTGTTATGATAGTCCCATCAAATCTACCAAGGAGCATATCATGAGAA

CAATCCACTGCAAAGACGACTATGTTCGAGTTTTATCATGGCTAGTGTACACTCGGCCTTA  
AAGGTGATATGTTTCTTCCGCCTGAAGCAACAAACACGATTTCCGAAAAGGGCCGGAAAA  
AGAAGTTGGACCGTGTGTTTTTACCAAAGACCGCGGTCAAGCCAAGGTTTATGCTAGAC  
GTGCTGCTCTTTGTATTGGCGGGCAGCCAAATCTATTTTCGAGTTATTGCACCGGTTGACA  
CGGTCTTTATGTCTGAAACGCCGGGCGCGACGGTTTACCATGCTGCCTGGGCTTTTGTG  
AACAGATTCCATTTGGTAAATTGAGCGACTAGAAAGATGAAATTCACGACAACCTTACTTC  
AATTTCAAACAAACCGTCCGGACCATATCATCAGCGGTGCGATAGTGCCAAAGACAAAA  
GAAGAAATTAACGAAGGCATCAAAGCTTACGTTGATTCTATTTGTCCCGTAGAAGATCGG  
ACCGATGAAAACGGAAATGACACTCTCAAATCGAAGAGGGTGCCCGACTCCCAGAGTCG  
ATGCGTTCGCGGCCAATTCAGTCACTATGAGGTAATCGAAATGAGATATACTCAACAGG  
ATCTCGCAGATGCCATTAGCTTTGCTGTGGGCGTTCACATTGATCAATTTGACAAAGGCG  
GAAATCCGTATATTTTGCACCCATTGAAATTGCTGCATTGGGCTGACATGCCAATGAAG  
ACGTTGATGTTCAAGTCTGTGCATGCTTCATGATTGCGCAGAGGATAGTTTCGCTGGGTT  
TTGCAGAGACACTGGATTTGATCGAGATAGCTTTTGGCACCGAAATGCGTCAACTCGTTG  
ATAATCTGACGAAGCGTGATGGTGAAAAATATGAGGAAAATCTTGATCGAATAAAATTGA  
CGGTCTGATCCGCGAAAGTGAAGTGCTTTGATCTTAGACACAATGCTGATCTGCGCCGAC  
TGAAAGGTATTACAGTCAAAGATCAAGAACGTACCTTCAAATACCAAGTCGCTAATGCCA  
AACTGAATATTTGGATTCAAGAGCAAAGGAAGAAGAAAATGCGTAATATTTCTGAGCTT  
TCGTCAGCCGAAAAGGTACAAGTGCATTTTCATGTTTCGTGAAATGAAGCATGGATTCGTA  
CAAATCGCCAAAATGTATGACATTCGCGAGACAAATGTCATCGATGTTGTCAAAGAAGTT  
GATGAAATGCGCGACAATCATCTGGAAGCACTTACCCGAGAGCCGGTAGTGTATCGGAAG  
CACCTTGTGGATCCCACACGGCATCAAATGATGGTCGCTTCAAAGCTCGGAAGCGCGCT  
AAAGGCGAAGCTTTTGGACTTTGCCATCTACATTGACTCCCGAGAAATCGCTTGAGATT  
TCTCAAGCCTCGGCCAACATGCCCGTCAGGCCAACAAAGAGAAGAGCTTGAAGCTTTGTTG  
AACAAATTCACACAAACTGATGTACATTCTCCGCGATTTTGGTTAAAATACTCCATAA  
TGAAAACCGAAATCACGGAGTATTAATGTCATCTCGAATGGATATGCTTATACGCTA  
CAATGCCATTGCTTCGGCCTCAGTCAAAGTTCCTGAACCTGTCAAAAAGCATCATTTTGA  
AATTTCTCGAGGGAAGCGAAGCACCGAAATCGAAGAAAAAATTCAAGCTGAGCGCGATGA  
AGTTGCTCGTCAAATTGAATACATGGCTTTCTCAGAGCAAATAAGCGTTACTTGAACC  
GTATCAAGTTAAAGTAAAAGCTGCGAATAGCGCGGCTTAGAGTGGCGTATAACTTTTCA  
ACAATTTGTTGAATTGTTGAAAGTCGACAAATGTGCATACACTGGTACTGTTTTCTGAA  
AGACCATGGCCGTTCTATTGAGCGCATAAACCCCAAAGTCGGATACACGATGGAAAACGT  
GGTAATCGTCACTGCTCGTGCAAACAGCCAAAGGGCTCATCTTGACCAATTTGTTACGA  
AGTGCATATCCCCGCTGATATGAAAGTCAAACTTTTTGGCGCAAAGCAATTTATCAATTGG  
AGAGAAATACAAAATGAATTGCATTAACGTTTTTGAACCGCTATAGTACATGACGAGTA  
GATGGTATTTTCCGAGAACTGGACATATCAAAGTGATTTTGTGCCAAAATCATCGAATT  
GTTCAATGAAAATACTAAACATGGTGGCTCCGCTCCAATAGTTGAGCCAATGGGAAATTG  
GCCATCTAAGAGCTATCTTAGCAACATGCCTCGTTTGTGCATGTTGAAACGCTATGGATG  
GGAAGTACGACGATTATCGTCACTCGTGCAAAGACAATCCTGGCAAATTTTACTGT  
CGAAGTATTCGGCAGCCCTGAAGCGAAATATCCTATATCGTTTATGATGAAATACGAAAA  
AGGATTTAAATTCAAATTGTTTTGATAAAAGAAAAGCCCCGACGAGTCGGGACTTTGTTG  
TATTTGCAATTTGTAAATTGATCAGATTAGACCGGAATGATTCTGGGTAATTTACACCT  
AACATAGGTGACATATCAGATTGACCTACCAAGTCATCCAATCATTACCTGTTACATTA  
CGTTCACCGGATTGACCTATACGTGTAGTGTACGGGTTAAGGGATAAACCATAACCGAAGC  
ATAATGCCAACAGATGGTTGCAGTGATGTTGAGTCATTGGTAATTTTATAAGCATCCAAA  
TCATCTGCTTCAATATACGGTGAATAGAACAACGAACCTACGTGTTCAATATGATTGACG  
TAATGCTTACAGCCAGTGATCAGATAGTCAAATGACGATAGCGTATCAACATACACTTTC  
AGTCCGTTGCGCAGAGTTCCTGCTGAAAGAGGATCTTCGTTTCGCATACATTCATCCGGAT  
GCTTCAAGCATAGCAGAAACGCGAGTTGTACAGAGAACATAGGTCGCTTCATATGATGTG  
TTTCTCAGCATCTAATTTTTTTCAGTTCGCATGCTTGTGATACAGAGTTCTTCCAAAAACC  
GGGGCGTCAGTGCTAGCGGTTAAATCCAGGATCCCATTTGGCTAAATATCTTCTACCTTA  
TAGCGGCGCGAAACGGTTATAAGAGTCTGAATAATGTCTTTGTTAATATCATCAGATATC  
ATAGTTGACAGGAGATCATCGACTACGCCTACCCATCCATTTTATTTGCTTCCAAATCC  
TACATCAATTCAACACTTATATTTGTCTTAAAGTTTGGCGTGTGCGAACTGGAAGTGTCCAC  
CGATCAAACCTTCAAATCAGTTGCAACAAATGATGATGCACCTTCAAATCTTCTGCTAAT  
GCTGCTTCAGACTTCATTCTCAGGTTGACGAGCATTACAGCATCGCCGATTGCATCGGCA  
ATGTTTCCAGTTGACGATGTCAAAGTGAGTGGGTTTGTGGCAGTGTAACCACATCATTT

GAATCTTTGAAAACATACCCCTTAGCCATGGGAGTGTCTAGTTGCGCAAGAGGAATCGAA  
TCCCGATCTCCGACTGACCCCATGTAAGTTGCAGCGCTGGAGAATGATTGATTACGGCA  
GGTTTCATATATTTACACCGTACAGTGTGGAGGTTGGCATGTAAGTTTCTTGAATTGCT  
ACCATTTCCGGTAAAAATCAAGTTGTTTGGCGCCCGGGTCAAGCCGACAAGAGCAGGACGG  
CTCGGACTATTTGCCCCGGTAGTTGTTGCTTCAGAAATCAAATCGTTAATGCTGCTCATA  
TTTTTCTCTCTTTGTTCTGCGATTATACGAACTCGTGTAAATCGTGAAGTTTGACGTTGAT  
GAAACCAATTCCAAGCACCACCATTTCGTGGCATAAATTTCCGTTTTTATCAACATTTATG  
AATGAGTTGCAGTTTATTGTCTGCGAAGCCTGCCAGATATTCTGACGACAGTCAATGTA  
TCAATATTTACGCCGGCATTAAACGGTGAGTTCCAACGAGTTTGCAGGTTCTGCATCACCA  
AATGAGCCAGTGATTGCTATTTTATATTTAAGTGACCTGACGCGCCATATGCAGCTATTT  
GGCATGTCACTGATTCCATTTTGGAAAGATTCATGCATAGAGGACATAACTGGAATATTTG  
ATTTTATTAGCAGCATATATTTTTCCTTATGCAGAAAAGGGAGCCCGAATGCTCCCTTAA  
CCATTCCTTAGTTGTGGAACCAAGTCCTTTTGAATTACAGTCCTTTAACCCATACACGGC  
GGAAGTAGGCATTCTTACCAACGCTGTGCGCACCAGGCATACCATTGCTGATTCCGACTGG  
TTGGAGATTGGGTGCGGGATTTCAGCGAACGTGTTAACACGGATGGCGTAACTAGTCTTGA  
AGCCCATGACCGGTTGGAAGTTCTTCGGATCAGAACACGCAGCGGGGTCAGTGCAAAGT  
ATGGGCAGTAGGAGATACCGGCATCCAGGTTGTTGGCACCGCCGTAACCCATGGTGAAGT  
AATCTTGACGGGCGTATTGATCTGTGTAGACCTTGTAAACGACCACCCAGAACACCAGCGA  
ACACACCATTGGTAGTATCAGCGTTCAGGCCAGAAAGCCATACCTTGAGCAGCTGGGGTGA  
TACCAGTATCAACCAGAGCCAGGACAGAACTACGTTACGAGAAGCGATGATGAAGTTTC  
CAGCACCACGACCAGTTTGACGAGCAAATACGTTAGCTTCCTTGTCGATTTGGATCAGCA  
GAGCTTTGTAGCTTTTCGCCAGCCCAACGAGCACCACGTACATCGATCGGGTCTTGGAAGT  
CAAACACACCGCCAGCAGAACCTACAGTTTGAGTCCAGCCAGATTTACCAACTTGAGCGG  
TGTAGTTAATCCAAGCGATCACTTCACGGTTGATTTCCAGCATAACTTCGTTAGCCAGAA  
TTCCGTTACGCTCGCTGTCAGCATCCATACCATGAACAGCGCGCAGGTCTTGGGCCAGTT  
CGATAGAGTATTGAGCTTTTCAGTTGACGAGATTTTCGCTTCGACGGTTTGCTTGTGATAC  
GGACGCTCATTCCGTTCCAAGGGTTATCGGTGGTTCCGTTAAATCCTTGACGAAGTTCGG  
CGATAGAGGTAGCCATACCTTCAGCAATTTTCAGCCAGTTTCGCAAGCAGCAATCTTGGCAG  
TAACCAGGGCATCCAGAGCAGCACCAGTTTCGTTGGTACCGACAGTCACGCTTCGCCAG  
TCACGTTCTGCAGATAAGCTGAACCAGACTCGTAGAAGAAGTGATAAACGGTATCACCGG  
TAGCAACAGCTTGACCAGCAGGCAGCGTAGCAAACGGAGTGCCATCGTTTGCAGTCTAG  
CACCTTGGCACCCCGACCTGAATGCCAAGCATCAGGAGCATAACATCGGGTGGAAAGCCA  
CCTTACCACCAGAAGCCAGAGCGTCTTTGCCGTAAACAGAACGCAGGGCAAATACTTGGC  
CAGTAGGACCAGTCATCGGCTGTACACCAGCGATATCGAAGGCGATCAGGGATGGAGTTG  
CGCGTCGTACCATGCCGATAACAGCAGGGCCGATGTTTGTAAATTGCTCCGGAAGTGTGGC  
CAGCAGCAATATTGGTAGGATCGTAACCGTGATCACCAGCAACTTCGGCTTCCATCAGAG  
ACTGACCGAATGCTTCAATCAGTTTGTTCATCGAGATACACCGGATCGGTTTTGCAATCTT  
TTTCCTGAGCTTCGAGAAGTTGGGCTACAAGAGCTTGCTTGTTTTTACCAGCAATTCGG  
GCAGACCTTCACCTTCCAGCAGCGGAGTCCATTTGTTTCAGAATTTCTTTGGTTTTTCAGAG  
ATATTGTTATAACCGTTATTTACTTAAAGAAGACATACGGGAAGCAGCGGCCAGATAGGCG  
GCCCTGGAATTAATTTGCCTGCTTGTATCATTTTGTCTCAACAATAACTTCGGGTTTCGAAG  
TTTACCGCAGCTGCAGATTCATCAATATTTAATGCTTGTTCCTGGATCGGTTTTTGTTC  
TTTTGACCAGAATTAGCAACCATTTTCGACAATCGCAGACAGTTTTTGGTGAATAACTATCA  
CCATATTCCAGGCCTTCAACAAGACTCAGAACTTTTTCTTTCTGTGACTCGGTTAAAGCT  
GCCGTAGCTTCTGAAATAGCTTTTTCTTTCTTCAGTGAAGAAATTTGCTCTTCCAGAGCC  
AAATTTTATCAACATCGATTTAATTTTCAGCTGTAGATTCATCCAGCTCAGCATTAGTTC  
GTCTATAACATCTACTTGCTCTTCTGGTACAGAGACGTTATTTTCGATGAACAGTTCTTT  
GAGACCGGTTGCAAATGATTCGAACAGCACAGACTTGATGTTTGTCTTCACTCGCAGCGC  
ATTTTCTTTTCAGCTATTCTTTGCCAAGATGAGTTAATAATTTATCAGCATCTTCGTAAG  
TTTTGTTTTACCTTCTTCACGGGCTGCTTCAATTCCTTCGGCCAGTTGAATTTTCGGCTGA  
AGAAGCAATATCGGCAATGTGAGATTCAGCGAGCGGGATTACAGCCGATCGCACAGCTTG  
CTCAAACGCAGTACTGACATTTTCTTTTACGGATTCGTCCAGCTGAACAGACTCGAAAAT  
ACTGTCCAGTTCAACGGCTACCGCGCCAGTTTCTCGCTGGATTCAGCCAGCAGTTTATC  
TTAAAGGGACATTTGGTTTTTCTTTAGTTCAACATTTAAGCCTATGTTTTTAGCCGATT  
GGCTGAACGCTTCATTAAGTGTACTTACATTGTTATTTATGGCATCTGTATGAGCTTCAG  
ATTCTTGTCTTTGCTCTCTCTTAGTGGTTAACGTACGCTTGTGGAGCAGATGGCCTCC  
AAACAACATCAACCGCTACTGTGAGGCGATAACCCTCCTGAACAAAGCCACCTTTAACTT

GCCCCGAGACCACGTACAGATACTCCCGGAATCCAACCAGCTCGTATATTGGCGGCAAGTT  
TATCACCTGGACCAAATCACCTTCTATTACCATGGCACGACCCAGTACATTATCGCCTT  
CCCACCATAGTTTTTCTACGATGATTGAAGCCAAATTGGGGGCAGGCATCGGCCTTGCA  
GATGTTTAGTTTTCGCCGAGTGATTGTTTAGAATTTATTTGGGTAGCAATAAATCGTCGA  
CAGCTTTGGCAAGAACAGCTTTAGGATAAATTCTCCCGTTTCTATTCTTAACGTTAGCTT  
GCATAAAGATGCCTTCAATATACAAAGCACCTTTACCATCATCCACTGATTGGACTACAA  
GTTCAGAACAGGTGCCGCCGGGAAGTCCCCATACTACAATTAGCAGCTCGTCTTCCATCT  
TATAACCCCAAAGCTTCACGCCGTTTCAAGGCACGTTTGTGTTTGGCGCTGCGCCTTTATCC  
CTATGATTGGTTGAGAGCGCTTAGTTTTTCGCCGCCTTACGAGCAATTTGTCTACGAGTA  
GCAGCAGTTAGCCCCGGTAGTTTTAAATGAATTGCGCTTCCGTGTTTCTCGATCTTTGGTA  
CGAGTTACTTCACCTTTCGAATTAACATGTTTGACAATTGCTTCTGAAATGGAAATATTT  
TCAACTGCAGCAATCATTGCCAATGACATATCTGTTTCGTCAAGTGAATGTTTGGAAATA  
ACACCGATATGTTTCATCGGTGCTAAATCCGGCTTCTTCGAAGGAGTTAACACTAATTACT  
GCGTGCGCAAACCTGAGATTCAATGACTGGTTGATTGCTGAATAGCCGGATGGAATAAGC  
ATTTATTCCTCCTCTTCATCTTCATCATCTTCGTCGTCATTCTCGTCATCTTCGTCGTC  
TCGGGTTTTTACCTTCGGTAACAACCTCCGCGAGCAATGGCCTGTTTTTCTTCGGCGTAT  
ACTGACTCGTTCACAAGAGCCATTTTCGCATTAAATTCACGTTTTGCTTCATTCAAATCA  
CCTGATTTGATAGCAACGTTCAATTTTTCCATTTAGAAATCATCCTCGTTTTTCAGGGTTC  
TGGAAGCGTTTCACATTCGCCTCTTTTTCTATTTGCTTTTCTCTTGAGCAATTTGCTCA  
TCAGTCATCTGCAAAATGTTATTCATGACATAATCATGCGAGACATATTTACCTACATAC  
GGCTCGAGTTGCGAAAGGGCGTCAACTCGTTGTTGAAGAGTTTCAATATCTTTCAATACG  
GTATAATCGGAATCTTGATGGAAATTAACCTTTATGTTATTTATTTGCTCTTCCCATTTCG  
CTTTCTAACATGATTTTTCTTGTAATCAAATTGGTTTTGAGCGGGTCAAGGAAAATTTCT  
TCAAAATTTGTGTTGAAGCTGAACAATAAATTCTCTGAAATCTAATTCATCGCGGGTGATA  
GCCATATCTTAGCCACCAATTACCATTCCGCCATCGTCGCGAGGCATCCGGGACAAAGGA  
ATTCTCAGAGCTTCTCAGAGCTTTTTATTGAAGTAGCGAACATGATCCATTTACCCATT  
GTTTGGGCGCCTGGAAGAGAAGTAACTTCGGTAACAGAATTACCATCTCTCCGCATCAAC  
CAATATTCCTTCAGTCATTGAAAGATTGCGTTTTTGTATTTTTACAGTACCTGTATTCGAA  
TCGTATAACAACGATTCTTCAGGCTCTGCATGATGCCATTCACGTATTCAGTTGCTTTG  
CGATTAGGCATATATCCTACGTCAATGTAGAAAACACGTCTTTCGGGAGCACGCGTAATA  
CGATATATTACCAAAGCATCTTCTAAGAGTTTTAATTGGTCTGCAGGCTTAACAGAATTA  
TGCAAATAACCGACAATCCCACGATTAGAACAATCCTGAAGGCCTGAATGCGCATATACA  
AAGGCACTTCTCGGAATTTAATGGGTGTGTTCCGGTTTAAACAGTCTCCCGTTATAGGCA  
TAACCTTCGCTTCCGGCGGTATAAACAATAAATTCGCGATAGCCTTTTACTATAGAAGTA  
CCACCGACGTCAGCCGTAACGATTTACGATAATATTCGACATGACGTGGGTCTAACCTG  
CGTAATCCAACAATGCCTTCTTTAGGATTAGGCATTATTTTAGGGAGAATATGCGGGAG  
TCAACATACCATCTGCAGAACACGTGTCCGGTCTGCGAGATACAATTAGCAATCTGCAA  
ATATCATCAAACCTCTTCTAAAATTTGTCTTTGATAGACGAACTAAATTCAGTATCATCC  
AAATCAAGCGATACTACCTTGTGACCCTTTTCGTAAACAACAGCTTCATTTCCGATATTT  
GCTACAGCTCGCTCAACCTCAGGTCTATTCATGAGTTGGCGATATGTGTTTATGAGGTCC  
TTGGTACCGGAAATGTTGTTATCGATATCAAAAAATTTGTTGCATTAGAGCGTTATATGAT  
GATTCTCCGTCGCGAGCTTCAATCTCCGTGGCACCATCATCTTCTTTAGGACTCGCAATC  
GATTCGTGGCCTTGTCTGAGCCGCTCGTCATATTCATTTTGTATCGACACGATCCCAAAT  
TTAAACAATTCTAAAACCTTCATACAACTCCTAATCAGGGAGCATTCTGCTTCTGTGTA  
TTTATTATTCCCACCAGTCGAGTGCAAACGTAGTTTTAAATGTAGAACTGTGTTGTTAT  
CATCCCAGTCGAGAGTAACTTCACCAACGTTAGTTGGGAAAAGACCGACAATGGTATATT  
CTTTAGATGTACTTTTCAGTACGATCTTTTTGACGAACAATGCCAGGCTTTTTTATATGCTT  
CTGGAATATCGCCAGTGATTTTATTACCCATTCCATGATTCAAGGCAATCCAATCGACAA  
TTGCCAGTTGAGTGTTATGGGCCGAATCGTTATAAATCGTAATCGTCCAGTCGTCAAAAA  
TACGGTCACCTGCAACATTAAGTTTGGCGTTTTCATGTATCCAACCGGGATTTTTTCAACAG  
TGGCTGCCGGCATTGTACCTGCTTAAAGCTTTAAATATGGAATTTTGGCCCAGGTATGGGA  
TTTCAATTTCAAACCGGTTAGCGCGGGCGAAATCACCGGCCTCAAATCCCTGAGGACAT  
CAGTTACGTCGATTATCAACCTCTATGTTTATTTATGCGCCCATATTTGAGCCCAACGCT  
GAATTATGCTAATTAGGCAGGGCCAATTAACCTCGTCCAAGTTAGCACCAGTTGATGTGCG  
TACAAAGTTCAGAGTGATGTAGTTAATTGAACGAGGAGCTTTGATATAAATCGTAGCTAC  
AAATTCACTACTGTCGATAACTTGCAGGAGTGTGTTTGTATGTATCAGAGACAACCCGGAA  
GTCATAAACACCACCAGTGACCTGATGTTGTCGAGATATTGCGAAACTTCATACGAAT

CTCTGACGAGTAAATGCATCGTTATTTCAAACAAATCGTATTTAGAAGTATCACCAATAT  
TTTTCTTCAACATGTTGAAGATGCGACGAACGTTAATTCGGTCAAATGGAGATGGAACCT  
GAGTTGCCATTTTGTCTCCAAAGAGAAACAAATCCGTCACCGCCGGCAAACCTTTAACGG  
GGATATTTGACACTTGTACATGGTATCACGCAGCGATTGCTTCGGTTCAATTGCCAGTT  
TGATGGTGTGGCCAAGTTGGCCGCGACGATATCCAGCAGGGGACATCGATGGATGTCCTA  
CTTGATCGGTGTAGGCACACAATCCGGCAATATCGGCAGAAAGAGGAACCCACCGGTTAA  
TATCATTGTATTTGTCATACTGATATTTATAGTTGCCTGAAATAAAAGCATATGTTGAGC  
TAATATTCATGATATTGTGACAACTTCACCACCAAATGTCACACCATTTCGCCATTCGA  
CAATATTCTTAACCGCTTGAGTGGTAGGAACACCAACAAGTTATTCTGACGGACGATTGA  
CGCATGCTACACAGTCTTGGCGGTCATCTGCGAGAGCAACGACATGTTTCTGGACAGTAG  
GTGCAACAGCAGCACCGTCAGATGCATATGCTCCAGCAAGCATCAGGTTGAAATGCAGAG  
CTTCTCTGTGCGCAAACAGATCCCAACCAGCAATCAATTGATCTGAACCAACAGCATCAC  
TTGCCGAAGCGCTCCACCGAGCCGGATGAGACCGGCAAAGCCAGCGTGCCAATTTACAC  
TAGAAGCATAAATGAAATCACTGGAACCATTACGGCAATAGTCGTCCATGAAATGTATTT  
CCATAAACATCTCGGTCTCCGCGACGAGTGGACAACACAGTAGATTCGACTACGATGCCG  
TTTCGACGAACAATAATAGCAAATTGGTCATCAGTCATCGGGCCGTATTGAATGACGCTT  
GCGCTTTGCTAGTGCAGTACCACCAAACGGGTAAATTGGCCGGGCTGCACCCTTTGGA  
ATGCGGCCTTAGAAAGTATTTCAACTTCGACAGTTGAACCGATTTCGCCGGATAGACGG  
CTGAAATCAGTGGCATTCCATATTTGGCAAAATTAGCCAGCACTTTGGTAGAAGTCATAA  
CATCTGGAGCTTATTCCGAATTACCAAAAGTTACTCCAGAATCAACTACGATATTACCCA  
AGGTTAAAGCAGCAGCAGATCCGCCAGATGCGCCCGATACTTCTGCGCGCCAGTTATTT  
CTAAGACAGGATATGATCCCAGCTGTTTGGCTTTTGCAATTACTGCAGCTGAAGGAACAA  
GCAAAGCCTTAATTTTACCGTCAGCATCAACTTTAGTTACTTTTCTTCTTCTGTAACAG  
TTGTGGTGTATGCTTAATAGAAACGGTATCACCTACGGTATAACCTTGTCTTCCGGTTG  
TAATTGTTACCTCGATTTGGTTAAACAATGGAGATGCGTTTTTAGCTTGCACCATGTCAA  
TTACGCGCACGAGACGAGGATCATTACCATACTGCAAGAAGTTCATACCCTCATGAAAT  
ACGGAGCAGTGACATTGTTTGAGCTACCAAACATATCAACCAATTCGACTTCATTTGTTA  
CTTGACGAATTTTCATAGGCAGGACCCCATGCGAATTGGCCGACTAATGCGGCACGGCCAA  
GAGCTGACCGAACGACAGTTGAATTGATGGAAGTTTCCTTCATTTCAATGCCAGGGCTCA  
GAAGTGCCATATTTTGGTTCCTTGGACGTTAGTTTAAACACATGTTTAATTATTGCTTTAT  
ATTTACACGAACGACATAACCATTACTGGCAACTTCGAAAGTTTCTTGTCCGCTGTCAACT  
ATAACGACAGGCGTATAGTCGTCATATAACTTTTCCATTCCCTGACGAAATATTTTCATTC  
GCCAATCGCATGTCATCTCTCTCGGTAAAATCAGAAAATCTCGGTTGGGTAGTAAGCCAT  
GCAAATATTACCAATGATATCACCAAGTCATCATGGAACCGTCTTCGGCTGCGCATGAA  
ACACCTTTTTCTGAAAATGTTCTCAGTTCCATTATCGTGCCTTTATGGTAATGCACTAAT  
TTTTCTTTTTTCGATTAATCCTTGAGAGTAGAACAACCTAGGGCTTTTGACCGTTTAGTT  
TGCTTAATCCCGAGGTCGTTGAACGAGTCACATATAATGTTTTCGTATTCCGGTTCCGAA  
TACAACGACTAAGCTATGGATACACCCGTGGCATGCAGCTCAATATAGATGTATGGCTGA  
TAATACATATTTAAGTACTTGAGCAACACATCAGGGAGTATCAGGTGTGTCGTGGTGTG  
CTGAGAAATACTGCAACCTGTTTCGTACGGGAATTCTGTTCTGTGTCATATGTGCATAGCA  
TGAGAATCTTGCCACGACCTTCAGCAGAGTCAAGTGTGAGATATATTTATGACCTTTA  
ATTGGTTCCTTACACATCGTGAAAGTGTCTGATGCTGGAACCTTCTTCCACGTCATTTTT  
GACAGTTTGAACCCGTTGATCAACGTTCCAGATGTTCCCTTGAAAGCAGTATTAAGCTCC  
TGTTGAAATGCCTCAAGGCTAGAACCGGCGATTGTCTTGGCTGACCAAGAATATCCGTCG  
TCAAAATATGAATCGATGCCATCTGTTTTAGAACCATCCGAATACATGCGCTCTTTTACG  
GCCGACCATGTTGCGGTATACGGAACAAAACCATATTTGCTTCCACTTCCATCCGAATTA  
GGGGTAATTGCAGCAGTCCAGATATCGTACCAATGATTAAGCCCATTCCGGCGTTGTTGTC  
ATCAAAATCTTCGAATGACGACCTGATGATATAACTGGCTGGATTGCTAACCACGCGTCG  
ATGAAATTGGGAATAAAAGCAATTTTCGTGATGTAATCAGCGCAAACGAGTTACTCCGC  
ACAGCATCAGTGGAACTGGAAAATGCACCAAGCGCACAACCATTTCOAAGAGTGATAGAC  
CCTTTATTCCATTCAACTATAACCAGGCTGCAGAAAATCTGGCAATAGCTCCAATGCCTAC  
TTTGTCTATGAAGAACTTCCGCTGACATGGATGCATTATGCACAAGGATACCAACGCTT  
TCAGCCGAATTGAAGCAAACAAAATGCGCGAAGGAATTAGCTACTACTGTCGTTTTTCCG  
AGCTGACGAGACAAATGTGCTGCCATCAGACGATTGCCAGCCATTATTCTAAGCATATCT  
TTTTGGTAGTCACGCAATTGGTCCCGGATAATGCCATAGTCAATATGCTCAATGCAGCAA  
TAGTTTTCGGCGAAATAAACGATTTCTTCTTTGCATCTCTTTCGCTCGGCTAACATCTCC  
TTTGTACATTTTAGTTTAAATGTTAGCACGCTTTTGATTCCGGCAAACCATTATATCCAGAA



CGCTTGTGTTTATCTTTAAACGTTCTAAACATTGACGGGTCGTCTGCTTGGATTTTT  
ACCCTCTTACTCCCTGTGTTTTAGATATCTATCAAATGTCGAGGGATACCACTTATCA  
TCGTGATTTGATAAAATCCATTCCCCATCTTCGCGCATTCTCTCTTTAACGTGGATGGA  
TAGGGCATGTGCAATGGGTAATCACTTTGGAAGATATTCATACTTCATCAGCCAATTCCA  
GCACTAGCAATTCATCAGGAGAACCCTTCGAATTCTATAATTTCTCCGCTTTCATCATT  
GAACTGTGCCGAGTATGGATGGTTCTGACGATGTTAGTTCTTTCATTTCCCTGTGCATTT  
TAATGAATTCTTTATTGGTTGAAGTCATTTGACCCATTAGCTGAGAAAATACTTCAACCA  
TACGTGGACTATCGGCATTTTTGGCATTTTTCCAATGGAATCTTTGCCATGTCCATCATCA  
TTTGAGTTTGAAAATGCATGTTGCGTCTAACAAAGCGTATAGTCATCATCCGGGTCAATTT  
TTCTATTGTTTGGATTTGATGTCGGCTCTTGTAAGACCAACGGGGCGTATACCTGCACGT  
CTTCCCCGGTGAGTCCTTCGATACCAGACAAAATCCTTGAGACTAGTGAAGTCTAAAAGAT  
CATTTATCGAGTATTTCTATTGTGGTCGAGGCGGTGATTTTTGATCGGTATTGTTTGT  
CATACTCCATCGAACTCCCGTCCCAATCTTGAGCTGGCACTGTTTTTGGATCAACTTGG  
TGATCAACTGATTCAAAATGAGTATCTTTGTTTATTTCTCTTTCATTGCCAAAGAAATCA  
AGATAAATCGTTCTAATTTACCTGCAATATTTTTGGTGTATGGATATAACCAACCAGTG  
AACTAAACATGATTGACCATTCAATACGGCGTCGTTGTTTCGCCAGGGCCATCTAGCTGC  
TCATCAGGCGTTATGGATGTGATAGTTATATTGATAACCCGCCCTTTAATAATTATTTG  
TTGTCAAACAGCTCGGTCATTGTGCATGAAAAATGTGGTTGAAAGTATGGTAAAATTTGT  
TCAACTATTTGAAATGCATCATCTTCAAGTCGGGTCCATATTCCTAGTTCAAACATGAAT  
GTGTATGGCACAGGGTTAGATTGCGCCAACGCTTTCCATTGGGTTTATTTATCCATTTA  
TTTTGAGTATTTCCAGTTTTTACCATTGAGTTATATTGCATATCGATCAAGTGCAACTTC  
ATTCTAGGAAGAATTGCTTCGACTTTTGCAATGTTGAATTCGGATGTTGGCATCGTAATA  
TCATCAATAGACATTACCAATTTTTCTTTACTTTCGCTAGGTGATAGGAACATCTTGAAAA  
TAATGCTGGCCATCTCGAAAACGAGAACTTGAATATGACCAAAAAGTTCCATTAGCATC  
AATACATATCGGCGTATTGAGCTGTTATAAAAAAGATTGCCAAACATTACTCTTCCTCAT  
GCCGCCAAATGGACTATTAAAGCTGTTCACTGGGTTTGTACCAATTGGATCAAATGGCT  
CAACAAATGGTCGAGCTTCCTTTTGCCCCTGAACACTCTCACCAAGCTGAGCGATTTCTT  
GATCAATTTAAACCATCTAAATTCATATTGGCTCCAGGTCTAAACCATTATATGGATCC  
TCAATTTCAGGTTTTTCTGGAAGTGGAGCCAATTATTGCACCAGAGTATATGAATTT  
CTGGGCAACAATTACCCTGATTTGATTTTTTCCCATCTGATAAAACGGCGTGTAAAGGTT  
TACCCGTGTTATCTAAAACAGGCTGTTATCCATTGGCAAATAAATCAGATCACCTAGTTT  
AGGTTCTTTTACATTTACTTGTGCTTGAAAAGGCCTGGGTTGATAGAAATTCTGACTTC  
GTCATTTTGTGATGGCCAAATTTAGAAAAGAACTCTGTTGTCCCTCATATGACTCGAA  
GCTATTGAGCCATGCCGCAAATTTCCATGCTTTTTCAAATCTGCTATTTGGGTCTTCTCC  
AAACACAACGTCCAAATTTGTATATTCTCTTTCGAGATAATAAAATTCTAAGCCTCTCAT  
TTGAATAGCTTCTGCAACTAGAGTGTGTCGTTGGAGGGCCTGAGAGCCCTCATACCGATTGAA  
TTTGACATACGGGTTTACAGAAATTTTTGCTCATTGTTTGGTATATCCGCTTCTATTTT  
TAAAGTAGCGAATAGTGACTTATCCATCATAATTTACCCCATGATAATAGGAGGAGGGCC  
ATCCAGGAATTCGAGTTCCTGTCTAAGCTTATCGGTATCTATTCTAGCTTCTTCAATTAG  
GCGTATTCATCGAGTGTACACCACCTGGAAGCTGCATACCTCGATGTTTCGCTAAAAC  
TTGGCCGTTTAGTTCTTTCTTTTTGCTTTTGCCATGACTTTTACCAGGGATTATTGT  
ATGACTTATGTTTTGTCATACCATTGGGTTGGCCTGCATAAATTTGGCCATGTGACATAT  
TAGGATTTGCGTATTTTTGCGCCACTGACGGCAAGCTATCGTCATCTGACATGGCAAACC  
CATATCCAGCCGAAGTGCCTGAAAGCATTGAGTCAACATTCGCATACGATTTGCAGTAAA  
CCTCAAATACCAGCAAATCTCCTTTATGCAATTTGCCAGCAACTCTCATATTTCCGGTAG  
TACTGGTGAAAAAGAAATCAGGCAAAGAAATAAAGTATGTCTCCCATCATGTCTCGATATG  
ACATCAATTGAGTGAAATATCCGTGATCTGCGCCAAAAGCATTAGGCCCATACCATGGGC  
ATTGGCCGCTAATCGAGGCTCCAGTCATACCATAACAAAAACAGTAAACCGCGGATAAA  
CAGCCGTGCCGTCCATGGTTATAATTGACCCAATATTGGTTTCGAATTACCTGAGTAACTG  
CTAAATCATTGCCTCCTCCAAAATAATTACACCAGTTTTAGCTTGTCTTCGGTTAATA  
CTAATGTTGCATATGTTGTGTGAAATCCATCGTAGTGATATTCACCATAACAATTCAGAG  
CTCTAGATCTGCAATCAAATACTTGTGCTCTGTTACTTCGACGTGCACGATAGGTGCAC  
CTAGACGTCTAAGTATAGCGTCTTAAATTTCTAACGGGTTATTAGTGGTATATGACATAA  
GTGTCTCCTTGATGCTTTTTAAGCAAATTTATGGCGGAGCCTTTTCGCGCTAGCTCGAAAAT  
GTTATCCTTTTAGTTATAATATCTATTAAGCCATAAAGGATAAAGTTGTATTTACAATAAA  
GGCTCCTGAAGGAGCCTTGAGATTATGCTGGGACAATAACAGCAGACTTTTTGCCGATAG  
TTATCGATTTAGCTGAACTTGAAGTCAAGTGCTTTGACATAAATTGCGATAGTATCATCCA

AAAATACATTGTACAGCCAGTTGTGTGCGTAGAGTCTACCATTTGATCTCAGGGTAAATT  
GTTGCAAATTGTTGTATGATGTAAGTCTGCCGCTTGTATGAGCTATTGAGATATCCAGAT  
TATCTGTTTCTAACAAACCAGATGTTTCAATTTTCGCTGCTTGCATTAATAACTAAACCGCCAT  
CAGTGAATTTGATTTGTCCGGATTCCAATATGCAACCGTTTGCTACGGTCTGATCAAAAT  
CAACAAATGGAATAATCTTCGACGTTTGAGTTGTAGTTATTTGAAAATCTCTCTTTTCAT  
CAGCAACCATGATGTTAGTTGCTTTAACCCAAACACCGTTTTTCGCAATACCAGCGACCTA  
CTGCAAGTGGCTTATCTAACTTAAGTTGAAGAGTTTCGCTGCTTTCTCTGACAGTTTTCT  
TAATACCATCTCTTTCAAGTTGTGTAATTTCCCGCCGCATTTCCATACAAGTCGGTTGTCA  
TCAGAATGTTTGCAGAAACAAGACATGAATTTTCATCACCCACACGTGAAATAACGTCAT  
TCAACGATAAAGTCATTTGGTTGTGATTTGTCTGTAAAATGTACAGTCGTCCATTTATAG  
GTGATGGTTCTCCGATAGAGCCAATAGCGGCGTAGAGATCTGAAATATCCCCCTGAATTC  
TACTGGAAGTGTCTGCCCCTAAAATCTGCGTAATTGTTGCAATATTAGAGGTATTTTCGAT  
TGATGTCGTGCAAAATTGTATTTTTCGCTATTAACATCACCGATTTTCTGCTCTACCGCTC  
CAAGACGAGATAACACACCTGTCACAGGTGTATTTCATCGTGTTCGCGAGAGAACTCAACG  
CACTTTCCTTCAACTCCACCCTTGACGCTATCGACACAGGGTTGGAAAAATCGATTTTTTA  
TCTTCATTTGATCAACGTCATCATTACCACCACCTAAAGTATTTTTCGATAGCGGTCAATC  
TGGTATAAATCGGAATTCCTGTTCCAAGATTAGTATTGGCGACTTCCATCCTCAAATCAT  
ATAAATCAGACGTCAATGGACCTACATCTGACTGCGCCCATGAATTTTCAAGCGCGGGTA  
TGCGCTGGGTGTTTACAGAGAGACGGTTTGGTTTACTTACTAAACCGATAATTTAATCCCG  
AACCTATCGAAGAAGGAACAGAATTACCGTTTATGTCGAAGCCTGGACATGCACCTAATT  
CGTTTTTATCCATTACAAATCACCATATACAGATCGAGCTGTGTCGTCTTTGAGATATC  
GATTGCCAAGCATTTCGGAAGTTGATTCTGAAAGAGAAAGAACACCTGCTAAATTAGTTT  
CAACCTCGGAATATCTTGCTTGATAGCTAAAATATCATTAAAATTAGCAATGATTTGGT  
CAATTACTGTATTATCACCGATTACACCCAAGTTATCTTGATAAATATTTACCGCATCGA  
CAATCTCATTGATTTTTAGGAATGACTGGGCATGGTCTTCGTCTAGCTGAACAACGTTCT  
GTTGAATATTAAGTGGAGCCTTGTGTAAACACCGTCGCTGGCTGTTTGGGTGGAAGCGG  
CCGAAAGCCGCTCTCCGTTTTTAATCCAACCAATTCGATGTTGACCATCACATGGAGTAG  
TAGCAACATAAGGAATAACTCCTTTCGTGATTTTGTCTATCCTATTTTTTTCCTCGAGTTT  
TTCTAATCTGGATTTAAGCTCTTATGAGCCTCAATCAGTAATGCAATGAGAGACATTGG  
AGAAACAGTAAGAGTTCGCTCGTCAAGTGTTTTGACGCCTTCTTGTAAACTTTTTGCAA  
TTGCTGTGCAAAAATACCTGCCTCTTTCGCTATCACGATATTGTCAGTCAAAGATTTATG  
TTTTGTGTAATCCCAGCGTCAAGGCTTCTATTTTTACGAGTGCATCTTTGATAGGCTG  
AATCTCAGATTTTAACCTGGTATCGCAACGAACATACATATCGTTAATGTAGATGTTTCC  
GGCTAGCCATAAATGACCACCTGGCCTAAGCGTAGCAATTGTGGTATCTACGTCATTGGT  
GCGAGTTGTCCTTCTAAAATACTCGTTGTTATTGTCTCCAACAGCAAAAAGCAAATACGA  
ATTCGTGTCAACGTCATCTCGTTTTTGAATGTTATAGCAGCCAAATCGGCATTTCTATT  
CCACAAAATTCCTTGATTGTTTGTCTGTGAAATTGATATTACCAGTCATTGTGCCACCTGA  
GCGATACAACACCTTGGCATAAGCCGAAAGAGCCGTATTTCGCTGTGAGCTTTCAGTATT  
AAGAAGGCGAACTAATCCTTTTTGAGTGCTAGTAGCATTCAATATGGAAAGTTTAGCTAG  
ATTAATAACGACAGTGTTATCAGCTAATGCTAATGTTTTCGCAATTTGTAGCTACTTTCAG  
CAATCCAGATAAGCTTTCGCTCCCTGCCATTCTTGATAAAGTATATGGTCTAACAGCATA  
GCCATCTCTAAGAAGTGCTGCTAAAGCTTGAGCCAATGTGGCCAAACGGACAACCTCCGTC  
TGAGCTTTCTGTTGCAGTTCCCCATGATTCTGAGAAATGCGCAATGGCCTGCTTGGTCTT  
AAGAGGAGTCATATCAGTGGTATCGTCCGGTGCCAGATATTGCCTGGGCAGCAGTCGATAT  
AAGGATTGTTCTCTTGCTGCTTCGGTAGAACCTTTATTTGCAATGACATACCCCAGTTT  
CGAAGGAGGTATTGCAGCGGTGTTAATAGATGAGGCCAAAGCTTCGTCAATTTGTTGCGTG  
AGGAGTATTACCAATAATGGCGTCCGGTACCCTGCGGCGTCTGCATCGCAATCCGCAGAAG  
ATTAGGAGTAATAACAGTATTGTCATCTCATGCCAGCTGCGGCTTCAGCTTCAGTAGCAAT  
TCTAATAATGCCAGGTACAACCTCAGTTGCTATCGGCAGGCCATTAACAGTTAATGCCCA  
TGGCGCTATTTCAATCAATGCGTCTGATACGGATTCAACTGAACTGGGCCAATCTGGCCC  
AGAGAAAAGTACCGAATCCGCTGAATCCGAAATAAATATTTGATATTGTGATTCATTAA  
TCAATCCTCTTGAAGTAATAAAGATCAAATGAACAGGTTACTGACCCACCAGTAAGAGTT  
TTGACTCTTTACGCATATATTTCCCAATTACCATATCCAGGCTTTCCAGGAACAGTAATT  
TCACGTTGAACAACAATTTCCCAACTGCTAAAATTTCAAATTTGCCATGCTCAGCCGAA  
TCAATGAATTGCACTTCTATGATGGGAGTTGTGGTGCCAGACTGTCTTTGAACAGAATAA  
AATAACATTCCGGCATCTCGCATTTCTTCAAATTTTGCCAAAATATGTGCGATACTGCA  
TCAGCGTTAGTTCCAGCGGCAATAACGAAAGGTATACCCTAAACTGTAATGACTGATTTG

TTAATTCAGAAGGAAGAACCCTTCCGCTAAATGTAAGTGTCTCAGCTTGACGAAGACCT  
TCTGGGGAAACTTGAACATCTGAAGTATATATCGCGTTAATAGCCAACATTGTCAGTGTT  
TGGAATTCGTCGATAGCAGATTGCCCGTTTGGATAGTTACACCGTCAATAAATGAGTCT  
ACCGTCGGCCACCTATATTTCTGGCACTCATTACTTGGGTGCCCGGTTTGGCCAGATAC  
TCGATATGAGTTGCTTTTCTAAAGATGTTGTGTGCACTGTCTAATGTTTGTGATATCATT  
TTCCACCCCTTACCCATTTGTATGCTGTAATTATCGGAGGAAGAATATTGATGTCTCCTG  
GCGATGTATTTCTTTATTTACAGCAAGAACTGATTCTACGTATTTTGTATAGCCAGGAC  
CAGATTCATCAGGGTCAACTTGGCAGCCGCGGATGATGATATTTCCATCGTTATTTGCGA  
CTAAAAATTTATTGCTTGAAACAAGCTCAGGCACATTTTGTAGGAATTAGTTCAACAGATT  
TTGAACCGTATGTTCCACCTACGGTATGGCTTGGATTACCCTGATTGTCGAGGTCGTTAT  
TGTTTAAACCAAATTCGACATCAGCCTGATTTCGATGTCAATCCTGCGACCAAACGCCCTT  
CAGCATATCTTTTCCATACACCAAATCCCATGTAATCACGTGGGTGGCAGGGTTGTTGG  
CATTCTCATATATTGTCCCAATCGGATAGAAAGCATCGAACAACCTGTTGGATATTTTCAA  
TTCTTCCGCTGAAAGTGCCTGGAATAATTTGTGACGTACGCTGGCCAGGATTGTCAAAT  
CGGTGTATTCGATTTGATTTTGGCTTATTAATTCTTGCTCGGTGTTAAGGTAACAGAAT  
CAGCTTTTTCTTTTATAGCATTGTACCGTTCCAATCCAACAGAGTACCAATATGCTTAT  
TGAACCATCAGATGGTGATCATGTCACCGGATTCAAATGTGCTTCCAAACTCAATATCGG  
TACTATTGCCGTAGTCATCCAATACGATAGAATAATCAGTAGATGACGGAACCCAGTTTC  
CACCATTATCCCAACACATTTGTTGAGTATCGCCATTTGCATTCTCGCAGAAGAACATCG  
GCAAATCGCCCGCCCTGCCCGATTAAGCATCGTGCCATTTAGAAGAACTTCAAGCGAAT  
CTGGATTTATTCTATTGTTTGGCTGAATATCGAATTCGTCAATAGTGAAATCAGTTTTTC  
TCGAAATATCTCCAACCCAGATTTACCAGGCGATGACGTTTTTTGTGTTGTTGATGCAT  
CAAAAATCTTAATATTCTTAAGGTTTTATGAACTCCGGTAAGAAGCGATTCCATCCATGT  
AGGTGACAATTGTTACAGTATCACCTTTTTTGTATGTCAATATCACGAATTCGAATACTTC  
TTCCATCTAATGGCAGCACTGATGTCGAATTGGCTGGGTGCTAGATCCATAGTTCGAGT  
TTTCGTTTAAAGTGTGCGCGTAATACAGCAAGTTACCGCGTAGATAGACTTCGAGGTTTA  
CAATATTGTAATTTGTTGTCCTGAAAACATTAGGAAAATCCGTTTGCCCATCAACAGTCA  
CAACTATTTCTATGTTGGCAACAGTACTCAAATCGGATGTTGTAATTTTATCCACACGCT  
TGTTCTCTACGATTTCCCATCTGCCTGGCGAACAATATAAAGCTCAACTTCCATCAAAT  
TTTTGTCAAGATTACTAGGATTTTGCGAACCCCTTAAACGCATCTCCCGTAGCAACAACCA  
AAATTACGTTTTGACTTGCCCATGTGCCCCACACATCCCGCAATTTTATTGCTTTATTGT  
AGTCGAAACAGATCATTTAGGCAAATTGACAGTAATAGAACCAGCGGTGGTGTTTATTG  
CCCATGAATCTCCGAATAATGGAGAAAGAGCTCCTACCGAATGATTTTTCCACGCACCTA  
GAGCGAATGGGCGATCTCCGTGCGCCAGTTGAGAATAGAGTTCGGTAAAATTGTTTTTGA  
CTTTTTGCCACCACGGCGGAGAGAATCGCCTTGGCCATCATCAACAACGTTTCCGATTT  
TGATTATTTCCATTATGATATTGCCCAATATTAATTGTGTCAATGGCTTTTATTGAAA  
ACGTATTTGCCCACTGAGATATTTACTTCAACGGAGACGTTGTGGCCCGTGCCAATAAA  
GAAACGAATTGTGCATAATTCGTTAGAGGTATTGTTAAGAACAGCATACTCAGTATTTAA  
AACCGCATTTGTAACCGTATCTACTGATATCAAGTATTCCGAACTTTTAAAACTGTGCC  
AGCAGTGTTCGGGCAGCAACCATCAACTTTATCGCAGAATATTCGTTTTTACCAGCAAT  
ACGAATATTAGTTGCAGTAGTTGTGGCCAAAATAGTTTTTTCAACTGGCATAATAGAATT  
TCCAAACATTGGGGTTATTCCGTATTCCCAATATTTTTCTGATCCTTCGTTCTTTGTGCA  
CCAGACAAAACCTCTGGCGTATGGAGACGTTATAATAAGAGAGCCAGATGTTTCTAAGAT  
ACTTTCGCCCGCTTGAGTGCGAATTATGAGAGGATTTGACGGAGAAATTGATCCATTACT  
ATTTATAAAGATCCAACCTTCCCAAACCTTTGCATTTGGTAGAGTCATGGTCAACGCGCC  
GCCTGACGTGTCTGCGTCATGCATAGAACCAATATCTATCGCATTCCCGGCATAATATTG  
TCGCGATAATTTCTGGTAATATCCAGTGTCGTAAGAATTTCGAGAGTCAGCTCCTTCAGA  
AGCTGACGAATAAAGTCTATAATACCAAATGCGTTATAAAGCGCATCAGTAATTTGGAT  
GAGTTTGACACCACCGTCATAGAGTATATCACCAGTTGAAGGATTACCTATAACGCCTAC  
ATCAATTCTCTTTTTTGGTAGATTCTAACATTTGTATTCTTTAAATGAGAAAATGATAT  
TGATTTCTTCTGTCTGATCGAGAGCTCGAGTGATAGGCTGTCTATTTTCCATCTATATCA  
TTTCTCCTGAATAGTTTTCCAATTCTTCAGGTTTACATGCTATCGGGGTCCCTTTAACAT  
CTGGATCGGACGGCAATGATTTTTTATCTAACGGGTTGATGATTACGCTCATCTGTGCGAA  
AACCAGTGTGCTGCTACTTTAATCCGGTAAATGAGGTCTAACTTATCCGGATACCATAGAA  
TAGCATGTTCCATACCCCGATCTCGCAGGATCGTCAGAAAGTTCATCCGGGAAAGGCACAA  
CAATATGTTCAATTTGTGCATCTGTTTATTGATACATCGGGCGGAATAGTGTACAGATAGT

CCCACACATAGCCATCACTCATGTCGATTGCCATAGCAGTCCCGCGAGGTGGTTCAACTG  
ATTCATGAGTTGCAGTCCATTTTCCACCTATAGTGATACTCTATGTTGTCATCTATTC  
CCGAGATAGAACACGAACCAATAGAAGGAACTTCAACACAGCGGTAAATCATCCAACCAA  
CCGAACTGTCCGGTACGATTGTAGGTAGCTGAGTTGACTACTACGATATCGACGATAAAAA  
ATGTCTTTGGATTGTCATATCTGATATCTCCCAATCTTTACGCGGAAGTATTGCGTCCA  
GTAGAGACTTATTAATTTTTACTGCACCTAGCATGTTTGTCCACAGGCCAACATCGCCAT  
CAACCGAATCATTGGATATGGAGGTGCAAAGCCGACATCGGTTTCATTCTGTTGACCACG  
GAGTATCACGTCCAAATCTGGCGTATATTGTGTTTTTGGTGGGCTCGTCGCCACCATGT  
CGTAAAAGTTTAGCAAATTTTTGTTCTAAATTTACTACTAACAATAGCACGAGAGAAAT  
TACTCATCTATTTTACCTGTGTTGGGTTTTGTGGATCACGAGGATTTCCAACGTCTATCT  
TTCAGTCGGTTTTCAACTAGTCGTCTAGATTGTGAAAACGTCACAGCCGACTGATCAAAC  
AAAGGACTCATTGCAAATCGTCGTTCTGATGGAAGTTTTCCCTAACCATGATTCTTCTTCA  
GTGTCATATTCAGGAGGAGGAACTAATGGTTTCGCCAGCATTGGCCCAACCAAGTCTAAA  
GCTTCTCCGGTGTGACAGTCAATATTTCCGTCAACGTCTAATTTGGCTACCCGA  
CCGTATTGCTCAGTTGGGTAACCAGCATCCCATCGATACGTTTTTCTAAATTATCGATGAT  
AGTTTCTACTTGTTCATCGATAAAACCAGAATTGATGAACATCGTGAGAAGTGTTATTCC  
AACAAATCCAAAACCAACTGGAGGAACAAAACGGAGAACATCTTGCGCATATCTAGACGC  
CGGAAGAGTTGACTTTATAGTCATGGTGTAAATATGATCTACCTCGATTCTAAAGTCAAT  
CGAATCGCTCATAAGCTCCTTTCTCTAACCCCTACCAATATTTACCTACGAACGAACT  
AGTTTCGGATTTTATTTTCTGGCCTTCAAAGAATTTCCCAATCGTATTGTGAATGGTTAT  
TCTCCACTTCAATTGGCCTTCAACTTACTCACGATCCACGTATGAGACGTTTGCACGTCC  
TGTAGGAGTATATATGGTCTTCCAACAATGTCTTGGCTTATGTTGGTTGAATAAACTAC  
GATGGTATATTCTATTCCATTCTTCACTCGATGTCGATTTCAACATCTTCGTTATAAAG  
CAATTTGAAAAGGAATTTAGATGATTGTTCAACCCCTTTCGTGGAATTAATAATCGTAGGC  
CCGAGATTCAAAAAATCTTGCGACAGAATCTCTCTCAGCTTCGTCCAAATAGATGTTTCT  
TCTTAAAACCTTCTGACCAAAGATATTCATACGCATATTGCTCGCGAGGGTATTTGTTTTT  
TATCAAATGAGCAATTTGTTGTAATATGTCCCGTTTCTGTCCGACAAGAATTGCAGATA  
ATATTTGCAAATGCACCAAATTTGGTATCTTCGTCCGAACAACTTTCAGGCATCATTTT  
AGTAACAAGTGGCTGAAGGTCAGGATCCTTTAATCCAACAAATGGAGCAGGTGTCCACGG  
AACTTCACGCTCTTGATTGCGCAGCTCAGCTACCATCATGACGTTGGCCGGCTTCCAGAA  
AATGCATATAGTATTTCTAACCCGATATGGGAATTCATAATACCCAATTATTTCCGCCAGT  
ATTTTTATGGAAAAGTACCCCATTTGGCATAATTGTTTGAAAGCGGTAAAGTACACGTTTTT  
TGCATACAGTGTTACAACGCCTTTGTTGTAAGTTTCTCTGTTTACCCTTTTATCACTTTC  
TGTTCCCTTCGTTCGTCGATTGAGAACGAGTATTCGATTTTTTGGTAAACAACAAGAGCTCT  
GTCGTTGTGTGTTATCCAACACCTTGTGCTAGAACGAGCCATCCATGTGAACGCTGCTTC  
GTTATAGTATTGCTGAGGGCCAAGTTTCCACTCTGAATCATCGGTATTGATTCTGAATGT  
TCCCATGTGAATCGGGATATCGGAATTATAACCTGGAGTCAATTCGATTTTACTGCTTC  
AAATACGTTGTCATATTTGTTTGGTAAATCTAGATCTGGCAAAGTACTTGGATATTTGAA  
GTTTATCTGAGAAACAAATATCTCTCCTCCATTTGTTGACAGTTTGCTATATTCATGCGA  
TATAAAAGTATGGCCTTCGCCAATACCAGAACTTATCGCCAAGAAGTACCATCGAACTC  
ATAAACTCCAGCCATTGGGTCATGGACAACATTTTTGGGGATTGTTGGGTCTAGACCTGC  
CTCAGTAACTACGCAAGTAATCAAAGCATAAAGCTTGCCGTTGAATGTATCAAGCTTTTT  
CGTAACAGCCCGTGCCTTTGCTGTTATATTGAAAGAGGTTGGGTCAAAAAGTTTCTCACC  
AAATATCGGACTACCTGGATCAGTATCAATCGGGGCATTAGATGTTTTGATTCTGCGCAA  
TTTATTTCTAGCTGCTACATATACCCAATCGTCATCGGCAGCATTATTTTTCTCCCTTCC  
TAAAAATATCACCAGGAAGCCGAGCGTATGAGATGAATAATTCAACATCAGAACCAAGAT  
TCAGTTCATCGCCAGTTTTTGGAGAATGTCAAACCTATCTGAGCTAAATCTGAGGTCAGCAG  
CTGACCATCTGACATCATTGCCCCGACGACCGTAATAGATGTTTTAATATCCAAGAAGAT  
ATGTAGTAGTGCTAGTTTGATAGGTTACTGTTCTACTAACTGGGTTGCCGACACGCCCGT  
TGAAAGCTTTGTAATATTTCCAGTTTTCCCCTTTGTCATTCGACACTTTGGCCATTGGCT  
GAAAACGCTCAAACAGATACAACACGTCGTCAATTTAGCTAGCATTGTTCTATTTTTGT  
CAACACACACTTGCTCAATAAATCCTTGTATTTTCGTGATAGTTTTCATCTGAAAGTATTT  
TGTCATAAAGATTCGTCGAATCAGTAATTTGATTGCTGAAAGCGAAATCTTCGCTCATT  
GCGAAGCCATAATTACATCAGTCTTGAAATTGACGTAGTTTCCGTTCTTTTTAGAGAACT  
TTTCTCTCAACAAGGAAGGGTCAGGTGTGAATCTTTCATGGCAGAAATGTAGTAGGCAT  
TTTCCGAATAGGTTTGAAACTCCTCAGTTTCTACCCAATCAGACATCTCAAATCCGTTTC  
CAGAAACGCGTACTCGCATTTTTGTAATATGTGCCTGCTTGTATAGATGTGTCTTCAAACC

ATTCTTCGACCGATGTTGCACCTAATTGACCCCAACTGCTTCCGGACCCTGCTCTAGTCT  
GAAGAAGTTCGGCAATATAGTAAAAATTTGAACCTACATCGTCCCAAGTCAAATATACTT  
GATTCGCTGATAAAATTTTGATTTTAAGGCTCGTTACGGCCGGTACTTTTATGATCATAA  
AATCTCAAAGGGCCGTTAGGCCCTTATTGTGAAATTGCTTCAAGAGTAATAGCAGTGTA  
CTGTTGACGTAAATCATTCTCAAATACGATAAGAGTTCCATCTTTCGCAAAGATAGCGTC  
ATCAACTGGTAATGCTACTATTACTATATATGCTCGAGCAAATGACTCTGCTGGTACAGG  
TAAAATTCCAAGGTCAAAGTTTATAACACTGATAGCATAGTCAACTGTTACAACCTCATA  
TTACTTGTTCCTCCACCCACTGTTGTTTTTTGTGAAATCACTACAAGAGTACTCTGATGC  
AGGAATATCGCCATCAGCAAATGGCCCAATCAAATTTTACCAGTTTGTGACGTAGAAAC  
GTAATTAACCTCATAACGTTACGTTATTCTTGGTGAGGTTGATTGTAGAACTATTGACTGA  
CCCCTTTTTTATTAGCATTATGGAAAGGTATTCCAGCCATCGGAGTTTTGAAGAACTTT  
CTGCTTCCCTGACAAGAGATATTTTCAGCAGAAGAGCCGATAATAGAATCATCCGACGAAT  
CTACACGTGTCAACATCTTTGATTTAGAGAAGTTTTTGTGAAAATTTCAACTTCATCAG  
TGTAATAGCGGTCAATAGAATCAATTATTTGCCCGCGAAGCCATTCTTCAGAGTTATACA  
GTTCTGAAAGGTTATATGTCACTTTGATTTTTGACTTGATGTACATGTAATTTGGGTCTA  
TTACTGCAGGGGTAATAGGGCGCGCGATTGTATTGTGACAAATAATTTTCAATGTCTCCT  
TTTTGAAAAGTTGTTAATCTAACCCCTTGTTTTGGCTTAATAGCGATGAACGCGTATACT  
CTTTTCTCACTGTCAGTGAAGCACTGAACGGCTTGAACAACCTGAACCAAACCTTGTGAGAG  
ACAAATGACTCCTAGTCGGTTGTAGTAACACATCTTTGCTGAGATTCTCTCATAACCGGG  
GAACAGTTCGCGGATTGTTTCGATGTCTTCGGGATCACCACCACCCTGAGTACCCACATA  
ATCGGCGTCATAAGTCGGATTCTCAATCAGATCAGTTATGACCATATTTTGAAGAGTATC  
GGTGTTCGCGAAATCTCTTGACCCATTTGCTGGCTCACCACGAGTGCTCAAATATTCGAT  
CACGATTGTTGGCCCGATATTCGGTTTGAGCCCGCCAATGTAATTTGCTACAAGAGCCCC  
GCCAGCGATTTTCGGTGCTAGCTTCACCTTCGCCAAAGAATATCTCAGTCGTCTGGTCAAC  
GGTCTCACGCATGTAAATTACGTTAGAAACACCCCAAATATCAACCATCGAATTATTGGT  
CCAATCGACCCAAGGTGAACCATCTACCCATACACGAACTTATAGATCTGTCCATATTGGG  
GTCACGAATCAAATTTGACTAATTCCATCAAATTTCAAGTCAGTTCGAACTATTCGTCC  
TTGATACACGTTTACAAGGGATTTCGTAAGTATTATTCTGACCACGAAATATTGTACCATC  
GTCAAGAGGAACGAATGGGTAGTTATCAGTACGTTCCACCGTACCAACGAATTTAGTTCT  
TCTCGGAATACGAATGCCGGTAGGATTCAACGGGTTTGTCGCTTTGAGCAGTAAAGTCGT  
ACTAGAAGCAGTACGAGAATCTGGCATATATCCCATGTCTGAGTATGTTGAACAACCTGA  
ACTTCTTAATACAGAGGTTTCGGATAAAACTCTCGAATAATGCTGAATTTGAAAATTGCTG  
AATATAGAGTGTGCAATATGCCAGAAAATCGGTTAAAACGTTAATCTTGAACCAATAAA  
GTCATAATCTTTAAATCCAACCTGGTTACCTAACCAGTCAATTAAGTCGCTTTTGATTGC  
GTCAGAGGTAGCGCCTTTAAAAAATATCTGGGATATTTGTTTTCCAGTTCATGGTATAAA  
CACCTTACTCGATGATTGCGCAATTGTGTCTCCGTAAGATATTGGATCACCAATTGATAG  
TGCGGGTTTTCCACCAACAAAACCTTCGCCGTAGTGGGAATAACGTAGCCGTCATGAAC  
ATCATAAGGCTCAACAGTATTTTCGATGAGGTATAATTCTGTGCGCCGTCAACGACGACCTT  
TATACCGTCAACAAAACCTTTTCCCTGCGTGGCTTGATTTTGTGTAGGAGGATATGTGTC  
ATGGCCAGTTGTCCAAGCCATATCGTAAGTCAATGCAGGCATAAAAGGCCCTCCTATGTG  
ATACTATTTAAGAGCTCCCGGGAGGCATTAATAAAAAAACAGGAGTGTATCTATCTGA  
TTTTTTCATTTTTTTGTACCCAATAGATTATCAGGGTAAATCTACTACTGATATTTTTAAG  
AATTACAGAGCGTATTTTAAACGTGTTATCGTAATATACAAGCCTGAAGTGTATTGGATA  
AATGGTTCAACAAGACCTGAAATGTTGGCACATGAGCTTTATGGCAATCAACAGCTATAT  
TGGGTTTTGCTAATGCTAAACGATGTATATGACCCATTTTTCGGGATGGATAACTACACAA  
GATGCTGCATATGATTACGCGCAGCAACAATATCCAGTAAATAAGGTCCTATATCATCTT  
GATGCCATTGGTGAAAAGTATTGGAATTTGGTAGAAGACCCAGATTTCCCGAGACATTGG  
TATGATGCTGGAGATACATCTAGATCACATATTCAATATGTTGGAGCACTTCGGGCCGTT  
GATTCCCTTGAAGCTCAATCTGCTGTCAATGAGCAGAAAACGAAAATTTCTGATAATTAGC  
GAAGCTGATATCAACTCGTTCCTAAACGACATGATACGTGAAATGGCAAAGTTTAAAGGT  
GCATAATATTTAAAAGGTATTGATAGATTTTTTACTGGCGTCGTAGAAGATCGTCAGGATC  
CGTACATGTTAGGAAGGGTGAGAGTGCGTGTACACGGTATTCACCCAGAACAAAAGGTTA  
GAGCAGACAACTATGGTTTAGCAACCGAGGATTTGCTGTGGATGTCAGTAACCATGCCTG  
TAACATCAGCGTCAGTTTCGGGTGGAGGCCAGGCTCCAGTAGGCATCGTGACCCGGTACTC  
ATGTATACGGAATTTTCTTGGATGAATTTTATCAAATGGCCTAGTTCTCGGGACATATC  
CCGGCATATATCCTATGATGCCTGATTTGAATAAAGGTTTTCTGACCCATCAAGAGAAT  
ATCCTCGGTACGTCGGTTCAGATGTGAATATTTTGGCTAGAGGTGGAAAAGACATACAAA

TTTCACCAGGCCCAATTGTAAAAGAAAACCAAATTGTTCCAGTTGTCGTAGAAGATCAAA  
ATCTCAACCGAGATGTTGCACAAGGTACAGATAGAACACCAAATGACGAAATACACCCAA  
ATCCAGATCCAGACGTAACAATAGAGGATATGTTACGTTATGACGAAGGTATTCGTGTAT  
CGGTTTATTGGGACAGTGAAGGATATCCAACCTGTTGGAATAGGGCAGTTGATAGTTCACG  
AAAAAAGTAGAAATATGACAAGAATAAACCAAATGCTCAGTCAACTAGTAGGCAGGCAGG  
TTAATGGGAGAATAACCGAAGAAGAAGACTCTATGCTGTTGCAACACGATCTTTCCAGCG  
TCTATTCTAGCATATCAAGCAATTACAAGGTCGGCCCGGTATATTCGATGCTAGACGTTA  
CTCGTAAAATGGCAATCGTCAATATGACGTTCCAAATGGGTGTTGGTGGCGTAGCAAATT  
TCAATATGATGCTTGGATACTTGGCACTAGGCCAATACGATAATGCGGCTTATGCTGCTC  
CCGATTCTTTATGGGCTAGACAACTCCATCACGAGCTCGTCGTGTGTCAGAAGTCATAA  
GACATGGAACTTGGTGCCATACGGTGGGTCACAAGGATCTGCGCCGTCATTGCGGACGA  
TGGGAATGTTCAAACGGCAGGTGTATCATCAACCGCCCAAGCTCCCTCGTTCACCGAGC  
CTGAATCACCTTACCCGGCTGTATATCCATATAACAAAGTGTATGAAAGTTAGTCTGGTC  
AAATCCAGGAATTTGATGATACACCCGGGCATGAACGCATAAGAACATATCATCGGACGG  
GTACGTGTGAAGAAATACATCCTGATGGAACAAAAGTACGAAAATTATTGGCGATGCTT  
TCTACATTGTCAAGAACGATGGGAATGTTTATATCGGCGGAAAACCTCAAGATCGTTGTG  
ACGGGGATGCTGATATTTTTGTTCTAGGCGATTCTAATAGCACAATATCTGGAAATGCTA  
CCCAATTCGTTTCGTGGTAATGTTGACGAGCGAGTAGAAGGGAATGTCAATCAGTATGTCA  
CTGGAAATTCATCGGCGTGAGTAAATGGAAATCTAAATGCCGATGTTGATGGAAACGCCG  
ATATTAAGTTATGGGCGACTGTTTTAACACGATTGATGGAAATTACACTCTAAAATTG  
GAGGAAATTTTTCTACCGCAGTTGGAGGAAGTAGGACAGATGATGTTTCTCGTAATTGGA  
AAAGACAATCGGCCTATGTATCCGATGTTGCAAAAGGAACCTTCGAAATTGATGGTTCTA  
GAGTAACTTGGGGTAATTCATGTCAAATATATTACCAGCATCAGCCGTTTTGCCTGTTA  
AAAGGGAAAACGAAATAGTATCGCAGACATTTAGCGCAAACCTAACTGAACCACGGGCAA  
CCCTGGTTTTCTTTGGAAATTAGTGCTATAGATAAAAATCAAGGAATAGTTATTGTCAACA  
ATGGATTTTCAGGACAATATACTGGAGCTTTTACCCTTGACGGTGGTGTATCATATCGTT  
TAAAACCGGAGAACGTGAATCAGCAAATAGATGGGACGATTCGCCTGATCCACAAACAA  
CGGATTTGTATTCTTTCTTGCGCCAGAGTAATGGAAAAGAATATTCAAACCTTGTTG  
CTTTAACATACGACGTTGTTACGCCAACTAGAGCCAGGTAATACTCCAAGACTAACCGT  
TAGATATGTGATAAGCAAGACGTATACACAAAATTAGTTGGTTAGTGGAACACATGGGC  
TAACAATTTGCGAGATTATGTATATAGGGGTAGATAATGGCATATTTTGGAAATTTAGGC  
TAAAACATCGAAAATAACAAGGGCAATGCAGATAAAATCACGTATAGGTCCAGTTGGGG  
AGCGTGGGTCATGAAATTTTGCATCAGTCGCGTTCAGTTTTAGCATGGAATTCTGAAGA  
AGGAATAATCCCGTGCTTTTCGAATGCTGACGGAAAAGACGAAGGTATTTTCATGGATTT  
TTGTGTCAAATGTCAAACGGCCAAGCATTCTGTTTCGAAGTAAAACCCGAAAAGGAATG  
CAGACCTCACCAGATGAAGTCTACGAATACTGCGAAAGCCAAAAGCAATTTATGGGAGA  
AATGTACACATGGCAAGTGAATACAGATAAGTGGAAAGCTGCTAATGCCTCGAGTATGGA  
AAAAGGTTGGAATTTCAAGATAATAACTGCAGATTCTCTTAGAACTCATTTTGGATGGAG  
AGGACAATGATTTTTGACTATATCAATGAAGCTCCACAGAAAAGTCAAGAAACCAATGG  
GTAACATTGGGAATAGAATGGAGAGAAGCAAATCCATAGGTGTAGCGGGAAAGGATTTT  
GCAAATCAAATGGTCTAAATTATGACACGTTTAGACGGACTATGCCTAAATTTCCCAAAG  
CAAGTTGATATTGCCACAGAAGTCGAAAGTCTAAAACCTAAAGCAAATTAATGCACGC  
GAAAAGCATTAGTCATGATAAATGACTTTAGAAGTCAATTACGTTCTAGAGCAGCTGAC  
ACTGGAGCAGCAAACACTAATAAATCTCAAAAATGGTTCAATGACACTGTCAAAAATCA  
ATTCGTGGTCACATGGTATCAAACCCGAAACCAGGGAGAATTTACACTTTTGCATATGAT  
GCAAAGCACAAAGATACTCTCGAATATTGGGATAGATTCCCGCTAATTTTCTTTTTGGAA  
ATGGGCACATCTTCATCAGGCCCTTAAGGTATGGCTTAAATTCGCATTATATTCCTCCAA  
AAGCTAGACAAAGCTTTTTTAGAAGAATTGCTAAAAAATTATGCAAGCACCGAACGACTAT  
CCAATAAAACGACTCTGAAAATAAATTGGTCAAATGATAAAGTAATGAATGGTTCCGACG  
TCATGATAAAAGCATACCTACCAGCTCATTTAAAAGGTTTCGATGCTAGAAGTGAAACCTA  
GCGACTGGGTAAAGCTCATTTACATGCCGCTGCAGCAGTTTATGTGCAAGGGCAAACGAT  
AATCTGCCAAAAGGTATGGGCACGTGCTTAATGGTAATGGCCTGGACTTCGTCTGGGCC  
ATTTTATTTTATGGATTAATAAACCATATATCTCGACGTAATGAGTTTAGCAGGGTGATC  
CCGGTAAACCCTGTATGCATCCAGTTATATAAAGGTTACTGGCTTGCCAGATTCAGCT  
TGCTTGAATCATTCATTTTTATCCTTTCTGGCTTAAATAGATATTATAACTAAAAGGATAA  
AAAGATAAGTTTGGAGCAAGCTCAAACCTGTAAACAGGTTTTAATTTTTTATGGAGATTTAC  
AATGGCTTTAAACAATCAATCGAATATTACTAACTTTACGCTTGATATACCGTCATCTGC

TGGTATTAAGACCATGCTCATGAACGTGCAATCAGCATCAATACCAGGTTTTAGTATACC  
TACGACAGAAATGCCATTA AATTCTCAGGGA ACTGCTAGACAAAACGTGCCCAGTTCAAC  
AACCGAATTTGATCCGTTGATTGTTTCGAGTGTTGCTTGATGAGGATTTTGAAGCATATAC  
CGAGATGTACAGATGGATGCTTTCAGTGAATGACTATGCTCGGCAA ACTCCCACTAAGTG  
GGGAACGGTTAATCAACTGCCAGCAATAACGCTTCATGTGCTTAATAACTCTAAGCGTGA  
TATAATTGCCTCATTCAATTATCATGGTGCTTGGCCATCTGAAATCGGTGAAATAGAGTA  
TTCTTACCCTGAAGATGGTGATGTCTCTGTGACATTTACAATTACCTTTTTCTTCAAATA  
TTTTGAAATTGAAAAAGATGGTGAATTAATACAACTTTGAGAGTATAACAATGATAATT  
GCGTTATCGGGCAAAAAGAGATGTGGAAAAGACACAGTAGGCGATCTATTGGAAAAAGAA  
GGTTTTCATAAGTACGCTTTAGCAGAACCTATCAAGATTTTCCTGTACCGTGCAATCCAA  
GATGACAATCGGTTGCCAATGTTTGTCCAATATTTTGATATGAAGGATTTTAACGGTCTT  
GGTTATGACCGTGAAGAATATTTGCCCATTTCTAATTCGGATGATTTGAGAATTATGCGA  
TCTGCATGGATGCTTGTGTGTGATGACCATCAAATCGATTACACGTATGCGCATACCGGA  
TTTATTTTCAGAAGCAGTTCATGGCAATAAGAAAGCATGGTCAATTCGTCGACTGATGCAA  
ACATTTGGA ACTGATATTGGTTGCGCAATAGATAACCGTATATGGTTGCAATATCTAGAA  
AATTTCTATTGAATCACGAAAATGTCGTTGTTGCTGACTGTCGGCAAGACCATGAAATG  
TCAGAAATGCGAGAATTGGGAGCAGTCGTTGCTCATATTATTCCTCGTACTGATTCAGTA  
GATACTCATTCCACCGAAGCAGGGCTTCCTATCCTGTCTGGTGATCATATAAATGATAAT  
ACAGGAACGCTTGAAGATTTGCATGAATGCGTTAACAATTTTCGTAAAAACACTAAACCCT  
AAGGATATAAAATGAACGCAGAACAAACCAATCGCTTCCCTGAAAATTCGAGTTTTTG  
ATCTGAGCGAGCAACTTGTGCTACTCAACAACAAGCAGAAGAATTTTATAGATGCGCTCA  
CCAAAATCGTCCACCTTTTGGGTGTGACCCCGGCGATGGTGAAGATAGCACTGTCCTTT  
CTTCTATTGTAGAAGCAGTAGAAGCTCTGGTTCCTTCTCAAGAAGTTGAAGTGGTAGAAG  
AATAATGTTTACAGACAGCTTCGTAGGAAGATACGTTGCTTGTAATTTAGTGATGAAAC  
GCTGGATTTTATCTAGCGTATTCAAGAAGA ACTTAGATTGCCAAATCTTGTTCCCTCGAGA  
CGAACTTCATTCTACTATCGTTTATAGCAGAGTATAAGTTCCATTTAACCCAGACGATTC  
GCCTGAACATTTGGCCGATAGTTGCTATCTGAGAATTTTGAAGCTCCAGAAAAGAATTT  
TCTTGTTCTGGCGTATGATTCTCCGCACATGCAAAAACGACATGCGTACGGCCAGGTCT  
TCGCTCGTCAGCTCATGATTTTGACGAATACATTCCTCACACCACGATTGCAAAAAGACAT  
TGGTCCCTCTGAAGTATGAAGGGTCATACGACTTCCCTATAGTAACAACACACGAATATGT  
GGAAGAATTACGTGAAGATTAAGCAAAAAGCAGATAATGTTCAAACCTGCGAAAATTGA  
TGTA CTATGAAATTCATGAACAAAACATTGTTTCAGAAATGAAA ACTAAGCAACCTTAAGG  
AAAATAAAATGCAAAAGCAAGTAATTCTGTCCACTGGTCCCTACCCTGACTGTATCCGGCC  
GTGCTGTCTCTGTTGAAGTAGGCCCTGTTGTTACTGCCCTTGTCAAAGGTGAAGGTGAAA  
AACCGTAGTAGTTGCTGAAGTTCGCCGTGA ACTGGTTGATGTTATTGTTTCATGAACCTC  
GCCGCTGGGTGAAGCTGTGCAAGCTGCTGAATAATTTTCAAATGCCCTATTCGGAGGGC  
ATTTTTGTA ACTATAGGAGAAGTTATGGAAATCTTTGTGTTTTATTTTGTGATCACATAT  
TTGGCAGCATGTACAGTTTTGGCTATTAACGTGATAAAGTATAACAACATCAACATTCAGA  
TGGAATTTTGT TTGGACA ACTGGCCCAATATGCGGAGTTGTATTGACA ACTGCACTATGC  
AGCTACATTATTCGTTTTCGCGTTTACACAGATACAATTGGAAAAATAAATGACAGATCA  
GCAAGAAGAATTTTTACATACGAAAACATCCGAATTAGTTAAAGTCTTGTATGAATATGA  
CATAAATGGCAGTTTTTGGAGGAAACAACAACGAAGAAGTTTGTGCTATCATGTTTCCATC  
AGATATGCCGCCAGATGATTATTCTGCTCATATTATCATCATGGTTATGAAACATATGAA  
AGAGCAATCTGGCTTAGATGAAGACGATCTTGATTGTCCTATTGGATGGGACTACTTTAC  
GCCTTTGGAATTGTGATGGAAAACGTTGGCATTGCAAGAGTTGTCAGAACAATTGAGTTC  
GATTAACATAAAGCATAGACTTGAGGTATAGAAAATGAAATTTGCACCCGGA ACTGTAAT  
TCCAGAAGGATACGTCATTA AAATCACTTCCTGGGAAAATGATGGTGAAGACGACGATCA  
TGTCATTCATACCGGCAGGCCAATGAAAGATATCGAATTCCTTTGAGAAAATCAAACCGAT  
TTTCAGTTCATACCACGACGAAAACAATAAAGGCTATGGCAACAAGATTATAATCCTGG  
GATGGCCGCCGATTTGTTTGAGATTTTTGTAGAAAATAGGCATTTGTCTTTGCAATTCAA  
ACGCTATCTAGGGTTGACACCAGATATGTATGATCCACTTGATGGCGATTTATACGAATT  
CATTCTGCCATGACAATTTCCGCAAAAATGCTGAAAGAAAACATCACCGGTTATGCCAAAC  
AGTATTACTTCGATTTAATTTGTGTGGTCGAGTCAATTGAAATCGAGTATAACCAGTCTG  
AATACGTTTTTCCAAAAATTACACCTCGTTAAAATTAAGGTTATCTAATGCAATTTTTAT  
TTGCATTATTTGCAGCTAGCGTTCAATACACTGCTGTTGCACTGATTGTATATGTTTTGC  
TATATGGTTATGAATTCATTGAAGAATGGCGGAAAGGAAAGCCCGACTCAAAGTTTCCAG  
CAAAAAGCCTATCAACCAGGCAGATTTATGGAGCCATTGCAGCAGCATAGCTACCTGTAG

CTCTTTTCTTGCTATGGAAGCTAATTGAATTCATTTACGTCAAAGTAGTAGTCGATAAAA  
TTTACAAAAAGGAGTTTACATTGATGGGACTATGTTTTATGATAGTCCCATCAAATCAAC  
ACGGAGTAATTTAAATGAAAATCTATCACACGCAACATATCGCGAAAGTTAACGGTATTA  
CAAAGGTTGACATGATTCGCGGCCATAAACTCAAGGATTTTCATTGCTATATCATGTTA  
AAGATGGCAAGGTCATTGATTGCGCCTTCAAAAATGTCACGGCACAATTCGGCACTATTG  
AAAAGATTGCTCGTGAAGTAGCAGCAGACCAAGAATACACTCTGTGAGAAACAACACAGT  
TCTGACAATGGGTTGACTATAATACCCATCAAACCTGGCCGTGGAGGGAATCAATAACCC  
GTGCTGAAATACTAATACCGAAGGAGGTAATAATGAAAAAAATTGTTTGGTTTTGGCTCTT  
GCTTTTGCATCTTCTTATGCGAGCGCAGATTCAACCAATTTGATAATTGGTGGTTTTTTTC  
AAAACATTACGAAAATGATGAAATTAATGAAAACATCCGGAGATAGGGGTCGAAATTGA  
CAACTTTTCAATAGTATATACGTGCGAAAACTCGATTTCATAAACCTTCGGTTCAGTTGGC  
TTATTCTGACACCTTTTACTCATGGAATTTTCGATATTGGTTAGCGCGTTGGTTTTAT  
GACCGGTTATCGATATGGAACCAATATGCCAATATCCGATGGTATAATGGTGTGATTT  
GGGTGCCGGGATAGCCCCGCTCGCCGCCATTGATATTTCCGGTAGATACCCCTATTCCGAG  
AGTCAAATTTGTTACAAGCGTAACACCAGTTGTTACGATGTTCCGATTAAGATTGAACT  
TTGGTAAATTTGAGAACGCAAAATGAAACTATTTACCCGAATGGTAAAGAAAAAACTTTC  
AAATCGTGGAAGCCTGAAAGAGTCCCTGTACGCTAATTTTGATTGGTGGGATGCTGAT  
ATATTAGATATTCCATTTAACTCGACTGTACATTGGGGTCTGTGCCCATTTGATCAAGAT  
ATCTACAATGGAAAAGAAACGTTTGTGGAAATTTCTGCAAAACCTTTTAGAAAAGGAA  
CTCGAGAGCCGAGCTGAGGAGCTTTGAATTGGAAACCTTCGTTGTAAAACCTGCCCGCTCA  
TCTAAAAGAATGGTTCATGTCTTATATGGGCGATTCGGGTGAACAGCATCTCATGGAACC  
ATGGCATGATGAAGGCATCGAAGGCGATCGCGTCCGTTTCAGATATCCATATTATTCTCG  
AAAGCGTGGCGAAGAAGTTGACGAGACCGCTGATATCGTAGTTACTGAGTATCCGGTGACT  
TATTGCGAAACGTTTTTAAGTTATCGCTGAAATCGAGCCAAAATTCACATACCAGGTCCC  
CATAAATAGATATACCAAATAACAAAAGGTCTAGCGCGATGCGGTAAGGAAGCGAAGCGG  
TTACATGCTTAATACGGAACCGATTAAGTTACGGCGGATGGACTGGGCTATCGGTAAACG  
GGGAGCATAGACCCGAGCACCTGGCGTTATTATGCAAGTATGGTGGAAATTGGTATACAC  
TGGAGACTTAAAACCTCCCCTTCGAGCTTGTGGGCTCGAGTCCCCTACTTGCACCAA  
ATTCAAATTTCTAAAGCATATTGTTTACACGCTTTGGAAATAAGATATTATTAACCTTATC  
GAATCAATACACGCATTCAGTCTTGGATGGGATAAATGGTGAAGCCATGGTTTTCTCG  
GAGCAAGCCTTAAGTGGACAGAACTCTCATCCTAGTGACGCAGGAAGTGTGTTTTGTTTGA  
AAAGAATTCTGGAAGATTGGCCCGAGTTGGTTTAAGGCACCGGTCTTGATAACCGGCCAT  
CGTGGGAATACGGTCCATCCGTTTGAATCGGATATCTTCTTCAAATTGAGGTGCTGTGA  
GCCGAGCGGCTTAAGGCGGACCTACTGCAGGACATACGAAAGCGTATCGTAGGTTTCAAT  
CCTACCAGCACCCATTAATTCTGAAGCATATTGCCAGAGTTGCTGGAAATGAGATCTTA  
TTGTCTCATCCATTAACAAGTTTATTTTGGGGTGCTGTAGCATAACGGTTCATGCGGCC  
GGCTGTTAACCGGTGAGGAACTCTACGTTGGTTTCCACTCCAACCATCAGCGCCAAAATG  
AATTCATGGAACGTTCCGGTAAATGGTATCCCAAGCGGCTGTAACCCGCTCGCCTCTGGC  
ATTCTTGGTTCGAGTCCAAGGCGTTCCACCAATTTAACATGAGAAATATATTTTATGAAG  
CAAGATCTATTTGATAGATACGGATCCTTCTGATTCAAAGAAGGAATAGACGGTGAATTT  
GCAATAACTGATGATTTAGTTCATTTCGATATTTTTCAATCATATCTATCAGACGACTAAA  
TTGCCATTTATATGAAAACGGCAGCTGGGTTAAGAGCATTGCGCCCAGATGAATTACG  
TTAGAGTATCTCTTATCAATTTGAAATATTAACGATCTGGAAAAGCGTCCGGACTAAATG  
AAGGTTTTGTTTATCTGATAACAAATCCAGCTTGGCCACATCATTTTAAAATAGGAAGTA  
AATTATCAATACAATCTCGATTATCATTGTACCATATTTATTCACCGAATTGCGATTTTG  
ATATCGTCTCTTATTTCTTCTTAAATCTCGTTTTGCGGATGATATAGCTTTACACAATT  
TGTATGGCGCTGATGGCGAGCGGATTTATGACAAAACGGGAGATAAAGTGAAAGAAGCTC  
TGCAATTTCTTCAATCATAAGCGCAAAATAGATAAACAAGTTTTACGAGCATCTCTAACTC  
AATTGGTAGAGTAGCGGACCTTTAATCCGTCAAGTCTGAGTTCAAGTCTCAGGGGATGCA  
CCAAATAACGGAGAGGATTGCGGGAAAGAGCCGTCCCGGCATGTAAAACCGGTCCCTTA  
CGAGTCTTGTGGAATCGAAACCAACCCTCTCCACCAGTTTTGTCAGTAAAGAAGTTGTAA  
TGCCTTGTATCAGGCACTTATGCGGAGTGACGTTTGAACCATAACGGAATGATTCCAGG  
GTGCTACAATTTGAGCGGCGAGTGTATGGCCGAGCACACCACCTTTTAGGCGCCGGAAGA  
CGGGTTCGAGTCCCCTACCGCTCACTGTAATTAATTTCAAGTAATCATTGGTGTGACCTT  
AGTACTAATGGTAGCTATCCTGGATGTGACCCAGGGAGTACGGGTTTCAATCCCCTAGGT  
CACCCCAATGATTTTTTTTTCGCGGGTAAGGTGTTTATGGATACATGCTAGCCTTCCAAGCT  
TGAGTAGACCGGTTTCGATACCGGCTACCCGCTCCAACACAAGTCACAGGGCTCTAGATT



CCTAGTCAGTTTCCCACCCCTGGTTGATGCACTGTCCATTATTGCGCCGTGACTGGAGCC  
GGCGAGTTGGACAACCGTATTGTCTCCGGCACTTAGATGACCGGCTTTAACAAGATAAAC  
CGGGAGACGTCCCGTAAAATCCTCGGACAAAACCTCAGTAGTCACTCCCGTCATTTTGC  
CGGTGAAACGAGGAAGTATAGACGGGTAACGTATTCAATCTCAGCGTAGGCAAGTGGTAT  
GTCGTTCCGTTTGGGACGGAATTTACGGGTGTTTCGATTCACCCCGCTGAGACCAAATTAC  
GTATGCGGATACTTGGTTGCAAACAAGTCCGTAAAGTCCCTCGAATGTGGTATCATCCTCT  
CCTGGCACTATCCCAGTGATGCGGTTATCCAGAACGGCGCAAACCTGAAGAATTGAGTCAC  
ATCCGTAAGGCCCTCACTCCAATTCTTCAAACACTCTTGTTTATGTGGCGGTTCGAGACAT  
CCCCACGTTCAAACCTGAAATCTCTATGTCCCGAGCTGCAGCGTTAGCGAAGAGTGTTG  
AAGGATTGAACTAACTCTGAGGAACATGTTATGAATGTTGTCAAATTAACAACCACGCGC  
GATGTCTGTTGTGATCAAACCAATTCATTGGTTCACATGAATTCTGCTCTGGCCCATGT  
GATGCTGGTGTGATTGCTAAATGTGCGGTTTGTCAAAGAATGGGAAATCGAT  
AGCAGCAGTAGTACCTTAGTCGTTAAGACTTAGCGTGAAATTGAAGTTGACACAAACAAA  
ATTCGCGTGACCTGACCGTTGGTGATTTAGTTCACATTTTAAGCAGATTTGATTTCCAT  
ACTCCAATTGATAGCATTTCGATTGAAAAGTTCATCTAATCTTGTATTTGCTTCATCTAAC  
GGAGATGGCGTAAATATACATGTTAATTGCGGGTTAGCTCATCTGGTAGAGCACAGCC  
TTTGTAACGCTGGGGTGGTCCGTTTCGAGTCGGGCAATCGTCACCAAATTTGTAAATGAGG  
AAACTATTATGTTATTTGCTTATCAAGTTATTGCTGTTATCTTCTTTATTTGCTCTTTCT  
TGAGCGACTATAAGCGATATTCGGATTCCCCTTCGAAATTGCGGGTAATTTGATTGACT  
CTGCTTTTGCAGGTGGTTTGTGGTCAATTGACGGTACTTATCCATATTTTTTGCATCGCAA  
ACCGCAATCGCTAAATAAATAACAAGGAAGGGACTTCTTCGGACCCGTTTCGTTAAGTAAA  
AGGGAAGACCATCTGGATATGACGAGGGCGTCGGCCTGTATCATATCTTGCTGGCCCTTG  
GCCTCCCTCGAGGTTTTGTTTGGAAATGGTGCGCCAGCACGTTTCAATATGACATTGGT  
GTTAGCGGTAGCACGCCGGTCTCCAAAACCGTGCGGCCAGGGTTCGAATCCTTGATGTCA  
TGCCAATAGTGGATTAGCTAAGTAGGTAGAGCTCTCGACCGATAATCGAGAGCGCATAGG  
TTCGATCCCAATATCCACTAACAAATTTTTAGGAGAAGTGGATGAGCGGCTGGAATCGCT  
TCCCTGCTAAGGAAGTAAACCGAAAGGTTTCGAGAGTTCAAATCTCTCCTTCTCCGCCAA  
ATGTATCCTGAAGCATATTGTTTCAAATTTCTCAATGAGTGATATTATTAATCATACCA  
AAACAGAGTTTAGAGCGGAGACATAGTTTATTTGGTTAAAATAGTCCCCTGTCACGGGAC  
ACCACCGAGTCCGATCCTCGGTGGCTCCGCTCCAAATTTTGATGCGATGTTGAGGAGAGG  
TCGTCCCTCGTCGGGCTCATATCCCGAAAATCAGCGGATCGAATCCGCTCATCGCTTCCAA  
CTTCAATCGCTTGTGAAACATGGGAAAATAGCAAATCTGGGAAAGGGTTCGCGAACCGBA  
ACCTTAAAGTAGCTTTCTAAGTACTTGTGTCTGGCAGTTCACACATACCTATATTTGTG  
ATGGGTTTCGAGACCCTAACATGCGCCCGAATAACAACGCCGGCGACCAATCGAATGATCG  
TTATCGGCTTTTTCATCTGACGGCCCTGTAGCTAGACGGTTCAGCAGGCGGCTCATAAC  
CGCTCGTAGTACGTTTCGATTCTACCAGGGTCACCAATTTGGGTTCTTCGTTAATGGGA  
AGACCGTAGGTTGCTTTGCCTCCTGGTGATGCTATTTTCGATACTAGCAGAACCACCAAT  
TTGAGGAAAATACTATGGATATCGGATCCGGCGCGCCTTGACCATCGTGTGCATTGAGTA  
ATTTTGCTCCGCATGAATTCGTTATCGATGGGAGTAAATGTTTCTCAATGGAAGGATTCC  
TTCAGGCTCTCAAATTCAAATCGCCTGAAATGCAAGAACACGTTTGCCTCTGGTTGGTA  
AAGCCGCTAAATTTAAAGGCACAAGGAAAAACTGGTGGAGAGCTCAGACTCTGTACTGGA  
AAGGTAAACCGATGCGGTGGCAAAGCGATGCTTATTCTGATTTAATCTACCGTGCGTACG  
TCGAAATTGCGAAGAATTCCGGATTTCAACGAGCAATCCTAGCCACCCGGAATTCCTCGT  
TAACCCATTTCGATGGGTAAAAGTAAACAGAATGAAACAGTGTTAACTGAACAAGAATTT  
GTTACAGCTGTATCGTATTCGAGATAAACTCCAAGCCGCATGATTGCGGCTTTTTAGTC  
ATATGGTCTCTTAGCTCAGTTGGATAGAGCAGCGCCTTCTAAGCTATGGATCATTGGTT  
CACATCCAATAGGGACTGCCATATTAAGGTGATCTCATGGCGATGATGCACTAAAATC  
TCATGCCCGAGAGGGAAGGGGCAGTGGAAATGCACGAAGCGAGAATTGGTATAAATTCTCC  
ATTGTGGA AAAACACCGGCCAAATAGAAAGCCCGGAGTAGTAAAAGTACAAATTCAGA  
AGATCAATTA ACTGATGAACAGAAGCTTCGCAGGCGTCAACAGGAATTGCTCAGATCAAT  
GTATTAAGGTAATTAATATGTCTGATTTACAACGTATGAAAGATGAGCTGAGTGAATTGG  
GTGTTTCGACTGAATAAGCTCAACGATTTCAATTATCATGTCTGATATTTACAAGACTGTTG  
ATCCTGATGAGAAGTTTCTCATGGAGCAACAGTATATCGCGATGGACAGGTATTACGATA  
TGCTAAAACGGCGAACTATGCGTCAATCATAATTAGGGCTCCTTCGGGAGCCCTTTTCGA  
ATTCTCTCGACGAGGTTTCAACATGAACAAATATTTTCGATCATAACTCTTTTTTCGTAAA  
TGCAATGCGTGTTGGTTCGGTCAATTTACCCACCGGGGTGCGAGATGGAGGTATTGAAAGA  
TCGATCAGATTTTTTAAAATCCAATAGAACAATATCCATAAATGTTGGTTCGGCAAACCGG

TAAAACAACCTTCATTTATCAAGCTTGGTAACGAATTAAGCAATCATGCCAAAGTCGGAAT  
GGTAGTCATGAACACCCAAAATAAGAAAATGACCAAAGTATGGGAGCTAAATGCGATAT  
TCTGACTTTTTAATGATATTAAGAGACAATTGCAGATTCTGGATTTAGAAAAAATTC AAT  
TCATCATGGTTGACGAGAGCGAATTTAGTCTCTTTGATGAGAACAGGGTGCACGATTTTT  
ACAAATGGGCAAAATTAGTAAAGGCCGAATTTGTAATAAACTTGATGCAGTCTGTTCA  
ATTATTCAAGCCTAGTGTTATTATTGCCATTTGAAATCAACACACATTACAAGGATTAAT  
AATGTCTAAAGCTACTCACACTATCGATTTTCGGTTTTGGTAAAATCGTTGCTCAGAAATC  
TGGTCATTATTTCAATGTTATTGAGAGTCATGACCCAATGATTCCCACAAATACCAAATT  
TCCAGTCAATGACACTTTGGTTCTGGAAGCAAAAGTAATCGAATTTGAGTAAGCGGCCCT  
AACGCTTATTTTTCACTATGGTAGAAGACATAATGACTGAGCACTACAATCGCGATAGTG  
CAGATGACCCAATCAAAGTTGTTAAAACATCGGGCGTAATTTATGCGGCCAGTTTGATGC  
ATAAATTATCTTACTATCAACTACCTGGAGGAGCGCTGCTCGTAGCAGACAGAGATATTG  
CACATGACATATGGCATGCATGTGATAAACCGAAAATGTTAGATACTTTGTCATTTTGCA  
AAGATAAAATGCATTTTGAGCTTTCGCTTAGGCCCTCCAGTAATCATTTTTGTAACTTCTG  
CCAATGTAGAGAGCATAACGCACTGCTTTATTTCAAAGACTGGGTTTTCAAATCTACCG  
AATTTACGGCGTATTACCTCGAACAAAGGTGACGGTTATCTCCAAAACCTGAGAAATCTTA  
TAGGATTTTAAATGTACTAACTTTACAAAACCTTCCGATATATCAAAGCCAAGAAGGTT  
GGATTATCAAATACCTGAGTTTGCCAAATTGGCACTTGAGCAAATGCATGCTTTTTGGC  
CATGGGATGAACCAGTTGTTGATAATGTTGCTCAAGATCTGCGCACCAACTTGACACCTG  
GCGAGTAGAACGGTATTACGACCGTTCTTAAACTGTTTACACTTTACGAGCGCAAAGTCG  
GTGAAGATTATTGGTCATCACGAATCGCTCGAACATTCGGTCGCCCTGAAATCAAACGCA  
TGGCAACTCTATTTGCCGCCGTAGAAGGTAACCTCCCATGCACCTTTTTACAATAAAGTTA  
ATGAAGTCTTTATCTGAATTACGAAGCTTTGTACACTTCTTGGAAGAAAGCGACGAGT  
TATCTCGTGGCATTACGTTTGTGCGGTAATCGGTATCAGACCCCGATGATGCCAAATCTT  
TTGCAGCTTTCACTTTCATCGAAGGTGCCGTACTTTATTCCAGCTTTGCATTCCTCAAAC  
ACTTCCAAGCCCAGGAATGTGGCAAAGACTTGATGCGAAATATTTGCCGTGGTGTGACC  
TTTCAGTTGCAGATGAACATCACCACTCAATTGAGGAAGCTATGTTGTCACAAACATTTT  
GCAGTGAAATGAAAGAAAAATATGGTGAAGATGTCCGGGCAAACTGAAAGATGACATTA  
TCAACATGGCATATCAAGTGTTTGATGACGATTCTGGCATCATCGATCTCGTTTTCGCTG  
AACCAATTGATGGTATAACTGCTGACGAGCTACTAGTTCTTGTCAAATCTCGAATTAATC  
TTTGCTTGAATACTTGGTTATGAGCCATCTTCGAACTCGAAAATAACCCTATCGCTG  
ATTGGTTCTATCGCACCATTAATGCCAAGAAATGCCATGATTTCTTCACTGGCTCAGGTT  
CGGAATACAACATCAATTGGAACCGATAAGGTTTCTCTGATTGCTGGTAAAATAATTCTG  
CCCTGGTAAACCATGGCAATCTTTGTAAAATCATGGTGCTTTAATGTCTAAAATTTCAA  
ATTCGTATCTTTGTCAGCCGAACGCAAACATATGCACTCAATTGGCGAAATGCCAGAGTG  
GTTTACAACGCAGGGCTATTCGATGTTCCGGAAAAATTATCAGTACAAAGGAGAAACCGT  
TCGTGGTGCATTCCGGCGAGTCGCTACAACACTTGCAAAGCATGATATCGGGCCAGAAGC  
TCCAGAGCGCTATTTGACCTTCTCTGGTCCGGTAAGCTGGCGATGGCTACCCAGTTTT  
CTGTAACACCGGCACAGATCGTGGAATGCCTGTTTCTGCGCAGGAAGTTATGATGGGGA  
CAGTGTCTTGACTTCTACGATGGCCAAACGGAAGTCGCAATGCTCGCTAAAACGGTTT  
CGAACTGCGTCATATCTTGGAGACATCCGACCTTGGGGTCCGATGTCTCGACCAGCCA  
CAACAAAGCAGAGGGACTCGTACCTGTATTTGACACGTTTCGTTAACACCAAACAAAGGT  
TGCAGCTGCTGGCCGACGTGGTGAATGGGCCGTTACGTTGACTTCTCGCATGGTGATTT  
CTGGGAGCTTTAGTGGTATGTGTTGAAAAACCCGGCTTCTGCAAACGTTGGTTGGGTATT  
TGAGAAAGAAGATTACGAAAAGCTTCTGGCTCGCGATCCTGAATATATGGCACGCTGGAA  
TGAAGTCTTTATATGCGCGCTCGTACTGGTAAGGGCTATATGTGGAAGAACTGGATCGC  
TAATGATCTTGCTCCACAAGCAATCAAAAATTCAGCTATCCGTATTCGTTCAAGCCAGCT  
GTGCACCGAAATCGCATTGCCATCTGACGATATGCATACTTTTACCTGTATCCTGAGCTC  
ATTGAATTCGCCTCGTTGGGATGAAATTAGTGCTGAAGATATCAAATGGGCTGTTCGTTT  
CCTTGATTCGGTATGGTCAGAATTCTTGGAAAAAGCGAAAAAACTCCCGTATGACACTCT  
CCTTAAAGCTATCAGATTCACCGAAAAAGCACGTGCGCTCGGTCTTGGTACTTTGGGTTT  
CCATACCTATCTCCAGATGAATGATACCGCGTTCGAATCTGGCGCCGCCCCATTCTGAA  
CAATAGCATTTATTCGCAAATCAAGGTTTATACAGAAGCAGCTTCTCGGGAATTAGCAGA  
AGAGCATGGTGAACCAGAATGGTGTGTTGGAACAGGTATCCGTAATGCTACATTGATCAC  
TATTACTCAAATATGAGTTCTGCTCTAATGGCTGGTGGTGTATCTCAGGGTGTGAGCC  
TCTCGTATGTAACAGCTTCATCCAACAGTCAAACGCTGGTGATTTAGTTTCGCTCGAACCC  
GGTATTGGCTAAAGTATTGTCCACCGTCTTTCTGATAAAGTAATCAAAGACCCCATGGA

AAATATTGCCACCTATCATAATGGTTCTGTTCAACATCTGGATATTTTGACAGACAATGA  
GAAAATGGTGTTCAAACAGCTTATGAGATTGACCAACATGCAATCATACGTCTTGCTTC  
AGCTCGTCAACGGCACATTGACCAAGCGCAATCAATCAATTTGTTCTTCGATGCTGATGA  
AAAACAATCAGTCGTTGCGTCCGTTTCATAGATCGTTTATGTATGACCCACGTCTGAAATC  
TCTTTATTATTTGCGTTCCGAGCGTGGAGTAAAAGCTTAAACTGGTGAGGCGGAGTGTTT  
AGGATGCCAGGGCTAACTGCAAGGGGGCGAAAGCCCCTTTTATAGAACATATGTGACAAAA  
TTTGAAACATCATCAGGTGAGAAAATTTAGTGTGGTATGCATAAAAAGTACGCATGCTAAT  
CCTTTATCGGACCCCTGTTGTGGGTCTGGACTAAGTTTAAGAAATGCCAGATCAAAAATAC  
GTTGTTTCTTGTATAAAAATCGGTTGAGTAGTTTGAACATTCGACCGAAGAAGAGATGAGT  
GAAGCGGAAATTTTGTTAATTTCAAGGATGGTTGATAACCCGAATTGTAGTAATATCGCA  
TACTGTGGTTTTTGGTGGAATGCTTTACGGTATGCTTCCGATGAGAGAAAAGAAGCATT  
CGCGAAACATCACGCCAGAAAATGATCAAGCGATATAAAGACAGTGATGAATTTAAAAAG  
CACAGCAACCGCGTGCAGGTTGCATGTAATCGACCGGAAGGACGGCAAATACGAGCTGAG  
CGACATGCTGAACTTTATACCCGCCCTGGTTAATCCGAGCGTATGTCGGCAATACAAAA  
GAAACGCAAAGCCGCCCTGACGTCAAGGCCAAAAAGGCTGAAGGTGTAAGAGCGGGCGAGA  
AAGGCAATAAAATTTCTTAAAACAATAATATGTCGGACGTAATGACTATTATAGATGGG  
CGATTTGTTGATAACTTAAAACCTCGCGGATGAGTTGTCAACAAAATATGATATAAAATAG  
ACCAAATATTTTGAGAATTATCGACCTGATCTTAATTCATTGCTGGGAGAAATGTGGCT  
CTACTAATTTTGTGCGCAATTTTGTCTATGCCAATCCGCTTTTTTGGATTTGGGTATATA  
ATTCAAGTATTACTTTCAACTGGGATTTCTTTCTTTGTTTTGGAAGGAATTACTGCAATA  
GCTTATTATACAGGAAAAATAAATGATTTATCCTTTCCGCGTTGACTGGTGTGCAAATG  
CTAACTCGTAAAGCCTATGCTTGCCAATGTTGACTATGAATATATTGATGTCGATTCTGA  
TGAAGGCATAGCTCTAACAGCAAAAATACGCAATTCGAGGTTTGCCTACAATGATTAATGT  
AGAAACAACCGATCGTTTTACGGGAGTTCCGAAAAACGTTGCGGAATTGAAGCAAAAAAT  
GGGAAGTAAACAATGGGCTCTTGGGAGCCCATTTTCACTTTTCAATTTTATGGTGACATCG  
CGAAAAATCCATGTTAGAATAAGTTTGAATCAGTAACATATGGAATACTATCATGAATCG  
CTACAAACTTCGGAGAACCCTCGAAGCAGAGTTTAAAGAAATCAACAGAAAAATCGTAGA  
AGATCGGTTGGCCTCTGGTCATGGCCTCCGTTTTTCACTCTGGAATACACTTATCATTTCAT  
AGATGTCTTTTTGCTTCGCAATATCAATATCGATCATACGCTGAGCTTGATCAAAGGTTT  
GAAGGAAAAATACACGAAGTTGACGCATACATGTCTCTTCCGTATCCTCCGCATCTTGA  
CGAAAAACGAGTCGAAGGTTTAGAATATCGACCAATTCGCTTAGAAATCTCTAATGGATC  
ACTTTGGAGTGGAATTACTCCTTCCAAAATTCCGCCATCATCAGAATACAGTTCTTCTTT  
GACATGTCGAATGGCAATAGTCAATTTACGACGTTTAACTTCAAACGTAACACTACAAAAGT  
AATTAATATGAGGGGTTATGAGGCTATTGATGATTCTCTTGATCGTATTTGCCACACAT  
GTTTATGCCGGTCCGTCGGTAACAGATTTTACGGACACTCAAAGTACAATTTCTCGTAT  
GCTTACTACTATGGAAAAGCTTATGACTTGACGGGAGAATTGCGAGATGTCAATAATCCG  
AATTACTGGAACGATCGTCATCTTGGCACATTATTCGCTGCTATCGCATGGGAAGAATCC  
TCAGCTGGAATAAACACTGGTAGATATAAAACGGGTCATCATGCGTATGGGATGTTTCAA  
AATCTTTACACAACGGTTACATCTAAACTCGACAATAGAGGAATTACGTACAGACATTGG  
TATCTGAAAAGCAATTTGGAGTGTAAGTTTCTTCTGCCGAATGGGCTATGGGTGAACTC  
TCATACTGGCTCAAGGTTCCAAAAGGTAGCATTGCAATTGCTCTGGCTTCATACAACGCA  
GGTTGGAATTACCATGCTGGTTTGAAGCTATCCCGATCGTGTTTTGGCAAAAAATCAAGAG  
CTCAAACAACGGACTTTATTTACAAATAAATGTTTACATTTTTGAGGTTATGGGATACT  
ATAACCTCAGTTAAACAACCAATCAAATGTGGAGTAAGTTATGGACTTCATCATCAATA  
AGTTCTGTATCGCGTTTATTGTGGCTGGTGAAGTTGATCGCGCTAAATTGGAAGGTTGCC  
GATTTTTCAATTCACTTTACGATATGAACGTAGCTATGCCAGAAGAATCTATCGGATACG  
AGTTCTTGATTACTCGCGATTCCCACGATTCCCAAATTACGATTCAGACCGATTACCGAA  
TTATGATTCACACCGATTTTAACTCGTCTGAAGTCCGCATAGATACTGGAAGATTCATTC  
GGGAGTACTGTTTGTGAGGTAAGCGCAATATCATCTTTTGTATTGCTGGGCGTCCATA  
AGTGGACGCCGTAGATATCGAATTCATCGTATCCTTTACAGCAATGGAAATGACCGTTA  
TGGCTTGGCTCATTCCGGTGGAGTCGGCTGCCAGAGCTATGATTTCAATGATGTTCTCGC  
ACACGAGGGTGAAATATGAAAAAGTCAATAGCAGCTGTTTTAGCACTGTCAATTTATGGT  
TGCGGCGCGGCCGCTCCTGCAATAGCAAACATGAACGAAACGTTCTGGTTTCTGAAAAA  
TCTGGAGTAATCAAAGAAATCACCGATGAAAATGGCACGTATGAATCTGCTCTGTCCGTT  
TCATGTGATATGCAATACGCACAGAAACGTGACGATTGCCTTGGGATTATTTTCAATAGT  
GTTTATTGGATAATTGACTCTGCACGATCTGACCACAGTATTTTATCTGGGCTGGGCGA  
GTTATGATTAATCTACGGAGTTGTACAAATCGTTGACTATGTTCCGACTGGGTCCGCT

ATCGTTATTTGGCGTAAAGATAATCCCGATTTC AACCCGATAGGCAAAGTAATGTCAATT  
ACTACACCTTCCGGCAAACGAGAGTACACAGTATGATCGTTAACACAGTCAAAGGCAATG  
CAATCAGTCTGTTTCTGAACGGCGAATATGACATGTTTGCGCATGGTTGTGACGTTTTTA  
ACCGAATGGGTTCTGGCATTGCTAAAGAAGTTCGTGAACGCCTCCCTGAGCTTTGGGTAC  
TCGATCAAAAGACAGTCGAAGGTGATCGTTCCAAGCTTGGAACGATCTCGGCCACAAGTT  
ACCCCTATGCTGGGCTTGCCTTCAACTTCTATACTCCGGCGAGTTACTGGGACCCTAGCG  
ATATGTTGTCCTATGATGCGGCCCGTTCAAGCTTTGAAACCTTGAAAACCTATGTGTCAAG  
AAACTGTAGATTTTGGCCTCGGTAAGCCACTATGTGTATTCCTAAAATAGGTGCTGGTC  
TTGCCCCGAGGTGAGTGGGGCAA AATTGAAGCAATCATCAACGAAGTAACTCCAAATCTCG  
ATATTACAGTGGTGGAAATTCGATGGCAGTCGGTAAATGGCAACAGTGTGGTCCGTTGATG  
AACCGTAGCTTCGAATGTGCAATAGTCGAATGACTTGGCGAAGTATGTAAAGGTATTATA  
ATACACTAATATCGTGACGCCGGGGATGTAGTTCTCGTGAATTACGAGTTGATGTACCAC  
GGCCGAGTGTATTGGTCAAACCTCAATGGTGCCGTAATGAAATTTCGAAAAGAATTTT  
TGATTGAACGCATTGGCGAATCGCTGGAAATCATCCAGGAGAAGGTATTCCATCAGAAC  
TGTGTGGCAAATATGAAACTTCAGTAGACGAAGTTGTCGACCGCGGGCGCTAGACTGTTT  
ATTACGACTTTGTTTTCTCCTTTCAA AAGTATGGAGTAAAGCGCTATTTCCGCGAACCAT  
ATGAAGTCGGTGCAACAGAAGAGCAGGAGTGCGCGATTTGGGAAAATGAACCTGATCTGA  
TGGATGTCAGTGAAGTCGAACCGTATGAAGTGA CTACAATTGAATACAAGTGGAAGAACA  
ATGGCTAAAGAAATAGAACGTAAATGGCTTGTTAAATTCATTCCATACAAGAATTTGGAG  
CAGTTTCCTCATAAGCAAATTCACAATTTTACTTTGATGGTAAACGCTCTCGAAGTGTG  
ATGGAACTGGCGTTCGTTAAAAATTAATAGAAACAGTGAAAACCTGGCGCCGGTTTGGTT  
CGCGAAGAGGTCGAAAACGAAATCGACTAGAACTGCATGGGAAGCCCATGATGCTGCC  
GGTTTACCAACTTGTGTTGTTAAAAACTCGGTACGAAATCCCGCATGGTCATGGATTAAC  
GATCGAACTCGATATGTTTGCTTGTGGGGAACAGTATATCGAGATCGAATTTGATAACGT  
CGAAGATGCCAATGCATTCATTCCACCGGGCTGATTCGGCGAAGAAGTTACCAATGATGA  
ATATCACACCAACTATGCACTTTTCAAGCGGCTCAACGAGGTCTAAATGGCAAGTCTTCA  
TTTTCACTATGCTGCAATGGATTCCGGCAA AAGCACACATTTGCTTCAAGTAGCACACAA  
TTACGAAGAACGTGACATGCGTACTATTATCATAAACCCCTGCGATAGATACGCCTGATGG  
TTCAACCGTATCCTCAAGAATTGGTATATCGCGGCCTGCTATTATGGTGAGGCAAAGCGA  
TAGTTTGACCGCCTTAATCAGCAAAGAGCATATTGGGCAGCACATTAGTTGTGTTTTGGT  
AGATGAAGCGCAATTTCTGCTTCCAGAACAAGTCAGCCAGTTTGC GGCTGTTGTAGACGC  
ACTGGACATTCCAGTAATGTGCTATGGATTGTTGTCTGATTCAAATGGTAACATATTTCC  
GGCAGCAGAACGACTGATGGTCTTGGCGGAAGAAAAGGTTGAGCACAAAACCATATGTTG  
GTGTGGCACCAAAGCTACAATGAACATGAGAATCGATGAGAATGGCAAGAAAGTCTGGGG  
GCCAATTGTTTCGATAGGTGGCAATGATCGCTTTATTT CAGTATGTGAAAACACTGGAC  
ATTGGGAAAATCTTCAAATAATTTCAA AAGATGTTTACAACAAGATTGTTTTGTATAG  
AATATCCTCAAGTTAAACGAAATGAGAAACACATTATGAAATGTTCTGATGTTTTTGCCC  
AAGTTCAACTTGCTCAAGCTTTTGAAACTGAAGAGTTGAGACGCAGATTAGCTCCGGTTG  
GAAAATTCGTTGCCGACGAAATGATTTCAAAGCGAGTCTTTACAATCACCTTAGCGGGCG  
ATAAATTCCTGGAATTTACACCATAAGTATCGTTGACTATCTAAA AACTCTTGAATATG  
AGATTCGAACCGAACCTCATCGTAATGAAAGTTATGTCATCGTAACTGCAA AACCTAAT  
TCAATCAAAGGAAATATAATGCGTACTATGTCCACA ACTCCGAAAATTACCATGAAAAT  
GGGCCTTTCTATCGCAGCCGGTCTGCTGACCGCAACTACTGCCCTGAATACCTTTACTGT  
GGTCGATGATGGTTCCGTTGCAACCACCCCTTTCTGGGTAAAGTTAGCCCGAATATCAT  
GCAGCCCGGTCTGAATATCATCAACCCGCTGGCATCAGTTGATACCTATTCAACTCGTGA  
TCTGAAGATGGAATTTCAAACGTACAAGTTCTTCTCAAGATAAACTGAAAACCTCTGT  
CGAAACCACTCTGATGCTGCGATTTCGACGGTGATAAAGCCCAGATGGTTCGCATCAACGG  
CGGTACCGAACGTCAGGCCATTGATAAGTGC GTTGCGAAGAAATTCGAGAGTACTGTTCCG  
TGAATCCGGCAA AAAACATCAAGAAAGCGCAAGATCTGTTTGGCGATCCTACCACTCAGTC  
CATGCTGCAAGACATGATCAAAACTTAAAGTCAACGACTATTCCAAGCCGTTTGGTTATGA  
GGTAACCGAAGTGTTCCTGCAAGAGATTACTCTGCCGAAGCTGATTCAAGACCAGGTTGA  
GCAAACCAA AATTCGTGAAGAAGCCGTAAACCAAGCCCAAGCGGATCTGGATAAAGCCGA  
AAAAGTGGCACACAACAGGTTAAGACCGCCGAAGCTGCGCCTGAAGCTCGTGAACAAA  
CGCGGTTGCTATCGAGCCTGATGCTGATGCTAAACTGTACGCCG CAGGTAAAGAAGCTGA  
AGCTAACGCTCTGCTGCAGAAAACCA TTA CTGCTGAAATGATCAACTGGCGCCAGCTGCA  
AGTCGAAATGATTCATGCCAACA AAAATCATGGTGGTGTACCGCAGACTGTGGTCCGGCGC  
TGTTTATGATGGCCAAATGCTCATGGACATGCGTTCCAAGTAATTTAACTCGGGCTCCTT

CGGGACCCCATTTTGATAAAGATAACTTGTAAATTGGAATATATTATGTTTAGCCGTGGT  
TCTACTTTAATCGAATTGATGGTATTAGTGGCGATTGTTATCATTCTGTTAGCCATAGCA  
ATACCGGCTTTTTTCGGATAACGAAATTTATAATCCGATCAATTCAGTATGCCCTCATGGG  
TTAACAACCGCAATTACGCCAAATGGCGAAGAAATCCTTGTCTGCCGAAAAAATCAAGTG  
ATCAATAAACAAACACTAACAAATCGGAGAATAAATGCAATAGCAACTCAAATGGGCATC  
ATGGCGGCATTCGTAGCAGCAGCACTTTCTGGTTGTGGCGAGCAACAGTCTGATACATTT  
TCTTATGATGGTCTCGGTGGAGAACCTAGGCCTACCGTAACACCGACTTGGGCAGAGCAA  
TGCAAGGACTGGGGGGTGGTTCGTTCGGAACAATGCCAACTAGCATTAAAGCAAGCAAAG  
GATGAACACACCTCAGCTGCACCGAAATTCATGACCAAACATCATGTGAATCGGGCACA  
GGTGCTGTATGCACCCAAACACAAATTCAGAATTCGGATGGTAGTTTCAGCGACGTGTTT  
GTTCCAGCTATGGCTGGTATGATTGTTGGCCAATTGATGTCAAGCAATGCTCGCCCGATG  
CCAGTATATGCGCCAAGTCGACCCGAAGATCGTCGAAATGGCTTCATCACTGCGAATGGT  
TCCTACGTTCCCTCGGAAAAGGTTCTATCGGGCGCAACCACTTTCAAACCTTCCTTTTGC  
AAGGGAAGTTTTGCCAAGCCGGTAGCATCTTCTAAACCTGTTGTGAGAATGTCATCTGGC  
GGTTTCTGAAAATCCGGTGGCTTCGGCTCTTCAGGTGGTTAATTTCAAAAAGCGGTTTAC  
AGTGATGGGACTATGATTTACTATAGTCCCATCAAATCAATAAGGAGTACATCATGATTT  
ATGCTGGCCAAAAATATAGAATCACCAGACCTGTAAGCGAACAGCACATGGTTGGTGTGG  
GTGATATTATAACAATCTCCCAAATCACTAGAAAAAGGCATTCGTTCTACGGATATTTCT  
GTTGACGATGATGGAATTCATATGAAGGAATTCTAATGTTTGAAGGCCCGTACAATATC  
CAGGAGTACTGGGAAAAAATCGAAATGTGCGTGGAGGCCGATTAATGATTGACGGAATT  
TATCGGATTAATGGCGAAATCTCTATGAATCATCGTTGCATTAGCCAAGGTGACGAAATT  
TATTTGAAAGAAAATGAAGACGGAAATATCCGCGGTCCATCAGTTGACTGGGACGGGCAT  
GAAACTGAAATTGGTTACATTTTGTGCCAGACGCAGTGGAAAGAACTCCCGGCAAACT  
TACCACGAGGCTTACCGAATTTGGATTGACACTGTTTTGGAGAAAGTAGAATGAAACGCG  
TCTCTATTGAAGCTCGTAAAGATTGGTTGCCACAGTTGACTTCTGAAAGTGTTTTGTGGA  
CCACTACTGACGAAGGTCCTTATTGGGCCGAAGCAATGGTTCAGCCCAAGGATTACTCCT  
TCACTCGCAAAGAGCAAGATCAACTCGAGAAAGCCGCTAACAAAATCCATGAAATGTGTC  
TTGAGACAATGGAATGGCTGTTTACTAGCGACGCCACAAAGCAAACGAAATTTTCAACA  
TGTTCATTTTCCCATACGATTCTCGTGATCAAATCATACGCAGTTGGGAAGATGACGAAT  
TGGGCCTTTATGGACGGTTTGATTTCATCATGACCGAATACGGACTCAAGCTTGTCGAAT  
ATAATGCCGATACCCCGACCATTCTCATTGAATCTGCAATATCTCAATGTTATTGGTTCA  
ACGATCAACGCGAAACATGCCATCAAGAAGCTTTTCAATTTAACGAAATTCATGAATCAT  
TTGTTAATCACTGGCGTGACATGAGCACTTATAACGCAATTGGCGATAAACTCAGCTTTG  
TAGCTACTACGCAAGTTGAAGATTTTGCTACATTTCGCATACATGGCTGAAACTGCTTCAG  
AAGCTGGACTGAATGTAAAATTGTTTCGATATCGCGGAAATTCAGCTAGGTGATGACGGTA  
ATTTTTATGACATTGAAGGCCAGCATATCGACTCTTGCGTCAAACCTGGATCCATGGGAAT  
GGCTGCATGAAGACGATTTTGGCAAAGCCATCGATGGTTGCAACACTCTGTTTATTGAAC  
CACCTGTAAAATGCTGCTTTCCAACAAAGCACTTTTGGTTCTCCTATATGAGCGTTATG  
CTGATTCCGAGTGGTTGGTCCCAGCCTATACAGAATCTGATTTTGACCGATTCAATCTGG  
TCACATATGAAAATCCGAAATAGGTGTCAAAGCCTATTGTTTCTCGCGAAGGATGTAATG  
TTCATATTTTTGAATATGGCGAAGAAAGTGGATTACCCGATGATAATTACGCAGAAGAAC  
CGTGTATCGTACAGCAATATATCGAATGGAAAGATTTTCGATGGCTGCTACCCAATGCTTG  
GTGTATGGATGGTAGGTAGCGATGCCGTGGGTTTGGGTATCAGAGAAGATGATAGCCGAA  
TTACCGGTAATAACAGCCGACTTATTCCGCACGTCGTAGAAAATTGACAAACAGCAGATG  
ATTTAAACCCTCTGTAAGGCGTTAAATATGATAGGAGTATATAGCCATGGATTGGCCATA  
TGCCTTGTCATATTGGTTAAACCAGTATGCGCTAAAGACAAAGGCATCAAATAGGCTTTG  
CCTTTGTTTAATACCATCAAGGAGGGGTCAATGGCCCATTTGTTCGTATGTTAAAAACATT  
TTCAATAATCACATCGGTTTTAGCTTCTATGCACTTCGTAGAGGCGGACCGTGAAAATGG  
GTCTTATGATGAGTACATGCGTGGCGCTTTAATAATGTATAGCAACGAAGTTGGGCCATC  
TCTAGATAATTCGGTTGAATTCGTAAGCATTGTAACGATAAATGGAAATCTGCTAAATG  
CTCTTCGAGTTGTTATCAAACCTGGAGATCTTGAAGCAAAGACATTCATAGCGGAAAGAGA  
AGGTCATGGAAGTAAGATTCGGTGTGTTGTAACCGAGAAAACAAGCATTTTTGTGATGAGT  
TTATTGGTGCCTGTTAATGTCAAGCACATGTGCGCATTCCGCGCACGTTTGTGACAAAG  
TCGTATGAAAAGCATATAGCATAACGAATATTGCTATGCCAATATGCCAGGGCTGATTGAT  
ATTTTCGCTGAAGCGTATATGGGTTTACGATTTACATATCGGCCGCGACTGTCCATTTAT  
AATGGAACCTTTGAGTGATTTGTCAAGCAACTTGCCAGATGGCGGAAAAGGTATCTGCC  
AGTGCACCTAATACGGTTCTCAAATACACCTAAAATGATATCCAAGAGCTTTGTTCGTATG

ACAATGTATAAACTATCATTGCACTAATTCAAATGCCCTGGTGTGAACCAGGGCATT  
GTATCCGTTTGAATAAAATTCAAAATGGTTGTACTCTTACGTTAAACGAGCTTAAAATG  
TTATCATAATCAACCAACGGAGACAACCGATGAAACGTGTTAATCAAATGCCCAAAAATG  
GTCAGCTTGTAGTTGTCTGGGTATGTGACGGCAAACCTCTGGTCTGAAACCTGGCGCTTGA  
ACAACGGGGTGGTTGAAATCCTCATGGATGATGACACTGCTGATGAATGGCGTACAAACG  
ACTGTTATTACGATGATGGTTATGAAGATCTCGAACTCAACTATATTGTGATTTAAAAAT  
GTCTATAATTCAGGAAATCGACAAGCTGTGCAAAACAAATAGGTGTGGAAGCATCAGAATT  
CAAGATTTTCGCCTTTTAGGAAAGTTGTGCGCAAACCTGAGTGGTCTTATGGGCTTTTCATT  
TGAGCGCGAATTCACTATTTACGAACATAAAGAAACGGGGCTATACTATCCCAGTTCATTC  
TGAGCGGCATAGAGCTCAATTTGTCAACGAAAACAACGAAGAGGTTATGGGTTTAGCTGA  
AATGATCGTTTCGGTGAGCGAAGTAGAACCTCACATAACAAACATGGCACACGTTGGCA  
ATTTGTGTAACGCTTTAGTCAATTTAGTGTATAATACCAGTACAATGGTTTAGACTAAAA  
AGACTGGAAATAAAAACCTCGAGCGAAGCTCGAACGCGAAGCGATAACTAATTGGAGATAA  
TATGCAAATTATCCTTAAGCCTACAGGCGAAGGTAACCCGCCGAAACAATCAAATCTGC  
CTATATGGCAGCAATGAATCACCTGTTCTTATCGTTTGTCTGTAGAGCATCCAGCTGT  
ACTGGAGCATCGAGTTAACATGTTTCAGTATTCAGAATCCTGCTATGAAAACCCGCTATGA  
CATCGTTACTTGTGGAACCTGCAACTCCCGAAATGTTCAAAGATCTTGGCTATTTCGA  
CCGTTTTGGCACCATTATTCTGGATGTCAACTTCGCGATGAGTCGCGGCCCTTGGATTAC  
AGTGTGTGCCGAACTCGAAGCATATGGGTATGAAGTAATTGCTACTCAAGAACTTGTTAA  
ACCTGCGCAAAAATCCCACAAAGTGTATCACTGATATGATCGTGGCCCCTTAAAAGGGGC  
CATTTGGAGGAATCATGAAAAGATATCGTTTTAAATCTGAACAAGCTCGACATGAATTCG  
CTGCCATAAGCGACATCAATGCTGCTATTGCTAATAGCGTATGCGATCGTGTGTTTTACG  
AAGCTATGCCACGAAATACTATCGATGAGATTTTTTTTCGAAATCAACGGTATTACTTTGT  
TTCCCAAGTATTGTCCTGTTTTCTCAGCTAACGAAGTAAAAGAATATTTGGAAGAAGTAA  
GCGCTGGGGATGTTGCTCACGAGATATCCAGAAGATATTGGATAATAACGATGTTGAGC  
AATTGTTTGCAGAAAACGCGGCCCTGCGGGAACGCATGTCTAAACTTGAAAATCGTCTTG  
AACGTCTTGAACGGTTGGTATAAATGAAATCTACAGCTTTAGCGTATGTTCTTTGGTTTT  
TTCTGGGGGGTTTTGGTAGTACCGTTTTCTACACCAGAAATTATGTCACCGGAGTATTT  
GGTTTTTTACTTGCAGTCTGTTTGGTCTTGGCTGGTTTTGTCGACTTTTTTATCACAGCAG  
GATTAGTCCGACGCGCAAACATTGAATGGCGCCAAAATCAGATAGAAATTAATACAATGA  
TTCGTCGAGGTTATTGACATAGTTTATAATTATGATCGTGCTGTTGTTATTGGCCGCTTT  
TTCCAGCTTTTTCCACCGTGGACATGAAATGCTGATTTACAAAGCGCTTCAAACCTGCTGA  
AACTGTTGCTGTTGTCTTCGAGTCATCCCATTTGTAATCAAACACAGTCAACCCACTTCC  
AACACTGATTCGAATCAGAATGTTCAAAGAATGGATGAGTAACAATCTCACTCCTAGCGA  
ACAGGCCAGTATTGTTTTCCGTAATGTTCTGACTACCGCTATAACGAAGATCGCTGGTA  
AACAGAAGTTCGTGAGGCCGCGCAAGAGCAACCGGGCGAGCGTGTGCGATGATTGCATA  
CGATAAGGATGAGGCTTCTTATTGGATCAAAACCTTTGGATGGGACCATATTCAATGCAT  
GGGCGTTTAGAATCACGGAAAAGACATCTCAAATACCCCAATGCGCGATGAATTTCTTCG  
AACCGGTTCTATCCACGACGATTTCCCTATTAATCCGTCAGTGCAGTCAATTTCTTTTGA  
ATTTTGAATACTGAAGGTTACGAACTACGCAGCCGGTTGACGGAAGAACGTGCGATGTG  
GGACAATGAACATGCAAAGGTTAAAGATAATCCATACGCTGATGCTCTCAACTGCAATAC  
TGCTGATGCCGTAGTAACGTGCAAGAACCATATTCTGGTTATTAGCAGCAAACATGCACC  
AGGCAAAGGTGCTCTTGCTCTTCCAGGTGCTCACAAGAATTCCAATGAGACCTTCCGCGA  
TTGTGCAATTCGCGAATTGTATGAAGAAGTTCGGATTGATGTCGATCGTCAAAAAATCAT  
TGGTTCTATTAAGCACACGAAGTATTTGATCACCCGAAGAGAACGGCAGAGTTCTGCAA  
ACCGACGGTTGCTTATTATATCGTACTTCTACCCAATGACGACGGTAGTTTGCCTGAAGT  
TCGTGCTGATGATGATGCAAAAGCAGCATTTTGGATGCCAAAGCATGAATACAAGAGAAA  
TCGGGCAGGTATGTTTACGATCATGCTGAAATCATTTACGCTTACCAGTATCTAGGA  
TACAATTACGGAAAATGTGGAAACATCAGTAAAGCAGAATAAAAATGAAAGGAATCTGCA  
TTCGCAAGAAAATCAAAAAGCAAAAATTTGAGCGCCCTACACCCGGTGTGACGTGCGAT  
ACCAAATTGCTCGTTGGGAAGTTGCAACAGTTTGTGTCATCACTGAAAATCCAAAGATTA  
TTTTACGCAAAAAGATGAGTCGAATTCATGTTATTATCGAACTTGCCACCGACTGCAGCG  
AAATGATTTCCAGCTTAAAGAAATTTCTCCCGAAGGTAACCAGCTGGGGTGAAACGT  
CTGAAACTTCCGAAATCAAATTCGTACAGTGGTCAATTCGGCTTGTGAAAGAAAACGAAG  
AAACTGTTTTTACCCCGATTCAAGTCGGCGACGAATTCATCCATCGTAATCATGATAAAC  
GATACGCGGTTAAATTCATCGCAGAAGACGGTCTCTAATTTCTTGGGATTCTGATTATC  
ATAGTTCAGTTTTTTGTTAACCGCAACGATCATGATCAACTTAAAGCATATCACATGAAAT

TTTCTTAAGGTGGTAATTATGTAAAAAGTAGTTTTTTGAGGGCCTTCACGGCTCTCATCTT  
TACGGTTCGCAATACTCCTGAATCTGGCCTGGATATGAAAGGCATTTTCATCCCCGATCCC  
AAAGACATTCTGCTTGGCGGAGCCAACAGAAGCTATTCCATCACAACTGGCAACGACAAG  
TCCAAGGACAGCAAGGATGATGTTGATATCGAAATGTTTTTCGCTCCAGCAAATCATCCTG  
GATGCGGCCAAGGGTCAAACCTATGCGCTGGATATGCTGCATTCTCCAAAAGACAAAAGTC  
ATCACCGACTCGTCTGTTTGGCAATGTATCCATCAAACCGGTCTGCTTTCTACACGACC  
AATATGACTTCCAATATGGGTTATGTTAGGAAGCAAGCGGCAAAATATGGTGTAAAGGT  
TCTCGTTTAGCCGCATTACGAGAAGTAAAACAGTTCATGGATGCTCTTCAGATTCACGAA  
AACCAAGACTGCGAGACCTAAAAGATCATCTGCCACAAAACGAGTTCTGCTTCTGGACT  
CACGTTGAAGAAAATCTCGACACCATCTCGTATTACACCATGTTGGGCCGTAAGTACATT  
GCTGGTGTAAAGATCGCGGAATTCTGCGGGGCAGTTGACAAGCTCTGGGCCGAATATGGC  
GATCGAGCTCACAAAGCTGAAGCAAATGAAGGTATCGACTGGAAAGCTCTAAGCCATGCG  
TTGCGAGGCGGTCTTCAATTGCTTTAAATTTACAAAACCTGGCGATCTGAAGTATCCATTG  
GCCGATGCTGAAGAAATCAAACCTGGTTAAAGCTGGCAAACCTCTCTTTTCGCTGTAGTTCAA  
GAACGACTGGAAGAAAATCGTTTAAAGCTGTTGATACGGCCGCAAAAGAGGCATCTAAGAAC  
GGAATGCCCGATAAAGTGGACATTGGACCATGGGAAGCGTTTGTGCAACAGGTTTACGCT  
GAAGCAATGAAAGAATATCTGGAGAGCAAATAATGAAATTGACTCGCTTTAAATTCAAA  
GTAAGGAAATGCTGATCGAGTATACTACTCGGATCAGACGCCATATTTGGGCAGTAGGTT  
TCAGCGCAAACACAGTTTTTATTGCCAGAATCAACAAACGTGGCCAAGTCAAAGTATTT  
TTGATGGTAAAACCTTTAAAGAAATTGATTCTTCGAAAGAAGGTTGGCTTCTTTTGCT  
CCTTTGAGTTTGAAATCTTTTGTGAAAAAGTAAGCTAAACGGTTTACAATGATGGGGCTG  
TGATTTACTATAGTCCCATCAAATCAACAAGGAGTATGTCATGAAAATCACTAAATCACC  
TAAACTGCAATCCATGGATTTTCGTTGGCCGTGTCGTTAAGGCAGCGGCAGAAACCAAAGA  
GGTTAAAATTTACCCCGATTTCGAAACCATTGCTGCCGGTATTACCGTAGGAATAGTTGG  
CGCATAGGCTGCAATGTGCTTTTTTGGCGATATCGATATGGCTCGTAAAATCTTTATTGC  
TGGTATTATCGCTGGCGCAACTTTCCTCGTTATGAAAAAGGGACTGATGAAGTGATTAAA  
GCGGCTGAAATGGCATAAATGATTGCACAGAACTCCGCAGAAATCGTCAATTCCGTATCT  
GTGCATTTTGATGATTTCTTCAATGATAATATGAAGGACACAATGATTGTCAAAGGCGGC  
TATATGTGTGATGACGCGGACAATTCCTTGCCTTACCTACGTGAAAAGCAGCCTTTTACT  
CATTTGCATAATGATGACATTATCAAACGTTTTTATTGCAGAACTGCGGGGATTGGGCTAT  
AAAGCAGAACTTGTGTCCACCTATGAGCCCTGATTACATTTTCAGTAGCGTTGGTAACA  
AAATGATCGTTTTTGGGGCATTAAATGGAGCTGAACATCGTTAAAGTATACTTGGTAAGCA  
CACTCCAAGTTGAATCGCTCATCGGTAATAAAGTCGGTGAACCTTGAGATTTTCGCTAAAG  
ACTATTGGCTGGTGAAGACGGATTTATCTTTCAGCATGACGGGGCAGGTATTTCCAAA  
ATGATTGTTTCGCTCTGTTATGAAATTCTCCGAAATGTCACGTTTCTGATGAAATCACGG  
TATTTATGGTTGAGGATTATGTTTCCGAAAGCGCCAAGGTTATTGTAGATATTACTGATA  
AGGAAGACAAATCATAAGTGGCTAAATCTACCCTTCGTTCTCAACGTAAACACCAGCGCC  
GACGTCACAACGACTGTGCTCATGTTTCGCAATTCCTTGAACACCTTACAATCCGAGCAGC  
ATGATCGCGATTGGCTCAATCTGGTTTTCGCAAATGTTCAATGTCAAACAATGGTGAAT  
GGGATAATACGTATCAAACACAGCCAGGATTCCGGCGTGGTTTTTGGTACAAAATTGACC  
GAATTATGAGGGAAAACCATATTCCATGGTGTAAAGCCAACACTGGTATAGCCAAATACA  
TTCATGAGAGAGGCGTCTCGCGAGTTCGCGAGTTGGCGTTTTTATACCGACAAATGCGTAT  
TGGTGTCTCGCACGGCTTCTTGAATTTGAAGTTCATCCCTCTGGTATGAATTTAGTTTTGC  
CGGTGTTGAATCGCTATCGGAACCGTCGGAATACCGTACTTCTCACGAAAATGGTTCATC  
CTAAGCCTGAAAACATTCATTATGCGACTACCGAAGAGATTGATTGCATGAGAGATACTA  
TTTGCATTGATAAAATGTTAAAAGAAATCCCAGCAATCGAATCACGAATCAGCGCTCTTG  
CTCGGAACTTGCCCAATTGCAAGATAAACTCCAAAATACACGACAAGATGTCCGCGATT  
ATCTTTCGAAAAGTATGGTATTTGATTGAAAAGTTAGTGTACAGTGATGGGAACATTGG  
TTATAATGTTCCCATCAATAAACGAACGGATTAATTTAAATGTCCATCAAACCTGCTGCA  
ATCAACATTGGGTACATAGCGTCATTTGCATTGTTTTATTTCGATGTATATCGGAACTGCT  
TATGCCGTTCTCGGATGTGCAAGGGCGGACATCGGTTCAACCATTATTGCGAGAATTTGC  
GAAAGAATTATTATGCGACAGTTAAGAACTTTTTGGAAAATCGTCGGGATACTTCCAATA  
ATCACTTTAAAACCTATAAGCCTGTAGCTGAACGGTTGGCAAATTATCACCCTTCATGA  
AGTTGGTAAATGATATTTGCTGAATCTGATGCCCGCATCGCCTCTCGGTAAACACAATG  
GCATCTCCATAATCAAGCCAAAGTACTTTAATGTTGATGCCGAAAACAACGTCACGGTTA  
AAGGAATTATTTGGCTCAACACAGTGTGTTGAAGCAGATTGTTTTGCAGCGAGACTGGAAC  
TGCTTAGGCATTATGGGGCTGCCGTCAATATTGATATTTCTGAAAAGGGCAGAAATCAA

TAGTTAGATTTAGCATCATCTTGAGCGAAATTAACGTGTCAAGCCTGTTGCTGAAGATG  
CAAACATTGTCGAAGAGGCACGATCGGCAGAACCTGTTAATCTCGAAACGGAAAAAGAAA  
TTAGCGAAAGCATCTTCTTTTCTGAAGCGATCGGAAAAGCTATCAACATTGTTGAGGTG  
CACTCCACTTTGGCTCTAAACGTTTGAACGAAAATGACAGTGAAGTCGCTAAGTTGCAAG  
CACTACGTAAAGAAATCGAATAACAACATGAAAATCATCAAAAACCTCAATTGGGGCTTAAT  
TAAGAATATGATCCGTCCACACATCGGCGTGAAAGGTATCCCTCTGATCGCAATGACTGA  
TTATTGCAAATCACCCATTGGAACCAGATGCCTCAAGGTACCGAAGAGGCAGTTTTCTA  
CGTCGAAGCTCGTGGTGGCAAATTCGATGAAATCGTTATCGGTGGCGTGGAGTATCTGCT  
GACCAAGTTTGCAGAAATCATCACCAAGCTGATATTGACGAAATGGATGCCATGAGAAA  
GGCTCACTTTGGCCGAGACGTATTCAACCGTGAAGGTTGGGAAGCAGTCCGCTAATATCA  
AGAACAACATGGCTGCCTGCCATCCAAATCGTTGCTGTTCTGGATGGTTCTGTTGTCCC  
AGTCAAGCATGGTCTGCTGACTGTTCTGTGTCAAAGCACCATTCGTTTGGCTGGCGGGCTG  
GTTTGAGCCAATCATTTTGAGAGCTGTCTGGTACACTTCTACTGTTGCCACGCTGAGCCG  
CGAATGTATCAAATCTATTCGCCGCCACCTGATTGATACTTCTGACCTGGAAGTAGGCAG  
TCCTGATTTTCGACTTTGTGCTGATGACCCGACTACATGATTTTGGTTCTCGCGGGCGTTAG  
TTCTGGTGAATCTGCTGCAATCGGCGGTTGTGCTGATCTGTACAACCTCCATGGGTACTGA  
CACTGTTGAGTCGCTGTATTTTCGCATAACAGATGTTTGGCGCTGGAAGGGCAGGCATCTC  
TGTACCAGCTCGTGAGCACTCCACCGTAACCTCTTGGCGTGCCGATCGCGAAAAGACGC  
CTACCTGAACTCTGTTGAACTCTTCGGTGCGGGTGCATATTCCATTGTGTATGACTCTAC  
CTATTTCAAGAAGGCAATCCGTGAAATCGAGAGATATAAGGACAAAGTTATCGCCGAGGG  
TGGTACTCTGATCGCTCGACCTGACAGTGGTGTAGGATCGACAATATCAGTTTTGCTCT  
GGAAACTCTGGGCGAAATCTTCGGTTATGAAACCAACAGCAAGGGCTACAAGGTTCTGAA  
TAAGCATTGTCGTATTATCCAAGGTGATGGCATCCACGGTCCCGAAGTTACCGACCGCGT  
TCTGACTGTTATGAAAGCTCGCGGGTGGGGTGTAGAGATTATTGCGTTCGGTATGGGTGG  
CGGTCTTCTGCAAATGGTTAATCGTGACACCTGCAAGTGGGCCATGAAAATGTCTGCCAT  
CAAATCAACGGTGTATGGAAAGACGTATTCAAATGCCAAAAGGCGCTGAATGTAAAGC  
TTCCAATAAAGGTCAACTTAAGCTGCGAATCATGGATGACGGCCGCTATTACTCAGAAGG  
AACTATTGAAGGTGGTCAAATGCTGTACGGCGTAAGCACCAAAGACGGTTTTGCTGAACT  
GATGTCGAAAGATGCATTCGTCCTGTATTATGACGCTGAAATGGGTCAAAAATTCTAGAG  
CAATCTGGCTGAAATCCGCCAGCGTACTGCAATTAATAATCATTCAAATGCCCTCCGAA  
GAGGGCATTGGTCATAGTAGAAATCAGGATCAACAAAATTATCAAGTCGTATGAGCAAGA  
ATGGCTGTACAAAAGAAAATAATCTATGAATGGGAAAATTCATACCTGGTAAAATATTT  
TTCGATTGACGGAGAATTCGGACATATTCCATCATATTGGGGCCAAATGTATGACGGATA  
TAAGTTAAATCGTTTACGACTCTTTATTGTTTCTATTGAATGGGGTCATATCGTTATGTC  
AAAAGGGGAGTGGGAAAGTAAAGCAAATCAAACCTGACAAGAAATGAATTCAAAAAAGCAG  
TAGAAAATAATGACCAATACGATTATCCTCTGCACAATGAAACAATCAACCAATTGCGTT  
CAGTTATTTCTGTCCCGCAAGTTGAATATGTTTTTTTGTATTTCAAGAATATCAATCCA  
TTTTACGCATAATCCCTCATGACGCGAGTATGTATGCGCATAACATAATCATGCCAAAGAA  
TTCACCAGGGTGATCGGTGGCAATATCAGAGTTAATCTTTTGTGACAGATCATGAACAA  
ATCAAAAACACGATATATTGGGCATTTCCAGATATAGAAGAGGTTGAAATTGGAAATTTCG  
AAATATTTTGGCCAAAGACGGTAAAATATATAACGCAACAATAGACTACAACACAAAACAG  
GTTATAATGGTGGCAAATGACCCTCAAGTTTAGAAAATTCAAAGCCAAAGACGAACGTA  
ATATGTTTAAAGTTACCACCAACTTCAGCGACAAGTTTGATGATAAAACGATTCATTGGG  
AACTGCCAGCTGTTAATTTAAACGAAGCTTCTATTGAAATTGAGCGTCTTGCCATTTTCC  
TGGA AAAATGCAAAAATCGATACCCAAACGGTAAGGGTGGTCTGGACGATTTACCCGACA  
TTCCCGACTACTATTGCTATTTCTGCGAAGAGGAAGAAAGCATAGAAATCTGGGAAAAAT  
ACGGTGTGAAACGCTATGGTGCCACGCCATGATGGTGAATATCAAACAACCTTGCCA  
GCTATGAAATCGTATATACTGATAACGATAACGTGAAGTACAGTGTAAACCGTGTAAATTA  
ATAAGAGCATATGGAGGAATCTTTATGCTCTTAAATTCCAAGTCTGCTGATGAATTA AAA  
CAGAAATTGTTTGAAGAACAAAATAAGTGTTGTAAATTGTCTGGAAACGAGTTTGAAGGT  
CCATACAATAAACAGCATTGATCACGATCACCTATTGCAAGGCCCGAATGCCGGAAAG  
ATTCGAGGCCTACTTTTTCAGTGGATGCAATCTACTTGAAGGCATAATGAAACACGATTT  
ATAGGGTCAGGATTAAGGCAAACGATGTTAATTACATCTAATGGATGAGATCGCTATTA  
CAATATGTAGATTCAGATCATTCAAACAATCCAATGCACCCGTATTACGTTCCGACAGG  
ACCAATAATTTCTCGAGGAAAAACTTGAGTGAATGAAGGCCGAACCTACGCGAACTAGGA  
TCTGAATTTGATGAAAAAGATCAAAAAGCTGTTTTATTCAAAAACCTGCAGAAAGCAATTT  
AAGAAGGCCATTCAGTGGTTACCCGATCACTTGTAAGCAATTAGTAGAAGGCCAAACTG



GCCTGCACCACGAAAATGCGAATAAAAACGCTGACTTTATCCCGACCATGCGAGATATGA  
TGGCATCTATCTCCTTATAGGATTACGCTAAAAGCATTGTTGCCATCTCATTTCATCGAAG  
CACATGATAGTGGAGATATTCATATTCACGATCTAGATTATGCTTTTACTCTTCCAATGA  
CAAATTGTTGCTTGGTTAATCTCAAAGAAATGTTCAACAATGGTTTCAAATGGGTGATG  
CCCAAATTGAAGAGCTTAAATCCTTTGGTGTAGCTTCAGCCATTATGGCTCAAATTACCG  
CACAAGTTTCTTCCCAACAATATGGCGGGACTACTCTTGCCAACGTTGACCAAGTCCTTG  
CGCCATACGCCATATTGTCATGGAATAAGCATTGTTTCTGTGCGACTGCAGTTTCATCAGCG  
ACAAGGATAAAAATTGAAAAACATGCATACGAGATGACTGCTAAAGAAATCTATGACGGTA  
TGCAAGGTTTCGAATACGAAGTCAACACGATGTTTACCACAAATTGCCAAACCCCGTTCG  
TGACAATTACATTTGGGATGGGAACATACTGGTTGGAAAAAGAAATCAAAAAGCTATTT  
TGAGAGTACGAATCAAGGGTCTTGGAAAGAATGGCATCACACCAGTATTTCCAAAACTC  
GTTATGTTTCATGGAAGCTGATATAAACTTAAATCCTGGAGATCCAACTATGAAATAAA  
CACCTTGCTCTGGAATGTTACGCCAAGCGAATGTACCCTGACATTATCAGCGCGAAAAAC  
TACCGATCGATCACTGGTAGTAAGACTCCTGTTAGTCCAATGGGTTGCCGGTCTTTCTT  
GCTGGTATAAAGTCTGGGGAACCTCGATGGCGGAAACAATTTAGGTGTTGTCTCTGTCAAT  
ATTCCCGGATTGCTATCGAAGCAAACGGAACAAAAGAATCGTTCTTTAACTACTTCAA  
GAACCTTTTGAATTGTCAGTTGAATCATCTCTGGAACGAATTAACACCTAGAAGGTGCT  
AAGGCAAAGACCGCCCAATTCTCTACACTGAAGGGGCTTTGGTCTATATCTTAATCC  
GGAAGAAGAGTTTTTTGCCGCATTTGAAAGAACGAGCATCGATTTCCATTGGTTATATTG  
GCCTTTATGATGATGCTCTGATTATGACTGGCAAATCAACAGCCAATGATCTAGAAGCAC  
GCAATATTGCGCTTTTCGATCGCAACATATCTCAATTTATCATGCGCAAAAGCAAACTCA  
ACACCGGATGGAAATTTAGTCTTTATTCTACTCCGTCTGAATCGCTGTGCGATAGATTCT  
GCCAGCTGGATCGCAACAAATATGGTGTATCGAAGGAATTACGGACAAAGATTGGTATA  
CGAATAGCTTGCATATTCCTGTTGATGCCAGTTGAACCCGTATGACAAAAGAGATGCCG  
AAAAGAATTTCAATTGGATTGCATCGGGTGGACATATCAGCTATGTCGAACTACCCAATA  
TGCGAAACAATCTCGAGGCCCTTGAGCAAATTTGGGATTACGCTATGGAAAACTTTTCC  
TATTTTTGGAACAAACACACCTGTTGATAAATGCTACGAATGCGGTTTTGATGGTGAATT  
CAAATACACCTCGAAAGGATTTAGTTGCCCGAGCTGCGGTAACCACGAGTCGGCAAAGAT  
GTCAGTTATCGGAAGAGTTTGTGGGTATGTTGGTGCTCCGTTGGCGAGAGGATTCAATAA  
AGGCAAACAAGCCGAGGTTTCATCACGTGTCAAGCATGTGAAATAATTATTAAGAGCTTG  
TTTACATTTGTGCAGATGTGTGTTAATATACATCTGCACAACTAAACAGCCCAAATGAG  
GTTATTATGTCTGATATTAAGCAAAGTATTGAAACCTTTGAAAAGAAATTCCAGGATATT  
AAGTCCATCCTGGAAACCCCAATGGATAAAGATGAAGCTCAACAAGCAATCCACAACCTG  
AATTGTATGTCTGAGGAATTTGAATCACTCGCTCAAGCTGTTGCTGATCGATTCTGCATT  
TCCTTCTCGACTGGTGATTATGGATATGGCCGTACCTATTATCCTAAAGGTAACCGTTTT  
TGGTCAGAAAGCAACGCCGAAGAGTATGGCCAAGGAACCGAGAATGTCTACTGCCTTAGT  
TCCTCTGATATGTGTTAAGGAGAAAAGCAATGGTTAGTCCTAATGAATTGGTTGAAAAGG  
CAGTTCAACTTCAAACACTTCTTGATGAAGTTGAAGCACTGGCAACAGAACATGCTTACG  
GCATGGAAATCAATGGCAATGAAGTTGATTTTCGACGACTGGCTGTCAAGCAGTTGTTATG  
GCGAAGGTTCTGAAGCATTGTCATTAATGCAGATGGCTCCGTGTGGATGGAAAGTAGTT  
GCTAATTAAGGGGCTTTCGGAGCCCCGATTTGAGGGTTTTGTTATGATTATTGTTTGTCT  
CTCCTGCTTTTCAATCTAGGCTAACTCCGTTTGTGCTCCTACAGTAAATATGGACAATG  
ACTTCATTGCATACGAAGAAGAATGGAACGAATATCAAGTCAGAATGCAAGGTCGGACTA  
TTGAAGTAAAAGCCCGAATGTTTCGAGCTTTTCGTCGTCGGTGATGGTAAATCTCGTTGCT  
GTTATCACGAAGCATATATCGTTCAACATGGCTCGTCCGTTGAAATGATTTACAACTCA  
TGGATGCTGTTCCCGGTAAGACGTATATGCCACTCCCGAAATTTCTTCTCGCCATGAAAA  
TGGCTCATCGGTTCAAAGAACAACACTCGCAATTTTCATCAAACCATGATGCACATTCGTG  
AAGTGCGTTAATTTGGTATAGTCATGGGGCCTGAACACGTGGAAATTTTCAAAGAGCGTG  
AAAAGAATCTCTGAATTATGGCCACCCGAAGCTTAACGTCGGTAAAGGCGCATTTTTCA  
AAGACGACATCTACACCAATGATCCTGACACAATTCACGAAGCAGTGGCGGTTGAAGGTC  
TTCCAGCATATCGATCATAATGTTGATGGCGCTGAAGTAATGACGTCAAAGAAAAAT  
TCTTTAATTGCTCTCGTCGTATTCAGTTGATGGGTGTTTATGAAGAATCTTGTGTTTTGG  
CTCTGGAACGTTGTCTTATTCCTTTCCAGGAGAAGTTCAACCCTATACAGCTTTTCAGA  
TGGCCCTTGAGAAAGTATGCACTACTATTACATCTGGCTGGTTCCGTTGAATTTGCGTGGG  
AAAATTATTGTGACGGTATGAATATTTACCCCGATTAAGTCAGTGCTGTGACTCATACG  
ACGAATTGTTCAAACGAAACCAGCATCTCCTGAAAATTCACAGTAAGTAAATATGGATTT  
TCACATAGGAGGTATACTGTGGAAGGATACATAGTCCAACAAAAGTTCGTCAGAACTGAC

ATCCCGGAACCAGAACCGGAAAAAGAGGATGAATCCGAAAATCCTAAAACAGACGAATAA  
AAGCTGTTGATAGTTTATGCCCATGTGTTATAATGACCCTGGGCATTTTTTGTAAATTGAAG  
AATGTAGTGGATATTGAAATGCATATTGAATCACAAAAACAGATTTCGAGAAGCTGAATGG  
TCTGTTTCGCACAGCAAAACACGCTCGAATGCGCGAACTGCGAAACGCATATGGAGAAGAC  
AAAGAAGCTGGCCGAGTCGAATCTGAACTTATTTTCAGAAGATCATGTTGCTAAAGCTATT  
TCGAGTTATTTGAAGTCGAATGAATATGACGTAATGCTTGACCGTAGAAAAGAAGTCGCA  
AATCAAAAATTTTCGTTGTTTCATGTTGCGATAACCGATCAAATCCAACCTTGTTTCATGGGT  
AATAAAGTAGTTGATCTTCGATGACGCAAATGCAACCGGAAATTTATTTGAGAGTCTCCG  
ATATGATGCTTGGAGAAGCTAAAGAGTTAATAAACCGCCCTCCTAAACTTTTCTTTGGTA  
AAGAATACGATGGGACTCATGTAGGCAGTATTTTGGAAAAAATACAGAAATAGAATGGTC  
CAGGAGATGCTTATCGAGTGGAGTATCGGGTACTGCTAGACGGCGGGGATGACGTAACCTG  
GAGTAGGAATATCCAATTATAACTGGATAACAAAAGTTGGCTACAGGCCTGATGTTGAAA  
TAACAAGAATCAAACCCACAGAGGCGACGTTAGACCGATGGAGATGTATCTATTCGGAGA  
AATGGCATGATTGAAATATACAGAATTGTTTCAGAATCGCACAAATGCCCGGCATGCGAC  
TTTATTGCCAATCGTCTTGAAGAAGATGGCATAGAATATTCCATAAAAAACTGTTTTACG  
GGATGCTAATACTGATCTCGGGTTTGGAGCACCAGCGAGACGTCACCGATGAACTCAGGCG  
TCGTATAGGGCAACCCAAAGGTTCCCTGGAGCTTCCCAAGGTTTTTGTAAATGGGATATA  
CATCGGCGGTGCCAAAGCTCTCCTGGATTATCTGGATTCATAGGCCTCTTCGGAGGCCTT  
TTTCGTTAAAGTAGTGTACAAGGTATTTTTGCGATGATAAGATAATTCACAAGTCAAGTG  
AATGAGATTTACATTAAGATCGATATACCGAATATTATTGAAAATATGAACAAAATGTTT  
GCGATTCTTGGGTATATGCCCAATAACGGCAAAGCGTGGACAGTCTATGTTGACGCAGAA  
GGCAAAGGCCGCCAACCAATCAATCGGCAAACCTGCTAAAATGGTTGGCTTGAACATCTGG  
TCGCCGCTGTGCCAGCACGAGAAACGGTTTGGAAATTAAGTCAACTCCGCAGCAACTTGAT  
GAAGGTCGCAAGTTTGCAAAAGACAACCAACGAACAATTGGTTGGTCAAATATGCTGGTG  
TATGACAAAAAGAACAACAATAAGAGCAATGTGTTTGAATGCTAATCCTATGTCAACT  
ATGTGAGAAAATACTTTGTCTATGAAAATATTGCCGAATTTATTCGTACAAAAATCAAC  
TCGTTTGTCAAGAAAAATACTTCTGTGCGAAGACCAATATGCGAAAGCAGCAGAACAAAGTG  
ATTAGCCAAATCACCAGGCTGGAAACGGCACATGTGAAACCCGTTTCAGAAGAAAAATGG  
TTGAGTCAATATGCAAAAAGATAAGCAAGTTGAGGGGCGGCGAAAAGATATTGAAATTCGT  
ATCCTCATGGACCAAATGTTCCCATCGAAACTCATGTTAAACTTGCTATTCTGTACCGT  
CGTACGGCAGGTGCACTGAATGCCAAAGCTGATGAGTTGGAAAAAATGCGGGACGAGATT  
AAGCTGGCAGTTGTTGAACTCGACAATTCTCGTTTAGACTTGGCTGCCAAACTTGAGTTT  
ATCCGCGAAAATCGCAATGCCGAAGCGCTTGGTATTTCTTGTTCGGAAGATGTCATCGAA  
TTGGCTGGTCTCACCAAAGTCGATGTCAACGATGTTATGCTGCGTATCGAAACCTTCAAC  
GGCGATAAACAAACAGCTGTAACAATTAGCGAAATTGAAAATTATATCAATGGTCCGAAG  
TAATTGAAAAGGGCCTCCTTGGAGGCCCTTTGAAAATGGAGTATGTTAATGATTTGCTCA  
ACATTAGTAACTCTAGTCGATCCAAATGGAATTCGAACTAACTATTGGTATAATCCGGTG  
ACAATGGTATATACCAACACGAAAGGCGAATCTATTGACGCATACACCGCTGATTCTAAG  
GGATATACTATCAGCCGAACCGAAGAAGCCAAAGAAACGATGGATTTCGTTTCACAAACTG  
TCTAATGCCGAAATGTAAGAATTATCGCGAAATGATAGGTAAAGATCGTCAGATTGAA  
CGAGAAGAGCATGATGGCAATGCTAAAATCGATTACGAAACTTTGGCTAGAGCCACTGAA  
ACTGCTGATAGTCTTATACTCAATAAGATTAACGAGCGATCTTTTGAATTTGAAGGCG  
CAGTATCTTTCAACTGTTTCTGGTATGTGCGGCTGCTGCGGCTGCCGTTGCACAAATCTCC  
GGTGGTATTCAAATGGGAGTAGAGAGGCGACGGAAGAGGACTTCGGAAGCCAGCCACGGT  
GAAAAGTATATCGCGCATTATAGCATTTCCTGTAGCAGATTTTCAGAGCCGTTGGTGAC  
GCATTCAAATTCGTCAAACCTCTGCGGTCTGCACATCCTCAGTTGTACATATCGGTTTT  
ACAAAATTGGCTTACACTAACTGGCTTTAAACAACCGCGAAAGTGAAGTAAAATTTGTC  
AAAGAATGGAATAGCCGATTTACCGAGGACGTGCTTATCAATATCATGCTGGAAAAAGGC  
TATAACATGTCGATCAGCTGCCCAAATCAAATATTGCTGTTGGGTGAGTTGTCGAATTAT  
TCCATTCCTGAAATTTTCGCGAATTGAAATGTTTGTAGACTATTGCCGCCGAACTGCTCCG  
AAGAGAGACTGAAACAGTCTACAATGACCGTCGATCGTGGTAAGATAATATAGTTGAAAC  
AAGCTTTCAAATTGTCGAGAGGAATTCAAATATGTCTAATGCATTCATTGCGGTTTCGTAA  
CTTTGCTGTACACACTGCCGCCGCGAATTCACCGCTGACAATATTCTTGGGCGTGAAAT  
CACCGAACAAATGATCGACAAAGTTGAAAACACAGTATGGGATGCTATGATGGAAGCGGG  
TCTTACCGGCATTGGACGCCTAGCGATTTCGAGTGTATTGTGCAATATATCCCAGATGA  
ATTCGGTACCCAGCCGCTTGGCCACACTCCTACACACGCAGGTTACAAGCAAGTCGCCGA  
AGACGCGTACAAGAAATATCAAGGAAAAGCTCGCAAAATCCGCCAAGAAATGTACGGCAA

CAAGCGATAATTTTCTTAGCTCCAAATAAAGTATCTGAAGGCTTTTCGCAGTCTTCCGAA  
ATAGGAATATACAATGGAATTCAAAATTATTGTTTCAAGCCGTCATGCTGGTCCGATTG  
ATCGCTATATTATGGATTTGAAAAATATCGACCCCGTTTCTCCGGGTGGTTGCGAAATGC  
ATATTTAACGTACTIONTCTGGTGCTGATATCATTTTCCATGTTAACGCTTATGACCCCG  
GATTGTCCAACGAAGTTCACCGGCACGTTTACATTCTGAATGCCATTTCGTGTGCCGG  
CTGGTGCACACGTAGTCCGAGTTATATAACGAGAAATTATAGCGGCCAGGCCGAGAAAGC  
TGTTAGCGAATTTATCTACATGGATTAATTAATAAATGAATTTCAAGGGCTTTTATGCTGGT  
GTAGGGAGTCGCGAGACTCCGGAACATATTTGTCTGTTTGTATGAAAGATATCGCGGCCGTT  
GCTGCGATCCTAGGATATAACCGGACGTTCTGGTGGTGCCGATAAAGCAGATGACGCATT  
GAAACTGAATTTTGGCAGTGGCTGATAGTTTACGATCGATAATATGGCTGAATTTGAT  
GTTTATCTGCCATAGAAACGATTCAATGGCCGTTTTCGCACCAAACATGCTCGTCACAAC  
CTCATTTTACCAAGCGCCAATGAGTGGGACGCCGAGCAAATCATGAAAACGGTCCACCCA  
ATTTACTCCAAAGGAGGTAAATTGACTGGTGGTGTCTTGCATTTTACTACTCGAAATGTG  
TATCAAGTTCTAGGTTATAATCTGAAAACACCTTCAGAATTCTTGGTGTGTTGTTAGGTT  
CCAACGGATAACGGAGTTTCTGGAGGAACAAATACTGTGTGGCAGCTTGCAATGTGTGCAT  
GGTGTAGAGTGTATAATGTATAACAACAGTTTGTAGATTGAGCCGCTTAAGGAATTTTGT  
GATCTGTGAAACTTTACTCTCTCCGCTATAACCAGCTGCAGGAAAAACTGCAGGTATTA  
TAAATCATATTGTTGAAAATAACGAAAAGGCAAGTATAGCCAGCATATCTAGACAATTGT  
CGAAGCAATCTTTCGTATACTTTGTCTGGTCTGGGCAGAGAAGGCGAGTTAGTTGACACCG  
ATAACCGTCAAGGCCAAACGTCGGTACACGAAGCAGTTATCAAAGCATCCGAAGAATTTG  
ATGTGATTTTTATAACGCACGCGGCTTAAATGGTTCTTCGAGATATTGATGCATTAANAAG  
ATTTAATCTGTATATCGACGAGGTTCCAGAATTAACAAGCTTCGAGCGATTTACTTTCA  
CAACATCAGTCGAAAGTACATACTCGAATTGTGCAAAATAGATGAAACTGGACTACTAG  
AGCTGCGAGATGAGCATCGAAAATCAGTCCAAAAAATGGCTATAGATGGCTTTAGTGAA  
ATGATGACATTTATTCAACTCTTTTTCCGTTGTATAAGGCACTCCTGACAGGTGTCCCTG  
TCAGGCTGTCTGTAGAGGGAGGTGTGCCGCAATGTTATTAAGTGAATGACGCGTCAAATG  
ATGATTGGGCAAAAGTCAAGTTAATAACTGTCTGTTCTGCAAATTTTGTAGCAGACTTTTA  
CTGGCATGATTATGAAGCATTTTAACGGATGGGCATTTGAAGAGTCTCCGCTAGTTGAGC  
GGTTAGCTTTCCGAGATTATCCTAAACTGCTCGCGTAAAAATTCATGTAATGTTTGTATG  
ATGACTGGTCTCGTTACACAGCCGACAAGGAAGTAGAGGGGATTTTCAATTACTCTCGCA  
TCGAAAATACTCTCGACACAATCATAAATGGCGATTTTCAATTTACAATCGAAATTCTTATC  
GGCCAAGAATGCCAAAGGGGACGGAAGTTCCTGATAACCCGCACGATCTAAACAATTATT  
CGGATTTTACCAATGTGGTTGTGATGTTTTCGTATAATCCGGCGCTTTGGCAAGTTCCAC  
TTTTGAAAGAACTCGCAAAGTCCGTAGGCTTAGATGAAAGTGCAATGGTTGACGCGTACA  
TAGTTTCAAAGTATCTTGAACCCGCATTTCAACTTTGCACAAGATGTGATATCCGAAATG  
AACATTCGCTAAAACCCATCAACCTGTATGTTCTGTATGAAATTAGCTCAATATATGT  
TGAGATATTTGCCGCACGCTGAGATATGTGACGGTAATTCATCAAAAATCACTAACAGG  
TAAAAAGAAATCGAGAATCGTATCAAGCTCTATACCAAATGACCGAGAAAGAAAGGTTCA  
AATACAATTATCTGCTAAGAAAACCTGGGCGAATACTCGATATCAATTCTGCGAAAGACC  
AGGGAATTATCCAGGACTGGATAATCACAACGCGAGAAAAAGCCAAAAAGAAGGCCTCTA  
CATGAGGCCTTTGTTCTATGCACAGGATAACATAGGGATCACTCTGGGGTTATCAGGAAT  
TTTTGATGATAGGTTATTAGTCTAATGACCTTGTTTAAACCTGGCTGATTATAGAAATCC  
TGGTTCCAGGTTGAAGCTTGCTTGAACCTTATTTTTTTTATCCTTTTAGTTATAATATCTA  
TTAAGCCATAAAGGATAAGTTTTGGCAGGGCCAAAACCTGCAGGCAGTAAAGTTAAATAA  
GTTTAGCAAGCTTATTAGTATGATATAATCAATCATAGGAGGAAGTGCCCTATGAAATAT  
GTTGACAACGACGTTCTATACCTGAATATTTGCAAATGGAAACAAGATATGCGTGATGCA  
GGGATTCACATCAAGATGCCAGATGCAATTGGTATAGACATTATGAAGATTGCAAAGGT  
TTTACCGGATATTACAAATTTGCTGGATATACGAAAATTGGAAAGACGGAATGAGATCT  
GATGCAGTCTAAGCTGTTGTAAAGGGATCGGTAAATTTTCGATGAAGAAAACACTACAAAAC  
CCCCATGCTTATATCACACAGGCTAGTTACCGCGCCTTTATCGGACGCATCAAGTACGAA  
AAACACGAAATGGCTATCAAATACCGGTATTTTTTTGACCAACGTGTATGACGAGCATGAT  
GAGGATATGTCACGATTGGTTGATGAAAATTTTCATCCAAGACATCCATGGCAAACCTAGTA  
GCCTATGAATCATCCCTTAAATCTAAAAAGAAAGATAAAGAGGATGTTCCCAATTTGGAT  
TCATTCTATGAAGACGGCCCTGAAGATTAATCTTTTACCCCTCATTGATTCAACATGCGG  
AGAAATAGAATTATTAAGCGTATTTTCGTAAAACCTCCAATTATTGCATTATAATATTCCTG  
TAGTTTTAAAATCCTGCCAATATTTTCATGGCAGCCGTTTCAAGTAGAAACTAGCCCCACT  
CGATTCGCATATTGATGTAGACACAATGACAATGGAGATTTTCATATGCCGCCTGATTACG

ATGTTGACCTTAGCACTGGTGCAGAAGCTCTGAGTGAAGTTGATGACCATAATCTCATGG  
ATTTACAAGAGGATCTACGAAAAACAAGCTGAAGAAAAAGCCGCAAAGCATCTTAAAAC  
TCATGGGAGAGAAATTAAGCGGCTGAAGAAACATGCTGAACGAGCTCTATTCGCAAACAA  
TAAAGAACTGTATGCGTATGCTATCAGTAAAGTTCGTACCCTTTAGAAGCAAAGCAAAT  
TCCGCATTCAGCAATGATCACTATGTTTGAAGCTAGTCGTCAACAAATTGTTGACATGGC  
TAAAGTATATGCTACTGCCATCCAACCGGCAGAAAAATAATCGAGCAAATCGCAAACCTG  
TTCCAGTTTGTCTATTTGCTCTATTATAGGCTCCACGGAGCCGATTTTTTGTATTAGGAT  
TTAAACATGAAACTTTTGCATCTCGGTGATATGCACAATGGCGTAAAAGATGATGACCCT  
TGGCATAAAAACATCGCTGAACACATAATTGACCAGGCTGTTGAGTATTCTAAAGCAAAT  
GGGATAACTCAAGGGCTTCAGAGTGACGACTTTTTTGTACGGTAGAAAGGCTGTAACACAA  
CGTACAATGGAATTCGTCAGGACTCGAATTACGCCCAAATTGAAAGAAGCTGGTATTATA  
TGCTATGTGATCGTGGGAAATCACGACATGAATAAGAAGGATAAAAATACATCCAAATAGC  
GTAAGCGAAACTCTTGGTAAAGATGAAACGTATGTCTGATTGAGAAACCGACGACGGTC  
AATATCGAAGGTCTAGATTACGACCTTATTCGGTGGTTGTGTAAAGAAAATGCATCAGAC  
ATTTTCGAGTTTGTCAAAAAGTCAGAATCCGCATGGTGTCTTGGTCATTGGGAACTAAGC  
GGATTCTATTTCTACAAAATATTCCGAGTTCGGGATCCAGTGGAGATTTTTTGA AAAAG  
TATGAAAAAGTTGTCTCTGGACATTGTCATACTCAATCAGACGGTGAAAATATTCACTAC  
ATCGGCACTCCTTAAACGATTACAGCCGGTGGTGAAGATGACACTCGCGGTTTCTGGGTT  
CTTGACACAGAAACCCGTGAATTTGAATTTATTCCGATTTCCAAAACATGGCACAAACGA  
CTGACTTCTCCTGGTGTACAATAGAAGAAATTCGCGAGTGCTCCGGTTGTTCTGTGCGT  
TTGATTACTAATGAAGTTGATGAAGGCTTGACAAAAGTTGAATGTCTTCTGGCTAAAATT  
GTTTCATGATTTGAGAACCATCAACAAATCTGGCAAATTTGAGGTTGATTCTTCATCTGAT  
ATAACCCATGACGGCGAAAATCTTACTGTTTCATCTATGGATACTTCTGGTAGTTTGATG  
ACCATAATGGGTTTATTCTCTGAAAGGGTCACAAATTCAGCATCGGTGCGGATCATAAA  
GAAGCAATCGTAATTATGGCAAATGAACTTTATGCTGAGGCTATTGCATCATGATTGTAA  
TTAAAAGAAGCACCTTGGATTTATTCTAGTTCGCTACAAAACATCATGTCCGTAGGCG  
ATGATCCTATCGATATGTCGCTTAAACAAATATGCTAAAACATGGTGCCTGCCAAAATG  
GTGCCGGAAAATCGACAATGTTGGAGGCAATTTATTTTGCCTATAACGGTAAACCTTTTC  
GAGATATTACAAAAACCAACTGCTGAATGAAAACACTGGCAAATAATTTGTTAGTGGAAC  
TTTGGTTGGAATACGAAGAAAAGGTTTTTCACATTACCCGCGGAATTATGCCTAATAAGT  
TCTCGATAACTTGTGACGGCGTGGCTATAGATGCTGCAGCATCAGTTAAAGACTTTCAGT  
CATATTTCAAGAAATGATTGGAATGAATTCTACCAGTTTTAAACAGATAGTTGTTTTGG  
GCACTGCTGACTATACGCCGTTTATGCTACTAAAAGCGCCGGAAAGGCGCAAACCTGGTG  
GAAGATTTGGTGAAGTATCCGGCTTAGCTCAAATGGATAAAAATCAATAAAAAGCCACGGA  
TTAAAGGGTTAAACCAGGATATCACTTCAGTTGATATGGAAATAAACCATATAAACTCAC  
AGCTGAAAACATAACCAGGATCACCAGAATAACTCTAATGCATCCAATGCTGCTGCCATAT  
CAGACCATCAGGCATTATATGACACTGCTCGCGAAAAAGGAAAAGAAGTCAAGTCGGCTA  
TTGATTTGCGCACAAACGCAAATTACAGAATTCGTGATGCCTGATTCCCCTGCATCCGATC  
TTGGCAAGTTTACAATGGCTAGTGCAAAGCCGCAACATGAACAAGTTTCCGGTA  
TTGCTCATATGCATGAAGATGGTAGAACGTGCCCAACATGGATGCAGCAATTTGACGATC  
CTGAACTGCTAGTGAAATTGCGTGATAAAAATGTCGCAGATCCAAGGTCAACTGGATAAAG  
CCGATATTCGCATAAATGAACTCAACCAAAAAATGATAGAGTTCAATGAAACAGCTGTTA  
ATTTCCGCGATCTTCAGAATAAGTTAAACAAAGAAAAACAGTCTATTGATCTTTATGTTA  
ACCAAGCTAAAGCTGCAAAGCTGCAATCGAGCGTCTGCAAATGAAAGAACAGATTACA  
CATCGGAAATCGACCAACTCGGGAATAACCTACGTCTAAAAATTAGTGCTAAGTCTGATT  
TAGAAAAAGAGAAGCACCGTAGGTCTTTGATAGCTGATCTTTTGAAGGATTCCGGGAATTA  
AAGCCGTCATCATGGCCCGCTATATTCCGTATTTCAATAATCGCATCTCTTATTATCTTG  
ATATAATGGATGCCGATTTTGGATTTACTCTTGATTCCGAATTTAAAGAAGTAAAAAAAT  
CTTCAGGAAGAAGCACATTCAGTTATAACGGTTTTTCTCAAGGCGAAAAAGCTCGTATTG  
ACATGGCTGTCATCTTTGCTTGGCGTTATTTAGCATCTGAAGTTTCCGGTGTAGATGTTA  
ATGCGCTGTTTATGGTTGAAGTATTTGCCGGTCCCTTATGATGATGATGCACATCGCTAAG  
TGTTTTCAATCATAGAAAACATGAAAGCCAACGTGTTTATCATTTCGCATGGAGTACACG  
ATCCTCAGAAATTTGACAGACCCATTGTAATGTCAAAGCTAGGGAGAAGTACGCTAATGA  
ATGAGGTAATTTTTGATGTTTTATAATCTTCCAACAACCTGCTCTTGAAATTAGAAGTTAT  
AATCTAACTGATGAAAATGGTCATGTTAATTTGATTGTCCTGATGAAGACCTGAAACAG  
GTCTTCAGCGAAGAAGATATCCGGAAGTTGAAATCAAATCGCCATGGTTATTACAATTTA  
GTTGAAATTTTCGACTAATGATTTGCGTGAATAGAAATTATATTAGAATGTTTCGTTATAA

ACACACTGAGGAATATGTATGCGTACTCAAGCCGTTCTTTTTGTACCAGCCGATAGCCGC  
CCTATGGGCGATAACGTGTTTAAAATTTCAGTTAAAATCCTGAAAGCTTGGGTACCATTT  
ATCAGTGATATTCGTGCAAACCAATTGCAAGCTCTTGAGCAGAAAATTCGGTTCGAACTA  
TATGCCGAAATTGATAAAATGGTTCGAGACATGGATATCGACTTGCTCGTACGCCGCCGA  
GAAAACATTCTGTCCAATGGCGGATATCATGTTAAAGGCATGAAGGACAACAAAGTACTG  
GCCAAACAATTCCAATACGACACTGACGAACTAATTATTCAAGCTGCTTAGACTGTCATG  
GCAGATTACTAATAAGCTATATCGTAGTTGTGTTATAATATTTCAAATATTGAAAGGAAT  
ATGAAATGAACTTACAAAAACACCACTGTCCGTAATGAAGAATTTTGCAGCTATCAATC  
CATCTCTGCGACTTACTCCTGGCAATTCATCATGACCAAGTCGGTAGATGGTGTTCAT  
ACGCTGAAGCTACGATCGCTGATGAAATTGATTCCGAGCGGAACATTTATGGCCTGCCTA  
ACTACCTTTCAATTCTTGATCAACTGGGTGAAGGTTCTGAAATCAATCTCTCAAACGGGG  
AAATTGTCATCCATAATGCTCGTGCAAAGTAAATCTGCCTGTTGCTGAATCTTCAGTCA  
TCGTGGTTCGGAAGCAACGGCTGCGTATGCCACCGGCTGATGTAGAGTTTGACCTGAAAG  
CTGAAGATTTAGCAGAAATTCTCAAATCTCTCGAGCAGTTGGTGCAGACCCGCATCGCGA  
TTACTAATCGCAATGATCATATTGTTATTGATGCGTTTGCCTCGAAGACGGCGATAATG  
CACGAACCCGATATTCTTTGACCGTCTGTCTTACGAAGGCACCAACAACCTTCAGTTTCG  
TTTTCAACCTTGAAAACGTCAGTGTGTCGTTGACGATTACAAAATCAATATTTCTTCCA  
AGGGCGCTGATCAATTCCAGGGAATTAATACCGCATATGTATTTGTCCTTGAAACATCTT  
CAAAGCACGACTTCTAATAAATCCTGGTGTGATATAATGCGGGCGTAAAAGCCCGCTTTC  
TTTTGAGAGGAATTTAATATGTTGAGAGTTGATGCCGGCGAATTCATGTTTAAAACAA  
ATATCGCCCAGGAACAATCGATGAATGCATTTTGCCAGAATATGACAAAAAGATTTTCAA  
ACCTATCGTTAAATCTGGTCGTATCCCCAATTTTATTCTTCATTCTCCTTCCCCAGGGAA  
GGGTAAAACACTACCGTCGCCAAAGCTCTGGTATCAGAAGTTGAAGCCGAGTTTCTGTTTCG  
TAACGGCGCAGACGCAACAATTGACTTTGTTTCGCGATGTTATGACTCCATTTGCAAGCTC  
TAAAACCATGGCAGCAGGTGGAAAAGTAGTTATCATCGATGAATTTGATCGAGCAGGTCT  
TGCTGATTCTCAGCGTCATCTTCGCTCATTTCATGGAAGCTCATTCCAAAAATTGCACATT  
TATCATTACTGCGAATGATTTGGGTGGAATTATTCCAGCACGTCAATCACGGTGTTCGTGT  
TATTCAATTTTCGTAAAGCCGATCAATCTGATAAAGTCAATATGATGAAACATATGTTTGT  
TCGTGCCGAAGCAATTTGTGATGCTGAAAATATCGAAGTTGAAGATCGCAAAGTTATTGC  
CGTTTGGTTAAAAGAAGTTCCTGATTTCCGTAAAACCTCTCAACGAGATGGATTTCTA  
TGCATCCGAAGGTAAAATTGACAGCGGTATTCTGAGTCTGGTTCTCAATACCCGCAACGA  
TATCGAACAAGTCATTGATGCACTTAAAGCTAAAGATTTGAAATCGCGTCGTGCAATGGC  
TGGTCAATACACGACTGAGTACCCTGGTTTTGTTGAACGTCTATGTAATGCACTGTACCC  
GCTCGTTAATGTTCCGGCAAAAATTTCGCATGTACGAAATTATCGGTGAAAACAACCAACT  
GTTTGGCAAAGCCGCAAAATATCGAGTTTCATGTTCAATATATGTTTCGTTTCAGCTTGCCGT  
AGAATTCCATGGTAACTGGCTGTAAGGAGTTCGATATGAATTTGAATTTCTTATGGGTG  
ATGATGAGCAACTCAATGAGCACGAAATTGCTTGGAAATCGAAAGATTGGGATGCCGTAT  
CTGCATTAGCTGATTCGTTCAAAGAACCTGCCGAAAACAATGCATTCGCATTGTTGGATG  
ATATCCCTTACACCAAAACGGACAGATGTGTATCAAATAGTCATTATCCGGCATGGTTTA  
TCAATAATGCTCTTTCGATGCATCCCGAAACACTGTATTCGGCCTACGTCACGAATCTTC  
TGTCAGCATTGCCGGCCCAAGCGCAATAACAATTACCTGGTGTATCTGTAAGAAAAGGCA  
AGATTTACGGCAAATGGCCTAACTAGATGAATCAATCAACGAAAAGCTTTATATTGCCG  
TTATAACAAGCAGCGAATAGCGTTGATTTCCATACCGCAATTATGTATATGCCAATCATGC  
AAAGGCGAAACACTTTGCATGATTTTCTGAAAATCACAAATTTATTGTCATTCCAGCTT  
TTGTTAAAACACTGTTGCGAAAACAACAAAAGATCAAACGCAGATGCTGAAGTTGGCTAAAA  
AATCCTAAGGTTTTCTTATGATCCAAATCGATATCAATCATCCTGATGATTTTCTGAAAA  
TTGCTGAAACACTTACACGAATTGGCATTGCATCTAATAAAGAGAAGCAACTTTATCAA  
GCTGCCATATTCTTCAAAGCAAGGCAAATATTTTCATCGTTTCAATTTCAAGGAAATGCTGA  
AACTAGATGGTCTACCAGTATCAGTTTCCGAAGAAGATATTTCTAGACGAAATAACATTC  
CTTCATTGCTTCAGTCATGGAATATGTGTAATAACTAACTCCTATTGCATTGTCATCTC  
ACAATACTTTTCAAGATTATTGGCCACAAGCAGAAGGCCGAATGGCAACTATTCGCGAAGT  
ATCAATTTGGTTAATGAAATGGCCTCAACAGAGGCCACTTAGAAGGACATATTATGCAGC  
ATTACACGAACATCGAAGTTATTGTAAATACCATTTTTGAGCGTTACGTTAAAGACGGTG  
TAAGACTATCGCGAAAACAATCTCAGCCAACGCTCTTTTCATCATGCCGCCCCAGGTG  
TAGAGACTAAGCACAAAGACATCTCTGGGCGTTTTTTCGTACCAAAGAAGCATGAAAATA  
TTTTGGGAAGCAAAGCAATGGCAAAAACGAATGGCCGAAATTGGCCAAGATGCCATGGGTA  
TGGAAGACTATTGATTTCTACATCTCCGATAATTATCGCGGATTTATTGATTTTAATT

GTGACAATCTCATCATCGTTGTAGTCGATATCGAAGTAACAGCTCCAGAATTCCCTGATC  
CCAAATTTGCAAAATATGAAATTGATATGATTTCCCATGTGCGTTTGCACGAGGGCAAAA  
AGACATATTACATTTTTGACCTTGTTAAAGATGTAGGCCATTGGGACCCATCTAAGTCTG  
TTCTAGACAGATATATTCTTGACAATGTCGTTTACATGCCATTCGACACTGAAATTGATC  
TTCTTCTCAACTATATACTAATGGAATCATCTACCACTGATTTGGTGTTTGGTTGGA  
ACAGCGAAGGTTTCGATATTTTCGTACATTATCACTCCAAGTATCAACATCTTGGGTGAAA  
GTGCGGCTAACCAATTAAGTCCGTACGGCAAGATCGGCTCAAAAACAATTACAAACATGT  
ACGGTGAAAAAACGATCTATCGTATCCATGGTGTTCGACTGATGGATTATATGGATGTTT  
TCAAAAAGTTCATTTTCACTGTTATGCCTGACTACAAGCTAGGTAACGTTGGATATCGCG  
AAGTTAAAGCAGACAAATTGGAATAAGACGGCCCAATTAATAACTTCCGAGCAGCAGACC  
ACCAACGATATGTCGATTACTGTGTGCGAGATACGGATATTATCCTGTTGATCGATGGCC  
GTCGATGCTTTATTGATCTTATTCTGTCTCTTTGTTATTACGCGAAAATTCGTTTCGAGG  
ACGTATTAGGAACTATTAAGTGTGGGATTCTATCATTTTTTAATTCGCTTGGCGAGAAAA  
ATATAGTTATTCCGATGGTGAAAGCTAGTCCAAGCAAAGTTTCCCTGGCGCATACGTAT  
AAGAACCTGTTCTGGTGCATCGATATGGCATGAGCTTTTACTTCACATCTCTGTATG  
CGAGTATTCTACGTCTTCTCGATATCAGCCCAGAGATGATTGCCGGAATGTTTGCACCTG  
CACATCTTGACGACTATATCAATAAGACTGCTCCTAAACCATCTGAAGTTTATAGTTGTG  
CCCCAACTGGCATGATGTACAAACGGGGTGAAGTTGGTGTACTGCCGGCTGAAACTGAGA  
AAGTATTCTTGCAACGTTAAGCCGAAAAGAAAATGATGCTTGCTGCTATACGCAATCAGG  
AAGCAATTAAGAAAAATTCTGGCTTCCAGGGGCGAAAGGGTAGACCACTAGTGTTCCGCT  
TTCGTATGGGTGTTAAATTATGCACCCATCTTGGAGGAATTACATTATGTGGTACATTTA  
CAAATAACGAATGAGCTAAACGGCAAATTTACGTTCGGGGTTCAGAAATCCGAAGACAT  
GAAAAACGACCTTTACATGGGTTTACGGCGTAGGTGTTAAACGAGCAATCGCCAAATATGG  
TGTTGAAAATTTCACTCGGACGACGTTGTACGAGTTTGCACAGCCGAAGAAGCTTACAA  
GATGGAAGCCGCCATAGTGAAGAGTTTTTCAGCCGTCCGGACGTCTACAACGCAGT  
GGTCGGCGGTAAAGGTGGTTGGGCCCATATCAAAAAGCCCGGGCAGCATATGAAAGCCCC  
CGTCATGTCTCCTTACATTGGGTCCTGCGTTTCGCCGCGCATATGAGCAAGACCCGAATAA  
AAAGCTTATTAACACCGCCAATTTCAACAAAGCGTTCGGAAAGGGACCGTGGCAAGAAACA  
TTCAGATGAGACTCGCCAAAAGCGGTCCGACTCGCTAAACGATTTCTACGCGAATAACAC  
ATCTGTTTTAACTGGTATCCCACAGTCAGCTGAGCATCGCAAGAAAATGAAAGCCGCTG  
GACTGAAGACCGCCACGCAAGCCAAGCAGAGCGTTCGAAAGGCCCTAGTAGTCTCAGGTAA  
TGACGCATTCGCTAAAAACAGGCTGGGCAAACTAATAGCGAAGAAACGAAGGCTAAGAT  
GTCCGAAGCGAAGAAAAAATACTGGGTTGAAAACCCAAAAGTTATTGTAATACTCCACA  
CTGCGGAATAGAAGGCATCAAGCATGCCATGCTCAGATGGCATTTCGACAATTGCAACA  
CAAAGAGGCATAATTATGGAACTCGAATTATGCCGCGACTTCAATGAAGATGAACTCGCG  
TATTTGAATACTCTTTCAACCGATGAACTTCATACCATGATCGGTCGTTGTGAAAAAGAA  
GAACAAAAACGCAACACCAACCAATTGTACCGCAAAAATTTGATCAACTCGCTTAACGGA  
GCTTATTAACACTTCATTAACCTGGAGCTCCTTAAACCCGGTGAACCTCAGGGAATCTCTC  
AATGAGACAATCCTGAGCCAAGTCTCGAAAGAGAAAGGTGCATCGACTATCGAAAGGCGG  
GTAATACCGAACCGAGTAGAGTACACCCTAGTGGGTGGAAGCGCCGGGGGTACAGCAATG  
CATATGATATAGTCTGCTCTGCATAGCGATATGCAGCTGTGAGTAAAGGTTCGCGACGACA  
TATCCACGGTCTTTGATTAACGACCAAAATGCGAACACCTGGTAGGTAACAACCTCTTCC  
GATCCTACCATTGCGAACTGCTGAAGCTATTACAACCTACGGTCAATTGGCTATTCCGGT  
GGATTGAGCGTAAACTGAACGAATGTATCAACCATCTTGTCAAACCAACTAATGTTGATT  
ATGTGTGTTATATTGATACTGACTCGGTGTCTCTCAACATGGAAGCAGTGGTACTAAAG  
TAGGGATTGACAAATTCGGGACACCAACCATCTTATCGATTTCCCTTGAGAATCTCGGAC  
ATAAAAAGCTCGAGCCATTTATCGACGAGTCATACAAAGAACACGAGGAGTATATGAACA  
ATGAGCAGCATCCCTTGCTCATGGACCGCGAAGCCATTTTTGGAACTCCATTGGGTCTG  
ACGGAATTGGTGGTTTCTGGACAGGTAAAAAGCGATACGCTTTGAACGTTTACGATATGG  
AAGGCACTCGATATGCTGGACCGCATCTGAAAATCATGGGTCTAGAACTCAACGATCAT  
CCACACCTTTGGCTTGTCAAAAATCGTTAAAAGAGTCAATTTCGTCGGTTGTTGCAAGAAG  
GTGACTCCTCTTTGCAAAATTAATTTCAATTCAATTCAAGAATGAATTCAAAATAATCGATT  
ATCAAGAGATTGCCGCAGTGTCTTCTGCGAATAATGTGCGCAAAAACGCGGATTCCGGCAG  
GATATCCAATAAAAGAGCTCCGTATCATGTGAAAGGAGCCCTTGCATATAACCGGATTG  
CAAAAACCTGACCAAGCAATTCCAGAGATTGATGAAGGCGAAAAGGTAATGGTTATTCCTC  
TTCGTGATCGCAATCCATTCAATGAAGCGTGTGTTTGTCTGGCCGTCAGGAACGCAAAATC  
CACCTGTCGTACAAGCCGATGTTTTGAAGTTTATAGATATAAATAAGCTTTTTTGATAAAA

CTTTCGTTAAACCACTTGCTTCAATTTGCGAAGCTACGAAAACAGATTATGAATTTAGGA  
ATAATTTGTTTGACATGTTTGATATTGGAGGAAATAGTATGTGTAATATGACAGTTCAAG  
ATATTCGTGACATCATGGTGTCAAATACCAATCAAATGAATTTTTTTACTGACAAATCCG  
GGGTTAAAACCGTTCGAAATTGCCCCAGTAATGTTTAAAGGCCGTTGAAAATCTAATTTTCG  
GTAAACTTAATCACGATTATATTGAGCCAGAGTTGTCTTGGTATTTGAGTCAATCTCGTT  
ATGTTGCTGATATTCCAGGTAACCCAGCAATTTGGGAAGCTGTTGCAGATTGTAAGG  
GTATTATCAACTCCAATTATGGCTGGGCTATTTTCAGCGAAGAAAATGGAAATCAGTTTG  
CAAATGTTGTCAAACATCTAATTGAAAATGCATACACTCGTCGTGCCAACATGATTTATA  
CTCGACCGTGTATGCATACTGATTACATTGCAAATGGTATGTCCGATTTTCATGTGCACCA  
ATAACGTCCAATACCAGATTCGGGATGGAAAGCTGAATGCAGTCGTTTCATATGAGGTCCA  
ATGACGCTATTTTCGGTTATCGGAGTGATTGGGCGTGGCATGATGATGTTTTGTCTTGAC  
TGGTTGATACTCTTCAATCCCATGAAATCATGGTAGAAAAGGGTGATATCTAATGGTGTG  
CTGATTCACTCCGTGTGTATGAAAGACATTTTGGCCTTATTGAACAATATATTGCTCAAT  
AATTCTCAACTTCAGCATAGCGAGCATAATGTTGCTCGCTATGTTTAGAATCTTTATAGG  
GTTGATATGATGTCACCACACAAAGGGAACATATATGGCATCCCACTGAACATGAAAC  
TCCCAAAAACCTTAAATGACGCTCATGCTCTTATACAGCATGCTATGGAAAACGTTAAAA  
AGAGCTGCTGATAATCGATAAATCAGGCAAATCACAGCTTGTTATATTTTTGATGCTCAT  
ATACATGATGGAAAACCTGCACGTAGATTACAAAGCAGTTAATGAAAATGATGAAATTCAT  
CAACTTGTTTCATGCAGCTATGAATGCACAAGTCAAACAATTATGAAAGATAAAGAGGCA  
CAAATTTGGTTGAAACAATCCTTGAAGACCTTCCTCTTCAACAATACGTACTTTATTTTCG  
GCGTACCCGTACATAAAAGAAGATTATTTTCGACCGTGGGCCTTACCGCGAGATTTTAAA  
CTCATCCAAAACACGTGAATGAGTACAATACAATCCCAACCAAAAACCTGCACTTGCAATC  
GCACTTGACAAAAGTCTATCGAACAAGTAACTCATGACGGTGTAAAGGAAGGTTTGGCT  
CGTCTGTCTTCTAAACCAGAAGATCATGCCTGGTTAATTAAGAAAACCTGAATCTTACTGC  
AGAGTCCAAGCGATGTATAACGCGTTCTCTAAGGCAATAGAGATACAGGAACATGCGGCC  
AAACCATTTGAAGAAGGACATAAGAAATTGCCGGATGTTGGCGCAATCGAAGATTTGATG  
AAAGAAGCATCGGCTATTTTCGTTTGATGGCTCAGTCGGACATGATTGGTTTGAAGATTAT  
GAACGACGTTATATGCTTGATCAATTCAAAGCTAATAAATTCCCGTTCATCTCAAACATT  
CTGAATAAAATAACCAAGGGTGGTGCAGAACTTGGCACGCTAAATGTTATCATGGCGGGT  
GTC AACGTTGGTAAATCTCTTGGTCTTTGCTCTGTGGCCGCAGATTATCTCCAAACTGGC  
AAAAACGTCTTTTTTTCTCGATGGAGATGGCTGAACATGTTGTTGCGAAACGTATAGAT  
GCCAACTTGCTTGAAGTCACGCTTGACGAAATAGATGATTGCAACATGAGCTTGGCTGAG  
TATAAAGCTCGGATGGAGCGTCTGAAATCCAGTAATATGGGTCGTTTGATTATCAAGCAA  
TACCCAACCTTCTGGTGCAAATGCTAATCATTTC AACCGGTTTTTTGAACGAGCTGAAGCTG  
AAGAAAAACTTCAAAGCAGACGTTGTTATTGTGGAGTATCTGGGTATCTGTGCATCCACA  
CGAATTCGTGGAGGTTCTGAGAACTCGTATACTTTGGTAAAAGCTATTGTGGAAGAATTA  
CGTGGCCTGGCTGTCCAACATCAAGTTGTTCTATGGACTGGTGCTCAAACCACTCGATCT  
GCATGGGATTCGACCGACATCGACATGTCAGATGTAGCCGAATCTGCTGGCTTACCAGCA  
ACTGCTGATTTTATGCTTGCAGTGATGGAACTGAAGAGTTAGCTCAAATGGGTCTCCAA  
CTGATGAAGCAAATAAAATCGCGGTATGGAGATAAAAATTGGATTAACAAATTA AAAAATA  
GGGCTTTAAAAGCGCAACCAGAGATGGTACGATGTAGAAGAAGAACAATCAAGGCCAGG  
AACGCCAAACACAGCTTCTCCTAGACAAGCTGACAATACGAAGGGCAATAACTCAAGACA  
GCATCTTGACGAACTTGCCGCGACAATGCATTTCTGATGGCCTAACGGCCATCGACATAG  
GAAACGGATGATGAAAACATTTCTAGAGTGTTCTGGTAAACAGAAAGATCATGTTAATAT  
GGATATACAGGTTGTGGAAGACGTTGTGGCTGGTGATTCTGCAGGAGACCCCGTCAACTT  
CGCAGCTGGTAAAACGTCTGGCGCAGTTATCCCCCTGGGCCTAAACTCCTTCTAAGAA  
GGACAAGAAGAAGAATGATTACGTTTCAAGCCGCTCAAGAAGCGTGCGAGGCTTTAGGT  
CATGTAGCCTTAAAGATTCTTAGAAATCAACCTCATCTTGATATTCTGAAGACAATCTAC  
ACGAATTGCTTTCCAAGCATGATGAAGGATGTCGTGTATGAGATGGCTGTTAATGCTGCA  
GAAATTGATTCGTA CTGGTTACGCGAGGAAAGCCATTCTCTCGTTTATAATATGCTCAA  
CACCGTGAAATTCTGTTAGAAGCATGTCGGCAATTGGATGCTAATGAATTTTTGTCTGAG  
TATAATGGGGCCAAGAGCCCCATTTGGAGTTATTATGTTTGCTGATTTTTTTGTTTGCCGA  
ACGAGCAATGATGCATTTGCCAATATTC AAACGAAAGAAGGGCAAGTTCAAGTCAAGATG  
TCCAACATGTGGTCATTCATGACGGACATGAACAAAGACCGCTTTTGGATGTATGAGAA  
GAAGGGCGAGTCGCAAGTTCATTGCTTAAACTGTGGTTATCAAAGCAATTTGGGCGGGTA  
TTTAAAGGAGCGAGAAGAAGTACTTTCTCGTTGATGGCTATTGGAAAGAAGAAAAGAAAG  
CAATGTCTTCAAGCCAGAAGCAAACCAAGTAGAACATCTCTTACCAAAAAGATGCCGGT

GTTTGA AAAAGTTAAATTTCTGTGAACGTCTAGAATTGCTACCAGTGAACCACCTATAGT  
AAAATATGTGCGCAAAAAGCAAAATACCAGAATCAGCATATAAGCGGTTATGGTTTACTCG  
CGAATGGAAGAAATTGGTAAATTCTATTTACCAGATACGTATACGCGCGAATCACGGGA  
AAATAGATTGGTTCTACCGATATTTGACAAAAACGGTGACATCCAGTCTTTTCAGGGAAAG  
AGCTCTATCAGCTAGTCCAAACAAATACATCACCATAAAGGCTCATGAAGATGCATCAA  
AATTACGGAATGGATAACAATTGATGGGAACCGAACTGTATGGTTTATGGAAGGACCGATT  
GACTCCCTTTTCATTCCGAATTCTGGAGCTATCACTGGCGGTAGTCTCGCATTAAAGTGAA  
GTTCCATTCAAAGCACTCGAGTCTGGGTTTCGTGATAGTGAACCATTTCATCCTGATACG  
TGCAAGTGACTGTCTAGACTAATTGATGCAGGTGAACGAGTTGTGATGTGGGACAGGTGT  
GATTGGGCGTCCAAAGATGTAAACGATTTGATAATGAATGAAAATGCAACTGCCGAAGAT  
ATTTTCCAGTATTGCAAGGACAACGTCGCGTCGGGTTTGCAAGCAAACCGCGATTTGGC  
AAATGGAAGCGTTGCTAAGGCCTCTGCGGAGGCCTTCATTGTTTTTATTGAACGATGACG  
AACAAAACAGTGTACACTATCTCTAAAGAGGATACTATATCATCATACAAACAAACTGA  
GTAAAACAACGGAGTATATCATGACAAGTATAAATCTCGAACATCCTGCTCTATTGTGCA  
ATGCTCACCTCATAGGCGAATGGTAGGAGAATCCTCGGGTTGCGAGCGTTTTGATCAAGA  
AAAACGGAAAGACTGGTAAAATTCCATCAAATTTACCGTTGGCACAAATAAAAACCTC  
TCGGCGGTCGAGGGCGTGTGGCTTTCTTTTACAACAAATTGGCTTGGGCACGCGATCGAT  
ATCTGATGCTAATGGAAGAAATGACAAAACCCGGCCATTTCGGCGACTGACAATTTGAAAG  
TTGCAATTTTCTTCCCTGAATACGCCATTTGTTTGGTGAATGGGAACCGTCAGACGATG  
ACATCTCGCTGAGTCGCACAAGCATTCTGAGATGATTCCCGAAAAGCATAAGTTAACTG  
AACTGCAAATTCACA ACTTAAGCAGATTCACGAATATAAGGAAAAAATGAACGAAATCT  
GAGCTTTATAAACGTGGATAACAAGTGGGCTTTTGACTTTAATGAATTTGATCGCGGCGCA  
CTGCAGGCTGTCCGCGATATCCAAAATACGGAGAACAAAACATGAAAGCTCTGACTATTG  
CTCTATTATACGCTGCTTCTACAGCTTCTGCTGCTAGCTTCGATTGTCAAGTAAAAAATG  
TGAATGCCATCGAGAAAGCTATTTGCGCTGTTCCAGAACTTCTTTGCTGGATGATCAA  
CGGCAGAAGCATTCAAGGCAGTATCTCATATTCCTGAAGTTAAGGCTGACCAAAAAGCTT  
ACTTCAAAGAGCGCAACGCATCAACGTCTTTGTCTTCGCTTAAGGACAATATGACTGACC  
GCATCATTGAGTTGCAGATTATTGGCGAATTGGAAGGTGTTTCAGAAAAAACCGCATTCTG  
AAATTTTCCGAACCGATTTTGCTAAAGCTACAAGTAATCGACCCGTCGAAAAAGACACGG  
TGGCAGATCTCACTTGGCAAGCAAAGCAAGGGGATGAACCTAGCATGCGTGAAAAAACG  
AGCTACACAGATTACCGTGACAAAAATGCTCCAATTTGGATGCGCGACTTTGCGTACAGG  
ATAGTTCGCAACGATGTGATGGGCAGATGGGTAGCTCAAGCTCGTTCTGCTGGTCTAATT  
AATGAATTCAGATCTGTAGAGTATAAAATCGAAACCGGTTTTATCAATATGACTATTGAT  
AATTTGAAAATTAATATTCAGCAGGGTCGTCAAGTGTGCGAACTATGGCAATACGATCA  
ATGAGGTAATACAAAATGTGGATTCTTATTCTCACCATAGTTGGAACAGGGATGTCTTCT  
GTTCAATCTATCCCGTTTAAACACGTATGATTCTTGTGAAAAGCTCGAATTGTGTGAATG  
AAAATACCCCTGATTCTAGGAAATATACTGCTGCCTGTGTGCGAAAAGTGATATAATGACT  
ACA ACTAACATAGGAGAACAAAATGACACCTCAATTTAATGAATGCGCACAACTAACTCA  
TAGTATGGATAAGGCAGTAAATGCACTGTATGATTGCCCTATTGCCAACGATAATCCTCT  
CAATCGAATGATTGACATGCAACGTCAACTTCAAATTGAGCTCGCACAAACGGCATCCAAA  
ATACAATCGCGACCCACGAGAGCTTAAA ACTTGTGGCGAAATTCTTGACTGGTGTCAAGC  
TCAGGACGAATATATTGCCGACGATATTCGCGAGCAGTATACTGCTCTAGGTGGAATGAG  
TAACCC CAGGCCGAATGCGATCTGGA AACCATGGCACGCTGAACATGCCGAATATCGCAA  
TCGACTATTTTCTGAATTGTGCGCCGGAAGACCTACTCGAAGCAAATTCGAGTTGATTGA  
CCAAATTC ACTTTTTCTTAAACACGATGATTGCGATGGGCATTGATGGCGATGAAATCTT  
CAA ACTCTATTATTTGAAAATGCCGAAA ACTTTGCACGGCAGGAGAATGGATACTAATG  
CTTGAACAAGATGAAATTGATGAAATCAATCGATTGCGCAA ACTAGATGTTGAAGAAGGA  
AGGGCGGATCTTTACGCCCCATATATTCCATTTCAAACAATAAAAATATGAGGATTTTTTAT  
TATGTATGAAGTCAAATGGATTGAAATTAACAGAGACAATCATGGCGTAACATTTGCTAC  
GAATACACCCAACGGCGTTCTAATCGGTGTTAATTACACTTTTAAAGCGGAAAAGTTTGA  
TATAACATTCATTCTGATATAAAAAGTTGTCAATAATCCCAATGGACATGGATATATTTT  
CTGCCACGGGTGATTCATGAAAAAATATGTAATCCAATGGAAAGACGTCGAAGGATTCTG  
TCATTTTCTGGATGGGAATTTGTATGGCTCATCTAGTGGTGTGCTATTCCATAATTCATG  
GGAAGATGCCAAA ACTAATATGCAGAAAGCGAAAGAAGCCATAACAGAGTATTTGAAAGG  
AACAAAAGTCGTCAAAAACCGCCTATTTGGGCTCCAACGATAGCCATAATCAACAAGCC  
GTCGGAACATTTGGCCAATGCGCATAAACGAATGTGTGATACAATGCATATCGTTGATCT  
TAATGTGATCCCAAACAAATGAGGTAAAAATGGTAACAAATCATGATTTGACTGTTGGC



CAAAAAGATGCTATTGAAAAAGCACTCCAAGCAATGAGAAGTAAACGTCATATTACCATT  
CGAGGGCCTGCGGGCTCAGGTAAACTACTATGACCCGTTTTCTGCTTGAGCGTCTTTTC  
CAGACCGGCCACCAAGGTATTGTTCTCACAGCACCTACGCACCAAGCAAAGAAAGAATTG  
TCCAAACATGCCTTGCACAAGTACATACACTTCAGTCAGTCTTGAAGATTAACCCAAGC  
ACTCTCGAAGAAAATCAAATTTTTGAGCAGAAAGGTACTCCTGACTTCTCCAAAACACGT  
GTGCGTATCTGCGACGAAGTATCGTTTTATACGCGCAAATTGTTTGACATTCTGATGCGA  
AATGTTCCATCTCATTGTGTTGTTATCGGCATTGGTGAGAAGGAGCAAATTCGGGGAGTA  
TCAGAAGATGATACGCATGAACTCAGTCCATTCTTCACAGACAAGCGATTTGAACAAGTT  
GAATTGACGGAAGTAGAACGTCACCAAGGTCCAATCATTGAAGTTGCAACAGATATCCGA  
AATGGCAAATGGATTTATGAGAAGCTTGACGATTCTGTTAATGGCGTATAGCAATTTTCAT  
ACCGTCAAAGATTTTTCTTTCAAATATTTTCGAAAGAACAAAAACGCCAATGACCTACTT  
GAAAATCGCATAATGACTTACACAAACAATTCTGTTGATAAGCTTAATTCGGTTATCCGC  
AAACAGCTATATGGAGCAAAGGCTGCGCCATTCTGCCGGATGAAATATTGGTCATCCAA  
GAACCGCTCATGTTTGACATAGACGTTGGTGGCCAAACTCTAAAAGAAGTCATTTGCAAA  
AATGGGCAAACGCTACGAGTTATAAACGTTAAACCTTCTCGCAAACGCTTAAACCAAAA  
GGTGTGCGGCGAAATTGAGGTCGAATGCACACTGCTCGAGTCTGAATGTTATGTAGATGAT  
GAAGATGACTATAGACGAGCGTGGTTTACGGTTGTTCTGTGACCAAATACTCAAATGCA  
ATACACGAATTTTTGTCTATTATTGCTGAAAAATATAGAAGTCGTGAAGTTTTCCCAAC  
TGAAAGACTTCTGAGCAATACGCAATACTTTCACCAAAGTTCGACCCTTGGGTGCAATG  
ACATTTCATAAATCACAGGGTTCAACATTCGATAATGCATATCTTTTTACTCCGTGTTTG  
CATCAATATTGCAGAGACCCGGATGTTGCACAGGAATTGATTTATGTGCGAAATACTCGT  
GTCCGCACAAATGCCTGTTTCGTATAAGTATCCTGATCAAGCGATCTATAGACCAGGTCA  
ACTGGTCTATTTTATCAAAAAACGGGTATCGCCATAGCGGAACCGTATTACAATACAAAT  
TCGGAGGTTATCGCATATTGAGTGATGCTTTTGATATGGTATTGCACATTAACCAAAACC  
AAGTGAGAGTAGGTTAGTATGAGCAAAGTGACAGCTTTTATTATTGACTGCGAAACAAT  
GGTCAATGCTCCTGATGGTGCAGTAGTTGACCTTGCTGTTTTGGTGGTTGAGCATGACCC  
GTACAAACTGCCTACGTTTGAAGATCTGTGTAACGCGGGCGTCGATTCAAATTCAATCT  
CCAAGAACAAAAACGCATGAGATTCTTTGACCAAGGAACAATCGATTGGTGGAAAAACA  
AGATGTGCAAGCTCAAATGCATCCTAAACCAACGAGCGAAGATGTCAGCGTCATGGAATT  
TTATGAAAGCTTCCTTGATTTTCTTGCAGCACAAGGGTTTGACAATAAAACAGGTCAGGG  
CTGGTGTGCGCGTCAAAGCTTCGATTTTCTATCATGATCGATGTTATCCGCAAATTTA  
CAACGCTCGTGAAAGATTCAAATACGAACCATGTTTCTTCTGGCAGCAACGTGATCTTCG  
TACTACTGTAGACGCTACTCTGATGATGCGAGATATGACCATGTGTCCTATGCCGAAGGG  
TGTGTTGGATGGATTTGTAGCTCATAACGCAATTCACGATTGTGCAAAGGCTGCGCTAGA  
ATTGCTTTATTCCAAGCGATATGCTCTCGGTCTCGACGATATTCCCACCAGTGATGATGT  
TGACCCGCGCAGTGTCCGCAAATGATAGTTGCTTTTGGAGAGGGGTTGAAAAACCCCTT  
CTTTTATCGCACATCACCTGGCGAGTTGACAAAATTCAAAGTGCTTATTTTATTAACGGG  
GCATGGGAATTTAACAGGGTTAATGGAGTTTTGTCTGTGCGAAGGTGATGTTAATTCTGCA  
ATGGAAGAATGACAAATTGCAATAGATGTTCTCAGGCGTTTGTAGTGGTGAATCCAAT  
GTAATCCTCGAATGGGCTAAAAATAAGGTATCAGAATGATTTACTAGCATTACAACGCAG  
ATAGCTTCTGGGGTACAACGATCCAAACAGCAATGGAAATCCGAAACCAGTTGAATGCAA  
CGATGGTTCGGCGGTTTGTCAAACGAAAAGATTATAATGCGCGATATGAAGAGTTGATTA  
AATCTACCGGTGAACTGCTTGGGCAAAGCATCCGACGACCAAACCTTGGGTAGCAAAC  
CAAATCCTTTACGGGATGGTGTACTAGTGGAGATTGAGAGTGAAACAAAATTACGCTTG  
GCTAGCATATCACTTCGGCTTGGTTCCAGCAAATGCTTGCAAATATGGCACTCGCGGATG  
TACGTTTGCTAACAAATAACCCGCACTTTGCATAATTCATTTCAACTGAAGATTTTTGTGC  
TATTTTGCGAATCGCACGACACTGCTTCCTTAAGGGCCGCGAAGTTGCCGTTTCATGATCA  
TGACAAATTGAGTTACGGCCGCTTGTCTGGGGCGGATGAGCGTTTTATCAGAAGTCGAGA  
CACTCGAATGCTGAAGTTTTCAGTTTTGGCTGTCAAATCATCGACTCATCATGTTTTGAA  
CCGGGTTCATCAACACTGATTTCCGATGGATTCAACGAACAAAACGAGGCCCGAAATTGAT  
CAGCAAGTAAATGAAGAAGTAGTTGTTTCTCTGGATATTGACGGTGTCTCAATACGCAG  
GATGATCACATGGAATGGAGAACTGACGAGAACAGTCACCTGTGTCGTGTTTCGCCATAC  
AAGCGTGGCGATATTGTCAGGAACCATAGACTCAGTTGGCTGAGGGAATGGCTAAAGAAA  
CATGATGCTAAAGTGGTTGTAATTCGCTCGTGGGTCGCTTTGCGTGATACTGGGAAAATG  
ATATGTGATTTTCTCGAACTTCCGTATCATTCCGAAGCATAACGATACTGGCGGTGGAAA  
TCTCATGGCACTGGTGTCTTTCGTATGTAGCCGATCATAATATCCATAGATGGGTGGTC  
TTGGATGACGCTAAGTGCATGCATGATCACGATGAGGTCCTACTTGGGCACCTGGTTCAT

ATCAAAGCTGGTCTCTATGAATCATACTTATAAGAGGCCGACTTAATTCCGCGACACCTG  
GTGGTCCCGCACCGAGAGTCGCTTGGGAAACAGCATAAATTAAGTAAGTTGAATAGAT  
AAAACAACCTGAGTGACTCACTGGAAAAAAGAACCAGGGCTTCGCCCCGTCGTGCTTGCAC  
GAATCCAGTTTGTCTTTTCATCTGATTTATATAGGAGCTCTTCGGAGCCCCCTTTTTTGT  
TTCAAACGAGTGTACAAGATAGTGCTTCATGATAAAATGACTTCAGGTTCAACAACAAG  
GAGTACTCTTATGATTTACGCGGTTAACAAATTCGGTGTAGCATTGCGATTGGAGCCAA  
CATTTGTGCTTATTTCGATTGCTTCTAGAGGGTGCCAAGTTTTCTCGTGTGCTGACGGTAT  
GTATGCTGCCATGGATCCTCAGGTTGTCGGTTAGGAGTATCACGTCAAGCAAGATGGCGA  
TGCTATCATTGCGAACTCGAACAGACCAACGTTTCGCGTAGAAAAAGATTTTGCTGAATT  
TATCTCTGAGTACGAAGGTTAAGTGTACAACCTGATGTGGCTGTTTCATAATGGCCACATC  
AAACCAACATGGAGTAATGAAAGAGCGCATTTCGAAGGATTTCTCCTCGACGTAATGTT  
TTCAAACAAGGTTTCTGTTGTTGAGAAATCCCTCGAAGAGCATCTCTGCTATAACCACTGT  
TCTGTATGTTTTCGAAGGCAATACTCGAATTGCTGTTCTCGAACGTGTTATCACCCGAGA  
ACGTACCAATTGGGTTCTGAAAGAAGGTATCTACGATGAGCTGAAGGGTAAAATCTGATG  
GGAGCTCCGAATCATAGATTGCTCCTATGCGAAGAAAAAGTCATGGAGTTGAAAAGGAA  
TTGTATGACCTTTTCATCGAAATGAACTGTATTGGTGCAAACAATCAAGACACTTGGGGC  
AAACTCTTTAAGACTAAGGCATACAATGCGTCTCAAGCTCTAATGGCCGAGTATAAAGAG  
AGAATTCGCAAAATCATTGCGACTAATATTCAGCAATCTGTCACCTACGCGTACGAGCTG  
ATTGGTTTGAGGGGATTTGTGGATGTTCCATGAAACGTGGACAATGACTATTAGTGAAA  
CTGCCATACGAGTAATAAAAATGAGAATTCGTCTTGTGCGATAAGAAAGTTTTCTTAAATG  
CAAACCGCCTAGATAGTCAATCCTACAGATTGGCAAGGACCATTGTTGAATTTGCAGAAT  
GGAGGCAACTCTGTCTTATAGGCAATGATGGTCCCAGATGGCTTCTCAATGTCTACGGTC  
CATGCTGGCGCGGTAGAATGTCTGCAAACCTACATAACAATATTACGAGGTTCAAATGAAA  
CTTAAATTGAAAATCCCTCTCTCCGAATATCAACAACGTTTTTTGCAAAACGGAACGGCAG  
AGGTTGTGGGCAAGTACGCTTGAACCTGAAATCCAAATCTGGAGAAGTTGAAGTTCTCGAA  
ACAATGCCGGACGGGACATTGAGAACAATGCTACTTTCCTTGGATACCACATTGGAATT  
CCACTCGAAGAACAACGATATTTTGAATTTGAGGAGCAAAAATGATTGATGACGTTAAAA  
TCGATATGACTAGCAGCTTTAACGCTAGCATGGCTGTTCCCTCCTAGATCAATGGGTTTTG  
TGCTGGCCAAGCTGATGGAAGAAGTAGGTGAATTAGCAAAGTCGCTGAACCAGCCAGAAC  
GGTGCGATGAACGCC

>NewGenomeName\_111

CTCTCTCGCGACTTAATATAATATTCAAAGCAACTGCCTGATAAATGGGTTTTACGTATC  
AATAAAATAGCTAATTCCTATCAATGGAGGACACTGTGGATGATGTAGTCCGAATATGGT  
TAGTTCTTGTACTCGGTGGTTCGACTAACTGGATTTTGAGAGGTCATAACAAGGGCAAAC  
AATACATACGATGTAGTAATCCACGACAACCTTCTTGGAGGGTATTCCGGTCACAACCGAC  
GTGCACAGAGTTTAGGTTGCGTTTAGGGTTCGTAATCGTGCATCACAACATTTGATTAAG  
AAAGCTCTAATGGTAGAAAATAGCGGGCACAAAGAGGTGGTTTAGGACTGCCGAGACATT  
ATTGATTCCGCTTTACGAGCAAAAGAACTAGATGCCAGCGGCAATACAGTGAATGGGCA  
CATGCACGAGATAATGAACTACACATGGAGGCGATCCCCAATGGATGAAAACCTAGCAGC  
TGTGTGGATTATGATTATGCTCCTCTTTATCATAAAAAAGACAGGGCCGATTAAGGCCCT  
TAACATTTTCTCGTTTACACCCTTCGGAAGCGGTATTAACCAGCGAAATATTGCTACTG  
CTGTTAGCAAAGAGAAGCGTACGACTCCCACAATGAACCACGATGTTGGAACATTGGTCT  
GGTGGGTTAGTGGGGCTTGATTACGCACGTTATCCCTACCTTCTACATTCTCAACATTTT  
CAGCTTTCACGTCAAGATTAGAACCATCGCGTATTCTTTATCTCCTATCTCAGTATCTA  
CTTGTTAAGCAGCATTCTGGTAAGAGAGTAAAACATCCTTTGCAGCCTCTACTGGAGTCA  
GATAACTACATCCATTAATAGATAGGACCAGCCGTAAACCTGTCAAGACGAGTAGAGAAT  
TCATCCTGCTTTTTACGTAGCTCATCAATAACCCCCCGGTGATATGTCAACTCAGTCTAG  
ATAATTACTAAGTTCTCATTCTTTGTGCGAACGTCGTTAACTAACGCCCTGTCCTCTCAG  
TGTTGGATTTGCAACTGAGGGACCTCTGTTTGAAGCTGACCAACCTTATAAGGTCAAGAT  
AGAGTAGTACCACCAATAGCCACTCCAACAGAGAGGAACGCATTGATTATAGCAGACTTC  
CAGTCGTTTACGATAACTACTTCCCATACCGTCCAAAGATGCTGCAACAATATTTAGGCG  
CATAGCGTAAGTATTGGGATTATCTACAATGCCTGAGCTATAGTAGATCTGGAGAATACG  
ATCTAGCGGTATCCCTTTATATTGAAGAGACAAAATAGAAGTGTAGACCTTGTGGTCA  
ACAGAGGATAAGAGAGAGGCCACGGTGGGGCCATCTCTAATGTGGAACGGTGTGAGTAA  
GAAGAGAATCAACGCCAAGAGTAATATAGCACGTTTTCGTACTTAATCTCTATAGTATTGT  
TCGTACTTACCTACCAGATCCGAAGGGTCCATTAATCTGGAGCACCTTCGGCAACCTTA  
CCAGATTGTTGCTCGTTGTATCGAAGTCCTGCAAAAACGTTTTTCCATGCGTGTGAAGTA

ATAACTCGTTGTCTAAAACCCTCGAAGGCTTACTCTTCTTCCTTAGACAACATCCTGGTC  
CGTAATGGAGCACCACCTCGTACTGGGTCATTCGCCAGTGCCTTCTTGCCTTTA  
ACCTCAAGAGGTAGTTTCCAGTTGATAGGACGTTTGATTAACAGTTCTAAGTACTGCTCT  
GGAGAAGCAACAAAGTTCTGCCAAATATCAGGATTTTCTTAAAATACGTTGTATGTTTCA  
ATCAATCGAGACTTACCTTAAATATCCTCGAAACCATTAATAACCACTTTCTCTTTACCA  
GCAGAGCCAGTGTACATACCACCACGGGTTTCGCTCGAGGCGGTAGTGTGAACCATGCTAG  
AACTTATCGGGCTCAGTATTCACTACAATCTTAAAGTCATCTAGGTTGTCCATTGTTGCT  
ATCATAACGTCCTCGTAACGCACTGGCAACTACATATAGCCCATGGTCGATAGTGTTCCT  
ATCCACTCTTTATCTCGTGCAAAAGTAGCTTTGTCTGAAGAGTTAACCATCGAGTCATG  
TTCTCTAGTGAAGATCGGAAAGCTCTGTCAATATCAGGTTGCGCAGTAGTAATATTATTT  
CGAATCATATCTAGGTTATATAACCGCCCGACCTGGCTTATTGTTTAGAGCTAGTATAGTA  
GGAACAACCTTCTCAGTCTCTCCACCTGTTTATTCTCTCCGCTTCTTGAGGGTTGGCA  
GTAATACCCACCATTTCTGTTAGTAACTGCACCATAAGCCCGCTGTATGCTTTATCCAATG  
TTCTGAGATTTAGTCATTAGGTTTGACAGGAATGGCTTGCTCTTAATCAGTGCCTTAGCC  
CGCTCATCACCAGCCATAGGCCGGAAGAAGGACTCTTTCATTGGGTCTGGAATAGGGTTG  
TTCTTGCGAAGTAAGTTAGGCCACCATGGTTCTGGTTGCCCTCGCTGTAATCATTTC  
GCATGCAAATCATTCTGAGCTTTAACCCAATTAATTGCTGTCAGGTCACTAACCAACGTC  
TCCATTTTTTGTGTTGAACCGTTTAACTTACAAGTCATTAGTTTCAATGGTGCCATTAGTA  
ATCGCACCAGGGTTAGTAGCAGTCTGCATTTATGTTATCTGTAACAGGACAGCACTCTGT  
TCTACTCCAATCTCAAGGGCACGTTGTTGTTCCAATCCAAATGTACCAGCTAGAGAGTTG  
AACATGGTTCCGAAAATATCATCTTGAGCACGAAGAGTCGCGTCATTAAGCGCGCCTGAA  
ATATCATCTGTGAAGTGCTCATCGTTGAGTTTACGAATCTCACTCTGACGCTATGATGGA  
ATCAAGCTGATTGCAGTTTGTGAGATACACCGAAATCAAACACAGTCAGTGTACCTTC  
TCACGATAATCATTAGGGCTTCTCTTCTGTAGATAGATCCACAACCTACCTTACGCAA  
CTCGAACTAGATGAACCGATGCCAAACAAAGTAGCACCACGTTAACGAGTTTGCATCGCA  
AGGAATGGATATGAGTTGATAGCTTCTGTCACGATGGCACGGGCTGTTACCTGTACCTCA  
CGGCGTTGCATTCCAGCTTTAAGATTATCTGCTAATCCACCTACCCGGCCTAAGTACGGT  
TGAATCTCAGCAGGGATTTCTATATCTAATGGGGTATCTAGAAAGTTTCGAGTATCGTTA  
ACAACACTCTAAGAACTACATCACCACCAATCTTGTGCCCAAGGCTCCCCACGGCCTGA  
ACGAGTCGTGCGAGACTATCATCACGCATACCAGCTTGAATTGGAACCTTGAGTAGAAGCT  
ACAGCTTGTATAGAGTCGCTTGTGTAAGATATTAGTTCCTTATAACTTTATTCTCCT  
TGTAGTGTATCAATTACATCTACATTCTAACGGTCTGATGAACTGTGCAAAGAATAACCT  
GAGCGAACC GGTTAATAATCATGTTGCGACTGAACTCTTCTGTTGGTTTCGCTACCAGTT  
AGCAGCTAATCAACTCCAGCTTGACGTAATTGGTAGAATCCTTCGGGGCCATCTGCGAGT  
GAGCTATCAATCGATATCATAATTAACCAGTTGCTCTCACTCCAGCCGCGTCGTTAATA  
GCTCACCCCATGCCACTTGTTCATAAGCTTTACTGACAACCTGCAGGTCCGTACGTTTT  
AGGTCGCTACGTGCTCTACCGAATCTTGTGCCCTCATAGTATTTACTCACAGACTGTGGA  
TTAAAGCCCAATGCTTTTGTAAAGGCTTGAGCCACACTAACTTCTTGCTGCTACAATGGT  
TGTCCGTTAGCTTTGATGATTGCTTGTACGTTTTACATCACACACGCACCGATTAAGTCA  
CGAGTTGATGTAGGAATCTTTAGCAATGATTGGCCCTCAATGGCACCATGTTAACGGCA  
ACTGTCAGTGTTCGGTCATCCGCTGATAACGCCACTTTGCCCGTAAACATCAAGATCTGC  
AAGAACCAATCTCGTGAGTACCGGGGCCGAAGACACGTCCGTACACACGGCTTGCAGCA  
CCTGCCGCTAATTCTGGTAGTGAGTAATCCACACTAATGTATCTATTTAGACTCTCCTCT  
ACAGTATTCAAGTTTCCGAAGCGAGTAGCCACGTCTGCATGCACAACAAGCCTCTTATA  
GCAAATCCAGTGGAGCCACTTTCAAAGATACTATCACCATTGGGATAAGGTCTTGTGGC  
TCGATACCCGCCAAGATGAAACAGAATGAACTAACAAAGGTACCGTAAGGAATACCACTA  
GGTCCGAAAAGCATTAGCTGGCCTGACACTAGATTAATCTTGTCTTGGGTGGATAGGGTA  
GTGCCTAAAATATCCGCGATAGATTTAGTAGCCACCTGTTGGAAATGGAACGGAATTGAT  
TGCTAACCTTGCTGGAACCACGCACGGTTAGATTGTGACATATTCAAACCGACTGCTTCG  
GTACGAGCAAGCACTTGTTCAGTGTCATATCGTTCGAACTTAGCTGCCTTGATACCTGCC  
TTACAGTCGTCGTAAGCGATACCAAGCGAGATACGAGAAGTCATCTTCTCAGCTTGTGCG  
AAGAAGATGCGACCTTTCTCTATGCATCGGCTCAACATGAATTGTGTTACTGGAATGCCA  
ATAGTCGAGATACGGTAGTCACCTTGACCAGCAACAACAGAGTCGTATAAGCCTGCCTTC  
TTCCATCCTTCGTAGAATTCACGAATATCCGGTAAAGTATTCTCACAACGATGTAAGTGA  
CTCTCAACGATACCTGGATCTTTCGCTAAGACTATGAAGTGTCTCTTACTCATTTCGATCA  
AACGCTCTCAGTGCGTATTGCTTACTCATTCCAGCTGCTACAGCAGAACCCATAGCGTGT  
ACCAAGAAGTGAGCAGGAGACAACAACCTAGCAGTAAGATAAACGCAACTCCATTGATA

TTCTGAACTGGTTCGGATTGGTTCATACGATATACACCTTCTGCCATTCCACGCATGTCC  
TTGCGGTCTTGATGCTCTGCTAGAGAATTAGCCATGTTTGACATATCAGGTTGGTCCTCA  
CTCATAATACGCATCATCTGAGTTACTTGTTCATGAGCAATCCATAGTTTGTACGAACT  
AGGGCATCTTCAAGTTCGTCAGCGACATTACCGCGAGCAGCTTGGATATTCTGGGTACCA  
ATGTCTTTTCTTTAATGTTTACTAGCTTGGTTCATCCAAGTGCCTATAGTGCCTGTTC  
AAATCGCTAATCGGCTAACGAGTTACGATGTAACCGAAGTATTGGCGCCCCGTTTCGACT  
GTAGAAATGAACTCAGCCTCTACGCCATCTGGACCAAACCTGATACGTTCCCTCAGCACGA  
GCCCTATGGAACCTACCTCCGTACACGTTGATAATTTTTGTATCACCTTCTGCAGTATCC  
GTTTCAAGGTCACGTAGAACATTGTTATTCTTGTACAGGGTTACGTGCTTTAAGACGCTCA  
GCATATCGTTCAGCATCCACTACAATATCAAAGTAACGCCTTGTCTTGTGTATGCCCGA  
GTCTTACCTTCTAAATTGATTGGAACCTCCTCTTTAACAAAGTGGTAAGCCTCCTTGTAC  
ATAAGAGGCATATCGCCCTTACGTCTATTTAGAACCAGTGCCTCAAGGTCACAGATATAT  
TCACGTCTAACGATAGCGAATTTCTAACCCCTGAATCCCTGTATCCTGAACTCGTTTGA  
GGATCTAGATAAGTCAGTTGATAACGTGACTGATAGAAATCTTCCAACAGTTCACCTGCC  
ATGACAGTGATGATTCGGGCAGTAGGGGGGTCATTCACGCAGTTCTCTTTACGAGCTTGG  
AACTTTGGCTAGCACTGGTAGCGACTTCCCTTAGCTTTAGAATACGCAGACTCTTACCA  
ATCTGTACAATTTTGTCCCGTATCATTTAAGCTGACTATATAGTTCGTCATTCAATACC  
GGCCACCCGTGGTCAGTAATCTGGCGCATTGTGTTCATATGCTTTGAACTCAGAACCATGA  
CGTTGAGTTAAGTCGGGACTGACACCTTTCACCACATCACGGTATGAATATACCTCATCA  
TTCGGTGTGCCTTCTTTAGAATCACATCTAGCTATTGTAATCCCTTAGTTTTAACACGT  
ATCAAACCTCCATTACATACTTTTACAATCCACTACGACTCTTAGGACGTTACCCCGAT  
ACACGAGTGAGTGTATCCATATAGAATGCACGGTCACGGTCTAGGGAAGCGTTTGGACTC  
ACTACCTTAGCCATGGTCTTAGCCATTATGCTAATCTTGTCTGTGTAGAAACCACCACGT  
ACTGCATCTTGGTTGTAGGCGATTATCTCTATAGTTACGTTACGTAAGTTTGTGACCA  
GTAATAGGGCCAACAATGTCACACTTGAACGCCACACCCATGTCCGTAGTTTCAAATGTC  
AGGCTAGATACTTCGTGTCTCTCCCAAATACGCGCAGCGATGTTCTCAGCAGATGCTTGT  
TGCTCTTGTGGAGTCAGTTAAACGCATTACGCGCTACTTCCCTGAGTTTCAGCAAATATA  
CCTTGAACAGTTGACCAACGTTTCTGAACTTCGGGTGCAATCTCTGGAGCAGCACCTTTT  
AGAATAACTCCCATATCTTCAATAGGGGCAGCAGTCGTAGCTGCATCGAAACGAGACATT  
GATACCCCAAGCCGCATCCTCCGACCGCGAGGCAACGTCTACAACGGTAGCCGCCACA  
TCTTGATCGTGTACTGCATTTTCGAGCAGTAGACGATAGACGGTTTAAAGACGCCACTGCC  
TTTATACCAGTTAATCCCAGAGTAAACGTATCTACCTTATCTAGAATAGAAGCCAGTTGA  
GTGTTGGATTCAGTCTCTACGGCTGTAGTAGAAATTAGTAATACCATCTGTAGGAACTCT  
TTATCTTCTGCTTCTTCTGAAGCTTACGCAACACTTTAAACTACCAACACGTTCTTTA  
GGAGGCGATCCCATTAACGTTTTCTTCGGTCTGCTCGGCCACCACCGGAAGCCCTAACC  
TCAGTGAACCAGTAAACGGATTATCCAGTGACTGCCTGTAGGGAATCAGAAGAAGGGGCA  
CTGTGTTAACCCGGTAAGAACATAGCAGTTAGGGCATCCATAGAAGTCATAGTTCCCTCAC  
AACAGTTCATCCCGCACCCACCGATTTGACGGAGTACCAATAATTGAGTTGCACCATCT  
TCCCGTCTTCTGGAGTTAGGTTAGTCTTCAATGAGTCTACGTAAGCCAGTTCAGCACCT  
AGCTCACGGACATAATCTACATACGCATCGTTATCAATCTTAGTCAGTTCTGCAGCAGAG  
TTAGCTAATACTTATGGATTATACCCGCAAGCTCATCAATAGCCATTGTTGTACCAGTT  
ATAGCCGCTTTCAAAGCTTCTTGTGAGAGTTAGATAGACGTACAACCTGGGTCAGAATTG  
TACGCTTTCATATAAGTTTTCATAAGGTCGTGATCACCAGTACGGAACCTACTAGTGGAT  
TCAGGTATAGCTACCTCTTTCATAGATCAAATGCGTACAAATCGTTACTCTTGTCCCAT  
TCTAGTGGATTGAAATCGACAAATCCTTCTCCAATTGGCATCTCTTATCTCCTTATATAA  
TTCTTTAACGAACTGACCAAAGTCAGCATATTGCATTCCAATGTGAGCAATAGCTCCAGC  
AGTATTAGCTTGGCGAGAAGCATTAGCAGCAGTTTGTAGAATAACCACTAGCATCTTTACA  
TAGCTGACGGGTGTGGGCTGAGAACTCAGGTTTCGATTAGTGTGTGAGCTAATCGACGC  
TATAGCACCTGCTTACCCGGAGCTACCCGACGTACCGAATTGAGCAGCACTATTCTCCAT  
TCTTGTCTCGTTGGATTCGGGCTTATTGTAAGCAAGGTTCAATCTACGGGTTTGCTCAAC  
ATCTGCACTCCGAGATTGGACATCTTGTCTGTTATCGATGCTCTTTAGATGCTTTGCTAGA  
TTGGGCAATGGATACGGCCGTAATAGCGACAACCGCACCAGCATCAACAACCTCAGCAGC  
AGATACAGCAGCGGCAGTTGCCATATCATACCTCCAATAGTTTACTGTAAAGGATGATAT  
CTACGTGCTACCCAAATCGCTCTATCGAGGCTGTAGTGGGATTTAGGCCAATGTGGAGAG  
CTGTTGCACTGTACACGTGTGCGGAACGTTTCAGCAACATCGAACATTCTCTTGAACACCG  
TACCACCGCGAAAATCTGGTTTTAGGTACAAACAAATAGTAGATGCTACACATTCTTTGC  
TGAATAGGGCTTTTAGAACTCCATTGTAATCACGTCTCTGATTGGAGTTTCTCGTCTC

CCCCACAATGATTTCCATCCTACCCGCCGTAAGGAGATTATATCAGCTTTCTAGATTCA  
ACTCGAAGACTGATTTAGTTGAACGAAGGTGTGCCTCAAGAAAATTATCCTCAAACAGAC  
CACTAATATACAATTCCTCACGAATTTCCGGTTTACTTTCCATGAAAATGTTTAAACAGAC  
CTTAGTACCACCACTAACGGTACTACCCAACCTTACGACTTACAATCCTTGGCTTGGCTT  
TGTTCTGAACACGTAAGTGGAAATGCCGTTCCCTAAGCCTCTAAGTCGCTCTGTGGCCGTGAT  
TACTTCATAAGGGTACACATTGATACCTGTGTTGAGATTTCATCGCTCTACGTCAACGGTA  
GCACTGACTGTGTGCGAGTAGTATCAGTCCACTTCTTGGCCGTAGGATAGTCCGTAACGTC  
CCAACGATTACCTAACACATGCTACATTCGTTTTGCTCATATCTTCTCCATCTACAAC  
TTTGCACCAAGTTTCTGTTCCGATTATGTGAGTCGCTGGCCTTGTATTTTATGCACGGGC  
TCGAGTATCGTTTGATTTCTGTGGAGCACTTAACAGGTAAGCCTATGGATGCACTAGGCA  
GAAGTCTTTAAAGTAATCTTGGTTAAACGAATAGAATCCAAACGAATCAACAGCACTTTT  
GACTGTTAGTTACTTAGTATCTCTCAACTCTTTATGCCCCGATTCCACGTCCCAATGGGAA  
TGTAACATCAGAAGACTCTTGTGTAACCTCTATCTATAACCAGCAACGGTACAGCAATCACT  
AACTACCTTGTTACCAATAACGTTACGCTCCGCAACATATCCGGTAACTGTTTCTGCTAC  
GGTAATGTCACTCTTGAACCGGTTAATGAAGAATGCAACATAACGTACGCTTAAGGTAAT  
CTCTAGGTCAAAGTTACTTGTATTGGCAATTTACGAACTAGCCATCGAACATATTTACC  
TGTCGGTTCTACAGTACGTATCGACTTAACCTTACTGGAAATTGTTATCTCATTATATAA  
CGATTGAATCGTGAGTTCTGTTAGTTTGGCTTCAGAGCGTTTTCCCGTTGTTTGGTCTGG  
AGATAGGACAATGGATCCATCCTCTGCCACTAGAAAACGGTATAACCATATGCCACAAC  
AGGACTTGGTGATACACCACCGTAGACAGTGATCTTGGCTACGTGATAACCAGTAACGGA  
GAACAGACCATCTGACGTACCACCCAACAGCCACACTCCATTTTCAGCAATGATAAACAC  
ACCACTGGAAACTTCTTCCAGTCCAACAATCTTACGAGTTGCGTTAATTTTTATGAAAAC  
ACCGTCTCAATCAACAAGAGCACTATCTACTTCACTTGTGTGGTCAGTTAACTGATAACA  
CATGTTAATCTCTGCGTTAGATTTAACTAAATGAGAGAAGAAAACGTGGTTACGGAAATA  
AGGACGTACATCAATTTTTCTTGGGGTTGCTGAGAATCCTCGATAGAATACTCGACC  
TGCCAATCTTTGAATGCAAGAAAGTTTACCCTAGCTAACACTTATAATGATCCTCCCGT  
AGAACCACCAGTTGCAGGAGTGTTTTGACGTTCTTACCGAGACCGGTAGTTGTGCTGAC  
TTTCATGCGAATTGGAGTAGACTTTCCGATTGCGTCTGCGTCTGTACCAGATGTTGTTTT  
AAATAACCACCAAATCTCGTACCCTTGGATAAGTACCGATTGTCGCAAAAGTTGAGTT  
AATTTTTTACTATCCCCACCTTGGTTAATTAGCCCAGACCGATAATCTGTAGATAGGGT  
GTTTGGCCGTTCTTTACTTGGAGCCGAACGTCCCCACACATCACGAATTTCAACGAACAC  
AACCTTTCTATCTACTACCGTTTAACTCCGTGCAAGTATTAAGTCTGTTTGAATATCCCT  
AATCTGGAGTGATATAGGGTCTGCTTCCCTGAGTTCCAAATACACTGATACCATAACCGA  
AGCGCAACTCATAAGATCCTCTGTAGTTCCCTTCTGTGGATAAAAATTTCTTGGTTGTTCAA  
TTACAATTTACGTTAGATAACGGCTCAACAGAAGAATCAAACCTATTTTAAAGTTATCACC  
GAACTGTACTACTAGAACTTCTGGAATGGCAACATAGTCAGTTTGCCATACGTCAACACT  
CGATAATAATATTTGGTCTGAGAAGTCTACGTAGGAAGGATACAAAGTACCTTAATCTTC  
CAAATCCAATCCATTGCGTCTTGCCCAAGCGTTAGCTTTTGAGAGGATGATGTTCTCACC  
CTCTCTGAAAGAATCCATAGGCATATTTAGAATGTTCCCTCCTGTTTTTAGACCAGACTG  
AAACTGATTGTCTACTAGATTAGCCTGTCGTTTTGCCAGTTGCTTTTGCTCGTCGTATTT  
CAGTAGCTAGTTATTGTTTGTGATGCGTTGCCAGGCGAACGCTCATGAGGGGTATTGCCCTT  
TAAGACACTCTGGTACGTGACCTCCGCCGTCAAATTTAATCTCGTATACAGTACCGTCTG  
TATCTGTAATCTCTAATCTAAAAGCATTGTTACTGCCAGTAAAATCCCCTTGAGAAGAA  
TTATCGACATATGGACTACGACGATTTGGGCAAGTTGAAACTGTTGGTGTGCGGTATTT  
GGGAATCGAATACTACCTTTGGCTTGGCAACTCTTGCAGTACTATGACGACAATGGATG  
GTAGCCCATGTTCTGCTTTAGCTGAGTCCATTTGTCTAATCTTGGCACTGAATGTTGCC  
TTCGTTCACTGATTAGGTATGGGAGCATGGCAGCTGGTAAATCAATAATCAAATCAGTC  
TCCTGCACAAACATAGGACTAGTATAAGCGATGCCTTGAAGTTTATCTTTGTGGATTGTA  
GATTCTACGTCTGTGTTGCGACTATCTAATACACGATAATCATCATCGAATGAAGCCCAG  
AATTGTGGAACCTTATCGTTTTGGATGAAGTACACAATGTCGCTGTCATCACGAACATTC  
TGTACGTTGGACTGACCTGAGTTAATAGAAGTGTGTGCGAGCTTCGAACTCATCTGGATAC  
AGGTACTTTAACTCAGTGTAAGATACTGGTCGCTCTTTCATTGAGGTATCTTATGGCAAG  
TACGTCATCTCTGGAATGTTGTCAGGAAGCTTTAAGTAGTTTGGTTTATCCACATCACTG  
ACTCCATCAAACATACTCCACCACGAAAGTAATCAATCGTAGAGTTGGTGCTTAGGCTG  
TCATACGAAGAACGCAGGATGTACGCCGCTGTATCGACTCAGTGGTCTCATCAATACCG  
TTGACGTTATCACCATCCAAATCACTCAGCATGCCTTGAACAATATGAATAACAGTATAT  
TTCATTATCGTTTACTAGATCTACCACCACCAGCCGTTCCAGCTCTGTCACCAGATTTAC

CACCATAGGACCGGTTGGCGCTTCGAGAACGTTCTCGAAAATTACCATCTCCATTAAGGC  
CACCGTGTCTCTAAAGTTCTTTTGTGATCTACGTCTTTCCCGTAACCCTTACGAACTTTTC  
CCTCACGTTCCATCTTCCGACGAGCCGCATGCCCGTTTGCCCGATTCTTCGTTTGTTCTG  
GAGTTCCTGGTACTTGTGCTACCCCTGTCGGTCATTACGCTTCTTTGCCTTTTTTTGAAT  
CTACGAGATCTAAAGAATTTCCGTCTCATCTTGACTAACAACGCTGAATCGACCGGCTAC  
ATATTTCAATTTACCACCAACGGACAACATGTAGTCAGGACGGGCAGGAATGATTGAGCC  
AAGGGAATCCATATTATCATTCTGGTATGCAGACGGCCACGTACTGAGGACTTGAACAG  
AGTGAAGATGTATTGACTACCTCCGATTGGGGTATATACAGCAGATTTGCCATAAGGGTC  
AATGGAAATTCCTATTGGAGTTGGAAATGACTCAATCTTGAGTGGCACAACACAGTAGT  
GCCATCACCTATGGCACTTAAGAATGTGGTAATTGGAGCATTGACAGCTCCTTTTTTCTTC  
ATGTATGTATTCTGGAATATCCTGATGTTGTATATCGGCCATTGGAATGACTCCTTG  
TTACGGGATTGTAATGAAATTAAGTAGATTCCCTTAATGTATCATGTTATCCATTCCCTGA  
ATTAATACTCGTCTTCGACAATACCTGTCCAGTCACCATAGACCAATTAGTTTTGAAG  
CAAAGTGTACACGAAAATATGCAGGTAAGAAAGCCCTCCGCAGAGGGCCTTGAGATTA  
GTGTTGCACTCGGGATACACCTAAAGTGACACCAGCATTGTTGGGATTCCAGCAATCGC  
AGGAGGTCGACTGATAATGCCAATCTTTTTGCAGCTGTCGGATGTGTATTGTTTGAATCG  
TACTATCTACCAGCTACGACACTTATTGGAACAGTGCATTAATGAGTTTGACATCACC  
CGAATCATCACCAGTCAGTATCAGCAATCTTGTAGTTCAGAGGGCCGGCCTCCATGAGAA  
ACCATCCATTGATGTGTCTACATACATTCCGCCACAATACCTCTCCAGCACGTCCGGTTTC  
TCGAATGACCTGTACTGACATATTGACCTTTGCTTTTCGACTAACGACGAAAGCTAGTAC  
TCAAGATGTTAGGTCTGTTTATACAAAATCACTGGCAATCTGTGTAACGTTGAAAGTAAT  
TAGAGAACCAACGTTTGATGTTCTCAAAGTTGTTAACC GGTAAGGAATTAGGAGTAGA  
GTAGCTGATTCTTATAATGCCCTCTCTAAACTCCGGTAAGGCTTGGTTTTCCACCGATT  
TTCTGAGAGGTTATAAATCAACACTTCACCATCCGTTTCGATCGAACAAACGATTAGCAC  
ATTAATAATGACTCTATAGTGTGTGGAATAAACTCTAAATCACTCTCACATTCGTTACC  
CGCCACTACTTGATTACCTTGCCCTACGTGAGTGTGTTGGCCAATCTAACAACCTCGAGGAG  
AGTCTGTTTACCTTTTGGCTTTCCATTAACGTAATAACAGTAGCTAGTTCCTTATCTAC  
CCAAGAACGCATGCATAGAGAGTAGGCTGGGACATCATCACTCCAATCTTTAACGTACAA  
GTCTTGTCCGATCCCGTAAGCTATCGCAACTAGAAGTGC GCCTTGTCGTAATCAAAGG  
CGTCCGGTAGAGGGAAGGTAGTTATTTCTACAGATTGGCTGCTACCCATATCTCCATTA  
CAAGATAGAGTTGTTGTACGTTAGTATGAAATGTAAGTGAAGAACCTCGTCAGTGCAATA  
CAATAAACTTTTAAACACAGTCTCACTGTATGGAACAGTTACGATAAATTCACGGGTGAT  
CAGAACCTCAGATACGTTTGTAGTTCTAACCCAGTATTCGAGAGCGCCATGCACTCGCCT  
AACAGCGGTAAGATCACGGTCAGAAGTACCCAGACCCTGCCCAGATGGGAAATAAGA  
TTCCCTGTGGCCATGTTAAGAAGCATAACGTTTTCTCCGAAACTACCGATTTTATGTAC  
AACCTCTGAAACTGAGTAAGATGAAACATCGAGTTCACCCTCGGTATTGGACAATTCACC  
AGGGTCCACGAATTTTCGAGGTATCCACCTCCCACTTAACCATGTGATTGTCAGAACTCA  
TCAATCAATTACAGATTCTGGATTATTGTCTATGTTATCTGCAATAACACACTTCGCCTT  
GATAAGACCCGCCTTGATACTATCATTTGAGTTCATATCTAGGTCACTTTCAATTTGGTT  
TGTTAACCTTCTGGGTTATCCCTGAATGGAGCCTCGTCATTGTGTGCGTCCTTAATCTT  
CTGGAAATTACGATTAATTGGCACAGAAATAGTGGAGGTAACATCACTCAGAACTTTCAA  
ATCTATACTATCACCTTAGTAGTATATTTTTTGACCTATAAAACTAAAGGGAGAGCCT  
AAGCCCTCCCTTGCATTAGTTCACCTATCTTAGATTGAACTTTGACCTTTAGCAACAGC  
AACGGCATCAGGATTCATACCTCCTTTACATAAAGAGGAGTTACACGAACATTACCCTT  
ATCAGTCACAGTTGGCGAAGTACCAGCGGGGTTGGAGGTACCTTCGCCATCAGTAGTTAG  
AGGACTTGCCCAAGTACATTCTAGAGTTGCTTTAACAACGCCCACTCCTTCGTCTTGTGC  
TTCTAGTGGTTGAACACCGTTGGTAGCTTCTGAACCTTTAGGACCTACTGCGATAACAGG  
GGCAGTACCACCAAGAGCAAACACCTCGGATACGTGAGCATAAGCATCAACAACCTGAAGC  
ACCTTTAGGCAGAAGTACTTGGTTGTATTTAGCATAGTCTTCCGAGAAAGAGGATACCCA  
AATATCAAAGGTCATATCCATAATGGAACCTTCTCTCTTAATGCCACTTGTTGCTGAGCG  
TGTACCACGAGCAGCATATAAGTTGTGAGTACCATGACCAGCATAACTTTCCAAACGCAT  
AATAAGCTCCTAAGATTAAATCTAGCAATGAACCGGAGGAGGGACACTCCCTCGCTCGGG  
TCATAGTAATGACTTGTAAGCAGACTCAGAAGCGAGCAATGGAAACAGAGCGTTCGTTACG  
TAGGATAACAAAACCATAACGACGGCGCGCAACGAACTCATTACGGGGAAGGTCTTTGGT  
ACTATAAGACTCAACACGAGGGGCTTGACGTTCCGGCGTACATTATAGGTTTGGAGTTGTA  
AACTGCAACACACATAACCGATACACGCATCACCGTTGGTGATTGTCTCACCACCAACCTG  
TTCCCTTACGATACGTGGAAGACGGTTAGAAGTTATAATGTGCCAGCCGTACAAGTTAGA

AATGAAC TTCTGGTCATGAGCACGAACGCCTTTATACACATCCATCGAGAATGGGTTAGA  
GTCGATAGCATTTCAGCGAGTTGGAAC TTGGTATTCAGAGTTGCCTCGATGAATGGGTC  
AACAA TTTGAATACCACCACCTAGTGGAACGTTTCGCCTTCTCCGCAGCAAGTTTCATGAA  
GATCGAGTCTTCCCGTTTCGATGGTCTTGTTAGTACCTGAAGCGATAAAGGTCGTGAGCCAA  
ACGGTTAATCTCGGTAGCATCAGCAGCACTTAGACATGGGTAAAGCTACTTGCAGATAGCG  
AGTTTCTAAGTCTTCTTGCATCGGACCAGAAGACTCTTGAGCACGCATTGCCATCAGAGA  
TTCCCTTTGAGCAACGTCTTGACGTAATTCGTCAGTAGCAGACCTATCATTTCGGTTGCA  
GTTAGTTAAACGCCTCTGTTAGTTACCAGTCTCGATTAGTTTGTAGAGCAGTTGAATTGC  
TTCATCTACATCCTGAATAGTTACCGTATCCACAGTTTTAATGTTTAGCACTTCACCCGC  
GAGAAAATCTAAGACGTTACGATACATCATTGTTGGCAAAAACCATCGTGTAGGTTTTTC  
CACAATGAATTTTGGATATTGTTGAGCCTCACTAAAATGGCGTGAGATGCCAGTATTTTG  
TGAACCTGTAGCACCAGACATATGTAAATCTCCTGACAAGTTAGTAAGCCTGAGAACTT  
CTTTACCACCTTTAGCCGCGAAAGCAAATGCACGGAAGGCAGCGACTAAGTCAGAAATAG  
AACCTCTTGAAC TCATTCTGAAGTTGACTTGTGGCTCTGGCGGGGTCTGAAAGTAAGCCG  
TAGTATGGGTACCTGTTCGAGGTAACAGTTCGAAGTAGTTGGCTTAGATTTCGACATCAAAAT  
AACTTGGAACTGCTTTAGGGGATTTAGCAGCGAGGTCGTTCAAAAAATGGAAACCTACTC  
CTAATCTAGGACCCTTGGAGTCTAGAGCCTTGGTTCGCCCTATTGCTACCACCAAATTGAC  
CAATGAGGGCATTAGTTACCGCTACTTGGTTAGGTTGTGCTTGAGCTCGGGCATCACGTT  
TCTTAAGTAATTCCAACACCGCCTGGTCAACTAGACTTGCTTGC ACTTGTGGTGCAGTTG  
GTAGGTGACTTTGAGCAAGAGACGCTACTACGTCGTCCAGATTGTTAGCGTTTCGCCAGGT  
CAGCCTTCACAGTCTCGTTCTTGTCTTTATACGTTGGTTTGCAGCTTCGACATTAGCAA  
TAAGCGAGTGAGCGCGTGGAACACTAGCTAAAGCTGATTGACGGTCTGCGTATTTACGAC  
CTTCACCCACATAAGCCGCAAGTTCTGGAACGAGTTGAGGAGGCGCAGGCGCAGGTCGTT  
GTACGGGTTGCTATGGTTCTTGAGCTTGTGGTTCTTGAGCTTGTGCCAATGAATATGATT  
GGTCAGCCATATAATTCTCCTTATTCAAATTTCTAAATGTGATTACGAAATAGTTCTAAT  
AACTTAAGGTTACAAGTAAATAACTTCTAGTCAAGTTTTTTCTTTACTATTTTATGCAGG  
CTGTATGGAGCCCCCATTAGGACAGTTCGAAACCATCCATTTTGATTTGTTGTTCTCGATT  
CTCAGCGATTTCGTGTCTTAGAATTTCCACCAGCCTAACCTGACTATCTTACTTCCAGC  
GCAATCGTTGGCGAACGGTACCTTTTGTTC AATTTTCATTCCTTGCGTACACAGAGTTTT  
TATCCTTATCTCCGTATACTAACGGTACTTGTGCTCCTTCCCTCGATTTGTGCCTGTGTTT  
GGTTAACAAGTGCAGAGGTTGTCTGTGCTTCCATAACTGTTACGTTAGGTTTGAAAATAT  
CCCAACCACCTAAGCTTATGTTGTGTTCCGACAATTTAGCCAGTTCTCAGTAGACACAT  
GAGGTTTAATCTTTTGCCAAATTGGAGTTTTAGCAAAGCCCATTAGGCTTTGTACTACTT  
GCGCTTGTCTGCAAAGTGTGCGAGCACCTCCAGGCCGTAGTTCGACATTTTGCTGGGATAC  
CGTCTTTGTTAACGTTTCATGTAGTTTGCCACTTTATCATCTGAGTTAAACATACGAATGG  
CATCTGCTACGTCTAAATTACGACGAGAAATCTCTAGCATGGCATAACAGAACCTTAGCCA  
CCAACATTAGTTCAAAGTTCATAATCTTCTCTTGGTACATACGCCAGCGGTGGTTTGAA  
GCTGTTGAGCCTCAAAGGTTGTGTCCTTCCGGGGAGCACGAATACCAATAGCTTAACGAG  
GAACTCCTGCAAAC TCTTTCAGCTTAGCTTCTAGAATCAGAATCTGCATATCTTCTTGTA  
GAGCTTAAGTGTAGGAAGCCATCAGCTATACATCACCATCACCATTGATGTAAATCTGTT  
CTATAGGTCCCCAAACAACTGCTCAACATCGCCTATAACATTCATTGAAGGAAATGCGA  
TTAGGTCAAGCACGGCAGCTTTCAAGTTCTCAAGGTGGTCGATAGTATATTGCATATCTA  
CTAGGTTATCTAGTGTCCCATAGAGTACAGCTCATGTTGACCAATACGCCAACAAACAAT  
GGAAGATGGGAGCTTGTGCAAACCATGATAGATTCTCTTTATCCTCGATTACAAACATGC  
GGGCAATGATTGTTACTTCCATATTGCGCTTAAATGTGCCTGACTCAGTATCGCGGTAGC  
CACCATAGAATGTCAGCACCTCAACGTAAAGACTTTGGGGGTAGAAGTAAAGGCTGCCAA  
GTCCGTCCAGTGAGCCGCCTACAGCTTTTTTCAGAGTCTTCCCTAGTGTAAGTGTCTAGCC  
CACGACGAATCTCTCGTATACGAGCGACTGGGGAAGAGGGAGAGGCGATCTCTGGCTGGT  
CCAGTTCCATTTGTAGTTACTCTCCCTCATGCAAGACAGTACGGATGTTTTCTGGAGAGG  
GAGCAAAGTCTACAGCTACGGGATTTAACACGCTATCTTTTGTGTCTTTGAGA ACTGCAC  
GAGGACCAAATAACGTATAAAGAGTAGCGCCAGATTCCCTTATCCTTGATAGGTTCCCTTCT  
CATACTGGACGGTGGCAAAAACAGTTGCCGTAATCAATCTAGTCAAATAGGAGTAGACTGA  
TTATTGTGCGGAAGTCCGATTCCCTAACGTTGTTATCCATGTATTGCTGAATAGCGTCCC  
GTTTGGCCTCATCGTGAAGGATCTTACCTCCCCGAATCAACCACTGTTCTTTAGGAACCA  
ATGCACTAATGTAGCGACAGTGAAGTTATCTCGATTCTTACACA ACTTAGGTAAAGTAG  
TTTTGTTCTTCCACAGTAGCGTCTGTTAGTCTTACAGGTCTCAGTAGCACAGATGG  
AGTTACGTATTTCACTCTTTTGGCGATAACC ACTCATGCCGCTGCCTGTTCCAGTTCTGCC

AAGTATTAGCAATCTGTTT TAGACAGATCATCACGAGTGTCGTTTGGGCATCTGTTGTAGTT  
CTAGAACCTTACCTTTCATTAATTAATTCCTCCAAATCTAGGGTTAAATTGAATGACGTT  
GCTTTCTCGTTTAGCGTTTGCAGAGAGTTGCAGTGTTTCTACCGCAATCTCTACAGGAGA  
AGCTAGAGGGTCTTTCAATTCATCATGAGGTGGACGACCCATCCCAAGCTCTTCTCAAG  
CATTGGAGGGTATCCACCTATTCTATGGCACATAACCTTGCTGATCCCGTGTTGCAA  
TACAGCAGCCGTACGCTCTTCTTAGATCCAAGCGCCTTAGTTGGTTCGAAACTAGTCGAT  
TCTAATCGTCATGCCTTCTTGCATAACTTCTCTTTAATATCGTTTACAATGATTTGCTG  
TGCCACAGTAACCTCGGCACGAAGTTTCTATATTCCCACTAACGATGCAAAGCAGAGCT  
ATGGTCATAGTAATCATTAACTTATCTGTCTTGAATCGGTCAATATCCGAAACGTAGAT  
GTAACCTTCTGAATCAATCCCAAATACAGCGATTGATGTAAAGTTGCCAATGTTAGAGAA  
CCTAACTGCAAAGTCCACAGCAGCTAAGATATTCAAAGTTCCGTCCTTAAATCAGTGTCT  
ACCTTCCCAATAGGTAACAAATTTCTTATAGTAGTATTGGAATGCGCTATAGTTCATACG  
TGCTGCTTCCGGGTCGTTTGGATCACTGTAGTACTGCGCAAAGA ACTGAACACGGTCAAC  
GTATTTTGCTTTCTTCTTAGCCAGAACACGGTCTCAAATCCAAACTCCTAACCATCAGA  
ACCAGGATGAGTACGAGGCCACAAGCATAACGCCACCTTCTTCTACTACACGCTAAAAAAT  
CTCCCAAACAGGTCTTACCTCTCCAGTCTCTTCTCCATATTGGTTCGAATACGGGCTGATG  
CTGATTCTTCCATGGGTCGTAATAACAGCAGGATGATACCGCGTACCACAAGTGTTAAC  
TAAACCATCAGAGTTTAGGATAGATTTCGATCTGAGAGATAGCAGCAGCTACCTTGGGTCT  
ACCATCCTCCAGATATGCGTTATCTGGA ACTACAACGTCATTAGAAATAATAACATCAGC  
GTGCCAAACAGTTGTGTTAGTGGTGAGGCCCGCAGTCTGAATAGTAAAGTCATGCATGCC  
TTCCATCTCACGTTTTGGGTGGGCAACTGCGATTACAGTGTCAGTCCATTTCTCACGTTT  
ACCTTCCCTCATGAATCATATCCGAACGGTACGGCGATAGCTTTTGGAAAGTCATGAT  
GTTCTGCCTATCCTATAACTGCATTTTCAGCAAGTTCACTGGTAGCAGAGATATATATAGT  
GGTTGGCTCTGGATGCTTAGTTCGGACACCAAGCTATCCCATGTGCCATCATGTGAGATTT  
TATGTGACCACGAGGTGATAGTAGAAGTTGGTTCGTA CTACTTAAATCTCCTTCCACTTTGC  
CACTTCTTGTGGACAGCACCGTAAACGTATTTTGCATTAAGCAATCGTAAAACCATCCA  
GAAGTGAGATTCGGCAGCTTCTCTAATTTTCGTTAATTTTACACACTCATGCCTCGTAATG  
GTCGTTTATGGTCTTCGTCAAGTGCATTTCTTAACCCGTGATGCAATCCATGACTCACGAA  
CTATTTGTTCTTGGTTCGTTCTGCCCCACGTTCCGCATATCCTACTTCGGCAAGGC  
GGTTGACAGCTGCAAAGACATAACCATCTCGTGCCATTTCCATTGCACTGAGTACACCCA  
TAGGGGGATATTGCATCTCTGCATCTTCACTCCATACTTCGAACATAGCGAAAAATTCTT  
GGTTAGCCTTAATCATCATCCAGTGTTGCTACCCACCTAAGCATTACTTGCATATTTAA  
TCGCATTTGGCTCTTCGATGTACGTCTCGACTAACGGCCGTTTAAATGCTTAGGTACTTCT  
CACCTTGAACATACGGTCTTCATCCGATATCGTGTA AATTGAGCTTGGCTTAAATCCCT  
TCCCTAAAAATAACCAGTGAGTAATCCATCCACCCATAACAGGCCCTCAATTCCTTCTTCA  
TTGGACCCCTTAGTGTGGCTTACTATAGGGGTAATATAAAATAAATACTTTACTAATCC  
AGAGGGTATTTTAAATTTAGTGGCCTTAACAGCAACCCTCCACGCCATCTACGCGTGGCGA  
GCCGTGTC AATCTGCCACCCCATAAATAATGGGTCACCAACTACTCAATATGCCGCTTGT  
ATACGTTATAGATTATCTTCATTTATCTCTAGTGGGAGAAATTTCTCATGTGTTTCCAAGT  
AGTTCTTCTTTATTCACAAATGTAGAACAAGCTTCATCCCATACCCATTTACCGGAGGCA  
AGTTCTCCGGTGT TTTATCTTAGTTTACCCCTAGAATCTCCTTTGTTGATTCGATAACCT  
AACAGTATACCAGGATTGACAGAGTTAACTTTAGTTCGTACCATCAACGGCAGCCCCAGCA  
GCACATCCTGCCTGCCACCGAGTCCAGGAGTCTGGCTTCTGATGCACGGGTGGCTCCA  
ATTTACCTGCGACACCAA AATTACCACCATTACCTCCGTTACCACCTCGATCTTCGTCA  
GTCCCACCGTTAACACCGGCGAGACCGGTTGTGCTGCTTGGCTAGAAATCCTTGACCGTAT  
CCCACATTACCAGCGGCACCACCGGTAGTGTATTTAGTATTGGGCACTGTTATAGTTCGC  
TTCATTGCATTAGCCTTCAA AACACCCACAGCGTCACCGTTGAATTTGGATGCATAGTAC  
GTCCACCTTCCCACGGCTATAGGGAAACCGTAGGTAACAACAGTGCCAAACTCTGCACCC  
GACCAACGATATATCTCGGAGCGACACATAACGGAGTAGACAGTTACGAGCACGAAATTCG  
ATTTGGTTCCCTGTAGCGTATGTCCAAGTTCCAGATGAAGGGTACGGCGTGTAGATTCA  
GTAGTAAAGAAACCGGTAACACCTTGTCTCTTTACGACCACCACAGCCTCCA ACTGCG  
ATTGTGCCGTTGTTGGTTAAGTTAGTGT TTTGTGAAGTCTGTACTCGTAAGGCAGGGCCA  
CCA ACTTGCCCTACTCCAGTTCTACCAACACCAATTTGTCCATAGTTGTTTCCATACTTG  
ATGCTGTTCAATTGTCTTGTCTACAAAGCCGCTGGAATCACAATTGCTGGAGTGCGGATG  
TTGGTTGAGTACACGCTCACACCGGAGTTAATCGCTAGATTAATGATAACCTCTTCTCTA  
CCACTTTACGCGGTAGCTAGGTTGAAACCTGCAGTAGTTTGACTGCTTGTGTAAGCAGAA  
GCGGGGTTTTGGAATTTCTTCCATTCCCCGTTTTTCACGAACCAAACCAAGCGCAAATTT



CAAACCTCCACCGACATTAACCTTTTCATTCTAGCCTGTCTGGAAGTACCAGAAAACATTTACT  
CCAACCTGGCTTGGTCCCTGGTTATACGTACCGTAGCCAAATATCTCCATCGGCACCACCA  
TAAGGTGCCCCAGAAGATACAGTAATCTGTGCGATTCTATGTGTGGGTACATCAGGACAA  
GAACGCGCATCAGTTGCATCATCATATGCGGGCTTTTACACCGGCAGTTGCTGCATAAGTA  
GTGGTACTTGTGTGTTAGTAGAACTAAATGCTCCCCCATCATTGTGCTTGGCTTAAACTG  
ACCTTAGGTGTAGTCGTCCAACGAGTTGTGAACTCCGGGATGCCTGCAATCCCCGACCAT  
GCTGGGACCTAACCAATAGGTTGGTATCTCGCCCCACTCTCACCTTTAGAATAGGCAGTA  
CCTGATAACTTCACTCGAGATCTAGCAACAGCATTAACTTAGACCTTAGTCCTTCCTTCC  
AACACCTTTGAATGTACAACCCTAGGGGGTGCACCCAGAGCATCTCTTTCCGTTGGGGTG  
GGTTTAAACCCTGTGTGGTAGATTTACGCGATGGGCGAGATTCTAAGTTGTCTATGA  
CCAGATTTTAAATATTAATCTCACTATTAAGTCCATACCGAGTTAATAATTGAAATGCC  
TTATCTGCTGGAGGTGATGAAAATGACCCTAAGTTACCGTAATTAGTGCCCTCTTGATA  
TTTGGACTCTTGTTACCCAGGCGAACATCACCAGTTAGATGTGGATACTGAGTTAAATCG  
AGAGTGTAAGACGACGCAGCCTACATCACCCGGTTTCACACCTCAACAGACGGAACAGAT  
CCAACAACCTGAAGCAGTGGGGGTATAACTTGGAGAGTATACCCTAACCTACCCTCATAT  
TGTGAGGTACATGACACCCTTTATCTCTCAGTATTGTTACTGATGAGGTTGCAGCCTCA  
TGTATTCTTCTAGTTCAAACAACCACCTTATCATCTACACCCTGACCAGCAGTGTTAATA  
TACACACTGCCTCTATTACCCATCACTGTGTACCCATCGAACTTTGCAACGCCTTGGGGTG  
GGAGAGGTATTTACAGAATCGGAGTCGATGAGCAACTCATCGGTCATTGTAGCTCCAGCT  
ATATTTACGGATCCTAACTCTGCGGGAGTTGGTTTGTTCGTATCCGAGTAGAACTTAGTA  
TCCGCGTCTGCTTTAGAGTACCCAGTGTTCGCATCGGCTAGGCCGGTGACAAGACCTACT  
CGACCATTAACGGACTGAACTCGAGTACCACGCTCTACAATACCCCAAGAGGAACCAGTC  
CAGACAATCTGGTCACTGTAGTGCAGTGTGGTGTGTCAGCTGGGATGTGTGTAGACACG  
CCATTTGAGTTGTTAGTAACTTCAACATAGGCTGCACCCTTAGGTGATGGGGGAGTTGGA  
GACATACCTTGGTAGATTGTTGGGGCGTCTGGGTCTCCCATCACAATGATGCTTGTGGGA  
GTGGTAAATAACTTGTCCAATAGCGCCTCACCCCTTATTACTGATAGAACCGGCACTACCG  
GCAAGGAAGTCACTTACCAAAAACCTTCTCTAACTCTTTAGAAGGGTCATTTTGAATCATT  
ACGTATTCAAAGTTACTGATATACCCCTTTGCAGGGGCCGAATCCGCGTCGCTTACTTTG  
GTTTGAATCTTATCATCCATCGAAACCTCCCTATGCCGTCACAGATACTCCCCTAAATTG  
AGAACCAGCAGCGGTTACTCTGCTTAGTTTGACGTTAATTACCGGAGAAGTTACGTATCC  
ATTCAGGATAAATTCTATAGTGTTCCTACTCTCTAGCAGAAGGAATAGTAAATGCAAACT  
GACTGCAGAAAATTCATAACAAGTTCTGAGATTTGCGCTAACATAGGAACGTCTGGAAGA  
CTTATACTCTACGGAACCGTCTACTCGAATACTCCAAGTGATTTGAACATCAGCCAAGAA  
TGATGGACTGAACCATGTCAACAAGACTAGTACATCCTCCAAACTCGCCATTGCAGCAGT  
CGCGAACGGTGCCTAATCACTCTGAGACGAAGACTTAATGAACGTGCGTGGTTAAGTGG  
AGTACCTATTCCAACAAACCTTGTGCTTGACAGTGCAGTAGCTCACCTAATGTTTAACTT  
GGTACCCTTACACCATTATCACTTTGATTGAGAAACCTTGAACGAATTCCACCTGTTT  
CCACACTCCAGAATCACGCTACACGCGAGATTCTGAATACCCTTGAGATTTGCTGTACTG  
GATGCCAGCATCAGATAACAACAGGGTTTGGGTTAATAGCGTTAATCAATGTTTAGCTCCC  
CCTGGTGCCTGTGGCTTCAATATACCACTCGAGAGAACCACGTTACCTTTGTCCACTTG  
TGGAACATTGTCACCTGTTGACCCCTAAGGTACCATTGGACCTCGCGGGCCCTCAGGCC  
TTGTGGCCCGATAGGGCATTGAGCACCTGTTAGGCCTAGTGGACCTTGCGGCCCAATAAT  
ACCTTGAGGACCTATACCCCTTGCGGGCCTGTTAAACCCCTATCCCCTTGAAGGCCTTT  
CACACCCTGTAGGCCACGTTCCCCTAGGGGACCATAGATGCCTTGAGGCCATTGATCGCC  
TTGCACTCCCCTCTCGCTTACGAACCGCGAGCACCTTGTGGAATTGTAGAGCCGACGGG  
TCCTTGCTTGCTTGAATCCTTGTGGACCTATACCAAACGGAATTGCTGGAGACCAATC  
ACCAGACGCTGCGATCGACTTTCTGAATATCGCACCCCTTGGTCACAAATGTAGACTGGAG  
ACGTACTGTGAAGCGGACTCCAGTTTTAGGAGCTTCATCACACGTTAGAACGTTACCCGC  
TATCTAAAAAGTATCTAGGGACTGGTATCAGTAGCCTTGCCAAACATATAGGTTACTCGT  
CAAGTTTGGAGTAAACAACAAGTGAATTTCTTAGCAGAGACATCTCCAACAATTCCTG  
TTCTTGAATTTAGGATCAAATGTATAGTCTGTTGCAAAGTAGACAAATGGTGGACCTTC  
ATCATCGTATGCACTCAAACCACTAAACAACCTTGAGCATCGATGAACAGAGAGTCGCC  
CTGATCACCATTCCGGGCCAACCCGACGAGGAGCACCCGGTAGGGCCTGGGTGACCCGTTAG  
GTCTTCGTAGTTACCCTCCGTACCATCAAGGTGGCGGAATCGTAGGTTTGCATCATCTA  
TTCATGCTCTGGAGATAAACCTTGTGGGGCCGCAAGAACGACACCCGACCTGCGGACCTTG  
AATGTTGACCCAAGAACCCCACTCAATAACTACACCAGTAACTGGGTCAATCTTGTGTC  
GAATCGAATTGATGTCTACATTGAGTAATGCTGTCACCAAGTTCGTAGATTGGAGTACG

ACCTACCACACCGTGTGGTCCCTGCGGACCCAGAATACCTTGTGACATTGAATACGCAG  
TGGACATTGATATCCAGTAGGGCCTCGCGGACCCTCTGGCCCAGCCGGGCCAGCCGGACC  
AACTCCTTCAAGTGAAGCAAATGAGTAAATGTCCACCTTGTCTGTAGACGTTGGGACGTA  
GTTAATGAATTGTACATGTGTGCCACTGTAGTGTATGCCACTTCTGGAAATAGACGGAT  
ACCGTTTTTATACACATTGCTACAGAAGGGACCGGCATCTACGTTAGTACCTCTGTTGAA  
GTCAAAAGAGAACCCATTACCACTATGTCGAATCACCGTTGGAACAATACCAGATACATC  
ACTTCTAAGGTTTCACGGTCTTCCACTCGAAGAGGTTTCGCTAGGGTTAATAGGAGCATG  
TAGGTTAATTAGACGGTTGGATTTAACAAGAACTGATGATCCTGTTGATAGGAACCATT  
CTTATCTGAGAGAAGATTGGAGTTTAGAGCCTCTCCAAACTTTTCAAACCTTGCAGTTTAT  
TGAGGGGGTGTAAAGCCTCCTCTTTCTTCAGTATGAGTAATAGTCATAGTTATTAAAGT  
TCCATCAGATTTATATAAATAGTTAATATGTCAAGTAACTAGTCTATAATAATGTTTAAG  
TATTAATACATTCCGATATAGAATCATATCAATACTTAAAAACACTCCCGTAGGTTACGC  
AACTACGTTGACCGGGTAGGTCCTATTCCCTTACATTACTCAGTCTCCATTGGCATCAACT  
ACGCAAGTATTCAACATACCCAACCTCTTTAGTGGCTACTCATTGAAAGGTACAATAC  
CAAGAATCTTTCGGTCTGCGGTGGGGCCGCGACTTGTTTACTATAGAGTATCGCCCCGTA  
GAGTGAAGCCGTATCGACGTCTAGAGCACAAATGTTGTCATATTTGCTTGGTCTTGTA  
TGACAAATAAGAAATCTGTAACGCCAGGATTTCTGTGGAAAATTTTTACGTTGCTGTGCT  
AACCAAAATAGCACGCCCTCGTGTCCCCCTCTACCCATCTCCGAGGATGTGCATGTACTCC  
TTTTTATCATTATGTGCGCATTAGCTGTACTGACACATTGTTGATACATGGGATGGTTG  
AGCATTAACTCAGCAATTTTCTCTACAATTCGGAATCTCCCCACACTTGCACGATTAC  
GTTCCCGCACAGCGATTCGGTGCGTTAACATATCGATTTATCTATTATTGGGTTGAGCTG  
AGTGTACTGTATATAGCTGGACATGATACTGAAAGCTAGCTAGCGACCAACTAGGTGATG  
ATAGATTGTCTATTTGTACCTGATACACGTAGATACAGAGCGTATTCCCGATTGATATCT  
ATGTTGAAAAATGAGATGTATGTCACCTGGAGTCCAATTAGGCTTGGTGTGAATTTTAC  
CCCGTCGGTAAGGCAACAGAATAACGATATGGAGGTAGATAGTTACAGTGTCTATCACTG  
CTCTTTAAAAATGTGGTTCACAATGATTACTCATTTAGGGTAATCTTCACACCGTCAAAT  
GTTTAAGGTGATACATAGGCCTGTGTTGCTCTGGGTTGATTGAGGTGAGCAGCGTTACAG  
ACTAATATCAAACACCGTTCTAGATGTATCGAACAGGAAGCTAGCCAACAACGCTTGACG  
AGGGGAGGGTAATTCAGTCAACATGGTCACTACGCTGTGGGTAGCATTTCGAGTTAACCGA  
ACGGTGCTCTAAAGGTTCTCTAATAATTCCGGATATTGACACTGACTTAACATCGGTACTG  
TGGTTGATGACGCGACGTTTCGCGTAGCTATGAGGGGTTATACTCTGAAGGGTATAGAGC  
TAGGGTGCCCTCGGTTCCGATTCTGTGACGCTTTATCTATAAATCGTCCAGCTAAACTAA  
CGGTTATGTATATAACTACAGTGCGGTTGACGTTGAGATGGTGGAAATTTTGAATGCAGAG  
TGTTGATAAGCCGAGACGAAAAGCATGTCCACCGTGAAACCAAAATGTATGCGACAGATT  
TAAGCAGCACGCCCAGCAGTCCGCCGTGATTAATTGTAGTAGGAGTGTATATTTAATGGC  
ATTAGATATCTGATTAATATCAATCTCTGAGTTAATTAGTAATATCTGGTTGAGCTAACG  
GTTGTTTAGTGTCTAAAAAATTTATGGTGAGGGGTTAACTAACTATTGTGTATAAACG  
ATTAAACTGCTACCCAATGTGATTGAGTTCATGCGCTCCGTGTTCAACTTTTACTCAC  
CAGAGGGCTCGTTCAATGTTAACTAGCCTTTATTGTATTCACTAACACGCGAGGGGCAAC  
AATGCAAAGTCGACTTACAATAACGTTTTACCAGACAAGGTCAACCGAATCAATAGCCT  
GTTAGTTATTGGAATTACTGCGGTAGGTGAGTCTGTAGTGAAGCTAACCAACAAGGTTA  
TAAATTGGTTCAAGTTATGTTTGAAGCATTCTCTATTATTCCACTCTCTGACGACCTGAC  
CAGTAAAGAATTAGACTTGTTCCTGACTGGACTAACCCTGGTCTAACTCTACCATCCAA  
CTAATCTCATGGGTGATTATCATGGCCCTACAACCTGACTGAACCTAAGTTCAAAGCTAAA  
CTAAACACTTGGGTAAAAGGCAGCAAGTTTAAAGCGTGATGTAATGCAAGCATTTATTGTG  
TTCGATGTAACCTCCCCACAAAACGACAAGCCCTTTACCAAACCTGTCTGAAGTAATG  
TTTGCTTGTGAAGATGTGAAGGCAGTCCCTAACCGGGATGTATCTGACTACAGCAAGAAA  
GTGATGAACGTTGTACCATTGAAGGCTAAGGGTAAAGTGTTCCAGATAGCGAACAAAAAA  
GCGTCTACTGAATATATCATTGGCTACCTGGAATCTGAGGCATGCTACGAGTTTAGCAAG  
GCCACCAAAGCAGCACAAATAATGGATATTATCAATGCGGCTGCACGTTGGGCTAAACAA  
CTGGGCGAGAACATTGATAACGGTATGTTAAAAGACTATCTACCAGATAACGCCGAAGAC  
CTACTAAATACACTGGGTCAGTTAGTAGGGTAGTAACTAGCAGCCTTTCCAAATTAGTG  
GCTGTTATGATTCTTGCCAGACACTTGATGAACGAGACTATTCTGTCTATTAAGACGCG  
TCCATGTGCTTTGTCCCTCAATTAATGTACTGACACTCCGTATGCTGGATACGTGGGTGC  
TCACAATTACATTAAAACTGAGGATAAATGGATTGTGAGTTCGATAGTTCTGTGACTCTT  
AGAGGCTGTAAGTGTGGGTAAATTGTACACTTTGAAAGACGCTGACGGTGTAAATGATCA  
TTTGTGCTGTTCAACTAAACTGTGAAACATACGTAAACGGTGGGCTAGATTGGTTTCTC

CGTGAGTTCGAGCAGTACGATTTTAAAACTGCTGTAACCCACACCAACCATCGACAAT  
ACTCCGGCCAACTAGCTGAAAGCTACCAGCATGTGCTATGACACTGAGTGATTTAGTAC  
AGGCTATCTGATTAGGTAGCCATTGTTAGTATACTTCACGCAACAATTGGAGAATATAAT  
GCGTATTATAAATATTGTAAGCAACGCCGTAGGAACCTACCGCAGACGAATTAGCACAGGA  
CGATAGTCTATAGATCAAAGGTAACCTATGTTCCATGATTGGTTCTGGGTACTTGGGT  
TATTGTTGGAAGCGATAAGGTGGTGGATGCGAAGACAGCAGACGTACCGACATCCTTCGG  
GATGGTAGCTCTGATCGTGTAATGCTAGGTGCGAAAAGTACTAGCATCATCATTCCCTCA  
GCGATATGGAGACCGCAACATGAAACAACCAAACCCAACTGGGCCCATAGTCCAGTGCG  
TTTGTGTTACACAAGCAAGCAGCAGACGTTGGACTGATCAAAGTGGACAATATAATCTC  
TCGTGCCACCGGAGGTGCGGTGTATGGTGATCGCCTTGGCTTTATCTGGGCGGTTATTAA  
ACAGGCCGGTGCAAACAACCGTAGTCTGTCAACCTCGGAAGCATAAAGGTCAAGTGTCTGA  
CTTATCAACTACAATGGCTCTTGTCCGCTGATTGATTAGGTATTCAATCATGCTCCGTAC  
AATTACTCTGAGTGTAGCCGAGCTGGTTATGGTATTGGCCAGACTCTTAGATAATCAAGT  
GCTAATCCGCTCTATCTTAAAGCCCAAGTCACTAGGCCAATGATTACAGTCTATTACACT  
TATGATTAGCATTTCCACGATTGAGGCGTGGTTCCTTTAGATGCAAATCGGAGCATGATT  
GATGCATTTTCGGTAAAGTTGTGAACGTAATCATGCTTATTACAGTACGTTAACGGAGAAA  
ATAAACTATTTGTACTCTAGTTCCTGGTCGTGTGGATGCGCAAGAACGTTTGCAAGAGGC  
TTACGCTGGTGGTACAACCTCGTAGCGCTGTTATCTTCCCAAGGAACGTAACCGGATGGG  
TACAAAGCCTCGTGTTAAGTCTGGAAGTACTAAGACTTATCGAACAGCGACACCTCCTCG  
TGGCTTTAAGCACTTAAACTGAATAAATATTAGGAGTCCATTATGGTACGTACGATCGCA  
TCAGGCGCATTTTCTTACGTTGCTACTGATAGTGAAGATGATCTAGCAGTATCAAATATC  
TCTGATGGTTGTGAACGAGACGCGACTCAGTTCAAACCTAAGCGTGACGAGCCTATTGCA  
GACCTTTTGGCTAGACAAATTCGTCAAGTAGAGTCATTTTGGCAGCAAAGCCCTGCGG  
GAAACAGAATTTATGTTCCGTATCTGTTCAAGTATTGGATGAATCAGTACGTGACGCC  
TTCTTTGAAGCGGCAGCGAAAGCAGTCGAGCAATTGATTGTGCAAGCTGAATCATTCCAA  
GCAACTAACATTAATCCCGCTAACAAAGAAAGAACTACCATCACGTTCTCAATAGAAGGA  
ATCATAATTATGTCTATTATCTCTAAAACCTTCCAGTATTTATCTCAACTGCGGTTAC  
CTAATGAATACTCAAAACCTCGTTGGCTTTACCATTGTAGACGGTGAAGAAATGGTCGAA  
GGTGCCTTGAAAGACGCACCCTTGGAAGGGGCAATGGCTGCATTCGAGGAGTTCAGCGAA  
AACCACGCAAAGCTGCGGCTCTACTATTCAAAGAAGGTAAATTGTCCCACCAGAAAATG  
ACAACCAAGATATCATCGGACTACTTGGGCGGTAACACGAACATTGCAATGGTTGCTGCA  
TGTGATTCAAGCCGTGAGGTAGGTGGCGTGTGTCGCCACGAGGCGTGACGAGGATGGTGAT  
TGGGAAGTTGTTACCATGAAATGCTCAACCTAGCAGACGATAGCAGTGTGCGGACACG  
GTGCACAGCTGGAACCAAGGTGCCGCGGAACACTTAGCAGTGTCTCTAATGATGACTGGT  
TCGCTAGGGTTTACTAGGTCTAAACACTATAATCGGTCCCCTACTGTGGTGGTGGGACCC  
CGTCCACTAACTCAACCCGAAAGAGAAAAATACCATGAGAGGTATTGTTTTAAATCAACA  
AATCCGTTCTGCAAGCGTATGCAACGTGCTGTAAGCTTGGTCTATTGAGAACCCAAAACC  
TGAGTGTGGGGGCTAACCAGGCATAAACACTTTGTTAGATGCCGCATACGCCCCATGTTT  
GAGACGTTCCAACCTGGATATTCAATTTAGTTGTGGTTTGAAGACGAAATACTAAGCAA  
AGAGCGCTACGAAGCTCTACGTGTTGATGGTGAACCTCGGCACTGAAATCAGCTACGAAGG  
TATGTACTTCAAAAATGCAGGAGGTTAGAAAAGAGCGCCGACCCTTCTACCAACTTGTGC  
TCTACAGCTAACTACCTCCTCATCGGTGGACATCGCATGGAAGAAGCAAAAATGATGAGTT  
CACTCTTCAACATAAGTAAGTGAAGAAGTGGAAACAAGCGCGTGCTGACAGCGCCACTGC  
AATCCGTGCGGTGCTAGACAGTGTGACACCACCAAGCAATTGCTTGAAGCATGGGCAGA  
GCTTGAACGCTTTATGCCAAGTGGTTATGTTGACCCAAGCAAAGTACAACCTACCGGCAAT  
CCATCCAACCTTACCAACTGGAGGGTTAACTTTGAATTCCTTTCTACTGAGTGCATTCTT  
GATTCTAACTTTGTGCGTATCGCTTCCCTCAGAAGCGGAACCATGTTCTAATGTTCCAAG  
ATCCACGTCTGTAGAATAACAATCGCAGTTCTATCACTAATGGATAAATTGCAGCGGCTAC  
GCTTAACGGTAAATTCTATGTAACTTCTTCTTAGCAACTAAGAAGTCACAGAGTTATTA  
CGATGGACTAGACTGCGCAGACAATCAATTGATTTTCAAGTTTATCTCTGGGAATGAAAAGC  
TCAATACATTCGAGCAAAGGTTGCGGACTAGCTCTAGATGCCATGCAATGAGTATCAGA  
TGAAATGGCTGCCGCTTTGGTTTATGTAGTAGCTTTGTAGTGAATAAGTCAAGGGTATCT  
AATGGGATGCCCTTACCGTGTTCCTCAAACAGTTTGCAACTGTTATGAAATAATATATT  
GAATCCCGTTTAAACCACTATCTTCGTATCTTTCCTAATGTGGTTGCCGTAAGAACCT  
TTGTTGGCCGTTCTGGGTAATGGTAAGGATTTGAACAACAAGGATACATCCGAGGCAAT  
TAGCAATATGGGGAATCGTATAACTTTGGTGAGCTTGTCCCCTTCACTCTTATCTATTCT  
TGGTCAACTACAGACGAAGTCCAACCCTTTCGTAAGTTTACTGGAAGCTGTGATGTTGGC

TTTAAAGACTCTGGCCAATACTTCATGCATTGTTTAAAGGTTATATGCAGACGAGATTCAA  
GGTCTCAAGCCTTGGAAGATACTCTTGATGTTGTA AAAAGTGATCTACTTAATACGCTA  
ACGATGGCTGACGAGTATGACTCTCCGGATGATACCGATAAATTCTTAAGCAAGTTAGAT  
GGAGCCAAGATTACTAATGAGCATGGCCGATGTGACTGAACAAAAATGCAACCAAACCAA  
GTTAGAAAAGTGTGGTCCCTTGATATTCAATGGTCAGGGTCCCTGAGTTTGCAGAGAAA  
GAAGTGCCTGAAAGTTGGTCTAGGTTTAGCCTAGGTAATGACTACATATTCAGCAAAACA  
GAGGTAGATGATGATCGATTTCGACCGCTACGCAAATATTTACTTGTGGTTGAAACACAAA  
GGCTTAACGCAGGGTGAACAGTTTCTAGCTTATTGGTGGTGGTAATTTTAGTGGATAAGT  
AGACAGCAGTTTCTAGTGCTCTCAATCAAGTTCATTGACTTAATAGAAGAAAATAACATG  
AAACGTATTGCTATTGCTTACACTGCCCAAGAAGGCGGTAACACTAAAGTTAGAGTTTTC  
TGGACGAACGCGGAAGACAAAGAGATTGCTATGTCCAATTTCAAATAATACCGCGAAGCG  
TAAACCGCCCAACCGACTACCAATTGGTACTAGATGCACAAATTCACTAACTAACACCGG  
TACTATCATCTTGGGCACTCTGCATAGAAGGCTAACATTGTAAAACAAAACCGATGTTCC  
CAACGAACAAAGCGTCAAAGTAGTGACCCACAAGAATAAGGATTCTGATGTAGCGGTGTT  
ACCTCACGAATCAGATAGTTGTGGCTCAGAAGCCATCAGTAGACAGGTTGGAGACGAATC  
ACACTAGTGT TTTGTAGTCACCCAATCTAGTTCGAGTACGGGTGCTTATGTGGGGTTCAG  
TGACCGGGAGCTATTCAGTTTGCTTGAAAAATGTTTAAATAGTACTGGTAAATAACATGC  
ACTTGAAATAGATGCAGGGCGATTACTTGCCCGTGTAATTGCTGGAGTTTTTGGCATCA  
AGCTAGTCATGCGAGAGGACTCTACGGTTCATTGACTGTCGGTAAGGCAATCACAATGC  
CAGTGCTAGGTCCCGATTGGGTGGTTCACAGTGCCAACGTGCAGCGTTTGTGCGCAGGAC  
TTATTCACGAGTGAAATAACCATAACCAGAACTAGCGCTTTTGATCTTAAGTTACTGCGTG  
AATTGGAAATCGACACCAACTAATTCTTTGGTATGGTACTCAACAGGGTTGTTGACAATA  
ACATTGAATACAAAGAGGATGGGAAACTCGCGGGTGTCTGATGAATCGATGGATGCTTTCT  
ATTCTAAAAGTTACATGAAAATCAGCAGTACGTTTGGTAGTTCTCCAGAAGAATTTAAGG  
ATGCCTGTGCATTA AAAAGCCCTTGTGCTTTGACCACACAATGCGCTCTCAATGGAGTA  
GCTTTGTAAATCTTCACTTAGAGGAGGGACTCACGAGTGAACCTGGCCGCGCTATATTCC  
ATACTCTGATGGACAAAGCCCAAGACCTAGCTTTAACCAAACGTGTCGGTGGTTTGCCTA  
GCCTGCCAGTCTGCAATCAGTTGATGGACTTGTTAGACCTGAAAGAAGAAAAAGGTGGGC  
CCAAGTCTAAAGCAGAGGGTTCACCGGACTCTAAATCAGTACAAGGTCAATGTAAGCCCA  
GGGACGGCGAAGGCGAAGTTGATGAGGGACAAGGCGCAGGAAGTGACTCAGGACCTCCTA  
GAGAGGGCGAAGGTGACGCAGGTGAAGGGGAAGTACCTCAGGAACTAATTGAGATGGTCT  
ACGGGGATTCTGGGCGTACTACCGGCGATTGGAAGTGCCTCCTGGTACTAACGTTAAGC  
TAACATACGATTGGGACGAAGGAGATACGTCTGGCTATTGTGTGCTAGCTGCTGAAGAGT  
TCCACCCTAAACCCGTTGCAGGCGCCGCGGTAAGAATCGCGTAGATAATGTGGTGTCTC  
ACTTCAATTTGACTCTGCGTGATAAGGTCTGGACCAACCTCAGAGTTATGTCCCGAGTCA  
AAAGTCAGCGTGGACACAAGCGAGGCGAGTTACATAGCAAAGCAGTGGCTGAATTATCGA  
CTGGCAGTGTGTTATCTGCCGTCAAAGGAACAGAAGGTTGTATTGAATACGGCTGTAA  
CTGTTCTGTTAGATAGTTCAGGCTCTATTTCTGGAAATAGCCAGTACTTCCACGGTCTGT  
AGGCGTGTGTTGTGTTGAATGATGCCTTGAACAAAGTCGGCGTGTCTGATTGAAGTTCTAG  
GCTTTACTCAA ACTTACGCAGGCGGCAACTAGTACAACCAGCTTCTCATTACGCCACCGT  
TGGGTCGTCGCGAAACGCCTCGTTACATGTTAGAGTCAATGCATGGAGTTGAATTAGCTA  
ATCATGAGGATGGTGTCTGCTATTATCTGGGTACTCTCGTCTAATTGGCCACAAAGCAG  
AACGTAAAGTCTTCATTGCATTAAGTGATGGTAGAACTGCATGTGTGCAAGCTAACTCTT  
ACGCATGCTCTAAGCAAGTGGTTCGAGGAGATTGAAAAGGATTCTCCAGTAGAAGTTTATG  
GCATCGGCGTTATGGACGATACCTTTAAACGCATCGACACACAAAGCGAAGTTATCAGAC  
GACCACAGCAACTAGAATACGCTCTACCTAATGTCGTTAAATCTTAAATTCTCGGTTAAT  
ACGGAAAACATATCATGGCAACAAGGACAACAGCAACATCAGAAGCTCTACGTTCTCGTG  
TAGCGGAGGCACTGGCAGCAAGTATGGGAGGTGAGGCTCGTAAAGATGAGTACGTGACTA  
CGGCACCTAAACCAGAACCTCCAACGATACCTACTGTCTTTGAAGATGAATTTCCACAAC  
CATCAGGTGACGGTGTGAAAGAGTATGCTGAAATCATTGGGCGTCGCCATCATAACGGTG  
GGTTTTATTTCCACACCTACAAGAAGGAAGATTGGATGGACGAACTACAATCTCTGATTC  
CAGAAATTGGTACCAACCTGAAGTTTGTGATGATGACCTCGCTCCTGCGATTCTTATGGGCA  
TTGAATACGTGAAACCTGTATTCGCTAATAGCGCAACCGGAGCTGGTTAGTCAGATACTC  
CAGAACAAATCTGTGCTCGTGTGCGGCATCCTTTTCATGTTCTGTGCTGGTATGGGTGGTA  
CCGAGACTAGCGACTACTTGGGTTCTCCTTAGTAGAGTGACGGCAGTATGGAAGGGAATG  
ACGGCCCGATGTCTTCCCCTATTCGTAAAGATGTATTCCTTCTGTACGATGAGCCATTTA  
AAGCGTCTGCACAAACAAACATGTGTATCCAACCACTGCTAGATACTCGTCTGACTCTGA

AATTGTACGGTCATCATCACCTGTTCAGGGTAACTAACGTGCTAATGGTAGCTTCCGTA  
CCATGCGTGCTGGTAACGTCCGTGGTTCTGGGGACCAGATGGATTAGATTGCGGCAGAGA  
AACAAAGACCAATCTACTCTGAACCGTATGGTGTACAAAATACATGTTCCGTACCCA  
ACTGAGAAGGCTGAGAAAGAAATTCTACGCCGTAAGTTCCCACAACTAACAGAGCGT  
TTGGCTATTAAGATTGTTTCCATAGCTAACATGAGTCGTAACGGCTGGGAGCCAGGG  
ACTATCAACATGTCCTACTCTGTACGTTATTCCCAAGATAAAGGCTAAACAATAACT  
GCGTTTACGTAACCCTAGGTATGCTTGCAAATTGACCTACTACGATCCTGTCAATGCG  
GAAGTTGAGAAGAAAGAGTTTGGATCCTGGTAAAGTTCATCGAGTACAAACCCTA  
AGGAGTTATCATGGCCTATTGTGGTCGTCGCGGTCTTTGTGTTTAGCACAGACCC  
CACTAAACTAGCCTATCTCGTGATTTCGTTTGGAGAAAGAGTGTGGCCTCAAACAC  
GTCGAAAGAGATAGTGGAAACAATAATTTTCGTCATAGGTGGTAGAAAATGTTGC  
AGAGACACCGTATCCTACGGCCACGAGATGGAAGTAAGTGATGCTCTAGTGTGGAT  
GTTTTAATCAGATTTGTTAAAGGGCTGCGGGTAAGTTTGTCCACTATTCATCAACT  
TAGATGAGGATGTTAGCGATGAGTACTACTTTGTGAGAAGTTCGTTGGATTAGTACA  
ATTTTCCACTCTAGTCGTTGATGTGTGCCACCTGTCTGAAACAAGTTAAAGAAGAG  
GGCTATTAAGGCTAATCTTGACGAGTTTGGAGTCACTACACCTCGTACATACAGCT  
TCACAAAAGACAGCTGTGGATATGGGATCTTACGAGAGATTAATCCATCTCATCAC  
CAGTTAACTCAAAGTCAATGGCAGAGATGGCTCAGTGGAGGAATCATAGAATATGTT  
GATTACAACCCACGAACGAGAGACTACATTATTCTTAAGCTAGAGGAGTTATTAGT  
ATGATTGATTCTCATTGGTTACGCTGTAAAGCCTGTGATGAAGAAATTCAACCACATA  
ATTTTCGTGTGCTCTGTGAGCATGATGAAATTTTTGAGGTTTGGGAAAACCTGTGT  
CCTGAGTGCTGCTAAAGTCGCACATTGCAACTCTGGCACTCAAGAATGGAACAATGAT  
TCAACAGGATTCACTAACTCCAGTATGGGAGATTCACTTGTGAATTGATGCACTCATA  
CATAACGGAGTTTCTTCTGGTGGCAGTTTTTCATTCCGAATACCGCGATCAAAGCCG  
ACGGAGACGACAACCCAGAGTTGACTCTCGTTGAAACGCGACATTTCTTTAACTGT  
AACGAAGTCTCAACAAGAACCGATTCTATGTTACCCACGTAGAGAACGGCGTTTAC  
CTTGGCTACTGTCATGCTGGCGGTGGGCAGGGTATCTACCGTGAGAAGTTTGCCCT  
GTTTAAAATAAATTAGCGGGTAGTAGTCCTAAGAAAATCCACCGTGATTATATTATT  
CCAAGGCCTATTTCCACTAACAGGTCAGAGTGGTCATCCCAGGCTAAAGTGTGGAT  
GTGGAAAGCCAGGCCACGGATGATGAAATTAACAAGAGGTTTCTGTTACGTTACCG  
AATCAGGTCGTGTGTTACTTCCACTGCTTTTTGATGGTGAGTATCGGGGATACCT  
CTCTCGAAGAGGGGAGTATCACGATAAGCGAAATACTTCGCAATGTCTAAATACC  
GAGAAAAGTTTCGCGCTGTATTTCGAACCAAGCACTATCGACTGTATTGTGGTGG  
AAGATGCTCTATCTTTTATCCCCTTCAGTAGACACACACTTTGCGTCTGACTTAT  
TGGAACATCTACATTAGACAATGTTCTAAATCTTATACGCGGTAATCGCATTAA  
ATAACAACATCTGGTTTGTATCATGATACCCGACAGGTCAAAAACAAGCTGCTCG  
AGCTTATAACTAAGTTGGAGTTGTTTGGTTACGTCCGAATGATTAACAGACACAA  
AGACCCTGAAGAACATTCTGACCCAGAACCCAAGGAGGTACAATGCCTTTAAAAT  
TTACATTCGGGTATACGGTTAAAGTTTTAGATAAAGGTCCCATCTACACATCACAT  
TCTATGTATGGTGCAGGATACCCTGCGTGGGTCAATGGCGCTACACCGAGACGCCT  
CACTAAATACGAAATCATTGGAGTGCATCAAGATGCAACTACAAGAATTCGTGTT  
GATAATATCTACCCGGTCAAATGCGAGTGGTCAAGTGTACCTATGCGGTGATCGA  
GGGCTGGAAGTACTAGATACACCGACTGTCAGTGCTCCAGTAATTGCAATCGCT  
CTAACACCGGTACCGTCTGTTTCAGAGTCAATGGATGCGTAATGATGGGTATGA  
ACTCGATACAATGCGTGGTTCGTGTAGTCGATGCTCGGAGGTTAACCAACAGCAT  
TAACGGAGCGTGATGGCTTGTGGGTGATGACCACCGTGACGGTTGGGAGGGAC  
CTGCAGCTAAGCATTCCGGAAGTTAAACCCGTTAGATGCGGCAGCAAGGTTACT  
CAACCTATCAGACATTACATCTGGAGTGTAAATCAGGGGTGAAGAGATTAAGG  
TTGATTTGGGTTTCGCTATATTACTTCTTGTGGGCCTGACTTAACTGACAACAA  
AGAGTAGCTAATTATTGAGGTCTACATGACTGAGGCCACTTACGGAAAGATTTC  
GGGTTTTGGATGATGTGGGTGGTGTTCACGACTTGATGGAATATGAGTACGAG  
TTGTTAGATACTCGTAATCCACTAGATTCTTGTGTTCCAGAAAGGTGATACTA  
CTCCAAACTGAGGAGAGTGGTCAAACCTCACAGTCTTCGACAATGAAAGCCAAT  
GATACTGTATCCGCAATATTTAAGGGGAGCGAAGGTTGTGTCAGTGACTCAACT  
GCTACAAAAGATCCGTTAGACGCAGCTCGTGCTGCGGCACGTGTAGTAGTCTTT  
GCTGATGAGGAGGCTAAATTGTGAGTTTACTTACTGAACATTTGGAGAGCCGT  
GAGAAGTACGAAAGTTACTCTCCATTAGCTCGTGAACATACGGTAGTACCTCC  
GTCTGGAAGGGAATCCAACCGATTAATACTTGGTTTAAAGAGTCTGAAGAAC  
GGGAGACTTTGATGCGGGTCTTTCTCGACGTGGTTCTGTACTATTAATTATGG  
TCAATTTATGTAGTACCAAGCTTGAAATATATCGTGCTATCTTTGATAAATT  
ACCGGCTCATGTTGTTGATGCTACCTTGGAACGCAGTATCGTTGATAACTATA  
TCACTCGCGGTTACTGTACTGCATT

GTCGGATAAAGCTCTCCGAGGTGCAGAAGGCCGAGGCGGTCACGGTTTATGACCTCCAAAA  
AAGCGTAGATGATTTGAACAACCAGTTAGCTTGAGTTGAGGTACTTGATTTGGTTGTGCT  
CGAAGACTCTATCGAGGATATTGATAGGTGTATCACCACCGGTGGCTACGATTCGCGTAT  
ACAATTCATAAACAAGTCAGTTGGTCGTCTGCCAGGGCAAGGTAAGCTGGTTGTGACTGT  
AGTTCGTCTAACACTGGTAAAACATCGTGCATGGCTTATAACGCTTCTGCTTTTTCTTC  
TAGAATGGCACAAGATAAAGTTGTGTTGCGGTTCAACAACGAGCAAGATGACAGTCACGT  
AATGTTAGGTACTCTTTAAGGTGCTATCAACTGGGCAAGTGTGACATCAACTTGCTCC  
TTCTCGTGCATTATCGGTTTATGTGGATTATGTTGGTAACAAAGATAAGAATAAGATTAT  
CAACACCGCTGACACTAGTGACCACGATGTAGAACATTACACTGAGAAGTACAATGTAGG  
CTTATTTGTTATTGACCAGTTGTGCGGAATACCACTGGTTTGAATGTGAGACAGCGATCGA  
AGTAGCTCGTCAAACATAAAATCTTTAACTGGGCGCGTGAGATTGGAAAGAAGTATGCCAG  
TGTTATGGGTACTCTCCCAACTGATGCGCAAGCGCAAGGTCAGAAATGTTTGGATATGGC  
CATGATGTACCGCAGGAAAACCGCTCCACAACGTGTGGCAGACACATGCGTCATGATGGG  
CCGTACTCATGAGGAGTATGAGAATGCCGGTCGATTCCTCACCATTGCTAACAAACATGAA  
TGCGGTAAGTCGTGAAGTAGACCCTGCCCGAGGTGAAGGCCGTGCCGAATTACGTATCGT  
TCGAGATACTGCTAAATTTAAGAAGATCTGAATGTGGTTAGACCATGTCCATGACCCTAC  
TGAGGTTTTTGTACAACGGTGTCAATTCGACTCTGAAACAACCATAACGTAATCAGGGTAT  
TGGGAAGTCACAAGCTTCTCCTTTCCATCCTGAAAACAAGATGTTGTGCTTTGGGTGCAA  
CACGCTAGGCGCTGAACCTGTAGTACTTCGTCCATAACATGCTGACTTCCCATCAATCGC  
TCGGGAGAAATGATGTGTTATTTTTGGTAGGCCAAAACATTAAGTTTCGACTTGCTGTGGAT  
GATGCGCACGTATCCTGCTTTCTGTGATATGTTACCTAACCTATGTAATTGGGATACCCA  
ACTGGCTGAGTACTTGTTCACTCGATAAAGACCACAAGATGGCGTCTCTCAACGGGTTGGC  
TATGAAGTATGGAGGTACATAAAAAGATGACCCTATCGCCGAATTTTGGAAAGCTGGAGT  
TGATGCTTCTAACATTCGTTTCCCGATGCTCAAAGAGTATTGGAAACATGACGTAATCAA  
CGCTCAGATAGTTTTCTTAGAACAAGTGGACCAAATCGTGACGGCAGGGCTTCTTAATCT  
TACTATGACTCAGATGGACGCTCTAATGACTACCCCTGAGATCATATGGCATGTTATGAA  
GTTTCGACAAAGACCTTGCTTTGGATTTTCGATAAACCTCTCCAAGCTGAGATAGAGGACAT  
CAAGGGTGCTCTATTTCTGTGCTGGGAGCTGTGTGTTTTCTAAAGAGTCAACCAACGT  
GGGCAGTAACTCACAGTTTAGTTCACTTATCTTTGGGGGTTTGGATAAGTACAAACAGAA  
AAATTACTTCTACTACGACGATGGTGCATGCTACATTCGAAGGGGGTGCTCGTGCTGG  
CCAACCTCAGACCAAATCTTTAAACGCCCAAGCGTCTGGAAGGTATGTGGAACAAAT  
CAATCCGAAAAGTAAGAACAGTTCGTTTCCAGAAGGTGACGACTCTCTATCTAGAGTCAA  
AGCCAAATACAATGGGGCCGCTGTTGTTGAACAGTTGTTCCGGTGATATTCTTAAATTCCG  
CTAATTGGAAAAGGATGTTAACACTTTCGATATTGGCTAAGCTTCTCAAATGTTCCCTCGA  
TGGTTGCCTACATGGTATCTATAACCACACTAGAACGGATACTGGTCGATTGTCTTCTCT  
TTGGCCAAATATCCAAAATATCAGCAACTAATGTTTTGCAAGTTATAGGGTTTGTGGAAT  
ATTCGGTGTAAGACTATAGGAGGTACATTGTGCGTAATTGTGTTGACAATAGATTAAT  
CGCATATACTGGGCGATGAAGGCCCGTTGCGAGTATCTTAAGAAAGTCCGCTACTCTCGA  
TATGGTGGGAGGGGATTTCAAGTCGAGTTCCAATGTTACTGAGAGTTCAGAGAGCGGGCA  
TACCAAATGGGGACTCGCCGACAATAACAAAAGATAGTATAGACAAGGACAAGAGCTCC  
AGGCCCGAAAATTGTAGCTGGATAACTCACTATGATAAGACGCAACTTGGTTCCTTGAAG  
TATAGGAATCACATTGAAAGGGTAGATGGCTCTATAGGGTATGTAACATAACAATCATACA  
GAATTTTGTAGGGAGCATTCTGAACTAAGAGTTCTTAAAGTAGAGTGTGAGTGACCTAC  
AGAGGAAAAACAACAACAATACAAAGGTTTCAGATGTCAGATCTCAAGCGATGTCTAA  
TCTCCCGATTTCCCAATGAAAAATTCATGGGATGTGATTTCCCTCACCATGAGGTAGTGC  
GTGGTGCGGTGTTCACTCGCAAACCAATGATAATGAAAGATATTATAGAGGGTGTTAATA  
CTCACTGTATGTCTGCTTCTTGGGCAAATCCAAAATACTCGTCTGAGGCAATCTTCGCAG  
GGTACAAGGCAGAAGCCCCTTCTTCCACCGAACTACGTAAGAAGGCCAAGCCTGTAACT  
TTGCTTTGCAATACGGTGCTGGTGCGGAGGCTGCTGTGGAGAACTCAGGTATAGAAGCAG  
AACAAAGCTCAAGCAATCATTGATAACTACTACAATCGTTATTGCGTGATAAAGCAGTTCC  
AAGATGATATAATCGAGCAAGTTTACAAGAGTCGTCTACCCTCTAGTCGTCGTAAGTAAA  
TCTGTAAGCCGGCTGGTGGAGGTGAGTATCGTAATCCCACAGGACGTATCTTTAGTATCT  
ATGCGTACTATTCTCCTGGGTTGCTTCGTTCGTGTCGTGTACAGATGAACTCATTCTCCCGA  
CACAAAGTAAGAACTACCCGAGTCAATCTTTTGCACATGGTGATATAGATCCTATGATGT  
TGTGACATATCTACAAACTACGGATGACAGACAAAACCTTACGTGATAAGTGCATCCTAA  
TTGGTACAGTACACGATTCTGTAGTGTGGTTGTTTCATCCCGACATTCTGTATTCTGCAG  
CATAGGCCGTTTCGTGGGTTGCTGTTACGTACGCCTGCATACGTGTAACGTTTCTTATAA

TTCCATTAGTTATGCCTTTGGCCTGTGAAGGTGTCATCCGCGACGGCGCATGGTTCAATA  
TGCATGGATACAAGTGTTAGGAGGTTCCATGGAACTGTAGCACAGAAAAGATGCTGAGG  
CGAAAACGAACGGCACCACCGTGATAAGGGAAGTAAATGGCTATGGAACTCCAGAGTAC  
GCTTCTCTAATTAAGCTACCCACAGATTAAGGAAGAACTCCGGCATGACAGTAGAAGAA  
TACAACCGTATGGTTGAATGCGATAATAGCCAATGCCAAATTTGTGGGCTGACTCCTGAT  
GGTAGTAAGTTAGACACTCTTCTTTGTATAGACCACAACCATGAAAACGGTGAAGTACGA  
GGATTGATTTGTGGACGATGTATCCTAAAGTTAGTCTATGCTATAGATGATCCAGAGATA  
TCAACCAATGCAAGAAAATACCTGCTAAAATAACTTAGCAAACCTCCATAAATCTTAATA  
ACAATAGGAGATTTTTCTATGACGACTATGACTGGTACAATCACTTCTAAAGCTAGCACT  
GATAAATCTATTAACCTAGGTGACGGTAATTGGTACTCAGCATTTCGCTGCATCGCAGCTT  
CCGGCTGATCTTAAAGCAGGTGACTCAGTAACTTTTGAATATAAAGAGAATGGCCGTTAC  
CGTAACATTCAAGGTGACCTTAAGGAAGCAGGTGGTTCTGCTCTAGCTGCGAGACGACGT  
AAAAGTGCACCAGCTTCCGTTGGTCGCGGTTATCGTGCTACCGGTCAAGAAGGCGGTTTC  
CCCATCCATCCACTAGCGTATGAACGTGCTCTTGACCGCCGTAACGCAATCGCTGCGGCA  
GGTACTCTCAGCGCTTGTGAGATTGCACATGGCACTGAGTGTGAAGATATTGCCGATGCT  
ACACTCTAACTCGCAATGAACTTCGAGGCATAATCATCCCCTGATATGGGCCGTCTGGCT  
ATGGCTGATATCCCTTCTGGCCATTCTGAATCAGTTTGATTGTAAAACCTCTTTGGCTCCA  
TCGGGCGCCATACTATTCTTTGGAGGAAATATGTTAGAGAAAACATGCTCAGTTACTTCGT  
ATGCTTATTGGTTCTGTTACTGTGGCTAATGATGACCTCTTCTTTCACAAGACCAGTCAA  
TAATACGTAAAGGTTCCACAGAAAAGTTTTGAAGGATTACAACAACGAAGATGAGCTGCTT  
CGCCAAGCTCGAGAACGTCAGAAAACGTGGACAAGAACGTCAACGTCTGGCAGAGAACCGC  
ATCGCTAAAGTCAACGACCTGTTAGAGGAATAATGATGAGTTCAGATGCACTATTAATA  
AGTTTGTAGACGAGAATGCTGAGAAAACAATCCAATTGGCTGAACCAAATTCAGCGATG  
TAGGGAAGTTATAAGCCTATCGCAGTGTTTTAGGGTACATCGAACAAGGATGCAGTCTAG  
AAGACCTAACTCAGAAAACCTCATAAGGATATCGACAGGGTGGAAATCTCGGTTAGTGCTAC  
AAAATGAAGATTGAGACAACCTCTCCACCTCCTGAAGTGGCCTCTTGGTTCAAATGGAGT  
AAAGAACAATGCTCCAACCTTATGGCAACCCTATCACGGTAGAGTAGGCTGCCCATGTTCT  
GAGTGCAGGATAAAAACCCCTGACTATATAAAAACAAAATATTTGGAGACAAGAATCATG  
GCTTCAATCAAATTATCTAAAGATCTATCCGCTGAAATCGTTTTTGTAGTAACACTGTAAA  
GTTACAACCTACCAACATGTTTCGCGGTGGTGGTTCTTGTAACCTCATCTGTTGGGCATTA  
ACTGCTTCTAAGTTGGTTTTCAAACCTCTTCTGATTGAGATTAATACGTTTCGCTTCTTGT  
GATGTTGCAGAACATTTTCGTAAAGCAATTCGTAATGATAATCTATTGATTAATGACCGA  
GGTTTAGAGGCACGTCAGGCTTAATATGACAACCGTAGTCGTACTIONGGTGTAGACGCTCC  
AGCGTTTCGCTTCGGCAATTAGATTTGACGATTTTCACTATAAAAACACCGGAGGGTGATTG  
CTATCGACGAAAGAGTGTGCTCCCAAGTCACTACAAGATTCTCTAATTCAAGTATGGGA  
GGCCACAGCGCCTCGACAATTGGCTGAATCTCGTTTTGAGAAATTTATCCAAGATATGAT  
AGATGATGGTCAGTGCAGGATGATGTGTTGTTTGTGGATGGCGGGAATAAATACCGATT  
AGATTTTCCACATCCTAAAGAGTACCCTTACAAGGGCAGACGACCGACAGGCACAAACC  
TTCCATCTTGATGAGTGCAAAAACCTCTCTAAGGGAGTGCCTTCCCACGATTGTTTGTGA  
TGGGTACGAAGCTGACGATGGTTGCGGCATTTTGTCTGATTGGATGTATGGAAGGTTACGA  
TGAACCTTCTGTTGTGTCACATTGATAAAGATATGGCTATGATTGAAGGTAATCACATGCG  
TTAGAGGCGTAACATCAATGGTAAAGACTTCCTAGCTGAGTTCTACGCGGTGAAGAAAGC  
AACAGCTCTACGACACCTCTATCTCCAACCGCTTTTTTGGTGACCCGACTGATAATATTCT  
GGGCTATTATAAGTTCTCTGGTAAGAAATTAGTTGCTGGGATCAAGTGTGGATTGGAATC  
GCTGTCTACTGAATTAGATATGTGGTCTGACGTGCGCCAAGTGTATGCTAAAGCAGGTCT  
GCGTGACGAGAACATCCTAATACAAATTTGGTCGCTGGCTTTGGATTCAACGTAAAGAAGG  
TGAAATGTGGAACCCTCCTACGAACGTTTTACGGTACTAGCACTATCTGCCAGTAGCAG  
CAGTACACGATAACCTATAAATTTGTAGCTAATATAATTGCCAGACTAGCCTACAATGAT  
ATGTATGCTGTAGCTCATGTACCTACAGCCCTATTTGAGTCTCTTGAATATGAAGACTTG  
GCAGCATATATCGCTGATAATCCGTTGACAGACGTTAAAGAAGATTACGGAGTATTTAAA  
GATGCGTAACATTGAACACAAAATCGTCAAAGCACAAAGCAACTTTCCTAGAACAAGA  
TCGTCGTCGCCAAAGTGTTGAGTACCATAGTCGCAAAGAGGAGGACAAACTGCGGGAAGA  
TTACGCCGCGTAAGTGTCGTGAGTCTAAACGTTACGAGACCCGCAAGTCCGGGTTCCCGTA  
GCGGATTCAAGCATGACTCTGCTAAAACCTGTCCAGTTCCCTTATGAGTCTGAGACAGAGG  
AATTACCTTATGCAGTTACGTAAACTAAGCATTAAATGCCTGCTTTTGTCTTTATTAAGA  
AAGACGGAAGTAAGTTGTATCTGGAATTGAAGGGGAGTCGTACTIONGGTCTGGCCGTGTTG  
AAATGACGCGTATCAAGAATTTACCCGACTTCAGGTATTCAATTGGCGTTCCAGATGG

GCACTCACCGGATTACTAAAGGTGCCAAAACAACGTATATCCAATGGTGGGCTAGAGAAG  
ATATCCTTGCATAGGATTGAAAGGGTAAACCAGCACACATTCCATCTGAGTGGTTAGAGG  
AGTTGAGTTGAGCGAGAATACTGAGCCAGATCCAGTACCTTGGACTGGTAAAGACCGTAA  
AGCTGCTTGGCATTTCAAAATCAGAGTAAATTGTGTCCGTATGCTCCGGGATGAAGCAGG  
AAACCTAATTTGACGTAACGGTAAGCCATTAGATAACTTAAAAAATGTAGGGGAGGAAAT  
CTCCGATGCAGAAATTTATCGTGGGAGGTGGGAAGAGTCTATATCTCACTGTTGGTCCTG  
TGGCACTGCAGTTGGCTCCGTTGATCCTGCGAATGTTTATGCTCTATTTCCCGTTGTTGT  
TAAACGTATAGATTTAGGTACCGATATCAAGCCAACTTCAGAGGAAATTAATACTGCTTT  
GAGTCTTGTTTTAGCTGAGGTACACGAGGGTTTAGTTCCCGTGTAATTAGTCGCAAAGG  
TTAACTCTACAACGTGAAACCTAACGAACTTACGATGTTAAAATCATTGGTATGGTAGA  
ATGTACTGGTAAACATAAAGGGCGGATTGGAGCACTACTACTACAATGGGTAAACGTTGG  
TACTGGATTCACTGATCAAGTACGTGAGTGGTGGTGGTGCACAATATGCAAGGTGTGAAAG  
TACAGCACGTAAAATTATTAAGTTAAATGTTGGGAATTGCCTAAATCTTGTGACGCTCCG  
TCACCCCTCGCAATATTCGTTTACGGGAGGATAAATAATTGCCTTTGGACCTAAAGGAGTG  
GCTCCGGCTTACATAGCAATGAATGAGATAAAAATAGTACACACTTGGTGATGCTAGGGCT  
GCATCTGAACAGAATAAGTCCATCATGTACGGTGTTCCTCTTGAAGATATATTGGCATT  
CATTGCCTATCACCTGCTGCTTGTATGAAACCAAAGATTTTATCGGAGTACTGGAAGAT  
GCGATTCTTCCAGTGATGGAGTCGACCACACAATTATGATTAATACAACAAGCAAAAATG  
ATTACTTACCTTCAACTGTTCAAACATTACGTTATGGCATTATGAAAAAGATTTTGTG  
ACATCGTTGATGAGAACGTCCAGCTTATGAAGCTGGAAGAGTAGGTGTGAGAGGTGCTCG  
AAGTGTCTGTGAGGGTCACAGTCACGAACACTGTCAGGAAGAAATCAGTGATATGATTG  
TGGTCTGAAACAACCTGTGTGAACGCCGTGATTACTCCCTTGCTTAATGTGCTAACACTG  
CATTCCAGAAGATTCACACGCGCAAAGGTACGAGCATTAAATGGTGGATTTTTTAAGGATG  
AGGATTAGAAGGAATGGGTAGTTCGTACTTACTAGAACCGGAAAGAAACTTGGATGGTAC  
AAACATCATCCTAACTACTGGAGTCATGGGAGCCGGTAAACGGCTGCCCTAATTAGCGC  
ACCAGCACAAATTAGAAAAGAAAGGTCCGGCTGACTGTTTGATTATTAACCAGAGATGTA  
TGCTCCTGATGAGGGTGTACGTGAACGTGATCGACGCACTCGACCTTGCCTGCTATTGT  
AACCCAAGAAGAAGTTGCTCGGGTAATTCCTTTGTCTGGCAGAATTGATTTTTTGCTCGT  
TGATGAGGCCAAATTCCTTAGTCCCGAGTTCATTAAGCCAATCTGCATTGCAGCAAATCT  
CGACAACATCCCCAACGTAGCATTCTACAGTTTAAAGACTGATTATCTCGACACGACGTT  
TGAGTGATGGAAAGAGATTGCCAAGTACGTAAACCGGATGTATGAGTTACAACACATTTG  
TGACATGCGTGGTAATCAAATCCGGTACACAAAATGCGTATTTCTGGTGGTATTGTTT  
GATTGAAGTTGGTACTGACAATTATCGAGCTGTTTGTCTGTATGTTGGAGTAAGGAGAA  
ACGCGTAAGATGTTCAAATGTGTACACTGTGCTGCGGAGCCTGGAGGTATTAATAATCCTA  
GACAGCCGAAGTGGTTTCACTGAGGTGATGACTATCTCATGCAAATCAAACGTTGTTCT  
GAATGCGGTGGTTGCTCCAAGGCTATCAGAGTAGACGAGGGTAGTTGAGATTATTTGCGA  
GAAGATCCTGACTTTGCACGCGGCGCTTGCAACATCTGAGGTTATTCCTGTTGTCCAAC  
CCTGAGCGATAAGCGCTGGGTAAATGATTACATCACACAGCTTGAGAATGTCTTTAAAAA  
ACAACGAGAAGAAATAGAGATGCTTAGGGCGAGGATTAATGAGTACAATAGTGAGTGGCT  
GTTTACGAGTATTGGTAGTAAAGTTGTCTTAACCTACTAAGTAACAACGCTAATTCTC  
ATGCCAACTGAATACACGTTATAGAGGAGTTACACACATTTACGTAAGCAAGAGAAATT  
ACTTACCCTTACATTGATGATTGTGCACTCTTTCCCAAACGATATGTCTTGCCCTGTTG  
TGGTACTAACTGTGAAATCGATTAGTCTCATGCCTGTAACCTCTCATATCGACGCAAGTAGC  
AACTGACCAAGGCTTACTTGACCTAACTTTGCCTGTCACGATAGCCGGTAGAAGTTGTC  
TAAGCGAATCTGTGGTTATTGAGTTAATCCCACAGAACGCGGGTTCGATAATGGGAAGCA  
GGAGGATGTGATTCCGGAGAGTTACACCTTGGTGATTGATTTATCGAGGAGCTCGTCTTA  
TAGCCTCTCCGCTAGCTTTTTGAGCTGATAACATGGAACAAGTAGAGCATGATGCTTTCG  
TGGAACCTATGAAGGAGATAGATAATGAGTGATGTAATTGGTATCGGAATCGCGGCGGGT  
AATCCAGATAACGAGTTGGGGATTGACAAATGTAATTATGAATCGGTAATTATTCTTGGT  
TCCTACAAAGAGGGTACTTAGGTGGTCCGCCAGTACTAACCTAACACGCGAGAAAATC  
TTATGGATGCTTGAGCCATTCAATACCAATACGTCCTCAATAGCTCGAACGAGGCTGAG  
TGATGGGAGAGAAATTGAGGGGGGTAGCTTTCCGATTTAGGCCAGACTTCTCAGTAGATC  
TTCTCTAGATATTATGGCTGATGCCGACAGGTGTAGCTATGGCCAGTCCTACCGTCAGCT  
CTGTTGGATTTACCGGACAGAAATTTTTGAAAGGGGTGGGGTTTCACTGAGGATTACTATC  
TCATATACAACTGTAAAGAAGATGGTTGGTATATGAATCACCTTGTAGCAGTTGACAGAA  
TGGGTTTAGATGTGCTTGTGTTAGCTATGGGAAACACCACAAGAGAAGAACCAGTTT  
GGAGTTATCTATGATTGTTTTTCTTGGAAATGAAGTACTCGCTGGAGATGAGGTAGTTGC



TATGGAGCGTCCTGGCGATCGTTCCTAGGAACTAATCAGAGGATTGGTTATTAAGATTAC  
TCCTAAGAGAGTAGAGTTGTATCAACTCGGTATCGGATAAAGGGTAATTGATATTAGTAC  
AATCAATAGTGTGAAAGTAAAGCAAGTAGAACATGAAAGAGTGGTTAAAGTGACTATAGA  
TAAAATTTAATTAGTGTGCTTAACGCTCTCTACTGAATATTCTATTCCAAT

>NewGenomeName\_112

ATGTATCTTTCACTCAAACAACACTTCAGGAAACCAGACAACGATTACTACAAATATAAC  
GGAAAGGTACGTGCGAACAAAAAGACATGTGAGCACAGGCAAGACCGTTATTTTTTTACG  
AAGTTACCGACAAAACATTCAAGAGCTAAACTCTGAACTTATTTTGTGCTAATTTTGTGTA  
TACAATCCTAAAGGACATCTCAGAGCACTTAGTGAGGATACCTATAATAAATGGAGAATA  
CATCAAGAGTCTTTCCTTATAAATTGAAACAAGACGTAATTCTTTCCTCGATGATTAT  
GAGTTACCATAGCAGGAAGCAGTTTTAAGAATGTTTCATAGTCTCTTCTGGTCCGCATCCA  
AAAAACATGAGAGAATATCGATCTGGAGAGGTCTCATTAGTAACATGGGTTGGGTTTGA  
ACATGTTTAGGGTTGATGTAATAATTTTGAATAAAGACTTTTCAGCAGAGTCAGTGC  
GCCCCAATGAATGTCGTGACGTATATACCATTTCTAGAATTAATTTGCCTAGAGTATAAG  
TCGGTAATCTTAGATACCATTAAGACAAAGTTATGAGTCGATTTGGCGCGTGCCAGCAAG  
TCCAATAAGATCTAAAATCAATCTTTAATTTTTATAAAGACTTTTCAGCAGAGTCAGTGC  
GTATACGAATCATTGATAAAGAAGAGAACTAGAACACATTGAAGATTGTAAGCACTTA  
TTGATAAACAAGACTTTCTATACAAGGTTGCCTGTAGCATCTAAAGAAGATAAAGACG  
CAGCAGACATGAAGAACCGAGTCAATGCTTTAACTAGTGCGTTTGGTTATGAGGACCGTA  
TCGAGTGTACGGGTACAATGGTTGGTACACTAGAGGCAGCAGCAAAGAGGGAGGATCTAT  
GATAATTATTATGATATCTGCTGCACTCATGATAGAATTAATAGATCTTATCTTTGACGT  
TTTAGATGCGAGAGAACTTCATAAAACACTAGACGGTACTTACGACGTTGTAGCAGATAC  
GGATTGGCAAGCAGATGATGATGGTCTTGAGTAAGCATTATATTACTAGGGATAAGAAGT  
TAAAAGAATTTATAGAGAAATGGAAGAAGCGCGTACGCTTCCCCAACTGCCACCACCAC  
GAAGTTGCCCGCTTGGCAACACCTATACTATGCTACGCCAACACAGTAGTATACAAA  
CAACTTACACACTAAAACGGAGAATACGATTATGTCTTTCGCATTACTGAAGAAAGCATT  
TAGCACTAGAAATACTTCCGCTAGATTGACTAAGGTGATTGAGAATCTGAACAAACCAGC  
TCATGGTAACAATGGCGCAGACGAGCGTCCTTTGAAACCAGAATTGGACAGAACAGGTAA  
CGTCTGCTGTTATCAGATTCTTGCCCGCACCTGATGCAGAGGAACTTCGTTTCGCTAA  
GTCCTGGTCTCATGCCTTCAAGCGTTCTCGTGGTCAATGGAATATTGAGAACTCTTTGCC  
ACCTCTTGGTAAACAAGAGCCTGTTTCAGGATATAGTGCTGAGGTATGGAACGCTGCAGG  
TGAGGGTCCTTCTGAGCGTGCACGCACCCGAGCACAGAAGAGAAAACCTTCTTACTCCTC  
TAACATTTACGTTGTGAGTGATCCTGCCACCCTGAGAATGAGGGTAAGGTATTCCTATA  
CAGATACGGTAAACAGATTTTTGAGAACTCGTTGAAGTAATGCAACCTCCATGTGCAA  
CGAGACTCCAATCGATCCTTTCAATTTCTGGAAGGGTGCTGACTTCAAATTGAAGATCCG  
GATGGTTCGTTGGTTACTGGAACATGATAAGGCTGAATTTGCCCCACCTAATACACTAGG  
TAATTATGATGGCAAACGTCTAGAACAATTTGGAAAGAGGGCGTCTCTTGTGCTGAGTT  
TGAAGTCCCTTAGTACTTTAAGTCTTATGAACTACTTAAGGGAGGTCATTGTTTAGTCTT  
GGGCAGCACTGCGCCAGTAGCACGTCCTTATTAATCTTTTGGAGATGTTAAACCTCAGGC  
TCCAGATTGCGGAGCAGAAGTTAAAAATTTGCGTGAGAAAGCAGTTGCCTCAGCTCCTGC  
CGACGATGCCCTAAATCTGTCTACTTTGCAAACTTGCTGAAGAGGACTGATTATAAAC  
TGGCACAAGGAGGGTGATAATGACCCTTCTTTTCTAGTATAATAAAAACATACTAGGT  
ATACAATGAAAACCTGCCCTCGCTGCAATCAATTTACTTCCATCTGTCCCTGTAAATGCTG  
AATGGATTGGAGACAGGAGGTATCGTCAACCGTAATAATCCTCTAGTTGATATGCATACG  
AACAAAACCTGCTATCGTTATGAATCTCGGGAAGAGTACGTACCTGTCTCTCCTAGATCGC  
CTGGTTACGTCACAACCTTACCGAGCAAACATTGCAACACCATCTTTCTATGTTGATCATA  
GCAGATCTTCAACTCCCCCTTCAAGAGGTTACATATCTCCGTCAGCTGATGGTAATGAGT  
GTAGCGGAGGAGCAAGTCTTGGAGGAATCATAGTAGGAGATGCAGGTGCAGCATGATCAC  
ACGGAGATGGTCGTTGGTGGGCATTACCTTTGGGAATCGTCGGTGGATGTATGATCAGGT  
GTGATGTTGATGGATCTTAGTGATGTCAAAAACCTAAAACCTCATAGAAGCAAAGAAGATGA  
CCAAGATATGATTGAGTCTGCTATAAACAGACACAATCGTAATGCAGGACTCATCAATAT  
GGTCTTAGGATTTCTAATCATCGCACTCTTAGCAGAGGGATTCTGTAGAGTTATCGGAGA  
GATACCTCCACTTATGGGTATCGATGCTGATACAATCTAAGTGATAATCGAAATAACAAA  
GGAGGAAGTATTAAGCACTTTCAAGATCATGAACAACATAGGCTTAGAAATTGTCTTA  
TGGTGAATATCGTCTGTAGATTTACTAGCAATTATGGGCGTCTTTAAAATAAATGAAAG  
ATGTAGCATTAGTATTATACTTGACTTTATTTATTAAGTCATTTCGCAGCCACCTTTGCAT  
ACGTGGTTAGGTTTCATGGGTTCTACGTTGGATACTTTTACCAGGGCATCAATTGATCATC

CCGAGTTGCCAGGTGTTAGAGAAGGCCGAACAGTTGTTAGGAGGTACTTTCAAGGGATATG  
AAGA ACTATCACTAGATGAAGTAGAAAAATATCCAGTAACTGCACAAAGAGACCATGAGT  
CCCTGGA ACTCTATCCCGATCTACAAGATCGTACGTATGAACTTGATGATCAAGACGGT  
ATGGTGATGACGATTGTGATATCCCTGCTCAACCGTACGTCTGCTCTGGAATCTCCCAT  
GACTTTTAGTTCCCGTAAAACGGCAAAAAATTTTCCGCCAAAAAGGTGACCCCGTTAGCT  
TTTTATGAGTGACATAAGTTATACAAAAGACCCGAGTGTCCCGAAACAAACATCGTGGTAT  
TCTTTGTGACATAACAAGTAGAGGAATCTAACGCTTCGGACTTAGTTGTCCGTGAATGGCC  
TGCTCAATCTCCTCCACCTGATTGTGTAGGGGGGAAACAATTCTATATAGATTCCTTTCA  
AGCTTATTA AACAGACTTGTATCAGGCACAAGGATGTCTGAATTAGTTAATTATGATTG  
GAGCTTCCCTATCTTCTAGCGCACCTAGATGTGCATGGTGGTACATCAATTTTTCCTCG  
TGGAACAGTTCACAGCTCTCAATCAGGATAACATGGTTCTATGGTACTCACTCAAGCAA  
GAGATACAGTGGATTTGATGCTAGTGCAGAGTTCTAACCTGTATCTTGAGCAGAGAAGGT  
CCA ACTATATAATGTATTAAGAATGAGAAACCAGGAATACATCCTATAGGAGAATGACT  
CAA ACTTATCACATTTATCTTCAAGAAAACTCCTCTTTGAAAATTTGACAAGAGAGGAA  
TTTACTTTATAATGGGTCACACTCTATACTGCCTATTGGAAAGATAACATAACATATTCC  
ATATGTTACGATGAAGCACGTGCTGTGGAACGCTCTTTTTAATTATGATTTAAATTTTAC  
TTACTAGTGCAGCATTTCGTATCGTTGCATATTATTTTTTGCAATTGGATTTGTAGTTG  
CACTCGACTTAGAGCTTTATCTCCAGGTCAGACCCCTGTCTGCTGACTCATCGATGAATG  
AGAGAAATGATTTTATAGTGCAGACTCATAGAAATTAATGTTGGCGACAAGTATCGGTAG  
TAAAGCTTTTTTGGTTCGGATGTAATATAGCATTGTTTGTATATCAAGGAACGTGCAA  
CACCTCAAGATACTTTCTAGAACGGTATATGAAGAGTGAATCAAAAAGAAAGTGAGTATGT  
GAAGGATAGAATGGAATACTCCCGAGCGTTCATCGAGTCAGTCAACCAGCGGTTGTAAT  
GAAAGCGTAGGGTAAAGATGAATAAACTTTTGCAACTTGTCTTATTGGATCATTTCCT  
GGCGCACTGCAGCGCAAGCTTGTATTCATCGTTGGGTTTCGGAGTGAACCTTATTGCCCTT  
CTATTGAGGAAGGATTTTTACCAAAGCAAGAGATGAAGAGTGAACCTTGATGTTTACGTTA  
CTATTCACTGGACAGCTATATAAGCTTAGTTTATCAGAAACCAAAGATGAGAACAGATAG  
AAGGCATTGCTACTCATGCTACTGACGCAATAGATAAGCGAGTATTCGATTTTTGGAAGG  
AGGACGGAGTATGAAAGACGAGTGGAAGATCCCTGCTGGCAGCATAAACAAAAGTGTATC  
GCAATGTTTACCCACGATTAACACAACACTAGCTACTTATATGGTAGAGTCGATGCAACA  
TATTAGTCGCAGCCTTGTAGAAAGGACGCGGAGGACGACCTTTCGTAGATGCTGATGGG  
TTGCAACTAGA ACTTCTACGTGATCCTGTGCTATCTAAAGAATTTATTTTTAAGGCCATA  
TTTTACTAATATCCGCCACCTTATCCAGAACAAGAAGAGCCGTTAAA ACTTAAACTGGAA  
CTGCTAAAGCCAGAGGACGAACTAGATGAAGAACTACTACTGGA ACTCGAACAGGTTGAA  
CAGGTCGAACTGGTGGATGAGTATGCCGGTTGGTACTGACATCGGCTACGTTGCTAGTG  
GTGGTTGTAGTAATTCTTGCTGAGGTTGGCGAACTTATTACACCTCGGGTTGCTCTCGTG  
GCAGAAGGTCCGTTATCGAATGACCTCACTACAGTATTA ACTGTAGATGAAGGAGCACTA  
CAACAAAGATAACCAACACTATCATAGTAGCTAGAAGCAATACTGAGAGGTGACTTCTTA  
TTATTTATATCATCTAATTGTGAATGAGGAGCGTACCCAATGAGAGTTTCAA AATCTTGA  
CTCCTTCTATCTACAAATCCTCTTTTGGAACTTAAATTCTTCTTTTTAATTCATTAAG  
TAATGCTAATGCTCATAATTAGATACTGGATATATTGAATCGCTCTCACCTTTTGTAGTT  
CCGTTTGGTCAA ACTATTCTGTA ACTTGGATTCACTTGAATTCCTTATTGACTAAGACT  
CTTTCATAATATAAAACATCCTTTGTTTCATAGTGATGCAAACTTCTCGATCGCCATAC  
TTTCTAACAACCATATGTTGTGCATCTCCTTCACTTCTTGGCCCCCTGCACAGCAA AATCA  
GGAATATTGTGTACCACTAACACAACAATCTAAAAATGGATCTTCTAATTCTACTTCT  
GCACTCATTGAGAGAGTTTCGCCTTCTACTGACGAATATGATGCAAAGAAGGTTGTATAT  
TTCCCTAGGTATTCTATAACTATAATGCTACGTCATATTTTTATGCTATACGATATTTG  
AAGGGTTCGTCTTTCTTGTCAACCCTCGCCAACACATACTTTTGGTAGAAAATTA AATAT  
GCCATTAGTATCCGTTTATGATGTCTGACTGACTGAGGGGACGAACCTCAGTAAATTGTA  
CTTGTAGTTCAACAGCAAGAACTTGAATCCTGCTCCCGCCATTTCTTTGTATTGAAGTAG  
ACTGGTTGTCTGTTGTGTAATTAACAGATGACCCAGATCATAACATGTATCCACTATAA  
AATCTAAACACGTGTTAGTTTCATGTGCTGCAGTGCTTGGAGTGCCTAATGGAACACTAA  
ATTCACCTGACGTTGGAGGCATTCGCATAAATGCCAGTTCATATTGATCAGGAATACCAA  
AAAATCTAGACCTGACATCACACCACCTATCTCTGACAAATTTTTTAAAATGATTTCG  
TCATTTGATCTTTATCACCTGTAGTATTTCCA ACTGTATTAGAATCTTTTATATATGATA  
ACTTTAATAAATCCCTTTCTTGACTTACATTTGCACGTACCTTAGGGTGAGCACCAGCCT  
TTACATATTGAGTTACTTATCTGATTGCTTGTGCTTCTTTATAGTTTCTTGCAAACATCT  
TAAAAGGAAATGAATGTTTTCAACAATTCATTTGACAAAATATCTGGTCAACATGACGCT

TTCATACTTTCCCTTCTGTTC AACCTCTTAGAGACGTCATGTTTAAATTCCTCGTACCC  
CTAGGAAACCAGATAAAGCATTAGCACCTGATGCAGTAGCAGAAGCAAAAACTCTGGAA  
AGACAGCGCTTCCAGTACCTTTAAGTTAACCTGCAATGTTGTCAAGAAATGTTCCACTTT  
GAATTGCATTGATCGCAGCCGCACCCCCAATACCTAAAATTGTTTGATTATATACTGGTC  
AGTGCTGAGCATTGACACCAACAGGAATCGCAAGATATGATGGTGAAGAACGAAAGCTTG  
TTCTACCTAAGTTTCTAGGATTATTATTTTGCCCGTAATAGTCTTATCCTCCATCATGAT  
AAATAGTTTTCTTTCTACGCATTCTTAGGGATGCTGTCTTTCCAGTAATACCATCACCTG  
AATCTGCATTAAAGTCTAACTCCAATACAGGCGCCTGTAATGGATAAAAATAGGGTTGAAT  
TACCGTTATCGCCGCGGTCAAAAAAGTCATTTGCCAAGATTTGTGCCTGTATACTAACAT  
GGTCTCTCTGTATTAATGAGGTATCATGGAAAAAATAGACCAAAGGTTCCAAGAAAGTAT  
AGAGGTGACCCCAATAACCTTATTTATAGATCGTCGTGGGAGTGTAAGTTCATGAAATGG  
TGTGATATAACCTCCACGGTTCAAGAATGGGGTAGTGATGAGATTATTATCCCTATATT  
TCCCCTGTTGATGGTAAAAGGCACAGATACTTCCCAGATCTCTATGTAATGTTAGAGGTT  
TGAACGTATTTGGTTGCAGTTTATCCATTGAAACAACTAAAGAACCTAAATCTCAGAAA  
CGAGTGACAAAACGTTATATTAATGAAGTCGTGACTTGGAGTGTCAATCAAGCAAAATGT  
AAAGCAGGAGAGGAGTTTTTTAAAGATCAAACTGGGAATCTTGGTGATCACCGAAAAG  
GAACTGAAAGTATAAAGGCAATCAGTAACACAGAACAGGCACAGTAGCCTTCATATAAAG  
AGTTCCTAGCGTTCTCGAAGAACGAAGATAATCATACTAGCTTTAGTGAAGTGTCTCGG  
TTTATTTTCTGACCTAGTTTATTACAAAATAATTTGGGACCTTCATTAGAACGAAGTA  
AAACAAAAGATTTCAACAACAGACTCCTCAACTCCGCATTCTCTTAAATTACTTTGCGA  
ATTCCACAAACGTTCCAGTAAACACATGACTACTGGTTCTTTGCTACATATAGGAACAG  
CATTTAGGTATTCGACAGATCACGCGTACAGTCAGATGACTACATCTTTCATTATGCCAC  
GGTCCCATTATACTATAGCATTATTGTAGCGTGGACTACAATATTTTCCGCTCAGTCAA  
ATCAATATGGAGAAAGTTATGATGATTATGTTTCGTGGATCATTTAGATTATGTAAATCGG  
ACTGAGTTGGAGGAAAAGATGTAGTGCAAGATGAGAAAATGATCAACGTATTGAAGGATT  
CAGGTGATCCTTATCTAATTGCAAAAACATTATAGAGTCACCGCGGTATGGGAGATGAGAA  
ATGCATTTCCCTTTAACATTGGGTCAATTCAATAAAAACAATGACACCTCTAGAGCAATGA  
CTCTGTGAGTTGGCCTCTTATAGGCACGCTATCGTCTTACAGTTGCGGCTGACTTCAGTG  
ATCCGGGCACATATCAGTTTCTGGTGAATGTAATCCATTTACATCAAATTTCCAGAAC  
TTGATAGATATAGTAGTGCAGTCTTCAAAAAACAAAGTCGACTATTAGCTCCCAGATAAC  
CGCAAAAAAATCCCGCTAAATATTTGACCCCAGCGGTTTTTGACTAAATAACAATACTG  
AATTCGACTACTATGGAATTACCTACGTTAAATGTACCAAACAAAAAAGTAACTACCG  
TCAGATGTTAGTACGGTGAATTATAGACGATTCCTCGTCAAAGAAGAGAAGCTTTTACTT  
CTCGCAACTCAATCTCAAGATCAAGAAGAGTTAATTGTTGCTATTAAAGTTATCATTGCT  
GCTTGCGCAGATGTCCGGGATATTGATAACTTGGCAACTTTTGACATTGTATACCTTTCC  
GTACAGATCAGAATAAATCTGTTGGTGACACTGTAAAGCTTTCTTTGGTTCGGCCCTGAT  
GATGGTGAAACGACTGTTGAAGTAGATATTTCTCTCAATAAAATCAAAGTCACAAAGACC  
AGAGGTCCAAAACCGGTCTTCGCATTACTGATGAAGTCACGATTACTATGGGGTAACCC  
AGATTAGAACTTTTGTTAATATGCACATTGTTGTTGTTGGTACGGAAGTGGGTGTTGAT  
CAAGTCTTTGAAATGGGAGGAAGTTGGATCAAGACAATTTCTGATCCAGTACAATTTTAT  
GACTGTCAGGACGTACCAAAAAAAGAATTTCAAGCCTTCTCTGAAGGTCTGGACACTAAT  
CAGATTCACATGGTTCAAGACTTTTTTTGAACTATGCCGAACTAACTCACTCAGTTAAG  
GTTACAAATCCAAACACAGGTGTAGAGAGTGATGTAATTTTGGAGGTATTAGTAAGTTTT  
TACGAATAGCCCTTATGCAGATGGACTTGACGACATATTTTGAGAGCAAATTTGCGTTAA  
TTCTCGACCACAAGTGGAATACTGAATATATTGACAATCTCATGCCATGGGAAAAGGAAG  
TCTATATGAATCTTCTAATTAACTTCTGAAAAGAAGAAGGAAGACGTATGAAGGACCAAA  
AGGCACAAGGTGGCTAAGATACGAGTCTACAAGTTAAATGATCCTGGATTGGCGACTATC  
AAAACCTCTATCGGTTGTTGCTGCGAGACAGACTATCCTTGCTCAAATAAGTCTTGGTAAG  
TCATTAGAGGGCGTTGGACCTACAGTCCTTGGATTAGAAAAAATCTCCTACTTGGGTCTA  
GTAATACAAAAGAAGACGGATGCAGCGGAAAAAAGAAAGGACCAGAGAGAAAGAGATGCT  
GAAGCTGACGAGTTGACAGACAAAGGTTTATCAAAATATTTCAATAAAAAGGGAAATGAA  
ACTAAAAAATTTAAACCAGATAATAATCCCAAGAGTGCCTTTAGTAAAATGCTTGGGTGG  
GTAGGTGATCGCCTACCTGGATTTGTACATCTAGCAAGAAAAAATATGTGGTTTGTCTTA  
ATTAAAGAATTATTAGAGCATACTGCAGATGAAGTAACTTTAAAAAAAAGCGACCTTC  
CTAATGAAGACACACTTTGTCTTTTGGAAAGATATATGGCTTTCGTAATGGTTAATTAAG  
GATTATATTGTAGATGGTATTGTCCAATTATTTGGTGATGATACAACATCATTAGGTAGA  
CTTGGTGATATCGGTAAGTTTATGTCAGGTATCATTGGGTTGAAATAACTGATGAACCCC

TTCAGTGGTATTGCTGATATTCTCTTTCTAGCAAATCTTATTAGTGCCACTAGATTCTTT  
CCAGTTAACGGTAGATCTTTACCGAATATTA AACCTTACAGACCTAATTTAAAAGATAAT  
AAGGTAACTTGAGGAGGACAATAAGCGCTGGGAAACGGATGAAACCTGATGCCTTCAGT  
GGAGTAAGAGAGTGGCTTAGAAAATTCGGAACGACTGTAGGTAATTA AATTACTCAAAGT  
ACTAAGACCGGTTTAAACCTTCTCAAAGACTTACAGATAGGGTAAAGAGAGTTGTTAGA  
CCAAACGACGTTACTCACTCAGGCACTAGTAATATTTTTACTAGAGCAGTTGATAGGATA  
AAGAGTAAATTAACATAAACTAAGGCTTCAGGAAATGTAAAACCGAATCTCAATTTGAAG  
GTACAACCAATCAAAATTAACATCCCAAAGCTATTAAGGTAAAACCTAAAGGGGGTGA  
AGACCACTGGGCACCCTTGTAGCGATTGATCTTGATATAGGAAGTCAAGCGGGATTGTTG  
TTTATAGAACAGGAAAATTTCTCAAATTTACATCATAAAGTTTGTGGCAATGAGTAAGGGG  
GAACA ACTAAAAGAAATTTCAAATGAGAACTAAAATAAGAGATTATGCTAAATCAAAA  
ACTGGTGCCTTCTGTGTTTGTCAAGAAATTTTTACTGGATGTGGATGGTTAGCAACGAAT  
TAGGTTAGACAACTTTTCGAGAGGGAGACTAATTTCTCTGAACGCAAAGCATCAGATAATC  
GGA ACTGTTGACAGTTCTGCAATGAATATTAATGAGTATAAGTAGTTCTATGAAAACATA  
AAACCTGTGAACAAGGATACTACTGAGTTTGTATGATCTGATTCCAGAGAATGATAAAAA  
TGGTGAACCCAACAACATGGTCTAAAGCAGATGGAGGTA ACTTACCAGAGTTCTTTCTC  
GGTGGTTTATTTAGAGCAGGTA AAAATGTAGCTTGTGCTGTAGTTCACACTGTTACTAGC  
GTTGCAAAGACTGTATGGTATGGTGTAGTAAGATTGCTTCAAACCCAATTGTATCTGGT  
CTAGCGTCAATGATTTCTGGTGACAACATTATCGTATCTGCTATCGACGCAGTAATTGCA  
CGTAGTTCTGGTGATGTCATGGGTA CTAATGAATGC ACTTGGTGGTAACAGTAAGTTT  
GCTAATATCAATACAGTTAATGCAATTAATCAGCCTACATGGATCCAAA ACTTGAGATTG  
AGTATGAGTGGACCAAGTGTCTCAAACATGTATCATGGTAAACTCAATGCAGTATCCAAC  
ATTAGTAGTAGATTTAAAGGTTTCTTTGATATGTGAAGACACAGCACGATTGGTAAGATT  
GGTATACAAGGTTTTAATGGTGATAGTTGTGGTGCTATTGGA ACTATAGTAGGACAGATG  
TCGAGTTTATCCCGAGTTCTTGAGAATTTTGGTAATAGGTTGAAGAAAAATAAATTAGAG  
CGTATCGTAGGAGCAGTTGCTGGTCTCGGAGGTTATGCAACTAAAGACCCTAATATATTG  
TTAATTCCAGTCATGGAATCTACCCTAGATGAACCAAGTGAGGGTTTGAGTGCATTAGGT  
GCTATTGGTAATATTGCTGACAAAGTAGCTATGAATGGTGTTTATAAAGCTATCATGAGT  
GGTGTTC AATCTGGAACTTGATAAAAGGATTACCAGA ACTTGCTGCAGATATAGGCGTT  
CATCCGAAAGTTTTAGGTGGACTGAACTGATGACGGGATTTATTACCGACTAATCCGTT  
AAAGCAGAGTATGCAATGAAGACGGCTATTGACTTTATACCTGTTCCGCTGATCGTAGAA  
AATATCGTTGCAGCACCTACTCCTGTACCAATAAGTAGCGGTGATACCACTTAGAAGCA  
CCATCCTCTACA ACTA ACTGATATTGGCAACAGATTACAAAGGTGCGAAACTCGATTTGT  
ATAAATTTGTTGACCTTAATGCGGCAGAAAGCACTACTCATGGAGCTAATGCCAACGGAG  
GTAATAGACAATTGACA ACTGTTATGAAGCAAATTACAAGAGCAATTAATGGTATGAGTA  
GAGTTGTGGCTGCTCTTGGCAGCACTATAGTTTCTATCACAGACGTGCAGATGAGGTTGA  
TGTAGATAGATGAAGCAAGATGTAAGACACGATCATT CATACCCAAATATACGAAAATAC  
AGCCTCCTCGTAAAACGGAAGCTTTTGGTAGTTTATTTAAGGGGTAAATACCAGGTTTCG  
TTCAATCACTTGCAAAAATCGCAAGTGCCTTGGTAAAGTCTTTCTTATTCCTTCCTGCTC  
TAAAATGGATGTCTAATCCCGAGATCCAAGCTAAGGTTGTTAAAGGAGTCGAAGTTCTTG  
CTACAGTTTTTTGAATTTATGCCATCTGTTGCTACATTTGCCTTTGTTAATTCTATAGGAG  
GCCTGTACGATCTTTTAAAAGAAGATGCTACGTGGATGGGCCGAATAGGTGGTTTTACGA  
CCGCACGTGCAGGATTGGGAACCGAATTCTTGGCATTAACTGTCTTACAAATGCAAAAG  
GGGCTATTATAACCTTTTCAAGCGTGCTATTATTCTGTCACCAGGGTCTCCTTGCTGCCT  
TCTCCAAACTTGCTACCCATCCTTTGATTGGAGGTGCAGCAGGGTTTCTTCTTACAAAAT  
ATTCTGATCAAATTCCTGGTTTAGTCCATAACAGTGAGGAAGCGATTGCAGAGGGTTTAG  
AAACAACAACAATTGAATCTGGTGATACCATCATTGCAGAATCTGAAGAAAAAACACAAA  
GAATCGCAGACCTTAAAAAACAAAAAGAAGATCTTACCCTTCATTATAGGTAGGTTGGTA  
AAGGAAAAGGATTTGAAGAGCTAATTTATCACTTAGGAAATGGTAAA ACTAAAAGTCACG  
GATTTTTTTGAACATGGAGGCTATCTAGACGGTTTTGCTAAGGGGGGTTGGGTTTCTGGAC  
CTCTGTCAGGGTATCCTGTATCATTAGATGGTAAAAACCTGATTATATAGGACATGGAA  
CTGATTATGCTGCACACAAGTCGGTTGGGGGTGCTTTTATTGTTCCGTTTGATACTCGTG  
CAACCAAAGAGCATTCTGATCTGACATCTCGAAGAATGACTAAAGCAACACTACTGGTAT  
TTTTAGAAGAAGGTGGTGGGTACGATTAGTTTGCTAAGAGAATGATTAACATTTAGTAGG  
GTGTCAGACCAACAGCAATACCTGAACCTAATGGTGG AATGTCAAATGGCTATGGTTATG  
ATACTAAACCTTCTGAAAATTGCCCTCCCACTATTAGTAGAGCGTTTGCAAAGCAACCGT  
TCAATCAAGATTATAAAGATCATGAAAATGCTGCTACGAAAAAACCTGGTTTCGGCAAAT

CTGGTCCTCTACAAACAGCAGCATTGGTTGATCTCACCTATGATCAAGGTCCAGGATGGC  
ATACAGGAATCCCCAAGTTCATGGCAGGGTTCAACAAAGGTGAATATGATATCGCAGGTA  
ATGAATTAGAATATAGTCTTTGGTTTAATAGAGTTGGATGTAGAGGTCCTACAATTGTCA  
GTTTGATGAACAATAAAGGTTTGGGAGACGGTATGGGACAATACCTTTTAGAGAGAGGTT  
TAGTAGTCCCTATGGAGGAGCCGAAATCAAGTAAAGCATTGACTGGACATTTGGATTGG  
CACAAATTTTTGGTGGAGCACCTACTGGAGCAGCAAATAGACTCTAATATCAATGAGA  
ATAGACGTGATGGTTTGGAGACTATTACTAAAGGTGATTCATATAGAGACGTGCCGAGTT  
AACATGCAGATACAGGTCCTGGATGGGGTATCGAGGGCGTTACCTATAAATTTGCTCGTC  
CTTTGGTATCCGCCCTACCTGCTGCTGAAATGTATGCTAAAATGAGGCAAGTATCAAATG  
GTATGGTAAAAGGTCATGATGTTGCAACCAGGGGTAGACCACCATCAAAAAATAAAGAAG  
TTGACGGTCACAACAACCTCAGTTCTTTGATAGGGAGAAGGTATAAACATGTCTGGTGCGT  
CAAATTCATGGATGAAAAACAATTCAGCTAGATTTGGTTGGAGTTATGAATAGAGTCAG  
GACCTCCGAGTGGTCACTATGATTACGAGGGTGAAGGTGCAGGTAAGACTCCGATCTTAG  
GAACAGCTAGATCTCCTTCTTATTGGTTCATAGATTTACGGAAAGAAAACGCAGTAAGAA  
AATTACTCGATTCAGGTAGACCATCTAGATTCAGTTTATATGGTTATAATAATCATCAAC  
CAGGTTCTGGAAGACCTTTTCTGACATGTTCTCGGAAGGAACATTTGGTAATATGGGAG  
ATTTCTTCAGAACCCAAGGGTATCAACCAAACAGATTGAATTCAGACTAGAGCAAGTT  
TTGCACAAAATAAGAGTGAACGAATCGGAGCGAAGAAAGTAACTGAACAAAGAAACCAAG  
CAAGAGGAGAAATCAATGCAAAGGCTTCGGAGATTGTGCAGATGGCGTTAGCTGTTGGTG  
AAGTGCAAAATCGTTCCAATAGGCAATTCATTTTCGACGGCTGAGTCGGCGATTAGGAGTT  
TATTAGCAGCTCCAGAAGGGGGAGGTACGGTCGCTAATGTTGGTGTAACAACAGGAACAG  
TATTACGGACTTCTGTTCCCTGACTTTACTTCATTTAATAATCCTTTAAGAGGTATTTTCG  
AATGAGTAAAAATTCTTCTAAAGTAGGGAAATTAGTTAGAGGACAGCCAGGTCAGATAGA  
GGTAACTCTATCCATTTACAGAAATGCAAGAAGTGTGGATACTCCAGATGGAGCATATGA  
TTTAGTTACATTTTTATGAGGTTTTGAAATTTATTAAGTATTGCAAATCCATGCATGGA  
GTGCCGTATCGGTTTACAAGATGCATGAGGACTTATAGGATTTTTAATAGGAAATGAGGC  
ATTTACTATTCAAGTTAGACCCTCTATCAGTTATCGAATGTACAATTTTCAGATCCTAGCA  
AATTCAATCAAGAATTAGGACTAGACAAAATAGTGTATCTTTTTGAATTTACTGTGCTTC  
TGATGAATATCGAATCAACGAACTACACAGGTATTTGGCAATTTTGAACACATTTTCAA  
GAATGAAACAGAAGCTGGTGCAATCGTAAAATAATTATGAGGGAAAGACTTTATAAAACC  
TGAGAAAAAATTATACATTGAAAATACTATTAACACACTGTCTTTTATATCTGCGAACTG  
GCGAGTATTTGATTTAATTTATTGGGTTTCACCAAGTAGTATGCGGGAAGCCAGTAAAAA  
GGGTCTTATGTACAACGGGGTTGCTTTTTTTGAAAATGCACTTGGATTTGGTTTTAATAC  
AATTGACTCTATGATTAAGGATAATGTCAAACGAGAGGAAACATCTGAGACATATATATG  
ATCAGGTAAAACAAGACTATACACATATCATTACACACCTATATGAATGGGTGAAGCAGC  
TTTTGATCGATTTAATCTGGATCTTAGAGCATTTCCTGATGAGAAAACTTTTTCAATGG  
TTTAAGACTTGGTTCCTGGTCAGGACCTAGTGTTCGTTAGGATCCTGTATGCATCACCTG  
ATCTAAAAGGGGAACTAGCTCAGATTTATATGCAGACGCTTGTCGCTATTCGTACGCTGA  
ATGATGGTCAAGAATGGCACATTTGAACGGTGGGAAGGCTGTAAATTTCCAGCATAAAAT  
GGATAATTTCTCTAAAAATGCTGCTAATTTACCTAAGCGAGTTAGAGACTCAATGCTTCC  
TAATAAAAATTATGATGCTAGGTGTCAAATAATCAGGAAAGAATTTATGAAGAGTTAGT  
TGAATTACAAGAATGTCATTGACTGCGTATGGAGTCATTACAACAAAATCAAATGACTAT  
CATCTTTCCTGGCAATTTTGAATTTATATGTCGGTTCGGGGGTTAACTTAAATATCCCTCC  
GACTAATCAATAGGATGACACACCTGAAAGAGAGCATAAGTATAATGGTTGATGGTTGAT  
TGCTGCAGTAACACATAAGGCAGTAGGTTTAGACTTTCAAACAGTACTTGTCTAACGAA  
AGACTCGGATATGCCGAATCTCTCACAAAACCAAGAGGAAGGCATAGCATAACTTGACCT  
CCAGACTCACATTTTTTATAATATAAGTATATAGAATTATGTATCTGCGGGGTAAACAAA  
TGGACACTATAGAACAACACATAAAAAAAGATAAAGATCTAAGCGGAAATCCTCTGACAA  
CACCTTCCGCTCGTAGAGAGTTTAAACAAGAAATACACGAACTAGAAGAGTATGTAGAGC  
ATCACCCACCTGAAATTGAAGGAGGTGATCATCACGATCAAATGCACTTGTACTATATT  
GTGATGAAAACCCAGAAGAACCAGAAAGCCTAGTTTATGACGATTAATTGTGACAGCTAA  
TATACAGGAGTTTGTGACTTTTCCTTATAGTGCTATGAACTCAAAGATTTCAATTTGTAT  
ATGGGAGAAGAAAGTTCCAGATGAATTATGTGATACAACCGTAGATTATATTGAGTGTCA  
ACCAGTCGATAAAAAATATTGGTAATGATAACGCATTGAGAACCGATCGAAGTAAGTTTCT  
TATCGAAATTAAGCACAGCATAACGCACGGCTTAGACATCTTAACGATTGCCTAACCCC  
TGCAGCATCATAATATGCAAATACATGGGGCGCTTTAAAGGGTGCCTATTTAACGAACAG  
TGAGATTAATTACAAAAACATTTGTCTTGTGTCAGGGTTATCATGTTTCGCATTATGAAAG

TTATGGAATGCAATCTGGAATGAAAGAATTGGGATGGACTATCTGCTCAAATGATATGCC  
TGAGGGAGAAGGGGAAACAGAATGTTTATTTCAAGAAAATAGATATCAACCACAGAAAGG  
GCAGATCTTGATCTTCTCTGCATCTTTTAGACATACTCAGTGAAGCACGCCTCCATATAC  
GAGAACCAAATAGATTGCAACTGGTTGGTATCTTTGTACACCACCTGGCGGTATTCATAT  
TCAAGGAAGTGCAGAGTAAGTGGGTCGACCACTGACTACAGTTACTGATCGAGATTGCTA  
TAATTCACCTGGAGGTGTTATACATAAAAAAGACGTATAAATAATTTCCAAGTCTAGAAT  
ATCCTCAAGTCAACGATTAGGGTAGGATACGTTCAAGGCAGTTCAACGCCAACAGGTTAT  
TTAACTGTCCGTGGAACAAGTAAATCGGCTGCCGGCCGACACCCATCTCCTAACACAGAT  
GTAACCTTCTGCTGCTGCGGACGGAACGGTGACTGTAGCAGTTGTTGTTATGGCACCTGCA  
ATTCAAGATTAATCAGGTAATATGCTTGGTGCTAGTCAAGTTTACAAGTTGTTCAAAGG  
GTCAGTAATTCATACGCTGAGTTTGGTAGCTCAAGTTATCAGAACAACACTAATATCTTA  
ACTGCTATTGGTGATTGGTCTAATGACATGTCGACTACAAAAGCAAACCTAAGATTTTCG  
TGTCAGAGGAAAATAAGATGTATCGTCCCTAACACACAGCACCAATAAGTTTAGTTAGGA  
AGATGAAGAGGTAGTGGTGTTTTAAGTTCGTTATTTTCATGCCTATAGATTAATATCCCT  
ATTGATACATTTGCAAGAATTCCTGCCAAAATGGCATCGGTGATATTCAAGGAGAGTAC  
TTCTTAGCATTATTGATACGCCAAACCAATCTTCACGGACGTCATTTTCGTTTCCAGCAA  
TACCTTGGAGTTTGGGCAGGAGGAACTATCGAGACCGGTAGTAAGGATGCGAACAACAAC  
CGGAACGCTCGTGGTATGGTGGTTATGAGCTGCTATGAACTTGCACCTTAATTTTTAATT  
ATAATGACACCTCCAGTTCAAATCGTTATAAATCCATGTTAGGGTTCTGCAAAAATGAAAG  
ATTACACCTGATTATGTATAGATTATCTATGAAAATGATCTGTGAACTCTTGAATGGTCT  
TCTGAAAATACATAGCCTAGACCTACCGCTGCTGAAATAGTTCCCTAACTTGCCAGTCAA  
ATGACTGCTCTGAATGCCAAGCAAATTAACGTGATAGATAATCTGAGTAACCAGATTTG  
TAAACACAGGTCGACATGTTGTATCTAGCCATCAAGGACAGTACGTTAGGTAGTGGAATA  
TGGATTGCAGCAGTCGAAGCAGTAAAAGCAAACATCATAAACCTAGATGAAGGAAGATT  
ACTTTCTAGGACACTGGACAAATAGATATCAAGCGCAATCTACACCTCACCATTTTTTCTA  
CTGTTGAACTATATGGGAGAAGTTAGAGGGTGGTTATCATTGAGATAATTTTTATAGAA  
GTGACGGTGCTAATAAATAATATAGAGAAAGATATCACAAGGTTAATGTAATATGCTTTG  
CTAAATTTATTTTTGAAAACCTACATTAGACTGGACAAGATCAGATAATTGTGATATGA  
TATTCACATCCAATGGTGAAGCATGGCATGGACACCTAGTAGGGGATAAATCCACTGGAG  
CCAAAGGCTATAAGATTGTATCTGAGATCACTGTTCCGGGAATCGACTGCTTAGTATGG  
GTCTAGTATAAGATGATAAAGGGAACATGGTATGGGGTAGTGAGGGCATTATAAAAATCA  
ATCGCTGTATCGACACTAAAAAAGCTGTAGCAATCTCAAAAACACGCAGACCTTTGTTG  
GTATTGTAAATAAACTTACGGTCGATCTTGTAGGAAAAGGTGGATTTTTCTGGTGGGTTG  
GTGAAGTAGGACATAATGAATAGCCTATCGAATTAAGTAGGGTCAAAGTTCGTGTGTTTC  
GATACTATACTAACGTAAGACGCGGAACAACCTACCGCTCTACCTACAGAAGATTTACCGT  
GGGCGTCAAGTTTACAACATACTGGCCTAGCGGAACTGGCGGACTAGGTGAAAGTTCTG  
GACAACCTTTAACCTGTTGCAATCGTCATGGGCTTCCCTTATGGATAGCGATCAGGGACAGA  
TCCCTATTGTCATGGGGGTTCTTGGCATTGAGAAATTAACGATACAAAAATTTAACAGC  
AAATTGCTTTTTACTGGTCTAGTAATAGATCCAGGTCTTCTGGTTAATGCATCCGCATTAC  
ACCCCGTAAATCCAACTCAACAATGGCAGGAACTAGAGAAGGGGGTTTCCCTGACAAAAG  
GTGCAAACAATATAGTTTGGCTTTCCTGGCAGGAAAACATGTGAGGAACGAGGACGTGTTT  
CTCCTAGGGATCTTGGAACTTCTGTCGATATGAATGCTAGTGAAAGTATTACGGTGAAC  
TGTGAGATCCTGAAAACCAATACACTCTGCTAGCGGTGTTGGTGGTGGTCTTGGAGATCAC  
TCGAATATAAACTTTTATATATGCCTGAAGATATTGGTGGTCATGCAGGAGCTCTCGTAA  
AAAATGAAGACGGGGACTTCCCTGGATCTGATGACGGGAAAATTTGAACTGCAATTCAGT  
TAACTGGTAAGGTGCAAAATTTCAATAGTCCTATATTTAAGCAAGTCGTTAGTGCTATCA  
GGCGATCTTTGGCGAACCTTGCCGAACAATTAATGTTATAACTATAATTAAGGTGCAA  
CTGACATTTCAATTTGACACTTTTACTGCTGTTATTGCTGCAGGTGAAAAGCTTTTGAGTG  
CTCTTTGAATTGTTGATAAAGATCATTGAAGTCTCATTCAATCTGCTATTGATAGTCTTC  
TTAGCATTGTTGACAATTTCCCTGAGGGTATCATCTCTCAAGCACAAATGGTAATGGACA  
GTGTTCTAAGAGGCATTGATGTGATTGTTAGATCTGTTCAAGGTATTCTTAACGAAGCAC  
TCGTCATTGTACATGATGAGTAATCTATTGTCTCTGGCAGCGAAAAGGGACGAGAATTCA  
TTAAAACATGCGAACAAGGAACACACATTATGAACGATCTTCTAAGTTTATTCTAAAATG  
CCATAACTAACATAACTGTATTCATGGCATTCTTTCTCAAGTTTGCAGAAAGTAATTGTA  
ATCGTAAACTCTCTGGTGTGAAATTGATAAAGGTGAGTATCCTCTATTTGGTACATCTA  
ATTGCTCACCTGAGGAACTCGCTAATATCAATTGCATTGGAGGAAGACATAGAGGTGATT  
GTGGCGAAAATGTTAAGGGTTGCGGAATACTTGTTAATATTATTTTCGCGAGCTGATCCTT

ATTTGTCTGCTGCTAAAACTTTCTAAATGGTGCATCTAAATTATAGCTTGGCACACCTG  
GTCGTGTAGCAATCATAATCCGCAAAGAAAATGGAACACTATTTTCATCAGTTAAAATAA  
GTCAAATAGCGTACGCTGAATATACTTTCAAGAAAGCATTGCATAAAGAAAAACCATATA  
TCTCTGATGATAAAATATGAAGACAATTAGTTGATTACAGTAAGAGACCAACAGAAAAGA  
AACATAATGTTCTGGTTGCAGATCGCGCAACGTACGTTGTTAACAGCCCTAAAGAAGTCC  
ACGGCGATCAATGCGGAGCAATTGATGGTTCACAGGGTACTTCTATTGAAGGTGACTATC  
TATTAGACATGACAGGTGATTGTCATGGTTCTGCTGGTGGCTCCTTTATGCTTAATGCTC  
AAGGTGCACCTAAACAGGTAACACAGATGGAATTCATCTGCTGAAAAAGACGTTAAAG  
AACATTCATTAACATTTGTTTCTGATGTTGATATGAATATCTCAGGTGCTGCATGTACTT  
ATGAAGGTTTCAGAAGTTAATATGGGTGCGGTTACTACAAAAATTATTGGATCTAACTTTT  
AAATTTTCATCTACAACAACACTAACATTGCTAGTAGTGGAATTTTATGGACTGCTGTAACT  
CTTTATACATAACTACCCATCGCTAGTAGAATTGAATAAATTCCTCCTTCTCCCATTC  
CTAAGGTTAAAACCTGGTAGTCTAAGAAAAGGTGGTGGTCTATGGAAACATATATGACAC  
CTGGTTTAGCTGCAGCAGCTGCTGTTCCCTAGACATATCGTTGCACAGCCTCCAGGATATG  
CCTTTGATCAAAATGGTTTGGCATAACGCTATCGTAGTTATGACACGACCATGGCTGGCAA  
CGGCTACAGCAGGTCTTGCTAGTTTAAACGGCGGGTGCAGTAGGAACTATCACTGCAGGTG  
CTGCGATGAACATCAATGCAACAGGAGCAGTAAACATAAAAAGGGTTGACGATATTCCTAA  
ATTAGTGCTATACTATGTGAGTCTTCGCGGATACCCCTCTTGGTTTGGTGCACATCACCT  
CCGCAGAACGACAGTAGACCCCTTGCAAGACCCTCAGGATGAGAAAACTTTTCTTAATTT  
GTCTAGGAGATCTATCGAAATCCGAGATATTGAAGGGTACCACAAAAAATAGAATGGGG  
ATGGAATGAAGAGGGAGCGGAAAGTTATTCAGAAATTTTCTCACCTTTGTGATGTCCA  
TGACACTGACCTTATTACCAATCGGTTTGCAGAAACAGAATGATTGTTCCACATTACAAT  
TTTGATCCCAACATTACATTTCCGAATTCTCTCGCAGTATTCATTGTATTGTTTATCTTC  
CCTCGTATCTACATAGGTTTCTTTGCAAATGAAGGTTTGCAGGCCCATGTGACGACCAC  
GCCGCTTAAAAATATGATTGGACCTATTGGCATTGCATTAGATCAGGCAGATCAAATCTT  
TCATTGCATGATTGATCTAACAGCAAACACTACATAGTTTGTGGAAAATCTCACCAACTGA  
GGGATCTGTTATGTAAGTTCCTGTAAATGAACTTGCTCCTGTATCTGATGAAATTTAAGA  
TCAAGTAGAGCAGTTACGTAAAAGTATTGCGGAGTAAGATGCCGCCTGAAACTAGATCTG  
CCATGTAAATGCTTTTTATTCAAACGGATCTTGTCTAAAGCAGCAAAAGCTGCGGATC  
TAACTAATAAAGAAATGAAGACTACTTTCAATGAATACTGAAATTTCCATGAAACTTCCG  
ACCTGGCAACAGCACTCAAAAAATGAGGAAAAGAGGCATTTTAATCGTCAATCACTTGGT  
GCTGCTAAAAAAGATTACAAGCATTACAGAAAAAACTGGGAATGTGGCGGAATCGGTAG  
ACGCACCAGACTTAAAATCGGTTGGTGCATGTGCCCGTGAGAGTTAATGTCTTTGAACTCC  
TACTGTCCGGCGGAAGACAAAAGACCTCTATCTAGACAGAGTGCCCTCCCGTCAAACTTAC  
TAAGATAACATGACGGTATTAATCAGCATCGTTGTAATCATTGAAGTAACGGCAGCCCTT  
ATAAGGTGCTACGAACCTCATTAAATGAAAGTTCCTCTAATACGGAACAGTTTCCGCTT  
TTGGTTAGTGAGGAATTGTATACAGAGGAAGAATTGATTCTAGTTTGGTGAGAGTTAGAT  
TATTATCAATCTAATAGGTATATACTAGATGCAAATACTAATCCTCCTGTGACAGGTGAG  
GGAAAACAAAAAACTAGAAAACAAGGAAACCTTGTGATAATGTTTTCCAATTGAGAGAG  
TATTCTCATATATTAATCTTTCTAGAAAAGTATTAGAACCTAGTTTGATATGTCGTACT  
GATCATCTATTTCAATGGAAATATTTACAACCTTTAGTATATCACACTTTATTTTCCTAT  
TATGGTGATGGTGCAGATTATCTACCAAAACACGATAACACCGTAGTCAGTGTGATATCA  
TGCTTATAGAAAGTACCTAAATGTTTTGAAGGTGGGGATTTTGTGTTTGAAGATTATATA  
ATGACTCCTAAATGGAGGAACAACAGTGCAGTTGCATTTCTGGCAGTACAAGACATTAC  
GTCACTCTTGTAAGATGGAAGATCAAAATAAATATCTAGGTAAAGGTAGGTATTCCTTA  
TCACATTCTTTGAATTTTAGATAATGGCGTACTTAGTTCATCCCTAACCACCCCGAATAG  
TTTGGGTCTAAAAGAATATATTCAGGATTTTGCAGAAGGTCATGGAGAAGTTAGACCTG  
GCATTTGGGTCTCAGTAAGGAGTCTCCAAGCAAAGGCATTATATGTCCAGACATTGCTAA  
CTGCTTCAGATGCACTCTTCGATAAGTTACCTTCCAGTGGAGTTGTATGGAAACCATATA  
TTGGTTGGTATGATCAGTTGCCATTAGATGTATTAACCTTCGGATTGTTTTGATTATA  
ATATTACAGTTGTAGAAAACCTATACTAGGTAGATGTCAGATCTTTGGTAAGGACAAGA  
AGATGCTAGCAGTAGAGTAGCAGTTCCTATTGATACTGCACACCCGGAGTTCTCTGTCT  
TAGATGTAACTTTTTCAGAGCATGAGCCAGAACTTAAGACATTTAACAGCATTACTCTAG  
ACAAGGGACTGTTTGGGGCACTATTTAATAACAGATGTCAGTTCTCCGATACTAGATCGC  
TAGTGATCGATAAAATCCACAAGACTTAACTCAAAGTATGCAAACAAAACCTATGCAGTAG  
AAACCCTACCTAAGTGGTGGTCTGTAGGTACACAGATGAGTGGGCATATAAGACAGGAG  
AAGAAGAGGAAGAACAATAGACCGCACAGGGGGTTGACTATCTTTATAAATAGACCTAT

ATCAAATAGTGGGATTATCTGTGGGTACCCGTA AAAATATCTCAGTTGGATACAATCTAAG  
ATGCTGACCTATCGCTGGAGGCAATTGTACCCGTGGGCGTGTGTTGACCCATTGGTTCCTA  
ACCGAGAAGCACAAGAAAATCAACTCTTTCGTGGAGTTTTACAAGGATCTAAGGCAACGC  
CTGGTCTTCATTTTGCTTATGACAGAGCTAGTGTGCTATACCAATGAGCGTAAGATTA  
TAGGTGTCGCATTTGGCGATGGAGGTTTATATTTTAGTAGAGGCAGCAATACTGCAACTA  
GATCTCCGCTTTTTGTA ACTGCTGTTGATGATAGTGC GACTAATACGGACATTGATCTCG  
CACCGAAAGTAACGGGA ACTGTCAAAATTACGGGTCTACTGACTATCGGTGACGGTTCCT  
TTATCTTAGAAGATGCACAAGGACCTAAGGCCAGATTT CAGGTAAGTCATGTAGGAACGG  
GAACTAATAGTCGTATCGGTACACTACCTGCCATTACATAGGGTGATGGAACAGGCTAGA  
TTGGTGAGGATACACCGAAAAACTACAAAAGAACACCATTCTTATTGACGAGGATTATC  
TCGTTACTACTAATGGCATTGAAGAGGCAAAC TTTTCGAATTA ACTGGGGTGAAACATCAA  
CCGCTAGACGATCATATTTTCTTCTGAAGCGGGCGCTGTAATATCTACAGTAGAACCAA  
CTGGA ACTGCATCTAAATTGTTAGATACAAAGGCAGAACAAACAGCCTTCAGTAAGGTT  
TTGTTAATCTTAAACTAGCACAAGACGCTGAGGTTGAAGCCATCTGGGCACAGTTTAAGA  
CGACTTCTCTATCTGCTAATTGAAGGCTTCTGGTCTGACTTATCAATTACTCTTGGTT  
AGAGTGAAGCTACTCGAGTATTACAAAACAATACTGTTGATAATTTCAATTCTTCAAGATT  
CAACGGTTATTTCAATGAAGATTACATTTTCATTTGCTAACTCAAATAGTGTTAACTACG  
TAACTGTTCAAATACCTTGTACTGCAAACCTAAATAGCACAGGAGCTCCTAAAACACTTG  
CAACACAGGCTCCTACACAGGTGCTTTCAAATAAAACATCGATTAACCCTGTGCTGAAGG  
GTGCAAGATCACA AACTGTAGGTAGTGTTACTCTTTCTATCGATAATATGACAGCAAACA  
GAACTTTCAGATTCCTGATTCTGATGCAACTCTGTTATCTACAGAAAACGTTACATTTG  
ATGACGTTTCATTTGCTGCAGGTATTAGGGCAGCTAACTGACCTGGTTCGAACAAGACAAC  
AAATTTTGTCTACGCAGGATTTCAACTAAA ACTGGCTACTCAAGGTTTACCTGCATGAA  
ACGAACCGGCAGCGAACACGAATACGTTGTTCTATCCTGCTCATGTTGCTAAATCTGCAA  
GGAAGGTTATCAACGTGGGTAAAGACGGAACAGGATCAGACTTCTCAGTTGCTCTTAATA  
GTTTTGATCAGAATTTAGTAGTAAATGGTTCCGCAGAGTCTTACAATTTACATGAGCATC  
ACGTGATCAATCGATATAAGATGACAGTAGACTCTGCCTTTGTCCCTGCAACATAGGGTT  
TCATTTGGCGGTCGTCAAATTAGGAGTGCTGAGAATAAATCAAAGTTTGGATACGAAGCTG  
CAATTATTCCTGATTATGTAGAACGTTTTGTAAAGATTTTTGCTATCAGGGAGATCACCA  
TTCAAAGTGTTACTGGTAGGTTCTCTGTTGGTAATAGTATTACGAAAGGTTCTGGGAGTG  
ATAAAACTACTGAAGTAATCTACGGTATTAAGGGA ACTTTTCTTCATGTAGGTCCTTCTA  
CTATTCACGGATCTGGTGCAGGATTTGCTGCAGATGACAGTATTCCAAACGGTGCGGGTG  
CATCAGCTACAGTTGCAAGTGGTGGTGTAGGAACAGCATCTAAGAAATTACTATTCTCTA  
GCACCTCAGGCGGA ACTTCCGACCACCGTTTGATTTCTGCAGGAATCGCTTTTGA ACTAT  
TCAACGATAGATCATGCAGAGTTCATCTTGCTGACTCTACAAACTCAGGTCAAGTTTTTG  
CTTCATCAATAACTAGTAATGGTGAGTGGGGTACTGACGGAACAACAGGTA ACTCTGATG  
ATGGA ACTGAATATCCTAGTGGTAAATCTACTAATGGCACCATTTGATACTAATGGGCCAT  
ACCCTCAA AATGCTTTAGCTATCACTTCACATACTTTGTTATACTGATATAACTCTCTTA  
CTGTACTTGCTTCGAACAATAATTCTGGTGGGTCAGAGGCGTATCTTACAACA ACTTCTA  
CCCCTTCATTCAATCAATTTTATATCTATGAGGTAGAGGGA ACTTGGACTAACTCTGCGT  
CTATCTTTGTT CAGAACAGTATCACATATACAGTTACTGCTCAATCTTCTGGAGCGTACG  
GTTATGTTTCGTAGTTACAGTTGTAATAACGTATATATTATTAAAGGAGTCAAATCAGCAG  
TCTTTGCAGGTT CAGATACAATCTTAGATAACCCCAAGTCATCTATTGCAATAAGATCTC  
CTGTGACTGTAAATAGAGTTGCTTTTGCTACTACTGCTGTGGAAAATAATTACATTATTC  
AACGTGCAACTAACGCTGAGCACGCAGTCGCAATGAATACTTCTAGTGTTGTTGGACCTA  
GTGATAGATTTATTATCAACAGCACTACACACAACAACACCTTGAGCTTCATAGGGTTTT  
AATTTTCTCAACCGTTTTCAATCCCCGGACATTCGGCAGTTAATTAGAAACAACA AAG  
CGGATAGGTAATGTCGCTAAGTAGACTTAAGAATATTATTACGTCCAGAACTGGTTGTAG  
CATATATGTCAACCCCGTCGATTTTCGATCCATTAGATGCTATAAATAACAGAGGAACCTC  
AGCTTTGCGTCCGTTCAA AAGTTTGCAACGAGCATGCTTAGAAGTAGCAAGATTTTGATA  
TATACTTGGTGTGAGTAATGACGGGTTTGATGCGTTTAGTATCATGATCTACCCTGATGA  
ATATATTGTAGACAGCAGACCAGGAGATGTTTTATTAACGAACGTTGCGTGTATTGATGC  
AAGTTCAA ACTTAGACTTCACATATCATAACGAATGTTCTATACAAATATATTT CAGTAGA  
AGGTGGTATTATCGTCACTAGAGGTTGTTCTTCATGTGCAACTGACCCTCGTCGTACAAA  
CATTATTCGAGAATATGTTCCATATCCTCCAACGTAAGCTGCAAAAGGCACTGAGACAGA  
AGATCAAGTTCTCCAGAATTGCAATCTTCAAAGTTTCTGGTGGTACTTATTTCTGGCA  
ATTCGCTTTCTTAGACGGTCCGGAAGAGGTTGTAATCTTCAAACCCGATACC ACTGAAAC



ATTAGCACCTTAGTCTTCACATCATAGACTGACTTGTTTAGAGTTTGCTGACGGTCTTAA  
GCCATTATCCACTCTTATGTCACAAGGAAAAGTCCGCTGTGCTGATTACTCTGCTGTATC  
TAGTATCCTGCGGAGAATTGATTGAGAGATTTATTATCGGAGAATGTCGAAATCTTTCGC  
CACTATCCCTGATACTGGAGATCCTCCAAGTACCAGATTCAAGCAAGGGTAGAAGA  
AAACCGTAGTGCAGGTCTATCTCCGATGAATACCGCGTCTTCGGAACACAAGTAATGG  
ACAAACCGCAACGGCTGTCACTGTTGACGAGTTTGATAACCCCAGGGGCCACGGCGTTTC  
TGTTGGTGTAAACATCAACGTTAGTGGTGTACGGAATCAACTGGATCGCAATCCGTTCT  
TGATGCCTGAGTTTATAACGGGTCTTTGACTGTCACTACGGCATCGGCTAACGTCTTCAC  
TTGCCAGATGCAAACATTCCCCTCAGGAAACGCAGTCGGATCAAACATAACTGTTTAGAC  
TGAGAATGATACTGCTGACTCAGCATATCCGTCCGCTTTTAACTTTCACTTCGATCAGT  
GCGTGGTATGAATGGTGTGCACGCAAACGGTCCAACAGAAATTGCTGTCAAATCAATGGT  
TGTAGCACAGTTTTCTGGACTGTCACTACAGAAAGACGAAACACTATTTGTAAGATATCA  
CGCATAAACTAGTAGGTATGGCGTAGCTAGAGCAGTTGATGGCGCACATTTGGATTGTT  
AGCTAAATATTGAAAAGGATTGGGTCATGATCCCATCTAGTGCAGTGACATCTCCTTCAT  
ACAGGCACTTTACGTGTTTCGCTGTGGTATACCAAGGTCATTTCACTGCACTAAGCGGCGG  
TGACATGTCGAGCACCAACTCTAACTCTAACTTTGGTAACAGTACTCTCAGATCAGCAGC  
ATTCTAAGCAGAAGCATTTTTACAAGATAAAGCGGGTACGATTACAAATCTCATTCCCC  
AAAAGCACTCAATACAATTCCATCAATAGCAACAGGAACTAATGGTCTTTCAATGATAC  
TCTTGCTAATGATGGATCAGTGAATGGTCTGATTCCAGTTATGACTGTATCTGGAACAAA  
TATTGCTACTGGTGAATCTTTCAGTTCAATTATCACAATTACTAGAGTAATTACACTTTC  
TGGTTCGAATACGGGCACTGTTTACAGAGGATGGTAATCTTTGGTGAAGACCCATTTGTTAA  
CCAGGTAAACATTGATATTCAAAGAATAAAGTAATTAATACTCCACTTTCTGGACAAGG  
GGGAACACCCGGCAGAAGACTACACATATATTGTTATACTGTTGAAGCGTCTCCTTCAAC  
CAGTAGAGTTCAAGGTTTTTCAGTCGGTGCATGACCAGAAGGGACAAGTAATAGTTTCGAT  
AGGAGATAAAATGAACAGCTGGTTAGTTGCACAAGGTGCATCTTCTTCAACGGTACAGTC  
AGCAAGCATATCACCTTATGCTCCTGCTGTATCTGGTCTTGCAGCTGGCGTGACTGGATC  
TCCAGTACAATATGTTAGTAATACAGCTACTACCAATGGTGTGCGGTTTCAGTCGTTGG  
TTGGTATCTACGTGTATCTTCTACTAAGAGCAGTATGTACGAAGCATTGTGAATAATAC  
ACAATAAAATCCAGTCAGTTTTACTCCTACTACGTTCCCTCAAGAGAATCCGTGATACAAG  
AGATTTACAAGATAGAACATATCGTGTACGGTATGTAATAGAGAAGGATAAGACTAATTC  
GCTCCCGAGAGATCCTATCTCTGGTTTTCTTATTACAACCCCTTAACAGTGATACTACAAC  
ACATAACTTACTACGTGCATTTTATATTTACGATATCGAGACAGGTCAAAGTTTCGTAAG  
AGGTGTTAGTGAAGGAATATCTTTTCTCACATTACTCTGCGGTTCTATTACACCTCCTAC  
ATCTAAGTTTGATGATAGGAAGTTCTAATAGAACGTTGATGAAGTATATCCTGCATTCCG  
CAGACATAATCCAGTTGCTACTGGTCCCTCCTGTAGTCTGTGGAGCTACCAATGTTATCAT  
ATGGCTTGTTAATTCTACTCATTGTGCAACTCCACCTGCTGCACTTGACCCCCAGAGATT  
TTTTACCAAAGAAGCATTATAGTCTTACTGATTGATACTGGTTGGCAGAATCCCGGTT  
AACTCCTGGGAACGGTTCAGTTAACAGAAGTCCCTCCAGGGATTGAACAGACTGCAGGGGG  
AGGAGACGAATAAACCCGGAAGATTGCTATTAGACAAGATAAGACTGGTGTGGTTTCACC  
AATCTACGTAGAGTTTAGACGACACTCAATCATGCGTTCTGGTAATCATACTTTGAATA  
TGTTGGTTTTGGTCCAGGTAATACTCAACTGCCTTCCCTCAAACCTTAGGTAGAACCATT  
ATCACCTCAGCAGATCCGATTTTCCAGACTATTAAGAAGAAGGAGGAGTTGCATTCTA  
CTCTGGTCTCAACAGGAATGGTGTATTGACACATTGGTAACTATGTGACTAAACCTGTGAC  
GGTTCAGATCACGAACGAAGATACTGCACAGTTGAATGTTGTTGCTGAAGAGTTCATGCC  
CATTGTAACGTTCTCAGAGTTAGTATAGACTGGTAAAGTGTCCGTGATTGGTGGTGCATC  
TAACGCACTTGAATACTTCTTTGCAGATCATGTCACATTTCAAGGTCTATCTACATTTAC  
AGACAACATAACCGATAAGAAATTAGCCTGCAATAGCCAAGATGGTACAGTCATAAAACA  
AACTTTACTAGCACCAGAAAATGCAAGTGGACTCCCCGACTTTAGTAATATCTCTGGATA  
CGATACGCCTGGTGTGGTGTATTTGTTTCCAACATCAATTGGCCACCTGGTAAGTCTCA  
TGGTTGGATATATTACGGAACCTGCGTGGTATCGGTGTGGGATCACGGATACTGGTCAAAT  
CAATGTTAGTAATGACTCTCGTGTAACGAGGATTGGTCTTGATGTTGCTCCTAAGTATCC  
TTCCAGGGCAAACGTAAACGGTTCAGTAAGTATTGATGGAGACTTATTTGTTACTGGCAC  
TGGTGGTGTAAACAGCTGCTAAATATAAAAAGAAACAATACACAGGAGACGGTAACCAACT  
AACTTTCGCTGTTTGCACATTCACCTGTGTATTGAACACACTGAGAACTCTTTGTTAGT  
ATTCATAAATCGTTTTTGCACAAATTCCAGGCACTACGTATACTGTCGATTCAAATGGTGC  
AAATGTGGTGTTCAGTGGTGGAGACGCACCTTTTCAACCGATATTTTGGATATTCTCGA  
ATTACCTATCAAATCACGAGGAGGGTTGCAACAGAGCATGGCTATTACAAGAATTAGTG

GAAATCAAATTTAAGACACGACAAGTTCAGTCATCACCACATTAAGTTTCTTAAGCACTA  
ACTCAGTGTGTAGATTACCTGGAGGTTCAACTGCAAACAGACGTACAGTTGTATCTGTTG  
GAACTTAACGATTTAATACTTCATTAGATTCTGAAGAAATTTGTAAGGCAGATGATGGAA  
CTAGATCGGCAGATTGGTCACCTGTTTCAGGTGGTGCTACTTCTCTCGGTACGGACAGTA  
GTATCATAACTAACACTTCACCTCTTTCAGAAAATAGTACTGTTCGGTCATTCAGCCGGAA  
ATGAGTTTGGAAACGCCACGTGGGAACGACCATTCACAATAGGAAATGGTTATAAACTTA  
CAGTAGAGTCAGGTGGGTGATGGAGTGTGGTATAAATGAAACTCAACGTTGGGGAAATAA  
AAGGATTACTGGCAAACAGTTCTAATATAAGTGTTCCTTCATAGCCTTCAATTATTCTTG  
AAACGGGAGCTCAATCGACGGGTACTACTTCATGAACCAGTCACATGGTAATTCCTTGTG  
GCACTACTATAGAGTGGGATCCCCAAGTCCGAGTTGATAAAAAAGATTTTTTGAATGGAC  
AAATGCGGTGGAATACAACAGACCATCACCTCCTATTTTATTATAAAAAGTTGAATCTATA  
CGGTGTTCGGGTACTGCTGTAGGAGATATCAGGAGACAAACAAGCCCTGCAGTAGATGGCA  
ACGCAATATATAGAGCAGGTAATAAAGTGGTATAGATTGGATTCAGCAAGAGGGGGCACC  
CCGCATACCGACTGTAGGTTAGTAATGATGATAATGGAGGTGATTGGGTATTATGCGTTG  
ATGCACGGATATCAACCTCTAAAGATCATATGACTACAGCATCAGTCATAATTACCGTAA  
CTACAGGTCTAGAACAAAGTAATACATCTACAATAAGATGGCGGACAGTTGGATTCAAG  
CATGACGCACTAGTTCAGTTATACTGGCACTTCCGTATATCGGATGCACGCATTCGATT  
TCGGTCTAGGAACGTTTTTATATCGAGACCAGCACCTGTAAGTTTGAATACTAGTGCTT  
CCGAAAATAATCCTAGAACTCAAATCTCTACTACATATCACGGGGGTCTCTCTGACAGAG  
GACCTAATACAGGAAGTAGAGGTTTCAGAGGCCAGCATACTTCTGGTGGAACATATTTTG  
CATACGGTAGCCACTCTGAGTCAGGTAACACTGTGGATCCAGAGAAGATACTAACGGGG  
CATCAAACCGATACTAATGGGTAAAGTAAATTGAGTAAAGTAACTCTTGGAGCATTGGGT  
GGTAATTCCAACACTATTGGTCAGGTAACCTTACCGGCAGGAGATACTTTGAGAGTTGAA  
GGTGACATATATCATCAACACAAGACTGGTGCAATGAATGTGCCTACAGGCACGACTCCA  
CAGAGTCCAAATAGTCCAGCTGTAGGTGTCGTGAGATTTAACACTGGTCAAAGTTACTTA  
GAGGTTTGTACTGGTAGTACATGGAATGATCTCAATGGTCTCTGCTGCTGCTGCTACTTCT  
AATTCCGGAECTCAATTACACCCTGCTATTAGTGGTATGGCACTCAAGGCCGCCGAECTA  
CCTTCTGATCTTTATTGGATTAAACCTAATGGGAGTGTAATAATTATAAAAATGTATATT  
GATAATGATCGTAATGGTGTGGTTGGGTTATAGTTCTACATGTTAGGACATCAACCTGT  
CAAGATCACATGACTAATAGTGTCTGTTTCGTATTAGTAATAGTTTAGTGCTTACATTTGGT  
AACACAAGCACAACTAAAGTTGAAGACTCATGGATGAACACTATGCGATCTTCATGCACC  
TACTCTGGTTCGCACTCGATGGTGCTTGGAAAGCACATGATTCTGGTAACCCTTATGAGAAT  
AGGTTGATTGATAGTGCTGATACTGCACCTTATCATCAACTGCTAGTATTCAGAACGCA  
AGAACACGAGATTCTTCTACCTACGAAGCTAGTAACTGTGACAGCCGACCTAGCACAGGA  
ACTAGAGCTTTAGGTGATCATCATACTTCTGGTAGTACCTATTTTGTAAATGGTAGACCC  
CCAGAACAAGGTAACAACCTGCGGATTTAGGTCTGACAATTTGGCTGCATCAAACGGATAC  
TTATGGTTAAAATCAAATGAGCATTTTAAACGTCAGCGAATTTAATGTATCTACGGAGAA  
CGACCGAGGGATTAGAATGGAGCCCAGGAACAATCTTGTTGTCAGTGGAACTCTTATTCA  
TACTCCTTTAAGTGGATTTACATTTCCCATTGGTACGACTGAAGAAACACCAAGTAGTCC  
AGCTGCAGGTATGTAAGCTGTAGCACAACTTAGGGCATGCTGAGGTTTATAATGATAG  
TGCATGGTTTTGTGCAAGATCGGGTGTCTTCGAACTGGAGGACCTGCGGAAAGTCCCGC  
AAAAAATTCTCAACAACCTGGCATGACTACGTTCTGGTTCATATAGTTTCGCACCACGTGG  
TCGCTCAAATATCAAATGTATGTGGATAACAGTATATTTGGTGGAGATTGGGCCTCGAT  
GGCAAGTGTTACAAAATCTACATGTCAAGAACATATGGCTCAAGCTGCTGTTTCGTATTAG  
AGCTACGAATGGGAATAGCCTATATAATACATAAACATCTAAGATGGCAGATGCATTGAT  
CAATGCTTTTGTCTCTGGAGCTAAGAATACAGGGTCTACTAGATATTGGATAGAAGCCAC  
TGGATTCTATAAAAATGTGTTTCATTGATTGTACTGCTACTGTAGATTTACTCAGTTCTCC  
TAGTAATCAGAACGCAAGAACAATATTATCTAACTGCAATGAAGGAAGTTTAGAAGACAG  
AGGTAGTAATACAGGAACTAGAGGTAATGGAGATTACCACACCTCTGGCGGGACGTA  
CGATTCTGGGACACACCCTGAATGAGGTAACAACCTGCGGATTTTCGAGAAGCCACTTAGG  
TGCATCTAATGGTTACCTCGGGGTCAAATGCTAAATCGAAACATACCGAATTTTTAAGAC  
ATATCTGAAATTAAGTAGATAAAGTTAAAGCAAGAGAGGCACCCGCAAGTGGTTCTGAA  
GTCAGCTATGATTCGTCTGGAAATATATCTTTTGCAGGCAATATATGATCTACTGGTGAT  
GTCAGTCTGATGCGGTTATCGTCAAGTCCCTCACTTCTTTTGGCCGGATATGCAACGACT  
GCTTTACCTGGTAGGGCAACTACCGGAAGTACTGCATGGGATACATATGAAGAAGTAATT  
AACGTTTGGGACGCAACGGAATGGAGAAGTCTTGGTAAGGGAGCAGGAATATCAGCTAGA  
GGTGGAGCAGCTTCAACCGCGGGAGGATATACTATCCATACATGTACAAGAGGTGGAGCA

TTAACTATTGATGGAAAAGGAACTGTTGATGTTCTTTTTGTTGGTGTGGTGCAGATGGT  
GGAAGTACTGTTGCTGTTCTTAACTATGGAAGAACTGACGGAGGTTCTGGGTGGAGGAACA  
GGTCATTGGGTTCAAGTAGCAGGTCTGCCTATCACGTCTGGAAGTTATCCAGTTAGTTTT  
CGTGGTGGACCGGAATGCTAATAAGTCTGGATAAAAATCCTGGTCAAATGGTTCGCCCTCC  
AAATTC AATAGTACTGCAGCATACTGTCGAGGAAGAGGGGCCTCAGGTCCTCGTATTAGA  
CCAGGTGGTTCGTGGTGGTCTGGCGGAGGAGCAGGAGGAGGTGGAGGTTCAACTTCTCAA  
AGTGGTACTGCACAACAACCGTCTGCACCTGGTCAGTCTGGTTCTAATGGACATGGAAT  
CCTGGTGGTCTAATAGTAACCAAGCATGTTACTATGCTTGTGCTGGAGGAGGGGCAGGA  
GGACCTGGTTCGACGGCTGGAAATAGTCGTCAGGCACCTGGTGGAAATCGATCATCAAGC  
GGATCTTGTGGAAGTAATACTACTACGTAGGAGGCGGAGGAGATGGCGGTGGTCATCCA  
GGTTCCGGTTCGTGGACGTAACGGTGGTTTTGGGTGGCGGAGGTCACGGTTGTTTTGCTTTC  
AACCGTCCGAATAATGGTTATGGTGGTGCAGATTCACCTGGTCAAGGTGCTGGTGGCGAA  
GGAGGTGCAGGAAATCCTTGGCCAAATGGGTCAAGTGGTAATGGCGGTAGTGGTCTTGTG  
ATTTTTAGATACCAGAAACCCTAATTCAGCAAAGTACGTCGCATCAATCTTGCATCGCTT  
CAAAGTTTAAATAGCATCAACAGGAGATTAACAATGCATTCACCCGCAAGGTTACAGGA  
TATATTGAACAAGATATGAGTCCCTGTTTCTTCAAGCAATCATTTTCATCAGTTGATAGTA  
ATGATAATTTTTATTGGCAGTCAACGTCTGAACTCTACAAGTGTGGTAAGTAAGAGTTTC  
ACCAGGAACCTCATCTGAAGTTACCTTTGCCGCATACATCATCTAATGACTCGCCTCTAA  
TCTTCTGATATCAAAGTAATCACTTGCATATTCTGTCATAACTGTTGCGGAGAAAGGTCT  
AAACTCCCCGAGTCTCTATTCCCGTTTGCCTATTTCTTTTGTGTCACCGTTCCGAGGGAC  
AAACAAGATGGATCTGTCTCCTAATGCTCTAGGGCCTACTTAGTATTAACCTTGATAGAT  
AGCAATTATTTTTCCATCAGCGATCATATCAGCTACTTCAAATGGTGTAGTAGGTCTAGT  
GCTTTCATATACAACCGAGTAAAGTTATCTTGGACAGGCCCGTGTATAAACAATACAA  
TGTTTCGCTTTATTTTTGTCACCAGGAACTTCATGGTGAAAAAGTTTTGCTGCTCCAATCGA  
CGTACCTGCATCACTTGTACAGGTTCAATGTATAGGTTTACATCACGAAGAAACACACT  
CAAATAGAAACAGTTTGTAAACGAATTTAGAAAAACCCCCCAGAGAACCAAACGTTCTT  
ACACCCTGTTTGTTC AATTTGATTGAGAATATATTATGCGACGTGTTCTTGTGTTTGTTC  
ATGTAACGAGAAAGCAAATCTGCGTTTGAATTAAGATCACGAAGCAAAAAATTTTATCC  
TGCATTAGGTAAACCTTACCGATATAAATAATTGATTGTCTATTAACACATTATCATA  
TATTAATATGGGTAGTTCGTCTCCATAAGATGCCAAACCCATAACTTTACCTGCATCTAG  
TTCATGAGACCCAAATGCCATGGATGTATTTTGAATCCCGTACCCTACCAAGATTGTT  
ATCGATCTGAGTCACAGCAAATTTGTGATAATATTCAAAGGAACAGCAACGTGTCTATC  
TACAATGGTAAAATCAGTAGGATTTGGTGCCCAAAAAGTTGTCGTTAATTCTCTACAATA  
AGTACCAGATTGAAACATATCTCCTACTAAAGGTACGCCAGATCCCATTCCGCTTTTTAC  
AATACAGCTTGCTTCATAAAGTCCACAGTTGTA AAAAGCTTATGCTGCATGGAGTTTATG  
ATGTGATAGTGATAGGTGATGAACCTCAGTGTTATACTTATTTTCTTTCGCTTTTACATA  
TAACTATATGGCTCCTCAACAATATAACAGTCAGCAGGTGTCAACTTGGCTACACCAGC  
AATACAAATATTACCAAGGTTTGAAGTTTCAAGAATAGTCATACATTTAAATGAAAAGGT  
ATGATACTTTCTATTATATCATCTTTTATTCTCAAGGTGGTAGACAATTTTCGCTATTTTG  
TAGTAAAGTAGTAGAGGCTTTGTGAACTCTACTGACTCCTAAATTTCTCATAGGATTTCT  
TGATTCCTGATACATTTATTATAACATGTTTTTTTAAATTATGACATTGACCACAGCGTGG  
TATGAAACCGATATTCCAAAGGAATTTTTAAGTCTCATAGAGAGAGAGTGCGCACCGTAT  
GATGATATAGTTAAGGTAGCGGGTGTAAAGAGAAGGAGAGATATTTGCTACAAGAGATAGT  
CAAACATCTTGGATTCCCTGCAGCTAATTGGGTGAGAGGATTCTGTCCGTCTTATGTA  
ACTG  
AGGACGGACAGATATAACTTTATGTATGATATAGCGGGTATTGTTAGCAATGGAATCCAA  
CATACAGCATATGATCAAGGTCGGTTTTATATTTCTCATCAAGTTGAAGAGCATGGCTCT  
GCAGACGAAAATGGTATGTTGAGAAAACCTGTCATTTATGTTACACCCCTCGTCCCCTGAA  
GGCTATTAGGGTGGTAATTTTGAATGAAAACCAATGAGGATCATGTCTATCTAGTGACT  
AGACGTAGAGGTACGTGTATTGTCTTTGCTAGTAGAACCACTCATTTAGCCACAGAGTTT  
TCTGGTTGTATTCCTAACACGCTGGTAAGGTGGGTAATTGAACCGAGGTGGCGATGATTC  
ATCACTAAGATTGAAGTCTTATTCAACTGAAGTATTTGGCGATTCTCCGCGTTAGTTG  
AAGAACCCCTTTTGCACGAAGAAAATTTTGTATGATAAAAATGGCAGAATGGAATTT  
TGTCTGAAGAAGGACGAGTTCCACATAGTGTGTCACGATAGAATCACCCGATGTATAAAG  
AATTATACAAAGATGTTCCATCAAGTATTGCACCAATCTTAGGGCAAAGCTATTTCCGA  
CATATTACATTTATAGAGTTTATTTGAAGGGTCAAGAATTAAGAAACATCATGATATAC  
CTGCATGTGTAATCAGTGTATCTAGGAATATCAGCACTAGCCCAACTAGACCATGGCCAA  
TATATTTTGAACCTCCTAACGGAGATGTTATGGAGCTTTACACAAATCATGGTGTGCTG

TATTATATAAGGGTATGGAGTTAAACCATTAGCGAGAACCATTA AAAAAGTACGCCAAAAG  
TTTACTATCACCAAATTTAATGCACTGACTAGGGTCAGACAGATATCAAGCCGACTATG  
CTTCTGACACCAAGTGCTAATTA ACTAAGGCACAACCTGACATATCAAGAAGATTGTTAC  
ATTACGCTAGGAAAAATGAAGACAAGATTGTCGAGAGAGTAGACATACTTGACGACTTTT  
ATGAATAGACGGACACAGATGAACTAGATGAAACAACGTGCGATCACCCTCCGAGATAGC  
TTTTTGGAGCCACACCCAATTGGGTGACGACCTGAGTCAATGCCAACTTTTCGTGGTCTGA  
TTGCGGGTGAGGGCGATATATATCGTCCAGTTTTAGATAAGTTTTGTATCTGCAAAACCTG  
CAGGTTTGGACTCAAGAGATTTAAATGAGGAAACCTACAGTGAGAACCCCTATACCAA  
TGCCCTTGGTAACGATGATCGTACTTGGTAGTGGAATGAAACAACAAATACTTGGGACG  
AAGAATAACAATGAGAAA CTGTATCAATTTGCCTCTTTTGATGTAGCGATTAATTTATT  
GAGACGTCGTGCTAAATGGTCGATAGATCATGACAAGTTTTATTGGAAAGACCCTACATC  
TTACCCAACTATGGATGGAGTTGAAGTTTTGTCTAAACAAAATAAAA GAATTTGAAGCGAC  
TCTTCTTAAATTTCTTTTAAACAGAACATCAATAAGCAGAAGCAGATACATGTCCCGATCA  
CGAATTTATCGCGTGAATTATATGCACGATCTTGAAGAGAGAGGTGTACATGCAGGACG  
AGGAAATGAGCGAGGAGAAGGGAAAGGTGCTAAAGGTGGTGTAGATCCTGAGTAATTTAT  
GAGTGTTTATTTTTATCATTACAGCTGGCCTGACATACAAAATCCCGATCTGATTTTCA  
CAATGCAGTTAATGATTCTGGCTTAGATTGCCTCAACCCTCATATCTTTGAGATATCAAC  
CAGTTTACAAGGTAGGCAGTATCATTTTTATGGAAGAGATAACACTCCAATATCTTAATGC  
CAGCAGAGGTCAAGTTAAAGAAATGATTGCAGATGATGTAGAAGCACAAAACCTCAAGAA  
AGCATCTGCATGGACAGGCTATGGGGAAGAAGGAACATATCATACAAAGCATCAACACAA  
CAGTGACAATGATATTAGTAGTGATACACTTAAATGTAGAGTAAGAAATCTTCCCTGC  
AAAAAATAGATCTTTTTATAATTTCTTGGACTGAGTATAACTATTTCCGCCAGGTGTAGG  
AGACGTTTGGATATTTCTGCAACTCTTTGTCTATGGCGCATACTAAGAAAAGTTAAAT  
GAGACATGGCTTGCAACATGATATTACACATGAAACCAGAATTTAGTATTCAATTCTACT  
CTATATATAGAATGCCTGACTTTGATATTCTTAAACGAAAGGTTAGATACAATTGAAAAAT  
TTAATGCCTCATATTTACATGGGGAGCCCTCTGTATGATTGAACGTGGCTCATCCAATG  
TAACTGATTCCTTTGATAATCTAGTCAAACGTCATGGTTAATGTCTGGTGATCTTATCG  
TTAAATTC AATGCTTAGTTATTAATCCTTTGACGAAAAGATATAATCGCGTTGGATGTC  
AAGAGAGACATTATCATGTTGATTGTGACATTGCAGGAGTGGTATTTTTAAGTGATGATG  
AAGATTGCTCCAAATGTTATTTCTGGGACGCTCACCATACATCATTTAATAGACCTTGG  
TTAAGATACTCACGAAGATGTAGTTGTCTAACTTATATTATCCAGAGGTGAAAGCGGGTG  
ATGTATTGTTATTTCTCTCACCTGTTACATGGTGTTTCCCTCATAACTCTGAAACAA  
TTAGAAAGACATTTTCATTTAACGTGGTAGTAGCAAATGTGGAACGAAGTGTATCTAACT  
GCTAATTTCTTCAACGAGGACATTTGTAATTGGTTCATGTCATTTTCATCACACTATGTTT  
GCTTTATATGGATCAGAGTTTGAGAATAAAAGGAATATTAATTTAACAGTACTAACTGAT  
GTTCTCTACTAACAATTCACCTTATGATGTAACAGACAATCTAAAGATAGTCCAAGCA  
AACGTGACTACAGAGGTTAGCAAGAAACACCCTAAAGCATGTCCTAATTATATACATTGC  
ACCGAGTGGACAGCACCAATATAGCTACCAAACAAACAAATTTTGATGAACACGTTTGG  
ACATCTATTCTATACTTAAATGATAACTTCCAGGTGGTAATCCTATTATTGTGGGTGAA  
ACAGTACCGCAAAAAAAGGGAAGTCTTATCATCTTTAAAGGAGAGTTAGCACATGGAGTT  
GAAGAAGTCACAGAGGGTGATCGTTATACTATTTCTGTATGGTCTAAAAATGAAATAGGA  
GTAAACAAATACAGATAATAATAGATTTATTCCGAAAGTCAATTTGCATGGATCGTTTGA  
ATTTAGCCCCGAAGATCATTCAAATCTATCTAAAGTAAGACTTAGTAGAGACAGAGATC  
AATGTGCATGCGTCAGATGACATATACTTTTTCTTGATTGGTAACAAAGTATTCAATTTG  
CAGTAAGAACTACGTTGAATAGTCCGTTTACCACGACATTGGTTTTAGTAGAGGATATA  
ATATGCGATGTCATGGTGCATGGTTGAACAGGAAGGACAAAGGGGATTACACAGAGAAAA  
ATAATCATTCTGATCACTAATAAGTGGTGGATCTTATTTGTCGCTCAGTGAGCTAAAAG  
GACGTACGCAATTCTGGGATGATAAACATGGTTTTGTCTGGTAGATATTTACCCGTATCGA  
ATTACACTGAACCTAGCAATAGAAATTCTCAGAGAACAGACGTAGATTGTAAGAATCGAA  
CGATTGTGTTATTTCCCTCACGTCTAAAGCATAGCGTTGCACCGAACTATTGGAAGAAC  
CTAGATTCTCACTACCATTTGAATACACATTAGAGGGTGTATTTGATGCAATGATGAACA  
CGGTGAACTATGTGCCAGTCAAATCAACGGTCCAGAGGCTCGCCCTTCAAAAAAATAGT  
GTTATACACATAGTGAATCGAAAACGGAAGAATGCCACCTGTCACTCTTAACTGCATAGA  
CGAGGATGAGACTCTTACATTA AAAAAGTTTTGATGCCGACATTCCTGATGATGTTGTCAA  
TAGAACTGCCGACTTCTACATGGAGTAGGTTATTGTTTCGAGGATCTTTCATCGCAAGT  
GTATCCAACTCAGGAAACCTGATACATACTACACGTAGTTTCTATTTTACAGACTCAA  
ATGGGTATGCCATTTCCGGCGAGGTGGTAGCGAACAAAGGTTCTACTCATGGTAAATCA

ATCCGAGACTAGCGACAAACAAAAGTAGTAATTAATAAAAAATCGAACATGAAAACAAAAGG  
GAATTAATAAAATGGAAGTGCAACACGCAATACGTCTGAATGAATCTTCTGCCGTAACATA  
TCAGGGAGCTTTTCACGTTTTGACCGAGTCAGTTATGTATCCAGACCCAGATTTGCGTGC  
GTGTGCCTATAATCAGGATTGTTTCAATGAACTGATGTACATAAGAGAACATGTTGTGAA  
ATATCTTTCATCGTTGATATCAACCCAAAATTTTGTAAACACAGCAGAATCCGATACAAT  
AGGACAAGAGAAGTAGGAACTCACTTCCACTTTATCTAAAGGGGAGATCAATGTATATTA  
ATCTGCTTTGTTAACTAAAATGCAATAACATCTATCCAAAGTAGATCTATTGTCATACGT  
TTCAAATTTACAGAAACGATACTCTGGGGATAAAATTACTGATGGATCTCGTCAGCTGAG  
TAAGATGACAGAAATTCAGAATATGGATGATTAACACTACATGTACAGGAGTTATACACATA  
ATGTTTCGGAAAGAAATTAATTTCTTGAAGCCAGCAATCAGGAACGGTCAGGAATACCAA  
TTTCTATACTGCGAAGGGGAGTTTCATAAACTCAAGAAGAACTTAGGCAATTCAGGAAG  
TGGAGGCCATCGACTATTATCGCACAGAAGGGTGGAGCTGGATAGGGAGTGTGACAGTTA  
AGTTAGTGTACACCCCCTATTGACACTTCTAATATCGTTTATATTGGGAAGGTCGAA  
ACAAACCAACGTGAAACTTTCAAGATAACCGGTATCCAGAGCAATACGTTTTTAAGTCGA  
ACGTATGTAGTTGAGTTTTGTTTCGACACACCTATTAATTTTCGACATGGAAGTCCACGC  
ACATGGTAACAAATTTAAAGACATTGTAACCTCGTGAGAGAACTGGTCTATCAAAGAAAGA  
ATGTGCTGCTATAAATAAGAATGGTTATACCTCATCTTTGTGTTATCAAACGGTCATAA  
GGTAGAGGAAGATGCTAGTATTCAACTACTGGCAACAATACTATTTGCTGTTCTGATGT  
TCTCAGAATGATGAGACATGATGATTATAGACAGATTGTGGGGTGCTACGATCAAGTCGG  
AGATCAAAGAATACTTCACACACAATCTGAGTTTTTTATTCAACAAAACACTATCTAAC  
TTAATGCGTAGATATGGCTTTTGCAACCGTAGAATTGCTTGTTAACTATGTTAAGAGTAG  
TCCACCTGGAGCAAAGCAGGAGACGCTTCTAAATTAGTTAGATATAATTTACAAGAATG  
TGTATCATGCTATAAAGCATTATATACTATCAATCCAACGGTAGATAGTAAGAAACAATG  
AAGAGTTCAATGTTGATTAATACTTGACGAAGCAATTGCAAGTGGTGTAGAATATGCAA  
GAAAGATATATTGCTAATCCTAGAACTGCAAAACGTAAGTTTCAGAAATGAGAGCGTTT  
TGCCACAGAAAACACTACACCTCATAAAGATATCGCGATGCCGCCAGATTATCTTGCTAAG  
GAAATCATTAAATCATTTCATCCTACTGGTAGAAGTCTTGACCCTAGTAGAGGAAAAGGT  
GCGTTTTATGCTAATCATTATACGGACAATAAATATTAGTGTGAAATAGGAGAGGGGAAG  
GATTGGTTACGATATCAAAGAAAGTTGATTGGAATAGTACTACTCCGCCTTGGTCTATG  
ATGCAATAATTTCTAGTGCATAGCAGGGAAGTGGCCGACAATACTGTATATCAAACAACG  
ATCAATCATTATACTAGTAAACGTGCGATAAAAGTTATGAGACCATATAACTTTGCAATT  
AAAGAGATATACTGTTCCCCCACCTACAAATCCTTGACACAACACTAGGGTTTCAACTT  
GCTCCTGTTTCATGCAAAGAGAGATTAATAAAGGAAATATTAGGTTTTCTTGACTCCTGTT  
CTTTCCTAATAACAATATGACTACATTCTTGTGTCCATGGTACGAATGATGTTTAGAGCCG  
AATTAGGCCTTTACAGATTAACACTATTATGAATACAACTTGATAAGTAAGCCACGTCTAA  
ATATTGCTGATTTATATTATCTTGAGAAAAGTATTTCAAAGATCAGAGGCATGATGAGT  
GGGAAGTTTGCCTAACACAAAGAGACCACCAAGGTAGAGCAAGAAAACCAAAGGACAAAG  
ATAAGTTCTCTACACCAGAATCTTCAAAGTTAGAAGTTGATGGTGCAGTATTAACAAGAG  
ATTTTTACGACCCAGAAAGATAAAAGCCGTACAAGGGAGGAACTAGATTTAAAATAACG  
GACATACTAGAGACGGTCACTGGTGGTCAGATGATCCTCACGATTGGCAACTCTAACAGG  
TTCGTGTAAGGTATAACGTACACGAAGCAATTAATCCTTATACTAAGATTACTTCATGT  
AGGACAAACCAGATGACGCTGACATTGAAAATGATAGGGTAGATGAGGAGTTTCGTGCTG  
TACTTGGAGAGAGGAATATTGTTATGAAAGATGGTAAGTTGTGTGAAGTTGAACCATTAT  
AACACGCAGCTTTCCTAAGTATTTCTAACAAGTATAACGTAGCGATGAAGACAAGTACTG  
TTTACCTCTAGATGTGGTTTGTGATTTTGAAGAGGCGGTTAATGGGTTCTAAAGTAT  
ATCTTGATTCTGAATTTAATAGTTGGAAGAAAACAACGCTGCCACACTATAACAGATTTA  
CTTGGGCATATCTTGTTTCTTATATCAAGTGTGAGGTAGTTGCAGAATATCTCGAAAAC  
TAAAGGAATTGATATTCACAGGATCTAATTGTCAAGTGGTAGTTGACCCCTTAAATGGAC  
GTGAAGATAGATTTTGTACTATAAATGTATCACTGAGAGAGTGGCAACAACACTCAAAGTGG  
GCACGTCAAGGTTTGTTCAGACCTCAGCGATGAACGGAAATCAGCCCGCTAAAAACATTA  
AATCATTTACTCTATTGTGTATTGATAATTTTATTGAAGGTAAGTATTTTAGTAACGTCG  
GTAGCATGAGAGGTGTTATCTGGAACGTATACTTAGAAGAGTTGCAACTTGCTTGGAAAG  
TAGTGCATGGTCGGGCAGCACCAACTTGAGTATGCGACATTACCAATAGGGATTTTCC  
TCGAAGACGAAGTCTTGACAAGTTAGGATAGTGTACACCCCTCTGGACAGAGGGGTTTTT  
TTATGTTATACGGATTGTATTGAAAGCTTATTATGCAACTACGTCCACACCAGACAAGGG  
CACCAAACTCTATGCAAGAGAGGAACAAGGGTCCAATCATTGTTCCAGCTGGTTGTGGCA  
AAACGTACAGCATTATTGCTGATACTTTTAAAGAGATTTACGTTACCAGTTGCACAGACTA

CAGTTGTAGTTGAACCTCGTATCTATCTTGCTAATCAACTTGGCGCAGATTTCCCGGAGC  
ATAATCTAGATGGATATCATAATCAAGATTTTCGATGTTGCCCATGTTCTCCAGGAGAGA  
CTCACCAGTTCAGCACAACAAATCCATTCCGATTA AAAACTTGGGTAAACAACAGAAAGT  
ATCACATTTTGATACTTACCACAGATCATTCAATTCGAAACGACGTGAATGGAATTTATG  
TAGAAGTTGATAGTATTTTCAATGAAGAAGCACATAATGGTAGTGGGAAGCACTTCCACA  
TTGCTCTATCTCAAATTTGTCTAGTATGAAAAAAGGAGTTACTTCTAGACAGGTACACCTC  
GCACGGGTCGTGGTGTATCACTTGACAGAGGTATGAACTACACCTCAGTATATGGAGGAC  
TGTTGGAGACTGTTCCCGGACAGGGACTTATCAAGTGAGGTGCTATTGTTCCCCCTAAGA  
TCGTGCCCTTTGAGACTCGTAACTCAACCACTCTTGACAAGTATAATGCTCAGGAGATTG  
ATGCTCATAACCTCAGAGATTTTATCGATACATGCGATGATAGTCAGATCAACAAGATCC  
TAGTGGGATCGCATAGTCCAAGAGTGTTGCGTATTATGCTGGGACATACTAAGGTTCTTG  
AGTATTTCAAGGACAATGGATATGACGTTATGCACATCACATCAAAGTTTGATGATGTCA  
TCAGTGGCACAAAAGTTGGTAGACAAGAGTTTTTTGACACACACAAA ACTGGGGTCCGG  
ACGATAGTAAAAGATTTGATATTTTCAACTATACATTACTATCTGGAGGTATCCATGTTT  
CAGGTTTGACTCTTACAGTTTTTGTGAGAACCCTACATATCATTGAGAGGGGCACAACTA  
TTGGTCGTATCATTTCGCGTTCATCCTGATGATCGTAAATCAGTTGGTGTGTTCTGATTC  
CTGCAGGTGCATTTCCCTTATTCTAATAACAATTTGTACAAGTAAGTGTTCCCTACTGGAC  
AAAACGTGGAGACGCACTTGGTAAAAAACTGCAGAATGTAGTCTACCAAATTTGTTGTTG  
CGGGTGTTCACCTATCGCTTATTGCTACTGAAATTACGACCACAAAAGAAACGATATT  
ATATGGGGGTTGTAGGAATACATTTCCCACTATACCTGAGAGACTCCCGATGTGTGTAAC  
TACTCCCATTATTATGGACTAAGGGATTATGGTGGAGAGTCGTACAAAATAGGACAAGA  
ACAAACACCCGAAGAACATATTGAAGA ACTTGTAAATAGTATTCAGAGAAGTTAAGAATGT  
TTTTGCAGATGATGGCACTCTATAGGTAAACATAGGGGATAGTTATTATAGCATTAGCCA  
TGGA AAAAGATCTATCATTTCAAAACAAAACAGTATCTAAA ACTGTACAAGATGTA ACTGA  
TCAATCAAACAAA ACTAGGTAACAAGTTAGGCGGATTA AAAAGAGACAGACCTTATTGGTAT  
TCCTTGGTGGTTAGCGCTTGCAGTACGCACAGATGGGTGGTATCTTACGCAAGTTATTAT  
CTGGTATAAACCTAAGCCGCCGCCAGAAAGTGGACGAGATAGGTGCGCCAAAGCACATGA  
ATATATTTTATTATTCTCTAAGAACAAGAAATATTATTAGGACAATGAAGCACTTAAAGA  
ACCGGCAAAAAGATTGGGGACCTAGAGAGGAAAGTAAATGAAAGTATCATAAGAATGGAAC  
TGGATTA ACTCCTCGTGCTGGACTCAAAAAGAGTTATCCTACGAGGAATAAAAAGATCAGT  
ATGGTCAGTAACTAATAAACCATATAAGGGA ACTCACTTTGCAGGATTTCCCCCTGACTT  
AATTCAACCTTGGATCCTACCAGGAAGAAAGAAAGGAGATTTAATACGCGACCCATTTAT  
GGGTAGTGGCACAACAGCAATGGGATCTACACAATTAGATAGGCATTATTTTCGTTGTGA  
ATTGCATGAAGAATATAAATCGCTGATAGATTCAAGATTACCAAAAACAGCAATTAGTGA  
ATTGATGGATTGTGACAGTTAAAGCACTCCACACTATCGGTTGGATATGACCCGATAGTC  
AATCATAGTATATTCATACAACAGATTTTTTATTAAATCAACAAAACACAAGCCTCGCACTC  
ACAATTTCTATAAAAACCTTTGTTTCAGTTTATCATCATCGGGACGGTTATCCTCACTGG  
TGTGATGCAGTCTACCTGAACAGTATAACAAA ACTAGAGTCAATTATTTAACTTCTCCCA  
GGGGGAGGCATGAGTTAACGTTGGTCAGATAACGAGTATGATTTTCGAGTGAAACGAATTT  
GTAAGACGTGACACTAATCCTACTTACTACTCAGAGACAGGAGAGTCAGCGCCCCCTAAA  
ATCGTACACTCAAATACAGAGTTCCTAGATCATTGTGGCCACTGTAGTGGAGAATTCGGT  
TATGCTATGATAAGGGACAGTGGTTCGGTAATGACACTACACACCCGCACTTTAGTTGGC  
ACTCCAGAGGAGATAGCAAAAATGAAATTTATAGTAAAAGACATAGA ACTCTATTTAAGTG  
AAGCTGGACACGGAGACCCCGATTTCCAATTCAAAGAACAAGATGAGTACGTAATGCACC  
AAAGATGTCTAGGTACATGGACAGCAAGAAATGAAAAACATTTCAAATAAATGATTTTTG  
AAGCCATAGGTTATCATCTAGCGTTTATTGACTCCGGGGTAAATGCATGACAAA ACTACCC  
ACTTCCGAAGGTGTTACCAAGACATGGTAGTGAAATTATCCAGATGAATGAAGAGCAAAG  
AACAGTCTAGATAGAGGACGTCAAAAAGATACACCCAGATTTTCCGTTTGACAGCATGGT  
CTATGAGACTCACACTCTAGGCACATACCTCGCCCACTCCCCTCAATCATACCCTATACT  
CAGAATAGTTGGAGAAACACAAGCAATACATTTCCCTTCTACCAGCACCCCAAATGCCCTC  
TTCTCATTCTATGGATTTTTTCGGATTGCAGTCGCGCTCGTCACACTTTACGTTGTTACTG  
TAAAGTATTGCAATAGTCCATTCAACGAGGATGGCAACTAATGCTGGATTTTTTATCAGG  
TGTCTTAGGGGATGTTTGCTCTGAGAATGATCTACCCACATGAGTGCAGATGACCTATT  
ATATGTACCTGCATAGTCAGACATCAAGATTTCTCAACCTCAAAAAAATTTGGTTCACCCA  
TTATATTGATGGCTGGGATATTATCCAACAAA AATCTTAATGTGATCTTTATCAGGACAA  
CTCAAGAACCTGACATTGAAATTACTCAAATGTCTAAGCACTTGTTTAGTGTGATGGAGA  
CCGCAGTCAAAGAGGGCAGGCATCTAGGTGCCCTATCAGTTTGCAGAGGAGTGAGTAGTAA

ATGGCAAAGACCCTAAGGACGAGGATTCAGAGTTCAGTTTAATTACTAACACAACCTTTTG  
GCGATTGGACATGTGAGGTCTTACAGTACGTTTAGTGTCACAATGGTTCCCTTTTCATAT  
CCATTACTCTCTGTAACGATGACATGACTAAAACAACACCAAGAGAAACAACCATTATCA  
AGTTGATGGAACCTGGTTTTTGACACACTTAAGTGTGTGATGATGTTGATGACCTGGCAT  
TTGAAATGAATGATGTCATGAGACACGCATTTGAAAAAGAAGTTCGCTATCCTATGGAGT  
TTAAATAATGAATCAAAACGACAAGAACAACCTCGAAAAATTCCGGTATGACTCAAATG  
AGTTGAATGAATTAAGATAACAATTATGTTGACAGATATGTTGAAAATATGTCAACTCAGG  
ACTTAGTCCAGTATAGCTTTCATGACTTGCTCAATTATGTTCCATAATCAATCAGATGTAG  
AATTTGGTGAAGAAGCGCTAAACTATAGGGATGATCCCTATGATGATTTTTGTTACTGACA  
TCAAAGAGTATGCAAACAGTGATTTTAAAAAACCTTLAGAGGGGAATAAGAAACAATGACT  
AGATCAGGACTATAAAATAAACTTATCAATTTTGTATTAGAGGATCATCTTGATGCTACA  
TTTGTGCAACAAACGGAGGGATTAACCTTATGTTCCGCTTGACAGGAGAAGAGGATTTTGAA  
GAATGACAAAAACTAACCTAACAAAAGGACCATTTCAAGAAATCTATGATGCAGTTAGGG  
ATTTACGTTATGAAATCAGAGAAGACTTAAAACCTTGATGAGGAAGTACCTAATACAGGAC  
ATTTAGATTTGTTGAGTGGAGTTGATGACCTTGCAAGTATTCATAAGTCACTCAACAAAC  
AATTTAAGCAAGTAAAACCTCAATCCCCAGATTAGGAGTGACTGTTAATTATCAGCCACA  
CACTACTACGGATGGGTTACCAAATACCCTAGAATACGAATAATCCGACAAAGACCAGAA  
AATGATTACAGAAACATTGCCAGTTCACAAGAGTGGAGATCAACTCAACAATTTGGTAAA  
ACTCTAGAATCTACTCAGAGACATGAGTTTTCAACTCGCACCCGAGCAGATCGAAGTGTT  
CGCGAAGATTCAAGATCGAGAAGGCAACGGAGGATTTTTCTAATGTAATCGGTTACATCA  
CAAGTTACGATCGTTTTGGATAATAATAAACATGAAGCGATTTCTAAAGAAGAGCATATC  
CAAAGTTAAAAGATTAGAAGGAAGTATGTTCTGGTATATACCTAATCGATCAAGAGATC  
ACAATTATGGAAGAGAAAGAACCAATTCATCTTTATCAGGGGGCATAATGGAACCAACT  
TACATGTACTTGCGCATAGCCCACAGGACGAGCATTACATATTTCTAACAAGATATGGG  
CTGCACGTGAGCGGGCAGGGATTGAACTAAATCAAGATGCAGAATTATCAATCCGCATTT  
ATGATGAAAACCTATGATGGAGTATATGACGGGGAAGAGTATGACAGTTAAACAAGTGTC  
CATACTTTACCATTCCACTCTATTATCCGTTATAATAATGATAAGTAAACATTTTTTATT  
ATAATACAGTATTTAATTGAAATCCCAAATATCCCGATCAGAGAACCAGTGAGCGGACTT  
TGCTATGACATACTATAAGACATGGCACAACAGTAAGGTCATGCGGGATTACTATGCTAT  
GCCAAGAATGGCACCACATTGATACAGGGCATTATACAGATAAAGATCAATCAATTCAT  
TCAAAGGAGATTTTTAAAATGGGTGCTAAATTAGACGTGTGCGCTAATTTTCATGAGACT  
TATAAGCAAGAAATGGAATTCCTAAAGATTCCGATCATTACATTCAAGATTATCGACCC  
GATCTTTATTACTATTGGGATAGTGCAATAGATGAGGATTATAATTGGAGAGACGATTTT  
CCTCATGCTGATTGTCTGCACGAACTCTGTTTTGATATAGCATAACGACAGAATAGAAAATG  
AAATGGAATTGTGACGGTTGTTAAAGTGTCAAATAGTCTCCCTATTCCTATACATTTACC  
TTTATAATATTAGTATCTTCAACAACCATCATGCACAACCTGTAAGAATTTTCGAGAATAA  
CTTGAATCATTCTACAACGCATGACACCCAGATGTTTTATATCCTATTAATGCATTGATT  
AGTGAAGAATTAGCCCTTGCTACACTCACATACCTTGATTAATGGGCATCATCTGCGGGT  
CAAGTAAACTGGGGATAAGTAGATCCTTTAGATCATAAGGGAGTCAGAGATTTTGTTTAC  
GCAAGGAGGTCAAAGCATGAGGAAATTCAAACCTCTAGAGAGAGTTGTAGGTTATAATG  
ATGTAACGATCGAGGCGAATAGCGTAGAGGAAGCGATCCATCTTTATTATCGTGGACAAT  
CTCCCGAGAGTGCGGTAGAGCAATACTAGTTGTTTAAACGATTTTGAATTTAGAGATATCT  
GTCCAGAACGATGGAAGATTCAACAGAAAAAGAAAAGTGGCTCATTCACTTGACAGAAGT  
TAAAAACGAATTACACTATTGCCCATCAACTGATGACGAACTAATTGGAATATACCAGAA  
TTTTGACGCTGTCACCTACGACGACATTTTTAAACCATTAATGTACAGTTCCAAGACTGT  
CACATAGTTGGAACATTCGCTTTATTATGGAATATGCTAGTAGCCTAAACAAAACGGATT  
TATGAACAACAATTATATAGTCACTGGTGCCAAGATGAGAGTCATCAATGTAATGCTCAC  
ATATTTGTTCAAGTCGGGAAGCAATCCAAATTACAAAACCGATTTTCGAAACCTTTTATGA  
CTATACTCAAACAAGCGTATAGCTATTCTTAGCAGAGTAACATGTCAGCATCACATCCAG  
AGAGCTTTGTGCAACAAGGGATCATGAGACATGGATAGACTACGCAACAAGCATGGCC  
TTACATACGATTAATTTACAACACTTGAGCACAATTGTGACAGAGGGATTCTACCAGAGA  
TCGAAGCAGAATCAAGCAACAGATCAAAGGACTTGAGCCGGTAGGATTACGGTCACATAG  
TTCCCTATTCAACCCACCTATCCCTTATAATAAGAGTTACAACACACAAATCAATGAGA  
CTGACTAAAAGCAAGCAGTTCAGCAATTTAGATGGGATTTGTCAGAATTCCTAAAATCT  
AACCTAGTTGTAGGGGAGACAACTTGAAAAGAGGGTGTGCTTTTAAATGATTTTGTAGAC  
GCTCTCAATAAAGATTGTCTAGTCCCTGATTATCAAGCGTATAACTACTCAAACCCATGC  
TAAGGGGATTTTTAAAATGACAAATAGTAAACTTGTACAGGAGTCACTAATGCAGTTAA

AGATTATACAACCTTGAGAATTTGAAGAGGAATCCGAACCCAGCAACAAATGTGACT  
ATACCGTTGTAGTGCCAGATACTGATCAAGTTTATCATGCAAACCTATAAAATGGACTTAA  
AAGCTGCAAATAAAAAGTGCAAGTGAGTGGGCAAGCGACTACGGTCGGGCTTCTGTAGATG  
TACGTAACATAAAAACAGTATTCGCAGTGCGGTAGTGTGACAGTTAGATTAGTGGCACAC  
GGTGACCCCATCTTCACTAGTTTACCGTTATAATAATAGTATATGAAACGAACTTCTAAG  
AAACATGACAATCTTAGAATACAAAAACCTCAATAAAACGACACTCTTATGATCGGTCT  
TGTTGAATCTGAACAGGAAAAATCCAGAGTAATCAAAGAATCCACGAAGTTGACAATTT  
TCGAAATGTGGCTTGCTCCTGTGCAGACTTCTCAGTATTTGTAGGAGAGTAGGCAGAGTG  
GGGTTTAGATGGGTGTTCTAAGGTCGATTTGGATGACCCTGATCTAGACATTGCTTAACC  
AGACAGAATTATCAAGCCTGACAACGGATACATTAGGGGAGTGCAATGGGACTAACCCCT  
AAACAACCTTGAGTATATCATCGATAGTCTCAATTTCCATTATGCATAGAATGAGCATATT  
AAAAGCGCATGATCGAACTGAATGCAAGTATAAGTAGTCTAGTAGCACACCAACCACAA  
GAGAGTTGCAAAAATGACTAGAGCAGAATAAGATTAAGTTTTTGAAGCATATAAAATCTA  
GCGACTTTCTATCACAGATGAGCAAGAAGTTTTAAGAGAATAAATTCTAGACGATCTTTT  
GTATCCCGAAGCCGGTAAACTAGAGGTAATCGACGCGACCCGACAGTAGTTTTACCAGTTTT  
AGATATTCCTAAGATCTCGAAGAGGACACATCTGAATTTAAACCCTTGATTTTGGATA  
AGTCAACGTACCTTATGACACTTTGATTCTGGGCACGGGGTCTCCGCATCTGTGAGTCGC  
CGGCCCTAAAATTATTGTATAATAAACACCGAAACCTTTTTATTAAGAGCAAAGTCTCAG  
CCGCAATGAACTCAATGATACGCAACGCTGTAGCATGGTCAAATGGGACTACTTGCACTA  
CTTACGTTAATGATGGATATTGCCTAGTCTTCCTTCATCGCAAACCTGTGGCAACTATAG  
GCGACTCATTCTGGCAGTCTTTGACGGAGGTTTTCAATCGAACACAACCTAAGGCTAGAC  
TCCACGCAGTGCTACACGAATTCAGACCACAAACAAAAGTGGACGCTAAAACTTTCAAT  
GGTTAATCAACGCACATAATATAGTATTGCCATTTATCACAGAGGGTCTAGGATAATGAC  
AGTATAGAATGGATTTGAAAAAAGTTCAACACCGACTACTTTCTACACTTTGGGAGAAC  
ATTCTGGATAGATGACAGAAGCAACTTATGTTTCATGACCAACTTATTAATATGGTTCTAC  
ACATCGGGATCTATGGGATTATGCTAGCGGGTGGAGAGTTTTAGAAGGGGTTACCTCGA  
GAAATTACTTGATGTTGATAAAACTTGTCTAGAATACAATAATTATGGTACGGAGGATTT  
TACCTAGTGCATCATGTTCTTAACGAGTAGTCGGAATTAGTTGAAATTGATAACCACGTT  
ACTCATTTAGAAAAGGGAGTCGAAGCCACCAATCATGCAATTAACCTCTGTAATCTAACC  
GGGAAGAAAGATTATACAGAACCCTATATAGAGTTCGATCGGAATTGAATAAACAACCTC  
AATGACATTCTAGCACAATGCCCAGATTATTCAGAACAATGCCAATATGGGATATGATCA  
CATTTAGAGGAGTGAAGGGTTAATCACTTTTAAATATAAGGATTATCTCACCTATTGCA  
TTCACCAGTAGAAAAAGACCGATGAGGACAGAAAACACTGCCGAAGAGAATACTTACAGG  
TCAATGTACTCTTTTACCGACATGAGCGGGGTATCCTTAAAACAACAGTGGATGTATGTA  
AGAATAACGACAAGAGAATTGACGTTAATGTTATGAGATAGTTATCGCAAATATTGGATA  
AGACAGCGATAAGATACCAATGCGGAAAATAAATCATTAAATGAAAGAAATCTAAGTGTGC  
GTTTTATCTGTGCGGTCAACCTCTCAGAGTCATGCACCCTCAGCACTCATCTCAACAGTTG  
TCAATTCATTCGAGGATATCCACATTTTCCCATAACACGTTGAGATTATTGGGAGTTAT  
GCCCCATAATAACACTGTAAGGGTTTAAACAATCAACTGTTTGCCTTCAACTAAGTCTAA  
AATGATCGACTCACTCCATAACGAAGAGCCTCAATCACTAGGACAGTTCTCTAGCATATA  
CGGAATGCGGATATATGTTTATGATCTCAGAGTCGAGAGAGACAAATGGTGCGTACGGAA  
GAACCAGGATATAAGCGTATTTGATTATCTCAAATCAATCGGTTATACTTGGGATTGTGT  
CTCTAGTTCTCAGGTAGGAGAGAGTTGACAATGTAATTACCCTATGCTATAATATGAGTA  
AATCGGAGGGTATCCAAATGTAACACGGAGAACAGTTACTGTTTATTAAAGAAAGGCAGTCA  
TATAAGCCCCGAAATGTTAAAGTCGCCCGCTACCCTAACGACCAAACGTTCCCCCGAGT  
ACTTGGTATATAATTCATAATTTTCAATTTAGATCAGTATTAAAAAAATTTGGGAGAATAAA  
AATGCCCTAGAGGACGATCTAAAAACAACAAGAATTTAGTGGTGCACAAGAGCGTAT  
AATATGGGCGATTGATCAACTAGTCAGACTGGAAGGGTATGTGGGTAACAGAATGTATGA  
ACGTGTAGGTCACGCTGCTTCTATCTACAATGTAAGAATAAGGATTCACTATATTTCACT  
ATGAACGGATTGGAAAAGGAGTCATCCACTAGATATCCCCCTAATTACAGACTATAGAT  
CAAAAATTATGTCCACGAATTTACATAAATACTCGCGGAAGATGATTATGGAGACTTAC  
TACACACTATCCCCTATGAATTATGTCAAGAGATGGGTTGGCACGGAGGAACCTATATTAC  
AGTATGTACTGAATGATTATGGAACAGGTTTTATTTTAAAGAATGTGAAGGACTGAGAAA  
GATCAAGAAGAAATTTCTACGGCGTTGAAAGCTAATAGGGATTGTTTACTGGAACCTCAAT  
AAAGGATTAGAGGCTTGAGAGAATCATCTTTCCGAATTACCAACGCCAGACAAAACATAT  
TACAAACCAGAAGGTGAAGAAGAGTACCTAAACATCAAAGGTAACCTATGCCCTGAGATAT  
AAACGTCTTAAGAACTACAACACGGTATGTATGATGAATCCTAGAGGACAGAACCATAT



CTGTAACCTCTAACTCCCTTAACGATACTCTCTGTTAGATTTAAGATCCTGAGGCAACAGG  
GCAGGTTATAATCACTTACAGTGGCTATCCGACTGCAACAATTCGAGATAATACCCAATA  
TTACGTATCTGCAAGAGAAGATAACTTCCTCATGTATAATGTTTCCGAAGTATGTCCGAA  
CAATGGTCAATCATATATTCAAACAGCAGGTGCATGTGGTAGGGTATTTAATTGTCATAG  
TTGTGTCAATAATTAATCTTGTAGATTAACCTTTAATCATATCCCTTCAGACCTTTCTTT  
TGACTTTGCATACTCTGACGTATGTTTCTCATACTGATATGCTCCGTCTGTTAAAGCTGG  
TCATGTATGAACTTCTGCGTATTATGTTGAAGATGAGATAAAAAATACGAGTGGAGGATC  
TGGTTCTAAGTATGGTTGTGATAAACATAACCACTTCAACTAATTGTTTCCCTTGCACGTG  
CCAATTTACCTGCACCGCAGCGACCACAGAGCTTATGTATAACCGCTCCCATAGATCGTAC  
GGCGACCCCGAGTGCCCTCGCCCCACTCTATTCTGGGCGTGGAACACATCTCACCAGAT  
CGCTTTCAAGAATGATGCGCTATCCACACAGATACCAAATGGGGAGGTGGACTTTGAGGT  
AGCAGAAATGGGTTCATCTATCTGTACTGGTACAAGGAATGAGAACCAACCACAGGGAAT  
TCAATTCCTTTCCACTGCAGATAACAACCTGGGTAGTGGACGCTGTAGCAGGTTTCCAGGA  
TTTTGAGATACATGACCATAATGGAGCACAGATGACCTGGGGTCTCTTAACTATATTA  
TAATGCAACCACAGTACTTAAGTTAAAGTTTCGTATTGCTCCGAATCTTCTTGATGATCG  
CCCCATTAACGGTACTAATTGGGAACTAGCGGTGGTTATCAGCAATGGATCAGGATAGCC  
AGTAGTTGATACATTGAAGATATCCTATCCACATATTCATACAAACGGAAGCACAACACTAC  
AATTCAACTACAAGTTAGGGTAAAAGCAGTAGGATAAATCAATTGAATATGTAGTTCATC  
AGGGTATGACCTACTGAGAGCGAATGATTCTATGAACGGACATAACCATTACCCGCGTTTT  
CCACACAGATCAAGAAAACCTCAAGTATCATGTGCGCTACTTAGAAGGGACCGGTTATAA  
TGTTGCAAAAGATACTCAATATCCATCAAATAGGGCGCACCAAATCACCACAGTAGCAGA  
AAAAGCCATTCCCGACCGCGAGATCTTGAATGGAAGGTATGAGCTTATCGATAAATCTAG  
GCAACGTGTCAGCGCAGACGTAGATCGGGATGCACCCGACATCTATAACTCCATAAAACA  
ACCAGATGTAACACTTACAATCACAATGGGCGCGTAACAGGCACTAAAATTGTCAATGG  
ATGGACTGGTTGGAACCAATTGAAGGAAGAACCTGAACTTCTTGTCACTGCAACAGGCAT  
TGAGAGTGGAAAAACGCGGAACCGAAGGGTACGTACTCTAAAGGAGTGCTCACAGCGTA  
AAAAATAACAATTGCAGGTTACGGATATGACGCAGGTAATGCTCTATTTCGCATGGAAGCG  
CAATATTTCCAAGGAACTTCCCAAACTCAAGAGAATCTTTCCAATGATGACTATACTCC  
CAAGACTTCTAAGCAACAACCTTATCCAAATTTGGAATAACTTACCTAAAGCGGGGGTAGA  
TCCAGGCGATGTAAACTAATTTGCGACTGCTCAGCCCGAACTTAACAAAGTTGGATACA  
ATTAGGTCTTACAGGTAGTGAGATTAGAGCGGTTCTTACTGATAATGAGGTAACACGCTT  
ACAAATTGACGCTTCTACGTCTCCAAACGTGACACAAACCGAATTTGCGTCTCTAGATGC  
GATTTTAGACATCGAATAAAGGCAAACCTTCTACTGAATAAACAACGCGTAGCAATATTAT  
GTCAGCTCCTGTCCGTAGAAGAGTTCAAAAACCTAGGACTATGAGGTCATTCCGCTAGATC  
TTTGGATACTCTTCGTTATGCTACACGAAATGATCAGTAGGGTTCGAGCTTCTTGTACGA  
TTCTGAACTTGCCGACACCGTAAAAGCCTTTTTGAAAGATGATAAAGAGCAAAGGCTTGC  
CGACAGAGATGCGGTTCTTGTGAACTGACATAAAAAGTGAGTCTTGAGTATACAAACCTG  
TAAAGAAAACCTTAGTTGAGACTGTTCAAGGGCCTTAGTCAATCTTCTGAGGCAGACTC  
TGGGACTAAATATCTGATGACAAAGTTTGGTGCGGCCCTACGTCAAAGTGAACATAAA  
CGTTAGACTTTGTGTGACACCAGTAAAATCCGATAATTCACATTTTACTTGTAACCCTCC  
TACACCTTCAACTGGTGGAAACAGTCAAAGGCGGAAATGGTGAAACTATGGTAACAGCTTA  
ACAAATGTCAAGTTTACACGGCCCTGGTTGTGCGAGCGAGGAGTTGTAGCGGAACATTATC  
TGTTCAACATGAACATGGTTCGAGCGGGTGATAATGCTGCCCGTGCAGGAGCAGCCTACGG  
AAATCCTTGCACACTGACTTAATGTCATTCAATCCAACAGCATCAGGAGCACTTGGTTGT  
GCATTATTCACGGGAACATATACTGGACACGGAGGGGGAACAGGACCTTACATCATCCT  
GGTCTTGGGGGAGGAGTATTAATAGGTTCTCCTTGTCCACAAACACCTCTTGATCAAAGC  
ACTTCTCCAAAATCAGTAGATGCGATGGATGCTACAGCCATATGGCCTCCGCATCCGCAA  
TTACCTTTTGCTGCATTAGTGCGCAATGGGATTGTTAATGGTATAATGCCTAGAAAGGAT  
TTCGCTCTTCTTATTACTACCCTACTCCAAGCTCTCATACTCACACAGTTGTTAAACCA  
CTTCCAAATGGTGTATGTGATCATACTACATCTTCTCCTGCGTGGCACTGTACAGTAGGA  
ACTGCGGGTGGTAGAGAAGCAGCACCAGGTCATGCTCTAAAATTACTGCCTACTAGTAAG  
ACCGTATTCCTCAATGGTTCGTGGAGCAGGAAGGTTTGGTGATCCTCTAGGTGATTATACC  
GTAGCGTTACCGTGCAACTCGCGTGTGAGGGTTGCAGTCCAAATATATTCATAGGAACT  
TAATTATGGAAATGAGTCTTTACTTGGGTAACACCATTGAGACAACACCAAAGAAAACAA  
GACCAGGTAGAGGGCAGCATAGTAAGTATATAGCTACCTCTCGTAACAAAGCAACAAAGA  
GGTATCCTTGCCAAGGGAAATAGAATTGTAGACGGTAACCGTAACCGAAACATTCTGTGA  
GACGTGTCAGATCATTTTTGTGAACATTAATAATGAATAGTGTGTTATTTGATTACTGAT

CCATGTTCTGTTGGATCCACTAGTAAAAAATCTGGAGAAGACGCGAAATGATACTGGCAC  
TTCTCGTTTTAGATGGCGTTAAAGAAAGGATCAGATAAGGAACGAAAGAAATCTTGCTCC  
TTTACGGATCTCGAACTTGGTATGGTGGAAAATGTGAATACACAGTATGTTGCTGTCGTG  
AAAAATGAAAATGCAATTAACAGGCGAACAAAAATCTAATAATGACCACGCCTCGTGAA  
AAACCATTTATACCTCTGGGAGGATCTATTATATCAAACCTATTAATTGAACGTCTTCAC  
GATTTTACAAGTGATTCTAACAAACAAGAGATCATAAATACGGTTAATCTGTTTGAACCT  
CGCGTACGTTTGACAGGAGTTAGAGTATAACCTCGGCATGTTACAAATACATTCAATGTA  
ACGATTGCGTTAAAAACAGTTGGAATCCCAACAAACGAAACTATCGAGTTCGTATTACAG  
AGAAGTACTAGTGCAACCAATAGCCTCACTGCATTAGACTTTGCAGATATCAAATCAT  
CTATCAAATCCTATCTGAGAAGTCGGAACGAATTTACGGGGTATGTCTTTGAAAGATCTT  
CTTAATCGTATCTTATCGACACATTACCGTATAATTAATATTATTCTGCATTTAATGCGA  
ATATGGCGATGAACGAGGCAGTTCTGCCTTCTGCTACTATTAGAGATAATGTTGTTACAG  
ATGCAACACTTTTCAATTACGTTCCACGTTCAAGTACGTCTTCCAGAGCATGCTTAAAAAC  
TAAATGTCCAAACAACCGAGTCTGCAGGAGCATATCCTGGCAGTATAACATTA AAAAATGG  
GTGCTGTTGCATCGGGTCGAAATTATATTATTAATATTCTATAAGATATTAGTACTACTA  
TCAGACCTAGCACAGGGATTTGCACTTTTGCCAATGTAAAGAACATGGAAGGTAGTATAG  
TTACCTTCCAATACATTGTAAACACCTTTACAACCTCTGGTGTATAAAGTCCCTTAGGAAG  
GTGCAGACCTATCTACTCTTAGTGTAAAGAGTAAAAGATAACAAATTATCTAAAACATCAG  
ACTTAAACAGTTTGACTTATACAATCACTGATTTGACTGCAACTACCCGAGCATACTTCC  
TCAGTGGAGGTGGACATAAGCGTTAAGAGGTAAAATTTGGTGATGATACTGCAGGTAGAG  
CTTTAAACGATGGAGAAGTCGTATTTTTATAGTAGTTGGTCCCTTCTGGAACAGAAGCAA  
ATGAAATTACCACAATTTTCGTTTCATAGGACCGATTACAGCCACTATTGGAGGTCCCTCTA  
GTGGCACCTCAGTCACTTTGATCATGAAAGAGAAGTCACAACCTCGGTGCTGCAGCAGCAG  
CTTAAGAATCTAGTAAATATATTGCACCCAGATTTCGACTCTGCACAATACAGAGCAGTAA  
CAGCACAAGATTACGCTTTAATTGCTGGGAAAGAGTATTCTAACGCCGATTCTGTTGCCG  
CATATGGTGGGAGCTCTTTAAATCCCCAATTTACGCAAACGTCCTTGATCGCAATCCAAA  
CCCAAATCGGTTCTTTACTTAACGACGCAACCACAAAATCAAGTTCTGCAGATTTAATAA  
AAAATGCTATGGCATCAATTTATCCTGTAGTTATTTACCCAGAACAGATGTATTGATATT  
TGAAAGTCTTTGCACAATACAATAGTGGCACAGCATCCAATACTGCCTATATTA AAAACTA  
ATATTCAGAACGGAATTAACGATTGGGCAACACAAACTCAGTTTATCCACTTCAATTCTA  
CTTTCATACCACTAGCCTTTGAAAACGCGGTGACTTTATCCGATAATAGTTTGAGTGATG  
TGTCTTTACAACGCTCTATCTTAAAATACATCTATCCAAAGACAATTCTGACTAAGACTT  
ACCGTAATCCTACTGGTGCTGATTTATATGATAGTGCTGCAAGGAACTCCTATGGAAATA  
CTTGTA AAAAGGGACCTATATTTGTTTAGGCCCTTTTAGGACAACAGATAGACCAGGAA  
TTGATCAACAGTTTGAACATGATGGTTTTGGTATCTTAAGAACATTATATAACACTAGTA  
ATAAGAAGGTCTATACAAATAATGTTGCAGGAACTCTAAATTATGCTACACGTGAAATTT  
CATTTGGTCCGTGAAATACAATTGGTTCAGGTGCAAATACACCTCCTACTGGATTTATAA  
CATTAAACAGATTCAACAAATGGTGCAGGTTCCGTAACAAATGCGGATCTACTTCTACAG  
TTCTTCATATTCCTGTTCTATTTATTCCTGCAAAAAGTTGCGCCTATTCTGCGGCAACAC  
CAGGAACAATTAACACTATAATAAACCCAGAGGTTACCTTTGTCCAGGATGTACGATAC  
CACCTCCAACGATACGTCTAAATAGTTTGGGGCCAGCGGTGTTTAAATATGGTTGCCACTC  
CTAGTACGCTTGCTGACATCTCAGACGCAGGTGATCTTACATCCTCTTTATGCTTATAGG  
TGTACATGTACGTTAATAAGGTCTCTCAGTCATTTGATTCACATACTCCAGATTTTATTG  
GAAACGGTTATCCATTATTCAATGAATCTATTGAAGATTACTATCGTTCTCAAGAACAAA  
CTGGTATAGGCCAGAATATTGTCAATGAGTTTTTACAATATCTTGATATTGATAAACTTA  
ACATCGATAGTCTTGATGGTGCTACAAAGTCGGGTGAATAGACCACTACAACCTGCTTATT  
AGATATTAGTTGAAAATATTGACAGTTCTTTAACTACAGATGGCTCTGTTTTAATTGGTA  
ATGAAATAGTTTACTATGAATCTACTACAGCATCAACAAACATTACTCTCAGCCAGGTA  
TTTCTTACGAGCAAGTAATATTA AATTGGACAACCTCATGCAAGTCTTCTAGATTCCTTTG  
ATGGCACTAGAGTTAGGTTACTCAAACCTCTCAGAACAGTCCAGTAGCAGCAACTTCAG  
TCCTGCACTTAATAGCTTCTCTTTACCGAATATTATTATCACCTGGTATTGATTACACAG  
TTGGTGGCACTGCTATTGTCTTGATTATTGTTCCTAGGACAAAATTCTGCACTCACT  
TCCCTTAACTTAGATTCCATATCAAAGTGGTGTGTTGAGAATAAAAATTATTGAAATAG  
ATAATTCATCTGGTTCTTTCGGTGAAGTTAAGAGACAGTTTACCATGACAAGAAATCGTT  
CACCTTCTGCACCTGTAGTAGGTGAATATGTCTGAGCAATTTACGATCAACGTCTAGTAG  
TTCCTAAAGTGGACATCTTTATTGAAAAAGATCGGTTTCTTTTCCTTACAGCACCTCTCA  
ATGGAAGATTTCTCTCACTATACTGAATTGAAGCACCTATTCCTTCATTTGGTCCCTGGTG

ATTTGGGGCACTCTCGTGTGACGATAATGGAACCTTTAACTTGCCTTTCTGTAGAAGAAA  
ATGGTAGTAATTCTCGTTTTGAATACCCTACTCCAGTCACTCTCAACTCCCATGCGGGTA  
GCGGTGCTCGTGTAAAGTACGCTTGTAATGGTATTAAGACTTTATCACTTTTAGAAGGTG  
GTAAAGGAGCCAGCGATACTAACCTCCTGTTGTTCCAGTGCAATCACCAACAAAACCTG  
GTTCTGTAGCAGGAACCTGTAAAGCACCGGTAACCTATCGGTAGTGTGTCTGGCATAGAAG  
GTATTAGTTCTGGTAGTGGATATACATTTACCCCTACAATCACTTACAAGCAACCTGGCG  
GTGCGATACTAGGCACGTGTCCTGTTGTAGGAGGTCAGGTATCAGGGACTATTCTATCA  
CTTATGGTGGTTTCGGATATACTACAGTCCTCACAACCTTATATTGATGAACCCACGGGAG  
CTAATCCTATTAGAGCAACTCTAACTCCTGTCTTGAGGGTTGGCACAATAACTTCTATTT  
CAATTTCTAATGCAGGACAAGGTTACATCACTCCTCCTAGAATATATCAAGTTCTCCAG  
TTGGTGCACAGGTCTTGTCCACAACCTGTTGATGCTAAGGGTCGTCTTGTAGGAATTTAGT  
TATTAGTTGCTGGTTGAGGATAGGATGACGTACCTTGTGTTTAGGTTCGTATCTATTACTG  
TCGATGGCACAGAAGCGTATCCGTGCGGAACTGGCGCTACTTCAACTGGTGCTATATTCA  
ACGCCAGAATTACTGATGTTTATATTAGTGCTTTTGTCTGGTTATAGTGTCCAAACC  
CTCCTGAGATTGATATTCAATCACCTCCGCAGGCATAAGCTTTTGCAACAACCTGGTCTTA  
ATGAAGTTACTGGATTTGTAGTAAATCAGTCAGGTGAAGGATATTCGAAATCAAATCCAG  
TTGGTAGTGCAAGGGCTGCAAGTTGTATTACTTCTTGTAGTGAAGATGGTAATGCTGCGT  
TTACAAATAACACTACAGCAGCAGCACATGGGCTTAGTTCTGATGTAAAATGTCTAGATG  
CTTTATTTTTAGAACGTTTACTAGACAAAGACACTTAAAAGATTTTACCTTATGTTCCAG  
AACTATATTATAAAAAAATTGATGTTAGACCAGGAATCAAGATAATTAAGATTTCTATA  
CTGTCAAAGGAACATCGTTGAGTGTTAGTTACTTCAGTAAACTGCTAGATGGTGAACAGC  
TGATTGTTACTTATCCAAAAGATCAAATTACCAATCCCTCTGCAGCAACATGGTTTACTT  
ACACTGTTTTGCGTGCAACTTTGGTAAGAGGAGATCCTACGAGTATTAAGACGGATTAT  
TAACTCAATATGCTGATATTGCTTATGTTAACGTGGTTGGAGCGAGTGCTTTGTTTGAAA  
ACTATATGTCTAATATGACTTCTGACGTCGTAATTTTGGAACCTTGTCTATCTGAAGACA  
ATCTTGCATCTTCTTTTACAGTTCCTTATAAAAACAAAACCTTGTCTGAACCTTTAGGCACTG  
AACACAGTATCATCCCTGTCGCCTCTACAATTGATTGGCCAGAGCGAAACGGTGAGTTTT  
TAATAGATAATAGTGAAGTGGTAAGATATAAAGAAAATTCGCTCAACCAGTCTATTGCGT  
GTACACGTTATGTTAATACTGATGTTGAAAATTTGGGATCTGCTACCGAGGGTACTTCTA  
AGTGCTCTGTTTTCGTTAACAAGGGCAGTCCTCAGGAAGTTGTCTTGACAATTGTTGGTA  
TTGTTGATGCTCAACGAACAACCTTACTCATAACAGGTTTCAGCTTACTTACCTGATGATA  
AATTAACAGTCTCTAAGTTGGGTGGAATAGGAACATAATGCTGAACTTACAACGTGGTTGT  
ATAACGTAAAAAATAAGTTAATATCAGTAGTATTAAGTTTGGTGGTGTTAATGATCAGT  
CCGCAACTGTTACTTGTGCTAATCATCATAGTTTCTTAGTTGGAGAACAGGTTCCCTTCT  
ATGATGCTAACCCAATCATCTATATTGGAACCTTCTCAGTTACATCTAGAGATAGTAATA  
CAGTATTTCCATATGAATTACCACAACCTGCCATAATAGTACCTCAACGTAATTTTCTG  
TATATGTTGACCTCAATAAAGGTAACCTCGGATGATACAGCTGTTTTAAATTGTATCGGAC  
GTGACACAAGTAATATTCAAAACCTCTTTTCTATAATAACTACGTTTACGTTCCCTTTA  
CAGGTATACCCAACATAAAGGTCAGTCCGTTCCCTGGTTTTGCTATTTTGCCAGGTAAGT  
AACGTAAAGTTAACTTTTTCCATTAGCAGTAACTACAATTTCTACAAAGAATAATATTT  
CACCCGGTCGTATGGGAACCTGGGTAAATGGTGTGCTATATCGTCTTATAAGTCTACAA  
TCAAAACAACCTTCGGGGCTTGTACTGATCTCTCTATTTCTAACGGAGGTTTCAGGATATA  
ATGCTGCTTCTCATCCAAAAACACATTTTCTGGTGGTTCGGGGAATTGGTGCAACATCTA  
GTGTAACGTGTTAATGGGTCTGTTATAGTAATTACTCTAACCGCAGGTGGGTCTGGATCTA  
CTTCTTCTCCTCTAGTTTCTATAGCAGGTGGTGGTGGATCAGTTGCTTCTGCAACCGCAA  
TCAACAATAAATGTGTTGTATCTAGAATCTTGATTAAGTATGGTGGAAACAGGATATGCAC  
CTCAACCTACTATTACTATGGTTGGTGATAGAGGAACTGGTGCTACTGGAACAGCATCTG  
TTCGAGGCCCTATCCAAGCTGTATCTGTATCCAATGGCGGTGCGTCATATACTTCAAATC  
CTACTGTAACACTAAGTTCTGTTAGTGGTCCCTGTTGCTCAAGAAATCGTTCAGAATGGTC  
GTAGTCCCTCTATCGCTATTTTTTCTGCAGGTTCTGAATATAGTCCTGCGACTACGATTG  
ATATTAAGGAGAAGGTTTTCGGTGGTGTGCTCGTGCAACGATAGATGTGGCTGGTGAAA  
ATGCAGGTAGAGTTACTACTATCTAAATTGTCAACAGAGGTATCGGATAGGTTCAATGTA  
CGACTTTATCTAATTTAACCTCTGTTGGTTCGGGTGCTACATCTAAAGCAAGCGTATTCC  
AATGGACTTGTAACCTACAAGAAAGATCTACCCTTGATGCTGCAAAGGGCGAAGTATTG  
AAGGATTTAATAATCAACATGGTGGTGAAAATGGTCACTTATCAAACCCACAAAGACTAA  
GATATCTTCTTGGTGATAATTTATTTGAAATTAATGCAGGGTTAGTCAAACAGCAAGAAC  
CTCAATTAGCACACTCACCTATTATTGGTTGAGCCTTGGATGGTAACCCAATTTATGGTC

CATATCGTACTCAGATCGTACTGATCTGAACTCTGCTATTGCTAACCTAAACATACCTT  
ATCAACTAAATGCAGAACTCATATAAATTGCTGTTACAAACCAAATCCTGTTAGAAAAG  
CAGGTTCTCTTTCTTTCTGAAGAATCTCGAGGTAGGGATTTTGAAGATTATCAATATGTGT  
GTGGGCAGGGTGACTCGGATCAATATAAGGGGCCTTTGTGAACGACACCTGAATATCCTA  
ATGGTAGATGTTGCTATTTTTTAACCTATTGATTCTACTGCAGATCTTAAACCCTCTATTCC  
CATATGTTCTTGGTGCTCGTATTAACCTCTGCTGTAGATACTTGGAAATTAAGTGCTGATG  
CTGTTTCACATACTATTCCCTACTGCTGTTGTTAGATATCGTTATCCATATGAGATCGTTG  
TTATAGACGTTGAGAGGGCACAAAATGCCTCTACCTACGCTATAACCCTAGAGAAGGGTG  
ATTTAGTACTATTTGATGTTGACGACTAAGATAGGAGTGGTATCAGTGATCAGAAGGAAA  
CTGATGACCGATATCAGGTTCTTGATGAACGTCTATTTCAATTATTTAATATTTGCCTA  
AACTCAAAGTTGATTCTAATGTTGACATTGAAGCTGAGACAACCTGCTACATTTAAAGATG  
CATGAGTAACAGGATTTACTATTCAAATGTAAGGGTTAGTTATCAGGTAATGACAGAT  
TAGTATTTCCATAACTGATACTGATGGTTCTGGGGTTTCTGCTCGTGTCTTAGCATCC  
AATGTGAATCAGTATTATCATAAGGTTTTGAGGATACTAGTAGTATAAAGTGTGGTCCTC  
TTAAAACCTACAAATCCTCATAATTTAGTAGCGGGTGATACAGTATTTGTTGATTATCCC  
CTGTAATCGACAATACTAATAAGTCTGATTTTCGTACATCAAATAAAGGTATTTAGGAGG  
TTCAAATTAATCAAACGGGATCTGGTTAGAACACAGATATTCCTCCTACAACCCTTAATG  
TTGGTAATGGATCTGAGGGTAGACTTGAAGCGGTTGTTACTAGTGAAGGTTCTGTGCGACA  
CTGTTAATTTCTTAATTATCGTGCTGGATATACTTCCAACCCTAGAGTTATCTTGACTC  
ACACACAGGTATGCAAAAAGCAGATAACTATGTTTCATAGATTA AAAATGAAAATTATG  
CATCTGTAAATGATGTATATGTGAATGATAATAAGGACGTCTCCAATTGTGGTAAACAC  
ACAACATATCTGATTATCTTGTGCTTTTGATGCAAAATTTTATGCAAGTTGTGTTAAAG  
ATTGGGAAGCAACTTTAGAAGTAAGTGGTGGTTTGGATAATGCAGAATTCCAAAAGTTAT  
ATGTTGATGGGAATGAGATTTGCGTTGCAGGTAGGAACTATCGTAACTCTCCCCTTTTAA  
ATGCATACAATCCAGATATTATCTTAGTTAAGTATGTTGAGGCAGAAAATGGTCTTAGTG  
CAACACTGAATTTTCAAAGAGCGTATGCAGGTAGTTCTGGATCTACTCGAACAGATGAAA  
GTACTGCACTTAAAAAATTCCCTGATATTAGATTTTTTATTTGTAGATGTACAAATACTA  
ACTCTACCAATCCTGACGATGTTTTTATTGCTCTAGTTGATACTACTGGAACCTTATGCTA  
GTAAGAGAAAATATACATCAGCAAATAGGTGTGAAAAGGTTACTGAGCTTGTAGTGAATG  
TATGTGGTGTATATTTCTCTATGGAGATTGCATCTGGTGTCTGAAACTGCAGTTAATG  
TTAATTTTGGTAAAGCAACTATGGGAAGTGTGCAATTCCAATTCCTCATATCAAACGGA  
TTAGTAATCAAGTGTATTCTTTCTTAATTTCTAGTCTTGAAATGGATGAATTTGATGAGG  
CATATATTACTGCTGCACCTAGACACATATCTGATAATCAACTACAACCTGGTTCCTGGG  
TAGGTATATTTTATACAACCTAGCGATCTAACTGACGATAAGGGATATACTGTTGCAGGTG  
GATCTACTACTGCAGCAAGTAAGTGTATTATTGTTATGTTTGGTGATCTTCAGGTAGCAG  
TTATTAAGATTGCTACAACCTGATTCAGTGCGAACCTGCAGAGTGTATTTAAATCGCTTATA  
CTGGTATAATTAAGTGTACATAACTCAACAGTTTAATATTAATAATATTGAAGGTATTA  
ATGTAACCTCTCTTGCTGTTGATAACTCTGGAGATGTTCCCTCTATCTGGTCAAACCTCCT  
GGAATAGGAATGAATTTATTTTCTCATTGAGATCTGGATCTACCACTGACACAAGTGATC  
ATTATACTTTAACATGTACATCAACTAATATGTGTATCGGTTATGCTGATAATGTGGCTA  
ACATTTATGGCTACAACCCTGCAGGATCTAACTCTACTTGGCTAAATTAACATCTTAAAA  
TAACTTCTGCTGCGTTAGGAACAAATTTAAATTAGAAGCGGACTAGTGAAGTTGGACTTT  
ATAAACAAGCAAGTTGATCTCAAACATTATCTCAAACAAAACAAACATTAGTTTCTAGTG  
GTGATCCTGAAGACGCGACAGGGGGTATTTGTTATACAATGATGTTTCTAGTGGAAAAT  
TAAAATTAGTAGTTACAAATGATACTACTAAATTAACATACGCAGGCTCTCCACTTCAGT  
CTGCATTAACATAATGATTGTTGATAATACACTGAAATACATTGGACTTAAGAAACAAC  
GTAATCAGTCTACTGCATATGTGAATGGAATTCAAGCTTTTACAGCAAGTGGTACTTATA  
AATCACTAAAGGGTAAAGATCTTCGTGTTGGTCAAATTAAGTGGTAGAGATGGAACCTGCAG  
GACCTATTAGTAAGAATGAGCACGGTCAATACTTTATTGATAATCTCAGACTTAGCAATA  
GAGCAGTCACTCCTTGCGTATCTCCTGTTTTAACTTATTCCCAACTACAGGTGCTTTTG  
CTTTTGCATCTCCTTGGGTTGATAGTGGATGGTTTACTACTAACCTTACTAAGTATGATT  
AAATTTATTACATTGGTTGGGGTCTTAAGATTGATAAAAATGCTGAGGCTGCAACAATCG  
GAACTCAAACCTGTTCAAACCTAATAGTTAAGTTGGTATTGTTTGAACAAGTGTAAGTGCTG  
TAACAGGTCTAGATCTTACTGTTAATAAGACTGGTTTTGCTTTAGGTGATGCAGGGTAAC  
AAAATCTAGACTTTTATGTTTCAGCACCAACTAGGAATGCATGCACTGAGTCACTCACTT  
AGAAGCAGAATATCTGAAGTTCTAGAACTCCAACCTGTTCCCTTTACCAGGTTCTAGAAAAT  
TTTAGGTTCCCTTCTATTGGTAGAGACAGATATTACTTTAAAGTAAATCCAACATCTAAGA

TTCATAATATCCAAGAACTTACATTTAATCAATCATTAACTTTACTGTAGGAACAAAAT  
TAAAATTAGTCAATGCAACTTCTGGAGCATTATAAATACTGGTTACATTATTTCTACTG  
ATAATCTTAATAATAGAATATTGCTTCCTGGTAATAATAATGGTTGGTCTGATTATCTGA  
ATCAGGGGCAATTAGTTACAGAGCAATTTAGTGAACAGACTACTTATGGCATTATAGATC  
CTATTCCTGCAGATGTTAATGAAATTGAAGGATATAATTTTGCACAAGTAAATAACACAA  
TACCAGGCACATTTTATCTTGATCCTGACAAGTATAATTTAGATGGAAGTTATAATGCTG  
CAGGTGGACGGTAATTAGAAAAGTTTTGTCAAATTTAAACCACATAGTGGTATTGAGTAAT  
CGATTAGATTTAATGAAGTATCTTCATCAGGATCTCCGTTTATTGTTGTATAGGTAGGCA  
CAATCACTACCGCTCATATTAGTTTTAATAGTGCATACTCTACACCTGACGGGACCAACT  
TAACTGGTGTTCAAAGATCATGGTAATTGCAAAATTAAGTTAGATTTAACAAGTTACTG  
CAGTTACAGATGGTGATCAAGTTTATGTAATTACAGTGACTAATCATTACCTATCTACTG  
GATCAATGATTTTTGGAGATGGTAATCCTACTCAAACTTTTGGTTATACGACATATGATG  
AATATGATGGGTCTTCTCCAGGTTCTCCAATTGTGACTGCCAGAGAATTTGGATATTAAC  
TTCCTAGTGCTGCACTAACTTCATCGGCTACCACAGTAGCAAATGTTAGTATCTACGTTA  
AGTCTACCGTTCTTAAAATGTATTATGAGGATCAATACCTGTGTGATGTCCGTGATTCCCT  
AGATGAGCGGTGATAACTAATCTTTCGTGAAAGATCCTTTAAACAAAATAGATTATTCTT  
TCAACTCTATTGAACGTGTGGGAACACCTCGTCGTACAGGAGCAGGATATCCTACTCCTA  
CTGTGAAACTTAAAGTTGATGAGGGTATCGGTACATATATTTCTGATTACATTGATCTCT  
CTAGATCTGGTGCTAACTGTCCTGTTTCTGATGGTAGTTATCTTGATGTTTCTGACTCTC  
CTGACAAGGGTACGTTCTCAGTTCAATCTGTTACGGTTCTAACGTTACTCGTGGTGGTG  
ATATTATTAGATTTCCCTTATGAACGAACCAGAAGCAGCTGCTGAAGTAAACCAAGCAT  
CTTATCCTACATGTTCTGTTAAGGCAGTTGGTCTATTGGTGCTATTCGTGTTGTTAATC  
CAGGTGTTTTCTATATAATTGTACCTATTGTTTCTCGAATGCAATCTTCTAGACAAATTG  
AAAGAGTTGCTATTAACGCACCCCGCACACAATATGCTGTAGGAACCTATACTGTTGTTT  
CTATTGGTGGTGATGGTGAAGGTGGATTTCGTAGAAATTAATGTTATTGAGTGAAGTGAAG  
CTACCGGAGTAACTATTCGGGTCAAATTCATCATTTTAGGTTACATCACCTGGGAAAA  
CTTATACTCCAGCTACTATTGATGCTGAGGCAATAACTGGTATTTTTGGATCTGGTTTAA  
CTCGTTCTGGTGACAGAGACAGAAGTTGTTATTCTTGCCTGGAAGTGGTGCAGCTTTTT  
TCACTCAAGGTGATAAAGCTGGTAAGATTATGTAACCTAAGAAGTATAACTTTGGTAATG  
ATTATCCTCATGACTCTACACTACGTCTTGAGATTAGATTCTGAAAAAATCTTCAGTAAA  
CATCAACCAGTATCCTAGACAGTATTACAGTTACCTATCCAGGTTTTGGATGTTACAGG  
CACATGCAGTTGTGTTTACTGCTGGTGGCGGAACAGGTGCTGTTGCTGAAGCAACAATA  
AGAAGTGTGTTGAGATTTAATTATTGTTAAGATCCTGGCGGGGGTTATTCTTCTACTC  
CTGCAGTTACTCTTAGGTATTCTTTCAAATATGTTGTAAACCTTGATTTAGGTCTTTTTT  
AGTATGCATTCCCGCTTGGTATTGCTAACGGTTCTGTGGATACACTTAATGTTGTTGATA  
CTCCTGACGGTGCAGAATTTCCGCTTGTGCAGCTGCGATCGGTGCTGTGAATGTAACAA  
CAACTACTACGCAATTACTGGTTCTGAAAGCTCTCTTGAACCAGATCAATTAACACTTG  
CTATGACTGCATCAAACACAACTTAAGGGATGCTATTCATATGTCAAAGCCGCCTCAG  
GTCTTCAACAATTAATCACAGAATCTTATGGTGGTGTGCTGCGACAGCATAACGTAATTACAT  
CTATCTTCTTAGAAGGAGAAGTTGTTTATAAAGGTGATCCTTTAGCAAACCTCAACTGCTC  
AGGGTTATGTTTCTACAAATAATCGTTGGCAGATAGGACCTCGGGTTCTAACATTGTAG  
ATTATACTGGTGACTTTATTGAAGGACCAACAGCAACTGGTGTAAATCCAAATCTTCGG  
GAACGATCAGTGACTTGAATATTGCTAAAGGTGTTGTTGAGATTGGTTCTCTACTAAGA  
CTGCAGGACAGTGTTCTGATGATGTTAGTAAACCTTCTGAAATTATCGAAAAGATTCAAG  
ACTGTTACTATAAGCAAGATCTCTTATGCTATTAAGTATGCTGTTTCTAGCCGTGAGT  
GGAATGACATTCTGATCCAAAACGTGCAGCATGCATCCTTCAAGGTATTTAGTGAATTAG  
ATGATTCTGATTACCGACTGGTTCCTAACAAAGGGACGGATTTCCAATTAAGTAAATCTG  
TTGAACCTTGCTAAACAAGCCATTGTTTATAAAGGTGATCCTTTAGCAAACCTCAACTGCTC  
TATATTCGGTACTCAAAAAGACAGAAATACTTTTCCGTCACAAGGGCCTTACATCTTCTG  
AAAATATGCTGACTTCTGTAGTTCAACGTATTGATTATATTTCTACGTTATCTGATGGTG  
AAAGGATTGCATTCCCACTAATAGTTGGTGGAACTAATATTGATGCTAATGCTAATCAAT  
TGATGATTGTTTTAAATGGCGTTGTTTCAAGTCCCTGGGACATCTTCAATGGTCAAGGAG  
ATTCGATTGTATTCAACGAACCTCCAGAACCCTCTGCAAGTCCCAAATACGTTAACGTTA  
CTATTCAAAATATGCCTACTAAGAAAATTTAATTTGATTAGATCGGTGGTATTTTCCCAA  
ATCGTGGTAATGAAATGGTTGGAACAGCATCCGGAAATCGGCTGGTTCGTTACCAGTGATG  
TAGGTAAGGATGATTTGGTTGCTTACGGTAAGGAACTATATGTAAGTCCGAGTGCAATTTG  
TTACAGTTGGTGCAACAGGGTTTGCTTCTTATCTTGATGCAAGTAATGGTTTAAACCATG

GTCAAACCTTTTCGGTATATTTAATTTTGGTGAGAAAATTAGTGACTTCCAACGTGATACTG  
CTTGAGTCGAATCAATCAACCGACAGAATGGGCAAGAAACATGTTTAGCACTATTAAGAT  
ATACTATGGATCCGTCTATTACCTCATTTGAAGTAGTTGCATATAAGACTTATGATAGTG  
TTGCTGATGCACCGTGTGCTGACGGAAAATTTACTACTGGCCAATACTATCAGATTGGTT  
CTGTAATTTTCTTACTGAAGAGTATTACACAGGGTCTGAATCAACACCTTTTGGACTTA  
CAAGAGCACAGCCTGGAACCTCTGCCGTATCACAACACGCAGATCATCCTGTAAACGAA  
CTCAAATTTCTGTCAATTTTCAACTAACTTTAATTAACAACACTGGAAGATATCACTCCA  
CACCTGGTCTTTACGACAATCAATTAAGTGAAGTTGTTATTGGTGCTCTATCTGGTGGAG  
TTGCTCGTGTTACTACAACCTTCTACATATCAAGATCCTGTGAATCACGAATTTATTAGTC  
AGGTTAATGTTTCTGAAGGTTCTTCTTTCTTTGGTCTATTATTCAACAGGATTATATCTC  
AGACCTATCCAACGTTGATCTTGATCATATTTCAAATCTCAGGTCAGAATTCTTGATT  
TTACAGATAGTCGAGCAGATCACCATTCTCAATTCCCTTCTACTGAAGAAATTAACAATT  
ATGTTATTCCTTACGATAATGCTTCGGGTACTCTACAAAATGAGATTATCATTAACTACC  
CATTAGAGGATGGTAATGATAATGGTGAACCTTGCTACTCGTGAAGGTGCTGTAGTTCTTA  
AATTCACCTTCTAGGGATACAGTTGGAATATGTTTAACTTTCTTCTGGTCAAATTATCAGAA  
CTCGTGAAACGAAGGAAGACGATATTGGTGCAAACCAAGCAAGAAAAACTGCATACGATG  
GTAAGGTCGGTATACTTGTAGAAATCGGTGGATATTATCATACTTACAAGTTATAAAG  
CATACCGAAATGCAACCAACCAGAAGTGTGTTGATGCATCTTTAGGTCGTTACCTGGAA  
CTAAAGAACATACTTTTGTAAATTGTGTTGCTGATTCAAACACTGCAGGTGGCGGTGCAA  
CAGGAACGTTTACTGCTGCGACAGGAACAACCTATAATGGGTTGAAATGTGATCTAGTAA  
CTGATATTAGCAATCACTCTTGAACAACAAGTAACACAGTTCTTATCGCTGACAACAGTC  
TTGGTCCGCTTCTGCGCAAGGTGGTAATACCTTACTAAAGCATATCCTCGGAGCACTG  
ACTCTGCATCAGGATCTGCTCGTAATATAGCTGCAGTTACACCACCGACGATAACAGTTA  
ACGCAGGTTCAACTACAAGTGATGAAAGTTTTCAGTCGCAGCTTCGGATGAATTTGGCT  
TTAGCTCTGCAGCGATTACGATGGAGTGTGGATCACACCAATTACTGTGAGTGGAGGAA  
CAAGATCTATCTTTGCTTTCGGGACTGCTGCAACTGAAGTGGCGCCTCACTTATATCTTG  
AGGCTGCAAATCTAGAGGACTATGTTAATTGCTCAAGAGTCATTCAAGGAAAAGCAAACA  
TATTTCCAACCTCAATGGACACACGACGCTATTAGTACCTCAAGTTCTGTAAGTAGAATAG  
TTGTAAGTGGTGTTCAGGATGGTCGTATTTACAGCGAGACCAATAACGACAGAACAAACA  
AACCAATTAGAATTGGTGTGATAGTGCAGGTGATAATCACGTTATTGGTTAATGGATG  
AGTTTCGAGTTTCTGCAAATGGAAGTTATACAGCGACATTTACTGCACATACCGGAATAT  
TCCAAGGTGATTCCAACGCTGTAATACTCATTCAATTTTGTGTTGCTGAAGTACAACAGC  
AAACAGATGATTGGTCTGGAACCTGCATCATTTACTAAGGATGAATGGTTCAATAATGATG  
CAAGTCTATAAACTTCTAGAAAGACTGCTGCACCTGCATGGTTGCCGGAAGTGACAACA  
GATACCATAACGCTGCAGATAATCGCCAAGGTAATAATCTACTTTATCAAGAAAACAGTTA  
TATATCAAATGAGACAGAGATATCCAGAACTTGTTATTTTAGGAACTAGTTTCACTCCAA  
CTACAGCCACGTATGACGCTGTAACCTGGTCTATTGTAATGACAATGACTAGAAACACAA  
TTACTAATGGTGGACAATGTACACCTCAGTGTGCATCAGTCAATACTGTGACTGGTATAT  
TGACTATCACTCAGATTACTCATGTTGGAACAAAAGGTAAGAGCATTAAATTTCAAGTTC  
GTGGTATTACATTTACATGCGCAGAAGATAGTAACCCTACTTATCAACCATATCCTCGTA  
GTACAGATCCGGTTGGAGGTAGGTGGTTGCGAGTTTCTAAACCGACTGCAGATACATTTA  
CAGTTGATGTTGCAACCTCATCTCATACTACAGCTCTTACTTTCGGATGTGCCTTAACTA  
ATGCAGTTGCTGTTGAGAAGGATACACTTAAGATTTTAGGTTATTCTTTGACATTTACTT  
GCGCTATTGATGGCCATACTGCAAATAATACTTATACTCGTACAACAGATCCTGCATCTA  
AAGATGTTGCTCTACCAATCGTATCTTCCAGTTCTACAAATTTAACAGGTAATGTAACAC  
CTTCACCTTTAGGTAATTTTCAACCAACTAACGCAACGGACGATCCTGAAACTGGTGCAG  
ACGTCATGACGACTGCTAATCATACTATCAATGTGGGAACACAAGGTAGATTAAGTCAA  
ATTCACCTAACATTTACTTGCCCAAGATGGTAACAGTAGACAGAAAACGTCTCCTCGTG  
CGACTCCGAGGTATGGTCAACCTGACCCGGCTTATAATACTGCTCGAGATGTAAGTGTAG  
TCGTAACGTGTACACCAGAGGTTAGTGGTCCAGCGGATGTTTCTACAACAGGTATTTTAA  
GAGTCAATATAAATGGTAACCATGGATTATGTACTCACAATAGAATTCAAATTGCTGAGA  
ATACATTAACATTCACATGTGCTTCTGATTGTAATGTTACAAACCAGACGTATCCAAGGC  
AGACTGAGCCTATTAGCGGTGATTGGGTTGAACTTGCCGTTGTTGATGCTGATACATTTA  
CTATTGATATTGGAACATCTAGTCATACCTCCGCACATTCATTTGTTTCTGCGACTGCAT  
TTGTAATTATAAAACAACTGGAACCTGTAACCTATAAACGTTTCGTGTTTCTCCTGAGGCGG  
ATCAATATGATCATATTATTGTATCTGCTGCATCAAACCCGGTTGTTACAGGTGGTAACT  
ACTTACAAACATTTGTCTCAGCTACAAATACCGCAGTGATTATGGACGAAGGTATTACTT

GTGAAGATAATATTCGTGATACAGGGAATGCGATCATTCAAGATCTGCGCAATGGTTCTA  
ACAATCATGTTTGGGATGCTGCATCTTACTCTGTAAAGAGAACTGATAACCCAGTTCAGA  
TTGCACAGATTGAACCTGTTGTTAAAGAAACATTATTCGCTTATGAAAAAGTTGATGCTA  
TGGTTCAGCATGTCATTAATAATGCTCTTTGTCCAGTTCAAGGTGATAATGGTTTAACTG  
AATTTACTGACGTATAATTTACTGGTTCCTTACCCTACATTGAATCAGTTTACACCTA  
CTAATGCAACTTATAATCCTGCAACTGGTGATATGGTATAGATAATTGGATCTCATTCAA  
AGACCACATCATCAATAGTTAATATTGCAGTCGCTCGAATCACATCTACATGTGCCAAAG  
ATGGCAATGATCGTCTCTGCATATCCAAGAAAACTGATGCTGCCGCTAAGGCAGTTC  
TAGCGGTCACAGCCGTTGTTGGTGGTATCACAAGTACAGATCACGTAGGTAACAACAT  
CTGCATGAGATCAATTTACGAATACATGTTTATCTGCAGTAGCTAATTCTGTCACTGAAT  
TAACTTTTACTACTGGTGACTGTGCAGATGTCTATTCAACTTTTGGTAACTTAATTAACA  
TCATTACAGAGAGAATTACAATTGCTTGTGCATCATCACCTGTTGATCATTTGGCAAGTG  
TTGCTAATGTTGCAGCTGCATATGAGTCCGTTCCGGGAACAGTTGATGGATATCTAGAAA  
CAACTTGAGCAGTTGATTATCATAAGGTAGGAAGTGGTTTATCATATATAAATCAGAATG  
CTACTGAAACGCATTAGCGTTTCAGAGATGCTGCAAACTCAGTCAGGCTTAATCGCACAG  
CAATCGTTGATAAAGAACCGTACCATTTGCTACAACATTTTCCTACGTTGGCAAAAACAC  
TGCCTAGAAACCAAGGTGGTGCCAGCTCTGACGGAAGTATTCGTATTAAGACTGACTTAG  
GCAATTCCTTTGATGCTATCGCAAATGATTCACATGAAGGTGGTAATCTTGAAACTACAA  
CAGGAAATGGATTGGATCTCTGCCAAAATGGAGGACTACGTTATATTCGTCTTCAGGTAC  
TCCACTCAGTAGATAATCATGGAAGACTTGTGATTATATAAAACAAGCAGTTTATAGGAA  
CCTTAACTGATACCAATACTAACAGTATTGTTGTTGGAGACAGGGCAATTACTGGTTCAG  
GTGTTTCTGGTTACTTTAATGCTGTTACAGCTAGAATTAATCAGCTCATTGCAAACGTTA  
ATATCATTATTGCTCCAACACGTCCAGCCTTTGAGACTACTGCTGATAGCTTATCCTTTA  
ACAAGCAATTTATTAAGGGAGAAATTAACGGTCTTGTCTACAGTTTCGTCCAGATGTCT  
TAAACGGTGTAACCTATAATGCAGGTGCTTGCAGTATGAATTAGAGTTTGTAGATTTAA  
TTGTTGCTCTTATTTCTGATTTACAGGCTGGTGGAACCGATAGCACAATTCATGAAGCAA  
GCACTTAACTAACTGCTGCTCTTATTATTTAACTATTGACAATGTTCTCCCTGCAACAG  
TATATGCTATTGGACAAATTGGAATCCTTGGTGAGTATGCGATTGAAAATGGATTATTAC  
CTCAAGGAGATGCTGGAAGTGCAAACAGATCTACTCAATAAGCCGCGCAATATACTGATG  
AATCAGCATAGAGCGATTCTATTTCAATTTCAAGAATCAATGGTGTGTATATGCATGGC  
GATACTTAATTGAGATCGTTAAGGTTATGTTCTCACCTGGCGAACTAGTAGCAAGATTGG  
CTGATAAACAATTATAATAAACGGCAAATTATCACACTAATGCCTTAAATGACGCCGTTA  
CCAGTCAATTTGTATCTCGGGCATGATCAACTGGTCAAGAAGTCTTTATAGAGGGTATGA  
TTGGAGACATTGTTTCATGATCTTATTACAAGTACTGATAAATCCACCGCATATC  
CAATGACATTAAGTGTAAGTTCTGGGACGTTTGGTGATCGAGAATTTATTACTGCCAGTA  
ATGGTAGTGAAACAAGTCTTGAATAGGACGATGTTAATAAAATCCTTGATGTCACCTT  
CATTTAGTTGAAGTGCATGGCTGGCAACTAATACATTATCTGCTCCTAGCGGTGCTACAG  
GAACCATGGCATGTGGTTGCGTAAGTTCTGCATACCATTCTGTGTAATAATCCAACGAACG  
TTAAGCTTATTGATAGAGCAAGAAACCTTAAATCTAATATTGAAGGTCTTGTCTTACTA  
CGAATATTTTCCCTGAACCAGAAAATCTTCATGCTACAGGTTGGACTGCATCAGAAACAA  
CATCTTCAGTTGATGTTACTGCTGCTCCTGAGGAAGCACAATCAGCTGAGAAGTAAACGG  
CTTCAACAAATAATACAGAGCACTGCAAGGGTAACAATTTACTCTAAGTTCCTTTAAGA  
CGTTTAATAGTGATACAACTAAATTTACTCTACCACTGGAACATTCGATACTGGTTCTG  
CAGTTGATGCAACTACTCAAACATTTACATATCAAATCTTTGTTAAAGCCGCTGTTTATA  
CGAAGACTTGATATAGCTAGCCCTTGATGACTCTGCTGCTACACGTCAAAGAGTATTCT  
TTGGTCTTGACTTATCAGAAGGAACTAGGGGTTATATCTTTACTCCTGATCTTGCCATAA  
CTGTAGATGCCTTTGGAGTAAGTCTGATGGTAATGGATGGTATCGCCTTTATATTACAG  
CAACATTCGGATTTGGCTTCTCTGAACTTCGCACATAAGTTTATACTCGAGGTCCTAACG  
GAGTACAAGTACGTACAGGTAATGTATCTCATGGATTATTTGTTTGGGCTCATAAACTCA  
ATAGTGGAGCCCTCCATCCTTATAGTGCAGTATCTGGTACATTATTCTATTCAAACAGTG  
TTTATAATATCAAGACATTTGTTTTGGATAACCTTGCAAAAGTATGGGTAACGCTCTTG  
ACAATACTTTAACATCGCCTTCGCTCTTGCATCTTAATATACGTTATATGGTGCTTATC  
TTGCGTCAGATTACAATAAATATATTATTCAAAGATCTATTCGTTATGATCTAAGTGAAA  
TTAGAAATCAGTTAGCCCCGTCACCTCATTATACAGCTATTACTAACACGCTGCGATCA  
CTGTTCCCTACAATCAAATGAGGTAAGCCGGAGGTTCCAATTGTAAGTACTTAGTGGCTGTGTTG  
ACCATGCTGATTACTTCTATGGTTTACTTAGTGACGCTTCAGCCGAACTCGAAACCGTTA  
CAGAGACTATTGGTGAAGAAGTTCAAGTTTATAACAGATTTAGTATTGATGTTAATCTAA

TTCATGGGTCTTTACAAATGGGTGAACTGTTGCTAAACAGGGAACAGGTGGTTTTATCG  
GTGTTGTATACGGTTTTTACAAAGGTGCAAACCTATTGGAATGTTGATGTTCCGGGCAACCG  
CAGGGGTTTGTGCCGTTACTGACAATCTTTTAGGTGCATCAAACCTTTGCAACCGCTCAAA  
TTTGTGCTCTTGAAGATCGTGTTTCATATTAGCGATGTCCAAGGATTGGTAGAGAACGATT  
TCCCTCTCAAAGGATATACATCTGGAAAGACAGCACAACCAACAGGATTCTAGCAAAAAA  
ATGCAGAGGTTACAGTTAACTACTGAAGTGACGTTAAACAGTGGATACTGCAAGTCTAACTG  
GAACATTTGAAGCCATTGCAGTGGTATATCCCCAGACCTCTAATAAGTTTATTGATGTCA  
CGATGAGTGATAGTCTACATGTTATGGTGGGTGATTTAGTCGCATCCATAGGTAATATTC  
GTCATGGTATTAAGATTCTTAAGAAGTGAATGTATTTACCGAAGTCAATAGACTGTATT  
CAATTTTGGCAGGTCATCAGCAAACCAAGTAGGTAGATAGTTCTAGGATAGATCTGGCAA  
ATTCTTTCTATACTTCATTCCTGTTGGTGGATTTACACCTTCAATTAGTGATATTTTTG  
GTGATTAAGCAACAGGAACTGCCGTACCTGTGGGACAAATTCAAGTTACGACTGTTGCTA  
CAAATACACGTCGGGGTCTGCAAGAGTTCAAGATATTGAGAATATTGGTTTGAATAAGT  
GATTATATCTTTTCGTCTGTTGTTGGTTCATTTAATAACAATGATGGTATTGAAGGTCCGG  
ATAATTATGCTTCAGCTATTCTTAATGTTGATGAGGATAAAGCTCGTGTCAAACGTTCCCT  
TAAGAGGATTTGATGGAACACAAAGATAATTCGAAGTCACTACAGATAATGGAACCTCAAT  
ATCTGCCTGACCCCGCAGGACACATGGTTCATTTTTGTTAATGGTATCCTACAACCACCTG  
GTCCAACCTAATGCAGACACAGCGTTCTATGATACTATTCAGTTCACTTAACCACCCGATT  
TAGCAGCATCCATTACAGGATTCTACGTTGGTAAACTAAGACAACCTTGATAATATTAGTC  
TCGAGTTTGGAGCCATTAAGACAATTATTCAACTTGAGACGTAATCATGTGCTCTACTCAT  
TTACTTTAACTGATGGTGTTCAGTCAAGCTCAAGGAGACCCGAAGACAATATATGCGTTT  
CACTTAATGGTCTGATTCAAGAAGCGGGTATCGGTTTTACTATTGTTGGTTCTAGAATAA  
TCTTTACTGGAGTTCCTCGAGTTAGTCCTAAATGGGTGGATTCTCTTATATTGGTTCTG  
GGGCAGACGATGATGCTTCGCAGGTTGTTCCCTCCAATTCTATCAAATGACTATATTGACA  
TTCAAGGTGAGGCTGTAGATAGTTAAGTTGCTTTTTATTGAATAAGCAAACCTGTCATATTA  
CATTTGATTACATTCGATCTGTATTCGGACTGAACGCTATCGGAACCGCAGCTCTAACAA  
CTGGCTTTATTAAGAAAGTTGAGGTAACCTGGTGTGGGTGAGGTTAGACTTTCAGACGTA  
CGGTTTCGTTTTGAGGCTATCGCAGGTTTTTAGGGTAATATCCGTGCAGTAGTTGGTGT  
CGGGTGTGGAACCTCAGTGCAACTGGTTCCTGGATAGAAAAATCCTTCAGTTGCTGTTGAGA  
CCACTGACGCTGGTGATTATGTCCGACCAAATCTTGCAAATTATGGTGATGAACTAATTC  
ATCCTGAGATCCTATAAACAACCTAAAAATCGTAGCGAGTAATGGCTATACAAGAAGTACTAG  
TCTAGGTTTCAGCAGCAAATGATAACTCAGGTGACACTCTGACAGCTGGTGGTGACAAGAT  
CTATGACTACTTTACTGCAATGTACGGTGCCGTTGCTCATGGAACCTACTGACTATTAG  
TGTTACAACTCAGCTGTTGGTCAGGTAGTTAGATATAACGGAAGTACGTTTTACCTTC  
TGACTGTACACTACTTACTTCAGCTTTCTCTGTTAATGGTAACAATATTGCATCCTCTTC  
TAACGGTTATATCGGTATTGATCCTAACGGAACCTGGCGACGTAACCTATGTCTAAGGGAAG  
TATCACAAGCACTTTCAATGGCACTACTGGAATAGTAGACTGTACTTCAAGAATTCCGTA  
TAAGAATGAGTTGACAACCTATTGGTGCTGCTCCTGCTGCAGTAACAAACTTTGTTATTA  
CGATCCTGTGGATGGCGATGATAATTCATATCTGAGCATTAAACATAACAGCAGGTGGAGC  
GGGCGCTGTAAGATCAAAGGCGGCAACTGAATATTTGAGTAGCGGATTAATTTCCGATAC  
TGAGATTACTTGTGCAGCTCCAACCTAATAGCCAAGACCTAAAAAGGAATGGAACCTAAGTT  
CGTTCCAGCTGATGATTTTCAGGGAAGTTCAGGAGGTGCCACTCAACAGCTCTTCGCTAC  
CATCTTTGGTGACAGTGGAAGCACTGCGGTGAGTACTACAACAGACTATTTAATAATTGC  
AGGTGGAACCTAAAATCACTGCTGCAGTTTTTGGGGACACTTTAACAGTGAACCTTCTCTAA  
AACGTTGACAACCACCTTATCAACGTTAACAGACCCTGATATGTCAGCTCTGACTGAAGG  
TGATACATTATTCTATAATGGAACCTAATTGGGTTCCTACTAGATCACCTATCACATAGGG  
GGAACCTGGTGCTACTGGTTATGCACACAACCTTTACGTTCAATGGACCTGGTTTCTCTGC  
AGCAACAATGAAGCTCAGATCTAGTTTTCAAAGAGGGGCAACATATGCTTTTCGATAACTC  
TGCTAATGGTGGCACACACCCAGTTAGAATTCAGAGTTCACCAGGTTTAAGAGTCACACA  
ATACACCACTGGTGAAAGTGGTAGTTGAACTGCAGTCCTTGATTGCACTGTTCCCTATGGA  
TGCGCCTGGCACACTTTACTATCAATGCACGATCTATACACAATGAGTGGGACTATCAC  
CGTTGTAAGTTAATAAATGACAAGAACTCTTCCTGGAACCTGGTGTGTAATCGAACCAAT  
ATTCGGTGAATATTTGGTATTCCTGCAGTCAAAGTATCAAATGCAGGATCTTGGTACGC  
ACCTAATGATCCGCCACGTCTTGCTGTGAGTGGTTTTCCGAACCTCCGGATGAAATAGCGTT  
ATTATATCCAATCATTGATGCTGATTCTGGACGAATAACTCACGTCAGAGTTTTGAATAG  
AGAAAAGGGATATGATCCTGTAATATTGCTAATTATTCCTGAGCAGGAAACACCACACGT  
GGTTACCCGATTTGATGTCAATAGATTATGGCAAAGTCATCCTAACTCTCCTACAACAGG



TACTTTCACACCTGATAGTTTTAGATTAGTTAGTGATAATCACCATAAACCACCTCAACA  
TTTCTTAACTGAAAGAGAAGCAGCCGGTTCTACAGTTCTCGTTGATAGAAGTTTGGATCA  
TACGATAATCTACCGTGGTGGCACGGATGGTCCTGATGTTGGTCAAGGAGATTTTCAGAA  
AAATAACGCACGTTCGCATCAAGACAACCTGGTGTGTTACTTCATACTCCAGCATGGTGATC  
AGGGGCATGAACTCGTACAAACTTCTCTGGTTATACTTTTTAAATCCGTTTGTGTAAAAAA  
TACTAATACTTATGATGCGGTAAATGTGAGAGGTGTTTACGATTATCAACCAAGTAAAT  
CGTAAATGGGTTTGTCTTTGTTATAGGTGTATTTGATGGAGGTGGTAAACAACCTCTACAC  
TTGGAATCTTAAAGTAGAAACAGGAAACCTTGTAGTTCGTGCATCTAACTTATATGAGAC  
ACTTGGTTCTATTGAAGTTGGTACAATTGTGGATGAAGTCTCAGGAACAGGTTGAGATGA  
AATTGGTAAGATTGTTAAAGATGATCAGAATAATGTTGCTAGAGTTTATATTAGCGCATT  
AAGAGGTGCCGCTTTCCAAGTCAATTATCTCGTGTTAGATTCTAATGGTTTTGTATCTAG  
ATTCCGTGGTGATCCAATGTCAAGCAATCCTTATTAATTGATTTTGGAACTGACGCCGC  
AAAGTTCGGTCCTTTCACACATGGTCAATTTTGTCTCCCTCCGTAAATATTCAAGTAAC  
AGCAAATTATTTAATTAAGATAATCACTCTGACGAACTACTCAGGCAGGTACAGGAAA  
CCCTATCAGAATTATCGCAACTCCTGCTGGTACGTTGAATAACGGAAAATTATACTACAA  
TAGCACTGGTGTATCTAAAGCACCTGCTACAGATTATGAATCAATTTATGCTCCATTATT  
CTTGCTGCATAGTGTGAAAAACAAGGATTTATTTCTTTTGTGCTTATCACAACCTATAT  
GGGAGGATAGAAAGGTGATGAAGATTACATGATCCTCAATACATCTGCGGCCACATATAC  
TCCTACGAACGATTAGTATGCTAGGGACTTTTATCAAAGTAATAGCAGTGATTCCAACAC  
TAAAAATTAGTCTAGATATATGGATGGACACTCAAAAATTTCTTGGTGTTTCTTTTGTGG  
TCATTCAATATACGGCCCGTGGGGATATAATTCTAGTGGTGCCGTAACAAGAGAAACCTC  
TCCTTATAGACTAAGGAGCACTCCTGAATTACCGGGTGGTCCGTCCTAAGGTAGATAGAGT  
ATCAACGGTAACCTACCCTCTAACCAATTCTAATGGGCAGTTCCTTTTTGGAGCTTCCCG  
TCCAACTTTTTAGAATTTTCATCGCGGAAAAACATACATTTTCGATCAAAATGACGCATC  
TAACGACAGTCAACACTTATCGACTTAAAGTACGGGCCATGGTTGACATCGGCAACACCC  
TGTTATCATTGGGAATACTCCAATTTGGATTCTGGCAATGGAATCTTATATTGTATTGA  
CGAGAGCGAAGTAACTTCTCAAGCATCTTTGTCAGGTTTTAACTTGGCAACATCTCGTGA  
GGTACGATTTACAGTGCCTGTGAATGCACCTATTGCGTTATATTTGTTTGTGCTTATACAAC  
TGCAGGTCATGGAATTAGAAGTGTCAAGAAGGAGAAGTTCTAGGAGAAATGGTATAAGA  
TTATAAGTACGATTCTTCTGTAGGACCTCATGAACAATTTAACGGTAAATTTGCTGTAAC  
ACCAGAGTATCCTAACGGAACCTATTCATTCTTCATGAGTGAAGAGACTGGTGGTAATCC  
CGCATATCCATATGCTGTGCGTCCTTAGTTTTACTCAACACGATGATTTAAAGGAGATTT  
TACACCTGCACAACCAACAGATTTGCTAAGAGATGCAGAACGTGAAGACGTTCTTGCTGA  
TGATGGTAGGGTTTCTTATATCAAGATGACGAAGTACGGTGATAATCGCTTCGGACCTGC  
AAAAGCAAAGATGTTTGTGCGGGTAGGATCTGGTGTCTGTTGGTACTCCTACTGTAAACA  
TGTTACTAGTTTAGCACTACTCGATGGTGGTTGAAGTTATGCTACTCCTCCAACACTTAT  
CTTTGAAGTTGGTGGTGGACAAGGTGCACAAGGTGCTGCTCAAATTTCTACTCTAGGACA  
AGTTACATCTATTGCAATTCCTGATCCTGCTGAATTCTCCAAGAACCTCCATTTATTTG  
AACAAACAGGTGGTGGTGGTATTGGTGACATGGCAGAAGCAACTGTCAATCAAGGTGTTAT  
AACGGCAATTAACATTACGGATCCTGGTTATAGATATACTTCAAACCCAAACGTTGTCTT  
TAAAAAATTAGTAACACTGAAGAGAAAATCTAGAGCACGTCAAGCATTAAACCGATCAAA  
CAGTTATTTGACTGGTCTTGTTAAAAAAGTTACCTCTAATGATACTGAAATATATGTTGA  
TTCTACAGATGCATTTCTGGTACTTGTGAGATGACTCTTCATTATGAAACACTCACTTA  
TACCTCTAAATCAGCAGGTAAGTTTGGTGGTTTGACAAGAGGTGTAACCTTTCAGTATGG  
TCTACGGGTTATTCTTGACGCCGGTCAAATGATCCAAATGGTGGTTCAACTTATAAGTT  
GTATGTTGGTGATAGAGTGATCCGTATAGTTGAGGAGGCTAATAACAAAGGTGCAAAAGT  
ATTTGACTGCAATCCGGTTACCCGAGAACTACTAGTTACTTTTTAACGCTGATTATTGAGC  
ATTTACTGACGGTGGTATTACTTCTACTGAAGATGCTATCGTACAGTTGAATGTAGGAGC  
TGCTTCTAGTGAATCTTCTGGATTTCGAATCTCAAACCTGTTCTTACAACCTAATGGATCTAA  
TATTTTCTTATTGAGTGATCCCCCTTCTTTTTGGCAGACAGATCTCTCCAAGATATTCT  
ATCAACAGCAGCAGGTGATGGAATCGCTGACCTAGATATTACTCGCACAGATCATGCTCG  
TCAAATCAGTGGTGATGGCGGTATCTTTAACACTTTATATGGTATCGAAGAAAATCAATG  
TGGACCAAATACAACAATTTCCAAGTAGGTGATTATGTAAGAGCTGGAACCTATTCAATT  
CAAGTATGCAACAATTCTGACTGCATGTGCTTTGAGTGATGGTGGTTGAGCACAATGCACT  
TCTAACTATTAACCTGGCAGTAGCAACTTGTAAATGGTATAAATTATAGCGTTACTGAAGT  
TGTTACAGGAGCAGCGTCCGTAGTGAGTGGAACCTGTTGGTTCTTATGATCGAACAACGAC  
AACGGTAGTTGTAGGGAGCATTGTGCGACTTAATACCGGTCAGATCAATGTTGGTACCTG

GGGATATCTTTATTAGTTCTCCGATAGTGGAACGTAGTTGATGTTATTATAAAAAGAACT  
TGGCGCAAACATAACGGCTGCACCGACTGTAACGTTTGAAAATGTGGGTAACATTCTAGC  
GACTGGAAGTGATTTACTCACAGCTGTAGGAGAACAAGTTCCTTCTATTACTATCAATAA  
TGGTGGATATGGTATTCAACAATCTGTTGATAATTCATTTAACCTACATCCCACAGTAAC  
GCTACTAATGCAACTGGTGTACCCTGGTGCGGGTGCAGTTACACAAGCAATTCTAGG  
AGGAGAGGACCTCGTAGTGATCCGTGGTGGACTCTATAGAATCAAGAGTATTGAATATCA  
AGCAACTATTCGCTCTTGACCCTCATATATAAACAGGAGTACAATAGTATCCCAAATGG  
CAGCCCTATTAAGTATCTATATCGAATATTTTGTGCAAAGAAGTTTATAACAGCACTGG  
AAGGTCCTGACGCAAACACAGTGACGATGCAGCAGCAACTTACCGTGATCGTTTGTATC  
TATTCATTGGTAGACCGCAGATTTGGGATAATGACAACCTCGCCCCACAGTCAGTAGACT  
CATTCTCCGAATTTTGGGATCGTACGATGACAGGATATCGATGAAGAGAGTCTCTACTT  
CTGACACGATTCAGGTCTTGCGTAGAATGGACTGGGTTTCCCGAGAACAACCTACAGGTG  
GACGAGGTTTTACCTATGATACGTATAAACATGGCAATTCTCCTACCAAACCTGCTGCTT  
CAGGTGCCACCAAATTATATTACACAGACTTTTATGTTGTGAAATTACAGTATCAATGTT  
ATTAAGCCATCTATAATGGAACCTTCTCCTTCTGATCCAAGTGGATAACCTTCTACAGTTG  
AACCTACCGGTACTTCAACTTCAATTATCGCTATTGGTGAAGGATATCGTTGGAAAGACG  
TGTCTCGAAGTCCCGTAGCATCGTTGATACATTTTCTCAAATGAATACATGCCTGTCT  
TCACCAATACATCGGTAAAGACAAATGCAGTTGCAGGTGAAATTGATACCGTTGGTATCA  
ACTCTGCAGGTTCTGGTTACAACAACCGAACTTATGATTATGTTGGAGTTACTGCTGATG  
GAAGTGGTGGCCGTGTGTGTATTGTTGTAAAGGTTCTGTAATATTAGTTCTGCAGCTGTTA  
CTTCTTGTGGTACAGGATACATTTTGTAGAATAAGCGTTGACATAATCACGGGTATTG  
TAACAGGAACTGATGCCATACTTGATGCTTTAATTCCTCCTCCAGGCGGACATGAATCTG  
ACGCAGATGATGAACTGGGTGCGTTCGGTGTAAATGATCAACGCCACACTATCATATGATG  
ACGGTGCAGCGGACGTCCCCAACGATAACGACTATCATCGTATTGGCCTTGTGCTAATC  
CTTTAAATTCGGAACTTCTGAAGCGATACATGATATAACGGTTTCTGCTCCAAAGCCCG  
CAATCTTCTCCGCTTTATTCCAAGGCAAGTCTGGGCCTGATGAACTATTACTCATAAC  
GAGTCTTTGGTCGACCCACGTTACTGCGCCTGGTCTTGTATTTCTTGGAAATGGCAAAT  
CTAAAGTTTTGAAATATTATAAGAACGCTAGTGATGGTATCTTCCCCGAAGTTACAGGGA  
CACAAAGTGAGTTTGACGGATCTAACGGCATCAATGGTGCAACTTCTGGTGCTGGTGCTC  
AAGCTCAACCCGACGTTAATTTCCCTCATGTTCCCAACTCTTCTTCTAGAACAAATCAACA  
ACTCAGAATATGATTGGGGTACGACGGTTAAGAATGGTATTTCGAAACCACAGTATCCGT  
CAAATAGCGGTCAGGTAGTTTACATAGATAATAGACGAGCAATCAGTCGTGCTAACTACC  
AATTAGATGAAATCACAATCGTTATCGAATTCTAATGGGACAAAATACCAACCTTAACGT  
CACACCATATCACGCCAACTTTGATACGCTAAAAAACATCTATCGAGGTTTGTTCGTCA  
TGGTTTCCTTATTCAAGCGAGGGTACTTTCTACGATGCAAAGCATCATGGAAAACCCCGT  
GGAGAATGTTGGTGCCCTCTAGTTTAAAGATGTTGCCAGAGGTATTGCACGTCAAGTTGG  
TTATGACCTGACTGTTGATTGCATCCTGCTCCAAGAATTTTCTTATTTGCTAATTTGA  
CATTTATCGAACTCAATTATAAGACAAGATCATCACTGGTCTTGCTACCGGTGAAAAGGC  
CACAGTTCTTTACAGTATTTCTTCTCCAGAACCAGATAAAGGTTATTACACGCTATATGT  
AATGGATATTGAGTCTGTTGAAGCTAACAGCACTCAAGCAACTCTCGCAAATAATGAACA  
ACTTGTACAGATACTGAAATCACTTTCGGAAGCACTTTAATTCAAGTTGGTTCTACCTT  
CGCACAACTACTGCCTCCTGGTTCTTCAAAAACGTGCTGTTGCTTATGCGCAATCTGG  
TGTATGGTTCATCAGAGGATTCTTTGCTGGGTTTGCATATCAATACATTCTTTTATGATCA  
AGATGGAAGCACCCCTCATATCGTAACGGACTTGATATTCTAGAATCAAGCGTTACCCC  
AGAAGATGACCTTAGGCTCAACGATAATGCTGCAGGAACATCTAACTCGGATGCTCCTGG  
TACTTCTAGATTTAGAATCACCACAACTTAATTAAGAGACTTCTTACTGATTATGCCGC  
TCAAACTTTATCGAACTTCTTCTTATCAACGCATCACCGGTAGACAACTTCTCGATTG  
AATTGCGTATGATGAATTAGTCAATAGTCTTGAAGTTGGAAGTTGTGAGGCGACTGGAGA  
TTACATTATTAAGACTTTGAGGTCAGTGTAGAGAAGACCTGGATGATGGATTTAACTC  
CGGCGTATATTCTGCGGGTGCTACAACCTCATATGGTGGAGTTGTTTCAGAATCAAATTT  
CCCAGTTGCATTTGGTGAACGTGTAGCGTATGTTAGAGGATATAGACTGAAGAGATTATC  
ATCACCTCCGATGACTCAGACAAACCTACTGAAGTTAAGCCAGCGCTCAGCCCGATAGT  
TCCACTTGAATGGGCAACATTACAACCTGTAATCTATGTTTATCGATTCCCTTATCTTGT  
AGGTTCTACAATCCCTAATGCATATCAAACCTGTAGAATCAAGAAATGGCTTTACAACCTAC  
ACACGGTGTGCAATGGTTTTGTAATTGGTTTTGCTCGTATTTCTTCTATGGGGCACAG  
TGGTGTCTGATAATATTTTGGAAAGCGCTCATGATCACTATAAGTTCAGTAACTTCGA  
TGCTCAAACGTTACAGTTTTAGAACTAGCATCTGCTCAAACGATTGCAGCAGGTTTCACT

AGATATTGGTGCAACCTCAGGTTATAGAGCATATCTAGTCAATGCTATTTCTAGCGGTGG  
TTCTCTCATTATATATCAAGTAGTAGGTAGTTTTGCAGAAGTTGAGATGGTCACCGTTGA  
TGGACAAGCAATTGATACTATCTGTGCATTACTTAGTTATACATAATCTGATACTTGTCA  
GTTTGTCTCCAGAGATGAAAGCACTAATGCTGTTTAATTAGCTGAAGATGCAATCTTAGA  
AGAAGATTTACCAGTTTGGGGTGATGCCTTTACATACAGCACTACTGCTGGTAATGTTTT  
AACTACCGATGCCGTCAGTGCAGCTGAGGGGGCAAGAACTGCAGGAACCTTATGCTATAGG  
TGCATCTGACTACACTAGTGATGCAAATGTAACAGGAGCAACATTCTCTACCGTAATAGA  
CGTTTCTGGTCCTGCAACAATTACTATTCTTAAGTGTGGTTTTGGGTCCATTGTAGGTGA  
AACATCTACTCTAGCAGATGCTAAACTTGGAGGAGGCGGCGTTGCTGTCCTCACATTTCA  
TCTTGCTACAGTTGGTCCTTCTATTGAGGGGTTACAATCAAACCTTTGCTTTAGATTTAAG  
ACCTGGCGATCAATTATATTTTAGTTCCCCAGAATTTGTTACTGTTACACTGTAAGTCG  
AACTGCATTCCCTACTACTAGTACATCAAACATCTTTAATTATGGAAGACAGCTTCTAAA  
TGTGATAGCTGGATGTGCCGCTCCGTGTGCAGACACTTTTGTGCTGCAGTTCGATTAAG  
AACTAAATTGTATGGCTTCAATAATGCTGATCTTCTTCGCGATATGCCTAAGCTATATGT  
TAAGAGTCTTACTCATGAAGCCCTGATTGTTGGAAGAAAATTTGATGCTGAGACTGATGC  
TTCTGACTCTATCTCTATAACTTGGCCTGAGCACGAACAGATCCAGTCATTTAGTGATGA  
GAACTATACAATTACAGTTCTTGCAGGATCTAACTCTACTGACCCAGTTGGTGATCAGAT  
CAGTATCAATACTACGAATTCTAGTGCTGCTGGATAGACACCACTCTCACGTTCTGAAAG  
AACAACTTTATAGATTGTTAACTTAACAAATATTACTTCTATTAAAGTAACACCGACTAT  
TTCTAATAACGTTACTACTACAAAACCTAAATCTGCTAATCAGATGTTTGTTTTTAAAGT  
TAATAAAACCCTCAAATCTTTCTAACCAAAATGATAATTTAACATATTCAAATCTATA  
CGGAACAAGAATTCTAGATAGAGACTTCCCCCTGGTTTAGTTGACGGCTATCTTCTCA  
CGTTGATATCAATCTCTACATGATATTAATCCTGTTAGTCCATCTGTAACCTTTAGTCGA  
ACCTACTATCTTTGCTACCGGTACTATCGTAAGTGGTAGAAATTCAACAGCAAGGGCAAA  
AGCTGTTGCTTGTCTCTGGTACCCTGAAAGTTGATGGTGTCTATCTATCTGATATATT  
CCAACCTGGTGAACTGTACATGGTTTTGACGGTAATTATAGTGACATCAATGAAATTGT  
TAATGATCGTGCAGGATCTGTTAATGTTGGTTCACAAGTTGTAAGTACTGATAGTTACTTCAG  
GGAATCAAGTCAAACCTGGTTTTATGGAGCAAATTTATTAATTTGTTTCGGAACCAAGGTAA  
CGCTGAGCCTGTTAGGAAATTAATAAATTAGTATTGTCTACTAAAGTCCACTCGAACGGC  
AGATTATTTTGGTGGTCGATCTTACTGCGGTAGATTATACAGCGATATTCCTTTCTTTAA  
GGTTAAATTCCTTGCTGATTACCTAGACTTTAGACCATGTGCAAAGAAGTGTGTTAGTAG  
AACAGGTCCGGTAGCATCTCCTGGATTTGTAATGATTCTACATTTGACTTTAAGTCAAG  
TGTGTTAAATGTATCTTGTGCACCTATTGCTACAGTCTTTGATATTCCAAACTTAACTAG  
TAATTTCCGTTGTGATCTTGTGATCGGTATCTACCTAGACTTGACAAATGTTTTGTCACGCC  
TACTGGTTAGTTCCATATTCTTAACGGTAAATCTTCTGAAAGACCAAAGAACCTGATTC  
TCTAAAAGATGGTGTGCTTATAGCAATCATATCTCATAAACCATATGGATTCGATCCACT  
TGCAGATGTATTGATTAATCGTTCTGAGAATAAACATTATACCATGCGTGTTATCGGTGG  
TTAGAACCGAGATTAGATCAGGTTGAATTTTATACATCACTCAACATGCTTGAGACTAA  
TACAAGCTAAACTCAAATCTTGAGGCTAGTGGTAAGTATCGTTTGAAGACTGGATTTAT  
TGTTGGTGATTTTGGTGATCATAGTTAGTCTGAGGTTGGAGATGACGATGTACTTGCTTC  
GCCTGACTTTAGACGAGGGTATGCGCGTCACTCTCATTACACAACCTAACGTTCCCTTCGT  
AATTAATATCACTTTGTCAACTTAGACTCAACTAACTGGTCCTCTAATTATGTTACCGTA  
TACTGAGGAGGCGATTGTTGAGCAAACCTTTGATCCTTGTGTTAGGAATATTGACCCATT  
TTACGTCTTTGCCTATATCGGTTCGTATTACTTTACCACCTGGTTCTGATGATTGTTTGA  
TACTAATAGCCTTGCTGCATCGGTTACAGCAGATTGAAAGTGATTTCTTCTAGATTCTTC  
TGAATTAATGTTGATCAGAATGGTTTTGCTCCAATTGAATGGGGAGCCTGGGATACTAC  
ATCGACAGATGAACAAGACATATCATCGGGGGTATCGAACTATCTTCATTGGTTAGTAGA  
AGATATCGGTAGATGAGCTAGATCTGATGTTTGGGATGGTCGTTGCATGCATCGTGATAT  
TCAGACTTAAACAATCGAAGTTACTGCAGATTATGGGATGTCTGGTGTGTTGAACGCAAAT  
TATTCCTAGAATTGAACGCCAATCTTTGGGTGATGCTATTCTTTCTAGCACATCTATTCC  
TTGGTTTCGTTCTAGAAACGTTGTTGCTGATGCTGCACGTCTATATCCAAGAACACGTTT  
CTATTCCTTCTTTGATGGAAAGGCAACTACTTATTGTTAGATTCTATCATTATTGAAAT  
GATTAAAGATCCTACAGTTTATAGTAGAACAACCTACTCCCTTTGGTATTGGAGAAAC  
CGAAACAGGTGAGATTAGTGGTTGTAAGTTTACGGTGGCTGCTCGTGATGATTTTTATCA  
GTTGAATCCTTATGAGGATACAACACTTCTACTACAGATGCATCTACCAATGGATTCTT  
GAACATTGCTACTACTGAACATTCTAAGCAAGCAATCGGTTTCATCTATGCAAATATGCA  
GGATCAAGAAGTATTAGTTGGAACCTTCTGGTTCTCGTGCAGTTGTTAAAGATCGTCTCA

AATTTCCGATCGTTTTGTAAATTA AAAACCTTCATTCTTTATTCCCAATCCTGGTGTAGA  
TACAAACCCAAGATGGTCAACCCGAAGTACTAGAACTTTGAGACTTTCCACATCTGATTTTGA  
TTCAGGTATTAATGGTGTATTGGCATCATCTGCTCAAACCTTTATAGGAAGCGTGAGGTTT  
GTTTAAACACATTTGAAGAAAATATCTTGACAATTCGTAACGCAGAAATAGATGATGAAAC  
TATAACTCAAGCACGAACAATTCAGACAAGTACTAGAACTGTGAGTAGACGGATTGGTTGGTA  
TGACCCGCTCGCACAAATCCTTCTTTGTTGATCATGTTCGGTGGTTCGTTTCTTACTTCAGT  
TGATCTTTACTTCTTTAAAAAAGGATACAAACATTTCAACTTCTATGCAAATCAGAACAAC  
GTAAATGATTATCCTACAACAACCATTTCTACCTTGATCTGATGTAACCTTTTCGATCCTGA  
TCAGGTTTCAAGTTCATAATCTTCTGCAGTTGCGACTAGATTCCCATTTGAGTCTCTGT  
ATATATTCCTCAATAGCAAGAATATTGTTTTGGTCTCCTTTCTGACTCTAACTCATATCA  
GATTTGGATTTCTAGACTGGGTGAGATTGATATCTCTGGTTGCAGAACAATTTCCAACT  
ACCTTACGCAGGTGTTCTACTCCAATCTCAGAACGCTACTACATGGACTGTAGATAAATA  
TGAATATTTAAAGTTTATTATCAACGCTGCATCCGCTGTATACTGGACGAACATAACT  
TGAATTGAACTATGCTGTATTTCGGTTCGAGGAAATGGTGGTCAGTAAAATCTTCGTTCTGA  
GGCTATTCTAAAATGCCAACCGAATTAGTTCTTACACTTAAATCCACAACATCACCTTA  
CACAGTTGGTTGTCGTATCTATCAAAGACTACTTTGGCAGAGGCTACGAATACTGCAAG  
AAGTGTAACAACAGGTGGTATTCAATTAATAATGATATTAATGGTACTGGCCAGC  
AGGATCTAATAGTGGTGGAGTAATTGCTAACCGTGTGCTTCTTCTAAGACATCAGCAAC  
TATGGTTGTTACTGGTGCTTATGTTGACTTTACAGTCGGTGAAACAATGACAGGCGACTC  
CTCTACTAGTTCTACAGCAGAGGTTGTAAGTTGGACTACTGGAACAAATACACATACACT  
TAAATATGTGTCTTCTGCGTGTACTCCATCATAAGAACTATTATTGGTGGAACTTCAGC  
TAGAACTAAAACAGTAAGCAGAATGACTTGCCCTGGGGTCCCTGCTGAGCCGGCTGCAAT  
CCAACCTTGCTACCCATAAAAAACACCAACCTATTCTTCAAATCAAAGAACGATTCGCGT  
TTATCATAGTAGTCACTGTATGCACACTGCATCTAACAATGGGATTCTTGAAGGCGCTTA  
ATCTGAGGTTTTTGTACTGCTTTGAGTGCATCTAAATCTGCTACTGATCCTAGTATTGC  
TGTAGGAGACGCTACTGCATTCCTCAAGAATATATACGGTTCTGCTATTGTAACAAGTAA  
CGTTCGTTACATTAATAATTAATGATGAAGTTATCTCTTATAGTGCAATGTCTACATATAA  
CAACACTATTGCTGCTCATGAACGTAGTCATGGAGAAACAACCGGAGCATCCCATGCAGA  
TGGGTCTGTAGAGGAGAGCGGTGACTTAGATGGTAAACCTCTAATCGAAATTAAGAAAAC  
TCTTGCAGGAATTGGAGATGTTACTTTAGATTACGACGAAACTTCCACATCATCTATTGC  
GAGCTTAGGAAATCTTGGTGGGGGAGAAGGTATCATTGCAACACAGAATATTCAATACAG  
CACTCGAGTAGTCAATTCAGAAGATGTTGCTTCTAAGACTGACATTACAGCTAGGAT  
CAACACAATTAGTGGGACGTCTATCAATGATGGCTCTACTTTGTTCCAAGCATAATGCTC  
AAATGCTGGAGTAGTCTCTGATATTATTTACGTCAGGATAATGAGTTGATTCCACCACA  
ATTAGTTTGTCTGCCATCAATGAATCATCTGAACTTAGCGGTGCTAGGTCATTCCGAAT  
GGAGTTTAAACATGACTACTGAAAAGACTACAATTTCCCCTATCATTGGTAGATATAGAAT  
GTATATCAGTTTGGTATCTAACCGTATCAATACTCCTTCATATCCTAATACGGCAAACCT  
ATCAGTTGGTGTATGTAGATGATGCACTTTATATGACTAAAACCTGCAACCCAACTCATCC  
TTCTGGATCTATCAAGGTTTATTTTGCGGGATGTCGCCACCCAACAGTGAGATTAAGGT  
GCTATCCAGAGTGCGTCTGTTGGATCTTCTGTTCTTATGGAACAACCTGCGATTTGACTT  
CTTCCCAGCTGCAAGCTCTAAGGATCCTGCAACTACAGAATGAGAAATCTATTCGTCATA  
TGACTAGGAAGTATCTGGTTTGTAGTATTGATCAATGTCAAATCAAAGTAATGTTCTTTT  
TCCTAATCAGGCATTAGTGCCGCTTATCAAAGATATAAGACCAATTCCTCTTGTGTATA  
ATGAAAATTCCTGTAAAAGTCAATGCAAATCGGTTTCGGGACTCCTATGCGGGTTCGGTC  
AAGTGTGCTGATAAATCTCTGTATGAGAAATATAGGGAAGCACCTAAAGCAGAACAAGTT  
AAGAAAAGGGATTTCTACTTTACTAAATGAAGTTTCTGAGTTAGAAAGAGATATCAGT  
GAAATTAATCAGTTTTTCTTACGTTAGTCTAAGACAAAACAACATAATGACTGTTGACA  
AAGTGTCAACAAGAAGAGATGCATTCTCAATACAAGGAGAGATATGCAAAGTAGCATGAAG  
AATATCGACAATTGTCTGCCAAAATTAAGAAAAAGAGGTTACTGCACTGCAACTATTGG  
GTGCTATGGAAACCATGGAATATTTTACAAAGGAAGAGGAAAAGACCGCTTCTTCTCCTC  
CTGATACAGTTACATCAAAGAATTTGAAGGGGGGACAGTCCCCCTCTCTTTTTTGGCATA  
AATAATAAATGAAGCCTAATATAATCGAGTCGTCGTAACGAATGGCCAATATCATTCAAT  
TAAGACGAGGTGGCGCACAGGAATTGGCGGACTCTAACCCGACCCTTGCACAGGGTTAAT  
TAGGTATCAAACCTTGCCACGCGTCGTTTTAAGATCGGTGATGGTGTGTCTGCATGGACCA  
CCTTAAGGCAAGAACTACCTGTACAGTCTACATCTAATCCAGCAAATACTTTAGATCAAT  
GGGATGCTGATGGTAACTTCTCTGCAGATAACCATTACTTCTACTGTTAATGGTAGCTCGT  
CTCTTGTCTCTAGACTTGCTTCATCTATACAAATCCCACTCTCTAATGTGGTTACTGCTG

CTGTTGTATATGCAGGTA CTCAAATCTTGAACCTATCTGCTGAATTACCACTGGTTTGTA  
CTCTCCCACATTACTATAGTACGTCATCCCCATCAGCTACTCACAATAAGGTCACTGTTG  
ATGCTAAAGGTAGAGTAACTGACGCACAAGATTTTACTGCTTTTAACA ACTGTACTCTTG  
CTGATTATGGTTTTGATGGAGCCAATGGCGGAACATCTGCACAACGATATGATCTAGAGT  
TATTTGCTGTCGCAAGTTTGACCCCTTCTGGTATGATCTCTAGGACTGCTTGTAATACTG  
TAGCAACTAGAGCAATTACTGGA ACTGCCACAAGAATCTCTATAAGTAAGAGTGCAGGTA  
ATTTCGAGGCACCCA ACTATTCATATAATTGCCACTGCTCTTACAGCAGGTA ACTATAATA  
CAGAATCACTGCCATGTGTATCTGGTGCAGGTGGCAATGCTGAACCCATTGGTACCGCTA  
CAGTTAACGCTACTTAGTTTACTGTTGATGCCCGTGGTAGATTAACCAGACTAACAAATG  
TGCCTATCACTACTACTGCAGAAGGTAGTAAGTATGCTATCTATAATTCACGTACTACTT  
ACGTTAAATACGACATCATTGATAATGTATCAAAAAGTTTACCAAGCCACCACGGACCTTG  
CTGTAGGAGTAGGTCCAAGTTCTTATGGCAGCGGTGACTCTGGCGGGTGGAGATATCTAG  
CTGCCGAAGCACCAGATCAGAAGGGAATGCGTAGTTTTGCACAAGTAGATTTACACGTTG  
ACGCGA ACTGGCACGTCACCATCGCCACCCG CAGGAGTAGATAATACACAAAAACAAAAGA  
ATAAACTAAGTTTGACAAATGGA ACTGCTGTTGGCAATTTTGTAGTAGATAACACACCTT  
CAACTTCTACCGCCAACAAAGATTTTGTATAAATTGAACTGTATTAAGATCAACAATCCTT  
CTGGCGGTTTACTATTTGGTGCTTATAATACTAGTGACATTGGTGCAGGAAAGATCGATG  
TCAATGTACGTTCTGACTTGAGCGATCCTGCTATTACTTTAGATGGGTCAGTAGCACAAA  
CTCTAAACAAA ACTGGTGATGGTAATCTGACTTTCACTACTTCTCAATACTCATCGTGTG  
CATGATTTTTAACAGTTTCAGCATCAATCGCTGGTTCGGAACTAGCACGGTTACAATTA  
CTGCAGAAGAGAAAGTTGATATTGATGCCTCAGATTCATACGGCAAAGTTCATGTGCAAG  
ATTATAGATGCCAATATAACAACATTGCGACGTCTAATTCGCTATGGACGTTAATCCTG  
GTGATGATCGTGCTACCAGTGGGTCACTTCGTGTTAATGCACGTTTACAGTTAGAGGGCA  
TGACAAAGACAATTAATTCAACAGTTAAAACAATTGATAATCTCTTAATAACGTTTGGTG  
GCGATACTGTTCAAGGTAGTGATGACAATAAAGATCGCGGAGTTGAATTCACATACTACG  
ACAATCAAGCAAAAATTGGATTCTTTGGTTACGAGGATTCTGAATCCCACCTCGGAGGAC  
ACGTCGATGGATATACATTTTTACGCAGCGCCACAAATAGTTCAGCGGTCTCTAGTGGAA  
CTGCGTGAGGTGTA ACTCCAGGGAATTTTGA ACTTACTAAAAATACTTACTCAACTTCTA  
ATACTCCAGGAGACTTAGTAGTTACTCGTTGTGTTGATCTTGGAGATGATGTTAATATTC  
ATGAATTGCTATATGGCGATGGCACATT CAGTGCTAATAGCACATCTAGATTTGATGATA  
ACTTTGTATTGCAAGGTGCTTCTAAGACATTATCATTGCATAATGGTCCTGGCACA ACTA  
AAATACA ACTTCACACTACTACAGGAAATGTAGAAATTAGTGGATTCATAACAAATACTG  
GTGCTATTGATGCAAACAGCACTTTAAATGTTGCATCCATAGTACCTCTTGAAGACGCAG  
ATGTACCAACTGTTGCACAGAATAGTGGAACTGGTATTTATGAAATTCAATAAAAATGACT  
ATGGTGCATTTAGATTTGATGGCGGTGGGTATGTTGAAGGGGAGGCAGTATTCAATTGTG  
ATGTTTTTAATAACGGTGCTCAAAAACAATAGAGACAGTGCTACAGAATCATTCCGGTAATA  
GAACTATGAGGACATCGGATCTAAAGTACGTTGTGGTTCAACTGCAGCGTAAACTTCTT  
CACATGCATCTGATCATACTTCTAACTTAAGAATCTTTCGTGGTGCAGGTATTCAA ACTG  
ACCTCCATATTGGTGAAGATCTTTCTTTTGGTAAATTGAATTATGGTGACAGTGCTTCT  
TCCAATTATTAGGAGAGTCAGGTAATCGAACTACTCAAGGAACATTAACAGTAGTAGGTC  
AAACAAATATTAATGACTCTCTATTTGTTAATGCTACGAACGAAAACGTTGAGATTCAAG  
ATGGATCTGCAGCAAATAAATTTACAGTGGATCCTGATAATGTTAATACATTAATTGAAG  
TAACACTTAACGCAAACGGTGTA ACTGATATTGGCGTAGACTCCGCTGTTAGAAACGGAA  
CGACTGATAAGATCTTTGTACATCTGCCTCAGGTTATACTCAAATAAAAACGCAATTTGC  
CAGCTGATGGTCATACCGAATTA AATTC AACACTTAATGTTGATAGTAATACAACACTTG  
GTGCACA ACTTCCAGTAACTGGTAACTCAGAGTTCAATCGAACTGTAGCTGGTGAGGCAA  
ACTTAGCAGTCAGATCAGCAACTACTGATAAGATGACTGTTGCATCTTCTACAGGTCCCG  
TACCAACTGATGGA ACTCTAGTTGTTGCAGGTCTCACAAAATTAATGTTTGTCTAATTG  
GTCAAAGTGATAACGGAGTAGTTAATATAAACGATGGTTCCGCCACATCTAAGTTTAGCA  
ATGATACTGATAACGGTAAGACAAGTATGATCGGTACATTGACAGTTGCTGTTGATACTC  
AACTTAATAACTCTTGGTGGTTCTAACGTTGTGACCTTACTAAGAAACACTCAGCAA  
CTCTGACAGGATCTTATTATGATGTTGGTCCCTTCAA ACTGCCTGGTGGTGCAGGTGTG  
GTAACAATCTTGTGTGGGGGAAGGTCTAAGAGTATATGGAGGCACTGAACTTACTGGTG  
CTCTTGGTAGTATTAATAGTGCTGCTATATCTGGAGCTTAAGTAACTCATGATAGTGTGA  
CTGTCACTGCAGACAATATGATGTTCAAGGTGCAGATTGAATGTGCAGCGAACAAAGTTA  
CAGTCGATCCCGAGAATGGTAGGACGGACATTCAAGGAACATTTGCTCCTGCAGATGGTG  
TAACTGCATCATCTGACCTTACAGTCCCTGGAAATCTTACAGTCAACCCTAACAACTA

CTTTCTATTCTCCGGTCACAACAATCGATGTGCCTGTTATTACTTTTGCACCTTGTTACTG  
CACGCGCGTCTATTGTTGAAATGGATCGTGGTATTGAATTACGTTAATACGATGGTTCTG  
CTAAAATAGGTTTCTTCGGTTTTGATAGATCATCCTCCTAATTCCCATTCTTAACAAGTA  
CAACAAATACTTCTGAAGTTCTCTCAGAAACAGATGGTGTCTAAGGGCAGGTATTCTAA  
ATCTTACTGGTGCGGGCACATCTCTTGATGTTGACGCTAATGCAAACATAGATGCCACAA  
TGACTGTAGTTGGTCTTATTTTTTTCACAAGTACCTTCAGGTTCTGCTTTTTGTTATCCCAA  
TAACATATAAGATTAATAATTTTAACACAGACCTACTAGATGGTGTACAAACGCAACTG  
CTGCAACTCCATCCCCAGTTTTTCTTCGTGATTCATCTGGTGATTGTGCGGGCTCATCAA  
TCACTGCTGCTAGTGGTGCAAGATCTGGCGCAGGTTTCTTAGGAAGCGCATCCACTGCCG  
ACGCATGGAAAACCTGCAAGAACACTCAGCCCTAGCGGTGTTGTATCTGGTTTTGTCGTCG  
TCGATGGAAGTGAAACTGTAGCACTTACAACAACCTCGTGTTGATGCAGACATCACTGCTC  
TCGCAGCGATGAATGGAACCTGGTTATGTTCGTACGGACTGCTGCTAACACTTATGCCCTAA  
CGACTCTCCAAGTCACCGCAACGCCTGGAATCCCTCTTACTAACGTTGATGGGGTTGCTG  
GTAATACTACATTTAACGTGGCTAGGGAATCTTCTAATTATGGAAACAACCTCGTCCTAA  
GAGACGGATCTGGTCACTTTGGTGCAGGAACCTATTACTCGTTCCTTATCTGGGAATGAAA  
CAGGTAATGTAACCTGGAAATGTAACCTGGTCACGTAACCTGATATCTCAAACCATGATAGTA  
GTGACCTTACTGAACGTCTAAACTCTACTACAAATATGAAACTGTTGACGATAGAGTCA  
ATGCTCTTATTACTGCAGGAATTGTTATTACTAAGGTTTAAAGCTGACGCTGCAAATACAT  
ATACACTGACTGTAACCTCAGTCAGATCTCTATACTGACATAGTTACAGAGGGATCACCAA  
ATCAATTCACAACCTGCTGCTAGAACTAGAACTCGTTTCACATATGGAACCTGGTATCACAC  
AAAGATCTGGGACTTTATCAGTTACTCAGTCTGCTATTAATACTGACAACCTATCTGAAG  
GATCAACTAAGCTCTTACTACTGCTGCTAGAACAAAGAACACACTTTACATACGGAACCTG  
GTATTACACACAGTTCGGGAACCTTTACCAGTTACACAATAAGATATCAACACTAATAATA  
GTACTGCTGGCTCTACAAAACCTATTACTACTAATGAACGAGTTGATGATAGAGTTAACG  
CTTTAACTCTTGCTGCAAATGGGGTAAGTAAGACACCTGATGACGCTTTAGGGACTCTAT  
CTTTAGCAGTTGACTCTAATGAGTTAATACTGGCATTTTTCCAGAGGCTTCTACCCTTT  
ACTATACAAAGACTCGTGCTCATGCAGGGGCAGACTTGAAAGTTGATGGTGCTTCAGGTT  
CAAACCTTGATCTTTCTTCTAAGTCTACTTCCGTTCTTTCTGGACGAACGTCTCAATACC  
ATACAGGAGCAAGAGTTCACGCAAACTTGACAATGGATATGAACAACCAAGAGCTATGT  
TAACTAACCTCGGAACCTAGCACCCTCAAGATCTTAACTTGTCTGGTGATCCTAGACCTG  
GCGCAGTTGTTACCACTGGTGTAGTGTGGAGGTGGCGGTGGATATACTCCACTAACTA  
CGGTTGTTTCATCTGGTTCAGCAACTGGATCTGGATTGACTGTCAATACCACGGTTGATA  
GTGATGGAAACATTCTACTGCTGCGGTAATTACAGGTGGTTCGGATGTCTAATTACTG  
TTAGTGTCACAGTCACTAACTGCAACGCAGATAAGATTCTTAAATTGTGCTTGGGAACAT  
TATCAGGTGGAACACGGTATTCATGTGCTACTGTAGCCGCAGTACTGGGGGGGACGGTT  
CTGCTGCTACTGGTGACAGTACTTCATCTGCAGGTGCTTTTTCAGTACGTAACAGTTAATA  
ACGGTGCCACAGGATCCGCTGCGGGTACTCCTATAAATATTGCTAATGCTAATGCCACTG  
GAGTTAATAAGCTTTGACCTATTAGTGCTGGACGGTCTGGTTATTCAACAGGAACCTGCCA  
TGCCACATCATCGTCCGCAACAGGATCTGGAGCAACATCAAATATCACTTCGGTTATTG  
CTAGTGGTGGAATCCCTACTATCGCAATCAACGATGATGGATCTGGTGACGCTGAATCTG  
GACTCGTGACAATTACTAAGGATAACGCATCTAATATCGTAACAGTAGGAAGAATTGGTG  
CTGCTTACGCATCAAGATTTGCAGGAACCTATAACTTAGGCCCTCTGATTATGGAACCTG  
AAGCATCTGGTGCGAACGCAACATTCACTGTTGTTGTTGATTCAAACGGTACTGCTTCTA  
TCACCGTAACAGATGATAGTAGCGCATTATCGCCATTGAAACTATCAGAGTTGCTGATG  
CTCAAATGGTGGTGGGGGTGGTGC GGCTCCTAAATTCGATGTAACAGCAAGACATGGTA  
GCACTGCTACAGTTCAGTATCTGCGATATATGGGAACCGTGCAACAGTTTATGTGCGCAA  
CCGTTGCAACAAATGCAACTCTAACTACAATTGACAACCTCAACGATGGAAGTTGGACCAA  
GAATTACAGGTGCTACTTCTGGCACTACTGGTATTAAGACTGATCAGGGAACCTAACCGA  
TCACTGTCAATTACCGATGACGGAGTCTTCATGAAAGGAGAAGTCGTCAGTGCTAATGGTG  
TAACTAAACTTACTTTCTCCTCATTCAGTTAATACGTTTTTGTCTGCCACTAGATCCGTAA  
ATAAACTGAACTACGGGACTTTACTCTACGTCGTTTTCAGGATTTCTAGTATGGCCATTA  
ACGTTTCTCCTGAGCAAATAGATGATTTGATAGAGAAGCGAATGATTTCTATCAAGAGT  
TTCCTCTGCAGGTAATCACACATCCTTCATGTTTATTGAAGTTACAGCTGCTAATAAAA  
CAGCAGCAGAAAGTGCAACCCAACAAGGATCTACCAATTGGTATGAGAACAACAACCTATG  
TTTCATTACGACCTAACATCTTAGGAAGCAATCAGGTATAGCCAGAGATGGGTGCTTCTA  
GTATTGTGCCTCGTAACACGGGCAAGATAAAGTATCCAACCTTTTTAAATGGCATATACG  
CTATGGCCCATGGTCATATTCTTCACTTTATGATATTTAAATACCTTGAGACACTTG

ACTTTGTTACAAAGTCTAGTAGAAGTATAATAGTAAGATATAACGAGAAACAAGGAAGCT  
TGTATCTCGATATGGATTTCGGATTCATTGGGAACAGGAGACAAAATTTTAGTCGAAGGTC  
CCGTACGTCAAGAAGCACAAAGTTATACAGCAATATATAGTGATAACTCGTTAAAAGATT  
ATGCTTAAGGATTGTTTCAACAACAATGGGGTAGAAACCTAAGTAAGTATGATGGCATT  
CAAACCTTAGGTGGCGTAATACTCACTGGCCGTCAAATTCAGTTGGTCGCAAGTCACCTCA  
AGAAGGACCTTGAAGATAAAAATACGTGATACATATGAACTAACTCCTCTAGACTTCGTGG  
GCTAATCTCTATTGTTATTTTCGCAACTCCCCTGCACAAGATTTTGTTCATTTCGAATCATT  
CTAACGCAAAAACGCTACAAAGCAAATGGTTCTGCACTGGAACAAAAATTTATTGAAATTC  
TGGTAGTTGCAAGCATTGCAATCTATGGGCCAGATATTTACTATGTTTCGGAGACCGATT  
TCAAGAAAGATACGAACTTTGGAGAGGACTCAAATTAGCAATTCGATAGTGCAGAAAACGA  
TTAGAGCATATGACAATAATGCTGAAGGATTGGAAGGACACGGTAAATTACTIONTAGGAGAT  
TGGGAGTCCGTATCGAAGAGAAGACAACCTTTTAGATTGTCCCCTGAGATATTTAAGGAGC  
AGCTGGTCGATAGTGTACGCTAAACGTCAAGGGGAGACCAAACGAACCGGACTTAACCT  
GGTTTCCAACAACAAGCATTATTGGCAACACAATTCGTAGAAGCAGAAAAACCATATT  
ATCAATTATGAAACGGATGAGTTTGGGAATTTAGTGTGAACTCTTTGAATGCAGTGACG  
AAGACCTTGCCACAGGAATCGCAGAGATCGATGCAAGCCAAGCTGCCTTTGCTAACGCTA  
TTACAGTTAACTTTGCTTCTGGAGGGTGTAGCGATTTACAGTTGCTGGAATTGTTGCAC  
GATGTACATGTAAAGTGACTGCTGAAGTAAAAGCACGGGATTGTTTCGGCTAGACCGTTAC  
AGGTCTTAATTCATTCTGGTGTCTTTACGATACTTGAAACGGTTACAGGACAGACCTCAG  
GTGCTGATTGGTCAACTGCATCATACTACACACTAAATAATTTGAATACCGCTAACTCTG  
TTAACAAGACAAAGAATTTGAAACGATGGATAACGATATAATTGAATTTACCGAAACTA  
CTCCATTCGGTACAATTGGTTCCTTGACTGACACCACAATCTAAAGTTAGGCACTTATTC  
ATACCACGAAGTTTTTAGGAGGCCTAACGTAGCTTTTGGAACGTTATTCAATAATAGTGA  
ATTACCTCGGACTGACGAAGTGGTCCAAGTAGCTTTAGGGAACGGTCCTGAACAAAATTT  
CTTAGCAAGGTTATAACAAGTTTCTGATCCAACCAACAAGGAGTTCAACTTACTCTACC  
CAGAATTTTTTTTTGAAATTAACGGGGTAGCATATGATAGTGAAAGAAATCGAGCCCCCAC  
ACAAAACATCAGGATGGCAAGTAGTTCTACTTCAACTAAGAATGTGTTTGTGCCTGTTCT  
TTATATTATTGGTTTGGAACTAGCAATCATCTCTAAAAATCAAGAAGATTGTTTACAAGT  
TTTAGACCAGATACTAACAATATCCAACCTCATCTCAATATGGCAGTGAACCTATTGTC  
GGAGATGACTGAGAGTAGAGATAGTCCCCTAGTCCCTCAATGGCTTCGAATATGAACATGA  
CTATGAGGGTAACTTTACTACAAGAAGAGCGATCATTTATACCTTACAATATACTGCAAG  
AACTTATCTGTACGGTCCCCTATCAGAAGCACAAAGTGAACAAAAAGGCATATAAAGATTA  
CTATACAGATACTACTACTACATCTGCATCAAGAAAAGTAAGGTTTATTGTTGTTCTAA  
TCCTCACACAGCAGATGCTGATGATGATTTTGGCTTCGGAGAGACTACTGCAGTCTTTAC  
AGCTAACTAGAAAAGTAAGCCTGCTAGAGGTGCTGACGAGGCAATTTTATCCTTTCAACT  
CCTTTTCGATGGTTCCTACGATGCTTTTGGAAAGTGAACCTACAAAACCTTCAAAGCATTG  
AAAAAAGTAAAACCAATTCTGTAAAAAACAGAGACTGAAGATGGGAAACAAGTCTCGGAG  
ATATCACGTGCTACTTCACATAGTTTAGTGATGAAAGGACAAGAAGCAGTGGGTTGTATA  
TTGGGAGTAGCACAAGCATCTGATCATCCTCGTGCGTGAGCAGTTGCTGCAACAACCATT  
AAGAACGTAGCAGATACTGCTGAGAAAGTAATTGACGTTTCAAGAAGAGGGCAGAGAGTCG  
GATGCTGATAATAAAAAGAATGCACCTTCTACAGTAAACAATGTGATGTTTGTGTTGCTG  
ACTGCACAGTTACAGAAAATGTTAAAGCTGAAAAAGGAAATAAACAAAATGGAAGAGCAA  
TATCAACACACGACGTGTCAGTATTAACGGTGCTTTGCACAAATCCACTTGCCGCAGGTG  
CAACTGAATCTCAAGTAAATCAAACAGGATATTACAGAGTTCGTTCTATTCCAGGTGAAC  
CAGCTGTGTCACTTGATGGTGCTCCTGCAATCACACTTGTCAGAAATGAATGCATTCTTC  
TCAAAGTGGTAAAACCTGGTGTGGCAAGAATTGTAGAAGCAGTATCGGATTCTACTGGTA  
ACTATATCCTAGGTCAGCATATTCATTCTACAGGTGATGCACATCCATACTCATCCGGTG  
ATGTTATCGCAATTGTAGATGATAGCACATCTCCTGCCATTAATTGCAACTTCCTCTCTG  
CAGGTACTTCAGGTAAAAAAATTACTIONGCTGTCACAGGAACCACAATCGCTACTGATAATG  
ATTCATCAGGTGCCTCAGCAGATTACACTTTTGCCTTCTCAGGTCCCTCGACCATTGTTA  
AAGGATGAAATAAAAATCTTTGCCGCTACAAGTGCAGTAATCATAGAAGAAATTCAAGTGG  
ATGGTGGTCAAGAGGCCCGCTGGAAATCAAGAGGAAGAGAGAATACTCAACTGGATGAAG  
AAGAATCGTTATCGCTGTAGGAAACTCCATGGAGATCGAGATAAAGCAGTTATGTACGCT  
ACTGCTAATAAGTTAGCACAGAAAGAACAATTGAATGTTATGTTCTATCAAGATTTCAATT  
AACTAGTCCAAGGTTATCTTACGATAAGGATGCTAGCTATAGCAACGTCAAAGATTACG  
GGAAACATTTATGCTGATCGTGGAACCTGCCGAAAAGAAGACTAGAGAAAGTAGAAAGTCT  
CTTGTAAGAAGATCTTAAGAAGTACCGTATAAGTTATAAAAAACGTGTAGGGCGGTATAAA

TAATCCTCACGTGAGGGAACAGGACTTGAGGTTTCAGACCCAATAAGTCGTAGCAAAGGA  
GTGTCTAAGAGACGTTTTGGTAAGATCCTGCGTCGACTAGGAAGTTCGCATGGTCAAGAA  
TAAGTTGTCAATAAGAAGGCAGGTAACCCTCCTAGAATACATGATACGTAGTTTAAAAAA  
GCATCTACGTCAATACACTTACGTAGAGCAAAGCAGGTA AAAATCCTGCTGGTTTCGCA  
GAAACATTTGGTAATAAAGACAGAAAAGCGGAACTCGGTCAAACCTCGCTAACCCGCGATG  
TACCATGGCAACTCATGAAATTATCCAAAAGAATAAATGTGATTATAGTTCTATGCACGA  
CTGGATTTCTAAGAATAAATCTTCTGATGAGTAGCCTGTTAGGGTTCAGCTCGGTGATGA  
ATACTTAGGTA AACCTGCGCCAGACAACCGGGACAAACGACCAAACACAAGAGCGGTTTC  
CAGTTAAATGACAAGAAACCTAAATGTAAAAGAGGCAGATACTGCCTTACGTGCAAAACA  
CAAGCAAGAACCTAATCCAATCAGAAAAGGAAAGGCAATCAAAGTGAAAACAGAATCTAA  
ACAAATACACGAAGGCGAAGAAGTTTCATGTTAGCATAAGGTAAAATCTCGCTATTCAGT  
TTGGCCAAGTGCCACTGCTAGCGGTGCACTTGTCTAATGCCGAAAAGTTCGTGAAAAAAA  
TTGGGGGAACAAAAGTAAGATAGAAGAAATGGATATGAAGGTAAACGAACTCCAAAATTC  
GAAATCAGAATGTTGGAAAACCTCATAAAAAAGTTGGTATGAAAATGAAGGGTGGAAAGCT  
AGTAAACGATTTTCCCCCAAAGAACGAAGCAAATGAATACACAGGACCAGACAAGGCAGA  
CAGAAAACCTTATCCAGAAAATGGATAACCCTAGATATCCTAAACAGTAAGCAGACAAAGA  
AAAGAAGATGGATCCTAAGAATCGTCAAGCGGTTATGGATAAAGCGACTAAGGGGATGAA  
GTCCTTCTCATGACGAAATAACCAACGATGCAAAGAAGTGTTGGCCAGATTTTGAGAAAAG  
GGGAACCCAAAAAGCCTTCGGCAATACATAACAACCGCTGTGTCAAAAAGGAAGACTTAGA  
GGATACCGGAGGAAAAGCGGAAGCAGGGACTAGGAAAAGCAGGAAAAACCAATCAGGCGG  
ACCTACCGACAAAGGCAGAAAAAGTTACGAACGAGAAAAATCCAGGATCTGACCTTAAAGC  
TGCTAACAAAACAATTGGATACCCCGCAGAGCAACCTTCTGCGCTAGAATGAAAGGAAT  
GAAAAAGACATTAAGTTCAAAGGAAACAGCCACCGATCCTGATTCAAGGATTAACCAAAG  
CTTGCGTGCTTAGAATTGTTGAACTATAACAGACTGTAGTCTGTACTATTAGAATAAAAA  
TCTGACCGATCTGTAGTGCTACATGGATCGGGGAACAGTTATATTGGTCTACAGTAAAAG  
GGGTTGCCCTTATGATCTTGCAGGACTAGTACGTAATAATCAATGAGATGAGACTTGTA  
TTAATCCATGTGAAGTATCCACTAATTGTCAAAGATGCGGATCTCGTCATGGAATGATTG  
ACGTTTTGACGGAGGGGTATGATAATGATTATTGGTTATGTATGTTATCAATTTGTATTA  
GATGTCATATTTGAAACAGCAGCAAGAAGAATAGCGTTGCATTAGAAGTTCCTTTGGGA  
GCAGCGTTCGATAAGATGCTTGCAAATCAGATGTTGTAGAAAATGGTAAGATCAAAGAT  
GCTTTGCTAGAAAGCCTAGCATCTTCAAGTTTGTGCAAGTATGGGAAGCACGTAATAGA  
GGACTATTCATACCTGAGATATTTTATGCGAGTGTGGCAGTAAAAGATAAGCATAGAAAA  
GATAACGTACATGTAGTTGACGCGAACCGTAATGATAGCTTTAAAATTATGGGCTTCTTG  
AATGGTGACTGGGATCCGAACACGACGGGTGGTGGATTTATGCATGGTGGTATAAAAAAT  
AATTTGCATACTACCCACTTTTGTATTTGCGATCCAAGGACTCCTCATGCACCAGGGGAT  
ATAATCTGTGCTCACAATAGTTTTGCCATGTATCTCTCTGTAAAGAAAACGAAACAAGCA  
CGCGACTTCAACAGCTATCAACGATACTATAGTGTAGACTGTAAAACGAGAACGAGGTTT  
TTTTCATCACACGCGTCTGTTTATACTTTAGCCGGCACATTGGAACAACAACCAGATATA  
TTGTATCACCCGACACTTCTTAGTTCTCTTGGGTCAACAGCAGTTGCTATTGGTGTGACT  
GTATCCATTATAGCGATCACGAGAAAGAGAAAACGCATCCGATAGGTGCCAGAGCTAAAC  
TGAATTATATTGATCGCAACCGTTGCCATTATTGATTTTTTTGTATAAAGATAGAGACTGC  
CAAAGATTTTGGGTGCTTGAGGAGATAGGTGCGAGCGCCCGATTTTGCATTTTTTGAGTGTC  
TTACACTTCAATGAATCAATGGGAGTACGAGGACCAGAACACATCTATCTAATGGAGGAG  
CATTTTGGACAAACACTTAACGAAACAGATCGTCTTGAATATCTGGAAAGTCGGTGTCTG  
AACTCTTATTAGGTTGATCGTCTTTCCGCAACCACCTCGTCTGTTATCTCCTTTTGGATC  
ATGGTGGTGTATTATGGGTGATATGCTGTATCTGCTTAGGACCTAGCTCATAAAGTAGAG  
TGGCATGCTGCACATGGATATGAAGAATACCTAACACGTTTTTCCAGATGTCGGGCTCATC  
ACTCGAATCAACGATGAGGACATTAACATGTAAACGATTTATCCAAAGCAATGAAGTAA  
ATAAAAATGAGAACCATCACCAGAAACGAGTATAAATTAGTATTAGATGCTCTTTGGAAAC  
GTCAGCGTGGCTTTATTGCAGGTATTAGAATGTTCAAAGAATATGAGAAACCTATTGATG  
AGTTTAAAAGGCCAGTGTTTCGTGACTACGAGATTAGACTTAACTCAATGAATTAATT  
GAACACAGGATCCCACCCCGTGATTTGCTGCTTCCAGACGACCGCTTATCTGCAGGACCA  
GTGGCACATATAGCACATGATATTAATATGGATTTAGACCTGCACCCAATCTATCGTCAG  
ATGGCTGATCACATCATTACATATATAAAGGCACCAGGTAGTGATCACTCAAATCACTGG  
GTTGAGAAAGAACTATGTGATTCAGATTTATGAAGGGAATGAATACTAAAGAATCTTCTG  
AACAACTGATTCAAAGTTTTACCAAACGTACGATGCAGTTGCCAGGAAGGAAACAAGAAC  
TTCCATCTGCATATGATGAGTTTGTAAAATTAGAAAAGAGATCTGACTTGATTTGCAGGTT



CTAAGTAAGCAATTGAATATGTTGCTTTTCGGCAAATTACCAGGAGATGGTAACCATCCTG  
GTATGAAAGACCACTCTCGCAACTAAAAAATGGCGGCGAGGCACGAACTCGCATTAGTCC  
CATTAAAGATGTCGGTGCATTACCCAGATTGCTGCACCCTCAATGGAGATGAAACTATCAT  
GCCCCATTATACTGTAGGTTATCACGATAAACAAAATCAACATTTTGAATTATGTGAGTA  
CGCTGAACATGCTTATCATACTCTCAAACAAGCAAGAGAAGATTTAGAAGGATTGAATAA  
TCCACACTCAGCAGAATATTGTATCAAAGAAAATCAAATGGTTCGGATTGGGTTTCATATG  
GATGGTGTTTATAATCTTTGTAATCGTCTCTTGGTATATCTACTATCTACTTCGAATGGC  
ATACAAGTAGATGGTCGATGGCAGCGATTACCCAGCGAGCAGTACAAGCTGCTATAACT  
TTAGAGTAACGGAGATTAATCGTGTGTTGACGCCATACTATTGATGTCAGCGTTGATT  
GGGGGTTTCATATATACATGAAAGAAAGAGTTAGAAATGCAGGAGTTGATACGCAAGAGA  
AAAGAACAAGCGATCTGAACGAGAGGGCATTTCGGAATATATGCTACTAACTGGATGAAAA  
AAAATTTGGAGTATGATATTAATGGGGATGCCGAAGTTACTATACGAACTGAACTTAAAG  
GTGGGCTTGGTAAGTATGGCAGCTTGCCTGGATGGTTATAGGATGGCGATGATTATGCAT  
CACTCAGCGGAAAACCTGATTGTGCAAGGATGTGCATGGTGGCCCGACGGTGGAAACAAAAC  
AAAAATAATTCCATGAGCTCCGTGAGATGAGACGTAGCTTCGGAACCTTGTCTAGTCTA  
GCATCTCTGGTTAGAATAAGATTTCAAGGTTACGACATTTAGAAGAACTTGTTTCAGAT  
TATGATGAGGTTACATACAGGTTATGCATCCATCTATAATTGCGTGTGGAATTCTAAGGGT  
TTAAGAAAGTTACATCTAGAAAAAGCAATTACAGTTAAGGGGATTGAGATATTTCACTTT  
GTATTAGTTCCAGATCCAAAGTTACCTATTCCTATCTTTGGATGTGATATCGTAGAGGTA  
TGTGGTAATGCTACTGCTGCTATAGTTGATGTGTACCAGTGCATAACGTAGATTAGAGT  
TTAGGTAACGTAACATATAATTTTAAACAGAGCAGGCATCTACCAGAGTAGGGTGAGATA  
TTTTACCATGGTGTAAAGTTTGTGAGATTAGGAGAGGATGAGTATCATGACTTTTTTATTA  
TTGTGGAGTGAATACTCAGAGGTATTCTGACACATAGTAAGAACAGCAGTAAGAGAATCA  
GACTTGAGAAATACTAGGAGGAGATATGACGATCTGTGATGGTATTGCACATCGCAGATG  
AAGAACAATAAACTGAGGCGGTGCCATTCCAATGGTTCGATAACCCGTGGGCATCTAAA  
TCTATACAGAACATACTGTTGACAAACCCGACCTATGAGAACAGTAAGGTTGGAAGCGC  
TCAAGGCACTTGCCATTGGCACCCCTCAAGAAACCAAGAAGAACGTGGAGGTTTACCTTA  
GGAATCCTGTTGGAATCGGTGAACTCTCAGATGTTCTTGGTGCATTCAGAACAATTTG  
ATTAGATTGCGAAAGAGGAGGAACGTTTGGAAAGTAATTGTTAAGTATTTTGAAGTAGGAA  
TGTATCTTTATGATTGATATGAATGATGGATCAGTATCTCCGCAACCCAAATCTAAAAAA  
AGTAAACACATCGATTGACTTCAAACCAGAAGTAGTTTCTGAGCTATTGAAGTGTCAAGG  
TGATCTCATATAATTTAACAATAAATTATATCAAGTTCGCTTCTCCAGATGAGGGTCTGGT  
TCAATTTAACATGTATCATTTCGAAGACGCAAAGGTATCTAAGTTTTATGATCGTAGAGA  
CAATATCGCTAAACTGCCTCGACAGTGTGCTAAGTCTACCATTGTTTCGGCATACTTAAT  
TTGCTATGTGTTATTCAATGGAACCGTGATCGTAGCAGTCCTAGCAAACAAGCAGCAAC  
TGCTAGGGAGATGCTTAAATGATTACATTTAGGTTAATAAAACCTCCTGAACGGGATGCA  
ACAAGGCATCCTCCAATGGGACAAAGCGGCTCTGGAACCTGAAAACGGCACTAAAATCAT  
GGCTAATTATATTTCCGCTGCTGCTGTCAGGGTTAGGTCATTTAGCGTTATATTTCTGTA  
TGTATTAGCGTTCATTCCGAATCATATCGCTGATCAGCTTCTTAGTTCGGTTTATCCAAC  
TATCTCCTCGGGTTAGTCTACGAAAGTTAGAATCATATCTACTCGTCACGGAATGAAGAC  
GTTCCACAAACGCTGGCTTGATGCAGAGCGTGTAAACGAATGAATATGTGCCTATGGAAGT  
CCTCTGGTCAGAAGAGCCAGGTATAGATGATGTAAGTAAAGTGCAAACGATTAAGAACAC  
ATGGGAATCTCAGATTTCGTGTTGAAATTTATTGTGAGCTCTTAGGTTCTGGTGATTAATT  
GATTGCTCCTAATTAGTAGACAATCATGACATATCATGACACACTTACATCTGCTTGTAG  
ACTTGCAGTATATGAACACGTGTTTCCAGACCATAATTATATTTTCACTGTTACAGTATC  
AAGAGGTGTTGGTCATGATTACTCAGCAGTTTATGGGATCGAGAACAACAATTATTGCTTA  
TAAAATCGTTGCCAAATATTATTACATTGAAATTAACCCATCGTTTCGACCAGATACTAT  
CGTAGAGATTGCAAACAATTATAATAACGCATACATCTTATGTGAAGTAGATGATATTGG  
TGGACAAGTAGCAGATATTATTAGTTTGGAGTATGAGAAGTTGGTGTGATGGCTGC  
AATGAGAGGTTCGTGCAGGTTAATAACTAGGTCAAGGTTTTTTTTGATAAGAAAACCCA  
TCGTGTTAACATGTAACAGCAAATAACAAGTTCGATGCTCTATCCTTAAAGCATTAAAT  
TGAAGAAGATAAATCGCTTATAACTGATTATGACACGGTTGCGGAATTAACACCGTTCTG  
TGCGAAAGGTCAAACCTTCCAAGCGGAAGAAGGTTGTAATGACGACCTTCCTATCTGTTT  
AGTGATTCTTGGTAGGATGGCAATGCAACCATACTTTACAGAAAAGTCCGATAATCACGT  
ACGTCCACACATCTATGAACAACACAAAGATACTCTTGAACCTAGACATGGCACCATTG  
TTTTGTAACCTGCCGGGAGGGAAGATGATTATTTTGTCTTACGCACAGGGCTAGGTGTGGAC  
ACTCGCGGAATACAGGGATAAATCCTACACGTGGGAGTTTAGATAAGGTTTCAAAAAAAT

AACTAATCCTAGCCATCTGATGTTGGAAGCACCCCTAGGAGATAATTCACCACGGCAGCCA  
ATCAATTATCTCCAGTTGTAGGGGTAAAGGAGAGAGACCCTACTACTATTACCTCATTAT  
CGACCGCTAACATTGGTGTGATCGCTGCACTTTTTTAGCTCGGTACTGTTGAAGAGATCG  
TCGAAATCTCCAGTGAAAGCGTTCTTGCAGCGCAATTTGGATAACCGAATGAGTTAACT  
ACGATAATTGGTATATTGCAGCAAAAATTTCTTCCCTATGGGCGATTACTAACAACAGTTC  
GTGTTGACTCGGCCTCTCTCAAAAACGCAGATATTAATGGAAGTGCAGTTAAAGTCGAGG  
ATTTAAGTGAGTATGAAACCACTTACGAAGGTGTTACTAGCACAGGGAAGTGGGCAGCAC  
AACTTCTGGAAGTATAGCAAACCCTGACGGCGTATTTGTAACGGACGCAGGTCCAGATC  
ATATCGCTGTTGCTCCTGCTCCAGGTTTCAGGAAACGTTTCGGTAATTCGTTGCTGACGAAG  
CACTCTCCGGAACATCAGGTCCTGCAGGTAAGTATTCAAATACAGCATGGTATTGACAG  
TCACATGTGTAGTTCGCGACCTCGTTTCTGGCACCCCTACAAATGTTTCAAATTGTGGTT  
CTAGCCAGACGGTTACAGTGATTGCTTGGGATCCTACTAACAAAGAACTTTAAATGGGTC  
TTCCTTCTGGAGGTAGCACTCCTATACATGCTGATGGTCAGACTGTAATTC AAGGATCTT  
ATACCAGTGATATTGCATCATCGGGTATTGTAAGAAGAGTATATATTTCGATTCAACAAAG  
GAAGTCTGGAATTCTCTGCTGCTGATATTATGCCTGATACTAACTAACTCCTGTATCAA  
GCAGTTATGTTTCGTTCTGAGTATGCAGAGCGTGAGAATCTACCTGGTGCAAAATGGATTA  
GCGTTCCTGCTGGTCCTCCTACTTTCATTCTTTGCCAATAATGCAGGTGGATTTAGAGATG  
AACTTCACGTTCTAGTTATGGATATCTATGGTGCTATCACTGGAACAACCTCGTGCTGTGC  
TTGAGCGTTTCATTGGTGTTC A AACGCACCTGACGCCAAGACATCAGTTAGTGGAGCAA  
ACCACTACAAAGAAATAATCAAGCCAAAGGCTGAGTATATATAATGGGGTTTACATGAAA  
CGGGACTATTGAATGCAACTGATTCTGCTGCTGCAGGAAACTCGGGTTTAGCTGCTGTTT  
CTAGACAGTTTAACTTACTACCCTCTCCAGACGGTTC TACTGGTTATCCTCAGGGACGCA  
CCACTGTAGGTTCTAAGGACAATGAAAAC TACTACTGCAGGTTAACTGGTGT TTTTCGCT  
ACGGTATTTCTGGTGGACTTTACGGTGTAACAAAGACATCTGGTTCAACTGCATATGGTG  
TTACTGAAGATCCTCTGT CACAAACAATCGAGTTAATTATTACTTGTCTTCTTGTGCAG  
ATGATGCTTCTGCAACCGCTAAAGTAAATTCTCTAGTTAACATTGCTGATTAAAGATGAG  
ATTTGTTAGTATTCGTTTCACCTCGTAGAGGAAACGGAATCGGAGT TACTTACTCTACTA  
CTACA ACTTATGATATCGTTATCTTCTTCGATCTATTACCGAGGACGCCTTACATGGTAT  
TTGATTGTGCATACAAGTATATCTACCCTAATTATAACGATGTATACAGATACGTTCAA  
CCAACGATGACATTGCAGGTTTATGTCTACAGACAGCTTAGGTTGAAGCACCATGGTTCT  
GACCTGCAGGTTTTCAACGCGGTGTCTTAAGA ACTGATATCAACCTAGGATGCACACCAA  
CTAAGACAAAGAGAGATCGCTTGTAAGCACACAGAATAAACCTGTCTGTGTCATTCCCTG  
GTCAAGGCGTGGTCCTCTTTGGTGACAAGACTGCACTCGGATTTGCATCCGCTTTTGGTA  
GCATTAAGGGACGTCGTCTAGTCGTCACCATCGACCGTGTGATCTCAGGTGCTGATACGG  
CACA ACTCTTCGAGCGAAACGATGAAGCACAGAGATCACTCTTCTTGAATATCATCGAAC  
CTTATCTGAGGGAAGTTTAAACGTCGTCGTTGGCGTCACTGACTGCGTAGTTAAGTAGGATT  
CCTCTAACAAACCCTCCAGAGGTAGTCGATTGTGGAGAGCTCTACGCGGAGAGTTTCGTGA  
AACCAACACGCTCCATCAACTACATTACCTTGACATTAGAAGCAACTAGAACGGGAGTTA  
CTTTCACCAAAGTAGCAAATTA AATTAATAACACACGTTTTTCAGAGGGTATCCACATCG  
GTACCCCTGAAAATTTTTATTGGTCTAAATATAACTGACGGAGACACCTAAAAAAATGG  
GAAAAAGAGGGACGTTTGACGATGCTATGGCAAATGCTCCATCAGACTTTGCTCGTCTTA  
ACCTATTCCAATTTGATTACCAATTCCCCTCTGGAATCATTAAATGCTTCTGATCTGCTAA  
ACCTTAGTATATTCACTGTTTCATGGAGCGAATTTTCCTTCATTCCAGATTGGTGTATTG  
ATGTTCCCTTTCAGAGGACATACTCTAAAAATCACAGGAAACAGGTCTGTTTGAACCGTGGA  
CAATCAGTCTTATGAATGACAGTAATTATGTGCTAAGATCCGCATTTGAATTGAGGACAT  
AAAGCATTCAAGAATAACAACCAGAACTTCACTTCCGCAGCAGGTCTTGGAGACGCAGATG  
ATTCAACTGGACACTTTTCTGACTTGAAGCCTCATCAGTTAGCAAGAGATATTA AATCTG  
ACGAGAAATCTAAAATTTCTCAAATCATATAAGTTCTACAACATCTTCTCTAGTGCTATCG  
CAGCGATTGATCTAGATTACGGAAACAACGTTGTAATCGAAGAATTCACCGTTGAGATGC  
AGGTT CAGTATTGGACTCCTCTAGCAGACGCCAACGACTAACCTTCTAAATAAAAACATGA  
TGATTAATTA AAAACATTTAATTGTGGCCAATCAGCTCTCGGGTTTTTCACTTGAGAGAGC  
AAAGAAGGTTCTATAGGACCTTCTTTTGTTC AACAGGAGAGTATGGATGGATCGCATCC  
TATGATAGGGGGCGGTGACTATGCGCATTCGGTCGAGTTTGATGGAACGGTTGGCAATGA  
TAAAGA ACTAATTACTCGTTACAGAGAAATGGTTCTACAACGACCGAGCGATAGTGGGGT  
TGAAGACATCGTGAAGGAAAATATGTGTGCCAACTTTAACGGCGTGCCCGT CGAAGTCGA  
GTTGTCTCACTTGAAACAATCCAACAACATTATAAAAATTA ACTAGGGAAGAGTCCCACAC  
AATTCTTCGCTTGCTTGATTATGATAATAGGTAGCCCGATATTTACCGGCGTTGGTATGT

CGTTGGAAGATAATGTTATCAAAAAGGTTATCGATCCAGATAACCCTGGAAATGGTCTTAC  
TGAGTTACGTTATTTTGACCCTCGTAATATTCGAAAGGTTACCGAGCATGATTTGAAAAC  
TCCCAACGAACTTACTGTTCTCGATCTGACGGCTCAACTTACACGAAAACTGCAGATTA  
TTATCTAGATAATGGTAAGGGTTTGAAGAAGTCTGGATCTCAGCATGGAATTAACATAGC  
TGCAACTTGAATCACTTGTGTCATTTTGGTATATAGGATATCAATAAGAAGATGACATT  
AAGTCATCTCCATATAGCAATCAAAGAGGTTATCCAACCTCCGTCTGAGTGAAGACTCATT  
GGTCGTCTATGGATTGTCAAGAGCACCATCAAGAAGAATTGCCTACATCCATGTAGGTAA  
CCTTCCTAAGAACAAGCGGGACAATACCTCCGTGAAGTTATGGGAAGGTATCGTAACAC  
ATTGGTGTATGATGCAGACAATCTCGAGATTAATGATGACAGGAAGTTCATGTCCATGTT  
TGAAGTCTTATGGTTACCTCGACGTGAAGACCGTTCGAGGAACTGAGATATCCACTCTTCT  
AGGCGGACTCAACCTTGATGAACTAGAAGACGGTAAATATATCCAGAAAAAGTTATACAA  
AATGCTGAACGTACCGTCATCAAGACTTGAGAATCAGACTACCTTTAACATACGTCGTGC  
GGCTGAAATTACTAGGGACCAAGCCAAGTTCCAAAAATTTAATGCACGTCTACGCAAGAG  
ACTCTACAATTGTTTATGTATCTCCTTAAACTCAACTCGTTCTGAAGGGCACAATGGC  
ATTTGAGGATTGGGATGACATCAAAGACTATATTCAATTTGACTTTATTGCTGACAACATA  
CTTCACTGAACTGAAGGAAATTGACATCCGCAATGTGCGTCTGAATGAGGTGAACACAAT  
GGATCCGTACGTTAGAAAATTCTTCTCTATTGAGTATATGCGTGTGTCAGGTTCTAAAACA  
AACTGAACAGGAGATGCATGAAATCGAATAACAAATGGATTCATAACGAGAAGCAGGTCT  
TATATTTGTTACAGAGCAAGCAATGGATCCCGCTATGGATCCTCGCGCTTCCCCCAATGG  
GGAAGTAGCTCCACAAGACAATTCTCAAGGAGACGCGGGTGAGGGCAAACGGGGGAGATAT  
CTAAACTATAAATAACAAATGTGAGAGTAAAATTATCCTTACTGAAATGGCAAAGCAACT  
AGATCCGCAAGTCGTCCGTGACGATAAAGCGAAAACAGGGGACTCCGTGAATGATGCATT  
GGCCGTAACCTGGATATAGTGCCATTCAAGCAAGAAAGGTAGAGTTCGCTAATAGTATGGG  
GTTTGTACAAGATGATACCGCACAGGTTGCTGCAGATGTAATTCCTGATAACCAATCTTA  
CGGAACTGACGAACCCGAAACTGTTGAACTTGAAGGTCGCAGACCTGAAGATCCTACTGC  
AGTACCCGAAGCACCCGCTGGTGACGGAACACCTTGTCTGTATAAGAACCTATCGAGGA  
ACCAACCGATGGGACTAATAGCTAAAGTGATTACAAAAGTTGGTTTAATCTGCGAAGATA  
AAGAAGGCAAGAAAAAATACTCCATTGAAGGTGTCTTTCTACAAGCGGAATTAGAAAAC  
GCAGCCATAAAAGGTATCCCGTCAAGACTTCATTCAAAGATGTCGCTAAATGTGATGCGA  
ACTACATGCAAAAAGGGCGTGCCCTTGGAGAATTAGGATACCCTGATGGTCCGTCAATTA  
ACCTTGACCGCTTTCCATAAGGTACTTTCTCTACAGGAAGATGGATACATCTTCATAG  
GTAGACTAAACCAGCGCGAAACACCTATGGGTGGGATCGCAAAGAACCTCTTAGATGAGG  
GTGTCTAACAAGGTGTTTCATCTAGAGGAATGGGTTCAATTCGTAAAGAAGACAACCTGTA  
ATGTTGTTATCGACGACTTTATGCTGGCAACTGCAGTAGTTAAAGTCGCCGATATTTACG  
GTCCTCATGCCTGTGTCAATGGAATTATGGAAGGAAAGGAGTGGGTTTGTAAACAATGGAG  
TCCTACAAGAACTGCTGGGGCAGTAATTAACAACAAATTGATCACGCAACTCTAATTA  
ATCTGCAAGAACGTAAGTTTTAGCATGTGAGGCGTTTTTGAAGAGTTTGTGATTTAAAA  
ATAAATACAGACAACGCTCATCTATAACGGAGTTTAAACAAATGGCTGAGACCCTCGATA  
AATAGATAGATAACATAGAGGAAGTGACGAGGGCTTCGCTCCTATCACCAAGACCACAA  
AACCGGGTGAGAAGAGGGGACACTACCAAAGCAGGAATTCCAAAAATAGTCCTCATCGTAG  
AAGGACCTAAAGTTGCTTCAATGGAAGGCGCAAAGGAACAAATAACGCAGGTAGCTCTG  
CTCCAGTTGCAGTGAACCTTGGAGGTTATAAGTCTCTGAGCACAATAACAAGGGCTGCAT  
GCGCAAACAAGAGGAGGTAGAAACCGACGATGGCGAAACAGAGGAAATAGATGAAACCA  
AGTACGACTTTTCTCAGGATGTTACAGTTCTTGTACAGGTGAGGAACTATGAGAATAGT  
TCCGAGTCAAAGCAGCTACTATTTTTGATGCAGCTGATACTGCCCAAGTTAATGACGAAG  
TTAAAGGGATGAAAGGAGCGTTTGAAACTACGCTGACTAAAGCACTCGCAAAGTGACACA  
GAGAATTGGCCGAGAAGGTTGACGATTACTTGTCTTAGGCTGCCGAGCAATGGTAGAAGG  
AAATGAGATTGCAAAACGAGTATCGCATCAAGACTGAGATGGCATCATGATTCTTCACAG  
GTCTAAAAGGTCTCTTCTTAGAGCACAAACGTTACAGTGCCTGAGGAGTAGTTTAGTCTGC  
TAGATGGAATCGCAGGTGAGCTTCATGATATGGAAGCTAAACTATACGAGCAAGTCGACA  
CTAATGTTGCTTTGAACAAGCGCATTGGTGAGTTTGTAAATATGGAAGTTGGGAACGACG  
GAGCTACTGGACTCGTAGAAACACAAAACGAGAAGTTAGCATCATTGGCAGACGGTGTTG  
AGTTTAAAAGTGAAGAAGGATATCGCAAGAAGCTCGAACTTTTAAAGGAATCATGCTTTA  
CTATGAAGGCTGAAGGCGCTACAAATGCAACTGAGAGCACAGAAGAAAGTTTCGCTCCGT  
TAGTAGAAAATACTAACAGCCGCAAAAAGTCAAAGTACGTTGATGCACTCGGTCATTGGT  
CTAAATAATTAATACTACTAATTCCAAGAGGTAATATAAAATGTCTTTAAATCAACTTCAG  
GAGAAGTGGCCGCCACTTCTAAATCACGATTCTCTACCTCAGATTGATGATGCACAGAAG

CTTGGCGTAGTAGCACAACCTCCTAGAGAACCAAGAAAAAGCATTACTCGAAGAAGGACAA  
AGCCTTACAGAGAGTCTAGGAACTGCAGTTAGGGGTGCTTTCGGTGGCGGTGGCACTGCT  
ACAGGTCCTGTACCAGGTTTTGACGCCTTATTGATCATTCTTATCAGAGGTTCAATGCCA  
CAATTAATTGCATATAATATTGCTGCTGTCCAGCCAATGACCGGTCTACAGGTCTTATC  
TTTGCTAAGAGAACCCAGTACGGTATTGAAAGAGATCCTTCCAGTGGCGATTCCAGAGAA  
ACCTTCTTCAATGAGCCTAACGTAGGTTTCTCAGGTATTGATGGTAACCGTCTTGCTGAC  
TACGATCCAACCTGCCTCTGGTAGGCCTGCCATTAACGATGATGAATGTGCTAAGCCAGGT  
CTTCTTAATCATAAGTCTGCAAGACCATGTGAGTTGACAGGTGACGCTCAAAGAATGAAC  
ACCACTGCTCTTGACGCAATTACGGGTGCAGCTGCAGCAACTGCCGTCAGAGCAATGGGT  
TTCTCAATCGAGAAAGTTAGGGTTGATGCTAAAGCTAGCGATTTACAGCCAGAATACAGT  
ATTTGGCTTGCTCAAACTTGAGAGCAATTCATGGTCTTGATGCCGAGCACGAGTTAGTA  
AAAAGTCCTCCAATAAAATCCTTGCTGAAACAATCAGGGAAAGTTGTGAAAACAATCTAC  
GTTAACGCTCATGCAGGTGCTTAAAACCTACTGCTACCGCATGTATCTGCGACGTTGAC  
GTTGACTCAAATGGTAGATAGTCTGTTGATAAACTCAAAGGACTTCTGATCCAGATCGAA  
ATAGACGCAAACGCAGTCGGTCATCAGACGAGTCGGGCAGCGGGTAATATCATCAGCGCA  
TCTGCTGATGGTGTATCCGCTCTTTCTATGACTGGCGTTCTTGATTACGTTCTTGATT  
CAAGGTAACAATGGTCTTGTACGCGTTGACACATCCTGAACTCTTGTTGGAAGTCTTAAA  
GGAACGATCAACGTTTACGTTGACCCATATTCAGCAAACGTAAGTGAGAAGCACTGCTAC  
GTGGAGGGCTACAAAGGATCGTCTTCTTCTGACGCAGGATTATTCTAGGGCTAATATGTA  
CCTTTTCAGCAAGTCAGAGCAATCAACCCTGAGACATTCCAGGAAAAAATAGCATTAAAG  
ACTAGAACCGGTATGGTTTCTACTCCATTCGCTCAAGGTCATAGCCAAGGTTCTTGTGCA  
CTTACTGCTAATACTAATGAGTATTACAGAAGAGTTCAGATTGTTAACTTAATGTAATAA  
GTCTTATTACTTAACATTCTAAAGGGTGCTAGACACCCACTATTTTTATGCTATACTCTA  
TATGTTGGTCGCATCACTGGGAGTGACTGAATAAACTTACTGGCATATAGCTTGTTCGG  
TGAAGCGACACATGTGGTGCTCGAGGTTACGAAATGCAGAATTACAAACCAAGTAGGTGCG  
TATGCAGAGTTGTAATTCTCAACAGTAGAAAGGTTCTCCTCTTGTTAGTATACAGGAATC  
CAATCTTCCCGTTGAATTCTTTGTAGAAGGGTACATTACCTAGTGAGATTTTCAGGCTT  
CCCTTATAAGTAGCAAAAGAGTTAGGGTCAACAAGATGAACTAACTTTCCTTATTACTC  
ACTTCAAAAAGCAGAGAGATTAATGCACAACCTAGTGTCCCATACTCAATTAGCTGGTT  
CTTCCCAGGAAAAACACGACACACGGCAAACAGAATTCCTTCGAGTCTTTAATCGAAGGAG  
ACGACCAACAACAGAACTGCCAAGGAATTTGCTAAGAGGTGCTTATGTAAGACATATTCT  
GGAAGACTAAGAAAGGGGGCAGAGATGCTCCCTCTTTCATGTGCTACATAGCTCTATCTC  
TATGGAATTATTTAATTGATTATAATCCATATTCGCCTGTGTGGCATGGAAACGGGTCTC  
TAAAGGAAGCACTTTTAAAATACCTTGACGATTGCGTTGAGAATTATATCATTATAAATG  
GCCTCATAGATAGCCTACACAGTAGATCTGATGAAGAGTACAAAGAGTAGACTAAACTCA  
ATCAGCTATCCGCCAAACCCAGTTAAGAATAACAATTGCTTTCAACCCAATACCGCCTCC  
GAGTTGAGTCTATCTGAGAGCATATCGTAGAGGGTGAAAATGTCAAACCTAGAAGACATGA  
TTTGGGCACAAAACCTAGCAAAAAGACATACCAGTGTTGATCCATGGAAGCGACCAGCAC  
GACAAAAGCAGCAAATCCTGACATGAATAATGGAGGGACTGACAATTTTCTGTATAACA  
TGGGGTTAGGAGAACACCACCCATCGGATTATAGAAGCGGGTTCAATGGAGCAGATGACA  
TTGGTGCATGGTATAGCAGAGTGAAACCTTACGGCCGGAGACAACGAGAGTAATGGCAAA  
CTCGTTCCAAGACCAACTAACAAATAGAACTTTCTTTCCCCCATAGGATATCTTTTCTT  
ATTAGGTAAGGCAGAGAAGGTGTATTTTTTATGTCAACCCGCAGAGATTCCATCAATACA  
TTTAAATGATGTTCTTATTCTACTGAAGGTTTAGTCCCTTACCTAGAGAAGGTACCAT  
ACGCTATGATGATTTAACCCTGAAGTTAACGTAGATGAAGATGTGTTAACTAGTTGGA  
GCTCCAACTGGCTGCGTGGTTTAGGAATCCCCAATATTATAATGAGCGTGTGTCATG  
GGGGACGAAGTGTCAACACGCACTATCACAAGACGGACGTTTCTGTGACGCTACTCTTCA  
AGTTCTATAACAATAACTTAGCAAACCTTTGATGTAGTCTTGAAAGATTTGTTTCTTAC  
AGA ACTATCAACACTCTCATTGATGTTTACAAGTTGATAATTCATTCATGACTTGACG  
GTCAACTTTTAAATATACTCTATACGAAAGCGGAAATGTATATTTCGAGAACTAGACGATG  
AAGACGTTCAACCTATTCAAATTTGAGCATAACATGGGGTGGGAAACAGATCTGGTATACT  
AAATCTTCTAGCTTGGCGATGAAACAACCATAACCCTATAAACAATTTAATTACAGGTTTT  
ATCGAAGGGTGGCATTTCAGTGGAATGATCGTAGAATGATTATGGCTATTGACGCCGTT  
GATGGTAAGGCAGATAAAATCCAAACCCAGTGGGAAGCAAATAAGCAACAGACAAGACAC  
ATAATGGTGGCGACAGGAGTTTTTGGAGATGAAGGCTGGTCTATCGAAATTACAAATCCG  
ATTGTTGAAAGAGGGTCTCATCAACTAGCACAGGCATTATTACTCCAAGCGATGCGCAA  
CGACTACAAGAAAATGTAGGGGTTCAAGGAACACCTTGTCGTCAGTCAGGATAACAGAT

TTCAATGAAGGAGTGGTTTGAACGTGAAAAGGATCAGGGTGTCTGTATCTTGAGCAATTT  
CAAGAAATGTGCGAAAAAGGATAGTGGAATTGACGGAGAAATATACTGCGAAGAATCTACA  
AAAAGTCGACAACCTTCATAACAGATATTCGGAGTATCACAATTGTTTCTGTCCTATGACA  
AAAGAAAGACAGTTTGAACCTACACGTCTCATAAAAAGAAAAATGGTTATATTATTAAGT  
AAAGCAACCTACTGAGTATACAAAGGAACACAGTTTGATTATAAACTTACTACACGAGAA  
GAGAGCAATATGTTTATTGATGGAGATGATGCTATCTGCAAACCTACAACCTTAAGATAGAC  
TACATAGAACAGTTTCTATTATATCTTGATAGTACCTTACGAATGATAAACAATCGTCAT  
TTTCAAATTAAGAATGCAATTGAATGGGAAAAATTTAAGAATGGTTTGTAAATGAATGACG  
GATTGACCTGTAAAGAAGTTATCGTCAATAAAAAGGAACAGGTTAAAGTCGACAAGGTAA  
TTTCCTATAGACATAATTGGACTAGAGGACAAATTCGAAGCGGAGTCCAATCAAATAGCA  
GTTGACAGAGAGCCTGGTTAGGAGATAGAGAACTCTGGTCCATGCTTCTTCGTATGATTA  
AGAAAATAAATGCAGATGCTCGGTGGAATCGAAAGATTACAGGGGGCGAACCAGTTCAGT  
ATGGTGGATATGGTGAAGGTGATTTTGATGATTGGAACATTGATCTGAACCCTCACCCAG  
TAAAGGGAGTAGTCCCATAGGTTAGTATGACACTCTTTCTAAATGACAATTACGAAGGAG  
GCCAAGTTGGTTTGGAGATATATCAACCAGAGGCAGATCCCAGACATAATAGTTTGAAGT  
AATATGCAGGATCTGCTATCGTTTTCCAATGTGATCGATGGCACACCGTACGGCCTATGG  
CATCTGGAACCTTCAATCGTTAGTAGCAAGGGATTATGGACCCCTTATTCGTAAAAAG  
AATGAAGTCTAACTTAAGATTGAAGCACAACCTCACATTCACTATGAGCTAGCAGATAGA  
TTGACCCTCCAGGTCGAGCCTGCAAAATTTATGCAGCAGAGTAGAAGATATACAGGATGG  
GAGAGTAAGATAAGTTTGCTTCTCCCGCAACAGGAGAGATATATTGGGGTCTAGTAGAT  
TACTTAACAGACTGGGCGAAAGAAAAGGGATATGAATATCAAATATAAGATGATGAATAG  
TTTGGTCATCCTATCACAGAGAATGAACTAATCACTCCCAAGTCGGTTGTACGGTTTGT  
AAATCACTGCGTCTTCCCCGACTCTACCGGTAAGGGATTATCTGTATAAAGGCAATTCAT  
GAAGCACTAAAATGGAAGAGACGACTCTTCTGTCCACCCAGGGTCAGAACTATCTTTG  
ATGATTTATGCATTGGTTAGATATCATTAAACGTTGGTTCGTAATGTTTTAATTGTAGTC  
CCCAATCCCTATCTTGTCGATCAAATGTATAAGGCCATTAACAACATATGGTTGGATGGCA  
AAGAAAGATGAACATAAGATATATGGAGGGCATGACTAGTATACAGTTCTCACTGTGACA  
CTCACGACTTGGCAGTCAGTATATAAAGAACCAGATTTGGTTTGATAGATTTAACTGC  
GTGCTTGGTGTGATGAAGCGCATCAGTTCAAAGCAAAATCGCTATGTAAATTGATGGGTATT  
TCCCATGATTGTAAATACCGTAGTGGTTTTACAGGAACACTACATGCTGGCAATGTAACA  
CATCTTGTATCAGACGATTTGTTTAGTTGATGTTCTCAAGTTACTAGAACAATCAATTG  
ATGTAGGCGGGGCACATTGCTAAATTAATAGTCAAGGTGGTTCTTTTAAACATGAAGAT  
AACTATTTGTAGGATATCGAGAGGAAATTGATTATCTAGTTGAACACGAAGGAATGAAT  
AAATCTATCCGTTAACTTGAGGGTGTCTCCGAGGAGATGCGCTTGTGCTTTTCAATTAT  
GTAAATCACATGGTGAACCTCTTTACAAATGGATAAATTGTTACACAGACAGACCCCGTG  
TTCTTTGTTTCATGGGGGAGTAGATGTCGATGATCGCGAAGAAATTCGTATGCTCACAGAG  
GCATCTGACAATGCGATCATTATTGCATCGTATGGGACGTTCTTCTGGCATCAATATT  
AAATTCCTACATAATGTTAGTTCCGCTTCACCTTCTAAATGTTCGGATTTCGTAATATAGAG  
TCTATTGGACGAGCCTTGCAGAAAGGTTAGAATAAATGAAAAGCCACTTTATATGATATT  
GCGGATGATATCTCCACAGACAGGGGCAATAACTACACGTTGAATCACTTCATGGAGAGA  
GACAAGAGTTATAATGCATAGAAATTTAGTATGAGATCATAGATGAAAAAGTAAAAGCT  
TATAATTAACACACAAGACACGAGGACGAACCTCACGGTATATTCAAACCTGGGTAGGGG  
GGAGGAGATCCTTGCTGACGCAGTTATGAGAGTAGACCGTAGAGAGAGTTTAATTTTCAT  
GTCTGATCCAGTTAGCGTATTGCCAACGACTAGGGACGTCGGCGAGCAAAGTCATAAAG  
AGGTCTGGGTTTTCAGTAAATGGATGCCAATGTCTGACTAAGAATTTTTTTGTTTTAAGAGA  
GAAGGCTATCATGATCATGGCAACTATGAGTAGAGCTGTCAATCTCATGTACGATGGATA  
CATCTTAAGCTAAGATGCCACTGGAAAGCAAATGACAGAACGTCAGGGTCCCCCCCCGGAT  
CGCCGGAGGATATCAAGGAAACACAAAAGACATCCGTGCCTTGATAGAAAAAGTGTATGA  
GAATGAAGTTTGATTTCTTCTGAACACTTACAGTGTGAGTATAGTTGTCCTTGACAGTTT  
GGTCAAGTGTGTTTATAATTAACAACAAAGAAAGATTTGTACTAGGAAATCTTCCCCCTAA  
AAGCGCTAGCATTATGTAAATAATCCAGAGATTCTTTCTGGTATTATCAAGTATATAGAG  
AGAGTAGAGCATGCAAAATAAAAGGGCCTTCCAAAACCTCGCGTCAATACTTACAATGGT  
AGGTGCTTTTCAAAGATTGCTGCTCATCTATTGTATAGACCTCACTTTATTACTTACATG  
AATAAAGATGATATGGTGTGTGATGGTATCGAGACTTGTAGACATTATATTGCTAACTTT  
GATCCTGCTAAGAGTAGAAACCCCTTGCATTTTTACTCAAATCGTATACTATGCTTAC  
CTAAAAGAAGTGCTAAAGCGAAAAGACGAATGGATATTCAAGAAAAACTTATAGAAAAA  
TCTGGATACGATCATGTATTCAGAGTTGACGGAGACGCAATTCAGAGTAGAGTCAAATT

AAATCCTCTGTCGAAAAGAATTCTAAACGATTAAGATTCTCTTAATAACAGATCAACACT  
TTGGAGTTCGTATTGACAACCAACATTTTATCAATCATTACAAAATGTTTCGTAATGATA  
TTGTAATTCCTTTTTCTGGAGCATCTGGCATTAAACAGGTCATTGGTCTTGGTGATACCT  
TTGATCGTCGTAGATTCATTAAGTATATGTCTCCAAACGAAACAAGCGAAATGTGGTTTG  
ATCCATTGAGAGATATCGGTAGCCCAATGCCCATGCTTACTGGCGACCATGACATATACT  
ACAGACATACTCCTCGAGCTAATGCCCAAATGAATTCATCAGAGGGTACGAAACAATCA  
CAGTCATTTGTGATCACGATACTGTCACTTTTGATGGTCTACCTAGTCGTCTCCTGTCTT  
GGATTTGTGAAGACAATTGCGAACGATTTCTCGTAGTTATCCAAGAGTCTGTTGCCCTTG  
TCAGTATGGGTCATATGGAGCTCAACGGTTTTGAGGCTCTTTCAGGTCAAGTAATAGAAG  
GTGGGATGGATCCCAATGTTTTAGTAAATTTAAAAGAGTATTCTCTGGACACTATCATC  
AGAAATCTACTAAAGGTAATATCAGACACTTAGGTAAGCCTTAACAAATTTATTGGAATG  
ACTACGCAGCGAAAATAGGTTTTACGTCATCGATACAGAACTCTTAAACTACTTTTT  
ATAGGAATCCCTTTGATGTTGTTTAGAAAGTGTATTATAATTCTGGTGTGTCTTGCCCGT  
ACGCATCAGAAATCCGAGGAACGTGGGTCAAATTATTGGTAGAAGATACAGAAGACTATC  
GGAAGTTCGACTACAATTTAAAACGCATACGGGATCTGGGTTGCGCAGAAGTTGAGATTT  
TTCAGGATCTTAGCGTGGAACTGGGGAATTGGAGAGAAGCGCTATAAACCGAAAACACTA  
TGACGTTGATAGACAAAGAGATAGCTGAGATAGATCTAAGAGTAAGTAAACCTAATGTTA  
ATTTTGTGAGGCGTGCATTATATCTAGTGGCATCGGAACGGTAATGTTTGTCTAACTGA  
GAAAACAACCTGGGGGTGTATACGCTAACTCTAAGTCCTGCGACTAACATGGTAAGAAGAA  
CGTGCTTGGTTTGGGAGATAAAGACGATGCTGAAAGATATATCGTACTTCGAGAGGGAGA  
TGAATTTAATCAGGAACTTGACCCTTTGGAATTAGATGCAGATTTCAATGCCGTGTATTG  
TCGTAATTATGAGTATTCTTCTGCTATAGTATAAACTAGTGACTTACTCATACCAAAAA  
CAAATTTGATAAATGATTGTTTTTAAAAATATTAAGTCTACGAATTTTCTTTGCCCTTAC  
GATCAATGGACAGACATTTGTTTGAATGAATCTCCCTCAACTCTCATTGTTGGTGCAAAC  
GGTGCTGGTAACTCGCCTCTCTTAGATGCGTGTGTGTTTTGTTTTATTCAATAAACCTTT  
CGAAAAATGAATACAGGACAGTTAGTAAAGAGAAACAATGAACAAGGTCTGGAGGTTGAA  
CAATTATTCTCTATTTCTGATGATGAGTATCGCGTTTTTCGGGGAGCGAAACCTAATGTA  
TTCGGGGTCTACAATAACCATAACATGGTTGTCCAAGATGCTGCTGCCAAAGACACACAG  
AAGTATCTCGAACAATCCTGTGTCAAACCTCGACTTTAAATCCTTTATACAGCTCGTCATC  
TTGGGTGCATCCACGTTTGTACCTTCATGCAACTCTTCCCACCTATCAGGACAGAAGTT  
ATTCAACATTGACTTCACATCAACATATTCTCCCAAATGAATGCGATCCTAACAGATCGC  
GTTAGAAAAGCAATGTAACAACACCGTGATTGTGATCATCTCCTTCAAACGCAGAGGTA  
GGTGTAACAACAAGAAAGAATTGTTAGCCCTCTTGCTGAAGTGAGTGCACCTCGTCAC  
AAAGATAAGAACAGTCAAATTAACACACTAATGAAAAAATAAAATCAGAAGTAGAGCAA  
CGTGATCAACTGATTGAAGAAGTAGAGACTTTTACTACAGGTATGATGACTGTAGATAAT  
CATAAATCTGTATTAGAAGACCTTCGTTAAGAACGATCTTCTATCAATTCAGAAATATAA  
TCTTCTGCCAAACAACCTTCGTTTTTTAAATCACATTCTGAATGTCTCCGTGTTCTCAG  
TAGATTCAAATGGAAGTTAAGAGAGCAGTGATTGGTAATTTTCGAAAATAAAGGAGGGCAT  
CTTACAAAAGATTTACAGGGTTGACTAATAAAATTGCTGATGCAGTTAGTGCTGCGGAG  
AAAATGGAAATTTCTTTCAGAAATATCATTGAAACTCGTAGTAAAGTATCCTCTGCAGAG  
AGAGAGATCCTACGTTGAGAGACAGGGAACGTTAACATAAATGAAATAATATTAGAAGT  
CAACCACACATACCTAAAATTAGAGAAGTAAAAGTATCTTTAGTTATGTTTCACAAAGAG  
TTATAAGGAACACCAAAATACTGTGGAAAGATTCATCAGACTGTTGATGAAGTTTAAGTC  
ATAGGTAATTTGTTAAAGGACGCTGGTATTAAGAGTCAAATTATCAAGACGTATGTTACT  
ATTTTTAATAATTAATCAATAAATATTTGCACAGCGTGGACTACTTTCTTAAGTTTACA  
CTTTATGAAGAAGTTAAACAAGCAACTAAGAGTAGATTTAGAGATGTATGTTTCATATTTA  
TCTTTTTTCAGAAGGTGAAGAATCAAGAATTGATTTAGCATGGCTATTTACGTGAAGAGAA  
GTTGCTCGTATCGAAAATAAGGTCGCTACTAATTTACTCATCCTTGATGAAGTATTTGAT  
AGCTATTTGGACGCAAATGGAACAAATGAACTCTGGAAGAATGTCCATGCTTTGGGTATT  
TCAAGTAACATATTTGTTATCTCCCACTAGGGTGATGTCTTATTACACACTTTCCTAAGG  
ACAGTTAGATTTGAAAAGAATTATGAAGCCACGCGCATGTGAGACGACTCGTAAATTATC  
GAGAGTATGCGCAAATCACTTGGAGACCACTCTGGAACTCAGATCAAGAAGCGGATCG  
GATTGCTTTAATCCCTACATTTAGTTTCATTCAGTTAGTAGTTACTAACTGTTTTATCGT  
AGCAAGTAAGATAAGACACTGGAACGATCATCATGTTCCGCCACTATATCAGCGTGAGCG  
AATTA AAAAACC GG CACAATAACTAGCACATTCTTAATTGGTCTGCTATACTAGGTGTAT  
ACGAAACACAGAAAATGATCATTCAAGAAGTAAAAGGAACTCTCGCTAAACTACTAGTA  
ACAGAAAACCTCATAGTTGAGCACCGTCAGGTTACAACCTGCATAGTTTCGATTTTGAGAAT

CTCGTTCTTTGCCTCCCTATCTGGAAGTCTGCCTAACACACTGGGTACGATCCGCGTGTA  
GGTCACGAGGTACGACACGCACTCTATTCTCGTGCAAATGGATGAGATAAAAGTGTTCT  
AAAGCATTCAATGATAGTCGCAGATGCTCGTATTGAAAACCTAATGAAACATACGTAT  
CCTGTTCTACGTGCGTCTTTCTTTGACGGATAACAACGTACTATGGAATCAAGATTTCTTC  
GGTCTCAAACATGAGGATCATGAGTATCTATCGCTGCTCGATCGCATCAATCTCTACTTC  
AAAGGCAAACCTTAATATTCTGTCTCAGCTGAAGAGACAGCATGGGTAAACAGAAGTAGA  
AATACGGAAACGTTTCAAGAAGTAGAAGACCTGTCCAGAGATCTATACGGCTGGGCTCAA  
ACAAAGCGAGCAGAGAACGAGGAAGAAGATATGGAATCTGATGTTGAGATTGGTCATGGC  
GATGGTAATATCAGTGGTGGACATTCTGATACAGAAAAGGAAGTCAAAGAGAAAGATTAT  
TCTGAATAAGAAACACCTGCACCTGAACTTGATCCTAATCAAGCACGGGATACTTCAGAG  
GATCCTCTTGAGAACCTATCAGAAGGTCCCAATACATACTTAGAACCAATGAGTGGCGAT  
AGCTCTGATCTATTCGATGACTTTGATCAAGTGCACGAACTGAGAGTACTACAGATAAA  
ACACTACAAATATCGTTAGAAGCCATATTTGATGTTGATGCTAAGGAGTGGGTTTACCAT  
GTTCTTCCTATAGTAGAAATTGACAACTTCTAGTTTCTCCCTCGACAATTCAATGTGAT  
CTTGAAGGATTATTCTCTTTTTACAAAAATAGTGACGAAGATGCGGAAACCTACACGCGA  
GAGTGTGCTCAGTATGCAGATGATCGTTACAACAAAATCAAGACAGATGCACAGCAATCT  
GTGAACTATCTTGTCAAACAGGTTGAGATGCGAAAGTCTGCTGATGATTACAATCGAGCA  
GCAGTAACGCCGACAGGTTTTGTCAACACTTATTCTCTTTACAAATACAACTAACTGAT  
GACATCTACAAGAAAGTCACAACCTGTTCTGAGTGCAAGAATTCTGGTCGTATTCTACAT  
TTTGAATGGTCTGGTTGTAGGCAGTATCAACGCTTGGATACTGTACAGCAAGTTTTCAAC  
TTGGTATTGCTCTGTCGTAAGCAAGCATTCTTTCCATGTCTAGGCCTTCCAGAGTTCA  
TAGTATGGTTATAATCATAGTAATTGCAGACAATGGAATCCCGCTTGTGAACCTAAGGAA  
CGTGACATTGGTATTGCAAATGAATTCATAATTCTTGAATTACTACCTACTTTGCAAGAT  
GCTAATTCACCTGAGACTTCGCGCAGACAACCTTTACAGTCAAGTATTTACTATCCGTTGA  
TACCGTAAGTCTACTATGCCGAAATCCAGTCTTGGTGGAACTCCACTTGCTGAAGATGTT  
TTCTGCACTCGTCAGTTGGTAAAAGATCTCAGGAAGGTAGATAATGCGCCGAAAGTTAAT  
GTTGTATGCTTAAGTGATGCCGAAGCAAATCCAACGTCAGACTGGACAAAAGTCCTTAC  
AGCACTATCATGCAGGAGATTGGTGAGGAAAAATTCAGACTTGCTGAAATCTGTCACTCA  
AGAAATAGAGTATTCATTCTTTGTGATTTTGACGCTGGTTATCAGCGCAAATTAATGGT  
TGTCCATACGAAACTACAAAAGAGATTGTGAGTTGCCTGAGAGAAATTAAGTGAATACAAC  
TGGATTGGTACCAGACTCTGCAGTACAGGCGAGGTATCAGGATTGATTTCGTATGCTTGGT  
ATGTACATAACAACGTCAAGACGAACCTTGGCAAGTAATGGAAGAAAGAAAGATTTGCTTAT  
ATCAATGATGCAGTTGGATTCTCTCAATCATTGTATTAGCCTGACAGGGGCAATGGCGAA  
GGAACCAAGACCATGCTGTAAAACAGAAAGGCGAAGTTGCTACCAAAGCAGAAGTACAA  
CGTGCAATCAAAAAACGCAAGGGTTATAAGACCACAAAACAAAACCTCGCCTCAAAGAAGTG  
ATTGAACAGCTCGCATCAAGTCTAGAGTGCCTCTATTTAAAGCGGGAACAATCTTTGAAG  
AACTGTTATCGCTGTGGATTATGAGGATGCAAAAAAAGTTGTATTAGCAAGAAATCCGA  
ATTATACCGTATTGAGTGTGACAGCAGTGTTCGGAAAAAGAGTGTCCACTTGCTATAGC  
ACTAAGCAGACATACCTTGATAAATACATCCATAGACAAAACATAGACTATGACTTTTGAA  
CCCAACCCTGTGACACCTGAGCAACTTGTCAACACCTAAATGATAATGTAGGGACAGAA  
GGCGAATGCAAAGACATTCGTGAGTTAGCAATGATACTTAACTATCTTACGCAATTGCG  
GGTAAAGGACTTCAGTCTTATAAATCAGGTTTAGGCAAGTGGAAATCGATCCATTGAGGAA  
ATTGAACGTGCGTACGACGCACCTGCTGCTAAGGAAAAACAAGCGCTGTTTCGCGATAAC  
GATCAGACTTATGTTACTATTGGTAACTTCACTTCTGTACAGAAAGTTATCTCATTGAAG  
AAGTTCTATCCTCTATTACATTACAGCTCCATCTGGAAACGGTAAGCCTCTATCAGCTGTA  
CAGGCATGTGATGCAACTAATAGGGGGGCAATCTTTGTCAACATGAAAATCGAAAGTGAC  
GAGGACGATCTTATTGGTGGTTTTTCGTCTTTTTAACC GCGAGACTGTTTGGCACAGCGGA  
CCTCTGTTTTCGGCTTTGGATAGGGGGGCTGTATTTTCATCTAGATGAGATCGACCTAGCA  
TCTAACAAAATTTTATGTTTGGAGGCTGTCTTGAAGGTAAAGGTGATTCCATAAGAAG  
CTTGGTAGGTATGTCATACCTGCTCAAGGATACACTGTTATCGCTACTGCTAACACTAAC  
GGCACAGGTTCTGATGATGGTAGATTTCATAGTAACAAATTTTCTCAACGAAGCTTTCAGT  
CAGAGATTCCAATTACATTTGAGCAATAGTATCCTTCTGCTACTATCGAGACTAAGATT  
TTGATCAATCATGGACGTGACAAAGACTTTGCAGAGAACTTAATCAAGTCGGCAGGTGTA  
CTACAGAAGACTTTCTTGGATGTTGGTGTGATGAAGTTATCACAAGTCGTCGTTTGGGT  
CACATTGATTCAGCATAACCACACCTTTCGCGATAAGTTGACAGAAATCACAACTGTGTT  
AACCGTTTTGACGATGATAAAAATCATCCCTCCTAGTTCTTCAGACAAAAGTTGACGCA  
GGAGAAGATTTAGAGTATACTGATAATCACGAACCTCAATCTTTCAGTTAATTATGAAGA

ATCGTGAAGAGGATTTCCCTGAAGTTCTCCGACATTACATCGAGAGGACTTACTCTCCAC  
ACTATGCTAGTGATAAAGATTA AAAACTCTTGATGTAATCGATGCATGTGGCAATGCTACAG  
GATTTTGTAGAAGTAACATTTACAGTACGCTTCTCGCTACGATCGAAAAGGTAGTGCTA  
GACAAGATCTCTTAAAGGTGCTACACTATGGAGTCTTAATCATGCACTTTTATAGAAGAG  
ATCAAGCAAACACTACGCAGCAGCAAATTTTGCAGCACAAGAAGTCATATTCAACATCACAG  
TAATTTCCCTACCCACAATCGCAGCGCTTAAATACTTTTGTTC AATCAACAAGTCTATTG  
TCACTAAACCTGGCAATACGATTTCTACGCTCAGGATTA AAAAAGAATATTCTCGCTATTG  
CCCAAGTGGCAGAACAATTTGATTGGCAAATTCCTATCTATGTTTTGTGAGTTCTCCTTG  
GAGGGTTATCTCTTTTTGCGTCACCAAAAATCGAGACTCCTGAAACAAACTACGTCACAG  
TAAGCGACCTACAAGGTCAATCCATGACACCTGATTTCTACACTGATCCTGATATCATCA  
CTAAGGCACCAGTAAAAGAAATCATCTTGT CATCACAGAAGGTGGAATTTAAACTTGAAT  
CTATAAATCTTATGCGATTACAATGTGCTGCTCTGGTATATCAACTCTCTGATCTTTGTT  
TGTATGGTGATGGAGAACTATGCAGTTATGTATGACAGGTAAACAGAATGACACTTCCA  
ATAATTATTTTGTAGAAGTTGGA ACTACTACAGATGAGTTTTGTTGTTGTTTCAAAAATG  
AGCACTTAAA ACTTTTATCTGGGGACTATGACGTATTACTGAATAAGGCAAAGGTTGCTT  
AGTTCAAAGATGACGGAATCAAATACTACATTGCTCTATAACATTACACATGACATGTTG  
GCACTGTGACACCTATCTAATCTGTGGTGGTAACAACGATTGTCCTTATGCAGAGGAGTA  
TAGATTCGTA ACTATGCTCCACTGCCCTAGCTGCGATTCTACGTAGAATTTTATTAACC  
TAAAAAAGATGAAAAAATTTGATAATGAACTGGACTATGAGAGACTTGTTGTTACAGACG  
AGGAGACTCTTAAGCTGTTTCTATTGGCCGAGGGGATCAAGGGGTTTCGTCTGGTTCACC  
ATTATACTAACGATATTTGTTCTCATTGGAGATTCAAA ACTTACACTGATGCTGCAAAAT  
CTTCCAACCATTCCTTAGATATGTATCTTGGATATCTTGATTAAAAAGATTTTATCGGTA  
TGGATATGTGTCGTAAGTTTCATGAAAGGAGTGTTACCAGATCAGGGAGAAATGCCACTC  
ATAGCGAGGGTAAAAAGTATTATAAAGAAGCTAATGTAAAACCCCGAGAACCAGATCATG  
CTACCTGTTATTGCGCTGAGTCTGCTAAAATATTTAAGAAGGTTTCGAGATGTTGTTGCGA  
AGAATAAAACATATGTTACAAAGAGGGGAGTATGGAGGGCGTCTGAATGAAGATTGTTGT  
AACTGATCCTTCCCAACAAAGTCTGCTCAAGTATTACCTGACAAACACATCGTCAATAT  
GGCACTAGAGACCTGTCAGATGCTTTCTATTGGTGCATCTGATAAATGGGGACACGTTAT  
TGGTTCCTACTTAACTAGATGGCACACCATACAATATAGATAAGGGGGCTTTTCATAA  
TCATCCCTACACTGGATGGGCACAAGATAATTGGACATGGTTGATAGTCCATGGTCTGTC  
ATTATCCTTTGAATATACTCTCAGATACGGTAAGATACATAGTTGTTGATCAACTATCGA  
ACATGCTGCAAAAATATTCCCTCCACAGGATACTGATCGAACACATTTTGT TTTTCGCATC  
TCCTGATCACACAAAGCGTGATAAGACTATTGACATTTTTTATTGCATACAGGTATTAAT  
CAATAGCAATTCATAGGTATCAGATAATTATGCAAGGTTACCTGATAGCAAACCTAACTG  
GGTTAATTTATGATTAGGAATGAGTTTTTGTAGGTCGAGAAGTAACGGCCTAAAAACGTA  
GAACAATCCATCTTGCCCGAGACTGTGAAGACTAACTTCAAGAGTTTTATCCAGCAGGGT  
GAGATTCTTAATCTGCTTCTATCTGGGACAGCAGGGGTAGGTAAAACA ACTTTTGCTAAA  
GCACTTTGTCAGGAATTAGGAGAAGACTATAATGCTATCAATGGATCCGATGGTGGACGA  
ATCCTTGACACCGTAAGAATCCAGTCAAAAAACGTTGTTGCAACTGTATTACTTACAGCA  
GAAGCTAAGCAGAAAGTTCTTATCATCGACGAAGCAAACAACACTACACCAGACGCTCAA  
CTCTTACTTCGTGCATCGATAGAAGAATTTCAAAGAATTGTAGATTTATATTTAGCAGT  
AATTTTAAATACAAAATTAGTGAAGCTCTACACGTTAGAACA ACTGTCTTAGAGTTCAAC  
GTTTCGTGCAAAA ACTAAACAACA ACTTGTCTGGAGAATTCTTTGTTGGATGTAAAGGTATT  
CTGATTGCTGAGGAAGTTACCTTCTCAGAAAAAGTTGGAGCAGAAGTTGTTCTGAATGAT  
TTTCGAGACTTCCGACGGACTCTTAATGAGTTGCAACGATATGCAAGCACAGGATGTTAT  
AATACTGGAATTCGAGCAGCACTACGAGACGCACATATCGATACTCTAGCTGAATCATTG  
AAAGCAA AATGTTTCAATGATGTAATGAAATGGGTTACCAAAAACCTAGATTCCGATCCT  
GTGTCTATCATGACGAAACTCTATGATAATGCTTCTAATCTAATGACAGTTCCTAGTATT  
GCACCAGCAGTTTTAATCATTGCTGCATATCAATACAAGTATGCTTTTCGTTGTAGATCAG  
GCAGTCTCTCTATTTGCATGGTTAACTCAATTGAAGCTTGAATGCGAATTCAATTAACAC  
CCAGTGACCTTTACAAAGAGGTAATTGAACCTGTCTTAAGTCCTGATTTTCTTGGCATT  
GGTCTTGCTAAGCATAACCATCATGATGAGGTTTCTGAAGGTATAACTAAAGTTGGTTGCT  
TCTCACATGTAGTCTAGAGAGAGCTGGTTATACATAGCTAACTACCAAGATAAAATCTG  
ATCACTTTCCATTGTTTCATGATTCAGTTGTTGAGGTCAGTAGAGACAATAACATTGACC  
CTAAAGTAATTTACAGGATCCATGTTAATCTGACTACTCAATTACACCTCAACAAAGGTG  
GTCCTGACCACACAGACCAGGACTTTCCTCCTAAGAATAGGTTGATATACTTAACAGAAA  
CTCATGGAGGTCTTACTAAAGTTGGAAACACCAACTACCCTTGTATGCATAATGACACAA



TTGTTTTTGAAGATGTTTCACGCTCACATAGAACAACACTTTGGTAAGAAGAATCGTTCTTG  
TTTACACATTTTTATGGTTATGACTAACAAATTTATTAAAAACTTGAAAAGAATAGAGC  
ACAGGTAAAGTCATGATTCTCCAACCTGGTTCTGGGGTGCTATGGCAGGTGCTGTTGTAGT  
TGGTAAACTATATGTTGGATCTTCATGCAGACAAATGGCCATATCAATGGATAGATGGTT  
TGAAGAGGCCATTGAGATGGTACAAATACCACTAACACCTCCGTCGGCACGCATGCTGGT  
TGTTCCAATGCCTCATCCAGATTTCTATGAGGATCCTATGATTAACAGATGGACTCTTTG  
AAGACACCACTGAGATATCCTGGCGCTAAGTCTCGTGCTACTAAAACGATGGCACAATAT  
TTCCAGACTATAGAGACCATACTGAATTCCGTGAACCTATTCTTGTAGGTGGATCTGTA  
GCGTTCTACGCTACTCAGATGTATCCTCATTAGGAAATCTGGGTCACTGATTTATACGAA  
CGTCTGTATACATTTAGGAATCAACTGCAAATGCATCGTGAGGATCTTAAGAACTAACCT  
GTTCAACTCAAGCAAAAATATCCAGATCCGTCTTCGGCAAACAATCTTTTCTTACAAACC  
AAAGAGTATCGTACTAGGCACCCAAACAATTGCGATTTTAAGGGTCGTGCTGTCGCTTTC  
TATCTTGATAACAAGTTCTCTTTATCTGGTCTCACTGAGACCTCCTCGTTAAGCGAACAA  
GCTTCTGATTCAAACTTTTCGATGCGACGAATTGAAAAAGTACCATACTAGGGAAGACTT  
ATCAAAAGGTGGGGAATCACTAATATGCAATACGAAAAATTATTTACAGATGATACTACT  
GCATTCGTATACTGATATCCTCCGTAGGATATCAAGGCACACTTGGATGGAAAGAGAGGC  
ACACTGGATATTGGACTCGACCAGTTTCTTTTGGCAAGAAGTTGTGATAGAGTCGAGTGT  
GATCAAATGCTTTCTTATAATCCTTCTAGTTTAGCAAAGCAAAGATTCCAAGGTTGGATA  
GCACAACAATTCGATCAGACAGATAATTTGAGATCTGTGGGTGACTACACGAAAGATCAA  
GGAGAACGCAACAACCTTCTCCTTTTAAATTATGGCCTATGATGAGAGATTACTTCTAGA  
GGACTATCTATACTTAAACAACCTTCTTAAAGATTATTTGATGGAGGATGATCCTGCATG  
GGTGAAGAACTATCCTTCAAAGTCATCAATAAATGCATGTCGCATCATTGGATACGAT  
CATGGATTCTAATGAACTGAGTATACATACTCATGTAGATAAATGTTTGCATTATGATTT  
CTTTATAAATGCCGTGAGACCCCGTATGAAATTTTCTCCTAGGGGTAAAGTAACAGAAAGT  
GAAAGATCTTGACCTTGTTAAAAAATACTATGGTTATAGTAATAATAAAGCATATTAAGC  
CTTATAGATCTTAACTTCATCCAACTTAATTACATTAAGGATCAACTGAACAAGAAGG  
TAAGACCAGACGAATGAAGTTAAAGAAGTCCAGCGGACTAAGAGGGGTAGGGTTGAAGTG  
AATTTAAAAGTACCAAACGATTTTCTAAAGGTTCCGCGAGACACTTACACGTATCGGTGAA  
GCATCTCCTAAAGAGAAAAAGTTATACCAGTCCTGTCAACTTCGACATAAGAAAGGCAA  
TACTAGATTGTGCATTTCAAAGAATTATTTGCTCTTCATAGTAATAAAGCAAGTATATGA  
TTGAATGATGTGCAACGTAAAAACAGAATTATTAATTCCTATACGACTGGGGACTAGTT  
CAAATTGTAATGTATCAGCAATCTCCGACGCTGCTCCATTAAGTGAAATTAAGTTATG  
GCATACAAAGAGAAAGGAGATTGGACGCTTGAGTCAAGATATAACACCGAGAAAAAACGT  
CAAGTCACAGAATGATATATAGTTTAGTTCTACTATATCAGCGTAAAGGCAAACGCCAAG  
AAAGTAGAGGATTAACCATACGGTGCTCTAGGAAAACCTCAAAGAGTTCAGTGAAGATATA  
GTAGAACAACCTTGCTGTGCTAAGTACATTCGTACGCCTGGGTATTTTGATTTGGAGTGCT  
GGTATCTTACCTTTGGAGTACGTTACGATACCTGGTTGGGAACAAGAAAAAATTAATCCT  
ACTTAGATAGTTTCGGTCGTCACGGGAGTCACAGCTAGTTTCTGCGGTCAAGCGGGAGGT  
AAGAAAAAGACTAGAGACAGTGGTGGTGGTGCAAACATCTCTATGAAAGACATGGAGATG  
CTGATTGAAAAAGCAACTCACGCAGCACCAACTCAAATTAAGTTAGTACTTCTCACA  
TTTAAATTTGCTAGTTATAATCATGCAAAAAATTGTACACGGGATCGCTAGCTTCTCAGC  
TGTTGTGGAACCTTGTTTTAGTAGGACTAGGTGGATATGTTTACATCCGTACGGATGCTAT  
CATTAAAGACATCAAAGAGAAAGAAATCAATGGAGCACTTCGTGAGTAAGTGACTCGCT  
ACCCGACATGGTAGATACACACCTACCTCGTGTAACCTGGTGCACCAGTTCCTTACCTTC  
ATTACCATGACCATTAATCGATATAAATCGGTGTAGTTGGTAGTATATTCGGAGTATCC  
CATCTGGGAATGATGGGTATATTTCCAGTCGAACAACCGAGAGTCAATTACCTACGATA  
GATGTTCTATAGATGGCTATACTACATATGTCATCTTAGCAGATAAAGGCTGGCTATAAA  
AATAGTTGCTCAGGCAACGATCCTAAGACAGCATTATATTAGTAAGGACATCAAAGAGAAC  
GGTTCTTTCTTAGCACTAGCAAATGCAACTCCTAATATCACTGAAGAATACTTGTTAGAT  
GGTATCATTAAATCAAGGCGGTACTGTATCTAACATGAGATATTGGACTTATCAACCACCT  
CGTTGACTGCAGAACAATCATCAGAAATACTCGCTGCTCGAAAAAGAGGAGCCTGTATC  
AAAGCAATCGGATCAGGAGAGGGTACAGGACGTCGCGTTGACACATATATTTGTGCTGCT  
GCTGCTCCTTCTATAAGTAGTATCCCTTTGTTAGTTTCGTTTCGGTGCTGGCTGGGTGGTA  
ATGTTTGGTGGCAATCACGGGGCTGATATAGGTAGAAATATGGGAGAGGATATCAGTAAG  
GATTGGTAATCTTCTTCTTCTTAGGGCGTTTGAATTGAGGTAATCCTTTCTTCTCACGA  
TACTTATAACACTTAACTCATTACGACATAAATTATTTGCTTCTTTAGCGAGTTTCTTT  
TGCATGATCGTAGTGAGTTTTTAAATGAGTGGCTTTATAACTCGCAACAGGAATGGTGT

GCAGCTGCAGAGGCTGTAGCCACCCTGCGATAGTTGCTGTTACGCAGACTTGCTTTGTG  
CTTGGTAGAAGTCTTTGAATTGCTGTAGTATCTTCATACTACACTACACAATGTCCACCT  
CTAACTTCATGAGCTATCACTCTTTTTTCACCATTTTGAGGTACATCACCTACTCTAGGT  
TTATTAGGTGGAGGAGACACAATCTCTTAATAATTTTTTGGTGTGCGGTGGCACCTCTGGT  
GTGTCTACTTCATGAGTATGTGGTGGTTAACGACAGGAGGTGGCGGTGCCTCTATGACG  
ATCTGTAATTGATGAGGCTGGTAATCCATCGCACCCCTATGTTGGCCCACCTGCATCGTAA  
AATACTAATACCTCATCTTCCTCGTCTTCAATTATTTTATTATTCTTGTCACTCTGCTGG  
GGTGCCTCCACACAACCAGGCATCTGCATGATGCCTTCACGTATGTTTACGGTAGCAGGA  
GGTACGAACGGTATTGGGTGAAATGGTTGTTTAGTTACCAATCTAGGATATCTCTAACA  
ACTATAATCGTTGTTTCGTATGTCTCGAACACTTGCGTTATTCACTTGTATGATTGGTGTA  
TCCATACATCATGGGTTTCCAATTGATATATCTTCTCAGTTATTTGCATATGTGCTGGGG  
ATCTCATGAGCATGAGGGGCAATGACATTAACATTCTGCACAACAACGTCTGCACGAATA  
CTATAGTATGGTGTCTTGGGATGGAATGAAAGACCCTCTTTCATCAAATTTCCAGAATTG  
TTCAAACGAGCTATTTCAAAGTCAAGTCTCTTATTTGTTACTTTTTGATTTCGTTAATGCG  
ATATTTTCTGCAGCTACGTGTTTACTTTGCTCTGGTAGTTTCTTATCTAATGGTCTAGAC  
GATGTTGGAGATAGACCAACTGAGAAATTATTATTATCTTTCTTTTCTGTTGTTGTAGGT  
ACATGGTATAAAAATATTACCTGGATTATCCTATAGACCGTCATCATTACATCTGACATA  
TCATACACAGTTTACATAGAGTATGGTCCGTATGGTTTTTGTGCTGAAGCAGTTCCTGTG  
TTGTACGCAGTAATATTCAAGGTAGCACCTTGACATTGAATGCCATTACCATATGTGTTT  
GTTATCTGCGGACCTTATAAAGCTTGTATTGCCTCGTTCGTCACTGAGACTGGTGAGTTG  
GCGATTGGACCTGCAGTCCCACTGACACCACACACTGTCACTGCGTTAACACTCGGAACA  
AAGGGCATGAATCCAGTAACGGCATATAACGCTATTTACTGAAGATACTTGTGTACCTG  
TTACCGAAGTTTCCGTTGTTTCTGTTTGTATTACCGTGAGGTTTGAAACACCTCTTCCA  
TGCAGGTTTTCGGTGTATTGACACTCTGTGCCCGCGTATGTATCGCGAAGTTGCTTTTTGT  
CGTTATAACCCGCCCATTTTGAATTTACTGCTTCATTAGTAATCACTTGGGTTTAATTAG  
TGAGAGATAAATAAGCATCTGTAGTTACGGCGTGCCCACTGACCGACCAATGATAACCTT  
AGTTATCGTCCATCGAAATCATGGTCCGCCACCACAGTGGACGTCGTTTTCGTTTGGGTGG  
TGATCGAGCCCTGTTGGCTATTCGGCACCAAGGAAGTGTATGACTGGGTTTGTAGCAC  
AACCCATAGCTATTAATAGGAATACCTTATACGTATTGCTCATGACAATTAGTCAAAAAT  
ACTCATTTTCGCTAACAAATTGAGCGGTCAATGAATTACCTTCACCGAGAGTTCCTGTTGA  
ACTTGTGCCAAGATTAATATTGATAGTATGACCATTTGTGATTATTCCTGGTGTACCTAT  
TCCAGCTGTTCCAGCACTTTGTGAGGTGATATGACCCCACTAGCAACTGCTCCAGAAGA  
CTTGCTAATCTGTTGCCATGATTGGGCAAATGAGAATGATCCTACACATGCTAGGTCATC  
CTCTGCAGATGATCCTGAGCTGCGATTTTGCCTCCAGTAATTGTTCCAAGTTCCTAC  
GCCTGTAGTAGGACCCTAAGCGTTAACACCGATAACCACCATGTACAGGGCTACCATTTCG  
CGGTGTACGTGTTGAGATCACGTTTTTTCCAAAGATTGAATAGCTATTGCCATCTCGTGT  
TTGAGTTACGAATTGAGGATCGACAGTTAGATGTAACCTAGATTGGTGTCTACTCGGTAG  
TCCGCCCGCATATGCGGCTGTGTCGAAGGTCACAAGAATAATGGTAAGAATAAATTTCTT  
CAATATTTTACTCTTAGCGAATCTTGCCTATATAGGTTTGCAAAACCTTACACCTATGT  
TCGGCATGAACCATTTCTGACATATCACTCTATGGTTAAATAGTAGTGTGCGCTTCGGG  
GACAAAAAGAAACACAGGCTTATTTAAGGAGCAACATGACTAACTTATCACAGTGGACAT  
CGTAGTATGTCGATCCAATTTTTAGCGCTGCAAATCGTTACAGGGTAGGATTCGATGATG  
TGTCCGTAAGACTACACCATAACGGAACAGGTTACCTACGCGACAAAACCTCCATAACA  
ATAATTGTAAGAATCCGAAGAGAAGTGGAGACTAGAAGTACTAGCACTCGAAGGATGGTCAA  
CAGACCAAGAAGAAGTACCTATAAAGCAGAACATACTACTAGTCAAATAAAAAGAGTAAG  
ATCCAAACTCAAAGAAGAACATCTAGTTCATAGAGCTGTAGGATCCAGAACATGTGCTA  
GAGGATCTAATCTATCAGATTCCGTAAAACCTTGCCAAAGGAGCCTCTGTTAATGCACTGC  
TAAGAAGTCAGTTACAAAAGGTATTTCCAGTACATTAGAAAAGACGAGTCTATGACGTAG  
CTTATCTAAAACCTCTCGCAGTTTTTAACCTGTAGTTAAAGATTCAAAAATATCACTTATG  
CTTTTTCAAGTGGGCGTTATTTTTTTTTAAACAAATGAAAGCATTGCAATTTCAATTGCTT  
CCTTTACTATTCCCGAGTGGTTGTGCAAATCCAATAACAAGGTTGAGTGGTGCAGTTCCA  
TCATTCCCATCTAAGATCTATACTCGTTGTTTCTCAGACGTATCAAAGCTGGTGGAGAA  
AGAGTAAACTATCTGGCAGTTGGTTCTGGTAGTGAAGAAAAGCATTGTTACGAGACC  
GTAGACTTCGGTGCCTGATGATCCTATGTAACAAAAGGATTTAGACAAAGTCTGAGGA  
GGATTAGTTCAGATAGCAATGATAGGTGTAACCTATTGCATTTGGATATAACAATCCTGAT  
TGTGATCTAAAACCTACACAACAACAGGCAGATGAAGTTGCAATGCGTATCATCACTTAC  
TGGAACGAAATTGGATGTGATGATCAGAGGATGACTTTGGCACATCGTTCAGATGGTTCT

GGAGCAACCTAGGTATGTACAAGTGGTATGCAAGCATTCTCTCCTACACGGACTAGCC  
ACAGGTTAACCTGCAGCGTGTCTAAAAGGTGTGGGAGGTTAAGGTAACGCAGGAGTTCGCT  
TGAGAAATTAATAACACCTGGCTCAATTGGTTATGTAAATCAATCTTATATTGAGGAT  
CTTTTAAGACCCGCAGCACTACAAAACAAGTGCGGTCACCTTGTAAAAAAATCAGTTGAC  
GCAGGATCAAAGGCACTTAACGGTATCACTCTTGATGAGAACCTTTCAGGTAGAAATCCA  
AATCCAGAAGTAGGAGCAGCGTATCCGATTGCAACTTTGACTTGGATACTTGCACATGAA  
ACCGGTAAAGGTAAGAACAACAACCTGCAAACAAGACAACCTTTATCAGCTCTATTGAGTGAG  
GAGTATCAAGATGAAGCAGGTAAGTTACGATTTCGATCCTCCTAAAGGTGACATTCCTGAG  
ACGGTAAGACCAGCAGATGACAAGATCGGTACATCGGTTTGTAAATAAAACGTATCGTAA  
TTATATTATGAGTGAAGAATCGTACGAACGAGAAAGGGTGAAGATGTTATCTCAGATCT  
TTAGGAGGTCAGAACTAAAGAAGATCCAAGTAATGCTGTGCGATTTCAACATAACAATCC  
ATATATTTTACGGTTGCAAGGAAAGAAAACCTGAAGAACCTCAAATTCCTATTGATTATGA  
TGCAGGTGACATTGTAAGTAAAATCAAAGATCCCGATATCTAATTGCAACCTAGGATTCC  
TCTGTCTTCGAACAACCAAAAATCTTTGGAAAGTAGTGGATCGGGTAACCGCATACGAGAC  
CTATCCAGATGTCAACTCTACATACAACACATTAATCGAGGCAGATGGAGGAAAACCAAA  
GCAAACCTCTGTTCTCGAATCAACGGAGTGAAAACGTTATTGGAGAGGTAACAGAGTTAG  
ATGAGGAACCTAGTTTCCATATCGAAAAATGCTATGAAGTGACGGGTGAGGACACAGTGA  
TCCCGTTTCCAGAATACAGTTCACAACGTGACGTCTTCTTGACATCTGAAAAAATCTTGA  
GTATACTAGATCCGACTCTAAAACCTGTTGGAAACCTACAATATATTCTAACTTCTTTCTT  
CGCCAACCTTCAACTAGCTGGTGACACTATACTTTACAGAGAGTATGAGAATGGAGACGC  
GTCTCAATATCGCTCATCCTTTTCTCCTACAATTTATGTTTTGTCTAAGAAAAAAGGAAA  
GTTTGCAACAGTAGCATGGAGATACGTGTCTACGGACAAGCTTCACTATGCAAGAGAAGC  
AAGACAGTTTGTCAAACAGTATGAACATGTAGATAAATTTGGAAGTCCATGGTCACGAAAG  
ATTTGTCTTTCACCTTCAATCGTCAGCAGTCTCCAGATGACATTGACTACCACATTTATCA  
GATGAAAATCTATGCATCGCACATCGAGGTTCAATGGGAGAGTAGATTCCCAAATGTAGA  
AGCAGCAGCAGTAGAATTGCTGTCAATCACCATTAACGATATGGTGACTACAAAATATTG  
CTGTTGGAAAACCTAGAGTGTGTTGATGCACTAAATAATCTAGAGTTGAATGTCTCTTGAC  
CGAACAAGAGAGGCTTACAACTTTATTACATGGTGGTCTCCAAGCTCTCCAGATACTCT  
AACTGGTTGGAACGATAATTTGTATGTGCGCCCATACATTGCTCGTTGAGCCACTCGTTT  
TCTCGGTGAGAAATGGAAGAAGAATTTATCCCCGTGGAATCGTCCAGATGCCAGGGAAGT  
GTACGTCCAAGGTAGGAGAAATTACTCGTACGATGCCTCTGGTGTTAATATCCTTGATTA  
CATCGAACTATATCATAAGTTTACATACTCAAATCAGGAGTCTTATAAGCACGATCACAT  
TACCTGTCTCGAATTAGGACAAAGAAAAGTAACACATGATGAGTTTGAATCTTCAAAGA  
CTTCTAAACAGCTGATTGCAAGAAGTTTATGAGATTCAACATTCACGACGTTGAGTTTAT  
TTACCGTCTGGAAGATAAGATGAAGTTTCTACAACCTAGCAATTACAATGTCTAATCACGA  
CCAGGCAAGCTTAGAAGATGGGTAGCTTCAGATCCGCTAGTGGGATACGATGATATATAA  
CTATCTTACAGAAAGAAACGTTGTTGGTCCCCACGAAAAGGAGGGAAGAAAGATGAAAA  
ATACGCAGCAGCGTCTGTCAAAGAACCGCAACCAGGATGCTATGATAGGGTTGTCAGTAT  
TGACCGCAATAGCCTGTATCCTCACCTTATTATGCAATACGCTATCTCGCCCGAAACACG  
CAGGGAGACTAGCCATCCCATTGCAAGTGTTAAGCGAATTCTCAATCAGGAGTTGGAGAT  
AAAGGAAGACTATTGTCTATCTGCAAACGCTACCATGTATCGAAAAGATATTCATTGTTG  
CGTGCCATAGATTAAGCCGAAGATCTACGATGAACGAACGATCTAGAAAAAGAAAATGCT  
GGCTGCAAACAGCAACATGAAAACGCACCATCTAACAACTTGATGCTGACATTTCAA  
GTTTATCAAATGCTGATGGCAAGAAAGATTCAACTTAAGTCTGCCTATGGTTCTATCCG  
AAATCAATACGTCCGAACTACATTCTTGCAAAGCTGAGTAAATTAATCTGTGAGGGCA  
AGTTTCACTCCGTTGGATCGAAAACGAAATGATCGAGTATCTCAACAAGATACTCTAAC  
GACAGGAGAAGATTATGTTATTGCTAGTTATACTAATAGTATCTACCTCAATCTGCGTCT  
TCTGGACGAGGCTGTATACAAGGGGAGAGAGACCACTGATTCGAGCATCGTCGGTACAT  
TAATAAGGTCTGTTAGGAGGAACCTGAATAATTCATTTCTAGTTTCGATGAAGCGTTTGG  
CACATATGCAAACCTCCTCCGAACAGAAGATGGTTCATGAAGCGTGAGAATATTGCCAACAA  
AGGTATCTGAACTGCCAAGAAACCATATATTCTCATCGTTTGGGATAGTGAGGGGATCCG  
CTATGGGAAACCTAACTTAAGGTCATGCGTATCGAAGCAGTTAAGTCTTCTACACATGC  
AGCCTGTGCAACATCTATTCGTGATTGCCTAACAGTTATCATGAATGAAGCCGAAGAGTC  
TGCACAATCCTCTATTGGTGAATTCAAAAATCATTGTTCTTCTTTACCTAATGGAGACAT  
CTCCTTTCCTAGAGATTGTCATAATCTAAATTAGAGGTCGAACCCTATAACGATCTATCG  
CAAAGGGACAAATATACATGTGAGAGCGGCACTCTTATATAACTTTTATAATAAGAGATA  
CAAGCTTACTACAAGTATCCCTTAATTCAACATGGAGAGAAGATCAAATTCGTCTATTT

GAAGACTCCAAACCCAATCAACGAGAACATTATCAGTTAGCTTAATACGGTCCCGAAATG  
GTTTGGACTTGGCAAAAAGGTGGATTATGAGCTACAATGTTAGAAGAGTTACTTAGACCC  
GATCATAGTGGTCATGGTCGTCATTGGTTGTCAGCCCGAAAGAATCGCATCATTGTAGTT  
GCGATTTTCATGCAATATGATTTTTAAAACCAAAAAGCAGTTGGTATCCCAGACAAAAGA  
GAACAGGTTTTTCGACGATGACTCAGGGGCAAAAATGGTTTTGAAAGTGCTTAGAAGCGTACG  
AACTCTGTAACCTAAGCTTATGGAGGTTTACGAGGGAGTTAACTGAAGACTGTTGTATCGG  
AAATTGGAAATGAATGTACAGGCCTAGTATCAGACGGAGTTTCTGCAGGTGGTACAAAAG  
ATTTTATTGATTCTGGTTCTTATGTCTTTAATGCCTTAGTTTCTGGATCAATTTATCGTG  
GGATGCCACGCAATAAAATCACAGCGATTGCTTGTGAATGATCAACTGGCCCAACTTTCT  
TTTGCCTTGGCATGGTGC AACACTTTCAAGATTCTGACCGTGATGCAGGTGAAATTTATT  
TTGAATCTGCGCCGGCTATTAGCAACCAAAGGATTGTGGATAGAGGTATTGAGGCAGATT  
GAATGATGATCGGTCCTGTGCATGCTATCGAAGAGTTTAGAGCACAATGCTGCAGGATTC  
TTGACAAATATATGGACCAGAATGAGACTGATCGCAAACCTATGATGGTTGTATTAGGTT  
CTGGTGGTATGCTTGTAGTAATAAAGATGTTGAAGACTTTGCTAAAGATAAGAATGTAT  
GGGATATGACACTCATTACCTAATTAAGGTGCTTTTTCTGTGTTCTTACGCTAAAATTAG  
CTAGAGCGAACGTTCCCTATGCCCGTAATGACTCATAATATGATGTTACAGTAAGTTGTA  
TTCCAACCTCAATCAATGAGAGGTGGAAGTAGACTCAAATACGCTTCATCAACAATAGTAT  
ATCTATCAAATCAAAGGAAAAAGATGGTACGGAGGTTGTTGGAAATAGTATCGCATGTA  
AAGCCCAAAAATCCCGACTAAGAAAAGAAAATTCTCTTGCAGAGACACGGTTATATTACG  
GTCTTGGACTTGATAGGTATTATGGATTACTAGGATTATGTGACAAGCATGGAGTTTTAC  
CACGCAAAGGTAATCGTATTAGGGTTGGCGAAACTGCTGTATATCCTAAATTCATCCTTG  
CTGAGCCCGAAAAGTATATTACTGATGCAGTCATGGAAGCATTAGACGAGGCAGCAAAGA  
AGGAGTTACAATATGGTCACTAATCTTACTGACTACATTATAAGCTATGATAATCTGTTT  
CTAGGGGATGTCGATAAATCAGTAATTCTAACATTCACTGAATCATATAGAGATGTGAGT  
CGTATCGATAGAGAACAAAGACCAACCTCTAATGAGGTGAGTATCTCACAAAGGTTTCAG  
GCAAAGATCTTGCATGGTTGTGTATCCAGAAACATAAACAGACAGTCTTTATTGATATT  
GTCAAAGTTTATATGAGTGCTTTTCAGTGATAACCAGATTTTCCTGTAATAGATCCTTTT  
GGGGCGTTTAGAATTAACCATATTATAATGATGGACTAGATCAATTTAAAGATCATGAA  
GTTGTCGAAGTTTATAATTTTGCTCGTAGATTTTTTGTGATGTTTTTATAGCAGAATGAC  
GTTGATGATGGTGTGCAAAGTAATTTACTAGATTGAGCTATGC ACTTTCACCTGAACGT  
GGTAGAATATTATTATCCAGCAACATGGCAGAATCGTCACTGAGGATTGCCACCTGAG  
TCTGACAAACAGTACATTGTTGAACTTATTTACACTACCTATGACTATCGAATTCACGA  
TTCTATGTAATCGCTTGTATAATAAGAAGTATGAAAGGAAGGATCTTGCTTTATTGAAGG  
TTGAATTTTTTACCAAAGGTTCTTACCTGATTATTTTTCTTGAAGTACATGAATACCTTT  
GTCCGTATGACGCATTCTCATATCTGAACGCACTGAGTATTGGATGTCAATAAAGAAATG  
ATCTTACAGAAGAACAATTTCAACAGATCGTTGAGGTTTAAAATGTCCTTTCCGATGACC  
CCAAAGACCAGACTGGCTCGTAGCTTCTACAGAAAATTGGTGTGAGGAGCGTGCGATGT  
ACTTATCGCTTATGGTATCTGTTAAGATTGCTGACGGTAGTGATACCAAACGCGATAAGG  
GTGCCATTACAGCAGATTCTTTCAGAAGCATTAGGAGTATCGTTTGATCAACATGTCGGTC  
AGGATTATGTTGAGAAGGCTATCGATCGTTTTTGAATATTATCATAATAGGAAACAAAGA  
AACCTTTTGATCTGGAGTCTTTTAATAAGATCCCGACGGCTGGTTTAAAGAAATAAATCAC  
TAAACATCGTTCTTGCAGGAGCAGGTGTCGGTAAATCTGTGGTCATGTGTC ACTTTGCTG  
CATCAACTTTATTGCAAGGTAAGAATGTTTATTACATTACTTGTGAAATGGCAGAAGAAA  
AGCTTGCAGAACGTATTGATGCAAAGCTTAAAAATGTTCTATTCAAAGCTCGCTGATC  
TACCACATCCAATCTTTGAAAAAAAGATTAAAACATTAGCACAGAAAACCTCAGCGGAAAC  
TTATTATCAAAGAATATTATTCAGCGGCAGCACCTGGAGGTCAGTTTAAATCGATTATCA  
ATGATCTTGCTTTGAAGAGAATTATTAGACGTCATATAGTCTTTGTAGATTATCTAAAAA  
TTTATGCTTACAGAGATACTAAGGAAGTATTGCGAATTTTTTATACTATGTTAAAGCAA  
TTGCTGTAGAATTTAGAGTACTTGCAGGTAGAATGCAACGTCCTCGATTGTCTCCGCGACAC  
AAACGACTCGCTCTGGTTTTGAGTCTAGTGATATTGATCCCCTGATACGAATGACTCCT  
TTGGTCTCCCTTCTACTTCTGACCTCATGGTTGCTCTTATCTCGACTGAAGACCTTGAGG  
GGATGAATAAAATTATGGTCAAACAACATAAAAATCGCTATAATGTTTCGTA CTATGAATA  
ATAGATGTTGTGTAGCTAATGACAGAGCGAAGATGAGGGTGTATGACGTAGAAGAGTCTG  
CTCCAGATGGCCTTGTTGATTCTGGTCAAGACGAAGCGAAGGTTGAGCTTGTCACAAGAT  
TGAAATCAAAGAAAACCTTAACTGCACTAAAGTATGGGTGGTTTTAAGAAGAATAGTGAA  
TTTGTA ACTGATTTTATATCTAAAGAGAGTAAGTATAGTGGTCATTTCCAAGATCGTTTA  
ACAAAATTAGATTATAAAGACTTCTCTTACATAGAGCATTAACTGCCGCACTCGGACTA

TGTGCTGAGTCAGGCGAATTTACTCAGATAGTAAAGAAGATATTATTTCAAGGTAAACCA  
GTTACTGAAGCGAGACTATTTTCATACGAAACGTGAATTAGTTGATCTCGTTTGGAAATTT  
ATACAGGCATGTATAGTATTAGATGTCTATCCAGAAGAGGTTATAGAAATGAATGTAGAT  
AAGTTGATGGGTGGATATCCCGGTGGAGAGTTTGTGGCCACTATTCTGAAAATCGTAAA  
CAAGCAGATGTTTAATGGTAGGACCTGGTGACTACCAGGCATTTGTTTGTGATCTTGTTA  
GCGCATACAATACTGTTGAATGGAAAGATGCTATTGCATTTTTGATTTGTGCAATTGGAC  
TTTATTGGATTAAAGTCAAAGCGATACAAGTTTAGGACTTGATAGAAAGAAATCAAGAG  
CACTACAAAAATTTATTGTTGATTCAATAGTTGAAGGCCATGAGAAAGCACACAGATCCT  
GATGTTAGGTACACTTGATCCAGATGAAAGGGTTCTATCTGGAAAAAAGGTAGAACCCTAT  
GCAATTTACAGCAGATTTAATTGCTGAGAATAATTGTGCTTTGGCACGTACAAAGAAAGA  
TGTCACATATAATTCGTTGCCTACTGATGAGTATGAAGTTCAAATTGCAGGTAGGTTTGC  
TGCCGATAGATGTATTCTTATCAAAAACAAAATGATGAATCCACTAATCTCTGCAGAACC  
TCATCCTTTCTTTGACTATGAGAAAAAAGTCCTTACCAAAGATGGTAGAGAGGGGTATAT  
GAAAGAGTTTAAAATAAAGAAAGACCAACATCAAAAAGAAGATGGCGACAAACGCTAGCG  
AAACTGCGAAACAAGAGGATGGTTCTAGAGTTTTTTTTCCAATCTGTAATCACAAGAAACA  
AAGAACCATCCTTAACAGAAATGGTAAAAGTCTACGAAGGATCCGGTCTGAATGGATAT  
CAACAAATGTTGAACAGACTTCAGCATTCCAAAAGTTGGTAGGATATAGTGGAGGGTATG  
AATATTCCAGAGGTAAGGACTCAGCCATACATTGAACACAATGCGCAGAAAGAGTGTG  
GTGTATGAGTAAAGTATCGTAGGAACCCTATGGCTATTGTAGTGGTTAAGAAGAGTGCAA  
AGAGAGTAGTAGAAGCAACTATAAAAGAAATTAATCATTGATGGAATGAGTAAAGATG  
CAAACTCGGTCAACTCAATGCGTATAACCATGTAGCATTGAACTCTAAAAGTTTAATTG  
TTAGATCATTTAAAGCAAGTGCAGCAAAGGAAAATACTGCTAACGCAGATCTTTACAATT  
CAGGTAGAACAACCTGGTCAACAGACCATAGTTAACATGGTTCCTAACTCTTTGAAGTGTA  
CGCTAACTTTAGGCAAGAAAACGTATTACCTATTTGATACTGGTGATGTTGGGTGTGACT  
TAGTGACAACGTAAGGAGGTAAAATACAGGGTCAATCAAGAAATTTTCAGGATCCCAAGC  
AAAGCAATTTAGTTCAAATAGGTCCCCTCCAAAAGTAAAGACGCAGGGGCAAACTTG  
GTAAAGTATCTAGGGTTACGTTAGATCTATTTCTAGGAGAGTTAAGATGAACCCGTCGAA  
ATTCAGCAACAAAACATAATCATCTTCCAAGAGTTGGTGGATGGAAGGATACAGATAAAA  
AACACTGGAATGACTTGTATAAAGAATTTGTAAACAGCTCGTATGATTGTTTTTGGAGTAG  
TCGCTGTCTATGAAATTATCCAAAAGGTTCGCGCAAGATATCGAAGCAGTTATAGACTATG  
CAATTTCATAAAAAAGGCGTCAGGCAGATTGAAGTCCTGCAGGTAGATTCTCTCCTAAGT  
TGAGTGCTATAGAATGGGCCATATTTGGAAGCAGATTGCTAAGATTAAGAAAATGCAAC  
AGTCCTGCACAGTACTATACTATGATGCATAAAAAGAATTCGGTAATGCTAACGGTCCGT  
TCATAAAGATAAACTAGTCCAAATTACAAAGTGTCCACAATTACTCGTATTACACTCTCA  
GCCTGCTATAATATTATTATATAGACAGAGGACACCTTGCCTAAAGAACACCTTAAACAC  
CTTGAGGATCTGATCTTTTCTGAACGTAAGGGAGCGTTGGATGCAGTATGGTATGCACTT  
CACAAACCAGACCTGGGTGTTAAGTGGCATGGTGCGCATGCTATCCTCTATGGCACACAA  
CCTGCGAATGGCAAATTGTTTCGTTTCGAACAAAATCCGTTTCTAAAAAACACAAGATCAAG  
ACCTGTTATGATCAAACAGATACTGACGAACCTTTACTCTGGCAACCGAGCGAACATTCTC  
CGCTAATGTCTTTGGAAGCTTCTCGTATCTGTGGAATTGTACAAGCTGATTTTCGTGGT  
TTCGGAGGGGGCAGTGTATATCGCCCTAATAATTTTTAGTATCGTCTTCCCTCTCCGATC  
GTTAGCGACAATGTCCCTTGCTCCGCATCCTTCTAATACCGAAGTTTCCCCAAAAGCTGTC  
GGCAGCATTCCGCCACGATCTTCTTCTACATTATCTTATTGTTACTCTATACGTAAGAAA  
GAGGCAGATGCATCGGTTGCAAAGTCTCCTGTCTACAATTGGGTCATGGCTCTCAGCAGG  
GTGCCTAAATGTAAAGTGCGTAGCGAGAAGGTACGTGCTGATATCAGAAACATATCCAC  
AGTTTTTTCCTTAGTGATTTACCAATTCCTTCAGCAGAATTATTGGATACTACTTTACCT  
GATCATTATACGTATGAAGTTAATGTTACCTCATTAGTGTGTGGCATCTATTGTTTCCA  
TTACAGCAGAGTGTAATGAAAAACATCGTTGTTGATGGAAGTGTGAAATGCTACATCTAT  
GGAAAACCTTCAGAACAGCAGGGTTTTCTAACTGTTTCAGATTCTCCCGACAAAATTGTA  
GATACTTTGAGATTTAGTACAGCGAACTTCAACCTTAGTAAAAATTGGACGAATAAACAA  
ATTTAATGACCTTCTAATAGAAGCTCCGAGAACGTTTACTGCTAAAGCCGCGGAAAAATT  
AAATCTTACAAATGGAGGTTACGGTAAAGACGCCGACCCATCTGGGAATGTGACTCACAT  
TTCTAAGGATGGTAAGCTTGTAAAATTACAGCATAAGATGCAGCGAGGACGCAACAGAA  
TGGAGGAGAAGAAACGGAAGGTGGCCAAGGTGATGTCGGTCAAGGCTCAATATCTATTAC  
ATTTGGAAGATTTAATGCACCGACTATGGGGCACGAGAACTTCTCAAGAAAGTAGCACA  
AGAATCAAGGTCTGGTGGAGGAGAGTATCAAGTCTATCCTTCAAGAACTCAAGATCCTAA  
GAAGAATCCTATCGATTCTGGAACATAAGATCAGATGTATAAGACAAGTCGATCCAGCCCA

TGCTAATGCGATCATTGATAATGAGGACTTGAGAACTATCTAGAATGTTCTTACTGCCCT  
TAACAATGATGGGTAATGTTTCAGTTAATATTGTTGGGGGTAGTGATAGAGAAAGTGAAC  
TAACTTAGTAGCATCATTTTACTACGGTGACTTATATACATTTGATCCGATTAGAGTAAC  
CTCAGCAGGAGGTAGAGACCCTGACTCTGAAGGAGCAGAGGGTATGTCTGCATCTAAGAT  
GAGAATGGCAGCGATGGACGCTGATCTAGATTCTTTCAATTAAGGTATAGCTCAAGCGAT  
GTCTAAGGAAGAAAAGAAGCTATGTATCTAACACTCAGACAATCAATGAATGTGCTGGA  
GTCATTTGATGACTCGGCTGAAGCATCATATCAACTTTATGAGATCGCTCCTAACTTAGA  
TCCACGAGGTTTGAGGGAAGCATAATATGCTACTAGAATCTTAGAAGTAGGTCCGAATGT  
TGAAAATATCGGCACAGGTATTGCAGGTAAGGTTGTAAGTCATGTTAGTAACTACACCAT  
TTACATTGATGAGCATGATAATCTCTTTCGCTAATGATTGAAAAACCTTATGGAGGCTAA  
GAAGTCTGTTTATGGATTTCGGGTTTACACCTGCAGCTGAGATAGGAACCAACGAATTAGC  
AGCCTATTATCGTAGAATGACGCCTGGCGCCTGCTGAGAGAAGATAAATAAAAAAGTAAA  
GGTTCCTAAGTAAGATTGATTTAAAGAACTTACCTGTCAGGAGTGCTTCATACCAAGAGG  
GGCAGGGACAAGCCATGACACTAGATCCCGTTGGAGAAGAAGAAGGTGAAGTAGATAATG  
ACGGTGATAACGATCCACCTGATAAGTATCTTAGGACACGTCGTTAGGCAAATGCCAAAG  
CTATGAAGCACGAACATCATCAAAAAGATGAGAATGGTAAAGTCATCGAGCTTGCTATTG  
AAGGGGAAGAAGTAAAAGCAGCATACTAGTAACGAATCCTGATAAGTAGGGTGACACCT  
AAGCCTATCAGAACTTTCAAGCAGGTCTGAAGGGTAAAGATGGTTTACCATTATACAAAG  
CCGCAGATCACATGAAAGAGATTTAAGTGATTCATCCTGATGGCAACATTGAATCACCTG  
AAGAAGTAGAGAAAGTAGCAGATCACACTAGAGCCAGGGATGCTAAGCTGGAAGAGGGTT  
ATGGTGAGGGGAAAGGGTATTCTAAAGGTGGAGAGGTAAGGGCTCAAAGAATGCAGAAAG  
GCGCAGTGGCATATGCTGGTCTTAAACAAGGCAGCAAGTGTAGTAAAGGAAAGAAACAGAA  
CTAAACTAAGGTAAAATGCCAAGCATTGATAAAGTAATGTTATTTTTCAAACACCTACC  
TGAAAAGAAAATAAAATTAATACTAAATTTCGACGAAAGGGAATTTTCATAGAGGGAGCTAA  
AACCTCAACCATGGCTAAGCTTGCAGGGTGCTTGAACACGACACAAAACGTCACGTGGA  
TGAAGTTGACGACGAAAAATCAGTATCTACCGAACAAAAAATTTTCGACAGGAACGAAGA  
AGTCGCAGAAGAATGCACAGAAAGCAATGCGCAAAGCGACAACCTCTGAAAAAACCTGTT  
AACCTTCAATCCATTTACGATGGATCATCTTATAGATTTTAAACAGGATCAGGTAAACC  
ACCACGTCTAATGGCTGCCTTTGACAAACCATCTGAACCTAACCTAAAATAAAAAACA  
AAGAGTCAAGAATATCAGTGTCCGGTGAACAGACTAAGTATGAAGTTATGAGTAAAGACAC  
GTATAAGAATGCACATAAAGACTTCAAGGGTGGCACTAAGAAAGAACCTTGGGTATCAGT  
TTAGAATCCCGAAAAGAAAGCAACCTTATCAAGATTTGTTAAATTCTCTGAAGCGAAGTA  
TGAAAGTGGTGCCTCAAACATGTTGCCATGTCTTTCAAAAATATAAGAGCAGTAGGTTA  
CGGTGGGAACGCCACAACCTCCAGAGGGCGAGAAGCAAGGAACATGATGAGAGAATGAAGAA  
GTATAAAGCATCCCAAATGAAAGAAGAAAAGCATAGAGCTAATGCACTTGATGGTCTAAA  
GAGACCAGTCATTGCCAGTATGGTAAAGGTGCTCCATAAGAACGGGTAGCAAGAAACA  
GAGAAAAGTCAGAGGTGCCAAGTCTATTGCAGGAACTGTTAATTATAAGATGATGTCAGA  
TCAGAAAAGCGAACTGCTGAAGTCGCTAAGAAGCATGGGTTTAAAGTCGGTTCAGAACTA  
CACTCATAACCGTGGCTCGTTATGGTGGTAAAGATAATTGCGACAAGGGTAGAGGATTATG  
GTCATGCGCACACCCTGTAACCAATCTCATTGTCCAGATGCTCAGTATTATTGCTTTGAT  
GATAGAGACTGCAAACCAATACCCAACGGTATCTCAGTAGTAAAGAATGGTATGTTGGCC  
AAAAATACGACAGTGTTAAAGAACGAAATAATTGTGAAGGCACAGAAAAACATACTATG  
CCAAAGTCAAAGAATCTCAAGGATGACATGGCATAAGGAAAAGATGCCAAAGACAAGTCA  
TATAAGACTACTACAGCAAAAGGCGTACGCTTCAATGACAAGATAGATTCTGGTCCATG  
AAGGACGATAAAAAAAAATAACGAATGATACCCTATCTGCCGTCTAATTACATATTAAGAT  
CATGATGGGAAATTTTTTAAATGCCACTGCCATAACGTAACCTATTCTGTGGTCAATAA  
TATCCCTGATGGCGCCGGACTTAGCGAGAACTAAGCGATAGTTCTTGATTCTGTTATTGG  
CAAGGCAGTGAACTCACCAAGACGACCGCGGCCAACGCTCTATTTGAATAAGTAAAGCA  
AACACTTGCTGCTAAATAAATCGCGTTTGCAGCCCTGATAGTGAGGTCTCTGAGACCCCT  
TTTTATATAGATAAATAACAGGAAAAAACAGAATTTTAGGAGCATAACAATGGCACTTTAC  
GGCGTAACTGATGCAGACGATTCCAAGCCCTTGTGGGCTGTGAGTGGGAGCGGTGTAGAC  
CCCCTAAATATTTTTCCAACCGCTGATGGTTGGTTTTTTGGTCACTACAAGAATGCCGCG  
AAGACAAGTGGTTCGATGAAATTTTAGCCTGAGATGATGGGCTTGTAGGTGCAGGTTCT  
CGTGGAACCAATACCCTGGGTGGTGCAGATATTACTGCAGTAGTCTTTGAAGAGGGAGGT  
TATGCGGGTGGAGCAACAGGTTCTCTTGTGTGATCTGTAACGAGCAGGTTACGTCACA  
AACGGTGCAACTTTTGTCTGAGAAATTCTACTGACAGTGCCAACATGACTGCAACTGCT  
CCAGCACAAACAGGTGTAACCCGTGATCAGTTAGCCTGCACTGCTGCTGCAACTGGTAAA

GCACTTGCTATCCAAGCACAAACAATCTCTGGAACAATCGTTGAGTCCGGTGGCGGTGTA  
GCATCCAAGAAGGTATGTGTTTCTGGTGGTGTAGTTGGTGCAGGTGGAAGTGGTTGTACC  
GCAACATTAAGTCAAGTAACTAACATATGAAATTTGACGAAATAAATGAGGATACATT  
TCTCATTTTTCGCCATTAAGCATTATGAAAATCCTCACTGTGTGACTCGAGAGGATTCTGA  
TGAAGATTTAAAACGCTTCGCGAATCTTAAAAGACTCTTGAAGCGTTATGTAAGAAGTGC  
TCCGTTAAGGACTCATCTCGTCATCAATCATATAACCATCTTATATAATGGTCTAGGTGA  
AGCTGGAACCCCTCTTGTTTACCTTAAATCAGAACGAGAATATTTGAGTTTAAACAAAGAC  
TCTACAGCTCTATTTGAAGAAATATCCAGTAGGGATGCTTCCAGACTTGGAAACTAACCC  
CGGTTTAGAAGAAGAACTTAAACAGGTATCGCCTATGATGACAGCAGGAACAAGCGGCTT  
TAGTGGTATCGCAGCTGCCAGAGATCCTGTAGCGGGTTTTGAACCTGGCATGACGATGAG  
AGGTAACCTTAAACAAAATTAAGGCACAAAAATCTAGTTGCTGTGAAGAAACAGATAGAGT  
AAACCCTAAAGGTCTTCTAGATTATTCCAATACAAAATTACCGTACCTGAGGTTGGTGA  
ATAAACCAGGATTGCCAATAGTCTGCTGAACTCAGGATGAAATTAAGGATGGCAATCCA  
GACTAAGTATAGGTCTGGCACTACTATTGAAAGAATCATGCCTGGTGGTGTGCTGCCAAATA  
CTTCATGGACAAGAGAACGTAGCACAAGAAGAATTTGAAGGAAGCCTCTGGACAAAAGAA  
CGCAAATATAAACGATAAGACTACTAAGAGCGGTTCGGAACATAACTCATCATGTGAATAA  
GAACGACGAGGCAGATGCACAAGCCGCGATGAAGAATGATCCGAAATACATTGTTGATAA  
GACTAGAGTACAAGGTGTTAAGGAAGCTGCAGGTGATCAGCAGGTGACGAGTCTATTGAA  
TCAGCAAAAGATTCAGAACATGAAGAAGAGAGTCCGGTTAAAGAAGCGAGAATTACAAAA  
ACACTTACAACGAAAACACAACACCTTAAAAACAAGCAAGGACTGGAGCAGAACATGA  
CGTAACAAGGTAATGTTCGGACCTTAATACCGCTATTATTGAGCGACCCGAAAAAGTTGTC  
GATTAAACGCAGGAGAATTCTGTGAGAATGGCTCTACTTCTTGCTGTGCACATTGAGAAG  
ATAGATAAAGAAGTCAAGATCGATCAAGTTTTGTCTGACAAGATTGATAGATTGTATGCA  
GCTAGTGATAGAGATACAGAACAGAAAAAGAACGGTTTTGAAAGAGACATCCGTAAGATA  
GATGCTCGTCTAAGATTGATGGAAAAGAAAATGTGGACTAGACTAGGAGCAGTTTAAATC  
TTAACGATCCTTGTATCAGCACGAGCACAGGCAGCTCTGAAGCAGTTGACAAACAATCAA  
AATCCTAGTTTGATACCAACAGAGATTAGTAGGTCTATTTTATTGACGATTCCTTTACGA  
ACCTACTCTCTGATCGTCTTACAGACTTAAAGCAGGTCAAGAACGGGACGTACAACGTGA  
GGCGTCCCTATTGAGGTGACTCCCAATATCCTAATAATAAAGCACGAGGTTATTTCTTCA  
CTAAGAATATTGTTCTCGTTTTTAAAGTGCCATAACTGCCGTGTAGTCATATCGTTTGGTA  
GCTTCCTAAAGGACCAAGCGAGTGACCTTCATGATGAAGACATCATGGAGAGATACAAAG  
TAGGACTCAGTGGTAAAGGTACGAATGTAGCAGATCCTGAGTTTAAATTAATAAAAACCAA  
TCTTGAACAAGAAGGGAGGACTACAAAGTATTTAGTGCTAAATATTTTCGCACTCAGCAT  
TAGCGTACTTAACCAAACGTGGTAGACCGAGGAAACCTTTATCGAGTTGATACTTTGTAG  
ATGAGTTTTGCACATCGGCTAACACACAGAAATCTACCTTCCGAAATGTCTCAAAGGATC  
ACCCGAGGATTATTATTCCTTTTATTGATGAAAATGGCGAATGGTTTGGATGTAGGGGGA  
GGTGTCTGAATCCCACCGATAAACTGAGGTATCGATCTATCATGTTGGATGAAGATCAA  
TTAATATATCTGGTCTTGATCGTATCAGCTTGAACAAGACCGATTTTATTACTGATGGTC  
CTCTGGAGAGTCTTTTTATCGACAATGGGAGGGATCTGGAAGGTGCAGAGGTTGATAGGA  
AATTAATAGATGGGTAAAGATGCAGTCTTTGATTACGCTAATGAAAAACGAAGCAAGGAAA  
ATGTTTGCCGTATTGAGAAAGCAATTGATATATGATATGAAGTAGTGATGTGGCCTAGTT  
GTCTGCAAGAGAACGATCTAAATCACATGTTCTCTTCTGGACACGACGTGCAATCTACGA  
GAGAATTTTATACATACTCAGGATTAGAAGCAAAAATTAATTAACCGAATGGAACAAGG  
CATGAATAGTCCAAGCTCACCCAAACCAATCAACGCCACAAAAGAAAAGGCGCTATAAC  
ACGCTTAGACCTTAAGAGGGTTCATAAGATGGTAGCTCTAACCTGTGAAGGTATTGCAGG  
GGTAACTGAACCTGCTGTAGACACTAACAGTGGTCTTCAATTTTTAGACGGAATTAAGAC  
ACCAGACAATCAAGAAATACTTAATAGTTCAGCGAATTATCTGTACTCTCTTGATCATCA  
TAACTATCATTATGTTGCTGCAAGATTGCTGCTGTTTCGGTCTTAGATAGGCAGTATATAT  
CGGTCACACTACTGGTCAGCCTCCTTTACTTGAGCATGTCAAACAGTGTATAGACAAAGG  
TGTGTATGATGGCAGTATTGTTTCCAAATTTACTGACGAAGCATGGGAAAAACTGAATTG  
ATATATTGATCACGACAGCGACTTTTTCTATACATATGCAGGTATTTCGTCAGGTCGTCGA  
TAAATATCTCGTTCAGGATCTTTCATCAGGGGAACTATACGAACTCCACAGTTCAAGTA  
TATGATAGTGGCGATTATTCTCTCCAAGACGATCATAAATTTTTATCCCTTGGCGTATGT  
ACGAAGATACTATGACGCAATCTCAAAGAAAGACTCAACATTCCAACGCTTATTATGGG  
AGGAGTGAGTTCGCCACTCAGACAATTTGCACGCTGTGTTCTGGTTGTTGTTGGTGACAC  
CCTCGATAGCATTTTTAGCAGTGACATTGCTATTTGAAAGAATGTTGCACAAATGGCGGG  
TATCGGTATCAAGGCGGGTAGAATCCGTTCTGTCAACAGCAAAATCGGTAGTGGAGATGT

ACAACACAAAGGTGTGCTACCTTTCTTCAAACAGTTTGAAGTACTGTCAGATGCTGCAC  
TCAGAATGGCATTAGAGGTGGAACAGCTACTGTCAACTTCTCAATCTGGCACCAAGAAAT  
AGAAGATATTATTGTTCTAAAGGATAATATAGGGACAGAAGACAATAGAGTGTGGACACT  
AGGCTATAGTATACAGATTAGTGAGTTCTTTAATCAAAGATACATTGAAGAGCGCAGGAT  
CCATTTGGTTAGGCCACATGATGTGCCTGGTTTCTTCGAAGTATTTGGAACCTCCTGAGTT  
TGATGATCTATGTGTATAGTATGAAAAAATCGTGCTATTCCTAGAAAGACGATGAACGC  
ACAGAACTCATCCTTGATCTATTGAAGGGGATAGCAGAAACAGGTCGCCTTTATATCAT  
GAACATTCATCACTGTAATAGTCACAGTTCATTCAAAGATAAAGTCAACATGAGTAACTT  
GTGTCAGGGGAATACTCTTCCAATAGACTGTATTTCGACATATACATGCTTCAGGTGAGAT  
CGCTTTGTGTATCCTATCTGCTATGAACGTCGGTAGGTTAAAGAACCTGGAAGAAATTGA  
TGAACATATGTGACCTTGCTATTCGTGGTCTTGAAGCATTGATTGATTATCAACAATATCA  
TGTCAATGCTTCAAAGCAAAGCGCTTTGAATCGGAGATCACTGGGTATTGGTAACATTGG  
ACTAGCACATTATCTTGCTAAGAATGGTGCTAAGGATGATTTCGTAGAAAGCATTGATTT  
AGTTCATAAACTTACAGGAATATTACAGTATGCTATGCTAACGGCATGGAATCGTATGGC  
AATGGAGAAAGGTCCTTGCGGTCATTACGGGAAGACAAAGTATACTGATGTAATTCTTCC  
TATCGATACAGATAAGATTGAAGTAGATGAGATTGTTTCGGATTGACCTGTCATGTGATTG  
GGAGTATCCCAGGGGCAGGATCAAGTAGTATGGACTCAGGAACAGCACTTTGTCCGCCCA  
GATGCCTTCGGAGAGCAGTTCGGTTGTGTCAAATGCCACACACGGAAGCGCGCCTCCTAG  
AGGCTACCTGTCCGTAATAACTTAAAGAAGGGACCCCTTAAGGAGATTGTACCGTCTTA  
TAACTCTCTAGACGCAAACCTATACCCTGTTATGAGATATGCATAACATTGATGCTTACAT  
CAAAGTAACTGCAGTAATGCGGAACCTGCTTCGATCAGGCAGGAAGGGGGAATTCGAGTTA  
GAATCCAGAGAATTATCCTGACGATGAAGTGCTGTAGCTGTGCTGGCAAAGAGGTTTT  
GTCCACATACAAATATGGGTGGAAGACAGGATATTAGTAAAACACATATGCTGCTATAAA  
AGATTGTAACGACGAACCAAACGACGATAAATTTATCAACGACATGCCACCTCGATGGA  
AGAGGAGTGTGACAGTCGCAAGGTCTGATGCAGAATTAAGAAGGAATGACTGTATTTACA  
AGAACAAAGTAAAGACAGAGTAACAACCAATGTTTTTTGGACAACCATTAGGAGTACAAA  
CATATGATGCATATAAGTATCCAGTATTTGATTGACTTACACAAGCACAACCTAGGATATG  
ACTGCAGTCCCGACGATGTAGCTCTCCAGAAAGATAGACCAGACAATCAAACCTCATAAC  
CAGAACAGAACCATCTTTACTTCTTACTTGAAGTATCAAATCATGGTTGGCACAGTTC  
AAGGTAGAGGACAAGGTATGGCTTTGATTCCCTACTGCACTCTTCCTGAGTTTGAAGCAT  
GCATGTGCGTAAGGCAGTTTAGGGAAAAGATCCATAGTAATTCCTATACTGACGTCATCA  
AGAATGGATATCCAGATCCTTCAGAGGTATTTGATACGATCTTAGATGATGATAATGTAC  
TCTCTCGTGACCATCAATGACTAAATATTACGATGAATTTATTAATTCTGCGTACGAGT  
TTCATAATTGTCAACCATGGGATATTGCTAAACAAGGAAATTTGACTGGAACACATGAAA  
GATAAGAACTAAAAAGAATACTCAATATGGCAATTGCAAACGTTAACATTCTTGAAGGAA  
TTCGTTGCTATGTCACCTTTGCGTGCTCTTTTGATTTTGGCGATAAAAAGCTTAGGGATG  
GCTCAGCTAAGATTCTCTCTAATCGATAGAGATAAAAGTCAACACGTGGTTATCACAC  
AAAATATGATCAGGAACTGGGCAAAGGTGACGACTCCGAAATGGCAGAAATCTCAAAG  
AACAAAACCCGTCGTCGTAGATATGTGCAAGAGAGCTGTTGAAGTGGAGAAGACTTGGG  
CAAACATTTGTTTAGGGAAGGTAGTATGATAAAATTGAATGTTTCGCGTACTAAATAATT  
ATATTGAGTGGAGTGCCAATCGCAGAATGAAAGCAATCGGATTAGATCCTGTGTTGGATC  
AAGTTGATAGAAACAATCCTTTGCCATGGACTTGACAATGATTAAGTAGTAAGGGTCAAC  
AAAACGCACCACAAGAAACGCAGATTGAAAGTTATGTCGTCGGAGGAATCAAACAAGACG  
TCCAAGGAGACTCCTTTGCAGGATTGTCTCTCTATCACAGAGTGGTTAGTCAAACCTTAT  
AATGATCGAGTGGAGCCAGGAAATCACTACGGTCCAGAAATTAAGTACAAGATCTGGACT  
GCTGCTAGGAAAGACGCAACTAAGAGTTTGCACGAGGACTTAACTAAAGATAAAGATAAG  
GATGAAATTTGTTAAAGTGTATCGTAGTGAACCTACCAATGCCAGGAATCTATGAGATAAA  
TATAATCTAAAAGTAAACACTTGGTACCAAACGTTTCATCCAATGCACGGACTCGCACTACT  
GGTAGTGATGTTTGCAGAACACGAAGCTTCCCCTGTGTAGTATGATGCTACGAATTGAA  
TCAATAAAGGATTGAGAACTCAGCGTTCAGAACCTTAGTTTCGGATGCTCATGAGTATCT  
TATAGATTACTTCTATACGACAGTATCAGAACCAAATTTGTGAAGCTTGGCAACTTGGACG  
AAAGTTATTCGCGGAACGGGGCGTTCATCCCATGAGCCCTATTTAATTGCTACTAGAGT  
GACGTGTTCTGATATTCAGCCAGTAATCGAGCGGGCTCTGATGTGTGAGGGAATTGATGA  
ACAAACAAGGCAAGAAATCAATGAAATTTATCAAGTAGATTTTACCAATGCTGTAGGGCT  
TGAGTGCGATTGGGACACATACGAATAAAGGAACGGACCTTGAACAAGTCTCTAACTTTA  
GGAGTAAAATATTGACTACAATTACTTACAGAGGCATCAAGTATGACGCTGAAGCATAACA  
AAGGAAAGGTTCTTTCAGAGCAAGCAAGTAGCACCCGTAACAATTTAAAGTATCGTGCTT



TGAAGGTCGAGCGAAAATTTCGCATCCCAGTCTTACTCATGACAGA ACTACAAACCATCGG  
GATCATATCCCTAGGGTCTGCTGTTTGCAGGATTATGATCTATCTGGAACCGCGTCTTCT  
GCTTCTCAAGTTACCAACAGTTGCGAAAGGTAAATTTTGAGACGGTTTATAGTCTTCCCG  
AATATGATTCCACTAAACGCGATGCCGTCAAGACCTTCGCTTTTTTAACTCATCGTGGAG  
TGCACCATGTAAAGTGGGTTTACCTCAAGGTACAATTCGGTCGTACACAACCGTGCAACA  
AAACATCTTAATTATTTTAAAGATACACACTTAAACCGTTGTCCTTTACGACTGGGGTTTT  
ATATGTTAGAATAAATATTATGAATGATGCGATGGAGCACCATGGAAATGTTTCCGCATC  
GTGCTGATGCCGAAACGATCTTTATTGCCTTTGAGACAGGTTTAAATAGACGCTGTGACGA  
CCAACCCATCTCTTAAGTTAAAAGCAGGACAAGATACTATAGAAGCCATAACGGTAATTT  
CAAATAGACGTCCCTTCCATGCTACAATCTCGGCCGAAGTGCTAGGTGATTCTGCCACTG  
AAATGTTATATATGGCAGAGAACCACATCGACATTGGACCAAACATCTGAACTAAAGTTC  
CATGCACACCAGAAGGTCTTAAGGCATGCTGTGCCCTCACCAACCAAGAAGTTGGTGTA  
ATGTCACAATATTATTCTCAGCAGCACAATCAATTCCTTGCATCTAAAGCAGGTGCAACGT  
AGGTTTCTCCTTTTGTAGGAAGAGTATACGATACGTCATTTCGATGGACTCTAATTTGTT  
AGCAGATTGCAGACGTATTTGCGACGACGCAAGACACACAAAGGTTCTCGCTGCCTCAG  
TTAGGGAAGTTCAACAAGTATCATCTGCCTTAAAGAGTAGGAGCAGATATATGCACTCTCC  
CTGTTTCTGTTTTTGTAGTAGATGTATAAACACATTCCCTACAGATATAGGATTAGGACTGT  
ATGATAAAAACCTGGAAGGAATTGCAAGGATGTCTGAATAAACAAATCGTAACTATCCTCC  
CACTGGGAGAGGTCAAATGAGAAAGAATGATATCGAACCCAGAATCTTTAGATTCAAACA  
CGAAGGCTATAATGAACTTGGCGGTGCCCGTCATGCCTGGAAAGCAGGTGCGGACTATTC  
ACTCGAAAGATTTGTGCAAATCCTACAAGAATATTACTCATGAAGAATAGAGGTTTAAAA  
ACATTGATAAAAGACCGTGACGTTGCAGTAGCTGAGCTAAAATATGCGGTTTATCCAGGC  
ATTGGAGCATATCGTATAAGTAGCGATACTGACAAGCACACTAGTTATCGTGACATCCAC  
GTCGAAGACGGACTTTGCGATTTCATCGTGATAATCCCTGGCTATGTGCAGGTACAACTTT  
TACCTCTATCGATATTGGCGATTTCTTCGGTTTCGACTACCGTATTATAAATAAGGTTAA  
TGAGAGATTCTACAGCCGAAGAAAGTAATTGTATGCCTTTAGAACACCGAAGGGAAATAA  
AAGAATACAAAAACAAGAAACCGATTGGAAGAAATATTTTGGCTCTTGTCCAGAATTAAA  
AGAAGAGGCTAAATTGTATGGAAAGGAAGTCTTTAGACGAAAAACTATAAGCCTACTGAA  
CTCCAAGGGTCAATGCAAATATGAGGAGACCCGACAAATATTTATCAATAATGTACTIONAA  
GGACCCATCAAAAGATGGAAGCCCTGCAGTTCACACCTCGAACATTCTTGGCAGCTACAT  
GCGTCAAGATTATTTCAATGCTTGACCACTGCTGGTAACTCTTCTATAATCTCCAGGTAA  
TTAAGCGACGTCTCCTTGGGTGCGGAGAATTCAACATTCCAGATTTCGATGATCTACATCAT  
GATCGATCAGCGGCATAAATGTGCTGAGCTCGAAGAGGAGGAACTTGAAAAACAATGGGA  
CAATAGCTCCGCGGAAAAAGCAACTACCTTCTAAGGAGTTCGGTCGTAGGTTCAATTCATA  
CCTGGCGCGTTCCCTTCGGGCCAATCGGTATATACAGGTTAAAAAAATTACTIONACAGGATA  
ACGCTTCTCGTCATGTCTGAATATGCTTACGGACTCACTAGGCCGACAGATTATACTTGA  
CACAGAACATCCTATCATATATAATGAACTAGTAAAATACAATGAGGATAAAGCTATACA  
ACTCTACGGTGATATAGATGAGGATTACGATATCCTTTTAGCCAAACTTGAAATCTATCT  
TTAGTATGAAACGTGAAACCCTTTTAGAGCGGTATCCATACCGTTAGGTGTGAGTTGGAA  
CTGTGCCAAGCAGTCGTCCATACTATCCTATCCGGAAGGTTACGAATGGACACAACGCC  
ACAGAAATATATATCGTCTTGACAATTAAGGTCATCAGGGTTATGTAATTGAAGACGTTG  
AATATACCAAATGGTTAGACCATGATCCTGAGCCCCTGTGTACTGCGGAAAAAGGGATG  
TCGTTTCCGCATCTAATTGATGAATTCCGAATTGTTATTGAGGATCTACATAGCAGTGAC  
TAATAAACCTGTTTCTCTCAACAAATGCATGTTAATATCCTAACAGACGGATAAATCCC  
GTCATTGCCATTAGACGTATAACTAGATGGTTTTAGGCGCGAAATCAACTCATAGTCCTA  
CTCGTAATGTGCGCCCTTTTGGGTGCTTTTAAATTTCTTTTATGTTGACTCTGAAATCTT  
AATATTTCAAACGCTTGACACCTGTTGAAACGTTATAGATAATTGTAACAGTTCCTAATA  
AAACTACACAAAATGACAACAAACACTGAATCAGGCGGAAGGCATAATATATATCCAAC  
GAACATCGTCCTCCCATTGATAAGA ACTATCGAGGATACGGAAAGAACCCTGAACCTCAC  
AGTGGTGGCTTGGCGATGCTTTGTTTAGTTGCGGGTATTTTCTCTTACGTTACCACTGGT  
AACTTCTCTTGGGTGGTCTTCTTGGTTTTTAAACATCGAACTTATCGAATCAATTATAT  
ACACACAATCAGCACACAACCGGCACGCAATCTGGACTCCAGAACTTAAAGGAGTTAATG  
GAAGGGCAGCAATGCTCGGTTTCGTAGCAGTAGTTGTTGCTTACGTTGCAACTGGTCAA  
TCACTCCAGGTTTTTACTGAGGTATGCATCAAAAGCATTAGAAGTAGAATTACAGAAAGA  
AGTTGGTAAGAACTTAAACGGTAAATTAGCAATGCTTGGTATCAACGCAGGTATCTGAGC  
TACTTCAACAGGTCAACTCATTCCAGGTTTCGTATAATGAAACATGGGCTTTTCGAA  
ACGAAATTAACGGCAGACTAGCGAAGATTGGTCAACTCGCAGCAGTAGTGGACTAAGAT

TACACAGGTTTCGATCGCACCAGGTTTTTTTCTAATGGACTATCACGACGTCATGGAGGCGT  
CTTAGAGAGCTATATCTGTACGTTACATTCCATTCTTATACTTTATTATTTCCACAGATT  
TAACAGCAACTGCTGGAATACCTGTCTACGCTCACGGATTTATTTAATGTATATAGATCA  
ACCAACGTGGATTCATACAATGGTGTGTCCGTTTATGCCTGCCATAACGCCCTTTGTGAT  
TAGTTTTCTCATGCTCGGTGATCTTCCCTGGGACGATGATGACGATGATAATGATGCTGC  
CGGAGGAGTTATAACGCCAATTTATAACTATGAACCTCAAAGAGCATAAGTACGTTACAT  
TCTTAGCATCAGGTGTTGACGATGCCAAATCCTAGATCACTCTATCAAGATATGGAGAAT  
CCCAACGTGCACTATGCAGAGTTACTATGTTATCCTGTTGCAGAATTAGAGTTTAAAGCA  
GATTGCAGTGGCAACAGAATAGTTATAACAACCTAAAGAGCAAGCTTGACTTCCTTTTTT  
TAATAAATAATTTTCATGTTACGTGTAATTTATCATGGCAGCATATACAAACCACTTC  
CGTATGGGTAACGACCCGAAGGACTGACGATTAATAATTGACTAGTTGGTTTCACCTAC  
TCCGTGGAACCCAGACAAAAGAATCGCAAGGATTTTTGACACTCAAGTAGGTGCCAGAAA  
GTTTCTTAAAGAAGGGGGTATGAAAGGTACCGTACGAAATCATTTCATGACAATTACTGCA  
TCAGACAAATTACCTTATGAAGGATGGTCTGATGACAACCCTGAAAAAGGAACAAAATAC  
ATAGGAAAACCTCTTACGAATCAGGCGATATTTCTATACACCAACAGATGTATGACATC  
TGCACAAGACATCTGAGTAGAATATGTGCCGCAGAAAAAAGGAATTATTACCCATCTTTA  
TCACTCAACTTATTCCTAAAGATATATTACTATAAATAAATCAAATTTGGTGAGGAAATCC  
TCACCTTTTTCTATGTGCACCCGTTTAAACCGAGACCTATAGGTCGGTAAATTACGTCTCTC  
ATATCCATAAGTGAAGGGATTGATGGAAATATGGTATCGATCTCCCCTTTGAGCCCTACT  
GAACAACCTCCTATTGACAAGTCTTTCAAGACAAGGCAGCCAGGGCGGACTCCTACAAGG  
AATGCCAGAGTTCTGCGAATGGGAAACAAGCACTAAAAACAGACTTTATGTGGGTTGGTT  
CGGTGTCTTAATGATTCCATGTTTATTACCAGCAGCAACATCTTTCATTTTTTACATTTCT  
TGCCGCATCAGCTGTTCGATATCGACGGAATCAGGGAAAATGTATCAGGCGCTCTAATACA  
TTGAAACAACATCATCTCAGGTGCAGTTGTTCCATCTTCAAACGCACTCGGTCTACACTT  
CGACCAAATTTGGGCAGCAGCGACAATCGATGAGTGGGTATATAATGGCGCTCCTTAGCT  
GTTGGTAATCTTCCACTCCCTAAACGAAATATCTGCCTACATGAGTAGACAGTGGGAGTT  
CTCATAACAGACTAGGTATGGGGCCTTGGATCTGTGTTGCTTATAACAGCACCAGTATCTGC  
ACCGTTTGCAGTATTCATTGTATATCCACTTGGTCAGGGTTGTCGCTCTGATGGTATTCCG  
TCTAGGAATCTCTGGAATAATCAACGTCATGTTTCGTTTTCCAAGCAGCGCACAACTTCT  
TATGCATCCCTTCCATATGGCAGGGTCAAGAGGTATGTTTCGGTGGTTCTATATTCTTCGC  
ACTGCATTGTTCACTTGTAAACACCTTCTCTACTCGGAGCGACCACTGAGGAGGAATCTCA  
GAACTATGGTTACAAGTTCGGTCAAGAAGAAGAACCCGATAATATTGTTGCAGTACATGG  
ATACCTCCGTAGATTAATCTTCCCAGATGCAAGTTTCAACAACCTGTAGAAGTCTTCTCTT  
CTTCCGAGCAGTGTGCCAGTTGTATGTGTAAGGTTACCCTCTATGGGTAGCTGTACAAT  
TGCATGCAACTTGAACGGATCTAATTATATGCAATCAGCTGTAGATGTTAACGGTAAGAT  
CATTCTACATGGGGTGTTCGTGCTTAAACAGAGCAAACCTTGGTATGGATGAAGTGCATGA  
GCGTAAACGCTCCCTACTTCCCCTAGACGTAGCATCTGGGGAAACTACATATGTTCGATTT  
AAATGCACCAACAATCGGTTAAAATAGTACTTTGGAGCACAAGCACACATGACTAAATTT  
CTCGTAAAGTACGTGGGATACTTTTCAATATTTGACTTCATATTCTTTATTGCAATAGGT  
ATGGCTTTAAGACCTGTCCTAACCTAATTTAAATAGAGGGGTAAGACCCCTCTTTTTTTA  
TGGTAGTTTATTATCCATAATGTAGTTTTGGTCTGTATGAGATCTACCTCACGCTGATG  
CTGATATAGCACAGAGGGCACGATTTGCTGTGTCTGATATGGAGCGTTTAGGAAAAGACT  
CTGAAGGTGTTGATCCTCTTGATTTGACAGGTTTCTATGATAGTATTCAAGAAGTTATTG  
GAGAAGTGCCCTCCTTCTTTAAGCGTCGAAGATGTAAACAAAGAACGTTGCCTGACCGCA  
CTATAGAAAATTACGATTGTTTATGGGAATATCAAGGTGCCCTTGGAGAGACTTATGATA  
GTGGTTGGAATTCTGAAGACGCAAAAAATGAAATTAGTTTAGCTAATGCTTTTCCTAAC  
CGACATTATCTCCAACAAGTAGTTCACAATATCAACGGGATATTAGTATGAGACCTCTAA  
CTGTCTTCAATGCTAACGAACTATAGTTACAAAAACTGCTTCTGAAGGATCGTCTCCAG  
CCCCGTTTTTCATCTCAATCTGAGTAGCTATCGACTTCTGAAGCAAATTAATAAGGTCTAT  
GGCCGAACACAGGAGCGAGTACGTTACCACTCGCCCCTCCAGCATTAAACATATAAACTTC  
ATATCACAGAAGCACAACTTATGGATTTACCTTGGCTGCTGACGAAACTGAATCTGTAA  
CGATTGGATCAGAGACTGCGGCGTTCATCAAAAATAGTAGTGGTATGACAACCACTGGAA  
TTCCCCTACTGCTACACGATCATTGTTCAGTGGGTGTCATATTAGTGAAAGTGATATGCA  
CGTATGAAGTCGCTAATCCCCCAGCGAAAGCTGATGATGAATATCTTTGGAGAAATAATC  
ATGGTGGATGGTATCTGAAGTTATGTAAGGGTGGAGCACGTGGAAGTGAACCCAGTATTT  
CTTGGGTAACCTCAGGTGCTCATCCCCTATGGTCATCATTCAATAACTTACGCAGAAT  
TCCGAAGCGATAATTATACTCTACTAGCTGCCTCTCAGACAGCAACTTATAATATAAATA

TTCCTACAGCATGTAATTATGATTTTGGCGTGTCCAGGCAAATAACACTGCTGCATTCTCAT  
TTGATGGAACACAGATTGCGACGTCCAGTTCATATACAACAAGTAGGACTGCTACACTTT  
CTAACGTGAGTGCGGGAATGCATACTTTAGCTGTCTCAGTTACTAAAGCTACTACATCTG  
GTAACGTAGCTGATACTTTGGACAGATAATGCTGGTGGTGTAGCATGGACAATTTCTCATT  
CTGGAGCTATAATAGCTTCATCATTAAAGTCTGTCTGCACCTGGTGACGGAAATCTTTTCT  
GGCACACTAGAAAGGCAACATGATATACAACTCATTACATAATGGAACCTCCGCAAAT  
CCCAAACGATCAACTACCTCAAGGGATAAAATAACATATAAGTTATGCTGATGCACACTT  
TGATTTTGTGTAGATCCTACGGAAATCAATGACGTACCCTTAGACACAGATGACTACTT  
AGAAGGAAAACAGAAAGTGCAAAAGATGTTAATTGAAAACCGTAAACGAACACACGAATA  
CCACGAATCCAAAAGAAACAATCCAAGAAGCAAAAAGAACCAGCAAGGAACGCAAGATTG  
ATAAAAATTTGTGCATTAGAGAGGATGATCTCTCTTCCAAATGAATCAATAAAAGAGTGA  
AGAAAAAATTGCGTGAACAAAACACTTGACAGATCCCAAAGAAAGTGTTAGTATAAATAC  
TCGAAGCGAAGAACGTAACGCGAACAAGAGTTCGGAAGGGTTCATTACTCCCGCTCCG  
TCTCTACAGCTAAAACCTAACAAAGAACACGTCTAGTTCTCTAACATCTGCAGGTATAAC  
TCTGCAAGAAAATAAGAACAACAATGATAAAATCAACCATCGCTGCAGTCGCTGCAGCC  
CCTCTTCTAGGAGCTGGTGCAGCTTTTGTCTGGTCCATTTGTTAACTTAGAAACAACCTGGA  
TCATAGCCTGATGGAACATACTCATCCGGGGGTTTAGAACCAGTTGTAGGATACGAGGGG  
GAAAAATCTGGTGGTATCGGTTGGTACATATCTGGTGTCTCTACTGTAACCTCATGGCGAA  
TTAACTGATGAGTTCGGAGACGTTTAAATTAGTAGAATACCCTGGTGGATCTTACGCTAAG  
TGCTCCGCAGAAATCTCTGGTGTAAACCAATCTGATGTGCGACATTGAGTTCACTACTATG  
CCAGGTGTTAAGTTCGTTTTCTAAACGGATATTTATAAGATGAATACAATGGACTCTATG  
AGTCCTTTTATTATTCGTCTAAACTATTATGATTTTTACCCTTTACACACGAGACCGGTG  
TTCTTACACCACTGAAATCATAAAGTTTTAGAACGAAAAAAATATAATTATCGGGAATA  
CAGATTAAGGGTTGACTTTTAAACGAGAATCATTCTATAATCAATTTGGAGAGGGATCAAC  
TTCCCTTAGGGTGTTTTAGGTGACACCAATCTTGGTGGCTGCACTGATACAGTTTCGATA  
CTTTCCTGATTACAACCAATCTGATGGAAGAATTTTACGGTCTTGTTGAGTCTGCTATT  
GATGCTGCGTGTGAGAACAATATGTTTCTCTTCTAACCGTATAAATTCTTTGTCTTACAGC  
AAGATTAACGTAATAAATTCAAGAGTTCGTTGTTAGCACAACTGCTAAAGGATTAGCA  
TTGACTAATTCTGATCTAGCTGCATAATTCAAGAATGCGTCTGACTCTTATCATCAGTTA  
CTTCGTAAACCATATGGGCATCGCGGGAACCGAAAACAAGGAAACTCTTAAAGTACTCG  
TCACAGATTTTATAGATGTTCTTCAATACGAATTGTATAAGAGACCACGTCGTTAGGAAA  
TCGTCTAAATAAAAAAAGCTAAGGGGAGTCCCATTGGTCTTGCACCTGTAGTATTATCAA  
CAATCGGTGCTTTTATTCTTGGCTTAAGCGTCTCTTGGTGGCGAAAGGGTACGTTGAAG  
ATTACAACGAATACGCTGCCTATGCAAATGCGGTCCACATCCTGGCATGTTTGTATGAAG  
CCGGTGACATGACTCATGATGAACTAATCTATATTCGACCAGCGTATAGGTTGTTACAAC  
ATGAAGATGACGCTGACGATTATGATTACCAAATTATGCCTCAACGATAAATTGAAAACA  
GTAGCTCTAGGGTACTAATTAGTGAGATCCTAAGAAAGGTCTCAAATACTAAAACCTAAC  
AAGAAAAGTTGAATTGCTGAAGATACACCACACTCCCGCACTACGGCAACTGATGATCA  
TCAACTTTGATGAGAGTATTCTATCAGAACTCCCCGAAGGTGAGGTTCCACACACTCCTA  
CCGATGCCCTGTAGGGTACAGATCTTACTAGACTTGAACAAGAATAAAGAGGACTATTCA  
GAATCTTCAACAGAGCTAACAATCGTCGCAAGTATTTGAATACAGGGTCCATGTATGTGC  
AGCTGTTAGAAGGAATGTCTGCTGAGGAAGCAGAACTTTCGGCTCTATGTAAGGACGGAA  
AGATGGGAGTCAAGTATAAGAGAACCCTTAGGCAATAGTTTCTGAAGCATTGCGATCTA  
TTGAATGGGGAGGCAGAAAGTTGAACGGAGTTTGAAGTTTTCATAGGAAAATGCACTCCCGA  
TGATGCAAAAAGATCAATCATTACTTTACACCGTGTATTTGGTTGAGTATAACTTAGATGA  
TAAACCCGCGTTTGTAAATTGCAATCGCAACTAAAGCTGTAGATCTTTTTGGTTATTACTA  
AGATCTCTAAAAAAGAGCTTTGTAACGTTTACTCACTCATAAGGTAGAATTAACCTCTAA  
AATATGGAGCAATCCAACACAGAAGATAGGCAAGCGGGACCAAAGATGAGCGTCCACTTT  
TTGCGTAGAAACGCACGCGATGCAGAGGAAATGTACAAGAATGAAGAAGCATCAAAAGCA  
GCTGCTAGATTAGTTCAATTTTGTGCAACCTCCAATTGTTATGGCACTATGGAATTGG  
TTGATGTCAGGATTGTTTGGTCTTGCCACTATTTCGATATCTAAAACGATTGGTTTGTAT  
CAGATGGCTAGGATTTTATTTGGAAAGTGTGAATAAAGTATGTTAGATATCTGTAACCTC  
TGTTGCAGTAAAAACTATCGGGTTTGTGCTAGGGTGAGTGTTTCTAAAAGCAAGAAAA  
CCCTGATGTTGGGGGTTTACTAAGGAACTGAATTAGGAATGGTCATTGGAGCGTCTTTGA  
GTAAGCGTTCATGACTCGAGATATTAACACTACTTGTGTTCTTACTGCTCAGGTCCCTAAG  
GAATAGATGGTGCACATATCAAAAAATTTACAGAGGTATGGTGACTTTTCTCTACTGGC  
AGATAGCAACTCTTCCAGAGCTACGTGCTCAAGACGAAAAGCGTAGACATAATGGTAT

TGATGATGTAGATCCATTTATGCAACAGGACGACGAGTTAAAAATGCAAAGGCGTTTTGT  
GGACGTAATGGAACCTCTATAAAGAAATGCTTCACCCAGGTATTGCAAAAAAATGTGCTAG  
AGTGGTCTTGCCTCTAGCAACACCAACTTAAATGTATATGAGTGGATCACTTCGCTCATG  
GGTTCCTTTCATTGATCTGCGTTCTGCTAGTGGAAACACGGAAAGAAATTTATGAAAATTGC  
CGAAGCATCCAAACAACATCTTATATGTCAGATCCCAACCATCTCCAAGGCATTTGATTG  
GGTCTCTGATGATGATTGTAACCTGTTCTGATGAAGACAATAACAAGGACCTACCACCATG  
TTCGAGGATTGATTAATGCCTCCTTAACCAGTGATAAACAAAAAACTGAAGAGAACAAA  
GGACTCTACATGACCATGAAAGCATATGATCAGTGAAGACAAGATAATCCCGGTAGGGAT  
AAAGACTGGCACGCAGGTGTGGGAAGTATGACCGATGGTCAACATCAGATGGAAGACGGA  
TTCAAAGAAGTCAGGTCTAAAGTCCAATCACCAATCCTAAAGCCAATCTATCTCGTTTC  
GCATAAGGGCATAAGCAAGAATAGGAACTAACTCTCCTCAAATTTTGCCCAATGGTATGT  
CGCGGAAACATATGAAACGTAAGAAACCTATCGACTCTTCATACTTGACAGAGGTTAAAT  
CTCTGACAGATAATCAGACACGAGCATTGCTCAGTATGCGGAAGGTAAGAATTTGTTAC  
TGCATGTTGCGCCAGGAAACGTGCGAACTTTTATTACTTTATATCTGGCTTTGCAAGAAG  
TGCTTGAAGACAACAGTTCGTATGTTAAAAGATACATTGTAAGGTCTCTAGTTCCTACTA  
GATAGAATGGTTTCCAACCAGGTGACCATGAAGATAAACCTTCACTGTTTCAGCTACCCT  
ACAAAGATATGGTTAGATCTCTGTTTATTACGCCTGATGTGCGACTACGTTCAAATGATAT  
GTGATAACTCACGTGCACAAGAAACCATTTCGCTTTCGGCTGATACTTATATTTCGTGGAG  
TCACTCTTGATTATGCCATTGTTATTATCGATGGGTACAGTACCTTAAGTTTTGATGCAT  
TGGCTTCTATGATTGCTCGCATAGGCGAAGACAGCAAGATTATCTTCTGAGGTGACATGA  
CCCAGACAGATCTTACATGAGCGAATGAAAAGTCTTCTATCTCAGACTTTATAAAAATTC  
TACAGCAGATTAATGAGTTTTGATGCATCGAGTTTGATATCAATGATTTGGTTCGCTCAG  
GACTTGTTAGGTCTTATCTCTTGTCAAATAATAATCTTGGTTTTTTATGTTTAAAGGCGT  
TCATGTTGGTAATATTTTCAGCTGATGTAGAAGTAGTAAGTAAAGATGGATCACGTATGTA  
TCCTATTCGTGATGCGGATAAATATTATCCTAGCGTAACCACAATCACAGCGTTTAAAGAA  
CGCAGAGTTTTTCAAAGATTGGAGAACCCGAATAGGTGAGGACGAGGCGAATCGCATCAG  
TGCTAGAGCAACTCATCGATGAAGGGCATCTCATAACATAGCGGAAGATTATGACAAAGG  
TCAATTAACCTTGACAGATACTTGGAATAATTCCTTTGTCTGTAAGATTGTTTCAATC  
AGCAAAGTCTACTCTTAACCGAATCAATAATAGTCATTGACTAGAGAAATTTCTCTATTC  
ACACTATCTTGGATTAGCAGTTCGAGTCGATTGTATTGCTGATTTTCGCTGGCGACTTAGC  
AGAGACCGATTCCATTACGTCTAGTAAAAAAGGAAGATCATATCGACAGCTAGTG  
TTTTCAAGAAACAGCCTACGCAGCGAGGTTTCTAGAAGGTTTCAGGAATTGAGGTCATGAG  
AATTGTCATCCTTATCGCCGCTTAAAGAAAGGATCTACACACGTATTTGAGAAGTTCAATCT  
AGATGACTATGTACAGTTTCGTCAAACGTACATCGAAGAATTTGTTAGGCCAAGAGATGC  
CTCAAGAAGCACTTGACGGTGAAGTTTTTACACCAACCAAATTCGCGAAGAGATTCAA  
GTTTATTTAAGAAAAGTAACGATCTCATTAGATACCTTGAAGCAGTAGTTACATACTGCC  
TAGAGATTGAGATTGAGGTAGAGACAGATCCCAGACTGATTTCTAAACCGATGAAAGAAA  
GTTTTCGTCACGAAGCACAACATTTGAATTATATAAAAGCATGTTCTACAGGACTATGAC  
AACTGTGACAGGGTTTGAAGTGTATAAG

>NewGenomeName\_113

AAGATGATCCAGAGTGCCAAGGTGCAGGTCTAAGTATCCGGTAGTGTACAGCGCTATCAG  
GCTGGGATCGAGATTGAGGCTGAGACTTTCAGTATTCTTATCGACGGTATATAGAACGAC  
AAAGTTCTTCCGGCGGTGCGTGACGCTCTGTTCAACGCTGTTGACTCACCCACGGAAGCG  
GGTTGCCGTGATAAGCCGAATATCATTCACTCCCCAACCGACATCGAGCCTTTGTACTCC  
GTCCGGGATGGTGGTTGATGTATGGACTTCGAAATGGTTGCACATCCCTTCATCATGTTG  
AGGACCTCCACTGATCGAGACTCCAAGGAATTCATTGGGCCCAGAGGCATCAGCTCTAAG  
GCTCCGTTGACCGTGACCGACATTTTTACGGTCCCCGCGGTTAATAGCGATATGAAGACT  
GTTTACACGATGCATAAGAATGAGGTTATTCAGGGTGTGTTCCCTCTGCTCGAGTCGAAG  
GCTACAGAGGAAAATGGCGTGGAAATCAAATAAACGTCGATCCTTCTGAGAGCTCCTAA  
TATCGCAAGGCAATCGTGAAGTGCCTGCGGTATGCAAGATTACCGTATGAGATCAATGAT  
GCTTTTGTGACGTCTGAGATCAATGACCGAACCTATGCGAGTCAGATTCGTTATGAGGAC  
ACAGAAACAGTTTGGATGCTGGGCATGTGCGCGTCCGTAACGCGCAATGCAGACAGCGTG  
GTTGTGATGGGCCAGCAACCTTATGGGGCCAACTATCTGTCCAGTAATAAGAACTGGCCT  
ATGATCATGTTCCCTATTCCTAACGGTGATTGTGACGTGAACCCTGGTCGTGAATGGACC  
ATCGTAGGTAAGAATGACCCTGGTTTTCCGGGAGCGCCTCGAAAAGTGTGTGTACGAAGCT  
TTTTAAAACGTGGTCCGGAAGTCTTGGAAAGAGATTAAGCAGCTACCTAGACTGACAGAA  
GTGCTGGCGCACATGACGCGTGTGCGTGGCGGCTTCTCAACCCGATACGGGTGCGCGGTT

ATCGCCGATTAGTTCATGACCACTTTGGGACTTTCAGTATTGACAAATGAATAACTTAT  
GGTGAGCAGTTTACTCGCCGGGAAACTGACAAGACTTTCGGTTAGGCTGACCTTATGAAC  
GGTTCGACACTGCTTTACAACATGACGGTAAGTGCATCCCCCAAATGTAAGTGGCTG  
TCTGAAAAGTGTCTTAACTGCTACGTTACGGAACGTATTGAGGCGCTGGAGATGCTG  
AAAGACCCGTTCTGCGGTAGAATGGTGCATAAAATTTCCGACCTTGAGAAGCGTCCTGTG  
GGTAGGGGTGAGAAGAAGTTCGGTGGTTATGGCATGTACGAAGCTAGTCACACAGTGTG  
GCTATCGACCAAGATGGTCTATCAAGAGCGGCCGGATTGCTCGCGCGGACTTTGAGGAT  
TTCGAAACCGCCTTGTGTTACAGTGGTGGACAGGTCAAGGATATGTTTGGTTTTGGTGCT  
TTCGTGTATCTGGACCGTAAACAACAGCAAGTGACTTTGCTAAAGAACTGGGGCTCGAG  
GGCAAGATGTAAATAGTGCCTCTTATTCGCAATGGCTGGCTCCCTGATGCAACAAGGATC  
GTTACCAGAGATGACCTTTATGAGCTTGCAAAACAGAATCTCATGGAGTATGATCTGAAC  
CATCGTACCAATTGCAGATCTACGTACCCCAATTGGGGAAGGAGCTTGGTATTTTTGGG  
GTTAAAGTAGAACTGAACCTGAGTATAAGCTTAAAGTAATCATGTCTTATCTGCTTTCG  
CACATCAAGGGAAATTCGGATCTGGAGAAGAAAGCTGAAAGCGTTGTGAATGCACGCATG  
CGTATTGGTATAAAGCTTTGGGTAGTTAAAGAATCTCAATACGCGCTGCTCTGGTATGTG  
GACCTGAAGCACTTCAACATAACCAGAGATGAATGAGTATCGACAACCTTATCGAGAGCAA  
GGGAAACTAAATGAGTCAGTTATCCGTAGCCCCTAGCGCAGCGCTGATGTTAGCAGCAG  
ACTACGGCTTGAAGGTCACGGACCGTGGTTTTGGCTCCGGCTGTAICTCGCAACCAGGCGTT  
GGATGATTGTACCAAAGACACCCAAGGGGTTTCTAAGCCCCAGAGGTAGATATGAGTT  
TCATCTCGGAAGCCAAGCCTGCTCCTGATCCTCACTGCTTCGCATGCCGTGGTGAGATCG  
GTGATTGTGCAAAAGGGGAAAGGAACGCGAATTCATTGATCCTGCGCAAACATACGATG  
GTCGTGTTAAACACGAGGGTGTGGAGAAAGACCTCGGTAAAGCAGGGGACGCGCTGGGCCG  
TCGTCTTTGAGGTTTCCGATCTGTATATCGAGGCCACTCTAACCTGTTGCCTGGACCAC  
ACTGGGTTCCCTTCGACTTAGGTTATTCAAGAGACCGCGGCTAAGTCGTACCTCGACGAAG  
AGACTGTTGAGAAGCATGAACCAGCGGTCACCATGACTCCAGGCAATGTTTGCATCTGGA  
TGCCTGATGGTACTCAGCACACCATCAACCGTGACAATGCTATCTTCCTTGAGGTGGGCC  
TATTGCCGATTGGGGGTGCTAGTGAAGGGGCAATCACGCTGACCAACGCAGGTAAAGAAG  
CCATGGCTGAAAAGGCTGTGCATCCCGGCCAGACCTTTAATTACTCGATGGCGTTCTGT  
ACTGTCACGGTCAGAAACAGGAAAGCACCCGTGCTGATCGCATTCTGAACGACATTATTA  
ATGATACTGTAGATGACAGTGAGGCTAAGTTATTGCAGAAGCTGGTGCACAACCCTTCTT  
ATGCGTCTGTGAAGATACTGTATGACTTTATTCAGCACAAACGGTCTTGAGATTCTTGATA  
ACGCTGTTGTGAAGGCATATATGAAGATCACCATCATAACCGAGGAACTTCGCGATAACT  
ACACACGAAAGGGTCCTAACTATAAAGGGCAAATCATTTCATGACTCGAAACATCATGG  
AAGATAACCGTAACCAAACCTTGTAGCCAGGGTATGCATATTGCTTCTCTAGAGTAGGATT  
GTGGGCTCGGTGTCAACTGACTGATTGAGGTTGCGGGCAACACTGCTGATGTTGTTTGTG  
TACCTTACGACTACAACCAACCGACGTGCCGATGCAGCCGTTATGAAGTCTGACATGTG  
CGGAAACACCAGTTGGTGAGCCGGATGAGCTGGTTATCAGGACGATGGGGGAAGTGCTAG  
AAGAGATTTACCTGGAAAAAGAACTCAGGAGGATTGATGTCAGATTTTGGTGTGGTCGT  
TGAAGCTGCCCGTGGTGTGTCATGTCGGGGCAGAACGTATTCGTTAGGGGACCCGGTGG  
TAGCTGCAAGAGTGAAACCATAAAGAGCATGCAATCGCTCTACGGAGGTGCGGTCTCAC  
AGTAGACCCAACGGGGTCTGCTGCCACTAAGGTCAGCGGAATGACTGCACAACGTGCATA  
TGGGCTTACAATGGGGGTGCTAACAAAAAGGATATTGAAGACATTAAGCGGTAAGTGAA  
TCGACAATTGAAGAGTATAGCGCTAAATTCATCATCATTGATGAGATCAGTATGTTTCA  
GGCTGATAAATTGTGGGACATGGATATGAAATGCCGTCGCGCTAGAAATTGCCCAAATAA  
ACCGTTGGGAGGTCTGAAGATCTGCCTGTTTGGTGACTACTACGAAAACCCGCCATCCT  
CATAGAGACAGAAAAGTAGGCGTATTTCTAGTTCCATTACACAGGAGTGTCTTATTTCTC  
ACATACTTGGTGGGTCAACAATCCGTATCCAATATGACTTGAAATAGTTTATCACCAAGTG  
CATTGTCTGTTTCTCAACGATGCATTATCGTCGGCGCCGTGGACAGCGTATTCAAGAAAT  
TGTTAAATTCATGATCACGCATTGTTATGATCATGGCAAGCTTCTTGATGCCATAACGAA  
CACACCGACAAGTGCTGCTGAGGAGAAAGCAAACAAGGAGCGTTTTGATGAGGTCTGTGG  
GTAGTCTAAGTTATACAGTGCGGAGACATCTGGTGAGTTTACTACAATCGTGCTCCATA  
TGAGCTTTACCTGAAGGAGGGAGCACAGGTAAAGTCCACAGTAGCCGACCGTAAAGCCTT  
TGCTGAGCCAGAGTTAGTCGACGGTTCCCGTGGAGACATAATCGATCTACGTATGGATAG  
TGTGCAGGTGCGTTGGGAATTTGGGAGAATAGTTGATGTCGATGTCCATGTTTGGAGAGTA  
TGTAGAATATAAACCAATCAAGGTCAGGACGTCTGATGGTACAACAACCAAAGACATTCA  
GAAGATCACTTTCGGTGATGACCGTGCTATGCCTATCCGTTTGGGGTGGGCTCTTACAAT  
CTTTAAGGCGCAGGGCTTGACTTTACTTGAAATGACTATAGACTATCGATATGACGCTTT

TGCACCCGGTATGTCTTATGTTGCTATCAGCAGAGTTACACCTGCTAATGAATTAAGACT  
ATTGAACAAGACCAAAGAAAAGGATATTATTGTAGACTAACGTATAGTATGGTTTTATGA  
ACAGCCTTTCCAGTGAATTAGGAGATAAAAATTATGGCATCATACTCTCGAAATGAGTTA  
TTTAAGAAGTTCTAAAAGGAACTCGAAGATTAGAAAAACGTCCCAGCCGTACGTGGGGTG  
AAGCCACCGCAGGATACTACACAAATGCAAATGGCCCCTCATGATGAGATGAGGACAGCA  
TAAGGCTACGTGCTTCGTGCTGTTCCACAATATCCGAACATTACAGCTGGTCGTTTTGGT  
TACCTGTCCCTATCTCGTAATGATTTAAGCTACCTGGAAGATTGGGTGTCATACCTCAAT  
AATGCATTGGTCCTTGGTAACCCTGTCAGAAGGATTCCATATCATTAAAGCTTCGCTCTT  
CATAACCGTATTGTGGAGCAGGGAAGTGTACAGCATGATAAAACCCGTTATGCAGGTGGT  
TCAGGATTTAAATCTCTAAAATTAGGGGTGAAATTTTATGACTATTGAAGTTAAACATTT  
TTCTGATCTGAAGAAAGTTTCAACAGAAAAAATGTTGACACTTGGTGATGTGGCTAGAGA  
TAATTATCATGAAGCCATCCTCACATGACTAAACCCGTGTGGCATTGTGGTCAATTCA  
AGACGAACTGGAGTTGCGAAAATATGCGGAAAAAACTATTTAACTGGCTGTTTGCAAAGA  
AGGAAGAACCTCATCGTGAAGTTTATGTGTTTCGATTTTCGAAAACGTGAAACAGGCCATG  
ATATTACTCTTCGCATGATTGATGTTGGGGAGTATGCCGAGGCAAGGGGTTTCCCTGCTA  
TTGATCAACAGGCACCGGGGGTGGCGTCGTGTTTGTGTTCAATCTTGAACAAGCCTCTA  
TGCAGGGGGAAGTTGATTACCACATGTCTTTTGTGGTTGAGTCTGTCACCTGAATTGCAG  
TGGGTATTCCGCAGCTAACCTAACCCAATACGAAGGTGCACAAGATGAGTAAGTCCTGT  
AAAGTCGACGCTGAATTCGAGCACATGAACACAGCCGCAGGTGCGGCTGCAGTAGAAGCA  
TTTTATAATGTTTCAAGTAGGCGGAGTTTTACAGCAAAGAGAACGATTGGGATTACAGTAGT  
TTCCAAGGCTTAGGACGCTCTGGTGTTCTAATAAACGGCACCAAGATCCTCGTTGACATT  
CCCGATGATCTCACGTACCATCGCCTACGTGAGCTTCTGAGTAATGCAGAGATCGGAGGT  
TGTTTGCATCGTGAGAAGGAATTCAAATGGAAAAGAGGGAAATGAAAATAGTTAAATTGA  
TTATCAGGCAGACCAAGATAGAAGAGGCCCAAGAAATTCTGGCAGTTCTCAATTATGAAG  
GTTCTGTATCATGGGGCATAACGAAGCCGAAGGTTGGGTGAATATTTCAATGGTACAAT  
CCGATAAGTCGATAATCGTTGTCTTAATACTGGTGGCGGCCTTACAGCTACTCACCAGT  
TACAGGTAGTCAATGGTGCCTAGAGGGAGTTCATCAGTGAGGTCGGTCTGAATAATGTG  
GTGGGGATCATTTCGATGGCTGCGGCACCATGGGGTGGGAGTATGCTAAGAATGTTTTT  
AACGCGTTTTGCTTCGACGTTTATGCGGGGGAATATGATGGTTATGAGGTGGTCAGGGT  
GACCATGCTAATATTACGTATGTCAATTATTGGATCGCTGAGGTGTTTGTTCAGAGAAG  
GACGGGATCCCTAAGCCAGATGTTATCTTTGCCTTTCCACAATGTACCAAATGGCAGAT  
AGCGGAGCTGATTATTTTGCCTCAAAGGCAGGCAAATACCGTCTGTTTTTCGGTCACAGCC  
GGGAATACAGCTAGGGTTCGAGCAATGTTAGGAGATAAGTACGGGTGTCCATACATGCTA  
GAGAACCCTGTGAGTGTTTCAGACCTCCAAATGGAGGAGTCCGAACCACATGTACCATCCG  
TATGAACATGGGGGATACCTACCCCATGATGATGTTTCATCCTTTCTTCCATGAGTATAAT  
AATCCGCGGAAGTCATAGCCAGAACGAAGTGTCTTTGAACGGGTGATGATTTTTAAAAT  
CCACCCGCAAAGCCCGTTTTCGGTAACGAAGGGTACTCAGAATAGCATAAAAAGCTCGGC  
GGAAAGTCTACCAAACAATACCGATACATTCTTTAACACCCCGCGGTTTTGATACTTTA  
ATTTTTGTTTTCCAACCAGTAATTGAGGCTAAGTGAAAGAGTTATTATTAGTTGGTTGTGCG  
ATCAGGGCCAGCGGCTGGAGATAAACGTATGCTCCTATACGCTGACAAAGTTTGGGGCAT  
ATACCCACAGATCAAACGATCCCGTCGCGCGCATTAAAAAGTTACGGCACTCCTGTTGG  
TCAAAGTACAGTGCAGGCTAAGATCTGTCCATATTCGTTTACTTCTACAATGGTGGTTC  
TGAAATGTCTGGAACAGTAAAACCTGTTCTTGCCTGAGTAAATGGTGATCCTTTCACGAA  
TGACTTTTGGTCGTACAACACCGCAGTCGATAGTGCTATCTGGTGTCTGTACTTTAACA  
AGGAACTTTTCTCTTTAAAACCCATCAGACAATTTATCGGCAGGAGAACACTGC  
TTCTGTACAGATCGGCCACTGACACGAATACCGTCGAACCAGTGGAACACATGGCGAT  
TGTTTACAATGTGACCAATCTCCAGTTCTATGTGAACGGAGACCTCATTGTATCGCAGGG  
ACCTGATGGCGGCGGGATTACAGCTTCATCATTTGCAAGGGTGTGTGTGGGGTGGGATT  
AGCGAATCTTTTCATGGATCATTCTCGAAGTTCAGGTGTTGCGTGGTATTCAGGTACTTC  
CTTCACTGTACCTTCCGCACCTTTGGATATGGATTAGGAGGTAAGTTGAAGAATGTGGCG  
ATCGCAAAGCTTCAACCCTACAAAAGTTTGAAGAATAATATGAACCTCTTTTTTGTAAAG  
GGATATCACATCCAAGGTAGAATTTGCTTCCAGGGTGGACTTTTTATTGCTGTTGTTCTT  
AGGCCGTTTTGGGGAATGAAAGGGGCGAACGGTCCGGATTGGGGCAACATTGTGGACTAC  
CGAGACGGAAAGCGATACTGGAAAGTATACACCTTCTCATGTGCGAAACCACAATTGTCCA  
GCGGCAGGTATTGGCAACGAAGCTGGATCAATATCTCGAAAGGCATATAGCTCAATACGC  
ATTCAAGGGTGCACGTGTTATATGAATGCCATCATGTGGCTACTTCACCACGGGCCCATC  
CCAATATGTTTGCAGGGTGTATCATATAATATCGTTAAGGGAGACAGGCGGTGTTTCCGAT

GACCGAAAAACAAATTCACAACCTCCTTACAAGAGGTACAAATAGTCGTGAAGGTGGTGGC  
ACGATGCCTAATTCTTCAAACACGTCTTCTGCTAGAAGAGGTGTTGCTTGGGAGAGAGCG  
TATCCGTCAACGCCTTAGATTGCAAGGATACCGGTAGACGGAAGCGTTCACGTTTAAAAT  
ATTGAGAGTATCAATGAAGCCTCTCAGCAAAGAGAGGTGTGGGAAAAATAGCATAGCTGT  
GGAAGAATAAGAGTAATTTTGATTTTTTCGGCTTACCGATAAAGGTGGTCAGGAAAACCCGA  
AAGCACAAAGATGTGGTAACAACGGCACTCTTGGAGGAAGCGTGAGTGATCAGCAGGGAG  
AAGATGAGCCCTTGAATCCGTAGTCGATGGCACCCGTATTCTGGCAGTTCCTAAATTGA  
GTCTCTCGCTTGATGCAGCGAAGTATTTTAAATTCGGGTCTGCTGTTTCATCAAACGACG  
GTGTAACCATTACAGCAACAACTAGCCATATTATCATAAGTACGGTAAGCTTACTGGAT  
AGGAGTCACGTGACTCGAACCTTCCAAGCGGACGAAGGGACACTAATCTTGGGTGGTCA  
CTTTGACGGCAGCATCTAAGTACTTTGGTCATAATGAAGCTGCTATGGGCGCTGGTCGTA  
AACAGATTTTTGTTCTTGAGGGTGAAGGTGGTGTGACCGCAGGGAGGCAGGCGGTTCCG  
ATGCTGTCATAGCTTTAGGTGCAATCCCCTATGCCACGAAAAGGGTGTAGGATTGGGCGG  
CGAGTGTGCTGACAGGTGTCAATCCACGCATGACGGTGGCGAAGTTGTAGGTATTCTTA  
CACTGCCTTTTTGTGGGATTACACTGTGGCTCAGCTAATGCAGTTGACACCTTCGCTATCG  
ATGAGCTGTTGATCCGTGTTTACGAAAAAGTACTTTTTGGGCTTGATAACGGTGAAGCAA  
CAGGGCTGGAAAAGGAACGTAAAATGAAGAGAGGTAAGGTAGCTACAGATGATGTTGCAG  
CATTCTTGATGTGACACAATATCTTTGTAATTGGTTACCCTATTAACGAAACGACCCGG  
ATGGTGTAAAGATATTCGAGATATGTACGTTGCTGGGAAGGGTCGTGAAACATTGAACA  
TGTTTTCCAAGGCAGCAGTCAGGTATGTCCCTGTCTAACCGATCAGTTTAAAGCAATCTCA  
CCATTGAGAACCTTCGTAAGAAGAAGAAAGATGGTGTTCCAATACCAGGCACGCATCGAC  
GTTATGAATCAACTAATGGCCCACGTGCTGGAGAGGTTTGGACTCTAACAGGACCAAGTG  
GGCGGGGTTGACACCCTGGTCCCTTCAAGCAGTAATATATGAAGAAAAGCTGGTGAATTC  
GGTGAAAACCCTCCCGTGAAGACGAGAGCAATACCGAGCGAAGCCGATGCGTCTCTCCTT  
GTATAAGGAGGGACTATGTACAAAAGTATACAAAATTTTGATTTAAACGTGGTTTTCTGAC  
AAATTTGAAGCATGAGGGAGGAGAGGCTATATTCAAAAACCTTGATAAACTGGCAAATAC  
TCGCGGGTTAGCCTGTGTGCGGAAGGGATACTTACTGGGTGGATGGTTCACCGTCTTGTA  
GCTTTTGCATTTTTGGACCCCTTAGAGGGTTAACATTATGTGAATCACACAAACGCTGAT  
AACGGGGATACCTCAGTTGACAATCTTTAATGTGTAACCCACCGAGAGAATCGAGACCCT  
GCTGTTTGAACAAGCTTGTTCCTCGTAGTGAGGAAATATGGAGATCGAAAGTCACAGTG  
AGTGAAGTTCCTCAGATAGCAAAAACCTCCGCAACAAAAACTCCTAGTATCAGATGTGGCG  
AGGAGATTCTCCGCTCCTTTTCGGATTGTAAAAAGTATTACATACAGAGAAAACCTTGGTCA  
AGGATAACGTCTGAATACGAATCTTTTCAGGAAGACCAAAAACCTAAGCCGGATTTCGGGT  
GAGCGGCACCAGATATACGAACCTGCTCAAGTTTGGCTGCCCCAGGACAGAGGTTGCTAAA  
ATGTTTTGTTTTAGAAATCCGACTGTAGTCAACATCAGGAGAGACTTTTGGGAACATGTA  
TCGACCAGCCGTGAAGGAGGTAACGGCGTACATCCAAGTGGTTGGATGCGCAAGTGATCC  
AGAAAGGACGATGATAAAGTCAGCTCTGCAGGGAAACGTGCAGCAGCCCCGATACGAGA  
TAGGGGCCGGGCACGAAATAACGCACCCTGCTGCACATAAGCACAAAGCACAAATTTCTCGC  
AAGATGGAGTATGCAATTGTGGATTCTCTTCGCATTATGGATATCCCGCGTCTTGACGTC  
TGCAAGGAGTAAGAGAAGATTTCAATCAGCCGTCTTGATGAGGAAGAGGAGGACTCAGTT  
AAGAGCCTGTACGCTGCAGAGTTGCAGGTTGAACCTAAAGCATCTGTTGCAGATCCTGAG  
CAGTTTCTCACTGAAGAAGAAAACATTTCCATTGACGAACGGTGGATTACTGAGGTCAAG  
ATCCAGAGCTTTGACCACTTCGTTGTTACTCCGATTGATCAGTTGAGTCATAAGCTGAAA  
CACATGGTGTACCTTTAAGGTTGTAAGTGGATTATCCTTGACCACCTGTGATGGTCATC  
TTCGGTTTTACGTCCGACAATGAACTCAGAGATTTGGACAATGCCAAGACCGAGCTTGCG  
GGATTCTGTAAGCATTATGATGAGCTCATTCTCAGCATTGCGACATGAGGCTAAAGGAG  
CTTCAGTGACCGAAGTCTATAGACGGTAATATGTCCCCTTTCAGGTATGATGTACGTA  
GAAGGCCTGCGTGGTTCTGCTGCACTGCAACAGCATTCTGTATTGTCTTGGGTGTTGAG  
CTAGATGAACAACCAGACCTATGTCGTGGTCGTGTCCGTGTGGTTGTCAGAAACAACCGC  
CCAGACAATAGACTCGGTGTCGACAGACACCATGAGTATCGTGGACAACGGACCATTCACG  
GATGCGTCTGGTTGGGTATGGGCAGACGGGATGTTCAAGCCTCACGGGGTAGCCACGCTT  
CGTCTGGAGGTTGGGTTTACATACCCTTCAACCCGATACTCCGGTGGGTGAGGACAATGTA  
CCAGCATTGTGCTGTTGGGCATCCGGTGAACCTCTGATGTTTACGACAGACATGCAAGAGGCT  
AGACCGTTTTGATGATGATTAACATCTGCGAGGTAGGTGTCGATGAAGACCAACCCAC  
CACGCATAGGAGGAGCTTGAAGGTTAGTTTCTAATGGACATCGAAGCTGATGGTCTGTT  
CGAGGCAGTAACCTGAATACCACTGAACCCTTCTTAAGGAATACGGTGTAAACAAGTGGAA  
TCTGTTTCTATATCCAGCGCACCCAGATTATGAGAGGGCGGTAAGATATGCTAGCAGCAA

GACAGACGCCAATCTCACCATGCCCCTCATATGACGACGTTGAGCCGTTTCGTGAAAACCTCG  
CCGTGGTAATGCGTGTACACCCGTTTTTGGATATGATCTACGCCACTGGCAGAAGCTATC  
AGGCATTGAGTACGACATGTTCCGAGACCCTAAGTCTCTGGGGACGATTGGTGATACCCA  
AGTTAACCGGTCCAATACTTTCTCTATGAGCCGTGTACTTTATCATGCCACCCACTACC  
AAATGGCTGTCCCGATCCAGTTTTGAACCCGGTAACCGGGAAACGAGACCGTGTGGTCC  
ACGTGGCCTTATGTCGTGGGGTTTTTCGAGTGTGGAAGTTTCAGATAGATGACTG  
GCGTAAATAGACGCTCTCGGAGTACGTTAACAGTGTGTGGGATGACGTTCTTATCAACGA  
ACTGACGTGGAGAGTATGTATTGATTAATCCACTGTTGCTCGTCACTCCGATGACAAGCA  
GTTTCATGTACACGGCTAAACCCGAACGTATTTCGCCAGATTAACTGGAATAACGTTTTTCG  
TCGACCTATGCTGACGGATTACCTGATGATCGAGCAAGAGATTCAGGGTGTACGTTCAA  
CAAGCATAACGGCGGAACAACCTTCGAGATCACATTGACGTTATGATGAAAGACATCTATGA  
AGACGTGCAATCGTTACCTGTTATGAAGGAGATGGTATAATCTCAACAACTAAGTTACT  
TGCTAACGCGTTTTGCTAGTGATGGTAATAAATCCCACCACGGATAGAACTGGTTACAGTT  
CAAGCTGGAGTATCCGGTTAACCGCGAGGGCGCTGGAGTTTAAGGGCCCTCCGAAAACCGC  
TTTCAAAGTATTGGTGAGGTCCTGCGGCCGGAGAAAGTTGCTGCATCTAGAAGTGTGT  
TGACGACCCTATGCACTGCGTGGATTTTCGAGCGGATACAAAGGAATAAATAGAATACCCG  
GGTGCCTCTGTCACCTGACCTGATGGAGAAGGCCAAGGAGGATTTGAGGAATGGTAAGAT  
GCCTGACCAGATTGTCCCGCTGAGGATCTCGAACCCAGGACTACCTCAAGAAGTACCAGAT  
CCGCAATGGGGACTGAAAGCCTACCATGTGGCATGTTAAAGCTCTGTCCAAAGAACCGTG  
CACAAAGGCGAGAAGTACTCAGAGATTGACCAACTAGTCAGCAAGTACATTGAGGAGCT  
TGTTGAATCAGCATATAAGTCTTTGATTATAGGGTAGTTAAGTAACACAGACGACAAAA  
CAACATCTCACAGCGCTAGTTTGATCATCGGCACGAGTCTGACAAGGCATATGAGGACAT  
CTGCAAGAAGTTCGGGCGCAAAGCTCGTTAGTTACGCTCCTCACCACAGCTGGAGTATAA  
CTTCGAAAAGCTATCTCCGAACCTCGAACGTATTTCATATGCACTTGGCAAATAACATCGT  
TTAGTCGTTGTCGCCGCGTAACCGTCGCTCAGTCCTCGACGCGAATAATGATGATAAGAA  
TGACTCATGTTTGCTATACCATTCTCGCCTTGAGATTGATGGGAAGATTCCCTACCCATTT  
TTCTGGACTGACCAACACCCGGGCGTTGCAACCACACCATTTGTGCACACATGCCTAAGAC  
AGATCCGAAGGAGCTGCTCGGTAAGAAATGCGAGGATTGTGGGTGTTACGGACGGGTA  
TGATCAGGTCGGTAGCGAGGGCTACAACCTAGAGGGCATGAACGCCGCACGGGGTGCATA  
CCAGTTCGATGGCGGTGAATAATTCGGGATCATGAAGGTCGGAGACGCTCACTCACGAAA  
CCCTGAAGCGTACACCAAAGCTTCAGGAACCCTTGTACACGTATCGGCGGTAAGGGTGT  
AACTGACAGTGTTCATGTTTCGGTGCTCGGGCGGTGGAGATTACAGCGATGTTCAACATCTC  
CCTTGACAAAGCTCACGCGTTAATTGAGGGTTTTGTGGGAGAGCAACCTCGATTTGAAAGG  
TCGTAAACAATCTCTGGAGAACTTCTTGGAACCACAGGGAAAGCGTTATATTCCTGGATT  
GGAGGATCGTAGGCTTTGGACCAGTTCTAAGCACCCGAGAGGGAATGCTTACATGCAGAC  
CGGCGGTGCTTCACTGTTTGACCTTGTGGCAGTCTGCTACATTTGGAAGTGGTGAGGCG  
TGCCTGGTATGACGTGGCTGAACTTCGCCTGATCTCGTGCCATCCGTAACATTGTGGCTT  
TGTGAGGTAACATCGAATAACTCTTTTATTTGTTCGGGAAGGCTATGGCTGAGAGTT  
CTGGTAGACTGTTACATGATGCTCACCCGGAGCGAAGCTTGTGAGGAATTTTAGATACCA  
GAACGTTTTGAGACTAATTCCTGAAAACAATCCAGCTATATGCGAGAAAATACATGACA  
ACTACCAAAAAGGATCGAAACATGCTACTTGCCGTTCCACTACGCGATGGATTGGTATGC  
AAGCATGATCATAACCGTAGTGTGGAAGTCTATCCACCAAAAATAGAACACATTGGTGAAA  
TATGATAAGATTAAGAAATTTTGTCCACTTGGAATTTTAAACCGGAAAACCGCTTGGGT  
AATGAACAGGTGGGGATTAGAAGTAACATATAACCTTTTCTAAAATTACTTCGTCGTATT  
TAGTATCTTGAAGGTAACACAGTCTTCAGAGGGAGCTTACAAATCAGACTTGGGCCTCAG  
CACCTGGCGAAATTGTGGAGGGACGATGGAAGTTTAAACGACTCTGACGAATAAGAAGGAT  
GTTAAGTCCTCGTCCCGATATACGTTAAGTCTTTGGACTAGCAGCGAGGGTTGTTTGCTA  
GTTGCTGTCTGGATATAATGTCTTACTGGCGTATGCCCTTGGACAAATTGTGTCACGGGA  
GGCAAAGAGTTCCTCTCTGTATTAGAACAGGGGGGGGGAGGATTTTTAGCCAAGTACTA  
CGACCAGTCATGTGAAAACGCATGATGTATAAGGTGCGCCAAGATTACTTCTGGGTAAC  
CGAACAAAGTGGCGTTGAAAAGAGAGCATTCCCCGTGTATCAATAGATAGTCCGATCTTA  
CGTGAAATCGTATGGCAACACGAAATGGTGTGGGCGCTATAAATAACCTCGCTAACTTT  
TGGACGAACACCAGCTCGAGGTTCCCTAAGAAAACTTTAAGAAGTGGGAGTGTGGTACCG  
TGGACGAGGCTATAGCTTTTCGTGAAATAATGGGAAGCACAAAGGCCGCTATACGACGGGA  
ATGAGTGGAGAAAGGCGGTAAGAGACGACAATGGTTAAATGTCAATAATGCCGAACGGA  
ATCGGGTTTATGAGGGCCTCTTTGGTGAAGATGGGAAGACACGCATTCATTAGTGCCCTG  
TTGGTGAGATGGTTGTGAAATGTGTTTCAGAAAGCTGCCTGTATGATGGGCTCTCCCATGC



ATATCACAGGTA CTTACTCCATAGGTA AAAAGTGGGCTGAGTGTCACTAAATTTAAAGGG  
GCAGAAGCCCCAGTTCTTGGATACTATAAAAAGTATGAGTCGATCCTTGCTTAAAGGGAAA  
CAAAGAAATCTATTCAAGTTGGTGAAGTGCAATACACCAACATATCTTCCTGCCACAAT  
CATGGACAGTCCCTGCCCATGTCTAGTAGGTCACCTTACTTCGTGTGGGTGAAGGAGTTG  
CAGCACAAACGAATGCACTTCCAAGACGTGGAGGTGCGAATGGCTACTTGGTATGGAGTC  
ACAACATCCTAGTTTTTCCGGGAGAGATTTTCCAAGTGTTCGCAAATAGTGCAGAGG  
GGCCGACGCTTCTACGTTTGTTCATGGTTCTGTACCACTAGTGGCTGCTTTTTTCCGGT  
CAGCACCTGCCCCCTACACCGGACTATAACCCAGAAGTGGGTGAGCCAGTCATATATAACG  
GCAGCGCGGGTGGGAATAATACCTCAGCCAATGATATAAAAAGTAGTAGTGGCTCAGGTG  
GTGCCGCATGGTGTATGCGGTAGGGTGCTAATGGCGGTGCATGCATACCTAGCATCAATAA  
TGAAATTTCAAGGCCAGGGTAGTCAGGGAGGCGGAGGCGCTGGCTCACGTGGTTATTACT  
TCTCTGGTTCCACATCTGGGGGAGAACTACGGTGCCGGTGGCGGTGTCGTAACCCATGGCG  
CCGGGGACAATAGTCATGGAGGTAGAGGTGGATAAGCACTAACAAATAGCAAGCGGGCGGGT  
CTGGGAGAGCAGACCCTAGAGGTGCGCCGGGGTGATAAATGTGGGGGTGGTGTGGACACG  
GATCTTCTAGCTCACCTAGTTCTTCAGCGGGGTGGAAAATCTGGGGAAATGCTGGAAATA  
GCGAATTCCCAAACAATGCCCGAAAGGTATAAAGAATAAGAGGAGGATGTATGATTAGA  
GAAGGTCCGTTGGTTACATTGAAACCAGGTGGCCCTGACATAGTTGTTGAGCTTATCTTT  
AAAAGACCGGTGACCTCCGACGGGGTAATCAGAGTCCTTAAATCTGCTGCCTGCACATGG  
ATGAACGAAAGCGATGTGAAAGAGGTGGATGCCTTTGCTTTCCCTTCCCTTTAAATTATC  
GGAGAGTGATATGTAAGTAAGAGGCGGACAAACAACGGTGGAAACGGTGAACGTGGGACT  
AGGCGATGCTGCGTTCAACTCGATTGTTTATGGTGAGACGATTGATTATCTTGACAGATGC  
TGTGTAGGAAAACTTTTGTACCACTTCCCTCCAGAACTTGCCACCGACGTTTTACGTTAA  
ATGGACGAGCAGGGAAAGTTACCGCTCTGGGTCTACAGGTAGACTAGCGCTGGTACAAGT  
CGATGTAGACTGGAATAACGCCAACCATGTTGGACAGGACAAGGAAGTTGGTTTATTGAC  
TGCAGAGGAATGGGAACTTTGCAAAGAGCTTTGCAATATCTCTAAGGTAATTAATACTT  
GCAAAAATAACAAAAAAGTCCCTTAACTTCATGGTTCAGGGGCTTTACTTTTAGGCGACA  
TAAAGAACCTGGAGGGTGGTGCATGTTGGAGGCAATAAATTATTTCAGAAGGTTGCTTGG  
GGCCTTGACCTCTGTGTGGTGTAGCTCTAGCGCTGTCTTTTCAAAAAATCAAACACACCG  
CGCGGTCTACGTGGTTCATGAAGCAATCATTGCTTGATTTACGGTGCATATCCACAGTAT  
CGGCTTATGCAAAATCACATGCCTTGGGTTAAACCCTTGGTGATTGGCGGATTTATGGTG  
ATTGCGGTGTTTATTGTTGTTGACATCGCAAATAACGTCAGCAACAATTGTAAGCTTAAC  
GGTGAACAGCGCCTCGCAAACAGTGCTGATGGAGTTGTCGTTGAGAACAAGGCGATCTGC  
GACGGTGATTGCGTGAAGTGGTCTCGTTACGAACCCTGAATAAATACTCACAAAAGGAGA  
TTCAAATGATAAAATTGACGATTGCTCTGCTGGCTATGGAGTTTGTGACAACCGCCCATG  
CGGACGAAAATGATGATTTCCAGATCGTCCCTATGTGAAAGGTTGAGGAGTGCTACAAA  
TCGAGCACTTCTCTCGGATTATTTGGTCTCGTAAGATGGATAGTATGGGAGAGACCTGTA  
TAGACACGGTCATCCCTCAATAGGATGGTCAGGTGGGGAATGTTCTTTGCGAAGATTCTC  
GCTGGTATCAAGGGTCAGCTATCAACACGACCAAAAAATCTGTGACCCGTGTTGCAATAG  
TCTACCACTATCAGTAGGGGAAGTCATGAAAAAGATTTGCCTCGCCCCCAGCTGGCACT  
TTCTTGCTCTGTACATGCTACAGAGTGCTATAACCGATACCTTGGCAAAGGGATCGGAGA  
TGCAGGCAATGCTGACGCGCTGGATGCTCAAAGCATGGTCTAGAAAGAGCAAAGGCTAA  
GATACCTGTGGCAGAACATGAAATAAACATCTCAGAATTTCAAGTGGCGCCTTCAAAAAT  
GGAAAACCAGATGAATATCCTCACAACCGCTGTTGAAGAAATGGAGAATAGAAAATGACT  
ATGACTCGTGGCCTTATCTTCAGAAAACCTGCACCGGTGCCCTACGGGCATGTAGGATCT  
CTTCGCCAGGCGGCTTCTCAGACGAGTAGCCGGTATCTGTTCCCTGTCATATGACCAGAAA  
TTGGTTGACGCACGACCAGAGTGTATTGGTTCAAAGTTGCGGCTTGTCGATCGCTACCGT  
GACTTGCTGGTTGTTAATAACCGATGAGGGTCTGGATACCGTGAAGGTTGACTAGGTTGAT  
GAGTCGAATATACCCGGAAACCCTCAAGGAGGAGCTGCTTATGCAAAACTGATCCGTAAA  
GAGCACCTATTGTTAACTACGACTTTGCCTTCTATTCTGAGATGGTGTACGGATCTTAC  
TTCAGTGAGGTCTTCCACGCAGCGAAGCTTGTGTTATCGACTGAGAACGTAAACCTGTT  
TCTATCTTTGCTACTATGATTCTTACCGGCCGGTACAACAATTTCTATAACCTGGCATGG  
CCTCCACGGAAACTCTTCATGTAAAAGGTCGCCTTTGTTGGTGTGACAGCACTGTTAAA  
ACGACCTTGACACATCACTTGGCATACAACTACGGTTCACCTTGGACTCCTGAGATTGGA  
AGACTGAATTGCAAGTGTGAGTATAACTCGATTGAGGTTGCGATGAGTCGTGAGGATTAC  
CTACGTGTCGCAATGGAGCGTCTCCTGTAAGAGATGGAGGTGGCTGGTTGGGGTGACCGT  
AGGGTACTGTTATTCGACACCACAAATCTGATCACACACTTCTGTGGAGTTCGTGCAAAT  
AAAATCTCCAACCTGCGACCAGTTGTTACGGACACTGAGCCTCGATGAGAGCTACAACGTT

TCCGATCTGTTCCCTGTTCCCTCACACCAGAGTTTCCGTTGGGTTTCTGATCATCCACGTTTG  
CAGGATGTCCAAGAAAAGTGAAAAGAGACGCATTCTTAGATTTACAAAATGATCTGGGCA  
TCTTAGGAGACAAGCAAGGTGGTGGTCATCTCCGGCAATGAATACGAACAGCGTACTCAA  
AAAGACGAAGAAGCGGTACGTAAATTCCTGAATATCCAAGGAGAATAAGCTGAACGTAAC  
GAATTC AAGCATGAAACAGGCAATTGGTTTTCTGAAAATATTTTAGGAAAGGCCCTCCGA  
GTTGGCTCAAGGTCTTCCGGCGAACGCTAACTGTCGTGAGCAAGGCTTCTCTATAACCAA  
AAGGAATCACAAGTGTGATAATGACTTTTCGAGGCGAGTATCTATCAGCGAGTGTCTGTA  
CAGTATTAAGATGAATGTGTACTAGGGCAGACCATGAACTTCAACTCCCGCACGAATGT  
GGGTGGCGACGAAACGTATCTTTCTCCTCGCAAATACTTTGGTTATGAGGAGTATGACGA  
AGCGGCAGACTGGAACATCGCGCACCTGAAAGGTGACTTAGATGGATCAAATAAACAGG  
TTTTATTTTTGAAAACCCAGAAAGGTTATCTTTTCCAGATCACCCATATGTCTGAAGAGC  
ATTTACTGAATGCAATCATCTGGCTACTGACAGGGTCGTGTCTTGTGGCCAAAACAGAAA  
TTGCTCCGATAACAACGTGGGTAGAAGCAACGGCTGTGGAGTTAAAAGACCAGATGGATG  
GTAATGGCAAAGGTTCTTCACTTATACCATTTTTGGTAAGGCTATCCCTGAAGGTGGGGTC  
TAGAACGGCCGCACCCTGAAGAAAATTAACCGGGTGGGTGCATAAGCTAGCCCACCCATTC  
CTGGTTGAGAGTGGTGGTGGGAATCGTGACGAGGTCATTA AAAACTAACGTGGGAGGTTG  
TGGGAGAAGATCCAGAAAGGTGAAATTACTTTGCAATGGCTTGTGACTTGGACGGGAAA  
GTCCTTGTATGCTTTTGTTCAGCGAAAAGATCTCACTGTGATATACTCACGGCGGCAATG  
GAATGGACCGAGGGCAGGGTTACAAAATGAGTTTGAAAAAAGATCACACTTATATCCAGA  
TATATAATAGGAAGGCTGGAGATAGCTCCCTTGTGATCTCTGATGATGCCGGAGGTTATC  
GTCTCGTAGGTTCCAAGATAACTGGTCAACCGATAGCCCCTTTTGCAGTTTATGTTGAAA  
TACATATAATCGCAGTGTAATAACCAAGGTGAATAACATCATTATGGTACAGGTAGA  
AACGGCTCAAATTCCTCCGGTCAGATTTTAAAGTGGGTAGATGGCAGACAGGCTTTAGAA  
TGGAGATGCCCTTGCTATGAAGGGTGGATAGTGGTCTTGTGAGATGTTCTCAATGAAG  
ATGCACCAAAGACAGCCTACCTATGCCGGATGCCAAGTGCCGGATGACTGGTTAAGGATT  
TCATTCTTCAAAGAGTGGGTTACTCAACAACCCCGCACGACCAGTGGCTGAATAAGGAA  
GGTGATCTTCAATTTGACAAAGACATTGTTTTGGAGGGAAACAGAAATTACACTCCTGAA  
GCATGTGCGTTTCGTTCCATTATACATACATACCGCATTTCGCCTCTTGTAGGAACAGCGGC  
CTAACTATGGCGGTAACCAAAAATACTACAGCAGGATGGTCTATGAGGCAGGGTGCAAGTTG  
GACGGGAAAAGAAAATACCTGGGCGTGCGAGCAACCCCTATGCTGCTCATGCTTTATAG  
CAAAGCAAAGGCTGAAACTCTTTAATCAGTGATCGAGGTAAACGCCTCCTCTGAATTA  
TATAATGAGCTTACTGCGAAAGACCTGCAAAAATGAGTTGACAGAAAATAAGCGACCTC  
CAAATGGAGAGGGAACAACCTTACTTGTGAGGATAAAAGATTAAACGATGAATCTATACG  
TGAGAACAACCTGGACCGACTTTTATGAATGGTCGAAAATTGTATATCTGTAGCTGTGCA  
TCAGTTGACCCTCCATCACTTTGGTGTGATCACCATGGTTCGGTGGGTTTATTGCATTTA  
TCTCCTCAGTGACAGGTATTATTGGAGTGATCCTTGTGCAAAGGTAAAACCTTCCAATT  
ATTATTTGGGCTCTATGGCGCCAGTGTGTACGCACACATCTCCTTACGTACAAACTCT  
ACGCTGAAACGATTAATTACCCTCTGCCAGTCACTCTGTTGCAGGTGTTAGGTGGGATTA  
TCTGCGCGAACAATCGGATTGTCTTTGGAGACGGCGAACGTGCGGATGCGATCAAAGAGT  
ACCTCACCACAAAGCAGCCGTGGTTGGTTGGGATTGTAAAGTTGGTTGTGATCGCCTTGT  
ATGCAGAATTTTTAAGCCTTCTCAATGAAAGTATCCCTTACTAGATGCCGTAGCAGCGA  
TCCTCTATGTTCTGGCAACATATCTGATGATGTTACGTTAAGCAGAACAGTCGTACGTGT  
GGATCATGGTGATTGTAGTCGCCCTCACTTTGTGGATTCAGACAGGACTCCACCTTGAAG  
CTCAGGGGTGGGCGGTACTTGCAATGTGGATCAATTTCCATTAAACTCTATCTGTGGTG  
ACTACAGATTATGGAAACACGAAGGAACTCTGTAATGAGTGGACTTTGGGAATCGTTGAC  
GATTCACCATAAATGGGAGGCGGGTACTGCTCTTTGTACGACGATGTTCCCTTTGGGACAC  
CGTCCTATATTTAGGGAAACATGGAAGTATAAAGTTATGGCATATTTAATGCTGGTTGT  
GGTCGTTGGTACGCTATTTATTGCCTTGTCAAGTTAGATAGTTGGTTATAGCATGTATAC  
AAATGACTGGACCACTTGCGCACAATCCGACGCTGTGGCATGATTCTAGGTGTTTCGATGC  
ACAGAAAGAACGGTGATTTAGACCAGTGCTGGGGCTTGCACCAGTAGATGAGATGCAAGT  
GACGTCCTTTACACCTAAACAAACTTAGACAGGGCAATGGCTATGAAATCTGAGCGAACA  
GGTCAAATATGTAGAAATGCACGAAGCCAGATCAAACCAGAATGTTAACCTGGAAGAG  
CAATTTGGTGATGGAATACTTCAAGCAGGATTTTGTATATCTTTATATCGATTATACTAAT  
GCATCCAGTTTCCATAAAGCCTTCCGTCAGAGCGATTCCCTGTAATTAGGGTTAACAGAT  
ATCGTTCACTTGGGCTGATTCCAGGTGGTGAATTGAACACCATCTGGTCTTTCCTGGAG  
GAGTCTTATCCGTAAACGCTTTAAGTGGCTACTGAGCCTGTTTAGCCAAAACCTCCATAGA  
GACCATTGGCAGTGGTAACACCATCACAGGGATACAGACAGCATTAGTGATGTTCTGAA

GGGACGTGACCCAGAGGGGGATTATAAGTACGAGCTTAAACCCCTGACTGGAAATGAGAT  
CAGGGTTATTGCTAAAAAGGAACTGGCAGATGTAGGAGCTAAAAAACTGCTAACAGAGGG  
CCGAGATCAGCTGCTCCAAGCGATAATGGAAGATTTGGATCGGCACAGTTGGAACCGTAG  
CCCCTCCCGCCATCTGCACCCCGACGTGCTGCTGGTTGCGGATGATTATTCTCTAGC  
ACGACAGAGACGCAGTGAAACGGGTTGCATTCGTGACGATGACGATAGCATTGTAATCAG  
CGTTTTTGTAGCGTCTGCTGTTTATCACTCGTGAAGTTGTGTGCGATTGTGGAAGTTATAG  
CAGTGGCAGATGTGAGAACGGCATTCTTTCAGGAGGATGTGCTTGAAAATAACAAAAACG  
TTTCTTTGTTCAATCGGTCATTCCAGTACCTCAGTCATAGACCACTCTGTACCGACGAGT  
GATCGTGCAAAATGTGATGTAAGCCAAATAAGTAATGGCACTGGAGGGTGGTAATGTG  
GTCACTGAAACAACATCTTCTAGCTTCCCAACGTGGATGGATTAACCTTTTATTAAACTC  
TTATATGTAAATAAGCAGTTCCTATAATCAAAATTTTTTCGGCGCTGGCGCTTTGATTCA  
TAGACTTGAAACTGTGCGGGGATATTGCATGGTCAAGGTGGTGGGTCTTGGCATAACTCT  
ACCTCCGTTTCGCGAATTGGGTAGCGATCATAATTTTGTTTATCGACAGTGTCTTTTGAG  
TTCCAGGGGCGTCTGCTCTTATGGAGAAAATCAAATTAAGTAAGAAAAGATCACTCTAAC  
TGTTAGCATAACATAGCTGAAAGTGGTAATCTACCCCTTCACTCACAAACGGAGGATTGAT  
GACTGAGGCAGTACCCCTATCGCAACCCACTCAGGAGAAGAAAAACTTTTCTCCGCGA  
ACTCGGCGAAGGTCAGTGTGCAACGAATGTTCTTCTTACGAGTGCCAGGGCACAGATGAA  
TCAGTTCATCGGCTCAGAGCGTATGCGTGATGAAATGCTGAAGGTGCTCCAAGCTGCAA  
CATCACTACTGTGGAAGAAGCTCTTGCATCGGTGCGTGGACACCGCAAGAACTTCCTGTA  
ATTAACGGTTCATCGTCTTTGGCCCTGAATCAACTTAGTCAGGTTGAAAATCTAGTGAT  
CGATAGACTGTTTCGGTCTTTACGGTGATAGCCAACAAGAAGAACTACCTAATGGGACAG  
AGAATGAGCGGAATTAACGAATTCAAAGATCGGATGACGGGCAATGTAAACCCCTTCGCA  
GAGCACAGCACCAAAATTCAACAGCACCAAACTGTAAAGAATACAGATCCTGATAGAGTG  
AAACGTACCCACATCCCAGCGCGAAACGGTCCGCCTGCAAAGGTGACTGAATGACCCGAT  
ACCCACCGAATGTTTATGCAAGAGGTGGACGAGAATTACAGCGTTATCGATCCCCAAAGC  
CAGGGTGAGTGGTAAGGCATGGGGGACAAGAAGCTTCTGCAAGCCACTCCGAAAAAATG  
CAGGTGACGTTGGTCTGTGGTTATAAAGACATTCTGCCAGGTATGTTTGCATCATTCCCG  
CTGAAAGTGAGCACGAACGGCTATAAGCCCTATGTCAAAGCTCTCTGAGTGTCAAGCCT  
TTAAACATTCTGGACGAAAGCAAAGTAGGTCAACATGCACCACGTCTGCAGCCGCAGCAA  
AGCGACCAAGATCAACAGTCTGGTGGTGGGGTGAAAGTTTACGGCGACATCACTGCTATT  
GCAGGGGGTCTGGCGATTTTAAATGATGAGAGAAACGGCCCTGGTTGTGTTGTTCTGTGCG  
GATGCGCAACTGCCGCAGATACTCGTCTCTGGTCGCCTGACAGCCTTTGTATATCTTGCT  
GATGGCATAAGTCTGAGACGGCTTTAAAGCTTACGCCGCAGGAGGTGAGGACTTGGCCCA  
GGTGGTTAGAAGTCTGGTGGCAATTATGAACCTAGTGATGTAGCCTGTGGTACCGGTAGG  
ACCGCCCTTAAGGAATCGATGGGTGCAATATATAAAGTGGAGGATGAACTTGAGGCAGTT  
AAAGCCATTTACCGTGCAGCTGTAGACATGAAGGCCTTCGTTGCGGCGCTTACTGGTATA  
GATGATGACTTAAATGCTGTGCGGAGCAAGTGCAGGTAGTGCAATTCTTGTTGCATCTAAC  
TGATATAAAGCCAAATCGGAAGTAACTGAGGCAACGATCCTGGAAAGCGCCAACAACGTG  
TATGTGACGTTCTCTGTGCTGGTGTATGACTTCTTACTACCTATGGCATGCCTGCGGAT  
GAACTCAACCTCAGACTGCTCGGCAGTCTCTGATCGGCACTGCAGAAGTACCCCTATG  
GATGCTTTTGATCCTCCGATGGACTTTTACAACGATATACCCTTTGCCCAATCGGCCTG  
CAAGATGGTAAGAAGTGTTCATTGCATTTAATAAATAGAAAAGGCGCTTTTCGGATCC  
TTCTTGGTTTATTGCGGTTGAGCAGATAGAAACCGTTAGCCTGGGTCCACAGGATCTGGT  
GGCCTGAGAAGTCTGAAACACAGACACACGAATCGTCAAATGCCAAACCTCATCCTCC  
AAGTAAATAAGACGAACATGACAACGGGCATACCAACCGCAATGCAGGAAAGGAACGCT  
CCCTCATCAAGCCGCAACATATCCGGATTTGTAGTCTTAATTCTCCGTCTATGAAGTTA  
GTATGAACAATGGATGGAGAATTTTCCAATCCGCCAACGTTGGGATTTGGTGTATATTCA  
GGACTGTTTTTATCTATGAACACGATCACGTCACCAACTTCATTTTTCGCGGATGGAATCG  
GTACGCACAGACAAGATGAAAACATAACCGCAAGAAGTATCTGTGAGTGATTGAGCATCC  
GGCCAGACCCTGTTTAAAGCAGTCCTTGTGATGTCAAACAACCCCTCTTAAAGGAAGGGC  
ATGATACCACTAGAGTCTACAGCTGCGTTCTTAGGAGTACTCGATGTGAACGAAATATCA  
TAAAACTCAGCATCTGCTGGCTCAACAGTCCACATAAGTTGACTTCTCGAGCCTTTGATG  
GCGTATGGGATAGACCCTGTGGTGTGATTCATCCGCAGTTGTTCCCCCAAACGATGCTTCT  
GGGATGTTAGTGAACCTGACCAGTGCTATCGGTTGACCCGAAGAGACCATAAAGGTTGCCA  
GCGTAATGAAGGTTCCCTCATAACCATCCAAAGGCTGATAGGGTTCCTTGGTTAAGG  
ACATCTGTTTTTCTATATAACAATGGATGTCAGCTTCGCAAGTTGTGAATCCCTTCTGTA  
GGAAGTGTAACATGGGTTGGTTCTAAAACCATGTTGATGGTGTGCCACGGCCAATTTGA

GCAGTTAGGCCAACAAAGACCGTAACGCTTGTATCAAGAATCAGGAATTGCCACTGCCCA  
CCGTCGATAACCCTGATTGTCTCCAAGGACCAATACCCTGTTTTTTAGAGCACTGAGCT  
GTCCCGATAACCCTCGTATATAAACAGTGCTGTTTATCATCAACACCTGTAGATGCGTTA  
GCCAATGAGTTTCTTCCGTTTCGCTAACCTCTGTTGAACATAGACGGTTTCAGTCACAGAG  
GCAAAGCTATCATCGATAAAGTTTTGTGTTTGTGGTGTGAAGTACCATCTATCTGATGA  
GTGGCCCCAAAAACACGCCGAAGTCTAATATTGTTTCAGGTGTGTCCCGCAAGCACGCAAG  
CTGTACGCTCTCACAGGGGACGCACTAATACTTCTTGGGATCGATATGCCGGTAGTAGTA  
CCAGAGCCAAGACATCCATGTGTGTTTGACCTGCACCCATTAAGTCTTCCATCTACCACC  
TGCCAGAGTGTGCTACGGAGAGCACAAGAACTCTGTGTAGATTGGCGAGGGATACTGTG  
CCTGTGATTGATGACGGGAAGCTCGACCAAGAAGATATGATATACCATTGCCATTGAAT  
TGACTGGAGTCCACACAATACTGCCAGCCACCATGGTTCTCTTTGACAACAAAGGCTCTA  
CCACCCCGAAACACATCAGCAACACCATTAGCCGCCAAGTGCCTATGGTCCTTGAACGAG  
CTTATTGTGCGGTTTGCGCATTCAAACCTACGGGTTATCCCCTTGGGTATAGAGTATACCG  
TCAATCAGGAGGAGCGCCATTCATCTTTTCGGAGCACACCAGCCAGATCACGGGTAAAT  
GCCACACTCTTATCACTACCGGGTGGGAGGTGTTCTGTCCCTCCCCAGAAAATGTCAAG  
AAGAGTCAAGGATTAGGATACATTCAAACCTCCCAAACCAAAGCTGTCCGAAGACAGCC  
TTGAATCATTACTGACGACGAACAATTATCATGTGCGATAAGACCGCCTTCAACGCCCTCA  
TAGATCAATTGAAGAATAGTCAACGAATCAAGCGTCTAGTAAATTGTTTCGCTGTTTAAA  
ACCAAGAAGTTACGATCTAAAGTCAACAGCGTGACGGCCAGTACCATCTTGAGTTAGGTAA  
ATCGCAGCAGACAACGGATCTGTGTTTTATGCCACGCGGCAAGTGTAAATCCGCATCA  
ACTGTTACGTTATAGATGTTGGAATCTCCACTTGTGGTCCATGCCGCTGTATAGCTATCA  
ATTCCTCATCAATAAGTGTCTGGAATTATACACTTGCCTTGGTTAGCATTAAAGAATCT  
TGTAACGTATGGCTATTGGCACTTACCGAACCGGTAGAGGTCAGAGATCCCACGTTGATG  
GTATAACCTGTCAATTCAATGGAAACACCTGTAACCGTACCCTGCATAACAAGGCTGTTA  
ACTGTGCTGTTTCTGTAGCGTTGATAAGGTTGACATAACCGTTTACGGTCAGGTTATCC  
TGAAGTGGGACATCGGCAAGCACGCTAAGATCCTCAATAAACTCAGACGTACCTGTAATA  
GAGAGATTTTCGACAATTGTAACATTTGCATTTCCGGGTGGAAATCGACCATATAGACTG  
CTTAACCCACCCCGTGTGAATGGACCATAGATGTATACGTTAGCAGCCGAGAAATCTTCG  
AGGGTTGTATTACCTTTTGCGGTCAGATCACTTGTAAATCAAGGTCACCGATTGTTGCG  
TGTCTTAGGTTGCTAACACCCCTGACCTGTCCGTCCCCACCAACAGTGAAATCGTCTGCG  
GTTGTAACAGAGTTTGGTCAAACATTAAGTCCGTGCAAAGTGAAGGTGATACCTGATACC  
TTACGTGCAATCTTCAGGTTCTCTACCTCAGTTGTAAGTACGACCTAAAATCTGGGTGCT  
GTAGGATCTTTGCTTCCGTTACCCCGGAAATACACGTAATCGCCGAGGTTATTACTTACA  
CCTGTGTGAGACATGGTGGTTTCATCTTCAGCCGCTGTTCCGTTGACAATAATGACCGGC  
TAGATCCTTTGGGCTACTCTCGCAGATGGGTCAAGGCGCGTCTTAAAGAATTTCCGATTA  
TCTGCGTCTGTCAATGTGGTGGTAAACTTGACACCTCTTGTGTGTCAGGATCAGTTTCTGG  
AAAAGACCTGTTGGGTTATCGGCGTTTACAGGGCGATTATGGTCAATTGTGTACCAACC  
ACCAAATATTGAGTGTGTCACCACCCGTTTCTGTCAACTATGCAAAGGTAAGCCTACCA  
CTTGAGATCGTTGACAAGGCGATAGCAATAGCCGTTGTAACAAAAGCAGTTGCGGCAAGT  
GATGAACTGTTGGTGTAGCCGGAGGGGTTGGAGCCTCTAAGTTTCTGTGTCAGGATCTGG  
CTGTTGATAGGCGCAGAGATAGTTGCCATTGCCGATACGTCGTTGGATAATCTTCAGTTG  
ACACTGTTGGCAGGTTTTTGTGGTTAACCCTAAGCGGCGCGTGTGTTTCGCTTGGTACA  
TTACAAGATTGAACCCCATTTGGGCCATTTAACGAATAAACTGGTTGTATACTGTGGTC  
TGAGTTCCCGCGAGGCACGGCATAGGCGGTGGTTAAAAGAACAGGTTCTTAAGAAGAGCT  
TTAGTAACCGTTGGAATGGTGTACGATCTTCAGTACCAACACTTTCCGGATGCCGATCTG  
TTGACGACCTCCTGGAGGCGTTACAGAGTCCCAACAACCTGATCGACAGCCTGTTCAAAT  
AGAGTGATGTCTGGCACAAGAGTCTCCTTGCTCGTCTGACTATCGCTCTGTACGTTGGGC  
TTGTGTTACTCCCCAGCGTACAGGTATTAGCTTACTGACGAGTTGAGGTGCAGCAACCGT  
GTGTCCAAAATCCACATATATCACACGGTCCACGTTCCACTGAATCCACAATAAAGGAA  
AATTGCCGTCCTTGAAGCGATGCGGATATTGCTCCAAAACCTTTGTGTGAGAAATGCTCTC  
AAGGTCTACTGGTGATCTCACAAATATCTTTAATAGATTTTCATCAGTGATTTTAAACACT  
TCCTCACTTTGAACAATGATCTAACACAGATGCGTACCTTGCAAGAACCACAAGGCTGAC  
CACAGTAGCGGTTGTTAGCCACTCTTTAGAGGTACTGTCTTAAAATCATGCACCCATGAT  
CAAAGCTTCCAAAACGGTCTGGTTTGTAGATTTGATGACATATCTCAATGCAAGAGGCAT  
CAAATATGGGAATGGCATGACTATTACCTGGCAGAAGAGTACAGGCACACATACGGAAAA  
GATCAGCCTCTACTTCCATCCCGATCTTATACACACTGTGGGAAACATGGGGGTTATTTA  
GGGCTACAAACATGATGCCATAAATAGAGACGGGTCAAAGAAGTGGCTATGAACCGAAAA

CTACCAGTTCGAAATGTTCTCCAGAAGGATATGGATCATTCCAAAAATACACATGATCCC  
TATACCCTTGTCTCCAGTTACCAGCAGCCCTGCAAAGCATAAGAAATATAGTGCCGAAAT  
TATCATCTACGCCGATTCTCCATGAGTAGCTTGATCTTATTGCTGAAGTCTGCACAAAGA  
TCGCCACGTCTTCTTTAGTGTCTTTCCCAAGGCTGAAACTTCATCACTAACCGTTTTG  
AGTGTCTAATCCAGAATCTCGTACGTTTTCCCTAGTGAACCTCTTCGCCTTACTCCTT  
ATGTTGTATCTATGAACTTCAGCCAGGACCTCGTGCCTTTTTTTGTAATTTGAGACTGGG  
ATTCTGAGGCCACCAATTAATAATCGTGATGCCATCTCAGTCAGCCGTGAGGATGGCA  
GGTAAGTCAATAGACAATATAGATTCTTTTGTCTTTGACTGGTCTTGCAGCCCACTTGA  
TATTAGGCGCATCCTCGGGGTCTGTTGCTAACAAATCAGTGCGGTATTTCTTCAGATTTT  
CGGGCTACGCTTTCTGGGAATCTAAAGTATATCATCTGGAAAACAAATCTTCAAGGGCTA  
AAATCTGGTTTGTAGCCCAAGACACTTCACTGGCCAGAAGAACTGCGTCCTGAGCAATAG  
CCTCTTTATTGTAATCTTTAAACTCCCCAGAGATGAATTGCACAGCCCCTAAAAGGGATT  
CAATAACGTCAGGAACTTCTTCAAGAACAGCAATCCTCATTGGGTCTGGGAGGTAGGCTG  
ATGGATCAGAAGACATACACAACACGACATCACCGGTGGGCAGAAGAAGAAAGTTGGTCC  
CCTATATCAATTTTGTCTATTCTTTCGCTATGTGCTACCAATCTTCCCAGGCTTTATTTT  
TCAGGAAAAATACACCTGACTCCATGTGTGCGCGTCTCTCGTCCGTCTATGTTGGGGTTT  
ATATTCAAAGTTCCCATATACCGTAGTCTTATATCCTCCTTAGTACAGGTTGGAAACCG  
TTAGCCATTGTCGGGTAGTGAGGCACTGTAGTGGTGCAGTGTAGTAAGTTCTGCCCTCA  
ACTCTTTCTTGTACCGAGAGCCCACCCGGTCTGTGCTTACCTGCATAAAATCTGGATT  
CAGTCATACCTGTTGCAACCCAATTACCTAAACGCATCAGCTGAACAACCTCCAGACGGGT  
TTGGTGTGACGTTAGCGTTACCATCTGCCGTAGCACCATTGATAGCTCTCACAACGTTTC  
GTCCACCACTTGCAGCGGAGTTGTTGCTGACAACAAGGGCGTTAACGTTACACTGTCCGT  
GTCCACTTGTATATGGGGTTGTCAAAGAGCATGTTGCGTCAACGTTGAAACCTTGAACGT  
TCCCTGTTGATGTTAAGGTTCTGTCTGTTGTTGAGGAGTGAATAGTTGGATCATTAA  
CCGGACCGAGTACGATAGTGTCTGAAGTGTGGACGGGTTGCAGTGACGATTGCACCGC  
GTCTACTTCGTCTTGTGATATTGGTACCATTTACCCTACAAAGTGCAGCAGTGCCACTAA  
TAGCATTGAACTGAATCATTATGAAGAATGCGCCACCAGAAGGGACCGAGCGGAAACGCA  
TACTATCCATGCTCGACGTACCTGGGTCATTACGGATATTATCGCCAACTACAAAAGCAA  
AGAATGTGGTATCTGCTCCTGGGTTGGTGGTTCGTGATGTAAGCGTAATCTGATTCGGATG  
GTTAGAGGTTTCAGGCGTGGAAACAGATAATTTAGCAGTCATGGTGTGCGCTGAAAAGTTCC  
CATATCTGGTATCAGACTCTGCTTTACTCTAAACATCAAGGTTTCTTCTTTCTGCCGCT  
TTGCTGCAAGGTGTGCTAGGTTCCCATTCACACGTAAGAAAGGACTGTCGAGACCAGGGA  
TGTGCACACCATTGAAGTACTTTGACCACGCAGTCAGCATTTTTAAAACGTAGTTAAATT  
CTGCGACTGTTGGCTTTTCCCAAGTCCCAACGTTTGTTCACAGGTAATCTTTAGGAG  
GTGCTTCGTTAATTCATGGGTGATAGTTAGAACAATATCTCGATTAGCCCAACTCTCTA  
TAGGTACTCTCGGCGATGCCATTCTAACCTCCCTTAAATCAAGGTATTCTCTCCATAAGA  
CACATACGTCAGGTGAGTAAGACCACGCTGTCCTGTTCCGGCTTACTGAGCGGATAGAACC  
GAATCCGAGTGCAGGTTTATCGACTGCGAATCCAAAATCCGTACCAGTTGTCTCTGTTAT  
GCTCAGGTGTGTTAGCATAGGCGACATGTCTTGCATCTCCTGGATAGCAGTCACCAATAT  
GAAACATGTGTTGGAATTGTCAATATCGAAACGCTATTTATCACCTTGTATTTGGTAAA  
GTTATCTTCCCCGAACATATGAATAAGGCTGTGCGTAATTTTCAGTGCATGTCACGTGCTT  
CTCAGCACTTGCCAAAAGGATGATAATGAGAGCACAATAGTTCATCTCGCTCAAGCCATC  
TCGCTCAATCGCGACATGCTACCCTATCTCACCAAGTATGACCCCTGTCGCAATTTTCAG  
CAATCTGTTCTCAGACAAGTTGACCCACATTTTCATCAAGCTTTTTGAGGCGTTCCAGATA  
ACCGGTCATAACTTCAACAAGGATTTCTTTCTTTGAGATAATCACCAGCGATATATTC  
AAAACCACCTTAAACGAAATGTGCGAGACTATGGATGTGGTTGACAACCTTTAAATTGTC  
TGCCATCCTAGCCTCATTAGATGATTTGTTGGAATGCACGGTAGTCTCTATCTAAAGCCA  
AGACTTCTGTCATTCCGGCAACAACATCGGTGTTAGTATAAGCATTGCCAGGTGCTACAC  
TATTCTGAACATCCACCAACAATTACGTGAAGCCCCCTCCTGTAATGGAGTAACCAACTG  
CGGATACCAACTGCATATTGTAATTTGTATCTGCAATGTTGACTAGATCATCGACGGCAT  
TCAGAGCAGCTGTGCTAGTGTGTTTGTCTGTCGACGGACGAGAGCTTTCCTTAATACCGAA  
CACGGACTGCAAGCTCTCGAGCCAGTGCTGTGCTGTGATAGACCGGTTCCGTCTGATCAT  
CTTCTGTGGTGACATCATAAAAAACGTTCCCATAGGTTGGGTTGGACAATGTGCTTATGA  
TATAACGTGCTTCACTGATTCCTTCTTTGGAACCACCCCAACTACATACTGAAACTTAG  
ATGCCGAAGCACCAAACCTGATGCGTTTCCCCTGTGTTGTTTGAAGAATCAACGAACCTTGC  
TGATGCCCTCGAAGTCTAAAACGGCACAAAGAACGGCAGGTGTAGTGGCATCAGCACCTG  
CTGCGGTGTTTTGTGAAGCACGAAGCGTGTAGTCAGTGTCTGTCTCAACATCGGAACCGC

CATTACCGGCAGTCATGTTGGTCATGCTGATAAAACCGCTTGGTGTCCGTATGATATTTG  
CGACAGTATTTGTTTCACGAGAGGTAGCCCCTGCTTTAGTAGCAATTACTTCAATGGTAA  
TTGATCTCTGACCCACTACGGGTGATGAACGGAAATCGACACGACCGTTAAGTACGCTCA  
TTTTCTTGTTAGCATCATACCAGATCTACATAGCACCACGCGCAGAGTCAACGACGATCC  
TGTCTTCGTTTAACTGTGTGGGCTTGACGACAATGAAATCACTAATCGATAATATAAATG  
CATTTAACTGAGAGCTCTTATGCACCTTATTTTCGTTGCGACAAGTTCGTTGATCTTGTG  
AACCATAGTTCTGATGAATCATCTAGATCGTATAGTGACCAAGAACCCAATCTTAGTTCA  
GTATTGGTAGCGCCAGGATCTTCCCTACGACAGGAGTGTCTTGCCTGGGCACGAAGTTAC  
CACTGTCATTGCTTTATGTTGTAGAGGTCCAAATCATGCAGTACGGGCCGGAATTGTAA  
CAACCATGTCGATGGTCCCTGATCCTCTGGTTTTACTTCGACGAAAAAAGCACCACGAC  
CAGGCAGTTAACCTAGATAAATAATTTCTGCCCCTGCAAGTGTCTGTACAGAATAGAGAG  
CCGCAGCCAGAAGGATCAATCGATATTCTCATTCAAAAATTGTGGTGGGTATGTCAA  
CAACAGTGTGACCTGTGAGTTGAAGTTGTCACCAGCAGTTCCGGATCAGCGACTTCTTGG  
TAACTGCGGTTAAAGTATCCAGGGATGGGAGCGCAAGGCCGTAGTTATTTAATCCATTTT  
CCGCAGCCACGAACGCCTCCTAGTGCTAGATTTTTGATCTAAGGTGTTGCTAATTTATAA  
TATTGTGATTTAATTATACAGGCTTATAATAAGAAATGGGCCCGAAGCCCCTGGTTATAT  
AGGTCCTTCCGCTGTCTACTTCGCGATTTGTGCAAACCATGGCCAAGTTACCAGATATGG  
CTGTCTGGAATGGATCTGCAATGGCCAGATAGAACGGGGTGATCAAAGCACCTTTTTGAT  
ATGGCCCTCCTATAATCGTTTTCTGGAGATCCCCACCATCGGGGCCGGCGCCTGGGACAG  
TGAGTTGCAACCCAGCAGAATTATATGCACGGGTAGGCCAAGGTTGTCGGATACTTGAAT  
ATGCTGCACACTCAAACGTTTTTGAGCCAAGCACAGTTGCCCTCGGTGAAGTCATTAGGTT  
CAATGTAACAAACCCCTGTCTCAACAACAAACAAACCAGCGGTCTTCTTCAGAATGATGT  
GCCTTTCACCGAATTGCTTTCCTTGAGGAAAATCATCATTATCAGACATGCATGTCTTAG  
CAGAATTAAGCCGTATGGCACCCCTGTTTCCGTTTGTCTCTGAGTGCTGAACAAGATCGA  
AAGCACAACCATATGTTGTTAACTGTCCAAAGCCTACCTGGTCGATGTTTGGCCTAGCGT  
CACCATTATCATCAAGGCTATTGATAGTAAAGATCTCAGCAGAACAGCAAGCCCAACCGT  
TCATCCCCTCGCCTGCCTCGCCCTGTCCAGCCCCATACGCGCCAAGACCATCAAACCTGGT  
TACTGAGAATGTCAGAAAGACGCAGTTTTGCGACAAGACCACGATATTTGAAAGTCTTGT  
ACTCAATGTCTCAACGTTACATTGCTGGTCCGGTCTCTCTATCACTAACTGGAATAT  
GTACCAGTCCCGCATGAATACGTACATTTTGCAGTGTAAAGTTACGGCACGGAGCAGCAA  
AGGTTTCGCTGGTTAACACCCCAACCCATAAAAAGTGAATCGGCTAGCACCATTGACTGATC  
AGCCACGAACACCATCTTTGACATAGTCTTGGGAACAAAACATAACGAGACCACCGGATG  
ACTGCAGTATTCGTTTGAATCGGATGCATAAGGAGAAACCCAGAGGCTCTCGACCTTAA  
CGTCACGGCAAAGCTTGAAGAGGATACATTGACCAACTCGGAGCATAATAACGTTACGCG  
TGATGATCCCATTCAACAAGCTGGTTATCAGAGGCGTTAGAACCATACGGTTCCGGCCCCG  
CAACGCCGTTACAAAGACCACAGTTAGGAGCGATATCTGTATTGTTGAGGTTGTCTGTTGT  
CTATATCTATGATTGTCAAGCCACCTCCGATATAGTGTCTCTGCACAACGTTATACTCAA  
TAACATCGTCTGTCACATCGATAAAGTTGAGACGGGCAAACGTACCCCGCGTAACAAGAG  
CGCCTGTACCTTGCTGAAGGATACCATCTTTACAACCTCTCGAATCACTATACAGAACGT  
CAATGGGACCTTCTAGAGCGAGGGTATGTAGTTCCATCGCCGTGGTTTTGTTATTATTAA  
CCCATGAGGAGTCTGTAAAGATGAGACGCCCTGCAAACCTGGCGAGTACAAACACCTGCGA  
AGGTAACCCAGCGGAATGTGATTTTTGATATATACATGTACCCCTTGCCGCCAATCTTGT  
TAAACCTTCCACCATACCATTCAACACCATCGATGTACACAATTGGCTCAAGAACCAGGT  
GCCATCACCATGCAGGAACAGCTTTTTTGGTCTCTTTTGCCTATGCAGGTGAAGCTGGTA  
CGACCTCTGTCTTGTAGGATATTTCCCAATAAATTGTGCAGGGGTAACAAAACCATCGA  
GTGAATGAGCCCCCTGATCCCGCTGCTCCACTCATAAAGGTTGAGCCATTAGCACCTACAA  
GGTCTCCACGTAGATATGGATCGTAGGCTCACCACGCCCCCTCATCAACACCACCTGTAG  
TCTCCGGTTTTGGATTAGGCAGGAAGACGTTTTCGGGTATGCCACTCTCTATTGATCGATAA  
TATTGGTAGATCCGTCGATCACGTGTTTTTTGGGAGAGACGTGCGTCCCCCTTACTTGGG  
AGGGAAACAGTCGCACCAACCCGACACGGGAGCACATATTTGTCCATGTTTATTACAGAG  
TGGCCTCCGACTGGTTAACAACCAGGTAGTCTCCATCGAAAGAGTCCGTGCTGTGCGTA  
AGTCTGAGAATTTGACGCTAAGTACTAGATCTGCCATTAATCCTCTTATCTTGTAAGCT  
CCCTGTCCATACCATACAGACCAACTCCTCATAACAATCCCTGGCGTCAAAGTCAAAGA  
ACACCCCATTTGTCAGTAACCGCATGTTGAGCAACAGACCAACACCCAGTCTACGGATTAT  
CCGGAGTCAGAACGATGTAGTTCTCTTGGATAGGAACGAAACAACGTTCTGCAACCAGAT  
CGATGTTAGGGAGACGATCACGCATTCTGCCATCCCCAACATATAACTGCCAACCATGA  
GCAAGGCTGACATGTGACTGGTAAATTCATATTCAGGTGCAAGCACCATTCCATCAGGAT

TAACGATGGTAGGAGTTTTGCCTTCTTTGTTTTCTTGGAATCATTGAGAAAAACAACCC  
AGTAGTACCCAACAGAGAATAGCTTACTTGGAATAGCTTCTCCACGCTGCGACAATCCTG  
ATACGCAACGCCGTACATAGAAGAATGCTCGGGCTTCATATCCAACACAAGCCTTTTCGT  
TCCATTGCTACATTTTGAAAGTTTTGAGCTCACCGAAGGTCTTCGCATCCCAACGATCGC  
ATACAAATGCCTGCGACATTAGTCCAGGCATGACTCGGTTGAAAGAGACATAAAACCACA  
TCGGGGAATCATAAAGGAAGTCTATGGTGTAATTCACGCCGTCCAGTTCGATGTTCTGAC  
CGTTGAGACAATACGGCGTAAGATACCGATACCCAGGGTACGGAAGACCACGCCAACCAT  
CGTACAGTGCCGTGTTTCGGGTCACTGATGTGGGAGAAAGGGATGAGACCTGGGGTTAGG  
GAAGGCTGTTTGTCTTCTTACCAATGACCGAACTGTCGCCAAGCTTCGCACTGCATGGGT  
TGTCTCCGTACACAGTAATGCGGAAATACATAGTAAAATCGACACCTTCTGTGGAAGTGC  
ACAAGTCAAGAACAGCATTCACTCAGTACCAATCGGTCCTTGCCTAACAGCATCAACAG  
GGTCCGGTGTGAGGTGCCAAGTTAATCTGCTTCAGATTATGTAGACCGATTAGGATTGGTC  
GTGGATCAGTTTCCGGATGATCTGGTTGATAGCTACTTATTACGAAACTGGATGTAGTTA  
TCTGAAGGGTAGTCCGTGCAACGTTTGTAGCCGGATCATGGCCCACCATCTCCAGTTGT  
TTTCATGCGTAATCGTATGGTTCGAAGTTAAAAGCGTTAGAGCGATATGTAAACGCAGAAA  
GGTCTGCTGTTTCTCTATCGGACAGGCAGAAAACAATCGTAGGAACTCCGTCCGCATGTC  
TGATGAGGGTGCAACGTTGGTCAATACTCCTTCTAAGAACACCACTCTGGTACTCAAAGT  
CTACAACCTGTGTACTCACCCCAATCCCAACTTTACGGGTGCGTGCAACAATGGCGTAAC  
CACTGCGCGGACGTGTTAAAGGAACGAAGTTTGACAGGGGGATATCGATTACATAAATCG  
AGTCAGTACCGCAAGGAAGACCAAAACGTTATGTCACCTCGCCTGTTTCAGACTTCGTTT  
TATTGAGGTCTAGTTCAGATCTGAACAATAGCCTATTGCCAAGGTCTTCCCTCCCTGCAA  
ACTGAAAACGCTACTTGGATTTACCGTAAAGACGGAAGTACTAGATCGCCTGCTGTTTCGAGGG  
TTATCTGAGCAGCTACTGCCTGATGAATACCAATATACCCTGCCGGGTCACGACAATACT  
CAGGGACCGCCGTTGAGGGGTAAGAGTAACCTCAGCTGATCCCGTAAGTGAACGGAATGA  
TGGCATAGGTGTTCTTGCAGAACAACCTATCGAACGGGTCATTGTCAGTATAATTGTCAC  
ATCCCATCAAGGCCCGCCTGCCAGCAAAGCCAGCGTTTTCTTGCTTCGGTGATCTGAGACA  
TAACATAGTAGGCATCACACCACAAAGGCTCAGCTTCAGAGGCGTTGGCCTGATATCACA  
TCTTAATAGATAGGTTGACGGATCGGGCGTGCCACATCGTGCTCCGGTCCATCTAGTACA  
CACCATGCTCTACAGGGTAGCAAGTTTCATAGTTGTTTTTGAAATTCCTGTTACCGTGG  
TATCTTTGCGTGGAACAGTCCCCCTCTCCGCCTCTGGGAGACCCTCTCAATAATAATAC  
CGTCCGAATCAACTTATCTCCCGACTCTGTCAATGATCCAATCGGCATCCCACTGAGACC  
CACACTTATCCCAATTTGTCATACCATCAGCGTTAGCAGCATATACTGTGCCGAAACCGC  
ATTCCCCTCCAAGATTAACATCAAAGATAAACCAGCCTTGTCAGGTATACTCCACAGT  
GAGTAGTACCATGAGGAATTAAGTCCCTACCATTTGACCATTACATAACTCTCCCCTTAC  
ACCCACCGTGGGTGGGTATCCATCGTAAGAGAGTCCGGTGATGTTCAAGACTTGCCTCAT  
TTACGTTTATGGTCCAGTTCGGGCTATATACAGCCGGAGGGTCTGGGATTGGCTGACCAG  
TAGGGTCCGAGCCGATATATGCTTGCCAAAATCTTCTGAAAGTTCCCGATATTTAAGGT  
CGTTGGTTTAAAGATATGCATATGCGCAACCGAGGAACAAGACAGACTGACCTTCGGTAA  
TTTCATCACCGTAAGGCTGAGCTTCTTGAGGCGTACAGTTGCTAAAGTGACTGAGGTAAG  
CCAAAACATGCTGTAACCTCAGGATGTAGTGCTGAACTGTCGGGTAAATGGTGTCTCCCT  
TATTCCTCTCAAAGAACTGTATGTGCTCATCGATCAATTGAAAAGCATTATCAGTGTTGT  
GCCGTAACCTGCACCACTACTCAACTCCAGCCATAATAATGGAGCCGAACTACTATTGCC  
ACCATCATCAGTGACGAACTGAAAGATGAGTCGGAACCCGGTGTATAAAGAAAGAACTGG  
AAGACTGTCATAATTCCAATTGATCTTACTGGCCCATGAAATTAATTCGTCCCTGTACT  
CAGTGTTAAGGACAAGGTAAACGACGGTGCTACATCCTCAGCCTTAGATGCATCGGTAAT  
TATGACAATGCTCTGACCTCCTGTCACGTTGGCAACAAAAGAATCACCCCTGTTAAGGTT  
ACATGATTCTGTCCCTTGAACATCGCCACGATTGAGAACTTACCTGGTCAACCGCCGTC  
ATCACTAGAACCGAACTCTTGCCAGGCGTTCCTCACTGGTGCCGCAATTTGGTTGACGGGGA  
AGATGACATTGGACTGATTTTTGGAGAGACACCATTCCATCTTTAAGACCTACCATCGGT  
ATCAAAGAATGCAAGGTCCTTCTTGATTCAAGGAACCCACCCTCAGAAATGAAGACAAC  
CTTCATAAGACCCGCACGAGTCATGATCGTGTCTAGAGAAGAATTCCTGGTTGTGTCTGC  
CTGATGCATGAATACATAGTAACCACCACATAACCGTGACGGCGGAAGGATGGTCAGACAC  
CTTCGCCGTTGGAGAAGAAACATCCGCCATTATTCACCCCTAACTGGATAGGGATGATGG  
ACTAGCCATCCTCTGTGGTGATGATATTAGTCTTATCATCTAGTAAACTACCAAGCGGAA  
TTGGGTTATCCAATCACACCAGGACCAAGTAGTCCACCATGTAGCATCTTTAGTGCGAG  
GAACAAAGAAATTGATCAAACAATAACATTCGTTAGCCAGGTGATTCAACCATCGTCAT  
CAAGAAGAGCAGTTGCACCTTCATGAGGGGTGGTGAATAATTCTCGTCTTGACCTACCA

AAGAGAGTCTTACCACTTACTGTTCTTTGGTTGTGACTTAATAGAAGGCTTGATAACTAC  
GTGTTGTCTTATCCATAGGTGAAAAGCTAGAGGTGATTTCAAGACTGTCAGTATCAAGAT  
ATGTTACTTCCTTGAGCTTACTGTCAAAGACACTCGGCACTACTCTTTTGCTTAGATAAG  
CTGGCTATGGGAAACCAAATGTCTTATAGTAACACCAGTGACCAGCCCAAATCTTGAATC  
ATAGCCACAGGCGCTGCCTAAGGCGGCCCTGGTTAACTCGATCAGATTCAGCCCCCAGC  
AGACATCAAGGTCTCCGGTAACTCGGTCCATAAGGAGATATTATTAAGAGTTGCCATTT  
AAACCTCTTATTGGTTGGGTGGCTTGGTATTACGGGAACCACAATCATCTGTCCATACGT  
AGACGTCATCATGTCGGACAAACCAATCATAGAAATCATTATTCACACCACGCGCTG  
TCATTAATTTTCCATCTGCTGTGACTCTTGCCCCGTTGACATCGATGTTCCCATCCACCT  
TTGCAGACGGTGTGCTGCACCAATGGTGAAGGACAATTGACCAGTCTTTTCAACAATGA  
ACGGTCCAACCATAACAGGTTAAATTAATAATCACCTTCCCCCGTCATGGAGAACTGAACGT  
GGTCGTTCCACAATTCAACTTTGTTGGGTCTATAGTGGTGGCGTTGCCATCACTTTCAA  
TAACTATAATGGACGACGCTCGAAAAAGTCCGTGGGTGTTCTTATAATTAGCGTACCTT  
CATTCCGCTCGGAGAAGGAGATACCGACAACCTTAACCAGGCTACACAGGAAGCGCCAGGC  
GAGCTTCTCCTCCAGTACTTGAAGGCATGGCTAGCGGGAGATCGAAAACGGCAGGATATC  
CTGCTACGCTGCCATCGTCGAAATTCGTTGACGCGAAGAGTTGGACATTGGCAGAAGAGA  
TTGCGTAATCAGCATCAACCACTCTTGCCCTTAGTCTGGGTGCTTGTCCCGAGGGTGCC  
AAGCGAACCATTGGTTAAGCGGGGCTTCCATACGATGAATTGAGGGCATCCTTCCCCCAC  
CACTCCACCACGGGTTTCTGCAAGACCGATCTCATCCATCCAATCACACCCTCGAGTTG  
CCCTCTGTGGGTGAGGTGCACTACTTGATAAAACCCTGTGTATTTTTGACTTTTCAGGTA  
ATTCGTGCTTTCAGGAATTATCGCACCAAGTAAGCACTGTCACCACAGCCAGACGTTTCGTC  
TTCTCTCGTCTCGGACGGACTTGGACCTTTGTTGGTTTTTGGTTTCCTTTAGGACTTACA  
TTTTTTTTCCAGCCTACCCTTTACTGGTTCAGGGTTTTCCGGGGTTGGTGACTCATGCAT  
ACCTAACTCCGCACGGATCTCAAAAACAGCCGTCTTAAACCACATGCTATGTGTTGTCCA  
GTAAACTGCAACATCTTGAACACTGAATGTTGATCCAGTATTCTTCGCCAGCCTTTTAAG  
ATTGTTTCGCAGCGTTACCTGTGAAAGCCATTGACTGCTGGAGAGTCTGACCACCGAACTT  
AATAACCTCCGAAATTGGTAGTTTCAAGTCTGAGATACCGTCTATAACACCTGTAAAAAG  
AGAAGTCCCCTTCTCTTAAAGACCTAGCGCCCTTTCAGTCATATTGCTGGTTGTGGCATC  
CCCAGGATCTTCGATGTTTGTCTAGTATATCCATCCCCTTATCCTGGACAAACGCAAC  
AGTCCCTGTAAAAATAATTTGGTTTTACCCATCAAACCTCCGTCTCAAGAACCCTGTGAAT  
ACACTTCCCCTTGTATATTCAAGATAACTAACTGTTTCGTCACTAAGTTTATAAAGCGT  
GGCATAAGTTTGATTTCGGGTCTATGGTCTTATCCGTGTTACCTCAAAGTGGATACATGC  
AGTGCCTGTTTCGTCTCCGAGATCAGACGCGTTATTTGTATCTTGGTTTGTATGATGAGC  
GATGTTCTTTGGTTTCTGTTCAATATAAACAGGGTTGCCAATGGTGCCTCTGTATGTACA  
TGATCAGTTAGTCGGCATCTGTTAATCCTCGTCTTCAGATACCTCGTCGTAAGCAGATGA  
ATAAAGGATTAGCATGTCAGACAAGAACCCTGAGATTGTATCTGCCGACACATTAGGTTGA  
CGGGATGAATGAAAAGAGACGCAGTTGCCCTGAAAAATAATTTCCAAATATTTAAACTT  
GGCAAAGGTGTGGAGAATTGTTGTACAATTGAAAGAGAACGTTGGATCTGTTCCAACATC  
CCCAGATTAACGTTCCGAGATTCGTCACTCTCGTTGCACTGCAACGTCATCTCGTTTGT  
TTGAATGTCCACTACCTCACGCATAGTTTGGTCCGCAAACGATCAATATACCATGAGAA  
TGTGATCATTGACATTATATACCTATCGCCTTCTCGTCATCAAAAATGGAGCCTTCTGGA  
GTCCTATTATTACCATCTGGTGTGAGCACACCAAGTACTTGCTCCTGCTTTCTAAAGTCA  
CCATTTTTCATAGAATCGACAAGTGCTTGCCATCGAACTTTGTGTGGGACAGCAAATTTG  
GTCCGACGACGAGGGATTTCAACCGCAGTGCTGGTAGATAAAGACTGCTCAGACCCTTTC  
TGCTAGGTTTTACCACCAGACATTTTAGGGTCCGAATAGATTGTCGCCACCGCAATTATG  
CCAAGGATGAAAGTCCGGACCTACCTGAAATCAAGCTGGAAAACCAATACGGCGCCATCA  
GAGTGGCAGCTGTAAACCCCCAGCGAGGTTAAAAGGTAGTTCTCGCTGACCTTATCTTCA  
GTCACCAAAGTAACTATATTACGTTTCAGAGGTAAGTCTTTTCGAGGACCTAAAGTACCTTT  
TCTGGGCCGCGTGAGGCAACCGGGTTTTGACCGTCTGTATCTGTATCAATGTAGTTGTTT  
TGGATATGATAAACAGGAGATGAGTTCACCCTGCAACTGAAAGAAAATTTCCCAACTTCG  
GTGACACCGTGGTCTCTAAACATTACCTTTTTTTTACCTGCGTAGGATGGCCTATCAACG  
GTCCTTGTGTACAAGTGTTGTTTCATCAACGTCTAAAATGATTGATAGGTTGTTGGTGTAG  
TTCTTGTCTTGTAGTTCTACGTTTCGCCCCGGCGTGGTTCAGACCCCTGGCGAAGAGCGTA  
TATTGCACCTCTCCGCTGGCTTCATGGGCTGTGTTGAACTTTGTCTCGACGGTATCCGTA  
GCCATATCCTAGTTCGGTTAGGAATAGTTGTTGGATGTAAATGGTGTGCGTCCACCCATG  
ATACAAGTTACGATTTTATCATAACTCTTAAAGATAAAACAATAACTAAGCGGGCGAAGCC  
CGGTTAAATTATTGCGGCACACCAGTCATTAACTTGATGTTACCCATGGTTACAGCTTCG



AGCTGCTTGTGATCATCTTCTTAAACTCACCTGCATCAATCTTGATTGTAATCTGTCAA  
TTGACAGGTTTCGGTTGGACTTACCATTGGAGTATTTCTGTGCGGGCCAGCACCCAGGCATC  
ATCTAGTCCTGGATTAGGTACTTAAGTCTAATATGATCAGTCATTCCCCTCTGACCAGTA  
ATAAAGTCTCAAGTTTTACCAATCCGCGAGTTTTTGTAAAGACTACCACGTGCGGTTGTA  
TCTGTGCCGTATCTTGAGTCATTGGACGCTTGAACCTGGTTCGAAGAAATAATTCCCCGCA  
AGCAAACCTTACTCCAGCAATCAGCCCCTACAGACCAAGCCAACTTGCAGCTTTACCCATC  
TTACCGTAGAGTGGACCATTTCTTTTCATCTTACCGCAGCCCTCGCCAACATCATCATCC  
CGACCACCGAAGATCGTTGTAAAGAATTTTTAAGCTCCGGATAGTTCAGCAATGTTTCGAA  
AGAACACCGAACCACGGATCAGAACTGAACCAAGAAGAGAGCACCAACACCCCACCCCT  
ACCCATTTCCATGCAGAGGCTAAATCCTCGGCTTTCTTACGGAAGATTGGAATGTAACGT  
TCCATGAGGCCTTGGATCAGCACAAAGGTATTGTAATAGGTATCGAGGATCTCCATGAAC  
GCGGCAGTGAACCCAGCAACAAATTGACCCCGATTTTGGGCCAACTCCCCGTTGGAGTCA  
AGCATTTTTGCAAGTTCGATGAACGCCCTTCTTAACACATCCCCAAATCCGCTCTGTAAA  
ACTTTGCTCTGAAACTCAATCCAGGTTAAGGTCGGTCACTGCATCCCAACACGGTTGCCT  
AACGATGCCTTTTGTAAAGCACCACTTAATTTGCAGCCTCGGAGCAATACTTGGCTAAA  
AAAAGTGGCACCTTCGCTGAATACAACCTCGCTATTCTGCATCATTTTCGAGCAACTCGGTT  
ACGTCGATGGTGGAGTCAATTGAAAGTCTCTTGGGAAGCCTTGAGGAACACCGGAAAACAT  
CCTGGAATACCTTCAGCAAGTTTCTGCAGCATTACTTCCCTCCAGGATCTGTCTTTTCCC  
ACCATCTGCTGGATTACGGGAATACTACTTTGGTATTTGACCGGATTAACCCGTACGACA  
GTAGAGTATTCAGCGAACGCCTTGAATAGTTCACCGTTCTGTGAGTTACTAAGAACAGGA  
TCCGATGAGATTGCCATTTAGGTGTAGCTCAGCGATGCAATCTTGAGGTTAAGAGCCAAT  
CGGTAACACTGTTACGACCAAACCTGCATGCGTTTCCCAGACGCTTTGGAGCTCTCAAGA  
ACCATTAGCATGGTGGCGTACATGCCATGGAAGAAGTACCACCTTTAACAACCCCTTGCA  
GTGGCATTGAATGCACCGTAGGCTCCGCTAACGATGATCCAGGTGCTACGAAGCTTTTTTC  
CACCCCGCTGTCAGTGTAAGAGTACTCGTATCTGCCTTCATGCGTCGAGTCTCCAGTGCT  
TGAAGTTCAGCACGCAAATTTGCAAACCTTCATAGTATTACTGTCAAGGAAGCGCTCTTTC  
AGAGAATCGTAACCTTTCAATTTTGAAGCAAAGTTTTTACCATAATTTAGCACGGAGGCGA  
TGACCTGCGTTTGTAAACCGAAAGTACCTAGCCTGCAAGATCACGGGAATAAAAGTTTTCA  
TCAGCTTCAATTTTCTACAGGCCAGTTGTGCGGACGCGAAGTTGCTCTTTGGTGACTTCC  
TTTTCAACGCTTATTCCACGTTGCACTTGATGAACCTGTACAGCGTGTAGAGCTGGGTCG  
AAAACCTTTGTTTGGGTCACCAACCATGCATGTCGCATGTCCGGCACTCGGGAGTATTGAA  
AGTTACTCTTAGAGCGCGGCCTGACCTGCAACGGAATTACCGTAGTTGTGCCGTAACCA  
CAACCTGTCTTCTCCATCCCACGTAGACGAGCCTGTAGGCCATTGTAATCCCCTTAAGAT  
TCTGGAGATGATTTTGCCTCAGGTGACCAACAGCCTGCTCCCTACGGGCCCTTTTGAATT  
TTGTCGATATCTTACGGGCCCGAGCTTCTTTCTTAGCCTTTGCAATAGGATGGGGTGTA  
GATTTTCGGTTGCTCAGCACCTCCCTATGTTGTAACCTTTTGGTGACAGGAAGTGCCTGC  
ATTGCAGAACAACTTAATGTTGCTGGGGGATCCGTCTTACTGGAAGAGAACGCCCCGCC  
GCTTCTTCCATTCACTCATCAAAGACTTCACAGCTTTCATTCCGCGACCGAAATTAGTC  
TTGTCCACCTCACATGAGACTTTGTTGACTGTCTGGCTTACGAAAATATTCGCCATTGGG  
TCCCTCTCAATAGAAAAGCGAGGGCCCCGAAAAGGAACCAGGCTTAACATTAACCTTCTTC  
TACCACGACGACGCCAGTTTGCACCTTGTAGCCATACTTTACTTTCTTCTCTCTCT  
CGTGGGCATGACAAACGAATTCTTCCACAGCGAGCTATTCTTTCATCTTGAGCTGATAGG  
AGCCATCAACAGATCCAAGGGAGCTACAGGGTTTCGCCTTGAAGTTTTTCAGAGCACGAC  
TCCATAAGTAAGGAATGCCAGTCAGTGAGCTATTTTTCTTGCACCATCCATAGCTCTCA  
GGAGGAATTTTCGGAATTTTGGTTCGGTGTACGCCGACCCATTTGCCTCGATTGGTCCAC  
CGAGTTCATTGATGGGTTTGTAGCAAGCGCCTCGGAAGTCCCTGAACGTCAGCGAAACC  
GTCTTTCGTGAAAAACAGCCGTAGTTAATCTCAGGAACTTTAGCGACCCGCTAGATGAA  
GTCTAACATTAAGTGTGGAACACAGCGTCAGTATCTTCTTGATCCGCCACGCCATCAAC  
GAATACATCTTCAAGAAATAATGCGAAACGTGTTTCGAGGTCTCAAGCTCCGTCCGGTGC  
AAAGAGGTATAGAATAGCCGTAAGAAGGGCATTAGAACGATTCTGGCCTCCCGTCAGCAT  
GGAACCAGAAATGGGTGCCACAGGGCCTGCAACATTACGAGCGTTCCTTCGGAAGGTTTTT  
CATGATCTTCGTTGGAGACCAGCGCGTGATAAAGAAGTTGTTACCTCCGACGTCGATTTTC  
ACTTGTCCGTCTGATATTCTTGTACGCTTCTGCGTCTTTGTTGTGCGAGTTACACATGCGT  
GTATAAAGGTCACATCCATGCGGCACACGGAACACTTACACGATACGAGTCAGGCCAGTT  
AGGCCGAAGCATGCGGAGGACAAAATATCTTGGTTTAAGAAAGCGTCAAGGACAACGATT  
TCCCCGCCCATGTGGCTACCTTATGATCCGCAGGTCACGTTTTTGTGTGTCTGAATCCAA  
CCGATGGTGCTGAGTCGCATCCCCTGAGAACCTTTAAGAAGGACAGGAAAGAAAAACAGC

GTCGTGATAGAGACGTGTTGCTGCCGGCTTGCAGAGATGCCGTTCCAAGAAGAAGTGTTC  
TGATGTGAAACCGTCATGACCCCAGATAGGTTACATGACAGCGCGGCCGATAGCTCACCA  
TCAAGCCCCCTGTGGGGGAGGATGTTATCTGCGTTACGGGCAACCACAATTTTAGTATCT  
GCGGCGCCACCAGTCACACGCTGGGGCCTCAGGTCCAGTTTGACTTTTTGACTGTCATAA  
GCATACTGCGTCTCCATAGCTGTATCCGTTCAATACCCTCCTGCACTTACAGTCTGACCG  
TTTCCGCAATTAGGCACTGTTTTATCTAACAGAAAGGTCATGCGGATCTTAACGAAGTAC  
AATGGCGTGTAGCACACAAGCTCCACTGTCCCCTTATTCCAATTACGATCAGCCAGTTAG  
TTAGTCGGTATGATCAGACGATGCGGGACTGTGATCACCGCACCGTAGAACCTTTGTTA  
TCGTCATGGTATCCAGTTAGGATAGACCCGTTTGCAATACCAACGTTGATCGGGTCATTC  
ATTATTGCAGCTTTCAGATAAGCAAGATCGTTATCTCTCATCATCATGGAGAGACCCATG  
TTAGAACCGCGTGACAAGTATCGAAGTAAACTTTCTTCTGTACGGAAATTCAGCCCGTCA  
CCGAAAAGGACTACGTCAACGTAACCTACCAGAAGCACACTTACCTTCGTTGAAGGAACCA  
AGACCGTTAATCATAACGGTAGAAGTTCACACTGTGGTCCCAAATGGTCTTGCGATCACTC  
ACACTCCGACTTGGAACGATCACACCTTCCATTGACTTCGGGTGGATTGCGTCACCATAA  
GAAGGGTTCGTAGGATGCCATTGCACCGGTACTGCCACCCTCTGGGAATACGCTATCAGCA  
AGAGGCTCGTGCATGCCGATGGTAGTAACGTAACGTAACGTAACGTAACGTAACGTAACG  
GAGCTGCTCCCTACAGTCTTAACCAGTTCGTCAGAAGTTGAATCAACGTCGGCTTGTAC  
GTTGCAGCAGCGAAAGGACTAGCACCGAGGATTGAAGCGTTGGTGTGAGGTTTCAGTACCC  
AGGAAGTACCACTTCTCAGTTGCAGATGGCACTTGAAGCAGAACAGACGACACAGTAACA  
CTTGACGAGTTTGTAAATTGTCATATCACGGCAGTCACGTCCACTACTGCATGTTCCATAG  
TTGTTTGGAGGGATCGTTACGGCGCCTGCGCTTGCCCTAGCAGTCAGAACAGGTGTCAGA  
GGTGCACCACCATTACGTGCTGCTGCCAGGCCAGATGTCAGAGAGTTTGGGGAGGATTCCG  
CGAGTCATTGAAAGAATATCGCTGGTCTGATAAGCGTCGGAAATGACGTTCAAAGCCACC  
GTGTTTCCGGTCTCAGTGTGGTGGTACTGTGACGTCCACGATGCGATAGATAAGCGCT  
TGACCACCAATCATCGGGTCTGAGGAAGGAATGTACAAGAAATCGCTTTTGCTGCAAAG  
GTGTAAGCTGGGGAACCTGGAGCGACTACATCATCTTCAAGCTATTCGAGTTCGGTATAC  
GCCTGAAAACGTTACAGCAAAGGCGCAGTCGATAGCCAGGAACAACGGGGTTTCAAACCCT  
TTCGTTAACATTGGTTGAGCACCAGTGTGACTGAAGCGTCAACCAACTTGTCAATTATAA  
GCCTTCGGGTTCCCTTTTCTTGATTTCTGTACATACAGTTATTCACCAGCAACTCTTTGTG  
CTGTATGCTGGGGGATTGCGCCACCTAGACGATCACTAATCAGCCAGTGCAGTGTCTATGA  
GCGAGTGGTTTGTGTTTAGCCTGCTGCTGGGTAGTGATATACGAGTGCATCTTTGATCTTC  
TCTACTTCTTCGTGATCACCCGTAATTTGATTCGATGAAGGTCACGTTAATTGAGATCAAG  
TCTACAGCACTGGTCTCAAATAGCTGCATATTCAATGGAACCTCTTAAACGAGAAATTGTC  
GAAGATGACGATTATACAAAAGGTGAGGTAACCGGAAACATCGGTCACAAATAAACGGT  
AGGTGCATTGCTCGTAAGACCCGGCTTAAGGGGTTGGAAGCTTTACCACGGTAGGCTGGG  
AAGGTGTAAACTATCTCGTACTTATGCACCGTCATCGCATTGCTCTGAGTAACACCACCT  
TCGTCAGGTAGCCATTCAATCTGGTCAACTGCCTTCTGGTTCATGAAGAATGAATTCAGCA  
TCCACCTTGGGAATCTCATCTTCACCTGCGAACACAACGTGTCGTCCTGTGGTTTGTGTTA  
CAGACTGCTCCCCTTTATTCGTAAGGGGGTCAAAGATTTCTCCTCGGAATTAGTGAATCCA  
GCCATTAACCGCCTCTGTTCTGCTCCCTGCGGGAAAGGATACTACGAGAGCGACGAAACGGG  
CGACACCTGTAGTCTGATAATCAACAGATTTAATCACAGGAACCCACACCATTTCCCCAC  
GCGAAGTAATCGGGTTTATTTGGTCTGCAAGTTCGTTAGAGCCTTCAACACGACATTTTA  
GCATCACAGAGGGATAAAAGGTGTAGGAGGCATACTATCTGCCCTCTTCCCGCATCAATT  
GTGTTGTATAATTGCTTGTGCGGTTACCTATTAACCGTTGGACAACACCCTCACGAATAC  
CAAACCTTTCATACTCAAGTTCAACTCCCTGGTTTTTCGGAGGGATGGCTTGTGTCAACTA  
TTGAACATTCTCCGAGTCGCGCTGTAAAGGTTGAGCGACGGATTAATCTATTTGTTCCAA  
GAAGTCTGTAACCCGCAATTTTGCCTCGACCCTCTCCTGTTGGATACTCTGAATGTCGT  
CGACTCTTTATGTTACCCATAGTGGTACATCGCCTCACCAATTCACCTGACATCGGCCGA  
CGAACGGATAATCTTCTATTAGGATGCAAACCGGAGTCGATAACGAAGGTTAACTTTCC  
AGCACCAGCTTAGACGGTCTTGTTCAGCATCGGGGTCGGCTTACGACCCGCTGCAACAAG  
GTATTCGAAAAGTTCCGTCTGGAGTTTTTCCAGTTCCTTATTGAATGCACCTGGGCCGCT  
TGACATAAAGGTACGGGAAGGAAGACCGTTTTCAATGCTCTTTATGGATTGTAGCGAGCGT  
TGCAGTGTAAATACCTGAGTGATGAGGGTCTTTATAAAAACCATATGAAACCTGACGCGA  
ATCATGTTCTTGGGTTACTCCGCAATAGTTCTCAAACCTTGCTCAGATCTTGCTTACTTGT  
GAGTTTTGCTCTGATATCCACATCCGTTTAGTAATTTTTCCACATTATCTTGACAATATC  
CACGACCAAGCGCGGGATAAGTAGCGAGTCCAGCGGTAAGGGTATCTCAGAGGAACTCCT  
GGTACACCCGTCTTGGATAACAATGCCTTCAACATCGATGGGACTCCTTGAATTCCGTCCC

GCGTACACACGCCAGTGTTCATCATGAGGTACACGACCAATGATGACTAAACTGGAAACC  
GCGCTGAGACAACCGTCCACATTATCAGGAATGGCATGACACTTGCTCTGGAAAAGTTTC  
CAGTTCGGGTATGGAGAACCACCTTTTACCTGGATGGTGTGACGCGGATCGGTTTAAAG  
CGTTATGTGATAGATGACTCTTCAGAATTTACCTCTAGAGGGATCAAGCAACGGACCACA  
TCAACGAGCGTGGAATAAAGTACACGCCACATGTCGCAGGTTGCTGATTGAGTGTGGGC  
CAGATTGCCTTAACCTTCTCAATCGTAACAAATGCCAGAAGTTTTCCGCTGCTTAAAGC  
TCTGGGGTATTGGATCAGAGGAGCAGTCGAATGTACGCAATCATATCCTGGACTGTCATT  
TTAGCTCCTGTTGGATTGCTCTTGTATCAATCAAAATCTTATCATAAAAATTTCTTTTTG  
CCATTAGCAACACTTGACAAGACGTTAAGTTCTGTTTCTTAAAGTCAGCAAACAAAAC  
GGAGAACATTTTATGAAACATACTAAGGCCGTTCTCATTTC AATTATCGCTGGAGCACTT  
AGCGGGTCAGGAGCTTGTCCGTCGGTTATGAAAATTCCTGATGTTAATAACATCAAAGCA  
ATTGAATCAAGTTGTTTGTACCTGAAGAGAATACGGCCAGCGTCCATCGACTTGTTCGT  
CCCGGTTGCGACAAACGCTACAGGAAAGGATTCTAACCTGGCGTCACAGTTGTTTAGTCA  
CGTAAGATGGATGAGATAACAGAACAGACTGAAGTATACCAGTATTTGAATGATGTGGCG  
ATCCTTTATGGAACCTGAAGGATGCAAAGGGGCGTGCATATGCACCCATTATAAAGACGGG  
AAAGACCTCGCGGCCAATCTGAAGTTGAAAGTAGGAGTGCCTAAGCTTCGAAAACAAAAA  
GCGCCGAAGGGCCTTCTGTTACGCCAGAATCCCAGCGGCTTTAAGCTTCGTAGGGAGTCC  
GTTAAAGTCTCTTAGCAAAGTTTCAACATCGGTTACTACAGAATCTACCAGTCCAGAAGC  
TTTCTTAACACCACCGAACCTGCTAGTTGTTGCTGCGGGAAGTGTGTAAGCTGAAGCGCC  
TTCCACGAGATCAGCAACAGTGATTGAGTTACCGGTACCAACATCGACAAATGTGGTTGC  
ATACAGACGCTCTGCTACAGCAGAAGGTGCCACATTTTATTTCTCCTGATAGGAATGAGG  
AAGGTAATTGCGGAATATTGTCAACAGAGCTTGCCTGATCCAAACTATCAATGTAATTCC  
AGTAAGTCTTCGTCAACTCGTAATGAGATCTGGATACGCTGTTGATTAAAGCTGTCATTT  
CACTATTGATGAAATCAGCGCAGTAACCATCCAGGAACAGGAACCGAAAGACCTTTGTGG  
TTTCTGCACCATCATCATCCCAAACATTCTTGATGCTTAACAAAGCTTCAAGATCAAAC  
TCCTGACGCAAACCTGGTACTCCCTGTCATAGTAAGGATAAGGGATACCGATGTCAATGT  
CCCCGCTAAGAACAGTTTGTGCATCTGCCTTTCTCTGATCTTATGCAGAGACAAGGTTGG  
CCGTGCTTTCTCCTCAAGTGA AATTACGTACAGCCCAAGTTTGTGCCGATTCTTGGGTTT  
GGTCATTGAAATGTGCAGCGCCTTCAGCCACCACATCCCGTTCAGGCATTTCTTTCGGAA  
TACTGGGAAGTAAGCTACCTCGACACGGCTTTCAGAATAGATCCATGAACCGGTGCTCT  
CGTTCGGATTATTCGTTCTGAACTCAGAAAGATATACTTGATATTGCCATCAGACCTTC  
TGATTAGAGGGATCTATGCGTAAACCACCTTCCCTCTCCTTGAGAGGGGGGCGGATGCC  
CCTTTATTGCTTGACAGACAATGCGGGTATGCCTGTCAGGTAGGTACGGTCCCCGAGGAT  
AGGAACAACCGTGTGGGTAGTTCCAAGAGTACCCGCTGGGACGTTTTAACATGCTAGGTT  
GCCAGGCCACGTCAGTGACGCACATGAGCCGGAGAACACGATAACGATGTTCAAGTGTCT  
GGGTGTACGTAGGTTAGTGAAGCTCGTGGTTTTGTTTGTGCTGTACAATCATCCTTGAAGTC  
TTGAGATACGCCAACATCGATAGCACCAGTTGTAGACGTAACCAGAACATCGTAACGATC  
CAGTTTCTGCCACGCATTGTCTACACGGACGCAATAGCCTGTATCTGCTGGTGCTTCAAG  
TACCGGAACATCAATCCACCCTGCATTTGTTTCGAGCTCGCGGAATGGTAGGGGCTCTATC  
ATAAAGGTTTCTCTACTCATGTTACCCGAGAAGCCAAGGCGCTAGCAGATGGTCTCTA  
GAAGTATTCCATTGTGGGTTTATTGATGAAGAAATCACCGATTTCGACCATCCGGTGGACC  
GGAGTTACCGGACAAGTTTGACCAAAGTACACCTTTGTCTCCTTTAATTCCCTAGATAGG  
CTGAATATCTTGTGGACCCTGTGGACCTTATGGTCCACCATCGCCGGGACAACCTTGGAT  
AGGTCCGAAGTTCTCATAAGTGGGTTCCGTACAACCCGAGAGATCTCCGTACAGAAATTA  
AACCTGACCAAGCTATCCATTGGAAGTAAGTTCAGTGATATGGCCGAATTTGCCGAGGGT  
TTCTACCCAGCATCCATCTGACCCTCCGGTCTTTTGGTCCCTGACGGCCATCTTGACC  
TGTGAAGTCCCCGATCGGTTCCCATGCGGTCCGGCTCTAACATACAAATACTCTTTGTT  
CCCACCGGAAGTTACTGAATAGATCCAGCCATGTTCTAGGTTTTGAACATCTAGCAGGTT  
CCCATAGTTCGCAATAAGACCTTTTGCAACTATACTTGGACCCATCGGTCTTGGTCCACC  
TTGGATACCAGGATCACCTTGTGGGGCCACGCATGACTCCAAGTTTTACCCAGTTCGTACC  
AACGAAAGCAAAGCTTCTCCAGTGTCCACTGTGGTCTAGAGCTCTTCTGTTGCTGCGCC  
GGACGGCCAAGCTGCTTGGTTGGCTACTGTACCTCTGGCATTGAGATAAACGCCATTGG  
ACCCTGTGGTCTGTAGCCCCTGCGGGTCTTGGAGTCTTCATCACCTTTTGGCCTTT  
AGGCCTCTGTGGGATATCCGACCAAGTTTCACACATAGGCATGACATCTCCTGTAGACCC  
GGTGTACACCTTGTGCGCCGTTTGGATAAACGTATGGACCTACGTTTATCCATTTAGCATC  
AGCCTGCCTCCAGACGTAAAGGTTTTCGTACTATAATCCAAGCCTCGCCTGGTGTCTCTGT  
TGCAGGAAGACCTGAAACAGCACCTTTAGTCCCAACAACAATCACCTGTAACAGCCTC

ACCACGATCACCCCTTCGGAGCTTGAGGTCTTTGTGGACCGCGAGGGCCAGTTAAACAAGT  
ATCGCCCTTAACCTCCCTGTGGACCGATAGGTCCGTGAATACCCTGTGGTCCTTTTGTTC  
GACAGGACCCTCTGACCCCTCAGGACCCTCTGGGCCTTGGTGGCCTTTTTGTCTTTAGG  
GCATTGTGGGCCGACATCACCTTGGTCACCTTTAGGTCTTGGACGGAAGCAATAACTTC  
CCTAATGTCGTCAGGTAACCAAACCCCAACGTTAATGCCCGTTTGAACAACCCAGGCGTC  
AGGCACAGCATTACTCAATTCAGGCAATACGTCAACAGTTGCTTCTGTTCCCTTCAGTTT  
TCCAATAGCGGCATCGTTACCTTTAATGCCGTTGTACCTTTAGGTCTTGTATGCCCTGG  
TACGCCCTGAATCCCTTGTATACCTTGGTCACTTTTTTATCAACGGTCAGCTCTGTTGCC  
CTTAGGCCCTGCCGTTTCGGTTCGCAACAGTGGCCCCTTGTGGACAGTCAAGCGCTACTTA  
CCCTACAGGTTGCCATCCGTCTGCCTCGCCAGCCCAAACCCACATCTGGACTTCACTGTT  
GTAGGTATCGCTGTCCGAATTTCCGTGAGGCGGAAGGAGTGAAGTATCAGTAACTGTACG  
CCTGATTACCTATCCTATATCATTTTTCGCTTGTAGGTCCAGCGAAATCGTCCAGATAAGC  
CCAAGTTACTGTGCAACTGTCCAGTAATGAGTTCCTATTTTCGTTAGTATCTCCCTCTGG  
CATGGTTCGCCGACGAGGAAGTTGGTATGGGCTTATAATAATTCCATGGACGTAATACC  
AATACCCGGATGACCTTGGTGACCCTTTTCGCCCTTACCGCCTTTTTACCCGGGAGGGAG  
AATAAGACGTTCTTACCAGGGTTCGGTCACTTCAGCACGATCGTCTCCGGTCTTGGTTCGA  
AAAAGGCACAACGATCTGAGGAGTAGCAACATACAGCTTTCGACCTGCCAATACGAGCAG  
GTTATGACTGAGACCGCTCACTCGGAGAGAAAGTTCCCTCAGGGCCACCTACAAAGGCGTT  
ACCGGAAGAAAGATCAACAACAACAGCGGCCCTCAGGGGAGTAGTGGAGTTACCACCACC  
GAGAAGTGTACTGTGGTTCGTATCCTCTGTGTAGAATTGCTAATCGTCCACAAAGGTTCC  
CCCGCCAGTACCTTTCGGAAGGATTGGCTCCGTGTTGACGACCTTATAATTGTAATATGC  
CATTTTTACCCCTTATTTTACAGGTTTCGAGTTATGCAAGTGGAGCCTTGAATTCAGGCAT  
CATGTATCCGAAAGACTCGCTTTTCGCAAGGGTCATGCCTTCGGTTCGCCGCGAAGTCAGA  
AAGTTTTTCTGTGCTCGCTTTCTTGTCTGCTTCGTCGCTCAGTGCTTCTGCTTCAGCCAG  
AATTGCTTGGTAACCAGCAAACCTTCACTTTCACCTGTTTCACTTCTTCCAGGTTCTTACCAGT  
ATTGCCAACAATTGCCCTCCGGTCCCGTACCGGGACGATTCCGGTCTGGAATAGGACTGTT  
GAGGAATACGATGTTTGTACGCATGCGGTGGGAAGAGTCTTCTGCATCCACATCAGTTCC  
AGAGATCTCAGCATGCGCCTTGAATTACTCAACAGAGATCCGAAAAGCACTTCGTTTATT  
TACGACGCAAAAGCCGTTTCAGAGGAAGACGGGCAGAAATACGCTCAGTCAAATCGGCTGC  
GTAAGTCGCAAAGAATCTCAACAATTCTACGATGGTAGAGAAACTACGATAGTTTTGATT  
AGCCATAAATTCGCCATTTGGTTACCCTAGTAAAAACCACTTGACACCGTTGATGAAGTG  
GCTGTTATTATGGCAGAGGAAGAAAAAGAGAGACGTGAATAATCGCTTCTCCTCTTAGA  
GGTAGCTGTTACGCTGTCTTATGCGGAAGCACCAGTGGAGCGAACATCCAGTTCGGGACG  
GGTGTAAGAGATCATGAATGAAGTTTCGCACTCAACTTTTTCTTCTCCAGATATGCAGA  
AGATAAGTACCGCAGGTACAGTTCTTGTGCAGGAGTGTCTGCTTACGAACGTCATCTGC  
TGGTGCATAGTGAATCTGGCCCATGTCGTAGATAACTTTCGGCAGAATGTAAGCTTCCCC  
ATCTGTGAAGTATTTGGAGATATCCTCGATGTAAGTTACGTTCTTGTGCACGAACATGCG  
GTTGTTTGTCTTTTCTGCTCCCGGACCCAGAGGCCGAGTAAGCTGCTCTTGAGTAGAAAA  
GGAGTATTGATAAGCGTTCATTACGATCGGATGAGCGATCATCACCGAGAAGCCCTTACG  
ATAAGCCAGCCCTACGATAACCGTGGTTTTTTGCCATTGGCATCCGGATTGTCCATGATCTA  
AGCACGAGCTTCAGCTTCGAGAACGTCAGAAGTGTAGATTGCAACATTGCTGAAGTCAAT  
GTTTGCAGTATGCTGTGTAACACCCCACTCGGTGAGGTAGTTGTACTGAGCACTCGGGTC  
TTGACGTGTCCAAGATTTATCCATGATCGCCGGGGAGCCTGCTTTTTTCTTTCAGTTGTTT  
ATGAGAGATGGGGCAACGACGAACCACACGAGCTACAAGTTCTCCTACAGTCTTCGGGGC  
GTCAGTAGTGAATACTTACGGAAGTTCTGTACGTCTGCCGGAATGATCTGACGCTCATA  
TGGGAAAACCGGATGTTGAAGTTATTCGGTTGCGCCTTGTCAATCCCAACGTAATTACG  
TTAACCTGACGACGAAGAGTCGGGAAGGAGGTTTCAACTTCGTGAACACGTTCCAAGT  
TGCAGAGTTCGAATCACCGTGGTACGCTTTGAACAGGTCCAGTTAGGCGATAAGACGGCA  
CTGACGTGGTACGATTTCCAGAGTTGCGCCAAGTTATTCGTTCTGGAAGGCGTCAGTGCG  
TACGACTCCCTTTGTTGTTACCTTGGTGTATATTAGATAGACGTTACAGGGATCGCATC  
ACAGCCGTCTTAATATTACGCGGTGATCTTCGGACCTTTGGCCTCAAGAGCCGCGGTAGC  
AGCAGCGTTGTATGAAGTAGTATCGCCGGTGAAAAACGTTTTGGCTTTGTTTACGGGTAAG  
ACCCGAACCTGCCCAACCAAGTTGTAAGTACGGCCAACCACGAAATGACGAGGAGGGTC  
GTAAACAGGACCCAGATCACGGTCCGGGATCACACGTAATGCGTCAGCAGCAGCGGAAGC  
GGCCATTGGATCGCACGCGGCGTTCACAATCATATCTGCTTGCAGACCAGTTACGAACTC  
CATCGGTATTTCTAGGAACCTGTAGCCCTGGTTCAGAATAGCCCACTTTACCCTGAGA  
GTCAGAGTAGTACCCATGGATTGTATTATCCATTAGTTTAAATCTCCTCGATTAGACGTC

TGGTGCAGCAGCTTCACGAGCGGATTTTTTCGCTTTCTCGATGTTAGCGTGAAGGATGTC  
TTTGGCAAACGTGTTGATGTCGTCGACAGTTCGTTACCGTCTTTTCCGTGTTACAGCAGT  
GCCGGTCTCTTTCTTACGTTGTCAACTTCTGACTCCAGTTAGTAAAGACGTGCTTGGGC  
TTTGTCTGAAGAGCTACTTCTGACCGTTAGCATCTGCGATGATGATGCCCCGCCGAGA  
AGCCTGGTCAGATTCATCAGCAAACGTGAAACCTTGTGCTTTAGACAGAGCGTCTTCCCT  
TTCAACTTCAATAGCGGCCCTTGATGATTTTCATCAACAGCAGCACCTTAAGCTTTGCCGTC  
TCCTAGTTGGTTGACCAGGTCAAGGTATTCCTGTGGCTTGGTACTTCAGTTATATCATC  
GGATACAGAGGTCTCCTTATTTTCTTTGGACGTATCGATTACAGGGCCAGGACCTGCTTC  
TTTGACGAACCCAGTCACCTGGAGATATTCGGACTCACCTTCGGAGATGGTCAGTCCTTA  
TTAAATTACTCCCTTTACAGACAGTCGCTGAAGCTTCAAAGTTCATAATGTTTCACAAG  
GCCGATTTCTTCATCGCTGTGCGCTGACTTGGCGATTAAGATTGACTCAATACGCCCTAT  
CAGCCATTTCTGGTGCTGTGCGTTCCAAGCTTTGGCCCACGCATCATCAGGGTTTTTCAGC  
GCCGTCATTTTCAAGTTCAGTTTGAAAGCCCATCAGTTTTGCACGCAGTTCTGCATCGTC  
GCTCCACATATAGAAGATCTTACGCAGGAACCTTTCGAAACTCATGGCACCCGGTAACCTG  
TTGCGGCTCCTCGATAACGTCTCCGGTACCCAGTCAGGTTTCAGGTCAGAATTGCTCAG  
AAGTGATACTGGACGGAGGTTTGCAGATAACCCTTGACTCTCATGGCAGAGTACGAAACC  
TTTTTCCAAAACGGAATTGGCTTATGCAATTGTCATTCGCCAACTTCTCAACACACTCT  
ACACGGAATTCAACGATGGTGATTTCTCCCGCTGCTTTCTCGAGTGATCCGGAACACTGA  
ATGCTCAGGCCACCAACATCGTTGGTCTTTTTAAAGTCCCACAGTACAGGGTCGTTATAT  
TTAATTTTTGCTACCCAGGTGCCAGCCCTGAGTACGTGCTCGGGCCGGATAACCACTACA  
TGAAATTATTCCTGAATACAAGAATACTCGACTGGGAGAGAGTCAGTCTCAATCAGTTG  
AAGTGAATCTCTTCTACATTGCCAGCTTCGTTTGCCTTATCAAAGTCTCCTTGGCCTTA  
GCGATTTTCACAGCAGACATCCATTCGGAGTGAGCGTCCTAGGCAGCTGTGCCGTAGATA  
ACTTCGTAAGAGATCATCTGATCGTCAGCGTCTTTCTGGATGCACAAAACAGAGGTTGAC  
ATGCTGATTTACAGACTTAAACATTCATTTTACATTGAAATTTGGAAGCCTTCTCGCTAGCG  
GCTTCAGGAGATTGGCCTGAAAGAATCAGGCCATTTGTAATACACAGTACCTTGCTCTTC  
TGAACGATAGACAGCTTAGATACCGTTGCAGGCTGGTCAGCCATACTTGTGTATTTCTTC  
AATCTCCCCGTCGTTAATTAGTTTAAACACCGTTCAGTTTCTTTTGAAGCTCTCTCAGTA  
ACTTGAATTAATTATCCCTATTGAATACGGAATAGTCTCTTTTGGAGGAGATTTTTCT  
GTGCTATTAGAGTGAGAGCCTGCTGACATAACCATCACCGGAGCGACTAGTATCTTGATCG  
AGTAGTTGCAAAGGTTGATCATATGATATGTGTCGGAGATCTTTCGTCAAAGCCACCG  
ACTTCAGGAATCTTGTGTTAACTGTAGTAGTTTTAGGAAGATACCCAACAGCACCGAAA  
CGCTGAACGAACCTTTGAGAAGCCTTCCATCTCGAATTCTTGGATCAGGCCTGTTTTAAGT  
ATGAGCATGTCTGCGTCTGCAAGACGGAGGTCAGTCAGAGACAGACGCTGAGGGATCAGG  
TCCGTGTTTTAAAGCCTAGACAACGATGTTGATGTCACGTTGAACGAAATGCCCGTGGCTG  
CACTGCTTCGATTCAGATAAGCTGTAAGACCCCTGGCCATCGTTGCCATGGCTGATGAAT  
CCAGCGCCAAATAAGTCGAGAAATTCCTTCTTGCAGAGACTCACCTGTTCCAATGTACTG  
TACTGATTACCTGCACCGTCAATACCTCTGTGAGACATCTTGTACTGTCCACCACGCTGA  
GCGTTCATGTCTGAAGGCAGGATGAAGTAGGTTTGTCAACTGCGCTGGCTTATACAGCA  
ACCGCCATCTATCCTTGAACCGTTTCCGATACTGGTGATTTTCGGTTCAATGGCTGCGTTG  
TTCAAGATCTGAGCACGGATGTTGAGTTCGATGATAACCACCAAATCTTTGGAAGCACAT  
ATTGGGTCGAGATGTTCAATCAGGGTCTTTTACGGAAAGGACCTTAACACCAAACAAGA  
GGCGAACACCGTCAGGGGGTGACTCTGTATCCCAAGACTCATCACCATCAGTTTATTG  
ATAGGAATGAAAACCTTCATACGCAGAGGAGGTCAGATGACTAATCAGTATCATAGAACTG  
GAGATTTGCGTCAGACCGTTGTGGAATTTGGCAATGGCCATATTACTCTGGTTCGTTCTCT  
TTCAGGCGCCGCCATCCTCATCAAAAACCCAAGGTCTCGAACGAGAAAGACTTGATGGT  
GGGTTAAAGGGAAGCTGATCACCGGTCATATACCCACCATATTTAGATCAGGCAGATTCA  
GTGCGGTACACCTTCGCAACGATGGAGAAACCATACTCCTTAAATGTTGCGACACTAATA  
GCCATATCGCGATGAGTTTGTGCTGGTTGGCATGGTCCTTCAGCGCGTATTCTATAAACTGG  
GCTCCTTCTTAGGATGCCTTACTATCACGATTATGCATGACTTTGATATCATTGAACGCT  
TTCGTTACGAAAACATACTTCGTATCAACCGCCGGGTAACAGTGACCTCCTTCTTCATA  
GGCTCGACGTGTGCGAGAAAACACTGCCAGCGTAACTCCCCACCTTCAGCACTTGGGAT  
CCAGCACCAAGCTGTGAAAGAGCGACAGAACCCTAGTTCCCTGGTACGAAGACGAATACCA  
ACCAGATTTTCGTTTCTTGTGACACCACCTCCGATGGTCGTGCAAATCTTGTAGAGACG  
AGTTATCCCCTCTGTAATATCACTTGTACAAGGTCGGAGGAAGAATTTTCGGGATAAGT  
ACAGGACTGACGATATCCTTCTTCTCCAAGAAATTAATAGCGGACCCGACGGAATCCGCT  
AAATCATTCTTACGGGTTCTTTTGTCTCGCTACCAATTAACCTTTTTAACTTCAGTTATT

ACGGCTTCAATTGTCTTAGCATCGAAACTGCTTCTGACAATCCGCACCATTCTGACTGA  
GCAAGTATTGCAAAGGAGTGAAGCCTGTGAGTTTTGAGTTAGTCGGTGGCGTGGGGCT  
CTCTCAACCAGAAACCTTTCAGCCAGACTCTTACGAGAGGTGCTTGTGAACTCCCTAATG  
CCTGCTTGACCGGGGTCAAGGCTGAAGATGATAAATACATTATCCTCATCGCATTGGGCT  
TGCTTTTCAATGGAATCATCACGTTACCAGCTTTCGTACGGACTCGGCCTTGCGTTTGA  
GTGGAGTATTGACCATCATCAACAAAGTCAGGGCAATATTCACCTGAACGATAATAACAC  
CGATCAGAGGCTTTACTTACATTCACAGATGCGGTAAAGTCAGGGTTTCTGTTACCAGAT  
CTTCGTTCTATACATGCCTTGTAGAATGGTCTAACGGACATAACGCCCGGTGGTGGGCAA  
GGAACGTCCTTGAGAAAAGATCGCTGGAAATATTTCTCACCTTCTGGACGAACGTGCCAG  
TTCCGCGGACTAGCTGTGACTTTTGAATATCCACAAGACCCTCAAGGAAAGGAAGATAA  
TCTGGGTTGGTGTCAAGCAACGGTGGGTTAGCGAAGATAGTCGCACCCATGAATTAGAAG  
GTAAGTGGTTTGGGCATGTTACGAGTGTCCAAACCGTTCCAAGGCTGCTCAATAAGTCCC  
TCTGATGTATCTCCCCAGAGGAACTCACCGTCCCCGACGAATGATCCAACGGATGATCCCG  
TCTCGCTCCTCACTAGGGAGACCGTTCATCGTTCGAGATACCACTCAATCCACTCTCTAATC  
TTGTTGTCAGGGTCCGGGTTGCGTGTGACGACCATAAAGCTTTCGTATATGGGTGCAGAA  
CGCAGACGAGACATGAGGTATACGATCTCAAGCCATTCATACTGTGTACCATCGGCAAAG  
ACAAGAAAGGTGTACTGTAACCCCTGGTGAGAATACTTGTCTTTCTCATAACCCATGTGG  
GACCATTTGACGTTAGCACCAAGATGGGAAAATTGGTTCCAGGTCTTTCTCCCTGAAGCGT  
GGTTTCAATCCCGGATCAAGCTGTGTAAACATGGCACATGCGGTATTCTGCAGACCACGA  
CCACCCTTCAACCAAGGGGTGTGTCTACGGAACATGATGCAGTTCGTTTCGTCGATCGTCT  
GTGATATTTATCGGTATTAATTGAAGCAGGTAGGATTTGCTGATCTAGCCGCACCCCA  
ATGATCAGGATTTGTGCGTCTTTTCCAGTATCATTTTCTTGTAGGACAGCCAGGTCGG  
AATGTCTTAATCAAAGACCTTCATTTTAAAGGCGCAGTTAGGCCTATAGGACGCGGTTG  
ACCGTTAACCTCGACAAAACAATGCCCTTATGACCAAGTAGGGGCCTTGTCAATCACTT  
TAGCGGATTAATAATGTTACGGACGTATTGTTGCCGAGTCCTTATCATGCTGCGGCCGTT  
GGTAGCATTACAGGATTTTGGTTTTTCATGATCGCGCTTCTCAGAGTTTGAAGCAGCATA  
CTTAAGGGGAGTTGGCTCCATAAGATCAACCATTGCAGCAGCAGGTAGTTGTGCAAGAAC  
CTTTGCCGGGTCAAACCTTCTCAACTAGCGGAACAAGATCAGGCTTCCCCTGACAACCAAC  
CCGTAGGGTGACTGCCATGATCAGTGCCCTTAATTCCTTATTCATGTCACCCACAGCTT  
TAGTTGTAAATGTCCACAAACTGGTTTGCAAGCCCTTCTTCTTGCCTGCACCAGACGTG  
ATGTAAACGTCTTGCTTTGCGCTAAGCTGTCCCTGCAATTCTGCAGTTTTTGTCTGCGAT  
TCTGCCATTTTCTGTCAAGGATATGGGTTGCGATCTGTTGTTACACTTGTAAAGACTGC  
CTTTCATCCGTGGTTTGTGTTGAAGATCCTTCTATCTTCGATCGGTATCACTCACCCCT  
AAATTGTAGGACTGCGTGCTCTGATCGTTATGCCAGTGCTTTGCAAACCTATCCCCCTCCA  
ACGATGCCGGCAAGCAGTCTGACCACCTTCGATTACCTTTAGTTTGCTTTTCATAAACGTC  
AAAGCCATTTCAAGTAGTATCATGAGATTTCCCATTGGTAACAATTACCCGCACGATTT  
TGAGCAGAGTTGTATCCTCATCTTCGTTCTATAATACCGCAGAATTGTAGGCAATCCGGG  
TAGGGACGCTCACAGACACTTCAAGAAGGACAGCGACAGATAAAGAGGTTTTTTCTCCCC  
ATCTCCCAGAGCTACCTTTCCCATCCCACCACTTGTCTACGTTACGGGCTTCCCTGCCCCT  
CTAGCTGAAGGTTTCAATCAAGGTAACCTTATCCCGGTTTCTCGGCGAGACTGCCAA  
CTTTGTGCCTTTGCTCTACAGCTTGCAACAGGCACAAGTTGTCAGAAGGACAAACTCCCC  
GCAGAGTTTTAGACTCTGGCCTTCGAGTATGCTGTCTGAGGCGTTGGCACAGTATAAAGA  
TATTTACCTCTTGAAGACCTGTTCTACCAGCTTTACCGACCTTCTGAGAGCCCGTTGCAA  
TCACGGGGATGATTTTATCACTAACACTCTCCAGTTTATCAAATATTAGCTCAAATGAAA  
ATGGGCTTTCTTCGTCGATAATCTCTTCAACGTTTCGTACCATCCATTCCAATCTGGAGGG  
AGTTGGCACGTTCCCAAGTTTCAAGACTGAAACTAGAAGCTGCAATGCCAAGCTTCATGT  
TCACCCGGCGCGAGATTGTATGACCGTGAGCGGGTTACTTATCAGCACGAAGCACACTAC  
TAATCGGGGAATCCGTCTTGGGATTCTATAACCATAACCTTCTGAGCGATGTGCTTCATGA  
AACTTTAGTCATACTCCCCTGCTCTTTTGAAGCTGAATGACCGTATATTAACGTAC  
AGTCAAACCTTGTCAAATATCTTCTGTGCATCAGGGAAAACATGGAATGCGATAGATTGCC  
GCACCGGTAGCTATTTTATTGGTAGACATGACACTATCTTCGGTTATACCGAAATTGTCA  
ATGTTCTCAATCTTACTCTCTTTAACGGCTTGGGTGAATTCCTTAAAAACCTCAACAGAC  
AAGTCTTCAAGATGTTTGCCTAGGAATCAATTGACCGGCGTGTGCATGTGTTTATCTTCA  
GCTTTGATCACCAGGGGAATGACATAATCTTTAAAGCTTCCCAGATCGTCAAGTTCCTT  
AAATATTTGAATGACCGTATGGAAATGCCTCAGTTCTCGGCTGCCTTTGTGAGGGCTGAT  
TGACATTACAAGCGGCTACGATTATTCATGTACGCAAGGAAAACCTCCCAGGTAATCCCAT  
GAAGGGAATTAAGAAGACTATCTCGTTTACTTCGCGGATGGTGAATAAGGATGTGATTGTA

CCAACCGCAACACGAATGTCGAGGCATATAAGGATGTCCATCAACCCGTTTGGAAATAAGG  
CTACGGAGGATCAGGTATTCACGTTTGTATGCTTCTTTTGGAAACATATTTAGCATGGTT  
TACTCCTTTAGAAATAAAAGCATTGGAGTGTGCGAGAAAAATAAAAGCCCCGCAATAGCG  
GGGCGAGCGATAGGAGACGAGATTGAATATTTATTATGATTAGAGTAAGAAAAGTGACGA  
ACGGCCCTTTGCTCGTCAAGGGTGTCTTATCCTTCCCAGTGTCCAGGCATTCTTTTGTGT  
CCGCTTAGTTATTTGAATGCGTGATCGGGACTCGTATCCGCAATCTTCGGCTAATGAGGC  
CAATATTATCTATATAGGCGTTACACTCCCACGCAATTGTTTGGTGGGGCCGGGTGGACT  
CGAACCACAGACTATCTACTTATCAGGGAGGATGTCTACCAACTGAGTTCCGACCCCATG  
TAATTGGTATTTCTGATGGAATCGTACCACAGCCGCTTGCAGTGTAAGACTACGTTAT  
AGGATTGAACTATGGAAGCCTTAAAGTGGTGGCCGTCAGGGGATTTCGAACCCGTAACATC  
CGACTACTAAGAACGGCACGTATACCAATTCCATAAATCGCGCAAATACGTTGAAGTCCC  
ACTGTCATCCTGATCAGCCAGAATCCTTATGAACCAGTATCATCGGCCCTGTAGATGCTA  
TCATGAACCAGGGCGTCAATGCCATTGTTTGGTGGAGAATAAGAGATTTCGCATTCTCCTG  
ATATCCCCGGTGAACCGATGTGTGCGACTTCACGCAGACCCTTTCACCAGTTGGTGAAT  
TACCCGGAGTCGAACCCCGATTCTCAGCTTCATAGGCTGATGCTCTGTCTAGGTCAACTA  
TACCTGCATTAATAATATGATGTTTTCTACCCTTAGCTTTATCCAGGAAGCCAGGCCCTT  
TTTGGCTGGCCCTCAAAGTCTGAGTAATGACAGTCGGCGATGGTCATGGTACCTGATACT  
GCGGCATTAGAATCACGTCAATAGATTTGATCAAGGGGCATGATTTGTAGTCTTCCAATA  
TCACAATTTTAAAATGGTCAGACCGGAAGGACTCGAGCCTGCCACCCGAAGCAACCCACG  
CTCCCACGTTCCAACCTTCGCTACTGACTGTTTTCTGTAAGTAATAATTGTCCAGAAGCT  
TACAACCTGGTATCGCTAGCTAGGTAACAAGTTCGCTCAGGTGAGTTGGAATTATCAATGA  
GGTTGTGTGGCGAGGACGATGGTTTTTGAACCTTCATTTTCCGCATAGACAGTGCGGCAG  
CATTCCCTCGTCAGCCACGGCCCCATAAATTTGGCGACGAGTAGAGGATTTGAACCTTCC  
TTGATCTGTCACTCGCGCCTGAACAGGCAGTCGCCAACAAAGTCGGCCAAATCGTCATTT  
GACTACATTATCAGCTAAAACAACCTTGCGCAAGAATAGTTTTTCTAATTTACAAATGG  
GGTGTCTGGAGGGATTTCAGACAACCAAGCCTCAGATTAAGGTAGGATACTTTTGGCTTG  
CGTCACCACTTGGATACAGCACCGGTATTGGGAGGAGAGTGGAGGAATCGAAACCCCTACC  
AATTCCAGCACACACGCTCCGAGACTGCTCGTCCACCGTGGGACGGCACTCTCCTTACG  
GGAAGATGTCAGACTATCAATTATCACCCCTATCGGGGCTACTGTTTCTTTGGCAATGA  
GATCCCTTGCCTGATTATGGTTACTCTTCCAGATGTGCCCGTGAACCAGGGAATCTAACT  
CTCAAGCCGTTTTTACCATTCAGCACGTTTCAAAGGGGTTTTTCTCAACTGTTTGTGTGCC  
TCTCCAAATTGGAGGGACCTGTGGTTATGGCGCCCACTTCTCAACGTCACGGGTTGAAC  
ATCACCTCATAAATGCTTGGGCCACACGTGAGGACTGTCAAAGAAAATGTTTCGGATTTG  
GGTGGGCGGGGAGCATTCAAACCTCCGTTGTCGAATTCGAAGCCCTATGCATCAGGCCAC  
CTATGTTAACCCCTATTGGCGTGAAGGTGAGGAATCGAACACCATATGACTGGTTATGG  
AGGCCAGCTTGCAGCCACTTAAATTATGTTACCCGCAGAAGGTTACCCGCCCTACGCGGG  
AATCGAACCCGCAACCCCACTAGAAATGGGTGATGACTTTACCTATGTGTCTAACCCGA  
CAAATTGAAGCGACATGCCGGATTCACACCGACGCCACCGACTTGGAAGTACGGGATGCT  
GGACCGATAACACTAATGTCCCATAATTTTGGTGGGAGTATCAAGCTAAACCCCTGCGAC  
ATAACGATTATCGGTGCGAGCGCTCTACTAACTGAACTATACTCCCTTTGTTTTGGTGGCC  
CACCTTGATTTCGAAACAGGAACCCCGACGGTCACGGATTTTCAATCCGCTGCAAACACC  
ACTCAGGCATTGAGCCCAAATCTTTATAGCGGTGGAAGCCGATCAGCACAGAAGCTGATG  
ATCTAAAACATAATCGCTCCGATAAATACAAATTTAGCAGCGCATGCTGCTGGTCCCTGCC  
AATGCACCAAATCCCATAACTGCCCGATTAATGCAATAACAGGAAACATCAAACCCCAA  
TTGAAAATATTGGTATCCTCATATTAAGATGTTGGGGTTAACCATTTTCGTTTGAAGGAT  
CGATGTCGGGCGTGAAAGGTTTTGATGGAGCCTTCTACGTAACCTTATTACCGTCATCAA  
CGTTTTGTAGTTTTTTCTTACGTACATTTTCTACGTCGTAGTAAGCAGACTTTTTTTCTT  
CGCCTTTTTTCGATGAAGAAACGGGCAATGTACTCTTTTTGTTGACCTTGCTGCTGGAAT  
TCATCATCAGGCCACGTAAAACCTGGTGTGCGGCAGGGATCATGGGGAACAACCTTTGTCT  
TCAGGTCAAATAGATTCTTCTCAAGCTGACATGAGTTTGATTCCTTTTCTAAAGGAAGCC  
CTTTTCCACCACGACGCTTTGTAAGCTGTTGTTTTCTGCCATAATTAATCCCACCTATT  
CATATTATTAGAGATGTATTTACAGTCAAGGGTGTGTTAACATCTTTGACTTTGAATT  
CAAAGTTTTAGAGCACTGTGGGGGAATTGAGCCCTCGACATTCGTTTTGAAGACTAAGCT  
GGTTCACCTTACCAACAGTGCTTTGTGCGAGGCAGCATGCTTCGAGCCCGCGTAAAAGTG  
TTTAGCAGACTGCTGCGTACACGCTTGACTATGCCCCGACAATTCTCGTGCCCATGACGG  
GACTCGAACTCGTGACCATTTAAGCAGGAGATTTTAAAGTCTCCTGTGTCTCTCCATTTTC  
ACCATTCCTGCAATCCTCGTTCCCTGAACTAAAAACATCAAAGTCTTTTCCAAGAGAAGG

TCCACCGCTTTGTATATGCATACCATATCTCCCTAAGCAAGACCTCGAACACAAGTGAAC  
AGATTTTTTATCAGATCTGATCTCGCTCTGTGATTTTGACAATGTAAAGGTATGCACACA  
CCAAAGAAAATTGCAATATATTTCTTTGCTCTTGGAGCGCTCTTTTCTGCGTTAACATT  
TCTTGTTAAGACTTGCAGATTAGTGATGAAGTTGTTATTCACATGACTGCCTATGTCGTC  
AACAGATTCTAAATCTGGAATAAGCTTTCTTCTAAGTCGCATCTCCATAAGAACTTTGG  
GTAGCTTCTTGTATTTGAATACCGTCATAAAGGAAGACGATCACATGTTGCATGACATC  
ATCCCAACATGCCGGCCTAAAATTTTTCTAAGCTTATCGAAATGCATACGCCTGTACCT  
GTATGGACCACGGACGCAAAAAATATTTTCAGCTGCCTGGTGACTCCACCTACCTCCGTA  
CACCACAAATGGTGATCTACGGCCCTAAAGCTTCTCATAACAGGAACATGGCCTGTGTCCC  
AGAAAGCCGATTTTCGTGAGGATCATTCTCCGCACAGATGATCAGTCTGTGAATCAAATGA  
TATCATCTAATGCACTTTAAAACACGATAAACATCTTATGTACGGGATGAAGTCCTCAAC  
ATCGCGATATTTCCCATACAAGTACCACGTGTTTGGCAGACACACCCCGCCTTGACCATTCT  
GTAATAATCGGCTCTCGCGATAACCAATTTTTCGGAAGCACCCCCAGTAGGTGTAGAAAG  
TTTTTGAGATTCTCAAACCCGGACATCAGCTGTTGGGTACCGGATGACGGAAGCGACCCG  
GATGTGCATTCTCGTCCCCTCCACGCGGGAGGGTGTGTTGCAGGTCGGGATGGAACCCGA  
CCTTGCCCAAGGTCCTACCCGACATTTGCTCCTCGTACAAGTGTCGTACCGATACTTATC  
GCGAATTTTGGGACTACACTACCAACTTGTGCTAAGGGGGAATTGTTAGGTCCTGCCGGT  
AGGAATCGAACACACAGTCTACGGCTTACAAGGCCGCTTCATCGCCACTTTTGCATTAGGA  
CCGAGAATGCTGTTTCCGATAAACTGCTCGGAGGTGTGGTTAGCCATAGCCAGTGTGCCA  
ATTACTTTTGACCCAGGATTGCGATAATCATCCAGATTTTATCGATGTTTTTTGTAAGTT  
CCAATTTCAAACGTTAACCTTTGAAATTTAATCTTTGAGTGTGAACTTTAACCTTTTCT  
ATCTCGCCAATCGATGTTTGATCCGTGCGGAGATATTGTCCGAGGAACAGACGTCAACGT  
TTCGTCTATATGGTTAAGTACGATGGAGTCTAACCTCTGGCCTCGCTAAAGTCATGATT  
TTTTCAAGTTTGCTTACCAAAAACAGCAATTACAGAGTTTACCGGTTCAAACCAGGCATG  
CACATACCTTTTTCATAAGTCCCGCAATTAATTATAGAGTGATCCCTCAATCTCTACTTC  
AGTCTTGGCATTGATCTCAGACAGTGCATCGTCAACGTCCGAAGTGAAGTCTTCGATCTC  
TTCTTCCAGAGAGGGGATGGTGTCTGCTAGACCCACAACGTCGTCGGTAGACGCGGAGCT  
GATCCTGCGGGTAGGACCTTCTACGACCTTTAGTTGTTACAGCATCCGGAGACTTGGCACG  
ACGAATGTACGGTGCAGCCTTCAGTTCCAGTTTACGTCGAACCTGAAGATGCTCCTTGGT  
CCGGCGAGCCGGAGCGTGGTTGTACTGCGCATTACAGCTTGGAAGCAGAAGCTCTTTGTA  
CGGAATGGTGCAGTTGCGTTCAATCGCCTGCGCAACTGTCATCTTCTGGTTATTTACGGC  
AGCCTTGGGGGTTACGTCGCACTGCACAATGTCCGCTTTGAGTTCGTCACGAACCTTCAG  
GCGGTCTTGCAAGCCCTGATAGTCTGCTTTAGCAGCTTTCTCAAAGGCATCAACAGGGAT  
CAGAGTACCAGGGATCTGACTCTAACCGTCCATTCCCTTAGCTATGCTAACAGCGTTAGG  
CCGTTGAACACGTTTCTCGATTTACCCTCGATCTTGATCAGAGTAGCCAAAGCGTGGGT  
CACAGACATTTTAGCAGACATATTAGTACCCCTCATTAAAGTTATGAATTTAGTATTTAC  
TCCAAATTTTGGCGACTTAGTTGTCGGCACAGTATATTAGGTTTTGTCCGTGTTGACC  
ACCACGCCTTGCGGATGAGGAGGTGCCTGAGCAATAGCGAGACGTTTTTCACGTTACAGAT  
TTAAGTTCAGCACGAGCAGCTTACCCTGTTACAGTAAGCATTGCGATACGATCCTCTCTC  
GCTTTACTATTACGAGTCGGTTCTGCCATTTGAAATTTATGAGGAGATTCCAGGTTGATC  
CTCGATGGATTCAGGTCGATAGGGGCATGGCGCTTAACATCAGCAACAGCGGCATTGATC  
GCTTCTTCGTTATTGTCCTGTGCAACAGCCAGTTCATTTTCGAGTTCCTTCAAGAACAGAC  
GGATCCATTCCACCCAGATTCCGAGGTTTCAGCAGGTTTGACATAACGCTATCAGCATT  
ACAAGAATCTTGACCATCAGTTTGGATTGTTTCGTCAGCCAGCATTTCGTTAAACTGCACT  
TCCATCTGACCCAGTTCTTGTGTTTGAATTGCATCCCTGACTGATCTGCTCAGAGGCT  
TCGGCCAGGACTTGAAGATCGGCACCTGCCTTGGAAGGTTAGTTGGAGCAGCGGTTACC  
GCGTTGGTGGCACGTTACGTTACGGAAATTACAGTTTTAGAAGAAGAGATTATGTGGTCA  
TTTTCGTTAAATTAGGTTTCAAATACCACAATTACTGATTGGGATTGTCGAGCCAATCTT  
TGACTGTTTCTTCGGTTGTTTGGTTGTTTTTCGGACAACGACCAGGAATGCCAAAGTATGA  
TAACCGCTCAAATAACAAGCACTCTCAGAATAATCATGCCGCCGCTCATCGTACAACGTC  
CATTATAGCATCAGAAAATTCACAAACAGCGTGCGCGTTTCGAAGATACGATCATCTCATC  
GGCAGGGTGAACAGCCTGTACCTCGACATCCACAAAGGGTTCTACCCAGTTGCCGAAAC  
AGCAAGAGCAGTTAGAACAGCATCAACTTACATGTGTAACAGAGATTCGAAAATTTCTT  
GCACTTTTGTAAGTTGGTGGGGCACGAAGGCTCCGAACCCTAGACCTTCCGCTTAAGAT  
CCCGCTACACTAACAGCTGTGTTAATACCCCGAATCTGGCCCGTGTTTTTCAAGAGGTTG  
CCCGGTTTCGTCACGCTTGATACGGCGCTTTAGTTTAAAGACGCATCGCCGCATCCAGCTT  
CGTCTATCCCATGCCGGATGAATTAATTCTTCTTACCTTTCGGCGCTACAGCGCCAACA



ACCTTCGCGACTTTAGCTTCAGCAGCGCGTTACAGTTCGTCCGGTCCGTGCGAAAGCGA  
TGTGAGGCAGAAATGATCTGACCACCTTTTAGGCGGGAAACTGATTCCCGGATAGATTCA  
ACGGTGCCATATTCATCACGACGCTTCTTACGAATAGAAACCGTCTTTGTTACACCGCCC  
AGACGAACATCATGAGGTCCAGACTGGGTCTGCGTGCAGCTTTGACTGAAGCTGGGACGAC  
TGTCTGAATACGTCGATTGCAGCAACGTTCTTGTGTTGCGTTTTTCTTAGCCATGTTTTAG  
TCCTTCTCTATTCGATAATGTCTCGTTGACGTTAGTAGTACTAAACTCTCTCACTTCCTC  
TGAAATCGTTTTTTAAATTGTTTTTCACTACTTTATGAAATCCCAGTGAAGGGTCATAA  
CGATCATAGGTATCAACCGAGGTTGCCTAGATAGTATCAGATCGGCTGTTCCATGATTCT  
GAAATATTAGGTGTTTCAATGATACCAAAAAACTCATATAGACGTTTCATTGCATCTCCG  
GCGTGGTAGGTGTAGCAAGCCTTGAACCAGCCACCTCTGATCTATGGGGGAAGCGCTCTA  
CCCAGCTAAGCTACATAACCATTCCGTCTTTGTGGGATGATTACTAATGGTTAAGGAAAC  
CGTTGTCAACCCCAAAAATGACAAAAAGCGCCAGCTTTTTGTTTCCAGTGATTCTGGCAT  
TGCTTGCGATCTGAAGTCGCCTGGTTGTCAAGACGCTGGTGAGATCATGCAGCTTCGCCG  
CGAACAAATCAGAACACCCTGCTTCATCACACCAACGTCATATTGCAGGTGAACAACCTTC  
TGTTGAGACTTGAAACTCAGGCTGCCACTGTTTCATGACGATGATTTTTGTGTCTAGTG  
GGCTCATTTACTGCCAGTGTCCCTTTTAGAACCGCGCCAAGAATAGTCTTTCTAAAATTT  
TTATTTCTCCTGTGTTATGTGCAGCAGAAGTACCTGGATGATCTATTTTACTGTAAGAGG  
TCCTAATGTAGTTCAGGAAATGTCCGTGACAGAACCATTCTGTTCACTAACATTGCAGAT  
GGTTACCTTCTTTGGAGCCATGAACGGAAGTCCGCAGACATTACATTCAGTGTAAGTAAAC  
AAAATTACGGAATGTATCAGTGGGCCAGTCTCTGTCAATCTTCTCAAAGATTGAGTCCAA  
AGTCTGGTCTTTCATCAGAAGCAATACCCTATCCTAAACCTACGAAAATATCTACGTCTT  
TAGACTGGGGAATGCCTTCACTGTAACCAAAAAATACGTCAAATTCGTCTTTCATCTTTT  
TACTCCTTTTCGCGGTGGACGTGTAGTCTCCGCTTCAGCACGGTGCCGCTTGCATTTTTT  
ATACTGTACGGAACATTCGGAGAGAGTACTTAAATATGAAGTCACCGACAACCTGGGTAGT  
AATAGGATAAGCCGCCTTCTTTCCGAAGGTTGCCACGTATTGTCATGCTTGAATACCAA  
AGCCAGCCCTAGAAAATGCCGTGTCTTTAGCTTTTGCAGTCGCTTCGTCAAGGGTAGGAT  
GGTGTGAATCGCGCTCAATGTGCTCTCCATTATCTGATTGAAGAACAAGCTTTAATTGAA  
ACATAATGTCTACAGTTAAGTTCTTAAAGATTTTCGAGTGGCTTCGATAGCTTCTATCTT  
AGTAGTTGTGCTATATTTCTCGATCAAACAATCCCTGTTGCCCTTGACACCACGACGATA  
TTCCCCTAGAGCTAAAGTGTTGGGGTCAAGCTCTTGGTCATCTTCATTCCGATTATCAAT  
CTCAAGCAAATGTTCTCCAGACCATCAAGGGTGTCCGGCTCCCAAGCCTTCTTCGGGTC  
TGTGTGTGCGGAGGCACGATCAAATCATGACGACTAACTGGATTTTCGCACTCAATATCT  
CCTTTTCTCTATCTCGCCAAATAATTGGATCGTGAAGGTTCCCTAAATGCTTTATTTCTCT  
TATCAGTCCCCCTTTTATTTTACAACATAATGCTCCCATTTTTTCAACCCACGTTCTGT  
TAGCATGTCCAGTGTTTGAAGATGCAGTGACATTCCTATTGTTCAATTCGCGTGTTGCTT  
TCTTCAGGTTTACCCCGCATTGTTGGTCGCTATCCTGTGACGATGGTCAACAAATTCAG  
GCATTTCTCCAGTCATATAGAGATGGGCAAGTGTATGAGACAAGTGTAGGTTTCCATCAA  
TACGTATTACAAGATAACCATGTTCCGCCGACCCAAGAACACTCTTTTCCACCATGGCAGG  
TAGTGTCTTCTTTCTTAAAAAACCTCTTTTAAACCATGTGAAAATGCATGTTTGCGGAT  
CGTAAAGCAAACGGGTTACGAGAAACTCTTGCGTCAAACCTACGCGCTGGATTCCTCACCC  
AGATCAATGTTTCCGGGATTAGTGGGTAACCAGACCGTGTACCCTTGCTGGCGTTCATT  
TGATGGCCGCAGCCAAAGAAAAGGATGCAAACGCCCGGTCCGTGGGCGTCAAGATAAGCT  
TCAAATTCTTGTTTACAGGCTTTGCAGTGCATCATGACTGGTCATACCCTATTAGGCTCC  
ACAATATCAAACGGTTTATTTAGTGTGTTATTACACGTAAGGCAATCTCGTACTGGGACC  
TCATACCAGCTGCGTGGTTTTTCCAAAGCCTACCTCACAGAAAAGCCCCGAAGAGGCTG  
ACAATTTAAATCTGAGAAGATGCCCGAACTCGAACCTGGGTCAGCTCTTCCGCAATCTCC  
AACTGACCCTTTGGGAAGACACAACGGAGTTCGTTACCACGAGACTGTACCTCATGCACC  
TCTAGACTGTCAACCAGTTTTAACTGATTGTGTCACCAGGAAGAACGATCAAAACCCCT  
TTTGCTGAGTTCTTACCGAGGTCAGTCTTCGGATCTTTCTTAACTATGATCAGCTTGCCG  
TCGATATCTGCACCCGTTGATTTACAGCCATGCCAGTGAATGGAGAGCAGTGTACTGG  
GTTGTGTAAGAACCAACACAGTACACGAGGTTACTCGCTGCAAAGCCACGATCTTTCAGT  
AGTTTAAAGATAGCGTTTGCACGAGCATCAACGGTAGAGTCACCGTAGACCAGGGCGACA  
TGACAATCAAGTACCTTGTACCCTCTGGAGTTAATTTTCGCAACCAAAGATTTACAACAAA  
CATTCTACGGCACCTTTTACTTCATGATCTCCAAGAGCTGACTCCTGAAAATAAAAATAAT  
ACATTATCTTCATCCTCTACCAGAATGCGATAATGTTTACCCTCAATCTTTGCAACTCGA  
GAGTTTGCCACAGCCTGTAATGCTGTGATAGTATCCTACCAGTCGTCGACCTCACCCGAA  
TAGCGAAACCCTGCAATAACTTGCTCAGGGATACCTGAGTCAGGTGCAACACACACGAA

CATCCACGAGAAAGAATTTTCATGTTTCCAGATCTCTGGTGATTTCTTGATAATCGCTCAG  
AATTCATAGCTATCGGCAACATAGGAACTAAACCGCTGGGAACAGTTTCCGTTATGTAG  
CGCTTCACTAACTCGACTTCGGCAAGAGAACGTTTATGATCAAGGCTCAGGCATTCTTGA  
TTTACTGTGATTTCTTCAATCTTATTAATGATGACACAAGTATTGGTTTTTGGAACTG  
TGTACAGATGCAGGGATACCCCAGAACCATTCTACCTATCATGCTGTAATAACGATTT  
GCATACACAATCGCGGGAATGGGATCAGTACCCATAGAACTGATCAGTTGACCAAATTC  
CTGTGTGCTGCGTTATGTGACCCACATTCACCACGATATGGAAAACAGTGGTTCTGGTAA  
TGAATATGCAGATTATTATCTAATGACTCAGCAGCCGAATTCTCAGACAGTTTACGATAA  
TGCCAAAATGTTGTTACCGTTGTGATTGATTCCCAGGTTTCTACTGCCATCACTCTTCT  
AGGAAGTTCAGCAACCACTAAAATCCGGATGGGTATTCTGTATCGTGAACATTGAAACC  
TGTACCAAAGACAGAGTGCCTTCTGGTAATCGACGGACTTTTAGAGGTACATAAACGAGC  
TCGTGTCGCTTCTCATAACCCCAGATTCCCACCACCCCGCTCTAATACTCAGTGAGAAA  
ATTTCTTTATAGTCTGAAATTGCTTCCGCTTTTGAGCGTTTGATAAAGTTTTCACTAAA  
ATATCGATCAGGAACTTCTGAGGGATCCGTGAAATCTAGCAAACATCACTCAGAGCTCA  
TTGTCTGCGCAGTGGATAAAGTGCTTGGCGTTACCGGCGGTTATACTCTCCTGAACAATT  
TCAGAACGTTTTTCATGCATCGACATATGACGCGGTCTGTACAAATCAGCGAAAGTAATC  
GGGCTTTCTTAATGCAGCATGTTTGTGTCATCACTGTGAAATTTTTGGGTGCATACTAGC  
ACGCGTTTTATACTTTGCCAAGAAATTTAGACGTTTTCCGTCTAGTCGTGATATCCATA  
CATTTTATCTACACCACCATCAAGAGTGACCTGCTTGCCGGCTGTGAAAATACCGTGTGT  
TACCTAAAGGGTAACATGTTTTTAACCGTTCTCCTTCATAGCTAGTTCAATGGCGCTGGA  
TATGCGCCCACCATCAGAGATGTGATCAACTATGACACATTCACGACCCGTAACGTCCCC  
AAAGACAGCAGTACCTGTGATCTGGTTAGTTTTTACACCAAGGACCTTACCTGCTTCAAC  
AAGCGGAACGCGGAGAGCGTCAGACACCTTCTGCGTTGTAAACGTGCTCCGTGATATGG  
TGAGATAATCGCATCATCCCTAACATCCAGTTTCAAACCTAAACCTTGCTGCAAGTCCAAG  
TTCGTGACGCATACCAACATTGTCCAGAAGTCGTGCAGAAACATCTCTGTGAGGGTCATC  
TTCGATAAACGTATCCAACCCAAGTGAGTTAACGATGGTTGCAAAAACCTTGATGGAGAA  
TGCCTCGCCAGGCTGCATCCCACGATCTTTTCGCGCATAGGGGATGGCCGGCAGGTGAAA  
GAAAGACTGTGCATGAATATTAAGGTTATCAAGTCGAGAGCAAGCATGTGCCCGCAAAGG  
AAGAGCCTTAACATCCGCAGAAGTCTTGAATTTGGCTGTGATGTCAACAAAACCCAAGTC  
ACTTCTGGTGCATAACTTAAATCGATCTCTACCTGTTTTCCACCACCCTTGAATGTAAG  
GTGATCAACATGGAATATCAGGTTGTTTCAGACGAAGTAGTAAACTCTTTTGTCTACT  
CAATTATTTGAATATCCTTTACAACTCTTGATTGTGGATTGTCTCTGTGAAGTCGTCTG  
CTAACCAATCTTTTCCAGAAACAAATCGTGGGACCGCAATCAACCCAATGTGCGCAACTT  
TCGCAGCTACAGCATAAATTTTTAACCGATAGGAGTCCATCAGTTTGTGCTGAAACAAAC  
TTTTCGTTGATTGGCGGCGCAATCTTTAGAAAACATTAATGCTTTAAAAACTTTTCAGA  
TTGAGAGGCCGTGCCCGCAAGCTCTTGCATATAATCGCCGCAGGTTCTTTCAAATTTGG  
GATTAGTAGAATATCCAAACGTATTACTGTACTGAATACTCTCTGCTGCAATGTCAGAGA  
TGATGGTTTTATTCTCGATCCAAACCTTTTCATACAGAGAAGAGAGGGACCTACCAACAA  
GGCCTTACTCAACCCTGAGGAGTTTATGAAAGCTTGGTAAGCATAAACCCGGACACCCT  
TCAACGCCCGAATCAACAAAAGAATCTTTTCAGAAGCACTTCTCTCATTTCGATTTTAGAA  
CTTCACGCATAACATCCTCTATATCGTAAGAATTATGTCATGCCTGTGTTTTGGATGCC  
TTTAGATTCTTGAGAACCAGAACGTATGCTGCGATTGTATCGTAGATCCTCTTTCTTTGT  
GAAGAGCTCTGATCCTGTCTGTTTCAGACTTCTCACTCAACCCAAAAGCTTTCATAAAGA  
TGGTTGAGATGGAAACAATACCTCATCCGCACCATCAGGGTTTAAACTTTTGAAGAAATG  
ATACCCACCACAATTTTATCAACGTTTGCACATGTTGTGGTGAGAGACGGGCATCTAA  
AAGTCACTGTGATGGGATAGTGAAGTGGTACCTTATGTTAACAGCGTTATCACC  
AATCTTTATCTCCACCACCATCTCCAATTTATTCCACATCGTATATAATTGATTATCCA  
CAAACCTAACGAAGATGTCAACATAATTATACCCAACCGGCTATTTCTAATTATTCCTAA  
ATAGGAACACAATGCTAACCTATCACTTAAACTAAGTTATGATCTTTCAAATCAACACA  
ATAAAGCATAAGATCTATATAACAAGAACTTTAAGTGGGATCTATATAATTCTACGGTTATA  
GAGCAAGTGGCTCAGTTTGGTCAGTTGGGTCAGTAGGGATGAACATAAATCTGCTGTCAA  
GATTTGACCTCTCGTTTTGTACATATAACCATGTCCCTATCGTTTTAGAAGAGAGTGTTAA  
CGTTGTCAATTAACAGCTAAAGCCTTTGGAGACGTAGAGGGTGGTAAGAGGCGTCGTA  
AGCCGATGTTTACAGATGAAGATAGTACACGATTGAGGAAGGTACGTGAAGACTTAGATG  
AATGCAACAAGGATCAGAAAGTTTGTTCGAGTTAACAGCTGGCCAACCCGCGCAGGCGC  
TGTTTGCAAATTACTACGACTCTGTTTGCGGTCGTCTACGCAGACCAAATGTGGTGGTGA  
CTCAGATGAAAGACTTGGCAGTGGAGCACATCGATGGTAATAATTGTGTTGTCGATCCGA

GTGAGATTCTCATAACGTACTGAGGGCCTCTCTGAGACGTTTTGGTGGTGTGGTCAGACA  
CTTGGGGTCCCTCACATCATTATATTCGATTCAGTGCCACTCATCCACTCTGGGGGCTAT  
TGTGGAGGATTATTTTGAAGCTTAGTCACACTTCTGACGGATAATCTGAATGCAGAGAGG  
CTTTTATGGCTCTCAAGAACATCATGGCTGTCGCTAGAAAGCCCTTTAATACGAAACAGT  
ATCTCGACAGCAGTCTGGATATTGGTGAGTCGTGGTTGGATTAATGTGTGTACATTCATG  
GTGATCGAAATGTTCGACAACCTTGGTGTGCTCGAAGCTTATGATATGGGAGCACAACAGTC  
TGCCCCGTGGTAACCCATACATTCTGGATGAGTACCCTACGGAGGACACAGTCACATGAA  
AAAAGTACTCAGGAAACCTGTAAGGGAAAAATTTCGAGACAACGCCTTTTGTTTTCAATAC  
CAAGGTTGCTATCTTCAAATAAGCACTTCAACGCTTGCACGATCATGAGGGCGGATCCTAC  
CGCAGAACAACCTTACAAAAGATGAAATTTACTAGCTGCGTGGGTGGGAACATAAATCTGCC  
TGATCTGGAAAGGCGTGGACACACCCAGTTCATGACGTTTCGGCCAAGAGAACGCCTCTTT  
AAGGCTGTATAAGAAAAGAACGAGAAGGAAGAGTAAGATATGAGTAATATCGATCATGTA  
ATATCAGAAACACACTGGTGTCTACCATTATGTTTGGTCTCCCATCCTGTGATAAGTGC  
GGTAAAGGCCTGAACGGACCTGAAGAAGATGCACCGAGTGTTGTGAAGATTAATGACGAC  
ATGGTTAAAACAGCGAACAAACACGTGTAAACTGGTGACGTTGTTGCACATTCACGTGTT  
TTTGTGATTACGTATGCTAAGCATGTTGCGCCGAAGCTTCGTGACATTCGTATCCAAATC  
TACGGAAAGATCTTTTCGGTTGTTAGCAACCACGACAACCAGACGACAAAGCGGGTATTT  
CGTGAGTGTGGTCACGAAGTTGTTGACTATAGAAAACCTTGCTTTCCGCACATACTAAGAA  
AAAATTGCGGTGTGTATGTCGCACTGCCCCGTATGCATCTTGGAATAAGGCACACAACGGA  
TCAGTCATGGTCCACGGACATAGCCGCGTGTATATAAAGCACCTGGTGGACGATTCTTA  
GTTGGGGGTTGGGATGTCCACGGTCGCCCATTGACTATGCTTGAGGCCGTTGCTTAGTGC  
CTTAAGAAGACTAATTACGATATTAATCACTGACGAGAGGGTAACCACAACCAAGAACGC  
ATTTTCTTTCCCTAAGAAAACATCAAATCTTTTAAACGCCCCAGTACATATTGCTGGCAGT  
TACAACCATTTCGAAAATCTTTGCCTACACTGGGTGATGAGCGGAGCTTGAGTCCAACAT  
GCCCTTGTACTGCTGTTTATATTGGTGGTTCGGGAAGTCGGTATGACTGTGCGTATCATG  
CAGGTTCCCTCGCATTAGCGACAAGAACATGAAATTATTGACATGGCTGTTGAACTTGGG  
TCATACTTGTGTCAGAATTTATGCCAGGTGAGTTTCAGTGTTGAGACACCGTATAATACA  
GCGTATTATCAGGTAGATGGTTATGAAAAAAGATCTGAGCTTCCCTCATGGTATCATTGA  
CTCTGATATAACTACACAGTGGGTGTTGATGGAAAAAGTATTTTACATCCTGTATATCT  
TAAGTGGCGTAAGTTGCTGCGAAGTGGTCTTCCAAAGCACAATAATCACCCTATTATAA  
CAGAGTATGAGTATGTGATAAATGAAATTACCTTTCCAAATTTATTACGTGGGTTGGTAA  
TACGGATGGTGTGCTGGCCGCCACTTGGATAAGGATATCCTCGGTGACGGAAATATATACTC  
GCCAGAGTCTTGTGCATTTCGTAAGACTACAATGTAATTACTCCTTTAAAAACGTTAAGAA  
AAATGGCAACTATATGATAGGGGTTTCCATAGAAATCCGCCTTGCGGACACCTATTACAG  
CCACTACAAATGGAGGTATATTTCGTAGTTTAAAGAATAGAGACCGATGCTCATAATGCTTG  
GCAAATTAACAACAGAAATCATGCCAAATCGCTTGCAATCACAGAACAGGGTGGTATACC  
AAGAGAAAAGATGCACGATATTATTTTATAAATTGAATATGACTTCCCTAATCGGAGAAGA  
AACATGCTCTTTAACGTAGACGTTCTGGTCCCTAAAAGGCAGGTCAACAAGAAGACTTAA  
ACTGAAGGCCCGCTCCCTGGCCTGTCCGTTCTGAAGTACATAAAAAATGTCTTCTGGGAT  
AATCTGTGGAACACAGATCCACGTCTCCTGGAATTCCGTGGCATTGTGGTTGATTAGCAT  
GACAATGTGGTTATGTGGCCTTTACCAAGATTTTCAATGACTTCGAAAATGACACAGAC  
CTTCCGGCAGACAAGGTGGTTGATGCATTTTCGTAAAGTAAATGGATTTATGGCATGCGGT  
GGTGTGTATCAGGGCCAGCATGTGGTGTCAACTAGAGGAACTCTGGGATTAGAGTTTGGC  
GTTCTGGCGAAGAATCACATTATTCATGAATGCCATGATACTGAGCACTTCATTAAGTGG  
ACACTAAGGGCAGAGGGCGAAGTACATCCTCGAAATCTCTGTTCCATCTGATCCGCGTATT  
GTTGATGAAGAACTTGGGGCGTCCCGGATTGCTGGTTCGAATACAGAACCCTGACGGCACA  
AGTTTCAGGCTGCATGAAGGTGGTCTCGACGGAATCGCCAATGTTACTAACTTCAATCGT  
CCTTAAGTTCGCTAGATGGTTATATTTTCCGATGTTGTTTAAAGTTCAAGGCATTGCAAC  
CACCAAGGTTATGTTGTGCGTGATCCAAATTATCCGTTTCAGCTTCTGTTGAAAATCACA  
TCCCCTCAGTATCTGTGATGAAGTTCTGTATGCTTGGTTCTAATAACAAGGGGGATATG  
AACGGGGATCATCCAAACAACGCAAAGCAGCGTATTGATGAAGAGTATTACCAACTGCTT  
GACCATATTCGTGAGTACTACACCAAAGTTGCTTGGTTCAGCTATGGAATCAGTGCAGCGT  
CGTATGTTAGTTGAAGACTGTTTTGTCATAGAAGATCTTTTTGACCGTGGGACTCGGTGT  
TAGGTTGGTGAGGCTCGATGACTTAAAGGGAGCCATTAATTACGGCCGTCCATATGCCTT  
GTGGATAAAAAATTAGCAGGCTTTTATTAGTTTCACGACAAGCGGTCAAACCATATCG  
GCGTGTACGCAGCGGCACTTCGATACCGATCTTAGAGGAGCTTCTGATCCTGATGGGTA  
TTGGTGTCTTCTGGCGCTTGAAGAAAAGATTGTCTTCGGAATGATGCTGTTTAGCCGGGT

CCAGCTGTTTCGTTGACTCATCGAACCCGTCAGCTTGGCCTAAGTTAATGCATGCAAAGA  
TAATTTAGCCTGGTATGGTGTAAACAGTTCCCAGAAAAAATTCCTGACGATAGCGTTTGG  
AAAGATACTAATCATCCTTCGTGGGGTTGGTGGTGCGGGTAAAACAACCGTGGGCGAACT  
CCTGAAGAATGACAGCAAAGTACCGCCTTACGGAGCGAATAAGTTCTACTTTGTTGATGG  
AGGGTACCGGTGGAAGCAGGAAAACCAGCACAAAGGCGCACTAGTGCTGCGAGAAAAACGT  
TCACCTGGCAATGAAAATCGGTTATGATCGCGTGATCGTCTCAACTACCTCTACCAGCGA  
GAAGGACTTTAAACCCTACCTTGAGTTGGCTAAAGGTTATTGATATCAAGTATTTAGCTT  
GGTGGTTGAAGTCCGTCATGGCCACGATTCAATTCACAGCGTTCCGCAGGAAACACTAGA  
TGCTAAAGAGCGTGGTCTGCGTCACTAGTGGAATTACAATAGGAGCAATAAGTGTGTGCG  
TTTGATTGTTTTTTCTGGTCCTGTTTTCTCTACAGAGAGTGGTGTTCGAACTTTCCGTAC  
TGATGAGTCAACAGGTAAGGCGTTGTGGGATGAAAACGATCTGTAAGAGGTTTGCCATCA  
CCACGAATTCCGTGGAATCTTCGGCCATAAAAACCCACATATTTTACCGTATGCGTTGTGA  
TGAAGTGCCTACAGTTCACCCGAGCCTCGGTCACCTCCGCGTTGCATCCTGGTTTCAGCG  
TTGTCAAGTGCAGGTTTTTAACCTGACCACAAACGTTGGTGGTCTTTTGGACCGTGCTGG  
AGTGCCGAAAGAGGCTACGGTCTACATTTGTGGATACGTGACGGAAATCATTGTCAAGGA  
CAATCCGAAACGTAAGACGGACATTATAGATGTCGGCTATAATGTGGTTGATCCTGATCC  
GTATAAGTCGTGTAACCTGAAGTTGTGTTCTCTAGTGAATTTGCACCAGAATATATCAG  
CAAGTATGACATCCTAGACACCGTCATCTACGAAGATATGGTGTGTTGTGCGATGCC  
AAATACAGTCATCAACTTCAACTGGGCGTAGTTTCCTTCGGTCCGTAAACGACCAAAGGT  
GCTTGTAGTAAACCCACGTATCAATTTTCTTGATCATGAACCGTATGATACTCATGGTGC  
TATGTAATTCATATGTGGTGCTGTAGAGGCTTTCAGCAACAACCATTCCATCGACACTGT  
GCACGATCATATTGAATGTAAGACGGCCTTACAAAGTAAGGACATATAATGTCCATGGCT  
TTAGATACCCCAACACCCTACGCCATTAAGTACGGACGAACTTATCAGGTCTGGAAAGTT  
AGCACAGAGGGCTATGAGGTAATTGTTGATTTTGGTATAGAAAATGGAAAGGTACAGCAG  
AAACGTAAAAAATGTGAAATGAAAAATGTTGGTTCGTTCTTGCCGAACAACCTGCTGCATTA  
TAGGCTGTGCGTGAAGCTAGATCAAATGGGAAAAGCAAGTACACCTTGTTTATCGTGAA  
ACAAAAGAGGCTTTACGGACTGAGGCGAACTTCTCTCCCATGCTCGGACACGATGCAACT  
ACCCGTTTAAACCGCATTAAATTTACCCTGCTTATGTGCATCTTAATCTTGATAGGGTACGC  
GCCCTTGTAACCTTGACACCGGTTGTATCCAGTATTTAATAGTCCCGGAAACCAGCAG  
CTCCCTGTTCAAGGAGCATCGTTGCAGCTGAAAAAAGATCTTGCAGAGTAGACTGAGATT  
GACAACCTTGAAGGTGAGCTATATATTCATGGTGTGCGCTTACCTAAGAATGTTGCTCTG  
TCTAAGAAGTGCCGTACACCTGAGCAGATCGAGGGTGTGATTGAAAAGGACTACCAATCA  
GATAACAACGCTATCTGAATGCTAGTGACAAGTATGGGCCAGTATGTCAAGCTTTTGAC  
GTTGCTGACTACGATGCAAGTATTGAACCCGTGATAAATGCTTGCCGATATGGCGTTTGC  
TCGAGAGTTGACCTTGAATATCACATTTTCGATATTCATGTAAACGCAAACAGCCCTTGG  
CATTACAGAGCGCCCTCATAAACACCGACTATCTGATCGTGCTCGCGTGATCTATTACGA  
GATTGTGAGGTCGATCCAACAATCAAAAATGTTGATCAGGGTGGGTTTGGCCTGACTGAA  
GGTGCGGTCACGCGGTTTCATGGGGCGATTTCATGCAAGAGGATAGTGAAGGTGTTATTATC  
CCTAACCTCAAGGGCTTGTATGAATTCGGTCAGGGATCTTCTGATCTAGAGAAATGGACA  
CCGGTCCAGGATGGTGAAGCGCAGGTGTTGCAGTCTGTGGAGGACAAAAACGGGTAGGGC  
CTACTTCGCTGCGCAGGAAAAGACGGAACCAGATTTAACTGCCAGATGAAGGGGACGCGT  
GAAGAATGTTCTCATGCGAGAATGTTACTTCTGGACGGTTAGTTAAGCAAGTTAACATGC  
CAGGCAAGGACTGACGACTGAGTTGCTCAGATCCATGTAGGGGAGAGTGAACGGGAAGTC  
AATTCATTGAAATGGGACCCTGTATACTTATGGCATTATATAAGGGGAAACCAGAAGAGG  
TGGAAGAACATGTGTTCAATGGTTCTTGCCAGGAGTTGGTTAAGTGACAAAGTGGATAG  
AGACTGGTGTCTGTCAAGACTAAGAGATTCAAAAACGAGACATCAGGAACATGGATGTGA  
ATGTGACCCAAGCTTGCCCTGGTGCTTATATCGTTAAGGTTGGCGACGCATGCCTTACAA  
TCTCAACATAGTAGTTTAGCTACCTGTCTGAGCTTGTACCAGATGAAGATCGTCTACCTG  
GTTATTACACGGCTAAGAACGTGGCGATGTGTGATAAGGTTGAGATGTGGGGCAAATAAT  
ATCACGTCAAAGGGGACAAGGGAAGTGCCGATGACACCCTGCTTGAAATCGACGATGGGC  
CCAATGTCCAGATGCGTGGTGAACAGCTGTAAAAGTCACTGAGGTACGTGCATAATTAT  
CTGGTATGGACTGGCGTTGCTTTGAGAAACAGTACTCAATGGTGGCGGGATTTATCTCCC  
CGACCGATTCCGTAAAGATAAGCTCGATGTCTTTATCTACTGGACCCAGGGGAAGAATAA  
ACGTGTACTGATTGTCTCGGCGGTTGTATTGGGCCTTCTGACGGAGGCCATTATCGAGCT  
GTTGTGGAACCAAATGGCATGCCAGTTTGTGATGGTCTGGCATAACAAGATTAATACCTCCTA  
TCAGTGGTTTAAAGAATGGGATTTATGGCGATAAGAGTCTTTTCGTTGCAAAGAACGGAGT  
GCTGCTGACATTAAGAATTATTCGCGATCAGCCTGATAGTGAGGATGCTACATATGTTGA

TAATTTAGGAGGATAGATGATCTTCGTTGGAGCTTATGAGACCCTACTGTCAAGGACCAA  
CCCGAAAGATATGGCGGAGTATGATCGTCACGTAGCTCAATGGACCCCCATAACCGCGTGT  
TGTTTCGTCGGGGCAAGGCGACTCCGGTTGATCTGCCATTCTCCTTCGTTGTTGAAGTGGT  
CCAAGAGCTTATGAAGGCTCTCATTGCAGTTGACCGAGTTGACGTTGTTGATGGGGCCTG  
TGATCGGTTTCGATGTCTGATCCAATGCTGTGTGGCGGCCTGAAACTTGTGGTGGTAGCTG  
GGAGAACTGTCTGAAGACAGCACGGGGTGTCTCAGTCCAACATCGGAGGGATGGTACAGCT  
TATTTTCGGTGCCCCCTTGTCTGTGGAATCAGTTGCTGCCATCCAGCAGCAGTGGGTTCGC  
ATTATGTTTCCGCTGAGAGATCATCTTGGTATACACCATGAGTCAGGTGTTATCCCCAA  
CGACTCTAAGTATCTGATGATGACACAATAAGAGAGGCTCACCCATCTTTGACCTTATG  
TAGTTACGATGAGTTGCCTACTGCCGAATGCAAATCTATGGTGAATCGATCCAACAGTCG  
CTACTCTTCTGTGGACGGTGGACGTAGTGGTGAAGACATCGTGTTCCCTCGATGGACAGGG  
TCAGATCATCAAGCCAAGCACCGTCGTAGAACCGAAAATTATTGCTTGACAATAAAGAAG  
GGGTCAGTCTAATGGACCCCATCAAGACAGAGAGTAGTAATAAATAGGGAAACGATTTTG  
ACGAAATTTGCAAGGGACTGTTACAATTGTCAACACGTCTTAATGTTCAAATAGTTATCG  
GCAACAGGCCTACATTCAGGCCGAAGAAATATATGTTCCGCTTCAGAATTATGCGCCGTT  
GGGGCGGTGTCAAGAGGTACGCTTCTGAATGCACTATCGAAAATCTTAAGACTTATGTAG  
ATCCAATGGAGAAAGCGGGCGGTAAGTTTATCGCCCTCCAGTAAAAGTGTTTGACAAAAA  
AAGCTAAATCGCTATACAGAATTGACTAGATAAACAGAGGAGAAACAAAACCTATGCCACG  
TATGCCTAAAATCAAAGTAGAACTGAAAACCTACGCAGCCAACTGACGCTGGAGACCGAGA  
GCGCCTGAAAGAAATGGTTAAGGTAGGTCTCGCTGCAAAGATCGCACAAAACAATGAGGC  
CTGAGAGCTCAAAGACATCGTTGCATTTGAGAAAGAAAGCCACAACCTAAGACCCGAAGGT  
CATCATGACCCTGATCAATGCTGTATCTGACCTCCAGTATAAGACAGGTAATAATGCGTAA  
AGATGTCTGAAGAGCAGGATGAGCAGTTGACCGAATCTGATATTCTGTTGGGTCGCGGGAG  
CAACTAATGACATATTACTTGAATGGTGTGGGACTTGTGGTTTTCTTGTGCTTCATTTAA  
GGGGTCGCAATACCGACTCTGGTTTTAGCAAAGGATACACTTTTTAGGCATGGGCCGTATC  
GCCTTTGTAGTCTCCGCCACCGTTGTTGTATGGTACTGGCTCCGAAAGGTGTCTATTAAC  
AGTGGAGGGGTTAATGCTGCTTAATCTTAAAGCGTCCACGTTGGAAAAGTTGCAGGCTCT  
CGCCCGTTACACGAATAACTCTGCTGCTACTTACTTAACAAAGATGGTTGATGAGTACGT  
TGACGAAAACGTAAAAACTGAATACAAAAGCAAGAGAAGAACCCAACTAATGCTGAAGG  
ACCTGAAACTTGTACGGTTTGTCTGGCCTGATCGTACTGGGTGGAAATGGCCTGACTGGTT  
GCGAACCTGCCACGTGCCTGCGGGTTGCGTTGGCGTAAAGGGTGACCCGTATGGTGACT  
AAAAGGGTTTTCGAGCAACAACAAGTTGGTGTGGTTCAGTAAAGGTGGACCTGCAACTAAG  
ATCTTTATCGGTTCCCGACATTCAACCCGTTGAATAACTCTAAGCAGCCGTGCGACTTCG  
GGACCAAGGATTCGATGACGGTTACCGCTAGAATCGGTGTTTAATACTTGGTTGATCGCT  
ACACGGTCACGATGGTTTTTCAGACGCTCTTCAAAGGTGTTAAGGAAATCACAGATGCAA  
TCATTTTACAGAATATCTAGGATGCGTTGATGAGAGAGGCTCGCTCAATGGACTTTGGTA  
CGTTGGCTGGTAATGTAAAGAGCCTGTTACTTGAACCTGTTACCAAGCAGTTTAAAGTCCA  
AGCTTGATCCGATTGGTATGGTGATTCAAAAACCTATCCGATAACGATTACCCGAATTACC  
CAGGGCAGGTAACAGCGATAATCAACGCAAAGATCGAAGCAACTCAGAAAGATCTGCTGC  
ATGAGAACTAAATCCAGCATAACCAAGGCTGAAGCTTAGGAACAGATCGAAGCCGCGCGCG  
GCGAAGCTGAATCTTAGCGACTGCAAGCTCAGGGCGAGACCAATGCTGTAGTGGCACAGG  
CAAAGAAGAAGCAGCATCCCTTCGGATTTCGAGGGGATGCTCTGCTTAAAAATCCGGAGT  
TCTAGCAAGTGGAAGCAACTAAGTGTGGAATGGCGTTACCCTGGTATGTATGACCTGTG  
GAGCATAAGGCTCGTTTCGTTTTCTCTGCGAGCAGGTAAGTGATAGTTTGCAAGAGGCCCGG  
TGATGATTATCGTCGGGTCTCAACATATCAAAGGAGATACTAAGTACTGATACGTCTAAAAG  
TCATCATAGCAGTATTAGCGCTCTTCCCCGTCGTTCCGACAGCCAACACCCACACCT  
TGGTGGACGAATACAACGATAACAAGCCCCATAGTCTGCATCTACAGTGGTGGTAGTCGCA  
TAGAATCCGTTGTTATGGATGTCGCTGGTTCCCTGGCCTCCCAACAAGTCATTCCACTTAG  
TTGACTTTGTGAAAGTGTCTTTGTTCTGCTTCTGTTTTATGCTTTTACGATGTTGTTGG  
GGTGGTATACGGGCGCCCTCCTGTTTGTATTTTTCTCATGGACGGCCACGGTGTGGAAA  
TCCCCGGTTGAGTTTTAAGGGTTGTATCCTTAAGGGTTCTGGGTAGTACCGGGTTCATGA  
CATCCAGGGGCACAAATGAGAGTAACGCATGAGGTTGTTGCCTTTTTACTCAATACGAT  
ATCTTTAGTAATCATTATCGCTGTGTCCACCCTGTCTGGATTCCAAAGCACCAAGCGGTT  
GGTGCCACGTTCTGGACGGTAGGAGACTCCATGACTAATGAAAAGGCTCTGCGGTTAGGC  
GATGCAAATAACGCCCTTGCTATTGCTACTGTTTATGACCCCCAAGATGCTAAAATACTT  
GGTCGGCGGGTGAAGTATTTCTACGGAAGCAAGTGGGAAGCGTTTCGTGAAAATATCGTA  
GGGAATGGGCGTTATGCAAAGATGTTGGCTAATCACACCATTATGCAAGCGGCTATCAAG

CTTCGAAATGAAGGCAGGGTTTTTCGTTGAGGCATCTCCCCATGATCCAATCTGGGGAATC  
CAGATGGCTGAGAACGACCCAGAATAAGAGGACCCAACCAGCATGAAAGGTCTTAAGCTT  
CTCGGAAATTGCTGGCACGAAGCGATGGATCGAGTAATTGGCACTATGGAGGTGCCTTTA  
AATTAGAGATTGAAATGGTTCCTAGACAGCTTGTTTTACTAACTTGCCTCTGACTTCT  
CTAACACCTATTGGGATGTCGTAAGGAAGAAATGTTATCCACAAGGTAATAATAACTATG  
AGATTTGGGGGGGAAAAGGACCCAAACACCCCGTAGAATGTCACGAAATCTGGGACTTTG  
TCAATGGCAACATCAGCCTAACACGTCTGATCGCACTTTGCCCATCTTACCGCGAAGTCA  
AACATATTGTTTTGGCGGGTGTAGTGGTAGGGGAGAAATAGCTCTTGGTCACTTCATGA  
AGTTCCATGCTGTCTCCAGACAAATTGCAAAACAGTACGCGCAAGAGTCTTTCGTTTAAAT  
ATCACGAACGTAGTAAACGGTAAAAATGAGAATTGAATGTCCGGCATTGGACGACAATT  
TGAGTAACGTTTGTGAGGGCTAGTGGGATATCCGTATGATAAAGATTGGACAAAAAAGT  
CACGAATGACTGTGTGATCGCGTTAGACCATGACCAGACTTGCATTGTGTCTGACGCTGG  
CGCTGGTGACCGTGCAATTAAGGCAACTCCCATAGCTTCTGTTCGGTCAAAGAACTTTAT  
AAAAAGACCAGAGTTCTGAGGTTCCACGTTGATGATGGTGGTGGATGTTTGAAGGACAA  
CAACGGCGATATGGAAGTTCAGGCTAAAGAGCAAGGCAGAGAGTTCACCCCTTGGGGAAG  
CGATGACTTCTTAACCGAAGATATTCTAACGCCTGAAGCAGTGAACAAGGCCTGCTTAT  
CCTGAAGACATAGATTAATGCGTTATTCGATCATGTGGTAATCGACAGAAGAAATGGCCA  
TGGTGTGCTCGACTGGGACTACAACCTACCGCCTGATGTTCCAGAACCAGGAACTTACCA  
AGGAAGAGGTGAAGACACCCTTCGTCCTGTGCTGTTGAAGGAATCCGCGAGTATGACTA  
AATGAAGAATAATGCCAAGGTCATTGATAGTGTGAGGCAGATGTTTACCTGTCTGTTCT  
GATGTATACCGGAACTGACCACTTCCAGGCTACTGGTAAGATCAACTACTTAGTTGCGTC  
GTTTCGACAAAGGCCCGAAAGGAACACCGGGTTTACCTCTTGATACGATGCGTGAGTGCCA  
GGTGAAAAACGGGAATCACCCGATCCCGATGATGATCGACTATTATATGGGTGACATCTG  
GGTGGAACGAAGCAACGTCGAGGGATGGGGACGTAGGTTCTTTGGCTACCAGATGTTATG  
TCGTACAGTTCAGTCAATATCAAGCCTGATCAATGTTTCCATATCTCTGGGCGTGTTGG  
AGACACTGCTGCAGGCAACCTGATCAGGCTTATTCGGAACGCCAAGTAAATGTGGACGGC  
AATCGGTAACCAGTAGATGATATGGTTACCTAAAGGGGTAGAGTTCACCTCCTCGGATGG  
TTTACAGCGCGAGACGACAGCAGGGCAATGGGCTTCAATCATCTTCCAGATGGTCTACAT  
GCAGCGAACTGTCGACGACCATACTACGCTCACATCTGAACCTTCGTCGCGTGGGGGTTAT  
ATGATTGGTACGAAGACCATAGATGCTGTAATGAGGGACACCAGGCCCTATCCGTGTCC  
TCGATGTAGCCATAATGCATGGTTGCAACAGGGCTGTGTGGACTGCTGAAAAAAGATAAT  
GGGGACTATGTTGTCATCACGGAAGACTTCCTTGACCCTGACAAGGTATGCAGTGAACCTC  
CGTCTGGAGGATTGTAAGCTTTTTGAGGGGGAGTAATTACTTCTCATTAAAAGCGCCGCT  
AATGGAGACCGTGAGTGTCTGTGGTGTGTTCAAGGACGAAGCTGTAGGAGATTCCAAT  
GAAGTTGATGTCGGGACACCAAGGCCTACGTCACCTGTGCTTACGTAATATGCGAACATGG  
TGATCCCGTTGGCAGGGAAATGATCAGGACAGGATGAACACACAGATAAGGGGAAGAGGCA  
GAAGGATGTTGTTATTTTGACAACGTTTCTGAGCAAAGCTGTTATATTGTGAAGAAGAT  
TACAAGCTTGGCTGAGGAGCACTGACTTGACCACTACGTCATGGAAGCCCTCAGTCTAGG  
TTCTCTGGGTAATGCACCTAGTGATGTGGCTGGCCGTTTTTCTGCATTGCGTACGCATT  
GTCCAGTTGGGTTTTCTTAGGGTATGGTTTAAATCCACACTGTTATCCCAACATCTGTAA  
ATCTTTTGCAAGAGGTCTTTTACCGATACAAGAGCGCACTAATGTGAAAGGAGAGGTTGA  
GACAGAGACAGGGGAAGAAGGTATACACAACGGGCCAGGTGAAGAGGGAAAAATCGCATAT  
GGTCAGGGCTGTTGAGTCGGACATGCCTGGATGTTTAAACGGTCTTACGATCGCGGCTGG  
AATGGCGGTATATGCCGATGCGTATTTGATCGGAAAAAAGTTCATGGAGCGAGTATCCAT  
ACAAGAAGGGTAAGGGGTCTGCATCAAAACACGAGGAAAGGAAGAAACCTGGCGTAGTG  
CCACTGACGCCAGGACTTTGGACAACAGATGCTAGTCAAATCGCTCCTTCCAAGGCGAAA  
TTGATACTTGCCAGGGGGGTATTGATCGTGTGCTTGGGGCGCCACTCTGCACTTCTTGC  
TTGGACCATGACGACTTCGATGGGAAATGTCGTGGAGTCTTGGGTAAGTGTGTGAAGACC  
CTCGATGGATATGTGCAGAAGGCATGGATGAAGTACGGGTCTGCGTACACAGCTACGTTT  
TTGTCCACACCACTCCGGAGTCTTGCTGACTATTTGGATAAGGATTTTGTCCGGTTCCCT  
ATCCATGCCGCGTACAAAGAAGATATGCTGATGTACTTGAGGCGATGTACCAATGACAAG  
ATCATTAAAAGGGGGGAACTCACCTCAGCATGATCACGACCAAATGTACTCAGAAGCAT  
GCTAGCATAACGATTTCCCTGGCAGAGTTTGGCAGACATAGGGGGGGGAAGATTTGCTGGA  
CAATTTGAGCAAGCCCCTTAAGTTCTATTACGAGAACTGGCGGAGTGAATACCGTGATCG  
AACTCTGATCGACCAGGTCATGCGTTTCGGTACCCTGAGTAACCCTAAGAGCCACAGTG  
GATGATCAAAGCATAACGCTGTTGAGAGAGATGCCAACCCTGCTTTGCTGTGAATGAACT  
TCTTGAAGTTTTCCGAGAGGTGTAATGCTAAGTAGAGAAAAAAGCCTTGCATTAAGAAGCG

AAAGGTATGAGCCACCGTGAACCTTGCTCGTCGATATCTGGGGGAAAAGAGTAAGGAACCT  
CATATCCGTCTGATCCTGAATGTGCACCAGTATATTGCAGAGGCTGCTCAGGTGATCACC  
GAGGCAATTGTTTCGCAATCCGGGGTCGTAGATCTTCTTGGTGACGTTGAGGTATCACCA  
AGGCTCGCTTGCCTTTAACCAGGTTAAGGCGTTTGTAAACATCTTCCCACGTAGAATAT  
GAGCCTTATATGTACACATGGGCGGGAAAAGTGGTTGTATAACCCTGCGATTATAAGTCTG  
AAGCTGCCGGTTGATGAGACGTTCAAACCGCTATCCACGACGACCCCGAACTGGTTGAA  
GAACTGCGCCATATCCTTGACGAGGGTGTATTGTTCATTGCACACAAGGCACGTTTCGAG  
AAAGACTGGGCTAACCAACGGGTTGCTTTCCCCGGTAAGAATTCGCCGTGACCGTACATC  
GTGATCGATACGCTTGCAGAACTAAAGTCGGTTTTCTCCCTGCCGTCCATCGCTATGGAG  
GCCGCGAGTTATTTCTTCGATCTGGCTGCCCGTCAGCGCCATCACGAAGGGATCACATTG  
TGGATTCTTTGCTTCCAGGGTGTAGGTTGCAGCATTTCGAGGAATTGCAGGTTTACAACATC  
GGGGATAATGCGGCACCTGAAGGTATCCACTTGAAAGTTAGTCCTTTCATGAAGAAACAT  
CCGGACTTGACGCTATATAATGACGATGACGACAACACTGTCCTTCGATACGTTTCGTTGT  
AACTCTGATAATGAACTGCCTATGGAATGTAAGGTGGGGACAAGCTGACTGTGAAATTC  
CAGGCATATCGCTGTGAATGCTTTGGTTCTGTTGTGCGTGACCGTCGCAACATCTGTACC  
AACGAAGTAATGTCTTACACGCTTGTGAATATTATTTAAGGTCTTCGGCCCCATTGGAAA  
GGAGAGAAGAATGAGTAGAGTTATCAGCATTCAATTCCCTGACTCGTGTGATAATGACTC  
GTTGATAAGGCATCTTCGTGATCTTGACATGCGTCTGGAGGAGTTGGTAGAATCGGAATC  
TGCGGCTGAGCGCTTTAATAGGATCGGGGCCTATCTGGACATCATTAAAGCCATGCAACA  
ATATGCGAGGAGCTGATGGATATTAACGTTCCGAATGGACCTCCGTTGAGCGGTAAAGAT  
GACGGCCCGACTTATCTGTGCGATTGTCACCCACAACACTGCACCACGAGGACGTTAAGGAA  
CTTCAGTTTGAAGTGGCTGGAAGGACCTCTGGCATCTCGACCGACCTGTGGTATGCTATG  
AAAACCTCGTCGTTACTAGGAGGTCCCCGGTCCCTTCCTGCTGATTGATGGTGTGAGTCTA  
CCTCCTCGTCAGTCAATGATTTCGATGCGCTCAGAAGGACTTCAAACCACTCTTCGGAAAT  
TCTACGTGTGGCAAGGCAGCGATTGCAAAAATCGAAGTAGAATGATCCGACCGCTAAGGTT  
ATTGTTTTTTCCGATGGTGGTTTCCCGGGAGAGAACCGAGAGCTTTCAGATCACGCGAAC  
GCAACTGCTGGCGGGTTGTTCCCTGTACGCATTCACCGGAAATGCAATGAATAGGGTAAC  
GCGAGCAAGAACCGGTTATACCTTGACGGTATTCGAGGTTATGAGAAAGTCTTCGATAAC  
AATGATGGTACGTCAACGCACTGCGCCGAATCTGTCTTTAGTGGGCGAGATCAATCAGC  
TATGCATAGGAGTATGCGTAAGCCACTTAAGACCGGTATTATGGGAGACCTAACGATCGC  
AGGTTACACGCACACACCGGCTTAACGGGATGGAGCAGGTATACAGTGTAGCGGCAGAATA  
GAACTTGCCGCATGTAAACCCGCAGGGGAGGTATTATTTAATCTGTCAAATACTTCCC  
TCCTGAGAAGGTTAATCAGTTACCTCCGTATGAGTATTGCGAAGATCAGTAACTGTACGG  
CAACCTGCGTTCGCCGCGCCGGGTCTGTTGATGCAGTTGCAGGTTGAGCGGCTGATGGACA  
CTTCAACCATTTCTGTCTCACTGAACGAAAGGCCATTTCTCGTCCAAGGTAAGATTCCT  
GAACCGAGAGACAGAGGAGATTTTCACGATCGAGCCTGGAAGTGGTCACGGCTTTTAGGC  
AACAAAACATAAAGCTGGTATTAAGATTCGATTCATCATTGATGAGCGTGATGAGTTCCT  
GAACCAGTCGGGCCCTTACATGATTAAGATCAAGTTCAAGACACCTTATGACCCAGCTGA  
AGAGCTTCGCATCTCTCTGGATCTTGAGAGCGATAACTGGAACCTCATCAAAGATTCGG  
GCTAGATACTGGTTAATGAAGAAATGCACCACAGGAGACTTCGTTGTCCACTATGAGTAT  
TGGGTGGAAGTAATCACCGTGGACGCAACTTTCTCATATGCTTCAAAGGGACAAGTTAC  
ATGTGCCAGGACAGTCTGTACGATATCTGGGGTTTAAAGGCGGGACGGAGCCGGAAACA  
CCTTACCGGCTCAACGGGAGAGGCCAATGAGTCTTATACCTGAATCTTGCAGTATCATAA  
AAGACGAACTACTTAGTCGTGCATAAAAAATCCCAAGTGCTGGGCCTTGATGCTGTAG  
GGATCAATGCAGCAGATCTTGCATCCCGAAGACTTCGTTTCCCGTCTGCTCACGGAGG  
TGCACCCTGGAATATTCACCACCGACCAGTTTCAGGAAATCGTAGGCTTCCAGCAAAAAT  
TCACAGATCGCAATCTCATACTTGAGAAAGTTAATGAGCAAGAGTTAGCTAGAGTTTTAG  
AAAAAATCATAGAGTTGATGTATATGTAACCTGTAAGGAGCGCAATAATGAAAAAAGCTGT  
ATTTGGCCCTCTTGTGCGGTGTAGTATTTTACCGCAGGGTTCGACGTATTACTACTTTTGA  
GCTTCAGTACCCGCGGATCATTGACATCGAACTGATGAGTCACCGTCTGTTTATTCGGAA  
CGCTATGAGTAGCTGTGCTATGCCGGTCAAAGAGATGATGGAGCAGGTTTCAGACAGACCG  
TGCTAGGGCTGTTAAGTTTTGAAAGAATCACCCATGGATGCTGGATACCGGTGAGCATGA  
CGCACTGCTTGGTGTGATGGGTATTCGGCTGAAGATTGGTGGAAATCGCGAAGGATTATGTGC  
GGCACGTTTTGCTGCTGAATTCGAAGATGCTGGTGACCACAAACAGATCACGAACCGCCT  
GCTCGACCCTTTCACCAAACGAAATCGGTCTTCACAGCACCTGTCTTTGAGGAGTTCCG  
TTGGTTGAGGGTACATAAGGATGCCGCTCAACCATCTACGCTTTAGTAGAGGCCATGAA  
CAAAGCGTTGGACGAACCAGTACCTGAATAACTGAAGCCAGGGCAATGACACACCCTAA

TGTTGATCACCTAGACACTGTGGGAAAGCAGACGAGTGATGACACATTTTATTACCATGT  
TCTTGACAAGAAAAACAACCAGTCATCTTCACAGGGGATGAAGCTAAGGCTATTTCTGC  
ATCTTCTTGCTCAGGTGTTTTATCGTGGGCTTAACAACACGAAAGAGGAAGCCATAGA  
ACTGTATGGGAAACGTTAAATCGGTAGGTAGGATAACGACTCTCCTTTTGATAATGTGTC  
AACCCCATGAAATGTGAGTCCAGCCCGTACGGTTATGACCCAGGCATCAATTCGCCGGA  
AAACGCTTTTTCTTGGGACGAAGCCATTACCCATATTGATCGCTAAACTCGCCTATGGAG  
GGGGAACCTACCGAGGCTGGACTCAGTTGCGTCAAAGACTGCCTAATAACTATGTTGAAGG  
TTGATGTAGATGGATAGGAAGGGATTTATCAGGTAGATACTGATGCGAATGTTTAGTCTC  
TTGAAGGGTGGGCTGAGAAAAGTCGCCACGGAACAAGAACTGCGCCAAAGTTTGTCCCTC  
CATGGAAAAGAACGTGTTCTGAGCTTGGCACAGGCTATGTGAGTGTTAGATTGGCGAACA  
ACGGGGTTCTAAAAACCTTCAGGGTGCATAGGTTTATTGCTGAGGTGTTCATACCAAACC  
CACTCAACAAGCCATTTATGAATCATAAAAAGGGCGATAAGAGAAAACAACAAGGTATAAA  
ATCGTGAACGGGTAAACGAGGAAGAGAACACTGTACATGAGATAGCAACAGGACTGAAGC  
GGGATAATCTGAGAGAGCCCATGCCTGGCCGTTTTGTGAGCTAACATCGGTACATAATGT  
AGTTTCTGGTTGACCAAGTTTCCAGCAATAACTATCTTGGATGGATGAATTGCGGTGAGA  
AAATACTCAACGATTATAGTCAGAATGGAGACTACATGATAAAGACAAAACGCAAACCAA  
CCCAACCTATTTTCGGTCAACTTGCTCTTTCTGAGAACCGTACCCGCATTTCGCTGTAACCC  
CGGATAGCGAACTCCGTGCTGGCCTTTATGCAGTAGGATTTCAAGTCAACGATAGTGTAG  
GGAATCCTAAGCTAGTCACAATACTTAACATGAAAAATGTACGATGTACGCACTACCCCT  
ATCTGTACCGTAAAACGACAATCTTTGTTGGCGACACTCGCCAGGATTATCCGTATGCAT  
AAATTTATAACGGTGTGATATTCTCCATGTAGGGATTTCCCTCCGATCGCGACATGGAGT  
TCGCGCTTGATCACCCATAAGATATTCCATTATATGCGAAGGTTACTAAGCGTAAGTACA  
CCAAACGTGTAGATCGTCCAGATTTTGTGATAGTACGTTTCGATAGTGAAAATGGCGCAC  
CTCGCAGTGACGCATGTTGTCTGGGCGAATAGTGAGGACAGAGAAGACCAAGTGGCAAAA  
CTGTGGCTTGGTTGACCAGTATCCCTACGCCGGGTGGCCCGACTTCAATGCTTTAACCGA  
TGACAGCAAGATGTGCGACGATGTTTAATATCCTGAGCATTCTGGTAAATTAGTTAACGT  
CGCTCCTCCGGTTCAGGATGATAAACCAAAAACAAGACGTTGACGAAGGTGATAAGCATAT  
TGATCGATACGGAGAATAATAGAGGGAATGTTTGATCAATACAGTTGTAAAGGGTGTGG  
AATGAAGGTACCGCTTGAACCAGAACGTCTGAACAGGTCTGCGATCTATGGTGTGAGA  
TAATCGTAACTGGTGACATATCTCTGTGGGCATCTACAAGCTCCCGTATATTGGTTGCAC  
CACTGGTGAAGCAACGCAAGCATTGCTCGATGCCTACGTGAGCCGAACAGACGACGACCA  
TTCAAGGATGGCTGAGTGAGTTCTGATCGGTGAGATCAACAAAGACGCTAACGGCGGTTT  
CAACAAGATCCCTGCCCTTTATAATTTGTAGCCCGAGCTTTTTGACTCGGGTTATTTGGA  
AGCCATGGGTATGGGCCGATGGAGATTGGGGGACTTAACAGTGTGATTCATCATTCCAA  
GGACCTTGACTACGGCGACACCGTCCTGAAAAAATACGTGACAAGGCCCGTAGCAAAGA  
CGACATCAACGATGTTGTTTTGAGTACCCGTATATGATGTTGTTGGGTGTTGCGATGGG  
GGTTATTAAGCGTATGCGTCAAGAGCGTCCTACACAAGATGGGATTAAGATTAATACGTA  
TCTGTGCGAACTGAAGATCGATGCCCCGACATCGTAACTGATTGGACTCCGTACGGGACG  
AACTGAAGGTGGTTCCTGCTGCATTATCAAGGCTAACGATACAGCGAAATGCATTGGTCT  
TGATCGTAAAGTTACGTATATGATCACCGGTGCACAGTCAGGTAATGGCCATTACCGCTC  
CTCCCGCTCAATTGGTGACGGCGTTCGTCGATTTTCGAACAAACACCTGGGTACACTCCC  
ATATTACCGTGGCATGGATGCTGGGGTGACAGAACACCGTCAGACCCCGTGGTGGTTC  
TCCCACGATCTCTTTTCGGGCCCTTGACCCTCAGATCGGAGAAGTGTTCGCCCTAATAA  
CCCGGAAACAGTTTCTACATAACGTATTAGCGCAATGGATTAATACTGCAAATTAAGA  
GACTTTTCATGAACCGTGTGGCGAAGAACCTATACTGGATGCTGGTATCTTACCAGGAAGC  
ACCACAACCTACCCGAAGGTATGTTCAAGATGATTATGCAGGAAATTGATGCAGAAGTTGC  
TCGTGTGGCCGCTGATACAAAGGTCATTAACCTGGGTGAAGGCTCGCGAGCTAGTAGT  
AGAGGTGTTAACCAAAGAGCAGAAACAGGTCGCCTGTACGTAGACTGGCCTGACGAGAT  
GAACCGGTTACCGCTTTCCGGGAGACTATTGCTTACTCCAACCTATTGCCAAGAAATTTG  
TCAGCCAACCATCGAAGACAAAGGAATGCGTAAACATCTTTGATATCCATGCAGACGATGG  
TGAGGTGCGTCTAGGCTTCGTGTGATCTCTCCCTGCTGGGCGTAGTTCTCCGGATGCGTA  
CGAGGATGTTACTTACTACACCGTTCATTATGATCGACCACATTACGGACGTCATGGATTA  
TCCGTATGACGATATGGAACACACTGCCAAGGCCCGTCGTTCAATTGGTGTGGTTTGTG  
AAACCTTGCTCATTACATTGCGATACACAAGGTTGCTTACTGCTCGGCTGAGAGCAAGCA  
ATTGGTTCATGACCTTGCATAGCTGCACACCTTCAGCTTACATATGGCGAGCCTGCATCT  
TGCAAAGACCGTGGTTTTACTCCGTGGATGACCAAGACCAAATACCCACTAGGGTAGCT  
TCCAATCGACTACTCCAAGAAAGGAGTTGATGGATTTGTGAAGAATCCAAGTCTCAAGCA



GGATAGGGAACTTTTACGGCAAGATATTATCCAAGTTTGTGGTATCCGCACTAACGTGTC  
GGAAGCTTATCTGGCGAACGAAAGTTCTTCTCTGGAGACGAACTACATACTGACTTTA  
CCCGCTGAGAGATCACATTATCCTCGAGAAATCACGGCTAGGGTCTGTGCTGTTTATCGT  
TTCGGAGTATGAAGAACTTTAGGATTACTCGACCTCTTCGTGGGATCTTAACACCAACTA  
CCTGATTGACATTTTCGCCGTCATTCAGAGGATCGCAGGGTGGGCGGTTAGTGCTGTCCT  
CTACGTGACTATACGCTGTTAAAAGCCGGATAGATCTGAATGATGGACCCGATGGACTG  
CCTGATCCGTGTAAGGAAGATGGGGGTGAAGACTGGGTACTACTTGAACGCGAAGGTTAG  
TGCTGGCGAATCACTCACCGCAGAACTTAAGTCGAGGAAGCATGCATAAGAAGTTACCCG  
CAGGGATTATCCACTGATAGCAGCCACCTCGGTTGAAGACCTGAACTGTGAAGGTTGTGT  
ATTGTACTTCTCATGGGGCTTTGGGACTTATTTTTCCGGAGATGAATCTATAGCAGTAGT  
GAACGCTGAGAAGACCTATCATAAACTCGGTGATTATCTGCTGATCCTAGGACAGCCAAA  
GGGTCTGTATGAGACCATCTAGAAAAAATACCCGGTCTGTTTGACCTGTACAAGGCTCA  
AAAGGAAAAGGATTGGTCTGAATACGAAGTTGAGCTAAATGAGTCAATAACTGACTTTGG  
AACCTGTAGCAAGTTCACGTCTAATGTCATGGTGCAGACGCTGATGTGGCAGTGCGAGGA  
AGATACTGTTGCAGCACAGGCGATTATCTCTCTGTCTTTACCTTTCATCACAAACAGTGA  
ACTTTTCGGCATGATGCAGAACCAATCTTAGATGGGAGATCTCCACGCGCCCACTTATTC  
AGATATCATCCGTCAGTGTGGCCAACCTCTCAGCTAATTATTCATGATATTCAAACAA  
TCAGGGAGTTCTCGAACCTTCTGGTGTGAGTGTCAAGTACATGCGTTAACTTGAAGTTCT  
TGGAGCACTCTATCGTCTCGACCCTGAATCAGTAGACAAAGACCTGGTTCGACGCTGTGT  
CCTACTTACATTGGTCGCGAGGATCTATCTGGAAGGGATTGACTTTATCTCCAGCTTCGC  
GTGTACCATTGCCATGGCGGAATACGGAGTGTGGTTCGGTTCGGTCAGCTTGCCGGGAA  
AATCATGCTGGATGGAATGCTGCGAACCAAGATGGATTTTGACGTTAGTGATATCTTTCT  
GACAGACCCGGTGTGGAAGGATAGGTTAATGCCAGGAAGTACGAGGTCAAGGAAATCCT  
TGACAAAGTGCGAACAAAAGAGCATGGTAGGGGTGATTACCTGTTTCAGGGATGCTTGTGC  
AATCATCCGAATGAATGCGCCGCTCCTGAAAAATAGGAGTAACTGGAAGTGCCTGCGAT  
TTATGGCTACTAGGGTTTTCCCTAACGACTTCAAAGCTACCAAGCGCGATGCTCTGACGTT  
TACGGATATCAGGATGAATCCACGCCGAAAACAGAACGCAAACCACGGGCAGACAAACAC  
GGATAGTCGTTTTAAATGCGTCAGTCACCGATATATACGGTTAAGTCTCGGACTTTTTCAGC  
AGTAACATTGGACAATTCGATTTTTGGTATCAGGGTTGCTTCACAACCCACCAAATTC  
TGTCACTTTCGATGGTGGGCGTGATATGGGCGTGGATTGTGCTGTCAAGGGTTGGTGCTC  
GCGCCGTCTGACTGGTCTGGACTGTGACAAGGACTTTTTTCAAGGTCAAAGCCTTTGGGT  
TGTCCCCTGAAAATGTTTCTGGGTGAGGAAGTGCCTTAGTAAATTGAGTACACCGGAAG  
TGGACCATTCTAGCACAGTTGTACCTTTGTGGCTGATATCGTTGTGAAGGGTTATGACGT  
TGCTTATACTTGCAAGATCCCATTTTTTCTGTTTACCTTCGAAACGGAGAAAGAATGAGC  
ATCTGAGACAACGTTTTTATTATGCAAGGCAGGGACCATTGCCAACACTGGGTCCGGGCA  
AGAGAGTCCGCTAGATCCATAGGTCTGGTGATTATGTATCTGACCTTCGAAATAAACTAC  
GCTCAAGACGCACCGGTGCGAAAATCCTCTCCAATACTCCCGACAACCGTACCCCGTATG  
TCTATGGATGATGAAACGAGCACCCGGCACATCGCAACAGCCGAAGAGTTCATTGCATAC  
GTCAATGCAAACATCTGAGGGGGTAGATGAGTGAAAGTAGTAAAACGCTATGGGCGTGTT  
GATGACTTGTCTCTGAAAAAAGTAAAACGAGCGGTTGAGGCCGCACGGTTAGCTACAGGC  
ATGGACCACAAGCCGCCCATCATCCTGCGGTACATATCGGTCAGCGGACTTTCAAGTTA  
TTCGTGACGACACCTGTCCGAGATGTGCAAGATATCTATCGGGAAGTGGAAAATCTGTTG  
ATGGAAGAAAGTCCACTCCGTAACGCTGCTAGCGGCCATCTTGAGTATCGCCATAATCGT  
TACAACGCGCGTTAAGGAAATGGAAAACCTTTATGCAGATAGCACCGGCTTCCCGGACCAT  
TCCGCAGAAGAGTTCACCCATGAGAATGCAACCAAACCAAGCACGCTCGTAAACACGCAC  
GGGTTCTATTAGCGGTGATTATGAGTACACATGTGGCAATGTCTCAGTTATTGCCTAAA  
ATCCTCTAGGAAGGGCATAACAGGGCGTTTTGGACATATTCACGCCCTTGATTACCTTTTA  
CGACGGCTGACGAACTGTTGCGTGGTAAACTACCGGGACATGCTTGAACATGGTATCAAT  
ATCGGCAATGTTAAGGTTGAGAAGCCGAAACCAATTGATGTGGCACACACTGCATAGACA  
CAAATCAACCAGGTTGTAGCGTCAAGCCGGTATAATCGACAGACCTGCGGTCACTTCGGC  
GAAGGTCTGTAGCAATACTTTGAAATGAGCTTCATGAAGAATGTGAATCAGTTCCAGAGC  
CACTGAAACGCCGACGGTCGGACCAACAACTGGTTCTTGATGCAAACCACATAATACTT  
CATCTGGTCAATACCCTGATGAGCGTAAATGCACAGGCACGTTTCTCACGATCAGCCGT  
TGTTTGGTTAAATCAATGTTCTGTAGGATGCTCTATTGTAATTATCTAACCGTCCACAAA  
GAGGGCCTCGGCGCTGATAAGGTGACCCCTGTGTTCCCGAAAGCTGTTATCTTCTAAAG  
GAAGGTGTAAACGTAATCCAGGCGATGCGAATTATGGTCTGTAGTTGCGTGCTATGGAG  
TGTTATGCTGAGAGAATTAACCTCCGACTTCATCTCAGTTCGGTTAAACATGCAAGTGACA

GGATATCCCACCGGCAGGGTGACGAGCATGGGTTGTCGAAGCTTTTTATCTCACTATGCA  
ACCGAAAAAAGAGAAAAAGTACGATGAACGATGCAATCTTGGCGTGGTATCCTTAAACTTA  
CCCATGATTACCGCCGAAGCAAAAAGCCGGCAAAGTTTTCTTCACACAACCTCATTGATAAG  
TATATAGAAATGCCTTATGAGACACAAAAGCTTCGTCTTGGTCGTCTGATCGAGGTTACG  
GCAACCAAGAACCCGACATTGTTGATGGAAGGTACTCTGGCAAGGCTCGGGCCTGATGAG  
AAGTTGAGGAAACTCTTCTATGGAGGCCACGCCTCCATGAGTATCCGGTTTGTCCGGCCTT  
TATGGGGCTGTCGCAATCCGTTCTGATGACCCCGTACGCAAGGCGATGGCGATGGATATC  
CTGAAGTACACGAAGCAAATCTGCGCAGCGTTCGAGGATCGCAGTGAGTTAGGTTTCTGC  
CGGTATGGAACACCTGCGGCAAGCCAGTGTGATCGATTTGCAAGCAGGTTACGGGAGAAA  
CATCCTGGTTTGATTGAAAGGGATTACCTAACAAACTATTCCCACCAACCTGTGTTGCTC  
GCCTGCGACCCGTTCAGTCTGTAGGATTACGGATAAGGTTTCGCAGAGAGCAGTACCGGC  
GGTATTTTCGGATACGTGGAAACCCCGAACCGGAAGCATATTATGCAGGCTCTTGAAGCG  
CTTATTCTCTATGGCTGCGAGAACATTAATTTTTTCGGTATCATTACAGCCAGTGGCTAAA  
TGCTGTAAATGCGGAATCTGCGGTGAGATGAAGACGACTGCAAAGGATTCCAATGTCTT  
TCTTGCTGGGACCATAAAGTAGGATCGATTTCTGTGATTCCCTCATGTATCCGGATATCGG  
TCAGCACCAAACCTCACGACCCTCCAACCTATGGTACGATGGAAGAGGTGCTGCAAGGGCTG  
AAACATGTATGCATTGCTGGGTTTATGAACTAACGGACCACGTGAGCGAAGAAGGGATCA  
GGTGCTCCCTTTGGGTGAGCGGTTACAGTCACGGATGTCCGGGGCTGCTTTAGCCGAAAAG  
CGTGATCGTAGATCTAAGTTCAGCTTTCACCAATTCGCAAGTTCACACGCTCATCAAAT  
TTATGGGAAGGCCTTTTATCAAGGGCTTGTCTTTACTCGGAGGTGAACCACTTGACCCGC  
GCAATGTTGAAGAGGTTCGTCAAAGTTATTCTGCGTGTCCGTGTAGTATTCGGAGATAGCT  
GGGATATCATGGTGTGGCCTGGATACACCTTAGTAGAAGTCCCAGAAATGGTTACAGTAC  
TTGTAGATATTAGGATGGACGGCAAGTCCGATGAGTGCAATGCTCAAACCAAAGGTTCA  
GAGGTTCTTACAACCAGAGGATGTCGGTAAGAATAAACGGTGGATGGATAGACGAGAAGT  
AGTTCAGTAACAAAACACTGCTTAAGGCATAACAGAGAGAACAGTCTCTGGAACCTCAGTG  
GCATAGAGCATTAGAACAAGCGTCCCACAGAGGTGCAACGGATGGAACCTGGTATCTGACG  
TTGCTGCCTGTGGCAACGACAGAGGTAATTCATGACTGAAATTAACGAAGAACAGAG  
CTTGGTGCCCACTCGCTGCTGGAAACGCTGCTGATCGGCGATTCCGTGGAACCTGGCCCG  
TGAGTTTGTGGGCCTTGATTTCCCTAAGACTGATCAATCAGTTTACGGAAACAACTGATTA  
TCAAATTGAAGCTCTCAAGCAAATGACCGCTGACGCAAGTAAAGGCCACGATGATGCGAT  
GGAAAAAAGCTTATTGCTGCTTAGGTTAATCTGAAGAAACCGCTGACTGAAGAGTTTAT  
GCAGTAGCTGATGGATACGATGGTTGACCCTCTGAAAGGAGCGCTGACACAGTACGAGCT  
TGATTACGCGATTTATTATAAACGTATCACCATCCAGATTTCCGGGGCTTGCGGCCCCGGT  
TGAAACGGCTTTTCCCGAGGCGCTCGGAGAGGGCGAAGCCAAAAGGTAGTCGTGAATAAA  
TGCTGCGAGCCCGGGGATTCATCCTGAGCTGATCGAAGGTGGGAACAGCGTCCGCAAGTC  
TGATGGCGATGTAATGTGCGAACCCGCTAGAAGATCCGCACCCGCAAAGTGCATTGCACA  
GGCTACGACTGGAAACTATTGCGGAGGTAATAGAACTCACCCGAGCACAACTGGACAA  
AATCTTCCCCCTCGGTGCAAGTTCTTGGAAAGAATGCGAAATTCGGACGCCGCTCAAGGA  
CCTGTCTGAAAAGACAGAGATTATTGCTGTGAATCGGATTGCGGGGTGCCGGTCTCACCT  
TGATGTGGGGTCCGGCGGAGTACCGGTATGTACGTCAACTCGTTAACGGTGGCTACTTTGA  
CAAGTACGACACTGGTCTTATTCTAGAAAGTTTTGGAAACACACCCCAAGTACGATGAGGA  
TGGTGCCAACGGCAAGGAGACGGCGCTGATCCAGCTGACCTGACTCACAACTGAAAGGC  
TCGCCGTAAAGAACTCGGTCTTGGCCTCGGTTACCACCCTGAGTTGAATGAACAGCCTGA  
GTATGCTGTTGCCAGCCCTGGCTCGTATTGGGACAAGAGACACATCAACCCGGCTTGCAT  
TGCTGATGATATCGTGAAAATTACCAAGGAGGTAAACAGTGGTACAAATTAACCTACCGA  
GCGCACAGCCAATAGCAAAAAGGCTTAATATGTTCTAACCACGTAAGGAGAACCAATATC  
GGAAGAAGCTCAGAGGCAAGTGCAGTAAACTTTCCGGCTCGCCAGCAACAACGTCCAGAA  
AGACAATTAAGGACCACCCGCAATTCGACGAAGAACGTAACCGCGCCCAAGCTCCTGTT  
TGTCTGAATGTAAAGCAGCAGGATTACCTTCACATGTTGCAGACTTGCAAGATCATAATT  
GCGAAAGGTATCTTCGGTTCAGGCAAACCTACCACGCATCAGCCGACGCTTCCGAGTTG  
CTACGTAGAAACGCACTCCACAACATCATTTTTCGCTCGGCCATGCGTGCAGACGGGTATA  
ACCTCCGGCTTCAAACGTGTACTTCACTGGTAACGCTGTTACCCTGTGTTTCGTACCATG  
TTGAGAACCATCCGCAAGCGCATGCCCGACGGCGCATACTACAATGCTCTGACATGAGGT  
TTAAATGGGCGTATCGCAGTTCAGGAAATGGAAAGCACTCGTGGTTCGACTATTCGACTAA  
AACAGCTCCCTACTGATCGCCGAAGCCCGGCAGAGTATCCAGACCGGAATGCAGAGTATC  
AGTACTCGTATTTCCGATAACTGTACACTCGTTGTTATGGGTGATGCCAGTCAGAACGAC  
ATTTAAGGTGAGTCTGGCCTGGAGTGGCTCATTGAGTTTTGCCAGCGACACAACTTGCA

GGTGTGGGTACTGTGTCCTTTCATGACCCGAATGACGATATCGTTCGTCCTGGCATAATT  
CGCGACATCGCTATTGGCATGATGGATAACCTGGACGCAAACCTATAACAAGCCGATGGCG  
TCTTAACAGGAGAAATACGGGAGATTATGCAGGGGTAGGATCACGTGAAACACCGCCAGA  
GGTTATCAGCGTCATGTAACACGCTGCTTCCCGACTAGCCCGGCTCGAATTCCTCTTCG  
GGGTGGGAACGCAGGAGGAGTGGATGCTTCATTTAGAGAGGGATGTAGAAATATCACGA  
AACTATTAACAATGGAAAGAAGACAGAGTATCGCACACGCTTGGCAAAGATTTACATCCC  
TGGTGCCGGCTTTGCTGGAGAGAATTAAGACCTTTGGGACTTCTGTGGCTATCCCTTGAG  
TTAACATGATCATCTCATGCCTGAACAAAAGCATAAAAAGGGATAATTCGGTTGAGGAAAG  
CCTTTCGAATTATGAGGCTCTGAAAACGAATAGAAGCGCTTTTGCCTCCATTCCCGTAC  
TGTGCAATAACTTCTGGGGGTAAATGTCCTCGATCCAAAGCCACTGCCATCTGCCTTTT  
CTATGATTCAGAAGATAAGCATCGCAACCCAAATGGGGGAACTGCAACGGCTGTCAATCC  
CGCCAAAAGTATGCCATGAAGACGCTTAACCTAAACACTCCGGAGCGCTTGGCCTTGCT  
TGAGACGTTTCTGACCAGTCTTGAGAGCAAGCGAGGTATGCAGGTTTAGAGAGAAGCGAA  
ATAAGTCCTACTGCCTTGTGAAGGTAGAAACAAGGGTTGGGTTCTAACCAAAAAGACGG  
GATAACGGGTTTAAGTTACCGATGCAGGTGGGGAGGCTCGTTATGTTAGCACCCTGAGG  
ACACGAAATCGTTCAATCATCTGACTGAACCTCTAGGGTACGAGTCCAAGAAGACTCATG  
TGGTCGGAGATACAGCCAGCTGGACAATTTCCGGGATGTTTCTCATTGTGGATGAAGGGT  
ACCGTGGAGCGAACGGTGAAGTTAAGTACCTGTTAGCTCGATAGGAGAAGTATGACACCT  
AGTATTCATTGGGTTGTTTCCCATCGAAAACCTTATCGATCTGAAGAAGAGTGCTGTTGTC  
GAGCCTGGATTTTTTCGAGGAGGAAGTAACGAAGCTTTTACCTTTTACCGTAAGGTAATA  
GCACAGAGTTTGTATGGTCTGAATGATGGATATCGTACACGTATTATTTACTGCCAAGAG  
GGGGCTGACAGTGTTGCTCACTGGATGTTTCCGGCCACACGTGAGCTACTTAATCCTCTG  
ATTTATCTGGATCATCAGGGGCGTATCTCGAGTTACGTGAATATCAGTCCGAAGGAATTG  
AATCAGTTCCCAATGCTGCTCACATCAGCGTTAGTCTCCGAGAGGGCAAGAAAATTTCTC  
GGGACATTCAAGTACAGCAAACAAGTGCTGGTTCGATGACGAGACAGGGTGCTACATTCAC  
TGGCGGATCAAGAATGCTTACAGTCTGAAAGGCTACATTTCAAACGCTCTCCAGCAGGAG  
TAATAAGGAACAGTACGAAACCTTTTTTCGGTATGCTGCCGGGGATGAGTGGGAACATTTA  
TACCCACCCGGACCAGTCTCATGATCAAGTCCCCTACATTGATGATCTGTATGGCTGGA  
AGACCATCAGGATCGTCTGCAAGTTATCCGCCCGTAGGCCGTTATGAGACGACCCGGGT  
GGTGATGGGCCGTTTCTGGTGGGCAAGTGTCTATTACTTTGCCGTATGTCAGTGCGATCCG  
TGAGAGTCAGGCACCGAGCGGCACCCCTGCCGAAGCCAACGTTTGTCTTCCGGGACAGT  
TTTGTGGTTGGCCTTTAAGGACCGCACAGTGGCAGGACTGACAGAGTTCCTGTGCCATAA  
TTAGCAAGGCGGGACTTTTCGGTGTGTTGCAAACATGTACGCTGAGAGAGCATAGGAGAT  
GCATTATTTTGAACGTATGATTGACGCCTTCTACACCCGGGCTTCCGGACCGATAGTGAGAG  
TGCAACTATCTAAGGTGGTGGCCAGGTGTGGATGGATGAGATCGGGATCGTTAAGCGTGC  
CACTTCGGTGTGTTGGATGAGAAAAGAGTCAAAGGGATGCATCAAGGACAGAACCAAAT  
CAGTTTTGGCTAGAAGAAGCCTTTACAGGAGAAAAAGGTTCGTTTAGACTGTAGACCTGAA  
CAACCTGCCAGAAGGTGTGCGTGAGAGCGTGTGTCTGAAGCGTGGTGTGACGGGGAAAT  
GTTCAAGTTCATCTTTCCACGCTGAGTTCAAAGGATCTCGAGGTCTTCAATGAGGAAGA  
ACTGCAATCCATCGTGTCTCAGATCGGTGCGCTTGCAGCAGGCTCTGAAGAACTTCTGAA  
GGTTACCACTCCTAATAGCCAGGAAGTGAATGGTGAATCCTCAAAAACACTACGAGGAGAT  
CGTTGCAAGTACTCTGGAGCAATTGGGGAGCTAATGTCTGCAACTTTAAAAAAGAAGGTA  
GACTGCAGTGCGTACGATGTCCACGAAACCCCGACTTGGACTCTTGAGGCCATTTTTAAG  
GTTTACCCGAATGATTCCACCAACTCTTACTTGGATCGTTAAAGATGCTCCGGTTAGTAC  
TACAACCTACTGCCTATGGGAAGCGCGGAGGGTAAAATCCGTCAGGGCGTAGGTGCTCTT  
AACACGGGTTCCCTACCACGTAAATATGGTTGCGCCCAACCCACCATGCTCTTTGGCGCAC  
AAATTCGTCACACAGGCGTCTGGTGAAGCGGATGTTGTGCTCATCTTGTGAGACCAGCA  
TCCCTTGAAGGCATGAAGCGTTGTGAGTGGTGGCAGTAGAACCCAATCAGTTCTCTTTTG  
GTAATTTCTCAAAGGCCATCCTTTTCCGACCATGGAAATACCGATGGCAGAAGTTATGCC  
TGGTTTGTGTTGCGGCAAGAAAAACAGGTTCCGACTGTAGCCATTTAATTTCTGGTGGGA  
CACAGTTACTAATGGCGCACACAAGATGCGAGAGATCGCAAACAACGGAGAAAAGGAAAC  
ACTGGAGTCATTCAAGGAACTGTACGATCAGATAGTGGACGGGCTAGCGCAGTGTGCGAG  
GAACGGGAGGTACGGGATGGGACTTTCTCTCTGTTCCCGGAGGAGATGAATGATTATCT  
GCGCCATATTGTTAGCGATCTTCGTGTTGACGGTTTACAGTCCGGTGGCATCAGCTACCC  
ACCAACAACCCGATGCACTGCAATAGCTTTTGTGCGTAACATTGTAAACCTACCGGGTTCG  
GCGGGTTTGGTCCGTTTGTACTTTGCATTCACAAAACACACACTTAAGCTGTTTCCAA  
CAGATTAGAACAACATGCGATTTTTTCAATTTACTACCGTCTTTTAGAGACCATGGGCTTCG

GAAAATACATGGGCGACCTAATCCATATCTCGACAGCGGAGTAGGATTATTGCCGTGACG  
GGAAGAATTTGAGAGTTAAATGTGGTAATCGCCCTGCCAGTGTGTATACTCGATTATTCA  
AGATGTTGAAATACGGCGCGATCGAGGACGACATGGTTTAACCACTCGACGGAAATAGAT  
TACTAAAAGACCTGTTCAAAAACATGAACCAATGGGAGAACAAACGAATGAAACAAAGTCT  
TACCAAAAAACAGGACATGATCCTGACCGGGTCCACAGGAATCCTTTGATAGTCGTTCAA  
CCTGATTGACGAAGATGGCGAAAAGCGACTGGGCCAATCCTTATGAACGCACGAGTTCGG  
AAGGAAAGAGTTCTCCGCTGAACTGAAGGAATACTAACGTGAAGACTTCATGGCGTGGTT  
TTAATAAGGGGAATGATGTTGAACGAACCTCAATGCCCGTGAAAACTTTTGGCGATAGCA  
GATTGGCTTTGTTGGCAAACCGAAGACCTTTCATGTGGCTTGAAATCCCCAGAGGACGCT  
GTTTCATCTGTACAACACTACGGGCAGTAACATGCACACAGTCTCACGGAATTTGCAGACGAC  
GAGCAGGACGGTGAGGGACGCGGGTTGTTTATGTTCCGTAAAGCCAGTACTGGGTTATGAC  
CCGATGGGCGACAACGCTACTATTGTGGCTACCCTTGCGGAAGAGAAGTACGACGCTGAA  
AATAAAGACATCGACCTCGTCTTTTACTACATCCGACAACCAGTGAGTAAAATGTACATC  
GCCGATGCATAATGAAAGTTAAAAAGGCTGTGCGGCCTCCTCTAAACTGAAACAATACAA  
GCGAAAATAATTGATTAATCAAACACACACCGTAGTAAAAGATCTGTGTAATGAGAACAT  
GGGGACACCGACCACAGTAGGTCTGGTGGTAACCAATATTGTAGAAGTTCATGCTCATA  
TGCTGTAGATGTGTTCCGCCATGAAGGCCAGTTTTGTTAAAGCTCTACAGTCCGTACCGA  
TGTATTTTTTACCAGAGGTGAAAATACAGACACAGTGAGGGGGTGGTGGTTCGAACCCT  
AGACCGAAGTTTTCGTTTTCCGTGTCCACGGTATTTGGTAGGAAGGCAACTATGCGTACAC  
CGCAGAAGAAGTGGCGATCATCCAATGAATCTGTATGCAAAGTTGACGGACGCCCAGAAC  
GGTTGGAATGACGACATGGCAAAGGCCCGCGAATCTTTAAAAACTCACGATCAGGAAGAA  
ATTCTACTGGTTTCCTAAGATGATATTGACAGGTTCGCGCACCGAAGTGGTATCGTCATAT  
GAACGGCAGGGTGGTACAGTGTGCAATTTAACTTCTTCATTGTGGGTGAGACTGGTCTT  
GACGAGTATGTCATCTACCCCAACAATAAATCATTAAAGAGACAATTATAAAAAATATATT  
GACGAAGCATTCTAAGGAGAGATGATGAAGGTATACATGTTAGGTGGCACAGTACGTGAC  
GGTTTGCAGGGCCGTGAAGTCCACGACCGTGACTACTTGGTTGTGGGTGCAACACAAGAC  
CAAGTGATTGAGGAAGGGTTCATGCAGTTGGGCGCCTCCTTCCCTGGGACCCCTCCATCCG  
GAGACTCAGGAAGAATACGCGCTCGCTCTCACTGAACGTGAGGTTGGTAGCTGTCACAAG  
AGGTTTCTGACCTTTTTCAACCCAGATCCAAGACTGGCAAACACCTGCCTCGTCGGGAT  
CTAACTATTAATGCGATGGCTCAGGATCTGTAAACTGGAAAAATCATTGACCCGTCCGGT  
GATCATAATGATATTGTAAGGAAGGTCCAGCGAGACCCGAAGTTGACATTTCTAGTTGAT  
CCTCTGCGTATTCTGAGAGCTTACAGATCAAAGCGCATTGTTGGGTAATGAATCGGATCTC  
CATCCTGAGACAAAATCTCTTTGTTAACAGAAGTGTACGAACTTGAAATTACCAGTCGC  
GCGCGTAAATGCAAAGAGATAAAAAAGGCTCTTGGGACTTATGGCTTTCGTACCTTAGCT  
GAAGCAATGACAGAAGTACGCGAGTTACCAGAAGTGAATCGCTGCGCGATGTAGAGCAA  
CCTCAGGAATTCATCCCGAAGGTCACGCATTCATGCATACATCGCTGTGCATGGATATC  
GCAGACGAGCACGAATCAAACCCATACAGGAAGTTCGCAGTCTGTGTACGACCTTGGC  
AAGGCCGTGGCGTTCTCCAAGAATGGCAACCTACTCGGCCATGAAAAGCCAGGGCGTGCT  
CCGGTTGATGAACTGTCTGAACGTATCCGTGTGCCAAACGATTTCTTGTGCTTGTCTCGA  
TACGTGACTGAGCAACATACGGGTGTTTCATGGCAGCACCCCTCGTAGAGTAATCGAGGGT  
GCAAACCCGCGATCACTTGAGAAGCTTTTCGAAGCTGCTGGTAACGTCAAGAGTACCAAG  
ACAGCTATGAAAGCGTGCGCGCTGGCTGACGCATCTTTCTGTGATGCAAAGGCCGTGGC  
CCGACAAAGGCAGCGGAACCTTACCCCAAGGGCTACGTTCTGATGGATGCTTTCCGGCGC  
ATTATCGCTGTGGTTACCAAAGTAATCTCCGCTGATGGTTTCAGCAAGGGCAAACAGGG  
ATTGAGATCGAGGAAATGATCAGGGTGGCACGTATCGACGCAACCCGACGCGTCACACAG  
GGTCAAATTGCCTGGTAAGGAGTGCTGTCTGAAGACTTCGGATAAGGAAGAGTAGACATA  
CGAGAAACATCCCTTTTACGCTGACAAACACGCAGGGCAGCTGGTTTTGTGCATGGAGCAG  
CCCCGGAGCTATAAGGAATAAGGGTTCGCGACTGGTGCGGGGATCAGGGGTGCAATTACGC  
ATTCCATCCATCGTACAGAAGCGTCAGGTTTAAATTTACACAAAATTTTCGAGTAGGGGAA  
AAGTAATGCCTATTGAGCCTGTATTTTATTTGTGCAATGGTAAACTGGCTATGTTGAAGA  
TTCTGTCGTTGAATTAGTTTTGTATGGATGAGATAAGTTCTTCATCCGTCAACATAGGGC  
TACTGGTGAGAGTCTTTTGGTATCTCGGACCTTTCTCTTTGCTGGGTGTCACCGTTGCCA  
CCATTTTTAAAGAAAATTTTGTATTGCAAGGAGAAAGCAATCAAGACAGGTATATCCAG  
CGTGGCAAATGAATACATTACTGGCACTCACGCAGGTACCCAGTCCCCGGACGCGATGTC  
TGAGATGTTCTTGAATGACTCTCACAGCCGGAACACTGCTGGAGATCTCATGAGGGCTTG  
GGCTGACCGCGATAACACCCTGCTCGTCTCTATGGTGGAAACCAGTCCACATTGCACGA  
ACTGTGTGAGAAGTTCAAGCCTCTGAGCAGCACTTATCCGTGGGCCTCTTTCTGTGAAGA

GCAGGATGCACGGAACGGGCGCTGTGACAGCATTAGCTGAAGTATTGCCACAGTATATGTA  
TGGGCCGCAGGCTTAGGATGTGGTCAATCTGTACCAACTCGGTAAGTACATCGCCCCAGA  
GAAAATCAACCAGTACTGTGATAAAATGGGCAATGTGATGCATAACTACACGGAATCGGA  
AACAGACCTGATGACACTGATCAAATCTTACCGACAGAAAGGGTTATAAGATGTAAGAAG  
GTGAAGTTTACTGCATACTGTTTATTGATATCATCTTTGCAACTACGCTGATCGCTACTT  
CCGAGATCCGAACGATCGGGTCAGATAACACGAAGGATCCGAATTTCTTTGACCTTCCCC  
TGCGGGATGTGGTAAAGGGTGTGATAACAACACTGTTAAAGGCCCCCGAATAATGATCTA  
CACACTTTATACTCTATTCACCCTGCTTGGTGTGATATTACTGACCCGTCCCTGCATGAT  
CGTGGAAGATTTCAAGTTGACTGCACGAAGTTGCTCGATGTTGACTGCCGTGCCGTTAA  
CGAGGGTTTGATCATGGTAATACACCTGATCCCACCTTCTGCTGGGCTTTTTGCAGGACT  
GGTGTTTAGGATTGGGAGTTGGAAACATAATTGCGTCTGCCCGCGCAATCTTGCGGGAGAA  
AGTAATCAAGAACGAAAAGATTCTGGTAGCCATCGGCCCTAATGGTTTTTTGTTTGTGCA  
AGTAGCATTACAGCTGCTTGAGCTAAAGTGGATAAATGAAAGACGTTGGTGGGTAGGATCT  
GATGATTGGTGTGAGGGGTACACCTACTGGGGAGGCAATCAATTGCGCGCTGGAAAGGT  
AAAACAAATCAAGGTGAATGAGGCGAAAATCCTTGTTGATTCTTGGCCTAATCACCCCGA  
TCCAGCACACCGTTATTCCATGGCGAATATCAAGTCGCGGGAGTGCATGATCAAGGCAGA  
AGAGCCAACAGGCTGGGATCCAAACGTGGACGTTTTATTGATGTAGGAGATCATTACAGCT  
GAGAGACGAGGTGAAATTCTTGCGGCGAAGATTGAGTACTAAGAGCTCTTGATATTCTG  
GGATAAAAAGCGCAAATCCGATCTTGTTTTCTCTTAAGGAGAGTTTAGGAAACTGGAGAC  
TTGTTGGGTTACTACTTTGGTAGCATCGCTTAAAGGATTACCCTCCGAACATTGCATGCC  
GAAATCCAAGGGCTTTTTCTGTGCAGAAATGATGTTCTTCCGCACACCAGACTGCACTATC  
AAGGAGTAAACACTTCTGACGAAGAAGGTGGGAATATTTACGAACTGACAAACGTCATG  
AAGCTCTTCATGTACATGCACCCGAACATCATCGCGCTAATGTTTCGTAGATGAGGATCAT  
ATTCTCCCAAATCTGATGCGTATAACTATCTACGTCAAACCGCACCCAGAAGGGCTATCG  
AGCAACGTGGCCTTTAGCCTCTCAGGCTACGCAATTCCACAGGTTATTCGTATGCGTCGT  
CACTATAAGTGGTTCAGCACGCCACAACCTTAAAGCAAAGCCAACCCAGAAGGAGTTCTTC  
CGCTGGGTGTCTAACCACAGCGAGCACCCGTTTCTGAAACGAGAGGATTTTATGCAGGCA  
CTGGACGGACTGACCAGCTTCTGCATACTGGTACCTTACGGTAACAACGTTAACGGTGTG  
GTGGAGAACTTTAATAGTTCTGGCCTATTCAATACTCACGGATCGATTTCGAAATGTGAT  
TAACATCAAGTTACCATTGCGGATAACAAGCGTAAGCCTTTGTGGATCGTAAAGTCTCTG  
GAAGAAGAGCTCAAACCTGGCGAAACAGAAGCACCCGGAACACTGGAAGTGAAGAAAAGT  
CGAAATGAGGCTCGTCATGAAGTACTAGGACTCCAACCTCGGATCCGATACCAAATATGCGATG  
CACCACGTGCGCCTGATGCGTAAGGCGGAACAGATCTTACTGACGGTATAGGCCTTGTT  
AAGAGGCCTGACGGCAAGGAACTGCTTGTTATCGGTGATGGCAAGTCGACCCTTGAACAG  
CATCTTGCACGGGCTGCCGAGAAAGGCCGTTATCTCAGAGGAGACCTGTACGAAAAGACA  
GCTCTCCAGACACAACCGCCCTTCAAGTCGCCGCTCGTGTACTTATGACCTCGCAACAT  
AGCTGCTGGGCCAAGATCGATGCTTGAAGCAGTAATCGTTATACTTAGGGTTCGCATATGA  
TGTTATTGCTGTGGTATGCACCATAGAGATGGAGAACGCTATAATTGTGCGGCAGATTCA  
CAATGCCAAGACAGAAGTATTGGTCCGAGGTTTGCTTCGCGTACGAGTTCGCCTGGCG  
GCTTGGGGCACTGGCCCAATATTTGATGAGGAGAAGAAATGAGACATCATGGATTGATGC  
GATGAATGATCGAGTTGGTTGCGGGATGGCAAAAATGAATACAAAATAAACCGTAACTTCT  
CTTATGAACCAGGAACTCGCCCGATATTCGACACCAGCAGGACGGCCTTGGTGTGATGTT  
GTGGGGGGTTACAATGTAAGGTTTACGCATAATGAGTTGTGGTGTGTAGACGCCAGATCA  
TGCGTAGATCTTACGTATGCGTAGCCTGTTGCAAGAGGCAACAGGCAACGCGCTCAAGGA  
TATTTACAGAAATGTTGGAGTTGGTTGGATGCACGATGCATGCCCGAATTGGGGTGGGAC  
ACGTATTCGTGATGATCGCCTGGGTATGTCTGTTACGGCTTCTCCTCCGCTCCCCGAA  
CCGTTCTTTCACAAGTTGATAGGCGGTAATTGCAATCCGTCAGGATTTTGAAACTGTGTG  
TGATTGTTCCCTTCCCCCTATATAATGTTAGCCAGGACAATGATAAAATGCCGGTTAATAT  
TATGATAGTTGGTAGTATGTCCCCTAAATTGGTTCGTGAACACCCTACCCAACGAGAACA  
CTGGCAACCTCTGCTGGAAAAGAGTTTTATGCAACAGGGCTGTTAAAAATAGCAGCCATT  
ACACCATTGCGGAAGGGCGATTGGAGGTATCTCGTGGTGTGACAAGCAAGACCCTATGC  
CATAACGTTCTATGTTGGAGATATGGGGAAGCTCCATCCTCTTGGCTTGGAACGGTCTT  
TGAACCAGTGCGAGGGTTTTGAGACGGCGATCTGGGACTTATATAGAAGAAGCGTGCTCA  
TCACCAATGTGCACAAGCAGTCTCTGGGATGAGGATACAGTATAAGAGAGAAGTTCTAGA  
ACCCCCAAACAAGGTATTCGTTGCCATTTTCATGATCTACGCAATAATTAGCGTGGTTG  
TGTGTTCTTATCCATTCCTTTGAGGAGATTGAATGAGGTACAGAGGAGATTGTAACAAAC  
AGTAGGACTCCCGGAGGCGTGAGACAGGCCGACAGCGTCGGTCAAACCCAGAAGGTAAAG

CAAGACAACACTGCAATTCAGACTTGACAGAATTGAGGGCGGAGAAACGTGCAACAATCACAA  
GTGAGTGGGACATGTGGGACGGTTAAGAGGTCAACCTTCTTTGCAGAGAGAGGATGCGTG  
ACAGAGGCAATCCTTGGGGGTCTGACCACATGCAATCCCTCCGTGCAAAGATAGTATCTT  
GCCTAATGTGTTGTGATAATATCCAAATTATCCCCGTAAATTTGAACCGTAGTAAGAATA  
ACAACATGAACTACACGAACCGACTGGAGTTGATTAAGGATTTAGACACCCTATGCCGGA  
AGAGTTAATAAAGCTTTTTGTAAAGGATATGACACACATCGTGATGAGTAAACTATAGGG  
AATTTCCAGGGCTGTGGCAAAGTCAAATCCGTGTCAAATGGTCGGTCGTTTTTCGTTGT  
GAAGAGTAAACAGAAAGCGTATTCTGGTAGAGTGATTTATCCAAAGCTTACAATAAAGCA  
TACCGCCGTAAGAGAAGAGCAAATCTTTTTGGTAACAACGAACAAGGATCAGGAAATCTG  
GATTTATACCGATCGTGTGTGCATCGGTGAGGTCGAGGTATAACAACCGAGATATGTTTTT  
GGACTCAACATCTCCAACAGATGAAGAAGAGCACTTGCCAAGTAAGAGCAGGGGTGCGGA  
TCTTGATATCCTTATGAAACAATTCCGGAAGAGTACCCGGAAGGATCTTGAAAGGCGGAT  
GTCTGGGATGTTTGTGAGGAGTATGGCTCTAAGATCGAAGAAAGATGGTTTGTGTCAAT  
ACGATAATCCCCCATTGGCGGTTTTTTTTTTATCAGTCTTTGTTCATTCTTCAATGACA  
AGATTGTCAGAAGTCTCAGTAACTGTCAGGTGCTCAATAGTAAAGTCCATTTTTTGTGGC  
ATCCCCCGGTCATGTCCTTCGAATCGAATATGGTCCACCTGGCGAAGTTTTTCGGATTGCA  
CAAATCTTGGATCGTTCAAGAACATAACACTATCTGCCGTTTAGATGGAATGTGTGCGGG  
TTCTTGGGGCTGAATGCGGATAACGGGCAGGTGGTATCCCGGCGCACACATTGGTCTGGC  
TCATTTTCGTTCCCGGCGACCGTCGCTAAGTGCTGTCATCAGCATGGTGTGCGCGTAATGG  
TTTTCTTAAAGAGAACATCTTTGATAATTGTGCGTTAGTCAATGGTTGACGAAATATTTAT  
TTCCGCCATAACGGGGAATAAATTCGGATAGGTGGTTGATTTGTGTGAAAAGTATGGTGA  
TGCAAGGGAAGAAGTGGGACAATGATCTAACGGAAGCAGATCCTTGCAGAAATCCTGAG  
TGATACCGACCTGTGTATCCACATCAGGAATGGTGTGAGAAAGGCTCCAAGGAAAGGGG  
AAACTGCTCGCTTATTATCGACGCATTGATACACACTGAACAGAACATCATGAAAAGAGG  
TCTCCAATGACGTACAGGATCTACAGCACAATGTCTTTGGACCCATGCTCCCGCGGAGGA  
GAGTTGTACTGCCTGTAAAGTAAAGTACCGTCTTACAACCTCGGTAGAAGTAATGCAACAT  
TACAGAAAACTTTGTGATATGCTCAGAGGAGACTTGAATGTTTGGATGCGGGAAACGGC  
GCATGATTTAACTGATCGGAACTTCGACTCCGACGGTCAAGTGGACCGGACACTGGAGAAA  
GAGATCATGGACAATGGTTGTTCTATGAGTCTGGGAGGTCTAGCAGGTACTTCGAAAGTC  
CGGATGTACCGTGGTTACCGAGTAAAGAAAACCAAATTCCCGGGTACGCCGGCTGCAAGG  
CGTTGCCGGTGTGGGTGACTACGCGGTACTTTCACACCAGTGGTGGTCACAGAATGAT  
CTACTGAATCTTAAATATAGTGATCCATGCACGTGAGTTTTGCCTAGTGATGTCCGTCGT  
TTATACTGGGCTGGACATGTAGATTTATCCGGTCATGTACACATGTGCTGGGGGTGCGTT  
GGTTGCATGCTGGTTTATAACTAAGCATATAATGGTAGATGCAAAATTCTCAGAAATGCC  
ATTTTCGTTTTTCAGCCCTCATCTGGCTGGCATAATGGAAAGCATAACGCTACGAGGTGCTT  
CGACGAGAGATCCCCAAGGACTCACTTTATCAGTTGTCCCTTTCCGATGAGCAATACTAA  
CATCGCCAGGAGAAAGAGATGGGCGGCGATACAACCTTTGATTTTCATCATGCGGGAAGTG  
TGGTAGGATAGCGATACAGGGAAGTTGCGCTTCAAGAACAAGGAGTTCAAATAGAGGGG  
CAAGCAGAAAAGGCCACTGTCTATATTTCAAGAATAAAGACTCTTGATTTTATGCTATA  
ATAGAGTCTTACACAACGCGAAGACATTATGTTCCAAATGCTCTTGTGCGGTAAGCCCC  
CATCTCCGTCGGAAGCATCAGAAAGGCAATGGCTGGGCGTGCCTGTTGACTTGCCCTATC  
AGAGAGTGACCAGTGGTACGGTAATTGCGGGACGTACCCAAGTGGCATAGGAGTTGCCAC  
GACGACTTGGCCCTGGATTCTCGATACTGTAGAGGATTTTTGGTCCGGACTCGGGCAATG  
GCTTGCAAACTGGAAGATAGGAGTTGGTTATTTTTGGGGGCGAACTCCGTGGGAGCGGT  
CCCTATTGTACGGGCTGGAAGGCATCCGTAGAGTTTATCCTGAGACGGGACAACAACGAA  
GATCCCCGCACAAAATTGGTAATACGGGCCGTATATGCTGTTGTTGCGATCATTACAGC  
CTCTCACTCTGACACCGACCTTTACCTGAAGTGACAAACCACACTTGTGGGGCCTGATGG  
GGCTCCTGTATTTCCGCCTGAAGAATCCCATGAATTTAGTGTAAGCGGCAGATCAAATT  
CCTCTTGACGTACACTCTCATCCGTAATACGATTACCCAAAGCGTCTCAGATTCAGAAGG  
TCTGCACGAAAACACTACCCAAGGGAGCCTTGACAGCTGAGAATTCTATAGTTCTCATTCCA  
CAGTCTATATGGACGTATGTTGTTCTGCTTGTGAACTGTACCCCCGCTCCTGCGAGAAG  
GGTAGTACATTTCATTAAATACACAATGACCGTAGCTCGGTTGAACGCATTCATTGCTCTA  
CAACACAACATGTTTAGGGAATTGCATTTCTACTACACAGGCAGCCTGAAGTGTGATGC  
TGTAACCTATCGCAGGGCGATTAGCCACAGGCTAACCGATATAACGCAAAACACCTGAA  
AACCCAATCCTCCGCCGCCCGGAGGTAAGAAAAGAGGCCCATTTTTGTATCGCTTGGGG  
ACGAAAAATATCCGTTGGCTCTAAGTTCGAAGTGCTAGACGGACAATCACAGCCACCGAG  
GGTTGTCAAGAATCTTTTACAATATCCGAGTGGTCCGATGTCGATACCTTGCGAGTTT

TTGGCTCGACGAGTGAAGATGATCAGTTGTGTGACTTTCGTTAGCCTAATCAAACCTAGG  
ATGATTGGATTGTTTACGACGTTTACGGCACGATTTCCCTTGACTTGCTTACTTTTGTG  
TGGGTCTGTCTCTTTTACATAATACACGTTATGCGCACCACAGATCGGACTGGCGCATGG  
GTGATAGTTGCACAATGTTACATTTCACTGAGCAATTACTCTGGCGTGAATGGCC  
TGCTATACGTTATCACTGTGAGAGTTTAAACCCGTTGTTATTCATTTTGTGGGGTGT  
CTAGATAATAATTCTTTTCATTAACAATGTAACGTCGATTTTCATTCCAATGTCTAAAAG  
AGAATCATTACGCAAATACAAACGTTTTCTGAATTTTCCAGAAAACACTTGACAGGGAGG  
GAAAATTGTGTATAGCAACACGCCGTTTTGTGCCTTTTGCCACATGATAACCGTTACCG  
TTTTCGCCTGTGATGGGCCAGATTCCCGGCAATGCTAATAACAATGAAATGGTTACTTATT  
GTAAGTGTGTTCTGTATTGCTACAGACGGCATTAAATAGACTTGACGTATCAAGAAAAGC  
TTTACTCATGAGGCATCTTTTATGCTCAGTAACAACCCTTTCAGCAGGCTTGCGGCCTGA  
ATTACAGATCGATTAATCATGGTTTGTGCATCGATTAACGGCGATTTATTGCTAATAAAA  
GATCTTGGCCTTCATCAAATCCGGACACTATAACACAAAGCCCTTACGGGGTGTCTCGC  
GACGGTAAACGATGTCCAGATTGACCAAGGGAGTTATCTGAATCTTCTTTATCTGGACAA  
TATAACACGCTAGCGATCAACTTTAGTTGATCGATGTTATCGTGGCGAGTGTGATAATCT  
CATTGTGTAACCATTCATTATGAATGAATGATAATGCCAAGGATTAGCCGTTGCGTAGTC  
AACTAAGTGATTATATCGTAGCGGCTACGAGCCACCATAACGCGAACAAGATGATAAGT  
ATTATCTTTTACTTACTCTCGTGTATCGTGTGCTCGTTAAGCTCGCGCCACTCCCCA  
CGATCAGGCGGACGATTATTTTATTGGACGAGCTCCTATTCTGATGCTCACGCTAGACCG  
TTCACACGATCGATTAGATGAGAACAGCTATCAAACGTGAGTTATTATCACGATTTTACA  
TGAAACAGTTTCAAATGCGTGTTTTATTGAGTTGATAACAGGCGGTCTCAATATTGACGT  
CCTAGTGGGTCAAATGCGATAAGCAATACCATTTTAAACGCAATTAACGTTTAAACC  
GTGTCTTCTCGTTAGCTATGCCGTTATATTGCTTTCCTGGGATATCTTCAAATCCCTTT  
TTTGCATAAATTGCCAACGGGGTTAGTAAGAATCAGTCTCAGTTGCGATATTGCAACTAAC  
GTAAAAGTGGGTAAACGAACGTTGTTGTGTTTGGGACACTCGTGTGATATGCAAAAACCG  
CGACAATCCCTACCTCAGTTATAACATGATATCCAGTGGTCCGGCAATGATGAACGGTA  
GATCATAACCATCGATCGGTTTAAAACGAGATATGCCACCACCCATAAAAACGCCAATG  
GCAAGGCGTCCATCATGGTGTACCTGTCCGTGCGGTGCGGTGACTTCGTACAAGGCAGG  
CAAAGCAGCCATAAAAAACACTTGACAAAACAGCCATAAATCAAGCCCTGGCTTTGTAAA  
GATGTTGGCATTACGGTAACGGTGCATTGATTGACTGAAAACCGATCCGCCGTCGAAGC  
ATTCCGCCCGCCTCATTGCGGCCACCATTTTCGCACATTTTCGCGAAGTACATATGCACAAT  
GATCGTTGAAGTCAAGCGCTTTTCTAAGCATTTCCTTCTATAGTCGGGCAGAAGATAATGA  
TCAGGTCATCAAGGGTGTCTAGTGATTGCTCCACGCTCTCACCTGCTGACATGCCAGGG  
GGCGATCCGTCTCGCTATAACTTGATGGTCAGAGACATTCAAAAGTGGTTACATTTTCCG  
TCAGTTCACTGCAGGCCGTGACCTAGCTACTAGCCTAGAATTTTTCAGGATCGAATTGAA  
AATCATGTTTCGACCGCATGAATAAAGCAGATAGAAACAGTTGCAGATATTCACGCTTTG  
TAAGGGTTTGTGCTGCGCTATCCAGGCCGCGCCCTTTCATGTCTTCGGGGGTCATTTTCA  
ACTTCATGAGCATTATCCTGGTTGTGTGGGTATGCGACGTAAAGCCCTCACTATTA  
ATCCTCGTCAAATCGGCCAGGTATTCGAACAATTCAAATTCATAGCTACAACATGCTT  
GACAAGCTCACTACTTTTATATTCTGAAGGAAACAGGCAGATCGGCGCGTCACTATACAG  
ACCCGTTATTTTCGATATACTCCCCGACCTTTTGTAGCGGTAAAGGTGTTTTTTCATTTTGGC  
TAAAATAACTTTTTACATGATGTGTGGTTCGCCAAGAATGATCGTTTTCGGGGATACAATCC  
GGTGTAACTATCAGGGCTCTTGCTTGGCGGATCTCAAAGCTTAATTTCCGTTTGC  
GTGGTGTCTATTTCCGCATTTCCGGATCGACGTTGTGATCCTTACAATACCACACCGAT  
TTCCACCTGCAATGAGGTTGCGTAAAAATTGATCGGTCCGGTTGCATTATTAATCATT  
TAAGTTTACCTCTCAGATTACGCCGGGGATGTCACCGGCTATGTTCTGATTAGTATTCGT  
TAGCATAATTTGTTACACGGTCACTAAGGCGCTTTGACCACCAGCACGATCCCAGAATA  
CGTCTTGATCTTGTGCTCTTCAATGTCTAACTGGTTATACACCGCTTGCGCTTGATATT  
CCATAGTCCAAGATAAACAACCATCAACTTCATTAATAACGCTTTGAGCTAAACAAAATT  
GCATACTATCCTTTAACCTTCCGAGCATGTAAGGCCCGCCCTTTCGTCCTGGTCCGGGGC  
ATTATGCAGACCAGATAGCGGGCTTTACATTTTGC  
AAATGGACATTAAGATTTTAAACGA  
TAATCCGCGAACCATCGTTTAAAGATACCGATCAATGCTTGCAGTTTATCATTATTGCTGG  
TAGTGATGAAATTTACCATTGTCGTTTACCTTTCCGGCTTCTGGGAGAACCATTTCCCGG  
CCTCAAAAAGATTTTAAACCGATCCGCGACTGGCCTGCAAGCTTTTTTTTTTATTCTTACTC  
GCCGTAATCATCGCCAACATTGAAAAAGTCCAGCATGTAACCCCCAGCGAGCCGTAGCAT  
GTACATTTCCCGGGTGTGGCGATGCGTATTGTCACTCCCTCTGCCCTTCACGCCCGAT  
CCCTGTTTCGTCCAGGTAATCGCGGATCATTGGTTCGCTGTAATCGCTAATCTGTAAGCC

GTCCCGGATATAAGGCAGGTCCTCCATCGTTGACGCTTCACGTTCCCTCAGGGTTGGCCAT  
CCTTTCTACCTGCTCACGTTCCCAAAGATGAGTCAGTGCCGACCGCATGATGATGACCA  
ATAAACATTTTTGTTTTTCATAATTCTTGCCCTTCTATTATGCCCGGGGGCGATCCCCG  
GCCTTTAATAACTTTATCCACTCCGGTTTTAGAGTGAAACGGAACAACCTCATTAC  
CTTCCCAACAGCCATGGCGAACACGTCCAAGATTACGGATCTGCAAACCTGTCAGCCTC  
CATTACTTGGCCTTTCGCCCTTCAAGCTGATATGAGACGTGATTATCTTTTACTGCATG  
CTGTGGTGTGTGATCAATTGTTGTATTTCGTGCGGTTCCAAATGTCCAGGCAATCCCCGT  
CACAGCATCATTAACTTGGTAACAATGAATTAAGGTATTGTGATCGAAACGACGAAAATC  
ACACTTTGCATTATCGGAACCGCCCGCCGGAAGAAAGAATCTATTTGCAAGTTGCGGCTT  
TAAAACCTCGCTTTTGATGGAAGATAATAACAGCAGGAAGATCACGACAGGCCACACAAC  
GCGACACATAAAGCGCGACTCTATGTAAAGCGGGTTTTATTAGTGTATTTCGTTTTTGTA  
ACCTTTCCTGATTCACCTCTACCTGGTGACCGGGAACCGTTGCCGCGCGTGTTTGGTAAT  
CATTCATCAACGAATCGCCCTTATCAAATGTTTTATGGCATTGCTTCCGCTTCTTGCGA  
AGGAATATTGGCCGGATCGATTAAATCAGGGTCAAGGCGTAAACCACTAGCCGCGAACTC  
GCAGCACAGCTGATACCGTATGATATAACAACAAAATCATTACTTTGCATTAACATAGA  
TGCGCCATAAAAACACTTACACGCGAAAACCTCGAACGTTAGATTAAGCTAATTTTTTCT  
GGAAAAGAATTTGGGTTTAGTCGCTTTTTTTAGCGCCATCTTTCGACTCCTCTAAAAGGC  
CGAATTGCTCGCCTTCTGAAGAATATAGAGGTTTTTCGTACACGTTGCTAGCCTTTTCT  
CTGTAAAAGTTTTCTTTACAATCCTATCAGTCTCCTCTCCCATGGACGTAAGGGAAATGT  
GAAAAGCCATTACAATAAGTCCGAACATGATCACTTATGCACTAAAAGACGTAGATAGC  
AAGAGCGGGAGGCATTGCTATCAAAAAGATACCCGCGCAACCACACACCACGAATTAGT  
TTAATCCAACATATAGTCTACCCTCGTTTGTGCGTGGGACCGTTGCCGCCTATGTAGAATC  
ATAGCATTACGGCGCGGGAGTCAATCGTTAATTTGTGATCTAGTTTGTGTGGTTGTAAT  
CCGCATAACGTACACGGGAAACCATGACCGCTAAATGCAAGAGGCAACCTACACAATCCG  
CCCGGGGGTCAACTTTTTTGAGATGCACAGGGGTATTGGGGCGGGTAAACTTAAAACGCA  
AAGGCACTTTAAGCGGATCACATACATCGATGCCGCTAACACACCAAACCGGTTTTGCC  
CGCAATTGTGGTAAACCATTTTAACCCGGAACCTGAGATCCAAGCGGCGCGATGTCAGAGT  
TCACGTTTTGCATTTTATCTTCTTTGGTTTGTGTGGTTGGAAACATTGCCGCCCTACGC  
ATTAAGATAACGCAACCACAACAGGACGCAAGCACTAATTTAAATTATTTTTTTGAGA  
CTTATTCTCATAACGACGCGATTTTGCATGATTAGCGACAATTAGGCGGATAGTTTCACTG  
CGTTACTATATTTACGGGAGTTTACCTTGGCGGCAGTATGTGATACCCCGCAAACGCT  
GTATAACTCTTTCTAAGCTTTTCCAGGGCTGACCCTGGCACGTGCATCACGTTGCGGATA  
TCTCCTTAAATTCATTTTCTGCGTAGAAAATCCTTAGAATTATCCCGGGCTTTTCGATTA  
ATCATCTTGTACGGCTTGCCACTGGAAAGCGCGCTTTCTTTCGACTAACCGCTTGTTAAG  
ATATGGATCGTGGCGGTGCGGCGCCAGGTTTTGGCCAGGCGTCCCGGCTAGTTGAGTTT  
GTCGTTTCCCGTGCCTCGCTCGTTTACTTCACGATATCCAGGAGATCATGCTGGCTTGT  
CATCTTTTACAGTGTGGCGCATAGTTTAAACCCTCGTTTTTTTATCGGTAGTTGTGTGCAT  
GTTCAAAGATCCGGCCATGTTACTCGGCTATTTCAATTAGCTCGCCTTTCGATGATCTCCG  
CGATCTGCTCCTTTGCGCCTTCTTTGTGATACGTGACGACTCCGCCCCGCTTTTTTCACTT  
CACACAATACGCCGTCACAATCGAGATCAATAAACGGGCCATATCGCCGGGTGTGGTAGT  
GGTGTGCGTGGAAGCTGTTTCTTAATGATGGTACACTTTGCCGATCCTGTATTCACTAT  
AAGCCACAGCAGGCCCCCGCCATAACCTGGCCGGGATATACCAGTAAAGAGCAGTTGCAG  
CCACCAAATCAGGATTTTAAACACTTTTAATAATCCTCAAACATCTCTTGGAGTGTCTC  
CAGGTCTTACAGACGTAAACACTTTCCGGAGTGCCTCGCCAGTCTTCTGACACGCAAGATA  
AATCTCCTAACCTTTGCTGCATTCCTCATATGGCCATATTAGCCAAAATCAGCATG  
AGAATCAGATCCCAGATCAATATCTGATAGCAGGCCGGATAGCACCTTTGCGGCGGGCGG  
TGTTGCAGCATAAACACGGGACCCGTAAAACAATGCTTTATTATCGTTGCGCTTAAAATC  
GTCGCGTGTCCAGTTATTTGATCAACGATGGAAACCTTAGTATCAAATCAAGCTAATTC  
TCTTGCCTGTGTTGGGGTTAAGCCAGTGTGACGGCCTACACGGTGACGCTTTCCCGTCTT  
AACATCTGAGCGGTAAATCTTCCCGCCTTTTTCGAAACTCACGAACACCAAATCGGCTTG  
CCCTTGTGGAACCTTGTTAACGCCAGCAAATTCCTCTTTAAAATCAATCCCTTGTACTTT  
CACAAAGTTGAACACGGCAACATCTTGATCGTCGAAAGTGATTTTGTATTTCAGGATATT  
TAACCTTGTCTTTGGATTGGCACTATCGCCGGGGTAGTTCAGATAATTGGTAGGGCTTTT  
CTTAAAACCCACCTATGTAGAGTCAATAATCTTTAATGATTTCTTTCTCTAAATAATC  
GAAGGCGGGCATCACTTGGAAAGCAATCAACTAATAGCTTAACGGGGATTTTTAGATTGTC  
GTTCCGTCGACCTGCCTCCTGCTTTACGTCTTCAATTGTGCGTTTTGTAGTGTAAAGGAT  
CGTGAAAACCTTGTCCGTTATCCATGCCTACGACCATTTACACCCGCTTTAAATAATTGC



TAGTAACCCGCTACACATGGCGATAAACGCGTATTTTAGTATGGGGCGCTTCAGTCCTTA  
TTTCATAAGCCAGATGATAGCCATTTTTTCAAGCCAGTAACGCATTGCACTCTGCTCTT  
CGTTGTATGATTATTCCCGGTGACGGGGCGACGCCAGGGCCAGCAAACCGCAACCTCTGT  
AACCATTTAGGACCGATATCAGATCCGCTCGGTGAGACGGGGCGGATATCTCTTGGTCTG  
TGTTCCGTTAACATCGCGACTAAAATAAAAGGATGCGAAAAACAACGAAAAAACCCCGG  
TTGGGCTCGTGCATGATAATCAGGTCAGGCGATTTACAGCGTCATACAGATTGATAGTTG  
TCGCAAACCTGTGTCATTTTGTTTACTTTTTTCAGTATGGCGGGAACCTCTTGCGCCTCGAT  
TAAAAAGGTAICTCGATCGACCAATGGTATGCCAGCTATTCGTTGAAGTTTATGAAATCTT  
TGTTACGCTTGTCTGGTCTTGGGTGACGTGGATCTTTAAGCCCTTCTCACTATCACACC  
GGTCCAGGTGGGCGCATCCTCATTTTATCCAGGTCATGGTGTAAAGATATTTGATTGCAA  
CTCGTAAAGCGGAGGAACCGAAACCTTCACGCAGCTCGGGCGACTTATACAGCGTCGGCC  
AGGTCTCGATCTCCGGGGTAGTGAACGAAAGCTATTAACAAAATATGTTTTACAGTACA  
TACCCATAAAGTCAAGACAATGAAAATTCAAAAATAGCGGATTTGTTGTGTACTGATTTTT  
TGAAAATTTCTATCATCGTTTCCATTTTCGATTACCTGCTTTCTTTACGTCTGGGTATTAT  
GGTCCAGTCTCACGGCGCTTGTACATGATTTTTTATCGGGTTCGTATGCGCTGCTAAACG  
TGCGGCGATGTGGGAAGGCTTTTGGGTTATATGGATCTGCTTGCCGTTTGGAGTCTCAAC  
ATAGGAGACCCGTGCGGCCTTGCCGTTACGGTAACCCGTTTTGATTTACAGAGTAGCAAC  
CAGGGCCGGGGCGCTGTCCTTTGCAGGACGTTGGTTCGGCGGTGTCCTGGATCGCTTCTA  
CATAACGACGGGGATAATCTGCCATCGTTTACAAACAGGCGCGTTGGTGCCGTTGTCGAT  
CACTTTCACGCCGTTGGCTTGGGAAGCAGTACCGGCCAGGGCACGAGAATCGAAATAATT  
TTTCATCGTGTAACCTCGTTTGTGTGGTTGATTTGTCAGGCTTGTCAATGTGTGGAGATT  
ACAGCCCCACACATTAGCCAGCGTCCACAATTATCTTACAGTTATTTTTTGACCTTTAAC  
ATTTATATAAGTGCTGCCGGCGTTTCTATATTGGTCAACGTATATCCGACAATCACCCGC  
CTGCAAATTAAGTGTCCATTATATAGGGATGTTAGTCCCCGACCCTGATCGTGTTTTGGT  
TAGCCCCTTTCGTTGCCACCACTGAGGCGCGACAATCGCTTGCACCTCCGCCAACAAAGA  
TCCGGCATTGGCAATACATCATTTTTCCATTATGTTTACCTCTTATTGGTTGCCGGGCGC  
TTCCCCGGTGTTTTAGTAGGATAACATAGCCGGAGTAGGGGAGCTAGCTTATACTAAGAT  
CTTTTTACGCCGTCAAAGTTTTCGATGATCTGCCCGCCTGCCTTTTTTGCGGCGTCCAG  
TCCTTACCCGTTGATCCCGTTGCCGTTGTAACCTTCTTTGCCTCGCTATACAAATCACG  
TTCGTCCTGGTTTGAATCGGTAAAAATGCAACCAATAATCTCATTATCCAGGAGGGGGAT  
CACGTTAGCACTGGCGGTCACACTGACAACATAATCACTCTCATTTAAGTCTCGCTCCAA  
AGCGTCTGTGGGGCCTCGTACGCGTGGCGCGATGGGTTATCATCCCCTCGGGCGATCAA  
GTCTGCGATCCGCTCTTTCAGGCTATATTGTAACGGGATCGCATATTTTAACTATTGGG  
CTCCGCCTTAGGATCATTACAGTGACCCCGCCCTGGAGATCGACGGTCAAGTCCCACTT  
ATCGCCAAATGTATCGTTTGTATTACAGCCTACATCGTCAAGGCTACAGTGCATGCTGTT  
TGCGGAACAATTGAAAGTTTCGATAGTGTCCATCTATTTACCTTTTCAGTGTGGGGCGT  
CGGAGTGTCCGGCTGCTGCGGTACCTAGTCAACGACATACTAACGGCTGTCAGTACCCCG  
GGACAAAATTTGTTAAAAAAGTTTTTCCTTTATCCTTGTTCATTCTGGGGGGGACCCGG  
TACTATATACCGACTGAGACACCAACGGCGGGTAAAGAAAAAGGAAAACGTAAACGTGGT  
ACCAAGCGAAACATTGGTGACCCATTTACCTGGGAAACATCAGGACATCAGTGTCTGTC  
TAGATTGGTGTCTGCTCATGTCTCGCGTATGTTAAACGGCGGATTATACGCGGCAAA  
AGTGGTAGCGGCAAACGGGGAAAGTTTTAGCGGATGTCCTGTAAAAAATCTTTTGACGTGG  
GGCTTGAATTTGCGCCGCCTTGGGTTAGTGTGGGTTTCATAGAAGAGGAAACGCCACCCC  
ATGGCTAAAAGTCGGGGCTAACGTACCGGGCGTTGGTGAATGTCGGAAGGTGCATCGAC  
GGCAGTTCGACCTGTTGTCACTTGTATAGATTTGCAAGGAATCTTGATCAGTGGGGTGGT  
TATGCTATTAGTTCCACACGCCGAGGGGTAGCGGGAATCGCGAGACAAACACCGAAGCTG  
CCCGCAATTCTGCAAACGAGAATGATTTTCATTCAACAATAGACTTCTCTTGACATCTCG  
TGTGCGTGTTTGAGAACATTACCTATCCCTAAAAAATTTTTCCGCACTGTAGAAAAAATA  
CGTTTTCAAAGTGAATACTCGTTAGAGAACAGCGCGGAAAGATTTTTTCGATACACAGA  
AAAAATACGTTTTTCGATTTTGAAAAACCGATCGTGTACCCCGGGTAATCGAGAAACAATT  
TTTTAACGATAGAGAAAAAATACCACTTTGAAATCCAAAACCTTCATCGGGTACTCCGACT  
TACATCCCAAAAAAAGGGATTTAACATTTCTGGACTTTTGCCACAATTCGTGTACCGGGG  
CATGGAATTTCCATTTCGTAAACATTTCTGTTGCATGGGTGGGGTATGAGATAAGGGGCTGG  
ACTATCCAAAGTCTTAAATCACACTAAAGTGGATATACACCCCGGCTATGAGGGAAACGC  
ATGTGAAAGACCATTGCGCATTTTATGTGGATTTCCCGTTCAAAAATCTACGGCAAATAG  
CAAGGGCGAACCGATATCATTTTGAAGCACCGTACCGTTTCATAACAAGGTCATTAAGAG  
AGATATCATGTGATTTACAGGTCGTCATTACATATATTCTGAGACTCCCATGCAGCTCGTT

CCTCTTCCTCTATGTCAAATATCCTATATACCTTCCCCTTTTCGTCATTTTTAGATCTCT  
GGGCCTTTATCTTACAAAGTTATTTGTAAAATGTTACACCTCTTGCATGTGTGCGATGTC  
GAGCAATATACCTATTCAACCACACAGGGTTGAACATACATGTATCAGAGCCGTAAGCCT  
CATTCCCTTCTACCAGCTAATCTTTGTCAAGTACATATACTTTTCGATAACTATCGCACC  
ACGATGTATGCAAGTTCTTAAATCAATGCCACGTATGGACAACAACAACCCCATGATATG  
AGGGCCATTACCCGCTGTAGGTTCTGTTTATCATAATGTGCCAATCCTTCCAGGCCGAAT  
GTTGAGGGAGTTTTCCCTCTTTCCGCATACACGTGAAAACTGAGCATCGTTAATGCCAA  
CACCACATCCTAAACTACTATGTTTTGTAGATGGTTCCGATTCCATATGCAAATCTAAAC  
TCATACCTTCCCTCCTAAACGTACACGGTTTACATTTTGGCTTCTACCCAAAAGTATCTC  
TCCATCCGCAAATATCATACTCTGCGTGGTGCGACCTTTTATACCTCCGGTTTTTCAGCCT  
GAGTTGGATTAATATCGTCCATGAAAGGATCCTACACCTCTGAGAGCCTGATGCGATAGA  
CCACTTTATCCTCCGTCAAGATGGTGGCAATGCTCCCATTGACAGGATCGATTCTGAAGG  
TATAATCAACGTACATAAACACAGTGGCTTACCGCAATAAGTCATCCAGTCCGTAACAC  
CAACAACCATATTGTTTGCAGAGCTCCCGTGCAGTGTAAGCTCAAAAACAGTAGAACCTG  
CATAGCAAGATCGGTCTTCCCTGAATGATCCTGAGTACAAAAGCACGCTTAGACGTATTCC  
AAACGCGAGACTCACGCGCGCTGTAAAGGCAGGAGGCTGTGTTAAATTCCCTTACCGCTT  
CTCTCGACATATAGAAATACTCATCCTAGATGTCGGCAAGATCCATCTTGTTATCAACAG  
ACAAAATATCTCTACTCAGGGTAACTCCGCGTGTGCCAACAGATATCAGGGAGTCTGTGA  
GAGTAACGACATGCGCTTCCCGTTGGGAGACATAATCCTGATAGTCACAAAGCTTTGAAC  
ACTTCGGTATAGCCGCCAGTTTAGAAGGCTTATACACTACTTTCCCGTGTGCTGTGCAA  
GCTATGCCTCTTCATCTTCATCAGTCTTAAATTCAAGGTAAGATATCTCGTGCTCTGTGC  
GCTCAAATATCTCGAGTAACTCTGATTCAAGATCCGGGTGCGGGTATTCGTTCTGGGTTT  
GATCGAGAATCTTCATGGTGTGGAAAACGGTTTTAATCTTAAAAGCTCCTGTAACGCCTT  
GTGAGGCGTAATAATTAAGAGCTGTCCGTTCTGCTACCTTGTAAGGGAAATACCCCGCAG  
TAGCGTTTCTACGCAAGATACGGGGCTTTGTGTTGTCAGGTCTTACCGCCCGTGCTCTTG  
GCAGACCTTAGACTAAATGTACGCCATATTCATTTAAGCTTTACATCATATGGGATTGG  
TAAGTTAAGAACATGAAGTAGCTCAGGCCCTATATCTTCGCTCATAACTTGAAGGTGTA  
GTAAGAGAACTACATCAACGCAATTCCAAAGGCCACCGAAGAAGTTCTGGCCCTGCTTC  
CTCTGAAAGAAAGATCCTGTTTATCGAACACCACCCCTACTAGGGTTCGCTTACGCATG  
AGGACGATGTTGGTAAAGTTTTCTTCACGCGGTAGGGCTGCTGGTGCATCGACCAGTTTA  
ATTGGTAAGTCCAAACCAGCCATTGACATGATATACATGTTCCCCGGGCTGTCAACAATG  
TCGGTGTGTTGTAGCAGACCGCCAGGACTGAATCCGGTATACTGGATTTTCGAGGTGACGG  
ATCAGGTTATGTTCTGATCTTTGACTTTACATAATTACCGTAATCATGCTCATAACCT  
GTATAGCATAACCAGGTGGCTTTGTTATACAACGCGGGGTATTTTCATCTTTCCGAGCTTC  
GCGATACAGTCTTTCCCATTTTACTCTATCCCAAGGTTAATACTCTGGAGGTGGGGTTT  
CATGGGGACCAATATAAGGAAATCATCGCTCCACATATCGGGTATCCTCCCCAGCTTTGG  
TCAGACAGCGGCCTTTTGCCTCCTTCGCAGAAAATGATGCCTATGTCAAGTCCCTCAGC  
CCAGCATCTGATCTCATCGTTCCTGTTAGTGTGTCGATCGGAGTGTCAAGAACTTCACAGA  
CTGGTCTGAATCTCTTGAACAGAAGAGGGTGACGAACTGCGACCACCTTTCCGGGTCAAG  
AGCGAACGTGTCATCCAAATGAAGCGTTATACGCTTTACCTTAGATGATTTCTCTAAGCC  
CCCATCTTCAATACGATAGTGACCCCTTATTGAATATATTGTCAATATAATTTTCAAGA  
CCACGCTGGACTGTTTCAGCTACCTCGTGCCGATCAGGACCGCGAGGTTTTATACAGTCC  
TGAAGCTGATGCATGTAAGCGGGGACGATTGCACAGTCGGTTCATCGGCAACCTCTGCG  
ATTGCAGATACATCATAAGGTAAAGGGCGATTGAGAGTTCGTGCCAGTTCTCCAACCTCC  
TCTCCAGGTTTCATCATGGCCGAAAAGTAGTCCGGGCTTGCGCCCGGACTGAGGACTGG  
AGCGCGCGTTCAGCGATTCCGGTCAATTAGACTCCTTCTCTTTTGCCTTCTCAGCTTCAG  
CGGCTTTTGCATCAGAATCCGGTTCATCGGCCTACTTCTTGACCCGCTCGTCTAGGTA  
TGAGGGTGCGGTCAGCCAGTTGCTGAGTATGTGGTGATGCACCGAGAATCTGACCGACAT  
ACGCCGTCGGCATTGTTGTAAGCTGTTTCTGTGTGAGGCATGAAGTTTGCATAGACAATAC  
CCAGGAATCATAACCACATAACCGAACACAGAGATCTTAAGACGACCCTTTGTCAGGTTCG  
CCTTAGGCACAGTATGGCGCTCTGCTCCACGCTGACGAGGTGCTGTTACCTCCCCAAA  
CTACGAAACGCAGCCAGCCTGAAGTATACCAATAGGATAACGTCCCCTCATTGAACCAT  
CACTATCAATCCTGGTGACAACCTACCACATCTCGGGCGCTAGAATTGGACCAGTCCGAT  
TCACGACAAGGTTCTGCCCCAGAAATCATCCAAACAGTTCCTTTTGACCATCCGTTTCTC  
TGTAACTTTTCTGAACTGCATACCTGATAAGATATGCAACCGTTGAAATGAAGAGCAGGT  
AGCCCCAAGCGCCGTA  
ACTCTCCATCACTAGTGAGTACATGAATCGTGTAGATCAGTAAAG  
ACCATGACATCAGTTATTCTCTTATTAATAAAAATTTGGCACGATTGGCCAAGGACCATT

TATACAATCAACGCTTGAGGACAGTGCCTCAAAGCCATTAAGGATTCAATCTGGATCTT  
ACCACCACAGGACTTTATCGCGCAGTCATATTCTTTGGCGTTATACCTTTTTTCGGGCAT  
ATAACACCCTGTCAAAGAATGGGTAGCAAATGTTTCGGTGAAGATATTTTTTCATTTCTCA  
TTGAGATCCGCAACCAGTGCCCCAACACGTATGCTGTTGATCCCATTGATATTAGCAGGC  
TTGCCTGTCATGCCAATTCGATTTTCGGAAAGTATCTCCTGCATCGTCTTAACCCATGACC  
GGGAAGTGCTCCAGACCAAGGAAAGAACACCAGTATGCTTTTTTCCCCTAGTTCGAGCGCT  
TTAGGGCAGCTATCGTCTGTGTAGGTCCGGAGTCCATCTCCATAACCTGGCAGTCCTTCC  
ATAGTCAAGCACAGTCTTGGCATAACAATCGCAACAGTCATCAACATGACAAGAGAAACTC  
GAGCTACTGGTCTTCCCACGGTACGTCGGAACCAGACGTTGACTAGAACGTTTAATATTA  
ACCATTTTTTCGGCCTTGGTGCCGCCACGGAGTAGATGGGGTAAATAAGTTTGCCCCCTGTC  
CCCAAACGGTTACATTCACATTCTTCGTCCGCCGACATCTGAATGCCTTCGCTATCGCTT  
CATCTCTTCTCTTGAAACCAACTACACACTTACAAAATCATGATTCACGTCTTCTATCC  
AAGATTTTATGTTTATACATTTTAAAGACCTTATGTGTATTAATTCTTATATGTAATCAT  
ATGCAAATTTTGCAGGACACGGGGTGCAAGTTTTTGCACCACAACACGGGTGTACACGAATG  
TGCTCATGCCTCTCCTTTTCGAGAGATAAGTCGCCGCGTGTGACCAAGTTTTTTATAGAGG  
TTCTGATGGACCATTACAGTAACACCGGTGGCCACGCTTATCGTCGTGTAACCTGGGAAAA  
ATTTCTTTGATTTTAGCTCTATGTATCGGGCTTTGTATTTTCATATGTAGCATGGCACGAA  
GATGTGTACACAACAAGATCTTGTACGTAACCTCGTTTTTCATCACAAGCTACCCTCCTCT  
CGCGCTTTCAGGACTACTGTAACCTCCCCACAATAGACAGGTTATAAAAAATCCATCGACA  
ATACCTACAAAGTTTTCAAAGACATGCTCTCTAAGAACTCTGGGCCACAAGGTATCCCA  
AAATCCATCATTGGAATCTGTCACCTTATCATCGTTTCTAAAGGCCCTGCAACGCCACTA  
ATCGTACATGTCTACACAAATTACAAAGTGAAAACACTACCATACTGAGAAAGTTGCTTT  
TCCCTTTAACTAGGGTTTTGCGTAATACCTATTTGACAAGCACCATCACGAAACCGCCCT  
ATATACTACGACTTATTGTTACGACGAGGGCCAAATAAGTAAGCATAATCGACCCTAGTA  
ACTGTTTTCTCTTCCCGATGAAAAAGCAAGAAACCTCTACTCCCAGGTTTCTCAGGCAT  
TGACCGAACAAGTCCCATTCCATCTTTCTGTCTAAGAAACGAAGTTGTACAGGATACTTC  
TTGCTATCTCTCCGGGAACCGAAGCATCTTTTCACCTTGCAGTAGCAATTAACATCATCC  
CCCGTCAATTCTTCATCGAGAGAGTAGAGATCAGGCATACACATTTGCTTTGAATGTAAC  
TTTTTCATTCTCACCCTCCAGATAATCTCTTAGGAATTCAATAACATACTCGTTCGCAT  
ATTCTTCTTCAACATCATTATGCAACATGCGGGTAACAACAACCGCCTTAGTGTATAGAG  
AGCTCTGAAATGGTGAAGACCGGTTAAAAAACAAAACATAAACTCCTCATCTGTGGTCA  
TCTCCAGAGGATTTACCGTGTAATCTGGTGAATAATGGTCTCCCACTCTCCTATCTTGA  
ACTTGTAAGACTCGAGGCTCTCCTGTTTGAAGTTGGGAGGTGCTCACAACCTCACAAC  
CATTCTTTGTGAAGCTTGTTCGGTCAATTGCCCGGTGTACATGATAACCACATCCACAC  
CGAGACCAACGGCGACGATTTTATTTTGAAGTGTGATCTAAGTCGCCCGCCCTTCCGAAA  
GCTGGATCAAACCTTAGCACGGTTTCTACCGCAAAGGGCACACAGTGTTCCTTTTACAA  
CCCAGTCATTTTTGAGACGACTCAATTCCTCAATATAACCATCAGTGAAGGGTATCACA  
GATGTTGCCTTTTGGATCTGATCATCCATGTACTGAATTGCCACACCTGCCTAAGTACCG  
CCTGTGGAGGTTACATTGTAGTCAAGCATCTCTTTGATGTTCTCCTGTGTGTACACTTTC  
TCATCACGAACCTTCGTTGATCAGCAAATAATGTACACAAAAAGTATTATAACGCAGA  
CAGGAGCCAATAAGCTCGATGAAGATATAAGTGATTGTCGTCTAAGATATAGAATATGAC  
ACAGCAAACCCATTACGCTGTAAATTGTAACCTAGTACTTCCCTTCGTGGCCAGATGATA  
CTTTGCTTGTGGTGATTGCACCGTAATTTTTTAACTTGCATCAGACCACGATCTA  
CGAGCAGGTTTACGGAACGAAAGATACCCTCCCACACGAGAAATCATTTCGTTGTCTGATC  
ATCTGCATGGAATCAATATATGGTTTACGCATTCTGGCGAACATTTCTCGTGCCTATTTT  
GGTCTTAAACACCCGCAGCCTTTAATGCTGCCTCTACGAGAGCCGATGACCATGCAAAG  
GTCTGATCTTAAACTACCGAACCTTGACACGAGTGTGGATTAGTGCACCCAAGAAGGTCA  
CGATCTGGGTAATAATCCCCGATACGAGTACCCACTCAGTGACCTGAAACAGCCTTCGCT  
TTGCGAGTGGCGCGGTAAAGTTCTTCCGCCTTCATCAAGTCGATCGAGAAAACACAGTAA  
CAGTATGCCAGATATCAGAATTCATAATTTTTATCATACTGTTTTCGCCCCACCAGGG  
TAAATCGCATAACCTGACAACGTGGTCCAAGATCGATTATAACAATATCTATGTTGATA  
TACCCATTTCGCACCAATATTGTCCAGTCTTGAATCGAAGTCCTCACCACGAGATCTATGT  
TCCTCGGTTATGTGGCGTGACTCATGGATGAGAATAACCGCAACTTACATTGTTGTTTTT  
TTACGATAGAATACATTGATATATTTTTTGTAGTGCTACTTCTGTTCCCTCAGTCATGTGG  
GGGTGTGAATCAATTCGGGAAAACAGCTTCTTCATCCGCTCTTCCGACAAACCCATAATG  
ATCTTAGGGTTTTAATACAGGTTGCCGTGGTCAGTGGCCGAGTCGGTAACCAACGGCAA  
TCAGGGATCATCGGCCTCGAACTCAGCAAAGTCCCGTAAAATGGGCGCTGTTGTAACAAT

GCTATACATACATATTGAATGTCCTTGAGAGTATCTTTTCATAAAGCTTGTCAATCACTAGT  
CTTTTGTCTTAATGCATATCCCTCTCGAAATAAAAAAGTCCATCCTTCAAGATGGCCTCA  
GAATCTGTGATTTTTGAATGCGGATCAACTCTTTTTCTTCAACGAAATAATCTCGTCCTG  
CCACCCTGAATCCCCATGCACGTTTTGGCCTTGGCTCATAACGGGGTTGATGGAATACCAA  
ACAGTACAATGGCATTACCCCTTCTTAACGGGGCTTCGCCGATAATCGTTACCCACTCAC  
TAACTACAATTGCAGGCTTGAAACCATAGGCCAGCTTCTTATGTGCAGGTGCCGTAGCTG  
GTGGGCCAAGATGTGTTAATACATTATACCACCTTGTTCAGCATCGCCGTGATGTTCTG  
GAGACGGATGACTGCCTCGATTATCAATTGGGTCCGTGCTGTTTGCAGTTTCTTGGATAC  
AATGATTCAATCAGCTTTCACAGAGCCAAGTTTATGGTGGGGAATCAGGATTGACTTGGG  
TTTACCTATCAACTTCTCTCCTGTCCTCGAGTTGGTGTACGGACCCATTTTTCTTGAG  
CTGTGAAAACGTCACACCTGCATTCATGCCTACATCAGGGGAGGTGCTGCAGTAGCTTGC  
ATACCCCAAGTGCTACCGGTACGTCATCCTACAGTTATGATGGCTCCGGTGCTTCTTCTAC  
GGCATCCTCCACAGCCTTGGTTACTTCTCCGTAACCTTCGCCCTTATGCTTATGCTGTT  
TGCTTCTGGCTCAGTGTGCTTGGATAGCAATTGTACCGTTCCTGTTGCCGGGATATA  
ATTAGTTTTCAGCATTTCATGTGGTCTTTTGGCATTTCGCCATCATTGCCTGAACAAC  
CTCGCGATCAAGCGGTTCACTTATTGTGATGGCACTCTTGTTCACCCAACTATCGTG  
CTATGCGTAGGCACGTCGAGTCAGACCACAGACGTGTCGACGCACATAGCCATTTTTATC  
GTCGATACGTTCAACTGGAGGTTCTTGAGGGTTATAACCCGCCACGGTTCCCATATGAAA  
CAGGTTGTTGGTGTGCTTGAACCTACCATAACCGAGTAACTTCGCACCCATCATGCCCTA  
GTCATCCAGGGTGAGTGAGAACTTGATACCACCTGTTCTTATACGCACAGACTTAATGTG  
GTAACCTCCTCGAGATTTTTCGTCGCGTGTGCGTAAATTTTTATTTCCAGTCGATCGT  
GTACTACACCTGGGTTGTTCCCGCTCTTGTGGGTGACCTAGCGGGCATTTCATTAGGCC  
TCTCAACACTTGATTTCAAATTGTTTACAGTGTATGCTTTGTGTCCTTTTGTCTGAAGGA  
AGGATAAAAATGAACAAATTGAACGTTGACGTTAAGCAAGTAAACGCCCCCAAGGTTACA  
GCAGATATCGACCGGAGCATCTTAAAAAAGACCATGCCACTCTCGACCTTATCGAGCAC  
TGCGGAAAAGAGCACGAGTAGCGTCAAATGGCAATGGTGGGTGTCTGGGATACGCCAAGA  
AAGAATACCGATGATTTTTCTTTAAGCGTTGAAACCAAGCATGATGGCAGACAATCCCCTG  
GCTGAAATACACCAGGGCCTGCTTGAAGGGGGGATACGAGACATAGGCCATTTTTCGTGG  
TTCTGGGGGGAAGACTGGGATGCTTATCTGGGGGAGAGCCTGAATGAGTGGTTTTTGGCC  
CGTCAGGCGCTACATGTCACAGACAGGGCCTCGAACTCATGCCCGTTCGAACGGGAAGAG  
ATCTCAAGAGTGGATGACTCTGCCAGTAGCCGGGGGCATGGGCATGGGGGTGACTTAAAA  
AAGAGTTCTTCTTGGAGGTTTTCAAGTCGTACAACGAAGGTAAGTACTCAGTTTGTGAGCCC  
CTGATCTGACAAATGGGACGTTGTGATCCAAACCTTTTAATCAATGAAGTGTGCGCAGA  
TATGGCTTTGGTTAAAAGGTCACGTAGAGGTCATGAAACGATACTCATGTTCTTCGGATC  
TCCTTATCTAACATAACCCCTTCTTGTATTTTCGCGACTTCAAGGATGGGGATAACTTCGGT  
GTGCAGTGCAACCGCCTAGGTGACCGGGTCTTCTCTTGCCTGATCGCCGCGTTAAGGTA  
AAGAATGCGCGGGAAGGCTTGCAGATTTGCAATATGAATGAGACATTATTCAGCTTCCGT  
TGGGTAGAAAGACTGAAATATATGGTGGGAGGAGGAACACCCAGCCCGGACGAGATAATG  
ATGATGGCAATGGCTCGATATACTGATGAGTACTTGCTTGACTACATAGATGATTGTGAT  
ACGCTCAAGAACAACCTTTTAATATGATTGAGCAACAAAGATGGCACGAACTCTCAATT  
CCACGACTCGAGTTTTAACCCCGGCGCAAGAACCTGCTCTGGCTATCAAGATTGGAGCAG  
AAGACCACCTGAATCAGAAAGACAAGGGTGGTGGTCCCTTACATCCTTCATCCCGTGAAGG  
TAATGCAATACATGATGACTGATGAGTTTCAACTGATGGCGATTGCTGGCCTGCACGATG  
TGTTGGAAGATACCGATTAAACGCCTGCTGTTCTGGAAATTCTGGGCTTCTCCAACCGTA  
TTGAACATTCTGTGGCTCTGAAGACCAAGAGTCCCAATCAAATACGGGCGTATAATTTCC  
AGGGCATTGCAAGCAACTATGATGCGCTCCGAGTAAACCTGCAGAGCTACGCCATAACC  
CTGGTGTTTCGTCGCCTGTAAGGATGTGCAGATAAGGATTTGATGCGTGACCGTAAAAACC  
ACGCGATGTATCTTCGTCTGCCTAAAATAAAAAGAACATCATGCTCCAAAAAACCTTTTGT  
CACAATGATGAATCTTGTCACTGCGTCGCACAACTAGTATACTCAGAAAAAGAAGTG  
CTCCCTGATGGGGATGCACTCGTGGATAGAGAGTAAGCATGTTCTCAAGTTATATGAACG  
TGGTTACAGTCAGTTAAGTAGCAGATGCAAATCGAGCGGGCGGGTGCCAAGACCCTTTTG  
TGTTTACGATCAAAATCTTTACAAGGTGACTCTATTCAGGAGCAAAGAATGTCGAGAAAC  
GATGCCTACACCCACCAAGGCACACTCAAAAAACCCCGCCTCGGCTGGGCGCGGACTGAG  
AACTACGCGAGACTTCTCCTTACTGGGTGTCTTACCAGCATTACAGAGACAGGAAAAGCA  
ATGAATGATTGTACAACCTGAGGAGAAAGTGGCGGGTGGTGTGACTACCTCGACCTTGAA  
TCCATTAATGAGCTTTGATATAAACAAAAATTTACAAGAGGCTATAGAGTTAAGGTGTAG  
CAAAGGGCAGAGCGTTGCGGCGATTGCGGACTTCTCTTGAAGCGGTCTGATCGCAAAGA

GGAACACCTTACCTACTATAAAAATGTAGCCTCTGAACTGAAATTTAGCATTGATTTCAGTC  
ACAGTTTGAAAGTGGTCAACGAGTAAAAGTCACAGTTGACAACATCATCAGAACATGCTG  
GGGAAATTACTGTTATCATAACTACACGCGTTACGTTTATGATGGTCAATTCAAGCCATG  
GGTTAAAAACCTATCAAAAACAGTTTTTTACTGCACCATATCGAACACCTGCCAGGCAA  
ATTCATGCGGAGGTTATTCGTCCTGACCAAGAATAGCCTCGGATAAGGGTGGGGGTGGC  
TGTTGATAATCTGTTTGGTAAACGCCTGTCTGAGGTGGAACCAGACGGGATGTGGATCCA  
CGGTGGTGATACATTGATTATCACTAAGAAGACGAAGAAGAATACGTAAGTTGAGAACCC  
GGTTAAGTGTGCGTGATCTGTGGGGACAGCGTAATGGTGCCTGCCGCCCTCAAGAGTGGA  
CAGATAAGACTGTTAATGAGGTTACAAAAGCGATCGCACGTCGGAGAAAACGTAAATTTT  
CAGAACACATGAACGACGGACGCGACTTGGATCCCCGTTTGACAGAGGTTACGCCATGT  
TAGAATAAGTACAGACTCTTAAAGAGCAGCTTGACATGCTATCCCGTCTCAGTGCAAACG  
AGAATCTTTGCTATGATCAGATCTGTGAAATATCCAAAGAAACAGAGATCGCGCAGATCA  
CCGAAGCGATGGACCTGTTTTATTATGGGTGTGAATGTTGTTCTGTCTGGGTGGATAAGT  
GGGAGGTTTAGATTTTACAGATTCGGCAGTCCAGCCGCTCCCTCGTCACCGCTTGCCCTCG  
TCGTGCATGGTATGCAGTCTTGGGTGCTCATAATCTAGAGACAGATTAATATATGTTCTC  
TGAGGATCTTGCAACGAGGATTCAGACGCGATCCAATTGTATTGCCCTGACGAAATTGA  
GGGAGAAGTTGCAAATCACCTTGAACCAAGGAAACAAACGCCTCTCGAGTCATAATATTT  
TTTATGATATCCGGATCGCCCGACGTGCCATCCCGGCTTAAATGCGCTTCTGTAACCGGC  
GTCGGCGCGCGCTAATGATCTCCGGTCGTGCTGGCCTAGGGAAAAGTCATGCAATGAGGC  
AGGTCGGAAACTTCCAGTTCGGCGAACGAGACAACAACCTGATCAACTTCCGTCTGAGG  
ATAAAGAGCCATCAGATGTTTTGGGCGTACGTATCCCGGTCTCAGACGCCAGGGGTGTT  
CTCGCACCGATTATGCGACCCGGAACCTTAGCTGGAAGATCCTTGCGGAAAGGTATCG  
TGTTCTGGATGAGCTTCTTCATGCGGAGCCTTACGTTGAGAACGTTGCACACCAGATCA  
TCCTGGCACGGTGTCTGCCACTTACATGTTTCCGGAAGGGGCGGTAGTTGCATGTTTCA  
GCGACCGTTCCGGCAGTGGTACGCCGGTACGTTTGGTGGAAAGCTCCTCTGGCTAAACGTG  
TGGTCTGGTTGAACTCGATTACGATAGAAGTGTTTGGCTGCAAAGTCTGGCCTGCACC  
GCGCTGTTACCTCAGAGTTGTTGCGTTTATCGGTGCAAACCCAGGTACACTGGACAACCT  
ACGAAGAGATGTTGGAATCAACTTCCCTTAAATATGCCACGCATCGTACTAGGGTTTCCG  
CAAGTGATATCCTGGCCGATTTTGTATGCAGGTATCTTGTCCCCACGCCTGGCACTAGCCT  
CGAACAAGGATCTGTGCGCAAAGCAGTGTGCGTGGGGTTTTGGTATTATCATACCCGTA  
GTGCAACCATGATTCCTATCGAGGGGGTTCATGGACGGCTCTTAAAGAAGAACACCGGGT  
CAGAGACCTCAGTCGTGTTAAGGTCCCTCGGTTCTCATGGTTCAATCTGCTTGCCTAAGG  
CAAGTCAGAACAAGAGTACACAGATGATCACTTTATGGACTTTGGTGCGAAGTTCTTGC  
AGTCCCTGTATGACAATTTGGTACCATGCTACGTCATTGATCTGTGATTTTCGTGAGGT  
CTGTGTCTATGTCATCCACCCAAGAGAACTATTTTGGTAAAGCAATCCTGTTGTCGGGTG  
ATCGTTAGCGCTTATCTGTGAAATTGTTGGGGAAATAACCGTTAGTAATGCAGATCATCA  
CAGAATAGCGCAAGAATTTTGTGGTAGGTCTTGCTGCACCCGTAACCAATCTTTGACAA  
CCCCAAGTGTGGCGATTAGTCTTTGATCACGCAAACAAAAGCGAGGACTAACTCAATGAC  
TAAGTTATAGTGAAACAAACCTCAGCAAGCGATGCCTCAAGGAACAAGGTACGCAACCT  
GTACTGGAATCCAGAGGAGTTCGTCGGGATGAAGAACGTGCAAATCGTGTGCTAAATGGT  
ATACAAAATGGCTATTTGGTATCTTGGCGAGGGATGGCAGGATGAGGGATGGAACGTGAT  
TGGTGCGAAGACCTTGCTTCGGGTATATTCATACGCTTGATACACGTGGTGTGTAACGTT  
TGGTTCGTTTAGTCTCTCTGAACATAAAAATATGTGAAGGATCAGACCCGGCGTGAACATA  
ATACCTGCCACAAGCGGGAAGACAATGGTTTTTGTGCGATCTTCTGGATGGATAGAGAGA  
GTGCTGTGGCTCTTATAGCCAAGATATCGGAGCACGACAAAGAATATGGTGACTTTCCCT  
GGGGTTGCGAACTACGGAACAGAGTTTTTCTCATGAAGGAGGAACTATGGTACAAGACAA  
ACTTCGTCCAGATCCTAATTATGACGATGTGATGGATGTACTTTCATGGTATGGATCCGT  
AAAATGCGGTGCCCTTCATGCCTGAAGATAGAAATGGGTACCGGTGTCATGATAAAAATGA  
TGAGTCCAACATAAGTCGCTGGAGTCCAGGTCCTGAATGGGAGGCTCACGTAGCATGATA  
CAATCTCTAATGGCATAGCTCAATTTGCCGCTGAAAGAGATCTACGAGGCTTGCGGGATT  
GATTGCATTCACATGGTGTGATGGCAGGTTTTACATAAGCGCGTCAGTGTATAATGGTTGTC  
TAAGCTAGGCCGAAGGCTGAAGCTCGTGATAACATGGTCGCTTTTTGAGAGAGGAGTTAT  
GCATGAAAGTAAAACCAACTGCAACTACAGCGACAGCTTAGACCATCCCTTCTGGCG  
ACGTCCTCGGTGTTTTGGAAGACGTGTATAACGGGACTTTCATTGAATACTATCGTTGTG  
AAAGGAAAGGTGGTGACCTTGACGTTTACCCATACGCGTGTGATGAGGTGAAGAAGTAAC  
ATGAAACAGAGTGGATAGGCATCGCAGGCGGTTAAATCTTCCCTTATCCTGTTACCCTGAG  
ACATGCTTGTTCAGGGCTACAACCCCTCTCGCTCGTCGTTATTTTGGCGGGGTTCTTGG

CCAAACAAAAAAGAGAGTCATGTAAGGCTTGGTGTCAAAAATTGTAGGTAAAGGTTTTTAA  
TTCTTGGCACACAGGGTTGCTTGGGCTAAGTATTCCGGGGTACGGGCGCACTTACTTTATT  
GACCACAAGGATCAACAAAAAGATAACATCCACATTACAAACCTGAGAGATGTCCAGAAA  
TATGAAGCCTTTTATAATTATAGCAGGGGTAATAAAAAAGAAGCATGTCTCCGTAAGTA  
TTCGTAGATAAAAATGTGGACAACACTCAGAGACCATGCCGTGTATAGCGAAACCCACCTT  
GGAACATTCGATTCTGCCAAGGAAACCAGTGAATGTTATCAAGCATAGGGAAAAAAGATT  
CATAACATTGTCATGGAGGACAGATTATTAAGCATAAAGTAAGTGACTCGATTGAGGCTG  
TGAAATCTGGTTAGGTCAAGGTTTTTCGCGCTGGGCAAAAAATTTTAATACACGATGGGAA  
GTGTAAACGCTTCTCTAATCAAAGAGGGGTTCAACAATGAACGCTGCGAACCTGAAAA  
CTGTGAGGGGCGTCAATTACAAGCTGGGAACCTGTACGGTGGCCCTTTTGTATGATAGTA  
CTCTCGCAGGATTTAATCTATACTCACAAGTCCACTATCATCATCGTAAACAGGGTCTCA  
GGAACTCGATTAGAATGACCTGCACGATTCGATGGTTGAAAATAAAAAAGCTCTTACGAA  
GCCATACAGACGACCCTATCGACATCTATCGAATCGCGTTCCTTCACTAGGTGCTGGGG  
TTGCAGGTCGTGACTGTAATTACCTCGGAGCTATGTTGAAATCAATCTTCCACGATTGTG  
ATGTAACGTGTGTTTATTGTACCGGAGCAAAAATGACGGTGGGAATTACCTGGATTCTGGT  
AGCTATCATTGGATTGTACGTCTTCATTAAGATGACGCAGCGAGAATTCGGGAAGGTGCA  
TTGTGTAGATCGCTTTCGTGTTATATGCATGGGATGGCTCTGGCCTGTGTACTTCACTAA  
TCTTGTGATGCTGCTAGTTATGACCGGCGACTGCAAATGAGTGCCTATTTTCAATGGAATG  
ATGGTCCACACTATAAGTGTGGACGTATCTGCAACAGATGGAAGTAGATTTACATACAGT  
GCTCCTCGTGGCTACAAAATATGCACTCATATCGATGACAAATGAAGATCATAGAGATGA  
TGTTGACAATCTAGTAAAGGCTAATGAGGGGATTGAATCCCTTGGGTGAAAAAAGAGGG  
GGATGACTGATGGAAGAAATGGGCGTTATAATTGATACCCACACTGCAACCTTCTGGAGG  
TCTGGTAACGACAAGACATCATGCCTTCTGCGGGAACCGCTACGTCTGCAATTGGTTCA  
AGTCGATACGATCCGCTGCGTTGTCCGTACTCCCAGCAGGACCGTTTTACGATCGAGAAG  
GTAACCACCGCAGGGGTGATTTGTTAGTAAGGACAGCGTGTACGTTCATCCATGATAAATA  
GAATGGCTGCCTGTGGGACCAAAAAGCAAAGATCGGATGGATAAGTTCCGTGCGCTGCTGA  
AAATGCCTGGAACTTGGCAAGCAAATAAAAATTTGACAACCAGAATCGTTATGTTTTAAT  
CTGTGTTACGAACCTGGTGGTTACGTCTTTAATTGAGCAGAAGAGAAACGACAATGAGTA  
AATCTGTAGCTGGTATCTGCCAGACCGGACAGGAACCGGTATACATTGGTGGTAACCGAT  
TACTAGCGCACTTACCGATGCCCGTCTTTTTGCGGCTTTGTTGACACGAAGGTGGTTC  
GGTGCAACTAAGGCTTTTTGTTATCGTGATCTGAAAAATCGCGGCGTCGATAAAGGCCATA  
TCCGAACCTCCGTTGTAAAAGAAGTACCCTTTCATGAGCGTAACATGTACGCCATCACGA  
TGACCAGTGCTTATTGACTACCAACGTGTGCGTGCTGGCACTCGTTGCTTCCGTTGTGG  
CCTAACGTCTTCTTAAGCTGCTTGCATATGCAACGAAAGATGTTTATCTGGAAGATGGG  
ATTCGGTCCGTAGAGGGTACTCTGAGCTATCGAGTGGCCTCTGAATATTTCCAGGATGCC  
ACGAATCGTTTAACTCCCGGCGAATCGGTTCTGAACCAAGCAGATTCTGTGAAGCGCACC  
CTGCAAGCCGTTAACGCATTCCATGTGGAGGAGAAGTAAAGTACTAAAGCAGTCAAATCC  
CCTAGCAATCGCAAGGCCCGTCTGGTGTATGCGTTCGGTCCATGACCGGCTTAACTTTGAC  
GGTCTTGATCAAACGGTGTGCGAACAACGCAAGCTTGTTAACCCGAGGGAGGTTATCCTG  
CCATACCTGGGGACTGTGAAGATACTGGACCCAGGTGAGCATTGTGCTTTACTCCGAA  
GATGACGTGGCGTTTCAGTCCAAAGAACGTGTACTGTCTCTTGAGCAGGAGAACAGCGGC  
TTCATGGCGTTCCTGGTGCGTGATGATAGTGACGCACTGCCGGAACAAGTAAACACAAG  
TGCGCAATCAACGAAGTCCCGATAGAGTCCCGGTTGAGATCGCTGGTGAATGGGCTGGT  
CGGGGATTCAGAACGCTGTCGTAGTCAAGCAGGTTGAGCAGTTCGTTGCCATCTTCGGT  
GTTGCATTCGGTCAGAAAGAAACCTCACTGAAATGGTTACCACCAAGCGCATTCTTCGGC  
AACGGCCTGACGGAACAGCGGATCTTCGATATGCTGGATTCCGGTACTGTTGCGCGCTT  
ATCTCGCTCCACGAACCGGAAATGGTACAGAACCGTCCGACAAGGCTGACCTTGCAGGTG  
GAAGGTCAATGCCGTGCTGGCAAGTTCTTCGGTTATGAGGGTGTGCGGTGAAGGGATCATC  
TGGTCTCCAAAGGGCCTTGAACCTGGCACAAGATTCCGGTCTGTTGATCAAAGTGAAAGGC  
GAGATACTCTGTCTCGAAGGTCAAGACCCTGACAGAAGCTGATCCGGGATGCCTACAT  
AATATTCGTGATTTTTGTCGAGTATGCGGTCAATGCACACAGTCTGGAGCAGGGTCTGAGT  
GAAGTGGCTCTCGACCAGCCCAAGATCCGTGAGTTCATCAGTTGGGTTAGCCGTGATAGC  
TACAAGCAAGGAGGAGTTTTGCTGAAAGCGTATACCCTAACCATAAATGATGTTGCCAAA  
TTTATCAGCAACAAATAGCCTGGTTAATACATGCAACAACCTGAACGAGGGGCTGTGTTGC  
CCCTTGTGCTATCCACAAACCTGCGGTTATAGCCAAGCCTTTGAAGGCGCAGGGTGAAA  
CCTTAATCTTCTAGGATCAAGAACAGGGTAGACATTCGGTGAAGAACATGCTACCTTTG  
TCTTCTCAGTTCAAAAAGCGAGGATTGTCAATAGTGAAAAACGGAAACCCAAGTTTGAG

TTGGGAAAGAAAGTAAGGGATCTTCTTAGCGGCAGGATACTAAGCATTACGAGTCGCTGT  
TACTTTAGTGGTTGGGTATACTCTTTCGATTGTGTGAGTATGTATTTGTAGCCAGAGGAA  
GATTTGGTGGCCGGACAGGGGACTGCGTGAGACGTTAAATATGAAGACTAGACAAATGGA  
GGATAACGTGGTAATCTCTATGATTATGACTTGCAATACCATCATGTTCCGGTAACGTTGT  
TGGTGGTGATATGAGCTTACTTCGCGTGGTGAAAACATTTAGATAAAGGGCGAGTTAGT  
TCACACCACGTAAGAGAAGAACAACACTGGGGTTATACATGGTGGCAGCAAGGGTATTTG  
CACCGTTGTTGGTGATGTTAATGTTAAGGCGTAAATGCTAGCAACGTCAAGAGTACTTC  
TCTTGATTTACATATTGAGAACGGCGCACTGGGGGATGTTACCCAGTGGCCGGGGATGT  
TTATGCATAAATGATCAAGGTTAATGTGAAAACGTCTCAGGTGACATATCCCGCCGTTA  
ATTGATAGATCCTTTCTTGGGGGGTTTTAATTTGGAGCAAGATTTGAAACTAAAAGCCAC  
AACTATGGCAACCGCCTGTGCATTTTCTCTGACTACAACACCAGTCTTCGCCAAAAAAA  
CGAAGATAAGCCCAGGTTGAGTCCTCTTTGTAAAAAAGACGCTACACCGGTGAACACCTT  
GGCATGTAATATGTATCGTGAAACCTTGGTGAAGGCCAGGATGGTCTTACGTGAATAGC  
TGTTGTGCCGCTTAACCGAAAAACAATGATAAGTTTCTGCGTACAGTGCAGAAGATTAT  
TTACAAACCGGGGCTGTTAACCTGGACATCCTACGGCACAAGCTTCTTAGTGTAAGAA  
AGATCCTTGGGTAAAGAGCCAGGAGTTCACAGAGATATTGACCAAGATACAAAACAAGAA  
CAAAATGCTCTATGAAGCCATTAATAACCAAGGGATCTAGGAATTATCTTTCAAAGAA  
GCTGAACCTTACTGGATTAAGGCGATGATTCGCACGGTCAGTATTGATAACCACATCTA  
CTACCAAGAAAAGCCGGACCCCGGGCGCCTGAACTATTGAAGAATTTTATTGAAGCTT  
TGTGTTAGCATTATCCCGCATCTAGTGGTACTGTCTATTCTCAATGGATGTTCTGCGAA  
CATGGGTGAGGAGCCTAACTTCACGGCCACCTGGTAGGCACCCACATAGTGCGGAAAGCT  
CTCAAAGAAACCCCGTAAATACCCGCAAAAAGCGGTGAGAAGG

>NewGenomeName\_114

AGGACTATCCCGTTCGATCGGCCCGTACTCCAGATTGATGTCGTCGGCGGTCCATTTGAC  
TCCCTCGTTCGTCACACGGTGATGAAAACGTTGTCGCCATGGAGGTGACTGGTGC GCGG  
TTCCAGGGCTTCGACGATGCGCCGGACGGTGACGAGCGGGGAGTCCGCCAGGTCCTACGG  
GAGCTGCATTCGGGCAATGCAGTACGCGAGTTCATCGTCATGACATCCATCCGGTACTC  
GTAGTGCTGCTCGCCGGCAGACGCGTCGTGCACCCTCGACAGGCGGGCGGAGTTCTGCTT  
ACGGCTGATCTCGCTACCGTCGGGGACGGCATGGGTGTCATCCATAGTACTGTGAAGTC  
CTTCTCGGACATGAGCAAGGACCTTTCAGAGGGGCGGTGGTGTATGATGGCGAAGTCCAACA  
TGAACAGGAACATGCCGACCATTACCAGCCCCCTACCAACTAGGCGGCCGAGGAACA  
GCCACTGTGACTGGATCGGCACCCTGCGTAGAGATTAGGCGTTGTGGCTTACCATATCTG  
GGGTCTCCTGTCAAATCGGCGGTGCGTCGGGGATCTCGTAGACGACCGGCTGGGATTGCA  
GGTGCGGTGCGGGATCCGCTACGTCGCAACGAAGCTCGCGGATGATGTACCCAGCTTGG  
GCACCGGCTCCCCCGGATCAAGGCGGGGGTGCCGGGCGCGAAGCAGGGGTGGTGCACGT  
AGAAGGTGCGCAGGCCCTGCAGAAGGGCGTCTACTTCGCCGTCTGACTGAGCATTATG  
GGTAGAACTTGGTGTGCGAGGCCCTGGACCGTGCTGCCAGCACGACCCGCCCGCACCGAC  
TGCATTCGCCCTTTCGCGGGAAGTTGGTAGAGAGGAGGGAGTTCGTGCTGACGCTGCGACT  
TCTGGGCCTTCCCGCGCGGCGGAAAGGCTACTCCTCTTCGAGCAGGCCGGCGTCTTCCA  
GTAGGTCCCCTCGCGGCGGTGGTTCGACGTGAAACGAGGTGCGCGGTTCTGGTTCGGCGAT  
GAGCTGGCGGAGGTCGTAAGAGATGGTGCCGGTGTGGATCTTGGTCCCGACGTCGCCCTG  
GTACAGGTACGTCGCTAGCTCGTACTTCAGCAGCTCTGGCCGGACCTCGATGGTAGGCAG  
CAGTCCGACGAAGCCCGCTCGTACGGAAGCGGCTGCAGCTCACCCAGCCGAACCTCGGC  
CACGATCGCCAGCATGTCCCCGGCTTTCACCTCGAAGTCCCATCCAATCATGGTGTCTTCT  
CCGTTTCCTCAGTCCCACAATCTCTCTCAACGCCACTCGGCGTCTGTCTTGTACTGCTC  
CTTGCCGACTACCTCGCGGGTCTGTAGATTACGATTGTCCACCCGATCAGGGAGCTGTA  
GTAGGCGGTAGCGATGTGCGCCCCGGTGAATGATAGGCCATGATGGTCCACTTCTCGTG  
GCGCAAGACAATCGGTCCCCGATTCCCTAGGGGCTAGTGCGAATACTCGCTTGACCAT  
TCGGTCACTCCTCCTGCCATCTTTCGTCCTCGAGCAGCGGGCGGAGCTTTTCGGCCAGA  
AGATTACTGTGTCCTCGAAGCCTGGTGCCAGGCCATGGGTGTCGCCCTCATCGTCGGCAC  
CGGCCGCGTAGACGACGTGGCTGTGCAGCTCTTGTTCGAGGACGATCTTGGTGACGGCGT  
GGACGATCGCTCGGCCCTTCAGGTTTCGCGCCTGGCTCGCCGACCTGGACCTGGCCGTTGT  
CGTCGACCGTGAATCCTGGGACAGCAGGGCCTCGTCGACGACCCACAGCATCAAGTTCCG  
GTGCGAGCTTGATCGCGTACACCGACGAGCAGGCGATCGCGTCGCACAACGCCCGTAGTG  
CAGCATCTTCGGAGCTTCCGAGGACGATGCGCTCGGTACTGCAATCGGTCTTCAGCAGGA  
CGCCAGTCGTGTATGCATATCTCCTTACGGAGTTGATCGTCGTAGTTTCGCTTGAGTGT  
ATTTACTGGGTGCGACTAGCCCCTGGGTTTGACGCCGACGGCATCATCCTGGTCCGGAAG

CGTGCAGAGGCCAGCTTAGACCAAACAGACGGCAGTACGGCCGTAGTCCACCTGTAAGTG  
CCACACCTGGCCGGTGTCCATCAACTGGTGGGAGAGCAAGATGGTCTGCTCGTCTGCTG  
TTCGTCTGTTCGAAGGCGAAGATGCGATCGATTCCATCACTCATCGGCCGTTCTATCA  
GTGTGCGCGTCTGCTCCGCTAGTTTTACCCCCCCAGCGCCAGCAGCCTGGTGACGGTGA  
CCGGAGTGCTCGCGGTGTGGTGCCTGTAACAGGGCTTCGGCCTCGTCTGGGCCTTCT  
CGGGGTGCATGGTGTGCTGGGCTGCGTCCACCTCGGCCTTGTCTCGGACGAGGGCCGGTGG  
CCATGCGGTAGCGCCGTAGAGCGGGTCTGTGGACCAGGTACCGGCGGGCGGATGTCTGCGG  
CCGTCTCGAGTGCCTCCTTCGGGTACCGCTTCGCGGACGGGGCCGGGATCTCGTACCCGA  
CCTCGGTGCCATTGATGACGTGCACGACAGTCGGGTTTTCGGTGCGAACGACGCCGGACCC  
AGACGGTGCCTGCAGCGGGCCGGGGGACCATGCCTCGCCTTCTCTATGTGGCCGCGGA  
GCGCGACGTAATCCATCGCCCCCTCTCCGCCTACAGGTTCGATGGCGTCTCTCTGGCGAC  
GATCTGTTAGAGCCTCTGAAGGTGGCATTGCGGCACGCCGGGGATGTGGGCCGGGACGTT  
CCAGCCGCCGAGGAACGTCCGACAGGCGGTTCGGGGTGCCGGACGAGCGGATGACGTAGGT  
GAGCGTGTGCGGGAGTGCGGCATGGAAGTCGGCGTGGTGTGCCTCCGGCAGGTTCGCCTAA  
TCTCGCCTCACCGATGGCGTAGCCCCCTGCAGGCGCCCGATCCGGATCTTATCGCGGCG  
CTCGATCGCCGCGGGCACCTCCTCGGCGCGGATGCGACTCTGGCGACCTCTCTTTCGGTC  
ACCCCCCAGGTTCGCTGTAGGCGATGGTGTGGCCGAGGGCACCCGGCGGGACGGTGATCT  
TCGTGCGCTAAGTGATGTATGCCGACTCGCCTTAGCACGTCGGGTGATCGGCCCAGTACC  
TGCGGAACGAGAAGAAGCCCCATCGGTTCGTCGTCGCGGTGTACGTTCCGGGCGCTATGT  
CGTCCGGCACGCGCGGGGTACCGGTGTCGACGTCGAACATCAAGGGCGTGGTGTAGGCGT  
CGCCGGTGTGCTGCAAGGTGCTGAACGGGTGCAAGGGCGGGGTGTCGACGCTTGTCTTTC  
GGCCGTCCCCGACCGACCGGGCCGCGCATCCGGCGAAGGCCAGCGTACCGGGGGCGGGCGA  
CCGCGACGAGCGTGTAGGGCCAGAAGCGCTGGGGGGACATAGTGAATCCCCTTGGGGGCTG  
TTCTGGAAGGGGCGTAGAAGTAGCTCGCCCAAAAAGCGGTGCAGCACTTCTGCTGGGGGT  
CCAATCGGTTCGCTCCACAGATGGCTCCTAAGGTTCGAGCCGAGGGACGATGGGGTGTCA  
GATGGAAGCGATAGAACTCCTCCTGCGTGGGTTCGGTTCGAAGATGACGACGGCGCCGTAGA  
TCTGCTGGATGCGCAGGATGCCGTTGGCCAGAAGCTGTGCCACTGGTCTCTCCTCTCAGC  
GGAAGTAGAAGTCGCGGGGGTCTCGGTAACCCCCGCGCGGGTGTGGCGATGGCGGCCT  
GGCGCTCGCAGGCGTAGTGCTGCTTACGCGCGCCTAGATGGATCTGAGGTGCGGGCAAC  
GCTTAGCTCCGTGTGGTGTGTATACGGCGGCTTGGCTGCTAATGAATCCCCTGATCAGAT  
CCCCCTCTCGGCAGTGTTCGGCTTTGTGCAACACCACGTCGATGTGTACGATCATCTCGCC  
TCGGATGTGCGAGGCGGAGTAGGTCTTTCGCGGTGGCCAGCTCGTGGCCGTCGTAGAAGTA  
GGCGCGGGCGGGTCTCGGACAAGCGGGCATTCTCTGCGCTGGTGTGCGACCGGGGCTGGTC  
GTAGGTGTGACCCGTCGGAATCACTAACAGTTGGTGTGATCGGATTGCCGGAGAGGATCGTG  
CGGCAGGTGCTGCAGGAGACCACCTTGAGAGACTTGTGGCGAGCGGTTTCTCGATGTGC  
AGGAGGAGCTTTCCTCAGACGCTCCGGGGTACTCCAGACCCGTGGCGGACAGCGTGCGGG  
TCTGCGGGCTTGGCGACGCGGAGAGTCGGGCTCATGGGTTTCGGTTCGGGCAGTGACGGGT  
CGAGGGCGTTCGCGTTGGTTCGGTCCGGTTCGACGCTGGTGCCTCAGGGCGGTGCGGGCCG  
CGGGATCTACGGTGTGTCGCGCCTTGTCCGCCGCCACACCCTGAGGCGATCATCAGGT  
GACGTCTGAACTGGCGGCTGAGCATTGATCAGATCCTTTGCGGCACAACGTAGAGTGT  
GGTTCAGGCAGTCGGCACAGAATGCCGTGCCGGTGGGTGAGGGGTAGGTCTTCATGCAGGC  
CTTGCAGTAGTGGTGGCGAACGGCCAGCATTCCGTTCTTCTCGAAGTTCGACGAAGGTGTC  
GGCGTCAACGATCGGTGCGGTCATGGCAATCACGTCCAAGATGGAGTTGGAGTAGTTTTTC  
GGTGTTCATGCTGCGAGCCTGCGCAGGTCCGGTGTATCGGCGACCCAACTCGCTGTCG  
GCCTTGTAGTCGTTCTTGCACCTCGCCGGTACGGTGGAGGCCAGGGGGTTCGAGCAGCTCA  
CCCATCAGCGCCGCGATGTGCCGGAAGGGTACCACGGTGTGTTCTCGACCGGCCGCTCG  
CCCGGCGACAACCTGGACGGATCCGGCCGTGGTGCCTGGGTAGACGTCGGTGCCTGCGCTAG  
ATATCGATGACCTCGTAGTGCTCGGGGTTCGAGCAACCTTGGCTGGACGCCTAAGCTGGTT  
TCGGTGCGGTTAGACATGACGGCAACCTTCAGTCTGTGCCGGAGGTTTTTGGTGGTGACC  
GGCACCGGAAACCGAACCAGGGGGCGCGCCCGTTTCGGCAGGGGAGTGGGTTCATCAGGCCAG  
CACCGGCCGGACGACGCTGTGGACCTTGTGGTTCGAGCGCCGTCAACCGGCCGGTACTTC  
TCCCCCTGCGTTGCGCTCGGCGCGGGTTGCGCCCTTAACGGTGGACTGGTGTGTTGCCCA  
GGTGTGGCGGGCCGGGATGACGCCCAACGCGGTGCCGTTCCAGGTGTTGGTTCGGGCGTC  
GTGCCGTTACATCGTTCGTCAGCTCGTTCGCGCTGGCAGGTGTCGATGGCCCGCGCCCGGCG  
CTTCTCCTCCGGCAGCGGCTGGGAGGCGTCCATGAACTGGAACCACTGCCCGTCCGGTGC  
CGTGGTCTGGCCAAGCTCGTCTAGGGTGTGCGTGAACCTCGTCCGGTCTCCTCCATCAG  
CTTGTGCGAGGAGCGGACCTCGTTCGAAGCGGAGGTTTCGAGTACCGGATGTGGCGCATCGT



GACCTGTGCTTCCATGGCATGCCGAGAGCGATGGCCATCGTGTGTCGTCGCAGACCGTGGC  
GATGATCGCCGGGTGCTACGTGGTGGAGAGGCTGCCGTCGAGCGAGGTGGCGGCGAGCAG  
GTTGGGCCGGTAGGCCGAAGCCGGTGGCCTCGTTTAGGAGCATCTCAGGGAAGGACACCTC  
GCCCCAGGCCTGGCCGCCCTGCCGGAGGACACCTGCACTGGTGTGATCTTGGGGCTGTCGCT  
GAGGATGGTGTGACCGCTCCGAGCGGCCACCCGCGGGACTGGTGCCGCTCGTACCCGTC  
CGTGAAGACCTTGAAGCCGTGGTGGTTGACGGAGCGGGCGATGGCGGGCGAGTCAGGGCAC  
CGGCCGGGCGGCGACGGGAATGCCGTCCGCGTGTGGCCAGTGACCTCGGTGAGGTGCGC  
GAGGAACTCGGCGAGGACGGGGAGCTTGACGGCCTACCAGTCGAAGAGGCGATCACCGAC  
GTAACCGATTGGGATGGCCCCCTCGGGGTGATTCAAGCCCTCGCCTTTGTCTCAGCGCG  
GTAGTCCCAGGCGTGGCCCCCGTTGTGCGTTCATGTCGATCACGGTGTGGTGTTCGGCCA  
AAGGTAGGTTTCAGCGGACATTGTTCTCTCCCTTTCGGGTAAAGGCTTTCATGAGTTCCA  
GTACGCGGGTGTGCTTGTGACGGTGGGGTATCCACCCCGGACGATGACCCCGGTGCCGT  
TCGTTGTGGTGTGATGCCGGCGACGGGGCCGGTGAGGGTGAACACAGACGCTGAGCTGCTTGA  
CGGCGCGATCGAAGCGGATGAGGCTGCTGGTCTCGATCGGGCGGTGAAGCCTGGAGCGTC  
CGTGCTTGGTGGCGGCGGTGCGGACCTGCTGTGTCGTGCGGTTCATGGCGGGGACTCCCTAGT  
AGTCGAATCACTGTGCGAAGCGGGCGTACTGGTCTCGAGCAAGAGGATGGAGCCGTGCG  
TGTTGATGAAGAGTCCAGAGTAGGGGAGGATCCAGGCGGTGCGCGGGTTGACGTACTCT  
ATCGGCGGAAGGCCACGAGGTGGGGAGGTGCGCCCCGCCGGCCAGAACC CGGGGGGGT  
TCCCCACAATCGCGCCAGGTCGTTGACGTAGTCGTTGTGCGGAGCCGCTGGCACCGTGGG  
TGAGGTTAGTCCGACCGCCTCCTGGACTACCGTCCGGTACTCGTTCAGGACGGCGAAGG  
CGGCGCGGGTGGCGGAGGTCATAGCCGGTGCCGTTTCAGTTGTGCGGAGGTGGCGGTGAGGC  
GGATCCGGCGGGCCTTGACGTACCCGAGGATCAGGATGCTTTCGGAGCCGTTCTTGGGCT  
CGGTGCGCTTCTAGTAGCTGACGTCCATGGACTGGAGGACGATGTGCAACCCGGTCCAGG  
TGGTCTTGACGGGTCGATTGCCGTCGTAGGCGATCAGCGTGTGAGCATAGTGAACGCTC  
AGTATCGGGGTTGCTGCTGCCTCGCTCCGCCAGCCCCAGGGATGGGAGATGTCGGTGTG  
GGCCTTGCGGATTGAGATCGGGGTGTGGTTTGGCTGGCGGTGCCGCCATCCACGGCCGCC  
GAAGTCGTGGCGGTTGTACCAGGTGCCACACTCGCAAACCTTCATTGCCAGTTCCTTTGG  
GCTGCAGTGGAAGTGAGTGGCGGGCCGATCAGCGGAAGCTGGTCTCGCCGGTCCGACCCGT  
CTCGTGTCCCCGCGCGAGCTTGCATCTCCGCCGTTCTTGAGGGTGGGCGATACGGGGTC  
CTAGTAGTTGGCTACTCTGTGGAGTTGTCTGACTGCTTATCCGGCGCCGGGTCTTGCCG  
ACCATCCGCGCTGTGGTGTCCGCGTCTAATCGCTGTTGCTGGCGGGTCTCCTCGTGTCCG  
ACCCTTTCGGGGCACGAGTGGCGCTCTGTGATTCTCTCGGTGGGTTGTGGGGGCTTTCG  
GTGTTGCTGTTGTGATGGCAACGTTTCCCCTGGTCCCCAGCAGTTGGCAAGTGGTTTGGG  
GATGTTGTTAGCAATCCGTTATCGTGTGGTTCGTTCAAGACCTTTGATCAACAGGCCTT  
GGGGCAGGTCAGGCCGTACTTCAGGCGTCAGGAGGCCTTGTGTCCATTCGGGCCGATTC  
TGGGAAAGTGACTTTGAGTAGCGGTACCTCCTTCTGGGGCTCGTGCCTGGTTCGGAATG  
AGTAGCCGCTCTGAGGGCCGCGGGCGGTTCATCTACACCCGAGTGTGCTAGGGCCGCCA  
GGCGGCCGGTCCGGTGTGAGCGACTATGACGCCGAGTACACGATCGTCTGCAAGCGCGGGGG  
TGGTCCGGGACCGACGTGATGTCCGTCAATGACGCGGGAGCGTCTCGGTGGTCTAAGGTG  
GATCGGCCGAACACTACGAGCGGCTGAGCCGTATGCTGCAGCTCGGCGAGGTCCTGGTACC  
TGGAAGCCCCCGCGCGCAGCGGATCTCGCGGCAGACAACGACGTGCGCCGGCTCTGC  
ACCGAGCGGACGTCATGTGGTGTAGTACAGGCCCGTCTTTCGTCTCACACGCTCCGAA  
GACCGTTAATGACACTGCATGACATCGGCCTGGCCGAGAAGGAGGGCGACCAGACCCGC  
GAGCGGATCACGCGGACCCGGCGCGCTCCCCGACGGCCGGGAGGCGCCACGGGTTCCGG  
CCGTACGGATACCGCTCCAGCCGCGACCCCGTCTCCGGCAAGCCCATTGGCCGGTGGCCG  
GACCCTGTGAGGGGCCGGTCCGGGCGCGGCCTCGGGCCCCGATTCCCTTGAGGAGTTCCG  
TGGCGGCGCATCGCAAGTGACCAGATCGCTTCCCGCGTCAAGCCGTAGCAGGTCGAGGAA  
AGGACGCCACCTTGCTCGGGAAGATGCTGGAGAAGCCCGCGTACGCCGGTCTGCTGACG  
CACCCCGGGGAGATCGTCCGGCCCCGGCACCTGGCCACCGGTAACCTGCCGAGGACGAGCAC  
TACCGCTTCATGGCAACCCTGAAGGACCCGGGCCCCCGGAGACAGAGCGGCACGACGCCG  
AAGTCCCTCGTACGAACCTCGCGGGCTGCGGAAAGTGCGGCTCGACGGTGCGCCGGAAG  
AAGAAGCCGCGGCGCACCGTGTACGTCTGCCGGGACATCGGGTGCCTGACGCGGCCGGCC  
TACGACGTTGACGAGTACGTCGAGGTATAGATGTTCAAGCTGCTGTCCGACCCGCGCGTA  
CGGAGGCGCGTAAGCCAGCAGGGCGACCGCAAGGCCTCGGCGGAAGCCCTGGCTAAGGTG  
GGCAGGATCCGTGCCCGGATGGACGAGCACGCCGTCGAGCCCGGCAAGGAGGACAACAGC  
CCGCGGGCCTTCGCTCTCATGCAGAACCAGTGGGTGGCCAAGTGTCTCGGATCTGGAACAG  
GTGGCGAACCAGGCCCTGAACCACCCGGGCCTGGTTCGACTTACC GGCCCGTACTTCGCG

GCGGTCTGGGCGCATATGGACCTGGACCCGACGCGACTTCTTGCCGTCCACCCAGGAA  
GTCACCCAGTACCCGCACCAGCTGCGACGCGAACGAGATTAGCCGCCGATCGAAGTCGTT  
TGGGGCGCATCGCAAAGCCCCTGCGTGGCGAGAATGCCGAGCGGGGGCTTTGCTTTTCG  
AGCTTGACGACGCCTGAGAGCGTTTTCTCGTAGGGCAGCCTGTTTCAGCGCAGAGACGTGG  
TCTAGCACGTCTTCGCGCCGTCGGTCTCTGCTGCGGTGGCGAGCAGGCCCGTGCTGAGG  
TTCACGAACTAGCGCAAGGTGATCGCGGTTCGACGCTGACGTGCGACGGCGTGAGAGGGC  
GGCCGCGTTCGGCTGCTGCTGTTGCTGGACCGGGTTCGGCTTGGGTCGCAGCGGTGCAAG  
GGCGGAGGGTTCCGGCCTGGTAGCCTCCTCGAGGACCGGGTTCGGCTTCCGCGGTCAATGT  
GTCCCTCTAACTACCGAGGCCCCACCCTAGCGCGGGGTTCGATCCACTCGAGGATTCGCTG  
CGTCCGCGGTCTCCTCCGCGCGCAACTTCGTCCGGTTCGCAAGGTTTCCCAAGATATGCC  
GCCGAGTTGCGCGACTGATACCTGGGTTAGATCCAGCCCGCGCGGGCGTTGCGGGATGGC  
GTCGCCGAGCAGGCTCTTGCGCTCGGTTCCCGTATCCGGGTTCGAGGTTCTAGTAACGGTT  
CATATTGATCATCATTTCCGGTTTGCCCAACATCTTGGTTCGGTTGCTTCACTCCTTCCAA  
CTTGCCGTGTGTAACGCCCTGGGTGGGCGGGGGGTTACGCTATGGTGCCCCGCCCAAACA  
TGGGTGTTGAGAGTAGGCCTAAAGAATCATGCCCGTTCTGTATACATCCGGTAACAGAC  
ACGTCAATGTTTGTGTGACCTTCGGGTATGCCACTGGGGCCAATTAGCTATGTGTTTGC  
AATGGCCAAGGGCTTGCCCTAACTTCTGGGCTCGGTTTTTGTGGGTTCCAGCAAGCCAG  
CCGTTGATCATCACTACCGACAACCAGCAGGAACCAACCGAATAGGTGAGCGAGATCACT  
GGACGGTGGTCCAACACGCCCCACATGAAAGTGCTCATGGTCACACATAAAAACCACCAG  
TTCTTACAGAAAGTCCAGAAAGTTGCACCAGGTCCTTTATCCGGGGGCAGCCTCGCACCAC  
CGGCGATACGCAGAGCGACTAGGAGACCTCTGTGATCACCACCGCCTAGCAAACCCATCG  
CCGCGCAACCTCCCCCGAGGGCGTTCGCGTTCGCGGAGAACGAGAAGGTCTTCGTCCACCT  
GTTCCGAGAGGACAGGCGTATGGCCCCTCATGGCACATCCACGTCACCTCGAACGAGGC  
CAAGCTGGTTCGCCGGCACCGTCTTCGTCCAGCACTAGCTCGTAGCCGACGGGGAGGCCGG  
GGCCTGCCGGGCGCATGCGGACGAGACCGTTCGAGCTGGCCGTGTACCGGGAACCTGCAGGT  
CATCGCGACCGAGCACCGGTCCTAAACCTCCACCCCAACCAACCCCGCCAGCCCCGCCAC  
CACCTATCGCGAGGTTTCGACCAGTCCGGTACTGCCCTCACGCCAGCCGGGCTGCCGTGCT  
TTATTCACCCTCCCTGCACCCGCCTTCGCCAGGAGGGGGGCATTTTCGTCAAGTCCGCATA  
TAGGCAGGGCTACCCGCTCGAGCATTTTCGACGGCGACGTGATCGACGACGTCGTCAACTG  
GAACTGGCCTGAGGACGACAGAAACGTTGCGTTTACGGCAACCAGGCGCGGCCCGGAAGT  
CTGCAGCCACCCCTAACAAACCGCACGCACGCTGGCACGGCTGCCCGGACGACACCCGCAG  
ACGAGTCAACGGGCAGCTCGAAGACCAGTGCCCCGGATCCAGGCACTTCCGCCGTGACGG  
TGCGCATCGAAATACCTGAACCACCAAGACCTCATAGACCGCGTGTTCGAAACCACT  
CAGCGGCCAACCCCGCCTCATTCTCCCGAGGAGCTTGATTATCATGGCGCAAAACACCTT  
CAACAAACCCGACGTCCCGAACTAGGACCGCGTGGCCCTCGGTTCAAGCCTGATCGGGGC  
CATGGGCGTCAACCTGGAGTTCGCTGAGGGCAGCCGGCGAGCCGACCCGCGCCAGCCGGT  
CGCGAGGGACGTCGCCTAGGCCGCTGAGCACGTAGGCTGACACCGCGCTCCCGAGAAGTC  
CACCCGCACGCTCAGCCTCGAGAACGGCACCTGCGGCGAAGACCTCGACGCCATCGAACA  
CCCGGTGAAGGCCACGCAGCTGGCGTACGACATCGGCGCGATCCAGACCGCCGTCCAGCT  
CACGCGGATGTTTCGAGCGGGTTCGCTCCGAGACCGGGTGGCTGATGGCATGAGCACCGAC  
GAGACCGGCCGATGGCGCGCGTGCCTGCCGACCCGGTTCGAGAGCAAGGGCTGGAGAAGG  
TTCATCTCCGCAAGCACCCAGAGCGAGCACTGCGCGCTCGGAGCCATCCGGGAGGCCCCC  
GACGGCAGCATCTTCGGGGCCGCCAAGTACGGGGCAGCAACGGGACGTCTCGCCAGACC  
CTGCGCGATCGGGGCGTCGAGTGCCACCCGGAGCGCGACTACTCCTGAATCGGCGCCAGC  
GCCTAACGCGAGGATTCCGAGAACTTGGACCTAGTCACCGACTGTAACGGCGCCCACGAC  
CGCACAGCGGCCGAGGTCCTCCAGGTCCTTCTAGAGGCAGACGAGGATGGCCGGCATCA  
TTCTCTCCCGGATCAGCATCCCAACCACCCACGACCAGCCCTGGCGGGAGATGGCGAAGT  
GTTTCGGCCAGGACCGGAAGGGGTACGTGGTTCGGGGAGATGCCGCATGTCCGCAGGGCTC  
CCGAGACCAGAGCCATTCTCGCCAGGCGAAGTGCTCCGCCTGGCCGGTCAAGCGTGAGT  
GCGCAGGCGATACGCTCGCCAACCAGGATATGGGCGTCATCCGGGGCCGGTGTGGCCATGC  
CCGGAACAAACGGATCCGAGGAGTACTGGCAGGTCGTCCGCAAGCTCGAGACGGCATCGG  
GCCGGGTGCCCCCAAGAACAAGCTCAAGACGGTATGGCCTAGACAGAGGGAGAGCGGCA  
CCCGGTCCATGCGCCCACGCCAAACCACCATGTACGAATTCCTGGGAGAATCACCCATG  
GGTCCGGAAAGCTATGCGGCACAAGCCAGATGTGGCAGTGGCGCGCAGACAAGTAGACCA  
AGGAATCATGAGCGACACGACCGAGAAGACCCGCCGAAGATCGACATAGATGGGTACCG  
ACACTCGATCAACATCCTGCAGTTCTTTCGAACAGGAGCGCGCAAGATCAACGCCCGGCT  
CGAAGAGCTGAAGGAGGTCGAGGGCGACTATCTCGCGATCATCAAGGAGGCCCTCGGCAA

GTCCGGCGATGTCAGCCTGCTGGACAACAAGCAGCTCGTCACCTCGCACAAGTCGAACCA  
GAAGCGACTGATCCAGCAGGTGCTCAAGCAGCGGTACCCGAAGAGTCACGAGCAGGGCAA  
GCCTGAGGTGGAAGTCCGGGCCTTCAAGGTAGTGGTGTGAGACGGCCGCAGCCCTGCTCT  
GACTATATCGAGATCGACGACCATCACATGGGCCGGATGAGAATCGAGTGCCACCGGCTC  
AGGTGACACAAGAAGTTGCACAAGGGATTCTGTAGGGGCTGTGGTACCGATGGTGAATC  
TCTTCGTCGACAGCAACGAGCGGCTCCGGTACGGCAAGCTGACTCGCTGCAAGGAGTGCA  
TGGAGGCACGCCGGGAGGCACAGAGCGCATCATGCACCATGTACGGCCGCCCTGGATACT  
GCCGGGACCCGTGGATCACCTGCTACAACCGCGAGATGACCAGCGGTCTGGCTCAAGCACC  
TGCCTGACGAGCTGAAGGTCTAGTACTGCATCCGTGGCGAGGAATGTCGCAGCAAGAGCC  
AGCCGAGACAGAAGCCGCGTACGTTCCGGGGCAACCTGTGCCAGAGCTGCTACACCCGAG  
ACGGGTACCTGCGCATGACAACGGAGAAGCGGGTAGCCAGACCCGAGGCCAATCGCCGGC  
TCCGCGCCAGAGCCAAATCAGATGCCGAGGCGCACAAGACAATCGAGCTACAATAGGAGG  
TGGGGTACTATATTAAGGCAGGTGCAGCGGGCGGGTGTTCGCTACCATCTGGGGCCGCTTA  
TACATTGGCACGACGTTCGAGAAGTGGCAAGCGGTGGATCGTGCACCCGAGTGGCTGACG  
GAGTTCCTTATCGACGTGCTAGTGGGTGCGGTACGAAGCGCCTCGTACCGCCCGTCAAG  
ATGTCACGGCCGTCCAGTGGGATCCAGTCCGGGGGTTCGATGTTTCCAACCGCAGAACCGC  
TCGGCGAGCGGGGGCTGTTGTTTCGATAGTCGTTTCGCAACCGAGGAAGCCCGTCCGGCGC  
GCGTCGACATCTTCCCGAGCTTCACTTCATGCATCCCGTTCGCGACACACGTTGTGA  
GGCAGGGACTCTGGGTGCTCATCTATCTCGGCTACCCGAAGTCCCGGCTCCTCTCCTGCG  
AGGAGCTGGACGGGCAGTACAAGGAAAAGAAGAAGTGACGACCACCCGGCACTGAAGGCT  
GATCCCCACCACCCGCGACGGCACCCACCCCAAGTTCGAGTCCGAGGACTTCCCGATCGA  
CCACCCGGTCTGGGTCTCGGTGCACCCGAGGACGTTTCGGCCGCCTCGATGTTCAAGGA  
GTCGCGCTCGTACGAATGGGAGCTCTCCTCTCTCCGCCGGATCGGTGCACTCCTCATGCG  
GCAGGCCGGATGGTCTTACCGCCTGGAACCTAACACACCCCGACGACGAAGTCCGTGACTG  
ATTCTCACCCCGAAACCCTGAAGAAGCTTATACCCAAGAGGTTCCACGCGTTCGGAGGC  
CTCATCTGCCTCGCCAGCGGTTCTTCCGGTGAAGTCAACACCACCTCATCCGCACCTCC  
ACCTCTCCTGACCGCAAGCCGAAGTTCTGCCAGTTCGCCAACTTCGTGCCGGGCAAGAGC  
GCTGTGGGCTGCACGTTCCGCAACGTTACGACGGCGTGCACCTTGTACGAGGTCGCCGAA  
AGCGACGAGGAGGGCGACATGCGGAGCTACGTCGGGACGGACATCTGCAATGGCTACTTC  
CAACACCCCGCGTGCAGGGGCTACCAGCGTGAGCAGATTTCAGTCCGGGCAATACCACGTC  
CCCCTAGACCGGGAAGGCGCCCTGCGGGACATCCAGCGGGCCGGAAGCCGCATCGCGGCG  
GACTACAGCCCTGATAGCCGGGAGGTGCGGGTCTTCTCGCCGAAGACACTGCAGGACGTC  
GTCCGCCAGTTCGAGGAGCGGGGGATGTTTCATGACTTGCACCGTCGCGAGGGCCGTTCCG  
GACGGCTTCCGGCTGCTGCACTGGTTCGACGAAGAGCATGGGCGTGCTTCACGCCCAGGAT  
GAGCGGAGCCGCTGACGGACGGGCAGGCGGCCGAGGAGCTGGTACGACGCTGCCGGCG  
GTATCGGATCCGGACGGCGAGGACTAGGACATGCACACAGTGGACCGCGAAGCCGTCCAG  
CACCCGGGCCACTACCGGACGATCCCCGAGACGATCAAGCGCCCGAACGGGATCGCGGCG  
AGGGACGTCACCCGGGGGTTCCCGTTCGCGGAGGGCAACGTCCTGTAGTTCCTTATCCTA  
GCGGCCATAACGGCGACCGGCTGGCAGACCTGCGAAAGGCCACGCAGTACCTGGACTTC  
GCGATCGAATTGGAAGATGAAGCATGAACAAACTAGGGGGACATCGATGTCTCACACCAA  
GGCCTTGCTCAAGGACATGCAGGGCAGCAAGGAAGCACCCCGCTGCCCGACGTGATCCG  
CGACGAGTTTGCCGAGATCCCGGACCACCCGACAATGTGCGAGTTCATCTCCAACACGCT  
CCAGGTCTGCGTGGAGCTGGGTATGAGCGTGGACTTCGACACTGCAGCAAGCGCCAACGG  
CCTGCTATATCTGGGGTTCAAGTGGTGAAGCATGGGAGACGGCCTCGGGAAGGAGGTGATC  
GACGCCCCGACGCGGACGGAGGTGTCGAAGTACCACTTCTCCGGCTTGTGCCCCGCGCGG  
CCGCTGATCGAGGGGTGGATGCCCGAGCAGGTTCGAGATGCAGGGCCTTGTGGTCCGCATC  
ATCTTCTCGTCCGTGCTCGGCGCGCTGAGCAACTCAAAGCTGGTCCGGGGGAGAGTAGTTC  
GTCTTCGCGAACCCGATCGGCAACACCGTGTGCTCGTCTGTGCTGGCCGAGAACGCCTGGACG  
GACTCCGGAGCAAAGAACCAGAACGAAGTAAACTGAGTACTGGGCAACACTATCGAAGC  
AGTTTCCGTGCAGCCCGCGCAGCAGATGGCCACGGGCCTGCTAGGTATGGAGGGGAGCCT  
CCACGAGATAGGTAGGCACATTAACACTGCCTGTCAGCTCAAGTTGCTGGAGATGCGCAG  
CAGCGGGAAGGGCATCGCGTACAGCGACGGCGAACATCTTACCCAGGTCCGGCCGCAAGGT  
CCGTACCATGAGGGACCAGGAAGGATCACAGCTTCTCGACGTCGGAAGTGTGTTCCGGGG  
ACTAGCTCCGGCAGACCCTGATCGGCGACGTAAGTGCTTGGGAGCGTGCAGGACCCGCGCT  
CTCAGCATAAAGGAGTTCGGGGCCGACGCGAGGCCGGTATGGTGTCTGCCCCCGGTTGGCGT  
AGTCGATGACCTCCAATCCCACCTCGAGCTCGAAGAGGTATCCGCATCCGCCAATCGCCG  
GCACGGCGATGCCCGGCACGATGGAAGAGGTTCATGGCGCTCGCCAACGCTGACCTCGGCC

GGGAACGATGGCTAACGTAAGACAGGGTCTCGAGCCGCTCGCCGGTACCTGCGACCTCT  
ACGACAAAGACACCCGGTGGAGATCGACTGGAATTTCCCGGTCCAGTGCATTCAAGA  
AGTTCAGCACCCAGGGACCAAGCTCGGAGTACCGTCGCCAGGTGCTCACCTACGGTCTCG  
GCTACCCATACTGGGCTACGAGGTGACAAAGGCCGGCATCATTTTCATCCCGCGAGCGG  
GTCACGTCTGCCAGTACCACCTGTGGATCGAGGACTCCAACCACCAGCGAGCTCTCTACA  
TGGCCGATCGGATGAAGAACAACCGCCTGTTTGTGCGACAGCCTCCCGATCGACAGGTATC  
CCGAAAGGGCACGGCATGTTCCGGCTACACCGTCGTTCTCGGGGATGTTTCAGCTCGTGGT  
GGAACCCAAACCCCGCGGCAACCGTGAATGCCCGGAACAGCGGGAGATCCGAACGGGT  
TCCTGCCCGCCACCGGGTGTGCCTGATGCCGTTTCAGCACCGACCACGCCTGCGTGCTGGT  
CACGGTCAACGGCACTGCCGGCCTGTACGAGTACCCGAAGGGCGGCCCGCGACCCGTC  
GCTGGAGTTCGTCACCTCGGTGCCCGACCTTATGGGCGTCTACCGACACTACCAGCAGTC  
ACCATGATGCTCACCTTCTCGTCTAGCCGCCCTCTCCTTCGCGGCCATCTCCGTCCGG  
CTGCAGACGTGATGACAATGGGCACAACAGAAACGATCGTCCTGATCCGTTGAATCAAGA  
TCGTCTACTCGCTGCAATCGGAGTCTACGTATCGCTTCAGTAGCTACCCCCAAGCTCT  
GTCCCGACCCCTGCGGGGCCACCAACCGATAAGAAGTGTCCACCAACATGAGCAGCGTCT  
GTGCAAACAACCACCTCATGGGTTTCGGCCAAGTCCGGGTCGTTCCCGACCCACTGCACCA  
GGGTGAAGGCCGTCATCTAGCCGGAGCCGGAGGTCACGCAGCTGCGCGACTTCGACTCCG  
GCGCGCCTGCCTTCTGGGACAAGGACAAGCCCGGGCCGAAAATGCAGCTCGTTATCACCC  
TGCACACCTAGGAGCCCGACCTCAACGAGCCGCACAGCGATGGCGAGCGCAAGCTCTACG  
TGGCCAGCCACAAGATGCGGAAGGCAATCGCGGCGGCTGTCCGCGCGGCCGGTAACAAGG  
GCCTGGCCGACGACGGTGCACCTCGCGTTGACCTACAGCCAGAACGGCTTCAATACCGGCA  
AGGACAATCCGCCCAAGGAGTACACAGCGCATTAGGTCCTGCCGACGGGTGAGGTCAACG  
TCGAGACCGGTGCGGCCGTCCCGGCCGCTGCACCGGCTCCGGCACCTGCTCCTGCCCGG  
CTTCTGCTCCCGCCCCCGCTCCGGCACCCGGAGCCGGTTCGTCGAGCTGGCACCCCGTAGG  
ATGCTCCGGAAGCGGCCCGCCGCTGGACTCTCCCCGAGGCGCTGGCGGCTCTCAACGCC  
TGACGGGTACCCAGGGCGGATCTAGCCACCGGAGGGGCTGGTCCGGGATTCTTCGGAGTC  
GGGGCTCGCACCTTTAAGGTACCAAAAAGGCAGGAAAGATCCATGGCAGGCCAGGTAAACC  
GTCGGCTCGCCGTGGAGATCGACGTGAGGGCGAACGTCACGATCGACGGCTACCGGTGGG  
CGACTGTCGACGCCGGTGAGATCGAGGGCGAGACGACGCTCTGGATCGCCGGCGACGTCC  
GGACGATCGTCATCCTCGCCCGGCAGGATCAGCTTGACGCGCCCGCAGATCGTCGCCTACG  
AGGTTTGGTTCGCTCGAGCGCCTGGAGCAGATCCTGATGACTACCGCGTACATCGCCCGAG  
GCGACGCAATGGACTCGTCCGAGCAGGACGACGGTGACCACTACGCATACGAGGACGAGA  
ACTGTTACAGGACGCACAAGCTAAAGGTCAGCGACCACGAAGTCGTCCGCCGGTGCCGAGT  
CGAGTGCCAGCTCTGTGGAGCGAGACACAATCTCCTCCAATGGACATTGAAGCGGGAGAT  
GGGTGAGGCCACGTTCTCGAGGGACATCTGCGTGCCCCAGTCGGACGGGTGACCCGAGGA  
GGTGGGGGCAACGTGCGTAGAAGACAGGAGGACTACCTGATCAGGAAGAACCAGGCGCACCC  
GGGTTCTGGACCGATCAGTGGCGCATCAACGGGCCAATCCTGCACTAATCGTTTCGACGAC  
GCGCGGGTGTGCTCCTCAACATGCTATGCCTCGAAATGATCTGGAACACGAATTCACGT  
GGGAATAGGAGGGATTGAGATGGCGACACCGGCACATGCGCTCCGCAAGGCGATCGAAGT  
GCTCAAGGCGGACGGCTCGATCCAGGGAGCGATTACAAAGCCCGGCTGGTACTGCTCGAT  
CGGAGCGATCCCTCAGGGCGTGCTGCACGCTCTCGGCGAGGACTACGTGAGCGCAATCA  
CCAGGCGTGCAAAGACGACCTGTTCTGCTGCGCGTGGAGACGGAGCGACTCGTCCGGGG  
CGTGATTCGCGACCCGCTACAAGCAGTCCAGAATCGTCCACTGGAACGACGACGGGCGGCG  
GATGGTGTCCGAGGTGCTCGACGTCTTCGAGACCGCACTGCAGCTGTCCGTACGATTTCG  
GGGACGCTGCTGATGTGCGCCCGGGTCCGCCACTCTGCGCGCGTCGATGATCACGGTC  
GGCTACCTCAACGCTCTCGACGAGAACGAATGGGTGCCGTAATTCTTCGCGATCCTGTTT  
GCCCCGCTGATCGTCAGCTGGCAGGCGGAGCGGTGGTCTCTGAACGGCAGGCGCGAGTAC  
CAGAACAGCCCCGGCCATGGCTGAGCGGCCAGAGCTGGACGTATGCGAGTGTGCCACTA  
CCGGTTCTTCCACTTTGAGCACTGCTACTACGACGCCCTGAAGATGGCCACCGTCTGGCT  
GCAGGGGTAGATAAGTCCCTACGGATTCCCGTGCGAATGCACACCATTCAAGGAGAGATA  
CGATGGGTGACTACACCCACAGCACGACACCGTACGTGACTTCGGGGAGATCCAGCCGC  
ACGGCGACGGCGCACCGGCCGAGCTCGACAACCACATGCTGATCCCTGGCAGCATCCAG  
TGAGGGTCGTGACCGGCGTCGGAGGCGACTTCGCCCGGCTCCTGTCCAGCGACGGCAGCC  
GGTGGTTCGCGTACGGGTGCACGCACCTGGAGACGGTCCCATCGGGCTGTTGCTCAACAT  
CTTCGGCAAGGAGTTCGGGGTTCGTTATCGGGGCGTCACCGGCACCGGCCCGAGGGTTCGT  
CCTCACCGAGCTCAACCAGAGGGTCAACACAGCGCCCGAGAGCTGAACGAGCCCGAGCG  
GTGGCAGACCTGGGAGCGCCAACGCGACGCCTCCGGAGGGCAGTTGGAATTCGTGGCAA

CTCCCGGCAGGACCAGAAATTACACACACGATGGCAACTGAGATCACACAGTCGTTCCGA  
GAGCGGGTGAAGAAGACTCCGGAGCAGCGATGGTTCGACTTGATCCGGAACCGGCACTAC  
TGGGACGGCTGAGCCCAGGCGCGGACTAGCAGCACGCCTGGACCCCCGAGCAGGACTAC  
GAAAGCAACGAGCACCTGTCCCGGTCTCCAACCCCCCGTCGGCGAGAGCGTCAGCAGC  
GCAGTCCAGCCCACCGGCCTGCCGGGGTTCTTCCAGCAGACCCGGGGGCTACGGGGCCACG  
CACGAGCTGAACGTCGACATCGACTACCCGGTGTCTCGAGATCGAGTCATCCACGCCGGGC  
CTCAGCCGCCTATGCATCGAAAAAGGAGCTGTCCGGGGGCCGACACGCTCCAGGTGCTCC  
GGGTGCTGGCCTCGGTCCGCATCTTCGAGACGGGCTACTTGGACGCCAGCGAGCGGGCGCG  
GCTGCGCACACCAGCAGGTGCCGTGTCTGGAGAAGAAGCACCGCGCACGGCTCACGCCGA  
ACAAGACGGGCTGATGGCCGTGAAGCTGGCTGCCGGGGTGTCCGGCTGGTCGACGAGGGCTA  
GGCAGGTGCACCGGCAGCGCGGCTGCTGATCCTGAACCAGACCACCGTCAACGGCTGCGT  
CGAGCACGTGGACTTCCACCTGGAGCCGGACGAGGCCGAGACGCTCGAGTGGTCGCTGAT  
CAAGAAGTCCATAACAATTGAGGGAGATTGGGGAGACGAGATGAACTCCCTGCCCTACCG  
CCCTGTGCGAAATTATGGGTGGAGCACGAGAGGTCCGGGGTTCAGTAAGAGATCGTCCGGC  
TTCGCCCGGCGCATGGGGCTACGGCTCCTCGAGATCGACGTCGCCGTCGGCGAGCGGCTG  
GAGATCGTAACGGTCACGGCCGACGGCAAGGCCCTCGTCTTCGAGAACGGCGAAATCACA  
AGATTGAATTACCTACTGCCGATCTCGGAGTAACGGAGGTGTGAGATGAAGGGCAACGGG  
CAGATGGTCAAGCTGTGACCCACGCGCCACGGCGAATGGCCGAGATGAGTGTGACGAG  
CACGAGGTGCAGTTGGCGATGAAGTACCCGGAGGCCGTCGTCTCGTCCAGCAAGTACGCC  
GGCTACCAGAACTACCGGCGCGGCAGGATCGACGCCGTTGCGAGGACCGAGAGCGACGAG  
CTGGTGGGCATCATGGTCGTCTGGCCGAGCCACGAACTGTGGCAGCAGCACATCGAGAAG  
ACCGGCCACGGTCACGGACGAAAGCTGAAGCCGTGGCTGAACATCTGATCTGGGGCCTGG  
CCCCGGATCCGGTGTACGTGTCGAGTGGCCTAACGAGGACGGCGCGTGGGTAGGCCTGT  
TGCTGTCTCTATTCCCCTCGTGTCTGCTCGACGAGACACCGGCCGCGGCACTACGAG  
GCATACTACACACGGTGTGGGTGCAAGTGGGCCACGAATCCGAAGGAGCGCATCATGTCA  
GACAGGCGGTTACCTAAGACGTCGTTACGCGGGCACCGTTCGCGTACAGTCGGACCC  
ATTCTGGACTTCGCGACGAACCTGAAGGACAGGCCCTCGCGACGAACGCGTCGACCACGGG  
ATGATGGGCGCACTGGGGGCGCCATACTGCGCCACCGCCGACCGGCCTCCGAGCTGCCG  
CCGACGTACGTCCCCCGAGCGTCGACCCAAGGGACGTCGACAAGCTGCACGTCAGCCTG  
TTCGCCCGCAAGAACCTCCGGCTGGTCCGCGAGGCTCATGACGTCACGGCGTCTTACG  
ACCGAGCACGCTATGCACGACAGGGCCGCCACGAGATCCGTGCGCTGGGCGACCATGGC  
CGAATGACTTCAGAGTCAACGAGGGCTGCCCGCGCTAATGGACCGTGGAGTTCACCGAC  
CGGGTGTCCCTGGAGGAGTCCGGCATGGCCGCGCTCGTCGAAGCCGGAGATACCACGTCG  
GGACAGTACGACAAGGTGCTAACCAGATGCCCGATTGCCAGCCATTCTGAACAGCTCCT  
GTTCCGCGCTGAGCGGGAACGGCAACGAGGTGCTGCTCGACGCCGACCAGGACCCCGAGGG  
TGGACAGGTGCTCTTAAACAAGGGGCGCCGCGTCTTCGTCGCCCGGCCCTTGGGGTGGGC  
AGTAGTGAGGCAACACAACCTGCGGGTGTACCGGCGACACAACACTCATTCCCAGGAGTT  
CTCGAACACCAAGGTCCACCCCAGCCAGCTCGCGGAGCTTACCCGAGAGGAGAATTGACA  
CGCCCGAGTGCAAGATCCAGGAGATCCTGGCGGCACGGAGTGAGACCGGCATCCCGGCCA  
ACGAGAACGACGTCGAAGAGTTTCTCGAGCACCTCGATGACGAGGGCTTCTACGTGTCC  
GGACGGGGGAGTAATCAGGAGCGACTTCATCGGTTGGCTGGACAGTCTCAGCCTGTTCCA  
TTGGTACGTGCTGTTTCGATCTAATCGGGCTAGCGTTCGGCCTCACAGACATATGCGTGAA  
GGACACGGGGGCGGAGTACCGCGCCCTGAAGGACGACGCGCCCGGCTGGGCACCCGGCTC  
GTCCAACCGGGTCGTGCGGCTGCTGACCATGGTCATCGTAGCCGTCGCCTGGCCGGTCTG  
CACCGTCATCACGCTCGACAAGCTGACCGTGCAGTCATCGTGTGCGGCGCAGCCAAGTG  
CCTGAACTGGTCGACGCGCCGGTACTGCGGACAGTCGAGATCACCGACGAGGATCTCGG  
CGTTCGCGTCTTACAGACCCGCTACTACTACGACTCGAGTACTGGCATGTTTCGACGCCGA  
AGGCATTGTGGCGAAGCCTGAAGGAAAGTGGTACCATGAGTAAGCGCATCAAGGCCCAGA  
ATGCGGCTCACCCGGTCAACTCGGTGCTCGAGACGACGTCGTACGTCTTCCATGACCCCG  
AGGCGCAGATCTCAAACGGCATGAGTTCGTGCGATCGAAGCAGCGGTTTCGAGCAGGACC  
TTCCGCCCTGCAGCCCGCTCGGGCAGCGTGAGCTCGCCCCGTACGACGACACAGAGTACG  
ACTTGCTCACCCGGCGCATCTCGAACCAGCGTCGGGAGCTCCGGCCCCCTGAACCGCGCAT  
ACCGTCGGCGCAGCGACGAGCCAGGCTCGAAGTTCACGCTGCTCAAGGACCAGGGCAAGA  
TCTCGATCCATGCGACGATGCCCGTAACCTGAAGATCACGCAGCAGCAGGTGGAGATCG  
ACCAACTGGGCCGACAGCCGGCCACCGCGACCGTCGGCGACCGACGAAAGAGGGGATTCC  
GATGGGCGCGACAGAGGAGCGTGGTCAACAGCCGTACCTCGCGCCCGTCACGAGAGCGGA  
CCTGCGCCGCGACCGGCTCTTGACCGCGGATCAACTCGACGTGTCCCTCGCGAAGGTAGA

CAGCCATCGCTCACCGTGGTAGCGGGATGCGTTGCTGCTGGTCGGGAATCTGCGCACTCT  
CGTGGTCTGCATCGGCGAGAAGAACCTGCACCACATCGGCCGATCCGCCGGGCAGCACAC  
GGTGCATCGCCTTACTAAGGAACGGGCACTCGCCCTCGGACATGAGGCGAAGCCCACCGT  
GACCTGGTACGAGGTCAGCTTGGCATTCCGGGACGGCGTGAGGCTGTGAAGCTGGTCGGG  
TTCACCACGGTCAAAGGTAACGAGGTCGTCGCCAACTCGGAGCACGTCGTCGCCCTCCAC  
CACTCCGGCCTGGACCACAGCGAGATCAACCTGATGAACGGGGACGACGTACAGGTCTAG  
AACCTCAGCCCCAAGCAGGTAGGTCACCTCCTCGCCGAGGGGAGGCTGTCTGTGGAATCC  
GTGTTACGCAGGAGAAGCACGCCCCAGGGGTAACCCAGGCGATGGCAGGTGCAGTACC  
TTGGCCGGCAGTACGTCTACTCGCCCTGGTACTTGGCCATGCGGGCGTCGAACACACTGG  
CCACCCTCGGAGGGCACCCCCCTGTCCGGGGCCTGCTCCTGGTTCAATACAATAAATGAG  
TGAGGAAGTGACAATGTTGGCGAATGAGATTCGCGGATACGCCGACGCGTTCGAGGAGTA  
CTGGAACAATGGCTGGAAGTCGATCCTATGGCCGCCGAAGGGGAAGAAGTTCGCCGCC  
GTCCGGGTACCCCGGTACGACGCGGCGATCGCCCTTACCACAACGTTCATGGCGTGGGC  
CGAGGACCATCCCCACGCCAACCTCGGACTGCGGTTGCCGGCCGAGAACGTGGGCCTGGA  
CGTGGACGCGTACGGCGAGAAGACCGGGGCGTCGACCATCGCGGAGGCCATGAAGCGGGA  
CAGCCTGCGGCCCCCGCCGGTGCCTACACCTGACGGACGGACTCGACATCGAGTATCCG  
CATGTACCGCAAGCCCGCCGACATCCCCCTGCATACGCAGATCAAGATCCCCCGACACAC  
GATAGGCAATATCGAGGCCGTCCAGGACCACCAACGGTACGGCGTGTCTGTGGCCGTCCAT  
GCACCTCGAGGGGCGGATGTACGAGTGGCGGGACGAGAAGCTCAACGTGGTGCCGGTCCG  
TTCGTTTCGACGACTTGCCCGAGGTACCGGGCCCGTGGATAGAGGTAAGTCTCAAGGAAGC  
TCCCGCTCAGACCACAGTGTCCCCGATCCGTTTCGAAGCGCTCCGGCAGCACCCCGCAGGG  
GAAGAAGAGCGAGTAGGTCGGCGAGGCTGTGCGGGGCGCAAAGACCGAACTCGACTGCGA  
GCCGGGGTACGTCGCGACGTCCCGAACGTTAACGTCCTGCGGCTGCTGCCTCTGGCGGA  
GTAAGGGGAGTAGGGCATCACCGAGGCGCTCGAGTCCCTGCGGTCCAGTTCGTCGGGAA  
GACGGGGGACCGGAACACGGAGTGCGAAGCCAAGGCCGAGTTTAACCGGAAATCGTACGG  
CCAGCGCGGGCACGACCTGCTCGACAGCGGGCCATCGGAGGAAAACCTGCTACGCGGACCT  
CGGCAGCGACGACAACGTCCAGGGATCCGAGACCCTGGCGAAGCTGCGGGCGCAGGCCCA  
ACCTGACCCCATCGTCGATTGGTAGCCGCATCCGTCGGATCCGGCCTAGCCGGTTCGCGCC  
GTACCTGTTTCGAGGAGGACCCGATGATCCGTC AAGCGAGTCAACCTTCTCCCGGGATGCT  
GGACGCCGACGCGTTCCTGTTTCGGCAAGGCAGCGGGGCTGGTTCGCCAGGTCGAGCCGCT  
GACCGGAGCGGCGGACGTCGCGGAGATCTAGTCCGGCGGCGAGGTCACGATGCGGAGCAA  
GCTGCTCACCGTTCGCGGGCCTGGCCAACGTGCGGCGGTTCGGAGCGGCTGATCGACGGGCT  
ACTCTACCGGCGCACCCCTGTAACAGCTCTCCGGCCCGCAGGGATCCTGCAAGACGTTCT  
CTCGATCGACATGGTCTGCGCGCTGGCGTCGAACCGAACAGACTGGAACGGCCACGACAT  
CACGTGGAAGCGCAACGGCAACAGTGGATTTCGTCCTGTACGACGCGGCCGAGGGGGTCTC  
GGCTCTGTACGCACGGATCAATGCGTGCTGCTCATTGAAGGGGACCGGCATCGACTCCCG  
CATCCTCCAGCTCCTCGTCTACCCGTAGGTGTTACAGGACAGTGCGTACACGCAGATGGA  
GGCGCAGGCCGAACCTCGCTCGAGCGCTCGACTGCGTGCTACGGAAACATGAGCTGCCAGC  
TCTAACAGCACAGCGCGGACGTATTCCTCGGCGTGCCGTTCCATATCGCGAGCTACGCGC  
AGGCGACCCATTTATTCGCGGAGCAGCTCGGACTGAAGGTCGGCGAATTGATCTGGACCT  
GCGGCGACGTCCATCTATATTCGAACCACGTTCGAGCAGGCGCCCGAACAAATGACGCGAA  
CGCACAGTGGATATCGGTGGCTGGCGCTGAATCACCGCCACTTTACCTTCGAGTAAACCG  
CCGACGACGTACAGTCCCTCGGCTACCGCCCGCACCCGGTCATAAAGGCCCCCGTGGCAG  
GGTAAAGGAGGTACGGCTTTGGCCGACAACCTGGACAATAGACCCTGACGCCGAGCCAGAC  
TGGCATATCGACTGGATCATCTGGCTCCAGCAGGGCGAGAGGATAACCACTTCAACCTTC  
GACATGACCGACGGAATCGCAGTCCGGCTAGACGGCGAATACGACGACGAATACGACGGTC  
TGGCATTCCGGCTGACGCCCCGGCCACAACCTACCGCGTCACGAATAATGTCATCACATCA  
GCCGGTCTCACTGCCGAACGCTCCATCACTATCCGCGTTCGAGACCGGCAATCTAAGTAA  
CTTCAATGGAGAACAAACAGTGTCTCTCGCACCCAAGTATCACCGTGAAAAAGTACAAGC  
GGTAGTAGGGCGCGGACATCACAGCAGCCTCGGGCGCGGGCAGTCGATGGAGGACTACG  
CCCACATCACGCCGGAGGACTTCGTCACCGTGGAGGGCAAAGTCCTCGTGTACGCTGTTC  
TCCAGGTCCTTGCCGACCTGATCATCGGCAACGGCAGCGTGACGGCGTTCACCGCGACCA  
AGGCCCTCATCGGCGTCGGCAAAAACAATACTGCACTCACCCCGACCCACAGCGTCTTGC  
AGGGCGCGCCCGAGCTGGTACCCCGGAGGGCAGCGAGGCGTCCGGCGTCTGCAGTGTC  
TCTCGGCCTCGGCCCTGTCCGCTTCCGCCGACGCCAAATTCCTCAGGGAGGAGTGGTGCC  
TCGGTATCGGCTGCGGCCCGACCGTGAAGAACGCCGTTTCGCGACCGCTGGTCTGGCT  
CGGCCGTGATGCTGACCCGCAAGGTCCAGTCGATCGGTACGAAGGCCTCCTGCGCCGACT

TGACGCTCTCCGCGACGGTCACCCTGTACTGATCCAAAACCTAAAGGCACCTGACTTGAT  
CCGCGGCTATCTAGTTGGGAGCATTATAGTTCCGGCTTACTGACCCGCCAGGCAGTAGG  
AACATAACAACGCTTAGTAGGGGCGGCTGACATGGACCACCAAGGAAAGGATCGAACGCAA  
ACCAACTCCAACGCGAAGCGTGACGTAGCGACAGCAACCGCCGTCGGGGCACTCGTCCTC  
GTCTCCGCTGTGCGCAGGCACTCCGGGCGCGTCGTGCGCAGACTGTTCCGGGCGCCGCCAC  
TTCGGGGCGTCCGGCAACTGGAGCATGAACACCAGCAACGGCATCTACGGGCGGCCTGCAG  
TTCTCGCATTCCACCTGGGACGCGTCCAAGCCTGAAGGCGCCGCTGTGCGCTGATCTG  
GCCACGATGGGGGATCAGTTCGCGGCAGCGGAAGCTACCCGGAAGGTGCAGCGCATCGGC  
GCGTGGCGGGTGAGTGGGGCGTAGCTCGGCCAGGGTGTAGTCACTGCCGGCGTTGGGACC  
GCGCCCGCCGCGCCGTGCTACGTCGGGCCGGCGCACTACCCCGCACCTCCGCATCGTGG  
GTGGAGGCGGGGACTGGCACTAAAGTTCAGGGCTTCCACGGTGGCCACAACGGCGTCGAG  
AACTCTGCCACGATTGGCACCTGAGCTACGCAGCGGGTCCGGGTCTATCGACCTGGTT  
GGTTCAAGTGCACCCCGCGGGTACGGTTACTACATCCAGCAGGCCGCCGACAATGAC  
GCGAAGATCCCGTACGGCCACATCTCCTAGATGTACGTCAGCGCACGCGACGACGACACC  
GGCGGATCCCTGCGCGCGGCGGTTCGGCAACCCCGGCTTTTCGACCCGGTGCGCCCTGGGT  
CTGCTGATCAGCGCCGAGCATCCGGAACGTACGTGATCAACCAGGGTTCGCGCTGGAC  
TGGTCCGGGCCCATGGGACTGCGCGTACACCGGCACCGGCACGTGTGTCCGGCCCTGTG  
TAAGAGGTGGCGGTTCGGGGACGGTCCGGTTCATCATGGCCTCGGATCCCGATGGAGTCGAG  
ACGGTGAACCTGGTTCCGGGCGACACGCTTTCGCACATCGCTGAGTTGTTCCGGGAACCAC  
TCCTGGGAGACCCTCTCGGACCTCAACAAGCATGTGGTTCGGGAACCCGCATGTGATCTAC  
CACCGCCAGTTGCTCCAACCTGGCCTGAGAGAACGGGAGTCAGCGGTATGGGTAGCCGAAG  
CAACCTCTACTGCAGCACATCTCGACCCTGGGCAATCGACTACCGTCGAGAGGAGGGCTG  
GGCACAGCGGTTGAGGAGCAAGCTCGAACGCCGCCGTGCTCAGCGTTTAGTGCGCGACGT  
GGGATACGACCTGGCCCCACTCGCCAGACCCAAGGTACTCAGAGATGGTTGCCCTACTA  
GGTGCCCTACGTGCCAACTGATGTCTACACCTCGACTAGAACCTGGACCTGCCCGGCTGG  
CGTCTGTCCGTTGATGTCTGGGTCTAGGGCGGCGGGCGGCACCGGGGCGGGTGTACCTT  
GTTCTCCGATAACAGCGGCGGCGGCTTGGGCGTTGCCTTCGCCTGCAACACGGTTCGCTG  
CACCCCGGATACGTCTACACCGTCTCCGTCACCACTGGCGGCACCGGACAGGGCTCAA  
CGCTGCAGTTGGCGGCGGCGCATCCTGGTTGGGTAGCACAGGCACCGTGTACGCCCCCG  
CGGCAACGGCGGATGGAAGTGCCAGTCCGGCACGGCCGGTGTGGCGGTACCTCTGTGGC  
GATCGGCAGCACGGTCTTCTACGGCGCCGACGGGTTCGGCCGGTAACCAGTCCGGCAACCG  
GTCCGGCGCCGGCGTTCGGCGGCGCAGGCTCGAACGGCTCTGACGGCCCCGGCGGCACGCT  
CTCTGGCGGCTCGGACGGTAACGGGTCCGGCCGCCAGTTTGGCAGCAACGGCGGCGCGGG  
TGTCACCACAGACGTGGACGGAAACCCCGACCGCATCCCCGGCGACGGCGGCGCTGGTGG  
TCGACGAGCCAGCAGGAACCTAATCGGCGGTGACAGCGGTTCGCGGCGAGGTGTGGATGAC  
ATACGTAACCGACATACGATCAACCCGTCCGAGGCCTTCGGGACGATGGCGGACGCGGC  
GACCGGCAACGCGCATGCCACCCCGACCGAGACCCTGTTGTTTCGACGAAATCGCCCCAAG  
GCTCTAGCCGTTGGCAACGCCAGATAACGGCGGGCGTCAGCCACGAATCCGCCGAGCCGCC  
AGCGACCATACCCAGGCGGACACCGGCTCCGGAACCTGACCTTGCCAGTGCATTCAGCGG  
GCTCATCCAGCCTACTGACACCGGCCAAGCCCACGATCAGGTCTCGGTACGTATCACGAT  
CGCCGGCGACACCGAACAGGGTTCGGAGTTCGACCAGATCTAAGGTCAACGCCACGACGGC  
GAGCGACATCGGCTCCGGCACCGATGCCAGCACACTGACCGCGCAGGTCTCGGCTGCGAT  
GGATAACGGCACCGCCGACGCCCACGCACACGCCAGCAACAGCGTGGTTCGACGGCGACGC  
CGGCTCTACGGCCGACGGCACCGCGACGATGCGAACGGACTCTAGAGACGAAGCCTGCGG  
GTCCGACGAAGCATCCACGACGGCGACCGTACCCAGGGCGATAACCGGAGCGGCGGCTTA  
CACGGTACCCGGCATCCGGCAGCCGTCGACGAACACCGCGGACGGGGACGATTCCAGCAC  
AATGCGGATCAGCCCGGTTCGGCGACACCGGCACCGGCACTGACTCTGCGCAGATCCACGT  
CACCGTCTTCGATATAGACACCGGAGGCGGGGCGAAGTTCGGCGTTCGTCAGGCTGTTCTC  
GCCCCGACGACGGCGCGACCGATTTCGAACGAGAATCATCGAAGGCCGTCAGCGGCATCCT  
CGGCGCACCCCGCCTGTTACCCGTCCCTCCGTTCAAGAGGAGGGTGAAGATCGAGCGTGA  
GCGCGAAAGTTCGAGTCGTGGACAGGGAAATCCGGCTAGTCATCCTTGGCAAAGGTCTGAC  
GCCACGCACGACCATCCCGCACCGCAACGGGCGATCGCTAGGGGTCCAGCGACGGAGACG  
CACGTCCGTCATAAAGCAAAAAGAGTAACAAGTGTCTACGAGATACCCGCCGAGCAGAG  
TCCCCGCGTCCCCGAGGACCAGTCCCTCGACATGCCGCTGGCGCTGACGGGGATCCGTGA  
CTACGTAGTCCACGAGCTGGACGTCTACCGATGCCCGAAGTGTGACATGTCCAGCTCAA  
GTACGGCGACACGGCCTCTCTCGTCTGCAGCGGGAGAAGACCCTCGAAGAGATCGCAGC  
CCTACCGGAAGGCAAGAAGCCCGGCGAGAAAGTTCGCACCGAAGACCCCCACAGCCGGAT

CCGCGCCCTTCGCGCCGTCGGCGACGACGAACCCACGGGCAGCAAGGAATCCCCCGCAC  
TCAAGAGGGTACACGTCGGATAAGCTGAGGAGGTGACTAGTGGCTGTCCGTCTTGGCGAA  
CAGAATCCACGGATCCTTCATCAGCCGACAGCCTGGGGTGGGGTCACCTCGGCGGGCCGA  
GAGGCATTTCAAGTCGCGGCCGAGGCTGGCCTGACCCTCGATCCCTGGCAGTAGAACGTG  
CTGCACGGCGCTCTCGCTTCGCGCGAGAACACCGTCTACAAGCCATACACGGATCAGCTC  
GGATACAAATGGGCCGCACGCGAAGTCGGCCTGATGATCTCCCCCAGAACGGTAAAGGG  
TCTCTCCTGGAGCCCCTCGAGCAGGCTGGCCCCTCCCTTGTTCGGCGAGCCCCTGATCATC  
CACGAGGCGCACCAAGTTCGGTACCTCCAAGGAGGCCTTCCAGCGAATCTTCTTCTGATC  
TAGAACAACCAGGACTTCTTGCAAGGGGTTCATGCGGGTCCACCGGTCACAGGGTGGAGAG  
GACATCGTGATGAAGAAGCCGAAGGGGTCCAACCAGCCACCGCAACGACTTTGGTTCCCT  
ACACGGACCAAGGGCGGTGGCCGAGGCTTACGGGTGACACCCTGATCCTCGACGAGGCC  
ATAATCCTCGACGCCGACATGGTCAAGGCGCTGATGCCAGCCCTGACGGCCCCGACCGAAC  
TTGTAGATCTGGTACACCGGCTCGGCGGCTGCCCGGAAGTCCACGCAGATCGGCCCCGTA  
CGCTCCCGCGCCATCGCTGGCGGGCAGCCCGCCGCTCGGGTTCGGCGAGTGGGCGGCGGAT  
CTTTCACCCCGCTCTGCCCGTCCGCTTGAGACGGGCACCAGAAGCCCGGCGACCCACTT  
ACGTGGGCAAGTGCGAACGTCGCCTTCGGGATCCTCATCCAGAAGCAGGGCATCGCGGGC  
ACCTTCCACTCAATGGACCCCAACTCGTTCGCGATGGAGCACCTCGCAGTCGGCGACTGG  
CCCACCGACGGGCCACGCAGGTTGGTGTATCGCCGAGAAGTACCGGAAGAGCCGCGTTCGAC  
AGCAATTCACTGCTCGGCAACGACTTCATCCACGGGGTTCGAATTCGCCACGGACCGCAGC  
GAGGCTACGATCCTGGCCGCCTGTCAGAACAGCTCGGCGTTCGTCAACTGAAGATCACG  
CCCTACGAGGACATCGGCTTCTACAAACGGTTCGGCGTCTAGTGGGTGCGTAGGGCGGTC  
CTGCACATCTGGTGTAACTGCGCCCCGAAGGCGGTAGCGATCGACCCCGCCGGCGAGGCC  
GGTGCCTTGAATTGCGCCGCTCCAGGACGCGCATGTCAACGTAATCACGCGGACATCGCGC  
GAGTACGGCGTCGCCTGCGGTGAGTTCCGCTGCGGCATCGCGCCGCGCAAGGGTAAGAAG  
GGCTACCTAACGCACATAAGCCAGGTAGCTTTCACCGCGTCGATCGCGGTCTCCGACATG  
CGGACCGCCGGTGACCTGTTAATGTGGAGCAAGTCGCTCTCGACGGCCGACATCATCCCG  
ACCGTCGAGGGCACGCTCGCAGCCTGGGGCTGGGAGAACATGTGCTATACGAAATCCGAA  
ACCCTCGCTACACCATAGGTAATCAAACGATGAGAGGCTGGACCAAATGAGGCGTATCGA  
TCTACAGGTGCTGTGCCCGGTGCGGATTGAGCTGGGCGTCACAGACACGGTGCCACCTT  
CGGAGTCTGGACCCAGATGGCCTGAGCGGCCGCAATTCTCGTTCGCGGTGTTCTTTCGTGGA  
GGTCACTGAATGATGGGAAAATTGTGGTACCACGTACGAGGCCTAGGTACCCCCACCGAG  
CAGCGGGTCGGCCTAGACGACCTCGCCAGTGGTACCGTCAGGACAAACTGCCCCCGTTG  
GCAAAGCGTCCGGGGTACAGCAACACCGAGGCGATCGACGTCGACTTCGCGGGCTATTTG  
CTCGGCGCGGTCAAGGCCAACGGCGCTGTCTTCGCGGGAGCGATAGCCCGGATGTTGGTC  
TTCAACGAGGTGCGCTTCTCGTTCAGCCGTACCCCGAGGCCGCGCCCGCCCGGCGACCTG  
TACCGGTGGCCGAGCCTGAACATCCTCGACCAGCCCTGGCCGAACGGTGCACCGGTGAC  
CTGCTGGCCCGAGCGATACAGGACACCGAACTGGCGGGCAATCACTACATCGTCTGCTAG  
GGCTCTGGCCCGAACCCGCGACTACGCCGCCCTCGGCCGGATTGGGTGAGCATCATCCAC  
ACCTCGCCGACGGATAATGCTGTGCAGTCCGACGTCGTCGGGTACCTGTACAAGCTCGAA  
GGCACCGAGAACGGGGAACTCTGGAAGGTGTACCCGGCCGATGGATCGAACGGTGCATC  
GCGCAATGTGCCCCGATCCCCGAGCCGGAGGCGGCCTACCGTGGAGTGAGCGGGCTGCCA  
CCGGTCCCTCCGCGAGATCATGCACGACAAAGCGGCGAGAAAGCACAAGCTGAAGTTCTTC  
GCGAACGCGGCCACCCCGTACCTCACGTAGTCGTTCAAGGAGAAGGTGAAGACTGAGCAG  
TTCAAGGAGTTCATGGAGCAGCGGACGACAGCCACGGCGACGGTGACAACGACTGCAAG  
ACGCTGTACCTCGGCAGCGGCTCGGACGTGCGCGTGATCCGCTCCAAGATGAAAGAGATC  
AATTCCAAATTGAAGCAGGGTTTGTCCGATTTCGCACATCGCTGCGGCCGGACGGAACCAC  
CCCGCGCTCTTAGGTCTTTCCGAAGGGCTGCAAGGTAGCTTGCTGAACGTGGGCAAATAC  
AAGGCGGCGCGCCACAACCTTCGCCGACGCGACAATGCGGCCCCCTCTGCCGCTCGTTGCCT  
GCGGCGCTCTCGTTGCTGGTCGAGGAGTTCGACGACTCGCCACTCTAGTACGAAGCGCGC  
GACGTCTAGTCCCTCCGACCGGACCTGAAATAGCTGGACGAGATCACCGCGCAGAACCCG  
TCCATGGTCTCGAAGCTCGTCATCCAGGGCTACACGCGGGAGTCGGTACCCGAGGCGATC  
GTAAAGGACGACCTCCGGGTGCTCAAGCACACCGGCCTCTACTCCGTCCAGCTCTCGCCA  
CCCGGAACCATCGGCAAGGCCGCACTGACCAGACAGACACCAGCTACCCAGACGTACGAC  
GTCAAGAAGGTCTGAATCATGTCGAGAACGACCCGAAGGCAGTGGTCGACGTCCGGAAC  
CGAAAACAGCCAACAGTCAAGTCCGGACAAGGCGAAATGGCCGCGCTCCCAAGGGAACGAG  
TGATCGAGAGTGGTTCTGTGTACTCGCTCGGTAGAGTTCCGATCCCATACGCCGCTGGC  
GAAGGCGACGGCCGGACCCCTCGAAGGGAACGTCACGGTTTTTCGAACAGGACACCGAGATC



AAGCCGTGGGAAGGCCGGCTCGCCGAACGGATCGCCAATGGCCCGTTCAATAAGGCCCTC  
CGTAGCGCAAGCCGAACATGCAGTACGACCAAGGCCGGGACTCCCAGCTAGGGTCCGGG  
CCGATCGGCATGTTTCGAGGACATCCGCGAGGCCGAGCACGGGCAGTTCGTGTCCGGCCGC  
GTGTGCGACAACCCCGTCTCGAACCATTCCGGCAGGTGATCAACTGGGGTGCCGTACCC  
GCCATGTCGGTCAAGTTCGCGTCAACCCGAGACGGGTGGTTGGACATGAACGGCAAGCGA  
GTTTCGAGACGACGAGATCAGCAATGTCTCTGGGAGAAGGGCCACCCGGGGTCCGCTGGCG  
CGCACGATCCGGGAGGTCTCGCTCTTCGAGGCTGGCCGCGGGTCTGACTCTAGCGTACGCA  
GGAACCCGCACCGGCCTCCGGATGACCCAGGAGGATCGCGACGCTCTACCGCCGAGTAT  
CGGCGCACCATGGCCGAGATGGAGGCCGCGCAGGACGTCGTTTCGATTGGTTCGAGGCTGAG  
GACCATCACTAGAACGATGTTCCGGACATGGCTCCACGCTAAAACCGTGTCCCATAGGGCA  
GTATCCTTCTGGATCGCAGGCGGATTTCGAATACAAGACTTCAATCGAGAGCGACTGCTCC  
CGGACGGGCAGCCCGGTCCCATCGATACTCCCGAAGCAGACGCCGCGCGCAGCCGGTGC  
ACCTCCAATCCCGAAGACACCAACGCCCAACCTTCAACAGGTGCATTACATGCAACCC  
GAAGAACGGCGGGCACGCCGAGCGAGATCGACGTCCGCCTCTCAGACATCGGTCCCTAA  
TAGCCCGTCCGCGAAGTCCCGAATGCGAGCAGGCCCGGTGGGACGGCCTGGAGGCCGAG  
CGCGCCAAGGCCGCAAGCTCGCTGGAGTGCATCGAAGCCCGGATGATGCGATTTGGTGGG  
CTGGCCGACACCGGCAGCACTGAGCGCGTCCGACACCCGGCACCCCGGGTACCATGCC  
CGCCGCGCCATCCACGACACCGACGACATCCGCCGGCAGGCTCGCAGCGAAGAGGATTTG  
GTCGAGTGCATCCAGGACAACGCCCCCTGGGCCACGGAGAACATGCACTTCTCGCCGGAG  
GTCTCGCGCCACGCCGCCAGGTGCGCATCGAGCGCCTGCTCGTCTCTCGACTCGAAG  
GGACACCTCGCCAAGCGGATCCTGGTACCGGCACCACGCCGTACCACCGCGCGTTCAGC  
AAGCCTGCTCTAGGGCAGAGCCTGCAGGGTCTGACGGCCGAGGAGGCACGCGCCCTCGCA  
CTCGGTGCCAAAGTTACGCCCGGCAGCAACGGTGGCTTCGCGGTTCGTCATTACGCTTGAC  
CCGACGATGATCTGCACCAGCGCGATCGACATCAACCCGCTGCGTGGCCTGGCGCGTGT  
GTCCTGGTACCCGGCAAGGAGTGGCAGGGCGTCACTCCGCGAACGGCATCGTTGTCTCG  
CGTGGCACTCAGGCCTGCGCGACCGACGGTCCAGCCGATCCTGGCACAGGCCAAGGTC  
CGTGCCGATCGTGTCTCCGCGTACGTCCCGTCTGGTTCGACATCGAGCATGAATGGTTG  
GCGATGCGTCAGGAGGTCACCCTGATGCTGCGCAAGGCGACGGACGCGGAGGAGGCCGGT  
TCGTTCTGACCCGGCGACGGGCTGGGCGTCAACCCGCGAGGGCTTGCTCACGGGCGTCTG  
TCCCGTACAGGACGTCGCTTGCAGCATCTCGCCTGCCCTCACCTCCGGTACATCTACTCC  
CTGGAGTTGGCGCTGCCGAACCGCTACAGCGCGAACGCCCGTACCTGGGCGCGAAGGCCG  
AACTACAACCGCGTGCCGAGATCGACACGGCTTGTGGCGCTGACCTGTGGGCGCGTCTC  
GGTGACGGGCTGCCCTCGCAGCTCATCGGCTACCCGCTGCCTGAGGCGAGCCAGATGGAA  
GCCTACCCGAAGACGGCTGTCGCCAAGCGCGTCTGATCCACGGCGACTTCCGCATTTTC  
CTCATCGTTGATCGCATCGGCAGGAGCATCGAACTGGTCTCCACGCCTTCGCGAACTCG  
GGGGGATCTACCGTGTGACAGGCAAGCGCGGCCTCTTCGCGGTGTGGATCAACAACCTCC  
AAGGTTCTGGTGGCCGCGCCTCCCGCGTCTCAAGACCAAGGTATCTCATCCACTGAC  
TCTCCCGAAGCGCCGTAGCTCAGTCAAAGGTGTTGCGCCCTTCGGTTCGTCAGGAGGGCG  
GCAGCAATAGCTCTCGGTGATCCATACATACCAAGGACGAGCTGCGCGACTACGTGCAG  
ATCCAGTGGGACGTGATCCAGTTCGACCAGAAGCTGACTGACGCCTGCGCCGTCGACTCT  
GGCGAGGACAAGTAGCACTGCGGCCGTCAGTTCCACAAGTAGGACACGGCCACCCCGCGC  
AGATTCAGATCGAGCGGCGGCGCAAGGTCACGGTTGAAGACTTCGCCACCAGCGCAGCC  
CTTTAATCGAGCAGGATGACGGGGTGGGCAAGTAGGAGCCGGTCGATACCGTGTGCGGC  
CTTCTGGCCCCCTACGAGGGGAGCGTCGACGGCCTGCCGTGGCCCTACTACCGGCTCGAG  
TCCCGGACTGCCGCTGAGTCCCGCGGAGCGATATCAGGCGCGGTTCTCCGCGTTC  
GCGCAGTGGGGCTGGCCGAGCGTTCGGCGACGGTCAAGCAGTCCGCGTTCAGATCGCC  
GCGCAAACGTACCTCCTCGCTGAAGCGCGCGTCCGGATGACCGGCAACACGCACTACGGC  
GGCGTCGTCCGCGTGGAGGATCTGCCGATCGTCCGCGACGAGGCTCTGCCGGTCCGTAATC  
AACCCGATCCTGGTGGAGGGACAGGACCACGCTCAGTGAGATCCGTCACGCGCTCGCTAA  
GACGATCAAGGCGGGCGTTCGACAGGACGCTGCACGCGTACAAGACGGTCGAGGAGATCGT  
CAACGTGCAGTGCCTGATGATCGAGCCGTTAAACGCCGACTTCGCGGGTGCCTTCAGGC  
CGGTAGGCACACCCGGAAGTTCTACGTCTTCGTGCTCCCTTCTCGTGTAGCAGGTCCAC  
GACGCGCCAGAAGCGGGTCGACCAGATTGTCTCCAGCACCGGCCCGAACAGCGAGGTCCA  
AATCCTGTACGAGAACTACACGCTCCGCTGAACGGCGTTCGTGGCCAGTGCTACGGCAT  
GAAGGGCTACGGCGGCCCGATCAACTCGGCCAAGGTTCGCGGACGTCGGCGCAATCCCGCA  
GGTCCGACTAACAGTCGATCCACACGCGTAAGGAGCTGGCACGAGCATGGCCGCTCTCAC  
ACACAAGGTTGTGTCCGACGATGGGAGCGCGCCTACCCTCGCCACTCCCAATGCCTCGGA

TCGCTCACAGGTCAGCAACGGCCATAACACATTCCTGTACGTCAGCAACACCGGGCGGCTC  
GGGTGCTAGTGCAGGATGACCCCGCCCGGCACGACCAGCTAGGACGTCGCCTTCTCTGA  
CCAGACGTTCTCCGTCCCCGGGGGCGAGGCGAAGTACATAACCGCTCCGGCGCGAGTACGC  
TGACGACTCCGGCCGGGAGACAATCGAGGTCACCGGCATGTTTCGCGTACCTGAAGGTCGC  
CGCCATCCGGGTCACCTAATGGCCCACGCGGACTTCCACAGGCGGCGCGAAGAGCAGGCC  
CAGGTGGCACCACGCCACGCAAGCGATAACGGCTTCTACCAGGTCCTGGGCAAGAGCGCC  
ATCCTCGTCGTGAAGCCAGGCAAGGTCGTCCGGCTGTCGGTAGAGCACGCCGCCCGGCTG  
GTGGCCTCCGGCAACTTCGAAGAGATCATCCAGCGGATCAATAACCGCTGAAAAGCCGACC  
CACTAGAGCCCAAACGCCACAAAGGAGTAAGGGTTATGGCAAAGATCGTTCTCCGGGAAG  
GCTTCGTTGAGGTCGATTGGGTGGACTTCTCGCATCACGTTTCGCCCGTGGCGCTTTCGC  
TTAAGAATGCGGCCGTCGAAACCATGACCTTCAGCGGCGGCGGCAAGGAGCAGGTCGACG  
GTCTGAAGGATGACGAGTTCGCCGTGAACTTCCAGCAGGATTTTCGACGCCGCCTCGGTG  
ACGCGAAGCTCTACCCGCTGTACGGCCTGGAAGAAGAGTTCGTCGGGAAGTATCGCCCC  
GCACCTGAGCGGCCTGGGCTACCAACCGCGAGAACAGCGTGACTTGATGCTGCTCGAGT  
ACCAGCCCCTCGCAGGCAAGGTCAGCGACCTCCCCGAGACCAAGGTGAAGTTCCCGACCC  
ACCGCAGCGGGATCTCGCGCTGGGTACCCGGCCGAGCTAGCGGCCCATAGCGATCGAACG  
GTACCGGCTCACCTATCAATCGATGTCATAGGCAAGCTCCCGTTCCGCGAGGTCCTGAA  
GGCGCTCACAGCGACGAACCGTTAGCTCCCTCGCGACTTCGAGATCGGCGTCAAGGAGTT  
CGCACGCGGGCTGCGCGACGAGGCTCGGGATCAGGCTCTCCAGAAGTTCACGTCTAAGAA  
CTGCCACCCCGGGCTTCGTGCGGTGGTGGCCGCTGGAGTGCTGATCATGCAGATCGAGAA  
GGGTATCCAGGTCATCAACTCGATACCTTAATCCGACGAGCCGATCATCCCTCGCGGCCT  
CGCGGGCGTGAAGGGCTGGCAGTACCCCTCTTCGGCAAAAAGGAACAGTAGGTGCGGCA  
GCGTCAAGGCACCGACTCCTGGTTCATCGAGACCATGCGTAAGCGCCTCGCGCCGCTGCG  
TAACCGCCTGGTGCACAACATCAACGACATGAGCCAGAAGAACGACGACGACAGCCACAT  
CGGCTGACGCAAAGACCAAAGCTGGGGCCAGGTGTTTCTGTTCGCGGGTCTGCGTGGCCCC  
CGCTCCCCTTTGCCGCTGCCCCCGAGATCCACTGCACGACACACGAAAAGGAAGCGCGA  
AATCATGGCACTTCTCTCGAAGAACGACATGCTCTACGACGACGTCCCCAAGAACGTCCT  
CGACTTCGTCCCCGAGTGCTGTGGCGAGGTTCTGGTCCGCACCCTGCCAGCCGTGAGCG  
GGCCGAGTGGGAGGCATCGACCGTCAAGACGAACAATGGCAATCAGTAGCAGAACTTCGA  
TAACATACGCGCCCCGCTTCGTAGCCCTGTGCATCTTGGGCGAGAAGGGTGAACGCTTTTT  
CGACACTCGCGCTGAGATTTCCGTGCTCGTCAACAAGTCCGTCGCCACCCTGCAGCGCGT  
CTTCAACGAGGCGCAGAATCTGAACGGCCTGACCGACGCCAAAGTCGAGGAGCTCATCCA  
ATCATTTGAGCAGGATCCCGACGAGGTTTCTACTTCCGCCAGGCCGAGACGCTCGGGATG  
ACCATCGAGCAGATGCTGGCGTTAGTATCCAGTACAGAGCTGGCGGAGTAGGAGGCGTAT  
GAACGCGCCTTCTGGCCGATCGGGAAGAGCTACGAAGAGCAGGCCCAAGCCAGCATCTCC  
GCCACGCTTGCATCCTGCTCCGTCTGTACGGCGAGCAGTTCGACCACAACCACCTCTCG  
GTTCTAGCAAGTACCCCGCCTGTTCGGAGTGGTACAGGCCTGAGACCGGGGGGAACTCG  
GTAGGTCAGGCCGAGATCGACAGCAGGTTCCGAGACTGACTGATCACCAAGGCCCGTCCG  
GCCGGGTGCCATTGCCGCAGCAGGTTCGGAGGGCTTCTTTTGTACCAGCCAATAGTTTT  
CGCATGGCAACGATCACCTCGCTCAACTTCCCGATCAGGATTAAGTTGGGACGGGACTCGG  
CTGAACAACGGTTCGTGATGACCTAATGGCTCTGCAGGCTCAGATGCGGACGACCACGGCT  
GGCTGGCTCCACTTCACGGTCGTTCGCCGACACCAAGAGGAGAAATCCTAGATCCCGGAG  
GTGCGCGCACAGGCGCGTGACATCCAGATGGGCTTATACCTGGACGACGGCCAACCCGCT  
AGGGCGGAGGCCAAACTCGGCATCCTGGCTCGCGATCGAGAAGTCGACGTGCTGGTGGAC  
GAGCATGACAAACCGAACAAGATGGACCTGATCTCGGACTCCTTCGAGAACGCGTGGGT  
AGCGCGGTGGATTTCCGGCAATTCGATGTACCGTGCGGGCTTCATGCCCAAGGTAGGCATC  
GCGGCGTTCGCCGCGGTGTCGTGTTTCGTCCCGAACTGATCAAACCTCATCGGTGCATCT  
CTCACCGCGTGATGGGTGGAGGCATCATAGCAGTCGGCGCGCCGGATCTCAAGGAGAAC  
TAGGAAAGGAAGGCGGCCAGGGAGGCGCTGTAGACCGATAACGAAGTCCACGGCCAGTCT  
GCCGCCAGCCGAAGCCGCAGCCGTAACCTGGAGACCTTGTCTATGGCCAAGACGAGGATC  
GCGGAACCCAAGACGCAACTTACTGACCTATTCGCGAGTGGAGCCCTGGCGATCCAGCCG  
CTCACGTCAGGCTGATGGATCTCGCCACTAACGCGATGCCCGCCGTCACGAAGGCGCTA  
GAGCAGTCCGGCCCGAGGGTCCAAGGGTTCGCCGACGCCCTCGGTGCGCTCCGCACGCAC  
GTGTCGAACATGTTACCGGGATGGCAGACGGCGTAGCGGGATTCGGTTCGGCTGTGGAAG  
ATCACGTTTCGATCTGGTCCGCCTGATCATGGAGCAGATCGGCGTGGCTGCCGGGAGGATG  
TCCGCGACGGGCACCGACCACTGGGATCGACTGTTGACCGGCTTCAACCAGTTCCTCGGC  
GGCTTCCTCGACGGCCTCGTCGACTTCACGGCCGCCGTCCACAACGGGGTTCGGTGACCCG

ATCTCGATCTTCGGTCTGCTCGGAGTCGACATGCGCGGCACGCTCGGACCGCTGGGCGAG  
CTGGTTGACGCTAACGCGAACGGCCTCATGCCAGTCCTGGACCGAACCGTGCATGCGCAC  
AGCCTCGTCAGCGGCGCACTGATGTCCGGCCTCACTCCGGCGATCAACTCGCTCTTCCCG  
TGCAGCAATGCGCTGCAGTCGTTGCTCGTCATGGTCGGCCAGTCGCTGACCCAGGCGATC  
AACCAGCACGAACCGCTTCTGCCCCGGATCGTGGACGCGCTCGTCTCCGCGCTCATTCT  
TCGTTAGAGGCGCTCATTCCCGCACTGGATCCGGTTATCGAACAGATCGCAGTAGGACTG  
AAGCCGCTGCTGGAGATGCTGCCCGGCGTGATCAACACGCTCTGCCAGATCGCCGTAAGT  
CTGGCAATCACGTTCCGGCAACATCACGCAGTGGATGTCCTCGCTGTTCCGCGCACCTCATG  
CAGATGTACGTCGCGTGGAAGGTGATCTCGACGGCTATGGCTTTCGGGCGCGGCATCAAT  
TTCGCGTACACGGCAGTCCGCACGGCCCCACGGTGGCGACTATCGCTCACACGGAGGCC  
GTCTGGGGGAACAACATCGCGATGAGCGCCAACGCGATCGTCTCGATCATTATCGCCATC  
GGCGCTCTGGTGGCAGCGATCGTATGACACGCGACCAAACTCAGTTCTCCAGACCGTC  
TGGGAGGCACTGAAGGTGGCCATGGCGGCTGTGTGGACCTGGATGAAGGATGCGCGGGAT  
GCCACGGTCGGATTCTGGCCTTGGCGTGGGAGCTGTACTCCGGCACGATCGTCAACGCG  
TGGAACGCCACTCGGACGGGGATAAAGGTAGCGGCACAGGCTGTCTGGGGATTCTCACT  
AACCCCTGGAAGTTCCTCTCGGTCTCAATGACACCTGGGATGTGCTCAGCGGCGTC  
ATCCAGGCTTCTGGGACTTATGGTGGTTATACATCCGTGCGAGTGTCCCGATCATCTTG  
GCGTGGCTCTAAGTCGCCTGGTGTGCACCGTGGTCCACTGTCCGGCGAGTCTGGGATAGC  
TTCGTAACGATCTTCCGACAACCTGTGGGATGGTCTCTTGAAGGGCGACACGGTCTTCGTC  
GAGGCCGTCTGGGTTTCAATCCAGATCCTCTGCGACGGACTGTGGAAGGCCGTGACGTCA  
GGCTGGAACGACTTCATGTTCTGGCTGCGTCCGATATGGCAGTGCTTGTGGAACACCGTA  
ACGCAGTTCGATGAATCTATCTGGAACGCCGTCAAGCTCGCCTGGGAGTTCCCGGGGCAT  
CAGGTCACGCCGAAGGAGGACTGGTGGGTCAACCTGTTCAACTCCGTCCGGCAGCCCTTC  
TGGAACGGGATCAAGGCTGCAGCCGAGACCGTCTGGACCGAATGCATTTCCGCGAAGAAC  
GCATTCGGATCGGCATCAAGGCGATGCGGGAGAATTATACAAGGCCCTGTGTGGCGGT  
AGGGAAGCCGTCTGGAAGTGGGTGCGTGGCTTCGCATGTGGCGTCTGAGATGCGATCACC  
AGCAAGTGGGGCGAGTTCAAGCAGAAGTTCGAAGAAGTCTTCAGCACGATGGTTCGACAAG  
GCCCCGAGAACTGGGATAAAGACCTGAGAAGCCTTGGCGAAGCCGATCAACTTCGTCATC  
CGCATCTGGAAAGACCAGGTCGCCGGTAAGATCGGCCTTCCGGCACTGGTCTAGAGCGGC  
GGTTTCGGTACCGGTTGTGGGGTCGACGGCAAGGTCACGGCAACGTCCGACGACATCCGG  
GCCCCGCTCTCGCGCGGTGCGCAAGTCTGGGCCGCAAAGCAGGTCGATCCGGCTGGCGCA  
CACGGCAACGTCGAGGCCATGGGTGCGACAACAGTCAACGGTGTGCGCCTACTACGACAGC  
GGCCGTCCGCCCGCGTGGATGATCGGCCAGCAGCAGAAGTGCAGCGCCTTCCCTGCAGGTC  
ACCAAGGCTCAGCTGGACTCGAACGACTACCACGGCCAGGGCAACACGCTGCACTTCTCG  
AACGGCGGCGCCTCCGGTCGACCGGAAACGATGGCCTTCTCGAACTGGATCGAGGACACC  
TGGGGTGCTAACACGCTCGAGCTGATCCACAGGCCGTCCGGAGGGAACATCAAGGACGGT  
AACAGCCTCGGCGACGGCATGGGGATCTACGGGGCTGGCACGATGGCCCAGCACGGGAAC  
CATGTCCACTGGACAGTCGACCCGCCCTTAACGAGGACGGGGGCGGCCAGAGCCCCTG  
GGCAAGATCTGGGGCGACGTGCGCAAGGACATCCCCTGGCCCTAAGAGTAGCTGACCAAC  
CCGATCCTCGGAGCCATCGCGGATCCATTCTACCTGGCGTCCGGTTCGCCGTTCCGCCGAA  
TTCTCGAAGGCAGCGGCAACGAAGGTCCGAGACGTGTACCTTGACAAGGTGCGCTGCGCT  
GAGGTTGCATCGGGTGGCACTGCCAGTGGAGACATCGGAGGCTTCATGCCCGACGGGGAC  
CGCTGGGCCTTTTCAACGTGGCCGTGCGAGACCTCGAACACCCCGCCACCCGCATCGATC  
GAAGCCTGGCAGGGAGGCGGGCACACTCTGATCACGCGAGAGTCGGGCTAGAACGCGCTC  
GCGTTCAAACTGGGATGCGAACGCTGCGGGCGGCAACGCTTCTCGCGGTCTGGCCCAG  
CTGATCCCACGACGTTTCGAGGCTACAAGGACCCGGGTACACCAACAGCGACTCGCCG  
GTCGACATCGTCGCGGCCAGATCAACTACATCAAGTCGCGCTACGGCCCCATCGTGAAG  
GTCCAGTAGGCGAAAGCCAACATGGCCCCTGCGGGCTACGGCACGGGTACCTACTGGGCT  
GCGCCAGGGTGGCACCTCGTCAGCGAAGTTCGGACCCCATATGGTGAACCTCCGTGGCGGC  
CAGCAGGTCAAACGTTTCGAGACATCATCTGCGCCCTGAAGGACTCCAAGTCCGGACAG  
AGCAAGAAGCTGGAGTCGAAGCTGACGGCCTACTTTAGCAGGCGGGTTCGATAAAGACCGGG  
TCCGAGATCAACACCTCCGGGGCGCGGTTTCGTGCAGTATGTCGAGGAGGCTATTGACCGA  
GTGCTGGCCACGGCCGGTATGCAGCTCAACCTCTCGATGCGGGTACCGCAGATTGCTGCT  
GAAGCAGCTGGGTACGTGGAGGATGTGCGGAATCAGCTTCCCCCGCAACTGGAGATGATG  
ATCCGGCAACCTATCGGCACACGGAAAACACAAGGGGCGCGCTGGGGTCAACTATGAATC  
CCGGTCCGCCGCTTACGCGTAGGGAAACCAATGGCTCTGTTCAACTTTCAGCCGAGC  
GGCGACGTGTTGAACGACGGACGAAAGAACCTCGGCGGCGTCACCGCCCTATGGCAGTCG

GTCACCGATCTCAGCGATGCCAAGTACTTTTCAGTGCCTGCCGTCGAAGGCAGACGCAGCC  
GTGTCTACCCCGTCGACCCACCAGCGTCTCCTACGGCGCGATCTTACCTCTGTGACT  
GTGATGATGCGGGTGGGCCACGACACTGGCGCTGCACCTTCCGTCACGTCCCCACCGATC  
ACGGTCGCAGTAGTCGCCCAGGACAACACCTCGTGCTTCTGACGCGCCCCATCCACCCG  
AGGAGCACCCCTCCAACACTAGATCGCCATCTACCAGCGTGACGCGCTCGGCCTGAGG  
TTAGATATACAGCTGCTGAACTACCTTCTGTGCCGGATCTTCTCGTACGCCGGCAACTTA  
GAACGCATCCGTTGCCTCGGACTCGGGTGTGGGATCAAGAACCGGCTGCGGCCGACCGTC  
GCGATCACCGCCCCGTCGGGCACCCAGACCACGCCGTCGCCGATCATCACGTGGACGTAC  
ACGCTTACCGACGGCGATGCGCAGAAGACCGTGGAATACAAGCTGTTACGGCCGAGCAG  
GGCCGAAGGTGTCGTTCAACCGGGACACCGCGCCGCGGTTTTCCAGGACACGCTGCAG  
GGCTACTTGACGAGCGTGCTGCTGCCGACGTAGATGAACTCGAACAACTAATGGGTCTGC  
ATGCGGGTCAGGACGACGATCGGCGCGCGCTCGGTGGGGTTCGGCCGTCAGTTCACGGTG  
TGCGGCCCGTCGCCCGCGATCCCCGGTGTGACGACCCGACGTACGCACTCGGCAGCCCC  
GTGATCAAGGAGGAGCCGGACAGCGAGTCGGGCCGCGCGTCTCTCCACATGCGGAACACC  
TCGACCATGCTCAGCGCGCAGGAGGCGGACGCGGTGGCGCCGGCCGACGGCCGCACCATC  
TCCGCCACCAACGCAACGATCACCCGCTAGTCCGGCGTCTCCGTACCAGGCGGAACGGCC  
TCGTGGACGGTCACGGCGACAGCCGGGGCAGCTTACAGGTCACGACGGACTTCATCGAA  
AGCGAACAGTTCGCTGCCGATGACGTCGCGCGCTCAGTTGCGGGCGGCGGACACCGGGCGC  
TACTGCCGGGTGGTGAAGCGGATCTACGTCGACGTCTGCGCCGACATCGCGGGATCTGCC  
CTGAACGGCAGCTCGGAGACTGCCTGGTCGAGCACCTGGACCGATGCCTCGGTGTACGGC  
AACGCTCCGGCGAACGGGGTTTAGACGCGGGTACCTCCGCGCTTCTGTGCGGCGTCGGCC  
AGCGAGGGGCACAACCGGGACCACCTCGGCGTCCGCTACGGCCTGAACACCCCGTGGGCC  
GTGGGCAGCCACGCCAGCCGCAACCTGCCCTCGACGTACGTCTCGACGGCTCAGAGGAGG  
CAGATCGGTGGCGAGTTTTGGGCGCCGGACGCGGCCCTTGACGGCGGTCCCTGCGGCAGCC  
GCCGGCACCGGGGTTTTCTCGTTCGAACTGCTTCAAGATGACGCACAACGTCCTGTCTCCT  
TCGAGCGGGTTCCGAGGTGTCTGCTCCGAGTTCCCGTCCGCCACTGCCGGCGGGGACTTC  
CCGCTGAACAAGCCTGCGGGTACGGCAACCGGCGACCTCATGCAGGCCTTCGTCACGACG  
TCGGAGTTCTGCACGATCACACCCCGGCTGGCTGGACCCTGGTCAACTCGGCGAAGGTC  
GCCGACTGAACCACGGACACCGCGAAGTTCGTCTCCAGCGCACCGCCACGGCGTCCGAA  
CCAGCCTAGTGGACCGATGGATTTCTGTCTACCAACTCGCTCCGGCGGTCCGGCTGTCACG  
GTTGCGTACGGCGGCGCACCGGACGTTCTGACGGACTCACAGGCCGCCTCGGGTAACGAC  
ACCCCGCTCGGCCTGCAGACGCGGTCTCTGTACAACACGGACCTGAACGGCTGGCGCGTG  
TTTGCTTCGCGGTTCCAGCCACGCCTCCGGCGGTACTCCGACGCCGAACCGGCAGTCC  
CCGTTCCGCGATCCCGCAGATCAGTTTCGTGCTCGCCTCGGCATCCCCGTGGTTCACGGCGAAC  
ACCGCAGGCTCGTACACGATCAACAAGTCGACGGGCACCCAGTCCGGAGACGTGATAGTC  
GCGACGTTCCGGTACCTCTGCAACGGCGTGGCAGTGACCCCGCCTGCGGGCTGGACCCTG  
CGGAACCACACGACGGCGAGCAAAACAAGCGCCCGTCCCTACGGCCTCGCGGTGATCTAA  
CGAGTCGTTGGAGGGTCGGAGCCGTCTCCCTGGTCCGGCACTAGCAGGGGCGGCTCGCTG  
GACCGCACTACGTGACGCGAGTATCTCGCGTACCGCCTCGTGGACAACGCATCCCCGTTT  
ATCTCCTCGAACATCACCGAGACCCTCAACTCGAGCGCGCTGGTAACCGGGGAGGCGACG  
GACACGAAAGCGCTGGCGTGGTGTGAGTCGGCCTTTGGTGGTCTGTGCGAGGCGGCCAAC  
GGCTTCGGCAGCACGAACGAGGTGCTGAGCGCATGGACAACACTAGGTGAAGTACTAGATC  
CCTTTCGGAAGCCGCGCTGGCAACGCAGTGCTGATGGACGACTCGAACGGCGACATGTCC  
TCGGGAACGTATGCGCGGTACGCGTACTCGAGCAACGCGCTCAGCGCGGGCGTTGGCTTC  
AACCGCTTCTGCGTCCGCTCGGTACGCCTCCGACCCCGGTGGCCGACGAGACGGCACGC  
ATCGCAGCCGGGCCGCTGGGTTCCGGCGAACCCGTGGGACTCCGCGAGGGTCTTAGACTCG  
AAGGCTCTCACGCCGACGCGCACCCAGTGGATTACTCGCATCTGGTCCCCAGGATCCGGC  
ACCGACAAGAGCACGAGGGCTCGCTGGTTCGGCATCCTGAAGCCTGCCAGGGCGAGTCA  
GTCGGGTACCCGACGGCCACGATAAACCGCACGGTTGACGTCTCGGTGGTCAAGACCCAC  
CAGTTCCCGGATCCCGACTCCGTGACGGCGACAGTATCGTTCACCGGATCGACGGCGGTC  
ACGCCCTACCTGACGGTGAACCTTCTACCGCGTCAAACGCTGCTCGGCAGCCACATCGGC  
TAGGGCACGCGGTTCCGCCCCGGAGGGAGGACCAAGTCGTGGGCGACGTTCCGCAACCCG  
AGCTTACCACGCGCATGTAGGTCCGCGTCTCGGTCTCCGCTCGCAACGTGTCGACATC  
GTCTACTGGGCTCGCGTCTCCCTGGCTTACGGCGTCTATGCAACCTACAAGCCGAGCACC  
TCGCGTGCTGAGCACCCGGTCTGGTTCGATGCCGCGGATCCAGTAGGCGGACGACGACGGG  
ACCTGCCACTCGGACTGGGCGGACTTGCCCTCCTGAAGCCATCCCGCCTGCGTTTCGAA  
CGGCGCTCCGGCACGGCCCTCTACACAGACCAGCTCCGATCACGCTGAACAACCGGAAG

TACCGCACTCGCACCATGCCGCTCGGCATCGCTTGGCGACTCGTTCATGTTCGGAGTGGGGG  
CCGGACAGCCCCGAGTTCACGGATGAGGGGAAAAACGACTGGCTCAGGGACATCTAGTAC  
CCGAACAACGACCTTCGGCTCAAGGTGGCCTGGAACAAGACGCGGGTGGCTAAGACGAAC  
AGCGCCACAGTGTTCAGCCTCTCGGCGCCGATCTTCCCGCGTGTCTCAGCGAGGGCTAC  
AAGCGCGAGACGTTACCCCTCAAGCTCACGCCGGTCAACCACGAGGAGCTTGCCGTGCTG  
CGAAGCTGCTTACGTTTCGGCCGGACCATGTTCCCTGCCGTGGGACATCGACTAGGCCTGG  
TGGGTGCGCCCGGTTCGGCGACCTGTTTCGAGGACGTGCTCACAACCTCCAATCGGCAGACC  
AAGCCGTGCGCGAGATGCCCTGCCAGTTCATGCAGGTAGCGCCGGCAGAGTGACAAGCA  
GATCCAAATGTCCCGCGCGACACACCGCTTCTTGACGAGGTCCGAGGCAGCCACGCCGT  
CTACAACCTACGTGGACGTAATCGCTACGGACCAGGAAACCCGGCGGGCTGGTTCGTGATGGA  
TGCGGAGATCAACGTCGCCCGGAGAGTCCACTACCGTCGCACGGGTTCGGATCGGCTGCGT  
AGACCAGGACGGCAGCTTCGTGCCCGTCGGCAACCCGGACATCCTGCCGCGTTCGGCAC  
CGAGATCTGGCCGTACCGGGGCATGATGTACGCGGACGGCACCCGTGGAGGTCTACCCGCT  
GGGCGTCTTCCGGCTGGCGGTTAGCTCCGTCCCTCAAGTTGTCGAGCCGGGGCAGCAACGC  
GGCAATCTGCATCTCCCTCAGCATGTTTCGACCTATGCCGGGTGGTGTGCGCGGACAATA  
CACGAAGACGTCCCGCATCAACGGGGGCACGAACATGATCACGGCGATCAAGATGATCCT  
CGGCCGGACGTTCCCCCACATCGCGTACGACGCGGTGTGACGACGATCACGACGTTTCAG  
CCGGGAGGTCTACGCCGCGCAGGTGGACCCGTGGGTGGTAGCCTCGGACCTCGCGGAGTC  
GATCGGCTGTGCGCTGTACTTCGACGTCAACGTCTGGGCGGTGATCGCCCCACCGGCCGA  
TATCGACGCGATGTCAGACCCCGACCTCACGCACATCGCGGGGCCGGGCTCCACGCTACT  
CGACCTGGCCCGCAGTACAAGGACGAGCCGTGCTACAACGGCGTGATCGACGAGGGCGG  
GTCCACGAGCCACGCGCTTCCCCCGGTGGGCGCTTAGGAGTAGGACTACGAACCCAGCTC  
TCCGCCGTACAGCTGCGGCCCGTACGGCGAGGAGCCGGATTCCGTGCAGGACACCTACGT  
GAAGTTTCAGGCCGACGCGCTGAAGTTGGCCGACGCGCTGTTTCATAGGCTACATCGGGTT  
CTCGGCCGCGCTGTGATATGCTCCTGGACGAACCCGGCGATGGAGGCCGGGGACGTCAT  
CCAGGTGAGAGTGACTCCATGAACATCGCCGGCCCCCTACACGGTTCGACTCGTGAACAT  
CCCGCTCAAGAAGGACTTCGTCCAGTACCTCAAGCGCCGAACACGAAGGGTTGCTTCGTG  
ATTGCAACCTACGGGTAACCGCCGGCGACCGTCCCTGACCTGTGTAAACGCTACTCGTACA  
AGTACTCTCATAGGTGAACGATGAGCCGAGTACCGACACCCGGGCCGGAGACCCCGCAGG  
GGAACATGACCCCGGCTCAGCAGACAGCAGCGGCCATCGCCGCCCAGGCCCAGGAGCGCC  
TGCAGCCAGCTCGCGAGCCGACGTGCTGTCCCGACGAGGCGAGATCTCCGCGCTCGTAT  
CGCAGGCGACCATCGTCCGCGTCGAGGGGCGCTACCCGCAAACCGTGACTATCCAGGTGCG  
GCGGGCAGACCACGGCCTCGATCGCGGCAGGCCGCTACCTGGACAGCTACGCGCCGCCTA  
CCGTAGGCACGGTGATCGTTCGTCGTCAGGAGCGGATCTGCTCGTCCCTCGGCCAGTTGG  
TGGACAAGCTTGCGGCCGGGGCGAACGGCTGGCAGGCTCCGACGCTGACGACGATGTGGA  
ACGCGAACCCACGTTTCATGCCGATCCTGTACCGGATGGTCTACGACGAGGGCGCGCGAA  
AGATCCAGTTAGCTGGCCGCGTCTGGCAAACGCTCTCCACACCCGGCAGGACACTGTTCA  
CGTACCCGGCCGACTACCGGCTCCGCGTGCTGCGCGCCTTCGCTGTCACCCGAGAGCACC  
TGACCAGCGGCGTGAACGCGCTGAAGCTCCAGCCGAACACGGACGGAACGTTGACCATCT  
CCGGCCATCAGGTTCGAGATCGTGAGCATGAGCAGCTCGGGCGGGCGGCATGACCCGGCACGA  
CGGGAACCAACCACAAACACAAGACGTTCGGAGATCGACAAACCTGGTGACCCGGAATTTCG  
TCGGCTGATGGACGGACTGGGTTCGTGACGACGGCAGTGGGAACGAAGTGGATCAGCCACA  
ACCACAGCACCCGGAATCACACGCACACCAGGACGAAGGCGTCCCTCCACTGGATTGATCT  
CGCTCGACGGCGCGGAGTTGTTCCCTCGGACTAAGAGGTCCGGACGGTGGGGCGACACCAA  
GCATTTCTACGAGTTCCAGCGTCGCCGCGCCGGGTCCGAACGATGACAGTCGCACTGCAG  
GCTGTGTCAGGCGGAGACGGCCACGGAGCGCAGGCTGCGGGTGTGTCGACGGAATAACGGC  
GCGCCAGTAGGACGCCAAGCTCAAGATGTACGGCGGCGTCTGCGCCATCTGTGCCGAGAC  
ACCGCCTCCGGGGGGGGTGTGGCCGTGACGACAACCACAACCGCTGTGAGGCAAGCA  
GACGTGTGAAAGTGTCTGCGCGGCCCTTCTATGCCACGAATTCAACATGGCTCGCGGCAA  
GGTCCGGAAGTCCAAACAGTTGCTGCACAAAGGGAACGGGTACCTCGACGGCGGGTACCC  
CGATTTGTACCTACTGCTCAGTTAGGATCGGAACTGCAAGAGATAGCCCAGGCCAATATC  
AGCAACAAAAGCAGCGAGCGATACGGCGGGCCGGATCGGGCTGTTTCGTAATCCACACCCAG  
GAGGACAACGACACCCGGGTGATCGCTGGCGGGGTACCTGCAGAACCCCCCGTCCGTGTGC  
AGCTATCACGACTCGAGCGACAACCCGACTGCATCGAGGTGGTTCGACACGGACCGTTCC  
GCGTGGGCCGTACCCGATGCGAACGACAACACGAACAACCTGTGCTCCGCCAGTAGCCGG  
GCCTCTATGTAACCAGAAGAATAGATCGCCAAGTACAGCGACGCGATCGCCTTCACTTGC  
TGGCTGATCGCACGCGATGCGAAGCACTACGGCTTCACGCCTTATATCATCAGGCAACCT

GAGGTCCGCGGGGGCAAGCAGGGCACGACCGACCACTACGGCAACACGAAAGGCCTGGGG  
ATCGGGGGCCTCACCGACGTCGGCGGCAGCTAGCAGTTGGACGTGCAGCGCAAGGCCATC  
GACAAGACCATGGATAACACGGCGTTGTTGCCGCCCCGCCCGCCGATCGCCAACCGG  
ATCGACGAGTGCGGGAAGGCTAAGGACTCGCTCCGCGACGCGCTCGCTGGCCAGAACCGA  
TGCCCGGACAAGAAGGGCCAGTTCCGGTACTTCAAGAACGGCGCGGTCAACTGGACCCCG  
GAGACCGGCGCGGGGGAAACGGTTCGGAGCCGCTCAAGAAGTTTCGCTGACCTGCAGTGT  
GAGACCGTCACGGTCGCCTACCCGACGGTTCGACCGCACAATCCTCAACGGGGCTGAACGGA  
CGTCCGTGGGGCGTCTTGAAGGATTCACCGGCGGCAACCTGTACCGCAATCAAGGGACG  
GACGAGGCTTTCTGTACGCACGGCGAGATCGGCAACCGGTGAGGGAGTAGCGGATTCGAG  
AACGGTCAGCTCGGCTGGCCCCTGTTTCGACGAACTGCCATTCGACGGCGGAGTCGTTTCAG  
TACTTTGTGCGCGGCCAAATCCCCTGGTCCGGCACGCTCAAGACCATCGCGCTCCTGACG  
GACGACGGCGCGGAGACACCCCTGGCTGAACAGTGTAAAGTAAGAGAAGGAGATCGCAATG  
ACTCTGCGAGAGATGACCGCTCACTACCGCGAGGCCGTCGGGGCTGGCATAGGACTCGTG  
CTGGTGATTCTCGCCGGATTTCTCGGACTGGGCGATGTTCTGCCACTGGAACGGCTGTT  
GTATTCGCGATCACGATCGCGATCCTGACAACGGCTCGCGTGTGGCTGGCGAAGAACGCC  
GACCTCATCGTCAACGCGGCCGACTCGATCGACGGACGGCAGCGCGACGTCCGGGGCCGAC  
GTGCCGAAACGCGGGAAGCACGCTCGGCAGTGAGCGCCGCGTACCTGGCACTTGTTCGTA  
CCATGGTTCGGTCTGCTGATCGCCACGAACGGCATCACGATGTGGCGCACCGAGCTGCTCC  
TCAAGAGGAACCAGACGGACCAGGCAAAGGCCAGGGCAGTCCAGGCAACAGCGAAGGCAC  
AGAGCGAGAACATCGGCGCGGCAGCTCCGCTCTTCCAGACAGTGTTCGGCCTGCTGGCCC  
GACTGCAGTCGCAGATCAACGAATACGCGCTACAGCTCCCCGACGCTGTGACGTACATCG  
CCTACCTGCGATCCGACATGACCCCATCCGGGAAGACGTCACGACCACTCCCAAGTCCC  
TGCAGGTGATCGAGAATGATCGACCCGCCTGACGTCAGGAAGGACAAAGGCCCCCCAGCC  
AAAGTCGCTCAGCGGCTCGGCTGAAGGGCCGTTTCTGCGTAC

>NewGenomeName\_115

CTCCGGGCCTGCACTCACTCGTCGCATCAGTTACCAACCGCTAGAGACTTGCCACTGGCT  
GCGTAAACGTAGGAATTGACCCTGGCTGACGGCCAACCTGACCGCCATCTCCAAAGTAACTG  
CTCCATAAGAGGTTAGTGATGCCTAGGAGCCCACACGTAGGGCCCCTTGCGCGCTCAGCT  
GCGGCTGTCCTTAGTGTCTCCTCAGCAGGCTTAGGTTATATCCAACACGACGAAGGAACC  
GTTACCGAGCATACTTCACTCGATTTCGCAAGCCTAACTTCTTACCAGGGCACACTGGC  
CCCAAGGTACGCTGACGGTTAGTCTACAGAGATGAACATTGCGCTGAGCTGCTTCGCACG  
GACGCCAACTCAAATGCCGCTGCTGTTAATCGCACTATCAAAGTCCCGCTGTACCAGTCC  
GAGTTCGACGCGCTCTGCTCGTTCTACTACAAGGTCGGGAACACTTACTGCACCACAAGC  
ACTCTGTTTAAGCTGATCAACCAAGGTCGATAGGACGAGGTTGGGCCGCAACTCCTTCGC  
TGGCGTTATGCTGCTGGGAAGGAATGCTCCGTCCGGGCTAACTACTGCTACGGCGTTTAC  
ACCCGTCTTAACAGCGAGTACACACTATGGCAAGGACAATACTGATCCGAGTACTGCTCG  
TGCTGTCCTTTCTCAGGCACGCTGTGGGCCTCTACGAGACGCACACGTCTGTATCTGAGG  
CAAGGACACTGCTAGAAGAAAAAAGACTCGCTATACGCGACCTACGGGCTTCTGAGGCTG  
GCATGCAGGTTTCTGTCACGGCTGTGCGTAGGCTTGCTCGCAGGCTAAAGCGTGCGTCA  
GCGATGCACTCGACGAGGAACCTCGTCACCGCGCGACTCATGAGCATGCAGGCGTTGCGG  
ACAGTTTTGGTATGCGACGCCCTGCAAGGATTGACCCTGACGGACCGTGCCACATCCA  
TTCCTCTCTACGGCGCCCACAGGCGGGCTGGTGAAGGTGCCGGTGGTCTACGCTGACTCG  
CTGGATAACTACAACGGTCCCCGGGGATTTCGGGCCAGGACCTCTGACCCAAAAATGATTC  
CCACGTACGCCGCCGCTCCCGGACATAAAGAACGCGCGATTTCGCCATCTGCCGTGGGCC  
GAATGTCGGGCGCGCTGATTAGGGAAGTCTGGTCAGGGCCGTTTCATCGATGCTGCTGTGG  
CGATCGACGGGGCCAGTATGGGATCGCTGTGCCGGGCTGTCAAGCAATTTGTTACGATGG  
CCGGGGCAAAGGGACAGGGCACGGCAATACAGGTTGTGTGGCGTTGAGATCGCGCAAAGC  
GCGGCAATGCGACAAGGCCGGGCAGACACAAGTGCAGATTGTCTTCTTTGGGTGCGCGG  
GATTGTGAGACCTGGGAGTGGTTTTCTAATTGGGTCACTATAGCGAAGGTAAACGCGATA  
CCCTGCGAATGTTTAGAAGGCTCGACGCGAACGGTCATATCTGTTTAAAGCCTGGGCAACG  
GCACAGCCCAACCACGCAACAGACCACGATGTCAACACCACATTATAATACCGAATGACA  
GTCCGTAACGGCCGACGCGGCACACGGTATTCGCGGATGCCGGACGGCAGATTAATGACC  
ACGCCACGCAAGGGAGGAACATAGGGCCAACGATAATAAAAAGACTAGACCGACAGGAATA  
ACAGTCTACGATGGTCACCACTGAGTCGCCAGACAGCAACACAGGGCGGAGAGTATGAAAT  
AACCGGTAGACAGAGACGAGAAACACTGGACACTGCGCCACATGTTTAAATTAACGGACT  
AACTGCTACGGCGACACTCTTCTAAGACACTGGAAACTTGCTAACCTAAATTGCTAGCTT  
GTCAGAGCGACAGGAACAGAGAGTGAACACAGCAGGTTGACAAGCTACACGCTTCACGGC

AACATCCGCAACACATCACAATGCAACACCAGCTTCAACGTACCAAGCACACACAGCATG  
TTGAATGTGACGTAGACATGAACGTAGCCACGCTGTAACATTAGCGGCAGCAAGGCAACA  
AGGTCAGTGAGAGCCGGGTAGTGCGGGAAGTACTGACTAGCATTAGATGGTAGAATACTGGAA  
TTTAAGGAACGAGGGGATCAGCGGCACTTATCGACGATCCCAAAGTCTCGCCGTCCAATC  
CTTAGCTTAACCGCGGGTATTGCGAGAGACGCGAATGAGACCGAGATCCCATGGAAATAA  
CTGGGGCGGTCTCAGGCTGAGAGGTGGTTCGAAACGATTACAGCAATACTGACTGTGCGG  
ATGATAGTCAACTAAATTAGGTGCATAATCGAGAGTGACTGCCGATGCCTGTAGCCCGAG  
AGGAACCAGCCGATAACACGGTGGTTCCTAAAGCCCCTTGTGTTTCATAGTGACCGGATG  
GTGTGTTACACACGTTACTAAGCCGAGTCGGCCTTAGAAACTACCGAGGTGGAAATCATG  
GCTAAGGATTCATCCACCAGTAAGGTGGAACGACAGCAGCAACTTGACGAGAAGAAGTAC  
GGCAAGGAACTTCGCCAGGATATCTGTGACTACAAGTCTCTGCGGTTTCAGGACAACCGAT  
CCTCTGTTGGCTGAGGCGCAAGGTCACATATAGCTGGTGGCTGAGTTGTCCGATGCTAAA  
GGGGATGTCGCAGTGACTGCAGGGCGCAAGCCCAGCGTGTATGCTGGATGTGCGATACTAC  
ACTGATGATGAACGAACGAGCAGTAACGCATGGGATACTAAGCAGACCAAGGCTAAGCCG  
GGTCTGTCTAGGCCGGTGCCTGGTAGCACCACGAAACATCAACGCATTATGGCGGGGCGAG  
TCCGCCAGCGACTACAAGGCATGGGAATCTCATCATCACTAAGTAAAGTCTGATCGTTG  
GCTCCGCCAATATCATCCCGGTATTGCATCCATCGGCAAGCGCGGCGCTAAGATGGACG  
CTGACATCCCCTTGCCCGGTGTGGCCATCCTCTCGCAGATCATTGACCACAACAACGTGA  
CACTGTTGAATGATCTGTATCGTTCGCTGCCGAATGGTTCCTCGTAACAATGTCTTGCCG  
AGTGGGCCTTCGCTAACGTTAAGGTGAGCATCAATGAATGCTCGAACCGTAAGGACATGC  
GTTTCTTGTTTCGCTAAGGACAAGGTAACGAACATCGACTTTGCATGGGAGAAGCCTTCGT  
ACGAATACGCGCAGACGTCTTACCTGATCCAAGCGTTCGACGTGCAAGTGGCCATCGCTA  
AGAGTCTGAAGCCAGAGGGCAAGGCGCGCAAGGATGACACTTACGTGGAAGGCAAGGTGCG  
TAGCCCAGCTAGTACAGCTGTCTGGCGTGTCCAATGCGACATAACGCCCGCACTCCCAAC  
CCAAATCTGGACGCCGCTATTTTCGCTGGTGCCTCAACCTATGGCCTGCCTATGAAACTCG  
CAGTCAACGCTATGGCCCTACTCGCTGTGTTGGCGCTCGCTAGCTGCTCTATCAATCTCG  
TAGTGATGGCGCACGCCGTTCTCGCCGTAGACAGCGCCGTGGACAGCCTAGTGGATGCAG  
CGGAAGTGATGAAAAACGGGGGGCTCGGTGACAACCAACGAGCCGGGCGCCACGGCTGG  
GCATCTTGTCGGGTGAGCCTGCCATCGGCGCGCAGTGCGTATGCCCGTTGTCTGCCGTT  
CGGTGCCGTCCTGGTACTGGAAGGCGAGCAGGTGCAATACGGTGAGCTGCACGGACCACT  
CTTTCGCATCAAGAGTCAAGGGACCATCGCAGCGTCCCTCTTGCCTGTCCCTGGCTTGAA  
GCTCGCCAAACAAGAGATGCGTAAGCTTGAGGGCTACGCCAACCGGCTAGGCTAAAGAAG  
GACGACTCCCCGCTGGACGCAACCGCAGCCATGCTGGTGGACGCCTTCAAAGCTATGATT  
GCTGTGTACCTCAGCAGGCTTGAGGTGCAGCCTGGCAGCCGTAAGGCGGACGGGACGCTT  
TCGGTGGCGCCGGTAGACTACAAAACACTGTGCGACGTCTGGGCTGTTGGTCTGCGGATC  
ATCAGCAACCAGCACAACGACACGGTGATCTAAGGCGCGGCAGGCAACGTCGCCGTCCCT  
ACCATGCACTTCCCTCAGGCATGTGGTGAAGGCCTGACCTTCTCGCAGGGTCATCACTTC  
TCGCTGTTCCCTGGAGCAGTGGGCGCGGATCCGCAAGTACATTCACAACACAGAGTAGCCT  
GAGGTGGGCCGCGATCTGTTAATGGACAACACGGTGATGATGTCGCTATATAACGAGCGG  
TATGGTGCCTTCCCTTGTGACCAGACCGAGTTTTTTGATGCGCTGGCGCGCTGACGAGTGA  
ACAAGTAATGCCCATGTAATGGGCTGCATTCTCAATTCCTACACCCTGAAAGGCCGGAT  
CTGATAGGAGAAACGACATTGCAAGATCTACGACTGGAACACCCGAGTGAAGGCCTCCGG  
CCTTACCGCTGGCTCCATGGTGGCCGAGTGGGCAGGTTGACAGGGGACAGCGCGATGCG  
ATAAGTATCACGAATAATAATCGTAGCTCGGCGATGATTGGCGTTGACGACCCATCACAC  
TTGAAGTTCGGCTTTACTTATCGTTCGGCAGCCTCAGAGCTGGTGGTCTGAGAACGCACGG  
CGTGAAGCGGCGGCCAACAGCTCTCGCGGTGTACGGAATGCCCGGCGCTCCTGCC  
ATTCACGGTAATGAGCAGGTGGCATTTCGCTCTAGATGTGCGAAAGCTAGTGGCCCATATC  
CGCGCAGCTGAGTAGGTGAGAGAGAACCTCGATATAACGTTGGCTGCGTATAACGAGCAA  
TGCTTACAGCAAACCTGCGGGCCGGCCCCAGCCGGAACATAACTTTGCACACGAACCACAA  
CCTAAGCCCCGCGGACTGCCATCGCACTTCATACGTCAAGGCGTAGAGCGTGGCGTAACT  
CGCTGCCGAGGAGACGTAACCTGATTTCGCAAGACCCGGCCCGGTTACGTGGATTCACT  
TTTGCTGCTGTAGTATTCATGCGTGACACGTTTCGATCTGGACGTTGAAGTCGCCTAGAAA  
GCTTTCAACGAACCTCAGGAGGCCGTCGGTGTAAAGACTTGTCTCGAATCGATTGAGAGGT  
TGAAACAATGGCCGAGGCTCGTGCCCTGGCCTGCGATGCACTGACGCACACTGATCCTCT  
CGGAGTAGTGATGAGCCTACTCCGTAAGAGCTGCTGTACCGCGAAGGCTTGGAAGCCAA  
CGCTGGTGTGGGTACCTCTCTGTCTGGTGGCCACGACTCTGCCATGTCTGAGGATCGCTT  
TGCACGTTCATTACGAGGACGCATAAGCAGCGCGCTCACGACCCTCATAGGGACGCCC

CAATTATGGCATCGCTCAATGTATTCCGTGTCATGACTGGCCGAATAGGAGTGC ACTCTC  
GACGTCGTAACGCGGTGGGTGTAGTAGCTGGCGTCGAAGATAACTTCGTGAGCGTAATGT  
GGGACGGCCAGACCTTCCACACCCGCAACAACCGTGTCTACCTGACTGTCCTTCCCGAGG  
CTGAGACTGTTAAAGCGGCTGAGATCAACGACCTGTACAACGTCCAAAAGTACATCCTGT  
CTACCTCCTGCGCCAAGTGC GCGAGACTCGTGTAGGCCAGACCGTTCCCGGGCCGGCGCA  
CCCACGCCGCCGCCCGCGCCATCGTTCGTAGCCTCCAACGAGTCCAGCTTTGCAGCTTTTG  
CCTTGCGAGAACTGGCCTGATCGTTGCCAGAAGAACAATAACGAAGTCGCGTGGGGT  
TCCTGCCAGCATCGCGCACTTCAAGGCAGTCGGGCTGACCAACGCGCGCAGCAAATCTC  
AGA ACTGGCTGGTCGGCTGCCGAATTCGTCCAAGTCTCCGCATGTTGCTCACTCCTGTG  
AGCATAAAGCGCGGTCTGTTGCTGATAGCATGTCGCGCAACTATCCGGGCCAGTGTTC  
ACGCTGTGCAGGTACATGCGGGCTCCAGCTCAAGGCCGAGAATGTCGCACCGAAGAAGA  
TCGAAACTACTCACACCATGGTCCAGCTGTAGCACGGCGCGCAGCACTCAGATCCTGAGC  
TAGCCTTCCCGTTCGTAGTGC ACTGCGGGCGCTCCAGAACCAAGGCAAGCATCTTGGCCCC  
GACTTTGTTGGCCGGCCGTTTGAAGATGCTAAGCTCGTCATCAAGGCCGGGTTTCGCTCAT  
ATCACTGTGGACAAGGTA AACTAAAGCTACTCGGCGCACGGAAGCAACCGTGCCAAATTC  
GAGGAATAACCCATGCAAATCAAGATCGCGCCTTACCTGATTGCTCTGGCCGAGTACATC  
GCCGAAGGGGCTGCTGAGCCGCACGCTTCGGCCCTGATCATCTGCTGTCCCTGCATGGC  
CGCGAGATCTTAAAGGCGCGCAGCCAGTACAACGCCAAGGTCGCCAGGGTGCATGTCAA  
CTTAAGGGGCGCAGCGAGCGTGCCGTGGGTCTGTT CAGCTACCAGCAGGCCGCCGAGGAG  
GGGCCCGATAAGGCAGTCAAGTTGCTGGACGCTCTCTATTGCTCCGCAACGTGACTGGGC  
GCATGCCAAGCGAGCCTTAGCTGCCTCGTTTGC GGGGCCGAGTATCGATTGGATCGCCA  
CTGACTACATGATTGCCGCGGAGTTTCGCGGAGCTTGAGCGCCGCGATGCCGCCTCTCCCT  
ACTTACCCCATCCATACGGAATCCAACCTATGAACCGACTGAACGTACTAGACCTGTAGA  
ATCGCTCCGCTGTCACCGGCGACATCATGTCCCTTCTGCACCGTGC GCGCTGCCTCGACC  
TGCTGGACTACAACGGAGGTCTGGATCAAGACAAGCGCATCGTGC GACC GGGTAGCGAGG  
GTC AAGAGCTGGGCCGACTGGGAGGCGATGGATTCCAGTTCAGTGGCTTCGGTATCAACG  
CCGAGCTGATCATGACCAGGCTGCGAGCTCTCTTCTACCATGTGCAGAGCTGTCGTCGCT  
AAGTTCTTACGCGATGCATGGATGGCCACTGTGCACACATCCGCAACGACGACCATAGG  
CAGTCACGCTTTAAGCGCAAGCCCGCCATGTCTATGCGCAAGATGTTGGAGCACTGGTGT  
CGCTGTCAGTGAGTACGTAATGCACATCTGCGGGGTGTCCATTGCGGAAAATTGGGCGCA  
TCCAAAATCCATGTAGGAGATACACCATGTAGAACGTACAAGCACTGATCACCGTAACCA  
ACGCCAACGGGGCAAAGAAGTCAAGCGGATTGAGAAGGTGAACAACCTGATCTGGAAGA  
CCACCCACGCAACCGTGGCGCTGGCCAGTTCTTGCAAGAGCGAGCCAACGAAGCTGCAC  
GCTTGAACATCTAACGCGGCACGGAGGGGTCTGTTCTGTTTCGGTTCATTCTGCCACTGCGC  
AAGAGGCGACCGGCAAGGTCATCGCCCTGGTCGAGCTGGAAGGCGGCACCAAGCTCCCGC  
AAGTCATGGCCATTGAAGATGCAGCGTTGATGATTTACGACGTTGCACCGAACAAGTTGG  
CTCCTGTCGTCGAGCAAGTCGAGGGCACTCCAGACCCAATTCAAGGCTCCCAAGTGTGCG  
ACGTTCCGGCTAGCGCAGTGGTTGGCTTGCCGTTTCGATGTTAGCAGCGTTCTCGGCGGCA  
GCGACGCTGACGCAGCAGTCGCTGGCCTGTAATGCTTGATCCTGGGCTGTTTGTGCCGAC  
TGATGACCTCTTGCATGAGGACTTGATACGGCAGCTTAAGGCGTAGGGGATCATGCACGC  
CGGTGCCGAGGGCGAGGCGGAGTTGACTTCCGGGACTTACACGATATGGATCCCCGTT  
CATTGCCGAGCCGGCCATATCAGGCGAGAACGAGACTTCGTGATCTCGATGCCGTTCT  
GCCTCCAGGACTTGC GCAACGTTGGTTCGGGGTCTGTCCTGTTTCGGTTACGAGAAGCA  
CGCCCTCGAAGTACCAGACTGACTAAGCACAGAAGTAGTTCTCAAGCATGAATGCTTAGG  
TCTGCACGCCTCTTTGACAGTACTGGTTGATCAGGTTATGCTTGC GGTGCGGAGCGGCT  
GTATGGCATAAGAGCTGGAGGTTTTGCCGTGCATACAGCTTGCACAATATCGCCAACTGA  
ATCACGCTATGGTCACTGGCATCTCGAGCTTGACGCTGGCTTTACTGTGGTTGTGGCACT  
TAGCAATGAGCAGGCTAGAGGCGGCAGAGAGGTTAAGGCACACGCCTTCTCCGAGGCTTT  
CCATGATCCTCAGTTGGCTACCGGATCGGCTCTGATCTTCCGGGTAAGCTGTTCTTCA  
CCGAGGCATGCCGGTTATTGAGAACGTGCGCCACTTGCTTGTGTTCTGGACTTAAGTGAA  
ATCAGAAATGAGTGGTTCGTCTTAGCCAAGAAATTGCCGGGGCGTGGCCACGCAATGCAT  
CCGCATTTCTGTGGTCATGGCCGTCCGATGGTTCTGTTCCACAACGAAACGTAATGGTCG  
GCGTTCTGCCACCGGTGCGTGACCATCCCATCAGTATTCAAACCAATCCCGCCGTTGCAA  
GAAGGCTTCAGGGCAGTGGAAACGGGAGCGGCTTG TAGAAAGAGCTGTAGAAACCGAGATC  
CGGCCACCGATCCAGCGTTGTATGACCTGGCCGAGTGGCCGCTGGAGGCACGGGAATGG  
TCATTGAGGCCGGGTTATCCACGCCGTGGTGTGTAAGAGTGGCGCCTACGATCATCCG  
CCGACCCGGCGTGCGGTGTTCTCGGTATTTGAAGATGCGCGCTTGACTGTCTGGCAGTCA



CTCAGCATATACGGAACGAGAGCAGCAAAGTATCTCAGCCAGCCGAGCGAGCCCCGAGTTA  
ACAGTCCCCTGTTCCGGCGGTGGATATGTCAGTCCGATAGTCGAGGACAGGCTGTCTGTG  
TACAAGATACGAACGGCGGGTTGCAAATCCTTGTGCCCTATGGGTAAAGAAGCTGCTGCCG  
AAAGCACGGGCTAGTTGTGTCAGCTCAGGCTCAGTACACGGTAGCCATCTGACTTGACCCT  
GACGGGCTAGCCGGAGTTCTGCCGCTGAAATCAAGGACTAACTATAGATGTTCCGGGATT  
GAATCCCAAGACTTCTAACGGAACGTGACCTAAAGTTACACAGCAAGCGCGAGATTCTGA  
AATGTCTTTGGACGTATCGCCGTTGCAATTGATGCTGGGACGAAAGGATTACGACAAGCT  
CCACCGGGTAGTGAACCTCGCGTTCATTGTATCAACTGACCGCCACTAACATCACTGACCT  
GGGACGTTACTCCAAGGCGGATCCCGAGTGTGATCTGATCTCTGTTAGCCGGGGGATCCA  
CAGGTTCTTCAACCCGATCTGTTACCTACAGTAAAGAGCGGAGCTGGCGGCGGGCTACCG  
CGCTGTGTTCCAGCAGATCGAGAAGCCGATCGGCGACACTGCGAGGTCAATGATCATGGG  
CCTGTTGTTGGAGTACAACCTTGGTGCACAACCTGAACGACATCGCCGAGCGCTTTTCCCG  
TAGTGAAGAAATAAACGTACGCGAGGTGCAGGCGGACGGACTATCGAAGTTTGAGCAGGA  
CATTGAGCGTAGGGTGAATCTGCCTTTAGTGGTGTCTGAAGAGTCGTTGTTTGACGAGGA  
CGTTAGCAACGTCCGGTTC AAGTGGCGCTGCGCTTGCTACGTCGGGACGATGCGGCCACT  
GCGCCGCGGCGACTTCGGCAACATGGCCGGGCGACCTGACAAGTGCAAGACGACTGCGCT  
CACTGACCTCCGCACTTACGGGGCACCGCAGTGCTAGTTCGTCTACCCGGACAACCCGGA  
GAGGCACCAGATTCTGAGTCTCAATACCGAAGGGCCGGGCAAGCGCATCCTCAAGCGGAT  
GATCCAGTCCGGCGTTTGGTTTCGGTACGGCTGAGCTGAACAGGAAGCAAACGGCTGGCAT  
CTTGCGGGATGAATACGACGTAGCGATTGCCGGTGGTCCGGCTATGATGAACGTCATCGA  
CATCAACGCATTTACGGCGTCGCAGCTAGAGGAAAACCTTCGAGCAGCCTCCATCCGGCTC  
GATGACCTTCAACATGGTGGACTACGTGAGCTGCGATGGTGGCCTTGCGAAGAGGGGACAC  
GATAACAGAACGGGAGTGTGAGGCTATGTATCAAAGGGCGCGCGACTGCGCTATGCCATT  
CGACTGCAAGGTACTCGCTCCGTCGCAGATCAGGGCGGAAGGTGCCGGCCAACCGTATCC  
AACTCTACCGATGCCAGTGACAGCAAGCCTGGCAAACCAGATGCTGCCTTTTTTTATTAT  
CACAGACGGAACGTGAAACGATCGTTCGGTTC AAGCGTTGCGTTTCATTGGGACGGCCAA  
GAACAAGCTACGTCTTAAAGGCCCGCCACAAAGTCCGCGTGCGAAAAGGGTGATGCACGC  
AGCAGCAGAACGCTATGTCCGGCAATAAATCACAGCCCGCGCATCCGCGAGATTGAAC  
AGGCCGTGTTTGACGGGATTCTACACTTCTGGCGGGAGGGCGCGTTTGCGTGCAACCGCTG  
ACATGACAAGGCCGGGAGGGATTGGCATAACGCGTGCGTGTCAGCATCTGCCGGGCCAACA  
ACGAAGTGCTCACTGAAATCGAGTTC CCGGTGGAACAGTTCTCGGCACCAGTTCATGAGA  
TCGCCAGAACGATGCGGGCGCTCGTTAACTGAGGGCGTACACAAAGTGGTCAAGGTATACG  
GAGTTGAGTTCCTCACTCTGTGACGTT CAGATGTGCGATCGAGTCAACCTTCAAGCAGAAG  
GCTAATCCCTTCCAAGAGAATTGGAAGGTGGGGGTAGGTAAAAGTCAGCACGTAAAACAA  
CCTGCGGCAATCAAGCACGATGACAAGCATCGTAGCAAGGGATGCCTGGCGCGCTTCTTT  
GAACCCAACCCGACTGCAAAGTATTCATTTGCTGAAACTTGAAGTTTGTCGTGCTGCAC  
GGGATCGCCGAGAAGCCCGCTGGTCGCAATGCGTGGGGGGGCTTTATCAACCGGGGTGGG  
GAAGTGTGGGACTGTCACCTTGTCGAGTAGCTGCTGCGCTGTCAAGGCCCGACGGCTCAC  
ATGCTCTCGCTTGACTAGGTGTGAGTGGGTTTCGGCGGGCACACGAAACACGATGCGGTC  
AAGGACTTGTGGTTCGTAGGGGATCGAGACAATCGACATTCCCGATGGCGCGATGATGTAG  
TACCTGTCCGGGCGACATCGGGAACACCTGCAAGAGATTCTCGGCCTAGTGGTGAACGCT  
CAGCAGCTCGGGCAATCCCAAAGCATCATGCTGCACGTGGGCGCGCTGGTCTTCACGATT  
GAGTCCGAACGCAACGGCATGAATGCCACTAAAACCTTGGGCTTGAAGCTGGCGGCGGAG  
CTGGAAGAAGAACTGGAAGCGTTGAACCTGCGGCTTGACGACTACCTGACTGGCGGCCTT  
CCGTCTAAATTCAATTGGGGCAGTCGCTTCCGGTTCGGTTCGCTGTGGTTTCGTTCCGGT  
GATAATTAAGAGGCCCGCGAAGAGATTCTAGATAAAGATTTCAAGCCGACTTATGCACAG  
AAGACTAAGACTCACTACCCGACATCGGACGGCAGCACTATAGGACAGGACGAGTTGAAC  
GACTCTCAGCTCTGTGGAAAAGCTGTGCCGACAGTTGTGTCTTTAGCGGGCGGCAAGAAC  
GCTCGTGAATCGTAGACGAAACGGCGTAAGGTTAACGACCTGTCGAAACCGAAGTGCGGT  
CTTGAGGACCGGACTTACGTGTTCCCCAGCTACACCTAGCCGCGCGACGAGTAGAAGACG  
GCCGCTCCGGGATTGTACCACGCTGGCTCTGCCATTATCGAAGTTCGCTGCAACCGGGAC  
ATCGCATTCTCGACGAGTAGGCACGCCGTGGCAGACTCGACTAGGACGTCGGGACGTTT  
ATCATGAAGACGAACTACAAGGTTGTGCAGACAAGCCTGCTCACGCTGGTTCATCCTGAT  
TCTCTGATCCAGCACATGATTTACATGATCAGCACGGTAACGGGCGGTTTCAGTTCAGT  
AACCCGAAGACGCAGAACTTGTGCAATGAAGGTGAAGGCAAGTGCATCGCGAACGATAAG  
TTCGTGTCCCGGTTTCGAGCGGAAATGTGTGAACATGCAATACGGCATCTCGTCACTGGAC  
AACTACATGCAAGCTATCCGTACGGGTTGGAAGCAGATGATCACGGACTTGCTGCCCGGT

GTTGACACGGACGTTGCACGGGTTGTGGCGACTGCCGTGATGGACGACCTGGAAGAGTAC  
CGACTGTGCCGCATTTAGCTTGCGGGCAGTGCGGTTGATCTCGGTTAGTGGGTAGGCAAT  
CGGACGAAGGCTAAGCTCCTCTCGTTCCAGCGTGCTTACGGCACAGGCGCAGCGTAGATC  
AGCGAATCCACTAGCTTCCCAATCGATGAGGTGTACGGACTGATCGAACCGGAGAACACT  
CGGTACCCTGAAATCGAACCGTTCTATGCTGACCTAATGGAGAAGATCACGAACAGCAAG  
ACCGCCTCCTGCTAGCTAGTTACACACCCCGGACTTCCCGGCTAATCAGGTTGGCTTCGGC  
ACCCGCCCGTATCGCACAGCAGACGCTTAGCTCTACAGGTACCGTGAGCAGTGCCTCCG  
ACGTTTCGTGGTGGAGAAGCCTGGTCCGAAGTCGTCGCTCTCGCCAACGGAAATCAACAAC  
CACATCGTGAAGGGCACTGGCGCTGAGTGGGCGACGTCAGCATCCTAGTTGTTGGTTTCG  
ATTTTCTATCGCCGCAAGTACTGGGGCTGGCTGGACCTTCTGATAAAGCAGGTAAGTTCGAC  
GCCGCCAATGTTGACGCGCATCCGAGTGTCCAGAACGTCGTGGCGGCTGTTTTTCGATGCT  
TACCTGGAATGTGCATCACCATTGATGGGGGCGTACTTAATGTGGGCGATCCCCTGCCA  
ATACCAAGCGACACAACGTGGGGCGAGAGCATGGCACACGAGAACGCCGTGGAAGGCATG  
GACGAACTGGCTTTACCGCTTCGTGAAGAAATCAAACCGCAAGACATCAAACAATATCTC  
TGAGAGGTTACACCATACCCGAAGCAACCTGTGACCAAGCCGCAATCGCAGCAGCCACCG  
CAGCATCAGTGGATCTAGAACCTTTTCATGAAGGAAGCGCAGACAGCCGGCGGCGGAGGG  
TTCCACCAGCTGCTGCCGGCTGCACCGTAACGCTAGTCGGCTACATCCAAACCTGCATCC  
AGATCGCGCTGCCGAGCAAAATCAATCCCGTCAAGTTCCTCTGTGGCCCCGAAGCTCAAG  
TCGAACTGATCTTCGGAAACAGCGTCAAGAGACACGTAAGGAGCTGGAGAACGGAA  
CCAAGGTTTAAAGTGCCTGACCGTAACGCTCAAGCAGTCGGTGAAGTACTGATCTCGGGT  
CCTACAAAATCTTCAACACGCTGAGCTATGACAAGACCGCGGCGCACTTCGCCCAATTGC  
TCGGCAAGCACTTCATCGCCACCATCAGCCACTCACCGAACAAGAAGGACTCGCAGTCCG  
CGTATGCTGGCTTCAAGTGCAAGACTGCTTGTACACCTTCATGGCTCCGACCTACAACC  
TGAACCCGATGGACATGATCGAGATTGGCGTCAACCGATGCCGGCGGTGCTGACTCCGC  
TTAAGCTGTTCTGCTGGACTCACCCGTCGAAACCTATGTGGGACTCGCTGTTCTCGAAA  
CCAAGTGCGACGACCACAAGGACGAGAAGTCTGGCGGGGTTACTCAGGACGGCAGCTAGA  
ACCATTGCAAAAACAAGATTCTCGGCTCAAAGAACTTTGAAGGTTCCGCAATCTTCGACA  
TCGTTGGCGGTCCGGACATCGCCGAAAACGAAGGGCCGGTGGTACACGATACCCCCGCGA  
CGGAGTCGGCTGCTGTTCCGCTGACGACGCTGCCCGGGCTGCATTGGGGGCGCTTTAAT  
GGATTGGCTAGAAGCTGCAATAGCTACTGCTGGCGAGGAGCCTAGCCCATGCGCGGCGAT  
CCCAGCCCTAGTGCCGGGACGGCTTTTGGAAATTGATGGTACTACGCTGCCTACTTCGT  
GACGGGTAACGACGAAGCCGATAGCGGTAAGGCGCTTCGAAACCTGATGCAGCGATTGAG  
CAGCATCAAGGAAATGACCGTGGCGAGCGGTGTGGTGTCCACCTGTCCGCCAGGGTTG  
TACCAAGGCCGACCGCTTCTTAGTGCCACCGTGCCACCGTATCAGGATCAGCGGACTGG  
CTCTGCCCGTTCTAAGAACTCGCGGAGCTTGCCTGAGTTCATGGAGAGCTACAAAGGCC  
GGAGTTCACTCCGAAGATTTGGGGAGACCGCGAGTCCGCTGACACGATGGCTGACATGCA  
TCAGAAGTGGGTACCCGAAAACAAGGGCGAGCTGATCGTGACAGCTACCCGTGACAAGGA  
CATAAGGATAGTACCCGGCAGGCACATGGACTGGATTACTACTAAGTCACTACCTACGTTCC  
GCAAGGGGATTGCGAGGCGATCGGCGTGAACGACTTGATCTATGGGCCAAAGTGGCTATG  
GCTGCGAACCCTGCAAGGCCACGGCGCGGATCACAACAAGGGATTGCCGTTCCACCGCAG  
GCCTACCGGCAAGTGAGTATAGGCGGCGATTCAAGAGCGCTGGTTCCAATTGCGGGTAT  
CGACAATGACGCCGATTCGTTCTGTGCAGTGGTGCAGTTATACTACACGTCCAACACACC  
TATGGCGGGGCTGTTGCGACTGCTTGAGACGTTGCTACTGGTATGGCTGCGGGCGGATCA  
GAAGGCCCCCTTACCAGCATGGTGAGCTCGTTGCAAGTAGGGGATGACCAGAAGGACCG  
CTTGCAAGCGTCGCTGCTGCAACCTCTGAAACGGGTGGATGTTATGAAAGCGGAGGTTAC  
GCAAATTGAAGCTAACCAAAAGACAACCTCAAATCACTACGGGACCAGATTCGTTCAAGTCC  
AGATAGTTTGTGTGGGATTGCAATTGGCATGACCGTGTGCTGAGGCTGTCTTCGCTC  
ATTGCCATTAACACGGCCTTAATCGTGGTACGCTCCATCGAAGTAGTAATAGCCTTCTTC  
GAGTGCTGGAGAACAAGCGCAAGCGCTTTGGCCGAGGCGACGTCGCAGAATTAGCGGGCT  
ACATGCAAGGCGCGCGGGCCTAGATCCCGACGCACGCCACTCCACAACCCGGAGGATTC  
ATCCGACATTCAAGACCGAAGAAGAGAAGCGCTTAGCGCGGAACGCCTAGGCCCTTAAGG  
CTCGCGCAATGCGAGCAAGGAGAAGAAATAAGGCGCGGTTCCCTGATGCGAGTGTTGAG  
CAAGAACAAGCACCCCGAAATTCCTGGAGCCTTTGTTTGGAACGTGGGCGCGGCTGTGCA  
GTACACTCGAGTGCTGGTGTGTAAGGCCATAACAAGGTGTCTCGTCAGACCGTCAAACA  
CTGGCGTGCGATGATCATCGACAACGGCGGCAACAGGGCGAAGACGGTCCGCGAGCTGCG  
CGAGATGCGCGTGCTTCGCAAGCCCGATCCGTTGTATGCTGACGAAGACTTCGACAACCC  
GCGCGTGTACAAGTCGACTCTGGCTGTCCCGAACAGCATGCGCCGTACCATCACCGAGA

TGCGCTGGCGTTTCTGCAAGCCGTGGCTGATAACGACCAGCGGGAAGTACCCTCAACCT  
CGGCAACGATCCGTACCACCATGCGATGTCGTTCCACGAGAGTCCCCAACTCTGCACAG  
CACAGGCGTTGAACTGGAGAAGGGCAGGAGGTGGTTGCATGAGCGGCCGAAGCTGTTCCC  
GGCCCTCTGGTCTGCGATTACAGCCCGCTTCAATCGAGTTCGGGAAGACCCAAGACCA  
CGGCTTGCGGGTGCCGTTGATTTCGAGGTTACCGGGAAGTTGTGTTCTTGAACGACGGCGG  
CGACCTCTGACATTGGGCCTAGAGATGGCCAGACAAGACTCCGCAGACCGACGTGAGGTT  
GAAGCATCAACCGAGCGGCGGAATTGTGGTAGACGTGGCGCAAACTCCTGCAACTTGGC  
TGTGGGCTTCCACCACGGCAACTTCTCGGTAGTGTACACGGCAAGAAGCAGGCGCCTCTA  
CTACCGGATGCACAGCGGATGCCTGAGCGATTAGGGCGCCTATGCTTTCGCCTACGGCTA  
GCACGCGCTGCGCAAACTGTTATTGAGTGCATCGTCATCCCTCATGGTCGACCAACGCT  
GGTTCCGATGGTTCTTAACAAGAAGGCCCGGTGGAACGGGAGCTTGTAGTATGAGCATTT  
CTGATGTGGCCACTGACTACAGTTGCGTAATCTGCATCGGCCCGGTGAACGGACACACCG  
GCAGTGCCAAGCCAAAGACAGTCGCCGTAAGTCAGCGAGGTGCCGGGTTGAAATTTGACG  
GTGGCACAGGGCGCTGGTCTGTGCATATGAGTTCGCATGTCGAACGCGTGTGGCCGTTGCGG  
TGGCCGTGCCTACCTTTGGGGCCATGAAATACGCCGCGCACAGTTGGAAACAGGTGGGGA  
CCAACAAGGAACGCTACCCCGCAGCCTTGTATGGCCACTTCAGGGCAATCGAATCCGTTG  
AGGCACTTGACCCGAAGAGCAGCTTGCCGCACTGGGATCACGGGGCCTGCAACGCTCTAT  
TCGTGTCCGGACTGGAGAACGTCCAATGAGCAATCCGCCCTCGTAACTGAATTTGGTCGT  
CAAGAGCTTGAGCCAAAATCTGCAAGCAGCCATCGACACCGGCAACCATTTCGATGGCACG  
GGTGATCCTCGGTGGCGCAGTTGACAGCATGATCAGCATGCTTACTACGCAGAACTGAG  
TCAGGACTTTGAAAACGCATTAGGCGATCTCGAGCACGAATAACATGGGAATGCCTTACC  
AGAAAATTTCTCCTACATAAGCGGAAAGAAACGCGCAACCTGAGCGCTAAGGCCCTGGCCG  
CGCTGCCGGAATTCGACTCCGGCAAGTAGGTTTTCTAGTCGAACTCCGACGCATGCTCGC  
TGATCATCGTGGACGGCCTCAACGTAGACCGCATCCTCTCCGGTTAGGCCACGGAACGCG  
TGAGTATGCGGCACATGCCCGAACACTTCCAGATCAGATCGGCGCGAAACAGGGTTTACT  
TCGGCGAGAAGTATGACCCGAATAAGCTGTTCAAGGATATTTCCGGCATGTTCCGCCCGC  
AGTAACCCAGTACGAGCTCGAAGCGTGGCGGTTTCGATGCAGTGAGCCGGCAAGATTACC  
GCACCGGCGATACCAAGCGCTCGTATGAACTGCGTATGAAAGCTCTGTGGCATGTGGCGA  
ACCGCGAGTACGGCGGTATTCCGACGATCAAACGTCCGCCGCTAGCTGAACTGCTCGCCG  
ATATCGACAGCATCGTACAGTATGGCTACAAGCTGGTGTGACGTCCTTTTTGGCGAAGC  
ATGCGGACAGCGAGTGAACGGCCGGTGTAAACCACGAAGGCCGCACCATCAAGCTGAAAG  
ATTACATCAGCGTTGTCCGTCAATTCGTCGGCATCATTGAAAGCGTCGGTAACCTACAGG  
GCATCGTGGGCGCGATCGAAGTACTGTGGCGCGGCAAGCACGGAGTGGTCAGCGGTGGAG  
GACTGATGAACGCCGAGCGATTAGAGCTTTTCAACGAGCTGCGCAAGGTGATCGCCAAGA  
TGGCGGAAGTACTTGCCTTCGGCATTACGCTTGACGGTAAACTGCGGGCACGGCGCTACC  
AGCGCATCGACGATGACAAGACCGAAGCCAGCGAGTTATGAAGCAGGCGGACATGGAACG  
GGAGATGGTAGACGGTGGGCGTCCGGCTGCGATGGCGAGGTTTCAAACCGCCGAGGCGGC  
GAATGAGACAGCGAATAATCAGCATTGTTCCGCGATATTCCGACACTTCATCAACCCTCT  
GCCAAAAGGTCAGGGAGGTTAACTGCACACGGCTGTTTCGAGGTGTGGCAGCAACGTGCAA  
AGTGCGGGAACCTGGTCAGGATACGCTGGCGTGGCGTGCATCACGGTCCGTGTTGTGAT  
CAACCAAGCCTCTCCGAAGGGGAGGCCGTATTTACTGGTGTGGCTATGGATATTGGCAA  
TCCGGTTTACAGCCAGGTTGCACTCGGGCAATATGAAGACCCGAAGCCTGATCTGTATTT  
CACGTTGGTGCAGAACCTTTAGCGCCGACAGGACCAGCAGCGAGCGACGCAGATTCAACGT  
CATGCGATCCAGTGCCGAGAAGGACGGGACGCGGCTACCGATTTGGGAGTCGGCGTTGAG  
AATGCACGTGGGCACCCTGTTGCTGGGCGCGTCTCTGGACATAGGTTTGGCCGAGACAGT  
CGATTTAAGCTTGAAAGGGAAGGGGACCAAATACCTCCGGCTGCACCCTGACCTTCTGGC  
ACTGGTTCGACCAGATCAAGGGATTCTGTGGCTGCGGCGTCCCGTTCGACCTGCGATGCGT  
GGGGCAGCCGAAACCAAGGTTACACCGACCGATGGCGGCTGGCAAAGGATGGCGATGGC  
TAGAACTGTGGCGTGCATGATGGGAGGGTAAGCAACACCGATCGCCGAGGACGTTGGGCC  
GCGATTCCATAAAGTGCTGAGGAAGGTGCAGAAGTGGTCTGCCAACTTAATGAGCGGAG  
TCTGGAGGTTACGAAGATCGCTAGGGAGCATTTCGACGTACAGGGTGTGTTGGTTAGCGA  
TCGGCGCGGCGACATGCCGACAAGCCTCTGTTTATACGGTGTGCTCCTGTCGTCACGCT  
CGTTGACGTGAACGCGTTTGAGCTTGGACAATGCACCCAGTGGCCACTGGAGGCACGGGA  
AAATCACACGCAACAGAAGGTTAGCGTAGCGCATCCGAGCGGACCCAACGAAGCTGTCCG  
CGTGGTGTACAAGTACAAAGGGATGGCCCTCGGTTTTGTCTTTTCTGTGCTCTATCGGAG  
CCGATTCTATGCCTCTGCCAGGGGCTCTCCCCACAAGGGAACCTACCTATCAATAGCGTT  
AATCCATTTTGCAGGTTCTGCACCTCTCATAACTTCAGCTTGCCTATTCCAGTTCCGGGG

AGCCAGGGACATCAATTGGGCGGCTAACAAATCTCGATAAGCAGCCGGTTCGAAGACCGGGC  
GCAATGGGTGCTAGGCAATGCTGATTTTATATGCCGCATCGCTGATCGCCCGACCAGCCA  
CCGAGAATGGACAGACGCAGATGTAACCTTCCAGTTCCGTGCGTGGTGCTTTGAGTACGC  
GGCTTGGTTACGGAATACTAGTTTCGTTTCGCACTCGAATCCCACCTGGATAAGACGACTT  
TTGTAATGTTCTTCAACACTTCTCAGCGATGCTACGAGATAGGGTGGGCAGGTGACCAAC  
GAACCTCAATCCCGACCGATTGCAGCACGACAATTACGGACTCGTTGCCACTGCAACTGC  
AGGAATCGTGCCGTCTGAGATTGCCGAACGCGATATTGCCAGACGCTGGAAGTTACACGA  
ACTTTTACGGTTCGCCGGTCAAATGTAGTGTGATGACCCTGCCCTACGGCTCGACACGGCC  
CTCCTGCCGGGACTTCATCATGAAGGAGTGCATGGACAAGGGCAGCAAGCCAGAGTTCGA  
CAAGCGCGAGGATGAGCCAGCTGCGCGCTGGCTCTCGTACCGGGTGTGTGATGGCATCGG  
AAAGGTGGTCGTAAAGGGACGGCAGGCGATGGACTGGTCGCAGGCAGCATCGGCCATCAC  
GCGCGCCGCGAACGCCCCACTCATCGAATTGAGGACCCCTGCTGGGTTCCTTGCGCGTCA  
GCGTTACCACCATGAGTATACTCAGGGAGAGCGGTTCGCAGCCTATCAGGCAAACGTAT  
CCGCATTAACGTCCAGACCTTCAAGGACGAGGGCGTTCGCGGGCGATAACAGGAACGGCTT  
CGTGCCCTACCTTTCATGCAGAGCTGCGACGCGGCGCACCTCATGTTCTTACCAAGGGCTG  
GGAGCACGAGGATGGTGGCGTGCACGCATTAGTCCACGACGACTACTACGCCTTGCGAGG  
TCAGGTGCCCAAACCGCACAGAATCCTGCGTAGGTTCGTTTGGGACATCCACCTGTACCA  
TGACGCTCTTAAAGCACTGGCGGGCGCAGGTGGCAGGGTTCGCCGATCTTCCAGACGCCGG  
TGACTTGAACCTGGTGGACGTAACCCGATCGGTTTACTTCTTCTGCTATTTGCGCCACTA  
TAGCGACAGGAACTTTTATACTGCAGAAAGCAGTGCAACGATTCACCCGATTCATTATG  
GGCAGCGAACTCGCGGTTCTCTAGAACAAGATTTGCCAGCAAGAACAAGTGATAGAGTCC  
ACCACACAAGAACTGGCGGCCTCTCTATCTCGCCCTCCAGATGTCCAAAACCTGGGATCC  
AGTCAGGTATTTAATTAGCTTATCTCAAACAAGCTGGCACGACTATTCGTGGTTAGTCCC  
AGCAGCTCCGAATAATCTTCTTTCTGTGTGGGTAGTCACAGAGCATGCTCTGTTATGGAG  
AAGGAGCTGGTGAATGGTTAAGACCACACATTGGCTTAAGGGGGAGCAGTACGGTGATGT  
CAGTGATGATCACCGTGATCGTTACGACAGCATGTAAGCCCTGTAACTTACGCCGAGT  
GAGCTATGTTGAAGCCCGGGGAGAGCCAATCAGCACAACCGAGGCAGGTAGGAAATTGAT  
TGACTTCAAATGATCATGGTGCTGGGCGAGACCTTCGTGGCGTTCTTCGACGTTGCTGA  
GCCGTGGTTTCGTGGCGGACAAGTACCTGAGCGAACAACCTGTTTGGCCCGCCACCGGGCAG  
GACGGGTGGCCTCAAAGACTTCATTGCGGCTGGCGAAGCTGTTGGCCGCAAAGAGGACTG  
CCGGTATTTTCGAGTTCGGAACGCGAGCCAATCCCCGGCAACCAGAACTGGCCCGCCCTG  
TCGTATATCGATGTCCGGCTGCGGGCAATCACACAACAGAAGTTTAAATTGGTATGCGTT  
CTGGTAAAGCGCTACGCAAACCGGCAAGATGATCAAGAAGGATGACCTGCTGCGCTGCG  
GTGACGCCATTCTGGAATCGGGGGGCTTGCCCACGCTGACCCGCGAAGGCGACAAGAACA  
TGATGGGCATGGGCCAGGCTCCCGCCAATCACGCCGCGAATCAACGAGGCGAGCAGGCAC  
GACAATAGGCCGACGCACAACGTATCTCAACCGAGCAACAAGCGGAAGCTGTTTCGCCAGA  
AAACCGCAGCTGCTAAACAGTCTGCCAATCAGCAGATGCAACTCCAGGCCCTGCAGCAGA  
ACGATGAGCCACCGAGGGCGCTCGTAACGCCGCGCTGCAAGCGAGGCGCGCTTCAGGCG  
AGCCAATCGGCAGCGGAGGGCGCAGCCAAGGAAAGCACGCCGAGGGTACCTAGTGCCACG  
GGCACCGCCAGCGCATCGACCCGGCGTAAGCACAGCGCCAACGCTGCTGGCTCTTCCTAG  
ACCCCGAGCACCCGCATGCTATTCTTGGTTTTTCGCTCAGCCGAATCCGTATCGCAGAACC  
TACACACCAAGCGTAGAGGTTTACTGGACAGGGCTGAGCGCCTCGAAGAAATTAGTAATC  
CGAGCGTGTGCCCGGAGGAGCAGAACGACATTGGGCGCGACGCGCTTACTACCCGCGGGA  
CGTCACTGGGCGCGCAATTTGTCAGTCTGCTGGCCAGCACACTTATGCTGGCGATGGTCC  
CGACACCCACCCATTATTCGGGCTGGCGATCTCCTAATCGGATACGCCAACATTCGTGG  
CCGAGAACGTCTCCCGATGGACTTGATGACGGAAGTGTCTTCGGAGGCCGAGCGTGATG  
CTTTGCTGCAACTGGAAATAATCGGTGGCCGCGAAGATCTTTATGCGGCCACGACGTA  
TTCAGATTGTCCGTAACGTGGTTACGGACAGTCGCAGTAAGTACAAGCTGGAGTTCATCC  
AGCTCATGGGGCTCGCAGTACGCCGGGCCCGCAACCCTGACATGTTGACCGTGATTATCA  
AGCAAGAGCTGACGTACTGCGAGGGGAGCGAAAACGTTCCCGCTCACATCGGCCCATGGC  
GCGAAGGCGATACCGACCACACTCGCCATCATAATACCGGATGCCGGCGCGTTAAGGGCG  
AGCACCGCAGCAAAATGCACGTTGACCAGATCGAACTGCCGTAGAGCAGGTTAGGTTTCGA  
CCTACGCTCTGGATTTCTGCCCGCTGCACCCGCTGACTTGACGTCTCCCGCTGTGCCAGC  
ATTACGGTGTGGGACGAGTCGAGGTCTAGTTCCCGGGCATCGGTACGCATGACGTGGTCA  
GCGAGGCCCTGAGCGATGGCTCGATCATGGCTCCGGAATTCGGGCGGCTCCAGAACCCAA  
CCGGGATCACCCGGCTCGAGGACTTCAGAACAGCAAAAACGGCGACGTTATGACCGGCG  
CAGCGAACGACCTTGAACCTGATCTTCGCCAACGAGGGACAGCAACGGATCACCGTGGGGT

CAGTCAGCAACAAATTCCAGCAGCGACGGGGCCTGGGCTTCCAGCTCAACTCCGTCGTGA  
CGCGGCAAGCTGAGCGTGAGACCCCCCAAGAAATGAGGGTGAAAGCGATGTAAGTGGTAC  
CGACGTTGGGGGGGGTTTTCTCACGAGCTGCCCGCGACCTCCATATCCATTTAGCTAATC  
GGCTGGTGAAGAAACCCAGCTGGAACATCAGGGGCACGAACTGCGCCTGGTGGTGATCA  
CGGGCCTGGAACGATTTGGCTGTAAAGTCGCTCTGGAACGCGTGACGATCTTCCTTGCGA  
ACGTGACTCAGTCGGAACAAATCCAGCCGCAGACTCGCATGAAGCTGGAAGAATCCAACA  
TCATCACCGACGTAGCGCCAGGTCTTGACGTCACCAACAAACGCTACGTTGCATCGGACG  
ATGAAATCCAGCAACGCATCCAACAGCTGCAAGCGCAACCCGCACAAGGCGTGGATGGCC  
CCGCTTTCGTTACCACTGCACAGGCATCCGCACAATTATCTTGAATCTGGTTGGCCGTAA  
CTACATGGAAGAAGCGTGCGCAGAAGGCGCACCGGCTGGTTGCGCAGTAGCCGCCCGGC  
AGCGGCCCCGGCGAGCACGAGCACTCAAGACACATCACAGGCGGCTGGCGCCGCGAACGA  
GCCATCCGTGCGAGCAATTGCCTACGAGTCCACATGACACAGCAACGCTGACAAGGCTTT  
GGCCAGATCGCCGCTGCGGGTATCCGCCCGGATCACCTCCCGCCCTGGTTCGCGCTGGA  
ACGCAGCTTCACTCTGCTGAAACACGCCCTGGCGGCCAAGAGAGTGCCGGACAGCGATCA  
TCCGGTGGATATCCTGACCGCAGCGGGAACCTAGGCCGCCGACGCCGAGGAAGCCGTCAA  
CCATCCAGTGACCGGCGACGTTTCATGCGCTGGCGGGTTTCACAGGGCGGTAGACCGCCGT  
GATGGAGTGGGGCCCCGCCAACGCTGACGATGCCGGGAAGGAAGCACTGAACGATCTGTT  
CGGTCGTCGGAAGACGCACAAGATCGCGGCGACCTACCTCGTGTGAGTGCAGCCGCGC  
AGGGGGTGTGCAGGAACCCGCTGCTGGCGTGGTCAACCTGGGTACGCTTTGGCCCGGGC  
CGGTGCCCGTGTGTAGAAACCCTGCTGATCCGCTTACAGGTCTCCGACGAGGCGAAAGC  
ACGGCGCGAGAAGCTGTGCAATGCGTACGTGACCTCGTCTGAGTACCAAGAAGTGGCCG  
CCGCTCGTGCCTAATGCTAAGCGGCCCGATGCTATGTGGTCCACTAAAGCAACAGGGA  
AACCAAGTCACTATTTTCATAAGGATGACTCTATGTCTTTGGATAGCTTTATCGTAGTTTCG  
ACCCAACGCTAAAATGGGCGGCACAGACCCGCTTGACCCCAAATTCGAAGAATTCGGTGC  
TATGGCCGCAAGCACTCTGCAGCGTTCGTTCCGTCACCGACGCCATGATCGCCGTCAAGCA  
GATCAAGGGCAGTGCAACCGTCTCCAACAATGCCATCGATGCAACCCAAGTCTCGCAAT  
GCAACCGGGCAAGACACCGAATGGTAAAGCCGCGCAGATTTCTAAAAACACCGGGACGGT  
TGCCCGCACCTTCTGGCCCGCGCCATCCTGCCTTTGCTGGATGTGTTCCAAACCCAGGT  
CGATGACCGTGAGGAAATCGCGCTGGACCACGGCGAACGCAATTCCATGTCCAAAGCCCA  
AGCGTTCCTGATCCAAGTTATCTTTACGGCTCGCCTAACCGTGAACCCATACGGCAAGCT  
GCCGGGCAACGCTGCTGGCACTTTCGTACCTCTGGCCGCTGCCGGTGTGGTGGCCGACAC  
AGCTAAGCTACCCGACGGCTTCGGACTGCTGTTTCGCGCAGATGACGGAGAAGGACGTTCA  
CCCAACCGTCAATGACGTGTGGGTATTCGTTTCGCCAACTACTTTCTACGCATTGCGGGG  
AGAGGAACAGGTCATCGTCGATCAGTACGTTACTTCCGATGGCACCAACCTCAGGGGCTCT  
CACCGGCACCGCGAGCGCCCTTCGAGTCGTAACGACTGGGAACCTGCGGAACTGGTTTGA  
AGGAGCAACCGAGCTGACTGACCGCGTCGCTGCACACATGGGCGATGACTACGCTGGCGT  
CTTACCTCCGTGCTTGCCTAATGCTCTCAACCCTCGCCATGGTGGCCCGGTCTCCCAT  
CGAGCTTGAATCGAAGGTCTTCTTCGACGACGTGTCCAGGCACTCGTACGTGGATAGTTG  
GTTGGCATTGACTCGGCTCCAAACCTTGCCAAATGGCCTGGCATCATCGTTTCTCCGTA  
ACGCGACTCTGGCCCGCAACGGGTTCCCTTTACGGGGAGTCTGTTGTGGGCGATTTTCTCT  
AGGTACGCGCGACTGACTTTTATTACTGAGCTTGAAGTGGTAAATCGTTGCCTTGCCACG  
ATGGGTAAAGCTGCCGATCAACTCGCTTGAGAGCAGCTTCAACCCAATTGTGACTAAGGCA  
CGGTCAGCGTTCAAAGACGTTACGATCGAAGAACAGGCCGTAGGTTGGTGGTTCATCATC  
GAAGTCGTCACAATGCAACCACAAGGAGCAACGCCCGGAGATGACGGCTGCCACCGACCA  
CCTACCAACTGGCTCTCTATCTAGACGCTGGATGATTACGAACCAGCATGACTTCGCATC  
CGTGACCGAAAAGTGTACGACAACGGGCAATCCGAAGTACGCAACGGGCACGATCTCATG  
GAAGTCATTAACGTCCCACCCGTTCCGTTTGTCAACCTGCCGGACAACGCTAAACGGTTA  
ATCCGTGACAACCCGGTGTTCAGTTCCAGATGGACTACAAGGGCGACGAGCTAAAGATA  
CAACAGGCTGACAATTGCTACACGGACGCCTATGCCATCTGGATGGCTGACCCCGTCCGG  
TCCGTCAAAGCCAACTGCTTCATAAAGGCTCGGCTGGTTCCGCGTTTGTGCGTTACAC  
ATTCATATCGCACGGACTGGCCGTTGGAGGTGATACGAGCAAAGGCACAGGCTATTACGT  
TTCGTTGAGCAACGGCGAACCCGACCAGGTAGCCCAGCATCGAAATCCCGGACAGAACTG  
GAAGTAAAGTCAACATGGTTTCGGCCCGAGTACGCGGCCTTGCCCGTCCCGGGGTTCCGT  
GATGATGTCGGAACATCCACGATCGGAAATCGCGTTCGACACTCCTTCTCGCGAAGACGG  
CAGGGCCTTCGGCCATGAGTCCGTGTATCTCCGCTTAACGAAGTCAGCATCATCCACCG  
CAAGTGCAGTAGCAGGCTCGACCATGCCGATTATTGTTGTGCTGACTAAGATAAGGGG  
CAACTTACTGCCAGTTGCCGCCCATGGCAATCTGTGCGGTTACCCGCCAGACTCATTCAA

CAGCATCATCCCAGTCGTC AATCTGGTACTTCGCGCGGCCAAGGGCGTAGCATAACGGTA  
CTCCGCAGTCGATCAATTCACCAGGCGCACAGCCGCTAACACGGTGGCCGCTAGGGTGAA  
GCGCGGTTTCGTATGCCACAGCTACATGCTGTGTGTCAAGCGAGCCTGCGCTCAGCACGT  
TATCACGGCGCAGTACACCACGTCGACCAGTAGTATCCGGGCATGCTGGACACCGAGGA  
CATCCCCGCAGTCGTCTCCGACCCGGAGACGCTCAGCCAGACCAAGCCGTCCCCGAACTA  
CCAGAGGCTGGTGAACGCCACTGTGTACGCTTACCAGAAAGACTTGAAGTACTAGTATCGG  
TACAACGGCGGGCGGTGGTTCAGCCAGCGGCCAATGCCGCAGAGTGGCAAGCGTTGATCAG  
CTCGAGCTTCCCCGGTAGTTCGGGCCTAATCGGTTCCACCATTCTCATCGACGGTGGGGC  
GAGAGTTAGCTGCGTTGGCGGGGACCAGCGACCAGATCGTCTGCGTGGCGCGCAA  
ACTGGAAGCTGCGGGCGGATTTGACCACGGTTCACGGGACAGGCAGGGTTCGTTATCATCAAGCC  
AACGAACGCGAGGTCGAAGTACGTCAAGGCCATAGCCAAAGACGGCACCAACGATGCATC  
GACGCAGGTGATCTGGGAGGAATAGCCCGGGCGTTCTGATGACGCCAACAGCAGTCACCAC  
AATCGGTGCGGTACACAACGGTACGTTCTACGTTGCCCTGTTGCCAGCGGCACCTCGCTGC  
GCTAGCCGGGATCAACGTGCCGCCATGGGAGCCGCTTTGGCCTGGCGCCCTCGACAGTCA  
ATCGCTGCATCCGTTCCCTAGGCTGGGACATCAACATCATCCGCATGTTCCAAGACCGTCT  
GATCATCTTACCCGCGGCTATCGTGTCCATGAGTAGCTCTGGTGAGTATTTGAACTTCTT  
CAGCTCGTCGGCCCTGAACATTGAGGAGAACGACCGAATTGAAGTTTATCCAATGGGCGG  
CGACGACGATGTGATCAGGCCAGGCACTTTGCTTGACCGACACCTGATCTTGTCTAGAA  
CCAGTGGCAATCCGCAGTGCCGGGACGTGACGCGATCAGTCCACTTAACGCGTTCGTTGC  
TGTACAGTCGGGCTACCGCCATAGCAACACCTGCCACTTGAGTCCAGCGGCAAGCTGAT  
CTACTTCGTCCAGAAGCGCGAGGGCAGGCTGACGATTCAACAAATGCAGGCCGGCGCTTA  
CGCTGAGAGTCTGGATACGTTTTAGAACACACAGTCCCTTCAACTAAA  
ACTTGATTGACGACCGCGTGCAGATTGCGGGCGGTAACGACACCACCCGCGCTGTTTGTTCGCACGACACCCGA  
CGCCAGCCGCGTTCGGGTAACAGCTACCCCGATTTCGCAGAACAAAGCGGAACGGTTATT  
CAATCGCTGAAGCAGGTGGACGTTAAGCAAGACGCTGGACGGTATGATGGGCATGAAGCC  
GAAACAAGGCGACCTGTACGTGACAACGCTTCGACATCACGTCAATGGGTTCGTGGTACGT  
TACGGATCGTATCACGATGAACACGGATGTTCCCTGACTGTCAGCGCGACAGCCAGGGCCC  
TTACAGCGCTGCCGTTCCGCGACCATCGGCAACGACGACTATCCCGAGGTACTGAGCGC  
CGCCTACAACCTAACCGCATCGCGTTATTGGTTGCTGGGCGATACCTTCGTTCGAGCGATT  
GGAAGCGGTGCGGGAACAGATTGGGCCAACCTACGATCCAAACCTGCTGATGGGTGCGGG  
GTTTCGAGAGTTACGTGGTGCTGACCAACCGATAACAGCCGCGCAATGAACGGCAAGGCAAT  
TCTTGACGCGCGACTGAAGCAGGGCCAAATAGACATGACCGTCTTCGATTTCGTCCGCGAT  
GGACGTGAGCAACTGCGACTTGGTTAACGCTCACAGCAAAGCCTATGCGGAACCGCTGCG  
CCGGGTTCCCCGTA  
CTGCTATCGATTGGGTA  
CTGAACTACAGCAGGTGGCCGACACTGC  
GTCGGGCATGGTAGGCGTGTACAAAGTAGTCCGAGACTGCAGGGGTATGCTGGCTGGACC  
TCTTTTGTTC  
CCCTGACACTCTCCGCGATCGAATTGCACGGGCAGCTCTATACATGACG  
GAGACAGTAAATGTTCTGGATTCCCATCATGATGGCCACTTTGGCGGTCTTGCAGTAAGA  
TAAGCTGACCTGAGACATCAAGAACCAGAACCGCATCAACAAGTCGAACACCTACGCAGC  
AACCGAGAAGCAACAAGTCAAGAGGATTCTGCCGTCTGAGAAGTGTGCCCTTAACCGCAT  
GAACCAACCCATCCAAACGCCAGACGCGCGGACCGCCTTCGGGTAGCAGTACAGCTCGGT  
CGAAGCACAGCCC  
GCCCCACTTGGCAGGCTGCTGACCACGGGCAGCTTGGCTAGCCGTGT  
GAAAGCCGCGGAGCTGCAGGGCATACTGGTTCGCGCGGTTCGAGTACGGCGGGCGATAGCGG  
TTCCACCACTTTGATGCTTGAGGCAACAATGGGCCTGCGGGCCGATATCCCGCAGCAGGA  
GATGCACCAGAGGTATTCCGTTAACCATTGGGCAATCGGCGACCTAGAGAAGAACAACCT  
GTACGACCAGTCTGGGATTTTCAACAACAGAAATTGTTACTTGACGACGTGGGATTGAT  
AGAAATTCCAGGCCCGCCGAAGATTCCAACGAACTCCGTTGGTGACGTGGCGATTGCCCTG  
TGCGATGGCATTAAATGCAGGGCGGATAACAGCATGCGCACGTTTCAGCAAGGGCGGGCGCGAT  
GGATGCGAATAGCGTGGGCAGTAAGCTCAAGTCTGGGTTAAGTCCGCAACGTGGCGGCTG  
TTTGCCGGGGACCGACGCTAGCTCGTTCTTCCA  
ACTCGGAGGCAGGACGTAATGGTAACA  
CAATTGGGCCAAGTCATTAGCGGTGGGCAACAACGGTTTCAAGCCGGGTTGGCGCCCCCA  
CCGCAGAAGGATAACCACGAGCTTCTGTCTAAGATGGCCCACCCGAACTTGCAGAAA  
TAACTGGAAGAATTGAAGCAGTCGAAGATCGTGGAGGGCATGCAACGTGTCGCCACACGC  
GAGGCTTCTCAGGAGATCAAGAAGGAAGACTCGGTCATGGCGAACATGTTCCGGGACCTCC  
GCGTCCGTAGCTGGCGCAGCCGAATCACTAAGGTCGAGGGTGTTCATGACTTCAACCCT  
CATATGTATGACGACAGGCAGGGTATGGCGAGCAGATCGACAGAGGAGTTCCGGAAGCAC  
GCTGTGCAGTGAAGGCACCCCGACGTTACGGGCAATCCCGATGGCGATAACGTGGCGCGG  
GCCAAGATCGTAGAAGGCCTCCGCCCCGAGATGAAAATACAAGACGAGGCCAAACCACGCT

TCGAAGCAGCAGCAAACCAAGAACAGCAGCAACGGTATGCTTGAAACTGCCGGTGACAAG  
CTCCACGGCACTGCGCTGCAGTTCGCATAGGGCACTGTGAGCAAGGACGACTTCTACGTG  
GCCGATGGCAGAGTGCTGCTATCCAGCAAGACTAACGCCGGGATGTCTCCCGCGAGGTCC  
AAGAAAGCGATGGTGGACAGTGCCGCGCTGGCTATGACCAGGGACAACGCGTGCGTTGAC  
CGTGTCTTCCAACGGACCGTGATGTACACCGGGCTTGACGTTGATACCCATAACAAAATG  
ATAAAGGTGCGCGATTTCAGCGGCCTCTAAGATCTATAACGAGTACGGTTTCAACAAGTAC  
AGCGCAGGTATCGGCGTGCTGATGCGCGGTGCGGCTGGGCGTAGTACGGCAAATAACCAC  
GAAATGGCTAACCCAGATCAACCGGCGCTACTTGGACGAGACAGGCAGTGAGACGGGCTTG  
CTCAATATGAAGAACGTGATCAGCATGGCTCGCAGCACGTGCTCCCGCATGTTCAACATG  
CAGGACCAGGTGGATGACCTGGTGAGCAAAGCGTACATGCCCGTACGGACCGAAGGTAAA  
CTGGCGCAGCAGGCGACAGAGTTGGTTCAGACCGGCAAGGTCGACTACGCTGAGGGAATG  
GGCATTACGCGCAACAAGACGGACGTAGAGTTCTACGAGGGCTTCACATCCAAGTTAGCA  
ACTGGTACACTGGAAGACGAGATGGATCTGGCAATCGAAAACACTACCCCACGGTAAGCCA  
TACGTTAACCCGCTATTGCAAGGCACGCTTCTGGAGCCATTTCAGCCAGATGATTGGCGGG  
GGCGTTCCGGGGCCGGAGTTCTACCGCACCATGCAGTTCCTTGACGCATGGCTACGGCGC  
CAGGAATCCGCTGGTTCGATTGATGAGTACCTCGCTAGCTAGAACGTGGGGTAGCTGCAA  
CGTACCGGGATGCGCTGGTCACGTTAGTAGGCCACAAGCTACTAGCAGCCAAGGCAGCT  
TGGGTCACGCCCTTATTGTGTTGGCCTAAGCTCAGCTCGGTGGACAACAAGCCGGTGATG  
CTTGAGGCCATCCGCAATCAGATCGAAGGCGCGGGCGTAATGAATAAGCTGGTTCGGTGA  
TAGATGAACGTGCCGGGCATGTCAGCTTCTGCCAAAGGCGTTGTGGTCAACGTCATCTCT  
GGTGATGCGCACGTCTATGTAGATAACCCTCGGCATGGCTCCGCAGGGAGCATTACCAGC  
GCACTGGAAGGCTCTGGCAGTGCAACCGTTGACACTGTTGGCGCATAAGCGATCCCCAAA  
GAACCGCGCCAGCAGCACCTGGCTGCACTCAATGTAGCCGACGCTCAGACGATTGAGCGA  
GTGTTTCAGAAGTAAGTGCCTCCGGGGCTCGTAAGTAGGGCGTGGCCGTCAACTTGGAC  
GGTGCGGACAGCAGCGTGACCGGCAAGAAGGGTGCAACAGCACCATGGACTAAAGTGACG  
GACCCGACCAACTGGTACGGCGTTGCAGACGCTGCAGTGTCCCTGATGCGCGTCCAGGAC  
GTAACCGACAAGGATGCCAAGGCTTACGGAGTCTATTAAGGCCTGCTGCTCCGGGACGTC  
AAGACAGCAACAGTGAATATCACAACCAAATCCTTGACTGAGTTCAACGAAAAGACTC  
AGGAACCGCATCGACGTTACTGACAGCCTCCGCGAAGATGGGCTTTAATAGGAGGCAGCA  
TGGCTGCCAGTCTCGATTCAATCGAAACCAGGAAAGTCAAGTGGGGCCCTGCGGAATCCT  
CTGGTTCAGGAACGCTTGCAGGACGCCGACCGCACACATGACTTCGGACAGGCGAGTACAC  
GCTCGCCGTCTGACGCCAAGGCAATCGCCAACGGCCAGAGGCCCGCCAAACTCAATGCC  
TTGAGATGATGTCTGCGTTCCAACAGGCAGAACAAGGCGCCGACGCGCAATTGACGCCG  
GTAATTCCCAGGAGCAAGGCGCGGCAGCCGGAGCCGAGGTCTATCAAGCGGTTTCGCAAAG  
ACCCGTTTAAGAATTCAAGCACCGAGAACGTCGGGCCAAGCACGGCGCTGACCGATGTAG  
CAGACCCAGCACCGGACGCTTACGTACCGGGAATGCTGGCCGAAATCAGTTAGAAGCAAG  
AGAGCAAGGAATGCTTAGGCCCGGTCGGTCAAATAGGCGCGGCAGTGCTGGAAACGACTG  
GCACCCGCGCGTTCGTACGGATGCTGAGCGCAACTACCACGGTATGCGCTCCTTCTAGG  
ACGACCCGAAGTTCGACGGCCGTGAGGGCCGTGAGATTTAGAGCAAAGCCTTGAGCCAAG  
AGGACCTCGATTGGGGGGCTAACGCCAGAAGCGCTTACGAACGGCAGAACATGCAGGCCA  
GTTTGCAGGTTACACGGGACCACTCCAAGGGTATCGGGGCGCAGGGCGATGGTGTTTGCA  
CCGTGATCGGGCTAACTGGTGGCGTGCTTGATACTGCGGGCTCTGCAGCAGGTAGGGGCG  
CGTGTAAGGTGCAAAGTTGACCAAGATAGGCATGGGACCGGGCGCCGTCCAGCGCTGCC  
TGATCGGTGCCGTTGAGGGTGCTGCAGGTAACGTTCTTGTGGCAGCACGTCTGCAGTGCT  
CTGTCGAGCAGGTGACGCCGGGTGACTACTTCTACTCCGCTGGTTTTCCGAGCCCTCTTCC  
GTGGCGGCGTCAGCAGCATGACCCGGTGAGTGTGCGCTGAGCCCTCTCCGCTTAGGCTG  
ATGCCTACTCTGGCTACACCAAGGACATCACAGTGTCTTACATCGACGGTAACCTCATAA  
TCCACGCAGGGCGTCTGGAGCACGCTGAGTACCGGCTTCCCGAGGCTAGAACGCCCGAGC  
AGACCGCCGGAGCAGCGCGTGACGTGTTTCGACGAGCGCTCCATGGCCAACGGGCAGCAGG  
GACTCGGGCTATGCAAGACATCGAATGCCTCCTGCCTGAGGTAGACACAACCAAGCTGT  
CGGCAGACGGCCGAGACGAGTTGACAGGCACGATGACGACGGATCTGGGAGGGCAGGTCA  
GCGACGTTGTGCGCCGGACGGCGGTGGGCGATCAGCGGGGATTCACCGCTGCGACCATT  
CGGACAACGCCAAGCGCCTTATCTACACCGAGAAGATGCTGCGCAGGCTCGAGAACCCGC  
TAACCGTCGATCAAGCCAAGCTTGATACCTTGATTCGCAACTGGCTTGCACCTATTGCGG  
CCAGCGCTATGGTAGCAAATTTCCGCATGCCGCAATTGATCCTTTCTCACAGTGGTTCATC  
CGATAATGAAGTGGATTGCAGCGACCTTGTGGAGTCGCCGTGTAAGCCGGTGACCCAC  
GCACTGCCGACGAATAGAGCATGCGAGCCGCCAACGTGAGTACAACAGCTTCAACGCC

TGTACAACGCGTCGTATGGTGCTTGCCGCTATTGGAGCGGCCGGCTCGTTGGTCAAAGACA  
TCCTTTTCAGGCAGACGCACTTCGAGGATTTCAACAAACTGGTAAGCACTGAAGGGCCAA  
ACAGCACACCCGGTATCATCGGTGACGCGCATCCGCTCGTTCGTACAGCCGCCGACGCAA  
TGGAGGAGGGTTTCCACCGTCTTCAGCCGACCAGCGCCGCGCCAAGTCACTCTGTTCCG  
AGTTGCTTCCAGATTCCAGCATCGGCTACACGCCGCGCATGCTGAAAACCAATTCATCG  
AAGAACACCGGAAGCGCCGTGAGGCGATCCCTGAGGAAATCCGCGGCCAACGGCAGGACG  
CATGGGCGGGCATAACCGGTAGGGGGGAAGTTCGCTCAAGAAGTAGCGGGCACGTACATTA  
ACCGCGCACGCGTTGAGGCGGCAGTCGGTCCGGTAACCACGGGGGATATGTCTGACCCGC  
ACGCAGCAGGCAACCTGCGAGGCACTTTGCCTCAACACGCCATGAGCGCAGCAGACATCG  
AACGGTACATGGTATGCGTTGGCTGTGGTGGCGGAAAGCACTCCAAAGGTCGCCTTGGTC  
TCGAGTTGACCAAGGAAATCGAACTGCCGGATTGCAGCGTGTTCACCATCCGTGACGCAT  
TCATCAACGTAACGTCCGTGCTGTTCTGCTGCAAATCCCGCTACGTAAAGGGCGACGTT  
CGCTGAGCCGCTGTGGCAGCATGCGCAAGGAAGGTATCAACCAGCTCTGTGAAATGCTGG  
TGTTGTCCGGTAAGGGCGCATCGGACAAGCGCTGGGCCAACCCAGCCGAACGCCTGCAACC  
AAGCCATGTGCAAATTGATGGGCAAGACTTACGGGACCACGCACCGACTGGCTGACAACT  
TCTGCATCCGGACCGGCGCCAGCCGCCTGGGCCAAGCAGTGATCCCTCAGCTCTCCGCGA  
CTGGGGGGATCGCTGCGCACTAGGGCAGATAGAAGGCAACGCACTTTATCAAAGACCTCG  
CACGCGGTGTGGAGGAGGTACGGAGAGGCAATACAAGCGACCCCTGGTACACGCTGGTGC  
AACCGGGCGTCCCCATCGGCGACGAAGACGTCCTTATGCCTTGTGAGTCGTTTCGATC  
ACATCCAGTTGGCAGAGATGGACGTTGCTGGTGCCTAGAACGCGCACTCCGTGGCGTAT  
CACAGGCACAGTACACCCTGACGGGGCACCGGTACTCTCAGGCAGTACAGACCCGAGGCG  
TATTGGAGCACATTTTCAACAAGGTCATGCGGTATGCGTACCACAGCACTTACCACTAGG  
CCCGGCATAGCCTGGGGATCAACGACAATTTGATCTCCGCCATCAAAAAGACCTTCGCA  
ACATCTCCGAGGTGACGGCACTGTGCGACTCAAGGCATTCGACATCCGCCAGACTGACC  
ACGCTGCCACGATGCAGGAGGTTCCCAAGGTGAACGAGCGTGCTGCGAGCCCGATCATCC  
AGAACGACTTCCTCGGCGAGCGACAAGCGTTCCTGCATGACTCGTTGAATCCCATCTTGA  
CTCAGTTCCGCTCGTACTCCCTGAACGCGAAGTCGAACCCGTGAACTCGTACACAGTTTG  
ACCAACGCACCGCGAAGGCTCTCGGTATGATGATGGGCCCGAAGTCGGTGGCCCTGCCGC  
TGCACCTTGCTGCGTGATAGCTATATAGGCTCTTATGTCCGCTGACCACGCTGCCGACT  
ACCGACAGAACAACCTTACGCCCTGATCTGCTGTCCCGCGCCACGCTGAACTATGCCTATC  
TGGCCGGTTCGCTGGGCGATACGGTGTATGCTTGCATGGGTCCGCTGGGCACACAGATGT  
CCGGCGTCCGCTCCGGCTCTCAGGATGTACTCGGCAACGTCCCGGCGCTGGGCTACGTTT  
CAAACACCGCGTAAGCGCTGAAGGATAAAGACTTGTCCGCCATTATCCAGGCAATGCCCG  
GTGGCAACACCGTGTCTTGTGCTGACAGCCGGACACCTGTGCGCACTGGATGCAGAAGGACT  
GATGTAACCGCTAAGTGGAACAGTTTTAAATAGGCCACTATAGCAACCCGAATAGCATT  
TCGGACGCATCATGACAGACTACGTGTCTAACAAACGAGTTCCCGGCAATGGTTCCATCA  
TGCAGATGGAAGTCAACTCCGCTGGCAACGACGCCGTTGTAGACTCTGGTGGTATTACGT  
ATTCCAAACCCGCTGACGGGAAGGCTCAGTTCTTCACTCCCGCAAATGACACCACTCCAT  
AAATCGTGGAGGACTAGCCGCTGGGTTACGTCCGGCTCAAGCACCTTCATTACCGTTGAGC  
CTGTGCCAATCGGCAAGATTGTTCCGGTGTACCGCGAGACGGAAGACCGTTACTCGCTGC  
GCAACTGCGTAGCGTTGCAGAACGTGACGTAGCGTGATCTTGACGCACTCGCCCGGCAGA  
CCGTCTTCCCTCGTTGAAAAAGCGAAGGACGCCGCGCAGTTCGGAATCGACACGGACCGCG  
ACACAACGCGACATGCCACAGCTGCAACCGGCGTGGCGCGTGAAGCTCTCGCACTGGCAG  
CCACCGCTCACCGCAACGCTTCGGCGGCTGGGGTACGGCAGACGCTGCTTCTAACGACG  
CCAAGTCGGCGTTGGTCAACCCCAATAAGGCAGCACATGATGCCACCTCGGCTAGACAGC  
GCGCCGCCATCGTGGGGACGCTGGCAGCTGCTGCTCAGACGAAAGCTGACTAGGCTATCG  
CTGCGGCGAACCAGGCAGACGCCAAGGTCAACCGGGCCGAAGGCAGCGCCAACGGAATTG  
ATGGCAAGGCAACCGCTGCTGTGGCACCCGCTAACGCGGGTACCGCCAGTGCTAAACGGA  
CTGAGTCCACTGTAAACGCGATTGACGGCAAAGCTACACAGGCTATCCACCCCGCGAACC  
CAGCAACCACTACCGCGAAGCTTGCCAAGGCAGCCGCCGAAGACATTGACGAGAAGGCGT  
CGAAGCATGGGCTACGGCCAACGGGGCCGCTGCTGACGTGGCAAGCGCTGATACTAAAG  
CTGATCAGAAAATCCAGACCTCCAATAATCAAGCTCAAACACGGCTGGCAAGGTAAACC  
GCCCGGTGATCAGATCACCGGGGTTCCGGTGGTTGAGCCGCGCGTGCAGGCTATTGGCA  
AGGCCGACAGCAAGGCGATGTTTGAATGCGACGTTGCTGGCCAGACTGTGCGTATGGCAT  
GGCTGACGTCTGACGAGATTCTCCAATTCGGTCCGACTTGTGGAAACGGTTCAGAAGTGA  
ATCATGCCATGAACAGCGCATTACGACGCGGGTGCGGTCTGAGAGAGTGAATGGCGGG  
CAGTTTCGATGGCATCCGTGATGGCTACCGCAACAACGTCCACCCGCAGCCCGAAGTTT



AAATCAGTCTTCGGGATAACGTGTCCGTGTGCGGTACCATGACAGTCACAGCTGCTGTCA  
ACGTCACCACCTACTCTACCTACCCAAGGCTGTACGTACCTACGGCGCAGTGCGGAAGTTG  
CAAACGGGCACATCTGCTTCCAGAACCAGCAAGGCGACGAGCTTAGTCTGATCTATACCG  
ACTCGGGGTGTAACATGCCTTACCGCAGAGACGGTGGCCGCGACGCCTTGGCGCTCTATG  
CAAACAAGACCGCAGGCTTCAACGGTAACATCCGTGCTCCCTCTGCCGCTATCTCCAGGC  
GAGTCTCTGCTGGTGAAGTTGCCGTCGAGCGGGACTGTGTTGTAAGCCAACGGCGCCTCGT  
GGCTTGCGAACGACGACAACGTATTCGGTGGGGTTTGGGGCCGCTAACTGTCCAAGTGGG  
TGAACTCCGAACCTCGTAACACGTGCCGAGTTCGGCGGTGCTGTCCAGGCTAAAGTCGCAG  
CATTACCGCTGGCCAAGACGGCTCCTACTCCATGCTGCAAACCTCGCGGTATGGTCAACG  
GCGGCCCGGATGAATGCGTCGACGGTGTATCAGCTCGGCTGGGGCAGCTGTGCAGGAGACT  
TCTCGGATATCGTCGGGTACGGCACTTGGCGTGTAAAAGGCCGTGTGGCCACCAGTATCA  
CGGTTGTTTTTAGCCCTATTAGGATGAGGGTTAGCTAATGTAATTTCCGAAGACCTATCG  
GGACGGGTTCACTGTGTACGGCGTTCGTTCGTCACGGGACGCCGCTGATTCCGGTAAGTT  
CATCCCCTCGGAAGTGATCTGGGGCCAACTATACGTTCCCTTTCGCTATCAGCGATCTCGA  
CACTGAACGTCGGGGCAAAGCTTTTTTTGACTATTGCTCGTCGCTTTGTGTGACCCCTA  
CAAGCGTAAGTCCGACGCCGAGCACGAAGCAGAGGCCAAAGACGCAGCCGAGCGACAATC  
TATGAAAGCTGAGCTATCCGACCTGATGATTGTGGTACACTTTAAACGGGGCGTCGCCAGG  
ACAAGTGGCCGGCGCCACCGCGATCCCGATCAAACCTCAAGCAGTAAGACATTCTCAGCAC  
TGATGCTGCAGACATGGTGAATTCGCAATACCTGGACTGCGGTCGTCGGCGGCGCCAAATT  
CTCCGACTCTTTTGTCTCGTTCCGCAACCCTCCGGTTCGTGCAATGGAAGGCGGGTATCTG  
GATTTTGATTCACGCAGGCTTCTACCTATTGACCCATATAAGACGAACTATAATGGCA  
GCTTCTAGTGCTTGCCTTGGCAATCTGCAAAGTTTGTTCACCGCTTACTGGGAGCATCGG  
TTTGACGCTGTCGAACTGCGCATCGTAGATAAAGGCTGCGTCCCGCTTACGTCCAACGAC  
CTTGACGTCGACCGGGCGTTCTTTAGCGACAACAACATCACCGTCGAACCCGGTGGCGAC  
AAAGACTTCGCCTGACTGGGCGCTCAGCTTGCCGCCGGCCTGAACGGTTCGTAACCAA  
GTCGAGCTTGACGGTATCCTCAAAGACGTGGTAGGCTGCATGTGAGTACGGAACCTCAGGG  
AACACAAGACGCCGCGCCACGCGCAGTTGGCGCTACTTCAGCTAACATTCCAAAGCTTCA  
TGCCGTTTCTGATTATCTGCATGAAGTTCTTTTGGTTTCGGACAACAGCGATCCAGAAAG  
ACATGGGCCTGTACCTTGAGCATGGCCCCAAAGACCTGATGGTTCGAGCACATCGCTCTC  
AAGCCAACCTCACCATTACCGCATTGTTTCGAGGTTTAGACACCGCTTCAAGACCAACGTT  
CTCGTGTTTCGGATAATCCCGGCATGTGGCAAGCAGGCCAAACGAAATCTCCACGCTAACCG  
TCCGACTCATTATGAGGATGGAATTTCTGGCTTGCCTCCGAACTGACCCGCAACCTGGTA  
ACCATGTATCCATGGAGAAGGTTCGACGTTACACCTGGCTGAGCGGCTTGGATAAGTCGC  
CCTACGTGGCGTGCACCGTCATTGATGGTTACACGCAGCGTAACCGACATGACTTGCTGA  
TTCCGGACAGCGTGCACCTCCCTCCAGAACTCCCCACCGCCACCAACCCCGAGCTTTTGC  
AGCAACAAAACCGTGCCGACCCGTCCATCGGAGTCCATCCCGTGGGCGCAAGCGTCGTGA  
TAGAACGTCGGTGCCGAGCGATCATCCCCGGGACTCCGCAGACGGACGCTTCCCTCGTACA  
ACACACTCCCGGCAGCACGCTTTGGCTTGCGCAATTGGCCGGGACGTTACAGAACGGTCCG  
AGAAAGAACC GGCGCATGGCGTGCATCTAGCGCAGTAGATCAAACAGCGCATGACCCGTG  
ACCCGTCCCTGCGGGCGGGCGTGGGGCCAACCGAACGTTCCCTGCCAACCAGTCGATCATG  
AGCTGCTGGGCGAGGACGCACTGCTCTCAAGGAGAACAAGCAGGGGCCAGCCAACCTTCC  
AGCTCCAGCACATGCTGTGTATGCTCCTGAGAGACATCGAGCGCCGCCACGCGAGGCC  
CTCACGTCGTCGTTTTGAACCACTGCACGCTTATTCCCTATGCACTTTGAGCGCGGCATCA  
TCGCTGAGCATCTGCGACAGTATAAGGTTCGGCTCTCTCAAGTTCCACTGCTCGATGCATA  
TTGTCACCGGCAAGGGGTTTCGCTGCTCATCAATGCCGAGTGCGGGCAATCCGCACCGCTG  
GGGGCGGCAAGAGCAGTGACGTAACCTGGGGTGACCGTAGTTGACCAGCGCGGTGGTAACT  
TCTTCGTCCGCTCGGTAGCGGGTATCCCCGGCGAGTACGTCGCGGACACGCTTAAGAAGC  
TGGTGGCGTACTGCAAGCTCTTGGAGCCTACCAGTCTCTTATAGAGATGCACATAGGCC  
GTGGTGCCTTACACAGGTTCTGCTTCCCTCAGATACGTGCTGAGGGCATGCCCTGCGGTG  
TGCAAGTGGTGTACAACACCGCCAGCAAGAAGAGCGTATCGCCGACACTCTCGAGCCAT  
TCTCAGCCAGTGGCGAACTCATCATGGACGAAATCCTCGTCACTGACCACCGGGCTTCGA  
CCCTCCGCCAGCCTGCTGACAATCGCGAGTTGTTTCGCCCTGCTGCACCAAGTTCATCAGAT  
TCACACGCGACAAGGCCGCGCTAGTAATAGACGACTGGCTCGACGTAAGTACTGAGCATCGCCG  
TAGCGTACTTCATCAAACCTTTGCCCGGAGACTCCCCACTCGTTGCGGAATCAGTCCGGC  
CTCAGGAGGTGGTCAAGGTCATGGAAAACCCGGTCAGCCACAACAACACTACATCAAGTCTG  
CTCAAATTGGCTACCGCCAATGAGTTCATCCTACAGCATGGAAGACAATACGACGAGATT  
CTCGACTCTGCCATCCCGCGGTAAACTCCGCGCCGGCCAGAAGCTCTGCCACTCCACTAT

CACTGCAATCTCCGCACCCCTCAATCCACAACGCCCAATCCGGCCTGAACTGCGCCGAGCT  
GGTTGCGTTCGTCACCGCGGCACTGAACGCCACTCCGCGGGCTCCCGGCCAGAACCCAGT  
CGTCGCATCGGTTACCAACGTCCAGAAAGTTTACACTGGCGGCGTGACCTACGAACTAAC  
CGTGTCTGCTGGCCAACCTGAACGCCTTACCGCAGTCGCTGCTCCTGAAGAAGTGATTTA  
TGTCTAGGTTCCGCCAAGTAGGGGCGCCTTGCCTCTCGGCTGAGGCTGTCCGTAGTATCT  
TCGCGGCAGGCTTCAGCGTTCACCAGCCCGAAGAAGGAAGTGTGAACCGGGCATAACCTTG  
ATTCAAGTGGAAGCTTACCATCTGCACCGGGCACACTGGCCTCGAGGTACTCTTAGGGT  
CACTCGACAGAGCCGCACAAGGCGCTGAGCTGCCTCCACGGCCGCAAGTCGGCTGGCG  
CCGCTGCTAAGCGCCCGATCAAAGGCCCGCTGTACCAG

>NewGenomeName\_116

TTTTTAACTAACGATCTTTTCACTAAAAATGCCTCCAAATCAACGGAGGTTTTTCTACAT  
GCACCAGCACTCAACCGTTTCGGACTTCTACCACAAACCAATAATCGACGCTATCAAACA  
CCTTGACGAAACTGCTGGTATGCCGGTGCTATCTCAAACCTCCTAACCTCCGAATCTGGAA  
ACAGTGCAACAATCCCGTAAGACTGCTGGGAGAAATTCTAAATCATTGCAAAAACGGTTA  
TCGCCGTGATGATAATGGTGACTTATTTCTGAACCCTGAATGCCAACTCGCCACTAAAAT  
TGTTTATCGTGCTCACAAGAGGGCCATAACCCTCCCTTTAAACAATACCCAGAGTCATT  
CACTCTGGACGATATTATTACAGGCAAACCGATTCCCTCAGACTGCCCTTCTGAGCTTCA  
ACTTACTCGTGAAGTCCGTGAGGATTACCGCATTAAATGTACTCTCCATAAACGAAGAGTG  
AGTCGAATGCTACAACGTGCTCGGATAACGTGATATTAATAACACTATAAACCCAGAAACC  
TATGGGTAACGCCAAATGCGACTTAATGTATGAAACATCTGTCTATAACAATGGCCTGA  
ACTGGTAACAAAACGACCCGTTAAATCTAACAGAGAGGACTACAACCTGTGCTAAGACTAA  
GGGTACCAAAGATGAGTGCTTGAAAGTCCTTGAGGAATCCACCATGCAATCCCGTTCGTGG  
CTTTACCGTTCAGAGATTGATGAATGCTATGCGTACTGCCCCACTGAAGGCTGGTATGT  
AGTATTCGATACTGTCACCTTAGCTAATGATCGTATTAAGGACTTCTATGCTAACCCCAA  
TGCTCTTCGTGACTATTTCCGTGATATTGACCGTATGGTTCTCACTGCCGAGGGTTCGGTC  
GGTCCATGATTCATCTACGGACTGCTATCAGTACTTTTATGTGCCTGAGTATGGCACCGC  
GCATGGCCCTTTACGCTTTCACGCAGTGCATGTTATGCGCACACTTCCTTTGGGTTTCGAT  
CGACCCTAATTTTAGTGAGCTGGTGCGTACTAATGGTCAAATAAATAGCTTGCAAAAACAC  
ATGGCCTTATGGTTACTCTATGGCCATCGCAGACCGGTATTCTCAGGATGCTTCCTCTCG  
GGCTGGATGGCTCTGGCCTGTCGGTACAAAGGGTGAAACCCTTAAATCCACCTCGTACAT  
GGCTGTAGGCTTCTACGTTGCTAAATACGTTAATAAAAAAGTTGATGTGGACATAGTCGC  
AAAAGGCTTAGGGAATCGAAAATGGGACGCTACATTAAGAACGCAGATGGCTCTTTTACC  
AAAGAAGCTATTTTCGAATTCGAAGGAGCCGCAACTTCGGGTTGAAACTACTCCCAATGAC  
GACGCTGACCGCGGAGTGTTAATCCAACCTTACCCAAGTGGGTTACTACGTGACCCCGTT  
CAACAACATCTTGAGGCAGAACGCCAAGTAAGAGCTACTATTGAGGCTGGCAAAGCAATC  
TGTATCCGACGTTTTTGGAGGCGGAACCTGTGACGACCAATCCGCTAAAATTCATGCGCGA  
TTTGACTCGATCAATCGGGGCGTCCATCCTACAGAGTTTTATGTCTAAAATGACGCATAA  
ATTAGCAATTACGGATATTTCCGGATGTGACTAAAAACTACGTTACTAATGCAGGAATTGC  
TGTTGCTGACTTGCGACTTAAATCCAAGTGGACAGCTGGTGGAAGTGAAGAAGTCAAT  
CCCAACTTAAAGAAGTCCAGGGCGTCTTCCGGCGCAACCTTTCGCCCTCACCGCAACGTG  
GTAGCAAAGACTGACGCGCTTGATGAAGTAATGTGGCTCAATATGATCGGCGCTATTCTT  
AAGGACTGGTTCCTCTATCAACAACATTACGTACATGGCAAAGAAGCAATGCTTGACATT  
CTAAATGAACGTGGCCTATTATCCACCTTGCCAAATGGCTTAGCTTACAAGGGAATCAA  
AATGACAGCAAATGAGAACGCAGTAGCCTTTCAAACGGCTATTCTCTCCATCAAACCTTAT  
TCAGGCATCTTCTGTTCTTGTCTGACTGAGGAAGATTTTCGAATTCCTCACTACTGAACC  
TGATATGGATAGCAACTGACCGCTCCCTAGCTCGCCGCACTATTGAGGCTTGCCTCTATGG  
AACTCTGGACATTGTGGGATAACCATCGCTTTCCTCCTCCTATTGAGTTTATTGCTGCTGT  
CATCCCTTATTATGTTTCATCCATTAACATTCAAACGGGATGGGTTATTATGGAAGGCGC  
TCAACTCACCGAACACATCATTAATGGAGTCGATGCACCGGTTTAAAGCCGGTTAACTCTT  
CGCGTTTACGTTGCGTGTACTCGACGGAACCACTGAGCTTATTACTTAAGCGGAAAACCTA  
TGCGCGTGAAAAACTGCGCGGTCAAGGAGTGATGGATGTCTAGAATATCTGTTTCGCCTAC  
CTGGTGGCAAATCTAAAGGTGGTCGCCTCTGGTATGTTGGCGGCACACAGTTCTGATCTC  
TAAGGGGCTTCCCTCCCCCTATTTAAGGAAACAATACGTCTATCGTACAAACTTCCGCTG  
AACGTATTACGCATGACCTCTCAAATCTGGTATTTCGAAGGTGCTAGAATCGGAGGGCTTA  
AAACGATCTTCTGGACTCCTGTTGTCGCTGGTGGTTCTTACCAAACCTGAAATGGTAGGCG  
CAATTCGTCTTTATCCTCTCCTTCGTGGTCTGGCTGTCGACTCTCGCGTTGACGTCTTTA  
CTTTGGATATCCCTCAGCGTTATGTCTATGGGCAACAATGGATTGACTTTATGAAGACTG

GTGTTAACGCTACTCCTCTGGCTCCGGTGACTTGTTTCATCTGGCTGTGATTCTGCAGCCG  
ATCTTGGCACTGTCCCGTAAACTGATTTGAAGGTTCCCTAAATCCCTTCATCAATCTTATC  
TCAATATTTACAACAACACTTTAATCCGCCGTGGTCTAATGACCTCACCTATGCTAAAC  
CATCTAATATGCACGCTGAGGATTACAAATGGGGCGTTCGTCTCGCTAACTTAAAGTCTA  
TCTGGACCGCGCCCATGCCTCCTGCTTCATTAACCTAAGCAGGATGTGACTACTGGCGCTA  
CCACTATCGATATTATGGGCCTACAAGCCGCCGATGCCAAACTCCACACTGAACAGGAAC  
GTGACTGTTTCAAGACTCGCTACCGCGATATTATTAAGGACTTTGGCGGTACACGTCGT  
ATGACGGTGATAACCGTCTCTGCTCCTGATGCGCTCTAATTTTTGGGCTTCTGGCTATG  
ACGTCGGCGGTACTGTCCAAACTTCATTGGGTCAGTTCTATGGTCGCGTCCAACAAACCT  
TTGTTTCATAAAGTGCCTCGCTTCTTTGTTCTTGAGCATCGCGTACTTATGACTTTATCTG  
TACTCGCTTCCCTCCTACTCGCGAAATGGAAATGCACTATCTCGTCGGTAAGGATTCTC  
TGATTTATACTGACATTGTCTGTGACCCTGTTCTTATGGCTAACGGGCTCTGCGTGGAA  
TTGAGGTAAGACCTCTTTCCTACTCTGCGGAACTGGGAAATTCCAAATTGCCGAAGGTC  
AATGGTATCGTACTCAGCCTGACCGCGTCCCTTATAACTCTCTTAACGGCTGCC  
CTTTCTATTCTGAACTGCCGTCTAAGGCTATTCTCGAACGTGTTCTCGTTCGAACCGATA  
ACTATGATTAATCTTCCGGTCAATGCAAATTGCACACTGGCACATGCAAACCTAGATTTA  
ACCCTACAGTATAACGTCATATGCCTACCACTCGTGATGGCATCATGACGTAATAAACT  
AAACGATGCACGGGGACTACTGTTGATTTGTGACCGTTCAAGGTTGAACAAGCGAAGCGC  
GTTCACTAACTTACGTAAGGAAATTCTCAGGCTTCAATCTTATCTCACTAAACATAATTC  
TCCGTGAACTTCTCTGTCTATTACTGCGACAAAACACCTGCGGCTGCTGCTCCGATTAT  
GTCTACACCGGAGATTAGCCGCTCTACTATTTTCGCTTCTTAATTCTGACTGCTGCCAA  
TACTCATTCTTGTGTCTCTCATGTCGTTTCGTATTGACGAAACCAATCCTACTGACAATAA  
GGTCTTATCGGTGCGCGCTTCTTTATCTGGCGTACCGTCTGATGCTATTGGTATTGCAAT  
GCGCTTTGAGGTGCTGACGGTACCGTCCCTACTGATCTCCCTGCTCTCTCCTCTGCTTA  
TCCGGTGGCATTCTTCACTTCTGGCGCTGATCTGTCATTGGAAGATGCCGTATCTATTCC  
GACGCATCCTGTTACTGCTGGTAATGCTGTATATGCTGGTATTCATATCAGGGCCAATC  
TTGGTCTACTGACGTCGTGTCCGGCCTCTTATCTGTTAATCAGGTAACCGAGAACTAC  
CGTACTACAACCTCTTAAAGAAGGTCAAATCTATGTTTCGGGGCTATCGCTGGCGGTATTG  
CCTCCTCTCTTGCTGGTGGACTACTTAAAAAAGCATTCGGGGGCGGTTCTTCCGCTCCCC  
CATCTGGCGTTCAAGGTAATGTCCTCGCTACTGACAATAATGTAATGGGTGCTAATGATG  
CTGGTATCAACTCCGATATTCAGAGTTCTGATCATTCCAATGGTCAACGAGCTGCTACCA  
AACCTATATCGAGCGTTCTAGCCGATACTGGCAAAGACGCCCAATCTTCAATCACTGGCG  
CTGGAGTTAGTAACTTACGGAAAAAATCGGAATCTCTAAAGCTGTTGCTGCTAAAGGTA  
AGGATACGAAAGAGTATATTGCTGCTGCGTTCGCCGAACCTCAACCCGTGGGAAATTGCTG  
CCTCTCGTGCTTCTTCTGCTGGAATGGTTGACGCGGGTTTTTCAGAACCAAAGGAATTA  
CTCGAATGCAGCTTGAGAATCAAAAAGAAATCTTTTAGATGCAGCACGACTCAAAAGT  
ATATCGCCGGTGTGAGTCTGTTACTTCTCGGCAAAATACTAAGGACGCTGTGTATGCTC  
AAAACGAAATGCTCCAATACAACCAAAAAGCATCTATGTCACGCGTTGGCGCTGTTCTCC  
AGAGCACAAGCCTGACCAAACAACCAAACTTCAGACACTATGCGGCAAATGCTTACTC  
AGGCTCAAACCTCAGGACAACACTTTACAAATGACCAAATCCAAGATATTACTCGAAGGG  
TCGGCGCTGATATTGACGCTGTTGCTGATAACTCTGAACGTACGCATGTAGAAACGGACC  
GCTCTAAGCAGGATGTCCAAACTCTCGTTACGATTCCTCACAGTCGGTTAAACCGCCA  
AGGATGTATCAAATGTCATTAGTGACGCTGTCCTGGTATTGTTGATTATTTTCGTGGCG  
TTGATAAAGGTGTCGCGGATACTTAGAACAATTATTTCAAAGATGGCACGTCGCATGGGA  
TAAGCTCAAACCAACGTACCAAATAA

>NewGenomeName\_117

TTGTTGACATTACCGAAACCCTTATGAGACTCTTGCTTCAACGATTGAAGTAGGAGTCTT  
TATTATGAAACCCGCTTACCGCTTGACTCATCCGATTCTCGGCTCTTGGTTGTTTAAAGTG  
CCCCATTTATATCCGTTATGAGCACCTTCATCACGGTCGTCTTATCAAGGTTTCGCGCTGT  
TCGTGATTTGTCCCCGCGTCAGCAGCTTATTGCTAACCATAAAAACCTGCTTTGACGTTGC  
TATTGCTGAGATTGACGTTACTTATTGTTCTGTCACTTATTTTGATAATGAGGCTGAGGA  
ATATACCGAGTGTGATTCAGAACTATGGATAATATCCTTGCTTATATTAACCTCTCCTCA  
TTCCCTTCGCTCTGAGGAGGATTCATCCGTTGATGTTGACGATATGGCGTGGCTTTATGA  
AATTGCGGAGTAAGTTATGGAACTGTTGTCGGAAAATTTATTACGTTGGCTGTTGTTGC  
TCTTATTCTGTATGGAATTGCCCGCTTAATTCGGAGGTTCCCGTGAAGTATTTAGTCTT  
GTGGATGAGCATTATGCTTATTGCCCTGATACGAGGATTTTGCAGATTACTCGTAGCCGT  
GTTTCTGACCCTCGTTATGAGCTTCGCTTTCTTACTGATGAGGAACATTTTGCACTTTTA

GATTGGTTGAAAAATCGCCCAACTTATATTAAGGCTTGACAGGCCCTTTAAAATACCCTCT  
ATATTGCCCTCATAGGTTCACTGCGAGGGCTTTTTTGCATGGCTTCTGAAAGCTTCTCTG  
ATGTTGTTAAGTCTGTTTGGTCGCACGCTACGGCTAAGCACGCTCATCTTCGTATGGCTG  
TTCAGGTTTATAATCGTAGTCGCCTTCTTTCTGCTTTGGTTTACCAGTGGGTAAAGCGCC  
TTTCAGAAGAGACTCATTGGATGATGAGACTTATGCCCTTATGAATCTCAGACTGGCC  
TTTTGGAAGATCATATGGCACTGTTGCGGAAGTGTGCAGCCCAACTTGATAATACGAACA  
CTAGAGACCACCGTACCCCTTTGGATGCCGAATGTGTTTTCCCGTTTGAAATGATTTGCC  
CAGGCGTTCGCTACGGTAAAACGTTGAATTCTCTTTGGACTAAGAATGTTGCTCAACGGC  
CTGAGAAGTAAATTCGTCAAGAGTTAGACATGGTTAAGCCTTTATCACTTAAGGATGAGG  
TTGCTAAGTAGATGGAGAAGATGCAGGAAAAAACACGCAAAAATCGCATGACTCAAAAAG  
TAATGAATGAGATGCGTATTGCTCACCAAAGGGCTGGTTTTTCGTATTTGATACGTCGA  
CACTTGCTGATGATCGTTTGCAGGCTTTAATGAAAACCCCAATGCTCTTCGTGATTATT  
TCAGGACTGTTGGTCGAGCTGTTCTGCGCGCTGAAGGTCGTTCCGGTTAAGGATTCCTACA  
ACGATTGCTATCGCTATCTTTGTGTGCCGGAGTTTGGAGGTCAGCACGGTCGTGTTTATT  
GGCATGTTGTGCATATGGTGCAGGACGCTTCCTTTGGGAAGTTACGACCATAATTTCCGGTC  
GCAAGGTACGTAATTATCGCCAGATTAACCTCGTTCCGTGGCATGTGGCCTTATGGCTTCA  
CGCAACCGATAGCTGTACGCTATAAACGTGTTGCTTATTCTCGCAAATGTTGGTTGTGAC  
CTGTTGACAAATCAGGTAAGCAATGCAGAGTAAGCCCTATCAGGCGGTTCGCATGGTATG  
TGACCAAATATGTAGCTAAGCAATCTGACCAGCGTCAGAAAAGCTATTACTGAGAGACAAA  
AAAATGTAAGAATCGAATTATGGCAATCTATCTGAAAAAGGAATTCAGAGTTCGCAGCA  
GCCGGCAACTCGGAATGGAGTTACCGTCGATCGCGCATTTTCAGCAACAAAGTGCTTCTGG  
AGCTGAGCCGAATCAGCTTCGATTCCAGCCCTCTGTATCAGATAGTGAAAGAGAACGCCA  
AAAAGCAATTGACCTTGAACATCGGCGCGCTGCCTTTGCACGTCATTTTGGATGTGCGCC  
CGGAAGTGAGAAGTATGTTGAAAAATATACGTCGTTTGATGAAAAAGACACCCGAGTTCA  
ATTGGCAGAGTTCTATCGCTTCAATGACGGTCACCTTAAAAAATGGGGATATTCCTGATG  
AAGCACGTCAATACATTATTGATGCAGGAATTACGACTTTTGATTTGCGAGCTAAAGCGA  
CTCAAACCTTAGGTGGTAAGTGACCCGTATTTTTCTCAGGAGAAGATTCATGCTGAGCTC  
GACTTGTTACTACTCAAGTTATCGCGCTACTTAGACTAAGCAGCTGATGTATTTGACTAT  
AGCTGACTTTACCAATGATGATGAAAAATGGCTTAATGCCTTTGGTAATTTGCTCCGTC  
GTGGTTTCAGATTGAGGATTGGAAGGGCAAGCATAATAAATTGCTTGACGATTTAAAAAA  
ACGTGATAACATTTGAGCTGTTTCAAGGTTTCTTACCCATTAATGTTAGGAGAATGTTA  
TGTCTAATCTTTGTTGCTACTGATGTTAACTTTGCTACTTCTGTTGCTGCTCTGAAGATGC  
TTCAGGCTTCCGCTGTTCTGGATATTACCGAGGAGGATTTTGATTTCCCTGACTGGTGATA  
AAATTTGGATTGCTACTGACCGCAACCGTGCAGCGTGCCTGTGTTGAGGCTTGTGTTTATG  
GAACACTGGACTTTGTGGGATAACCCTCGGTTTACTGCTCCTGTTGAGTCTATTGCTGCCG  
TCATTGCTTATTATGTTTATCCCGTCAACAATCAGACGGCCTGCCTCATCATGGAACGCG  
CTGATTTTACGAAAAACATTGTTAATGGCGTCGAGCGTCCGGTTAAAGCCGCTGAGCTCT  
TGGCGTACACCTTGCCTGTTAAGGCCGGATTCAAAGAAACGGCTCTGAGCGCTGAAGAGA  
ATGCTCGTCAGAAACTTCCCTGCAAGTGGAGTTATGTAATATGAAGAAAGCTCGTCGTTCC  
CCTTCTCGTAAGAAAGGCGCTCCTCACTGGTATGTAGGGGGTTCTCAATTTTAATTAACG  
GGGCTTCGGCCCTATATGGATTCTTAAATGTCAAACGTGCAAATTTCCGCTGAACGTAT  
TCCTCACGACGTTTCTCATCTGGTTTTTGTATGCAGGCAAAATTGGTCGTTTAAAGGTTGT  
TTCTTGGACTCCTGTTGTTGCAGGTGATTCTTTTGACCTTGATATGATTGGCGCTATTTCG  
CCTTTCCCGCTTCGTCGTGGCCTTGCTGTTGACTCTCGTGTTGACCTGTCCACGTTTTA  
TGTCCCTCATCGTCATGTATATGGTGAGCAGTGGATTGCTTTTATGAAGCAAGGTGTTGA  
TGCTGCTCCTTTGCCCTGTTCAAGTCTCGCGGTTGGGATAGTGCTCAGTATCTTGC  
TACTATCCGTCTAGTAACTTAAAGGTTTCTTCAAGGTTACCTGAACAC  
TTACAATAATTACTTTAAAGCTCCGTGGATGGATGACCTGACTTATGCCAACCCGTCTAA  
TATGGAGGGTGAAGGTGTTTCGTTTTGGTGTTCGTGCATGTAACCTTGAAAATTTGGAC  
TGCTCCGCTTCCCGGATACTGAAACCTCTCATTCTATGGAGACTGAAACCACCTCCAT  
TGACATTATGGGTTTGCAGGCCGCTTATGCACAATTACATAATGAGCAGGAGCGTGATTA  
ATTCATGACTCGTTATCGTGATATTGTTAACGAATTTGGAGGTAGTACTTCTTAGGATGC  
GGATAATCGTCCTTTGCTTGTATGCATTCTGAGTTCTGGGCTCAGGCTATGATGTTGA  
CGGCACCGACCAAAGCTATCTCGGTCAGTTCTCCGGTCGTGTCCAGCAGACGTTTAAAGCA  
TTCAGTACCGCGATTCTTCTGCCCTGAGCATGGCACTATGTTTCACTCGCATTGGTCCG  
CTTCCCGCCGACTCATGAAATGGAGATGCATTCCTTAGTTGGTAAAGAAGATTTGACTTA  
GACTGATTTGGCTTGTGAACCTGCTTTGATGGCTAACTTGCCCTCCTCGTGAGGTTAATAT

GTCTCAGTTCCTCCATTCTGGAAGTGCTAGTGCTAAGTTTAAAGATCGCTGAAGGTCAGTG  
GTATCGCATGCAGCCTTATCGCGTTGCATTGCCGTATAACTATCTTGATGGTTTTCCGTT  
CTATAGCGCCATTGCGTCTGATGATATTAAGCAGCGCGTTCAGGTTATTACTGATAACTA  
CGATGAGGCTTTCCAGTCTATGCAGCTTGCGCACTGGCATAATGCAGACTAAGTTTAAATTG  
CACCATTTATCGTAATATGCCGCCCACTCGCGACTCTATTATGACCTCTTGATTATGTGG  
GGCTTCGGCCCCCTTTAGGGATATTGATTATGTTTCAAGTTTATGTATCTAAACATGTTG  
CTCCGTTACCTCTGTGAATCGTGCCTTTTCTATTGCCCTGCCGCAATCCCGAAGTTG  
TTAATTCTGGTGAGATTGTTGCAGGTCGTTCTACTTTTCGCATTGCTTCTTCTATTGCTT  
CTGCTTCCAATGGAAGTGGTTTTGCTTTTGTTCAGATGATGGATCCGAATTCTCCTGATT  
CTCAGCAGGTTTTCTCTGTTGCTGCTTCGTTGCCTTTAGTGTTGATTTCGAATTATATTC  
CTTGTGTTGTTTCGTTTTGAGAGCACTGTTGCTCAGCCTACCAGCTTTGATATTGCAACCG  
CTGATTTTATTCCGGTTGAGGCTTCCGCCCTTTCTCCTTGTGCGCTTAGCCTTCGCGATT  
GTGTTACCGTTGATGTTAAGCCTCGTACTGAAGGCAATAATGTTTATGTTGGTGTGGTTT  
TCTTCTCTGCTGCCGCTAATGCTGGTAATGTCACTGGTGTGTTTTCGAAGGCTCCGGTTG  
ACCACGAAGTTACAGTTTTGAGCCGCTTAAATAAAAAGGCTGCCGCACTCCCGGTTAGAT  
GCCTGCCTAGTGTAGGGCAGACCGAGCCGTACGGAGATACCCGATAAACTAGGAACGTGG  
AAGGCGCAAGCCGCGTTCCCTCCTGCGAAGCCCCAAAAGGAGTTACAGCGATGTTAGGTG  
CTGTTGTAGGTGGTATTGCTTCAGCCTTAGCTGGTGGAGCCGCTTCTAAGCTGTTTGGTG  
GTAAACCTGCCGCTCAAGCCGCTACCGAGTCCACTGGCCTTTGTAATGGTCAAGGCGTTA  
TTGGTATGGATCAAGATGCTGGTATTCAGTCGGCTATTCAGGGCTCTAATGTTCCCAATG  
GCCAGATTCCTGCCCCACGCAGACTGGTGGCGTTATGTCTGATGCTAAAAATATGATTA  
AGAATGCTGGTAAAGATTTGCTTGATGGCGTTATGACCGCTGGAAGTGATCGCATTAAAGC  
AGGCATTGGTTGATAAAGTTGAGTGGTAACGATGCAAGGAAACAAGGACAAGCAACCCGTG  
ATTACTTGGCTGCGGCCTTCCCTGAGCTCAATGCATGGAAACGTGCTGGAGCTGGTGCTT  
CCGGTGCCGATTGGAGTCTTCCGGCCTGAATCAGCAAAGGAGTTGATGCGTATGCAGC  
TGGATACTCAGAAGGATATTGCTAAGATGCAAATGCATAATAATTTGCAGATTGCTGGTA  
TTCAGTCCGCTACTTCTCGCGAGAATACGAAGGATTCAGTTTATGCTCAGAATGAGATGC  
TTAAATTTAATCAACAGGAGTCACAGGCACGCGCTGAGTCTATCCTCGCCAACCCTACC  
GTACGGCTAAGCAGGCTGCCCATGAAATTATGAGAATGGCCCTTACTCGTGCTCAGGAGA  
CTGGTCAGCATTAACTAATAGTCAGATTATGGCATTGGAGAAAAAAGTTTATGCAGAAA  
TCGGAAAAATTCATCAAGATACTCAAACGCTCGTTATGGTAGCTCTCAAGTTACTGCTG  
CGGCGAAAGATGTTACGAAGATGATAACCGATGCCACTTCTGGTGCTGCCGGTTGGGTCT  
CTCAACAGTGGAATTTCTTTTAAAGATGGCAAGTCTAATGGTATTCCCCTCAATACCA  
GAAAATAA

>NewGenomeName\_118

CGATTCGCGGTGATTACTATAACCATCACCAGTTTAGCCTTTACACAGAATGTCAAGATGG  
ACCAATCGCTCGACTTCGCCCACGATTCGTTGAAGGCGGGGGCCGGAGGCCAGCGGTT  
GGCCCTATCCCACGAGTGGCGCACTTACAGGTGGGGACGTCATCCGTACAGGGGGGTACG  
TCATGCTTACAGGGGGGTAGGTCTTAAAGGGGCGTCCCCGTACGGGGAGTTGCGTCACGC  
GTAGAAGGGGGTACGTCACTGCCAATCACAAGCTGCTACGTTGCGAAAGTGACGTTTCCA  
AAATAGGGGGCGCCCGCCTCTCTGAATATTTAGCGCACATATCGGTCGGCAGTAGCCATA  
CGCATGGCGATCCGGTTTATGACGCGGGAACGGCCGACAATCGGCCGCTGGGGCCAGTGA  
ATTGCTGCTTAAACGGAGAGGGGCAAGCTGGGCCAGGTGAGCCGGGCAGGGGCAAGTAGT  
TTCAAATGAACGCTCTCCGATAAGATACTCCACACGGACCATCGACGGTGCTCAGGGCAC  
CTACAAGATCACGGACGATCTAAACCCTCACTGCAGCGAGATCCGGATAGGTATCGTTC  
GAATTACAATCACTCTATCGCTGTGTAGCATAACGAGTGCTCCCCTCCCCTGCGCTAAGAT  
ATGGAACCTGCGGACAATTCGAAAGTACGCGGTTCAAGAATGTGCTGGGCTTGAGGATCG  
ATCAACCCAAGCCTCCCTCGCAGATGCGATCGTGCACACCTCCGAGGACAGGGTACCCG  
GGCTAAAAGACACCTTGATAAGCACTACACCCAGCCGACCCCGGACCGCAAATAGGCGTA  
AAAGATTGTAAGATGGCTAGACTAGCTCGGAGACCGAGAGGCAGAAGTTACTCCTTCAGA  
AGAAGACGATGGCACCACCTCAAGCGACTTCGACGAAGATATAAATTTGACATCGGAGG  
AGTCAGCGGTATCGTAGACGAGGTTTGGGGAAGGCCTTTCACAACCCCGCCCCGGTACG  
TATACTGCGACGCTGCCGAACCCTCAATCAACTAACCTATCCGCTTCCAAGGGATGTTT  
TGTCTCACGGAAGGACTCATTGTGCTTAAAACAGCACAGCTGGGGGCTATGCAGACCAC  
ATGTACCGGGAGAGTGTCGCCAATATATTCGAGAACCTGAAAGCGTTCGTGCTAGCCTCA  
ATGAACCTGACATACGGGTGCAAGATCGGAGGCCAATCACCGGTGAGTTGATTACGGAC  
AGGTCTAGATATCAAGCCGCGGATAATAGGACTAATTGCTGGCTGCCGCTAGATAATAAC

GAGTCCTCCGCTACACCTTCGGCATTGTGGAGACGGGCCTTTATGAGATTGCCGCCTACG  
GACTCTTGACGGTTCTTTAATCACTCAAAGCAGATGACACGGCAAGACATGGGTTGCCGG  
TTTGGGGGCTGGCGCCTGTTCCGACACATTAACCCCGGTTTCCGCTCCTTGCCACTAAA  
ACTTATGGATCCTTCAGCCCTGCGGCGAGTCTTCGCTTCCAGGGATAGTAACTCCC CGCT  
AGAGATAATGTGATGTACAGCAGCGATCACCCGAACCGCGGGCAAGAAGGCGGACAACCG  
ATGACGGGGGGCATTGATTATGCGACCGGGAAAGCGACACCCGACGTGCAGCATTACCT  
ACTATGCCCAAGACCCCTGATCATCACCGCTACAACAGCGCAGGGCGCGCAAGTTGGC  
TGAATGATTAACACGCAAGCTTTGTGGTTCATGTGTAACGGATATGCGCTTTGCTATACTC  
ACAGTACACGGTGCACAATCGTCTTTTCCCTCAAGCGCAACGTTCTTTTTCTATACTGTAC  
TTCAACCACCGCAAGGCGAGAGGAGCCGGGGTACCCTAGGGCAAGAGAGGGGCACATGTTG  
GTGCCCGTCGGCACCGAGGCCATCGACGTCAGCTTCATGTCAACACCCGCATCAGAGGTG  
GACACTAATTGCGTTACGTTCTACGTATCGCCAGGCACAAATAAGTAGCAACAGTACAAG  
TCCGGCACAGCTCCCTACGCGCCAACGGAGCCGGTAATGATCAGCGAAGCATGGGCAATA  
CTACGCGTCCAGTCTTTCTGGGAGCTTGCTAACAGAGAGAGGCCATACCCATGGGAATTC  
AACTGGGCGACGACCACCGGCTACTGGCAGAGCCAGCCCTGAAGAGTGGGGCGGTCTAAC  
CCCCCCCCCTTAAACCCCCCTGGGGGCGAATCCCCCCAGGATCCCGTTTTATATT  
GCACACAGGAAACGCGGAAATTAGATTTCTAGCACTCTA

>NewGenomeName\_119

ATTGCACACTTAATTTGAAAATGGCATGTGATACACCTTTTTATCTCAATAACCCTAGC  
TACCCTATCTACAGCAACTACCGCAAGTTCGGTTCCTTGTGGAAAGTGTTCAGCATGT  
TTGTCCAGACGCACTAGCGTCTGGACATTTTCGTTTAAAACTCACGCAAAAAATGCTATA  
TCTTCTTATTTCACTACTTACTTACAATGCCAGATATGTACCTATATCAAGTAGGGGT  
TTCCTTACACTCGATAAACGAGACATTCAACTCTATTTTAAAAGGCTTAGGAACTTCAT  
TCAAGAGATCACGAACCCCTAAAATATTATTTAGCAGGAGAATTTGGAAGCAAAACATTT  
AGACCCCATATCATATCATACTATTTAATGCCAACATCGACCTAATTCATAAATCATGG  
GACAAAGGAGAAGTACACCTAGGGGAATTAACAGACCCTTCGGCCGCATACACTGCAAAA  
TATATAAACATAGGAAAAGTTTTACCAGTGCACAAAAATGATGATAGACTGCCAGAATTT  
AGTTTAAATGAGTAAGAACTAGGACTTAACTATTTATCAGAAAAAATAATTCGATATCAT  
AGAAGCGATATTGAAAGAAATTTTATAACATTGGAAGACGTAAAGAAAATAAGCTTACCT  
AGATACATTAGAGCAAAAATTTGGACAGAGCGAGAAAGAATAACAAGCAGATAAACTA  
GCACAAAAATTCAAAGAGTTAGAGCAACAAAAAGAAACAGAGTACTACACAAAAAATCAA  
ACATTGGAAGGATATGGACAACCTTAAAGCAAATGGAAAAGCCCATAGAATTATTACACAC  
GAAAAACGAGCCCGAGAAGGGCGCAATAAAATTTAGATCAAGCTTCAGTTATCAAGAAAA  
AACAGAGGACCAGGAGGAGAAATCATCAATGGAACCAAGCCAAACAGTTACAGACATGAC  
TTTGTCAATTATCAGAACTAGTACAACGATACACCAGAGGACAATCAGTGGCAACCTTTAC  
ACCCGTTTATTACGGAGAAGAGGAAGAATTCGTAGACGCTAGCAGAATGGATCCTATTGA  
GCGCATAGAGTATGCTCGATTCATTAGAGAAAAAACTCAGAAACCAGACACTCCCTAGC  
GGAGCATCAAGCTGGCGACGAAGGAGCAGCCGAGCCGCAAAATGAGCGGTGGGCAAGAAAA  
AATTAACAGACAACCCCCCACATGTATCATAACAAAAGAGTAAAAAAGGGAAGTTTA  
ACGGTACTACCGCTAAACTTCCCGATACGTGGCGCTATGGCAAAACAACAAAAGCGCAAT  
GGCAAAAGGCCTTCGAAGAGGAGGCCAAACACTAATAATCCTTGATATATTAGTGCTAAT  
TGACACCAAGTAAAAACGAGAGCCTGCGAGAGTAAAAACGCAGATAGAAAATTAACACA  
AAAAACA AAAAAGTTAATGGAACCAAGTAACTACAGCCGAGCAATCACAGCCGGCGTCAG  
TGCCTATCGGGCGGAGCCCAAGCAGACGCCACAGGAAAACA AAAAATCTCGTGC  
ATTCTCCAGGGAGATGTACGAAAAACA AAAAGCAGACACTTTGATGTTTTGCGATATGCA  
GAACCAGTATAATTCACCAGAGCATCAAATGGCAAGATTA AAAATCTGCAGGATTAACCC  
AAATATGGTATACGACAAAGGCGGGGCTATTCAATCTGCTGGAAATATACCAACACCAGA  
TGTTCAAGGAGGACAATTCAGA ACTCCCGACTTTGCGCCAATATCAGGAGCTGTACAAGG  
ATATTTTGATACCAAAATAAAAACAGGGTCAATAACAATAACTTAATGGCTGCAATAACATC  
AATTCAACGAGAAGCTATTTTACAAGCTGCACAAACATTGACAGCAACAGAAAGTACAAA  
AGTTCAATCTATAGCCTATGCATTGGCACAACAAACTTTCAATATTCAGTAGAAGGAGC  
GAGATTAGCAAACGAGCAAACCAGAGCTAACACACAATATACACTTTCTGAAAATGTAAG  
AAAGTCAGCCTTACAGGCACCTTCTTTAGCAGCAGCAGTAGAAAATGTATTAAGAATCAA  
AGCAGAACTGCTAATACAAATGCTGCAAGAGGACAAATAAACCAACAATTA AAAACCT  
CCAACAAGATTATAGATTA AAAAGAATTTGAAGAAGATTTAGCAAAACAAGGGATATACAA  
AAATGACCCTTTATGGTCAAGGGCATTAGCTCAATTTATTGAAGGTCTCACTGGAGGTAT  
GTCTATGAAAGATTGAGGAAAAAAGACAGGAGGATGGTTTAAACCAATCAGGATTTAAAAA

TGCAACTAAATCAACAAAGTCATGGTGGATGCCCAAATAAAACATTTCAAAAAAACGTCT  
GAAGAAATAAGAAAAGATGTAAATGATTTGATAGATCAAATAAATAACTTAGTTTTAGAA  
AATGAATCAAATGATGCGGTAGCATTAAAGCAGATTAGATTCTGTATGTTCTTTACTACAA  
ACTACCCTTATTCATATTAATAACTTAAACAGCAAAAACCAATGCGCTACGGAAGAGGCG  
GAAGATCCCGCAGAAAAGGCTACGGCCGCAGAAAACCAACACTTACTTAGTTAAAAGAG  
GAGGCATAAGACTATAATGGCAAATGCAAACCTATTTAACTCGGTTACAGCTACCTAAAGT  
AGCGAGCAATGTATTCGACCTTTCACATGATGTGAAAATGTCGTTTAAAATGGGTGGTCT  
TTACCCAACATGTGTAATGGAATGCGTACCAGGTGACAAAGTAAAAATAGGCACTGAAAC  
GATGCTTCGATTTGCACCACTTATCGCACCAAGTAAATGTTACAACCTCA  
TTATTTCTTTGTGCCAAACAGAACATTATGGCCAAACTGGGAACAATGGATTACAGGAAA  
CTTGGATGTACAAGCACCATGGTTTAGACTATTTCTTCCACCAGCTTCAGGAGGATTTCA  
TGTTAAATCTTTAGCGGATTATTTAGGATATCCAACCTTTGTTAACGCCAAACGCTATACC  
ATATCCTGAGCCTGGAGCTCAAGTAGGAAGCCCTTCCCTGTAGCAGCTTACAACAAAAT  
TTATAATGAATACTACAGAGACCAAATCTTCAATCTCCAGTTTTAGATTCATTAACAGA  
TGGAGAAAATGATCCATTTAGGAACCTAGCAGCAGGACCTGTAAAAAAGAGCGTGGCA  
GCATGACTATTTTTTCATCATGTTTACCATGGGCACAAAAGGTGACGCTGTAACCTATTCC  
AATAGGAGATGTAACCTATAACTATAATGCAGCTGCAGGAGGAACCTGTTATGCGACAGGT  
AGATGGCACACCATATATAAACCAAACAGATCTTAATTATTCAGATGCTGGAGGACAACC  
TAGAGCAAGAGGAGTAACAGGGACACGTTACAATTTTGATAACTCCATCCAACCTATCAGG  
AACTGCAGAAGCAGCAGATATTAACCTCACTTAGAAGAGCATTAGACTTCAAGAATGGTT  
AGAAAGAAATCCTAGAGGAGGAACAAGATACATTGAAAGCATACTTGCTCACTTCGTTGT  
AAAGTCTTCAGATGCTAGACTTCAACGGCCAGAATACTTAGGTGGGTCAAAGGTAAAAT  
GGTAATTAGCGAGGTATTATCTACCGCAGAAACAACACTCCCAGTAGGTAACATGGCAGG  
ACATGGTATATCCGTATCAGGAGGTAATGAATTCAAGTACAATGTTGAAGAACACGGGTG  
GATTATTGGAATAATTTCTGTAACACCAGAACCAGCATATCAGCAAGGAATTCATAGATC  
ACTCAGCAAATTAGATATACTAGATTATTTCTGGCCAACCTTTGCAAATATTGGAGAACA  
AGAAGTATTAGGGAAAGAAATTTATGCAAATGGTATTAACATTGGAGAAACATTCGGTTA  
TGTTCCCCGGTATGCAGAATATAAATCTTAAAGAGCAGAGTAGCAGGAGAAATGCGAAC  
TTCACTTGATTACTGGCACTTAGGAAGAGAATTCAGTGCAGCACCAAACCTTAAATGGAGC  
ATTTATTAATGCGACCCTAGTACGCGAATCTTCTCAGTTGAAGACGCAGAAGTTGACAG  
CATCTACGGACATATCTTTAACAACATTAAGGGGATTAGAAAAATGCCGAAAT

>NewGenomeName\_120

GTGTACACATCTCTATGCACACATCCCACCCTTAGCCATAAGAAGTGTGGTCACCGTATA  
GAGTGCCGTGTGGCTTATTCGATCGAATTGTCTATTCGTTTAACTCACGAGCTACAAATG  
CACAGGGTGTCTTGTATGCTGAACCTCACGTATAACGATGATTAGTTATCTCAACATGGT  
CAAGGTTTTAAAGATGAACTACAACGGTTTTTCAACCGTTTGCCTTAGGCTGGTTTTAAC  
TTTCGTTATGTTGCCTCAGGTGAGTATCGTGATCTTCTTGAAGGCCTAATTATTAGTTT  
GGGTTATTTGGTTTGGATTGTGCTCATGACCGTTGACTGTTTGGAAAGTTCTAATGGTGAT  
TATAGTTTAACTTCTGCAACCATCTCGAAGTTATGGCTCAGGTGTAATCATCTGATTGGT  
TCCCTTAAATTTGAATCAGCTGCATACACTGCCCGATATATCTTGTCAAAGATTAAGGGC  
TTGCAAAAGACTGAACCGCTTACGTTGAGGATTAACCTGCAGAAGTTGTTTTGCCTAAT  
CCCGAACTTTTGGTTCTGTATAAAGGCATTGGCCGTTCTTGGTTTAGGGATGGCTTCATG  
TCGGATGAATTTCCGCCTGCGTGTGTTATTTCTGCCCAGGGCTCTAAAGCCCCAGTTCCA  
CGTTTTTACAAAACCTTTGTTTAAAGGAGGTTGGCTCCGATCTTGCCTGGATATGCAGTAT  
AGGTCTTCATTTTCGTTCCGAGTCAGATCTCGAGTGTAAGCTTATGAGGACCTTCCGTTT  
CGTAAGCGTTCGCGTTGTCTTGTAGCTCTTCTCGAGCTTCACTTTCAAACGTATAATT  
AACAGGCTTTGTTCATGATGGTATTTGTTGTTTGTGGTAAAGACCGCGCCGCGGATGTTCT  
TAACCGACCCATTTTCGTTCCCTCATCGTGATGATGCCATTCGTGATTTCACTGATGGCGT  
GAATCGCGCATCTGGTGATAGCCAGTTGAGTAAGCATCCCGATGATTTTGATTTTTATTT  
CTTGTGCGAATTTTATGATGCCCGCGGCGCAATTGTAATAATGAGCCTCAGGTTCTTGT  
TCGTCCAAAAGACGTTGTGCAGTCGTAATGACCCTTGTGGGCCTTCGGGGCCACTTTATT  
GAATTCATTTTGGAGATTGTATGTTTTATAATAAATCGGTTGAAGCACAGAATTTTGCA  
ATGGTCCCTCGAGCTGACATCCCCGTTCTCGATATTCTATGCAGAAAACCTTAAAGACT  
ACGTGTGATGGTGGTCTTCTAGTTCCGAGTATGAGCGAAGACGTTTTACCCGGAGACACA  
TTAATGTTAATGTCACTATGTTTCGGGCATTTGTCTACACCCATCTTTTCGGTTATGGAT  
AATCGCCCTTTGGACTCGTTCTTTTTCTTTGTTCCCTAATAGTATGGTTTGGACGAATTGG  
GTTAAGTTAATGGGGGAGCAGGTTATCCCTGCAGATACTATTTCTTACTCTATCCCTCAA

CAAGTCTCCCCAGCTGGTGGCTACGCTATCGGGTCTTACAGGACTACCGAGGTTTACCG  
ACTGTGGGTCAAGTTACGGCTGGTGTAAAGTTTACAATCGGCGTTACCTACCCGCGCC  
TATAATTTGATTTCTAACCAATGGTCGAGGGGTGAGAATCCACAGAATTCGCGTGTTGTT  
AATAAAGGTGATGGCCCCGAGTCTACACGTTCTACTGTTTGTGCTTTGCAAAGACGCGGT  
AAGCGTCATGATTGTTTTACTTCTTCTTATCAGCTCCACGGTAAGGTGGTACTGCTGTT  
TCTCTTCTTTAGACACTCGTGAGCCTGTTTAGGGTACTGGAAAGACTCTGGGCCTTTTC  
GCTGGTGTACTCATTTAGGTATGCATGCTGAAACTCCTAATACACTGCGTAATGCTTCT  
TCCTCTTACAATATCAATAGTGGTTCTACGCCTACTGGTGTAGGTGGTGTATTAGTGAG  
AATTTGGTGTGTTACTTCTGGTTTTTCTGGTATATATGCTGATTTGTTGGCTGGTACG  
TCTGGGACTATTAATCAGCTTCGTCAATCTTTTCAGATTCCAAACTTGCTTGCACGTGAG  
TCGCGAGGTGGTACTCGTTACACTGAGATTTTTCGCTTCTCATTTCGGTGTACTTCGCCG  
GAAGCTCGTTGCGGCGTCTGAGTATTTATCTTGTGGGTCTACTCTTATTAGTATTTAT  
CCGACTGCCCAAACCACTGGTACTGGTATTTCTGTCCAGACTACGCCGCAGGGACATTTA  
GCTGCTATCGGTGTTTATCAGCCTCACAACCATGGGTTTACCCAGTCGTTTGTGGGGAT  
TGTTGTGTTATTGGTGTCTTTCGCGTTTTCTGTTGATTAGACTTATCCGCAAGATTTACGG  
CGTCATTGGAGCCGTTCCACTACCTATGATTGTTACGTTCCGGCTTTTTCGATTCTTGTT  
GAGCAGGCTTTTTTAAATAAGGAAATTTATGTTACTGGTGGTTCGTCTGATTCGAATGTT  
TTTGGTTATCGGGAGCGTTGGGCTGAATATCGCTAAAACCCTTCTGAGAGTACTGGTCTT  
TTTTGTTCAATTGTTCGGAGGTACTGTTGACCCGTGGCATTATGCGCAGGAATTTACTGGG  
GTGCCTACTTTGAATTCAAATTTTATTGTACATACACCGGCTCTCGCTCGCAATTTGACG  
GCTGGTTCTACTGCAATTGGTATGCAGTTTTTTCGTTGACGCGTTTTTAAATGGTAACGCT  
GCTCGTCTCTTCCAATGTTCTCTGTGCCTGGGCTTATCGATCATTTTTAAGCCTCAAGC  
ATTCTTTTCGGGGTATGATGGAGGGTAAAGTTTTTATGTGTGTGTTTGATATTCTTAAGA  
GTGGTTTTGATTCTGTAGTTCAGTTGTTAATGCCCTTCTTCTCATATTATCTCTGCTG  
GCGCTTCTTCTTGGTTTTAAGGGTTATACTGATACCAATGCTTCTAATGTTGCATTGG  
GTAATCGCCATATGGATTTTCAAGAGCGTATGTCTAATAATGCTAATCAACAGCAAGGTG  
AGGATACGAAGGCTGCTGGCCTTAATCTTCTGCTTGCTTATTTGAAAGGTGGTTCGTGCTA  
CTTCGCCCTCTGGTGCTATGCCTTAAGTTGTGAACCCTTATGCTGCCGGTGTGCAACCG  
GTTATCAGTCTGCCAATCCCCAGTTGCCAATAAGCTAGTTGGTAAGGCGGGTGTGAGA  
ATGAGAATGCGGATGGTCATACTATTAAGAAGCGTGCTGATACTCGTTTTTATCTCGCTG  
ATAGGCAATTGTCTTTTTCGTTCTGCTGATGAGAAGCGTCTTCTTTTAAATCTACTGTCTT  
TTCAAGGTCAGAATATTGCTGCAGAGACTAAGAATATTCCTATTGAGGGTGATCGGTTAA  
TTGATGGGATTATACAGCTCGAATCGTCTGTTAAGCTTATTGAAGCGCAGACGTTAACAG  
AAGAGCAGCGTAAGCAGCATATGTTTTCGCTCTAGAATTGAAGACTTTGAATGAATCGGATT  
TGGTGGCTGCTAATTTAAAAGCTATTATGCAAGCTGACAATTTGGGTCACCATTTTAGAC  
AGTACAAACCTTTGGCTGATACTGTTATGAACATTTTTCGTATGTGGAGACGTTAAGGAA  
TTTGTATGTTATTTGCTTCCGCTTATGATAATTTTGTATGCACGTTCTTACGAGTTTGT  
TGAAGTGTTTAGACGATTCTTTGACTCAGCAGCAACCACGCGAGGAGTCTGATATCAATA  
ATACTGTTGACCTTTTTACGAAGACTGGTCATTTACCTGATCCAGTCTCTATGCCCCAGT  
ATGTTGATTATTAGGGCGTCTTTGCTTTTTCAGTCTGCTATGAATGTAGTTCGTCAGGACG  
ATGAGACCTTTATGCGGATGCACGAAAAGTTCGTGCTAGATTCCCTAATTCCCCTCAGG  
AGTTTTTGGAGTTGTTTCGTTGATCCAGCGAATTCTAAGAAGGCGGTGGGCACTGGTTTGG  
CCTTGCTACTACCTAAGGAGACTCCTCCGGTTCGACGCAGATCCTGTTGCTTAATCGTGTT  
TGGGCACAGTTCGCTACTTGATGTAACGGTGCCTGTTAACAACCTTTTTGTCTTTCTGTTC  
TACTGGAGTAACTATGAAGGCTATGCACCGTCACAATGCCAATTAACCCTCAAGCGCTTC  
TTCTTTTATACGTAACCTTATCAACGACTAAGTTGATTAAAATCACTGCTGGCCCTATGCG  
CAGTGGTATACGCATCTAAGGTTCT

>NewGenomeName\_121

ACCGGCCACTTGGAGCCACGGAGCCCCTTGCAGCTATGCATCTGCAAAAGAGGGAAGCAG  
CCGCTAAGAGGTGGTCCCTTACGCTGAATAACCACACAGATGAAGCGGTGTCCGCCGTGA  
AGGCGTGGAACGCGAGTGAGTACCATTACGCTGTCGTTGGACGCTAAAAGGGGGAGAATG  
GTACGCCGCAATTTGCAGGGCTACATTCATCTAAAGAAGAGGGCTCGGCTAAGCACTCTGA  
AAAATTACTTAGCCGTGCCATTTGGGAGAAAGCTCGCGGTTCCGGTCAGCGACAACGAGG  
CGTACTGTACGAAAGATGGGGCCGTGATACTTACCCTGGGCATGCCGGTGGAAAGGGAACC  
GTAGCGATCTCTCCGGAGCTGTTGCCGCCGTGAAAGCCGGAAGTCGAATGGTGGATATCG  
CGCGAGAGTTCAGTGAAGTCTACGTCAAGTATGGGCGTGGCTTACGTGAACTGGCGCTTC  
TGATTGGACAGAAACCGCGAGATTTCAAACCGAATTTATCGTTGTCACCGGTCCGTCGG



CGGTGGGCAAGAGCCGTTATGCTAATGAGTATCCTGGCACTAAGTTTTATAAGATGAAAG  
GGACTGGTGGGACGGCTACTCTAACGAGGATGTTGTCGTTTTTTGACGACTTTTATGGAT  
GGATACCTTTTTGTGAGTTACTGCGTCTCACTGATAGGTATCCACATAAGGTTCCCGTGA  
AAGGATCCTATGTGGAGTTTACGTCGAAGGTCATCACAGTGACCAGCAATACGCACACCG  
ACTCGTGGTACAATGAAGAGAAGTGCTATCTACCCGCGTTGTATCGGCGGATAAATAAGT  
GGCTGACGTGGAATGCCATCCGGTTCGAGGATGCACCGGATTGTATGAAGAACTACCCTA  
TAAACTATTGATTACGCCTCCTCCCTCATAGTGCCTTTCGAGGAAAGAGCAATCGCGGCC  
AGCCAAGGCGGCCGCGTTCACGGGTA CTTCGCGAGCGCACCGTTCGCGAGCGAAGTTCCCT  
AGTGAAGTTCCCGAGGAAAACACTTGAGCTGAGGCGATTTATAATTTTTACTTAAATA  
AATAAAGACAGGAAACAGTATTGTGTGTCTGTACTTTATTTAGGGTTTTCGAGGTGGGT  
AGGTTCAATTTGTCTGAACTCAACATATATCGTCACTTTTGCATGGAATAGTAAAGCATCG  
TGGGGCTGGGGCCAACTGATGGCGAGGCCGTAGTGCTTTACTCTAGAGCCCGAGCTGGGT  
AAGTTTTGGTCTCCTTTCTTCATCAGAGGTATCCATGCGGATCTGGGGTTGGTTAGCCAT  
TGCCTGCAGTAACGTTTCCCGCGTCCGGTGTCCGGAATGGAAATTTGGGGTTCGGGGTTCGG  
AACAGACGCTTGAATCCTTTGCGGAGGTCCCCTGTCTGGCGGCGTCCAGTTTGCTAGC  
GGGTCTGTCTCCAGGCCTGGCTTCTTGAAGAAGACTTCAAGGTGGTTGTCTTGAATGGGC  
ACATTGTGCCCTATAACCATGCCATGATCCCCAGTTCTCGTTTGTAGTGACGCATTTTGAAT  
TTTGCCAGCCGGATCCTGTAGTCTTCAATGGTAGCCTCCAATTAATTGTTCCCGAGTCG  
AGGAAGTCGTCCAGCATTATGTTGAGGCCGTCCGGTAGCCATTTAGGGTAGTGTACCT  
GAGCCGGCGCATTCTTGTCTGTACATGCGGACAACTTGAATCGGTATACTCTGTTAGTT  
CTGTGACCACGCTATTGGTGAGTCTGCGTCTGCGCCAGTCACGTCGTCGCCATCGCCGT  
CTAATCGCCTGTGTCTGTGCGCGTCTCCTAGCAACCTGTATGAAAGAGCCAATCACGAGC  
TGTCACGTAACCGTGGCTCCAAGTGGCCGTTGAGTATT

>NewGenomeName\_122

ACCGCGGGCCGGGGCCATGGGGTCATCTGGCCCCTGGCCAAGCATGCGCAGTAGTGGCG  
CATGCTCGATGGCCGGGCAGCGGCCTTTATTTGCGGAGCATGCGCAGAAGGCCGCGCAGC  
GGCCGCTATTTGCGAAGCATCATGGCAGCACGGCGAGACAGCGGAGCCCGTCGCTGGGGC  
TTTACTCTGAATAACTACACTGCCGAGGAAGAGGAGACCGCTCGCAATCTGATTCATGAT  
GCAGATAAGTACGCGTTTGCATAATCGGCAAAGAAGTTGGCGAAAGCGGTACTCCTCAT  
CTGCAAGGCTTCATGCATTTTAAGCAAAGCAGCGGCTTACAGCTCTAAAGAACTTTTT  
CCTCGCGCGCATTTTGAGAAAGCTCGCGGCAGTGATCAGCAGAATGCTGATTATCGTGGG  
AAACACGGCGAAATACTTACCATGATCGGGACTCCGAGTGATAATAATTCGAGTGATCTT  
GCGGGAGCTGTTGCCGCTGTGAAACGCGGAAGTCAAATGAGTGAAATCGCGCGAGAGTTC  
AGTGAAGTCTACGTCAAGTATGGGCGGGGCCTCCGTGATCTCCGGTTGCTGATTGGTTGC  
CCGCCCCGCGATTTCAAACAGAAGTCATCGTGCTGATTGGCCACCTCGCTTTGGCAAG  
TCAAATTTGGCCAATGAGATGGAAGGGTCTAAGTTCTACAAGATGAAAGGTGATTGGTGG  
GATGGTTATGACAATGAAAATATTGTCAGAATCAATGACTTCTACGGTTGGCTGCCGTAC  
TGTGAGTGCCTACGTCTGTGTGACCGGTACCCTCACCGTGTGCCGGTGAAAGGTGCCTAC  
GTGGAATTCACCAGCAAGAAGATTGTGTTTACCAGCAATCGCCATGTGGATGGGTGGTGG  
AAAGGTGAAATTGAGAAGAGTGCCTTCTACCGACGGATGCATGTGTACAAGTTTTATGAG  
ACTGGTGAATTCAGGACATGCCCGGACACATGCTCCCGCACCCAATCAATTATTCGGCG  
CGAGATGAAAACACCCCCCTCGGGATGACAGTCGTTTTATCTCCCGCCCCCGAGTCGCG  
GAGTGCGCGAAGCGAACGGAGCGCGAGTGGCGCGGAGATTGTGACGACCGACGCGCGT  
AGCGCGGAGGGAGGAGACCACTTGCTTTGAATTTAATATGCTATCTTTATTAGAGAGATC  
CAACAACACTCCTGTCTATGTCTTTTTTCAATTGCCAGTAATTGTTAAGCAGTCCCCGAACT  
TTGACAGGTCTTCTTCAGATTTCTTCAACATTATCTGAGCGAACTGCCTGAATGTTACAT  
ATATAGTTATTTCCGGCATTATATCCAGTGCCTGTCCAGGTGAAGGCCAAGAGAATGCCA  
GCCCGTAGTGCCTACTCTTGTACCGTCCCTCTGGGTCCCTGCTCGCATTTCTAAAGGTA  
ACCAGCCTGATCTACTGCTTTTACGCCACATTGATGCTGAAAAGGTAGAGGCTGTCATAT  
CTGATATGGTTAGTTGAGGCTTTGGGCGTACCAGCCTCTTAAACCCTCTGACCAAGTTCC  
ACGCCCTAGCCCCGTCCCACTTATCCAATGGGTCTTGCCTTTGATCCTGTAATTTTATAT  
CTTTAACTCTGGGGTTCGTGAACTGGGACTGTTTACCCCCACCCCTTGCAATTTTTGTTG  
TGACACCTTCAGGCCTCAGCACAACCTTTTGTAAATTAATCCTGTAATCCTCGAACGGCC  
ATTCTGCCGGTATTCCTCTAGACCTATAAAGTCATTCAGGTTGAAGGTGAAGAAATCTG  
AGGCCCACTTTTGTGGGTGAGTCTTGGATGGGAAGTCCACTGTGAATTGCCGTCTAAATC  
TGAACAAGTATTTTCTGTTCACTGTGCGCTCTTCGGTTCCGGGGCAACCTGTGACGTC  
TGCGCACTCGTCTGGGAAACCGCCTTCTCCGGAACCGCGAGTAACACGCCTCCTTCTGG

TTGCTGAGCGACGTACCTAAAATAGGATGGCCCCACGGCCCCGCGGTATAGTATT

>NewGenomeName\_123

TTCCCCTACCGGGTACCCCGGCGCGCCCTCATGCCCCCGCCTGGGGGTGCCTTCGGAAGT  
GTACGCGTGGGGCATGTAGTGTGCTCCATGCATGAGTAGCGAATTTGCTAGTCCGCGCCT  
TCATAGTGCGGTTAGGGCGTTCAGCAGGTCAATAGGTTCTACCTAGGTTTCGTCCTTCTAC  
AGATTAGGCATGTTGTAGGCGGCCAGGTAGATTCTTGGTGCCTGCCCTCTTCACTTCTCT  
GATAGGGGATCGAGTCTTGGTTACCCATGCTCACTCGACGTCTTCTAGGGCGGGCTGA  
CCCCGTTTGCCTGCACCTCCTCGGCGCTGGACCCGCCGACTGCGATGGTTGCACTGCGA  
CCCTCCGGCTCTCTTCCCAGCTTTTCGTCGTCGCCGGTGATCTCCAGTTACTGCGGGGTC  
TAGGTGGCTCGGTCTGACCCCGCAGCCCTCGCTTTTCTCTTACTAGTGAGTCAATTCTTG  
TAAATATCAGTACCACTACGTTATTTAATGAATGGTTATAGAAGGGGCAACAATAGGTCT  
GTCGCGTCCGCACTCATATTCAGGGCGTGAGGCATACACACTAGCTAATGCAAAGCGCTG  
TGGAGGTTCTGAGCTAATGACTAGGCGTGGCGGGGAACGGTACTCCCCAACTAGTCCTAG  
TCCGACAAGGCAAGGTGAAAGCTAGGCAAGCCTGGCACGTTCAAGTTATGACGTAAAACG  
CGAGTCAATTCTCAAGGTAGATGCACGGAACCGTGTTCAAGGCTGAGATTTAACGTGCGCC  
TTTGCTCTCCCTTGGCTCAATGCGTGCCGCTGTGCCAGGCATTCGTCAAGGAAAGGCC  
TGGCCGAAGCTTCCAGGCATCGCTACGCACAAGTTGCGATGGCGAGGAGACACAGAATAC  
GGTTTCGCGAGATTAAGATCGACCAGACCCTCACAGCTCTTAACTGTTTCGGGTCTCCCG  
TCGAACGCCATTTATCCAGCGTGTCCGATATACGTCTTGCAGGCAAAGGTAAACTAGTCC  
TTGTCAAGAAAGACTAATGCCCCTAAGATAAAGTTCAAGCTAGAATGTCAACGCGGGAGC  
ATTTTACCTTCCCTATTGGCGGCTGCCCGCCATCTACAGTAATGCGGGTATTGTATGGG  
AAACCAACCTCCCTGGGGATGCCTCCACAGACAACTAACAACCGAGCGCCTAGTTCGAA  
CGACGGTCACCAAGCAGGCCGCTAACGGTGAAGCGCAGTCAGGGGCGGGGCCTTGCCAA  
CAAATGAGGCCTAAGCTGACGAAGGTGACGACTCAGTACTGGGCAAATGTACTACTGCTG  
GGAGATTCATCTTCCCCTTACCCGGGTCGAACCTGCATTGGCACTAAGACTAAACA  
TTGTGCAACGACGGGGTTAGTGATCCTTGTCAAAAAGTGGGTAGTGATAGTCCCGAGTG  
CGTTACCTAACAATTATTGCGAACCTTGGCCACGGCAGGCTTATCCTACATTGGATCCAG  
GGAGTCGGGGCGTAATGCTCCGCCAAGGATGACGGAGAAACCTGCACTAGCACGAATGTG  
TGGTTAAGTCAAGCAAGTTAATAGTCCCGTGTTAGATCTCAAGCTGACACCTACAGCGCA  
CCGACAGCAGCGTCGAACCGCAACCCTCCCGCCTGACCTGGTCCACACACAGACGTGAGC  
CGCCCGCCACCTGCGCTGGCGATTGCAACCCGTTTCTGACTCTGACGCAGCTGGCACGTT  
GAATCAATGGGCCGTGGCGCTGGAGCATGAGCGCCAGCCTAACGCCGTGTGCAAACATCG  
TCATTGCAGAAAAGTACCAGTCGCAGGAATTATTAATGATGATAGCCGACCGTCGGGGA  
CGTACGCCGCCAAGGCACACGGTCTGCCATTGTGCCCTAACGCGTATCCTGGCCCAAGTG  
CTCTATACGGCTATGTCCAGCGTATACCGCTTCGCAATAACGCCATCTTCCAAGTGGTA  
CTGTGGCCTTTCTACCACAAAACCGTGCGGCGCACACGGTGTAGGACACCTGCCTGGCG  
TACACAATATTATGTTCTCAATGCCATGAACCAATAGGATTTTCGTAATTAAGCGCAGTGA  
CCTAGCCGTGTAACCGGTCGGCTAGGGTATGCGCTTGTACTATAGTGCCCGCGGTGTAGT  
CAGTGTACCGGACTAGCCCCTGAAGCTGGTGGCCATCCGCGCTCGTTGAAAAGCGTTGGC  
CGGTTGATTCTAGAAGTTCGGCCAGACCACCGTGAGCGCAGTAAAGTACTACGCCGGGAT  
AATCCCGCTTGTATAAATCGAGGGAGGCAACAGCGACCTAGACCGCGCGGAAGCCTCGCA  
ATGGTACCAGTGTGTCGCTGTCGGCACCCCTGGCCGTGGGGGTTGATTTCCCTTGTGAGTT  
AGCGTAACTGCTGACCCATTCCGCCGAAGAGGAAGCGACGGGCTTTGCCGTCAAGCCTTC  
CCACTCGCTGTAGATATGCCATGACTAGTGGGGGTTTGGAGACCACTTAAGGTTAAACCCG  
ACGTAGCCAGTACCTTCCGAAAATTTCCGATAGGGCAACCGTTCGACGGTGAACAACCAGA  
ATATACACAAGCGCTTCAGCCGTAATTCGAAAATGATTTTTTGGGTGCTTGGCTGTTCG  
TAGTACGAGGCGGTCTAGTGCATATTAGCACGCACTGGACGTAAGTTCTTCTCTCCCGCC  
CATCGCCGCGCAGCCTCGCTAGCTGAAGGTGACGACCTACCACGGGAGGACGCCTGCAG  
CTTAAACGGTTGTGCTCGGCGCTCGAAAAGCGTAAAAACGAGGCGAGTATGCGAGCTGTAA  
TCGGGAGCATCAGGTACGGCGCCCGCGGTCAACCGTATGCAGTTGCGTGTGGCGAACGG  
GCGGGCACGGAACCGGATGTTTCTACGTCCACAGTGGCGCACTCATCCACGACGCAATC  
CAAACGCTAGCGTCTCCTGGCATGTCCCGTAAGGTGTCCAACCAACCATAGCGTGTGT  
AAAAGTTTCAGCGACCGTATCGAGCATAAGCAACACGCCGTTAGCAAGGAGCGGATGGAG  
TTCATGTGCTGGGCGATTTCGCTTCTTTTCGTGGCACGAGCTTTCTGCCAACACGAGATC  
GCCGCGATAGGTCCTGCCGTTTACGAATACGTGGTTAGGTTTGGTGTCTCCGATAGTAATT  
TTCCTGTACAACCTCGATGCAGCGTTTCCGCGCTTGTTCGTGAGCATGTGACTGCTTACTAG  
TACGTGCCCGAGGCTGGTAAACCATTCAGCTAATACTGGCGTCATTACTCACGAATTGGG

AACCAGCATGTCCGCAGACGTTACGAAAGTAGTGCACAAACGCATCTATGGCTGCAAGAA  
ACGGGCGGAGTAGGCCTGCGAGAAAATCATGTGCCACGCCGAATGGCCTGGATTTACTGT  
GCACCTCATCAGCTGAGACAATAGATAGCCTGCCAGGGTAGCTATTGGGGCTTACGTGCC  
TCGCCCCCTCCACTTGGAGCACTCAATCGATGTGGCACCAGGAGCGTCCGGCGGAC  
CCTTCTCACGGCTGCCATCCATGCTGGCATTCTACTGGAAGTGTACCGGGAGGGTGACGA  
CCGCGGGACGGCTTACGTCTTGGACCCCCTATCCGTGACCCTTTTTGGTAAAGAGACACC  
GAGGGACTAGGAACTTATACGTATTCTCGTAGGTGGCGAGGAGGCTACGAAGAAGCGCTA  
ATTGGGCAGGCCGAAAGTAAGCGAGTTTGCATTTAGACCGTAGATCAGCTATCCCATGA  
CCCTCAGACGTTACACGCCACCGGGAGAGCGTCAAGTATCACTGTAGACGCGACGTCAA  
AATGGAGCACGGGCAGACCAGCACGGACAGCGCTTCCAGGGCCGACTCAAGGTCCCGGGC  
CCTCAGCCGCTCGGCGACGCTCGGCTAGTTCTGATCGAATAACTACGAGGAGGGATTGCC  
CCCGGCCGTGACTAAGTTCAGAAAGCTTTTCTAGTTTTCCAAGAAGAGGGAAACCCCAA  
GAGGCTGTTGGAACACGTGTATGGTCTGATTTCTGTCGCGCCGAAGTGGTAATAGCCACTT  
CGTCGTGCTGTCCGAGTTTGGCCCCGAACATTCCGCTCGTTTATGTCGGAAGTATCCCT  
AGCACAGGACTGGCAAGTAGACGGTGTATGATGAGGTGCCAAACGTGATTATAAAGGTGAA  
TAATGATCTGTCACCGCGGTCTGCGGTATCTATCTGTTTATGTTCTCGCTAATGTTTAGC  
CTTTACACATAGGCGCTAATCGGGTTCGGTACAGCTGCGCGGCTAATACGTCAACGTGTC  
TACAGCGATTTTTGGAGGTTTGGACTCGACAGAAGGCTGGTTGTACTGCAATGGGAGGTA  
GAACTACGACTCCTCCACATGGAATACTGTTCTTAATAAACCAGTGGGAAGAGTAGGCTA  
GCGCTTACGTACCATCCGCGGCCCGGTAACGCGCTTAGTGACGTAACCCGCTGCCTTAA  
GCAAGACGATGCGGTCGTACGGGCAAAGGGCTGCCGGTCTTGCCATCCTCTATATGTACA  
GGAATTTGGGGCACGCGTAGATGAGTTCGTTGACGCGAGAGGACTTGATGCACCGACCTC  
TGTACCTTCGTGGTCTCCCCCTTCTGCCGGGATGGTTTGAATGCCGTGGACCGGCTGAC  
CTATCCCGGGACTACCAATCCTGAGCGCCAGGCCACGTGCGACGTAAACGAGGAGTCGA  
TTGTTAGGTAGCCCGGTACCGGAGGAGCTATCAACCCGGTCAATCAGAAGTCCCAGGAAAG  
AGATCGAACGTTTLAGACAGGTAGTGCTTATCCGATAACTATGCCGCCATGAAGTGGGACG  
GTATATACGTACAACCGAATAGAGTTGACACCGTGGGGTATTGGCGCCACTCTATATGT  
AGTCTCCTAGCGGTGTGCGGGCGGAACCACCTTTGCAACCCAGTGCAAGACGCCTTGT  
CCGGCAGATCTTTGTATGAGACTTGGCTGCGAACAGTTTAAAGAAGACCCCTATGCGACT  
TGGGCAAGTCTGCTATTGCCCTAGGTTGACATATAGCATTTCGAGCGCATTGGTGGGTTGG  
TGCCTTACTGTCTCACGAGTTCATACCACCAGAGAGCGCAAAGATGACATCGAGGCTT  
ACGGTTGACGGTGTAGTACTCGGGGCTTATGAATCAGGCGGTTTTCGTGGGCAAGGCAGAC  
TCTCCCCTGGATCGTTCCAGACTGGCGGGGGACTTCACAAGCGGGGTGCGCTTCAAGCGA  
CACGGCAGTTAGGGATGGGTGTCCACCAAGGTGCACCAGTATCACGATTCCGAGGCACTG  
GAGCAAGCGCTGTAGGAGGCGGGTATCTACTTGGGTAGGTGCCAAGACGGTTCGTAGCTGG  
AGGTTTCTGTGGTACAGAGATTACACTATTCTGTCTTGGCGCGACCGTGGGCAGAGTGGG  
TGGTCGTGCGGCTGTTCTTGACCACCTCTGCTGGGAAAGAAATCGCCCCTGAGCGAGAA  
AATGTATCCCGATCAGAGACCACCCGGAAGCCCGCGAAGTGGATCTGTGAATGGATCTGG  
AACGGGGTACCTTCGACTCAGTGTGGTTCTTGAGTCCCCAACCGCCTATTGGCCGCACCA  
TTACCCGCTACATGAATGAGAGAGGAGCTGGCTCGCCGTCGTTTAAACCGGCCCGTGGAT  
CCAAGGAGATGCCGTGATACGGGAACCGTTTCAAACAGACGAACACACCATCTCAGACGG  
CCCTATGGGAACGGATCGTCTAGAAACGGTAATGATCGCGTACGCTTACGTTTCTGTGCT  
AGTTTCCCGGATGACGCAAAGCGCTGTGATCTCCACGCGAGTACACGCTACACCTATGT  
TGGATGTCGTTGCCGGTACTCCACCAACATAGTCCGCGGCTCTGTGGTTAAAGTAGCCGG  
GGATGGAAGTATAGCAATTTCTGTGGGCGAAGTCTGATCGTGACCCGTAGCCTGCCCTT  
AGAAATCGCTTTCGAGCTGTGCGCCGCGAGAGATCTGACTAGAGGAACTGTGGTGGCG  
AAAGCATGCCGTAAGAGCAACCGTGGCAACAAAGGTAACCGACGCATGGTTTTTCATCCCT  
GGCAGAGCTTTCGCTGATGACCCCGATGTGAGTTCCTCATGCCCTCGCTGCGACGCCGA  
ACTGGTGTGGTGCAAGCGTAGGACTACTCCCTGAGTTCAAAGTACGGCGTATTAGAGGGC  
AGAGGGACAGTGGGTAACCAGTCTACGGTTCGCGTGTCTCGCAGAGTGGTGTAGTCGTTA  
TGAAATGCAACCCGGAAGTGGAGTTGAAGCTCCTGCGGTAGGATGACCGCGGCCACAACG  
TCGATCGAGACCCGGCCGCTGCGTAATGGAGAGTAGTTCTCCTGGCGATTTAGGCTGAGC  
TCGGGGAGTGGTAGGAGATAACAGTTTTTGAAGAGTCCGGCTAAAGATGTGCCCCGG  
CCCCGACTACCCCTGCTCTACCGCAGGGGAACGCCACCATCCGCAACCATATCCAATA  
AGTTAACGCCAGGCGCCAACCGTCGATCCCAAGGCTGCCGAGCTGATAGCTAAACCCAC  
TACCCTTCGCATGTAGGCGGTTACCATGGAGCGCATCCAGAGGATACCCTAGCGGATTGC  
CGGGCCCTTCGCCAGTGGCCCCCAGCACGATAAGAGGATCATCACCGGAGCCGCACTGGG

CGAGGCTAAGAAGGAGGCCGGGATGCAGCGACGGGTCTGCGTTAAGGCCTGCTACGACCG  
CGCCCTCGAAATTGTCACGTCTAGGCATATCACGAACGAGCGGTGTCCGCGGCCTCGTAA  
CATTACTGAGTTCGCTGCCATCCTGGCGAGTAGCATCTGGTCTTAGTGCAGTAGGATGG  
CTGCATAACCCGACCCCTTGGCGTGTACGAGTAACCGCTCCGCTCGTTACTAAATTTCCG  
CACCGATTAATTTGGACCTTGGATGTTGTTAAGAACCTGAAAGGCGGTGTCCGCTTGGTA  
GCCGAAGTTAAGGCGGATGCGGATTACATGCAGCCGCGCATGCCCTTTCAGCAGGCGTAA  
CGGGATACCGAAGAGCTGGCTCGCGTGCTCAAGTCCGTGTACCCGTAGCCCGGGGAATAC  
GCGGGCTCGTGCAACGACTTTGAGCAGGCACCTCACAAAATCTCATAGCTGCATGGGACC  
TGGATTAACCAGCGCTACAGATTCGATGTCCTCGAGGACAGGGAAGTCAACCGCGATGAG  
TTCTTGAAGAAACGGGAAAGGGATCAGTACGATGACGCTGTGCCGTGTCAGGACCACAAG  
AAGCCAATAACGACTTTGCAAGGGATAACCTACTCTCTGGCCGGAGCGGTAGCATGACTG  
AGCTAGAAGCGATCCCAGCTAATCCGTTAGTGTGAAGTAGAACTGTGAGCATCAACCCGG  
GGTGTAAGTCACGTTGAGTAGAGAAGAGAGTCTAAGCCATATGATCCGTGACGTCATTCA  
CAAGCGTAGATACAGCTCAAAGCTTTCGCTCCTCTATCGGCCCCCTGGTTTAATAGCGGC  
CATCTATGCTTCCAACGCCAACAGGCCGAGGCCGAGGCCCTGGGGCCGCCGGATGCAAA  
ATGGCAGAGAGGTCATAAACATAGCCATGACCCAGCATTATGTGAAGCCCAAGCTTAGAA  
CCTGGCAGAAACCACAGAGATGCTGGAGGTCCGCGGAGAGCTGTGAAATCTGCACCTCGC  
CGCGCGTAGTAACCCCTCTACCCAACCTTAGCGCGTTAACTCCTTGCTGCAGTACCGATTA  
CGCCGACTGCTGAAGCGACCCATCCATGACCTCCGCCAACACGCCGTTAGGGCGGAGGTC  
CATTATGCGTCAGGTCACAATGTCCGACCGAAGGGATCTGCAGGGGGGAGTGGAGAGGGA  
TTTGAAGAATTATGCCTAGGAGAATGTCATCTGCGCGCAAATTTATCAGATTCTAGCGGG  
CACCATCAGTTGTCACAGGGCAGAAGGCTTTGCTCGTTTCGAGACGACCCCTGAGATAGGC  
CGGGGCGTGCCGGCGCCGGTACAGGCAAAGGAAGTCTTACTTGAGTATGTACCCATGGGC  
AATTCGGAAGGTGCGTACCTCTGTATCGTAAAGGCCAAAGAAGCTCTATGCGCCCAAAGC  
AAACCGCAATTGGTACGGGCATCCCCGAGCACGAGTTTTACCCATCGGCGCAGCCTCTGG  
CCC GCGAGTAACTGCGCGCACTTAGCACCGCGAGAAGAAACGTGAAAGCTGCGTAATCG  
GCAAAGCCATCGTGTGTTGATGGGCGATCAGCCACCGCTGTCGCGAGGGCTGGCAGGAGA  
CGAAGAAACCCGTTCTCGTGGGGGCAGACGACCAGCCCCAGGAACGCCTTAGACCACGGA  
CCAACGATCCTAAACGCACAGTTAGCGAATCGCTGCCCCCGGGCGTGGACTTATATCTGT  
TTGTCAAAGGCATTAACCTATGTGCTGTACTGCATAAGGCCCCCGTTTAGATTGACCACG  
GCCAGGGTAACTGATACACGCCATTGCCGAGAGATGGTTTGGGCTCGCCAATGGCCAAG  
TCCAGCCGAATTAGTCTTCGGCCTGAAACCCAGGTAACCCCCCGTATGTCTTCCCACCTG  
AGCACTACGATCATCGTAGTAGGCAGTGTGTGATCAGCGATCACTAGCTCGCAGCGTTCT  
AGGTGAGACAGGCTCAAATAGATCCGGAAACTACTTTCGAATGCGGCGCTCGGGAGTCGTT  
GGGCTAAACGCCAAGCGGCCGCTCACCTCGAAGCAGATAGGGTGTGCTACGCCTTCGACC  
GGGATCAATCCAGGGTGGACGCGTCGCCAGCTGCCCCACCAGCTTAAGTGGCCTCCGCC  
ATGCAGTTCTAATCTGCCACGCTACCAAGTGTTTAGACCTTAACCGTATCAAGTCGCCAC  
GGGGAGAGGTGTTGAATCATGGGTCGCCCCCGAGTGCGGGGCAATGCGGGGGTATCGAT  
CGCCACAATGCTGGCGGTGTGAATGCCAGCGCGGGAGCCGGCTGATCGACCGTCCCCCG  
GGAATTTGGCACCCGATCAGGCCGCTGCCTGTTATTTAGAAATAATATTGCGGCTGGAAG  
TACATTCGGGACGAGAAATAAGCAATCATCACGAACCGCTCCACATATGCCAGTCCTAGA  
TCAGAGAGAATGGTAACGAGAGGCCATCGGGCCAATAACGTACGCGGACCTAGGTGGTCC  
GCGCGTAACGTGTGTTCTAGGAGCAACATGCCCTGGACGAGCGTGCGCTAACTTCTGGGG  
GCGATGACTTATTGGTCCTATCTGGCGACGGTGAGGAGTCTGGTCATGGATATTATGACC  
CCTCAATCGCTGTGCGAGACGTAGGCGGCACAAACGCTGATAGGAACGGAAGCCTTCGGT  
AAGGTTGGCACCGCGGGGCAATCCCATTAGACATAGATCCGTTATCCCACCGCGGGTAC  
CTTGCTAACCAGTACCCATACATCGGTGCAATCGGATGCCAGGTGAACATCCTGTGCGTT  
CATAGCCGGGTCCAGATCGTGTGGAACGCACCGCAATGCTTAAGCTGCGCCAGCACATT  
GACCAGAGTTCCACAGCGAGCGACATTAACAATCTACCTGGGCGGATGTCTCCATTTCGT  
GCCGTTGCTCCGCTCGCCCAGCATGAGACCGGGGCGAGCTGCTGATGTAATGTTCCACCAC  
CCTCCCATGGTCCATGAGTTTGAAGCAGAGTTGACCCAGAGTGGAAGCTGCAAGTGGCCA  
AGTCCGAGCACCGACCTCAGTCAGAAGATGCAGCAGAACTACTACGTCCGGCTGCTCCCG  
CTTAATGTCTTACAGACGCTTATCTACGCCCTTCTGGGGGGAGCCTCAGTGATTTAACG  
GGATGCCCAGATAATGGTAAGACGAGCCTCATCGTATCCATCCTTGC GCGCTTTGCGGGA  
TAGATAGTCAGATACTTCGTCATGGAGCGACCTACCCTTGGGCGGTACTCCGAGGGCCTG  
GGTCAACGATTGAGGACACCGATCTACGGTCCGGCCATAGGGACTGGCTCGCACGCGTTG  
GTGGCCTTGAACCTACGCCGTCACGCTGCGGGATGCAAACCTCTGCTAGGTCCGCGAGTACG

GATCGTGTCCGCTTACTGGATATGCACTATGCGTGTAGGCTTCTATCGAATAAGGAACC  
GCAACAATAAGACTCGTTATGGTTCGCTTGCATCAGACGTCGTA CTTCGGCGGGGTTCAA  
CCGGCCAGGCGTATGTCCAAGGTCGATGACGTGGAGGAGAACGCGACCCCGGGCCATGCT  
CTGTGCTGCGCCATGCCGGCGGGTGCCAAGGGACTGTACACATGCGCATCTAGGGTAGT  
ATGATGCAGTAGACGGCGTAGTCAGCGAACGAGGACAGCAAGACCGGTAGTCACGGCGCG  
CTCGATCTCATGGTGACCAACGGATCGCTCGTTGAGCTGGGAGTGCCGCCTCTTCGTGTT  
ATCACCCCCCTAAAATCGCGGCTCCTAATGGACAATGATCCTAGCCATATTACATCAGAA  
TCATTGTTGGATGGAGATAAATGTGACTTCGACCACGGTTCTTAAACAGTGGATAGTAAG  
CGTCTCAGACCTTGTGTTATTGGCCCGGGCCCGGTCTTTTCTTATTTGAAGCGGAGCACA  
GTGCTAACCCGCGTCAATCAACTTATGCCACGCAAGACCCCCATATATCGAGAAGTTGCA  
CGAGCGCACGATAATCCACCTGAACAATGTA CTGTAGGAACTGGGCTGCATAGGTGTATG  
GCTCAAGAGATTAGCCTCAAGTGCCGTCGTTTAGAGGCTGACGAGGTGCGGTTCTCATTT  
GATGACGCATTACTCCTTGACAGCGGACTCGTAGTGACACCTGCTTACTTGA ACTGCTC  
ATCCATTCCAACGTCCGGCGCCCGTCTGAGCACTTCATCATGCACGATCCCGCACATCAA  
ACGAAAGATGACGGAACGTTTACGTTAGCTTGGTCCCTCGCCCTTAAATTTCCACACGGT  
GAAATGCATCCA ACTCGACAAGATGTTGCTCTAGTATAAGACCCACGTGGGTGCGTACCC  
CCA ACTAATACTCGCCGTACGTTGGGTCTCTTGCCATATTCCTGATTAGCCGGCTGTGCA  
GGGCTATGTGTGGTTGCCTTCCACAGGGGACAGT CGAATCTTATGATGTCTGGCACGC  
GACGCAAAACCTACGTTGGGGTCTGTCTACGGGAATGCCGAAGGTATTTATCGTCACTCC  
AGAGGCGGAGCTGGTCTGCAAGCTCCGGGCAAACGGCTATTC ACTACCGGAACAGGTGTG  
CTCGATGTTGGGGCATACCCGTACCAAAGATCAAGCATACTACA ACTAACCTTTGCATTA  
GTACTAAGGCCCGTCCCATCTGGCATGCGACCCGCGCACCACCCGGTGGCTGGGCACCAGG  
AGGGACACTACAGGCACATCTGGGACAGCACGCTCCATGCAGATGAGAATTGAGATGAGT  
AAATTGCACCGTTCCGGCTGCCCTGACGAGGGGATGTGGAGTAGACAACACGCGAGGGCA  
TCCAATGCAGGAGGTTGAATGATATTGCGGCTCTCCTTTCTGTAAACCCTGTGCTCCACCA  
TTCCACGACCCGAGAGATTACGACAGGGAGCTTCCAATAACCGCCCAGGGGGACGGGG  
AGAAGGACGTA CTAGTTCGCCTGCTTACGTGGCTGGAGGGCAAGTACCTGAAAAATGTGC  
AGGTTCTGATGCTCGACCTGGTAATACTAGGGGGCTAAGAAGGCCGGGCTAAGGTTCCCT  
TTAGTAATTTGCTGCCCTTAGACGACCGTCGTCGTCACAGTGGTTTCGAGGTGCAGACGC  
CTTTCCTCCCGATGATCGAGTGCCAGTGGCACCTGTCCATCTAAAAGCAGTCTTGGACCG  
CCTACACACTCGCTATTATCACGCAGGTTTCCTAGCGTGT CAGGGCTGCCGAGTGACGAG  
GCCTGATCCTCAAGGCCCCCCCTCCGCTAACTGTGCTATGGCATGACCTCCGGGT CATGGA  
CGGTGAATCCTGGTTTCTGAGCCCCGTAGGCGACTATGATGCAGACGGATAGTGCTGCCT  
TCGACGCCATGTGGGCAGGCCCGGTTAGGTCGTCCGCCAATAAGATAGTGAAGTGCACAG  
TCCTTATGGAGCACTGGGCTGAAGTCGATGCACGCGGGTAGACGCCTTACCACAGGGCCT  
CGAACAACCACAGTTGGCACCTAGCTCGTATGAGGGCGGCCTATCCAAAACGCCCTATT  
ACTGCCGCCCTCGTAGCGTCCCGCATATGGAGACA ACTAAGGTTGCCAGAATGCGCCTCC  
CACCGTTCGAGCGGCAGTGAGATATCTACTGGGCAGTTGGATTGAAAGCGGCACATAAAC  
TCTTATGTTGTGGCTTTGACACACGGCAAAGAGCGGGCTGGGACTCGCGCTTGTCCC GGA  
TACTTCCCAACCATCCAAAGCAAGGAACGGCCGCCTTGATGGT CGGCACTTGGGATCCGG  
GTCCCTCGGTCTGGGCGAGGTGTGGTTAGTTTACTCGTGGAGGAATAGAAGGTACCGACA  
ATAGCTCTAGCGGAAGATAACCAATCGCTCATCCTGGCAACTT GCGTCCCCGCGCTGCCT  
GAGATCAACCTGGCCATGCCCGATGGATGTTTCCGCGGCCACGGACAAGTCCGTAGCCGG  
GTACTGCATACGCACATTAGCTCCCTGGGGCATCAACCCAGCTAAGATTGAATCATAACC  
GACGGGGTAGTGCTCCTCGTATCACCAATCGCTGGGCACGAGGTGTCATGGATCGTGACG  
CGTACCGCAACGACTTCCA ACTGTCCTGACAACGTAATGGCTGGGTGTATTGGACCCAG  
TTCGCTGAGTACTTCCGGTCTAACGCCACGCAAACGTACACCAGGTT CGAAGAGACAGCG  
ACGAAGATCGGTGGGTTTCCCTAGCTCCAGGCTGTAAAGGAAGAGTGCAGGGAGTGGCGC  
CACATGCGTAAGGTGGTAGCGGAGCTCCGTGCCGTGTA CTTCGCCCGTCCCACCGGTAGG  
GTT CAGCACACCGGTTCGCATGTTGTACAGGCCGACGACAATGATCGATGGCAACGTTCTG  
TGGGGGAAGGTGGTGGAGCGCTGCGAGGACTCTCCGGCTTCCGATT CCTGCGAGCTCTAC  
TGCTGGTACCTGAACACCGAGCGTGCAATTGTCAAACGGTCCACTCAGGAACCTCAGCTG  
CACTAACTGAGAGTCTCCGTACAGCAGTCGCTGACGGATCTGACTACTAAGTTGCACTGC  
CAAACGCGGAGTGAATACCATCACAGCGTCTTACTGTTAGGCGCGACGTTGAAATGCCTG  
ACCCGAATGCCCCGCACCCACGCTCGTGGCCGCTAAATTTATGAGAAATCTGAGTTTGCC  
GGCCTCATTGAATCACTCAACGCTTTCCTCTACCCCCACGCACAGGTGCGAGGCGGAGGGA  
ACACACGTTAGCCGGCAGCACTTGAACCCCGCTGGCTAGAAGGGCGACCAGAACAAGACC

CAGGTGACTGTTTCATAACGTGGAATATGGTCACCCACAAATGGAGTATATTGACCCGGTG  
TTGGTGTGCACCGACACCAACTGGACTCAGCAACTGACCTTAGACGTCTTGGAGGAGTAC  
GCGTACGGCGCAACAGACTGTCGCTGGACCAGGGTATGGACCGGCGTCTCCCACCGGTGC  
GACGTGATGTCCGCGGCGTATAAAACAAGCTCGGAGCTGCACTGAGTTCTGGCCTACCCC  
ACGCTCTAACCCACCGATAAGCTTACACCGACAGTAGTTCTGGCGAGGGGCTCACGGCACT  
GAGTACCGCTCTGAGGCCCTCGACACGGAGCGCAAGGTCATGAATGTCATGGGGATTGTA  
CAGGACGTCCCGCCGAACGGGAACGACCTCCACAGATTGAAGATTCACGCAACGGATTGC  
GATTGCCCGACTATAACCGTACGGGCGTTTCCAGAACATACCTCGAGCCGGCACACTTTGG  
CTGATGGAGAGTGTCCAGTCCCCTTCTGGCCTGTGGGGCGGGCGGTTGGCGGTGGACTAC  
TCAGGCCTGAAGAGAGTGTGCTGGCTGCTCCCAGCGTCCTGTACAACCTTGCTCTTGTAC  
ACCGGCCATGGCTCACACTCTCAATGCCTGCGCCTGGCCGGAAGGACCATAACCCACTAC  
GACCAGGTGCTGCACAAGGCAGTTTATTACAAGCCAGATCCGCATCATAAACGGTACAAG  
TAGACGCGGACGTACTAGCAGCCAAGTGGAAACCGCTGTATGGTAAGGGGCGGTTGACGAG  
CGTATCGCATGTGCCGGTGATTTATCTCTCGTTAACGACCAGGATTTCTTGAAACGGAC  
AGGTGCCTATCCCCGGTTAGGATCCTATTCCGTAGGATTATGCGCGCACAGGTCCGGCAT  
AGGGACGGCATGACTAAGGACGGGGAACGAGATCAGGAAGACGCGACTGGGGCGCGACGG  
TTCTACACCGGTGGCTACCAGCAGGCGCCAGCTAGTCGATGTAACAGCTGCCGGTAGTGC  
CGGCACAAGCACAATGAGTTGCGCCACCGGTACCGTGAGTGAATGGACGGTCTGATCGCA  
AAATCCTGGAAGCAGAGCGAGGCTTCTCACCCATGGAGGTAACGGCAGTACGAGTACTA  
AGTTGGGTCTGTTTCGCGAAGCCCCTATTGAACACTGAGCTGCAACAAGGTACGTGTGC  
CTCATCAACAAAGCCTGGAATTGCCTATAGCGCGAGGTAGACGAATTGCGGAAATGGGTG  
TTGGCCTTCAAGGGTCCGATCAGCGTGCAAGGCTAGTATAAGTACAAGCTCGCCAGCCTG  
CTATTCACAAGGGCGCATCTCGCGTTCCCAACACCCGCTTAGGGAGGGGTCAACATGGCA  
GACGAGGAGAGCATACTGGGCAACTCCAATATCTACATCAATCACTCGCGCTACCTGC  
TGATTGGCTGCACGAAGTACCCAGGACGCTCCCCACTCTTTGGCCAGACAGACCTGTAA  
TCGGGTAGGCGCAGGAATGGGTTACCGTCGTGACCTAGGCAGCGGCGCTCCGCTCTGTCA  
AGGGGGACAGCATTCTCTGGGGTTCACGGCAGCCACGTAGCCATATATTTCTGCCGAT  
GGTATGGGTTCGATGCCCCCGCTCCCCGCCGACGAGCGAGGTGGCGATGAGACGTGG  
CTGCTGCTGCCAAACGCAGGTGACTCGACCTGAATGCCCGGATGCCATGGGGGACGCCAT  
GTTTGGGCTACTCTACTCGTCCAACCTGAACGTAGTCGAGTGCTTTGACGCGTCCCCTGT  
ACCTGGTATGGTATAATCCGGAACCTGCCAGAACAACCTGGCCCCTCCCAACCTGTGCGCC  
GAGCCCACGTATGTGGACCTATGCCAACGCTTCAACGGAAGAGACAGCGGTAAAGGCCTAC  
GCCAGAGCTTACATCTTCGGCCAGCTCGTGCGGCACGTACGCTCGGTATGCACGCATCG  
CGGACGCAAGAAATGTCCGCGGACCCTTCCCATCATTACCAATTGCGCTCCACTATTGTC  
TGTGGGGGCTATCAGACTATATACGGCACGCCCGCCCTCGTGTCGGCATATCACATGGTG  
GTTTGCAACAATGCGCATCGGGCCACTAGCGTCATCTGGAGCAATATGACCTCGTTGGGG  
ACGGCCAAGCCCTTCGTGTAAGTGTCCGCTACGCCGCCCTCGTGGATATCGTGCACAAA  
GTCTTGACAGGAACAGCCCAGGCAGAAATCGCAGAGTCATGACCCTAAGCGTCAGCCAGCCC  
CTCCTCGACATGGCCAGCAAGAACGCGTACAAGACTCCCAAGCTTCGCCACTTCGCTTCC  
GCCCTTACGTGAGACGACATCCGACCAACCAAGCCTCGCACGGCATCCACACGGAGGGC  
ACAGACGAGACTACGAGAACGTACAAGACGTGCCTCACAGATAGAAACGCGCTGTCCATG  
GTCTCGCCTCCCTCGGCCAACGAGCAGTGCCTTTGCGGAACGACGAACCTGAGCTCCCCA  
GAGAAGCTCGACGCTTCTCGTCCTGCGACGTCCGGGTTATCTCAAACCTGCGGCCCCGCT  
TAGATCCCGACTACACCGACTATCACCGCTACCAAAATGAACATGGCGCCTGCCACGCCG  
CCGGTCCCGGTCCTGCCTCAGGTCCGCGCTGCGCCCCCGGTGACGGTACCGGGAGTCATG  
CTGGACTTGTCTATAATGCAGTCAGCCACGCAGGGTTCGTGGATAACCGCGGTATTGGGGC  
TTATCCGAGTCGGGGTTCGTTACCGCGCACGGTGCCAAGGTCCACCTGATGGTGCCTAATC  
GACAACCGCTGTTGGATGGCGTTGGGGTGCCGTAACGCGTTGGCGCCAATGTGAAGACTA  
ATAACACTGAAGATCTAAGGGTAGACAAGGAGCCGCTGCCCGACCAGTGAGGCACTGGTC  
CCTATTATTCCCGCAATGACCCCGCTCGCCCCGGCGTGTCCGTATAACCCTGGAGTCACTGA  
ATCCGACGCGGAAGCCATACTAATGCACTCGTAAGGCTACGCCTACGTTGGCGGACTTGG  
AGCCGCAAGGAAGTATCGGGGCTACGTGGAAGCTAATCAATGATGGAATCCCCGAGAACA  
TCCTCATCCACCTGAACCGATTCAGGGCAGAGGGGGCGGCCCTGGTCCCGGACTGGGTAC  
CGTACGGCGTGCGGTCCGACCGGACGGCCGATTGCAAGGACCTTCGGTTCGACCCCCGACC  
CCGTATGTGAGGGGGAGAGGGGAATGATCGATGTCCGCAAAGAGGGCGAATGCATTGTTT  
GCATCAACGCCGAGTTCACGTGATGCCTATCGCTTCGAGCCACGAGGAATAGGGGGAGGT  
TCATTAGGGCGTTGATTCTCACCGGCGAGACAGTCGATGACGTCAGAGGCCTGGCGCGCT

GTGGGCTGAAGAGCGTTCGCAGACACCGGTTGCCGGGAGAAGCCAGATGGTATAGTGAACA  
AGAACGACGGGGGAAGTGAATCTTTAGGGCAGAAGCCCTCATCTGCCATCATAACGCGAC  
CCGAAGCCCATTTCTGTAAATGCACCGCCCCGACCAGGAGTGCGCCTTCTGCCACCGCT  
GTGAACTCGACCTTAACCCAGACCTGCGGTAGTCGTTGACTGGATGAACGGTAAACACC  
CACGAATCTGCAAGTAGAAGCTTGACGAGCCTGATGCGGTTGGAGAGTAAGACGCAGCTC  
AGACGCGTGCGCCTCACCCATCTAATCACAGCGCTGGCATGGTTCTGTCAGTCTGTGTT  
ATAATGATTGAGTAGCGCATGGCACGCGTAGCGGTGGTCGATAAGCACCCTTTACCGGC  
CAAATCAGCTGCGGCATCTACCTGTCATTTAATGCGGGGGGAAGCCTGGTCCGCATGACA  
GCGGGTAGATAGTGTACCAAGAGAACTACCTATGAGGCAAACATGGTGTTCCTGGAGAAT  
GCATTCAGGTCTGAATAGCGACGGGCCTTAGCTACTGTAAGTGGCCACTAGCCACCC  
GAACAAGCCGCTGAGGCAAAGGGGGTAAGAGGCCGTCAAGGCACACCAGTCCGCCTGGAA  
TCCCCCGAGGGCCCCAAGAACGCTCGTCAGAATCCCTGCGGGGTATCTGGGTCGATACAG  
GAACAACCTTAGCAGCGGCCCTACCCGATGCATTGTTGGTTAGCGATGGTAACACGC  
CACACACTGACCATTTCGCTCAACTTTAGGGGACGAGGGGTGGTATGTCGGGATCTCTTAG  
AAAAATGAGCACGACGGGTTTCACAGAAGTCTCGCACTAGCGAGAGTGAAATGACGGCCG  
TGCGGGCCGCACGTCCCACGACATCTGCGGGTTAGGGGACGCGCACCTTGGAAGCCGGCC  
CATATATTTTGCCTCCGACAGCGCGTCCCGTCCCAAAGTAAGGGCAGTCCGGGGATTCC  
GGGAGCAAAGCCTGGTCTTAACCTGTTAAGCAACGTATGGAACATCCGCTGTTAGCGGG  
CGCATTACTTGTGTGTTCTATAGAGATCGACTCGGATCTCGACTGGGGATAAAGCATTG  
GGCAGGATGTGAAGCCGGTAGCTGCGCTGTTTCGCGCGGCTATGGGGAGGAGAAGATGCAG  
TGGAACAGAACGGTACCGGATTCGAATGACCCAAGAATTAAGCCCGTTTTCTGATCGATT  
GCTATATGCCATCACGCCCACAACGGGAAAAAGGAACAATGTTTCATGGCGAAGCACCCGT  
ACGCTTTCACGAGACAAAATCCGCACTGGATGACCGTTTAACAGTTGACCACAAAGACGA  
GCGAACCTGTGCAGTGGGCCGGTATGTCATTATAGAACCACTACTGGACGGTCAAACGCG  
GATACGGGGAGGAGATGCGTCACTATAAGATTGATGACTGCGTCTCGTTGCGGGGGTGT  
AGGTTAGCTTGCACCCCTGGTAACTTTGTTAGAGGAACGCGCGTGTCTCAACGATGAGC  
AGGGGATCGGCATTCTCTAGTGCTCCTCGTACGGCCTGAAGGTCGTAGTGTGGACTCGCC  
TCTAGTCTGTTAGCACGATTTTTGTCTTTCCGACGGCTTAGGGCGTTTACAACCTTCAGCC  
GCAAAACATTACGCTGGGAGCAGCTGCGTGAAGCTCACGCATGCAAGTTATTTCCCCAGA  
GAATACGAGCGCTTGTCTACACAAGTACTAACAACACTAGGCCAAGGGTTCTATGATTAT  
TACTGTAGGGAGGTGGGTCTCTGCAGCCGAAGATAAGGACGGTGGAGCTATAGCACGGCAT  
CTTGTGGGCGGAGTAAGGAGCGACGTGCTTACATGGCCGACACCAGCAAGTCTGGCCGG  
GTCTCCCTTCTAAGCTCCGTCAGTGGTGGTTCGCCGGGCATAGCTGGCCGTGTTTCGAGTG  
CTGAATATCGCTGTGAGCCCTATCCGTAACGTGGAAAGCGGAACATCCCGCATTTCTAC  
CGGCAAGAAGTACCGTTCGTCCCTGCTACGAATCTTCCCTGGAACGCCGGTTCGCCCCGA  
ACCCACCACTGGATGGTCCCAATGGAGAGAACAGCTATCCGCTCATGGAAAACGTCGCC  
ACGCTGCACTGAAACTCATGGTACTGTGCAATCCGCATGGGAACGCTGATGAGTGAGCG  
CATGTGATCAATGCGCGGCAATGGCGGCTGCAAGCCGAGGCCACGGAGATGCAGGAATCC  
AGCATTCCGCGTCAACAACGCGCTGGGCCCGTACCACGCCAGGCGGCTAGATCATGAATT  
TGCCTCGCGGATCATGAGTTCGGGGAAAGCAATATTGGTTCGGCAGCACCAGAAGCGCTA  
AGGGCCCGTGAGGACGGACCCTCGCGAAACTCAGGTCCAGCGTGCGAACCGCCACTGCGC  
TCTGCCTGAAATGCACCAGTGTGCGGAAGTTCACAGCGCCCCGCGAGACGGCAGGATCTA  
TGACTTCCCTGCCTCCCGTCACTTTACCGCCCGCACTCACTATCAACGGCAGGAAGCAAT  
GGCGTTGGTTGTGCTGAGCAAGGCACGCGGCCAGGAAGCGTTTTGCGTGCCTGGCCATG  
CCGGGGCAAACCAGACACGCACGGCGGTTTGAGCATCGGAGACGTTCTGGAGCACTTCAT  
GCGGCACACCGCCACGCCACCAGCCACCCGAAGCTGCATCCCCACGTCCTCGGGCGGAC  
CATCGCGCAGGATCCATTTGTATGAGCTAGACACCGTACTAGCACCATATACTTCGACCT  
GCGTTGGTGGTTTGTGCGTAGAGCGGGCACGCCAGGAAAGTGCGAACCCCTGACTACGAT  
TTGTCTTTTCGTAAAGAAAGCCCGGTAGGTTCAGTTAGGCCGGAATATAAGGATGAGTTG  
CTACATCCACGCCGGCTAGCGTAGCCGCGACCCGACGATGGATACAGGGCGGTGGAAGCC  
GCGCCATCTAGGACAGGGCGTCAAGTTCGCATGCGAATCGCGTGCACATGGCTGAAGTGCG  
TATAGTCGGAGCTTACGTGTCGTCTTACATTAGGGATGACTGTCCCATGGTATTGACTGT  
GCCGACCGCTTGGGAAGGGAGCTCAGGCGGTGGGCCCTGCCCTGGGGCTATTACGCTCTA  
TTTCCCTCTAATCCGTTAGACCTGCCGTACTCGCGCGCCTCCTCGCCCCGAATTACGGGA  
CAACCCGTGGAGATGCACCGATGTGTTTCGCTGTGCGAACAAGATTCGGGCCGCGGGTTT  
CAGCATAACTCCCTACGCGGTAAGTATCGAGTTCCCGTGACACAGTGGCCCCGGTGT  
GTTGGGTATGGCTCAGCGCGACCCGCATCCCGAAGGGGCTTCAGGATTCCAAGACACCTT

GGACTTGGACACGGATGCCTAAATGTCCCTGAAGCGGCTTACGGCTTGGGGGCGTCATTA  
GCCGGTCTCGCCGCTGGAGAAGATGGAAGGCCACCATGCTGACCAGCCCCTAGGCAGGGC  
CCCCATGGCGCAGGCCGCCCTTCACCTCGCAAATGGGTGCCAGGTTACCTACAGCAG  
TGGCGGGGTTCGAGAAGAGTACGGTTTTCAACAGTCGAGAGGCCAGATTTATAGGGAGCT  
GTTGCACGTGGACGAGATCCGCCGAAGGGTTAAAGAGGCCTCGATAGTATCAATGTGTT  
TGTACTGTATTCTACCGACTCTCACATGACCCGCTTGGATCCAAGATCAAGATGGTTTTGT  
TGTGCGCAAGGCTGATTTGTACGGCGCCCTGTAAGCAGAGCTAGACACGTGACTGGCCGA  
GGCGTACTCAACGATAAGGTCATTCGCTTCTTAGTGCCCTTGC GCGTGGACCAGCCTTC  
CGGATAGCGATCTACTTACGAGCGTCGCCCTCCGGATAAAACAAAGAAGCGACC GGCCCTGA  
CATCGCGTGCTTATCCTCGCGGCTTCACGACCCGATGTGGTGCAAGTGAGTTC CCCTCAA  
GGAGGGTGTGGCGACTCCAAGCCGCACTCCTACCACTAGATGGCCGAGGCAGAGGACGC  
CCGGATCGGCCTCGACACAGCAATTACGGCCTTTAAGGAGTGGCACCTAGCCCTGCTTTT  
GCCAAATAAGGACTCTCCCTTCAGCCCGGCTTACGATCCCGTCATCACCTACGTATTTG  
AGACTATTCGCGCGGTGTACCGGAGGGCACTTCCA ACTGCCTGGGAGAGCAAGAGGCGCT  
GGCACCCTTTTGTGTTTCGTATCTCGCCCCATTAGACA ACTCCCGCTATTTGCTGGTCTC  
GACTAACGAGCATCCAATGCCGGGCGCCGCCG CAGAGATGAGTGTGGTGCGGGAGCAGAA  
ACTCAGCGCCGCTGGCGTCTCAACGATGATGAGGATGAGGCCGGCTGGACA ACTCAGCGA  
CCACGATGACCGGGGCCCGCGGAAGTACCAGGTTAAGATCAGGCCGTAGGGTGTCCCGGA  
GATCGTGATGGTAGAGAAGCGGTACCTTATGCGAGCCAATAATCGGCGCGCTGCCGCGGA  
ATAGGACTCAGGACACGCCCTAGGCGCACCGCGTCTAACCTACCCCGCCGACTGATATA  
GGACAATGGACATAACAGTGTGGCGATAACCAAGAAGTTTTGGGCACAGACCTCTATAGC  
CGATGAAATGCCACGGATATTCCGCTAGCGTTCGTGCCGCTCTATTCCGGAGATCGATTC  
TATTCAGCTGTATCTAGGGGGACGGGTGCAAGAGAGTGTAGGCCACGGGGGAAAAGGTA  
CCCGGACATGACCCTGTTCCGCAGATCGCCATTTAGGTTCTTTGTACGGTATCAATATAA  
TGACCAGGAGGAAATCGTCCCCAAATAAAGCGAGGCATAGGTTGTGTGACCATCGAACCA  
GCTCTTGTTGTTGGTAAGGACCTTGGACTCCCAGGACATCCGCCCTCTGTTTGAACGGGGA  
CACCGTCATTTATACGGCAGGTGATGGGTGCGTTATCGCTGCCTTTATAGCCACTTGCCT  
AACCCCGTATCATTTCACCGAGCCCTCTTTGAGATTCGACTGGCGGCAACAAGCTGCC  
GCGCTAACGGACGCTGCTACATGGATTAGGCGCAGGTAGCGTATCACTAGCAGCATTATA  
CACC ACTTGGGCTTTTTAAGGCTCGTGTCTTAGAGGGGGAGTGGTCACTGGGGCACCTCG  
TGTCTTGGTCACGATGGGTCCGATGGCACCCGTGATCGAGGGAGGCGCCTCTGACTATG  
TTCCGCCGATAGCCGACGGCCTCCGGGAGCACTGGCCGAACATCCTGCCTGAGTTCTCGG  
ACGCGGGTGTGTTCCACCGTCTGTTCCGGACAAAACAGCCGTGGCCGGCAACTGAACA  
CCACGCCGAGATTCCATTCTCCAGCACTGATCCGCGGGCTTAACAGACACGCTCTAGGA  
GGGTCTATGGCTAAACCGACTAAAAGGAAGGGGGTAGTGTCTCAGGGGCCCCAATTGTC  
GCTGGGCATAAGAGCGGTGGAGGCGTGGTTGTTGCCGGCGTGAAGGCCGCCTCGAAGCGA  
CCACTGGCAGCGTTGCTGAAGGAGCAGCGCCTTGTAGCCAGAATCTATAGATGGTCTG  
AGCGAATATAACATACCCACGATTGACACGAGTTGTTATGGCGAGGGCGCAGGATGAAGCC  
GACGCCAAGGATCGCGGTACACGTTATGTAGTTAACGCACGATCGCTTGGCATTAAACATC  
GGACACCGCAGTGACAGCAAACCCCTTGAACGTGGGCCGCAAAGGGTGATTCGACA ACTA  
GCCCGATGGCCGTGGGCTTCAAACAGTTGTCCATAGCCTCTCTGCTGGTTCCCACTATCG  
AGAACACGCGGAGTCGGAAGTATTAGAGTACGTCTAGCCCTCTGCGGGCGCCTGCCTCA  
TAAACA ACTTGCCCCCTAGTTAGCGGTTAGCCTCTTGCCGGTTGGCTGAGTTAGATCGC  
AGATCGTGCTAGACGAGACGCGAGAAGGACTCTCCGCCACTAACTCCACCGAACAGTCCC  
AACTGCACAGTCGCCCTGCCGATCTGGAGCTCCTCGTTGCTCCGCTCCACGCCGCAAACG  
ATGGCCTGGCATTCTGACCCGTCGCCTCATGCTTCTGGTAGACGCAGTCCACGCCCGCG  
AATAGCGCGACCCTGACCCAGTTAAGGATCCCTGCTGGCCCATGCAGCCGTA CTGGGTGC  
GCCGAGCTCTTACTCCACACCGCTCGGAATGTAGTTTCGACAGCAGATGGCGCTCCCTG  
AACTGCCAACC GCGACACATGCAGACGTCCAATAACCACCTCATTGCCAAACGCTACTCAT  
TCAAGACCGCCTAGTAACGGTTGATCGAGGGCGTACCTACCCCGGCCGGGAGATGCATCC  
CAGCATGGGAAGAGCAAGAAGGTTAGTCAGTCGGCCCGTGCTCTAGCTAATTTGCGCACG  
TATTTCCGGTCTGTTACGATGATTGGATCACACCCACGTCGAGCAATTTGCTGCTGGCA  
ACGTAGAGCGGTACAGTGGCCAATCCTCTAGTCTGCTCTCCCTGCGGGAAACTTGTCT  
TGGGCGAGTTCGAGGGTGGGATTATGGTCAGGCTCTTGGGCGTTGCTAAGGGCGGCGCTG  
TGGACGTCTATGGTGAGATGAATACCGGTTGCTTCGTATCGGGCCATGTTACTACA ACTG  
CGACGAAAGAGCAAAGCGATTTCAAACCTATCGGGCAGGCGTCCGCTAGTTTCGGGAGCT  
TCGAGATTCGCTAGCCGCGAGGGTACATGTACGCCGAGTCAGTTCGACACACTGAGCTTG



CTATGGGAGAGGTGCTTCGTACTGTTGCTCCAGCGTCACCGCACATCCTGGGCGTTCGCGA  
ACAATCGGCCGGCTGAAAGGTTCTCGTAGCCAGGGCCGTACCTCAGTACCCAGGGGGCAT  
CGCGTAGTAACGGCGGGGTTCTTCTCGGGATTCCCAAGAGCGTGTACCGTCTTTGCATTA  
GCACCGGAATGCCGGCGCTGACGAGTACCAGGGGGTCCACCAACTCCCTTAGCGTACGAC  
AGCATTCCAGTGCAAGCGACTAGAAGCTTGAGCAACTCACAAACGAATTCGCTCTTGACA  
TTGTCCTAATGGGTATGCGAGCGTACATCCTTGTTAGCCTCTCTATTCTGTCTAAAGACA  
CACGCGTTATGGCGCCGGAGCCCAGACAAGAAATCTAACTTTGCATAACAACCACCGGCTG  
TAGTTCGCTGGGCGCTGGTTCGCCGAGAAATTAGTAGGAGTCCCTTACCTCATATGTGCCGA  
GCCCCACCCTGTGGTATCGGGGGCCGGCCCCGACGGTGATGCGACGGCTACCTCGAAGCA  
TGCGCCGTTAGCTGGCCCGCCAGCTTAGGTAGCTGCTGCTGTCAAAGTTGCGCGTTAGGC  
GTCGAACCTACGCGCTGAGTCCACGGAAGCTATATCCGAGCCTGGTCGCCTCGTCGCATA  
CACGGGGTAGCACGGGTTACGCGAGCTGGCTGCAACCCCCGAGTCTCGGCCTGGTAAATCT  
CATCATCCATAGTTAGCACCTGGGGATCGAACAGGCGTGTATTCAGCCTACTGGGGAGCA  
TGATCTATGCTTCTTCGACGATCTGGAGCTGACCGAGGTGTTTCGGCGACTAGCTGACCTA  
GTTTCTTCACGGGGAAGCTTGTAGGCTGCCTAAGCCAGCACCCCTTACTGGCCATCGCCG  
GCGTCATGCGATGCTCAAGGAGATCGCTGTCAGTAATTAGGCCGTAGCGGAATGGGTGTA  
TGTGTTATCCTCTGTCGCGGACGAATCAAATCGGGGCGCGAAAGCCGCCGATAGCGTAAT  
TAGGGAACTCAAGAGACCCAAGATGGCCGGCAAGCAAAGCATGGAGCTTGGAGGTCCTG  
CGACCTAGTTGGTATGTATAACATACGACCCGGGGGCAACCCAGGCACCATGATGATACT  
TCTCCACGGTGTATAGTACGGACGTGGATCTGCACCCACACTCCCCGCACCAGAATCA  
CGTATTGCGTGCCCTTCTTAAGACTGGTATGGAGAGATTTCCGTATAGAGATCGAGCCAG  
GAAGTATTGCACTGCCATACCCAGAATCGTGCGGGTCTCGGTGGTGCGCACGCGGATGT  
TAGCTAGCACCCAGAGGACCCCTAGGAGTACTAGATGCTAGCTATATGTCCAATTCGAA  
GCTCACCTCCCATATGAAAGGCCGCTCCATGCACGGCACCCCTCAAACGGTAGCTAGACCA  
CGTATGGGCAGGCGACATTGCAGGCGGAATCGCCAGTGAGGACGAGGTAGGCGGGAGTAA  
CAACAACGACTACCTGAACCTTACCACGGACACTGCTGTAAATACCAGGTATTACGTGGA  
GAAGCCTGTCGGCATCTAATCGAACCTGGATACCCGCTAGTAATCCGCTTGGGCGTACCG  
TGGCGGTTTTCGCCGCCATTACGACCAAGCCTGCATAGTACGGATCCTGAAATGCAGCGA  
ACTAGTAGTCCGCGCTCATCACTCGCCAGCCTTTGACTATAGTAGAGTGCTGCCGCTCTC  
CTGCTCTGGGGCTGCACTTCATGCCATCCGCTTTCCTGACGTCCTGGTACCGACTCACAA  
GAAAGGCTCAGATGCACTGGTCTTCTGCCCTAGGACCTCCAGTTTATGTACGTGGCTGT  
CACCTTCTGGCCTTGTAAATCTTCTAGATCCTATTAGAGAATGTTCTCGAGCTCAACAT  
TGGCTGTGCCAGCATCCGTGGGGACAACCTTCATAGGCGTTGGACGTATCGTAAGGTTGAA  
CGGCGCTCGTACGTCCCACTCCCGCCGCTTCTCGCAGTCCGAGATCAATTGGAACGCCCT  
CGGTGCCAACGTCACCGTCACCGCCGAAGACGTTTCGAAGTAAGACGTTTCGAATACCTCAC  
GGTGATGGGCCATCACGCAGCCCGCGTATACGCGATATCCGCCACGACTTGTAGGTGAA  
GAGAATCCGGTACCACTATCGGTACACCTGCCAGGCGTAGATCAGCTACAAGCGACGCAC  
CTAAATTGAAGGGTTACCTAACCGCCCGGACCCAAATCCAACAAGGTCAGCCTTCTAGCT  
GTGATAGGTCACCTCGGAGGAGGACGTTGTTTTGGTACTTCTGGCTGAGGAGGCCCAACAA  
AAGGAAATCCCTATCGAACTTACATTTCTAGAGCCCTGAACCAAGCCCTAATGGTTTTT  
CGTAGACCCCCGTGCTATAGGAACATGAGACGTACACGATACGAACCCAGAGTCTAGCC  
CCTGAGGCTCACGCTCGCCTACAATCCATAGCAGAGGGATGGCGATAGAGCTTCTGGGAC  
GCGTTCACCCTTATTCCC GCCCGGACGCGTGTAGTTCTGCTACCCGCAGTTTCTTCTG  
TTCTCTGCAGAGGATGAGGCTAAGTTGGCCTGCGCGGGGCGTTACATCCAACGACTCTT  
AGAGGGTCTGAGATGGATGTTACTCGGCTGTAGGTGCCTAATACTGCATCCTCGCGAC  
AACGAGCTGCTTTAGTGTGACCGCCATCCCGTAGTGTACAGCTGCGCCTAGGCGGGCGTAG  
GTAGCCGACCTATTAGCCTAAACTACGGCAGAGAGCATTGTGATTTATATGACCCGAGCA  
GACGCGCAGGTGCCCGCGTCCGGATTAGTCAGTGGGAGTTCCCCCTACGGTAGCGTGCT  
ACGGCTACCCGAGTCTTAAAGCGAGGTACAACACTAGTGAGATACTTTTGATGAGTGATCCT  
GCGGCTACTCGTTGGCGTCCGGTCAACAGACTGCCGAAAGTGGCCTTAAGGGGCTGGTGAC  
GTCGCACATGAATATACTCCGTGTTCTGCAGACAGGACGTCGCTGCCGTAACCCGGTACA  
CCTGAACAGTGACGCCATAGCCCCTACACACCCCAACCGACACGGGTACGTCCTTCCCAT  
ATTGTCCGGGAAGGAGATCCTGCTCCTAGGGGGTAGTCAGGACGCGACGCTGGATTTCT  
GCGCGGTGCATACGGGGAAGGACTGTTCAATGTGTCACCTCTGGTACCGTGCGGCACGTAC  
TTAAGAAGCTTCGTACGCGCCACGCTTCATTTTCGCGTGTTTCGTGGTGCTTACCTTTGT  
TATCTCACGCATTTTGTAAATTGTCAGGGCCGAGTGCGAACCCCTGACTAAAACCGAGCTGG  
CTACCCGTTCTAATCCACGGCGCCATCTCGAAGCAATGAAGACTACCGTCATCAACCA

AGGCACGTGGCTTATGAAGCCCAGAAAAGTGTCCACATCTTCAACAAATTCCTGACAGGC  
CTCCGGTGGCGTCTGCTCACCCCACTCCACCGGAATCAAATACTGGTGCAACGTTTGG  
TACTACTGCCTTTATTTAGAGCTTCGAGGACAGTCCTGAACCGTACGTAAACCCGCTCGA  
GCAAACCGCGGTCACTGCTGAATGACGCAGTAACTTCCATCGTGCAAGTCATGCATTCAA  
TATCAGTGACGCTGTTGAGCTGCGTGTAAGCTCCCACTAAATGAGGACGGGATGATCAG  
CGAATCGTCACCCGTAAGTACGTGTAACAGACGCTGGGTGCGATCTTCCGCGGTAGTG  
GGACGAGGCTGCGTCTTAGAAAGAACAAGCAGAGCTGATGGACGTGCCGCGAAGTATCAC  
TACTCAGCCCCAACTTAAGATCCACTGCCTCTTACTACTAGCGGTGCGCCTCTTCGTT  
CGATGGGGCGAACCCCTGCCTCGGTGTCTAGTGAGAAGGGTGACTTTGGATTACCAGCAT  
TGCGTGTGAGATGCTCTTGCGGGCTCGCGATTACCTGTGCGTATCGTCTGGGGGTTACCC  
TCTTCTGGGCTGCCTAGCCAATGTCAGGGCCCGAAGTAACAAGTAATCCATCAAGGTGGG  
TGCTTCTACAAACGTGGCGAACCCATAGCAGGATTCGGCGGCCGACAACGACGAGCTGCT  
ACTCGCGGGCCAAACCCACAAGGGCCAGGTGGCGAGAAATTACTTACTTACGAGCCTCCC  
CGGGACACTGCGGGTACCAGATACACCTGCTTTCACGACCCCGCGACCCGCGTATGGTTCGT  
TGCGCCCGAAGTTTGCTTGGCCAGCCCCCGGAGCGCTTCTGCGCGCTAGTTGTGGGGGCC  
GCATGCTCACTAGTACGGTGGTGTTCAGTGAGGCCGCGCGACAGTAAGTTGTCACTGCC  
GAAGTCTGTTTCGAGGCGCATACCTTTCTAGTCGTCTGCCAGTACACCGAACATCGAGGT  
CGTCATCAGTTCATATCCACGTTCATGGTTTGACACCGTTACCTCGGGCATAAGCAAGAA  
GTAGTTTGACGGTTCGTTGTACAAGTGCAGATTCCGACAGGTCAGCACGAGTTCGTTTCGT  
CTGGGCCAACAGCCTCAGTTCGAGATTGAAGTTTACGGTTCGGGTCAATCTCGGCGAGCT  
AATCAAGGAACGACTGCCGACTGCGGACACGATCAACAGGGGAGTCTGATTCTGTACCG  
TGTCCGCGCTCAGTATGCGGACTAAGAGGGGGCAATCCGAAAGTGTAGTGCGGACATGTA  
ACACGAGCACAAAAGCTTCGCGCACATGGGCCCCGGCCCCGTTGTCACACGGCCTACA  
CTGTGAGGATCCTCCAGCAACACGGGTGCAGGTGGACACCAAAGCTGTTGGGACACAGGG  
GATCGATCAATACTGCATTGGCAGTCGCCGACTCTCGGTGCTGGGGCCGGACCCGCCAG  
CCTCCGGGCCCTTTCTGGTGTCTCGAAAACCACATCACGCACGTAGTTGCACAGTCAAAC  
GTTGTCGCTCGATAATAGCCGTGTCGAGGCCTTGCCTGTGCCCCATCACGTACGCAAGCC  
GCCAGCGTACACGAGCACGTTCGATTTGCATCCAACTCGGGACCTCGCTGCGCCTATGCC  
ATAAAACCCGGCGGCAACCTCCGGCACCCCTGCTAGGTTTACATTTAGTCGACGCACTG  
CTCGCTAGCAATAGACCACCACTGCGATTTGGCAATCACAGCCCGGAGAACCCTTTCCG  
TTACAACCAGCGAATACGGAGGCAGTAGAGGCATTACCAGCGCCACTCGCGTACGGCAGG  
TTTTTCGCCAGTGTAAGGAATCTGCGGCGTAGTGAAACGCGGCGAACAGACTAAGGCGACA  
CATATACTCAACGAGGAGGCCCCCCGCTGGAAAGTCCACCGTGGTTCGAGGGCATGTTCG  
GCTATCGACGGGCCCTCGCGGGGACGTTTCGCTAATGACCGTCAACAAGTTTCAGGGCCCC  
GGACATCACGCGATTGAATTGCTTTTTAGTGGACCCCCGGGCTAGGCCCGTCAGCGGTC  
AAGGTGGGAAGCGTTGGATCCAGCCTCGAGGAGTTGGGCTTTCAGCAGGCCGATGACTCT  
CTGGACCACATGCAGCTGAATCGCGCGCAGCGGGTTCGACTGAAGCTAACTTATCCAAGAG  
GTGTGGCTCGGCACCCACGCACCCTTGTGACGGCTGCGGACGGGGCCGCGTAGCCTGACG  
TATTTAATAGATGTCGGTGAGTAGGGAGAGGTATCATCAGGTGCCACATACGGCCCTGCG  
ACTTTCTCGTGCGGCAGTGTGCGGCAGCACATCCGGCACGTGAGGCACGGACACCATAGC  
GGCGTAGCTAACTCTCCTCAGGGTAGTTTTCGCGCCGGCGAGGGGGCGCCTGTCCCATAGAAG  
AGCCATATGGCAGATCGTGCTCCGCAACGCTCGAGTCAAGTAAATGGCTACCTCGGAAAA  
GTGGTTCTCTATAATCCGCGGCGACTACATGCTAAGCGGACACAGGGCCAGGTTTACCGC  
ACTCTCCCGAAACGGACTATCCTGCTCCAGATTCCGGGCGATTATCGGTCAAGTGACCTTC  
ACTTCTGGCGGGCTGCATTTGTACATGCAGGGACAGCTGGAACGGATGCTCGCGCAGGCC  
CTCGAGGATTAGGAGGGATATGACCAATCCCGTCAGTTAAGTCCGGGTCGTCTCCAAGGT  
TAAGACGATTGTATCCGCCAGGCTGAAACTGGGCAGCGCGTGCAGGCTTTCAGCCGAATC  
CACGGTCTGTTGTTACCGTTTAAAGTAGCTCATAACAGGACTCGTGGTTAGAGTACCGGGTG  
CGCCTAGAGGGCGCGGTTTACAGGCTATCTACACTGGGCTCTGTTCATAGGCCTCACCTCC  
CAAACCTCTGTAGAAACGCCTCGACGTTGCCCATACTAAGGTCTCTGCGGCGATGGGT  
ATTAAGGAGGATGGTATGCGCATCGCTGTCTTAGGACACACTATTCTTCCAAGCTAAGGA  
GACACTCAGCGCCGCTGTGACTTGGAGGGGCAGAAGCAGGAAGACGTGCAGATGGAACAT  
TTCCAGAGCGACGTCGGTGCCTTCGGTTCCCGGCCCGAGGACGTGGTCCAACCTGCTTGTA  
GAGCAGAGCTTGGCCGCTGAGCTTAGCGAAGATTCCCGTGAGGTGCCCGCAGCTGTGAAG  
TACTTGGGTGTACTGGACACCCGTGGTTTCGAAAGCCGGATAAAGGTGATAGAGGAGCGT  
CCGGTCTCGGCGGGCTGTACCCGCGCCCTGGAGCCCGTAGCGAACACGGCAGACCCGACG  
GACTTTGAAGCCGTAGTTGAGCAAAGTGCAATTACGTACGCGACGATGCCCTGTATACG

GCGCAGAATGGTACTGTTGGGCGCGTGACGGCTAATCGGCAGACGCCCGGTTGGACAAG  
TCGTTGGCGGACAGATTGAGAACGGACGCATTTGTGCGTGTTATGCAGGCACAGTATGGG  
GGTGCTGAGGAGTCCCTGAACATTCTCGGGTTTTTCGGGTCCCTAGGCCCTTGTCGTCCGG  
GGGTCGCAGGCCTAACTCCACCGAATAACATGGGCTACTATGGCCGCCATGCCACTGTGG  
ATCGCGACGCGCATCGGCTCCATCGGGGAAAGCGCGGGCAATGAGCTTACCGCCGCCGT  
CGAAAGTTCACCCTGCACCCCAATGCTGCAGCTTCAGCGCCGGTCTGACTTGATCGGGCC  
CGAGCGAGGGCAGCTGAGCTAAAGTGCCCCACGTGCCCGGAAACGGAGTCAACATCCTTG  
AGCGGACTGGAACAAGAGCTACCACCTAGGTTTCATCCAGACCACCGGGTAAGTGCCAAAT  
GGCGCGGTAGCGGTGCATGAGCTACGAACAGCGCCTCTGACCCAGCTAGACTATGACCCG  
CCGATTAACAGTCCCAGCAACCTCAGTCCCGCAAGCTGGACGAGGCTGTCAGAGATGAG  
ATGCAAACAGGCAGATTCTCCAGACACTGGGGGCTGGCCGCATCGGGAAGCAGCACCCGG  
GACGAGAGTCAACCATTCTTTCCACTGCGAGCTTAGCCGGCAGCGGAGGTCCTTACTCCG  
ACGAGACAGGCGAAGTAATCCGAATCGCCGCCAGTGGGATTGCCTTCCCGGCTGCCGCC  
AGAGACAAGGAATGCAGAAGCCAAGTAAGGCCGGAGAGAGGGCGAGACCACGCTGGGAGAG  
ATTCCAAGAAACGTCCCACAAAACGCCTAGTAGATACCCCTACAGCCCCGAAAGAACGG  
CTGTGCGCTGCAGTGTGACGTAATAACAGTTAACAGCGAAATGATCCCTAGGGGAGCCC  
TACTGGGACGGCGTAGGGGTATGGACGTTGTGAGGGTACGCCGTGTGCTGCCCGTAGAG  
CTGGAGAGAGTGAATAGCCAGATCGTTAGTCTCCCTAACAAACAAGGAGATCGACTATAAT  
GGCGCTAAGGCGAATCTCTCTGTCTGGGTCGTGCGGTGAAGCACGGCGAGGACGAGCTG  
ATTATCAAAGGCCAGAAAATCGCAAGTAACCGACGCGACGATGGGTTGGGCTGTGGCCTT  
GGATTTGCGCGGCAAGAGCATAATCGTCTGCCGGCCTATGCGTATAGCAACGGCCACGCC  
ATAGGGGTCCGAGAGTGAGGCATTGGGAGCATGACGTTCCGCGAGAACGATAATCGGCGAA  
TCAGCTGGGTTGGAATCCTGGATAGTTCCAACAGTGCCAGCTGGACTGCAAGCGCTTT  
GCGCATGAGTTAGGCGTAACTAGTATGTGTTTCAGAGGTTCGCACTCTGACGTGTACGGTGT  
GAGCCCAGCACGCAAAGTGTCCGTGAGATCAAGGAGACCTCGGAGGCAAAGCGCAGCAGC  
AACTTCGGCACCCAGCTCGACGCATGAGCGGTACTCCAAGTTTAAACAAGCAAACCTAGTT  
CGCGCTGAAAACCTTAATCACCAAGAGAGCGGGCCACTGGTTCATAAACTTAGCTCGGGTA  
GAGCTGCTACACAACAGAATCGGATATTCCTCTCCCCGGGGGAAATGATAATATCGCA  
CGCGTGTATGTCATCCCAGTTACCCAGTAAAATTCCCATGTCAGCCCCGTCCCAGGCTGG  
ACAGTGACCAAGGGAGCATTAGCATCTTCTAGATACACCGCTGAGAGCCGAGCATCTAGA  
GGCTATTCGCAGCCCTTGGGATACCTGGCAAGACGGTCAGCCTGAGACCTGGACTTATTA  
CTTGCAACCACTCCACCAGTAGCAACGTCAGGACGTGTTCTCGGTCCGCGACCCCTAGTT  
TGACTTCAAATGAGAGTCCGCCGACAACCTCCTTGCGGAGCATGTTACGATACCTAAGA  
AAATTTTACAGCCACGACGGATCTTAGGCTACGTGATGAACCGAGCTGTATGGGCACGTG  
CATCAACATCACCGTGGCACACCGGCCGATCACGCACGGCCACATGTTCTCGCCTAAC  
GAGGCGCAGGGGCGAACCACTGACTGCGGATGTGTATAGCCCAATCTCTACGTGACCAT  
TCCGCGGCAGATGGGCAGCCTGTGCGTGCGCCCTCGCTGGCATGAGTCTATACTCGGGGT  
GTGTGCCATGGCATACTGCGTAAGGATTATGAGGCCCTGGACTACGCTAACAACTT  
CCGCGTGACTGGCCGGGACCTCTCCCCGGTGCATGGATGTGGCCTGGCTGGTTCGCTTTC  
AATAGCCGGTCTCTCTGACGCGTCGGCCTGCATGTTTTGGGGTCTGACGTAGTTCCTACC  
AGCCATGAATACGCGTATCTCCCAAGCCATTGAGTCCGTGTAAGTACAGGCCAGTCTGGT  
CGACGATCCGGAGAATGCTTCCGGTATCGAAACTACCGACATGCAGGATCGCACCTCTTT  
TTAGGACTGAATCATTCTCGACGGCTCCGTATCCATGGTGAAGGTGGGTCCGCGAAAGTAC  
TGTCACCCCGGTTTAACTCCCCACAGGTGGAGTATCAAAAAGGATGACATTCATTCTCA  
CGGACTTGCTTGGGATGCGCTGGAACGCAAGGTGCATGGGGTGTGCTTGCCTCCCAGTTC  
GGGCCGACCCGTTTGGTGCATTCTCGGTCTTGCGCCCTATTACGGACGTGAAGCGCCA  
TGCCGGCGTGCACCTTTCGATGATTTACAGCGCGCGGTTTCGGGACATACGCCAGTGGGG  
AGCTGGCCTCGCGCAGTGCACAGCCAGAACCGCCTCTGGCCCCCGCGCCTGGAGCCTTTT  
GAGACCGCGCGCCTTTGAGAACCCTACGCTGTGAAGACCGCAAAGAAACAGCTAACCGA  
GAGCCTCGTGCCGCGCCTAATCCAGACATAGAAGGAGGGTGGGCGGCACTGAAGCTCGGT  
TCTGACAGGTATACACGACAAGGCCGCCGGTGTCCGGCCCCGATTTTCATGGATCGGCCGGG  
CAGGACAGACACGGATGCAATCTGCGCCGGGTCCTTGGAGGCCGCTACAGTCGACGTGAA  
AATCGAGAGTATCACGACGAGGTCCAATGAGAAAGTTGATGAGGCCGTCATTTCCAGAC  
CAGCGAGTCTAGCGTACCACTTGAAATGACCGTCCAGATGATCGCTCAGGTCCGGTGGCCC  
AATCTCCATGGCCACATGATTGACACCATTCATACTGCTTTGAAGATACTTACCCACA  
AGAGCTGGGGGTTCTGTGCGCCACCTCGGCAGGCGGTGTTGACGGAGACGACGCATGTAA  
GCTGTCTTCGGGTGCTGCTACTTAGGCACCTTGTTTTAGGTAAGGCTCAGCGTTCCAAA

CATTAACGATCTTATGCTACAGTTCAACCTCCTAACGTCAGACTTGGCCGGTGCATTCCC  
ACATGGCTGTACGGGTTTTACTACAGCCAAACGTCCAAAAAGCCTTTCGCAGTAAACAAA  
GCTGACATCATCTGTGCTGTGGTAGGTAACAGGAGTGAGCACACTGGAGCCCCTCCACGG  
GATCGCGGGTACAATGGTAGGGCTCTTGAACAATCGCCATGCGTAGTCGGGGTGGACCT  
TACGTTGGATCCTGAGCCGAATATGTACTACGGGTGGTTTTCCCTTGGTTCGTATCGACCT  
CGTTCGCGAGGTGCGGTTAAATAGTTGGCTTTGTTCAGTGCAGGCTATCGTACGCTCACG  
GGAAACTACCTGGACGCCGTGCGTTACATGGGCAATCAGGCCACCCCGATGTGGACTGA  
GATGAGCTTTGTCCACGCGCACCGGTACGGCCCCTACACCGACTTACCCATGTAGAAGAG  
GGCTAGTGTATGGAGACCTGTACGCTACGCGTTGCAGATGCTGTGCCGCTACAGCCTGAA  
AGACCCGTCCGGCGGTAAGATGAAGGAAGCTGAGGATTACAACCCCGAGTTCTACAGTAA  
CTAAGTCAGGAGTAGGCGCGGCCGACTTGCCCGAGGCTCCAGAGGGTTCACGCTAAAG  
ATTAGATTCACGCCGCATGGCCTACAGGTGCCTGTGCGGCCCGTTCGTTTCAGGGCACAAG  
CTTAGCGCAAGCCTCCTCGGTAAGAATCTGGACCAGTTCAGAGTTCGGTTCATCTTCGG  
GCTCAACCAGCTGTTACGGGGAACGATCCATAAAGCACCTCAAACCTGGATTATTACTCCC  
TCTAGCGGAAGAGGACTCTACAACCACTATGGATGGAGCTGGAAACGAACAGCGCAAAGG  
CGAGCATGGGGACCTGGAGGCAGAGGCCGCGTACGCGGTTTCGCTAGCAGAGTCTTGGG  
CTAAACTGTCGGTGTGCGGATGATAGATGACGCTGCATGCTTTTTTCGGACAGACTGGTGG  
ACGTAGATTGCTATCTTCCCCTCTTTCACCCCTGGCCAGCTTCCATGGTAGTATTGTTCA  
GGTAGCGGTGCGATGACTACAAGGGGAAGGCACAAAGCGCAATGGCGATTACTTGCAGGC  
TGCGCGAACCGCACTCTCATTAGTGCGAGGGAAGGCGTGTACTCCACGACAAGAGACCTG  
ATTGGAGCAGGCACAACCATGGGGCAAACACCTATGACTTGGATAGGCTACCTAGGCGAC  
GGAGTGAAGAATACGGTCCACGACATATTCCCGTACAGGTCACTGGAAAGGGCGTTAGAA  
ACTGGGAGCGGGGGTCCGGGCACGCGTACATTCAGCCCTGCAGGTTGCATCCGACTGGCC  
GGTGACCAGGTAAAGGGAGCCGGAATACGTGTACGGCGTACCGCTGAGACAGTCCAGCCC  
CGGCGCTTTGCCTACGACAGCGTGCCCTAACTCGGCTATCCATAGAAGAGACTAATAAG  
CAATCGTCATACCCGATAGACAAGGCTATAAATGAGACACGGGCAACTTGTTCGCGAATCT  
CTGGGTCTCGCAGGAGATGCCAGGGGCATTGGGTAGACGCGATCGTACGAAGTGCAGTCT  
GCCACCATGAAGATGTGCGCCGGTTGCGGCTAGACCCGGCCGTCCCGGATAAGGGGGCAA  
GGGGTTGTAGGCTTCGACCTCCGTTAAAGTTACCCCAACGGGTCCCCTGAACATAGCGTA  
CGACTTCTGGATATGACGCGGGACACAGCAGCGCACGTTTCGCGCGGTAGGTGAAGTCGCG  
AGGCACACCCTTTCGTCACTATACACGACCAAATCGGAAGCTAAAATTGTTCTCCTCGTCAT  
GCAGTGCCGCTCTATGGCCAACTCGATTCTGCCGCCTTGCACGCTGTCGTTGATCCAGAG  
TCACCTCTTACATAACCATTTCGTAATTATCCGATAAAGAGATTAATGAGCCGCACGGCC  
TCACTTTCAGCTTTACGGTGAGGGCGCTATAGCTATTTTTCGACCCGTGTGCTGCATTACC  
GATACACCCGCTCGCAGTGGTTGGCTGGAAGCAAACGACTACCCGAATGTAGCGTTGGTG  
TCGGCTTGATCGCATACTGGACTGTGCCAACAACCCCTCCTTTTGTTCAGCAGAATTTA  
TCGATTTTCTATAACACGCGAGACATCCCCTTACGGGTTTTTCGCGCTAGCTCTCGCCTA  
GGGTAGCTGTGTGGGGACCGGGAGCTTACAGGGAACACGGGGCTAATTCGTTAAGTTCCC  
TCTGCCGTGAAAGAAAGGGAAACGGCCCCGAGCTAACTTTGAGCCTTTGGTATAGATTTA  
ATCGCCATCAGCCACAGCCTTTGGTGCACAGTACCACTGAAGGGGATGGTAGTAAAGGGG  
AGCGCTTTACCGCGTGTATAGACGTGAAGGTGACCAATGGAAACAAAGCCGGTGTCTCT  
TTCACCCACCGCTGTGACCCTAGGAGCACTATAAGTATATCATCGATCCTCCGCGTCCGC  
GGTGGCGACTTTGGCTTTATGGTGGAGGACTCTCTCCGACGTTGGTCTCTCATCTCGAAA  
GTTTTCTCATGTGCCATGGCCTCGAACTTATTGCGGTTGCAGAATTAGGGCGCCTCCCG  
CTCGGAAACCTGCGATTATGTCGATGCACACTTTGGAGTGATATTGCCTGTGTCGTAACAC  
GGCGGGGCATTCCACGGTAACTCCGAGCAGGGCAGCAAGGACAACCTGCAGGGTCTAAGGA  
AGGCCGTTTTTGACAGGGACCGCTTTTACCCTACACCCACTGTAGAATGACAATCTCGTCG  
GGTGGCCGGATGCTTATTTTGTTCAGAGATTCTTAGTGCTACATGCCTCGGAGACCACGGC  
AGTGTTTACACTTCTGCTATCCCGTATCTGTTTGGGGTGCCTATCGAAAAACACTTA  
AGCGACCGAGGGCTGACGCCCAAATCAAGGCAACCATAAAAGTTCCTTAAACAAGGCGTC  
TGTCGGCGACCCGGCCCGATTAAGTAAGCATCGTTCGGTTCGTTGGGCGCCCGTCTTGAAGGG  
TGCACAGTTCCTACTAGAGATACAGTCAAGCGCGCAGTCTATTGATGCATGACGTGTGTAC  
AAGGTGGAAAAATGGCATGCCACTTCGGTTCAGTAACTCTCGGGGATACTCGTTAGGGTTT  
ATTCTAGCCGGGATGGCACGCTGTACCACGCCGAGTCTACAACCTGCCAGTTTAGCGAGT  
GCCCCGATGCGGTTGTGCGTGCTTCGTGGTGAGGGCTCAGTATCTACGGCATCGAGTGCG  
AGTGCCGTTACTCCTCCACCCAGGTGCAGGTACAATTGTGCCAGGGACAGAACCGGCCAC  
GCCAATACGACGGACAGTACGTACGGCGGTGGAACGATCGACGTTTCGTATCGCAAATACG

ATCGATGCGTCTGAATCGACGTTGGGACTGTTTAAGGAGCTCACGAAAACGGAGCGCTCA  
GGCGTTACGAAGCAGCTCAACTGGCTGGTGGGGAATTATCAGGTAACACTGTGCAAGCAA  
CGAGTGCTATTCTCCGGAACTGCTCAGCTCCCGGGGGTAGCTTGTGTTTCACCAGCTGC  
GCTTATTGTGAGACCGGAAGCCTCCGGTTCCTTTGACGATGGCTTTTATTGTTGCTATCC  
TAGATTTCTATTAGGATAAAACGAGTAAGTGCGATCAGACAGGGAGGGCCCGCTAGTGG  
GGTTGCGCTACCTGCGCCAGGTTAAACCTGATGATAGCATCACCCGCTCACAGAACCAGA  
TAGAGATTACAAGGGTCTACGTAGTATCACTGAATGGACGATATCCTGTGAAAGTCCACG  
AGCGTTTTGACAGGGCGCTACGTCTGCGGAGGATGTAAACGCAGCTCGTGGACTGCTCGC  
TCGGCGTACGGACGTGCATCCAGTAGACCAAGACGAGAATCCATGAAGACGTTTCAAGGT  
TGATGAAGTAAGGTCCTCAACTCACTATTATCGCCGACCAACGGGTAGAGTCCTATCACG  
CCAATACATGATTTTTTCGGCCTCGGGGACCTGGTGAAGTACGCCACATATCTCGTGGTGC  
CCTTCTGTAACGCCCAGCATAAAGGCTCGGGAGAAGGCGAATTCCAGCCCCAGCTGCTCC  
ATAGTCGCCCGGTATTGCCAGCCCTGGAACGGTGACAGTCCACCGGGGAGCGGACAACTG  
TGGGGGAGTTCTCCGTACACTGGGCCTTGATGGCTGTGCGCAAGTCCGCTTCCCTAACTT  
ATTGGGGTATCACCTGGTTCGCTATAAGACTGACGTTGCATCCTGGTGAGCCCCGGCGACA  
GCGAGGCCATCAGAAACCGGTCCATCGCCATCGGGCGTGCTAAGAACAACATGCTATCGA  
AGGCGTTGCCCTCCCTTGTGGTCGATAGGTACGGTGGCACCTTGTACCGGGGCCACGGC  
AAGAGCGGAAGTCTATTGAGGGCACTGGGGCTGTAGGTGGCCTCAATGTCCGCGTACGGC  
CGGGCCGATAACCCTGAAGAAAGCTAGCTTCTGTAGTACAACGATTCGCTCGGACCCGGCA  
CGCACGTTAGGATGGCGGTACCCGTCGATTCCGGCGAGCCTAGTCATGGCCCGGACATTA  
CACGTTTGTGAAGGTCGAGACGCGAGACGGGCACTTCAGAGGCCAAATTGTGCCAATGTGC  
TGGGCCAGGTGCGATACCCCCGCGACTCCCGGTTTCATGTGCGGATCCGTCCTCTAAAACC  
CTGCAGGTCTGCTTTTATTGATCCGCGAGCTGATGGTGGCCACACGCTCACCTGAATAAG  
GACTCAGGAGTAGGTTCTCGGCCGAGGCCAGGTACGATGGTTCGAGTTGCTCCTAGCGT  
TAACGATTAAGTCAATTGGGATAGGCTGACCTGGATGGGTTTCATGAACGTTTAGGGCTGC  
TCAAGACGATCATCCTTTTCCACATCCGGCGGGAACTGCGGCGAGGGGCCAGCGTGTT  
CTAATGACGGTGTAGTTTTGGTGTATATCCACTTCGCAGCCTAGGGCGGATCCAAGGAAT  
GCGTCTCTAAAGAGTTGCTGGCATGGTTGGATCATTTGAGTACTGATAACGTGGATAAGG  
TCGTGCTCGTAGTGTAAAGACAAGTGCGGGTGTATAGTGACCCAGCTCTGCCGTGAGGGTT  
TCCAGGGCTTTGCAGCTTTCGGTAACCATAGCCCCTAGGGCGTAGCCGTAGACGAGAGGC  
ATGGCACCGAGCTGAAGGAACCTAACC CGCGGCACAACCTGTCCAGTTGTGCGGAAGT  
GCCACCTCGCGCTACATCGCACCCCGCTCCACGAGGACCCGGAGTTTTTCTTGAAGAATC  
CGATGTAGTTCCGCGATATGCGAGGGGATTTCTGCCGGCGGAAGAACATCATCTCTGTGCG  
CATGCCCCATGAGCTTGGTAGTCTTAATTGCTGCTCTTGGCGGGTGCGAATTCGGAACTCC  
GTGTAATCCTGGTGACCGTGGCGCTACGTGACCTAGCGCGCCACCATGCTTAAGCAGTGG  
AGGAGTGACAGCGTAGACTATCGGGCACGGCGCCGATTTACGCCGGGCACTCCCCACGT  
GCCAGCGCACTCGTAGAATGAGGTTGGGAATCTGATATAGAAAGTTGACTTCACGGCCAA  
CTTCGAGTTGCAGCCTAGAATTGCTATGCCTATCACAGAGGAGGCACAGCTGCCTTCCCT  
AGAGTAACCCGTGATCGTGTGTCAGTTTTTTCGTGCTGTGCACTATCTAGTACAGCAGCA  
TGTCTGCAACGAGCGGAAGTAGTTCCTGCTGGCGAGTGGTCATGGGGCCGCGGAGGTTCA  
AGCCTTCAAAGACCTCGGCCGACCATGCCCTCGCGTTGCGAAGTGGAGGCGTTAACAACG  
AATCGGTGTCCTTAGGTCCAGACGCCGTCCTACGTACCCTACTTTAGAGGGCCATCGGTT  
ACGTCACTACTTGGTCAGATGTTCAAGTCTGTGGGCACCCCTCACGCCCGGTGCACTTTCC  
AGGAGTGCGCGGAGGACCGCCAGAGCGCCATACATGTGTACTGGGACGGCATCAGCCTGT  
CCGTGACCTTGGAGGAGATAGAGGGCGGCAAAGCCGCTACGGTATCAGTGCCATAACA  
TAGGTGTCTACCGCCGGGCTTGGGTGTTAAACGAGCGGGCTGGCAAGCTGCCGCTAGCC  
TCCGCGTATCACGTGCGTTCGCACGAATGTTAGTCTCTACCACGCCGTCCTCAAGCCAAGT  
AGCAAGGTAGACCCGGGGTAGCCTAAGGGTTCAAATTAACGGTGCAGCGTATTCCTTTCC  
GTGTCCTCGATCACCGTTCGACCGCTTGTGACCGACTGTGTAACGAGGATTTGCGATGAG  
TCTAACGGTAGTGCTGAGCCTGGCCCTCGTTGTAAGTGGCGGACCGGGCCTATAGGCAAG  
GCCGAAGGCGTGGCAGTGCCATCGCAATCCCAGGCCCTCGCGACGAAGCTAGACGCGAGC  
GGAAGCCCGAACCGGGCAAATTCAACGAGGGGTACCCCTGTCCGGGGCCAGGGCCCACT  
AGTAAAACGACATCAACGGGATGAGATCAATTGACCAACTGCTTTGGGAGATCCTCCACT  
GCCTCCTGCCGTGCGTGGCGAGATGGGCGCTCAGCCCAGGGGCTGAGCCTGTCCCCTGCC  
AGCACCGCGCTCCCCAAGCGATGCCTACCAGTAGATCGGTCTCCGACGTCCATCGTAGC  
TACCGACTGTAGGACGGCGTAATGAGCTCCCCTGATTGGATGACTCAATGATAAACTTCT  
GGGGATTATTTTCGCAACTGTTGGACCCATCCGTACCGCCTGCGATAATGCAGCGATGGG

AGCACCATATCCCAAAGCGTCTCTCAGGGCGAGTAGGACCAGCTGAGCCATGCCGGTGT  
GGCTCCTTGGAAACCAATGTTTATTCTGCCCTGGCTCTCGCTGGGTGGAATAGGCTAAG  
AGCCAGAAATGTACTGCCGGACACGCCCTCGTCGTAGCTGGAGGCCTGATGCTGCACGG  
TGACTCCTCCACCGACAATAAGCAAACATTGGCGGTACATTAATCTTTGGCGCCAT  
CACCCCTGGAGCGTAGAATTAAGGGGCGGAGTGCCCAGAGGTCTATTGTCTCCGAGGAC  
CCCTTGGGTGCGGGTCTGTCACAGGGAGGTCTGATCTCACTTGC GGCTGGTATAACCAGCC  
CCCATCCGCCAGTGCTCGCAATCCATTCTAGTCCTGCGAGCCCCAAGGATCGCGAGTGCG  
GTTTGCCTCGCACAAAGTTTGGCGGTACTGTGCTCGGGCTATATGCGTGCCTAATTGCCG  
CGCGGACACACACTCCCGCGACGGGTCTCGGCCACGGCGCGTGGGCATGTTCTAATGC  
GCATCTCCCTTCGCTCACCTCGTACTTCGTACGCTGTCTAGCCGTTCACTGGTGCGTTC  
ACAATTCCCTCCCCGGGACCGTTATGATTTACAAGTCCCGTCGTCGTACCTCGTCTCCTC  
CATAGGCCTGCGC

>NewGenomeName\_124

AGCAGGTGGGTGTACTATTACCCCCCTGCTGGGCCGGCAGACCCGAATATTAATGGGAT  
TAATACATAAATCGGCCGCCGAGTAAGCGTAAAGCTCAGTAGCTTCGTTATGGGCATCGG  
CCCAAATTAAGCCAACGAGGGTGCTTGTGGGGAGGACCGTAGTTCAGTTAGAAAGC  
GATATATTCCTTGCTTCTATACGGAGGAGCAGCGAAAGAAAAAAATCGCTGTTACACAT  
GTAAGAAGACTATTAGTTCGCAGAGTTTAAACAATACCCGTCAAGTTGGAGGCTGTGGTGC  
TCTCTCTTCTGTACATACGGTGTGCCATGATGAAGCTCGTCGGGATGAAAGAAGGGCGG  
AGTTGGTAGCGCGGCCCGCCCGTCCCTCCGACCAAGTATACGAAGGCGTAGGTATGTCA  
GGGCATCTATAGAAGGCTCGTATTCGAAACGCGCTTGTATCATCTTTGTAATTGGGTATA  
CAAACATTTGAATACCGCACCTTAACGAATAAAATGTAAGCTTAATAAACTAAGACATGA  
CAATAAAAAAAACTATGATATAATAAAACTCTATTGTGCCAACGTTGTATAATTA  
GGTCTGTTTAAATATACATATGTAATGAAGATTACAGTAATGTTTATAATAAATGACTTG  
GAAGGAAATTAATAATTAATGATAAGATATAAAATATACCGAATAGATAAAAAGAGGAA  
AATGCAATCAAGCCCTGTCAGGTTTACGTATGTCGAATATATTAAGGGCCGAAGGCCCT  
CAATCTGCAGGTAAATCGGTGCTTCTTCGTGACGAAGCAAGCGTATTATTGTAAACAAG  
AAAGGGTCTGACACCTTTAGTAGAGGTCTCTATACAGCTATCACATGATAGCTGGCTAT  
GGACCATAGGGTGGACTCCAAATATATTAATAATAACAGATCAAATATTTAGGACATA  
GATATTAATATTAATTAAGAGAGGGAAAGAGAACCCGTGCGCGGCACACTGCTGTGC  
TGGTGGGACAGATGTCCCGCGTTAGTGCCCTTACGTC

>NewGenomeName\_125

AGGGGCCACTTGGGACCAGGGAGCCCCATAATGGCACCTGTTAGAGCTGCTGCTGCAAA  
GAACTGGTGCTTTACGTTGAATGACTATAAGGCCGACGAAGAAGCTAAAGTGAGGCCCT  
GCTCCCTGGTGAGTTCCACTTTGCAATATGTGGGAAAGAACGGGTGGAGGAGCGAGCTCC  
TCCTTTGCAGCGCTTTCTACATCTTAAAAAGTAGCAGCGACTTAGTGCCCTAAAGAAATT  
AATTGCCCGAACTACTAGGAAAAGGCCCGTGGCTCAGATCATGATAACGAGGAGTATTG  
TAGTAAGGATAACGAAGTGATAGTCACCATTGGGGAGCCAGTTCAGGGAACCGGAGTGA  
CCATGCCGGAGCTCTTGCCGGCGTGAAGGCCGAAAGGAGAATGGTGGAAATAGCGTGACA  
GCTTAGCGAGATCAACGTCAAATATGCGCATGGTCTGAGGGATTGTGCCCTCATGATTGG  
CCAGATATCCCGTGACTTCAAGACGGAAGTCGTGTCATCACGAGTCTTCCAGGGTGGG  
CGACTCGAGACTTGCCCTCTGACATGGAAGGATCGAAGCTCTATCGGATTAAAGGTGACTG  
GTGGGATGGGGATTCCCTATGAGGATATAGTCATCATGGATGACTTCTAGGGGTGGGTGCT  
TATCTGTGAAATGTCGAGATTGATTGAAAGGTGTCCACATAAAGTTCCCGTGAAGGGATC  
TTACGTGGAATTCACATATACGAAGATTGTCATACCGAGCAACACGCACCCGCAAAGTTG  
TACTGTCCGGATAAGTGTTATCTGTCAGCGTTGTTTCAGGAGGATCATAAAGTGGAAGTA  
GCGTGTTGGACTGAGATTTGAGGAAGTGCCCGATGCTATGAAGAAGCACCCGATCAAATA  
TTAACTCAGCCCCGACCAAAGAGCGTCGCCGAGGTGATTAATCAACAATACACGCGC  
AGCGCGCGGCGAAGGCCGACGGCAAAGCCGCCTGAGACCGCGCGAAGAGCGGCCAGGAG  
CGAGCGATATCGAGCGGGCGGCCCGGGTCCGCTCGGGGTACCCGCTCTAAGGGCCG  
AAGGCCCGAAGCAAGCTGTTTTGTACCCCCATCAATTGATAAGGCTTCAAGCATCTAA  
ATGGTTGGTGTCTTTATTATGGAGTATCCAAGTGAGTTAAGTTCACTTGCCGGAATTCAG  
AGTAGATGGTGACCTTGACCTGGTAGTCCATCTGGTTGGGGTGGGTTCTGGCCAACTGA  
AGGCTAACCCGTAGTGTTGGACCCTGCTTTCGGAGCTCGCAAGGTGCTGATCACTTTCT  
TCATGATCGATTTCCAATGGGAATTGGGATTGTAGAGCCACAGGGGCGCCGTTACGTTAG  
AAGTATCAGTGGCGGTACGCTTAGTTGTGGTCTTGTTTTATATGGCCTTTTGAAGTCTT  
TTCTCAGATCCCAATTACGAGCCACGTCCAAGTTCGCTAGAGGGTCAGCATCAAGTCTTG

TCTTTCTGAAGATGTCGTCTAGGTGTTTGTATAGGATAGGTCGCTTGTGCATGAACGCTT  
TCCACTCCTCCCAGGTTAAATTGAGCTTTCTCATTTCCTACTATTGCTAACCTGAATCTAT  
AAAGTTTAAAAAGTAATCTCCAGTTGATAGTACACCAATCCAGCGAGTCATCCAGTATAA  
TGTTGCTTCCATCCGTTCCAAATTAAGCTGAGACCCTCCTGTCCCTTGCTGTAGTATCT  
GACCGAAAACCCTAACAAATCTGACTCTATAGACCCTGTTGGTTCTCTGGCCCCCTCCTGC  
TGGCCTGTATCCTTCTCTCCCTCCYCCAGTAACGACTTCTCCATCTTCTCCTCCTGTGAG  
CCAAAAGTCGTCTTCTCCTCCCAGACTGGTTAAAGGTTAACCAGATCGGGGTTAATAATT  
AACCAGTGGCYCCATGTGGCCGTGRCAGTAGA

>NewGenomeName\_126

TCGTTTTGAATACTTATTTTTGGCTTGCTATTAACATTTTATAAACTCCTTAATTGTTA  
TTTGATACCAATTTGATACCGTTTAAATCAAATATGCTCATAGCTTGATGTTTTTTATCAG  
TATAAAAATGTGAGTACGTTTGAATCGTTTCTGTAATGTTAGAATGCCTCATTAATTCCA  
TTAATAAATACATATCGACACCATTATTAATTAAATTGCTAGGGTTCGAGTGTCTTAAAT  
GGTGTATTTTTAGATTTCGGGAATGCAGATTTAAAATGATACGAATAAGTAACGTATCTAA  
TAGGTTCTAAACCCCGAATATAAAAATAGTTTTTCGTCAAATATTTATATCTTTTAGAAG  
ATTCATTCTACATGTTTTTAAGCATCTCTCTAATTAATTTGGTACAGGTATTATCCCTT  
TAGAGCTTTCTTTTTTTAGATTATATTCAATTTTTCTATTACTTAAATTGATTTCCCTTAT  
TTACGTCAATTTTCGCCTTTTATTTTATCGTAATCTTTCCACTGCAAACCTAAAGCTTCTC  
CTATTCTAAGACCAGAATAAAAATAACAGTTTAGTCAGCTGACGAGCAGTATCATTGTGA  
TTTGTCTACTTTTTTCATCAAATCTTCACGAGTGATAAATTTAGCTTGTGGTTTTGTTT  
TGGGCATAGGAGTTACCGATAATGTGGGGTCGTATAAGAGCTTGTAAATGCTTTTTGGCGT  
AATTGATAACTGCTTTAAAACCTGCCACACAGATCGTGCATAGTCCACAGAAAGACCTG  
CATCGTTTAAACAATAATTCCTGAAAGCAGTACATTACGTAGTAGTGATTTTGCCAATAG  
GGATATTTCCGAACCTTTCTTTTACGTGAGTATTATATTCTGTAGTTCGCTTTTCTATTG  
AGCGTGCAGAAAGATTTTCATTTTTTAAACGCTCTAAAAATATATATTCAAAGGGTGGAT  
TGCCCGAGTATCCATATTTAACATTTTGTATAAATGCGCTTTCAGCTAGTTTGGCATCTT  
TCTTACGTTCAAACCCACGCTTCATTTTTGGTTTGTATTACCGTATACATCTTTATATC  
TAATGGAAAAATACCATTTACCTGTATTACCATCCATATACTGGCATTTTACTTCTCC  
CTCCTCAAATTTGCCAAAAAATAATAAGGGTAGGCGGGCTACCCGTGAAAATTGTATAAC  
AAAAGAGAGAGCGCAGATGCACCCTCTCATGTGCGCAAATATCTCAGCGACTTGTCTAATT  
TGAAGCTTGCCGCAAATATTTTCAGCGGCTTGTTTTGTATATATGTAATATAACCATCAAAG  
AGAGTGTAGTTCAAGCGATTTAATTAAGAAATCTAATTTTTATACTATTTTCAATTTTAT  
CTACTGTTTCTTTTGAATATGATATTTCTCCGGCAGGGTCATACCTATTAATTTTCGATA  
TTCTATCCTTGCTGATTGTACTGATATTTAGAACGTTAGCATAGGTCTTTTTTATACTAGA  
ATCGCTCATATCCTTTGCGAACCTTCGAAGGTTTTTTGAAGTCGTCATTCAGCGATTTGT  
TTTCATCAAGTAATTTCTGATCGTATGGGTTTGTGCTTTTGTGACACCTTTTCAAGATTGT  
TCATGATTTTTTTAACTAAATCCTTACCCTTACGTCCATTTTTTACAATACTAAAGGTA  
ACAAATCTTCTTCGATATGCACATTGAATTTGCTTCTGGAAGATGTAAGTGGCACTACCG  
TAAATATTGGATTTTTATTTGAATCGTTATTATTGAGTACCATATAAAAATGGTTTCCAG  
AAGACTCTTGCCAACATTAACACCTAACTTTACATAAATTATAGTGCCTTTTTTATATC  
TGGCGTAACTTTTGTTTTCTTTTAAACAATCTAACTTCATGCAATAAAAACCTCTGGATATT  
CAAGACACCATGAACTCATATATTTAAATTTGTAAATCTCGCTATGTTGAATCTTTTTAA  
AATTATTAAGTGTGTTTCTAAAGGTGCGCTTCTTCCATCCCTCATCCTCCTCAGCCA  
CACAAGCGTTATTAATCAATATCCAGTAATTGTTGATTTTTCTTATCGAACTCCTCCTGA  
GATATTACTCCGACATCTAATAATTTCTTTATATTTTATTAATTCATCAGCAACAGATAAA  
CTCATTTTTTTCAGAATTGGATGGTCCCATAGAACTTCTCGAATAGAGATTTGTTCTTGT  
CTTGTTCGCGCATTCTAGATACAGTCTTTTTTGTATATGCTTCCTATAGCGATACTTGAT  
GAACCGTGATGTATAATTATTTGCGCAAAAAGAAGTCCTTTTTTATACGAAACAGAATTG  
ATTTTCTCGAATGGAAATTCATGAAATTTCAAACCATATATCATAACCGTTATCTAAGAAT  
AACAAATCTCAGACCAGTACATACTATTAAGTAGGTATTATTATTGTACAATCCCGAAGTT  
ACATACATTATGTTTTTATTATCTTTTTAAAATCATAGGTAGTTCTTTCACTTCTTTTTTT  
GTACCAAACAATCCTCTACACCTATTTTCGCTGAATCTTTGGTAGATTTTAGATAAGTTT  
TCGTCAGATTTATTGATATCACTTTCAAATTCGACTGCTTTTCTAGGTTTTCTTTGGTAT  
TCTTTTAAAATTTCTCTTTTGTCTTCAACAGATAGTTGCTTGTATTGCTTCTTTTCTTCT  
TTTGTTTTAGTTGCTAAATATTGACTCTCAATCATAGTTTCTTTGAACTTTAATCTGCTC  
TTAGGTAATACTTTTCATGTTTCTTCTCCTATATTTATATTTCTTTATGTTTAAAACCTC  
TCAACGGCTCAAATGTAATCGAATATTCGCCATTGTGAGTTCCAATACCATATATCTTTT

TAGATAGTTCTATTGCTTCTAATATGTATTCTTCGCTTAATTGTAGATACTCAGACAAC  
CATAACAAGTTGCGTACGCCATCATTATAAGCTTCTACAATTTTCGCGTAGCGGTACAGCTG  
ATATAAAGCCGTGTCGTCTTGCCTAATTTTCGAACTTGCCTGATTGTTGAATTTTCGATTGAT  
CTAAAAGGTTGCCACACGGCAACTTGTGGTGGGCAAGTTCCTCATATAACTTTTTAATT  
TGTTCTTTTCGGATAAGGTAGGTCTAAGAAAAATTACCCCTTCTTGATACCAACCATCGA  
AGCTCGAGGTACTCTTTGTGTTTCTTTCACTTCAACTTCACATTTTCATAAGCAATTCTT  
CGTATTTTCCCATGCGCCAAATCCCTTTGGCGTCTTATTTCTTTCTATCTTTAACCCATT  
GCATAAAATTTTCGATTTCTTCCCATTCTTCGGGAGCAAATTCATCTTTATTTGTATGAC  
CGGCTATAGTTTCTTGGTTAATACTTCTGTCTGCTGTAATCCTCGATTTAGGTACATTAA  
ATTAATCTGCTAATTGTTGGACTTTTGATAATCTAGGATATTTAAGTCCTTGAAGCCAGT  
TAGAGATTGTTGATTGACTTACCCCGATTGCTTCAGACAATTCTACTTGAGTACTGTCGT  
TCTCTTTCATAAGTTGCTCTAAGTTCTCTGATAAAATTTTCTAGCACTCTTATATTCCA  
TAAATTTCTCCTTTAGTATTACTTAATGTAATACTAATTTACCATAAGTAATATCACTTT  
TCATTACAAAATATTACCTTTTTGAAATAAATATCACTTTAGGTGTTGATATATTACTTT  
AAGTGATAGTATAGTTGTAATGTCAACGGGAGGTGATACGAAATGCCAGAAAATTTAAA  
AGAGTTCCCTGTAAAGCTCTGGAGCACTAATTCGAATATGACACAACAAGATGTCGCTGA  
TACATTAGGCGTTACTAAACAATCTGTAATAAGATGGGAAACAGATGACGCAGAATTA  
AGGCTTACAATTGTATGCTTTAGCCATATTATTCAAGACAGAAGTTGATTATATAAAGGC  
TAAAAAAATTTAACATTAATATCACTTTAAGTGATAAAGGAGGAACTCAGATGCAAGCAT  
TACAAACATTTAATTTTGTATGAATTACCAGTAAGAACATTAACAGTAAGTGAGGAACCGT  
ATTTTGTAGGGAAAGATGTAGCAGATATTCTAGGTTACAAAACCTGGCAATCGTGATATTA  
ACGCTCATGTTGATGTCGAAGATAAGCTGACGTACCAAATCAGTACCGCAGGTCAAAGAC  
GAAATTAACAATCATCAACGAATCGGGTTTATACAGCCTAATCTTCTGTTCAAACCTCG  
AATCAGCTAAACGATTCAAACGTTGGGTAACTTCAGACGTCCTACCCGCGATTTCGAAAAC  
ACGATATCCACGCAACAGACAATGTAATTGAACAAACATTAAGATCCAGACTACATCA  
TTACTGTTGACTGAGTATAAGAAAGAAAAAGAGCACAACTTACTTTTACAACAAGAAA  
TTGGAGAGCTAAAACCCAAAGCAGACTATGTAGATGAAATCTTAAAGTCAACTGGTACAT  
TAGCCACAACCTCAAATCCAGGCATACTACGGTATATCAGCACAAAAGTTAAACAACACTAC  
TACACGAAGCTAGATTACAACGAAAAGTGAATAAACAGTGGGTGCTCTACTGAGACCACA  
TGGGCAAGAGTTACACAGAATCAGACTCTATACCAATTGTACGCTCTGACGGTAGAGAAG  
ACACAGTTTTTCAAACCTAGATGGACACAACAAGCTGATTGAAAATACATGAAATCATGA  
CTCAATTAGGTTATGAAGCTAGTTTGGGGGAGCGTAAATGACACCACAACAAGAAA  
AGCTAAACAATATAGTATTAGCACTTTATGCAGTTAAAGAAAACAATAATCAAACATACA  
CACACAAGATACTCTTACTGTAACATATGCAGGCGAGATTGAGCTCACTTACGAGGTGCG  
ACAGAGAGACACACCTTGAATCAATGACTGGGTGGGCAATTGACCAAATCGAACAGCACC  
TTGATTTAGACGAAGAAGATAACACACAATTGAACAAACAACCTAATAGGAGGAATTAC  
AAATGAGCGCACTATACAAAAGAAACATCCTCACCACAAGGGCAATTCTGACGTCGAAGG  
TTGTAAAGATTGAGAAAATCACAAGATTTAAATTTAGAAAATTTGATTATCCAAAATTA  
ATAATGCTCAGAGCAAATCAATGTTGGATAGTGCCAGTCACGATCTAAAAGATATTTAAC  
TGTATTCAAATTTTCATATCTTGTGTTGAGCTTTTAAAGCTTTTCGTATAAAGCTATTGAATA  
AATAATTTTCGTAAGATACGTTTTTCAGGAGCATCTTCTTTCACTTATTTATTCTATCTCT  
AAAAAAGTCACGGTGACCACCGAATTCTTTTACTGCTTGATTACTAAGTTCACCAAAGAT  
ATTTTAAAATCATTAAATTCATACTTATCACCTCCTTTCACTAGGAGATAACTAAATT  
ATACACAACACAAAATAAAAAGGAGGAATAGATATGAGAAAAAATAGTTTGCAAGCTAA  
AGAAGTTGAAGTAATTTTATCTGTTTCGAAATCCAAAGCAGGACAAATAATAAGAGAATT  
GAATAAAGCGCTTGAAGACGAACGTTACATTGCGATTTCGAGGCAGAATACCAGTCCAATA  
AGCTAGAGAAAATTCCTTATCACTGCTTGTGACAGAGAGAATAATGGAGGCGTTGAA  
AAAAGAAAATGAGTAACATTTATAAAAAGCTACCTATTATCAGTATTGTGCTTCACAGTCT  
TGGCGATTGTAATCATGCCGCTTCTATTCTTCAAACAGCATGGTCAATTGCGGGAGTCG  
CATGTATCGCAACATTCATATTTTATAAAGAACAACCTTTTATGACAACAAGGAGAATGAA  
AAGATGTCAGATAAAGACTTGATGGAAACAGTTGACAAGAGAAGGAGTGACAAGATTTA  
ACGGTGAGGGAACCTAGGATATTTGCTAGGTTTCTCTGATACTTATTTTATTAAGTTAAGA  
AATGGTTCAAGAAGAATTATCGATCGGAAGAGAGATAGAATTAATCGTTAATTAACGGT  
GAATACGACATTGTAATAAATTCCTAAATATTCACGAGATTCTGAACAAGTAGCATATGAC  
AAGGTATAAAAACAAGCTTTAAAAGATTTAGAAGAATTTGTAATAATAAAAAAACTGTT  
ACATGCGACAACAAGTAACAGTGACAAACACTTGAGAAAAATTTTCATGGTCAATATAAAA  
CGAAATAAAGGAAGTGTCACAATGTACTACAAAATAGGCGATGTATGTCAAAAAGTAAT



TAATATAGACGGATTTCGATTTTAAATTAGCAGTTAAGAAAGAAGATTACAGCATTCTAGT  
GAATGTCTTAGATTTAGAAGATTGATTTATCGACGGTATAAATATAACCGATGAGAATGA  
TCTATACACAGCATTAGACATATTAATCAATTTCTTTCTGAATGGATTGAAGAGAACAC  
AGACGAAAGAGATAGGCTAATTAAGTATAGTCATAAGATGGTAGGAGGTCGCTATGAAGCA  
GACTGTAACCTTACATCCTCCGTCATAGGGATATGCCAATTTATATAACTAACAACCATC  
TGATAATAACTCAGATGTTAGTACTCCACAAATAGAAATAGAGCTAGGGAATTTAACGG  
TATGGAAGAAGCGAGTATCAATATGGATTATCACAAAGCAATCAAGAAAACAGTGACAGA  
AACTATTGAGTACGAGGAGGTAGAACATGACTGGACAAACATTATTTGAACAGTTGAACA  
GTAAAAACGTGAATGATCATAACAGAAACAGAAAAATGGATTAACCTTATCTAGCATGGTCAT  
ATGCACACCAAGAGCTGAAAAAGATTGACCCAACTACACAGTAAAAGTATACGAGTTTC  
CACATCCAGATATTAACACAGAAAATTATTTTGTACCTTATTTGGCTACACCAGAAGGCT  
ATTTTGTACAGGTATCTGTGACTGTGAAAGATAGTACAGAGACTGAGTGGCTTCCAGTAT  
TTGACTTTAGAAATAAATCGCTTCTAAAGGTAGTGCAACAACCTTTCGATATTAACAAAG  
CGAAAAACGATGTTTTGTTAAAGCTACGGCTGTAGACGGTTAGGGCTTAGATATCTACA  
ACGGGGAGGAACTACCAAGTGCAAGTGACAACGATATTACAGAATTAGTAGAGCGTATCA  
ATCAGTTCGAGAACTTATCTCAAGAAAAAGGGCGAGATGCACCTATCGATAAAACGATGA  
GATAGCTAAAAATATCTAACATTAATAAATTAAGTCAAAAAACAAATCGCAGAAGCACACC  
AAAAATTAGATGCGGGATTAACAACATCGGATAGTGCGGAGAAACAATAATGTTAAACAG  
AGCAGTATTAGTAGGACGCTTAACAAAAGACCCAGAATTAAGAAGCGCGCGAAATGGCGT  
AAATGTAGGTACATTCACATTGGCAGTAAACAGAGCATTACGAATGCTCTGGCCGAGCG  
TGAAGCAAATTTTATAATCGTAGGAGTGTTCAGAAACAAGCTGCAAATGTTAAAAACTA  
CCTTTCTAAAGGGTTCGCTGGCAGGTGTAGACGGGCGACTACAAACACGTAGCTACGAAAA  
TAAGGTTCGGGCAACGTGATTTGTGACAGAAGTAGTAGCGGACAGTGTTCAATTCTTAGA  
ACCGAAGAATAACAACCAACAACCAACATCAATTATCATCAACAAAGACAAGCTCAAAC  
TGGTAATAATCCTTTTGGTAATACCACTGCGATTACTGAGGATGACTTACCGTCCAGATT  
GGAATGATTAATGCCGAAAATTACTAGTTATATCACTCAAGACGACGGCACAACAACAG  
TTGTCATATCTGATGTTGAATTAGGTAATAAAGAAACATTACTAGTTGATAACGGTTTTG  
ATGTAGAAGTCGATGTAAGCGTCATACATCCATTTTCAATTACCGGCTAGCAACGCAAT  
TGATATTCGCATTGTGTAACGATATAGAAGCTCATAACAGGACAAGCTCGAGATTATATA  
GGCAAATGTTCCAAGACTATGTGAAGTTTCTGTATGGCCATGAAGAAAGCATGTCTTTAT  
CAAATTGTTCTCGAACTATAGCTAAGCAAATTATAGAAGCGATGTTTGAGTTGATTTTTA  
CAAATGCGATTCCATTAATTAATTAATCAAGCAAATTAATGAAAGAAGGTAACAATTATC  
TTTATTGGGCAAATGTTACGCGTCATTGCATTAGATGCGGAAAGCCTCACGCTGACTTAG  
CACATTATGAAGCACTCGGCAGTGGGATGAACAGAAATAAGATGAATAACTATGACAAAC  
ATGTATTAGCGTTATGTCGCGAACATCACAACGAGCAACATGCGATTGTTGTTAATTCGT  
TTGATGATAAATATCACTTGCATGACTCGTGGATAAAAGTTGATGAGAGGCTCAATAAAA  
TGTTGCAAGGAGAGAAAAAGGAATGAATAGACTAAGAATAAAAAATACCACTCCTAAT  
CGTCATCATGGCGGTAGAGATTAGAAATGATATGCATGCTGTAAAAGTGGAGAAAATTTT  
AAAATCTCCGTTTAGTTAATACAGGTTTTTACAAAAGCTTTACAATAGGCGGACAAACTA  
ATCGAGCCTTTTTTGTATGTCTAGTACCCAGGGGATGTAATGTAACCTTAAACTTTAACC  
TCAATGCCAGAAAGTTTACTTATTGTTTCTACGTTGTGTCTGACGTTAACATTCTTTTA  
ACAAATTCTAACCCCGAACCAATCTTTGTTTTTCTATAGTCTTATTAAGTGATTTAA  
AACTGAGGAGCATAAAAGTTATTATAAATTCGTTGTTTTGTTAAGTAAGACATGTCAAAA  
GTTTAATTTAAAACCCCTAACCTTACTAGGTTATTAATTCAAATTTCCGTTGATTCTATA  
TCTAACGGAGAGTTTTTTATTAACGTGTCCGATATATTCATACCGTCATTCTTTAGGTTT  
AAAACCGCTCTATATTTAACGGCAGGGTCTACTTGGTGATTCTTTAAATGTTTTAAAAGA  
ATAGCATCATTTGGGGATAAATTGTATAATTGTTTCAACAAATGAATGGTGCGTGAATGAG  
TTTTTTCTGTCATCCATATATGATGCTATTAGTTTTGCGAACATATTAATAAGTTTTT  
TCACTAAAGTAAAACCTTTGAAGCTTCTAGAGCAGGGACTAGAAGATAAAATTGTGGTTCT  
TATAAATTATTTTCAGGTACAGAAGATATTTCTTTTTTAAATTGTTCTATGAATTTTTCA  
AATTCTACTTCTCTTTGATAAATAACTTTATCCCCATAAAGGGGGAATTTCCCAAAGACA  
AGTTCCCAAGTTTTAGAGAATGTTTCTACAGGCCCTTTGGATGCGCCTTCGATAATTTTA  
TCAATACCTTTACCTAAAATAGCATCCATAATTATCACCCCAATCTAACCCAATAGCG  
ATAATAAAATTATACCAGAAAGGAGATAACGAAATGGCAACATTTAGACCTATAAAAGAA  
AGTGGCGATTTTGTAACTGTGCATAAATCGTTTATGTTTCGATAGTAATTTAAGTGCGAAA  
GCTAAAGGGATATTATTGATTTCTTAAGTCGTCTGACAATTGGCAAATATACACGTCA  
GAAGTAGTTAAACATATGACTGATGGTCAAAATTCATCAATAGTGGCGTTCATGAAGTT

ATGGAAAATGAATATGTTTCACAGAATACAAAAAAGAGCTGAAAACGGTGTGTAAAGGT  
TTTGAATACTTAGTTTAGGAAAACCAACCGAAATGCCATTTTCGGAAAACGGATTATCG  
GCACACGGGTTTTTCGGAAAACGGAAAACCGAAAAGGGCCTACTACTAATAAT  
AATAGTACTAATAATGATTTAACTAATAATAACAATAGTAATAATGATGGAAGTACATTG  
TCGTGCGGCCCGACTGTGTATTCCATTCCCTATAAAGAAATTATCGAAAACCTTAGACAAA  
AAAGCAGGAAAGCATTTTAAACAAAATAGAGCTAAAACAAAAGATTTTATTAAGCAAGA  
TGGAATCAAGATTTTAGGTTGGAGGATTTTAAAAAGGTGATGGATATCAAAAACAGCTAAA  
TGGTTAAACACGGATAGGGATAAATACCTTAGACCAGAAACACTTTTTGGCAGTAAATTT  
GAGGGGTACCTCAATCAAAAAATACAACCAACTGGCACGAATCAATTGAAACGCATGAAG  
TACGACGAAAGTTATTGGGATGAGGGGGATATTATGAAACCACTATTCTGCGAAAAGATA  
AACGAAAGCTTGAAAAAATATCAACCTAATCATGTGCGAAAAGGATTGAAATGTGAGAGA  
TGTGGAAGTGAATACGACTTATATAAGTTTGCTCCTACTAAAAACACCCGAATGGTTAC  
TAGTATAAAGACGGTTGCAAATGTGAAATCTGAGAGGAATATAAGCGAAACAAGCAACGG  
AAGATAAACAACATTTTCAATCAATCAAACGTTAATCCGTCTTTAAGAGATGCAGCTGTC  
AAAACTAACAGCCACACAATGACAAACAAGTACGCGCTAAACAAACAGCAATCGAGTAC  
TTTCAAGGCTTCTCTACAAAAGAGCCAAAATAGTCAATATTGCTAGGTTTCATACGGAACT  
GGCAAAGCCACCTAGCATGCGCTATCGCAAAGCAGGTAAAGCTAAAGGGCATAACGGTT  
GCTTTTATGCACATAGCAATGTTGATGGATCGTAACAAAGCGACAGACAACAAAATGCA  
GTATATACTACAGACGAGCTAGTCAGGTTGCTAAGTGATAATGATTTACGTGTACTAGAT  
GATATGGGTGTAGAAAACACATAGCACACTTTAAATAAACTTTTCAGCATTATTGATAAC  
AGAGTAGGTAAAAAAAACATCTTTACAACCTAACTTTAGTGATAAAGAATAAATCAAAAT  
ATGAACTGGCAACGTATCAATTCAAGAATGAAACACAATGCAAGAAATGTATGAGTAATC  
GGAGACGATTTTCAGGGAGCGAGACGCATGCTAACCAAAGAATTTTTGAAAATTAACCTTG  
AGTGTTTCAGATATGTACGCTCACAACTCATAGACGAGGCACAGGGCGATGAAAATAAGT  
TATATGACCTATTTATCCAAAACCTTGCAGAACGTCATACACGCCCCCGCTATCGTCGAAC  
ATTAAGGAGTGTTAAAAATGCCGAAAGAAAAATATTACTTATACCGATAAGATGGCACAG  
AAGATATTAAGGTCAACAAGTATAAAAAGAATGAGAATGAAGTTTATTCGCTCACAGGAG  
CCCATTTTCAGCGACGAAAAGAAAATTATGACTGATAGTGACCTAAAACGATTTAAAGGCG  
CTCACGGACTTCTATATGAGCAAGAGCTAGGTTTACAAGCAACAATTTTGTTATTTAGA  
GGTGGAAGATGAGTAAATACAACGCTAAGAAAGTTGAGTACAAAGGAATTGTATTTGATA  
GCAAAGTAGAGTGTGAATATTACCAATATTTAGAAAGTAATATGAATGGCACTAACTATG  
ATCGTATCGAACTACAACCTAAATTCGAACTGCAACCTAAATTTGGGAAGCAAAGACCGA  
TTACGTATATAGCCGATTTCTCTTTCTGGAACGAAGGGAACTGGTTGCAGTTATAGACG  
TTAAAGGTAAGGCGACTGAAGTTGCCAACATCAAAGCGAAGATATTCAGATATCAGTATA  
GAGAGGTGAATTTAACGTGGATATGTACAGCGCATAAATACACAGGTCAAGAATGGATGG  
TATATGAGGACTTAGCGAAAGTCAGACGTAAAAGAAAAAGAGAAATGAAGTGATCTAATG  
CAACAACAAGCATGTATAAACGCAACGATTGATATAAGAATACATCCCGTAGTTGAATAT  
CAGCATTATGATGATGTGGATAAAGGAAAACAAACGCTGGCAGAGCGCTTAGATAACAAT  
CCGGACGAATTAATAAATATGACAGCATAACAATAAGACATGAATATATAGAGGTGGAA  
TAAATGAGTATCCTAAAGATTAACGGTAAACCGTATAAATTTACCGAACATGAAAATGAA  
TTGATAAAAAAGAACGGTTTAACTGCAGGACTGGTTGCAAAAAGAGTACGAGGTGGCTGG  
GCGTTGTTAGAAGCCTTAAACGCACCTTATAGCATGCGCTTAGCTGAGTATAAAGAAATT  
GTGTTATCCAGAATTATGCAACGAGAGGCTTGAGAACGTGAAATACCTAGACAACGACTT  
AAAGCGGCTGAATTACGTGAGAAGAAGCCACATTTGTTTAGTGTACCTCAGAAACATTCA  
CGTGATCCGTACTGGTTTGATAATACTTATAACCAAATGTTCAAGAAATGGAGTGAAGCA  
TAATGAGCATATTCAGTAACGGAAAAGTAGATATGAACAAAACGGAAAGACAATGTTAAGC  
AACCGGCGCAGTAAACATGCGGCAACATTGAAATCATAGATTTTATTGAACAAGTTACGT  
CGCAGTACCGACCACAATTAGCATTTCGCAATAGGTATTGCAATCAAATACTTGTCTAGAG  
CACCGTTAAAGAATAGTCATGAGGATTTACCAAAGCGAAGTTTTATGTCCATAGAGTAT  
TTGATTTGTGGGAGGGGTAACGATGGCAACGCAAAAACAAGTTGATTACGTTATGTCATT  
AGAGGAGCAATTGGAGTTAGAAAACCTGCGAATAATATACAGACGAACAAGTTAAAGCAAT  
GAGTCATAAGGAAGTTAGCAATGTGATTGAAAACCTATAAGGCAACCATAAGTAATGAAGA  
GCTATACGACGAATGCATGTCGTTTGGTCTGCCTAATTGTTAAAAGGAGTGATGACCATG  
ACAGATAGCGCGGTAAAGAATACCTAAATCAATTCTTTGGATCTAAGAGATATCTGTAT  
CAGGATAACGAGAGAGGGGCACATATCCAGGTAGTAAACGGCACTTATTACTTTCACGGT  
CATATCGTGCCAGGTTGGCAATGCGTGCAAAAGACATTTGATACCGCGGAAGAGCTTGAA  
CCATATATAAAGCAAAATGGATTGGAATACGAGGAATAGAAGCAATTAACCTTTATTTTAA

AAGGGCGGAACTATGAAAATCAAATTGAAAAAGAAATGAATTTACCTGAACCTTTTCCA  
ATGGGCTTGGGATAACCCCAAGTTATCAGGTAATAAAAGATTCTATTCAAATTATGCTGA  
ACGCAACTGTTGTGTGACTTTTGTATGTTGATAGCATCTTACGTAATGTGACGGGATACGT  
ATCAATTAACGATAAATTTATTGTTCAAGAGGAGATATAACAATGAAAATCAAAGTTAAA  
AAAGAAAAGAGATTAGATGAATTAATTAGATGGGCGCGAGAAAATCCGGACCTATCACAA  
GGGAAAATATTCTTTTCAACAGGACTTAGTGATGGATTTCGTTTCGTTTTTCATCCAAATTCA  
AAGAAGTGTTTCGACGTCCAGTTTTATTCTAATTGATATCCCCTTCATAGTGGATATTGAA  
AAAGAAGTAACGGAAGAGACTAAGGTTGATAGGTTGATTGAATTATTCGAAATTCAAGAA  
GGAGACTATAACTCTACACTATATGAGAACACGAGTATAAAAGAATGTTTATATGGCAGA  
TGTGTGCCTACCAAAGCATTCCACATCTTTGACAATGACCTAACTATGACGTTAATGTGG  
AAAGATGGGGAGTTGCTAGTATGATGTTGAAATTTAAAGCTTGGGATAAAGATAAAAAAG  
TTATGAGTATTATTGACGAAATCGATTTTAATAGTGGGTACATTTTGTATTCAACAGGTT  
ATAAAAGTTTCAATGAAGTAAAATATTACAATACACAGGATTTAAAGATGTGCACGGTG  
TGGATATTTATGAAGGGGATATCGTTCAAGATTGTTATTCGAGAGAAGTAAGTTTTATCG  
AGTTTAAAGAAGGAGCTTTTTATATAACTTTTAGCAATGTAATGAATTACTAAGTGAAT  
AGGACGATATTATTGAAATTGTTGGAAATATTTTTGACAATGAGATGCTATTGGAGGTTA  
TGAGATGACGTTACGTTATCAGATGAACAATATCAAATCTTTGTACTAACTCTAACAA  
GTTATTTGATAAACTTCACAAACCATTAAAAGATCGTGAAGAGTACAAGAGGGCGACGAAA  
TGAGCTTATTGGGGATATAGCGAAGTTACGAGATTGTAACAAAGAACTGGAGAAGAAAGC  
AAGCGCATGGGATAGGTATTGCAAGAGCGTTGAAAAGATTTAATAAACGAATTCGGTAA  
CGATGATGAAAGAGTTAAATTCGGAATAGAATTAACAATAAAATTGTTATGGAGGATGA  
CACTAATGAATAACCGAGAACAATAGAACAATCCGTTATAAGTGCTAGTGCGTATCACG  
GTAATGACACAGAGGGATTACTAAAAGAGATTGTGGACGTTTATAAGAATGCGCAAGAGT  
TTGATGAAATCCTTAAGGGTTTACCTAATGCTATGCAAGATGCACTCAAAGAAGATATTG  
GTCTTGATGAGGCAGTAGGGCTTATGACGGGTCGAGTGGTATATAAATATGAGGAGGAGC  
AGGAAAATGACTAACACATTAACAATTGATCAGTTAAAAGAGGTATTACAAATACAAAA  
TACTTTGACGATAGAATACCAACACCAAATTTACGAGATAGCAAGATTGCGTATGCGGTT  
GAATTCCTTGAATGGTTTAAACACATCGGAAACGTTCAAGAATTGGAAGAAGCAACCAGGT  
AAATCGTTAGACCAACAGCTAGACGAGTGAGCAGACATGTTAGCGTTTGGATTGAGTATT  
GCTAATCAACAAGCAGATAACATGGAAGAAATTTTTGGATATTTAGATGAGGGAGATTTT  
AACGACTATATAGAACGAGTTGAAATCGATTATAACGATAGTGATGTGGTAGATGAATTT  
ATGTCAACTGTAGATGAAATGTATTAAGTCCATATAGTAGCAACTTATTTTTACCGTTT  
GCATTAGCGAACAATACTACTACTATCGATCAACTCATTGACGCATACAAAAGGAAAATG  
AAAAGGAACCACGAAAGACAAGATGGAACAGCAGACGCAGGGAAAGGATACTTATAAAGA  
CATATTAGATCGGGTCAAGGAGGATTTGGGGAAGTGACACAATACTTAGTCACAACATTC  
AAAGATTCAACAGGACAACCACATGAACATTTTACTACTGCTAAAGATAATCAGACGTTT  
ACAGTTGTTGAGGCAGAGAGTAAAGAAGAAGCGAAAGAAAAGTACGAGGCACAAGTTAAA  
AGAGATGCAATTATTTAATTAGGTCAGTTGTTTGAATAATAAGGGAGTGTCTGAAATGA  
CGGATGTTACAATGAAAATTTTCAGGTGGAGTTTATTTTGTAAAACAGCTGAACCTT  
TTGAAAATATGTTGAAAGAATGCCGTGTTGTAATGGTTATATTTACGCAAGTACTATAA  
ACAAGCAACCAACGTATATTAACACAGATACGATTGAATCAATCACACTTATTGAGGAAC  
GTGGGAAATGAATCAGCTGAGAATTTTATTACATGACGGTCGTAGTTTGGTACTAGGTGA  
AGATGAAGTATTTAACGAAATAGTATTTCTTTGGATGATTTTAGAAATGATGATCACTA  
TTTAACGATAGAAAAGATTATGGCAGAGAAGTATTGAACAAAGGTTATATAGTTGG  
GATTAATGTTGAGGAGGCAGACGATGACTAAACATATATTAAGACTAGTATTCTTACTAG  
CGATGTGTGAGCTAGGAAAGTAGGTAACGGAGCAAGTATATATTATGATGACGGCGAATG  
GTGATGTAGAGATGCCGAGTGACTTCGCAAAGTTGAACGATCAGTCTGATTTGATGAGGG  
CGGAGGTGTCAGAGTAGAAGATGTGGTTAGTCGTAGCAATTATATTACTAGGCATCTTAT  
TATTTGGTGTGATGTTGCAAACTGAACAGTTAATAGGCGATGTGAAAGTTAAAGATCGGG  
AGATAGAGATATTAAGAAGTAGATTGAGACATTATGGAGATTAAAGATATTTGTACGGAG  
GGTATTCATGACTAAAAGAAAGACGGATTAATAATCGTCAACAGTTCGGAAATTAGAAGA  
CGAGTTGTGCGATTATCCTAATTATCATAAACAACCTGAAGTTTTAAGATTTGAAATAAT  
GACACCGTGGATTCCAACAGATACAAATATAGGCGGGGAGTCTGTACCATCTAATACATC  
AAAACAGAAATGGCAGTAACTAAGTATCTTTGTAGTATGAGAAGAGGTAAAATACATGA  
GTTTAAGAGTGCGATTGAACGTATAATCAACACCTCAAGTAGTAAAGAACGCGAAATCAT  
TCAAGAGTATTATTTAAGAAAAGACTTTGATTGCGGTTTGTATGACATACACATCTC  
TGAAAGTACAGCGCATAGTATCAACAAGAAAATCGTGTCTAACTAGCCGAAGAATTAGG

AGAATACTAAATTTAACAGTAAAATGCCAGTTTTTTGACACCTCTAACGAGATATTATGAT  
AGTGTAGGATATAGACTATCTTACTGCGTTTTCCCTTATCGCAATTAGGAATAAAGGATCT  
ATGTGGGTTGGCTGATTATAGCCAATCCCTTTTTTAATTTTAAAAAGCGTATAGCGCGAG  
AGTTGGTGGTAAATGAAATGAACAAATTAATAAAAAGCGACGTTTGCTTGCAGAAGTAT  
ATACAATACCTGGTACTGAATGTTATGGCAATGCTACTAAGTCAGCTGTGGATGCCGGAT  
ATAGCGAAAAGACCGCGTACTCACAAGGACAGCGTATGTTAAAGCATGGTGAAATTCAGA  
ATTATATCAAGGAGGTTGAAACAAAACCTCTTTGACGAGAATATTATGTCAGGTCAAGAAG  
TGGTATATAGGCTAACTAGAACAGCTAGAGGAGAACACACGGAAGTTAAAGCTGTCGTAA  
CTAAAACCTGGAGACTTTAAATAGAATCCGTATACTGGCAAAAATGCAATTAGTATACGATG  
AACACATACAACCTTGTACTAAGTCACCTAAAATAAGTGACCAAAAACAAATCCTTAGAGA  
TGTTAGGTAGACACCACAAGTTATTTACAGACAAACAAGAAGTCGACCACAAATTACCGA  
GGTTTGTGATAATATCCGGAAGATGATTAGTCATGTATGAAATACTTGAGCTAAAAAA  
TAAAATCGGTGGTGGCTACAATAAGTTTTGGCACAACAAAACCTTTTACCGTGTGTAA  
AGTTCAAGGGGTAGCAAGAAAAGTAAAACCTACCGCTAGTAATCTCATTATCGAATAAC  
TAAATACGATTGGGCAAATATACTTGTAGTCAGAAGATTTAGCAACACTAACAAACAATC  
AACGTATACAGATTTAAAGTGGGCAACTAACCAATTAGGCGTTGCTCACTTATTTAAATT  
CAACGAAAATTTGCCTTATATAACTTATAAACCTACTGGACAAAAAATACTGTTTAAAGG  
TTAGACGACCCATTGAAAATAACATCGATTACTGTTGATACAGGCATTTTGTGTAGGGC  
TTGCTTTGAAGAGGCTTATCAAATAGAAACATTCGCTAAGTTTTGGCACTGTTGTTGAGTC  
AATATGTGGTAGCCACGATAGTCCGGAATTTTTCAAGCAAATCACAGTCACTTTTACCC  
GTGGTCGGAAAGACATTCGTTTTAAGCCTACATCTTTTGACGAAGAAACAAAATTAACAA  
TACTTTTTCAGATCCAACCACTTATAGTGTTAATGAATGGTTAGATAAAGTCGATATTGA  
ACGATATGAAGATTTGTATCTAAAGAGTCCTAGACGTGCAAGCATCCTTTGTGATGGAGA  
TTGGGGTGTTCAGAGGGGCTTGAATTCGATAATTTTAAAGTGGAAAGACTTTGATTGTTT  
TGAGGACTCTAAAAGAACGCAAGAAATATCTCACGGAATGGATTTTGGATTTAGTCAAGA  
CCCTACACCAGTAGTTAGTACGGTGTAGATTTAAAAAACAAAAGTTATGCATCTATGA  
TGAACACTATAAAACAGCGATGTTAACTGATGATATAAAACAAATGCTTATTAAAAAAGG  
ATTAGGTGATGTAGATATTGCAGCTGATTATGGGGCTGGTGGAGATAGGGTGATCAGTGA  
ATTGAAATCTAAAGGGATTAAGGTATAAAAAAGCGTTGAAAGGCGCCAATACTATTTT  
ACCAGGCATTCAATTCATTCAAGGCTCTGAAGTTATTATACACCCTTCATGTGAACACGC  
TATTGAAGAGTTCAACACTTATACATTTGACCAAGATAATGATGGTAAGTGGTTGATCAA  
GCCTATATATGATAATAACCATATCATCGATGTATTGCGTTATACTCTTGAGAAATGTCA  
TATCGTACGTAAAAACGTAAAAAGAACATAGAAAGCAAAAACAAAAGTAGTTAAATATCT  
AGGATTATAGGAGGGACCAAATGTTAAAGGCAAACGAATTTGAAACGGATACTGATTTAC  
GAGAAAACAGAAATTACTTGTTTAAACGATGAAGCTAATGTTGTTTACACATATGACGGGA  
CAGAGTCTGATTTATTACAAAACATTAATGAAGTAAGTAAATACATTGAACATCACATGG  
ATTACCAACGACCTAGATTAAGGTGTTAAGTGATTATTACGAAGGTAAAACCTAAGAATC  
TGTTTGAGTTAACACGACGCAAAGAAGAGTACATGGCAGACAACCGTGTAGCGCATGATT  
ACGCATCTTATATTAGCGATATTATTAACGGTTATTTCTTAGGTAATCCGATCCAATGTC  
AAGATGATGATAAAGATGTATTAGAAGCTATTGAGGCGTTCAATGATTTAAATGATGTTA  
AGTCACACAATAGATCTTTAGGATTAGATTTGTCAATTTATGGCAAAGCTTATGTGTTAA  
TGATTAGAAACCATGATGATGAAACGCGTTTATACAAGAGTGAGGCAACGAGTACTTTTG  
TCATATACGACAATAACAATTGAACGTAATAGTATCGCAGGCGTTAGATATTTAAGAACTA  
AACCAATAGACAAGACAGACGAAGATGAAGTGTTTACAGTTGATATATTTACTTCTCAG  
GTGTTTATAGATATCTTACCACTAGAAGAAATGGATTGAATCTCACACCACGTGAAAACG  
GTTTTGAATCACACTCTTTCGAACGTATGCCTATTACAGAATTTAGCAACAACGAAAGAA  
GAAAAGGAGATTATGAGAAAGTAATCACTTTGATTGATTTGTATGATAATGCAGAATCAG  
ATACTGCTAACTATATGAGTGATTTAAACGACGATATGTTATTGATTAAGGTAACCTTAT  
CATTAGATCCAGATGAAGTAAAAAAACAAAAGAAGCTAACGTGTTATTTTTAGGGCCAA  
CCGTTTGAGAGAATAGGGATACAGGTATCGAAACAGAAGGTTTCAGTTGACGGCGGTTATA  
TTTATAAGCAATACGATGTACAAGGTACCGAAGCTTATAAAGACCGTTTGAACAGTGATA  
TACACATGTTTACCAACTCGCCTAACATGAAAGATGATAACTTTAGTGGCACTCAATCGG  
GCGGGGCAATGAAACAGAAATTGTTCTGATTAGAACAACGTAATAAACTAAAGAAGGAT  
TGTTTTCTGAAGGGTTAAGACGTCGTGCTAAGTTGTTAGAGACAATAATTCAAATACAC  
GGTCGATTGACGCTAACAAAGATTTCAATACTGTGAGATACGTATACAACAGAACTTAC  
CTAAATCATTAAATGGAAGAATTAAGCTTATATTGATTCTGGCGGAAAGATTAGTCAAA  
CAACTTTAATGTCTCTATTCTCGTTCTTCCAAGGCCCTGAATTGGAAGTCAAGAAAATAG

AGGAAGATGAGAAAGAATCTATTA AAAAAGCTCAAAAAGGTATTTATAAAGAACCTAGAG  
ACATCAATGATGACCAACAAGATGATGATACAAAAGATACTGTTGATAAAAAGGAATGAT  
TGAAATTGCCTAACAAAAACACTCAAGAATATTGGGAAGAACGCAGACGCAAAGCAATCG  
AGAATGAGTTGAATCCTTATAAAAACCAAAGCTGACGTAATAGACCGTATATTGAATATGA  
TGATTAGGCGCATTGTAAAAGAAATCAATGCGTTTATTGTAAAGTACGGAGATTTTGCAG  
GCGTTACATTACAAGAAGCACAAAAGATTATTGATGAGTTCGATGTAATAGCGTTTCAAG  
AAGAAGCAAAAAGATTGGTCGAAAACAAGGACTTAAGCGTTAGAGCAAATGAAGAATTA  
AGAATTATAACACTGAGATGTATGTATCTAGAGAACAGATGTTAAATATTCAAATAGAAT  
TCTTATATGCTTATGCAACAGCTCAAACAGAATTATCGATGAGGGGAATATTTTCGAATCAA  
CAGCTTATCGTGTGTTTCAGGGATCAAGCGGGTATTTTTGGTGAAGGTGTACAAGTAGCTA  
AAGAAGTTATAGATACAGTCGTTGATACACAATTCATGGTGTGCGATTGGTCAGAGCGAT  
TATGGACTAATACGGAAGCGATGAAACAAGAAGTAGAAGAAATAATTGCTAATGTGGTAA  
TTAGAGGTCGACATCCTAATGAATATGTTAAAGATATGCGCAAGCACCTAAACAAATTCG  
AAGGCACAGCAAGACAAAAGACTGCAGCAATTAATCATTGCTTTATACGGAATCGGCAC  
GTGTTTCGCGCATAATCAAGTATTGACAGCATGAAAGAAATTTACCGGAAGGATATTATA  
TGTATATTGCAAAAATTGAAAGAAGAACAACACTAAAGTATGCGAGGGGGTTAATGGTGAAA  
TATTCAAAGTTAAAGACGCTAAAATTGGTGTAAATTTCTACCCTATGCATATCAATTGTC  
GTTTCAGATTGTGCATTACTACCTAAATCTATGTGGCCGAAAAACCAACCAAGAAACGAA  
AAATATAATACTTCGGAGGAAAAGTGAAAAGCGATGATTGATTTAAAAGTAAAAGTTTTT  
AAATGCAAGTTAGCATTGTATGATAGTAAATTAAGAGTTTGGAGGATATTGGTATGAGCA  
ATACTGACAGATACTTTAGAGACATAGCAAGAGAGTTAAAAGGTATACGTAAAGAGTTAC  
AAAAGCGAAACGATACAGTTATTATTGATTCAAACCTTAGCCAGCGTAAGGTTCGGCAGTAT  
TAGCCAATAACTAAAACCGAAATATAACGTACCACTCTTTTTATAGCTAGCACTTAATT  
GTGTTGGCTATTTTTTATGTCCAAAACGTGCTGATGACATAAAAAGCACGCGTGGA AAAA  
CAGTCGACAGACTATAGATGTAGCTATATCTCATGGAAGAAAATAAACTTAAGTTAATT  
TGCAATTTTTTGACAGACCAATCAGATGACCCGGACGAACCAGGCGGAGATGGTAAAAAAG  
GAAATCCTGATAAGAAAGAACATGACGAAGGTACTGAAATAACTTTCACGCCAGAGTAAC  
AAAAGGAAATTCATGAAATACATGAACGTCGTGTAGCCACGAAAAGAAAAAAGCTGATG  
AGTATGCAAAAAGAAAAATCAGAAGAAGCCGCTAAAGAAGCTGCTAAATTAGCGAAAATGA  
ACAAGGATCAAAAAGATGAATATGAACGTAAACAATTGGAAAATGAGCTGGAGCACGTAC  
GCTCAGAAAAACAATTAATGAAATGCGTTCAGAAGCAAGGAAAATGTTAAGTGAAGCAG  
AAGTAGATTTCATCAGATGAGGCTGTTAATTTAGTTGTACCAGATACTGCAGAACAAAATA  
AATTGAATGATGAACTTGTTTCTAATGCAGTAAAAAAAGCGGTTAATGAAGCGGTTACGA  
TGAACGCTAGACAATCGCCATTGACTGGTGGAGATTCATTTAATCACTCGACTGAAAATA  
AATCGCAAAACTTAGATGAAATAGCTCGACAAAAAAGAATTATGAAAAATTAACGGAGGC  
ATTTAAATGCAACAAGCACAAAATTA AAAAATAAATTTGCAACATTTTGCGAGTAACAAT  
GTTAAACCGCAAGTATTGAACCCTGATAATGTAATGATGGACGAAAAGAAAGATGGCAG  
TTGATGAATGAATTCACAACGCCATCTTACAAGAGGTTACGGAAAACCTCTAAAATTATG  
CAATTAGGTAAGTACGAACCAATGGAAGGTACTGAGAAGAAGTTTACTTTTTGGGCTGAT  
AAACCAGGTGCTTACTGGGTACGTGGAGGTCAAGAAATCGAAACATCTAAAGCTACATGG  
GTTAATGCTACTATGAGAGCGTTTAAATGAGGGGTTATCTTACCTGTAACAAAAGAGTTT  
TTGAATTACAATTATTCACAATTCCTTGAAGAAATGAAGCCTATGATTGCTGAAGCATT  
TATAAAAAGTTAGGTGAAGCGGCTATTTAGAATCACGGGAACAATCCATTCGGTAATTCA  
ATTGCACAATCCATTGAAAAAATAAAGGTTATTAAGGTTACTTACACTAGATAAC  
ATTATTGATTTAGAGGCATTACTTAAATATGACGAATTAGAAGCAAATGCGTTTATCTCA  
AAAACGCCAAACAGGAGCTTGTTACGTAAAATTGTAGATCCTGAAACAAAAGAACGCATT  
TATGACCGTAACAGTGATGCATTCGACGGTTTACCTGTGGTTAATCTTAAATCAAGTCGC  
TTAAAACGTGGTGAACATAACTACTGGTGATTTTCGATAAGTTGATTTACGATATCCCTCAA  
TTAATCGACTACAATATCGATGAAACAGCGCAATTATCTACAGTTACAAACGAAGATGGC  
ACACCTGTAAACTTATTCGAACAAGATATGGTGGGCATTACGTGCAACTATGCATGTAGC  
ATTGCATCTCGCTGATGATAAAGCATTGCTTAGTTAGTCCGTGCTGATGCAAAAACCAAC  
GTCAAATCCAGGCGAAGTTTAATAAATAATTAGGAGTGAAAAAATGCCCGAAATCATTGG  
AATTGTTAAGTAGATTTTACAGATTTAGAAGATAACAGACATGTCTATATGAGAGGGCA  
TGGCTACCCTCGCAAAGGTTATGATCCTACAAATGAACGTATAAAAATCTTTAGCCAGCGT  
TGAAAATAAACGCTATTAGCAAATGATTTACATAGTAAATGACAAATTAACCAAAAAAGA  
ACTTGTGCAAAATAGCTAGTGTGTTGGCCTACAAGTTGATGAAAAACAAACAAAAGCTGA  
AATTATCAACACTTTTGAGTCGCTAGAGTAGGTGGTTTTATGACTACGCTAGCTGATGTA

AAAACCGTATTGGTCTTAAAGATGAAAAGCAAGATGAACAATTAGAGGAAATTATAAAA  
AGTTGTGAAAGCCAGTTGTTATCAATGTTACCTATTGAAGTTGAACAATTACCGGAAAGG  
TTTCGTTACATGATTAAGAAGTTGCAGTTAAACGCTACAACAGTATTTGTGCTGAAGGT  
ATGACATCAGAAGCGGTTGACGGACGTAGCAATGCGTATGAATTGAACGATTTCAAGGAG  
CATGAGGCTATTCTTGATAATTAATTTAATGCTAGAACGAGAATAAAAAAGGACGGGCT  
GTGTTCTTTTGAGATATGAAGATAGAGTAATTTTTCAATTAGGACAAGTAGCAAATTACC  
ATCCTAAAACCTAGCAAAAAAGAAAACGCACTAATCACTTATGATGCGATACCATGCAATA  
TTAACCCCTTTTCTAGAGCAAGAAAGCAACTTGAATTTGGCGATGTAAAAATCGAAGTAA  
CTGTCCTGAGTGTCAAAGAATCAATATCTTACCCTGTTAGCCACGTGTTGGTTAATGGCA  
TTCGCTACAAGAGAGTTGGTACAAGGATATACAGACACGAAACGTCATATTATATCGAAG  
AGGTCAATTGATGAATATAGATGGATTAGACGCACTGTTAAACCAATTTACGGTATGAA  
AAACAACATCGATGATGATGTACATAACTTGAACAAGAAAACGCCAAAGAATAGGTTAGT  
ACGCGCTAAATTGAAAGCTAGAGAAGTAATGAATAAGGGTTATTGCACTGGTAATTTATC  
ACGCAATAATAGATATTA AAAAATCTGGCAATTTGCAATACACTATCACATCGCATGCACC  
TTATAGTAGTTTCTTAGAGTTTGGTACTCGATACATGGAGGCATAACCTTTTATGTGGCC  
AGTATATGAGGTAATAAGAAAATCGACTGTAGAAGAGTTGAAAGCGTTGTTTGAATAGGA  
GATAAAAGCATGACACCAAACCTTACAACCTTATAATAATGCGTTTGAAACGCTACAAGGA  
TATGGATTCCCTGTTATTTCTCGTAAAGAGATGCAACGAGAGGTTCCGTATCCTTTTTTT  
GTAATAAAAATGCCGGAGTCAAACAGAAGTAAATCCACGTTTGATAGTTTTTCTGGTGAC  
ACGAATTGAGTTCTTGATATTTGGTGTGTAAGTGATGATTTAGGACATCATGACGGACTT  
GTTAAAAGATGTATTGATGATTTAACACCTAGCGTTAAAACAAACGATTATGACTTTGAA  
GTAGATGATACTAACATCACACAGTTAGTTGATGATACTACCAATCAAGAATTGCTACAC  
ACATCAGTAACGATAACTTACAAAACATTTTAAAAAACGGAGGAATATTGAATGGCAAAT  
ATGACAAATAGTAATGATCGTATTATTTTATTTATAAAAAGCTAGCGAAAAAGTAGATGCT  
ACTAAAATGCTTTTTTTAACTGAATACGGCTTAGCACATGAAGCTGATACAGATACAGAG  
GATACAATGGACGGTTCTTATAACACAGGTGGTTCTGTTGAGTCAACACTGTCTGGTACT  
GCTAAAATGTTTTATGGTGACGGTTTTGCAGACGAAATTGAAGATGCAGTTGTAGATCGC  
GTATTGTATGAGGCTTGGGAAGATGAAAGTAGAATACCTAGCAAAAATGGAGATGCCACC  
TAATTTAAAGCGAAATATTTCCATGGTTCCACAATAAATTTGAATTA AAAAGCAGAAGCT  
AACGGTATTGATGAATATGAATGTGAATATGGAGTGAATGGTTCGTTTCCACCGTGGAATT  
GCAACACTACCTGAGGCTGTAACAAAGAACTTAAGCCGACTGGATACAGATTCCATGAC  
ACTACAAAAGCAGATGCGTTATCTGGCGAAGATTTAACAGCAATTCCAGAACCTAAGGTA  
GATTCATCAACGGTTACACTAGGAGAGGTATAAAAATAGGGCGTTAAGCCCGATTTATTT  
TGTTTAAATTAATCATGAATGGAGATTTTAAAGTTATGAATGTATAAATTAACGGAAAGTC  
ATTAGAATTAAGTCTTGGGTTTAAATTTTTAAGAGAAATCGATAAACGATTAGGTTCAA  
AGTTGAGCAAGCTTCTATCGGTCAAGGTGTATCAATGTTGCCTGTAAGTTTAGAGAGTGA  
AAATCCTGTTGTGATTGGCGAAATTTAAATTGCAGCTACATCTCACTTAAAAAACAAGC  
AATTACTATTAATACCCTTGCTGAAGCGCTAGATGAAATCGCAGAAAATATCGGACTAGA  
AGTATTCGGTTCAGATATTTTAAACGGAGTTGGGAAAACGACCAATGACCCGAAACCTAGT  
CGGAGTAATGGAAGCGGAGGAGAAACCAGCGGAAGCGTAATAACTTACGACAGAATCGTT  
ATAACTTGTATGTCAACACTTGGGATCACAGGTTTGAACGTTATTGAGAAAATGACATTA  
ACAGAATATAACTATCGAATGTATGCGAAAGAGTATGAAATTCTAACCCAAGAATGCGAA  
CGTTACAAACTTGCGTTTGCTATTCGTGATGCTGCAGCTACAAAAAATGTTGGGACAGAA  
AATAAACCTAAAGAGGAATATGTTTTTAAACCAGGAAACGACGTATTGCCTTATGAAGAG  
AATATCCAACCTGCTTAAACGAAGAGAAAGATCTAAGATTTAGTAGCGAACGTGATGAATAC  
GAACCACAAAACAATGAATACTTTAAAGTTATAGCAGAATTTAAACAAGCAATAGAAAGAG  
AGGTGTTAATGTGACGGAATATAAAATTAAGCGACTATTGAAGCCAGAGTAGCCAAATT  
GAAAAGGCAAATCGATAGTGCGGTTAAGTCTGTGCAAAGATTTAAACCAGTAGCAGATCA  
AACCAAAGATGACGAATTAATGCTGATGATAAAAAATTACAAAAA ACTATCAAAGTTGA  
TAAAAAGTCTTTAGATGCCTTTAGTAACAAAAAAGTAAAAGCTAAATTAGATGCTAGTAT  
ACAAGACTTGCAACAAAAGGTACTAGAATCGAATTTTGAACCTGGACAAACTAACTATAA  
AGAAGTTACTCCAGAGATTA AATTACAAAAACAGAAATTGACTAAAGATATTGCTGAAGC  
AGAAGCTAAGTTAGCCGAAC TAGAAAAGAAGCCTGTCAA AATTGACATCAATGCTGATAA  
CATTAAATTCAATCGAGTGTTAAAAGTATCTAAAAATAGTCTTGAAGCTTTAAATAGGTC  
TAAAGCCAAAGCTATTTTAGATGTAGACAGCAGTGTGCTAATTCTAAAATCAACCGTAC  
TAAAGAAGAGCTTAAAAGTATTCCAAATAAAACTAGATCTAGACTTGATGTAGATTCAAG  
GCTTTCTATGCCAACTATTTATGCGTTTAAAAAATCATTAGACGCATTGCAAAAATAAAAA

AACAACAAAGGTAGATGTCGATACTAATGGTTTATAGAAAGCTCATGGCTACATAATAAA  
CGGAAACGACAATTTCCAAAGACAGATGGGGAATTTAGCTAATATGTTCCGTGTGTCCGG  
TACTGTAGGTTCTAATATGATAGGTGTATTACTAACTTCATCTCTTAGCATTTTAATACC  
TGTAATAGCGAGCGTAGTACCTGTAGAGTTTGCACATTAACGTTATCAAAGTGTTAAC  
GGGTGGTGTACTTGTCTTAGGTGGTGTGTAGACATAGATGGTGCAGTCTTTGTAGCATT  
TGGCGCAACGGCTACCAGCGCTATAAAAATGCTTAGTGACGGCACTTTACAAGCTAGCAC  
AGCAACAAACGAATACAAAAAAGCTTTAGCTGGCGTAAAGTCAGCATGGACTGATTTTAT  
AAAGCAAAATCAATCCGCTATCTTTACAACCTCTTGCAAATGGTTTAAATACTGTTAAGAC  
GGCAATGCAGCGCTTACAACCGATTTTTAGTGGTATTTCAAGAGGAACGGAAGAGGCGTC  
TCATAGTGTACTTAAATGGGCTCAAAATGGCGGTGTAGCATCAAGGTTCTTCAACATGAT  
GACTACAACCTGGTGTTCGGTATTTAACAAGCTATTAAGTGCTGCAGGCGGTTTCGGTGA  
CGGTTTAGTCAATGCATTACACAATTAGCACCCTGTTTCTATGGTCCGGCTGATTGGTT  
GGATAGATTAGGTCAATCTTTATCTAACTGGGCTAATAGTGCAGCTGGAGAAAATTCGGT  
AACTCGTTTTATTGAATACACAAAAACAAATTTGCCTATCATTGGTAATATTTTTAAAAA  
TGTTTTCGCTGGAATTAACAATTTGACGAATGCCTTAAGTGGATCGTCAACTGGTATATT  
CCAGTCTCTCGAACAGATGACAGCTAAATTTAGGGAATGGTCTGAACAAGTAGGACAATC  
TCAAGGGTTCAAAGACTTTGTCAGTTACATACAAACAAATGGACCACTAATAATGCAATT  
AATTGGGAGCATTGCAAAAGGATTAGTTGCATTCGCAACAGCGATGGCTCCTATAGCTAG  
TGCAGGATTACGCGTTGCAGTAGCAATAACTGATTGGATAGCTAACTTGTTTGAGGCGCA  
TCCAGCTACAGCACAAATTAGTTGGCGTCATTATAACTTGAGTTGGTGCATTTAGATTTTT  
AATTGCTCCAATATTAGCGGTAATGGATTTGCGGGGGCCATTAGCAGCAAGATTAGGCGC  
ATTAGTACCTAGGTTAGGTTGGGCTAAAACAGGACCTTTAGTATTGAGTAACGCAGTGAC  
ACCGTTAAAAGGTCCAATAAAATTAGTTACAGCTATATTCCAATTGTTAGTCGGTAAGAT  
TGGTTTAAATTAGAAATGCTATCACAGGACTAGTAACTGTGTTTGGTATTTTAGGCCGTCC  
AATAACAATAGTAATTGGTGTAAATTGCTGCATTAATATCTATATTCGTTTTATTGTGGAA  
TAAATATGAAGGATTCAGAACTTTATTATAAATGCTTGGAAATGCGATAAAAGCGTTTAC  
GGTTAATGTTTGAATGTATTAAGCTGTAGCTTCGGTTGTATGGAATGCTATTTAAC  
AGCTATCACTACAGCAGTATCGAATGTTTACAATTTTGTAAATGATTGTTTGAATCAAAT  
AGTCGCTTATTTACAAGGGCTATGGAATGGAATTATCGCTATTGCACCAACAGTATGGAA  
CCTTTTAGTTACAATCATTACAACCTGTTTTACGACGATAATGACAATAGTTATGACGAT  
ATGGACAGCTATTTGGACGTTCTTAAGTACAATGTGGAATACGTTAATTACACTCGCTAG  
AACGATTTGGAATTTGTTGGTCACTGTAATAAGTACTGTGTTTACAACAATCATGACTAT  
CGCAATGACAATTTGGAACGCTATTTGGACGTTCTTACAGACGTTGTGGAACACTATAGT  
AACTGTGGCAACTAAGGTTTGGAACGCTATCACTACAGCTATCCCTACTGCGTTACAAGC  
GGCCTGGAGTTTCATTTCTAATACCTGGAATACGATTTGGAGGTTCTTATCTGGTATATT  
AACGACGATTTGGAATAAAGTTGTAAGTATATTCACACAAGTTGTATCAACTATATCAGG  
CAAATGTCTCGAGCTTGGAACTTCATTGTCACTAAAGGTATGCAATGGGTATCTACTAT  
GACAAGTACGCTAAATAACTTTGTTAATAGAGTTATTCAAGGATTCGTTAATGTTGTA  
CAAAGTTAATCAAGGTATGACAAATGCAGTAATTAATAAATAAAGTTTTATAGGAGATTT  
TGTGTCTGCAGGTGCTGATATGATCCGTGGTTTAAATTAGAGTTATTGGACAAATGGGTGA  
CCAATTAGTAGATGCAGCTAAGAATGTTGCTAAGAAAGCTTTAGATGCAGCTAAAAGTGC  
TTTGGGTATTCACTCACCTTCACGTGAATTCATGGATGTTGGTATGTATTCAATGCTAGG  
TTTCGTTAAAGGTATAGATAATTATTCAAGTAACGTTATCCTTAATGTTTCTAATGTTGC  
ATATATAGTAGTTGATGCATTTCAACCTACATTAACGCACCTGACATTTCTAGTATTAC  
AGGTAACCTAAGTAGTTTAGGAGGAAATATAAATGCGCAAGTACAACACACATCTAT  
TGAAACATCACCGGAGATGGAACTGTTAATGTTGACTTCGATGTTAATAACGTTGCGCT  
TACTAGTATTGTTAACGGCAGAAATGCTAAACGCAATTCTGAGTAATACTTATAAAGGAC  
GTTACAAATGGACATAGAATTAACAAAAAAGATGGTACTGTCAACAAATTAAGTGAATA  
CGGGTTTATCGTTAACGATATAGTAATTGAAAGCATGCAAATCATCAACAAGTATCAAGA  
CAAAGAAAATATGAACGGTCCGCGTATTAATGGGGAGCAATTATATCAGTAGAGATTTAGT  
TGTTCCCTGTTTTTTGTAAGTAAAAAATCGTTCAGACATTGCTTATATGCGAGATATGTT  
GTATTCGTTAACTACTGATATAGAACCAATGTATTTACGTGAAATCAGAAGAAACAAAGA  
GTTGAATTACAGGTTTACTCAACCACTTCTGATGATTACGAGAAATTAGATAAAAAACAA  
CTTCCCGGATTATGAATATCAAGACACGAGCAACAAATTTATGTAAACGGTAAACAGTA  
TAAAGTTATTTTGAGCGGAGTTATAAATCCTAAACACAAAGATAACAACGTTGCTTTCGA  
ATTGAAGTTTAAACTACAGGATTACCATACGGCGAAAGTATTGGAACAAGCCTAGAGTT  
AGAAGAAAACAAAAAGGTTGGATTGTGGTTCGTTTGATTTAATATTGATTGGCACGCAGG

TGGGGATAAGCGCCAGTATACATTTGAAAATGTTAGTAAAGATACAGTTTACTATCATGG  
TAGTGCTCCTAACCGCCAATTCAACATGTATAAAAAGATAGCAATTATTTTGTGCGAAGA  
TACAGAATCGTTTTTATGGAATTTAACGCATGCTGAAATAATGAAAATCGAAGGTATCAA  
ACTAAAAGCTGGAGACAAAATTGTTTATGATAGCTTCCGAGTTTATAAAAACGGTGTGA  
AAGAAGTACCGAAACGAATATAGCCCAACAAAATTTAAATACGGAGCTAATAAATTAGA  
GTTTAATCAAACGGTACAAAAGTTCAGATTGATTTGAAATTTTATTATAAGTAGGGTGC  
AGAATGACAATAATTGTAAGACCACCTAAAGGTAATGGCGCACCTGTACCAGTAGAACCA  
ACTTTAGTGAAAAAGTTAATGCTGATGGTGTATTAACTTTTGATATTCTAGAAAATCAA  
TATACTTATGCAGTTATTAACGCTATAGGGAAAAGATGGATTATTAGTCTTGTGCGAAGGT  
GAAAACGATAAGAAAGAATATGTAATAACTGTCATTGATAGGTAATCAGAAGGCGACAGA  
CAACTGGTTGAAGGTACTGCTAGAGAGATTCCCATAGACAAGTTAATGATCGATAGAATT  
TATTTTAAACGTAACAGGATCTTTTACAGTAGAAAGATATTTTAAACATTGTGTTTCAAGGT  
ACTGGAATGCTTTTTCAAGTCGAGGGCAAAGTTAAATCTTCAAAGTTTGAAAACGGCGGT  
GAAGGCGACACAAGGTTAGAAATGATAAAAAAAGGTTTGGAACATTTTGGATTAGAATAT  
AAGATCACATATGCTAAAAAGAAAGACAGATATAAGTTTGTATTGACGCCATTTGCAAAT  
CAAAAAGCGTCTTATTTTAGTTCCGACGAAGTGAAAGCCTACGCTATAATATTCGAGGAA  
GATGCAAGTCCTTTCGCCACCGTCATTAGAGGATATGGTAATTATTCAGGAGAAGAAACA  
TTCGAACACGCTCGGCTCGTATTGGAAGCTAGAAGTGCATTAGCTGAAATATACGGAGAC  
AGCCACGCAGAACCATTTAAAGATGGTAAAGTGACTGACCAAGAACTATGGATAAAGAA  
TTACAATCGCGATTGAAAAAGTCGTTAATAACAATCTTCTCTTTGGACTTTTTGGTGTTA  
ACAGAATCATATCCAGAAGCAAACCCACAATCCGGAGACATAGTACAAATAAAATCTACC  
AACTAGGTTTGAATGATTTATTCGTATAGTACAACCTAACACGATTAGGGGTATAAAC  
AATGTAATTGTTAAGCAAGATGTAACGCTTGGTGAGTTAATCGAGGACAACAATATATG  
AAAAAAGTTAATACTGCAGCTAACCATGTTTCTGGTTTAAACGATGTTAACCTTTCTAAT  
CCTAGGAAAGCGACAGAAAACCTGAAGGCTAAAGTAGCGTCAATAGCTAAATCAACACCC  
GATTTGATGAGTAGAACTGATCTAATTGAAGACAAACAACGGAAAGTGAGTTCTAAGACT  
GTAAGTGCATCAGATGGCACTATCGTTCATGATTTGATAGATGAATCAAACATTAACAT  
GAAAAACATTTGGAACGATTGGCGATTCTGTAGCTCGAGGATCACATTCGAAAGCTAGT  
TTCACAGAAATGTTAGGCAAGAAGTTAAAAGCTAAAACGACCAACCTTGATGAGGTGGC  
GCAACAATGGCAACAGTTCCAATAGGTAAGAAGCGGTAGAAAACAGCATTATAGACAA  
GCAGAGCAAATAAGAGGAGACCTAATCATAATACCAGGTACAGATGATGACTGGTTACAT  
GGTTATTGGGCAGGCGTACCGATAGGCACTGATAAAACCGACACTAAAACGTTTTACGGC  
GCTTTTGTTCTGCAATTGAAGTTATCAGGAAAAATAATCCAGCTTCAAAAATACTTGAA  
ATGACAGCTACTAGGCAATACCGTATGAGTGGTACAACGATACGTCGTAAAGATACGGAC  
AAAAACAACCTAGGGTTAACTTTAGAGGATTATGTCAATGCTCAGATATTGGCGTGTAGT  
GAATTGGATGTACCAGTATATGATGCCTATCATAACAGATTATTTAAGCCATATAATCCG  
GCGTTCAGAAAATCAAGTATGCCAGACGAATTGCATCCGAACCAGAGGGGTCATGGAGTT  
ATTATGTACGAACTTATTAATAAATTATTGCCAGTTTTACGGATAGAAAAGGAGGAAGACA  
TGGATAATAAATTAATTACAGACTTAAGTAGAGTCTTTGACTACAGATATGTAGATGAAA  
ATGAGTATAACTTAAAACCTTATTTTACAGACATGCTGACGGATTTAATTTCTCTCTTGAAT  
ACCATAGAAATAAAGAGGTATTTGCACATAATGGAGAGCAAATAAAGTATGAGCATATAA  
ATGTCACAAGTAGCGTCTCTGATTTTTTAAACGTATCTAAACGGCCATTTTACGCAATATGG  
TACTAGGTCACAACGGCGACGGTATCAACGAAGTAAAAGACGCGCGGTTGATAATACAG  
GTTATGGTTATAAGACATTGCAAGTACGTTTGAATCATGATTATTCAACATTAGATGCTT  
TCACTAATAAAGTTGAGAAAGCTGGAGATGAACGCTATAAAGAATATCGAGCGACAGAAT  
ACCGATTCGAACCAAAAGAGCAAGAACCGGAATTCATCACAGATTTATCGCCATATACTA  
ACGCCGTAATGCAATCATTTTGGGAAGACCCTAGAACGAAAATTATTTATGTGACGCAAG  
CTAGTCCAGGTAATCATTACATGTTATCTAGATTGAATCCCAACGGACAATTTATTGATA  
GATTGCTTGTGAAAAACGCCGGTCACGGTACACACAATGCGTATAGATACATTGATGGAG  
AATTATGGATTTATTACAGCTGTTTTGGACAGTAACAAAAACAACCTAGTCTATACGTTTCC  
AATATAGAACTGGAGAAATAACTTATGGTACTGAAATGCAAGATGTCATGCCGAATCTAA  
TTAACGACAGATATACGTCAGCGATTTATAATCCGGTAGAAAATTTAAGGATTTTTAGAC  
GTGAATATAAAACCACAGAAAGACAACCTAAGATTTTCGTTGAACTTTGTTGAGGTTAGAA  
GTGCTGACGATATTGATAAAGGTATAGACAAAGTATTGTATCAAATGGATATACCTATGG  
AATACACTTCAGATACACAACCTATGCAAGGTATCACTTATGAGGCAGGTATCTTGTATT  
GGTATACAGGTGATTCGAATACAGCCAACCCTAACTACGTAAGAAGGTTTCGATATAAAGA  
CAAAAGAATTGTTATTTAAACGATGTATCGATATTGGCGGTGTGAATAATAACTATAAAG



GAGACTTCCAAGAAGCTAAGTGTCTAGATATGTATCACGATCTAGAAACAGGACGCAAAG  
CGTTTTAATAGGGGTAACCTGTTGTACCTGGTAACAACAGACATCACTCAATTTATTCCA  
TAGGCCAAAGAGGTGTTAACCAATTTTTAAAAAACATTGCACCTCAAGTATCGATGACTG  
ATTAAGGCGGACGTTATAAACCGTTACCAATAGAGAACCCAGAATATCTAAGTGTCTATTA  
CGGAAGTTGGTCATTACTATATCTACACGCAAGACACACAGAATGCATTAGATTTCCCGT  
TTCCGAAAGCGTGTAGAGATGCAGGTTGGTTCCTTTGATGTACTGCCTGGACACTATAATG  
GTGCTCTAAGACAAGTCCTTACCAGAAATAGCACAGGTAGAAATATGCTTAAATTCGAAC  
GTGTCATTACATTTTCAATAAGGAAAACAGCGGAGCATGGAATTTCTGTCCGCAAACG  
CCGGTTTTTGGGAACATATCCCTATGAGTATTACAAAATTATCAGATTTAAAAATCGTTG  
GTTAGATTTCCATATCACTACTGAAGAATCACAAAGATTTACCGATTTTCGTAAAGACT  
TTAAACGTATTGCAGGTTGGATATTAGAAGTAAAATCGAATACACCAGGTAACACAACAC  
AAGTATTAAGACGTAATAACTTCCCGTCTGCACATCAATTTTTAGTTAGAAGCTTTGATA  
CTGGAGGCGCTGGTAAATGGAGTTTATTCGAAGGAAAGGTGGTTGAATAATGGTAGTAGA  
TAATTTTTTCGAAACATGAGAACTTAATCGAGTTACAAACAACATCACAATTTAATCCGGT  
TATTTACACAACCATCGGTTTCTATGAATCAGATAGAGGAACTGGTGTTTTAAATTTTGC  
AGTTACTAAGAATAACAGACCGTTATCTATAAGTTCTGAACATGTTAAAACATCTATCGT  
GTTAAAAACCGACGATTAGATCGTAGATAGAGGCGCTTATATTTTCAGACGAATTAGCGAT  
AGTAGATGCAATCAATGGGCGTTTGCAGTATGTGATACCGAATGAATTTTTAAAACATTC  
AGGCAAGGTGCATGCTCAGGCATTCTTTACACAAAACGGGCGTAATAAGGTTGTTGTTGA  
ACGCCAATTTAGCTTCAATATTGAAAATGATTTAGTTAGTGGGTTTGATGGTTTAAACAA  
GCTTGTTTATATCAAATCTATTCAAGATACTATCTAAGCTGTCGGTAAACACTTTAACCA  
ATTCAAGCAAATATGGCTGATACACAGACGTTAATAGCAAAGTGAACGATAGTGAAAA  
AAAAGGCATTCATCAAATAGAAAGCAAGGAAAACGAAGTTATACAAGCTATTACTGCGAC  
GCAAACACTAGTGCAACACAAGCTGTTACAGCTGAATTCGATAAAAATAGGTGATAAAGAGCA  
AGCGATTTATGAACGTGTTAACGAAGTTGAACAACAATCAATGGCGCTGACCTGGTTAA  
AGGTAATTCACAACAATTTGGCAAAGTCCAACTTACTGATGATTACGGTAAAGCAAT  
TGAATGGTCTGAGCAGTCCATAGATAGCGTTTTAAGCGCAATTAACCCATCTAGGATTAT  
TCATATCACTAGCGCAACAGAGGCGCCAACATTTAAAGATACAGGCATTTAGAGACGCC  
AAAAGAAGATGGCGTTGATGATGGATCTGAAGTTTCAGCAACTACGAATAATTTAGGGAA  
ATCAGGCTTGTTAGTTGTTTATGTTGTTGATTACAGTACAGCTAGTGCTACATGGTATCC  
AAACGATTCAAAAGATGAGTACACAGAATATAAAATCGGTGGCACATGGTATCAGTTCTA  
TAAAAAAGTTGACGAAGAATTAACGAAGAAATTTGTTGAATAAACGGCTAACAACGCTTT  
GAATCAAGCTAAGCAGTATGTAGATGATAAATTCGGAACAACGAGCTGGCATCAAGATAA  
GATGACAGACGCGAATGGTCAATCAATTCAGTGAACATAAATAATGCGCAAGGCGATT  
GGGATATTTAACTGCTGGTAATTACTATGCAACAAGAGTGCGGGATTTACCAGGTAGCGT  
TGAAAGTTATGAGGGTTATTTATCGGTATTCGTTAAAGATGATACAAACAAGCTATTTAA  
CTTCACTCCTTATAACTCTAAAACGATTTACACACGATCAATCGCAAACGGCAGACTTGA  
GCAACAGTGGACAGTTCCTAATGAACATAAATCAACGGTATTGTTTCGACGGTTGCGCAA  
TGGTGTAGGTACAACAATCAATCTAACTGAACCGTTCACAACTATTCTATTTTGTGGT  
AAGTGGAACCTTATCCAGGTGGCGTTATTGAGGGCGTCGGACTAACCGCATTACCTAACGC  
GATTCAATTGAGTAAAGCGAATGTAGTTGACTCAGACGGCAACGGTGGCGGTATTTATGA  
GTACTIONTATCCAAGCCAAGTAGCACTACTTTAAGAATAGATAACGATGTGTACTTTGA  
TTTAGGTAAAACATCAGGTTCTGGAGCGAATGTCAACAAAGTTACTATAACTAAAATTAT  
GGGGTGGAAATAATGACAATCACAGTAAACGATAAAAACGAAGTTATCGGATTCGTTAAT  
ACTGGCGGTTTACCCAATAGTTTAGATGTAGATGATAACAATGTGCCTATTAATTTTAAA  
GAAGAGTTCGAACCTAGAACCTTTGTTTTACTAACGGCGAAATTAATAACAATAGCAAT  
TTCGAAAAAGAAGACGTACTGAATGCATAAAACCAACAAGTGCCTCAGATTTAAGTGAT  
AAGGAACTTCGCGGAATGGTTGCCAGTATGCAAATGCAGGTGGCACAAGTGAACGTATTA  
ACAATGGAATTAGCTCAACTAAGCGCTATATTAACACAACAGTTGACTGACTTGAAACCT  
AACAAAACAAGTACTGAGAGGGACGTTAACTAATGAAGATGATTTATCCAACCTTTCAAG  
GACATTAACACTTTTTATGTGTGGGGTTGCTATAAAAATGACCAATTAAGTGGTACATA  
GACATGGGTGTAATCGACAAAGAAGAATATGCATTGATCACTGGAGAAAAATATCCAGAA  
ACAAAAGATGAAAAGTCACAGGTGTAATGCTTGTGGCTTTTTAATTTAACACAAGTAGG  
TGGCGTAATGTTTGGATTTGCCAAACGGCACGATCATGAATGGCGAATTAGAAGATTAGA  
AGATAATGATAAAAACAATGCTTAGCACTCTCAATGAGATCAAATTAGGTCAAAAAACTCA  
AGAGCAAGTTAACATTAATTAGATAAACTTTAGATGATATCCAGAGGGAAAGACAGAT  
AGACGAAAAAATAAGAAAGAAAACGACAAAAATATACGCCATATGAAAATGTGGATTCT

CGGTTTGATAGGGACTATCTTCAGTACGATTGTCATAGCTTTACTAAGATCTATTTTTGG  
GATTTAAAGGAGGTGATTACCATCCTTAAAGGGATTTTAGGATATAGCTTCTGGTCGTGC  
TTCTGGTTTGGTAAATGTAAATAACAGTTAAGAGTCAGTGATTCGGCACTGCCTTCTTAT  
TTTGATTGAAATGAGGTTACATACATGGGATTACCCAATCCAAAGACCCGAAAACCTACAG  
CAAGTGAAGTAGTAGAGGGGGCGTGTATATTGCTAAAAAGAAAATAGCTATTGGTGTAC  
CTGGTTCTGGAATGGGGGCGCAATGTTGGGACTTGCCTAATTAGTTGCTTGAAAAATATT  
GGGGGTTTAGAACATGGGGAAATGCTGATGCTATGGCTCAGAAATCTAATTATAGAGGTA  
GAGATTTCAAGATAATTAGAAATACAAAAGATTTTGTACCACAACCAGGCGACTGGGGTG  
TTTGGACTGGTGGTGGGCAGGACATGTAAACATTGTAGTGGGACCATGCAGAAAAGACT  
ATTGGTATGGTGTGGATCAAAACTGGTATACAAATAATGCAACAGGAAGTCCGCCGTATA  
AAATCAAACACTCTTATCATGATCGACCAAGTGGAGGAGTTAAATATTTTGTGTTGACCAC  
CATATCATCCGGAGAAATCTACGCCGGCACCTAAAGCCGAAGACGACAGTGATAATAACG  
AAAAAAATAATAAAAAAGTTCCGATTTGGAAAGATGTAACAACCTATAAAGTACACTATTT  
CTAGCCAAGGGGTTGATTATCGAGAATAAATTTATCACTGTATAGTAGAAGGTAATCGAC  
GACTCGAACAACTATAGGAATAATGATTAGAAACGCACAAACGATGAGCTCGGTAGAAA  
GTTTATATAACAGTAGGAAGAAATACAAACAGGATGTAGAATATCCCCACTTTTATGTTG  
ATAGACATAAATTTGGGCACCTAGCAGAGCTGTATTTCAAGTTTCTAATGAACCTGATT  
CTATACTTATAGACGTATGTGAAGCTTATAGTGCAGTAGAAATGAATTTATTTTTAATG  
AGAATCACGCAATGGCTGTAGCTGTAGATATGATGGCCAAATATGAGATACCTCTAAGTA  
TTGAAAATTTAAAAGTAGACGACAGCATTGCGGTTTCGATGTTGGAACATGTTAATTGGA  
ATATGATTGACAACGGTGTCCCCCTAAAGATAAATACGAAGCAGTAGAAAAGGCATTAC  
TTAATATATTTAAAACAGAGAATAATTATTAATTTCTATAACCAAACCAACATTAACAA  
AATCTAGAATAAAAAGTTATGGTAGATAATAAAAACGCTGATATAGCGAATGTAAGAGACT  
CATCAACAACAGCTAATAATGGCTCGGCATCTAAACAACCGCAGATCATAACAGAAACGA  
GTCCTTATACATTCAAACAAGCACTGGATAAACAGATGGCAAGAGGTAACCCGAAAAAAT  
CTAATGCTTGGGGTGGGCTAACGCTACACGAGCACAACGAGTTCAGCAATGAATGTTA  
ATCGAATATGGGAAAGTAACACGCAGTGCTACCAAATGCTTAATTTAGACAACCTATCAAG  
GCGTTTCAGTTAGTTCGCTTAATAAGATACTTAAAGGTAAGGGGACTTTGAAGAATCAAG  
GTAAAGCGTTCGCAGAAGTTTGTAAAAGCACAAACATTAATGAAATTTATTTAATCGGGC  
ATGCTTTCTTAGAACGTGGATATGGAACAAGAACTTCGCTAACGGAAAAGATGGGGTAT  
ACAACACTTTCGGCATCGGCGCTTACAACAACAATCCTAACTACGCAAGGACGTTTGCTA  
GGAATAAAGGTTGGACATCTCCAGCAAAAGCAATCATGGGCGGTGCTAGCTCCGTAAGAA  
AGGATTACATCAATAAAGGTCAAACACGTTGTACCGAATTAGATGGAATCCTAAGAATC  
TAGCTACCCACCAATACACTACTGCTATAGAGTGGTGACAACATCAAGCAAGAACAATCG  
CTAAGTTATATAACCAAATCGGCTTAAAAGGTATCTACTTCAAAGGGATAAATATAAAT  
AAAGAGGTGTATAAATGTACAAAATAAAAGACGTTGAAACGAGAATAAAAAATGATGGTG  
TTGACTTAGGTGACATGGGCTGTCGATTTTACTGAAAGATGAAAATACAGCATCTATAA  
GAGTAGGTATCAATGACAAACAAGGTCGTATCGATCTAAAAGCACATGGCTTAACACCTA  
GATTACATTTGTTTATGGAAGATGGCTCTATATTCAAAAATGATCCCCTAAGTATCGACG  
ATGATGTAAAACGGTTCCTTACCTACAAAATACCTAAAATGCCTATCAGACACGCTGGTT  
ATGTTTCGATGTAAGCTGTTTTTLAGAGAAAGAAGAAGAAAAAATACATATCGCAAACCTTT  
CTTCAATATCGTGGATAGTGGTATTGAGTCTGCTGTAGCAAAAGAAATCGATGTTAAT  
TGGTAGATGATGCTATTACGAGAATTCTAAAAGATAACGCGACAGATTTATTGAGCAAAG  
ACTTTAAAGAGAAAATAGATAAAGACGTCATTTCTAACATCGAAAACAATGAAAGTAGAT  
TTAAAGGTGCGAAAGGGGATAAAGGCGAACCCGGGACAACCTGGTGCAGAAAGGTGATACAG  
GTAAAAAAGGACAACAAGGAGCACCCGGTAAAACGGCACTGTAGTATCAATCAATCCTG  
ACACTAAAATGTGGCAAATTGACGGTATAGATACAGATATCAAAGAAGAACCTGAGTTAT  
TGGATAAAAACAATATCGCAAATGTTGAAGGGTTAGAAGATAAATTGCAAGAAGTTAACA  
ACATCAAAGATACAACTCTCAATGACTCTAAAACGTGTACGGATTCAAAGATTGCTGAAC  
TAGTTGATAGCGCGACTGAATCTATGAATACATTAAGAGAATTAGCAGAAGCATTACAAA  
ACAACCTCTATTTCAGAATGTATATTGCAACCGATTGGCTCAAAGGTAGTACAGAAGATT  
TTGAGGAATCCAATCAAACACTGACTGATTCATATGCTTCAAAAAATCATTATCATGACG  
AGGGGTATGTTTTGTATCTCAAGCTTTTACTAAACAACAAGCGGATAAGATATATCAAC  
TAAAAGCGCATCTCTACCGACGGTAAAATTTGGACAGGAAGATAAATGAATATAACT  
ATATATATCAAAAAGACCCTAATACACTTTACTTAGTTAAGGGGTGATATTTATGGAAGG  
TAATATGAAAAATGTAAAGAAGTTTATTTACGAAGGTGAAGAATATACAAAAGTATATGC  
TGAAATATCCAAGTATGGAAAAAGCCCTCATCATTTGCAATAAAACCCCTTACCTAAAA

TAAATATCCGGACAGCATAGAAGATTTAACAGCAAAATGGACAATAAATGGAGTTGAACC  
TAATAAAAGTTATCAGGTGACAATAGAAAATGCACGTAGCGGTATAATGAGGATTTTCGCA  
AACTAATTTAGTGTCAAGTGATTTAGGAATATCAGGAGTCAATAGCGGAGTGGCAAGTAA  
AAATATCAACTTTAGTAATCCTTCAGCGATGTGGTATGTCACTATAAGTGATGTTTATTC  
AGGATCTCCGACATTGACCATTGAATAATTTTAAACGACTAATTTTTTAGTCGTTTTTTA  
TTTTGGATAAAAGGAGCAAACAAATGGATATTAAGTGGAAATTGAGATTTAAAAATAAAG  
CAGTATTAACAGGTTTAGTTGGTGCATTGTTGTTATTTATCAAACAAATCACAGATTTTT  
TCGGATTCGATTTATCAACTCAATTAATCAAGCCAGCGCATCATAGGTGCTTTCCTCA  
CGCTACTTACAGGGATTGGCGTTATAACTGAGCCAACGTCAAAGGGCGTCTCAGATTCAT  
CTATAGCACAGACATATCAAGCGCCTAGAGATAGCAATAAAGTAGAACAACAAGTTACGT  
GGAAATCATCACAGGACAGTAGTTTAAACGCCGAATTAAGCGCGAAAGCACCAAAGAAA  
ATGATACATCACAACCTTTCACAGACCCCTCTAACGATTTTGGCTTTCATGTGAATGAGT  
ATCATCATGGAGGTGGACATAATGCAAGCAAAATTAATAAAAAAGAGTTTATAGAGTGG  
TTGCAAAGTTCTGAATGAAGACAATTCATGTGGACTTATGGTATGGATTGCTATGCTTT  
GATTATGCCAATGCTTCTTGGAAAGTTTTGTTGGGATTACTTCTGAAAGGTTTAGGTGCA  
AGAGATATACCATGTGCAAACAATGTTGATGGACTAGCCACTGTATACTAAAATACGCCG  
CACTTTTTGACAAAACCGGCCATATGGTTGTGTTCCGGTAGTAATTACGGTGCAGGATAC  
GGACACGTAGCATGGGTAATAGAAGCAACTTTAGATTATATCATTGTATATAAGCAGAAT  
TGGCTAGGCGGTTGCGGGACTGACGGAATCGAACAACCAGGCTGGGGTTGGGAAAAAGCT  
ACAAGACGACAACATGCTAATGACTTCCATATGTGGTTTATCCGTCCGAATTTTAAAGT  
GAGACAGCGCCACGATCAGTTCAATCTCTACACAAGCACCTAAAAAAGAAACAGCTAAG  
CCACAACCTAAAGCAGTAGAACTTAAATCATCAAAGATGTGGTTAAAGGTTATGACCTA  
CCTAAGCGTGGTAGTCCCCCTAAAGGGATAGGTATACACAATAACGCACGGAGCAAAGGG  
GCGACTGCTGAACCATACCGTAACGGATTAGTAAATACACCATTATAAAGATTAGAAGCG  
GGCATTGCGCATAGTTACGTATCAGGCAACACAGTTTGTCAAGCGTTAGATGAATCACAA  
GAAGGTTGGCATAACCCCTAATCAAATACGTGATAAATAAATTACGGTATTGAAGTATGT  
CAATCAATGGGCGCAGATAACGCGACATTCTTAAGAAATGAACAGACAACCTTCCAAGAA  
TGCGCTAGATTGTTGAAAAAATGGGGATTACAAGCAAACAGAAATACAATCAGATTGCAC  
AATGAATTTACTTCAACATCATGCGCTCATAGAAGTTCGGTTTTACACACTGGTTTTGAT  
CCAGTAACTCGCGGTCTATTGCCGGAAGATAAACAATTTCAACTTAAAGACTACTTTATC  
AAGCAAATCAGAGTGTATATGGACGGTAAGATACCAGTTGCCACTGTCTCTAAGAAGTCA  
AGCGCTTCAAGAAATACAGTTAAATCAGTTGCGAGGGCCTGGAAACGTAATAAATATGGT  
ACTTACTACATGGAAGAAAGTGCTAGATTCTCATACGGTAATCAACCAATCACTGTAAGA  
AAAATAGGACCATTCTTATCATGCCCGGTAGCTTACCAATTCCAACCTGGTGGATATTGT  
GATTATACAGAAGTGATGTTACAAGATGGTCATGTCTGGGTAGGATATACATGGGAGGGG  
CAACGTTATTACTTGCCTATTAGAACATGGAATTGTTCTGCCCCACCTAATCAGATATTA  
GGTCACTTATGGGTAGAAATCAGTTAGAATGACATAGTCATGTCTATTTAAGCAGGTGCG  
TTACATACCTGCATTCTATTTACATTTAAAGATAAATGTGCTATTATTTTACTAGAACT  
TTTTAACATTTCTCTCAAGATTTAAATGTCGATAACCGGCAGGTACTACGCTACTTGCCT  
ATTTTTTATGCTATAATGTAATTACATTACCAGTAACCAATCTGGCTTAAATCCACATTT  
CCGGTAGCCAATCCGGCTATGCCGAGGACTTACTTGCGTAAAGTAGTAAGCAGCTGGCTG  
CATATTTAAACCACGCATTCTAGTTACTGGGTGGTTGTTTTTGTTCGCCATTCTGTTCTG  
TCTACATCTTTTTGCGCAAGTTGTGTATTATGTATATATAGTATAAATAAGGGATATTTT  
AAATGGAAGATAATTAATTTTAGGAAAAATGTATTCATTCAAAGCTTTATATTTTTTTA  
CTGCAGCTTTTGTAATATATTGACTATTATAACAACAAAAAATTTTGAGGTCGCTATAT  
TAGGTGTAACACTTTATTTATGCCTATTGTTCTAGAAAATTACATGAAGAATGTTTACA  
ATAAAGCAACTAAGATTTTGAGAAGAATAGGATATATATCCCTACTTTATTCATATTTA  
TAAACATTTTAATATTTATTTTATGTTATTATATGCCTACATATAAGTTTATCATTAGTA  
CAAATTGGTATGTTGGTGTCTATTATAATAACAACAATACCATTAGTTTTTATTATGATAT  
TAGATATTTTTCTTTATGGACTTAAACAACGAGGAAATCAAAGCTAGTAATGGTACTAAAG  
AGTATTTGAGAAAGAACAGAGAACAAGTAAAGAACTAAAGATAAAGCAAGAGAAAGTAC  
TGAAAGAGAAAGAACGTCAATTTAAATAGAAAGGTTCTAAACGAAAGGCATGATAGTAAT  
GGTTATAACAATTATAAGCGTTTTGTTATAAGTGCTATCTTATTATTTTATTTGTCAGC  
GGTAACTTTCACCGCAGTTAGATCTTCTTATTATAATGTTAAATTTAGTGTACCAACGCT  
ATTTGCAATACCATTAATTTCCGGTCAGTACACATCTAAAATTTACAAGACTTACAAATT  
TTCTGACAGTAAAAAAGCCTTCAGAATGCTTTTTATTTATATTTAAAAAATATCCGGTAGC  
AATAGCTATGTTTTTAACTATTATTGCCACAAATATCGCTGAACAAAATGTTAAATAATC

AAGTGGTGCAACTTATAAGAAAAGTGAAAATTTATAGCAGAAGAAACGTAAAAAATGAT  
TAACAAGGTGCTTCAAAGTAATACTTATGGAGAAATGCTTTTGGGAATATAAAGAAGATA  
CTTAGTATTTCTTGTGATTTTAATATAATAGGTTTATTATCTTTTCCTGATGAAATTATA  
ACCGTACCCTTTAAGATGCGGTTATTTTTATTCTATAACAATCAACAAAACCAACACC  
TATTAATTTAGCAGTATGGTTTTTTATATGCGAAGCTAAAATAACTACCAATGATACCAT  
CTTTGATACCATTTTGTGTTGTAACAGAAAAACAAGGAAAATAAAAAAGGCAAAAAACG  
CATTAAATCAACGTTTATTGTCTCATGAAATTTAAATGTATATAAATTTCACTTCGCATT  
CG

>NewGenomeName\_127

ACGTAGGGGGGGGGCTTAGTATTACCCCCGCCCAAGATCAGCGGAGTCATTTACCCTCG  
CTATAGGCCGTTAGATGTGTATACACGTGGACGATCACGATCAGTGCTTCGTGAAACGAA  
TCTGACGAAAGATCGTCCGAAGCTTCGTGGTAGGGCCCCCATGTTGCTTTATCTTTACTC  
TAATAAAGTAAAGTAAGATGCTGTCCCTTGCTTTATTCGTTGGATAGTTGTTTACAGCTG  
TCTTTGCTTCGCCGCGAAGCAAAGGACATTCTCATCGTCTATTAAAGCTGTGTTCTCCGT  
TTGTAATTCGTCCGAATTATCGAGCGAAAGTCTCGTTCTTGTCTATGGAGGATTTCAAG  
CAACCAAAGCTCTCTTATGGAGAGATAGTTCAAATGAAGGAAGAACAAGATGCTTTCTGG  
AGTTTTTATCATGAGTTTGTCCGTCGCAATGAAGATGTTCTTGGAGAGATGTGCAGACGC  
CATGGAAGGAAATTGCCTGCATATCCAAAGCTCCCTACATATGCCCCGATACGGTGGGTT  
CTTAAGACTAAGGCAATTTATGATGTCAGAGTAGATGAATGTAAGTCATGTTTCGCATGAG  
GAAATTAGTAGTAGGGATTAGAATCCCATTAAGAAAGAAGGTTTAAAAGACCTGTATGAT  
TCAGGTAATTATAGATATCAAGTGTATTATTCTTCATCGTGTAAATAGAGATAAATCAGAT  
TAATAGATCAACAATTACAATTGTATTGTTTCTGCTATTGTTTATGTTTCATTAATAATT  
TATGGTTTGCAAACCAGAGCTATTCAGAGGTAGAAGACAACACTACAAATGATACCATATA  
CATTACAATGATATTTGAGAAATATATTATTTTTAATAACTCTGCGAAACTATATGTCTG  
GGCCCAATAGGCCCAAATGCTCTGAAGCCCAATGAAATAAACACTGAAGTGCGTCAGCTG  
ACGTCAGCTGACTCCTTGATG

>NewGenomeName\_128

TGGTATTACCCCTGTGCCGGGATCAGAGACATTTGACCAATAGTTGACTATTATAATAGC  
CCTTGGATTATATGACACGTGGCCGCTCAGGGTCCCTGAGGCTAGTGAAGCGGTTAAGCT  
GAACGAATCTGACGGAAGAGCGTTCACACTTAGATCTAGTTAGCGTACTTAGTACGCGTT  
GTCTTGGGTTGATAAATAGAGTGCTTCTGAACAGATCGTTCAGAATTCATAGCGAGATG  
AATTCTGGTGATGGTTTCAATACACACTCATAAGAAGAAGGTGGTGGAGATTCGAAGAAG  
GAAGTTTTATATAAAATAGGTATTATTATGTCATGTATTGTAGGGATTGTAGGTTTATGG  
GTTTTAATTATATTATGTTGTGCTGTTCCCTCGCTATGCTAGATCAACGATGGACGCTTGG  
CTATCTTCGTCTTCTATTATGAAGAGGAAGATGGCTTCAAGGATTACTGGTACTCCGTTT  
GAAGAACTGGTCCCTCATCGTGAAAGAAGATGGGCTGAAAGTAGAACTGAAGCGACGAAC  
CAGAATAATAATGATAATGTAAATAGATTTAGTGGATATGTTGTAATTTTATATGGAGTA  
ATGAGAATTATTATTATCTGTTCTTCGTCTGTGTTTTTAAAGCTGTTTCTGTGTTTTAA  
TGGCGTCTGTAGAGAGAAAGGAATAATTGTAAGGTAGACGACGATGTAGTGGATTACAGT  
TGTCTTTACTTCGCCTCGAAGAAAGACACATTTCAAGTTGTGAGTGTATTGCTTTTGAT  
GAAGCTTGCTCGAAGCAGCGTATAACTTTAATTTGAATTTGGTTTTGGCGCGTTAGTGAA  
ATTGCGGCTGTAAATGTGTCAAGTTGTGAGTGGCTGAAATAAGATAATAGATATATTATT  
ATTGTTTTAATTTAATTCCGCGAAGCGATATGTTAAGTGATATATGGAACGAAGCGTTTT  
GATGACGTCATATGTCTCCGTGCTTACGTCTGCACGGGGCT

>NewGenomeName\_129

ATGACTGAGCCTGGAGCATCGGAGTTCAGTTGGGGACCGGGAATGCATACGCATCCTGAC  
TTGGACTACGACGCGGGGAAGTCTCTCGCGCCCAACAATGTGGAGACGCTGCACGATCAG  
ATGCGCGATCTGCATGCGAGCAAGCGGACCAACGCCGCACGCGCTGGAGAGACGATGCGG  
GACATGTACTTTGCACTCGGGTATCCGGATCGCTACGGGCCCAAGCCCGCGCTTGTGCAA  
GGCGATGGCAAGGCGGAGCCTAGGCCACGCCCCGAGGAGTCACCGGAGACATTCGAACGC  
AAGCCGTAATCGTTTGTGCAATAACAGATGTGCAGTCGGTCCGATTCGTGGCTAGGGAGA  
CCACTGCCGCCCGACAGGATTATTGAGGGACGAATCCGCGCCTGACCGAAGGGAATTGCA  
ATGCCACGAGGTGATACCACCAAGGAGCTGACCGACCGCACCGTGGGGAAGCCCGACGGG  
CTAGAGGAGTTCCGCCCGAGTTTGGAAATCAAGGTCGGAACGTTTACAATGCGTTCGCAAG  
GATTTGGACCATCCCAACTATCGCAGCATGCCGTGTCTGATGTTCCATGTGCCCTTGCAG  
TTCCGCAGACACTATCGTGTGGAACGTCTCGCGAACTTCTCGGGCGACCCGGACGACTAT  
CGAATCGACAACCACGGCTACCGGCTGTGTGAGGCTGAGACGCCGCGACGGCCACGGGT

TGCCTCAAGCGTGCAAGCAACCGACAGCCGTACTTCGAGCAGCATGGCGCGCGCCTACAC  
CCGCTGGACAAGCTGCGAGTTGATCCCAAGGATCCCAGCACACCAGGACGCGCATGGAGCTG  
TTGACGCACGGGTACATTGATGTGGAAGACCTCACCGACGACGAACTCAAAAATGGGCTT  
GTGGCTCCGGGGCGTGGTGGTAAGGCAATGATCCACTTGCCCAAGGACGTGTACACCAAG  
ATCGTCAACAGCCACTTTGACCGTGTCAAGGAGCCGATGGTTGATGGGATGATCCCAGCC  
ATCAAGGTGCTCAGAGACATTGCAGAGAACAAGCACGACATCTACGAAGCCAAAGACCGC  
GTCAAGGCCGGCACCTACATTGTGGACAGAGTCCTTGTAAGCAACCAGATAACGGCACAG  
GTGCTGGGTGGTGTGATGGCGGGGCCAGGAGCCCTGGCAGCAGATTGTGGCCGGGATC  
ATGGACAACACGCGTGCAGGAATCCCGTGCGGCGCGCGCTCCCCTCTGGCGGAGAAGGC  
GCTACGCTCAACCACAACGGTGAGGCCGAGGAGGTTCTCGATGTTGAGCTTGTGGAAGAG  
TCTGCGGCAGATCATGATTCAGCGACGCCGCGAACGCCTGACGACACGGGACCTCATGCG  
AGCGCTCTCATCGCAGCCGTGCTCCCAATGCAAAGCCCAAGCGCGCCAAGGCCAAGGCG  
TCTGCTGGCACGAGTGGCACGAGTGGCACGAGTGGCACGACTGGAAAGCCTGCCAAGCTG  
CGGGTCAACCGGCCGAAGCGCGACGCCAGGTAAGCTTCGCGGTGCGGGGTGGACGCGAGG  
CCGCCAAGCAACCGGAGTGGACCCGGGATTCGCGCAGATTCCCTTCTGTCCCGAGTTCAC  
TCCCAAGAAGTGCAGGACTGGCAAGGAGCTGAGATTGGCGAAGCAGGGTGTGCGTCGGGA  
CATCAACGGTCCGACCAAGCAGGCACCGTCTGTACCAAGGCTGTGCAGCCCGCGCCGAA  
GACCAAGCTGCACCGGCCAAGACAGCCTAGGAGGGTACCATGGCCAAGGGCGTGAAGAA  
GCTTCAAAGCGCAAGGGCACAACCCCATCCCGCGTGACAAGTGGAAGTCTGACGACAT  
CGCTCGGCGTCAGCTCGAGCAGGACCAGAAGCTCCACCTCACCACCAAGGGTCCGCACAC  
CGGGACCAACGACAGCTTCAAGTAGCACCTCGCCACGGACATGCTTCCCGTGACGGTTAC  
CCGGAGTGGCACTGTCCAGGTGGCTGGGCGCGGTCCCCTGGCGAGGCTGTGGTGCTACA  
GACGACGCTCCAGCTCTGGCGGGCAGCCAACAATAAGTCGAGCGCGTGGCCCATGCCCT  
CGGGTTACCGGCGCGAACCGACCCGACAGAGTAGGATCACGTGCATGCCCAAGAAGAAGG  
TCACCGGGGCCAAGCTCAAATGGGGTAGCGCTGCCAGAAGCGAGCTCAGCGAAAGGCTG  
CAGAAGCCAGTGCCCGGAAACGGCGCAAACGAGGCCTACAGGACATTCTGAAGCGCAAAA  
GGCGCGCAGCCGGCAGCTTCTCCGAGGTTGCAAGAGCTCGGTCAAGGAGGCCAGGGAGC  
ACGACCTGTGCGGTACGGGGCACGGGGCCAACAAGGAGGCCTACCGTGCCAGTGCAGCCG  
AGAGCCGCAAGATCAAGGCCGCTGGCGGGACGAGCTCGGCCGACCGCGTCTACAGCACTG  
CCCGCAAGCTCAAGTACACCGCGCCTCGCGGTAAGGCAGGCAACCAAGGCAAGGTGGGCC  
TGAGCTCGCGTAGCAAGGGTTCAGGCTCGTCGTCGGACAAGTTCAAGCAATGCGATACTG  
TCTATGCGGACGGCAAGTCTTGACAATCAGGAGTTTCTGCGAGGCCAATGGCAATACCT  
ATGTCGATGCCAAGGCCGACAACGGAACCGATCTCTCCCTCGTCATCAAGGGCAGCGGTC  
TGGACAAGAAGACCATCCGGACGACTGTGGGCGATCGCTCGCGTTCAGGATCCAAGACTG  
TCAAGCCTGGCGACAGCGCTGCTGCACATCGCACCAAGAGCTTCTCTCAGAATGCGCGTG  
GTGTGTGATGGGTGGCCGGGGATCGAGCTCCAGAGCGCCAAGGACATGAGCAGCATGT  
CCGAACGCGACTTGCAGAACGCCATTCTGAACGCTCGGACCGCAGCCGACAAGAAGGCGT  
ACTCCAACGAGTTGGCCAAGCGCAATCTCGACAATCACTTTACCAAGGGCAGCAAGAACG  
CCTCGACAGAAGAGCTGCAGAACAAAGGTGAAGGACGGCACCACTCCGTCTCGGTAAGA  
CCGCCATCGGCGCCGAGCTGGACCGCCGCGCCAAGGCGAAGGCACCCGCGAAGGCCCGTC  
GTGGGCGTCGACCTGAGAAGCCGATCGCCCAGGTGATGAAGCCGCCCAAGGACGCGGTGC  
CGCTGGTTGACAAGAATGGCAATACGACCCCTGAGGCGATCCGCCGATACGGGAACGACA  
AGAAGGAGTCTGGCTATCCCAACGCCGATGATCGTGCGGCCTGGAACAGGCTCGTGGGTC  
GGGAAACATAACCGCGACTTGAGAGACGACATGACACCGCGCCAGCGCGCCAACCTACCGCA  
AGGAGCTGCAGCGTAAGCTGGACAACCCGCGGATCAGCGATAGTGTCAAGAAGCAGGCC  
GCGATGAGATGGATCTGCTGGATGCGCTCGACAAGGGGTCTGGCAGAGGATCCGCGAATT  
CGGGGGATGCCAGGGCACAGCGGTACTTGATCTGCACGACCACGAGCTGCAGGACCGGG  
CCAGCGAGATGGGTGCTCTGGACTTGTACAAGCGGGATCTCAAGGGCGAAGGACACTTCG  
ACCGCAAGCCTTGCGAAATCTCCAAGGAAGAGCGGTTTCGCAATGCCATTCAGGGTCTGA  
TGCGTTACGTGCAAGAAGATCTTGGGTACGAGGTCGATTGAGACGAGCAGCGGCTCGACA  
ACGCCCTCATCAACGACCCGCGCATGAAGAAGCTGCGAGCCATCCTGGCCAAGCTGGGAA  
AAATGACAGGGCCGACCGAATCCCGGTTCGGCCAATCGCACAGAAATCAAGGGTAAGACTT  
CGGACGATGTGGATACGGCCATTGATGACCTCAAGGCTGCACAAGACAGCAACAATTCCG  
ACGCCAAGGCTAAGGTGCTCTGGAACGTAAGTTCGGCACTACGACAGCCCCGCCGATTTCA  
GGCTTCTCGATCTGCACAAGACCACAACGCCAGAGTCTAGCCTCGTACCGGGATGTGT  
CCTCGGCGATCAACCGCTCACTGCGCTCTGGCGAGAATCTCTCCAGGAACGCCTGGAAGC  
GTGGCGTTGTTGAGGATCTGGACAGCATGATCAGCGAGTCCACCCTTAAGCGGCCGATCA

CCGTGCGCCGCTTCATCGGTTCAGAGCGCTGGCGGAAGTGGTATTCGTGGCGACTATGCAA  
AGGTCAAGAAGCAGCTAGAGTCTGGCACCTTCAAGGACAAAGGCTTTATGTCCACAGAGG  
CCGTTACGCCGGGATACTCGGTTCGGCCAGATGGGACGGCTGTTGTCCGACCGAGAGAAGC  
CCGGTGAGAACGATTTTCGTGCTGGAAATGGATCTTCCCAAAGGTTTTAATGCGCTTGATC  
TCAGGAGGGAAGACCTCAACGACAAGCATCTCAGCGAGATCCTCCTGCCTCGGAACAACG  
CGTGGGAGGTGACCGGTACGCGCACCGAGGAGGGCATCACCGTCTACAAGGGCCGCCCCA  
GACTAAGCCCACGTATGACGAGGTTCCGTCCAAGCGACGCAAGAAGTCACGACCAGCAC  
AGCCAATCCTGCTGCTGCACAACCTTGATCGCTGGCAGATTTACGACACCGAGATCGAGGT  
CACCACCGGGGGCGGCCGAGAGCGCCGCAAGGTCTGGGACCCACACGCTGGTCAGCTCGC  
CATTGAGGAAAGCCCTGCGCGTAACAAGGTGGCCTCCTGTGGGGCGACGCTTCGGCAAATC  
GGACCTGGGTGGCAAGCGGCTGGTTCCGCCCGCATTCCTGGCGTACTACCGACAGGACCT  
GCTCCGCACCACCAACAAGGCGATGATCTACTGGATTGTGGGGCCGGAGTACTCGGACGC  
CGAGAAGGAGTTCGCGTACTGTGGAACACCTTGGTACCATTGGGTGTACCCTTCGACAA  
GCCTGGCAGCTACTACGATGCCGTTGGCGGAAACATGCACCTGAGCCTTTGGCAGGGCGC  
ATACCAGGTGCATGCCAGGAGCGCCAAGTATCCCAACACGCTCGTGGGTGAGGGCTTGAG  
TGGCGTGATCCTGGCCGAGGCCGCGAGGCAAAAGCCGTCTGTGTGGACTAAGCATGTGCG  
TCAGACGCTGGGAGACTTCACGGGCTGGTTCCTACGTCAACTCCTGAGGGCAAGAA  
CCACTTCCACGACAAGTTCAGATGGGCCAGGAGCCTAACAAATCCGGAGTGGGAGAGCTG  
GCGCATGCCAGCTAGGCGAATCCGTACGTGTACACGCGCACGGGCCGTCTGGTCGCGCT  
GGGCAAGCTTCCTCCCGAGACGCCCATACCCGACCATGAGTACACGCGCGACCGACATGT  
CACCATCATGCAGCAGCTGATGCGCGAGAACCCGACGGTGTCCGCAATTCAAAATCGTTGC  
GGACCATAAGCTTCGGGTTGACCAAGAGGTGATTGAGCTCGCAGCCGACATGAGCATCGA  
GAGCTTGAACCAGGAGATCGGCGCGGACTTCACCGAGTACGTGGGCAAGGTGTTCAAGGA  
CTGGGGCGAGGAATACCATGTTGCAGACCTGGTGGACTACAACGTCAAGCAATTCGTAAC  
CTACTTCAACCCCAATTACGAGACATATGCAGCTGCGGACTACGGTTACACAAACCCAAA  
TGTGTGGCTAGTCATACAGATTGGCAAATGGGGCGAGGTCAACGTCTCCGCGAGATCTA  
CATGCCGGGGCTGAGGGCCGATGCGTTCGCTGATGAGATTCGGCGTCAGATGCGCAACCC  
GCCAAACCTTCGAATCGTCTATCCGGACCCCGCTGACCCTATGTTCGACAGAGACGTTGAG  
CCAAAAGCTCGGCATCCGCGCCGCTGGCGGAACAGGTGGTGAGAAGCGCATAACGCTCAA  
CCTGATTCGACAGTTCCTGAAGCGTGGGCGTAAAGACCCACCGACCTCACGGGTATGGG  
ATGGCGTCAGCAGCTGCTGTTTGATCGGAGCTGTGCGAATGCGCGCCGTGAGATGGAGGC  
GTACCGCTACCCTGACAGCACGGACAAGCCGAATCCAACCTCGCTGGTCTATGAGGAGCC  
GCTCAAGAAGGATGACCATGTGCCCGAGGCGCTGGGTGATTCTTCGTGGGGCACTACGG  
CGAGAAGGCGCTGGTGAACGAGCGTGCCGGAACACGCATTTCCAAGGCCAACATCGAACA  
CCAGCGGACACACCGCGAGCGCCGTAGCACCAACGCGCCCAAGGACATCAAGTACCAGCG  
CCTAACGGATGGTGGACCTGATGCATACCAGTACAAGAATCCCGACGTGGGTTGGAGTAA  
AGAGCTGCTCGACTGATTCGGAGTAGGATAAACACCCATGGGCCAGGACAAACGCCAATA  
CGGCAGTACGCAGCAGCTGCGTGCAGGAGAAGCCATTTTCCCAACGCCGGAACGGATTT  
CGACAAGGCGCGGCTGGCCAGTTACCGGCTGTACGAGGACATGTACCTACCAACACGTC  
CGACTACCAGGTGATCTTGCGTGGTGGCGACGAAGGTGACCAGCGCCCCATCTACGTGCC  
CAGCGGCGAGAAGCTCATCGAGGCGAAGATGCGTTTTCTCGGACAGGGGCTGAAGTGGGA  
GTTCTCCAAGAAGGACGCCAAAGTCGACGACGCCATCAGAGTCCCTGTTTCGACCGGGAGAA  
CTGTGAGCAGAAGTTCGAAAGTCTCAAGCGCTGGACCGAAATCCGCGGTGACTATGTGCT  
GCTGCTGATCGGCGACGACGAGAAGGACGAGGGATCCAGGCTCTCCTTGCACGAGGTGGA  
CACCAGCACGTATTTCCCGTACGAGGATCCGCGTTACCCTGGCCAGGTGCTGGGCGTGTA  
CTTGGTGGATGAGTATCCGCACCCGCATTCGAGAAGAAGAACGAGAAGTGTGCGCGCGT  
CCAGAAGTACATGAAGACGGTCGACGACGACGGGAAGCCAGTCCCCGGTGGCGCGATCAA  
ATACACAGAGGAGCTGTACGAGCCAGGCAAGTGGGACGACCGTCCCGAGTACCTCTCGA  
GCCCGACCACATCAAGAAGCTGAGCACCTCACTGAGGAAGAGCCTCTGCCCGAACATAT  
CACGACACTGCCGGTGTTCCATTTCCGCGGACACACGATTATGAACGCGATGTTCCGGACG  
CTCTCGCCTGGCGGGGCTCGAGTCGTTGATTGCATCTGTCAACCAGACCATGACGGACGA  
GGATCTGATCATGGTGTGTTGGGGGACTGGGCTTCTACGCAACAGGCTCAGCTCCGCCGCG  
TGATTCGCGCGGCAATATGGTGCCGTGGACAATCAGCCCGCTGGGCATGGTTCGAGCATGG  
CCAGACCAACAAGATCTACCGAGTCCATGGTGTGCAAGCCTTGAGCCTAGCCAGACTCA  
CATGAACAAGGCCGAAGAGGCCATGCAACAAACCAAGGGCATCCCCGACAACGCTGTAGG  
CGTGGTGGACGCTTCGGTTCGCCGAGAGCTGCATTGCCCTGGATCTCAAGCTCAGCGCAAT  
CCTCAGCAGTTGCGCAGAGCAGGAGCTAGAGCTGAAGTCAGTGCTCAAGCAATACTTCTA

TAATCTGGTGACGCAGTGGCTTCCGGCGTATGAGGGTGTGGGGATTGACGACGCTGACAA  
GAAGCTCACCGTCACCATCACCTTCCGAGATCCCAAGCCGGTCAACAACGAGAAGCGATT  
CGCACAACTGTTGGAGTTGTGGGAGGCTGGGCTGATCCCTGCGAAGAAGCTCAGCGAGGA  
GCTCAGCAAGATCATGGGCTTCGAGCTGACCGAGGAAGACTTCAGGCAGGCCACCGAGGA  
CAAGAAGACCCAGGGCATTGCCCAAGCGGAAGCCGCCGACCCGTTCCGGGGCGCAAATGGC  
AGCAGAACAGGGTATCCCCGACGAGGAAGACGACCAAGCCCTGAACGGACAACCGTTGTG  
AGGAGCTAGCCATGGCCAAGGGTAGGGCGCAGCAGCAAGAAGCGCAAGACATATGCCGGCT  
TCAAGTCAGAGAGGTCGTGGCGCTGGGCTTTTTCGACCAAGCAGCCCTGGGCACGCGAGA  
AGTCCCACAAGACCGAGGGCGGACCCAAGGACCGTTACCGTCGACTTCCAGAGAGCAAAC  
ACTCTGGTGCAGGCAAGAAGGTCTACATAAGGAAGAAGCGTTGACGATCGAGCTGGAACG  
TCCTGAGGACGAGCAGGTTTGGACACGAGTTCCGCATGAGCTTCCCCAGGACGCGGTGGC  
TTGCCTGGTGCATATGTGTCAGCAGAGCCCCAAGGCCGAGATCTGCGGCTTTATCACCGC  
GAGCCATGGCATCACCCCGAGTCCAAATGTATCATCAACGCCGGAACGCGAATTCATCAT  
GGACCAGGGTCAGATGATGCAGGCGCTGTTTCGAGAGAAAGGAGATCGGCACCTACCATT  
CCACCCGACGGGTGACCCCTGGCCAAGCGCTTACGATACTGATCACATTGGTTACCTGTA  
CCAGCAGGGCTGCCCATGGGATTACTACATCGTGACGAATGCCGGAGTGTTCCGATATGA  
GCACAGGGACAGGCGCGTGGCGGACGTCGTTGAATCCAGAGATGATGATAGTTCATGTGT  
TGCCGGTGGACGACCTGATTGAGCATGTAGAATCGCCGACTGCCCGTGCGATCCGGACC  
TCGAGCTGATCGAGCGTACCGACGACCATTTTGGACAGATGTACAGCCGCAATGCCGCCG  
ATGGTCGGAATGATGAGGCTGAGGAAGAGGATCTGGTTTGACCTCTCCACTCGAAGAGCC  
GACAGTATCACATCAGCGCCTCGCAAAAAGTGGCTCCTGAGATACTTGGAGAACAGGA  
GAAATACGATGCAATCATCGCAATAGCCCTGCTTGACGCTGCGGAAGATGCGGAACAAGG  
CATACGCCAAAGGCTTGGCGACGACCGACCTGGATCGTCGACTCGAAGATATCAACTGCA  
GCTCGCGCAGTCTGCTGCACGTGACTCACTCAAGCTGCTTTTCCGAAACGTGCATTACAGC  
GATCACAGCGGGTCAATCGGCGGCAGCGGTGCGGCGGTGCGAAGCAGGATTCCACGACGA  
TCGCCGATTCTGAATCGGCTGTTCCCGAACCGCGCTCGGCGCGCCAAGTACGAAGACTC  
CATGCGGCAGAGCGCATCCCGTGGCGTTCAGGCCATGATGACGCGTGTGCTACAGAGCAA  
CCGACCCCTTAGCCCGCGAGTTTACCACACGCAAGCCCTGGCCAACGGCACGGTCCGACCG  
AGTGATCAACTCAGCACTGGCGAAGGGTGATGGTGCGGCCGCAATCGCCAAGGCCGTGCG  
CCAGAGTATCCGCCCGGACGTGCCTGGCGGAGTCAGCTACGCTGCAATGCGCCTGGGGCG  
CACCGAGATTAACAATGCATTCCATGCTCAGGCGATTAACGACATGAACACCAAGCCATG  
GGTGGATCATGTGAGTGGCACCTGAGCAAAAACACACAAGGAGCAGGGCTGTCGGTGCGA  
AGTGTATGCTCGCATCAAACGCTTTCCAAAGGAGGCGATTCCAGACAAGCCCCATCCGCA  
ATGCCTCTGCTATATCACGGCTTCGCTGACACCCTGGGAGGAATTCGAAAACAACCTTTCT  
GATGGGAATGTACGACAGCTACATCGACAACAATTTGCGGTAATAGGGTATGGTAATCCG  
CAGGAAGGAACCTCATGAATGACACATTCCTCGCATGGCTCGCCGCTACCGGCTTGACG  
CTGTCTGGCCACGACGACGATGGCGATGGTGACCTCGATGGTTACGACGACGATCCGGAT  
GATTCGGACGACGCTGCATCGGATCGAGGATCGTCTCGACAGTCCGACGACGGTGATGAT  
CGCGACAGTGGCGATGACGCCAATGATGCTGACGACGACGATCTTCGAGCAGATCTCAAG  
GCGAAGGACAAGAAGATCGCCAAGCTCGAGCGGGACCTCGAAGACGCCCTCGAGATGATC  
GAGGAGGCAGAAACCAATCGCCGCAGGCGAGGTGACGATGACTACGATGACGACGACACC  
AAGTACCACGAGCTGCGCGACGAGAACTACAAGCTCCGCGCCCTGCTCAATGGTCCGTAC  
ATCCGTTTCGAGATCTCGAGCTTCCGCGCCAAGGACGGGAATCCCAAATGGGACTGGGAG  
GACCCGCAAACCGTGTTTCGCGCTTCTGAAGACGGCAGACCTCGAGGTCGACGTCGAGACG  
GGCGAGATCGACGCTCTGGAGGAGCAGCTGCGGGATCTTGACGGAACAAGCGGTTCTTG  
TTGCGGCAGTGCAGCTCTCGTCGTGGCGCTTCCGGTAAAGTTCCCGGTGGCTACAGCGAC  
AAGAAGAAACACAGTCGGGAAGACCTCGCGTCCGACTTCTCCGCATTCAACACCATGATC  
TGACTGAGAGGTTGACCAATGGCGAGGTATGACACGTACAACGCCTACGGCGGAGGCTTT  
CCAGCCCCGCTGTCAGCCGACTGGACTGACGCCTACGCTGGCAAGCTGTATGCCGCTGGC  
ATCAACAACGTCGGGGCTGTTGTGAAGGGCGCAGGCCAGTCCGGCGTGGCTGGCGTGCTG  
GTGCTACCAAGGGGGCCAAGGCCGATCCATCGTGACGTCATGAAGTTTGGCGAGGTC  
GTCGAATTCGGTCCCACCTCGGGCACTCCCGGCACTGCCTTCGGCGCTGATGGTACGGCG  
AACTACGCCGACACCAGCACCGGCGCAATCAACTCCACGTCCGGCGAGGCCAAGGTCAAG  
GTCGGACACACCGTCCGTGCGCAGCAGTATCGTCGCCGTGGCCGATGGCGTTGTGCAA  
CCTTCGCCGAACGAGGAGTGAGGCAGCCGATGAAAAGTGAACAGAAGGAAGGCTCATT  
AGGGAGAGTTTCTCGAGATCATCGCTGCGGTGTGCTCTCTGGTTCATGACAACAGGGT  
GGCTTCAACACTGCCGGTGACATCAAGTACAAGACCGCCGATGGCGTGTGCTACGACAGC

CTGTGGAACCTGTTCAGCAAGGTCACGGACGAGTGGAAACAAGCACAAGTCCAAGATGGTT  
CAGCTGATGACGTTCCCGGTACCAACCAGACCGAGAAGGTGCCGCGCATCGGCCAGTTC  
GGCTTCGAGAAGGCCTCGGAGTTCGGCGTCCCCGAGAGCAAGCGGACCGAGCTGAGCTTC  
TAACAGCTCGCGTACGACTTCGAGGACTACGACCTGGCCTTCCGATACACCTGGAAGTTC  
CTGCGTGACGCTCCGTCGTCGACATCAAGGCGTACCACAACCAGGCTCTCCAGGCCGAC  
GCCAAGCTTATCCACCGCAAGGTGATGGAGGCGATCATCGACAACCGCGAGCGCGAAGCG  
GACATCGAAGGCCTGCCCTACAAGGTCTATCCACTCTACAACGGCGACAACATGATCCCG  
CCGTAGTACAACGGCACGCCCTACACCACCGGCCACAACCACTACCTGGTCTCCGGTGGT  
ACGAAGATCGACTCCGCCGATGTGGAGATGGCTGCCGACCACATCCGTGAACACGGCTAC  
ACGGAGGAAAACGGCACGCAGCTCATGGCCTTCGCACACAAGGCCGAGATCCAGGAAGTC  
CGTCAGATCCGCTTCGGGCAGACGAACAACAACCTCGGCCGTGGCGAACGACGACCTCGTG  
CAGTCGCAGGACGAATCGCCCCTGTACCTGCCGAACGCGGACGGCCTGCTCGGCAAGCAG  
CCGCAGTCGATGTGGAGGGGCTTGCGCGTCAAGGGCTCCTACGTCGACGTGCTCTGGATT  
GAAGAGCCGACCATGCCGGCAGGCTCCGTTCTGTTCCCTGGCCACTGGCCGGAACGCTCGCC  
AAGCAGAACCTCGTCGGCTTGCGCGCGCACGAGGACGCGGCGCGGCGCTGTCTGCGTCAG  
ATCCCCGGCAACCAGACCCGGTACCCCTGATCGACAGCTTCTACCAGCGGTCATTCCGC  
ACCGGTATCCGTCAGCGTGGTGGTGCAGTTGTCCTGCAGGTCAAGGCCCTCTGGCACTTAC  
GACATCCCGACCAAGTGGACGAACGGTGGTGGATTCTGAATGAGCCGTGTAATCCTAGAGG  
ACCGTCCGCTGTCCGATGTGGACCGCGCATGGCTCAACGAGCGCAGCATGGGGTGGAAAGT  
TCGAGCTGATCGACCTCGCCTACCTCCGGGGTCGGACAAGGTCTAGGATGACACCTCGA  
CCAAACCGTCCGAGCCGCAGGGCGATGACGACGCGGAGGTGGAGGTCGACGAGGACATCT  
CGAACTACGTCTAAGGCCTCCCCAACAAGGACGCCGTCAAGGAGCGCCTGATCCAGGAGG  
AGGTGGAGTTCGAATACGATGCGAAGCGTGGGGAACCTCAATGGCCTCCTCGCGATCCACC  
TGCAGGAACAGCGGTACGCCGGCAAGGACGTCGAGCTCGGAGACGGATTGTGGCCTCCGA  
AGCAGATTTCCAGCTGTTTAAGACGCATCTGTGCGGGCGTCGATGGTATTTGGGAAGATTA  
CGAGATCTCAGATACCATCGACGCCCTCGGGTCTGTCAGCAAGGCAGTGCGTGCTTACTG  
GTCCAAGGTGGTCAACACCACATACTGCTGACCGATGTGAGCGAGAGGGGCAGCTCGCA  
TAACGCAACCATCATCTACCGCAATGCCATGGAGCAGTTGCAACGGTGGGATAAGATCAT  
CAAGGAAGAGGACGCCAAACAGGAAGTCGAGACCGTCGGTAATGTGAGGTTCAACCGAAT  
TTCGAGGAATTTCTCGTCATGACCGTGTGACCCAGTGCGCAAAGGGGATTGGAATTCCTG  
CGTGCTGGCACACGCGCATTTCATCGACGATGATCCGACCACGATCGTCCTCAATCGTGGC  
CAAGCAACCTGCGTGGAGAAGCCTGGCGGCGGATAACGATTTACCCCAGGGGCTCCACGA  
ACTGCACAGATCTTAAAGGTCATCAACCAAACTGGCGACGGGTCGGCACTAACCGAGGCC  
CAAGACAGCATCCAGACGCTGGTACGCGAGTACATGCTGCTGGGGGCTCATGATTCTGTG  
GCCGAGGTTGGCGACTGGTGGGTGACGGCAAAAATCGGAACACAGTGACCGAATTGCTC  
GTGGCAAATGGCTACGAGCGCAAATGGCGTGTCCGCAGCGTGGGGCTGGAGCCCAATTAT  
GGCTAAGATCGAGTTCAAGTTCAAGGACTTCGAGCTACGCCAGGGGGTGGAAAGATATGGA  
AGCCAAGGTCGACCGCGCCATGAAAGGCCACCAGCAATGACCATGCGGTCGAGGGGCACGGC  
CCACATGAAGGAGCATGCTCCCTGGACTGACCGGACGGGTGCTGCGCGAGCTGGTTTGCC  
CGCTGTGGCCAGCACTCCACAGCCCGACCGCTACGAAATCGTGTTTGCCACACGGTGCA  
CTATGGCATCTGGCTCGAGATCGCAAACAGCGGTCCGGTACGAGATCATCATGCCACAGT  
CCATCTTGAGGGCAAGCTCATGGCTCAGCGTCTTCGCGGCCCTCCTGGGGAGACTCCGATG  
AGCAGAGCCGACGTGCTAGATGCGCTCCGGGCCGATGTTGCGCTCGGGCAAAGCTCGTT  
CCGGGCAACATTCTGACGAACTACTCCAAAGAGGGTCCGCCTAACCATTTGGCTCCAGGG  
CCATTTGCAGTGATTGTTGGGGTGGCAAACGATTGACCTGCGGTGAATCGCGGACCC  
AGAGACGTGAACATCTGGGTTACATCCCAGCAACGTCAAAGCACTGACTACACGCGGATC  
GCTCGAATCCTCAAGCGCACCAAAAGAGATCATGCTGTCTCTGGAAGACGTTGCTGGCGCT  
GATGGGGCCCCTTGGTCAGCGCGCCCTTCCTGGCGGAGAGCGATGATCTAGTTGACCCG  
GGATTCGAAACGATCACGCGCTACGCGACATTCAGCGTGCTCAGCAGAAGCACCTGAAGT  
CAAGTACGATAACCAACAGGAAAGGATGCTCTCATGGCTAATCAGATCACCCACCGCCC  
TCGGATGTCAAGCCCGCAGAGGCCCTCTGCACCCGAGGCCAGGATTCGTCCTCGGGCAAG  
CGGAAATCTCTCAAGTTCGTTGGCACGAAGAAGATCTCACCTTCGCATCGCGCCGGCAGT  
CACTACCACATCACCGAGGCACAGCTGGTGGTAGCCGGTGTGCCGCGCGAAAGGTGCTTC  
AAGTCCAAGGGCTCTGGCAAGGATGCGCTCGCTGTGACCGAGGTCACCTTCGGCCCCGAG  
ACTCAGCACAAGGTGCCGCTCGACGCCTTCTACAAGGAGTCCGCAGACCGGCTGTTGCAG  
GAGCCGGACATCGTCCTCGTTGAGGAGTAGGGAACGCGTGAGTGCAATACCGATGCAAGG  
GCAAGGTTACGGGGAGCTGTGCGAAGACGGTCTCCTCGTGTCCATGTGCTCCACATCA



CTTGACAGGAGGGAAGAAGCGATCGTTCGTCCTTCACTACATGGACCCGAACACCGGCA  
CCATCAAATACACCTCGCGACCATAACCGGAACCCATTGAAAGGTAAGGAAAATAGCAATT  
GACACCGCATTGCCCTATGGTCTGAGGGACGTGAAGATCACACCCTATGCAGACGAGGGT  
GGCACCGTTCTCGGCGATACGAGCTACGACCTGCCGGACGCACAGACGTTACAGCTTCAAC  
GAAACTGAGGAGTTCGCCGAGCTTCGTGGCGATGACCCGGCTGGTAGCGACGCACGGCAAT  
GGCGCACAGGTCGACTGGTTCGCTGGAGGACGGTGGCATCAGTCTGGTCATCTGGACGATC  
CTGACGGGTGGCCAGTTGATCCAGTCCGGGCTGACCCCGAATCGCAAGGAGATCATGCGG  
AAACGCGGCACCGACGTGCGTCCGTACTTCCGCGTGGACGGCCATGTCATGTGCGGAGTCC  
GGCGGCGACATTGTGGCGCGCGTGTACCGCTGCCGCTGCAATGACAACATCGGCGGTGAC  
TTCGGCGACGGTACTTTCCACATCACCAGCTGCTCGGGTGTGCGGTCTGCCCTGCTGGAT  
GAGGCGAACGACCTGCTGTACAACATCATCCGTAACGAGACCAAGACGTCTCTGACGCTC  
ACCCCTGAGCCCAACCCGCTGCAGTCGCCGGAGAACCTGTGCGCCGGCACGACCACCGCC  
ACCAGCGTCGTCTGTGCTGGACGGAAGTCGTTGGCGCGGACGAGTATCGGGTGCAGAAT  
TCTCCGGACGCCGGTGTACCTGGAGCCTCGTCGACGACGTGGAGGACCCACCATCACA  
GTGAGCGAGCTCACCGCCAGCACGGCTTACCAGTTCCGTGTGGCGACCAAGGTGCGGACGT  
GCGCTGCCGGTGTCTCGGCTCCTTTGCTGGTACCACGCCTGCCCAAACCTAACCCAAG  
GCTCTCTGGGGCGCTGGGTGTGGCAACTCGACTGCGCCCCAGAGATTTCCATCTAGAGCC  
CAAGGAGGCCTTGATATGCCCGAAATCAGCGAGCAAGAGTTCGAAGAGCTCAGACGGATC  
GGAGAACAGACTCTGGCACAGGAGAATGCCCGCAAGTCTTCAGAAATCGAAGAACCGGCC  
AAAAGGCCGCTCTTGAGGCCCTGGCAGAGGCCGAGGAAGACAAGTTCCTCGTCAAGGGC  
TGGGGCAAGGATGTCGTCCCTAAGACATTCGACATCCAATGTCCCAGCGGACAGTGGTGC  
CACGCCAAGACTTTGACCATCGAGGACGCGATGTCGCTCGGTTTGTGGACAGCCTTGAT  
CTGTTACCAGTACGCTCATGGCTCCGATCATGGCCAACGACGAGGACAAGAAGCGCGAC  
GAAGAAGAGCGGAATGGTGGTCTCCTCAACAGCCTCAAGGATTCTGGCAAGCGTGCCAGC  
GTCTTCGGCACGGTGAACCGTGTGACGGCGCATTGCGTGTGTAAGCCGCGCGTGGTCTC  
GAGGACGACGGCAACCTCCCCGAAGGCACTGTCTTCGCCGACGACATCCCGTTCGCTGAC  
AAGATGCACATCTTCCGGAATGTGTTCTGGGGAATGGGGAATTCCACGATGAACACGTTT  
CGCGAAGGACCGGAAGGCAGCGTGGCAGCTGTACCAGATGGCGCTCCTGTACGGGACGCG  
TCCGAGTGACCTAGTCGGTTTGGAGGATCCGTTGCTGCGATACTCCTCTGATCGAGGGCT  
GCGGATCTTCGGCGTAACGGTGGAGAACAGGGTTCGATGATGCTGGCCATGCTGCGGGCCG  
TGGCGCCGAGAACAACCGGAATCGGGAAGCGCTTCAAACCGGTGCGCGCAAGCGCACCTT  
GGCCAAGCTGCTGGGTGAGGACATGGTGTAGTAGCTCAGCTGGCTTCCGAGATCCGGCGAA  
GGCGGTGTGACGTGCCAGATTACGACCTTGGGCGTGCCCATGGCAAGATCGACTTCGACG  
TTGACAAGAGTGGTGTTCGACGCGCCGAAGGCGCGATGGACCGCATGGAGGAGTCGGCCC  
ACAGGGTAGCCGAAGGATTCGACGATGCTGAGAAGTCAACCTCTGCTTGGGAGAAGACCA  
ATCGCAAGGCTGTGGGCACCACTGAGGCTAAGGCGCGTGGCGTTCGATCGCTACAGCCGCA  
TTCAGGAGGAAGCCGAGCGCGCTGCAATTTAGCGTCGCAAGGCCGAGAAGGAGCTCAAGG  
AAATCCTCGATGCCGGTAAGGCTACCGAGGAGGAAATCCAGAAGGCCATCGAGAAAACCA  
ACAAGGCCAAGGGCAAAGCGCTACAGCTCGCCAAGGAGCGCAAGAAGGCTGAGCGCGATG  
TCGAGCGAGGTGCAGCTGGCCTGCCACCGAGCACGAGACCAAGCTCAAGATCAACACCA  
AGGACGCCGATCGGGACGTCGATCGTTTCTTCGACAATGTTGATCGTCGTGCTGAACGTA  
GTGCGCTCGTCATCGCCAAGCAGGGCACAGGAACCATCAAGGCTGGTGGCGGACGGATG  
GCGTAGGTGCGCTGGGCGGGTTGCTGGGGGTACCGGGTTCGGGTGCTACCGGCGTCCGAA  
GCATCGGCATCTTTCAGCATGGCGCGGCGATCGCTGATCTGTCTGGTGCCTGGGTGTTT  
TGCCCGGCGTTCGTGGGTGCAGGTGCCATCGCGATGGTACGATGCAGCTCGCCACCAACC  
GAGTCGGCGAGGCTCTTAAGGACCTCGGAACCGACGACTTCGCCGACGCGATCAAGGAGC  
TAGCTCCGGCTGCACAGTATGTGGCCGTTGAGCTCAACACGCTTCTGCCCGTGTTTAAGA  
ACTTCCAGAAGGACGCCGAACAGGCGCTCTTCGTGCCGCTCAAGGGTGTGACCACTGAGC  
TGACGACGACCTTCTGCCGACGATCCAGGGTGCACCTAACAGATCGCCAACATGTTTCG  
GTCGCACCGGCGCTCGCCTGGCGGAATGGCTCATGAAGCCAGAACAGCAGCGCGAGATCC  
AGAACTTCTGTGCAACACCGTTCGAGGGCTTCGAGCGTCTGTGCGATGCTGCTCAGCCAC  
TGTTGCAGGCATTCACCGACATCATGACGGTGTGAGCGGGGAGTTCTTCCCCACATCGGTG  
GTGAGATCGCTGAGGCTGCAAAGGAATTCGCTGGCTGGTTCACACCATGCGCGAGAATG  
GCGAACCCGCCGCGTGGATCCGCGATGGCATCGAGGAGCTTAAGACCTTCTTTGTGCGC  
TCAAGAACTTTGGGCTGGGCCTGGTGTACATCGGCCGATCGCCAACGAGTTCGGCAGCG  
GTTTCATCGCTCTGTTCGAGAAACATAGCCAGACTTTCCTTCTGGACGCAAAGTGTG  
AGGGACAGGAATCCCTACCAAGTTCATCGCCACGAGTGAGGCCGCGCGTGTGCTCA

TGCCGCTGCTTGAGAAGCTGGGCACGCTGTTGTTTCGGCACCATCGGAGCAGGATTGGCGC  
GCTTGGGAATTGAGCTCGCTCTGGCGTTCAACTTCCTGTTTCGAGACGCTGAATGTCGGCT  
TCCATTATCTGATCCAGGTGCTGATCAACAGCGCACCCCAGATCACCCAGTTCCTCACGA  
CTGTGGGAAGTCTTTTCGTAGACATCACAGACAAGTCGGACCGCACTTGCAGGCATTGC  
TCGGGACAATTGCAGATTTGTTCTACAAGCTCGGGCTAGCCATTAGTCCGCTAGCGAGCG  
CGCTGGTTCAGGGTGTCAACCTGATCATCAATGTTTTCAATGATAAGTGGGACAGAATCG  
CCAACAGCCTCAATGGCTTTGGGGCTTCTGTTGCGAAGGCGATTGAGACTGGTGATTGGT  
CTGATGTCGTTGATCGCATCACGAACCCGTTCCAGCCCTTGGGCGATGCTGCGATGCAGG  
CTGTGCTCGACGCTATCAATCGTTGGACCGAGGATATCGCGGAAGCCGGTCTCAAAGTCA  
TGATCGCCTAGGCCGACGAGATCACCCCTGGATCGACATCAATGCCCCGACATGGGGCG  
AGAAGATCGTCAAGGGGCTGCTCGACGGCTTGGTCGGAGCTATCCCGGTCATCGGACCGG  
TGTCCAAGAAGGTCCTTGGGGCGCTGAGCGATTGGTTCCCGAGTTCTCCGACCAAGAAGG  
GGCCGTTTTTCGGGTACCGGCTGGACGCCGTACCGTGGCAAGGCGTTGATGGAGGGCGTCC  
CCGAAGGCATCTTGGCTGGCGGAGCAAGCGCCCAGAAGGCCCTGGGATCGGCCGTGGGAG  
GCGCGAGCGCCGGGATGAACTCCGGCATCAGCGACCTCGTCAAGGACCTCACCGAGCTCA  
CGAGCTTTGGTCGGAGTCTGCTCAGCTTTGTCCAGGGCATCAGCGACGTCGTGTTCCAGA  
CGATTAAGTTCGCCACCACAGACTTCAAGACGGGCGAGAGCACCTGCCAAAGCGCTTCG  
TGCGCAATGTGAGCGATGAAGAGCTCGCCAAGCGTCGTGAGGACAAGGCGTATCGCGACA  
GCCTCAAGGAGCAGTAGGAGACCGGCACCGGTCCCACGGGCGCTCTGTATCCGGAAC TTC  
AGCGCCTGCTTGAAGCAGACCAATCCTGGTGGAAACAGGTGAAGCCGCAGTTCCGTTGATCC  
AGAAGGAAGACGGCACCTGGACTTCTCCGAAGAAGGAGTGGGCCAAGCTCATTAGCGTG  
AGTCGAGTGGCAACGCCACAATCACCCAAGGCATTCAGGGCGCCAACCTCCGGCGGGGAATG  
ATGCCGAGGGGCTGTTCCAGATCACGCTAAGCACTTGGAAAGGCGTACGGGGCCACAGACT  
TTGCTCCGAACGCGATGGCCGCCTCTCCGCAGCAGCAGGCGATCATCGTTGCGCGGATCA  
TCCAAAAGAATCCGAGCGGGTCTGACTGGGGTGCGAACCTTCCGGGGCGTGAGGACCCCG  
AAGAGCTGCTGAGAGGCTTGACGACTGCCAGCGCAACTAGCACGACGAGCAATCCATCGG  
CCAAGTCGAAGGCCAAGGCTGCAGGCAGCGAGGAAACGCTCAAGCCTGCGACTGGCCTCC  
AGATGGAGGAGTTCGGAGACGGTTTTCTCAAAGGACAAGAAGACCGAGGCCGTCTATCGAG  
AGATCGATGGATCTTATTACAACGTCACCGATTTGGCCGTCGGCAAGGACGGCAAGCCGC  
TCCTCAACTAGGACGGCAAGCCCATCGCCCGCACGAGCGCCAACAAGAGCGCGTCTCGGC  
CCTCTGCGCAAAGGCACGGGAGCCGTATGGCCTCAAGCCTGGCACCGATACGCATGGCT  
ACGGGAATGGCAATGCCGATGTGTTCCCGAGTGGGTTCATGGATCTAGACGATCAGTTCG  
GCATCAAGGCCAGCACCTACAAGGGTTCATCAGGAGTCTTACCGCAACGAGCCTGCCTATG  
CACCAAATCCGCAGCGCCTCAACCGAGGGATTGACTGGGTCCGGTCCGACTAAGAACCTGC  
AGGCGTTCGCCGAATATCTCGAGACGATACCGGACGCCCTGGAGCAGGAGATCTGGAAGA  
ACCCCGACACCGGCCGCAAGACCGGTACCGCTGGCGGAAAGATCAACCCTGGATACTATC  
CGCAGGACACCTATGATGTCCACGGCGGCAATGATCCTAGCAACATCCACGTTACACCC  
GGCAGTCGATGTCGATCCCGTTGCCGGGCGAGGATTATGTGCCTGGTGAGACGCCGACCA  
GCACGGGTGATTCGATCCTGGACGAACTCCAGAAGATCACGGCGAACACCGAGGAAAGCA  
GCAGCACCGAGGACAAGACGCTGCGCCAATTCCTCGATCAGACTTCGATCCTGAACGAAC  
TCGTACGGCCGCACAGGATCCCAGCAGCTCGGATGAACAGGTACAGGCTGCCCTGGGCG  
GGCTGCAGACAGCCATCGCCGCTCAAACCAAATGGACACGCCCTGCCAGTCGGTATCTTG  
CCGATCAGCTGTGTGGCATGCAGAGCCAGATCATGACAGATCGTGGCTTCGGCGTGGCCG  
ACAATCCTGTTGATGCGGCTCAGGCCATCGCCAATGGGGCGATGGGGCTGGTTGCCGACG  
TCTTCAAGATCATCGACGACACGCTCAAGTCCATTGAGTCGGCAAGCGAGATCAGCTCA  
CTCTTGTTCGCGGTATTGAGAATACCGAGGACATCATGAAGATCATCGACAACGTTTCATA  
GCTTCATCCAGCTGGCGGGAACCATCGCCCAGACGGAGACAGACGGCCCCGAACCTTCGCGA  
GCTCGATCGCGAGCATTGCCGGCGGAGCACTCGGTGGCCAGGGTGCCGTGGGCGGTCTTC  
AGGCGGCAGCGGCGATCTCGGGAATCATCACGTCGGTGTCCAATCAGTCAATGCCGCAA  
TTGATCTGGGCCAGGAAGCGTACCGAATCACAGCAAATACTACGGCAAGTTCCTCAGCT  
ACCTGCTGGGTGCTGGCGAAGGTTCTCTGATGGGCGACATCAGATTCCTTCTGGTCAAGA  
ACGAGTGGACGCTCAAGGCGTGGTCCGAGGACAATCCCGAGGACAAGCGCAGCCATCAGG  
TTCCGGCCTGGCTGCGGGATGAGCGGAGCGTCGCGGAGCAGGGCGGCAAGATCCGAGACC  
TCAACATGTACATCGGGCCTGGCACAGACCGCAATGAGGCCATGAACGAGGGCATGTGTC  
GCGTGATGACTGACCAGGGAGGGGTGTTACCAGTGAGTACTAATCTCGAACCTGGCCAG  
TACCAGATCGGAGATTTGGTGTTCGGCCGTGGCACCATGTATCCTGTGACAAGCATTAAAG  
ATCCAGAGCTCCCAAGTGCAGGCACAGGATTTCCAGGTGATTCGCAGCGACGAGGTGCAA

TTCGGGCAGGACAGCCTGCTGCCCGGCCCAATCGTGTTCGAGCTCGGTGTCTATGATTC  
AAACGAATCGCCAATGTGGAGCCGTACACAGGCCGTGTCTTCAACGAGGAGCCCTTCAAG  
AAGCTCCTCAACAAGCTCGCAGCCGAGTGGCGGGGTGACGACGTCCGCCAGAACTGGGGT  
GCGATGAAGGCGCTGAAATGCTGCGAGCGTGATGGTAAGGTAAGGTAAGGTAAGGTAAGG  
CCCGCAAGTTTCAGACCACCAAGCGATCTCGGAAATCGTCTTCTTCACGGTGACTGCA  
GAGTTTCGTTCGTGCAGACACGCTCATGTACTCCGACAAGGAGTCTGGCGTCGAGGTGCTC  
AAGGGTGATGTCCCGACAATCATCAATCGGGCTGACGGCGAGGCCAAGAGATGGTTGCGC  
GTGGTGGGCTATGGGCCGCTGACGCACCCGGTCATCACCATCGGAGACCAGCAGGTGCGAG  
CATGACGTTGAGTTGGCAGATGGAGAAGCCTTCGAGGTCAGCTCGTATCCGTGGAAGCGT  
CGTGCTATCAACAATTCTGGACAGAACATCAGTTCGAAGCTGATCGGCCGACACCCAGTAC  
CTCGACCGGATGCAACTCCGTCCAGCCGGAGTTCCGACGCCGGTACGGAGGACCTCCGAC  
GAGATCAACACATGGGTCCCCGAGCTGGGCAATCAGTCTGGATGGAGACGATAGAAGGG  
GTGAACAACCTCAATCTTCCCATCACCTTCAAGACGATCCATGGCCGGGTGGTTCGTGCGA  
TTTGATCTGTTCAATCCGGAGTTCGACGAGAAGTTCATCGGCTCGGGCGTGCTTGCGGA  
ATCAGCGCCTGCCTGTACACTAAGAAGACCTTCGCCAAGCGGAGCCAGTACTGCGACGCC  
AAAATCGTTGAGCCGTGGGGTGTTCGGAGCGGCATCGTCATCCTGAGTAATGCCACGATG  
ACCAACTTCGCACTGCTCGAGGTGACTTCAGGACCCGACAACGACTACCTCAAGATCCGT  
TCTGGCAGCGCCTACAACACATACTCGACCGTCCGGGACAGGTGGAAGAATCCGAATAGC  
TGAAAGAGACGGACGTGGTGGGAATCGGCTCCGCGTACGATGAGGACACCGAGAACACC  
ACCTACACAGCGTATTTCAATGGCGATCCCGTCGCTGAGTGGTCCGACGAGGAAAATGTC  
GTCAGCACAGCTGCGACCAATCGGTCACAGGGATTCATCTTCGACATGGAAAGTCAGCTT  
CTGACCATCGGCACAGGGTTCAGGACATTCTGGCTTACGACACTCGGACGGTGCAGGCT  
CCTACCGGCAGAGTGTTCGTGCTCTGGCGTTATGCATACACGGTGGCCTCATGAAAGCCC  
ATGACCGCAACCGATTTCATCATCGAGGAAGCGCGCACGGGCCGAATCCTCACCCGCGATC  
TTCACGTAGAGAATCCGAATATCCTCAAGAAGCTCAGTGGCCCTTGCGTTATTGAGTTTG  
ATGTCGATCACCGACACCCCTCGGTCCAACACCCCGACGGCACAGGCCCCATCCTGTTCA  
AGCCCTGGGGCCACTGGTGCCATGTTCGAGCGCGAGATTCGGGGCAAGCGCGTCATCATCG  
CCTCAGCCCTATTCTAGCCCAGAGAGGTTCGACCAGGAGACAGACCTGCTGAAGGCGCAGT  
GGCAGGGCTTCTCGGGATATCCCAAAGACCTTCCCTGGCTACAGAACTGGAATCCGATCG  
CGGTCGATCCATTCGGGATCGTGCACCGCATCTGGACGCGACCTCCAGAGCTATAGCAATG  
GCAATCTCGGCGTACAGGTGTACTCTCCTGGCCCTGGCGGAACACGCGTCACTCCGCCAA  
ACAGCAACACCTAGCTGCTTCCCTGGATTCTCCTTTGATAGCCAGCAGTTCATCCAAGACT  
TCTTCGCCATCTTCATTTCGGCGCGTTGACTTCACCGACTGCGGCGATTACATCAACAAGC  
TGGCTCGCGACATTCAGTTCGACTACTTCGAGGAGTCGGAATGGAACGAGGATCACACAG  
CCATCAACAAATTCATTTCGGCTCGAGTATCCGCACGGGGTGTATTCCAAGATAATCTGA  
GCTTCCGGATGAACGAGAATGTGATCCGGGGCAAGAGATAGATCGAGACAGAGATTGAGT  
GGACCAGCGACATTGGCATTTCGCGGCTGGTTCGCCGCAAGGTCTACAGCTCTCAGATCA  
GCAACGCCGACCCAAACCGCGACAGACGCTTCATCCTTGAAGAAGATGCTCGCAACAACA  
GCACCGAGCGGTCTGAAGCCTGGGCGCATCGGCAGCTGACCAGACGTCAATTCCCCTCGT  
AGTGGGAAACAATCACCATTAATATGCATCATCCGAATGCTCCGTTCCGGTACGTGGGATG  
ACGGCGACCAGATCAGAGTACAGGGGCTGATGCCGTGGGTTCGGATATGTTGTCCAGGCGC  
ACAAGATCATTGCGTGCTCCCTTGACGAGACGTCGGCGACATGCGAATTGACACTTCGAG  
CTGAAGGCTCATTACGCTACGATCCGATCTTCTTCGAAGGCAAGCTTCCGAACCTTCTGG  
CGAATCCGAGTTTCACCGCCAGCATGTTCAACTGGACTGCCGCTCTGGGCAGCTGGTTCG  
GTGACAGCCTGCGAGGCAAGGATTCTCTCGGAGCGGCTCGTGTACGTGTAACGGCCAAG  
AGAAGCTGCACCTTAGCGAAGCCGTACCAGTTGCGGCAGGCGATGATGTAACGCTGAGCA  
CGTGGGTGTATTGGCAGAATCTCGTGGCCACCGGCCGAGCCGCTCGCGGTGATCCTCAACA  
CCTACAACCTCGGATGGCGAACTGCTCAACACCGTGTGTTCGATCGCACATCGGGCTCTG  
GAGAGTCGCCGGGCTGGGTACAGCTCAGCAACGCATATAACGATTCCCTCAGGAGTCGCGT  
CGATGCGGGCTGGTGCACGAGTCATCGAGGACGCCATGACCGGGTCTGTATGGTATGACG  
AGTTCTACTTCACGAACGACGACTGATGGCCTACGAGTGCAGAGCAAGGAATCTCGGGC  
TCTGCGGTCTATCCAGAGCAAGAACTACCCTGACACCAACAAGGATTTTCGTCAAGAATCT  
GAGTCGGCTCAACAGTTCTGTTGACTACATCTCGTCTACATGATCATGCAAAAAGGG  
CATTGATCACGCCAATAAGAACTTCATCGAGCAGATCCAAAGTTTCATCAATGATCTGAT  
CGTTCTGTTTGTGGCGGAGAGCCCACGGGCATCGAGCTCGGCGACCTCAAGTACATCAT  
CCAGGCTCTGGGCGCGCTGTTTCGGCTTCAACGGGCTATTCCCGATGAGCTTGATCAACGC  
GGTGCAGCACTTCTTCCCTCGGGTATGTTGTTCCGCTGCCACAGTTTACAGACGTCATCAC

CGACACCATCATCGCCTGGGCCGAAGAGCGCGGGCTGGACCCAGAGTTCGTTGATGCGCT  
GCGCGAGCGCGCCGACGCCATCAATGCTCTTGGCATGAGCATTGGCGATTTGTTTCGCCAA  
TATCATGAGTATCTTCAACATCTTTTCAGATTCCAGAGCTCGGTACAGGACCGCTCGCCGA  
ATTATGGGATCTGCTGGCAGGCATTTTCGATGGAACCAACGGGAATGCGCTGCGGCCGGT  
ATTCCTCGCCATCAGCAACTGGACCATTCCGTTTCATCGAAGGTCTCGCTTCACTGGTCCA  
CTATCCGGACGACCTGGTTCGACGGCCTTGCCAACGGAAAGTTCCTCAAGATAAACTCACC  
GCTGAATGCGGCAAATCTGTTTCGGCGCTATCGGATCTAATCTTATCAAGGTCGTTCTCTGC  
TCGTGTACTGACCAATCGTCGCGTTGAGCTAATCGACAATCCGCACTTCACCGAGGATGC  
CATCGCTCCGGGCAGCGGGTGGGCCGTGGGCATGCTGTCTCCCGCACCGACAATGATGG  
CACAGGTAGCGCGACGGTGATCGCCAACGTTTCAGCCGCACGCACTCAACACCGGGGCAA  
CAAGGACGACAAGATTCCTGTCGGCCCTGGACAGCGTATTCCCTTGGGCATCTACATGAG  
TCATGACGGCGCTTTTCGCTACAGGACCGGCGATCATTCCGCAGGTTTCGGCGATTCAATGG  
CAACATCCCTATCGTCTGCCTGTACGAAATTGGATCGTACACTCCTCCTGTGGAAGACCT  
GCCGTGGCCTGGCCACAAGCTCGAGGGTGTCTACACAGTTCGAGGAAGATGTCACCCACAT  
CCAGGTGCGCGTGTACGTCACCGAAGCCGCCCTGGCGGGTTCGGTATCGCATTGACGATGT  
GGATTTAGCCAAGGTCACCGACCTGGCCTTGATCCCTGGTCTGTCAACAAGCCTTGAGGC  
GCTCGAGTCTGGCCAGCGTGTCTGTCAGCACGCAATCGCCAACGCGGTCAGCAACATCCC  
GATCATCGGCGATGGGCTCGAGGATCTGATCAATGCGCTACAGAACTTCAATCCGGCCAA  
TATGGCTGGAGCTCTGGGCAGTTCCTGCTGAAGGGCGAACTGTTTCGGGATCATGGGACA  
CATGATCGCTGCGGCGCGTGGTGTTCGGTGTTCGGCGGTAGCCGAGGATGCCACGCTCGC  
AGACCTGGACAACGCGATGAATGCGGCGCTCAACAATGTTCGCCGGATCCGACGAGACAAC  
CTTCGTTCGATAACCACGACATTCGTTCCGGTGAATGTGGCTTGACCAACTACATTGATGT  
CATCGGCGTGGGCAAGGGCCAGGACGGCATGGACGGCCCGACGGTGCAGCCGATCCCCGG  
TGTGTTTCGGACAGGGTGGGCACCTGGGAAAGGTGCTTGCCACCACATGGGTCAAGGGTGT  
CCACTACGACAATGATCTCACCGGCTTCCAGGTCACCTTCAACAGCAATGGCTCTGTGAC  
CTTCTCGATTCCCCGTTACAGCCTCACCTGTCCTCCTGCAAGCGGACCTCCGCGCCAATT  
TCAAATCGGAACAAGGTGGCACGGCAAGGTTCCGGGCACATATCTCTACAACGACCGCCC  
ATACGCTGCCGGCGGAACACAAAACCAGCCTGGAGGCAACGGAATTGGACCGGGTGGCTC  
TGGCGCTGGTGGTGGCGTGTTCAGAGTGGTGGCCGAGGCGGACCTGCCGGCGGATGGGT  
GCGTCGGCGTGTCTGCTGAAGCAGAGAAGCCGTCTACTGGATCAGACACGACGCCTCCGAC  
GCCTCCGAAAGTTAGCGTTGTCAATGCGACGAATGACACTCTGTATCTGCTCCCGAGCGG  
AAGCGTGGACCAGTAATGGCTAATCATGTTCAGCGACTTGGCCGGATATCTGTTTCGACCTT  
GATGACTCAACGGCACCCCTCAACCCAGAGCCGGTCTGCCGAGCTCTGGTCTGCCGTAT  
CCCATAACGAGGCCTTGACGCAAACACTGACTATAGCAAACGCATCTACGTCACGGCGATC  
GACAATGCTGGCAATGAGACCGACCCCATCCCGCTGGAGGAAGCTCACAAACGAGCTGAGC  
CCATTCCACGCCAGCAAGCTCAGCCCCACGCCAGAACAATCGCCCATGAACTCAACTCGC  
ACCACTGCCATCGACAACATCATCAAGGGATGCCTCGCGGCTGGTTCGGGTCTTGGTGTG  
ACGGTGGGGATTACGAGCCCGTGGGGATACTACCTTGGCAGCTTCGGTGAGGGCACCGGC  
GTCGACCGACACTTCTCATGGTCAGCCAAACCAAGAGCTTACTCATCTGGGCTGTGATG  
ATGGCCATTGACGAAGGCCGTCTCTCCCTCGACACCACAATCAACGACATTCTCGACACG  
CCGTGGAGCACCAGTCCGACCATTGAGCAGCGGATGATGATGCGGTCGGGTATGTACAAC  
TACCAATCGGACTCGGCATTCGGTCTGCAGGTGGCGATGAACCCTGCGATGTCGTACAGC  
CTGCAGCACATGATCGTCAAGAGTCGCAACGGCGCCAAGCAGTTTGAGCCTGGCGAGAAG  
TATGACTACAACAACGGAAACTCGGTGCTCTAGCATTGATGCTCGAGGAAACGGACCCC  
AAAGCCCGCAAGATCCACGAAATCATCAAGCAGGACATCCTTGAACCGCTGGATCTCGTC  
AACACGAATTTCCCTACTGTCACCAGAGGACCTCCGGCACCTTCTGCCATCCTGTTCTCG  
TGGAACCTCTTCTTGTGCTCATCGGCCTCAAGCTCCGCCAGAACGTGACCGTGCAGAAC  
CCCAACATCACATGGGCGGCTGGCTGTATGACCAGTGTGCTTGGCGACATGCTGAAGTGG  
GGCAAGGAGCTTCGCGACTGCACGCTGCTGTCACCAGAATCAGCCGATCTGCTCCACACA  
ACTCACATCATGTATCCGAGTGCACCCTGTGGCCTCAACAAGGACGGTGCAACAGAATTC  
GGATACGGATTGCACGGCCATATCAAAGTTGGCGCCTGGCGGGGATCCGACGGCAGTTGG  
ATCGGCTGCGACTCTGCGACAATGTACGAGCCCACCACCGGCACCATCATCACGGTGTAC  
GAGAATTTTCAGACACCGGGATTGCTTTCTTGGCCACAGTTTGGCACGAATGCGCGGAG  
TATGTGATGCCGGGGTTCGGCGACGCATCCGGGCTACCAGACCGGCGAGAATGCGGCAGGT  
ACGGTCCGCACATCGGTGAAGAAGCTTGGCACGTTGTCCGAGGGTGCAGGTGTTTGTCTCT  
GGCACCGAAGGCGTTGAATTCGACAATGCGAGTGCAGTGCAGCAGCTCTGGACGAAACC  
GCAGCATTCAACATCGCGTCCGATGCAAAGGCATTGGTGGCCTGGGTTTCTGCAGAAGGT

AGCACGACTGGGGAGGGCGCAGCCGTCAAGGCCAAGATTGATGGCATTGAAATGGAGAAG  
GTTGTGTCGACAACCGATGGCACCACCTCCGGGAATGGCCTGGTGTGCTTCCGCCACCTC  
AATCCGCCGACCGGGGCGAACAAGAAGGTGACATTCGAAGGGATGGGATCTCTTGCACAC  
TATTATGCCAATGGCGCAGCCTCGTACAAGAATGTCCGGGTCCTTTGGAGCGCCTGTGAAG  
AACAGGGGTTCCGGGGTCGTCTGCCAGCCTTACTGTCCGGCGGCACAACATCTTTGGATATG  
GTTGTGGGCGGATACTATTTCCAGGGTGCGCACAACCTCCTTCAACAAGAATGTTTCGTGGT  
GTCAGAGGTCAGGCAGCATTTCGTCAACCAGGGCCTGTTGTTTCGGAGACTCTGCCGCTGGC  
GGAGACGTCACCTTGACCGAGACATTACGAGCTCGATTTCAGTGGTCAGGGACGGCGTTC  
GTTCTTCCGGGCTGAGGAGGGGCTGATGGCTGTCCGATGGAGGGCTGAGAGCTTCTCGATAA  
TACCGACCGAGCTTAACCAGCTCGTCAATGAATCTGTCCGGTGACCAGAGCCAGTATGGCC  
TTGCTACCGTTGAACTCCAGAAGCTTCGAACTCACATGGAGGCAATCGCTTACGACTATC  
TAGTGTTCGTCCGGCGACTGAGCTCAAGAACTCTCCACGAGCGCCTCTGCTGGACAAGTGT  
ATTTCCGCAACATCCAGACAGCCGTGAAGACGCTCGTGACCCAAGCGCTTCCGGGAGTCA  
CAGCTCCGGTAACATGGCAGGGGACAGGCCCGCTCCCGACAGGGCGTCGGCATCCCTGTCC  
AGAACAAGTGGACAGCATCGGCTGGAACCGATGTGTACATCGCAGCCGTCATGGACCGCT  
CGGGCAGGTTACCGGGCGGACATTCCGGTGGCGAAGCGGGCACTCTTATGGCAGAAGTGT  
TGCACAACAACAACGCTAGCACAGGACGTACGGCGTGTGGCGTTTCGCAGGCAAGGGCG  
ACGGCACCAACAAGACCTTCTCCATCACAGGTAGCGGCTATGGTTGGTTCGGTGTGTGCA  
TCTTTGCCTTCTCTGGCGTTGTGTCCGTCGGAATACCCGTGACCACGTACGGATCGGGCA  
CTTCGCCTTCGCAGGTGGTCACGGAACCGGGGTGCAGATACTCGGACGAGGGCGCTGGCG  
GAGCTGGTGTCCGGCACACCGAGTGCCTTCTCTGGTGGGACCAACAGAGTCAACCAGAACA  
TCAACGGTTCGAGCCTCGCAGTCAATCAAGTTGAGGTGCCACGAACAACAGGGGGCAACCA  
CGCAGAATTACCCTTATGGCTACATCTTCCCTGCCCTCCGGAATACATAGGAGTGCAGAGT  
TGAATACACAGTTGCAGGCGATCAAGGACGCAATGAATACCCTTGACTTCGATACTGCGC  
GTGATCTGGCCAAGTTGTATGTTCGAGAACCATCCGGAGGAGTTCGTTCGACTATTACCAGA  
TTGTGGAGGAGTCCGGCCAACGAGGAAGAAGCGATCGCCAAGGTTCGTGAAGTCCATTGAGG  
TGTTGCGAGCTGCAGGCCTCACCCAGCAGCAGTATCGTGGTGCAGACCTTCCATCTGTTC  
GCTGGGACCCGCAGAACATTGGCGCCACAACGGATCCTGTGGTGCAGCAATCCAATCCCGT  
TGACTTTGAGGAATGACTGAACATGGCGCAGGCATATTCTGTACGCTGGATGTGGCCCA  
GGGAATGCTCCGGTGGTAGCACCAGCTACGCCGAAGCTCTTGGGTCCCTCGCCAAAGATCAA  
GATTTACTCAGGCAACCCACCGGCCAATGCTGGGGCTGCGCTGAGCGGCAACACGCTACT  
GGCCACTCTCACATCCGCAAGCACGCCTATCGCCAGCCAGAGCGATACTGGCACTGCCGC  
GCGTGCAGCTGGGCCACGTTCCGCGTGTGCGGTGGCCGCAGCCGCAGGTACGGCCACCTT  
CTTCCGCACCACCACGTCCGACACAGTGAGCGACCAGGGTACCATCGATACTACTGG  
TGCAGTCCCAACATGTCTACGACGTCGTTACCCGCTGGGGCCACCATCGCAGTGAGCTC  
GCGGACAACAGACTTTCCGTACGGCCATAAGAGACAGCATGGCATTATCCAAAAGCAG  
GGCTACTGGAAATCCGAGAATGTCTGGGGCATGTGTGACACAGCCGAATTGGACTACAGG  
GCTGTGCCGGGGACCAGCTTCAAGCTCCGGCGTCTCAAGGGATCACCCAACATCACTCTC  
AAGGCACAGATCTGGCGTCTTGACAAGATCGAACCATGATCACGTCGCAAATCGGTTGT  
TACACAGCCGAAAACCTCGATGGCGAACAGCAACCACAACCTCTGCGACGGCGATCGACTAC  
AACTGGAACAAGCTCCCCTACCAGAAATGGGGGACATGGCCGAATCGTGCGGTTCGTGAT  
AAGATCGTCGACGATTTCCGCGGAATCATCGAATTCGGCGGTGACTGGACCTCGCCGCGT  
GACGAGATTCATTTGAGCTGCACTTCGCCGAGGGGCATGCTGGCACCGAGGCGCTCGCC  
AGGGATTTGGCCAATGGCCTATGGGGTATCTGGAAGCCCGGAGCAGCCCCAGCCCCAAC  
CCCGCGCCTGGCGGAGGGAACGACGGCATTCTGCGGATCGGCTCCGAGGGGGCCGGAGGTG  
CTCAAGATGCAGCGCGGTATGAACTCTGTGTTCAAGAATTACCGCGCCATGCCGCTGTTG  
GAAGACGGCATCTTCCGGGGCCAAGACCAAGGAAGCTGTCGTTCGAGTTCCAGCAGCGTTCA  
CTCATTTCATGTGGACGGTGAAGTTGGCCCGCAGACCAAGGCGAAGCTCGCCGAGTACGGC  
ATCGTGCTGACCGGAGCGACTGCTCCGACCGCTCCGCCAGCCATCGTGCCGCAGAAGGTC  
TGGCCTCAGACCGCCGGTGACCGTGAGCTTCTCGAGTACATTGCGGGCGCAGCGGGGCT  
GGCGACCCGTCGTGGCCGATCAAGCTCGGCAACAACAAGAAGGGCGATCCGCTCACGGT  
CGCGATCGACTTGGCTTGACGGCCAAGGACATTGAAGAGATCAAGGGAATGCTGTGCGAG  
TGAAGAATCTGTGCAATTAAGGAGGCTGGCATTGCGCTGGTAGGTAAGTACTGCTGGCACGG  
CCGTGGCTAACCTCGCAGCCGACGAGAATGTTCCGACCCCGTGGGGGAATCCGGTGTCA  
CCTGGCTGGCTGTTGCCGGTGTGCGCCCTCAGGACCGCGCTGACCTGGCTCAAGCGTAACG  
AGCCACGGTAACCTGAAGCAGAAGAGCTCCTGCGCCGTGCAAAGGAACGCGCATCCTCGT  
CCTCCTCTGCATAGGAGGCTGGGCGCAGTGGCTAAGGTGCTGGTACTCGTATTGACCTGT

GTGTCGTGTCCGCAGGCTGAGAGCTCAGCCGACGGCAATGACCAGCACCATAGCCAGCTG  
TGCAGGGATGAGGAATACGCCAAAAGCATGCGGTGCGAGTGTGGACGGGTGCAGAGTGGC  
CCCAAATCAATCACGCCTCCGACTGGCGGACACGGTGGGGGAGCTCCGCGCCGAAGTTTG  
ATCGGGAGGATCCTGGACAAAGTAGGGCTGGGAGCGCTCCTCCGATGTTCCGTCCAACAG  
ACGCTCGACGCTTGCGCAGCATATTCCGCAAGCCTCGTCCGATTGACCACGGCAGAATGT  
ACGTGTGCGGTATGATGGCGCTCTGGGTGTGGTCTCTGTCAATTGCTGGTGATCGGACCTA  
TTCCGAACTCAACCATCGACGAGCTCACAGACTATGTCCAAAACATCCTTGCTTCATGTA  
TCTTCATCGGCTCGTTCGTGTGTCTGTTCGGCATCGCCCTCGGCACTAAGTACGTCTCTCC  
CCAAAGCGGATATCCGCTTGTGCTACCGCTTCTCGTTGTGGGGAATCCCCGCCTTGGCAG  
GGAGCGTCCGAACGTACGCATGGGCCATCGCCACAATACTGGCTCATTTTGGGTATTGG  
CGTATGCAGCTTCCGTCCGAACATTCATCTGCCTCCGAATCGTCTGGAATGGGCTAGATT  
TGCTCTTCGAGATTGCTCGACTAAATGAGGAGATCAATTACCTCAAATACGGTTCGGGCT  
CTGAAGAGCGGCTAGAGGACAGGGACGATGAACGGAAATGTTGATGTTGGCTGGATCCTC  
ACATTCCTGGCCCTCGTGTCTGCTAGCGGGCCAGTGCTTTCCGGTGTCTTACTATCGC  
AGCCGCAAGCGTCAGGCAGAGGCAGAGGGCAACAACAAGATGCCGATACCGGAATAAAG  
AAGGTTTCTGAGCAGGAACTTTCGCAACGCGTTCGTCAATGAATGATGAGCGCTGGATC  
ACGCGTGAGTAGCGCTGGCAGGAGCGCGAAGACGCTCTCGAGCGCAAAAATCAAGAGCTG  
CGAAAAGAGATGGATAATTTGCACTCTGACATGAATGCCTAGCTTGAATTCATCGCCAAT  
GATGAGCAGTGGCATTCTATGACCGGATGCACCGCATCCAGAACGATCTCCCTGCGCCA  
CAGGATCGGATCACATTCAGCAGTTCATGGAGTCGCGCCGAGAGGCAGCGGGGAGGATG  
TAACATGGAACTCAAGGTTGGCTCAAGCGACGCGAACACTGATGGTGAGGTAACCTCGCTG  
GCAGAACTGGGTAAAGCGGTATGCCGCAAGCTATTCCGACATCATGGGCCCCATCGATGG  
GTACTATGGCTGCTCGGATGCCGACTTCACCCGTGAGCTACAGCGCCGTCTGGGGCTGCC  
GATCACCGGCGTGTTCGATGATGTGACAGCCCTGCACCCAAAGGTCAATTACCGCTGGAA  
GGGGCAAGGCGCCGGGCAACCAGCCGCACGCCGAAGATGTCGTTCTACTCCAATCCCGG  
TTCGGGCGCAACGAATTCGTCGGCCCATCGTACGAGGTCGGCGAATTCTGCAAGAACGT  
CCTGAAAATCAACCACCAGCCGGTGCATTCGGCCATCGGCGGATATCTCGGACTGATGGG  
TGGCGACCCCAAGGTCAGCTACAACGACGTCATCTATGACCAGTACAAGTCGCTGGAGTG  
GTTGCTGGACAAGAATCCTGACACCAAGGACCCAGACGTCGAGTTCTGGTTCTCGGGCTA  
CTCGCAGAAGGCCGACGGCCTCGAAGACGCACTCGAGATCTTGTTCGGCGATGGGAGATT  
CACCATCCCCAAGACGGGCGAAACCGTGGGTCCGGGTAAGTACCGGCACCTGCGGCCAAG  
AATCAACGGCACCATAACAGTTTGGCAGTCCCAGCACGCAACACGGCCCCACGCGCGTCTG  
GAATCGCCCACCCGGAAGCGGCATCTCCCGCAAGAAGCGGCCGCGAGTGGCTCAGCATGCT  
CACCTGGGACATCGTACCCTTCCCCAGGGGCACCGGACTTTTACGCTGCCTGCGACCA  
TGACATCCGACAGTTGTTCTACGAGTGGTTCATCAAGGCCGACACCGAACTGCCCTTCGT  
GGTGTACACGGCGCAGATCATCATCCCGGCGCTCATGAATCTTCTGGCTCCATTCTTGGG  
AGGCTTCGGAGGGGTGACGAGCCCGCTGGCTGACGGGATTCTGGCGAGCGCTACCGTCAT  
GCCGATGAACCTGCTCCACGGCCTGCTCAGCGGGGTGGCAGCAGCCGACAATGCTCCGAA  
CCCCAAGCTCATCGAACTCCTCAGCGTGCGTGGTGTCTGACGAACATCCCGCAGCTCAT  
CAAGCTGCTGACCAACATCTCCGGCGTCCAGACGCACGGCGATTACCACCTTCCGAAGCC  
AGAGTTCAACGGCCCGCCGCGGAATCCAGGTCGGCTGCGACATCGTTGCGGGCTTCCGGCG  
GTAAGGAACACTCATGGAACGCGTGACAGTTTCCCAAGACAGCAACAACGAATGGCGCTG  
GCGGTTCAAAGCCAACAATGGCCGGGTGATGGCTGACAGCGGCAAGGGTTACCAGAACAA  
GCAGGACGCCCTCACAGCGATCGATGCTGTGTTTGGCGGGCTTCCGCCAGAGGTGGTGGA  
TGAGGCTGGCTCGCAGCTCCGGGTAGTGCCGAACGACCCAGCGCTCGAGGCCGCGCTGAC  
GCTCTTGACGTTGATGACAGGGGACGACTGGGACCGCCCGAAGCTCGTGAAGTGCTCAGC  
GAGCTTGCGCCAGCACGCTTGCGCAACGCTCGTGAAGCAAGGTGTTGGCGTGCACAAGC  
AGAGGCTATCTTGGGCGAGCGGTGGGCCGAATAAGGGAGCCCCGAACCAGCTGAGCATA  
GCCTGTAGCTGCAACGGCCGATCGCTCTGCAGAAGCCAACGTAGCACCCAAAATGGATCT  
GTCTCCGGGAACGCCTCCCACCGGCGAGGAGCTTCGGCTCAAGGCGCGCAGCCGTATCGA  
CAGATGGCGCAAAGAAAGAGCCGGAGCTCCTGAGGACTCCGGCTCCGATACTTAGCCAGA  
CTAGATTTCCAGTGCGGGCTGCTCGTCTCTCTTCTTGGAGTCTTGAGCTCCTTGCGAGC  
TGCCTTGACGGTGAACTTGAAGGCTTCGCCGAACCTCGCGATTTCCGTAGACCGGGCCGAT  
GCCAGGTAGACGCTCAGCTCCTCGGTCAACGTACGGGTGCAGACGCAGCAGCTTCCGTA  
GATTGCGCCGAACCTGCTTCATCTCTCTCGTAGCTCATCCGCTGCTCGTCCGGTCAGGCCTCG  
GAGCGGCCGCTTGCCCTCGTACTCGAAGTGAGCGGTGAAGACGGTGCCAGCAGTCTCGTC  
GTGGCGGTTTTGCTCGACGACGACCAAGCGCTTGGCGACCTGGTGGCCGCGCTGGGTTTT

GTAAACCTTGTAGATGGTACCGTCGGCGACGCTGTACATGCCATCTTCCAGTTCGTCGGT  
GGCAGGCTTCGCTTTCTCGGCGACCGGGGTGATGTTGGTTCCTGGATTCGACCGTCTC  
ACCAGCCATCTCGGTGGTCCCGATGACCGGATCTGCGCCCTTGATGGTCAGGCTCTTCAG  
CCAAGCGATCAGGTTGCTGGCATCCTTCGAGCTGAAGGACTTGTAGCAGAACTCGTAGCC  
GTCCGATGCACCGTGGTTGTCGACGACGTAAGCCAGCGCAGCGTTGACGAGTTCGCCGAG  
CAGGTCGCTACTCATGGCCTTCCCTGATCTCATCCATGACATAACCGGGTGCCGTCCACACC  
GTTGTCGTCGCGCTTGATGGCCAGTCGATCATCATGCGGATGGTTCGAAGCGCGAGACAC  
AGCCTTGTGGCGGTAGTCGCTGGCCCACGCACGCTGCTCGAGCAGGTCCTTGATCCAGTT  
GATCTGCTTGTGGTTCGCGGGCTTGACGGTTGCGGGTCGCGTTCATTTTGGATTCCCTTCT  
CCGGTGTCCGAGGCGCTCTGGGTAGCCTCGCTGACAATAACGAACGTTACGGCAGAAATTG  
CAGTTTCGCTACTCCTTTCAAAGTCAGCGCTCACGGCGCGTGGGTCCGGCTCGCCTACC  
AGGACAAACCTACTGCAGTTGCACAAGACGCCCTCGGCGTCTCCAGCAAGCCGCATGG  
CCGCCACCGCGCGGGCTGGTAGTGCGAGGACCACGGGAGTCCGCCGGCGCACTGGTCTACG  
GCGTACCGGGTGTGTCGGAGAAGCTGCATTCCCCGCATTACCCACTGCCAACGCTCCATC  
AGGCGATGGCCCGGATCAGCGCCAGCATCGCGCGGGCGCATGTTCGTTCTACGGCATGCCGG  
TGATGACCACGACAGTCTTGCCGTCGCGATTGACGACCCACTTGCGGGCTATCGTCTTCGC  
CGACTGGGAGGGCGTCTGCCACCTGGCGGGTCGTCACGGTATGCCGTCACGCTATCGCGCA  
GCGTACGGACGGTCAGACCGTCCCTCATCGGGCGTCATTGCCGGCCAACCCGGGAACGCTCA  
GCGCTTTCACGATGCTGTCCACCTTGTACATGAAGTTCGGCTGTGGTCCGCGCTGCGGA  
CTGCCCCGTCAACCACCTTGTCCAGGTAGTTGTAGCGGACCAGAACTTGCTCGGCCTGCC  
CGCGCTCGAAGGTGATCGCACTGGCCACCGTTTTGTTCGGCGATCTCCTGCCCGCGGGACG  
TCCATCCGAACCTTAGCGGCAACTTCGGTGTATCTGCATACGCTGGTTGACGTTGGTGTATGG  
GCATGAGGCCTCCTGGGCTCGTGGGGATGATTGCGCCCCGAACGTTACGCCACCGCGCCG  
ATTCGGGCTACTCCCTTCTACATGCGTTCGTCGAAGGGGTGGCAACAATATTCGGCCCCGA  
GCAGCGCAATCGGGTTCGACTAGAGTAACGTTCCCTCCTGTGCGCCTCCCCACATCCCCAG  
GAGCCCCAATGAGCATCACATTCCAGCCCGGTCAGCAGGTCGAGGTTACTCCGGCGACA  
ACGTGCTGCACCCCGAGACGCTGAAGCCCTTCTGGTATCGCATGGTCGTCACAGCCGGAC  
CCTTCGAGCTGAATACCGGCCACGAGGGGTACCGCGTCTCCTCGGTCCGGGGAAAGCCTGAGC  
CGTCATTCGACCAGTATTGCAAGGCTGCGAATGAGATGCGTCCCGTCGCCGACGTCGATC  
CCGAGCTCGCTGCCCGGTACGACGCGTTCGGGAAGTGGGTTCGGCAAGTGATCCGGCTGGC  
ACGCCGCGCAGGCTACTGGGTCTGCAAGCGGTGCTGGCAGGGCAACCTTGGCGGAGAGAA  
GTGCCTGTTCTGCGGGAGGGCCAAGTGAGCGAGCTGTGCGCCCTCTGCGGGCACGAGTTC  
GAGGAGCACTACTCGCAGGGAGACTCGAGCGGAAGGCTGGTGCAGGGGTGTGAGGCCGAT  
ATCAGGACACCCTGCACAGCCTACAACCTCCTCCACCCGGCGCGTTCGCGAGTGCGACTAC  
GTTCCCTGCGATTGCACGGGATTCGAGAGCGAACC CGCACCCGACCCCGACATCACCGAA  
ATCGACATGTGCGACCCGGAAGGACGCTGATGGAGTACATCGACGTGCTAATCACACGC  
ATAGCACAGACGAAAGCAAGGATCTGGACCAGATCATCATGCCGACTCATATCGCCAAAG  
CTCTTGAGGCTGCTGGCTGGACTGTCCGCAGCACAATCGTTCTGGATCACAAGACGGGGC  
TGACGGGCAACTTTCGCAACGAGAAGGTTTCAGCACCCGCATCGAGAAGGAAGCAGGACACT  
GAAATGGCCAAGGAAAGCGTCATCAACCGAGTGCAGAAGCTGCTGAACCTCGCGATGGAC  
CAGAGCGCCACCGAGGACGAGCGCAAGCTCGCCCAGGAACGCGCGGACGCGCTGATGGCG  
CAGCACATGTTTGACCAGATGGACCTCAAGCCCGAGGACCCCGGTTCGGTTCGCGCGTACC  
AGTACAAAGTGGGAGTTCTTCTTCGAGTTGGAGTTCGAGTGCAGCTAAAGGACTTGCTC  
GCAGCCGTCGTCCGGCACGCTACCTGCCGTGCCACGAGCACGCGCAGGATCGCCAAGGTC  
GGCGAGCACAACATGGTGGTGACCATTGTTGGTACGCCTGAGAACATCGTCTACGCCGAG  
CGCCTGTGGATGGTCGTTTTACCGAGCTCACCAGGAACATGTTCCCGAAGGTGGACCCC  
AACGAGAGCTTCGACAGAAATGTGTACAACCTTCGTAAAGGCTGGCTTTAAGTGGCAGGAG  
ATCCATGAGCTGCTCTGGCGGCACAAGGACGATCCGCATTGGATGGAATTCCCGTTGAAC  
GACCCGTATCCGCCAGAGAAGCAGAGCGAATATAGCTGGCATGCCAAGGTGTATGGTGGC  
GACGGCGGACGCTGAAAGCGTGCCTACACTCGTGAGGTCAAGCGTCTCGGCGAAAGCAGC  
GCGCACACACAACACGACATGGCGTGTACCGCCGGAGCTATGTGCAGAGCTACTCGAGC  
ACAATCTCATTGCGGCTGCACGACATGCGGAGCAAGAGCGAGGACGCTGTGAGCGATCGC  
GACAAGTTCGCCCTGGCGGTGGGCAGCTCGCCGCACGAAGCTGGCGCCGTGTTCTATCCG  
CTGTTCCCGCAGTTCGACCCGGAGAACATCCGCAAGCAGCGTGAGGAGATGCTCCGCCAG  
GAGCAGATCCGTTGGCAGAACAGGACTCCCAGGAGCGGGCTCGCGCTGAGAAGGAGCGC  
CTCAAGCGTGAAGAGCGCGCTCGCAAGCACTGGGAGAAGACGCGGGACACGAGCTACGAC  
CAGGCTGGCTGGGCGCGCGGCAGTGATGTGGCCAAGAAGGTCAATCTCAACGACGACACA

CAGATCCACCACAGCAAGAAGGAGATAGGGTGTATGTGGATTGGCGACTGGCTCGAGGCAG  
CCTACGAGCAGCGCACCGAAGCTCCCGACGATCTGGACAACGACGAGTGGTGGCCGGAGG  
ACGATGGTGTATGAGTGACCAAACGCTCAAGCTCGCAAGCGAACTCCACGAGGCAGTGATC  
GCCTTCCGGGACGGCTACGTCTACGGCAAGAGCCTCACCCGAGCTCTCGACAAGGCCATC  
CTCATGGCCGATGCGGCCGACCGGCTGAACGGCCATCTCCTCGAAGTCATCAACGATCAG  
CAGTAGCAACACACCTGACCATCAGCAGCTAGGCTACGCCTTACCTTGTCTCAGAAGGGA  
ATCTGACACATGAGCAAGACCACCTCAGCCATCGCCACAGGCAAGACCGCCGACGTCTCC  
GCTCTGGCGGAGAAGCACGACTGGACGGCCGAAACCAAGGAAGACGTCAAGAACGACATC  
CCCACGCTCAAGCTTACACGCGGGCGATGAGTGGGTTGAGATCCGCTGGGACGGGAACCTCC  
TGCAAGGAGATGCCGACGGTCTGCCACGAATGGCAGCTCAGGTACGTCCGGAACGTTGCA  
GCTGCGAAGCGCGTCTCGAGGCTACTGCCGAGCAGAATGCGGAGCCTTTCCAGAAGCGG  
GCTGTGGCCAAGCAAACCTGCGCGCAAGACCACGCCTGCCAAGCGGCCTCGCCGGAAGGAC  
AAGCTCGTGGAGGCGCTTCCCGACAGCGACGACTAGCAGATCAAGGAAGCCCTCCTCGGC  
CGAAGATCCTCTGGCGTAACAGCACGAGCGGCCGAGTTTAAGGAGGATGTGGTGTGGCC  
GGCAAGAATACGAATGGCCACTACTATGTGTCCCACGAGGGTGAGAAACGCACGATCAAC  
TTCATCGGCGCATATGGTTTTTCGAGCGGTGAAGATTTCTGCGATTACGCAGGTGAGATAG  
GCAAAACGAGTAGCCCGAATCGGATCGAATAAGGTACGATTGTCTTATCCAATCGGAAGC  
AAGAAGTGAATCTCAAATGGACGTTTCGTACCCTCACCTCCAGGGATCGCAAGGTTGCCG  
CCCCGCTGGACCAGCTGGCCTCTGACGACCAGCTGACCTACCGGATAGCAGAAGGTGCTC  
GCCGGGCCAAGATCGGCCGTACCGTGTGGTACGAGATGGCTGCAACTCGTGTGTCTGACG  
GTAGGCAGTACCCCTATTGGCTTGCCAAAGACTCGGGTAGCTTCCGTGGCTCATTCTGA  
ACGGCTTCGACCTGTAGTAGCGCGAATCGGGCCGATGGGGTAACGTTCCGGTCTGTCAACG  
AGGAAGGGTATCCAATGAGCGAGCTCAATGTAGGCGATCGAGCGCGAATCATCAAGGTCA  
GCGATCTGGACAACGACCGCAAGGTCATCACCGACCCCGCCGGGGCAGCTGCGCTGTTTCG  
GAGGGTACGGACCTGGAATTGGCGATGTCGTGGTTCATCACCGCGAAGACCCTCGGCGAAC  
TGTACGACTACGAAGCCGAATGGGAGATGGAGAAGGGCTACGAGACCTTCAGCTTTCTGG  
CGAAGAGCTGGAGCCAGTCAAGTGAGTAAGCGCGCGTGGAAAGATATGGTTGGAGGACGG  
CAAGATCGTCCTGCTGACCGACGGGTACGATACGGCGGTTCGTCGAGAACATCAAGCTGTA  
CTTGCCGACGCCGCGCTCGTTCCGGCGTACCACCAAGACGTGGCACGTCCCCCAGATGTG  
GGAGACTTGTGTGCGCCCTCCGCCAGCTCGCCAATCGGCATCGAGCCGACGTGAAGATGAG  
CGACGAGGACCGGATGTGGGCTAGGGCCGGGAAGCTCCGGCTGGCGAGCATCCCCGACGT  
CAACGAACACAACGTACTGCAGCTCATCCCGAACAATGAGCGCGAGCTGACAGCCATGGC  
GGAGGCGCTGAAGGCACGCCCTTCCAGACAGTGGGCGTTCGGTTCGGCGCCACAGCGCG  
CAGCGTTCTGATCGCCGAACACCCCGGTCTGGGCAAGACGCTGCAAACGATCGGCCGCTGT  
GGCCGAGTGCGGCCTGAAAGGACCCGTCCCGGTAGTTGCCGCGCCGAAGTCGGCTGCCGT  
CATTACCTGGCCCAACGAGCTGCGGCAGTGGGTGCCGGACGACGTTCGTGATCCCGATCTC  
GGGAGCATGAAGCCTGCAGAACGCGCGGAAGCTTTCGAGCGCGCCAAGGCTTACGCCGA  
GCACGGCGACATGCGCGTCTGGGTCGTACGAGCCCCAACTACGTTTCGCATGCGGGCTGA  
GCTCGACACCTACGGCAACTATGTGTACGAGGGTGGCCAGAAGATTGTGCAGCCGGTACG  
CGAGGCTCTGCAAGTGCTGGTCGACTTCGAGTGGTCAGCGATCGTCGTGGACGAGTCGCA  
CAAGACGCTCGCCTGCGGTACGGGTAACCGCAAGAAGTGGTCTGCACAGCGCCTGGGCCT  
AGAGCTGCTCCGGGTGAAGAAGGTTGGGCTGCGGATAGCCCTAAGCGGCACACCCTTCCG  
GGCAAGGAAGACAACGCCTACGGCACCTTGCAGTGGCTGCGACCCGACCTGTACACCGG  
ATTCTGGAAGTGGGCTGAGAAGCACTTCCAGATCTACGGCGATGGTTCCGGACAGATCGT  
GGGTGAGGTCAATGACTCAGAGGAGTTCTACAACAGCCTCAAGCCAGTCATGGTGCGGGC  
CACCAAGGCCGAGGTCGTCAAGGACCTGCCTCCGAAGATCTATGCCGGTGAGCATCTGGA  
CCCCGAGGACCCGCATTCCGGAGTGGCAATTTGGCTTCCGATGGAGGGGAAGCAGCTGAA  
GGCGTATCAGGCTATGGTCAAGGATGCAGCCGTCAAGCTGGAGAGCGGTGTCCTTTCTC  
CAACGGCGTCTGTCGGAGATGACGCGTCTGAAGCAGATGGCCTGCTCCTATGGCGATCT  
GGCTATTGCTCCGACAGGCGAGCAGACGTTCCGTCCATCGTTGCCGAGCAACAAGTTTGA  
TTACCTTGTAGACCTTCTGAGCGATCGTGGCCTCGGTAGTGGCGAGTTCCACCCTACCGG  
GAAGGTGATTGTGCCAGCCAGTTCACCAGGCTACTGAATCTGTTCTACGCCGAGCTGAA  
CAAGCTGGGCATCAAGTGGCACCTGCTCACCGGCGCGACTTCGGAGAAGGAGAGGCTCCG  
TATGGCAGTCGCCCTTCCAGAACACCAAGATTGGCGACGTCACGCCGCACGTGTTCTGCT  
CAATACCATCGCTGGTGGCGCGTCTATCACTCTGGACGCTGCGGATGATGTTGTGACGCG  
TGACGAAACCTGGATCAAGGACGACCAGGAGCAGGTGCAAGATCGCGCTCACCGCATCTG  
CCGTACCGACCACACCGTAACCATCCACAACCTTCGCAGTATGGGCAGCATCGAGGAGCG



CATCGCCACGAGTGCCTTTGCTCAGGATCGAAACATCAAGTCCATCATTGACGGAGCGCG  
CGGTGTGCGAGTTCGCACTCGAGCTCCTGGAAGGAGTCAAGGCATGAGCACCTCAGCGCA  
TGCTTCATCACGGCCATGCTCAGCGGGTCATCAATGTACTTGCTGGCCTGGCGGACTCAC  
GGCAAGCCTCTCACCAGAGAGGAGATGCGGGATTACATGGAGCGGTATGTACACCGGGAG  
AAGGCAGAGCTGGCAGAGCGCCGTCTACAGGCCAGCTCTACAACGCTCGGCGTGGGGT  
GTGCCGCATCCGGACGCGGTTACACCCGTGCGGATCACGAGGTTGCACGTGTCTAGAAAG  
GGGAGAGGCGAGCGAAAGGAGTAAAGTTAAATAAAAAGTCGGAAAAATTACCGATTCCGAC  
CAAGAACCAGTAAGCTTCATTTACGCCCAAAAACCTTCATAATCCCAACGAACAGAAGGA  
AAAACGATGTCCCCGAAGACCGCGTCCAAAGAGACTAGCACCACCCGCGAAGGCAAGGTG  
CGTTTCGATCCGTTTCGCCAATCCGGGCACCCCTCGCCGAGCAGGAGGCCGCGTGGCTGAAC  
GAGCAGTTCCCCGGCCTGAACGTCAAGGCCAGCCACGTCCGTGCGGTCATCAGCAACCAC  
ACGCGTTCCAGAAGTCCGACCTTCGCCGCCAAGCGCGGGACGCCGAGCGAGCCAAGCTC  
GCCCAGGATCGCGAGGCGCGGAAGGCTGCCGCCGAGCAGCGCAAGGCCGACGCCGAACAG  
GGCAAGGCAGAGCGTGAGCAGCGCAAGGCAGAGCGTGCGGCCGAGGCAGCAGCCAAGGCT  
GCCGAGAAGCCCGAAACCAAGCCTGCTGCAAAGAAGGCCACTCCGGCCAAAGCCGAGCCC  
ACGCCTGCTCCCAAGAAGCGCGTCTCGCGTCCCCGGAAGCGCACCCGGTGACGTGCCCGCG  
GAGGACGCATTCTGATCCACCCACCCCTCGGGGTGGCTGAGCCTCTGGGACATGGGGA  
GGCGCAAAGTCTCGGTGGAGGTGAGCAAGTGCACCTCTGAGCATCGGATCTCCATCAC  
AGGACTCCGGTCAAGTCCCGGAATTAATCAGCCTCCTCCAAGACAAAAGCTCACTGACAG  
AAGGGAATCTGCAAAGTGAAACGCATCAAGAAAGCCGCGATCGCCGGTGTGGTGGTGACG  
CAAGTCGGCCTCGGAATCCTCAGCGCCGCACCCGGCGAACGCCGACTATGTGATGGGGTGT  
GAGCGAGTCCGCTGGGGCTTCCTGTTCAGTGGCTATCGCACAATCTGCGACGACCCCAAG  
CGTCCGGACGGCAGCTGGGACCGGACGCGTCTGTAATGGCCCAAGCGCACATGGCTGGC  
GGATACTGCTCGGGCAGCAGGTATTACGTGAGCTGCACCCCGAGCTACTGGTTCAACGAG  
AGCACACAACGCCTCGAGACCTATCCGGTCACTGATGCCACTGTGTTGCCTGGCGAACCC  
GACTGGCTCCCTCCGGGCACGAACAGGATCCTCTGATCCATGGCACCCAAAAGCCACGA  
ACATAAGGGAATGCATGAAACCCAAGGTGTTGACATTCATTGCCTGCGAGCAGTGCGGCA  
CCCCTTCGGTGGGCCAGAAGCTGGCGAATACGACTACCGAAATCTTCCTGGCAAGATGA  
CGATTGCCGAATATCTCGTCGAAGAAGCTCTGGCGAGTATGTGGCTTCGTGTCATCTGGG  
GAGCCGACGACGTAATTCTGTGTGACCCTGATTGCGTCAAGAGCTGGCTTGATGAGGTGG  
TGTCGCGTGGCAACTAGAATCCCGCTGCCCTGCTACGCACGACCGAACGCACCGTGTAC  
AAGAGGTGCCCGTGGCAGTGGTACCAGAGGGTGTGCGCGGCCCTCGTGCCGAACAATCCC  
AGCCAGGACGCGCGGTGGTTCGGTACTGGCATTACCTGTGCAAGGTCGAGTGGTACGTC  
CCCGGACGCAACCGTGGCCGCGACATGCACGAGACCTGGGACGAGTTCTCACAGGGTACG  
TTCACCACAGTAAGCTCGCAAGGGCTGGTGAACGACGAATGGGAGAGCGAGTGGGTTGAC  
GCAAACAAGCTGGCGCACGCCATGATTGACACCCACCAACAGCCGTATGGGAACGACGAC  
AACTGGGAGGTGATCGCTGCTGAGCATCCATTTTCGGTCTGATCCCGCACCCCGACAAG  
ACAATCAACCGTGCGGTGTGCCGGTGCCTCGGCACCATCGACCTGATCATCCGCGAGCTG  
GACACCGGCGAGATTTGGCTGGACGACACCAAGACCCGCGCGCATCTATAACCCACCAC  
CTGAGACTGTTGGAGCAGCCTGCTGCGTACGTAGCTGTGGGCACGCACGTCCTCCGGGAG  
CAGGAGAGGATTGGCCCCAAGGAGCAGGTCAAAGGCATCATCTTCGACTTCATGCGGAAG  
GGCTTTCGGACGATCGACATCGCAACGAGCGCGGCGAGTATTGCAACAACCCGGTCAAG  
AACCACTTTGTCGAAGCCATCCTGAATTGTCGGGGTTATCAAGGTCCTCTGAACACCGAG  
CGAGATCTGCTTCGGCTTAAGCTCGACGAACTGCAACACATCTCCGATGAGCTCAACCTG  
ACGGTTCTGGGCGATGTCTCAGCCAACCAAGGGTGCGCCCTCCTGTTGCGAAAGAAGATC  
GTGAAGAGCCCGAAGGAGTGCTCATGGCAGCTCCGCCGGATCGGCGAGGAGGTGCTACAC  
ATGAACGCTGTGCGCGCCGGTAAGCTCCCGATCCTCAAGACGCCGCAGGACGACTGCAAC  
TTCTGCGATTACTTCGATCTCTGCGAGCTCGACGAGTCTGGCGGAGACACGGAGTATTTCT  
GTGTGCGAGGCATTTGTGGTTCGTGATGCCTACGCGGATCATCGCGAAGGCGCTGAGAAT  
TCGAAGATCAGCGTCAAGAACAACAAAACAAGACAGGAGTGCGATGAGGTGGCCGGTAGCCT  
GAAAGATATGGGCCTCAAGGAGGTTGCAGCCCTCAAGAAACGCGTGAACAGCCAGTACGC  
CTTCAATCGCATCAACGGTGGTGACCGAGACAACCTAATCGAGCTCATCAACGAGGTTGC  
GGCGTACATCATAAAATGCCTGAAGGCGAACCAAGCATCCCCGATTTCTACTGAGAAAG  
GAAGGCTGATGGTCCAATCCAAGATCATCAAAGTCGCCGACGACGAGGACTACGTGAATC  
TCCTCGTGTACGGTGAATCTGGGGTGGGCAAGACGGTGTCTGCGGCAGTGACGACAAGG  
TGTTGTTGTTGCGCCGAAGACAAAATCAGACGGCCTGCTCTCCGCCAAGCTGGCGGGTA  
CCACGGCGGACAAGTGGCCCATCCGGGACTGGGGTGATCTCGTTGAGGCGTACAACACTATC

TCGACGAGCCC GAAGAAATTC CATACTGGATCGTGGTCGACTCGCTGACCAAGATGC  
AGCTCATGGCCATGCGGGACATCCTCGATCGTGCCGTCGAGGAGAATCCGAGCCGTGATC  
CGGACATCCCGCAGATCCAGGACTGGCAGAAGTGTTACGAAATGGTGAAGCGGATGATCA  
AGTGCTTCAACGCTTTGCCGGTCAACTTTCTGTACACGGCGCTGTCGCGGCAGACCGAGG  
ACCAGGAAGGTACCGAGAACCTTCTCCCCGATCTGCAGGGCAAGAAGGACAACCTACGCC  
AGCAGGTGGTCAGCTGGATGACCAGCTTCGGTTGCATGCAGATCAAGCGCGACCGTGTCA  
AGACGGACGACGCCATCGCCAAGAAGGTGAAGGAGGTGCGCCGAATCACCTGGAAGGACA  
CAGGTTTGGTGACTCGCAAGGACCGCACCAACGCTCTCACCACGTACACCGACATCCGCG  
ATGTCACCGATCCTGAGGATAATGGACTCACCTCAAGGACATCAGGCTCCGCATCGATC  
GGAAGAAGTCCGGCTCTGCCAAGTCGGCAACCACCAACGTCCGGCCAGAAAACTGCGT  
CGGCTCGTACTCAGAAGGAGAGTGCATAAATGCCAAGCTAAAGCCATTCTGCATCGGCG  
ATGTCGAGGACATGATCAACGCCGAGAACTCCTTCAACACGGAGGTCGTGCCCAAGGGCG  
TGCACCAGGCGAAGGTCAAGCGCCTGAAGCACGCCACCATCCAGAAGGAAGGTCCGAACA  
AGGACAAGAGCCGCTTCTGGATCTTGATGGAGGTGTCGTCGGCCCGAAGTCGACGCCGTAGA  
AGTACATCGGTGCCTCAATCTCGCACAAATTTCAACGTGATCGAGTCCGGCGCTGGCTTCT  
GCAACGACTTCCTCAACGCGCTGGCGGGACCGGAGCCCGCCAAGCAGGCCGCGCTGAAGC  
GTGCGTTCTGGGCGGACGACATCGTCGTCGATTCGGTTCGGGCACGTGATGAAGATCGGCA  
AGAAGCGTGTGAGTGGCGACGGCAATGGCGAGCTCGTTGTCACCGTCAAGTCCAAGCTCG  
GCAAGGACACTCGTTCGGGCGATCCGCAGGCACAGGTTGACAAGTACCTGGTCCCAGG  
CTAACGACGACGACGATGACGACGACGTCGATGAGGACCTGGAGGACGACAATGATCTCG  
CCGATGTCGACGACGAGGCTTCGGACGACGATGATTCGGACGCCGAGGATTCGGACGACG  
AAGACGACGAAGACGACGAAGACGACGAAGACGACGAGGACGACGAAGACGACGAAGACG  
ACGAGGACGACGAGGACGAGGACGAGGACGAAGACGACGAGGACGACGAGGACGAGGACG  
AGGACGAGCATGGTGAATCCGACTCGCGCCGTGCGGAACTCGAAGCCCTGACCATCGCCA  
AGCTCCGCGTCGAGGCCAAGAGGGTTCGGTGTGCCGCCAGCAACGATCAAGGGCCAGTCCA  
AGGACGAGCTCATCGATAACCATTATCGACGCCGAGGCTGACTCGGACGGCGAGGACGACC  
CGTTCTGATCGGGTAGCACATCGGGTACCTGACAGACGAAACCGTCAGGCTAAGTCGTGG  
TAGCGACGTCCACAGTCCGACCCCAATAACTTTTCAGCAAAGGAGCCATCATGGCCGATGA  
GCGTCGGTGCCTGCGGATGTATCATGGTTCAGGTCGAATGAAAACACACATGGCTCTG  
CATCCACTGCGACCTCAACATCGAACCTGAGGAGTACGCCTCGTGAAATCTGTTGCCATC  
CTTGGTTGTGGGCCTTCTGGGCTCCTCGTGGCTCATGCAGCCGCCATGCTCGGCTGGGAC  
TTCCGAATCTACAGCAAGAAGCGCAAGAGCTTCTCGTTTGGCAGCCAATACCTACACGAG  
GCCATCCCCGGCATGACAGAGCCAGTTGCGGGCGATCGTGGCATAACAACCTTGTGGGTACG  
CCAGAAGGCTATCGGCAGAAGGTGTATGGCGCTGGCTACGATGGCAGCGTGTGCGCCAGAA  
GACCTCGAGGACGATCACTACCCCTGGAACATCCGGACCACCTGCGACAAGCTGTGGGAT  
GCCTATCACGACGAGATTGTCGACGTGGTGTGATCGACAAGCGCTGGGATTCGGCCGAATTC  
TTCCGGAATGGCAGCACTGACTTCCGCCCCGACCTTATCATCAGCACGGTGCCTCGCAAG  
ATCTGGGCCAAGATTGGCGATGTGTTTCGCAAGCCAGAAGGTGTGGGCGATCGGGGATGCG  
CCCGAGCTAGGACAGACGGTTCGGTTCGAGCCCAAACAGGACAACACGATAATCTGCTAC  
GGCACAGCCGATGTCGGCTGGTACCGGCTGAGAAAGGTGTTTCGCCAACACCACCATCGAG  
TGGCCACACGACCGCAAACCTCGTATCCCGAACATGGCTGAGGTCGAGAAGCCGCTCTGG  
CACAACAGTTCTGGAGCCAGCGACTTCCTTCACATCGTTCGGTACGGCGCATGGGAGAAG  
GGCGTGTGACGACAGACGCCTTCCACCAGGCCATGAAGTACCTCGGACAGGACAAGTTG  
GACTGACCGATGATGGGCAAACCTGTTGTTGGACTTGACATTGATGGGACACTATTCGAC  
TACCATGGGCACTTCTTGCCTTTGCAGATGATTGGTATGGCCGACCAATGCCGGACCCG  
CAGGACATCAACCCAGGCCTGCCCTTACAAGTTTATGCGCACGTCGAAAGCTACGTAC  
CGGCACTGTAAGCTGGCATATCGCCAGGGAGGCATTGAGCGCAGCATGCCGGTGTATCAT  
GGGGCGTTCGGAGCTGACCCGAGCTATCCGCCGCGGTGGCGGAGAAGTGTGGATCTGTACG  
ACCCGTCCATATCTCAAGCTCGACACCCAAGCGCCAAACACCATACACTTGTGCGGCGC  
AACAGAATCCAATTCGATCACATGCTCCGCGGGCCACACAAGTATCGCGACCTCGTGAAA  
CAGGTGGGTGCGGAGCGAATTGTGCGGAGTGCTTGACGACCTGTCAGAGATGTACGAGCAA  
GCAGAAATGTTGGGGCTCAACCCATCCTTCGGGACCAGCCGTACAACAGACACATCACC  
GCAAACCGCATCAAACATCTGTACCTCGCACAGATCTCATTCCTCGCGAGGATCGAAGTG  
TACAAAGAGAAACAGAAGGGAAGCTGATGGGCTCGACATATTCATCAGACAATCCGTTGA  
GCTTCGCGCTGTTCCGGCTGTCCCGCCAGGCAGAGTGGCCTGTCTGGCGGAGGCTGGACT  
GGGGATAACCCATCCTGCACCTTGGTCCTGGCGACAAGATTGTCCGGGGCGCTGAGGAAAC  
TGGACTACCCCGCATTCGATTCGATGACCCAGAGATCAGCTTGCCGTACGATGACGGGT

CAGTCGGCGGTGTCATCGCCACGCATGTGCTGGAGCATCTGGCTGACCCACGCCACTCA  
TCCGGGAGGTGGCGCGTGTGTTGAACTTCGGGTGCCCTTCAACATCCTGGTGCCACACG  
GTCAGTCGCCGATGTATTTGCAGGACCTCGACCATAAGACACCGTTCGTGCTTGACACGT  
GGAAGAACTTCCTGCACAACGGATTCCATGACAACAATTACGGCGAGGGCGGATTGCCCG  
TCAGTATCGGGCGCCATCTTCAAGTTTGCCCTCAAGGAGGGCAACGAAACCATCATCACCC  
AGTCATCAAGGAGTGACAGTGTCCAACGAAAACAAGGGTGTTCAGTCATTCTGGAAGA  
GCTCACCTCCAAGTACGCCAGTCCGGTGGATGACTTGATCGCCAAACAGCTTCCGCGCGT  
GCCAGAGCTGTTCCGGAGCCAGGCGCGGACTACAGCGACCGCTCCGGCATCTTCTCGGC  
CGAGGTGCTCGGTGCGCCGGGGCAGTTCGCCAGATCTGGCGCAAGAGTCCCAAGCTCAA  
AAAGGGCATGTGGGAACAGGACGCGCTCGAGAAAGAGACCGTCGAAGAGATCCTGTTTGA  
TCTGATCGGGCATTGCCTGCTCGCGTTGGACATGATCCCAGACAGAATGCGGATCGGCCA  
GGCTCCCAGCGGACACTCATGGATACGAGGGTACGAGATCGGCCGAAGTCAGGGCGCGTTC  
TTCTGGCACCGAACGCTTCACTGAATCAGACAAGGGTCCGATCACGGGCAAGCGCGATGC  
TAACGGTGGCGACTTCCGTGTCTAGGGCGTGGGTGCTCGGTGGCACGTCCGGCATCGGGA  
AGGCTTGCGCCGAGCGGCTCGGCGTATACATGGTGGCCACGAGACCGGTCTACGAGAAG  
GGGATTGGGACGTCCGCAGGGATTTGCGATCCATCTTCAGACACGATGAGGTGATACTC  
TGACCCACATCGTGTCTGCTGCAGGCATCAACCATCTCGACTGGATCGGGAATGGTGGC  
GGAGCCATGTGGAAGTTATCGACACCAACCTGAATGGATTCAATTCGTCTGATGGACGGC  
TGGTGGCGCTTTGGCTACTACAGCACTGGCTAGCTGGGTGGGTATCCGTACCACATAAAGC  
CCAGCATCGTTGTGATCAGCAGTGATGCGGCTGAGCGACCGCTCCGAACCTCTATCGGGT  
ACTGCGCAAGCAAGGAAGGGCTCAACATGGCCGTCAAGGTGGCTGCCGGAGAACTCGGTC  
CGCACGGCTGGCGGATCAATGCCGACTCGCCGGGGATGACTGCGCCACGGGCATGAGTG  
ATTACATCGACTAACGTGTTCCGGGAAGCGCGAGGTTGGACTCCGATCGAAGCTGCGCAGT  
ACGAGGCACAGCAGGAGGTCGTCCCTGGACGCATCGATCCTCGAGAGGTGGCAGAAGTGG  
TGTTGATGTGCTCACCCGACCTGAGCACCTCAACGGGTCCATCATCACCATCAATGGCG  
GGCGCTGACCAGTAGGAATTCGGCCTCCCCGAGACGCGAGGCTGAATTTCTCCGAAAC  
AACCCGATTCGCGCCGGTGTAGTAGGCTTCGGCCAGTGTCTAGAGGGGAATATTGAGTT  
GAAGCACCTTGAGCTCAGCCATCCAGACCCGATCCGCGACAAGCGAATTGGTGAGGAGCT  
CTCTTTTCCAAAACCAGCAATGGCTTGTGCGGTGAAACCGATGAAGTTCGTATCGCCTCA  
CACCCACTCAACCTTCTCCTACGGCGATGGCTACGGACCAGTCAAGGAGCACGTCCAGCG  
AGTTGCGGAGCTGGGCATGGGCGCTCTGGCGCTACCGAGCACGGCATCCTGAGCAGCCA  
CGCACAACCTCGAGAAGGCCTGCAACGAAATTGGAATCAAGCCCATCTTCGGGTGTGAGCT  
ATACGTTGCTCCGCCAGGCGAGAACCGCAAGTGCCATCAGACGGTCTGGCGATGAACGA  
GGTCCGGGCTCCAGAATCTGAACCGCATCGTACCAAGAGCTGGAAGAACTTCTACCGCAG  
GCCACGACCAGCTGGAAGATGTTGGAGGAACACAATGAGGGGCTCATCGTACTTTCAGG  
ATGCGCCGATAACGTGCTATCATGCACGCTGCTGGGTGGTAAGTTTTACGGTGACAAGCG  
ACTCACTGCAAGCAAGCGCGAGATCGCTCGTGCCGCTGGGCTTATTGGACGGTACCAAGA  
GGTATTTGGAGAGCGGTACTACCTTGAAGCCCAGAGATTTCCAGGACTTGATCGCACTTG  
CGTCTCAATCCGCTCCTCGCACGGCTATCGGGACTCACCGGAGCTCGTCTTGTGGAAC  
GGCTGATGTTTATTATCCACGTGGATCCGACAATGATATGCAGAAGATTCTTCACGCGAC  
TCATCGCGGGTCTACTGTGGAGGCTACTGAGGCGTCTGGGAGTATGACATTCTCCTCAC  
TTACCCGGAATACGACCGAGAAATCTATATGGACCTGGTGGGTACGGGGCTGACCAAAGC  
CCAAGCGCGGAAGCGGTTCTGGAGTCTGGCCGAATCGCTGAGCGCTGTAACGTGCTTCT  
GCCGAAGAACCAGCCGATCCGTTTCCGCAAGCCTACCAAGGAAGTTGACGGCACGCAGGT  
GCCGATGAGCGCCAACGAGCTGACCCGTAAGTGGCTCAACGAGGGCTGGCACTTCCGTAT  
GGCGACCAACCCGAACATGCGGAAGAACCGCCAGGCATAAAGGCACGCGTCGAGCATGA  
GCTTGGCATGATGGAGGAGAAGGACTTCCTTGATTACTTCTTGGTACTCAGCGATGCGGT  
CCGTTGGGCCAAAGACCACAAGATTCGGGTTGGGCCCGCTCGTGGTAGTGCTGCGGCGTC  
GCTTGTGTGCTACGTGCTTCGGATCATTGAAGTCGATCCGATGCTCTTCCCGCACATGCT  
GTTTGAACGTTTCAATTGAACCGACACGTACAGAGCTGCCCGACGTCGACCTTGACTTCTC  
AGACGGCCGACGAATCGAAGTCAAGCGCTACCTAGAAGAGAAGTACGGTGCGGACCGTGT  
TGGTAACATCGGAACTTACGCGTTATCGTGGCAAGAACTCGATCGACGACGTGGCTCG  
CGTGTACAACATCCCCGTCTGGGAAACGGAAATCGTCAAGAACCTCATCATCGAGCGCTC  
TGGCGGTGACAGTCGATCAGTGATTCTCTCGAGGATACATTCAACATGTTCCCAAGGC  
CGCAGCAGTTCTGGAGCGTCACCCAGAGCTCGCCAACGCGATTCCGGGGAGGGAAATTA  
CCGGGGGATGGGAGTTCATGCTGCGGGCATCGTCATTAGTAACACTCCCATCACCGATAC  
CTGCGCAGTGTACGAGCGCAATCGGCCGGCAAGACGACGCGAGGTCATCGCATAACGACAA

GAAGGACGGCGAGTACGTGGGCATGATCAAGGCAGACTTCCTCGGTCTGTAGACGCTGGG  
CATGATCGGTATCGCCCTTGACATGATTGGGATGGGCCTTGAAGACCTATATCGAATCCC  
TCTTGATGACCAGAAGGTGCTGCAGGCATTCCGTCGTGGAGACGTACCTGCATCTTTCA  
GTTTGAAGGACGAGCTACTCGGATCGTGTGCAGTGACGTTGTGCCGGACCACTTCCAACA  
CCTGGCGGATATCAACGCACTCAGCCGCCCGGGTCCGCTCTTCTCAGGAATTACTGCGGC  
TTAATGCGAGGTCAAGCACGGCCGCAAGACTCCAGAGCGGTACCATCCCATTCTGGACAA  
TCTGACTGACTGGACATATGGTCAGGTGGGGTACCAGGAGCAGGTTCTCAGCACCATCAC  
GGGGCTCGGAGGCTTCCCGATGAGCGAGGTCCACAATATCAGTAAGATCATCTCCCAAAA  
GCTCGGCGAGGCCAGTTCGAGGCCAAATAACAAGATGTTTCGAGGACAATGCTTGCCAGAA  
GCATGGCTGGACCCCGGAGCAGGCGCAGAAGATCTGGCGCTTCCTGGCGACATCAGCCAC  
CTACTCATTCAACATCGCGCACTGCATCAGCTACAGCATGCTCGCCTACTGGCTGATGTG  
GATCAAGCAGCACCACCCACCGCGTTCTAAGCGGCCAGCTGCGCAAGGTCAACGACGA  
GAAGCTCTACAAGTTGATGCGGGATGCGGGTGCGGCACAACATATCTATCCTCCCGCCAAG  
CATCAACGAGTCGATGGCGAGCTGGTTCGGCTCTCATGGAAGGTGTTGTGCGCGCAGGATT  
CCTGCTGATACCGGCAGTGGGTCCCAAGACATCGGAGGTGATAGGCGAATGGCGCAATCA  
GAAGATCAGGAAGGGACAGAAGGCAATCGCAGCCAGTGCCCCGGACCTCATGTGGTTCGGA  
CCTGCTTGAGGTAAAGGGGATTGGCCCCAAGTCCATCGAGAAGATCGTTGCATTCTGCGA  
GGCAGAGGACCCGTTCCGGCTCAACAGGGTTCAAGACCTGTTCAAGTCTCTGCGGCGGAT  
CATCAAGCCCGGCAATGGGTATGGGGTGCCAGCGTCTACGCATAACAGCGAGAGCATCTC  
GCGGACCGGCGACCACGACGGCATTGTCTGGATGGGCATACCCAAGGCGAAGA ACTATCA  
GGACTATATCGAGAACCAGCGGTCTCGGTACGGCAAGGAAGAGGCCGAGATTCTCGCTGA  
GATGAAGGATCCGCTTCTGGTCAAGAGCTGTGTGGTGCAGTGCTTTGACGACTATGACGA  
CGACGTGTACTGCCGGTGAATCGCTGGCAGTTCCTCCCAAGTTTGAGAAGATGCTGGAATC  
GCTGGCCGTTGATGGCAGCAACGTCCTCATTGTGCGCGGTTCGCAAGCGTGACGACTTCGG  
AGTGTCACTCCACGTGACGGATGCGTGGGTGCTTGAGTGGGTTCGAGGACGATAGGCTGAA  
GTATGGGCAAGAAGAAGAAGCGTGTGGGCAAGCCCGGCCCAAGCACAAACCCGCTGAAGC  
TGGTGGGTGGTGGCGAGGACTCGGACGCACGCGTCACCAAGGTCATCCAGAACATGCTCA  
AGCCGCCAGAGACGGTGTCTCGCGCACATCCAGCGCGTAGGGGCTCCGTTCTGGGTAGCAC  
CATTTGGAGTTTCGCAAGGAGGGCGAGCAGTACGCGCGTCCGTGCCTGGTGGTGCCTGACG  
TCGACCTGATTTCCGGCCGAGCTCGCCATCTGGCTGCTGGCGGGGAGCCTGCCGAGACGT  
ACACGGAGGAAGCCCGCAATGCGAGCCGCGCAGCCGCGCGTAGTGTGCGAGGCGCCAGC  
CCAAGAGCGACCTGGACCCACAGCCATTCTGGCCAGGTCTAGGAGATGCTGTAGCAGG  
TTCACGGCGCACAGTCGCGGGTTGCTGACACAGCATCAAAGATCGAACCCACCGAGCTTT  
CGGACGAGGATCGCGACGAGCTCCTCCGCAAGCTGCGCGGTTAATTCCAACAACAAGAAG  
GGAATCACATCATGACCGGGAAGAGATCGCCA ACTACGCCGACGTAGCGATGTTCAAGG  
CCGAGGAGATCGACCGCACCAAGGGACCGCAGGTGTTCTGCTGAGCTGCAACAACAATC  
CGCTTGGGAGCATCGCGGCGGCTGCCAAGGCGTACAAGGGCGAGTTTCGTTGAGTCACTGG  
CCCAGATCACCGACGACGAGCGCCGGTACTACCTCAAGGAGGTGCAGAAGTCGGTGCTTG  
AAATGCTTCTGGAGGCTGTCCAGTTCCTACTTCCGCATCACCGGTGTGACTCGCGGGTTCA  
CCCACCAGATGGTCCGGCAGCGCAACGCAGCCTACTCCCAGGAGAGCACGCGCTTCGCCG  
TCACGGAAGACGTCCAAGACGGATTGCCACCCAGCCTGCAAGACACGATGCCATGGAACG  
AATGTGTCGAGGAATGTGCGATGGAGATCTATCCAGTTCGCGAGCCAACGGCGTGAGTACC  
TTCAGGACAGGCGTGACCAGGCTGAAGAGTTCGCCGATACGATGGCCGACAAGGATCAGC  
TCTGGCGTCGTCGGTGGGATAGGGATATCGGCGTCATCGAGGAGGAGTACAACGCTCTGG  
TCAACAAGGGCATGCCAGCCGAGGACGCGCGTGGATAGCTGCCGACGAACCTTCTGACCC  
AGATGAACTACATCACCGATCTGCGTGGCCTCAAAGGCCATGCAGGCGTGCGGCTCTGCA  
CGCATGCGCAGTTCGAGTGGCGTCAGGTCTGGGCCAGATCGTTCGGGCGATCCGTGAGT  
ACGGGAAGACCCAGACGTACATGACGAACGACAATGTCCATGACATTCCGGAGAACCAGA  
AGTCGTCGCAGTGGCAGTTCGATGCCTTGGCGGACATCTTCCGGCCGATCTGCTACTACC  
GGGGGAGCTGGCAGTTCAGGTAGACTTCGACCGGCACTGCATAATCCGTGATCGCGTCCG  
AGGAGAATGCCGGTATCAATCGGCCGAGCACCAGCTGGGACAAGGAATGGGTCCGACCGA  
ATCCTCTAAGCCCCACTGGCGCTGAGGGTTACATCGGACCGATCTTCCCGGCTGAGTGGC  
TCCTGGATCCCTCAGCGGCAAGGACGAAGTGACCAAGGAGACCCGCGCATGCCTACTGTG  
TGGGAGGGTGGTCGATCGGGCCGCCCTCACCAACACTGGCTACACAGCTTCATCTGCGC  
GCGATGCAGTGAAGGATTGAAACGATTGAGCTCGAAGCTCTTCCACGACAGGAGGGGA  
TCCAGTTAGGAATCATCGTCATTGATTTGGCCGAAGGGAGGTGCGACCGTGCGGCTATGC  
GTAATAAGAAGCGCAACAGAGACAGCGAATCCGGAATCAACTATTCCACAGCACC GGTC

TCGCTGTTGATCCGGGCGGAACGACCGGCTGGTCCTTCATGTGTGTGGAGCCATTGGCTC  
TGCACGACCCGCAGGAAATGGTACTCGAGAACATCATCGCTCATCAGCACGGCGAGCTCA  
GCAGCACTGTTCGGATGCAATGTTCGCGGAAGGCGAAAACCTCTGCGTCGCAGACCTGTAGG  
AATTCATCTCGGCTCGGCCCCAGGCCGCTGTCTTGGTGGAGGACTTCGTTATCCTAAGCA  
ACAATCGGAGTCGCGAATTCCTTTCGCCCGTTCGCGATTACCGCCGCACTCAAGCACCTGC  
TATGGGCCCACAAACCGATACATCATCCGACAGACACCAGCAGACGCCAAGATCACTGCGA  
GCGATGACCGGCTGAAGAGCTGGGGCTTGTTCGACAAGCATGGCAGTCTTGGGCACGCAC  
GCGATGCCGATCGGCACGCAATGACATTCCTGCGCAAGGCCAAAAGCAACCCGAAGCTCC  
GGGCGATGGCTTGGCCGTACCTATTCGGAGCGGAGGGTATTTATGCAGTCGAAGGCGACG  
GACAAAGCTGGGGCTGATGTGCCGCCAGCGTGGCTGGTTCGGGTGCTGGCCGAACACCAG  
CCGCAGATGACTGGGCTGTGGTCCACATGCTCTAGGAAGAGCACGCACGCCTTCGGCGCT  
CCGAAGCACTAGTCAACCTTCTCTGCGGAACATCAAGCGGCCGAAGTACATCGCGCTCTG  
AGTGATGGCGTCGCAGCTCTTTTCGAGGAGGTTTCGGTGAGCAAATCGGACGAGTTCTATG  
CCAAGGCGATGGTTCGCGCTAGGTAATGCAGAAGCTGCGCAAGCTCACCTCAAGGAAAGCT  
TCGACGACAATCACAACACCTTCTGGTCTCAGCGCGTACTTTCGCGCACTGTGCCTTGGCGC  
ATGCATACCTCAAGGTCGCAGAGTGGGAGCTCGGCGTCGAGGCCTGGAACAGGAAGGAAG  
AGGACCAGGTCTCGGTGCTCACCTTCGGCACAGACGAGGTGGTTCGCGACGTTCCCCGACG  
ACATCGAGGAGCGCCGATGAGGCGCGCGGGCATGAACGACCTCAATCCGACAGTCGTCAA  
GAGCCAGAACGACGACCAATAACAAGAATCCAAATCCAAAGGACGCCTTCACATTCGGGCG  
CACGTGCCCGGACTGCGCTGGCGGGCTACAGTTCAAGTGGGACCGGATGAAGTTCGGGCC  
CAAGCGCAAGGTATGGATCAGTCTGCTGCTACGAGCTTCAAATGGAAGGGCTGCCACC  
AATCAACACGGTTCGGCCCCGCATCGGAGGAGGAAGAATGCCCCGTGGAGTAGCGATGACT  
AAGGAGCAAATCGCAAGGGCGGAGGAGCCTTTGAACGAAGGCTGCTCTTACCTCGACGTC  
TCCCGAACCATCGGCATCGCCGAGTTCAGCATTGCGCTCAAGTTCCCCGGTTCGGGGCTGG  
ACACAAGAGCAAAAAGCCGAGCACAAACGTCTCAATGATTTGTTCAAGCGTCTCGACAAC  
ATCTGGGGCTTGGAGAGGGCACAGAGAGGCGAGAGGCGCGCATCATAGGTTTCAGTAGCCC  
GCATCGGCCAGAACCAGTACGATCAAAACCGTAACAAGGAGGAACCATGAAGCTCACCGG  
AACTGCCCCGCGAACGTCGCGGGTGAAGCGGGTGGGTTCGAGCCAGAACTCGACCAAGCGCT  
CAAGGAGTATGCCCGCGAGCTCGGCACCAAGACCTCACCAACCTTTCGCGCCGCGTCATCAT  
CCTTGGCTTTCGCGCAAGAGGGCTTCCAGATCGACAGCGAAATAGTTCCGCTGCCCGACAG  
ACCATCACACAGGAAGGATTGACCGATGAGCCGAGTGGAGGTGGCCCTTCGCGAGCGTAGC  
GCTGTCTGCGGCGATGCTCCTGAGCCAGGCCGCTGCTGTGGGCGCAGAGCCCGAGCAGCT  
GTCCGGGAAGGACCAGTTGTACCTCACACGCCTAGTCATTGGCGAGGTGCCTTACGGATC  
GGCTGCAAAAGCCCTCTCCATTGCACGTCGTGTATGCCAGGCTACCACTGGCGGAGACTG  
GGACTCCACCTCTCTCGGGAAGCTCGGCCAAGAGATCATCCGCAACAACCCGAAGTTCGA  
CGCCGACTCGGCAGAGAACATCATGGTGTTCGAGCATGACACTGTACTGCCCCGAGAACAT  
CCCCGACTGGTTCCACGCCGAGACGGCCAAGTATCTCGCCGAGGACGCCGGTGTGGCTGT  
CCCTGTGGCGACGAATCCTGGTCCCTACAAACCCCTCCCACGCTAGGAGCGTCTGCCATG  
GACACAGCGCCTTTTGGCGTATCTACCGCTGACTTCATCGTCTGGGGGATCACTTTCGCG  
CTCACGGCTCTCACAGCTTGGCCGCTGAAGCATGGTTGGCGCGTGAAGAGTCCGCTAGAG  
CTTGTGCATCGCACCTTCAACAAGCACGGCATGCCACCAGCGGTATCTGCCACATGGC  
TTTTATCGTACGGCGCGCCACTACGCGCTCCGAGGCCATGAGCAGGTTCGAAACCCGGGGG  
TGCGGCGAATGCCTGAAGGAGCTGAACCCAACCTCAGTTTACCCACATCACTAGCTGTCCC  
AGCTGCTGGTTCGTTCGGGGCGCTACCGTTCGGCCCGATAGAAGAATACTTCAATCTCCA  
CCCGAGCAGACGATCTGGGTCGAGAATAACGATGGCAGCGTCCATCTCCACAAAGCCTTG  
GAAGAGAACGGGGCCGAGATCAAATACAGGGTCTGGGGGAGAATGGCAGCGAGAATGCAAG  
ACCAAGGACCTGAATCTGATCCGGGAATTCCCAGTGAAGCCTGTGGTGTACCGCATATGC  
CCGAGTTGCGCGTACACATGGTTTGGAGCACTAACAGAAGGGAATACATCATGATAATGAA  
AAACAGTTCGGAGGACGCACTGCGGAAGGCTGCAGCTTCATTTGCTCTGCGTCAAATTCG  
TGAGGTCAAGGAGCGCGCTGACTACATGCTCGTGCACGCCCTGACCGAGGCCGACGTGTA  
CGAAAGCATGCTCGTGAGGGCTGGGAGCAGCGCGAGAATCTTGGTTCGCTGGATAATCAC  
GCCAAAGGACTCAAGAGTGTAGTCCCAGACCCGGACGACGTCGTCGGCTGCGTCCCAGT  
TCTCGTCCGAAACCCCGACGACATTGGCGAGCACCCGAGAGCGTAACGAAACGTTCCGCCG  
GTACTIONGATCCGCGCTTCGGCAAGGATTGGTTCGGGCTACGTCGGCAAAGTACCCTACCA  
GCAGAGGTATCGGGAACACAAGGAGCCACAGCATCTACGGCACAAGCCCTATGGGTATCC  
GAACCCGGCCTGGGAGCTGAACTACTTCCGCGTCAACACCTTCGGCTGGACGCACTATGT  
CTGCCGAACCAAGCATGACGAAAGCTGCTGGTGCACGAAGAGCCAGAGGAGGTGATGGA

CTGATGGACTGGAATCTCCTGATCCGCGTTGCGATGGGCGCTGCGATGGGCGCGACGATC  
TATTTGGTTCGGATGCATCGTCCGATACATCGTCCGATACAGAGCAGACAAAAGGAGGCC  
CACCAATGAGAGGCGTGAAGGGCACTGGCCAGGGCACATGGGCAGCGCGCTACGACAGCG  
TGTGCTCGGTGTGCCCGTACTCAATCTTCAAGGGTGATCCAGTTCACAAGGTGCACAACA  
AGGTAGGCCACGAGGAGTGCCATGCGCTTGATGAGCGTGGCGGGTTCGGCCTTGATGTCA  
GCGGCATTGAGCAAGAGCGCATCGACGGCCGATACGGCAAGTGCTACGAGGACCGGCCGA  
GCCACACAGTCCGGGGCCGACGCTAGCACGAACGCAAATGTGGCGAGTGTTCAGATAC  
TTGCAGGAGAATGCCCATGAAACTCGAAGACACACACGGCGGATACGCCGGTAAGAGCTT  
GGTCGAGAAGATGCAGGACAAGCTCGACCCTGCTTACAAGGCGTGGCGCGATGCCGGTGG  
CTGTGATCATCGACAGAACTCGCAACAGGGACGGCACAACAGGAACTTCGACCGGGTTGA  
GGGCTGTGCGGCGCAACTCGGAGTCCTCAGGGGCACAGGTACAAAACATGAGATCGAGGA  
AGCGGAAAGGCGATACAGATGAGGAATCCCTTCAAGTACGGTAGCCCGCAGCGGGTTGTG  
TTGGCGTACTGGATGATGCGGTGGGCGTACCGGATCGTTGAGAGCATTGATCGCGGTCCC  
GTCCCGAAGATCAGCATGTGGACCTTCACCTTTGAGCGTGGGAAGGGTGCGGTCGTTTCG  
TAGGACGATCGGGCAGAGCACAAGGGTTGCAGACTCGTGTATCTCAATGATCGTGAGTAT  
GACCGTGCCTGGTTCGGAGAGTGCCTCGTTCGGCAAAGACGAGGACGAGTACCAAGACGCC  
TTCTCACCCTGGATCTGCCCCGATGAGCGGTACAGCCAAGTACGACAAGAAGATCGGCAT  
CAATGCCGACTGGCGGAAGACCACGACGCGCGGGCCACGAGGAGCGTACGGCAGTCGCCC  
AGACAGTCCAGGAGACCTAGAAGCACCCAGTTGTAAGGGATTCGGGTCACGCTGGCTGCC  
AGACGGCACTTGCCCCGGTGCGGCAGGCACTGGACCTGCGTGTACCAGACGCGCGACGC  
AAAACGAAAGCCCTTCGGCACCAACGGAAAACCTACCACACCTTCTACAAGACCAAACC  
ATTGGAGGGACAATGAACGATCCAGTCGCCGAAGCTGGACTACGGGCGATGAGGAAGGTG  
CACGACTACCAAGGCCAACCATGCCCTGATCGTCGCCGCCCGTGAGGCGTTGAAGCCG  
ATCCGCGAACTGCACTACCCAGAACCTGATGACCGAGCCCCCTTCTGCCCGGAATGCCTT  
GTCGAGTGGCCCTGCGACACCGCCAAGCTGGTCTACACCACCGAGGAGCTGGAGCGATGA  
TCTTATGGCATGCTCGGCGTGAACCTCGAGCGCTCTCGGAACCATCGTTTCTACAATCTGC  
CGGTGGACAAGAGTGTCCAAGCTATGTACACCTGGTGGGAGTACATGGACGAGATCGACT  
TGGTGAATGGCGAGAACGACACCATACGCATCACGGTCATGGAGGAAGACACTCACCTC  
CTCCAGGAGATCTGTTCCCTGAAAAGCCCAAGGTCATTTCGCGCACTTCATCAGAGGTTGA  
CACCGAAAATTAGCCTCGAGTACCAGATCAACACAGCGTACTTAGCCCAAAGCACCATCA  
GCCCCGCTCGAGGAGATCAGGGCCGACGGGTGGATGGCGCTCGGCCACTACAAGATCCAGC  
GGTACTGCATCCGAGGCCGCATCAGGCCTGGCGGAGACGGTTACGAGCCATATCGCATTG  
TCATCGTGGCTGGTGAGGTCAGCCCTCCGGGCATATGGTATTCGTGGTCAGGACAGCCCG  
AGGACGTGCCGAACGAGGTACTIONGACAGAACTTACCACGGGATGTTTATGGCAGATAAAT  
AGCCCATCCCCAGAACCAAATACCATCCCCTCACAGAAAGACAGCATATATGTTCTGTGCG  
TAGGAATCGCGCGGCCGCAAAGAGAACGCGCGCATGTACAATCTCGGCAAGGTCTATGG  
CTACCTCGATGCTCTCAAGGAGCTACCACAGCCATCCAAGTGGAACCTCAACTGCGCGA  
AGAGAAGGCGCTTCTGGTGTCTCCGGGCGAGCCGCCGTGGACCCTCCACAGTTTTACCTG  
CTGGTTAGAGGGCGAGGTGCTTCGAATGAGCAAGACAAAACAGATTCCGCCAGACGAGTG  
GGTCAAGGAGGTTCGAGCGCGTACAGTCCCGCCTAGACCGTCTCACGCGTCGTCGGAGGTG  
AACGACATGGATGTCGACCTCATGATGGCAGTACGTAAACAGCGGGCCACATGGCCTCGA  
CGATGTGGGTGGAAGCCGCACCCACCGACAAGCCCAAGGCTGAGCCTGATAAACGGTAA  
GCTATCTAGCTGCGGTAATAGGTGACCTTGCGGGTCTAGGCCAGAGAAGAAGGGACACA  
TCGTATCATGTCAACAGCTGGAAATATCAACAGCGCCAAGCCATTCCGACGCGCGGTAGA  
AGGCTACCGTGAACGGGGATGGGCGGGAACGCTACCGCTGCCGCTCGGAGCAAGAAGAA  
GCCTCCAACAGTTTACACCGGGCACACAGCGCCGTACCCGAGCGACGATGACATCGCGAG  
GTGGCTGCGAATTCCCAAGTACGCCCAGGGCAATATCTGTCTGCACCTGGGTCCGGTAGC  
GACGCGTGGGCCGGACGGAGAACGCCTGGAGCTCATCGGGATTGACGTCGATGACTTTGA  
AGAAGGTGGCAAGGACAAGGAGGGCGGCAAGCAGCTCGCCGCGCTCGAAGCCGAACCTCG  
GCCACTCCCCAAGACGTCTAACAGCAGCTCGCGCACAGGCGTGAGCGGGATCCGCTTCTT  
CCTGGTCCCCCCCCAGCACGCATGGATGGAGAAGGCCCGCGCCGCACATCGACTTTGTCTG  
CAAGACATACCGTTACGCCATCGTATTCCAAGTTGCCACCCAGGCGAGGTTCGATGAGGA  
GATGTGGAAGGTCATCACCGAAGGTGGCCAGTACAAGTGGCGCGATCCGCAGGGGCGAGTT  
GCTGGATGGGCTAGAGGACACCCCTGACGTTAATGATCTGCCCTCCTGCCCGATGCGTG  
GGTAGAGCGGCTGAGCCGTGGCGGCATGAAGCTCTCGGACGAGGACGCCGAGATCGACAT  
GGATCTGAACGTTGACGAGATGTTCCGGTGGGCGGTGGGTTTCGTTGCCGGGCAGTGACGA  
GGACGGCCAGCCCTGCTCCAAAATGAAAGCGGCAGTTAAGTACTGGCAGGGGCAGATTGA

GGAGGACGCCTCTACCCACGACAAGATCACCGGCTCGCACTGGAATCTGGCCTGCTTGGC  
CACCGAGGGGCACACCGGCTGGCGGCAGGCCATGGCAGCTGTGGATGCGAGCATCGCCGA  
AGACACCATCGAGAACCGTGGGAAGCGCGAAATCAGCGAGCTGCGCTCAGAAATCATGAG  
TAGCAAGGTGAATGCACTCCGAAAGCTCAAAGCCCAGATAGACAAGGGCAGGCGCAACGT  
GCTCACGGTGTGCACGTGCTACGAGCCCAGCGCAGACGAGCTCGACGCGTTCACCGCCAG  
CCTCAACAGCGTAAAGGCAGCTGCCAGCGTGCCTACCGGGGAGCGCGCGGTTCGCCAGCGG  
CGAGGGGCGAGACGGATATTGGCGCGATGGCATGCCAATGGCACCCCGCTGGACCCCGG  
CGACTACGAGCAAAGCGACCACGGCAACGGCGATCACTGGATCAACCTGCACAAGGACAA  
TGCATTCTACGTTCCGGCGCTGGGAGAGTGGATCATGTGGACAGGGAAGAGCCGGATCGT  
GGGGGAAGGCTGTGCCGAGCGGAGCTACCGACGCGTGAAGGCTCGCCAGAAGCGGTATGC  
CGAACAGCTTATGCGGCGCGCGGCTGAGCTCAAGGCTGCGCAGGATCCTACGGCCAACGC  
GGCTGTGGCGATGGCGAAGAGCTGTCGTAGCTGGGCCAGCCGCAGCGGCGATGTGGGGTC  
GATTGAGCGTGCCTCAAGGCCGCCAGCATGGAGCTCGGCATCGAAGAAGGCGAGCTCAA  
CTCTAATCCGGCGCTGATCTGCTGCGGGAATGGCGTGCCTCGAACTCGATCTGTGCGCCGCT  
CGACTCCCTGGCGGACGACTCCCAGAGCGCTGGGCGCAACGGGGATAGAGGTAGGCGCAA  
CGGACGGAACGGCACTGCAAATGTGGCTAGCTTGGCCGAGGACGACGAAGAGTTTGATCT  
TGACTACGAGGCTGTGGCTCGCAATAGCCATGTGCGCCTGCGAGAGATCCGGCGCGAAGA  
CTTGCTGGCGCTGAGTACTGGGACTAACTACCTGCCCTGGCAGGAGCTGGTGGCCGGTGA  
GTTCCGGCACACAGGAAGCGCTGTATGCGAGCACGTGGGCCCAGCAGTAGAGATGTATCT  
GCCTGATGAGGAGGTGCGGATGTTCTGCAGAACTGCTAGGGTACAGCCTGCTCGTCGA  
CAACCGAGAGCGCATCGTCTGTTTCCGCACGGGCCAACGGGCAGTGGTAAATCCACCTT  
CCTCAACGCCACGCTCAACGCGCTCGGCGAATATGCGGATGTGGTTGATCTGGGCATCTT  
CAAGGGCGACCGCCAGACCAACCCAGATCTGGCTTACGCTCTCCCAAGCGCATTGTGAC  
GTGCTCCGAGGCTAGCCAGCTGAACGTGCTGCACGCCGACATGTTCAAGCGAATTACGGG  
CGGTGACCCGTTGAGTGCAGAACTGAAGTATAGCAACGAATCTGTCAAGCGGAAGCCTGC  
ATTTGTGCCGTGGATCGCCACCAACACCCACCCAGCATCCCTGGGGCCGATGCTGCGGT  
GGTTGATCGGACGGTGGTGGTGGGATTCAATGAGCAGATCCGTAAACAAGACGTCGGCAT  
GAACGCGATGCTGTCTAGTCCGAGGGCCAAAACGGCTGTGCTCGCGTGGGCGGTTCGAGGG  
CTGGGGAATGAACCGGCGCGAGGGGCTGAGGCGCGCTGATTTCCCGGCTGCAGTGAAGGG  
TGAGAGCTTTGAATTCACCAACCAGATCTCCGATGTGAGCGAGTTCCTGAGTGAGTGCGT  
GGAGGAGGCTCCGATGTGCCTCCGGCGGAAGGCTGAGAGGCGCGCGTGGCGCGTGTGCGA  
CTGGCCCAGGAATGGCACATAACGGTCAGCGAGGTGTACGACGTGTACGTCACCTGGTG  
CCCGGACAACCGCGTTCGCGGATCGTAACATCATGAAGAAAAATGGGTTCTCGCGCCAACT  
GAAGGACTATGGATATCGGGCCGAAGTTGTCAAGAAATATGGCGTCACTTCGAGAACTTA  
CGCTGGCTTCAAGCTCAACTCTCCAAATGCACGCGTTTTGAAATTGCAAAAAGACAGCTG  
ATTATTGGACAAGAATGGCACTGAGACGGGGCTGTTACGCAATGCGTATCCCAATCAGTA  
ACTACATTTGACCAGCGGAAACATATCATTTTGGTTACTGGTTGGGGTTCGTTTTCACTT  
AGGGCTATACCTACTCTCGTTCTTATACTTCTACCCTGTTTTCCCTACTATCTATTATCT  
AAAAAAGCGAAACGGGTAACCTCAGGAGGGTATAAAAATGTTGGTAGAGCAATAGATTTCG  
ATTTTTGAGAGACCCGGAATGCGCTACCGAATAGGTAACCCGAACACAGGCTACATGCGG  
AAACATGTTTCGTTTCGCATAATTTCCGGTGTGACGGATAGCCTGGGAGGGTATCTAGGAGC  
GTAAATTTGTGGGATCAGAGATGGTTTGGACAGCAGCAATCAAGACTGATGGAATTGGAG  
GAATGGC

>NewGenomeName\_130

TCCCGACTCTGATCAGCCCACCCTTCCCCCGTAGGCCCTCCGCCTGGTGGGCCATCCTCG  
CCTTGCCTGGGTGTTGCCTGGGTCATCCCTGGGAGCTTCCGGCTGCGCCGGTGGTGGCGGT  
GGGCTTCCCTGCCCTGTCGCCAGCCCTTCTGCACGGCTCATCGGGAGTGCCAACCCTTGG  
GCTAGCGCTGTCGCTCTACCGGGCTTGGCCGTAGTACCTGGAGCGCTCCAGCTCGTGCCG  
GTGCATGGCCCTGGCTACCTCGTACTCCTGGGATGCCTGCCGCTTCCGCCAGGGTGGTGC  
GTGGTGCCGGTGGTCTGCGCTGCCACTGTGCTAGCTGTCTCTGCCATGCCGCGTCTCG  
CTGGTACCGGGCACGCTCACCTCTGTTCTGTCTGCTCAGCATCCTCTGTGCCTCCTGTGG  
TCCTGTCCGGTGGTGGTGGCGGAGTGGCTGGCCTTGCCTCTCAGCGTAGCCTTGCCTCTT  
GTCTTGCCATGGCTCTACCTGGCTGCTACCTGGGTATTCGCTGGGGTTGCCTGGGTGGTC  
CTGGCCACTCCCTCTAGGCCACGTAATCCACTCGCCTCTACCTGTCCTGTATAGTCCTGC  
ACCCTGTCGCTCCCTGGGTGCTGGTCTGTCTCCCTGGAGCTGCACTGGTCCAGTTGTCTT  
ACCTCGCCGCTCCCTCGCTGCTCGGTGCGACCTGCGGCGCTGATGGACTCCTATTTGTC  
CATTGTGTGTGACATAACCGCAGCCTTAGTGCCATGCGGGTTCAGGGCGATGGCCTAGC

TTGCTGGGTGGACCCTGGCTGTTACCTGGGAACGATAATCCTGGCTAGCTAGACTAAGCC  
TCGCATGCGTGGGTCTCTATACGTGCGTAGAGGCTCCAGGCAGGGCCTAGGCGGGGTGTT  
GACACGACAGGTAGGCGTCTGTACTCTGCGCCCTGTCTCCACGCAACACCGCCTCTACAG  
GCAGCCTGGAGACAGGGTTGACACACTACCGGGACATCGGTAGAGTGCGGAGCCAGAGGG  
ACGGAGCAACGCAACCTTCCAAGCGCGGCACATGCCATAGGCGCAAGGGACACGGCGAGG  
TTCCAGGGCAAGACCGACTACGTGTAAGGCCGGCAGGCATCGCAGAGGGGATTGACAGTA  
ACACGCTCAGTCGGTACGATGTGCACCACTCGGCAAGCAACGCAACATCAGCTACCGGGT  
TGACACGACAAGGCCGAGTCGCTAACATGGCCACCAGCAACAAAGCGGACCGGCGGATAA  
CATGGTCCGGTAAGCTCCAGCAAACCTGGCTGGGCTGGACGGGTAAGACGAGTGAAGCTGA  
CAGCGAAGGCCCTTCGTAGAAGGCAGCCGAGGTGGATCTCGCACCAGAAGGTGAACTGTA  
GGAATCGGGCAGCGCCTTAGGACTGCCAGGGGGTCAAGGCTAACCCCGCAAAGAAACAG  
CCGAGCGTTAGGATCACGTCCCAGGAGCAGTGTCCCAGGGGAGTATCTTGTACAACCGACAG  
TAGTCGGATGCCTGCAAGCCGAATCAACGGCTGGCCTCCGGGGCTGGGCATCCCCTCGCAA  
GTCGGTTGTATCTGGCAAGAGCCATCGGGTTGGCGGATGGGCTGCGAATGGGCAGCGATG  
GCTCTTGACCAGATAACAACCAACCGGAGTAACCATGAGCAAGAACGCCTCTGGTGCAGCC  
AAGGCCGCAAGCTACGGGCCGATATGAAACGCTATATCGCTGGCCACCAGCGCCACGAAG  
GTAGCCGAACCTGATCGCCATCGGCGACAGCTCCGCACGGGCTGAACTGCGCAAGATGCGC  
GATGTTTCGGTACAGCACGGACAAGGCAACCACTCCCGGACACTTCTTCAATCCCAAGGGC  
AAACACTTTGCCCGTGGTTCCGAAGGCAAGGCACGCAACATCCTCAAGGGCTTCAACGCC  
CGCAAATCTCAAGCAAAGGCCTCTGACCATGACCAACCAACTGACCAAACCGTCATCG  
CTTTCGTTCGGTACCGCTGCCATCACCATGCCATCGAAGCCAGCCGCGTTTCGTGGCAAGG  
AACTCGACGAGGCCATCCAACCTGACCGGCCTGTCCATCCTGAACCACGTCGATCTCCACG  
GCGACGTGACCGTAGTCAAGGCGCTGTACGAAGCCATGCCGCAGGGTAGCCGCCGCAATG  
CGCTGGTTCGAGTGGCTGACCATGTTTCGGCAAGGTACAGGTGAACACCGACAAGAACACCA  
ACAAGGAGCATCCGTTCCGTGTAACAACAAGTTTGGCAAGACCGATCTCGTCGGCGCCACCA  
ACGAACCGTGGTACGGGTTCAAGCCGGAGAAATCGCTCGATCAGGAATTCAACCTCGGGC  
CCGCACTCGCCGCTGTCCGCAGGCAAGTGCTCCAGGCGCAGACTAAAGGCAAGGTGATCG  
TCGGCGCTGAACTGCTGGCCGACCTGGAAGTCCCTGGCCGCAAGGCCGACCCATGGTTCG  
AGAAAGCCAAGCGCGCTACTGCCGACTAACTAGCTCAAGTCGAGCGCCTGCGAGGGCGGGC  
GCTCCGCTGGACCTAGTACAACCTGGAGATAACCACGATGACTTTCGAAGCGACGTCAGCAAC  
GTCAAATCGCCCTGGCTCAGTACAGCCGGCCCGCCACTATCCCTACGGCGAGCAGGCCG  
TTCAGGAGGCAAAGTAATGGATATCTGGATCGCTCTTCCCTTCTTCGAATTCGGCCTGAA  
CGTTAGCGAGTGGGCCGTGCAATTCACGCTGGGCATGATCGCAACCGCCCTGTTTCATCCA  
TCTGCTGCTGAATCGGTGACTCAAGACATGGCCCTAGCGGGCGACCCTCACCTACTCCGG  
GGCCATCGCTGGACCCATACAAGCCAGAACTAAACCATGCAAGCTTTGAATACTCTGTT  
GATGGCAATTCCCAAGGACCTGGCAGGCCGATTCAACGCAGCCGACAAGGCGCTGTGCGC  
CCATGGCTTCCGTATGGGTGACCTGAACAGCGCCACGTCCTGACCCCTGGCGGGTTAC  
CGTGGTAGGGCGCCGGCGTGACCGTCAACCGCTACGACGAAGCGTATCGGTTGAGCCGCGA  
TATCGACTCCGCAGGCTTCGACGTGCTGCTGGTCCAGGGCAGCCCGCTGTCCGGGCACGT  
CACATGCCAGGCGTACGGCTGGATCAACGCTGAGTACCACAAGGGCTGTGCAAACGGGCG  
CCCGATCTTCGACATTGCAGGAACCACGTACCATGTCTTCGCGCGATCCCTACCGTATCG  
GCCACCGCGTGGGGCTGGTGAACCTACAGCGACCGCTACCTGCGTGCCGACGCGGCAGGCA  
CCCGGGGCATCATTGGAGCCATAACCCGACCGACCCGCTGTATGACGATCTACCACGTAC  
GCTGCGAGCGGACCCTGCGCCTTATCGAAGGCGAGGCCCGTAACGTGGGGTTTCATCAGAC  
AGCTACCGACCCGCAAATGACGTGGCTCATCATCGCTGTCAGCCCGTCGGGCGGTTGCGC  
CTTCGTGTGGAGTCGCTAGCGACCGGTGCGTCCCTTGCATTCTACTCACGCAAGGAAGC  
TAAACGCTGGCTTCGCAAGCATCGCCGCACGGCCTTGCTTGGCAGCCGATTCTCATAGT  
GAATTGGAGCAAACGCATATGAATCCTACTTACGTGCTCCGTCTCAAGGACGGAACCACC  
CGCCAGGTGGCCGCGACAGCATCATCGCCGGCCACAACCTTCGCCGAACTCTGGTTCTCT  
GGTGGCGTGGTCGCTATCTACCCGGCCTGTGAAGTACAATAGGTGCATCGCACTGACCTC  
GTGAAGGAGGGCGAGTAATGACCGACAAGACCGTGTATGTCAAGCCTGAAGACCCGGCGC  
CACCAGTCTTGTCCGTAGGACGCCTGTCACCAGGTGAACTCTACAAGGTAGTGACGCCTA  
GCTCGGCAGAGGGCGCCGTTATGCTGGCGACCAAGCAGACACCTGCCCTCGCTCAGGCAG  
TCATCGTACTGCACAGCATGAACCCCGCGCAGTACGCGGTCGGCACGGCCATACTAGACA  
TAGACTGGCGGTGCCGCGCCTGGGTGCCGGAGAGTACATCATGCTCGTTCAAGGGGAGG  
CCGACCAATGATCGCTGCCCTGTTTCGTACTCGACCTGTAAGTGTGCCCCGGCCTGCTTGC  
AGGCGACTGCTACTGCCTCGCAGTGGCGCCCGCCTTCGAGAACCCTACGGAAGTGCAGTT



CCAGGACGCCTGCCTGATCGGGTGCCTCTGGCCCTTCGTGCTCGTAATCATGGTCTACCT  
AGGGGTGCGATCCTTCTTCTGTGGCGCTCTGGGTGGCTTGCGCCGCCATCGGCAACGTCT  
TCACAACAAGCGATAAGGAACTGCGATGATCCGTACCCATATCCACGGCACCAACCGTGA  
GCAACCCCGTCTTACAAGCACGCTGAATTAGAGGGCGGGCGAGCTGTACCGAGTCGTGCA  
GCCCCGAGTCCCGTCGGGGCATGCTGGTACTCGGGCTGGGGAGCCCCGACCGACCGTGGCGT  
CCGCACGGTGGTGCCTGTAGTCATCCACGATGAAGTTGAGGGGAACCTGTCTACTCCGAG  
TCCTACCGTGCTGCGTAACGACACCTGGCGCATGGTGTCTCGTGAGCAAGGGCACCCA  
GACTCACC GCCGAGTGACCAAGGCGAAGGCTGCCGCGCCAGCCTTCCACCGTGGCCAT  
TACTTGCCGCGAACCAACTCAACTGAGGAGCTACAGCATGACCAACGTCAACACCACCAC  
CGAGACCACCACCGCTGCCGTCTGGGGCGCCAAGATCATCAAGAAGCCGGCTACCGTGG  
AGACTTCCGCAACAACGTGGTCTTCCACTACACCGCCCTGGCCAAGCTGACCGAGACCTA  
CAACGCGGGCGGTGCTGCCCTGCAAACCGCCGAGCGCCTGTCCAGCCTCGTCGCCGGTGA  
CGTTATCACCTTCGACCACGGCAAGGGCGAGAAGGCCGAAGTGCTGAGCGGGCAAGTCAT  
CAGCGTGGTGC CGGCATCTATCAGGTGCTGGTGC GTTTCAGCGACAGCGCCCCGGCCAA  
GCTGCTGGACGTGAAGGCTTGCGCCATCCGCGCCGTCCAAGCTCCGGCTGCTCCGGCTGA  
ATCCCTGGACGAAGCCATCGCCCAGGGCGAGGAAGGCCCGCACGTAATAGGTCTGGCCCT  
GCCGAGCCTATTGCGAGCTAGCCATACCATAGGAGGAGTCAACGTGAGCAAGCACAACC  
CGAACACATCAGCGGCCCGGTACGCAGCGTGAGCGTAGCAAAGTCTCCCGTCGTCCAGGA  
CCTGGAAGACCGCCTGGAATCCTCCCTGCGCGTGTGCCAGGAACGCGCCCAGGATATCGA  
CACCTGAGCCGCCGGCTCCAGGCTGCCGAGCGGGCACGCCGCTGGGACATCGACGAGAT  
TCTCAACCATCAGGCGAGGATCCGTCTACTCCAGAACGACTTGAACGCAGCGCATGATGC  
CCACGAGGCACAAGAGCGCCGCGCTCGCAAGGCAACCATCATGGCCTGGGTATGCCTGCT  
GACCGCAGGTTTGGCCGTCACCCTGAAGCTGGCAGGAGTCTGACCATGCAGTGCAAAGAC  
CTTTACACGAACCTCGCACCGGACATGTTACGCGTACAGTGCTCCAGGTGACCCCGGAG  
ATGCGCCGCGTGGCCAAGAGCCGGGCATTGCCCCACGCCCTATACGCCCAAGAAACAGGCT  
TCGGGCGGGACTTACACCGCCCGTGTGAGCGGGCTCTCCTGTGACGGTGGTAAGGTGGAG  
GTGCGCCTGGATAACGTGGAGCGCGTCAGCACCTGTGACTATGCCGATCTAGAGGCGCTG  
GTAGCGGCCAGCTTGTGCCAGGCCGACGCGAAGCGCGCCGACGAGTACGAAAAGCTGCTG  
CTCAAGGCATTCCCGCTGGTATCGAAGAAGGCCGGCCCGCTGTCCGCCAAGGACTTCGAG  
GTACGTCTGCACGATCTGCTCGTAACCAAGCTGGCGGTAAACCGTGCCCTGCGCGATGCC  
GGAATAGAGATGGACGGACCGCTGCGCAGCCGGGTACGGAAGCTTGC GGACCGGAATAAC  
GAGATGGGCGCTAAACTGTTACGCTCCAGCAGGGCTTGACCCGGCTGGTGGAGGTAGGT  
CAACGGGCGGCCCTGTATTGGGACGACGCGGAGACTCAGCGATTGCTGACGGTGGCCCCG  
ACCAAGGCCGTCTGTGCGGCTCATCAGCAAGCTGACCGGCGTGCGGTATGCCTCCCGCGCT  
TCCGTGGCGAAGGCTGAGGCCGAGGCTCGTGAGCGGGCGAAGGCCGGCGGCTAAGCACACC  
TGGCAGTCAGCAACCTTCGCATCCACCATCGCCGGCGGCGTCTGTGGGACGCGTGTGACG  
TACCTGCTCGTCTAAGCGACCGGGGCTACTACGGGGTCAAATCCGAGGGCGTTCCCTAGA  
GCGCCCTCTCGTGTGAGTCTGGAGGATCAGGAACATGCAATACCACTTCACGCATTACGA  
CGGATACTGCTTCGGCGTCGAGCTGGATGACGAAGCCGTCTTCCCGTGCATCAACGGAAA  
GCGGGCGACCTGGGACAAGGTGGCGGCTTGTGCCGGTAGCCTTGTGCATTACATGGCGCA  
GGACCTGATTGACTTCGGCCAGCGCAAGTTCAGGGAGATCGAAGATCAGCAAGACGAGTC  
TGTACCCGCTGAACCTGAAACCCGGCCTGATACAGATCAAGACGATCCACGTATTCAGCA  
TCCAGGCGTCGAAGGACGAGCCGAACCTGGTGGGAGTGGTTCCTGTGGCAGCGGAAGTACC  
ACCCACTCCGCGACAGCCTGGACACGGCGGGGAACTGAGTGCGAGTATCGCAGAGTATG  
TGCACCGCCTCCGCCGGAATGGCTGTAGAGATAGGGACATCTGGCACAACAAGGGCGGGC  
TGCTGGCCCTCGGTGCCTTCAGCATCGCCGGCGAGATGATTGGCTCCTGACTCGTGGTGG  
ACAACGAACTGCGCGCCCTGTGCGTGGACGACCGGGACAAGGGGCAGGGTATCGGGCGCTG  
AGCTGGTGC GCGCCCGAGCTTGCAGGTGCCGAGCGCCTGAGTTGCTTCGAGTTCCTGG  
AACCGTTCTACGCCGGCTTGGGCTGGCGCACCGAGCGCCGCGCGGCAAACCTGGACTGATG  
GTGAGCCGGACGTGCTGCACATGAGGGCGCCCCGGTTATGACGCATGAGGTGATGACATGG  
CTTATCGGAACAACAACCTGGTCATCGGAGCCGCTTTCAGTCTGGTGGCCCTAGGCGTT  
CTGATAACGCGGGACAACGGCAGCCCGCCTACGGCACCCGCATGACCTGGGACCTCCAGG  
ACATGTTTCGAGGCCCGAGGCGGGCTGCGTCCCCTGTGGGAGGAGTGGTATCAATGGCACT  
GCGCCGCGACTCCTGGGTGAAGCAGGCGCAGGCGCTCGCCGTAGGCCAGACTGGCAGGGT  
CCGGCACGTCTGGGATGCAAGAGCATGAGCCGGGGCGGGACCAACATGACCGTCAAGAA  
TCTGCCGGACCGTTGGGTAGCGTATTGCTACCCATGCGAGGAAGGTGGCGTGGTTCGAGAA  
AACGCATGTGCGGATGGTGAATGCGCGGATCAAGAACGCTTTATGCCCTGGCCCCAAGA

TGCCTCGGACTGGACGCGGGCCGACTGCTATCAGTCGCTCTAGGGTTTGCTGCTGTCCAA  
GGGCATCGACTACAACGTGATGACCCAGGGCTGCCGCTGCTGTACAGCGGAAGGCAGCA  
TCGGCTTATCTTCCCTACCGACGCGGGCTGGATTGGGCGCGCTACTGCCGACCAAATCC  
CAAGTGGGTGGGCTACGGGTATCCTGCCCCGATTACCATGGATGGCCCCAGGAATTATC  
AATGGGCAGGGCATGGGTGCTGACGGAAGACTACTTGTTCGGCGCTGAAGGTGCGGTGGGC  
CTGTCTCGAAGTCTCTGCTGTTCGGTCTGAACGGTACAAGGCTGCGCGACAGGCGGGCGGC  
GATCATGTTGCAGCAGACCTGCGACCGCGCCTTCATCTTCTTGGATGGCGACCCGGCAGG  
TGTCGGTGGTAGTGCACGCGTTATGCGTTCGGTCCGGTCCCTGCTTATCGAAGGCCAAGT  
AATACCTACGCCGGGCGGGTTCGACCCCAAGGACCTGAACCGCGAGCAGATAAGGAGCCT  
AGTAATTGGACGTATTGACGCTACACGCACTGAGTGACAGGGACCGCTTCCGCACGTTGC  
GGTGTGTGGTGCCTTAAGGGATGATGGGGCCGGAGACCTGCTTTCTCATCGACTGGATCG  
AGCAATACTGGAAGGTCTACGCCGCGCATCAGAAGGTGGACCCGCGAGGCGCTGCGCGAAC  
TGATCAAGCTGCGAGGTGGCTACCAAGCGGAACAAGTGGCGGTAGTCCTGAACCTCGTCA  
ACCAACTGGACAAGCCGGTAGACCCGGACTCGCTACAGGGCCTCGTGTCCCAGCTCAACG  
AGCTGTATTTTTTCAGGGCGGGTGGATGCCCTCCTGGCGCAGTACAACCAGGGCGAGGACA  
TCGACCTAGCGTATGAGCCGCGCCGGCTGAGCGACGAGGCCCTGCGCCGCGAAGGGGTCA  
GCAAGCCGACTGACTACGTGACGGACGACGTGTTTCGATATCCTGGCCGAGGAGCAGGGTG  
AGCACGGCATCAAGCTGCCGGGGCTGGTGTACCAGCGTATATGAAGGGCCTCCACGCCG  
GGCCTCAGTGCTGGTGGCTGCGCCACCGGATGCCGGCAAGACCTCGTGCATGGCCTGGA  
TCGCCGTACACATTGCACAGCAGCTCAAGCGGTACTTCGACCCGGGCCGGCCATCCTAT  
GGCTGAATAACGAGGGCAAGGGGCGGCGGATCAAGCCGCGCCTGTACTCGGCGGCCTTGG  
GCATGACCGTGGGCGGGATTCTTGCCATGGACCCGGAAGAGGTACGCAAGCAGTACGTCCG  
ACATGATCGCCGGCGACTCCGAGCTGATTTCGCATCAAGGACGTCCCTGGTGGGTCCCTGG  
CCCAGGCCGAGCAGGTCAATTGACGCGATGAAGCCGGCGGTGGTGTGTTTGGGACATGATGG  
GTCACGTCAAGGGTGGCCCGCGCAAGGACCAGAACCAGCACCGACGAGATGGAGTATAAGG  
TGGCCGAGGTCCGCGAGATGGCGGTGCGTCACGACTTCATCAGCTTTATGACGTGGCAGG  
TCAGTAACGATGGCCACGACCAGTTGTTTCGCGCCGCGAGTCCTGCCTCAAGGATTTCGAAGA  
CATCGGCACAGGGCGCCGTGGATGTGCAAATCCACCTGGGCCGTCTCAACGGTGCAGGATC  
AACAGGTCATGCGTGGCCTGTCCCTGCCGAAGAACAAGTTCAGATGGACGGGAAGCCGT  
CGAACGTGGAGGCGATGATTAACCTTCGACACCGCTCGGTGTCGTTTCTTTGAGAGTGTA  
ACCATGCAAGCTAAGCATAGCCGGGTGCTCGAAGGCACCAAAGAAATTCACTGGGTTC  
ATTGCACTGCTGACCGGGGTCAAGGCCCTGTTGCTACGCCTGTACTCTGATGCACGGCCC  
AACGAGGGCGACGCCATAGCCGGTGGGTTCCTCGCGACCTCATGCATGGCGCCACTCCA  
AAGGACGTGGACTTCGCCCTGTACGGCATGACGCAGTATCAGGCTGAAGTGCTCATCAAC  
AGCGTGCTTCCCTACCCTGGACCCGCGCTTCGTCCGGGACGGTGGCTGGAGTACCGAGTAC  
GCCGACGCAGGTGAGGGCCGTATCTTCAAGGGCGTGCTGACCCTCGTAGGCCCCCGTGGC  
CTGGAGGGCATGGACGTGGATTTAACTACTACGACGCCGACAGCCTTGGCCGGGTTCATG  
GAGTCGTTTCGACTTCACCATCAACCAGGTAGGCATTGCGTACAACCAGGCCCGACCCCGAC  
GGCGGCCCGCGCCTGGGTTCGTACCTGCACAAGGACGTTACCTGGGGCGTGAACAAGGAA  
GTCGGTGCAGGCTCACGTCTGCCGGAACGATGCGAGAAAATGCGAGCCAAGGCCGCGTAC  
TACGGATGGGGTAACGTGTGATGTGCAAGCGCGACGTGGTACTGGATATGGAGAAAGGCA  
TCTGGCGTGGTGTGACCAGAACGACAAGGCAGTCGAGGCCATCATCAAGAAGAACGGGT  
ACGTGATCGTCGAGCCTAAGATCGACGGGTGCCGTGCCATCGTCGGTGCATGGCCTGG  
TGTCCCGCAGCGGGCGCCGCTTCCCTGCCCTGGACGGCCTGGAGGATCGCATCATCGCGA  
AACTGTCCCAGTCCGGCCTGGACTCCGGTTCGCGTGCTGGACTGTGAGATGTACCTGGAAG  
GCATGCCCTTCAGTGAGGCGACCGGGAGTATGGCCCCGAAGACCCCGCTGACCGAGGCCG  
AGCTGAAGTGCCTGCATTTTCGCGGTATTTCGACGCCACCCATATCGGCGTGCTCCGCAAGT  
CGCGCTAGTCCCAGCTCGTGTACGTTGAGGGCCGCGCCATGGTCCGCGAGCCTCATGGAAG  
ATTGCCGGCGGGGCGACACCACGTACTTCTTCCAGTTAGCCGCAACAATCCTGCCGTTCTA  
TGGAGGCGGTACTACGCTGGTACTGCTACCACCGCTCCATGGGCTTCGAGGGGGTTCGATGG  
AGAAAGACCCGAGCCTGACCTACCGGAACGGCAAGGTTGCTGGCTGCTACAAGCGCAAGC  
CGGAGATCACCGTGGACGGGCGTATCGTCGGGTACGTGATGGGAAAGACTGGCAAGAACG  
TGGGCCGCGTTCGTGGGGTACCGTGTGGAGCTGGAAGATGGTTCCCGCACCGTGGCCGCCA  
CCGGCCTGAGCGAGGAGCACATCCAGCTCCTCACCTGCTCCCACTTCAACGCCACATCG  
ACGAGGCCGTGCCGAACCTACGGTTCGTATCGTCGAGGTCTCCGCGATGGAGCGCTCGGCCA  
ACACCCTCCGCCATCCAGCTTCAGTCGCTTCCGCGACCTGGCCAGTAACCCTGGAGTGA  
AGGTATGAAGATTTCGAAAGTCCCATAACCGCAACGACCCGGAAGATATGGTATAACCACGC

CACCAACCGGGATTGCTGCTGTATCCGAAGTACGTCATGGGTTCCGTGTTTCATCAGCCA  
GGACGGAACATTCCGCATCTGCGTCATGGCAGGGACTTGGGACCACGTTGGGTCCGAAGT  
TGGGCATCAGGCGCGGGACATCCAATCCCTCGGCGCCGGTCGCCGTAAGTTGCACCGCGT  
CATGCGACGGCTGCGTCGCAATCTGCGACAGGTAGCAGTCAAAGTATGAGAATGCCAACC  
GCGGAAGAACGTATGATCCGCTGCTTGCTGGCGGACATCCACGAACCCCTGGGCCTGCTG  
TTCCCCGGCCTCCGCACCAAGGCCACATGGACCCTCAAGCGGAAGAGCTGTTCGATTCTGA  
ATTGACTACGACCATTCTGAAGCTGGGCCGTATGGGATTCTGCCACGCGGTCTCCCTGTAC  
CAACTGACCAGATGGGGACGTGAAGGAATGGTCCGCTACCTGATGCAGGAGATTCCAGC  
CGTGTGCTGGAAGGTCTGCTGGTCAAGTCGCAACAGTACAGTCAAAGCAACTGGTACAGC  
AAATGACGACTATCCGAATCCTCGACCTCGAAACCGAGAGCTACGAGCACAGGGGGCGCA  
AGGCGTCGCCCTTTGACCCCCGCAACTATGTCGTCATGGCCGGCTGGCGGGACGATGTTG  
ACGGCAAGGTTCGGCCAGAAGGTGGAACATCGCTTCCGCAGCCGGGCCGAAGCCGAAGACC  
CGACCAACCGCTGGTTCAACGTTCGACGGCGTGGACGTGATCGTAGCTACAATGCCATGT  
TCGAATCGAACTGGTTCTTACCCGCTACCGGGGCGAGTACCTGGCCTTCTGCGACGCG  
GGGGCCGGGTCTGGTGTACCCAGCAGGCCGATTATCTGCTGAGTCATCAGGCGTGGCTGA  
ACCCATCACTCGACGAGCTGGCTCCGAAGTACGGCGTCACCCACAAGGTGGACGGCATCA  
AGATGGTGTGAGACCAGGGCGTGTACCTCGGAGATGGGCCAGGACCTGCTGAGCGAGT  
ACCTGTCCGGCCCCCTGCGGTGATATCGAGAAAACCGCCCTCGTATTCTACGGCCAGTTGA  
TGAAGCTTCAGGCCCGTGGTATGTCGGCTGGTTCCCTGGATCGCTGCGAGGCCCTGATCG  
GTTTCTCGGCGATGGAGTGCGCCGGCCTGAAGGTGGACCTCGAAGTCGCCAAGGTGAACC  
ACGCCAAGCAACTGGAAGAGGTGGCCGGGATCGAGGCTGAGCTGAAGAAGCTGATGCCCG  
ACTTCCCGGAATACTTCGAGTTCAAGTATAACCAGCCTGTATCACATGAGCGCATGGCTCT  
ACGGCGGCGAAGTGCGGTACAAGGGCCGGGTGCCCTACGAAGATGGCCGGATGGAGAAAG  
CCGACTTCGTGCGCTTCGGTACGGCCAAGCGGGGGACACCGATCGAGAGTACCTCGGTGC  
GGGTCCCGCTCAGCGAGGTGATCCTGGACGACGACCAATGGAAGTGGCCGGCCATCACCG  
AGCTGGCGACCAAGTACGGCCCCGGTTATCACGTTCTCCGCCGGCAAGATCAAGGGCAGCA  
TCAAGGTGTTCCGCGAGGACACGGACATTCCGGCGACCAAGTGGGATGACGACCAGCGAT  
TCCGGTTCCCTGCCTGGTCAACCTGCCAACCTGCCGGAAGTAGTGCGTGAGAAATTCC  
TGGGCAAACGCCCGGAGTTCCAGTGCGCCCTCACCTGCCGGATGGATCGCCGGTGTTC  
GCACCAGCGGTGACGCCCTCAAGGCTCTGGAGAAACAGGGCTTCGAGGCGGCCAAGCTGT  
TGATGCGCCTGGCCGAGCTCCACAAGGACAACCTCCTTGTCTACATCACCCATACTACC  
ACAAGGATGGGACGATTAAGGACACGAAGGGGATGCTCCAGTACGTGGACGACGACGGTA  
TCATCCACCATTGCTGAATACGACGGCGACGGCGACAACGCGCCTGTGCTCCAGCCGCC  
CGAACCTCCAGCAGCTCCCGTTCGAAGGACGAGGACGACCCGGAAGCCGGCAGCCGCGTGA  
AGGAGATGTTGCTGCTCGCTTCGGCGCGGACGGGATGATCGGCGAGACCGACTATAACCG  
CCCTGGAGGTGGTGTATTGGCGGCCCTGTCGAAGGATCGGAACCTCCTGGCGAAACTGA  
TGGCCGGCACTGACATGCACTTGTACCGCCTGGCAGGGAAACACAACAACCTGGAACGGGT  
TCGACTAAGACCAGCTCGTGGCCATCAAGAAGGACCCCAACCAACCGTGGCACGGTTCGCA  
TGATGCAGGCTCGAAAGAACATCAAGCCCAAGGCATTCTCGGCGCAGTACGGCGCGAGTG  
CGGCTGGTATCGCATTCAACACCGGCTGTACCGTGGAGGAGGCCAGGAATTCCTGGACA  
ACGAGGTGGCCCTGTTCCCCGAGTCCATCGCATTCCGGCAGATCGTCCGCGACAGTGCAG  
AGGCCACCAGCCTCGTCATGTACAAGGCCGACGACCAGATGCCGGCAGGCGCCTTCAGCG  
AGATGGGGCCGGATGGCAACTGGCGCCAGTACCGCCGGGGATTCTGGCGAGCGCCGGGTG  
GTACCTGCTACAGCTTCCGCCAACAGGAGCGCTGGGACAAGGAACAGCGCAAGACGGTCA  
TGGACTTCAAGGACACGCAGATCGCCAACTACTGGAACGAGGGCGAGGCTGGGTTTCATGA  
TAACCGTCAGCGTAGGGCGCATCTTCCGTTGAATGCTGCATGGCCCAGGATGCATGGTTA  
CCGAGTTCCTGATCAACAACGTACACGATGCCGTGTACACCGACTGCCACAAGGACACCG  
CCGCCGAGGTCAACAATGGCGTGCGCGACATCATGGCCGACGCCGCCCGCTACATGAGCG  
AGCGCCAGGGCTACGACATCGCCGACGTTCCCTTCCCGGCAGTGGCTGAGTTGGGGCCGA  
ACATGTTAAATATGGAGGTGATCCAGTGAAGAAGTGCACCCGCTGCACACGCCTGAGTT  
CATCAAGACATTCTGGACCAGACCGGGTGCCTGCCGGGAGTACGCCGTACGGGCCGCAC  
CACCGGCATTGCTCTACTGGCCATTGGCATGGCGCTGTCCATCCGAGGGAAACCTGAC  
GTTCTGTTGACCACCCGGACGGCAGCGCGGCAGCACTGGTAGCCAGCATTGAAACCATACT  
GGCGACCTTAGGCTACAAGAACGTCTCGTTTCGACCCACAACCCGTGCGGATGGGGCGCAG  
CGTGAGCATCGTCTTCTAGACGCTGCCGAACGCCTGATGACCCTTCTCTACTCCGGCCTT  
AAATCTTCATCCGACACGAGAGAGACCACGCATGACTCAACGACTCAACGCTCTGCAAGC  
CGCCCTCGCCCTAGCCAACAAGGCTGCCGAGACCGCAACCATCGAAATGTCCCAAACCTC

CACCGGGGGTGGCGGGTCGCATCTTCCC GGCGGGCACCGCCCTGGGCCGCTTCTGCAT  
CTACATCGAGCTGGGGGGACACGCCAAGGAATTCCAGGGCAAGCTCAAGAATACGGCCCC  
TCAAATCCGCCTGGGCTTCGAATTGTGGGGCGACGTGAACCCGCAGGCCGGTAACCCGCA  
GAGCCGCCCGGACGACCTGTTCCACACCTACGAGGCCGACGGCTCGATCAAGCCCGGCT  
GTTCCGTACCTTCGAGATGACCCTCGGCAACAACGAAAAGTCCAAGACCAAGCTGGCCTT  
CGACAAGATGAACTGGAGCGGGCAGCATACCCACTTCCCTCAGATGCTCGGCCAGGCGTT  
CATCATCCC GATCAAGCGCACCAAGATCACCAACGGCAACAACGCCGGTAAGGAACGCAA  
CGACATCGATTGGGGCGGCATCATGAAGCCCTATAACCCGGTTGATGGCAGCCCGTATAA  
CGTGCCGGA ACTGCCGATGGACCTGTTGCAGTATTTCTTCTTCCATGCGCCGACCAAGGA  
GACCTCTGACGCCCTGTATATCGAGGACACCTCGGACAACGGCAAGTCCAAGAACTTCT  
GCAAGAGACCATTGCTCGGCCACCAACTTCCCTGGCTCGGCCCTGCACATCATGTTGGG  
CGGCGGC GACGATCTGATCATCAAGCCAACGAGCCAGGCCCCAGGCAGCAACCTGCCGGC  
AGTGCCCAACGTGGCCGCCGATGCAGGGCTAGCAGCAGCCCCCGCCGTCCCGGCAGTCCC  
GCAGGCAGTGGCTCAGGCGGCCCCAGCGTGCCCCAGGTGGCGAATGTGGCTGCCCTGT  
GGTAGGTA CTGCCGAGGCGCAGAACGTGCTGCCTGACATCCC GCAGGTGGCCCAGGTGGC  
GGCTCCGGCAGCAGTCGAAGTGCCGACGGTCCC GGTAGTCCC GGAAGTACCGCAGGTTTA  
ATGCGGCTGCCATCGGAAGAGTTCCTGTCAGGACTATCCGAGCAGTTCGACCGTACCATG  
GCAGGCGGGACGTTGGTGTGTGACGCCGACGGTCCC GCTTACGTGGCTTCGGCTACTGCA  
AAGACCCTGGACACTGCGCTCCGGCGATTCTGGAAGATCATACTGGAGCAGCAGTTCCTG  
GCGCACTGTACAGGGACACGGGTCCACCTCACGGCAGCAGGTGGGGCTAAGGCTTACCGC  
GACGTGTATCCGACCATGAAACCCACCAGGGCCAGCGCAAGGGGAAGGCATAGCCCGCG  
CTGCTGCAGCCGCTGCGGCCGGGCTGTGGCCGACGTGCATGAACGAGGCGGGGCGCCTGAA  
GGGATCGACGTTATCCTGCACACGTTCTTCGAGGGCGGATGACGGCATGATGATGGATGCC  
TACGCCATGCAGGACAAGGCCATCATCCAATCCGACGACAAGGACTTGCGGATGACGATC  
TACCCGTATTGGGAGATCGATAACAGCGGGTGTGAGCAGGATCGACGGGGGCTTCGGCTAC  
CTCAAGGAGGCGTATACGCCGTCCGGTCAGTTCAAGCTCAAAGGGCACGGACGCAAGTTC  
TTCCTGGCGCAGTGGCTCGGCGGGGATACCGCTGACAACATCCGAGGAATCGATCGATTC  
AACGGTAAGCTCAGGGGGATGAAGACGGCCTTCGATATCCTCCACCCGATCACGTACGAG  
GACGAGGCCATCGACATGATCCTGGAGGCGTACGCCAAGATCAAGCAAAAACCCGCCGGCA  
GAGGCCGAGGTGCTGTGGATGCGCCGAAGGCCTAGCGACAATGCAGCGGAGTACCTGTTA  
AGCCGAGACCTTCGTCCGGCTTTCGCCAGAGGATCATCGAGCTGGACGCCTACCACGAG  
GCGCTGCTCCAGAAGCGGAGGGAGAGTGACTATGACGAGTGAGCCGAAGGTCTACCAGAT  
ACCGCGCAGCCAACAGCGCACCTTCACCTGAAGCTGTGGGCCGAGCAGGGCAAGCTGTG  
CCC GCTCTGCGGTAAGCCCATCGATATCAGCGCGAAGGGCGAGGCGGTGATGGACCACGA  
CCACGAGACGGGGCTGGTGCGGGGCGTCCTGCATCGATCCTGTAATACCGCAGAAGGCAA  
GATCACGAACGCGGGCGGTTTCTGGGGATGCAAGTCGATGAAATACACCGACATCATCCC  
CTACCTTCGTGCCCTGCTGACGTACCTGGAGGGGCCGAAGCATCCGCTGATCTACCCCT  
GCACAAGACCCGACGAGGAGAACTCGAAGCGAAGCTGGCCAAGCGCCGGCAGGCAGTCCG  
CAAACGCAAGGCGGCGATGGCCGTCGCAAAGCACAACGCGAGGAACGTATGAGCAA ACTC  
CGAAGCAATTCACCAATGGGTACCTGCGCAACGTCTATGTTCGAGCTGGGTCTCAAGACG  
GGCGCCGAGCATCTGACCAGGCATTCGCGCTTCGGCGAAGTGAGCCGCCAGTGCTTCCGC  
AACTGGTGCATCAAGCTGGCCTTCCACGACAGCAGGACCCGCGGCACGTACGCCAAGAAG  
GGCGCTCTGCGCTGGCTGGGCCGAAAGGCCGCGGAGGTAGTGCGCAAGTTCCTGGCGCC  
GTGGGCAACGTGGTTGGCAAGGGTCCGAAGGTA CTGAGCCTGGACATCGAGACCTCGCCT  
ATCGAGGGTTGGGTCAGGTGCTCTGGAAGCAGAACGTTAGCCTCAACCAGATCAAGCGG  
GACTGGACTATTCTGGCGTTCTGCGCGAAGTGGATGCACAGTGACGAGGTGATCTCCATG  
GAATGCCAAGGTGATCCCTTGACGACATGCACCTGCTGGTGCCTGCATAAGCTGCTG  
GACGAGGCCGACATCATCATCGTCCAGAACGGCAAGCGCTTCGACGTGCCCAAGATCAAC  
GCCCGTTCTTCTGAACAAAATGCCGCCGCCGCGACCGTTCAAGGTGATCGACA ACTTG  
ATCATCGCCAAGCAGCAATTCGCGTTCACCAGCCGCAAGCTGGAGTACATGACCCACAAG  
GCGTGCACCATCAAGAAACGCCTCCACGGCAAGTTACCCGGATTCGACCTGTTGGCAGCC  
GGCCTCCAGGACAACCCGGAAGTCTGGGAGGCGATGCGCCTGTACAACATTGACGACGTA  
CGGTCGATGGAAGAGCTGTACATCCTGATGCGCCCCTGGTTCGTTCGGCCATCCCAACGTG  
GCCGTGTACTTCAACGACGCCGAGCCGACCATCCGATGCCCGAAGTGTGGCGACACGGAT  
GTCAAGAAAGAAGGCTGGGTGCATACGCGGACCGGCAAGTACGAGCACTAGCCCAGCGGC  
GGCTGCGGTGGCTGGAGCCGAGGGCGGTACACCCGCCACACCTCGGAACGGCGCAAGGCC  
CTGCTGAGCAACTAAGGAGACACCATGATCGTTCGACAAGTAGTATGAGGTCGCGCTAGCT

GAGCGCTACAAGAAGGGCGCCGCCCTGGACGAACGCAAGGTCGGCAAACCTCCCGATGCAC  
CTGGTGGTCGATGGCTTCCCCTGCTCAAGCGGGAGCTTGCCCGCATGATGCAGTGGGCC  
TCCGAGGTCACGGGCTACAAGCCGCACTACTGGAAGAAGATGTCGGTTGGCGAGTTCAAG  
GCCGCACAGCATCGGCACGAGTCCAAGCGCCTGCTTGAAGGGCCGCTCGATTACGAGTCG  
GGCCTGATGCACCTCGGGCATGAGGCATTCCACACAATGGCTGCCGCCGCGGTGGCCCTC  
ATGGATCGGGAGAAAGGCAATGAGTAAGATCTGTTGGTGTACCCGACCGCACGAGACCGA  
TGAAGGTGTTCCGGGTCATCTGGGCCTTCAACAAGCGGGGCATCGGGGTCAACTTCGTAC  
AGCGTACATCACGCCGGCGATGGTCAGCCATCGGGACTGGAGCCATGTCATACTCCCGGA  
CATTCTCCGGGTGATGGCGGAGCGCCTGGAGCGGGAACTGAAGCTGGTGGAAGTGCCTG  
GTTCCGCGCTGAGATTCTGAGCTGCGGGGAATGGCGTGACTIONCGAGCGATGACGCTGGA  
TGGGGCGGTTAGCCTGGCCGAGGCTGAGTGGGGTCCCAGGATATCGGGCGCGTAATCGA  
AAGACGATAGGAGACGGAATGGACCTGATACAGCAGCAGATCGCCACGAAGAGGCCCTG  
GTCGGGGCGGCGCAGAATGACGCCCGCATTGCTTGGAAAAGGCGATTGCCCAAGGGTCC  
ATCGACCGCATCCCAGGGAGCGCATCATGTTGATGCGAATGCTCCCCATCGTGACCGAA  
GCGATATACGCCACCAGGAAGCGAAGGCGGGCGGGGCCGAGCGATGCTACAGCACCTG  
CTGCGGATCATCGACGCCAGGACCTCGCGGTTCATGGCGCTGCGGGCTGGGCTGTGATG  
CTCATCAACTACCAACGATCACTGCGACGAAGTATTACACCCACATGGGCAAGATGCTC  
TGTCGCGAGGTCGAAATGCGGTTGGCCTTCAAGGTCAACCAACCCTATTACGACCGGACG  
CTGGACTACCTCAAGACCAGCAGGACTCGCAGCGTCCGGCACATCCAGTAGACGACCGAC  
GCTCTTCTGGACGCGGTGCTGCCGAAGACGCGCGCATCGACCTGCCCGATGGCGACTAT  
CTGCGCCTGGGCATGTTTCATCGGCGATCCGCTCCTTCAGTGCGGCCTATTCGAGCCGAA  
CGGTTTGTAGGGCGAGGGCGGCACGAGTGTCCACCTGGAGCCGTCGCCGGAGGCCAAGGAG  
TTCCTACAGGACCCCTCGGCGGCAATGACCTGGGGCGGCCAGGGCGTAGCGTGATGCTG  
GCCCGGCCGAGACCCTGGCAGGACTGGTGCGATGGAGGCTACTACAGCGCCAAGGTGCAG  
AAGCACCACGTACTGGTGCAGCACCAAGCACCAGACCAAGCGGGCACGGCAGATGCAG  
CTCCGCCACCTGGGCCGGGACAAGATGACCCGAGTCTACGAGGGCGGTCAACGTGCTGCAA  
TCGGTAGCCTACGAGATCAACCACGACGTGTACGAGATCATCGAGCGCGTCTTCACCTCC  
GGTGGCGGCGTGCTGGGCATCCCCAGCGCACGTACCCGGACAAGCCTGAGCTCCCGCTC  
GGCGCCGAGTGGGCCAAGGAGAATGCCAGTGAGCAAGAGCTGGAGGCCTTCAACCGTTGG  
AAACGCTCCGTCCACCGGTAGTACACCGGGGAGCGAGAGCATAACCGCCAAGCTTCGCGAA  
TTTGCTGCACTCTACCTAGTTGTTTCGAGAGCATCATGGCAAGGCAGTGTACTTCCCAGT  
CACGTTGACTCCCGTGGCCGCATGTACTATTGGGGCACACCGAATCCCCAAGGGTCCGAC  
ATCGCCAAGGCCGGCCTGCGCTTCCACGAGAAGCGAGTGCTCGGCAAGCGCGGACTGTGC  
TGGCTCAAGGTCCACGTCGCCAACTCCCTCGGATGCGATAAGGTGTACTTCGACGACCGG  
GCAGCCTGGGTCGATGAGCGATTGGATGACTTCCAGCGAGCGCTCGACGAGGGGACGGAG  
AACTATCCGAGGCTCTTTCCCGAAGCCGAGTCGCCCTGTGCGCCATCGCAGGTCTGCTG  
GAACTGCGGGCGGCTTACGCCTCCGGCAACCCCGATGGGTACGCCAGCGGCTTCATCGTC  
CACATGGACGCCACCTGCTCCGGTCTCCAGCACTACTCGGCTATTCTCCGAGATGAGAGC  
GGCGGAGCCTACGTCAACCTCCTACCTCCGGGACTTGCCAAAGCTGACATCAACTCCCGA  
GTGCTCGGACTCGATAATGAGGCTCTGGAGAGAGACCGAGCGGAAGGCGCGGATGGCGAG  
GCGCGGGGTTATGCCCTTCTATGGGATAACGCTGGTCTGACGTGGAACCTGACCAAGAAG  
CCCTGGATGACGCTGGTGTACGGCACCACGTTCAAGGGCGTCTGGACCCTGCTGGAC  
TACCTCGACGAGTCCGGCGTGGAGATTCCCAGGGCGCCCCGTCATACCGCCTGGGAAGC  
TACATGGCGACGCTCATACTGGACGCAATCCGCGAGACAGTACCATCGGCAGTCTTCGCC  
ATGGAGTGGTCCAGCGGCTTGCTAAGGCCCTTCTGACGCATCCAAGGGTTTGCAGTGG  
ACAACGCCGCTCGGCATGCAGGTCTTCCAGTCCATCCCGAAGACCGAGGAGGTGCGGCTA  
CGGCTGCGAGGGCGAGGCTGTGAGTACGTGACCCTGTACGAGGCCAACGACGAGCTAGAC  
CCGCTGCGCAACGCCACCGGCATCGTCCGAACTTCGTGCATGGCCTGGACAGCAGCCAC  
CTGGGACAGACGGCCCTGACCTGTGCGGCAGAGGGAATCCCAGTCCAAGCCATCCACGAC  
AGCATGGGGACCTACGCTGGCGACGTGGACC GGCTGCACGTCCACATCAGGGAGCAGTTC  
GTCACCATGTACAGCGGCCCTGCGTGCTCGTAGAGCTGGCTCGACAGCTTGGGGTAGAG  
GCTACCCCGGACCGTCGGGGATCGTTGAATCTGGAGGCTGTGCGGGACTCTTGGGCGTTC  
TTCTGCTGAGTAGATTATGTCACCCACGTAGGAGCAAGTGCATCCGTCCAGAGGCCTCGT  
AGAGGAAGAGGGCTCAGGGAAGTCCAAGAGGAGCAGAAGTGAGAGAAGACGACTACCAA  
GGATTCTAGATAGAGTAGAATAACCAGCATAGGAGATATGATAGATGGTTACTATAAAGA  
GTAAAGGGCCAAGGATTATGTCACCCACAGTGAAGGATCGAGAACAGGCAAGGGTAAGG  
CCCACCCTGTGACGTTACCTCTCAGCAGATCGAGTGGCTAGAACAGACCTTCTCTGAAC

ATCAGATCAGTCTGGAACCACGATGGAAGACATCCAGTTTCAGGCTGGCCGCCGCGATG  
TGGTGCGGGCTATCCGCCTGCGTCGCCGCGATGCAATCGCAGTGGAGCTTACAGGATGAA  
CAAGTCACTCTGGCGAGTCCACGCAAAAGCCGGCGCCCCTTCCGAACTGATGGGGCTGTG  
CTGGCTGGCAGTACAGGAGCTGGAAGAGTTCACCCCCTTTCGCTCGAAGGATGAAGCCCT  
GGAAGCGATGCTTGTCAGTATCGAGGGCAATGATCGGACCGAGCTGCTGGTCTTCCGTGA  
TGGCCAACCTGGCCGGCGGAGCCTGCATTGTGTTTCGAGGACGATCCCCACATCGGCCCGTG  
CGTCACCGTGCAGTGGCAGTACGTTTTGCCACGCTACCGCAATACAGGCGTGGCGCGAGA  
GTTTCATCCGCGAACAGCACCTACAGGCCGGCTGGGGTCAAATCCCCCTCGTGTGCTGGAG  
CCATCGCGAGAGCGATTGCCGGTATATGATCCACTACCGGAGAGCAAAGCCTTATGGGCA  
AGAAAGTGAAAAAGGTGCTGGGCAAGACGATCATCGGCAAATTCGCTGATGGCCTGCTCG  
GCACTGACCTGAGCGGCGCACAAATCCGACGCCCGCAAGATGGAAGAGCCGAACCGCCTCA  
TGCAACAGCAGGCCGGTCCAGCTCGCAAGAAACCAGCAGGTTGACCTCACCACCGAGAACG  
TGGCGCAGGTAAACCTAGGAGCGATGGCCGATGCCACTGGCACCGGCAATCGAAGACGCC  
GGAATCAGGCAGGCACCTGGCGTATCGCAAACCCTCGTTATCAACTACTGACGAGGTACGC  
CATGAAGTCTACCGCGGCAATGCTGTGGGAGAAGCTTCGGGATGGGAGAGTGGAGCAGTG  
AGCTATCGAGTTCGCCAAGACCACGCTACCCTTCATGATGGTTCGATCCCATGTCCGGCAG  
CCGAGGAGTCGTAGAGCACGACTTCCAAGCTGCCGGTGCCCTGCTCGTGAACAACCTCGC  
CGAAAGCTCGCGCGGTGCTGTTCCCACGGGGATTCCGCTCTTACGTTCCGAACTTAC  
CGATGCGATCCGGCGCGAAGCCTACAGCCGGGACACTGACATCACCGAAGTGACTGCTTC  
CCTGGCCCCGCTGGATCGCAAAGCAACACAGCGCCTGTTCCAGAACGCCTCCCTGGCGGT  
CCTGACGCAGGTGATCAAGCTACTGATCGTGAAGTTCGCAACGCCCCGCTATACCGCAATAG  
CGACGAGGCCACGGTAGTCGCATGGTTCGCTCCGCTCCTACGCGGTGCGCCGAGATGCGAC  
CGGCCGATGGATGGACATCGTGCTCAAGCAGCGCTACAAGTCCAAGGATCTGGACGATGC  
GTACTAGCAGGACCTGATGAGTCCGGGTCGCAACCTGTCCGGTTCGGGCAGTGTGACCT  
CTACACGCATGTTTCAGCGCAAGAAGGGCACGGCGATGGAATACGCCGAGCTGTACCACGA  
GATCGACGGCGTGCGTGTGGGCGAGGAAGGCCGCTGGCCTATTCACCTCTGCCCGTACAT  
CGTACCGACCTGGAACCTCGCCCCGGCGAGCACTACGGTCGAGGCCACGTCGAGGACTA  
CATCGGCGACTTCGCCAAGCTGTCCCTGCTGAGCGAGAAGCTCGGCCTGTACGAGCTGGA  
GTCGCTGGAGGTCTGAACTTCGTGGACGAGGCCAAGGGCGCGGTGGTTCGATGACTACCA  
GGACGCTGAGATGGGCGACTACGTGCCGGGTGGCGCGGAGGCCGTCCGGGCCTATGAGCG  
AGGCGACTACAACAAGATGGCTGCTATCCAGCAGGGTCTCCAGGATGTAGTCGTCCGGCT  
GAACCATGCGTTCATGTACGGCGCCAACCAGCGCGTCGCCGAGGGCGTCACCGCCGAAGA  
GGTCCGCATCACTGCGGAGGAGGGCGGAGAACACGCTGGGTGGCACCTACTCGCTGCTCGC  
CGAGAATCTCCAGTCGCCCTGGCGTACGTCTGCCTCTCGGAGGTGGATGATGCGCCGGG  
CCAGGGCATGATCACTAAGCACCACAAGCCGGCTATCGAGACGGGCCTCCAGCCCTGTC  
CCGGGCCCGCCCGTGCAGAGCATGCTCAACGCATCCCAGGTCATCGCAGGCTTGGCCCC  
GATTGCTCACCTCGACCCACTCATCTCGCTACCGAAGATGATGGACACGATTTGGGCCGC  
TTTCAGCGTCGACACCTCGCAGTTCTACAAGAGCGAGGAAGAGATAACAAGCCGACGCAGA  
ACAGCGGCGCCAGCAGGCCGCGCAGGCCCCAGGCCGCACAGGAGACCTTGCTGGAAGGCGC  
TTCCGACATGACCAACGCACTCGCAGGCGTCTGATAGATGCAACAGAACGAACAGCAACT  
GCCACCGGGCCTCGCTAACCTGGTTGCCAACGTCCCGCCCGCCGCCGACCCGACCCCGAG  
TCATGTGCAGGTGATGCCGAATCCCGTCATCCAGCCGCAGCCCCAGTATGCGGCGCAGCC  
GGGACAGGCAGGGTCCCGCAGCAACTGGCTATCCCGACCCTGCAGCCGCAACCCGTTCC  
GACCAGCGCCATGACGCCGCACTACCAGCCGGTAGCGGTCCCCGCCGCTGGCCAACCCGT  
TGTACCGCAAGCGCCCGCACAGCCGGTCCGGTAGCTCCTCCGGTCCGGGCGCAGTTCC  
TCTTGAGAACCTGGAGTTTCCGCCGCGCCCGCATTCACTCCCAACGGAGAGATCGTAGG  
CACCTGGCGGGGAATCTGGAAGGCGACCCGCAACTGGCGCCGTCCATCAGCTATCTGGA  
AGCGTTCACCGACAAGATCGACACCGTTCGGGCCTTCGGTAAGGCCGCCGAGCACCGCGT  
TCCCCGCTTCATCGACGAGCACTATCTGAAAGAAGCCCTGGGCGAGGCCCAAGCGCAGCA  
CGTCATCAACGTGGCGAAGGGCGTTCGTGACCTACGTGGATGCTCAGACCCAGGCAGTCTT  
GAAGCAGAACTATGCCGCCGTCCGGCGTTCAGGCTCTGCTCAAGTAGGCCGCCAGCGTCTT  
CAACCAACACGCTGACCCGGCTACCAAGGCCGCCATCGGTTCGCTGATGGACTCGGGCGA  
TGCTCAGTCCATGTAATACGCCGGGAAGTAGATCGTTGCCTTCGTTCAAGGCTCCGGTGC  
CGTGGTTAAGGCAACCGGCCAAGCCCTTGGCGAAGCGGCCGCTGCCCTGGCGGCCCTGTA  
CGCTGAGCAGTACCGTGCCGAGGTCTCTAAGCTCCCGTTGAACGCATCGGAAGCCGACAT  
AGCCGCTCTGCGTGATCGTCGCAAGGCAGGTATGGCGCATGGTCTCTAACGACCCTGCC  
TACTCCGGCCTTAAACCAACAACCAAAAGAGAGAGAATCTCATGAGCTTTCTGAACGACT

TGACCCGTCGGAACACTACGCTGGCAAGAACGCGGACGTTGACATCCACCTGGAAGAGCACC  
TCGGCATCGTCGACAAGCACTTTCGCCTACACCTCCAAGTTCGCGCCGCTGATGTACATCC  
GCGACCTGCGCGGCTCCGACGTCGTCCGCCTGGATCGCCTGGGTAACGAGCAAGTCAAGG  
GCCGTCGTGCCGGCGAAGAGCTGGAGCGCAGCCGAGTCGTGAACGACAAGTGGAACCTGA  
CCGTCGACACCCTGCTGTACCCCGCCACCAGTTCGATCACCAGGACGAGTGGACCCAAT  
CCTTCGACATGCGCAAGGAAGTCGCCGAGCTGAACGGCCAAGAAGTGGCCCGTAAGTTCG  
ACCAAGCCTGCCAGATCCAGGTGATCAAGGCCGACGCGATGGATGCTCCGGTGGACCTGG  
AAGATTCTTCTCGCCGGGCGTGCTGGAGGAGCTGGACCTCACCGGCGTCACCTCCTCCA  
AGGAAGCCGGCAACAAGATCGTCCGCATGCACCGCAAGGTGGTTCGAGTCTTCATCAACC  
GCGACCTCGGCGATGCCGTCTACTCCGAGGGCCTGACTCCGATGTCGCCTCGTGTGTTC  
GCCTCCTGCAGGAGCACGACAAGCTGATGAACGTCGAGAACCAAGCCACCGGCGCGACCA  
ACGCCTACGTGAAGTCGCGTGTGGCCATCCTCAATGGCGTGAAGGTGCCGGAGACTCCGC  
GCTTCGCCACCGAGGCGATCGCAGCACATCCGCTGGGCGCCACTTCAACGTGAGGGCCG  
AGGAAGCCGAGCGCCAGATCGCCCTGTTCTCCCGAGCAAGACCCTGATCACCGCCCAGG  
TGGCGCCGTTTCAAGCCAAGCTGTGGGAAGACCACGATCAGTTCTCGTGGGTCTTGATA  
CCTTCGGATGTACAACCTCGGTGCCCGTCGCCCGGATACCCTGGCGCCATCGAACTGA  
AAGGCATCAACGCCTTCGACATCACCAGTGATGCCGCGAAACCCGGCACTTCGGTGTGG  
GGTTTCTTCAAAGCCTAACGACCCGCGCAGATTCCCTGCGTGGGTTTTTTCGCTTTAGGA  
GAAACCCTATGCTACTACTGGACGCAAGTGAATGTCATCCTGGGCAAGATCGGCGAGTTGC  
CGATCCCGAGCATGGATGAAACGTACCCAACCGAGGCCATCGCCCTACCCGAGTTGGAGG  
ACCAGCGCGTCCAGTTGCTGACGCAAGGCTGGTGGTTCAACACCCGGTGGGAAGCACAAGC  
TGACACCCGACCCGCAGGGCCGTATCAACCTGCCCAAGGACACCTTGCGGTTCTACCCGG  
ATTCCCCGATCTCCAGTGGGACGGCCTGGGAGTGCGCGACGCCAACACCCGGCGACAACC  
GTATCGGCAAGGTAGTAGAGGGCTGGCTCGTGTGTCCCGTGAGTGGGACCGTATCCCG  
AGATTGCCAGCGCGTCATAGCGCACCAAGCCGCCCTGGCCGTGTACACCCACGAGATCG  
GGCCGGACGAGACGGAGCAGGTCATCGCCAGGAGTTGCAGGCGTACCAGAACGAACTGA  
GCCGCATGCACACCCGATCCCGCCCGCTCATCACCCAGGCCAAGCGCAGCTTTAGCCGGT  
GGCGGCGCAGCTTGAGGACCTGACCATGAGCTCCAAGCAATCCGCGTACCCCAACCTGCT  
GATGGGCGTGAGCCAGCAGGTGCCGTTTCGAGCGCCTGCCCGGGCAGCTCAGTGAGCAGAT  
CAACATCGTGTCCGACCCCGTGTCTTGCCTTCGCCGCCGTAGCGGTATCGAGCTGATGGC  
GCACCTGCTGCACACTGACCAGCCTTGGCCGAGGCCGTTCTGTACCACACCAACCTGGG  
CGGTGCGCAGCATTGCGATGCTGGTGGCGCAGCACCCGGGGCGAGCTATACCTGTTCCGCGA  
GCAGGATGGCCGCATGCTGATGGGGCAGCCCTGGTCCACGACTACCTCAAAGCCGCCTA  
CTTCCGGCAGCTTCGCGCCGCCACGGTGGCTGAGGACCTGTTTCATCGCCAACCTGAGCGT  
GAAGCCGGAAGCCGACCCGACTGACGTGAAGGGCGTGGACCCCAATAAGGCGGGCTGGCT  
CTACATCAAGGCGGGTCAAGTATTCGAAGGCGTTCTCCATGACCATCATGGTCAAGGACAA  
TGCCACCGGTACGACCTACAGCCACAGGGCCACCTACGTGACGCCGGACAACGCCAGCAC  
CAACCCCAACCTCGCCGAGGTCCCGTTCAGACGAGCGTGGGCTACATCGCGTGGCAGCT  
CTACGGCAAGTTCCTCGGCGCCCCGGAGTACACCGTGCCCGACTCCACGAAGAAGTACCC  
CAAGGTGACCCCGACACGGCTGCGGCTACGGTAGCCGGCTATCTCAACCAGCGGGGCGT  
GCAGGACGGCTACATCGCCTTCGGGGGCGACGGGGACATCGTGGTTCGAGGTGTCTACCGA  
TATGGGCAACAACACTACGGCATCGCCTCGGGTGGCATGAGCCTCAATGCCACCCGACGACCT  
ACCGGCCCTACTGCCGGGTGCGGGTACGCCGGGCACTGGCGTGCAGTTCATGGACGGGGC  
CGTCATGGCCAGTGGCTCGACCAAGGCGCCAGTCTACTTCGAGTGGGATTCGGCGAACCG  
CCGCTGGGCGGAGCGCGCAGCCTACGGGACCGATTGGGTCTTGAAGAAGATGCCCTTGGC  
CATACTGGGACGAGGCGACCCACACCTACAGCTTGAACGAGCTGGACTACGACCCGGAG  
CGGCTCCGGCGACGAGCACACGAGCCCCACGTTCAACTTCGTCAACCGGGGCATCACCCGG  
CATGACGACCTTCCAGGGCCGGCTGGTTCATCCTGTCTCAGGAGTACGTCTGTATGTCCGC  
GAGCAACAACCCGCACCGCTGGTTCAAGAAGTCGGCGGGCGGCGCTCAAAGACGATGACCC  
CATCGAGATCGCGGCCAGGGCAGCCTGACCGACCCGTACGAGCACGCAGTCACCTTCAA  
CAAGGACTTGATCGTCTTCGCCAAGAAGTATGAGGCCGTTGGTCCCTGGCGGGCGGTATCGT  
GACCCCGCGAACGGCGGTTCATCAGCATTACCACGCAGAACGATCTCGCTACCCGAGCGGT  
ACCCGCCGTACAGGCCGTAGCGTGTACTTCGCCGCTGAGCGTGCCCTGGGCTTCATGGG  
CCTGCACGAGATGGCCCTGTCGCCATCCACGGACAGCCACTACGTGCCCGAGGACGTTAC  
CAGCCACATCCCGAGCTACATGCCAGGGCCGGCAGAGTACATCCAAGCGGGCGGCCTCAAG  
GGGCTACCTCGTGTTCGGCACCAAGTACGGCGGACGAGATGATTTGCGACCAAGTACCTGTG  
GCAGGGCAACGAGAAAGTGCAGAACGCATTCCACCGCTGGACGCTACGGCACCAAGATCAT

CGGGACCTACTTCATCGGGGACAACCTGATGGTCTTGATCCAGAAGGGTCAGGAGATAGC  
CCTGGGCCGGATGCACCTGAACAGCCTGCCTGCACGGGAGGGCCTGCAATATCCGAAGTA  
CGACTACTGGCGGCGTATCGAAGCGGCTGTCGAGGGCGAGCTGGAGCTGACTAAGCAGCA  
TTGGGACCTGATCAAGGACGCCCTGCCGTGTACCAGCTACAGCCCGTGGCCGGCGCATT  
CATGGAGCGCTACCAGCTCGGCGTGAGGCGCGAGACCAACCAATGTGTTCCCTCGACGT  
TCCCGAGGCCGTTGTTCGGCTCGGTCTACGTGGTTGGCTGCGAGTTCTGGTCCAAGGTGGA  
GTTACCCCCGCCAGTGCGGCGGGACCACAACGGCCTGCCGATGGCCGCGGCCCGTGCAGT  
GCTGCACTGCTACAACGCCAACTTCGGATGGACCGGAGAGTTCTGTGGCGCATCAGCGA  
CACGGCCCGGCCAACCAGCCGTGGTACGACACGACGCCTCTACGGCTGTTTCAGCCGGCA  
ACTCAACGCCGGCGAGCCGTGGTGGACAGCGCCGTGGTGGCCGCTGCCGGCCCGGGTCCG  
TATGGCGACCTCCAAGTTCGAGTTGAGCTGCCATAGCCCCTACGATATGAACGTGCGGGC  
CGTGGAGTACAACCTCAAGTCCAACCAACCTACAGGAGGGTGTGATGGCATTCTGGCTA  
CCACTACTGGCCGCTGGCGGCATGTTCGGCTCTCCAGCAGGGCCTATCCAACAAGGAAGAA  
CGCCGCACGATCAAGGCCGAGAACAAGGCCCGCCTCAAGACGGACCTCGACAACCTGGGC  
GCCGCTGCCTGCGACATCGCCAACCTGGGCGTTCATGGCTGCAAGCTACCGCAAGCAGGCC  
GAGGCCTCCCAGGTCGAGGCCAAGCTGCAGGGCATGCTCGCCGGCGGGTGCGCCTCGGCA  
CAGGCAGGGGCCTTCGGGGTCAAGGGTGCATCCGTAGATGCGGTGGCCCTGGACTTCGAG  
CGCGAGGTGGGCGAGGCCCTGATCCAGATTGACGATAACCTGGACAACCAGATGTGGAAG  
CTCGCAGAGGAGGCACACTCCAGCCAGGCCAGGCTAAGGCCGGCCTGCTGGGGCAGAAG  
AGCACACAGCGGGGCAACGCTCCCCGCTGGTTCGCCGGCCTGATGTCTGCGGGTTCCCTA  
TACGCAAGCCAATACTTCAAGTTCGGCGCCACGCCTAAAGGAGGCAACTGATGGCCGGAAT  
CGAACGTGCTCCCCAGGAGCTTGGGATCAACGTCCGACAGACTCAACTCCAGCCGGGCC  
AGAGCGCCCGGCGCGGGGTGCGAGACTCCGAGGTCAACCATAGCGGCTCAAGCGTGGGTT  
CGCAGATTCTCGACGGCATACTTGGTGCCTGTCATCAGATTGCTGGCAAGTGGTTCGAGC  
ACAACGTGCAGCAGGAAGTGCTTCGCGGGCGAGCGTGCCCGCATGGCCGGGGAGGCCGAGG  
ACGCCGAAGACAGCAACATCCTGGCCAAGCCCTTCGTGAAGGGCGGCTGACGCAAGCAGG  
ACTACCGCATCGCCAGGCTGACTTCAGTATCAAGATGCAGCAGTTTATCGCCACCAAGG  
GCCGTGAGGTGACTCCCGAGTAGTTCCGAAAGCACCTGTTCGACAGGAAGCGGCCACGTGC  
TGGACTCCACCGAGGGCATGAACCCCAACGACGCCCTACAGGCGCTGGCCAGCAGCAGA  
AGGCCGAAGAACAACCTTTCGGCATGCAGGCCCTAGGCCTACATCGACTGGTCCATCGACC  
AAGCCGCCCGAGGCTTCCGCACCCAGGATAACAGCATCCAGGCCAAGGCCGTGCAGGCC  
AGGCCACAGGGCGACGAGCTGTCCCGGCAGTTGAGCCTGGAAGAGGCCGGCCTGTTCTACA  
CCAACATCATGACCTCCGAGGACATCCCGCTGGAGGTGCGCGACAAGGTGGGCATGCATT  
TCCTAGCGGCCAGCCTGGATATGAACCAGCGGGGCATCTACGAGAGTCTGCGCGACGCCG  
GCTTCCTCGACGGCATGGCCTTCGACGACCGACGTGCGCTCAATGGCCTCTACGAGAAGT  
CGAAGGCACAGACCCTGGCCAAGGACTCGATGGCCACGCTACGGGCCGACGCGGACTTCC  
AGCAGCGGGTGGCCAACGGCGCCATCACCGTCTTGCCGAGGTCGAGGCGTATTCTCGGG  
GCATGGTGGGGGAAGGCCGGTGGAGCGACGCACAGGCCATCTCCCTCATGACCAAGGCTA  
TGACCGGCCTGGGCAACGCACAGAGCATGCAGGGCATCATGGCCGGCCCTGGAGGCCCGCG  
ACATCAACGCACTGCACACCCTCGGGACCAACGTTACCGAGGCCCTGGAGCAGTGGTATA  
AGATGCAGGCGGGCAACGGCTCCAGTCTCACCGATCGGTTGGTACAGGGCACGCAACTCG  
GCCTACGCCTGGGGACCTTCCCGAAGACCTACGGCGAGTCCGTTGGCAGCGCGGTCCGCA  
TGACCCAGGCCGCCAAGGAAGGGGAGGCCAACCCGGAGTTGGTCTACACGCTGAACAGCA  
TCTTCGAGCAGGTGGCCTCCGCGCAGGAGATCAACCCATCTGCCGGCAACGTGATTCTCT  
CGGGTATCCCGGAGGCCGAGCAGGGCGCCGTAGCCTGGGCACTCACGCAGATGAAGATGG  
TCATCGCCCCGGCGCAGGCCCTGCGGGAGTTCAGCGCCAACGCGGAAGTCGTCAAGCAGA  
TGACGAGTTTGAGAAGGGCCAGAACACCAAGGCCTTCAAGGACCACCTCGGTAAGCAGG  
TCAACGACAAGTTCGTGAACAACATCTTCGGTTCGGGCCTGGAACATGCTGACCGGAGAGA  
GCGACCTCAGCAACAACGAGGCCGTCTAAGCATGTACCGCCGTGCAACCATCGACGAGG  
CCAACCTGGCTGGCAAGCGACCGCAAGCACGACGAGACTCCTCAGCAGCGACACAGGCCGGG  
AGGCTCTGCTGGAGATCGCCGCCGCCAACGTCCGCAACCCGACTATCCAGGTCCGTGAGT  
CCCGCAACCTCAAGGAGGGGGAGCTGTTTCAGCCGCCGCGACAGCGCGCCGCTGATCCTGC  
CGAGAGGCACTACCGCCGAGCAGCTATTCGGCACCAACGACACCGAGACCATCGGCGCAG  
GACTGGCCGAGCAGCACAAGCCGACAGGTTGAGGGCCTCCTGGGCTACAAGTCCGTAGTGG  
CGTTTGAGTTCGACCGCACCAAGTGGCAGCCTACTCGGCGTCGAGTACGACGAGAGCGGGG  
TGGCCCTGGACCGTACGCGGGTTCGATCCACAGGCCGTGGGTAAACGTAGTGCTCTAGCGCA  
ACTTCGATAAGCTGAACGCTATACGGGGCGCCGAGTATGGGGCCAACGTCAAGGTCAGCG



GCACGGACATTCGCATGAACGGCGGCAACAGCGCCGGCATGTTGAGGCAGGATGTGTTCA  
ACTGGCGTAAGGAGCTGGCACAGTTCGAGGCCTATCGAGGGGAGGCGTACAAGGATGCCG  
ACGGTTATAGCGTGGGCCTGGGTCACTACCTGGGCAGTGGCAATGCTGGGGCAGGAACTA  
CGGTCACGCCTGAGCAGGCCGCGCAGTGGTTCGCCGAGGACACCGACCGAGCGCTCGACC  
AGGGCGTGAGGCTGGCCGACGAGCTGGGCGTTACGAACAATGCTTCGATCCTGGGCTTGG  
CCGGTATGGCCTTCAAGATGGGTGAAGGACGTGCCCGGCAGGTCCGCAACACCTTCCAGG  
CGATCCGGGATCGCAACAAGGAGGCCTTCGAGGCGGTGTCAGGAACAGCAAGTGGTACA  
CGCAGACGCCCAACCGGGCAGAGGCATTCATCAAGCGCATGGCGCCCCACTTCGATACCC  
CGAGTCAAGTCGGGGTTCGACTGGTACAGCGCCGCAACAGCGGAGTAAGACATGGCAAAGC  
AATTCAAGGGCCGTATGACGCACAAGTATCCCCTCGACCAAGCAGAGCTCGACGAGGCCA  
AAGTACAGGGTCAGCTCGATGCCGTGTCCACCGTGGAGTTCGACGCCCTGACGGGCAGCG  
TGATCGGAGAACGGAACGTGGCGGGAGGCCAACGTGCCAACGCTCGGGAACCTGGAGCGCA  
TCGTGCGACACCAGAACCTGCCGGCCCTTGACCTTGCTTCTGCACTCTGGAACCAGTCCA  
CTCTCGTCCGACGCTGGGACGATTCGCTCCAACCTCGACGCAGACCTTGCGGGCGAACACCA  
CCGGCAAGGTGGACCCCAACTTCGACGCCGGGACCTACGGGGTCCAGGCGCTCCAGGCGG  
CTGGCATCCAGCCGACTGACAACCTCCAGATCATGGCCCCGCGCCGGCAACGCCGAGG  
ACGCAGCCTTCCTACTGTGAGGATTC AACGGTATGAGCAAGACGAGCATATCGTGGCGG  
ACAACCCGTA CTGGAACCTCGCAGCGGGCATGCTGGACCCGGCTGCGCCGGCAGTTCGATG  
CGTTATTTTCGGTGCTGGCCGCGTTCTACGGCTCGGTGCTGCTGGCATGGCTGCTGCTG  
GCGGCGCTGGCCAAGTCGGGTAAGTTGCTGGGCTGGATGCCGCAGGTGCCGACGTGGATG  
CCGGAACCTTCATCTTCGCTGGCGCTCTCGGTGCTGGCGTGGGTGCTCTGCTGTGGTCTG  
GTGCTGGACGCAAGTGCAGCCCAACGCAACCCGCATGTGCCCGAAGTATCGGGCGC  
CTACTGTCCGGCTGCCAGAAGTAGCGATGACCGCCGAGGAAGCCGCCGCTCGTGGCTTCA  
AAGCAGGCGATGTTGTGGACCTGCTGGACGAGGGCACTGTCTGTCCC GGTAAGCTCCC  
GAGTGGAGCAGGCCGAGATAACGGCCATCCCGCGCCGGGACACTGCCTTCGGTGACGAGC  
TGCACGGCCTGTCCGGCCGCAAGTTGTCCGAGGTGGTGGACAACCTCAAGACCCACGCCG  
AGGTGCCCAAGCCGTTGCACGGCGTGGCCGCCAAGGTGGCCGAGACGTTGAAGACCCTGG  
AGGGCCTGGGGCGGCGCACCATGTTCCGCGTGGTGCAGGGCGGGGATAACCGTAGCTCCG  
CCTTCTTAAGCCAAGCACGGCTGGTCTGCATTCGACGCAGGGATTGGACACTCTGGTCC  
ACGTGCGTGGCAGCACGGCGCCGGGCCGCGTGGGAACCAACCCGGTCACGGTCCCTCCACG  
AGGCGGTTACGCCGCCACGGTAGGCGTGATGAATACCGCCCTGCGGAATCCTGGCGCGA  
TGA CTCCAAGGTGGCCAGGCCATGCAGACCCTGGAGAACGTCAGGGGTAACGTGCTCA  
ACGCCTTGAAGCAGGACC GGCCGCGCCGGACGGCAACTTTCCGAGTTCGAGGAAACCCTGC  
TGGCGGGCAACTCCAATACCCTGGCGAACGTCAAGGAGCTGGTGGCCTGGGGCCTGACGG  
ACACCCGCTGCCAGAAGACCCTGAACCGGCAGAGCTACGGCGACGGCGGGAAGGGCCTCT  
GGTCCC GGTTCTGCTGGGCATCCGCAGCCTGCTGGACCTGCGGCCTGATGCGGACACGG  
CGCTGAGCCGCGTCTGGCGGCCTCAGAGACTATCATGGACGCCATGCCGGGGTACACCA  
AGGCCAGGCCAAGTGGGTCAACAAGGTCCC GCCAGTGACCGAGGAGGCCAGCCTGGAGA  
CCAACGTGCGATCCACCCGGGAACGTGCCCGAGAGGGTGCCGGCTTCGTGAACCGATTCT  
ATAGCGAGGCCGACCTCCTGGCACAGCCGGGAGAGGGTGC GCGGGCGACTCCTGAGCCGTC  
TTATCGACGACCCGGTACGTCGGGATGGGTAGATCAACCAATAACAACGCAGCGAGCTATT  
TGCGCCGCTACCGCTACGAGTTCGAGGGCTACGTCAAGTCCAACGACGAGATGATGGCGA  
AGGCGATGGCTGAGCAGGGCGTGGGCCTGACCGCTCGGGCACTCAACTCCCGCAGCGCTA  
TGGCCGTCCGGGATCAGCTCAACGAGCAGGTCACGCGGGAGCTGCTGCGCTGGGACCGGG  
AGTGGACCGCCTATGGCAGCGTCCGCGTAGACCCGAACCTACCGGCCACCATCAAGGCC  
TGGCTGACCACTCCGACGAGATTCACGGACTGATGGGCCAGCGTGCACGGGAGGCCGGCG  
TGGGTGGGTTTCGAGAACTTCGCACCACGCCCCGGGTACTTCCACCGGTGCGGGAACCTGGT  
CGAAGATGGCGCAGATGGACGAGGCCGCCCCAGGCTTGGCTCGCCGCGCTATCAGCGACG  
CCGTATTCCGGGGCATCCCTGGATTGGAACGTGCGGATGCTGACACCATCGCACAGGCCA  
TCGTACAGCGGGCACGAGACC GGCGACCGGTATCCGCTCCGACTTCATGGGCGCGATGG  
GCGTGGCTGATACGGCCTTCATCCGGCAGGCGCTGGAAGAGGCCAACGTGTCCAGGCCA  
AGTTCGACAGCATCATGGCGAAGATCGAGCAGAAGCAGTCCGACCAGGGCACCGTCGAGT  
ACGGCAAGGGCCGGCTGTCGCTGGACATGACCGCCGAGATCAACGACAACGGCACCGTGT  
ACCGCGTACAGGACCTGATCGACCGGGACCTCGACCGACTGATGGAGAGCTATTCAGGCA  
GTATGTCCGGCCACTCGGCGCTTGCTCGGGCAGGTATGCCGGGGCGACTCCGAGGTTCGAGG  
CGTTCATCCGTGAGTACCAGCGGGAGGCCGCGCACCTGGGCACCGACAAGGTGCAGGAGC  
TGACGGGCCAACTGCGGGGCGTCTTCGGGGACTTACCGGCCAACGTACCGCGCGGGCACC

AGCTCGGCCCGTCGCTCAGCGGGCCAGCGGGCTGACCAGCGCCACCATGCTGGGGTTCT  
CCGGCGTGTACCAGCTTGCAGAGCTGGCCACGATGGCCCACCGCCATGGCGGCTTCAACG  
TCCTGAAGGCCATGATGAACTCCCGCCTCGGGGACTTCGTAGGCGCCATGCGCCGTAACC  
CGGACCTCGCCGACGAGATGCAGACCGTCTCGGCCTGAACCTCGCCAACGACATCCGCA  
TGAAGCCCTGTAAGCGGCAGTTCGACACCTTCCAGCCAGCCAGGATACTTCATGGATC  
GCTTCTGCACGCAGGTGAGCAGGCTGTCCCTGTCTCAACGGCATGAAGTTTATCCACA  
ACTGGCAATCCCGCATGAACGCCAACCTCACCTTGAACAAGGTGGCGCGGGCCGCGCAGG  
GGGATGAAGCAGCCCTTCGAGTGCTCCAGCAGTACGGGAACGACGTGGACTGGACGCCAG  
TGCTGGCGAGGGTTCGCGGTTATGTACATAACAGAGGAAGCAACGCCAGTCCATGAATT  
GGGGCGCCTGGAGCCAAGCAGACGTGAACACCGTCATGAACACCGCACTGCGGATCATGG  
ACGACTCGCCGCTGTATGGTAGGGTTCGGTCAGAACTCGGGCTTTGCCCGGTCCCCTGTCTG  
GTCAAATCCTGGGCCAGTTCGCGAGCTTCATGGCCTTCGCGCACAAAGCTCCTCCGGG  
GAACCTACGAGAACTCCGGCGAGCTTGGCGTGGCCTCGCTCCTCGCATTCCAGTATCCGC  
TAACAGCGCTGATGATGGGTGCCAAGGCAGCGATCAACGGCAAGTTCGACACCTCTGATG  
AAGGCATCCGCAAGATGGCCATCGACGTCATCGGCTACACTGCCGGCCTCGGCTTCACCG  
CCGACATGTGGGGCGTAGTACCCGGGCACTCCCGGATGTTCCGCCCCGGTCTTCGGGCTGG  
CGGAGCACTACAACGAGGTGTTCCGTGGCGTCAAGGACCTAGTAACCGGCGACGACCCCG  
CAGCCGCCACCGGCTATATCGTAAGCGGCGCCCGCAGGGGCACTGCCTTTCGTCAACGTAT  
TCCCGACGACCAAGTTGCTGCTGGAATCCATCAAAGGGGAATAACGTGGCTCGGTTCAAG  
TATCCCGAGACCATCCACGTTGCAGATGGGGTTCGAGGCTGTTTTAGTCTCGACTTCCCG  
TTCCTGCGGCGTGAGGACGTATTCGTCCAGGTCGATAAGATACTCGTCACAGACTATACG  
TGGGTAGACGACACCAACATCCAATTGGCCGTGGTGACGAAGAAGGACCAAGAGGTCCGC  
CTTTCGCGACGCGCCCCCCCCAGGTCCCGGACACACAGTTCAGCCAGGGCATCCCGTTC  
CTGCCTCGATAACAACGACGCGAACAACAAGCAGCTCCTGTACGCTGTGCAGGAAGGCATC  
AACACCGCGAACCTCGCTCTCGATGGCGTACTCGACGCGATCCGTATCGCCGAGGAGGCT  
AGTCGCTGGCGCAGGACGGACTCGACGACGCCAATGCGGCGCTTCGCCGTGCCCTGGGC  
TTCGCTGAGATTCGCACCGTGACCGAGGACTCGGCTATTGCGCCGAGCTGGCGGGGTTAC  
TGGAACCGCTGTATCACTGCCGACAAGCCTCTGACCTTGACCATGCAGATGGCAGACCCG  
GATGCACCGTGGGTTCGAGTTCAGCGAGGTTCACTTCGAGCAGGCCGGTGTGCGTGACCTA  
AACATTGTAGCCGGTCTGGCTTTACCATCAACCGTTTGCAGAACACCACCATGCAGCTC  
TACGGCGAGATTGGCGTGTGTACTCTCAAGCGGCTGGGCGCTAACCACTGGATCGTGTTT  
GGGGCCATGGAGGACGAATAAAGCGCGGCATTATCGCGGGCATCATGGCCTCCCAAATTC  
GACGGCCCAAGCCCATCCTGGCGACCTACCCGTATCCCATCATGGAGGCGGATAATCGCT  
GGGCTGCTCGGCCCAATATCGTGGCAGCTCTGACCAGGGGCACTCTGAAGGAGGTCCGGC  
CAGAAGACACGCTGGAGCACTACAGGGCAGCCACCGCTGTACTGACCGCCAGCATGCGCA  
GCCTGACACAAACGGGCTACGGCGGAGCCTGGCCGTACCAGCTCCTAACAGGTGTGGCAG  
ATACCACCCTCCGGTTCGCTGGTGAAGTCTACTACGGTTCGAGGCTCAGCCCTATCTAGCCA  
CGCCGGCGAACCCTCGGCGGACCTGCGGGTAGTGCTCATTATCGCGAATTACGAGGTAG  
AGCCGTTCCATTACACCCTGACCAACAGCCTTGTACAGGCGGAGCTGAAAAATGTTTAAAG  
ACCGAAGTAAAGAGACGTTACACCCTGATTCGCCGCAAGGCGGACGGCACTCGTGTGGAG  
ACTCTGGAGTTCGACAACATCATTACGAATGCGGGCCTGGATTGGATCGCCGCTATGGAT  
ACCGACCTCATGGGCGAACCCTAGCGGTCAGCACTTCTACAGCCGATCCCAACCCGAGC  
GCACCCGCCATCCCGGAGGTTGTGCAACGCACGTCCGCATCTGCTCCTGGTGGAGGTACT  
ACATCGGGCCTGGATGGCGAGTGGCTGTTCTGGCGGAAGCGTTGGAGATTCCCGCAGGGC  
ACCCTAGCTGGTCAAGTCTGGCCAACGTAGGCCTCATCTGCAACTCGGATCGTCTGCTTC  
GAGAATAACACGGGTGAGCTGATCCCGAAGGATAACCAGCTGTCTGACTCGCATCAAG  
GACGCCGCGGGCAGCCTACTACTCTGGTGGTGGCCGCTGACGAGATTCTGGACGTCCAG  
TACGAGTTCGCGAGCCGGCCCGTAGGAACGGCTGAGGCCAAGTTCGTGATCTCCGGCGTG  
GAACGCACCTTCGGGCTGATCCACAGCCTTTTTCGGAACCGTGCTAATCTCTCCGGCGAA  
CGCTACATCTTCTACAACACCAACCCCTACATCAACGGCAAGGACGCCTCCGGCGGCAAT  
GTCCTAGACGGTTCAGTGGCAGAAGAAATATCCCAAGTACGTGCGCGCCTCTTACAAGGCG  
CAGATCACGCTGCTGACCCCGGTCCAAAACGGCAATATGGCTGGCGGCATCACCGGCACC  
GAGGAACTCAAGTTTACAATGGACTTAACTATGTGCTCGATATCAACCCCTGTTGTG  
AAGAACAATACCCAGGAGTTCACCGTGACCCCGGAGTTTACGGTGGCGAGGGCATAACCT  
ATGTCACTGATCTACGACTTCAACCCGGACCTTGATCCGAAGGCTAAGTCCAAGTTCGTA  
GGTGCAGGAGGCCGTAGGGACATCAGCGACGTGCTAGACTTCTGCGACGGGGGTCTGGGT  
ATCCAGGACCCGTCGAGGGCATGATGGTCCGCGTGTGGCGAACAGAGCTTCGCCAGGAC

GGGACCTACCTGGGTCACGAGGACGGCTCGAACGAGATTTCGCATCGGGCGGAGGTATCGAA  
GAAGGTATCTCCCCGATGTCCCTCGACTTCGACAGCAACATGAACTACGTGTGTGCTTTC  
GTACGAGCCGACCGGACTGGTGCAATCTCCTACTTCAACGTGCAGCAGGGCCCGGGCTC  
CTCGTGACGCTTGGGCAGGTTGACTATGCCAAGGTGGCTCTGGACGACAAACGTCCGGGG  
GCTACCGCCTGGGCGCAGGTTCTCGTGCCCTACACACGCAACTGGAACCTCTACGTACGC  
ACGCAAAATGAGAACTACACCGAAGAGCACCTGGAGGTGGATACCGGCAAGGTATTCCGG  
CCTCTGGTTAAATGCGGCATGGGCACCAACCTCCGCTTCCAAGTCCAATTCAGAGGGCAC  
ATGTAATGAGTATAAAGCAGACCGCGAGTGCTGAGCTGCTGGGCCTGCTTCACGAGCTGG  
TCTGCACCGCTATCGAGCGCAACTTCAAGTGGTACATGGACAACGACATCCCGAACCCCG  
GATCGGATATCGCTGCCGCCACCAAGTTCCTCAAGGACAACGAGATCACCTGTGATCCGT  
CCGACACCATCAACATCGACCGTCTCCGCGAGGAGATGCGGCAGGCGCAGGCGGAGAATC  
GCCGAATTGCCTTGGAGGGCTTCATCGCTGGCGAGACCGACGACGAGATGGAACGCCTGT  
ACACCCACTAAGGAGGCAGCATGACGCCGCAAGAACGATTCCAGATAGCCCACGAAGTGC  
GGGATATGTACCCGCGCTTCCGGGACTTCTGCCTGGACGCCATGCTGTTCCCTCGGCTTCA  
AGATGACCTGGATGCAGCTCGACATCGCCGACTTCATGCAGGACTCGCCAACAAGGCGA  
TGCTTGCTGCCACCGTGGCGAAGCTAAGTCCACCATCGCCTGTATCTACGTGGTCTGTT  
GCATCGCGCAGAACCCGGCCACCCGTGCCATGCTGGTCTCCGGATCCGGAGACAAGGCCG  
AAGAGAACGGCCAGTTGTTACGAAGCTGATCATGCACTGGGACCTGTTGGCGTACCTGC  
GCCCGGTGGCCCGCATGGGCGACCGGACCTCGGCTACCAGCTTCGATGAGAACTGGGCGC  
TGAAGGGCGTCGAGAAGTCGGCCTCCATCAACTGCATCGGGATCAGCGCCGCCCTCCAGG  
GCTACCGGGCTGACGTCCCTGATCCCTGACGACATCGAGACCACGAAGAACGGCCTGACCG  
CAACCGAGCGGGCCAAGCTGACGCGGCAGTCGCAGGAGTTCACCTCCATCTGTACCCACG  
GTAAGATTCTGTCCCTGGGCACTCCGCAAGTCCGCGGAATCCATCTACAACGGCCTGCCTG  
CGCGGGGCTTTCTCATGCGCATCTCGGCGGGCCCGTTCCCGACCCTGGACGAGCAGAAGC  
GCTACGGAGAGTGGCTGGCCCCCTCTATCGTGGACCGTATCGCCCCGCTGGAAGAGAAGG  
GCCACAACCCCGCAAAGGCAAGGGCCTGGACGGCACCCGTGGCTGGGCGCCGACCCGC  
AGCGCTACAACGAAGAGGACCTGCTCGACAAGGAACTGGACCAGGGTGCCGAGGGCTTCC  
AGCTCCAGTACATGCTGGACACCAGCCTCGCCGACGAGCAGCGCATGCAGCTGAAGCTTC  
GTGACCTGCTGTTTCATCGACGCGACGCACGAGAGCGTACCCGAGCAGGTGGCCTGGGCTA  
CCGACGAGCGCTTCAAGCTCAAGTTCGACGCCACAGATTCCCGGTCATCAAGCCTGAGC  
TGTACCTGCCGGCGCTGATGGCTGGCGGCTGGGCATCGCTCCAGCAAATGACGATGTGCG  
TGGACCTTGCCGGCGACGGTGGCGACGAGCTGTCGTATGCCCTGGGCGGGACTCTTGGCC  
CGTACATCCACGTCGTGAGCATCGGCGGCTGGAAGGGCGGCTTTGCCGAGGAGAACCTGG  
AGAAATGTATTGCCCTGGCTGCGCGCTATGGCGTCAAGGTGATCTGTGTCGAGAAAAGCC  
TCGGCGGTGGTTCTGTTGGCCAGCTCTTCCGCAACCACATGCGATCCATCGACCCGGACA  
CCAACAAGCCCCGCTATGAGGCCATCGGCGTAGAAGACCGCCAGAAGTCCGGTCAGAAAG  
AGCGTCGCATCATCGACACCCTGCGGCCCATCATGCAGCGGCACCGTCTGATCTTCCACG  
TATCGGCGATGGATTCCGACCACGTGGCCTGTAAGCAGTACCCAGCGGACAAGCGCAATG  
AGCGCTCCGTGTTCCACCAGATTCACAACATCACCACCGACCGAGGCTCACTGCCTAAGG  
ACGACCGGATCGATGCCCTTGAGGGACTTGTCCGCGAGCTGACACCATCGCTCGTAAAGG  
ACGACGAAGCCGCAACCCGCGCTCGTGAAGAGGCTGCCAAGAAGGAATGGCTGAACAACC  
CGATGGGTTACTACTAATTCTGTCCTTCGGTCTCTCGGCATGGGGCGGGAGCGTCGCAAGG  
GCCGCCAAAAGGACGAAGACTATGATGATTGATACCGCCACCGCGGGCGGGCAAAGGCAC  
CCTCGCCGTCACCGGCTTGGGGATCGCAGTTTAATCGCCCTATGAGATCGCCAGCCCCTG  
TGCTGCGGTACTACCGCGCTCTACGTAGGCGCCAGCTCATCACCTGCTCCCGCAGAT  
GCTCGATAGCATCTCGGAGCTACGCCGGAGGTTCAAGAAGTGAACAAGCCCCTGCGCGGC  
GCAGCCCTTGCGGCTGCCCTCGGCGGCCTTGGCGCCCTGGAAGGCAGTGAGACCACCGCC  
TACCGAGACATCGCCGGCGTCCCCACCATCTGCTCCGGAACACTACTGCCGGGGTCAAGATG  
GGCGACAAAGCCACACCAGAGCAGTGCTACCAGATGACGCTCAAGGACTACCAGCGCTGC  
GAGTGCATCGTCCCTGGACGCCATCAAGGTGTCGCTGAACGTCAACGAGCAGACCGCTCCG  
ATGTTCTTCTGCTAAAACGTGGTTCTAGTCTGTACAACCAGCACAGCGTTCAAGCGCTTC  
AACCAAGGACGCGCCACTGAGGGCTGCCAAGCCCTGGCCATGTGGAGCATGGTCAACGATC  
AACGGCCAGAAGGTCGTATCCAAGGGCCTCGTGAATCGCCGCAACGCGGAGATCAAACAA  
TGCCTCGAACCATCGTCGCAATACTCGTCCCTTGTGTGGTAGCCCTGGGAGCCTCGTACG  
GCTTCGTCCAGAGCTACCGGGCCTTGGGTATCGCCAGGAGGAGATCAAGCGGCAGACGG  
CCCCTGCGGAGGCCCTGGAGGTGCGCTACGCCACCTTGCAGCGCCACGTCCTGGAGGTCT  
CTGCCAGGACAAACAGCCAGCGCCAGGAGGTTGACCATGCCGTGGACCAGAACCGCCCGT

GGGCTGACCGGCCTGTGCCCGCTGCTGTCGGTGGCAGCCTGTGTAACCGCCCCGGCGCCC  
GCTGTCCAGTGCGAACACCCACTGATTGACCTACCACCCAGGCTGGCCTGATCCGCGCT  
GTAGCGGCCTATCAGGACGCCCTGGACCTATGCAACGCCCTGAATCAAGGAGATTGACAT  
GGCGAACACCCGCGAGCAGTACCTCGCTGGCCGTAACACCGGCCTGACCTTCTACCAGGT  
GTGCCAGCCCGGCACCGACAACCGCATCGCCCTACACGACATGGACGAGGCCGATGTCAG  
AGCCAAGGCCACCGCTGTGATCGCAGCAGCCACTGCCTTGGGCGGCGAGGGCGGGGATAC  
CCCACCGGACCCGCTCACCGCCTACAAGGTGACGAACGGTGACACCCTGCCCGTGGACGG  
CGGTGGTTCGCTGAAGGTGACCATAGCCAACGGCGCCATACCAAGGTGCTGTACACCGC  
ACCGGCGGGCTGAGCTTCAGCCCGTCCAACCTGACTACATCCGTAACACAAGGAACTGAA  
CCATGGCAACCTTCGCCGGTGAACCTCAGAAAGCCCTCCGCGCCTTCGCCGGCACCATCA  
AGAACCTGATCCGTCCGCTGGCAGGAGCGGCCCTGGGTTCTGGCTACAACGAGACCAAGC  
TGCAGCTGAGCTGGTCGCACACCTCGACGAGCTGATGGCTGCTGTCGAGACTGCCAAGG  
TCAAGGTCTACGCGTAGTAGTTCAGCCGAGCACCTGCATAGTCGGGTGCTCCACTGGAA  
CTACTGGAATTTTTATTGAGGGTGTGTGTCGGCTGGGTTGGCTGGTGTGGGCGGGAGTAG  
TACTCCGGGTCTAATTTTGGTATCGTCGTGTGAGAACCCTCCCGACTCTGATCAGCCCA  
CCCTTCCCCCGTAGGCCCTCGGCCTGGTGGGCCATCCTCGCCTTGCCTGGGTGTTGCCTG  
GGTCATCCCTGGGAGCTTCCGGCTTCGCCGATGGTGCGGTGGGCTTCCCTGCCCTGTGCG  
CAGCCATTCTACCCGGCTGAGCGGGAGTGTCAACCCGTGGGCTAGCGCTGTGCTCTACC  
GGGCTAGGCCGTAGTACCTGGTGCCTCCAGCGCGTCGCGGTGCATGGCCCTGGCTACGT  
CGTACTCCTGGGATCCCTGCCGCTTCCGCCAGGGTGTGCGTAGTGCCGGTGGTCTGCG  
CTGCCACTGTGCTAGCTGCCTCTGCCATGCCGCGTCCTGCTGGTACCAGGCACGCTCAC  
CTCTGTTCTGTCTGCGCAGGATCCTCTGTGCCTCCTGTGGTCTGTCGGGTGGTGGAGCC  
GGAGTGGCTGGC

>NewGenomeName\_131

TTAAATTTAACATTCTTAACCAGTTTCATAAAGTCTTGTGCGAGTTTGTGCGTTATGCAG  
AATACGATACCAGTTATCTACAATATCATCCAGTAACGGGCTATTCTCTTTAAACTACGC  
ACAAACTACTTTTATTCGTTTCGTTTGTGCGGTGAATTTTTCATCACAGATCTTTTTAGT  
TGCTTCGTCCACAATCCAACGAGTATGAAGGAGTAACTTGAAACCTCGTTATTATAATG  
ACCACGGGACAGTCTGTCAATAAATTTCTGGAATACAGCGTTCTAGTTCATCGTCATGAAA  
CAACATAGTGATCACACCCAGATATTCGGCATAACCCAGATGATTGGTCTTAACCTTCTT  
CGCCAGACCAGTCAGTTACCGCGAACAATTTTAGCGCACATTCCAATTGTTCTTCAAC  
GAGATATTTTTGTGTCTCGTTTCGAGTAATAATACTTTGTTACCCCGAAGTAGTCAAG  
CGCCGTATGTAATGTATTTTCACTATAGATCGATTTACGACTACGGCTTTCGAATGCATC  
ACCTACGCGGAACATGTGCAAGCCTGATAACTCGGAATCTCCGCCGCTTTCATGTGATG  
GCTGGTTTTATGCCAACTGTGACCAATCTTTTCCATGATATACACGTTAGCCAGCATGGG  
AGCCGCTTACGTTGTGTACGCTCGGTCTCTCCGGCTTAACTGCTTTAGCACGCATATC  
ATCGGCCACAGAACTTTAATCACGGTCAATTCAGAATAATCAAAATACTGTTTGATGTA  
CGCGATATTCTCCATATGTTTTTCGTTGCGCTGACGGAACACAAGTACCTTTTTATTGAT  
GCCGTATTCCTGGACCATGCCGTTAATAGTCAGTGCACGCAGTTTCGGGTATCGGTATC  
ATCAATAAGACACATAATATCTTCTTTATGCATCCATACAAAATGCGCAATATTGTACTG  
ACTGCTAACGAAAGCAGGGCGCAATTTGCTGATTGTGAGACGAGTACGATACAGAGTATA  
CACCTGACCTTCTACCTCATTAGGCGAATCTTACTCGCATTACAAACTTATTATAGAT  
TGCTACCGGATCGTCCCATTGTCCGAACCTACCGATCTTGCTAATAAATATTGCGTTGCGT  
CGATGAATACTCGCTCATAAATTGAGAAAGATTACGCTCTGTTTTAATGTTGGCGATCTG  
TTCTTTAACCTTTTCCAACATCACTTCATTGATTTCTGCAATGCGTTTCTCGATGTTGCG  
TTTAGTCTCAATTGACAAGTGAACCTTCTCACGCGATGGCATCAGGTCCAGATCACCCAA  
CTCAAAATTAATGTAAATGGTCTGGTGTGGCGGTTTATAGCTTCTAACCATGTGCCGCG  
AACATATTCATACGGGATCGGATACTGGATCTTACTCATGATTGCATATACTATATAGGA  
ATCGTTATCATGCCATTACAAACATAAATAATTATCAAAGCTAGGGAAATAACTAATTCC  
GATTGCATTGATATTCGGTTCGTGTTCCCCAAAATGACGCAGTACAAATTGCGCTTGTGCG  
ATGCCATGTCTGAATGTCTTTTTCTTTCCCCGAATAGTGATTTTTCAGTCCAATGTCTTC  
ACAGTTCGGTACGTCGACAATCTGCACCAATTTTCGGCATAGAGTTTTGCACAAATGCCGT  
AAAGCCATAAGCGCGACCAATCTAATAGTTTACGATTGTAAAGGTGTCGGTATAGCTATA  
AGCAGACTTCGCACCTAAACCAAAGATCCGATATAATCATTAGTCTGGTCTTTTGTGTA  
TTCAAAGTAAACCGTAAACAGTTGTTCTAATTTCTTTTCTTAGACGGAATACCAGTACCATA  
ATCTCGCACAGAAAATACGGTTCGATTGCAGTCGGTAAATGAATATGAAACGAACGATC  
TAATGTTCCGGCTTCTTTGTGAGTGTGGGTAGCATTACATGAATACTCCCGGACGCAAGC

ACGCTCACATTATTAATAAGTGTTCTTAGAAACCACCATAAAAGCCTTTCTACTTGCTTT  
CAATGAAAAATCAACCGCACTGCTCATGTCACTGCCAAATACTTCTTCATTATCAATAAG  
CATTTTCATAATATAATCCTCACTTAATTACAATCTGCTTAGTCCATCTCTGCGTAGATT  
ACATCCCACGCCAAAAATCAATAAACGCATTATATGTCACGGTGCAATCGTTGTCAATT  
ACTTCTTTTCGCATATTTCTTGATGTTTTTCGTAGGAACTTGC GGATCAATTTTGTGTTA  
CGAAGGTGTGCATTTTCATACCCCAAACATTTTCATAAACAGGTACATTGAATTCTTTTCT  
CGATGGCACTTGGCGATCAGATAATCAAACTTCGACTCATTTTCTATTCTTATACATG  
TTCAATCACCCAGTGCAGATGGGCTTCTGCGTCAACCAGTTCAGCGCGGCTTTTCTCTAA  
GCATTTGCTGTATTCTTTACGTTTCGCACTCCGCAATTTTCGGTTTTTCAGGACGTCTTCATA  
GTAAGCAATTACGCCTTTCAGGTCTGAACTTTACGGCTTGCCAATTCGATGTAATGCTT  
ACGCATTTTGTCTTCTCCTTAGTGGTATCTCGTTTTCGATGGGGACATTATTATCTATCCCC  
GTTCCAGTGTCAACAGATTTTTAATCTTTTTTCAATGCATCCATTACTCGCTCTGCGATC  
AGATCTCGTAAGCACTGATAACCATGATATTTGATGGCAATGTCACGCAGATCATTAACC  
AGTTGCCGTACTTTATGGTCTTTCAGATCGTCTCTGTATTTTCGATTTAACCGTGTCTTTA  
GGTGGATTGTGGATAACCTGAAAACCTTGTTTCGGCAATCACTGCGGCTTCGCGCTGGCGT  
TCATGCTATACTGGATTTTTGATCAGGTCTGCTTCCATGAAGTTTGCCATACTCATCATC  
ATGTTATTCTTTTTGCTCATTATTAATCCTCAGAATAGAAAAGGGAGACTCCCATTATA  
GAGAATCTCCCTTGTATGTCAACTAAAATTTAAAGATGCAAACCTCCCGTGGTGAATTTT  
TGCATATGCATCATATGCTCTAGCGGCTTCCCTCCGGAGTCGCAAACGACCCTATGTATTT  
TCTGTCTCCGTTTATCCTTATTTGTGCTTGGCACGGTCTTTTGTCTCGATCCTTTGCGATG  
AGTAACACCATTATATATGCTCGTGCACCCGTCCATTTTCTTTTTATTGTACATGTTTTG  
TTGTTGTGTTGCCTCCCGTAAATTTGGTGGATTGTTGTTTTCTGGATTCCCGTCTATGTG  
GTCTATTACCTTAACCTGTGTTTCGATATTTCAAGAAACCAGACAATTCTATGTACAAGATA  
TGAAATGTTCTCTTTTTAACCTTATTGTTAACATCTATTGCCAAATGACCGTAATTTAA  
ATTTTTTGTTTTTACTTTATCCCCGACTTGGTAAAAATATCCCTCTGGTAGACCATTAAA  
AGACGGACTATTTATTTTGTGATATAGTACACCTTCGGTGTGTCCTAATCTTCGTTTTAA  
TTCCTCTTGAATTTCTCAATACCAAATTTTCGCACTTATCATATTATGACGCCATCTATG  
CCCTCCTCATGTCTGAATCTTCACTATAGAGTATATCGAATAGCTCTTATAGTTTTCCG  
GTAACGTGATGATCTCCATGACAGGTTTCGTTGATCACGCGATGATAGTCTGATTCTGTGA  
GCGATGCTAAACCTTTGATATATCGATTGTTGTAACCTTTGATATTATCTCGGTCCTTCT  
CGAAATCTTCTAGGTCATAATACCATCGAACATCATCACCTTTCTTTGGTTCAGCAATGA  
TAATAGGTGTTTTTCATAAAGCGGATTCGTCCATCTTCGAACAATTCAGGCTAACGTGCAA  
AGAAAGACATCAGACTAGATTTAATAGACCCGATCCCGTCAAGTATCATCGTTCGGTCATAA  
TCGCAATATTTTTGTATTACGTAAGTTCCAATGCATCAACACCTAATTGCAAGCCAGTGA  
TCGCCATGGTGTAAAAAATTTCCGGCTTCTTTACAATGATTGCCTCCGGTTGTTCCCACG  
TTGTAAGAGTTTTGCCTCGCAACGCGAAACCTCCATGTAAATCTTGATCACGTACAGAGA  
TCAGATAGATGATCGCGGAATCACCTTCCGTCAAAAACAGGGTAGTTTCTGCGTCACTGC  
CAATAAGTTTAGCTTTAACGTGTTTTGTTACCTTAGCCCGTTTTGCTGCCTTTGCTGCCT  
TAGTCGCTGCCGCTTTATCTGCTGCCTCTTTGCGTGCCAGGACTACAGCAATAATAGGCA  
TGATAATGTTTTCTTTCTCCCAATGACTTTAGCCAGCTTTTTAAAATCAAGATCAATAT  
GACGCATGATATCACCAAGTTGGGTTAGTCAAGCGGTCTCTTGTCTGTGAATCAAACGAA  
GGTTAGGCAATTCACGAACAATCAAAATACAGGTCAATCCAGACTTAACCGCAGCTTTAG  
TAACATCAACCTTATATTCTTTCTTGATTTCGCTTTACAATCTCTTCACAAAGATCATCTG  
CCACGTAGTCTAAGTGTGTTCCCGGTTTTTGGTAAACAGACCGTTAGCAAAGGATACTG  
ATTTAAAACCTTCTCCCTCGACCGCCGGGACTAGGGCAAGTGAAAAGTTTTTATCTTCAA  
TGACGAACAGATCAACATTCTATAGGTTAGCATAATCTTTGAACTTACTAACAATACGTT  
TACCGTTAAACTTAAACGTGATCTTAGGAAATATTATGCTCAATGATTGCAGAGGATCAT  
GAACAATATCTAAAACAGAGTTGGCCATCATATAACCTTCGAAGTGGTTCGAAGTCTGGGC  
AAAATGTAACCTTTGTTCCCTTCACTTTTGTGTTGACGATGACCATGTGATATTTTTAG  
CACCGTTTTGTACATAGAAAGGTCATTTCTGTTTTCGCCGTCACAGGTACACACCAGCAAACC  
AATCGATAAAGAAATTTGATAACGACGACCCAACACCGTTCATCCCGTGCCTTAATCGAT  
TGGTATCATCAAAGTTATACCCTGCTTGCCTTCGTGTCCATGCGGATACTGGTTGCGGAA  
TCTGCGTACCCTCTGGGGAAGTAACCATATGTTGAGGAATACCGCGACCGTTGTCTGTTA  
CCGTAACAATATTGTTTTGGATATCGACGCTAATCATATTGGCAAAGTCAAAATTAGTGC  
GAATCGCCTCGTCTACAGAGTTGTCGATGATCTCATCAATGATTTTACCCCGTCCAGGAA  
CATATGAAATTTTTGTCCATTTACCGAACAGGAAACGTTGATGTTCTTCGTAAGTTGTTG  
ATCTTAAATACATTCTGCACGCTTAAGGACATGCTCACGATCAGATAACATGCGAAACT

CACTCATTATTAACCTCTTAATAACATAACCATAACTTACCGCAACCGCCACGAAGACG  
GCTGCTACAATCATATTA AAAATTGAGTGATTGTCAAGTATATGACTCATGACACGCGCA  
CATTTTTATCACAGTAGCCGCCATTAATACCGCGCGGGGAGTTAATCCCTGTTTGCATT  
CTTTACCACATTCAGAGCATTTCGGTCTTTTACGTTTCGGAAATTTTGC GGATTTTCTGAA  
ATTGACCGTGTTCCTTCAAGAATAATCATAAAAATGGCATATTATCCCTTTGTTTCTTA  
ACTGAATATGGATCTGGATTTTCTGGCAAGTCTTCCAGACCCATAGCATAACGTTGTGCA  
TAGATTCGCATAAGAATATCGCGAGCGCAATCATGCATTCCGTCATGCGCGATAAATGCG  
TCTAGCGTACTCATTGGGAACGGGCATTACACATAACCACGATGCATCAATGTACGCTCA  
ATGGCGGTGCGAACATCTCGGATATTCCAGAATCGCACAGGTTCAAGGCTGAACGTCTCT  
CGAGTATTGTGTGCACGGCGGATCATATCAACTAGTAACGGAATATCAAACGCATCACCG  
CGTGAGCACATTACGGATTTAACCGGATCTACTCCTACGGCTTCACAGAAGGCGTTAAAA  
CGCGCGAAACCTTCTTTAGTTGATACTTCCGTACCATTTGTGATTAATTGCTTTCTCATG  
CCTTCTGAGGCGGTATTCTTCCACCATTCAACCACACCATGATCAAACACCTTACACCT  
TTCTGGGAAGGAATATCAAATTTTACCAGAAAGGAATTGTCAACCAGTTATTTAAGTGTA  
GGTGGATTTTGC GGATTTTCTTTAAATCCGGTTGCCGCCATATTGATAACCGCCCAACA  
GGCGGATAACCTAATCTTTCAATGTCAATCATTAAATCCACTGGAAGCATTTTAAATACC  
GTCCGCGATATGCCGGAACA ACTCCAGATCGTTTTTATCCAGAATGAAACCGCTACAATC  
AATAATGCCGTTACCGTAATTATCGGTTAACAGGCGTTCCGTTGCCATGTATGCGCGTAC  
TTTGTGTTAAAATTCATTACATGTTGTGCATAATCACAATGAATCTTTTGACGGTTCCA  
CGCGACAATTGATTCTAGAGTTATTACATTAGCCACATTATTAATAACCACATTTCAA  
AACCTCGCTTAGTCAAATGCTCGATCATTTTATTGATACATGCAGCCTCACTATCGCCGG  
ACACGTTCCAGCCGTATAGACCCCATCTAAAGCACATGGTAACAGTTCCATTGTGACGGC  
TTTCCGTCACATCATTAAATTCTCGGATACTTCGCATAATCATAATAATATCCTCAAATA  
TAGTCTACTCGATACCGGGCACGGGTAACACCAACATATAATAACTGCATTGCCAATTCA  
AAGTCAACATTGTCTGTACACATGCAAGGAGTATACAGGAACACGCGGTCTACTGTATC  
CCTTGTGACTTATGAATGGTGAAGCTTGTAATGCATTTACATTCAAGAACATACGGTGC  
ATCGTCCAGAATGAATCCCAATCTGGTTTAAATTTTGGCTTCTCTTTCTTCATTTGCGGA  
TGTTGTCCGGCGACCGTATTCAGATAGATAGAGAAAATTCTCTTCTGACGTTGTTCTGTT  
AGAATATTCATTTCTATTAATCCGGTTTATCTGTAGAGATTCCGTCTGCATCTAAACCG  
TCTTTCTGATTTAGAATCTCTTTGTCTTCGTCATCATCGACGCTTCCACTGTCAGAGTA  
TATCCTAAA ACTGGTTGCGGATCTACCCCGTACAACGTAATGTACATTCGCGCGGTATA  
ACCTCTTTAACTCGGATCATCTCACCATTGTTAAAATAA ACTAGGAATCTTCTTCCCG  
CGTTCATCTCGCAGATATTCGATCAATGGTTCCTGAGTAACCAGAATGTCATCTACAATC  
ACTGGTTCATCGGTGTTATAAACGCGCTTACGGACAATTTCAATTGAGTTTTTTCGACGCTC  
TTGTTAGTGTAGGCCAGAATACGGTTTTCTAGAAGGTCTTCCGGCGTTTTAACGGTTTCG  
AATTAATGGTTCATAAACTCCGGCAGAGTTGAGCTATGGAATACACCCTCGTTACCGCAC  
TACGTTTCGAACCCCATTTACCATTACAGACTGCGGTGCGCACGTC AATTATTGGCGCA  
TTAGATCGTTTAAATCTCTGTATGTTCTACATTCTGAAACCTTTCATCCGTGAAGAAAGGA  
GAGATCGACGTTGCACCGCTCGGATCAACTGGTCGTA ACTGGAGCGGATCGCCA ACTGCA  
ATAATAACGATTTCGACCGTTGATACTCTTCATGAGAATATCAAATAGTTCTTCTCGACC  
ATACTCGCCTCATCAACAATGATGAGCTGAACATCATCTTGCTTAGGAGTATGTTTTTGC  
TCAAATAGTTGAGTATCTTCATAGTTGGTCGGGTTTAGTCGCAGTAGTGCATGTAAAGTA  
AATCCTTGACGACCTACAGCTTTACTCAA AACTTTTTTAGCCTGGTGGGTAGGCGTTGCC  
AAAACCACACCAGTTACACCACGGCGGACCATTTCTGAACAATGAATTTTATCATTACA  
GTTTTACCATTACCCGCCGACCACGGACAGTTGTATGCTTCTTTTGTTC AATGCGTTTC  
ATTAGAACATCAA AAGCATGTTTTTGCCCGTCTGTTAACATATCGAAAGTTAAACTCTG  
CTCATTATCCTCAAACCTCACCTTGCGAACACAGATAGTTTTGAGTTCTCGCCGTACCC  
TTTCTTTTTTCATATTCAGGAATTTTATATTCGATACCATCCCGAACAATTT CAGAAGACC  
GGATTGTGCCAAATTTTCGTTTACGTACAACCTGGTATTACGGTTCACCCGCCAATAGCC  
TCTCACAATAATCTATCTGATCACTCATTGACGCTAACGCAGCATCATCTGTTTCGCAAG  
TTAGGACGCGACCCCTTCGCGTCCACTGAGTATTGAAAAAATCCGTCTTTATCACGATAAC  
ATACAGCTAATACATGCATTATAAACCTACTTTTCGCTTTCATCAATTCAATCCACGACGC  
ATCAATCGGAGGCCCGTATTTAAAGCGTTCTTTTTGTGCTGGCGGTAAGTTCTCATACTT  
AGAAAGAGATTCAATCAAACGCTGGTATATTTTAGCACGACTTCGGTATTGTTTGAAT  
AGCCTTAAGTTTTTCTTCTTTCTTGTGATTTTCGCTAAGGGCTTGCTTGAGATCTGCAAT  
TTTCTGATAACGTTCTTCCATACGGAAGAGAGTATTTCTGATAGCTCGCTCGACTGCCTA  
TGCTTTCTACGGTTCGTTGTGCTTTCTGTGGCGCTCGATTGCCAATTTCTTTTCTTCGAT

TGCTATTTCTGATTTTTGATGCGATTCTCGTTAAGTTCAATCCACTCTATGTACTTCGG  
ACGTAGGGCAATTTTCATCATCAGAAAGTTTACCGTTAGTTCCTATTTTCATGGATCTCTTT  
AAGAGATTCGATAGTGTGATTGCCACCGAAAGAATTGTATTTTCAGTTAAACCGGCGTTAC  
ATTGCCATCAACATATCCCAGATTGCAATCAATGCGCTCTAAGGAGAGTCCATCATCAGC  
TTCACCGAGAGCCTCACCGGAATAGGCGTAATGAGTCTGTCGGTAAATGTTACGCACAGT  
GACTAAGCTCATAGAGAAGTCTTTGTTGCGACTTGAGGCACCAGCCATGATAGAGTTCAG  
ACGGAAAACAACCAGCGCCAATTCTTCGTTAGATTTAAAAGCAAACAGTTTCATAATTGA  
GTCTCCTTAGTTGGTATGTGTGTATTATTGTCTATCTGGTTTGTGCTGTCAACACTTAAA  
TTAAAGAAAATTTGTCAATCTCAATCAGATCGCCATTACACGCGTAAACTTCCTCGATCT  
CATCAAAGATCATGGTTCGTCCTGTCTTGTATATGCATTCGCGCTCATCTGCCAACATAG  
CATACAAAGGCAGTCGCGAAGTCGGATTGTCATACTCTTTAGACACCACTAGGTCAATAG  
CATGTTTCGTAATAATTCATGCAAGGCTTGGTAGGTTTTATTGCAATAATCTTTCTGTG  
CATAAACATCTGTTGCAAAGTCCTCTGCTGTTGATTGCAGTGGCGTAAAGTTCATAGGAC  
GCTCTACAACGACAGAATCGCCTACAATTAAGGTATCCAGCTTACGGCCTTCTCATTTC  
TCATACCGCGATACAAGGCTTCATGATGCACTAACCCTCAGTCTTTTCAATCAATCCAT  
TAAGGATAGAATTATCGGTATTTTCTTTAGAGTTCATCACCTCATCAATGATGTTAAGTT  
CTTCTGGTGTAATTTGCATAATAAAAAAGCCTCCAATCTTTTCGACGGGCGGCATAATTA  
ACCATTGATTGAGTTTGTCAATCACATAGTGTATGTGATCTATAAATAAGTTTGCTAGAA  
CTAAAGGAGATCACAAAATGAACTATAAACGTATTTATGTTAACCTGATTGAACGTGCTA  
AGACTAGAAATCTCGACGGATACACAGAAAAGCATCACATCATAACCAGTTGTATGCATG  
GAAGCGATGACCCACCAACCTAGTAAGACTTACACCTGAAGAACATTTTATGGCACATC  
TTGTGTTAGGTAAGATATAACCAGATAATAATAAACTGATATATGCCGCTTACATGATGT  
GCGTTTCTTGTTCATGGACAAAGACAAACAATAAGCGTCACGGATGGTTGCGTAGAAAAA  
CGACGGAAGCGCATAGTAATAGAATACGAGATAGTAAGGAGAACGATCCAGAATATAGAT  
CTAAGGTTTTCGGGATGGGCTAGAAAAATGGGTAAAGCCATGAAAGGCGTTAAGCGAGGAC  
CGGAATTTAGCAGAAAGTTGGCAGTAACAAACAGAAATACCGTGAGGAGAGAAGATACTA  
AACGTAAGATCGGGGAAGCCAACAAGGAAAGAAACGTACAGAAGAATATAAAAGAAAAC  
ATAGTGAAAGGTATAACGGTGAAGGTAATCCGATGTATGGTAAACGAGGAAAGGACCATC  
CCGCATATGGTACCAAACCGTGGAACAACGAAACATCATTGGTTGAACATAAAGCATGGT  
GGCGGTTTGTGTCATGTTTATTACTGGTATCGGAGAGATATTGACCGTGGAACACATA  
AACGCCACGGTCATAAGAGAATGTTGGATGAGTTAGGTATCGTTGGTTGGCGAGAACAAG  
AGCCAGCCCGCGAAGAAGATCAATTGAGATGTTTCGCTAAACGCTGGAATCCTTATGATG  
ACCAAGCATGGTTAGATTATGTTAATACCCGCTTTCCAAACGACGAGAGTTTTCCCGTT  
CTTCAACATATAAAGACAAACAGATCCTTCGCAGTAAGCCCCAAGGCCAAGAAATTACA  
CATAATGAAATGGAGTTGGTCGACGGCTTCTAGGTATGTTTCCAACGATGCGCCGCGAGA  
TAAATCACTAAAGAGGCGGTTTTCGTGCTTCCATATGAGTGGCTTTCCAGTGTTCACAC  
CGCGCTAGCGTCTTTCCCGTTAGACATAACCACCAACGCAGTGTACAGTTCTCGCGTTTC  
GTCGTC AAGCGCATTATCATTAGCTCGAATAGAATCTAAAATCTCTCCACATGTTTTGAA  
TTCATCAAGTTTTGCGACCCACGGACGGTCATTTGATACCTGGTCTTGTAGTGCTTTCTG  
CATGTCCATCATGTGTTGAAATGGGTTATCACCGTTGGCGATAATCTCTTTATATTTTTC  
TTGTGCAAAATTCAGAGTTTCCGCTTTACTAAGTGTGCACAAGAATTAATTTCTAACAT  
ATTCACCTCATTAATTAATAATTTACAATATTTTCATAAACCGCATTTTAGCCATCAGACTT  
TGTACGGTGTCTCTTTGATAAATTCCATGATCTGGTCGCGTGTGGCTCCCTCGTCCTGA  
ATCATGGCATTAAACGTCTTTAGAAAGCCGTGGGCAACGATCGCACAATAACAATCTTTTCC  
CCTGCATTGATAAACTTTTCCAGTCGGCGCATTGTATCGGCCGATCGTGGATCCGCATCA  
TGACTAACTCTCGCTGGTCTGGCAAAGGTATTTTCATCTAATCCCAAAGTACCGCCAGTA  
ATTGCACACCCGTTATCAATAAACAATGAATCGATCGGACCTTATAAGAAATACACTGGT  
TACTCGGATCGGCGCGTTTCATGACCAGAGACCTTACTCGCTGACTCATGAGTTTTAATC  
GTCATATATTTGGTCTTTCCGTAATCCTTTCTCAATGCTCGCCCTGAATGGATTCTATC  
TTGTTCTCTCGGTTAAAGATAGCAATCACTAAACGCGGCTCAGGTTGTGGATTCTTGAAA  
GTATCAGCCTTAATGTGATTTACTACCATTTGCCATTTTCTCGTGAAATACAGAAGATCC  
CATTTATGGTGGGGAATGCAACGATCACTGACATACTTTCTTATAGGATGATTAGTCGGA  
AGAGTATCTAATCTCTCGCAGAAAGGCAATGTTTGCATTTCTTAATCTCCGGCTTACT  
ACTTTTTTTATTGGCTTAAACGTGGTGTCTTGGGGTCGCCTTGTTCCCTCCGTCGTTCC  
ATAAGCCATTCCCTGAATAAGGCAGGCTAATACTGTTTGTAGAAATTCACCTCACGGCTGA  
TTGTAGTTACAGTTGAAACAACCACAACGCAAACCTATCCTTATGGGTATAGATACGGAAT  
CGCGCTTGACTATGATTTTTCTTTGAGTGACCGCAGATCGGACAACCTACAGACCACCGTA

AATGAGCTAGTATGCAACCGTTTAAAATTTTCGTTTCGCCGTATAGGGCTTTTTCCGCTATT  
TCATAATCTACGTAGTAAATCATACTAACCTCTTATAGCTCAAATTTTCATGAAAGTTCCC  
ACACTTTTCATTTGCATTCTCTCCGTTGTCATCTCAGCCAGATTTGTAGACACTTCCACCT  
GGCGATATGTAAGAGAATACTCGAATACGCCCTACCGGGTCAAGTTCTGTAAATTCTTAT  
TCTTTTTTCGGCTTCAAAAAGTGCATATGCGCTTTTAAAGACATTTTCATCGTAATCATTAA  
GCGCCACCGATGAGAACATGATAATAATACCAGAATAGATAACAGTCTCAGACATTTTTT  
CTGTTTTTGTCTTTTATCCAGACAACCCGAAAAGACAACACCCGAAATAGCCGTCACAA  
GCCCGATAATGAATATAATAAACTAACCATTTGTCTTTCTCCTTTTTGCGTTTATCTTTA  
CGCGCTACACTAGGTCCACGATTGGTAATAGACCCGCTCGTTTCCCCTGCTGCGATTTTC  
TCAGGATTGCCGCCAGCATCGCCAGCGGTTCATATCTTCTTTGAGTTTATTTTTCTTCAACC  
AACTGTTTAAAACCAATCATAGAATAATCTCTTTCAGTAAGTCAACAATCTGGTCTTTCC  
TCAGTTTATCCTGATTTTCTACAATCTTGATAACCCAATCGTTAACATCTTTGCGAGTCA  
CGCGGGACATCGATTTTATACGATGAAACGGTTCGTAGAAATATACTGCTTCATTATCGG  
GCGCAGCAATTTTTTGACGCATTTGATCTTTATCGGCCATAAAAACAATTGCAATTTTCG  
GATCTACACCAGCCACAGCATAAAGTTCGGCGACTCCCCAGCGTCCTCCCGGTTCAATCA  
TCCCAGCGTGTTTACCGTTAATAAAGATAAGAATGTCTCCGTTATTTGCGGTTTAAAATG  
CTACATCTTCCGGCGTAATCATGTTCTTCATAATATCGTCTCCTTAGAGTCTCATTACAG  
ATCGAGAGAACGTAGAAAGCAAATGTTTTATTTCAATTCAGTTGTTCGTTAAAGGTCTTTGC  
GTTTCTCTTTCATCTGTTCGTTTAGCATTGTTTCGTTGTTTTTCAACATTTTTATCAATAT  
GCTTAGTACAATTACCAATATCAGCATAAGTTGGCATAACCCAATTCTAGACATAATGCGG  
TTGGATGCAGGGTAACAGTCCATAAACCGCTAATCTTCTTAAATACGACTGGGTGTAGTG  
TACTATCTACATCGTCCGGTGTACCTTTTTGTCTCTTTCAGTGGTGGGATCTCGTCAT  
ATGGCTCCAATGAAGTTACTTTAATATCAGATACCTCATCAAAGGATCCGCGTACATCCG  
CAGGAAATACACGAGCTATTTCCCAACCGTGATCACGTAGAGAAGTAATATTTTTCACTC  
CCCCACCATGCGTGATGATTGATGTGACATTGCCATCGAGGTCCACAGAATTTACGAGAA  
ATGGCTTATCGTCTGTCAGATCATTATAAACTGTGCTTCGGCTGTAGTCATCTCCAGAA  
ACAGATCTCGGATCGGACGACCATCAGGTGCGTTACTTTCCTTGAGAGTATAGAAGCGAC  
TTACGATCCATTTTGTTCGGTAAAGCTTCAGCGATCATGTTATATCTCCTATCAGATCATT  
CACCAGCGCCCCGAGGGCGGATTGTATTAGAAAGTCATGTTGTTTGTAGCTCGTCGAG  
TTTTTCTCGTTTCTCGGCTTGCTGTGCGCTTTGTGGTTAACTTGTGCATACTCCTGATC  
TGCATCTGGTTTGGTACTTCATAACCAACGCTGATTGCCTTTCTTCACACCCACGTTAAA  
CCGTGAATAATAGTTTTTGTACCAGTAAAGAGACTTGATCTGCTTCATGAGTTGGACGCC  
CATTTTAGCCGGGTCTTCCGTTTCGATCACACCCACACAAAGTCGGCAGTAGCTTGAAG  
ACCGGCTGATTCAGCGGTATCACTCATGTTAAGGTTCGGAAGCATCCCAACCCGCGCGGGT  
AGTCTGTGCCGAGTCCACCCACAGCATCCCCTTAACAAAGAATCCTCGTAGTTCTTC  
CGCAATCGCCTTAACTAGTGTGTAACAATTTTCAAAGTATACACGCAAGCGAGACGATGC  
GCAAATCCCAGATAGTCAACAATCACAACATCAGTTTTAACTGTTTCTTGAGTCGCAA  
TTCATTCATTAACGCCTCAAAGTCATTGGAGTTCGCGCCACCAGTAGGATACTGCTTGAT  
CATCAATTTTCCAACCGGAGGATCTCCGATCTTCTTCTTCTTAAACACGCTTCATGCGTGC  
GGAAAATTCGGAAAAGAAACATTACCATTATCCACTTCATCTAATGTAATGTAAGCAA  
GTTTCGCGGCATACGATGGCTACGACATGCTCTGCCATCTCCATTGAGATATAACAAGAC  
ATCATAACCACATTCATATAATGCGCAGCATGAGAACACAAGCCAAGCGATTTACCAAC  
GTTTACAACAGCAAGCAACACATTTAGCGTTTTTCTTCCGCCCTCCTTTTCGTGATTTT  
ATTCAACATCGGCATCTTAAACGGGATCTTATTCGCCTTAGTCTGATATAGCAAGAATCG  
TTTTTCAAAGTCATTAACAGTCATGACCTACATCAGAATCAAACGTAATGGATAGTGC  
TTCTGATGATCTCAGGAATAGCAGCCTCACTAGGCAATTTCTTATTCTGGTTCTCTTT  
TGCTAGTTGTGCGTTTCGCTGAATCTCTAGCGCCCGTGACATTGCATTATACACGGCAGG  
GTCACGAAAAAATTTTTCGGTTTCTTTCATTAACCAATCAAGGTCTTCCGGTGTATTCTC  
AGGCGAATCAAAAAGCGTTTTAGCCCCTTCATATGTTGTCTGATTGCCTCTCTCCTTGTC  
TAAAACAATCTGTAATGCAGTTGGTGTAGGAAAATTGGAATATTCGTTTACGTCCTTTTT  
AATCAGCCTATAAATCAGTTTTTCTTCGTCTTCGGTGAAGTAGTCAACTTTAAGGTGAGG  
CCATACATTCGTAAAGAATGCGCCATTGTAATCAACTGTGTAAGATAGTTTTAATCAT  
ACATAGCCCCAACTACACGCATAACAAAGGTCTTGAGTTTATACCAGAAAGTTTCTTTT  
TTCAACTTGTTTTCTGCCTTTTGATCTGCGCTGTTAACGCCTTAATGACGTGTGGATAT  
ACCACATCACGATCTGACGGCGTGGAGTAGTCGACCACAATACCTTTAGTGTCTGGATCG  
TATTCAAGATTATGAATATAGACAATATGATGTTCTCCCTCTTCATCAACAAATATAAAT  
TCCTGAATAACTGTCTTCATTGCTTCTTGAATCAAGCCGTGTGCTTCTTCTAAACTTGTT



GGTTTCTTATCCATAATATAATCCTTTCTAGATATGAAAAAGGGGCACGTAGCCCCTTTT  
CTACCATTGTTATGCTAACATATCTTAGATTTCTTTGTCAACTGCTTCGTCACACTGATCAC  
TGGCACCAGCTTATAATGATCGTTGATTGCTTCGTTAAACTGATCGTTTGTGAGAAGTGG  
TTCCAGAACTCAATACTATTGGTTACTTTAGCATAGAACTTGCGTTCTTCGGTTTCCAT  
CTCTCCGGTCTCTGTATTCAGGATTGAACGAGGATACCAGCCGTTTGACGGTTTCACTAC  
CCAGCCTAAATCTACAACCAAATCCAGCAAACCGGAATAAGGATCGATACCTCCGCTATA  
TGTTACGCTAATCGGCATCATAGATTTTACTTTAACGGTTCGTGATTTTTCCGCATTTCAG  
GATAAAATCATAACCAGTAATTTTCGGTTCCTTCTTTCTGCTGACGACGACCAATAATGAA  
AACTTCATTGGCTGAATACATCGCGCCCGTACCGCCGGACATAACGGTCTTACTAAACAT  
TTCTTGGGATTTCGTAACCTCTGGTTAATAGCGAAGCACGGGATATCATTTCATAGTCAGATA  
CGGCGTCACTATACGGAACAAGCCTTTAAGTACTTTCGCTCGCGTCATATCCTGTGCGGA  
TTTCTCATTAAATCGCGTCTTCAACTTCTATGTTACTTGCTAAGTTACCGATTGAGTCAAT  
AAATATGATCACTTTATCTTCACGGGTAATTTGCTCAAGCTGGTTCATGATTTCAAATGT  
AAGTTCCTTCGATGTTCTAGATTGGAACATGCACCACGCGATCAGGATCTTCACCCATAGA  
TTAAAGATAAGCGGGTGTAAATACCGAACTCAGAATCAGAGAACAAACACGCCGGATCAGC  
ATTCTGTTTCATGTATGCACTAACACAAGTTAATCCCATGTTTGATTTAAAGTGCTTAGA  
CGGACCAGGTAATAAAATCAAACCAGATTGAAAGCCCTTCTTAAGATCACCTGAAAACGC  
AATATTCAGCATCGGGATCGTAGTGCGAGTATTTGGTTTTTCGTTAAAGAGGCTGGATTT  
AGACAGTACCGCAATAGTTTTTCAGGTTAGAGTTCTTTTTTCAGTTTTTCCAGTACAGACAT  
TATTAATACCTCTATCCAGTTAATCCGTAATACTTTAATAGCTTCATTGTTATTAGATCT  
TTGTAGTGCTCTTGAATTAACTTTTTCATGGCATCAACATTGATCGTCACAAATACTTCG  
TTGCTGTGATTTCCGTGAACTTTCTTGAAATGCTCTATGCCTTCCTCACGTTACGTTTA  
ATCTTTTCAATGTCTCTCATAGTATATTTCTCACGTTGGCGGGTATCGTCAACAAACACC  
CGCCATTATACGCACTTTATCTTAAATGTCAAACCTGTCCGTCAATGAAGTAACTTTTTTC  
ATATTGCAGCTTCGCAGCCGTGGTAATGTTCTCCAGTGGTTTGACGAAAGTCTTATTA  
CACCAAAGGCCAGTCCAACCCCTTCAACACCTCTGATTCAAATTCCTCGCGGAATACGCGT  
ACCCGACAACCAACCAAAAAGTGGTTTTCTCAAACGGATTTTCGGTCTTTAAGCGGTACAAT  
CATAACCTTCTCGCCTTCACGAATCGGATCTACTCCGAATTTTCCAGCATTACGATTATT  
ACACAATACACTCTTAACCGCATACGGACAACCCTTAATCGGATACCCGTTTGAATCGCT  
GTATTTCCGTAGGTTGTTTGCAGATAATACCGCAGCAACATCAAGATAGTCAAGTTTTTT  
AAATTCTAGCTCAAAAATACCGTAGTATTCCTGCAATGACTCTTCACCTTCCTGCAACAT  
ACGGCGAATACATTCTTTCAGTGATTTCTGGCATGCTTTAGCGGTGGAGCTACGTTGCGT  
TTGCAAGGCCATGAATTTTAGCTTAGGTTAGCAAAAGCGCGTGCCTTGCATGTACCAAAC  
ATTAAGAGCATAACGCTTTTTTAGCAGTCCAGAATCCACCGATACCCACAGATTTCAACGG  
AGGACCAGCAATTGCCTCACGGTCCATAAACATCAAGTGCTCATAGTTGTTTCATGTACTC  
GCATAACTCGCGATATCCCTTGTCGATAATAGGTTCCATTTCGATGTTTACCGAAATTATC  
AAGGAAGTCAACAAGTTTTTCGGTATCGTTCGAAACGGTCTTCCCGCCAACCTTATCAAT  
AACATTGTTAACCAGCACATAAACGGAGTCAGTATCACAATAACGAACATATGCAAAATC  
AGTCGTTCCGCAAAGATCCTTTAAGTATTCGTTAATCTTACGCTCAATCCACTGAACTGC  
AATCTGACCGAACAGTGTGATCGCACTAGCGTTACGGGGATCATAAAAACGGAATTTAGG  
ATTCCCAACGCACCATTAAGGGAGTTGATCAAAACTTTACGAGCAAGCTGGTTTGTATT  
GCACAAGATCGACTCGTCTTTACATTCTTCCAGTAATTCCTCTAATGCATCTTTACTCAA  
TTCAGAAAGCATCGATTTAAACACGTCATCGAAGTCGTGACGCACTTCAACGCTATAGCT  
AATGGTTCCCCATAAACATGATTTTCATCGTGTAGAATCGCTTTACAGAGTTCAGCATT  
GCGGTCACATGCCAACATCATGTTTTTGTACTGCTTACGCTGATCGAATACCTTTTTAAT  
CTCAATCGGTACGATACCGTGAACATCTTTTCTATACATCCATCCGTGAGGCGAGCAAGA  
ATACTCATCACTCGGACGTGGTGCAGTTTTATTGATATACTCGTGCATCGGTGCAGCATC  
AAAAGACCCGGCGATTGTTGCCGGCTAAATTTTAACTGACGGATGATTGATGGATACCA  
TTATGTTACGCGTGGTTCGCTACTCCCAGCGCCCGTTCTCTTGCGTACTGCTACATGTCAC  
CACGTAGATCAGACTATATCACATTCTCATAGAGAATCCTGCCATCTCGACTCGTTTGAT  
TCTACTCTACTCGGTTTCGTTACCCTTTTCGATAGTCGTTGAACAACCTGCATCTTTAAGCTT  
ATTTTGGTCAAACGGAGTTCTCTTACAGTATCCGCTATAATTCTTACCCTGATACGGAT  
TAGACTCCAGTTAAATATAGTCGTTAATGCTTCCTCGTTATGTATCTTGTACTTTTATA  
AAATGTCTTTCATCTCGCGCCTCCAATGTATATCAATATCTATATACATTATAAGACACG  
TTAGCTCAAATGCAACTGCTGCTGATTGTCTCCTTAGAGATTTGCCAGCAAATAAGCAG  
GTTATTTCGATCACTGTCACCAGTGAAAGCCCATATCAGTTCAGGGAAGTAAGGTCAAAG  
CTCATCATCCAACGGTAAGCATTCCGGCACAGGTTCTTTTACGAATTCGCCCGGATAAGTC

TGCTTAGGCTGTATCTTGCTCTCTGGTACTACTTTACCCCTCACCTTTCAGAGATCCGAAT  
ATAATAGCATCCCATACTTTCATCGGGTTATATACATGGTTAAATTTAATCTTTGCGTAG  
AAACATGTGCTATACACCAGATCGATAAATCCGCGCTTTTTATCAATCGCCACACACGG  
TCAACGTCACCGATGTTATAATCTATGTAAAGTTGATGGTTGTCATCACGCAATTTGTT  
AACGGACCATAGTAATCAACCATAACCGATTCTGTCTCCTATTCAGCAACATAATCTAAC  
GCATATCTTGGTTGAGTCGTAAGCTAAGTTTCTTGTACAGGTCAATATAATCAAGGCTT  
TCGATCCCATGATCGTAAATGCTTCACGATACTTGCCAAAATCATCCTGTGAGATTCGG  
GATTTAATCTTACCGCACGGGCTTCGACGGTTAGCGGTTCTACTTCCGAACCTATTACTG  
ATACGTTTAAATGATATATGGAATATCGAATGTTTCTGTGTTCCAGCCAGTGAAACCAACG  
GGTCGGTTTTCTCAAAGAATCGGATGTATTCTAACAGCAATTCATCTTCTGTGTCATAG  
ACGTTATAACAACGCGCTCTACAATGTCAGGCCGAAGAATTGACTTGCTAGATTCCCAG  
ATTTACCGTTTTTTCTTTCAAATGAAATACGAAGAAACGATCATGTACGGAAACATAA  
TGCGTAATTGCATCGATAGGATATTTGCTTCTTCTGGTTTAGGAAATCTGGGGCAGTG  
ACCTCGATATCAACCCATGCAACACAGATTGTATTTGCTCATGTGCAATCTCGCCTTTA  
TACGTATCAGACAGATAGGAGGTGATAAAGTCACCCATCCCTAGCGCCTCCTGCCCCATT  
TCTCCTATCTTTTTACGCCGTTTGTGGCCTCGTTCATAGATGGGAATTTTTTAGCAATT  
CAAGGCTTGGCATAGATATCTTTATAATTCGTAACCATAACCAGGCGCGGCATGATGAAAT  
AAAGCTGGCGTATATTCAGCGTAATGCTCTTGTCTTGTCCAGCATCTACAATATAACGC  
TCTTAGATCTTATAACCCACACGCACACCTGACAGAAAATACATAATATAAACTCCTTCA  
CTTATGAAAGACAGTCATTATAGGGGAATCGACTTAGTTTGTCAACACCCCTATCCCATC  
AGTATCTTAGCGTCCGATCTGATATTTCTCTATCAGCGTCCACTCTTCTTTCCGTTTTGAA  
AGACAGTACACGGAAATTATTAACCTTCGGTAGTTTCAAATCACTATCAATCAGGGTACG  
CAGACTCCACTGCGCAAGAAGTTTTGCAATGTTATTACGGCGTAATTCATCTTCCCACGT  
CATTTTAACTACTACGACCATCTAATTTCAACAACCTCCTGAAATGAACGATGTAATAGCG  
CCGTTTTCTTTGGAGCACATGACAAGACTGATTCAGTGTTTTGTCTCGATTGTTGGCAAT  
GCCGCAGCGGGTTAAAGTTTCTTAATTCTAAGGAAGTTTTCAGGACTAATCAAATTAAT  
TTCAATCATTTTACCACCTTTCTATAATCTTTTTAAGTCGTTTCTTTCTGTCTGATTCT  
TAGTAACACCCGCCAAAAGGTCATCGGTCGCATACGGTTTATTGTGCTTCAATACCTTGT  
CCATATATCCCTTTTCATTAGCCAAATCGCGATAAAACCGGGCGTCATCCATATTTACAC  
AATATGCGTTCGCCACTGCCATTAACCAATTTTTGTCCAGTTCCTTCTGTTTGTTTAG  
CCCGTTTACTGTATCGTTTCCCCTTAGAAATACTCTGTAAAAGATAAGCAAATGCATT  
GATATGGGAGGCTAGGACCGATTAATTCATCACATACGCGCTATATAGGCAATCTTCGT  
GCTGGGCAAGAGCGGTGTTAATCCATCTCTGATTATATGGAGAATTGTTTCCCACATTAA  
CACGCTGTTTATCTAAGGTGATATGATCCATGAGAGCAAATTATGCATTGTCGGTTTTCT  
CGGTGAATGTGACAGCTAATTCAGACACCTTTTCCAATCACGAGAGCGCCATGCAATTT  
AATGCTCGTCTAATTGTGTATCATCTTCACCGAAAAATTGACCTAACATTATACGAACTC  
CAATTC AACATTAATTGCATTAACAAACAGACAATGTGAATCTCTTGATAAGCCCCGTG  
CGAAGCATCTGATTATTTACCGATAATCTCAGTGAGACGAATCATAGAAGCTGGCTT  
AACTTGAGTATACAACTCAGTATAAAGTTTCTTGACAAATTGAGCATATGTATTGGTATA  
GAGTGGTGCAGTTTTACGCACATTAGCAAACCTGTTTAGTTTTAAGTGCTTCCACCACATC  
GGTTCCTCAGTATTGCTACTTTTCGATAACCATGCTCAATACGCAAGCATCAATTTTAGC  
ATGTTTAGCGTAGCGGTCCAAAAGTTTCATTACGCGCCGGAAGTCTGGGAAGTTCTGCTT  
AACCAGTTCGCTAATATGCGCATTCTTCTACTGGCACACCTTCTTTATCAAGAATTGC  
GTTACACCGGACGATCATTTCTTTCAACATGCGAAGCTGATCATCTCTAGTCGGAGATCC  
AAACGTGATGGGGTCAAACGAGAGCGTAACGCTGGGATAATACCTTCTAGATCGTTTTGC  
TGTGATAATGAATCTCAAATTTGTTTGTGATGCCTCAGAGAACTACGCAAGAGTCTTTC  
AGCGTCAGCCAACCCCGCTCGGTCATACTCATCGATAATAACAACCTTTGCCCTTCTCTCG  
TTTTTCTTCAATTGAGTGATACCCTCTGTGCAAAGTGTGTAATCTCATCGCGGATAAAATC  
AATCTTACAATCTGCGCCGTTGACAAACAGATAATCAACACCCACATCTTCGCAAAGCGC  
CTTAGCAACGGTTGTTTTACCAGTACCCGGCGAGGGGCTATGCAGGATCATAGAAGGGAT  
TCGGCCTTGCTTAAACAATTTGCGCGAAGATCTTATTATCTGCTTCCAGCAGAATACATTC  
AGAAATTGATTTCCGACGGTATTTCTGTTCCCACTGGAACCTCATTTTCATTAACACTCAG  
CATGTAATCACCTCTCACAAATCCATCATTAATAATGGGGAGCATTTTACTCCCCACAA  
ACAGTATAATAGTCGGTGTAGCTGGCGTCAAGGTCACACGCGATAATATAAGATATGGTT  
TCGCTTGACAGCCATACAGCCTTACGGCGAGTGAGGCTTAGTTTGTAAATCGCCGAAGTCC  
GTAGCAACCAGTTTCATGTTATCTTTACGAATAAAGAAATGGAAGTCTGCGTTTCCAGTA  
TATTTGCCCATATCAAGACAAAACATCTCATTAGGCTTGTTTTGTCAATCTCTTCCCAA

CCTTTGATCATCAGACGACCATCAATCGGTAGAAAGTTCAAGGCGATCCACTTTAAGCTGA  
TTGCTCATTTCATAAGCTGTTTCAGATCGTCGTTCCCTCAGTTCGTAATCGACATCGCCT  
GCAGGTGGAGTAACTCGGCCTTTCGGTGATACGATAGTAGCAGCACTAGCACCAGGATAA  
TTAATTTTGAGACGATCATTAGACACACGAATGTTCCGGTGCGGTTATCAACCGTAATA  
TCTGCTTCATCGCCCACCAGATTCAGAATGCCCAGGAAAGAGTTAAGATCATAGATCCCG  
ATTCGTGTTCCAGTTCCTTGATTAGAGTCGCTTCACCATATAACAACGTTTGTTCATATTT  
TTGGTGATTAGGACGTGTCCTTTTGTACAGTTGATACCCGGGTTAATAGCGGTAAAGTTT  
TTCAGGGTAGCAATGGTTTCTTTAGTCAGTTTCATCGAAGCACCTTTATCATGTTAATCA  
ATTAATTACGGGTTTACTTCATGCTCATTTTGAATCTTTAGCATTCTTTTCGATAAATTTT  
TTCTCGGCTTCCTTATCGGATGAGTGAGTATACTTCAATCCAATGTAAGCTGTCAAGTAT  
TGTTGCAGAGCATAGACAGTAACAGGATGCTTTGCGGTCTTTTTTCCGTCGAGATATACC  
AGATCACCACGAACATCAAACGCAATTTTACGACGAATCACATCATCAACAAATTTATCT  
AGGACCAAACACCCTCAATACACTCTATCCCGTGACGGTAGTTCATTACATCATTATCT  
TTGATTTAGTCAAACGGGATATGACATAATTTACTATTTTGTAAAGATGAATAGCATTGT  
TCTTTTAAGCTCATAAGTTGCATTCTATCACTTCCCATCAGCAAATACGATCAGACGAGT  
TACTACTACGCTAGCGGCTCCAATCAGCAGTTCATCAGTGTCAATTTGATAACCCTTTTA  
GAGAATATCATTACCTCGAATAGTATTAGTGCCTTTAGCAATTGAATCATCGTAATACTT  
GCGCATGGCCGCGAGCCATTTTTTTTTGCACCATGTCATCAATATGTGCGTACAGTTCAA  
GCGTGCGTGCTGCGGGATAACCTTCATTGTAGGTTTCTCCCTTTCTGGCATTGGTAGTAC  
GCAAGCTTTACGGATCTTGCTCATTGCTCGGTCAAATTCGAGACTGGTTTTCTTGTTCTG  
AATGTCTGCTACATTAATTTTAGCCAGGTTTGCGGAAGCAGTCATAATATTAATCTCCAA  
GATAAAATCAGTATATTACGTTCTAAAGTTTGTGCAACTCCAGCATCAGGGTAATCAAG  
TTTATCAAAGTTGGGGGCCAGCATAAACTCATGATGACGACAAGACAACATTTTTGTAT  
GTCCGGATCGCTGTATATGCTGTTTTTCATATCCCCATACTAACTACATATTCTTCACC  
GGAATATAGATTGATTATTGTATACAATTCAAACTCCGGCTGCGTTACTCCGTCAAATGT  
TAACTTTCATTTAGTGTATCGCCCACGTTTACCCATCTTGAGATGACGGCTGAAATCAT  
CAGGGTTATGGTCACGATGGCAGATAATATACACGTTATCATCTAACTTGTCAATTGATGG  
AATCAAGTTCTTTTGCGCCCTGAACGTCCGTAGCCCCATCATAAATTTGTTGAGTACCA  
ACAAAGAAATATTAGTACCTGATACTTTACCAGCAACATCACGCCATGTAAAGAGCATCG  
CAAGGTCAATACGTGCCTTTTCGCCCTGACTGAATGATTTATACGAAAACGATTGACGCC  
CCCGTGATTTGATTGTTTTCGATAAACTCTTCATCTAGCGTAAAGCTATCATCCGCTTCCA  
TGTGATCAAGATAATACGAAATCCGATCAATGAAATATGCAATATATTTCTTGACGATAG  
ACGCCTTAACACCGGAATCCTTCAACATTTCTGTTACAAATCCACGGTGTATTCTTCAA  
GAACTAGCTTTGATTTTTACGAGTAATCTCTACCAGTTCGTGTTCCAGTTTAGCAAGTT  
CTTCGAAATGTCAACCCTTCCTTTTTGCAGTTCCTGCTTTGCTTTCTGGATCTGTTTAG  
CCCGACCAACAGATGCCGTTAAATTGGCTCTCGGTGATTCTATAGCGCGTTAATTTCCA  
AGACCTTAGTTTGTGCTGTCTGTAAAGAATTGGCCTTCTCTGCGTATTCTACGCGTTTCT  
CGTCAATCAGAGACAGTTTATGTTCTGCTTGTGCTTTTTGTTTCGCGTACAGCTTGATCAA  
TGCCTTGAATGATAGGTTGTGTGCACGCAGGACAGGTCCCGCTTTACCCGTGCATATGGA  
TAACACGGTTAAAGTTCTGGATCTGCGCACCAATGTGTGCGATAGCCGTATTAATTTAG  
CCAATGCCGCGCTAGGATCTCCCGGCATAACAACAGCCAATAGCTCACCGGTCAAGCGCA  
TTTTCTCGGCTTTAACTGCTTTAGCCGATTCTACCTCTTTATCACACATATTCTGCAAAC  
GCTGTAGATTCTCGGCACTAGCCTTGCTCACGTCCTCTATGTACTTTTTCTGAGTGTTGA  
TTTGTGATGAACGTGATTAACCTTTCAATTTCTGCATCTGGATATGCTGGGTAATCTCGC  
GTACATACGCTTTATTCAGTTTATCCATTTTCGCCTAACGTAGCAATATCAAGCAAATCCT  
CGACCAGTTTACGGCGACCCGCTGCCGGACGACTCATAAAAGGAACATAACCAGCAGTGC  
CTAAAACAACGATCTGTTTAAAGCTCGCTAGGTTTCATTCTAGGATACCTTCAAATAAT  
CCTGAAAGTCTTTGGTGCTTGCCTCTCGTCGATCTTTTGACCGTCTCCATGCACTTCGA  
ATACTTCCGGTTTTTGACCACGTTTGATATAAACTCTTTTCGCGGCCAGTTCAAACCAGA  
CTTCGACTAACAGTTTCTTTTTGTTGACGCTGTTAATCAATTGGCCTTTCTTGATACTAC  
GAAACGGTTTACCGAACAACACAAGCAAAGCGCCTCGATCATGGTTCGATTTACCAGCAC  
CGTTAACACCAGTGATTACTGTCTTTTTGAATCCGTCTAGGTGAATCTCAACAGGGTCAG  
CACCCACTCTCATTATTTTTGATAGCGCAAGGTTTTAAAATTTAACTTTGCCATTAAGC  
CACTCCGCAATCGCACATTCATAATATAACTGCTATGACATCTTCATCAATGTTGTAA  
ACACATGCTGCCTTCACTTTAACTAATGTGTCTGTGCGATCAGGCAGCATGATCATATAA  
TCCAGTGTGCGCAGGATCATATGTCATAAAGGGATCAACATAAAGCCCTTTATTCAATGCC  
AGATATTCGCGAAGACCTTCTATAACCCTGTGTCTAAGGTAGGTTCATCGATAGAATCATT

GTAGTGTATGTTCCCTCTAAAAATTCTTCAATTTACCTTGCAGGTCTTCCGCTTGCTTTT  
CCAGAATATCGCGAAATTCACCTACAGGCAAGCGGTAATCACATTTACCAGTCGTTGCG  
GGAGAATATAACCCTTTATACATTGACTCTGACGCTTCTAGGAATACCCCACTATGCATGA  
CAGAGGTCCAACCTGTTAACGTCAATGGAGTATTCGGAAAATAATACATGCTGGATTGTT  
TCCACTGGACGAAAGCACCATATAACAATCGGATTATATTCACCAACCACACTCTTAATAA  
TGGATTCCACTTCGTCTTTTACAAAGTCGCCAATGCCCATAGTCACCATCAATTCTTGTG  
AGTGAATCACGTTAAGGAAACGACGGTAGCCGTCATCATAACCACAGCTTAACCACTGGCT  
GACCCACATTTTAGCAATACGCGCTTTTACGATAACCATAGATCGGATTCTTGTAAATATG  
ATTGTTTTAGTGTGTACGCGTGCATCAATTCAATAAAAATATTCATTGCTATCGAATCAG  
GATCAGCCGCGACCATAGTAGTATTTCATAATATGTTCCCTCGTTCAATTTTCATATTGTTTC  
AGGTCTTCTAAAAGTTCATCCACTGCTTGTTTCAGCACATGACGCAGCGTAAAGTAATAG  
CTTTCATAAAAATTCTATTTCCGCGCGAGGAATAGATGGAATCTTACACTCAGCAGTAGTA  
TCGGTGAGTCGCTTTTCGACCATCATCCGAACTTCTTCATGCTCTTTGGAATACCATAA  
TCAACGGAGATTCCCTTGCCTCGAGCAAACATAGGCAATGCCGCATTAATTTCCATCACC  
TTTTGTGCAAGTGTTTTTCATCATAACAGACTCCATAGACCCACGAGCAATAATATTCTGGG  
TGATATCAGCAACTTTACTGGATACGATATTTGTTAGCCCCTCTTTGGTGATATTTTAC  
GATCAAATGGGATTTTCGTCATGAGTCCACAAACCATAGTTAGACCGATATGATAGCATAT  
ACTGACCATCTCGCACAACCTCAAATACATGGATCCTAGTGAATTTTCGACAAACCTTCGT  
TGATTTCTTTCAGTGTCTTAGCAATCTTAACAACCTTCCAATCAATTTTAAGAGAGTATAA  
CGGGGATTTCTCCCCGCGTCAACTAACTTTTTGCGTTATTTACTTCGGCTAAAAGTTCAT  
CAGAAATACGCTTGACCGCCGCAAGTTCCTCCGGTTCTAGGTTTTGTTCTTCCAGATATT  
CATAGACCATCTGAATAGTGCTTTTAACTTCAATAACACCTGTTTCCCTGTGATGCGATAC  
TCTCTAGTTTATGGACCACCTTTAGCTTGTGTAACCGCCTCTAACGCGCTTTCTAACT  
TAGTTAACCCATTATCAGCGACCGTTGCGGTAAGACGCACACTAAGCCGTTAAAAGCGTT  
CTACATCGATTTTATCGTCTGACGGGTAAGTGCTACGCACATGATAAGTTTTGTCATTCT  
GAATAAACTCTTTTTTGTGTGTATCGGTATAGAATACCCAAAGAGCACGCGGATCGTTTA  
CGTCACCCGCCGTTAGTGTGTATGGTGGACCAATATACGTTACGTTACCGCTATCACTGA  
GAGTATCAGAGTGTCCCGAAAACACCTCACGGTATTTCTTGAGGAAGTCCGCGCTATAAC  
CTTCGGATTTTAGCCCTTTATAGACATAGTAGCCAGACAATTTCCAATGGCCTACACAAT  
ATCCGCTGAATGATTTTTGAATAAACTCTAAAATCTCTGATTTATTGTCATCACAAAACC  
ACGGGAACAGGTCAAATGATACACCATCAAAGGTAACCTGGTTCCGGTTTATCGATATCCT  
TAATGCAATCATATTGGCTTAACACTTCACGCGGTGCGTTAGGCTGGATCTTATGACGTT  
TGAATAGATCATGGTTCCTACGGTACATAACAGGTGATTCCAGATTCTTCCAGAAACG  
GGATGACCTTAGTACGGTTACAACCTCATCGTCGCATGAGTAATAGCTTTTTCGGCAATTA  
ACCAATCCCCTGTTAGAATCCATGTCTTAATATTATGATCTTTAGAGTATTCAACCGCTT  
TCTTGATGGTATCAAGAATACTCTCATGCACCCACGGATCATCGCCACCGATACCAGTAT  
GCAGATCACCTAAAAGCAAAATTTTACAGTCTCCTCCTCTCTGCGTTTTTCGATGCTCTC  
ACTATATCACAGAAAATAACAAGGGAAACCCCTTACAGAGTCTCCCGTATAAAAGCCAT  
TACAGCATACTTAATATCGTTTGCCGTGTAATGACCCAGATAGCAGAAGTTAGTCTGGC  
GTGTGTGACTGTTTGTAGATATCACGTAATTTTCCGATAGCGTAGATCTTCCGGATCACGA  
TTATCATCGATGGTAGCTTGTTACGCCACCCTTAAGTCGTGAAATCTCTCTCGAGTTC  
TTACGCAAAATATTTTCCGCTTTCTTAGCGGCTTTAGCCTCTAGTTCTGCTTGTACTTTG  
TCTACTTCATTCACTGCAATCTTGTTCATGCTGTTTCATCGTAAGTCATGTTATTTTACCTC  
TGGGATATAATCAATTATTAAGAAAATTCATCTTCTGATACATTATAGCTATGTGAGAT  
TGGACCCGTCAAGACCTCAAGATCCGGTGATTTGATATTGCACGGATAGATACCACCGG  
AACGCCGAGTCTCTTAAAATAATTTGGCCAGATACGGCACGAGGTCAGTTACAAACTC  
TGCTTCTTCCAGCAAACGGGAAACGTTAATTTTCAATCTCATAAAAATTGGTACAGGCTAG  
GCAATTCCTCAGTCAATACATCTTCAACCTTTGGCGCTTTCCGGTATATTGACCGATTCTT  
CGTAGTTGTTGATTTTATCGCAACTGCCCTGTATGAATGCCTCATCAGCAATCTAGCACA  
TATCAGCGTCGCGTTCGTCATATAACATGATGCACAAAATATTTGTATTTCCGGGGCTGTCG  
CTGTTCTCTCTTTTTTAAATGCGCTGTACAAATGCATTAAAGCACGCTTTCGGTGATGTAAG  
CATCAGGATTTTTATACTTTGGCTCGTCAAATTAATTCAAACCCTTGACCGCCGCTTCGA  
TTCCGTCGTCGATCATTTTCGTCGCGCCATGTTTACTATAACCAGAAAAGTTAAAACGAC  
GTGATAGATTTTTAGACATTTGCATAATTGCTAGGCCGATTTGATCGCATATTGGAACCT  
GCCGACCTTCTGCTGCAATTTGTTGTTTCCAACGGCAAATTTCTTCGTAAAGCCCTTTAT  
TGTTTACATAATCAGACACTTCGCACCGTCGCTATTATTTAGGAAATAACCCTTTCCGGC  
TCTTCCCCATTGCCAAGATACTTTCTTTGCTTGATTATCCACACTATAACCATCTCTACT

GATTCACCGTCTGACCGATCAAGAGTTTTCCCTTTTTACTTCATGCGGTACTTAAATCCG  
TTAAATCTTGCATTCTCTTACTCGTTAAAGTCGAACATCTTTTTAAATGATTTTCGCCCT  
TTACGCTCACCCTTTCTAGCGGAATCATTCCGGTCTGTTATTACATTGGCATTAGGTAGA  
ACCGTTTTTAGATAATCTACCGACGCCAATCAGGAACATATAGATTAACATTCTCCTTG  
CTCTCGTTGTCTCTCAGGTTCAAACGCAAAGATAATTGAAATGCTGGTTCAGATAATCA  
GACACATGACGCGCTTTGACAAACTCGTTTCTCGGGAGATCGCAACTATTAGCAAGACCT  
TTTTAAATATCAATCTCCCATCGTTGAGGGTTAAAGCTGCACATCACAGCAACATTTTTA  
TGATGAATGTAAGAGTTAAGACCATAAGAACCGTAAGGTATCCGCTACCAATACCATT  
GTGCACGCTTCTCGGTCCCTCTTCACGGTATAAATGAAGTCATCGCCACATTCATTTTTA  
ACCAATCAACAAGACGTTCAAAGGTATTGTTTGTCTGCCTGGTGACGCGACCAGCGT  
TCGGAGTCTGTCATTAGGATGATGTTAACTATATCTGTATTTTTATACTCTTTGAAATAT  
AGTCTGGATTCTAGCGCACTCGGAACAAAATCGCAATTTGCATAGTATCGTAGATACTTC  
CCGCTATATGTATCAAAGAGATTTGCCGATGCTATCGTAAACCTTTTTAAAGTCTCCCCAC  
GTGCCGTGTTTGTATCGTTCAAGAATACAATTTTCGACCCATTCTTCCGGTGTCCCTTCG  
TTATTTTTTACCGTAACGGTGATTTTCTTCTCTAATAACGCCTCATAAAGCCCTCGAAGA  
GAAGAATCGATCATATCAGTACCATCCTTTGCACTTTCTATCTTTTCTTTGATAGCGGGC  
GTCTCAGAGTCTTTTAGAGCTAAGTTCTGTAGGCATTCCGATTTCGTCCGGTGATTGGTTCCG  
CAATGCTTCGTGATAAGTTCAAGATTAGACTTAAACGGATACTCATTAAATTCAACCAAT  
TGAGGAAATTCATCAATGTAAAGAGCATAATCACCAAACATTTTTGAACGTTACATATTA  
GATAACGCTGTATGTGTAATGAATATCACATCAGCACCGTCTTAACTGATTGCATTATC  
GACGCTTGCCTTAAAGCCTTCTTAGTCTTGGGCTATCGAACACGACAGCAGCAGCCG  
CCCATTCTTTTAACTTATTGTAAGATTGTTCACTTAAAACACGAGATGGCGAAGCAATA  
ACCGCTTTTTCTCTTGTCTCTAGGACGTGGGAAAGTATAGCATCAGTTTTCCCCGCCACT  
TGCAATGCGATTAATGTTTCAATCTTCATTAGAAACCCTTACGTCGTACTTTCTAGCATT  
TCTTGATCATTTTATCAGAAATTGCGCGCCTAGGTGCAATCTTTTACACCCGAAAGCCC  
TAATGCCAAATTCAGAGAGAATATATTCAACTAACAATTCACGCACACGCGCTTTACCGA  
TATTCACGCCGTTATTTTTCAGATATGTCTGGCCTTCGACTTGCATCGGGTCTAAATCTG  
CGTCCGCAATATTGATGTGTCGTCATGCGCCAAATCGAGAATAAACCATGTGTGCGATTG  
CATTGTGTAACATAATATATTCTCACTCAAGAATTACTTAATGATACTTCCTTTAC  
CAGATCCGTGACAATGAGCACAACACCTATCACCACTCAATCCTGTTCCGTTACAGTGTT  
TACAGTTCTCCAACGGTAAAGCCATTATAGCAAACAAAGCAATAATGATCACCGAAACTA  
AATTCTCAATAAGCATAATTCTCCCGAAGTTCTTTATAGCCTCCAATGTGCTCGTTGTCA  
ATGAATATCTGGGGGTATACAAATAGGAGGCTCTTTGAGTTCAGACTCCGCGCCAGTTCT  
TCAATCATATCAGGTCGGGAATAATGTGAACCCCAACCTGCTTGAATACTGGTTTAAAGT  
GTATACGGAATACCCAGATCATCCAGTAGCGTCATTGCACTAATAACAACATAACAATGA  
TAAGCCTCTTTCGGTATGCCGTATATCTCGATCATTCTCAGCCTTTAATCGTTCTAGTT  
CTTCTTCCAGTTCCTTGATCCGTGGGTCACGTTCAAAGTCACACTGCAACTTAGTGGCGA  
ATACTCGTTTAACTGATTGTAATCATCGATTTTACACACTTCATCTTCGCCATAGCGAC  
GTACAGAACTTCGTAGTTATTGAAGAATTGTTGCATCATTGCTTCGGGTGATAGTTCTG  
CCGATACTACTTTAAATATTGCTCTTCTGTAGGCGAAAACCACTAGCAAGCATAAAGAT  
AAACCTATCCATTGTCTGGACACTGGTAAGCCTTACCATCGATTTCAATCACAGAAACAT  
AATCAGGTTTAGTAGATGAATCAATAGCTAAGACTTTAAACGAACGGTCCCCGATAAACT  
CGAAGATCACACGATTTCGCATCACTGGTTGCAAATGCTTTACGCGGTTGTTGTTTTACC  
ACTGATAGGTCATACCAACAACAACATATTACTAACCTCGCTCCTTACCAATCAAAAAT  
TCAACTTCACGACGTTTAAATGTCTTCTGGAAGGTCTTTAATCTTCTGGCGATCTTGCATC  
ATTTCCGTCCATCTTGTCAAGTGATGCGATGAAATCATCGAAACGTTTCGAAGGTTTTACCT  
TCATTTGCTTCGCCAAATTTAACCATTGTCAGGCCGTAACGACTACTAAACAGACGTTTT  
AACTGTCCAACGAATTTAGAATCAGTGGTTATAACTTCCAATTCTTCTACTTCACGAAAG  
AATTTTCTATCAGAATCAATAAACCAGCTAGTTCCCGTATGGTTCGCTATCTTTTGTGCG  
CTCATTAGAGTATGGTCTTTACCATCAATTTCAATTCATCAATTTGCCACATGGACTA  
ACATTTTTAACAGTAAAAGGTCTATAATTTATTGCTCGAGCAATAACATAATTAAGGTTA  
GATACGGTTTCAGCATAATGGCAGAAGTCTGTCATAGCATTGTCATCTTCCAAGTATAA  
GTTTTACCAACTTCCAATTTGTGGGGAACCTTCATCAACTTCACGAAAGAATTTCTATCA  
AATGGACTAAAGAAATATGTTGCAGTCCAAATGTCTTTTCTGTAGCCGTTTTCGCCGTA  
TGATAAAAACCGTCTAGCTCTATTGCATCAATCCAACCGTTACCCTCGATCTCGATGATG  
ATAAATGGCTTGTACCAATCGCTGGACTAATATCGCTGTTAAGTGGAGAAAGAACACCT  
TCTCCGTTAGTAATAAACTCAGTTTTAGCGTTTTCTGCTTTCCAGGTGTAAGTTTTACCA

ATTTCCATTTTCATAATATATTTCCCTTAACCGATTTTATCAAGTTCGTTTAATGCTTTC  
TCTGCTTCTGCATAGCTTGCACCCCTTCCGGCATTGTTGTCAAGAAAATCTTTAAACTCT  
TCAAAACTGGAGATATGACGCAAGGCGTTAGCACCGATAGCCGCATGTGATTCCGGATTCA  
AAGCGGATTTTATAATTATCCATCGCCAATTTGAGAAGATCAATTAATTTAGATTCTTCT  
GGAATAATAATTTGTTTGAATCTGCTACGGTTCATGATCCAGAAACCAACAAGATAGACCT  
ACATCGGTTGAACTCATATAAGTTCCATCATGAAGATAAACAGAACGCACGTATCCTTTT  
TTCGCATCAACCGACGCAACTTTAAACGGTAATCTCAGATATTTCAAATAATCAACATCA  
TACCATTTTAAAAATTGGTTTGCATCTTTTACATCTTTCCACGTATAGGTCTTACCAACT  
TTCCATTTTCATAAGATCATCTCTCATTTTTTGGTACGTGCTTCTAATTGGATCATATGGTC  
GCGCGTTTGTATTTCGCGGATAGCACCGATCCGGATAGGCATACCATCAAGCATGCT  
CTTAATACCTTCTAGGGTGGTAATTTTGGCAATGCTATTATGTTACCCCATCTTATCGAT  
CAACTGAATGTCGTAGGCTTCCAGAAGCAGACCCAGGCGTTCTAAAGTTAGGTCTTCTTC  
TGTTTCTTCCGATTCTGGAGTCTTAGGTTCAATCGTAACTTCGGTAAAGAAACGTCGCTC  
ACCCGACCAAACACACACCGGAACAGCCAATATGGGATTCTTTTAAACGTCATAGAGTC  
GAAATTACTACCAATAATAGTAATTTCTCTAACATCACCTTCATCGTCAAGGTCTTCTAC  
CCTAAACGGGCGACCAGCCACCAAGTCCACAATACATCTGTTAATAGACGACGAAAAGTT  
AGTCAGTTCGGCTTTTCGTTGCTTCGCATTCAATCTTGTAAGTTTTACCAACTTCCCATT  
CATAATAATCACCTCAAATAATTTTCACTGGAATACTATTAACAATCTTGTATTGTACTT  
GATTGTCAGACCCCCGCCACGGCTTCTTCGTTGGCATATCTTTAATATAACGCCCATCGA  
GGAACATGTCAACTGATTCTACAATTTTTCTTTGCTCATCATTCAATTGGTCAAGAGTAT  
AACCGGACCATAGCCAAATATCTTTATTTGGCGTCCATGATTTTACTTTCATCGATGATCC  
GCTGTACACCCTTTAAATTGCGTTTAGACACCGGATCACCACCTAAGAATGTTAGCCCCCT  
GCATAAAATCAGGTCTAAGCAGATCCAGAATCAATCCCATTGTATCATCGGTGAATGGTT  
CCCCGTTCTTAGGCTTGAGTAGGCTAGCATTAAAGCAACCATCACATGCGTGTGAACATC  
CGGTAACGTAAAGGGAGACTCTCACTCCCTCACCGTTAACCATTTTACAATCTTTGATAT  
GGGCATCGCGTAGTTTGCCGTATGTATCAGTACTCATAGTCAATTACCCCGAACTCGTTT  
ACAATCTGGCCTTTATAGTAACCACCGCGAGATGCGAATTGAGAAGCTGGGCTTAGGTAT  
TCGTATTCACGGATTTCTGCTTGTGCGTTTTTCAGTTTCCCAAATCAGTATAGACCACATA  
TTTGATTCTCCTGTAAAGTTGTATCTCGTCTTGATGAATATAGTATAGGGGATCTCGCGA  
TCCCCGTCAAGCATTATTTAAATTTTTTCGAGAGATTTCTACCACAGGCGGCTGGTAGG  
TACTCACCGGCAAACATGAAGTGGTCATCTGGATAAGAACGCAGCATACTCAAATAAAC  
TTCCGGGTCTCTTCGTAATCTTTACGTTTACGATAAAGGACATTCTCGCCAGTACCGATC  
ACACCTTATCTGGATCCATGCTCTTTACGCACAAACCATTGTACAGTATCTTTTTTAACC  
CGAATCACAACAGGTTCCCAATACCCAGCGCATCCGGCTACACCACACGAACAGGTGAGG  
AAGTATTGACCTTTTGTCTTTGTTTTCTCCACCCGATATTAACCGGATGCCATTCTGTGA  
TACTAGGCTAAACCATCGTGTGTCGCTTCGATCTGTTTATTGTCAATTCTTACCGTAACC  
AGCCATACAGGGATCTTATTTGTTGGTTCATCATTATAACAAGAATCATCATCAATGTGT  
TCTAATGTCATGTCAACATTAATTGATTTTGGCGTGTCCATGTATCGTTGTGCTTTACGC  
TTACGATACAATAATTTAGACATATTCACCTCACATTATAAACGAAATTGTACGCCATCA  
AAATGAGAAGTTGCATTACAGTTATTATAGATAATAAATACTGTATCTGGCGCTTGTACT  
ACAAATTGACTTGCGTAAACAGCGGCAACAGTAAAAATACGATCCGTGAGACTATGTTTA  
ATTTCTGTCCCAACTTCCAGTGGGGTGTACTCTTCTCTTCGGCCCCAACACCAAACAG  
CCTTCTTTCATGGTACGCCCCGAATCTTTTTATCACAATTACACGGTTCAGCAAAATCAAGC  
GTATACAATTCACGAGAGTTGTGTCAGTATAAACCAACACAGTTTGATTATGATAGCGAATC  
ACATACAGGTTATTATCTTCGTCAACGACACAAAACACTACGGATTCGTGTGCCTTCGCTT  
TACTCCAGCAGATATTAACAACCGTTCCCATATAAAGAACTTTCTTTTGTACCAAAA  
CTAGCCAGTGTGCTAGCGTGCATTTTAAACAACACTACACCATCACCATTACTAACTTGCGA  
ATTTTAATTTCTTTATTCAATATACAAAACATAATGTTGTTCTCTCTTGTTTTTCGATGTG  
AGCATTATACACGAGCTATTCCGGTTGTCAACACCCCAAACGAAAAAGCCGGGCCTTGC  
GGTTCGACAAAAAATTCATGTGCTTAAACGCGGTTTACCATGACGGAGTGTTCCTCGTGG  
TTAAATGGACGCAGATCAACAGATCCAAGATATCCACTAACGCGACGGATAACATTCATC  
TTTTCCAGATAGTCATTTCCGCAATGAGGGCAAACAAAACAGACTCGGTTCGCTCTCATT  
TCCTTATTAGATCCGAATACATGACATACATCAGAAGGAGTATTAACACCGAAGTACTGC  
AACTTATCCATTGCATAGTCTACTACAGTTTCAAGACCTTTCAGGTTGTTTTTCATGTCT  
GGAACTCAACATAAGAGATCATGCCAGCGGACGCCAGCCAGTGATAATCTTTCTCAAAG  
TCGATTTTCTCAAATGGTGTAACTTTCCGGTCTACGTCAAGGTGGAATGAGTTGGTGTAC  
CAGTCATTATCGGTAGCACCCCTTAAACAAGTCCAAATTGCTCTCTGTCCAGTCGATTAAC

CGATAGCAAAGGCTCTCGGCTGACGTACCGTAAAGACTAAACCCAGGTTTCGGTTTCGTCC  
TTCCATTTTTTCAGTATAATGACGCGTGATGTTAAGAATATGTTTACCGTATCGCTGCGCA  
TCTTCCGAATCACACGGATGTA CTCCAAACAGGACGCTCAGTACCTCATGTAAACCAATA  
TATCCAAGAGAGATCCTAGCGCGACCATCTTGCAGCACTTCCAAAATTTTCATCGTTTTGA  
TGAATACGCAAAAATGCACCTTCTGTATACGGTACAGGAGCAACATTGGCTTTAGCCCCT  
TTTAAAGCGCCTACGCGACTCATAAGCGCATCAAAGCAAATAGTCATACGATTAGCTAGC  
TCTTGTTCGAATAGGTCAATTCTGCGCATAATAGACGCTTTCCCAGTACGACGCGCGGCA  
ATAAGAGCAATACGAGGAAGATTCCGAGTCACAACAGCCAAGTTATTACGTCGGTCTAAT  
ACTTCCTCGCCTTTGTCAATTATGCCACACACCCAGGAACTTCTACACATTCTTTGTGTA  
GGGTAGGTCGCTAATCTACCCCCGCTTTTCGGCTGCTACATGTGCGCCAGGCAGATCAGAC  
TATATCTTCTATCTTTTCGATAGTCTACCATTTTCGGATCACTTGATCCTACGCCGCTTCT  
TCATCACGGCTAGTCGTTAGGCATTTTCATAGCGGAACTCATATTCATAAAGTATTGGTTTT  
TTTACCATCAAGAATTGCAGATACATTTTTCCGAGGCAAGCCCAATGTTTCAGAAAGACT  
TCTCACGCTTTTGAATCTCTGCTCTTGTCCGGTTTCTTTATGGATCGCAGTAACCTCATA  
TGAACGACGTTTGAACCTTATAGCACCCGTGTTTCGTAACCTTCTTTTCGTGTTTTTCGCTGTT  
AGTCCCCCACTCAAGGTTAGATGCATCGATTATAGTTTTATCGTCGTTTTTATGTTTCAC  
ATATCGATAGCCGTTAGGATTAGGAATCCAACATTCAGCCACAATAACATGAACACGCAA  
ATATAAAGGTTTCTTGTCTCTCCTTACCCTTACTATTGTATATCCGGTATTGTTTTCTAT  
CCAGGTA CTCAACTGTTTACCTTTAGGAGAAAACACCCGTCCATCTTTTCGCTACCATATA  
TTCGGTATCACGAATTTTTCTAAGTTCGATAATATGTCCTCTTATCAACACTGGCGTAAA  
GAGAATATGACCGCTATGGTTAGCATGGGATTGTCCTCTAGAGAGTTCCCCCGTTTAGGC  
AGATTTTAAATGAGCTGTTTAAAGTTTACCCAACGGGCTAACCGGAACACTAGATCCAGT  
GATGCTACGGTTATTCTACGCAGAGATATAATCAGGGTAAAGACGCTTACTAGAACATTC  
CAATGCAAGTTGCTTAATGTCGTAGTTCCGGATCTTCCGGTTTAAAGTTTAAATCCTTCTTC  
TAAGAACATCACCGCTTAGCAAACACCCGGAGTTATACCGGCTTTACCTAAACCTTTAGT  
TCGAACCTTTCAGGATCGCTTTCTAAATCAGTTTTTCTCCCCAGCTAGTACCATAACCAA  
GGTTAAAGTCACAAAAGTTGTTTGACCGTTGGTAGAGAACAAAGTGTTGATCTCATATTC  
CAACGCCTGATATCCGTCTAACGTTTCTTTTTCTGTTTTCTTGTGCATAGAGAGTATC  
AGCTTTGATCCCGCAGCTTTCGGCATCAGCAAGGTATCTATGATATGTTTTCTTAAACATA  
CGGCGCTAACACCTGGTCGATGTTTGCAATTGTTGTCCCGCCATATTGAAGACTTACCAC  
CTGTGCGATAATTTGAGCGGTTACAGCACATGCAACACCGATCGATTTAGGACTTTCGAT  
TTGTGCGCTACCCAATTTAAAACCATTTCTCTAACATGTCTTTGAGATTAACAAGACAGCA  
GTTAGTAAAAGGCATAGCTGGTGCATAATCCATATCATAATAATGAATATCACCGTCTAC  
ATGCGCTTTATAGATGTGCTCAGGTAACCCGGTTTTAGCAATATGTGTAGACACAGTGCC  
AGCAATCAGATCTCGACGTGTCGGGAATGTTTCGCGCGTCTTTGTTTCGCGTTCTCTTTGCT  
TACTTCGTTTTCTTTACCCGTTGCGATCTCTGTAATGTCTTTGATTTGTTTTCCATTGT  
ATCACCCATGAAAAGCGGGATTTCTCACGCTCGTTGATAGTTATTTTACCAGTTCTGCT  
AATCCTTTTTCTTTAGCTTCTAGTTCAGCTTTAAGCTGTTTAAATCTCTTGTCGCTTCTTA  
TTAGCGGCTTCTGCTTACTATTTTCGGATAACCTGATCTAGCTAGA ACTCCCAATCCGGA  
ATATTTTTGATAACGTATCCGTCAACAATAATTGGTTCGGAGATTCTGTACAGCTTCTGT  
TTAGTTGCAAAA ACTTTTCATTGCTGGGGTGAAGTATTCATTTTCGTTATCTTCAAACCAA  
TAACCTAGACTTGCATTCTCAATACGAAGATGAAGTTTAAAGATCAAGGTCTTTATCATCG  
GTATATAGGTCTTTTACACACCCCATAGAATTAACAACA ACTTTAAAACGAATTTTATCT  
ACACCACCAAAAACATCTTCAAGAATATCAGCAATTGAGCGATTAGCTCTAGAATGGTCCG  
CTGAATGAGTCAAGGTTTTTCGTTAGTTACAGTATACCTAACATCTTGTACCCACATAATA  
TAATCCTCTCGTTGTTAAGTGGGAGTATTATAGCATAATCCCTTCGCATGTCACGCACTA  
ACTATTTTCTTTACTGCTTTCACCTTCTGGAGAATTACACGAATCTCTTCGATCTCTTTT  
TCAGTCTCTTTAACAATTTCTTTGCGATTCTGAATATCTGTATCGAGATTAGCATCAAGT  
TTAGGCAGCATGTCAAGCAAGA ACTTTTTAAAATTTTTTCAGGTATCGGATAACAGCACCT  
TCACCCATTACCACCACACCAACACCGTCCGGCATATCACCAAACAGGTTAACAAGTTCA  
GACAGATGATCATGGTCTTTTAAATCCTTCCCTCCGTTTCAGATGGCAGTTCAACAAGTTA  
TGACGGTCATCATTGCTGATCAAGTGTTACCCGCAAATCCCGAAAGATTTTCGGTGTATAT  
TCTACACCATCAATTTCAATCGCGTCTACACTTCCATAATCATCTACTTTAGTTAGCTTA  
AATCCTTGTCCTGCTTTTGAACAATTTCAACAACATGACTTGCTACAGTTTCAGCGGTA  
AACCAATATGGCAAATTATGCTGATTTGGCTTGTAGCGTTCACCTACTTTAAATCTCTGA  
CCATCCGCTTGCATAGCATGAAATTGTTGTTTCGTGATTTCCGCGAAGTATTCAAGTTCCG  
CCACCATCAAACACACAAGCCCATGATCACAAAACGATCTGCCTTAAACAGTTTCACCT

TTCGCGGTGATCATGGTAGCTGATCCGTGCAATTCTTCTTCAACTAAATAGCCATATTCCG  
ACAAAAACAACAAGTTTCATAGCTTCTCTGTGATCTGGATCATGCTCTCCCCAGAATCGC  
TTAAATTCTTGCAAACCTTCTGGTGTAAAAGAATAACATTTACCTTATTCAGAGTAAGTC  
GGCATAGCATCCTCTTTCTTGTTCATCGCTTCGTATGCCTCTTTTGAGATGCGTTTAAAG  
TATTTACGCTCATTGTGCATAATCATAGTCGCCCAATAATAAACGATATCCTCAGCGGAA  
TAACTACCTCTCCAGCTTCAATAGTAATAACATGACCGTTGTGATCTTTTTCTAATACT  
TTAAAGCCCTGTTTCGCCGATTTTCAGCAACCCGAATATGACCACGGCGCGAAGCATTGGTC  
AGAATAATTGAATAGCGAGAAAAGTCTAGAAACTCATCTTTACCACCTTCACGGAATGCA  
TAGTAATGACCTTCAAAGAATTTAGCTATAATATAATCCTCTCGTTGTTTAAATGGGAGT  
ATCTTACTACTCCCGTTTCATCATGTCAAGCGTTAAATGACTTTTTGGATCTCTTTCAGT  
TCAGCTACTTTATCGGCGCTGAATTTAGCGTAGATATCATGTGCAATAATTTCACTTTCA  
AGAAAGGTTTCCAGCCGAGATCTATTTTCAATAATGAACTCTGTGAGATCTTCCGCGTTC  
TTGATAAAGATTTTATTGACAGTAATGTCATCTTCAATCGCAAAGGAGATAGAGCGAACT  
TTACCAAACAAGTTCATCAGATCCTCCAGCGATTCTTCTTTCTTAACTGGTTTCATTTCT  
TCAAACCTGCTTTTTAGTGATGCGTTTTAAAGTATTTACGCTCGCTTGATGAATCATGATT  
AACGCACGCTCATAATCATGAGTTACTTCCAAATACACTTTACCATAACATTAACCGTA  
AGAACTTTAAAGCCCCTGTGAAGCACACCATAACAGGAACTTGTTATTTTGTGGATAGCGT  
TTAACCAATTCCTCTGCGGACTCAGCATTACGGAAAGTGTAATAACGACCTCGTTCAAAA  
ACAGCATCATTTGAAGACTTAGCTGGTTACAATTTATACGTTTTCTGTACCATAATATAA  
TCCTCTATCATTTCACTAATTGAACTGCACGAGACAGAATGCGGTCACACGGAAGAAGCA  
TAAATACCCAACCTCGGATCAAAGTCTTTAGCGGTATATGTATTTCCATCAACCGAGATTT  
CACCTACATAACCATTACTTGAACTTTAAGAACAGTAAACCCATTCTTGATGACTTCGT  
AGGTATCTTTCAATCCTTCGTAGTCATCCTCTAGGAAGTCTTGACTTGCTTGCCTCAAATT  
TAAAAACATAGGCCACACCGGATTTAAACATCTTACGCATTGTTGATTCTCCTTCTTGAT  
TAGATGGGAGTATTTACTACTCCATTTCTTATTGTCAACTACTATCTTAAATCTTTGTA  
TAAATTGTTTCTTATACTTCTTCGTGATATCTTGTTTTGTATCAGCGTCACAGTAATCGA  
GACCTTCTTCGTCCATAACAGCAACCACTTCCGCGCGCGTCAAGCGTGAAAATCGTTTTTC  
CTTTATCAACAGCATATTGAGGATGTAAATGATTGTTGGTGTAGTCTCCTTTGATGTAAT  
TAACATAGTTTGTAGCCCAAACAACGAAATCAGCTCCTAAAGCACCAACCAACCGGTT  
TAAGGTCTCCGGTCAACGATCCTTCTAGGCGGTTGCAACACGAATGAAGCAATCCCCTTA  
CACGGCCTTGCCCTCTCCCATCTAGATCGTGGTTCGTGGGCAAGATGGTTTTTGTCTCATAT  
CCTCAAAAAGTGGAATTTGTCACAGGGGGCAAATACCCCCCTGTTTTTCGAATAGTTCTT  
GTTTGTACTCTTTAGCACTCTTAGCAGTCAGTAACATAAATTCATCCTTCAAAGAAGGTA  
TTAACCATGAATCTTGCTTTTACTACAAAGGATCGGAACTCATCAAAGCCACCAATAT  
AATCACCATCATAGAAAATCTGCGGCATGGTGGCAATATCTTCTACCCCTGCGCGATCCT  
GAATGTGCGCAATGATAGAATCAATCTTTACAGGGCGACCGTTTTTCGTGGAGACCATCAT  
TGACAGGAATATCGATGTAAGGGATCTTACGCGACTCGTAAAGGCGCTTTGCATTCTGGC  
AATACTTACAGTTGTAACCCTCAAACCAAAAATTTCCACCATGATGTACCTCAATCTAA  
GTTAGTTACATAAACTTCTTGTATATCAGAAGACTTACCATCTGAACGATCTAGGCAAGA  
GGTCTTATTCAACAGGACCCAGTTTAAATCATTCCCCTTGATAAAGTCAAGGAGATGATC  
ATTTACCTTTCTTTATGATGTGTGACATTACTGATACCAGACCGAAAACCAGTTCCAT  
AATAGATTCTACACACTGATAGAATTTAATCTCTTCCCTCGTCACTCCAGAATTTATTCTA  
TTCCGCAGAAGTGATAAGGTCAGGCGGGTCAAATAAACGATATCACCTGGCAAGATCTC  
GATCTCGTCATAGCGACAAGACGTAAAACCTGATTTCGACCGTCTTTGTTTTCTTCTTAAA  
ATTCAGGACACGCTCAACCGCGTTTTTCGCTAAAAGTCCGGCGACCAAAAATTAGCATTAAA  
TTCTCCCTTCGTGTTATGGCGGTTAATGTTGCTAAAACCTGTGCTGAATCAGAAGAAACAG  
AGATATCGGATCTGGATTCTCATTATACTTCTTACGGAATGCCATGTAAGCGTCTTTATC  
TTTGGGAGGCAAACCATTCTCGGCAATAATCCGCTTGATCGTACAAACCGGGTCAGGACA  
CTCGTCAATCGCTTTGTACGCGTCAATTAAGCGGTGATCATAGTCATGAGCCAGCACATC  
CCCTTCGACGTACAGAGACACGCTCAAGCCGCCACAAAAGGCATCAACAAAGCGGTTATA  
GTGCTCAGGGAAATACTTACTAACACCAGGCTATAACTTTTTCTTATTGCCAGTATAGGT  
AATTAACCTACTGCTTTCTTATTATCCCTTCTCAATTGAGTTCTCTCGATCTCTACC  
AGTTGAAAAATTCTCGCCAATCACACGGAAAACCTGCAGTTTCCGAAATGATCCTCTTTG  
TAAAGTTCGTTACCGGATGGGACCTTAATATCTGTTACGCTATAGTATCCGCAACAATCG  
CAATCACAATCTGTACATTCTGTTTTAGTCGGAATATCCATCATTGCCAGATACAAAGGT  
ACATCGTCTTGCTCAAAGTTCTTGTAACTTCATGGTTCGCATGAAACATAGTTATCATCA  
CCACCGAAAGGCATATAATGGCCATAATCGGTTACAGGGTGACCGGGTAATTCCCATACT



ACAATTTTAACATTACCACGAAACTTTATACCCATAATTTACCAAGAAAATGAGTATCG  
TCAATGTAAATCTTACTAGGGGTTGAATAAACCATTTATATAATCCACATAACTCAGAGAA  
TAGAATCTCTCTTAGCTTCACTGACTGCTCTCAGAATGTTAGCGTATACTCGAAAGGAAA  
GTCAATACCCAACCTTCAAAGAGAAATAGCCTACCGCCTCTTTATGCTTATCGGTTAGGGC  
GATCCTAACCAATCCCGTTGAATCTCTTTAGGCGGTGAATGGATAGTAACACGTGTATC  
ATGCAATGTGCGAGTCACCATTACGAATCAGGATTAACGGTTTATCGTCATTGAAGATCGC  
CGACCCATTACGGTTCGGTGAGTGTTTTATACTAACCATCAAATTCTAAGTAATATTCTG  
GAACCATATAACCGTTAAAGTCGTTACACTTATAAAAATGGGGTGCATTTAAGGCTGGAG  
GAGCATTAGTAATGAGTTTACCCTCTAGAAACAGAATGTAATTAATAGGTCTAATACCTA  
CAGAATCAGGGGCTAAACCTTTTTCTTTCAGTTCAGCGAGCGGTAAAACCTCGTCCAGATC  
GTAACCTTAGCCATGATTTTCCCCAATTCATCAAGGTTATCTCGCACCATTTACAGAGTAT  
TTTTCTACTTCTTACTCTTAGTGTGGATCTCCACGATCTCATCTTCACTATGAGAAAAGT  
TTAGTGGCAATAGCGGCACTTCCCTTGACCCGTCTTGATCGCTTCTTTCAGTTCAACCAAC  
ATTTCCGCGTGTTTCAATAGCAATTCTTTCACGTTCGAACATAAGCGACGGTCAAAGCCTCA  
TCAGCGATTTCTAAAGCATTTTCAGCACCACCAACAACCATTTTACGAGTAGACAGCATA  
AATTCACCTCACATTATTTACGTTAAAACCGTCATCAATCCAGCCGACACTATTTGGTT  
TAACAGTTTTACCATAGGATGCATACTTAATCAAGCAGGGTTAATCATTACCATATC  
TTCCTAACCGTACTCCCAAATCAGGAATATCCATGTATGCGGGCTTTATATCCCCATGTAC  
CGTGTTACAGGATCAATCTCAACCGGACGGCCTTTACAAGCATACACTACATCGTGACGGT  
CAACGATAACATAGCGATAGCCAGCCGGAAGATACACAGTATCGCCGTAACCTTTAACTG  
GAGTAGCAGAAGAGATAAACATAATATAATCCTCACATCGTTCAATTGATGCGGTCATTA  
TATGATAACCGCATTTTTATGTGAACAGATTTTTAAAAATCTTCTTCCGGTTGATATCGA  
CCGTCATCGACTGGTTTTGGACTGAATCCTTTATGCGTGCGCGGCTTCGCTTCCGGTTTA  
CCAGCAGTCATCAAACCAAACATTTACGCCCTTATAACACATAACATTATCAACCACG  
GTCCAAGTTATAGGCCATACGATTGCAGCAATACAAATGCTCCTGTATCGACCTCTTTG  
GTGTCCTTGTCCAATCTGGCGTACAAGCAGAATACTAGATACGAGCTCATTGCACCAGTA  
GTCCAGATATAAAGCACATTAACAATATCTTGTGTTGTCACATTATCCTCCTTACATGTC  
TTGCAGTGCACAAAAGCATTTTTCTTCATAGTCATAGAAAATGTCTAAGTATGCTTTTTTC  
CACATACTCGCCATTAATCCGAGCGGCAGTAACAATCAGAGTGGTCCAGTTAGATCCGCT  
CTGAACGGTAAAGGTTTTAATACCCAGCTTCGCTGCCAAGTTCGAACGCAAACCGGACGCA  
ACCACGGCAGGAAGTGATATTGGAAGTTTTGATTTGAAAGCCACCGCGAGTTTCAGAAAT  
TTCTACTTTAGCGAAAGACAGGTTGCTCATTTTTGATTCTCCTTAAGAAAGTCTGTTTTCGT  
TTTGATGTGTGTAGTATAGGGGTTACGTGATCCCCTGTCAACAAATTTTTTATGATTTTA  
GTTAATTAACCACTACATCGAAATGATGGACAGAGCACGCCTTATTAACCACATACTCAT  
CGTGTTTAGGAATAGCGCCTAACCGCTTTATTTTCGCTCGCTGACACGATAAACCGCTTAT  
CCGGTGCATTTACCTTACATGCTTCAACAACGCACGGGAAACGCGTTTCAGAGAGTTCTG  
GACGGTTTTGTGAATCCATCAGGACAATGAATACCCTGTTACATTGATTGTAGAATCCTG  
TTTTTGATTTTCATCAAGTTTTCTTCTCTGTACAATTCGTGCAATCTTCCTTTTATGATTT  
GGTTGGTTTTGTGCTTCACAGTTTACCATTCAACAAGATCTTTACCCAATTCGAAAGCC  
CATTCTCGGTCTTCTTTACGTTTTGTAGGTAGGGACTTTTCGGACAGTCTACGAAGAGAT  
GTTGTGCGTAACAAGAATGATCCCAGGAATGGTGGGATGTTCCTTTTCCATATAACAATAGGA  
CGCGAGTCACTATCAATACCTTGTAAGCAGGTGTATCCTGAATCACTTAGAATCATATAC  
TTTTTCATTTACACATCTCCGTTTCTCAACCAGTTATTAAGCGACCAAACCATGACG  
CTTTTCGTGCTTCTTTTACTTTATGTGCACGAAAACCACTGAAATACCATTCTTAATCCT  
CACCGAATCATGATTCAACAGGAACACCCGCATTTTCGTAGTTCTCTGGTCTTTGTCATAA  
ATCCTTGACATAAGGGTCGACCTTCAACAATGATAAGAAGTTAACTTTTTCTATGAAAG  
TATACCCAGCGCGGTCAATAATTTCAATTTTACATTTTACATTATCTCCATAGATCTTTCC  
GGCAATATCAATTTACCAGCGCGACCATCTAGGATAAGATGCGGTAGGTGTATGCAGTT  
TTCCACCCCACTCGCTTCATTTCTGAAACGGTGACGTAAGCCCATCCGTTTCGCTGTAAT  
AAAGTCTACTTGAACGTTGAGAGGAAAGCAAGACTTTTCTACGTCTTCAAATCCGATAAC  
GTGTTTTGTGCTTGAATATGGAATATATCCGCTGATCATTTTTGTGATCTCCTTATACTCA  
AGACACCATAAGCAGGTTCGCACATGATAAACGCTCAAACGCTGGCAGATATGGGACCAT  
AGATATTGTGCACTGTTTCGGCATATTTGAAATATGTGATTTCTCTCAAATTTACGAAA  
TAAGTATTCGATTTTGTGTGCTCGACCGGAGTATATCCGAAAGCGGGTTCCAACCTCAACA  
TCTGAACTAAATGCCAATTTAACAGAATTTGTTTTCCGGACCGCTGTCAGGTTTCTTCT  
GGGTACAGCACAGCAGGTTTAGCGCCTAAGGGGATAAACTCAGTATTTTTAATGAACAGA  
ATAGCATGATACCCGTTATATTCCGACACTTCCATAGTAATAGGAAAATAGATATGGGAT

AAACCTGGTAGATCTCGCATATCGTGAAAGGTCGCCATCAACTTTTTCTTTCTATATTCC  
TCACTCTTCTGTTTCATGTCTTTTATGTGGTAATATAACACGATTAATACAGCAAGCACC  
AATTACGTTATGAGCCCCACAAGTTAAACATTTATAGTCATGGAACCTTTTAGGGAATCG  
ACCAAACTCATAACCGACTAGCGCCGCGTGTACTTGTAGTCTCGATCTCATCCATATCAGC  
CAATGTTTTAACCTTCATAGTATAATCCTCCAATGGTAGTTTTGCGAAGATGGTCATTAC  
ATGGTTTTAACGCATCACTCGCGGTGTCATAGCGAGTATTATCATAGCACCAGTAACCAT  
CCGTCAACTGATAAGTCAATCCGTCCTTTTTAGCATCAATGAAAGACAATTCTTTGAAAG  
TTTCTACTTTCTTTGCTGATACTCCACGGTCACGGCTTTTAGAGAGTTTAGCCAAAATGC  
GTTACAGCTTGTTCCTCTTTATTGCCAGACAGATCCCAGATGATGTTTCTTATATGCTTGA  
TTAATTGTTCAAGTGTCTATCTTTGATTCTCCTAAGTTGGTATGCGTGCATTATAGCATTG  
TGATTATCTTTGTCAACACCCAAACACAAAAAAGGCTAGCCCGAAGGATAGCCAATAAAA  
TTACACGCGTGCACCGTAGATCGTGCCTACTTTAACCCAGCGTGGAGCATTACCAGAAAC  
GGCTTTACCAGCAGCACCACCGTTATATTCTGTACCGTTCCCTGAGTATTACATCTTCC  
TCCAACAGCACCAACGTTACCGCCCGCACCGCCGGTATATGCACTAAGAGACCCCTCACC  
AACAGATGCTTTACCAGGAGCGGAAATATTACCAGCAGTTGCACCGGAACTCATATGAGA  
GGAAGACCCTCCAGCAACGAATGGGCGACCACCCACCACCAATACTAGTCGACCCCT  
GTTACCGCCGCCACCGCCGCCACCGCCGCCAGCGATAGCACCGTTATTTGTAATTCGTAG  
ACGTGTACCGATAGCGTTATTGATTGCGTTTCCACCAGCAGCGCATGCAGCGTTACTACC  
ACCATTACCCCCACGTCCGTAGACAGTACACCAGACTTAATTATCAATGTTACATATTC  
GTTTGTAAACGAGCGAGGGAAGTCAAGACAAGCAATGCCAGTAGATTGGGAAACAATATC  
ACCAGTGATAGTAATTACTACAGGAGTAGATCCTTGTGCTTTCATCCAGTTAATAAGAGT  
GTCTTGATTGTAAGAGTACTAGCACCAATGCTTTAATGAATCTCTTTAGAGCGTCCGAC  
CATTGCCGACATATACGCCGGACGACTTAAGCGTACAGCTTCCATTGCGGCACTCATCCA  
CCGTTGACCAGTCTCGGACACAGCAGATGATCCCACCCATCCAGAACATATTGCCATAAA  
ATTTCTCACAAAGAAAAGCCCATTTAAGGTGCATTGATTGATAATATTACTTAGTTGAT  
CTCTGCTTACCATCCAAGAAGAAAGACTTTGTTTTGTTAGGATAGCGAAGCGCCCATGA  
TTCGGCAGTTTTAACACCAGTTTCGAACAATTGACGGCTGGTCACTTTAGCCATACCATC  
TTCGATGGCAACGCTTGCAATAATGATCGGGTACTTATCGCCACGCATGAAACCGCAGCC  
AGCGGAAGATTTGATAATTTAACAGGTGCCATTTTTGATTCTCCTAGAAAGTGTGCGTGT  
TTCGATGGGCGTATTACGCAATAACACCGGATCGCTGTCAACACTTCCAAGAAAAATTT  
TTAAACTAATCGAATATAGCCCAGAATTTACGACCTTTAGCCAGTCTAAAACCTTCCA  
TTAAGGTGCGCGTAGTCATAATTTGCAACCATCAACTGACCATTTTTTCATGCACCAATC  
ATGAGAGAAAATTTGCCCGCATAAACTACGATAGTAATAAGCTTTCCTCATTCTGGCGG  
TGTGGAAGACAAAGCGACCATATGACCATTGAGCATAGTAACCAGTGATGGAACAATAAA  
ATTCGGGCTAACCTTAATACTGTTAAATTCGTTTGTGTCTTTCATGCCAGACCTCGCAA  
ATACTAATAGCATAAACATGCTGGTTATTCATAATATCAATTGCATTGTGATAACGAGCT  
GAACCATCAAGGATAAGTTCTTGTTTATCCTGTTTCCGTTTGGTATCACGCGCAGCCATA  
AGAGCATCAAGAACAGGTCCAAAGTGATTATCTAAATCATCTTCGGTTGCAATGTTTGCT  
ATTACCTCGTCTATCCGTGATTCTAATGCTTGCTTTTAGTTGATCACATGCTGCGTATAT  
TCCAACACATCAAGACTATCGCGGGTAGCGTCCCATGTTAAGGTATTCCCGCATGAAGA  
TGATCAATTAGGCGTTGTATGTCAATCTTCATTTGTAACCCTCCTCTGAAAGCACATCCT  
AGATCGTTGAGTCAAGCTGCATTAAATTCCATATAATAGAGTCATAACTACCGAAGCCAG  
AAGTAAAATTACAACACACAGGCGATATGTCTTATGAAAATCGGTGGCTGTCTCTGCAT  
CAATAGGCATATCGTTACCTGAAACCACCAGACATTTTAGAATCATAACTATGCTAGCCG  
GTGGCGCTTGCTTAGTCTTACAGCATATTTTCGATGATCCGTCTTGCTTTTCTTCTT  
TGATACGTCCAGACCAACTCCGGTTTCGGTATTGATTACATAATAATTTCAATCACATCAT  
TTCGCATGCTTACGGTCTCGATAATGGTTTTGTAAGCCAGTTAAGACGATCACCGAAA  
AACTTTGCGGTGTTACCCTTCGGATCGCGGAGCATGGTTTCTACAATCTCATCGGCAGTA  
ACAATTTCTCCTTTCTTTGCTGCATGTTCTACCATATACTTCAAAGATTCTACGGAAGCA  
AGTGCTGCGGCTACTGGATTAATCATTTTTGATTCTCCTTTGTCGTCGATGTGTGCATTA  
TGCTATACCCTATTCCGGTTGTCAACACCTAAAAACGAAAAAGCCACCCTTTCGGATGGC  
TTTTTGATGATATTTTATTAGCTCCATTTGTATAGTAGCTTTTGAATCGACCTATGCTA  
AACTAGTTAAACATAGTAACCAATTCACCATCCCTTTCCAATGATAACCCTTCCCTCGTCT  
TAGACGGGTCTTCCGATTCGGTAGTAATTGAACACGCGAAAGTATGAGGAAGCCAAATAG  
TTGTGTTAATGCTAGTATTCTGTTACATCTGCTATGCATCCCACGCTGACTAACATTAAG  
CCAGTCGAGTGAGTTTATAAATTGTTTTAAAGCATAGAGCTTTGGTATCGTCAAAAACGC  
TCTGTGACGAGCTCTCAACATCATTATAAATCTCACTAGCCATTTGCGTTAACTCTTGCA

ACTAGGCAATTTTCGCTAATCTCCTTGCGGACGACCAACTTTGGCTGATAACGACCAGTGA  
TCCCAATATTGCTTTCAGTGAAATTATCAACCAATTCTTGCACCTCAAGATAGAAGTGT  
CTTGAGCCTTATGTTTTGCATAATATCCAGGACAAGTTACCCCAAATGCGCAGCATGCG  
TATAAGCAACACTTATCAGACATTCCTCCGATAAAGCGGTCAACTTTATTAGCCTTCCCT  
CTTCGGACGTCTTTAGAAAATCACTTAATTCATGTTCTAGATTCTCCATATTATGCGAC  
AGAACAAATTGTTGTGCGGCATATCCCCCATAATAAAACACTGCCTAGAATCCATACGT  
TACTACGAGCATAACATCTTCTAATATGGGCATGAAATTTCTAGCTGGTTTCAATGGAA  
GGAGATATGTTGTTTACATATACTATCATTGCGCCGTCGTAATAATCAGTAAAGTCACCA  
GTTGGATCATATTGATCAGTAGCGACACTTCCGACCGCAGTCAAGCATATTGCCGCTGTT  
AGAGTTTTACGAATATATGACATAAGTCATTCCCCAGAGTGAAAATATTCAGTTATATT  
TATAATCTGGGGCTTTATTTATGATTAACCTTATTTGGTAGTACCTTCAATAAAAATGTT  
TACTACACACAGAAACATATTTATCCTCTGCACCAACTTCTATTTGAGCACCATCGCGAA  
TAACATTACCCTCTTTATCTACACGAAGGACCATGTTGCTTTCTTGCCACAATGACAAA  
TACCCTTCATTTTCGATCTGTTTATCAGCAAATGCCATTAATGCCGCAGATCCTTCAAATA  
GATTGCCCTGAAAGTCAGTGGGAAGCCAGATCACAGTACAGGGATATTAGCATCATCAA  
CAAGCGCACTCAAGCCTAAAACATGCTCTTTAGTCATAAATTGGGCTTCATCTACAAAA  
CAGCATCAGGACGCCAGCGATCCGGTCTACGTTACCTAACGATTCACGAGAAACCAAAT  
CGAAAAAATCATCCGATTTAGTGAAGGTGATCGCTGGGGCACTTAGGCCAATTCGGGAAA  
CGACTTCACTTTATGATTCTCGATTATCAATCACTGGCTTAAGAATTAATACTCGCATAT  
CACGTTCTGTACAGTTATAAGCACTTTGTAACAGAGAAAGTTGATTTGCCAGCGTTCATAG  
ATGCATAGTAGAAATATAATTGCGCCATTAACCTAATACTACAAAAATCCAACAAGACCTAA  
ACCGATATAAGTCCAGATACCAATAAAAAAGAAGTTAATGCACATGGCAAGGATAAACC  
TTTCAACGTTTTGGGATACCCGACCCAATATCCCTACCATCTTCAAACCGGATCAGTTT  
ATTGCATTGAGAGACCATATCAACCACAATATGTTAATTTTCGAGATTGCAATAGATATTG  
TTTTACAATCTCTACACCCTCCATAATAACAATAACGAAAATAAAAAGACCACACAACAAG  
ATTAATGATAGTCTCAAGCATTCTATCACCTCCACCCAATCAGGTGTTCCCTGAAAGA  
CTCCTTCTCCTTCATGATGGTCGCAACCTTTATTGCTACAATACATCCACCAATCCCACA  
TTCCCTACGGAAAACGCTGCATCTCGTCGTTACAGCAAGTGAAGATAATAGGCCAACCAC  
ATCTAACACATCGGCAGTTTTCTTTCATGTGAGCGGTATTCCGGCTTCTTCATAGATGACT  
CCAATATAATCGACATTTACATTTAGGGCAATGCGGTTCTTTAATAATAATACCCGTCTGT  
CTTTGGAACACTAACAGGAGCGGTTTTTATATTGTATTCAGTGAAACAACGAAAACAGGC  
TACGTTTTCTACAGACTGACGTTTACCCAATCACCGGAATATAGATCATTTTGATTTGT  
CATATTCAACCACCACAATGTTAATGTCCGGAGTTGCAAAATTAATGATCTCCTCTACAC  
ATTCCCCTCAAGGCCACCGATACCGCAACCGATTTAAGGAATATAGCAAGGCTGTATAG  
CACCTTCAAAAACGTCATTGATAGTCTCAAATCCTTTCAGGATAGCACCATATTCTGCTT  
TTGGACCCGGTCGGAATTGGGTATATAGATTCACCCCGCATCAGTTATAACCAATAACTT  
GATGCGTCCAGACACTAAACCCACCCAGCTTTTCTACCTTACCGCGAGAAGTTTGTGTTGT  
CAATCTCTAACGCTTGCGGGAACCTCTGTGCGGATCTTTGCTGCAATACCAGCACCCATAG  
TATGAAAACGATGACAACCATGAATTAATGATCGTTTCCTTGTTTAAACAGGGCGATGA  
GTTTCGCCCTTTACAGTATCACTAATCATAATATAAACCTCTCATTGTCACGGGAAGACA  
AACCGGCCATAAAAACGGCTTAACAGAGTGTGCGGATAAGCAAAGCATACTTGCTTATCAG  
GGGAGATACAAAAGGTTGCGTTTTGTTCTAGCAAACCTGGCAATACGCAGATCCCAGC  
CTGGATTTTTTCGTTTTTCGTCTCGACCTTGGTTGGATGCTTCGTCGAGTTCAAGTGCGA  
TAAAATCCCTACACATGTTATCATCATCACAGAAAGTTTTAATGATCTTTTTGTTGATCT  
CAAATCCTTTGTATTCGAACTTTGGATAAGGGCGCTCATTACTAGCAAGCACACCAGCCG  
AGAACATCATAGCAATCACAACAATTATGGTCAACTTCTTCATATAGTCCTTAATAGCGT  
TTAGTCTTAAGGATGCCTCTACTCTTTAGATGGTTAGCCTTTTTTTAGTACACCTTTAGCA  
TAACCTAACCCAGCTTTATAGTTCCATCCAGCATTGTAAGAAGCTAGCGCGAGTCGGATA  
TTACCGTTTCGAACATCAAGCCAGTATGCTAACTCATCCATCGCGTAGAATGCAGAAACC  
TCGCAATTCATGATGAAGATGATAGTCTGGCGATCACTCATTTTAAACACCGCGCTTTGCT  
TTTTTCGCTTTCACCGTTTTTLAGGTAATTTTGAATAATCCATAAGCATGATGATTTTTTC  
TTTCGTTCTAAGTTTGCACCCGCGCTTGATTCTTGCCATGCGATAACCCGCGAGGATGTGA  
CCTAAACCCTTTCGTTTTAGCGATTATCCGGATGGTCCTTTTTCAACTTACCGCTTTTT  
TTGACTTGGTCGCCGTGTTGATAGGCGAAATGTAAATAATCTAGTTGGTATGCTGTAAAG  
TTGTCTATCGGCCCTTTTTGATCGGTGCGCTAGTCGATGCGTGTGTAGCATCAACGGCT  
AGTGACAGACTCAATACTATCGCTTTTAGAACTTTTAAACATTAATTTCTCCTGTTTGTCT  
TAACTTTCTGATTCATAATATCGCCCTATCACCAGAAAGTCAAGCATTATTTTTAACCA

ATTTCCATTATTGGTCTACCTGCAAAACAACCGCCGACATTTTACCCGCCAGTTGTTTTG  
GATTCTCTATAATCATTCCGGCTGCATAGACCGGGATATGGCTTACCTCTTCGAGTAGAT  
CAACTGTCATCCCGATCAACATGTTACCGTCAGTAATTTCTAATCGATTCCGGTCGGTCTC  
CCATTTTCAAGAAGTCGAAGACCTCCGGCAAACGAGTTTCTATCTTCTTGAATAGTTCCA  
TTGTCTTATATTCATCGAAAAGACGATCGGTTAGACGGTCGATCATAACGCGGACTAAAGC  
GAATGAAAATATACTCACCGTAACCATCATTCAAGCACTTGTCTTTGATCTGCGCGTTGG  
TTTTGCGCATTTCGGTTTTCGAAGAATCTACGCAGCTTACTACGGCGAACATGTACGTTAA  
TTGTTTTCCATTATATTATCCTTTCTTAAACAAATTGCGTATCCAGTATACAAACGGGATT  
TCTTTAAACTTGAATTTCTCTATAGTTAATTCTTTAGTAGCAAGATGAATACCATAAGCA  
TCATGTGTAACTATATGCCATTTTGTATAGCCCGAATGTAAACAACCGTCTGGATCTAGG  
TTAATAAGAGCTTCTCGCTCACTAGGATTATTTTTCCACAATTTTGTAATAGGATCGCAC  
ATCATTTCGACCTAGCGTACCATGAATAATCTCACAACGGTAAAGTTTTCCAGCGGTGAGA  
TAGGCGCACCCGTCATACTCGGTCTAAACACACACTTCTTTAACACTCATTTTAATACTC  
CTTTGTTGTTTCTCTGGGGGTATATTGCTCCCCCGATCATGTGTGTCAACTACTTTTTTC  
AAGATTTTTTTTTGATTGCATTCCAAAGACCTTTATTTCCAGGTTGTTTTGGTTCTTCGAT  
CAGTGTCCATGTCCGACCGTCTAAGTGTGCGCAATGTTTAAAGGCAAATAAAAATCTGGTG  
TCCCTTATCAGCACGGCTATAACCACTATTCGCAAATCTTTCATGTGGTGTATATTCATA  
CAGTGTATTAGGTGTAATATACTTGCAGTTACTATAAGGCGTCATCACGTACATCATGGT  
ACTAACTCCCAACGATCACCGCGAAGATGAGAACATCCACCATCAAGAAGTATCGTAATA  
CGATAACCTATATCATCTATGATGTAACCGATTGTCCGGTGGATTTTCGTCCGGCTAGGGCC  
GGGTAAGATCATACTTTCCGGGCGTAATACCTTGTCTTTATTGGTATTGGTTTAA  
ACTTGCATTTTCTTAATCTCCTATATTAACCTAACCGGGTATAGTGTTCAGAACACG  
GTCAGATGAATATATTCTAATAGATCTTTCCAAAAGTCAACATCTGGTTCGTCCGGAATA  
CCGTTTTTCTTTGCCTCTTCACGCGCGTGTAAACACGCTCGTAGAGATCTTTCCATTCT  
TCCCGCACATTATCAAAGGTTCTTTTCGCCTAACTTACACGCTAAAATAGAAGAACTTCGC  
GCGAGAGGGAATTGTAGATCACCTGTCTGACAGATTTCAAGTAGCTGATAAACAACATGC  
AGAGCATGAGAAAGATCTTTCCAGTTACTGAAATACTTTTAAAGCATTGGCTACCTGCTTT  
TTGAGATAGCCAGACAAACCCACATACGAACATGTTAGAATTTATCTCGATGCGTTCCG  
ATGTGTTCCCATCCTCTGGAGGATTCAACCAACATGTTACTAGGCGCCTGCACCATATCA  
ATCGCGCCGATATCGCCTTTACATGCCAGATTAATAAACCGTTTTAGACTGAAGATATTA  
ACGTCAATATCGTCTTGGGTGTCCTTGATCCCTTGACCGCAAGTGCTTTGAGCATAAGTGT  
TCTTTCATCGATCCTAAGATAATTTTTTTTCGCAGTCGGAACAAAGGTACCACGATAATCT  
TTATCGGAATTTTCAGTATCAAGGCCGTATAAGTGAGATCCGAAGACCATTTTATCCATT  
GTATGCATAATTAACCCCTCATTAGTATTTTACGTTACGTTCGAACGCCTTTACGAATCTG  
ACAAATAGCGGACGGTGAAACATTATATATTCTTGCAAGTTCTATACCCTTCATACGGGG  
AGAAGATAAAATCTCTTCCACTTGGTCGCCGGTAAAGTTGTGCGTTTTCCGTGGTTCTCTCC  
CCAATTTTTGTTTAAATCCTTCTTTCTTCGCATGAACAAGATTTCCGGGTAGCTGTGCTCA  
TTCAAGATTATAAAGGTCATAGTTTTGTTTGTTCATCCTTATGATTAACCTACACGGTA  
GTTATTTGGATTCCGAATAAACGCAACCGCCATAGCTTTATGCATGTTACGGTTTTTTCT  
AAATCCATCCGGCTTATAACATACTGTAAATTTAGAATAACCAGTTTTCCATAAACACT  
AATATAATTTCCGGTCTCCGTATTTCTAACCCTACCATGAGAGCTAATCTCAAATTTGAGT  
GTAGGGCAACAGCGCAACAATTACTTTCCATTCTTCTACAGGATGGTCATCACAATATGT  
TTAATCATCATAACCACTCATTAAAATAAAGCCAACCCCTTTCGGATTGCCTTAAAAATT  
TACATTGCTTCCGTAAAGGTGCGCGAAATAACGTCACGTTGTTGGTATGGAGTCACACTA  
TTGAATCTTACGGCATATCCGCTAACGCCAATGGTTAGTTGCGGATACTTATCAGGATTA  
GCAACCGCATCGAGAAGAAGATCGCGACTCGTAACACTGGAATTAGCGTGCTGACCACCT  
TCGACAACCGGAGCACCATTATCTACAATCACCGGACGGAAGCTAGTTGTGAGCAGTGCC  
AGAGAATCGATGTCTTCTGCGTCGATCACATGGTCTTCTGCGAATGTTTTACAAACA  
ACTTTATCGCCGATCAGTGCTTTGAGTTCCGGATAACCAGATTCATAGGCGCGAAGTATCCA  
CCAATAATAGTACCTTTATGCTCACCTTTCATGATTTGAATTGCTTTAAATTCCATAATT  
CACCTCTTATAGATCAGGACGTTTCGTCATTAATTTTACCAACCAAAAACACGATAGAGTTT  
ATCAGGTTGGACTTTCAGATTCTTTTTAATGGTGGCACGGAATCGACGAGCTACGCTAGC  
TTTATTTTTTATTAGTTGATACCTAAGCCAATGACAATAGGTTGGTCTTCTACCTTACCC  
ATCCCAACACTAAGTCGATTCAATTCTAAAACACTGCAATACGCTGTCAGTAAATCCGCGC  
ATGGTAGTATCTAGGCTAAAATTTGTTTTGTCAAGACTACGACTTCCCCTTGTGATCGGA  
TTCAGGAAAGTTCCGGATAGATGTACAATCTACATCTGAAATATTTACATTTTGACCGCGA  
CCGCGATCTCGGATCGTTTTGGCATGTTCCCGCGTCGTTGAAACGATAAAGACTCTATAG

CCTTTTCGCGTATAAATGGTCATATAACTTGATTGTAGCGTCTGTATGCCCTGTCTGACGG  
CCTAAATTGATTGATACGATGGAATCAAGGTCATCAGCAAATTGCGTTCGCTCACGGCGT  
TCTATGATGCCATTTACGGCAGATTCACACGCAGCATAAATCAAATCTTTACGTTCTAAT  
TTTACATCATTATTCATGGTAAAGTCTCCAGTGAACGGGGAGAGATCCTTAGATTGTCTC  
CCCGTTGATGGTTAATATTTTATTTTGGATCTGGGAAATTC AATAGAGCATATTGTCCAT  
AAAATTTCCCTAGCTGGATTATCATAAGCGATTGCAGCTTCGATTTGTGTGTCATATTGTC  
CAAGAACATGTCTTTGTAGGTTGACCATTATACTAGCTCTCCATTTCTTACGCAAATCCT  
TCCTGTTACACTTACTAACACCCTTATACACACTAGAAAACCTTTTACTTTTCTTTC  
TATTATGTGGATTTTTCGCGCTCGGTTGCCTCCCTAAGATTTGGAGGATTGTTATTAGCAG  
GATTACCGTTCGATATGATCAATTAATCTAACATGCGTGCCATGTTCTAGATACCAAACAA  
CCCTATGCACGAATAGATGAACTCTAGGAAGACCGCCATCTCTACTATACCAAATCAA  
GATGACCATCTTTATTTGTTCTGACTTTAACTAAATCACCGTGTATATCTACTCCCTA  
ATGGTCGCTTTTGTAGCTTTACTATCGACTCTATAATAAGATACCCTCTATATGAG  
CATATCTAAGTTTCATCTCGTTTTGTAGGGATTTCATCCCAATATTTAAAAGCCATTTTAT  
AATCCTCACAAAGCCAGCGATTAAGCTGGCTTTATTTTACTTATACCGGGTCTGGATATA  
CCTTTTTATCGAGTTCCATCTGCGGTCGGTCTTTAAAAGTAACCCAATCAACACCGCAGA  
TAACAGGAACACCCAATTCTCGACCAGATTGTTTATATGCATCAGCGATCATAACGGTAGT  
ATTCATGTTCCGTGTATCCTTATCTTTCGGATACGCTACAACGTCAACCGCGAAACCGT  
GAAGATGACGAGATGTCATAGTCTTAGATTTACCTTCCGCAACAAATTTCTTTTTCGTTT  
CTAGACTACGTACACCTTCCGTAATACCAAAGTCGACCGGAGTCAGTTCTAACGCACGAT  
GAACTACTTTTACCCGGTCTGGATGCACACCAACAAGCCGATCTTTGCTTCTTTGAGATA  
ATTTAAACATTATTCACCCCTTTGTGAGTGATAATATTTAGATCCCGACGATCCTGCAT  
AGAGTTCTTGTATTAGCACCAATAAGGATAGCATTAAACGACAACCATTTCGCCAACCAATC  
CACTGATTATTAGAAATGCTAAATCCGCTTGTAGGCCAAATACAAGCTTTCTGGTACAC  
ATACTCAGAGCAATAATCAACATCACTGTAAAACCAATGCAAATCTCATTTTATTTTCC  
TTTTCACTGTATACGTTTATAAACTAATACATTACCTCATCGCGTCCGGTGATCCAACA  
TGCTAGGGCGGTAAACAGGTTTACAATTCCCAACACACCTACTGACGCAGCGCTGTCAAC  
AGACATAGGAACAGTCAAGGCCATAGCTAACATAGCAACGCCGCAAATGACATTAAGCAC  
AATTATAATAACCCCGAAGAAAACCAATTGTCAATCCTCCGACACAAGAAAACCAACAATC  
ACGCCAGTGATAAGACATGATGCGCCGCTAATCAGACAACCCGCACCACGTGATTCCCAC  
CAGATCAGAGAAGCGACAATAACACAGAATCCCCATACTACCGCAATCACAACATAGGCA  
AGGGTCGCCAAAACATATATTTGTTTATAATAAATCCCATTACCAAACAATAAGAAA  
AAAGCCATATAAACAGATACGAGGCAATTGACGCGGCAAGCAAAGGATATTAGAGAATC  
CGCCGTCTATCCAGGCGACAAAACAGAATACGCCAGTATAGAAGCATAAACCAATTACAA  
AGCATATTATAAGTAACCATAGATAAAACGCCATAGAAAGCCCTCCATCGAGATAAATTA  
GTGCGGGTAGCACATTACCCTACCCGCATTGTTAGCCATCGCAGAGCGGGTAATAGAACG  
ATTCCAAACCAACCGCTAACCACACCCAAACACACAGCAACAAGCAGATTCATTCCGGTCA  
TTTGGAATCATCGCAAACAGAACACACCCACACAGAAAGCCATTACCATTGAAGTTAAC  
ATTTGTTCAACGATTATCACAGCTTTAAAGTCGTAGACGCATAAACATTAAGGTCAGGCC  
AGTTAGGTTTCGAAATTATACTCAACATCCCACAAATATAGCGGTTTAGATGTATCAGCCA  
AGTTTTTAAAATCTTCTACCCACTTTTCAAGGCTATATGATGGATAAACAAAGGCCATCAT  
ATCCGCCGTTACGTTGGCTTACTGGTTCGGTTCAGTAAAACTACCTCAAGATCCGGTAATT  
CTTTTTCAAGGATAACCGCCAGCGCATAAATCAGACGGTCTTCCATGTTACGCTGCCGAA  
GGACCGTTGTAAGTGGGTTTATCTGGTTCCTAGCAAGCACCTCCACATTTTCACATAAT  
GAAATTTTCACAGACACAATTTTACCATAAGTGAAGAATGAATATACATTATCGAGATAT  
TCAACGTCACCTACAATCACATCAAATGCGGATCAGCAACCGGCCGCTACATATTCTACC  
AGTTCATCAAGAGAATGCAACTTAATTTTCATCAATTCGGCCGTATTTGGTGGCATCTTTG  
ATTTTAAAACACGTTCTTTTCAGCTGATCCTTAAAGATTTTCACGCGGAGTTTCAAACAGT  
GTTCTCATAATATAATCCTCACATAGTTAATCAATGGTCAATAATCTTGTACATTATAAC  
AGAAAGAACAAGACCGCAACCCACATATAGATCCCAGCTATCAATGCAATTTCAATAAC  
ACAATATCCAAGATATACAACAGGAATACAAACAAACATACAGACCAGCGCAAAGAACT  
AGCAAACACGCTAGAAAATCCGATAGCAGTATTAGTAATATTCATATTAACACTCCACGC  
GGCTTAAGTCAACAGCAGTTGCATACAGCATAATGAATATGCTAGCCGATCCGAGAATCA  
ATGCACCCTCACATTTTGAAGTCGCTCATCAAGATGTAACATTATCCATCCGAGGATGT  
TAAAGGCGCAGACCGCACCTATGTTTCGCTAACCAATTAATCTTTTTTATAATATATGTTA  
GAAAGACACAGTTTTCAAGAAATCCAGATTTTGTAGTACCGAAAACAGAAAAGTAGTGT  
TCCTTTTTTCGGTTTTTCGAGAAAGCGATTGTCTTCTCTACATGGTGACGGAAGCCAGACAG

ACGATCACCCAGGTCAAGGCGGCAAGCGTAAGTAGTGCCGTTTTTCGAAAGTAACCTCGAT  
TTGAATTTTGTGCATATTCGCTCTCATAGGCTTTTGTCTGCCGCTTCCTGTGCTTTACGCTC  
GAAGTCTTCGAAGTGGTATACTTTGTTTTCGTTATCGAATACAGAAGATTCAGAGAAGAT  
AACTTTAACAGATACTGGTTACATTTTGTACTCCTTAGTAGTTTCGTGTTTCGTTTCGAT  
GGGTGTATTATGCAATACACCCTCTCTCGTGTCAACAACCTTTTTAGTCTTTTTTCAAAT  
TTCTACAGCAGTTTCTACAGCAGCTTTACAACCTTCCCATATAATGGACATAGTAAGGAA  
GTTAAAGCACCCGCAGGAATCAACCTTTTTAGAGATAAACCATTCTACAAACGCTACGCT  
CATACCATGCTCTTTAGCGGATTCGCGTAATTGTTCAATTTGGTCTTCCATAGTATCACC  
TCAACACTTAACGTTATTCAAACGCAAACGGTCTATTCATCCTATTGTAAAAGTACATAC  
AACAAAGCGTAGTTATGTTTTGGTTGTACCGTATCAGATAGACACGCTTTTACAGCCTCAC  
GGTCCGCTGGGTCTACACCCTCAGCTTTAAGTAATGCTAAAATCTGGTTATAGCGTACTC  
TTATTTTTACTAATGGTTTAGCCACCATATTACCCCTTATAGTTGATCAGCGATGTAAG  
CGTGACAAGCGCGGAGTTTCATTAATGCACTACCTTTCACTTCGCCTACGATGTTTCATAA  
CTTCTAAGTGGTTGGATGGATTCATCTTAGAGCACCAGATCTGGTTAGCCAATTCCGGTT  
TACTCATATTTGGTTCCATCTCAAAGAGTTCACGCTCAAAGTCAATAGTTTCTTTTGCTG  
CGTCTTTAAAGTTAACCATGTTGATTCTCCCGTTTCGTTGATGGTTGTATTGTAGGGGAG  
TTATCCTCCCCTGTCAACACGTATATCAGAAATATGCAATATAGTTTGCCGGTCCGACAG  
AGTCATCATTCGGCATTGCTTTTACTGCCAGATCCAACCCTGCTTCAACTTTCTATTTAG  
CGGATTCTTCGTTATAACCCAGATTACCAGAATAGCTACTACGTTTTCTTTGCTTACTG  
CTTTCAGTTCTTTAGTGATGCGACGTGCCATAATTTGATTCTCCGTTTAAAGAAAGTGTGT  
TTCTTTTCGATGGGTGAATTATGCTATAGGCCGGATCTGGTGTAAACAACTTTTTTTACA  
AAAAATTTTTTCGGCAATAAAAAAGCCACTCCGAACAGTGGCTTATAGGGATGGTAGCGAA  
TCTTCCTTGTCTCCAACCTGCTAGCGGCCTAGCAAGTGAATGCTTTAGCGTACCGGATCG  
CCCATACGCTGTAATAAATGCAGCTAGGTGACGTCCAAATCATTCTAACCGCGCTGTCTT  
TAGTTCAGTATTATTTATATCGCTTTCGCTCGTGACGTATTTGATTCTCTTCCTTGATAG  
AGTTAAATGCGTCAAAAAGACACTTGACACTAATAATAAACATAACCGTATTTTCTACGA  
TATCCCAGTGCTTCGCATCAGTACAGATACCCCTAACGGTAAGAAGTGCATAGTGCAG  
AAGAGATCACAAAGCATGATACTTGCTAAGATATAAAAAGTCATTTTCATGGTTTTACCTC  
AATTCCTTCGATATTCATCACACATCCACGCCGTAAGCAAGAATCCTACCACATAAGCAAC  
AAAATACGTTAATGCTGCGTCTGGTTCTGTGCTGTGTATCATTAACAGCTAGAAC  
GGTCTTAACAAATACATTTAAAATAATTAGCCACGCGAATAATTCATCGTTCGCCCCAT  
TTCGGTCCAGTCTTTTCAAACCTGTACATTCCGTAACAATCTCGAATTATCCACGTAACA  
AGAGCACCGTCAACACAGACAATACACAGAAGATGTAAAACGGTCCAGTTGCATTATGA  
ACATGAGCAAGCCATGTACAGAAAACACATGCTAAGAATGTAAAGAACATCATAAAACAC  
AAGAAAGCAAATATTTTTATGCTACTCGTAGCGCCACCCTACAACAGATCATAAGAAAAC  
CCTACGCATTAAGAATTGCATCAAATATAGTGAACCTCAGGTCCACCTATCAACGTCACTC  
GTTCTCTTCATTCATAGATCACAGAGCCATCTTACAGCACCACATAAAGCGATCAAAG  
ACTAGGTATAAACGAGATTACAACAAATTTACAAAAATCATCTAAGGTAACACCGGAATA  
GCTACCTACTGTAACAACACCGATCATCAGCCACAGAAAGAAAACAATGCAATCAGAAA  
CAAAGTATTGCTATACAGTTTATTGATCATTAGACACCCCCACGACGATCACTTTCAA  
ACTTTTTTACCATCAACGAAGCATGTCACAACCTGCCTCGTGGACTTCCGCAAATTTGTTGT  
GTCACCCACTTAAGGTCAGAGCGAAACAATGTTTCGATTAATAACAATTTTTTATCGCTC  
TTATCCTTACCCACAAATTTTGCTTTAACCATCTCCAATACCATATTATCACCTTATTTG  
CTAATCGCTAAACCCAATCCGAAGAGAGCACCCGATGCTACAGGCTACCTGAAAGTCTCA  
AATGCAGTAAAGATATCTTAGCCACCAGCTAACAGAGTTGCAGGAAACAGAGTACCAGCT  
ACGAACATAAAATTTTTACCGATAAGTTTCATTTTGATTCTCCTTTCGTTTATTTGTGGG  
GGTATCTTACTACTCCCGTTTCATGTTGTCAACTGTTTTCAAGAAAACGTTACTTCGTCT  
ACAACGTTTTTTCATGACATCGATTTCCATTGCGGTCAGAACACGTTGGAAAATGTGCTGC  
ACATACGCTTTCTGGTATTCATTTGATGGCTTGCTATCGAAAGTCTTTTTAGTGATAGT  
TCATCACCGAAAGGTAAGTGTAAATTACATTTTCGTCGTCGGTCCAAGCGATATAAGCAAAC  
TTCCCGTTATCCCAGAAGCGAGCACTAATTGCTACTTTTGTGTAATCGAATCCTACTTCG  
CTGTGAGATTCAAGAACTACTTGCGTACCAGTTTCTTTATGAAAGTAGTAGCGGGATACT  
AAGGCAAATACGGGTGTAGTGACATTCGAATTTATCTTTAAACATCATATTTAGATT  
CTCCTAAGTGTGTTTCGTTTCGATATGTGCATTATGCCGTAGTCGTTTATGGTTGTCAAC  
ACCTAACAAACAAAAACCCGGAAAAATTTTCGGGGTATAAAATTACAGTTTAGTCGTCCA  
CTCCAGGTCTAGATCTTCGACATACTCATGAGATCGGACAATCTCTAAATCGAACTCCAG  
GTCAGTGCCAAATTTCCGCGCAACAACATCATAAGAAGGCGTGATATGCGGTACATATTC

AGGATAATCCCGCGTCGCGCCTAAAGCAGTGCCGATATCGTGTCGGAATTGCATGTAGTC  
GCTTTCAAATGCCAACACAAGCGCATTAGTACCGGATTGAGTTTCTAACACTTTCAGATG  
GCATAGAGAGCCAAAAAACTTTTCACCCTCTTCTGGGATAAACGGAACGTAGACACGAGA  
ATATAAGATAGTGCTATGCAGTTTATCACGAGGAACGGCATTAGGCAGATCGTAGAACTC  
CTGCAATTTTTCAATGCGGTCTACGCTATCCTCAGTGCATTTAAGAGCCGCATATCTACC  
TTAACGGATTTCGCGAAACGGGGTAATAATCAAGCCTCCGGGATCAGTTCTACTCCCTCT  
TCTGCCTCTTCCGCTTCTTCGTCTTTAGGGAGAAGTGCTTTCACTTCTTCGACACTAGCA  
TCAAGGGAAACGGTCCCGTTTTTCGTCTGGATGAATACCCAGTATGCGTACCAGTTCCATC  
AATACACGCTCACGATCTTTCAGTTGGCCTTCTAAGAATGCGGCCTTTTTCTTGAGTGTC  
AACAGACGTAATTCAGGACATTAATGATTTTTTTCATGCTGATTGGACATATTCACATCT  
CCTACTTGTAGATAACTTTTTATTATATGTTTCGCGTGAATCGCGCTTCAAATTCTTCTA  
ATGTACAATTATGTATGATAATGGTTTAAACCGTCAATAGGCCAAAATTCCTTTTTCGGTGG  
AGTGGGTCGATAGAATACCAGTATCACGCTGAATATGCAACACCTTAGCACCCATAGCAC  
GCACGAGAGCAATTTCAATTGGCTGAAGCACATCAACCACTACAAATTAACCTTCTTCAT  
TTTTGCGCTTCATAAACTCATTACGAATAGATTACACCAATAAAGCGGATTGATCAAGT  
TAACCATTATATCAGTACCGAGAGTGGTTAACATGAGACGAATAGACCAGACGTTATTAT  
GTTGTTTCGCCAATCTCATTAAACGACCTGGTAAATCTCAGCCAGACGATCACAAGTAAAGG  
AACTACCGCCATACCTCGAATCTAGCATAAGCTGACACTGAATAAACCACTTATGCGCGG  
TATGGGTATCAATACCTAGATCGGCTTCTCTGTCTCGCCCTAACCCGTCAAAGTCAAGAT  
AAGTCAGACCTTAGTCTGGTTAACATTCGCACAATATTTCTTTGATGGGTGCTGCCAGTT  
GATAACTATGTCCATCAATGATTAACGCCGCAGTAACTTTTCCTACTCGCTTTTTACTAC  
AAAGTGCAATCAATTTTCATGATATAAGCCTCTTAGTACTTTCTAAAAGCAGGGGGCATCG  
CTGTAATACCTTGCACCCTCTGACGATCCGCCGCCTGAATTGCTGGGCGAGGAACGATCA  
GTTGACCAGCACGTTTCGATGCTCATTGTTTTAAAGGGAAGAATTGCAGTACACACCAGAG  
TATCATGCATATTATCGGTGTATGTTAACTCAAGTTCCCCCAATCGTGAACACCAACAAC  
CATAAAAGTTAAAAGTGCAAACAATGTTACGTTCGTTGCTTCCATCATGTGAGCTTGAA  
CGGCTTCCGGGATTGAATCCTTCCACGCAGTGGAGTTACCGTTATTGTAGTCTACTATAG  
AAAGCCTCCATGTGTAAAGGTTTAGATAGCTGTCTAAATGCTCATCGACAATAAACCGGA  
CTACCAACGGGTCAAACCTCCACATGACTAGACGGATAATCACCGACCGCCAAACCATTTT  
GACCAGCAACTTGCTTAGTTCGATGGAATGGTTATAGCCGGAAGTGTAACACCTTGAGCAT  
TTAAAGTAAAGCCTTTTGTGGTTGTCCATCTCGAATATTGATCTGACAGGTGCTGGGGT  
TAGCATAGCTAAAGAGATTATACATTACTGATTCCACAAATGAAAATATTTATTAACAAT  
TGTCGCTTTGCGACGTGCCGGAGGCACTGACTACTTTTTAAACCGAAACAATTTTCTATT  
ATTCTAAAGATCTTTCTTCGTTTTGGTTATGTTTTAAACCAATAACTATCTTTTTTATACAG  
TTATAAATAAAACGGGTACTATACGAGGACGTCTTATGACAGATGACATTTTGTAAAC  
CCTATGCTCGTCTGGATAACGAATTAGCAACATTGCGGGGTGAAGTTCTCTATTTGTCTA  
AATGCAATACAGATCTGCTTAAGCAGATTGCTGAAAAGGATGATCAAATAAAATCCCTTT  
CAGGGGCATTACGTGATCGCGACAAGGCATTAGAGATCATACAGCGTGTTACCAATAAAG  
AAGAATTAAGACTTCTACATGGTTATGCTCGTGCCATCGATCTATAATAAAAATCCC  
CGTTATTGACGGGCTTAATGTTAACTATTGATCATCTCAATGACGTTTTGTAGCTCTGAT  
ATGGTTAGCGTTTCTGTATATCCATCTGGCATACTACTTTACTAACATAGAAACCTTTA  
TACTTTTTCTTTATTGCACATTCATAGAACGAGCATCATCACCGTTATCGTATTTTTTA  
TAAAATGTCAACTCATCACGAAATATAGATTTTGAAGATTGGTTTTGTCTTCTTTTTATT  
AATCTGTTGTTGGTTATACCAATTTTATAGCAACCGCAACATTTTCTTTGTATAAAGTT  
TGACATAAATGTATGCAGGTTTATCCTCTTAAAGCCTTGATTGCTACACTTAGGGCAA  
CCGCTATTTTTTGATACGCAGTCTCCTAAGTTTGGCGCAAATTCATGTCCGCTACTACAA  
CACATTAGCAATTTTGTTTTTAGGATTCTCTATACTCACCGCCAACAAAATCAACAAAT  
GTATCACCTTTATCAATCGCCTTATCTGTTATTTCTTTACTACTTGCTCAGTTGACTTC  
TTGTTTTTACCTGAACATATTTTACATCCAGCTCCATTAATAAAAACGAGTGACCGGAT  
GCAGGATATTCATGTTCTTTAGGGCATTAACTAAGATATTTCTTTCATAAAAATCTTTA  
TAATCAGACACATAGCCAATGACTTCGGGGTCTTTTTGGTTCTTCTCATCTCTGTTAGC  
AACTCTTCGCTATCCTAGCGTTTACCCTTAAACGCAGAGACAACCATGACCTTGATAAAGA  
TATATAAATATCCTAGTAAAGTTTTTGTGCAATCAGGACAAAGCACTAGTAATTTCTGTC  
ATTTGACCTGTATATCCTTTAGGAATATCGATCAATGTGCATTTTCCGCATATTGTCGTT  
AATGCATCATCTATTCTTTCATTGGTCCAGCGTAAGCGTCCAGTGCATTCATGACATTTT  
ACAGCCAGTCTAAGAGTATCTAAACTAAATATAGTTGACGTATGTCCTTTATCACATTTT  
AAATTAATCTAGTATCCTTTGTGTTGGTGTATTCTCCGACTAGACCATAACCATTCATAA

CAAGATGGGATATGTTCTTTTACCTTCTCTGGATATACACCGAACGGTCTAGGAACTGAA  
TTGGGTTTTCTTTCTTTAGTCATATTTTTATATCCTGTAAATTGAAGCGCCGTCACCAGC  
GGCGCTATTTTTATAATCATTAAAACAATTTCCACACCTTACGAGCATCATATTTCTGT  
CTTTGCTCATAAACTGGTAGAGCGGAAGATACACAGCCGTGCTCAAATCTCTGGTGCGA  
TCTCAATCAGTTTTGTTGGATGTGTCCAGGCAAATATGCTTTGATCATGTGGCCTCCGC  
CTCTCATATCTTTAACATCACTCTATTTAATTTTTAAACGAGTTTTATTACTAAGAGTAG  
GTGTACTCGCGGATTGTGCGCAACAACGCTTCTAGGAACTGCTGGCGAGCTGTACGTGGCG  
CAAAGTGCAAATTCAAACCTAGCATAATCTCGTTTTCCCGCTTTAGATGTACCAAATGCTA  
GACAGATAATCAAGGGGTATCGGTCAAAGAATGGCAAAGAATCCCGATGTTTTGGGTTAT  
ACGCATAAGTCTAGATCCGTCCCACCTTGTGGTATTACTACCTGATGACCTTTTACACCAT  
CCTTGATGGTCTTCATAAACCCTCCTATGATTTTTTCATTAGGACGACGCTTCGATACAG  
GACGCATAGACGCACGAAAATCATTAAATCACCATCATATCGCGTTGCTACATATTGAGAG  
CCTTTGAACCTTTCCCTTTTAGTTTTTCATCTTCTATTGCTGTTTTAATTTGCTGGTAT  
AACGAGACATACTTTTAGTGAAAGTAGCATAGGCTATTCCCTTAGAATCTGCAAATGCTT  
TAGCTGTCATGCCTTTGGCTATTGCTTTTCGCAAATTCTACACCCAATTCGACCCACTGTT  
TAGACTTTTCGTTTTTTGGGGTAGACGGCTTTTCGTGTTCTGTGATAATTTCAAATACGCTC  
ATAATATTATCCTCTATTTGTTAAGCCCTTTAAAGCCAAACACTTTCTTTAATGCTTGCT  
CGGTGATGATCTTAAACTCCATGTTATGCTTTTTGGCATAATTTACGGCAGCTAACCATT  
TTTCAGTATTTTTTTGTGTTTGTTCATACTTCATGCATATATCGTTGCTTTGTCTTCGCGG  
TCATTCTTTTTGGATTTTCCGGTGGCCTTGTCTCTTTAGCTGCTTTAACTTCCATAAAG  
GCTCCTTGCCACCAACAATCTTAATGTAAAATCCATAAAGTATATGTGTCTTTTTCCGT  
CTGTTGCTGGCTCATAAGGAATTACTACGGTCTCAGATCCCCATTTTGCAACTCTAGGAG  
TGCGGTCTAGCCACTGCATGATCCATCTTTCCCAGCTTGAACGGTATGTGATCTTACGTA  
TATCCCCTTTATACTTTTCCCTTATTCTCAGGAACATACTTGCCCTTATAAGTGTTATATT  
CTCCCATTTTAGCACCTTTATTATAAATACATAATACTATTTATCAATTGAGGGTGATA  
AAATGCTCTTTTCTTTCTTCCCTGACATTGAATACAACGGCAAGATGACTACTGACATTG  
TGCGCAATTACCGCGCATATTTCAACGCTATAATTTCTGATTATAACATAACAATCATATT  
ACATTCAAGGTAGTCCACGACCGGAACAAGGTGCATATGAAGTAGCCGGAAACCAACAAC  
TTTACTGGATCTTGCTGATGCTTAATGACGTAAACGATCCGTTCCATGACTGGATCACCG  
ATCAAGAGACCGCATATGAAGCAGCCGAACAACGATATGCTAATGTCCGGAGGAAATCAAG  
TATTATACCACATTGATATTGACGGAAACAAGTATCGGAATCTTACCGAATATCCGAAAG  
GATCAAGCAATTGGTATGATAAAGGGGATATTCATCCCCGTCATTTGCAGTTTCATGGTG  
CATTGTCGGCAGTGGACACACTGGAAGATGCGATCCTCCGTAAGGAGGAACGACGCAAGC  
TCAGGATCATAGCTCCTACACAAATTAACAATTTATTAACGCAGTCATTTCGAGAAATGG  
AAAAGGCTGATGTGTAAGGTGATTAGTTATGCAAATGTTTAATAACACCGTTAAAAGGTT  
TACATGAATTGTAGAAAACAGGGAAGACCCATTAATGCTGGGGGGTGTTCAGGTTAGGAT  
TCATGGTATACATCCCTCGCTATCCGCGCACGGTGACATTCAAGCTTTCACACCGAAGA  
TCTATTATTGATTACGCCGGTACATGATATTACAAACGCGGCAATCTCCGGTAGAGGTCA  
AAGCCCTACTGGTATTGTTGAAGGTTCAATGGTATTTGGTTTGGCTTTAGATAAACGTTA  
TTTATACTGCGTTATTCGGGGTACTATTGCCGGACAATATACAGAGAAACCACACACTAC  
AGGAGGTTTTTTGCGACCCCTCTGGTGCATATCCTCGTTATATTGGTAATGATGTTAATAT  
TCTTGCTCGTGGCGGTATTAACCCAGAAACCGGACAAACAACAAAACCTGACAGTGTCTA  
TATTCGTGGTGCAAACACTGGAGTTGCAGTAAATCCAGACGACGAGCCGTTAGACCAAAT  
TCCGGTTGATGATAATCCTGATGTTACATTAGAGAAAATGCTGAGGGGCGATGAGGGATA  
TCGCGTGAAATGGTATCTTGATTCAGAAGGATATCTGACCATAGGCATCGGGCATTGAT  
CATTTATAAGAAAACCAGTGATCTGGGTATTATCAATAATGAACGTTCTAAGCTGGTAGG  
GCGTGAAGTTACAAACGGAAGACTCACCGCCGAAGAAGTTAGTAAGGTATTTGCTGACGA  
TATAGAAAGGACTCGTCGTGATATGCGCAAACATCCACGAATTGCACCTGTCTATTCTGA  
ATGTAATGCCTCTCATCGTTGGCCATTAGAAAACATGGCATGTCAAATGGGTGTTGGTGG  
ATTCGGTAAATTTAAGAATAGTCTTGCTGCGATCTTAGCGGAAGCATGGAAACAAGCCTA  
TGATGCATTACGTCAATCTGTATGGGCTAATCAAACCTCAGGACGGTCAAGCCGTGTTTC  
TAAAATTATTCTTACTCGTAACTTAGAATCATATGGCGTAATTGCTCCAAGAAAGAGGA  
ATCTGTTTCTGATGATCCGCGAGCACGTTGGAGAAATGCCCGTATTCCTGCCTATAAGAC  
GCAGAGAGCAGAAGAAGACCCAGAAGCACCGTTTACCCACAGGACACACGAATCATTTT  
TAAAGAGCCTAAGAATTCGTATTCTGCGAGGTATCCTTATAACCATGTGTACGAGTCAGA  
GAGCGGTATATTATCGAGATTGATGATACTCCTTCTCATCAGCGTTATGACCGCAAACA  
TCCTTCTGGTACATTTGTAGAAACCAGACCGGACGGAACGAGGGTAGAAAAGATTGAAGG



TGATGATTATCTAATCGTTAAACAAGGCCGGAAAGTAAACGTTAAGGGTAATTTGCAAGT  
TGTTGTTGAAGGTGACGCGCAAGTTTATTATATGGGTAATGTGATGCAAACCATCGGTGG  
TAACGTCACTGAATTTATTCGTGGCAATGTTAATCAGACCGTTGAAGGTACAGCTAACAT  
GCATGTTGTAGGTGATGTTACCGCTCAACTTGACGCTAATTTAACGGCTAATGTCAAGGG  
TGATGCTGAATTAATGATCGAGGGTAACACTACCGAAACAATTAAGGGTAACCTATGATT  
AACCGTTGAGGGTATTTTTAATATGACCGTCAATGGCACTAAATCAGATCAGGTTAATGG  
TGA CTGGTCCCCTAATTGTGGTGCAAGCGTTAAAGATATTGAATCTGGTACAGTTC A AAT  
TGATGGTAGCCGATTGATTTTGGGTGAGGGA ACTATTGGTTGTAATTCTTCCGATGAAT  
TCAAAATTGGAGGATATCAGCGAGCGAGAAATCTTTGAGGTGGTGTCTCTTATAAAGCA  
ACGCCACCGGATGCAAATACCACATACACAATTAAGAGTTTAAGATCAGCGAGTATCGC  
CTTAACAAGGGCGTTACCGTTGAAGAACTGAAATATCTGGTGAGTATCGGGATAGTTTT  
TCGCTTGGCGCGGATTCTCTTAAATATAGAACGAAAGATAGAATTAATAAATCTGCTGGA  
AGTTTTGATGAGTTACCTGATCCA ACTACCGCAGATCTATATTTTTTTAACGCTCCTACA  
CGTCTACAGGAGGTTTATACTTATAAAGTAAACCCTAACCTATATCCAATCTGTTTCAGAG  
TCTTCTGGTGGTCTGGTGAAGGAAATAGTGGTGGTTCCAATAGCCGGGAGGGTGCTGGA  
GAACTAATCCTCCTCCGGTAGTAACCGAACACAGAATAGAGAAAGTTTATACACAAACC  
GTTTTTGAAATTGGGATGTGTGGGAGCAGCAACTAAGAGTTTATGTACATAGGGGTGTT  
TAATGGCTGGATTATCCTACGATAAAGTTAAA ACTACAGGGCACGGAAAATACCCA ACTA  
CGGTAATTAATGCAACTCAATCAAAGGTATTTGTTGAGGGTATCCCTGTATTAGTCGGAG  
GAGACGCAATTACACCACACACAAAAACA A AAGCCTTATGATACACACGGGGGAACTA  
CGGTCGCCAGTACCCCGAAAGTATTTGTTACCGGAAAGAAAGCAATTTAAATGGCAGACC  
GTATTAGCTGTGGCGATACCGTTCGCTAAGGCATCACCGAAGGTATTCATAAAATGACAAA  
GCAAAAAATTACACAAATCCCTGATATTTTTAATGCTGCTACATTCGATGAAATTA A AAG  
CGCATTAACAGACTGGATGAGAAACCAGAAAAAATTTAAAGATTTTGATTTTAATGGTGC  
TGGTATTAACGTATTGATGGACTAGCTCGCATATAACTCTGTATATTCAGCAATTCGC  
TAACGCCGCGCTATATGAATCTTTTGT CAGAACGGCAGTTACGCGTAGTTCAGTTGTTGA  
AGCCGCGCAAGATTTAGGATATTTGCCAGCAAGTAAA ACTAGTGCATCGACTACAATTAT  
GTTGCACGTAACACATGCTCGACATCCGGCAAGTATTCGAATCCCACGAGGAACTAAATT  
TATTGCAAGTGTGATCGCCGGACGTGTTATCCGTTTGTGACTACAGAAGACGTTTTGAG  
CGTTTTAGGTTCAAATGGTTTATATACGCCTATGCTTAAAGTCGCACACGGTTCGTATTGT  
TCGTACAGAAATATTATTTAATCCGAAGAAACA A AATCTGATCCGCGATCCTGATATTGA  
CCGCGCTCAGGGTAAATTGTGGGTAGACGGTGCTGAATGGAAAGACTGGACACGAGAAAG  
CATTGTAAACGCAACTGGTGCAAGCAATATTTTCTATATGCGTGAAACCGTAGACGGTCT  
TACAGAAATCTTCTTTGGTAAAGGTGAATCAACTTTATCTACTGCTGGCGGTGCACTGGA  
AGCAAATTATATTGGTGGACTTAAGCCTTCAACTGGTGCAAATATTGTTATCGAATATAA  
CAGCACCCAAGGCGCGGAAGCTAACGGATCTGTCAATTTTACAGACGCGGATACATTGGC  
ATCTATCTCTATTGTTAA AATTAATGAGAAACCGACAAATGATCGTGATTATGTCGGTGC  
AGATGGTGGTGGTGTATCCTGAATCAATCGACCGTAAGCGTGA ACTTGCTCCGGTAATGCG  
TGAGTCTCAGCGTCGATGTGTTACTGCTTGTGACTGTGAGGCTTTTGTATCTAGCCGTTT  
TGGTAGTATTATTCAGGCGGTACAATGTTTACC GACCGAGAAAAACCGGGTAAGGCTTT  
TGTTGCTGTAAAGCCTAAATCTGGTTTGC GTTAGACA ACTGCTCAAAAAGAAGATATCCG  
CGATTATCTGGCAA AATATAATCTTGCCCCTATCAGCTGAGCATCATTGACCCAACTA  
TCTGTATATTAACAGAATATTA AAGTTTCCTATTCAATCAATGACTTGTCAGAATCAGT  
GCAGTGGTTGCGCGGTGCGGTTATTGATCAGATCGATGCATACTATACCGACGTAGTGGA  
AATTTTAAACAGACCTATAGTAAGTCTAAAATGCTTGCTCGTATTGACCAAGCTGATGT  
ATCTTTGATAGGTTCTAGTGCAGAAATCGAGATGGTGC GACAGATCGACA ACTTCTATAA  
AGCACCTATGGCTGGAATCAAGTTTTTAAAACAGTATAAGAGCGGAATCAAGTCTAGTTC  
ATCCA ACTTAGCAAAGGACTACAAGCAATATCCGATCCATTATGTAAGTACAGAAATGAA  
CAAAGAATCCGGTTTAGCTAAATTGCTGGTTGGACCTTTCCCTGTTGGATCTGCAATCGC  
TTTACCGCACTATTCGGCACTGATTTTGATAAAGAGGTTGTCGACGGTGCGGACCTATA  
CTTTGAGGTTGGAGAGGTT CAGCATTATGACGACCTTATTT CATGGGATCTGGGTAAACT  
GAATATCAATAGCGATCGCTTACTGGTTCATATATTTAGTTGACAGCTAAACCGATTGC  
TGATAACATCTTTACTAAAGACGGTCTTTGATCGTGTGTTGAAAAGGATCTCCGTCGGCC  
GTACACA ACTATTAGTCTGGAGGCAATTGCTCAATGATTAGAGCGCCTAGTGTA ACTAGC  
TTGACAATAGAAAAGTGTCTGCTAATCAGGCGTATATCACATGGGATGACGGAGGCGAA  
AACTGCTTTTATTTTGTGTAGTTAGCCGAAACCAGAACACGAGACGGGGAGATCATCCCC  
GTCGATGAGTTAAGCTGGGTAAACCTGGGATATACTGCCGAACAAA ACTGGTTTGAGGAT

AAAACCTTTTTCCAGAATATTGGTACAAATTTTCGTGTAGCAGTAGCCGCAGAAGGATTT  
GAACACAGTAAATGGACTGAAACCGAAGAGTTTCAGACATTTAAAACAAACGCACATAAT  
TTTTCTATGATGCCAGAGTTCAACCCTGCATACGAGTTTGTTAAACAAAAGAGTACATAT  
GATAATCGTGATTATATTAATTCATAGTGATTTAATTCAGCATCTATGATGAAGGAA  
GATTTTGTCTTTAGTCCTGAATATGCAAACATGACAAATATCTCAAACACTACATTGTAGTT  
GATGAGAAGTTACATGAAATACAGGATCACATAGAAAACGTTTGTATTGATATAAACCGC  
ACCATGTTAGCGGAAATGAACGGTGTTTTGTAGCTTTTCGAACGGTTCAGCCGATTGTG  
AAAGTGTCAAATGATAACGGGCAATCATGGAAAGCATGCAAGGCTTTTAATGACGGTGT  
GGCAATCCGGTTTCCAGTACGTGCGTTTATCAGTCTAAAACCACTACTTACGTTTLAGGA  
TTTGACCGAATCCTTCACAGACGACACGCTAGAGATACTCGATCGAGCGCGGACGATGTT  
CGATTTAGTGATGATACGATCATTTCGCCAAGGTTGGTGACGAGAACGATTTAGGCTTT  
GCCGTTGAGGTCTTTGGTGTATTCTCCAGATTGACAGGTGACACCACAAAATACGCCGAA  
GCTATGGCGTGCAGTGCCGATTATTTGTGGTTTGGTGCTAAAGATGTTATTCGGCGGATT  
CGTCTTAAGAATGGTCCTGTTGATACGGTACATGGTTCGCCTACGTTTGGAGAAAAAATA  
TTCGAACCTGATGTTATCCGAGTAACAGGAAATGATAAAGCTGTCATTCAGAAGATGGAT  
GTGATCGACGTTAAATTGCTTGTATTTGTTACGGGTGAAGTTAAAGAGCGTTATCAAGAT  
CCAATAAACCAGAAAAGGTTGGTCCGTCGGATGATACGGGTGTATACTTAATAGGGAGA  
GATGGTCTGTCTTTTCCAGAGAGGATTTGGCAACACTCCGCAGGAAAGGGAATACATTCAG  
CATGGGTTCCAGTAATATGTCAACCAATGGGGAAGAGGTGTTTCATAAGCAATTATCATCAC  
CACTTGGAAGCATTTCCTGATCCAGAACTGCCGCGAAATATGACTTAGGCGAAGCT  
GTGAAATATTCTCAGGAGCCAACTTATCTAACTGATAAGAAAATACATCAAACACTTTTC  
AGAGCAATTTGTGATGATTTGCGTATTTGGGAGTTGGGACCGCAAGCGTATTATAATGAG  
GCTGATTATTCATGGATGCATCGAAACGGTGTCCGTGTGTGGATCACAAATGATAATCGC  
CCGTTGGTTGTTTATCCAGAGGTTATCTATACTCAGGAAGTTGATCCATCTCGCATTCTT  
GACCAAAATTGGGTCAACCGAGAAGTTTATGGTAAGTGGACCGTGACCTGTTATCTTAAC  
AATGTAAAATTTGAAGGATTCAAACAATATGCATCCGGTGTAAATGTTCCATAAAAACACG  
GGAGAGATCATAGGATTCTAGCAATTTAATTATCCTGTTGGTGACCAAGTTGATGTATAT  
TGGCAACCTACATATGTCGCATTTGTTGGTGCATTCCAACATCAGGTTCCGGGAGGTTCCC  
TGGGTTCCCTGTTTATTATGACAGTGAGCAAGATCCAGAAATTCGGCCTTTACTGAATAAG  
ATGACGCCTGATCGCTTTTACTTGAGAACGAAAATTCAGACAATTCTCTGAATATTAT  
CTGCAATTCCTAAGTGATGGTTCAGGAACATATTATAATAAACTAAAAAATCTGATTAAA  
AACAAATATCCACGCGAGCAAGATGCATATGAGTATCTTTGGTCAGAAATCAACAATCGA  
AACATCTATGCAGATAAAAACAAGCTAGATGCGGTCGTAAGATTCTTTGAGTCTCGCAA  
TCAGATTTTTATTCCACTAAGGGCGTGGAGGCTTCTTACAAGTTCTTGTTAAGTTACTT  
CATAATGAACGTGTGGAAATTGAGGTTGAATCACAAGCCGGATTAGAGTATGATATTGTT  
GTTAGTTCAACGAACATTGACGAGGATATCGTAGGACGCACGATCTATACTCCAACCGGA  
CTGGCTAACGTGACTTATCTTGAAAGGGAATATGAAGTTGGACGTCTACGCTGGCGAGTA  
ACCATTACAACTGATCGGGCGGTTTGTGCAAGGTCAAGTGATCAAATTAGAGAAAACA  
GCGTTTGAGGGGATAATCCTTGTGGTGTACTTGGTAAAGTGTTGTTGTGTAGTTCAATC  
GACTATATCAACCGCTCACGAAGCCAATACACCATGAAGATTAAGAGTGCATTGCCAGTT  
TCGCGCTATGAAAATGATGTAATGCGATTCGTTTCATCCTGTCTGCTTTGGTTTCATAGGT  
GTTACTCGTCTTACAATGTTTATTAATAGCGGGTTAAGTATGAGACACGTAGAACTATA  
ATTCAATCTCTGAAAATTATAAGGTTGACAGCGGATTGCCTAGCGTGTATCCTGATCGT  
GTTGCTGATCTTGATGTTGCTGGAAATATTAAGATTGACCCACTAACAGGGAAACCATTT  
TACTTAACGTAACCGACAATTGGCGAAGAGTTTCTGTTCTCTCTGAATATGATCACGAG  
AACAGCGAATTGTTCTACGGACTTAAAGCAAGCGAACGAAGATTTGCAATGAGTCCACTG  
TTTGACCAGTCGGCGGTAACATTCTATATGTTCCGTCAACTTGTAGATAAACGGTGAAG  
GATAATATAGGGAATCCACGCGATCCGAAGAATCCGACACAGAGGAAAATTAATTGCTAA  
TGAAAATAATGTGATCTATCGCTCAATCATTACTAGCAAATTCAGAACAGAAAACTTCT  
GAACTTCTATAATTGTGTAGGCGATGGAGCAAATCAAATTCGAATTTATGGAACGTTTGG  
ACGTTCCGGAGCCGTGGTCAGAAAACGAAAAGAGGTGGGCTTTGCCCCACCTTATCCGAC  
CAATTCTACGGCTGGTGTGTTGACATGTGGACCCATATGATGGGGGCGGTTAAGATTAA  
CAAATCACTTCTTGATGCGGTTATCCCTCGTAAAGATTGGGGTGATACCGGACAGGATAA  
CCCGCGCACATTCTTATCAATTACATTGTTGTTGTCAACTCAGCACCATATAACCGAAC  
TGATGTCCGGTAGCGGCTGGATGGTGTATCGCGTACCCGATGTTCCCTGAACGCGGTTACTG  
CTCGATTTCAAGCATTGACGCTTATGTAGAGTGTTTGAATTTGTCCGGAATGTGGACCCA  
CACTCATGAATCAATCGCGCCACCTGTAGGAAAGGGCGATTCAATTGATATGGGGTATGG

ATATCGTTGGGAATATCTGTACACAATTCCACCTGATGCGGCGATCAACCGTTGCACCAA  
TGAACATATTGTTCTACCGGTCCCCGATGAACTGCGACAAGATCCGGAGCGTTGGGGCTA  
TGACAATGTGATGACGTGGTATAATGACTATAATCTTCTTTATCGGCTCAAAGTAGTAAC  
TTAGCGTTTTTCAGGCTTATATGGACTCTGCGCAATTCCCAACTACCGCGTTAGTGGGTAA  
TACTGGCTTCGGTCAGTTAGGCATTATCGTTAACCCATTGGAAATGAAAGCACGCCCTAG  
CGATCCAGATGTTAAAGCGGTCAAAGATAAGTACCGACCGCAAGACTAAGAGCCCACTC  
AGGCGAAATGATCTACATGGAAAACCGACAACCTATCGTTCGGTCATTAGATCAAACAGA  
ACTTGTCTCTGTTTTGTTGAGTTCTAAGTGTATGATTTTAAAAGCCAATTCGAGAGAGT  
TGACTTTTTCCCATTTTTGGAGTTGACGATCTTATTTGGTAAGGTACAATACACACATCTA  
AACATCTGAGGATAAATTATGGCACGTCGTAATTTACAGATACTTGTGAAGATATTCAG  
GTATCCCCTTGCGGTTGGGATGTGATCGCGAACGGTGAAAAGATCGGCGAGCTCATCGAT  
CATACTCATTCACTAGCCGATTACACCGATGAACTATGGGAGGGTATCAACTTCATG  
AATGACACTAAACCATTACAGGACTATCGACGAAGCTATCTAGTTCGAGTATAATCCA  
TTCGGTATGTGGGGAAGTAAAGATAAGTACCGACCGTAAATATTAATTGCATTACACATTGA  
ATAAAGCTAAGTTCCCAATGCAAAAAGCATTACTATGGTCTACGTGCACAAGATCCTAAAC  
TCTACGGTACTCATTGGTTTTGTAAACATGATAACCAATGGCACACATGCGAAGAAATGC  
ATGAGATGATGAAACAGGGTATTGAATTTAGTTGTTCTAATTATGACCATCGTATAACTT  
TCATTTCGAAAATTGAAACGATGGATTCGTAAGAATGCGCAATTTAAAACCTTTGTGTTTCG  
TTATGTATCAGGTTTATTTGGGACATAGCGTCACCGTCACAGCAATGGCTAAATAATGGC  
ACGACTTTCTACACAAGAACAATAACACGATCGGATGATGGAGTGGATTTATTCAGG  
TCGCCATTAACATATGAAGAAAAGAATTTTGCTATAATAACTATCATGGCGATGGTCT  
AGGCGGTTTCAGGTGCATTCTTACCCCTGAAGGGCTTGCATGGAATTTACCATCGATGC  
ACATTACACAGGAAAAGTATTAGATCTTTGTGCTGGGAACGGTCGCTTATCTTTTTGTAT  
GTTACATCGTTGTAAGCCAGAAAAGATCGTATGCGTCGAACTCAATCCAGAATTTGCGCG  
GATTGTCAAGATACTCTTACCGGAGGCAGAATGGATCACCAGCGATGTGTTTGAATTTGA  
GTCAAACGAAAATTTCGATGTGGTGTATCAGCAATCCACCTTTCGGGAAAATCAATACAAC  
CGACACAAAGGATGTATTTGAGTACACTGGCGGCGAATTTGAATTTAAGCTTATGACATT  
AGGCCAGAAGTTTGCCGATGTAGGTTATTTTATTGTTCTGCTGGTTCGCTGGTTTTGC  
TTATTCCGGCAGACCTTATGATGACGTGAGCATGAAGTATAATAAATATCTAAAATGGAG  
CAAACAACTGGTTTTGGTGACTTACGACGGATGTCGGATCGATACATCAATCTATCGCGA  
TGAATGGCATAGTACCAACGTTTTAACGGAAGTGGTTGAGGTTTCGGTATTACGAGAAAGA  
AGCTGTAGAAGCGCCTAAATCACGTCCTAACGAACAATAGAAGAAAGTGAGGTGATTAC  
CTTACCGAAACAGGAAAGCGAGTCTGCGACGCTCTCAGATTTGTTTGACAATTAATTATA  
AGCCGTCCTTGTGGGCGGCTTTTTTGTATGTATTCTATAAATAATACATCATAACATGAG  
GAATTAACAATGGCACAAGTTCCAAAGATAAGAATAGACACAGGTAAGTGTGCGGCAATCC  
CAGCACCGGGGACAACCTCTATGACGGCGGTAATAAAATTAACGATAACTTTGATTCAAT  
ATATGACGCATTTTCTGATCAACGCTTTAAAGACGTAGACCACGGCGTAGGAAGAACGGT  
TGTTTATGTGACCGGATACTATCAGAAACATCCACGTCAAAGCTACTCTGGTTCCGCTGT  
TGAGATTGGGAGTCTACACGATATCGATAACAAGTCAAGGCGCACTTATTGCTATTCTACC  
TAAAGCAAAGGTCGGTGAGGCTGTTGTATTCATAAATAGTAACGGTAGCCTTTCAAAGAC  
TACACCGGTCAATATTCGAACTCAAGCAGGTGTTTCTATTAGCGGGTATTCCGGTGATGC  
TACAATAACACAACCATTTTCAAAGTCACTGTTTGGTGTACTGCCGTTGAAGGTAGTCG  
CGTAACATGGCCATTGGGTATCGAAAGTATGTTTACCGATAACAACAACGCCATTAGATAA  
AACAGTTAACGTAAGTGGAGTAGCAACAACGTTGCTATTGCCGCAAAAACAGAATACGT  
TTCCATCAAATTATGAACTACCGTAGCAATACATCCGGTTCAAATATGCGTTCAAGTGA  
AACGCTAATGATGATCGATTCTAAAGCCGGAAAAGTTTATGCGACGGAATATGCAGTTTT  
GTCGAAGACAGAAGACGAATTATATACCGTTCGTTATTTTCATCGGTTCCGGCGATAAAGT  
ATATGCAGAGTATAAGGCTACTTGCGAAAATATTCGTTTAGCAGTTAAAGCCGTAGACAC  
TATTAATAAGGGGTTGCGACATGAAACAATTAATTGATATCGGTAACGTTGTTGATGAC  
GGTACAGGTGATTATCTAAGAAAAGGCGGTCAAAGATTAATGACAACCTTTCCTGAACCT  
TATACTAAGCTGGGGGATGGTGTATCCCTCATGCATCCGGCGCGTGGAAAACCTCACACA  
CAACCAGTATTAGAACCAAATTTTGGTGTATGCATGGGCGATTAATACAACGAACAACACT  
GTTTCTTTTGAATTGCCTAAAGGTGGAGTTGGTGATTATAACAAGACAATTAACCTTCGT  
GATGTTTGGCGCTCGTGGGCGTCTCATAACGTAACACTTAAGCCAGCACAAAGGTGATACC  
ATTAAGGGATCTCTAATCGGCCGTGAGTTGTATAAAGATTTTATGGATGTTGAACTGGTT  
TATTGTGCGCCTTGACGCTGGGAATATATCGAAAACAAGCGAGTTGACACGATCACCAG  
TCTGACCTAAGCACAGTAGCAAAGGAGATTTATATTGCCACAGAAGGGCAAACAGATTTT

CCTAATGTATCTGGTTCTAACACATATAACACTCGAAATGTTGAAGTATAGTATTGAGGA  
AACCTTTTATATTATGGCAAGTCTGTTAGTAATGACTCTAACTACGGTTCAATTGGTGAG  
GATGGATCACTTGTTGAACTTGAAGGCAAAGCATTAAACTTCGTTTTCTTGTTCGGCT  
GGGGATACGGTCCAAATTATTACATACATGGACGGAATTGCATCATTCCGATCTAGTTAC  
ATCACACACACAATTAGAGTGTATGATACCGGAATGACCGCACTAGAACTATTCCCTGGT  
GAAGTGTGGGTAGGTGATTTATCGACGAAAAAGAATCTACCAATGCTGATTTGGGAATT  
AGTAAACGTGATATAATTAACCCAAATTCATTTGAGTTATTAATAAATGGTACTCAAATG  
ATTAATAACTGGTGATTCTTATCTTCCTTCGTTTGTGTTGTGAAGGTGATGACTGAGAAACC  
GAAGAGAGTTGCGCACTTGTGGCGGTAAGTGGGTACAGTCTGGAGCAGATTATTCCTG  
GTATTTGATGAGAATAGCATTGTAACAGGGATTAAATTATCTAAAGGGTTGGACAATAGA  
GATACTATAACAATTCGTTGGTTAATAACGATATCGGAACTCTTTTAGAATGGGATGGT  
GTCGGCGGAATTAAGAAAAAGCAGACAAGATTTATCTCTATAACGAAGACGAAGTTAAT  
TTAACAAAACAAATTGAATATACCGACTTCCAGAATCCTAGCCAGAAAAACACTCGTCCG  
GAGGAAGAGTATTCAGGTCGAATTATGGATATATATGCACTGTTTGATATTTACCATCCG  
ATCGGCACTATATATGAAAACGCACATAACCAAGCTAACCCAGCGAAATATATGGGTATT  
GGTATCTGGGTTCCGGTAGGGGGAAGGAGAATTTCTTGCTGGTTGGTCTTCCGATGCCACC  
GTCCAGGATTTTGCATTAACAATATCGATCTTGATATTCATGGACAACCTACACACACC  
GCTGGTGGTACTGGTGGTGAAGTTGCCTATCAATTCAAGAAAGATATGATTCCTGAATTT  
CAATCCAGCGATCGTGTTTTGGTGAAGACGATACAGGGTCAATTATCATTGGTGGTTGT  
CAAGTTGACCCTGATGCGGCAGGTCCAGCGTTTACGAAATATAGAGAGGATATCGTAAAA  
GTTAATACTGGAAATGCTGATCCATCAAAGGTGGGTATTCTTCCCTCCATATCGCACCGTT  
CATCGCTGGTGAAGGGGAGGTTAATATGATTTCTCAAACGCGTTCTAAAGCAAGCGTATT  
TTCTAGCGACGCAGCATTTCATTTACATACGATCCAGGGTCTAAAGACCCCATTATTGGTGA  
CATTGCCCCAATTGGGGGATTAAACGTAGACCAATGTCGCAAAGGTTCTTTTGTAAACAA  
CGCACAAATCAGCCATTGATGATTTGTATAGCATTCTATGCTTAATCTCGGTGCTGTATT  
GGTAGCTACAAATTCAACTCCACCGGAAGGGGCGGGACAAATAGAACTCTTTCTTTCAC  
TGGAACGGTAACAAATAAACACGATCCAGCCGCGAAAAAAGTTGTGATTGAAGTTTTGGG  
TTATCCATTTGTTGTTAATGTTGGAACATCGAATGTTGCATTATGCGAAATGGTCACAAG  
AAAATTTAATGAATTGGGAGACAAAAGCATCCTGTTCTTTAAAGTTCAGAGGAAAGGCAC  
TGGCAACGATCGAATAGAGATTCAGTCTATTGATTCAAACGCACACGACGCAACGGTAGT  
AGAAAAATATGGTATTAGCGTTCGTGGGAAATAAATTCCTGCTTGTTATGGTTATGG  
TGCATGGGCCAGATTGGGAACGGGAGAAAAATTTGATTCAACACTAGTCTATTTGAAGCG  
TATTGAGTAAGGTCTAAAATTATGAATAACACTATTAATCACGTAAGACGATGCACAG  
TATGTTAAGTTTGACCCTACCGGAAATTGGCCTAGCAATATAAAAAACGTACAAGCGGCA  
TTAGCCGCTATTCAGGGATTTGCTATTGCAGGTCTTCCAACGGCAACCGAAGATACAGCG  
GGTAATGCTGAAATTGCTACTCAACAAGAAGTAGATGATGGGTTGGATGGAACATAAAT  
GTTACCCCAAAACATTGTCTGTTAAGCTGTCAAGAACGGACGCAACAAAACCTTGTCAAA  
GGGATCACTCGCTATGCTAATAACGATGAAGCTATGGGCGATACTCCAAATATTGCAATT  
GGTCTGATACATTAACCCATGTTTTTCGAGAATAAGAAAGCAACGGAACTGTACAGGGT  
ACAATTAATAATGTTCTATGGATGCGGCAAAAATCGGTAGTAATGAGACTATGGCGGTC  
ACGCCTAAAAAGATGCACGCTGCTATTGCTCAGAATGTTACTGGGTTGATTCCACAACAA  
AGCACGGAGACCGAGTCCCGTCAGGGTTTAGTTCGACTGGCGACAAGCCACCAACGCTT  
GCTGGTACTATCAGAGAAGGATTTGCCGCTAGCCCATATGCGTTTTCCAACGCAAGCGCC  
AATGAAAATCAGGCGGGTACTGTTAAAATTGCGTCATCCAACAAATGATTGACTGTAAT  
GACAACACAGTAGTAGTATCAGCACAAAAATTTGCGAACACTAAAGCAACCAGTGGACAA  
TTCGGTGTGTTAAGCTAACAGATAACCCAGGATCAGGCGAGGCAAACACGGCACTGTGC  
GCAAACGCTCGTGTATCGCCTCTAAGTGATGGTATCGTTACTTGTGATGTGTATCATCAA  
AGTGGAGGCGACGGAAACCAGTTTATCATTAAAAATGAACTGGATTGTCTTTGGATGCC  
ATTGGTGGCATCATGCTTACAGCATTTCACAGTTCCGACCACGCACACTTCAAATCTGC  
AACGGTCAATGGTTAAATAAAAACCAGTATCCAGTATTATTTTACGAATCGGTTTCACT  
TACGGCGGAGATGGCGGAGACAACCTTTGCAATACCCGATATGCGAGGGCTTGTGCTAGA  
GGTTGCGACCACGGTCGAGGACTAGACCCAGGTCGTGGATTTGGTACTTATCAAGACGAC  
ACCATGCAACATGTGACAGGTAACCTTCCCTGTAACCAACCGTTGGCGAGGTTGGACTGGT  
GGTGTATATGCCATCACAGGCGGTCAATGGAGCACGAACACTATCAAACCGGTGGTGGTGT  
GATTGGGGTAGTATCGTTACCTTTGACAGCGCAAGACAGGTTAGAACGTGTGGCGAAACT  
CGCGTTAAGAGCCTTGCAATTAACACTACATGAAAAGGGTACAATAAGGATCGAACAGTTAA  
ACATTCGAAAGATCCCTAACGTCGATGGTGTCCCTGTAGAGGGACAGAATTCTATTAGCT

GGATTA AAAAATGGTGACTGTCTAAGCGCAGGAACCACAGAAACAGGACACGAGGGGACGC  
TTAACCGCGCTCCTTATGCGATT CATCAAATATTGTTCTGCTAGATGAAAATTCTAAGA  
CAACGATAACAAAATTTAACGAAGTTGATACAGCAGTGAATGATATTA AAACTACTTTAG  
GCGCGGTTGCTGATGGTAGTATTATTGATCTTGTCAATCAA ACTATTGCAAAGGTTGATT  
CTGTAGAAGAAAATATAGGAGAATCTTCAAAGATATTACAAACCACAGTAGATGAACTGG  
CAGAGGCAGGAAAGAAAATTGGTGTTCCGTCGGCAGCAGCTCCGATTACACGGACAATAT  
ATGATGATATGTCTTTCATCTAACAAGAATTGGGCGCTTCCCTAACTTCAATATCAACG  
ATTCTCCAGATCCGCGTACTTCCGGTTCGGTATCAAATATCGAGTTATCCAGAATACGG  
AAGCATTAAACAACCACGGTCAGCGAATCCGCCGACTAGAAAACGACCGGCAAGATTCTG  
AAGTTGGAGAGCTACCAAAACAAGTTAACA AACTGTGAAGCGAGCTAGGAGATACATCAC  
TAGCAACACAGGACAATGTTTATCCTCGTCTTCGCACAAATACTCGCAATATCGCTAGTA  
TATCAAACGAAGTTAAGGAAGTAAAGAAAGCGATTCTATTTGATTAAATTCCTGATATCG  
GGACTAAAGTACTAAGCTACAATCTGATTATACACAGCTAAATGATGAAGTCAACGGCG  
TTGACGCTGGTATCCGTCCTCGTTTAACTCTTCTGGAAAATAATAATGGCAGTCTCAAG  
CCGCTGGAAGTATTGATTATCGATTGACTAATCAAGAACGGGAATTTGTAGATCGTAAAT  
CTGTTGTCGGTGTTAGTGGTGCTGTCGGTCTACGTGGTGAGGTGGCACGAATCTCTAACA  
CAGTTGGTACTGATAGTGAGCGTCATACTATCGCAGGTCGTCTAAAAATTGTCGAAAACA  
CACAGGGACGACTAGAAGCTAGCGTAAAGGTTATCGAGCAAATGATCGGCGATCGAGATT  
CCGGTCTAACCGCCGGGGTTATTTAGCTGGCAAGCGCCATGTACGGCAATCCAGAAGGAA  
GCACGCAGCTTGAAAAGATGGGATCGTGAAA ACTGTGAAGGAATTGAGCACATCAGATG  
CAACCAAGGTAGCAGACGTTCTGATGATGGTTTCCATTATCTACGTAAGCACGGGGAAT  
GGTTCAGGTCGGATGGGCGGCTGGTGCATTTAAA AACACCGCTCAGATTGATATTACTC  
TCGACGGACAAGATCAATACAAAGGAATCCCACTAAACCATATGACCGAAGATGTTCTGT  
CACGTGCAATGGTTAAGAGCGAATCTCTTGT TACGGTTAACGACAAAGGCTTATTCCGTT  
GTGATTTCCGTTGTTCTGTAAATGCGGCACATAACGCTACTTTCGTAGTCGTTATTCATA  
AAAATGGTCTGATTGTACATGAGGTACGGAATGGTCATTATGGACCTGATGATTTAATTA  
GCTATTCTACTAGTGGTTTCCTAAATATTGAAAAGGGCGACCGGACCGATATTAGCATT  
AGGGCGTATCCGAAGAAGCATTAGCGCAACAGCTACAAATTAAGAGCTCCTCTTTGGAA  
TTTCTCCGGTATAAGAAATTAAGGGGCGTTAAGCCGCTTTTTAGTTTATAGGTGATATT  
ATGTCAGGATATGTAACCAATAACCCAAGAGAATTAAGACGCTATTCTGCGTCGTTTA  
GTGGCACCAGTAATTGACGTAGAAGAAACAGAAGACCAGATTTACGATTGTATTCAGAGA  
GCATTAGA ACTCTATGGGGAATATCACTTCGATGGTGTGAATAAAGGATATAAAGTATTT  
CGTGTTAGTGCAGAGCAAGCGCTACATGGGGTATTTCGACTTAAGCGATTCTGGAGTATTC  
GCAGTAACTAAAATAATTCGTACAAACGTAAGTAGCGCGGCTACGATGGATGGTACTGCC  
TTTTATCCGTGGTTTACTGACTTTCAGTTGGGTTTAGCGGGTTTAAATGGCGGTTTAGTA  
TCTGACTGTAGTAAATTTTATAGACCAAATGCAATGGGCGGTGATCTAGGATATTTCGAA  
CAGCTTATGAGCTATCGAGCCGCTATGCAAAATATGCTTAATCCGCAGCCAGATTATTGG  
TATAATAGCGCAAACGGACA ACTTAAGATAACAGGAACTTCCGAGAAGGTGATCTAATT  
GTTGTTGAATTATATGTTAAAAGTTATGTTGATGTACCTGATATGATCGGCGCGGTTGCT  
GGTTATGCTCATGCGGGAGGATGTTCTACCGCTGGCGGGATTAGCGCCGTTTATGATGAC  
CCA ACTGCTGGTTTAAAGCCGGATTGTTGCTGCCATGGGACCGACCCGTGATAACAAGCAG  
GTCGCACGTAATGACCGTTGGGTTAAGACTGCGCGACTGCGTTTACTCGTTAGCTATGG  
GGCAGATCTTAGCTAAACATCAAGGGTTGCAATTACCAGGTGGTGGCACTGTTGATGGG  
GTCGGAATCGTCGAAGAAGCACGCGCGGATATTGAGAAATTGCGACAAGA ACTACTTGAC  
TTAGATCCTCCGTTCCGCATCCTCATGATTTGATTTATTGAGGGAGTATCCCCCATTTG  
GAGTAACATATGTTTAAACAAGACTCTTTTTGCTCGCCTTGAATCGCAAAGGTTTATGAG  
AATAAACTACAAACCGAGATTCTCAATCCTTACGTAAATTTCAACCGTCATACAAACACC  
CAGACGTTAGCCGACGTTATGGTCGCCGAAGCTATTCAGATGCGAGGTGTAGAATTATAT  
TACATCCCTCGTGAATTTTTTATACCAGATATGATCTTTGGTGAGGATGTTCAAAGCAA  
TTTACTAAAGCACGTAAATTTGCTGCGTATATAACCTCTTTCGACGGGTAGGAAGGTGCA  
GGAAACTTTTTTCAATCTATGGGTTATACGGCAAACGACGAATTAACATATGCGGTGAAT  
CCTAACCTATTCAAGCATCAAGTAGATGATCAAGATCCAAAATCAGTTGACTTGATTTAT  
ATTCCAATGAGTAATGATCTCTTGGAAATTAATTCCGTCGAGCCATATCAGCCGTTTTTT  
CAGGCTGGCAAAAATGCCATGCGTAAAATTATTGCAGAGAAATTTGTGTATAGCGGTGAG  
GAAGTGCGGCCAGAATTACAACGCAATGAGGGAATTAATGTTGATGAGTTTACGGATTG  
GATCTTGCACCGATCACTAATCTGGACGCGTTAACAGATATCAGCTTAGATCAGTACAAA  
GAAGATACGCAATTCAGAAGCGAAGGACAAGATTTTATTGATCCGTTTGATCCTATTAAT

GGCAAGGGTTCACCTTTCTCCGATTTTTGATAAATACTTGTACTGAAATAATATTCGGAT  
CTAATGACTTATGAAAACTATTATCTATACGAAATAAAGAACAATATAAATGGTAAAAT  
ATATGTTGGCATTTCGTGGGTATGATGGTGACATATGTCAAGCTCCTTATATGGGTAGTGG  
ATTGACGCTTAAGAGGTCTATTAACAGAACGGGATTGAAAACCTCACAAAAACAATTCT  
CAAAACGTTTGACTCATGGAAAGAGGCAAGGAAAGCAGAAAGAGAAATAGTTACAGAGGA  
ATTTGTAATAAGAGAAGATACCTATAATGTTTCGGTTGGTGACAAAGGTGGAAATACTCA  
CGCTGGGATCAGCGAACAACGAAGAAAACCTTCAAGCGAAAGACACGCTGAAGCAAACCG  
AAATAGAGTACGGAAGCAAGAATCTAGAGAGAAGGTTAGCGCAAGATTCAAAGGTCATAA  
GCTATCACAGACGCAGATAGACGCTCTAAAGAAGGCAAACACAGGAAGAAAGTTCACAGA  
AGAAAACAAGTTCAAAATAGGTAAAACGTGGCGAGGAAAGAAACGACCAGATATAGGAGA  
AAAGGCTGCGGCAACATTAACAGGGAGAAAACCTACCCCAAGAACATGTGGCAGCAATAAC  
GCAAAATACACCTAGAGGAAAACAACACTTTAGGGCCAAAAGATTCTTCGTCGACGATAT  
GGAATTTTATATTTTGAGTAATGCAGCTAGAATGTTTGGTATAAGTTATAAAACGGTTAG  
AGCTAGACTTCTCTCAGATAACTTTCCTACATGGAGATATGAATAAATGTTTTACATTT  
TTACAATTCGTCAATTCGAAGGTATATTGTATTGCTGTGTAATTTAGTCACCGGCGTACA  
AATTAAGGGGTGCGTAGTGACGGCGAGCGTTTTATTAAAGTTCCTATCACGTACGCAA  
GAAAGAAAATTCATGATGAGTCCGGACAAATATAACAATATCTTAAGCGAGGAAGACGT  
CGCAAAGGTAGAACTATTTACGCTCGTATGTGTCTTTCTTTAATTGGTATGACGTACGC  
CCAGAACTTTAAATCCAATATTGCAGAAAAGGCAGTACCAAAATATACGGCTGATGGAAT  
CAGGAGCGTAACACAATATAAACCTGTACCATATAAGTTTACTTTTCGAGTTAGGGATTT  
TACGCGTAACGAAGATGATATGCTTCAGATAATTGAACAGATTCTTCCCTTACTTCCAGCC  
TCATTTTAACTGTAAGATTAAGAAGTACACGGTAATGATGTATGGATTGATAGAGATAT  
TCAGGTCACACTTAGTTCTATTACTCCAGATGAACAGGTAGGCGAAGATAAGTTTTCTCG  
TCGTCGTCTTGAGTGGACCATTATGTTTGAGTGCATCGGGTTTATCTATCCTCCAGCCAC  
CGACGTTAAGGGGGAAATCAGAACGATTTATCTTGATTTTCATGCTAATCCTCGTGAATT  
AAATCCTAGCGGTAATATTGAATCAGTGGATCATGAAGTTGTTAAACGTGATGGTGAGCA  
AGAAGAATGGGACGGAACATCAAAGAATCATATACTAGTGATACTCCTATAACCAGTTGC  
ACCGACTCCACCGGGTCCACGTATTGTAAGAGAATTTGATGAGGTAATTTATTATGTAG  
ATCTAGCCTTAGAAATGATGCAATTAATGAATTTTCGAAAGTCTAAGTCTTCCGGGGTCAT  
TCGACGAGGAAGAATATCGAGTGGGCTATGATCCGATCGTCTTGACTCCGGTTCGAAAGCC  
ATCCAGAAGATCGTAATATTGACTTACAACGAGCTTATAAGGAGGCACGTCAGAATATTC  
ATTTTCATAATCAGATGATGATGGACGCCGAAAAGATTTATCTTGAACCTGGTAAAAATA  
GTGAGTCTCCGAGGTTCTACAGGCATTTAACGGCCTCATGCAGCCAATGAACAACAACA  
ATAAAGAATTGCTGAACATCCATAAGGATATGAAGAAAATCACCGAGCAAGCTGGAGAGA  
AAATGAAAGATAATACCCAGCCGCACCAGTTAATATCCAGAATGCGACCGTCTTTATGG  
GTTCTCCTAGTGATTTAATGGATGAAATCGCAGACGAGGAAGCGCGGTTATTGAAGGCG  
AGACAGTATGAGCGTGATTGAAGGGATTAACGCAATGGCGACGGATGAACACCCGCTACA  
TTAGCTCATCCGTCTCCACTAGAACTAAAATTGATTCTAATGGTATTGAATGGATTTT  
ATCAAAGCATGATGATAAATGGTATCCTAAAAGTTTTCCGACTATCTGAAATTAACAG  
ACCGCAGAAAATAAGGATTCAAAGCACTGATCCAACAAATTATAAGTTCTATAAAGATAG  
TGACAATATTCGCACGCGGTATATGCGGTTAAAGAATGGGCGAAGGGCGAATATTA AAC  
TCAGTATACCCCTGAAATGATCGCGGAGTGGAACGATGCCGTAAAGATATTGTATATTT  
CGCAGTAACCTATTGCGCAATTACACACATCGACTACGGTACAATCAAAGTACAATTGCG  
TGATTATCAGAAAGATATGCTTAAGATCATGGATGAAAACAGCATGCGCGCCATAAACT  
CAGTCGTCAGCTATGGAAAACCTACCGCTGTAGCAATATTCCTTGCTCACTACGTTTTGCTT  
TAATAAAGACAAAGCCGTAGGTATACTGGAACACACAGGATCAATGGCAGTTGAGGTTCT  
AGAACGTACTAATCAAGCAATTGAACTATTGCCGGACTTCTTACAGCCTGGTATTGTAGA  
ATGGAACAAGAAATCTATTGTGTAAGAAAAAGGGTCTAGTACGGGCGCTTATGCATCGTC  
ACCAGATGCTGTTTCGCGGAAACTCCTTTAGTTTCATATACATAGACGAGGCAGCCTTTTT  
TAGTGCGTGGCAAGACGCATGGTTAGCTGTTCAACCAGTTATCTCATCCGGTCGTGAATC  
TAAACTGCACTTGCCAACAACCTCCGAACGGGCTTACTCACTTTGATGACATTTGGCAACC  
AGCCATTGATGGTAAAAGCGGTTATGCACCTTATGAGGCGGTTTGGCATTCTGTAAAGA  
ACGTCTTTACAATAATGCTGAAATATTCGATGATGGTTATGAGTGGTCTCTCAGGCGAT  
GTCCGGATCTAGTCTTGAGCAATTCCTGCAGGAACATAACGCTGAATTTTTCGGTAGTTC  
CGTACTATGATCAGGGCAACCACACTATCAAGATTATCATTTATTGACGTTGTTAATGA  
CAACGGGTTTAAATCAGTTTGAGAAACCGAAAGAAGGTAGAAAATATGTTGCTACACTAGA  
TTGCTCAGAAGGTCGACGACGGGACTATCATGCAGTGCAAATCATTGATATTACTGAATT

TCCTTATAAGCAGGTTGCAAGTATATCAAAGCAATACTACGTCCCATTTTATATTACCGGA  
GATTGTCTTTAAATATCTCATGATGTATAACGAATGTCCAGTTTATATCGACCTAAATGG  
TACGGGTGTATCTATTGCTAAGTCTCTTGCGATGGATCTTGAATATGATAATATTATTG  
CGACTCATTCATAGATCTAGGGATGAAACAATCCAAAAGATCTAAAGCATTGGATGTTG  
GGCAATAAAAGAATTAATAGAAAAAGATAAGCTGATCATTAAACCATAACGGAACTATTCA  
GGAGTTGCGCCCATTCTCCGAGAAGGGAGTAGGCTGGGCGGCAGAGAAGAAGGTTTTACGA  
TGATTTGGTTATGAGTCTGGTAATATTTCTGTTGGTTAACAACCTCAAGAAAAATTCGCCGA  
ATACGCAGGAAAAGACGAAATGCGCATCGCCTCCGAAATATTCCGAAAGAAATTAATGA  
ATTGGGGGAAGAATACGCGCCCGTGGTAATATATGACGGTGCAAACGGCATCGAAGCATA  
TAGGCTGCGTGAAGGCCTAACAAATGATATAAATACGATAATGGATAATAGGATGAGGAAA  
TTCTGAAGACTCTATTATCACCGGGTTTCGAAACGAAAGAACTACTCTCTCCACTACCA  
TTGTGCAATCTGCGACTGGTCGCTCGGCGCTGGTAGGTAATTTCAATGGGGTCCAGCTT  
TCCAGATTGTTCAAGTAAGTGAAGTTGAATTAGTTAATAAACTTGGTCAGCCGGATA  
ATAACACCGCAGACTATTTTATGAGCGGGGCTAACTTCTTCCAATATGGCAATGACCTGC  
GTGTTGTACGTGTACTCAATCAAGAAAAAGCAAAAAACGCAACTGCCCTAGCTGGTAACG  
TAGAGTTTGAAATCACAAACGAAGGTTCAAACCTATGAAGTATGCGATACCAGCAAGATTA  
AACATAACCGTCAAGATATTGAAACGGCAGGTAAGTAACCAAAGTTGATGGTGATGGTA  
AAGTTAAGGGCGTATTTATCGCAACTGGTAAAATTATCGCTCACGCTAAAGCAATAGGCG  
TATATCCAGAACTTATGAGCGGTTGGACGGCAGAGTTCACCTTCTTCGTCAGGTAACGGTA  
GTGAGTCGTTGTGAGTAACTAAAATTGTTACCGATTACAGGCTTCTCTTAACGGATCTGG  
AACTTCCCGAGCCAATATCATCAATCAAGATTTTTTGACAAAGCTCAAAAAGTATGATA  
TGCCAGCGGTAATGCAATCTATCCTGGTGAGCTGGGCAACTCTCTGGAAGTTGAAATTC  
TGCCACGTAGCTCGTTCAGTGGCGCGGTAGCACCTGAATTAAGTATCCGTTCCGGCG  
GAACTCGTGCCGCAGCACGCAACCTAATTCCATATGCACCGCAGAATGATATTCAATGTG  
CGTTTATTGTTTCGTCGAGATGGTGTGTTGGTAGAATCCTATGTACTGTTTACTCTGAAAG  
GGGATAAAGACGTATAAGGCAATTCTATCTACATGGACTACTTCTTTGGTCGTGGTTCTA  
GCCAGTACATCTATGCAACCGCTCAAGGGTGGGTAGATGGTTTCAGTGGTATTATCTCTC  
TTGCTGGGGGTGTGTCTGCTAACGAAGCCAGTACGGGCGACCGTGGAATGATCCGTTCA  
TTGGTGCGATGATGCAAGGTTGGGATCGGTATGCTCAACGAGAATCTATTCACGTAAACC  
TGTTGATTGCTGGTGATGTGCTGGCGAAGACGTTGCGTCTCTACCGTACAGAAACATG  
CTGATTCCATCGGTTATGAGCGTCAGGATTGCTTAGTAAGGGTTTCTCCGCCGCGTAGCA  
CTGTTGTCTATATTCCGGTCACTACCGCCATCGATAATCTGATCGCATGGCGAGAAGGAA  
ATAGCAATTATTCAGACAACAGCATGAACATTAATACCACTTACGCGGTTATTGATGGTA  
ACTACAAATATCAGTATGACAAATAGAACGACTTACACCGATGGGTTCCGTTGGCTGCTG  
ATATTGCTGGTTTGTGCGCTCATAATGATGCTGTATCCCAGCCGTGGATGAGTCCGGCAG  
GTTCTAACCGTGGTCAGCTCATGAACGTGGTTAAACCGGCTATTGAGCCTCGCAAGGCAC  
ACGGTGATCGTCTGTATCAGGCTGCAATTAACCCGGTGATCGGTGCTGGTGGTGAAGGGT  
TTATCCTGATGGGTGATAAAACCGCTAGGACTGTTCCCTAGCCCGTTTGACCGCATTAAACG  
TTCGTCGTCTGTTTAAACATGCTGAAAAAGAATATCGGCGATCCAATCAAATACAACTGT  
TTGAAAACAACGATAACTTTACTCGCGCTTCTTCCGTATGGAGGTTTCGCCATATCTCA  
GCACGATTGCTCTCTTGGTGGCATTATGACTTCCTAGTACAATGCGTCACCACGTACA  
ACACGTCGGATGTAATTGATCGCAACGAATTTGTTGCTGGTATGTTTCATCAAACCAGCAA  
AATCGATCAGCTATATCATGCTCAACTACACTGCTGTGGCAACTGGTGCTGATTTTGACG  
AAATTATCGGTCCAGCTAACCAGGCATAATCAGTAAATTAGCATGGATTAAGTTAAAT  
CAAGCGGGGATTTTCTCCCGCTCTATTAAGGAATATCAATTATGGCACTCGATTTGAAT  
GATAGTACACGCGGTTAGAGTCTGGCGATTTTGTCTCGTCTAACCTGTTTGAAGTTGAG  
ATCCCGTATCAGGGGCAAACTTTAAGCTGATGTCTGAGGCTGCGACTGTCTCGGCTGCT  
ACCGTAGAAATAATTGCTGTAGGCTATCAAACCGTAAAATAAACATCGCTGGCGACCGT  
GTATACGACGACTGGACCATCACTGTATTCAACGGTGACGCACACAAGATCGGTGATGCT  
ATCGTTGCATGGAGCGATCAGACACATGGCACAGGTGCGGCGATCACTGGTGCAACTCCT  
GCACAGTATAACAACAAGCTATTGTTCTCAACTTAACCGTAACACCGAATCAAACAAGC  
GAAAAACATTGTACGGTATTTTCCCGACCAACGTTGGTGAAGTAACCCCGACTGGGAG  
CAAAACAACGCAGTTGAAACGTTTGAACCTACTTTTGTCTATCGACTGGGTAGAATAAATA  
TATTATCATGCGGGGAGAAGTTCCCGCTTAATTTCTCCCAATTCGAGGGGAATAATGTT  
TAGTAGATTAATAAATGCTTGCAGCGTTGGGCTGATTTTGAACAACGACCAATACGAAGATCA  
AATTAAGATAAAGCAGCGTCTATCGCCGCACCTAGAAACAATGATGGTGCTACGGAAGT  
AGAAATTAATGATAATTCACCTGCTAGCGCGTGGAAACCCTATTACCCAGCAATTTCCAG

CACCGACCAGAAAATGAGCACAACCTAAGCAATTAGTTAGCACATATCGCGGGTTGATGAG  
TAACAATGAAGTCGAAAAAGCTGTACAAAATATCGTTAATGATGCGATTGTATTTGAAGT  
AGGTCATGAAGTTGTTTCGTTAAATCTTGAGGCGACTGGCTTTAATGAATCCGTAAAAGA  
GCGCATTTCATGAAGAATTTAAAGATCTTTTAGACACTATCCAGTTTGATAAGCGTGGTCA  
GGATATGTTCCGTCGCTGGTAGGTCGATTCGCGTATTTTCTTCCAAAAAATCATCGGCAA  
AAATCGAAAAGATGGTATCGTAGAATTACGCCAGCTTGACCCACGAAATCTTGAATACGT  
TCGAGTGATCGTTACAGAAGACACACCGGAAGCTAAAATTTATAATGCAACAAAAGGATA  
TTTCATGTACACTGTAGGCAATAGCTCTTATTGCGCAGGTGGTCAAGTATTCTCTCTTAA  
TAGTCGAGTTACAATCCCGCATAGTGCTATTCCATACGCTCACAGCGGCTTGATGGATTG  
CGATGATAAATATATCATTGGTCATTTGCATCGGGCTGTTAAGCCAGCAAACCAGCTTAA  
ATTGTTGGAAGACGCAATGGTCGTTTATCGTATCACGCGTGCACCGGAACGCCGAGTGTT  
CTGTATTGATACCGGAAACATGAACAACCGCAAGGCTGAACAGCACATGAACTCAGTGGC  
ACAGTCTTTTAAAAACCGCGTTGTTTCATGATGCATCGACTGGTAAACTTACAAACCAGCA  
ATCAAATCTATCAATGACAGACGACTACTGGTTACAGCGTAGAGATGGTAAAGCAATCAC  
CGACGTTACTACTTTACCGAGTGCATCCCGTAGGAGTGATATCGATGTTATTCGCTACTT  
TAACCGTAAATTGTATGAAGCGTTGCGTGTGCCATTGTGACGTAGCAATCTCTCCGATGC  
TAATATGGTGATCGGTGGTGATGGTTCAAAAATAACTCGCGATGAGTTGGAATTTTCGAT  
ATTGATTAAACTCTGCAATCACAGTTTTCGGAAGCAATGCGCGATCCTTTGAAATATAA  
TCTGATTCTCAAAAATGTACTTACGGAAGATGATTGGGATCGTGAAATAAATAATATCAA  
GGTGGTTTTCCATCGGGACTCTTACTATACAGAAGTTAAAGACGCGGAAATTTTAGAACG  
TCGAATCGGTCTAATCGAACGTATTACACCTTACATTGGTAGATATTTCTCTAACCCAGAC  
AGTGATGCGTGACATTTTGAAATATACCGATGACCAGATGGACACCGAGAAGAAAAAGAT  
AGAGGTAGAAGCGAACGAGCCGCGCTTTAAACAAACTCCCGATGAAATAGAGGATTTTTTA  
AATGAAACAATTTATCGAAGCAATTAAACTCGCGATCTAACGCTGATCGAAAAAAGATT  
TGATAAGATCATGCAGGCTAAAAAAGCCAGATCATCGAATCCAGCGTATCGAAATCGC  
ATCAAGTATCATGATCGAAGGTGAAGAAGAAAAAGTCCGCGATGATGAAGAAGATATGGA  
AGATGAAGATCAGGACGACGAAGATCGCAAAGACGATAAAAAAGACAAAGAAGACGACGA  
ATAATAGCAAGCTAAAATGATTAAGATTTTACACCTAAAGCTGACTTAAAACTTTTCT  
GCCGGAAGCACAGGAAAAATTAGACATGTGGACTATGTTTGAGTCAGAAGAAGTATTGAA  
AATCGTTGAAGGTATTTCTAGGATGAGCCGGAAGTGGCTGTAGCAATGCTGTCTATCAT  
CGACCGAATTACTGTAATGAAGCAATGGTTAAACATGTAAACGCACGCGGGGAAGTTGA  
ACGTAAGAAAGATCGCAAAACCCGTGAGCGTAATGCTTACATGACTACTGGCCTAAGCAA  
AGCTAAACGCCGTCAAATTGCCCGTTCGTGCTGCACAAACCAAACGTGCAAAGCCACCTAT  
CGAACGTCATGCGGAACGTAAGCGCAAAAAAGCAATGCGTAAACGTAAGGCGTTAGGATT  
CTAACAGGAAACAACATGGAAAAGAACGAATTACTGATCGAACAATGGGGCGTTCCTTGT  
GCTCGCGGTAGTTTCGTGCTGCTTGAATCATTGGATGATAAGGCTACAGGAAATCTCTAT  
ATTCAAGGGATTTTCTGCAAGCCGAAACGGTAAAACGTAATAAACGCTGGTATCTTCGC  
AGTGTCTAGAAAATGCGGTTACTAAATACATACACGAACAAGTTGAGACACATCAAGCT  
CTAGGCGCACTTAATCACCCAGCAAGAGCAATGCCAGATCCATCTAATGCTTGCATCATG  
ATTGAAAAATTGTGGTGGGAAGGTAATAACGTGATGGGTAAAGCCCGTGTATTGATGGG  
GATAAAGGCGCAGGTGATAAACTTGCTGCACTGATTCGCACTGGCTGGATTCTGGCATT  
TCTCCCGTGGATTGGGTTCGGTTTAAAGACTCTGGTCGCGGATACAATATTGTACAGGAA  
GGTTTTGTGTCGACGGTTGGTGTGATGTTGTTTGGGGTCCGAGCGCACCCGGATGCGTGG  
GTGACTCCTGTGTTTGAAGTCAACGGATAGCGGTTCTAGCGCGTAAGACGCACCAAAAAGC  
GATAAAACCGAAAAAGTACTAACCCTACAGCCTCACAAACAAACATCGTTCGAATCGAAT  
AATATTGCGTTTATGGCGCTCGCAGAAGCGTTATCTAAACTCTATAAATAATAACGTCGT  
TATCAACAAGAAGGTTATAACCATGCTTAAAGTAATGATGCTCGAAGAAGCAAAACAGAT  
CACCGTAGACGTTGCTCTCGATGACCAGTTTGAATCCGTCGAACTGTCGCCGGAAGTAAA  
AGAAAATTTTGCTACTATCTACGCTCAGGCGGTAAGGCTAATGCTGTTGCTCTGGCAGA  
AAGCCAAATTGAAAAAATCGCCGCTAAAGCCGATGAACTGTTAGAATCAAAGGTCGAAGA  
ATCACGCTCCGAGATTAATAACCAACTGTACGAAGATGCAGATAAATTCCTGAATCACTT  
AGGCGTTCAATGGCTGGCAGAAAATAAAGAAGCCGTACCCCGAAATATTAAGCGGATCT  
GTGCGAATCCCTGATTGGTTCTCTGAAAGATGTTCTCGTTACTACAATGTTGTAGTGCC  
GGAAGAATCTATAGACGTTGTTGCTGAACTTGACGAAGCACTCAAAGAAGAAACAGAAAA  
AACCTCCGAACTCTTTGATGCCAAACTGCAACTTGAAAGCGAAATTTGTGGTATGAAGCG  
CGAACAAGCGATGAATGAAAGCACTCGTGATCTTTCCGATACTCAAAAAGAAAAAGTAAC  
CGCGCTGATTGAAGGTCTGGAATAGAGCGAAACTCTCGATAAGAAATTAAGTCAATTGT



CGAAATGGTAGCTAAGAAAGAAGACAAACCAGCTAAGATTGAAGAATCACTAAATAATGA  
TGCCGACAAGCTGAATGTCATTGCAGAAGCTGTTGAAGAATCAGAGAAAAAAGCATCTGT  
AGATTCCGGCGTATCTCGCTACCTGAATTTTCATCTAATGCGATTCAAATCCACTAATAAA  
TACTTTAGGTTAACAACAAACAAGGTTTAAAGAACATGAAAACCTACCAAAAACTGATGG  
AAAAATGGTCCCCGCTGCTGGAGAACGAAAAACAGCCGGAATTCGCAACTGCGTTTAAGC  
AGAACTGGTTGGTAAAATTCTGGAATCTCAGGAAGCGGAATTTGCTGTGGATCCGATTT  
ATAAGGATGCAAAAGTTGTTGAAGCATTTCGGTGGCATTATCGCATAAGCCGAAGTTGCTG  
GCGACCACGGTTATAACGCATCTAATATCGCGTCTGGACAGACTACTGGTGCAATCACCA  
ACGTAGGTTTCGGGTGTTATCGGCATGGTTCGCGCTGCTATTCCTAACCTGATCGTATTTG  
ATATTTGTGCTGTTTCAGCCGGTGAGCACTCCGACTAGCCAGATCTTTGCAACCCGTTCTG  
TATACGGTGGCGACCCGCTGGCTGAACACGCTAAAGAAGCATTCCATCCGATGTAATCTC  
CAAATGCGTTCCATAGCTCTCTGGCTGCTAAAGATGCAACGACTGTTTCTCCTACTGGCA  
CTGCGTTCCGGAACGCACTCTCAGTACTCCTATTGCCGCAGGTGATATTGTACACCACA  
CCTTCGCAGAACTGGCATCGCATATCTGCAAAACGTTACCGCAGAACAAAGTAACCCCGA  
CCAAAGCTGACAGCGAGTCAGATTATGAAGTTGTCATGAAGCTGCTGGAAGAAGGTAAC  
TGGCTGAAATCGCTGTCGGTATGGCTACTTCCATCGCTGAATTGCAGCAAGGGTTCAATG  
GTTCTCAGAATAACCCGTGGAACGAAATGTCAAGGCGTATTGACAAACAGGTTGTTGAAG  
CGAAATTCGCCAACTGAAAGCCCGTTATTCTATCGAAGTTGCGCAGGATCTGCGTGCTG  
TTCACGGTATGGGTGCTGATGCTGAACTGAATGCTATCCTGGCTAACGAAGTTCTGCTGG  
AAATCAACCGTGATATCGTTGACGTGTTCAACTTTACCGCTCAGGTTGAGAAAACTGGTA  
TGACCCAGACCGTTGGTTCTAAACCTGGTGTATTTGACCTGCAAGACTCGATTGATACTC  
GCGGTGCTCGTGGGACTGGTGAATCCGTCAAGTCTCTGATCTATCAGATCGACAAAGAAG  
CTGCTGAAATAGCTCGTCAGACTGGTCGGGGTGGTAACTATGTTATTGCTTCCCGTA  
ACGTTGTAAACATTCTGGCTTCTGCTGCTCAGGGTATCAGTCTTGCTATGCAGGGTGCTG  
CACAGGGTCTGAATACCGACACCACTAAAGCTGTTTTCGCTGGTGTCTGCCTGGTAAGT  
ACAAAGTATTCATCGACCAGTATGCTCGTCAGGACTACTTCACCGTAGGTTACAAAGGCG  
ATAACGAAATGGATGCTGGTATCTACTATGCTCCGTATGTTGCTCTGACTCCGCTGCGTG  
CAACTGATCCTCAGTCTTTCCACCCGTTCTGGGCTTCAAGACTCGCTACGGCATCGGGA  
TCAACCCGCTTGCTGACAGCGAATCCAGGCGCCGTCCGAACGCATCACCTGCCGTATGT  
TGCGCACAGACAGCGTAGGTA AAAACGCATACTTCCGTCGTGTATGGGTTAAAGGTTGCT  
AATATAAGCCATTCTGAAAACCTCCGGGCGGGTGAATACCCGACTTATCATAAGCCTTA  
TGACAGTGTAAGTGCTAATTCCAACGGGAAGACTCGAAGGGGCCTACCCTTTTTGCGTA  
TTATAACCCGTCATAAATTAGGTTGAAAGCCTATACTCTATTGGGAGCTAAAATAGATAT  
ACACAACAAACAATTCGACCAGCTTTCGTAGTAACTGCATGGCAAAGGGACCAATGACTG  
AAATGAACGTTTCATGTACATATTGGGTCCGATAGATTTAGGAGATAGACAGATCTGGTGT  
ATGCCGCCCTTGTTATGACATTCCAGCGTGACGCTAGCGGTACTTTTGGTTTTTGGTACGC  
TGTTCCCTGAATTAACCCCAAATCTCCATAAGGAGGAAATGCATGAGTAAGAAAGAAAA  
CAGCTATGTTATGACTCGTAAGGAATCCAACGAATTGAAGTTAGCATTAGCTTTTGAAT  
TATTCGTTCTGATCATGCAATTAATCTGGTAAACAAAGTTAACCGTAGCGTGGATAATGT  
GTCTAGGAAGAAGTAAGTTTATTCTGGAATCCCTCGGATTCCTTTTTCTTTTTGTATAAA  
TATGATATATCCATTAAGGCAAATACAGGATTCATAAACATGACTCAAATTTTTACAGAA  
CTGTTGCGGGAATCTACTTCTTAAGTAGCTAACCCAGCCAGCGCGACCGCAACTATTATCA  
ATAACTCGCGCGGTAACAACCTGATTTTCTCTGATCTGGAAGCAATCCAGTCAACGGAT  
CAACCAGTACCTGCATTGTACGGCCTACGTTATCTTAATCGTGATGGTTAGATGGCTTTC  
CGAAATGCTACAACCTACGGTGGCCCGGCTGGTGTATCGCACAGAGATTGAAGAGTTTTCA  
AAAGAAAAATCTTATGACGAAGGCGCACTGTTCAAATCAGACAATGTTGTATGCGAAGTT  
GTGACCGCTGGTACAGTCGGTCCAGATGCCGAAACTCAAGAAGCTGCAATCTTTAAAGGC  
ATAATGACAAACAAAATTCGTTTATAAAGCGATCGTGTATCGGTAGAATACTTTGAAGAT  
AAAAACACCGAAATTTTCGTCTACCTCAATGCAGTTTGATAAATGGAAGGTTAATGTAGGT  
TCTCGTAAACTGAAAACCTCATTGACGACCGAATTGATGCAGGATCTTGAGGCAAGCCAA  
AACAACTCTGAATACTCTGTAATTGATCTTCTGGCTACGATCGCTACAGAAGAGATCAAC  
AAAGATATTATTCAGAAGTTGATCACTGTATCATATCGCTATAAAATTAAGGGTTCACC  
CCTGACGGCGTACTTGCTCTCGTTAGCGTTCAGGATGCACCAGCACAAGCACGTGAACTT  
TACCGCTATGCTGACGAACTGAGCTATCAAATGTTGCGGACTTCCCTCCTTTTCTGGTACA  
TACGTTTTGGCGTCTTCTCGCGTGGTTGGCCTCCTACAATCTACCGGATGGATGGAAGAA  
ACCGACAATGCTCTAAGCGAAGGTCGTCTACGTTGCGGGCTGGAAGTGTACGCAGACACG  
ACAGCACCTTTCGATTATATGCTCGTTGGTTGTAAGCACATGATCGGTGGTATGCAGAGT

GTAGGTTCTCTGTTCTACTCCCCATATACAGAAGCCGACGGTGCTGGCGCGTATAAGAGT  
GTCATTGACCCTAATAGCTCCCAGCATCATGTAGCTATTATGAATCGTGTTACACTCTCT  
GTCAACCCATATACATCAAAAGTTAATCAGGAAGAACACCAGGTCATCAAGGGTGACGAT  
TGGGGTAAAATGGCTGGACCTTCAGAAATGTCCTACATTTTAGGAATCGAACTGCCACCG  
CTTGATATTGACAACGCTTCACTAAATATCTAACCAAGATAAGTCAGATCCGCCCTAGAT  
TTTTTCGACGGCGGATCTATTTTCTTGATGATATAAGTTAAAACATGGTATCCCATGTCT  
ACGGGCAACATAAACAGCAATTATAGTTCATCCCGCAACGATTCCATGAACTTCTTTTCGC  
CCAGAATATCACACAATCTACAGGATCATCAAGGGTCTCACCTAAGACTTGAGCAACATT  
TCTAGAAAACAGATTTTGCATGAATAACGATATAGAACGAGGATTATCATAAACGTGTTC  
TAATTCATCCATCTCCTAATTTTTTTTGTTCCTAAGGTTTGCCATGCAATAATATCATGACC  
GTTTTGCTTGTGGTCATAAACTTCCAGTTTGGAATCAAAATTTTTCAATAATCTGGATC  
GTAATACTTCATGAAAGCATTGTCCATACCGTAAGCCTCTCCAGAATCCGCTACAACGCG  
TTTTTCTGACAATACCCTCCCAATGGTACAAGCCATTATCAAAATGTCGCTAGGCCCTTT  
TCTAGAGCCTATTAAGCACATCTACGAAGTTGTTTTACTCCAAACACATCATATAACTG  
GTCAAAGATAATATTTCTCCATAGAAAGCCATATCATTCTACAAGTTAATAACAAATAC  
AAGTATCCGCGTAGCGGAAGCGAGCACAGGGAGCAATAAAACACTTCCAGTAATTGATTA  
ATAAATGTTTCGAAACAAATTTTTATTATTCTATAAGATAAGATTTTCGTTTTGATCATTAT  
TTAATCACACATGTAAAACTCCACAAAAGGATATCGCTTCGCGAACTCCTACGGAGTAT  
AACATTTGTGTTACCATATGTAGTGATTAATAATTAACCAAACATACATTTTCTATGTTC  
TAAAGATCTTTCTTCGTTTTGATCAGAATTAATCAAACAGTATTAGTATTGTGCGCTTG  
TAAACTAAAATAATGTTATTAACAGACAACAAAAAGGCCGACCCGAAGGACGGCTAGTG  
TTAGTTATTCGTTGATAACGATCTTATTTTCGGCGAATGGTAACATAACTTTTAGAGATGA  
TCAGATCATCCGGCACTACGTTAGTTTTGTATGGCTGGAAGCGAACAAGCATCTGATTGC  
GTCTAGACCCTTCTTTAATCTTGGTTTTTATCTGGATATTGTTGCCAACGTGAGCAACCG  
CAATTTACCTTTATTCTCATAGACCCTTGCTGGTAACGTCTCCTGCAAAAGTCTTAG  
TAACTTGCAATGCTTTGTGCGTATGCGTTAGAGCTGTGGACTTTCAGAAGGCCAGCCGTAG  
CAATACGGGAGAAGGTGATCGCCGGAGATTGCCAAACATCAACATTAATTTGCTCGATCA  
GAGTAACACCGCCCTGATCAACTGCTTTTAATGCTTAGAACCTTGCTTTTTTTCATTGCTA  
CGTGGTTGTTACGTAATTTCAATAATTAGTCACCTCTATTGATTAGTTATTCAGAATATTA  
ATTACAAATCAGGACACTGCCCGTTTGAATGCGTCCAGGATAACAGTGTTATTTGGCTTG  
TCGACACGTTTTTGAACTTTATTTTTAAATTTTTTGTGATGTGGTTTTTACGATAAACC  
ACTTTTTCACGGCTGGCGTAAGCCTCGCCTGCATCCTTTACCATCAATCATGCCTTAGCC  
GCATCTTGTCCGCTGATCCCACCAATCTTCTTAGCAATATCAACAAAGTTAAGACCGTGG  
TCTTCGAGTAGCATGTAAACCGTTAACGCTGTTTTCTTGTCCATCACTTCGCCCGTTGA  
CGATTAACAGGATAGTTATCAGTACCGGAACTTGATCATGACAGTTCAAATAAACCGGA  
TAAACGCATTTTCTGACTTCCACCCATGACATGCGACTAGCTGATAGCCCATTGTTGCAA  
CCAAAGCCAGAAAATACATCTAGATTGGTGCTTCTTTGATCAATCGTACAATCTCATTCA  
TACTACAACCTACATATTCATAAACACAACAACGAATAATACAGTAACAGTTAACAAACGC  
CATATTCAACCCCTATTCATAATATTTTCTTCGCTTCACTATTGACAGTAGCATGTGCA  
TGCCTGCCATTATAGGCATCTAAATCGCTCTGTCAAGCACAAAAACAAAAAGCCACCCC  
GAAGGATGGCTGATAGATTTCTTTAAGCAGGATGCGTTTCACGAATGCGTAGAACTCGCT  
CTGACGTATCTCGGTCCGTTTATGTAAATCTTTGGAATGATACATGAAACCATTGCGAG  
ATTCCATGCACGTGCAATCACTATATTGTTCTTCCGCTGCCGCGATTGTTCCAGATCTT  
TGGCGTACTTGCTGGTTGAATAAACTTCTTGATCACGCCACTTAACCCAGCCTCATTGA  
ATTTGACAATCTCGTCAAATACCCCCATCCAATGTAGATAAATTAAGTTTTGCGCCACG  
GGATCGGGTGTACGTAGCGAAACATTTCAACAACCTTCCATTGTACATTTTCGGCTTGAC  
TAGCTGCAACTCGTACTGTTTCATCTTCGATCTGCTGATATAGTTTAGCAACACACCAGA  
ATTTGGCTGTGTCATCGTAAGTAGCGCTCTTTTGAACAGATGACCGTCTGGCACGATAG  
ATAATCCTTCCAGTGCTTCGCCGTCCTCACTACCGATTAGAGTCGGTGACAGTTGCCCTT  
CGCGCTGCAAAATACCAGTTATGTTTTGTTTCGTCATTCAGGCATACCGCTAGAATCGCCTA  
CAATGTCTCTGACACAACATAATTAAGTAAGATCTCATTACCTAGTGCCACGGTCTTTG  
ATTCCACCACATCCTGTTCTACGTTCAATGTTGCCAGCATGATTTTAGTCGATGCGCTAT  
CGGCTGAATTTTCCGACTCACCCACCCTTTTACAGTATACACGCCGTTTTTATCTGCTG  
TAAATTTTTTGATTGTATTCTGTTTTGTGTCTATAACTTCTTCGCCCTTACTCCAAC  
TATAATATAGTTCATAGTTGTCTGCTGGAGTCTTCCCACCCGAAAAATTTACTGTTGCAT  
GTAATTCTCCATCTTTTTGTGATGATTCGTAGAATTGCGGGCGGTTCCGGTGAAATTTATGA  
TTAATTCCTTCTTCCATGAGGAAAACCTCAGATTCTACTGATTCCATCGTATCAGTAT

CTTGTACCTTGACTTTATAGCTACCCGCGTCTTCACTTGTGTCGCCTTCTACAGTTAGCG  
AAGCTGTGTTTCGTTTGTATGCTGTTGGTCGTCTTTTGTCCATGTATATGTCAAATGCTTG  
GTAATGGATCGTCACCCGCTAAAGTCGCCATTAAGGTGAAACCATCTCCAGCAAGAAAAC  
ATCTTTTGTAGAGTGTATGGAGAGTGTGAAAGCCATATAAAGCCACTCCCATAGAAAAT  
CCGAATTTAATTAATGGAAATAGTTGATTGCCACCAAACAGATAACTATTGCGTTATTCC  
AATACATGAGTATTAGAATAATGAGGCAACGAGGCCGAAATAGTCTCGATCTCGTCTGGG  
TATTTGTTCTGTTTGTATGTAATACATTGATTTTGTAGGCATGTAGTATCCTCTTTTTAA  
TTGCATAACGGAAC TACAATTGTAATTATAACAAATATTTTACAAC TTTTATCACCCAAA  
AATTACTTGAGTGTGTGGAATTGACTATGTTTAGTCTCTTGCACCTTGACAGACCCATCG  
CGTTTGATATTATAGATCAGTGACTTGAGGGTGTGCGGTACATACGCGTGCGGGTAACGT  
TCTGGATACTTCATCCAATCTGGAGTATTAACGATCCAGTCGAAAATCCACCAAGGGCAG  
GAGTAGTAACCCCGACCGCCACCGATCAAGCAAATGGTCTGACGGAAGCCAGTAAGATCG  
CAAATTGAATCAGTGTATGTGCTAGGGAACGATGCTCTGCATCGTCAGAGAAAATGTTT  
GCTACCGGAGATTTCAATTTAACTTCCGGTGCTTCTTCAACATCTGACTTAACTTCTTCG  
ACCACTGTTTCAACTGCTGGAGATTCTTCTTTTGTTCCTTCAATGACGATCTCAGGTTCT  
TTCATTGCTTCAACCAGAGACGGATCAAATTCGTGCAATACTATTTTATCATCTGCGGTG  
TCTGCTGCCTGAATAAGATCGTTAATACTGGTTCCTTCTGCCGGAGTTTCTTCTTCCATT  
TCGGAAGCCAGTTTTGTTAATTCGGTCTTTACGAACTCGATCATGTTCTCTAGTGATAAA  
GTCTTTTTGACCTTAATATCAAATTGTTTTGCGTAGTGAGCTAATTCTGTTTTAGCTGTC  
TTCTGTGCTTCTTTGTCGTCGGATGCCGCAATAGCGCGGAGTTCTTCGAAATATTCTTTA  
TCAAACATGTTATTCTCCTGATTGGGGGTGTTGCATAAATATTTGTATAATGTATTTAT  
TGATTGAGGCTATTCGCTATGCAAGACATTA AAAATTCACTTTCTGAACTATTCCCATGTT  
CAAATTGAATGTAGCGATTCAATTTTATTAGAAATGCGAGATTATTTTAGTTTTGAAGTC  
GAGGAAGCGCGGTTTCAAAAACGAGTAAAATACGGAGGCTGGGATGGGCGTATTCGTCTT  
TTAGTGTGCAACGGAAAACCGCCAATCGGCCTAACTAAAACCGTGGAATCTTCGCTAAA  
AATATGGGCTAAGGTGTATGGGTAGATCCTCGCGTATTTCGAAAAAGAACAACTTACAGAA  
GAAGGAATTGCAAAATGGTGTATGCCTTAGAATTATATTCCGGTGCTAACAGGATCAAC  
CCGCATTGATATCAATCTTAGGCTGTCTTTGAAGGTATCCATCATAAACGCCGTATGTTA  
GTTTTGCCTACGTCCGCTGGTAACTCTGCGATTGCTTGTATGTTGTCTCGCTGGTACTTA  
GAGAGCTACAAAGGGAGAGTGCTGATCATCGTTTCTAACACGTTGCTAGTGGTGCAAATG  
CGTGATGACTTTGTTGATTATCGCAAGTTTCTTATGAAGCAATTTATACTATCATGAGC  
GGTACTAGTAAACACGTTAGGTGATCGCCTGATCGTTGTTAGTACGTCGCAACCTGCATGT  
AAACAACCTCGTGAGTGGTTCAGCAATTTGGGATGGTATTGTGCGACGAATGTCACAAA  
GCCACTGCTAAAAACCTGCTAAGCATCGTTACTGATATGGCTCATTGCCAGTTTAAGATC  
GGCATGACTGGTTCCCCTCGTGACGGGAAAGCTAACAGGATGCAGTATGTAGGGCTTTTC  
GGTGATATTTCTAAGATCGTGAGTATTGACCGCCTGATGAAAGAAGGGCAGGTGACAAAA  
CAGAAAATTA ACTGTCTTTTCTTCGTTATACCGATGAGGCATGTAGCGCGGTAAAGGGG  
CGAGAATATGCGGAAGAGATCAAGTATATTACATCTATCCCACGACGAAATAAGTTTGCT  
TGTAATTTGGCGCTAAAACCTCGCTAAGAAGGGCGAAAACGTATTCCTGATGTTCCGCAAC  
ACTATGCACGGAAAACCTTATGTATGACGCGTTACAGAAGGTACACGACAAGGTTTATTAT  
ATTGACGGTGGAGTTAAGACAGAAGAACGAGACGAGTTCAAAAAATTAGCGGAAGGGGAA  
ACAGGGATCATTTGTGTTGCGTCTTATAGTGTATTCTCTACTGGTGTTTCAATTAAGAAT  
TTGCATCATGTTATTTTCGGTCATCCAGTGAAGGAATCAACTATCGTTCGTCAGAGCATC  
GGTCGTGCATTGCGTAAACATGGTTCTAAGGAGATTGCAACGGAGTGGGATGTTATCTAT  
CTTTTGGCAGCTAAGACAAAGAGCAAGAATGCTAAGAAACAGTTTAGCCACCTTAATTAT  
GCTCTTAAACATGCGCTTGAAAGAATAAAAATTTACAACACCGATCAATTCGAATATGTC  
ACGAAAACAATCGAGATCTCACAACAGGGGCTTTAATGTCCCTTTAATCTACGGAGATT  
AAAAATGATTAGCTTTAAACATTTTTTGGTTGAGGCGGCTATTGACGGTTTCATGAGTAA  
GATTTATTCTTGTAATACTATCGAGGGATTAATGAACTTGAGGCATATCATGAGAAGTG  
CAAGAAAGAAAAGAATTGAAACCTGCTGATGACATTTTCGATCCGTGATGCTATCGCTGG  
ACGCCGTAAGCAACTGGAAGCGGACAACGAGCCAGAAGAGGAGCCGGAAGAGGATTTTTA  
AGATATAAAAAAGCCCCATCAATGATGGGGCAAATAAACCAATTA AAAATCGGTTATCAA  
CAAATTACATTAACAGCAGTGTGTTGCTCTACGAGTTGTTCTTGTTCCTTCGCCGTTTCGCAT  
CTTCACTAATCGAACGTTCAATTTATTAGCTGTAAGCAGTAGCCAGTGTGCACAACGCCGT  
TTTCTGTCTGGACGGATAACGCAACCTCGACAGGTTGTTTACAACAAATACAGATTTTCA  
TAAAAATTCCTCCTGCATGTAGTTAGCGACCAGATTCCAGCATAACGCAATTCTATAGCAT  
TCTTGATCGCAAATCCACGAGATTTAACGATATCAAGTGCGGGACCAGCAAATTCGATTA

CCATCTGGTAACATGCAATTTTTGTATCAAGCGGTAAGATCTCGTCGTCTGCCGCCATGA  
CAACTTTCAATTCTGATTTCTCAGATTCAGCACGACACCAGTCATCACTACGGTTAGTGT  
AAAAGTCAAGACGATTTTTCATAGCCTTTTTCTTTTTAGCCTGAAGAGCAATCGTCTCTC  
TTTTCGCCTCGCTGTAAATCCTTAACCACTTTGAGTATACTACCGGATTATTCACCGCCT  
CCCATTGCAACTTAGTCGCATCGATCTTCGTTTCAGCTTCTAATTGTTCTTTCAAATCGT  
TTAAGTCCATTATATCCCCTTATTCACTCTACGACCTATATTATATCACACACAAAATCA  
CTTTGCAAGTCTTAGGCGTGGTTGTTCAAGATCATCTGGGTTATCTATTACTGAAAAGTA  
GATTGATACTATGATTGAGTTATCGTCGTACTGCGGAGTTACTTCTACTGTCAGGCTTCG  
GACCCGTGGTTCATAGTTTTGGGTGCGCTCATTGATGTTTTTTTGATACGGTATCCACTGT  
CATTGGGTTTCATGTTCTCAAACAGTGATTTATTGAGATCGCATCCAAACAGTGGATCAA  
TGGACGAGATCCTTTGCGAGTAGTCACGATCAGTAGAATAGAATCTTTAACCGCTTGAAT  
CCCTATGTTCTTTTAAACGTCGTTATTCCACGATCTGGATATATTGACATCCGAATCAGT  
ATACATCTGATTAATAGTTGCCATGTTATAGCTCAAAAAATTTTAAGGAAATTTCGATAGA  
CCTGATAAGGTATATACACCAGATTCCCCGCATTTCGCACTTGATCGGTACTGCCAGCGTG  
ATTTGATTTGTTGTTAGCTCGTCGATCACTTCTTCCACTTTATCCGTGGTAAGCATATCC  
AGCACGCAGTCAAAGTCCTGTGCGCTCAGGTCGTCTATATTGAATTGCTGATCGCCGATC  
ACGATATATTCGATACTTGCAATTACCATCTGCATAATATCATCATCTTCTGTAAACTTA  
GGTTGACGATACTTGATTTTTACTTGTCTAACTCCAGAATATACGGTTCAACTTCTGGT  
ATCTGTGTGTGTGAAACATCAAGAGGGTATACTTTCTCTTTATTGCATACACCACACACC  
CAAGTAGCATCAATTTTCATCTTATTGGGGCTGTGACACCATAAGAGAAGAAAAATATAT  
TCTGCTTCGCATTTCTCTAGCTCTAATGCATTGATCCCCGTACATTCATGTATGATCTCT  
ACAACAACCTCTGACAGGTTGCCAGTCTCTTTGCTGCTACCAGTTATTTAAATTCGCCG  
AAGGTGAAAGCATGGGCGTGTATAAACTTTTCGCCCAATTGGATCTTGAAAAAGTATTGG  
ATAATAAACACCCTTTATAAACACATAGAATTATCTAGTATTCTATAAATACCCGAAAG  
GGGATTATACCATGAATATTATCCGAATAAAACTGCCGGAAGATGTGCAGAGGTTTAAA  
CCATTCACGGTAAAAGATTATAGAGATTTCTTCTGTTGTCAACTTAAATTAAGATGAAT  
CCAGAAGAAGAACAACGATTCTGGAAGAGCTATTAAGAAATATATCGAGAAGTAGAT  
CCGTCATTTTCGAGAAAATATTTTCTGAATGTCTTTTCTAGCTCAATTGGTAAAACAAAG  
CTACCGCTTTGTTTTAGTTGCACGACTTGCAACAAAGAAAGAAAAATGTTGCTTAACTTG  
CAGGTTGAAGCACTAAAACCAATCGTTCTAGAGGCCGACGGGCTCAAATAACTTTCCGA  
TATGTTAAACCATCAACCGACTATGCAAAAACGTTTCTGGATGCGATAGAGCGTGTATCT  
GATGGTATTAATGATTATCTATGGACTGAATTACCGGCAGAAGTTAGAGAACAGGTTATC  
GATTCAATCTCATTTGCTGTTTTTTGAAGAAGTTGTTAAGCAGATGCACACAATCCAGATC  
GAACAAAAGATATGTTGTTGTGAAAGTAATGACCTGAAATACATAGGTCTTCTTCCATTA  
TTCAAATTGTTGTTGAATCCTGATGAGTTATTCATCTTTTATCGAGTAAACCATCTATTG  
GCAAAATCAAATTATTCTATCAGTGTTCTTATGGATAAGTTACCGATTGAGAGAAACATT  
GCACTGACACTGGTCGAGAAAGACGTAAAAGAGGCAAATAATGCCAAGAACGGGGTTTCC  
TAATGTCTAAATAAAACTTTATCAGGATTATTAGGCATGTCTAAATCATCGCTTTATAGA  
GTTGGGTGCTACCTTTGTTACAATAACTCTGCGTGATTTCGATTTCGTGGGGTGAATGAAGG  
ATTGTTGCAATTCTATGATAATAAGGCGATGCATACAAAATTAAGGGGAGAGAGATCAT  
TCAAATTTTCGGTATCCACTGGTAATACAGCGGAAGTGTTAACGGAGTATATTGGATCTC  
TCATAGTAATGTAACAATTGACCAAAAATCCGTCAACTTTTTAACATACCAGTTAAAGAG  
CTATCACGAAACCCTAAACCTGCAATTTTCTCGCTCATTGACAAATAACGCGGCTAATAA  
CGTTACTAGCATGATTGATGCCATCTATAAGTATGTTCTTTTATGGAAACCTACTATAAA  
GGGTGATAACGTTGCTATTCCTTGTGTCTGTTGGTTAGTACCATAAATGCCTATATGTA  
TTTTGTTAGGGCATAACGGGCAAAGCGTAGAAACCGAGTCTTTCGTGTATTGCTGGGAAGC  
TTTTGATAGTATAACGATTGCTGGATACGATACAATATTAATAAAATGAGCCAATACCTGC  
TATAATCTGTTAGCCAAGACTCATGGGGCAATTTATTGATATGTCGCCTAATCTGATCGT  
TTTTAATTTTGAGCGGCAGACTAAGCGCAATGCTAAAGTTAAAAAATTCATTTAGCAATG  
TGACATACACCACTATTGAATTTGTTACTAAGCAGTATAATAAAATTTATTGGTGGTAATG  
GGGATAAATATTGCACACTTTGCTCATGGTGGCGCTTATGGCGATTTAACTTATAAGAATG  
CGTTTTTGGAAAGTCCTAAACTTGCCACATTAGAACAATATGATTCATATGCTACCGCCG  
TGTGTCACGGTAATTTTTCATTGCGCCCCGGTATGGTTATTCGATTCTTTGATTAGAAGC  
AACAAAGCACGCAATGATTTTATTGTTGACGAAGTGGTGCATGAAATTAGCCGAGAGCAAG  
CAATAACTCCCCTGTATATGATCGGTAACAGCGAAGAATAACAGCAAGTCAAATTTGAAG  
GTAAGATATAATGACAGAAAGTAAACCTATGTTAAAATTTGTTGTCCCTGTATAAAAATT  
AGAGATAAACGGGAAAAATATCAAGATCCCAAAAATGGGGATTAAGCAACATCGATTATT

AAAAGATGTTTCGTAGCTGTGATGAAACATTAAGAGTCTGCTTGATTCAATCTGAGCTGG  
GTTAAACGCAGCCGAGACTGCGTTGATTATGCTTAACCTTTGTGCGTTTATTGGTAAGTG  
TCTGGAAGAAAAAGATGGTCTTAAGTTGTCTGATGTATATATTTGTACAGAGACTGAATT  
TACTTTAAATGGTAAAGCCTTTAAATTTAAAAATCCAATGTATACATCTGACCCCATAT  
CGATGACGCTGATTTCTTGAGTCATCATTATCACGATCCTTGCCTAGACTTCCATGATTT  
CCCTGCTTTTATTATGGATGGGGCTACAGGATTAAGAAAACTATTGCACTGGACACACC  
GGAAAGTACTATCTATGGTGGAAATTAACATATTGGGTCGCCTATCATGAATGACGCATTA  
ACATCATTTTCGCGGGATGCGGAAGGAAGCTGAAGAAAACCCGATTGATAAACTTAACAAC  
TTAGATAAACTTAATTCTATTGATAATTTGCAAGCCGCTACCGAACTGGTGGCAGAGACA  
GTAGAGCAAAAATCTAAGGAAGTTGTTGGTGCCTGAGGATAACACCGCAGCCAATGAA  
TTGACGGCAGAAAATACACAATCTACCGCTGGCAATAACCAAAAACTTATGAAGAATTG  
CAAAATCTCAATAATTACTCTTCTCAGATGAATGATAAATTACGTTGTTTTGGTGTTTTG  
ATGGAACATAGACTTGGTGTGTCAGTAAAATGGCTAGCGGTATTGGTGCCATTGAAGAA  
GCATTGAAAAAACAGAACAAACCGCAAAAAATGCCATCACCTCAGCCAGTTTTGCCTACT  
GAACCGAACAGCCTAACCAATGACAATAACAAGGTCCTCAAAGAAAAAACAGATGCT  
GATGACCGAAAGAAAAAATCGCCACAGATAACCGTAATGCTGATTCTATGGAAAATCTT  
CTTAAAGTTGTTTCGTGGAGGATTTAAACAAACCATAGGTATCTTAATAAGGTCTTAGGG  
ATGTTATTTAAGATCACTTTGACCGCTATGGCAGAAGCAGCAAAAATGGGGTGCTCTTTTG  
ATGGGTATTGTTTTTGTCAATTGATACCCTGATGGTTCATTTTCAGAGATTGGAGTGATTA  
TTCGAAACAAAATTCATGAATTTATGGGTAAGGTCGGAGGATGGGCTGGTCCATTAGC  
GATATTTAACTACTGTTTCGTACGGTTCGAGATTATTGGTCTAAAGGCGAATATGGAGAG  
TTAATTAATCTCTTGTATGGGTATTGGTGTGATGCATTCTATAAAACCTTTATCCAATT  
GATCGAATTATCACTACGGGTATTGCTCAAATTCCTCGTATGATCCCTGGCATGGGTGAG  
TATGCCGATAAGTTAGAATATGGTGCTTTAAAATCTGCTGTCGCTCAAGGCTATACGCCA  
AATGAAAGAGAACTCGAATTGATGAATAAGGTCGAGTCTGAACACGAAGAAGACAAATAT  
GGAGAGCGCGCAGGGTGCACCGGAAAAGCCCGGGATATTGGCGAGGCCATAGGCCGATCT  
ATTAAGGTTAAAGTTAAGGATGGTCTTGTAGTCTGGGCTGGAGAGAACAAAAGGATGTT  
GACGCAGAGAAACGACAAGAAGAAATTAACCGCGGAGAATATAAGTCTGTTTCTGCTGAA  
CAACGATCTACTAGTCGTAACCTTAGAATTAAGCGAGGGCGAGATCAATAATATTACT  
GAAGTTATGGAGAATTTGATCGGTGACTATGACAAAGAAAGACTGGGAGAGTTGAAAAAG  
GATATTGAGGTTTACCGTGAGCAAGTTCAGATCCTATATTAGTTGAAAGTGATCCTTCT  
CAGTTAGAGCATCTTATTGAAAAATTTGATGAGATGTATGCTGATTAACCTAAGGGTGTG  
GTTCCAATAAAGCTGTTCCGGCAACTGAAACGGAAACAGCAAAAACAAGCAGAACGTA  
GAACAAATGCAGAAACCAGCTAAAATCCAGCAACAAACAACAAATCAGACCTCAAACGTA  
AATAATACACAAATTGTATTGAACAATAGAACTATTAACAGGGTGCACCAACAACCTAGA  
ATTGATGCCCCAGGTACAATTAATATGGGGAACCTTTAATGAAAATTAGTGTTATCAATG  
ATGCCGTTGATAGCTTTAATGCGCGGGTTAAACCTCCGCTGGTTTTACCTAAAAAATTA  
AAGGGAAAACATTAACCGCTCAATTCCTCCGCTGAACGTGCTAGAGGTAATGATGCTAGCG  
GTAATTAGAACAACGACTTATATAACAATGGTCTGTTATTCCTGCTACGATTACACAT  
CCCGTACTACTGGATCGTTGCGTGATTTACAGGATAAAGAAAAATGTTGCTAGCGGTTTTG  
GCGGTAGCGTTAATATCGCTGGTTTTGATTTAAATTTGGGTGGGAGTAATGCTGCATTTG  
ACCGAGAGGCAATTGCTAATATTCTTCTTCTCGTAGACAATCTGACGTTGACGCTGCCA  
GCCACAAGTTAATGATGTTGGTGAATCTGTTATTTCTCGCGGCGGTGGTACTTTAGGCG  
GTGCTCTTTCTAATATGCAATCTCCTGCTGTTATTGGTGGTATCGAAAGTATTCCTGGTG  
GATACCTTGCCGTTACCGGTGAACAGATTTCTCATACTGCGCGAAGCATGTATGCGGGTG  
CTGACGCACGAACGAAAACTACGTATGGCATCTAACCCACGTAAGTATTGAAGACCTTC  
TCAATCTTCTGATCATATACGAAACGTTTCTAGAGTTGTCTTATGGTTCTAGTGGTATTT  
CCAGCACCGCAAAAGAATTAAGCGGAAGTTGATGCGTGGTATAAAAATACACTATTGA  
GCAAATCCACTCAAATGAGGCAAAGAGAAATGATACGCTGTTGGAAGGAATCACCGATT  
TTCTATCCAACGTAATTACTCTATCTAACCCGACAATATGGATGATCTCTAACCTCGGCA  
AGCGTACATCGTTTGAAGGGCGTAGCGATGCATTTGGTCCCCTCAGATCTCAAGTGTAC  
GTCTGGACAAGTCGCCTGATGGTAAGTTAATGGCCTTGCTATTTCTCCTAACTTGCCGA  
GTACCTTTCTTCCGGAAGTATCATTTAGAGAGATCTTGACACTTCCCCTGGTACTATAT  
TTGGGCGGGCGGCAAAATGTTTGATTTAAATGACTTTAACTAACAAAGCCGCTAACCTTGA  
CTTTCAGCGATCTAACTTATTCTGCGTGGCATTGTCACCCTCCAAGTAATAAGACACA  
AGCGGTCTAGAAAGTATGGCTGGTGCCTATATGATATTATACCAAATGCATTAATGA  
CTATTCGGGTTTACTCGTGGTGATTATACCTACGCATTAACAATCTTGCTGTACAGGG

TGTTAGGCGTGTGCTGTTGATTCATCTGGTGTCAAAAAGTATCTTTTAGGTGCAATGTCATC  
CCGCGTAGTTCAATCTCTACTGGGGCAATTTGATGTTGATCCATATGAGCTTGACTGGTT  
CAATATGGCATATAAGACAAGCGGTCTTATGGTGTATGCTGATAAGGTTCCAGAAAACAG  
ATTGAATTATGAAATGGACCGAAACCACAATGCGCCCAACATTCGAATTACCGGACGTGA  
TTTTGATCCGCTTGTATTGAGCTTTAGAATGGACTCTAGCGGATCAGACTATAGAGCAAT  
GCAGGATTGGGTTAACTCAGTAGAAGACCCCGTTACAGGGGCTTCGTGCGCTTCCTGTTGA  
CGTTGAAGCATATATTCAGGTCAACTTACATAACCGAATGGGAGGTCCTCACACGATCAT  
GATGTTTAAATGGTTGTGTTCCCTGTTGGTGTGAGTGCACCGGAATTAACACTATGAAAACAA  
CAACGGAATCACAACATTCGATGTTACTTTTCGCATATCGTTCTATGCAAACCTGGTGCTGT  
AGGAGAGCATGCCCGCGAGAATGGATTGAGGATAAGGCCATAAACGCAATAACAAACAC  
TTTCGGTAATAATTTACTTGATAGTGGGTTATCTGCTGCTGGTAATGCTTTATCGCGTCT  
AAATGGCGTTGGTGGGCGTGTGGTGAATACTGTCACTAACTGGTTCTGATAATCGAAAGG  
CGGCGATAATCCCCGCCTTTTTATTTTGCTAAATCATTGCAATATTTTAGTGCTTACTT  
TGAAAGTCTGCGCTGTAAAGTTCTTCATAACGGGCACAATAACCGTTTAAATGCTGCCTTT  
CTTGCTTCTTCCATCTGCATGTCAGACATGATAATACAGCGATCCCTTGCTTTCATC  
TTCTCCAGTTGTATAGACTCTTCTTTCTGTTTGAGCAATTCTTCTTGACGCTTCTTTTCT  
TCTCGTGCTTCTTCTCCCGCTTCTTTGATTGCATCCTTGAACATCTGCGTATGTGGT  
GCTAAACCAACTTTAACGCGATCCACGTCTGGACGTTTCATTTTAGAAATAAAGCATGAA  
TCGATCTGATCATCACTTGCATATGCTGCTTTCCATTCACGAAGCAAGAAAACCGGATCT  
GATTTAGCATTATCATAGCTTCCATGTTAGCACAAACCAGTAAGAATGAATTCAGCCGCA  
AGACCAATCAGTTTAAATCATTTCATTTAGTCACCTCACCGAAAATTGTAAATTGTCTAG  
GATTCTCATCGCCGAAAGATTCTACTACGTCGTTACCTTGACGCAAGTCCCGCGCGGTA  
AAATTACTTCACATTCGCAAGGGTCCATGCAATGGACCCAACAACAAAACCTTTATGAT  
CTTTTACATCAATCAACCATGATACTTTACAAGAATTTTGCATCTTCCGGTAATAGATT  
AATATCGATTCTCACAATAAAGGCTAGTGCTGTTTGATAGCCATTCTCCAAGATGATCG  
GTGTCATGCTGGTCGATAAAAAGTTCTTAAAGGTAACCTGCTTATCTTCAATGATGCGCT  
CTATTGTCTGAATGTCAAGATGTGGACCGCCATAAAGAGTACCGTTTAACTTTTCGGCTT  
TATCCATGACGCAAACGATCAAATCAACAATCTCTGATATCTCATCGGTCATGTCTTCTG  
CGCCTAAGAGAGCACCATTTACCCATTCGTATTGTTTCAGACACATAATCACACATTGCAG  
TATATTCGTCTGGGGTTATGTTGTCATGTTTGAATGTTTTAATACATTATCTCCAAAGT  
CTTCGGAGTGTACTTCATACATTGCATTAATGATTTTCTTGACAAATCCATAATCTTGTG  
TCTCACGCTCAAGGAAGCGGATAACCTTCACATAATCATCAAAGTTAATCTGATCGCTGA  
TAATCTCATTGATCATTAAACCATTATTCTCCTCAATGTCATATGTTTCGATGTAATTAT  
CGATACGTTCCATCATTGATACGCGTGATTCTTCCGAAAGACGAAAATCCTGTAATTGTT  
TGAACATTTTAAACCTCCCATATAACAGAGAACGGGCCTAGTATAAACTAGTCCCCGTT  
TGAGTCAACCATTATTTCTAAAAAATTACATTTTAAATTTATCTGGCATTGCGTCTACAG  
ATACCAGATCAGCGATAAGCTGACGTAGAGTTGCCTTATCTGCTTCTTACGTTCCGGTTT  
TAGCTTCGCTAATGAAGCTGGAGAAAGACAGGTCAGAAGCAGGTTTAAACAACACGTTTAC  
GGATGAATGCATCACCGTCTGCGATCATCGCGCCAGATTCTTGTAAATGCTGCCAGTTTAT  
TTTTGTTTATAATATGTGCCTCAATGTAATGAGTTTCTTGTGAATCCGTCGATGCCGTTAG  
CACGAGTTATCGTATGAAAGGATAACACAACACCGCGAGGAAGTAAAATCTCGCATTCTT  
TGTAAGTAAATGCTTTGTTACCTACTGGCAATACAGGGATGTTTTCCGCGCCAGCAATGG  
AGAAAGCAACATTAGCGCGACCTTCAAGGCGAGAGCCAGCTATAGAGTCAACAACAGCAA  
CGGCACTAGCCACGTTTGCATTCCAGCCGCCAAAATGTTAGGTGCAAGGGAAGTGCTCA  
CATAGTTTTTAAAGTAAAACGCTTTTTGCTTACGTGCAGTTTCCACATTTGCGACCGGA  
AGTCCATAACCAGATACAGAATAGTACCCGGATCAAGTTTAAACGCCACAGTTGTAGAAGG  
CATTATCGAGTGCATCGCACATCTTGACCAATTCTTCTAGATCTGAGATTCCTTCAAAC  
CTTCCAGCTTACGGTTCGGGTAGGAAGTTGTTTATGATGATGCTGCATCGGCATATT  
CGCTCGACGCAATACCTTCCGCGCCTGGCAGATCAAGACCAATATTTGGCATCATTTCAC  
CCATGTTACTAGCAATTGCTTCAAACATAACCGGAATCAACATTACGTAGGGCATCGGTTT  
TAATCTGGGTGATATTACTACGCAACATTTACAGCTTTTACATCTGCTGCCATAGACTGGT  
CTACTTGATCCATTGCCAGAGCGGTGATCTTGTCTTTCGAATACTTCCCTCGCGCATGATTT  
CTATTAAGCGTTTGTGTTGATGCTGCGATAACTTCCGCAGACAACGGATCATATTGATCCT  
GAACTTTTACCAGTTCGCTTACTGCGTATTTTGCATCGGCTTCGCTTTCAAAAATAGTAC  
GCATAAAACCATAGCGAGTGATAATATCACTAGTCCAGTCATTCAGAGAATGGGCGGTTG  
AACGTTATAAGGCTTGACGATCAATCAGAGTATTAATCTGTTTCTTAGGTTCTGCTCCGG  
TGATATCTCCTTCCGGTTTAAAGATTAATTTTTTCTGGATGATTCACGTAGTTCGCTTAAAT

AGGTCGCTTGAGTTTTCCACATTTCTTCTTTAGTCGTACGAGAATGAGCCGCTACGCGTT  
GTTCCGCTTCCGCGTTTTCGTTCTTCTTCTGACACAAGACTAGCCGCATACGCATCATCTT  
TTGTCAGAGATTCACCAGTAGCCTAAGATACCCAGCGACCAGCTAAATCATTTTTCTACTT  
TAGTGAACAAGGAATCATCAAGTTTAAATCCCTTTAATCTTATCAATCGCCATACCGCGAC  
GATTGACAACAATAAGCGATCTTTGTGCTCGTCATTACTTCTGCTGGAATACTTCTA  
ACTTCGGTGTACGACGCACCAAAAAGCTCTATAACGCGCCTAACCAGTTCGGTCTTTCCCTT  
TCATGCGGGATGCGTTAAAACGGAACATAACAGCGTCTAGTTGCACTTTACGGGCTGTTT  
CCATAACCACGTCAAAGCACTTAACTAATAACTGCAATCGGGATATCGCCTAGACCAGTCT  
TAAGCTGTACAATACGACCGCGTTTGTTCATCTCGCACAGTACAACATGTGCGCTCTTGT  
CACCCATACGAATGATTTTAGGTGTTTTGTTTCGTGAAGTTACAAAGACGGACAATCACAT  
CTTTATCGCGTGTCTATACTGCAAAAAGCTGTTTAGAATTCTGCTTAGGCTTTCAACACT  
GTACCGGGGCAATACTACCAAAGTTTTCTTCCCTTTTCGTCAACAGCCATTTGTCGAAAG  
ATTCAATCACTAGATCGTCGATTTCTAAGTTAAACATTTTATATCCTCTAGTTGATAACC  
TATAAACCTATATTTATGAAAACGGGGCTTAAACGCCCTTTCTATTATAATGCACCATTG  
AGCTATTGCTCTAAGGTGTATCCTGAAAAGTCTTTTTCAATCACGATATACTTCCCTACT  
CGTTTAAATAACAACCGCGCATTTCAACGTATTCTGCGTGGTTTATGGTACGAGTTGTTCAA  
TCTTCCAGTAATGCAGTACCGATTTTCGTTAATGCGGTCATAAGTTACGTCGGTAATGATG  
ATTTGATGTTAGCCATTTGATACTCCTGAGTAGTTTCGTTTCTGTCTGGGTGTATTACGA  
TCTACCCCTCTGTTATGTCAACAACCTTTTAGAACATTTTTGAAATTAATTCTGCTTTTA  
TTTCGCAGAGAACATCTAAAGATTTCTCGTCCCCCGCTTTTGCTGCTTCTGCTTGTATTT  
TTGAAATTGCTTCAATGTGAGCAATTATAAGCCGCTTGAACCTTLAGTGATTGCGATGA  
TTGCCGATTTCGATGGTTAAGTGTTTCATGTTTGATTCTCCTTTCGTTTCGGTATGTGTGT  
ATTATAGGGGATCGATGATCTCCTTCAACAACGTTTTTLAGTTATTTTTTAATTGCTCAT  
CTTGCAATAGGGCAATCACATGCTGGCGATGTTCTTCCGATTGAGGCACACCGAAAAAGT  
TTGTTTTGTAGAAATACTCTAATCGGTATTCTCGTGAGATCTCCTCCATCATGATCGCGG  
GTAGTCCGAGATTTCCGAAACGTCGCTTTTCTGCTGGCGTTAAATCACTGTAATACAACA  
TAGAATCATCATTACCCGCAATGCTAAACTCGTCGTTTCATAAAGGAGAATATTGCGTTTA  
AACGCTGTTTACCGTCCACGATTTTCGATCTCATAGCGAGAGCCATCATCAATCTTAGCGA  
TTGCGATAGCACAACCGGAAAAATCATTAAATCAGGTTTTTCGATAAATATACGTTTGTGTT  
CTGTGTCCCATACTAAAGGACGCTGATAATCTGGGTTTCATGTTGATATAGCCTTTTTTCTA  
ACCATCCATCATAAACAGAGATGACAACGTTTTTLAGTATTGGTATAGTAACGGCGTTTAG  
GCGTTAAAGGGTTCATGTTATAGTCTCCTGAATGGATCACCACGTAAATCAATATCTTTT  
AAGAACTCATCCCATGAATGCCGGATATTGTTCTTAATTCTCCAGATAAGCGCATGGATT  
CAACGCTCTCCCATCTGGAAGTAAGGATCATATGATCCGTATGCCAATATGCTACGACA  
ATTCCACAATCAGCGCAATAGTATTCTATTTCACTTGCTGGCGACCAAAGTCCATCAAGA  
TGATCGGTGATCTTGCTTTTCGATTTTACGGCTATGACAATCAGGGCAACGGATGCAATGA  
CCTTGTTTATCGTAATTTGACGTTAGCGAATACTTAAACAATCTCATTATAGATCCTTAT  
GTGCTTCAAATGCTTCCCTTTTCGAATCCTCACGGGGTGAGTGACCTTATACTCTTTTTTT  
TCGTTCCCTTCCCGCCTCGCTTAGAATGCTGTTTACTGTACCCTTAATTATTCTGCAACG  
GTTTCTTTTCTGGCATTATAAAGCTTTATCCGGACCATAAGCAAGTCTTTTTTCGGGTACA  
TATCACGGGCGGCAATATACTCAGGAAACGTAGGATGCTTATCATCTTCCGGCAAATAAC  
CGCCATATTCCCACGGATGGAACACATAATCAGGGTTACGCCACATGCAAGAGATGACGC  
TTACAGGATTCTCTATCATGTAGGGAACCTCCTAGCCATTCACCAAATATGCGGTTATTT  
TTGCTGCCCGTACATCATGAACCTGAATCAATGGTCCTTGCTCTCGTTTCTTTCGTTCAA  
AGTGTGCAGCGCAATAACAGCTAAATTTGGTGCACGGTGGGACTGAAAAGATAATATCCG  
GTTTCCCGCATTCGAGGTCCATTGCTCTTTCGAGCCAGTTCAAATCAATCGAGGTGTTTA  
CATGCGTAATGTGTGGATGTTCAAATCTGGTATTATACTTTTTGTATGTACCGTGGTCCG  
CGTCATCCGCATTAAGCAGACTACCTGATGACCTGCTTTAGCCGATTCTAGCCCCATTA  
TCCCCGATCCGTCAAAGTTGCAGAATATTAATTTTTGTTTACGCTGCCCCCATTTGGTTT  
GATAGTAACAGAATCTAAAAGACCTTTGTTAGCCAGTTTCGCGGCAAGTTTTTCAGATCCGC  
AACTTCCCAGCCAGCCGCAATCAGGTTATCAATGAGGCTGTTAGCAACTTCTTCGCTCAT  
GAAAGAGCACTGTTTGCCGATGGTGTAGCGTACACGCTGTAATTTTCAGTTTACGGAAGCA  
TCTAACGTTTCAGGCTTTTAGCGATTTTCTTTGCGGTTTCGATGTTAGCCATTGTTGAGT  
CTCCTAAGTGCTATCTAGTCTTGATGGTTATATTGTAGGGGAGTTATCCTCCCTGTCAA  
CACTTTTTATAAAATTATTGGTTAATTTCTTTTTCGTTGCTAGGATAGTAACCTTCTTTA  
ACTCCGAGATATTTTCGCAACCATCCCTACAATCTTCTGTGCTACTACAAAGTCAAATTTG  
AGATAATCCTCGCCGTGGGTTTTCAATGATATATGCTTCACATGCTGCTTTAGTCTCGAAC

ATTTTGATTCTCCTTTTTTCGTTTTTCGGTATGTGTGTATTATAGGGGATCAGTGATCCCCTG  
TCAACGACTTTTTAGCGACGGCGACGATGTCTTATGCGAGTTGCCTTTTTGGACGCTTTAT  
ATGCCTTTTTACCGTTTTTATATGCTTTTTTGGTATAGGATTGATTTATCTTATTGTTTT  
TGTATGTTTCCCGGTTCAGTATTAATTTTCGTTACATTCGACGAACCGGTGTCGATGTTCTT  
GTGGTATGATCAAACATTTATCATAATTAACCATTTTCGTGTTTTCGTTGTTAGTGGTTTTCT  
TTGGTGTGTTGTTTGCACATAACAGACCCAGCAAAGAGAATGAGTATAGCGCTCAATAACG  
AAAACATTGTTTTCTTAATCATAATATTCTCCTTTAGTTCCTGCGGGAGTGTGAATATAA  
CACTCCCTTAATATTTTGTATTATTCGTGATTAGTTTCGATGTTGTGCATTTTGCACCAG  
TCCAGCCAATCGCCAGATCTTGGTGGTTAATGCTTTTAGCTGCTGCCCTCGATTTTGTCT  
TTGATACCCATATGTGCGTTATGAGTAAGCATTGTTACAGTGAGCTCGATTTTATCGTCT  
TTCGCTTTAACATCAACCCGTTTGGTCCACTGACTACTAGCAACGCGAATGTTTCATACCA  
ACGATGTTTCCGATGAATGCTTCTTTGTTCTTCAGGATTTCCGGTTGCTTTGATGAATTT  
ATTTTGTACTTCAGCTCGTTTTCCGGTATGGGTGTATTATGCTATGTTCTTACTTTGGTG  
TAAACAACTTTTTTAGATATTTTCGGAAATAAATTTTAAACTTGACGTAACGGTTTTCT  
CATCTTTGCTGGTATCCGGAAGTTCTTCTTTTACTTCCTGTGCAAGATAGATATTTCCGT  
TCCAAGTGAAAGATCCGTCTTCGTTTACTCGATAGATGATCATCCACTCGCAATCATTTT  
CGATTTTCATATACACAGAGAAGGGTGTAAAGCGTGAAAGCTATTGATTTCAAGGTGCAAGC  
CGTGACGTTTTGCAAAGTTGGTAGTGGTTTTAGTTCAGTACAATTGTTTGGTTCTCCTAAG  
TGGTATCTCGTCTTGATGGGTGTATTATGCTATACACAGGATCTGGTGTCAATGCCTTTT  
TTAAAATTTTATGCAATAAGAAAGCCGACGCTAAGGTCCGGCTAATAAAAATCATTTAGACA  
ATAATCATTCAGTGCAATCCGGTCCGGCGTATGCTGGTGTACGTCAAGCGCAATCACTT  
TCACGCGTGCTTTCTCGCGACCTGGGTATTCTCGTTACCAGTGCTTATGACCTTGAACAT  
TTTATACTGCGATGCTTCTTCGAAAGTACGGACCAGACAAGGGTAATCAGCGTAAAGGAT  
CTCTAGCTCTTCGGTGTATGTAACATATTCATCATGATTACTGGTCTCTAGTTTAAAGCCG  
AGACTTTCGGAACATTGGGAGATTTTCGCGGGTAAATTCAAAGATATTATCTTTCATACT  
ATTATCCACAATAGTTGGATGAAAAGGGGGGCTTAATGCCCGTATATTAATAAGTGCCT  
TCCTGTACACCGTAGTAGAGTTCATCGTTGATAATTGCATTAATGCGACGGTGTGCATAT  
TCCTGATTGGTGCAGCTGTCAGCAAGTTCTACCTTGGTTTCGCCATCATGGGTGCATTTA  
GTGATAACTTTACCATCGGCAATTCTGTAGTTGAACTCTTTAGCTACCGCATCGCGTACC  
AGACGTGCAAACCTTATTGTTGCGGAATGCATTGTGCGGCTTCATGTGCAGCGTGAGCGTAT  
TTGTTAACTTTCAGAGTGATAGTAATGTATGCCATAATTTGATTCTCCTAGTTGGAAAGT  
GTATCTCGTTTTCGACAGGTGTATTATGCTATACACCCGCTCCATTGTCAACGCCTTTTTA  
TAAAATAATTTTCGATATCTTGATGATGTTTTTCTCGTGCTTGATCTGCCTCGGCTGGCG  
ATACGTAGGAAGCGATAATCTTCACTACTGTTGCACCTTTTTTCGGTGTACGACACCCAAA  
GATTATGGAAACCGCTATTATTAACACTTGATAATAAAATGATTTAATGTTAGGGAAAT  
TAAAAGTGTAATAACGTACCCTTAATTCTGAATCTACGTTTAGATAGATCAACGCACCTA  
GATAGACCGTCTCGCTCGTTCGGTCAACTAACAGTAGAGTATTTTCGAAATTTCTTAATT  
TGTCTTTTGTAAAGGAAAATCATAGTATAATCCTCAATTAGACCAAATTAACCTTGGTGT  
GTGGTGTCTCTCGTGCGTCCGCTTCTTCCGGTGTACGTTACGTGCGACGGCAAT  
AACCTTGTGCTGCCTCTCCGTGATGATAGATCTCTACCCAATGGTTATGATTTGCGAATCC  
GTGGTTTATTGCGTAAGCGAACGGCTTAGACGTCCAGTAGAACTATAATATCGTACAAT  
AAGTTCGCTATCAATGTACAAATATGTGCTGTCGTTTACATTGCCACTAACAAACAAAAC  
AAGACAATTGCGAAGATCTGACAATATTTTGTGAGTCAATTTTATAATGTGACTGTTAAT  
AATTAACACCACTCAAGAGTTTTTGAACACATCTATCCATTGTTGAGTATATGCGGTT  
TCTTTCCATGACACAATAACAGTCGAATAATGGTTTTTGTTCAGTAAAGGACGGGCAT  
TTTGATGCATCTTCCATCATTTTTTCGGCGAATTCTGTTTCGTATACCCGCAGAATCTGT  
GGTTATCCTTTGTATTCTTTAAATTTGCTCATAATCATTCACTACCTTATCAGCTTCTTT  
TGTTGTTTTTACATCAACTGCGATAACCCGTAAGCTTCGTCATGGTTCCACCAATAATC  
GTGAATATCGGCTTGTGATTTATCACCAAGGAATCACGAATATCATTTGTACATTTATA  
GTTAATGTGACCGTCATAGTCAACATAAAGGTAATTATCGAAAATCGGCGTTTTTAAGAT  
CATACCGAAAAATCTTTCTTCGTGCTCTTATCCAGTGTTGCAGTAATTCGCCTCATAAT  
ATATTCCTCTTAGAAAGGGATGGTCATTTCTTGAGCTTGTACATTCTCGTAAGGATTA  
CTTCATCCAACCGATATTGTCTACCAGCATATGCACATTTTTATCATATCCTACGTGGGT  
AGTCAATACTGTATGTGCTTACCTTCTACGATGTTTTCCATGTACTTCTGAACCTACGAT  
AGCTTTCATATTGATTCTCCGTTTGTTTTTCTTGATGGGAGTATCTTACTACTCCCTTAA  
TCATTGTCAACTATTATTTGGGAATTTCCGGTGCCTGCTCGGATAGTAGCCTTCTTAA  
CACCCAGATATTTTGAACCATTCGGGTGATCTTCTGTGCTACTACGATACCGACTTTCA



GGTAGTCATCACCGTGGTTTGGCCACAATGTATGCTTCGCATTCTGCTTTAGTCTGGAACA  
TTTTTGATTCTTCTATATCTCGTTGGTATGTGTGCATTATAGGGGATCCCCGGTCCCCTG  
TCAACAACCTTTAGAATGCTTTATATGCGTATTTCTAAATTTGTCTGCCACTTCATTGGG  
ATGTTTCATATTCTACGCTGATTCGAGAACAATAGCTAGGTCGATTTTCGTAATCCAACC  
GTACCAATGATTTGATGTTTCGATTTTTTTCAATTGGAAATTAGTCACTTTTATCTGTGCG  
ACAAAATACATCTAACTGCTCATCGATGTAAAAGATCCAATCTTCATAAAGAATAACGGG  
TATTAGCAAGATTTTTATTGCCTTCAACGAAAATTTTCGGCTACAAACAAATTAGGATGTT  
CCATAGTAATTTCTCAAATTTATACAGCTTCGTAAACTTCCCAATGTCCAACACCAGCA  
CGCTTAACGAAAAGGTTTTCTTTGATGTTATTCATAAACGTCTGGATGGATTTAATGCGG  
TTTGAAGGTTTCCATTGTTTCGATGGCATTGCGGGCATAACATAAATAACATTACCAGTTCGC  
TTATATTCAGCAACCACTTTAAGACAACACATAATAATATCCTCAATTTGTGGGAGAGTA  
TTTCCCCTCCCGATGTTCTTAGATTACATTACACAAAATGGCGTGTCAATGCTTCTTTTG  
CGGTTCCGCTAAGACTTTCGATCTCGCTGGCATAACATCAACCGCCAGAACTTGTACAA  
CATCCTCGGACCGTAACCAGTGAGTATGGCCTCTGTAGAACTTGATAACCAGACTACCGT  
CCTCGTCCCATTAAACGCTATCGCTAGCCACCACACATCACGGTCGATAAAGTTGATGT  
AAAGCACACTACGCTACATTGAATTAATTACTTTCAATACTGCGACTTTCATCTCCTCCA  
CGGTATGGTCTTCCATTTTGAAGACCTCACCTACCTGAACTTTTTCCATGTTACATGCTC  
CGAATATGTTGAGCTGCATCTTCCAGTTCGTGCTACTGACACTGTGTGCCAGTAAGTGA  
ACTGGTTGTGGTTCTTACCTTCCATAGTATTGATCAGTTTACCGTTTCTGGGTGGAAT  
GTATCGTTGCCGTTCCAAATAGGATACACATCATCTTCTGTTACGTAGATAATAAGTCCA  
ATCGGTGATTCTGGTAATAGAAAAATTTTACCCTGCATCTTTGCGATTGTTTACGATA  
TCTTTTATTGTCTTCATTTAGTTACCTCTCGTTAAATTACATCACAATCACGCCAGCCGG  
TAAAAGTTGTCGTTTCAACTGGGGATTTTCTGCTACTGTCAAATCAATGATTTCTTGTGA  
CGCGGCAATCATATAGCCATTGGTGACATTGTTTTGCATCAGTTAAATGGTTTCTTCGTT  
GTAGCGGATTTTAGCGATGATTTTCGTTGAAGTTCATGTATGATTCTCCTAGTTCGTTTCG  
GTATGTGTGTATTATAGGGGAGTTTAACTCCCCTGTCAACAACTTTTTAAAGTTTTTC  
CTTGATAACGGTCATAATTACATCTTCTGCTCGAGCGGTCAGATTATCAGCGTCGGCATG  
TGGGCGGTTGGTTGTTACAGAGATAACACCGTTGCGCACTGGTTTGATATTGATATCAAG  
ATGATCCGCGAAACGTGCGCCAGTTACAGAATGAATTTTGGTGTAAATTTCTTTGCCAG  
TGCCTTGCGAACCTCACGAATCAGGATAGCGTTTTTTCAGTTGGTTCTCCGCGCTCATGGT  
CTTCTGGGTGTGCATGGTTCCGTCGAAGTCAATCATTGGCAGCATTACGATGTGTTTCAT  
TTTTGATTCACCGTTTAAAGAAGGTGCGTTTTTCGTTTTGATGTGTCTAGTATAGGGGATACG  
TGAGCCCCTGTCAACAACATTTTTGAATTATTGTTTCATGTGTTTAAATGGCTTCTTCCAT  
AGCCAGCACGTTTCGATAGTTAGGGTATCGTGTTAGATCGTCATACATTTCGCTTAAGGGT  
GGAAACTTCTCAAACCTCTGGGTTTTCTAGATACAGTTGAACATATTGTTTCTCTACCAT  
CTCGGCTCTTAGTTTGTCTGCTTGTTCCTGTTTCATATGATTTTCGTTGGACCCAACACCAA  
CAAATGATAAAGGTGATCAACGGGCTAATGATCAATGATAGGATAACATAACCGATAAC  
GCTACGGTTTAAACGGCTTTCGCTACATGCCTACCAGGAAAACAGAAAGGACATAGATAAA  
GAGAAAGAACATATAATAGTGATTCCTTATTTTCGCGCTCGTACTTTTCGAAATAAAATT  
CTACTGGCTGGTCATGAATTGACAGCAAGCCAACGCGTTTAGCCGGTCGCAATCCCATAT  
TGCCTGAATATACTTCTGGAAGTTCTCGCTTATACTTACGCCAGTATTCTAAGCCCA  
TACAGCTTTTATAAAGATTGCATTGTACACACGCCGGTTTCATGGTATCAAGTATTTCAT  
GTTCCGGTTTATGCATTCCTACGACCTTATACTTCCCCGATCCATCATCATTACGGGCAA  
TTCGTCCATTTTCATCATAGACTACCTTTGAGCGTCTCAGTACTGGTTTGATGTGGTCTG  
CGTGCCAGCGATCCCCTAGTTCCCTCGCCACAATAGGCACAACGTCCACCATATTTCAATT  
TCAGTATCTGGCGATGCTCTTTCTTTGACAATTTTTTAGGTTTAGGGGCTTTCGCCCCCT  
CATTTTCACACATCGGATACCTCTTTTACTGTATTGGCAGTGGGCTTGTGCTAGTGAGTA  
CGTTTGATGATTGGGAGAAATAAAGAGACCTCCGGTTCCTCTTCTTTACCAGATTTGCTG  
CGGATATAACCGTTGCATGTCATCGCCATGACTTCTCCAATCAGGTTATGACGGTCAGCC  
CATAACATTTCTCGGTCGAGTTCATTTTCGACGATCGAACGGAATTACACGTTTCAGTTCCA  
TCATCCCCTTTTTGGGTTGTAGTGTGCGGTAAGCCCGATCCGGTGTAGTCTCATTTCGT  
CCGCACGCACTACGGACAGTAAAACCGCCTACCTTATTGGGGTCTTTACTATGCGGATAT  
ACATCAATAATTTCCGCGGCGAAGTCAATCACTTCTTTAAATTTAACCTGATCTTTACTA  
CGGCGCTCTTCAAATACACCATGTAAATTTTTAAGGATAATACCTTCGAAGCCCATGTTT  
ACATAGCGATGTTATACTTCGCGAGCTTCATCTATATTGTTAACTACAGTGTGTTTCGATT  
ATCTCAACACGAGGATCGTTAAGTTCTTCAACAATCTGTTTTAGTTCTTCGAATCGATCT  
TTATATTGCTTCGTTGCTTCTCGTTTCCGTAATACACATCACGGTCGATAACATCCCAG

ACAGTGTAACAATACATTGGGCTTCTTATTTTGGGAATTGTTCCCTTTCAGTGATTTGTTG  
AGGATACCATTTCCGGTCTGACGATCTGCAACAACCGATTCTTTTACTGCTTCCGCTCCT  
GGCGTTAATGGCATTTCCTCTTCTTCAAATATCCATGACAGAGTACCATCATAAACGCTT  
TCAACGAAGTTCTGCGCTGGGGTTTGCGAAAGGGTAGGCATATATACCAATTCCACCTCT  
AGAACAATCCCCCGCCTAGCAGACGCTCTAAAACAGCATTCAAATCATCCAGCCCCTGA  
TAGGTATTACCTGAACGGGTATAGATTGCTAATGTTTCCCGTCAATATAAGCCATCCCA  
CCAGCGCCATCGCTTTTAAGTTGTGCATACGCCAGATACTTGATATTAGCAATAGTCTTA  
TCAGAACATGACGATGCAAGGTGACACGGTTGCTGGGGGATCAGTTTCTTCCATAGCTTG  
TTTGCAGGGGTAGCTGACCAACCGAATTCCAGATCACGATTCAGGACAATCATTGCACCT  
TTAGCATCATCCTCTGACAAGCAAGTCAGAGTATCGGTAAGTACTAGCTGTAATGCTGCATTA  
CCAGTACTTGACGCGTGGCAAGTTTATTTTTAAAGACCTGTAATGCACCGGATAAAGAC  
AATACAGACGAATAACGTTATGGTTTATCGTATTTCTTTACGCCAAACGTAACCTGTTTG  
CAATATGCCAGATAAAAACATTCTTTCAGTGTTGCATTGCTTGCAGATTCTTTCAGGATC  
TTTTCTTGCAGCGATGTTTTGTCTGTTGCTGCAAACCTGGTTAATGATATTAAGAATTCAC  
ATTTTACC CGCTTTTGTAAAGCGTTCACGAATATCATTGAGGATACTACAAAATTCCGA  
TTCAGTCTATATGGTCTTTAACGGATCAGTTCCACCTATGCTATGACGTAATTTCTTATT  
TCCTGTAGCGAGTAATGCTTTACAAAATTCTGGGTTATTCCGTGCCATCGTAACAAATGC  
CAGATGTACCAGTCTGTAATAATGCTCACTCATACGATGAATCGGGCGAATCTTAAAATT  
TAACATGTGAGTCTCAATCTTATCAGTTCTTCCGGATCTTTTTGATTTGCCACCGTTCAT  
CAAAAAGATTTCTCTTTGTCCCTGAGGGTCTTAAATCTTAGCCCCTGTAAAAATCCTTC  
TGTGCTGTTAATATCGCAACCAATAGACGGAATGGTCTTTTATTAATATTACTCAATTC  
AACCGATGGATAAGGTCCACCCGCATAGAGATTAATTTCAGAAGTCATTGAAACTAATCT  
CGTAATCAGAGAGAACGGATCACAATCGTCATTAGGAATATCGATAGTAATCGAATGAG  
GATTTACCCATAGACCAAACCTGGTCTTGTTCGGTGAATACTTCGGTATGGATTTCTGTTGA  
TGTTTACATTCATAGTTTTTCAGACTAAAATTCCGTAATAATCAATAACTTACAAAATCAT  
ATAGCCAAAATCTAGGCGGGATTATTTCCCGCGGTTTAAAATCATTAAACCGTAAACTACC  
ACAATATTCTGTTTGTGTGTTACAGTCCATGTCAGGTCGATCTCTTCTTACTTATCAACG  
CCGTTAATAACGTCTGGGTGAGGAACTTTATTCATCTTGCCATGTGGCAGTAGAACAGTT  
TAACCCAGCAATTTCTTATCTACAGTCTCGCCAATATCAATAATCTTACCTACCAGCGGA  
ATCTCGCCCATAGTGCCTTTTGCTCAATAATGATCCCCATAGAGCTTTTTACTTCCGGTC  
CCTGCGCTTTCCGTTTTAGCTCCGATAATTACATAATCACCAAGTGCTTTAGGAGTTTTA  
ACGGTCTTAATTTTATTACCTCTTCAAATCAATACAGTTAAATGATGAATTATTTATAAA  
TTTCGACGATCTGCGCGGGAGTCAACCCATCTTCATTAATCAGACCATCAAGCCAAAAC  
TACGGAAACCTTCAACTGCAATTTTCATATACTGGCAAAGATGTTTCTGATTCTTTACGCG  
GTTTTTCAACATTCGGAACCTAACCACTTTTCGTATATTTTCGAACGGCATCAGTGCCGGAT  
CTAGCGTGGCGATCAACTCAAGGACAGTACCATCTTTCTTAATAAACTGCAAAGAGTAAG  
TACCGACCGAAAACAGTTTCTTTAGTGCTTCGCGAAGTGCGATATTATCAACTTGTTTACG  
TCATTATCGATACCCTTCAAATCAGTCAATAATGCTTTTGGAAATACGCGCGATCGTAATA  
TCCGCATTATTCAGAATATCAGCCCAATCACGCCAACAGTTCGATCGTATGTGTCGCAA  
TACTATAGATGTTTAAATTCAACTTTTTGCAATTGCTTTAGGGCAATCTGGACACGGTGAA  
GCAGTACACCACATACTAGCGCCTTCAATCGATATACCGCTACGGGCAGCAAACAAAATA  
GCATTTAATTCAGCGTGGATCTCGTTTTTCTGTGACCATGCACTATACTCTGATCGTTTT  
TCTGGGATCATTGTTGCGTTCATCATCCAGCCAACCGTTTTTATGGGCATGACAGCTACAA  
TTTACTTGCCCTGCTGGTGTTCCTTTAAATACAGTAGAAATGATTCGCCCGTCTTTTTTCG  
ATCAGTGCGCATTCCTTCTCGAAACACATTTAGAGTTCTTTACGATTAGATAGTTCGATC  
TGCATGTAAGTTTGTGACAACATAAATAATCCTCACATATAAATTAACCGTATACGCGA  
AAGAATTCGACCGATCCGTGCTATACTGTTGTACATTGAATGTATTACACCATGATCA  
TTGCTCATAATGACATATACTCCGACGCTCATCAGCAAACGGGGTAACTAGTGCGGGT  
TCAATTTCAACATTTAAAACCGTTTAGCAAGTGCTTCGCCTAATTGCTTGAGTTTATCG  
GTAAACATTTAAAAGTCTCCGTAGTTAACCTGAAAACATTCTACACCAATTGAGCGGTACA  
TGTAACCACTTGATCACGGTCATCTACTGCCAAAACAACATGATAACGCGGTGCACTTT  
CCGAGAAGAACATCTCTTTCTTCACTTCATGGTCTGGACGTCGATCATTAGTTTCACGCT  
GGAAGTGATCGCTAGTTTCAATACCCTGTTACGCAGCCATTGCAGAGTATCTTCTTCGC  
AAACATCCTCACGCCCTGAGAATGTAATGATACGATAACCATTATCACGATACAGTTTAA  
GCATTTTCGATCACTTGCGTACGCGGTTTATCTTCTTTGACCTTTGTCCAGTCAAACGGAT  
GACGACCGCCCTCATCCGCTAATGTCCGATCAATATCAAAGATCACCGCTTTCGGTAGCA  
GGGTATTCGGTTTGTATACTTCTTGACCCATATATTCCTGCATAAGATATAAATTGGTTGC

CCAGATGAGAAGGTGGAGTTGCTTTCTCGCCGCGATAGAAATTACGTGTCTTTGGTGTCT  
CAAACGATTGATTGAACACTTGTTTCAGTATACACCGCGTTAAATTCTTTTGCAAGTTGTT  
TGTAAGAATACACGATGTTTTTCGTTTCAGGTTGGTATCAGAGATAATGATACTCAATCCGC  
TTGATGGAGTCACGCGAGCAATCATTCTCTGAATAGACTCTACCAGCTTTTCTTTGGCT  
TAGTATACTTGTGTTTCAAAGTGCCTCACGCCAAACAACATAAGACGAAGATCATCAC  
GATTCACATTACGATAATTACTAAACCGTTTACATGTTTCCGTAGCCATTTAGTTTTAC  
CGGACACAGAACAACCAACGGTTAAAATCACATCACATTTCCGGCATTATTTCTTTTCGG  
TGTGCACCGTTGCTCATTAAGTTCTTTGCGATAATAACACATGATCAACTTACTTTCAAG  
TGTATATCTCTTAATATCAGCCAACCAGACCCTAAATTTTTGGGAGTCCTCCCACGCCAT  
AGAACTCTAGGTTTACCGTATTTTCGTATCCACTTTCAGGTCAATGTCAACTTTTTCTAT  
TGGTGCTGGAAGTGGAAGATGTAATGTCGGTTCCTGTGAATAATGGTCCATTGTACACGA  
AGAAAGAGCAAATACAATAGGTACAGCGAAGACATGGATTATGGCGGTGTGAAAATTCTT  
ATGTGCTTTCTTAAACAACCAGTGTTCACGAAAATTGAAAACACCATAATGATAATAAT  
CCTTGCACCTATCCCCAGATAATCACCCAGATTAATAATTGCTTATCTGCTCTTGCCTAGG  
CAATATTTCTATGCTCATTTAGTAGCCTCCTTTAATTCTTCGGTAAACTCCTTCAATGAA  
TCATTAAGCTGTTTCTCTACCAACTTGGCTTTTTGTGCTGCTCCATAGCCTCGTGTAGCG  
TCTTTCATTGCTTTGTTGTGTTCTTCTGCAAACCTTAGGTCATATTCCGTACATCTCCTTT  
TGTAGTGATTCTACGACCTTCATCTTTTCATCTGTCTTTTTTCTTATACTCTGTAAATTCC  
TGATTGAATCGGTCCACCTCCTTTTTAATTTCCACCACATATTGCCTCCTACCCCCAGC  
AACACAGATATGATAACAATGTATATCAGCTTTGACATATTACCCCCAACGACAAAAGGC  
GGGCAACTAGCCCCGCTTATTATTACCACTCAATATTATCAGCCGGAATCAGTTTCTTAT  
AATTCCGTAGATAGTAAGTTTTTCATTGAAGCCAGAATACGGTCATGATCAAGGCCATCAA  
ATGCAATCATCAGACACATGAAAATATATGATTGTGCATCACCATGTTACGTGATTCTGA  
TAGTCGCATTGGATGCATGTGTCTTTCTGTCTTCTCCCGCGTGCAGCGTTACAAAATTCTG  
TTGCTGTCGTAAAGGCATTGCGATGAATGGACCTGAATGCTTCCCTCGAATAGCACAATTC  
GGTCCAGAGCTTCCGGTTCGCCTTCATATGCAGCACACAAATCATCGGTTTAGCCTTCTA  
CGACATAGTAGATCAGGTTATTAAGAAACATCGATGTGTTTTTAATGTTATGCACACCAA  
TATAGCATTCACTCTTCACCTTGAACATTTGACCGTCTTTAGTGCGTGCAACAATCCCTT  
CGATACCTTCTGCGGTCCGAACCTTCATCAAGAATATTGCTAAAACGCGCTGAATGAACCT  
GTAACGCACCTACCAGATGAGGACGTAGGATTGCGTCAGCAAATAGCATTGATGCAGTA  
CGTACTCTCCTGTGACGATATGGCGTACATTCAGAAGTGTTAGCGACGGTTCAGCTTATT  
CTACAACAATTCGGTTGCTGGGTGCTGTTTATTCAAAGTTGAAATTATATTCAGACCCAA  
TATCGGTGATCTTAGCGCGTAGATCCGCATACTTCTCTGAATACAGAAGACCGTTTGCTC  
TCTCTGCCTGGCTTGAGTACAAGGCCGCTTTAGACTTCACCTGAACATAGCCGTTATCAA  
TGTATGTGCTTACTAGGCTACCCTTCATTTTGTCCATGACAATTTCCACATCTTCCGGCT  
TAATGCGAACGCGATCATTCTGACCCAAATTAATAAACTTCTCCATAGGACGAGATGCAA  
TGCGGACAGGTCGGTCTTTATCATCGATTTCTAACTTGATCCCGCGACACTCCAAAGCAT  
CTGGTTTATCCACATATCCGGTTTGCTCAAGTACAGGTAAGTAAAAATGCGCATAACGGG  
TTTGCATCGCCGTAATTTTCATCTTTGTAATAGAACGTATCAGATCCGTCACATAGTGCCA  
TCAGATTTTTGAACAATGCTAAAACTTTTTTTGGTTGTTTTCTTTTGGTTGACATAATTTGT  
GTTCCATTCTGGTTTAAATTTGGTGATCAAACAGGTTCTTCGATATCGGCAGTGCTTAT  
AATATCTTTACCCGTTGGATTCTCGATGTACAACCTCAAAGCATTGGCGCTAATAGAATGT  
TACTGTCTTACCTTCTCTAGCGCCTTATGAATATTCTTACTCTGACGAGTATCCGCTGT  
TGGTGTTTGTCTGTTAATGCTCGTCCGGTAATGATTGATCCGCTTTCTGAGATTAACAGT  
GTTACCAATGTATACCAATTCATCATCAACCAGAATAGAGTAAAGAACATTTAAACGGTC  
TTTCTGAGGCGGTAGAATCACATCATCTTTACTCTAAACGTGAATATTTAACGAA  
TCCATAGTTTTCTATTAGCTCATTAAATCATTATCCTTTCCCTCACGTCACAACAAAGGCGG  
GATTTCTCCCGCCACGTTATTAACCTTTCCAGATTATCGCGAGCTTCGTTACGCTCCTTG  
ATGATTTTTCAGGACAAATTCAGTTTCTCTTTGTTTCAGTGGTCCGTTTTCCATTGCTTCT  
TTGACGGTAAACACTCCGCCACCTTGCCCGTATACAGTGACAGTGATTTACCTAACATC  
GTGGTATGACAACCGCCAATTTTCGGTGATTTCGAAAGAAACAATCACCTCACGGATAGTA  
TTGCCATCGTTGATTTCTTCCAGCGTAATATCGCTATTGTAAGCGGTTGCGTTTACCATA  
CGGATCAGCATAGTCTGATCTGGGGGGCTGGTCAATTTGTCCATTGCATGTTGCAATGCA  
GCGTAACCGAAAACCTTAAACGACGTCCAGACCGTCTTTGCGACCTTGAACCTTTGATCATC  
TTGATACTCCTTAGTACGTTAGTTTCGTTGCGATGGGGTATCTTACTACCCCCGTTTGGAG  
GCCGTCAACTACTTTTTAATGTAAAGTTCGAATTTTGCTACCTTACGTCCTCGTTTATTG  
AAAGAAACCCACGGACGGTTTTCAATGTAGAACAATTTCTTCGCCTATAATGAATACTGAC

TGATTGTAAAGGCGACCCATCAGGTCAAGCTGGCGAATGCTAGTAGATTCGTATACGTCG  
CCTACCACAAAGTGTGTTGCTGATAGAGTCGGTGCAAGTAAATTTTCATTTTATTCTCCTA  
TGTTTCGTTTCGATGGGGGTATCTTACTACCCCCGCTAGTCAGTGTCAACTACTTTT  
CTTGTTGATTTCATCCACCATTGAGTGAGCTTATCAATTTTGTGTTCCATCCAA  
CTTATCCCACCGTATCTGAGGGTTTAAACAACCGGAATAGGTAAGGTGTACGTGTTAAGTG  
AACTCGGTCACTGTAGTAATTGATGTACTGCTTTTCAATTCTAAGTTTCATCATTTTACG  
ATGAAAATAGGCAATGACTTGTCTTCTGTTTCCATATGTTCCCTCCGTTTCGATGTGCGT  
AATATGCTATGGTAAGGTCTGATTGTCAACACCCAATAACAAAAAAGTCGCCACTATTG  
GCGACTTTGAACAAACATTAATCATGACCGTGATTGCAATATCCGCTCGTGTGCGTGCCT  
TTGTGATTACCTACGTCAAAGACACGATAACCATTTTACGAAGAAGTTTAAACACTTCT  
GGGTTATCCTCAAAGACTCCGACAACCTTCATCTTTATCAAAGGATTTAATTACCTCTAAT  
TTGATGTGATAGTCTTTACGGGAATCATTGCGACCTCTCATAAAGATTTTATCGAAACAC  
ACATCATTAGCGATCAACCATTCCACCGTTGCCATGTAAGCATGTGAACTTCGTCCGGTG  
AGGAAGTAAGTCAAATGCCCCTTGTCCGAAAGAGCATTGATAACACGGATTACATCGTAA  
ATGCGGGAATCTCACCCACATTCGTGGTTATATTCGATCCACGACTCGACTTTATCAAGA  
TTTTCGGTTGGCATCTTTGCTAGTCGTTGTGTTAGATCTGTGATCGTAAAATCTAAATCG  
ACAAAATATATCATAGATATTTCCCGAATCGGTTGTAGTCATCGTCTGTTAAATCGGTAT  
TAACCTGAGACACCAGATACATAATCTCTACTTCCCTGCGCTGCATTCTGCACTTCGTCAG  
AGTTGAACCACTTACGCATCCACGGTGAAGGATGACGACGAACACTAAACGGGCTTTTCA  
GTCCGGCAGCACGCATACGGGAATGTGCCAGGTATTCTACATAGGTTTTTCAGAGTTTCCG  
GTTAGAGGTTAGGAATTGCCCCATTGCGAGTAGGTGGTCTACCCATCCTTTTTCTTGCT  
CGACAACATCCAGAAAGATTTTCGTTGCTTCGCCTTCAAGTTCTTCCGCAAGCTGTTTCC  
ACTCATCACAATCAACCCCCGTTTGCCATTGACGAATAATGTATTGTGTGCCATTTAAGT  
GAAGTTGTTTCATCACGCGCAATAAATTTTCATGATCTTTCGCGTTACGTTCCAGTAAACCAC  
GTTCCGGCAAAGCTGAACGTACATGCAAAGGCCACATAAAAATAATTGCATCCAGTGCCT  
TGACGCAGTGTGCACACCGATAAATCGAAGCCATCAGATCTCATTTTGTATCTTCGAAAA  
ATCTTCTTGCATAATCTAATGCTGTCTGGTTCGCTAGTTCTTCCCAATAGCGGAGATCTT  
CTTTTGCATTCTCATACTTACGTATCCAATAAAGAACATCATCATAATTTCCCGAAAG  
ATTCCGCTCGCTTCATGATAGCAGGGTTATCGGTGATCTGGTTCGAACTCACTAGCCGGAT  
CAATGAAACAGTTACGCATAATGTGTGTATAGCTTCCGGCTATGAATCGTTTCGCTGAATG  
TCCATGTTTGCACCATGTATCGAGAGTTGGATCAGATACAATTGGACCAAATGCTGCGG  
ACGGTGCAGCACCCTGAATTGAATCAAGTAATGTCTGATACTTCAAGTTTTTCAGTAAGCA  
AACGCTTTCCAACGTCACCCATATTAAGATATTGAATGCGGTGGGTTGCACGTGAATTTT  
CTTCTGGACGCCAGAAAAACGACAGAGATTTTTCAATTAATTCTTCAAATACTTGATGAC  
GCTGAATGTCATAACGAGCGATACCTAGACCGCTACCCAGAAACATCGGTTTCATTATAA  
TATCAAAGTGTCTCGATTAAATACCGTATTACCCCTTACATATTCCTCATTTTACAGT  
TATCAAAGCGGCATCGTCGAGCATTGCCTTTTTTAGTAATTTTACCGCAATGCGGACAAG  
GATGTGCCATTGTTGCTTCCCTTTGTCCGTTGTGAAATCAGCTTTCTCATTTCCCTCGCTAT  
TTGGTATTCCTTGAGTTGGCGATGGTTTCCCAAACATAGGATTTTACTTCCCATTTCTTA  
GTTTTGAAATGTTTAAACGCGTGCTCCATTGTTTTTCGCTTACGCATTTTACTTTTTGTCT  
CTTCTGATTTTATTACACCTTTTGAAGATTCGCTAATCTTTCTTTCGCGTTTCTTCTTTCA  
TCGGCTTGCCCTTTCTTTGTTTCAGAGATAAGTACCCTAGCTTGTTTCATGTACCCTAGACG  
AAACAATATACTCTCTTTTATTGGTCTTCGCATTTTTTGGTAAACACAGCATAACCAATG  
CTTGTGCCATAGGTCCACCATGAATTTTGGCCAGCAGATGATGAATCACGAAATGTTCTT  
TTGCTGTCAACTCAATCAGGTTATCAACTTCATCACCGCCACCCATAGCTCGCGGTA  
TATGATGTGTTGCCTTATATCCTTCAACGGTGCCCTGATCTTTGCTTTTTCTATGATTG  
CGTCATGTAGTATTTGTAGGTTTCATGAATTAATCCTCTTTTCTGTATACCATTATTTATC  
AGGTATCCAGAAGAAGGATTAATTCACCTCACTATTATCCGACAACCTCAAACATTTTAT  
CATCAGGAAGAATAGCCATTCGACGCGGTATTAATCCTCAACGTAGTAGCAAGTCCCAT  
CATGTCGAGCATCATATTCATCACCAGACAACAAGCTATCAGCTAGCTCAAATCTACAC  
CAACACATTTTAAATTTGGGCATACTAACATCCTCACTTGATTTTGTATGGGTGACTTATAG  
CGGGGATTTCTCCCCGCGTCAACACTTATTTTACAGCTTGATGCTGAGTACTCGCTAGC  
GTCTTCCGTACCATCTGCACCGTCGCGAAAGTTTCGCATAATAGATGGTTTTCTGACCGAA  
ATATTGAGCAAACAACATATCATCTAACACATCAGCAATATCGACGTTTCCAGTCTTATA  
AGTGCCTGGATCGTATGATGTATTGGAACATAATCGCCTGATACACAAACTTCTGCATGAT  
CGCTGCCGGTGTGAGATAAGGCTTGTACCTTTTTTGTATCAGTGTCCAAAGCAGGTCAAT  
AACATCAGGATTATTCTCCACGTTCCGGAATAACCTGATTAAATTGCACTTCTTTCGATCC

TTTAACCGATACAATCCCGCGAGGCGGTTCAATACCGTTGGTCCTGTTAGATACCTGAGA  
AGACGACTCACAAGGCATCAGCGCCAACAGTGTACTGTTACGATGGCCATGTTTTTTCAG  
GTCTTCGCGCAGTTCTTCCCAATCCATCTCATAACCGCATCCACCAGTTCATCTACTGT  
CATTTTGTACCAGTCGATAGGAAGTTCACCGCGACCATAGCGTGTTTCGTGCATAAGTTC  
GCAAGCACCTTCTCTTTAGCCAGTCGCACGCTAGCCTTAATCAGAGCATGTTGCAAGCG  
GTCAAACGTTTTATGCGTAAACTCGTTAGCGTCTTCATATGTGAAGAAATTATCTGCTAG  
ATGTGAGGCAAAGTTAGTCACACCAACACCCAGAGAGCGACGTTTTTTGGCTGTCAGCGC  
TTGTTCTACAGGATAAACCTTATAATCTCGCAGGTTGTCAAGAGCACGCACCATATCCAG  
AGCAATGCGTTCCTACTTCGTCCATATTTTCGATATCGAAATTACCTAAAACATATGCTGC  
CAAAGTACATAGGCTAATTTCTGAATCATCACGACCCATCGGTCTTGTAGGCAGAGCAAT  
TTCACAACACAGGTTAGATTGTTAATCGGTGCTCTATTACGAATAAAGGCCCCCGTGATT  
GTTTCATGTTGTCTATGAACGTTGGGTAGATTCAACCAGTGTTAAAACGTTCAATTGCCAC  
CGTAAAACATGTCTTCAGCGTTAACACGAGTTTTACGAACACTCGGGTCTTTTTCCAG  
TTTTTCGCAAAGCTGGCGGAAACCTTCCTCGTCTCGGGAGTAGAGATCCCACAACAAGCC  
ACCCGCAACATCTGGACTAAACAGAGTAATGTAATCCCGTTTAAGGAATCGCTCTACCAT  
CAGGTTATTAATCTGTACGCCGTAATCAAGATGACGTATGCGGTTATCTTCCACCCCTT  
ATTGTTCTTTAACACAATCAGACTTTCAAACCTCTAAATACCATATTGGGTAATAGAGAGT  
CCCCGCCACGCGACGAATGCCGCCTTGTGAGCATGACTTAACGGCCGTCTGAAAATGTTT  
CCAGAATGGGATAACGCCAATATGACGAACATCCCATGCCAATCTTAGATCCGTCCGC  
GCGAATCATGCCAGCGTCGATACCGATACCGACGCTTGCTAGTATACTTGATGATTGC  
ATTTGCTGTTTCGTTGATGCCCTGCAATGAGTCTCACTTTCGATCACCACACACGAACT  
AAATTGGCGTGTTGGGGTACGCACACCTGCCATACTCGCAGTAGGTTAGAGAGATTTGCTT  
ATTCGCAACAGCATTATAAAAATCAATCACATTTTCAAGTCGATTTTCTGTCTCTTCTTG  
AGGCAATCACATACCGATCAGCATATACGCAAATTGTGGTGTTCGATGATTTTCTTAGT  
GCTGCGATCCTGAACAAGATATTTCTATTTTGACTGCATCGCACCAGCATTGGTCATTTT  
AAAATCAAGTTTATGGTCGATGAATTTCTCCAGATATTCCACTTCTTCATGGGAATACTT  
TTGCAGAATTTTCGCGATCATATTTTCCGGTTGCAATATTACGCTCAATATGGCTGTAAAA  
ATCAATCGGTTGGAATTGACCGTATAGTGATTTGCGAAGCGCGAACATTGCAAGGTTACT  
TGCTACATATTGATAATCGGGTGTTCCTATAGTGATGTTATCTGCTGCGACCTTAATCAA  
TTCTTTCTGGATATCATTGGTGGACATACCTTCTGTCAGAAGTGGTTCAACCATATCAA  
CAATTTATATGGATCCACGTTATGACCTTCGGCTGCCCTTCCAGAATTTTCATTACTTT  
TTCTTTTCAAACGGAACAGTCAGACCGGAAGACTTAACAACATTTTAAATCATATTACC  
TCACTTTAAATTTTAGCAGGAACAAGTTTATCCTCCATATTGGGGGCCTTCGCCCTTTT  
GTTATACTGCCATTTGAGCGGTGATCGCTGGATGGCTTTGATAGTTGTGAATTTCAAAT  
CTTTCGGAGTCTTTGTCAATACCTCATCTAAAGATTTAAACTCCGGCTACTCAATTATTG  
GTTTAGCAAACGGAACACGGCTTAACTGGTCCATAACTTGATCAAAATGGTTTTTTGTA  
TGTGGCAATCACCACACTGATAAATCAGTTCGCCAACTTCTAATCCGCAAATCTTCGCGA  
TGATATACGTTAACAGTGCATAGCTCGCTACGTTGAACGGATTCCCTAAAAGGGATCAT  
CCGAACGCATGAAAAATAAACAACCTCAATTTGTTGTCGTTGGAAACATAAAACTGTACAA  
TCCGATGACAAACACCTAACACAGCATTATGCGTTTCCTGTACGTTCCATGAATCAATGA  
ACATTCGACGACCATATGGATCATTCTTGATCATGTCACTAACTTTTTGTAACCTGGTCT  
CCCAAATCTTCGGGCGATAGACATATTCTTCATCGTCTTTAGTGCTTGATGTGTCTGCGT  
CCATACTAACAACATCGTGGTATCAGGTGCTATAATATCCCCACCCAGATAATCACTAT  
CAAGCAGATAACCGAAATAACCATCATCTACCCATTCTGCAATCCCCGCAAGCAATATG  
CATCATTAAACAAAATTAGATTGAGTCTTCCAGTGGTCTGCTCCAGAATATAATCAAACC  
CTTCATAACGCATACCACGCCAGATAGCACATAAACGGTCTTCTGTTTCATTGGTTGGTG  
TAAAGTATTCTACCCACGGGTGCTTAAATGTATGTGTATATTTGCTCTTTACGCGCTTAA  
TTTTGATTTACCGTGTGGATAAATCGGTTTTTCGTGCGCCATGCCATGCCATACATATTAC  
CGACATTACAATCATTGAATCGCAAGGGATTCTTTTCTTTTCATATCAGGACACTTGCCGA  
GCCAAATATCAAAGGCTTCTCGTCAAACCTTGCCGCGTGTAATTTCCCGTAAGCGACGGC  
GGTCAAGTGATCGCTCCATAAACCATAGCAATTCGCCAATTACAGAGGCTGTAGCCACCT  
TTTTAGTGGTCAGTAAGGGGAACCCCTTGCTTAAATCAATTCGCATTTCTGCACCGAATT  
TAGAGAGCGTACCTACCCAGTTCGGTCTTACAGATGCCAGCCATTTTCAAGAACATCAC  
GCAATAGTTTCAAATATTCTTTCATCCACACCACCTTTTTCTTAGTGATTGCTTTCTTA  
CGCAGTTTTGCTACTGTCTCGTCAATGCCTATAAAGATAACACCACGGTTCGAATACAGTT  
GCAGGTCTTGAGATATCGCTATTTTCTTGACAGTAAGCCATGATGCGCTCGCTTCATCA  
TAGAGATATTGTAAACTGTAATAATCTACGGCGACTGCGTTGTTTTACTAGGAGCCGTC

CATAATTGAATAATACCGACTTTTCATTATTGTTCCCGTTCACAATGTAAACACCGACTAC  
CAGCAAACATCCAAGATTCAGCACAATGTTTTCACTCATAATCTGTCAGGATTTTCCAGT  
TACGCCTTCTTACGTTCTAAAATGTGTTTCGCTGATCAGGTAATCATCAAGGAAGTAATTA  
TGTGCTTCTTTTGTGCAAAATCAAAATATAATTCCTGAATGATTTCTTAGAGATACCA  
ACATCATATTCGAACGGATCATTAAATTCCTTCTCGTTGAACATATGTTAACACAATACGG  
TCCGCAAAGTCCACCGCTTTTTCAATCAGGGAAGGTCCACCAATAACGCTTACCAAACCT  
TGCAATTTCTCTATGACTTCTACTAATTCCTTAAACCCACCATCATTAGTAATCGCGGTA  
TACACCTCTGGTTGGTCGCCGTTACTTGCTTTCGGTGCTGGCTTACTGGTATCGGTGCTA  
ACAACCACATTCACGCGACCTTCCAGTGCTTTAGGAAGACTTTCAAAGGTATTACTTCCC  
ATTACCTCCGCCGCAAGATCCCCATCTCCCATAGTGCGCATTTTAAAGTTTTCCATGTCC  
TTTTTGATTGGACGACCCACGCTAAACCGCCTTTAAAACCAAAGGCCAATTTTCATCT  
GACATGTGAGTGTACCAATCTCAAATACACATTGAATCATAATATTAATCTCCTATCAA  
ACCAGCTTGAGATAGTTTTCGTTAACGTTTTCTTCTGTGATGTCGGTTTTAAACTCAATA  
CCAACATCAGGAGAAACATAATAGCGTTCGGAATATTCACGCCACATTTACAGTAGGCTG  
ACACCAACATTAACACAATTTTCCCAGAAACGGAACATAATTTTATTTGCGGTGTGGCGG  
TAATGGCTTTGAATCAAACCTGCCATCACGGCGACGTGATTCATAAACCGTAATACAGTCT  
CGGTTAGCGGCTTTAAGACATTCTTCAATAGTGCCGCATGAGATAATTTTCGTTTGAGTCG  
TTTACGATTTGTTCTACAGTCCAGATAATAATCCTCTCTTTGTTTCGATGTGTGTATT  
ATACAGTACCACACAAGCATGTCAACACCTTTTTCATAAACTTTTAGGCAATAAAAAAGC  
CTCCCCGAAGGAAGGCTTTAAAATTCATTACATCCCTAACAGAGCGTCAAGATCATCCAG  
ATCAGAAGCGGAGGAAGTACCGCCACCCAGATCCAGCGATGCCATCAGGACAACAGCGGA  
AGAATCTAACGCCGTGCTAGCTGCGTTAATACCAACTACAGTGCTAGCTGCGTTAATACC  
AGCATCGAATGGATTCAGCTGTGCGACAAAACGTCAAGCTGGCTTTAATCGGTGCCGC  
AGCACTGGAAGCCGCAGCACCAGCTACCATAGAAACGCCCATAGTTTTCTTAAATTTTGT  
TTCCCGTCCATCGAACGGTATAAACTGGATAGGCGCAACAATCTCACTCAGGTCAACCAT  
ATTTCCATCAGATATTTCTGATATGCTTCGTCTTCAATTTTCGAAAGCTGTGATTGCTG  
CATGAAACTAGAAGCATCATAGTTCTGGTGTTTATCAACCTGCTTAGCTTTCAAGCGGAA  
GTTAGCACCGGAGAACACACAAGTTACATCTACCGGAACTTCGTCCATATCGGTATTCAC  
GTTAACCATTGCAACGCTCTTATCATAAATTTTATGTCCGAAGCGGAATTTGAATACCTT  
ACCTTCATTTTCTGGTGCTTTAGGATCTTTCAGTACCAGAATATTTGCGTAATAAGAGGC  
TTTACGCTTAATCAGTTGACGTTTCGGTTTTATCGGTATTATACAGATCTTTTTTCGTTAAT  
ATATTTGCACACAGGGCAAGAATCAAATCACCGTGGGTGCTGGAGCAGTTTTCACATA  
CCATTTGCCATTAACCTTTGAAGGAATGGATTACCAGTTTCACAATCGGCAGACCGTCTTC  
TGTCATAGACGGCAGGAAGCGAATCAGGGCTTACCAGTACCAGGCTGCATCAGTCTTAAT  
CTTCCACTCTTTCGGATCTTCTTTGGAGAAACCGTTGCCACCTTCAATGCGGCCAGTTG  
GGCTTGACAGATTGGAGGAATCTTGGCGTTTTAAACATATTCATCTTCTTTTGATTA  
ATTTACTAGACTATTATACAGAATTATTTACTTGTCAACTATTTGTTTCAGTATTTAA  
TTGAGATATTTCTTTACACTCTTTAACTACTTTAATAAATAATGCTCTTGCTTTTGCGGC  
GTCAATAACAAGTAGTTTCTTGCACGCCTGCATTTTAACTATAAGTTTTCAAATCAA  
GTCTTTGGCTACCTTGTGCTGTTTCGACGGTTATATTTAGAAAGCTATCTAACACATAAA  
CGACTGAAACGATATAATCCGATTTTGCAGTAGTTTAAAGATACCGCTAGTTTCGGTTGC  
GGGATTGTATGTAATTAGCTTTTTAAGAGTAACCCCGCGTTTCTCGGAGAAGTATACCAG  
ACTTTAATGTCATCGTCAAATCGTGTTGCTGCATCGGTTAACTTTCCTATGTATTCCGT  
ATAAAAGCCGTAAGCGTCAACATCAGTGATTTACCTACCCATGCATCGGTATTAGCTAC  
CAGATTGCTTAGGAATAGGAAGTATAATTCTCTTAGATGGTACTTTTCCGCTAATTTTGC  
GAAATAACGTATCTCTGCGTTTATTGCATGCGGCATCAGACAACCGCATCCTCTAATT  
GTATTTTACGGAATCATAACGTCCGTTTCATGTGAGTTTTCTCATGCAATATAACATATA  
CACAGATTTAGCATTAAATTCGCATATCTGGATCTGGAGGAAGACGGTTTCTGATCATA  
TACCCCTTAAATATCGAGAGTGCTGGTTCGGTTCGTCGATCACTCCCTTCTGAGCGTTCT  
ATTTACTATACATTCGTCAGTGATCTTGTCAATAATGGACATCGGAATATACATCTGATA  
GTGACCATATTCGATAGAGTTTTCTCTTCAATCTGCGTTGTGCGTTCAAGAGAAGACAA  
ACCTTCTTCAACAACCAGTTTTTCGATTGCAAGACCGTTTGCTGTTTTGTTTCGCGGTTTT  
TACCGCATGTTTCATTAAGCATTGAACACCCGATAATAGAGTTCTACCGCTTCGTCGCGTT  
CTGCTTCGAACGTTTTCGCGCGGTTGCTGGTGATACAGTTTAAACAGAATGCCCCACATTT  
TACCATCGACGCCTAATTCTTCTTTAGCACGCTGTTTGATCTCTTTGATCTTATCGCCGA  
ATGCTTCTGAATGGTTTTCTGATCGCCGGCTTCTTTAATGAGTTGTGCCAGGGTATTTCC  
CGTGCCTACTTTCGTCAAATACTACTTTTTCTTTTTCTGTTTCAGTGAAAATATTAACCC

TCTTTCGTCATTAGTTGAACACCACGTTTCAGCTTTTGA AATTCGCTAGGACTTAAATCG  
TCACCAACATATTCTAGCATCATATCTCGGAGAATGTCTAGTGCTTTTTTCATCACCTGAT  
TTTAACTCGAACGCAAGTTCATTGTGAGCCTCTCCCAACCTTTCGCCGACTTTGCAATAA  
TAGAAAGTGTCTTTGCACATTTCCACTATAGCACCTCAAGGTCAAGTGTCAATGACTTG  
CGGTATGTCATTACTTGAATAAAGGATCGATAAGGTCGGAGTTTACGCCTAGACTATCA  
ACATAATGATAGAAATCATA CATTGTTGAAAAGTGATTTCTTCTCGGTTGAATAGTCCA  
GATTCACTAACACCTATTTTGACCATAATCAATGATCTATTAACCTCAAGTCGAGCATAA  
ATTCTTTTTCTACGCATTCCATGATCTTCGGTAGCATAATAAAATTCGTGTTTTAGCGTG  
TTAGCACGATCTACTAGAGTGTACCCGTCATACATTGCTACCCACAAATCTCAGTTTGT  
TCGACGCCAATTTGTGAGTGTGCATAGTATCTTAATTCAAGTTATTTCAAATGTCAACCC  
TTAGAATTCACTAATTTTCTGCAACATTTTAACTAACGCATTGGTTACAAAATAGTTATA  
AATTTTACCGCGTGGTGTCTGGTTTTGATTTCTCCCATGCTAACAAAATTTCATATTCGAT  
GTGATCAGGAATAAATTCAAAATCAATAAGTTCGCGGTTTTTCGT CAGAGCGTAGTGCTTC  
TTCCTCTGTCATCAAAGACTTTGGATCTTCGGCATCGAAAATTTGCTCTATCCATTTGGT  
TGCAATTTGGTTTAGCTCGTTCCCTTCCAGTCGTGAGATAATGAAATCACTAGGGCACTT  
GATAGGAGCTTCACCGTCTTTGAGTCACCCTTAACACATTTTACCATAAGGTCATTGTA  
AGGGCTAGCATATTTGCATTTTCGTCTTGCTTTCTGTACTGGCGCCCACTGTTTCACGTT  
TTTGTATTTGTGCAACTGTGTGTAGTACCATCGCCGGAGTAGATTAGCACCTGGCGACC  
TTCTAGAGAAAACTTTTAGTTAACACAGCGATTGTATCATCTGTTTCGACTTTGGCAAC  
CTTAATAACGTGATAAGGCATGTGCTCTTAAATCTCTTCGGTGATCTTATTGATCGCAGC  
AAAGATCATCTCCCAATCATGTGGATCTGCGTCTCGATTTTCCCTACGGTTGCGTTTATA  
GTAAGGGGCGATATCACGTCGCCAGTAACCTTACTTGAATCAAAGGCAAGTACCGTAAT  
TGGGTATTGCTCTTTGAATTTTGT CATATTATAACGCATGGTCTCAAGGATAAGATGACG  
AATCAAGCCTTCATGAATAGGATCTTCCGGTTTAAAGGTATGCGAGATAGTAGCAATCAT  
AAGCTGCGACACATCAATCAAATGCACACCTTCCGGTAGTTTATCATCTGGATCATCGAA  
GAAGTCATTAAGTGTAGCAGTAGTTTTTGTCAACGGGTTATACGTCATAATTAAGTTCAC  
TCGACTCTCACAACAACATATTTGCCAAACGAGTTAGTTACTTCGCTATCATAACCCGTAT  
TTCTCCATAACTCGCAGAATTGCATTGTTTAAATTCGGCACGGAAATAATTATAATCCTTA  
TCAGGGATTCTGTCAACTACCCACTTTGCACGTTCTGACGAATCAACTTTAACCATAATA  
TATCATCCTCTTTTGTCTTATCAATCCTCATTTTATAAATATGAACATAACCAGAAAAGG  
AGACCCACTAATGGCAGATTTTCCCTCAACATTTCAAGGCCACATTTGGCTTTGACGCTGG  
TAATGAAAAGGTCGTCAATGTAGCATAACGCAGATTAACACACATCAACGAATGCGGTCAA  
CGTTGAATTTTTCAATTACCATAATGGTATTACTCAGTATGACACA ACTCGCGGTTATGA  
TCAATACGGA ACTACAATCGATCAAACCCGTCCGTATTATGCAAAAAGAAGATATCAAAT  
GCCAGCAGGTGATTTTGACCCGACTAAATGGCAAGCACTGCGCACGGACCCACGTTGGGA  
TTATATTGCAGCAACTTCCAGTGATACTCCTTTAAAGTCTGGTGATTATATCGCAGCAGA  
TGGTCAATTTGTAAACTTGACATTCTCTATGCCAACTATCCAGCAGAGGGAGACTAT  
AACAGTAAAAGATATCGGTGGCAAGTGTGGTGTAAACGACTTATCGTTCTTGATTTTCATG  
ACATGAGTTTTACTATAACGGCAATGTGTACAACCGAAAATGGTATTGCGCTACCCCGTA  
TGCAATGAACTATTTTCATCTTTGTTTCGGAATCGTTGGCATGTTTATCATAACGGGAACAGA  
GCCGCGCGGTGTATACGCACAGCCAGCGATTGATGCTATTCAAATGCGGAATGGTGATCA  
GGTATTTTCGTCGTAGTTTCGTTGGGTAGTATTACCTTAGTGCTTCCTAAGTTTGCCAACAA  
TGCGGACTTGATCTAGACTACTGACCTTGACGGATTAACCGCAACCAACCACGTTACGGT  
TAAAGGTCATGCGCACGCAGAAGAACAATCAATTGGCACGTTTCGGTCTAAAAGAGATTAT  
CGGTAAGCGTAGCGGT CATGTTGTATTCATCTTTGACAAGACGGAAAAATTATGGCGTTT  
GTGGGATGGTGATCAGGCTGTTTCGTCTTAAACCGATCATCGATGGCACTCGCTGGCGACC  
TAATAGATATGTTGCTGTATTTGGTGGTTCGTGATGGTACTCTGACGCTCCCGACCAATGT  
CGAGCCGGGTGATCGTATTCAAGTTTCTATGCAGTATATGCAAGGAAACCAGAATTGCTG  
TATTATCACCGCCACAGAGTGTACAAAGATCCTTATGCAGAAAAACATGGTTCAGTTTCC  
TAAGCGTAGCGAGTACCCATTCAATGGGACTGATACATGGTCTCGAGTCTCTGAATTGTC  
TTTCAACGCTGCAAATGATTATGTACCTTATTTGGAATTTCTCTTATTCAGAAGGTGATGA  
TGGTAAGAAATACTGGTTGGTGGCACATGCTCCCCGATTGTAGAACGTGTAGATCCGAC  
TCCTAAAGATCGTGTTGGTGTAAATTGCACTGGCTGCCAAACTGAAACGAATAAAAACCA  
TGAAGAGAATCTTACCGACGAAGTTGCAGTAACCCAAAAATGTTGGCTAATAATACCGC  
CAACGAAACTCGACGCGGTATTGCTCGCATTGCGACTCAAGCGGAAACGCATCAAGATAC  
TGTTTCCA ACTTCTGGATGATGTTATCGATACGCCTAAAAAGTTAAATGACTGTGTTCC  
TACATAAGCCCGTCGTGGTGTGATGGAAATTGCAACCCAGCACGAAACCAATGAAGTTTT

AGACGATACCCGCGCTATTACTCCTAAGAAATTAGAAGAACGTCGCGCTTCCGAAGATCT  
CGCTGGTGTGCTGAAAGTGGTCAGGCTGGCGGCAGTGCGGCCGCTCGACGTGGCGAAGC  
TGGTACAGGGATCTATAACATCAATGATCATGCTAAAATTGTTACGTCTAAAAACATCAA  
CGAAGTCAAGGCGACCGAACCTTCCCCTGGTGTGGCTATCTGGCAACTGACGCGGATGT  
GCAAGGGGCTACAGAATCAAGCCCGCAAGATGCTTTACTCATCACGACTCGCACGCTAAC  
GAAACGTACTGCTACCGAATCGCGCACTGGTATCGTTGAAACTGCAACTCAGGAAGAAAC  
AAACTGAGGTCAAAGTGATAACGATATCATCACGCCTAAAAAGTTGCATACTCGCCGCGC  
AACGGATACTTTACACGGTTTAGCCGAAATCGCAACTCAGCCGGAATTTGACGCAGGTCT  
TAACGATGCTCGCATTTCTACCCCCTTGAAGATTAACCTTCTGTGAGCATGCACAGCG  
TTTGAAAGTTCGATCCGACTCTAGGGCTTAACCCTACTGGTGATTTGTGGCAAGGTATCAC  
CATTCGCGGTTTGGATGCAACCGAAGATACAAAAGGCGTCGCTAAAGTTGCTACTACTCA  
GCTTACGGATGCTGGTCAAGATGATACTTCAATCATCACGCCTAAAAAGCTGCAAGCCAA  
AAAGGCCACCGAAGGTAAAGAAGGTATTATCCGAGTTGGTACTCAAGCCGAAACCGTGGC  
TGGTGCCTGACAAATGTAGCAATGTCTCCGACGAACTTCAAATATGATGTTTCAGACAGA  
GGATACACGGAAAGCAACCGAAGCGCGTCGTGGTTTCTTGAAAGTTGCTAATCAGGAAAA  
CTGTTTTGTTGGTGATACTCTGCAAGGATCTACTCAAGAACTAGGAAACTCCCAGCATGA  
AGGAATTGCTGTTACCCCTAAAGGATTGAACTACGTACTTGCTAATTTCTTACCTAAGAT  
GGCAACCGCTCAGAATAGTTTCGAATTGGGTAACTAGAGGCCGCTATATGAGCGCGTAG  
AGACATTGACCAGACCATAGAGAGCAATTACACGTTTAATAAAAACGTTAACGTGAAGGG  
CGATTTAGAGTGCTTAACATCAGGTTTCTTTGAAACTCTGTATGTGACTAAGAAATCAAC  
CGACGATCCGAGTAACGGTCATCTTGTGTTGGGTGAGCGTGGAGTTGACGTTACACCCGG  
AATTACTCTGCATGGCACAACCGCATCGGAAGGCATGAAAAAATCGTGGTCTATTATCGT  
GGGCGGGACTGGAACAGCGCAAGATGTTGATAGTGATGCTATCGCTTTCGGCAAAATCAA  
TGATGGTGGAGTCGTCGAGCATTACGCCTTTGCTATGGAACACAATGGCGACGCGACAGC  
ATATAAAGACTTTATTGGAGGTCGTAACCTGTATGCGAAACAAGGCGGATTATACATTGT  
TGACCAGTCTAATCCTTCAATGACTAGTTCCCCAGATGCGATGCCGAATATCGGTCACGG  
TGGAAGTGTTAACATCAAAGCAGGTCATCAAACGTTAACTACAGAGATCGCCGGACAGAA  
ATATCAGCTCGTACACGCAGGAAACGCTGATGAAGTTCTTAAACCGTCAGTTTGTTAAGAA  
TGCTGGCGATACAATGGTCGGTAAGCTGACTATGGATAATGCGCCTATTGGTTCTGTAA  
GCATGAAGCTAGCGCGGCAACCGCTCCGGCAATCAGCGACATCGGTTTCTGGAATATGCG  
CGTTACTACTCAGAACATCAAAGAACTTATCCATAGAAGAAAAACGGTACTCTGATGCA  
ATGGGGTACTGACGCGGACGGGCTTACCAGCTTTGGTCCCCAGATGGTACTCATAAACT  
TTATATCCGTTCCGGTACTGGTGGTCCATGGACCGCATGGGGTGAAATTTATACCATA  
GAATAAGCCTACCGCTCAGGAAATCGGGGCAGTAGTTGCAGAAGGTGGTTTAATGAACTC  
TATGACGGTGCAGACTGGATCCAAGTTGGTAATGTTTAAATCATCGCCAATAATCTGAC  
TGGTACCGTAGACTTTATCTGGGAAGACTAATTAAGGGGGCGAAGGCCCCCTATCGGGT  
TATTATGACACAAGATATAGAACTACGCAACACTGGAATGAGGTTTGCGCATTTTCGACGA  
AGACTCTGCGACCTTACCAGCATTTCAGAAAATAACTCTGTGATGTATAAGCTGGAAGT  
GCGCGGATCTAATGCGGATTCGACCAAACCAGCAAGGGTTAGATTTAATGGAGTGGAGAT  
CGTTGGCACTGGCTATGAAAATGGCCTAAGTTTTAAGGTTCTTACTCCAACCTGGACAAC  
ACACGAAGAAAAGGTGTTCTATGGTCGCGGTGCTGTTTTGGCAATGCGTGATTATCTTGA  
TTTGCTGAAAGGTGACTATATCATTGCGATGGCAACACATTGGCAATTGTTTGCACATCC  
GATAAGTGATGATATATTTTCTAAGCTGGGATCTGTATCTTCCCGAATCACATTTAGTT  
TCAGCAAATGCCTCGTGTATCCTATTCAGCAATTTATTCTACTAAAATTGGTAAAATAGT  
GTGCGAAGGGATGCAAGCAACGCACGGAGAAGGTCAAGATTCGTCTATACAAATTGAAAA  
AGTTTATGATACTATAGACGCTCTTGCAATAACAGGAACACCACAACGATTTTTAGATTA  
TCCGTTGAATATGTTAGCGAAGATGCCGAACTTTTAGAGCTACTACAATGGCCTCATGA  
TGAGATCAGCGCACGCCTTGAATATCTTAGCATAAAGGCAGGGGACAACTATCAATATC  
CTTTGAATTGTTCCATGATAGTGCCGACGCCGACCCAACGTAACAGCGCGTTTCTATCA  
CAACTACTTCACTGGTGGACAATATCAAACCTGGCGTTCGTTATAATACCAGCCAGAAGGA  
TCAATGGGAAAAGTTTGAACCCGTCTATACCGTACTGGGATGAGTTGCTAGTGTTACCAC  
TGGTTGTATCAGATATCCAACCAACTCAAATGAAGGTATTGTTAAAACCTAGAAACATACT  
AATAACGCCGATCAGCGGAGTCGTCAAACCTACTGGTCCGACTTCATTTGGTGTAAATGG  
TGTTAAAAAACTCGTATTCAGGATAACGGTGATTTTACTAACCCCTGTAATGAGTATTCT  
TAAACTGCCTAGAGTTAATAAACACAACACATCCAACAACCTTAAAGAGTTCGATGTTGA  
TTAACATTTTTAACAAGCCGAACCTCCTGGTCGGCTTTATTTTTATACAGTTGGTTAAAA  
CATAACCGAAACGAAGAAAGACCTTTAGAATAATAGAAAAGTTGTTTCGGTTAAAAAATA



GTCAGTGCCTCCGGCACGTCGCGAAGCGATATTTTGTAAACATTCTATAAAATACTCGGAA  
CTATAACTAATTTTTGAGGGTGTCTTATGGCAGATTTGAAACATGGATCTACTGTAGGCG  
GTTCTCCCATTTGGACGCAAGGAACTTGACGAGCCAGTCAGCGGGGGAACAGCTTTTCT  
ACAAAGGTCATAAAATCTATACCGCTTTTGATACACCTTCGCCTGCCGATTTTGATGCTG  
TTAGTGCTATCGACGGAGGCACCTTTCATAAAGCAGGTCCATTTTGAGGAAGGTTAAGCG  
TAGGTAGCGCATCGGCTGGAGAAACCAAAAAGAACGGGATCTTTAAAGGAAATAGATATG  
CGGCTCACTTTGATGGTGTATGTTGGGGTTTGCATTTCGTGGAAATCTATTGGTTTTGTCA  
ATGCCCCTGATGGCGTTATCATGACTTATATTGACACAACCACAGGTGATCTTAAACTA  
AAGGGACTATCGAAGGGACAACCATTAAGACACAGGTCAACGCGTCTATAGCCCTGTTA  
ATAAACCAACGAATAATGATTTAGATTTGATATCTCGTCGCGGTGATACCCACAAAGGAA  
CATATAATTTAAACACTGTCACTGTAAACTATCGGTTGATTCGAAATTAATTGCAAGGT  
AACGTGATTTAAGTAATTTTGATGCGACTAGGATCTATTATGGTAGCGTTCTTGATACGT  
TGGTCTTCCGAAGAAAAGATGAGCCTGCCATTTTGTAAATGGCAGAGAAGGTCGTTTTT  
ATCACGCCAACATAAACCAACTAAAGGCGATGTTGGGCTAGCCAATGTCACCAATGACG  
CACAGGTTAAACGTGCTGGTGTATATTGAAGGTAACCTGCAAGCGCCTAGAATGTTGG  
CAACAAACGATCCGGATGGTCCTAATGAATTGGTTCGTTGAGCTACTTTGAGAGAAAAT  
CAATGGTAGCAAATCCAACCATCTTTGGCAACGGTGTGGAAACTCTTATTAATAGCG  
GCATCTATCGTGTGAAAATGCTGGGTCAGGTAATAAACCGTCTGATAGGTATTATA  
ACGGTGTTTTGATGGTATATCGCCAAGAAGATGCGGTCGGTACTCGTCGAATTGTTCAAG  
TGTATTATCCTGAATCTATTGACCATCCGATGTGCTGGCGTTCGTGTTCTGGTGAATCAT  
GGACTGCATGGAACATGTAGATCACCGTAAATTAGCCGATATTCGCTATGTTAACGTAA  
CTGGCGATACCATGACAGGACCGTTAACTGTTCCGGCTGCAAACGGTGTAGAACAGCTA  
GAGGTGCACATAATGGTGATAACTACTATGCTGCGTTAAATAGTGCCGATGGCGCGACCA  
TGATTCACCGTATCAGCGATATTAAGACACTGAAAAATTGGGTATTTACATGATTCGA  
AAGCTGTTTTCGTTAACTCGCGTGGAATACTAAAGCCACAGACCGCTATAAACTTTACC  
ACGAAGGGCATCAACCCACCCCTGCCGAAGTTGGCGCAGTTCACGTAATGCGGTGATTG  
ATTTTGGTACTTTCTAATTTTAGCGGGGATTATCTCCCCGCCTTTCTAAATAATATTATT  
CTAATAACCGGTTAGGGATTTTATAAAATGGCAGATTTAAACAGAATCCAATTTAAACGT  
ACTAGCACGAAAGGTTGTAACCTGATGCTACTCCAATGACGTAAGGTGAACTTGCTATC  
AACCTGCATGATTATTATTGTTTACAAAAAATGACTCTGGTCTATTATTTACTTAAGC  
CGTCTCCGATCTATGACAGCGATGTTACCATGGCTGGTAAAGTAAAGGGAGATTTTAC  
ATTTTAGGTAAAACCGCCAATTATCATGAAGCGCAGACAGCGGGAGACCTTAACCGCTTT  
GGATCATTCCGTACCAACGGTCTAGATGGATTTTLAGATTTGACCTTGCATGTTCTCAT  
TCTGCTGGCGTTCAAAATGGTTCGAGGATTTACTTTCCATTATGCGACTGGCGAATCTCGT  
GTTGAAAAATATGGGTATAATACACAGGGACAAAAAGCATTAGCTAGAAAATGTATCAT  
GAAGGTGATAAACCAACTCCAAGAGAGCTGAACGTTTCATAGCAAACAAGAAGTAGATAAA  
ATGTGTGTTAAAACGTTATACTTTCTACAGGTTCTGGTGATATCGTTGACGGGTATTTT  
AAATTAGCGACTGCGATGATTCACAAGACGGTCGTAGTGTATTTTCCGTATTCGTTGT  
GGTAACGGATATAACATTACTCCATACGATCAAGTTGATATTGTAAAAATTGTTATTCAC  
AGTGGAATAATCGTCCTAAAGGTGTTAACGTTATTGCATACCGCCGAAATACAAACAAA  
GCATTTGATGTTTTGGCTGTTAATACTTCTGGTGATAACTATCATATCTACGTGTAGTAT  
CAGCGTTACACTTATAACGTTATTGTTGAATTTGGTAGAAGTGATGACGTTAATCTGGTA  
GTCCATGACGTACCAGACTTTGTTGTTGATCGTCCTGTTGGCGATAATGTTATTGGGGGT  
CGCGCGGTAACCTTTTTCAACACCGAAAACAAACGAGGTGTGTTGAGTTTTGACGACAAT  
ACACAAAACAGCTATGATATTGTTACATGAGTAATGATAAAGGTACAGGACGAAAATAT  
ATTCGTAAATTCGTTAGTAACTATAATGAAATGATCTGGCATGAGACGGTTCAAGGTAAC  
GTATATCGTTTAGCTGCTGGAACACTACGGACGCAAACGAAGTTCTCAAATTACCTACCGC  
ACGTTGCAAACCTGGCAATGCTGTTTTTACGGTGGTAATAATAATGTTCTGTTTACAGCGT  
AAACCCGGA AAAAGTAACTATCTGGAATATTATGATGCCCGTGACGGAGCAAATAAACGT  
CAGGGATATATTGCGTATGGCGATGCCACAACCTAACAGTTGTCAATTATTAACGAACAC  
TCCGAAGGTAATAACCCGATTTTCTTTAACGAGACAGGTCAAATTTCACTTAACGTAGGA  
AAGACAAAAATTGTTTCATAGCAAGGGACAATATATTTCTACCAACGCCGAAAACCTATCGC  
ATAATTTATGGTAATTATGGAACATTCTGACGAAATGATAGCGTTAAACGTTATCTCATG  
TCCACTGCCGAAAATGATAAATGGGGTACTTGGAAATAGCTATCGACCATTCAATTTACAAC  
CTAACAGCGGCGATGTTCAATTAGGTGGTGTAGGTAAGTCTGCATTAACGTTAGAA  
TGTGCTTCTCGTGCCGCTCGATTTAGTAATGACGTTTACATTAAGAAAGGGCTTTTGACT  
TTCGACGCTGGGCGATTAGGATCTCGCGATTATATTAGATTTAACCATTTGGGGCGATAGC

ACTAACGGTCGCGAAAACATCCTACAGAGTCAAGACAGTCAGGGGCGCACATCTTACCACT  
GAACGTGCTATGGGTACTGGGAACATAATAGCACGTTTTTAAAGGCTTTGTTTCGTGTTGAC  
TCTGGTGAGATTGCATTTGATGCTAATCGGGGGTTGCAGTCTCAATTTACCTTACACACA  
TGGGGTAACGAGCAACGCAAACACGTTTTTGAATGTAAGGATGCTACAAGTTATACCTGG  
TATGCAGAATGTACTCAGGGTGGCATTGGACCTATTCTGTTTCGTTATGGCGGGTAGTCTA  
AACGTTGGTAGCAATATCACACCAACTGGTCCGGATATTACGTTTTAAACGCGCTGGCAAT  
AAACACATCTGGTTTAGAGATCCAAACGGCTTAGAGTTAGGCCTCATGTACTGCGATGAT  
GCTGGTGCTATTCGCTGCCGTGGTCAGAAACAAGCCCAGGCGTGGAAATTTGCAGATAAA  
ATGATCCAGTTTGAACACTGGCTCTGTATCCGGTGCCGGTGTATGGCCTGATTCGTGGTGAG  
GTTGCTGGCGGTAGTTGGGCTAGCTGGCGTGTATCGTGCTGCTGGCCTTATGGTTGGGTCT  
CCTCAATCAACCAATTCCGCTCATAACATCTGGAAAGCTACTCATTGGGTACGATATCAC  
AGTGCTGCAATGGGTGTACATGTTCCAAACGGTTCTATCGGTGATGCTATAGCTCGCCTA  
AACGTTTCATGACGCCAACTTTGACTTTAGCGCCTCCGGTGACATGTCCGGCAGGGCGTAAC  
GGTTCGTTTTAACGATCTTTGTATTCTGTTCTGATGCTCGCCTTAAAATCAATTAGGAAGAG  
TATAAGGAGAATGCCACTGGTAAAGTTAATCGCATGACTGTGTACACCTACGATAAGGTT  
AAATTTTTAACTGACCGTAGTGTTATCGCCAATGAAGTTGCTATTATTGCTCAGGATCTT  
GAGAAAGAATTGCCGGGAGCATTAAACAACCTTCTAAGGTCGGCGACCCAGATAAAACCAGAA  
GAGATCTTAAACAATTTCTAACTCTGCTGTCAACGCTCTTTTAATTAAGGCGTTTCAGGAA  
ATGAGCGAAGAAATGAAAGCCGTTAAAGCTGAACTTGCGGAACTTAAAAAGAATTAAGGA  
AACGCCTAGGGAAGGGAACACTACTAAGGAGACACGGCTATGGTCTATAATATCGTCATTGG  
TGCTTTGTCTAATTTCCGAGTCAAATTAAGTCAAAGTTAATTAGTGAACAGATGCACAC  
TAAAATTTTCTTCTATTGCGCTCTTCGTCTTGCGGCTTATACCAATACGCCAATTGATGA  
TCGTTTTGTGGAAGAACATTATAAGGAGTTTAAATAAAGATCAGTCTGAAGATAGTAACGA  
GCAAGATAAACCTAGTGATAGTCAACTACCTAAATAAGAGTACACGGTCATAGTTATCAT  
AGGGCATTATATGAAAGTTTCTGAAAAAAGGAAAGCCTTTGCTATCTCAAACGTCCTGCG  
CGCTATTTTCACAACTTAAAGCACGGAGTTGCCCGTACTTCGTGGTTTTGCTGCAGTCGT  
GTTGTCCATAGTGGCATTGTCGTTTATAGTAAAAACGAGATATTTGCGCTTTATAAAGA  
GCCTCGTTATGAGACTTATGCTCACCTTCTCCAGGTAGAGAAAGACCGCAATTTTGATAA  
TGCAGCACAGGAGCAGTTACAGATAGTTCATGTATCGGCTGATGACGATTTTTCTGCTGT  
TTTTAGTTTTCTCGTCCGAAAACCTAAACTATTTTGTGATTTGGTGGCATAATGAAGGAAA  
GCTGCCGCATACAATCGATGAAAAGAATTTAGGCGGATTCCCTATCAATAAAAACGAGTGA  
ACTTTCTCGTAGGCATCTTTTAGGTAATCATATTTTACCGATAAAGATTTCCAGTACAT  
TCCATCAAAGAAAAGAAATTAGAGAGTATCGATATAGGGGTTATGTATTCTTGTCTCTAT  
ATTCAATTTTCGACAATGTGTCTGCTGGTAGTATCTCCATTGCATGGAAGAAAAAACCGGA  
TATTGACATTGAGAATTTAGACTCTCTTTGCAATCAATCTGCCAGAATCCTCGGAAGGAT  
CAGATACCTTACAGGGGAAGGCTTTAGGCCTCCCCTTCTATTTATTGGCGCATAGAAGCC  
CCTGAATCACATTTTGTGCTGTATGATGAAAACAGGTAGCGCACCCAGTCATCGGCTTGT  
TCGTCTTCGTGAGAAAACGCGTAATTGCGTGTATACCGCTTCTACTTTGACCAGTGCA  
ATAGGTCTTTCTGGAAGATCAATCAATCGGGCAAATCACTATCTTCCACTCTACACGA  
GCAATATCATAGCCCATCTCAAAGTATAACAATCGCTGGTTCTAATTTGATCCTGGAACT  
TCCCGTAAACATTTCTGCCAACCTTACGTGCATCTTTTACAATATCTTACATGTAATGAC  
TGTAATTTTTAGCTAGATCAATGATGCAATCAACAAAGAGGTAATAGCGTCGCAGTGCTT  
CCAGCACAAACATCTTCAAGACGACCTTTTCTCCAATCGCTGAAATGTGTTAAATTCCT  
TTAGGATCGCGTCCATCGCTACATTAACCTCTTTTATAGTATCTTTCGTATTATCTGCAC  
CTCGGCTAATCAAATTTTGGTTAGGTCTTCTGCTTTTTCTTGAAAGTTGTCAATTTCAA  
ACTCAATCATAATCACCTCTCATAATTGCACGCAGTTGTTTCAACATTTTTTCGTGCTTT  
GCTAATTCTATACGTTGTAATAGCAAACCAAGTGAATTTTCATTGATTCATCATCTTTC  
ATAATCAAATTTACCGAAAATATTCTCTGTCATAATTCCTGCTTCGTGATAATTTTCG  
TCATGTTTCATGGTGTAGTTATGATCATTTAGTGCTTTAATAGCAACGAGCACGGAATCTA  
AAATCACTCGATACAGGGTAAATTTTACGCTATTTGTGAATACCGATGTTCTCTCGACTT  
TATCGATCAGATAGCTTAAACCGATAGCGCCTCGTTTATTTCCCTTGTTACTTTATCGG  
CGCTAAACAACACCGGATAAATAACGCGGTGTGATTAACCGCGCTGCCTCCTTCCATTCTGA  
TCGCTTTCCATGACTCATATTTTTCATAGTTAAACATTATATAATCATCTTACAGATGAA  
AACCTGTTACGATACCGCATCGATCATAACCGCTAGGAGTCAACGGTTCGCCCTCTTTGA  
TTTCAACTTTGAATTGACTCCCTTTTCGCTTATACTTCTTCCGGTACCCCCAGCGATTTCGG  
CGTCTGATTAGTTTCATCCATAATCCAACCTAGGCTGCATGAGCGCATAGTTTACATAGT  
CCATTTCTGGGGTCATGTATCAATGTTAATATATTTGCAGTTGACGCGTTTACGAATTT

CAAATTCCTTTATTATCAACCTGTACCATGTATAAATTCAGTAGTTTCTGGGATCAGTTCCC  
ACACAATCAGTACATTTTTTCATAGTTCACCTCACTTAACAAAGATTTTCTTTAATGCTTT  
CAGGATCGCTTCTTCCGGTGCTTCTTCCGGTGGAGGAAGCAGTTCTACCACTTCCTCTTC  
CAACTCGATATAGTCTACCAAATATTCTACATAGAATGCAAGTGCTTCCATGAAATTAGA  
TGCTACATCCGATTCCTCCACAAGCGTCTACACGCATTGTATCAACATCACTGCGATCAAG  
TTTGTGGATGCTTCCAGATAGTTTCGGTCTACCAGACTTCCCACACTATCAGCTTTC  
GGTTTTGGTTGCTGTTTTATAATCGGTTTCGTAATGATGCAATTGACGTTGAAAATAATT  
GATAATAACACATTTTGCGTAATTGTTTTGAATTTCCATGATGTAATCCTCACTTATCGT  
GAAGAAGTTCTAAAACCTTCTGTCATACTTTGTCAATATTAGTTGAATCAAAAACCTGTAC  
GGTATCCCCAGCTTTGACCGTATGATCGCGAGCAATCCCCATATCCCCAGTGTTCAACCT  
GATAGTATTCAACGAATGGGTGCTGCCGAACCTATCACACGATCGCGATTAAAAATTACCA  
TAATATAATCCTCACGTCAACAACCTATTTTCGGCTGTACTTCTGCCACTTTCGGTAATA  
CTGTTTGTAAAATTGTTTTACGTTTTGACCATCTTACTATACGTGTTATCTACCATCAA  
GTCAAAAGAGCTCCCGGTGTCGGGTAGTTCCTCATTCCGGATAAGTTCTTTAATTAAGT  
GCCCTGATGATCTTTGTATACTACGTTAATGATGGTCTTTTCTGCTTCTTCGTCCCGAC  
CATCCGGTGATTAGCTTTCATCGCATCCACCAATCTTTTGTGATCTTCATGTTATTA  
TTTCATCACTTAACCTCTTCGCAAGTATATCTCCACTCAATACGTTTATCGTTTCCACCG  
CGCTCAGCATCTAAGATATGACGGAATGTCAATTTGCTTTCATAATCAACAAGTTTCTTT  
CCTTCGAATTTAGCGCCATGTTTTGCAGAAAATATCGATCCGATTTTCTAATCTTCGCTG  
TTGATCATAGTTCCGTTATCTGTGATTTCAAAATCCCTAACTACAGGGTCTTGCATTGTG  
CTGGAGATCATGATTTTAGCAATGTCACCTCTCGTAGAAACCTTGATCTTTGCATTTCTG  
TTCATAATATCATCATATTCTACACTCATGCCATTGATTGTAGTAATTTAACAACCTTC  
GGGCAAATGTAGGAAAACGTGGTCTCTTCGGATTGATGACTTCCGGCTGTTACTCTTCA  
ACCTTCGGTCTTCCACCCTTTTTCTTCTGTTTCGGTAGTTCTTCTTCAACCTTCGCA  
GAAGTCTCTGAATTGCTTTCTAGTGCTGTTTCTTCTTTATGTAATAGATTCATCGTGTTT  
TGAATTTGAGCGTTACATACAGCCTCCAGCGGCTGAATCTGCCCCGATATTGATCATTGTA  
TCACGAACAGTTTTATTCCAGTTGCGTACTGATGCTTCAGAGACGGATCAATCTTAACA  
GCCTTAACATACACCTCATGAAGTTTAGCGTCCAGTGCGGAGATTGACTCATTAGCCCAA  
ATAAATCTCTGATTTGTTAGTAGCTTTAGTGCAATCAAAGCACGCAGCGTTAACACCG  
ACAGCAGTAGCAGAAAGAACGATAGCAGCGATAATGTTTTTCATAATATATTCCTCAGTG  
TTTTGTCCTGATGGGAGTATCTTACTACTCCCATAATCCGGTGTCAACTACTTTTGTA  
TTTCTTCTACAGTAAAATCCTCAATGTTGTTGTGCTCGGCGAACGTTGCAAGACCAGCAT  
TCCATGCATCATCCTCAGAGAAGAATACACCGTAACGTTTCATATCCTTTAGCGCCTTCAC  
ACTTAACCATTAATTTGTGAGTATGTTTCATTTAATTCTCCTTCGTTGTCTCGATGAGT  
TTAGTATAGGGGATCGCCGATCCCCTGTCAACAACCTATTTTTCACTTTTTACCCGCTCGT  
GCATTAATACGCATTTTCTGCATAGCCATGATCTGGCTTACTACTTCTTCTTTACGTTCT  
TGCGTGATAACGTGACCAGATTCCGCAAACCTCCCCTCAATTTCTTCTACGATCTCGCGA  
ACTTGAGAACGTCCAAAGATGCCGTTTCTTCGAAGCTCATAAATTCTGTTACTACTTGC  
TCGATAGACTTCATGTCATTCTCGTTTTCGTACGGTATGGGAGTATACTACTACTCCCATT  
TCTTTACGTCAACAACCTATTTTAAATTTTTCGACCTTCACCCATTCCGCGTATTCTTG  
CGCGGCTACTTTCGGATTTACGCCGTCTTCGTATATTGCTTCAAGTAATTCTTCGTCCGT  
GGGCTTATACCCTAGACAAGCCTCCACCTGATTTCTCCAAATTTTATACCAGTTCATATT  
ATCACTAATCAAGAGCGCGTGTCTCTGAATCTTCCCATGCTTGATCCATAACAGCCTTGA  
AAAGATATTCTAGAGTCTCATCTTTATGGAATCCGAAGACTTTAGACGGAATATCTTCAA  
TTGCTCCTCCAGCAACTTCTGCATTACGAGCTTGGCAATAACGCAACTCTAAGTTATCGA  
GATAGCGACCGCCTAATTTACCATAACCAGCCCAGCATTTCAGTAACCTACTTAATTTG  
CAATTAACACTTTGCTGTTTTCGTTGCTAATCTTTGATTCTCCTTTTTGTTTGGTGTG  
TGTGTATTATGAGAGTCTTTATTCGTGAAGTCAATAACTTTTTTAAAATAAAAAAGCCGAC  
CACAAGGATCGGCTTGATAATCAGTTACTTACTAAATTTCATTTTGGCTTCGTCTACCGC  
ATGAGATGCCAGTACCGCAGCCGCATGTGCAGTTTTATCTGTGTAGCAGAGAACGCCAG  
ATAAATTCACGCCAAAGGTTAATCATCTCGTAGATCATATCAATATCAGTTTCTTGTTT  
GTTGGCGATGCTATTCGTGTTAACTGGTAAGGTAACGGCTTGATCTGTACTGGTTCGCGC  
CATCGGGCTAATCGGTTTCGGATCAGTCAAAATAGGTGCTGTTGTGGGTGGTGTCTCCA  
TACCCATTATTCCACGGTTTAAATCGTTGTGTCGTTAAGTTTATAAGGATTTTTGTCTGG  
GTC AACCATCCATACATGATGTGTACCCAAACCATCTGAAGTGATGCGTCGTTCAAGTCAA  
AATTTATTTCTCTCTGAAAATTTCTTTCATCAAGCTGTCAATCTGTGCTCTGGGTTCTGG  
TGTGTTTTTCAACTCTGCTAATTTGCTCAGAGATTCAGTGGTATCCGGTTGGTTTCTTC

CAGTGTTC AACGACCATTGGCACAATCTTTTTAGTATTGTACACAAATGCAATATAACC  
GCCCTCTGGATATTCTTTCATAATCAACCCTTCTTAAGTTCTTTAAGATCTTCCTTATAT  
TACTTCATTGCGGTCGTCTTTGTCCAATACTCATATTTCACTATGATGTTTATCGGGATCT  
GTGACCATTTCGATCATACTCTTCTTGAGTAACGCTATACAACGGCATAGAACTAGGTTA  
TCGGCGTATGGACGCAGTTTTTCATGTCCATTGATGGATTGCATTACCTCGGCCTTTTAC  
TTGCCCTGTAGCTCGAATTCGCCCTTAATTACGCGATCGATATACTCGGCTTTAGCCATT  
GCATAATTGTATGCTTTCAGCGTTTCGGCTTGCATCAATTCAATGCGTTTATCGACATAC  
CCTAATCGGATTTTCGACGAATTCGACGGATCAGATCGCTCGCTATCTCGAATACTTCTACT  
AAACCACGTTCAATTAACCACTACTATATTCTGGGGCTACTAACTGTGTTAGTTTAAAATCC  
TTCATGATTTGCTCATGTTCGAGCGGATTCATCTTCGCTTTTGAAATAATCGCGTTTGAGT  
GTTACTTCAAATCTGAATCCATCCTTAGAGCAACGGTCAGTATACGATAACAATCAGATCT  
TTGCCTTCAGTACAACCAGTACCGCTACCTATTCTTCGCGGTTCGAACTTATAAGGAACT  
TCTGATATTGTCAGCTTAGTCTTGCCGTTTAGTTTCATATGTACCCTCAAGAATCACACCA  
TCGCGCTCATCACGAGGGACAACCTTCCCGCGAATTCGAGAATTGAACACTAGGTTCT  
TTATCCAGTTTTCCGGCAAGTGCTAGCTCTGTGCATTCATTAAGGCTTTCCAATGAATGC  
AGTAAAATGTCAGTTTTATACCATGTAGCAATACCACTAATACCATTAGCCAATAGCATA  
GGCACAACCTGGCAAGTAGAACGCGGGCGGGATGTGTACCAGATCTTCGTGCTTAGGTGCG  
CAATTCATATCTTTATAGATTTTAAAGAAGTTTTTCATGCACACGAGCAAAGATATAACGT  
GTCGCACCTGCTTTCTGGACTAAACGCGAACC GAAGTTACCATGACCGTCAAGCAGTGGA  
GTATTATTGATCCATGTATTCGCCATGAGTGATCCGGCTTCTACGGCTTTACGTTCCCCG  
TGGTGATAATCCAACCTCAGCAACAGCACATCCAATATCTGCCATCTTACGGGATTCCTTA  
CGGTCGCCTTTACTCTTTTGAAGTGCGCACTCCAGAACAAGCGTTCCGCTGGTTTAAAC  
CCATCCACCAATTGAGGAATCCCGGCTTCCCTCGGCAAAATAGATCGCATATTCCTTAGCT  
TCAATATGCACAATGCTTTCAAGGCTGCGGTAAGTAAATGTGTTTACAATTTGACTAATT  
ATATCTATCTTCACCTCATAACGCTTACAAATCACATTCTTTACTTTATCAGACTTATC  
AGCCCAATCCAATAGCCATTTTAAACGGAACGATTGACACAATAAACGGGGCAGCAATCAA  
AGCAAACAGGATACACCTGATAATCAGGAAAACGCAAGTGACAAAACCTAGCGATAGAGAT  
CCCGACAAAACAAAATACCATACAAAAAAGAGTAATGAGATAGAAAGGCCAGAACACCCA  
CTCCCGCAGCTTAACGCCTTTGTATGCTCTGAATTGCTTAAATTATACAAAACACTCTCG  
GATAGACGCGTACTGGACCGAAAAATCATCTTTCATTGCTCGGCATGAGCAATCTTCTAT  
TTTAGAATGACCTAGCATTATTAACCGCCTTTCATCATTGATACAGGAATTGTTTTCTGA  
ATTGTATATAATTGGCCTACTTCAATTTTTTCTTGAATCACCACGACGTTACAATATCCA  
CTGTCTTTAAGTCTTCTGACAATGACTCGTTAGTGTTTCGTGCGGTGATAGCATTGACTGTT  
CTCACCAATTCACCGCAAATAATAGCACACCCTTTACAATTGCCAGTAACTTTCATGCTA  
CGACCGTGAACAACAACCACATCACCGTAAATCACATTTTCGTTCGTTCGTATTTTCGTAATA  
GCCGTGACCCTCATAATGTATTCCCTCTAAGAAAGGCCGCCAGAGCGGCCTATGTTGAT  
TATTGTTCTACAGTATAACCGAGGTTTTCAAGCCATGCAATAACAATCTTTTCGCCAATT  
TAACCGAGAATTCATCAGCGCCGTATTCTTTAATGAAAGTAGATGTACCATTATTTCTT  
ACTACGTGCGGGATCACAATATGTTTCAGGAATTGCGTCTGGCAGTTCACTATGATCATT  
TCATTAACGATATCTTCGACACTAACATTATTAACCAAATCCACATCATCCATCGTCACA  
GTAACGCGACCGGACGGACGCAACGAATATTGGCTAGTTTCAACTTCAACATGTGCACTT  
TCGCAAGTAACTTTCAAATCAATCATAATTAATTCCTCTGTTAGTAATGACTAAACCCTT  
CGGTCACATCTTCAACCACATAGTAACGATGACGGCGCAGTTTGGCATTTCGCATAATCTT  
TCGGGATACTAACACGTGACGCGGATCAACTTTACATTTAATGATGCGGCCTCGCCCAC  
CGCCATAGTGCGGAATATAGTGTTCGATGCAACGTGGAGGCCATTAGAGCAAGTGAGAT  
CATCATCTGGGTCCACGTCTTTACGATTCATTTTAAACCGTGCGCCCTGGGCAATTATCAA  
ACGTATGAGTAAAGAAATCTTTATAATCAACATCAACACGTTTCCATGCATAGAAACAAC  
CATCTTCCCCGATCTCAATGCCGTTGTGCTCTAAGAAGTCAAATAGACGATCTACCGCCT  
TACGGCTAGGGTTTTTTCTTGCACTTATCAAAGAAATACAGATAGTGCATATATGGCTTAT  
TCTCTTTAATCGACTCAACAACGCGAGGAGTCAGATTAATATCAATAACAATATTATGAT  
AATACACAATACCATTTTCTAAACGGAAAGCACCATGATGATATACTTCAATCGCTTTCT  
TAATGTCCATCAGCGTAATAGCTTTGATGAAATCATTATGTTTAAATCGCTTCCAGTGCTT  
CTTTAAAGTTAACATGCGACGGATCAGCTGTATAAACGATGTCACCACATGTAATAGTAA  
TAACTTAGTTGAGGCTATTGCTACGATTTTTGAGTAAGTAGTCACGGGCTCTTATGCGC  
GTTACCCCCCTTTTCTTTACTGGTTTTACGGCGTGCTTTACCTTTTTCTAGGGCCTTGC  
GACCTTCCGCTACAGCGTCTTTCTGAATGAGTAATACGCGGGAGGCAGTACTACGAGATA  
CCCCAAATGCTGCCGCAAGTGCTTCGCGGGTAGTAAACTTACGTTTCGCCCGACTGTATAG

CCAGTTTGGATTTGTTTCGCAGAATCCAGGCATTGAACGTCTCGGTCAGAGACGGTAATTT  
TGGCTATAGACATAGTATTCATTCCTCTATTAGTTGGGCGACTATCGCTGCCCGATTAC  
ACCATTATTCCAGAATTATTTTGCCTTCGACAACCTTGCGGATTGTGCGGTCTGCTACATT  
ATAGATTCGTGCCAGTTCGCCTTTAGTCAAGCCACGAGCGTATTGTTTACGGATGGTTTC  
TTTCTGGATAGCGGTGAGTTTAGTCATAACATCAACGC

>NewGenomeName\_132

GCCCCGCCCGAGGTTTAGCGGAGTCAACGAGGGTCCATCCCACCCGTTTCATTGAATATT  
CACGTGTACAATCATGATCTGTGACTCGTGCAGCGAAGCTCACGGAAAATTTTACACACT  
AACGTTGGTCGCCGCAATGCTTTTCTCTAGTTTTTTAGAAGTAAATAAAGATTCTTTTTTA  
TTATGATATTACTTGTAATTTATTTTATCATTGCACCGTCATGAAGCAAAGAACTTTCTC  
TCTCTATAAATTCCAGTCCTGTTTGTGTTGTGCATACAACGAAAAATGGTGATCAATTGG  
AATCGGTCAGGCAAAAAGGGTAGCACAACACCTCGTCGTGGTTACACCAGGGCTTCCAAG  
TCGGCTGTCCCACAACCATAGGCGTCGTTTCATCAGGCAGCTGTATTGAAGAAAGATGAC  
GTGTCCGGTAGAGAAATTAAGCCGGAAGGTGCTGTTGCGCGTTACAAAATTCATAAGGTG  
ATGTAGAGTTGCACCATGAGGATACGCCCGGGACAGTTGGTGAATTATCTAATAGCGAAG  
TGGAGTTAACCTGTTGTTAATTGGTCTGAAGCTTTCACGGCGCCTGCTCAAATTTGGAAA  
GAGAGTTTTCAAGATACGATTACTATCATAGTCAAAGTTAAAGCTGAATCAAATTTCTGTA  
GCTGGATCAGATTGTACTAAATCATTCAATAAGTTCATCAGATTTGGAGCTGGCATTAGT  
CAAACAAAACATTTTTACGTTATAACGTATACCTGTGAAGCTGTCAAGACTGTATTAGAA  
CATAGAGTGTATAGTGAAGTATAATACCACTGTGTAATGATGAACATATTAATAATGAGT  
AAGTATTGCGTTTGATCTATTTACTCCGGGAAGCGGTATGTTTTGTGCTTTGAGTATTCA  
TATATACCCTTCAGTAATGAAGGGATAATGTCTCTTTCCCTTGATGTGACGTCATTTGA  
TACCGTGCTGGGCTGGGGCGGGGCTTCGTATT

>NewGenomeName\_133

TACCCGCGAAGCCGCTGTGCGGTGCGGTGGGGGGAGAAACCGGATAAAAACAACCCCAT  
ATGCAGATATCAATTGAATTTGGTTCTGCTGTGTGAAATCTGAAAAATCACAGCGGTCAT  
AGTGCAACAATTTTTAACACGGGACGTCAGCACCTGACATGGCAAAGCTGGAATGGTAAA  
AGCTGGAGCAGGCATTCCGATGCCAACATGCCGAAACGGGTAAACTTTACTACACTGGT  
GCCGGAAGAAATAGATTAATTACAACACCGGCAGAACCCGTATAGAAATGGGCAAAATCT  
ATCATGAAAGTGATCCTAAAAACGCTCACGAAATAGATCATGACATCTCAGATGAAGTAC  
CCAGCAATGACGCGGGTCCGCGCATGCAAAATGTGCAAAAAACTCTGATATAAACAGCG  
CAAATTCGGCAGAAACGAAACGGATTGGTGGTTCCCGACTTTTGCCGCCTTCAAACGCTT  
TATTTACAGAAACACCCACGCCGTACGACACCGTGGATATGCGAAGTATCTTGAGGCCG  
AAAACCTCATGGATGATGCGTCCGACATGCTGATATTCGATGAACTGGTGTTCACCGGGG  
CCCGCGCACTTTCAGTAACTAAGGCCCTTAAAGGGATGTGCGCCGACATGGAAGAGGCAA  
ATGAAGTGAAACCCGTGTGCTCTTAACGACATAATACTCAAAGCTGAAAAGGCCCTTG  
ACCGGAATATTGACCGGATCGAGTCAACTGTACGCTCATTGCTGACGCGGGACGTCTTAG  
GTGAGACACCACCATAACTACGTGCTTACCGGGAAGGAAGCCACGCCCGCCAGAGATAAAC  
TCACAGCTGAAACCAATATTCTGACCAACCAGCGTCGGGGCGTTGTTACGCCTCTCAGGG  
ACATCGTGTATCGCTGGTTGAAATGAGTAATTCGAGGAGACTGGATGACATTCGGAAG  
AACGAACCGCGCTGTGATGAGCCGTCAGAAATTACCGAGCCTGAACAACGACTGTTTCATC  
ATGACTAAACTGAACAATCCCACGTGGCCGCTCAATCATCTCTACAAGATACAGAACGAA  
AAAGGTGACCTCGTCACCTTCAGAATGGGGTCCACGCAGCGCCAATCGTTCCGGAGCATG  
CACAATAAAGATATTATCCTGAAAACGCGCCGGCTGGGATTTGCCACGGCCATTGCTATG  
TACCTTCTGCAAGCCACTATTCATCCCGCATCTGAAATGCGGGATCGTCGCTCAGGAT  
AAAAAAGCTGCCATTGAATTCCTCCGCACAAAATTTGCTGTACCGATTGATCATCTCCGT  
GATTGGCTAATAGCGTCATTCACCATCGTTGAACGTACACAGCGGTGCGAGCGGTGGCTAT  
AGCCTGTTTGGTCACGGCTCGAGTATCAAGTGGGCAACCTCATTCCATTTACGTACGGTG  
CCGCGCCTGCATATCTCAGATCAAGGTAAAATTTGCGCGAGATATCCGGCTAAGGCGAAA  
GAACTGCCAATCGGTAATCTTAGTGCCGTCTCTGCTGAAGGCTTTATTCTTGATGGGTCA  
ATAGCTAAAGGCGTGGGGGGGGATATTTACGAGATGAGTAACCGAGCACAGGAGATCACT  
GCAATAGGGTTATTGTTAACGCCACAGGATTATATATTCCAGGTTTACACCTGGTGGCAG  
GATCCTCAATACAGCCAAAGAGTGCCGCATAGCGGGGTGAAGCTGTACGCGAACAAGG  
ACGTATTTTTTTACGGGAGAGAACGCAATGAACATCACGCTTACTGACGAACCGAAGAAG  
TGTAACATCAATAAGGAAACTGAATAACGTGAGGAAAGGAAGCAGGCGTTTCCCTCAACA  
GCACGGGACGCGTGTCTGACATCCGAACACTACGTGTTTTCTGTGCCGAAAGTATATTGCAG  
ATCGAATCAATCTGATCGCCAGTGATGATTGTTTATGACATTAATAAATGTTACATGAACG

GAGACTAAAGCTCAGTCTCCACGTGAAGGAAATAAAAACGAGATGCCGCGCCCGCTGATG  
AATGATCTGCTGGTATGGGAACCTCCGGATCAGGAGGAAGGTTATGTTTGTGGAGCAGAT  
ACTGCAGAAGGGCTGGAGCACGGCGACCGCTCATCGCTGTATGTTGTGAAACGCAGTAAT  
GACGAGCAGTTTTCTCAGTGGTTCGGGCATCTCGATGCTGGACTTTTTCTCAACTAATT  
TCGCAGGTCTGTTCGTATGTTTATGAAAGCGTCTTTGGGGCCGGAGCGCAATAATCACGGA  
CATGCACTTAGACTGATACTCCGTGAGCTCTAGCCGACGCGTCATATATAACAACGAATAG  
CATCTTGACCAGCCATATGACGACGATACGCCCCGCCCTGGCTGGCTGACAACCCGTCAG  
AGCAAACCTGTTCTGACCGAAGGAATGAAAACGCTTCTGAATAATGGAATATCCGGGATC  
CGCTGGTCAGGCATATTATCGGATATGTACACCTACGTCTATGACGCGAAAGGCTGCATG  
ATTGCAGAAGAGGGATGCTTCGATGATCAGCTCATGACGTTTCATCATCGCCCCGGTGAGG  
CGCGCCAGAAGGCCGGCGGGGGTAAAACCGACAACGGATACACGCAGAACCACACACTGG  
ATGGCTCTCTGATGTAAAATGAAACTAACCCCATGGCGACGAAAAACGACAATGGAGACA  
CGCCGCGTTTTCTCAGCGCCACTTTCAGGCGCTTTGTTCTGCCATTGACAGCCAGCCTA  
AATGGCGTGATGCCGCAATCAATGTCTGTGCGTATTTTCGATGGCTATCAGCTGCTACCGG  
AAGTCCTTCAGGTATTGAAAGATCGCGGTTCGGCCGATGACTATCCATAACCTCATCGCGC  
GTACCGTCGATGGCGTTCTGGGAATGGAGGCGATTACACGGACTGATCTGGCGCTTATGA  
CAAACGAGCCAGACGATGACAGTGAAAAATTGCCTGAACGTATGAATGCTGAATTTGCCG  
AGGCATGCCGCTTGGCTATATGAATAAAGCTCGCTCTCATGCCTATGCGGGACTAATCA  
TGGCGGACCTCAGGTGTATGGAGGTCTGACGAAACACAAACCCGATAGAGCCTGAATTTA  
AGGTGCTTACTCTCAGCCGGAATGAGCTTTGCCGCGACGGGCTGAGCATGGAGGCTGATT  
TAAGTGAAGTCCGATGGCTGATGCGTCGCGTCTGGATGGATACCGTTGAGGCAGAAGCCA  
CATTCTTGGAATGGCTCAGGTATCGATTAAGCCATTGATGAATGCCGTGGTATTGTGCG  
ATGCCACGGTTGCTGAAGGCCAGTCCAGTCCGTTTGTGAGTGCATGACACGAGTATCAGT  
CTTGGGATCGAAAGCCGAACGAATGTCTCAGCGTGAACGCCGACTTGTGCTGCTTGATG  
TGCTTTATTACCGTACATTCGAGCGTCTTCCGGTGATTGAACTCAGTAAGGGACGAGTGG  
TGGCCTTTGCTAAAGCAAATCTGACGCAGGCGGCAGCTGTGGAGTCCGGGTGGGTTCCGGG  
TGAAAGCCGGGCGGGAAAGCCGTATTCGTGAAGCGTGGGTTATCGGCACACACTTTATTG  
CGGATCGCCTCTCAAGTGTCCGCATGGGATGTTTCCGCTGTTTCTTTCCGGGGGATAACC  
GAAAGGCTAAAACCGGGGAGTCAGACGGGCTAATTTCCGGCGCCATTGCCGGCACAGGACG  
TGGTGAAGTTTCGTCTCCGGCTGACCTGGTTGCTTCCGGCCAAACGCGCGATAATCG  
ACGAGGATGCCACCAAGTTGTCAGTCAACCACCCAATTGAGCAGATCGAACGTCCGGATG  
GCACTATTAACACTGAACCCGATCCGAAAAAATCACAAAAGTTTCGCAGATGTTTTTCGGA  
TTGAGCAGGATTTTCAGGTGCGGACCAGCAGTTTCAGGTCATGCATGAATCGTAAAAAC  
TTATCCAGGATACCATGGGAGTTTATCCCGCCTTTCTTGGGCGGATTTCATGTGCGACGT  
CAGGCATAGCTATCAGGAAACTGGTTTCGCAGGGGGCGACCACTCTTGCGCAAATCAACG  
CTCACTACCAGTTTGCCAGCCAGCAGGTGGGACGACAGTTGCTGCCTTATCTTCTCGATG  
ACCTGCAAAAACCCCGTAATCATGGAGTGGTGATTACTCGCGATGAAGGCTAGCATCGCC  
AGACCATTGTCCGCAATGCTGAAGGTGATAATGGTGAACCTGACCAATGATATTTCAAAGT  
TATATACACATATTGCCCTGGCGCGTGTTCAGCAGACACCAGCGTTTAAGGCACAGCGTG  
CACCGCGAATGTCAGAGGTTATTCAGGGGTGGAAGCCTTAGGGCGCAGGCTGTTGTGCTGG  
ACCTATGGGATAATCTTCTGGATGTGCCACATTAACAGGAGTTTACTGCGCGTATTTCGTT  
CCGCGCTGGGGACACCAAAATCACCGGAGGAAATGACGCCGGAAGAACAGGCAGTAGCGG  
CCCAACAACAGACACTTCAGCAACAACAGTCCGAACTCCAGATGCCCGAGATGGCTGGCA  
TAGTGGCTAAACAGGTAGCTGACGCCGCCAGTGCACATGCCGCTGCACACCGGGATAATG  
CCAGTGTCCAGCGGGAAGGCGCACTGAAACAAGGGCACCGTTATGTGGGTGCGCTTAAGC  
AGGCACATACGGCAGAAATTACTGGCGTACAGAATATGGAACAGGCGCAGTACGATC  
TTCAGTAACAGATGGTGTATACGTTACAACAGCGGGCGATGGAAATGTGCTCTGTAAAT  
TCTGGCCTCAATTGAACCCCGTCATAGTACGGGGTTTTTTGTTTCAGGAGGTAAGCGTTC  
CGGGAGCGGTGCGCTTCTTTCGCGGGGGCGGGCGATAAGCCTTATGTACTCAATCATCCCGA  
TCTGTCCGATACTCGGACCATGCGGAGTTATTTATGGATTTTTGACTTACGGGTGAAGAA  
AGCCCGGAACAACACTAGAAAAACTGCTGGCGGGACTTGGGGATGTCGATATAGGCACTCCC  
GCACAGGACGTCGTCACGGAAGCTACAACACTGAAAAACATGCGGATGAGGTACCTCAGACT  
CAGACGGGCGATAACAATGTGGCACCGACTCCCGATGCCACTGTGGAGCACACGCAGGAC  
GTGAAGGTGCCGGAAGCGAAGGCGGGGCTCACCCGCCACGCCAAACACGGCATTACCTAT  
GCAGTCTAGAGGCTGAAGGTTCCGATATGCGACGGGCCGAACAGGAAGCCGCCCTTCTC  
CGTGGGCGAGACAGCTCGAGAAAAACGCAGGGCGGAACTGCTGACGTCTCAGATCCACCAT  
GCCGGTATGAGCCCCACACTGTTACCGGAGAAAGAAAAAATTTCTGATGAGCAGATTCCC

CGTCTCAGGGTGATGTATCGGGAAATTTGTGACGCGATAGCTTCTCTCATCCATAATAAT  
AGCTATCTCGAGTCCC GTTTCACCAATCAGCACCGTATGCAAAGGTAATGGTGGTGAG  
GATTTGTCAGCCGTTCTTATTGCGATGAATGCCGTGCGGCTGCTGACAAAGTCGCAGGAG  
TCCGATCCATATCGCTTCTCGGTTGCTGTATCCATCGACGGGAAGCTCCAGAATGACCAC  
GCATGGAAAGACAATACGCTCACAGAACGTGTCGCTGAAGTGGCCCCTCGCACGCATGTT  
GCTGTCAGAGAAGTCAGTGAGTCCTCGGCAGACATCAAGGAAAACAAAACGGATATCCGG  
AAAACGGCGGAAGAGAATGCGAAGACCGCTGAAGAGCTGCAGCCAGTTCTAGCTTCCCC  
TCAGATTTAGGCACCACGGCTTCCGGCGGAACCGGTAATAATTTTGAATGGTTACTTGGC  
GCTTCGCATTCAGAGGCAGAGGCGATTATGCGCGGTGAGACGATGGCTGATATAGACGCG  
CTTCTGAAGGAGCTCGGGTAACCTGCTGAAGAAGAAGTAAATAATGACGACTGTAACAT  
CAGCCCAGTCGAATAAGCAGCCTCAGGTGGCCCGTTTTACCTCTGGCAACCGAAACGACT  
CGATCGTAAATATTCTACTGAACAGCAGGAAGCGCCAGTCGAGGTCTAGCCGGACAAGA  
AAATCACTAAGCAGTCCGGCGCGAGCGCGCCGGTGGTCCGTGTCACAAACCTTAACACGC  
GGGCCGGTGATGAAGTGACCATCAGCATCAAGCACAATCTCTCTAAACCTCCGACGATGG  
GAGATGACCGTGTGCGAAGGTGGTGGTGAGGATCTCAGCGATGCTGACTACTCCCTGAAAA  
TCAATCACGGACGTCACCTGGTGTATGCAGACGGACATATGAGTCAGCAGCGCACGAAGG  
TTACCTGGCATACTCAGCCAGAACGTATCTGGGGACGTACTTTAATGACCTGCAGGACC  
ATAGTGTGATAGTGGCTCTTGCTGTAGCTCGTGCTGATTATGAAGCTGGCTCAGTAGTCT  
GCCTACAACGGAGTACGCTGAATTCAACAAAAGCCTGACCAACGATGTAAGTGCCTCCGAC  
ACATCACCGTCACTCTTTTGGCGGTGATGCGACAAGCTTTGAGCATATGGAAGCGGCAGA  
TATTTTTTCTATTGGCCAGGTTGACAATCTCACGGCGTTCATTGACGAAATGCATCATGC  
GTAATAGCCGGTTCGTTTGTCCGGTGATGATCTTACGGAGAAGAGCTATCTTACGTCCT  
GTCCGACACGGCGTGCCAGGGGAATGTGTGGTACACCTCGAGGTCCGGCAAGTACTGGGG  
CCGGATGATGGTTCGTTCCGTGAAGCGCGCAAAGGTGTTAATCATCCGCTGTTCTAAGG  
TGAATGTGCTATGAGGTGCAATATCCTGTATCGTAAGCGAGCAGGAATGCCGAACCATTT  
CTTTCAGGGGTCAAAGGTTCTGGTATCAAAGAATAACCTGACGGCAACCGTGTAAGAGGT  
CGCTGTTGCAACCAATCTTGACGGCGCCATGTTACCGGGGGCTCACGCGCTGACCACTCC  
TTACGATCAGAATGCGGGCGGTCACTTCAGCATGGTTGAGAAGAAAACGGATATGGATAT  
ACGTAAGTATGCAATCATCTTGATCAACGGTCTAAAACACATCCGTTAGCACGTGAA  
GAGCGTTAAGATGTGGGGTCCCGCGTGATTGCCGTTGATGCAGCCGTGAAGCTCTGATT  
ATTTCTTTACCTATGTGCGGGTTCGCGCGGGCTTTTTTCAGGAGCTATTATTTATGGCAA  
AGACTATCCTTGCCCCGTCAGTGAACGGGCGTATACGTCTACGCACGGTAATGAGT  
AAGTGTGAGAAGGCGTATTTACGGTGAATGCTCCGGAAGCGGAAAGTGTTATTCATCTTC  
TCTCACTGCCAGTGGGCATCCGTATCAACTCGCTCCAACCTGGTCTCGACGGGTGGTCTGG  
CTCCTGCAACCGTCAGCATTAGTCCGGTGAGCATGCTCTCATCGATAACAGCGATGCTC  
TTTCTGCAAAAATTTGCCAGCTATGTGCCAGTGGAGCTGAACAACACACTGCGTGACGGGG  
AGCTGGTTATTGTCACGCTTAACACTGCCGCTTCAACTGGCATCCTGAATGTGGTGCTGC  
GTTAAACCGTGGTGGGAGACTAATTAACCGTCCGGCCCCGAGTCATGCGAGATTTTTGT  
CCGGGGAATTATGTGAGTTAGAAAACCTGCCGTTGTCTATATCTGCCCAAATCCCGTCA  
GAGCACACCATTGCCGGAAGTCGCACGCTGTTCCACGTTTTTGTGCCGGTGCATGATGAC  
AGCGCGATAGCCTCGCAACAGCTGGGGTTTCTGATGTCTGGTTTCTCTGTAAGAGCTT  
GGTGATGCTCTGAAAAAGCAAGAAAAGAATGATCAGTTGCGGCAGGCACAGCAGGCGCAT  
GAAAGAGTGCTTGTGCGCTGGCAGAATCGCAGAACAGTTTTTGTGTTTCTGTTAACGGC  
CAGGAGGTGGATTTAAGTGAGCTCACCTCAACACTGCTGGCGACGCAGTGTGTGGCATAA  
GAGCTGGATATTCACAAAGACCCGAAAGGAACCGCTGAGGCATTCCCTATCCGGGTGCGT  
TAGGCATTACGCCGTCGTGATGCGGAGACTGACCAGCATGGCGGAACAGAGTGACTTTTT  
ACCGTATGTCCGTCGAAATATGATCGGTCCAATGACCATTATGGGGACGGATCCTCTGTC  
TATGACTGCCTTGCCATTAGCCGCCAGTCGTTGGTGTGCCGTCGGATGATTACTCTTGT  
ACCAGTAGCCGGAAGAAGAACTCGTGCTTACGTATGACAAAGAGGCTGAGGAGTGCGTTCA  
TATCGTCCGTATCTCTGGAGATGATCATAAGCTTTTTTGTGGGTCCGGATGTCTATGTCAG  
CACCGGACGCTCCCTGCGATTTGCCCTGTTCTCCTGGTGAGGTGATCGTGCTTCATGGCGT  
GGCTCCTAAAGCCGGACGCCGCCAGTTACCGGATGAACTCCTCACATGGCCGCAATAAGT  
GGCTGCCGGGGCGCTAGAGCGTTTTGTTTATGCAGTCTGGTGTTCATGGTACATCCCTT  
ACGCGCAGAGTATTTTTCTGTACAGTTTTCTGAGGGGATCCGTCCGGCATAGCGACATAC  
AATGGCGCCAAGCCCGTAGTCTTCATACCGCAACCCGTACTCAGGCAGAGGTTTTTCTG  
ATGACGACGGTGACAGAAATCATCGCACTTGTGCATACACAACCTGGTTGACCCGGTGTG  
GTTTACTGGCCCCTGCACGAATTGTGCGATTAATAACAATGATGCTGTGAAGGCAGGGATT

CTGGCGAGACTCGATGCTGGCGGAAGACTGGAAACAATAAGTTGTGTTCCAGCCCCCGT  
CTGGTTTTGCCCCGATGGTGTATTACACCGTATTGTCGTTATATGCCTAAGACACGGTAGT  
GCAGTGAGACCATTATCCCCGGATGTGCTGGATGCGCAGTATCCTGAGTGGCCACAATG  
AATGGTATTCGTGAATGTTTTATCAGCAACCACTTGTCCCCGCGCATATTCTGGCTGTTT  
CCTGCGCCTAACAAAAAATAAGTAATGATGCAGTGGGGAGCCGGACACAGGAGGCCGTT  
TATTTTCTGACGCAGGACGAAGACACGCCAGTACCACTGGAAGAGGCTTATGTTGACCCA  
CTGGTGGAGTGGAAAGTTGTTTCGTGCTTTCAGTGATGATGCGGCCGGTGGCGGAGGTTTCG  
GTGCTGGCAGCGCAGCATTATGAGAGTTTTGTTGAGCAACTTGGGATCCAGCAGGGGGCA  
GATAGTGCTTTGTATGCCCGTAAAAAAGTGTTAACGGAGGTTGAGAGTGAGTGTTGTTG  
TTTCGGGGACGCTGAAATCTCCTGCTGGTGTGGCCATATCAGGAGCAAATTTTACCCCGA  
CGGCGCTGACAGTTTCACCGGATGCGCTCAGCGGCACCACTGCGTTCGTACAGCGCTCCTG  
AAGGTGGATCTTACGGAGTGCCGATCGATCCGGAGGAGTATGCGGGTTCGGTGACGGGGA  
AAGGGAAGACTGCTGTCTACGGACGTGTGCGTATTGAGGAGTCCGAAAGTACGGAGACGC  
TCAATATGCTGTCACGACGAAGTATTGTTGCGGTTAGCATAACCCGGAGAACTGGTGACAG  
ATTTCCGGCAGATACAGAATAGTGTGGCTGATGACCTTGCCACTATTCGTGCGCTGAGTG  
AAGACACGGGGACGAAAAAGACAGAGGACACACAGGCAAAAAGAAGTGAAGCAGCCAGCG  
CGAAGTGTGCATGTGACAGTACAAAGAGGGTAACCAGCAGGGCGGCAGAAGCAGGACAAA  
AAGCCACTGATGCCACTGAGGCCGCGACCCCGTCAGTCACAGCAACGGGGAAATGTAGAGG  
AAAGCTCGACCCGTGCCAGATAGTCTGAAAAAGCTGCCGCTGCTGATGCAGAAAAAGCCA  
GACAGCTTGCTGAAAAGGCCAGCCTGACGCAGGAGAGCGTCGGAGAGATCCCTAAGCGGG  
CAGAGCCTGGCACTGTGAGTGCTGCAGAGGCCAGAGGTATGGCTGAGAATGCACGCGGGC  
CTCGGGGGCCTCAGGGAGAAACTGGTCCGAAGGGGGATTTCGGTCTAAAGGCGAAAACG  
GTCCAGTAGTCCCTCAAGGGCCCGCAGCGCCGAAAGGAGAGCGTGGGGACGTTGGTGCTC  
AGGGGGCTGTAGGGCCTGCTGGTGC GCGTGGTGAGAACGGCGAAGATGGGAGGTGAGGAC  
CGCAGGGAATCTCTGGCCTGAAGGGGCATTCCGGAGGGCGGGGGCCTAAAGGAGACCAGG  
GGGATATGGGGCCAAAAGGCGAGAGAGCTGATCGGGGAGCTCCTGTAGGCCCTCAAGGTC  
CTAAAGGGGAACGAGGAGAAGCCAGACCACAGGGACCGATGGAAGCAGGAGGTCTTCGGG  
GGGAGACTGGCCTCCGAGGTGAACCTGGTCCCTACTGGTCCGAGAGGGCAACGCGAAGAGA  
CCGGACCTCAGGGACCTCGTGGAGAGCCATGTCCGGCAGGCAGCGCAGCATATGTGGGTC  
ATGCAACGCCGGCAAATAAGGGAGTTGTGGAGTTAAGCAGCGCAACGGTTCAGTGATGATG  
AAACGAAGGCTGCCACCCCGAAAGGGGTGCTAGCGGCAATGGACGTGGCAAATTAAGCGA  
AAACAAAGGCAGAAGATGCTGCAGCAGAAGGTGGTGTTCCTCGGTCGGCACGGAGATAGAG  
GGGATACGGGGCCAGCAGGTCCGGGTGGGTTCGGAGGGTGATAAGGGAGAACGCGGTGCCA  
CCGGTCCATCGGGGCAGCCGGCAAACGGGGACCGGCAGATGTTACTAGTCCGGCAGGCC  
CGCAGGGGCTGCATGGTGACAGGGGAGAGCGGGGAGAGACCGGTCTGACGGGAAATGCCG  
GTCCACAGCATCAAAAGGGAGATACCGGTGCGGCAGCCCCGGCAGGCCACATGGACCAA  
AAAGAAAAACAGGTGCGGCAGGCCCGGTGGGGGCGACCGGACCTCAGAGGCCGAAGGGCG  
ACCCGGGGGATACGCAAAGACGGTTCGGTCTGGGGCCGGGAAACATTATTGAGACAAACA  
GCCATGGCTGGTTCCCGGATACAGATGGCGCACTCTTCACGGGAGTGGCCTATCTTGACC  
ACAAAGAAGCCACCCGGCTTCAGGCTTTTTTTCTAGCATTAGCAAGTCAGGTTTTCTGACG  
GGCCGCGGCAGGTTGTCAAGGGGCTAGATGAAGAGGGCAGAGCTCCAGGCAGACCAGGAG  
AATGACATGAACTTTTTGAGAAAGCTTATGCAGAGTCTGTCCGGTCGCGGATAGGATGAT  
CTCTGTGAGAACAAGAAGTCGCTGACCGCACAACTGCGACTGCAACCTGGCGAGATTCTG  
GCGTCAGATGAGAAGGGCATAATTCCGGAGCAGGTGAGGGTAATCACACAGGTAGCGAAA  
CTTAGTTCTGATAAAAATCAGATACCGTGTGTGGTAAGACCGCTGCAAATCTTGCGGGCT  
GACAGGACGTGGGAAAATATTGGCGGGATGAAAAAGCCGACAGCTTCAGAAAAACGGTAG  
CCCTGCTCGGGTTTTTTGTTGTATGATAGGGGGGGGTTACTAGAGTGTGAAGTAATAAA  
TATGTTTATAGGATGCAGTGAAGGATGCCGTGTTATTCTGGTTCAAGAGTTGTTTATGCC  
GGGAAATCGCAGAACGATTGTGCATAGTATAGAATCCTGGTTAATAATCTGTGATAGTCA  
CTTGGGCCATTAAATGCGCAGTATGAATCAGGGACGCCGTTTTTATTCCGCTGAATCTGGA  
TACATTGAAAGTGGAACATTGTGTGGCCTTGCAGTGAATTGGGAATTCACACGAAGACA  
GCGAATAGGTTTCTATATACGGGAAAGGCTACAAATGGGCGGTATGGTGTGAGTGTGTAA  
CTTCTCGCGTGTGCGGAGTGATGCTTCTCGTTGCTACAGCGGCAAAGATTATGCTATGCA  
ATGAGGGGAGGAATATGCGGCCCCAAACCTAAAGAAAATTGCAATGATCAATGAAGTTGT  
TTAGTCATCATCAGAATTCATGCAAGGCATTTGGTTACAGTGATGCCGATCGCGATTTT  
AGTGAAGTCCATCATATATCCCCTGATTTATAAGCTTGAAGCCGTCGAAGGACTTTCTAT  
GCCCTATATCGATAGCACCAAGATGCGTGGGATGATGCCGCGCGTGTGACATCCAGGCT



GTCCGAGCATTCCGCTGTACTGGCGGAAGACAGCCATTTTCAGGTATGGTGGTTTTACACC  
AGAATGTCAGATATTAGGGGTAGAGAAAACATTCACAATTAAGCCAATAACCATTTTTCA  
GTAGCATGTCACCTTTCTGGTGTGCATGGCCGGATGTGGTGGATGAGATCCGCAGAACGAT  
CGCTCAGGACACCCACGAGGGAATTTACTACACTGACGGGCGTATTCCTAAAGTGACTTA  
TGGGACTATTGCCTCAAAGGAGAGGTGAATCTCCCGATATCATAGATTCGTATGGGGAT  
CTCCGCGCCTACGACAAGTCCTGTCTGTACTGGTCAGCAGGGGCGTCGATGTCTCCGACGA  
TAACCCGGATGATGATGAAGCCCGGTTTTATACGGAAGCGCTCGACACCGATTATGGTGA  
CGAAGGTACGCCAGGTCTGGCGTCTGTGGAGGCGACACTCCGTTCTCGGGGTACTGCGGT  
ACAAATGACGCTGGCTCCGGTGCCATTGCAGAATTCATGTATTAACGTCGCTGGATTTA  
TCGCTCTGCATCAGGTTGGGGGGAGGCGGGTTTTCTACTTGTGGCTGAGTTGTATGCATC  
CGTGTTACAGTAACATGGACAAGGTACCGGCGATAAACCTCGCACCTTCTCTGGCGACACG  
GCATCTCCTGCCGCCACCTGAGAATATGACAGGCCTTTGCCTGATGGCATAACGGTATAGC  
CGCCGGGTTCCGCCGTAATGAAGTGATGTTTTCGGAAGCGTATTTGCCGGTCCATCGTC  
GGAAGTGAATCGAGACACAACCACAGAAGATATTGTAGCTATCTGTCAGCTGGTAACGGC  
ACTGGTGGTGGTTACAAATGGCGAGCCTTATTAGTTCAGTGAGGTATCACTGTCCACAAC  
TTCTGGTTCCAAAATCCCTTCAATGCAGGCGTGTGTGAGCAGGCGGAATATGGTTGCGAT  
GGACGGGTTTGTGCTTTATGAAGGAACATATGGCCTGGTATCTGTTGGTGCAAACGGGAA  
TGTTGCGCTGACGAAGGAACAGGTTGCTTACCGCAATACAGGCAGAGTCAGTTTAATCC  
GGCCTCATTGTGGCTTATCCCCGGCGTGGTGAACACGTTGCCTGCTACAAGAAACCGGA  
TGTTAAGCAGGATGTGGTTGTATGCCGTCCGGTGAACATGGATAACCGTTATCACAGTAC  
ACCGTTTGGGTGCGCAGGACTTGATCTCGCGAAAGATATGATGCGCGTGGTGACAGGAGA  
CAAAAAGTCAGTGCTTGCCGGTGAGGCTCTGCCCTCAAGGATAAGGTGGAATCCAAAAT  
TTATTTATACCCTGAAAGAGTCTCTTCTTCTATATCAGGGTGACATCTGCAGCGCCTGA  
GCGGCTCTTGATCACCATTATGGCTGATGAGGTTCTTGCATTATTTTGCGCCGGGTAC  
GTTTAAGGGAAGTGTGGTGAGACGTCGGGCAGTAATCGGGCAAACACTGGCAGGTAATAGC  
ATCCGGATTCCGGGCAGGTGCAAGAAATAACCCTGACTACATCAATGTCGGAGATGCCGGT  
ATGTCCAGGAAACCGTGGCGTGGCGGGAAGGATTTATCCACTGTTGTGGAGAAAATCGAA  
ATTGGCACCGGGCAGCGCGGTGAAGGACGTCATGAATTTGAGACCCGTGCGGAACTGATT  
GGTCTTAACTCGCCCGGCGACGAACATCGGGTGGTGGCTCATATGCACTGAATCCGCGT  
ATTAAGACTGGCAGTGCTTAAATGACTGTTGATTTTCTAACAGAACCGCTGAATTTAAG  
GCGACCGGTAGACTTGCCTCGGTTCTTCTTGAATAGGACATGCCTAATGAGCGCGGACAA  
TCACTGACTGAAAACACTAGCGGGGTACGGAGCATGTCCTTCTGATGCAGTGTAGGTTGCC  
ACGACGCCGGGGCACGTTTACGGCGATCCGGTTGACCCTGGCTGGTCGGGATTTTACTGG  
ATACGTTCTGTTAACGCGGCAGGACTGAAAGGTCCATGGAATGCAGAAAAAGGCACTCCG  
GCACAATCACAGATCGGCGTGAAGGCGATTAGTAACAAGATCCGAGATGAGGCTGCAGAG  
TCGCCGGTTGTGTCCGAGCTGCGTAAAGAAATAAAAAATGCGCAGGAGCAGGAGGTAAAA  
GATGCTGCAATTAAGACAACGGAACCTTGGAGGGACTTTAAGGCAAGAAACGACAAGAACG  
ATTGGTGGTATTGAAACGCGCATTAGCACACCCGATTCCACAACCAGTGGATCACTTGAT  
GAGGTCCACAAGCGCATCACTAAATTCGATAAAGAACGCGGTAAGGCTTTTCTCGCAATG  
TGGTCAAAAAAAGCTGGAGTTGATGGTATCACAACGGGAATCGGGATTGTGCGCCGAAAA  
GACAGCGAAGCCGGACCCGTAAGTAACGTTACACTTGCTGCGTCGGCGTTGTTTGTCTTA  
GATCCAAAAAATCCGGACAACAGAGCCTATTTGGTTGCGGTATCAGGTGGCCAGGTGGTG  
ATTCCGAAAGCGATGATCTATGACGCGCTGATTGAAACGCTGGTGTGCGGGAAGGTTGTG  
GCCTATCAGGTAAAAGCTGTGTTAAGTATCTCTTCATCCGTTACCCGGAGTGCCGTTATA  
CAGAACGGGAACCTTTCATGTTGATCCTCACGATAACCTGAAGATTATAGGCCTTTTATGT  
GTTACGTCACAAGGGCAACTAACCATTGTTACTCTAATCAGAATGTAGGACTAGTGATC  
CGAATGATAAATTTGAGCTGTATGACGAGAATGGAGGACTTGCTGTACGAATAGTCAGA  
TTAAGCTGATCAGGAGGTGAGTATTGGAATACCGTTTTGCCATTTATAACAGAAATAATG  
TTAATCTTACGGGCGTGCTGACGCAAGTAATTTTCATGGACAGATTTACAGCGGAGGCTG  
TCTCTAAGCCGTACTCTAATAATCCTGACGGGAACTCAGTGCTGGCTGTATGTTGGGTAT  
TTCCCTGGTTTAAATGTATTTGCGGGTCCGAAAGTTCCGAAGATGACCATTACGCACAATA  
CGGTGACCTGGTCAATCTTGAGCAGGGTTAAGATCTTACCTTTATAACAATTTGGGGAT  
AAGTGTCTGTATGGTTTGACGATTATGAAGGACGGTGGCAGCATATGGTTTAGTCCAGG  
TTTTGCGCCGAGTGCTGATCAACAAAGGTACCTTGCCGGCGACTGAAAAGTCTTCTT  
GAAAACATTAATCTCGTCAAACACAAGTCGTTTCATCTTTATCAAAAACAGAGAAGAAGGC  
GGAAGTCATGTACAAATATGGACAGAAGGCAGGATTTACATACTAAGGTTTCATGTAAT  
TGTCAGGGGAACGATCCCTGGTTTACGACGGCTTATGTTTTCGCAAATATGGTTACTCC

ACCTTCTTAGTATGGGATCGCCATGTAGAACCAGGACGGTGAGATGATTTATCATGGCGA  
AATGATGGTGCTTGACGCGAAGTTAATACCCGTTGGTCTCAGTTTTGAAAAGGACCTTGG  
ATATCAATACGCCATCCTGCCTGCACTAGTCGGGTATTATAACTGGAGCAGAACTCCTTA  
TAATCGACGGAATTATATGTCATCCTCTGGTGCTGCAAGAAATAAATTATATTCCTGTGA  
GCAATGTTCCGGTGGTGCAACAAGGGATATTCGAAAGCCGTATATAGATAAGGTCCTGGT  
TATTAACACGTCAGTATATGATTAGTTGAAGCGAGTCTTTCATGTTTCATTGAAAATGTCT  
ATACAGATGTATTATTA AAAAGTTTAGCGTGTTATCTGAATACAGGATATCTTAAATGAA  
GAGTATAGCAACACTGGTTGTTTGTGCAATCTCCGGGATTGCCTGTGTAAATTTACCTGC  
ACATGCAGCAGAAGGAGAGCATACAATTTCTCTGGGCTAAGCGCACTTTCAGTTTCCGCG  
ACTGGAGGATTTGGTCGAGGATGCGACTGGTCATAAGAGGGAGACTTTTAGTCATCTCGT  
CTACAGAACTAGTGTTTCATCATTGGGCGAATATACAGATCGTCATGTTAGTAGATATCA  
AGGCAAGGATATAAATCCACAGGGCATTATATCAGGTCTAGCTACGAGATAACGGATTA  
TTTTGGCGTTATCTGCTCTTTTACATAGACGCGTTCGCACTAACTCACAGACATTTAT  
TGATGTGCAGTCAGTCGATCATTCCAGGAAGATTAAGAAACCCGGCAGCTTCTGCCAGCAC  
GGATATCAGGGCGAAGTACTGGAGTCTGTTAGCGAGGCCTTCATGCCGTGTTAATCAGTT  
CATGAGTTTAAATGAGATGGCAAGGATGGGCGTTGCTAAAGTTAGCGCTTACCTGAAAAT  
TAAGGACAAAATTAACAGTAGTGGCGGATTTTCTGAAAGCAACAGGACGAAAAAACCTC  
CCTTGCGTGTGCTGCAGGTGCACAGTTTAACTGAATGAGAGTGACACACTGGATGTGGC  
TTACTAAGGCTACGGCTCTAGAGACTGGCGCACGCGTGGCGTAACCGCTGGAATTTGGCT  
GAGCTTATGACCTGTATGCGGTAACCGTGTACTCCCCGCTGTGATGGAGGGGTTTTTATT  
GCCCGAACAGGGAAACAACCGTAAATTATGTGTGGGGGCCTTTCGGCTGTTGGCTGGAGG  
GTGAACCTGATGGCCTGATGTGAAAGGGCCCCGATAGGAGTTAACGTTGACCCGAGGCC  
CAACCCATATTA ACTTAAGAAAGTAGATTGTTAGCGCCTCTCTGTAAAAGGAGTCAAGCG  
CTATGTCGAAAAAGCGATTATGACCGTCACTATTTGCATGACGGTTATCTTCACCATCT  
GGATGTTGCCCGGTGCACAGTGTGAGTTCGGGCTGAATCCGACGGGAGCGGAGATTGCGG  
GGTTCCTACAGAGTAAGCAGTAGGAAAAGGGCGACGGGGAACAGAGTCCCCGTCAACTGG  
TTGCTGAGGTTACGCCGATATGCCACCCGTTTCCGGTGAGAGAATGAACGATAAAAATTCT  
CCGGTAAAGGCATCGTGTGTGAGGAATTCCC GCGACTATGAATTTATGAATGAAGTTAA  
AGACGCCGGCCTTAAAACGCAGGCGGTTTGT TTTGAGTTACCTGATGGCTCGTAGGTGCT  
TCGCTCTGTGCACAGTGTGATCGTATCCCTTCTGTGCTAGTGTTGTTGGGCGTGTGTAC  
GGGGAGAAACAGCGTTGGTTCGTTACCTGCCGAAGGTGAAGAAGTTAACCCATCTGGCTGG  
CGGACACTGGGATGAGTTCATACGGCAAGGGGGGTTTTATTCCGGCTGGGAAAACGAGT  
GGGCTTCGAGCGATTGCCGGATGAAGACGATGGTTCATGGTCTTCAGGATAGCGGTCTG  
ACTGCTAAAGATTTCTTCATTGTGTTAAATCCAACATTGTAATTCACATTCTGACCCTTC  
TGCGGCAGGGTTTTTTGATATCCAGGGGGCCATGATGGGTGGAAGTGAAGGCGGTGGTGA  
TACTAAAGTAAAATCAACAGCAGCGCAAATAGCACAGGAAGAAGTGGACTCGATAGGGTG  
GCAGGATTACAAGAATATCCTCCGCCCGGCTGCAGATAACTTCATTGGAAAAGTGGATGA  
CCTGAACTGTGAGCAGCAGCACGACAATATCCCTGGCACCACAATTCTGGGGTATCAGAA  
TCAGTTTGGAGAGGCACGGCAGGTTCTTGCGAGTAACCTGCCTCAGTCCGGCGTTGACCC  
ATCGAGTGGACGTTTTTAAGGCGGTAATCCATGCGCACAGAGTCACCGGGCAACCGGGCA  
TATTGACACACCCACACGGGGGCGAGATATCTCAGGCAGGTAAGTATGTTGCTCGTCGACG  
GGATGTTGCTACTCTCCGTGCTGGTCAGAAGGCGGATGCGTTACAGAGTTCTACCTCTCT  
GACAGACAGCAGTCTGGCAAAGCTAATTGGGACGCACTGTCGACGTTTACGAAACACCA  
GGGGCGAGCCTCTCTCGTTGGCGCTGGTCTGGGTGCGGCAGGTCCATATGCGATGCATGA  
GGCTGGCGGAAGGTGAGGAAGTGGCGGTCCAAAAACACCCGGCACCAGCGCTAATGCCAT  
TCAGCATCAGGCTCAGAATTGGAGACTGTACTTATGGCGTATGGCAAATACGAAACTCTC  
GCATGGGCAGGATATTCAAGAGCACCCCGCCCCAGGGTCACTGGCAGACGTCAGCCACG  
CTGACACCCCAACAAAACGACGACTGGGGAACCAGATATTTGCCCGCTTCGCAAGGCTG  
GCTGACCTTGTGGAGAACAACAGCCTGATGAATCCACAGCTCGCACGGGTGGGAGGCCTT  
GCAACTTCCGGTCTCCGTACAGCTCAGATAGCGCAGTATAACCAGATGGTGAGAAATGGG  
GTAAACCGCCCCGATAATCCCGACTGTAGTACGCTGGGGTTACGTAATGCACTGGCAATT  
GCTGGCGCGAAGCATGCTCTACGTTAAGCTGAACAGGATCGACCGATGACTATTCTGACC  
GGGGCATCTGCACAGGGAAGACAGAACTGAGTGTTGGGGGCCACTGGTGGAAGCGTAA  
GACGGCGATAAGGGATAACGTTTAGTGGATATTGCAAATGTGCCGCGGCGGAGGCATTA  
CATGGAATAAGTGACGGACACAGACGACGTGAAGAAAATGAGGCTGCGTACAAAACGATG  
GCGACGCAACACAAAGCGCAGAACAAACCAGAATATCGGTACTGGCATTAGTACGGGGGCG  
GCTATTGGCGCAGCCATTGGTGGTCTGTTGGTGCTGTTCTTGGAACAGTAATTGGCGGC

GTTGCTGGTTCTTTTTTTTAAAGGAGTGGTGATCGAGCGAATTAGCACAGGGGTTAATTGC  
CGGATTCAGCAGCGTCGACCACGCAAGGACCCTTCGTAAGGACTTTGGTCTGCGTGAAGC  
ACAGCTTGCCCGGCTCCATAAAAATAACGAGCGCAATTTTGCCTTTGCGGAGTCTCAGTT  
TGAACATAATAAAAACGGTCATCAGCGGAACTTTGATTGGAGAGCCAAAGTTGACGACCG  
TAATCATGCACTGCAGGAGAGGGAGTTTAAACGCTATCCAGAATTACCGGAACGCGTCACT  
GCGTATGGATCAGCAGCGACTCCAGTTGCCGAAACACAACCAGCGACGGTTTGTAGTATAA  
CGATATGATTGCCATAGCCAGGCACTAATGGAAGCGCTAAGAAATACAATTGAGGATGT  
CGATCAGGACGCTGTAACGCTTCAGCTGTGGCAGCTGCCAAAGGGACATCCAATAATTCT  
TATGTCGAACGGAGGCTATGCATCGAAAGGGGGTGAGGCCGTGTGCGACCTGCAAAAAAT  
CTTTGGTGCTAATCCAGACACGGCGATCGATTTCGAGGAAAAGCCCCGGAATACTGGTTGT  
GATTTCTGCCGTGTTTGGCCCTCAACTACAGCAGCCTATCGGCATGCCTGATTCAACCGG  
TGACAAAACGTTAAAAGAGGCCACGATTGGCCGTATCGTACCAGTACAGCGGTAAGGGAA  
CGTACCTATCGGCCTTGATTTACATACAGCTATGCCTCCACCGCGCATAAGGCTGTAAC  
AGAGTACGGCAGTGCGCCGCCTGTTGATCAAACCGTCTTGCGCTGCCCGTTGATAAGGA  
TATCGCTCAGGTCAGAGATCGCCGCAAATTTGCAGAGATAACGAAGAATTATGGGTATCA  
TATGCCGACCCAGCACGGACTTTCTCTGAAAGAGCTTCAGAAGGACGCCAGCAACGTAGC  
TTCGGACGCGCTTAAGACTGGCAGGAACTGCCAGGCTGCGGTGGATGAATATAATGCTGC  
GCCGGGGTCAACCACGCATCAACAGAAAATTGAGCAACAACCACTGCAGCAGTAGATTAT  
CAACTGGGCGGGAGATGATCCTGATAAGCTGTAATTGGCCAGAAATGTAGCGGCACGTCA  
GCCTGAAATGCTCGAACCACAGAATAAGAGATTGCTGGGGAAGGGCTATGCGAATTGTCT  
CCGTATTCAAAAGGCCAGGGGGGAACAGGCCAGGGATGAAAGCGCTTCATCTGCATCTCA  
GTTTATACGTGGACTGAGACAGAATTACGCCAGTAATTCACGATATTCCATTAATCCCA  
TTTCCTGTAGCCCGGCAATGTGCCGGGATGTTTTATGGACTCTGCATTGCCAATTCAGC  
GGAACAGCGTCCTGAGGCGCAACTCGGTAACCAGAAAACGTAAGAGCCTGAACATTCTGCA  
ACCCGCGGAAACTGACAGCGATGAAGCATTTTTCTCTGAGCTGAATCGCTGGAAGGACAA  
CAATACGTAGTTCAGCCTGGGTGATGCATTGCCAACAAATGGGTAAAGGTTTCGCCGAGTC  
CGTCCGGGAATAGGGGAAATAACCCGTGGACTCGGTCATGCGATGATTACAGAGCTCGGT  
AAAAGAGGGGGCGCTTTTTTAAACGAGTTCAGCCGTATGGGTCTGCCCGGTGTCCCAAC  
TGTGCAGGATATTTTGGCCGGTGGCAGCAGGGGGGCTGATGAGGTAATAGATACCCTCCC  
TAATGGCAAAAACGCGGTTACTGATACTGTCGGTAGAGGTATGAGGGCAACCGGTAAGCC  
TGTCAGTGCTGGAACCAAGGCCCTGATGTATGGCTGACTGGTAAGCTGTCGCCGGGTGC  
AGTTCGTGCGCTGAATGCGCCGATGACCGAAGGCTCTAATGAATCTGCGGTCTGGGTGGC  
GAAGGGTGTAAACCTGATTGGTGCGGTTTTACCTGATATGGTTGCTGGCGGTGTGGCTAG  
AAAGGTGGGTGACGGCCACTGCGAAAAGTGCTTACCGCCGAGCTGGAGTAAAAATGCCT  
CTCGGCAGGGATGTAGCTGGAAAGAGCCACGGCGCTGGCAGCAGAAGCTGTCGATAAAAA  
ACAGCCGGATTTATTCTAGGCGGGACTGATCACCCATTCCACTATGAGTGCATAGGGCCA  
GCGTGCAATAGCGGCATCAGATGCTGTTCTTAATGCTGATTGCGCTGAGCTGGCGCAGTC  
ACGGAAAATTCAGCAGACGTTTATGTCCATTGAAGCCGACCCGCAGCATGGACGGCTTAC  
CGAAAGCCAGAACATGGATCTAGCAAAAAGAGCGTGTTGCAGATAAGGAGCGCAAGCCGCT  
GGCAACCGATCCTGAATTGAGTGCTGTGAGTGCCATGGCGGCGAGACTGGGTGACACACA  
ACTGTTTACTCTGGTTACACGAGGCACAGTGAAGACAGGTAAGAGCCGCAGTGTGAGAAC  
TGCCACGGAACAGGGGGCGATTAATGCGGCGAAGGTGCGGCTAATCACGCTATCAGGAAAA  
CACGGCATTGCGCGGGACCGCCTTAAAGGGTGTGTAACGGTGGGAAGGCCTGGCCGATGC  
AACGAGCAAAGGTGCAGCCTTTGGTGCTGCGATGGGGGCTCCGTTTGTGAGCTTGCCGG  
ATATAGTGGCTCACGTCAGGCCGCTGAAGAAACCCGCATGCGTGATACTGAAACCGTGCC  
GCAGGACGTCGACGCTCCCAACACGAATCTTTGCTCCGGTGGCGCAGCAGCATGAACG  
CGTGAAGGGAATGAATCCCGACCAGCTTGTGAGCAGTATGCTGATCCCGATGTGGGAGC  
AGAGGCTGACGTATCCGCGGCTCATCGCCGGGAGGCTACCAGCCAGTGGTGGAAATGAACT  
GGACGAACAGCCGTAGCGACAGGCTGCGATGAATGAGCTTAAGGCTAGGCCGCGTCTGTA  
ACTGCGTGCGGCATACGGCAGCCACAGCCAGAAAGAGGGGGCGGACCCAGACTGAAGAAAA  
ACAGTTTCAGGGAATAAGCGGAGTCATTCGCCCAACAATTAAGCGACGGCGGAAGCACA  
GTCACAGCCTGAAAATGCGGAGGATCGTAACGGGAGCATTACCCGACGGTGGCGTTCCG  
GGATCCGAAGGAAGTGCCATTGAAATTAACGGGAATGGAGCGTCCAGACCAGCCGAACC  
CATTGAGAAGGAGCGCCCGACAGACGGTATTTACGCATAGGAGAAGCGCCATGGGGAG  
TGATGTTTTCCGTAATGCCACCGCGACCGGCCTGATACCGTCCGTAGTGAAGAAAGGCGC  
GAATCAATATGCCGTTGAAATCGATAAGCCTGCGTTCTCTGAAGTTGTGGCAACGCGAAC  
CTTTAACGCCCTGGCTCACGACAAGGGTATTGCTGATGCTGACCCCATGGAGCAGGCTGC

GTTTCATGCGTAACCAGCGATTCCGAAGTTTCACGGGGGATGATACGGAGGTACGGGCATG  
TCTTGTCAAGTGGCAACGCGCCGACGGCAGAGGAGCATGTAAGTTCACAGACGACTGAAGA  
TGATGCCGGTCCGAAAGCACAGGAGTTAACAGATAGTCCACGCCTGCCCGTTTCGCGGCGA  
TATTCCTCCATGACAGAGAGATCCGTTCCCGGGAGAAAGTGGCGCATACGCCGGATTGAAA  
TCAGGTTCGGACGTGGTGGTTCGTTTTATCAACCCGGTGAGGTTAAAGGCCAGAGGTTACA  
GAAAGGACAAGCTCGGGCGCCGAAAACGTCGTTGGTTCGACAGGGGGAAACACTCGAGGG  
TGACCTGGTTTTGGCGGGGTCTGCCGTACCTGATGCGCCGAATGCGGCGGCACCGGTACG  
TGAACGGCTACCGGCTCCGCACATTGCGCGTAATGTACGTATGGCACATTCTGAATCGCG  
CCCCCGCACTGTACGGGACTCACTTCCTGAGCTTGCACAGCAGGCAGAAGGACGCCGACA  
GGCCTGAGGAAATCGTGAAATCCCGCAGCGTGAGCCAATCGCACCTGCTTCTAAATCAAC  
TGTCCCTACTGATAGAGAAGCTACAGTGCGCGGAAGTGAAGTAAGGGGGCAAAAAAATTGA  
AGACTTTGGTGAACATATTAAGGGCGCGGCAAAACACCGTTATGCCAGCTTGCTGAGAC  
ACTGGGTAAAAAGCTGGAAGACACGGATTATGTCACTCAGCCGCACAGCAAACCTGTTCCC  
GAAACCGGACTACGTAAAACTGGCGAACAAAGGTGCTGATGCTGATACTCTGCGTATGAT  
AGCGCTGGATCGTAGCGATATTGCGGCGAAGAGGAACCACAATACGGCAGGATGGGGGGGA  
AAGCATAAAAAAAGTACGACACAGTATATCGTGAATTATGCACGGAACGGTCAACGCGAA  
ACGGGTTCGAGAAATGGATGGAAGGCAGAATGCCCTCCCGTTGCGCGGATACCTGTCAACT  
GTCACGCACTCAGCCGCCCTAACAGATAGGGCGAGCTTCTGCTTATCGGGTGGGATCGGG  
TGTGTATCAGGCGGGACGAGGGCAGCGTCACGAATCGACACAGAACTTTATTCCTGCG  
CAATAAGGACAGTAAGGGGAGTAACCTCTTCTCCCGAACGCAGGGATGAATTACTAGC  
AAAGGCGAGATTCTGGTTTTCTGAGCAGGAGGAAAAATCACAGGCGAAAGGTGGTGAACA  
AACAGCACAGTCATCGGGTGACCAAATCAGCCTTAACGTTTTCCCGAATATCCACAGTGG  
CGATATTTTTATCGTTTTAAGGTAAAAAGAAAATGAGGGCCAGAGGTGGCTTTAAGTCGGC  
CAGTGAGGCGCGTAAGTACACTGATTACATCGTGATGAGCTTGTTCGTGATCTTAAGGA  
GATGAGGGGGATTTCGCGTGAGGAGCAGCGAAACCCACGAACCGCTACCGTACCGGACC  
AGAACGCCGTAAGGGGAATGTTTTACCGGATCAGTTCGGTGCTGCGTTCAGTTTCCGGGG  
TTTGCACTTTGGTAACTACGTGGTAGGTCCGTGTCGTTATGCTGATTTTAACCGGCATTA  
TGACACGCTGCATGTCCTAGCGGAAGTACTGAATGTACCGACAATAGCGTTTTGCTTGAT  
CGGTCGTCTTGGCCTGGCATTGTTGGTGGCAGTGGTAAGGGTAAGGCCGCCCCACACTAGGA  
ATCAGGTGAGGTGGGACTCAACCTGACAAAAGGTAACGGACCGGGTGCGCTGGCGTAGAA  
ATAGCTCCATTCTCTGGATAATTATTTTGGTTCGTTATGACGTTTCCAATTTCCGGGAAAAT  
TACGTCAGGCTGCCACTTGATGACGGCAGCACAGCGTCTCCGGCGCATATTCAAAGACGG  
CATGTATGTTGGTGTGAATAGCCGGTACGTCAGAAGGTTTACGACGCCTTTAAAGGTAT  
GACTCAGGCCATTA AAAACAGTGACATGCCGCGTCGTTTCAGCGCTTCTCGATGAGGTGCG  
CTCAACACCTTACTGGTCAACGGATGTTGAAAACGCGGCACGTGCCTTTGAGCGGTATGT  
TCAGGATCAGGCGCGTATGGCTGGCGTGGAGAATGATTATACGGTCTAAATCCGAAACGG  
ACCTGATCACAAACACAGCGAACACCTACAGTTATCCGACGAATCCCGAACTGGATGGCGG  
TACTCGTGAGGCATTTCGATCACCTGTTCCGCACCCTGAAAATCCATGAGCCGGACAAGGG  
AGATTCGTATTATTCACGTAAGGGCGATACCCGCACACCTGAAGGTAATCTCATTTCGGA  
TGTTAACCGTAGGGTGGAAAGCCGACGACAGCCCGGTACCGCAGTTTGAAGCGGCTGCCCG  
TGGCGTGATGGGCGGCATTATGGACAGTCACCTGAAGGTCCGTGTGGTGAAGTCACCGAA  
AGAAGCTGTAGCGCTGGCGGGTGAATTGTTCCATGGTTACGGCAGGGGGCGTTCATTCTA  
TCGTCCGGTTAAACGAAAAAATTGTCCTGTTGGCGGATAACATCCCTGACGGGCGGACCGC  
TCGCAAGAAGCTCCGTAACGAGGTCATTTCGTCATGCCGTGGAGCATGTTGTACACCAGC  
GGAAGATCAGACGATTATGAATAACGCGCTAAAAACCCGCGACAGTGATAACGTCGCCAT  
GCGTGAAGCCTGGCCTAGGGTTTATGCTTCCTAAGGTCAGGTATCACCTGAACCACATGT  
GGGTGAATTTCTGGCACATATGGCGGAGATACTGCCTAATAAATTTGTTGCGGCATGGCA  
GCGTGTGTTGTTGCCCTGGTTAATGGGGTATTGCGTTCGTACGGGGTACTGAAGCCGACTAA  
ACTGAACGATATATGACTTGTTCACGCGAATATCCGTACGTTCCGGCCAGCGTGTGTGGCA  
AGGTTACACGCAGCGTGAGGATGGCGCGAGTGCATCTTTTCAGTACTCATGTGCTTGTAA  
ACGTGATCCGTCCAAAGTGCCGGCAGGTGAGGGCGAGCGTTTTTCGTGAAGAGCTTGCAAG  
AATGATGAAATGTCTGCGCACACAGATTTAACGGTAAACATGGGGCGTACGCCGCCTGT  
ATTGCGTGACCTTAGTGTACCGGACTTGACGCTGGTAATTTCCCGCGATACTGTGAGGAA  
GGTCACCAATGGTGTGAAACATGGGGTGCCGATGGAATTTATCGAGAGACTACAGTAACT  
GATGCACGATCCGGATGCAACTTACCGCTCAGCGCCAAAAGAAATGCGGTTGTTATGCT  
ACTTGATGACGTGGAGAAAAATGGTGTATCCGGTGGAGACAGTGGCACACATGAAGGCTGT  
CCGGTTCGCGTCTGGAAATCAACAAGGTAGCTTTAGTTATCGGTACAGAAAAATGGAAAAA

ACTTAAGAGTATGGACATAACAGGGTTAACGTTGTACCGGAGCGAAGAATTAAGCCGCGA  
TAATCTTCTGCACAGAGGTCTCCAATTGCCCAAACGGGCACATTCTTATAGTGGCTCTGC  
GGATAAGAACTCTATCCAGAAGATATTCGCAAAGGGCCGTATTACTCCCGAACCAGCAG  
TCTGACACCGTAAGAGAAAAGTGCCCTCGCGTTTAGTGTGCCAGAAGCAGGATAAACTCCA  
GGCGCTGAAAGTCGTTCCGGGACAAGATCCCTAAAGCCTGCGGCAAAGTGAGCGACAGTAA  
CCACGCTTAGAAGCGGGAAGAACTCTTCCTCGGGAAGGCGGAAAACGACCTGAACGTGAT  
GAAGGAGCGCAACGTTTCAGCAACTGGCTAAAATTCTGGCGGAGTACAAAATTGAGCAGAC  
TGATCTTGATGGGTACCTCTACTCCCGTACGCGCCGGAACGCAACGCGCTTAACGCGAA  
AATCAACCCGAAAATGCCGACTGCACTTCCGAGATGTGCAACGCCGACGAGGCGGAAAT  
CATGCAACGTGGATGTAACAGAGGCAAACAGGGACAGTATGTCCTGTCAGGCAGGGATTAT  
TGAGGATATGCTGGCCAATCGCCGTGAGCTTATCCGTTAGGACGGACTTGAAGAGACCGT  
TACGATGGATGACTGGCAGAACGCCTACCGTTACTACGTTCCCTGTAAAGGTCAGTATGT  
TGACGTTATGGTGTCACTGCCACGCACAGGTAAGAGCTTCACTATCTGCATACGTGAAAG  
CAGGCAGGCTATGGGCCGTGCATCCCTGGCACTGTCTCCGTCCATTAGTCGATACAGGA  
CCTGAGCGAATCGGTGATCCGCCATCGCAAAAACGATGTGGGTGACGCCTTCCCGAAACC  
GGTGCAGGATAATCCAGACAAGGATTACTGGCAGGTATTCCCGATGACAGACCGGATAA  
CATCCGAACGGTTCTAGAGCGCAACGAGCAGGAACTGGTGAAACCAGTCGCTAGGTTGT  
CGGAGGCCCTGTACCGACGGCAATGATGTCAGACCGGTACTTCACCACCAAAAAGAACGG  
CAACTTGTACTACATCAAACCTCCATGATCCGCTCCTGATCCGTTTCGATGAAGAGTAATCG  
ACCGGAGACCATCAATGCCTTTGGTTCGTACGCTGGGGAAAATTAACCGCTACCTTGCAAT  
GGTAAACACGTCGTATAACCCGGAATTGCTGGTCAGTAACTTCGTCCATGACGTGCTGAA  
TTCCGTGATGAACCTGAAGGCCGAGCAGGGGGTGAGCGACGGTAAACTGAAATGGCTGGA  
TAACTTATCCCGCGGGCTGTGGTGAAAGACAGCCGTTCTTCCCAGTCAGCCATAGACGA  
CAGTCTGCGTAGTAAAACCCTCACTGGAAAAGGTGCACAGTGGGAAAAAGTGTGGAAAGA  
GTTTGTGAGGACTGCGGGAAAACCGGCTGGTTTAAACACGGGACAACCTTGAAGGCCAGAA  
GAATGAAATGGATCGCCTTGCCTCACTGACGATGGGGGGATTGAAAAGCCAGAGAATCGG  
GGCGTAGAATTCGTTCCCTTAACTGTGAGGAAGATGCCAACGGTGCGGTTGAAAACGCTCT  
GCCACTTTCTGCCTATCAGCACGCCCGTGAGGCTTGATTGTCACGCCACCAGGCGGCGAC  
CCTTGACACAAACATGACGGTGGACTTTAACCATAGTGGTGAGCAGGGGGCGCTGATGAA  
TACGCAGCACATGTTCCGCCAGCGCCAACATTCAGGGAACGGCAAATCTGGTGAGAACGCT  
CGGACACCCTAATGGTGAGGGACCTTTATTGAAGCCCCTTCCATGAAGTATCTGAATGT  
TGTGGAGACAATCGCGCTTGCCGCTGTGGGAGCAGATTATCTGTTTGGCTCGCTTACCG  
CAACGTGGCGGGTGAGGATGACGATGGGGTTAACTGGTATGAAAAGGTGCGGACTCATGT  
CAAATAGCGTTACCTCGTCATTATGAAATCGGTGTTCCGGGGGAAATGCCGGAGAGAAGTA  
GAGTATGCCTGTGTCTTACGGGTACAACGTTTTCTTCCGGCTCGGGCATACTGCAGAAGG  
TGTGGCGGCGGGTGACCTGACGGCGTCCCCTGTTGCCTGTAAAGTTGTTTCGTGGTGTCT  
CGGTGCACTCCGCCCGGTTGGAAGTGAGACGTGAAAACACTGTCCTGGGCACTGCTGAA  
AAATGCAGCGCCGATCATTCTGCGTACGTTTGCTAACCTTGCCATGCCTGAAATTGTCAT  
GCGGACGCACTTTCACCAGGAGAACATGCCTTTTGGTATACCAAAAACCTGGCAGCCAGCT  
GGGGAGACGTTCAACGCCATAAGCATAAAAAGGCCTTTGCATCCTGGCTTAATGCGTTCTC  
ACGTGGCAGCCAGTACCGTCCCGGGGCGGTGGATATCACACCGGAATCGCTGAAATTCTG  
CATTGATTATACCTCCGGCGGGACAGGGCGCTTCATTTCCATAACTACGATTGCGGCGCT  
TCAATCGCTGAATGGTATTGATCTACCGGCACAGCAGGTGCCCTTCCCTGAGGAAACCCTC  
GCTAGAGCTGATGCCGTATGCAGACCAGCAGAATATGTACGACCGGATGTCGGAGCTTGC  
GCAGTCTCACGCAGAGCTGAGCAGTCTGACCGTTGCAGAAAGGACAACGTGCACTGGCTA  
GTACAACGGAAAATTGTCAATGAACGGGCTTATGTATGATACCCACCAGAGACTGAAGGA  
TGTGCGTAATCAGCGTGATGCGATTTACGCCGACAGTACTCTCAGTCTGTGCAACAGTC  
GGCGAAGGTGATATCCGTAGTGTGGGATATGCAAATTGCCGTGGATCGGTTTAAACCGCGA  
GTACAGCAAAAAAGTGGGAGAGGATTAACAGAAATGGCCCCGGAGGGAATTGCGGGGCTG  
ATTAAGAAATCAACACTCATTGACCTGTAATAACCGAAGGTATTTACACATAGTCAGATG  
ATCATTTTCATGTAATGCAGAGAGCCGTTTTATGTTTAAATGAAGCAAAAATTTGCAGAAATG  
GGACCCTATTTGCTGAAAGAGCATGGCGGATTTATGTGTTTAAATTAAGCTGAAGCAGGAG  
CGGTAATGGCGAATGGCATTGATGAGCTAAATAATCTTGGTATGTTAGTAAGCGATCTGA  
TTTAGGCGAGAGGATGTTACCCCTTATCGCCAAGAAACAATACCGGCAAGCAGAATTGC  
GGATGGAACCTTTCAGGCCACGATGAGATCGATGAGGAGTTTTTTTCAGCCAGTATTGGA  
TCGCTTTCTTATATCCAAAGATAGGCCATTTGACATCCTCCACGCCCTGAAGGACGGAGA  
TTTACAGCGCAGCGGATAAGACTCGGTGTTTTGTTGAAAAAACCTGTGATAACTCACAGA

GAACCCGTCAGTAAGACGGGCTTAGTAAGCTGGGACGGTGACTTTAATAAGTTCAGTGCC  
TGTACATCCACTTTAACACTGCTCAAGCCTTTATCAATTTAACCCCTCAATTCTTACTTGG  
TTTTTCGGAGAAACATTCTGCCCGGCCATTTCGCTGTCATCGAAATACGTGACAATAGTC  
CCGCTATTGTCGCGAAACTCACAACTTCATCACCCACTTTTTCAACGATGCTCACTTCA  
AGGATACCCCATGGATCATCCTTGAGTTCTTTTGCCTGCGCTACTCTTGAACGCTCTGCT  
TCAGGCCCTTGAAACCGCCCTGCTGTGCAAAAGGGCCAAAAGACACAGCAGAGATAGGT  
GCTCCACCCAATACCTTTTGCAGTGACAGTTCTTCTGCTGAGATGAACATTCAAACAGCA  
TTTTTCAGAATGGTAATGCGCGGGTGCGTTGACGATGCCTGACACATCAGTGGTGGTGAGA  
GATTACTCCCCTGCTAGGTCACTTACTTGTGAGATTTCGTAGTCTACTAAGACAGCGACAC  
CCGTCGGACCGGTTTCGTATTCGACACCTCGCGGACGTCATTTCCTCGGTACCAGTGCCGTCA  
ATATGACGGTTAACCCAGATGACAAGCAGGGCGATTTACATCGCCTTTTGTGCTTCATAT  
CCTGCTTCTCCTTGCCTTGCGGCACGTAAGAGACTAATCTACATGTGTTAAGCATGGATT  
GAGCCTCAGATTAATGTTAAGCGTCTTGCCGGACCCGTAATGTAAACTGGGGGTTTTCTA  
TATCTGCCATAGGTGTCCATGCCCAGGGAGATAGCCTCAAGCACCCGCGGCAAGTATCC  
TTAACTTTTCTTATTCCGCCAAGACGTTTTTATCTCCAGCGAAAAATCGAATAAACAACAA  
GCAGCACTTCCATTACTGTTCCACCATGTGCGAATCCTTCAGGCCGGGTCATTGATTGAC  
CTTTTTCTCAATATTTTAAATGTCATTGTCCGCATCCAGTATTGCAGTTCATGCTGCCCG  
CTACCGTGCTTTGGTGTCTTTACTTAAACGCTCGAGACTGGCAACATATTCTCGGAGCTG  
ATCGTGTCTGTTAGGAAGCTATCTAATGTCTCTCACCCTGCCTCACCATCGTTGGAACA  
CCGCCAACATACCGAAATGGGTCCACAACACATCCACACTGGAAGGACAGGAAAACATG  
ATCCTGTTTCATGATACTCAATGGCGCGATTTTTAATGCTCTGTTGTGTGTAGTTTTTCT  
GCCAGTTATTGCTATGTTCCGCAGCTTCTCTTAAATCGCGCTTCGGCTGCACCAGTGTGAT  
GATATTCTCGTCTTCATTTTCGATCAGTTCACCTCCTGCGGCGGTTGTGATAGCGGCATC  
CAGTCTTACGGTTTCCACGTCGCACCCGGAATTCACCACCCGTCACCAGCGTCAGGATGC  
CCCGGCATGAAAGCCGCCCACTTCACTCGCCAGTCACCTTTCCTGTCAAACCTCCACGGCA  
ACAAGAACGGCTGTCATGGAATTCGGCATTTCGCTCACTTCGACTTATCCAACCATTCGCA  
GTCACAGGACAGTTGCCAGACACCGCATTCTGCAACCGTTCCAGGTCGACGTATTCCTGA  
ACCCTGTTTCCGTCTCACGCCTGAAGCCATTGCTCAGCCTTTAGCGCATCAGTGTGAAAC  
GCACAAGTTCGACCGACATCAAATTGCATCTCGCAGGGGTCAGCGATCTGTTCAAACCTGC  
GCGTGTGGCAAGTTGTAAGTTTGGCTTACGAGTTCGGCTTCAGTTCCTGGTATACGCTTC  
TCTGATGCGCCAACCTATCACATGCCTATCGCGTAGCGCTTCTTCCAGGTCGGCAACAAGG  
CATTCACTATCAATTAGGTCGTTCTATGCAGTTCGAGCTGAACTCTCAGGTTCCCATAC  
CTAAGCGCAATCTCCTCGTTCTCCTGGTTGCGGCGTACGATGTACTGCTCCTTTCTTTCC  
CGTTCATCCAGCAGTTCACAGCACGGTAGCCGGGTTAGCCTCTGCTATGAATTCAGTGTG  
CATAACCCTGCGCATCTGATTCAACCTTGCGATTAACATGACATTCTACAATCACACCAC  
CGTGTCTCGTTTCGATTTTTGGGAAACAAACTCCTGTAAATAGCCGTGCTCGTTAA  
CAGATGTACGCCCTGTGATATAGCTTCTTTAGTTACTTTCTCTACCCCTTAAACGCATTA  
CCTGATAGTCAATCTTGCTCATTTTACTCGTCACTCCGGTATACAGGGATTACTACGCC  
CCTCTTCTTGTGCGCAAGCTGGAACCCCTGGTTCCATGCCGTCAAACCTAAGGCTTCG  
AAAAATGAATCCATTTGCTTATGGCGTTGCTCCTGCCCTCCGCGTTTATTCCATTTTTTC  
AGGGACAAAAGTGTGAGCCAGCCTCCTCTGCAGAACATGATGTAGAAATAATCCAGGAGA  
GCTAGGCCGGTGTTCAGGGCTGTAGTGATCGTTGTCGTGGGGTTGATGTTACAGTCACCC  
CTCTGTGTTTGTATAAGTTCAATATCCTGCTTGTACTGGCGCAAGCTCTGCATCCAC  
GAACAGCGAGGCGTCGCCGCTCATCTACCGGAGCGGCACACTCGCAAGGACGAATAGCAG  
ATGGGGTATTACTACTGGATTTGTATTTTCGCAGGGAGAGAGTGCGCACAGATTCTTCGA  
TTTCATCAGCGTTGTCGACGAAATCTGCCGATTTCTTTCTTTCAGGCATGAAACAAGGC  
GCTGGAGCTCCTTTGTTTTTGTATTTCGAATTGCCTTGCCCGCAGGCTTTTCAACATTGG  
TCTGGCCCGCTGAACTACGAAACTCGACTGGTCAAGCCGTGCAACGTCTCTCAGTATCAC  
ATATCTGTTCTTCGTCACCATGTAAGGGGTCCCATACCCAATGTCATAAAACTTGTTCGT  
GTGGGAGGAGTTGAGCTCTTTCACGATCGGGTACAGGTGATTGCTGAGGTCCTGGACTTG  
TTCCACCCAGAGCTGCATGTAGCAGAGGAGGATCATTTCTCGTCTGTGAATTGTTGCTG  
TGATTATGCTTGTGCTGACTCCATGTTGCGCAGTGGTTGTTTCGCACTCGATGAAGTATAT  
GCGTATCTGTGCGCCTTTTTCGTTACGATCGACCACCGCCATTTCTTTGGCTGTATCGAG  
GGTAAGGTGTTGATCATTTTTCCCTCGCCCATATCCTATTTCTAGCTTCTGGGAAATACC  
TATATAGTCCCTGGTTTTCTACTAATCACTACTATTCAATACGTTCTGTAATCGACGTTAC  
AAAGCGGTAACCTACTCCAAGAAAAGGAAGTATATCACGGGCATTAACGATAAGAGTGGT  
TTAGTTGGCGATAGTGCCGTTGAAAACGGGGAGGAGTTGCCTGGACATGATGACCTCCTT

ATATGTTTAGTTTATAACCTCCCGTTAGTAGCTGGCGGTTCGGGTGTCAATTGAGCCAAAT  
AAGAAGCTCAGGGCATATGCCCTTTCGGGGGTTATAGTACGACTCTCCACCCGGCCTTA  
GTACGGATGTAAGTATGCCAAATTCAGGCGTAAAAAAGCTCCAAGGCTACGGGGTTCGG  
AGCCCGCTTATTTGTTTCACTGCGGTAAGTATGCGATAGCTTTGGAGGATTTCTCAATCGG  
CGCAACATTGATGAACGCCTAACGGTAAATGCCTCATCCAGTAAATTAACGCAAATTCG  
ATCACAATCTTGCCTGAATTTTCGGAAATATAAAGTTAAATCCCCTTAAATGTATGTGTC  
ACTATGGGGGCAAATGTGGTTGTTTGGGGCATATTTGAGGGAAAAACAACGTATAAAG  
AACGGTGCAAACCTTGATTTGTTTTCATGGTCAAATGAGGTGTAAAAGATTGAATAAGGTAT  
GCTCTTGGACGAGGTTAGGTAATTTCTGTGTTTTTAATTTCTTCTTGCTTTCAACACGTCTC  
AGGATATGGTTTATGATTTTGAAAAATATAATTTTATTTTCATCCTCCTGGACACTTTGGG  
TCACGTCTGGGGCACGGGCATTACGGACATTATTCAGCATGGCATGTTGAGTCAACGCTCA  
GCTCAGGCATCCATGCACCATAGGCATTGTAGACCATGCTAGCGCTGGAGTGCCCCATCT  
GTGATTCAATAACCGACGGGTTTGCTCGGCAAGATAAAGCCCTGCACGCATAAGTATGGA  
GAGGCAGATACGCTTACGGGATGAGATACCCGCTCTTTATATTAATGAATCCCATGTGG  
CTCCGATGGGGCTGGCCGCGTAGGTCATAACGGCCGGGTGACTCTTGGGAACGATTTGCG  
CACAGAAAACAAATGTGCACTCGTGCACAACGGTTCATACGTCCTCGCGTTAGTATACAT  
TGATCTGCTGCTGCCAGGAGGAGTAAGCATCGCCTGCTTTTTAAGCGCTTCACTTG  
CTGGTGCCAGAAGATGTATGACCCGGTTGGGGCCTGAGTCGGTCTTCGGTAGGGTAAAAT  
CGCCGAGTTTTGTAAAATTTTCGTCGCACTGTTATAGTGACAGCTTTCACGTCCATAGCTT  
CCCACGTAAGTGCGGCAATTTACCCGTGACGCATCCGTGTAAAAATAGGCACTGCCCAGC  
GGTTTTTGGTCTGTTGGTTCATGGCAGGCATGAATCAGACGGCTATACTAATCTCTGGTCA  
GTGGATACGGCACTGGTTTTAGTTTCCTCAGCGGTGTTCTTGCAGTAAACGGGTTTTGCC  
CCGGATGCCCGTTTTTCGGCAGCAAAGCTGAAGATTCCGGCTGTTGTTGTCACGTAACAGT  
TCACTGTGGGTACGGTTCATCCTTTTCGGGACGTGCTGGTTTTGCCTGCCTCCCTCTTCCC  
CGGTCAGTAAAGCTTTCCTGATACACAACAGATCTTCTTATGTAATCGATGAAGCCAGCC  
TGCTAGGACCAAGCCTCGGTAACATATTTTTCAACACTGATTGATAATGATTTAAGGCGT  
TGCTACGGATTTCCATTGCTTTCAGAGTAAGCCATTTCTGTGCCAGTTCACCGACGGTGA  
TAACTTATTATAACAGGCCAAATGGCTTCAGGTCAGGTGAGACCGGGAATCGATCGGCAT  
AATAAGACGTGCTGGTTCGGTCTCAAAGCAGACCGTAGCCCTTAATTTCTCCAGAGATCT  
TTCTGTTTTGCGGTGTCTCGGGCACGCGAAGAGTTTCGAGGACTCGTTTACCCCTGTACT  
CAAACGTTATTTGGAGTTTTCTCCGAAATGGTAAACGCCGGTTGGATCGGCGCAATTCG  
CCATTGTTCCCTCCTGCGTCCAAGAGCACGCCCAGGTTATACTCTTATGGATAATATTTAA  
ACACCCTGAGATAGTAAGGGTGAGTCTTCGATCCAAGTGTGGTGGTACGAAGATGTCAG  
AGAGAGTCGCTGTTTTTCTTTGGCGTTCGGTCGGGGGCTATATGTTTGTATTCTCTGCCG  
GTCATCCACGCACTGTCCCTGACGCGTAATATTGTACCTTTACTCAGGCCTGATACCGCC  
ACTGAGACCTCCAGTGTTACCAAATCATCCGATTTTATCTGAACGACAGGTGTGATGACT  
GGCTGAACGCCATGGTTCGTTGGTTTTCACTCACCATTAGTTGCCCTCTGCATGTGC  
AACAAAATCCCGCCATCGGGGGGCTTGGTGTGCTTTTAGTTTTTCAAGTCGAATCTTGGT  
TACGTCTTCTCGAAACGAACACATCGTTTTTTCGTCTTTTGATATTGCTAAGTTATCAAT  
TTGCGCGGCACTCTACCCTTCTATCATCCATGAATCTAAGGCGCGAACAGCCTCGCTACG  
CTTTTTATCTTCCCAGCATTTTTGATATCGACGAGGACATCAACGCAATTAAGTAAAT  
GTGGAGTTTGTATTTACATTCGATCATGACGGCTTCGCCATCAGTTCCGCCACAGAGTGA  
AGATAAATCTTCAGGGTCTGGCTGGTATTTCTATAACGTTAGAGGGTTGAATGTTGAACA  
CGCTATCATCATCTCCATAAAACCAAGTCGCCGTAGCGAGTTGAGATCAAAGAAATCCT  
AGCGAGTGCAGGATTGTGATACAGTGGCGATATTCATGTCTATAGCGAATCACTTTGCC  
GGTTTATCACCGAAGTGCATGTGTGATTGTCTTGATTTTCATATCCCTCATAACGGAACA  
TCAATTCTTCGGATGGAATCGTTCGCGCTTCGGGAATCCCTTTGTGGTAATCATGCGGTAA  
TACTCGGGGAACCTTAAATCGCTTATTCAGTAGTTATTAACAGGCGATACTCTTCCGTG  
TACTCTCCGGGCGAAATGGCCTCGAAGCATTACCTTTAACTGCAAGTGGCAGGTTAGCC  
ACGGTTAGCCTACTGCGGCGGTTCTGATAGCGGCATCCAGTGAGTTGCTTGCTCAATACC  
CTCACCCGGCTTAACAGTTGCATCTCCGCGCCGATAGGTGCTTCCGGAGTACCGTGCCGA  
CCATATTGGCGGTTCAACCAGACAGCTATCGAAATTCACCGAAATAAGCACGTTCTGGCC  
TTTTCCAGGCGATCGACCACTACAGCTTATCGAACTAATAGGAGTTACCGGAGAGTTACC  
TGCCTCATAAGCGGATTTACAGCCAGTGCGTAAAGCGATGCGTTGCTTACACATAACGAAAC  
AACTTTTATGTTTTTTTTTTTTTCTGACAACCATTCTTGGAGTGAACGTTTGGCAGTCCG  
GCCTGCCGCTCAAATCGTGGTAGGCACATATATAGTGCTACATTTCCCGGCATCATCGT  
ATTGTGCGGACGAATAAACGTGATACAACCATTTTTAACGAGCTCAATCCCCTGTGTC

GTTTGGGGCGAATGGTTAAGTGGTCAATACAGTCACCGTCATTTCTTAAGCGGGCGCTC  
AATATTATATCGCAAGTCCAGGCTGCCGATTGCTGTTTGGTTTCTTAAGTCATTTCTTT  
CTCGGTGAACGTTGTCATGTGTTAGTGCTTCTCTACTTCAACGCCATCTTTCAGCGTGAA  
GCCGTGCGGTTTCGTCAGCCAACTGGTTAACCCAGGCGCATGACGCCTAGGCATATAGAC  
GCTTGCAGTGGGGTGGACCTTATTCTTATCAATGCTGGCAACGTGCTCGCCGTTGTATT  
GCTCAGCGTGTCTAGGACACAATAAAAATTTCCCTCCGGCTGCCCTGAAATACTTTACTGC  
CTTACAAGACGATCCTACGCTTTTTCCGGTTTAGGCGTCAGGACGATTTCATTCTGCAA  
AGTTGCCATTTTCAGTTTTTCGTTATATGCGTTTTATTTTATTGTGAAGTGTGTTGAACGACG  
CCCATAACCACCTCATTATAAAACTTACTAACTAGCCCAATTATTTTCCGGTTTGCCGAGA  
CAAAAATTTGCGGGGATATCGGTGTCATCAGCACGGTAAACAGAATGAGAAAGTAAAATT  
CTGTCGCTCTACTTTTTCGCGGATATTCTTTTGAGAATATTGTAGGCCCATCATTCTCCT  
TTGTTGCTCCTCAAAAATTTTATGCGCTTGCGCAAAGCACGCCTTTTGTCTTTGCTTATT  
CGACAGCGATCCTTGCGCGCCTCTTTTGTACATCCAGCCCATGCCCAACCGATATAGTCA  
CCGAAGCCTGGCCACTTATCTTTGCCATCTGTTTCAGTCGAGGCAATCTCTATTGAGATGC  
ATGGCCTAAGTTGCGGCATTAGCCATATCACTCTCTTATAGTGCGCAAGTGGTATTATCT  
GCGGTTATGCTCCGCGCTGGGCTTTTTGCAAAAACATAATCCATCATCCCGAAATATCT  
CATCAACGCCCTTCGTCGGTTGGTGAGTCACACCCACTGCCAGACGCCAGGAGCGTTTCT  
ACGAACATAACATAATTTTTGCTTTACGGTTTTTTCATCGGTTGCCTCTCCGGCACCTCTTT  
GGTGCTCGGTGAGCCGATGTAATACCGGTAGGGCGGCGCTTTGGTGTCGGGATGATGTT  
TTTGCAATTAGCCCAGAAGCCCGAAAACAAGTCGGATACGTTATCAAGTAGTTACATGCC  
ACACGCCCTATTCACCTCTTTTGATGCGACTGCCACCGGCGAGCTCGGCTACACTTTGTT  
CCCAGAACCCTTGTGAAGCGCCTTAAGCTTGTAGTCAATCGGTGGATATTCGCGATTAA  
AGTAGGCCTGAGCATCATTCTCAGTTTCGTCAGGTAATTCGCCAGGGCCAAACAGTTTGT  
TCTTTATCCATATGAGTCCGTTCTTAGCGTCGCCACTTCCCTGCCATTCGATAATGGCAG  
CCTGCATGACCAGAATGCTATTCCCGATTAATAGGTCCAGTTTTTTGTACCGGGTGTGGA  
TGTTTGCATTCTCGCTTGGTACTTTTACATTGCACCTTTTCTGCGCCTTAAAGTAACACCT  
GCTTATCGCGTAGAGCTTCTGCCAGGTCAGCAACGTGGCAATCACTCTCAATAAGGTTGT  
TCTCTGCTGCTACAAGCTCAACACCCAGCTTCCCAACCGTAAGCGCAATCTACTCGTTCT  
CCTTGTGCGGGCGTTTGATGTATGGCCGGTTTCTTTCCCTGTTTCATCTCGCAGTACCAGCT  
TGGAAGCCGGGTTAGTCTATGCCATGAATTCAGCTTTAGCATAAGCGTGATCACCTGTTT  
CAATCAGGCGGTTAACATGACATTCGGCAATCACGCCACCGGGTCTCTTTTCCATTTTT  
GGCAAACAAATACTACAGTTAAATTGCCGTGCTGGTTAAGGGATGCACGCCCTAAGAGGT  
AGCTCCCTTTGGATGGTTTCTGTGCCTTTTACCCAGTCCCTGATAATTAATTTGCTCA  
CTTCGAACCTCACTGTTTACTGATAAGCTACAGCTCCTCCTCACAACCTCGCACAAAGTCCG  
ACAACCCTACACGGCCAGGCGTTTCCGCTCATTAGGGAATCGCCACACTCACAACACTG  
AGTGGCAGAAACCTCCTGGTGGTTCAGGGGGCGCAATTTTATTGCCGTGTTGGGCTGTAA  
TTCATCAATTTCTGATGTTGCATCAATGAGGTCTGCCATCTATCATTAAATCCCTGAAGTA  
ATCGTGAATACGCTTGAGGGTGAATGCAAATAATAAAGAACGAGCCTGTAGCTCCATGGT  
GATTTGGCTTTTTCATCTTCTCCGTTCCCTTAAAGACGCCGTTTAAATAGGCCGATCGCCAGA  
CTTAAATGAGTTGGTGTGAGTCCCATTAGCGTTACCGTTTCGCGGAGCTTCTTCAGAACG  
CTTCGGTAAATGTCATCGACGTTTTTATCCGAAAACCTGCTGTCGGGCTTTTTTGTATGTCA  
GTATTTGCCCTGTCGAGCAATGCTGCGAAGGTTCGTGTTCCCTGCTCAGGTGACATTGAACAA  
GTCCCGTGTGCGCAAGCCTAAGCAAACAGAATAAGAAGCCTGCTGCCAGGAAAATGCATT  
CTGTTGTTGTTAAGCCGGGTCTCTAGTTTGCCTTCTGCTTTCTCCGCCAGCATTCTAG  
CTTTTGTGAAAGGGATGTCAGTACGATGAAATTTCTTCGCCTGTCTCTACTGGTATTGG  
CACAAACCTGACTCCAATTTTAGCGAGGCTATGTGCCCTCTAGATACTCGTTCTTAACTC  
AACGGGACATGATTTGTCTAGAGAGCTGCCTGTCTATTATTTATCTCCTCAGCCAGCTGC  
TGTGCTTTCAGGTGAGTTATGATAACAGGAAGGGCGGAAAGTACCCAGCCCCGCTTTGTA  
ACGGAGTGGACGAAAGCGCTCGAACCTACCCGGATATTATCGTGAGGATGCTTCATCCCC  
ATTACTACCAAATAACAAAACCAATTTCTGCCAGCGCCTCGTCCAATTTGCCAAAGA  
ACTACCGAACATCTCGTCTAAACATGCCATGTACTTTTCATCCCGCTTAAACCACGACGTAAT  
GCAGGCCTTCACGCTTCCCTACCTGGGTAATGGTTGGCAAATAACAGGCATCTTTTCGTG  
TTACCCACATGCTGGACTGCACCTGGTCCCTGTAAGCCGGCTTTATGGCATCGACACCAC  
GGCGCCGGAACCTTGTGAAATCCCGGTAGGTAATCGGGCATTTTCAGTTCCATGACATTTG  
AGGCACTGCATAAACCATCGGGAGAGCAGGCGGCACGCATACTTTCGTCGCGATAGATGA  
ACGGGGATTCAATAACAGTCACTCCGGAAGTGAACCTCAAACAGGGTTCTGGCGTCGTTCCG  
CGTACTGTTTTCCCGAGGCCAGTGCGTTAGCGTCAACTTCCGTAGCCACACTGGATCAAT



CTTCGGCAAGGAGGTTGTGGCAGTAGGAAATTTTCATGTCAGGCCACTTCTTTTCTGAGC  
GGGGCTGTGCTATCACGTTGTGAACCTTCTGAAGCGGTGATGACGCCGAGCCGCAATTTGT  
GCCATGCATCACGCACCTTTTCGACAGCTCTGACGTCCGTTCCGGTAAGCTACAGGATAA  
CGACCGGTGTCATGCAGCCACCTTCTGCTCAGAGGTTTTCTGTTTCAGGAATCCAAGAAC  
TTCCCCTGCTTCGGCCTGTGTCAGTTCTGACGATGCGCGAAAGTCGAGGCCGAAATATCTG  
GGAACAGAGCGACAATAAGTCGTCATCACATGTTTTATACAGGGCGAACAGCAGAGTGTT  
AAACTCCTGCACGGTTTCATCGTTAACCAGAGTGATGTTGCGTTCGGGCTGGCGTGCTGC  
AGTGTAGGCAGTATTTGCGACAATGCGCTCGGCTTCATCCTTGTTCATAGATACGAGCCAA  
TCCGAAGGCCAGACGGGCATACTGAATCATGACTTTATGCCATAACCTCCGTTTGGGATG  
CGACTGCCACGGGCGGTGATTTCTCTGCCTTCGCGGGTTTTGAATGGTTCGCGGCCGGCA  
TTCATCCATCCACTCGGCAACTCATATCGGTCAATTACGGTCGATGCTGTGAATCCGGGA  
TGTACAGGATTTATGGTCTGCTCAAAGCCTCAGCCATCTAACTGCCGGTTTTAATTGAT  
GGCGCGGGGCCAGCCATCAACGCCACCACCGGAACGATGCCGTTCTACTTATCAGGGAA  
GGCGTAAATTTCTTTTCGTCCACGCATTATGGCCGTACTGCTTGGCGACGATCAGCAATGC  
GATCAACTGCGCATCGCTGGCATCACCTATAAATGCCGTCTGGCGAGGAGTGGTGAACAG  
TTCCTCTCGGTCCGAGAAATCCATGCTGGCACGTTTCATCCAGCTTCCCTGTCAGCATTGC  
GAGTGATGTAATCTTCGGGTTTATACCTATGAATCAATATCAACCTGGTGGTGACCACTT  
GTTTCAACCATGTCCTGGATGTGTTCCGCTTTCGTTTCTTATACTCAGCATCTTCATCA  
AACGCACGGGTAATACTTTTTTGTGGCCCCGAGGCGTTGCTAATGATCCCTGCAGAGT  
GATTCAAACATGTGCTGGGGCAGACCTATCCCAAGTCGTCGCCAGGTCTGCGTCTTTC  
TTTTACGGGCGATCTGCTGGTAGTGTGCGTCCAGCGCTGAGCCTCAAACGACCCTGA  
ATGGTATAAGCGTTCATGGTTGAACCTCTGACATAGCGCTGAAAATATCGCCCCGCGAAAT  
GCCGGGCTGATAGGGAACGCAGGGAAGGGGGTTAGTGAATGGTTTAGCTTGATGTCAGTT  
CCAGTATTAATATCCGTTTTTTATAAGCGTCGACCGCCTCACGAAACATCTTTTCATCGC  
TAATAAAAGTGTGCGTAGTGAATTTAGTCTGGATAGCCATAAGTGTGGTATCCATTTTTG  
GGGACTACTGGCTGATTTAGTCTGTGATAAGGCGTTTCCATCCTTCACGTAATTTACGG  
GTGATTCGTTAAAGGAAAGATTTCGGAAGGGCAGCCAGCAACAGGCCACCTCGCATTGGCA  
CAGTACATGGTGTGTTTCTTATTTGTACATGAGGAAAACCGCCTCGAGTGAAGCGTTATG  
GGTATGCGGTAGCGCCGCGCTCAGGCGGCTTTGCGTGTACATCATCTGAATCAAAGACA  
ACTGATGTATCGATATCGGTAAATCTTATTCCTTCGCTCCCATCCATTGGAGGCCCTGCT  
TCCTGACCATTTCCATCTTTCCAGTCGAACTCACACAAAACCCATATGCACTTAAGTAG  
CTTGAAATAGCTATAAGCAGGGCACCTTTCGCAAGCCTGATTAATACAGCAATTAATAAA  
GAGCCGTGTTTATTGAGTTGGTAATCAGAGTCTGACCAGAAATTATTAATCTGGTGAAGT  
ATTCCTCTGACATTACGTCATGGTCGTTTGAATTTCTATACATTCTTTTCACTCGTAA  
TCAATGATTTATTTTTGATGTTTGACATCTGTTTCAGATCCTCCCGGATATAAATTCGCC  
CTCACATTGGAGGGCGAAGAAGATTACCAATAATCAGAACAAGTCGGCTACTGTTTAATT  
ACGAGGGATATTGCTCCGTGTATTCCTCGTTGGAATGAATAGACAGTGCTGTCTATATT  
CTGTTGTTTATTCTAAAATAAAGGCCACCATCAGCTAGCCTTGTTGTAGATGTTGCAGG  
TACCAAGTAAGTGATTACATGGAACGCCATAAATTATGAATTCATCGTATTACCGGTCCA  
TCTCCACCTCTTGTCTATTGGCATTCTTTCGTTAGTGTGGTCAGCGGAGAAGCATAAAA  
AAGCCACGCCCGATTGTTTTAAAAGAAGTGCATTGGGCTGTGGTTTTACTCCATTTG  
CGTTAACGCGATAATCACAAATCGCGGTTTCATGAAATTCATATATCACCTAAAATTAG  
TGATTTGCTGCCTTATTTCACTTTCTGGCGACCAACACAAGTCATCTGGCTGTCAATTGT  
TTGGATTGCCGGTAGCCTGCCGCTTAAAGAGCTACATTTGGAAGACGAGTTGAGTCTTCA  
TATTTTCTGATCAAAGTTGTCAGTGTATCTCTTCTGCTCTCATCGTTGGTTTTCGCTTCG  
CATTGTAAGACCACTCGTGATGGGGTGAGCCTGTGTAGTTTGAGGGAGATAATCGCCTCC  
TGACTTTGCATGTTTTCGCGACGAGCTCTACGGCGAGAAGCTGCGGGCGCCATTACATTCT  
GTTTTTCTGGACTTGGATTCCTCTCGAATAAACGTTGTCGATGCAATCTCGAACTTCTTC  
CTGAGTCGGGTGCTTCTGCATCGCACTCCACAGCTAATGTGGTTGGGTGATATGGCTTTT  
CAGCAACGTAGTAGAGATTTGACTTTGTTTAAAGAGCCTCCCAGTCTGTTTCACTTGGCT  
TGCAGCGTCTGCTGATGGTTAACGGGTACGATAGGCAAGTCACTTGGTTAATAACAATTT  
GTTCTAAAACGGGGCGTTTTGTTTGCAACGCTTCGTATTTGATTGTATTGTTTTTTGCGT  
GGGTGTGTTGCCTCGGCGATGTAAGGAAAGATCAGGATTGTGTTGTTTAGTGTGTGGTAT  
CTATTTACTTTCCAATAAATAAATTGTTTATGTGTTATTTTGGGCGAGACGAAAAGAAA  
ACCATGCATGGAGGCCGGGTTGATGATTACCCGTGTGGCCTTGAGCGATAATGCTCAGAC  
ACATGTTCAAGATCTCCATTCCTAACCAGTATAGGCATTACATTAACCTGCTCAAACG  
AATTGGTCATTCAATTTGTATGTAGACATCTGATTCTTCTCATATGGGCGGCAGCCCAAC

ACCCGCTTGCACAAATGTACCAGACTCGCTAAGGTTACATCGCAAATATTTTGTACCTTT  
ACAATGACTCCTTCTGGAGGCTCTGGTTAAACTGCATGAATGTCGGACTTGGGGGTTGGA  
CATTGTGCAGAATGCTTTGTCATAATTGAGGCTGTACGTAAACTTTAAGCATTGAAGAGT  
TGC GTTAGGCTTCTTCGTTTGTGTTATCGTTAGGAATGCCGTTAATCGTAACTGTAACCG  
CTGATTCGGGTGAAGAAGTACTGGAAGATCATAGCTATGAAATACATTAGCCTTGCCTT  
AGACTATTGTTGGTTCGCCATTCAAATATTGTTCCCTCACTGGATTCTTTGTTAATCGGAG  
CGACTGGGATTGCTTCACCAGAGTGGGCAGCTTCAAACCTTTTTGATGTCCTTTTGCATGC  
GGCTTTTATATGCAGTGATTCTGCTGTCGCTAGTCTTTGGCTCTGTTGCGTTGATGTATC  
GCTCGGCAAGCTCATTGACATCAAGTTGAGTAACATCACCCATTTCTCTTCTTAGACTA  
CCGTTATGAGGGGAGCGAATGAGTTTTATAAATTTTCGAGCGGTGTCATCTTTCACTATGA  
TCAGCGACAGAAGCTCTTCAAGAAAGTGCTTGAATGCCTGCACGCTAACGGTTGAATTAG  
CCATTTGCTCTCTCTAAGTTATTGACTCAGATCGTGTATCCACGAAGTGAATTGCA  
TGCAACTCAAGTCTTGTGAGTTTCCCTGCCAGATCCACTCTCAGTAAAAAAGGCCGCA  
GCTCGGCGACCTTTCATCTCCTAAATATCTTTTCTGCTACCTCTAGAAACAGCAGGCTCG  
GTGAGCCCAAACAACCTTCAAGCGCATCGGTGAGAGAAAGCTCCGTGCAATACGGGTGTTT  
TTTCATATCTTTCTGCAACCAAGACATTTTCCATCCGTCCAGAGAGCGTATGCACTTGAT  
TCTGATTGATGGCAGGGCGTTTTGCCACCTGCCTCACCTGCCATACAGGACGCTGCTCA  
CCGATATTTATCGGCCGGTTCATTGATGATATAGACAATATCAAGCTCATTACGGATATGC  
TCAGATGGCCTTATGCTTTCAATCAATAGGTGAACTTCTATTTGACCGCTTGATGCTCAT  
GGCATTAAACTCCAGCTATCCTCTTTACCCAAACGTCTCTTCAGGGCATTGGCTGACGA  
TAACTTTCCCCCAACGGAACAACCTCTCGGTGCAAGGGATCGTTGGATATTGCGGGTTA  
GTGGCTGTAGAAAGAGCTGACCGTTATCCCTGATCAGTTTATTGGCTGTAAATCCATCAC  
CACCAAGTCTGCCATGCAGAAAACGCCGGGCTCAACATTTTCTCAGGGTCAACCAGAA  
TTAACCTCCCGTCATGAGATCTAGGTTGGGCACCAGTTGGTGCGGTCATTGACTTACCTT  
CAACCTCACGCTAGACGGCAGAGTCACTGGCCCTTTTGATTGCGCTTACTAATCTCTCCG  
CATCACCTTTGGTTAAGATGCCGAGTTCTGGCGAGAACATCCAGGCTAAACATGAGAAA  
AGACAGGGCACTCATATTGTTTCTTAACTAGGGCCGACGAGTATGCTCCAACCTGGTGAAA  
ATGTCACGTCGTGGTTAATTGATATGTTATCGAGACCTAAGTATTTCAACACCACCCCAA  
AATCGCTAAAAGATAGATGACGAGACCCTCGCAACCGCTGTCCTATTCACCGTGC GGCA  
TACCTAGCTTCTCGGCTCACTTCTCTTGATTGATGTGCGATCTCTTTAATTCTGAATCTAG  
CCAGTTCATACCATTTCAATTTTCATGCCCTTATTATTACGCTCTGTACAAGAACCATCCA  
TGCACAATGTGTATTTTTACTTGGCTTTGAGACGAAGATGTTGTATTTTTTAATTCGTGG  
TTACTATGGAGGGCATATGAGCAACCGACAAAAATATCGAAGGTCACTGAATATGTCTCC  
TACAACACTTGCTAAGGTAGTTGGATTCACACAGGGAGAGATTGGACTGGAAGCCGG  
TCGTCGCTTCCCATACTTAAACATCCCGTGCTCTGCTTGTGTGTCTAAATAACTTAGG  
CGCAAAGAAAGTCTTGATGACGTGTTCCCGCTGGAGCAAAAAGCGCCTTCATAAGCAGA  
GCAGCTCTTTGTAACAACGCACATACGTTCTATATTGCTGAAAGGCGAGTCCCAAGATAT  
CTGACGAACCTAAGGCCATATGCGTTTCCGCTTATACCTCTCAACTAGCTATTCCCTCTCT  
TAAATCTTTAGA ACTGGAACCAGCAAGTTACAGCAA ACTATCACAGCGAGAAATTGATCG  
CGCTGAAACTGATTTACTCATCGACCTGGCAACGCTTACCCGGCGCCGTCTGGCAAAGAT  
GATTGGGTGACAGGAAGCGGAGATAAGGTGAACGGACTGGAGATTTATTGCTTCGGTCTT  
GTGTTCTTTTCGGAATGGCATCAGACATCAGTCCGATTAGCAGAGCTTTTAAGCATGCGCT  
TGATGATATCACAAGGAAAAAATCCCCGGCCGCCACCGAGGATTTTAAGCAAATTAATTT  
GCAATTCTGAGGGAATTACTGGATCAATCCACAGGCGCAATTATCACAAAACA ACTCAGT  
GCTGGCCAGGAAAAAAGTCACGAACACATCCTACGTGTTGCTTACTGTCCAGCTTCAAT  
CAGCCTGGTTCGATTCAGGGCTGAGTTGGAAAAAGTGAGGCTGATGCTGAAGGATTATGGT  
GATGGGTGACACATCTAATCTAGCGGAAGCACGAGAGGCAAGAAGGCTACAACAACCGCA  
TCAAAGCAGCGGTAAGGGGTATGCCCTGCTTACCGTAAAAAATATGGATGTGCCGTTTTA  
CAAGTACGCAGAAACAGCGCATCTGTGGGTCCGCTTAATCCTCGAAGCAAAAACATACGCC  
TGAGTATGTAATGACTCGCGCAGGAGAAGTTCTGGAAGGCAGAGGCAAGCTACGTGGCGG  
TAGAACTCTCTGGCGCTGGGAACAGGACGCAAACCAGTCCGTTTTTCAGTAACTGCGTAG  
AAAGTTCAAAAAACTCGGCGCGATTGATTGGGTTTTACACGTTAGATTCTCAGTTTTCTA  
GGGAGAGAAATATCCCGATTATAACTCATATTTTGTACCAGCAGATTACCAGCAAATTAG  
CACCTCAAAGCCAGCAATACCAATGCCTGCAAGCAAGTCAGTACCAGCAGATTACCACCT  
AATTACCACAGATAAAGAATATGAGCATAATATCTCTAAGACTGACGTCTTATGGAGTGC  
CACAGAAGACACAAAGTCTGACAAGGAAAAACCTTCCGTTAGCTGTCAGGCTATTGTCGA  
TGCATACCACGAAATACCTCCTGAAGAGCAAAAACAGCTGCGCACTGAATGACAAGCCTAA

AATCGAGATGCGTACGTTCTGGCGCAAAGCCGGAGTTACAACCCGCCAGCTTGACGTGCA  
TCGGTCCACGATGCAGAACTGGAAAAATTATTAGAGCTACGTAGGCGAAAATTGCCGATT  
GATGTTTCGAAGAGCGCCAAAACAGTCACCGCTGAACCGTCTTGCGCAAATAGGGGTTTTA  
GTTCTGTTCACGACAATACCGACTTGAAAGTTCGTGAGGGTGAACACGATGACCGATA  
ATTTTTATGCGCCGCGTCATAGCATCGAGGCAGAGCAGGCAGTCATTGGTGGATGGCTTC  
TGGATGATGACAGTGGTGAGCGTGTCCACAAAGTTCTGGCGATGCTGCTGCCTGATTTCGT  
TTTACAGCCGAACAAACAAAATCATTGTTCGGAGAAATAACCAGAATGCACCGGAAGCAA  
AGACAGTAAATGGCCTGACGCTTTTCGATGAACTGGAGCCTAAATCGTTAACGGCGACTT  
TGGGCGGTATAGCTTATATCGCTCAGATCGCTAAGAACACGCCAAGCGCAACAAACATCG  
TTGCCTATGCAATGGAGGTTTGTGAAACCGTAATGGATCGCTGCGCCATCAACCGGAAGA  
CTGAAGCGACGGAATTGCACTGTTCCCGCAACGGAATGAGTGCCTCGAAGAAGAACGTAG  
CTATACAGGCGAATTTACGCAATTCTCAGACCATGCAACAACAGGATCGCGTTGCGGCC  
TTCGCTCATTTGGACAGATTATGGAAGACTGTGTTAGGGACCTTGTGAAGCGAATTGACC  
CGTCAGGCGAACACGAGGAATGACGACAGTGATCCCATCGCTGGACAGAAAGCTGTCAC  
CGAAAGGTCTGGTGAAAGGATGTCTCTTTGTTCATGGGCACTCGCCCTAAGATAGGGGCAA  
TGACGCTAAACAGCCAGATGGCAATCAATTTCCAGAGCATGGGAAAAAGCCCGCTCTGA  
CATTACGCCGTGAAATGCTAGGTGATTAGATTCTGGAAAACTGGTAGGACAGAAGTCAG  
GTGTTAACCCGAATATTGTTTACCTTCCGGCGACACATGACGCCGATAACGGCTACTAGG  
GTGCTAACTATGGCCCCTGCAACAGGGCGATCGAAACAGCTAATAGCTTGAGTGAAATCG  
ACATGCTTTACATCGACGACACGTCGGTATTCTCTCTGGATCAAATCGTAAACGAAAGCC  
GTCGAATCAAACGAGAAAAAGGATGCGTTTGCATGATTCTGGTCGATTAAGTAACTAG  
TGACCGCTGAGAAAGCCGCGAGCAGTAACCTTGGTTACGGCATAATCACCAAAGGACTGA  
AGAACCTTGCCACAGAGCTTGATCGCGTTGATGTGCTTCTGACGCCTCTTAACCACGCAA  
TGCAAAGCCGAACCAATGATCCCACACTACCATGTGACCTTCGAGATACAGGCGAGATTG  
AACAGGATTGCGATTATTATGTGAGGATCCATCGTGAAGGTGCTTTTTTATGACAGTGTT  
CACCTGGTGAAACCGAACTAATCCTACGTCTCAATCGTCATGGCAATTCCGGCACTGTGT  
ATTGCATCCAGGCACGGTGCCTATTTGTGACCCAGACCAGCAGTCTTCTCAAATGCGCC  
GAGGTCAACGCGAGGAACCGTCGGCCGAGAAGAAAGCAGGATGCTGATGAATAAAACAAA  
TTAGCCAGTCGGGAAAAGGCATGGGGAGCACGAATATCCTTCGCTTTCAAAGAACAGGG  
ACTACAAGTAATCCAGACCGAATCGGAAATCGCCAGGCAGTTATGCGATGGCGGATTCT  
GAACGGAATTTAAATTACGCGCCAGATGATATCGTTTAAAGGGAATGATATAAATCATCA  
ACGTATAGCGGCGTATTGCTCCCATCTTCCCGATGACGTTGACGTTGATGAAATGGTTAG  
GATGACCTAGCATTGACCATCCACATCACTGAGCTAATGCCAGGCCTGCCGGTAATCGCA  
TCCCTTTTTACTTGGGCGAGAGGGAAGTGAACGATAGCTACCTTCAGTTTGAATAATGGG  
GGTCATAAGACACAAGCCAGTTCACGGGAGATGACATATTATAAGAGTTTGCCTGGGGGA  
TAGGGAAGGCATCGCGCTCTGCTATTGAACGGGATATCGACTGGCCCGAATCGAAAGACG  
ACTTTTGGTAGGAAGGTGAGGAAGGTGCTTCTGCGATGGGTTATGAGTATGGGCGTGACA  
AAACGGTTATTGCGGTAATGAAAGCCAGCAGCGCCGAGGAATCAAAGAAAAGAATTCCG  
ATTAAGGAAATAACAATCACTAAATCACTTTTTAGGCATCACAAATCGCTCTGTAGCGAG  
GTAAGGCTGGCAAGGCAAGCCAATAAGCAGCGAGAATGCAAGTGGCGTCAGTATGTGTG  
TGACGAGGTGTTAAGAAATGAGTACGATAGCTGAGCTTGTGAGGGCTAAGTTTCGCTAAG  
AGTAGGTGCGTGGGAATCGGTATCGTTCATCGTCCAGTTTGCCGTCTGATGAGTATTTG  
AGCATTACCCGCGAGCACGACGCTATCCGCGTGAGCGTGTCTTTAACGGTTGTTCAAAC  
TCAACATTGAGTTTAAACGCAACAGAATTATCCGGGGTCTGGATTAAGAGTGAAGGAGTG  
AGCATGAGCGACCGATGATTAACCCACCAACAAAAAGAATATCCGTTTTGCGGCGGT  
AATGCTGGTCTGTGGGTTGGGCCCGGAATAAATATTGAGGTGTGGAGCTATGCTGAATGT  
GACTTCTGTGAAGGCAGGGGGGCATGGGCACCAACAGTTGCTTTGGCGGCTGAACTATGT  
AACCGTTGAGCCGTAGATGAAGCAAACCTTTCTGCTTCGCAACGAATCACTCAGAAATAA  
CGCCGTAGACCCCATCTCTCACTACCTATAGACGACAAGTCACCCCGCGATGTCCACGT  
CAAAGAACCAAGCGCACCAAGGCCAAAATGACCGTAAGTGGCCGATGCTGAACGATGT  
TTCTCATCTGGTGCTATGGCATGGTCAACGGCTGGCGCCGGAAGACTGGAAAGACCTGTT  
CACTGCCCTGTGCTTAAACACCAAAAACTGGAGCAACGAAGTGTACCTGGTATCGACAG  
TGGCGTTGTTCATGCTTGGCGTGCGTACCAGCAAAATGCGCAAGGACAGCATGACTGAGCT  
TATCGAAGTCATGTTCCGGTTCGGCTCATAGCACAACGTGCGGTGGCGTGATGACAACAC  
GCGAAAGTATGAATGGGCACAACGAAAAAGTAGGGCCCCATGACTATCAAATCCAATAAG  
CCAGCACACGACAAGGACTGCTGGCAAACGCCGCTTTGGCTTTTTGATGCACTGGATATT  
GAGATTGGATTCTGGCTGTATTCAACTGCGAGCGACAAAAACGCTCTGTGTGCTCCCTGG

CTAACTGAGGCTGACGACGCGTTAATTTCTACGGGGATAAGTCACGGTGCTGTCTGGAAT  
GACCCATCGTCCAGCAATATCAGGCCGTGGGTGGAAAAAGCCGCAGAGCAGTGCATACAA  
CACCCACAGGCGGTAGTGATGAATCTGCCAGAGGATATGTCAGTTGGATGGTTCAGCATG  
GCTCTGGAGAGTCTGGACGTCGTTTCGCATCCTCGCTGATGGACGGATTAATTTTATGGAC  
CCGTCGACAGGGCTGCAGAAGAAGGGAAACAGCTAAGGCTGAATGTTGCTGATTTGGCGA  
CCGTTTCATCAGTCCTCGACGGATGTTTACTATCGTATCCAAAGCGGCATTGACGGCGAGC  
GGGCTGGGCGTAAGGAACGCTGTATAAGGCCACAGCTACGAAGGCTCACAGACATCATCT  
CCGATAACTGCAAATACCTCCCAACGAAACGATTCGGAAATAAACGCAAGCCAATCGCAA  
AAGAATCTCACGTA AAAACCTTCAATTACACCGCTCAGCTGTCGGATATCGGGTGCCTAA  
GACATCGTGCGAGATAATCACAATGCTTTCAATTCAACCTGGATTTGGAGTTAAAATCAA  
ACAAGGCCGCATGTTTGGCGAAAAAGTGTACAACGAAAAATGGCGTCTATCCGGTTGCC  
CTTTATCAGTACTTATTGGATAGACAGGGAGGCAACAAATTATTGGTATACCTGCGGCAG  
AGCCGCATTTAATGACCCAGACTGGTTTGTGAAAAACCACCGCGCCGTTTCGTTAGGCAAA  
TAGAATGGCCAATATCACATACATGATGGCTTATCAAAAAACATGGAAAGAACACCGCGA  
TCGATAGCAACAAGACATGGGAAAGCTTAAATCAATAAACATGGAATTAAGATGAAAGCT  
CGGTGAAGCAATACCAGACATTGATGCCTACAATCGACGTGTAATGGTGACCGGGATGC  
TTAGCCCAGCCCAATCACTTCAATACCACAAAGAAAGCGTCGAGCGTGCTTTAAGGTGTG  
CTAACAGCGGTGAGAAGCTGCATGTGCTTGGAGTTCACAAGTCTGGGTATTGCTGTGCAG  
ATCTGATGAGCGATCAGGATAGCTCAGTGTACGAGGAAGAACACGATGGCCAAATCTGGG  
CGAGGGAACCTTCAATATATGCACGGAGTGGTTTCACCCGTCATTCTCAAATCAGCGGTGG  
TACTGCCCGGAACACGGAACCTCAGTTAGCACTCAAACCTAGAATGTTACCAGCGAAAAAAA  
GGGAAAAAGCAGCAGAGGAGAAACGGCGACGAGAGGCGCAGAAACAGAAAGATAAAAATG  
GATATTCGAAAACCTCGCCTTAAAGGCTCGCAGTTACTGAATTAACAAGCCCAACAAGCC  
GGAAACGCCTGCATCCGAGAAGGAGACCTCGACTTACCATGTAGCGCGTGCGGAACGCTA  
ATGTCTGCTCAGTCGGATGCCGGACATTACGGGATAACTTCTGCGGCACCTCAACTCCGA  
TTAATGAAGGCAAAATTCGCAAGCAGTGCCTGGAGTGCACCAGCATAAAAGCGGAATT  
CTCATTCCCTATCGCGTCGAACTGATTAACCGAATCGGAAAGGAAGCTGTAGACGAAATC  
GAATCCAACCACTACCTCCACCGCTGGACTATCGAAGAGTGCAGGGACATCACGGCAAAG  
TAACAGCAGAACCTTAAAGACCTGCGGATCAGCAGAATTGAGGCGGCATGGCGTTCTCAG  
AAATAACCATTCTGACATGCTCGTTGAGACATATGAAAATCAGACCTAGATACCCAAAA  
TACTGAACTTTAGTCGCAACTCTGCCAGTAAATACAGGGGCGATAAAGAAGGAAAAAGAC  
TCGCTATTGCCAGCGGTGTTTCATATAGTTCATCGCGGTTGGGGTGAATTTACGGAGGCGT  
GATATCCGGCAGGGTGCATGAGTGTGCTGGGGGGTACGGGCGGCAAATAACCATGAGGCTGTG  
ACCTGGTCACCCATTTCCGCCGGATTTATGGGACTGATCCCCGAAAAAGTAACATCTCGC  
CCACAGTGCTGTGACGATGCTGCGATGGTGATATGCGGCTGTATAGCCCGCCTGTACCGG  
ACAATCGCGATCTGCATGTCTTGCTGGTTGATTATTACGTGCTGGGGAGGACGTTTCATG  
GCGCTGGCACCGACGCATGGGTGCTCTGACACCAAGACAGGTAGTCGCCCTCACAAAGCG  
GAGGGAATCGTTGAAGACCTGCTGAAGATACTGGGATTGAGGCTTTACGTGGAACGGTTT  
GATGAGTGTGGATAGCCGGGAGGGTGAACCTCTGTATTTTGTACGCGACAAACTAGTTGA  
CGATCGTAGAATTCGGCATATCATGATAAGAGGGGCTACATTAGCACGGTCCCTCACCCC  
CCGATGCGCGGGGTTCTTGGTTTCCCGAATCCTGTGAGCTAGACGAAAAGTATACAGAAA  
GGAAGGTGCGACCACAAATAATAACAAAATCTTAAAAATTGCACATGGCACTATTAATTT  
TCTATATATTGTGTATATTTTATATTGCAGGATGATCGTGTAACGAATCTTCCGTAACAG  
CATTTGCTCTACGAGTTTGCCAGCCTCCCCAATGGATGGCTTTTTTTATGGCCGTAACA  
TACTGGTTATCAGTAAATATTGTTGTCTACGTACGTGAAGCCGACGCATGCGATCTCACC  
AGATATGTTAAGGTGGCGGCGCTCTTTGAATAGCATAATCACTTTCATTACGTTACTGTT  
ACGTTTATCCGGTGCGCCGTA AAAACGCCTTCTTCAGCGGATGGAGGATGTCAAGAATAT  
AGGTATCGTACGGATCTCAAGGAGTAATGTGTATCCTGAAAATAATTATTTTTAGAGTGC  
TCGACTTTTCCTTTGTTATCTTTTCAGTTAATCGGGTTGAGAAGGAATTTACCTTAGACT  
TCTCGGCCGCAAAGACGTATGTAACCTTCGCTGTAGGTCATACGCTCTGCAATAGGTACTC  
CATTAGAGACTAGTACATCAGGAGATACATCTTTACTGATGATTGATAGTGGTACAAGGG  
ATAATTTGCTTGAAGCTGGTGTGACAGGGGATAAATCCAGAGGAAGGGCGGTTTAATAATC  
AATAGCTTAATGGTGATCGAAGTCATTAAGATGTGGCAGGGTTTGTTAACAGGACTAATA  
ATGTTTTTTCTCGGTTTACTGATTTTTTACATGAGACCTTCCAGGTACAACAGCGGTTA  
CAGTGTCTGATGACAGCAGCTATACCACGTTACAGCGTGTTGGAGGTATCAGGCGTACGG  
GGATACAGATAGATCGCCTTTCTTTGACCACTTCATATCTCGATTTTATGTCACATAGTG  
GAACCTCACTGACGCAGACTGTGGCAAGAGCGATGATACGGTTTGTTACTGTGACAGCTG

AAGCTTTAGGTTTTTCGCCAAATACAGAGGGAATTTTCGTACAACGCTGGATGACCTCAGTG  
GGCGTTCTTATGTACTGACTGCTAAAGATGTTGATCTTACATGTAACCTCGGGAAGGTTGA  
GTAGTGTCTTCCAGAGTATGATGGACAAGACTCTGTTTCGTGTAGGAAGAATTACTTTTG  
GAAGCATTAAATGCAATTCTGGGAAGCGTGGCCTTCATCCTGAATCGTCAGCATCATGCAT  
CGCGAGTTGACAGAATGGAATCCGATGAGTTTTCTTCTATGTGGCCGACAGATGGAAGAG  
TCCGTGTGATTACGCACAATAAAATATTGTGGGATGCATACGCTCAGGGAGCAATTCCGA  
TGCCTGTACCATTAGCAGTTGAGGGGGTAACTGAAAATAACATAATTAATAGCTGCAT  
CGTTTTATTATTTTCAGCAAGTGCCTGGCGGCGCCTAATTGTGTACCCGAAAGGTGG  
AGTATACAAAATATAATGATGACGGTACCGTTACAGTTAACGTGGGTGATAAAGAATTAT  
ATACCAAAGATGGAATCTGCAGTCTCTTCTTCTCAGTGCGCAAATTACAGGGATGATTG  
TAGCCATTAAGCTGATGCCTGTCATAATGGAGGGGGATTAGCGAAGCGATTTTTCTT  
GACTTACAATAGCTCAGTGAATAAGCAGGCTGAAATTCATAAATGTGAAATACATCTCA  
AGTCAGTCAGTTGTTGCCGACTGATGATGGATGTCTTAGAAAATTTCTGCATGCCAAA  
CCCCCTGTGCGGAGTGGCGACAGGTGAACGGTAAGATCTCTTTGATGATCGTAAGCGAGA  
ATACGCGGGTTTACTGACACCAGGCCGAACCTACCAGGGAGGCACCCGGCACTATGCAATG  
GCACATAGCGCCAGACTCCAGCCCCTCTCCAGAGGCGCTTTCTTTTTGACAGAAAAGCC  
CGCGCAGGGAGACGTTGGCGGCCACGAATTAACAACACAACGTGAAGTAGTATTTACAGT  
TACCTATAATATCCGACAGTAGTCACTCTGCGCAATACCAGCGGCCGTTTTTCATATTGCGG  
GTTGTTGTCTATCTTCTCCATTGTCCTGTAGCTTCCGAATTTACAGCAGGCTCATCATT  
TACACACAATATTATCCCGGCCGGGACGATTCATGACATTGCCACACTAGGATGCGGTCA  
GGGCGGCATCGGCGTCAGACCTTGCTGATGCCCTTGCGCAAAAATTCGTGTAGGATGGA  
AACCATTCGGGGTGGCGTTTTCTTCGTATACGGATGATTGCGCACGACAGATTCAGGGCA  
TTGTCACAGCAGGTGACGTGCGCACACCTGTGGTGCTTTAGCTGGGAGATAGAGAAGCTG  
CAGTAATCAGCGACACCAGTGACCCCGGGTATTACTTTGATGTGGTTCTGGCAGGGGAGT  
CAAACGCAATCTCGTATGGTGAAGGTCTTCTGTTTTCCGGAGACATACGACCGTCCGCACC  
CGCCATAAAGCAGTTGTCGCGTTCGAGTACCGTGACACCAGGGCCGTGTCGCCTGTAACA  
ATAACGACATCGTTCCGTCGCACCATTTTCTGCATGATGTGCAGGACATGAGTCGCCTTA  
GCCTTCCGAAAGCGGACCTTTCAAAGGGGCAGTAAGGCACCGTGGGGCCGGGACTACATA  
TCGCCAAAAAATCGCAGCCGTTTATACCGGCGAATCCGGGCATTCTGTTGGTTCCGTA  
GTCGGGGTGGTTAAGCCTTCACCACCGGAGGCGAGGGGCGCATTCAGTGACGCGAGTGGTT  
ACTTGGAGAATTCAACCAGCTGAGGTGTGGACAAGCCGCTGTATAAAGGACCTTATCGGTC  
TAACAAAAGCAGCAATGAACAAGTATCCGAAATATGTTCTGATTGCAGTGGTGAAGATGC  
AGGGGGAATTTGATTTTGGCGGTACGCCGGCTAATCACTCAGCATAGATTGGTGCGCTCG  
TTGACAAATTCCGTGAAGACCTGGCGGAAATGACAGGTCAGTGCGTTCGTAGGCTCTCCTG  
AGGTTGTTCCCTGGATATGCGGGTACAAGACGTAATTCTGGAAGCAGAACAACGAATCCT  
AGTACCAGACGGTGTACGGCAGCTGCAAAAACAAAACGAAAAGAATATCCATTTTCGTAC  
CGTTCATGACGGATGAGAATTGGGTGCATGTGCCGTGCAACCAACCGGATGAAAACCTGG  
ATATTGCGGGTAGCGGATATTGCGGTTTCGAAGTGGCGAGACAGCTCAGCCACCTGGACCT  
CACAGGACAGGGCGAGGCATTTACAGCGCCTGGGCACGCCGTCCGATTATTTCCGAACGTA  
TGGCAACGGCGATTTTTCGCGCAATACGGAAGAGTGGCGCTGAACGCGGGGGCATCACCGA  
CAGTAACAGAGGTGCGCCCCGACATCGCCTTCCGGTGCAGAAGCCACAGCCGTCACAACAC  
TGCTCTTACCTTGGCAGGGAGCCAGAGGGTACCCTGAAAGTACAGGGATGGTCAGCAC  
GTGGCGGGAGGGGTCCAGTAGTCCGCTAAGCGAAGGGAACCGGAGGTTAGGCAGCCAAGG  
TGACCAAGGAAGACGGTAAAAGGAGCGGGGTGCTGGTGTACGCCGCGGGCAATGGTGCGG  
ATCTGTTACAGAAGGGGTGGCGGATTCGCTGCCACTTTTAGGTATCGGGAGTGCAAGCTG  
CGAACCAGTATGCTTCGGCGTTTTACTGGCCGGTATCTTACAGCCACAGGGCGTTGCGC  
TGACCGGCGACGGGTAGAATCACCAGCTGGCAGCGTTCTACATCCAGACAGATGCAATAG  
AACTGAATGTGTGCTACTACAATGCGAAAGTGGCGACAAACAACGGGATGCAGGGAATCT  
TTGGTGCATTTGCTAACGCATGGCGTACGGTGGCCTTCCGCCTTACCAGGGAATAACAGCC  
TTCAGGAGACGCCGTTATCGACGGTACGGTGGCATAACCGTTCAAGCTGATGCAGTCAC  
CGTCAAGTGCATTTGCGGCGGATAAACCAGCATGTGACAAACATTTCCAAAGGTGCTACTT  
ACCCGGTGCTGATGGACAGCATTGCGGTGGAATTGAACAACACAGACACCCCGGCATGTT  
AAAACAACCGTCAGCGACAGGAATCCACGCTGGCGGTGGTAATACCTATGGAGAAAAAA  
TAATGGAGCGAAACATTCGTGGTATGGTCTCTTAAATCAAAAACAGTTCTTATTGTCAACC  
ATAGCGGAAAGAAATTATGACATTTCTGAACCAGTTAAAGCTGTACTTATGTACGGTGG  
AGGTGAGCTGTATCTCCTATCGGGTGGGTACTGGGCCATGCGTGACTTGTGCGCAGACG  
GATCGCCAAAATGTCCGCTGAGAAATTCAGTGCCAGTCAATCAGCCGGAAGCAAGCCCGA

AGTGCCGCTCATTTAGCGGCAAATTTCTTTAGTCACATCTTTTCGAGGAGAAAATCTCCTGT  
TAGGAATTACATCCCTGGTTACTGCTAAAGCACTGAAGGAAGACCTGGGCTCTGGTGAAG  
TCCGGAGCGGCCTGAAACAGATACTTCGGCAAACCTGGAAAGGCGTCTTCATGCAGAGG  
TTGATGCCATTCTGCATGAGCTCCTGGCCGCACCGGGAGCTCCGGAGCCGAAGGCCATCT  
CGGGTGAGGGGAGTGCTTTAGATCGCGGTGACCCACACCGGACAGCGACATGATGATGT  
AAGCAGGCGTCATGGACCACCGGTGTGTGCCGGTGGTCTTTCTTCTTGCTGTGTCTTCC  
GGATTGCGCGAGAGGGGTTCATGTACTAAATGAAAGAATCACAACAGGTGTGTGCTACAC  
CACGTAAGCTGAGGGAATGGTCTACTGGTTCCCGCAGTTGCTGGACAGGGTTTCCCGTC  
TTAGTAGGCGGCCGTAGGCGTGTGGGGATTTCGGCTGTTTGAGCTGCTGACATATCTGAC  
GTACCTACATTTAAAAATTTAAAAAGGACCGGCGTATGGGGGCTCCGGGAGAGTTATGTGA  
TGAGCAGGATACTCTGCTATGGTCTATCGGCTGCCGTTCTGGCGCTGATTGGCGCAGGTG  
CTTCTGCGCCTGAAATCCCTGACCTGTATCTGGCTGAAAAGCGAGGTAACCACACCACAG  
CATCCCGTGATGGCGCGGGTAAGTACCATCTGGCGTGGAGCGACCCGGGTGGTGGGTA  
AGCGTGTTATTCCTGACATGAAGCAGTCCAAGAAAAAATGCGATCGGGTTAACGCCATTG  
AACGTGATATGGCGCTGGCATGGGTGGAGAAAAGAGTCAAAGTGCCGCTGACCGATAACC  
GGAAAGCGGGGAGCGCGTCTTCTGGCCGTACAACATTGGACCCTGTAAGTGTTTCCCTT  
CGACGTTTTACAGACGAATTAAGTCAGGTGACCGAAACGGTGCATGCGAACCCATTCGCT  
GGTGGATTAAGGACGGTAGCAGAGACTGCCGACTACGTTCAACAACTGTTACGGTCAGG  
TATCCCGTCGTGACCGGCAGTGCTCTCCGGCGTGTCTCGGGCTTCGACAGATAACAAGAAT  
ATTCTGCTGGGAAATGATGATTGTTTACAGGTACGGTTAACCCGAAATCCCACAAATTGG  
CAAAATGTAAGTGCATAAAGTTAAAAACAGTAGTTTAACTCAGGCACCGTAATGATGCC  
TTTGTCAATTTCTGCGTATCTCATGAGCATCTCCCAACACAGAACCTTTCAGGATGACGCT  
TCAGGACACCGTTTTAGCTGTCCGGTGCCTTTCTGTGGTCTGGATTCTGTGAGACAAGGT  
GCGTCACTAAAAGGAAGTAACCCATGAATACGATGGCCATGCCGTTTCACGGTAACTCTC  
TTTATGTACTTAACCATAATAGCCAACCTTACGTTCCCATGAGACTTCTCGTTGCGGGGA  
TCGGGGTAGCCTCGAAATCCAGGTGTTTAAAGTTAAGATAGCGTTTTGCGTCAACTACAA  
CGGAAATCGTTATGGTTGCTGAGGCTGAGAAACAACGCAATGGGGTTTCCATGCCACTTC  
GAAAACCTTGCCGCCTGCCACAAACCATTAATCCCAGCAGAGTAAAACCCGGAATTCGCG  
ATAAGGTCATCCGGTATCAGGAAGAGTGCAGCATGTTTATTACGAGTACTGGTTCGAAGG  
GTTTTGTCGTTAATCACCGTAAAATGAGCGTGATAGAAGAACTCAACCAGGCTTGTGCGG  
ACATGAAATGGGATAAAAACATTGCCAGCCGGTTTTGCTACCGGGCCGAATGAGTGGAAAC  
AGGTTTCATGCCACGCATGTATCAAACTCCGTACGCTGGTAGATGAAGTCAATATGCTGA  
TTGATTTTTGTCCTGGGTGATACAGGCAAAGGGAAAGTAAATAAGGCGGATTGTTGGGGTG  
GCCAATGATATCAGATAAACTCAGAACGCTGGTGAAGAGCCTCTGAGTACTTAACTGCAT  
TTCATTTTTAGTCCTGCAGGTTGCCATTTTTCTTTTTCCACCGCCTGGCGAGTCCTGACGTT  
ATCGGGACTGGAGGGGTCAAACCGTGATGAACCGTGAACGGTGGGTGGCGATTATTGTCC  
TGGCGGTTGGGTATGGTGCCTGTGGCTGTCAACAACCATACGGTGACAACGCGCTCA  
CCTATAAAGCGGAGCGCGATAAAAAAGCCAGACAGCTGGAACAGGCGAATGCCAGCGTTA  
CTGACAAGAAGGTGCGCCAACGTGCTGTGGCTGCGCTCGATGAAAGATAATCCAGGGAGT  
TAGTCGATCCTAGTGCTGAAAATGAACTCTGCGCGCTGGAGTTGCCGCTGGTCTTAAGC  
GCCGGCGGATCAACGCCACCTGCTCCGGTACCGTGGGTGTAGCCACCGGCACCTCCCGCA  
TGGATAATGCAACCGGCCCGCGACGGACAGAAAAGGCTGAACGGGATTATTTGCTCCTCG  
GAGAGAGGCTGGTCACTATGCAAAAACAACCTGGAAGGAACCCAGTAGTATATTAATAAGC  
AGTGCAGATAGAGTTGGCCATATCGATGGGCAACTCATGCAATTATTGTCAGCAATACAC  
CCGCGTTTTAGCGGACTATAAATTCCTACAGTAATAAAACCGTGCAATCCATTTAAGAT  
TATTCGCTGGGTTTTTGTTTTAAACAACCTTTTTAGTGCTGCCACAATTTTTGGCTGCACC  
TACAGTTTTCTGCTTCCCATTTCCAGAAACGAAGAACTGATAGGTGATGGTTTTCTTTGG  
TGCAACTGCTGACTGTTCTTTTTGAACAGTAAACGTCTGTTGAGCACTTCTGTAAATAAG  
AAGGGCCAGCGCAGTAGCGAGTCGCATTTTTCTTCATGGCGTCATTCATGCTTTTTGA  
AGTACGCAGAATCGAATGTGTGGATAATTATACAAACCCTAAACAATGAGTTGAAATTTT  
ATATTGTTAATATTTATAAATGTATGTCAGGTGCGATGAAAAGACATTGGATCCCCGGGT  
TAACTATGTCCGCCGCCCTGGCGGGGAACCTTCTCTGCGGGATTGTGCGGGGCTATACAAA  
ACCGATGCACACCGGGTTTTCTTTTTTTGACGAGATGGGAGCGAT

>NewGenomeName\_134

CAGTCGGTGAAGCTGCAGATATTATGAACTGTGTTTGTGACATCCTGTATTTGCAATACA  
AGGCAGATTATCCTGAACTCAGTGAACTCAGATTGTGGATTTGATTAAAAACGAATTGA  
ATTTCCAACCTCAATTTGAAAGCTGAAAAATGGATGATGAAAGCATGTACCAAGTAATTTT

TATCGAAATTCTCATAGTCGTCCTTATTGCGTGTACATGTCCATGTGGGATGACTATTG  
GAACGGTAAATGCAAAAACGAAATCACTGAAATTAACGCATGGCTCAAAAAGTATGATAT  
TACACTGTGGCCAAAAGACCGGAAAGCTGGTCCATTTTCAAAGTGGGTAATTTGTTAGAT  
GACACTTTGAACGACATCAAAATAAGCCAATGCCAGTGTATCAATATCCGAAAATTGTAT  
AAAGCTCTAGCTGAAATTCGCAAAGACGATATTGCTAATCCTGATTTTCGATCAAACCTGGA  
AATTTGATGTCTTTGCTTTACAGATCGCAAATGAAAGATGTTAAAAAAAATCCATTTGGG  
AGGACTGAATCTCAACTGCAGCTGTCATTGCGAGTATTGTGCTCATGTTTCGCAAAAACAC  
AAAGTAGTGATATAATGGCAACTACTCTATTAATTCATTTTGAGGAATATCAATGTCTGA  
TGAATTCAAAGTTCTAACTCCTCGCGAGCACGTAATTCTACGCCAAATATGTATGTAGG  
TTCTGTCGCATATTAACACATGAGCGATTCTTGTGTTGGTAAGTATCAATCCGTTTCCTA  
TGTTCCGGGCCTGGTAAAAATCATCGATGAAATCATCGATAACTCGGTTGACGAAGGTAT  
TCGTACCGTTTTTAAATTTGCAAATAAGATTGATATTCGCTTTGATTTCTTGAAGGTTT  
TCTGACGGTAGCGGATAACGGCCGAGGTATTCCTCAACCTCTGGTAAACACTCCAGACGA  
AGAAATCCCTAGGCCTGTCGCTGCCTGGACACAACTATGGCAGGCTCAAACCTTAATGA  
TACCAACCGCGTATCAATGGGGATGAATGGCGTAGGTTCTTCTCTGACAAACTTCTGCTC  
CAAGACTTTTATCGGTGAAACGTGCGATGGCAAAAACCTTCTCACTGTCACCTTCTCTGA  
TGGTGCATCTCAAGTCAATTGGGAAACGAAGCCGGGTAATATCAAAGAAACGTCGGTATA  
TTGCATCCCTGATGAAAAGCACTTTGAAGGAATAACGAACGATCCGCAGATAGTAGATAT  
TATTTAGATCGAATCACGGCATTGTCTGTGGTGTCCCGAAGATTAATTCACCATCAA  
CGGTGAAGTGGGTTCAATGAAGTTTGCAAGATACGCTAAAATGTTTCGGTGTGAATCTCT  
CATTCTCGAAAATGATAATTTAGCCTCGCATTCTGCAATTCTCGTGAAGGATCCGCT  
AGTCAGTTATGTCAATGGTTTGAATATCAAGAATGGTGGTCCCACATCGATTACTTGAT  
AGATGGCATTGCGGACGAACTTATTCCATCAATCAAACGAAAGTATAAAATTGAAATAAG  
CAAAGCTCGAATTAAGAATGCTTGACAATGATTGTGGTTGTTTCGTGGAATGAGTAATCT  
TCGGTTCGAGTCTCAGACAAAGGAACGTTTGACCAATCCGCTTGGCGAAGTGAATCACA  
CATTGAGCTGGATTTCAAAAAGTTAGGAAAGCAAATCATGAACTATGATGCTATCCTGAT  
GCCAATCATCGAGGCTGCTCTTGCTCGTCATCTGGCTTCAGAAAAAGCAGCATTGACGAA  
AGCCCAAAAAGCAGCAGCAAAAACCAAAGTCGCTAAGCATATAAAGGCCGGTTCCCTGGGG  
TGACATTACCAAAGAAACAACCTCTGTTCCCTGACAGAAGGTGGTTCGGCCATTGCTTCTT  
GCTGAGTGTTCGTGAGAGCGAGTTGCATGGTGGATATGCTCCTCGAGGAAAGGTTATGAA  
CATTTGGGGAATGAAAGGTTCTGACGTGCTAAAGAACCGAGAATTGGCTGATATTTGTGC  
AATCATGGGTCTCGATTTAGCTAATCCGGATGATGTCTAAAATCGCAAAGACAAGAAAGT  
TGCAATGATGACCGACCGGATCCAGATGGCCCAGGCTCAATTTACCCATGTCTACTCGC  
GTTCTTTAGCCGTTAGTCAAAGTTGTATGATCTCGGTTGCGTACGATTTGTAATACTCC  
GGTAGTCATCCTTTCTAAAGGAAAGCAGACCAAGTGGTTTTATACGATAACTGAATTTGA  
TGCGCAAAAGTAAAAGTACAAAAGTTGGGAACTTCGATATATCAAAGGATTGGGTTTACA  
TCGCGAACACGAATATTCCGAAGTTGTTAATAACCCTCAGTACGATATCGTTCGATCTTGG  
ACCCGATTGGGAAGAATTGTTTCGAAATGCCGGTTGGCGATGAAGCAGAAGCTTCGAAAACA  
AGGTATGTCACAATGAAAAGGGCTCTTCGGAGCCCTTTGTTGTTTTTGAAAAACAGTGTA  
CAACGCTTAATGTGAATGGTATTATGGCTCCATCAAATCAACCAAGGAGTACATCGTGAA  
ATTCGTTTCGAGTTAAATTCAAATCCCCGGAACATCGTAAAGCTTTTGCTAAATCTGCCTC  
GTACAAAGCCGAATTTGAGATGTTTCATGCCAGACGAATTTTACTAGGCTTGACCCACA  
CAAAAATGTTCAATATCGTTTGGTCGATTCTGATGGTGTGATGATTGATCTGCCGGAATC  
AACTGGAGGTGGCGGAATCATTTTCGACGACGAAGAAGCTTCAATTTTCATGGAAATTAT  
TGAATAATTTACAAACAAAGCAGTTTACAATCGTGAGGCTATGGGATACTATAGCCTCAA  
GTTAAACGAATTAGCAAAAACATGGAGTATTTTAAAATCATCAACTTCACCGAAGCATT  
GGCAACGTTAACTCCCATGCGATGTTCTTCTCCCCGATCTTGATACCTTGATCAGTGTT  
TACGGTGTGAAACTGATTCATCGTCAGTCTTCATGTACAACAAAGGCACAAAGAAAGCA  
TAGCGTCTCGGCGGCAAGAAAGCTGCTTCATACATCGAATACGTTCAAATTGAATTGGCG  
ATAGGAGAATAAAATGAAAGCACGTTTCAAATCTGAAGAAGCACGTCAGCAGTTCATGGA  
CTACGGCGAAAAGCGTTGGGCAATTGGTCCCTCTGGGTGACACAAATAACAACCGTTCGCAT  
CGCTCGTCATTTAGGAATGAAAGAGTTCGATGTTGTCAAATCGAGTTTCCATTTGCTGG  
CTGGTTCGACATCGTCATTGATGACATGGTGTTCGAGTCTATCGCTAGTGACGAAGTTT  
CTTCTTCGAGTTCATTGATTGATTGACTGGCCTGGCAGCCCGCCGCTTTTTTGTATCAA  
AACAGTTTGAGGCTTTACCTATTCGATCGAAGCTCGAATTTATCCTTTTAGTTGTAATAT  
CTATTAAGCCATAAAGGATAAAAATATCTAGTTCGACTGGGTGGAACCAGGTAAACCTGG  
CTGAACTCAATAGTTTAGTCAATAATACATTCACATAAGAATAAGGTATCATCCAGGTTT

AACCCAGTTAATCCAAAAATTATTTTAACTTTAACTGTGTCATTGTAATGTTTACTGTGT  
TAGGATAACACCAGTAGAAAAACAAGGAGGTCATTATGACCCTGCATGAAGAAATATCT  
GAAGCTCTGGTTCGAATTTGTTCGCATCAACGTACGATTCATGGGTGATGAAGAAACAGCC  
GATGAACTGAGCGACGAAGTTAACCCAATTATAGCTAATATCAAAGCTGGTATTGCAACC  
CGCAAAGAACTCGGCCGGCTGTGTCATTTGGGTCTGTGCACGAAACTAATCTTTATGGT  
TCCGATTGGGGCAAATTTGTTTCCAAAATGGAACACCGCATGAAAAAGGAACATAGTTAT  
GCAAATCACCTTTAAATCCGAAGAACATCGCAAAGCATTTCACGTATTGCCAAATGCAA  
TGAATGGATTGCTCACACTCTCGGTATGGACACATGGGAATGCCGAGAAGAACCGGCAGA  
TGAATATGACAAAACCCAGTATTCGCAGTTCTTGACGGTTTCGGTAATCAGGTCGCCGG  
AGTGTGTTGTGAATGACGGCGGTGAGTGTGAAGATCATGCATGGATTTTCTGGGGTGAGCG  
CAAATATTTCTATATTTCTGAATAAAGGAAACAATAATGATTATCGGTTCTAACGAACA  
AGATGTGATGATTGGTAATGCACCTTCTAAACGGACCGGGTTTAAAATCCAGGCTGGGCG  
GAAGGCCCTTCCAAGTACTTTCTGAAAAGCGTTATAAAGACAAAGCTGAAGCAGTTTTACG  
TAAGCTTTCGTGCAACGCGGTTGATATCCATTGCGAACTTGGAAGGACATATTCCGTT  
CAACGTCACTCTCCCCACTTCAATTTACCCATGGTTCGTAATCCGTGGTTTTTGGAACTGG  
GCTGACGCAAGAGCAAGTTGATGAAATTTTCACTGTCTATTTTCTTCCACCAAAGATGG  
TTCAGATGATTCAATCGGTGGTTAGGCCTTGGTTGCAAGTCTCCATTTGCATACAGCGA  
GTCGGGTGGCGGTTTCACTGTAAAAGCTATCAAATGGCCTGTGTACTGTCTACAACAT  
GTATATGGATAATGGAGAACCATTTGCTACACCGATGTGCGACTACTCCGACGCCCGAAGA  
AGACGGTCTCGAGATGCTCGTTTCTATCCCTGAGCACGAACATGCTCGCTGGAAAGTACT  
AGCTCGCAAAGTGCACCGGGAATTTGATGGCTGCAAACCTTACATCACAAATATGGATGC  
AAGCAGCATTGAAGAATTTCCGAATCAAGATTGCTTCTTCAATACTGACGAATTCGCCCG  
TCTAGGAGCGGTGTATGCTGTAATCGGTGGAGTAGTGTACCCGATCCCTCAACGTCTCCT  
GGCATCCGATATGGTATTCCGATATGCTGGTAAAGCTGCATATAACCAAGTGCCCTATTGG  
CTCAGTTGACATTCCTCCTTACGGGAAGAATTGTCGTGGACCAAAGAAGGCGAAGATAA  
CAGTATTGGTCGACTTCGTGTTTTTTCTGATAACTTTGCCGAATGCATAAAGAAGGAATT  
TGACGGAATAACCGACAAACGAAAAGCCGTAATTAAGCCAGTCGATACAACAACACTATGT  
TCGTCAAGCTATTTTAGATTTGACCATTGATGGCGAGCGAATTAACGATCTTATTGATCG  
ATATACGGATATGTCAAAGCTTAGTGACATTACCGTTTGCGCATATCGTGGCGGTAGTTT  
GCGCCAGCATGTTACGCGTTCGGGATATTCGTGGAGAAGTTCCAATATAGATGCAAAGA  
AGTCGTTGGCATCAGTCGGCGTAAAGTGCATGTTTCTCATCAAAGATACAGGTGAAGGTAT  
TCCGAATATGGTTCAGGCGTATCATCCTGATATTGGTGATACCATTCCAGTCGTGGTGT  
GAACAAAACCTCGCAAACCTAAAGAAGAGTGAGTACGCCCGATATGGACGAACCATGAAAGC  
TATTTGCGAAAAGTTTAGCGTTGACGAACGCTCAATTCTCAAATTTAGCGAAATGAATGA  
TATTCGAAAAGCATTACCATACATAAGCGCAAACGCTCTACTTCTCGCGATGCTAAACC  
AAACGTTCAACGTCATTACATCAATGACTCCGACCTTCGTGACGTTGAATTAATTTACAT  
GAAATCCGCTGAAATAAAAGCTTTGAAGGAATTGGGGTTATTTTCGTATAGCGATACATT  
TGACAGAATTGCGCTTAAAGCTTCGCAGTATACAATGCGTAGTGCCCTAGCAAATGAT  
AGAGCTTGGAGCAATCGAAGTTTACGTCATCGATAATGGAAAGCGTTCTACCCGCTGTGA  
AGGCTCCTGGTTTGAATGCGGTTTTAAGTGGGCATATGACCAGTACAAAGTGCCGAAAG  
ATGCTTTTGTATTTCTTAGTGCCGAGTGCCCTAATACCGGAGACTATGAAGAAGCAACTC  
GTCTTAAGCAAATGGGCATACTTGGAAATTGATCTAACCGAAAAGTTTGACGAAAACCATG  
ATGATTTCTGAAATGATGCATCCCAATGGGTTGAAATCGGAAATCCCGATCATGCCGATT  
TTGCTGAAATCAAAGAATATGTTGATGAACAGAATATAAAGTATTCCGAAATGTTCTATG  
ATCATAGGGAGTCATTGAAAATTAACGCCCGCTATTGTTTGCAGTTGCCGTTAGTGGTA  
TAGAATTAAGTCTGAAATCATGAAAGATATCGAAATTTCCGGGCTCAGTAGGAGCCCT  
TAAAACAAAGAGGTATGATATGGCTAAGGTTAAAATTGTTAAGTGTGTTTGTAAATGAAAC  
CAAGTAACAGATTTTTGACAAATATTCTCTTGGCAATGTGTCTCAAGCTTATTTGGCAAG  
TGAATACTGCGTATCGGTAGATAACAATTGCTCGGGTTCTGAAAGAAGTCCGAAATTGGGA  
TATCTCTGCTGCAACGTCAGAGGATTCAGCTGCGGAGGAAGAATTGCTGATAAGCTGGA  
ATGTACCTGAATGGCCAATTCCAAGTTCCTTTCTGTGACCATCGGCGCCGAAACTTATAA  
CGCATCTGGCGATCACCCACAGTTCATGGAAATCATCAGTCTTCTGCGCGAAGAAAAATA  
CGATGAAGCAATGGAAATGTTGAATATCAAGCGTGGTCTTGAGCGATATGTCTCTGGCGA  
TCTGGTTATCGAAGGCGGGACACTGAAATGCAAGGATCTGATCATTGATTCTGGTCTTAC  
TCGTGCTCCTCGTCCGAAAGATGCAAACGGCGAACCTTTCGAGCCGCTCGTTGCATTCTT  
TGCAAATCTGATGGCTAACCCGAGTCGTGCGAGCCGTATATCAGCTGTACGACTTCTGGA  
ACACAACGACATTGAAATCACCGATGATGGTTATTTCAATTGCTTGAAGCGTGTAAACAG



CAATTTCAAAGACATGGACAGTGGCAAATTCGATAACTCTCCTGGAACAGTGGTTAAGGT  
TAATCGCTTCCAGATTGACGAAAACCCTCACGTTACCTGCTCTCACGGTCTTCACGTTGC  
TGCCAAGTCTTATATCCCTCATTATGGTGGTGGTTCTGGAAAAGTGATTGCATGCAAGGT  
CAACCCAGCAGATGTGGTCGCTCTTCCAACCGACTACAACAATGCCAAAATGCGTTGTGC  
CGGGTATTAAGTTCATTAGGAAGTAACTTCTAACTTCAAACAAATGAAGCACTACTAATT  
TTCATAAGCCCTCTTCGGAGGGCTTGTTTGTAAAGGGGTTGTATGAGCTCACCATTTAGCA  
TTATATTTTACAAAGACGATGACATTGTTGGTTCGGGTTATGGAAATCATAGTTGGATT  
CGCCGAATGACTTACAGTACGCGAAGAACAATAATTGCAGTTGTTGAAGGAACATCTTGGC  
AGTTAGGACCATTCGAAAAGAATGGACTCATTTCATTGCTGCTGGCTGAGTGTTTTATG  
CTCAAGATTACGAGAAAATGAAACAAATCCTTTCTCTTATAGAAAGCTTGGATTTAACCG  
ATTTTTTCATTGTCATATTCTGACATTGTGAGGAAATTGTAATGACGGTACCGATGAACGT  
ATCCCATGACGAATTTATCGCCCTTAGTCATATCCAGCCGTTTCGACGCGGATATTATTCG  
TCTTCAGATCTGCGACCAACTCAAAAAGCATCCTGACACGAGGGATGAGCTTTTTGAAAA  
ACGGAAAAGGAGAGATGATGATACCATCCAATACGCTCTCGATGAAGCGGCTGGGAATGA  
TATTCCTCGGCAGGAGGTCATTGATAGAACGGTTCATTCACTGAATGCCGAAATGGGTGT  
CGCATATATCCTGGGTGGTGTCTGGGGAGTGTGTTGACTGGTTAGACAATGACAATATCAC  
CTTTGATGTGCCAACACCTGGGTTCAATCTGGTAATAAAGACTTCTTTTGCGAAATGGCC  
AACAAATGCATACCGCTGGTGTCTAAACCGTATGGCAAATCAGAAGGGCTGTGCTTGTACGC  
TGGTTTTCGCGGAGATGCTGATGTTTACTTGGTATTGAACATCAATGAATATGCTGGCCG  
TATCACATATAGGCCGAAGTGCTTCTTCAAAAGCGAGCTATGGAAAATATCCGTATGT  
GATCTACGTTCCCAAGCGCGCGGTGGAGCATACTACTAGACAGCAGAACAAATTTGT  
TTATTTTTATAACAAGTGGTGTACACTCTGATTGTGCGTGATAAAATGCTCCTATCAACA  
ACACGGGAGCATTTTGCATCTAGGAAATGAAAATGAGAATTCCTGATTTTCTGAAAAGAC  
GCGCCAGGCCAGACTGTGCCGAGCAAAAGACAGAGCTGATAGCTGAGCACAGAATGCTTT  
GCTCATTGATAGATCATCATCATCATGTGCTATGACCGCGAAGACTTACCTGATCTCA  
TTCAAGCCAAGAAAGACCGCGATGCAATCGAAAACCTCCTAACGGAGATTACTAAATGAA  
AACTAATACACATCACGTCACAGCTATTGATGCCAGTGTGTTGGCACTTTTGAACCTGA  
ACCGGCAAACTTTCGGATTCAAAGTACACTTTCGAAGATGTGATGCATAGAATAGGTTA  
TACGATGATTGATTCGTTAGCAACGCTTGAAGCTCCCTGGAAGGTATTGAAGCACTTGT  
TTATGAAAACATGATCACCTTCCCCTGCTGGGTAAAACGGGTTGGGAATCACTTCGATGA  
AATGTATGACGTGAACTGGGTTTTCTTTGATTTTGTTCCTTCTGAATAAAACAAGTT  
TACAAACTCGTGGCTATAGGTAAGTAACTATAGCCTCAAGTTAAACAAATAAATAAACACGGAG  
TAATTTTATGATCAACTACACTTTCAAATGCGAAACTTCTACCGAAGCCTTCAATTATGT  
TGTCGGCACCAAGCGTGGTAACGCCTGGGCAAATAAACTCTTCGCGATTATCTGGACGG  
AACTGGCGATAAAGATGCCACTATCACCTCATGAAAGAAGAAAACTGTAAATTGAGCA  
AGTAATGAAAGGCCCTAAAACATTCGACAGCCAATTCAGGTCTCGCGGCGGTTTTGCGTA  
AGACATCAGCAACGGCGAAATCAAGAACGAGCCAATGTTTTTCAACTCAGACTTGGAATT  
CGCGTACGAGAACGGCGGCCCTATCACTCGCAGTTTTATCGAGAATCTCCCCCTCGATAG  
GAAAAGCATTGTGATTTTCGATTCGCGTGTTCACATGCTTATGCCTGGGTGGTACCCCGC  
GATTCCCGGATATCACCATGATGACGTGCCGCGCCCGCCGAGTCCGGTAGGCCAGCACTT  
TGCAACTGCAGGACAGCCAGACTATGACAATCCTCGTTATCTGTCTCGCCATATCCTTGT  
TTTGGTTAACGGCTATATCTGCCCTACTCATTTTCCAGTAGGACGATCGGAATTTAGCCA  
AATTCCTGATGGAGAAGTATCTATCGGCAATGGTATCGGGAAGTCATGGCTAAACTCGA  
AACTGGCGAGTTAAGTAAGCATATTGCTCCTGATCGAACTCTTGTAGAGTTTACTGGCA  
AACCTGGCACACTGGGTCAAAGCGGTTAGAAACGGCTGGCGTTGGTTTGGTTCGAGTTTC  
TCGCGACACTGATCGAGTTCTGGCACCGTCGAATGAAATTCGACGTCAAATTCAGTTTA  
CGTGGAAATTCCTGATGGAGGGTTGGTGTATGGTTAAGTATCGTTTTTGTAGTGAAGAGCAA  
TTCAACGCATGGGCCAAGCAACATTATGCACAGGAATTCGCACTTGCTTTTGTATTCATGG  
GATACAATCTTCGAAATGGAAGACATCGGGCGTAAAGTTTGTCTCTGATACCACCGAAATC  
GACGGCGAAATTTACATGAGTACTCAATGGTACCCATTCAATATAACAGACCGTGGCAAT  
CACATCATCGAGCTGAAAGAAAGAACTCTATTTCTTGCAGCACATTGAAATAATATAGC  
TGGCACGAATTCTGCGAATTTGAAATCGGAAATTATGGTACAAAAGATTATCACGTTATT  
TGCTTAACAGCTGTGTTAGTTTAAAATACAAGTCAACCAATTGAATAGAGAAAAATATCA  
TGAAAATAATCTTACTGCTCAACGTATTGTAGTTACTGGTGCCCAACGTGTTGGTGCAT  
TTGAATTTGACGCAGGAAAATTCCTGGGTGCGAAATTCATTTTTCGCGCTGGCAAAAATC  
GTGAAAGCATTAGCAAGCCCGCATTTATGTTATCGCTAAAGATGATGTTGCTGTAGCTC  
GTACTTTTGTGGCCAAACAAGAAAAGAGTGTGGTTTTAACGAGACCATTTCGCGAGTAA

TTAGCTGCTGTTGGAAATATACTGACGGTCTTCCACGGAAGATTTACCGCTAAGTCACAG  
GTCAAAACAAGACACATACGGTTTACCATATCCCGATGTCCTTGGTGCCAAGACTGTTGA  
ATATGCAATATCTTGAGCTGTTTGAAGATAACACCACCAAATATCAGTCGCTCACTGCTG  
TTTCGCATCCACTGTTTAAAGGTATATAATTTGAATATCAAACACGATAAAGGAATACCCA  
TGGCATTAGTTTAGATGATTTTTTTGACCAAGAGCCGATTTTGCCGGTTCAAAACCGG  
CATCTAATCCCGAAACTACGCCTTGGAAATGAAAGCAAAGATGATGAATTGTTTCTCCGC  
CAGGAATTACCATCAACCAGGTCACCGATGAAACGGTAATCGAAACTGAAGTACTCGATT  
CTTCGGTTGTTAAAGAAGTCGATGAAACTGAAGTACTTGAAGAGCAAATTCGGCAATGAC  
AATCTGAAATTGATTCAGATATTCGGCATGGAAGAAAACCGTATTGCAAAGTCATTTAA  
CTAATCTGCATAATCGACATCTGCAATCGATCATCAACAATGAAGCTCTTGAATTTGCGA  
TGTATACACTTGAAGAACGTGCAATCCCATCTATCATCGATGGCTTTAAACCGCTTCAAC  
GCTTTTTCTTGTATCGCGCATTGGAATATGCCAATCAAATAAAGACCAAGTTTAAACAAAG  
TAGCAGCGCTTGCAGGCGGTGTTTCTGAGGCAGGTTATCACCATGGCGAAGGTTCTGCCG  
CAAGGGCTGGACAACCTTATTGCAAATACATGGAACAATAACATTCCAGTATTGGAAGGAT  
ACGGAAACCTTGGTTCTCGTCTTGTTCACAACAGCAGCTGTACCTCGAAATGTGTTTTGTC  
GTGTCCATCAGAATTTCTGGGGCATCTTTAAAGACGTTTCTCTTTCTCCGGTGCATCCAG  
ACCCTGAGCAATTGCCGCCGCTTTTTATCTGCCTGTTATTCCCTATGGTTCTCGCGAATG  
GCGTAAAAGGTATTGCCACTGGCTATGCTACTACAAATTTCCCGCATTCTTACGAGAGTC  
TAGTCAAGTGCACACTGGCTGCGGTAAAAGGCGAAGAAATCCCCGAGCCGGAAGTGCAGT  
TCCCATGCTTTAAAGGTATTGTTTCGTCGAATCAATTCAAATCTATCGAAATCGAAGGTC  
TATTTGAGCTAGTTGGACAAACCAAACCTCATTATTACCGAAGTTCCAGTTCGATATGATC  
GTCTTGAGCACGTCAATATTCTCGACAAGCTCGAAGAACAGGGGAAAAATCGTAGGTTACA  
AGGAACAACAAGTGATGGAATCCGGTTGGACGTAACCTCTCAAACGTCAGGATAAACTTG  
GCGAATTCATGTAAAAAAATCCGGAACCTGACATGAGCGTATCATCATAATGTTCAACC  
TTCGCCAAAATCTTTCGCAAAACATCACCGTTCTCGGTGAGAATGGAAAATTGGCAGAGT  
ATCAATGTGGCGCCGATCTGATTCGACACTTTGTGGAGTATCGCAAAAATACACCAATC  
AGCGTGTATCTTCGAAAAAGAAAAGGCAGAATATTTCGCGTGATTTGGCTTGGGCCAAAT  
TTGCCTTTGTTAATGAAGTGATTGAAGCAAAAATTGTTCTTCGTGGAGAATCAAAGCGC  
AACTTATTGCCGAAGTAAAGTCCAAGCCGAATATGGCAGGATTTGAAAACGAGCTAGTTA  
GCATGAGCATTACCGTCTAACTGAAGACGAAACTCATAAACTTCAGGAAGAAGCTCTGA  
AACAGACCAAAGAATACGACTACTGGTCGAGCACTACTCCAGAAAACGAATATGTTAAAG  
ACCTCGAAACTTTAACAAAACAAAACAAAGGTCTCTTAGGAGGCCTTTGTTGTTTCTAG  
ACAAAAGTGTGTACAAATGCTTTAGATTGTATAGAATAGCCTCAAGCTAAACTAACTGTC  
ATGGAGCATATTATGATTTACAAAGCGCTGAAAAACAAAAGCAGCATGTATTATGAGGAA  
CGCGTACAGTGGATGCGCGAAAATCATATCGTTGACGTTCCCACTCCAAATTATACTCTC  
AATTTTGCAAATCACAACGGTTATCTTGGTCAATGGCATTACTCTAACCGTGAAAACAGT  
ATTTAGAAAAACAAAATCAATATGCAACATGGGAGTCCATTAAGAAACAATCAACCAT  
GAGCTGGCTCACTGTGCAACCATAGGTCATGGCCACGATGAAGCATGGCAGCAAATGGCC  
GTTTCGTCTTGGAGCAACTCCTGCTAAAATTTGCACCCTTGGCCAACCTGCAAGAACCGTAT  
GTCATAATGTGCAAAGGCAAAGTTGTAGGATATTCTGAGGTATTGCGAGTTGGTTCAGAC  
GCTGCCACACGATAACATAAAGGAAAAAAGATACAAACCTTTGGATTTTTGTCAGTATAAG  
GTAAATCCAGAATTCATCGATAACTCCCCTGGTGCGAACCAAGTGTGCAAAATGCCAACA  
CGAATCAAAGACAAACAGCATTATCGCCGATTTTCTCAGCTATCTTTGAGGAAAAGCA  
TGAAATTGTCAAATAATGCAAAAACCTAGTGTACTCCGTTAGGTATGGTGATACTATAGC  
ATCATATCAAACAACCTGATTAATAAACAACGGAGTATATCAAATGTTCAAATCACAAA  
ATCCAAGTAATGCAGATCAACCTCATGAAGTAAGCTGTTGAAAATTTCCAAGGTTTTGAA  
ATCAACGCAGTAATCATGAATCCGCTCAACAAAATGATGAACAACGAAGTTCTCGATAAG  
CGTGAAATGAATCGTTGCGAACAGTTCTTCAACGACATTATTCAAGACGATCTGATGTGG  
CAAATGCTGATTGCGCTAAACTCGCAAAAATCCATGAAGCGTAAACTTGCTGCAGCGATG  
AAAAAAGCTTAAGTTATTTCAACAAAGCGGTTTACAACGCTAAACCGCTTGATTAATAA  
GCTACAAGTTAAACAAACTACCACAAAGCAAACGGAGTATTTAAAATGACCATGACCAA  
ATCAAAGCTATCGCAAAGTTCTGAACTACTCCAGCATCTCTGAAAACGCTACTTCTGTC  
TTCATTCAAGTTGCCAAGAAAGCTTTTCGTTACTGCTGTTGAAATTGCGGAAGCCACTAAA  
ATGAACAAAACGCAGTTCCTCAATATCGGCGTGATGATGAAAAAGGGTTTGATCGCC  
AAAGCTGGCGACGGCTACGTAACCACCGAAAGTGGTGATGCCATTTTCATCGAAGCTGCC  
GAAATGTGGAAGCTGCCCAACCTGAAGTTGAAGCACCTAAAGTAGAAAAGAAAAAAGGA  
ACTGGTAAAGCTCGCGAAATCACAGTCGAAACGACTCAAATATCGAGCTCGTCGAGCGG

CTGCTGGCTAACCTCGGCATCGAGCACAAAGCAAGCAGTCATCAATCGCCAAAACACTACGAA  
ATAACTCTGAACAAACGCCACGCTGATGCATACCGCAAATTCGAAATTCTCAACCGCGGC  
ATCTTCCGTATCGTTGGTTACAAAGTATCTGAAGAAATCATCAACAATTTCAAAACTTTG  
GGTTGTGAAATCAAGCAAGGTCCGGCAAACCTGCTACATCGATATCACCGCGAATGAAAAC  
AACATCGTTCGTCTGATGGAAGAAATTCAGCCGCTAACTAATGCGACTAATTACAAGCA  
ACTAAGAAAACATCAGCCATCGCATGTTATGATGTGATGGTTGATTTCAATTTGAGCAA  
AATATGAAAATTTTAATTGTTGGTGCTGGTTTGACTGGAGCAATTATTGCGCGTTGTCTC  
GCTGAACAATGGCATGACATCACAGTCATTGACAAACGGAAACACATCGGGCGGAAACTGC  
TATGACGAAGTTCGAAATGGTAAACTAGAACATAAGTACGGACCACATCTTTTGCAT  
AGCGACTTGGGTGTGCACAATTTCTTTACGCTGGACTTCTGGATTCCCTATGAGCAC  
AAGGTAAAAGTCGAATGTAGAGATACATTAATCTCATTCCCCGTGAACCTGAAAACACTC  
CAAGAGCTCTATGGTATTGAAACGGAGCAAGAGGCCATCAAGAATTTTGAAAAGGTTCTGA  
GACACGAAATCTCCACCAAGTGGGATGAACTTTTCGATCATTCCGTAGGAAAAGACCTT  
GCCGATAATTTCTTTAGACCATACACGAAGAAAATGTGGGGCACTGATCCTAAAACATT  
GAGTGTGCTGTTGGCGCAAGGATTCCCCTGAGCACCTCTAATGATGACCGATATTTTAGT  
GATAAGTACCAATATATGCCCGAAGGCGGTTACTCTAAGATGTTTGAAAGAATGCTTGAC  
CATGAACGAATTGAGGTCAAATTCGCACGCCATTCCAAAAGGAAATGGAAGCTCAATAT  
GACTTCATTTTCAACTCGATGCCTATCGATGCGTACTATGAAGTCAAATGTGGCAAATTG  
CCGTACCGTTCTTTGCGCATGGAAGTAAAAGAAGAGAAGCATGATCATGGAATTACTACC  
GTGAATAACTCTGCTTCTGAAGAAGGTCATACTCGTTACACCGTTTCGAAGAATATCCA  
GGCCGTGGCGATGGTGACATGGTGACTTACGAGTACCCCTGCGACTACGATGTCACAAAC  
GAGCCGTATTATCCAGCGACTCACGGAAAAGAACTCTATGCTAAGCATGCTGAGCATGCA  
TAGAGTGATAAAATGATGTTTATCGGGCCGTATGGGTGCATATCAGTATATCGATATGTGG  
AAAGTAGTTCGCACTGGCCTCGATATCGTTTCAGATTTCAAAGCATAACTCATAGCCGGC  
CGTTGGCCGGCTTTTTAAAAGGAAATAAAATGAAAATTTCTTGTAAGTGGGACTAATAACT  
ATCATGCTCGCCCCAACTGGCATCTGGAAAACGTTCTCGCTATCGTCTCGTGCCTGCGA  
CTACCGGTCTCGTCGAAGCTCTCAAAGATATGGGCCACGATGTTGATCAACGCTTCGTTA  
CCCCAGGTGAAGACCTTAGTGGCTACGACAAAGTCTTCACTGCTTATTTTCGATTCTACTG  
GCGGTATGCAACCAGGTGGTTATTGCGTTTACTGGCTTCTGGCAAATCGTCCCAGCGCA  
TTATTGTCATTGATGACTGGCACACTCCCGAACGTTTGATGAAAGGCTTCAAACAGTCTG  
CCACTCGCACCCGTGAACAATTTGAAGAAGTCTGTTCCGCGAATTTATGCTGAACGACC  
AGCACAAAGAAGCTACTGATGCAATCACTCCTGATCCTTCGCTGAAAGAAGATATCGTCC  
GCGGTTATGCTAAGAACGTCTTCGATTCTCACCGAATTTCTGCATTTTCGCATTTCGACAAGT  
TCGAAGTTTCCAAGATTTTCGATTATCCACATGAATCTTATTCGTTCTGTCCCAGATCCT  
ATGTTCTAACCAGATGATCGGCTGCGCGAAATGGGTCTGGCACGTCAAGATATTTTGC  
GCGAACGTAAATGGATTTTCGCCGGTATCGATGGTCTTCTTACAAAGAAAGCACGTAAGT  
TCATAGACAACCTCAGTTGGGATGTAGAAGTATTTGGTTCGTGCAACTATCGAGGTTGATG  
CCAAACTTGCAAGAGAGCCCGATGTAATTCAAGCTTACTCGGGTGCCCGCGCTGTTTTCT  
ACCCACACCAAAAACAACACTACGGCTCCAACCTGGTGGCGCAATCGACCACGCCAATGCGCTG  
ATATGGGTGCTGTTCTCTTTATGATGTCTGATGAAGAAGCTTCTTTGTTTGGCCCATCTT  
AAATGGGGCTTTTCGAACGAGAAGTTAGAAGCCATGACTGACGAAGAGCTCGGTGATCCTG  
CTGGTCGTCAGAAGGCAGATTATTACAAGTCAAATCCTCTGGACAAAGAAAAGTTCCAT  
CTTGCTTTGATTTGATTATGGCGTGATGAGTTTTACCAAAGCGGCTTCGGACGCTTTTTTC  
GGGAATTTTATGAAGCAAATTATCGTAAGGCTGTTACGCCGATTTACACGCGACAAGAAA  
TCACACAAAATGGCCTGGGCACGAGTGTGGCAAGCTGCTATCGAACACCACACCGGGTTT  
CCATGTGAGTTGATGCATGAGGCTAAACCATGGTCAGAATATGATCGGGTCTATGTCTAT  
TTCAATATTGCGCCGTATGACAGATTGAGTTAGTTTGGCGGTCCCTTAGCCACAATACGCT  
GAGTTTATTAATGTGCTGAAGGATTCACCGGTGAAGTTGTTGCATTAGACAAACCTTTG  
GCCCGTTTTGGTGAATTCTGCAAAGCACGTTGTTTCAACAAACATAGTGAACCCAACATG  
AAAGTTCGAGCTATGGAGAGGAATTGATTGGGGTTCCATTCAAGCGCAATTTGACAAA  
GCCACCTGTTTAAACGATGGCTTCTTTGCCGTTTGAAGATGTTACACTCGGTGATTCTAAC  
AGTATTTCAAGTGTGGCAGCCAGGCTATACGGCTTGTGCTGCGACGCGCAAACATTACGT  
GGAGCTTTGAAAAGGGGATTGTCAAGTATCCTTCTGATAAAGTTCGGAATTTGACAATT  
TATTTTGAAAACATCGACGTTCCGGTATCGTTTCGGTTTACAAAATAACCCGATTTCCGGAT  
GTAATTGAAAAGCTCGACGAGTATGAAAACAACACTAGTCGGACTAAGGGAGTCTGGACAA  
TTTACCGGAGAAATCGAACTTGTGCACCTGCTTTCGATTGATGATGAGTCAAGAAAATC  
CCAACAAACAATATGCTTAAACGGAAAATCGTTTAAACGGCAGTTGGGCTGAAAGAAATTCA

TGGATGAGCATTTC AATAATGGATTATCGGAAATAGCATTCAAACACGGTTTCAAGGTT  
CATACTTGCCAAACAGCTGGTATGTCGAAACGTATAGAGACCCAAATCATTCTTTACT  
CGCTTGGAAGCCATGAAAGGTTTGCATCTTGCCTTACCATTCTATCGGTATGAAGGGTTT  
AAAGATAGCAACACTCTAGAGTTGTTTGACATCTAAAGGCCTTCGGGCTTTTTTTGGGAT  
AAAAGTGTGTACATGTGTTTTTTTGCTCGATATTATGGCATTGCTTGATAAAGGAGAATT  
GAAAATGTCAAACGACCAACATGTTATAGCGACAATTAACGGCTCGAGTTCAAAGTGC  
GCTGTATCGCTGTCGTGCCATGGGGCTAAAGTTTCCGGGAACCGAAATTTTTGAATTTGT  
CAGTGTGGAAGCATAACGACTGGCTGAATCGTGAAGATGACGATGGCCTAATGAAATA  
TGAAGGCAAATTCGATCGGACCCACCCGTTCTGTCGTAACAGTCAAGCAGGCTGGTTCTCG  
GAAAATCTATGTTGATATCATCGGCGAAGAAGGTCAACCTTTGGTAGATTGCGAGTACTA  
TGCCTTTGTTCTGAAGATTTAGCCTCATTTCGAAAAGTCTAAGGACAGAGTAGGCTTCA  
GAAAATGCGATAAAGAGTGAAAATAAATGTGTACTCTCAATGAGGCTATTGATACTATAG  
CCTCATCAAATAAACGAATACAGAAACACGGAGTATATAAAATGCAAGTAACCATCAAAA  
ACGGTCTTTACTTTGGTAATGTTGTTAACGGTACTTTTGAAACTAAGGGAAACACCTGGT  
GGGATGCCAGCGAGAACGATCCCCGCGAAGGTAAAGTTAACGCCGTGCTGAAAGGCAAAT  
CTCGGATGGTTTGGGTAAATCGCAATGACATCGTGATTACCGAAAGTTTTGATGGTATTG  
CTCAAACCTGATGTCGCTGAAAAACTGTTGACGAAATGCGTTCTCGAGTCGCAAAACGCT  
TCGATGTAATGGACAAAATGACCTTAGGACTTGTTAAAGGCACCATTTCGTTCTCTGATTA  
TCTCTGGTGCTCCTGGAATCGGAAAGACCATCAGCTCGGAGAAAAAGCTGAAACATGCTG  
ATGAAATTGGCGGCATCTTTCTCTTCCATAAAAGGAAAGTGCTCTCCCATCGGCCTCT  
ACATCCACCTCTGGGAAAACCGTGATGAAGACTGTGTTGTGCTGCTGGATGACGTCGATG  
TGTTCTCCAACGAAGACACTCTCAACTAATGAAACCTGCTCTAGACACTGGCGAAGAAC  
GCATCAGCACATGGGGTACTGCCAGCAACTCCTTGGCAGAACGCGATATCCCCAACAACT  
TCGAGTTCAAAGGTTCCATCGTCTTCATCTACTAACGCAGATATCGACGCTGAAATCGATC  
GTGGCACTAAACTTGCACCGCACCTCGAAGCTCTGCAGTCTCGCTCCATCTACCTAGACC  
TTGGGGTTCACACTAGCCGCGAAATCATGGTTCGAGTGGAATACGTAATCACTAAAACCTG  
ATATGCTGCAAAAACGCGGACTGTCTGAAGCACA AATTGTCAATGCGTTGGAATGGATGA  
AAGAGAACGTGGTCCGCCTCCGCTCTGTATCTCTGCTAAGTGCCCTCTACCTCGGCGATT  
TCATCAACACTGATAGTGATTGGGCCGATGTTGCTGAAGTTACACTCCTGAAGTAATACG  
GATGAGCTGGAGGAATTCCTCCAGCTCCTTAATATTGTTATTCATCTTTGTA AAAACAAT  
CAAGCTGGTTCACACTGGTTAACCCAAATGGAGAAATGAAATGAATCCGAAAAAATGGTC  
TTATCAGGAAATATTTTGGGAGTGCAGAAGCAAAGCCCCAAATTCCTACGGTTGAAGGTA  
TTCGAGCAAATGCTCTTGGAAATTTTCAAGCAACTCGAAGATCGAATCGCTGCTGATTTCG  
AGACTCTTGACCAAATTGCTACTCGCCGGCAAACGAGCTGCAAGCGCATGAACTTGCCA  
TCAAGAATTTGATGGAACGTCATTTCGGCCATAATGAACAATTTGTCTGCTGAGCAAATC  
AAGTGAGTGACTACATCAAACCTGCTGAAGTTATGAAGGCTAATATTGCTCATATTTGCT  
AATAACCAGAGGGCTCCTGAGGAGCCCTCGTTTTTTGGAATCAATATGCAATACAGTTTT  
GGCGAAATCACGACTTTGGTATTTGGACTAATATTCATTATGTGGCTTTTGTATAAAGCT  
CGACATTTCATATTGGATATTTTGGATGCTGTTTGTTCGCACGTTTGTTAGGAGAGATTT  
TGAATCCAGTTGCTAAACATGACTTCAAGAAAGGTGGAGCTCATGTAGACAAGAAACGAC  
GCTTAAATGAAAAGCGCAAACAAAAACATAAGAAGGTGTACAATGATGGA ACTAATTATT  
GATGTTTGGAAAATTGTAAGCGTCGCAATCGGCGCATTATCATCATGCGATTGATCGTA  
ATAGCTTCAGCTAGCAAAGGCTTAATTTCTGCAAGCGACCATATCTACGAAATTTTAGAC  
AAATGGCCAAGTTTGAATCTTCGGGTCAAGAGTTGTTTGGTAATTACCGCATTGTTGTC  
ACCCCTTTGGTCATTGCTCTCCTTCTTGT TTTGATCACTCTGTTTTGGCCAATTGTGTTG  
CTGTATATTATCGCAAAATAAAAAGGTATG TACTTTTTGAAAAGATTTTTGTAAAATGTA  
ACATATCAAATTTTGCCGTATTGATAAGAGAAACAACATGGCATACAATGAAACAATAAA  
AGAAATCATTTCAATTGCGTCAGTTCTGATCAAATTTGGCTGTGAAGACATTCCGAACAA  
TCAAGA ACTTTTCGATCGTTCTTGAACGAATTGGGTTTAAATCACCAAGTGGAGAAGT  
GTTCACTCGAGCTGGTTTTAGGACAAATGATGAAGCGTCTACCAGCTGATCAGCGTGAAG  
AATTAGTAGAAATGTTCAACCAAGGTCATCGCGACGTCAATCACCA AATGATCGTGTATC  
CAAACAGCAACTATGGAAATATTATGGAAATCGAAATCGAGAAAAAGTACCGTGTAATCG  
ACGCCTCTCGTTTTGAAAACGAGCACGGCATCAAAAATGGCCATGAATTTCTTCGTGGATT  
CGCTAGATGAGGATGGAGATATTAGGTCTCGCGGAATTGCCTGGAATGGAGTAGACGGCG  
ACAGCAACGATTCTTCATACGCCGTTGGGCATTGCTGATGAAAGGCTATCAAGATCATT  
GTCCAGAAACACCAGCGGATTACTCAGGCGCTATTGAACAAGTATGAAAAAAGGGAACCG  
TAAGGTTCCCTTTGCTTTATCTAGCTCTACTCTAAAAGTCTTTCGGCTTGATTGCAAATA

ACGAAAAGATTGTTTTTCATTAATTACTGTCTTTTTACGCCAAAACATCCATACTGCCCA  
GCATAAACGTTGTCTAAGTTTACAATCGGGCAACTGTACATGTATTCAAACCTCATTGTGC  
CCCGCAGGAAGAAACGCAAAATCCTTGTAATTGCTAAAATCTCTTCTGAAAAATGGACC  
ATATATTCATTAGATGTTTTGTTTATTGGATACCCGCCCTTTCCATATCTACAAGTTCC  
AACGGCGTTTTCCCTACGTGGCGACCATTTCAACGAAATAGTTCAAGTTTCTACGTCTA  
AAAGAAAATATAACTGAAAAATCTGCTCGACTTGAAACATATGCTATTTCAAGCTGTTCT  
TGTGTGCTGCCTCAAATTTTCTATCGCGTTCGGCTTGAAGAATTTCTGGTAATTTTGA  
AACCGAGTATCTCGATAAACATTGAAGATTTTCGTCTTGATGTACCAATTGAAACCAAGT  
ATGAATACAAGGATCAGCAAAATTGCCCGATAAAATACAACCTTCGCCGGTGATAGCGTCT  
TTGAACAATCGGTCCAGAATTTCCATCAGAATCCCCGCACGACCAGGGGGTTGAGTTCT  
TGCCTTTGGTTTCTGTACTCATAAAGTTTTTACTCCTGTATAACAGCTCTATTTAATGC  
TTTCGGCACCTGACGGTGCCGAAATGTCATTTATAAGAATCCATTGTGCCAGTTAGTTCA  
TCTTTTGCAACTCGCATTGCCCTGTTGGGGGTTTGCTTTGCCCAAGATGAATTAGGCAAT  
TCAGAGTATGCTTTAGACCAGTCCTTATTGGCTATGAATGCGAGTAATATTTTGAATCCA  
GATAGACGAGGACCTCCCATTTGGAACATTAAGTTACAAATAGCATTTTTTTCTAATAGGG  
TCACAAGGATGATATCCTAATTTGATATTAGGATATTTCTTGATTTCACTTTTGACTGTT  
TGAACATCAGAGCTAAACAGTGCCTGCACTCAGAGATTACCCCGTTCACCTGG  
CAACCAACCTGTTTACTCAATGTATGGTTTATCAAGGCCATATCGGTTGTCTTCTGAGGT  
ATAATCAGGTGACCTATCCCAACGGTAGGGTACCCTAGATGGTCCCACTACACTTTCAA  
ACTCTTCCCTCATCGTAGATGAGCATGTCTTCTAACGTCATATGCATTCTTCTTAATTAT  
TTCCGAATATTGACGGGTTTGGTGGCCAGAAAATGATTTAATCAGCTCGCCGTTATACG  
CCGCAAGATGCCCGGCACCCGGCAAAGCCATATCAAATATGGCGACCATGACGAATTTT  
GACCTCTATCACCCACATCATGTTGATCAAATCTCCATAGTTTCCAACCTACTTCAAATT  
GTATTCGGCCTCGGCCCGTTGGATGCGTGAAGTTGAAAGTACGTGAGCCATAACCAATCGG  
AAACATATTGATCTGGTGGCGTGTATACTCGAGTTTCTTGCCACGCTGGTTATCCCATC  
TCCATCGTAGATTAACGTATCCGAGATCTCAGCCGCGATGAGACGCCCGGCCAGTTCCGA  
TGTATCCGATTTTTATGGTTGCACGTTGTAATGAATTCCGTGGAGTAACTGAAAT  
TCTGATTTCTGTTGTACGGATATCTAAAGCCAGACCTCATGTAGCACCGCGATGGCGATC  
TGCTTTTATTGAAGTAACTCGATAACCCACCAATTTATAGGTGACGTACCTTGTCATAAT  
AAAACGCCGAAAGTTGTGGGTCTGCCGCGTTGCCTGCGGAAGATAGTCCCGCAAATCGCC  
GGACGTTGGTAATCCAATTTGGCTTTTTGATATCACCGGTATAACCAATCGCGTTATACC  
CAATGCTCCAAAATCGCCCATGGCGTTGAGACATTTTGCCTCCTAATGTTATATAAAGTT  
CAACGCAGCGTTCACAGTATAAACTATTGTTCCGCCTTCAGTGGCAGCGAACTCGTAAGT  
TTGAGATCGAACTGTTCCCTTGTGGATTAAATACCCCGCGGTGCACACCATCTACTTG  
ATACCATCGAGCCTCTGTGCAGTTGATATATGTGATTCCACCATTTCTGATACGCACCCA  
TGCCCTGCCGTCCAAAATAGGGTAAGATTAACGGTTGTGCCATCTATATAAGTGTAGAT  
TGTCTGACGGGTTGATGCATTATAGCTAAACGTCGCATATGGCGGTGATTGTTTCCAGT  
GACAACGGATTGTGTAGATGCAATCTGCTTAAAGACTAGCCATTCCAGCCAACTGCTCGAG  
TAAACCTGTTGTTCCAAGACCGGCTTTACTCAGAATGTTGGAGGCCCATCCATTGGCCTG  
GAACTCGGTGTTTGCCTGAGACAACCAGATGGGAACGTTAGGTACGGCCATATTCCAAC  
CCGTCACCTTCTCGGAGAGTTTCTTGACTGCTCCACCAGTAGCGCAATCAATGCGGAGT  
ATGATAGCGTCAGGATTTCCGGTCCCGTCTTCGTTCCCTGAATCCACTACTCGAGTAACAG  
CTTCGGGTAGCACCTGCTCGACGTCTTGTGCAATCAATCCGACCTCTTTCTTGTCGTA  
CAGTGGCTTCAAGCGTCTGCTTCTTGTGCTAGGAGTAGGCGGTGAGTGTGACACTTTCC  
GTAGCGCGTCACGTAATCCACAAAGTTCTTCTTAAGTCGCCGGTATGACCGGATGTA  
CGTCATTCGCGTTCACATTCCTTGTACATACTCCCTGCATACGAAGCGAGTCCTTGTGAGT  
GGAAGAGGAAGTCCCCTCCCCTCCACAAGTGTAACGTACTGGCAAAGCGGCCTGCCATGT  
GGAACCCGACGCCCGGGCGACTGTCGATAGCGGGGTTACCGTTCACCTCGATAGCGCACT  
GGTAGTAGTCGTTTCCCCCGGCATTATTTACCACAAACCTGTCGCCTTGTTCACCAGCT  
CGAAAGGCCCTTTCTGGGCACCGGCCACCTGTCCGCAATCCACGCTTTAGTTCCAGCAA  
AGTTGATAGCCAAGTATCCGAAGAATCCTGCTGCGTTTCCGTGAGCTTGGTTGAAGAGAT  
AGGTCCATTAGTATTCGGAATGCCCGCAATGTTGGGTCTTGGGAAGAATCCAGATTGAC  
GACGGAGATTACAATCGCCAAAACCTGTGGAAATGCCAGTTCCGTACGTCCCAAGAGCAA  
AACCTGCCGGAGCCGCACCAACATCCGAGGCAGTCGGCTTGTTCCTTAATGGTAAATCT  
TGCAGATAGCCCCACGTCCGCCACTACGCGATGTGAGAGAGTTATCAGCACCTATCGTGC  
CCCCAATCCACAGGCGTCTCGCTCAGAGCCATCAGGTGCGCTCCACACGATGTCTGCCA  
TGTCACTAGCAGAGTGCCCTACAAGGTCAAGTATCCCTGTGACTCCTAGCATCCCGGATA

CAGTCCCACCAGCAACAGGCAGAGCCCCAATTTTCAGACAGGGACCAACACACGTCACGCG  
CACCGTTAACGGACTTAGCAGCGTTGCCGATAGTCAGGGTGCGGGCTGTACCCAGTTTCG  
CCGTGGTCATGTTGCCGGAACCGTCAAAGTTGGTGCCGTTAATCTGGCGAGCCGTAGCCA  
CCTTGGTTGCCGTGGCCGCATTGCCAGCAAGAGCGCCCGTGAAGGTCGGAGCGGTACCC  
CAGCAGCCACGACAAGCTCTGTAGGGTTTGTAGTACATCCAATAGGTAGTGTTCGCTCCGT  
TTACTCTACCCTTGAAGTATTCGTTACCGTTATCACCGGTTTTGAACCACATGTAGC  
TGTCGGTGTGTCGTCAGAGGCATTCTTGAAACCAATCTTAGCGGAATCAGAATTGAAGA  
CCCAGCCCAGCTCGCAGGCAGCATCGACGAACGTAAGCCCACCGGTCATTGCATCGCCAG  
CTTAGCAACCGCACCAACGTTAGTTGCAGAAATCGTAATATTCGATGTGCCATCAAAAG  
GAACACCTGCAATACGTCTAGCTGTCTGTAATCTAGATGCCGTAACGGCATTTCATTGA  
CTGGAAGAGCTCCTACTGCTTCTGGAGTTGGGTTATATCCGTTATCGTAAACACGATTGC  
TTCCGTTATACGTACCAGAGCCTTTATCAAAATTCGCAAGAACAATGGTTTTTGTATCTC  
CAATTAATTGGCCATTAACCGCAAAGGTAGATGTTCCATATGTAACATCAGTTGCACAGG  
CGGTGACGGCTGTTTCGATATCGACATTAACCTCATATCGGGAAAGCACGTGTTTCAACGT  
AAACAACAAACCCATCTACGGCCTCAGATGGTCCGTGGATTGAGTAAATTGCTCTTTCTG  
ATGTAGAATAAATCGTAAACTGGCCTACGGCATAACTTGCACCGTCACCCCATCCACTGG  
CGCGAACATTACCGGTAAATAAACAATTGTTTCATTGGAAGTGTGTATGGCCAGATAAAG  
TATCGATAAAGACAAATGAGTTGGATGCACCATTTGTTGCAAAAAGAACCGGAATATATC  
CGGAAGCAGGTGCTCCAGCAAGAAGTGTGATCGTCAGATCTTTCACACCTTTACCTGAAG  
CAGTAACAGTCGATTCAACCAAATCACGACGTTCCACAGAATTAGCTTCGGTGCCTTGCT  
CGGCAGACAAAAGAACTTTTGGAACAGTCAAATTGCCAGACATAGTGTGCCGATTTTTT  
TAACGTCATCGGAGCGTGTATGGCTGTCGTTTGTACTGTCACTGCTAGAGAAGCATTG  
CACTGCCGTCGAACGATACTGAGCCAGTTGCGTCTCCGGTCAAACCTCATAGTTCTTGCGC  
TTTGCAACTTTGATGCATATAACAGCATTTCACCCGGCAGCTAATGCACCAATTTCTGCAG  
GAGTAGGTTTATCAGCTTCGGTATAAATCTTGTGGTTTGCTAATTTAGTGCCTGCCGAGT  
CGTATGCGTATGTGTACATAACCATAACCGATACTTCCGTAATCGAAAGTAATACTACGGG  
CATTTCGCACCGTTACTGGCCGTTGGATGAGAAACGTTAATAGTCAATCCACTGAATCGGC  
CCAGACTGTTATGTCTGAAGAATCCGGAATAGCCATTGACAAGTTATGAGGTGTTCCCA  
TATCAGACGATTTGCTCAGCAAGTGTGCATTTCTTCGCAGTATAGGTGTTTCAGTCAGATA  
AATCGTGCATCAGCCTCGCTCTGGTTAAAGTATGGATTATCCATAGCAGATCGTTGGATA  
AGACCGGTGTCGTAATCAAAGTCCGCCCGTTCGATTGTATACGGCGGAATCAAAGCGA  
ATTTTAGTGGTAGTCATTCCATCTTGGGCATAACCGAGTACTAAATCAGTTCCACCAGGT  
GCGCCAATATAACAGGTTTTTAGACGAGTTTGTCTGAATGAACTGGACACTTCCATACTTT  
ATATCAAAGTTTCCAGTATTAGCGGACACCAACGCTCCTATCAGAGAAACATCACCATTT  
AGATTTAGCGATTTTAAAGTCCTTCAAATGCCCATGCGCCGTTGGTGTGTCAGTCATTGCCAC  
TTTAAAGTCACCAGCCGCATCAGTTCCAACATATGACTGAGGCGTATTTCCCTTTGAAAA  
ACGAATATAAGCAGGACCACTAACGCTTGAAGCGTAAATGGGTAATCCGTGGAAGT  
TTCGATGTACAGAACACCCGAGATAGTATCGCCAGCACGAGATACTACTTGGAGTTCATT  
TGCATTTGGTTTATCGTTTTCCGAATAAATTCTTGGACCCTTGTACAGGATAGCATTACC  
GCTTGGTACCAGCGCAAGATTTCTTGGTGCCAAACAGGTGAACCAACGATCGTGGTTCC  
AACTTTTAAATCTGCCATATGGGCTCCCTTGTTTAACGAATGATTGGTGATTCTTTATTA  
TATTTAAAGCACTCAAATTAAGCAATCCTGGCTCCAGGTTCAAGCTTGCTTGAACCTTA  
TCTGTTTATGCTTTTAGTTATAATATCTATTAAGCCATAAAGGATAAGTTTTTGGCAGGGC  
CAAAACCTGGAAGCCAGGATTTGATATTCTATTTAAAGCAAACAAGGGCCAAGAGGCC  
TTATCTTTTCGTTAAATCGTTTGGAGTAATGATATTCTTTTGTTCAGATTCAAAGCTG  
TAATACAGGATTGGTGTAATTACCGGTATTGCTGATGATATTAGCTCTAATACCATTAC  
ACCACATGCTGCATCCGCCACTTTATCATCATCGTCCCTTGTAACCCGCGTTATAGTGAC  
ATTTGCACAACCTGCTGTTCCAGCACTGACGCTTGACGGATATCGGTATGCTGCAGAAGC  
AAAAATCTTCGCCCTGAGCTTTGCGTTGGCAGTTTGAATAACCTACAAATTTTGTCCA  
CACACCTGGGGCCGGTGTGTGCGTTCCAGCCATATACTGGTTTTCCATATGCCTGAAGA  
GTCCTGAGTCCATAATAAAAAAACATCTTCCACCGGCGGTAACCTAGTGTCTAGTCGCT  
GTGCAGCTCGCATTGGATATGATATATTGATTCCCATTGCGTTGTTATATTTTCAGACAA  
ATAACGCTTAAATTCGTATTGATTCCCCTGAGAAATATTCATTTATGTCATCGACATT  
TCTTGACGGTAATCCACACGCTCCAATATCGACACCGTCGTCAAAAACAACCTTGCAAATG  
GGCATTGTGTCTTCTGCGAAACTGTTAGGATTATTCCCAACAAAATTCTCGTAACAAA  
GCGCTTTAATGTTATATTGAAAATTGCAACGTACGAACTTCTATATACTCTCGGAGTAAA  
AAGAGCATCGGATTGTGATTTAGATAACTAGAAACAGGCCACGACATAGCTCCATATTG

TTTCATGAATGTGTCAAAAATCCTCTGACGATCTGATAGCATCATGCGAAACTACTACTCC  
TATATTGTCAGATGGTGCAGACATTAGATATGTTCTTAAAGTGTCAAGATGCTCGCGTCT  
AGAATATATGTCCAACGTCGCAAAATTAGATGCTACTCCGGTTGGAGAAATAGTGATAGC  
GTTACACCCCTCCCGTACGAAGGCAAAACCGAAACAACATTGATTTTGACATACGGCCC  
TCTGACACTGGAGTCATCATTGACTCCAAGTGCCTTTATCATATACTTTATTGCGTTATT  
TTCACCTAAGTGATTTGATTCAACGTAAGATGGCCCAAGATGGGCCATAAATTGTTCTGT  
CATAACGATTCCTTATTCTTCCCAGATAAACTCAACTGTCTTGGTCAAGTTGTTGGCAAC  
GATTTTCACATTACCAATTTTGTTCGAATCTCTAATCGTTATATTATTGGGAGATGAACC  
TGTAATATCAACTGGACCTACGTCTTGAGCAGTAGGTTTGTACCCTTGTGATAAATCTC  
GACTCAAAGTTTCCGATCCTTACGATTGGATTCTGATTTCGTATCAAGACACACACGGCC  
ACTCGCTGTATCGGTATTTCCGAAAACGAAGTCATTTCCACGAGAGGTAATGTAACGATT  
TGAGTTGTTGAAATACAAATACTTAACATAGTCACCAGTGTGTTGACAGAAGCATTGCTAC  
AGTCATAGTCGATGCACCATCACGACGAAGATATGTTGGGTTGAGATTTGTCTGAGCGTT  
GGCAGTATGAATTACCGGTGATCCATTAATTGTGAAGCCATCAGTAGAGCTTGCCAATAC  
AGCCATTGTTGAACTAGCATTACCAACTATGAATCCGCCTGCAACAGATTGTGCATATTG  
ATTCGCCGCTACTTCGGTTTCACCCAGAAAATTCTCGCACCTATGTTTTCCATAACAAG  
GAAACCAGCAGTTGATTTTATATGTTGTGCAATTCGTACATCACCGGCTCTATTAACTTT  
CAGCTTACAAGAGAAAGTTGAACCGTCTTTAGTTGCAATAGCAATATCACTGCCAGAAAC  
TTCAGAACCACCAACGCCACCTGCAATAAATGCCCAATCGTTTATTGCAGCATCACTTCC  
AGCCATTATGGTGATACCATTGGCTCCATCAGCAGCTCTAGTTTTACCTATTTGAACAGA  
GTTTGTGCGACGTATTATCGTTAATCACTCTTGGGCTCGTTGTGCGTAGCATTGGTAATAAC  
TGCAGCTACCATTGCGGCAGTAAAAGTCATTCGGCCTGTTACGGTTTGAGCAACAGTTTCG  
ACGGACCCAATCGTTAGCAACAACACCACCAAGTTTCAGTGAGTTCTGGGCGGTTGTCAT  
TTTCGGCATATAGTTTTGCAACGCATAGTTCAGACTCACTGGACTAACGGCCAGCCCATC  
ATTTGAATATGATGTGTACGGTTGGGTTGAAACGACAATATCGTGTCCAATGAAAGTTGA  
CTCTACTGTTTCTGCTTTGACAAACCCACGACGTGTTTCATTTCCCTGACCATGTCGGTTC  
AGTTTGCCTATATATATGAAGTCTTCTGGACTAACAGCCAAATTAGTTGCTGTTCCAGT  
TCTAACTTCAGCGGTTGTGCAACCCGGATAATACCGTCCAGAGTTCTCGTCGCTTTTCT  
TCCATCGAGTTTCTTTGGAGTTACGATGGTATTGTGTGAACTAGATCCATTCTCCTAAG  
TTGGGTTTAAACACGCAATGTCCAACATTTAGCTTCTGTTGCAAGACTTATTCCAACAGA  
GACAGTGCTCCAAATGGTTCAGATTGGGTCAAACCATCAGTCGTGTTTACCGAAATTCT  
TGCCGATTGTTGAAACGATTCTTCAATTTCAATGGAGTGACGATAGTTAAATCGTTTGT  
CGCAGTATCTATTTAGATGTGCGTGGCAATACGGGCAATACCTGCGAGAGTTTCTGTTGA  
AGTGCGATCATTCAACTTTTTGGGAGTATTAGCACGGGTATCATCAGTTCCGGCATTGT  
TTCAGTCTGGGTTGCAATCTCAATCAGACCATGATTTGATTCTGTCGCTCGACGAGCTCC  
CAATCTTTCCGGCTGTTACAAGCAAAGGCCCAAGTGGATCAGATGATCCCCCGTCAACTTC  
CGCCTGTGTGACAATATAACCTATCCCCTTAGCTGTTTCGGTAGCCTGAATTCATCCAG  
GGCTAACGGTGTGACAGCTTTCGACTGATCGGCTTTGTTATAAACAACAGTCCCAGCAGC  
TGACCGAGTTGTACCAGCTATTCCATTTTTAGAAACCACGGCTAAGATACCGGTCAGAGT  
TTCTGACGCAATACGATTATGCAACTTTTTGGGAGTCACAATTGTTATGTCGCCAGTTGA  
GCCGTTTGCTTCTGCTTGCCTTGAATCTCCGCTAAACCACACCGAGGTTCCGGTAGCAGT  
CCTGTCACTTAAGTTTTTCGGAGTGACGATAATGTCATCCAAATAAGTTGAAGTGGCTAA  
CTGATTGACTTCAGCGGCTGTTGCCAAACGGGCAATGCCACGACGAGTTTCAGTAGCAGT  
CTTATTAGCTAATGTTTTTGGAGTGACAATAGTTTCGTCATTTCAGGTTATCTTCGTGATT  
TTTGTACTTCCGGCTTGATACGCGAGAGAAGCCACGCCAGACGATCACGACGAGTTGT  
ATCAACACGTTCAACTTTTGGTTGAACATTTCCGATCATCCATCCGTATTGCGAAGCAGT  
AACACCCACCAGGGACGGGTCTAAGTGTGCGTACATTAGCTCGACATATGGAACGTAATC  
TGTGTCAGCACTTATAGAAATAGATGAAACCAATTCCCACCCATTTGTCATCCGGTATTC  
CGAACGACGCTGGAACCTGCATTTGACCTGTCGACCAAACAATCAGCTGATTTGAACCTGG  
ATTTACTCTGATTGTACAAGTTTGACCTTTTCTCAGATGATCCATAGTGATTTGAACACG  
GTCACCTATGGCTACTTCTCTGGAAGAGTCAGCACGGTGGTCTGCCTTGGCAAATTACT  
GTTGCCAGTCACCAGAATGTGTTCAATCGGCAGCAGTGCTTTGTCAGTTTTGGTAACACG  
AATGCGTGTCTTTGGTCTCCATCCCATACTTTCCGAGTCAAAGAAGGAAAATCGCCTAC  
GAATGATCCGTAACCAGAAGTGCGCGATTTCGATTTTTGTAACACCGGTTTCATTAATATT  
GTGACCTGAACCTGGGCAAGTCTCAAGAGTCGAGTGTTAATCGGGTTCATCCCATCAAT  
ATCATGGGTTGTAATTACATCGCCATGGCTAGTATGTTTTGGCAGAACAAGACGAATTGT  
TCTTGCCGCAGTACGTCTCCAGGTAACCATCCCTGACTGCAACTGTAATCCTTGAATCCA

TGGCTCAACAAAATAACTGTTTATTGCTGTAGCTGCTACATCCACTTGCCATCTGTTTCC  
AGCTGCTTTATAGACGAACATATATTGGCATAATGGGACAGTTGCACGGAAGCGAGCGCC  
GACTGGCTGCCTTATATTCGATGACTGCTGTTCTATAGATACAACTTCCAGATCGTT  
AACACCTGGCTGACCGCCTACGTCCTTTATTACTAAAGTATCGCCATCGACTGGTGATGT  
TGGCAAGTTGAAAACAGTTTGTGAATCTATTGTCAGCAGTGATCTATTGACCAGAACT  
CAACTGAAGTGAGGGCCCCGTCGAGTTAATGAACTGCCATGTTGGGTCAACACGGAGACC  
AGTCCATATTGTGACGTCGAAAGCTCGAGCCGGGGAAGCAATATCTGCTTTTGCGTAAATA  
AATTCGACGCTCGAAAATTACAGCATGTTTTGCATCATACCCACTGGTGCTGTCATATTC  
GTAAATTGTGTTATATTTGTGGAAAAATCCATCGCTAACGCTATCGGACAAAATTGTCTG  
ATCGGCCATTGCCACGTTGATCAGTTTTTCGCCAGCTGCATCAAGGCCGCTTGTGGCGCG  
AAAGGCTTGTCTAACATTTTTGAAGCTCTCCTTTTTCTAACTTAGTTATTTATGTTAGT  
ATGTCTAGGTGTTCAATAAGAGAAATTGAAATGAACTTAAATGATTTGATGGGTGAAACC  
ACAAAGGATGCTGTCAATATTATTGACGCATCTCAATTAATTATCGCGACAATAATGGCT  
AACTTTACTCCTGAAGATGTAAATGAGCGAATGCTCAGACATGGAATTCTGGATACGGTT  
CGAAACACCGTCAAAAAGTTCAAAAACGAATATCCCGAACTATTATCACATTTGACGAT  
TTTGCCAATGGTTATTGGAGACGTGACATTGCTTGGTATAACAAATTAACCGGAAAGGCT  
AATAAAGAAGAATCTCCATCGGATTCGGAACCTCTCTTTAGTATTATCAATAAAGTGGAC  
AACGAAATGCTTAATATCTACCCAGGTGTTAAGATGATCAAACCTTGATAAACTGAGGCT  
GACGATATTATTGCAGTTTTGGTCAAAAAGTTCACCGAAGAAGGTGATGTGTTATGATT  
TCATCTTCTGACTCTGACTTTACTCAATTGCACAAATACAAGGGTGTCAAGCAATATTCA  
CCTGCTCAGAAGAAAGCAGTATAGCCAAAATATGGTAGTCCAAAGCATGACCTGCTTGT  
AACTGATTAAGGGTGATGCAAGAGATGGTGTTCGGGAATAAAAGTTCGTGATACATTT  
GTCCTTGATCGTGTGCAAGGTGAACGTGCTCCACCTTGTCTACCAAGTGGATTAATTCA  
ATCGTTGAATCTGAAGACCCTCGAGCTGCATTGGAAAATGAAGAATGGCAAAAGCGTTGG  
GATATGAATGTTTCGGTTGCTTGGATAAACTTCCACCACATGTTTCGGATCGAATC  
ATTCAAGCTTATAATTCTTCAGTAGTCAATCCTCGTGGTAAATTGTACAGCTATTTTGT  
AAAAAAGGCTTGGTTAACTTCTCCATAAAGTAAATCAATTCTAAGGAAATAACATGAAA  
GAACAGACGCAAAAGAAAGAAACAGTACGAATTCAACCCGGCTGTTTCATGGCGAACGTCT  
CCAAGAAATTATTACCGAAGCATCAAATCTGCGCACCATGCAAGAATCTTATGCTGAAAA  
GGTAAAAGAGCAGCTCAACATTGCCATTACTGAATGCGGTGTTGACGGCAAACCTGTTCAA  
TCAGCTGTTCCGGATTTACCACAAGCAGGAACGTGAGCAATTTGAAGATGCTGCCGATGA  
AGTTACTTCAGTGTATGACCAAACCTTTAAAGGCCAATGATGTCAAATCCGAACAATCTG  
AATGATAAAACCGCAAACGGGATAGAGATAGAAAATCTGGTTAAAACTGGATTGACATAT  
CTGGAAGCATGTGTTTCAGTGGTTGGAAGAAAATCTTTAGAAATTAACCTCGTGCCACAAA  
TATATCCCGCGAGCGGTAATTGACAAACTTTCAAAGAATGTGTCTGTTCCGACATGCTT  
AGACCTTCCATTGCAAAATCGATGACACGAAATAGTTTGCACTTTTTGATGTGAGATTTG  
TATGATCGCTCTCCGATATTCGCCTAGACCTGATAGATTTATTAGTGCAAAGGGCGCGTT  
TATGCTTTATTTGATGATGAAACAACGTATGGCTGGAAAATATGACATAATCAAATATAG  
TTGGAATATGAAAGTTACTGATTCTGCGTTTAATAAACGCAGAGATAAGTACTTCTTTGA  
TAAGACGAGCGATAAATTTACCTTAAAGACTTGACAGAGATATTTCTGGCAACGTTTTT  
GGAAAATTGAAATGGCTGGGCCGGAGATCTTGTATTATGAAGATGCAATGGCAGCCCATCG  
AGAATTGTTGGGAAGATACATCAGATTCCCTGACAGATACAGGGAAGACCTGAATAGCCA  
GGTGTATTTTTGCAATAAAGTCAATGTTCCGATAGGTAAACTATTGGAGTATAATGAAA  
AACAAACAACGAGCCCAATTTCAAATTACTCCAATCTGTCCTGATCAAAACAGAAACAT  
TTTTGGTTATTGATTCATTCCTTCGTATAATCGACAAAATCGATGAGAAAGTGTGACGCTG  
ATAAAATCTTGCAAGACAGGCATACCAAATTGGTCAATTACCGGAAATTTGTAGTAATAA  
ATAATGATATAGCTAAAGCCAAGTTTATTCAACACGTAAAAGAGTTTAAGGCTGAAGTTT  
AGCTATATCAAAATTGATGTAAAATGTAAAACGCAAAAACAACCTGTCAAAAATAAGATA  
GGAAAATAAATATGTTCAAGCGCAGCAATCCTTCTCAACTTCAAGCTCAACTGGCCGCAC  
TGAACCATAATGCAGGTGGTTTCGGTGGAGATAAGAATGAATGGAAACTGAAAACCTGATG  
CAGCTGGTAATGGTCAAGCAGTAATTCGTTTCTTCCCGGTAAGGTGATGAAGGTCTTC  
CGTTTGTTAAGCTGATTAACCACGGCTTCAAGAAAAATAACAAATGGTATCTCGAAAATT  
GTTCTTCTACCCACGGTGATTTTGACAACCTGCCCGGTTTGCCAAAATCTCAGCCGCGATG  
ATTCTTACAACACCAACGTTGAAGAATATAAGCTGCTGAAGCGTAAGACTTCTATTGGG  
AAAACATTCTGGAATCAAAGTCCCTGCCACTCCTGAAAATGAAGGCAAGGTGACGAAGA  
TTCGCATTGGCGCAAAGGCAATGGAAAAAATTAAGTCCATGATCAACGTCGACCCGGAAA  
TGGGCGAAACCCAGTAGACGTAACCTTGCCTTTTCGAGGGTTCAATCTTCGTTTACAAAA



CCAAGAAAGTTGGCGGTTTTACCAACTATGATGACTGCAAATTCTTGGCTCAATCCGAAA  
TTGCAAAAATCAACGATCCCGAATTCCAAAAGTTCCTCACTGATGGCATGGAAGATTTGA  
GCAAAAATCCTTGCTCCTTCCGAATTCAAGCCTCTTGAAGAACTGGAGAAGAAATTCAAG  
CAAGTAATGGGTAGTTCCATCGCTGCTGGCTCTGCCGCTTCTGCCGAATCTTCTCTGTCT  
AGCGAACTGAATGACTTCGACGAACAGCTTACCTCGTTGACACTGATGTAGTTCAGCCA  
TCCGTGCCTAATGCTTCTTGTGATCTCGATGACGATCTGGATGCTTTTTCTCGGCTAATAA  
AGAAAAGCAACCTTCGGGTCCTTTTTTTTGCATCACAATCTTTCAAAAAGTAGTCTACAAC  
TATGCCATACAGTGTAGAATGTCTCCATCAAATCAACCAAGGAGTAATAAAAATGAAAGA  
CATTCTCGATTATCCAGTTGACACCAAGGGTTCGGATTTGCCACAAGAATTTCTCGCTTT  
GCAGGTAAGTCGTTGTGAAAAGACGGTTGCCGCGTTTGGAGGTCAAGATGAATTTTTCGA  
ACTCATCAACACTAAAGCATGTGGCGGTTGGGTTTTGGACTATAAGGCCAAGTTTGAAGA  
AGTAAATGGCGTCAAATTCCCAGCAATATCAGATTCGAATTATAAGGAAAGGTGAAATG  
TCAACGAACAAAGTTCTCATCAAATTCAAATCTCTAAAGCTCGTGCTAAATTTGCAGCT  
TCCTCTGCAGCTAATAGCGCAATAGCTGAATATATGCAGCATTACGAGCTGTTTGTCTGTC  
AATAAAGGGTATGGCGATATTGTCAATTCGCGAAGATGGCAAAGAATTTGAGCTCGATGGA  
TACTGGAGTCCCGCGATTTTTATGTCAGAGCGTCGATATTTTGACATCGAAGTGATTTAA  
CTCAAACATTGTTCAAAGGAAATATTATGAATGTTAACTAAATGTTGGCACTATCG  
TTTTCTGAATTTCTCACAACACAAATGTGCGGAATCTTTATGCCCGTATTTCTGGAAAGT  
CGTGTTTACGATCGCATCGATCACCGGCTCGATTTTACTGCTCATTGCTCTTTTCACATC  
TATTAGTGCCAGAATCTTCGAAGGACTTGGCTTTGCCCTCGATAATATGGTATAGTACTG  
GAGCCTTGCCGCTGTAGTAGGTAAGTGTACCGTCAATCTGCTATTGTGCTGGTTGTGCG  
AGTAATATTCGGATTTGTTTGGGCCAAAGAAAATTTCAAGCCACCAAACAAGAAGAACC  
GTTGATTATCACCTTTGTCAAGAACA AAAAGTCTAAAATTTGCCAACGTCTGGAATTTGA  
AGACATGAGCAAAAAGACTGAAGAATAAGTTCGCAACCCGTGAGGTCATGATAAAATGAC  
CTCACTAAAATAAAACAATCTCCGGCTTATAATGTTTCACTAAGTAAGGAATGATTAATA  
TGATTATTAATAATGAACGTCATCTGGCTTCTATTGCAAAAATTCGCGATCTTCAGCCGA  
TCCCGGGTGTGATGCTATCGAATGCGCAACCATCGACGGCTGGGAAATAGTCGTGAAGA  
AGGGCGAATTCGCAATTGATGATGATTGTGTATATTTGCAAATTGAATCCATGCTACCGA  
CAGATAATCCTGCTTTACATTTTGGAAATCCCGTGCCAGGATGTACGAAGGCAAAATGC  
TAGCTCGAGTGAAGACCATTAACTTCGCGGCCAACTTTGTCAAGGTATAGCTTTGTCCG  
TTAACGCGTTTACGATCGGAGA ACTGGTCCGGTGTATTATGAAATGGACCAAAGTCTTGACC  
AAGTGCTCGGTATTATCAAATATGAGCCGGCTCAAGACGGTTCTGGCTGTAACCCGCGCG  
GTAATTTCCCTGGTTTCAATTCGAAA ACTGAGGAAGAACGCTGCCAAAACATTTTCAGCA  
AATACAGCGCTCGTTACAAAGATGTTGTGTTCCAAAAGTCGCTGAAGCTGGATGGTAGTT  
CTATCACCATGGCATGGGTAACAGATCCTGACCTGTCCCTCGCGCTTGAAACCGAAGATG  
AACCATATGCTCACGATTACGACGACGCTCACTTTATCCTAGCTTCTCGTAATCCGGTTC  
TCCGCTATAACCCCGAAAGCAAGTCGTGGATGGGTGTTGAAA ACTACCAAATCATCGAAC  
AACTGAAGAAGTTGGGCAAATCTGTGCGCAATTCAGGGTGA ACTGATGGGTCTGGTATCC  
AGAAAACCCTCGAAA ACTTCGACAAGTACCGGATTTTCGCATTACGTGCCTGGTTTATCG  
AAGAGCAACGTTTTTGCTACCGACGTAGAGTTCCATGACCTGTGCCGTGCTCTCGGCATGG  
AAATGGTGCCGAGATTGGTCTGTTGCAAGCCGTTTGAACAATATGAAACTGTCAAAGAAA  
TGTTGGCTGATGCGGATATCCGTCCATCAACCACACGATTGCTGACGGTGTGCTTAATA  
AGTCTGTTGACCTCGTAGATGGCGAGATGAATCACTTCAAAGCAATCAACAATAAATTCT  
TGCTGAAATATGAGGACTAACATGAAAATTAAGAAATTGCAACCTTTACAAGTCTTGTGT  
CCGAAATGCTGGATAATTGAAGATTATTGCTACTGCTATTGAGAATTCTATGTCTAATAG  
ATTGGGGCTGAAATGCCCTATTCTCTTGAACAGATGAAACAGATATCAAGTCATTGAAC  
CGAATCCAACACGGAGGTCCAGTGTGATTAAAGCCGTATTTGCTTTAGGTGTACCGTCCG  
ATTTTCATAAGCATGGAGGTTTTGTATTTGGTAAAGATGGCGATTTACCATGGCCATCGA  
TCCCGAAGACTTGAAACTTTTCAGGGAAAAA ACCGATGGGACTATATGTGTTATGGGTG  
CAAATACATTCCAGTCGCTCCCAAAGAATCTTCAGGGAAAGGGTAATGGTTGTTATTGGCG  
TTCCTAAGCGTGAGTGCCGGAACAAATCAGGTGA ACTTCCCTCATAATTTCTGCAATCTTG  
ATATTGACTGGATTTCTGTGAAAAAGAACTATATCCAGAAAATGATAAATCGATTATCG  
TTGGCCTTGGTCTGATTCTGTGTCAGTCGCCACAAGTGTGATGAACTCCATATCAATTTTC  
ATAAGCTTACTTCTGACTATGATACAATTGACCCAACAGTTTATATCACTGATACCGCAC  
TAGGAGTTTTCTGTGTAACGGAAAATGAATACTATCGCGTATCGAGTTGAACGTGAAC  
ATTGCACCAACATTAAAGCAGAAATTTGGAAATGATTCAATCCACCGATTTAGTATGCGA  
TATTATCACCCTGGGCGAAAGAAGACAGATCGCACTGGAGTAGGCATCCGTTAGGTATA

TGGTCGAATGCTTCGCTTTGACCTCAGCAAAGGCTTCCCGGCCACCACATGCAAACGTCT  
AGCATTGTTCCAGTCGTGGTTAAATTGCTGTGGTATATGCAAGGTTCAACCAATGTCTGA  
ACATCTGCGCAAATTGACCTATGGCGAAGACTCTGATCGTTAAACCATCCGGGATGATAA  
CTATAACAAGCAAGCCGTTGATCGTGGATATTCTGATGGATACCTTGGTCCCGTTTATGG  
CACGCAATCGCGTATGTTTCGGTAAGAAAAACCCGGTTCGATCAACTGCAAAATGTGATCGA  
TCAAATCAAAGCAAACCCCGACAGTCGTCTTTTGGTTGTTGCATGGAATCCTGAAGA  
TATCGAAAAATGGCTTTGCCTCCATGTCACCTTTGCGCTGCAGTTTGAAATATATGAAGGC  
AAACTCAGTTTGTGATGTGGAGCCAACATTCCGTCGATGTTGGTCTTGGACTGCCATTCAAT  
ATTGCGTCTTATGCGCTTCTTGTCCATATTTTAGCTCGAATTTGCAATTTAGAAGTTGGT  
GAATTGGTATTCTCTGGTGCAAATGTCCACATTTACGAAAATCACCTGAGTCATCTCGGC  
GGTATGCTTTCTCGTGAAGAACGCCCTTTGCCTACGTTGAGTTTCCCGGATATTGACAGT  
TTGAGTGATCTGCGTTTACTGGAAGCAGCCGATTTCCGTCGACGGGTATGACCCACAT  
CTAACAATTAACCTACCGATGGCTGTGTAATGACTATATGCACCGTTGTAAACGTCAAG  
CATGAAAGATGTGACGTTTCGTATACAGCGAGGCACTATAAGGGGTAATCCAGACGGAGAA  
CCCCATTGGAAACGGCAGGATTATCTTGACAATTACAAAATGCATTTAAAACACCAAATA  
AAAACCTGGGGTTATTACTCTTGCCGATTTAGAATCACTACGAGGCAAGAAATTTGGGGTGT  
GGTTGCAAACCATTGCCATGCCACGGAGATATTCTTTCTGATCTAGTCAATCGCATGTTT  
AAGGATGTGTCAAGCGTAGATGATTTTCATATGACATTAAGAAGAACACGAATTCATTCAGA  
TAGCAGAATTGACCATAGGTAAAAACGGACGTATATCCAGAGATTTTTGCTAAAGACCCA  
TCACTAAAACACATCATTTATTTGTTTACAATTGATGATGAAGTTGTGTATATTGGTCAA  
ACTAAGAAGTTGCACAAACGAATGGACTCATATGCTATTGGCAAGTATTGGAAAAATACG  
AACAAAGTCACATATCCAAAAATCCAAGTTTCTGGAAGAAGCAGTAAACTCGGGTAAGAGA  
GTTTGTGTTTGGATAAAGCATTGCTTCCAATCGTTATAACCACTCCTGCTGGGTCAAAC  
GTTATAGCTGACCTAGACGCGGAAGAGAAAAATTTATCGGTATTTTTAATCCTGTTCTAA  
ATTCAAAACTGAAGGTTAAATTATGAGCAGAACAACCTGAACTTTTTAATAACTTGATGTC  
TGTTGTTGAAAAATCCTTAAAGGGCAATTTCTACTTCAAGGACGTCATTACGAGTATGGG  
GACAAAAGCTCGAATTTTCAGCTATTTTATCGCTTCATATACCGATTGGGTGCAAGATGA  
TGCTTTGGAATGTCGAGGCATTATGTTTGAGCTAAATGATAAAAACGAGCCAGTTCGAAT  
CATGGCTCGCCCAATGCAGAAGTTCTTCAATCAGAAAGAACACCCCATGACCATTTGGGCT  
CGATTAAGCTAAGATGATCGGTTTCGATGGAAAACCCGGATGGGTTCGCTGATTAGCAGTTA  
TCATGATCGAGGCTACGTTTAACTGAAATCTACAGCTGCGGTTTTCTCCGATCAAGCCAA  
TAAAGCAATGGTGATGTTGAATTCGCCTGCTTAGGAAAAATTTGCGCGATGCAATTGTACG  
AGCCGGTCCCGATTCTACTTTCAATATGGAATATGTTGGCCCAAGCAATCGGGTTGGCCT  
TCCGTACGAGGAAGAAGAATTGATTGTTCTCAACGTACGTCACAATGAAGCAGGTCAATA  
TGTATAATTTTCTACTCTGCTGGATGACCCATTGATTCGTCATCGTATGATCGGGGTTTA  
TCCTTGCCCGGATTGGAGTAAAGTTACACCCGAAGAATGGGAAGCTGAGACTCGTGCCGA  
GACCGATGTTGAAGGAGTTATCGGTATTATGCCAGATGGCCAGCTGTTCAAACCTGAAGAC  
CGACTGGTACTCCTCTTTCATCGTACCAAAGACTCGATCAATAACAATAAGGCATTGTT  
CCAAGCCATCAAAGAACGTGCTTCCGACGATCTTCGTGGCCTGTTTTCCGATGATTATGT  
CGTTTTGGCAAAAATCGAGGCCCTTGAATCCGCTTATATTGATACTGTTGCTTAATACCA  
CAAAATTTGCGCAGAATTGTTTTACGATTTGCGAGGTTTTGACCGTTCGAAGTTTTGCTAT  
CGAAGCACAAGCGAGAATGAAAGAATGTCGGTATCTATTTAACGTAGTTATGCAACAGCA  
CGGCCGCGATTGGGACGGCGAACTCGCTGTCGAGAAAATCGAAGAACACATCATCACAGA  
ATACGCAACATACGTTCCAATGGCGTACCGTTAAATAAAGTTGCAAAAACCTGTGTACATT  
TGACGTTGTAATGCTTAGAATAAATCCATAATCAACATGGAGTTAACCGAATGAATCATT  
ACAATTACACCGTCGAAATTCTCATCAACACGTACGCTCTCGGCCGGCAGTTCGGATGGAA  
TTCGAACTTTCGACAAAAGCGGTAAAGTTGTAGGGTATATTACTGATTTGCGCAAAGCTG  
CTCATTCTGCAGCCGAAAAGAAAAGAAAATCCTAATCGGACTCTCGGGAATACTATGAAC  
AAGCTAAAACCTAACATTGGCCCAATGGTCAATGAAGTTGTGAACGAATTGAAAAATGTTT  
TTGCAGGCACACCCGCAAAGGTGTTTATTAACGAAACGATGCCGAATGTCAATTTTCATGG  
GAGCCAAGTTCTATGTTATCTTGTCTCCACTGACTGACAAAATTCGTGTATACATCACTC  
ATAAAGATGCATGCCGCATGAAGTATGTTTTCCCGCAACATGCCAACTTGATATACGTC  
AAAGCGGAAAAAGCATTGTTGACTGATGGTTTGACACAGAGCGAAGGCATCGCTCTTGTC  
AAGGATTCGGCGGAAATGTTGTTAACTTTGAGTTCTCTGCTCGGTTGGCTAAAAAGAAAT  
GCGTTATATCTCATCAGAATGGTCTTAATGGCCATTATGATGAAAAATCAACCCGACGAA  
ATCTCTACGATAAAAAATAGTTTAGAATCGATGAAATCATTCCAAACTAAGTCGTATAAG  
AATGCAAAACCCGTCACTGAGGCCCTGCAGAAATCTCCAAAAGCTACAAAGCAAATGGAA

AAAATTGCGGAAAAGACACCGCAACTATTTGAAAAACGAATGAATATGGGCTTCCAGAAG  
TTAGCTGATCAACTTCAGGAGAGTACGAAATGAGGTATATCGTCATTCTACTCGGATGTC  
TCCTGATCACATCCTGTGCATCTAAGCCCATGTTGCCAAAACCATCGCCGCTACTCAAAC  
TCGATATAACATGGAAAGCAACCGAAAATGGAGCTTTACTAAGTTTTGAGGATTACAATA  
AGTTGGGTGTATGGCTAACCCATGTCAACAGATATATCAAAGATCAAAAACAAATAATTC  
AAATATGTGTGGATAACAATTAATGACTGAACGTTTTCGCATCTCAACAACCTCATTTTTGACT  
GTTGGTCTACTTGTTCGGGAAAAGCACCTGGGCAAATGAGCAAGTTTGGACAAATCCT  
ACGAAATACGTTAATTTGACTCGTGATGATTTTTCGTTTTAGCCTTTTTGGCTGACGGACT  
TGATCTGACTACAAGTTCAATAAGCATAATGAGCAACTGGTAACGAATGCTATCCAAAAA  
GCAGCGATTGAAGCTATTGCCATGAGCAAGACTATCATTATTTCCGACACCAATCTGAAT  
AAGACGACTCAATGAACTTGGAAAATTTTCGCAGATACTCATAACGTTGAGTTTGTGCTGA  
AATCTTTTGCGCCGGGCCTTCTGTCTACTCTCATGGAGCGTAATCGCTAGAGGGGAGCGG  
GCTTTGCCTGAATTCGTTGTGAAGCGTCAATATGTCCAATATATGGTTGATTTTTGGAGGC  
CAGCGGGTTTATACACCTGACTTTGCAAACCTCGGGCAATCATTTTTGGCCTGGATGGC  
ACCCTGTTTGATAACAGCCAACGGCATGCCTTCGATTGGTTCGAAAGTTCTGGATGACACT  
CCCCGTGACTCTGTCGTAGAACTTTTCAAACGTACGTTGATCGCGGTTATGCTTGCAAT  
ACCGTTTCTGGCCGTGATGGTGTCTTGAAGCAGATTCTATCAAGGCTCTGAATAACGCC  
GGTCTTTTCCCTGCTGCCATTACCAACGCGCTGCAGGCGATTCTCGTTCTGATGATATC  
GTAAGAGGAGAAATTTTCTGGCAACAGATCGAGCCCAATTGGTGTGCTGTTCTGTGCAATC  
GATGATTGTCAAAGGTTGTTGATATGTGGCGTCGTATCGGGCTGGAGTGCTGGCAAGTT  
CAACCTGCTGATTTCTGATTCAAAGGCCCTTTCGGAGCGCATTTTTGTAAGAAATCAAT  
AAAAAGTAGTGTACAGGACGGTTTAGTGTGATAATATAGTCACATGAACAGAATGCAGTA  
AAAAAATGTTTTTTGACACCTACGACACTGCGCTGGCAGAGTTGGAAAAGCGCTGCGGCG  
AACTCCAGAACAAGTTAAAGCTCGCGACAAAATGCGATGGTTTTCAATAACTCAAATTA  
GCATCAACGAATTTGAGTTGATCGTCGCCAATGGTGCAGGCGGGCGTGACTATTATTTGT  
TTGCAATTTTCGTTGACACAACCTCCTGTGCCGAAGTTTATCATCAGCTGCTCTCGGGTAA  
TCGCATGAAAGATAACAAGTGTATTACCACATGCCTATATCGTTGCACAAGAATCTCATTG  
TGTTTCGTGGAAAGTAGCTGCTATCATTTTCGAAAGATGGTTCGAATTAATTCGACCGGTTA  
TAACGGAAGTGCAGCTGGTTGCAACCATGCCAATTGTGATGACCATGCGAAGCAAAGTGG  
TTGGCTTGATTTACGGTAAGCTGCGAGGAATGTATCGGCAAGCACACAGTGAATGGTC  
AAAGGCAAATGAAATTCACGCAGAATTGAACGCCATTCTGTATGCCGCGAAAACCGGGAA  
AAGTATCGATGGTGTGAAATGCACGTTACTGTTTTCTCCGTGTGCAGATTGTGCAAAAAGA  
CATAGCTCATTCGGGGATTAAGCGAGTCGTCTATAATGGGTTATATGATCGTAATCCGCC  
TGGCTGGGATGACATACTCATTAAAGTCTGGAGTAGAAGTAGTGAAAAACGAAAAGCCTCC  
CAACATTATCAAGAAAATTTACACCACCAGCAACCAAAATTGAGGAATTTATTATGATCG  
TTGAAGTCTCTCCTAACGCCGAAGCACTTGAAGTCAAATTCCTTTGATGTTAATAGCGTCG  
CAGAAGCTGCCGTTCTGGGAATCGATCCCGAATGGGTTGACGATGTCAAAGCCGTCTGCC  
AAGTTGACAGAAACCAACCGCTGTTTGGTTATAATCCGTGCCTTATCGGTTTTGTCACTG  
GTCATCCGGATTTTGC GGATGGTAAAGTGATTTCGCACTTCTACTGTAGATATGGTAATTC  
ATACTCGTGGTGAGTTCGAAGAACGTACTATCGTTTTCACTCGCAATTCTCGTTATGAGG  
TGATTAATGAACATTCAGCTCGATCCTAAAGCACTCGAATCACTTATCCCCGAAGGTCC  
GGAGGCTAGTGTAGAAGTGCAAAATGCAGTTATTGCTAACTTCGCAAAGAAAATGCAAGA  
AAAGCATCTTGAAGATGTAACACGGGACCAGATTCTGTACAGCTGTTCAAGAGGCTGGTCT  
TTCGATGGATACATATTCCATTGTTTCGTGACATGCTGAACAAAACGATCACCAACAACGG  
TTGGGATGCATCAAGTGCGAAATTGAAGACCAATTCCAGTTTGGCTCGTGCTATCCATAA  
CTATGCCATTCAGCAAGACCTGAAATTGATGAAGGGTATGGAAGCATGAGCCAATGAAAT  
GGTTAATAAAGAAGCTTGGAAAGCGCGAAGAAGCTGGCAAAGGTTTCGTTGAGCATTACAT  
CCAAGAAGCTGAAATGAATAGCGCAAAGCAAAGAACCAAGCTTTTTCGGGAAAGCGAATC  
TCGGATTGTTGCTGCCTGTAAGCAAAAATATGCCGGAAATCATTCGTCGCGAAATGGTGAA  
TTATCTGAGCAAACCAATAACTGTAAGGAAATAAAATGTCTAAGCAATATGTAATTCA  
ACAAATGCTGTTCTCTATTTTTGGCTGACGGCGAACATGAACTGATTTTTAGAAAAGCAGA  
CGATTCGCATCGGGTAATGCTTGCTACTCGTGACACTGTCCTGATTGAGGTTGCTGAAAA  
AGGTGATAAAGCTTTTACGGCAACAGAACCTGAAGAAAAGAAAGAACGCAAAGAATGTAA  
TATTTTGAACGTAGTCGTTAACGATTTGGAAGCAAGAGCTTGGCGATCGTTCCGACTCGA  
TCGACTCGTATCTATCAACGGTACTGGTATGGCCACGCTGGCATCTCTTATTGGTGCTCA  
ACATCGCAAACAAGTGAATATGGGCCACATCGAAGAGCGTTACGTTTCTACCGAAAGCAA  
GGTTATGTGAATTTTAAATACGTTGACCCCGATGAGTTGAGCGATTTGGTTCGAAAACCTC

TTCGCGATTTGAGCTTTTGTTCAGACGAACACGGTACCAATACATAGTTCCTTGTAGAAGA  
CGAATCCAATTTTTAATCTGTGCTGAAGTTTGCAATACGATGGGATAACTTATAATTATC  
CCATCAATAAAACAGTTAAAGAGAAAATCATGACTAACGTAACACCTATTGCTCAATTTG  
AAAGGATTATTCTTGAATCAACAAATTTGGCATCCGCAGGTGATGAAATCATTTCAGATT  
CTGAATTTGTTCTTGGAACCGGATCTTCTGAAGTTCCTCTCACTGCAGAGCCTATCT  
CAGTCGGTAAAGACGTACCGAACCATTTGAAAGTAGGTATGCAAGTTTTGATTCCAAATG  
GCCGTATGCACAATTTACCCGATCCTCGTTATCTGTCCGGCGAAATCAGTGCGAACAATA  
GTCGAAAGCTGTCAGCATGCCACGGGAAAGATATTCAAGTCTGTATGCTTACTTGAGTG  
TCAATATAAGATTAACAAATTAACAAAAGGAAATGAGAATGGCTAAGAAAAAGAAAGC  
AGTTGAGAAAAAGTAGAAGCTCCGAAAACCTGGCCGTCAAGGTTACAAGCGTAAATCCAA  
CAGCCGTGTTGATCAAGTTGGTGATGCTCTGGTAGCTCGTGTTAAGCGCCAAGTCAAACA  
TATTGATAAGTTTGGTCAGCCTAAGCACGAAGGACGCAAGCGCCAGAAGTGATTAGTGGG  
ACCTTCGGGCCCATTTTATTTTGAAGCGGTTTAAAAAGGAAATATAATGCAATACGA  
AAGACCTATTATTTGACTGATGTGACGGGGATTTGGTTCAATGGAGATCTGGCCTCGC  
ATATTTTCGCTCAGAAAAATGGCATTTCGGACCGACGAAATTTTGAAAACCTCTGGTTCGACGA  
ACGATTCCGCACTGGTGAAGAATTGTTTCGGTGTCAACGCGCGAATTGCAAATATCTTGAT  
GCGCGAGTATAACAACCTCAGATTTAGTCAAATATCTTCTGGATATGTCGATGCAATCGA  
TGTTGTAATCGAATGAAAGATCCATATGACTTTATTGCCATTACTGCGCTAGGTGATTC  
TAACCAAGCTCTGCTCAACCGGTGTTGCAACCTGAACACACTTTTCCCGGGCGCGTTCAA  
AGATCTTCTGTGTGTTGACATCGGCGAAACCAAAATGCCGCATTACATTTCCGTAAAGCA  
AAAATATAAAAATCGTTTGGTTTGTTCGATGATTTGGTAAGTAATCTCCAAGATTG  
TCATGATGCGATGTCGCAATTGCCTCAAATTCATATGCTTTCGAACTGAAGGCGGGCGTTA  
AGTAACACATGATATCAACAAATACCACACTGCTAAGAATTGGTACGATGTTGAAAAGCT  
ATTAGATCAACTTGATCCAAAACCAAAATACAATCGATTTGTACATCATTCCACTTGGCA  
AGATAAACCTACCGTCTCTGAGGTAATAATGAAATGCATATTTTAGACATTCTGAACGAAA  
TTTCTCAACTGATTCGTCAAAGAAAAAGAAAAAAATCCTGAATCGCAACAAAGAAAAT  
AACTTTCTCACAACCTGTTTTACCCTTTCGTATAACCGTCAGTTAACGTACGGCATTACA  
CCAAAAGGTTTGAATTTTCGGCGGTTTCGGTTGTACCTATGAGTTTGGAAAGTTTCTGCGTC  
GAGCTTGTCAAAAAATATCCACCCGAAATTTGACAGGTAACGCGGGTATTCACTACATG  
CAACAGATGCTTGATAGTATGTCAAGTTCTAGTTGTGAAGTTGCCAGACGTATTCTTTCA  
AGGGACCTCAACTGTGGAGCATCTGTTGCTCTTGGAAACAAAACATGGCCCAGGCATCATT  
CCTGAACAACCTCAGATTCTTGCAGCACCATAACAGGGAAAAGAATTTGAAGAAAATCCGT  
TGGCCTGCTATTCCTCAATTGAAAGCCGATGGTGCCCGTTGCATGGCTCTCGTATCTGCG  
GATGGCTCACAGGTATCAATGGTGTACGGAACGGTAATGAATCTCTGCAGTTGTATGAC  
ATTACATCACAGTTGAAGGAACTCGCTCAGGTTGTGAGAGAGACTCTGCAATATTATGGT  
GATTTTGTATAGACAGCGAATTGATTCATCGAGCTCCATTTTCTGCCTCCATTAACG  
GCGAAACAACATACACTGGATGATCTGTTCCGAATTCCTGAGACAAATGATGAAGAAGAA  
ATCGAATCAGATCGACACAAGTCCTATGGTTTAAAGTAATAAAGCTCTAAATGGAACAATT  
AGCGACGTTGAACAATCAGAAATGATTTTTAACGTATGGGATATTATTCCGCAGGAAGTT  
TATTACGAGCGCGAAAAGAGCACATTGTACTACGAGAATCGATTTGCTACTCTTGCTTGC  
CTGACTGAAGCTTTCGATGGTACCCAAAAATATCAAAACATTCAACCCATTGAATCCGAA  
GAAGTTGAGACATACGAGCAAGCTATAAAAATTTATCAGAGATATGTTGATCAAGACCGA  
GAAGGTATCATTCTTAAATATAAAGATGGCCTGTGGGCAAACGCTAGAACAACCTGACCAA  
ATCCAGTTCAAGGTAGAAGTAGAAATTGATTTGAAGATTGTCGAAGCTTATCCTCATGGA  
AAAGATGCGTTCGAAGGTAGGTGGCTTTGTTCTGGAAGATTCTTCAGGTCAAATCAGGGTT  
CGTTGCGGTTCCGGCTTAAAGACACAACCCATAAAAAGGTAATGGCGCTAAAGTCGAG  
ATTCCTATCAGCGAAAGGCATGAATAGGACCGCGAAGCGCTTATGCTGATAGAAAATGAG  
TTGATCGGCCAGATTGTTCAATGCAAATGCAATGGATTCCAAGAGAGGCAGGGGGCGTAAG  
CCGAATGAAGCAAAATTCAAGCTGTTTCTTCTTTTTTCCACCTCATCCGACGTGACAAA  
TCAACACCAAATCATAACCATGATGTTTTCCACATGCTATTCTGGACTGAAAAAGGCCT  
TCGGGCCTTTTTTCGTTTTCTGTTGTGTACATGTAGATTTCGGCTTTGATAGTATGAATACG  
TACACAACCTATTGTAGAAATTCACATGATTGTTAAAGTTCGATACAATTTTGAAGAACAC  
ACTGGCGAAGCCGACGACGCTCAAACCGCTTTTGAGAAAACAACCTGAAGTTATGCTGTCA  
CAGCTTCCCCAAAACAGAAAACACGTTTTACGCCACTGTTCCGAATGAAAGCCGTTTT  
GGCAGCGGTGATATTCGTGCAATGAAAGTTATCCGTATGACCCGTGTTGACCTCATGGCT  
GTTTCGGGCGGACGACTTCGAATTTCCGTTCTTTGTAAATGTATGTGAATAAGCTCCTTCG  
GGAGCTTATTGGAGAAAATTATGCTAAACCTTCAACTGTTGTAACCTGTGGCTATTGAAA

AGCCAGATTTTTCAAATCACATCCGTCATTCGGCGGATCTACCGCGGACACAAGAAATT  
CCCCAATAACTTTTTGAAGAATTAGAGTGGGCATGTAAGAACGTAGAATACGCTCATGATG  
TTAGCAGCCACAGAAACATGCCATGGATGAATTTGGAATTGGGGTCATATGAGCAAGTGC  
GGCTAAATTTTACTATCATGGTAGAACTCCCCAGATATAATCAGAATGTGCACTCGTA  
TAGCCGAGCAACGATACACCGACAGTGGCATGTGTATTTTGAATAAATATGACGACGACG  
TGTCTAGCTATTGCGATGAAGAATTTCAAACGTTTCTGCTGCTTTGCGGTCTGGAATAT  
TCGACGATGCAAATAAAAAATTCGTAACCGAGTGCATACGACGGATGGATTCACATATAG  
CAGAATCTGAAAATTTTAATAAATCTGTATGGAGAGGAATGTCTCTCAATAAGGCAAATT  
CTATTAATTTAAAGATAGTGGGTCTATTCTCTTTAAAAAATTCGGTATCGACATCATTTT  
GCCCCGCTTTTTTTCAATTACGGCATTGCGCAATGCAGACATCTCGATTTTAACGAAATCA  
CACGCGAAATTGTTATCGATGGCGACCCACATCGACCTGTCACTATAAACATGCACATTT  
ACTGTCATAATGTGAAGCACCTGATTCCGGGAAACCTTAGTCCCTACCCTGAGGAGTGC  
CAGTAATTTTGGAGAAAATGACTGTACTCGTAATAGATGAGACTTTCGAATATGTGTCTC  
ACGTCGACAGTTTTTGTGTTTAAAGCGAAAGCGGTTCCGTTAAGTCAATTCACTGGAA  
CAACATTAATAGTGTAATAACATTTTAGACCTATAAGGAAAACAAAATGATGCTATTTG  
AGATGACAAATGAGCAATTGGACGAGGTGTTGACGGTGGAGTTGGAAAATACCGTGTGG  
TCAATCTTTTGCCAAAGACAAAAGTTCCGTATGTATTAACATCCAAGTTCCTGGTTCAG  
AAAATCTGGCTTTGCGATTCTGTAATCTTACTTCAAAGGGTGATTCCGCGAAGCAGGTCA  
AACCTGGCGACAAATTCATGCAAACACAGGTCATCCAGATGTCAGAAAAAGGAACACCAC  
AGGTTCTGAGAGATGCTCTCGGTAGTGACCCCATTTGGCGCAATGAATATGATAACTGACA  
AAATCGTTAATATGCTTCTCAGGTATAGAATGGATCCAACGCTTCTGATGTTTCCGACAA  
AGGCACTGAAAGGCCAAGCTAAAAATATTGCGCGAATTGCATCCCGGCTTTTGCAAAAAC  
GATCCGGTAGAAAGTTTATTGTTTTGCAAGGATTGTTGGAAAGAGGCAAAAAATATACAT  
ACATTATGATTTATCGAAAATCAACAAGAAGCACTAGTGTCAAAGGATTGGAAACTGATC  
CTGAGCTTTATACGGTTTCATCTACCAGTGTAGGCGATGTCGTCATTGATGTGAAAAC TG  
GTGAAAAGTCAAAAGGCAGAAGCTATTGCTGGGTTAATTGAAAAGTGAGAAGAAAAC  
GTTCTACTAAGTAAATGACAGACTTCAAATACACGTGGAGATTTGATCAAGGCATTCA  
CAACCAGTATTGCCTCTTCGGACAAGGAAAACAATTACTACGACCCTTTGGCGTTGGCC  
CAGTCGAGAAAAACCGCCAAGTAGCGAGGCTGAGGAAGCAGATATCAATGCTTCTAACA  
CGATAACCAGAGAACAAATACGGAAATCGCATTATTACAAATTCTCTAATTTAGCCGCTG  
CTATTTGTCTTGACAAAATTGACTTCGACAAATATGATGCGTCAAGCCATGAATTGCTTG  
CTCTCTATGCGGAGACGGTTCGTCAAACGTCAGAGAAAGCCGCACAGAAATGGGCAGATG  
AAAATATTCTGATGAACATCCGGGTGTGAAGAAAGGAAAAGTCGATTTTCATGGTTTATA  
AGGAGGTGAGACGCGCTATTATGGAATGGGCGAATTATCTTGGTAACAAAGTTAATGATA  
CTGTCGGCAGTGTTAATATGAGAAAAAGATTGCCACCTGAATGTGTTGATGCTATGCAA  
CTTACACTTCGATTGACTATCGTAAGATTAATAATGTTTTTCATCGCCAAGGTAAAACCAT  
CAGCTAAAACCGTAAATGATATACAGAATCTCGACAGAGCTTTTGACATTGCAGGAATTA  
AACTTCTGAGAATCTCACCTTTGGCGGCGTATAAAATGCCCAAATTATCCAGCGAAAG  
TCGATTTGGAAAATAAAATGTTTTATTTTTCTAACTACGTGTCTTGTCTGCTGTTCTTA  
TTGTATTGTTAGGTGGGTCTATTGCCGAGCATGACATTGACATTCTTAATGCTAAAGAGA  
ATGATGACGCGCAGGTGCAAACAGCCAAAAAACACGGGGCTCATTTCGCATTTGCTATC  
AAAATGTCCCGGTCCAGCTCTTATAGTTAACGGGATGTCGAGTTATACGAAAGAACGC  
GAAATTGTTCTTCCACGAGGAACAATTTTTGAATTTAAAAAAGTCAGTAATGTTGGTGAA  
TTTACTTCAGGAAAAAGGAAATATCTGATAGATTGTTCTGCCGTTTTCAAAGTCAAATC  
GACGAATCCACAGAGATTTACGGCGGTGATTTGCTAATGCAAACAGGCGAAGTCAAATG  
ATTGAAGGTTTTTCTGGATTCATGAAATCTCGCGAAGATGAAGAAAAAGAAAGACTAAAA  
GCTGAAAGCATACAAAGAGACAATTATTTGTCAACTCTCATCGACTTAGGTGGAGAAAGC  
AAATTTGTCCAGGTAGTAGAATAAAAAAGGGAGCTGTATGGCTCCCTTTTTGTTACCCAA  
ATGAACCAAATTTTGACAACCATCCACCAGCTTGTGTTGCCGAGTTCAGGTAATAAATCAC  
CCTTAAGCCAGTCTTTAAGCAGTGCTTGATTAACCGCACCAAGTGTTCATGACTCGATACG  
CGAATGTAACGTCAAACGTTGTAATAGCATTGTTATCCTCGTAGCTAAGTTCAGGTGCTG  
ATACGCTAACAGGTATGGAACCATGAAACATCGTTACAGTGTGGGGTATACCGTCTCTCG  
AGTCCAAATTCATTTGTATATCTTCTTCAACATCAGCAGGCACTCAACGCAGTCCGGTGA  
CAGGGTCTTCGACGGCATTACCCAATCCTGCATAGCCCGGTCAATTGGCAGCCTGATGGT  
CCATTCTGAAACTAATTATGATAGGATCATACTCGCGCCCCATCAATTTGATGTTTGGAG  
CGTTGTGAAATTTGTCCATTTCATAATTTAGCCGGTTTTCTGGCATTTTTTACAGAATAAA  
CCGTAAACCAGTATGTGTATTGCCCGCATTCAAAAAGTCAAGCAAACACGTAGCGACTT

CAAATTGACCAAGTAGGGACTGTATAGTTCGAAACGTGATTGCGCCGATCAAGTATCTCG  
AAATACCTGATTTGCGTATGATGCTTTTTGTGTGCCTTGAACCTATGACTTTGTTCAAGGTG  
CTCGAAAGCATAACCTTGTGTCAACCCGGCAAATCTTTCCCAAATGGAAGATTGTTATAG  
AGATATTCACCGAATCCATCAAGCAAATAGGTTTGTTTTAGATGATGGGGTTGTTGCGAA  
AACAAACAGAGAACATATTTGTTTTCTGAAAGTCTTTATTCAATTCTTGTTGAAATTCATC  
TAATGTATACATGATGATTCCTCATCATATAGATTAGATCGATTGCGGGCAAGAATCTCT  
CTGAAAGTGACTTCAAGTACAAAACCTTGAAGGCCAAATTATGTGCTATTGCTAAACCGCCG  
AAATGACCGTCAGGGCTCTTATCGAACCGTATACTTTGAATTTGCGCTGGCCCAAATAAA  
TCAGACCGCATATCAAATGAACTTGTGACCCGAAATTTCTAATAGTCCAAATAATTGGA  
TTAGAAACAACGTTAACATTACTCAAAAATGATGTTATTCTTTCAAACATCGTAGTTTGA  
CCATGAGTTGCTTCTGGTGTGAGTGCGTTAATGAATGTTCCCTTGTATGCTTCATCGAGA  
GTGCTTTTTATTTGACTCGCCGTTTTGACTTTTCTATTGCTCCGTACGAGTATTACGAG  
AGCATTTCCTAAATTATCAAAAATTTGCATTAGGTCGTATACATTACGAGGCGTTAATTGC  
CAGGTATATGTTTTTGTACGATTCTCTGCGCCAGCGTACAGTGCCCTGGCTGCGATGTAT  
ACTTGCTCACCACGGTCAGCAAATGCTCCCTGGGTAATAGACTCCAATCCGCCATACAAT  
GCATGAGAAGCCATCGAGCTCAGTGCCCCGGTCTCAGAAGTGTGCTCGTTCGTTCAACCAGT  
GATTGCTGGACATCATTGAAGTTTTGGCTAATTGTATCTACATCTGTCTGTCCCCGAGGC  
ATCAGAATGTTAGCTATGGCTTCCTTGACAACACCCTTACGATAATCGCCAATGTTATTT  
TGACCTGATCTGAACGAACGCAAATCCCCAGTCTGTCTGCCGGCATAGTTAAATGCTGAC  
AATGTCAAACCGTTTTTATACAGATCATTAAACATTGAAATCTTGCGCTGAGTCATTCGCT  
GAATTTCTCTCGGCAGGGAATTGGGCTATCGCAATTTTGCTAATAGGCCTGCGAGGTGAA  
GAACCCGTTGCCGGGTTCTCTCCTTTCAATATTAGGCCTACAACAGCCTGAGCCCCGCCG  
TCTAAAAGTTCAGTTACTCTCATAAGATGTTATTTCTATAACCAGGTCCAGGCGAAGATG  
TTCTTGAGCCTGGACAAATGTTTGATTCTGATTTTTGACAATGTTAGCCTTTGTGTGAT  
CGTTGTTTTGACTGGCTGCCTCTTGCTTCTTGCTTTCAACTCTCTTCACTTCTTTGTCGA  
TAGATTTAACAGTCGAAAGCTCTGGTTCAGGAGCAGGTTTTATTGCTGCTGTCGGCACAA  
CCAATGTTTTCTCATGCTCGGCCAAGAATTTAGTCTGTTTGTCTATTTCCACTCTAAGTT  
GTTCATAAGATTCCTTAGTCAAATTACCTTCTTGATAAGACTGTTCAACTTCATTGCAAC  
GATCATCGAGCAGCTCGCGGTGTTTGTTCATAAATTCAGGCGAAGTTTCATTCTTTTTAG  
CAGTAACGCCAACATGGTTTATTTTCCCGCTCAGAACGTTATATCTGCCAAATTGCTCTA  
CTGTAGTATTTTTGGCGATTACCATGCGTTTTTACGCTTTTTCTTCTCGTCAGAGGTCT  
CTTCATCTTCCCCATTCACTTTACCCCATAGCTTTGTAAACCAATGAACTTCGGTGTAT  
TTGCGTCTTCAGCTTCGCGTCTTCTAACCCGGCCGATTACTTCTTCTCTTCTTTGAAAG  
GAGTATATCCGACATCTGATGCAGCAACTGATCTTGCAAGGAGTTTCGAGCGAATCGGCTT  
TTTCATCTGCACCGAGAGCTCTTAATATAGTTGCGCCAAGTTTGGCCAAACCGAGCTTCA  
TCATATTGACCATATATTTCAATTTGGTCAAAGGCACCTACTGCAAGACGAACAAACATTT  
TTGTATATTCATCACTCTTGAAATAATTCATCAGGTCGGTTATAACTCCATGAACATTTT  
CAAACGGTGTGCTAAAGAGCCCAATTGATTTTTAGATTCGGCGTAATTCCTTCAAACA  
TTTTAGTGCAATGAGTATAATGACGAGATAAAACGTCAAATGTCATAATCAAGGAGAGCA  
CGAGTGCAGCCATTTTGGCAAATGAGAACGGCAGTCAAAGTGTATTTGAACAACATTG  
AACTTATTGAATCGGCAACGCTAATAGTTTTCTTAAAACCATGATCGACTGACGACACAA  
TACGATCTCCGATTCGGTCAATCGCACGTTCAACATTTTCTTCTTTGTCTGGTTAACTT  
TATCCTCTTTTTTTCTTCTTTGGCCTATCGTTTTTTAGGAATTTGATATCTTCAGAAA  
TAGTTTTCAAATACCCTAAAACCTGGGTTATTTTTGGGTGTTTGTCTTCTTCTCTACTA  
TCTTTTTAGCTGCTTGGTCACTAGTGTGTTGCGGTAATTGGATTTTTTTACCATCCG  
CTAAGAAATTATTTTTAGCTTTTCAGCAAATTCAGTTGCTAAATGTTTTGTTGG  
AAGTATCTGAGATCTCCTTCAAGTGCTGATTAGAAATTTCAAGTGGCTTCCGCGGAAAGTT  
CTGTTGCAGCAGCAATATTTTCGGTTTTCAGAAGTGTGCTTAACTATTTTACGAAGTTCTG  
AATTACCTTGTTCAACTGTTTCAGCTATAAGCTCAGATGAAGCTAAAAGATCGCCAGTGT  
TGTCTGGCGGATTTTCAAAGCAGTTTTGAGATTAGATTGCTCAGAATCTGTTTGCCTAT  
CTTCTCAAGTCTCTTAGTGTCTTTTGTAGTAGCCATTAATTAATTCCAATAATGTTTGA  
GCCACCATTTATTTTGGCAAATGGTGTATCAAGTGAAATAGTAGAACTATAAAAATCTGC  
CCAATCCAATACAAGCGCAGATGCATCTTCGAATTTAAAGTCAAACCCGCTTTTTGCTTT  
GTAGTATTGCTTGGTCACTGTCCAATTTTCGATACAAACGTATCAGTTATCATGGGAGG  
TTTGAATAACAGAATAATGCCGTTTGTAGCTCGAATTCATATTTTGCCTAATAAAGCTTT  
GTCTATATCAACGTCAAACCGTTAATGGTTTGAACGGTCGGCAACTTTTTGTTGAATGC  
CAGCAGATGCAAATACCATATCTGGTTCAGCGGCAGTCAAACCCGAGCGAATAGAATC

AAGCAAGTCGATCATAACATGAGTCTACACCCTCCATATCTTTTCAGCAATTTGATATGCCT  
GAAACCAAGTTTTGGAATTGTGATCTCTTTTCCATTGACTTTTATAGTCTTAACTGCAGG  
GATAATGTTCAATTTGGGTTTCATGTTATTTGCCTTTCGTTAAAATCTGTATGAGCTTTC  
GAGTTGTTGAAAAGATACATATCTGTTATAGATTGCTCTCTGCTTATTTTCATATATAACT  
GCATCAACGAAATACTCGCCTCTAAATTGATTCTTTTGATCGTAGAATTTCAAACGCATG  
CCTGGTACGAGACAAAATTCTCCGTATGTTTTTGTGTGCAATACGCATCGGATTCTGAA  
AATATTAGAGACCTATTGTACTCTTCGGCACCAGGGCGGCTTATTTGGTCATAATATGCA  
CCGGAACGGCTATTACAACTGAATTTAGCCCTTCGCCAGTAACAACCCGAGTGTGCATT  
TTGTTTATGAATGAGTGAGTATAAAACGAGGATTCTCGTATGGGTTACGGGTATACGCG  
TTTGCTTTTGTCAACCATTCAAATCACAGCATACTTTTTTATCTACCATCGCAATAGTT  
TCACCAAACAACCGCGGCACCGTCACGACGTATTGAATTGGATCATTTTTGTCTAATAGAT  
TCAAAACCTGACATATGAATGCCTAACATATCTTCCCAGACGAATGGAACACTTTCGTAT  
CCAGTCGTTTGGCCATGTTCGGCTAACAACTTGTAGTATGCATTTATGTCCAACACCCAA  
TCTGTCATTGGCACTCTAGTGCCGATCGAATTGATTGCCGGCGCGAGTTTGGGAGTTCCT  
GAATACCAATAATCAATCATCTCGTTAACGGATGCTACAGCATCATTGTAAACATTCTG  
CAAACCTTGAGATTACGTACCGAATGTAATGAACCCAACCTGGACTGTTATGATGTTGTGCG  
CCTTTCATATCTACGTTTGGAGAAAGATGTTTGATGCCATAACAACGGTTATAAGTTATT  
TCAGTGTTTCGCTGTTTTGAGAGATGTTTGGATTATTTTCATCACCAGTCAAACGTGTCTGT  
AAACCGTTTGTGATCATAAATTTGCAGCAGCCCTTCATTTATAACCATTGGTTAGACCAACT  
CTCATGGTCATGGAAATAAAAGTTGCTGCTAATTCAATAAACCTATTCTCCATCCAGACA  
TCATAATTCTGGTAAAGTTTTACAGAGACATTGGGATAACCAGCGGGTTGTAACATTAAT  
TTTTCTCCTTAATTCTTTTTCCACCAGGCTGAGAACAATGGACCTTTCGACTGGTAGCA  
TATTAATTATGTCTGCCAGAGAATAGTCATGTCTTACTAGCGCTCTGTTTATCTTGTAAA  
AATTGAAAATTTTCATGAGGACTAACCAAAACCTCAAAGAAATGGAGCATATTAGTAAAAG  
TGATGTCATAATCTTTACAACATTTGATTTTTTGTATTTACTAAAATCGGGTTGAATGATT  
TTGATAGTTCAACAAATTCTTGGTTTGAATCATATCAGCCAATTGACTGCGCTCATCTT  
CACCCAGTTCATCCCAGGTGTATTTCGTTGTGCCCGTCATATATCCTATCAACAGTCTCAT  
AGAAGAGTTCGTCGGGTGAACCTGATTTACGAGGCATACGAAATTTGAACGTTAGGTTGT  
TTACCGGCAACTCTGGAGTTTTTGTGGCTCTCGTGTGAGCTTCAATCTAAGATTGTGCA  
TCGACTTGCAGTGCGGGCATGTGAAAGTTGCGTCCACAAGTGATTTGCCCAAACCTTACAG  
AAAAAACTATCAGAAAAATATGTTACGTTCAAACGGCGTATAATCCTGATCCATTTCTT  
CGAGCAAATCGAAAAATATCTCAGGTTTCTCTAAAGGCTTACTTCTCATCTCCTTTCTGA  
TCAATAATAAATCACGATATTCTGAAGCTGTTATCGGTATAAATCTGTGTGTGCCGCTCG  
GAAGCTTTATGCGGATTATATTCATTATAGATACACTCCTTTTAGGTTATTTAAATACAT  
TTAGGAGGACTGTATGGACATTAATAATCACAGTTGGAAATAAGCAAGTAGAAACTACCAT  
GTTGTGCGGTGCGCGAATATCTGTCTATCGTAAATGATGCAGATGAAATGATTCCGACAAT  
CATTTTAAATAAAATAGGTCAGCCGTTACCGAAACATCTAACTGAGCAAGCTCTCATCAA  
ATTGATAGCGATCTAAAAGAAAACAGTCATCAAATGACATCAGAGTGCACGCTATGTCA  
AAAAGAAAATAAGTTTGAAGTGCATCCCGATAATGTCTGTGTTTCTGACGGATTGGGGCT  
ATCGCATGGCGCTGGCGGAATGGTTATCAATATGAGATACCCGATGATGTTTCGAAGATCG  
GGATATGTTTGTGATTATAGACAGATGTATCGTGTGATTTGAATATGCAGATCAGATATT  
CAAGTGGGAAGATTCAACAGAAAACGAAAAAGACACTTTATTTAAGCATTGACGTTTTTC  
AGATATTGAAGCTATCGTAGAAACACTTCAATCTCCACAGGTATATGCTGCAGTTCCAAT  
CGAGTGTGAATGTGGAAAGCAATACCCAGCGGTTATAAATGGTGCTAGTAAATTGTTAGA  
TTCAGTGGGGTAAAATGAATATAAATCTGCTTTATTCAGATCTTGACCCAGATTTCAAC  
AAATCGTGGGACAATGATGTGTTAATGACACGAGGAGCTCGTGCCGTAATAAATTCTATC  
ATAGGGATTGTTTCTACTCCCATTGATGCGAGACCATTTAACCCATGCTTTGGCTGCGAC  
TTACCGGACCAGCTATTTGAAAACATTACGCCGTTGGTGATAGACACGGTTAGACGAACT  
ATTCATACGGCTATACGAACTTTGAGCCACGTGTATACAATCTTCAAGTGCAGTCAACT  
GGATATTACGATAATAACGAACTAATTGTCGCAATTCGATTTTCAATTATCGATAATCCA  
GCAGTAATAGACGAAATAAAAATGAACTTTCAAATTAATTTAGCCCTCTTCGGAGGGCT  
TTTTTGTACGAAAATGCAACAAAAACGTCCTTGGGAAACAGCATAAATAAAAAGTCAGT  
TGAATTGCTGAAAAGAATAAGAACTCCAGGAAACGGGATGTAAAATCAATACTGGAGC  
CCATGGCTCCAACGAGCTTGCTCGTTAATTCTTATCCTTTTAGTTATAAATATCTATTAAG  
CCATAAAGCATAAAGTTTTGGCAAGCCAAAACCTGGAAGCCAGATTTTACTGTTCAACTA  
TCGATTTATAGTGTATACTGGCCTCAACACTAAAGGAGAGTAAAACATGATCATCAATA  
AAATTCAGAAGTTCGTATGTCTTGTGCGAACTTTGGCTCTGATGGCGCTAAAGCTGCAA

CTCTTCTCGGTCTAGTAATTGGCCAGGTCCAGCAAACCTCGAGATAATTCCGACGCTGCAG  
TTATCAAAGTAATCAATTCCCTTTTGAAGGGAATTCGCGAGCGTATTGCTCCAAAACACA  
ATCAGCACGACCTCGGCAATGCATATCGAGAAGAAGCACTTCTTTCTCAGTTTATTCTC  
AAGCCATTACTGACGAACAATATAACGCGGTCGTCAATGGTAAAGCTGTGCTAGACCTTT  
ATCCGGTGCATGGCCCAAATACCAATCTTATCACTGGAAAACCTTATGGCACAGCTGTGAG  
CCGGTGTGAAAGATGGAATTTGGTCTATCCCTGACGCTGCTTCGTTGAAAAAACAGATCG  
AAGTATACATCCCTATCGCTTTGGACGTAATTGGAGAATAAAAATGAACGATGAAATTTGC  
GTGGTATGTAAACAGTTACTTCTAAAGCTCTTGCTGTTTACACATCTTTTGGACCAGCG  
CATCCTGGTCCATGTGCCATTATGTTGAACTTTACCTCTTTCAGAATCTACCGGAATT  
ATTGAAGAGACCGAACTTCTGGTGTAAAATAAAAAGGCCTGCATACGCAGACCTTTGTTT  
TATCAGAAGTCTTCAGGCGGTTTCGCTTTCTTCTCTGGCATTTCGAATTCACTCCTACGG  
CCAGCGATAGCATCTCGCACCAGAAATATCATCGGTGGGTGTCAATTCAACTTCTTTCACT  
CGTTGTTGTAATATTTTTCTAGCTCATCTAGTCCTTCTGCTGTTTGACACGCGGCAATT  
TTAGACATAAGTGAATGCACTGTTGATTCTGCTATAAATTGCTGAAACATTCCCATTGCA  
TCCCTCCTATAACGAAATTTTATGCAATGTGTAATTACATTTTTCTGACACATATCTTTC  
AATACGTTCTATTGCGTGTGTCAGGGCGTAATTTTTCTTTGTGTATTTCCCATGAACATT  
GATTATCCCAATATCGTCAAAAATGTCCATACTGTAGCAATATTCTTGGATGAATGCTG  
TCTCAAAACTCGCCCAATAGTTTGGAGAACAGTTACCTTTAATTTAACAGGCTGTGCAA  
AATGATATGATGCAAATTTTTGATTGACACACCAGTAGAGAAAACACCATATGAAGCTAC  
GAAAACATGACCAGTTCCACCTTCGGCGATGATTTTCATTTGATCACGGATTTTCGGTGT  
TGATCTCCAGATATAAAAATGAACTTTACCTGAGTCATGAATCTTTCTAAGCGTATTGTA  
CAAAGCCATACCATGCGCTTTCAGGCGAAACATAACAAATGCATTTTCATTTTTGTCTGC  
GATTTTTTTAGCCATCGAACATACACTTTGTTTCTTTTTGTATGACTCGTGATAAATTT  
TATTTCTTCATCAGAAGAAAATTTTTCTGGCAGAAGTTCGATCTTCGCTCGAATAACCAAG  
CTGAATTGCTTTAACTTGCAAATTACATACTTGGCCCTCTTCCATTAGCTGTTTTGTTGT  
TACTGGTCTAAATATATCCCCAACATGCCAACATATTGCAAAATGTTTGTCTTCCATC  
TCGCAGAGAACCAGACAAACCGTATTTAAACGGTATATGATCGACGGATTCGATGATTTT  
CTTTTTTGATGTCCAGTTGATAGATGACACTAGTCGTCCATAACACAACCGAATTGGTC  
AAACCATTCAATTCTGCTTAATGGCAGATTGCCAAGTAGAAACATAGATCAAAGCATT  
CGACTCTTTACGGTCCCCTTTTTATCCCAAGCATAGCTTCTCGAGGGAAAAGACGGTA  
ATCGACAAAGTCATCAATCATTGTTGACAAGAGATGTCGTTGGAACATTGACAAGAAC  
TTCGCCTTTGTAATTTTCCAAATACCACAGAGACAGCAATCCTTGAATCAGCGATTTACC  
AGCAGATGTAGGCACATTTAGCAATATTCTTCTTGGCAGATATCCCCTCATAACACCATC  
AGCCTGATACCAGTGAGGAGTGATTTTGTGTTACCAGAATAAATATCTTTGCTGTTTAC  
CCATGCATCAAATTCGGAAAGTGAAATACTTTGTCTTTCCCTGATCTACGGGTGAACAAC  
TATTTTATAATCGTTCTGCTCCGCAAACCTTTATTGCTTGAGTGACTAGTCCATAAGGAAG  
CAAATGATCATATCCTAGCAGGAATATGTCACCAGACCAACCACACTTGAAACGCGG  
AGAAAATTGATAGCCATCAGCTTTAAATGAAAAATACTCCCGTATTTTCATAGAAGATCGA  
GTTTTCGCAAACAACCCTGGCAAAACTGTAGTTTTCAAATACAATATTTATCATTAAACG  
TCTCTTAAATAAGTCATATAGTTTTATTTATACAAAGGAATCACCATGAAACAGAACTT  
TTTAGTCGCTCTGATATCGAATCTCAGATTTGTTCTCTTTCTGCCGCAGAAGGCAAGAAA  
AACTAGCAGATTATGCTCACAGAATTACGACATTAAACTCGTCAGAAACAAGTCGTTT  
GAAAATATGATGAACGAATTTGAATCTGCTGTCAAAGCCAAATTCGAGGCCGCTCGTGCG  
GAAGCTGAAGATGGTGAAGAAAATATCGATATGGGAGAACGTGTTGACATATCAAAGGGG  
ATTGAGCTTGACCCTGATAAAATGGATATTGAAGATGAAACATCTGAAACAACAGAGCAG  
CCTGTTGTTGCTGAACCATCGGTCGAGATTGTCGATCAAGAGCAAGTAGAAGAAAACCG  
GCCATCCCATTTCTGAGTTGAAAATTGAAGCCCCTACAGCAACTGAGACAACCACCTAA  
GTAGAAGAAAACCGGTTTCTGATTTTGTGTTAGTCATTCCCTGAAGACTATCCGCCAAA  
TATCGGCTGGTCGGACCAGAAGGCCGCGCATTATATTGTTCCATATTGGATACTCGAT  
TGGATGCAGGGAAGAAATTGGAAAATTGAAATTGCAGAATGTCAATATGACAAAGAGCTG  
TTGAAGTCATTGGCAGTTTACATTGAGCGAGATGGTTCTGTTGCCATTCGCGAATCACGA  
AATAGCAAATTCATCGTTATTTATAAACCAGGGGTATATGACCCCTTCTTTTGTAAAGG  
AAAAAACTATATGGCAATTACTGCTTCTATCTCTCCACTTGATCCATCCGTTTCGGAAGG  
TAGTATTGTTGACTTTACCGTTACTTTTATCGGGGATGACACGGTTAGGGAAGTTGTTGG  
TTACGAATGGCTTGTTGACGGCGTTGCTCAAAGGGGAGAAACACCAACTACTTTTATCAA  
AACCTTTGATTCGGCCGTTTCGTTTACTGTAAAATGCAATGTGACAGACGCTCTTGTTGC  
TGACGACGGTGTGAGCCAGTTGTTCTTGGAGCCGAGAGTGCTGTGACCGTCAAGAAGT



ACCCGCACTTTATGGAAAGCATTGGTACGTTACACCCTTGGCTTTCAAAAACCTCAAGTTT  
CTCGTGGGTTCCGTACTGGGTGCACTACTGCATGGTAGCGAGTCCAACATGGCGTCCAAC  
ACCGGAAGAAAGTCCTTGGCTAATCATTACTTTCTCGATTGACCAAGCGGTGGAGGAATA  
CGGCGAATGCTTGATGAAAGAATCCCGTAATGGGTACATTTACAAAGCATCTGCTTATAC  
CAAGTAAAAGGAGCCTTCGGGCTCCTTTTTTGTTTACATTTCTAGAAAAACGAATTATGA  
TGGCTTTGCGAACTTTGGGCAATTCACAAGGTTCCGAATAATTAAGGAATCTTCCTAATC  
GAAAGTGAGGAAATTATGCTGAAATCGGCATTAGAAAATGTGATTTTGGAAAATAGTCAA  
GCCATCGAAGGCAAAGTGCTTGTACCGATGCCAAGAAAATGTTCACTGACCCGAATTCCG  
CCAATTCATCACAGAGCCAAGAACCGTAATGAGCGGTTTCAAATCCAATTTTCGTGATTG  
ATGTACACTGCAACAACCTTATCCAGTTGCAATTGACGGCCCGATATGGGAATCGTCGTCT  
TCCCTGATGTATCCGATGATTCTGCGTACCCATTTTGGTGATTTTAACTCAATGGCCAT  
AATTTACGTGACGTTCTTGATACTCTGCTTGAACCTCAGGCGTGAATTCAAAAAGAAAATG  
GCTCTTGCGCATCTGGCAAACCTGCGTGACTGTCCAGATGACGGTGTGCGATTACAACAAA  
GCACAGTGGTACACTAAAGCTATTTTATGTTTGATGTATGCTCGATTTGCTGATGATCGA  
GAATTCGACATCTAAAAAGTTGTA AAAAATTGCAAAAAGCGAATACAATCGAGCCGCAATT  
TCCATAATCTCATCCGGTGGGATTTTGTCTCAATGCCTCAGTCGATTCATATGTTTATGCT  
TCCGCATTACCGATTACTTTTTCTGTGACACAACATAACGACAAAATATTCAAAGATAGTG  
ATTTCTGAACACGGATACGTCGCTGACCCGGGCAAAAATGCATCGAGTTCGTCTGCTAACA  
GAAAAAATCAAAGATCGGCTGATCAAAAACCGAGCGTCAACAATTCATGAAATAGTTGTAC  
AGTGATGGGCTATGTGTTATGATAGTCCCATCAAATCTACCAAGGAGCATATCATGAGAA  
CAATCCACTGCAAAGACGACTATGTGCGAGTTTTATCATGGCTCGTGTACACTCGGCCCTA  
AAGGTGATATGTTTCTCCGCTGAAGCAACAAACACGATTTCCGAAAAGGGCCGGAAAA  
AGA ACTTGACCGTGTGTTTTTACC AAAGACCGCGGTCAAGCCAAGTTTTATGCTAGAC  
GTGCTGCTCTATCTATTGGCGGGCGGCAACTCTATTTTCGAGTTATTGCACCGGTTGACA  
CGGTCTTTATGTCTGAAACGCCGGGCGCGACGGTTTACCATGCTGCCTGGGCTTTTGTG  
AACAGATTCCATTTGGTAAATTGAGCGACTAGAAAGATGAAATTCACGACAACCTTACTTC  
AATTCCAAAACAAACCGTCCGGACCGTATCATCAGCGGTGCGATAGTGCCAAAGACAAAA  
GAAGAAATTAACGAAGGCATCAAGGCTTACGTTGATTCTATTTGTCCGGTAGAAGATCGG  
ACCGATGAAAACGGAAATGACACTCTCAAATCGAAGAGGGTGCCCGACTCCCAGAGTCG  
ATGCGTTCGCGGCCAATTCAAGTCACTATGAGGTAATCGAAATGAGATATACTCAAAGG  
ATCTCGGAGATGCCATTAGCTTTGCTGTGGGCGTTCACATTGATCAATTTGACAAGGGCG  
GAAATCTGTAAATTTTGCACCCATTGAAATTGCTGCATTGGGCCTGACATGCCAATGAAG  
ACGTTGATGTTCAAATTTCTGTGCATGCTTCATGATTGTGCAGAGGATAGTTCGCTGGGTG  
TTGCAGAGACACTGGATTTGATCGAGATCGCTTTTGGCACCGAAATGCGTCAACCCGTTG  
ATAATCTGACTAAGCGTGATGGTGAAAAATATGAGGCATATCTTGATCGAATCAAATTGA  
AGGTCTGATCCGCGAAAGGGAAGTGCTTTGATCTTAGACACAATGCTGATCTGCGCCGAC  
TGAAAGGTATTACAGGCAAAGATCAAGAACGTACCTTGAAATACCAAGTCGCTTATGCCA  
AACTGAATATTTGGATTCAAGAGCAAAGTAAGAAGAAAATGCGTAATATTTCTGAGCTT  
TCGTCAGCCGAAAAGGTACAAGTGCATTTTCATGTTTCGTGAAATAAAGCATGGATTCGTA  
CAAATCGCCAAAATGTATGACATTCGCGAGACAAATGTCATCGATGTCGTCAAAGAAGTT  
GATGAAATGCGCGACAATCATCTGGAAGCTCTTACCCGAGAGCCGGTAGTGTATCGGAAG  
CGCATTGTGAATCCCACACGGCATCAAATGATGGTTCGCTTCAAAGCTCGGAAGCGCGCT  
AAAGGCGAAGCTTTTGGAGACTTTGCCATCTACATTGACTCCCGAGAAATCGCTTGCATT  
TCTCAAGCCTCGGCCAACAGGCCCGTCAGGCCAACAAATAGCAGAGCTTGAAGCTTTGTTG  
AACAAATTC AACACAAACTGATGTACATTCTCCGCGATTTTGGTTAAAATACTCCCATAA  
TGAAAACCGAAATCACGGAGTATTA AAAATGTCATCTAGAATGGATATGCTTATACGCTA  
CAATGCCATTGCTTCGGCCTCAGTCAAAGTTCCTGAACCTGTCAAAAACCATCATTTTGA  
AATTCTTCGAGGGAAGCCCAGCACCGAAATCGAAGAAAAAATTCAAGCTGAGCGCGATGA  
AGTTGCTCGTCAAATTTGAATACATGGCTTTCTTCAGCGCAAATAAGCGTACTTTGCAACC  
GTATCAAGTTAAAGTAAAAGCTGCGGAGAGCGCGGCTGAGAGCGGCGTATAACTTTTCA  
ACAATTTGTTGAATTGTTGAAAGTCGAAAAATGTGCATACACTGGTACTGTTTTCCCGAA  
AGACCACGGCCGGTCTATTGAGCGCCTAAACCCCAAAGTCGGATACACGATGGAAAACGT  
GGTAATCTTCACTGCTCGTGCAAACAGCCAAAAGGCTCATCTTGACCAATTTGTTACGA  
AGAGCATATCCCCGCTGATATGAAAGTCAAACCTTTTTGCGCAAAGCAATTTATCAATTGG  
AGAAAAATACAAAATGAATTGCATTAACGTTTTGAAAACGCTATAGTACATGACGAGTA  
GATGGTATTTTCCGAGAACTGGACAAATCAAAGTGATTTTGTGCTGCCAAAATCATCGAATT  
GTTCAATGAAAATACTAAACATGGTGGATCCGCTCCAATAGTTGAGCCAATGGGAAATTG

GCCATCTAAGAGCTATCTTAGCAACATGCCTCGTTTGTGTATGTTGAAACGCTATGGATG  
GGAAGTGGCGCACGATTATCGTCAATCGTGCAAAGACAATCCTGGCAACATTTTACTGT  
CGAAGCATTTCGGCAGCCCTGAAGCGAAATATCCTACAGCATTATGATGAAGTACGAAAA  
AGGATTTAAATTCAAATTGTTTTGATAAAAAGAAAAGCCCCGACGAGTCGGGCCTTTGTCTG  
TATTTGCAATTTGTAAATTGATCAGATTAGACCGGAATGATTCTGGGTAATTTACACCT  
AACATAGATGACATTTAGATTGACCTACCAAGTCATCCAATCATTACCTGTTACATTA  
CGTTCACCGGATTGACCTATACGTGTAGTGTACGGGTTAAGGGATAGACCATAACCGAAGC  
ATAATGCCAACAGATGGTTGCAGTGATGTTGAGTCATTGATAATTTTATAAGCATCCAAA  
TCATCTGCTTCAATATACGGTGAATAGAACAACGAACCTACGTGTTAAATATGATTGACG  
TCATGCTTATAGCCAGTGATCAGATAGTCAAATGACGAAACCGTATCAACACACACTTTC  
AGTCCGTTGCGCAGAGTTCCTGCTGAAAGAGGATCTTCATTTCGCATACATTCATCCGGAT  
GCTTCAAGCATAGCAGAAACGCGAGTTGTACAGAGAACATAGGTCGCTTCATATGATGTG  
TTTCTCAGCATCTAATTTTTCAGTTCGCATGCTTGTGATACAGAGTTCTTCCAATATCC  
GGGGCGTCATTGCTAGCGGTTAAATCCAGAATCCCATTGAGAAATATCTTCTACCTTA  
TAGCGGCGCGAAACGGTTATAAGAGTCTGAATAATGTCTTTGTTAATATCATCAGATATC  
ATAGTTGACAGGACATCATCGACTACGCCAACACCATCCATTTTATTTGCTTCCAAATCC  
TACATCAATTCAACACTTATATTTGTCTTAAAGTTTGCCTGTGGGAACTGGAAGTCCAC  
CGATCAAATGAAAGCAGTTGCGACAAATGATGATGCACCTTCAAATTTCTTCTGCTAAT  
GCTGCTTCAGACTTGATTCTCAGGTTGACGAGCATTACAGCATCACCGATTGCATCGGCA  
ATGTTGCCAGTTGACGATGTCAAAGTGAGTGGGTTTGTGGCGGTGTAACCACATCATT  
GAATCGTTGAAAACAACCCCTTAGCCATGGGAGTGTCTAGTTGCGCAAGAGGAATCGAA  
TCCCGATATCCGACTGACCCCATGTAAGTTGCAGCGCTGGAGAATGCTTGATTACCGGCA  
GGGTTCATATATTTACACCATAACAGTGTGGAGGTTGGCATGTTAGTGTCTTGAATTGCT  
ACCATTTCCGGTAAACAATCAAGTAGTTTGCAGCCCGGGTCAAGCCGACAAGAGCAGGACGG  
CTCGGACTATTTGCCCGGTAGTTGTTGCTTCAGAAATCAGATCGTTAATGCTGCTCATA  
TTTTTCTCTCATTGTTCTGCGATTATACGAACTCGTGTAATCGTGAAGTTTGACGTTGAT  
GAAACCAATTCCAATGCACCACCATTTCGTGGCAAATTTCCGTTTTTATCAACACTTATG  
AATGAGTTGCAGTTGATTGTCTGCGAAGCCTGCCAGATATTCTGACGACAGTCAATGTA  
TCAATATTTACGCCTGCATTAACGGTGAGTTCCAACGAGTTTGCAGGTTCTGCATACCA  
AATGAGCCAGTGATTGCTATTTTATATTTAAGTGACCTGACGCGCCACTTGCAGCTATTT  
GGCATGTCAGTATTCCATTTTGGAAAGATTCATGCATAGAGGACATAACTGGAATATTTG  
ATTTTATTAGCAGCATATATTTTTCCTTATGCAGAAAAGGGAGCCCGAAGGCTCCCTTAA  
CCATTCCTTGGTTGTGGAACCAAGTCCTTTTGAATTACAGACCTTTAACCCATACACGGC  
GGAAGTAGGCATTCTTACCATCGCTGTGAGCACCAGGCATACCATTGATGATTTCGACTGG  
TAGGAGATTGGGTGCGTGATTCAGCGGACGTGTTAACACGGATGGCGTAACGAGTCTTGA  
AGCCCATGACCGGTTGGAAGTTCTTCGGATCAGAACCACGCAGCGGGGTTAGTGCGAAGT  
ATGGGCAGTAGTAGATACCGGCATCCAGGTTGTTGGCACCAGCGGTAACCCATGGTGAAGT  
AATCTTGACGGGCGTATTGGTCTGTGTAGACCTTGTAAACGACCACCCAGAACACCAGCGA  
ACACACCATTGGTAGTATCAGCGTTCAGGCCAGAAGCCATACCTTGAGCAGCTGGGGTGA  
TACCAGTATCAACCAGAGCCAGGGCATAAACTGCGTTACGAGAAGCGATGATGAAGTTAC  
CTGCACCACGACCAGTTTACGAGCAATTTTCGTGAGCTTCTTGTGATTTGGATCAGCA  
GAGCTTTGTAGCTTTCACCAGCCCAACGAGCACCACGTACATCGATCGGGTCTTGGAAAGT  
CAAACACACCAGCAGAACCTAGAGTTTGTAGTCCAGCCAGATTTACCAACTTGAGCGG  
TGTAGTTAATCCAATCGATAACTTCACGGTTGATTTCCAGCATAACTTCGTTAGCCAGTA  
TTCCGTTAGCTCGCTGTCAGCATCCATACCATGAACAGCGCGCAGGTCTTGGGCCAGTT  
CGATAGAGTCTTGTGCTTTCAGTTGACGAGATTTTCGCTTCGACGGTTTGTGCTGATAC  
GGACGCTCATTTTCGTTCCAAGGGTTATCGGTGGTTCCGTTAAATCCTTGAGGAAGTTCGG  
GGATACAGGTAGCCATACCTTCAGCAATTTTCAGCCAGTTTCGCCAGCAGCAATCTTGGCAG  
TAACCAGGGCATCCAGAGCAGCACCAGTTTGTAGTTGGTACCGACAGTCACGCTTCCGCCAG  
TCACGTTCTGCAGATAAGCTGAACCAGACTCGTAGAAGAAGTGATAAACGATATCACCGG  
TAGCAACAGCTTGACCAGCAGTCAGCGTAGCAAACGGAGCGCCATCATCTGCACTGCTAG  
CACCTTGGCACCCAGACCTGAATGCCAAGCATCAGGAGCATAACATCGGGTGGAAAGCCT  
CCTTACCACCAGAAGCCAGAGCGTCTTTGCCGTAAACAGAACGCAGGGCAAATACTTGGC  
CAGTAGGACCAGTCATCGGCTGTACACCAGCGATATCGAAGGCGATCAGGGATGGAATTG  
CGCGTCGTACCATGCCGATAACAGCAGGGCCGATGTTTGTAAATTGCTCCGGAAGTGTGGC  
CAGCAGCAATATTGGTAGGATCGTAACCGTGATCACCAGCAACTTCGGCTTCCATCAGAG  
ACTGACCGAATGCTTCAATCAGTTTGTTCATCGCGATACACCGGATCGGTTTTGGATTCTT

TTTCCTGAGCTTCGAGAACTTGGGCTACAAGAGCTTGCTTGTTTTTACCAGCAATTTTCGG  
GCAGACCTTCACCTTCCAGCAGCGGAGTCCATTTGTTTCTTTGGTTCTCAGAG  
ATATTGTTATAACCTTTATTTAATTAAGAAGACATGCGGGAAGCAACGGCCAGATAGGCG  
GCCCTGGAATTATTTGCCTGCTTGTATCATTTTGTCTCAACAATAACTTCGTGTTGAAA  
TTTACCGCAGCTGCAGATTCATCAATGTTTAATGCTTGTTCCTGGATCGGTTTTTGTTC  
TTTTGACCAGAATTAGCAACCATTTTCGACAATCGCAGACAGTGTGGTGAATAACTATCA  
CCATATTCCAGGCCTTCTACAAGACTCAGAACTTTTTCTTTCTGTGACTCGGTTAAAGCT  
GCAGTAGCTTCTGAAATAGCTTTTTCTTTCTTTCAGTGAAGAAATTTGCTCTTCCAGAGCC  
AAATTTTATCAACAGCGATTTATTTTCATCTGTAGATTCATCCAGCTCAGCATTAGTTC  
GTCTGTAACATCTACTGGCTCTTCTGGTACAGAGAGGTTATTTTCGATGAACAGTTCTTT  
GAGACCGGTTGCAAATGATTCGAACAGCTCAGACTTGATGTTTGTCTTCACTTGCAGCGC  
ATTATCTTTTTCAGCTATTCTTTGCCAGATGAGTTAAAAATTTATCAGCATCTTCGTAAAG  
TTTTGTTTCAACTTCTTTCACGGGCTGCTTCAATTCCTTCGGCCAGTTGAGTTTCGGCTGA  
AGAAGCAATATCGGCAAAGTGAGATTCTGCAAGCGGGATTACAGACGATCGTACAGCTTG  
CTCAAACGCAGTACTGACATTTTCTTTTACGGATTCGTCCAGCTGAACAGACTCGAAAAT  
ACTGTCCAGTTCAACGGCTACCGTGCCAGTTTCTCGCTGGATTCAGCCAGCAGTTTATC  
TTAAGGGACATTTGGTTTTTCTTTAGTTCAACATTGAAGCCTATGTTTTTAGCCGATT  
GGCTGAACCCTTCATTAAGTGTCTTACATTGTTATTTATAGCATCTGTATGAGCTTCAG  
ATTCTTGTCTTTGCTCTCTTAGTGGTTAACGTACGCTTGTGGAGCAGAAGGCCTCC  
AAACAACATCAACCGTACTGTGAGGCGATAACCCTCCTGAACAAAGCCACCTTTAACTT  
GCCCCGAGACCAGTACTGATACTCCCGGAATCCAACCAGCTCGTATATTGGCGGCAAGTT  
TATCACCTGGACCAAATCACCTTCAATTACCATGGCAGACCCAGTACATTATCGCCTT  
CCCACCATAGTTTTTCTACTATGATTGAAGCCAAATTGGGGGCAGGCATCGGCCTTGCAG  
GATGTTTAGTTTCGCCGAGTGATTGTTTAGAATTCATTTGGGTAGCAATATAATCGTCGA  
CAGCTATGGCAAGAACAGCTTTAGGATAAATTCTCCCGTTTCTACTATTAACGTTAGCTT  
GCATAAAGATGCCTTCAATATACAAAGAACCCTTACCATCATCCACTGATTTGACTACAA  
GTTTCAAGACAGGTGCCGCCGGGAAGTCCCATACTACAATTAGCAGCTCGTCTTCCATCT  
TATAACCCCAAAGCTTACGCCGTTTCAAGGCACGTTTGTTTTGCCTGCGCCTTTATCC  
CAATGATTGGTTGAGAGCGCTTAGTTTTTCGCCGCTTACGAGCAATTTGTCTACGAGTA  
GCAGCAGTTAGCCCAGTAGTTTTAAATGCATTACGCTTCCGTGTTTCTCGATCTTTGGTA  
CGAGTACTTCACCTTTCGAATTAACATGTTTGACAATTGCTTCTGAAATGGAAATATTT  
TCAACTGCAGCAATCATTGCCAATGACATATCTGTTTCGTCAAGTGAATGTTTGGAAATA  
ACACCGATAATTTTCATCGGTGCTAAATCCGGCTTCTACGAAGGATTTAACACGAATCACT  
GCTTGCGCAAACCTGAGATTCAATGACTGGTTGATCTGCTGAATAGCCGGATGGAATAAGC  
ATTTATCCTCCTTTCATCTTCATCATCTTCGTCGTCATTCTCATCATCTTCGTCGTC  
TCGGGTTTTTACCTTCGGTAACAACCTGCGCGAGCAATGGCCTGATTTTCTTCGGCGTAT  
ACTGACTCTTTCACAAGAGCCATTTTCGCATTAATTCACGTTTTGCTTCAATCAATCA  
CCTGATTTGATAGCATCGATCAATTTTCCATTTAGAAATCATCCTCGTTTTTCAGTGTT  
TGGAATCATTTACATTCGCCTCTTTTTCTATTTGCTTTTTCTTCTGAGCAATTTGCTCA  
TCAGTCATCTGAAAATGTTTTTTCATGACATAATCATGCGAGACATATTTACCTACATAC  
GGCTCGATTTGCGAAAGGGCGTCAACTCGTTGTTGAAGAGTTTCAATATCTTTCAATTCG  
GTATAATAGGAATCTTGATGGAAATTAACCTTTATGTTATTTAGTTGCTCTTACCATTCC  
CTTTCTAACATGATTTTCTTGTAAATCAAATTGGTTTTGAGCGGGTCAAGGAAAATTTCT  
TCAAAATTTGTTGAAGCTGAACAATAAATTTTCTGAAATCTAATTCATCGCGGGTGATA  
GCCATATCTTGGCCACCAATTACCATTCCGCCATCGTCGCGAGGCATCCGGGACAAAGGA  
ATTCTGAGAGCTTCACCGAGCTTTTTATTGAACTAGCGAACGTGATCCAGTTCACCCATT  
GCTTGTGCGCCTGGAAGAGAAGTAACTTCGGTAACAGATTTACCATCTCTTCGCATCAAC  
CAATCATCTTCAGTCATTGAAAGATTGCGTTTTTGTATTTTTCACAGTACCTGTATTCGAA  
TCGTATAACAACAGATTTTTCAGGCTCTGCATGATGCCATTGACGTATTAGTTGCTTTG  
CGATTAGGCATATATCCTACGTCAATGTAGAAAACACGTCTTTCCGGAGCACGCGTAATA  
GGATATATTACCAAAGCATCTTCTAAGAGTTTTAATTGGTTTGCAGGCTTAACAGCATGA  
TGCAAATAACCGACAATGCCACTATCAGAACAATCCTGAAGGCCTGAATGCGCATATACA  
AAGGCACGTCTCGGAATTTAATCCGTGTGTTCCGGTTCAAGCAGTCTCCCGTTATAGGCG  
TAACCTTCGCTGCCGGCGGTATAAACAATAAATTCGCGATAGCCTTTTACTATAGAAGTA  
CCACCGACGTCAGCAGTAACGATTTACGATAATATTCGACATGACGTTGGTTCGAACCTG  
CGTAATTCACAATGCCTTCTTTAGGATTAGGCATTATTTTATGGAAGAATATGCGGGAG  
TCAACATACCATCTGCAGAACAACGTGTCCGGTCTGCGAGATACATTTAGCAATCTGCAA

ATATCATCAAACCTCTTCAAAAATTATGTCTTGGATAGATGAACTAAATTCAGTATCATCC  
AAATCAAGCGATACTACCTTGTGACCCTTTTCATAAACAGCAGCTTCATTTCCGATATTT  
GCTACAGCTCGCTCAACTTCAGGATTATTCATGAGTTGGCGATATGTGTTTATGAGGTCC  
TTGGTACCGGAAATGTTGTTATCGATATCAAAAAATTGTTGCAATAGAGCGTTATATGAT  
GATTCTCCGTCGCGAGCTTCAATCTCGGTGGCACCATCATCTTCTTTAGGACACGCAATC  
GATTCGTGGCCTTGTCTGAGCCGCTCGTCATATTCATTTTGATCGACACGATCCCAAAT  
TTAAACAAATCTAAAAACTTCAGACAAACTCCTAATCAGGGAGCATTACTGCTGCCTGTA  
TTTATTATTCCCACCAGTCGAGTGCAAACGTAGTTTCAAATGTAGAAACTGTGTTGTTAT  
CATCCCAGTCGAGAGTAACTTCACCAACGTTAGTTGGGAAAAGACCGACAATGGTATATT  
CTTTAGATGTACTGCCAGTACGATCTTTTTGACGAACAATGCCAGGCTTTTTTATATGCTT  
CTGGAATATCGCCAGTGATTTCAATACCCATTCCATGAGTCAAGGCATTCCAATCGACAA  
TTGCCTGTGAGTGTTATGGGCCGAATCGTTATAAATCGTAATCGTCCAGTCGTCAAAAA  
TACGGTCACCTGCAACATTAAGTTTTCGGTTCGTGTATCCAACCGGGATTTTTTCAACAG  
TGGCTGCCGGCATTGTACCTGCTTTAGCTTTAAATATGGAATTTTGGCCCAGGTATGGGA  
TTTCAATTTCAAACCCGTTAGGGCGGGCGAAATCACCGGACTCAAAGCCCTGAGGACAT  
CAGTTACGTCGATTATCAACCTCTATGTTTATTTATGCGCCCATATTTGGGCCCAACGCT  
GAATTATGCTAATTAGGCAGGGCCAATTAACCTCGTCAAAGTTAGCACCAGTTGATGTGCG  
TACAAAGTTCAGAGTGATGTAGTTAATTGAACGAGGAGCTTTGATATAAATCGTAGCTAC  
AACTCATTACTGTCGATAACTTGC GGAGTGTTGTTTGTGTATCACAGACAACGCGGAA  
GTCATAAACACCACCAGTGACCTGATGTTGCCAAGAAATTGCGAAAGTTCCATACGGAA  
CTCTGACGAGTAAATGCATCGTTATTTCAAACAATTCGTAATTAGAAGTATCACCTATAT  
TTTTCTTCAACATGTTGAAGATGCGACGAACGTTAATTCGGTCAAATGGAGATGGAACCT  
GAGTTGCCATTTTGTCTACAAAGAGAACAATTCCGTACCGCCGGCAAACCTGTAACCG  
GGTTAATTGACACTTGATACATGGTATCACGCAGCGATTGCTTCGGTTCAATTGCCAGTT  
TGATGGTGTGGCCAAGTTGGCCGCGACGATATCCAGCAGGGGACATCGATGGATGTCCTA  
CGTGATCGGTGTAGGCACACAATCCGGCAATATCGGCAGAAAGAGGAACCCACCGGTTAA  
TATCATTGTATTTGTCATACTGATATTTATAGTTGCCTGAAATAAAAGCATATGTTGAGC  
TAATATTCATGTTATTGTCGACAACCTTCACCACCAAATGTACACCATTTCCGCAATTCGA  
CAATATTCCTTAACCGCTTGAGTGGTAGGAACACCAACAAGTTATTCTGACGGAGGATTGA  
CGCATGCTACACAGTCTTGGCGGTCATCTGCGAGAGCAACGACATGTTTCTGGACAGTAG  
GTGCAACAGCAGCACCGTCAGATGCACATGCTCCAGCAATCATCGGGTTGAAATGCAGAG  
CTTCTCTGTCAGCAAACAGATCCCAACCCTCAATCAATTCATCTGAACCAACAGCATCAT  
TTGCCGAAGCGCTCCACCAGCCGATGAGACCGGCAAAGCCAGCGTGCCAATTTACAC  
TAGAAGCATAAATGAAATTAAGTGAACCATACGGAAATACTCGTCCATGAAATGTATTT  
CCATAAACATCTCGGTCTCCGCGACGAGTAGACAACACAGTAGATTCGACTACGATGCCG  
TCTCGACGAACAATAATAGCAAATTGGTCATCAGTAATCGGGCCGTATTGAATGACGCTT  
GCGCTTTGCTAGTGCGAGTACCACCAAACGGGTAAATTGGCCGGGCTGCACCACTTTGGA  
ATGCGGCCTTAGAAATTATTTCAACTTCGACAGTTGAACCGATTTCCCCGGGATAGACGG  
CTGAAATCAGAGGCATTCCATATTTGGCAAATTAGCCAGCACTTTGGTAGAAGTCATAA  
CATCTGGAGCTTATTCCGAATTACCAAAGTTACTCCAGAATCAACTACGATATTACCCA  
AGGTTAAAGCAGCAGCAGATCCGCCAGATGCGCCCGATACTTCTGGGCGCCAGTTATTTG  
CTAAGACAGGATATGATCCCAGCTGTTTGGCTTTTGCAATTAAGTGCAGCTGAAGGAACAA  
GCAAAGCCTTAATTTTACCGTCAGCATCAACTTTAGTTACTTTTCTTCTTCTGTAACAG  
TTGTGGTGTATGCTTCATAGAAACGGTATCACCTACGGTATAACCTTGTCTTCCGGTAG  
TAATTGTAACCTTCGATTTGGTTAAACAATGGAGATGCGTTTTTAGCTTGCTGCATGTCAA  
TTACGAGCACGAGACGAAGATCATTACCATACTGCAAGAAGTTCATACCCTCATGAAAT  
ACGGAGCAGTGCCATTGTCTGGGCTACCAAACATATCAACCAATTCGACTTCATTTGTTA  
CTTGACGAATTTTCATAGGCAGGACCCCATGCGAATTTGCTGACTAATGCGGCACGGCCAA  
AAGCTGACCGAACGACAGCTGAATTGATGGAAGTTTCTTTCATTTCAATGCCAGGGCTCA  
GAAGTGCCCTATTTTGGTTCCCTTGGACGTTAGTTTAAACACATGTTTAAATTATTCCTTTAT  
ATTTACACGAACGACATAACCATTACTGGCAACTTCGAAAGTTTCTTCTCCGCTGTCAACT  
ATAACGACAGGCGTATAGTCGTCATATAAATTTTCCATTCCCTGACGAAATATTACATTC  
GCCAATCGCTTGTATCTCTCTCGGTAATAATCAGAAAAATCTCGGTTGGGTAGTAAGCCAT  
GAAAATATTATCAATGATATCACCAAGCCATCATGGAAACCGTCTTCGGCTGCGCATGAA  
ACACCTTTTTCTGAAAATGTTCTCAGTTCCATTGTCGTGCCTTTATGGTAATGCACTAAA  
TTTTCTTTTTTCGATTAATCCTTGAGAGTAGAACAACCTAGGGCTTTTGACCGTTTAGTT  
TGCTTAATCCCGAGGTCGTTGTACGAGTCACATATAATGTTTTCGTATTTCCGGTTCGGAA

TACAACGACTAAGCTATGGATACACCCGTGGCATTTCAGCTCAATATAGATGTATGGCTGA  
TAATACATATTTAAGTACTTGAGCAACACATCAGGGAGTATCAGGTGTGACGTGGTGTG  
CTGAGAAATACTGCGACCTGTTTCGTACGGGAATTCTGTTATGTCGTATATGTGCATAGCA  
TGAGAATCTTGCCACGACCTTCAGCAGAGTCAAGTGTGAGATATATTTATGACCTTCA  
ATTGGTTCCTTAAACATCGTGAAATTGTCTGATGCTGGAACCTTCTTTCCACGTCATTTTT  
GACAGTTTGAACCTGTTGATCAACGTTCCAGATGTTCCCTGGAAAGCAGTATTAATCTCC  
TGTTGAAATGCCTCAAGGCTAGAACCGGCGATTGTCTTGGCTGACCAAGAATATCCGTCG  
TCAAAATATGAATCGATGCCATCTGTTTTAGAACCATCCGAATACATGCGCTCTTTAACG  
GGCGACCATGTTGCGGTATACGGAACAAAACAGATTTGCTTCCACTTCCATCCGAATTA  
GGGTAATTGCAGTAGTCCAGATATCGTACCAATGATTAAGCCATTAGGCGTTGTTGTC  
ATCAAAATCTTCGAATGACGACCTGATGATATAACTGGCTGGATTGCTAACCACGCGTCG  
TTGAAGTCGGGAATAAAAGCAACTTCGTTCGATGTAATCAGCGCAAACGAGTTACTCCGC  
ACAGCATCAGTGGAACTGGAAAATGCACCAAGCGCACAAACCATTTCCAAGAGTGATAGAC  
CCTTTATTCCATTCAACTATAACCAGGCTGCAGAAAATCTGGCAATAGCTCCAATGCCTAC  
TTTGTCTATGAAGA ACTTCCGCTGACATGGATGCTTTATGCACAAGGATACCAACGTTT  
TTAGCCGAATTGAAGCAAACAAAATGTGCCAAGAAAATAGCTACTACTGTCGTTTTTCCG  
AGCTGACGAGACAAATGTGCTGCCATCAGACGATCGCCAGCTATTATTCTAAGCATATCT  
TTTTGGTAGTCACGCAATTGGAACCGGATAATGCCATAGTCAATATGCTCAATGCAGCAA  
TAGTTTTCGGCGAAAGAAACGATATCTTCTTTGCATCTCTTTCGCTCGGCTAACATCTCC  
TTTGTACATTTTAGTTTTAATGTTAGCACGTTTTGATTTCGGCAAACCATTTATCTAGAA  
CGTTGTTTGTTTTATCTTTAAACGTTCTAAACATGGACGGGTCGTCTGCTTGGATTTTT  
ACCCTCTTACTCCCTGTGTTTTCAGATATCTATCAAATGTCGAGGGATACCACTTATCA  
TCGTGATTTGATAAAAATCCATTCCCCATCTTCGCGCATTTCTCTCTTTAACGTGGATGGA  
TAGGGCATGTGCAATGGGTAATCACTTTCGAAATTATTCATACTTCATCACCAATTCCA  
GTTCAAGCAATTCATCAGGAGAACCTTCGAATTCTATAATTTCTCCGCTTTCATCATTTT  
GAACTGTGCCGAGTATGGATGGTCTGTTCGATGTTAGTTCTTTTCAATTCCTTGTGCATTT  
TAATGAATTCTTTATTGGTTGAAAGTCATTTGACCCATTAGCTGAGAAAATACTTCAACCA  
TACGTGGACTATCGGCATTTTGGGCATTTTCCAATGCAATCTTTGCCATGTCCATCATCA  
TTTGAGTTTGA AAAATGCATGTTGCGTCTAACAAATCGTATAGTCATCATCCGGGTCAATGT  
TTCCATTGTTTGGATTTGATGTCGGTCTTGTAAAGACCAACGGGGCGTATACCTGCACGT  
CTTCCCCGGTGAGTCTTCGATACCAGACGAATCCTTGAGTCTAGTGAAGTCTAAAAGAT  
CATTTATAGAGTATTTCTATTGTGGTTCGAGGCGGTGATTCTGATCGGTATTGTTTGTG  
CATACTTCCATCGAACTCCCGTCCCAATCTTGAGCTGGCACTGTTTTTTGGATCAACTTGG  
TGATCAACTGATTCAAAATGAGTATCTTTGTTTATTTCTCTTTCATTGCCAAAGAACTCA  
AGATAAATCGTTCTAATTTACCTGCAATATTTTTGGTGTTTGGATATAACCAACCAGTG  
AAACTAAACATGATTGACCATTTCAATACGGCGTCGTTGTTTCGCCAGGGCCATCTAGCTGC  
TCATCAGGCGTTATGGATGTGATAGTTATATTGATAACCCGCCCTTTAAACAATTATTTG  
TTGTCATACAGCTCGGTTATTGTGCAGGAAAAATGTGGTTGAAAGTATGGTAATATTTGT  
TCAACTATTTGAAATGCATCATCTTCATGTCCGGTCCATATTCCTAGTTCAAACATGAAT  
GTGTATGGCACAGGGTTAGATTGCGCCAACGCTTTCCATTGGGTTTATTTATCCATTTA  
TTTTGAGTATTTCCAGTTTTTACCATTGAGTTATATTGCATATCGATCAAGTGCAAATTC  
ATTCTAGGAAGAATTGCTGCGACTTTTGCAATGTTGAATTCGGAAGTTGGCATCGTAATA  
TCATCAATAGACATTACCAATTTTTCTTTACTTTCGCTAGGTGATAGGAACATCTTTAAAA  
TAATGCTGGCCATCTCGAAAACGAGAACTTGAATATGACCAAAAAGTTCCATTAGCATC  
AATACATATCGGCGTATTGAGCTGTTATAAAAATGATTGCCAAACATTACTCTCCCTCAA  
GCCGCCAAATGGACTATTAAAGCTGTTCACTGGGTTTGTACCAATTGGATCAAATGGCT  
CAACAAATGGTCTAGCTTCCTTTTACCCCTGAACACTCTCACCAAACTGAGCGATTTCTT  
TATCAATTTAAACCATCTAAATTTCAATATTGGCTCCAGGTCTAAACCATTATACGGATCC  
TCAATTTCTGGTTTTTCTGGGACTGAGGAGCCAATTTTTTACCAGAGTATATGAATTT  
CTGGGCAACAATTACCCTGATTTGATTTTTTCCCATCTGATAAAAACGGCGTGTAAAGGTT  
TACCCATGTTATGTAAAACAGGCTGTTATCCATTGGCAAATAAATCAGATCACCTAGTTT  
AGGTTCTTTTCCATTTACTTGATGCTTGAAAAGGCCTGGGTTGATATAAATTCTGACTTC  
GTCATTTTGTGATGCCAAATTTAGAAAAGAACTCTGTTGTCCCTCATATGACTCGAA  
GCTATTGAGCCATGCCGCAAATTTCCATGCTTTTTCAAATCTGCTATTTGGGTCTTCTCC  
AAATACAACGTCCAAATTTGTACATTCTCTTTCGAGATAATAAAAAGTACAAGCCTCTCAT  
TTGAATAGATTCTGCAACTAGAGTGTCGTGGAGGGCCTGAGAGCCCTCATACCGATTGAA  
TTTGACTTACGGGTTCAGAATATTTTGTCTATTTCGTTTGTGATATCCGCTTCTGTTTTC

TAAAGTAGCGAATAGCGACTTATCCATCATAATTTACCCCATGATAATAGGTGGAGCCCC  
ATCCAGCAATTCGAGTTCCTTGTCTAAGCTTATCGGTATCTATTCTAGCTTCTTCAATTAG  
GCGTATTCCATCGAGTGTTACACCACCTGGAAGCTGCATACCTCGATGTTTCCCTAAAAC  
GTGGCCGTTTAGTTCCTTCTCTTTTTGCTTTTGCCAGGACTTTTACCCAGCGATTATTGT  
ATGACTCATCTTTTGTACATACCATTGGGTGGCCTGCAAAAATTTGGCCATGTGACATAT  
TAGGATTTGCGTGTTTTTGCGCCACTGACGGCAAGCTATCGTCATCTGACATGGCAAACCT  
CATATCCAGCCGAAGTGCCTGAAAGCATTGAGTCAACATTCGCATACGATTTGCAGTAAA  
CCTCAAATACCAGCAAATCTCCTTTATGCAATTTGCCAGCAACTTTCATCATTTTCGGTAG  
TACTGTTGAAAAAGAAATCAGGCAAAGAAGAAAGCATGTCTCCCATCATGTCTCGATATG  
ACATCAATTGAGTGAAATATCCGAGATCTGCGCCAAAAGCATTAGGCCCATACCATGGGC  
ATTGGCCGATAATTGAAGCTCCAGTCATACCATAACAATAACAGTAAACCACGGATAAA  
CAGCCGTGCCGTCCATGGTTATAATTGACCCAATATTGGTTTGAATTACCTGAGTAACTG  
CTAAATCATTGCCACCTCCAAAATAATTACACCAGTTTTAGCTTGTCTTCGTTTAATA  
GTAATGTTGCATATGTTTTGTGAAATCCATCGTAGTGATATTCACCGTACAATTCAAGAG  
CTCTAGATATGCAATCAAATACTTGTGCTCTGTTACTTCGACGTGCACGATTGGTGCC  
CTAGACGTCTAAGTATAGCGTCTTAAATTCTAACGGGTTATTAGTGGTACATGACATAA  
GTGTCTCCTTTATGCTTTTTAAGCAAATTATGGCGGAGCCTTTCGAGCTAGCTCGAAAAT  
GTTATCCTTTTAGTTATAATATCTATTAAGCCATAAAGGATAAGTTGTTTTTACAATAAA  
GGCTCACGAAGGAGCCTTGAGATTATGCTGGGACAATAACAGCAGACATTTTGCCGATAG  
TTATCGATTTAGCTGAACTTGAGTCAAGTGCTTTGACATAAATTGCGATAGTATCATCCA  
AAAATACATTGTACAGCCAGTTATGTGCGTAGAGTCTACCATTTGATCTCAGGGTAAATT  
CTTGGAATTGGTGTATGATGTAAGTCCGCCGCTTGTATGAGCTATTGAGATATCCAGAT  
TATCTGTTTCTAACAACTAGATGTTTCAATTTTGAAGCTTGCATTAATACTAAACCGCCAT  
CAGTGAATTTGATTTGTACGGATTCAAATATGCAACCGTTTGCTACGGTCTGATCAAAT  
CAACAAATGCAATAATCTTCAACGTTTCAGTTGTAGTTATTTGAAAATCTCTTTTTTCAA  
CAGCAACCATGATGTTAGTTGCTTTAACCCAAACACCGTTTTTCGCAATACCAGCGACCTA  
CTGCAAGTGGCTTATCTAACTTAAGTTGAAGAGTTTCGCTGCTTTCTCTGTCAGTTTTCT  
TAATACCATCTCTTCAAGTTGTGTAATTTCCCGCCGCATTTCCATACAAGTCGGTTGTCA  
TCAGAAATGTTTGCAGAAACAAGAGCTGAATTTTCATCACCCACACGTGAAATAACGTCAT  
TCAACGATAAAGACATTTGGTGTGATTTGTCTGTAAAATGTACAGTCGTCCATTTATAG  
GTGATGGTCTCCGATAAAGCCAATAGCGGCATTGAGATCTGAAATATCCGCCTGAATTC  
TACTGAACTGTCTTCCCCTAAAATCTGCGTAATTGTTGCAATATTAGAGGTATTTTCGAT  
TGATGCCGTGCAAAATAGTATTTTGCGTATTAACATCACCGATTTTCTGCTCTACCGCTC  
CAAGACGAGATAACACACCTGTCACAGGGGTATTCATCGTGTTCGCGAGAGAACTCAACG  
CACTTTCATTCAACTCCACCCTTGACGCTATCGACACAGGGTTAGAAAAATCGATTTTTA  
TCTTGATTTGATCAACGTCATCATTACCACCACCTAAAGAATTTTCGATAGCGGTCAATC  
TGGTATAAATCGGAATTCCTGTACCAATATTAGTATTGCCGACTTCCATCCTCAAATCAT  
ATAAATCAGACGTCAATTGACCTACATCTGACTGCGCCCATGAATTTTCAAGCGCGGGTA  
TGCCTGGGTGTTTACAGAGACACGGTTTGGTTTACTTACTAAACCGATACTTTAATCCCG  
AACCTATCGAAGAAGGAACAGAATTACCGTTTATGTGCAAGCCTGGACATGCACCTAATT  
CGTTTTTTATCCTTTACAAATCACCATATACAGATCGAGCGGTGTCGTCTTTGAGATATC  
GGTGGCCAAGCATTTCCTACGTTGATTCTGAAAGAGAAAGAACACCTGCTACATTAGTTT  
CAACCTCGCGAATATCTTGCTTGATAGCTAAAATATCATTAAAATTAGCAATGATTTGGT  
CAATTACCGTATTATCACCGATTACACCCAAGTTATCTTGGATAATATTTACCGCATCGA  
CAATCTCATTGATTTTTAGGAATGACTGGGCATGGTCTTCGTCTAGCTGCACAACGTTCT  
GTTGAATATTAAGTGGAGCCTTGTGTAAACACCGTCGCTGGCTGTTTGGGTGGAAGCGG  
CCGAAAGCCGCTCTCCGTTTTTAATCCAACCAATTCGAAGTTGACCATCACCTGGAGTAG  
TATCAACATAAGGAATAACTCCTTTCGTGATTTTGTCTATCATGTTTTTTTCTCGAGTTT  
TTCTAATCTGGATTTAAGCTCTTTATTAGCCTCAATCAGTAATGCAATGAGAGACATTGG  
AGAAACAGTAAGAGTTCGTCGTCAAGTGTGGACGCCCTTCTTGTAATAACTATTTGCAA  
TTGCTGTGCCAAAATACCTGCCTCTTTGCCTATCACGATATTGTCAGTCAAAGATTTATG  
TTTTATGTAAATCCCAGCGTCAAGGCTATCTATTTTTACGAGTGCATCTTTGATAGGCGG  
AATATCAGTTTTTAACTGGTATCGCAACGAACATAACATATCGTTAATGTGATGTTTCC  
GGCTAGCCATAAATGACCACCTGGCCTAAGCGTAGCAATTGTGGTATCTACGTCATTGGT  
GCGAGTTGTCTTCTAAAATACTCGTTGTTATTGTCTCCAACAGCAAAAAGCAAATACGA  
ATTCTGTCAACGTCATCTCGTTTTTGAATGTTATAGCAGCCAAATCGGCATTTCTATT  
CCACAAAATTCCTTGATTGTTTGTGCTGTAAAATTGATATTACCAGTCATTGTGCCACCTGA

GCGATAACAACCTGGGCATTAGCAGAAAGAGCCTTATTCGCCTCTGAGCTTTCAGTATT  
AAGAAGGCGAACTAATCCTTTTTGAGTGCTAGTAGCATTCAATATGGAAAGTTTAGCTAG  
ATTAATAACGACAGTGTTATCAGCTAATGCTAATGTTTTCGGAATTTGTTGCTACTTTAAG  
CAATCCAGCTAAGCGTTCCTGCCATTCTTGATAAAGTATCTGGACTAACAGCATA  
GCCATCTCTAAGAAGTCTGCTAAAGCTTGAGCCAATGTGGCCAAACGGACAACCTCCGTC  
TGAGCTTTCTGTTGCAGTTCCTCATGATTCTGAGAAATGCGCAATGGCCTGCTGGGTCTT  
AAGAGGAGTCATATCAGTGGTATCGTCGGTGCCAGATATTGCCTGGGCAGGAGTCGATAT  
AAGGATTGTTCTCTTGCCGCTTCGGTAGAACCTTTATTTGCAATGACATACCCAGTTT  
CGAAGGTGTTATTGCAGCGGTGTTAATAGATAAGGCCAAAGCTTCGTCACTTGATGCGTG  
AGGAGTATTACCAATAATGGCGTTCGGTACCCTGCGGGCTCTGCATCGCAATCCGCAGAAG  
ATTAGGAGTAATAACAGTATTGTCACTCATGCCAGCTGCGGCTTCAGCTTCAGTAGCAAT  
TCTAATAATGCCAGGTACAACCTCAGTTGCTATCGGCAGGCCATTAACAGTTAATGCCCA  
TGGCGCTATTTCAATTCAATGCGTCTGATACGGACTCAACTGAACTGGGCCAATCTGTCCC  
AGAGAAAAGTACCGAATCCGCTGAATCCGAAATATAATATTTGATATTGTGATTCATTA  
TTAATCCTCTTGAAGTAATAAACATCAAATTAACGGGTTACTGACCCACCAGTAAGAGTT  
TTTGACTCTTTACCCATATATTCCCAATTACCATATCCAGGCTTTCCAGGAACAGTAATT  
TCACGTTGAACAACAATTTCCCAACTGCTAAAACCTTTGATATTCCCATGCTCAGCCGAA  
TCAATGAATTGCACTTCTATGATGGGAGTTGTTGTGCCAGATTGTCTTTGAACAGAATAA  
AATAACATGCCGTCATCTGGCATTCTTCAGATTTTGCCAAAACCTATGTGCGCATACTGCA  
TCAGTGTTAGTTCCAGCGGCAATAACGAAAGGTATACCGTAAACTGTAATGACTGATTTG  
TTAATTCAGAAGGAAGAACACTTCCGCTAAATGTAAGTATCTCAGCTTGACGAAGACCT  
TCTGGGGAAACTTGAACATCTGAAGTATATATCGCGTTAATAGCCAACATTGTCAGTGTT  
TGGAGTTCGTCGATAGCAGATTGCACGTTTGGATCGTTCACACCGTCAACAAATGAGTCT  
ACCCTCGGCCACCTATATTTCTGGCACTCATTACTTGGGTGCCCGGTTTGGCCAGATAC  
TAGATATGAGTTGCTTTTCTAAAGATGTTGTGTGCACGGTCTAATGTTTTTTGAAATCATT  
TTCCAACCCTTACCCATTTGTATGCTGTAATTATCGGAGGAAGAATATTGATGTCTCCTG  
GCGATGTATTTCTTTATTTACAGCAAGAACTGATTCTACGTATTTTGTATAGCCAGGAC  
CAGATTCATCAGGGTCAACTTGGCAGCCGCAATGATGATATTTCCATCGTTATTTGCGA  
CTAAAATTTATTGCTTGAAACAAGCTCAGGCACATTTTGAGGAATTAGTTCAACAGATT  
TTGAACCGTATGTTCCACCTGCGGTATGGCTTGGATTACCCTGATTGTCGAGGTCGTTAT  
TGTTTAAACCAAATTCGACATCAGCCTGATTTCGATGTCCATCCTGCGACCAAACGCCCTT  
CAGCATATCTTTTCCATACACCAAACCCCATGTAATCACGTGGGTTGGCAGGGTTGTTGG  
CATTCTCATATATTGTCCCAATCGGATAGAAAGCATCGAACAACCTGTTGGATATTTTCAA  
TTCTTCCGCTGAAAGTGCCTGGAATAATTTGTGACGTACGCTGGCCAGGATTGTCAAAT  
CGGTGTATTCGATTTGATTTTGGCTTATTAATTCCTGCTCGGTGTTGAGGTAACAGAAT  
CAGCTTTTTCTTTTATAACCATTTGTACCTTTCCAATCCAACAGAGTACCAATATCCTTAT  
TGAACCATCAGAGGGTGATCATGTCACCGGATTCAACTGTTCTTCCAAAATTAATATCGG  
TACTATTGCCGTTGTCATCCAATACGATAGAATAATCAATAGACGACGGAACCCAGTTTC  
CACCATTATCCCAACACATTTGTTGAGTATCGCCATTTGCATTCTCGCAGAAGAACATCG  
GCAAATCGCCCGCCCTGCTCGATTAAGCATCGTGCCATTTAGAAGAACTTCAAGCGAAT  
TTGGATTTATTCTATTGTTTGGCTGAATATCGAATACGTCAATAGTGAAATCAGTTTTTC  
TCGAAATATCACCAACCCAGATTTACCAGGCGATGACGTTTTTTTGTGTTGTTGATGCAT  
CAAACTCTGAATATTCCTAAGGTTTTATGAAATCCGGTAAGAAGCGATTCCATCCATGT  
AGGTGACAATTGTTACAGTATCACCTTTTTTGAAGTCAATATCACGAATTCGAATACTTC  
TTCCATCTAATGGCAGCACTGATGTCGAATTGGCTGGGTCGCTAGATCCATAGTTTCGAGT  
TTTCGTTTAAAGTGTGCGCGTAATACAGCAAGTTACCGCGTAGATAGACTTCGAGGTTTG  
CAATATTGTAATTTGTTGTCCCGAACACATTAGGAAAATCCGTTTGACCATCAACAGTCA  
CAACTATTTCTTTTTTGGCAACAGTACTCAAATCGGATGTTGTAATTTTATCCACACGCT  
TGTTCTCTACGATTTCCCATCTGCCTGGCGAACAATATACAAGCTCAACGTCCATCAAT  
TTTTGTCAAGATTACGAGGATTTGGCGAACCTTTAACGAATCTCCCGTAGCAACAACCA  
AAACTACGTTTTGACTTGCCCATGTGCCCAACATCCCGCAATTTTATTGCTTTATTGT  
AGTCGGAAACAGATCATTTAGGCAAATTGACAGTAATAGAACCAGCGGTGGTGTATTATG  
CCCATGAATCTCCGAATAATGGAGAAAGAGCTCCTACCGAATGATTTTTCCACGCACCTA  
GAGCGAATGGGCGATCTCCGTCGCCAGTTGAGAATAGAGTTCCGGTAAAGTTGTTTTGA  
CTTTTTGCCACACGGCGGAGAGAATCGCCTTGGCCATCCTCAACAACGTTTCCGATTT  
TGATTCTTTCCATTATGATATTGCCCAATATTAATTGTGTCAATGGCTTTTATTGAAA  
ACGTATTTGCCACTGAGAGATTTTACTTCAACGTAGACGTTGTCGCCCGGCCAATAAA

GAAACGAATTGTGCATAATTCGTTAGAGGTAGTGTTAAGAACAGCCTACTCAGTATTTAA  
AACCGCATTGTGTAACCGTATCTACTGATATCAAGTATTCCGAATTTTTTAAAACTGTGCC  
AGCAGTGTTCGGGCAGCAACCATCAACTTTATCGCAGAATATTCGTTTTTACCAGCAAT  
ACGAATATTACTTGCAGTAGTTGTGGCCAAAATAGTTTTTTCAACTGGCATAATAGAATT  
TCCAAACATTGGGGTTATTCCGTATTCCCAATATTTTTCTGATCCTGCGTTCTTTGGGCA  
CCAGACAAAACCTCTGGCGTATGGAGACGTTATAATAAGAGAGCCAGATGTTCCTAAGAT  
ACTTTCGCCCGCTTAAGTGCGAATTATGAGAGGATTTGACGGAGAAATTGATCCATTACT  
ATTTATAAAGATCCAACCTTCCCCAACTTTGCATTTGGTAGACTCATGGTCAACGCGCC  
GCCTGACGTGTCTGCGTCATGCATAGAACCAATATCTATCGCATTCCCGGCATAATATTG  
TCGCGATACTCTCTGGTAATATCCAGTGTCTGTAAGAATTTCGAGAGTCAGCTCCTTCAGA  
AGCTGACCAATAAAGTCTATAATCACCAAATGTGTTATAAAGCGCATCAATAATTTGGTT  
GAGTTTGACACCACCGTCATAGAGTATATCACAGTTGAAGGATTACCTATAACGCCTAC  
ATCAATTCTCTTTTTTGGTAGATTGTAACATTTGTATTCCTTTAAATGAGAAAATGATAT  
TGATTTCTTCTGTCTGATCGAGAGCTCGAGTGATAGGCTGTCTATTTCCATGTATATCA  
TTTCTCCTGAATACTTATCCAATTCTTCAGGTTTACATGCTATCAGGGTCGCTTTAACAT  
CTGGATCGGACGGCAATGATTTTTTAACTAACGGGTTGATGATTACTCTCATCTGTGGAA  
AACGAGTGTTGCCCTGGGAGTGATGCCTCAGGGAAGTATACTGAGTCCATATACGCTCGGA  
ACCGGAGTGTGTCTACTTTAATCCGGTAAATGAGGTCTAACTTATCCGGATACCATAGAA  
TAGCATGTTTCATACCCCGATCTCGCAGGATCGTCAGAAAGTTCATCCGGGAAAGGGACAA  
CATTATGTTCAATTTGTGCATCTGTTTATTGATACATCGGGCGGAATAGTATACAGTTAGT  
CCCACACATAGCCATCACTCATGTCGATTGCCGTAGCAGTCCCAGGAGGTGGTTCAACTG  
ATTCATGAGTTGCAGTCCATTTCCACCTATAGTGATACACTCTATGTTGTAATCTATTC  
CCGAGATAGAACACGAACCAATAGAAGGAACATCAACACAGCGGTAAATCATCCAGCCAA  
CCGAACGTGTCGGTACGATTGTAGGTAGCTGAGTTGACTACGACGATATCGACGATAAAAA  
ATGTCTTTGGATTGTCATATCTGATAGCTTCCCAATCTTTACGCGGAATTATTGCGACCA  
GTAGAGATTTATTAATTTTTACTGCACCTAGCATGTTTGTCCACAGGCCAACAACGCCAT  
CAACCGAATCATTGGATATGGAGGTGTAAGCCGACATCGGTTTCATTCGTTGACCACG  
GAGTATCACGTCCAAGTCTGGCGTATATTGTGTTTTTGGTGGGCTCGGCGCCCACCATGT  
CGTAAAAGTTTAGCAAATTTTTTTTTCTAAATTTACTACTAACAAATAGCACGATAGAAAT  
TACTCATCTATTTTACCTGTGTTGGGTTTTGTGGATCACGAGGATTTCCAACGTCTATCT  
TTCAGTCATTTTTTAACTAGTCGTCTAAATTGTGAAAACGTCACAGCCGACTGATCAAAT  
AAAGGTCTCATTGCAAATCTTCGTTCTGATGGAAGTTTTCTAACCATGATTCTTCTTCA  
GTGTCATATTCAGGAGGAGGAACAAATGGTTCGCCAGCATTGGGCCAACCAAGTCTAAA  
GCTTCTCCGGTGGCAGAGTCATGCTCAATATTTCCGTCAACGTCTAATTTGGCTACACGA  
CCGTATTGCTCAGTTGGGTAACCAGCATCCCATCGATACGTTTTCTAAATTATCGATGAT  
AGTTTCTACTTGTTCATCGATAAACAGAAATTGATGAACATCGTGAGAAGTGTTATTCC  
AACAAATCCGAAACCAACTGGATGAACAAAACGGAGAACATCTTGCGCAGATCTAGACGC  
CGGAAGAGTTGACTTTATAGTCGTGGTGAATATGATCTACCTCGATTGATATAGTCAAT  
CGAATCGCTCATAACGCTCCTTTCCTCTAACCCCTACCAATATTTACCTACGAACGAACT  
AGTTTCGGATTTTATTTGCTGGCATTCAAAGAATTTACCAATCGTATTGTGAATGGTTTT  
TCTCCACTTCAATTGGCCTTCAACATACTACAATCCACGTATGAGACGTTTGCACGTCC  
TGTAGGAGTATCTATGGTTCTTCCAACAATGTCTTGGCTTATGTTGGTTGAATAAACTAC  
GATGGTATATTCTATTCCATGCTTTGACTCGATGTCGATTTCAACATCTTCGTTATAAAG  
CAATTCGAAAAGGAATTTATTTGATTGTTCAACCCCTTTCGTGGCATTAAACATCGTAGGC  
CCGAGATTCAAAAAATCTTGCGACAGAATCTCTCTCAGCTTCGTCCAGATAGATGTTTCT  
TCTTAAACTTCTTACCAAGATAGTCATACGCATATTGCTCGCGAGGGTATTTGTTTTT  
TATCAAATGAGCAATTTGTTGTAATATGTCCCGTTTCTGTCCGACAAGAATTGCAGATA  
ATATTTTCGAAATGCATCAAATTTGGTATCTTCGTCCAAACAACTTTCAGGCATCATTTT  
AGTAACAAGTGGCTCAAGGTCAGGATCCTTTAATCCAACAAATGGACCAGGTGTCCACGG  
AACTTCACGCTCTTGATTGCGCAGCTCAGCTACCATCATGACGTTGGCCGGCTTCCAGCA  
AATGCATATAGTATTTCTTACCCGATATGGGAATTCATAATACGCAATCCTTTCGCCAGT  
ATTTTTATGGAACAGTACCCCATTTGGCATAATTGTTTGAAAGCGGTAAAGTACACGTTTTT  
TGCATACAGTGTTACAACGCCCTTTGTTGTAAGTTTCTCTGTTTACCCTTTTATCACTTTC  
TGTTTCTTCGTTCGTCGATTGAGAACGAATATTCGATTTTTTGGTAAACAACAAGAGCTCT  
GTCGTTGTGTGTTATCCAACACCTTGTGCTAGAACGAGCCATCCATGTGAACGCTGCTTC  
GTTATAGTATTGCTGAGGGCCAAGTTTTCACTCTGAATCATCGGTATTGATACTGAATGT  
TCCCATGTGAATTGGGATATCGGAATTATAACCAGGAGTCAATTCGATTTTTACTGCTTC



AAATACGTTGTCATATTTGTTTGGTAAATCTAGATCTGGCAAAGTACATGGATATCTGAA  
GTTTATCTGAGAAACAAATATCTCTTCTCCATTTGTTGACATATTGCTATATTCATGCGA  
TATAAAAGTATGGACTTCGCCAATACCAAAAACATATCGCCAAGAAGTACCATCGAACTC  
ATAAACGCCAGCTATTGGGTCATGGACAGCATTFTTTGGGGATTGTTGGGTCTAGACCAGC  
CTCAGTAACTACGCCAGTAATCAAAGCATAAAGCTTGCCGTTGAATGTATCAAGCTTTGT  
CGTAACAGCCCCTGCGTTTGTCTGTTATATTGAAAGACGTTGGGTCAAAAAGTTTCTCACC  
AAATATCGGACTACCTGGATCAGTATCAATCGGGGCATTAGATGTTTTGATTCTGCGCAA  
CTTATTTCTAGCTGCTACATATACCCAATCGACATCGGCAGCATTATTTATCTCCCTTCC  
TAAAAATATCACCAGGAAGCCGAGCGTATGAGATGAATAATTCAACATCAGAACCAAGAT  
TCAGTTCATCGCCAGTTTTTTGAGAATGTCAAACATCTGAGCTAAATCTGAGGTCATCAG  
CTGACCATCTGACATCATTGCCCCGACGACCGTAATAGATGTTTTAATATCCAAGAAGAT  
ATGTAGTAGTGCTAGTTTGATAGGTTACTGTTCCACTAACTGGGTTGCCGAAACGCCCGT  
TGCAAGCTTGGTAATATTTCCAGTTTTGCCCTTTGTCATTCGACACTTTGGCCATTGGCT  
GAAAACGCTCAAACAGATACAACACGTCGTCATTTTCAGCTAGCATTGTTCTATTTTTGT  
CAACACACAGTTGCTCAATAAAGCCTTGTATTTTCGTGATAGTTTTTCATCTGAAACTATTT  
TGTCATAAAGATTCGTCGGATCAGTAACTTGATTGCTGAAAACGAAATCTTCGCTCATT  
GCGAAGCCATAATTACATCAGTATTGAAATTGACGTAGTTTCCGTTCTTTTTAGAGAACT  
TTCCTCTCAAAAAGGAAGCCGATGTGTGGATTCTTTCATGGCAGAAATGTAGTAGGCAT  
TTCCGAATAGGTTTGAAACTCCTCAGTTTCTACCCAATCAGACATCTCAAATCCGGTTC  
CAGAAACGCGTACTCGCATTGTTGATGATGTGCCTGCTTGTATAGATGTGTCTTCAAACC  
ATTCTTCGACCGATGTTGCACCTAATTGACCCCAACTGCTTACGGACCCTGCTCTAGTCT  
GAAGAAGTTCGGCAATATAGTAAAAATTTGAACCTACATCGTCCCAAGTCAAATATACTT  
GATTCGCGGATAAAAATTTTGATTTAAAGGCTCGTTACGGCCGGTGCTTTTATTATCATAA  
AATCTCCAAAGGGCGGTTAGGCCCTATTGTGAAATTGCTTCAAGAGTAATAGCAGTGTA  
CTGTTGACGTAAATCATTCTCAAATACGATAAGAGGTCCATATTTTCGCAAAGATAGCGTC  
ATCAACTGGTAATGCTTCTATTACTATATATGCTCCAGCAAATGATTCTGCTGGTACAGG  
TAAAATTCCAAGGTCAAAGTTTAAAACACTGATAGCATAGTCAACTGTTACAACCTTCATA  
TACTTGTCTTCCACCCACTGTTGTTTTTTGTGAAATCATTACAAGAGTACTCTGATGC  
AGGAATATCGCCATCAGCAAATGGCCCAATCAAATTTTACCAGTTTGTGACGTAGAAAC  
GTAATTAACCTCATAACGTTACGTTATTCTTGGTGAGGTTGATTGTAGAACTATTGACTGA  
CCCCTTTTTTATTAGCATTATGGAAAGATATTCCAGCCATCGGAGTTTTGAAGAAATTAT  
CTGCTTCCCTGACAAGCGATATTTGAGCAGAAGAGCCGATAATAGAATCATCCGACGAAT  
CTACACGTGTCAACATCTTTGATTTAGAGCAGTTTTTGTGAAAATTTCAACTTCATCAG  
TGTAATAGAGTTCAATAGAATCAATTATTTGCCCGCGAAGCCATTCTTCAGAGTTATACA  
ATTCTGAAAGGATATATGTCACTTTGATCTTTGACTTGATGTACATGTAATTTGGGTCTA  
TACTGCAGGGGTAATAGGGCGCGAGATTATATTGTGACAAATAATTTTCAATGTCTCCT  
TTTTGAACAGTTGTTAATCTAAGCCCTTGTTTTGGCTTAATAGCGATGAACGCGTATCCT  
CTTTTATCACTGTCAGTGAAGCACTGAACGGCTTGAACAACCTGAACCAAACCTTGTGAGAG  
ACAAATGACTCGTAGTCGGTTGTAGTAACTCATCTGTGCTGAGGTTCTCTCTTAACCGGG  
GAACAGTTCGCGGATTGTTTCGATGTCTTCGGGATCACCACCACCCTGAGTACCCACATT  
ATCGGCGTCATTAGTCGGATTCTCAATCAGATCAGTTATGACGATATTTTGAAGAGTATC  
GGTGTATGCGAAATCTCTTGACCCATTTGCTGGCTCACCACGAGTGCTCAAATATTGAT  
CACGATTGTTGACACGATATTCGGTTTGAGCCCGCCAATGTAATTTGCTACAAGAGCCCC  
GCCAGCGATTTCCGGTGCTAGCTTCACCTTCGCCAAAGAATATCTCAGTCGTCTGATCAAC  
GGTCTCACGCATATAAATTACGTTAGAAACACCCGAAATATCAACCATCGAATTATTGGT  
CCAATCGACCCAAGGTGAACCATCTACCCATACACGAACTTTAGATCTGTGATATTGGG  
GTCACGAATCAAATTTGACTAATTCCATCAAATTTCAACTCAGTTCGAACTATTTCGTCC  
TTGATACACGCTTACAAGGGATTGCTAAGTATTATTCTGACCAAGAAATATTGTACCATC  
GTCAAGAGGAACGAATGGGTAGTTATCGGTACGTTCCACCGTACAAACGAATTTAGTTCC  
TCTCGGAATACGAATGCCGGTAGGATTCAACGGGTTTGTGCTTTGAGCAGTAAAGTCGT  
ACTAGAAGCAGTACGAGAATCTGGCCTATATCCCATGTCTGAGCATGTTGAACAACCTGA  
ACTTCTTAATACAGCGGTTCCGATAAAAACCTCTCGAATAATGCTGAATTTGAAAATTGCTG  
AATATAGAGTGTGCAATATACCAGAAAATCGGTTAAAACGTTAATCTTGAACCAATAAA  
GTCATAGTCTTTAAATTCATCCTGGTTACCTAACCAGTCAATGAAGTCGCTTTTGATTTC  
GTCAGAGGTAGCGCCTTTAAAAAATATCTGGGATATTTGTTTTCAAGTTCATGGTATAAA  
CACCTTACTAGATGATTGCGCAATTGTGTCTCCGCAAGATATTGGATCACCAATTGAAAG  
TGCGGGTTTTCCACCAACAAAACCTTCGCCGTAGTGGGAATAACGTAGCCGTCATGAAC

ATCATAACGCTCAACAGTATTTTCGATGAGGTATTATTCTGTGCGCCGTCAACGACGACCTT  
TATACCGTCAACAAAAGCTTTTCCCTGCGTGGCTTGTATTGTGTGCGGAGGATATGTGTC  
ATGGCCAGTTGTCCAAGCCATATCGTATGTCAATGCAGGCATAAAAAGGCCCTCCTATGTG  
ATTCTATTTAAGAGCTCCCGGGAGGCATTAATAAAAATAAACAGGAGTGTAACTATATGA  
TTTTTTCATTTTTTGTACCCAATAGATTATCAGGGTAAATCTACTACTGATATTTTTAAG  
AATTACAGAGCGTATTTTAAACCTGTTATCGTAAAATACAAGCCTGAAGTGTATTGGATA  
AATGGTTCAACAAGACCTGAAATGTTGGCAAATGAGCTTTATGGCAATCAACAGCTATAT  
TGGGTTTTGCTAATGCTAAACGATGTATATGACCCATTATGCGGATGGATAACTTCACAA  
GATGCTGCATATGATTACGCGCAGCAACAATATCCAGTAAATAAGGTCGTATATCATGTT  
GATGCCATTGGTGAAAAGTATTGGAATTTGGTAGAAGACCCAGATTTCCCGAGACATTGG  
TATGATGCTGGAGATACATCTAGATCACATATTCAATATGTTGGAGCACTTCGGGCCGTT  
GATTCCTTTGAAGCGCAATCTCCTGTCAATGAGCAGAAAACGAAAAATTCTGATAATTAGC  
GAAGCTGATATCAACTCGTTCCTAAACGACAGGATACGTGAAATGGAAAAGGTTTAGGGT  
GCATAATATTA AAAAGGTATTGATAGATTTTTTACTGACGTCGTAGAAGATCGTCAGGATC  
CGTACATGTTAGTAAGGGTGAGAGTGCGTGTACACGGTATTCACCCACAACAAAAGGTTA  
GAGCAGACA ACTATGGTTTAGCAACCGAGGATTTGCTGTGGATGTCAGGAACCATGCCTG  
TAACATCAGCGTCAGTTTCGGGTGGAGGCCAGGCTCCAGTAGGCATCGTGACCGGTACTC  
ATGTATACGGTATTTTCTTGATGAATTTTATCAAAAATGGCCTAGTTCTCGGGACATATC  
CAGGCATATATCCTATGATGCCTGATTTCAATAAAGGTTTTCTGACCCATCAAGAGAAT  
ATCCTCGGTACGTGCGTTCAGATGTTAATATTTTGGCTAGAGGTGGAAAAGACATACAAA  
TTTCACCAGGCCCAATTGTAATAGAAAACCAAATTGTTCCAGTTGTCGTAGAAGATCAAA  
ATCTCAACCGAGATGTTGCACAAGGTGCAGATAGAACACCAAATGACGAAATACACCCAA  
ATCCAGATCCAGACGTAACAATAGAGGATATGTTACGTTATGACGAAGGTATTCGTGTAT  
CGGTTTATTGGGACAGTGAAGGATATCCA ACTGTTGGAATAGGGCATTGATAGTTCACG  
AAAAAACTAGAAATATGACAAGAATAAACCAAATGCTCAGTCAACTAGTAGGCAGGCAGG  
TTAATGAGAGAATAACCGAAGAAGAATACTCTATGCTGTTGGAACACGATCTTTCCAGCG  
TCTATTCTAGCATATCAAGTAATTACAAGGTTCGGCCCGGTATATTCGATGCTAGACGTTA  
CTCGTAAAATGGCAATCGTCAATATGACGTTCCAAATGGGTGTTGGTGGCGTAGCAAATT  
TCAATATGATGCTTGGATACTTGGCACTAGGCCAATACGATAATGCGGCTGATGCTGCTC  
CCGATTCTTTATGGGCTAGACAAACTCCATCACGAGCTCGTTCGTGTGTCAGAAGTCATAA  
GAAATGGAACTTGGTGCCATACGGTGGGTACAAGGATCTGCGCCGTCATTGCGCACGA  
TGAGAATGTTCAACCGCAAGTGTATCATCAACCGCCCAAGCTCCCTCGTTCACCGTGC  
CTGAATCACCTTACTCGGCTGTATATCCATATAACAAAGTGTATGAAAGTAAGTCTGGTA  
AAATCCAGGAATTTGATGATACACCCGGGCATGAACGCATAAGAACATATCATCGGACGG  
GTACGTGTGAAGAAATACATCCTGATGGAACAAAAGTACGAAAATTATTGGCGATGCTT  
TCTACATTGTCAAGAACGATGGGAATGTTCTTATCGGCGGAAA ACTCAAGATCGTTGTGCG  
ACGGGGATGCTGATTTTTTGTCTAGGCGATTCTAATAGCACAATATCTGGAAATGCTA  
CCCAATTCGTTTCGTGGTAATGTTGACGAGCGAGTAGAAGGGAATGTCAATCAGTATGTCA  
CAGGAAATTCATCGGCGTGAGTAAATGGAAATCTAAATGCAGATGTTGATGGAAACGCCG  
ATATTAAGTTATGGGTTACTGTTTTAACACGATTGATGGAAATTACTGTAAAAATTG  
GAGGAAATTTTTCTACCGAAGTTGGAGGAAGTAGGACAGATGATGTTTCTGGTAATTGGA  
ATAGACAATCGGCCCATGTATCCGATGTTGCACAAGGAACATTCGCAATTGATGGTTCCA  
GAGTAACTTGGGGCAATTCAAGTGAATATATTACCAGCATCAGCCCTTTTGCCTGTTA  
AAAGGGAAAACGAAATAGTATCGCAGACATTTAGCGCAAACCTAACTGAACCACGGGCAA  
CCCTGGGTTCTTTGGAAATTAGTGCTATAGATAAAAATCAAGGAATAGTTATTGTCAACA  
ATGGATTTTCAGGACAATATACTGGAGCTTTTACCCTTGACGGTGGTTTATCATATCGTT  
TATAAACCGGAGAACGTGAATCAGCAAATAGATGGGACGATTTGCCTGACCCACAAACAA  
CGGATTTGTATTCTTTTCTTGCGCCAGAGTAATGGAAAAGAATATTCATACCTTGTTG  
TTTTAACATACGACGTTGTTACGCCAACTAGAGCCAGGTAATACTCCAAGACTAACCCGT  
TAGATATGTGATAAGCAAGACGTATACACAAAAATTAGTTGGTAAGTGGAAACATGGGGC  
TAACAATTTGCGAGATTATGTATATAGGGGTAGATAATGGCATATTTGGGAAATTTAGGC  
TAAAAACATCGAAAAATAACAAGGGCAATGCAGATAAAAATCACGTATAGGTCCAGTTGGGG  
AGCGTGGGTCATGAAATTTTTTCGATCAGTCGCCTTCAGTTTTAGCATGGAATTCTGAAGA  
AGGAATAATCCCGTGCTTTTCGAATGCTGACGGAAAAAGACGAAGGTATTTTCATGGATTT  
TTGGGTCAAATGTCAAACGGCCAAGTATTCCTGTTTCGAAGTAAAACCCGAAAAGGAATG  
CAGACCTCACCAGATGAAGTCTACGAATACTGCGAAAGCCAAAAAGCAATTTATGGCAGA  
AATGTACACATGGCAAGTGAATACAGGTAAGTGGAAAGCTGCTAATGCCTCGAGTATGGG

AAAAGGTTGGAATTTCAAGATAATAACTGAAGATTCTCTTAGAACTCATTTTTGGATGGAG  
ACGCCAATGATTTTTGACTATATCAATGAAGCTCCACAGAAAAAGTCAAGAAACCAATGG  
GTAACATTGGGAATAGAATGGAGAGAAGCAAATCCATAGGTGTATCGGGAAAGGATTTT  
GCAAATCAAATGGTCTAAATTATGACACGTTTAGACGGACTATGCTTAAATTTCCCAAAG  
CAAGTTGATATTGCCACAGAAGTCGAAAGTCTAAAACTAAAGCAAATTAATGCACGC  
GAAAAAGCATTAGTCATGATAAATGACTTTAGAAGTCAATTACGTTCTAGAGCAGCTGAC  
ACTGGAGCAGCAAACACTAATAAATCTCAAAAATGGTTCATTGATACGGTCAAAAAATCA  
ATTCGTGGTCACATGGTATCAAACCCGAAACCAGGGAGAATTTACACTTTTGCATATGAT  
GCAAAGCACAAAGATACTCTCGAATATTGGGATAGATTCCCGCTAAATTTCTTTTTGGAA  
ATAGGCACATGTTTCATCAGGCCCTTAATGTATGGCTCAAACCTTGCATTATATTCCTCCAA  
AACCTAGACAAAGCTTTTTAGAGAATTGCTAAAAAATTATGCAAGCACCGAACGACTAT  
CCAATAAAACGACTCTGAAAATAACATGGTCAAATGTTGAAGTAATGAATGGTTCGACG  
TCATGATAAAAGCATACCTACCAGCTCATTTAAAAGGTTCAATGCTAGAAGTGAAACCTA  
GCGACTGGGTGGAGCTCATTTACATGCCGCTGTAGCAGTTTATGTGCGAAAGGCCAAACGAT  
AATCTGCCAAAAAGGTATGGGCACGTGCTTAATGGTAATGGCCTGGACTTCGTCTGGGCC  
ATTTTATTTTATGGATTAATAAACCATATATCTCGACGTAATGAGTTTAGCAGGGTGATC  
CCGGATAAACCTGTATGCATCCAGTTATATAAAGGTTACTGGCTTGCCAGATTCAAGCT  
TGCTTGAATCATTCAATTTTTATCCTTTCTGGCTTAATAGATATTATAACTAAAAGGATAA  
AAAGATAAGTTTGAGCAAGCTCAAACCTGTAAACAGGTTTTAATTTTTATGGAGATTTAC  
AATGGCTTTAAACAATCAATCGAATATTACTAACTTTACGCTTGATATACAGTCATCTGC  
TGGTATTAAGACCATGCTCATGAACGTGCAATCAGCATCAATACCAGGTTTTCGTATACC  
TCCGACAGAAATGCCATTAATTTCTCAGGGAACTGCTAGACAAAACGTGCCCAGTTCAAC  
AACCGAATTTGATCCGTTGATTATTCGAGTGTTGCTTGATGAGGATTTTGAAGCATATAC  
CGAGATGTACAGATGGATGCTTTTCAGTGAATGACTATGCTCGGCAAACCTCCCACTAAATG  
GGGAACGGTTAATCAACTGCCAGCAATAACGCTTCATGTTCTTAATAACTCTAAGCGTGA  
TATAATTGCCTCATTCAATTATCTTGGTGCTTGGCCATCTGAAATCGGTGAAATAGAGTA  
TTCTTACCCTGAAGATGGTGATGTTTCTGTGACATTTACAATTACCTTTTTCTTCAAATA  
TTTTGAAATTGAAAAAGATGGTGAATTACTACAACCTTTGAGAGTATAACAATGATAATT  
GCGTTATCGGGCAAAAAGAGATGTGGAAAAGACACAGTAGGCGATCTATTGGAAAAAGAA  
GGTTTTCATAAGTACGCTTTAGCAGAACCTATCAAGATTTTCCTGTACCGTGCAATCCAA  
GATGACAATGGGTTCCCAATGTTTGTCCAATATTATGACATGAAGGATTTTAACGGTCTT  
GGTCATGACCGTGAAGAATATTTGCCCTTTTCTAATTCGGATGTTTTGAAAATTATGCGA  
TCTGCATGGATGCTTGTGAGTGATGACCTTCAAATCGATTACACGTATGCGCATACCGGA  
TTTATTTTCAGAAGCAGTTCATGGCAATAACAAAGCATGGTCAATTCGTCGACTGATGCAA  
ACATTTGGAAGCTGATATTGGTTGCGCAATAGATAATCGTATATGGTTGCAATATGTAGAA  
AATTTCTATTGAATCACGAAAATGTCGTTGTTGCTGACTGTCGGCAAGTCCATGAAATG  
TCAGAAATGCGAGAATTGGGAGCAGTCGTTGCTCATATTATTCGTCGTAAGTTCAGTA  
GATACTCATTCCACCGAAGCAGGTCTTCTATCCTGTCTGGTGATCATATAAATGATAAT  
ACAGGAACGCTTGAAGATTTGCATGAATGCGTTAACAATTTTCGTAAAAACACTAAACCCT  
AAGGATATAAAATGAACGCAGAACAAACCAATCGCTTCCCTGAAAATTCGAGTTTTTGT  
ATCTGAGCGAGCTACTTGTGCTACTCCACAACAAGCAGAAGAATTTTTAGATGCGCTCA  
CCAAAATCGTCCACCTTTTGGGTGTGACCCCGCCGATGGTGAAGATAGCACTGCCCTTT  
CTTCTAGTGTAGAAGCAGTAGAAGCTCTGGTTCCTTCTCAAGAAGTTGAAGTGGTAGTAG  
AATAATGTTTACAGACAGCTTCGTAGGAACATACGTTGCTTGTAATTTAGTGATGAAAC  
GCTGGATGTTATCCACCGTATTCAAGAAGAACTTAGATTGCCAAATCTTGTTCCTCGAGA  
CGAACTTCATTCTACTATCGTTTATAGCAGAGAATATGTTCCATTTATCCCAGACGATTC  
GCCTGAACATTTGGCCGGTAGTTGCTATCTGAGAATTTTTGAAAATCCAGAAAAGAATTT  
TCTTGTCTGCGTATGATTCTCCGCACATGCATAAACGACATGCGTACGGCCAGGTCCT  
TGGCTCGTCAGCTCATGATTTTGACGAATACATTCCTCACACCACGATTGCAAAAAGACAT  
TGGTCTCTTAAGTATGAAGGATCATACTGACTTCCCTATAGTAACAACACACGAATATGT  
AGAAGAATTAAGTGAAGATTAAGCAAAAAGCAGTTAATGTTCAAAGCTGCGAAAATTGA  
TGTAATGAAATTCATGAACAAAACATTATTCAGAAATGAAAACCTAAGCAACCTTAAGG  
AAAATAAAATGCAAAAGCTAGTAATTCTGTCCACTGTTTCTACCCTGACTGCATCCGGCC  
GTGCTGTTTCTGTTGAAGTAGGCCCTGTTTTACTGCCCTTGTCAAAGGTGAAGGTCAA  
AACCGGTAGTAGTTGCTGAAGTTCGCCGTGAACTGGTGTGATGTTATTGTTTCATGAACCTC  
GCCGCTGGGTGAAGCTGTGCAAGCTGCTGAATAATTTTCAAATGCCCTATTCGGAGGGC  
ATTTTTGTAACATATAGGAGAAGTTATGGAAATCTTTGTGTTTTATTTTGTGATCACATAT

TTGGCAGCATGTACAGTTTTGGCTATTAACGTGATAAAGTATACAACATCAACCTTCAGA  
TGGAATTTTGTCTGGACAACCTGGCCAAATATGCGGAGTTGTATTGACAACCTGTACTATGC  
AGCTACATTATTCCGTTTCGCGTTTATACAGATACAATTGGAAAAATAAATGACAGATCA  
GCAAGAAGAATTTTACATACGAAAACATCCGAATTAGTTAAAGTCTGGTGTGAATATGA  
CATAAATGGCAGTTTTGGAGGAAACAACAACGAAGAAGTTTGTTCGTATCATGTTTCCATC  
AGATATGCCGCCAGATGATTATTCTGCTCATATTAGCATCAAGGTTATGAAACATATGAA  
AGAGCAATCTGGCTCAGATGAAGACGATCTTGATGGGCCTATTGGATGGGACTACTTTAC  
GCCTTTGGAATTGTGATGGAAAACGTTGGCATTGCAAGAGTTGTCAGAACAATTGAGTTC  
GATTAACATAAAGCATAGACTTGAGGTATAGAAAATGAAATTTGCACCCGGAACCTGTAAT  
TCCAGAAGGATACGTCATTAATAACTCTCCTGGGAAAATGATGGTGAAGACTACGATCA  
TGTCATTCATACCGGCAGGCCAATGAAAGATATCGAATTCTTTGAGAAAATCAAACCGAT  
TTTCAGTTCATCCCACCACGAAACAAATAAAGGCTATGGCAACAAAGATTATAATCCTGG  
GATGGCCCGCGATTTGTTTGAGATTTTTGTAGAAAATAGGCATTTGTCTTTGCAATTCAA  
ACGCTATCTAGGGTTGACACCAGATATGTATGATCCACTTGATGGCGATTTATACAAATT  
CATTCTGCCATGACAATTTCTGCAAAAATGCTGAAAGAAAACATCACCGGTTATGCCAAC  
AGTATTACTTCGATTTAATTTGTGTGGTCGAGTCAATTGAAATCGAGTATAACCAGTCTG  
AATACGTTTTTCCAAAAATTACACCTCGTTAAAATTAAGGTTATCTAATGCAATTTTTAT  
TTGAATTATTTGCAGCTAGCGTTCAATACACTGCTGTTGCACTGATTGTATATGTTTTGC  
TATATGGTTATGAATTTCTTTGACGAATGGCGGAAAGGAAAGCCCGACTCAAAGTTTCCAG  
CAAAGAGCCTATCAACCAGGCAGATTTATGGAGCCATTGCAGCAGCATTGCTACCTGTAG  
CTCTTTTCTTGCTATGGAAGCTAATTGAATTCATTTACGTCAAAGTAGTAGTCGATAAAA  
TTTACAAAAGTAGTGGATATTGATGGGACTATGTTTTATGATAGTCCCATCAAATCAAC  
ACGGAGTAATTTAAATGAAAATCTATCACGCGCAACATATCGCGAAAGTTAACGGTATTA  
CAAAGGTTGACATGATTCGCGGCCATAAACTCAAGGATTTTCATTGCTATATCATGTTTA  
AAGATGGCTAGGTCATTGATTGCGCCTTCAAAAATGTCACGGCACAATTCCGCACTATTG  
AAAAGATTGCTCGTGAAGTAGCAGCAGAACAAGAATACACTCTGTGAGAAACAACACTGT  
TCTGACAATGGGTTGACTATAATACCCATCAAACCTTGCCCGTGGAGGGAATCAATAACGC  
GTGCTGAAATACTAATAACTAAGGGGGTAAAATGAAAAAAATTGTTTGGTTTTGGATCTT  
GCTTTTGCATCTTCTTATGCGAGCGCAGATTCACCAATTTGATAATTGGTGGTTTTTTC  
AAAACATTACGAAAATGATGAAATGAATGAAAAACATCCGGCGATAGGGGTCGAAATTGA  
CAACTTTTCAATAGTATATACGTGCAAAAACCTCGATTCGTAACCTTCGGTTCAGTTGGC  
TTATTCTGACACATTTTACACTTATGGAATTTTTGATATTGGTTAGCGCGGTGGTTTTAT  
GACCGGTTATCGATATGGAACCAAATATGCCAATATCCGATGGTATAATGGTGTGATTT  
GGGTGCCGGGATAGCCCCGCTCGCCGCCATTGATATTTCCGGTAGATACCCCTATTCCGAG  
AGTCAAATTTGTTACAAGCGTAACACCAGTTGTTACGATTTTCCGATTAAGATTGAACT  
TTGGTAAATTTGAGAACGCAAAATGAACTATTTACCCGAATGGTAAAGAAAAAACTTTC  
AAATCGTGGAAAAGCCTGAAAGAGTGGCTGTACGCTAATTTTGATTCGTGGGATGCTGAT  
ATATTAGATATTCCATTTAACTCGACTGTACATTGGGGTCTGAGCCCATTTGATCAAGAT  
ATCTACAATGGAAAAGAAACGTTTGTTTGGAATTTCTGCAAAAACCTTTTAGAACAGGAA  
CTCGAGAGCCGAGCTGAGGAGATTTGAATTGGAAACATTCGTTGTAAAACCTGCCCGCTCA  
TCTAAAAGAATGGTTCATTCCTTATATGGGCGATTCGGGTGAACAGCATTTCATGGAAGC  
ATGGCATGATGAAGGCATCGAAGGCGATCGCGTTCGATTTAGATATCCATATTATTCTCG  
AAAGCGTGGCGAAGAAGTTGACGAGACCGCTGATATCGTAGTTACTGAGTATAGGTGACT  
TATTGCGAAACGTTTTTAAAGTTATCGCTGAAAACGAGCCAAAATTCACATAACAGGCACC  
CATAAATAGATATACCAATTAACAAAAGGTCGAGCGCGATGCGGTAAGGAAGCGAAGCGG  
CTAGATCCTTAATACTGAACCGATTAAGTTACGGCGGATGGACTGGGCTATCGGTAACG  
GGGAGCATAGACCCGAGCACCTGGCGTTATTATGCAAGTAAGGTGGAATTGGTATACAC  
TGGAGGCTTAAAACCTCCCCTTCGAGATTGTGGGCTCGAGTCCACAACCTTGCTCCAA  
ATTCAAATTTCTAAAGCATATTGTTTACACGCTTTGGAAATAAGATGTTATTAACCTTATC  
GAATCAATACACGCATTCAGTCTTGAATGGGATAAATGGTGAAGCCATGGTTTTCTCG  
GAGCAAGCCTTAAGTGGACAGAACTCTCATCCTAGTGACGCAGGAAGTGTGTTTTGTTTGA  
AAAGAATTCTGGAAGATTGGCCCGAGTTGGTTTAAAGCACCAGTCTTGATAACCGGCGAT  
CGTAGGAACACGGTCCATCCGTTCAAATCGGATATCTTCTCCAAATTGTGGTGTGCTGTA  
GCCGAGCGGCTTAAGGCGGTCCTACGGCAGGACATACGAAAGCGTATCGTTGGTTGGAAT  
CCTACCAGCACCCATTAATTCGAAGCAGATTGTTTACAGAGTTGCTGGAAATGAGATCTTA  
TTGTCTCATCGATTAACAAGTTTATTTTGGGGTGTATGTAGCATAACGGTCATGCGGCC  
GGCTGTTAACCGGTGAGGAACTCTACGTTGGTTCGACTCCAACCATCAGCGCCAAAATG

AATTCATGGAACGTTTCGGGTAATGGTATCCCAAGCGGCTGTAACCCGCTCGCCTCTGGC  
ATTCTTGGTTCGAGTCCAAGGCGTTCCACCAATTTAACATGAGAAATATATTTGATGAAG  
CAAGATCTATTTGATAGATACGGATACCTCTGATTCAAAGAAGGAATACACGGTGATTTT  
GAAATAACTGCTGATTTAGTTCATTCGATATTTTTCAATCATATCTATCAGACGACTAAA  
TTGCCATTTATAGGAAAAACGACAGCTGGGTTAAGAGCATTGCGCCCAGATGAATTACG  
TTAGAGTATCTTCTCAATTTGAAATATTAACGATCTGGAAAAGCGTCGGGAATAAATG  
AAGGTTTTGTTTATCTGATAACAAATCCAGCTTGGCCACATCATTTTAAAATTGGAAGTA  
AATTATCAATACAACCTCGATTATCATTGTACCATATTTATTCACCGAATCGCGATTTTG  
ATACCGTCTCTTATTTCTTCTCTAAATCTCGTTTTGCGGATGAAAAAGCTTTACACTATT  
TGTATGAAGCTGATGGCGAGTGGATTTATGACAAAACGGGAGATAAAATGAAAGAAGCTC  
TGCAATTCTTCAATCATAAGCGCAAATAGATAAACGAGTTTTACGAGCATCTCTAACTC  
AATTGGTAGAGTAGCGGACCTTTAATCCGTCAAGTCTGAGTTTAAAGTCTCAGGGGATGCA  
CCAAATAACGGAGAGGTATTGCGGTAAGAGCCGTCGCCGATGTAAAACCGGTACCTTA  
CGAGTCTTGTTGGAATCGAAACCAACCTCTCCACCAGTTTTGCAGTAAAGAAGTTATAA  
TGCGTTGTCATCAGGCACCTTATGCGGAGTAACGTTTCGAACCATAACGGAATGATTCCAGG  
GTGCTACAATTTGAGCGGCGAGTGGATGGCCGAGCACACCACCTTTTAGGCGCCGGAAGA  
CGCGTTCGAGTCCCGTACCGCTCACTGTAATTAATTTCAAGTAATCATTGGTGTGACCTT  
AGTACTAATGGTAGCTATCCTGGATGTGACCCAGGGAGTACGGGTTTCGAACCCCGTGGGT  
CACCCCAATGATTATTTTCGCGGTTAAGGTGTTTATGGATACATGCTAGCCTTCCAAGCT  
TGAGTAGACCGGTTTCGATACCGGCTACCCGCTCCAAACACAAGTCACAGGGCGCTAGATT  
CCTAGTCAGTTTCCCACCCCTGGTTGATGCACTGTCCATTATTGCGCCGTGACTGGAGCC  
GGCGAGTTGGACAACCGTATTGTCTCCGGCCCTTAGATGGCCGGCTTTAACAAGATAAAT  
CGGGAGACGTCCCGTAAAATCCGCGGACAAAACCTTCAGTAGTCACTCCCGTCAATTTGCG  
CGGTGAAACGAGGAAGTATAGACGGGTAACGAATTCATCTCAGCGTAGGCAAGAGGTAT  
GTCGTTCCGTTTGGGACGGAATTTACGGGTGTTTCGATTCACCCCGCTAAGACCAAATTAC  
GTAAGCGGATACTTGGTTGCAAACAAGTCCGTAAAGTCCCTCGAATGTGGTAACATCCTCT  
CCTGGCACTATCCAGTGATGCGGTTATCCAGAACGGCGCAAACCTGAAGAATTGAGTCAC  
ATCCGTAAGGCCCTGACTCCAATTTCTCAAACACTCTTGTTTGTGTGGCGGTTCGAGACAT  
CCCACGTTCAAACCTGAAATGTCGATGTCCCAGCTGCAGCGTTAGGGAAGAGTGTTTG  
AAGGATTGAACTAACTCTGAGGAACATGTTATGAATGTTGTCAAATTACAACCACGCGC  
GATGTCTGTTGTGATCAAACCAATTCATTGGTTCACATGAATTCTGCTATGGCCCATGT  
GATGCTGGTGTGATTGGATTGCTAAATGTGCGGTTTGTCAAAGAATGGGAAATCGAT  
AGCAGCTGTAGTACCTACGTCGTTAAGACTTAGCGTGAAATTGAAGTTGACACAAACAAA  
ATTCGCGTGACCTGACCGTTGGTGATTTGGTTCACATTTAAGCAGATTTGATTGCCAT  
ACTCGAACTGATAGCATTTCGACTGAAAAGTTCATCTAATCTTGATTTGCTTCATCTAAC  
GAAGATGGCGTAAATATACATGTTTAAATTGCCGGTTTAGCTCATCTGGTAGAGCACAGCC  
TTTGTAACGCTGGGAAGGTCCGTTTCGAGTCGGGCAATCGGCACCAAATTTGTAAATGAGG  
AAAATATTATGTTATTTGCTTATCAAGTTATTGCTGTTATCTTCTTTATTTGCTCTTTCT  
TGGGCGACTATAAGCGATATTCGGATTCCCCTTCCGAAATTGCGGGTAATTTGATTGGCT  
CTGCTTTTGCAGGTGGTTTGTGGTCAATTGACGGTACTTATCCATATTTTTTGCATCGCAA  
ACCGCAATCGCTAAATAAATACAAAGGAACGGACTTCTTCGGACCCGTTTCGTTAAGTAAA  
AGGGAAGACCATCTGGATATGACGAGGGCGTCGGCCTGTATCATATCTTGCTTGCCCTTG  
GCCTCCCTCGAGGTTTTGTCTGGAAATGGTGCGCCAGCCCGTTTCAATATGACATTGGT  
GTTAGCGGTAGCATGCCGGTCTACAAAACCGTGCGGCCAGGGTTCGAATCCTTGATGTCA  
TGCCCATAGTGGATTAGCTCAGTAGGTAGAGCACTCGACCGATAATCGAGAGCGCATAGG  
TTCGATCCCAATATCCACTACCAAATTTTTAGGAGAAGTGGATGAGCGGTTGGAATCGCT  
TCCCTGCTAAGGAAGTAAACTGAAAGGTTTTGAGTGTTCAAATGTCTCCTTCTCCGCCAA  
ATGTATCCTGAAGCATATTGTTTCAAATTTCTCAATGATTGATGTTATTAACCTACATCCA  
AAACAAAGTTTAGAGCGGAGCCATAGTTTATTTGGTTAAAATAGTCCCCTGTCACGGGAC  
ACCACCGAGTTCGATCCTCGGTGGCTCCGCTACAAATTTTGATGCGATGTAGAGGAGAGG  
TCGTCCCTCGTCGGGCTCATATCCCGAGAATCAGCGGATCGAATCCGCTCATCGCTTCCAA  
CTTCAATCGCTTGTTGAACGTGGGAAAATAGCAAATCTGGGAAAGGGTCGCGAACCAGGG  
ACCTTAAAGTAGCTTTCTAAGTACTTGTGTTTGGCAGTTCACACATACCTATATTTGTG  
ATGGGTTTCGAGACCCTAACATGCGCCCGAATAACAACGCCGCGACCAATCGAATGATCG  
TTATCGGCTTTTTCATCTGACGGCCCTGTAGCTAGACGGTTCAGCAGGGCGGCTCATAAC  
CGCTCGTAGTACGTTTCGATTCCTACCAGGGTCACCAATTTGGTTTCTTCGTTTAAATGGGA  
AGACCGTTGGTTGCTTTGCATCCTGCTGATGCTATTTTCGATACTAGCAGAACGCACCAAT

TTGAGGAAAATACTATGGACATCGGATCCGGCGCGCCTTGGCCATCGTGTGCATTGAGTA  
ATTTTGCTCCGCATGAATTCGTTATCGATGGGATTAATGTTCCCTCAATGGAAGGATTCC  
TTCAGTCTCTCAAATTC AATTCGCCTGAAATGCAAGAACACGTTTGC ACTCTGGTTGGTA  
AAGCCGCCAAATTTAAAGGCACAAGGAAAAACTGGTGGAGAGCTCAGACTCTGTACTGGA  
AAGGTAAACCGATGCGGCGGCAAAGCCATGCTTATTCTGATTTAATCTACCGTGCGTACG  
ACGAAATTGCGAAGAATCCGGATTTCAACGAGCAATCCTAGCCACCCGGAATTCCTCGT  
TAACCCATTCAATGGGTAAAAGTAAACAGAATGAAACAGTGTTAACTGAACAAGAATTTT  
GTTACAGCTGTATCGTATTCGAGATAAACTCCAAGCCGCTTGATTGCGGCTTTTTAGTC  
ATATGGTCTCTTAGCTCAGTTGGATAGAGCAGCGGCCTTCTAAGCTGCGGATCATTGGTT  
CACATCCAATAGGGACTGCCATATTAAGATGATGTCATGGCGATGATGCACTAAAAATC  
TCATTCCCGAGAGGGAAGGGGCAGTGGAAATGCACGAAGCGAGAATTGCTATAATTCTCC  
ATTCTGGAAAAACACCCGGCCCAAATAGAAATCCCGGAGTAGTAAAAGTACAAATTCAGA  
AGATCAATTA ACTGATGAACAGAAGCTTCGCAGGCGTCAACAGGAATTGCTCAGATGAAT  
TTATTAAGTAATTAATGTCTCTCATTTACAACGTATGAAAGATGAGCTGAGTGAATTGG  
GTGTTGACTGAATAAGCTCAACGATTTTATTATCATGTCTGATATTTACAAGACTCTTG  
ATCCTGATGAGAAGTGTCTCATGGAACAACAGTATATCGCGATCGACAGGTATTACGATA  
TGCTAAAACGGCGAACTATGCGTCAATCATAATTAGGGCTCCTTCGGGAGCCCTTTTCGT  
AGTCTCTCGACGAGGTTTCAACATGAAAAAATATTTCAATCATAACTCTTTCTTCGTAAA  
TGCAATGCGTGTTGGTTCGGTCATTAACCCACCGGGGTGCGAGATGGAGGTATTGAAAGA  
TCGATCAGATTTTTTAAAATCCAATAGAACAATACCCATAAATGTTTGTGCGCAAACCGG  
TAAAACA ACTTCATTTATCAGGCTTGGAACGAATTAAGCAATCATGCCAAAGTCGCAAT  
GGTAGTCATGAACACCCAAAATAAGAAAATGACCAAAGTATGGGAGCTAAATTCGATAT  
TCTGACTTTTTAATGATATTAAGAGACAATTGCAGATTCTGGATTTAGAAAAAATTCAAT  
TCATCATGGTTAACGAGAGCGAATTTCTTCTCTTTGATGAGAACAGGGTGCACGATTTTT  
ACAAATGGGCAA AATTAGTAAAGGCCGAATTTGTACTAAAAACTTGATGCAGTCTGTAA  
ATTATTCAAGCCTAGTGTTATTATTGCCATATCAAATAAACACACATTACAAGGATTA  
AATGTCTAAAGCTACTCACACTATCGATTTTCGGTTTTGGTAAAATCGTTGCTCAGAAATC  
TGGTCATTATATCAATGTTATTGAGAGTCATGACCCAATGATTCCCACAAATACCAAATT  
TCCAGTCAATGACACTTTGGTCTGGAAGCAAAGTAATCGAATTGGAGTAAGCGGCCTT  
AACGCTTATTTTTCACTATGGTAAATGACATAATGACTGAGCACTATAATCGCGATAGTG  
CAGATGACCCAATCAAAGTTGTTAAAACATCGGGCGTAATTTATACGGCCAGTTTGATGC  
ATAAATTATCTGACGATCAACTACCTGGAGGATCGCTGATCGTAGCAGACAGAGATATTG  
CACATGACATATGGCATGCATGTGATAAACC GAAAATGTTAGATACTTTGTCATTTTGCA  
AAGATAA AATGCATTGTGAGCTTTTG CATATGCCTCCAGTAATCATATTTGTA ACTTCTG  
CCAATGTAGAGAGCATAACGCACTGCTTTATTCTCAAAGACTGGGTTTTCAAATCTACCG  
AATTTACGGCGTATTACCTCGAACAATGTGACGGTTATCTCCAAAACTGAGAAATCTTA  
TAGGATTTTAAATGTACTAACTTTACAAAACCTTCCGATATATTAAGCCAAGAAGATT  
GGATTATCAAATACCTGAGTTTGCCAAATTGGCAGTTGAGCAAATGCATGCTTTTTGGC  
CATGGGATGAACCAGTTGTTGATAATGTTGCTCATGATCTGCGCACCAAATTGACACCTG  
GCGAGTTGAACGGTATTACGACCGTTCTTAAACTGTTTACAATTTACGAGCGCAAAGTCG  
GGGAAGATTATTGGTCATCAAGAAACGCTCGAACATTCGGTTCGCCCTGAAATCAAACGCA  
TGGCAACTCTATTTGCCGCCGTAGAAGGTA ACTCGCATGCACCTTTTTACAATAAAGTTA  
ATGAAGTCTTTATCTGAATTACGAAGCTTTGTACACTTCTTGGAAGAAAGCGACGACT  
TATCTCGTCGCAATTCAGTTTATCGGTAAATCGGTATCAGACCCCGATGATGCCAAATCTT  
TTGCAGCTTTCACTTTATCGAAGGTGCCGTACTTTATTCCAGCTTTGCATTCCTCAAAC  
ACTTCCAAGGCCAGGAATGTGGCAAAGACTTGATGCGAAATCTTTGCCGTGGTGTGACC  
TTTCAGTTGCAGATGAACATCACC ACTCAATTGGTGAAGCAATCTTGTTCCAAACACTTT  
GCCGTGAAATGAAAGAAAAATATGGTGAAGATGTCCGGGCAA AACTGAAAAATGACATTA  
TCTACATGGCATATCAAGTGCTTGATCACGATTCTGGCATCATCGATCTCGCTTTTCGCTG  
AACCAATTGATGGTATAACTGCTGACGAGCTACGAGTTTTTTGTCAAATCTCGAATTAATC  
TTTGCTTGA A AATATTGGTAATGAGCCTATCTTAGAAATCGAAAATAACCCTATCGCTG  
ATTGGTTCTATCGCATCATT AATGCCAAGAAATTCATGATTTCTTCACTGGCTCAGGTT  
CGGAATACAACATCAATTGGAACCGAGAAGGTTTCTCTGATTGCTGGTAAAATAATTCTG  
CCCTGGTAAACCAGGGCAATCTTTTTAAAATCATGGTGCTTTAATGTCTAAAATTTCAA  
ATTCGTATCTTTGTCAGCCGAACGCAAACATATGCACTCAATTGGCGAAATGCCAGAGTG  
GTTTACGACGCAGGGCTATTCGATGTTCCGGAAAAATTATCAGTACAAAGGAGAAACCGT  
CCGTGGTGCATTCCGGCGAGTCGCTTCAACACTTGCAAAGCATGATATCCGGCCAGAAGC

TCAAGAGCGCTATTTTCGACCTTGTCTGGTCCGGTAAGCTGGCGATGGCTACCCCAGTTTT  
CTGTAACACCGGCACAGATCGTGGAATGCCTGTTTTCTGCGCAGGGAGTTAGGATGGGGA  
CAGTGTCTTACTTCTACGAAGGCCAAACGGAAGTCGCAATGCTCGCTAAAAACGGTTT  
CGAACTGCGTCATATCTTGGAGACATCCGACCTCCTGGGTCCGATGTCTCGACCAGCCA  
CAACAAAGCAGAGGGACTCGTTCCTGTATTTGACAACCTTCGTTAACACCAAAAACAAAGGT  
TGCAGCTGCTGGCCGACGTGGTGAATGGGCCCCGTTACGTTGACTTCTCGCATGGTGATTT  
CTGGGAGCTTTAGGGGTATGTGTTGAAAAACCCGGCTTCTGCACACGTTGGTTGGGTATT  
TGAGAAAGAAGATTACGAAAAGCTTCTGGCTCGCGATCCTGAATATATGGCACGCTGGAA  
TGAAGTCTTTATATGCGCGCTCGTACTGGTAAGGGCTATAGGTGGAAGAACTGGATCGC  
TAACGATCTTGCTCCACAAGCAATCAAAAATTCAGCTATCCGTATTCGTTCAAGCCAGCT  
GTGCACCGAAATCGCATTGCCATCTGACGATATGCATACTTCTACCTGTATCCTGAGCTC  
ATTGAATTTGCCTCGTTGGGATGAAATTACTGCTGCAGATATCAAATGGGCTGTTTCGTTT  
GCTTGATTCGGTATGCTCAGAATTCTTGGAAAAAGCGAAAAAACTCCCGTATGACACTCT  
TCATAAAGCTATCAGATTTACCGAAAAAGCACGTGCGCTCGGTCTTGGTACTATGGGTTT  
CCATACCTATCTCCAGATGAATGATACCGCGTTCGAATCTGGCGCCGCCCCATTCTGAA  
CAATCGCATTATTCGCAAATCAAGGTTTATGCAGAAGCTGCTTCTCGGGAATTAGCAGA  
AGAGCATGGTGAACCAGAATGGTGTGTTGGAACAGGTATCCGTAATGCTACATTGATCAC  
TATTGCTCCAAATATGAGTTCTGCTCTATTGGCTGGTCTGTATTTTCAGGGTGTGAGCC  
TCTCGTATGTAACAGCTTCATCCAACAGTCAAATGCTGGTGATTTTGTTCGCTCGAACCC  
GGTATTGGCTAAAGGATTGTCCCACCGTCTTTCTGATAAAGAAATCAAAGACCCCATGGA  
AAATACTGCCACCTATCATAAGGGTTCTGTTCAACATCTGGATATTTTGACAGACAATGA  
GAAAATGGTGTTCAAACAGCTTATGAGAGTGACCATCATTCAATCATAAGTCTTGCTTC  
AGCTCGTCAACGGCACATTGACCAAGCGCAATCAATCAATTTGTTCTTCGATGCTGATGA  
AAAACAATCAGTCGTTGCGTCCGTTCTTAGAGCGTTTATGGATGACCCTCGTCTGAAATC  
TCTTTATTATTTGCGTTCGAGCGTGGAGTAAAAGCTTCAACTGGTGAGGCGGAGTGTTT  
AGGATGCCAGGGCTAACAGCAAGGGGCGAAAGCCCTTTTTATAGAACATATGTGACAAAA  
TTTGAAACATCATCAGGTGAGAAAATTTATTGTGGTATGCATAAAAGTACGCATGCTAAT  
CCTTTATCGGACCCCTGTTGTGGGTCTGGACTAAGTTTAAAGAAATGCCATATTAATAAC  
GGTGTTCCTTGATAAAATCGGTTGAGTGGTTTGAACATTCGACCGAAGAAGAGATGATT  
GAAGCGGAAATTTGTAAATTTCAAGTATGGTTGATAACCCGAATTGTAGTAATATCGCA  
TACGGTGGTTTTGGTGGAAATGCTTTACGGTATGCTTCCGATGAGAGAAAAGAAGCATT  
CGCGAAAAATCACGCCAGGAAATGATCAAGCGATATAAAGACAGCGATGAAATTA AAAAAG  
CACAGCAAGCGCGTGCAGATTGCATGGAATCGACCGGAAGAACGGCAAATACGCGCTGAG  
CGACATGCTGAACTATATAGCCCCCTGGTTAATCCGAGCGGATGTCGGCAATACAAAAT  
GAAACGCAAGGCCGCCCTGACGTCAAGGCCAAAAAGGCTGAAGGTGTAAGAGCGGCGAGA  
AAGGCAATAAAATTCTTAAACAAATTAATATGTCCGACGTAATAACTATTATAGATGGG  
CGATTTGTTGATAAAATTA AACTCGCGCATGAGTTGTCAACAAAATATGATATCAAATAG  
ACCAAATATTTTGAGAATTATCGACCTTATCTTAATTCATTGCTGGGATAAATGTGGCT  
CTACTAATTTTATGCGTAATTGTTGTCTATGCCAATCCGCTTCTTGGATTTGGGTATATA  
ATTCAAGTATTACTTTCAACTGGGATTTCTTTCTTTGTTTTGGAAGGAATTACTGCAATA  
GCTTATTATACAGGAAAAATAAATGATTTATTATTTCCGCGCTGACTGGTGTGCAAACCTG  
CAAACCTGTA AAACCTATGCTTGCCAATGGTGACTATAAATATATTGATGTCGATTCTGA  
TGAAGCCATAGTTCTAACAGCAAATACGCAATTCGAGGTTTGCCTACAATGATTAATGT  
AGAAACAACCGATCGTTTTACGGGAGTTCCGAAAAACGTTGCGGAATTGAAGCAAAAAAT  
GGGAATTTAACAATGGGCTTTTGGGAGCCATTTTCACTTTTCAATTTTATGGTGCACATCG  
CGAACAATCCATGTTAGAATAAGTTTGAATCAATAACATATGGAATATTATCATGAATCG  
CTACAAACTTCGGAGAACCCTCGAAGCAGAGTTTAAAGAAATCAACAGAAAAATCGAAGA  
AGATCGGTTGGCTTCTGGTTCATGGCCTCCGTTTTTCTGGAATACACTTATCATTTTCAT  
AGATGTCCTTTTGTTCGCAATATCAATATCGATGATGCGCTGAGCTTGATCAAAGGTTT  
GAAGGAAAAAATACACGAAGTTGACGCATACATGTCTCTTGCATCCTCCGCATCTTGA  
CGAAAAACGAGTCGAAGGTGTAGAATATCGACCAATTCGCTTAGAAATCACTAATGGATC  
ACTTTGGAGTGGATTTACTCCTTCCAAAATTCGCCATCATCAGAATACAGTTCTTCTTT  
GACATGTCGAATGGCAATAGTCAATTTACGACGTTTAACTTCAAACGTAAC TACAAAAGT  
AATTA AAATGGAGGGGTTATGAGGCTATTGATGATTCTCATGATCGTATTTGCCACACAT  
GTTTATGCCGGTCCGTCGGTAACAGATTGTACGGACACTCAAAGTACAATATCTCGTAT  
GCTTACTACTATGGAAAAGCTTATGACTTGACGGGAGAATTGCGAGATGTCAATAATCCG  
AATTACTGGAACGATCGTCATCTTGGCACACTATTCGCAGCTATCGCATGGGAAGAATCC

TCAGCTGGAATAAACACTGGTAGATATAAAAACGGGTCATCATGCGTATGGGATGTTTCAA  
AATCTTTACACAACGGTTACATCTAAACTCTACAATAGAGGAATTACGTACAGACATTGG  
TATCTGAAAAGCGTTTTGGAGCGTAAAAGTTCTTCTGCCGAATGGGCTATGGATGAACTC  
TCATACTGGCTCAAGGTTCCAAAAGGTAGCATTGCAATTGCTCTGGCTTCATACATCGCA  
GGCTGGAATTACCATGCTGGTTTGAGCTATACCGATCGTGTTCGCAAAAAATCAAGAG  
CTCAAACAAACGGACTTTATTTACAAATAAATGTTTCCATTTTTGAGGTTATGGGATACT  
ATAACCTCAGTTAAACAAACCAATCAAATGTGGAGTAAGTTATGGACTTCATCATCAATA  
AGTTCTGTATCGCGTTTATTGTGGCTGTTGAAGTTGATCGCGCTAAATTGGAAGGTTGCC  
GATTTTTCAATTCACTTTACGATATGAACGTAGCTATGCCAGAAGAATCTATCGGATACG  
AGTTTTTGATTACTCGCGCTTCCCACGATTCCCAAATTATGATTCAGACCGATTACCGAA  
TTATGATTCACACCGATTTTAACTCGTCTGAAGTCCGCATAGATACTGAAAGATTCATTC  
GGGAGTACTGTCTGTGAGGTAAGCGCAATATCATCTTTTGTTATTGCTTGGCGTCCATA  
CGTGGACGCCGTAGATATCGAATTCATCGTATCCATTACAGCAATGGAAATGACCGTTA  
TGGCTTGGCTCATTCCGGGTGGAGTCGGCTTCCAGAGTTATGATTTCCATGATGTTCTCGC  
ACACGAGGGTGAAATATGAAAAAGTCAATAGCAGCTGTTTTAGCACTGTCACTTTATGGT  
TGCGGCGCGGCCGCTCCTGCAGTAGCAAACATGAACGAAACGTTCTGGTTTCTGAAAAA  
TCTGGAGTAATCAAAGAATTCACCGATGAAAATGGCACGCATGAATCTGCTCTGTCCGCT  
TCAAGTGATCTGCAATACGCACAGAAACGTGGCGATTGCCTTGGGATTATTTTCAATAGT  
GTTTATTGGATAATTGACTCTGCACGATCTGACGACAGTATTTTATCTGGGCCTGGGCGA  
GTTATGATTAACCTTCCGGAGTTGTACAAATCGTTGACTATGTTCCGGACTGGCTCCGCT  
ATCGTTATTTGGCGTAAAGATAATCCCGATTTCAACCCGATAGGCAAAGTAATGTCAATT  
ACTACACCTTCCGGCAAACGAGAGTTCACAGTATGATCGTTAGCACAGTCAAAGGCAATG  
CAATCAGTCTGTTTCTGAACGGCGAATATGACATGTTTGCGCATGGTTGTGACATTTTTA  
ACCGAATGGGTTCTGGCATTGCTAAAGAAGTTCGTGAACGCCTTCTGAGCTTTGGGCAC  
TCGATCAAAAAACAGTCGAAGGTGATCGTTCCAAGCTTGGAACGATCTCGGCCACAAGTT  
ACCCCTATGCTGGCCTTGCCTTCAACTTCTATACTCCGGCGAGTTACTGGGACCCTAGCG  
ATATGTTGTCCTATGATGCGGCCCGTTCATGCTTTGAAACCTTGAACACTATGTGTCAAG  
AAACTGTAGATTTTGGCCTCGGTAAGCCGACTATGTGTATTCCTAAAATAGGTGCTGGTC  
TTGCCCAGGTGAGTGGGGCAAATTGAAGCAATCATCAACGAAGTAACTCCAAATATTG  
ATATTACAGTGGTGGAAATTCGATGGCAGTCGGTAAATGGCAACAGTGTGGTCCGGTGATG  
AACCGTATCTTCGAATGTGCATTAGTCGAATGACTTGGCGAAGTATGTAAAGGTATTATA  
ATACACTCATATCGTGACGCCGGGGATGTAGTTCTCGTGAATTACGAGTTGATGTACCAC  
GGCCGGGTGTTTATTGGTCAAACCTCAATGGTGTCTTAATGAAATTTCCATAAGCATTTT  
TGATTGAACGCATTGGCGAATCGCTGGAAATCATCCAGGAGAAGGTAGTCGATCAGAAC  
TGTGTGGCAAATATGAAACTTCAGTAAGCGAAGTTGTCGACCGCGGGCGCTAGACTGTTT  
ATTACGACTTTGTTTTCTCCTTTGAACAGGATGGAGTAAAGCGCTATTTCCGCGAACCAT  
ATGAAGTCGGTGCAACAGAAGAGCAGTACAGCCCGATTTGGGACAATGAACCTGATCTGC  
TGGATGTCAGTGAAGTTCGAACCGTATGAAGTGACTIONACAATTGCATACAAGTGGAGAATA  
ATGGCTAAAGAAATAGAACGTAAATGGCTTGTTAAATTCGTTCCATACAAGAATTTGGAG  
CAGTTTCTCATAAGCAAATTGCACAATTCTACTTTGATGGTAAACGCTCTCGAAGTGTG  
ATGGAAACTGGCGTTCGTTAAAAATTCATAGAAACAGTGAAAACGCTGGCGCCGGTTTGGTT  
CGCGAAGAGGTGCAAAACGAAATCGACAAGAATACTGCATGGGAAGCCATTATGCTGCC  
GGTTTACTAACTTGTGTTGTTAAGAAGTGGGTACGAAATCCCGCATGGTCATGGATTAAC  
GATCGAACTCGATATGTTTGCTTGTGGGGAACAGTATATCGAGATCGAACTGGATAACGT  
CGAAGATGCCAATGCATTCATTCCACCGTGTGGTTCGGCGAAGAAGTTACCAATGATGA  
ATATCACACCAACTATGCGCTTTTCAAGCGGCTCAACGAGGTCTAAATGGCAAGTCTTCA  
TTTTCACTATGCTGCAATTAATTCTGGCAAAGCACACATTTGCTTCAAGTAGCACACAA  
TTACGAAGAACGTGACATGCGTTCTATTATCATAAACCTGCGATAGATACGCGTGATGG  
TTCAACCGTATCCTCAAGAATTGTTATATCGCGGCCTGCTATAATGGTGAGGCAAAGCGA  
TAGTTTGACCCCTTAATCAGCAAAGAGCATATTGGGCAGCACATTAGTTGTGTTATGGT  
AGATGAAGCGTAATTTCTGCTTCCAGAACAAGTCAGCCAGTTTGCGGATGTTGTAGACGC  
ACTGGACATTCCAGTAATGTGCTATGGATTGTTGTGTGATTCAAATTGTAACATATTTCC  
GGCAGCAGAACGACTGATGGTTTTGGCAGAAGAAAAGGTTGAGCACAAAACCATATGTTG  
GTGTGGCACCAAAGCTACAATGAACATGAGAATCGATGAGAATGGCAAGAAAGTCTGGGG  
GCCAATTGTTTCGATAGGTGGCAATGATCGCTATATTTCAAGTATGTGCAAAACACTGGAC  
ATTGGGAAAATCTTCAAATAAATCTCAAAAAGATGTTTACAACAAGATTGTTTTGTATAG  
AATATCCTCAAGTTAAACGAAATGAGAAACACATTATGAAATGTTCTGATGTTTTTGCCC



AAGTTCAACTTGCTCAAGCTTTTGAAACTGAAGAGTTGAGACGCAGATTAGCTCCGGTTG  
GAAAATTCGTTGCCGACGAAATGATTTCAAACGAGTCTTTACAATCACCTTCGCGGGCG  
ATAAATTCCTGGAATTTACACCAGAGAAACCGTTGACTATCTAAGAACTCTTGGATATG  
AGATTCGCACCGAACCTCATCGTAATGAAAGCTATATCATCGTAACTGCAAAACCTAAT  
TCAATCAAAGGAAATATAATGCGTACTATGTCCACAACCTCCGAAAATTACCATGAAAAT  
GGCCTTTCTATCGCAGCCGGTCTGCTGACCGCAATTACTGCCCTGAATACCTTTACTGT  
GGTCGATGATGGTTCCGTTGCAACCACCACTTTCCTGGGTAAAGTTAGCCCGAATATCAT  
GCAGCCCGGTCTGAATATCATCAACCCGCTGGCATCAGTTGATACCGATTCAACTCTTGA  
TCTGAAGATGGGATTCTCAAACGTACAAGTTCGTTCTCAAGATAAACTGAAAACCTTCTGT  
CGATATCACTCTGATGCTGCGATTTCGACGGTGATAAAGCCCGGATGGTTCGCATCAGCGG  
CGGTACCGAACGTCAGGCGATTGATAAGTGCGTTGCGAAGAAATTCGAGAGTACTGTTTCG  
GGAATCCGGCAAAAACATCAAGAAAGCGCAAGATCTGTTTGGCGATGCTACCACTCAGTA  
CATGCTGCAAGACATGAGCAAACTGAAGTCAACGACTATTCCAAGCCGTTTGGTTATGA  
GGTAACCGAAGTGTTCCTGCAAGAGATTACTCTGCCGAAGCTGATTCAAGACCAAGTTGA  
GCAAACCAAAAATTCGTGAAGAAGCCGTAAACCAAGCCCAAGCGGATCTGGATAAAGCCGA  
AAAAGTGGCACAACAACAGGTTAAGACCGCCGAAGCTGCGCCTGAAGCTCGTGAACAAAA  
CGCGTTGCTAACGAGCGTGATGCTGATTCTAACTCTACGCCGAGGTAAAGAAGCTGA  
AGCTAACGCTCGGCTGCAGAAAACCATTACTCCTGAAATGATCAAATGGCGCCAGCTGGA  
AGTCGAAATGATTCATGCCAACAAATATCATGGTGGTGTACCGCAGACTGTGGTTCGGCGC  
TGGTTATGATGGCCAAATGCTCATGGACATGCGTTCCAAGTAATTTAACTCGGGCTCCTT  
CGGGAGCCCATTTTGATAAAGATAACTTGTTAAATTGGAATATATTATGTTTAGCCGTGGT  
TTACTTTAATCGAATTGATGGTATTAGTGGCGATTGTTATCATTCTGTTAGCCATAGCA  
ATACCGGCTTTTTTCGGATAACGAAATTTATAATCCGATCAATTCAGTATGCCCTCATGGG  
TTAACAACCGCAATTACGCCAAATGGCGAAGAAATTTCTTGTTCGGCAAAAATCAAGTG  
ATCAATAAACAAACACTAACAAATCGGAGAATAAATGCAATAGCAACTCAAATGGGCATC  
ATGGCGGCATTCGTAGCAGCAGCACTTTCTGGTTGTGGCGAGCAACAGTCTGATACATTT  
TCTTATGATGATCTCGGTGGAGAACCTTGGCCTACCGTAACACCGACTTGGGCAGAGCTA  
TGTCAAGAAGTGGGTGGTGGTTCGACGGAACAATGCCAACTAGCATTTAGGCAAGCAAAG  
GATGAACACACCTCAGCTGCACCGAAATTCATGACCAAACATCATGTGAATCTGGCACA  
GGTGCTGTATGCACCCAAACACAAATTCAGAATTCGGATGGTTGTTTCAGCGACGTGTTT  
GTTCCAGCTATGGCTGGTATGATTGTTGGCCAATTGATGTCAAGCAATGCTCGCCCGATG  
CCAGTATATGCGCCAAGTCGACCCGAAGATCGTCGAAATGGCTTCGTCACGGCGAATGGT  
TCCTACGGTCTCCAGGATAAGGTTCTATCGGTGCAAACACTTTCAAACCTTCCTTTTGC  
AAGGGAAGTTTTGCCAAACCGGTAGCATCTTCTAAACCTGTTGTGAGAATGTCATCAGGC  
GGTTTCTGAAAATCCGGTGGCTTCGGCTCTTCAGGTGGTTAATTTCAAAAAGCGGTTTAC  
AGTGATGGGACTATGATTTACTATAGTCCCATCAAATCAATAAGGAGTACATCATGATTT  
ATGCTGGCCAAAATATAGAATCATCAGACCTGTAAGCGAACAGCACATGGTTGGTGTG  
GTGATATTATAACAATCTCCCAAATCACTAGAAAAGGCATTCGTTCTATGGATATTTCT  
GTTGACGATGATGGAATTCATATGAAGGCATTCTAATGTTTGAAGGCCCGTACAATATC  
CAGGAGTACTGGGAAAAAGTCGAAATGTGCATGGAGGCCGTTTAAATGATTGACAGAATT  
TATCGGATTATTGGCGAAATCTCTATGAATCATCGTTGCATTAGCCAAGGTGACGAAATT  
TATTTGAAAGAAAATGAATACGGAAATATCCGCGGTCCATCAGTTGACTGGGACGGGCAT  
GAAACTGAAATTGGTTACATTTTGTGCCAGACGCAGTGGAAAGAAATTCCCGGCAAACT  
TACCACGAAGCTTACCGAATTTGGATTGACACTGTTTTGGAGAAAGTAGAATGATACGCG  
TCTCTATTGAAGCTCGTAAAGATTGGTTGCCACAGTTGACTTCTGAAGGTGTTTTGTGGA  
CCACTACTGACGAAGGTCCTTATTGGGCCGAAGCAATGGTTCAGCCCAAGTATTACTCCT  
TCACTCGCACAGAGCAAGAGCAACTCGAGAAAGCCGCTAGCAAAATCCATGAAATGTGTC  
TTGAGACAATGGAATGGCTGTTTACTAGCGACGCCAAAAGCAAACGAAATTTTCAACA  
TGTTCAATTATCCATACGATTCTCGTGATCAAATCATAACGAGTGGGGAAGATGACGAAT  
TGGGCCTTTATGGACGGTTTGATTTCATCATGACCGAATACGGACTCAAGCTTGTCGAAT  
ATAATGCCGATACCCCGACCATTCTCATTAAATCTGCAATTTCTCAATGTTATTGGTTCA  
ACGATCAACGCGAAAAATGCCATCAAGAAGCTTTTCAATTTAACGAGATTCATGAATCAT  
TTGTTAATCACTGGCGTGACATGAGCACTTATAACGGAATTGGCGATAAACTCAGCTTTG  
TAGCTACTACGCAAGTTGAAAATTTTGCTACACTCGCATAACATGGCTGAAACTGCTTCAG  
AAGCTGGCCTGAATGTAAAACCTGTTTCGATATCGCGGAAATTCACCTAGGTGATGACGGTA  
ATTTTTATGACATTGAAGGCCAGCATATCGACACTTGCTTCAAACCTGGATCCATTGGAAT  
GGCTGCATGAAGACGATTTTGGCAAAGCCATCGATGGTTTCAACACAAGGTTTATTGAAC

CAACCTGTAAAATGCTGCTTTCCAACGAAGCACTTTTTGGTTCCTTTATGAGCGTTATC  
CTGATTGGGAGTGGTTGGTCCCAGCCTATACAGAATATGATTTTGACCGATTGAATCTGA  
TCACATATGAAAATCCGAAATGGGTGTCAAAGCCTATTGTTTCTCGCGAAGGATGTAATG  
TTCATATTTTTGAATATGGCGGAGAAAGTGAATTCACCGATCGTAATTACCCCGAAGAAC  
CGTGTATCGTCCAGCAATATATCGAATGGAAAGATTTTCGATGGCTGCTACCCAATGCTTG  
GTGTATGGATGGTAGGTAGCGATGCCGTGGGTTTGGGTATCAGAGAAGATGATAGCCGAA  
TTACCGGTAATAACAGCCGACTTATACCGCACGTCGTAGAAAATTGACAAACAGCAGATG  
ATTTAAACCCTCTGTAAGGCGTTAAATATGACAGGAGTATAAAGCCATGGACTGGCCATA  
TGCCTTGTCATATTGGTTAAACCAGTATGCGCTTAAGACAAAGGCATCAAATAGGCTTTG  
CCTTTGTTTAATACCATCAAGGAGGGGCCAATGGCCCATTTGTCGTATGTTAAACACATT  
TTCAATAATCACATCGGTTTTAGCTTCTATGCACTTCGTAGAGGCGGACCCTGAAAATGG  
GTCTTATGATGAGTACATGCGTGGCGCTTTAATAATGTATAGCAGCGAAGTTGGGCCATC  
TCTAGATAATTCGGTTGAATTTCTTAAGCATTGAAACGATAAATGGAAATCTGCTAAATG  
CTCTTCGAGTTGTTATCAAACCTGGATAACTTGAAGCAAAGACATTCATAGCAGAAAGAGA  
AGGTCATGGAAGTAAGATTTCGGTGAGCTTGTAACCGAGAAAACAAGCATTTTTGATGAGT  
TTATTGGTGCGTGTTTAATGTCAAGCACATATGCGCATTCCGCGCACTTTTATGACAAAG  
TCGTATGAAAAGCATATAGCATAACGAATATTGCTATGCCAATGTGCCAGGGCTGATTTAT  
ATTTTCGCTGAAGCGTATATGGGTTTACGATTTACATATCGGCCGCGACTGTCCATTTAT  
AATGGAACCTTTGAGTCATTTGTCAAGCAACTTGCCAGAGGGCGGAAAAGGTATCTGCC  
AGTGCACCTAATACGGTTCTCAAAAACACCTAAGATGATATCCAAGAGCTTTGTGCGTATG  
ACAATGTATACACTATCATTGCACTAATTAATAATGCCCTGGTGTGAACCAGGGCCTTTTT  
GTATCCGTTTGAATAAAAATTCAAAATGGTTGTACTCTTACGTTAAACGAGCTTAGAATG  
TTATCATAATCAACCAACGGAGACAACCGATGAAACGTGTTAATGAAATGCCCAAAGTG  
GTCAGCTTGTAGTTGTCTCGGTATGTGACGGCAAACCTCTGGACTGAAACCTGGCGCTTGA  
ACAACGGGGTGGTTGAAATCCTCATGGATGATGACACTGCTGGTGAATGGCGTACAAACG  
ACTGTTATTACGATGATGGTTATGAAGATCTCGAACTCAACTATATTGTGATTTAAAAAT  
GTCTATAATTCAGGAAATCGACAAGCTGTGCAAGCAGATAGTTGTGGAAGCATCAGAATT  
CAAGATTTTCGCCTTTTAGGAAAGTTGTGCGCAAACCTGAGTGGTCTTATGGGCTTTAACT  
TGAGCGCGAATTCATTTACGAACATAAAGAAACGGGCTATACTATCGCAGTTCATTC  
TGAGCGGCATAGAGCTCAATTTGTCAACTAAAACAACGAAGAGGTTATGGGTTTCGCTGA  
AAGGATCGTTTCTGTGAGCGAAGTAGAACCTCACAAATAGCAAACATGGCACACGTTGGCA  
ATTTGTGTAACGCTTTAGTCATCTTAGTGTATATTACCAGTACAATGGTTTAGACTAAAA  
AGACTGGAAATAAAAACCTCGAGCGAAGCTCGAACGCGAAGCGATAACTAATTGGAGATCA  
TATGCAAATTATCCTTCAGCCTGCAGGCGCAGGTAACCGCCGACACAATCAAATCTGC  
CTTTATGGCAGCAATGAATCACCATGTTCTTATCGTTTGTCTGTAGAGCATCCAGCTGT  
ACTGGAGCATCGAGTTAACATGTTTCAAGTATTGAGAATCCTGCTATGAAAACCGCTATGA  
CATCGTTACTTGTGTTGGAACCTGCAACTCCCGAAATGTTCAAAGATCTTGGCTATTTTGA  
CCGTTTTGGCACCTTTATTCTGGATGTCAACTTCGCAATGAGTCGCGGCCCTTGGATTAC  
AGTGTGTGCCGAACCTCGAAGCATATGGGTATGAAGTAATTGATACTCAAGAAGTTGTTAA  
ACCTGCGCAAAAATCCCACAAAGTGTATCACTGATATGATCGTGGCCCCTTAAAAGGGGC  
CATTTGGAGGAATCATGAAAAGATATCGATTTAAATCTGAAGAAGCTCGACATGAATTCG  
CTGCCATAAGCGACATCAATGCTGCTATTGCTCATAGCGTATGCGATCGTGTGTTTTACG  
AAGCTATGCCACGAAATACTATCGATGAGATTTTTCTCGAAATCAACGGTATTACTTTGT  
TTCCCGAGTATTTTCTGTTTTCTTAGCTAACGAAGTAAAAGAATATTTGGAAGAAGTAA  
GCGCTGGGGATGTTGCTCACGAGATATCCAGAAAGATATTGGAATAACGATGTTGAGC  
AATTGCTTGCAAAAACGCGGCCCTGCGGTAACGCATGTCTAAACTTGAAAATCGTCTTG  
CACGTCTTGAACGGTTGGTATAAATGATATCTACAGCTTTAGCGTATGATCTTTGGTTTT  
TTCTGGGGGGTTTTGGTAGTCACCGTTTCTACACCAGAAATTATGTCACCGGAGTTATTT  
GGTTTTTTACTTGCAGTCTGATTGGTCTTGGCTGGTTTTGTCGACTTTTTTATCACAGCAG  
GATTAGTCCGACGCGCAAACAGTGAATGGCGCCAAAATCAGATAGAAATTAATACAATGA  
TTCGTCGAGGTTATTGACGTAGTTTATAATTATGATCGTGCTGTTGTTATTGGCCGCTTT  
TTCCAGGTTTCTCCACCGTGGACATGAAATGCTGATTTACAAAGCGCTTAAAACCTGCTGG  
AACTGTTGCTGTTGTCTTCGGGTCATCTCATTGTAATCCAAACACAGTCAACCCACTTCC  
GACACTGGTTCGAATCAGAATGTTCAAAGAATGGATGAGTAACAATCTCACTCCTAGCGA  
ACAGGCCAGAATTGTTTTCCGTAATGTTTCTGACTACCGCTATAACGAAGCTCGCTGGTA  
AGCACAAGTTCGTGAGGCCGCGCAAGAGCAACCGGGCGAGCGTGTGCGATGATTGCTTA  
CGATAAGGATGAAGATTCTTATTGGATCAAACCTTTGGATGGGACCATATTCAATGCAT

GGGCGTTCAGAATCACGGAAAAGACATCTCAAATACCCCAATGCGCGATGAATTTCTTTCG  
AACCGGTTCTATCCACGACGATTTCCCTATCAATCCGTCAGCGAGGTCATTTCTTTTGAA  
ATTTTGGAATAGTGAAGGTTACGAAATACGCAGCCGGTTGACGGAAGAACGTGCGATGTG  
GGAAAATGAACATGCAAAGGTTAAAGATAATCCATACGCTGCTGCTCTCAACTGCAATAC  
TGCTGATGCCGTAGTAACGTGCAACAACCATATTCTGGTTATTACCCGCAAACATGCACC  
AGGCAAAGGTGCTCTTGCTCTTCCAGGTGGTCACAAGAATTCCAATGAGACCTTCCGCGA  
TTGTGCAATTCGCGAATTGTATGAAGAAGTTCGGATTGATGTCGATCGTCAAAAAATCAT  
TGGTTCTATAAAAAGCACACGAAGTATTTGATCACCCAAAGAGAACGGCAGAGTTCTGCAA  
ACCGACGGTTGCTCATTATATCGTACTTCTACCCACTGACGACGGTAGTTTGACTGAAGT  
TCGTGCTGATGATGATGCAAAAGCAGCATTTTGGATGCCAATGCATGAATACAAGAGAAA  
TCGGGCAGGTATGTTTGACGATCATGCCGAAATCATTTCACGCTTCACCGGTATCTAGGA  
TACAATTACGGAAAATGAGGTAACATCAGTAAAGCAGAACAAAAATGAAAGCAATCTGCA  
TTCGCAAGAAAATCAAACAGCAAAAATTTGAGCGCCCTACACCCGGTGATGACCTGCGAT  
ACCAAATTGCTCGTTGGGAAGTTGCAACAGTTTGTTCATCACTGAAAATCCAAAGATTA  
TTTTACGCCAAAAGATGAGTCGAATCCATGTTATTATCGAACTTGCCACTGACTGCAGCG  
AAATGTTTTCCAGGTTAAAGAAAATTTCTCCCGAAGGTACTACCAGCTGGGGTGAAACGT  
CTGAAACTTCCGAAATCAACTTCGTGAGTGGTCATTTTCGGCGTGATGAAAGAAAACGAAG  
AAACTGTTTACACCCCGATTCAACTCGGCGACGAACTCATCCATCGTAATCATGATAAAC  
GATACGCGGTTAAATTCATCGCAGAAGACGGTTCTCTAATTTTCATGGGATTCAGATTATC  
ATAGTTCAGTTTTCGTTAACCGCAACGATCGTGATCAACTTAAAGCATATGACATGAAAT  
TTTCTTAAACGTGGTAATTATGTA AAAAGTAGTTTTTGAGGGCCTTCACGGCTCTCATCTT  
TACGGTCTCAATACTCCTGAATCTGGCCTGGATATGAAAGGTATTTTCATCCCCGATCCC  
AAAGACATTCTACTTGGCCGAGCCAAAAGAAGCTTTTCCATCACA ACTGGCAACGACAAG  
TCCAAGAACAGCATGGATGATGTGGATATCGAAATGTTTTTCGCTCCAGCAATTCATCCTG  
GATGCGGCCAAGGGTGAAACCTATGCGCTGGATATGCTGCATTCTCCAAAAGACAAAATC  
ATCATCGACTCGTCTGTTTGGCAATGTATGCATCAA AACCGGTCTGCTTTCTACACGACC  
AATATGACTTCCTATATGGGTTATGTTAGGAAGCAAGCGGCAAAATATGGTGTTAAAGGT  
TCTCGTTTAGCCGCATTACTAGAAATAAAACAGTTCATGGATGCTCTTCAGATTCACGAA  
AACCCAAGACTGCGATACCTAAAAGATCATCTGCCACAAAACGAGTTCTGCTTCTGGACT  
CACGTTGAAGAAAATCCCGACACCATCTCGTATTACACCATGATGGGCCTTAAGTACATT  
GCTTGTGTTAAGATCGGTGAATTCTGCGGGGCAGTTGACAAGCTCTGGGCCGAATATGGC  
GATCGAGCTCGCAAAGCCGAAGCAAATGAAGGTAGCGACTGGAAAGCTCTAAGCCATGCG  
TTGCGAGGCGGTCTTCAATTGCTTGAAATTTACAAA ACTGGCGATTTGAAGTATCCATTG  
GCCGATGCTGAAGAAACCAAATTTGGTTAAAGCTGGCAAAATGTCCTTCGCTGTAGTTCAA  
GAACGACTGGAAGAAATCGTTGAAGCTGTTGATACGGCCGCAAAAGAGGCATCTAAGAAC  
GGAATGCCCCGATAAAGTGGACATTGGACCATGGGAAACGTTTGTGCAACAGGTTTACGCT  
GAAGCATTGAAAGAATATCTGGAGAGCAAATAATGAAATTGATTCGCTTTAAATTCAAAA  
GTAAGGAAATGCTGATCGAGTCTACTACTCGGTTTCAGACGCCATATTTGGGCAGTAGGTT  
TCAGCGCAAACACAGTTTTTTATTGCCAGAATCAACAAACGTGGCCAAGTCAAAGTATTT  
TTGATGGTAAACTCTTAAAGAAATTTGTTTCTTCGAAAGAAGGTTGGCTTCTTTTGCCT  
CCTTTGAGTTTGAAAAGTTTTGTGAAAAAGTAAGCTAAACGGTTTACATTGATGGGGCTG  
TGATTTACTATAGTCCCATCAAATCAACAAGGAGTACGTCATGAAAATCACTAAATCAAC  
TAACCTGCAATCCATGGATTTTCGTTGGCCGTGTCGTTAAGGCAGCGACAGAAACCAAAGA  
GGTTAAAAATCTACCCCGATTTCGAAACCATTTGCTGCCGGTATTACCGTAGGAATCGTTGG  
CGCATGTGCTGAAATGTGCTGTATTGGCGATATCGATATGGCTCGTAAAATCTACATTGC  
TGGTATTATCGCTGGCGCAACTTTCCCGTTATGAAAAAGGGACTGATGAAGTGATTA  
GCTGCTGAAATGGCATAAATGGTTGGACAGAACTCCGCAGAATTCGTCAATTTCCGTATCT  
GTGCATTTTGTATGATTTCTTCAATGATAAGATGAAGGACACAATGATTGTCAAAGGCGGC  
TATATGTGTGAAGACGCGGGTCAATTTCTTGCGTAACCTACGTGAAAAGCAGCCTTTTACT  
CATTTGCATAATGACGACATTATCAAACGCTTTATTGCAGAACTGCGGGGATTGGGCTAT  
AAAGCAGAACTGTTTGTCCACCTATGAGCCCTGATTACATTTTCAGTAGCGTTGGTAACA  
AAATGATCGTTTTGGGGCATTAAATGGAGCTGAACATCGTTAGAGTATACTTGGAAAGCA  
CACTCCATGTTGAATCGCTCATCGGTAATAAAGTCGGTGAACCTTGAGATTTTCGCTAAAG  
AATATTGGCTGGTGAAGGACGGATTTATCTTTCAGCATGACGGGCCAGGTATTTCCAAA  
ATGATTGTTTCGCTCTGTTATGAAATTTCTCCGAAATGTCACGTTTCTGATGAAATCACGG  
TGTTTATGGTAGACGATTTTGTTCGAAAGCGCCACGGCTATTGTAGTTATTACTGATA  
AGGAAGACAAATCATGAGTGGATAAATCTACCTTTCGTTCTAACGTAAACACCAGCCCC

GACGTCACAACGACAGTGCTCATGTTTCGCAATTCTATGAACACCTTACAATCCTAGCAGC  
ATGATCGCGATTGGATCAATCTGGTTTTCGCAAATGTTCAATGTTAAAACAATGGTGAAT  
GGGATAATACGTATCAAAACATAGCCAGGATTCCGGCGTGGTTTTGGTACAAAATTGACC  
GAATTATGAGGGAAAACCATATTCCATGGTGTAAAGCCAACACTGGTATAGCCATATA  
TTCATGAGAGGGGCGTCTCGCGAGTTCGCGATTTGGCGTTTTCTACCGACAAAGGCGTAT  
TGGCGCTCGCACGGCTTCTTGA AATTGAAGTTCATTCTCTGGTATGAATTTAGTTTTGC  
CGGTGTTGAATCGCTATCGGAACCGTTCGGAATACCGAACTTCGCACGAAAATGGTTCATC  
CTAAGCCTGAAAACATTCATTATGCGACTACCGAAGAGATTGATAGCATGAGAGATACTA  
TTTGCATTGATAAAAGGTTAAAAGAAATCCCAGCAATCGAGTCACGAATCAGCGCTCTTG  
CTCGCGGACTTGCCCAATTGCAAGATAAACTCCAAAATACACGACAACATGTCCGCGATT  
ATCTTTCGAAAAGGTATGTTATTTGATTGAAAAGTAAGTGTACAGTGATGGGAACATTGG  
TTATAATGTTCCCATCAATAAACGAACCCATTAATTTAAATGTCCATCAAACTGCTGCA  
ATCAACATTGGGTGCATAGCGTCATTTGCATTGTTTTATTTCGATGTATATCGGAAATGCT  
TATGCCGTCCTCGGATGTGCAAGGGCAGATATCGGTTCAACCATTATTGCGAGAATTTGC  
GAAAGAATTATTATGCGACAGTTAAGAACTTTTTGGAAAATCGTTCGGGATACTGCCAATA  
ATCACTTTAAAACCTATAAGCCTGTAGCTGAACGGTTGACAAATTATCACCCTTCATGA  
AGTTGGTAAATGATATTTTGCCGAATCTGATGCCCGCATCGCCTCTCGGTAAACACAATG  
GCATCTCCAAAATCAAGCCAAAGTACTTTAATGTTGATGCCGAAAACAACGTCACGGCTA  
AAAGAATTATTTGGCTCAACACAGTGTGTTGAAGCAGATTGTTTTGCAGCGAGACTGGAAC  
TGCTTAGGCGTTATGGGGCTGCCGTA AATATTGATATTTCTGAAAATGGCAGAAAATCAA  
TAGTTAGATTTAGCATCATCTTGAGCGAAATTAACCGTGTGAAGCTTGTTGCTGAAGATG  
CAAACATTGTCTAAGAGGCACGATCGGCAGAACCTGTTAATCTCGAAACGGAAAAGAAA  
TTAGCGAAAGCATCTTCTTTTCTGAAGCGATCGGAAAAGCTATCAACATTGTTTCGAGGTG  
CACTCCACTTTGGCTCTAAACGTTTGAACGAAATTGACAGTGAAGTCGCCAAGTTGAAAG  
CACTACGTAAAGAAATCGAATACAGCATGAAAATCATCAAAAACCTCAATTGGGGCTTAAT  
TAAGAATATGATCCGTCCACATATCGGCGTGACAGGTATCCCTCTGATCGCAATGACTGA  
TTATTGCAAATCACTCATTGGAACCAGATGCCTGAAGATACCGAAGAAGCAGTTTTCTA  
CGTCGAAGCTCGTGGTGGGAAATTCGATGAAATCGTTATCGGTGGCGTGGAGTATCTGCT  
GACCAAGTTTGCGAGAAATCATCACCAAGATGATATTGACGAAATGGATGCCATGAGAAA  
GGCTCAGTTTGCCAAAGACGTATTCAACCGTGAAGGTTGGGAAGCAGTCCGCTACTTTCA  
AGAACAGCATGGCTGCCTGCTCATCAAATCGATGCTGTTCTGGATGGTTCTGTTGTCCC  
AGTCAAGCATGTTGTGCTGACTGTTCTGTGCAAAGCACCATTCTGTTTGGCTGGCGGGCTG  
GTTTGAGCCAATCATTTTGAGAGCAGTCTGGTACACTTCCATTGTTGCCACGCTGAGCCG  
CGAATGTATCAAATCTATTCGCCGCCACCTGATTGAACTTCTGACCTGGAAGTAGGCAG  
TCCTGATTTCAACTTTGTGCTGATGACCCGACTACATGATTTTGGTTCTCGCGGCGTTAG  
TTCTGGTGAATCTGCTGCAATCGCCGGTGTGCTGATCTGTACAACTCCATGGGTCCCTGA  
CACTGTGCGAGTCGCTGTATTTTCGCATAACAGATGTTTGGCGCTGGAATGGCAGGCATCTC  
TGTACCAGCTCGTGAGCACTCCACCGTAACCTCTTGGCGTGCCGATCGCGAAAAGACAC  
CTGCCTCAACTCGGTTGAACTCTTCGGTGCGGGTGCATATTCCATTGTGTATGACTCTAC  
CGATTTCAAGAAGGCAATCCGTGAAATCGAGAGATATAAGGACAAAGTTATCGCCGAGGG  
TGGTACTCTGATCGCGCGACCTGACAGTGGTGTATGATCGACAATATCAGTTTTGCTCT  
GGAACTCTGGGAGAAATCTTCGGTTATGAAACCAACAGCAAGGGCTACAAGGTTCTGAA  
TAAGCATTGTGCTATTATTCAAGGTGATGGCATCGACGGTCCCGAAGTTTTTCGACCGCGT  
TGTGACTGTTATGAAAGCTCGCGGGTGGGCTGCAGAGAATATTGCGTTCGGTATGGGTGG  
CCGTCTTCTGCAAATGGTTAATCGTGACACCTGCAAGTGGGCCATGAAAATGTCTGCCAT  
CCAAATCAAAGGTGTAAAGAAAGACGTATTCAAATGCCAAAAGGCGCTGAATGTAAAGC  
TTCCAAGAAAGTTCAGCGTAAGCTGCGAATCATGGATGACGCCCGCTATTACACAGAAGG  
AACTATTGAAGGTGGTCAAATGCTGTACGGCGTAAGCACCAAAGACGGTTTTTGTGAACT  
TATGTCGAAAGATGCATTCGTCCTGTATTATGACGCTGAAATGGGTCAA AAAATTCTAGAG  
CAATCTGGCTGAAATCCGCCAGCGTACTGCAATCAAATCATCATTCAAATGCCCTCCGAA  
GAGGGCATTTTTTATTGTAGAAATCAGGATCAACAAAATTATCAAGTCGTATGAGCAAGA  
ATGGCTGTACAAAAGAAAATAATCTATGAATGGGGAAATTCATACCTGGTAAAATATTT  
TTCGATTGACCGAGAATTCGGACATATTCCATCATATTGGGGCCAAATGTATGACGGATA  
TAAGTTAAATCGTTTACGACTCTTTATAGTTTCTATTGAATGGGGTCATATCGTTATGTC  
AAAAGGGGCGTGGGAAAGTAAAGCAAATCAA ACTGACAAGAAATGAATTCGAAAAGCTC  
TAGAAAATAATGACCAATACGATTATCCTCTGCACAATGAAACAATCAACCAATTGCGTT  
CAGTTATTTCTGTCCCGCAAGTTGAATATGTTTATTTGTCAATTTCAAGAATATCAATCCA

TTTTACCCATAATCCCTCATGACGCGAGTATGTATGCGCATAATAATCATGCCAAAGAA  
TTCACCAGGGTGATCGGTGGCAATATCAGAGTTAATCTTTTGTGCGACAGATCATGAACAA  
ATCAAAAACACGATATATTGGGCATTTCCAGATATAGAACAAATTGAAATTGGAAATTCG  
AAATATTTTGCCCAAGAATGTAAAATATATAACGCAACAATAGACTAGAACACCAAAATAG  
GTTATAATGGTGGCAATATGACCCTAAAGTTTAGAAAAATTCTAAGCCAAAGACGAACGTA  
ATATGTTTAAAGTTACCACCAACTTCAGCGACAAGTTTGATGATAAAAACGATACATTGGG  
AACTGCCAGCTGTTAATTTAAACGAAGCTTCTATTGAAATTGAGCGTCTTGCCATGTTCC  
TGGAACATGCAAAAATCGATACTCAAATTGTAAGGGTGGTCTGGACGATTCACCGACA  
TTCTCGACTACTATTGCTATTTCTGCGAAGAGGAAGAAAGCATAGAAATCTGGGAAAAAT  
ACGGTGTGAAACGCTATGTTGGCCACGCCATGATGGTGAATATCATAAAAACCTTGCCA  
GCAATGAAATCGTATATACTGATAACGATAACGTGGAGTACAGTGTAAACCGTGTAATTA  
ATAAGAGCATATGGAGGAATCTTTATGCTCTTAAATTCCAAGTCTGCTGATGAATTA  
CAGAAATTGTTTGAAGAACAAAATAAGTGTGTAATTGTCTGGATACGAGTTTGACGGT  
CCATAAATAAACAGCATTGATCAGATCACGTATTGCAAGGCCCGAATGCCGGAAAG  
ATTTCGAGGTCTACTTTTCAGTAGATGCAATCTACTTGAAGGCATAATGAAACACAAATTT  
ATACGGTCAGGATTAAGGCAAAGGATGTTGATTACATCCAATGGATGAGATCGCTATTA  
CAATATGTAGATTCAGATCATTCAACACATCCAATGCACCCGTATTACGCTTCCGACATG  
ACCAAAAATTTCTCGCGGAAAACTTGAGTGAATGAAGGCCGAACACTACGCGAACTAGGA  
TCTGAATTTGATGAAAAAGATCAAAAAGCTGTTTTAGTCAAAAATGCAGAAAGCAATTT  
AAGAAGGCCATTCAGTGACTACCCGATCACTTGTAAGCAATTAGTAGAAGGCCAATCTG  
GCCTGCACCACGAAAATGCGAATAAAAACGCTGACTTTATCCCGGCCATGCGAGATATGA  
TGGCATCTATCTCCTTATAGGATTACGCTGAAAGCATTGTTGCCATCTCACTTAATCGAAG  
CACATGATAGTGGAGATATTCATATTCACGATCTAGATTATGCTTTTACTCGTCCAATGA  
CAAATTGTTGCTTGGTTAATCTCAAAGAAATGTTCAAAAATGGCTTCAAATGGGTGATG  
CCCAAATTGAAGAGCTTAAATCCTTTGGTGTAGCTTCAGCCATTATGGCTCAAATTACCG  
CACAAGTTTCTTCCCACCAATATGGCGGGACTACTCTTGCCAACGTTGACCAAGTCCTTG  
CGCCATACGCCATAATGTTATGGAATAAGCATTGTTTCTGTGCGACGGCAGTTTCATCAGCG  
ACAAGGATAAAAATTGAAAAATATGCATACGAGATGACTGCTAAAGAAATCTATGACGGTA  
TGCAAGCTTTCGAATACGAAGTCAACACGATGTTTACCACAAATGGCCAAACCCCGTTCG  
TGACAATTACATTTGGGATGGGAACCTAAGTGGTTCGAAAAAGAAATTCAAAAGCTATTT  
TGAGAGTACGAATCAAGGGTCTTGGAAGAATGGCATCACACCAGTATTTCCAAAACCTC  
GTTATGTTTCATGGAAGCTGATATAAACTTAAATCCTGGAGATCCAACTATGAAATTA  
CACCTTGCTCTGGAATGTTTACGCCAAGCGAATGTACCCTGACATTATCAGCGCGAAAAAC  
AACCGATCCATCACTGGTAGTAAGACTCCTGTTAGTCCAATGGGTTGCCGGTCTTTCTG  
GCTGGTATAAAGTCTGGGGAACCTCGATGGTAGAAACAATTTAGGTGTTGTCTCTGTCAAT  
ATTCCCGGATTGCTATCGAAGCAAACGGATCACAAGAATCGTTCTTTAACTACTTCAA  
GAACGTTTGAATTGTCAGTTGAATCATCTCTGGAACGAATTAACACCTAGAAGGTGCG  
AAGGCAAAGACCGCCCAATTCTCTAGACTGAAGGGGCCCTTGGTCTATATCTTAATCC  
GGAAGAAGAGTTTTTTGCCGCATTTGAAAGAACGAGCTTCGATTTCAATTGGTTATATTG  
GCCTTTATGAAGATGCTCTGATTATGACTGGCAAATCAACAGCCAATGATCTAGAAGCAC  
GCAATTTTGCCTTTTCGATTGCAACATATCTCAATTTTTCATGCGCAAAAGCAAACTCA  
ACACCGGATGGAACCTTAGTCTTTATTCTACTCCGTCTGAATCGCTGTGCGATAGATTCC  
GCCAGCTGGATCGCAAGAAATATGGTGTATCGAAGGAATTACGGACAAAGATTGGTATA  
CGAATAGCTTACATATTCCTGTTGATGCCAGTTGAACCCGTATGACAAAATAGATGCCG  
AAAAGAATTTCAATTGGATTGCATCGGGTGGACAGATCAGCTATGTCGAACTACCCAATA  
TGTGAAACAATCTCGAGGCCCTTGAGCAAATTTGGGATTACGCGATGGAAAACTTTACC  
TATTTTTGGAACCAACACACCTGTTGATAAATGCGACGAATCCGGTTTTGATGGTGAATT  
CAAATGCACCTCGAAAGGATTTAGTTGCCCGAGCTGCGGTAACCACGAGTCGGCAAAGAT  
GTCAGTTATCCGAAGAGGTTGTAGGTATGTTGGTGTCTCCGTTGGCGAGAGGATTCAATA  
AGGCAAACAAGCCGAGGTTTCATCACGTGTCAAGCATGTGAAATAATTTTTAAACTTG  
TTTACATTTGTGCGAGATGTGTGTTAATATACATCTGCACAACTAAACAGCCCAATGAG  
GTTATTATGTCTGATATTAAGCAAAGTATTGAAACCTTTTAAATAGAAATTCCAGGATATT  
AAGTCCCTCCTGGAAACCCCAATGCATAAAGATGTAGCTCAACAAGCAATCCACAACTG  
AATTGTATGTCTGAGGAATTTGAATCAATCGCTCAAGCTGTTGCTGATCGCTTCTGCATT  
TCCTTCTCGACTGGCGATTTTGGATATGGCCGTACCTACTATCCTAAAGGTAACCGTTTT  
TGTTCAAGAAAGCAACGCCGAAGAGTATGGCCAAGGAACCGAGAATGGCTACTGGCTCAGT  
TCCTCTGATATGTGTTAAGGAGAAAAGCAATGGCTAGTCCTAATGAATTGGTAGAAAAGG

CAGTTCAACTTTAAAACTTCTTGATGAAGTTGAAGCACTGGCAACAGGACATGCTTACG  
GCATGGAAATCAATGGCAATGAAGTTGATTTTCGACGACTGGCTGTCAAGCAGTTGTTATG  
GCGAAGGTTCTGAAGCATTGTCATTAATGCAGATGGCTCCGTGTGGATGGAAAGTAGTT  
GGTAATTAAGGGGCTCTTCGGAGCCCCGATTTGAGGGTTTTGTTATGATTATTGTTGGCT  
CTCGAGCTTTTCAATCTAGGCTAACTCCGTTTGTGCTCCTACAGTAAATATGGACCATG  
ACTTCATTGCATACGAAGAAGAATGGAACGAACATCAAGTCAGAATCCAAGGTCGGACTA  
TTGAAGTAAAAAGCCCGAATTTTCGAGCTTTTCGCCGTCCGGTGTGGTAAATCTCGTTACT  
GTTATCACGAAGCATATATCGTTCAACCTGGCTCGTCCGATGAAATGATTTACAACTCA  
TGGATGCTGTTCCCGGTAAGGACGTATATGCCACTCCCGAAATTTCTTCTCGCCATGAAAA  
TGGCTCATCGGTTCAAAAACAACACTCGCAATTTTCATCAAACCATGATGCACATTCGTG  
AATTGCGTGAATTTGGTATAGTCCTGGGGCCTGAACACGTGGAAATTTTCAAAAAGCGTG  
AAAAAGAATCTCTGAATTATGGCCACCCGAAACTTAACGTCCGTAAAGGCGCATTTTTCA  
AAGACGACATCTACACCTATGAACATGACACAATTCACGAAGCAGTGGCGGTTGAAGGTC  
TTCCAGCATATCGATCATAATGTTGATGTGCGCTGAAGTAATGACGTCAAAGAAAAAT  
TCTTTAGTTGCTCTCGTCGTATTCAGTTGATGGGTGTTTATGAAGAATCTTGTGATTTGG  
CTCTGGAACGTTGTCTTATTCCTTTCCACGAGAAGTTCAACCCTATAAAGCTTTTCAA  
TGGCCCTTGAGAAAGTATGCACTACTATTACATCTGGCTGGTTCCGTGAATTTGCGTGGG  
AAAATTATTGTGACGTTATGAATGTTTACCCCGACCAAGTCAGGGCTGTGACTCATAACG  
ACGAATTGTTCAAACGAAACCAGCATCTCCTGAAAATTCACAGTAAGTCAATACGGATTT  
TCACATAGGAGGTATACTGTGGAAGGATACATAGTCCAACAAAAGTTTCGTCAAACACTGAC  
ATCACGGAACCAGAACCAGGAAAAAGAGGATGAATCCGAAAAATCCTAAAACAGACGAATAA  
AAGCTGTTAATAGTTTATGCCCATGTGTTATAATGACCCTGGGCATTTTTGTAAATTGAAG  
AATGTAGTGGATATTGAAATGCATATTGAAGCACAAAACAGATTCGAGAAGCTGAATGG  
TCTGTTTCGTACAGCAAAACACGCTCGAATGCGCGAACTGCGAACCGAATATGGAGAAGAC  
AAAGAAGCTGGCCGAGTCGAATCCGAACTTATTTTCAGAAGATCATGTTGCTAAAGCTATT  
TCGAGTTATTTGAAGCCGAATGAATATGACGTAATGCTTGACCGTAGAAAAGAAGTCGCA  
AATCAAAAATTTTCGTTATCCATGTTGCGATACCGATCAAATCCAACCTTGTTTCAAGGGTT  
AATAAAGTAGTTGATCTTCGATGACGCAAATGCAACCGGAAATTTATTTGAGAGTCTCCG  
ATATGAGGTTTGGAGAAGCTAAAGCGTTAATAAACCGCCCTCCTAAACTTTTCTTTGGTA  
AAGAATATGATGGGACTCATGTCCGCGAGTATTTTGGAAAAAATACAGAAATAGAATGGTC  
CAGGAGATGCTTACCTAATGGAGTATCGGGTACTGCTAGACGGCGGTGATGTCGTAACATA  
GAGTAGGAATATCCAATTATAACTGGATAACAAAAGTTGGCTACAGGCCTGAGGTTGAAA  
TAACAAGAATCAAACCTCACAGAGGCGACGTTAGACCGATGGAGATGTATCTATTCGGAGA  
AATGGCATGATTGAAATATAAGGAATTGTTTCAGAATCGCACAAATGCCCGGAATGCGAC  
TTTATTGCCAAACGTCTTGAAGAAGATGGTATAGAATATTCATAAAAAACTGTTTTGCG  
GGATGCTAAAACCTGATCTCGGGTTTGGAGTACCAGCGAGACGTCACCGATGAACTCAGGCG  
TCGTATAGTGCAACCAAAAGGTTCCCTGGAGCTTCCAAGGTTTTTGTAAATGGGATATC  
CATCGGCGGTGCCAAAGCTCTCCTGGATTATCTGGATTCATAGGCCTCTTCGGAGGCCTT  
TTTCGTTAAAGTAGTGTACAAGGTGTTTTTTCGATGATAAGATAAGTCACAAGTCAAGTG  
AATGAGATTTACATTATGATCGATATACCGAATATTATTGAAAATATGAACAAAATGTTT  
GCGATTCTTGGGTATAAGCCCAATAACGGCAAAGCGTGGACAGTCTATGTTGACGCAGAA  
GGCAAAGGCCGCCAACCAATCAATCGCCAAACTGCTAACATGGTAGGCTTGAACATCTGG  
ACGCCGCTGTGCCAGCACGAGAAACTGCTTGGAAATTATTGCAACTCCGCAGCAACTTGAC  
GAAGTTCGCAAGTTTGCAACAGACAACCAACGAACAATTGGTTGGTCAAATATGCTGGTG  
CATGACAAAAGAACAACAATAAGAGCAATGTGTTTGAATTGCTAATCCTATGTCAACT  
ATGTGAGAAAATACTTCGTCTATGAAAAGTATTGCCGCATTTATTCGTACAAAATCAAC  
TCGTTTGTCAAGAAAATACTTCTGTGCAAGACCAATATGCGAAAGCAGCAGAACAAAGTG  
ATTAGCCAAATCACCAGACTGGAAACGACAAATGTGAAACCCGTTTAAGAAGAAAAAAGG  
TTGAGTCAATATGCAAAAAGATGAGCAAGTTGAGGGGCGGCGAAAAGATAATGAAATTCGT  
ATGCTCATGGACCAAAATGATCCATCGAAACTCATGTCAAACCTTGCTATTCTGTACCGT  
CGTACGGCAGATGCGCTGAATGCCAAAGCTGATGAGTTGGAAAAAATGCGGGACGAGATT  
AATCTGGCGGTTGTTGAACTCGACAATTCACGTTTAGACTTGGCTGCCAAACTTGAGTTT  
ATCCGCGAAAATCGCAGTGCAGAAGCGCTTTGTATTTCTTGTTCGAAAGATGTAATCGAA  
TTGGCTGGTCTCACCAAAGTCGATGTCAACGATGTTATGCTGCGTATCGAAACCTTCAAC  
GGCGATAAACAAACAGCTGTAACAATTAGCGAAATTGAAAATTATATCAATGGTCTGAAG  
TAATTA AAAAGGGCCTCATTGGAGGCCCTTTGAAAATGGAGTATGCTAATGATTTGCTCA  
ACATTAGTAACTCTAGCCGATCCAACCTGGAATTCGAACTAACTATTGGTATTATCCGGTG

ACAATCGTATATACCAACACGAAAGGCGAACCTATTGACGCATACACCGCTGATGCTATG  
GGATATACTATCAGCCGAACCGAAGAAACCAAAGACACGATCGATTTCGTTTCTCAAATG  
TCTAATGCCGAAATGAAAAAGAATTATCGCGAAATGATCGGTAAAGATCGTCAGATTGAC  
CGAGAAGAGCATGATGGCAGTGCTAAAATTGATTACGAAACTTTGGCTAGAGGCACTGAA  
ACTGCTGATAGTCTTATACTCAATAAGATTAACGAGTGATCTTTTGAATTTGAAGGCG  
CAGTATCTTTCAACTGTTTCTGGTATGTTCGGCTGCTGCGGCTGCCGTTGAACAAATCTCC  
GGTGGTATTCAAATTGGAGTAGAGCGGCGACGGAAGCGGACTTCGGAAGCCAGCCACGGT  
GAAAAGTATATCGCGCATTATAGCATTTCCTGTAGCAGATTTTCAGAGCCGTTGGTGAC  
GCAATCAAATTCGTCAAACCTCTGCGGTCTGCACATCCTCAGTTGTCACATATCGGTTTT  
ACAAAATTGGCTTACACTAACTGGCTTTAAACAACCGCGAAAGTGAAGTAAAATTTGTC  
AAAGAATAGAATAGCCATTTACCGAGGACGTGCTTATCAATATCATGCTGGAAAAAGGC  
TATAACATGTTCGATCAGCTGCCCAAATCAAATATTGCTGTTGGGTGAGTTGTCGAATTAT  
TCCATTCCTGAAATTCGCGAATTGAAATGTTTGTAGACTATTGCCGCCGAACTGCTCCC  
AAGAGAGACTGAAACAGTCTACAATGACCGTCGATCGTGATAAGATAATATAGTTGAAAC  
AAGCTTTCAAATTGTCCAGAGGAATTCAAATATGTCTAATGCATTCATTGCGGTTTCGTAA  
CTTTGCTGTACACGCTGCTGCCGCCGAATTCACCGCTGACAATATTCTTGGTTCGTGAAAT  
CACCGAACAAATGATCGACAAAGTTGAAAACACAGTATGGGATGCTATGATGGAAGCGGG  
TGTTACCGGCATTGGACGCCGGGCGATTCTCAGTGTTATTGTCCAATATATCGCAGATGA  
ATTCGGTACCCAGCCGCTTGGCCACACTCCTACACACGCAGGTTACAAGCAGGTCGCCGA  
AGACGCGTACAAGAAATATCAAGGAAAAGCTCGCAAATCCGCCAAGAAATGTACGGCAA  
CAAGCGATAATTTTCTTAGCTCCAAATAAAGTATCTGAAGGCTTTTCGCAGTCTCCGAA  
ATAGGAATATCACAATGGAATTCAAATATTGTTTCAAGCCGTCATGCTGGTCCGATTG  
ATCGCTATATTATGGATTTGAAAATATCGACCGCGTTTCTCCAGGTGGTTGCGAAATGC  
ATATTTTACGTACTACTTCTGGTGCTGATATCATTTCATGTTGACGCTTATGACCCCG  
GATTGTCCAACGAAGTTCACCGGCACGTTTATTACATTCTGAATGCCATTCGTGTGCCGG  
CTGGTGCACACGTAGTTCGGAGTTATATAACGAGAAATTATAGCCGCCAGGCCGAGAAAGC  
TGTTAGCGAATTTATCTACATTGAATAATTAATAATGAATTTCAAGGGCTTTTATGCTGGT  
GTAGGGAGTCGCGAGATTTCCCGAACATATTTGTCGTTTGATGAAAGATATCGCGGCGGTT  
GCTGCGATTCTAGGATATACCGGACGTTCTGGTGGTGCCGATAAAGCAGATGACGCATTT  
GAACTGAATTTTGGCAGTTGCTGATAGTTTAGCCATCGATAATATGGCTGAATGTGAT  
GTTTATCTGCCATGGAAACGATTCATTGGCCGTTTGCACCAAACATGCTCGTCACAAC  
CTCATTTTACCAAGCGCCAATGAGTGGGACGCCGAGCAAATCATGAAAACGGTCCACCCC  
ATTTACTCGAAAGGAGGTAAATTGACTGGTGGTGCTCTTGCATTTTACTACTCGAAATGTG  
TATCAACTTCTAGGTTATAATCTGAAAACAACCTCAGAATTCCTGGTGTGTTGTTAGGTT  
CCAACGGATAACGGAGTTTCTGGAGGAACAAATACTGTGTGGCAGCTTGCAATGTGTCAT  
GGTGTAGAGTGTTATAATCTTTACAACCAGTTTGACATTGAGCGGCTTAAGGAATTTTGTG  
GATCTGTGAAACTTTACTCTCTCCGCTATACCAGCTGCAGGAAAAACTGCAGCTATTA  
TAAATCATATTGTTGAAAATAACGAAAAGGCAAGTGATAGCCAGCATATCTAGACAATTGA  
CGAGGCAATCTTTCGAATACTTTGTTCGGTCTGGGCAGAGAAGGCGAGTTAGTTGACACCG  
ATAACCGTCGAGGCCAAAAGTCGGTACACGAAGCAGTTATCAAAGCATCCGAAGAATTTG  
ATGTGATTTTTATAACGCACGCGGCTTTAATGGTTCTTCGAGATATTGATGCTTTAAAAG  
AGTTTAACTGTATATCGATGAGGTTCCAGAATTAACAAGCTTCGAGCGATTTACTTTCA  
CAACATCAGTCGAAAGTCACATACTCGAATTGTGCAAAATAGATGAACTGGACTATTAG  
AGCTGCGAGATGAGCATCGAAAATCAGTCCAAAAAATGGCAATAGATGGCTTTAGTGGAC  
ATGATGACATTTATTCAACTCTTTTTCCGTTGTATAAAGCACTCCTGACAGGTGTCCCTG  
TCAGGCTGTGAGTAGAGGGAGGTGTGACGCAATGTTATTAAGTGAATGACGCGTCAAATG  
ATGATTGGGCGAAATTCAAGTTAATAACTGTCTGTTCTGCAAATTTTGTGACGACTTTTA  
CTGGCATGATTATGATGCGTTTTAACGGATGGGAATTTGAAGAGTCTCCGCTAGTTGAGC  
GGTAAGCTTTCCGAGATTATCCTAAAACCTGCTCGCGTAAAATTCATGTAATGTTTGATG  
ATGATTGGTCTCGTTACACAGCCGACAAGGAAGTAGATGGGATTTCGAATTACTCTCGCA  
TCGAAAATACTCTCGACACAATCATAAATGGCGATTTTCAATTTACAATCGAAATTCCTATC  
GGCCAAGAATGCCAAAGGGGACTGAAGTCCCTGATAACCCGCACGATCTAAACAATTATT  
CGGATTTTACCAATGTGGTTGTGATGTTTTTCGTATAATCCGGCGCCTTGGCAAGTTCCAC  
TTTTGAAAGAACTCGCAAAGTCGGTAGGCTTAGATGAAAGTGCAATGGTTGACGGGTACA  
TAGTTTCAAAGTATCTTGAACCCGCATTTCAACTTTGCACAAGATGTGATATCCGAAATG  
AACATTCGCTAAAACCCATCAACCGGTATGTTCTGATATGAAATTAGCTCAATATATGT  
TGAGATATTTGCCGCACGCTGAGATATGTGACGGTAATTCAATCAAAAATCACAAACAGG

TAAAAAGAAATCGAGAATCGTATCAAGCGCTATACCAAATGACCGAGAAAGAAATGTTC  
AATACAAGTATCTGCTAAGAAAGCTTGGGCGAATACTCGATATCAATTCTGCGAAAGACC  
AGGAAATTATCCAGGACTGGATAATCACAATGCGAGAAAAAGCCAAAAAGAGGGCCTCTA  
CATGAGGCCTTTGTTCTATGCACATGATAACATAGGGATCACTCTGGGGTTATTAGGAAT  
TTTGGATGATAGGTTTTTAGTCTAATGACCTTGTTTAAACCTGGCTGATTATAGAACTCC  
TGGTTCCAGGTAGAAGCTTGCTTGAACCTTATCTTTTTTATCCTTTTAGTTATAATATCTA  
TTAAGCCATAAAGGATAAGTCTTGGCAGGGCCAAAACCTGCACGCAGTAAAATTAATAA  
GTTTAGCAAGCTTATTAGTATGATATAATCAATCATAGGAGGAATTGCCCTATGAAATAT  
GTTGACAACGAAGTTCTATACCTGAATATTTGCAAATGGAAACAAGATATGCGTGATGCA  
GGGCTTCACATCAAGATGCCAGATGCAATTGGTATAGACATTATGAAGATTGCAAAGGT  
TTTACCGGATATTACAAATTTGCTGGATATACGCAAAATTGGAAAGACGGAATGAGATCT  
GATGCAGTCTAAGCTGTTGTAAAGGGATCAGTAAATTTTCGATGAAGAAAACACTACAAAAC  
CCCCTTGCTTATATCACACAGGCTAGTTACCGCGCCTTTATTGGACGCATCAAGTACGAA  
AACACGAAATGGCTATCAAATACCGGTATTTTTTGACCAACGTGTATGACGAGCATGAT  
GAGGATATGTCACGATTGGTTGATGAAAATTTTCATCCAAGACATCCATGGTAAACTAGTA  
GCCTATGAATCATCCCTTAAATCTAAAAGGAAAGATAAAGAGGATGTTCCCAATTTGGAT  
TCATTCTATGAAGACGACCCTGAAGATTAATCTTTTACCCCTCATTGATTCAACATGCGG  
AGAAATAGAATTATTAAGCGTATCTCGTAAAACCTCCAATCATTGGATTATAATATTCCTG  
TAGTTTTAAAATCCTGACCATAATTCATGGCAGCCGTTTGAAGTAGAAACTAGGCCAACA  
TGATTGGCATATTGATGTAGACACAATGACAATGGAGATTTTCATATGTCGCCTGATTACG  
AGGTTGACCTTAGCACTGGTGCAGAAGCTCTGAGTGAAGTTGATGACCCTAATCTCATGG  
ATTTACAAGAAGATCTACGAAAAACAAGCTGAAGAAAAAAGCCGCAAAGCATCTTAAAC  
TCACGGGAGAGAAATTAAGCGGCTGAAGAAACATGCTGAACGAGCTCTATTCGCAAACAA  
GAAAGAACAGTATGCTTATGCTATCAGTAAAGATCGTACCCTTTACAAGCAAAAGCAACT  
TCCGCATTCAGCAATGATCACTATGTTTGAAACTAGTCGTCTACAAATTGTTGACATGGC  
TAAAGCATATGCTACTGCCATCCAACCGGCAGAAAAATATTCAAGCAAAATCGCAAACCTG  
TTCCAGTTTGTCTATTTGCTCTATTATAGGCTCCACGGAGCCGATTTTTGTATTAGGAT  
TTAAACATGAATCTTTTGCATCTCGGTGATATGCACAATGGCGTAAAAGATGATGACCCT  
TGGCATAAACACATCACTGAACACATAATTGACCAGGCTGTTGAATATTCTAAAGCAAT  
GGGATAACTCAATGGCTACAGAGTGAGGACTTTTTTGACGTTAGACAGGCTGTAACACAA  
CGTACAATGGAATTCGTCAGGACTCGAATTACGCCCAAATTGAAAGAAGCTGGTATTATA  
TGCTATGTGATCGTGGGAAATCACGAGATGAATAAGAAGGATAAAATACATCCAAATAGC  
GTAAGCGAAACTCTGGGTTAAGATGAAACGTCTGTCTGATTGAGAAACCGACGACGGTC  
AATATCGAAGGTCCTGATTACGACCTTATTCGGTGGTTTTTTAAAGAAAGTGCATCAGTC  
ATTTTCGAGTTTGTCAAAAAGTCAGAATCCGCATGGTGTCTTGGTCATTGGGAACCTAAGC  
GGATTCTATTTCTACAAAATATTCCGAGTTCGGGATACAGTGGAGATTTTTTGAAAAAG  
TATGAAAAAGTTGTCTCTGGACCTTCTCATACTCAATCAGACGGTGAAAATATTCCTAC  
ATCGGCACTCCTTAAATGATTACAGCCGGTGATGCAGATGACCCTCGCGGTTTTCTGGGTT  
CTTGACACAGAAACCCGTGAATTTGAATTTATTCCGAATTCCAAAACATAGCACAAACGA  
CTGACTTCTCCTGGTGCTACAATAGAAGAAATTCGAGAGTGCTCCGGTCGTTCTGTGCGT  
TTGATTACTAATGAAGTTGATGAAGGCTTGACAAAAGTTGAATGTCTTCTGGGTAAAATT  
GTTTCATGATTTGAGAACCATCAACAAATCTGCCAAAATTGAGGTTGATTCTTCATCTGAT  
ATAACCGATGACGGCGAAACTCTTACTGTTTCATCTATGGATACTTCTTGTAGTTTCGATG  
AGCATAATGGGATTATTCGCTGAAAGGGGCGCAAATTCCAGCATCGGTGCGGAACATAAA  
GAAGCAATGGTAATTATGGCAAATGAACTTTATGCTGAGGCTATTGCATCATGATTGAAA  
TTAACAAGAAGCAGCTTGGATTTATTCTAGTTCGCTACAAAACATCATGTGCGTAGGCG  
ATGATCCTATCGAAATGACGCTTAACAAATATGCTAAAACATGGTGCACCTGGCAAAAATG  
GCGCCGAAAATCGACAATGTAGGAGGCAATTTATTTTGCCTATACGGTAAACCTTTTC  
GAGATATTACAAAAAACCAACTGCTGAATGAAAACACTGGCAAGAATTTGTTAGTGGAAC  
TTTGGTTGGAATACGAAGAAAACGTTTTTCACATTACACGTGGAATTATGCCTAATAAGT  
TCTCGATAACTAGTGACGGCGTGGCTATAGATGCTGCAGCATCAGTTAAAGATTTTCAGT  
CATATTTGGAAGAAATGATTGGAATGAATTCTACCAGTTTTAAACAGATAGTTGTTTTGG  
GCACTGGTACTATACGCCGTTTATGCAACTAACAAGCGCCGGAAGGCGCAAACCTGGTG  
GAAGATTCGCTGGAAGTATCCGTCTTAGCTCAAATGGATAAAATCAATAAAAGCCACGGA  
TTAAAGAGTAAAACCAGGATATCACTTCAGTTGATATGGAAATAAACCATATAAACTCAC  
AGCTGAAAACATAACCAGGATCACCAGAATACCTCTAATGCATCCAATGCTGCTGCCATAT  
CCGACCATCAGGCATTATATGACACTGCTCGTGAAAAAGGAAAAGAAATCAAGTCGGCTA



TTGATTTGCTCACAAACGCAAATTACAGAATTCGTGATGCCTGATTCCCCTGCATCCGCTC  
TTGGCAAGTTTACAATGGCTAGAGCAAAGCCGCAGCGCAACATGAACAAGTTTCCGGTA  
TTGCTCATATGCGTGAAGATGGTGGAACGTGCCCAACATGGATGCAGCAATTTGACGATC  
CTGAACTGCTAGTGAAATTGCGTGATAAAATGTCGCAGATCCAAGGTCAACTGGATAAAG  
CCGCTATTCGCATAAATGAACTCAACCAAAAAATGATATAGTTCAATGAAACAGCTGTTA  
ATTTCCGCGATCTTCAGAATAAGTTAATCAACGAAAAACAGTCTATTGATCTTTATGTTA  
ACCAAGCTAAAGCTGCAAAGCTGCAATCGAGCGTCTGCAAATGAAAGAACAGATTACA  
AATCGGTAATCGACCAACTCGGGAATAACCTACGTCTAAAAATAAGTGCTAAGTCTGATT  
TAGAAAAAGAGAAGCACCGTAGGTCTTTGATAGCTGATCTTTTGAAGGATTTCGGGAATTA  
AAGCCGTCATCATGGCCCGCTATATTCCGTATTTCAAGAATCGCATCTCTCATTATCTTG  
ATATAATGGTTGCAGATTTTGGATTTACTCTTGATTCCGAATTTAAAGAAGTAATAAAAT  
CTTCAGGAAGAGGCACATTCAGTTATAACAGTTTTTCTCAAGGCGAAAAAGCTCGTATTG  
ACATGGCTGTCATGTTTGGCTTGGCGTGATTTAGCATCTGAAGTTTCTGGTGTAGATGTTA  
ATGCGCTGTTTATGGTTGAAGTATTTGACGGTCTTTATGATGGTGTATGCACAACGCTCAG  
TGTTTTCAATCATAGAAAACATGAAAGCCAACGTGTTTATCATTTCGCATGGAGAACACG  
ATCCTCAGAAATTTGACAGACCCATTGTAATGTCAAAGCTAGGGCGAACTAGCGTACTGA  
ATGAGGTAATTTTTGATGTTTTATAATCTTCCAACAACCTCCTCTTGAAATTAGAAGTTAT  
AATTTAACTGATGAAAATGGTCATGTTAATTTGATTGTCACTGATGAAGACCTGAACCAG  
GTCTTCAGCGAAGAAGATATCCGCAAGTTGAAATCAAATCGCCATGCTTATTACAATTTA  
GTTGAAATTTTCGACTAATGATTTGCGTGAATAGAAATTATATTAGAACGTCCGTTATAA  
ACACACTGAGGAATATGTATGCGTAATCAAGCCGTTCTTTTTGTACCAGCCGATATCCGC  
CCTATGAGCGATAACGTGTTGGAAAACCTCAGTTAAAATCCTAAAAGCTTGGGTATCATT  
ATCAGTGATATTAGTGCAAACCAATTGCAAGCTCTTGAGCAGAAAATTCGGTTCGAACTA  
TATGCCGAAATTTGTTAAAATGGTTCGAGACATGGATATCGACTTGCTCGTACGCCGCCGA  
GAAAACATTCTGGCCATTGGCGGATATCATGTTAAAGGAATGAAGGACAAAAAAGTACTG  
GCCAAACAATTCCAATACGACACTGACGAACTAATTATTCAAGCTGCTCAGACTGTCATG  
GCAGATTACTGATAAGCTATATCGTAGTTGTGTTATAATTTCAAATACTGAAAGGAAT  
ATGAAATGAACTTACAAAAGAACCCTGTCCGTAATGAAGAATTTTGCAGCTATCAATC  
CATCTCTGCGACTTACCCCTGGCAATTCATCATGACCAAGTCGGTAGATGGTGTTCAT  
ACGCTGAAGCTACAATCGCTGATGAAATTGATTCCGAGCGGAACATTTATGGCCTGCCTA  
ACTTCTGTCAATTCTTGATCAACTCGGTGAAAGTTCTGAAATCAATCTCTCAAACGGGG  
AAATTGTCATCCATAATGGTCGGGCAAAGTAAATCTGCCTGATGCTGAATCTTCAGTCA  
TCGTGGTTCCGAAGCAACGGCTGCGTATGCCACCGGCTGATGTAGAGTTTGACCTGAAAG  
CTGAAGATTTAGTAGAAATTCTCAAATCTCTCGAGCATTGTTGGTGCAGACCCGCATCGCGA  
TTACTAATCGCAATGATCATATTGTTATTGATGCGTTTGCCGTCGAAGACGGCGATAATG  
CACGAACCCGATATTCTTTGACCGTGTGTCTTACGAAGGCACCAACAACCTTCAGTTTCG  
TTATCAACCTTGAAAACGTCAGTGTGTCGTTGCCGATTACAAAATCAATATTTCTTCCA  
AGGGCGCTGCTCAATTCCAGGGAATTAATACCGCATATGCATTTGTCCTTTAAACATCTT  
CAAAGCACGACTTCTAATAAATCCTGGTGTGATATAATGCGGGCGTAAAAGCCCGCTTTC  
TTTTGAGAGGAATTTTAATATGTTGACAGTTAATGACGGCGAATTCATGTTTAAAACAA  
ATATCGCCCAGGAACAATCGATGAATGCATTTTGCCAGAATATGACAAAAAGATTTTCAA  
ACCTCTCGTTAAAACCTGGTCGTATCCCCAATATTATTCATCATTCTCCTTCCCCAGGGAC  
AGGTAAAACTACCGTAGCCAAAGCTCTGGTATCAGAAGTTGAAGCCGAGGTTCTGTTTCGT  
TAACGGCGCAGACGCAAAAATGGACTTAGTTCGCGATGTTATGACTCCATTTGCAAACCTC  
TAAAACCTATGGCAGCAGGTGGAAAAGTAGTTATCATCGATGGATTTGATCGAGCAGGTCT  
TGCAGATTCTCAGCGTCATCTTCGCTCATTGAGGGAAGCTCATTCCAAAAATTGCACATT  
TATCATTACTGCGACTGATTTGGGTTGAATTATTCCAGCACTTCAATCACGGTGTGCTGT  
TATTCAATTTGGTAAAGCCGATCAATCTGATAAAGTCAATATGATGAAACATATGATTGT  
TCGTGCCGAAGCAATTTGTGATGCTGAAAATATCGAAGTTGAAGATCGCAAAGTTATTGC  
CGTTTTGGTTAAAAGAAGTTCCTGATTTCCGTAAAACCTCTCAACGAGATGGATTCTA  
TGCAACCGAAGGTAAAATTGACAGCGGTATTCTGAGTCTGGTTCTCAATACCCGCAATGA  
TATCGAACAAGTCATTGATGCACTTAAAGCTAAAGATTTGAAATCGCTTCGTGCAATGGC  
CGGTCAATACACGACTGAGTCCCCTGGTTTTGTTGAACGTCTATGTAATGCACTGTACCC  
ACTCGTTAATGGTCCGGCAAGCATTTCGCATGTACGAAATTATCGGTGAAAACAACCAACT  
GTTTGGCAAAGCCGCAATATCGAGTTTCATGTTCAATATATGTTTCGTTTCAGCTTGCCGT  
AGACTTCCATGGTAACTGGCTGTAAGGAGTTCGATATGAATTTGAATTTCTTATGGGTG  
ATGATGAGCAACTCAATGAGCACGAAATTGCTTGGAAATCGAAAGATTGGGATGACGTAT

CAGCATTAGCTGATTCGTTCAAAGAACCTGCCGAAAACAATGCATTTCGCATTGTTGGATG  
ATATCACTTACACCAAACGCAAAGATGTGTATCAAATAGTGATTATCCGGCATGGTTTA  
TCAATAATGCTCTTTCGATGCATGCCGAAACACTGTATTCGGCCTACGACACGAATCTTC  
TGTCAGCATTGCCGGCCCAAGCGCAATACAATTACCTGGTGTCATCTGTAAGAAAAGGCA  
AGATTTACGGCAAATGGCCTAACTAGATGAATCAATCAACGAAAAGCTTTATATTGCCG  
TTATAAAGCAGCGAATAACGTTGATTTCCATACCGCAAAGATGTATATGCCAATCATGT  
AAAGGCGAAACACTTTGCATGATTTTCTGAAAAATCACATATTTATTGTAACTCCAGCTT  
TTGTTAAAACCTGTTGCGAAAACAGCAAAAGATCAAACGCAGATACTGAAGTTGGCTAAAA  
AATTCTAAGGTTTTCTTATGATCCAAATTGATATCAATCATCCTGATGATTTTCTGAAAA  
TTGCTGAAACACTTACACGAATTGGCATTGCATCTAATAAAGAGAAGAACTTTATCAA  
GCTGCCATATTCTTCAAAGCAAGGCAAATATTTTCATCGTTCATTTCCAGGAAATGCTAA  
AACTAGATGGTCTACCAGTATAAGTTTCCGAAGAAGATATTTCTAGACGAAATAACATTC  
CTTCATTGCTTCAGTCATGGAATTTGTGTAATAACTAACTCCTATTGAATTGTCATCTC  
ACAATAATTTAGAGTTATTGGCCACAAGCAGAAGGGCGAATGGCGACTTTTCGCGAAGT  
ATCAATTTGGTTAATGAAATGGCCTCAACAGAGGCCACTTAGAAGGATATATTATGCAGC  
ATTACACGAACATCGAAGTTATTGGAAATACCATTTTTGAGCGTTACGTTAAAGACGGTG  
TAAGACTATCGCGAAAAACAATTCTCAGCCAACACTCTTTCATCATGCCGCCCCAGGTG  
TAGAGACGAAGCACAAGACATCTCTGGGCGTTTTTGCGTAAACAAAGAAGCATGAAAATA  
TTTGGGAAGCAAAGCAATGGCAAAAACGAATGGCCGAAATTGGCCAAGATGCCATGGGTA  
TGGACGACTATTGTATTTCTACATCTCCGATAATTATCGCGGATTTATTGATTTTGATC  
GTGACAATCTCGTCATCGTTGTAGTCGATATCGAAGTAACAGCTCCAGAATCCCTGATC  
CCAAATTTGCCAAATATGAGATTGCTATGATTTCCGATGTGCGTTCGACGAGGGCAAAA  
AGACATATTACATTTTTGACCTTGTTAAAGATGTAGGCCATTGGGACCCATCTAAGTCTG  
TTCTAGACAGATATATTCTTGACAATGTCGTTTACATGCCATTCGACACAGAAATTGATC  
TTCTTCTCAACTATATTCAACTATGGAAATCATCTACCCCTGATTTGGTGTGTTGGTTGGA  
ACAGCGAAGGTGTCGATATTCCGTACATTATCACTCGAATTATCAACATCTTGAGTGAAA  
GTGCGGCTAACCAATTAAGTCCGTACGGCAAGATCGGCTCAAAAACAATTACAAACATGT  
ACGGTGAAAAAACGATCTATCGTATCCATGGTGTGCACTGATGGACTATATGGATGTTT  
TCAAAAAGTTCAATTTTCACTGTTATGCCTGACTACAAGCTAGGTAACGTTGGATATCGCG  
AAGTTAAAGCAGACAAATTGGAATAAGACGGCCCAATTAATAAGTTCCGAGCAGCAGATC  
ACCAACGATATGTCGATTCCTGTGTGCGAGAAACGGATATTATCCTGTTGATCGATGGCC  
GTCGATGCTTTATTGATCTTATTCTGTCTCTTTGTTATGACGCGAAAATTCGTTTCGAGG  
ACGTATTAGGAACTATTAAGTTTGGGATTCTATCATTTTTTAATTCGCTTGTCGAGAAAA  
ATATAGTTATTCCGATGGCGAAAGCTAGTCCAAAGCAAAGTTTCCCTGGGGCATAACGTAA  
AAGAACCTGTTCCCTGGTGCATATCGATATGGCATGAGCTTTTACTTCACATCTCTGTATC  
CGAGTATTCTCCGTCTTCTCAATATCAGCCCAGAGATGATTGCCGGAATGTTTGCACCTG  
CACATCTTGACGACTATATCAATAAGACTGCTCCTAAACCATCTGAAGTTTATAGTTGTG  
CCCCAAATGGCATGATGTACAAACGGGGTGAAGTTGGTGTACTGCCAGCTGAAACTGAGA  
AAGTATTCTTGCAACGTAAAGCCGAAAAGAAAATGATGCTTGCAGCTATACGCAATCAGG  
AAGCAATTAAGAAAAATTCTGGCTTCCAGGGGCGAAAGGGTAGACCACTATTGTTCCGCT  
TTCGTATGGGTGTTAAATTATGCACCCATCTTGGAGGAATTACATTATGTGGTACAGTTA  
CAAATAACGAATGAGCTAAACGGCAAATTTACGTGCGGGTTCACAAATCAGAAGACAT  
GAAAAACGACCCTTACATGGGATCAGGCGTAGGTGTTAAACGAGCAATCGCCAAATATGG  
TGTTGAAAATTTCACTCGGACGACGTTGTACGAATTTGCGACAGCCGAAGAAGCTTACAA  
TATGGACGCCGCATAGTACTAAAGAGTTTCTCAGCCGTCAGACGTCTACAACGCAAT  
GGTCGGCGGTAAAGGTGGTTGGGCCCATATCAAAAAGCCCGGGCAGCATATGAAAGACCC  
CGTCATGGCTGCTTACATTGGGTCTTTTCGTTTCGCCGCGCATATGAGCAAGAACCGAATAA  
AAAGCTTATTAACATCGCCAATTTCAACAAAGCGTCCGAAAGGGACCTTGGCAAGAAACA  
TTCAGATGAGACTCGCCAAAAGCGGTCCGACTCGCTAAACGATTTCTACGCGAATAACAC  
ATCTGTTTTAACTGGTATCCCAAAGTCAGCTGAGCATCGCAAGAAAATGAAAGCCGCTG  
GACTGAAGAACGCCGCGCAAGCCAAGCAGAGCGTTCGAAAGGCTCTAGTAGCCTCAGGTAA  
TGACGCATTCGCTAAAAACAGGCTGGGCAAACTAATAGCGAAGAAACGAAGGCTAAGAT  
GTCCGAAGCGAAAAAAAACACTGGGTTGAAAAGCCAAAAGTTATTGTAAAATGTCCACA  
CTGCGGAATAGAAGGCATCAAGCATGCCATGCTCAGATGGCATTTCGACAATTGCAACA  
CAAAGAGGCATAATTATGGAACCCGAATTATGCCGCGACTTCAATGAAGATGAACTCGCG  
TATTTGAATACTCTTCAACGGATGAACTTCATAACCATGATCGGTTCGTTGTGAAAAAGAA  
GAACAAAAACGCAACACCAACCAATTGAACCGCAAAATTTTGATCAACTCGCTTACGGA

GCTTTTTAACACTACATTAACCTGGAGCTCCTTAAACCCGGTGAACCTCAGGGAACCGCTC  
AATGAGACAATCCTGAGCCAAGTCTCGAAAGAGAAAGGTGCATCGACTATGGAAAGGCGG  
GTAATACCGAACCGAGTAGAGTACACCCAAGTGGGTGGAAGCGCCGGGGGTGCAGCAATG  
GATATGATATAGTCTGCTCTGCATAGCGATATGCAGCTGTAAGTAAAGGTCGCGACGACA  
TATCCAAGGTGTTTGATTAACGACCCAATGCGAACACCTGGTAGGAAACAACCTCTTAC  
GATCCTACGATTTGCGAACTGCTGAAGCTATTACAACCTACGATCAATCGGCTCTTCGGT  
GGATTGAGCGTAAACTGAACGAATGTATCAACAATCTTGTCAAACCAACTAATGTTGATT  
ATGTGTGTTATATTGATACTGACTCGGTGTATCTCAACATGGAAGCAGTGGTACTAAAG  
TAGGGATTGACAGATTCCGGGACACCAACCATCTTATTGATTTCCCTTGATAATCTCGGAC  
ATAAAAAGCTCGAGCCATTTATCGACGAGTCATACAAAGAACACGAGGAGTATATGAACA  
ATGAGCAGCATCCCTTGCTCATGGAACGCGAAGCAATTTTTGGAGCTCCATTGGGTCTG  
ACGGAATTGGTGGTTTCTGGACAGGTAAAAAGCGATACGCTTTGAACGTTTACGATATGG  
AAGGCACTCGATATGCTGAACCGCATCTGAAAATCATGGTTCTAGAACTCAACGATCAT  
CCACACCTTTGGCTTGTCAAAAATCGTTAAAAGAGTCAATTCGTTCGGTTGTTGCAAGAAG  
GTGACTCCTCTTTGCAAAATTATTTCAATCAATTCAAGAATGAATTCAAAAACAATCGATT  
ATCAAGAGATTGCCGCAGTGTCTTCTGCGAATAATATCGCCAAAAACGCGGATTTCGGCAG  
GATATCCAATAAAAGAGCTCCGTATCATGTGAAAGGAGCCCTTGCATATAACCGGATTG  
CAAAAACCTGACCAAGCAATTCCAGAGATTGTTCAAGGCGAAAAGGTAATGGTTATTCCTC  
TTCGTGATCGCAATCCATTCAATGAAGCGTGTTTTACTTGGCCGTCAGGAACACAAATTC  
CACCTGTCGTAGAAGCCGATGTTTTGAAGTTTATAGATATAAATAAGCTTTTTGATAAAA  
CATTGTTAAACCCCTTGCTTCAATTTGCGAAGCTACGAAAAAAGATTATGAATTCAGGA  
ATAATTTGTTTGCCATGTTTGATATTTGAGGAAATAGTATGTGTAATATGACAGTTCAAG  
ACATTCGTGACATCATGGTGTCAAATACAAATCAAATTAATTTTTTTACTGACAAATCCG  
AGGTTAAAACCTGTCGAAATTGCCCCAGTAATGTTTAAGGCCGATGAAGATCTAATTTTCG  
GTAAACGTAATCACGATTATATTGGGCGAGAGTTGTCTTGGTATTTGAGTCAATCTCGTT  
CTGTTGCTGATATTCAGGTAACCCAGCAATTTGGGAAGCTGTTGCAGATTGTAACG  
GTATGATCAACTCCAATTATGGCTGGGCTATTTTCAGCGAAGAAAATGGAAATAAGTTTG  
CAAATGTTGTCAAACATCTAATTCAAAATCCATACACTCGTTGCGCCAACATGATTTATA  
CTCGACCGTCTATGCATACTGATTACAATGCAAATGGTATGTCCGATTTTCATGTGCACCA  
ATAACGTCCAATACCAGATTCGGGATGGAAAACCTGAATGCAGTCGTTTCATATGAGGTCCA  
ATTACGCTATTTTCGGTTATCGGAATGATTGGGCGTGGCATGATGATGTTTTGTTTTGAC  
TGTTGATACGCTTCAATCCCATGAAATCATGGTAGAAAAGGGTGATATCTAATGGTGTG  
CTGATTCGCTCCGTGTGTATGAAAGACATTTTGGCCTGATTGAACAATATATTGCTCAAT  
AATTCTCAATTCAGCATAGCGAGCATAATGTTGCTTGTCTATGTTTAGAATCTTTATAGG  
GTTGATATAATGTCACCACACAAAGGGAACATTTATGGCATCTACCACTGAAGATGAAAC  
TCCCAAAAACCTTAAATGACGCTCATGCTCTTATACAGCATGCTATGGAAAACGTTAAATA  
AGAGCTGCTGATAATCGATAAATCAGGCAAATCACAGCTTGTTATATTTTTGATGCTCAT  
ATACATGATGGAAAACCTGCATGTAGATTACAAAGGAATTAATGAAAATGATGAAATTCAT  
CAACTTGTTTCATGCAGCTATGAATGCACAAGTCAAACAATTAATGAAAGATAATGAGGCA  
CAAATTTGGTTGAAACAATCCTTGAAAACCTTCTCTTCAACAATACGTACTTTATTTTCG  
GCGTACCCGTACATAAAAGAAGATTATGGCGACCGTGGGCCTTACCGCGAGATTTTTAAA  
CTCATCCAAAAACACGTGAATGAGTACAATACAATCCCAACCAAAAACCTGCACTTGCAATC  
GCACTTGGCAAAAAGTCTATCGATCAAGTAACTCATGACGGTGTGAAGGAAGTTTTGGCT  
CGTCTGTCTTCTAAACCAGAAGATCATGCCTGGTTAATTAAGGAACCTGAATCTTACTGC  
AAAGTCCAAGCGATGTATAACGCGTTGTCTAAGGCAATCGAGATACAGTAACATGCGGCC  
AAACCATTTGAAGAAGGACATAAGAAATTGCCGGATTTTGGCGCAATCGAAGATTTGATG  
AAAGAAGCATTGGCTATTTTCGTTTGGTGGCTCAGTCGGACATGATTGGTTTGAAGATTAT  
GAACGACGTTATATGCTTTATCAATCCAAGCTAATAAAGTCCCGTTCATCTCAAACATT  
CTGAATAAAAATAACCAAGGGTGGTGCAGAACTTGGCACGCTAAATGTTATCATGGCTGGT  
GTCAACGTTGGTAAATCTCTTGGTCTTTGCTCTTTGGCCGCAGATTATCTCCAAAACCTGGC  
AAAAACGTCGTTTATTTCTCGATGGAGATGGCTGAACATGTTGTTGCGAAACGTATAGAT  
GCCAACTTGCTTGAAGTCACTCTTGACGAAATAGATGATGGCAACATGAGCTTGGCTGAG  
TATAAAGCTCGGATGGAGCGTCTGAAATCCAGTAATATGGGTTCGTTTGATTATCAAGCAA  
TACCAACTTCTGGTGCAAATGCTAATCATTTCAACGCGTTTTTGAACGAGCTGAAGCTG  
AAGAAAAACTTCAAAGCAGACGTTGTCATTGTGGACTATCTGAGTATCTGTGCATCCACA  
CGAATTCGTGGAGGTTCTGAGAACTCGTATACTTTGGTAAAAGCTATTGCCGAAGAATTA  
CGTGGCCTGGCTGTCCAACATCAAGTTGTTCTATGGACTGGTGTCAAACCACTCGATCT

GCATGGGATTTCGACCGACATCTACATGTCAGATGTAGCCGAATCTGCTGGCTTACCAGCA  
ACTGCTGATTTTATGCTTGCAGTGATGGAACTGAAGAGTTAGCTCAAATGGGTCTCCAA  
CTGATGAAGCAAATAGAATCGCGGTATGGAGATAAAGATTGGATTAACAAATTCAAATA  
GAGCGTTAAAAAGGGCAACCAGAGATGGTACGATGTAGAAGAACAATCAAGGCCAGG  
AACGCCAACACACCTTCTCCAAGACAAGCTGACAATACGAAGGGCAATAACTCAAGACA  
GCATCTTGACGAACTTGCCGCGACAATGCATTTCTGATGGCCTAACGGCCATCTACATAG  
GAACTGATGATGAAAACATTTCTAGAGTGTCTGGTAAACAGAAATATCATGTCAATAT  
GGATATACAGTTTGTGCGAAGACGTTGTGGCTGGTGATTCTGCAGGAGACCCCGTCAACTT  
CGCAGCTGGTAAAACGTCTGGCGCAGTTATTTCCCCTGGGCCTAAACTGCTTCTAAGAA  
GGACAAGAAGAAGAAATGATTACGTTTCGAAGCCGCTCAAGAAGCGTGCGAGGCTTTAGGT  
CATGTAGCCTTAAAGAATCTTCGAAATCAACCTCATCTTGATATTCTGAAGACAATCTAC  
ACGAATTGTTGTCCACGCAAGATGAAGGATGTCGTGTATGAGATGGCTGTTAATCCTGCA  
GAAATTGATTCGTACTTGGTTACGCAAGGAAAGCCATTCTCTCGTTTAGAATATGCTCAA  
CACCGTGAAATTCTGTTGGAAGCATGTCGGCAATTGGATGCTAATGGATTTTTGTCTAG  
TATAATGGGGCCAAGAGCCCCATTGGGAGCTATTATGTTTGTGATTTTTTGTGGCGA  
ACGAGCAATGATGCATTTGCCAATATTCAAACGAAAGAAGGGCAAGTTCAAGTCAAGATG  
TCCAATCTGCGATCATTCCATGACGGACATGAACAAAGACCGCTTTTGGATGTATGAGAA  
GTAGGGCTAGTGGCAAGTTCATTGCTTTAACTGTGGTTATCATAGCAATTTGGGCGGGTA  
TTTAAAGGAGCGAGAAGAAGTACTTTCTCGTTGATGGCTATTAGAAAGAAGGAAAGAAAG  
CACTGTCTTCAAACCAGAAGCAAAACCAGACGAAAATCTCCTCACCAAAAAGATGCCGGT  
GATTGAAAAGTTAAATTTTTGTGAACGTCTAGAATTGCTCCCAGCGAACCACCTATAGT  
AAAATATGTCGCAAAAAGCAAAATACCAGAATCAGCATATAAGCGGTTATGGTTTACTCG  
CGAATGGCAGAAATTGGTAAATTCTATTTACCAGATACGTATACGCGAGAATCACGGGA  
AAATAGATTGGTTCTACCGATATTTGACAAAAGCGGTGAAATCCAGTCGTTTCAGGGAAAG  
AGCTCTATCAGCCAGTCCAACAAATACATCAACATAAAGGCTCATGAAGATGCATCAAA  
AATTACGGAATGGATAACAATTGATGGGAACCGTACTGTATGGTTTACGGCAGGACCGATT  
GACTCCCTTTTCATTCCGAATTCTGGAGCTATCACTGGCGGTAGTCTCGCATTAAAGTCAA  
GTTCCATTCAAAGCACTCGAGTCTGGGTTTCGTGATAGTGAACCATTTCATCCTGATACG  
TGCAAGCGACTGTCTAGACTAATTGATGCAGGTGAACGAGTTGTGATGTGGGACAGGTGT  
GCTTGGGCGTCCAAGATGTAAACGATATGATAATGAATGAAAATGCAACTGCCGAAGAT  
ATTCACCAGTATTGCAAGGACAACGTCGTGTCGGGTTTGCAAGCAAAACTGCGTTTTTCGC  
AAATGGAAGCGTTGCTAAGGCCTTTCGGAGGCCTTCATTGTTTTTATTGAACGATGACG  
AACAAAACAGTGTACTATCTCTAAAGATGATACTATATCATCATAACCAAACAACTGA  
GTAAAACAACGGAGTATATCATGACAAGTATAAATCTCGAACATCCTTCTCTATTGTGCA  
ATGCTCACCTCATAGGCGAATGGTAGGAGAGTCCCTCGCGTTGCGAGCATTTTGATCAAGA  
AAAACGGAAAGACTGGTAAAATTCCATCAAAGTTTACCGTTGGCACAATAAAAACCTCTC  
TCGGCGGTCGAGGGCATGTGGCTTTCTTTTACAGCAAATTGGCTTGGGTACGCGATCGAT  
ATCTGATGCTAATGGAAGAAATGACAAAACGCGGCTATTCCGGCGACTGACAATTGGAAAG  
TTGCAATTTTCTTCCCTGAATACGCCAATTTGTTTGGTGAATGGGAACCGTCAGACGATG  
ACATCTCGCTGAGTCGCACAAGCATTCTGAGATGATTCCCGAAAAGCACAAGTTAACTG  
AAATGCAAATTCAACAACCTTAAGCAGATTGACGAATATAAGGAAAAAATGAACGAAATCT  
GAGCTTTATAAACGTAGATACAAGTGGGCTTTTGACTTTAATGAATTTGATCGCCGCGCA  
TTGGAGAATGTCCGCGATATGCAGAATACGGAGAACAAAACATGAAAGCTCTGACTATTG  
CTCTATTATTCGCTGCTTCTACAGCTTCAGCTGCTAGCTTCGATTGTCAAGTAAAAAATG  
TGAATGCCATCGAGAAAGCTATTTGCGCTGTTCCAGAAACTTCTTTGCTGGATGATCAA  
TGGCAGAAGCATTCAAGGCAGTATCTCATATTCCGGAAGTTAAGGCTGACCAAAAAGCTT  
ACTTCAAAGAGCGCAACGCATCAACGTCTTTGTCTTCGCTTAAGGACAATATTACTGACC  
GCATCATTGAGTTGCAGATTATTGCCGAATTGGAAGGTGTTTCAGAAAAAACCGCATTCTG  
AAATTGTCCGAACCGATTTAGCTAAAGCTACAAGTAATCGACCCGTCGAAAAAGACACGG  
TGGCAGATCTCACCTGGCAAGCAAAGCAAGGGGATGAACTTAGCTTGCCTGGAAAAAACG  
AGCTACACAGATTACCGTGACAAAAATGCTCCAATTTGGATACGCGACTGTGCGTACAGG  
ATAGTTCGCAACGATGTGATGGGCAGATGGGTAGCTCAAGCTCGTTCTGCTGGTCTAATT  
AATGACTTCAAATCTGTAAAGTATAAAAATCGAAACCGGTTTTATCAATATGCCTATTGAT  
AATTTGAAAATTAATATTCAGCAGGGTCGTCAAGTGTGCGAAACTATGGCAATAGGATCA  
AAGAGGTAATACAAAATGTGGATTCTTATTCTCACCATAGTTGGAACAGGGATGTCTTCT  
GTTCAATCTATCCCGTTTAAACCCGTATGATTCTTGTGAAAAAGCTCGAATCGTGTGAATG  
AAAATACTCCTGATTCTAGGAAATATACTGCTGTCTGTGTCGAAAAGTGATATAATGACT

ACAACATACATAGGAGAACAAAATGACACCCCAATTAATGAATGCGCACTACTAACC  
TAGTATGGATAAGGCAGTAAATGCACTGTATGATTGCCTTATTGCCAACGATAATCCTCT  
CAATCGAATGATTGACATGCAACGTCAACTTCAAATTGAGCTCGCACACGGCATCCAAA  
ATACAATCGCGACCCACGATAGCTTAAAACCTTGTGGCGAAAGTCTTGACTGGTGTCAAGC  
TCAGGACGATTATATTGCCGACGATATTCCGCGAGCAGTATACTGCTCTAGGTGGAATGAG  
TAACCTCAGGCCGAATGCGATCTGGAAACCATGGCACGCTGAACATGCCGAATATCGCAA  
TCGACTATTTTCTGAATTGTGCGCCGGAAGACCTACTCGAAGCAAATTCGAGTTGATTGA  
CCAAATTCACTTTGTCTTAACAAGATGATTGCGATGGGCATGGATGGCGATGAAATCTT  
CAAACCTTACTTGA AAAAATGCCGAAAACCTTGCACGGCAGGAGAATGGATACTAATG  
CTTGAACAAGATGAAATTGATGAAATCAATCGCTTGCGCAAACCTAGATGTTGAAGAAGGA  
AGGGCGGATATTTACGCCCCATATATTCCATTTCAAACAATAAAAATATGAGGATTTTTAT  
TATGTATGAAGTCAAATGGATTGGAATTAACAGAGACAATCATGGCGTAACATTTGCTAT  
GAATACACCCAACGGCGTTCTAATCGGTGTTAATTACACTTTTAAAGCGGAGAAGTTTGA  
TATGACATTCATTCTGATAAAAAAGTTGTCAATAATCCCAATGGAAATGGATATAATTC  
CTGCCACGGGTGATACATGAAAAAATATGTAATCCAATGGAAAGACGTCGAAGGATTCTG  
TCATTTGCTGGATGGCATTGTATGGCTCATCTAGTGGTGTGCTATTCCATAATTCATG  
GGAAGATGCCAAAACCTAATATGCAGTAAGCGAAAGAAGCCATAACAGAGTATTTGAAAGG  
AACAAAAGCCGTCAAAAACGACTATTTGGGCCCTCTACGATAGTCATAATCAACAAGCC  
GTCGGAATATTTGGCCAATGCGCATAAAGGAATGTGTGATACAATGCATATCGTTGATCT  
TAATGTGATCCCAAAAACAATGAGGTA AAAAATGGTAACAGATGATGATTTGACTGTTGGC  
CAAAAAGATGCTATTGAAAAAGCACTCCAAGCAATGAGA ACTAAACGTCATATTACAATT  
CGAGGGCCTGCGGGCTCCGGTAAGACTACTATGACCCTTTTCTGCTTGAGCGTCTTTTC  
CAGACCGGCCAACAAGGTATTGTTCTCACAGCACCTACGCACCAAGCAAAGAAAGAATTG  
TCCAAACATGCCTTGCCCAAGTCATATACTTTCAGTCAGTCTTGAAGATTAACCCAGC  
ACTCTCGAAGAAAATCAAATTTTTGAGCAGAAAGGTA CTCTGACTTCTCCAAAACACGT  
GTGCTTATCTGCGACGAAGTATCGTTTTATACGCGCAAATTGTTTGAGATTCTGATGCGA  
AATGCTCCATCTCATTGTGTTGTTATCGGCATTGGAGAGAAGGAGCAAATTCGGGTAGTA  
TCAGAAGATGATACGCATGAACTCAGTCCATTCTTACAGACAACCGATTTGAACAAGTT  
GAATTGACGGAAGTAGAACGTCACCAAGGTCCAATCGTTGAAGTTGCAACAGAAATCCGA  
AATGGCCAATGGATTTATGAAAAGCTTGACTATTCGGTACTGGCGTATAGCAATTTTCT  
ACGGTCAAAGATTTTTCTTTCAA AATATTTTCGAAAGAACAAAACGCCCAATGACCTACTT  
GAAAATCGCATAATGGCTTACACAAACAATTCTGTTGATAAGCTAAATTCGGTTATCCGC  
AAACAGCTATATGGAGCAAACGCTGCGCCATTCTGCGGATGAAATATTGGTCATGCAA  
GAACCGCTCATGTTTGACATAGACGTTGGTGGCCAAACTCTAAAAGAAGTCATTTTCAA  
AATGGGCAAACGTAACGAGTTATAAACGTTAAACCTTATCGCGAAACGCTTAAACCAAAA  
GGTGTGCGCGAAATTGAAGTCGAATGGACACTGCTCGAGTGTGAATCTTATGTAGAAGAT  
GAAGATGGCTATAGACGAGCGTGGTTTACGGTTGTTTATGACCAAAAATACTCAAAAATGCA  
ATACACGAATTTTTGTCTATTATTGCTGAAAATTATAGAAGTCGTGAAGTTTCCCAAC  
TGAAAGACTTCTGAGCAATACGCAATACTTTCACCAAAGTTCGACCCTTGGGTGCAATG  
ACATTTTATAAATCACAGGGTTCAACATTCCATAATGCATATCTTTTTACTCCGTGTTTG  
CATCAATATTGCAGAGACCCGGATGTTGCACAGGAATTGATTTATGTGCGGAAATACTCGT  
GCCCCACAAAATGTCTGTTTCGTATAAGTATCCTGATAAAGCGATTTATAGACCAGGTCA  
ACTGGTCTATTTTATCAAAAACGGGTATCGCCATAGCGGAACCGTATTACAATACAAT  
TCGGAGGTTATCGCATATTCAGTGATGCTTTTGATATGGTATTGCACATTAACCCAACC  
AAGTGGAGAGTAGATTAGTATGAGCAAAGTGACAGCTTTTATTATTGCCTGCGAAACAAT  
GGTCAATGCTCCTGATGGTGCAGTAGTTGACCTTGCTGTTTTGTTGTTTGAGCATGACCC  
GTACAAACTGCCTACGTTTGAAGATCTGTGTAAACGCGGGCGTCGATTCAAATTCATCT  
CCAAGAACA AAAAAGGCATGAGATTCTTTGACCAAGGAACAATCGATTGGTGGAAAAAAGA  
AGATGTGCAAGCTCAAATGCATCTTAAACCATCGAGCGAAGATGTCAGCGTCATGGAATT  
TTATGAAAGCTTCTTGTTTTTCTTGCAGCACAAGGGTTTGACAAGAAAACAGGTCAGGG  
CTGGTGTGCGCGTCACAGCTTCGATTTTCTTATCATGATCGAGGTTATCCGCAAAATTTA  
CAACGCTCGTGAAACATTCAAATACGAACCATGTTTCTTCTGGCAGCAACGTGATGTTTCG  
TACTACTGTAGACGCTACTCTGCTGATGCGATATATGACCATGTGTCTATGCCGAAGGG  
TGTGTTGGATGGATTTGTAGCTCATAACGCAATTCACGATTGTGCCAAGGCTGCGCTAGA  
ATTGCTTTATTCCAAGCGATATGCTCCCGGTCTCGACGATAATCCCACCGGTGATGATGT  
TGACCCGCGCAGTGTCCGCAAATGATAGTTGCTTTTGGAGAGGGGTTGAAAAAACCCCTT  
CTTTTATCGCACATCACCTGGCGAGATGACAAAATTCAAAGGGCTTATGTTATTAACGGG

GCATGGGAATTTAACAGGGTTAATGGAGTTTTGTGTGTCGAAGGTGATGTTAATTCTCCA  
ATAGAAGAATGACAAATTGCAATAGATGTTCTCAGGCGTTTGTAGTGGTGATTACAAT  
GTAATCCTCGAATGGGCTAAAAATGAGGTATCAGAATGATTTACTAGCATTACAACGCAG  
ATAGCTTCTGGGGTACAACGATCCAAACAGCAATGGAAATCCGAAATCGGTTGAATTCAA  
CGATGGTTCTGCGGTTTGTCAAACGAAAAGATTATAATGCGCGATATGAAGCGTTGACTA  
AATCTACCGGTGAAATGCTTGGGCAAAGCATCCGACGGCCAAAACCTGGGTAGCAAAC  
CGAATCCTTTCAGGGATGGTGTACTAGTGAAGATTCGAGAGTGAAACAAAATTGCGCTTG  
GCTAGCATATCACTTCGGCTTGGTTCCAGCAAATGCTTGCAAATATGGCACTCGCGGATG  
TACGTTTGCTAACAATAACCCGCACTTTCGATAATTCATTTCAACTGAAGATTTTTGTGC  
TATTTTGCAGAGTCGCACGACACTGCTTCTTAAGGGCCGCGAAGTTGCCGTTTCATGATCA  
TGACAGATTGATTTACGGCTGCTTGTCTGGGGCGGATGAGCGTTTTATCAGAAGTCGAGA  
CACTCGAAAGCTGAAGTTTCAGTTTTGGCTATCAAATCAGCGACTCATCATGTTTTGAA  
CCGGGTCATCAACACTGATTTCCGATGGATTCAACGAACAAAACGAGGCCCGAAATGGAT  
CAGCAAGTAAATGAAGAAGTAGTTGTTTCTCTGGATATTGACGGTGTCTCAATACGCAG  
GATGATCACATAGAATGGAGAACTGACAAGAACAGTCACCTGTGTCTGTTTCGCCATAC  
AATCGTGGCGATATTGTCAGGAACCATAGACTCAGTTTGCTGAGGGAATGGCTAAAGAAA  
CATGATGCTAAAGTGGTTGTAATTCGCTCGTGGGTCGTTTTGCGTGATACTGGAAAAATG  
ATATGTGATTTTTCTCGAACTTCCGTATCATTCCGAAGCATACTGACTGGCGGTGGAAAA  
TCTCGTGGCACTGGTGTCTTTCGTCATGTAGCCGATCATAATATCCATAGATGGGTGGTG  
TTGGATGACGCCAAGTGCATGCATGATCAGATGAGGTCCTACTTAGGCACCTGGTTCAT  
ATCAAAGCTGGTCTCACTGAATCATACTTATAAGAGGCCGACTTCATTCCGTGACACCTG  
GTGGTCCCGCACCCGAGAGTCGTCTGGGAAACAGCATAAATAAAAAGTCAGTTGAATTGAT  
AAAACAACACTGAGTGACTCACTGGAATAAAAAGAACCGGGCTTCGCCCGTCGTGCTTGCC  
GAATCCAGTTTGGCGTTTCATCTGATTTATATAGGAGCTTTCGGAGCCCCTTTTTTGTT  
TTCAAACGAGTGTACAAGATAGTGCTTCATCATAAAATGACTTCAGGTTCAACAACACTAG  
GAGTAATGTTATGATTTACGCGATTAACAAATTCGGTGTAGCATTGCGATTGAAGCCAA  
CATATGTGCTTATTCGATTGCTTCTAGAGGCTGCCAAGTTTTCTCGTGTGCTGACGATAT  
GTATGCTGCCATGGATCCTCAGGTTGTCGGTTAGGAGTATCACGTCAAGCAAGATGGCGA  
TGCTATTATTTGCGAACTCGAACAGACCAACGTTTCGCGTAGAAAAAGATTTTGCTGAATT  
TATCTCTGAGTACGAAGTTAAGTGTACAACACTGATGTGGCTATTTTCATAATGGCCACATC  
AAACAACATGGAGTAATGAAAATGCGCATTTCOAAGGATTTCTTCTCGACGTAAGGTT  
TTCAAACAAGGTTTCTGTTGTTGAGAAATCCCTCGAAGAGCATCTCTGCTATACCACTGT  
TCTGTATGTTTTCGAAGGCAATACTCGAAGTGCTGTTCTCGAACGTGTTATCACCGCAGA  
ACGTACCAATTGGGTTCTGAAAGAAGGTATCTACGAAGAGCTGAAGGGTAAAACCTGATG  
GGGGCTCCGAATCATAGACTGCTCCTATGCGAAGAAAAAAGTCATGGAGTTGAAAAGGAA  
TTGTATGACCTTTTCATCGAAATGAACTGTTTTGGTGCAAACAATCAAGACACTTGGGGC  
AAACTCTTAAGACTAAGGCATACAATGAGTCTCAAGCTCAAATGGCCGAGTATAAAGAG  
AGAATTCGCAAAATCATTGCGACTAATTTTCAGCAATCTGTACGTACGCGTACGAGCTG  
ATTGTTTTGAGGGGAATTGTGGATGTTTCCATGAAACGTGGACAATGACTTTTAGTGAAA  
CTGCCATACGAGTAATAAAAATGAGAATTCGTCTTGTGCGATAAGTAAGGTTTCTTAAATG  
CAAACCGCCAAGACAGTCAATCCTACAGATTGGCGAGGACCATTGTTGAATTTGCAGAAT  
GGAGGCAACTCTGTGTTATAGGCAATGATGTTCCCGAATGGCTTCTCAATGTCTACGGTC  
CATGCTGGCGCGGTAGAATTTCTGCAAACACTACAAACAATATTTTCGAGCTTCAAATGAAA  
CTTAAATTGAAAATCCCTCTCTCCGAATATCAACAACGTTTTTGCATAACGGAACGGCAG  
AGGCTGTGGGCAAGTACGCTTAAACTGAAATCCAAATCTGGAGAACTTGAAGTTCTCGAA  
ACAATGCCGGACGGGACATTGAGAACAATGCTACTTTCCTTGGATACCACATTGGAATT  
CCACTCGAAGAACAACGATATTTTGAATTTGAGGAGCAAAAATGATTGATGACGTTAAAA  
TCGATATGACTAGCAGCTTTAACGCTAGCATGGCTGTTCTCCAAGATCAATGGGTTTTG  
TGCTGGCCAAGCTGATGGAAGAAGTAGGTGAATTAGCAAAGTCGCTGAACCAGCCAGATC  
GGTGCGATGAACGCC

>NewGenomeName\_135

CTCTCTCGCTGCTTAATATACTTTTAAAATCAAATGCCTGTCAAATGGGTTTTACCTATC  
AATAACATAGCAAATTCCTATCAATGGAGTACAGTGTGGAGGATGTTGTACGAATATGGT  
TAGATCTTTTACTTGGTGGTTCGACTATCTGGAGTTTGACAGTTCATAACAATGGCAAAC  
AATAAATACGACGTACTAATCCAAGACAAATACTTGGAGGGTATTACGGTCACAATAGAC  
GTGTTTCAGCGTTTTGGTAGCGTTTAGTGTTTCGAAATCGTGTATTACAACACTTGACTAAG  
AAAGCTCTCATGGTAGAAAATAGAGGACGCAAAGACGTGCTTGGAGACTGCCAAGACATT

ATTGATTCGGCTGTACGTGAAAAATATCTAGATGCCAGCGGCAATACATTGAATGGGCA  
AATGCACGAGATAAGGAACTAAACATGGAGGCTATCCCAAATGGATGATAACCTAGCAGC  
TATGTGGATTATGATCAAGATCCTGTATATGATAAAAAAGAGAGGGCCAATTAAGGCCCT  
TATCTTATTCTCGTTTGCAACACTTCGGAGGTGGCATTAGCCAGCGAAATATGGCTAACG  
CTGTCATCAAAAAGAAGCCTAAGACTCCTACAATGAACCACAATGTTGGAACATTGGTCT  
GCTTGGTTAGTTGGGCTTTATTCCCTAACGTGATCCGTACCTACTACATTCACAACCTTTT  
CAGCTTTCACCTCAATATTAGAACCCATAGAGTAGTCTTTATCTCCAATCTGAGTATCTA  
CTTGTTAAGCAACATTCTGGGCAGGAAGTAAAACACCCTTAGCCATCTCTCCCGGAGACA  
GAGAACTACACCCATTAATAGATAGGACCAGCACTAACCCGTGTCGAGACGAGTAAAAATG  
TCATCCTGCTTGTTACGTAGCTCATCAATATCGCTCCGGTATTATCTCATCTCAGTCTGG  
ATAATTACGAAGTTCTCATTATCTTTTCGAAGTTCGTAACTAACGCCCTGTTCTCTGAC  
TGTTGGCTTGGCAACTGACGGACCTCAGTTTGAAGCTGACCAACCTTATAAGACCAAGAA  
AGATTAGTACCACCAATAGCCACTCCAACAAAGAGGAAGGTACTAATTAGAGCAGACTTC  
CAGTCGTTTAGCATAACTACCTCCCATAACCGTCCAAATAAGCGGCAACAATATTCAGGCA  
CATAGAGTAAGTCTTGGAGTTATCGACCATGCCTGAGCTTTCGTAGATTTGGAGATTACG  
ATCCAGCGGTATCCCTTTATATTAAGAGAAAAATTAGAAGTGTAGACCTTGCGGTCATA  
ACATCGGATAAGAGAGAGTCCCAAGGTAGGGCCATCTCTAATGTGGAACGGTGCGAGTAA  
GAACAGAGTCATCACCATGAGTTATATTGCACGTTTCATACGTAACCTCTATAGTATTGT  
TCATACTTACCTAGCATATCCGAAGGGTCCATTAACCTCTGGAGCACCTTCGTCAACCTTA  
CCAGATTGTGGATCGTTGTAACGAAGTCTGCAAAAACAGTGTTCAACGCGTCCGGAGTA  
ATAACTCGTTGTCTAAATTCATCGAAGGCTTTCTCTTCTTCCCTTAGATAACATCACGGTA  
CCTTTTGGAGCACACCTCGTAGTGGCGCATGCTCTAGCGCGTCTGCCTGCTGGCGTTTA  
ACCTCAAGAGGTTCTTTCGAGTCGATAGGACGTTTGATTAATTGTTCTAAGCACTGTTGA  
GGAGAAGCAGCAAAGTCTGCCAAATATCAGGATTTTCTTCCAATACCTTGTACGTATCA  
ATCAATCGAGACTTACCATAAATATCCTCCACACCGTTAATAAACACTTACTCTTTACCA  
GCAGGGCCCGTGTACATACCACCACGGTCTCGCTCGAGAGGGTATTGTGAACTATAGTAG  
AACTAATCTGGCTCAATATTCACTAGAATCTTAATGTCATCTAGGTTGTCCATTGTTGCT  
ACCATACGTACACCTATCGCACTGGTAACTACATGTAGCGCGTGGTCGATAGTGGTTTTC  
ATCCACTCTATATGTCGTGCATAAGTAGCTTTGTACTGAGGAGTTAACCATCGCCTAATG  
TTCTCTAGTGTAGACCACAAATCTCTGTCGATAACAGGTTGTGCAGTAGCAATATTATTA  
CGAATCATATCTAGGTTATATAACCGCCCCACCTTGCTTGTGTTGGAGCTAGTGTAGTA  
GGAACAACCTTCTCAGTCTCTCCCGCCTTTTCACTCTCTTTCTCTTGTTCAGAGTTGGCA  
GTAATACCCACCATTACGTTAGTAACCGCACCATAAGCTCGCTATAAGCTGTATCCCAAG  
TTCTGAGATTTAGTCATTAGGTCCGACAGGAATGGGTTGCTCGGAATCAGTGCCTTAGCT  
CGTTCGTCACCAGCCATAGACCACGACATGGATTCCCTAATTGAGTCTGGAATAACGTCG  
TTCTTGGCTAAGTAAGTTAGGCCACCATAGCTCTGGTTACCACACGCTGTCACCATTTCC  
GCAGGCAAATCATTCTGAGCTTTAACCCATTTTCATAGGTGTCTGGTCACTCATCGACGTC  
TTCATGTTTTGTTGGAACGTGTTAACTTGTAAAGTCAATAGTTTCAAATGTGTCTTTAGGA  
ATCGCACACGGTTTTGTAGCAGACTGCATTGAGGTATTCCGTAACCTGGACAGCAGCCCGT  
TCTATTCCAATCTCTAGTGCACGTTGTTGGTCCAATCCAATGAACCAGCTGGAGAGTTG  
AATATGGTTCCGAAAATATCATCTTGAGCACGAATAGTGCCGTCGTTAACCGCCCCATAA  
ATATCATCTGTGAAGTTCTCAACATTGAGTTTACGAATCTCACTCTGACGCTGTGATAGA  
ATCAAGTTCATTGCAGTTTGTGAGATAACCCGAATTCTAACTGAGTCTGTGTTACCTTC  
ACACGATAATCATTACAGGGCTTTCTCTTCTGTAGATAGTTCCATAACTACCTTACGCAA  
CTCGAACTACATGGACCGATGCCAGACAAAGTAGCACCACATACACAAATTTCTTAGCA  
AAGAATGGATATCAATTGATAGCTTCTGTCATGATGGCACGGGCTTTAACGAATGCCTCA  
CGGCGTTGCATACCAGCTTTAACCTTATCTGCTAATCCACCTATACGGTCTAAGTACGGT  
TGAATCTCAGTATCGATTTCTATAACTTGTGGGTTATCTAGAAAGTTTCGAGTATCGTTA  
AAAACACTCTGAGAACTACATCACCACCAATCTTGGGCCCAACGCTCCCGACGGCCTGC  
ACGAGAGGTGCGAGAGTATCAACTTGAATACCAGGATGAATTGGAGTGTGATCAGAAGCA  
ATTGCCTGAATAGAGTTGCTTGTGTCAGATAGATTAGTTGCAATATAACTTTATTCTCCG  
AGTAGTGTATCAATTACATCTAACTTCGAACGGTCTGATGAACTGTGGAAAGAATCACCG  
GAGCGAAGTTGTTTACTAATCATGTTGCGAATGAACTCTACTTTTGGTTTCGCTACCACTT  
AGCACCTAATCAATTACAGCTTGACGTACTTGGTATAATCGTTCCGGGGTCATCTGCAAGT  
GAGCTGTCAACCTAGTTCATAACTGAACCAGTTGATCTCTCTCCAGCCTCGTCGTCATAA  
TCCCACGCAATAGCCATTTTGTAAATAAGGTTCACTGACAACCTGCACTGCCGTACGTTTT  
AGGTCGCTACGTGCTATCACTGAATCTTGTGCCTCATAGTATCACTCACAGACTGTGGA

CTAAAGCCCAATGCTTTTTGGTAAGGCTTGAGCCCCACAAACTTCTTGCTGCCACAATGGT  
TGTCGTTAGCATTGATGATTGCTTGTCGTTATACATCCACCACGCACCGGTTGGGTTA  
CGAGTTGATGTTGTAATATCTAACAATTATTCGCCCCCTAAACTGAACCTTGTTTACAGCA  
TCTGTGAGTGTAGACCGTCCGGAAATAACGCCACTTGGCCATAAACATCATGTTCTGC  
AAGAACGCAATCTGGTGATTACGAGAGCAAATAACGCGTCCGTACACACGGCCTGCCGCA  
CCTGCCGCTAATTCTGGTAGTGAGTAGTCCCCACAAAAGAATCTAGGTAGAGTCTCCTCT  
ACAGCATTCAAGTTTCCGAAGCGAGTAGCAAAGTCTGCATCCACGCCAAAGCCTCTTATA  
GCTAATCCAGTACATCCTCCTTTCAAAGTTACTATCACCATTGGGTTTAGGTCTTGTGGC  
TCTATACCTGCCACGATAAATCAGAATCAACTAACAAAGTTACTTTAAGGAATACAACCA  
GGTCCGCACAGCATTAGCTGGCCTGTCACTAGATTAATCTTACCTTGGGTGAACAGGGTA  
GTGCCTAACATAGCCTCGATAGATTTAGTAGCAACCTGGTGGAAATGGAACGGAATTGAT  
TGCCAACCTTTCAGGGATCAAGCACGGTTAGATTGTGACATATTCAAACGGAATAATTCT  
ATACGAGCAAGCACTTGTTTCAATGTCATATCGTCAAACCTTAGCTCCCTTGTTACCTGCC  
TTACTCTTCGTAAGAGATACCAAACGAGATACGAGAAGTAACCAACTCACCTTGTTCA  
AAGAAGAATCGACCTTTCGCTATGAATCGGCTCAAGATGGATTGTGTTACTGGTATGCCA  
CTAGCCGCAATACGGTAGTCACCTTGACCAGTAACAACAGTATCGTATAAGCCTGACTTC  
TTCCATCCTTCGTAGAATTCACGAACATCCGGTAAAGTTTTCTCACTACGTCGTAAGTGA  
CTCTCAACGATTTCGTGGATCCTCCGCTAAGTCTAAGAAGCGTCACTTAGGCATTCGATCA  
AACCTTTCAGTGAGTGTTGCTTACTGATTGAAGCTTCTACAGTAGAACCCATAGCCTGT  
ACCAAGGACTGAGCAGGTGACAACAAACCTAGCAGTAAGTTAAACGCAGCTCCTTTGATA  
TTCCGAATTGGGTCGGATTTGTTAAAACGATATAAACCTTCTGCCATTTCCGGGCTTGTC  
TTGCGGTTTAGATACTCTGCTAGAGCAATCGCCATGTTGGACATATCACGTTCTTCCTTA  
CTCATAATACTCATCATCTGAGTTACCTGTTTCATGAGCAATCATTAGTTTGTGAGGAACT  
AGCGCTTCATCTAGCTAGTCAGCCACAATACCGCGAGCAGCTTGGAAATGCTGGGTTGCA  
ATATCATTACTTAGATACTTACTATCTTTGTTTCATCCACCTGTCGTGTAGTGCCAGTTAC  
AAATCGCTAATCGGGTAACGAGTTGAGATGTTACCGAAGTATTGGCCTAACGCTACGATT  
AGAGAAATGCACTCAGCCTCTACGCCTTCTGGACCAAACCTTGATACGTTCCCTAAGCACGA  
CCGCTACGGAACCTTACCGCCGTACACGTCGATAATATCTGTATCACGTTACAGCAGCATCC  
ATCTGAGGGTCACGGAAAACATTGTTGTTTCATGGCAGGGTTACGTTCTTTAAGAGTCTCA  
GCTTATCGTTCCGGCATCCACTACATTATCAAGGTAACGGATTGTCTTGTTGTATGCACGA  
GTCTTACCATCTAAATTGATTGGAACCTCCTCTTTAACCAAGTGGTAAGCATCCTTGTAG  
ATAAGAGGAATACATCCATTACGACTATTTAGAACCAGTGGGTCAAGGTCACGGATATAT  
TCACGCCTAACGATAGCGTATTTCAAACCCTGAATACCTTTCATCCAGTACTAGTTTGAA  
GTATCTGGATAAGTCAGTTGATAACGTGTCTGGTAGAAACCATCCAACATTTACCAGTC  
ATGTCAGTGATGATTCGGTCAGGAGGGGGGTCATACACATAGTTCTCGTTACGAGCTTGG  
AAACCTTGTATTGCACTGGTAGCGACTTCGTTAGATTTAGAATAAGCAGACTGTTTACCA  
AGCTGTACAGTTTTGTTCCCATAGCAATTAATCTGTCTAAATAAGTCCTCATTCAATATC  
GGCCACCCTTGGTCAGCAATCTGGCGTATTGTGTGTCGACGATTTGAACTCAGAATCATT  
CGTTGGGGTAAATCAGGACTGTCACCTTTCACTATATCACGGTAGGAATATAACCACATCA  
TTCAGTGTGCCTTTCTATAGAATCAGATCTAGCTATTGTAATCCCTCTATATTAACCCCT  
ATCATACTTCATTCAATAGCTTTTTGGTATCCACTAGGAATCTTAGCACGTTGACCGGAT  
AAACGAGTGAATGTATACACACAGAATGCACGGTCACGGTATAGGGACGTGTTTGGACTC  
ACTACCTTAGCCATTGTCTGAGCCATTATGCTAATCTTGTCTGTGCAGAAACCACCAT  
ACTGCATCTTGGTTGACTCGATCATCTCTTTAGTCACGTTACGTAGTTGTCTTGCACCA  
GTCATAGGGTTACCAGTGTACGTTTGAACCTTCTCACCTTATCCGTAGTTTCCAATGTC  
AGGTTAGATACTTCGTGTCGCTCCCCAATACGCGCAGCAATTTCTCAGCGAATGCTTGT  
TGCTCCTGTGGAGTCATTGGAACGCATTCCCGGACTACGTTTCGTAGTTTTCAGCAAGGATA  
GGATCAACAGTTGACCAACGTTTCTGAACTTCGTGTGCAATCTCTGGAGCAACACCTTCT  
AGGATAACTCCCATATCTTGAATAGGAGCAGCAGTCGTAGCTGCATCTAAACGAGACATT  
GATACCGCACAAGCGGCATCCTCCGTACGCGAGGCATCGTATAACAACGGTAGCGGCAACA  
TCTTGATCGTGTGCTACATTCCGAACATCAGACGATCGACGTTTTTAAAGACGACACTGCT  
TTGATTCCAGTGAATCCTAGAGTAGCTGTATCTACCTTATCTAGAATAGAAGCTAGTTGA  
GTGTTGGATTCAGTCTCTACGGCAGTAGCAGACATTAGGAATACCATCTGTTGGAACCTCT  
TTATCTTCTGATTCTTGTGCATCTTCACGCAACTCTTTAAATTCACGAACATGTTCTTTA  
GGAGGTGATCCACAAAACGTTTTCTAGGTCTGCTCGGACACCACCGGAAGTCATAACC  
TTAGTGAACCAGTTACCTGCTTCTGGAGTGACTGCCTGTAGGGAATCAGCAGATGGAGCG  
CTGGCATAACCCGGTAAGAACATAGCAGTTAGGGCATCCAAAGAAGTCATAGTTTCCCAC



AAACCTTCATCCCGCACCTCACCGATTTTACGACGAACCCATAATTGAGTTGCAACATCT  
TCCCGTTCTTCTGGAGTTAGGTTAGTGTTTCAGTGAGTCTACATAGGCCAGTTCAGCACCT  
AGTTCACGGTTATAACCTACAGACGCATCGTTAGCAATCTTAGTCAGTTCTGCAGCAGAG  
TTAGCTAATACTTGTGGATTATCTCCAGCTAGCTCATCAATAGCCATTGCTGTACCAGTT  
ATTGCCGCTTCCTTAGCTTCTTGTAGAGAGTTAGCTAGACGGACAAATGGGTCAGCATT  
TACGCTTCCATGTAACTTTTCAAAGGTCGTTATGACCAGTACGGAACTTACTAGTGGAT  
TCACGAATAGCTAGCTCTTTCTTAGATCAACTACGTACAAATTGTTGCTCTTGTCCCATT  
TCGAGTGGATTGGAATAGACAAATTCTTCTCCAATTGGCATCTCTTAGCTCCATATATGA  
TTCTATAACGAACTGACCGAAGTGAGCATATTGCATTCCAATGTTAGCAATATCGCCGGC  
CGTATTAGCTCGACTAGATGCATTAGCAGCATTTTGAGAATAAACACGAGCTTCTTTAGA  
TAGCTGACGGGTTTGGGCTAAGAACTCAGGCTAGCATTAGTGTGTGAGCTAATGGACGC  
TACAGCACCTGCTTACCCGAGCGACCGGACGTACCGGTTTGGAGCAGCATTATTCTCAAT  
TCTTGTCTCGTTGGATTCCGGCTTGTGTAAGGCAAGGTTACGTCTACGGGTTTCCTCAAC  
ATCTGCAATCCGACATTGGACATCTTGTCTGTTTTCGTTGTTCTTTAGATGCTTTGCTAGA  
TTGGGCATTGGATACGGCTGTACCAGCGATATCCGCACCAGCAGCAACAACCTGAGCAGC  
AGCTACAGCAGCGGCAGTTGCCATATCACACCTCCACTAGTTTACTGTAAACGATGTTAT  
CAACGTGATACCCATAGCTCTCTATCGAGGAGGTAGTGGGAGTTAAGCCAATGTGGAGAA  
CTGTTGCACTGTACCCCTGTACGGAACTTTCAGCAACATCCAACATTCTCTTGAACACCG  
TACCACCGCGATAATCTGGTTTTAGGTTCAAACAAATGGTAGATGCTACACATTCTTTGG  
TGAATTGGTCTTTAGGAACTACATTGTAATCACGTATCCGGTTGGAGTTTCTAAGCTC  
TGCCACAATGGTTTTCCATCATAACCGCCGCTAGGAGAGGATAGCAACGTTCTAGATGCA  
ACTCGAAGACTGATTTAGTTGAACGAGGTAAGGCTCAAGGAAATTATCCTCAGACAGAC  
CACTAATATACAATTCCTCACGAATTTTCAGGTATACTTTCCATGTAATGTTTATCATAAC  
CTTAGTAGGTCCACTCACGGTTACTGCGCAGCCTTACAACCTTATAATCCTTGTGGCTC  
TGTTCTGAACTCAAACCTGGAATGCCGTTCCCTGAGCCTCTAAGTCGCGCTGTGGCCGTGAT  
TACTGCATAAGGGTACACATTGATACCCTGTTTGAATTCATCGCTCTACGGCAACGGTA  
GCACTGAGTGAGACGAGGAGTATCAGTCCACTGCTTGCCCGTAAGATAGTCGGTAACGTC  
CGAACTAATACGTAACAACATGTTAGATTTGTGTGCTCTCGTAACTTCTCCATGTACATC  
TTTGAACCAAGTATCAGTTCTCATCATGTGAGTTGCTAGGCGTGTAATTTGTGCACGGGG  
TTGAGTATCGTCTAATTTCTGTGGAGCATTAAACAGGTAAGCCTATGCATCAACTAGGCC  
GAAGACTTTAAAGTAATCTCGGTTAAACGATTAGAATCCAAACGAATCATCATCACTTTT  
GATTGTTAGATACTCAGTATCTCTCAACTCTTCATCCCCGATCCTACGTCCCAATGGTAC  
TGTAACATCAGAAGACTCTACTTTAACTCTATCTATAACAAGCAACGGTAAATTAATCACT  
AACCACCTTATTACCAATATCGTTACGCTCTGGAACATATCCGGTAACCCTCTCTGCTAC  
AGTAATGTCACTCTTGAACCGGTTAATGCAGAATGCAACATAACGTACGCTTAAGGTAAT  
CTCTAGGTAGAAGTTACTTGGATTGGCATTTCCTACTAAGTCCAGCGGGCATTTCCTACC  
TGAACGTTCTTACGTACATAACCGACTTAACCTTACTGGAAATAGTTATCCCATTAGATAA  
TGATTGAATCGTTAGTTGTGTTAGATACTGTGCAGAGTGTTTTCCAGTTGTTTGGTCTGG  
AGATAGGACAATGATTCCTTCCCTCTGCCCAATAGAATACGGTATCACCATCTGCCACTAC  
AGAACATGGAGACACACAACCGTAGTCAGTATTCTCGGCTACGTGATAACCAGTAGCAGA  
CAACAGACCATCTTACGTACCACTCATCAACCCCACTCCATTTTCAGCAATGATGAACAG  
ACCACTGGACACTTCTTCCAGTCCAACAATCTTACGAGTTGCGTTAATTTTTAAGAGAAC  
ACCGTCTGTATCAACAAGAGCACTGTCTACTTCACTTGTGGGGTCAGCAAACCTGATAACA  
CTTGTTAATCTATGCGTTAGATTTAACTATCTGAGAGAAGAATACGTGGTTACGGAAAGC  
AGGACGTACATCAATTTTGTCTGGGGTTGCTTGGAAATCCTGCATAGAATACCCGACC  
TGCGAATGTTTGAACGCGATAAGGTTTACCAGTAGCTATCACTTGTAATGACGCTACCGT  
AGAACCACGAGGTGCAGGAGTGTTTTGACGTTCCCTTACCGGTACCCGTAGTTATGCTGAC  
TTTTCGTCCGAATTGGAGTAACTTTCCAATTGCGTTTACGTCTGTACCAGCAGTTGTTTT  
AAATAACCACCAAATCTGGTACTTACTTGGATAAGCACCGATTGTCGCATAAGTTGAGTT  
ACTCTTTTTACTATCCCAACCTTGGAGTAATTAGCTCTGACCGATAATCTGACGATAGGGT  
TTTTGGCCGTTTCGTTACTTGGAGCCGAACGTCCCCACACATCACGAGTTTCAAAGAAGT  
AACCTTTCTAACTAATAACGATTTAACTACGGGCCGTGATTGAGTCTGATTGAAAATCAAT  
AATCTGGAGTGATATAGGGTCTCCATCCTGAGTTACAATTACAAAGATAACCTCTACCGA  
AGCGCTACTAATAAGATCCTCTGTTGTACCTTCTGTGCTTAAAATTTCTTGGGTGTTTCAT  
TAACAATTTCCCGTTAGATAACGGGTCAACAGAAGTATCAAAGAAATTTAATTTATCATC  
GAACTGTACTACGAGAATCTTAGAATGGCACTATAGTCAGTTTGGCATAACGTGAACACT  
AGATACTAAAGTTTGGTCTGAGAAGTCTACGTAGGAAGGATACACAGTACCTTAATCTTC

CAAACCCAAACTTTTTGCTTCTTGCCCAAGCGTTAGCTTTTTGTGAGAATGAAGTTCTCACC  
CTCTCTGAAAGAATCCATACGCAGATTTAGAATGTTCCCTTATATGATTAGACCAGACTG  
AAACGGATTGTATTCTCGATTAGCCTGTCGCCTTGCCATTTGATTATGCTCCTCGTTTTT  
CAGTAGCTAGGTATTGTTTGATGCGTTGCCAGGCGAATGCTCTCGAGATGTATTGCCCTT  
TAAGAACTCTGGTAGTTGACCACCGCGTCTAACTTAGTTGCGTATAGAGTACCTTCGT  
TATCTGTAATCTCTACTTTACAATCCTTTGTTACTGCCATTAACTCTCCTTGATAAAGT  
TTATGGAAAGATGGACTACGACGATTTGGGCAAGTTGAAGACGTTGGTGTGCCGTAATTA  
GGGAATCGAATACCACCTTTGGCTTGCCAACCTTTGCGACTCATATGTCGACGGTGGATT  
GTAGCACATTGTTTCGTCTTTAGCTGAGTCAATTTGTCTAATCTTGGCACTGAATGCTGCC  
TTCGCTTCACTGATTAGGCGTGGGAGCAGGTCAGCAGGTAAGCAATAATCCAATCCTAT  
TGCATCACAACTTCGGACTAATATAAGCGATGCCTAGAGTTTTATCTTTGTGGATTGTA  
GATTCTACGTCTGTGTTGTAGCTATCCAATACAAGATACTCATCATCGAACGAAGTCCCG  
AATTGTGGAGCATTATCGTTTTGGATGAAGTACACAATGACGTAGTAATCACGTACCTTC  
TGTACGATGGACTGACCTTAATTGATAGTAGCTTGGCGAGCTTAGAACTCATCTGGATAC  
ACGTACCTTACCTCAGTGTAAGATACTGGACGCACTTTCATTGAGGTGTCTTATGACAAG  
TTCGTCATCTCTTGAATGTTGTGACCTAGCTTTAAGAAGTTGGGTTTATCCACATCACTG  
ACTCAATCAAACGTACTCCACGACGAAAGTAATCCGTCGTTGAGTAGGTCATTAGGTTG  
CCATACGAAGAACGAATGATGTAAGCCGCTGTAGCGACTCAGTGGTATCATCAATAGAG  
TTGACGTGATCACCATCCGTATCACTCAGCATGCCTTGAACAATATGCATAACAGTATAT  
TTCATTATCGTTTTATTGTGACTTCCACCACGAGCCTTACCAGCTCTGTCACCAGATTTAC  
CACCATGGGAACGGTGGCCACTTCGAGAACGTACTCGTAAATTACGATCTCCATTACCGC  
CACCGTGTTCAAAAGTTCTTTTGTGATCTACGTCTTCCCGTAGCCCTTACGCCTTTTC  
CCTCACGTTCCATCTTCCGACGAGCCGCATTCCCTTTTGCCCGATTTCATCTTTTGTCTG  
GAGTTCCTGGTTCTTGTGCTTCTCCTGTCTGTCATTACGCTTCTTTGCCATTACTGAAT  
CTCCGAGATATTAAGGATTACCGTTTCATCTTGACTAACAACGCCGAATTGACCGGCTAC  
ATATATCACTTTACCACCAACGGACAACATGTAGTCAGTACCGACGGGAATGATAGCGCC  
ACGGTAATCTATAAAATCATTCTGGAATTCAGACGGCCCACTTACTGAGGATTTGAACAG  
AGTGAAGATGAATTGACGACCTCCGATTGGCGTATATACAGCAGATTTGCCAGAAGGGTC  
AATGGAAATTCCTGTTGGAGTTGGAAATGACTCATTGTTGAGTGGGACCAACTCAGTAGT  
CCCATCACCTTTGGCACGTAAGAATGTGTTAGTTGCACAATTAACAGCTCATTTTACTTC  
ATGTAAGTATCCATCTGCAAGATTCTAATGTTGTATACCAGCCATTGGAATGACTCCTTG  
TTCCTAAATAGTAATTTAATTAAGTATAATTCCTTATTGTATCATGTTATCCATTACTTA  
ATTAATACTCGTCTTCCGCCGATCCCTGTCAAGTCACCCTAGAGCAATTAGTTTTGAAT  
CAAAGTGTACACGAAAATATGCTGGTAAAAGAAAGCCCTCCGCAGAGGGCCTTGATATTA  
TTGTTGTACTCGGGATACACCAAAAGTGACACCAGCCTCTGTTGGGATTCCAGCAATCGT  
ATGAGGACTACTGATGATTCCAATCTGTTTGGAGCTGTCCGATGTGTACTGTTTGAATCG  
TACTTTCTCACGATCCACGACACTTATTGGAACAGTGTAATGTATGAGTTAACATCACC  
CGAATCACCACCAGTCAGTATCAGCAATTTTGTAGTTGCAGACACCGGACTCCATGAGAT  
ACCATCCATTGATGCTTCTACATACATTCCCCACACTACCTCTCCGGCACCTCCCGTTGC  
TCGAATGACCTGTACTGACATAGTGAACATTGCATTCACACTAGCGACGTAAGTTAGTAC  
TCCAGATGACAGGTCTGTTTGTCCAAAATAACTGGCAATCTGAGTAACGCTGAAAGTAAT  
TACAGAACCAACGTTTGTGTTCTCAACAGTTGTTTAAACCGGTAAGGAATTAGGATTAGT  
GTAGCTGATTCTTATAAAGTCCTCTTTGAACTCCGGTAAGCCTTGGCTGTCCCATCGATT  
TTATGTGAGGTTATAAATCAACACTTCACCATCCGTTTGGATAGAACAAACGATGAGCAC  
ATTATCTAATGACTCTATAGTGTGTGGGATAAACACAAAAGCACTCGCAGAATCTTTAAC  
CGCCACTAGTTTATTACCCTGCCCTACGTAAGAGTTTGGGCAATCTAACAACCTCGACAAA  
AGTCTGTTTTCCCTAAGGCTTTCATCAACATACTCAACAGTTGCTACTTCCCTTATCTAT  
CCACGGAAGCATCCATAGAGAGTAGGCTGGGACACCAACACTGCTGCCTTTAACGTACAA  
GTCTTGTCCGATTCCGTAAGCTATTCCAACACTAGCACTGCACCTTGTGCTAAATCAACAGG  
CGGCCGTGGAGTGAAGGTAGTCATTACTACAGATTGGCTGCTTCCCTTTTCTCCATCAAC  
CACGATAGAGTTCTTGTACGTTAGTCTGAAATGTACGTTAGGAACCTCGTTAGTGCAATA  
CAATCCACTTTTAAACACAGTCTCACTGTATAGAACATTTACGACAAATTCACGGTTGGT  
TAGACCCTCAGATACGTTTGTAGTTCTAACCACGTATTCGAGAGGGCCATGCACTCGCCT  
AACAGCGGTAAACTTACTGTCAGAAACACCCACACCATGCCAAGATGTGAAACAAGA  
TCTTCCCTGTGGCCTTGTTAAAGAACCCTACGATCTCTCCCATACGACCGATTTTATGTAC  
GCCCTATGACACTGAGTTAGATGAAACATCGAGTTCACCCTCAGAAAGGGTGAATACACC  
AGTGTCCACGAAGTTCGAGGTATCCACATCCCACTTAACCATCTGATTGTCAGAAACTCC

CCCATCAATTACTGATTCTATATTATTATCAATGCTATCGACAATAACACGCTTCGCCTT  
GCTAACGCCAGCATTGATACTAATATTTGGGTTCTTATCTAGGTCACCTTCAATTTGGGT  
GGGTTAACCCCTGGGTTATCTATGAATGGAGACTCATCATTGTGTGCGTCCTTAATCTT  
CTGGAAATTACGATTAATTGGCACAGAAGTACAGGAGGTAACATCACTCAAAACAATCTT  
AGCCATACTATCTCCCTAGTATTATAATTTTTGACCTATAAAAGAAAAGGGAGAGCCT  
AAGCCCTCCCTTGCATTTCGTTCCCTCCTATCTTAGATTGACCCTTGACCTTTCGCACCAGC  
AGCGGCATCAAGATTGATACCTACTTTCACATAACGAACAGTTACACGAACCTTACCTGC  
ATCCGTCACAGTAGGCGAAGTACCAGCGAGTTTGCAGGTAACCTTCGGTATCAGCAGTTAA  
AGCACTTGCCCATCTACCTTCTGGATTTGGTCTAACAACGCCCACTGCTTCCCTTTGCGC  
TTCTATCATTTGATCACCGTTGGTATCTTCTGAGCCTTAGGCCCTACTGCAATAACAGG  
GTCAATACCACCAAGAGCAAACACCTCGGATACGTGAGCATAAGCATCAACAACCTAAAGC  
ACCTTTAGGCAGAACTACTTTGTTGTATTAGCTTAGTCTTCCGAGAAAGAAGACCCCA  
AATATCAAAGGTCATTTCCATAATGGAACCTTTCGTCTTAATGCCACCTTTTGGTGAGCG  
TGTACCACGAGCCCCATATAAGTTGTGAGTACCGAGGCCAGCAGAAGTTTCAAGACCCAA  
AATAAGCTCCTAAGATTAATCTAGTAATGAACCGAAGGAGGGACAATCCCTCACTCCGG  
TCATATTAATTACTTGTAAAGCAGTCTCAGAAGCGAGCAGAGCAAACAGAGTCTCTTTACC  
TAGGATACCAAGAGCATAACGACGTCGAGCAACGAACCCATCACGGGCAAGGTCTTTGCG  
ACGTTCACTCAACACGAGGAGCTTGACGTTCTGCGTACATTATAGGTTTGGAGTTGTC  
ATCAGCAACACACATACCGATCCACGCAACGCCGTTGGTGATTGTACACCACCTACATG  
TTCAATCAAGATATGTGGCATAACGGTTAGAAGTGCTAATGTTCCAGCCGTACAAGTTGGA  
AATTAACCTCCTGGTCTCGAGCAAACCGCCGTTAAACCCATCTATAGAGAATGGGTTAGA  
GTCGATAGCACTTGCAGCGACTTGGAACTTGGTATTCAGAGTTGAGTGAACGAATGGGTC  
AACAACTCTGAATACCACCACCTAGTGGAACGTTTCGCCTTGTGAGTCTCAAGTTCCATGTA  
CATCTAGTCTTACGTTTCGACAGTCTTGTAGCACCTGTAGCGATACGCTTGTGAGCAA  
GCCGTTAATCTCGTTAGCATCAGCAGCAGTTAGACCTTCGTAAGCTACTTGTAGATAGCT  
AGTTTCAAAGTATTCTTGCATCGCACGAGTAGACTCTTGAGTACGCATTGCCATCAGAGT  
GTCGATTTGAGCACCGTCTTGTGCTTATTAGTCAGTAACACACCAATCATGGCCGTTACA  
GTCAGTAAAACGCGTCTGTAGGTTACCAGTATCGATTGGTTTGTAGAGAAGTGGAGAGTC  
TTCTTCCACATCCTGAATAGTTACCGTACAGACAGTTCTAATGTTTAGCACTTCACCCGC  
AGCAAAATCTAAGACGTTACGATACATCATTGATGGCAAGAAACCATCGTGTAGGGTTTC  
CAGAATGAATTTTGAATATTGTTGAGCCTCAATAAAATGGCGTGAGTTGCCATTATTTTT  
TGAACCAGTAGCACCAGACATATGTAATCTCCTTAAAAGTTAGTGAGCGTGAGAACTT  
CTTGACCACCTCTAACAGCGAAACACATGCACGGAAGGCAGCGACTAAGTCAGGAGTAG  
AACCTGGTGAACCCATTTTGAAGTTCAGAAGTGGCTCTGGCAGGGTCTGAAATTACGCCG  
TGGTTGGGGTAGCTGTGCAAGTAACAGTCGAAGTAGTTGGCTTAGATGCGACATTAAAAT  
AACTTGGAACCTGCTTTAGGTGACTTAGCAGCCAGGTCGTTCAACAAATAGAAATCTACTC  
CTAATTTAGCAGCCTTGGCCTTTAGAGCCTTGGTTCGCCTTATTGCTCTCGCCAAATTTAC  
CAATCAGCGCATTAGTTACTGCTACTTGGTTAGCTTGTGCTTGTGAGCTCGGGCATCACGTT  
TGTTCAAGTAATTCCAACACCGCCTGTTACGTACACCTGCTTGCACCTTGTGGTGCAGTTG  
GTAGGTGACTTACAGTAAGAGACGCTACGACGTCCGCCAGATTGTAAGCGTTCGCTAGGT  
CAGCATTCAAAGTCTCATTCTCTTGTGCTGTATACGTTGGTTTTTCAGCTTCGAGATTAGCAA  
CATGAGATTGAGACTGTGGAATACTAGCTGAAGCTGCTAGAACGTTTGTGCTATTTACGAC  
CTTGACCCACATAAGCCGCGACTTCTGGAGCCATATGAGGAGCCGCAGGCGCAGGTCGTT  
GTACGGGTTGTTATGGTTCTTGTGAGCTTGTGGCTCTTGTGAGCCTGTGCGAATAAATTTGCTT  
GGTCAGCCATTATATTCTCCTTATTTAAATTCCTAAACGTGCTTACGAAATAAATCTAAT  
AACTTAAAGTTATAAGTCAATAACTTCCAGTAAAGTTTTTTCTTTACTTTTATATGCAGC  
CTGTTTGAACCCCAATTAGGTCAGTCGAAACCATCTATTTTGATTTGTTGTTCTCGATT  
CTCAGCGATACGCTGTCTTACAATTTCCATCAGTCTTCCCTGACTACCTTACTTTCAGC  
GAAATCGTTGGCGAACTGTACCTTTTGTTCGCCTTTAATTCCTTGTGCTCCAGACAGTTTT  
GATACTTATCTCCTTATACTGACGGCACTTGTGCTCCTTCTTCGATTTGTGCTTGTGAGATT  
GCTTAACAAGTGCAGAGGTTGTCTGTGAGTGAATAACTGCAACGTTAGGTTTGAATAAT  
CCCAACCACCTAAGCTTAAGTTGTGTTCCAACATTATAGCCGAGTTCTCAGTAGGCACAT  
TAGGTTAAATATTTTGGCAAACCTGGAGTATTAGCCATAGCCGTTAGGCTTTGTACTACTT  
GCGCCTGTTCTGCAAAGTGTGCGAGCACCTACAGGACGTAGACGACGGTTTGTGGAATAC  
CGTCTTTGTTAACGTTTCATGAAAGTTGGCACTTTATCATCAGAGTTAAACACACGAATGG  
CTTCAGCTACGTCTAAATTACGACGAGAAATCTCTAACATCGCATTTCAGAACCTTATCCA  
CTAACATTACTTCAAAGTTCATACTTTTCTCTTGGGAAGATACGCCAGCGGCGTTTTGAA

GTTGTTGAAACTCGAAAGGTGTGTACTCACGGGGAGCATGAATACCCATAGCTTCAAGAG  
CAGCACCTGCAAACCTCTTGGATCTTAGCTTCAAGAATCTGAATTTGCATACCTGCTTGT  
GAGCTTGTGTGTAAGGAGCCATCACCGGTACATCACCATCACCATTGATCTAAATCTTGT  
CTATTGGTCCCAGACAACTGCTCAACATCACCTTTAACCTTCATTGAAGGAAAAGCGA  
TTAGGTAAAACACCGCAGCTTTGAAGTTCCCGAGGTGGTCGATACGATAATGCATACCTA  
CTAGGTTATCTAGTGGTCCAAATGCGTAGAGGTTATCTTGACGAATCCGCCAACAAAT  
GGAAGATTGGAGCTTGTGCAAACCATGATGGATTCTATTTTTCTCGATTATAAACATGC  
GGTCAATGATTATGACTGTCTTATTACGCTTATATGTACCTGACTGAGTATCGTGGTAGC  
CACGATAGAATGGCAGAACCTCAACGTAAGGACTTTGGGTGTAGTAGTAAAGGAAGCCAA  
ATCCGTCCATAGAGCAGACTACAACCTTTTCAGAGTCTTCCCTAGTGTAAGTGCCTAGCC  
CACGACGATACTCTCGTCTAAGAGTGACTCAGGAAGCGAGAGAGGCATTCTCTGGCTGGT  
CCAGTTCCATTTGTAGTTACTCACCTCATTCTACACAGTACGGATCAGTTTTGGAGAGT  
GCGCAAAGTCTACAGCTACGGGATTAATAACAATATCTTTTGGGTCTGTTGCGAACTGCAC  
GAGGACCAAATAACGTATCAGGAGTAGCGCCAGATTCCCTCATCCTTGGTGGTTGCCTTCT  
CATACTGGACGTTGGCAAAAAGTTGCCGTAATCAATGTTGTCCAATAGGAGTTGACTGA  
TGATTGTGGGGAAGTCCGATTCCTTAACCTTGTTATCCATGTATTGCTGAATAGCGTCCC  
GTTTGGCTTCATCCTGTAGGGTCTTACCTTCCCGCTTGAATCACCGTTCATTTAGAAACA  
ATGCACTAGTGTAGTTCGAGTGTAAGTTATCTCGAAGCTGACACAAATTAGGTAAGTAG  
TTTTGTTCTTCCACACTAACGTGCTGTAAGTCGTCTTAGAGGTATCTTTAGCAAAGATGT  
AGTTACGTAGTTCACTCTTTTGACATAACCACTCCTGCCGCTGACTGTTCCAGTTCCTGCC  
AAGTATTAGCAATCTGTACAGCCAGACCATCACTAGTGTCTGTTTAGCATCTGGTGTAGTT  
CGAGAACCTTGCCTGTCATAAATTAATTTCTCCAAACCGAGGGTTAAATTGAATGACGTT  
GCTTTCTCGCTTAGCGCTTGCAGAAAGTTGCAGTGGTTTTACCAGCAATCAGTACAGCAGA  
AGCGATAGGGTCTTTCAAGTCATCATGAGGTGGACGAGCCCCACAAATTCTTACTCTAG  
CATTGGAGTGTAACCACCTTTTCTATCCACATAATACCGGTCTAATACCGTGGTTCCAA  
TACAGCAGCCGAACGTTCTTCCCTTAGACCCAAGCGCCTTAGTTTGTGCGAACTCGTCGAT  
AGTAATCGTCATGCCTTGTGCGTAACGTCTCTTTAATATCGTTTACAATGATTTGCTG  
TGCCACAGGAACCTCGGGACGAAGTTTCTTATATCCCACTTACTATGCAAAGCTGAGAT  
ATGGTCATAGTAATCATTAACTTATCTGTCTTGAAGTGGTCAATATCTGAATCGTAGAT  
GTAACCTTCTGAATCAATCCCAATAATAACGATAGCTGTAAAGTTGGCATTCTTAGATAA  
ACTGACTGCAAAGTCCACAGCAGCACAGATATTCAAAGGTCTGTCCTTAAACGAGTATCT  
ACCTTCGCTATACGTAACGAATAGCTTTTAGTAGTATTGGAAAGTGCATAGTTCAGACG  
GGCTGCTTCCGGGTCTTTTGGGTCAATTGTAGTACTGCGCAAAGAAATGAACACGGTCCGAC  
GTATTTAGCTTTCTTCTTAGCCAGAACACAGTTCCTCAAACCAAACCTCCTTACCATCAGA  
ACCCCGAGGAGTACGAGGCCACACGCATACACCATCTTCTTCTACTACACGCTCAAAAAT  
CTCCCAAACGGGTCTTTCTCTCCAGTCTCTTTCCATATTCGTGCAATACGGATTGATG  
CTGATTCTTCCATGTTTCGTAAATATCAGCTGGATGATACAGAGTACCACAAGCTTTGAC  
ACTACCATCAGCGTTTAGCGTAGATTCCATCGGAGAGATAGCAGCAGCTACTTTGCGTCT  
ACTATCCTCGGGATTTGGGTTATCTGGAAGTACAACGTCATAAGAAATAATAACATCAGC  
GTGCCAACCAAGTGGTGTAGTGGTGAAGGCCAGCAGTCTTAATAGTAAAGTCTCGGATGCC  
TTCCATCTCACGTTTTGGGTGGTCAACCACGATCATACTGGCAGTCCTTTTCTCACGTTT  
ACCCTCCTCCTCATTAATCATATCCGGCCAGTCCCAGGCGATAGATTTTGGGAGTCATGAA  
TTTCTTAAGATCCTATAACTGCATTTTCAGCAAGTTCACTGGTATCAGAGATATACAGAAT  
GGTTGGCTCTGGATGCTTAATCACACACCAAGCTACCCTAAGAGCCATCATTTAAGATTT  
TATGTGACCACGAGGTACAGTACAAGTTGGTTCGTAATACTTCAATCCTCGTTGC  
CACTTCCCTTGTGGACCGCAGCGTAAACGTATTGTGGAGGAACCAATCGTCAAAACATCCA  
GCAGTGAGACTCAGCAGCTTCTCTAATTTCTGTCATCTTACACACTCATACTCCAAGTG  
GTCGTACATAGTCTTCTCAAGTGCATCCTTAACCCGTGTTGCAATCCGTGTCTCACGAA  
CAATTTCTTCTTGAATTGGGCGTCTGCCACACGTTTCTCATATCCTTCTTCGGCATGCC  
ATGTGGCAGCTGCAAATGACTTGGCATCTCGTGCCATTTCCATTGCACTGAGTACACCGA  
TAGAGTGATCTTGAATCTCGGCTTCTTCAATTGCATTCCCTCGTACATAGCGTAAATGCTT  
GGGTAGCCTTAATCTTCTTCTAGTGTGTCACCCACCTAATCCTTCTTCGAAAATTTAA  
TCTCATTTGGGTCTTCGATGTAGATCACGATGAACAGCCGTTTAAATGCTTAGGGAGATCT  
CACCATTGAACATACGGTCTTCATCCTGAATCGTGTAATTTGAGCTTGACTTGAATCCCT  
TCTCTAAAATAAACCCCTGAGTAATCCGTCTACCCATACAGTCCCTCAATTCCTTCTCA  
TTGGACCTCCTTAGTATGGCTTATTATAGGGGTGAGATACAGTAAATACTTTACTAGTCC  
AAAGGGTATTTAATTTAATGGCCTTAACAGCAGGCCGCAAGCCATCTCGGCTTGGGTA

GTCTTGTCAATCTGCCACCCAGAAATAATGGGTCACTACTACTCGATATGCCGCTTGT  
CTACGTTTTAGATTATCTTCATTTATATCTCATGGAACAATTTCCAATGGGGTTCCAAGT  
AGTTCTTCTTTATTCACAAACGTAGAACAGGCTTCATCCCTTACCCATTTACCGGAGCCA  
AGTTCCACGGGTGTTAATCTTTGTTAGTCATAGAATCGCCTTTGTTGATTAGACGACCT  
AACAAATTTACCAGCATTGACAGAGTTAACTTTAGACGTACCATCGACGGCAACCCAGCA  
GAACCTCCCGCCTGCCACGGAGTCCGGGAGACTGGATTCTTGATGCACCGGTGGCTCCA  
GTTGCACCTGCGACGCCAAAATTACCACCATTACCTCAGTTACCACCTCGACCTACGTCA  
GTCCACCGATAGCACCGGCAATCCCGTTTGTGCTGCTTGTGAGAATCCTTGACCGATT  
CCCCATTACGAGCTGCACCCCGGTAGTGTATGTAGTATTGGGCACTGTTATAGTTCGG  
TACATTGCGTTAGCCTTCAAACGCCCAAACCGTACCCGTTGAAGTTGGAGGCATTGTAC  
GTCCACCCTCCACGGCTATACTGATACCGTAGGTAACAACAGTGCCAAAGTCTGGTCCA  
GACCAACGATATATCTCGGAGTTACACCTACGGTGGAAACAGTTACGAGCACGAAAGTGC  
CTTTGGTTCCCTGTAGCGTATGTCCAAGTTCCAGATGATGGGTACGTCGTGTAGATTGA  
GTAGTAAAGAAACCGTTACCACCTGTACCTCCTTTACCACCACCACCGCCTCTACCTGCG  
ATTGTGCCAATGTTTGTAAAGTTAATCTTTTGTGAAGTCTGTACTCGTAAGGCAGAGCCA  
TCAGCATGCCCTACTCCAGTTCTAGCAACACCACTCTGACCATAGATATTACCATTCTTG  
ATGATGTTAATTGTTTTTCTGCAAAGCCGTTTGGAAATCACAATTGCTGGAGTGCTGGCG  
TTTGTTTAGTACACACTCACACCGGAGTTAATCACTAGATTAATGACAACCCCTTCTCTA  
CTACCTACAGCCGTAGCTAGGTTGAACTTGCAGTATTCTGACGGCTTGTGTAAGCACAT  
TCCGGGTTTTGGAATTTTCATCCATTCCTCCGTCTTTACGAACCCAACCAATCGGATATTC  
CAAACCTCGTCCGAGGTTAACTTTTATTGTAGCCTGTCTGTAAGTACCAGAAACATTTACT  
CCAAATGGCATGGTCCCTGCTTATACGTACTGTAGCCAAATATCTCCATCTGCACCACCA  
TAAGGTGCGCTAGACGACACAGTAATCTGTCCCTTTCTCTCGGCGGCTACATCAGGATAA  
GAACGGGCATCAGTGCCAACATCCTATGCGGCTTTTACAACGGTAGTTGCTGCATAAGTC  
GTAGTACTTGTGTGGTAGTAGCACTAGATGCTCCCCCATCGTTTACGTTGCTTAATCTA  
ACCTCAGCTTTAGTAGCCCGACGAGTTGCGAACTCCGGAATGCCTGGAATCCCCTACCAT  
GCTGGAACATAACCAATAGGTTTGTATCTCGCATCACTCTCCCCTTTAGAATAGGCAGTA  
CGTGCTAACTCCAATCCCGTTCGAGAAGCTGCAATAACTTGGGCCATAGTACTTCCTTCC  
AACTTCTCTGAATTTACAGCCGTAGCGGTAGCACCTAGAGCACCTCTTCCGTTGGGGGC  
GTTTTTAAGCCTGTGTGGTAGATTTACCCCATGGGCGAGATTCCCAACTTGTCTTATTA  
CCAGATTTGAAAGATAAAACCTCACTATTCATTCCATACCCGATAAATAATTGGAATGCC  
GTAGCTGCTGGAGGTGAAAAAATGACAATAACTTACCCTAATTTGTTCCCTCTTGCATA  
TTTGGACGGTTGTTACCCAGGCTAACAAACACCAGTTAGATGTGGATAGTGAGTCAAATCA  
CGAGTGTTAGACGACGCAGCTTACATCACACGCTTTCCCCCTTCAGCAGACGGAACAGCT  
CCAACCTATTAGGCAGCGGGTCTATTACTTGGAGAGTATATCCTAACACTACCCTCCTAT  
AGTGGGGTAGATGACACCACTTCATCTCGCAGAATTGTTACTGATGAGGTTGTTGCCTCA  
TGTATTACTCCAGTTCCAATAACTACCTTATTATCTACACCCTGACCAGCATTGGTAATA  
TACACACTGCCTCTATTACCAAACACTCTGTACCCATCGAACTTTGCCACGCCTTGGTTC  
GGAGTAGTGTTTACAGAATCGGAGTCGATGACCAACGAAGCACTCATTTTAGCTCGAGCT  
ATATTTAAGGCTCTTAACTCTGCGGGAGTTGGTTTGTTCGTATCCGAGTTGAACTTAGTA  
TCCTCTTCTGATTTAGAGTGCACAGTGTGGCTTCGGCTAGGCCGGTGACATTACCTACT  
CGACCATTAACGACTGTACTCGAGTGCCACTCTCGACAATAACCCAAGAGGAACCAGTC  
CAAACAATCTGGTCACTGTGCAACACTGTTTCGTGTTTCGCTGTGATTTGTGTAGATACG  
CCATTTGCGTTGTTAGTAACTTGAACATAGGCTGCACCGTTTGGTGATGGGCAAGTTGGA  
GCCATACCTTGGTTGATTGTTGGGTCGTCTGGGTCTCCCGTCACTACGATGCTTGTGGA  
GTGGTAAATACGTTGTCCATTTTTGCCTCACCTTAATACTGATAGGACCGACACTACCG  
GCGAGCCAGTCACTTACCAGAACGTTCTCTAACTCTTTAGTAGATTTAGTTTGTATCATT  
ACGTATTCAGAGTTACTGATAGACCCCTTTGGAGGGGCGAATCTGCGTCGATTACTTTG  
GTTTGAATCTTATCAACCATCGAAATCTCCTTATGCATTCAAAGATACTACCCTAAATAG  
AGAACCAAAGTGTTACTCTACTTAGTTTTATGTTAGTTCCCGGAGAAGTTACGTATGC  
ATTCAGGATACCTTCTATAGTGTTCCTCTCTAGGAGAAGGTATAGTAAACGCCAAAGT  
GCCTCCTGAAAAACCATAACAAGTTGTATTATTTCCGATAACATAAGCACGTCTGGAAGA  
CTCATACACGACGGAACCGTTTACACGGATACTCCAAGTGATATGAACATCAGCCAAGGA  
TGATGAACTAAACGAGGGCATCAAGACTAGTAAATCCTCCAAGCTCGCCATTGCTGAAGT  
CGAAACGGGGTACTAATCACTCTGAGGCGAGCACTAAATGAACGTGCGTGATTTTGTGT  
AGTACCTATTCCACCTAACGTTGTACTTGACAGTGCAGTAGCTGACCCAATGTTTAACTT  
GGTAGCACTTACGCCATTCATCGCTTTGATTCTCAAACCTTGAACGAATTCCTCCTGTTC

CCACACTCCAGAACCACCATACACGCGACTTTCTGAATACCCTTGAGGTTTGTGTTGTA  
GATAACCAACATCATAACAACAGGGTTTGGGTTAATATCGTTAATCAATGCTTAGCTCCA  
CCAAGTGCCTGTGGTTTCAATATACCTCTCGAGAGAACCACGTTGGCCTTGGTCCCCTTG  
TGGACCTTTGTACCTATTGGACCCTGTGGTCCGATTAGACCTCGTGGGCCTTCCGGCCC  
TCGTGGCCCGATAGGGCATTGAGCACCCGTTAGTCCTTCTGGAGCTTGCGGACCAATAAT  
ACCTTGAGGACCCTGTGGCCCTTGTGGGCCTGTAAACCCTTATCCCCTCGAAGGCCTTG  
CTCACACTGTGGGCCACGCTCCCCTTGGGGACCTTGGATACCTTGAGGCCATTGGACGCC  
TTGCACTCCCGTCTCGCGTTGCGGACCGCGAGCACCTTGTGGACCTGTAGAGCCGATGGG  
TCCTTGCTCACCTTGAGGGCCTTGTGGACCTTGAAGCAACGCAATAGCTGGAGACCAATC  
ATCAGACGCTGCGCACAACCTTTCTGAAGATAGCACCTTAGTGACAAGTGGAGACTGGAG  
ACGTACTGTGATGCGGGCAACAGTTTTAGGAGCTTTATGACACGTTAGAACGTTAGCAGC  
TATCTCAAAGTATCTAGGGACTGGTAGGAGTAGCCTTGCCAAACATATAGGTTACTCTT  
CAAGTTTGGAGTGAACATAAAGTGAACCTTAGTAGAGCCACCCCAACAATTCCTG  
TACTTTAAATGCAGAGTCAAACGAATAGTCTGTAGCAAAGTAGATCAATGGTGGAACTTC  
ATCATCATGTGCAATCAGACCACTAAACAACCTTGGAGCATCGATGAACAGAGAGTCGCC  
CTTATCACCTTTAGGGCCAACCTGGACGAGTAGCACCGGTAGGGCCTGGATGACCCGCTAG  
GTCTTCGTAGTACCCCGCGTACCTTTAGGGTTGCGGAATCTTAGGTTTGCACCATCCCA  
TTCATGCTCTCGAGATAAACCTTGTGGCCCTGCAGGAACAAGAACGCCCTGCGGACCTTG  
AATCTTCACCCATGGACCCCACTCAATAACTACACCAGTATCTGGGTCACTCTTGTGGC  
GAATCGAATGGATGTGGTAGATTGAGTGATGCCGTCACCAAATTGGTGGATTGGAGTACG  
ACCTACGACTCCGTGTGCTCCCTGCGGAGCGAGAATACCTTGTGACTTTGAATACGCTG  
TGGGCATTCTTATCCAGTAGGGCCTCGAAGACCCTCTGGCCCCGCGGGCCTGCCGGACC  
AACTACTTCATGTGGAGCATATGAGTAAATGTCCACCTTATCTCGACACGTTGGGACGTG  
GTTAATGAATTGTACCTGTGTGCCCACTGTAGTGTATTCCACTTCTGGAAATAGACGGAT  
ACCGTTTAGATACACTTTGGTAGAGAAAGGACCTGCAGCTACCTTAGTACCGCTGTCGAG  
GTCAAAAGAAAATCCATTACCAGTATGTCGAATCGCCGTTTGAACAATACCATATACATC  
ACCTTATAAGGGTTCAAGGTCTTCCAGTCGAAGAGGTTTCGGTAGGCTTAATTGGTGCAGG  
TTGGATAATTAGACGGTTGGATTTACATCAAACCTCATGTTCAATTTGATTCGAACCATT  
CTTAACTGAGAGATCATTCTAGTTTAGTGCCTCTCCAATCTTCTCAAACCTGGAGTATAT  
TGTGGACGTGTTAAAGACTCCTCTTACTTAAGCAAGAGTAATTGTCATAGTTATTTAAGT  
TCCATAAGATTTATAGAAATAGGTATTATGTAAAGTAACTATACTATGGAACCTGTTAAG  
TATTGATAGATTCCAATATAGACACCTCTCAATACTTAAGAATACCCCGTAGGTTACGC  
AACTACGTTGACCGGGTAGGTCGTATTCTTTTACTTAAGTCTCCGTTGGCATCAACT  
ACGCAAGTATTCCACATACCGAGGTCTTTAGTGACTACTCATAATAAAAGATACAATAC  
CAAGAATCTTTCGGGCTCTGGTGGGGCCATGACTTGTTTATTATCGAGTATCGCCCCGTA  
AAGTGATGCCGCATAGACGTTTAGAGCACAAATATTTTCATATTTGCTTGTCTTAGAAA  
TGACAAATAAGAAATCTGGAACGCCATGATTTATGTGGGAAATTTTTGTGTTGCTTTGCA  
AACCAAAATAGCACGCCGCGTGTCCCCCTTACCCATTTCCGGGGATGTGCATGTGCACC  
TTTTTATCTTTATGTGCGCATTTTGGCGCACTGATACAGTGTGCGATGGATTGTATGGTTG  
AGCATTAACATTCAGCAATCTTCTCTACAATTAGCAATCTCCCCACACTTGCACAACACTAC  
GTGTCCGCACAGCGATTCCGGTGCCTAACATATTGATTTATCTATTATTGGGAGTAGCTG  
AGCGTTCTGTATCTAGCTTTACATGATACTGAAAGCTAGATACCTACCAACTAGGTGATA  
ATAGGTTGTTTATTTGTGCCTTATACACGTATATAAAGAGCCCATTACCGATTCATATCT  
ATGTTTTAAATGTGATGTACGTCACCTTCTAGGTCAGTTTGGCTTGGTGTCAATTTACAC  
CCCGACGGTAAGGCAACAGCCTAACGATATGGAGATAGATGGTTACAGTGTATCTCTT  
CTCTTTAAAATGTGGTTGACAATGAATACTCATTTAAGGTAATCTTCACAACGTGAAAT  
GTTTGCGGTGATACGTAGTCCAGTGTTGCTCTGGGTTGATCGAGGTAAGCGGCGTTACCG  
ACTACTATCAAATACCGTTCTAGATGTCCCGATCAGGAAGCTAGCCAACAACGCTTGAGG  
AGGTGAGGATGATTGTGTTAACATGGTCACCACGCTCTGAGGTGCAATCGAGTTAACCGC  
GCGGTGCTCAAACGTTCTTTAATACTTCGGCTATTGACACTGATTTAACATCAGTACTG  
AGGTTCATGATGCGACGCTCTCGCGTAGATGTGCGGGGTTAGACTCTGAAGGGCATAGAGC  
TACGGTGCCTCGGTTGCGATTCTGGGACGCTTTATCTATAAATTATCCAACATAACTAA  
CGGGTATGTATATGACTACAGTGCGGTTGACGTTGTTATGGTTGAATTTTGAATGCTGAG  
TGTTGATAAGCCGTTACGAAATGCGTGTCCACCGTGAAACCAAAATGTATGCGACTGTTA  
TAATCAGCACGCCAAACAGTCCGGCGTGATTAATGGTAATAGGACTGTCTATTTAAGGCC  
ATTAGATAGCTAATTAATATTAATCTATAAGTTAACTAGTAATATCGGGTTGAGCTAAGG  
CTTGTTTAGTGTCTAAAATATTTATGGTGAGGGGTTAACTTATCTATTGTGTATAATCG

TTAATACTGCTACCCAATGTGATTGAGTTCTATGTGCTCCGTGTTCAATGTTACTCAC  
CATATGGCAAGTTAAGTGTGTCTAGCCTTTATTGTATTCACTAACACGCTAGGTGAAAC  
AATGCCAACTCGAATTTCAACTAACGATTTACCAGACAAGGTAAAGCGAATCAAGAGCCT  
GTTAGGTATTGAAATCAATGAGGTAGGTCAGTATGTAGTGGAAGCTTACCAACAAGGTTA  
TAAATTGGTTCAAGTTATGTGTGAAGCATTCTCTATTATGCCAGTCTCTGACTACCTAAC  
CAGTAAAGAAATAAAGGTGTTTCATGACTGGACTAATCCCTGGTCTAACTCAACCTTCCAA  
CTAAACTCATGGATGATTATCATGGCACTACAATACTGAATCTAACTTGAAAGCTAAA  
CTGAAGAATTGGCTAAAAGTCAGCAAGTCTAGGCGTGATGAACTGCAAGAATTTATTGTG  
TTCGGTGTACTACATACCCCACAAATCGACAATGTCTTTACCAAACCTGTCTGAATTAATG  
GTTGCTTGTGAAGATGTGAAGGCATTCCCTAACACGATGTATCTGACTCGAGCAAGAAA  
GTAGTGAACGGTGTAGCATTGAATGTTAAGGCTAAAGTGTTCAAGAATGCTAACAAGAAA  
GCGTCTACTAAATATAACATTGGGTACTTAGAATTTTCGGCCTGCTACGAGTTTAGCAAG  
ACCACCAAACCAGCAAAAAGTAATGCATATTATCAATGCGGCTGCACGTTGGGCTAAACAA  
CTGCGTGAGGACATTGATAAAGGTTTGTTTAAAGACGCTCTACAAGATAACGCCGAATAC  
CTACTAAATACACTGGTTCAGTTTGTAGGACAGTAAACAAGCAGCCATTCCAAATGAGGG  
GTTGTTATGGTTATTGTCCATCTACTCGATGAAGGAGACTATTTTGTCTATTAAGATGCG  
TCCATTTCCTTTGTCTCATTAACTTTACTGATACTCCGTTTGCTGGATACGAGGGTGC  
TGACAAGTACATTAAGACTGAGGATAAATGGATTGTGAGTGCATGGTCTTTGACTCTT  
ATAGGCGTACTCTTGGTGAAGTGTACACTTTTAAAGACGCTGACGGTGTAAATGGTCA  
TTTGTTCGTGTTCAACTATAACGGTGAAACATTCGTAACCGATGGTCAAGATTGGTTTGT  
CGTGAGTTCTAGCAGTACGATTTTGAAAACCTGTTTGACCACATTCCAACCATCGAAACT  
ACTCCGGCCAACTAGCTGACAGCCACCAGCATTACTATGACACTGAGTTATTTACTAA  
AGGCTGTCCGATTAGGTGGCCTTTGTTAGTTTCATTACGCATCCATTGGAGAATATAAT  
GCGTATTATAAATATTGTAAGCAACGCCGTAGTAACTAACGCAGACGAAGTAGCACAGGA  
CGATAGCCTGTGCATCAAAGGTACTACCTATGTTCCATGTTTGATTCTGGGTGAGTGGGT  
TAGTGATCGTAGCGATAAGGTGGTGGATGCGAAGACATCACACGTGCCAACAACCTTCGG  
AATGTTAGCTCTGATTGTGTAATACTCGGTGCGAAAAGTACTATCATCATCATTCCCTCA  
GCGATATGGCGACAGCAACATGAAACAACGCAATCCAACTGGGCCCATAGTCCAGTACG  
TTTGTGTTTAAACAAGGAAACAGCAGACGTTGGCCTAATCAAAGTGGTCAATATAATCTC  
TCGTGGCACTGGTGGTGGTGTATGGTGGTGCCTTGGTTTATCTGTGCGGCTATTAA  
ACAGGACGGTGCAAACATCCGTAGTCTCTCAACGTGCGAAGCATACTGCCAAGTGTATGA  
CTTAGCAACCACAATGGCTATTGTCCACTTTCTGAATAGGTATTCAATCATGTTCCATAC  
TATTACTCTGAGTGTAGCCGTGCTGGTTATGGGATTGGCCATTCTCTTAAAGAGTCTAGT  
GCTTATCCGCTCTATCTTAAAGCCCAAGTCACTAGCCACAGTGTATAGATCATTACACT  
TGTGCTTAAACATTTCCACTCTTGTGGCGTGATTCTTTAAGATGCCAATCGGGGCATGATT  
GATGCTTTTCGGTAAAGTCTTGCTCTCAATCCTGCTTCTTTACGTACTTTTACGGAGAAA  
ATAAACTATTTGTAGTCTAGTTCCTGGTCGTGTGGATGCCCAAGAACGTTTACACAACAC  
TTACGCTAGTGCTACATCCCGCAGCGCTGTTATCTTCCCAACGAACGTAACCGGATGGG  
TACGACGCCCCGTGTTAAGTCGGGAAGTACTAAGAATTATCGAACAGCCACACCTCCTCG  
TGGCTTTAAGCACTTAAACTGAATAAATATTAGGAGTCCATCATGGAACGTACGATCGCA  
TTAGGCGCTTATTCTTTCGTTGCTACTCCTCGTGGAGATGATCTAGCCGTATCAAATATC  
TTTGATGGGCGTGAACGAGACGCGACTAAGTTCAATCCAAAGAGTGACGAGCCTATTGCT  
GACCTTTTGGCTAGTCAAATTCGTGAAGAAGATTTATTTTTGGCAGCACAAACACGGAGT  
GAAACAGCATTTATGGTCGGTATCGGTGCAGTAGTAATGGATGAACCAGAACGTGACGCC  
TTCTTTGAAGCGGGAAAGAAAGCAGTCGAGCAATTGATTGTCGATGCTGAATCATTCCAA  
GCAACTAACCATTAATCCCCTAACAGAAAGACCTACCATCACGTTCCCAATAGAAGGA  
ATCATAATTATGTTTATTATCTCTAAAAATTTCTCACTATTTGGTTCAACGGTGGTTCAC  
CAACTCTACACTCAGACGCTCGTTGGCTTTACCATTGTAGACGGTGAAGAAATGGTTCGAA  
GGTCTTTTGAAGACCCACCGTTGGAAGGGGCAATGTCTGCATTTCGAGGGGTTTCAGCGAA  
AACCACGCAAAAGGTACGGCTCCACTGTTCAAAGAAGCTAAATTCTTCCACCAGAAAATG  
ACCATCAAGATATCCTTTGACTGCTTGGGCGGTATCATGAACGTTGCAATGGTTGCTCCA  
TGCGAATCAAGCCGTGAGGTAGGTTGCGTTATCTCCAAGCGGCGTGACGAAGATGGTGAT  
TGCCAAGTTGTTACCATGTAATGCTCAACCTAGCAGTCGATAGCAGTGTTCGGACTTG  
ATGCACAGCTACAACCAAGGTGCCGCGGACCACTAAGCAGTGTCTCTAATGCGGTTCGGGT  
TCGCTAGGCTTTACTAGTTGTAAAGAATCTAGTCGGTCTCCTACTGTGGATGTGGGAGCC  
CTTCCACTAACTCAACTTGAAAGAGAGAAATACCTTGAAAGGCATTCGTTTAAATCAACA  
AATCCGTTCTGAAATGGTTAGCAACGTGCTGTAAGCTTGGGCTATTGAGAACCCAAATCG

TGAGTGTGTGGGCGAACCACGCAAAAACACGTTGTTAGATGCCGCATACGCCCCATGTTA  
GAGAGGCATCCAACCGGATATTTCGATTTAGTTGTGGTTTGAAGACGAAATTCTAAACAA  
AGAGAGCTAAGTATCTCTACGTGTTGATGGTAAACACGGCACTGAAAACATCTACGAAAG  
GATGTACTTGAAAAATGCAGGAGGTAAAGAACGAGCGCCGACGCCTCCTACCAACTTGGGC  
TCTACAGCTAACTACCTCTTACCCGGTGGACTTCGAATGGAAGAAGCAACATGCTGAGGT  
CATTCATCAACATGAGCAAGTGAAGAAGTTCGAAACAAGCTCGTGCTGACAGAGCCACTGA  
AATCAGTGCTGTGCTAGACAGTGCGAAGACCCCAAGCAAATGCGTGAAGCATGGGCAGA  
GCTTGAACGCTTTATGCCAAGTGGTTATGTTGACCCAAGCAAAGTACAACAACCAGCAAT  
CCTTCCAACCTTACCACCTGGAGAGTAAACTATGAATTCCTTTCTACTGAGCGCATTCTT  
GATTCTAGCTTTGTGCGTATGGCTTCGCTCAGAAGGTGAACTAAGTCCTAATGTTACAAG  
AGCTGCGTTTGTAGAATAACAATGGCATTGTATCACTGATGGATACATTGCAGCGGCTAC  
GCCTTACGGTAAATTCTATGTAGACTTTATCTTAGCAACTAAGAAGTCACAGATTTATTA  
CGATAGACTAGACCCAGCGGAAAAACAATTCATATCAGTTTGTCTGTGGGAATGAAAATC  
TAAATCGATTCGTGCCAAAGCTTGCAGACTAGCTCTAGATGCCATGCAAGAAGGCTCAGA  
TGAAATGGCTGCCGCTTTGGTTTATGTAGAAGGTTTGTAGTGAATAAATCAAGGGGATCT  
AAGTGGATGCCCTTGATCGTGTTCCTTAATCCGTTGGCAACTGTTATGAAATACTATATT  
GAATCCCTTTTACCCACTATCCTAGTATCTTTCCTAATGTGGCTGCCTTACTAGAACCT  
TTGTTTGGCGTTCTGGGTAATGGTGAGGATATGAACAAAAAAGGATACGTCCGAGGCAAT  
TTGCAATGTGGGGAATCGTATTACTTTGGGGAGCCTGTCCCCGTTACTGATATCTATTCA  
TCGTCAACGACAGACGAAGTTAAACCCTGTCGTAAGTTTGTCTGGAAGCTGTGATGTTGGC  
TTTAAAGACGCTGCCCAATACTTCATACATTGTGTTAGGTTAACTCCAGACGAGATTGAA  
GGTCTAAAACCTTGGGAAGATAAATATTGCTGTTGTCAACAGTGTCTACTTAATACGCCA  
ACAATTACTGTCGAGTACCAATCTCCCGATCAAACCGATAAAAATCTTAAGCAAGTTAGAT  
GGAGCCAAGATTACTAATGAGCATGGCGGATGTTACTGAACCAAAAATGCAACCAAATTC  
GTTTGAAGAGTGTGGTCCATTGTTGTTCAATTGTCAGGGTGCCTGATTTTGTAGAGACA  
AAAGTTCGTGAAAGTTGGTCTGGTTTTAACCTAGGTAACGACCACTACATCTGGAAAACA  
GAGGGAGAGGATGATCTATTTCGACCGCTAACCAAATATTTACTTATGGTTGAAACACAAA  
GGCGTACCGGAGGGTGAACAGGTTCTAGTTGATTGGTGGTGGTAATTTTAGTGGATAAGT  
AGACAGTAGTTTCCAGTCTCTCAATCATGTTCTTTGACGTAATAGGAGAAAATAACGTG  
AAACGTTTTGCTATTGCTTACACTGCGCAAGATGGCAGTAATACTAAAGTTACAGTTTTC  
TGGACTGATGCGGGAGACAAAGAGATTGCTATATTCAATTTGAAGTAATACCGCGAAGCG  
CAAACCGACCAACACATCATCAATTGGTACTAGCTGCACCAAATCACTAACTAAAAAAGG  
TAGTATCATCATGAGCACACCGCATCGTAGGCTAACACTGCAAAAACAAAACCGATGTTCC  
CAACGGACAAAGAGTCACAGTAGCGACACACAACAATAAGGGTTATGATGTTGAGGTGTT  
AGCTCACGAGTCAGATAGTTTTGGCTCTTAAGCAACCTGTAGACACATTGAAGGCGAATC  
ACAATTGTGTTTTGTAGTCACCCACTCTAGTTCTAGTACGTGTTCTTATGTGGGGTTAAG  
TGAACGGGAGCTAGTCAGTTTGTGGAAAAATGTCTAACTACTACAGGTAAATAAGATGC  
ACTTTGCAATAGATGCAGGGCGATTACTTGCCCGTGTAATTGCTGGAGATTGTGGCATCA  
AGCTATTCATGCGCGAGGACTTTACCGTTCCAATGACTGTGCGTAAGACAATAACAATAC  
CAGTGCTAGGTCCCGAATGGGACGCTCACAGGGCCAAGGCGCAGGGTTGGTGGGCATGAC  
TTTGTACGAGTGTACCACCATTAGGGAACCTAACTCTTTTGAATTTAAGTTACTGCGTG  
AATTGAAAATCGACAACAACAATTCATTGGTATGGTACTCAACATGGTTGTTGACCATG  
ACATAGAATCCAAAGAGGTTGGGAAACTCGCGGGTGTCTGTTGAATGGGTGGATGCTTTAT  
ATTCTGAAAGTTGCATGAAAATCAGCAGTCAGTCTGGTACTAATCCAGAAGAATCTAAGG  
GAGCGTGTGCATCAAAGCCCTTGTGGCCTTTGACCCCAACAATGCGATCTCAACGGAGTG  
GCATTGATAATCTTCACTTAGAGGAGGGACTAACAACCTCAACTTGCCCGCACTATGTTCC  
AAACTCTGATGGACAAAGCACAGGGCCTTGACTTAACCCAACGTGATGGTGGTTTTGCCTA  
ACCTGCTAGTATGCAAGGAGTTGATGGACTTGCTAGACCTGAAAGAAGAAAAAGGTGGAG  
CCAACCTCTAAAGCCGAGGGTTCATCGGACACTAAATCAGGACAAGGTAGAGGTAAGCCCA  
GCGACGGTGAAGGCGAAGGTGACGAGGGAGAAGGCGCAGGAAGTGGCTCAGGACCGCCTA  
GAGAGGGCGAAGGTGAAGCAGGTGAATGAGACGTACCTTAAGAATAAATTGCGATGGTCT  
ACGGGGATTCTGGGCGTACTCCCGACGATTGTAAGCGTGCTTCTGGTACTAACGTTAAGC  
AACTTACAATTTGGATGCACTAGATACGCCTCGCTATCGTGTGGTAACTGCTGAAGAGT  
TCCAACCTAAACTCTTTGCAGGCCGCTCCGTAATAATGGCGTAGAAAATGTGCTGTCTA  
TCTTCATTTTACACTGAGTGATAAGGTCAGAAACGTCCTCAAAGTTATGTCGCAAGTCA  
AATGGCAGGGTGGCCACCAGCGAAGCAAGTTACATAGCGAAGGTGTGGCTAAAGTATCGA  
CTGGCAGTGGTGTATCTGCCGTCAAAGGAACAGAAGGTTGTATTAAATACGGCTTTAA



CTGTTCTGTTAGCTAGCTAAGGCTCTATGTCTGGATGTAGCCAGTACCTCCACGGTCTGT  
TGGCGTGTGTGTGTTGAAGGATGCTTTGAACAAAGTCGGCATGCCGATTGAAGTTCTAG  
GCTTTACTCAAACCTTAGGAAGGCGCCAAGTACAACCAACATCTCATTAGTTACCGT  
TCGGTCGTCGTGATACGGCTCGTACTTGGTAGAGTCAATGGATGGAGTTGACTTAGCTA  
ACAATGAGCATGGTGTCTATTATGTGGGCACACTCTCGTCTAATTCGCCACAAAGCTA  
AACGTAAGTCTTGATTGTGTTAAGTGATTGTACCCCTGCATGTTAGCAACCTAACTCTT  
ACGCTTTCACTAAGCAAGTCCTCGAGGAGATTGAAAAGAAATCTCCAGTAGAAATCTACG  
GCCTCGGCATTATGGACGATACCGTTGAACGCATCAACTCACAAAGCGAAGTTATCAGAC  
CACCAGAGCAACTAGAATAAGCTCTACTTAATGTCGTTAATTCTAAGATTCTCTGTTAAT  
AAGGAAAACATATCATGGCAACAATGACAACAGCAACATCAGAAGCTCTGCGTTCTCCTG  
TAGCGGAGGCACTGTGAGCACGGATGGCAAATGAGGCTCGTAAAGAAGAGTATGATACTA  
CAGCTAAACAACCAGAAGCTCCAAAGAAACCTACTCTCATTGAACATGAGTTTCCACAAC  
CATCAGGTGATGGTGTGAAAGAGTATGCTGACATCATTGGACATCCTCATCAAACGGTG  
AGTCCGACTAACGCACGTACAAGACAGAAGATTTCGACGGAAGAACGACAATCTCTCATT  
CAGAAATCGATGCCACATGGAGTTTGATGATGACCTCGCTCTTGCTATTCTTATGGGCA  
TTGAATACGACAAACCTGTATCCGCTTATAGCGCACCCGGAGCTGGTAAGTCAGTTACTC  
CAGAACAATCTGTGCTCGTATCGGGTACCCTTCCATCTTCTGTGCTGGTATGGGTGGTA  
CCGAGCCAGCGACAACGGGGGTTCTCCATGGGAAACTGACGGCAGCCTGGGATGGAAAG  
ACGGCCCAATGTCTTACGCTGTACGTAAAGGTGTCTTCTTCTGAACGATGAGCCATTCA  
AAGCATCTGGACAAACAACATGTGTATCCAATCACTGGTAGATACTCGTCGTAATCTGA  
AATTGTACGGTCATCTCACCTGTTAAGAGTAACTTACGTGCTCATGGTAGCTTCTGTA  
TCATGCGTGCTGATAGCGTCCGTGGTGTGCTGGAGACCAGATGGATAAGTTAGCGGCAGAGA  
TTGAAGACCAATCTACTCTGCACCGTATGGTGTAAAAAGTTCATGTGCCATACCCAACG  
AGAAGGCTGAGAAAGAAATTCTACGCCGTAAGTTCGCACAACCTAACTGAACGTTTGGCTA  
GTAAGATTGTTTCTTAGCTAACATGAGTCGTAAAGGACGGGAGCATGGGAATATCACCA  
TGCCTTACTGTGTACGTGATTCCCAAGAACAGGCTGAACAATCACTTCGATTACGTAACC  
CTGCGTATGCTCTCAACATGGCCTACTTCGATGCTGTTAATGCCGAAGTTGCGAAGAAAG  
AGCTTGAGAAAATGTGGAACCTGGTTAAGTTCGACGAGTACAACTCTAAGGAGTTATCA  
TGGTCTATAATGGTCGTCCGGTCTGTGTGTTTAGCACAGACCCCATTAACCTAGCCTATC  
CTCGTTATTCGTTTCAGGAAGAGGATGACCTCAACCACGTCGAAAGAGGTAGTGGTTCAA  
CTATCTTCGTCATAGCCGGTAGAGAATGTTGGAGAGACACCGTATCCTACGGCCACGAGA  
GGGAAGCAAGTGACGCTCTAGAGTGCATGTTTAAATCAGATTTGTTAAAGGGCAGTGGGT  
AAGTTTATCCACTATCCATCAACTTAGATGAGCAGGTTAGCGTTGAGTACTACTTGGTGT  
AGTAGTCGTGGAGTAGGAGAATATCCACTCTAGTCGTTGATGTGTGCCACGTTGCTGAA  
CAAGTTTATGAAGAGGCTATCAAGGCTATTCTTGAAGAGTTTGAATCAATACACCCCGT  
ACGTACAGTTTACAAAAGAGAGCTGTGGATATTGGATCTTACGAGAGATTATTCCATCT  
CACTAACAGTTAACTCACACTGCAATTGCATAGATGGCTGAGAGGTCCAATCAAAGAATA  
TGTTGATTCCAACCCAAAACCAATGACTACATAATTGTTAAGCTAGAGGGGCTATTGGT  
ACGATAGATCCTCCTTAGTTACGCTGTAAAGCCTGTGATAAAGAAATCCAACCACATAAT  
TTTCGTGCACTCCGTGAGCATGATGAAAATGTATAGGTTTTCGGAATACCTGTGGCCTGAG  
TGTCGTGCTAAAGTACCACATTGGTACTCTCGCACTGAACAATGCAACAATGATTCATCA  
GGGATTGATTCACTAACTCGAGTATGGGAAATTCACTTGGTGAATTGCTCCACTCATT  
CATAACGGAGCTTCTTCTGGTGGCAGTTTTGATTCCGAATACCGAGATTAAGCCACAT  
AGACGACAATCCAGAGTGAGCTATCGGTGAAACGAAACATTTCTTTGACTGTAAGGATAG  
GCACAACAACAACCGATTCTATGTTACCCACGTAGAGAACTGTGTTTACGTTGGCAACTG  
TCATCCTTACGGTGGTAAGGGTATCTATCGTGAGAAGTTTGCCCGTGTTTAAAATAAACT  
AGCAGGAAGTAGTCCTATGAAAATCCTCCGTGATTATAAACTTCCAACGGCTACTACCAC  
TTACATGCCTGAGTGGTCATCAAAGGCTAAAGTGTGGATGTGGAAAGCCATGCCACGGA  
TGATGAAATTAAGATAACAGGTTTTTGTAGGTTACCGAATCAGGTCGTGTGTTTCTTCC  
TACGTAATTAGATGGTGTGATCAGGGATACCTCTCTCGAAGAGTGGAGGATAACGATGA  
AGCGAAATACTTGGGAATGTCTAAAGACCGAGAACATTTTTCGCTGTATTCAAACCAAAG  
CACTAGCGACTGCACTGTGGTGGAAAGATGCTCTATCTTTTAAACCCATCAGTAGACACAC  
CCGTTGAGTCTGACTTTTTGGTACATCGATAACAGTCAATGTTCTAAATCTTATTTCGCGG  
TAATCCCAATAAGTACAACATCTGGTTAGATAATGATAGCCGACAGGTCAAATCAAGCT  
TCTCGAGCTTAAAGCTAAGTTGGTGTGTTTGGTTCGTCGGAATGATTAAGACAGACAA  
AGAGCCTAAAGAACATTCTGCCCTGAACTCAAGGAGGTACAATGTCTTTAAAATTTACA  
GTCGGGTATACGGTTAAAGTTGTAGATAAAGGTGCTACCCGCACATCACAGTCTATGTAT

GGTGCAAGACACCCTGCGTAGGTGAATGGCGCTACTCCGAGACGCCTCACTAAATACGAA  
ATCGTTGGAGTGCCTCCAGATGCAACTACTAGAATCGTTGTTGATAATATATAAGCGGTT  
CAAATCTGAGTGGTCAAGAGTACCTAGGCGGCGAGCGAGGTCTGGAAGTACTAGATGCACCG  
ACTGTCAGTGCCTCAGTTTCAGCAATCGCATCAACACCGGTTCCGTCTGTTTCAGAGTCA  
TGGATGCGTATTGATGGGTCTGAACACGATACAATGCGTGGTCTGTGGTTGATGCTCGT  
AAGCTTGGCAACAGCATTACGGGTGCGTGTGGCTTGTGCGTGATGACCACCGTGACCGT  
TTGGGGGGGACGTGGAATCAAGCATTCCGCAAGTTAGAACCTATAGATGCGGCAGCAATG  
TACTCAAATTATCAGACATTACATCTGGAGTGTAAATCATGGGTGAAGTGATTAAGGTTG  
GTGATTGGGATCGTTACATTACTTCTGGTGGGCCTGACTTAACTACTACAAAGAGTACC  
AACTATTCGGCTCCACAGGTCTGATGCCACTTACGGAATGATTCCGGGTTTTGGATGATG  
TGGGTGATGTTACGGCTTTATGGATTTTGTAGTATGAGTGCTTAGGTAATCCTAATCCTC  
ACTGGATTCTCGTGTTCAGAAAGGTCATACTACTCCAAACGGAGGAGAGTGGGCAAGCT  
TAACAGTCTTCTACAATGAAAGCCAGTGGTACTCTATCCGAAATATTGAAGGTGAGCGAA  
GGTTTGTGAGTACTCACCTGCTACCAAAGATGCGTTAGACACAGATCGTGCTGCGGCGT  
TGTTATTAGTCTTTGCTGATGAGGAGGCTAAATTGTGAGTTTAGACTTACTGAAAATTAG  
GGAGAGCCGTGAGAAGTACGAAAGTTACTCTCCATTTGTTGGTGAACAAACGGTAGACCC  
TCTCGTCTGGAAGGGCATCCACGCGAGTAAACTTGGTTAAAAGAGGATGAAGTACCTGA  
AGACATTGATTCCGGTCTTTTCTCGACACGGTCTGTACAATTACAGATGGGCATTTATC  
TTGTGACAAGCTCGATATATATCGTGCTATCTCTGATAAAAATACCGGCTCAAGTTGTTGA  
TGCTACCTTGGAAACGCAGTATCGTTGATAACTTTATCACTCCCGGTAGGTGTACTGCATT  
GTCGGATAAAGCTCTCCGAGGTGCGGAAGGCGGGCCGGTCACGGTTTATGACCTTCAAAA  
AATCGTAGAGGCTTTGGCCAACGAGTTAGGCTAAGTTGATGAACTTGATTTGTTTGTCT  
CGAAGACTCTATCGAGGATATTGTTAAGCGCATCACCACCGGTGGCTACGATGGGCGTAT  
CCAATTCATAAACAAGTCAGTTAGGGGTCTCCAGAGAAAGGGAAGCTGGTTGTGATTGT  
AATTCGTCTTAACACTGGTAAAACAACGTTACAGGGCTTATAACGCTACTGCTTTTGCTTC  
AAAAATGGCAGATGAAAAAGTTGTGTTGCGGTTCAACAACGAGCAAGATGGCGGTCAGGT  
CATGTTACGTACTCTCCAAGCTGCTATCAACTGGGCTAGTGCTGACATTGAGCTTGCTCC  
TTATGGTGCATTGTCTGCTTATGTGTATTATTTGGTAACCAAGATAAGATTAAGATTAT  
AGACAAGGCTGACACTACTGTCCACGATGTAGAACAATAGATTTAGAAGTACAATGTAGG  
CTTTATTGTTATTGACCAGTTGTGCAAAGTCCACGGGTTTCAACGTGAGACAGCGATTGA  
AGTAGCTCGTCAAACATAAAATCTTTAAATGGGCGCGTGAGATTGCTAAGAAGTATGCCAG  
TGTTATGGTACTCATCCATCTGATGCGCAAGCGGAAGGTCAGAAATGGTTGGATATGCC  
CATGATGTACCGCAGTAAACTGCTCCCCAACGTGTGGCAGACACAAGCATTATGATGGG  
ACGTACTAATTAGGAGTCTGAGCAAGCTGTTCAATTCCTCATCATTGCTAAAAACATGCA  
TGGGTAAGTTCTGATGTAGACCCTGCACTACGTGAAGGCCGTGCCGAGTTACGTATCGT  
TCGAGATACTGCTGAATCTGAGGAGATCTAAATGTGGTTACACCATTTCGATGACCCTAC  
TGGGGTTGTTGCTACAGCGGGGTCATTCGACTGTGAAACAACCATAACGTAATGATGATAT  
TGGGAAGCCACAAGCTTCTCCTTTCCATCCTGCAAATAAGATGCTGTGCTTTGGTTGCAT  
AACGTTAGACGCTGAACCTCCAGTACTTCGGCCAGAACATGCTGACTTCCCAACACTCAC  
TCGTGAAAATGGTGTGTTGTTGTTGTTAGGCCACAACATTAAGTTCGACTTGCTGTGGAT  
GATGCGAACGTATCCTGGTTTCCGTGATATTTTACCTAACCTATGTATTTGGGATACACA  
ACTTGCTGAGTCGTTGTTAACTGGACAAGACCACAAGATGACGCTCTTAAACGAGTTGGC  
TATGAAATAGGGAGGTACATAAAAAAATGACCGTATCGCCGAATTTTGGAAAGCTGGCGT  
TGATGCTTTTGACATTCCTTTCCCGATGCCCGAAGAGTTTCGGAAATATGACGTAATTA  
CACTCAAGTGGTCTTCTTAGAACAAGTTAACCAAATCATTAAAGGAAGGTCTTCTTAATCT  
TACTATGTCTCGGATGGACGCTCTAAAGGCTACCACTGAGATGCAATGGCATGGTAAGAA  
GTTTCGACAAAGACCTTGCTTTGGATTTAGGTCAACCTCTCCAAGCTGAGATAGGTGACAT  
TAAGGGTGCTGTATCGTCTGTGGTGAAAGCTGTAGGTTTTCTAAAGACTCAATCAACCT  
GGGCAGTACTCCAGATTAGTGCTCTTATCTTTGGGGGTGTGGTCAATTACAAGGAGAA  
ACATTACTTCTACAACGACGATGGTACGACTGGTACGATCAAAGGGGGGTGCTCGTGCTGG  
CCAACCAAGATCAAAATCCTTCAACGCCCAAGCGTATTGAAGGTGTGTGTAAACCAAT  
CCATCCGAAACGTAAGAACGGTCCGTATCCAGTAGGTGACGACTCTCTATCTAAAGTCAA  
AGCCAAATTCAAAGGTGACGCTGTTGTTGAACAGTCGGTCTGTGACATTCTTAAATTCCG  
CCAATTGGAAAAGGATGTTAACACCTACTATATTGGCTATGCTTCTGAAGTGTTCCTGA  
TGGTTGCCTACATGGTAACTATAACCACACTAAAACGTCTACTGGCCGATTGTCTTCTAT  
TTCGCCAAATATGCAAAATATCAGCAACTAATGTTTTGCAAGTTATATGGTTTGTGTAT  
ATTCGGTGTAAAGACTATACGAGGTACGTTGTGGGTAATTGTGTAGACAATAGATTAAT

CGAATATACTGGGCGATGAAGGGCCGTTGCGAGTATCCTGAGAATGTTTCGCTACTCTGGT  
TATGGTGGGAGAGGGATTTTCAGTAGGGTTCAAATGTTACCGAGAGTTCAAAGGGTTCGGTC  
TACCAAGATGGGTACTCGCCAACCTTAACAAAAGATAGAATATACAAGGTCAAGAGCTCC  
AGTCCCGAAAATTGTAGATGGATAACTTACTATGATAACACGCAACTTGGTTCCTTGAAG  
TATTGGAATCAGATTGAAAGGGTAGATGGCTCTATAGGGTATTGAAGTAACAATCTTACA  
GAATTTTGTAGGGAGCATTCTGAACTAAGAGTGCTTTAAGTAGACTGAGAAAGCCCTAC  
AGAGGAAAAACAACAGAACAATACAAAGGTTTCACATGTCAGCTATAAAGCGATGTATAA  
TCTCCATATTTCCCAATGGAAAGTTCATGGAATGTGATATCTCTCAACTTGAGGTAGTTG  
GTGGGGCGGTGTTAACTGGCGACCCAATGATAATGTAAGGTATTGTTGAGGGTGTAGATA  
CTGACTGTATGTCTGCTTCTTGGGCAAATCCAAAACACTCGTCTGAGGAAATCTTAGCAG  
GGTACAAGGCAGAAGACCCTTTCTTCACCAAACACTACATAAGAATGCCATGCCTGTAACT  
TTGGTTTGAATACGGTGTGGTGTGAGGCTGTAGTAGAGAACGAGGGTATCGAAGTAG  
AACATGCTCAAGCAATCATTGGTAACTACTACAATCGTTTTTGTGTGTTGAAGCAGTTCT  
AAGATGATGTAATCGATCTAGTTAACAAAAGTCGTCAACCCTCTAGTCGTCGTAAGTAAA  
TCGGTATGCCGGCTGGTCGTGGTGAGTGCCGTAATCCAACAGGACGTATCTCTACTTTCT  
ATGAGTACGATGCTCTTGAGTTGCTTCGTCGTCGTGGACAGCCGAACTCATTCTCCCCA  
CACAGTGTAAGAGTTAACGGAGTCAATTTTTTGCACCTGCTGATTTTGTTCCTATGATGT  
TGGGACATATCTACCAACTACTGATGACAGACTAATCATTACGTGATAAGTGCCTGTAA  
GTGGTACAGTACACGATTCTGTAGTGTGGATGTTTCATCCCGACATTCTGGATTATGCAC  
CAAAGGCCGTTTCGTGGGTGATGTTACGTACTCCTGAATACGTGGAACGTTAACTTAAAG  
TTCCGTTTGATATGCCTTTGCCTTGTGACGTTGACATCCGCGAGGGCGCATGGTTTAAATA  
TGCCAGGATACAAGTGTTAGGAGGATCCATGCATACAATAGCACATAAAAGATGGTACGA  
TGAAAGCAAAGAGCACCACCGTGATATGGGAAGAAAGCGGCTAGCGGAAATCCAGAGTAC  
GCATCTCTAATTAAGCTACGCCACAGATTAAGAAGAAGTACGGCATGACACTAGAGGAA  
TACAACCGTGTGGTTGAATGCTGTAATGACCAATGCCAAATTTGTGGGCAGACTCCTGAT  
GGTAGTAAGTTAGACACGCGCCTTTGTATAGACCACAACCATGAAACTGGAGAAGTACGA  
GGATTGATTTGTAGACGATTTAACCTAATGTTAGGCTATGCTATAGATGATCCAGAGATA  
CTAACCAATTCAATTAATAACCTGATAAAATAACTAAGCAAACCTCCATAAAATCTTAATA  
ACAATAGGGGATATTTCTATGACGACTATGACTGGTACGATCACGTCTAAAGCTCGCAGT  
GGTAAATCAATTCAACTAGGTGACGGTAAATGGTACTCAGAATTCGCTGCTTGTGAGATT  
CCGGCTGAACTTAAAGCAGGTGACTCAATAACTTTTGAATATAAAGAGAATGGCCGTTAT  
CGTAACATCCAAGGTAACGTTAAGAAAGTAGGTGGTTCTGCTTCTGCTGCGAGTGGTGA  
AAAAGTGGTCCATCTTCCGGTGGTTCGCGGTTATCGTGCTAACGGTGAAGCAGGTGGTTAC  
CCAATCCATACTAGCGTATGATCGTGCTCTTGACCGCCGTAACGCATTTGCTGCTGCA  
ACGACTATCATCGCTTCTCAGATTGCACATGGCACTGAGTTTGAAGATATTGCCGAGGCT  
ACACTCCAAGTACGAAATGTCCTTCGAGGAATAATCAAATGCTGATATGGAACGTGTGGCT  
ATGGCTGATATGACTTCTGGCGACTTTGGATAAGTTTGAATTTGATTGTAACCCCTTTGGCTCCT  
TCGGGAGCCTTTCTTAATTTGGAGGAAATATGTTAGAGAAACATGCTCGTTTACTTCGT  
ATGCTTATTGGTTGTGCTACTGTCGCTAATGATGACCAATCTTTGACAAGACCAGTCAA  
CAAGACATTAAGGTTCCACGGAAAGTTGTGAAGGATTACAAGCACGAATTTGAGTTGATT  
GGCCAAGCTCGAGAACGTCAGATAGGTGCAGAAGAACGTCAACGTCTGGCAGAGAACCGG  
ACCGCTAAAATCAACGACCTGTTAGGTGAATAATTATGAGTTTAGATGAACTATTATTTA  
AGTTTGTAGACGAGGGTTCGGGAGAAAACAATCCAATTGGCTGGACCTAAATTCACCGATG  
TAGGTACGTTAGAAGCCTATCGCAATGTTTTAGGCTCCATCGAACAAGGATGCAGTCTGG  
AAGACCTAACTCAGAACTTCACAAGGTTATCGACAGGGTGAATCTCGGTTAGAGCTAC  
ACAATGAAGTTTGAAGCAACTCTCCACCTACTAAAGTGGCTCCTTCGTTCAAATGCAGT  
AACGACCAATGCACCAATTTATGGCAACCCAATCACGGTAACGTAGGCTGCCTATGTTTCG  
GAGTGCTACGATAAAACCCCGACCCTGTAACACAGAAAGATTTGGAGACAAGAATCATG  
GCTACAATCAAATTATCTAAAGAACTAACCGCTGAAATCGTTTCTACTAACACTGTTAAA  
GTTACAACCTACCAATGTGTTACGGTGGTGTGCTTGTAACTAATCTTTTGGGCATTA  
ATTGCATTTAAGTTGGGTAACACAACCTCTTCTGATTGAGATTAACCCAGACGCTTCGTGT  
CATGTTTCAGAAGATATTCGTACAGCTATTCGTAATGACAATCTAATGGTTGATCACCTA  
GGTTTGAAGGTACATGAGGCTTAATATGACTGCATTAGCAGTAACTGTTGCAGACGCTCC  
AGCGTTTCGCTTCGGCAATTAGCTTTGAAGATTATCACTATGATACACCGGAGGGTGAATG  
TTATCGACGTAAGAGTGATTCTCACAACCTCGCTACAAGACTCTCTAATTCAAGTATGGGA  
GGCCACAGCGCCTCGACAATTTGCTCTATCTCGTTTTGAGAAGTTTACCCAAGAGATTCT  
AGATGATGCTCAGTGTTACGATTAGGTGTTGTTAATTTGAGGCGGGACTAAATACCGATA

TGATTTTCCACATCCTAAAGGATGCCCTTACAACGGCAAACGCACCGACATGCACAAACC  
TTTCTATCTTGATGAGTGCAAGAACTATCTGATGGAGTGCCTTCCGACGATTGTTTGTGA  
CGGCTACGACGCTGACGATGGTGGCGCCATTTTGATGAGTGGGGGTATGGAAGGTGACCA  
TGAACGTCTGTTATGTCATATTGATAAACATATGGATATGATTGAAGGTAATTACATGCG  
TTGGAGGCGGAACATCAATGGTAAAGACTTCCCTGCTGAGTTCTACACGGTGAAAAAAGT  
AGAAGCTCTACGACACTTCTATCTCTAACTGCTTTATGGTGACCCGACTGATAACATTCC  
CGGCTACTATAAGTTAACTGGTAAGAAATTAGTTGCTGGGATCAAATCTGAATTGGAATC  
GCTGACAACTGAATTAGACATGTGGACTCACGTCCGCCAAGTCTATGCTAAAGCAGGTAG  
GCGTGACTAGAAGATCCTTATCCAAATTGGTTCGATTGCTTCGGATTCAAAGTAAAGAAAG  
TGCAATGTGGAACCCTCCTACGAACGTTTTACGGCAAGAGCAGAAAGTGCCGAATAGCAA  
CAGTACACTATAACCTATAAATTTGGAGCTCATATTATTATCAGACTAACCCACCATGAT  
ATGTATGCTGTAGCTCATGTATCTACAGCTATATTTGAGTCTCTTGAAGATGAAGACTTG  
GTAGCATATATCGCTGATAAAATGGATACAGGCCTTAAAGAAGCTAAAGGAGAATTTAAA  
GATGCGTAATACTGAAAACAAGAATCGTCAAAGCAAAAAGCAACTTTCCTAGAGAAAGC  
TCGTCATCGCCAACGTGCTGAGCACCATCGTCGCCAAGAGGAGCACAACTGCGTGAACA  
TTACGCCGAGTATGTGTCGTGTCTAAAGGTCACGAGGCCCGCAAGTCGGGCTTCCCTA  
GCGGACTTGAGTATGACTTTGCTAAAACTGTCCAGTACCTTATGAGTATGAGACAGAGT  
AATTACCATATCAACATACGTTAACTAATCATATAATACCTCCTTTTGTCTTGATTAAGA  
AAGACGGAAGTAAGATGTATGTGGAATTGAAGGGTTGGTGTACTGCTTCTGACCGTGTA  
TAATGAAGCATATCAAGAATTGTTACCCGACTTTAGATATTCATGCAGCGTTCAGATGT  
GCACTAACCGGATTACTGAAGTTGCCAAAACAACGTATATGCACTGGTGTGCTAAAGAAG  
ATATCCTTGCATAGGATTGAAAGGGTAAACCAGCACACATTCCAACCTGAGTGGTTAGAGG  
AGTTGAGATGAGCAAGTATAATGATCCACATCCAGTACCTTGAATTTGTAAAGACCTTAA  
AGTAGCTTGGTAATTCACAAACAAAGTTGATGGTGTTCGGATGCTCCGCGAGGAAGCAGG  
AAACCTAATTTACGTAACGGTAAGCCGTTATATACTCAGAAAATGTACCGGAGGATAT  
CTCCGATGCAGAAATTTATTGTGGGAGTTGGGAAGAGTATATATCACACTCTCGTTCCTA  
TGTCACTGCACTTAGAACCGTTGATGGTGGGAATGTTTACTCTCTATTTCCCTCTTGTTGT  
GAAACGTTTAGATATAGGTATTGATATGAATCCAACCTTCGGAGGATATTA AAAACCCCAT  
GAGTCTTGTTTTAGCTGAGGTA CTGAGTGTTTAGTTCTCCGTGAAATTGATGGTAAAGG  
TAAAATCTATAGAGTGAAACCTAACGAGGCTTACGATGTTCAAGTCATTGGTATTGTAGA  
GGGTAATGGTAAACATAAAGGGCGGATTGGAGCACTACTTACTCCAATGGGTAATAGTCG  
TACTGGATTCACTGATAACGACCGTGAGTGGTGGTGGT CACAATAACCAAGGTTTGAAAT  
TACACAGCGTAAAATTAGTGAAGTAGAATGTTGGCAATTGACTACATCCGGTCAGTTCCT  
TCACCCTCGCAGTATTGGTTTACGGGAAGATAAACCATGGCGTTTGGACCTAGAGGAGTG  
GGTCCGGCTTATATAGCAATCGATGAGATTAATAAGTACACACTTGGTGATGCTTGGGCT  
GCATCTGAACAGATTAAGTCTACCTTGTACGGTGTTCCTGTGATGATATATTAGCATT  
CATTCCCTATCACAAGCTACTTGTATGAAACGAAGGCATTGTATTGGAGTACTAGAAGAA  
TCAATTCTTCCAATGATGAAGTTGAAAACACAATTATGATTAATACATCAAGCAAAAATG  
ATTCCTGACCATCAACTGTTCAAACATTACTTTATAGCATTATGAAAAGATATTGTTT  
ACAACGGTGATGAGAGCGTCCAGCTTATGAAGCTGGAAGAGGAGTTGTGTGAGGTCATCG  
AAGCGTTCTGTTAGGGTCACAGTCACGAACACCGTAAGGAAGAGATCGGTGATATGATTT  
TGGTCTTAATCAATCTGTGTGAGCGCCGTGGTTACTCCCTCGCTGAATGTGCTAACACTG  
CATTCCAGAAGATTAACAAGCGCAAACGTCAAAGCATTAGTGGTGGTTTTTTTTGAGAATG  
AGAATTTGAAGAAATGGGTAGTTTCGTACTTACTAGAACCGGTAACATAACATGGATGGTAC  
AAACATCATCCAACTACTGGAGCTATGGGAGCCGGTAAAAAGGCTGCCCGTATTAAGGC  
AGTAGACCAATTGGAAAACAATGTCCGAATAACTGTTTGATTATTA AACTAGAGATGGT  
TGCTCGTGATGAAGGTGTACGGGCACGGGATGGACGCACCTCGACCGTGTCCCCCAATTGG  
AACCCAGGAAGAAGTTGTTTCGGGTAATTTCTTTGTCTGGCAGAATTAATTTTTTGTCTCGT  
TGATAAGGCACAATTTCTTTAGACACGACTACATTAAGCCAATTTGCCTTTAAGCAAATCT  
CCACAACATCCCTAACGTAGGATTCTACAGTTTAAACGACTGATTATCTCGACAATTCGTT  
CCTGGGATGGAAAGAGATTTCCAAGTTCGTAAACTGCATGTATGAGTTACAACACACTTG  
TGAAATGTGTGGTAATCAAAATCCGGTACACAAAATGCGTATTTGTGGTGGTGAATCTTT  
GATTGAAGTTGGTACTGATAATTATCGAGCTGTTTGTCTGTATGTTGGAGTAAGGAGAA  
ACGAGTAAGACGTTCAAATATGAAAATGTGGTGC GGAGCCTGAAGGTATGAAAATCGTA  
GCAAGCCCAACTAAGCTTGAGTTAGGTGCTGACTATCTCATGCAAATCAAAGTTGGTCT  
GAATGCGCTGGTTGCTCCAAGGCGATCAGAGTAGATGAGGGTAATTACGATTATTTGCGA  
GAAGATGCTTACTGTGCACGCGGCGCTTGCCAAATCTGAAATTAGTTCCTGTTGTCACAG

CATGTGCGATAATCGCGGGGTAATGATTACATCACACACCTTGAGAATGTCGTTAAAA  
ACAAC TAGAAGAAATTGAGATGCTTAGGGCGATGATCAATGAGTACATTACTGAGTAACT  
CTTCAGCGATCATGGGTAGTAAAGCTGACTTTTAGTTACTACGTAACAACGCTAATAAGC  
ATGCCAACTGTATCCTCGTTATGCGTAAAGTTCCACACATTTACGTAAGCAAGAGGAATT  
ACATCACCTTACATCGATGTATTATGGACTCATTCCCAAACGATATCTCGTGCCTGTTG  
AGGTACTAACTGTGTACTCGATTAATCTCATGCCTGTAACCTCATATTGATGCAGTACC  
AACTGACCAAGGCTTTACTTGTCTCACTGTGGCTGTCACGATAGCCGGTGGAAGTAGAC  
TCAGCGATTCTGTGGTTATCGAGGTAACCAACAGAACGCGGATTCAAGCATGGGAAGCA  
GGATGAGGTGATTTCGCAGAGTTAAAAGTTGTTGATTGTATTTAAGGCGGAGCTCGTCTTA  
TGGCCTCTCCGCTTGCTATTTGAGGTGATAACATGGAACAAGTAGAACATGATGCTTTTCG  
TAGAACCTATGAAGGCGTACTTAATGAGTGATGTAATTGGTATCTGAAAGGCTGCGGGC  
AAGCCAGACAACGTGTTGGAGATTGCCAAAGGAAATTATGTATCTGTGACTGTTCTCGAT  
TAAGACAAAGATGGTACTTAGATGGTCGGGCCAGTACGAACCTAGCACGCGGAGAATC  
TTACGGTTGCTTGAGCAATCAATCACAAATACGTACGTAATAGGTCTAACGAGGTGGTG  
TGATGGGAGAGAAATTGAGGGGAGTAGCGTTCCCATTTGTGCCAGACTTATCAGTAGAAA  
TTGCTCTAGAGATTCTGGCTGATGCCGCAGGTGTAGCTACGGCCAGTCCTACAGTAACT  
CTGTCCGATTTACGGGACAACTTTTATGGAGGGGTGGGGGTACAGTGAGGATTACTATC  
TCATATACAACTCTAAAGAAGATGGTGGTCTATGAGGCAGCGAGCAGCAGTTGACAGAA  
TGGGTTTTGAAGTGATTGATGTGGAAGCTAGGGCAAGCCCCACAAAAGAAGAACAGTTT  
GGAGTTATCTATGATTGTTTTTCGTGGAAATGAAGTACACGCTGGAGATGAGGTAGTTGC  
TATGGTGCGTCGTGGCGAACGTTCCGAGGAACTAATCAGACGATTGGTTATTAAGATTAC  
TCCTAAGAGAGTGGAGTTATATCAACTAGGTATCGGAGAAGTCGTAATTGATATTAGTGC  
ACTCAATGGTGTGAACGTACAGCAAGCAGAACATGAAAGAGTAGTTAAAGTGAATACAGA  
TAATATTGAATTAGTATGATTACCTCTCTCTATGTACTTAATATCCTATTCCAAT

>NewGenomeName\_136

AAGTATCTTTCACCTCAGACGGCACTTCAGGAGACCAGACAACGATTACTACAAATATAAC  
GGAAAGCTACGTGCGAACAAAAAGACGAGTGAGCACATTGAAGACCGTTATTTTTTTACT  
AAGTTAGCATCGAAACATACGGGAGATAAACTCTGAACTTATTTTGTGATATTTTTGT  
TACAATCCTAAAGGACATCTCAGAGCACTTAGTTAGGATACCTATGATAAATGGAGCATA  
CACCAAGAGTCTTCCCTTATGAATTGAATCAAGAGGTAATTCTTTCCCTCGATGATTAT  
GAGTTACCATAGCAGGAAGCTGTTTTAAGAATGTTCTTACTCACTTCAGGACCGCATCCA  
AAAAACATGAGCGAATATCGATCTGGAGAGGTCTCATTAGTAACCTTGGTTGGCTTTGCA  
TCATGTTTAGGGTAGATTTAAAATTTTGAAAAAACTTTGTCCGATCCTATCTGTAAAAAT  
GCCCCAATGAAGGTCGTGAAGTATAAAGCATTCTAGAATTGAATTACCTCGAGTATAAG  
TCGGTAATCTTAGATACCATTCAAACGAAGTTATGAGTCGAATTGTCGCGTGCCAGCAAG  
TCCAATAAGATCTAAAATCAATCTTTAATTTCCATAAAGACTTTTCAGCCGAGACAGTAC  
GTATACGAAGCATGGCTAAAGAAGAGAGACTAGAACACATTGGCTATTGTAAAGCACTTA  
TTGATAGACAAAACACTTTCTATAACAAGGTTGCGTGTAGCATCTAAAGATGATAAAGACG  
CAGCAGACATGAAGAACCGAGTCAATGCTTTAACTAGTGCGTTTGGTTATGAGGACCTTA  
TCGAGTGTATGGGTTCAATTGTTGGTACACTTGAGGCGGCAGCAAAGAGGGAGGATCTAT  
GATAATTATTATGATATCTGCAGCACTCAAGATAGAATTAAGAGACCTTATCATTGACGT  
TTTAGAAGAGAGAGAACTTCATAAAACACTAGACGGTCCTTACGACGTTGCAGCAGATAC  
GGATTGACAAGCAGAGGCTGATGTTCTTGAATAAGAATTATATTACTAGCGATAAGAAGT  
TAAAAGATTTTATAGAGCAATGGAAGAAGCGCTTACGCTTCCCAAACCTGCCACCACCAC  
GATGTTGCCCGCTTGGCAACACCGATATACTATCATAACGAGTACACAGTAGTAGACAAA  
CAACTTACGCACTAAAACCTGAGAATACGACTATGTCTTACGCAATACTTAAGAAAGCATT  
TAGCACTAGAAATACTTCTCTAGATTGACTAAGGTGATTGAGAATCTGAACCCATCACC  
TCATGGTAACAATGACGCAGACGAGCGTCCTTTGAAACCAGAATGGGACAGGACAGGTAA  
CGGTCCTGCGGTTATCAGATTCTTGCCCGCACCGGATGGAGAGGAACTTCTCTCGCTAA  
GTCCTGGTCTCATGCCTACAAACGTTCTGGGGGTCAATGGAATGTTGAAAACCTTTTTCC  
ACCTCTTGGTAAACAAGAGCCTGTTTCAGAATATAGTGCTGAGGTCTGGAACGCTGCAGG  
TGAGGGTTCTTCTGAACGTGCACGCACCCGAGCACAGAAGGGAAAACCTTACTTACTCCTC  
TAACATTTTCGTTGTGAGTGATCCTGCCACCCTGAGAATGAGGGTAAGGTATTCCTATA  
CAGATACGGTAAACAGATTTTTGATGAACTCGATGAAGTAATGCAACCTCCATTGGCCAA  
CGAGATTCCAATCGATCCTTTCAATTTCTGGAAGGGTGCTGACTTCAAATTGAAGATCCG  
GAAGGTCGTAGGTTACTGGAATTATGATATGGCTTAATTTGCCCCACCTAATACACTAGG  
TGATTATGATGGTAAACGTCTAGAACAAATTTGGAAAGAGGCGAACTCTCTTGCTGAGTT

TGAATTCCTTAGTACTTTAAGTGTTATGAACGACTTAAGGGACGTCATTGTTTAGTCTT  
GGCAGCACTGCGCCAGTAGCACGACCTTATTAATCTTTTGAAGATGTTAAACCTCAGAC  
TCCAGATTGCGGAGCAGAAGTTAAAAATGTTTCGTGAGAAAGCAGTTGCCTCTGCTCCTGC  
CGAGGATGCCGTAATGTATCCTACTTTGCATAACTTGCTGAAGAGGACGGATGATAAAC  
TGGCACAAGGAGGGTTGTAATGGCCCTTCTTTTCTAGTATAATTAAGATAACACAAGGT  
ATACAAGGAATACTGCCCTAACTGCAATCAATTTCCCTTCCATCTGTCCCTGTAAATGCTC  
AATGGATTGGAGAGACGAGGTCTCGACAAGCGTAATAATCCTCTAGATGATATGCATACG  
AAGAAAACCTGCTATCGTTATGAATCTCGATAAAGAGTACGTACCTGGCTCTCCTATATCGC  
CTGGTTACGTCACAACCTAACGAGCAAACATTGCAAAAATCATCTTTCTATGGTGATCATA  
GCAGATCTTCAACTGCCCTTCAAGAGTTTACATAAATCCGTCAGCTGATGGTAATGAGT  
GTAGCGGAGGAGCAAGTCTTGGAGGAAACATAGTAGGAGAAGCAGGTGCAGCATGATCAC  
ACGGAGAAGGCCGTTGGTGCGCAATACCTTTGGGAATTGTCTGGTGGAGGTATGATCAGTT  
GTGATGTTGATGGATCTTAGTGATCTCAAAAACCTAAACTCATTGAAGCAAAGAAGATGG  
CCAAGATATGATTGAGTTTGTCTATAAACAGACACACTCGTACTGCAGGACTCATCAATAT  
GGTCTTAGGATTTCTAATAATCGCACTCTTAGCAGAGGGATACTGTAGTGTTATCGGAGA  
GAGACCTCCATTTCTGGGTACCGATGCTGATACAATCTAAGGGATAATGGAAATATCAAA  
GCAGGAATTATTAAGCACTTTCAATATCATGAACAACATAGATTTAGGAAGTGTCTTC  
TGGAGAGGATCGTCAGTAGATTTATTAGCAATTATCGGCGTCTTTAAAAATAAATGAAAG  
ATGTAGTATTAGTAATATACTTGACTTTATATGGTAAGTCATCCGCAGCGACCTTTGCAT  
ACGTGGTTAGGTTTATGGCTTCTGCGTTGGATACTTTTACCAGGGCATCAATTGATCATC  
CCGAGTTGCCAGGTGATAGAGAAGGCGAACAGTTGTTACGAGGTACTATCAAGGGATATG  
AAGAACTATCACTAGATGAAGTAGACAAAAATCCCGTAACTGCACAAAGAGACCATGAGT  
CCCTGGAACCTCTATCCCGATCTGCAAGATCGTTCGAATGAACTTGAGGATCAAGACGGTG  
ATCTTGATGACGATTGTGATATCCCTGCTAGACCGTACGTCTGGCTCTGGAATCTGAAATT  
GACTTGTAGTTCCCGTGAAACGATAAAAAACTTTCCGCCAAAAAGGTGACCCCTTAGCT  
TTTTATGCGTGACATACGTTATACAAAAGGCCGTGTATCCCGAACCAACATGGTCTTAT  
TCTTTGTGACATACAAGTAGAGGAATATAACGCGTCGGACTTAGTTGTCCGTGAATGTCC  
TCCTCACTCTCGTCCACCTGATTGTGTAGGGGTGAAACAATTCTATATAGATTAATTTCA  
GGCTTATTAAGCAGACTTGTATCAGGCACAAGGTTGTCTGAATTAGTTAATTATGATTG  
GAGATTCCCTTATCTTCTAGCGCACCTTGATGTGCATGGTGGTACTTCAATTTTCCCTCG  
TGGAACATATCAAAGCTCTCAATCAGGAGAACATGTTTCTATGGTACTCAGCCAAGCAAA  
GAGATACAGTGGACGTGATGCTAGTGCAGAGTTCTATCCTGTATCTTGTGCAGAGAACGA  
CCAACCTATATAATGTATGAAAGAATGATAAAGCAGGAATACATCCTCTAGGAGAATGACT  
CAAACCTTATCACATTTATCTTCAAGAAAAACTCCTCCTTGAAAATTTGACAAGAGAGGAA  
TTTACTTCAAAATGGGTCACACTCTATACTCCCTATTGTAAAGATAACATAACGTATTCC  
ATAGGTTACGATGAAGCACGTGCTCCGGAACCCTCTTTTTAATTATGATTGAAATTTTAT  
TACTAGTGCAGCATTTTCGTGACGTTGCATGTTATTTTTGCAATTGGATTTGTAGTTG  
CCCTCCACTTAGAGCTTTGTCTCCAGGTCAGACCCCTGTCTGCTGAATCATCGACGAATG  
AGAGAAATGCTTTTATAGTGCAGACTCATAGAAATTAATGTTGGCGAAAAGGATCGGTAG  
TAAAGCTTTTTTGGTTCGTATGTAATATAGCATTGTTTGTATATCAAGGAACGTGCAAA  
CACCTCAAGATACCGTCTAGAACGGTATATGAAGAGGGAATCAAAACAAAGTGAGTATGT  
TAGGGAGAGAATGGATTACTCCAGAGCGATCCATCGAGTCAGTGCACCAGCAGTTGTAAT  
GAAAGCGTAGGGTAAAGATGAATAAAACTTTTTCAACTTGTCTTATTGGATCAGGTGTCT  
GGCGCACTGCAGCGCAAGCTTGTATACATCGTTGGGATCGGAGAGAACCTTATTGTCCTT  
CAATTGATTAAAGATTTTTACCTAATCAAGAGATGAAGAGTGAACCTTGATGTTTACGTTA  
CTATTCACTGGATAGCTATATAAGGGTAGTTTATCAGTAACCAAAGATGAGAACAGATAG  
GAGGCATTGCTACTCATGCTACTCCCGCAATAGATAAGCGATTATTTCGATTTTTGGAAGG  
AGGACGGAGTATGAAAGACGAGCGGAAGTTTCCTACTGGCAGCATAAACAGAAATGTATC  
GCTATGTTACCTACGATTATCTCAACACTAGCTACATATATGGTAGAGTCGATGGAACA  
TATTACTGGCAGCATTGTAGAAAGGAAGCGGAGGACGACCTCTTCGTAGATGCTGATGGG  
TTGCAACTAGTACTTCCACGTGACCCTGTGCTATCTACAGAATTTATTTTTAAGGCCATA  
TTTTACTAATATCCGCCACCATATCCAGACAAAGAAGAGCCGTAAAAACTTAAACTGGAA  
CTGCTAAAGCCAGAGGAGGAACTAAATGAAGAACTACTACGGGCACTCGAACAGGTTGAA  
CTGGTCGAACTGGTGGATCAGTATGCTGGTTGGTACTGACATCGGCTACGTTGCTAGCG  
GTCGCAGTAGTTATCCTTGTCTGGGGTTGGCGAACTTATTACACCTCGGGTTGCTCTCGTG  
GCAGAAGGTCCGTTATCGAATGACCTCACTACAGTATTAACCTGAAGATGAAGAAGCACTA  
CCACAAAGATAACCAACACTATCAAAGTAGCTAGAAGCAATACTGAGAGCTGACTCCTTA

TTCTTTACATCATCTAATTGTGAATGAGGAGCGTGCACAATCAGAGTTTCAAACCTCTTGA  
CTCCTTCTATCTACAATTCCTCTGTAGGAACTTAAATTCTTCTTTGTAATTCATTAAGG  
TTATGCTCATGCTCATAATTAGATACTGGATCTATTGAATCGCTCCCACGTTTTGGAGTT  
CCGTTTGGTCAAACCTGTTCTGTAACCTGGATTCACTTGAATACCTTATTCGACTAAGACT  
CTTTCATCATATAAAAACATCCTTTGTTTCATAGTGATGTA AAACTCCTCGATCGTCATAC  
TTTTAACAACCATATGTTGTACATCACCTGCACTTCTTGGCCCCTGCACAAAAAATCA  
GGAATATTGTGTACCACTAATACAACACAATCTAAAAATGGATATTCTATTTCTACTTCT  
GCAGTCATTGGGAGAGTTTCGCTTTCTACTGACGAATATGATGCAAAGAAGGCTGTATAT  
TTCCCTAGGTATTGTATAACTATAATGCTACTTCATATATTTTATGTTTAAAGATATTTG  
AAGGGTTCGTGATTCTTGTACCCCTCGCCAACACATACGTTTGGTAGAAAACTAAAATAT  
GCCATTTGTATCCGTTTATGATGTCTGATCGACTGAGGGGACGAACCTCAGTAACTGTA  
CTTATCGTTCATCAGCAAGA ACTTGAATCTTGTCTCCCGTCATTTCTTTTTATTGAAGTAG  
ACTGATTGTCTGTTGTA AAAAATAACAGATGACCCAGAGGATACACATGTATCCTCTATAA  
AATCTTAACACGTGTTAGTTTCATGTGCTGCAGTGCCTGAAGTGCCTAATGGAACACTAA  
ATTCACCTGACGTGGGAGGCATTCGCATAAATGCCAGTTCCTAGTGTTGAGGGATACGAA  
AAAACCTAGACCCTGACACCACTCCACCATTACTGACAAATTTTTTAAAATGATTCT  
TCATTTGATCCTTATCACCTGTAGTATTTTCAATTCTTTTAGAATCTTTAATATCTGATT  
ACTTTAATAAATCACTTTCTTGACTTACATTGGCACCTACCTTAGGGAGAGCAACAGCCT  
TTACGTAAC TAGTTACTTATCTGATTGCTTGTGCTTCTTTGTAGTTTCTTGCAAACATTT  
TAAAAGGAAATGAATGTTTTCTAAAAATTTTTGACTAAAAATCTGCTCAACATGACTCT  
TTCATGCTTTCCCTTCTGTTCAACCTCTTAGTGACTTAATGTTGAAATTGCCTCGTACGC  
CTAGGAAACCAGATAAAGCACTAGCACCTGATGCCATAGCAGAAGAAAAGAACTCTGGAA  
GGACAGCGCTTCCAGCATCTTTACGGGAACCTGACACGTTGTCTAGAAATGTTCCACTTT  
GAATTGGATTGATCGCAGCCGGACCCCAATACCTAACTTGTTTGATTATATACTGGTC  
AGTTCCGAGCATTAAACACCAACAGTAATCGCAAGATATCATGGTGAAGATTGATAGTTG  
TTCTACCTAAGTTTCTAGGATAATTATTTTGCCCGTAATAATCTAATCCTCCATCATGGT  
AAATAGTTATTCTTCTACGAATTCTTTGGGATGCTGTCTTTCCAGTAATACCATCAGCTG  
CATCTGCATTAAAGTCTGACTCCATTACAGGCGCCTGTAAGGGATAACATGGAGTTGATA  
TACCGTTATCTCTGCCGTCAAAAAGTCATTTGCCAAGACTTCTGCCTGTATACTAACAT  
GGTCTCTCTGTATTTACGAGGTATAATGGAAAAAATCGCCCAAACGTTCCAAGTAAGTAT  
AAAAGTGATCCCAATAACCTTATTTATAGATCGTCGCGGGAGCATAGGTTTCATGAAATTG  
TGTGATATAACCTCCACGGTTCAAGAATGGGGTAGTGATGAGATGATTACTCCCTATATT  
TCCCCTGTTGATGGTAAAAGGCACAGATACTTCCCAGATTTCTATGGAATGTTAGAAGTT  
AGGACTTTTTTGGTTGCAGTTTATCCATTGAGGCCAAACCAAGA ACTTAAA ACTCAGAAA  
CGAGTGACAAAACGTTATATTAAGGAAGTCGTGACTTGGAGTGGCTATCAAGCAAATGG  
AAAGCAGCAGCGGAGTTTTGTAAAGATCAA AACTAGTAATTCTAGTTGATGACCGAAAAG  
GAACTGAAAGTATAATGGCAATCAGTAACACAGAACAGGCACACAAGCCCTCATATAAAG  
AGTTCCTAACGTTCTCGAAGAACGAAGATAATCATACTCGCTTTAGTGACCTGTTCTCGG  
GTTATTTTCTGCACCTAGATTATCACAAAATAATTTGGGACCTTCATTAGAAGGAAGTA  
AAACAAAAGATTCCAACCAGAGACTACTCAACTCCGGATTCTCTTAAATTACTTTGTGA  
ATTCCACAAACGTTCCAGTAAACACATGACTACTGGTTCTTTTCTAAATGTAGGAACAC  
CATTTAGGTATGCGACAGATCACGCGTACAGTCAGATGACTACATCTTTCATTATGCCAC  
GGTCCCATTAACTACTGCATTGATTGTAGCGTGGACTGCTATATTTTCCGCTCAGTCAA  
AGCAATATATAGAAAGGTATGATGATTTTGTTCGTGGATCACTTAGATTATGTAAATCGG  
AGACAGTTGGAGAAAAAGATGTAGTGCAAGATGAGACAATGATAAACGTTTTGAGGGATT  
CATGTGATCCTTATCCAATTGCAAACATTATAGAGTCACCGCGGAATGGGAGATTAGAA  
ATGCAATTCACTTTAACATTGGATCAATTCATAAAAACAATGACACCTCTTGAGCAATGA  
TTCTGTGAGTTGGACTCTTATAGTCACGCTATCGTCTTACAGTTGCGGTTGACTTCAGTG  
ATCCCGGCACATATGAGTTTCTGGTGAATGTAATCCATTTACATCAAATATTCCTGAAC  
TTGATAGATATAATAGTGCGGTCTTCTAAAAGCAA AATCGACTATTACTTCCCAGATAAC  
CGAAAAAAAATCCCCTAAATATTTGACCCCCGGGGTTTTTACTAATTAACAATACTG  
AATTGGCCTACTGTCAAATAACCTACGTTATATGTACCACACAACAACTGAACTACCG  
TCAGATGGTAGTACGGTGAATTATAGACGATTTCTTGGCAAAGAAGAGAAGCTTTTACTT  
CTCGCAACTCAATCTCAAGAGCAAGAAGAGTTAATTGTTGCTATTAAAGTTATCATTGCT  
GCTAGCACAGATGTCAGGGATATTCCTAACTTGACA ACTTCTGACATTGTATACCATTC  
GTTCAGATCAGGACTAAATCTGTTGGTGACACTATAAAA ACTCTTTTTGATCGGCCCTTAT  
GAAGGTTAAACGACAGTTGAAGTAGATATTTGCCTCAATAAAAATCAAAGTCACAAAGACT

AGAGGTCCAAAAACCGGTCTTCGCATTACTGATGAAGTCACGGTTAATATGGGGTAACCC  
AGATTAGAACTTTTGTAAATATGAACTTTGTTGTTGTTGGTACGGAAGCAGGTGTTGAT  
CAAGCATTGAAATGGGAGGAAGTTGGATCAAGACAATTTCTGATCCAGTACAATTTTAT  
TACTGTCAGGACGAACCAAAAAAGAATTTGAATCCTTCTCTGAAGGTCTGGACACGAAA  
CGGTTCCCATGGTTCAAGACTTTTTTGAACGATGCCGAACTAACTCACTCAGTGAAG  
GTTACGAATCCCAACACAGGTGTTGAGAGTGATGTAATTCTGGCGGGATTAGTAAGTTTT  
TAGGCATAGCCTTTATGCAGATGGACTTGACGACATATTGTGAGAGCAAAGTTGAGTTAA  
TTCACGACCCCAAGGTGGAATAGTGAATATATGGACAATCTCATGCCATGGGAAAAGGAAG  
TCTATATGAATCTTCTAGTTAACTTCTTAAAAGAAGAAGGAAGACGTATGACGGAGCAA  
AGGCATAAGGTGGCTAAGATATAAGTCTATAAGTTAACTATCCTGGATTGGCGACTATT  
AAAAATCTATCGTTTGTGCTGCGAGACAGACTATCCTTGGTCAAATAGTCTTGGTAAG  
TCAGTATAGGGCGTTGGATCTTAAGTCCTTGAATTAGAAAAAATCTCCTACTTGGGTCTA  
GGAATACAAAAGAAGACGGATGCAGCGGAAAAAACACATGACCAGACAGAAAGAGGTGCT  
AAAGCTGAAGAGTTGACAGACAAAGGTTTATCAGAATATTTCAATAAAAAGGGAAATGAA  
GCTAAAAAATTTAAACCAGATAAGAATCCCAAGAGTGCCTTTAGTAAAATGCTTGGGTGG  
GTAGGTCATCGGCTACCTCCATTTGTAGATCTAGCAAGAAAAATATGTAGTTTGTCTTA  
ATTAAAGAATTATTAGAGTATACTGCAGATGAAGTCAACTTTAAAAAAAAGCGACCTTC  
CTAATGAAGACCCACTTTGTCGTTTGGGAAGATATATGGCTTTCGTAATGGTTAATTAAG  
GATTATATCGTAGATCGTATGGTCCAATTATTTGGAGATAATAACAACATTATTAGGTAGA  
CTAGGTGAACTCGAAAAGTTTTTGTACGATCATTGGGTGCAATTAAGTATGACCCCA  
TTCAGTGGTATTGCTGATATTATGTTTCTAGCAAATCTTATTATTGCCACTTGATTCTTT  
CCAGGTAACGGTAGATCTTTACGGAATATTAATCCTTACAGACCTAATTTAAAAGATAAT  
AAGATGAGCTTGAGGAGTACAATAAGCGCGGGGAAACGGATGATACCTGGTGTCTCAGT  
GGAGTAAGAGAGTGGCTTCGAATATTCGGAACGACTGTAGGTAAATAATTTACTCAAAGC  
ACTAAGACAGGTATAAACCTTCTTCAAAGACTTACAGATAAGTTAAAGAGAGTTGTTAGA  
TCAAACGACGATACTCAATCAGGAAGTAAATATTTTACTAGTGCAGTTGATATGATA  
AAGAGTAGATTAACATAAACTACGACTTCAGGAATTGAAAAACCGAATCTCAATTTGAAG  
GTGCAACCAACCACAATTAACATCCCAAAGCTATTAAGGTAAAACCTAAAGCGGGTAGA  
AGACCACTGGGCGCCCTTCTAGCGATTGATCTTGATATAGGAAGACAAGCGGGACTTGGT  
TTTATAGAACAGGAGAAATGTCAAATACCTCATAACGTTTGTGGGAATGAGTAAGAGG  
GATCAACTAAAAGAAATCAACTGAGAACAATAATAATAGATTATGCTGAAACAATACT  
ATTGGTGTCTTACTGTGTTTCTCAAGAAATTTCTACTGGAGGTGGATGGTTAGCGACTAAT  
TAGGATAGACAACTTTGATGAGGGAGACTAAGTCCCTGAACGAAAACCTTAGATAATC  
GGAACGGTTGACCGTTCTGCTATGAATATTAATGAGTATAATTAGTTCTATGAAAACCTA  
AAACCTGTGAACAAGGATACTACTAAATTTGATGATCTGCTTCCAGAAAAGGATAAAATA  
TGGTGGAAACCCGACAACCTTGGTCTAAAGCAGAAGGGGGTCACTAACCAGAGTTCTTTCTC  
GGTGGTTTATTTAGAGCAGGTAAAACCTGTAGCTTGAGCTGTAGTTCACACTGTCACTAGC  
GTTGCAAAGTCTGTATGGTATGGTGTAGTAAGATTGATTCAAACCCAATTGTATCTGCT  
CTAGCGTCAATGATTACTGGTGATAACATTATCATATCTGCTATCAACGCAGTACATGCA  
CGTACTTCTGGTGTATCATGGGTACTACAATGAATCCACTTGGTGGTAACAGAAATTTT  
GCTAATATCAATACAGTTAATGCTATTAATCAGCCTACATGGACCCAAAACCTTGAGATTG  
AGTATGAGTGAACAAAGTGTCTCAAACATGTATCATGGTGCAGTCAATGCCGTATCCGAC  
ATTAGTAGTAGATTTAAGGCTTTCTTTGATATGTCAAGAAACAGCACGTTTGGTAAGATT  
GGTATTGAAGGCTTTAATGGTCATTTTTGTGGTGATATTGGTACTATATTAGGAGAGATG  
TCCAGTTTATCCCGAGGTCTTGAGACTTAAGGTAATAGGTTGAATAAAAATAAATTAGAG  
CGTATCGTTGGAGCAGTTGCTGGTCTCGGAGGATAAGCAACTAAAGTCCCTAATATATTG  
TTAATTCCAGGCATGGAATCTATCCTTGATAAACCAAGCGAGCGTTTGGAGTGCATTAGGT  
GGTATTGGTAATATTGCTGACAAAGCAGGTATGAATGATGTTTATCAAGCTATCATGAGT  
CGTGTTCATCTGGACACTTTATTGAAGGATTACCAGAAGTTGCTGCTGATATAGGCGAT  
CATCCGAAAGTTTTAGGTGGACTGAACTGATGACGGGATTTATTACCGAATAATCCGTTT  
AAAACAGAGTACGCAATGAAGAGGGGCGATTGACTTTATACCTGTTCCGATGATCGTAGAA  
AATATCGTTGCAGCACCTACACCTGTACCAATAAGTAGCGGTGATACCCAATGAGAAGCA  
CCATCCTCTACAATAACTGATATTGGCACCAGATTACAAAGGTGCGAACTCGATTTTT  
CTAAGTTTGTGGACCCTAATGCGGCAGCAAGCACTACTCCTGAAGCTAATGCCAAAGGAG  
GGAATAGACAATTGAAAACCTTATGAAGCAAATTACAAGAGCAATTAATGGTATGGGTA  
GAGTTATGACTTCTCTTGGCAGCACTATAGTTTCTATCACACACGTGCAGATGAGGTTGA  
TGTACATAGATGAAGATAGATTTAAGACACGATCATTCATACCCAATATACGAAAATAC



AGCCTCCTCGTAAAACATACGCTTTTGTAGTTTATTTAAGGAGAAAATACCAGGTTTCG  
TTCAAATACTCGCAAAAAACGCAAGTGCCTTGGTAAAGTCTTTCTTCTTCCTTCCTGCTC  
TTATATGGTTATCTAATCCTGAGAACCAAGCTAAGGTTGTTAAAGGCGTCGAAGTTCCTG  
CTACAGTATTTGTATTTATTCCATCTGTCGCTACAGTTGCCTTTGTTTCGTTCTATAGAAG  
GCCTGTACGATCTTTTAAAACAAGATGCTACCTGGATGGGCCACTAGGTGGTTTTACGA  
GCGCACTTGCAGGATTGGGAACCGCATTTCGTGGCATTAAACGTGTCTTACAAATCCAAAAG  
GGGCAATCATAACCTTATCAAGCGTGCTATTATTCTTTCACCAGGGTGGCCTTGCTGCCT  
TCTCCAAACTTGCTACGCATTCTTTGATTGTAGGCCAGTAGGGTTTCTTCTTACAAAAT  
ATTCTGATCAAATTCCTCGTTTAGTCCAGGACAATGAGGGGGCGATTGCAGAAGGTTTAG  
AGACAACAGCAATTGAATCTGATGATATCATCATTGCAGAATCTGAGGAAAAAGCACGAA  
GAATCTCAGACCTTAAAAAACAAAAAGAAGATCTTACCCTTTATTATAGGTAGGTTGGTA  
AACGAAAAGGGATTGAAGAGTTAATTTCTCACTTAGAAAATGGTAAACTAAAAGTCATG  
GAATTTTTGAACAGCGAGGCTATTTAGATGGTTTTGCTAAGGGGGGTTGGATTTCTGGAC  
CTCTGGCAGGATGTCCTTTATCTTTAGATGGTTAAAACCTGATTATATTGGACATGCAA  
CTGAATATGCTGCACAGGAGTAGGTTGGGGGTGCATTTATTGTTCCGTTTGATACTCGTG  
CAACCAAAGAGGATCCTGATCTAACATCTCGAAGAAGAAGTGAAGCAACACTACTGGGAT  
TATTCGAAGAAGGTGGTGGGTACGATTAGTTTGCTAAGAGAATAATTAAGATTCAGTAGG  
GTGTCAGACCAACAGCAATATCTGAACCTAATGGTGGAAATGTCATTTGGCTATGGTTATG  
ATACTAAACCTTCTGATAATCGCCCTCCCACTATTAGTAGAGCGTTTGCAAAGCAACTGT  
TCTAACATGATTATAAAGATCATGAAAGTGCTGCTACGAACAAACCTGGTTTCGGCAAAT  
CGGGTCTCTACAAACGGCAGCATTGGTTGACCTCGCCTATAATCGAGGTGCAGGATGGC  
ATACAGGAATCCCCAAGTCCATGTCAGGGTTCAACAAACGTGAATATGATATCGCAGGTA  
ATCAATTAGAACATAGTCTTAGGTTTAATAGAGTTGGATGTAGAGGACCTACAACCTTCA  
ATTTGATGAACAATAAAGGTTTGGGAGACGGTATGGGACAATACCTTTTCGAGAGAGGTT  
TAGTAGTCCCTATAGAGGAGCCGAAATCAAATAAAGGATTTGACTGGACATTTTGATTGG  
CACAAATTTTTGGGGGTGCCCTGCTGCGGCAGCAAATTAGACTCTACTACCAATGAGA  
ATAGATGTGATGGTTTGGAGACTATTACTAAAGGTGATTCATATAGAGACGTGGCTAGTT  
AACATGCAGATACATGTCCTGGATGGGGTTTCGAGGGAGTTACCTAAAAATTTGCTCGTC  
CTCTGGTATTCGCCCCACCTGCTGCTGAGATGTCTGCTAAAATGATGCAAATATCAAATG  
TTATGGTAAAAGGTCATGATGTTGCACACAAGGGTAGATGAGCATCCAACAATAAAGAAG  
TTGACGGTTACAACAACCTCACTTCATTGATAGGGAGAAGGCACAAACATGTCTGGTGCTT  
CAAATTCATGGATAACTAACAAATGCTGCTAGATTTGGTTGGAGTTATGGAGAGAGTTACG  
GACCTCGGAGTGGTCGCTATGATGACGAGGGTGAAGGTGCAGGTAAGACTCCGATCTTAG  
GAACAGCTAGATCTCCTTCTTATTGGTTCATAAATTTACAGAAAGAAAACGCAGTAAGAA  
AATTACTGGATTCAGGTAGACCATCTAGATTCAGTTTCTATGGTTACAACATGATCAAC  
CAGGATCTGGAAGACTATTGCCTGACGTGTTCTCGCAAGGAACATTTGGTAATATGGGAG  
ATTTCTTACAACCCATGGGTATCAACCAAACAGATTGAATTCTCAGAATAGAGAGAGTT  
TTGCACACAATATTAGTGAACCAATCGGAGCCCAGAAAGGAAGTATCAAAGATACCGAG  
CAAGAGGAGCAGTAAATGCACACGCTTCGGAGATTGTGCAGATGGCGTTAGCTGTTGGTG  
AAGTGCAAGATCGTTCCATTAGGCAACTCATTTTCGACGGCTGAGTCGGCGTTTACGAGTT  
TATTTGGAGCTAGAGAACGTGGAGCTACGGTCGCTAATGTTGGTGTGACAACAGGAACAG  
TATTACGGACTTCTGTTCCCTGACTTTACTTCATTTACTAATCCTTTAAGAGGTATCTTCG  
ACTGAGTAAAAAATCTTCTCGAGTAGGGACATTTGTTAGAGGACAGCGAGGTCAGATAGA  
GGTAACTCTATCCATTTACAGAAATGCAAAAAGAGTGGACACTCCAGATGGAGCATATGA  
TTTAGTTACATTTTTAAGAGGGTTTGAATTTATAAAAAGTGGTGCCAATCCCTGCATGGA  
CTGCAGTATCCGTTTAGAATATGCATGAGGACTTATAGGATCTTTAATAGGAAATGAGGC  
ATTTACTATTCAAGTTAGACGATCTATCAGATATAGAATTTACAATTTTCAGATCCTAGCA  
AATTCATCAAGAATTAGGATTAGACAACTAGTGAATCTTTTTGAATTCCTGTGCTTC  
TGCTGAATATCGAATCAACGAACTACACATGATTTAGCAACTTTGAACCCATTTTCAA  
GAATGAAACAGAAGCTGGTGCTATCGTAGAATAATTATGACGGAAAGCTTTTATAAAACC  
TGATAAAAAAGTATATATTGAAAATACTATTAACACACTGTCTTTTATATCTGCGAACTG  
GCGAGTATTTGATATAACTTATTGGGTTTCACCAAGTAGTATGCAGGAAGCCAGGAAAAA  
GGGTCTTATGTACGACGGGGTTGCTTTTTTTGAAAATGCACTTGGATTTGATTTCAAAC  
ACTTGACTCTATGATTATGAATAATGTTAAACGAGAGGAAACATCTGAGACATATATAGC  
ATCAGGTAAAACAAGAGTAAAGTCATATCGTTACACACCTAAATGAATGGGCGAAGTAGC  
TGTTGATCAATTTAATGTGGATCTTAGAGCATTTCCTGATGAGAAAAACTTTTTGATTGG  
TTCCGACTTGCTTCTTGGTCAGGATATAGTGTTCGTTAGGAGCCTGTAATCAAACCTG

ATCTAAAAGGGGAACCGCTTAGATTTATATACAAACGCTTGTGCTATTTCGTACGCTGA  
ATGATGGACAAGAATGGCACATTTGAAGGGTGGCAAGGCGGTAATTTCCAGCAAAAAAT  
GGATAATTTCTCTAAAAATGCTGCTAATTTTCCTAAACGAGTTAGATAATCAATCCTTCC  
AATTAATAATTTTTGATGCTACGTGTCAAAAAAATCAGGAACGAAATTATGAAGAGCTATT  
TGAATTACAAGAAAGTCATTAGATGCGTATGGAGTCTTTACAACAAAATCAAATTACTAT  
CATCTTTCGTGTTAATTTTGATTTATAGGTCGGTTCGGGGGTTAACTTAAATATTCCTCC  
GACTAATGAAGAGTATGACACAGCTGAAAGAGAGCCTAAGTATAATGGTTGATCGTTGAT  
TGCTCCAGTAACACATAAGGCAGTAGGTTTAGACGTTCAAACGGTACTCGCTCTAACGAA  
AGACTCGGATATGCCGAATCTCTAACACAACCAAGAGGAAGGCATAGCATAACTTAACCT  
CCAGACTCACATTTTTTACAATATAATTATATATAATAATGTATCAACGGGGAAAACAAA  
TGGACACTATAGAACAAAACATAAAAAAAGTCATAGATCTAACCGGAAATTCTCAGACAT  
GACCTTCCGCTCGAAGAGAGTTTAAACAAGAAATACACGAACTAGAAGAGGATGTAGAGC  
ATCACACAACTGAAATTGAAGGAGGACATCATCACGATCCAAATGCAATTGTACTATATT  
GTGATGAAAACCCAGAAGAACCAGATAGCCTAGTTTACTGCGATTAATTGTGCCGGCTAA  
TATACAGGAGTTTGTGACTTTTCCTTATAGTGATATGAACTCAAAGATTTTCATCTGTAT  
GTGGGAGAAGAAAGTTCCAGATGAATTATGTGATCCAAACGTACACTATCTTGTGTATCA  
ACCGTTCGATAAAAAATATTGGTATTGATAACGCATTCAGAACCGATCGAAGTAAGTTTCT  
TATCGCAATTAACCACAGCATAAAGGACGGCTCGGACATCTTAACGATTGCCTAACCCC  
GGCAGCATCATAATATGCAAATACATGGGGCGCTTTAAAGGGTACCTATTTAACGAACAG  
TGATATTAAGTACAAAAACATTGTCTTGTGTCAGGGTTATCATGTTTCGCATTATCAAAG  
ATATGGGATGCAATCTGGCATGAATGAATTGGAGTGGACTATCTGCTCAAATCATATGCC  
TGAGGGAGAAGGAGAAACAGAATGTTTATTTCAA AAAAATAGATATCAACCACAGAAAGG  
GCACATCTTGATCATCCCTGCATCTTTTAGTCATACTCAGAGAGGCACCCCTCCATATCC  
GAGAACCAAATATATTGCAACTGGTTGGTATCTTTGTACACCACCTGGCGGTATTCATAT  
TCAAGTCACTGCAGAGTAAGCGGGTAGACCACTGACTACAGTTACTCATCGAGATTGCTA  
TTCTTCACCTGATGGTGTAGACATGAAAAAGACGTTTATATACTTTCAAAGTCTAGGAT  
ATCGTCAAGTCAACCATTTGGTTAGGATACGTTCAAGGCAGTTCAACGCCAAGAGGTTAT  
TTAACTGTCAGAGGAACAATTGAATCGGCTGTCGGCCGACACCCATCTCCTAACACAGAT  
GTAACCTTCTGGTGCTGCGGACGAAACGCTGACTGTAGCAGTTGTTGTTATGACACCTGCA  
ATTCAAGATTTGTCAGGTAATATGCTTGGTGTAAGTCAACTTTTACAAGTTGTTCAAAGG  
CTTAGTAAATCGTACGCTGGGTTTTGTAGCTCAGGTTATCAGAACAACACTAATGACTTA  
AGTGCTATTGGTGATTGGTATAATGACATTTTCGACTACAAAAGCAAACCTAAGATTTTCG  
TGTCAGATCAAACTAAGATGTATGGTCCCTACACACGGCACGAATAAATTTAGTTAGGA  
AGATGAATAGGTAGTGGTGTTTAATTTTCGTTATTGCATGCCTATAGACCAAATATCACA  
AGTGAGACATTTGCAAGCATTCACTGCCAAAATGGCATCGGTGCTATTCAAGGAGAGCAC  
TTCTTAGCATTTCATGGATACGCCAAACCAATCTGCACCGACGTCACTTCGTTTCCAGCAA  
TACCTAGGATGTTGGGCAGGAGGAACTATCGAGTTCCGGTAGTAGGGATGCTAACACGAT  
CGGAACGCTCGGGGTATGGTGGTTATGATCTGCTATGAACTTGCATCTTAATTTTAAATT  
ACAATGACACCTCCAGCTCAAATCGTTATAAATCCATGTTAGGGTTCTGCCAATTCAAAG  
ATTGGACCTAATTGTGTATGGATTATCTATGAAAATGATCTGTGAACTCTTGGATGGTCT  
TCTGATAGTAAATAGCCTTGAACACTGCTGCTGAAATAGTTCCCTAAATTGCCAGTTAC  
ATGACTGCTTTGTATGCCAAGCAAATAAACGTGATGGACAATCCGAGTAGCCAGATTTG  
TAATCACAGGTCGCCATGTGGTATCTAGCCATCAAGGACAATACGTTAGGTAGTGGAACA  
AGGGTTGCAACAGTGGAAGCAGTAAAAGCAATTCATCATAAAGCTAGATGGTGGAAGGTT  
ACGTTCTAGGACAATGGACAATAAGATCTCAAGCGCAATCAACACCTCACCATTTTTCTA  
GTGTTGAACTATATGGGAGAAGGTAGAGGGTGGTTATCATTCAAATAATTTTTTCAGAA  
GAGATGGTGCTAATAAACCATATAGAGTAAGATATCACAAGGTTAAAGTAACATGCGTTG  
CTAAATTTATTTTTCAAACCTATACATTAGACGGGACAAGACCAGAGAATTGTGAGATGA  
TATTCACATCCAATGGTGAAGCATGGGATGGACACCTAATAGGGGATAAATAACACGGGTG  
CCAAAGGCTATAAGATTGTATCTGAGATCACTGTTTCCGGGAATCGACTGCTTAGTATGG  
GTCTAGTATAAGTTGATAAAGGTAACATGATATGGGGTAGTGAGGGCATTTATAAAATCA  
CTCGCTCTTCCGACACTAAAAAAGTCTTAGCAGTCTCTAAAACCCGCAGACCTTTGTTG  
GTATTGTAAATAAACTTACGGTCGATCTTGTAGGAAAAGATGGATTTTTCTGGAGGGTTG  
GGGAAGCAGGACATGATGAATATCCTATCGAATTAGGTAGGGTAAAAGTCCGTGTGTTTC  
GATACGTTACTAACGTAAGAAGCGGAACAACCTACCGCTCTACCTACAGAGAATTTACCTT  
GGGCGTCAAGTTTACAACATACTGGCCTGGCAGGAATTGACGGACAAGGTTAAAGTTCTG  
GACAACCTTTAACCTGTTGCAATCGCTATGGCATTCTTTATGGATAGCGATCAGGCACAGA

TCCCTATTGTCGTGGGAGCTCTGCGCATTTCAGAAATTAACGAAACTCAAATTTAACACC  
AATTTGCTTTTACTGGTCAAGTAATGGATCCAGGTCTTCTGGTTAATGCAACTGCATTAC  
AGCCCGGAAAACCAAACACTCAACAATCGCAAGAACTAGAGTAGGGGGTTTCTGACAAAAG  
GTGCAAACAACATAGCTTGCCTTCTGGCAGGAAAACATGTGAGGAACGAGGACGGGTTT  
CTCCTAGGGATCTTGGAACTACCGTTCGATATGAATGCTAGTGTAAGTAGTACGGTCAAAC  
TGTGAGATCCCGTAAAACCAATACACTCTGGTACCGGTGTTGGTTGAGCTTGGAGAACAC  
TCGAATATAAACTTTGATAATTTATTGAAGATATTGGTGGTCATGCAGGAACACTCTGGTAA  
AAAATGAAGACGGGGACTTCTGGATCTGATGGCGCGAAAAATTGGAACACTGCGAGTCAGT  
TAACAGGTAAGGTGAAAAATTTCAAAGTCTGATATTTAAGCAAGTCGTTAGTGATTTCA  
GGCGAACTTTGGCAAACCTTGCCTACAATTAATGTTATAACTATACTTGCAGGTGCAA  
CTGTCAATTCTATTTTTCACTTTTACTTCTGTTATTGCTACAGAGGAAAAGATTTTGAGTG  
GTCTTTGTATTGTTTATAAAGATCATTGAAGACTCATTAAATCTGCGGTTGATAGTCTGT  
TTAGCATTGTAGACAATTCCCTTGAGGGTATCATCTCTCAAGCACACATGGTAATGGACA  
GTTTTTCAGAGAGTCATTGATGTGATTGTTAGATCTGTTCAAAGGATTCTGAACGGAGCAC  
TCGGCAATGTAAATGACGAATAATCTATTGTCTCTGGCAGCGAACATGGACGAGAATTCA  
TTAAAACATGGTAACAAGGAACACACACTCTGAACGATCTTCTAAGTTTAAATCTAAAATG  
CCTTAACTAACTTAACTGGGTTTATGGCGTTCTTTCTCAAGTTTGCAGGAAGTAATTGTA  
ATCGTAAACTATCTGGTGCAGGAAAATGATAAAGGAGAGTATCCTCTATTTGGGACAACATA  
ATTGCTCACCTGAAGAACACGCTACTATCAATTGAATTGGAGGAAGACATAGAGGTGATT  
GTGGCGAAGATGTTAAGGGTTGCGGAATACTTGATAATATTATTGCCCGAGCTGATCCTT  
ATTTGTCGGCTGCTTAAAACACTGTGCACATGGTGCATCTATATTATATCTTGGCACACCAG  
GTCGTTTAGCAATCATAATCCGTAAAGAAAATGGAACACTACATTTCCCTCAGTTAAAATAA  
GTCAAATAGCGTAGGCTAAATATACTTTCAAGAAAGCATTGCGTAAAGAAAAACCGTATA  
TCTCTGACGATAAAATAGGAACACAATTAGTTGAGTACAGTAAGAGACCAAAGAAAAGA  
ATCTTAATGTCCTGGTTGCAGATCACGCAACGTACGTTGTTAACAGCCCTAACGAAGTCC  
ATGGCTATCAATGCGGAGCAATTGATGGTTCACAGGGTCTTGTATTGAAGGTGACTATC  
TATTAGACATGACAGGTGATTGTCATATTTGTGCTGGTCGCTCCTTTAGGCTTAATGCTC  
AAGGTGCGCGTAAACAGGCAAAACAAGATGGAACCTCATCTGATGAAAAAATCGTTAAAG  
ATCATTCAATTAACATTTGGTTCTGACGTTGATATGAATATATCAGATGCTGGATGTACCT  
ATGAAGGTTTCAGGATTTAATATGGGTGCGGTCACTTCACAAATTATTGGATCTAACTTTT  
AAATTTTCTACATCAACTAACATTGCTATTGGTGGAAATTTTATGAACTGCTGTAAACT  
CGGTAGACATTACTAGACCATCGATTGTAGAATTAATTAATTTCCCTCCTCCTCCCATT  
CTAAGGTTAAAACACTGGTAGTCTTAGAAAAGTTGGGTGTTCTAGGGAAACATATATGACAC  
CTGGTTTAGCTGCTGAAGCTGCTGTTCTGAGACATACTGTGCGCACTGCCGGCAGGATATG  
CCTTTGATCAAAATGGTTTGGCATAACATAAACGTAGTTATTACAGGACCAGGGCTGGGAA  
CGGCTAGAGCAGGTCTTGCTATTTTAAACGGCGGGTGCAGTAGTAAATATCACTGCAGGTG  
CTGCGATGAACATCAATGCAACAGGGGCAGTAACCATAAAAGGGTTGACGATATTGCTAA  
AGTAGTCCATACTATGTGAGTATACGCGAATACCCCTCTGGGTTTAGTGCACAACACTT  
CCGCAGAACGACAGTAGACCCCATGCAAGACCCTCAGGATGAGATAACTTTTCTTAATTT  
GTCTAGGAGATTTATCAAAATCCGTGATATTGAAGGGTACTACAAAAAATAGAATGGGG  
ATGGAATGAAGAGGGAGCGGCAAGTTAGTCAGAAATTTTCTCACCTTTGTGTTGTCCA  
TGACATTGACCTTATTACCAATGGGTTTGCAGAAACAGAATGATTCTTCCACATTTCAAT  
TTTGGTCCCAACTTTACATTTCCGATTTCTCTCGCAGTAATCACTGTATTGTTTATCTTC  
TCTCGTATGTACATAGGTTTCTTTGCAGATGAAGGTTTGCAGGCCCATGTGGCGACCAC  
GACGCTTTAATGTATGATTGGACCAATTGGCATTAGATGAGAGCGAGCAGATCAAAACTT  
TCATTTTATGATTGATCTAACAGCAAACATAAATAGTGTGTTGGAAAATCTCACCAACTAA  
GGGATCTGTTATGAAAGTTCCTGTAATTGAACTTGCTCCTGTATCTGCTGAAATTCAAGA  
TCAAGTAGAGCAGTTTCGTTAAAGTATTGCGAAGTAAGACGGCGCCTGAAACGAGATATG  
CCATGTAATTGCTTTTTTCAATCAAACGGAGCTTGTCAAAGCAGCAAAGCTGCTGATC  
TAACTAATAAAGAAATGAAGATTACTTTCAATGAATACTGTAATTTCCATGAAACTTCCG  
ACCTGTCAACAGCACTAAAAAATGAGGAAAGAAGGCATTTTAAATCGTCAATCCCTTGGT  
GCTGCTAAAAAAGATTACAAGCATTACAGAAAAAATGGCAATTTGGCGGAATCGGAAG  
ACGCACCAGACCTAAAATCGGTTGGTCATGTGCCCATGAGAGTTCATGTCTTTGTACTCC  
CACTGTCTGGGGTATACAAAGATCTCTCTCTAGACAGAGTGCCCCCGTCAAACACTTAC  
TAAGATAACATGACGGTATTAATCAGCATCTTTGTACTCATAGAATTAGCGGGAGCTCTT  
ATAGGGTACTACGATCCTTATTAATGAAAGTTCACTCTAATACGGAACTGTTGCAGCTT  
TTGTTTAGTGAGGATTTTTATACAGATGAAGAATTGATCCTAGTTTGGTGAGAGTTAGAT

AATTATCAATCTAATAGGTATATACTGGATGCGAATACTAATCCTCCTGTGACAGATGAG  
GGAAAACAAAGAACTAGAAAACAAGGAAACCTTATTGATAATGTTTTCCAATTGAAAGAG  
TATTCTCCTATATTAATCTTTCTAGAAAAGTATTAGAGCCTAGTTTGATATGTCGTA  
GATCATCTTTTTCAATGGAAATATTTACAACCTGGAATATATCACTCTTTATCTTCATAT  
TATTATGATGTTGCAGATTATCTACCACAACACGATAACACCGTAGTCAGTGTGATATCA  
TGCTTGTAGAAAGTACCTAAATGTTTTGAAGGTGGGGATTTTGTGTTTGAAGATTATATA  
TTGACTCCTAAATGTAGAAAACAACACTGCAGTTGCACTTCCTGGCACTACCAGACATTGC  
GTCAATCCTTTCAAGAGGGGAGATCAAAAACAAGATCTAGGTTTAGTTAGGTATTCCTTA  
TCACATTCTTTGAAATTTAGATAATGGCGTACTTAGTTCATCCCTAACCACTCCGAATTG  
TTCGGGTCTATACAGAATATATTCAGAATTTTGCACGAGCTCATTGAGAACTCATACCTG  
GAATTTGGGTCTCAGTAGGGAGTAACCAAGCAAAGGCAGTATATGTTTCAGACATTGCTAA  
CTGCTTCAGATGCACTCATCGTTAAGTTACCTCTCAGTGGAGTTGTATGGAACTATATA  
TTGGTTGGCATGATCAGTTGCCATTTGATGTATTAACACATACGGATTGTTTTGATTA  
ATATTACAGTTGTAGCAAAACCTATACTAGGTAGATTTTCAGATCTTTGGTAAGGACAAA  
AGGTGCTAGCAGTAGAGTATCTGTTTACTATTGATACTGCACCCCGGAGTTCTCTGTCT  
TAGATCTAAACTTTTCAGATCATGAGCCAGCACATAAGAGATTTAACAGCATTACTCTAG  
ACACTGGAATGTTTGCGGCACTAGTTAATAACAGATGTCACTTCTCCGATAATAGATCGC  
TAGTTATTGATAAAGTGCACAAGACTTAAAGTCAAAGTATGCAAACAAAAATATGCAGTAG  
AAACCCTACCTAAGTGGTGGTCTGTAGGTCACACAGATGAGTGGGCATAGAAGACAGGAG  
AAGAAGAGGACGAACAAATAGACCGCACATGCGGATGACTTTCTTTAAAAATAGACCTAT  
AACAAATAGTGGGATTATCTGTGGGAACCCGTAAACTATCTGAGTTGGATACAATATAAG  
ATGCTTACGTATCGCTGGAGGCAATTGTACTCGTGGGCGTGTGTTGACCCTTTGGTTCCTA  
ACCGAAAAGCACAAGAAAATCAACTCTATCGTGGAGCTTTACAAGGAACTAAGGCAACGC  
CTGGTCTTCATTTTGCTTTTGACAGCGATAGTGTGCTATACTAATGAGCGTACGATTA  
TAGGTGTTGCATTTGGAGATGGAGGTTTATATTTTCAGTAGAGGCAGCAATACTGCAACTA  
CATCTCCGCTTTTTGTAAGTGTGTTGATGATAGTGCAGTAAACGCGGCAATTGTTCTCG  
CAGCGAAAATAACGGGAACTGTCAAAGTTACGGGTCTATTGACTATCGGTGACGGACCTT  
TGATCTTAGAATATGCACAAGCACCTAAGGCCAGATTTTCAGGTAAGTAATGTAGGCACGG  
GAGCAAATACTCGTATCGTTACACTACCTGCCATTAATCTGGTGATCGAGCAGTCTAGA  
TCGATGAGGATACACCGAAAAAACTACAAAATAGAACCATTCTAATTTACGAGGATTATC  
TCGTTACTACTAATGGCATTGAAGAGGCAAACCTTTTGAATTAACGAGGGTAAAACATCAA  
CCGCTAGAAGATCATATTTTCTTCTGAAGCCGGCACTGCAATATCTACAGAAGAACCAA  
CTGGACCTGCATCTAAACTGTTTCGATACAAAGTCAGAACAAACAGCCTTCAATAAGGTT  
TTGTTAATCTTAAACTAGCACAAGACGCTAAGGTTGAAGCCAACAGGGCACAGTTCAATA  
CGACTTCTCTATCTGCTAATTGAAGTCTTCATGGTCTGACTTATCAGTTACTCGTGGTT  
AGACTGAAGTACTCGATTACTACAAAACAATACTGTTGATCATTTCAATTCTTCAAGATT  
CAACGGTTATGACAATCAAGATTACGCTTTCAATTTGCTTACTCAAATAGTGTTTACTACG  
TAATTTGTTCAAAGACCTTGTACTGCAAACCTAAATAGCACAGGACCTCCTGATACACTTG  
CAACAGAGGCTCCTAGACAGGAGCTTTCAAATAAAACATCGATTAACCCTGTGCTGAAGG  
GTGCAAGATCTCAAACCTATAGGTAGTGTACTCTTTCTATAGGTAATATGACAGCAAACA  
GAACTTTTCAGATTTCCCTGTTTCTGATGCAACTGTGTTATCTACAGAAAACGTTACAATTG  
ATGACGTTTTCATTTGCTGCAGGTATTAGGACTGCTAACTGAACTTGTCGAACCAGACAAC  
AAATTTTGTCTACGCAGGATTTTCGACGAAAACCTGCTACTCAAGGTTTACCTGCACGAA  
ACGAACCGGCAGCGAACACGAATACGTTCTTCTATCCTGCTCATGTTGCTAAATCTGCAA  
GGATGATTAACAACGTGGCTAAAGACGGAACAGGATCAGACTTCGCAGTTGCTCTTAATA  
GTTTTGATCAGAAGTTAGTAGTAAATGGTTCCGCAGAGGCTTACAATTTACATGAGCATC  
GCGTAAGCACTCCATTTAAGATGACAGTAGACTCTGCCTTTGTCCCTGCAGCACAGGGTT  
TCACTGGCGGTCGTCAAATTAGGAGTGCTGAGAATGAATCATAGTTTAGATATGAATCTA  
CAATTATTCCTGATTATGTAGAACGTTTTGTAACGACTTTTGCTATTAGGGAGATCACCA  
TTCAAAGTGTTACTGGTAGGTTCTCTGTTGGTAATAGTATTACCTAAGGTTCCGGGGAGTG  
AAAAAACAACCTGAAGTAATCTACGGTATTAAGGGAACCTTTCCTTCATGTAAGTTCTTCTA  
CTATTCACGGGTCTGGTGCAGGATTTGCTGCAGATGACAGTATTCAAACGGTGCGGGTG  
CATCAGCTACAGTTGCATGTGGTGGTATAGGATCAGCATCTAATAAATTAATTTCTTA  
GCACATCAGACGAACTTCCGACCACCGTTTCATTTCTGCAGGAAACGGTGTTGAAGTAT  
TCAACGATAGATCATGCACATTTTCATATTGCCGACTCTACTAACTCAGGTCAAGTTTTTG  
CTTAATGAACCACTAGTAATGGTGAGTGGGGTACTGACGGAACAACAGGTAACCTCTGATG  
ATGGAACCTGAATATCCTAGTGGTAAAACCTACTAATGGCACCGTTTATACTAGTGGTCCAT

ACCCTCAACATGCTTTAACTATCACTTCACATACTTTGTTAGACAGTTATAAAGTCTCTTA  
CTGTACTGGCTTCGACCAGTAGTTCTGGTGGATCAGAGGCGTATCTTACAACAAGTCTGTA  
CCCCTTCGTTCAATGAGTTTTATATCTATGAGCTAGAGGGAACTTGGACTAACTCTAGGT  
CTATCTTTGTCCAGAACAGTATCACATATACTGTTACTGCTCAATCTTCTGGAGTGTACA  
GTTATGTTTGTAGTTACAGTTGTAATAACGTATATGTTATTAAGGACTCCTGTCAGCAG  
ACTTTGCAGATTCAGATAACAATCTTAGATAACCCCAAGTCATCTATGGCAACAAGATCTC  
CTGTGACTGTAAATAGAGTTGCTTATGCTACTACTGCTGTGGAAAATAATTACATTATTA  
AACGTGCAACTGACGCTGAGCATGCAGTCGCAAAGAATACTTCTAGTGTGTTGGACCTG  
GTGATGGATTTATTATCAACAGCACTACACAAAACAACACCTTGAGCTTTATAGGGATTT  
AATATTCCTCAACCCTTTTCAATCCCCGGACATTCGGAAGTTAATTAGAAACAACCAAAG  
CGGCCAGGTAATGTCGCTAGGTAGACTTAAGAATATTATTACGTCCAGAAGTGGTTGTTG  
CATATATTTCAACCCCGTTCGATTTTCGATCACTTAGATGCTATAGATAACAGGGGAACCTC  
AGCTTTGCGTCCGTTCAAAGTTTGCAAAGAGTATGCTTAGAAGTAGCAAGATTTTGATA  
TATACTTGGTTGGAGTAAAGAAGGGTTTGATGCTTTTAGTATCATGCTCTACCCTCATGA  
ATAGATTGTGGACAGCAGATCAGGTGATGTTTTATTAACGAACGTTGCATGTATTGATGC  
GAGATCAAACCTTAGACTTAACGTCTCATAACGAATGTTCTATACAAATATATTTTCAGTGG  
AGGTGGTATTATCGTAACTAGAGGTTGTTCTTCAGGTGCAACTGACACTCGTCGTACAAA  
GATTATTCGAAAATATGTTCCATATCCTTCAACGTACGATGCAAAGGCATTATGACCAA  
AGATCAAGTTCCTCCAGAATTGCAATCTTCAAAGTTTCTGGTGGTTCTTATTTCTCGCA  
ATTCGCTTTCTTAGACGGTCTGAAGAGGTTGTATTCTTCAAACCCGATTCCACTGAAAC  
ATTAGCACCTCAGGCTTCACATCATAGACCGACTTGTTTAGAGTTTGCTGACGTTTCATA  
TCCATTATCCACTCTTACGTCACTAGGAACAGGCCGCTCTGCTGATTACTCTTCTGTATC  
TAATATCCTGCGGAGAAATGATTGAGAGATCTATTACCCGATAATGTGGAAATATTTTCG  
CACTATCCATGATAACAAGTGTAGATCCGCCAACTGACCAGATTCAAGCAAGCGTAGAAGA  
AAACCGTAGTGCAGGTCCTATCTCCGATGAATACCCCGTCTTCGGAACGCAAATAAAGG  
ACAGACCGGAACGGCTGTCACTGTTGACGAGTTGGATAAACTCAGGGGCCACGGCGTTTC  
TTTTGGTGTAAACATCAACGTTAGTGGTGTACAGAATCAACTGGATCGCAATCCGTTCT  
TGGGGCATGAGTTTATAACGGGTCTTTAACCGTGACTACGGCATCGGCTAACCTCTTAC  
TTGCCAGATGCAAACATTTCTCCTTAGAATACGCAGGCGGATCAAACATACCTGTTTCGTC  
TGCGAATGATACTGCTGACTCAGCATCTCTGTCTGCTTTTAACTTTCACTTCGATCAGT  
GCGGGGTCTGAATGGTGTGCACGCAAACGGTCCAAAGGAAATTGTTTTACATCAATGGT  
TGTAGCACAGTTTTCTGGACTGTCCCCCAGAAAGACGTAACAGTATTTGTAAGATATAA  
CGCCTCAACTAGTAGGTATGCCGGAGCTAGAGCAGTTGATGGCGCACATTTGGATTGTTT  
AGCTAAATGTCGAAAAGGATTCGGTCATGATCCCATCAATTGCAGTGACAACCTCTTCAT  
ACAGGCACTGTACGTGTTTCGCTTTGGTATACCAAGGTCATTTCAATGCACTAAGCGGCGG  
TGATATGTCGAGCACAACCTCTAACTCTAACGTTGGTAACACTACTCTCAGATCAGCAGC  
ATTCTAAGCAGAAGCATTCTATAAGATACAGCGGGTACGATTACAAATCTCATTCCCC  
AAAAGCACTCAATACAATTCCATCAAGAGCAACAGGAACTAATGGTCCCTTCAATGATAC  
TCTTGCTAATTATGGATCAGTGAATGGTCTGATTCCAGTTATGACTGTATCGGGAACAAA  
TATTGCTACTGGTGCATCTTTCAGTTCAATTATCAAATTACCAGAGTCATTACTTTTC  
TGGTGCAAATACGGGCACCGTTCACGGGATGGTAATCTATGGTGAAGACAGATTTGTTAA  
CCAGGTAAACATGGATATTCACAGAACGAAAATAATTAATACTGCTCATTCTGGACAAGG  
GGCACTCCCGGCAGAAGACTACACTTATAATTGTTATACTGTTGAAACGTCTCCTCCAAC  
CAGGAGGGTTCAAGGTTTTTAAAGTCGGTGCAGGACTAGACGGGACAATAATTTGGAT  
AGGAGATAAAATTAACAGCTGGTTAGTTGCACAAGGTACATCTTCTTCAACGGTACAGTC  
AGCAAGCCTATAACCTTGTGTTCTGCTGTATATTGTCTTGCAGCTGGTGTGACTGGATC  
TCCATGACACTATGTTAGTAATAAAGCTACCAACAATGGTGTGCGGTTTCAGTCGTTGG  
TTGGCATCTACGTGTTTCTTAACTAATAACAGTATGTACGAAGCGTTTGTGAATAATAC  
ACAATACAATCCAGTCAGATTCACTCATACTACGTTCTCCTCACGAGAATCCGTGATACGAG  
AGACTTACAAGATAGAACATATCGTGTACGTTATGTAATAGAGAGGGAAAAGACTAATTC  
GATCCCGAGAGACCCTATCTCTGGTTTCGTATTACAACCCGTTAACAGTGATACTACAAC  
ACATAACTTACTACCTGCATTTTATATTTACGATATCGAAACTGGTCAAAGTTCGTAAG  
AGGTGTTAGTGAAGGAATATCTTTTCTCAGATTACTCTGCGGATCTCTTACATCTACTAC  
CTCTAAGTTTGATGATAGGAAGTCCTAATAGAACGTTAATGAAGTATGTCATGCCTTCGA  
CAGACATAATCCGGTTGCTGCTGGTGCCTCTGTAGTCTGTGAAGCAACCAATGTTATCAT  
ATGTCTTGTTAATTCTACTCATTGTGCAACTCCAACCTGCTGCACTTGACCCCGAGAGATT  
TTTTACCAAAAAATCAATTATAGTCTTACTGATTGATACTGGTTGCCAGAATCGCGGTTG

AACTCGTGAGTACGATTTAGTTAACAGAAGTCCTCCAGGTATTGAACAGACTGCAGGGGG  
AGGAGACGAAGAAACCCGGGAGATTACTATTAGAGAAGATAAGACTGGAGTGGTTTCACC  
ACTCTACGTAGAGTTTAGACGACACTCAATCATGCGTTCTGGTAACCATAACCATTGACTA  
TGTTGCTTTTGGTCCAGGTAATACTCAACAGCCCTCCCTCAAACGTAGGTAATAAAAT  
ATCACCTGAGCAGACAAGCTTTTCCCAGACTATTAAGAAGAAGGAGGTGTTGCATTCTA  
CTCTGGTTTCAACCGGAAACGTGATTGACAGATTGGTAACTAGGTGACGAAAACAGTGAC  
GGGTCAGATCACGAACGAAGATACTGCAACGTTGAATGTTGCTGGTGAGGAGAACACACC  
CATTGTAACGTTCTCAGAGTTAGTATCGACTGGTAAACTGACTGTGATTGGTCGTGCAAC  
TAACGCACTTGAATACTTCTTTGCAGATCATGTTACATTCCAAGGTCTATCTACATTTAT  
AAACAACATAACCTCTAAGAAATTTACCTGTAATAGCCAAGATGGTACAGTTACTAAACA  
AACTTTACTAGCACCAGACAAACCTAGTCGAGTCCCCGTCTTTCGTCATATCTCTGGATA  
TGATACCCCTCGTGTTGGTGATTTTGTTCACACATCAATTGGTCACCTGGTAAGTCTCA  
TGGTTGGATATATTACGGACCTACGGGGTATCGGTGTGGGATCACGGATACTGGTCAAAT  
CAATGTTATTAATGACTCTCGTGTAACGAGGATTGGTCTTGATGTTGCTCCTAAGTATGC  
TTCCAGGGCAAACGTCAACGGTCCAGCAAGTATTGATGGAGACTTATTTGTTACTGGCAC  
TGGTGGTGTACCGTTGCTAAATATAAAAAGAAACAATACACAGCAGACGGTAACCAATT  
AACTCTAGCTGTTGGCACATTCACATGTTCCATTCAACACATTGAGAACTCTTTGATGGT  
ATTTATAAACGCTCTTGCAAAAATTCCAGGCACTACGTATACTGTCTATTCAAATTTGTGC  
AAATGTGGTGTTCAGTGGGGGAGACGCACCTCTTCAACCTATATTTTGGATATCCTCGA  
ATCACCGATCAAAATCACGAGGAAGGTTGCAACAGAGCATGGCTATTACAAGAATTAGTG  
GAAATCAAATTTAAGACACGAGAAGTGCAATCATCACCACATTAAGTTTCTTAAGCACTA  
ATTCAGTGTGAAGATTACCTGGAGGTTCAATTGCAAACAGACCTACAGTTGTATCTGTTG  
GAACTTAACGATTTAATAGTTCAGTAGATTCTGAACAAATATGTAAGGCAGATGATGGAA  
CTAGATCCGCCGAGTGGTCACCAGTTTCAGGTGTTGCTCCTTCTCTCGGTACGGACAGTA  
GTTTCAGAACTAACACTTCACCGATTTTCAGAAAATAGTACTGTCGGTCTTTCAGCCGGAA  
ATGAGTTTGGAAACGCAACGTCGCAAGGACCATTCACAATAGAAATTGGTTATACACTCA  
CAGTAGAGTCAGGTGGGTAATGGAGTGTAGTCTAAATGAAACTCAACGTTGGGGAAATAA  
AAGGATTACTGGCAAACAGTTATAAAATAAGTGTTCCCTTCATAGCCTTCAATCAGTCTTG  
AAACAGGAGCTCAATCGACGGGTACTACTTTATGAACCAGTCACATGGTAGTTCCTTGTG  
GCACTACTACAGAGTGGGATCCCCAAGTAAGAGTTGAACAAAAGATTTTTTTAATGGAG  
AAATGCGTTGGAATACAGCAGAGCCTCACCTCCTATTTTATTATAAAGGTTGAATGTTA  
CGGTGTCTAGAACGGCTGTAGGAGATATCAGGTGACAAACAAGCCCTGCAATAGATGGAA  
ATGCAATATATAGAGCAGGTAGATAAAGTGGTATAGATTGGATTAACCAGAGGGGCACG  
CCGCATACCGAATGTAGGTTAATAATTATGATAATGGAGGTGATTGGGTATTATGCGTTG  
ATGCACGGACATCATCCTCTTGAGATCATATGAGTTCAGCATCAGTCATAATTACCGGAA  
CTACAGGTCTAGAACGAATACTAAATCTTCAATTAAGATGGCGGACAGTTGGATTCAAG  
CATGACGCACTAGTGCCAGTTATACTGGCACTTCTGTATATCGGATGCACGCACCCGATT  
TCGGTCTAGCCACGTTTTCATATCGATACCAGCACCTGTAAGTTTGACTACTAGTGCAT  
CCGAAAAAAGCCTAGAACTCGAATCTCTACTACATATCAAGGGGGTTTCTCTGACAGAG  
GACCTAATACAGGAAGTAGAGGTTTCAGAGAGCCCCATACTTCTGGTGGAACATATTTTG  
CATACGGTAGCCACGGTGAGTCAGGTAAAGACTGTGGATCCAGAGAAGATACTAACGGGG  
CATCAAACCGATACTAATGGGTAAAGTAAATTGAGTAAAGTAACTCTTGAAGCTTTGGGT  
GGTAATTCGAACACCATTGGACAGGGAACATACTGCAGGAGATACTTTGAGTGTTGAA  
GGTGACATATATCATCATACAAGACTCGTGCAATGAATGTGCCTAGAGGCACGGCTCCA  
CAGAGTCCAAATAGTCCAGCTGTAGGTGTCGTGTGATGTAATACTGGTCAAAGTTACTTA  
GAGGTTTGTAAATGGTAGGATATGGATTGATCTCAATGGTCCAAGTATCCTGCTACTTCT  
AATTTCCGGAACCTCAATTACACCCTGCTATTAGTGGTATGGCACTCAAGGTCCCGAATTA  
CCTTCTGGTCTTTATTGGATTAACCGAATGGGAGTGTAATAACTATAAAATCTATGTT  
GAGAATGATCGGAATGGTGTGGTTGGGTTATAGTTCTACATGTTAGGACATCGACCTGT  
CAAGATCACATGACTACTAGTGCTGTTTCGTATTAGTAAGAGTATAGTTCATACATTTGGT  
AACACAAGCACTACTAAAGATGAAGCCTCATGGATGAAATCTGTGATATCTTCATGCACC  
TACGCTGGTCCCCTCTATGGTGGTTGGAAGCACATGATTATGGCAACCCTGATAAGATT  
ACGTTGAGTGATAGTGCTGCTACTGCATCTTTATCATGAATTGCTAGTAATCAGATCGCA  
AGAACACGAGATTCTTTACGTACGAAGCTAGTATCTGTGACAGCGTACCTAGCACAGGA  
ACTAGAGCTTTAGGTGATCATCACTTTAGGTTGTACCTATTTTGCTTATGGTAGACCC  
CCTGAACAAGGCAACAACCTGCGGATTTAGGTCTGACAATTTGGGTGCATCAAATGGATAC  
TTATGGTTACAGTCAAATGAGCATTTCATAGTCAGCGAATTAGATGTATCTACGGAGAA

CGACCGAGAGATTAGAATGGAGACCAGTAACAATCTTGTTAACTGGAAATCTTATTA  
TACTCCTTTGAGTAGATTTCCATTTCCCATCGGTACGACTGAAGAAACACAAAGTAGTCC  
AGCTGCCGGTCATGTAAGCTGTAGCACAAACGTTTGGGTATGCTGAGGGTTATAATGATAG  
TGCATGGTATTGTGCAAGTTCGGGTGTTCTTCGAAATGTAGGAACTGGGGACAGTCCCGT  
TGAAAATTCTCAACAACCTCGCATGAGAACGTTCCGGTTCATATAGTTTCCCGCTACGTGG  
TCGTTCAAATATCAAATGTATGTGGATAACCGTATATTTGGTGGAGATTGGGTCTCGAT  
GGCAAGTGTATAAAATCTACATGACAAGAACATATGGCTCAAGCTGCTTTTCGTATTAG  
AGCTACGAATGGTAATAGCCTATATAATACATAAACATCTAAGATGGCAGACGAATTGAT  
CAATGCTTTTGTCTCTGGTGCTAAGAATACAGGGTCTACTAGCTATTGGATAGTAGCCAC  
TGAAATCTATAAAAATTTGTTTCATTGATTGTACTGCTACTGTAGAATTACTCAGTTCTCC  
TAGTAATCAGAACGCAAGACGAAGATTATCGAACTGCCATAAAGGACGTTTAGAAGACAG  
AGGTTGTAACACAGGAACTAGAGGAATTGGAGATTACCACACCTCTGGCGGGACGTACGT  
CGATTATGGTAGACACCCTGAATCACGTCAGAACC GCGGATTTGAGACGCCACGCTAGG  
TGCATCTCATGGTTACCTCTGGGTAAAAGCTAAATCGAAACATACCGAATTTTAAAGAC  
ATATCTGACATTAAGTAGATAAACTTAAAGCAAGAGAGGCACCCGCAAGTGGTTCTGAA  
GTCAGCTATGATTCGTCTGGAAATATATCTTGTGCAGGCTATATATCATTTACTGGTAAT  
GTCACTGCTGATGCGGTTATTGTCAACTCCTTACTTCTTATGCCC GGATATGCAACGACT  
GCTTTACCTGGTAGGGCAACTACCGGAAGTACTGCATGGGAAACATCTGAATAAGGAATT  
AAAGTTTGGGACGCAACGGAATGGAGAAATCTTGGTAAGGCAGCAGGCATATCAGCTAGA  
GGACGATCAGTTTCAACCGCGGGAGGATATACTATCCATACATGTACAAGAGGTGGTGCA  
TTAACTATTGATGGAAAAGGAACTGTTGATGATCTTGTAGTTGGTTGTGGTGCAGATGGT  
GGAACGAGTGTGCTGTTCTTAACTCTGGAAGAACTGACGAAGGGTCGGGTGGAGGAACA  
TGTGATTGGGTTCAAGTAGCAGGTCTCCCTATCACGTCTGGAAGTTATGCAGTTAGTTTT  
CGTAGTGACGGGAATGCTCATAAGTCTGGGTAAAATCCTGGTCTAAATGGTACGCCCTCC  
AAATTC AATAGTATTTTAGCATGCGGTGAGGATGAGGGGCCCTCAGGTCCTCGTAATAGA  
CCAGGTGGTCCCTGGTGGATTTGGCGGAGGAGCAGGAGGAGGTGGAGGTTCAACTTCTCAA  
GGTGGTTCAGGACAACAACCGTCTGCACCTGGTCAGTCTGGTTCTAATGGACATGGAAAT  
CCTGGTGGTCC TAAAATAACCCAGGATGTTACTCTGCTTCTGCCGCAGGCGGTGCAGGA  
AGATCTGGTTCGACTGCTGGAAACATTCGTCAGTCGCTGGTGGAAATGTAACATCAAGC  
GGATATTGTGGAAC TAATACACTCTACGTAGGAGGCCGAGGAGATGGCGGTGGTCATCGA  
GGTTCTGGTTCGTGGACGTAACGGAGGTTTGGGTGGCTGAGGTCACGGTGGTTTTGCTTTT  
ATCCGTACGAATAATGGTTATGGAGGTGCAGATTCACCTGGTCAAGGTGCAGGTGGCGAA  
GGAGGTGCAGGAAATCCTTGGCCAAATGGGTCAAGTGGTAATGGAGGGAATGTTCTTGTG  
GTTTATAGGTACCAGAAACCCGGATTCATCAAAGTATGTCGCATCAATCTTGGATCACTT  
CAAAGTTTAAATAGCATCAACAGGAGATTAACAAGGCATTCGCCCGCAAGGTTACAGGA  
TATATTGAACAAGATATGAGTCCCTGTTGCTTCAAGGAAACATTTAATCAGACGATAGTA  
CAAATAATTTTATTGGGAGTCATCGTCTGAACTCTACAAGTGTGGTTAGCATGAGTTGC  
ACCAGGAACCTCATATGATGTTACCTTTGCCGCAGACATCATCTAATGACTCTCCTCTAA  
TCTTCTGATATCAAAGTCATCACTAGCATATTCTGACATGACTGTTGCAGAGAAAGGTCT  
GAACTCCCCGAGGCTCCTTACCCGTTTGCCTATTTGTTTTGCTGCACCGTTCCGAGGGAC  
ACTCAAGATGGATCTGTCTTCTAATGCTCTAGGGCCA ACTTAGGATTA AACTTGATAGAT  
TGCAATTATTTTGTGCATCAGCGATCATATCAGCTACTTCAAATGGTGTAGTAGGTCTAGT  
GCTTTCCATATACAACCGAGTAAAGTTATCTTTGACAGGCCCGTGTATAAACTATACAA  
TGGGGGCTTTGTTTTGTCACCAGGATCTTCATGCTGAAGAAGTTGTGCTGCTCCAATCGA  
CGTACCTGCTTCACTTGTACAGGTTCAATATATGGGTTAACAACACGAAGTAACACACT  
CAAATAGAAACAGTTTGGAACGCAGTTCACAAAACCCCCCAGAGAACCAGACGTTCTT  
ACACCCTGTTTGTTC AATTTCAATTGAGAATATATTGTGCGTCGTGTTCTTGTGTTTTGTTT  
ATGTAAGGAGAAA ACTAAATCTGCGTTTGAATTAAGATCACGAAGCAAAAAATTTTATCC  
TGCATCATGTAAACCTTTACCGATATAAAATAATTGATTGTCTATTAACCCATTATCATA  
TATTGATATGGGGAGTTCGTCTCCATAAGATGCTAAACCCATAACTTTACCTGCATCTAG  
TTCATGAGACCCAAATGCCATGGATGATTTTTGAAATGCCGTACCCTCACCAAGATTGTT  
AAAGATCTGAGTCCCAGCAA ACTTGTGATAATTTTAAAAGGAACAGCAAGGTGTTTATC  
TACAATGGTAAAATCAGTAGCATTTGGTGCTCAAAAAGCTGTCGATAATTCTGTACGATA  
AGTACCAGATTGAAACATGTCTCCTACGATAGGTACGCCGGAACCCACTCCGTCTTTTAC  
AATAAAGCTTGCTTCATAAAGTCCACAGTAATAAAAAGCGTATGCTGCATGGAGTTTATG  
ATGTGGTAGTGATACGTGATGAACCTCAGTGTTATCCTTATCTTCTTTTCGTCTTTACATA  
TAAACTATATGGCCCCCTACCAATATAACAGTCAGCAGGTGTCAACTTGCTTACACCAGC

AATACAAATACTACCAAGGTTTGC GGTTTCAAGAATAGTCATACATTGGAATGAAAAGGT  
ATGATACTTTCTATTAGATCATCTTTCATTCTCAAGGTGGCAGACAATTCGCTATTTTG  
TAGTAAAGTAGTAGAGGCATTGTGAACTCTACTGACTCCTAAAATTATCATAGGACTTCT  
TGCTTCTGTTACATTTATTGTAACATGTTTTTTAATTATGACATTTACCACAGTGTGG  
TAAGAGACCGATATCCAACGGAAGTGTGAGTCTCATAGAGAGTGAGTTCGCACCGTAT  
GATGATATAGTTAAGGGAGCGGGTGTGAGACAATGAGAGATATTTGCTACAAGAGATAGT  
CAAACATCTTGATTTCCTGCAGCTAAATGGGTGCGAGCGTTCTGTCCGTCTTATGTACTG  
AAGTCGAACAGATATAACTTTATGTATGATATAGAGGGTCTTGTTAGAAATGGGATACAA  
CATACAGCATATGATCAAGGTCGGTGTATATTCCGCATCAAGTTGAAGAGCATGACTCT  
GCAGACGAAAATGGTCTGTTGAGAAAAGTGTCAATTTATGTATCACCCCTCGTCCCCTGAT  
GGCTATTAGTGTGGTAATTTTGAATGAAAACCAATAATGATGATGTCTATCTAGTGCCT  
AGACGTAGAGCTACGTGTATTGTCTTTGCAATTAGAACCACTCATTGAGCCACAGAGGTT  
TCTGGTTGTATTCCTAACAGTCTGGTAAGGTGGGTAATTGTACCGAGGCGGCGATGATTC  
ACAACAAAGATTGAAGTCTTATTCAACTGAAGTATTTTCGCGAATCCTCCGCTGTTAGTTG  
AAGAACCCCTTTTGAACGAAGCAAATTTGGATATGATAAAAATGACAGAATTGAAACTT  
TGTCTGAACAAGGACGAGTTCCACCTAGTGTGACGACAGAATCACCCGATGTATAATG  
AATTATACAAAGATGTTCCATCAAGTATTGCCCAATCTTAGGGGATAAGTTATATCCGA  
CATATTACTTTTATAGATTTTATTTC AAGGGTCAAGAATTAGAGAAACATCATGATATAC  
CTGCATGTATATTCAGTGTCTCTAGGAATATCAGGACTAGCCCAACTAGACCATGGCCAA  
TATATCTTGAACCTCCTAGCGGAGATGGTAAGGAGCTTTACACAAAGCATGATGATGCTG  
TATTATATTAGGGTATGGAGTTAGACCATTAGCGAGAACCGTTAAAAGGTA CTCCCATAG  
TTTACGATAACCAAATTTTGATGCACTGACTAGGGTCAAGAGAGATATCAAGCCGACTATG  
CTTCTGACACCAAGTGCTAATTA ACTAAGGCACAACCCGACATATCAAGAACCTTGTTAC  
ATTGCGCTAGGAAAAATGATGACAAGATTGTCGAGAGAGTAGACATAGTTGACGACTTTT  
ATGAATGGACGGACACAGTTGCATTAGATGAACAACGTA CTACTACTCTGAGATAGG  
TTTATGGAGACACACGTAATTGGGTTAAGACCTCAGACAATGCCAACTTTTCGTGGTCTGA  
TTGCGGGTGC GCGGGATATATATCGTCCAGTATTATATAAGTTTGTATCTGCAAAACCTG  
CAGGTTTGGACTCGAGAGATTTAAATGAGGAAACCTACAGTGGTAACCCCTATACCAA  
TGCCCTTGGTAACGAAGATCGTAATTGGGAGTGG AATGAAACAACAAAACATGGGACG  
AGGAAAAACCATGAGAAAAGTGTATGAATTTACCTCTTTTGATCTAGAAATTAATTTATT  
GAGACTTCGTGCTAAATGGTCGATAGATCATGAAAAGTTTGATTAGAACGACCCTACATA  
TTGCCCAACTATGGAAGGAGTTGAAGTTTGTCTAGACAACATCAAAGAATTTTAAGCAAG  
TTTTGCTTATATTCTGTTTACTGAACATCAACAAGCAGAAGCAGATACATGACCAGATCA  
CGAATTTATCGCGTGAATCATA CGCACGATCTTGACGAGAGAGATGTACCGGCAGGACG  
AAGAAATGAGCGAGCAGAAGGGAAAGGTGCTAAAGGTGGTGTAGATCCCGAGTAATTTAT  
GAGTGTTTATTCTTATCATTACAGCTGGACTGAGATACAAAATCCCAATCTGATTTTCA  
AAATGCAGTTAATGATTCTGGCTTAGATTGCCTCAACCCTCATATTTCTGATATATCAAC  
CAGTTTACAAGGTAGGCAGTATCATTTGATGGAAGAGTTAACACTCTCCTATCTTAATGC  
CAGCATAGGTCAAGTTAAAGAAATGATAGTTGATGATGTGGAAGCACAACCCCTCAAGTA  
AGTCTCTGCATGGACAGTCTAAAGGCAAGAAGGAACATATCATACAAAGGATCAACACAA  
CACTGACAATGATATTTGTAGTGTGATACACTTAGACGTAGAGTTAGAAATGTTCCCTGC  
AAAAAATAGATCTATTTATTATTTCTTGGACTGATTCAAACTCTTTCCGCCAGGTGTAGG  
AGACGTTTGGATATTTCTGCAACTCTTTGTCATGGTGCATACCCTAATAAAA ACTAAAAT  
GAGACGTGGCTTGCAACTTGATGTTTCACATGAAACCATATTTTAGTATTCAATTGTACT  
ATCTATATAGAATGCCTGCCTTTGATACTCTTAACGAAAGGTTAGATACAATCGAAAAAT  
ATGATGCCTCATATTTACATGGGGAGCCCTCTGTATGACAGAACGTCGCTCATACAATG  
TAACTGGTTCCTTTGATAATCTAGTCAAACGTCATCGTTTAATGTCTGGTGTCTTGTG  
TTAAATTCAATCCTTAGTTATTAATCCTTGGACGAAAAGCTATAATCGCGCTGTATGTC  
CAGAGAGACATTATCATGTTGTTTGTGACATTGAAGGAGTGGTATGTTAAAGTGATGATG  
AAGATTTATCAACATGTTATTTCTGGGACGCTACCAAACATCATTTAATCGACCTTGGGA  
TTAAGATACTAACGAAGATGGAATTGTCTAACTTATACTATCCATAGGCCGAAAGCGGGTG  
ATGTGTTGTTATTTCACTCACA ACTGTTACATGGTGTTTACCCTCATAATTCTGAAACAA  
TTAGAAAGACATTTTCAATTAATGTGGTAATAACAAATGTGGAGTGAAGTGATCAA ACT  
GATAATTTCAATCAATGAGGACATTTATAATTGGTTCATGCCATTTCACTACACTATGTTT  
GCTTTATATTGATCAGAGTTT GAGAATAAAAAGGAATAATAATTTAGCAGA ACTAACTGAC  
GTTCTCTCAACAAATAATTCACCTTATGATGTAACAGACCATCTAAAGATAGTCCAAGCC  
AACGTGACTACAGAGGTTAGGAAGAGTCACCCTATAGCAAGTCCTAATTATATACATTGC



ACAGAGTGGACAGCACCAATATAGCTACCAAAACACACAGATTTGGATGAACACGTTTGG  
ACATCTATTCTATACTTAAATGATAACTTCCCAGGTGGCCATCCTATTATTGTGGGTGAA  
AAAATACCGCCAAAAATAGGACGTCTTATCATCTTTAAAGGAGAGTTAGCACATGGAGTT  
GAACACGTCACAGAGGGTGATCGTTATACTATTTCCGGTATGGTCTAAAAATAAAATAGCA  
GTAGACAAATACAGATACTATTAATTTATTCCGAAATTCTATTTGCATGGATCGTTTTA  
ATTTAGCCCCCGAAGCTCATGCAAATCTTTCTCAAGTAAGACTTAGTAGGGACAGAGACC  
AATGTGCATGGGTATATCACATATACTTTTTCTTGATTGATAACAAAGTATTCAATCTT  
AAGCAAGAACTACGTTGAATAGTCCGTTTATCATGACATAGGTTTGAGTAGAGGATATC  
ATATACGATGTCATGGTGCATAGTAGAACAGCAAGGACAACGGGGATTTACCGAGAAAT  
ATAATGTTTCTAGTTCACTAATAAGTGATGGATATTTTTTGTCTCTCAGTGAACATAAAG  
GACGTACGCAATTCGGGGATGCTAAACATGGTTTGTCTGGTAGATAATTCACCGTTTCGA  
ATTACACTGAACCTAGCAATACAAATTATCAGAGATCAGACGTAGAATGTAAGAATTGAA  
CGATTGTGTTATTTCCCTCAAGTCTAAAGCATAGCGTTGCACCGAAACTATAGGAAGAAC  
GTAGATTCTCACTAGCATTGACTATACATTAGAGGGTGTGTTTGATGCAATGGTGAACA  
CGGTGAACTATGTGCCAGTCAAGTGAACGGTCCAGAGGCTCGCCCCTTCAAAAAAATAGT  
GTTATACACATAGGTTATCGAAAACGGAAGAATGCCAGCTTTCACACTTATCTGCATAGA  
CGAAGGTGAGACTCTTACATTAAGAGAGTTTCATGCCGACATTCCTGATGATGTTGTCAA  
AAGAAGTCCGACTTCTACATGGGGTAGGTTATTGTTTCGAGGAACTTTCATCGCAAGT  
GTATCCAACCTCAGGAAACCTGATACATACTACACGTAGTTTCTATTTTACAGACTCAAA  
ATGGGTAAGCCATTTCCGGCAGGTGGTCCGCAACAAGGTTCTACACTCATGGTAAATCA  
ATCCGAGACAAGCGACAAACAAAAGTAGTAATTAATAAAAAATCGGACATGAAAACACAAGG  
GAATTAATAAATGAATGATCAACACGCAATACGTCTGAATGAATCCTCTGATGTACCATA  
TCATAGATCTTTTCCCTTTTTACCCAGTCAGTTATGAAACCAGACCTAGATTTGCGTGC  
GTGTGCCTATAATCAGGATTGTTTCAATGAGCTGATGTACATGAGGCACCGTGTGTGAA  
ATATTTTTCAACGTTGATATCAAGCCACAACCTTAGTCATTACAGCTGAATCCGATACAAT  
AGGACAAGAGAAGTAGGAACTCACTTCCCTTGATCTAAAGGGAGATCAATGTATATTA  
ATCTGCTTTGGTAACTAAAATGCAATAACAACCTATCGAAAGAAGAAGTATTGTCATACGT  
TTCAAATTTACAGAAACGATACTATGGGGATAAAATTATTGATGAATCTCATCAGCTAAG  
TAACATCACAGAAATTCAGAATATGGATGATCAACTACATTTACAGGAGTTATACACATA  
ATGTTTCAGAAAGAAATTAATCTCTTGAAGCCAGCAATCAAGAACGGTCAGGAATACCAA  
TTTCTATACTGCGAAGGGGAGTTTCATAAACTCAAGAAGAAGTCAAGGCAATTCAGGAAG  
TGGAGGCCATCGACTATTATAGCACAGAAGGGTGGCGCTGGATAGGGAGTGTGACAGTTA  
AGTTAGTGTACACCCCCTATTGACATTACTGCTAATATCGTTTTATATTGGGAAGGTGCAA  
ACAAGCCAACGTGAAACTTTCAAGATAACGCATATCCAGAGCAATACGTTTTTAAGTCGA  
ACGTATGTAGGTGAGTTTTGTTTCGACACACCTATTAATTTTCGACATGGAAGTCCACAC  
ACATGGTAACGAATTTAAAGACATTGTAACCTCGTGAGAGTACTGGTCTAGCAATGAAAGA  
ATGTGCTGCTATAAATAAGAATGGTTATTCCTCATCTTTGAGTTATCGAACGGTCTTAA  
GGTAGAGGAAGATGCTAGTATTAAACTACTGGCAGCAATACTACTTGTCTGTTCTGATGT  
TCTAAAAATGATTAGACATGATGATTACAGACAAATTGTGGGGTGCTACGATCAAGCCGG  
AGATCAAAGAATACTTACACACTATCTGAGTTTTTTTATTGAACAAAACACTAGCTAAC  
TTCATGCGGAGACATGGATTTTGCAACCGTAGAATTGTTTGTTAACTATGTTAAGGGTAA  
TCCACAGGGAGCAAACCAGGACACGCTTCTAAATTGGTTAGATATAATTAACAAGAATG  
CGTATCTTGCTATAAAGCAATATATACTATCAATCCCAAGGTAGATAGTAAGAAAAAATG  
AAGCGTTCAATGTTGATTAACACTTGACGAAGTAATTGCGAGGGGTGTAGAATATGAACA  
GAAAGATATATTGTTAAACCTAGAATATGCAAAACGTAAGTTTCAGAAATGATAGCGTTT  
TGCCACCGAAAACCTACACCTCATAAAGATATCGCGATTACGCCAGATTATCTTGCTCAG  
GAAATCATTAAATCATTTCATCCTACTGGTAGAAGTCTGACCCTAGGAGGGGAGAAGGT  
GCGTTTTATGCTAATCATTATACGGACAATAAAGATTGGTGTGAACTACGAGAGGGAAGA  
AATTGGCTACGATATCAAATAAAGTTGATTGGAATAGTACTACTCTGCCTTGGTCTATG  
ATGCAATAATTTCTAGTGCATAGCATGGAAATGGCCGACAATACTGTATATCGAACACG  
ATCTATCGGTCTACTAGTAAACGTCGAATAAAGTGTGAGGCCATATAGCTTTGCAATT  
AAAGAGATATATACTGTTCCCCACCTACAAATCCTTGGATACAACCTAGGGTTTCAACTT  
GCTCCTGTTTATGCAAAGAGAGATCAGATAGGAAATATTATGTTTTCTTGTACTCCTGAT  
CTTTCCTGATACAATATGACTACATATTTGTGTCCATGGTACGTATGATGTTTAGTACCG  
AATCAGGGCTTTACAGATTAAGTCTTATGAATCCAAGCTAGAGAAGTAAGCAACGTCTAA  
ATATTGCTGATTTATATTATCTTGAGAAAATTATTTCAAAGATAAGAGGCATGATGAGT  
GGGAAGTTTGCCCAATACAAAGAGACCTCCAAGGTAGAGCAAGAAAACCAAGCACAGAG

CTAAGTTCTCTACACCAGGATCTTAAAACGTAGAAGTTGATGGTGCAGTATTAACAAAAG  
ATTTTTACGACGCATAAAGGTATAAGCGATAACAAGGAAGGAAGACTAGATTTAAAGTTAACG  
GACATGCTTGAGACGGACACTGGGGGTCAGATTATCCTCACGATTGGCAACGCTGACACG  
TTCGTGTAAGTCTGAAGTACACGAAGCCATTAATCCTTATACAAAGATTACTTCATGT  
AGGACAAACCAGATGACGCTGACATTGAATATAATAGGTAACGTGAGGAGTTTCGTGCTG  
TATTTGGAGAGAGGAATATTGTTATCAAAGATGGTAAGTTGTGCGAACATGAACCATTAC  
AACACGCAGCTTTCCTATGTATTGCTAACTAGTATAACGTGGCGAAGAAGACAAATACTG  
TTTACCTCAAGATGTGGTTTGTGATTGTTGAAGAGGCGGTTTTATGGGGTCGTAAAGTAT  
ATCTTGATTCTGAAGTTAATAGTTGGAAGAAAACAACGCTGCCACACTATAACAGATTTA  
CTTGGGCATTTCTTGTCTAATATGAAGTTTAAAGAAAGCTGCAGAATAACTCGAAAAAC  
TAAAGGAAGTGATACTCAGAGGATCTAATTGTCATGTGGTAGTTGACCCCATAAATGGAC  
GTGAAGATAGATTTTGTGCTATAAATGTAGCATGGAGAGAGTGGCAATAACTCAAAGTGG  
GCACGTCAAGGTTTGTTCAGCCCTCAGCGATAAACGGAAATCGGCCCGCTAAAAACATGA  
AATCCTTTACACTATTGTGTATTTATAATTTAATGAAGGTATGTATTTTAGTAAGGACG  
GTAGCATGAGAGGTGTTATCTGGAACGTATACTTAGAAGAGTTGCAACTTGCTTGGAAAG  
TAGTGCATGGTAGGGCAGCACACACGTTGAGTATGCGACATTACCAAGAGGGATTGTCC  
TCGAAGACGAAGTCGTGACCAATTAGGATAGTGTACACCCTCTGGACAGAGGGTTTTTT  
TTATGTTATACCGTTTGTATTGAAAGCTTATTATGCAACTACGTCCACACCAGACAAGGG  
CATCAATTGCTATGCAAGAGAGGAACTAGGGTCCAATCATTGTTCCAGGTGGTTGTGGCA  
AAACGTCCATCATTATTTCTGAAACTTTTAAATAGATTTACGTTACCATTTGCACAGACTA  
CAGTTGTAGTTGAACATCGTATCTTTCTTGCTAATCAACTTTGCGCAGATTTCCCGGAGC  
ATCATCTAGATGGATATCATAATCAACAGTACGATGTTGCCCATGTTCTCCAGGAGAGA  
TTCACCATTTCAGCACACCAAATCCATACGGATTAAGAAGTTGGGTTAACAACAGAAAGT  
ATCACGTTTTTGATACTTACCAAAGATCATTCAATTCGAAACGTCGTTAATGCAATTTTTG  
TAGAAGTTGATAGTATGTTCAATGATGAAGCACATAATGGTAGTGGGAAGCACTTCCACA  
TTGCTCTGTCTCAAATAGTCCAGTATGAAAAAAGGAGCTACTTCTAGACAGCTACAAGTA  
GCATGGGTCGTGGTGTATCACTTGACAGAGGTATGAACAACACCACAGTATATGGAGGTC  
TGTTGTAGAACGTTCCCGGACGGGGACTTATAAAGTGAGGTGCTAGTGTTCCCCCTAATA  
TTTTGCCCTCGAGACTCGTAACTCAAACACTCTTGACAAGTATACCGCTCAGGAGATTG  
ATGCTCATACCCTCAGAGATTTTATCGATACATGCGATGATAGTCAGATCAGCAAGATTC  
TAGTGGCATCGCATAGTCCAAGAGTGTTGCGTAAAAGGCTCGCACTTACTAATGTTCTTG  
AGAATTTCAAGGACAATGGATATGACGTTATGCACATCACATCAAAGTTTGATGATATCG  
TCAGTGGCTCAAAGTTCGGTAGATAAGAGTTTTTTTACACACACACAAACTGGGGTCCGG  
ACGATAGTAAAAGATTTGTTATTTTCAACTATACAATACTATCCGAAGGTATCCATGTTG  
CAGGTTTGACTCTTACAGTTTTGTTGAGAACCCTACATCTCATTGAGAGGGCACAAACTA  
TTGGTTCGACCATTTCGAGTTCAGCCTGATTACCGTAAATCAGTTGGTGTATGGTCACATTC  
CTGCAGGTGCATATCAATTATTCTAATAACAATTTGTACAAGTAAGAGTTCCTACTGGAC  
AAAAAATGGAGACGCACTTGGTAAAAAAGTGCAGAATCTAGTCTACCAAATTTGTTGCTG  
CGGGTGTGACCTATCGATTCTTGCTACTGAAATTAGGACCACAACAAGATACAATATT  
ATATGGGAGTTGTAGGAATACATTTCCCACTATACATGAGAGACACCAGATGTGTGTAAC  
TTCCCCCGGTATTATGGACTAAGGGAGTATGGTGGAGAGTCAGCACAAATAGTACAAGA  
ACAAACACCCGAAGAACATATTGAAAAACTTGTAAAAGTATTAAGAGAAGTTAAGAATGT  
TCTAGCAGATGATGGCACTCTATAGGTAACATAGGGCATAGTTATTATAGCTTTAGCCA  
TGAAAAAGATCCATCATAGCCAAAACAACAGTATCTAAAAGTGTACAAGATGTAAGTGA  
TCAATCAAACAACACTAGGTAACAAGTTAGGCGGATTCAAAGAGACAGACCTTATTGGTAT  
TCCTTGGTGGTTAGGGCTTGCAGTAAGCACAGTTGGGTGGTATCTTACGCAAGTTATTAT  
GTGGTATAAACCTAAGCCAATGCCAGAAAGTAGACGAGATAGGTGCGCCAAAGCGCATGA  
ATGTATTTTATTATTCTCAAAGAACAAGAAATATTATTAGGACAATGAAGCGCTGAAAGA  
ACCGGCACAAGATTAGGGACCTAGAGAGTAAAGTAAATGAAAGTTTCATAAGAATGGAAC  
TGGATTTACTCCTCGTAAGGGACTACAATGAGTTATCCTACGAGGAATAAAAGGTCAGT  
ATTGTCAGTAACTAATAAACCATATAAGGGAACTCACTTTGCAGGATTTCCCCCTGACTG  
AATTCAACCTTGGCTCCTATCAGGGAGAGAGCAAGGAAATTTAATACGTGACCCATTTAG  
GGGTAGTGGCACGACAGCAATGGGTTCTAAACAATTAGATAGGCTATATATTGGTTGTCA  
ATTGCTTGAGGAATATATATCGCTGATAGATTCAGATTACCCATAACAGCAATTAGTGA  
CTTGAGGGATTGGGACCGATAAAGTACTCCACACTATCGGTTGCATATGACCCGATAGTC  
AATCATAGTATATTCATACAACAGATTCTTATTAATCAACAACGCAAGCCTCGCACTC  
ACAATTTCTATAAAAACCTTTGCTTCAGTTTATCATCATCGGGACGGTTATCCTCATTGG

TTTGATGCAGTCCTACCTGAACAGTATAACAAACGAGAGTCAATTATTTAAGTTCTCCCA  
GGTGGCGGCATGAGATAACGTTGGTCAGAAATAGAGTATGATTTTGAGTGAAACGAATTT  
GTAAGACTTGACCCTAATCCGACTTACTACTCAGAGACAGGAGATACAGCGCCCCATAAA  
ATCGTACACTCAAATACAGAGTTCCTTGATCATTGTGGCCACTGTAGTGGAGAATTCGGT  
TATGTCTATGATAAGGGAGAGTGATTCTGTAATGACACTACACAGCGCACTTTAGTTGGC  
ATTCAAGAGGAGATAGCAGAATGATATTTATAGTAACAAACATAGAACTCTATTTAAGTG  
AAGCAGGAGACGGAGACCCCGATTTCCAATTCGCAGACCAAGATGCGTACGTAATGCAGC  
ACAGATGTCTAGGTAAATGGACAGCAAGAAATGAAAAACATTTCAAATAAATGATTTTTG  
ACTCCATAGGTTATCATCTAGCGTTTATTGAATCCGAGGTAAATGCATGACAAACTACC  
ACTTCCGAAGGTGCTACAAAGACATGTTATTGAAATTATCCAGATGAATGAAGAGCAAAG  
AACATTCTAGATGGAGGACGTCAAAAAGTTACACCCAGATTTTCCGTTTGCCATCATGGT  
GTATAACACCCACGCACGAGGCACATACCTCCCCACTCCCCACAATTGTACCCTATAGT  
ATGATTAGTTGAAGAAACAAAAGCAATACATTCCCTTCGACCAGCACCCCGAATCGCCTC  
TTCTCATTCTATAGGTTATACGGATTGCAGTCGCGCTCGTACACTTTACGTTGTTACTG  
TAAAGTATTTGAATAGTCCATTCAACGAGGATAACTACTAATGCTAGATTTTTTATTAGG  
TGTCTTAGGGGATTTTTGCTCAGAAAATGATCTACCCACATTGGTGCAGATGACCTATT  
ATATGTACCTGCATAGTCAGACATCAATATTTCTCAACCTCAAATAAATTGGTTCACCCA  
TTATATTGATGGCTGGGACATTATCCAACAAAATTCTTAATGAGATCGTTATCACGACAA  
CTCAAGAACCTGACATTGAAATTACTCAAATGTCTAAGCACTGGTTTAGTGTGATGCAGA  
CCGGAGTAAAAAAGGACAGGCATCTAGGTGCCCTATCAGTTTGCAGAGGATGGGGTAGTAA  
ATGGCAAAGACCCTAAGGACGCGGAATCAGAGTTCAGTATAATTAACAACAACCTTTG  
GCATTTGGACATGTGAGGTCTGACAGTACGTTTAGTGTACATAGGTTCCCTATTCATAT  
CCATTACTCTCAGTAACGATGACATGACTAAAACAACACCAAGAGAAAAAACCATTATGA  
AGTTGATGGAACCTGGTTATTGACACACTTAAGTATTGTGATGATCTTCATGACCCCGCAT  
TTGAAATGAATGAGGTCATGAGACACGCCTTTGAAAAAGAAGTTCGCTATCCTATACAGT  
TTAAAATAATGAATCCAAACGACAAGAAGAACTCGAAAAATTCGGTATGACTCAAATG  
AGTTGAATGAACTAAGATACCATTATGTTGACAGATATGTTGAAAATATGTCAACTCAGG  
ACTAAGTCCAATATATCTATCATGACTTGCTCAATAATGTTTCATAATCAATCAGATGTAT  
AATTTGGTGCTGAAGCGCTAACTTTTAGGATCATCCCTATGATGATGTTGTCACTGACA  
TCATAGAGTATGCAAACAGTGATTTCAAAAAACCTTTAGAGGGCATAAGAAACAATGACT  
AGATCAGGACTATAATATAAACTTATCAATTTTGTTTTAGAGGATAATCTTGATGCTACA  
TTTGTGCAACAAACAGAGGGATTAACCTTATGTTGCTTGACAGTAGAAGAGTATTTTGAA  
GAATGACAAACACTGACCTAACAAAAGGACCATTTCAAGAAATCTATGATGCAGTTAGGG  
AGTTACGTTATGAAATCAGAGAAGACTTAAAACCTTGATGGGGAAGTACCTGATACAGCAC  
ATTTAGATTTGTTAATGGAGTTGAAGACCTTGCAAGTATTCATAAGTCACTCAACAAAC  
AATTTAAGCAAGTATAACTCAATTCACCCAGATTAGGAGTGACTGTTAATTATCTGCCGCA  
CACTACTACGCGTGGGTTACCAAATACCGTAGAATACGAATAAGCCTACACAGAACAAAA  
CATGATTCTAGAAACATTGCCAGTGCACATGAATGGAGATCAACACAACAACCTTGGTAAA  
ACTCTAGAATCTACTCAGAGACATGAGTTTTCGATGTACACCCGCACTGATAGAAGTGTT  
CCCGAATATTCAAGGTGCGAGAAGGCAACGGAGGATTTGTGTAATGAAATCGGGTACATCA  
CAAGTTACGATCGTTTTGGATATTAATAAACCTTGAGCGATTTGAAAGAAGAGCATATC  
CAAAGTTAAAAGAGTAGAAGGATGTATGTTATGGTATATACTTAATCGATCAAGAGATA  
CCAATCAACGAAGAGAAAAAACAAGTCATCTTTAACAGAGGGCATAGTGGAAACTGTCT  
TACATCTATTTGCGCATAGCCACAGGACGAGCATTGACATATTTCTAACAAAGATATGGG  
CTGCACGTTATCGGGCAGGGATTGAACTAAATCAAGATGCAGAATTATCAAGCCGCATTT  
ATGATGAAAACATGATGGTGTATATGATGGGGAGGAGTATGTCAGTTAAACAAGTGTC  
CGTACGTTTACCATTAAACTCTATTATCCGTTATAATAATGATAATTAACAATTTTATT  
ATAATACAGTATTTAATCGAAATCCCAACTATCCCGATCTGAGAACCATTGAGGCGACTT  
TGCTATGACATACTATAAGATATGGCACAACAGTAAGGTCACGCGCTATTACTATGCTAT  
GCTAGGAATGGCACCCTCTGATGCAGGGCATTTATACAGATAAAGATTACTCTATTCAT  
TCAAAGGTGATTTCTAAAGTGGGTGCTAAATTTGACGTGTGCGCTAATTTTCATGAGACT  
TATAAGCAAGAAATGGAATTCCTAAAGTTTCCGATCATTACCTTCATGATTATCGACCC  
GATCTTTATTAATTTGGGATAGTGCAATACATGAGGATTATAATTGGAGAGACGATATT  
CCTCATGCTGATTGTATGTACGAAAACCTGTTTTGATATAGCATAACGAGAATAGAACATC  
AAATGGAATTGTGACGCTTGTTAAAGGGTCAAATAGACTCCCTATTCTATACATTTACC  
TTTATAATGTTAGTGTCTCCACAACCATAATGCTCAACTTTAAAGAATTTGAGAAATAA  
CGTGAGTCATTCTACAACGCATGACACCCAGATGTTTTATATCCTATTGATGCATTAATT

AGTGAAGAATTAGCCCTTGCTACACTCACATACCTCGAATAGTGGGCATCATCTGCGGGT  
CAAGTAAAATTGGGATAAGGAGATCCTTTAGACCATGACGGAGTCAGAGATTTTATTTAC  
ACAAGGAGGTCAAAAGCATGATGAAATTTAACTTCTAGAAAGAGTGGTAGGTTATAATG  
ATGTAACGATCGAGTCGAATAGCGTAGAGGAAGCTATCCATCTTTTTTATCGTGGGCAAT  
CTCCCGAGAGCGCGGTAGCGCAATACTAGTTGTTTTACGAGTTTGTATTTAGAGATATCT  
GTCCATAACGCTGGAAGATTCAACAGAAAAAGAAAAGTGGCTCATTCACTTGACAGAACT  
TACAACCGAATGGCACTATTGCCATTACTGATGACGAACTAATTGGAAGATAACCAGAA  
TTTTGACGCTATTACCTACGACGACATTTTTAAATCATTAAATGTCCAGTTCGAAGACTGT  
CATATAGTTTGGACATTCGCTTTATTATGGAATATGCTAGTAGCCTAAACAAAATGGATT  
TATTAACAACACTTATATAGTCACTGATGCCAAGATGTGAGTCATCAATGTAGTGCTCAC  
ATATTTGTTCAAGTCGGGAAGCAATCCAAATGACAAAACCGATTTTGAAACCTTTTATGT  
CTATACTCGAACAAGCGGAGAAGCTATTCTTAGCTGAGAAAAATGTCAACATCAGATCCAG  
AGAGCTTTGTGCAAAACAAGAGATCATGAGTCATCGATAGACTACGCAAAAAAGCATGGTC  
TTACATACGATCAATTTACAACACTTGAGCGCAATTCTGACAGCGGGATTCTACCACAGA  
TCGAAGCAGAATCAAGTAAAATATGTAAGGACTTGAGCCAGTGGGAATACGGTCCACAGAG  
TTCCCGATTCAACCCACCTATCTTTAAAATTAGGACTTACAACACACAAATCAATGAGA  
TTGACTAAAAAGCAAGCAGTTCAGCAATTTAGATGGGATTTGTCAGATTTCTAAAATCT  
AACCTACTTGTAGGGGGGACAAAACCTGAAAAGAGGGTCTGCTATTAATGATTTTGCAGAC  
GCTCTCAATAAAGCTTGTCTAGTCGCAGATTATCAAGCGTATAACTACTCAAACCCATGC  
TAAGGGGATTTTTAAAATGACCAGTAGTGAACCTGTACAGGAGTCACTAATGCTGTAA  
AGATTATTTAACTCGGTAATTTGAATAGGGATCCGAGCCAGCCCAGCAACAAATGTGACT  
ATACCGTTGTAGTTCAGATACTGATCTAGGTTATCATGCAAACATAAAAACGGATTTAA  
AAGCTGCAAATAAAAAGTGAAAGTGAGTGCGAAATCGACTACGGTCGGGTCTCTGTAGATG  
AACGTAACCTGAAAACAGTATTTCGCAGTGCAGGAGGAGTACAGTTAGATTAGTGGCCCAT  
AGTGACCCCATTTGTCAGTATTACCGTTATAATAATAGTATATGAAACGAACTTCTAAG  
AAACATGACAATCTTAGAATACAAAAAACTTCACTAAAACGACACTCTTATCATCGGTCT  
TGTTAAGTCTGAACAGGAAAAATCCAGAGTAGTCAAAACAATCCACGAAGTTGACAATTT  
TCAAAATGTTGCTTGTCTCCTGTGCAGACTTCTCAGTATATGTAGGAGAGTAGGCAGAGTG  
GGTTTTGATGGGCGTTCTAAGGTCGATTTTCGATGACCCTGAACTAGACATTGCTTAACC  
AGAAAGAATTATCAAACCTTACGACGGATACATTAGGGGAGTGTAATGGGACTAACCCCT  
AAACGACCTGAGTATATCATCGGTTGTCTCAATTTCCATTATGCAGAGAATGAGCATATC  
AAAAGCGCATGATCGAACTGAATGCTAGTATATGTAGTCTAGTAGCTCACCATCCACAA  
GAGACTTACAAAAATGACTAGAGCAGAGTACGAGTAAGTTTTAGAAGCATATAAAAGCTA  
GCGAGGTTCTATCTCAGATGAGCAAGAAGTATTAAGAGAATAAATTCTAGACGATCTTTT  
GTATCCAGAAGACGGTAAACTAACGGTAATCGAAGCGAACGCAGTAGTTTTACCCGTTTT  
AGACATTCCCAGAGATCTCGGAAACGAAACATCTGAATTTAAACCACTTGATTTTGGATA  
AGTCAACGTACCTTATGACACTTTGATTCTGGGCACCGGGTCTCCGCATTTGTGAGTCCC  
CCGCCCTAAAGTCATAGTATAATAAACACCGAAACCTTTTTATTTGGAGCAACGTCTAAG  
CAACAATGAACTCAATGATACGCAACGCTGTAGCATGGTAAGATGGTATTACTTGCACATA  
CTTACGTTAATGATGGATATTGCCTAGCCTACCTTCATCGCAAACCTGTGGTAACTATAG  
GCGACTCATTCTGTCAGTCTTCGACGCAGTTTTTCAATCAAACACAATAAGGCTAGAC  
TTAACGCTCTGCTACGCGAATTCAGACCACAAACAAAAGTAAACGATAAAACTATCGAT  
GGTTAATCAACGCACATAATATAGCATTGCCGTTTATCACAGAGGGTTCAGGTATAATGAC  
AGTATTGAATGGATTTGAAAAAAAGTTCAACAGCGTCCACTTTCTACACATTGGGATAAC  
ACTCTGGATCGATGACAGAAGCAACTTATGTTTCATGACCAACTTATTAATATGGTTCTAC  
ACATTGGCATCAATGGGATTATGCTAGTGAGTGGAGAGTTTTAGAAAGGGTTAAGCTCGA  
GAAATTCCTTGATGTTGATAAAACTTGTCTAGAATAGAATAATGATGGTACGGAGGATTT  
TACCTAGTGCATCATGTTCTTAACGAGTAGTCGGAATTAGTTGAAATTGATAACCAAGTT  
ACTCAGTTAGAAAAGGGAATCGAGGCCACCAATCATGCAATTAATCCTGTAACCTACCC  
GAGAGCAAAGATTATACAGAACCCTATATAGAGTTCCATCGTAATTGATTCAACAACCTC  
AATGTCATTCTAGCACAATTCAGATTATTCAGAACAATGCCATTATGGGATATAATGA  
CATTTAGAGGAGTGAAGGGTTTTATCACTTTTAAATATAATGATTATCGCACCTTTTGCA  
ATCACCAGTAGTAAAACACAGATGTGGACAGAAAACACTGCCGAAGACAATACTTACAGG  
GCAATGTACTCTTTTACCGCCATGAGCGGGGTATCCTTAAAACAACACAGGATGTATCTA  
AGGATAACGACAAGAGAATTGACGTTAATATTATGAGATAGTTATCGGAATTATTGGATG  
AGACAGCGATGAGATACTAATGCGGAAAATAAACCAATATTGAAATAAATCTAAGTGTGC  
GTTTTATCTGTGCGGTCAACCTCTCAGAGTCATGTACCCTTAGCACGCATCTCAACAGTTG

TCAATTCATTCCAGAATATGCACATTTTTCCAATTACGCGATGAGATTATTGGGAGTTAT  
GCCTTATAATAACACTGTAAGGGTTTATCAAGTCACCTGTTTGCCTTCAACTAAGTCTAA  
AATGATCGACTCACTCGATAACGAAGAGCCTGGATTACTAGGACAGTTCTCTAGTATATA  
CGGAATGAAGTTATATGTTTATGATCTCAGAGTCGAGAGAGACAAATGGTGCGTACGGAA  
GAACCAGGTTATAAGAGTATTCGATTATCTCAATTCATCGGTTATACTTGGGATTGTGT  
GACTAGTTCTCAGGTAGGAGAGAGTTGAGAATGTAATTACCCTATGCTATAATACGGGCA  
AATCGGAGGTTACCCAATTGTAACACGGAGAACAGTTACTGTTCAATTAAGAAGGCAGTCT  
TATAAGCCCCCTAAATGTTAAAGTCGCCCACTTCCCTAACGATCAAAGGTTTCGCCGAGT  
ACTTGATAGATAATTCATAATTTCAATTTACATCCATATTAAAAAAACTTTGGAGAATAAA  
AATGCCCTAGAGGGCGATCTAAAAACAAACAAACAATTTAGTGGTTCGACAAGAGCGGAT  
AAAATGGGCGATTGATCAACTAGTCAGACTGGAAGGGTATGTAGGTAACAGAATGGATGA  
ATGTGTAGGACACGGTGTCTATCTACAATTTAATGAATAAGGATTTCGCTATATTTCACT  
GTCAACTGCTTGGAAATGGAATCATCCCACTACACATAACCGCTAATTACAGACTATAGAT  
CAAGAATTATGTCCCCCGAATTTACATAAAGACTCGCGGAAGATGAGTATTGAGACTTAC  
TACTCACTATCCCCTATGAATTGTGTCAAGAGATGGGTTGGCACGGAGGAGCTGTATTAC  
AGTATGAAGTGAATGTTTATGGAACAGGTTTTTTTTTAAAGAATGTGAATGACTGAGAAA  
GATCAAGAAGAAATTTCTACAGCGTTGAAAGCTATTAAGGAAAGTTTACTTGGTCTCAA  
AAAGGATTAGAGGCATGACAGAATCATCTTTCCGAATTA ACTACGCCAGACAAACCATAT  
TACAAACCAGAAGGTGAAAGAGAGTACCTAATTATCATAGGTA ACTATGCCCTGATATAT  
AAACGTCTTAAGAACTACAACACGGTTTTGTAAGATGACTCCTAGAGGACAGAGCCATAT  
CTGTA ACTCTAATTTCCCTAACGATACTCTCTGTTAGACTTACGATCCTGAGGCAACAGG  
GCAGGGTTTGATCACTTACAGTGGATATCCGACTGCAACAATTCAGATAATACCCAATA  
TTACGTATCTGCAAGAGAAGATAACTTCCCTCATCTATAATGTTTCCGAAGTATGTCCGAA  
CACTGGTCAATCATATATTCAAACAGCAGGTGCATGTGGTAGGGTATTTAATGGTCATAG  
TTGTGTCAATAATAAATCCGGTAGATTAACCTTTGATCATGTCCCTTCAGACCTTTCTTT  
TGACTCTGCATACTCTGACGTATGTTTCTCATACTGATATGCTACGTGTGTTAAAGCTGG  
TCATGTAGAACTCCTGCGTATTAAGTTGAAGATGGGATAAAAAATAGGAGTGGAGGATC  
TGGTTCTGTGTATGGTGGTGATAAACTTACCTCTTCAACTAATTGTTTCACTTGCAGGTG  
CCA ACTTTCCCTGCACCGCAGCGACCACAGAGCTTAAGTATAACCGCTCCTATGGATCATA  
GGGCGACCCCGACTGCCCTCACCACACTCTATTGGGGTTTGGAACCACATGTCACCACAT  
CGTTTTCAAGAATGATGCGCTATACGCACAGATACCAATTTGGGGAGGTGGACTTTGAGGT  
GGCAGAAATGCGTTCATCTATCTGTACTGGTACAAGAAATGAGAACCAACCACAGGGAAT  
TCCATTCCTTTCCACTGCAGATAACA ACTGGGTAGTGGATGCTGTAGCAGGTTTCCAGGA  
TTTTGAGATACATGTCCAAAATGGAGCACAGATGACCTGGGGTTCTCTTA ACTTATATTA  
TCATGCAACTAGAGAACTTAAGTTAAAGTTTCGTTTGGCTCCGAATCTTCTTGATGATCG  
CCCCCTAACGGTACTAATTGGGA ACTAGCGGTGGTTATCAGCAATCGATCAGGATAGCC  
AGTAGTTGATACATTGAAGATCTCCTATTCACATATTCATACAAGCGGAAGCACA ACTAC  
AATTC AATTACAAGTTAGGGTAAAAGCTGGAGGATAAATCAATTGAATATATAGTTCATC  
AGGGTTTGACCTACTGAGAGCGATTGATTTTATGAACGGACATAACCATGACCCGCGTTTT  
CCACACAGATCAAGAAA ACTTCAAGTTTCATGTGCGCTACTTAGAAGGAACCGGTTATAA  
TGTTGCAAAAGATACTCAATATCCATCAAATAGGGCGCACAAAATCACCACAATAGCAGA  
AAAAGGCATGCACGACCGCGATATCTTGAATGGAAGGTATGAGCTTATCGACAAATCTAG  
GCAACGTGTCACCGCAGACGTAGATCTGGACGCACCCGACA ACTATAACTCCATAAAACA  
ACCAGATGTAACACTTTCAATAACAAATGGACGCGTAACAGGCACTCAAATTGTCAATGA  
ATGGACGGGTTGGGACCCATAGAAGGAAGA ACTGCACTTCTTGTCAACACAACAGTCAT  
TGAGAGTGGAACAAACGCGGAACCGAAGGGTACCTACTCTAGAGGAGTGCTCACAGCGTA  
AAAATAACAATTGCAGGTAAGGGATATGACGCAGATAATGATCTATTCGCACGGAAGCG  
CAATATTTCCAAGGA ACTTCCCAAAACTCAAGACAACCTTCCAATGATGACTTTACTCC  
CAACACTTCTACGCAAAAAGTTATGCAAATTTGGAATAATTTACCTAAAGCGGGGGTAGA  
TCCAGGGGATGTAGACCAATTTGCGACTGCTCAACCCGAA ACTTAACAAAGTTTGATACA  
ATTAGGTCTTACAGATAGTGAGATTAGAGTAGTTCTTACTGATAATGAGATAAAACTCTT  
ACAAATTGACGCTTCTAAGTCTCCAAAAGTGACACAAACCGAATTTGCGTCTCTAGATGC  
GACTTTAGACATCGAAGAAAGGCATACTTTCACTTAATAAGCAACTCGTCTCAATATTAT  
GTCAGAACCAGTCAGTCGAAGAGTTCAA AACCTAGGACTAAGAGGTTATTCCGCTAGATC  
TTTGGAAGTCTTCGTTATGCTACACGGGATGATCAGTATGGTTCGAGTTTCTTGTACAA  
TGCTGAACTTCCCGACATGGTAAAACCTTTTTGAAAGATGATAAAGAGCAAAGGCTTGC  
AGACAGAGATGCGGTTCTTGTGTA ACTGACATAAAAAGTGAGTCCTGAGTATACAA ACTG

TAAAGAAAACCTTAGTTGAGACTGTTCAAGGGCCGTTGGTCAATCTTCCTGAGGCAGACTC  
TGGGACTAAATATCTGATGACAAAGTTAGGTGCGGGCCCTACGTCAAAGTGAACATAAA  
CGTTAGACTTTCTATGACACCAAGTGAAGTCGGATAATTCACATTTTACTTGTAACCCTCC  
TGC GACTTCAACAGGTGGAACAGTCACAGGCGGAAATCGTGAAACTATTGTAACATCTTA  
ACAAATGTCAAGTTTACACGGCCCCGGTAGTCGACCGAGGAGTTGTAGCGGAACGTTATC  
TGTTCAACATGAACAAGGTGAGCAGGTGATAATGCTGCCCGTGCAAAGCAGCCTACGG  
AAATCCTTCCACAATGATCTCATGGCATTTCATACCAACAGCATCAGGAGGACTTGGTTGT  
GCATTATTCACGGGAACACATACTGGACACGGAATGGGAACAGTACCTTCACATCATCCT  
GGTCTTGGTGGAGGAGTATTAATAAGTTCTCCTTGTCCACAAACACCTCTTGATCAAAGC  
ATTTCTCCCAAATCACAAGATGCGATGGATGCTACAGCCTTATGGCCTCCGCATCCGCAA  
TTAACTTGTGCTGCATTAGTGCGCAATGGGATTGTTAATGGTATGATGCCTAGAAAGGAT  
TTCGCTCTTCTTAGTACTCACCTACTCCAACCTCTCATACTCTCGGAGTTGTTAAACCA  
CTTCCAAATGGTGTATGTGATCATGCTACGTCTTCTCCTGCGTGGCACTGTACAGTAGGA  
ACTGCGGGTGGTAGAGAATCAGCACCAAGGTTCATGCTGTAAGATTACTCCCTACTAGTAAG  
ACCGTATTCCTCAATGGCCGTGGAGCAGGAAGGTTTGGTGATCCTCTAGGTGATTATACA  
GTAGCGTTTCTCGCAATTCGCGTGTGGGGGGTGCAGTCCAAATAGATTACAGGAACT  
TAATTATGGCAATGAGTTTTTACTTGGGTAACACCATTAAGACAACCCCAAAGAAAACAA  
GACAATGTAGAGGCCAGCATAGAACTCTATAGCTCCCTCTCGTAACAGATCAACTCACA  
GGTATCCTTGCCAAGGGAAATAGAATTGTAGACGGTAACGGTAAGCGAAACACTCCTGTA  
GACGGGTGAGATCATTTTTGTGAACATTAATAATGAATAGTGCCGTTATTTGAGTACTGAT  
CCATGTTCTGTTAGATCCATTAGTAATAAATCTGAAGAAGAGACAAAATAACTGGCAC  
TTCTCGTATTAGATGGCGTTAAGGAAAGGATCAGATAAGGAACAAAAGAAATCTTGCTCC  
TTTACGGAACCTCGAACTTGGTATGGTGGACAATGTGAATACACAGTATGTGTCTTTTCGTG  
AAAAATGAAAATGCAATTATACAGGCGAACAAAATCGAATAATGACCACGCCTCGTGAA  
AAACCATATATACCTCTGGGAGGATCTATTATATCAAATTATGAATTGAACGGGTGGAC  
GATTATACAAGTGATTCTATCTACCAAGAGAACATAAATACGAGTAAAGGGTTTAAACCT  
CGCGTACGTTTGACAGGAGTTAGAGTACAACCTCGGCATGTTACAAAAACATTCAATGTA  
GCGATTGCGTTTTAAAACAGTTGGAATCCCAAGGAACGAAACTATCGAGTACATATTAGAG  
AGAAGTGAAGTGAACCAATAGCCTCAAAGCATTAGACTTTGCAGATATCAAAGCAT  
CAATCAAATCCTATCTGAGAAGTCGCAACGAATTTACGGATTATGACTTTGAAGTATCTT  
CTAATCATATCTTATCGACACATTACCGTTCGAATTAATATTATTCTGCATTTAATGCGA  
ATATGGCGATGAAAGAGGCAGTTCTGACTTCTGCTACTATTAGAGATAATGTTGTTACAG  
ATGCAACCCTTTTAAATTACGTTCCACGTTCAAGTACTTCAGCTAGAGCATGCTTAAAGC  
TAGAAGTCCAAACAACACAGTCTGCAGGAGCATATCCTGGCAGTATAACATTAATAAATAG  
ATGCTGTTGCGGCGGGTCGAAATTATATGATTAACATTTTTTAAAGATCTTAGTACTACTA  
TCAGACCTAGCACAGGGATTTGCACTTTTGCCGATGTAAAGATCATGGAATGTAGTATAG  
TTACCTTCCAATACATTGTATACACCTTTACAACCTCAGGTGTATAAAGTCTCCTACGAAG  
ACGCAGACCTATCTACTCTTGGTGTAAAGAGGAAAAGATAACAAATTATCTAAAACATCAG  
ACTAAAACAGTTTGACTTACACAATCACTGATTTTACTCCAACCACCCGAGCATACTTCC  
TCAGTGCAGGTGGACATAAGCGTTAAGAGGTAATAATTTGGCGATGTTACTGCAGGTAGAT  
CTTTAAACGTTGGAGAAATAGTACTTTTAGAGTAGTTGGACCCTTCTGGAACAGAAGCAA  
ATGAAATTACAACATTTTCGTTTCATAGGACGGATTACAGACAATATCGGAGGTCCATCTA  
GTGGCACATCAGTCACTTTGAGCATGAAACAGAAGTCACAACCTCGGTGCTGCCGCAGCAG  
CTTAGGAATCTAGTAAATATATGGCAGCCAGATTCTACTCCGCACAATACAGAGCAGTAA  
CAGCACAAGATTACGCTTTAATTGCTTGAAAAGAGTATTCTAACGCTGATTCTGTTGCTG  
CATATTGTGGGAGCTCTTTAAATCCCCCTATTTACGTAAACGCCTTTATCGCAATCCAAA  
CCCAAACCGGTTATTTACTTATCGACGCAACCACAAAGACAAGTTCTGCAGATTTAAGAA  
AAAATGCTATGGCAGCAATCTAACCTGAAGTTATTGACCCACAACAAATGTATTGGTATT  
TGAAAGTCTTTGCACAATACGATAGTGGCACAGCATCCACTACTGCCAACATTAATACTA  
ATATTCAGAACGGAATTAACGATTGGGCAACACAACTCAGATTATTCACATCAATTCTA  
CTTTCAGACCACAAGTCTTTGAAAACGCGGTGACTTTATCCGATAATAGTTTGAGTGATG  
TGTCTTTACAACGTTCTATCTTAAAATACATGTATCCACACACAAATCAGACTAAGACTT  
ACCGTAAATGCTACCGGTGCTGATTTATATGATAGTGCTGCAAGGAACTCCGATGGAAATA  
CTTGTAATAGGGACCTATATTTTCGTATAGGCCTTGTTAGGACCGCAGCTAGACCAGGAA  
TTGATCAACAGTTTGAAGATGAAGGTTTTGGTATCTTAAGAACATTAGATAACACCGGTA  
ATAGGCAGGTCTATACAAAAAATGTTGCAGGAACTCTAAATTATGCTCCACGCGAAATTT  
CATTTTCGTCCTGTTAATACAATTGGTTCAGGTGCACATACACCTCCAACCTGGACTTATAA

CAACAACAGATTCAACAACACTGGTGCAGGTTCCGTAATAAATGTCGATCTAGTTCCTACAG  
TTCTTCATATTCCTGTTCTATTTATTCCTGCAAAAGTTGCGCCTATTCCCTGCGGCAACAC  
CAGGAACAATTAAGACTATAATAAACCCAGAGGTTACCAGTTTCCCAGGATGTTTCGATAC  
CACCTCCAACGATACGTCAAATCAGTTTGACGCCATCAGTGTTTAATATGGTTGCCACTC  
CTAGTACACTTGCTGACATCTCAGACCCAGGTGATCCTACATCCTTTTTTTGCTTCTCGG  
TGTACATGAACGGTAATAAGGTCTCTCAGTCAGTTGATTCACGTACTCCAGCTTTTATTG  
GAAAGGGTTATCCATTTTTCAATAAATATATTGAAGATTACTATCGTTCTCAAGAAACCA  
CTGGTATAGGGCAGAACATTGTCAGTGACTTTTTACAATATCTTGATATTGATAATCGTA  
GCATCGATAGTCTTGTTGGTGCTACATAGTTGGGTGAATCGACCACCAAAACTGCTCATT  
AGATATTAGTTGAACATATTGACAGTTTTTTAACTACAGATGGCTCTGTTTTAATTGTCA  
ATGAAATAGTTTACTATGAACCGACTACAGCATCAACAAACATTACACTCTTCCCAGGTA  
CTTCTTAAGAGCACGTTATATTAATTGGACAACCTCATGCAAGTCTTCTAGATTCCTTTA  
ATGGCACTACAGTTATGTTTACTCAAACCTCTCAGAACAGTCCAGTAGCAGCAACTTCAG  
TACTGTACTTAATTCTTTCTTTAAGGAATAATGTTATCACCTGGTATTGATTACACAG  
TTGATGGCACTGCTATTGTCTTGACTATTGTTCCCTAGGACAAAATTCCCTGCAGCTCACT  
TCCCTTAAACTAAGATTCCGTATCAAAGGGGTGTTGTTGAGAATAAAAATTCTTGAAATAG  
ATAATTCATCTGGTTCTTTCGTTGTCGTTAAGAGACAGTTTACCCTGACAACCTAATGTCT  
CACCTTATGCACCTGTAGTAGGTGAATATGTCTTGGCAATTTACAATCAACGTCTAGTAG  
TTCCTAAAGTGGCCATCTTTACTGAAAAAGATCGGTTCCTTTTTCTTACAGCACCCTCA  
ATGGAAGATTTCTCTCTATACTTAATTGAAGCACCTATTCCTTCATTTGGTCCTGGTG  
ATTTGCGCACTCTAGTGTTGACCATAATGGAACCTTAACTTGCGTTTCTGTAGAAGAAA  
ATGGTAGTAATTCTCGTTTTGAAAACCTCCTCAAGTCACTCTCAAGTCCATGCGGGTA  
GCGGTGCTCGTGTAGCTACGCTTGTAATGGTATTGAGACTTTATCACTTTTAGATGGTG  
GTAAAGGAGACAGCGCTACTAACCCTCGTATTGTTCCATTGCCATCACCACAAAACCTG  
GTTCTGTAGCAGGAACCTGTAAAGCACCTGTAACCTATCGGTAGTGTGTCTGGCATAGAAG  
TTATTAGTTCTGGTAGTGGATATACATTTACCCCTACAATCAATTACAAGCAACCTGGCA  
GCGCTAGACTAGGCACCTGTCCTGTTGTAGGAGGTCAGGTATCAGGAACTATTCCTGTCC  
CTTATAGTGGTTTCGGATCTACTACAGTCCTCACAACCTTATATTGGTGAAGCAACGGGGG  
CTAATCCTATTAGAGGAACTCTAACTCCTGTCTTGAGGGTTGGCGTAATAACTTCAATTT  
CAATTACTAATGCAGGACACGGTTACATCACTACTCCTAGAATATCTCAAGGTCTTCCAG  
TTGGTACACCGGTCTTGTCCACAACCTGTTGATGCTAATGGTCGTCTTGTAGGAATTTAGT  
TATTAGATGCTGGTTGGGGATAGGATGACGTACCCTCTGTTTATGTTCGTAGCTATTACTG  
TCGATGGCACAGAAGCGTATCCGTGCGGAACTGCCGCTACTTCAACTGGTGCTATATTCA  
ACGCCAGAATTACTGATATGCATATTAGTGCTTTTGTCTGGTTATAGTGTTCCAAACC  
ATCCTCAGCTTGATATTTAAGCACCTCCTCAGGCATAAGCTTCTGCAACAAATGGTCTTA  
ATGAAGTTAGTGGATTTGAATTAATCAGTCAGATGAAGGATATTCAAATCAAATCGAG  
TCGGCAGTGCAAGGGCTGCAAGTTGTATTACTTATTCTACTGAAGATGGTAGTGCTGTGT  
TTACAAATAACACTACAGCAGCAGCACATGGGATTAGTGCCGATGTAAAATGTCTAGATG  
CTTTAATAGTAGAACGTTTACTAGACAAAACACTTAAAAGTTGTTAGCTTATGTTCCAT  
AACTCTATTATAAAAAAATTGATATTAGAACAGCAAACAAGATAATTAAGACTTCTATA  
CGGACAAAGGAACATCGGTAAGTGTAGTTACCTATGTAACTTCTATACGGTGAACAGC  
TGATTGTTATTTATCCAAAATATCAAATTACCAATCCCTTTGCAGCAACATGTTTAAACAG  
ACACTATTTTGCCTGTAACCTTGGTAAGAGGAGATCCTACGAGTATTAGAGACGGATTAT  
TAACTCATTATGCTGCTATTGCTTATGTTAACGTGGTTGGCGCGAGTGCTTTTCGTTGGAA  
AATATATGTCTAATTTGACTTCTGAAGTCGAACCTTGTGCAACTTGTCTAACTGAAGACA  
ATATTGCATCTTTTTTACAGTTCCCTATAAAAACAATACTTGCTGAACCTTTAGGCACTG  
AACACAGTTTTGCCCCTGTCCCCTCTACAATTGATTTGCCAGAGCGAAACGGTTAGTTTT  
TAATAGATAATAGTGAAGCGGTAAGATATAAAGAAAGTTTCGCTCAACCAGTCTGGTGCGT  
GTACACGTTATGTTGATACTAATGTTGAAGATTGGGATTCTGCTACAGAGGGTGCTTCTA  
GCATCTCTGTTTTTCGTTAAAAGGGCAATCCTCTGGAAGTTGTCTTGACAATCTTGGTA  
TCGTTGATGCTCAACGAACAACCTCTTAGTCAGACGGGTTACGCTTACTTACCTGGTGATA  
AATAAACAGTCTCTAAGTTGGGTGGAATAGGAACTAATGCCGAAATTACAACGTGGTTGT  
CTAACGTAAAAAATTAGTTAATATCAGTAGTATTAAGTTTGGTGGTGAAAATAATCAGT  
CCGCAACTGATACTTGTGCTAATCATCATGGTTTGTAGTTGGACAACAGGTTCACTTCT  
ATTATGCTAACCCAATCCTTTATATTGGAACCTTCTCACTTACATCTAGAGATAGTAATA  
CAGTATTCCCATATGAATTACCACAACCTGCAATAATCTTACCTCAATGTAATTTTCTTG  
TATCTGTTGTCCTCAATAAAGGTAAGTTCGGATGATACAGCAGTTTTAAATTGTATCGGAC

GTTACACA ACTAATATTCAA AACTCCTTTTTCCATAATAACTACGTTTACGTTCCCTTTTA  
CAAGTATACCCAACGAAAAGTAAAGTCCGTTCCCTGGTTTTCTAATTTGCCAGGTAAGT  
AACGTAAAGTTAACTTTTTCCATTAGCAGTAACTACAATTTCTACAAAGAATAATATTT  
CACCCGGTCGTATTGGAACATGGGTAAATGGTGTGCTATATGGTCTTATAAGTCTACAA  
TCAAGAAAACTTTCGGGGCTTGACTGATCTCTCTGTTTCAAACGGAGATTCAGGATATA  
ATGCTGCTTCTCATCCAAAAACACACTTTCTGGTGGTCGAGGAACGGGTGCCACACCTA  
GTGTAAGTGTAAATGGGTCTGTAAAGTAATTACTCTAACCGCATGTGGATCTGGATCTA  
CTTCTTCTCCTCTAGTTTCTATAGCAGAGGGTGGTGGATCAGTTGCTTCCGCAACTGCAA  
TCAACACTAAATGGGATGTATCTAGATTCTTGATTAAGTATGGTGGAAATAGGATATCCAC  
CTCAACTTACTATTACTATGGTTGGTGATGGAGGAATTGGTGCTACTGGATCTGCATCTG  
CTCGAGGTCCTATAACAAGCTGTATCTGTATCCAATGGTTCTGCGTCATATACTTCTAAGC  
CTCCTGTCACTAAGTTGTGTTAGTGGTGCTGTTGCTCAAGAAATCGTACAGAATGGTC  
GTATCATCTCTGTCGCTATTTTTTCTGCAGGTTCTGAATATACTACTGAGACTACAATTG  
ATATTGAAGGAGAAGGTTTTCGGGGCTGTTGCTCGTGCAACGAAAGATGTGGCCGGTGAAA  
ATGCAGGTAGAATTAATAGTATCTAAATGGTCAACAGAGGTATAGGACATGTTCAATGTA  
CGACTTTATCTAATTTAACCTTTGTTGGTTCGAGTGCTACATCTAAAGCAAGCGTATTCC  
AATGGACTTGTAAGTACAAGAAAGATCTACCCTTGATGCTGCAAAGAGCGAAGTGTCTG  
AAGGATTTAAAAATCAACATGGTGGTGAAAATGCTCACTTATCAAACCCACAAAGACTAA  
CATATCTTCTTGGTTATAAGTTATTTGAAATTAATGCAGGGTTAGTCAAACAGCAAGAAA  
CTCAATTAGCACACGGAAGTATTATTGGTTGAGCATTGGATGGTAACCCCATTTATTGTC  
CATATCGTACTCAGATCGTACTGAGCTGCGCTCTGCTATTGCTAAACTATACATACCTT  
TACAATAAATGCAGAAGTCAATAAATTGCTGTTACAAACCAAATCCTGTTAGAACAG  
CAGGTCCTCTTCTTCTGTCATAATCTCGAGGTGGGGATTTTGAAGATTATCAATATATTT  
GTGGTCAGGGTGACTCGGATCATTATAAGGGTCTTTTGTGGACGACACCTGAATATCCTA  
GTGGTAGACGTTGCTATTTTTTAACTATTGATTCTACTGCTGATCGTTATACTCTATTCC  
CATATGTTGTTGGTGCTCGTTGTAAGTCTGCTGTAGATACTCGGAATTTAAGTGCTGATG  
CTGTTCCACAGACTATTTCTTCGGCTGTTTTTAGATATCGTTATCCATATGAGAACGTTG  
TTATAGCCGTTGAGAGGGCACCAAATGCTTCTACCTACGCTATAACCCTAGAGAAGGGTG  
ATTTGCTACTATTTGATGTGGAAGACGAAGATCGGAGTGGTATCAGTTATTAGAAGGACA  
CTGACGATCGATATCAGGTTCTTGATGGACGTCATTTCATTTAATTATTGAATATTTGCCTA  
AAGTCAAAGTTGATTCTAATGTTGACATTGAAGTTGAGACAAATGCTAAATTTAAAGATG  
CATCAGTAACAGGATTTACTATTTCAAATGTAAGCGCTAGTTATCAGGTAATGACAGAT  
TAGTATTTTATAACACTGATACTGATCGTTCTGGGGTTTTTGTCTCGTGTTCACGATCC  
AATGTGAATCAGTATTATCGTGAGGACGTGAGGATACTAGTAGTATAAATTGTGGTCCAC  
TTAAACTACAATGCTCATAATTTAGTAGAAGGTGATACAGTCATTGTTGATTATTCCC  
CTGTAATCGCCAATACTAATAAGTCTTATATCGCACACCAAACCTCAAGGTATTTGGGAGG  
TTCAAATTAATCATACGGGATCTGGTTACAACACAGATATTCCTCCCACAATTTTTATTG  
TTGGTAACGGATCTGCGGGTAGTCTTGCAGCGCTTGTTACTAGTGAAGGTTTTGTGCGACA  
CTGCTAATTTTCTTAATTACCGTGCTGGGTATACTTCCAACCCTAAAGCTATCTTAACTC  
ACCCACAGGTATTCAAAAAAGCAGATAACTATGTTTCATATATTAATAAATCAAATTTATC  
CATCGGTAAATGATGTATATGTGAATGTTAATACGGACGCTACAATTGTGGTCAAAGTC  
ACAACATATCTGATTATCTTGTGCGTTGATGCAAACTTTCTGCAAGTGGTGTAAAG  
ATTGGGAAGCAACTTTAGAAGTAAGTGTGGTTTCGACAATGCAGAATTCCAAAAGATAT  
ATGTTGATGGGAAGGATATTTGCGGTGCAGGTAGGAACTATCCTAACTCTCGCCGTGTA  
ATGCATCCAATCCAGATGTTATCTCAGTTAAGTATGTTTAGGCAGAAAATGGTCTTAGTG  
CAACACGGAATTTCAAAGAGTCTATGGAAGTATTTCTGGATCTACTTGAAAAGATGAAA  
GTACTGCACTTAAAAAATTCCCTGATATTAGATTTTTTATGTGTAGATATACAAATACTA  
ACGCTGCTAATCCTGACGATGATTTTATTGCTCTAGTTGATAATACTGGAAGTCTTCTA  
TTAAGAGAAAATTTACATCCGCAAACAGGTCTGAAAAGGTTGCGGAGCTTGTAGTTAATG  
TAAGTGTGGATATTTCTGTCTGGAGATTGCATCTGGTGTCTGCAACTGCAGTTAACG  
TTGACTTTGGTAAAGCAAATATGGGAAGTGTGCAATTCCAATTCCTCATATCAAACAGA  
TTAGTAATCAAGTGTATTCTGTCTTAATTTCTAGTCTTGAAATGGATGAATTTGAGGAGG  
CATATGTTACTGCTGCACCTAGACACATATCTGCTAATACTACAATGGCTTGTGGG  
CAGGTGATTTGATAAACTAACGATGCAACTTACGATAAGGGATATACTGTTGCCGGTG  
GAACTACCTCTGCAGCAAGTAAGTGTGTTATTGTTATGTTTGGTGATCTTCAGGTAGCAG  
TTATTAATAATTGCTACAAGTATTGAGTGTGAGAGCAGCAGAGTGTATTTAAATCGGTTATA  
CTGGTATAATTAAGTGTACATACTCAACAGTTTAAATAATAATATTGAATGTATTA



CTGTAACCTTCTCTTGCTGTTGATAACTCTGGAGATGTTTCATCTATCTAGGCAAAGTTGCT  
GGAACAGGAATGAAATTATTTTCTCATTGAGATCTGGATTTACCACTGACACAAGTGGTA  
ATTATACTTTAACTTGTACATTAATAATATGTGTATCAGTTATGCTGATAATGTGGCTA  
ACATTACTGGCTACAACCTGCAGGATCTAACTCTACTTGGATAAATTAACATCTTAAAA  
TACTTCTTCTCCGTTAGGAACAAATTTAAGTTAGAAGCGGACTAGTGAAGTTGGACTTT  
ATAACAAGCAAGTTGATCTAAAACATTAACCCAAACAATACAAACATTAGTTTGTAGTG  
TTGATGCTGAAGACGCGACAGGGGGTATTTCTGTTATAATATGATTTTTCTAGTGGAAAAC  
TGAAATTAGTAGTTACTAATGACTACTAAATTAACCTACGCAGGCTCTCCACATCAGT  
CTACATTAACTACAATGATTGTTGATAATACACTCCAATCCATTGGTCTTAAGGAAGAAC  
GTAATCAGTCTACTGCATATGTAATGGAATTCAAACTTTTACAGCAAGTGGTTCTTATA  
CATCACTAAACGGTAAAAATCTTCTTGTGGTCAAATTACTGGTAGAGAAGGAACTGCAG  
GACCTGTTTCGTAAGAATGAGCACGGTCAATACTTTATTGATAATCTCAGACTTTGAAATA  
GAGCAGCCACTCCTGGCGTACCTCCTGATTTAACTTATTCCCAACTACAGGTGCTTTTG  
CTTTTGCATCTCCTTGGGTTGATAGTGGATGGTTTACTACTAACCTTACTCAGTATGATT  
AAATTTATTACATTGGTTGGGGTCTTAAGAACGATAAAAATTGCAGAGGCTGCAACAATCG  
GAACTCAAACCTGTTCAAACATAAGTTAAGTTGGAATTGTTTCGAACAAGTGTAAAGTGCTG  
TAACAGGAGTGGAGCTTACTGTGGATAAGACTGGTTATGCTTTAGGTGATGCAGGGTACC  
AAAATCTAGAACTTTATGTTTCAGCACCAACTATGAATGCATGCACTGAGTCACTCACTT  
AGAAGCAGAATATCTGGAGTTCTAGAACTCCAACCTGTTCTTCTCCAGGTTCTAGAAAAC  
TTTAGGTTCTTCTATTGGTAGAGACAGATATTAATCTAAAGTAATTCCAACATCTAAGA  
TTCATCATATCAAAGAACTTACATTTAATCAAACATTTAACTTTACTGTAGGAACAAAAT  
TAAATTAGTAAATGCAACTCCTGAAGCATTTTTAAAGAGTGGTTACATTATGTCTACTG  
ATAATGTTTATAATAGAATATGCCTTCTGCTAATAATAATGGTTGGTCTGAGTATCTGA  
ATCAGGGTCAATTAGTTACAGAGCAATTTAGTGAACAGACTACTTATGGCATTATAGATC  
CTATTCCTGCAGATGTTAATGAAATTGAACGATATAAATTTGCACAGCTAAATAACACAA  
TACCTGGCGCTTTTGATATTGATTCTGACAAGTATAATTAAGATGGAACCTTATAATGCTC  
CAGGTTGACGGTAATTAGATAGTTTTGTCAAATTCAAACCATATAGTGGTATTGAGTATG  
CGATTAGAATTTATGAAGCATCTACATCGGGATCTGCGCCTATTGGTGTATCGGTAGTCA  
CAATCACTACCGCGGATATAAGTTTTAATTGTGCATACTCTACAGGAGAACGGACCCACT  
TAACTGGTGGTTCAAAGCTCATTGTAATTGCAAAATTAACCTTAGATTTTACTAGTTACTG  
CAGTTACAAATCGTGATCTAGTTTATGTAATTACGGTGACTAATCATTACCTATCTACTG  
GATCAATGATGTTTAGAGATGGTAATCCTACTCAAACCTTTTGGTTATATGACATATGATG  
AATATGATGGGTCTCTTCCAGTTTCTCCAATTGTGACTGCCAGAGAATTTGTATATTAAC  
TTCCTAGTGCTGCATTAACCTCATCGGCTACCACAGTTGTAAACGTAAGTATCTACGTTA  
ATTCTCCCGTTCTTAAAATATATTATAAGGATCAATACCTGTGTGAGGTCCGTGATTCTT  
AGATTAGCGGTGATAACTAACTTTCTTGAAAGATCCTTTAAACAAATTAGATTACTCCT  
TCAACTCTATTGATAGTGTGGGAACACCTCGTCGTACAGGAGCAGGAAATCCTACTCCTA  
CTGTGAAACTTAAAGTTTATGAGGGTATCGGTACATATATTGCGTATTACATTGATCTCT  
CTAGATCTGGTGCTAATCGTCTTGTCTGATGGTAGTTATCTTGATGTTTCTGACACTC  
CTGACAAGGGTACGATCTCAGTTCAATCTGTTACGGTTCTAACGTTACTCGTGGTGGTG  
ATATACTTATATTTCCCTTATGAACGAATCAGAAGCAGCTGCTGAAGTAAACTACGCAT  
CTTATCCTACATGTTCTGTTAAGGCAGTTGGTTCAATTGGTGCTATTCTTGTTGTTAATC  
CAAGTGTTCCTATATCATTGTACCTGTTCTATCTCGAATGCAATCTTCTAGACCAATTG  
AAAGAGTTGCTATTAACGCACGCGGCACAGAATATGCTGTAGGAACTATACTGTTGTTT  
CCATTGGTGGTGATGGTGACGGTGCATTTCGTAGAAATTAATGTTACTGAGTGAACCTCATG  
CTACGGGAGTAACTATTCCGGGTTAAATGCAATCATTGAGGTTATATCACCTGGGAACA  
GTTATGCTCCAGCAACTATTGATGCTGAGGCAAAACCTGGTATTATTGGATCTGGTTTAA  
TTCGTTCTGGTGAAGAGCTAGAAGTTGTTATTCTTGCCTGCTGGAACCTGGTGCAGCATTTT  
TCACTCAAGGTGATAAAGTTGGTAAGATTATGAACTTAAAGAATAACTTTGGTAATG  
ATTATCCTCATGACTCTACACTCCGTCCTGAGATTAGATTCTGAAAAAATGTTTCAAGTTAA  
CATCAACCAGTAACCTACACAGTATTACAGTTACCGATCCAGGATCTGTATGTTTACATT  
CACATGCAGTTGTGTTTACTGCTGGTGGCGGAACAGGTGCTGTCGCTGAAGCAACAATA  
TCAATTGTCGTTGAGATTTAATTATTGAGTAAGATCCTGGCGGGGGTTCTTCTTCTACTC  
CTGCAGTTGCTCTTAGGTATGCTTTCAAATATGTAGTAAACCTTGATTTAGGCCTATTT  
AGTATGCACTCCCTCTTGGTATTGCTAACGGTTCTGTGGATACACTTAATGTTGGTGATA  
CTCCTGACGGTACAGAATATCCGGTTGCTGCAGCTGCGATCGGTGCTGTGAACGGAAC  
GGACTTATTACGCAATTACTGGTTCTGAAAACCTCTTGGACCAGATCCATTAACCTTG

CTATGACGGCATCAAACACAAACTTAAGTGATGCAATTTTCATATGTCAATCCGGCCTCAG  
GTCCTTCAACAATTACTCACAGAATCTTCTGGTGGTGTCTGCGACAGCATAACGTTATTACAT  
CTATCTTCTTAGAAGGAGAACTTGTTTATAAAGGTGATCTTTTAGCAAACATAAAGTATC  
AGGGCTATGTTTCTACAAATAATCGTTGGCAGATTAGACCTCGAGTTCTAACATTGTAC  
ATTATACTGGTGACTTTATTGAAGGACCAAGAGCAACTGGTGTAATATCCAAATCTTAGG  
GAACGATCAGTGAGTTCAATATTGTTAAAGGTGTTGTTGAGATTGGTTCTCTCACCAAGT  
CTACAGGGCAGTGTTCTGATGATCTTAGTAACCCTTCTGAAATCATCGAAAAGATTGAGG  
ACTGTTACTATAAGCAAGATCTCTCTTATGCTACTAAGTATGCTGTTTCTACCAGTGAGT  
GGAAAGACATTCTGATCAAACCGTGCAGCACGCATCCTTCAAGGTATTTAGTGAATTAG  
ATGTTTCTGATTACGGACTGGTTCCTAACAAAGGGACGGATTTCCGACTTACTAAATCTG  
TTCAACTTGCTAAACCAGCCATTGTTTATAATATTCAAAGTTTAGCTTTAGAAGAACCAG  
TATATTCAGAACTCAAAAAGACAGAAATACTTTTCCGTTACAAGGTCCTTACATCTTCTG  
AAAATATGCTGACTTATGTAGTTCAACGTATTGATTATATTTCTAGGTTATGTGATGCTG  
AAAGGATTGCATTCCCCTAACAGTTGGTGGAACTAATATTGATGCTGATGCTAATCAAT  
TGATGAGTGTTTTAAATGGTGTGTTGTTGAGAATCCTGGGACATCTTCAATGTTCAAGGAG  
ATTTCGATTGGATTCAACGCACCGCCAGAACCCCTCCAAGTCCCAAGTACGTTAACGTTA  
CTATTCAAAATATGCCTACTAAGAAAATTTTATTTGGTTAGATCCGTTGGTATTTTCCCAA  
ATCGTGGTAATGAAAAGGTTGGAACAGCATCCGGACATCCGGCTGGTTCGTTACCAGTGATG  
TAGGTAAGGATGTATTTAGTTGGTTCAGGCAAGGAACTACGTGTATTCTTGTGCATATG  
TTACAGTTGGTGTAAACAGGGTTTGCTTCTTATCTTGTGCGAGTAATGGTGTGCCCGATG  
GTCAAACTTTCCGGAATATTTAATTTGGTGAGAAAATTAGTGACTTCCAACGTGATACTG  
CTTGAGTCGAATCGATCAACCGACAGAATGGGAAAGAAAATGGTTAGCACAAATGAAGAT  
ATACTAAGGATCCGTCTATTACCTCATTGAAAGTAGTTGCATATAAAACTTATGATAGTG  
TTGCTGCTGCAACTGGTGTGACGGAAAATTTAATACTGGCCAATACTATCAGATTGGTT  
CTGTAATTTTATTACTAAAGAGTATTATACAGGGTTCTGAATCAAAAACCTTTTGGAGTTA  
CAAGAGCACCGCTTGGAACCTCTTCCGTATCACAAACACGCAGATCATACTGTTAATCGAA  
CTCAAATTTCTGTCAATTTTCAACTAACTTTAATTAACAACACTGGAAGATATCTCTCCA  
CTCCTGGTCTTTACGACACTCAGTTAAGTAAAATAATTATTGGTGTCTATTTAGTGGAG  
TTGTTTCGAGTTACTACAACCTTCTACATATCAAGATCCTGTAAATCACGAATTTATTAATC  
AGGTTAATGTTACTGAACGTTCTTCTTTCTTAGGTCTATTATACAACAGATTTATATCTC  
AGACCTATCCAAACGCTGATCTTGATCATATTTCAAATCTCAGGTCAGAATCCTTGATT  
ATACAGATAGTCGAGCAGATCACCATTATCAATTCCTTCTACTGAAGAAATTAACAATT  
ATGTTATTCCTTACGATTATGCTTCGGGTACTCTACAAAATGAGTTTATCAGTAACTACC  
CATTAGAGGATGGTAATGATAATGGTGAATTTGCTACTGGTGAAGGTGCTGAAGTGCTTA  
AATTCACCTTCTAGGGATACAGTTGGAATATGGTTAATCTGTCCTGGTCAAATTATCTGAA  
CTCGTTAAACGAAGGTAGAAGATATTGGTGCAAACCAAGCAAGAAAACGGCATATGATG  
GTAAGGTCGGTAGATTTCTTTGAAACGGTGGATATTAGCATAACATTCACAAGTTGTAATG  
CATACCGGAATGCATCCAACCAGAAGTATGTTGATGAATCTTTAGGTCTTTCACCTGGAA  
CTAAAGAACATACTTTTGTAATGGTGTGTTGGTGATTCAAACACTTCAGGTGGCGGTGCAA  
CAGGAACGTTGACTGCTGCGACACGAACACTACCTATAATGGGTTGAAATGTGATCTAGTAA  
CTGAAATTCGCAATCACTCTTGAACAACAACACTAACACGGTCTTATCCCTGACAACATCC  
TTGGTTCTGCTTGTTCGGAAGGTAGTAATACCTCTACTAAAGCATATCCACGGAGCACTG  
AGCCTGCATCACGATCTGCTCTTAATATAGCTGCAGTTACACCACCGACGATAACAGTAA  
ACGTAGGTGCAACTACAGGTGATGAAAGTTTTGCAGTCGCATCTTCGGATAAATTTGGGT  
TTAGCACTGCAGCGATTACAATGGAGTGTGGATCACTCCAATTAAGTGTGCGTGGAGGAA  
CACAACTATCTTTGCTTTCAGGACTGCTGCAACTGAACTGTCACCTTACTTAGATCTTG  
AGGCTGCGTATGTAGAGGATTAGGCTAATGGCTTAAATAGTCATTCAAGGAACACCAAACA  
TATTTCCGACTCAATGGACACACGACGCTATTAGTACCTCAAGTTCTGTAACCTTGAATGG  
TTGTAACCTGGTGTTCAGGATGGTCTGCTTTACAGCGAGACCAACAACGACGGAACAACT  
AACCAATTAGAATTGGTGTGATACTGCAGGTGATAATCACGTTATTGGTTAATGGATG  
AGTTGAAAGTTTTCTGCAATGGAAGTTATACAGCGTCATTTACTGCACATACAGGTATCT  
TCCAAGGTGATTCAAGCGCTCTAATACTGATTCATTTTGTGTTGCTGAAGTACAACAGC  
AAACAGATGATTGTTTCGGGATCTGCATCATTACTAAGGATGAATGGTTCAATATTGATG  
CAATTCATACACCTCTAGAAAGACTGCCGCACCTGCAGGGTTGGCGGGTAGTGCCTACA  
GATACTATAACGCTGCAGATAATCGCGAAGGTAACGACAACGTGATCGAGACAAAATTTA  
TATATTAATGAGACAGTGATATCCAGCTCTTGTTATTTTAGGAACTAGTTTCACTCCAA  
CTACAACCACGTATGACGCTATAACTGGTCTATTGTAATGACAATGACTAGAAACACAA

TTCCTAATGGTGGACAAAGTACACCTCACTGTGCATCAAACAATCCTTCGACTTGTATAT  
TGACTATCACGCAGATTACTCACGTTGGAACAAAAGGTAAGAGACTTAATATTAAGTTC  
GTGGTATCACATTTACATGCTCAGAAGATAGTAACCCTACTTATGATCCTAATCCTCGTA  
GTACAGATCCGGTTGGAGGTGGGTGGTTGCCAGTTTCTAAAGCGACTGCAGATACATTTA  
CAGTTGATGTTGCAACCGCTTCTCATAGTACTGCTCTTCCCTTCAGATGTGCCTTAACTA  
ATGCAGTTGCTGTAGAGAAAGATACACTTAAGATTTTAGGTTATTCTTTAACATTCACTT  
GCGCTGTTGATGGCCATACGGCACATAAACTTATACTCGTACAACAGATCCTGCAGCTA  
AAGATGTTGCTCTACCAATCGTATCTTCCAGTTCTACAAAGTTAACAGGTAATGTAACAC  
CTTCACCTTTAGTTAATTTCCAACCAACTAACGCAACGGACTATCCTGAAACTGGTGCAT  
TCGTCATGACGACTCCTAATCATAACCATCAATGTTGGGACACAAGATAGATTAAGTCAA  
ATTAAATAACATTTACTTGCCACAAGATGGTAACAGTACACAGAAAACGTCTCGCCGAG  
AGACTCCGAGGTATGGTCAACCTGATCCGGCATATAATACTGCTCGAGTTGTAAGTGTAG  
TCGAAACGTCTACACCAGATATTAGTAGTCCAGCCGAGGTTCCACAACAGGTATTTTAA  
CAGTCAATATAAGTGGTAACCATGGATTATGCACTCACAATAGCATTCAAATTGCTGAGA  
ATTCATTAACATTCACGTGTGCTTCTGATTGCAACGCTACAAACCAGACGTATCCAAGGC  
AGACTGAGCCTATTATCGGTGAGTGGGTTGAAATTACCGTTGTTGAGGCTGATACATTTG  
CTATTGATATTGGAACATCTAGTGATACTTCCGCACATTCATTAGTTTCTGCGAGAGCAT  
TTGTACTTATTAGACAAACTGGAAGTGAAGTATTAACGTCCGTGTTTCTCCTGAGGCGG  
CTCATTATGATCATATTTTTGTATCTGCTGCATCAAACACGGTTGTTACCGATGGTACCT  
ACTTACAAGCATTTGTCTCAGCTACAAATAATGCAGTGATTATGGGCGAAGGTATTACTT  
GTGAAGAAAGTATTCGTGATACATTGAATGCGATCATTCAAGATCCGCGCTATGGATCCA  
ACAATCATGTTTGGGATGCTGCATCTTACTCTGTTAAGAGAAGTCTTAATACAGTTCAGA  
TTGCGGAGATTGAGCCTGCTGTTAAAGAAACATTATTCGCTTATGAAAAAATTGATGATA  
TGGTTCAGCATGTCATTACTTATGCTCTTTGTCCAGTTCAGGGTAATAATGGTTTAACTC  
GATTTACTCAGGTTTAAAGTTAGTGGTTCCTTTCACTACATTGAATCAGTTTAGACCTA  
CTAATGCAACTTATAATCCTGCTACTGGTGATAGGGTAGTGATAATTGGATCTCATTCAA  
AGACCACATCATCAATAGTTAATATTGCCGTCGCTCCTATCACATCTACATGTGCCAAAG  
ATGGCAATGATCGTACTCCTGCATATCCAAGAAGGACTGATGCTGCCGATAAGGCAGTTC  
TGGCTGTCACTGCCGTTGGTGCTGGTATCACTAGCACAGATAGCGTAGGTAGAACAT  
CTGCATGAGATCAATATACGAATACATGTTTATCTGCAGTAGCTAATTCTGTCACTGAAT  
TAACTTATACCCCTGGTACTGTGCAAATGTCTATTCAACTTTGGGTAATTTAACTAACA  
TCATTACAGAGAGAAATATAATTGCTTATGCATCATCACCTGTTGATCATTTGGCAAGTG  
TTACTAATGTTGAAGCTGCATATGAGTCCGTTCCGGGGAACAGTCGATGGATATCTAGAAC  
CAAGTTGAGCAGTTGATTATCATAATGCAGGAAGTGGTTTATCATATACAAATCACATTG  
CTCCTTAAACACAATAGCGTTTCAGAGATGCTGCAAAGTCAAGTCAGACTCAATCGTACAG  
CATTGCTTAAAGAACCGTACCATTTACTACAACATTTTCTACGTTTGCACAAACAC  
TGCCTAGAAACCAAGGTGGGGCAAGCACTGACGGAAACATTCGTATTAAGACTGACTTAG  
GCAATTCCTTTGATGCCATCGCAAATGATTCACAAGAAGGTGGTAATTTTGAAGTACAA  
CAAGAACTGGATTGCTCTCTGCCAAGATGGAGGACTACGTTATATTGCTCTTCGGGTAT  
TCCACTCAGTAGATAATCTTGAAGACTTGCTGATTATATAAAATAAGCAGTTTATAGGAA  
CCTTAACTGACACCAATACTAACAGTATTGTTGTTGGAGACAGGGCAGTTGCTGGTCCAG  
GTGTTTCTGGTTTCTTTAATGCTGTTACAGCTAAAATTAATCAGCTCAATCCAAATGTTA  
ATAACATTATTGCTCCAACACGTCCAGCTTTTAAACTGCTGCCGATAGCTTATCCTTTA  
ACATGCAATTTATTAGGGAAGTAATTAACGGTCTTGTCTACAGTTTCGTCCATATGTCT  
TCCACGGTGAACCTATAATGCAGGTGATTGGACTGATGAATTAGAGTTTGTAGGTTCAA  
TTGTTACTCTTATTTCTGATTTACAGGCTGGTGTACCGATAGCACAAATCAAGAAGGAA  
GCCCTTAACTAACTGCTTATCTTATTATTTAATCTATTGACAATGTTCTCCCTGTATCAT  
TATATGCTATTGGATAAATTGGAATCCTTGGTGAGTATGCGATTGAAAATGGATTATCAC  
CTCATGCAGATGCTGGAAGTGCAAACAGATCTACTCAATAAGCCGCGCAAATACTGATG  
AATCAGCATAGAAGGATTCTATTTCAATTTAGGGATCAATGATGTTGTATATTCATGGC  
GATACTTTAGTGAGACCGTTAAGGTTATGATCTCACCTGGCGAACTAGTATCAAGATCGG  
CCGACAAACAATTATAATAAACCGCAAATTATCACACTAATGCCTTAAATGACGCCGTTA  
CCAGTCAATTTGTATCTGGGGTATGGTCAACTGATCAAGAAAACCTTTATAGAGGGTACGG  
TTGGCGACATTGTTCAAGATCTTATTACAAATGATACTTACGATAGATCCACCGCATATC  
CAATGACATTAATTGTAAGTTCTGGGACGTTTGGTGATCGAGATTTTGTACTCCAGTA  
ATGGTGGTGAAGCAACTGCTCTTGAATCGGACGATGTTAATAAAATCCTTGATGTCAGTT  
CATTTAGTTGAAGTGCATGTCTGGCAACTAATACATTATCTGCTCCTAGGGGTGCTACAG

GAACCATGGCATCTGGTTGAGTAAGTTCTGCATACCATTTCGTGTAATATTCCAACGAACG  
TAAAGCTTATCGATAGAGCAAGAAACCATAAATCTAATATTGAAGGTCTTGTCTACTA  
CGAATATTTCCCTGATCCCGACAATCTTACTGCTACAGGTTGGACTCCATCAGAAACAA  
CATCTTCAGTCGCAGTTACTACTGCTCCTGAGGAAGCACAAATCAGCTGAGAAGTAAACTG  
CTTCAACAAATAATACTGCGAACTGCAAGGGTAACAATTTCACTCTAGGTTCTTTGAAGA  
CTTTAATAGTGATACTACTAAATTTCACTCTACCCTGGAACATTTCGGTACTGGCTCTG  
CGTTGATGCAACTACTCAATCATTAAACATATCCAATCTGTGTTAAAGCCGCTGTGTATA  
CTAAGACTTGTATATATCGAACCCTTGATGACTCTCTTGCTACACGTCAAAGAGCATTCT  
TTGATCTTGATTTATCAGAAGGAACTAAGGGTTATATCTTTAGCAATGATCTTGCCATAA  
CTGTAGATGCTTTTGGAGTCAATCCTCCTGGTAATGGATGGTACCGCCTTTATATTACAG  
CAATATTCGGATTTGGGTTCTCTGAACTTCGCACATAAGTTTATACTCGAGGTCCTAACT  
GAGTACTAGGACGCACAGGTAATGTATCACATGGATTATTTGTTTGGGCTCATAAACTCA  
ATAGTTGAGCCCTTCATCCTTATATTGCAGTATCTGGTACATTATTCTATTA AAAAATCTG  
TTTATAATATCAAAACGTTTGCCTTTCGATAACTTTGCAAAACTTATGCGTAACGCTCTTG  
ACAATACTTCAACATCGCCTTTCGCTCTTGCATCTTAATATACGCTTTATGATGCTTATC  
TTGAATCAGATTATAATAAATCTATTATTCAAAGATGTATTTCGTTATGACCTAAGTGAAA  
TTAGAAATCAGTTAGCCCCGTCAACTCATTATACAGCTATTAATAACAACGCTGCGATCA  
CTGTTCCCTACAATCAAATGAGGTAATCCGTAGGTGCCAATTGTA CTTAGTGGCTGTGTTG  
ACCATGCTGATTACCTCTATGGTTTACTTAGTGACGCATCAGCCGAACACAAAGCCGTTA  
CAGAGAATATTGGTGAAGAAGTTCAAGTTTATAACAGATTGAGAATTGATTTAACCTAA  
CTCATGGTCCCTCCACAATGGGTGAAGCTGTTGCTAAACAGGGCACAGGTGCTTTTATAG  
GTGTTGTATACGGTTTTTACAAAGATGCAAACTATTGGAATTTTGATGTTTCGCGCAACCG  
GAGGGGTTTTGTGCAGTTACTGACAATATTTTAGGTGCATAAAACTTTGCAACCGCTCAA  
TTTGTGCTCTTGAAGCTCGTGTTTCATATTAGCGATGTCCAAGGATTGTTTCGAGAACGATT  
TTCCTCTCAAAAGATATACATCTGGACAGACAGCAGAACCAACAGGATTCTATCAAAAA  
ATCCAGCGGTTACAGTTAACACTGAAGTGTCGTTAACAGTGCATACTGCAAGTCTGACTG  
GAACATTTGATGCCAGTCCAGTGGTATAGCCCTAGACCTCTAGTAAGTTTATTGATGTCA  
CCAAGAGTGATAGGTTACATGTTAACGAGGGTGATTTATTCGCATCCATAGGTAATACTC  
GTCATGGTATCAAGATTCTTAAGA ACTATAATGTATTTACCGAAGTTATTAGACTGTATT  
CAATTTTGGCAGGTCATTAGCAAACCAAGTAGGTAGATCGTTTCGAGGATAGATCTGGCAA  
ATAATTTCCCTAGACCTCATTCCCTCTTGGTAGAGTTACACCTTCAATTAGTGATATTCTTG  
GTGACTATGGAACAGGAACTGCCGTACCTATGGGACAAATTCAAGTTACGACTTTTTCTA  
AAAATACAGGTCGGGGTGCTGCAAGAGTTCAAGATATTGACAATATTGGTTTGAATAAGT  
GATTATATCTCTCGTCTGTTGTTTCGTTCAATTAATAACAATGATGGTATTGAAGGCCCGG  
ATAATTATGCTTCAGCTATTCTTAATGTTGATGAGGATAAAGCTTGTGTCAAACGTTCCCT  
TAAGAGGTTTTGATGGAACACAAACATCATCCGA ACTCAGTACAGACAATGGA ACTCAGT  
ATCTGCTTGACCCCGCAGGACACATGGTTCATCTTTGTTAATGGTATCCTACAACCACCTG  
GTCGAACTAATGCAGACACAGCGTTCAATGATACTATT CAGTGC ACTGAAGTACCCGAAT  
TAGCAGCATTATTTAGATGATTCTGCGTTGGTAAACTAAGACA ACTTGATATTATTATTC  
TCGAGTTTGACCCATTAAGACTATTATTCAACTTGAGACGTAATCATGTGTTCTATT CAT  
TAACTCTAACTGATGGTGTT CAGTAAAGCACAAATGAGACCCGACGCCAATATATGCGTTT  
TACGTAATGGTCTGATTTAAGAAGCGGGTATGGGTTTTGCTATTGTTGGTTCTAGAATAA  
TCTTTACTGGAGTTCCTCGAGTTAGTCCTACATTGTTTGGATTCTCCTATAGTGGTTCTG  
GGGCAGACGTTGATGCTTCGGAGGTTATTCCTCCAATTGTATCAAATGACTGTATTGACA  
TTCATGGTGTGACTGTAGATAGCCAAGTAGCTTTTATTGAATAATCAA ACTGTCTTATTA  
CCTTTGATTAAATTGGATCTGTATTCGGACTGAAGGCTACCGGAACCGCAGCTCTAACAA  
CTGGATTTATTAAGAAAGTTGAGGTA ACTGGTGTTCAGGTTAGACTTTCAGACGTG  
CGTTTCGTCTTGAGGCTATCGCAGGTTTTTAGGGTAATATCCGGGCAGTAGTTGGTGT  
CGGGTGTGGA ACTCAGTGCAACTGGTTAAGGACAGAAA ACTCCTTCAGTTGCCGTTGAGA  
CCACTGTCGCTGATGATTATGTCGCCCCAAATGGTGCAGATTATGGAGATGATCTAATTC  
ACCCTCATATCCTATAAACA ACTAAAACCGTAGCGAGTAATGGCTATAACAAGCACTAGG  
TATAGGTT CAGCAGAAAATGATAACTCCGGTGACACCCTGACAGCTGGTGGTGGCAAGAT  
CTATGACTACTTTTCTGCAATGTAGGGCGCCGTTGCTATTGGA ACTTACTGACTTTTAG  
TGTTACAAACCCTTCTGTTGGT CAGGTACCTAGAAATAACGGAATTACGTTTTACCTTC  
TGACTGTACACTACTTACTTCAGCTTTCGCTGTAAATGGAAACAATATAGCATCCTCTTA  
TAACGTTATATCGTTATTGAGCCTAACGGA ACTGGCGACCTAACTATGTCTAACGGAAG  
TGTCACAAGCACGTTTAATGGCACTACTGGAATAGTAGACTGTACTACAAGAATTCCGTA

TAGGAAAGAGTTGACAACAGTTGGTGCTGCTCCTGCTGCAGCAACAAATACTTGGTGT  
CTTTCCTGTAGATGGCGATGATAGTTCACATCTGAACATTAACATAACAGCAGGTGGAGC  
GGGCGCTGTAAGATCAAAGGCGGCAACTGAATATTGGAGCGATGGATTAATGTACGATAC  
TGAGATTACGTGTGCAGTTCCAATAAGCCAAAGCCTTAAACAGGAATGGAACAAAGTT  
CGTGCCAGCTGATGATTTTCAGGGAAGTTCAGGAGGTGCCACTCAACAGCTCTTCGCTAC  
CATCTTTGGTGACAGTGGTAGCACTGCGATGAATACTTCAACAGACAATTTAATAATTGC  
AGGTGGAACAAATTCAGTGTGCGGTTTTTGGGGACACTTTAACAGTGAACCTTCTCTAA  
AACGTTGACCACCACCTTATCATCGTTAACAGACCCTGATATGTCAGCTCTTACTAAAGG  
TGATACATTATTATCTAATGGAACAAATTGGGTTGATACTAGATCACCTATCACATAGTG  
GGAACCTGGTGCTCCTGGTTATGCACACAACCTTACGTTCAATGGACCTGGTTTCTCTGG  
AACGACTATTGAATCTTAGATCTAGATTCCAAGAGGGGCAACATATGCTTTTGATAACTC  
TACTAAAGGTGGCGCACACCCAGTTGGAATTCTGAGTTCACCAGGTTCAGGGTACCCT  
ATACACCACTAGTCAAAGTCGTCGTGGAACCTGCAGTCCTTAATTGGACTGTTCCCTATGGA  
TGCGCCTGGCACACTTTACTATCAGTGCACGATCTATTCACAAATGAGTGGGACTATCAC  
CGTTGTAAGTTAATAAATGACAAGAAGTGTTCCTGGAACCGGTGCTGTAATCGAACCAAT  
AGTCGGTAAAATATTTAGTGCTCCTGCAGTCAAAGTTTCAAATGGAGGATCTTGGTACGC  
ACCTAATGATCCGCCACGTCTTGCCGCGACTGGTTTCCGAATTCCGGATGAAATAGCGTT  
ATTATATCAAGTCATTCATGCTGAGTCTCAACGAATAACTCAAGTCAGAGTTTTGAATAG  
ACAAAAGGGATATGATCCTGTAATATTGCTAATTATTGCTGAGCAGGAAACACCACGCGT  
GGTACTCGATTTCGATGTCAATAGAGTATGGCAAAGTCATCCTAACTCTCCTACAACAGG  
AACTTTCATACGTGATAGATTTAGATTAGTTAGTGATAATCGCCCTAAACCAAGTTACCA  
TTTATTAACCTGAAAGACAGGCAGCGGGTTCTACAGTTCCTCGCTCATAGAAGTTTTGATCA  
TACGATAATCTACCATGGTGGAAAGGATGGTCCTGATGTTGGTCAAGGAGATTTTCAGAA  
AAATAAAGCACTTCGCAACAAGACAACCTGGTGTCTCACTTCACACTCCAGCATGGGGATC  
AGCAGCGGGGACACGTACACACTTCTCTGGTTATACTTTTAAATACGTTTGTGTAAAGAA  
TACTAATTATTATGATGCGGTATATGTGTGAGGTCTGTATGATTATCAAACAAGTAAAT  
CGTAAATGGGTTTTGCTCTTGATAATGATGAATTTAATGGGGGTGGTGAACAACCTCTACTC  
TTGGAATCTTAAAGTATAAACAGGAAACCTTGATGTTTCGTGTCTCGAACTTATATGAAAC  
ACTTGGTTCTAGTGAAGTTGGTAGAAGTGTAGATGAAGGCTCAGTAACAGGTTGAGATGA  
AATTGGTAAGATTGTTAAATACGAACAGAATAATGTGGCTAGAGTTTATATTAGCGCGTT  
TAAAGGGACTGCTTTCCAAGACAATTATCTTGTGTTAGATGCCAATGGTTTTGTATTTAG  
ATTCCGTGGTGTATCCCATGTCAATCAATGCTGATTAATTTGATTTTGGAACTGACGCCGC  
AAAGTTCCGTCCTTTCTCACATGGCCAATTATGTATCCCTTCTTAAATATTCAACAAAC  
AGCAAATTATTTCAATAAAAATAATCAGTCTAACGAAAATACTCAGGAAGTTACGGGAAA  
CCCTATCAGAAGTATCGCAACTCCTGATAGTACGTTGAATAACGGAAAAATATACTACAA  
TAGCACTGGTGTATCTAAAGCACCTGCTACAGGTTATGAACCAATTTATGCTCCAGTATG  
CTTGCTGCATAGTGTGCAAAAACAAGGATTTATATCTTTTGTGCTTATCACAAATATAT  
GGGACGATAGAAAGGTGATGAAGATTACATGACCCTCAATAAATCTGCGGAAACATATAT  
TCCTACGATCGATCAGTCTGCTACGGACCTCTATCAAAGTAATAGCAGTATCCCAAGAC  
TAAGGTGTAGTCTAGATATATTGATGGCACTCAGAAATTCTTGGGGTGTCTTTTGTATGG  
TTATTCTATTTACGGACCGTGTGGATAACAATTCTAGTGGTGCCGTAACAAGAGAAACGTC  
TCTTTTTAGACTAAGGAGCACTGCTGAATTAGCGGCTGGTTCGTCCTAAGGTAGATAGACT  
GACAACGGTAACCTACCCTCTTACAACCTTCTAATGGGCAGTTCCTTTTTGGAGCTTCTCG  
TCCATACTTTTTAGAAATTTATCGCGGAAAAACATACATTTTCGATCAATACGACGCATG  
TAACGACAGTCAACTCTTATCAAATTAAGTACGGGCCATGGTTGACATCGGCAACACCC  
TGTTATCATTGGGAATACTCCAAATTTGGATTCTAGCAATGTAATCTAATATTGTATTGA  
CGAGAGCGAAGTAACCTCTCAAGAATATTGGTCATGTTTTAACTTGGCAAAATCTCGGGA  
GGTACGATTTACATTGCCTGTGAATGCACCTATTGCGTTATATTTGTTTGCACATACAAC  
TGCAGGTCATGGAATTGAAACTGTTCAAGAAGGAGAGGTTCTATGAGACATGGTATAAGA  
TTATAAGTACGATTCTTCTGTAGGACCTCATGTTCAATTTAACGGTAAATTTGCTGTAAC  
ACCAGAGTATCCTAACGGACCCAATTCATTCTTCATGAGTTAAGAGACTGGTGGTAATCC  
TGCATATCCGTATGCGGTGCGTCTAGTTTTACTGAACACTATGACTTGAAGGAGATTT  
TGCACCTGCACAACCAACTGAATTCCTAACAGCTGCAGAAGATGAAGACGTTATTGCTGA  
TGATGGTAGGGTTTCTTATTTCAAGATGACGTAGTACGGTTATAATCTCTTCGGACCTGC  
AAAAGCAAAGATGTTTGGTGGGGTAGGATCTGGTGTCTATTGGTACCCCTACTGTTCAACA  
TGTTACTAGTTTGGCACTACTCGATGGTGGTTGAAGTTATGCTACTCCTCCAACACTTAT  
CTTTGAAGTTGGTGGTGGACAACGTGCACAGGGTGTGATCAAATGCATACTCTAAGACA

AGTTAAATCTATTGCAATTACAGATCCTGCTGAATTCTCCCAAGAACCCCCATTTACTTG  
AACTACAGGTGGTAGTGGTATTGGTGACATGGCACAAGCAACTGTCAATCCAGGTGTTAT  
AACGGCAACTAACATTACGGATCCTGGTTATCGTTATACTTCAGATCCAAACTTTGTCGT  
TAAAAAATTAGTAACACTGAAGAGAAAATCTAGAGCACGTCAAGCATTAAACCCATCAA  
CAGTTATTTGACTGGTCTGGTTAAAAAAGTTACCCTTAATGATACTGAAATATATGTTGA  
TCCTACAGATGTATTTTCATGCTACTTGTGCTAGATGACTCTGCATTATGAACCACTCACCTA  
TACCTCTAAATCAGCAGTTAAGTTTGGGGGTTTGACAAGAGGTGTAAACTTTCAGTATGG  
TCTACGGGGTATTCTTGACGCCGGTCAAATGATCCAAATGGTGGTTCAACTTATAATTT  
GAATGTTGGTGATAGGGCGATCCGTAAAGTAGAGAAGGCTAATAACAAAGGTGCAAAAGT  
ATTTGAGTGCAATCCGTCTACACAAGAACTACTAGTTACTTTTGACGTTGATTAATGAGC  
ATTCATTGACGGTGGTATTACTTTTACTGAAAATGCTAACGTACAGTTGATTGAAGGATC  
TGCTACTAGTAAATCTACTGGATTTCGAATCTCAAACCGTTCTTACAACACTACTGGATCTAA  
TAGTTTCTTATTGAGTGATCCCCCTTCGCTTTTGGCAGACAGATCTCTCCAAGATATTCT  
ATCAACAGCAGCAGGTGATGGAATCGCTGACCTAGACATTACTCGCCGTGATCATGCTCA  
TCAAATCAGTGTGGATGGTGGTATCTTTAAAACCTTTAAATGGTATCGAAGAAAATCAATG  
TGGACCAAATACAACACTATTACACGTAGGTGATTATGTTAAAGCTAGAACTATTCAATT  
CAAGTGTGCAACAATTCTGACTGCATGTGCTTTGAGTGCTGGCGTCTAACACAATGCAGT  
TCTAACTATTACACTGGCAATAGCAAATAGTAATGGTATAAATTATAGCGTTACTGTAGT  
TGTTACAGGAGCAGCGTCTCTAGTGAGTAGAACTGTTGTTTCATATGGTCGAACAACGAC  
AACGGTAGTTGTAGGGAGCATGGTCCGACTTAATAGCGCTAAGATAAATGTTGGTACGGG  
GGGATATATTTATTAGGTCTCCGATAGTGGAACAGTAGTTGATGTTATTATAAAGAACT  
TGGCACAACCTATACAGCTGCACCGACTGTAACGTTTGAAAAGGTGGGCAACATTCTAGC  
GACTGGAAGCGAATTTCTCACAGCTGTAGGAGAACAAGTTCCTTCTATTACTATCAATAA  
TGGTGGATATGGTATTCATCAATCTGTTGATAACACATTTAACCTACATCCCACAGTAAC  
GCTCGCTAATGCAACTCGTGTTAACACTGGTGCGGGTGCAGTTACACAAGCAATTCTAGG  
AGGAGAGGACCTCGTAGTTATCCGTGGTGGACGCCATAGAATCCAGAGTATTGAATATCA  
AGCAACTATTCGCTCGTATCCCTCATATATAAACAGGACTACGATAGTATCCCAAAAAGG  
CAGCCCTATTAAGTATCTATCTAGAATATTTTGTGCAAAGAAAGTCTTAAGTGCAGTGG  
GAGGTCTGACGCAACGCACAGTGAGGATGCAGCGGCAACTTCCTGTGATCGTTTGGATC  
TATTCATTGGTAGACCCCAGATTTGGGATAATGAAATGTCGCCCTACAGTCAGTAGACG  
CATTCTCCGAATTTTTTGGACCGTACGATGACAGGATATCAATGAAGAGAGTCCCTCGCGT  
CTGACACGACTCAGGTCTTGCGTAGAATTGACTGCGTTTCCCAGAGAAACGACAGGTG  
GACTAGGTTTTAGCTAGCACATGTATAAAGGTGACAATTCTCCTACGGAACTGCTGCTT  
TAGGTGCCACCAACTTATATGAGACAGACCTTTATGTTGTGAAATCACAATATCAATGTT  
ATTAAGCCATCTATAAAGAACTTATCCTTCAGATCCGAAGGGAAAACCTTCTACAGATG  
GACCTACTGGTACTTCAACTTCAATTATCGCTATTGGTACAGGTTATCGTTGGCAAGACG  
TGTCTCGAATCCCCGTAGCATCGGTTGTTAAGTTTTCTCAAATGAATACATGCCTGTCT  
TCACCAATACATCGGCAAATACAAATGCAGTAGCAGGTGAAATTGTTACGGTTGGTCTCA  
ACTCTGCAGTTTCTGGTTACAACAACCGAACTTATGATTATGTTTCGAGTTACTCGTGATG  
GAAGTGGTGGCCGTGTGTGTATTGTGCTAAAGGATCGTAAGATTAGTTCTGCAGCTGTTA  
CTTCTGGTTTCAAAGGATATATATTTTGTAAAATACGCGCTGACAGTATCACGGGTATTG  
GAACAGGAACTGATAGCATACTTGATGCTTTAATTCCTGCTCCAGGCGGACATGAATCTG  
ACGCAGATGTTGAACTGGGTGCGTTCGGGTAATCATCAACGCCACACTATCATGTGATG  
ACGGTGCAAGGGAAGTCTCAAACGATAACGAATATAATCGTATCGGCCTTGTTACTAATC  
CTTTAAATTTTCGGAACCTTCTGAAGTGATACCTGATATTACGGGTTTCAGCTCCAAAGCCG  
CAATCTTCTCCACTACATCCCAGGGCAAGTCTATGCCTGATGAACTATTACTCATAAC  
GAGTCTTTGGCGGACCCACGTTGCTGGTCGTCGCTTTGTTCATCTCTTGGAAATGGCACA  
CTAAGTTTTTGAATATTACAAGAACGCTATTGATGGTATCGTCCCGGAAGTTACAGGGA  
CACAAATTGAGTTTGACGGCTTAACGGCATCAATGGGGCAACTTCAGGTGCTGGTGCTC  
AAGCTCAACCTGACGTTAATTCCTGATGTTCCCAACTCTTCTTCTTGGAGCAATCAAGA  
ACTCAGAATATGATTTAGGTACGAAGGTTACGAATGGTTATTCGAAACCACGGTATCCGT  
CAAATAGCGGTCAGGCAGTTTACATAGATAATAGACGAGCAATCAGTCGTAATACTACC  
AAGTAGAAGACATCAAATCGTAGTCGATTTCTAATGGGACAAATTACCAACCTTCAGGC  
CACACCATATCACGCCAACTTTTATACGCTTACAAACATCTACCGAGGTTTGATTTCGTC  
TGGTTTCCCTATTCAAGCGAGGGTACCTACTACGATGAAAAGCGTCATGGAAAACCTACGT  
GCAGAATGTTGGTGCCCCCTGTTTAAAGATGTTGCCAGAGGTATTGCACGTCAAGTTGG  
TTATGACCTAACTGTTTATTGAATCCTGCTCCAAGAATCTTTCTAAATTTCTAAATTTGA

AATTTATAGAACCCAATGATAAGACAAGATCATCACTTGTCTTGCTACCGGTGAAAAGGC  
TACAGTTCTCTACAGTATTCCTTCTCCAGAACCTGATAAAGGTTATTTACGCTATATGT  
AATGGATATTGAGTCTGTTGATGCTAACAGCACTCAAGCAACTCTCGCAAATAATGAACA  
ATTTACATACAGATACTGAACTCACCTTCGGAAGCACTTTGATTTAAGTTGGTTCTCCCTT  
CGCACCATCACTGCCTCGTGGTTCTCTTCAAAAACGTGCTGTTGCTTATGCGTAATCTGG  
TGTTTGTTCATCAGAGGATTATTTGCTGTGGTTCGCATATCAATACAATCTTTCAGATAA  
CGATGGAAGCAACCCCTCATATCGTATCGGACTGGATAATCTCGAATCAATCGTTAGCCC  
ATAAGATGACCTTAGGCTCAACGATAATGCTGCAGAAACATCTAACTCTGATGCTTCTTG  
TGCTTATAGATTTAGATTCACCACAACTGAATTAAGAGACTTATTACTGTTTATGCCGG  
TCAAACTTAATCGAACTTCTTCCTAACAAATGAATCACCGGTAGACAACTTCTCGCTAT  
AATTGCGTATGCTGAATTAGTCAATAGAGTTGAACTTGGAAGTTGTGAGGCGACTGGAGA  
TTACGTTATTAAGACTTTGAGGTCCTGTTGGAGAAGACGTGGATGATGGTTTTTACTC  
TTGCGTATATTCTGCGGGGGCTACAACACTACATATGGTGGACTTGCTTCAGAATCAAATA  
CCCAGTTGCATTTGGTGAACGTGTAGCTTATGTTAGAGGATATAGACTGAAGAGATTATC  
ATCACCCGCCGATGACTCAGACAAACCTCCTGAAGTTAAGCAAGCGCTCAACACGATACT  
GCCACTTGAAATTGGCAACATTACAACCTGTAATCTAAGTTTATCGATTCCCTTATCTTGT  
GCGTTCTACAATCGCTAATCCATATCAAACCTGTAGAATCAAGAAATGGGTTTACAACACT  
ACACGGTGATGCGAATGGTTTTGTAATTGGTTGTGCTCGTACTTCTTCTATGGGGCACAG  
CGGCGATCCTGATGATATTTTTGGAAGAGCTCATGATCACTATAAGTTCAGTATCTTCGA  
TGCTCAAACGTTACAGTTTTAGAACTAGCATCTTCTCAAACACTATTGCAGCAGGTTCACT  
AGTTCTTGATGCAACCTCAGGCTATAGAGCATAGCGGGTCAATGCTATTTCTAGCGGTGA  
TGCTCTCATTATATATCAAGTAGAAGGGAGTTTTGCAGAATTTGAGATGGTCACCGGTGA  
TGGACAAGCAATTGATACTATCTGTGCATTACAAAGTTATACATATTCAGATACTTGTCA  
GTATGTCACCAGAGATGAAAGCACTAATGCTGTTTGGCTTAACTGAAGATGCAATCTTAGA  
AGAAGATTTTCTGTTTGGGGTGGTGCCTTACATACAGCACTAGTGCAGGGAAGGGTTT  
AACTACCTATGCCGTCAGTGCAGCTGATGGGGAAAGCACTGCAGGAACTTAGGCTATAGG  
GGTATCTACCTACACTAGTGAAGCAACTGTAACAGGACCTACATTCTCTACCGTAATAGA  
CGGTTCTGGTCTCCAAAATTACTAATCTTAAGGGTGGTTTTGGGTACATTGTAGATGA  
AACATCTACTCTAGCAGATGCTAACTTGGAGGAGGCCGTGTTGCTGTCCTCACATTTCA  
TGGTGCTACAGTTGGTCTTCTATTGAGGGGACAGAATCAAACCTTTGCTCAAGATTTAAG  
ACCTGGCGATCAATTATATTTTACTTCCCAGAAGTTGTTACTGTTACACTGTAATCT  
ATCTGCATTCCCTACTACTAAAACATCAAACATCTTTAATTATGGAAGACAGCTTGTAAG  
TGTAACAGCTGGATGTGCCGCTCCATCTGCAGACACTTTTGTGCTGCAGTTCGATTAAG  
AACTAAATTGATGGCTTCAATAATGCGCATCTTCTTCGCGATAAGCCTAAGCTATATGA  
TAAGAGTCTTTCTCATGAAGCTTTGATTGTTGGAAGAAAATTTGATGCTGAGACTGATGC  
TTGTGACTATATCTTACTTGTCTGAGAACGAACAGTTCCAGTCATTTAGTGATGA  
GTACTATACAATTACAGTACTTGCAGGATCTAACTCTACGGACCCAGTTGGTGATCAGAT  
CAGTATCAATACTACTGACTCTAGTGCTGCTGGATAGACACCATTCTCACGTTCTGAAAG  
AACTACTCTAAAGATTGTTACCTTAACAAATATTACTTCTATTAAGTAACACCGACTAT  
TTCTAATAGCGTTCCGACTACAAAACAAAATCAGCTAATCAGATGTTTGTTTTTAAAGT  
TAATAAAACCACTCAAACCTTTGCTTACCACAATGATAATCTAACATATTCAAATCTTTA  
CGGAAAAGAATTCTAGATAAAGACATCCCCCTGGGTTTAGTTGACGGCTATCTTCCTCA  
CGCTTGATAACAATCTCGAGATGACAATAATCCTGTTAGTCCATCTGCAACTTTAGTCGA  
ACCTACTATCTTTGCTACCGGTACTATCGTAAGTGGTAGAACTTCAACAGCAAGGGCAA  
AGTTGATGCTTGTCTCTGGTACGCTGAAAGTTGATGTTGTTTATCTATCTGGTATATT  
CCACCCTAGTGAACTCTACATTGTTTTGACGGTAATTATAATGAAATCAATGAAATTAT  
TAATAATCGTGCAGGATCTGTTGATGTTTCGTTCAAAAGTTGTAAGTACTGAGAGTTACTTCAG  
GGAATCAACAGAACTGGTTTTATGGAGCGAATTTATAAAAATTCTTCGGAACCTAGGTAA  
CGCTGAGCCGGTTAGAAATTTAAAAATTATTATTGTCTACTAAAGTCTACTCCAACGGC  
AGATTATATTGGTGGTTCGATCTTACTTCGGTAGATGATACAGCGATATTCCTTCTTTAA  
GGTTAAATTCCTTGCTGATTCCCTAGACTTTAGACCATGCGCAAAGAAGTGTTCGTAG  
AACAGGCCCGGTAGCATCCCCTGCATTTGTAAATGATTCTACATTTGACTATAAGTCAAG  
AGTGTTAAATGTATCTTGTGCACCTATTGCTACAGTTTTTGATATTCCAACTTAACTAG  
TAATTTCCGTTGTGATCTTGTGTTGATCTACCTAGACTTGACAAATGTTTTGTACGCC  
TACTGGTTAGTTACATAATCTTAAAGGTAAATCTTCTGATAGATCAAAGCACCTGATTC  
TCTAAAAGATGGTATGCTTATAGCAATCATATCACATAAACCATATGGATTCGATCCACT  
TACAGATGGATTAATTAATCGTTCTGTGAATAAACATTATACCAGGCGTGATATCGGTGG

TTTAGAACCGAGATGAGATCAGGTTGAATTTTATCCATCACTCAACATGCTTGAGACTAA  
TACAATCTATACTCAAATTCTTGAGGCTAATGGTAAGAATCTTTTGAAGACTGGATTAT  
TGTTGGTGATTTTGGTGATCATAGGTAGTCTGAGGTTGCAGATGAGGATGTACCTGCTTC  
GCCTGACTTTAGACGAGGGTATGCGCGTCACTCTTATTACACAACCTAACGTTCCCTTCGT  
AATTATCATCACTTTGTCAACTTAGACTCAACTAACTGATCCTCTAATTAGGTGACCGTA  
TACTGAGGAGGCGATTGTTGAGCAACCCTTTGATTCTGGTGTTAAGTGTTTTAACCCATT  
TTACGTCTTTGTCTATATCGGTAGTATTACTTTACCACCTGGTTCTGATGATTGTTTGGGA  
TGCTAATAGCCTTGCTGCATCAGTTCAACAGGTTGAAGGTGATTTTCGTCCAAGATTCTTC  
TGAATAAAATGTAGATCAGAATGGTTTTCTACAATTGAATGGGGAGCATGGGCTACTAC  
ATGGACAGATGAACAAGTCATATGATCGGGGGTATCGAAATATTTTCATTGGTTAGGAGA  
AGATATCGGTAGATGACCTAGACTTGATGTTTGGGAAGGTCGTTGCATGCACCGTCATAT  
TCAGACTTAAACCATCGAAGTAAGTGCAGATCATGAAATGTCTGGTGTTGACCGCAAAT  
TATTCCTAAAATTGAACGCCAATTTTTGGGTGATGCTATTTTTTCTAGCACATCTATTCC  
TTGGTTTCGTTCTAGAAACGTTGTTGCAGATGTTGCACGTCTAAAACGAGGAACACGTTT  
CTATTCATTCTTTGATGGAAAGTCAACTACTTATTGATAGATTCTATCATTATCGAAAT  
GATTAAAGATCCTACAGTTTATAGTAGAACAACCTACTCCCTTTTCGTATTTGACAAAC  
CGAAACAGGTGAGATTAGCGGTTATAAGTTTACGGTGGCTGCTCGTGATGATTTTTATCA  
GTTGTATTCTTATGAGGATACAACACATCCTACTACAGATGCATCTACGACTGGATTCTT  
GAACATTGATCCTACTGCACATTCTAAGCAGGCAATCGGTCACATCTATGGAAATATGCA  
GGATCAAGGAATATTACGTGGAACCTTCTGGTTCTCTTGCTGTTGTTCAAGATCATCGTCA  
AATTTCCGATCGTTTTGGTAAATAAAACCTTCATTCTTTATTTCCCAATCCTGGTGTATA  
TAGAAACCCAAGATGGGCAACACGAACCTAGAACTTTGAGACTCTCCAAATCTGATTTTGA  
TGTAGGTATTGGTGGTGCAGTGGCTTCATCTGCTCAAACCTTTATAGCAAGCAGGAGGTTTC  
GTTTAAACACATGTCAAGAAAATATCTTGACAATTTCGTAAGGCAGAAATAGAGGATGAAAC  
TGTAACCTCAAGCACGAACAATTTAGACAACCTAGAACTGTGAGTAGGCAGATTGGTGGGTA  
TGACGCTCTCGCACAAATCCTTCTTTGTTGATAAAGGCGGTGGTTCGAATCCTTACTTCAGT  
TGATTTTTACTTCTTTAAACAGGATACAAACGTTTCAGTTTCTTTGCAAATCAGAACAAC  
GTTGAATGATTATCCTACAACAACCATCTAGCTTGATCTGATGTTACTCTCGAACCTGA  
TCCGGTTCAGTTATCGGAATCTTCTGCAGTTGTAACCTAGATTCCCATTTGAGTCCATGT  
ATATATTCCTCAATCACAAAATATTGTTTTGGTCTCCTTTATGACTCTAACTCATATCA  
GATTTGGATTTCCAGACTGGGTGAGATTGATATCTCTGGTTGCATAACAATTTCCAAACT  
ACCATACGAAGGTGTTCTACTCCAATCTCAGAACGCTACTACATGGACTGCAGGTCAATA  
TGAATACTTAAAGTTTAAATATCAACGCTGCATCCTTCTGTAATACTGGACGAGCTAAACT  
TGAATTGAACAATGCAGTACTAGGTAGAGGACATGGTGGTAAGCGAAATCTTCGTTCTGG  
TGCTATTCTAAACTGCCAACCCAGAATCAGTTCTTACAATTAATCCCCAACATTACCTTA  
CAACGTTGGTTGTCGTATCTATCAAAGACTGCTTTGTCAGAGGCTACGAATACTGCAAG  
GACTGTAACAGCAGGTGGTATTCAATTAACCTATTAATGATATTAATGGTACTGGCCAGC  
AGGATCTAATGGTGGTGGAGTAATTGCTAACCGTGTTGCTTCTTCTAAGACATTAGCAAC  
TATGGTTGTTACTGCTGCTTATGTTGGCTTTACATTAGGTGAAACAATGACAGGTGGCTC  
CTCTACTACTTATACAGAAGAGGTTGTAAGTTCGGACTACTGGAACAAAGACACAGCCACT  
TAAATATGTGTCTTCTGCGTTTAAATACATCATAAGAACTATTATTGGTTGAACTTCAGC  
TAGAACTAAAACAGTCAGTAGAATGACTTGCCCTGGGGTGCCTGTTGAATCGGCTGCAAT  
CCAACCTTGCTACCCATCAATAACACCAACCTAGTCTACAAATCAACGAACGCTTCGTGT  
TTATCGTAGTAGTCACAGTATGCACAGTGCATCTAACAATGGGAATCTTGAAGGCGCTTA  
AACTGAGGTTTCTGATACTGCTTTGACTGCATCTAAATCTGCTACAGATCCTCGTATTGC  
TGTAGCAGACGCTATTGCATTCCACAAGAATATATACGGTGCTGCTATTGTAACAAGTAA  
CGTTTGTACATTAAGATTAATGATGAATTTATCTCTTATAGAGCAATGTCTAGATATAA  
CAACACTATTGCTGCTAATGAACGTAGTCATGGAGAAAGAACCGGAGTATCCCATGCCGA  
TGGGTCTGTAGCGGCGAGCTGTGACTTAGATGGTATACGTCTAATAGAAATTAAGAAAAC  
TCTTGCAGGACTTGGAGATGTTACTTTAGATTACGACGAAATTTCCACATCACCTATTGC  
TAGCCTAGGAAATCTTGGTGGGGGAGGAGGTATCGTTGCAGCACAGAATATTCAAACAG  
CACTCGTGTACCTCAGATTCAGAGGGTTTTGCTTCTAAGTCTGACATTACAGCTAGAAT  
CAACACAATTAGTGGTACGTCTATCAATGATGGCTCTACTTTGTTCCAAGGATAATTCTC  
AGAGGCTGGTTTGTCTCTGATATTAGTTTATGTCAGTATTATGAGTTGATACCACCACA  
ATTAGTTTCTTCTACCATCAATGAATCATCTGAACTTAGCAGTGCTAGGTCATTCCGAAT  
GGAGTTTAAAATGACTACTGAAAAGACTATAATTTCCCCTGTCGTTGGTTCATATAGAAT  
GTAGATAAGTTGGGTATCTAACCGTATCAATACTCCTTCATATTCTAATACGACAAAAC



ATCAGATGGTGATGTACATGATGCACTTTATATTACTCAGACTGGAACTCAAACATAATCC  
TTCGGGTTCTATCAAGGGTTCTTTTTCGGGGATGTCGCCACCCAACAGTGAGATTAAGGT  
GCTATCGAGAGTGCGTCCTTTTGGATCTTCTGTTCTTATGGAACAACCTGCGATTTGACTT  
CTTCCCAGCTGCAAGTACTAAGGTTCTTGCACCACAGAAAGAGAAATCTATTTCAGCTTA  
GGACTAGGAAGTATCTGGTTTGGAGTATTGCTCAATATCAAATCAAAGTAATGTTTCTTTT  
TCCTAAACAGGCATTAGTCCCCTTATCAAAGATATAACACCAATTCTCTTGGCTGTATA  
ATGAAAATCCCCGTAAAAGCCAATGCAAATCGGTTTTCGGGACTCCTATGCGGGTTCCGTG  
AAGTGTGCTGATAAATCTCTGTATGAGAAATAGATGGCAGCACAGAAAGCAGAACAAGTT  
AAGAAAAAAGGATTCCCTACTTTACTAAATGAAGTTTCTGAATTAGAAAGAGATATAAGT  
AAAATTAATCAGTTTTACTTACGTTAGTCTAATACAAAACAACCTAATGACTGTTGACA  
AGGTGTCACAAGAAGAGATGCATTCTCAAATCAAGGAGAGAGGTGAAAAGGTGCATGAAC  
AATATCGACAATTGTCTGCGAAAATTAAGAAAAACATGTTAATGCACTGCAACTATTAG  
GTGCTATTGGAACCATAGAAGATTTTACAAAGGACGAGGAAAAGACCGCTTCTTCAACTC  
CTGATCCATTTACATCAAAGAATGTGAAGGGCGGACAGTCCCCCTCTCTTTTGGCATA  
AATAATAAATGAGGCATAACATAATCGAGTCGTCATAACATATAGCCAATATAATTCAAT  
TCAGGCGAGGTGGCGCACACGACTGGGCGGACTCTAACCCGACCCTTGCACAGGGTTATT  
TATGTATCGAACTTGCCACGCTTCGTCTTAAGATCGGTGATGGTGTCTTCTGCATGGCCCT  
ACTTAAGGGAAGAACGACCTGTACAGTCTACTTCTAATCCTGCAAATACTTTAGAACAAC  
GGGACGCTGATGGTAACTTCGCGGCAGATATCATTACTTCTACTGTTAATGGTTACTCGT  
CTGTTGTCTCTAGACTTGCTTCATCAATACAGATCCTACTCTTTAATGAGGTTACTGCTT  
CTGTTGTATATGCAGGTCCTCAAATCTTGAACCTATCCGCTGATTTAGCACTGATTTGTA  
CTGACCCACATTACGATAGCACGTCATCTCCATCAGCTACTCACAATAAGGTAACCTGTTG  
ATGCTAAAGGTAGAGGAACTGACGCACAAGATTTTACTGCTTTTAAACAACCTGACTCATG  
CTGATTATGGTTTTGATGGAGCCAATGGCGGAACATCTGCACAACCATATGATCTAGAGT  
TATTTGCTGTCGCAAGCTTGACCCCTTCTGGTATACTCTCTAGTTCTGCTTGTAATACTG  
TAGCAACTAGAGCAATTACTGGAAGTCCACAAGTATTTCTGTAAGTAAGGATTCAGGTA  
ATTCGAGTCACACAACCTATTAATATAATCGCCACTGCTGTTACAGCAGGTAACCTATAATA  
CAGAATCCCTGACATGTGTATCTGGTGCAGGTGGTAATGCTGGACCCATTGGTTCCGCAA  
CAGTTAACGTTACTTAGTTTACTGTTGATGCCCATGGTAGATTAACAAGACTAACTAATG  
TGCCTATCACTACTGCTGCAGAAGGTAGTAAGTGTGCTAGCTATTACTTACGTACTACTT  
CCGTTAAATACGACATCATTGATAACGTATCGAAAGATTGCCAATCCACCACCGACCTTG  
CTGTAGGATTAGGTCCAAGTTGTTATAGCAGCGGTGACTCTGGCGGGTGGAGATAGCTAG  
CTGACAAAGCACCAGATCAGAAGGGAATGCGTAGTTTTGCACAAGTAGATTTCCACGTTA  
ACGCGAACTGGCACGTCACCATCATCACCCGAGGAGTAGAGATTACACTAAAACAAAAGA  
TTTAACTAATGTTCACAATTGGAACGGCTGTTGGAAATATTGTAGTAGATAACAACTTT  
CAACTTCTACCGCCAACAAAGATTTTGATAAATTGCACTGTATAAAGATCAACTATCCTT  
CTGCCGGTTTACATTTTGGACCTTATAATAGTAGTGACATTGGTGCAGGAAAGATCGATG  
TAAATGGACGTAATTTGACGATCCTGCTATTACTTTAGATGGGTCAGTTGCACAAA  
CTCTGAACAAAGCTGGTGTATGGTAATCTTACTTTCACCCTTCTCAAAGCTCATCGTGTG  
CATGATTTTTAACAGTTTTCAGCATCAATCGCTGGTTCCGGAACGAGCATGGTTACAATCA  
CTGCAGAAGATAAAGTTGATATTGATGCCTCAGATTAATACGGCAAAGTTCATGTGCAAG  
ATTATAGATACCCATATAACGACATTGCTACGTCTGATGCCGCTATGGACGTTATACCTA  
GTGATGATCGTGCTACCAGTGGCTCACTTCGTGTTAATGCCTGTGTTCACTTAGAGGGCA  
TGACTACGACAATTAATTCAACAGTTAAAACAATTGATGATCTCGTAATAACTTTTGGTG  
GCGTACTGTTCAAGGTAGTTATGAAAATAAAGATCGCGGAGTTGAATTGACATACTACG  
ACAGTCAAGCAAGAATTGTATTCTTTGGTTACGAGGATTCTGAATCCCTCCTCGGAGGAC  
ATGTCGAAGGATATACATGTTTACGCCACGCCACAATAGTTCAGCGGTCTCTAGTGGAA  
CTGCGTCAGGTATAACTCCAGGGAATTTTAACTTTCAACAATTACTTACTCAACTTTTA  
AGACTCCAGGAGACTTAGTAGTTTCTCGTGCTGTTGATCTTGGAGATGATGTTAATATTC  
ATGAATTGCTATATTGCGATGGCACATTCCGTGCTAATAGCACATCTAGATTTGATGATA  
GCATTGTATTGCAAGGTGCTTCTAAGACATTATCATTGAATAATGGTAATGGCACAACCTA  
AAATACAACCTTCTCACTCCTACAGGATATGTAGCAATTAGTGGAAATCATAACAAATACTG  
GTGCTATTGATGCAAACAGCACTTTAAGTGTGTCATACACTGTACCTTTTGAAGACGCAG  
ATGTACCAACTGTGCGCACAGAATAGTGGAACTGGTATTTATGAAATTCATAAAAATGACT  
ATGTTGCATTTAGATTTGATGGCGGTGGGTATGTTAAAGGAGATGCAGTATTCAATTGTG  
ATGTTATTAACAAACGGTGTCAAACCAAAGAGACAGTGTACAGAATCATTCCGTAATA  
GAAACCATGAGAACATCAGATATAAAGTACGTTGTGGTTCAACTGCAGCTTAACTTCTT

CACATGCATCTGATCATACTTCGTACCTTAGAATCTAGCGTGGTGCAGGTGTTCAAATG  
ACCTCCATGTTGGTGATGATCTTTATATTGGTAGATTGAATTATGGTGACAATGATTCCT  
TCCAAGTATTAGGAGAGTCAGGTAATCGCACTACTCAAGGAACATTAACAGTAGTAGGTC  
AGCTAAATATTAATGACTCTCTATTTGTTAATGTTACGAACGAAAACTTTGAGAATCAAG  
ATGGATCTGCAGCAAATAAATAACAGTGTAACACTGATAATGTTACTAGATTAATCGAAG  
TAACACTTAATGTAAACAGTGTAACACTGATATTGGCGTAGACTCCGCTGTTAGAAACGGAA  
CGACTGATAAGATCTTTGTACATCTGCCTCAGGTAATACTCAAATAAAGCGCAATTTGA  
CAGCTGATGGTCATACCGAATTAACCTCAACACTTAATGGTGATACTATTACAACACTTG  
GTGCACAACCTTACAGTAACTGGTAACTCAGAGTTCAATCGAATAGTAGCTGATGAGGCTA  
ACTTAGCAGTCAGATCAGCAACTACTGATAAGATGACTGTTGCATCTTCTACAGGTCCCG  
TAACAACACTGATCGAACTCTAGTTGTTGCAGGTCTCACAAATATTAATGTTTGTCTAAATG  
GTCAAATTGATAACGTGGTAGTTAATAATAACAATGGTTCCGCCACATCTAAGTTTAGCA  
ATGATACTGATAACCGGTAAGACAAGTATTATAGGTACATTGACAGTTTCTGATGATACTC  
AACTTGATAAATACGCTTGGTGGTCCTAACGTTGTGACCTTAACAAGAAACGCTCAGCAA  
CTCTGACTGGATCGTATTCGGCTGATGGTCCCTTCAAACACTGACTGGTGGTGCAGGTATCG  
GAAACAATCTTGCTGTGGGGGAAGGTCTAGGAGTATATGGAAGCACAGAACTTACTGGTG  
CTCTTGGTATTATTAATAGTGCTGCTATATCTGGAGCCTTAGTAACTCATGATAGTGTGA  
CTGTCACTGCAGACAATATGATGTTCAAGGAGCAGATTGAATCTGCAGCAAACAAGTTTA  
CGGTGATCGCGACTATGGTACCACGGGCATTCACGGAACATTGGATCCTGCAGGTGGTG  
TAACTACATCATCTGACCTTACAGTCTCTAGAAATCTTCCAGTCACCGAAACGACAATA  
CTTTCTATTCTCCGGTTGCAACAATCGATGAGCCTGTTGTTACTTTTGCAGCTGATACTG  
CACGCGCGTCTAATGATGAAATGGTACGTGGTATTGAATTACGTTATTACGATGGGTCTG  
CTAAAAGCGGTTTCTTAGGTTTTGATAGATCATCCTCCTAATTCCAATTCTTAACAAGTC  
CAACAATACTTCTGAAGTTCTCTCAGAAACAGATGGTGCTCTAAGGGCAGGTATTTTAA  
ATCCTACTGGTGCGGGCACATCTCTTGATGTTGACGCTAATGCAAACATAGATGTTACAG  
TGACTGTAGATGGTCTTGTGTTTCAACAAGTATCTTCAGGTGCTGCTTTTGTATCCCAA  
TAACATATAAGATTAATAATTTTAACTCAGACGTGATAGATTGTGCTACAAACGCAACAG  
CTGCAACTCCAACCCAGTTTTTGTTCGTACTTCATCAGGTGATTGTGCTGGTCATCAA  
TCACTGCTGCTAGTGGTGCAAGTTCTGGTGCATGTTTCTTAGGAAGCGCATCCACTGCCG  
ACGCATGGAAGACTGCAAGAACACTCAGCCCTAGCGGTGTTGTATCTGGTTTTGTCGTCT  
TCGATGGAAGTGAAATAGTAGCACTTACAGCAACACGTGTTGATGCAGACATCACTGCTC  
TGGCAGCGATGAATGTAAATGGTTATGTTCGTACGGACGGCTGCTAACACTTATGCCCTAA  
AAAATCTCCAAGTCACCGCAACGCCTGGAATTATTCTGAGTAACGTTGATGGCGTAGCTG  
GTAATACTACATTTGACGTGCCTAGGGCATCTTCTAAATCTGCAAACAACCTTCGTCCCAA  
GAGACGGATCTGGTGACTTTGGTGCAGGAACTATTACTCGTTCCTTATCTGGGAATGACA  
CAGGTAATGGAACCTGGACATGTAACCTGGTCACGCATCTGATATATCAAATCATGATAGTA  
GTGATCTTACTGAACTTCTAAACTCTACTACAAATATTAACCAGTTGACGATAGAGTCA  
ATGCTATTATTACTGCAGGAATTTTTATTACTAAGGTTTACGCTGACGCTTCAAATACAT  
ATATACTGACTGTAACCTCAGTCAGATCTCTATACTGATATTGTTACAGAGGAATCACCAA  
ATCAATTCACAACCTGCTGCTAGAACTAGAACTCGTTTTACATATGGAACCTGGTATCACAC  
AAAGATCCGGGACTTAATCATTCTCTCAGTCTGCTATTAATACTGACAACGTATCTGAAG  
GATCAACCCAGCTCTTACTACTGCTGCTAGAACAAAGAACACCCTTACATACGGAACTG  
GTATTACACACAGTTCTGGAACCTTACCAGTTACACAATAAGATATCAACACTGATATTA  
GTAGTGCTGGTTCTACAAAACCTATTGACTAATGAACGAGTTGATGATAGAGTTAACG  
CTTCCACTCTTGCTGCATCTGGGGTAAGTAAGACATCTGATGACGCTGGAGGAACTCTAT  
CTTTAGCAGTTGGCTCTAGTGAGTTAATAATGGCATTTTTACAGAGGGTTCTACCCTTT  
ATTATACAAACACTCGTGCTCATGCAGGGGCAGACTTGAAAATTGATGTTGTATCAGGTT  
CAAACCTTGAACCTTCTTCTAAGTCCACTTCCGTTCTTTCTGGAGGAACGTCTCAATACG  
ATACAGAAGGGAGAGTTCACGTAAAACCTTGACAATGAATATGAGTAACCAAGAGCAATGT  
TAACCAACCTCGGAACTAGCAGCACTCAAGATCTTAGCTTGTCTGGTGATCGTAGACCTG  
GGCAGTTGTTACCACTGCTGTTAGTGTGTCGGTGGCGGTGGAGTTACTCTACTAACTG  
CGGTTGTTTCATCTGGTCCAGCATCTGGATCTGGATTGACTGTCAATACTACGGTTGCTA  
GTGATGGAAACATACTACAGCTGCGTTAAGTCCAGGTGGTTCTGGATGTCTAATTACTG  
ATAGTGTCACAGTCCCTAACTGCAACGCACATAAGATTCTTAAATTGAGCTTGGGAAGAT  
TATCAGGTGGATCACGGTATTCATGTGCTACTGTAGCAGCAGTACTGGGGGGGACGGTT  
CTGCTGCTACTGGTGACCGTACTTCATCTGCAGGTGCTTCCAGTCACGTAACCGTTAATA  
ACGGTGCCACAGGATTTCGCTGCGGGTACTCCTATTAATATTGCTAATGTTAATGCCACTG

AAGTTCAGAAGCTTTGGCCTATTAGTGCTGGACGGTCTGGTTATTCAAAGGAAGTGC  
TTGCCCCATAATCGTCCGCAACAGGATCTGGAGCAACATCAAATATCACTTCTGTTATTG  
CTAGTGGTGGTATCACTACTATCGCAATCAACGATGATGCATCTGGTGACGGTGAATCTG  
GACTCGAGACAATTAATAATGATAACACATCTAATATCGTAACAGTAGGAAGCATTGGTG  
CTGCTTACGCATCAAGGTTTGCAGGAACCTATAACTTAGGCACATCAGATTATGAAACCG  
TAGCATCTGGTGCGAACGCAACATTCACCGTTGTTGTTGATTCAAATGGTACTGCTTCTA  
TCACGGTAACAGATTATTGTATCGCATTTCGCGCCACTGAAACTATCAGACTTGCTGATG  
CTCAAAGTGGTGGTGGGGGTGGAGCGGCTCCTACATTCGATGTAACAGCAATCCATCGTA  
GCACGGCTACATTTCCAGTATCTGCGATTTAGGGGAAACGTACAACAGTTTATGTCGGTA  
CCGTTGAAGCAACTGCAACTCTAACTATAATTGAAAACCTCAACGATGCAGGTGGGATCCA  
GAATTACATGTGCTACTTCTGGCACTACAGGTATTAAGACTGATCTGGGAACTAACCAGA  
TCACTGCCATTACCGATGACGGATTCTTCATGAAAGGAGAAGTCGTCAGTGCTAATGCTG  
TAACTAACTTACGTTCTCCTCATTACAGTTAATACGTTTTGTGTGCCATTAGATCCGTAA  
ATAAACTGAACTACGGGACTTTCCTCTACGTCGTACAGGATGTCCTACTATGGCGATTA  
ACGTTTCTACTGAGCAAATAGATGAGTTGATAGAAGAATAGAAGCATTCTATCAACAGC  
TTCCTCTGCAGGTAGTCACACATCATTTCATGTTTATTGAAGTTACAGATGCTAATAAAA  
CAGCAGGAAAAAGTGCAACCCAACAAGGATCTACCAATTGGTGTGAGAACAACAACCTATG  
TTGCATTAGGACCTAACATCTTAGGAAGCAATCAGGTATAGCCACAGATGGGGGCTTCTA  
GTATTGCGCCTCGTAACACGTGCAAGATAAAGTATCCAACCTTTTTAAATGGCATATACG  
CTATGGCCCATGGTCATATTCTTCACTTTATGATCTTTCAATACCTTGAGGCACTTG  
ATTATGTAACAAAGTCTAGTCGAAGTATAATAGTAAGATATAACGAGAAACAAGGTAGCT  
TGTATCTCGATATAGATTGGGATTCATTAGGAACAGGAGACAAAATTTAGTCGAAGGTC  
TCGTACGTCCAGATGAACAAATGTCTACAGCAGTATAAAATGATATCTCGTTAAAAGATT  
ATGCTTAAGGATTGTTTCAACAACAATGGGGTAGAAACCTAAGTAAGTACGATGGCATTCC  
AAAATTTAGGTGGCGTCATACTCACTGGCCGTCAGATTCGGTCCGACGCAAGTCAACTCC  
AGAAGGACCTTGAAGATAAAATAGGTGATACATATGAACTAACTCCTCGAGACTTCGTGG  
GCTAATCTCTATAGTTATTTGCAACTCCCCTGCACAAGCTTTTGTTCATTGATTTCATG  
GTAACGCAAAACGCTACAAAGCAAACGGTTCTGCACTGGAATAAGAATGTATTCAAATTC  
TATTAGTTGCAAGCATTGGAATCTATGGGCTAGATATTTACTATGTTCCGGCGACCGTTTG  
TCAAGAACGATACGGACTTTGGAGAGGACACAAATTCGCAATTCGATAGTGCGAAAACGA  
TTAGAGCATATGACAATAATGCTGAAGCATTGCAAGGACATGGTAAGCTAGTTAGGAGAT  
TGGGAGTCCGTATCGAAGAGAAGACAACCTTTTATATTGGCCCGTGAGAAATTTAATGAGC  
AGCTGGCCGATAGTATCACGCTAAACGTCTAAGGGAGACCAAACGAACCGGACTTAACCT  
GGTTTCCAACAACAAGCATTATTTGGCAAAACAATTCGTAGAAGCAGAAAAACCATATT  
ATCAATTAGGAAACGGATGTGATTGGGAATTCAGTGTGGACTCTTTGAATGCAGTGACG  
AAGACCTTGCCACAGGATTTCGAGTGCATGCAAGCGAAGCTGCCTTTGCTAACGCTA  
TTACTGTTAACTTGGCTACTGGATGGTGTAGCGATTTACACTTGGTGGAAATGATGCAG  
GAGGTACCAGTATAGTGACTGCTGAAGTAAAACCATGGGATTTTGCAGCTAGTCCGTTCC  
AGGTCTTAATTCATTCTGGTGTCTTTACGATACTTGAAACAGGTACAGGACAGAGCTCAG  
GTGCTGATTCCGGCAACTGAATCATACTACTCACTAAATAATTTGAATACCGCTAACTCTA  
TTTAAACAAGACAAAGAATTTAAAACCTATGGATAACGATCTAATTGAATTTACCCAACTA  
ATCGATTCGGTACAATCGGTTCCCTTGACTGACACCACAATTTAGTGTAGGCACTTATTC  
ATATCACGAAATTTTATAGGAGGCCTAAAGATGCTTTTGGATCGTGATTCAATAATAGTGA  
ATTACCTACGACTGACCAAGTGATCCAAGTAGCTTTATGGAACGGTCCTGAACAAAAATT  
CTTAGCAAGGTTAGTACCAGTTTCTGATCCAACAACAAGGAGTTCAACTTACTCTACC  
CAGAACTTTTTTTGAAATTAACGGGGTAGCATATGATAGTGAAAGAAATCGTGCCCCCAC  
ACAAAACAACAAGATGGCAAGCAGTTCTACTTCAACTAAGAATGTGTTTATGCCTGTGCT  
TTATATTATTGGTCTGGAGCTAGCAATCATCTCGAAAAATCAAGAGGATTGTTTACAAGT  
TTTAGACCAGATACTAACAATAAGCCAACCTCATCTCAGTATGGTAGTGAACTATTGTC  
GGAGATGACTGAGATTAGAGACATTCAGTAGTCCTCAATGGCTTCGAATATGAACATGA  
CTACGAGGGTTACTTTACTACAAGAATAGCGATCATTTATGCCTTAAAATATACTGCAAG  
AACTCATCTGTACGGTCCCGTATGAGAAGCACAAGTGAACAAAAAGGCATATACATATTA  
CTATACTGATACCACTACTACATGTGCATCAAGAAAAGTAAGGTTTATTGTTGTACCTAA  
TCCTCACTCAGCAGATGCTGATGATGTTTCTGGAATAGGAGGTACTACTGCAGTCTTTAC  
AGCTAACAAGAAAAGTAAGCCTGCTAGAGGTGCTGACGAGGCAATCCAATCCTTTCAACT  
CCTTTTCGATGGTTCCTACGATTCTTGTGGAAGTGAACCCACAAAACCTTCAAAATCATGTG  
AAAAAAGTAAAACCAATTCTGTAAAAAACAGTGAAGATGGGAAACAAGTCTCGGAG

AAATCACGTGCTACTGACATAGATTGGTGATGAAAGGACAAGAAGCATTAGGTTGTCAA  
TTGGAAGTAGCACAAGCATCATATCATCCACGTCCGTGAGCAGTTGCTCCAACAACGATT  
AAGAACATCGCCGATACTGCTGACAACTATTTTAGGTTT CAGAAGAAGGTGACAGAGTCG  
GATGCTGATAATAAAAAGAATGCGCCTTTTACAGTAAACAAGATGATGTTTGTGGTTGC  
CCTGTACAGTTACAGAATATGTTAAAGCTGAAAAAGGAAATAAACAAAATGGAAGAGCAA  
TATCAACACACGACGTGTCAGTATTAATGGGCTTTGCACAAATCCAGTTGCCGTAGGTG  
CAACAGAATCCCAAGTAATTAACAAGATATTACAGAGTTCGTTCTATTCCAGGTGATC  
CTGCTGTGTCCCTTGAAGGTGCTCCTGCAATCACACTTGTCCAGAATGAGTGCATCCTTG  
TCAAAGGTGGTAAACCTTGTCTGGCAAGAATTGTAGGAGCCGAATCGGATTGACTAGTA  
ACTATATCCTAGGTAAGCATACTTATTCTACAGGTGACGCACATCCATTCTCTCCGCTG  
CTGTTCTCGCAATTGTAAATGATAGCACATCTCCTGCCCTTCATTGCATCTTCCTCTCTG  
CAGGTACTTGAGGTAAAAAATTAATGCTGTACAGCAACAACAATCGCGACTGGTAATG  
ATTCATCAGGTGCCTCAGCAGATTACACTTTTGCCTTCTCAGGCCCTCGACCATTTGTTA  
AAGGATGAAGTAAAATCTTTGCCGCTACAAGCGCAGTAATAATAGAAGAAATTC AATTGG  
ATGGTGGTCAAGAGGCCCGCTGGAAATCAAGAGGCAGAGAGAATACTCAACGCGAAGAAG  
AAGAATCGTTATCGCTTTAGGAACTCCATGGAGATCGAGATAAAGGAGTGGTGTACGCT  
ACTGCAGATAAGTTGGCAGAGAAAGAACAATTGAATGTTATGTCCTATCAAGATTTCAAT  
AACTAGTCCAAGGTAATCTTACGACAAGGATGCTATCGATAGCAACGTCAACGATTACG  
GGAAACATTTATGCTGATCGTTGAACTGCCGAAAAGAAGACTAGAGAAAGTAGAGAGTCT  
CTTGAAAAGATCTTTAGAAGTACCGTATAAATTATAATAAACGTGTAGAGCTGGATAAA  
TAATCCTCAGGTGAGGGAACAGGACTTGAAGTTTCTACCAAAGAAGTCGTAGCAAAGGA  
GTGTCTAAGAGACGTTTTGGTAAGATAATGCGTCGTCTAGGAAGATCGCATGGTCCAGAA  
TAAGTTGTAAC TAAGAAGGCAGGTAACCCTGCTAGACCACATGATGCGTAGTTTAAAAAA  
CTATCTACGTCAATACACTTACGTAGAGCAAAGGCAGGGAAAAATCCTGCTGGTTTCGCA  
GAAACTTCTGGTATTAAGACAGAGAAGGTGAACTCGGTCAAACCTCGCTAACCTCCGTTG  
TACCATGGCAACTAATGAAAATATCGAAAAGAATAAATGTGGTTCTAGTTCTTTGCACGA  
CTGGATTCGTAAGAATAAATCTTCTGATGAGTACCCTGTTAGAGTTCAGCTCGGGGATAA  
ATACTTAGGTAACCCTGCGCCAGACAACCGGGACAAACGACCAAAGACAAGAGCGGTTT  
CATTTTCGAGGACAAGAAACCTAAATTTAAAAGAGGCAGATACTGGCTTACGTGCAAAAAA  
CAAGAAAGATCCTAATCCAATCAGAAAAGGAAAGGCAATCAAAGTGAAAACAGAATTTAA  
ACAAATACACGAAGACGAAAAAGTTTCATGTTTCGCATAAGGTAAAATCTCGCTGGTCAGT  
TTGGCCAAGTGCCGATGCTAGCGGTGCACTTGTCAAATGCCGAAAAGCTCGTGAAAAAAA  
GTGGGGAAACAAAAGAAAGATAGAAGATATTGATATGAAGGTAAACGAATTCCAAATTT  
CAAACCAGAATGTTGGAAAACCCAGAAAATCGTTGATATGAAAATGAAGTGTGGTAAGCT  
AGTAAAGGATTTTCGCCCAAAGAACGAAGCAAATGAATACACAGGGCCAGACAAAGCAA  
CAGAAGACTTATCGAGAAAATGGATAACCCTAGATCTGCTAAACAGAAAGCAGACAAAGA  
AAAGAAGTTGGATTTTAAGAATCGTCAAACGCTTATGGATAAAGCGATTAAGGGGATGAA  
GTTTACTCATGAAGAAATAACCAACGATGCAAAGAAGTGTGGCCAGATTTTGAGATAAG  
AGGAACCCAAAAAGCATTTCGGCAAAAAATACAACCGCTGTATCTAAAACGAAGACTTACC  
GGATGTCAGAGAAAAAGCGGCAGCAGGTCCTAGGAAGGCAGGAAAAAACCAATCAGGCGG  
ACCTAACGACAAAGGCAGACAAAGTTTCGAACGAGAAAATCCAGGATCTGACCTTAATGC  
TACTCACAAAATAATTGGAAACCCCGCAGAGCAACCTTCTGCGCTAGAATGAGAGGAAT  
GAAAAGAAATTAAC TTCAAAGGAAACAGCCAGCGATCCAGATTCAAGGATTAACCAAAG  
CTTCCGTGCTTAGAATGGTCGATCTATAACCGACTGTAGTCCGTA CTATTAGACTACAAA  
TCTGACCGATCTGTAGGGCTACATGGATCGGAGAACAGTTATATGGGTCTACGGTAAAAG  
CGGGTTGCCCTATGATCTTGCAGGACTGGTACGTAATAATCAATGAGATGAGACTTGTA  
TTAATACATGTAATGTATCCACTAATTGTCAAAGATGCGGATATCGTCATGGAGTGATTG  
ACGGTTTGACGGAGGGGTATGATAAAGGTTGTTGGTTATGTATGTTATCAATTTGTATTA  
GATTTTCGTATTTAAAACAGCAGCAAGAAGAATAACGTTGAATTAGAAGTTCCTATGGGA  
GCCGCGTTCGATAAGATGCTTGAAGATAAGATGTTGTAGAAAATGGTAAGATCAAAGAT  
GCTTCACTAGAAAGTCGTGCATCTTAAATTTTGTGCAAGTATGGGAAGCACGTAATAGA  
GGACTACTCACACCTGAGATATTTTATGCGAGTGTGGCAGTAAAAGATAAGCATAGAAAA  
GATAACGTCGATGGAGTTGACGCAAACCGAAATGATAGCTTTAAAATTATGGGCTTCTTG  
AATGGTAACTTGGATCCCAACACGACGGGTGGTTCGATTTATGCATGGTGGTATAAAAAAT  
AAATTGCATACTACCCACTTTTGTATTTGCTTTCCAAGGACAGCTCATGCACCAGGGGAT  
CTAATCTGTGCTTACTATAGGTTT GCCATGGATCTCTCTGTTAAGAAAACGAAACAAGCG  
CGCGACTTCAACAGCTATCAACGATACTAGAGTGTAGACTGTAAAAGGAGAACGAGGTTT

TTTGCATTACACCCGTCTGTTTAAACTTTAACGGGCACATTGGAACAACAACCAGATATA  
TTGTATAACCCGACACTTCTTAGTTCTCTTGGGTCAACAGCAGTTCCTATTGGTGTGACT  
GTATCCATTATAGCGATCACGAGAAAGAGAAAACGCATCCGATAGATGTCTGAGCTAAAC  
TAAATTATATTGATCGCAACCGTTGCCATTATTCATTTTTTTGTATAAAGATAGAGACTGC  
CAAAGATTTTGAGTGCTTGTGGAGATAGGGCGATCGCCCCATTTTGCTTTTTTGGGTGTC  
TTACTTCAAAGAATCAATGGCAGTACGAGGACCAGGCCACATCTATCTAATGGAGGGG  
CATTTTGGACGAACACTTAACGAAACAGAACGTCTTGAATATCTGGAAAGTCGGTGTCTG  
AACTCTTATTTGTTTGTATCGTCCTTTTCGCCAACCACCTCGTCCTTATCTACTTTTGGCTC  
ATGGTGGTGTATTACGGGTGATATGCTGTATCTGCTTACGCCCTAGATCATAAAGTAGAG  
TGGCATGCCGCACATGGAGATGAAGAATACCTAACACGTTTTCCAGATGACGGGCTCATC  
ACTCGAATCAACGATGAGGAAGTTAAACATGTAAATGAATTATCCAAAGCAATGAAGTAG  
ATAAAATGAGAACCAGCACCAGAAACGAGTATAAATTAGTATTAGAGGCTCTTTGTAAAC  
GTCAGCGCTGCTTTATTGTAGGTATTAGAATGTTCAAAGAATACGAGAAACCTAATGAGG  
AGTTTCAAAGGCCAGTGTTCGTGACTACGGGATCAGACTTAATCTCAATGAATTAATT  
GAACGCAGGAGCTCACCCCGTGATTTGCTGCTTCCAGACGACCGCGTATCGGAAGGTCCA  
GTGGCACATATAGCACATGATATTAATATGGATTTAGACTTGCACACAATCTCTCGTCAG  
ATGGCTGATCACATCATTACATATGTATAGGCGGCAGATAGTGATCACTCAAATCACTGG  
GTTGCGAAAGAACTATTTGCTTCAGAGTTATTAAGGGAATGAATACAAAAGAATCTTCTG  
AACAACTGATTCCAAGTTTTACTAAACGTACGATTCAGTTACCAGCAAGGAAACGAGAAC  
TTCCAAGTGCATATGATGAGTCTGTAAAATTAGAAAAGAGATCTGAATTTCTTTGAAGGT  
CTAAGTAAGCAATTGAATATGTTGCTTTTCGGCAAATTACCAGGAGATGGTAACCATCTG  
GTCTGAAAGACCACTTCCCAAGTAAAAAATGGCGGCGAGGCACGAACTCGCATTAGTCG  
AATTTAGATCTCGGAGCAATCACCAGATTGCTGCACCCTCTATGGAGATGAAATTATCAT  
GTCCCATTATACTGCAGGTTATCACGATAAACAAAATCAACATTTTGAAGTATGTGAGTA  
CGCTGAACATGCTTTTCATACTCTCAAACAAGCAAGAGAAGATTTAGAAGGAGTGAATAA  
TCCACACTCAGCAGAATATTGTATCATAGAAAATCAAATGGTGGGATTGGGTTTCATATG  
GATGGTGTTTATACTCCTTGTAATCGTCTCTTGGTATATCTTCTATCTACTTCGAATGGC  
ATACACGTAGATGGTCGATGGCAGCGATTTCATCCAGCGAGCCGTAAGGTTGCTATAACT  
TTAGAGTGACGGAGATTAATCGTGTTGTTGACGCCATACTATTGATGTCAGCATTGATT  
GGGTGATTCTATATACATGAAAGAAAGAGTTAGAAATGCAGGAGTTGATAGGCAAGAGA  
GGACAACAAGAGATCGGGACGAGAAGGCATTGGGAATAATTGATACTAACTGGATGAAAA  
TAAATTTGGAGGATGATATTAATGGGGTTGCTGAAGTGACTATAAGAATAAACTGAAAG  
GTGGGCTTGGTACGTATGGTAGGTTGCCTGGATGGTTATACGCTGGGGATGATTATGCAG  
CACACAGCGGAAAACCTGAGTGTGAAAGGATATGCATGGTGCTCCGACGGTGGATCAAAC  
AAAAAAAATTCCATGAGCTCCGTGAAATGAGACGTAGCTTCGGAACCTTGCTCTAGTCTA  
GCATCCCTGGTTAGAATAAGATATTAAGGTCACGACATTTAGAAGAAGTTGTTTCAGAT  
TATGATGAGGTTACATACAGGTTATGCATCCATCTATACCTTCGTGAGGAATTTAAGGGT  
TTAAGAAAGTTACATCAAGAAAAAGCAGTTAAAGTTAAGGGGATTGAGATATTACACTCT  
GTATTAGCTCCAATCCAGAGTTCCTATTCCCTATCTTTGGATCTTATATCATTGAGTTA  
TGTCGTAATGTTACTGCTGCTTTAGTTGATGTGTCACAAGTGCAGAATGTAGACTATAGT  
TTAGGTAACATAACATATAATTTTAAAAAGAGCAGGCATATTCCAGAGTAGGGTGCCATA  
TTCTCGCCATGGTGTAAAGTTTGTGAGATTCGCAGAGGATGAGTATCATGATGTTTTAATA  
TTGTGGAGTGAATACTCAGAGGTATTCTGACACATAGCAAGAACAGCAGGAAGAGCATCA  
GACTTGAGAAATACTAGGAGGAGATATGTCGATCTGCGAGGGTATTGGACCTCGCAGATG  
AAAAACAAAAAACTGGGGCGGTGCTACTCCAATGGTTCGATAACCCGTGGGCATCTAAA  
TATATACAGAACATCCTATTCGACAAACCGGACCTATGAGAACAGTAATGTTGGAAGCTC  
TCACGGCACTTGCCCTTCGCACCCTCAAGAAAACAGAAAAGAACGTGGAGGTTTACCTTA  
GGAATAGTGTGGAATTGGTGAACCTCTCAGATGTTCTTGGTGCTATTCAAGAACAATTG  
ATTAGATTGCGAAAGAGGAGGAACGTTTGTAAAGTAATTCATAAGGATTTTTAAGTAGGAA  
TGATCTTTTATGATGGATCTGAATGATGGATCAGTAACGCCCTCAACCCAAATCTAAAAA  
AGTAAACACATCGATTGACTTCAAACAAGCAGAAGTTTCTGAGCTATTGAAGAGTCATGG  
TGATCTCATATAATTTAACAAAAATTATATCAAGATCGTTTCTCTAGATGAAGGTCTGGT  
TCAACTTAACATGTATCACTTCCAAGATGAAAAGGAACCTAAGTTTTATGATCATGGATA  
CAATATCGCTATACTGCCTCGACAGTGTGCTAAGTTTAGCATTGTTACGGCGTACTTAAT  
TTGCTATGTGTTATTCAATGGAACCGTCATCGTAGCAGTCCTTGCAAACAAGCAGCAAC  
TGCTAGCGATATGCTTAAATGATTACATTTAAGGTAATAAAACCTCCTGAACGGGATGTA  
ACAAGGCATCCTCCAATGGGACAAAGCTTCTCTGGAACCTTGAATACGGCAGTAATATCAT

GGCTGCTTATATTAACGCTGCTGCTGTCAGGGGAAGGTCATTTAAAGTTATATTTCTGGA  
TGAATTAGCGTTCATTCCGAATCATATGGCTGATCAGCTTCCCTAGTTCTTTTTATCCAAC  
GATCTCCTCGGGTTAGTCTACAAGAGTTACCATCATATCTACTCGTCACGGTATGAATAC  
GTGCCACAAACGCTGGCTTGATGCAGAGCGTGTGACTAATGAATACGTGCCTACGGAAGT  
CCACTGGTCAGAAGAGCCAGGTATAGATGCTGTAAGCGAAGTGCAAACGATTAAGAACAC  
AGCTGCATCTAAGGTTTCGTGTTGAAATTTAGTGTGTTCTCGTAGGTTCTGGTGATAAACT  
GATCGCTCCTAGTTAGTAGAGAATCATGCCATATCATGACACACTTACATCTGCTTGTA  
ACTTGCAGTATATAAACACGTGTTTCCAGAACATATTTATATTTTCACTGTTACCTATC  
GAGAGGTGTCGGTCATGATTACTCAGCAGTTTATGGGATCGATAACACAACACTATTGCTTA  
TAATATCGTTGCCAAATATTATAACTTTGAAGGTAAACCCATCGTTCGACCAGATAGTAT  
CGTAGAGATTGCAAACAATTATAATAACGCATACATCTTATGTGAAGTAGATGTTATTGG  
TGGACGAGTAGCAGATATGATCCAGTCTGATTTGGAGTATGAGAATTTGTTGATGGCTGC  
AATGAGAGCTCGTGCAGGTTAATAACTAGATCAAGTTTTTTTTGATAAGAAAACCCA  
TCGATTTAACATGTAAACAGCAGAATAACTAGTTCATTGCTGTATCCTTAAAGAATTAAT  
TGAAGCAGATAAATCGCTTAGAACTGATTATGACACGGTTGCGGAATTAACACCGTTCGG  
TGCGAAAGATCAAAGATTCCAAGCGGAATAAGGTTGTAATGACGACCTTCCCTCTGCTT  
AGTGATTCTTGGTAGGATGGCAATACAACCCTACTTTACAGAGAAGTCCGATAAACACGT  
ACGTCCACGCATCTATGAACAACACAAGATACTGGTGAACACTAGACATGGCACCATTG  
TTTTGTAACCTGCCGGAACGGAAGATGATTATTTTGCCTACGCACGGCGCTAGGTGTGGAA  
ACTCGTCAATAACAGGGATAAATCCTACACGGGGGAGTTTAGATAAGGTTTCAAAAAAAT  
CAGTAATCCTAGACATCTGATGGTGGAAGCACCTAGGAGAAAATTCACCACGGCAGCCA  
ATCAATTATCTCCAGGTGTAGCTGTAAAGGTGAGAGACAATAGTACTATTACCCCATTA  
CGACCGCTAGCATTGGTGTGATCGCTGCATATTTTTAGCTCGGAAATGTTGAATAGAACG  
TCGAAAACCTCCCGTGAAAGCGATCTTGCAGGGCAATTTGGCTAACCGAATGAGTTAACT  
ACGATAATTGGTATATTGCAGCAAAATTTCTGCCTTATGGGGGACTACTAACAACGGTTC  
GTGTTGACTCGGCATCTCTCAGAAACGCAGAGAGTAATGGAAGTACAGTTAAAGTTCGAGG  
ATTTAAGTGAATGAAACCCTTTTCGATGGTGTACTAGGACGGGGCAGTGGGCAGCAC  
AACTTCTGGAACATAGCAAACCCTGCCAGCGTATTTGTAACCTGACGCAGGTCCAAATC  
ATATCGCTGTTGCTCCTGCTACTAGCTCAGGAAACGTTCCGGTAATTCGTTGCTGATGAAG  
CTCTCTCCGGAACCTGAGGGCCTGCAGATGAAGTATTCAGATACAGCAGCGTATTGACAG  
TCACACGTGTTGTTGGTGACCTCGTTTCTGGCTTGCCTACAACCTGTTGCAATTTGTGGTT  
CTCCCCACACGGTTGCAGTGCTTGTGTTGGGAACCTACTAACAAGAACTTGAAATGGGTC  
TTCCTTCTGGTGGTAGCACTCCTATCCTTGGTGGTGCAGACTGTAACCTTAGGATTTT  
ATACCTGTGATATTGCATCATCGGGTATTGAAAGAAGAGTATATATTGGATTAACAACAAAG  
GGAGTATGGAATTCTCTGCTGCTGATATTATCGCTGATACTAACTCAACTGCTGTATCAA  
GCATTTATTTTCGTGCTGAGTATGCAGAGCGTGAGAATCGACCTGGTGCAAAATGGATTA  
GCGTTCCTGCTGGTCCCTAGTGCAATCTTTGCAAATAATGAAGGTGGATTTAGTGATG  
AACTTCACGTTCTAGTTATGTATATCTATGGATCTATCGCTGAATCAACTCGTGCTGTAC  
TTGAGCCTTTCATTGGTGTTCAAAAGCACCTGACGCTAAGACATTTGTTAGTGGAGCAA  
ACTACTACAAAGAAATAATCAGGCCACAGTCAGAGAACATATAATGGGGTTTTAATGAAA  
CGGGACTATTGAATGCCTCTGCTCCTGCTGCTGCAGGAACTGGAGTTTAGCTGCTGCTT  
CTATACAGTTTAACTTTCTACGCTCTCCAGACGGTTCCTACTGGAAATCCTCAGGGACGCA  
GCACTGTAGGTTCTAAGGACAATGAAAACCTACTACTACATGTGAACTGATGTTTTTCGCT  
ACGGTATTTCTGGGGGACTTTACGGTGTAACAAACACATCTGGTGCAACTGCGTATGGTG  
TACTGGTGATCCTAAGTCACAAACGATCGACTTAATTACTTGTCTTCTTGTGCAG  
ATGATGGTTCTGCGACCGCTAAAGTAAATCTCTAGTTAACATTGCTGAATAAAGTTGAG  
ATTCGTTAGTATTCGTTTCACCTCGTCCAGGAAACGGAATCGGAGTACTTACTCTACTA  
CTACAACCTTATGATATCGTTAACATCTTCGATCTATTACCGCGGACGTCTTACATGGTAT  
TTGATTATGGATAACAAGTATATCTACCCTAATTATAACGATGTATAACAGATACGTTCAA  
CCAACGGTGACGTTGCAGATTTATGTTTACAGACACCTTAGGTTGTAGCACCATGGTTCT  
GACCTGCAGGTTTTGAACACGGTGTCTTAAGAAGTCTATCAAACCTAGCATGCACACCAA  
CCAAGACAAAGAGAGATCGCTTATATGCAAACAGACTAAACCCTGTCGTTTCATTCCCTG  
GTCAACGCGTGGTCTCTTTGGTGACAAGACTGCACTCGGATTTGCATCCGCGTTTGATA  
GCAATAAGGGACGTCGTCTAGTCCCTACCATCGACCGTGTGATCTCAGGTGCTGATAAGG  
CACAAACGCTTCGAGCGAAACGACGAAGCACTGAGATCACTCTTGTGTAATATCCTCGAAC  
CTTATCTGAGGGAAGTTTAAACGACGTCGAGGGCGTCACTGACTGCGTAGTTAAGTAGGATA  
CCTCTAACAACCCTCCAGAGGTTGTGATCGTGGAGAGCTCTACGCGGAGAATTCGTGA

AACCAACACGCTCCATCAACTACAGTACCTTGACATTAGAAGCAACTAGAACTGGTCTTA  
CCTTCACCGAAGTAGCAACTTAAATTAATAACACACGATGTTTCAGGGGGTATCCACATCG  
GTACCCCTGAAAATTTTTCTTGGTCTAAATATAACTGACGGAGACACCTAAAAAATGG  
GAGAAAGAGGAACGATTGACGAAGGTAAGGCAAATGCAGCATCAGACTTTGCTCGTGCTA  
ACCTATTCCAATTTGATTACCAATCCCCCTGGAATAATTTATAATTCTGATCTTCTAA  
ACCTCCCTATCTTCACAGTTCATGGAGAGAATGTTCCCTTCTTGCCAGATTGGTCTTATTG  
ATGTTCCGTTTCAGAGGACATAAACTAAAACCTCGAAGGAAACAGGTCGTTTGAACCGTGTA  
CAATCAGTTTTATGAATGACAGTAATTATGTTATATGATCCGCATTTTAATTGTGGACAT  
AAAGCCTTCAAGAATACAATCAGAACTTCACTTCCGCAGCAGGTCGTGGACACGCAGATG  
ATTCAACTGGATTCTTTTCTCACTTGAAGCCTCATAAATTAGCTAGAGATATTAATCAG  
GCGAGAAATTAATGTTTCGCAAATCATATAAGTTCTACAACATCTTCCATAGTGCTATCT  
CAGGGATTGATCTAGATTACGGAAACAACGTTGCAATCGAAGACTTCTGCGTTGAGATGC  
AGGTTTAGTATTGGACTCCTCTAGCAGACTCCAACGACGAACCTTCTAAACAAAACATGA  
CGATTAATTAACATTTAATAGTGGCCAATCAGCTCTCCGGTTTTACTCGAGAGAGC  
GAAGAAGGTTCCCTATAGGACCTTCTTTTGTTCAAAAGGAGAGTATGGATAGATCGCATCC  
TATGGTAGGGGGCGGTGACTATGCACATTCGGTCGATTTTGATGGAACGGTTGGCAATGA  
GAAAGAATAATTACTCCTTACCCAGAGATGGTACTACAACGACCGATGGCTAGTGCGGT  
TGAAGACATCGTGGATGAAAATATGTGTGCCAACTTTGACGGCGTGCCCGTTCGAAGTCGA  
GTTGTCTCACTTGTAAACATCAAACAACATTATAAAATTAACCAGGGAAGAGTCCCATA  
TATTCTTCGCTTGCTTGATTACGATAATAGATCGCCCGATATTTACCAGCGTTGGTATGT  
CGTTGGAAGATTAGTTCATCAAAGGTTCTCGATCCAGATAAACCTCGAAATGGTCTTAC  
TGAGTTACCTATTTTGACCCTCGTATCATTCGTAAGGTTACCGAGCATGATTTGAAAAC  
TCCCAATGAACTTACTGTTCTCGATCTGACGGCTCAACTTATACGAAAACTGCAGATTA  
TTATCTAGATAATGGTAAGGGTTTGAAGAAGTCTGGATCTCAGCAAGGGATCCACTGTGG  
TGCAGCTTCAATGACTTGTGTCATTTTGGTATATAGGATATCTATAAGAAGATGACATT  
AAGTCATCTCCGTATCGCAATCAAAGAGGTTATCCAAGTCCGTATGAGTGAAGAATCAGT  
GGTCAACTATGGATTGTCAAGAGCACCATGAAGAAGAATTGCCTACATCCATGTAGGTAA  
CCTTCTAAGAACAAGCGGGACAATACCTCCGTGAAGTTATGGGAAGGTATCGTAATAC  
ATTGGTGTATGACGCAGACACTCTTGAGATTAAGGATGACAGGAAGTGCATGTCCATGTT  
TGAAGTCTTATGGTAACCTCGACGGAAAGACGGTAGAGGAACTGAGATATCCACTCTTCT  
TGGCTGACACAGAATTGATGTACTAGAAAACGGTAAATATATCCAGAAAAAGTTATACAG  
AATGCTGAATGTACAGTCATCAAGACTTGAGAATCAGACTACCTTAAACATAGGTCGTAC  
GGATGAAGTACTAGGGACCAAGCCAAGTTCTAAAAATTTATTGCACGTCTCCCCAAGAG  
ACTCTCACAATTGTTTATGTATCTCCATAAACTCAAGTTGTTCTGAAGGGCACAATGGC  
ATTTCAGGATCGGGAGCATATCCAAGAGGATGTTCAATTTGACTTTATAGCTGACAACCTA  
CTTCACTGAACTGGAGGAAATTGAAATCTGCAATGAGAGTCTGAATGAGGTGAATACAAT  
GGATCCGTACGTTAGAAAATTTCTTCTCTTGGAGTATATGCATTGTCAGGTTCTAAAAA  
AACTGAACAGGAGATGCATGAAATTGAATAACAAATGGATTCCCTAACGAGAAGCAGGTCT  
TATATTTGATACAGAGCAAGCAATGGATCCCGCTATCGAGTCTCGCGCTTCCCCAATGG  
GGAAGTAGCTCCACAAGACAATTCTCAAGGATACGCAGGTGAGGGGAAACGGGGAGATAT  
CTAAACTATAAATAATAAATATTAGAGTAAAATTTATGCCTATTGAAATGGCAAAGCAACT  
AGTTCCCCAAGTCTGCCGTGACGAAAAGCGAAAGCAGTTGACTCCGTGAATGATGCCTT  
GGCCGCCACTGCATATGGTGCCATTCAAGCAAGGAAGGTTGAGTTCGCTAATAGTATGGG  
GTTTGTACGAGATGATACCGCACCGGTTGCTGCAGATGTAGTTCCAGATTACCAATCTTA  
CGAACTAACGAACCCGAACTTTAGAACTTGAAGGCCGACACTGAAGAACCTACAGC  
AGTACCCGAAGCACCCGTTGGTGACGGAACACCTTATTCTGTATAAGACCCTATCGAGGA  
ACCACCCGATGGGACTAATAGCTAATATGACTACAAAAGTTGGTTTAATCTGCGAAGATA  
AAGAAGGCAAGTAAAAATACTTCATTGAAGGTGTCTTTCTACAAGCGGAATTAAAAACT  
GCAACCATAAAAGGTATCCCGTCAAGACTTCATACTAATAAGTCGTTAAATGTGATGCGA  
ACTACATGCGAAAAGGGCGTACTCTCGGAGAATTAGGTTATCCTGATGGGCGTCAATTA  
ACCTTGACCGCGTTTTTCCATAAGGTACTTTCTCTACAGGAAGAGGGATACATCTTCATAG  
GTTGACTAAACCTGCCCGAAAGACCTATGGGTGGGATCGCAAAGAACCGCTTAGATGAGG  
GTGTCTAACCATGTGTTTCATCTAGAGGAATGGGTTCAACTCGTAAAGAAGACAACCTGTA  
ATGTTGTGATGGACGGTTTTATGCTGGCAACTGCAGTAGTTAATTCCGCCGATAATTACG  
GTGCGCATGCCCGTGTCAATGGAGTTATGGAACGAGAGGTGTGGGTTGGTAACAATGGAG  
TCCTAAAAGAACTGCTGGGGCAGTAATTAACAACAAATTGATGACGCAACTCTAATTA  
ATCTGCACGAACGGAAGTTCTCAGCAAGTGAGGCGTTTTTAACGAGTTTGTGATTGAAAA

ATAAATACAAACAACGCTCATCGATAACGGAGCTTAGAGAAATGGCTGAGACCCTCGATA  
AATAGACAGATAACATAGAGCAAGTGGACGAGGGCTTCGCTCCTATCACCAATAACACAA  
AACCGGGTGAGAAGAGGGACACTACCAAGGCAGGAAGTCCAAATATAGTCCTCATCGTAG  
AAGGACGTGTAGTTGCTTCAATGCAAGGCGCAAAGGTAAGTAAAGACGCAGGTAGCTCTG  
CTGCAGTTGCAGTGAACCTTTGAGGGTTATAAGTCTCTGAGCACAAGAACGAGGGCTGCAT  
GCGCAAACAAGAGGAGGTAGAAACCCAAGATGGCGAAACAGAAGAAATAGCTGAAACGA  
AGTGCGACTTTTCTCCGGATGTTACAGTTCTTGTACAGGGGAGGAACTATGAGAAGAGT  
TCCGAGTAAAAGTAGCTACTATTTTTGAAGCAGCTGATACTGCCAAAGTTAATGACGAAG  
TGAAAGCGATGCAAGAAGCGTTTGAAACTACGCTGACTAAAACACTCGCAAAGTGATA  
GAGAATTGGCCGAGAAGGATGACGATTACTGATCTTAGGCTGCCGAGAAATCGTTGATGG  
AAATGAGACTGCAAATCGAGTATCGCATCAAGACTGAGATGGCAACATGGTTCTTACAG  
GTCTAGAAGGTCTTCTTAGAGCACAACGTTTCAAGTGCCTGCGGAGTAGTTTAGCCTGC  
TAGATGGAGTCGCTGGTGAGCTTCATGATATGGAAGCTGAACTATACGAGCAAGTCGACA  
CTAATGTTGCTTTGAACGAGCGCATTGGTGAGTTTGTAAATATGGAAGTTGGGAACGACG  
GAGCTACTGGACTAGCAGAAACACAAGAGGAGAAGTTAGCATCATTGGCAGACGGTGTTG  
AGTTCATTAGTGAAGAAGGATATCGCAAGAAGCTCGAAACCTTGAAGGACTCATGCTTTA  
CTATGAATGCTGAAGTCCCTACAAATGCAACTGAGAGCGCAAAGAAAGTGTGCTCCGT  
GACTAGAAAATACTAACAGCCGTAAAAAGTCAAAGTACGTTGATGCACTCGGACATTTGT  
CCAAATTATTGACTACTAATTCCAAGAGGTAAATTTAAAATGTCTTTAAATCATCTTCAG  
GCGAAGTGGCCACCCCTTCTAAATCACGATTCTCTACCTGAGATTGATGATGCACAGCAC  
CTTGGCATGGTAGCACAACACTAGAGAACTAAGAAAATGCATTACCCACAGAAGGACAT  
AGCCTTACAGAACTCTACGAACTGCAGTTAAAGGTGCTCTCGGTGGCGGTGCCACTGCT  
ACAGATCCTGCCGACGGTTTTGACGCCTTATTGATCATTCTTATCAGGCGTTCAATGTCA  
CAATTAATTGCAAATAATATTGCTGGTGTCCAGCCAATGACTGGTCTTACAGGTCTTATC  
TTTGCAAAGAGCACCCAGTACCGTATTGAAAGAGATCCTTCCAGTGGCGATTACAGAGAA  
ACCTTCTTCAATGAGCCTAACGTAGGGTTCTCTGGCACTGATGGTAACCGTCTTGCCGAC  
CACGATCCAACCTGCCTCTGGTAGGCCTGCCATTAACGATGATGAATGTGCTAAGCCAGGT  
CTTCTTAATCATAACCCTGCAGAAACATGTGAGTGGACAGGTGATGCTCAAAGAATGAAC  
ACCCTGCTCTTGTAGCAATTGCGGATGCCGCTGCAGCAACTGCCTTCCCAGCAATGGGT  
TTCTCAATCGAGAATGTTAGTGTTGCTGATAAAGCTCGCACTTTAAAGCCAGAGTACAGT  
ATTTGGCTTGCTCAAACCTTGAGAGCAATTCATGGTCTTATGATGCCGAGCACGAGTTAGCA  
AAAAGTCTCCAACCAAAAATACTTGTGAAACAATCAGGGAAGTTGTGAGAACAATCTAC  
GTTAACGCTCTTGAAGGTGCTTTAAACTACACTGCTACCGCAGGTATCTTCGACGTTGAC  
GTTGACGCAAATGGAAGCTGGTCTGTTGATAAATTCAAGGGACCTCTGATCCAGATTGAA  
ATAGACGCAAACGCAATAGGGCATCAGACAAGTCGGGCATCGGGTAGTATCATCAGCGCA  
TCTCCTGATGCTGTATCCGCTCTTTCTATGACTGGCGTTCTTGATTAGGTTCCCGGTATT  
CAAGGTAACAATGGTCTTGTACGCGTTGACACATCTTGAATTCATGTTGAAATCTTAAAG  
CGAACGATCACCGTCAACGTTGACCCATATTCAGCCAACGTAAGTGACAAGCACTGCTAC  
GTGGAAGGCTACAAAGGAACGTCTCCTTCTGGCGCAGGATTATTCTAGTGCTAATATGTA  
CCTTTTCAGCAAGTGACAGCAATCAACTCCGACACATTCCAGGAAAAAATAGCCTTTAAG  
AACAGAAACTGTATGGTTTTTTATTCGATTCGCTCAAGGTCTTAGCCAAGGTTCTTGTGCA  
CTTACTGCTAATACTACTGAGTATTACAGAAGAGTTCAGGTTGTTAACTTTATGTTATAA  
GTCTTATCACCTAACATTCCAGAGGGTCTAGACACCCACTATTTTTACGCGATACTGTA  
TTTGTGTTGGTCGCTTCACTGGGAGTGACGGAATAAACTTACTGGCATATAGCTTGTACGG  
AGAAGCGACAGAGGAGGTGCTCGAGGTTACAAAATGCAGAATTACAAACCAAGTAGGTC  
TATGAAGAGTTGTAACCTCAACTGTAGAATGGTCCCTCCTTGTAGTATACAGGTATA  
CAATCTTCCCGTTGAGTCTTTTTGTTGAAGGGTTCCTACTACCTAGTGAGATTTTCAGGCTT  
CCCTTATAAGTAGCAAAGGGTTAGGGTCAACTAGATGAACTAACTTTCTTATTACTC  
ACTTCAAAAATGCAGAGAGATTAATGCAGAACCTAGTGTCTATACTCAATTAGCAGGTT  
CTTCCCAGGAAGACCACGACACACGGCAAACAGAATACTTCGAGTCTTTAATCGAAGGAG  
ACGACCAACGACAGATCTGCCAAAGAATTTGATAAGAGGTGCTTATGTAAGACCTATTTCG  
TGAAGACTAAGAACGGGGGACAGAGATGCTCCCTCTTTTATGTGCTACATAGCTCTATCAC  
AATGGTATTATTTAATTGTTTATAATCCACATTCGCCTGGGTGGCATGGAAAAAGGTCTC  
CAAAGGAAGCACTTTTTAAATACCTTGACGATTGCGTTGAGAACTATATCGTTATAAATG  
GCCTCATAGATAGCCTACACAATACATCTGATGAAGCGTACAAAGAGTAGACTAAACTCA  
ATTAGCTATCCGCCAAACTCAGTTAAGAATAACAATTGCTTTCAACCCAATACCGCTTCC  
GGCTTAAGTCTATCTGAGGACATATCGCAGAGGGTGAAAATGTCAAACCTAGAAGACATGA



TTTGGGCACAAAACTAGCAAAAAGACATGACACTGTTGATCCATGGCAGCGACCAGTAC  
GAGAGAAAGCAGCAAATCATGACATGAATAATGGAGGGACTGACAATTTTCTGAATAAGC  
TTGGGTTAGGAGAACCACGCATCGGATGATAGAAGCGGGTTCAATGGAGCAGATGACA  
TTGGTGAGTCGTATAACTGAGTGAAACCTGATGGCCGGAGGCAACGAGTGTAAATGGCAA  
GTCGTTCCAAGACCAACTAACGACTAGAGACTTTCTTTCCCCTATAGGATATCTTTTCAT  
ACTAGGTAAGGCAAAGACGGTGTATTTTTTATGTCAACCAGCAGAGATTCCATCAATATA  
TTTAAATGATATTCTTATTCCTACTGAAGGTTTAGTTCCTTTACCTAGAGAAGGAAACAT  
ACCCGATGATGATTTGTCCACTGAACTTAACGTAGATGAAGATATGAGAACTAGGGAGA  
ACGCCACAACGTCTACGTGGTTTAGGAACTCCCAATATTATAAGGAGCGTGTTCATG  
GGGACGAAGTCTGAACACGCACTATCACAAGACGGAGGTATCTCTGACGCTACTGGTCA  
AGTATCAAACATCAATAACTTCGCAAACCTTTGAGGTAGTCTATAAAGATTTGTTTCCGAC  
AGA ACTATCAACACTCTCATTGATGTTTACAAGTTGATAATTCATTGACTCCACG  
GGCAACTTTTAAATATACTGTATACGAAATCAGATACGTATATTCGAGA ACTAGAGGATG  
AAGACGTTCAACCTATCCAATATGAGCATAACATGGGGTGGATAACATATCTGGTATACT  
AAATCTTCTAGCTTGGCGATGAAGCAACCATCCCCATAAACA ACTTAATTACAGGTTTT  
GTCGAAGGGTGGCATTTCAGTGGAATGATGCTAAAATGATCACGGCTATTGACGACCTT  
GCTGGTAAGGGAGATAATTTCAAACCCGGTGGGAAGCAAATAAGCAACAGACAAGAGAG  
ATAATGGTGGCGACAGGAGTTTTTGGAGATGAAGGCTGGTCTATCGCAATTACAAATCCG  
ATGGTTGAAACAGGATCCTCATCAACTAGCACGGGCATTATTACTCTAAGCCATGCGAAA  
CGACTACAAGAACTAAAGGGGTTCAAGGAACACCTTATCATCAGTCAGGATAACAGAT  
TTCAATGAAGGAGTGGTTTGAACGTGAAAAGGATCAGGGTGTGTGTATCTTGAGCAATTT  
CAAGCAATGTGGAAAAAGGATAGTGTAATTGACCGAGAAATATACTGTGAAGAATCTACA  
AAAAGTCGTAACCTCATTACAAATATTTGGAGTATAACAACAGTTTCTGTCTTATGACA  
AAAGAAAGACAGTTTGAACCTAAACGTATCATAAAAGAAAAATGGTTCGACTATATAGGC  
ACAGCAACCTGCTGAGTATACATAGGACCACCTTTGATATTAACTTACTACAAGAGAA  
GAGAGCAATATGTTTATTGATGTAGATGATGCTATCTGCAAGCTACAATTTAAGATAGAC  
TACATAGAACAGTGTCTCTTATATCTTGATAGTTTCTTACGAATGATAAACAATCGTCAT  
TTTCAAATTAAGAATGCAATTGAAAGGGAAAAATTTAAGAATGGTTTGTAAATGAATGACG  
GATTGACCCACAACGAAGTAATCGTCAAGACAAAGGAACAGGTTAAAGTCGACAAGGTCA  
TTTCCTAGAGTCATAATTGGACTAGAGGACAAATTCGAAGCGGGCGTCCAATCAAATAGCA  
GTTGATAGAGAGCCTGGTTAGGATAAAGAGAATTCGGCCGATGCTTCTTCGTATGATGA  
AGAAAATAAATGCAGACGCTCGGTGGAATCGAAAGCTTACAGGGGGCGGACCAGTTCAGT  
ATGGTGGATATCGCGAAGGTGATTTAGATGATTGGAACATTGATCGGAACCCCTCAGCCAG  
TAAAGGGATTAGTCCCATAGGTTAGTATGACACTCTTCTAAATGAAA ACTACGAAGGAG  
GCGACGTTGGTTTGGAGATATATCAACCAGACACAGATCCGAGACATAATGGTTTCAAGT  
AAAATGCAGGATCTGCTATCTTTTCCAATGTGATCGATCGCACACCGTAAGGCCTATGC  
CATGTGGTACTCCTCAATCTATAGTAACATGGGTATATGTACCTCCTTATTAGTAAAAAG  
AATGAAGTCTATCTTAAGATTGAAGCACAACCTCACATTCACTACGAGCTAGCAGATAGA  
GTTACCCTCCAGGGCGAGTCTGCAAAATTTATGCAGCAGACTAGAAGGTATAAAGGATGG  
GAGGGAAAGATTAGGTTGCTTTCTCCCGCAACAGCAGAGATATATTGTGGTCTTGTTGAT  
TACTTTACAGACTGGTCGTAAGCAAAGGGATTTGAATATCAATGATAAGATGATGAATAC  
TTTGGTCATCCTATCACAGAGAACGAACTAATCACTCCCAAGTCGGTTGTACGGTTTGTA  
AAATCACTGCGTCTTCCCCGACTCTACCCGTAAGGGATTATCAGTATAAGGCAATTCAT  
GAATTCCTAAAATGGAAGATACTACTCTTCTGTCCCCCAGGGTTCGGGACTATCTTTG  
ATGATTTATCCATTGTTTAGATATCATTTGACCGTTGGTCGTAATGTATTAATTGTAGTC  
CCAAATGCCTGCTTTGTCGATCAAATGTATATGGCCATTGAAACATATGGTTGGATGGAA  
AAGAAAGATGAACATAAGATATATAGAGGCCATGACAAGTATACAGTTCACAATGTGATA  
CTCAGACTGTGCAGTCGGTATATAAAGAACCAAAGATTTGGTTTGTAGATTTGAATGC  
GTGATTGGTGTGATGAAGCGAATCTGTTCAAAGCAA ACTCGCAAAGTAAATTGATGGGTATT  
TGCCATGATTGTAAATTCGTAAGGGGTTTTGCAGGAACACTACATGCTGGCAATGTCAA  
CATCTTGTATCAGAAGATTTGCTTAGTTCGATGTACTCAAGTTACTAGAACAATCAATTG  
ATGTAGGCGGGGAACATTGCTAAATTAATAGTCAAGGTGGTTCTTTTAGAACATGAAGAT  
AACTATTTGAAGGATATCGAGAGCAA ACTGATTATATAGTTGAACACGAAGGAATGAAT  
TAATCTATCCGTTAACTTGCGGGTGTACACCGTGGAGATGCGCTTGTGCCTATCAATTAT  
GTAAAATGACATGGTGAGCCTCTTTACAAATTGATAAATCGTTACATAGACAGACCCGTG  
TTCTTTGATCATGGGTGAGTATATGCCGATGAGCGCGAAGAAATTCGCACGCTAACAGAG  
GCATCTAACAATGCGATCATTATTGCTTCGTATGGGACGTTCTCTTCTGGCATCAATATT

AAATGCTTACATAATCTTATTTTGGCTTCACCTTCTAAATGTTCGGATTTCGTAATTTATAG  
TCTATTAGACGAGTCTTGCAGGATGGTTACATTAATGAAAAGCCACTTTATATGATATT  
GCGGATCATATCTCCACAGACAGGGGCAGTAACTACACGTTGATTCACTTGATTGAGAGA  
GACAAGAGTTTCAATGTATAGAAATTTCAAGTGTGAGATCAAAGATGAAAAAGTAAAAGCT  
TATTATTAATAACAAGAAACGAGGAGGAACCTTCACGGTATATTCAAACCTGGGAAGGGG  
GGAGGAGATCCTTGCTTACGCAGTTATGAGAGGAGACCGTGGAGAGAGTTTAATTTTCAT  
GTCTGATCCTGATAGCGTATTGCCAACGACTAGGGACGTCGTCGAGCAAAAATCATAAAG  
AGTTCTGGGTTTTAGTCCATGGATTCCAATGTCTGACTACGAATTTTTTTGTTAAAGAGA  
GAAGCATAACAAGATCATGGCAACAATGAGTAGAGCTGTCAATCTCATGTACGATGGATA  
CATCTTCGGCTAAGATGGCACTGGAAAGCAAATGAAAGAACGTCAAGGTCCGGCCTCGAT  
CGCCGGAGGATATCAAGAACACATAAAAAGACATCCGTGCCTTGATAGAAAAATTGTATGA  
GAAGGAAGTTTGAATTTTTTCTGAACACTTACAGTATGAGTATAGTTGTCCGTAACAGTTT  
GGTCAAGTGTTTTTATACTTAAACCAAAGAAAGATTTGTACGAGGAAATCTTCCCCAAA  
AAGCACTAGCATTATGTAACATAATCAAGAGCTTCATGCTGGTATTATCAACTATATAGAT  
AGAGTAGAGAATGCAAAAATAAAAGGGACTTGCAAAACCTCGTGTCAATACTTACAATGGT  
CGGTGCTTTTCAAAGAATGCTGCTCATCTATTGGATAGATCAAACATTATTAATTACATG  
TTAAAGATGATATGGTGTGTGATGGTATCGACACTTGTAGACATAATATTGATAACTTT  
GATCCTGCTTAGAGTAGAAACCCCTTTGCGTATTTTACTCAAATCGTATACCATGCTTAC  
CTACAAAGAATTGCTAAAGCGACAAGACTAATGGATTTTCAAGAAAAAGTTATAGAAAAA  
TCGGGATACTATCATGTATACAGAGTTGACGGAGACGCAATTTCAAGAGTAGAGTCAAATT  
AAATCCTCTGTCGAATAGAATTCTACACGATTAAGATTCTCTAGATAACTGATCAACACT  
TTGGAGTTCGCATTGACAACCATCATTTTATCAATCATTACAAAAAGTTTCACAATGATA  
TTGTAATTCCCTTTTCCAGAGCATCTGGCAATAAACAGGTTCGTTGGTCTCGGAGATACCT  
TTGATCGTCGTAGATTCATTAATATATGTCTCTAAACGAAACAAACGAAATGTGGTTTTG  
ACCCATTGAGAGATATCGGTATACCAATGCCCGTGCTTATTGGCGACCAAGACATTTACT  
ACAAACATACTCCTCGAGCTAATGCCCGAAATGAATTAATCAGAGGGTACGAAAACATCA  
CAGTCATTTGTGATCACGATACTGTCACCTTTGATGGTCTACCTAGTCGCCTCCTGTCTT  
GGATTTGTGAGGACAATCGCGAACGATTTATCGAAGTTATCCAAGAATCTGTTGCCCTTG  
TCAGTATTGGGAATTTGGAGCTTAACGGTTTTGGGGCTTCCGGGTCAAGTGATAGAAG  
GTGGGATGGATCCCAATGTTTTTAGTAAATTTAAAAGAGTATTCTCTGGACACTATCATC  
AGAAATCTACTAAAGGTAATATCAGATACTTAGCTAAGCCGTATCAAATTTATTGGAATG  
ACTACGCAGCGAAAATAGGTGTTACGCTCTTTGATACAGAAATTCTTAAAACACTTTTTT  
AGCGGAATACCTTTGGTCTTGTTTAAAATCTGCATTATAAATCTGGTGTGTCTTTCCCGG  
ACGCATCAGAAATCAGAGGAACATGGGTCAAATTATTGGTAGAAGATACAGGAGACTATG  
GGAAGGTTCGACTACAATGTAAAATGCATACGGGATCTGGGTGGCTCAGATCTTGAGATTT  
TTCAGGATCTTATCGTGGATCTGGGGAATTGGAGAGATGCGCTTTAAACCGCAGAGACTA  
TTACGTTGTTAGACAAGTAGACCGCTGAGATAGATCTAAGAGACAGTAAACCTAATGTTA  
AGTTTGTGAGGCGTGCATTATATCTAGAGGCATCAGAACGGTAATGTTTGTCTAACTCA  
GAAAACAACCTGGGGGTGTAGATGCTAACTCTAAGTCCTGCGACTAACATGGTTCAAAGAT  
CGTGGTTGGTTTGGGAGATAAAGACGATGTAGAAAGATATATCATACTTCTACAGGGAGA  
TGACTTTAATCAGGAACCTTGACCCCTTGGAAATAAGATCCAGAATGCATTGCCGTGTATTG  
TGGTAATTATGAGTATTCATCTGCTACAGTATAAGCTAGTGACTTACTCATACCAAAAAA  
CAAATTTGATAAGTGATTGTTTTTTGAAAATATTAAGTCTACGAAGTTTCTTTGCCAATGT  
GATCAATGGAAAGAAATTTGTTTGAATGAATCTCCATCAACTCTCATTGTTGGTGCAAAC  
GATGCTGGTAACTCAACTCTTAGATCCGTTGTGTTTTGTTTTATTCAATTAACCCTCT  
CGAAAAATGAGTACAGGACAGTTAGTAAAGAGAAACAATGAACAAGGTCTGGAGATTGAA  
CAATTATTCTCTGTTTCTGTTGATGAGTATCGCGTCTTTCCGGGGAGCGAAACCTAATGTA  
ATCTGGGTCTACAAAAACTATAACATGGTTCGTTCCAAGATCCTGCTGCCAATGACACCCAG  
AAGTCTCTTGAACAATCAGGTGTCAAACCTCACATTTAAATCCCATATACAGGTTCGTAATC  
TTGGGTGCATCCACGTTTGTACCTTCATGCAACTCTACCCACCTGTCAGCATAGAAGTT  
ATTCAAGATTGACTTCACATCAACCTATTCTCCCAAATGAATGCGATCCTAACAGATCGT  
GTTAGAAATGCAATCTAACAACAACGTGATTGTGATCATCTCCTTCAAACGCAGAGGTA  
AGTTTAAACAATCAAGAAAGAATTGTTAGACCTCTTGATGATGTGAGTGCACCTCGTCAA  
AAAGATAAGAACAGTCATATTAACACACTAATGAAAAAATGAAATCAGAAGACGAGCAA  
CGTGATCAACCGATGGATGAAGTGGAGACTTTTACTACAGGTATGAAGACTGTAGATAAT  
CATAAATCTGTATTAGTTGACCTATGTTAAGAACGATCTGATATCAATTCAGAAATATAA  
TCTTCTGCCAAACAACCTCCGTTTATTAACCACATGCTGAATGTCCTCCGTGTTCTCAG

TAGTTTAAAATGGAAGTGAAGAGAGCAGTGATTGGTAATTTTCGAAAACAAAGGTGAGCAT  
CTTACAATAGATTTACACAGGGTTGACTAATAAAAATTGCTGATGCAGTTAGTGTTGCAGAG  
AAAAAGGAAATTGTTCCAGAAATAGAATTGAAACTCGTAGTAAAGTTTCCTCTGCAGAG  
AGAGAAATCGCACGTTGATAGACAGAGAACGTTAACATAAAATGAAGTGATATTAGAATTG  
CAACCAAACAGACCTAAAATTAAGAAGTAAAAGTCTCTATAGTTATGTTGCAAAAAGAA  
TTATAAGAAACACCGAAATACTGTGGAAAGCTTCATCCGACAGTTGATGAAGTTTAAGTC  
ATAGGTAATTTGTTAAAGGACGCTGGTATTAAGAGACAAATTATCAAGACGTATGTTACT  
ATTTTTAATAATCTAATCAATAATTATTTGCATAGCATGGACTTCTTTCTTAAGTTCACA  
CTTTATGAAGAAGTTAAACAAGCAATTAAGAAGTAGGTTTAGATATGTATTTTCATATTCA  
TCTTCTTCAGAAGGTGAAGAAGCAAGAGTTGATTTAGCATGTCTATTTACATGTAGAGAA  
GTTGATCGTATGAAAATAAAGGTCGCTACTAATTTACTCATCCGTAATTCGGTGTGTTGAT  
AGCTCTTTGGACGCAGATGGAATAAATGAACTCTGGAAGAATCTTCATGCTTTGGGAATT  
TCAAGTAACATATTTATTATCTCCCACTAGGGTCATGTCTTATTACACTCATTCCCTAAGG  
ACAGTTAGATTTGATAAGAATTATGAAGCTTCGCGGATGAGAAACGACTCGTCAATTTTG  
GAGAGTATGCGCAAAGCACTTGGAGACAACCTCTGGAAACTCAGATCCAGAAGCGGATCA  
GATTGCTTTAATCCATACATTTAGTTCCATTGCGTTAGTAGTTACTAACTGTTTTATCGT  
AGCTAGTAAGATAAGACACTGGACCGATCATCATGTACCGCCACTATATCATCGAGAGCG  
AATTAAAAAACTGGCACAATAACTAGCACATTCTTAATTGGTCTATTATACTAGGTATAT  
ACGAAACACAGAAACATGATCATTCAAGAAGTAAAAGGAATACTCGCTAAACTCCTGGTA  
ACAGAAAACCTCATAGTATAGCACCGTCAGGTTACAACCTGCATACCTCGATTTTGAGAAT  
CTCGTTCTTTGCCGCCCTATCTGGAAGTCGGCCTAACACACTGGTTACGATCCACGTGTA  
GGTCGCGAGGTAGGACACGCACTCTATTCTCCTGCAAATGGATGAGATAAAAGTGTTCT  
AAAGCATTCAATGTAGTCCCAGATGCGCGTACTGAATACATAATCAAACATACCCAT  
CCTGGTCTACGTGTGGCTTTCTTTGACTGATACGACGAACTAAGGAATCAAGATTTCTTC  
GGTGTCGAACATGAGGATCATGAGAGTCTATCGCTGATCGATCGCATCAATCTCTACTTC  
AAAGGCCAAAGTTAAGATTCCTGTCTCAACTGAAGTGACAGTATGGGTAAACAGAACTAGA  
AATACGGAAACGTTTCAGGAAGTAGAAGACCTGTCCCGAGATCTATACGGCTGGGCTCAA  
GAGAAGCAAGCAGAGAACGAGCAAGAAGATGTGGAACCTGATGTTGAGGTTGGTCATGGC  
GATGGTAATATCATTGGTGGAGATTCTGATACAGAAAAGTAAAGTCAAAGAGAGAGATTAT  
TCTGAAGAAGAAACATGTGTACCTGAGCATGATGCTAATCAAGCACGGGATACTTCAGAG  
GATCTTCTTGAGAACCAATCAGAAGGTCCCAATACATACTTAGAACCTATCAGTGGCGAT  
AGATCTGATCTATTCGATGACTTTGATCAAGTGCACGAAACTGAGAGTACTACAGATAAA  
ACACTACAAATAACATTAGAAGCCATATGTGAAGATGATGCTAAGGAGTGGGTTTACCTT  
GCTCTTCTATAGTAGAAATTGGGACACTTCTCGTTTCTCCCTCGACAATTCAAAGTGAT  
CTTGAAGGATTGTTCTCTTTTTACACAAACAGTGACGAAGATGCGGAACCGTACACGCGA  
GAGTGTGCTCAGTATGCAGATGATCATTACAACAAAAGCAAGACAGATGCACAGCATTCT  
GTGGACTATCTTGTCAAACACGTTGAGATGCGACAGTCTGCTGGTGATTACAATCGAGCA  
GCAGTCCAACGACAGGAGTTGTCAAGACTAATTCTCTTCACAACACTACAACTAACTGAT  
GACATCTCAAGATAGTCACAACCTGTTCTGAGTGCAAGAATTATGGTCGTATTCTACAT  
ATTCATTGGTCTGGTTCTAGGCAGTATCAACGCTTGGATACTGTAAAGCAAGTTTTTCAGC  
TTGGTATTGCTCTGTCGTAGAGCAAGCATTCAATTTCCATGTCTAGGCCTTGCAGAGTTCA  
TAGTATGGTTATAATCATAGTAATTGCAAACAATGGAATCCCTCTTCTGAGCCTAAGGAA  
CGTGACATTGGTATTGCAAAGAAGTCAATTTCTTGAATTAATCTACTATGCAAGTT  
GCTGATTCGCTTGAGACTTCACTCAGACAAATTTACAGACAAGTACTTACTATCGGGGGA  
GACCGTAAGTCTACTATACCCAACCTCCAGTCTTGGTGGAACTCCACTTACTGAAGATGTT  
TTCTGCACTCGTCAGTTGGTATAAGATGTCAGGAAGGTATATAATGTGCCGAAAGTAAAT  
GTTGTATGCTTAAGTGATGCCGAAGCAAATCCAACGTCAGACTGGACAAAAGTCCTTAC  
ACCACTATTATGCAGGAGATTGGTGAGGAAAAATTCAGACTTGCTGAAACCTTTCACTCA  
AGAAATAGAGTATACATTCTTTGTGATTTTGACGCTGGTTATCAGCGCAAATTAATGGT  
TGTCGTTATTCAACTACAAAAGAGATTGTAAGTTACCAGAGAGAAATTAAGTACAAAC  
TGGATTGGTACCAGACTCTGCAGTACAGGCGAGGTATCAGGATTGATTTCGTATGCTGGGT  
ATGTACATAACAACGACAAGACGAACTTGGCAAGCAATAGAAGAAAGAAAGATTTGCTTAT  
ATCAATAATGAAGTTGGATTCTCTCAATCTTTGTATTTGCCTGACAGGGGCAATGGCGAA  
GGAACCTCAAGACCATACTGTAAAACAGAAAGTCGAAGTTGCTACCACAGCAGAACTACAA  
CGTGCATTCAAAAACGCATGGGTTATAAGACCACAAACAAAACACGCCTCAAGTCAGTG  
ATTGAACAGGTCGCGTCAAGTCTAAAGTCACTCTATTTAAAGCTGGAACAATCTTTGTAG  
AAACTGTTATCGCAGTGGATTATGAGGTTGCAAAAAAAGTTGTATTAGCAAGAAATCCTA

ATTATACCGTATTTAGTCTGACTGCAGTGTTTCGGATAAATGACTGTCCTCTTGCTATAGC  
ACTAAGCAGACATACCTGCTATAATACATCCATAGAAAAACATAGACTATTACTTTTGAA  
CCCAACCCTGTGACAACCTGAACAACCTGTTCAACACCTAACTGATAATGTAGGAACTGAA  
CGCGAATGCAAAGACATTCGTGAGTCAGCAATGATACCTAAAATATCTTATGCAATTGAG  
TGTAATGGACTTCAGTCTTATAAATCAGATTTAGGCAAGTGGAATCGATCCATTCAGGAA  
ATTGGACGTGCGTACTACGCACCTGCTGCTAAGGAAATAACAAGCGATGTTCCCGATAAC  
GTTCAGACTTATGCTACTATTGGTAACTTCACGTCTGTACAGAAAGTTATCTCATTGGAG  
AAGTTCTATCGTCTATTCATTACATCTCCATCTGGAATCGGTAAGACTCTATGAGCTCAA  
CAGGCATGTGATGCAACTAATAGGGGGTCAATCTTTGTCAACACCAAAAATCGAACTGAC  
GAGGATGATCTTATGGGTGGCTTTCGTCTTTTGAATCGCGACAATGTTTGGCACAGCGGA  
CCCGTGGTTCAGGCTTTGGACAGGCTAGCTGTATCTCATCTAGATGGGTTCGACCTAGCA  
TTTAAACAAAATTTTTGTTTGGAGGCTGGGCTTGAAGGTAAAGGTGTATTCCATAAGATG  
ATTGGTAGGTATGTCATACCTGCTCAAGGATAAACTGTTATCGCTACTGCTAACACTAAC  
GGCACAGGTTCTGATGATGTTAGATTCGTAGTCTCAAATTTTCTCACCGAAGCTTTCCGT  
CATAGATTCCTCAAATACATTTGAGCCATAATATCCTTCTTATACTATCGAGACCAAGATT  
TTGATCAATCAGGGATGTGACAACGACTTTGCAGAGAACTTAATCAAGTCGGCAGGGGTA  
TTACAGAAGACTTTCTTGGATGTTAGTGTTGATAAAGTTATCACAAGTCGACGTTTGGGT  
CACATTGATTCAGCATAACCACATCTTTCGCGATAAGTTGACAGAAATGACAAGCTGTGGA  
AACCGTTTTGACGATGTTAAAAAATCATCCTTCCTAGTTCTTCATACAGTAGTTGACGCA  
GGAGAAGATTCAGAGTATACTGAGAATCACGAACTCAATCATTAGTTAATTATGAAGA  
ATCGTGAAGAGGATTTCCCTTGAAGTTCTCCGACATTACCTCGAGAGCACCTACTCTCCTC  
ACTATGCTAGTGATAAGATTA AAACTCTTGATGGAATCTATGCATGTGGCAATGCTACAG  
CATTTTGTAGAAGTAACATTTACAGTACACTTCTGGCTACGATCTAAAAGTAGCGCTA  
GACAAAATCTCTTAAAGGGGCTACACTATGGAGTTTTAATCATACTTTTCTAGAAGAA  
TTCAGGCATACTCAGCCGCAGCAAATTTTGCAGCACAAGGAGGCAAACCTCAACATCAAAG  
TAATTCCTCAACCCACAATCGCAGCACTTAAATACTTTTGTTCATAAACACGCTCTATTG  
TCACTAAACCTGGCAGCACGATTTCTACGCTCAGGCTTAAAAAGAATATTAGGGCTATTG  
CCCAAGTGGCAGAACAATTTGATTGGCAAATTCCTACCTTTGTTTTTGGAGTCCTCCTTG  
GAAGGTTATCTCTGTTTGAAGTACCAAAAATCGATACTCCTGAAACAACTACGTCACAG  
TAAACGACATACAAGGTCAATCCATGACACCTGATTTTCGACGCTGATGCTGATATCATCA  
CTGAGGCACCAGTTAAAGAAATCAACTTGACATCAGAGAAGGTGGAATTTAACTTGAAT  
GTATAAATCTTATGATATTACAATGTGCTGCTCTGGTATATCAACTCTCTGATCTTTGTT  
TGTATGGTGATAGAGAACTATGCAGTTATGTATGACAGGTAAACAGAATGATACTTCCA  
ATAATTATTCAGTAGAAGTTGGAACACTATAGATGAGTTTTTTTTGTTGTTTCAAAGATG  
AACACTTAAACTTTTACCTGGGGACTATGAGGTATTACTGACTAAGACAAAGGTGGCGT  
TGTTCAAAAATGACGGAAGCAAATACCACATTCCTCTATAACATTACAAATGAGATGTTG  
GCACTGTGACACCTATCAAATCTGGGGTGGTCACAACGATTGTCCTTATGCAGAGGAGTA  
TAGTTTCGTAACCTATGCTACGCTGCCCTATGTGCGATTCCCTACGTAGAAGTTTATAAACC  
TAAAAAAGATGAAAAAATTTGATAATGAACTGGACTATGAGAGACTTGTTTTTACAGAAG  
AGGAGACTCGTAAGCTGTATCCTTTTAGCCGAGGAGATCAAGGGGTTTCGTCTGGTTCACC  
ATTATACTAACGATATTTGTTCTCATTGGAGATTCAAAACCTCACACTGATGCAGCAAAT  
CTTCCAACCGTTCGTTTGCTATGTATCTTGGATATCTTGATTA AAAAGAATTCATCGGTA  
TGGATATGTGCCGTAAGTTCCGTGAAAGGGGTGTCACTAGATCATGGAGAAATGCCCTC  
ATAGGGAGTGTA AAAAGTATTATAAAGAAGCTAATGTAAAACCCCAAGAACCAGATCATG  
CTAACTGTTATTGCGCTGAGTCTGCTAAAATATTTAAGAAGGTTTCGAGATATTGTTGCGA  
AGAATAAAACATATGTTACCATGAGGGGAGTATGGAGGGCATCTGAATGAACATTGTCGT  
AATTGATCCTTCCCAAACAAGTCTGCTCCAGTATTACCTGACATACACATCGTCAAGAT  
GGCACTAAAGCCATGTCAGATGCTTTCTATTGGTGCATTTGGTAAATGGGGTTACATTAT  
TGGTTCTCGACTTAAACTAGATGGCACACCATAACAATATAGATAAGGGGGCTTTTCATAG  
TAATCCCTACACTGGATGGGCACAAGATAATTGGACATGGTTGATAGTCCATGGTCTTGC  
ATTATCGTTTGAATATGCTCTCAGATACGGTAAGATACATAGTTCTTGATCAACTATCGA  
ACGTGCTGAAAAAATATTTCCCTCCACAGGATACTGCTCGAACACAGTTTGTTCACATC  
TCCTGATCACTCAAAGCGTGATAAGACTATTGACATTTCTATTGCATAAAAAGTATTATAT  
CAATACCAATTAATGGGTATCAGATAATTATGCAAGGTTTCCTGATAGCAAACCTAACTG  
GGTCAATTTATGATTAGAAATGAGTTGTTGTAGGTTGAGCAGTAACGGCGTAAAAACGTC  
GAACAATCCATCTTGCCCGAACTGTGAAGACTAACTTCCAGAGTTTTATCCAGCAGGGT  
GAGATTCCTAATCTCGTTCTATCTGAGACAGCAGGGGTAGGTA AAAACAACCATTGCTAAA

GCAC TTTGTCAGGAACTAGGAGAGGACTATTATGATATCAATGGAACCGATCGTGGACGA  
TTCCTTGACACCGTAAGAATCCAGGCCAAAAACGTTGTTGCAACTGTATTACTTACAGCA  
GAAGCTAAGCACAAAGTACTTATAATCGACGAAGCGGACAACACTGCAACAGACGCTCAA  
CTCTTACTTCATGCATCGATAGAAGAATTTCAAAAGTATTGTAGATTTATATTTAGGAGT  
AATTTTAAATATAAGATTAGTGAAGCTCTACACCTTAGATCAACTGTCTTAGAGTTCAAC  
GTTTCGTCGAAAACTAAACAACA ACTTGCAGGAGAATTCTTTGATGGATGTTAAGGTATT  
CTGAATGCTGAGGAAGTTACCTTATCAGAAAAAGTTGGAGCAGAAGTGGTTCTGAATTAT  
TTCCAGACTTCCGAAGGACTCATAATGAGTTGCAACGATATGCAAGCACAGGATGTTAT  
AATACTGGAATTCAAGCACCCTAAGAGACACACATATCGATAGTCTAGCTGCATCATTG  
AAAGCAGAAAGTTTCAGTGATGAAATGAAATGGGTTACCAAAAACGTAGATTCCGGATCCT  
GTTTCTATCATGACGAACTCTATGATAATGCTTCTAATCAAATGACACGTCCTAGTATT  
TCAGCAGCAGTTATAATCATTGGTGCATATCAATACAAGTATGCTTTTCGTTGTAGACCAG  
GCAGTCTCGCTACTTGCATGGTTAACTCAATTGAAGCTTGAATGCGAATTCAATCAACAC  
CCAGTGACCTTTACAAAGAGGTACATGAACCAGTCATAAGTCCTTATTTTCCTTGGCATT  
GGTCTGACTAAGCATACTTCATGATGAGGTTTCTGAAGGTAGA ACTAAATCTGGTTGCT  
TCTCACATGTAGTCTTAGAGAGACCTGGTTATACTTAGCTAACTACTAAGATAAATTCTG  
ATCACTTTCCATTGTTTCATGATTCATTTGTTGAGTTCAGTAGTGACAATAACATTGACC  
CTAAAGTAATTTTCGAGGATCCATGTTAATCTGACTACTCAAACACACCCCAACAACATG  
GTTCTGACCACACAGACCAGGACTTTCTTCATAAGCATAGGTTAATATACTTAACAGGAA  
CTCATGGAGGTCTTACTAAAGTTGGAAACACCAACTACCCTTGTATGCATAATGACACAA  
TTGGTTTTGAAGATGTTACGCTCACATAGAACAACGTTGGTAAGACGAGTAGTTCTTG  
TGTACACAATTTTATGGTTATGACTAACAAATTTATAAGAAAACGTGAAAGGAGTAGAGC  
ACAGGTAAGTCATGATTCTCCTACTGGTTCTGGTGTGCTATGGCATGTGCTGTTGTAGG  
TGGTCAATTATATGTTGGATCTTCATACAGACAAATGGCCAGATCAATGGATAGATGGTG  
TGAAGAGGCCATTGTGATCGTACACCTACCACTAACACCTCCAACGGCACGCATACTGGT  
TGTTCCATGACTCATCCAGCTTTCTATGCGGATCCTATGATTATCAGAAGA ACTCTTTG  
AAGACACCACTGAGATATCCTGGCGCTAAGTCTCATGCTAGTAAAACCATGGAACAATAT  
TTCCAGACTATAGAAACCATAACGGAATTCGGTGACCCTATTCTTGGTTGGTGGATCTGTA  
GCGTTCTACGCTACGCAGATGTATCCTCATTGGAAATCTGGGTCAATGATCAATACTAA  
CGTCTGTATACATTTAGGAATCAAGAGCAAAAGCATCGTGATGATCTTAGGAACTAAGCT  
GTTCAACTCAAGTAAAAATATCCAGATCCGTCTCCGGCAAACATTCTTTTCTTACAACCC  
AAAGAGTATCTTAATAGACACCCGATTGATTGCGATCTTAAGGGTCGTGCTGCCGCGTTC  
TCTTTTGATAACA ACTTCTCTTTAACTGGCCTCACTGAGTCCTTCTCGTTCAGCGAACAA  
GCGTCTGATTCAAGATTTTCGATGCGACGAATTGAAAAAGTACCATACTAGGGAAAGACTT  
ATCAAAACGTGGCGAATCACTAATCTGCAATACGAAACATTATTTACAGATGATACTAAT  
GCATTCCTATACTGATATCCTCCGTAGGATATCAAGGGACACTTGGATGGAAAGAGAGGC  
ACAGTGGATATTGGACTCGACGACGATTCTTTTCCAAGAAGTTGTGACAGAGTTGAGTGT  
GATCAAATGCTTTCTTATAATCCTTCTTGTTTAGTAAAGGAAAGATTCCAAGGTTTCGATA  
GCACAACAATTCGATCGGT CAGATAATAAGAGATCTGTTGGTGACTACACGAAAGATCTA  
GGAGAACGCAAACA ACTTCTACTTTTAAAGTATGGCCTATGATGAGAGACTACTTCTAGA  
GGACTATCTATACTTAATCAACTTCCTTAAAGATTATTTGATGGAGGATGATCCTGCATG  
GGTGAAGAGCTATCCTTCATAAGTAATCAATAAATGCATGTGCGCATCATTGGATACGAT  
CATGTTTGCTAATAAAAAGACTATACTACTCATGTAGATAAATGGGTGCAATATGATTT  
TTATATAAATTTTCGGGAAACCCCGAAAGAAATTTTCTCCTAGCGGTAAAGAAACAAAAGT  
GAAAGATCTTGA ACTTGTAAAAAATACTATGGTTATAGTAATAATAAAGCATTTC AAGC  
CTTATAGATCTCAACCTCATCCAACTTACTTACATTAAGCATAAACTGAACAAAGAAGG  
TAGGACCAGATGAATGAAGTTAAAGAAGTTCAGCAGACTACGAGGGGTATGTTGAAGGG  
AATTTAAAAGTAACAACGATTTTCTAAAGGTACGCTAGACACTTCCACGTATCGGTGAA  
GAATCTCCTAAAGAGAAAAAGTTATACCAGTGCTGTCAACTTCGACATAAGAAATGCAAA  
TACTAGATTGTGCACTTCAAAGAATTATTTGCTTTTCATGGTAATAAAGCAAATCTATGA  
GTGAATGATGTGCAACGTAAAAACAGAATTGTTAAATTCCTGTACGACTGCGGACTAGTT  
CAAATTGTAATGTATCAGCACTGTCCGACCCTGCTCCATTATTTGAAATTAAGTAATG  
GCATAGAAACAGAAAGGAGATTGTACGCTTACTCAAGATATAACACCGGGCAAAAACGT  
CAAGTCACAGAATGATATATAGTTTACTTATTATATCAGCGTAAAGGCAAACGCCACG  
AAAGTAGAGGATTAACCATACGATGCTCTAGTAAA ACTCAAAGAGTTCAGTGAAGATATA  
ATAGAACA ACTTGTGTGCTAAGTACATTCGTCCGCTGGGTATTTTGATCTGGAGTGCT  
GGTATCTTACCTTTGGAGTACGTTACGATACCTGGTTGGGAACAAGAAAATATTAATCCA

ACTTAAATAGTTT TAGGTCGTCACGGGTTTCACAGCTACTTTCTGCGTACAAGCGGGAGGG  
AAGAAAAAGAATAGAGACAGTGGTGGCGGTGCTAACATCTCTATGAAAGACAGGGAGATG  
CCGATTGAAAAACAACCTCACGCAGCACATACTCAAAGTCTTAAGTTAGTAGGTCCTACC  
GTTAAATTTGCTAGATATAATCATGTAAAAAATTATGAACGGGATCGCTAGCATCTCAGC  
TGTTGTAGA ACTTGGTTT TAGTAGGACTAGGGGGATATGTTTACATCCGTACGGATGCTAT  
CATTTAATACATCAAAGAGAAAGCAATCAATGGAGCACTTCCTCGAGTAAGTGA CTGCT  
ACCAGACATGGTAGATACACAACCACCACGTGTA ACTGGTGAACCAGTTCCCTTACCTTC  
ATTACCATGAATCTTAAATGGATATAAATCGGTGTAGTTGGTAGTAATTTCCGGAGTATCC  
CATCTGGGAATGATGGGTATATTTCCAGTAGTACAACCGAGAGTCAGTTACCTACGATA  
GATGTTCCCTGTAGGTGGCTATACTACATATGTTATCGTACCTGAGAAGGTTGGCTACAAA  
AAACTTACTGAGGCAACGATCCTTAGACAGCATT TATTAGTAAGTACATCAAAGAGAAA  
GGTTGTTTCTTAGCACTAGCAAATGCAACTCCTAATAGCACTGAAGAATACTTGTTAGAT  
GGTAACATTAATCAAGGCGGTACTGTATCTAACATGAAATATTGGACTTATCAACCACCT  
CGTTGACTGAAGCACAATCATCAGAAATACTCGCTGGTTCGAACAAGAGAACCCTTTATC  
AAAGCAATCGGATCAGTAGAGGGTACAGGACGTTCGCGTTGGCACATATATTTGTGGTGCT  
GCTGCTCCTTCTCTAAGTAGCATCCCCTTTGTTAGTTTCGTTTCGGTACTGGCTGGGTGGTA  
ATGTGTGGTGGCAATCACGGAGCTGATATAGGTGGAAATATGGGAGAGGATATCACTAAG  
GATTGTTATTTCTTCTTCTTCTTAGGGCGTTTCATTGGAGGTAATCCTTTCTTCTCACGA  
TACCTATAACACTTTAACTCATTACGAAATAAACTATTTGCTTCTTTAGCGAGGTTCTTT  
GGCTTGAGCGTAGTCAGTTTTTTAATGAGTGTCTTTATAACTCGCCACAGGAATGGTGTT  
GCAGCTGCAGATGCAGTAGCCACGACTGCGATAATTTGCTGTTACGCTGACTTGCTTGGTG  
CTTGGTATAAGTCTTTGAATTGCTGTAGTATCTTCATACTACACTACACAATGTCCACCT  
CTAACTTCATGAGCTATCACTCTTCTTTCACCATTTTGGAGGTGCATCACCTACTCTAGAT  
TTGTTAGGTGGAGGAGACACAATCTCTTTATAAGTTTTTGGTGTTCGGTGGCACCTCAGGT  
GTATCTACTTCATGTGTTTGTGGTGGTTTAAACGAGAGGAGGTGGCGGTGCCTCTATGACG  
ATCTGTAATTGATGAGGCTGATAATCCATCGCACCATGTTGGCCACCTGCATCGCAA  
AATACTAATACTCATCTTCCTCGTCTGCAATTATTTGATTATTCTTGTC ACTCTGCTGG  
GGTGCTTCCACACAACCAGGCATCTGCATGATGCCTTCACGTATGTTTCCGGTAGCAGGA  
GGTACGAACGGTATTGAGTGAAAAGGTTGTTTAGTTAACCAATCTGGGATATCTCTAACA  
AATACTCGTTGTTTCGAATGTCTCGAACACTTGGCTTATTCACTTGTATCTTTGGTGTC  
TCCATACATCATGGGTTTTCTATTGATATATCTTCTCAGTTATTTGCATATGTACTGGGG  
ATCTCATCAGCATGAGGGGCAATGACATTAAGACCCAGCACACAACGCCTGCACCAATA  
CCATAGTATGGTCTCTTGGGTTGGCATGAAATACTCTCTTTCATCAAATTTCCAGAATTT  
TTCAAACCAGCTTTTTTCAAAGTCAAGGCTCTTATTTGTTACAGTTTGATTGTTAATGCG  
ATATTTTCTGCAACTACGTCTTTACCTTGCTCAGGATTTTGTATCTAATGGTCTAGTC  
CATGTTGCACAGAGACCAACTGAGAAATTATAATTATCTTTCTTTTCTGTTGTTGTAGGA  
ACATGGTATAAAAATATTACCTGCATTATCCTATAACCGTCATCATTCAACTCTCACATA  
TCATACACAGTATACATATAGTATGGTCCTTATGGTTTTTGTGGTGAAGCAGTTCCTGTG  
ATGTACACAGTAATATTCAAGGTAGCACCTGACTTTGAATGCCTTTACCATATGTGTAT  
GTTATCTGCGGACCTGATAAAGCTTGTATTGCCTGGTTCATCACTGAGACTGCTGGGTG  
GCGATTGGACCTGCAGTCCCGATGACACCACCCACTGTCTCTGCGCTATCACTCGGAACC  
AAGGGTATTAATCCATTAACGGCAAATAACGCTATGTACTGAAGATGCTTGTGTATCTG  
TTACCGAAGTTACCGTGGTTTCTGTTTGTATTACCGCGAGGTTTCGAAAGACCTGTTCCCA  
TGCAGGTTTTCGGTGTATTGGA ACTCTGTGCCTGGCGTCTGGATCGCGAAGTCGCTTTTTGT  
CCCGTATACCCGCCCATTTTCGAAATTTCTGCTTCAATAGTAATCACTTGGGTTGATTTAG  
TGAGAGATTAATAATCATCTGCAGTTACGCCGTGCCACTGACCGACCAATGTTAACCTG  
AGTTATCGTCCATCGAAGTCATGGTCCGCCACCACAGTTGAAGTCGTTTCCGTTTGGGTGG  
TCATCGAGCCCTGTTGGCTATTCGGCACCAAGGA ACTGTTATGACTGTGTTCTTAGCAC  
TACCCATAGGTATTAATAGGTATAACTTATATGTATTGCTCATGACAATTAGTCAAAAAT  
ACTCATTTTCGCTAACAAATTGAGCCGTC ACTGAATTACCTTCACCGAGAGTTCCTGCAGA  
ACTTGTGCCATGAATAATAGTACTAGTATGACCATTTGTGAATATTCCTGTTGTACCTAA  
TCCAGCTGTTCCAGCACTTTGTAAGGTGAAATTACCCAACTTGCAGCTGCCCCAGAAGA  
TTTGCTACTCTGTTGCCATGATTGAGCAAATGAGAATGATCCTACACATGCTATGTCATC  
CTCTGCAGATGATCCTGAGCTGCGGTTTTTGA ACTCCAGTAATTGTTCCA ACTGTTCCCTAC  
GCCTGTAGTAGGACCTAAGCGTTAACACCGATACGACCATCTACACGGCTACCATTTCG  
CGGTGTACGTGTTGTGATCACGTTTTTTCCAAAGATTGAATAGCTATCGCCATTTTCGTGT  
TTGAGTTACGATTTGAGGATCCACAGTTAGCTGTAAACTAGGTTGGTCTCTACTCAGTCG

TCCGCCCGCATATGCGGCTGTGCCGAAGGTCACAAGAATAATGGTAAGAATAAATTTCTT  
CAATATTTTACTCTTAGCGAATCTTGCACATTTAGGGTGTGCAAACCTTACACATATGT  
TCGGCATGTACCATTTCTGACATCTCACTCTATGGTTTAATAGTAGTGTGCGATTTCGGG  
AAGAAAAAGAAACACAGGCTTATTTAAGGAGCAACATGACTAACTTATCACAGTAGAGAT  
CGTAGTATGTCGATCCAAGTTTTAGCGCTGCAAACCGTTACAGGGTAGGATGCGATGATG  
GGTCCGTAAGAGTACACGAATACGGAACAGGTTGACCTACGGGACAAAACCCCTCCGTACA  
ATAATTGGGAAGAATCAGCAGAGAAGTGGAACTAGAACTAGCACTCGTAGGATGGTCAA  
CAGACCGAGAAGAAGTACCTATAAAGCAGAACATACTACTAGTCAAATAAAAACGAGTGAG  
ATCCAAACTCAAAGAAGAACCACAAGTTCATAGAGCTGTAGCATCGAGAACATGTGCTA  
GAGGATTTAATCTATCAGATTCCGTAGAACTTGCTAAAGGAGCCGCTGTTAATGCACTCC  
TAACAAGTTAGACACAAAAGGAATTTCCAGAACATCAGAAAAGACGAGTCTATGACGTAG  
CTTATCTAAAATTTTCGCAGTTCTGAACCTGTTGTTCAAGATTCAAACCTATCACTTATG  
CTATTTCAAGCGGGTGTATTTTTTTTTAAACAAATGAAAGCAATAGCAATTGCATTGCTT  
CCTTTACTATTACAAGTGGTTGTGCAAATGCAAGAACAAGGTTGAGTGGTGCAGTTGCA  
TCACTCCAATCTAAATTCTATACTAGTTGGTTCTCAGACGGATCAAAGATGGTGGAGAA  
TGAGTGAACATCTGGCAGTGGGTTCTGGTAGTGGAAGAAAAGCATTATTTGACGAGACC  
GTAGACTTCGGTGCGCCTGATGATCCTATGTAAAAAAGGATATAGACCAAGTAAGAGGA  
GGATTAGTTCAGATACCAATGACAGGTGGAGCTATTGCATTTGGAAATAACAATCCTGAT  
CGTGATCTAAAACCTTACACAACAACAGGCGGATGAAGTTGCCATGCGTATCATCACTTAC  
TGGATCGAAATTGGATGTGCTGATCAGAGGATGACTTTGGCACATCGTTCAGATGATTCT  
GAAACAACCTAGGCATTTACAAGTGGTATGCAAGCACTCGCTCCTACACGGAGACTAGGC  
ACAGGTTAACCAGCTGCGTGTCTAAAAGGTGTGGAAGGTAAAGGTAATGCAGGAGTCCGA  
TGAGAAATTAATAACACCTGGATCAATTGGTTAGGTAAATCAATCTCATATTGAGGGT  
CTTTTAAGACCCGCAGCACTACAAAACAAGTGTGGTCACTTTGTAGAAAAATCAGTTGAC  
GCAGGATCAAAGGCACTTAACCGGAACCCTCTTCATGAGAACCTTGCAGGTACAAAGCCA  
AATCCAGAAGTAGGAGCAGCGTATCCGATTGCAAATTTGACTTGGAACTTGCACATGAA  
ACAGGTAAGGTTAGAACATAACTGCAATCAAACAACCTTTATCAGCTCTATTGTGTGAG  
GTGTATCAAGAGGAAGCAGGTAAGTTAGGATTCGTTCCCTAAAGGTGACATTCCTACG  
ACGGTAAGAGCATCAGATCACAAGATCGGCACATAGTTTGGTTATATAAACGTATCGTAA  
TTATAGTATGAGTGCAAGAATCGTACGAACGAGAAACGGTGAAGATGTTATCTGAGATCT  
TTAGGAGGGCAGAATAAAGAAGATCCAAGTAATGCAGTAGCATTTC AACATAACAATCC  
ATATATTTTACGGTTGCAAAGAAAGTAAACTGAAGAACCTCAAATTCTTGTGATGATGA  
TGCAGGTAACATTGTAAGTAAAATCAAAGATCCCGATATCTAATTGCAACCTCGGATTCC  
TCTGTCTTCTAACAACCAAAATTCTTATGAAGGTAGAGGATGTGGTGACCGCATAACGAGAC  
CTATGCAGAGGTCATCTCTACAACAACACATTAATCGAGGCAGATGGAGGAAAACCAA  
GCAAACCTCTGTTCTTGAATCAACGGAGTGAAAACATTATTCGAGAGGTACCACAGTTAG  
ATGAGGAACGTAGTATCCTTATCGAAAAATGCTATGAAGTGACCGGTGAGGATGCAGTGA  
TCCCCTTACCAGAATCCAGTCCACAACGTCATGTCTTCTTGACATCTGAAAAAATCTTGA  
GTATACTAGATCCGACTCCAAAACCTGTTGCAAATCTACAATATATTCTAAATCTTTCTT  
CGCCGACCTTCAACTAGCTGATTACACTATACTTTACAGAGAGTTTGAGAATGGAGACGC  
TTTTCAATATCGCTCATCCTTTTCTCCTACCATTTATGTTTTGTCTAAGAAAAAAGAAAA  
GTTCCGAACAGTAGCTTCGAGATAAGTGTCTCCTGATAAGCTTACAATGCAAGAGAAGC  
ACGAGAGTTGATCAAACAGTATGAACATGTAATAATTTTGAAGTCCATGGTCACGAAAG  
ATTTGTCTTTAACTTCAATCGTCAGCAGTCTACAGATGACCTTGGCTCCACATTTATCA  
GATGAAAATCTATGCATCGCACATCGAGGTTCTATGTGTGAGTAGATTCCTAAATGTAGA  
AGCAGCAGCAGTAGAAATGCTCTCAATCACCATGAACGATTTGGTGACTACAAAATATTG  
CTGTTGGACTACTAGAGTGTGTTGATGCACTAAATAATTTAGAGTTGAATGTCTCTTGGAC  
CGAACAAGCCAGGCTTACACACTTTGTTACATGGTGGTCACCGAGCACTCCAGACATTCT  
AACTGGTTTGAAGGATAACTTGTACGTCGCCCCATACCTTGCTCGTTGAGCCACTCGTTT  
TCCCGGTGAGAAATGGAAGAAGAAATTGTCCCCATGGAATCGTCCAGATTCAAGGGAAGT  
TTACGTCCAAGGTAGGAGGAATTACTCGTATGATATCTCTGGTGTTAAAATCCTTGATTA  
CATCGAACTATATCATAAGTTTACATGATAAAATCAGGAGTCTTATAGGCTCGATCGCAT  
GACCTGTCTCGAAATAGGACAAAAGAAAAGTAACTCATGATGAGAATGAATTCTTCAAAGA  
CTTCTAAACAGCTGATTGCAAGAAGTTTATGAGATACAACATTCACGACGTTGACTATAT  
TGACCGTCTGGAAGATAAGATGAAGTTGCTACAACCTAGCAATTACAATGTCTAATCAGGA  
CCAGCCAAGCTTAGAAGATGGGTAGCTTCAGGTCCGCTAGTGGGACACGATGATATATAA  
CTATCTTACAGAAAGAACGTTGTTGTTCCCCCACATAAAGGAGCGAAGAAGATGAAAA

ATACGCAGGACCGTCTGTTACAGAACCGCCACCAGGATGCCATGATAGGGTGTGCCGTTT  
TGACCTCAATAGCCTGTATCCTCATCTTATTATGAAATACACAATCGCGCCCGAAACACG  
CAGGGAGACTATACATCCCATTGCAAGTGTTGCGCGAATGCTCAATCAGGAGTTGGAGAT  
AGAGGAAGACGATTGTCTATGTGCAAACGCTAACCTGTCTCGAAAAGATATTCATTGGTG  
CGTGCCATAGATGAAGCGGAAGATCTACGATGAACGAACGATCAAGAAAAAGAAAATGAC  
GGCTGCAAGACAGCAACAAGAAAACGCACTAACTAACAAATTTGATGCTGACATTTCAA  
GATCACCAAAATCCTAATGGCAAAAAAGATTCAACTTAAGTCTGCCTATGGTTCTATCGG  
GAATCAATACTTGCGAAACTACATTCTTGCAAATGCTGAGTAAAGTACTCTGTCAGGGTA  
AGTTTCACTCCGTTGGATCGAAAACGAAATGATCGAGTATCTCGACAAGATAGTCTAAAC  
GACAGGACAAGATTATGTTATTGCTAGTTATACTAATAGTATCTACCTCATTCTGCGTCT  
TCTGGTTCGAGGCTGTATAACAAGGGGATATAGGACATTGATTTCGAGTATCGTCGATCACAT  
TAATAAGGTCTGTTAGGTGGAACCTTGAATAATATATTATTAGTTCGTATGAAGCGTTTGG  
CAGATATGTGAACTCATACGAACTGAAGATGGTCATGAAGCGTGAGAATATTGCCAACAA  
AGGTATCTGAACTGCCAAGAAAACATATATTCTCATCGTGTGGGATAGTGAGGGTATTCG  
CTATGGGAAACCTAACTTAAGCTCATGCGTTTCGAAGCAATTAAGTCTTCTACACATGC  
AGCCTGTGCAACATGTATTCATGATTGCCTAACAGTTATCATGAATGAAGCTGAAGAGTC  
TGCACAATACTCTATTGGTGAATTCAAAAATCATTGTTCTTCTTTACGTAATGGAGACAT  
CTCATTTCCTAGAGATTGTAATAATCTAAATTAGAGGTCGAACCCTATAACAAGCTATCG  
CAAAGGGCCAAATATACATGTGAGAGCGGCATACGTATATAACTGTTTTAATAAGCGAAA  
CTAGCTTACTCCCAAGTATCCCTTAATTCAAAATGGAGACTAGATCAAATTCGTCTATTT  
GAAGACTCCAACCAATTCAAAGTGAACATTACTTTGCTTAATTCGGTCCCGAAATA  
GTTAGGACTTGGCAAAAAGGTGGATTATGAGCTACAATGTTAGCAGAGGTATTTAGACCA  
CATCAAAGTGGTTATGGTCCTCATTGGTTGGCAGCCTGAAAGGATCGCATCATTGTAGTT  
GCGCTTTTCACGAAATATGATTTTTTCATACCAAAAAGCATTGGTATCCCAGACAAAAGA  
GAGCAAGTTTTTCGACGATGAGTCAGAGGCAAAAATGGTTTTGAATGTGCTTGGAAAGCCTACG  
AACTGTTTTAACTAAGATTATGGAGGTTTACGAGGGAGTTAACTGAAGACCGTTCTATCGG  
AAATTGGAAATGAATTTGCAGGCCTTGTATCAGACGGAGTTTTTGCAGGGGGTACAAAAG  
ATTTTATTGAGACTCGTTCTTATGTCTTTAATACCTTAGTTTTCTGAATCAGTTTATCGTG  
GGGTGCCACGCAATAAAATCACAGCGATTGCTGGTGAATGATCAACTGGCACAACCTTCT  
TTCGCTTGGCATGGTGCACACTTTCAAGAATCTGACAGTGATGCAGGTGAAATTGATT  
TTGAATCTTCGCCGGCTATTAGCAACCAAAGGATTGTGGATAGAGGTATTGAGGCAGATT  
GAATGATGTTCTTCTGTCCATACTATCGAAGAGTTTCGAGGCCAATGCTGCAGGATTC  
TTGACAAATATATGGACCAGAATGAGACTGATCGCAAACCTATGGTGGTTGTATTAGATT  
TTGGTGGTATGCTTCTTAGTAATAAAGATGTTGAAGACTTTGCTAATGATAACAATGTCA  
GGGACATGACACTCAGTCACTTAATTAAGTTGCTTTTCGTGATCTCACGCTAAAATTAG  
ATAAAGCGAACGTTCCCTATGCCATAATGACTCATACATATGATGTTATAGTAAGTTTTA  
TTCCAACCTCAATTAATGAGAGGTGGAAATAGACTCAAATAGGCTTCTTCAACAATAGTAT  
ATCTATCAAAGAAAAGGAAAAGATGGTACGGAGGTTGTTGGAGATAGTACCGCATGTA  
AAGCCCAAATTTCTACGAAGCAATGAAAATTCTCTTGTAGAAACACGGTTGTATTTCCG  
GTCGTGGACTAGATAGGTATTATGGATAACTAGGATTATGTGACATGCATGGAGTTTTCC  
CACGCAAGGGTAATCGTATGAAAGTTGGTGAATTGCTGTATATCCTACATCCATCCTGG  
CTGAGCCGGAAAAGTATATTACTGATGCAGTCAAGGAAGCATTAGACGAGGCAGCAAACA  
AGAAGTTACAATATGGTCACTAATCTTACTGACTACATTATATGCTATGATGACATGTTT  
CTAGGGGATGTCGATAAATCGGTAATTCGAACATTCATTGAATGATATAGAGATGTGAGT  
CGTAAAGATAGAGCACAAAGACCAACCTTAAATGAGGTGAGTATCTCACAAAGGTTTCAG  
GGAAAAGATCTTGCATGGTTGTGTATCCAGAACCATACACAGACAGTCTTTATTGATATT  
GTCAAAGTTTATATGAAAGCTTTTCGGTGCTAACCAGATTTTCTGTAACAGATCCTTTT  
GGAGCGTTTTAAAATTAACCATATTAGAATGATGGACTAGATCAATTTAAATATCATGAA  
GTTGGCGAAGTTTATAATTCTTCTTCTTAGATTTTTTTGTGATGTTTTTATATGAGAATGAC  
GTTGATGATGGTGGACAAAGTAATTTAACTAGTTTGTGCTATGCAGTTTCACCTAAACGT  
GGTAGAATATTATTATTCACAGCAACATGGCAGAATCGTCCCTGAGGATTGCCACCTGCG  
TCCGACAAACAGTACATTGTTGAACTTATTTACACTACCTATGACTCTCGAATTCACGA  
TTCTATGTAATCGCTTGATAATAAGAAGTATGCACGGAAGGTTCTTGCTTTATTGAAGG  
TTGATTTTTTTACCGAACGTTCTTCCCTGATTATTTTCTTGAATAACATGAATACCTTA  
GGCCGTATGATGCATTCTGATCTCTGAACCCACTTAGTATTGAATGTCAATAAGGAAATG  
ATCTTACACAAGATCAATTTCAACAGATCGTTGAGGTTTAAAATGTCCTTTCCGATGACC  
CCGAAGACCACGACTGGCTCGTAAATTCTACAGAAAATTGGTGTGAGGAGCGTGCGATGT



ACTTATCGCTTATGGAATCTGTTAGGCTAGCTGACGGTCATGATACCAAACGCGATAAGG  
GTGCCATTCCGCAGAGTCTTTCAGAAGCATTAGGAGTATCGTTTGATCAACATGTTGGTC  
CCGATTATGTTGAGAAGGCTATTGATTGTTTTGAAGATTATCATACATAGGAGACCAAGA  
AACCTTTTGATCTGGAGTCTTTTAATAAGATCCAGACGGCTGGTTTAAGAAATAATTCAC  
TGAACATCGTTCCTTGCAGGAGCAGGTGTCGTTAAATCTTTGGTCATGTGTCACCTTGCTG  
CATCAACTTTAGTGAAGGTAAGAATGCTTATTACATTACTTGAGAAATGGCAGAAGAAA  
AGCTTGCAGAAAGTATTTATGAAAACCTTTAAAATGTTCCCATTCAAAGCTCGCTGATC  
TACTACTTCCAATCTTTGAAAAGAAGATCAAGACATTAGCGCAGAAAACACAGGGGAAAT  
TTATTATCAAAGAATATTATTACAGCGGGAGCACCTGTAGGTCAGTGTAAATCGATTATCA  
ATGATCTTGCATTGAAGAGAATTATTAGACCTGATATTGTCCTTGTAGATTATCTAGACA  
TTTATGCTTCACAGAGATACTAGGGAAGTATTGCGAATTTTTACACCTATGTTCAAGAAA  
TTGCTGAAGAACTTAGAGTACTTGGGGTAGACTGTGACGTCCCGATTGTCTCCGCGACAC  
AAACGACTCGCTCTGGTTTTGAGTCTACTTATATTGATCCCACTGATACGAATAAAACCC  
TTGGTAACCCTGCTACTTCTGCGCTCATGTTTGCTTTTTATCTCGACTGAAGACCTTTAGG  
GGATGAATACAATTATGGTCAAACAACATTAATAATCGCTATAATGTTTCGTGCTATGAATA  
AAAGATTTTGTGTAGCTAATGGCAGAGCGAAGATGAGGGTGAATGACGTAGGAGAGTCTG  
CCCAGATGGACTTGTTCATTCTGGTCGAGACGAAGCGAAGGTTGAGCTTGTACAAAGAT  
TGAAATCAAAGAAAACCTTAAACTGCAGTAAAGTATGGGTGATTTTAAGAAGAATAGTGAA  
TTTGTAACCTCTGTTATATCGAAAAAGAGTAAGTATAGTGGTCATTTCTTAGATCGTATA  
ACAAAATGAGATTATAAAGACTTTTCTTCACATAGAGCATTAACTGCCGCAGTCGGACTA  
TGTGCTGAGTCAGGCGAATTTACTCAGATAGTAAAGAAGCTATTATTTCAAGGTAAACCA  
GTTAGTCAAGAGAGACTATTTTCATATGGAACGTGAACTAGTTGACATTGTTTGGAAATTT  
ATACAGGCATGTATAGTATTAGATGTCTATCCAGAAGAGGTTATAGAAATGAAAGTAGAT  
AAGTTGACGAGTGGATATCCCCGTGGAGAGTTTGTAGCCACTATTCTGAAAATCGGAAA  
CAAGCAGATGTTTAATGGTAGGACCGGGTGAATACCACGCATTTGTTAGGGATCTTGCTA  
GCGCATACACTACTGTTGAATGGAAAGATACTATTCCATGTTTGATTCTACAATTGGAC  
TTTATTGGATTAAGTCAAACCTCGATACAAGTATAGGACTTGATAGGAAGAAATCAAGAG  
CTCCACAAAATTGATTGCTGATTCAATAGTTGAAGGCCATGAGTAAGCACACAGATCCT  
GATGTTAGGTACACTTTATCCAGATGAAGGGTCTATCTGGAAAAAAGGTAGAACCCTAT  
GCAATTTACAGCAAATTTAAGCGCTGAGGATAATTCTGCTTTGGCGCATACAAAGAAAGC  
TGGCACATATAATTGGTTGCCTACTGATGAGTATGAAGTTCAAATACCAGGTAGGTTTGC  
TGCCGATAGATTTATTCTTATCAAAGACAAAATGAAGAACCTTCTAATCTCGGCAGAACC  
TCATCCTTACGTTGACTATGAGAAAAAAGTCCTTACTAAAGGTGGTAGAGAGTGGTATAT  
GAAAGGATTTAAAATAGAGAAAGATCAAGATCAAACGAAGATGGCGACAAACGCAAGCG  
AAACTGCGAAATCAGAGGATGGTTCTAGAGTTTTTTTTCCAATCTGTAGTCACAAGTAAGA  
AAGAACCATCCTTAAAAGAAATGGTAACATTCTACGAAGGATCCGGTCTGAAAGGATAT  
CAACATATGTCGATCAGGCTTCAGCATTCCAAAAGTTGATAGGATATAATGCAGGGTATG  
AATATTCCAGGGGTAAAGGACTCAGCCATACATTGAACACCATGCGAAGAAAGAGCGTG  
GTGTTTGAGTAAAGGATCCTTGGAAACCCTATGGATATTGGATTGGTTAAGAAGAGTGCAA  
AGAGAGTAGTAGAAGCAACTATAAAAGTAATTACTAACATTGATGGAATGAGTAAAGATG  
CACGATTCGGTCAACTTAATGCGTATATCCATGTAGCATTGATCTCTCACAGTTTAATTG  
TTATATCATCTAAAGCACTTGCAGCAAAGAAAAATACTGCTAACGCAGATCTTTCCAATT  
CAGGTAGTACAACCTGGTCAACATACAATAGGGAACAAGGCTCCTAACTCTTTGAAGTGTA  
CGTTAACTTTAGGGAAGAAAACCAATTAATACTATTTGATACTGGTGAAGTTGGGTGTGACT  
TGGTGACAACGTAAGGTGGTAAAATACATGGTCACTCAAGAAATGTTTCAGGCTTCTAAGG  
AAAGCAAATTAGTTGAAATACGTACAGTCCCAAAAGTAAAGACACAGGCGCAAAACTTG  
GTAATAATATCTAGGGTTACGTTAGTTCTATTTCTAGGAGATTTGAGCGGAACCCGTCGAA  
CTTCTGCAACAAAACATAATCATCTTCCAAGAGTTGGTGGATGGATGGATAGAGATAAAT  
AACACTGGAATGACTTGTATTAATAAATTTATAACAGCTCGTGTGATTGTTTTTGGAGTAA  
TCGCTGTGTATAAATTTATCCAAAAGGTGCTCAAGTTTTTCGAAGCAATTATAGACTATG  
CAATTTAATAAACAACGCGTCAGGCAGATTGGAGCTCTGCAGGTAGATTCTCTACTGTGT  
TGAGTGCTATATTATGGGCCCATATTTGTAATCAGATTGCTCAGATTAAGAAATTGCAAC  
AGTCATGTACAGCGCTATACTATGGAGCGGTAAGAATTCGGCAATGCAAACGGACCTT  
TTCTAAAGATAAACCAGTCCAAATGACTAAGTGCACACATTTACTCGCACTACACTCTCA  
GCCTGCTATAATATTATGATATAGACAGAGGACACCTTGCCTAAAGAACACATTCAACAC  
GTTGAGGATCTGATCTTTTCGTAACGTAAGGAAGCGTTGGATGCAGTATGGTATGCACTT  
CACAAACCAGACCTGGGTGTTAAGTGGGATGGTGCGCATGTTATCCGCTATGGCACAAAC

CCTGCGAATGGCAAATTGTACGTTTCGAACAAAATCCGTTTTTAAAAAACACAAGTTCAGG  
ACCTCTTATGATCAAACAGATAGTGACGAACTTTACTCTGGCAACCGTGCGGACACTCTC  
CGCTAATGTCTTTGGAAGCTTCCTCGTATCTGTGTAATTGTCCAGGCTGATTACGTCGGT  
TTCGGAGGTGGCAGTGCTTATCGCCCTAATAGTTTTTCGTATCGTCTTCCCCCTCCGATC  
CTTAGCGATATTGTCCTTGCTCCGCATACTTCTAATACCGAAGTTAGTCCAAAGTCTGTG  
GGGAGCATTTCGCCACGATCTACCTTCTTATTATCTAATTGTTACTCTATAGGTCAGCAG  
GAGGCAGATGCATCGGTTGCAAAGTCTCCTTTCTTCAATTGGGTCTCGTGTCTCAGCCGG  
CGGCCTAAATGTAAAGTGCGTAGCGATAAGGTACGTGTTGATATTGAGAAACATATCAAC  
AGTTTTTTCCTTTGTGATATACCAATTCCTTCAGCAGAATTTTCGGATACTACTTTACCT  
GATAAATATAATTATGAACTTAATGTTACCTCACTCAGTGTGTGGCATCTGTTGTTTCCA  
TTGCAGCAGAGTTTAATGAAAAACATCGATGTTGATGGAACGTGAAATGCTAGATCTAT  
GGAAAACCTTCAGAACAGCAGGGTTTTCTAACTGTTTCAGATTCTCCCGACAAAATTGTA  
GATACATTGACATTTAGTAATGCGAACTTCAAACCTTAGTAAACATTGGACGAAGTAACAA  
AATTAACGATTTTCTAATAGAAGCACCGTGAACGTAGGTTGCTAAAGCAGCGGAAAAATT  
AAATCTTACAAATGGAGGTTACAGTAAAGACGCCGACCCATCTGGGAATATGATTTACAT  
TACTAAGGATGGTAAGCTTGTA AAAATTACAGCATATGATGCAGCGAGGACGCAACGGAA  
TGGAGGAGAAGAAAGGGAAGGTTGCGAAGGTCATGTCGGTCAAGGCTCAATATCTATTAC  
ATTTGGAAGATTTAACGCACCGGCTATGGGGCACGAGAACTTATCAAGAAAGTAGCAA  
AGTATCGAGGTCTGGTGGAGGAGAGTATTATGTATAGCCTTCAAGAACTCAAGATCCCAA  
GACGAATCCTATTGATTCTGGAACCTAAGATCAGATGTATAAGACAAGCCTATCCAGACCA  
TGCAAATGCGATCATTGAGAATGAGCACATGAGA ACTATCTTGAATGTTCTTACTGCCCT  
TGACAATGATGGGTAATGTTTCAGTTAATATTGGTGGGGGTGGGGATAGACAAAGTTAACT  
TAATTTATTAGCATCGTGTTACTCCGGTGACTTATATACATTTGATCCGATTA AAAATAAC  
CTCAGCAGTAGGTAGAGACCCTGACTCTGAAGGAGCAGAGGGTATGTCTGCATCTAAGAT  
GAGAATGGCAGTGATGGACGGTGA ACTAGATTCCTTCGATTAAGGTATCGCTCATGCGAT  
GTATAAGGAAGAAAAGAAGCAATGTATCTAACAGTCAGACAATCAATGATTGTGCTGGA  
GTCATTTTCATGACTCGGGTGATGCATCATAACATCTTTATGAGATCGCCCCTAAGTTAGA  
TCCACGAGGTTTGAGGGAAACATAATAAGATACTAGAATCTTAGAAGTAGGTACGTATGT  
TGAAAATATCAGCACAGATAATTGCAGGTAAGGTCGTAAGTTGTCCTAGTAACTACCCAT  
TTACGTTGATGAGCATGATAATCTCTTGCGATAACGGTAGAAAAACCTTGTGGAGACTGA  
GAACTATGTTTGTGGAATCGTGGTTAGACCTGCAGGTCAGATAGGAACCAACA ACTTAGC  
TGCATTTTATCGTAGAATGACGCCTGGCGCCTGCTGAGAGAAGATTAATAAAAAAGTAAA  
GGTTCCTAAGTAAGATTGATTTAAAGAACTTACCTGTCAGGAGTGCTCCACACCAAGAGG  
TGCAGGAACAAGCCACGACACTAGATCCCGTTGCAGAAGAAGACGGTGAAGTAGATAATG  
ACGGTGATAATGACCCACCTGATAAGTATCTTAGGAAGCGTCGTTAGGCAATTGCCAAAG  
CTAAGAAGCACGAACATCATCAAAAAGATGAGAATGGTAAAGTCATCGAGCATGATGTTG  
AAGGGGAAGAAGTAAAAGCAGCATACCCAGTAACGAATCCTGATAACTAGGGTGACACCT  
AAGCCTATCAGAACTTCAAGCAGGGCTGAAGGGAAAAGATGGTTTACCATTATACAAAG  
CAGCAGATCACATGAAAGAGATTCAAAAAGATTTCATCCTGATGTCAACAATTATTCATCTG  
AAGA ACTAGAGAAAGTAGCAGATCACACTAGAGCCAGGGATGCTAAGTTGGAAGAGGGTT  
ATGGTGTGGGGAAAGGGTATTCTAAAGGTGGAGAGGTAAGGCTCCAAGAAGGCAGAGAG  
GAGCTGTGGCATATGATGGTCTTATCAAGGCAGCAGGTGTAGTAAAGTGTAGAGACAGAG  
CTAAACTACGGCAAAAATGCGAAGCATTGATAAAGTAATGTTATTTTTCAAACACCTATC  
TGAACAGAAA ACTAAAATTA ACTAAATCCGACGAAGGAGGATTTTCATGGAGGGAGCTAA  
AACCTCAACCATGGCGAAGCTTGCCGGTGCTTGAATCACGACACAAAATGCCACATGGA  
TGA ACTAGGCGACGAAAATCAGTATCTTCCGAACAAAAAATTTACGACAGGAACGAAGA  
AGTCGCAGAAGAATGCACTGAAAGCAATGCGCAAAGAGACA ACTCTGAAAAGAACCTGTT  
AACCTTCAGGCAATTTTCAGGATGGATAATCTTATAGATTTTGATAAGGATCAGGTAAACC  
ACCACGTCCAATGGCTGCCTTTGACAAACCATCTAAACCTAACCTAAAATAATAAAACA  
AAGAGGGAAGAATATCAGAGTAGAGGAACAGCCTATGTATAAAGTTATGAGTAAATAAAC  
GTATAAGAATGCACATAAAGACTTCAGGGGTGGCACTATGTAAGATACTAGGGTATCAGT  
TTAGTATCTCGAAAATAAAGCAACCTTATGAAGATCTGTTAAATTCTCTGAAGCGAAGTA  
TTAAAGTGGTGCGTCAAAGTATGGCGCCATGTCTATCAAAAATAAAAGAGAAGTAGGTTT  
CGGTGGGAACGCCCAACTCCAGAGGCAAGAAGCAAGGAACGTGATGAGAGAATGAAGAA  
GTATAAAGCATCCCAAATGAAAGAAGAAAAGCATAGAGCTAATGCACTTGATGGTCTAAA  
GAGATCACTTATTGCCAGAATGGTACAGGTGCTACCATAAGAACGGGTAGCAAGAATCA  
GAAAAAAGACAGAGGTGCTAAGTGTATTGCAGGAACTGTTAATTATAAGATGATGTCAGA

TACGAAAAGCGAACTGCTGCAGTCGCTAAGAAGCATGGATTTAAGTCTGGTCAGAACTA  
CACTCATACCATGGCTCATTATGGTGGTAAAGATAATTACGACAAGGGTAGAGGATTATG  
GTCATGAGCACACCCCTTAACCAATCTCATTGTCCGGATGCTCAGTATTATTGCTTTGAT  
GATAGACTGCAAACCAATACCCAACGGTATGTGAGTAAGAAAGAAAGGTATGTTGGCC  
AAAAAACGACAGTGTTAAAGAACGAAATAATTGCCAAGGCACAGAAAAACATACTGTG  
CCAAAGTCTAAGAATCTCCAGGATGACAAGGCATAAGGAAAAGATGCAAAGACACGTCC  
TATAAGACTACTAGAGCAAAAGGCGTGCGTTTCAATGGCAAGATAGATTCTGGTCCCATT  
AAGGACGATAAAAAAAAATACGTTTGATACCCTATCTGCCGAGTAATTACATATTAAGAT  
CCCGAAGGGAAATTTTTTAATGCCACTGCCAGACAAAGTAATCTATTCTGTGGTCAATAA  
TATCCCTGAATAAGAAGGACTGGGCGAGAACTACGCGATATTTCTTTATTTCGTTATTGG  
GAAGGCTGTGAAACTACCAAGACGACCGCTGCCAACGCTCTATTTGAATAAGTCATGCA  
AGCACTTGCTGCTAAATAAGTCGCGTTTGCAGACTGATAGTGAGGTCTCAGAAACCCCT  
TTTTTTATAAAAAAAGACAGGAAAAAACAGAAATTTTATGAGTATAACAATGGCACTTTAC  
GGCGTAACGGATGCAGCCGATTCCAAGCCCATGTGGGCTGGGAGTGTGAGCGGTGTAGAC  
CCCCTAAATATTTTTGCAACCGCTGATGGTTGGTGTTTTGGTCATTACAAGAACGCCCT  
AAGACAAAGGTTTGCAGATGAAATTTTAGCCTCAGATGATGGGCTTGTACGGGCAGGTTCT  
CGTGGAACCAATACCGTGCCTGGTGCAGATGGTACTGCAGTAGTCTTTGAAGAGGGAGGT  
TCTGCAGGTGCAGCAACAGGTTCTCTTGTGTGATCTGTAACAAGCAGGTTACGTCACA  
AACGGTGCAAGTTTTCTCGTGAGAAATTCTACTGACAGTGCCAACATGACTGCAACTGCT  
GCAGCACAACAGGTGTAACCCGTGATCAGTTTGCCTTCACTGCTGCTGCAACTGGTAAA  
GCACATGCTATCCAAGCACAAACAATCTCTGGAACAATCTTTGAGTCCGGTGGTGGAGTA  
GCATCCAAGAGGGTATGTGTTTCTGGTGATTTAGTTGGTGCAGGGGGAAGGGGTTGTACC  
GCAGCATTAACTGCAAATTAACATAACATATGAAATTTGACGAAATAAATGAGGATACATT  
TCTCATGTTTCGCTATTAAGCATTAGCAAAATCCTCACTGTGTGACTCGCCAGAATTCTGA  
TGAAGATTTAAAACGCTTCAAGAATCTTAATGGACTCTTGAAGCGTTATGTGAAAAGTGC  
TCCGTTAAGGACTCATCTTGTTCATCAATCATATAACCATCTTATATAATGCTATTGGTGA  
AGCTGCAACTGCTCTTGTTTACCTTAAATTAGAAAGAGAATATTTGAGTTTAATAAAAAC  
TCTACAGCTCTATTTGATGAAATATGCAGTCGGGATGCTTCCAGACTTGGAAACAAACC  
CGTTTTTGAAGAAGAAGCTTAAACACGTATAGCCTATGATGAAAGCAGGAACAAGCGGGT  
TAGTGGTACCGCAGCAGCCAGAGGTCCTGTAGCGGGTTTTGAACCTGTCATGACAATGAG  
AGGTAACCTTAAAAAATTAAGGCACAAAAATCTAGTTGCTGTTAAGAAACAGATAGAGT  
AACTGTCAAGGTCCTTCAAGATTATTTCCAATCCAAAATTAACGTACCTGAGGTTGGTGA  
AACAAATCCTAATTGCGAATAGTCTTCCCTGGACTCAGGATGAAATTAAGGACGGTTATCTT  
GCCTAAGTATAGGTCTGGTATTACTATTGAAAGAATCATGCCTGGTGGTGTGCCAAATA  
CTTCATGGACCAGAGAACGTAGCACAGAAGAATTTGATGGAAGCGGCGGGGCAAAGAA  
AGCAAATATAAACGATAAGACTACTAAGAGCGGTTGTAACATAACTCATCATGTGAATAA  
GAACGACGAGGCAGTTGCACAAGCTGCGATGAAGAATGATCCGAAATACATGGTTTATTA  
GCCTAGAGTACACGGTGTAAAGGAAGCCGTAGGTGATTAGCAGTGGAAGAGGTAATTGAA  
TCAGCAAAGATTCAGAACATGAAGAAGAGACTCCGGTTAAGAAGCGTGAATTACAAA  
ACACTTACAAGTAAAAGACAACAACCTTAAAAACAAGCAGGGACTGGAGCAGAACAAGA  
CGCAACAAGGTAATCTCGGACCTTAAACACCGCTATTATTGAGCGACCCGAAAAATATGTC  
GATTCAATGCAGGAGAATGCTGTGAAAATGGCTCTACATCTTGCTGTCCACATTGAGATG  
ATATATAACAAGTCAAGATCGATCAAGTTTTGTCTGACAAGATTGATAGATTGTATGCA  
GCTAGTAATAGAGATACAGAACAGAAAAAGAAAGGTTTAGAAAGAGACACCCGTAAGATA  
GATGCTCGTCTAAGATTGATGGAAAAGAAAATGTGGACTATATTTGGAGCAGTTTAAATC  
GCAACCATCCTTGTATCAGCACGAGCACAGGCAGCTCTGAAGCAGTTGACAAACAATCAA  
AATCCTAGTTTGATATCACCAGAGATTATTAGGTCTATTTGATTGACAATTACTTTTCGA  
ACCTAATCTCTGACCGTCTTACAGACTTAAGCAGGTCACGAAGGGGACGTACAAGTGTG  
GGCATCCCTCTTGAGGTGACTCCCAATAACCTAATAATAAAGCAGGAGGTTATTTCTTCA  
CTAAGAATATTGGTCTCGTTTTTAAGTGGCATTACTGTCTGTAGTCATATCGTTTGGGA  
GCTTCCAAAAGGACCAAGCGAGTGACCTTCATGAGGAAGACATCAAGGAGAGATACGAAT  
CAAGTCTCCGTGGTAAAGGTAGGAATGTAGCAGATCCCGAGTTTAAATTAATAAAAACCAA  
TCTTGAACAAGAAGGGAGGACTACAAAGTATTTAGAGCTAAATATTTGCACTAAGCAT  
TAGCTTACTTAACCAACGTGGTAGACCGAGGAAACCTTTAGCGAGTTGATACGGTGTAC  
ATGGGTTTTGCCTATCGGTCAACACACAGAAATCTACCTTAGGAAATGTCTCAAAGGATC  
ATCCGAGGATTATTATCCTTTTATGGATGTAATGGCGAATGGTTTGGATTTCGGGGGA  
GGCGTCTGAATCCACCGATAAACTTAGGTATCTATCTATCATGTTGGGTGAAGATCAA

CAAAGATATCTGGTCTTGGTCGTATCAGCATGAACAATGCCGAGATTATTACTGAAAGTC  
CACTCGAGAGTCTTCATATCGACAATGCGATGGATTTGGAAGGTGCTGATGTTGATAGGA  
AATTAATAGATGAGTAAGATGCAGTCTTTGCCTACGCTAATGAAAAGCGAAGCAAGGAAA  
ACGTTTACCGTATTGAGAAAAGCAATTGATATATGATATGAGGTAGTGATGTGGCCTTGTT  
GTCTGCAAGAGAACGATCTAAATCCCTTGTTCTATTCTGGACACGACGTGCAATCTACGA  
TAGAATTTTATACATACTCAGGATTAGAAGCAAAAATTAATTCACCGAATGGAACAAGT  
TATGAATAGTCCAAGCTCACCCAAAACAATAACCGCCATAAAAAGGAAAGGCGAGATGAC  
ACCCTTAGACGTTAAGAGGGTTCATAAGATGGTAGCACTTACCTGTGAAGGTATTGCAGG  
GGTCACTGAACCTGCTGTAGAGCCTAACAGTGGACTTCAATTTCTAGCCGGAAATAAGAA  
AGCAGACAATCAAGAAATACTTAATCGTTCAGCGTATGATCTGTACTCTCTTGATCATCG  
TAACTATCAGTATGTTGCTGCAAGATTGCTGCTGTTCCGGCTTAAATAGGCAGTATATAT  
CGGTCCCACTGATGTTACGCCTCCTTTACTTGAGCATCTCAAGCAGTGTCTAGACACAGG  
TGCGTACGATGGCAGTATTGCTTCCAAATATACGGACGACGAATGGGAAAAACTGAATTG  
ATATATTGATCACGACAGAGACTTTTTGTTTACATATGCAGGTATTAGTCAGGTCGTCGA  
TAAATATCTCGTACAGGATCTTTCATCAGGGGAACATAACGAAATTCGCGAGTTCAAGTA  
TATGATAGTGGCGATTATTCTCTCCCAAGACGATCATAAATTTTATCCCTTGGCGTATGT  
ACTAAAATACAATGACGCAATCTCAAAAAGTCAGACTCAACATTCCAACGCTTAATATGGG  
AGGAGTGCGTACGCCACTCAGACAATTTGCAAGCTGTGTTCTGGTTGTTCTTGGTGACAC  
CCTCGATAGCATTTTTAGCAGTGACATTGCTATGTGAACGAATGTAGCGCGAAGGGCGTG  
TATCGGTATCAAGACGGGTAGATTCCGTTCTGTCAACAGCAAAAATCCGTAGTGGAGATGT  
AGAACATATAGGTGTTCTACCTTTCTCAATCAGTTTGAAAGTACTGTAAGATGCTGCAC  
TCAGAATGCCATTAGAGGTGGAACAGCGACTGTCAACTTCCCAATCTGGCTCCACGTATT  
AGCAGATATTATTGTTCAAAGGATAATATAGGGACAGAAGACAATAGAGTGTGGGCACT  
AGGCTATAGTAGTCAGATTAGTGAGTCTTTACTCAAAGATTCATTGGAGAGCGCTGGAT  
CCCTTTGGTTAGTCCACATGATGTACCTGGTATCTTCGAAGTGTTTGGAACCTCCTGAGTT  
TCATGATCTATGTGTATAGTAAGAAACAATCGTGCTATTCCCAGAAAGACGATGAACGC  
ACAGAAACTCATCCTTGATCTATAGAGGGGGATCGCAGAAACAGGTGCGCCTTTATATCAT  
GAACATTCATCACTGTAATGGTCACAGTTCAGTCAAAGATAAAGTAATAATGAGTAACTT  
GTGTCAGGGCAATACTCTTCCAATAGGCTGTATTTCGACATATACATGCTTCCGGTGAGTT  
AGTTTTGTGTATCCTATCTACTCGGGACGCCGGTAGGTTAATGGACCTTGAAGAAATTGA  
TGAACATATGTGACCTTGCTATTCGTGGTCTTGATGCATTGATAGATTATCAACAGTATCA  
TGTC AATGCTGCAAACCAAAGTACTTTGAATCGGAGATGCCTGGGTGTTGGTAACATTGG  
ACTAGCACATTATCTTGCTAAGAAGGGTCTAAGTATGATTTCGTAGAAAGCATTTGATTT  
AGTTCATAAACTTACAGGAATATTACAGTATGCTCTCTTAACGGCATGGAATCGTATGGC  
AATGGATAAAGGTCCTTGCGGTCTTTACGGTAAGACCAAGAATACTGAAGTAATTCGTCC  
TATCGAGACAGACAAGAGTGAAGTAGATGAGCTTGTTCCGATTGACCTGTAATGTGATTG  
GGAGTATATCACGGTCAGGATCAAGGAGTATGGACTCAGGCACAGCACCTTGTCCCCCA  
GATCCCTTCGGAGAGCAGTTCGGTGTGTCAAATGCCACAAACGGAAGCGCGCCTCCTAG  
AGGCTACCTGTCCGTAATAACTCAAATAAGGGACCCTTTAAAGGGATTGTACCGTCTTA  
TAACTCTCTAAACGCAAATACTTCGCTGTTATGGCATATGCATATCATTGATGCTTACAT  
CCAAGTAACTGCAGTAATGCAGA ACTGCTTCGATCAGGCAAGGAGTGGTAATTCGAGTTA  
GAATCCAGAGAATTATCCTGACGATGAAGTGCCTGTAGCTGTTTTGGAAAAAGATCTTTT  
GTCCTCATACAAATATGGGTGGAAGACATGATACTATTA AAACACATATGATGCTATAAA  
AGATGGTGACGACGAACCAAAGGTCGATAAATTTATCAACGACATTCCTACTTCTGAGGA  
AAAGGACTGTGACAGTCGCAAGGTCTGATGCCGAATTATAAAGAATGACAGTAATTCACA  
AGAACAAAGTAAAGACAAAGTATTAACCAATGTTTTTTGTACAACCATTAGAAGTCCAAA  
CATATGATGCATATAAGTATCCAGTCTTTGATTGACTTACACAATCACAACCAGGATATT  
TCTGCAGCCCCGACGAGGTGCTCTCCAGGAAGATAGATCAGTCAATCAGACTCATAAC  
CAGAACAGCATCACATCTTTACTTCTTACTTGAAGTATCAAATCATGGTTGGCACAGTTC  
ACGGTAGAGGAAAAGCTATGGCTTTGATTCCCTACTGCTCGCTTCCCTGAGTTCGAAGCAT  
GCACGTCGTTAGGGGAGTTT TAGGGAAAAGATCCATAGGAGTTCCTTTACTGACGTCATCA  
AGAATAGATATCCAGATCATT CAGAGGATTTGATACTATCTTAGATTACGATAATGTAC  
TGTCTCGTGACCAACAATGACTAAATATTACGATGAATTTATAAATTAAGCATAACGAGT  
TTGATAATTGTCAACCATGGGATCTAGCTAGACAAGGAAATTTAACGGATCACAGGAAA  
GATGAGCACTCAAAGAATACTCTATATGGCACGTGGAAACGTTAACATTCTTGAAGGAA  
ATCGTTTCTATGTCACCTTTGCGTGTTCTTTTGT TTTTGGCGAAAATAAAGTTATCGATG  
GCTCAGCTAAGATTCTATCTCTAGTCGCTAGAGATAATAGTCAACACGTGGTTATCACAC

AAAATATGATCAGGAACCTGGGCAAAAGATGACGACTCCGAAATGGAAGAAATCGCAAAAG  
AACAAAAACCCGTCGTTCGTAGATGTGTGCAAGAGAGCTGTTGAAGTGGAGAAGACTTGGG  
CATACTATTTGTATAGGGAAGGTAGTATGGTTAAATCGAACGTTTCGCGTGCTAAATAATT  
ACATTGAGTGGAGTGACAATCGGAGATTGAAAGCAATCGGATTAGATCCTGTGTTGGATC  
AAGTTGATAGAAACAATCCTTTGCCATGGACTTGACACTGATTAAGTAGTAAGGGTCAGC  
AAACCCGACCACAAGAAACGCAGATTGAAACTTATGGCGTCCGAGGAATCAAACAAGACG  
TCCAAGGAGACTCCTTTGCAGGATACTCTCTCTATCACAGAGGGGTTAGTTAAAGCTTAT  
ACTGATCTAGTTGAGCCAGGAAACCGCTACGGTCTACATATTACTGACAAGCTCTGGACT  
GCTCCTAGGAAAGACGAAACTAAGAGTTTGCACGAGGACTTAACAAAAGATAAAGATAAG  
GATGAAATTTGTTAAAGTGTCTCGTACTAAACTACAAATGGCAGGAATCGATGAGCTAAA  
TATAATGTGAAAGTCACACTTGATACCAAACGTTTCATCCAATCCAGGGAATCGCACTACT  
GGTAGTGATGTTTGCAGAACACGAAGCTTCCCCTGTGTAGTATGATGCTACGAATTGAA  
TCAACAAAGGATTGAGATACTCAGCGATCAGATCCTTAGTTTCGGATGCTTAAAAGTAACT  
TAGAGATTACTTCTATACGACAGTATCAGAAGCGAATTATGAAGCTTGGCAACTTGGACG  
CAAGTGATTTCGCCGAACGGCGCGTTCTTCCCCTAGAGCGCTATTTTAATTGCCACTGCAGT  
GACGTGTTCTTATATGCAGTCAGAAATCGAGCGGGCTCTTATTTATGAGTTAATTGATGA  
ACAAATAAAGCCAGAAATCATGGAAATTTATCAGGTAGTTTTTACCAAGGCTGTGGGGCT  
TGAGTGCATTGGCAAACATACGAGTAAAGGAACGGACCTAAAACAAGTCTCTCAATTTG  
GGAGTAAAATCTTGACTACAATTACTTATAGAGGCATCAAGTATGACGCGGAAGCATAACA  
ATGGAACGGGTCTTTCAGAGCAAGCAAGTAGCAGCCGTAACAATTTAAAGTATCGCGGTT  
GGAAGGTCGAGCGTAAATTCGCATTCCCGTCTACTCATGACAGAACTACAATCCATCGG  
GGTCATATACCTAGGGTCTGCTGTTTGCATGATTATGATCTATCTGGAACCTGCGTCTTCT  
GCCTCTCAAATCACTAGAAAGTTGCTAAAAGTCAATTTTGGAGACGGTTTATGCTCTTACCG  
AATATGATTCCACTAAACACGATGCCGTCAAGACCATCGTTTTTTTTAACTCATCGTGGAG  
TGCAGCTTTTGCAGTGGGTTTACCTCAAGGTACAATTCGGTCGTACACGACCGTGCAACA  
AAACATCTTAGTTATTTTAAAGATACACACTTAATCCGTTGTCCTTTACGACTGGGGTTAT  
ATATGTTAGAATAAATATTATGAATGACGCGATGGAGCACCATGAAAATGTGTCCGCATT  
GTGCTGAAGCCGAAACGATCACTATTGCCTTTGAGACAGGTTTAAATTGACGCTGTGACAA  
CCAACCCATGTCTTAAAGTTAAAAGTAAGACAAGACACTATGGAATCCGTAACGGTAATTT  
CAAATAGAAGTCCATTCCATGCTACAATCTCCACCGAAGTGCTAGGTGATTATGCCACTG  
AACTGTTATATATGGCTGAGGACCATATCGACATTGGACCAAACATCTGACCTAAAGTAC  
CATGCACACCAGAAGGTCTTAAGGCATCCTGAGACCTCACCAACCAAGAAGTTAGTCTAA  
ATGTCACAATAGTATTCTCAGCAGCACAATCAATTCTAGCATTAAAGCAGGTGCACCCG  
AGGTTTCTCCTTTTGTAGGGAGAGTATACGATACGTCATCCGATGGAATCCAATTTGTTT  
AGGAGACTGCAGACGTATTTGCCACGCACGCACGTCACACAAAGGATCACACTGCCTCAG  
TTAAGGACGTTCAACAACCTTTCATGTGCCTTAAGAGTATGAGCAGATTTATACACTCTCC  
CTGTTTCTGTTTTGAAGTAGATGTATAATCACATTCCTACAGATAAAGGATTAGGACTGT  
ATGATAAAAATTGGAAGGAATTGCAAGGATCTCTGAATAAATAAATCGTAACTATCCTCC  
CACTCGGAGAGGTCAAATGAGAAAGAATGATCTCGAACCCACAATCTTTAGATTCAAACA  
CGAACGCTATACTGAACATGGCGGGCGCAAGTAATGCCTCGAAAGCAGGTGCAGACTATTC  
ACTCGCAAGATTTCTGCAAATCCTACAGGAATATTACTCGTGAAGTATAGAGGTTTAAAA  
CCATTGATACATGACCTTGACGATGCAGTAGCTGAGCTAAAATATGCGGTTTATCCAGAC  
ATTGGGGCCTAGCGTTTAAAGTAGCGATAATGACAACAACACTAGTTGTTCGTGACATCCAC  
GTCGAAGTCGGACTTTGCGATTGATTGTGAAAATCCCTGGCTATGTGAAGGTACAACCTT  
TACAGCTATCGATATTGGCGATTTCTTCGGTTTACTACAGTGTATACATAAGGTTAA  
TGAGAGATTCTACAGCCGAAGAAAGCAATTGTATGCCTTTAGAACACTGAAGGGAAATAA  
AAGAAAACAATAAGAAGAAACCGATTGGAAGAAATATTTTGTCTCTTGTCTAGAATTA  
AGATGCTATGAAGGTGTAAGGTAAAGGAAGGCTTTATACGAAAGACTATAAGTCTACTGAA  
CTCGAAGGGTCAATGCAATTATGAGGAGACCCGACAAGTATTTTTCAATAATGTTCTTAA  
GGACCCATCAAAGATGAAAGCCCTGCAGCTCACACCTCGAACAAACTTGGCAGCTACAT  
GCTTCAAGATTATTTCAATGCTTGACCACTGCTGGTAACTCTTCTATAATCTCCAGGTAC  
TTAAACGAGGTCTCTTAGGGTCGAAGATTTCAACATTACAGATTTCGATGATCTATATCAT  
GATCGATCAGCGGCATACATGTGCTGAGCTCGAAGAGGAGGAACTTGA AAAACAGTGGGA  
CAGTAGCTCCGCGGACAAAGCAACTACCTTCTAAGGAGTCGGTCGTAGGTTCAACTCATA  
CCTGGCGCTTTCCCTTCGGACTAATCGGTATATACAGGTTAAAAAATACTACAGTATA  
ACGCTTCTCGTCATGTCTGTATATGCTCACGGACTCAGTAGGCCGACAGATTATACTTGA  
CACAGAACATCCTATCATATATAATGAACTAGTAAAATACTATGAGGATAAAAAGTATACA

ACTATACGGTGATGTAGATGAGGATTACGAAATGCTTTTATCCAAACTTGAAATCAATCT  
TTAGTATGAAACGTGAAATCCTTTTACAACGGTATCCATACCGTTATGTGTCTGTTGGAA  
CTGTGCCAAGCAGTCGTTTCATACTATCGTATCCAGAAGGTTACGAATGGAGACAGCGCC  
ACAGAGACATATATCTTCTTGACAATTAAGATCAACAGGGTTATGCAATTGAAGACGCTG  
AATATACCAAATGGTTAGACCATGATCCTGAGCTCACTGCGTACGTCGGAAAAAGGGATG  
TCGTTTCCGCATACAATTGATGAATTCCGAATTGTTATTGAGGATCTACAGAGCAGTGAC  
TAATAACCCTGTTTCTTCTCAACCAATCCATGTGCATATCCTAACATAGGGATGAATGCC  
GTCTTTGCCATTAGACGGTGAAGTACTAGATGGTTTCAGGTGCGAAATCAATTCATAGTCTA  
CTCGTAAAGTGCGCCCTAATGGGTGGTTTTAATTATCTTTTATGTTGACTCTGAAATCTT  
AATATTTCAAACGCTGGACAACCTGTTGAAATTTTATAGATAATTGTAACAGTCCTTAAAA  
AAACTACACAAAATGACAACAAAGACTGCATCAGGCGGACAACATAATATCTATCCAACT  
GAAGTTCGTCTCCATTGATAAGAATATCGAGGATAAGGAAAGAACCCTGAACCTCAC  
AGTGGTTCGTTGGCGATGCTTTGTTAGTTGCGGGTATTTTCTCTTACGTTACCACTGGT  
AACTTCTCTTGGGTGGTTCATCTTGGTGTTTAACCATCGAACTTATCGAAGCAATTATAT  
ACACACAATCAACACACAACAGGCACGCTAGCTGGACACCAGAAGCATAAAGGAGTAAATG  
GTAGGGCAGCAATGCTCGGTTTCGTAGTAGCAGTTGTTGCTTACGTTACAACCTGGTCAA  
TCACTCCAGGTTTTTACTGATGTATTCATCAAAGCAGTAGAAGTAGAATTACAGAAAGA  
AGTTGGTAAGAACTTAACGGTAAATTAGCAATGCTTGGTATTAACGCAGGTATCTGAGC  
TACTTAACAACAGGTCAACTCATTCCAGGTTTCGTATAATGAAACATGGGCGTTTCGAA  
AAGAAATTAACGGCAGACTAGCGAAGATTGGTCAACTCGCAGCGGTAGTGGACCAAGAT  
TGCACAGGTTGGGTGCAACCAGGTTTTTTCTAATGGACTATCACGACGTCACGGACGCGC  
CTAAGAGAGCTATATCTGTACGTTGCATTCCATTCTTATACTTTATTATTTCCACAGATT  
TAACAGAACTGCTGGAATACCTGTCTACGCTCACGGATTTATCTAATGTTAATAGATCA  
ACCAGCGTGGATTCATACAATGTTGTGTCCGTTTATGCCTGTCAAACGCTCTTTGCTGT  
TAGTGTCTCATGCTCGGCGATCTTCTTGGGACGATGATGACGATGATAATCATGCTGC  
CGGAGGAGTAATGACGCCAATTTATAACTATGAACCTCAACGAGCATAAGTACATTACAT  
TCTTAGCATCAGGTGATCACGATGCCACATCCTAGATCACTGTATCAAGATATGGAGAAT  
CCCAACGTGCACTATGCAGAGTTACTATTTGATCCTGGTGCAGAATTAGAGTTTAAAGCA  
AATTGCAGTAACAACAGCATAGTTATAACAACCTAATGAGGAAGCTTGTCTTCTCTTTT  
CAATAAATAATTTTCATGATAGCGTGTAATTTATCATGGCAGCATATACAAACAACACTTC  
GGTATGGGTAGCGACCCGAAGGGCTGACGATTAACTTATTGAGTAGTTGGTTTCACGTAC  
TCCGTGGAACCCAGACAAAACCTATCGCGAGGATTTTTGACGCTCAAGTAGGGGCCTGAAA  
GTTTCTTTAAGAAGGGGCTATGAAAGGTACCGTACGAAAACATTCATGACAATTACTGCA  
TCAGACAAATTACCTTATGATGGATGGTCTGATGACAACCGTTAAAAAGGAACAAAATAC  
ATAGGAACACCTCTTTACGAATCAGGCGATATTTCTATACACCAACAGATGTGTGACATC  
TGAACAAGACATCTGAGTAGAATATGTGCAGCAGAAAAAAGGTATTATTACTCATCTTTA  
TCACTCAACCTATTCGTAAAGATATATTCCTATTAATAAATCAACTGGGTGTGGAAATCC  
TTACCTTTTCTATGTGCACCCGTTAACCAGACTCCTATGGGTTCGGTAAAATACGTCTCTC  
ATATCCTTAAGTGAAGGGATTGATGGAATATGGTATCGATCTACCCTTTGAGCCCTACT  
GAATAATCTCCTATTGACAAGTCTTTCAAGACAAGGCAGCCAAGCCGACTCCTACAAGG  
AATGCCAGAGTTCTGGGAATAGGTAACAAGCACTAAAAACAGACTTTATGTTGGTTGGTT  
CGGTGTCTTAATCATCCCATGTTTATTACCAGCAGCAACATCTTTCATTATTACATTTCT  
TGCCGCAACCTTGTGATATCGACGGAATCAGGGGACCTGTCTCAGGCGCTCTAATACA  
TTGAAGCAACATCATCTCAGGTGCAATTGTTCCATCTTAAAACGTAATTGGTCTACACTT  
CGCCCAAATTTGGGCAGCAGCTACAATCGATGAGTGGGGATATAGTGGGGGTCTAACCA  
GTTGGTAATCTTCCACTTCTAATCGAAATACCTGCCTACATCGGTAGGCAGTGGGAGTT  
ATCAAACAGACTGGGTATGGGTCTTGGATCTGTGTTGCTTGTACAGCTCCAGTATCTGC  
ACCTTTTGCAGTATTAATTGTATATCCACTTGGTCAGGATTGTCGCTCTGAGGGTATTCTG  
TCTAGAAATTTCTGGAACATTCAACGTCATGTTTCGTTTGCCAAGCATAGCACAACATTCT  
TATGCATCCCTTCCATATGGCAGTGGCAATAGGTGTGTTCCGTGGTTCTATATTCTTCGC  
ACTGCATTGTTCACTTGTAAACACCTTCGCTACACGGAATGACCACTGAGGAGGAATCTCT  
GAGCAATTGTTACAAGTTCGGTCAATAACAAGAACCCGATAATATTGTTGCAGTACATGG  
ATACCTCCGTAGCTTAATCTTCCCGAACGCAGGTTTCAAGAAATGAAGAAGTCTTCATTT  
CGTCCGAGCAGTGTGCACAGTTGTATATGTAAGGTTACCTCTATGGGTAGCTGTACCAT  
TGCATGCAACTTGAACGGATTTAATTAGAGCCAATCAGCTGTCGATGTTAACGGCAAGAT  
CATTCTACATGGGGTGTGCTGTTAACAGAGCAAACCTAGGTAGGGAAGAAGTGCATAG  
GCGTAAACGCTCCCAACTTCCCACTAGACGTAGCATCTGGTGAGACTACAGAAGTTGATTT

CAATGCACCGACAATCGGTTTAAATAGTACTTTGGAGCACAAGCACAATGACTAAATTT  
CTCGTAAAATACGTGGGATACTTTTCAATATTTGACTTCATATTCTTCATTGCAATAGGT  
AGGACCTTAAGACCTGTCCTAACCTAATTTAAATAGAGGGGTAAAGACCCCTCTTTTTTTA  
TGGCATTTTAGTATCCATAATGTAGTTTTGGTCGTGTATGAGATCTACCTAACGCGGAAG  
CTGATATAGTACAGACGGCACGATTTGCTGTGTCTGATATTGTGCGTTTAGGAAAACACT  
CTGAACGTGTTGATCCTCTTGATTTGACAGGTTTCTATGATAGTATTCAAGAAGTTATTG  
AGGAGGTGCGCTCCTTCTATAAAGCGTAGAAGATGGAAACAAAGAACGTTACCTGACCGCA  
CTATAGAAAATTACGATTGTTAATGGGAATATCAAGGTGCCCTTGGAGAGACTTATTATA  
ATTGTTGGAATTCTGAAGACGCAAAAAATGAAATTAGGTTAGCTAATGCTTTTTCCCAAC  
AGAAATTATCTCCAACAAGTAGTTCAGAATATCAACGGGATATTAGTATAAGACCTCTAA  
CTGTCTTCGATGCTAACGAAACTATAGTTACAAAAACTGTTTCCGAAGGATCGTCTCCAG  
CCACGTTTACAGTTCAATCTGAGTAGCCATCGACTTCTGAAGCAAATGAATAAGGTCTAT  
GGCCGAACACAGGAGCGAGTACGTTACCTCTCGCCCCTCAAGCATTAAACATATAAACTTC  
ATATCACAGAAGCACTAACTTATGGATTTACCTTGGCTGCTGATGAAACTGAATCTGAAA  
CGATTGGATCAGAGACTACGGCGTACATCAAAAAATAGTAGTGGGATGACTACCACTGGGA  
TTCCTCTACTGCTACACGCTCAATGCGAGTGGGTGTCATACTAGTGACAGTGATATGTA  
CGAATGAAGTAGCTAATCCCCCAAAGATAACTGATGATGAATCTCTTTGGAGAAATAATC  
CTGGTGTATGGTATCTCAAGATATGTAAGGGTGGAGCACGTGGAAGTGCAACCAGTACTT  
CTTGGGTAACCTCAGGTCCCCATCCCCTATGGTCATCATGCATGAATACTTACGCAGTAT  
TCCGACGCGATAATTATCCTTTACAAGGTGCCTCTCAGACAGCAACTTATTGTATAAATA  
TTCCTACAGCATGTAAGTATGATTTTGCATGTCAGGCAAACAACACTGCTGCATTCTCAC  
TGGATGGAACAGAGATTGCGACGTCCCGTTCATATACAACAAGTAGGATCGCTTCACTTT  
CTAACGTGAGTACGGGAATGAATACTTTAGTTGTCTCAGTTACTATAACTACTACGTCTG  
GTAACGTAGCTAATACATGGACAGATAATCCTGGTGGTGTAGCAGGGACAATTTGTCAGT  
CTGGAACTATAATAGCTTCATCTTTACGTTTATCTGCCCCTGCTGACGGAAATCTTTTTT  
GGCACACTAGAAAGGCAACATGATATACATACGCAATCACATAATGGAACCTCCGCAAAAC  
CCCAAAGATCAACTTCGTCAACGGATAAAATAACATATAAGTGACGCTGATGCACACTT  
TGATTTAGTTGTAGATCCTCCGGAATTCCTTGTCTGACCATTAGACACAGATGAATACTT  
TGAACGAAAATATAAAGTGCACAAAGTGTTAATTGAAAACCCTAAACGAACACACGAATA  
CCACAAATCCAAAAGATACAATCCAAGAAGCTAAAAGAAACAGCAAGGACCGCAAGATTG  
ATAAAAATTTGTGGATTAGAGAAGATGATCTTTTTCCAAATGAATCAATAGAAGAGTGA  
AGAAAAAATGGAGGGAAGAAAACACTTGACAGATCCCAAAGAAGGGGTTAGTATAAATAC  
TCGAAGCGAAGGACGCAACGCGAACAAGAGTTCCGAAGGGCTTCACTACTCCCGGTCTGG  
TCCCTACAGCTAAAAGCCTAACAAGAACACGTCGAGTTCTCTACCATCCGTAGGTATAAC  
GCTGCACGAAAATAAGAACAACAATGATTAATCAACCATCGCTGCAGTCGCTGCAGCC  
CCTCTTCTAGGAGCGGGTGCAGCTTTTGTCTGCTACATGTTAACTTAGAAACGACTGGA  
TCATATCCTGATGCAAGATACTCATCCGGGGGTTTAGAACAGTTGTATGATACGAGGGT  
TAGAAATCTGGTGGTAACGGTTGGCACATATCTGGTTCTCTACTGTAACACATGGGGAA  
CTAACTGATGAGTTCGGAGACGTTTAATTAGTAGGATACACTGGTGGATCGAACGCTAAG  
TGCTCCGCAGAAATCTCTGGTGTAACTAAATCAGATGTGACATTGAGTTCACTACTAAG  
GCACGCGTTAAGTTCGTTTTCTAAACGGATATCTATAAGATGAATACAAGGGACTGCATG  
AGTCCGTTTATTATTCGTCTAAACAATTATGATTTTTACCCTTTACACACGAGACCGGTG  
TTCTCAAACCACTGTAACCAACAAGTTTTAGGACGAAAAAATATAAGTATCGGGAATA  
CAGATTAGGGGTAGACTTGTAACGAGAATCATTCTATAATCAATTTGGGGAGGGATCAAC  
TTCCCCTTAGGGTGTATAAGTGCCACCAATCTTGGTGGCCGATTGATACAGTTTCGATA  
CTTTCCTGATTACAACCAATCGGATGGGAGAATTTTACGGTGTGTTGAGTCTCTTATA  
GATGCTGCGTGTGAAAAGAATATGTCTCTCTTGCAACTGTATAAGTCTTTGCCTCACAGC  
AATATTAACGTAATGAATACAAGAGTTCGTTGATAGCCCACCTGCTTAAGGATTAGCA  
TTGACTAATTCTGATCTAGCTGCATAATTCCAGAGTGCGTTTACTGTTATCATCAGTTA  
CTTCGTATAACCAATGGGCATCTCGGTGAACCAAAAAGAAAGGAAAATCACAAAGTACTTG  
TCACAGGTTTTGATCGATGTTCTGAAATACGAATCGTATAAGAGACTAGGTTCGTAGGAAA  
ACCCCTAAATGAGAAAAGCTAAGGGGAGTCCCATTGATATTGCACTTGGAGTATTTTCAA  
CAATTGGTGTTTTTATTCTTGGCTTAACCGTCTCTTGGTTGGCGAAAGGATACCTTGAGG  
ATTATATCGAAAACGCTGCCTATGTAATGCCGTCCAGATCCTGGGATGTTTGATGAAG  
CCGGTGACATGACTCATGATGAACTAACTATAATGGACTAGAATATAGGTTGTTACATC  
ATGAAAATGACGCTGACGATTAGGATTACCACATGATGCCTAAACGATCAATTGAAAACA  
GTAGCTCTAGGGTACTAATTAGTGAGATCCTAAGAAAGGTCGCAAATGCTAAAACCTAACA

AAGGAAAAGTTGAATTGCTGCAGATATACCTCACTCCCGCACTACGTCAACTGTTGATCA  
GCAACATTGATGAGAGCATTCTATCAGAACTCCCCGAAGGTGAGGTTCCATACTCCTA  
CCGATGCCCTGTAGGGTCAGATCGTGCTAGACTTGAACAAGAATAAAGAGGACTATTCA  
GAATCTTCAAAGAGGTAACAATCGTCGCCAGTATTTGAATAGAGAGTCCATGTATCTGC  
AGCTTTTAGAAGGAATGTCTGCTGAGGAAGCAGAACTGTCCGGCTCTATGTAAGGACGGAA  
AGATGGGAGTAAAGTATAAGAGAAACACTAAGGCAATAGTTTCTGAAGCATTGCGATCTA  
TTGAATGGGGTGGCAGAAGTTGAAAGGGGTTTCGAGTTTTCGAAGGAAAATGCACTCCCGA  
TGATGCAAAGATCAATCATTACTATACACCTTGTATTTGATTGCGTATAAGTTAGATGA  
TAAACCCGCGGTTGTAATTGCAATCGCAACAAAAGCTGTATATCTTTTTGCTTCTTACTA  
AGATCTTTAAAAAAGAGCTTTGTAGAGTTTACTCAATCAGAAGGTAGAATTAACCCTAA  
ATTATGGAGCGATCCCACACAGAAGAAAGACAACCGGAACCAAAGATGAGCGTCCACTTT  
GTGCGTAGAAAAGCGCGCGACGCAGAGGAAATGGAAAAGAATGAAGAAGCAGCAAAGCA  
GCTGCTAGATAAGTTCAATTGTTTGTCCAACCTGCAATTGTTATGGCACTATGTAATTGG  
GTGATGCCAGGATTGTTTGGTCTTGCCACTATTTCGATATCTAAAAAATTTTGGATTGTAT  
CTGATGGCTAGGATTTTATTTGGACAGTGTGAACGACGTATGTTTGATATCAGTAACTCC  
TGTTGCAGACAAAGCTATCGGGTGTGTTGCTAGGGTGAGTATTCCGAAACAGCAATATAA  
CCCTGATGTCGGGGGATTACTTAAGAACTGAATTAAGAATAGTCATTGGATCGTCTTTGA  
GCAAGCGTTCATGACTCGAGATATTAAGACTACTAGTGCTCTTGCTCCTCAGGTCCTAAG  
GAATAGGTGGTGCACATATCAAAAACTTCACGGAGGTACGCTGACTTTTCTCTACTTGC  
GGATAGCAACTTTATTCCAGAGCTAAGTCGTCAGGACGAAAAGCTTAGACATAATGGTAT  
TGACGATGTGGATCCATTTATGCAAAGGACCACGAGTTAAAAATGCAAAGGCGTTTTGT  
GTATGTAATGCAACTCTATAAAAAAATGCCTCACTCAGGTATTGCGAAAAAGTGTGCTAG  
GATGATATTGCCTCTAGCAACACAACTTAAACGTATATGAGTGGATCACTTCGCTCATG  
GGTTCCTTTCATTGATCTGCGTTCTGCTAGTCGAACACGGACAGAATTTATGAAAATTGC  
CGAATCATCCAAACAACATCTTATATGTCAGATCCCAACCATCTCCAAGGCATTTGATTG  
GGTTCCTGTTGATGATTGTAAGTCTGTTCTGGTGAAGACGATAACAATGACCTACCATCGTG  
TTCGAGGATAGATTAATGCCTTCTTAACCCGTGATAAACAAAAAATACTGAAGAGAACAAA  
GGACTCCACATGACCATGAAAGAATATGATCAGTGGAGACAAGCTATTCCCTGTAGGGAT  
AAAGACTCGCACGCAGGTGTGGGAGGTATGACCGATGGTCAACATCAGATGGAAGACGGA  
GTCAAACAAGTCATGTCTAAAGTCCAATCATGACATCCTAAAGCCAATCTATCTCGTTTC  
GCATAAGGGCATAAGCAAGAATAGGAACTAACTCTCCTCAAATTTTGCCCAATGGTATGT  
CGGGGTAACATATGCAACGTAAGAAAGCTATCGACTCTTACACTTTACAGAGGTTAAGT  
CTCTGAGAAATAATCAGACACAAGCATTGCTCAGAATGCGGAAGGGAGGAATTTGTTAC  
TGCATGTTGCTCCAGGAAACGTGAGCACTTTCATTACTTTATATCTGGCTTTGCTAGAAG  
TGCTTGACGACAACACTTCGTATGTTAAAAGATAAATTCTAAGGTCTCTAGTTCCTACTA  
GATAGATTGGTTTCCAACACGTGACCATGAAGCAAACCTTCACTGTTTCAGCCTCCAT  
ACAAAGATATGGTAAGATCTCTGTTTATTATGCCTGATGTGCACTTCGTTCAAATGATAT  
GTGATAACTCACGTGCACAAGAAAACATTCGCTTTAGGCTGATACTTATATTCGTGGAG  
TGACTCTTGATTATGCTATTGTTATTATCGATGGGTTGAGTAACTTAAGTTTTGATCCAT  
TGGCTTCTATGATTGCTCGCATAGGCGAAGACTGCAAGATTATCTTCTTGGGTGACATGA  
CCCAGACAGATCTTACATGAGATACTGATAAGTATGCTATCTCAGACTTTATAAAAATTC  
TACAGCAGATTAAGGAGTTTCGATGCATCGCTTTTGATATCAATGATATGGTTCGCTCAG  
GACTTGTCAAGTCTAATCTCTCGTCAAGATATAATCTTGGTTTTTTATGTTTAAAGGCGT  
TCATGTTGGTAATATTTTCAGCGGATGTAGAACCAGTAAAGTAAAGATGGATCACGTATGTA  
TCCTATTCGTGATGCGGATAAATATTATCCTAGCGTAACCACAATCACTGCGTTTAAAGAA  
CGCAGAGTTTTTCAAAGATTGGAGAACCCGCATAGGTGAGGACGAGACGAATCGCATCAG  
TGCTAGAGCATCTCATCGATGCAGGGCATCTCATTACATAGCGGATGATTATGACAAAGG  
TGAATTAACCTTGAAAGATACTTGGAAAATATTCCATTGTCTGTAAGATTGATTCAATC  
AGCAGAGTCTACACTTAACCGAATCGCTAATAGTCATTGACTAGAGTAATTTCTCTATTC  
ACACCATCTAGGATTAGCAGTTCGAGTCGATTGCATTGTTGATTTCGCTGGCGAGTTAGC  
AGAGACCGATATCATTCCGTCTAGTAAAAAAGAAAGATCATATCGAGAGCTAATG  
TTTTCAAGAAACAGCAGCCGGAGCGAGGTTTCTAGAGGGTTCAGGAATTGAGGTCATGAG  
AATTGTCACCCTTAAGGCCACTTAAGATGGATCTTGACACGTATTTGAGTAGTACAATCT  
TGATGACTATGTACAGTTTCGTCAAACCCACATCGAAGAATTTGTTAGGCCCAGACAGGC  
CTCAAGAACCCTTGAGGGTGAAGTTTTTACACCTACCAAATTCGCGCAAGAGATTA AAA  
GGTGATTTAATAGAAGTAAAGGGCTCTTTAGATACCTTGAAGCAGTAGTTACATTCCGCC  
TTGAGAGTTAAGTTGAAGGAGAGACAGATCCCAAACCTGATTTAGAAAATCGATGAAAGAAA



CTATCCGTCACGAAGGACAACATTTGAATTGTATGAAAGCATCTTCTGGAGGACTATGAC  
AACTGTGACAGGGTTTGAAGTGTATAAG

>NewGenomeName\_137

AAGATCATCCGGAGTGCCAAGGAGCAGGTCTAAGTATCCGGTAGTGTACAGCGCTATCTG  
GCTGGGATCGAGATTGAGGCCGAGACTTTTCAAGTATTCTTATCGACGGTATATAGAACGAC  
AAAGTTCTTCCGGCGGTGCGTCAACCTCTGTTCAACGCTGTTGACTCACACACGGAAGCT  
GTTTGCCGTGATAAGCCGAATATCATTACTCCCCGACCGACCTCGAGCCTTTGTACTCC  
GTCCGGGATGGTGGTTCAGGCATGTACTTCGAGATGGTTCGCGCAGCCCTTCATCATGTTG  
AGGACCTCCACTGAGCGAGACTCCAAGGAATTCAGTGGGCCCAAAGGGATCGGCTCTAAG  
GCTCCGTTGACCGTGACCGACATTTTTTCGGTCCCCGCGTTAATAGCGATATGAAGACT  
GTTTACACGATGCATAAGAATGAGGTTATTGAGGGGGTAGTTCCTCTACACGAGTCGAAG  
CCTACAGAGGAAAATGGCGTGGAAATCAAATAAACGTCGATCCTTCTGAGAGCTCCTAA  
TATCGCAAGGCAATCGTGAAGTGCCTGCGGTATGCAAGATTACCGTATGAGATCAATGAT  
GCTTTTGTGACGTCTGAGATCAATGACCGACCCTATGCGGTTTCAGATTCGTTATGAGGAC  
ACAGAAACAGTTTGGATGCTGGGCATGTGCGCGTCCGTATCCC GCAATGCAGACAGCGTG  
GTTGTGATGGGCCAGCAACCTTATGGGCCAACTATCTGTCCAGTAATAAGAACTGGCCT  
ATGATGATGTTCCCTGTTCTTAACGGTAATTGTGACGTGAACCCTGGTCGTGACTGGACC  
ATCGTAGGTAAGAATGACCCTGGTTGCCGGGAGCGCCTCGAAAAGTGTGTGTAGGAAGCT  
TTTTAAAAACGTGGTCCGGAAGTCGTGGAAGAGATTAAGCAGCTACCTACACTGACAGAA  
GTGCCGGCGCTCATGACGCGTGTAGGTGGCGGCTTCTCAACCCGATAAAGGGTCGGCGGT  
GTCGCCGACTAGTTCATGACCCTTTGGGACTTTCAGTATTGACAAGTGAATAACGTAT  
AGTGAGCAGTTTACTCGCCGGGAAACTGACAAGACTTTCGGTTATGCTGACCTTATGAAC  
GGTTCGACACTGCTTTACAACCTATGACGGTAAGTGCATCCCCCCTGATGTAACCTGGCTG  
ACTGAAAACCTGCTTCAAACGTGTCTACGTTACGGAACGTATTGAGGCGATGTAGATCCTG  
AAAGACCCGTTCTGCGGTATAATGGTGCATAAACTTTCCGACCTTGAGAAGCGTCGTGTG  
GGTAGGGGTGAGAAGAAGTTCGGTGGATATGGCATGTACGAAGCTAGGCACACAGTGTGG  
GTCATCGACCAAGATGGTCTATCAAGAGCGGCCGATTGCTCGCGTGGACTATGAGGAT  
TTCGAAACCGCCTTGTGTTACAGTGGTGGACAGGTCCAGGATATGTTTGATTTTGGTGCT  
TTCGTGTATCTGGACCGTAAACAACAGCAAGTGACTTTGCTAAAGAACTTGGGGCTCCAG  
GGCAACATGTAAATAGTGCCTCTGTATCGCAATGGATGGCAACCTGATGCAACAAGGATC  
GTTACCAGAGATGACCTTTATGAACTTGCAAAAACGGAAGCTCATGGAGTATTATCTGAAC  
TAGCGGACCAATTGCAGATCTATGAACCCCAATTGGGGAAGGAGGTTGGTATTTTGGG  
GTTAAAGTTGAAACTGAACCTGAGTATAAGCTTAAAGTAATCATGTCTTATCTGCTTTCG  
CACATCAAGGGAATTTCCGATCTGGAGAAAAAGGCTGAAAGCATTGTGAATGCACGTATG  
CGTATTGGTATACAGCTTTGGGTAGTTAAAGAATATAATTACCCGCTGCTCTGGTATGTT  
GACCTGAAGCACTTCAACACACCAGAGATGAATGTGTACCGACAACCTTATCGAGAGCAA  
GGGAAACTAAATGAGCCAGTTATCCGTATCCCCTAGCGCAGCGCTGATGTTAGCAGCAG  
ACTACGGCTTGAAGGTCACGGACCGTGGTTTGGCTGAGGCTGGACTCGCAACCAGGCGTT  
GGATGATTGTAGCGAAAGACACCCAAGGGGTTTCTAAGCCCCAGAGGTAGATATGAGTT  
TCATCTCGAAGCCAAGTCTGCTCCTGATCCTCACTGCTGCGCATGCCGTGGTGATATCG  
GTGATTGTGCAAAAAGGGCAAAAAGAACGCGAATTTTATTGATCCGGCGAAAACATACGATG  
GTCGTGATAAACACGAGGGTGTGGAGAAAGACATCGGTAAGCAGGGGACGCGCTGGGCCG  
TCGTCTTTGAGGTTTCCGATATGTATATCGAGGCCACTCTAACCTGTTGCCTGGACCAC  
ACTGTGTTCCCTTCGACTTAGGTTATTGAAAAGACCGAAGCTAAGTCGTACCTCGACGAAG  
AGACTGTTGAGAAGCATGAACCAGCGGTCACCATGACTCCAGGCAATGTTTGCATCTGGA  
TGCCTGACGGTACTCAGCACGCCATCAACCGTGACAATGCTATCTTCTTGGAGGTGGGCC  
TATTGCCGATTGGGGGTGCCAGCGAAGGGGCAATCACGTTGAGCAACGCAGGTAAGAAG  
CCATGGCTGAAAAGGCTGTGATCACGGCCAGACCTTTAATTACTCGATGGCGTTCTGT  
ACTGGCACGGTCAGAAACAGGAATGCACCCGTGCTGATCGCATTCTGAACGACATGTATA  
ACGATACTTTAGATGAGAGTGAGCTTAACTTGTTCAGAAAGCTGGTGCACAACCCGTCCT  
ATGCGTCTGTGAAGATACTGTATGACTTTATTCAGCACAAACGGTCATGAGATTCTGATC  
ACGCTGATGTGAAGGCATATATGAAGATCACCATCATAACCGAGGAACCTCGCGATAACT  
ACACACGAAAGGTTCTAACTATAAAGGGCAAATCATTTCATGACTCGAAACATGATGG  
AAGATAACTGTAACCAAACTTGTAGCCAGGGTATGCATATTCCTTCTCTAGAGTAGGATT  
GTGGGCTCGGTGTCAACTGACTGATTGACGTTGCGGGTAACGCTGCTGATGCGGTTTGTG  
TACCTTACGACTACAACCAACCGACGTGCCGATGCAGCCGTTATGAAGTCCTGACAGGTG  
CGGAAAAACAGTTGGTGTGAGCCGGATGTGCTGGTTAGCGGGACGATGGGGGAAGTGCTAG

AAGAGATTTACCTGGAAGAAAAAACTAAGGAGGATTGATGTCAGATTTTGGTGTGGTCGT  
TGAAGCTGCCCGTGGTGTGCTGTCATGTCGGGGCAGAAAGTATTCGTTAGGGGACCCGGTGG  
TAGCTGCAAGAGTGAAAGCATAAAGAGCATGCAATCGCTCTACGCAGGGTCGGTCCTCAC  
AGTAGACCCAACGGGGTCTGCTGCCACTAACTCAGTGAATGACTGCACAACGTGTGTA  
TGGGCTTACAATGGGGGTGCTTACAAAAAGGATCTTGAAGACATTAAGCCGAAAGTGAA  
TCGACAATTGAAGAGTAAAGCGCTAAATATCATCATCATTGATGAGATCAGTATGTTTCAG  
GGCTGATAAATTGTGGGAAATGGATATGAAATGCCGACGCGCTAGAAATTGACCAAATAA  
ACCGTTCGGAGGTCTGAAGATCTGCCTGTTTGGTACTACGACGAAAACCCGCCCGTCT  
CATAGAGACAGAAAAGGAGGCGTATTTCTAGTTCCACTACACAGGAGTGTCTTATTTTTC  
AGATACTTGGAGGGACAACAATCCGTATCCAAGATGACTTGAATAGTTTATCTCCAGTG  
CAGTGTCCGTTTCTCAACGATGCATTATCGTCTGCGCCGTGGACAGCGTATTCAGGAAAT  
TGTTAAATTCATGATCACGCATTGTTATGATCATGGCAAGCTTCTTGATGCCATAACGAA  
CACAACTACAAGTGCTGCTGAGGATAAAGCAAACAAGGAGCGTTTTGATGAGGTCTGTGG  
GTAGCCTAATTTATACAGTGCAGGAGACATCTGGTGAGTTTACTCAAAAACGTGTTCCATA  
TGAGCTTTACCTGAAGGAAGGAGCATAGGTAAGTCCACAGTAGCCTACCGTAAAGCCTT  
TGCTGAGCCAGAGTTAGTCAACGGTTCCTGTTGGAGACTTAATCGATCTACTTACGGATAG  
TGTGAAGGTGCGTTGGGAATTTTGGAGAATAGTTGATGTCGATGTCCATGTTTGAGAGAA  
TGTGGAATGTAAACCAATCAAGCTCAGGACGTCTGATGGTACCACAACCAAGAGATTCA  
GAAGATCACTTTCGGTGAAGACCGTGCTATGCCTATCCGTTTGGGGTGGGCCTTTACAAT  
CTATAAGGCGCAGGGCTTACTTTACCTGAAATGATTATAGACTATCGATATGACGCTTT  
TGCACCCGGTATGTCTTAGGTTGCTATCGGCAGAGTTACACCTGCTAATGAATTAAGACT  
ATTGAACAAGACCAAAGAAAAGGATATTATTGTAGACTAACGCATAGTATGATTTTTTGA  
AGAGCCTTTCCAGGGGATTAGGAGATAAAATTATGGCATCATACTCTCGAAATGAGTTA  
TTTAAGAAGTTCTAAAAGGAACTTGAAGATTAGCACAAACGCCCCAGCCGTACGTGGGGTG  
AAGCCACCGCAGGATACTACATAAATGCAAATGGCCCCCTCATGATGAGATGAGGACAGCA  
TAAGGCTACGTGCCTCGTCGTGTTCCACAATATCCGAACATTACAGCTGGTCGTTTTGGT  
TACCTGTACCTTTCTGGTAATGATTTAAGCTACATGGAAGATTGGCTGTCATACCTCAAT  
AATGCATTGGTCCTTGGTAACCCCATCAGAAGGATTCCATATCATTAAAGCTGCGCTCTT  
CATAACCGTATTGTGCGAGCAGGGAACCTGGAAAACATGATAAAACCCGTTATGCTGGTGGT  
TCAGGATTTAAATCTCTAAAATTAGGGGTGAAATTTTATGACTATTGAAGTTAAACATTT  
TTCTGACCTGAAGAAAGTTTCAACAGAAATAATGTGACACTTGGTGTGATGTGGCTAGAGA  
TAATTATAATGAAGCCCATCGTCACATGACTAAAGCCTTGTGGCATTGTGGTCTATTAA  
AGACTAACTGGAGTTGCGACAATATGCGGAAAAAAATGTTTAACTGGCTGTTTGCAAAGA  
AGGAAGAACCTCATAGTGAAGTTTATGTGTGCGATTTTCGCAAACCGTGAAACAGGGCATG  
ATATAACTCTTCGCATGATTGATGTTGGGGAGTATGCCGAGGCAAGGGGTTTCCCTGCTA  
TTGATCAACAGGCACCGGGGTTTGGCGTCTTGTGGCTGTCAATCTTGAACAATCCTCTA  
TGCAGGGGGAGGTTGATTACCACATGTCTTTTGTGGTTGAGTCTGTACCTTAATTGCAG  
TGGGTCTACCGCAGCTAAGCCTAACCCTACGAAGGTGCACAAGATGAGTAAGTCCTGT  
AAAGTCGAGGCTGAATTCGAGCACATGAACACAGCCGAAGGTGCGGCTACAGTAGAAGCA  
CTTTATACTGTTTCAAGTAGGCGGAGTTTTACACCAAAGAGAATGATTGGGATTACAATAGT  
TTTAAAGGCTTAGTACGCTCTGCTGTTCTAAAAAACGGCACCAAGATCCTCGTTGACATT  
CGCTATGATCTCACGTACCATCGCCTACGTGAGCTTATGAGGAATGCAGAGATCGAAGGT  
TGTTTCCATCGTGAGAAGGAATTCAAATGGAAAAGAGGGAAATGAAAATAGTTAAAAGGA  
TTATGAGGCAGACCCAGATAGAAGAGGCTCAAGAAATTCTGGCAGTTCTCAATTATGAAG  
GTTCTGACATCATGGGGAATAACGAAGCCGAAGGTTGGGTGACTAATCCAATGGTACAAT  
CCGATAAGTCGATAATCGTTGTCTTAATACTGGTGGGGGCCTTACAGCTACTCACCAGT  
TCCAGGTAGTCAATGGTGCACCAGAGGGAGTTCTTCAAGTGAAGGTAGGTCCGAATAATGTG  
GTGGGGAGCATTTCGATGGCTGCGGCACCATGGGGTGTGAGTATGCTAAGAATGGTTTT  
AAAGCATTGAGCTTCGACGTTTATGCTGGTGATTATGATGATTATGAGGTGGTCAGCGTT  
GACCATCCTAATATTACGTATGTCAATTATTGGATCGCTGACGTCTGTGATCCAGAGAAA  
GACGGGATCCCTAAGCCAGATGTTATCTCGGCCTTCCCACCAGGTACGAAAATGGCAGTT  
AGCGGAGCTGATTATTTGCCTCAAAGGCAGGCAAATAACCGTGTGTTTTTCGGTCACAGAC  
AGGAATACAACCTACGGTCGCAGCAATGTTAGGAGAATAGTACGGGTGTCCATACATGCTA  
GAGAACCCTATGAGTGTTTCAGACTTCCAAATGGAGGAGTTTGAACCACATGTACCATCCG  
TATGAACATGGGGGATATCTACCCCATGATGATGTTTCATCCTTTCTTCCCTGAGTGTAAT  
AATCCGCGGAAGTCATAGCCAGATCGAAGTGTCTTTGAACGGGTGATGGTTTTAGAAAT  
CCACCCGCAAAGCCCGTTCCGGTAACGAAGGGTTACTCAGAACAGCATAAAAAGCTCGGA

GGAAAGTCTACCAATACAATGCTGATACATTCTTTAACACCCCGCGGTTTTGAGACTTTA  
ATATTTTTTACCAACCAGTAATTGAGGCTAAGTGTAAGAGTTATTATTAGTTGGGTGTCG  
ATGAGGGCCATCGGCTGGAGATAAACGTATGCTCCTCTACGCTGCCAAAGTGTGGGGCAT  
ATACCCACAGATCAAACGATCCCGTCGCGCGCATTAAAAAGTTACGGAACACCTGTTAG  
TCAAAGTACAGTGCAGGCTAAGGTCTGTAATACTCGTTTACTCCTGCAATGGTGGTTC  
CGAAATGTCTGGAACAGTAAAACCTGTTCTTGCCTGAGCAAATGGTGATCCTTACACGAA  
TGACTTTTTGGTTCGTACAACACCGCAGTCGATAGTACAATCTGGTGTATGTACTTTAACAA  
AGGAACCTTCTTCTTTAAAAACCTATCAGACAATAATTTATCTGCAGGATAACTCTGC  
TTTTGCACAGATCGGCCACTGACACGAATACCGTCGAACCAGTGGAACACATGGCGAT  
TGTTTACAATCGGACCAATCTCCAGTTCTATGTGAACGGACACGTCATTGTGTGCGCAGGG  
ACCTGATGGCGGCGTGAGTACAGCTTCATCATTTGCAAGGGTGATGTGTGGGGTGGGATA  
AGCGAATCTTTTCATGGATCAGTCTCGAAGTTCGGGTGTTGCGAGGTATTCAGGTACTTC  
CTACACTGTACCTCCGCACCTTTGGATATGGATTAGGAGGTAAGTTGAAAAATGTGGCG  
ATCGCAAAGCTTCAACCCTACAAAAGGTTGAGGATAATATGAATATCTATTTTGATACG  
GGATATCACATACAAGGTAGAATTTGTTTCCAGGGTGGTCTTTTTTATTGCTGTTGTTGTT  
AGGCCGTATTGAGGAATGAAAGGGGCGAATGTTCCGGATTGGGACAACATTGTGGACTAC  
CGAGACGGAAAGCGATACTGGAAAGTATACACCTTCTCATGTGCGAAACCACAATTGTCCA  
GCGGCAGGTATTGGCAACGAAGCTGGATCAATATCTCGAAAGGCATATAGCTCAATACGC  
ATTCAAGGGTACAGGTGTTATATTAATGCCATCTTGTGGCTACTTCACCACGGGCCAATC  
CCAATATGTTTGCAGGGTGAGCATATAATATCGTTAAGGGAGACAGGCGGTGTTTCCGAT  
GATCGAAAATCAAATTCGCAACTCCTTACAAGAGGTACAAATAGTCGTGCAGGTGGTGGC  
AACATGCCTAATTCTTCCAACAAGTCTTCTGCTAGAAGAGGTGTTGCTTGGGAGAGCGGG  
TATCCATCAAAGCCTTAGATTGCAAGGATACCGGTAGACGGAAACGTTCCCGTTAAAAAT  
ATTGAGAGTATCAGTGAAGCCTCTCAGCAAAGAGAGTTGTGGGAAAAATAGCATTGCTAT  
GGAGGATTAAGATTAGTTTTTGATTTTTTCGGCTTACCGATAAGGTGGTCAGGAAAACCCGA  
AAGCACAAAGATGTGGTAATAATGGCACTCTTGGAGGAAGAGTGAGTGATCAGCAGGGAG  
AAGAAGAGCCCTTGGAATCCGTAGTCGATGGCACCCGTATTCTGGCAGTTCCTAAATTGA  
GTCTCTCGCTTGATGCAGCGAAGTATGTTAAATTCGGGTCTGCTGTTTCATCAAACGACG  
GTGTAGCCATTACAGCAACATACTAGGCATATTATCATAAGTACGGTAAGCTTACTGGTT  
ACAAGTCACGTGACTGGAACCTTCCAAGCGGACGGAGGGACACTACTCTGAGGTGGTCA  
CTGTGACGGCAGCATCTACGTTCTTTGGTCAGAATGAAGCTGCTATGGTCGCTGGTTCGTA  
AACAGATTTTTGTTCTTGAGGGTGAAGGTGGTGTGATCGCAGGGAGGGAGGCGGGTCCG  
ATTCTGTCATAGCTTTAGCTGCAATCCCCTATGCAACGAAAAGGGTGTAGGATTGGGCGG  
CAAGTGTGCTTACAGGTATCAATTCACGCATGACTGTGGCGAAGTTGTAGGTAATCCGA  
CACTGCCTTTTTGTGGGATTACGCTGTGGCTCAGCTAACGCAGTTGACATCTTCGCTAACG  
ATGAGATGTTTATCCGTGTTTTTCGAAAAAGTACTTTTTGGGCTTGATAACGATGAAGCAA  
CAGGGCTGGAAAAGGAACGAAAAATCAAGAAACCTAAGGTAGCTACAGATGATGTTGCAG  
CATTCTTGATTCAGACATTATCTTTGTAGTTGGTTACCCTATTAAGCGAAACGATCCGG  
CTGGTGTTAAAGATATTCGAGATATGTACGATGCTGGGAAGGGTCCTGAAACAATGAGCA  
TGTTTTCCAAGGCAGAAGACAGGTATGTCCCTGTCTAACCGATCAGTTTAAGCAATCTGA  
CCATTGAGAATCTTCGTAAGAAGAAGAAAGATGGTGTTCATTACCAGGCAAGCATCGAC  
GTTATGAGTTAACTAATGGCCCACGTGCTGGAGAGGTTTGGACTCTAACTGGACCAAGTG  
GGCGGCTTTGACACCCTGGCCCCTTCAAGCAGTAATATATGAAGAAAAGCTGGTGAATTC  
GGTGAACCCCTACCGTGAAGACGGGGCAATACCGAGCGAAGCTGATGAGTCTCTCCTT  
GTAGAAGGAGGGACTATGTAGAACAGTATACAAAATTTTTGATTGAAACGTGGTTTATGAC  
AAATTAGAAGCAAGAGGGAGGAGAGGCTATATTCTAAAACCTTGATAAACTGGCAAATAC  
TCGCGTGTTACCCTGTGCCGGAAGGGCTACTTACTGGGTGGATGGTTCACCGTCTTGTA  
GCTTTTTGCATTTTTGGACCCCTTAGAGGGTTAACATTATGTGAATCACACAGACGCTGAA  
AACGGGGATACCTCAGTTGACAATCTTTAATGGGTAACCCACCGCGAGAATCGAGACCAT  
GCTGTTTTAACAAAGCTTGTTCCTCGTAGTGAGGAAATATGCAGGTTCGACAGTCACAGTG  
AGTGAAGTTCCTCAGATAGCAAAAACCTCCGAAACATCAACTCCAGTAGCAGATGTGGCG  
AGGAGATTCTCCGCACCTTTTCGGATTGTAAAAAGTATTACATACAGAGAACTTGGGCA  
AGGATAACGTCTGAATAGGAATTCTTTTCAGGAAGACCAAACTAAGCCGGCTTTCCGGT  
GAGCGGCACCAGATATACGAACTGCTCAACTTTGGCTGCCCCAGGACAGAGGTTGCTAAG  
ACGTTTTATGTTACTAATCCGACTGTAGTCAACATCAGGAGAGACTTTTGGGAACATGTA  
ACCACCAGACGTGAAGAAGGTAACGGCGTACATCCAAGTGGTTGGATGCGCAAGTGCTCC  
AGAAAGGACGATGATAAACTCAGCTCTGCAGGGAAACGTGCAGCACCCCCCGATACGAGA

TAGGGGTCGGGCACGAAATAATGCACCCTGCTGCACATAAGCACAAGCACAATTTCTCGC  
AAGATCGAGTATGCAATTGTGGATTCTCTTCGCAATATGGATATGCCGCGTCTTGACGTC  
TGCAAGGAGCAAGAGAAGATTGCAATCATCCGTCTTGACGAGGAAGAGGAGGACTCAGTT  
AAGAGCCTGTACGCTGCAGAGTTGCAGGTTGAACCTAAAGCATCTGTTGCAGATCCTGAG  
CAGTTTCTCACTGAAGAAGAAAAAATTTCCATTGACGAACGGTGGATTACTGAGGGCAAT  
ATACAGATCTTTGACCCTTCGGTGTACCCCGATTGATCAGTTGAGTCATAAGCTGAAA  
CACATGGTGTACCTTTAAGGTTGTAAGTGAATTATCCTTGACCACCTGTGCATGGTGATC  
TTCGGTTTTACGTCCGACAATTAAGTCAAGAGATTGGACAATGCCAATACCGAGCTTGCG  
GGATTCTGTAAGCAGTATGATGAGATCATTCTCAGCATTGGCACATGAAGCGAAAGGAG  
CTTCAGTTACCGAAGTCTATAGACGGTAATATGTCCCCTTTCAGGTATCATGTACGTAAA  
GAAGGCCTGCGTTGTTCTGCTGCACCGCAACAGCATTGCTGTATTGTCTTGGGTGTTGAG  
CTAGAGGAGCAACCAGACCTATGTGGTGGTCATGTCCGTGTGGTTGTCAGAAACAACCGC  
CCAGACAATAGACTCGGTGTCGCAGACACCATGAGCATCGTGGTCAACGGACCATTACG  
GATGCGTCTGGTTGGGTAGGGGCAGACGGGATGTTCAAGCCGGACGGGGTAGCCACGCTT  
CGTCCTGAAGGTTTGGTTCATACCGTTCAACCCGATACTCCGGAGGGTGAGGACAATGTA  
CCAGCACTTGTCGTTGGGCATCCGGTGCAACTCTGATCTTCAGCAGACATGGATGAGGCT  
AGACCGTTTTGATGATATATTAACAACCTGCGAGGTAGGTGTCGATGAAGACCAACCCAC  
CACGCATAGGAGAAGCTTGAAGGTTAGTTGCTAATGGACATCGAAGCTGATGGTCTTTT  
AGAGGCAGTAACTAAGTACCACTGAACCCTTCTTAAGGAATACGGTGTTAACAAGTGGAA  
TCTGTTTCTATATCCAGCGCAGCCAGAGTATGAGAGCGCGGTAAGATATGCTAGCAGCAA  
GGCAGACGCCAATCTCACCATCCCCTCATATGACGAGCTTGAGCCGGTTCGTGAAAACCTCG  
CCGTGGTAATGCGTGTACACCCGTTTTTGGTTATGATCTACGACACTGGCAGAAGCTATC  
AGGCATTCAGTACGACATGTTCCGAGACCCTAAGTCTCTGGGGACGATTCGTGATACCCA  
AGTTAAGCTGTCCAATACTTTGTCTATGAGCCGTGTACTTTATCATGGCCGCCACTACC  
AAATGGCTGTCTCGATTGATTTTGAACCCGGTAACCGGGAAACGAGACCATGTTGGTCC  
ACGTGGCCTTATGGCGTGGGGTTTTTCGAGTGTCCAACCTAGAAAGTTCAGATAGATGACTG  
GCGTAAATAGACGCTCTCGGAGTACGTTAACCCTGTGTGGGATGACGTTCTTATCCACGA  
ACTGACGTGGAGAGCAGGTATTGATTAGTCCACTTTTGTCTGTTAGTCCGATGACACGCA  
GTTTATGTACACGGCTAAACCCGAAGGTATTGCGCCAGATTAACCTGGAATAACGCTTTTCG  
TCGCCCTATGCTGATGGATTACCTGAAGATCGAGCAAGAGCTTCAGGGTGTACGTTCAA  
CAAGCATGAGGCGGAACAACCTTCGAGATCACATTGACGTTATGATGAAACACAGCTACGA  
AGACGTGCAATCTTTACGTGTTATGAAGGGGATGGTATAATCTCAACAACCTAAGTTCCC  
GGCTAACGCGTTTGATAGTGATGGTAATAAATCCCACCACGGATAGAAGTGGTTACAGTA  
CAAGCTGTAGTATCCGGTTAACC CGGAGGCGCTGGAGTTAAGGGCCCTCCGAAAACCGC  
TTTCAAAGTATTGGTGAGGTC ACTGCGGCCGGAGAAAGATGCTGCATACAGA ACTGTGT  
TGACGACCCTATGCACTTTGGGGATTTTCGTGCGGATACAAAGGAATAAATGGAATACCCG  
GGTGCCTCTGTACCTGACCTGAAGGAGAAGGCCAAGGAGGATTTTAGGAATGGTAAGAT  
GCCTGACCAGATTGTCCCGCTGAGGATCTCGAACCCAGGACTACATCAAGAAGTACCTGAT  
CCGCAATGGGGACTGAAAACCTACCATGTGGCATGTTAAAGATCTGACCAAAGAACCGTG  
CAAAAAAGCGAGA ACTGACCCGGAGATTGACCAATTAGTCAGCAAGTGCATTGAGGGGGCG  
TGGTGAATCAGCCTATAAGTCTTTGATTATAGGGTAGTTAAGAAACACAGACGACAAGAA  
CAACATCTCAGAGCGCTAGTTTGATCATCGGCACGCGTCTGACAAGGCGTATGCGGACAT  
CTTCAAGAAGTTCGGCGCAAAGCTCGTCAGTTACCATCCTCACCACA ACTGGAGTATAA  
CTTCGAAAAGCTATCTCCGAACGTCGAACGTCATCATATGCACTTGGCAAATAACATCGT  
TTAGTCGTTGTC ACTGCGTAACCGTCGCTCAGTCCTCGACGCGAACAAGGATGTTAAGAA  
TGACTCATGTTTGCTATAACCATTCTCGCCTTGAGATTGATGGGAAGCTTCTGCCCATT  
TTCTGGAATCACCAACACCCGGGCGTTGCAACCACACCATTTGTGCACACATGCCTAAGAC  
AGATCCGAAGGAGCTGCTCGGTAAGAAATGCGAGGATTGTGGGTGTTACGGACGCGTA  
TGATCAGGTCGGTATCGAGGGCTACAACCTAGAGGGCATGACCGCCGCACGGGGTGATA  
CCAGTTCGATGGCGATGAATAATTCGGGATCATGAAGGTCGGAGACGCTCACTCACGCAA  
CCCTGGAGCGTACACCAAAGCTTCAGGAACCCTTGTTACACGTAACGGCGGTAAGGTGT  
AACTGACAGTGT CATGTTTCGGTGTAGGGCGGTGGAGATTGCCGCGATGTTCAAGATCTC  
CCTTGACAAAGCTCACGCGGTAATTGAGGCTTTGTGGGATAGCAACCTCTATTTGAAAGG  
TCGTAAAGAATCTCTGGAGAACTTCTTGAAGGCACAGGGAAGCGTTATATTCCTGGATT  
GGAGGATCGTAGGCTTTGGACCAGTTATAAGCACCCGATAGGGAATGCTTACATGCAGAC  
CGGCGGTGCTTCACTGTTTGACCTTGTGGCAGTCTCCTACACTTGGAAATTGGTGAGGCG  
TGCGTGGTATGACGTGGTTGAACTTCGCCCGATCTCCACCATAACGTAACACTGTGGCTT

TGTGAGGTCACATAACATCGAATAACTCTTTTATTTGTCGGGAAGGCTATGGCTGAGAGTT  
GTGGTAGACTGTTATATGATGCGCACCCGGAGCGAAGCTTGTGAGGAATTTGGGAGACCA  
GAACGATTAGAGACGAATTCCTTCAAACAATCCAGCTATATGCGAGAAGATACATGACA  
ACTACCAAAAAGAATCGAAACATGCTACTGGCCGTTCCACTACTCGATGGATTGGTATGC  
AAGCATGGTCATCCCGTAGTGTGGCACTCTATCCACCAAAAATAGAACACATTGGTGAAA  
TATGATAAGATTAAGAAATTTTGTCCACTTGGAAATTTTAAACCGGAAAACCGCTTGGGT  
AATGAACAGGTGGGGATTAGAACTAAAATTTTACCTTTCCTAAAATTACTTCGTCGTATT  
TAGTATCCTGAAGGTAACACATTCTTCAGAGGGAGATTACAACCTGAGACTTGGGCCACAG  
CACTTGGCGAAATTGTGGATGGACGATGGAAGTGTAACGACCCTGACGAATTAGAAGGAT  
GTTAAGTCCTCCTCCCGATATACGTTAAGTCTTTGGACTAGCATAGAGGGTTGTTTGCTA  
GTTGCTGTCAGGATATAATGTCTTAATGGCGTATGCCCTTGGACAAAAGGTGTCAGGGGA  
GGCAAAAAGTTCCCTTTCTGTATTAGAACAGGGGGGGGGAGGATTTTLAGCCAAGTACTA  
CGACCATCCATGTGAAAAAGCATGATGTATAAGGTGCGCCAAGATTACTTCTGGGTAAAC  
CGAACAAAGTGGCTTTGAAAAAGAGAGCATTCCCCGTGTATCAATAGATAGTCCGATCGTA  
CGTGAAATCGTATGGCAACACGAAATGGTGTGGGCGATATAAATAACCTCGCTAAACTTT  
TGGATGAACACCAGCTCGAGGTTCTAAGAAAACTTTAAGAAGTGGGCGTGTGGTACAC  
TGGCCGGGGCTAAAGCTTTCTGTGCAATAATGGGAAGCACAAGGCCGCGGAGACGACGGGC  
ATGAGTGGAGAAAGGCGGTAAAAGACGACAATGGTTAAAATGTCAATAATGCCGAACGGA  
CTCGGGTATATGAGGGCCTCTTTGGTGATGATGGGAAGATACACATTCATTAGTGCCCTG  
TTGGTGAGATGGTTGTGAAATCTGTACAGAAAGGTGCCTGTATGATGGGTTCTCCCATGC  
ATATCACAGGTACTTACTCCATGGGTAAAAGTGGGCTGAGTTTCACTAAATTTAAAGGG  
GCAGAAGCCCCAGTTCTTGGATACTATAAAAGTATGAGTTGATTCTTGCTTAAAGCGACA  
CAAAGAAATCTAGTCATGTTGGTAAAGTGCAATACACCAACATATCTTCTCCCAACAT  
CATGGACTGTCCCTGCCCATGTCTAGGAGGTCACCTTACTTCGTGTGGGTCAAGGAGATG  
CAGCACAAACGAAGCCGCTGCCAAGACGTGGAGGTGCGAGTGGCGACTTGGTATGGAGTC  
ACAACATCCTAGTTTTTCCGGGAGAGATTTTCCAAGTGTTTTCGCAAAATAGTGCAGAGG  
GGATGACGCTTCTACGTTTGTTCATGGTTCTGGACCACTAGTGGCTGCTTTTTTCCGGT  
CAGCACCTGCCCGTACACCGGACTATACCCAGAAGTGGGTGAGCCAGTGATAAATAACG  
GCAGCGCGGGTGGGAATAACCTCAGCCAATGATATAAAACGTCGTAGTGGCTCAGGTG  
GTGCCGCATGGTGTATGCGATAAGGTTCTAATGGCCGGTCACGCATACCTAGCATCAATAA  
TGTAATTTCAAGGCCAGGGTTGTCAGGGAGGCGGTGGCGCGGGCTCATGTGGTTATTACT  
TCTCTGGTTCCACATCTGGGGAGGACTACAGGGCCGGTGGCGGTGTCGTAACCCATGGCG  
TTGGGGACAATAGTCATGGAGGTAGAGGTGGATAAACAGCAACAATAGCAAGCGGCGGGT  
CTGAGAGAGCAGACCCTAGAGGTGCGCCGGGGTGATAATTTGGGGGTGGGGCTGGACACG  
GATCTTCTAGCTCACCTAGTTCTTCAGCGGGGTGGAAAATCTGGGGAAATGCTGGAAATA  
GCGAATTCCCAAACAATGCCCGAAAGGTATAAATAACTAAGAGGAGGATGTATGATTAAA  
GAAGGTCCGTTGGTTACATTGAAACCATGTGGCCCTGCCATAGTTGTTGAGCGTATCTTT  
AAAAGACCGCTGACCTCCGACGGGGTAATCAGAGTCCTTAAATCTGCTGCCTGCGCATCG  
ATGAACGAAAGCGATGTGAAAGACGTGGATGCCTTTGTTTTCCCATAGTTTTAAATTATC  
GGAGAGTGATAAGTAAGTAAAAGGCGGGCAAACAACGGTGGAAACCGTGAACGTGGGACT  
AAGCGATGCTGCGTTCAAGTCATTTGTTTATCGTGAGACGATTGATTATCTTGCAGATGC  
TGTGTGGGAAAACTTTTGTACCGCCTCCTCCAGAACTTGCCACCGAAGTTTTACGTTAA  
ATGGACGAGCAGGGAAAGTTACCGCTCTGGGTCTACAGGTACACTAGCGCTGGTGCAAGT  
CGAAGTAGAGTGGAATTACGCCAACCATGTTGGACAGGACCAGGAAGTTGGTTTATTGAC  
TGCAGAGGAATGGGAACTTTACTAAGAGGTTTGTAAATATCTCCAAGGTAATTAATACTT  
GCAAAAATAACAAAAAAGTCCCTTAACTTCATGGTTGAGGGGCTTTACTTTTAGGCGACA  
TAAATAACCTGGAGGGTGGTGCATGTTGCAAGCAATAAATTATTTAGTAGGTAGCTTGG  
GGCCTTGACATGTGTGTGGTGTGGCTTTAGCGCTGTCTTTTCAAAAAATCAAACACACCG  
CGCGGTCTACGTGGTTCATGAAGTAATCAATGCTTGATTTACGGTGCATATCCACAGTAT  
CGGTTTATGCAAATTCACATGCCTTGGGGTAGACCCTTGGTGATTGGCGGATTTATGGTG  
TTTGCGGTGTTTATTGTTGTTGACATCGCAATAACGTCAGCCACAATTGTAAGCTTAAC  
GGTGAACAGCGCCTCGCAAACAGTGCTGATGGAGTTGTCGCTGAGAACAAGGCGATCTGC  
GACGGTGATTGCGTGAAGTGGTCTCGTTACTAACCCTGAATAAATACTCACAAAAGGAGA  
TACAAATGATAAAAATTGACGATTGCTCTGCTGGCTATGGAGTTTGTGCAACCGCCCATG  
CGGACGAAGATGATGAGTTCAGATCGTCCCTATGTGAAAGGTTGAGGAGTGCTACAAAA  
TCGAGCATTCTCTCTGATTATTTGGTCTCGTAAGATGGATAGTAGGGGAGAGAGCTGTA  
TAGACACGGTCATCCCTAAATAGGTTGGTCAGGTGGGGAATGTACTTTGCGAAGATTCTC

GCTGGTATCAGGGGTCAGCTATCAACACGACCAAAAAATCTGTGACCCGTGTGGCAATAG  
TCTACCACTATCAGTAGGGGAAGTCATGAAATAGATTTTCCCTGCCCCAGCTCGCACT  
TTCTTGCTCTGTACATGCTACAGAGTGCTATACCGATACCTTGGCAAAGGGATCGGAGA  
CCCAGGCAATGCTGACGCGATGGATTCGCAAAGCATGGTCTAGAAAGAGCAAAGGCTAA  
GATACCTGTGGCAGAACATGAAATAAACATTTTCAGAGTTTCAAGTGGCGCCTTCAAAAAT  
GGAAAACCAGATGAATATCCTCACAACGCTGTTGAAGAAGTGGAGAATAGAAAATGACT  
ATGACTCGTGGCCTTATTTTCAGAAAACCTTGCACCGGTGACCAACGGGCATGTAGCATT  
CTTCGCCAGGGCGGCTTCTCAGGCGAGTAGCCGGTATCTGTTTCATGTCATATGACCAGAAA  
TTGGTTGACGCACGACCAGAGTGTATTGGTCCAAAGTTGGGACTTGTTCGATCGCTATCGT  
GACTTGCTGGATGTTAATACCGATGAGGGTCTGGATAACGTGAAGGTTGACTAGGTTGAT  
GAGTCGAATATACCCGGAAACCCTCAAGGAGCAGCTGATTATGCAAAAACCTGATCCGTAAA  
AAGCACCTATTGTTAACTACGACTTTGCCTTCTATTCTGAGCTGGAGTACGAATCTTAC  
TTCAGTGCGGTCTTCCACGCAGCGAAGCTTGTGTTATCGACTGAGAACGTAAACCTGTT  
TCTATTTTTGCTACTATGATTCTTACCGGCCGGTACAACAATTTCCATAACCTGGCATTG  
CCTCCACGGAAACTCTTCATGTAAAAGGTCGCCGTTGTTGGTGTGACAGCACTGTTAAA  
ACGACCTTGACACAACACTTGGCATACAAATACGGTTCACCTTGTACTCCTGAGATTGGA  
AGACTGAATTGCAAGTGTGTGTATAACTCGAGTGAGGTTGCGATGAGTCGTGAGGATTAC  
CTACGTGTCGCAATGGAGCGTCTCCTGTAAGAGATGGAGGTGGCTGGTTGGGGTCCACCGT  
AGGGTACTGTTCTTCGCCACCACAAATCTGATCACACACTTTTGTGGAGTTCGTGCAAAT  
AAAATCTCAAACCTGCGGCCAGTAGTTACGGACACTGAGCCTCGATGAGAGCTACAACGTT  
TACGATCTGCTCCTGTTCCCTCACACCAGAGGTTCCGTGGGTTTTCTGATCCTCCACGTTG  
CAGGATGTCCAAGAACAGGGAAAAGAGACGCATTCTTAGATTTACAAAATGATCTGGGCA  
TCTTAGGAGACAAGCAAGGTGGTGGTCTTCTCCGGCAATGAATACGAACAGCGTACTCAA  
AAAGACGAAGAAGCGGTACGTAAATTCTGAATACCCAAGGAGAATATGCTGAACGTAAC  
TAATTCACGCATGAAGCAGGCTATTGGTTTTCTGAAAATTATTTTAGGAAAGGCTTCCGA  
GTTGGCTCAAGGGCTTCCGGCGAACGCTAACTGTCGTGAGCAAGGCTTCTCTATAACCAA  
ATGGAATCACAAGTGTGATAATGACCTTTCGAGGCGAGTCTCTATCAGCGAGTGTGTA  
CAGTATTAATATGATTGTGTACTGGGGCAGACCATGAACTTCAACTCCCACACGAATGT  
GGTTGACTACGAAACGTATCTGTCTCCTCGCAAATACTTTGGTTATGAGGAGTATGACGA  
AGCGGCAGACTGGATCATCGCGCACCTGAAAGGTGACTTAGATGGATCAAACATAACAGG  
TTTTGGTCTGGAAATCCCAAGAAGGTAATCATTTCGGATCACCCATATGTCTGAAGAGC  
ATTTACTGAATGCAATCATCTGGCTACTGTCAGCCTCGTGTGTTGTTGCCAAAACAGAAA  
CTGTGCCGATAACAACGTGGGTAGAAGCAACGGCTGTTGAGTTAAACGGCCAGATGGATG  
GTAAGGGCAAAGGTTCTTAACTTTTACCATTTTGGTAAGGCTATCCCAGAAGGTGGGGT  
TACAACGGCCGCACCCTGAAGAAAATTAACCGGGTGGGTGATAAGCTAGCCCACCCATTC  
CCGGTTGAGAGAGGTGGTGGGAATCGTGATGAGGTCATAAAAACCTAACGTGGGTGGTTG  
AGGGAGAAGCTCCAGAAAGGAGAAATTACTTTGCAATGGCTTGTGCTTGGACGGGAAA  
GTCCTTGTATGCTTTTGTTCAGCGAAGAGATCTCACTGTGATATACTCACGGCCGCAATG  
GAATGGACCGAGGGCATGGTTACAAAGTGAGTTTGAGAAAAGATCACACTTATATCCAGA  
TATATAATAGGAAGGCTGGACGTAGCTCCCTTGCATCTCAGATGATGCCGGAGGTTATC  
GACTCGTAGGTTCCAAGATAACTGGTCAACCGATAGCCACTTTTGCATTTATGTTTAAA  
AACATATGATCGCAGTAAAAAATCACCAATGAGAATAACATCGTTTATGGTAGAGATAGA  
AACGTCTCAAATTCTCCCGGTCAGATTTACAAGTGGGTAGATGGCAGACAGGCTTTAGAA  
TGGAGAAGCCCTTGCTATGAACGGTGGATAGTGATCTTGTGCAGATGTTACTCAAAGCAA  
ATGCACAAAAGACAGCCTACCTATGCGGGATGCCAAGTGCCGCATGACTGGTTAAGGATT  
TCAGTCTTCAAAGAGTGGGTTACTCAACAAACCCCGCACGACCAGTGGCTGAATAAGGAA  
GGTGATCTCCAATTTGACAAAGACATTGTTTTGGAGTGAAACAGAAATTACACTCCTGAA  
GCTTGTGCGTTCGTTCCATTATACATAAATACCGCATTCGCCTATTGTAAGAACAGCGGC  
CTAACAATGGCGGTAACCAAAAAGTACAGCAGGATGGTCTGTGAGGCAGGGTGCAAGGTG  
GACGGGAAGAGAAAATACCTGGGGGTGCGAGCAACCTCCCTTGCTGCTCATGCATTATAG  
CAAAGCAAAGGCTGAAACTCTTTAATCAGTGATCGAGGTAACGCCTCCTCTAAAATT  
TATAATGAGCTTACTGCGAAAGACCTGCAAAAATGAGTTGACAGAAACCTAAGCGACCTC  
CAAATGGAGAGGGAACAACCTACTTGTGAGGATAAAAAGATTACACGAAGAATCTATACG  
TGAGAACAACCTGGACCGACTTTTATGAAGGGTCGAAAATTGTATATCTGTAGCTGTGCC  
TCAGTTCAGCCTCCATCCCTCCGGTGTGATCACCATGGGCGGTGGGTTTTATTGCATTTA  
TGTCCTCTGTGACAGGTATTATTGGAGTGATCCTTGTGCAAAGGTAACCTTCCAATT  
ATTATTTGGGCTATGTGGCGACAGTATTGTACGCACACATCTCCTTACGTACAAACTCG

ACGCTGAAACGAATAATTACCCTCTGCCAGTCACTCTGTTGCAGGTGTTAGCTGGGATTA  
GCTGCGCGAACAACCGGACGGTCTTTGGAGACGGTGAACGTGCGGATGCTATCAAAGAGT  
ACCTCACCACAAAGCTGCCGTGGTTGGTTGGGATTCTAACGTTGGTTGTGATCGCCTTGT  
ATGCAGAAATTTTAAGCCTTCTCAATGAAAGTATCCCTTGACTGGATGCCGTAACAGCGA  
ACCTCCCTGTTCTGGCAAGCTATCTGATGATGTTACGTTAAGCAGAACAGTCGTATGTGT  
GGATCATTGTGATTATAGTCGCCCTCACTTTGTGGATTCAGACAGGACTCCACCTTGAAG  
CTCAGGGGCGGGCAGTACTTGCAATGTGGATCAATTTCCGATTAAACTCTATCTATGATG  
CCTACAGATGATGGAAACACGAAGGAAGTCTGTAATGAGTGGACTTTGAGAATCGTAGAC  
GGTTCACAATAAATGGGTGGCGGGTACTGCCCTTTATACGACGATGTTTCGTTTGGGCCAA  
CGTCCTAAATTTTCATGAAAACATGGAAGAATAAAGTCATGGCATATTTAATGCTGGTTGT  
GGTCGTTGGTACGCTATTTATTGCCTTGTCAAGTTAGATAGTAGGTTATCGCATGTATAC  
AAATGACTGGACCACTTGCGCACAATCCGACGCTGTGGCATCATTCTATGTGTTTCGATGC  
ACAGAAAGATCGGTGATTTAGACCAGTGCTGGGGCTTGCACCTGTAGATGAGATGCAAGT  
GACGACCTTTACACCTAAACAAACTTAGAAAGGCGAATGGCTAGGAAATCTGAGCGAACA  
GGTAAAAATTATGTAGAAATGCACGAAGCCATTTACGCCAGTATGTAAACCGGAAAGAG  
CAATAGGTGATGAAATACTTCAAGCAGGATTTTGTATATCTTTATGTAGATTATACTAAT  
GCATCCAGTTTCCATAAAGCCTTCCGTCAGGGCGATTCCCTGTAATTAGGGTTAACAGAT  
ATCGTTCACTTGGGCCTGATTCCAGGTGGCGAATTGACCACCATCTGGTCTTTCCTGGAG  
GAGTCTTATCCGTAAACGTTTTAAGTGGCTACTGAGCCTGGTTAGCTCAAACCTCATAGA  
GACCATTGGCAGTGGTAACACCATCACAGGGATACAGACCGCATTAGTCCATGATCTGAA  
GGGACGTGACCCAGAGGGGGATTATAAGTACGAGCTTAAACCCCTGACTGGAAATGAGAT  
CAGGGTTATTGCTAAAAAGGAACTGGCAGATGTAGGAGCTAAAAAACTGCTAACAGAGGG  
CCGAGATCATCTGCTCCAAGAGATAATGGAAGATTTGGATCGGCACAGTAGGAACCGTAG  
CCCCTCCCGCCACCTGCAACCCGACGTCCCTGCCTGGTTGAGCATGATGATTCTCTTGC  
ACGACAGAGACGCAGTGAAACGGGTTACAGTCGTGATGATGACGATAGCATTGTAATCAG  
CGTTTTTGTAGCGTCTGCTGTTTATCACTCGCCACGTGGTGACGATCGTGGAAGTTATAG  
CAGAGGCAGATGTGACACCGGCATTTCTTCAGGAGGATGTGATTGAAAATAACAAAAACG  
TTTTTTTGTTC AATCGGTCATTCCACGACCTCAGTCATAGAGCACATTGTACCGACGAGT  
GCTCGTGCAAAATGTGATGTAAAAGCCAAATAAGTAATGGGACTGGACGGTGGTAATGTG  
GTCACAGAAACAACATATTGGAGCTTCCCAACGTGGATGGATGATCCTATTATTAACCTT  
TTATATGGAATAAAGCAGTTCCTATAATCAAATTTTTTCGGCGCTGGCGCTTTGATTCA  
TAGACTTGAAACTGTACGGAGATATTGCATGGTCAAGGTGGTGGGTCTGGGCATAACTCT  
ACCTTCCGTTTCGCAAATTGGGTAGCGATCATAATTTTGTTTTTTCGACAGTGTCTTTGGTG  
TTCCAGGGGCGTCTGCTCTTATGGAGAAAATCAAATTGAGTAAGAAAAGATCACTCTAAC  
TGTTAGCATAACATAGTTGAAAGTGGTAATCTACCCCTTCACTCACAAACGGAGGATTGAT  
GACTGAGGCAGTACCCCTATCGCAACCCACTCAGGAGAAGAAAACTTTTCTCCGCGA  
ACTCGACGAAGGTGAGTGTGCAACGAATGTTCTTCTTAACAGTGACAGGGCACTGATGAA  
TCAGTTCATCGGCTCAGAGCGTATGCGTGATGCAATGCTGACGGTTCGTCGAAAGCTGCAA  
CATCACTACTGTGGAAGAAGCTCTTGCATCGATGCGTGGACACCACAAGAACCTCCTGCA  
ATTAACGGTTCATCATCTTTGGCCCTGAATCAACTTAGTCAAGTTCGAAAATCTAGTGAT  
CGATAGACTGTTGGGTGTTTACAGTGATAGCCAACAAGAAGAACTACCAAATAGGACAG  
AGAATGAGCGGAATTAACGAATTCAAAGATCGGATGACGGGCAATGTAAACCCCTTCGCA  
GAGCGCAGCACCAAATTCAACAGCAGCAAACCTGTTAAGAATACAGATCCTGATTGAGTG  
AAACGTACCCACATCCCAGCGCGAAACGGTCCGCTGCAAAGGTGATTGAATGACCCGAT  
ACCCACAGATTGTTTATGCAAGAGGTGGACGAGAATTACAGCGTTAGTGCTCCCCAAAGC  
CAGGGTCAGTGCAAAGGCATGGTGGACAAGAAGCTACATGCAAGCCACCCCGACAAAATG  
CAGGTCACGTTGGACTGTGGTTATAAAGACATTCTGCCAGGTATGTTTGCATCTTTCCCG  
CTGAAAGTGAGCACGAACGGCGATAAGCCCTATGTCAAAGGCTCTCTGAGTGTCAAGCCT  
TTAAACATTCAGGACGAAAGCAAAGCATGTCAACATGCTCCACGTCTGCAGCCGCAGCAA  
AGTGACCAAGATCAACAGTCGGGTGGTGGGGTGAAAGTTTTCGGCGGATATCACCGCTATT  
GTAGGGGATCTGGCGATTCTAAATGATGTGAGAAACGGCCCTGGTCGTGTTGTTCTGTGCG  
GATTCGCAACTGCCGAGATAACCGTTTCTGGTCGCCTGACAGCCTTTGTAAATCTTGCT  
GATGGCACAGTCTCAACGTCTTTAAAGCTTACGCAGCAGGAGGTTCGAGGACTTGGCCCA  
GGTGGTTAGAAGTCTGGTGGCAATTATGAACCTAGTGTGTTGATCTTGTGGTACCGTGGG  
ACCGGCCTTAAGGAATCGATGGGTGCAAGGTACAAAGTGGAGGATGAACTTGAGGCAGTT  
AAAGCCATTTATCGTGCAGCTGTAGGCATGAAGTCTTTCGTTGCGGCGCTTACTGGTAAA  
GATGATGACTTAAATGCTGGCGGAGCAAGTGCAGGTAGTGCAATTCTTGTTCATCTAGC

TGATTTAAAGCCAAATCGGAAGTAACTAAGGCAACGATCCTGGAAAGCCCCAACAAACGTG  
TATGTGACGCTCTCTAAGCCGGTGTATGGCTTCTTGACAACCGATGTCATGCCTGCGGAT  
GAAATTCAAACCTCAGACTTCTCGGCAGTCTTTGAGCGGCACTGGAGAAGTACCCACTATG  
GATGCTTTTGATCCTCCGATGGACTTTTACAACGATATACCTTTGCCCAATCGGCCTG  
CAAGATGGTAACAACCTTGATCCATTGCATTTAATAAATAGAGAAGGGCGCCTTTCGGATCC  
TTCTTGGTTTATTGCGGTTGAGCAGATAGAAACGGTTAGCCTGGGTCCAAAGGATCTGGT  
AGGCCTGAGAAGTCTGACACACAGACACACGAATCGTCAAATGCTCAAACCTCATCCTCC  
CAGTAAATAAGATAAACATGACAACGGGCATCACCGACCGCAATATAGGAAAGGAACGCT  
CCCTCATCAAGCCGCATCATATCCGGATTTGTAGTTCTTAATTCTCCGTCTATGAAGTTA  
GTATGAACAATGGATTGAGACTTTTCCAATCCGACACCGTTGGGATTTGGTGTATAGTCA  
GGACTGTTTTTATCCATGAACACGAAGACGTCACCAACTTCATTTTGCGGGATGGAATCG  
GTACGCACAGACAAGATGAAAACATAACCGCCAGAAGTATCTGTGAGTGATTGAGGATCC  
GGGCCAGACCCTGTTTAAAGTAGTCATTGTGATGTAAAAACGACCCTCTTAAAGGAAGGTC  
ATGATACCACTTGAGACTACAGTTGAGTTCTCAGGAGTACTCGATGTGAACGAAATATCA  
TAAATGTCAGCATCTGCTGGCTCAACAGTCCACGTAAGTCGACTTGTGCGAGCCTTTGATG  
CCGTATGGGATAGACCCTGTGGTGTATTGCATCCGCAGTTGTCCCCCAAACGATGCTTCT  
GGGATGTTAGGGAATTCACCAGTGCTATCGGTTGGCCCGAAGGAACCATAAAGGTTGCCA  
GCGTAATGAAGGTTCCCCTCATAACCATCCAAAGGCTGATAGGGTTCCCTTGGTTAAGG  
ACATCTGTCTTCAACTATAACAATGGATGTCAGCTTCGCAAGTTGTCAATCCCTTCTGTGA  
GGAGCTGTAACCTGGGTTGGTTCTAACACCATTGTTGATGGTGTGCCACGGCCAAGTTGA  
GCAGTTAGGTCAACAAGACCGTAACGCTTGTATCAAGAATCAGGAAATGCGACGGGCCA  
CCGTCGATAACCCTGATTGTCTCCAAAGGACCAATACCCTCTTTTTTAGAGTACTGATCT  
GTCCCGATACCCTCGTATATAAACAGTGCTGTTTATCATCAACACCTGTAGATGCGTTA  
GCCATTGAGTTTCTTTCGTTTCGCAAACCTCTGTTGAACATAGACGGTTTCAGTCACAGAG  
GCAATGCTATCATCGATAAAGTTTTGTGTTTTGTGGTGTGAAGTACCATCTATCTGATGA  
GTGGCCCGAAAAACACGCCGTAGTCTAATATTGTTGAGGTGTGTCCCGCAAGCACGCAAG  
CTGTACGCTCTCACAGGGGATGCACTAATACTTCTTGGGATCGATATACCGGTAGTAGTA  
CCAGAGCCAAGACATCCATGTGTGTTTGACCTGCACCATAAAGTCTTCCATCTACCACC  
TGCCAGAGTGTGCTACGGTGAGCACAAGAACTCTGTGTAGATTGGCGAGGGGATACTGTG  
CCTGTGATTGATGACGGGAAGCTCGACCAAGCAGATATGATATACCATAACCAGTGAAT  
TGACTGGAGTCCACACATTACTGCTAGCCACTATGGTTCTCTTTGACAACAAAGTCTCTA  
CCACCCCAAAAAAATCAGCAACACCATTAGCCGCCAAGTGCCTATGGTCCTTGAACGAG  
CTTATGGTCGCGTTTTCGCGATTCAAACCTACGCGTTATCCCCTTTGGTATAGAGTATCCGG  
TCAATCAGGAGGAGCGCCATTCATCTTTTCGGAGCACACCAGCCAGATCACGGGTAAAG  
TCCACCCTCTTATCTCTACCAGGGTGGGAGGGGTTCTGTCCCTCCTCCAGAAAATGTGCGAG  
AAGAGTCCAGGATTAGGATACATTCAAACCTCCCCAAACCAAGGCTGTCCGAAGACAGCC  
TTGAATCATTTCTGACGACGAACAATTATCATGTGATAAGACCGGGTTCAACGCCCTCA  
TAGATCAATTGAGGAATAGTCACCAAATCAACCGTCTAGTTAATTGTTTCGCTGGATAAA  
ACGAAGTAGTTACGATCTAAAGTCACAGCGTGACGGCCAGTACCATCTTGAGTTAGGTAA  
ATCGCAGCAGACAACGGGTCTGTGCTTTCATGCCATGCACCAAGTGTTAAATCCGCATCA  
ACTGTTTCGTTATAGATGTTTCGAATCTCCACTTGTGGTACATGCCGCTGTATAGCTATCA  
ATCTCCTCATCAATAAGTGTCTGGAATTATACCCATGCCTTGGTTACCATTAAGAATCT  
TGTAACGTATGGCTATTGGCACTTACTGAACCGGTAGAGGTGAGAGATCCCACGTTGATG  
GTATAACCTGTCAATTCAATGGAAACACCTGTAACCGGACCCTGGATAACAAGGCTGTTA  
ACTGTGCTGTTTCTGTAGCGTTCTTAAAGTTGACATAACCTTTTACGGTCAGGTTATCC  
TGAACCTGGGACATCGGCAAGCACGCTAAGATCCTCAATAAACTCAGACGTTCCCTGTAATG  
GAGAGATTTTCGACAATTGTAACATTTGGATTTCCGGGTGTAATCGACCATATAGACTG  
CTGAACCCACCCCTGTGAATGGACCATAGATGTATCCGTTAGCAGCCGCGAAATCTTCG  
ACGGTTGTATTACCTTTTTCGCGTCAGATCACTTGTATATCAAGGCCACCGATTGTTGCG  
TGTCCAAGGTTGCTACCACCCCTGACCTGTACGTCCCCACCAACAGTGAAATCGTCTTCG  
GTTGTAACAGAGTTCGGTCAAACATCAAGTCCGTCGAAAGTGAAGGTGATACCTGATACC  
TTACGTCCAATCTTCAAGTTTTCTACCTCAGTTGTAACCTGAGACCTCAAATCTGGGTGCT  
GTAGGATCTTTGCTTCCGTTACCACGGAAATACATGTACTCGCCGAGGTTATTACTTACA  
CCTGTGAGAGACATGGTGGTATCATCTTCAGCCGCTGTTCCGTTGACAATAATGTCCGGA  
TGGATCCTTTGGGCTACTCTCGCAGATGGGTCAAGGCGCGTCTTAAAGAATTTTCGGATTT  
TCTGCGTCTGTCAATGCGGAGGTTAAACTTGACACCTCTTGTGTCAGGATCAGTTTCTGG  
AAAAGACCTGTTGGGTTATCGGCGTTTACAGTGCCATTATGGTCAATTGTCTACCAACC



ACCAAGCTATTGAGCGTTGCACCAACCGTTTCTGACAACCTATGCAAAGGTAAGCCTAACA  
CTTGAGATGGTTGCCAAGGAGATAGCAATAGCCGTTGTAACAAAAGCAGTTGCGGCAAGT  
GTTGGACTGCTGCAGTTAGCCGGAGGGGTTTCGAGCCTCTAAGTTTCCTGTCAGGATCTGG  
CGTTGATAGGCGCAGAGATTATTGCCATTGCCGATGGGTCGTTGGATAATCTTCAGTTA  
ACACTGTTTCGCTGGGTTTTTTGCCTAACCGTAAGCGGCGCGTGTGTTACGCTTGGTACA  
TACTCGATTGAACCCCATTTGGGCCATTGAACGAATAAACTGGTTGGATACTGTGGTC  
TGA CT TCCC GCGAGGCACGGCATAGGCGGTGGTTGAAAGAACAGGTTGTTAAGAAGAGCT  
TTGGTAACCGTTGGAATGGTGTACGATCTCCAGTACCAACACTTTCGGATGCCGATCCG  
TTGACAACCTCGTGGAGGCGTTCAGAGTCCTCAACAACCTGATCGACAGCCTGTTCAAAT  
TTAGTGATGTCTGGCACAGGAGTCTCCTTCCTCGTCTGACTATGGCTCTGTACGTCGGGC  
TTCTGTTACTCCCCACCGTACAGGTATTAGCTTACTGACGAGTTGAGGTGCAGCAACCGT  
GTTTCCAAAAACCACATATATCACACGGTCCACGTTCCACTGAATCCACAATACAGGAA  
AATTGCCGTCATTCAAGCGATCCGGATATTGCTCCAAAACCTTTGTGTGAGAAATGCTCGC  
GAGGTCTACTGGTGATCTCACAATATCTTTAATAGATTTTCATCAGTGATTTTAACACATT  
TCCTCACTATCAACAATGATCTAACACAGATGCGTACCTTGCAAGAATCACAAGGCTGTC  
CACAGTAGCGGTTTTTAGCCACTCTTTAAAGGTATTGTCTCTAAATCATGCACCCAGGAT  
CAAAGCTTCCAAAACGGTCTGGTTTGAAGATTTGATGACATAACTCAATGCAAGAGGCAT  
CAAATATGGGAATGGCATGACTATTACCCGTCAGAAGAGTTCAGGCACGCATACGGAAAA  
GATCAGCCTCTACTTCCATTCCGATCATAACACACTGTGGGAAACATGAGGGTTATCTA  
GGGCTACCAACATGATGCCATAAATAGAGACAGGTCAAAGATCTGGCTATGAACCGAAAA  
CTATCAGTTCGAAATGTTCTCCAGAAGGATATGGATCATTCCAAAAATAGACATGATCCC  
TATACCCTTGTCTTCAGTTAGCTGCAGCCCTGCAATGCATAAGAAATATACTGCCGAAC  
TATCATCTACGTCGATTCTCCATGAGTAGCTTGAAGTCTGTTGCTGAAGTAAGCACAAAGA  
TCGCGCACGTCTTCTTTAGTGTCTTTCCCAAGTCTGACACTTCATCCTAACCCTTTG  
AGTGTCTAATCCAGAATCTCGTACGTTTTTCCACAGTGACCCTCTTCGCCTTACTCCT  
ATGATGTCTCTATGAAGTTCAGCCAGGAGCTCGTGCGTTTTTTTTGTTCATCTGAGACTGGG  
ATTCTCAGGCCACCATTAAAATAATCGTGATGCCACCTCAGTCAGCCGTGAGGATGGCA  
AATAAGTCAATAGACAATATAGATTCCGGTTGCTCTTGACTGGTCTTGCAGCCCACTTGA  
TAGTAGGCGCATCCTCGGCGTCTGTTGCTAACAAATCAGTGCGGTATGTCTTCAGATTTT  
CGGGCTACGCTTTCGTGGAATCCAAAGTATATCATCTGGGAATCAAATCTTCAAGGGCTA  
AAATCTGGTTTGTAGCCTAAGACACTTCACTGTCCACAAGA ACTTCGTCTTGAGCAATAG  
CCTCTTTAATGTAATCTTTAAACTCCCCAGAGATGAATTGCACAGCCCCTAAAAGGGATG  
CAATAACGTCAGGAACTTCTTCAAGAACAGCGACCCTCATTGTTGGTCTGGGAGGTAGGCTG  
ATGGATCAGAAGACACACACAACACGACATCACCGGTGGGCAGAAGAAGAAAGTTGGTCC  
CCTATATCTATTTTGTCTATTCTTGCCTATGTCGTACCAATCTTCCCGGTCTTTATTTT  
TCAGGAAAAATACACCTGACTCCATGTGTGCGCCGTTCTCGTCCGTCTATGTTCCGGATGT  
ATATTCAAAGTTCCCCACATACCGTAGTCATACATCCTCCTTAGTACAGGTTGGAAACAG  
TTAGCCATTGTCGGGTAGTGAGGAACTGTAGAGGAGCAGTGTAGTAAGTTCGCCCCCTCA  
ACTCTCTCTTGTACCAGACCCACACGGTTCATGTCGTTACCTGCATAAAATCTGGATT  
CACTCATACTGTGGCAACCCAATTACCTAAACGCATCTACTGAACA ACTCCAGACGGGT  
TTGGTGTGACGTGAGCGTTACCATCTGCCGTAGCCCCATTGATAGCTCTCACAACGTTTC  
GTCCACCACTTGCAGCGGAGTGGTTGCTGACAACAAGGGAGTTAACGTTACACTGTCCGT  
TTCACTTGTATGTTTATGGGGTTGTCAAAGAGCTTGTGCGTCAACGTTGAAACCTTGAACGT  
TCCCTCTTGCTGTTAAGGTTCCCTGTCTGGATGTTGAGGAGTGAATAGTTGGATCATTAA  
GCGGACCGCGTACGGTAGTGTCTGAAAGTGTGGACAGGTTGCAGTGACGATTGCACTGC  
GTCTACTTCCGCTTGCGATTTTGGTACCATTTACCCTACAAAGTGCAGCAGTGCCACAAA  
TAGCATTGAACTGAATCATTATTAAGAATGCGCCACCAGAATGGACCGAGCGGAAACGCA  
TACAATCCATGCTCGACGTACCGGGGTCATTACGGATATTATCGCCA ACTACAAAAGCAA  
AGAATGTGGTGTCTGCTACTGGGTTGGTGGTTCGTGATGTAAGGGTAATCTGATTCGGATG  
GTTGGAGGTTGAGGCGTGGAAACAGATAATTAAGCAGTCATGGTGTGCGCTGCAAAGTTCC  
CATATCTGGTATCAGACTCTGTTTTTCTCGAAACATCAAGGTTTCTTCTTGTGCTGCCGCT  
TTTCTGCAAGGTCTGCTAGGTTCCGATTCACACGTATGAAAGGACTGTCGAGACCAGGGA  
TGTTACACCAATTGCTATACTTTGACCACGCAGTCAGCATTTTTAAAACGTAGTTATATT  
CTTCGACTGTTGGCTTTTCCCAAGTCCCAACGTTTGTTCACAGGTCATCGTTAGGAG  
GTGCTTAGTTTAATTCATGAGTGATAGGTAGAAGAATAACTCGATTAGCCCAACTCTCTA  
TAGGTACTCTCGGCGATGCCATTCTAAGCTCCCTTATATCAAGGTATTCTCCCCATAAGA  
TACATACGTCAGGTGAGTAAGACCACCCTGTCTGTTTCAGCTTACTGAGCGGATAGAACC

GAATCCGAGTGCAGTTTAGCGCCTGCGAATCCAAAATCCGTCCCAGTTGTCTCTGTAC  
TCTCAGGTGTGTTGGCATAGGCGACATGTCTTGCATCTCCTGGAGAGCAGTCACCAATAT  
GAAACATGTGTTGGAAATGTCAATATCGAAACGATATTTAGCACCCCTTGTATTTGGTAAA  
GTTGTCTTCCCCGAACCTATGATTAAGGCTATCGGTAATTTAGTGCATGTCACGTTCTT  
CTCAGCACTTGCCAAAAGGATGATAATGAGAGCACAATAGTTCATCTCGCTCAAGCCATC  
TCGCTCAATCGCGACCTGCTTCCCTATCTTACCAAGTATGACCCCTATCGCATTTTTTCAG  
CAATCTGTTCTCAGACAAGTTGACCCACATTTTCATCAAGCTTTTTGAGGCGTTCCAGATA  
AACGGTCATAACTTCGACAAGGTATTCTTTCTCTTTGAGATAATCACCAGGGATATATTC  
AAACCCTCCCTAACGAAATGTGCGAGACTATGGATGTGGTTGACAACCTTTAAATAGTC  
TGCCATCCTAGCCACATTAGATGATTTGTTGGAATACAAGGTCGTCTGTATCTAAAGCAA  
AGACTTCTGTCATTCCTGCAACAACATCGGTGTTGGTATAAGCATTGCCAGGTAGGTCAG  
TATTGTGAACATCCAGCAACAATTACGCGAAGCCCCCTGCTGAAATGGAGTAACCAACTG  
CGGATACCGACTGCATATTGTAAGTGTATCTGCAATGTTGACTAGATCATCGACGGCAT  
ACAGAGCAGCTGTGCTAGTGTTTTGTCTGGCACGGACAGGAGCTTTCCTTTATACCGAA  
CACGGACTGCAAGCTCTCGAGCCTGTGCTGTGCTGTGATAGACCTGTTCCGTCTGATCAT  
CTTCTGTGGTGACATCATAAAAAACGTTACCATAGGTTGGGTTGGACAATGTGATTATCA  
TATAACGTGCTTCACTGATTCCTTCTTTGGAACCACCCCAAACCTACAACTGAACTTAT  
ATGCCGAAGCACCAAACTGGTCCGTTTCCCCTGTGTTGTTTGAGAATAAACGAACCTTGC  
TGATACCCTCGAAGTCTGAAACGGCACAAGAACGGCAGGTCTAGTGGCATCAGCATCGG  
CTGCGGTGCTTTGTGAAGCACGTAGCATGTAGTCAGTGTCTGTCTCAACATCGGAACCGC  
CATTACATGCAGTCATGTTGGTCATGCTGATAAAACCGCTTGGTGTCCGTATGATACTCG  
CGACAGTATTTGTTTCACGAGAGGTAGCCCCACTTTAGTAGCAATTACTTCAATGGTGA  
TAGATCTCTGACCCACTACGGGTGATGAACGGGAATCGACACGATCGTTAAGTACGCTCA  
TTTTCTTGTAGCATCATAACCAGATCTACATAGTACCACGCGCAGAGTCAATGACGATCC  
TGTCTGCGTTTAACTGTGTGGGGTTGACGACATTGAAATCACTAATCGATGATATAAATG  
CATTTAACTCAGAGCTCTTATGCACCATATTTTCGTTGCGCCAAGTTCGTTGATCTTGTG  
AACCATAGTTCTGATGAATCAGCTAGATCGTATAGTGACCAAGAACCCAATCTTGGTTAA  
GTATCTGTAGCGCCAGGATCTTCCCTGCGACAGGAGTGTCTGCCTGGGCAGGAAGTTAC  
CACTGTCAATTGCTATATGTTGTAGAGGAGTAAATCATGCTGAACGGGCGGTATTGTTA  
CAACTATGTCGATGGTCCCTGATCCTCTGGTTTTCCTTCGACGAAAAATAGCACCACGAC  
CAGGCAGTTAATCTAGATAAATAATTTCTGCCCTGCAAGTGTCTGTACAGAATAGAGAG  
CCGCAGCCAGAAGGATCAACCGATATTCTCATTCAAAAATTGTGGTAGGTATGTCAA  
CAACAGTGTGACCTGTGTGTTGAAGTTGTCACCAACAGTTCGGATCAGCGATTTCTTGG  
TAACTGCGGTTAAATGATCCAGGGATGGGAGCGCAAGGCCGTAGTTATTTAATCCATATT  
CCGCAGCTACGCACGCCTCCTACTGCTAGATTTTTGCTCTAAGGTGTTGCTAATTTATCA  
TATTGACATTTAATTATAAAGGCTTATAATAAGAAATGGGCCCGAAGCCCCTGGTTATAT  
AGGTCCTTCCCCTGCCTACTACGGGATTTGTGCGAAACCATGGCCAAGTTATCAGTTATGG  
CTGTCTGGAATGGATCTGCAATGTCCAGATAGAACGGGGTCATCGAAGCACCTTATTGAT  
ATGGCCCTCCTATAATCGTTGTCTGGAGATCCCCACCATCGGGGCGGGCGCCTGGGACAA  
TGAGTTGCAACCCAGCAGATTTATATGCACGGGTAGGCCAAGGTTGTGCGGATACTTTTCAT  
ATGCTGCACACTCAAACGTTTTTTGAGCCAAGCACAGTTGCCTGGGTGAAGTCATTAGGTT  
CAATGTAACAAACCCCTGTCTCAACAACGAACATAACCAGCGGTCTTCTTCAATATGATGT  
GCCTTTGACCGAATTCTTTCTTTGAGGAACATCATCATTATCAGACATTCATGTATTAG  
CAGAATTAAGCCGTATGGCACCTCTTTTTCCGTTTGTCTCTGAGTGCTGAACCAGTTCGA  
AATCACAACCGTATGTTGTTAACTGTCCAAAGCCTACCTGGCCGATGTTTTCGCTAGCGA  
CACCATTATCATCAAGGCTGTTGTTATTAAGATCTCAGCAGAACAGCAACCCCAACGGT  
TCATCGCCTCGCCTGCCTCGCCCTGCCAGCCCCATACGCGCCAAGACCCTAAAACCTGTT  
TACTGAGAATGTCAGGAAGACGAAGTTTTGCGACAAGACCGCGATATTTGAAAGTCTTGT  
ACTCAATTTCTCAACGTTACATCGTTGGTCCGGTCCGTCATAGCACTAACTGGAATAG  
GTACCAGTCCCCCATGAATACGTACATTTTGCAGTGTAAAGTCACGGCACGGAGCAGCAA  
AGGTTGGCTGGTTAACACCCAGCCATATAAAATGAATCGGGTAGCACCGTTGTCTAATC  
AGCCACGAACACCATCATTGACATAGTCTGGGGAACGATAACATACGACACCACCGGATG  
ACTGCAGTATCCCGTTTGATTTCGGATGCATAAGGAGAAACCCAGAGGCTCTCGACCTAAA  
CGTCACGGCTAAGCGTTAAGAGGATACATTGACGAACGCGTCGCATCATAACGTTACGCG  
TGATGATCCCATTCAAAGTTGGTTATCAGAGGCGTTAGAACCATACGGTTCCTGCCCCG  
CAACGCCGTTACAGAGACCACAGTTAGGAGCGATATCTGTATTGATGATGTTGTGCTTGT  
CTATATCTATGATTGTCAAGCCACCTCCGTTATAATGTCTCTGCACAACGTTATACTCAA

TAACATCGTCTGTCAAATCGATAAAGTTGAGACGGGCAAACGTGCCCGCGTAACCAGAG  
CGCCTGTACCTTGCTGAAGGATACCATATTTACAATCTCTGGAATCACTATACAGAACGT  
CAATGGGACCTTCTATAGCGAGGGTATGTAGTTCCATCGCCGTGGTGTGTTATTATTAA  
CCCATGAGGAGTCTGTAAAGATGAGACGTCCTCCATTCTCGCGAGTACAAACACCTGGGA  
AGGTAACCCAGCGGAATGTGATTTTTGATATATACATGTACCACTTGCCGCCAATCTTGT  
TAAACGTTCCACCATAACCATTCAACCCCGTCGATTTACACCATTGGCTCAAGAACCAGGT  
GCCATCACTATGCAGGAACAGCTTTTTTGGTCTCTTTTGCCTATGCAGCTGAAGCTGTTA  
CGACCTCTGTCTTGTAGGATATTTCCCCATAAATTGTGCAGGGGTAAACAAAACCATCGA  
GTGTATGAGCCCTGTTCCCGCTGGTCCACCGATAAAGGTTGAGCTATTAGCACCTACAA  
GGTCTCCACGTAGATATGGATCGTTGGCTCAACACGCCCGCTCATCAACACTACCTGTAG  
TCTCCGGTTTGGATTTCGGCAGGACGACGTTTCGGGTATGCCACTCTTTGTTGATCGATAA  
TGTTGGTAGATCCGTCGATCACCTGTTTTTTGGGGGAGACGAGCGTACCCCTTACTTGGG  
AGGGAAACAGTCGGACCAACCCGACAAGGGAGCACATATTTGTCCATGTTTATTCACGAG  
TGGCCTCCGACAGGTCAACAACCAGGTAGTCTCCCTCGAAAGAGTCCGTCTCTGTGCGGTA  
AGTCTGAGAATTTGACGCTAAGTACTAGATCTGCCATTTAATCCTCTTATCTTGTAAAGCT  
CTCTGTCCATAACCATAACAGACCAAATCCTAATAACAATTCCCCGGCATCAAAGCAAAGA  
ACACCCCATTTGTCAGTAACCGCATGTTGAGCAACAGACCCACACCCAGTCATCGGATTAT  
CCGGAGTCAGAACGGTGTAGTTCTCTTGGATAAGAACGAAACAACGTTCTGCAACCAGAT  
CGATGTTAGGGATACGATCACGCATTCCTGCCATCCCAAACATATAACTGGCAACCATGA  
GCAAGGCTGACATGTGACTGGTAAATTCATATTCAGGTGCAAGCACCATTCCATCAGGAT  
TAACGATGGTAGGAGTTTTGCCTTCTTTGTTGTCTTGGAAATCATTGAGAAAAACAACC  
AGTTGTACCCGACAGAGAATAGCTTACTTGAATAGCTTCTCCACGCTGCGAGAATCCTG  
GAACGCAACGCCATACATAACAAGAATGCACGGGCTTCATGTCCAACCCAAGCCTTTTTCGT  
TCCAGTGCTACATTTGTGAAAGTTTTGAGCTCACCGAAGGTCTTCGCACCCCAAAGATCGC  
ATACAAATGCCTACGACATTAGTCCAGGCATGACTCGATTGAAAGAGTTATAAAACCACA  
TCGGGGAATCATAAAGGAAGTCTATGGTGTTATTCACGTCGTCCAGTCGATGTTCTGAC  
CGTTGAAACAATACGGCGTAAGATACCGATACCCAGGGTACGGAAGACCACGGCAACTAT  
CGTACAGTGCCGTGTTTCGCGTCACTGATGTGGGAGAAAGGGATGAGACCTGGGGTATACG  
GAAGGCTGTTTGTCTTCTAACCAATGACCGAACTGTCGTCAAGGTTTCGCACTGCCTGGGT  
TGTCTCCGTACACAGTAATGCGGAAGTACATAGTAAATTCGTCACCATCTGTGGAAGTGC  
ACAAGTCAAGAACAGCATTACGCAGTACCAATCGGTCCTTGCCTAACACCATCAACAG  
GGTCCGGTGTGAGGTGCCAAGTTAATCTGCTTCAGATTATGTAGACCGATGAGGATTGGTC  
GTGGATAAGTTTTCCGGATGATCTGGTTGATAACTACTTAATACGGAAGTGGATGTAGTTA  
GCTGAAGGGTAGTCCGTCGAACGTTTTGTTGCCCGGATCATGGCCCACCATCTCCAGTTGT  
TTTCATCCGTAATCGTATGCTCGAAGTTAAAAGCGTTAGAGCGATATGTAAAAGCAGAAA  
GGTCTGCTGTTTCTCTATCGGACAGCCAGAAAACAATCGTAGGAACTCCATCCGCATGTG  
GCATGAGGGTGCAAGGTTGGTCAATACTCCTTCCAAGAATACCACTCTGGGACTCAAAGT  
CTACAAGTGTATAGTCACCCCAATCCACAACCTTACGGGTGCGTGCAACAATGTCGTAAC  
CACTGCGCGGTCGTGTTAAAAGACCGAAGTATGACAGGGTGATATCCATTCATACTATGG  
AGTCAGTACCGCAAGGAAGTCCAAAAGGGTATGTCACCTCGCCAGTTTCAGACTTCATTT  
TATTGAGGTCTAGTTCACATCTGAAAAATAGCCTATTGCCAAGGTCTTCCCTCCCTGCAA  
ACTGACAACGCTACTTGGATTTACCGTAAAGACGGAAGTATGATCGCTCGCTGTGCGAGGG  
TTATCTGAGCGGTTACTGCCTGATGAATACCAATATAACCCTTCCGGGTCACGACAATACT  
CATGGACCGCGTTGAGGGTTAAGAGTAACCTTAGCTGATCCCGTAAGTGAACGGAATGA  
TGGCATAGGTGTAAGTTCGAGAAAACCTTATCGAACGGGTCATTGTCAGTGAATTGTCAC  
AAACCATCAAAGACGCTGCCAGCAAAGCCAGCATTTCCTTGCTCCGCTGATCTGAGACG  
TAACACAGTAGGCATCACACCACAAAGGCTCAGCCTCAGAGGGCGTTGGACTGAAGTCAGG  
ACTTAATAGATAGGTTGACTGATCGGGCATGCCACATCGTGCTCTGGTCCATCTAGTACA  
GACCATGCTCTACAGGGTAGCAAGTTTCATTGTTGTTTTTGAATTTTCGTGTTACCGGGG  
TATCTTTGCGTTGAACAGTCCCCCTCTCCGCCTCTGGGCAACCCTCTTCAAGAATAACAC  
CGTCCGAATCAACTTATCTTCCGACTCTATCAATGATCCAATCGACATCCCACTGAGACC  
CATACTTATCGCAATTAGTCATACTATCAGCGTTAGCAGCATATACTGTGCCGAAACCGC  
AATCCCCTCCAAGCTTAACATCAAAGGCAAACCCAGCCTTGTCAGGTATACTCCCAAT  
GTGTTGTACCATGAGGACTTAAAGTCCACCATTGACCATTACATAACTCTACCCTTAC  
ACCCACCGTGGGTTGGGTATCCATCGTATGTGAGTCCGTGATGTTCAAGCCCTGCCTCAT  
TTACGTTTATTGTCCAGTTCGGGCTATATACAGCCGGAGGGTCTGGGATTGGCTGACCAG  
CAGGGTCCGAGCCGATATATGCTTGCCAAAAATCCGCTGCAAGTTCCCGATATTTAAGGA

CGTTGGTTTAAAGATATGCATATGCGCAACCGAGGATCAAGACAGACTCACTCTCGGTAA  
TTTCATCACCGTAAGGCTGAGATTCTTGAGGCGTACAGTTGCTAAAGTGACTGTTGTAAG  
CCAAAACATGCTGTAACCTCAGGATGTAGTGCTGAACTGTCGGGTAAATGGTGTCTCCCT  
TGTTCTCTCAAAGAACTGTATGTGCTCATCGATCAATTGAAAAGCATTATCAATGTTGT  
GCCGTAACCTGCACCACTACTCAACTCCAGCCATAATAATGGAGCCGAACTACTACTGCC  
ATCATCATCTGTGACGAACTGAAAGATGACTCGTAACCCGGTGTATAAGAAAGAGCTGG  
AAGACTCTCATAATTTCAATTGATCTTACTGGCCATGAAACCAAATTCGTCCCTGTACC  
CTGTGTTAAGGACAAGGTAAAGGACGGTGCTATATCCTCAGCCTTTGATGCATCGCTCAT  
TATGACAATGCTCTGACCTCCTGTCACGTTGGCAACAAAAGAATCACCCCTGTAAAGGTT  
ACGTGTTTCTATCCCTTGAACATCGCCAGGATTGGGAACTTACCTGGTCAACCGCCGCC  
ACCACTATCACCGAACTCTTGCCAGGCGTCCCACTGGTGGAGCATTGGTTGACGGGGA  
AGATGACATTGGACATATTTTCGGAGAGACACCATTCCATCTTTAAGACTTACCATCGGT  
ATGAAAGAATGCAAGGTCCTTCTGGATTCAAGGAACCCACCCTCAGAAATGAAGACAAC  
GTTCATAAGACCCATACGAGTCATGATGGTGTCAATAGAAGAATTCTGGTTGTGTCTGC  
CTGATGCATGAATACATAGTCACCACCACGTACCGTGACGGCGGAAGGATGGTCAGACAC  
CTTGACTCTTGAAAAGTAACATCCGCCATTATCACCCCTAACTGGATAGGGATGTTGG  
ACTAGCCATCCTCTGTGGTGATGATATTAGTCTTATCATCTAGTAAACTATCAAGCGGAA  
TTGGGTTATCCAATCATCACCAGACCAAGTAGTCCACCATGAAGCATCTCTAGTCCGAA  
GAGCACAGAAGTTGATCAAACAATAAAATTTGTTAGCCAGGTGAATCAAACATCGTCGT  
CAAAAACAACAGTTGCACCTTCATGAGGGCTGGTGAATAATTCTCGTCTTGACCTACCA  
AAGATAGTCTTACCCTTACTGTTCTTTGGTAGTGACTTAATAGAAGGCTTAATAACTAC  
GTGTTGTCCTTTCCATAGTTGAAAAGCTAGAGGTGATTTCAAGACTGTCAGTATCAAGAC  
ATGTTACTTCTTGAGCTTACTGTCAAAGACAGTCGGCATTACTCTTTTGCTGAGATAAG  
CTGGCTGTGGGAAACCAAATGTCTTATAGTAACACCAGTTACCAGCCCAAATCTTGAATC  
ATAGCCACAGGCGCTGACTAAGGCGGCCCTGGTCTAACTCGATCAGATTCAGCCCCGAGC  
CGACATCAAGGCCTCCGGTAACTCGGTCCATAAGGAGATATGAATAAAGAGTTGCCATTT  
AAACCTCTTATTGGTTGGGTGGCTTGGTATTACGGGAACCACAATCATCTGTCCATGCGT  
AGAGGTCATCATGTGCGACAAACCAATCATAGAAATCTTTCATATTCACACCACGTGCTG  
TCATTAATTTTCCATATGCTGTGACTCTTGCCCCGTTGACATCAATGTTCCCATCCACCT  
TTGCAGGCGCTGTTGCTGCACCAATGGTGAAGGACATTTGACCAGTTTTATCAACAATGA  
ACGGTCCAACCAGACCGGTTAAATTAATAATCACCTTCCCCCGTCATGGAGAACTGCACGT  
GGTCGTTGACAGTTCAACTTTGTTGGGTCTATAGTGGTGGCGTTCCCATCACTTTCAA  
TACCTATAATGGACGACGCTCGAAAAAGTCCGTGGGTGTTCTTATAATTAGCGTCCCCTT  
CATTCCGATCAGAGAAGGAGATACCGACAACCTAACCAGGCTACACAGGAAGCGCCAGGC  
TAGCTTCTCCTCCGGTACTTGAGGGCATGGCTAGCGGGAGATCGAAAACCGCAGGATATC  
CGTGTACGCTGCTATCGTCGAAATTCGTTGACGCAACGAGTTGGACATTGGCAGAAGAGA  
TTGCGTAATCAGTATCAACCACTCTTGCCCTTCGTCTGTGTGCTTGTCCCGATGGTGCC  
AAGCGATCCTTTGGTTAAGCGGAGCTTCCATACGATGAATTGAGGCCATTCTTCCCCCAC  
CACTCCACCACGGGTTTCTGCAAGACCGATCTCAGCCATACAAACACCACCCTCGAGTTG  
CCCTTTGTGGGTGAGGTACACAACCTTGATAAAACCCTGTGTATTTTTGACTTTTCAGGTA  
AATCGTGCTTCCAGGAATTATCGCACCAGTAAGCACTGTCACCACAGCCAGACGTGCGTC  
TTCTCTCCTCTCGCACCGACTTGGACCTTTGTTGGTTTTTTGGTTTTCTTTTTGGACTTACA  
TTTCTTTTCCAGCCTACCCTTTACTGGTTGAGGGTTTTCCGGGTTGGTGACTCATGCAT  
ACCTGACTCTGCACTGATCTCAAAAACAGCCGTCTCAAACCACATGCTATGTGTTGTCCA  
GTAACCTGCAACATCTTGAACACTGAACGTTGATCCAGTATTCTTCGCCAGCCTTTTAAG  
ATTGTTCCGACGTTACCTGTGAAAGCCATTGACGGCTGGAGAGTCTGACCACCGAACTC  
AATAACCTCCGAAATTGGTAGTTTCAAGTCTGAGATACCGTCTATAACACCTGTAAAAAG  
AGAAGTCCCCTTCTCTTAGGACCTAGCGCCCTTTCAGTCATATTGATGGTTCTGGCATC  
TCCCAGGATCTTCGTTGTTTGTCTAGTATATCCATCCCACTTATCCTGGACAAACCCAAC  
AGTCCCTGTAAAAATAATTTGGTATTCACCATCAAAATCCGTCTCAAGAACAATGTGTAT  
AGACCTCCCCTTGTAGATTCAAGATAACTAACTGTTTCGACACTCAGTTTATAAAGCGT  
GGCATAAGTGTGATTCGGGTCGATGGTGTATCCGTCTTACCCAAAAGTCGATACATGC  
AGTGCCTGTTTCGTCACTGAGATCAGACGCGTTATTTGTATCTTGGTTCGTATGATGAGC  
GATGTTCTTTGGTTTTCTGTTCAATATAAACAGGGTTGCCAATGGTGCCTCTGTATGTACA  
TGATCAGTTTGTGCGCTTCTGTTAATCCTCGTCTTTCAGATACCTCGTCGTAAGCAGATTA  
TTAATGGATTAGCATGTCAGACAAGAACCCGAAATTGTATCAGCCTACACGTTTGGTTGA  
CGGGGTGAATGAAAAGACACGCAGTTGCCCTGAAAAAATGATTTCCAAATATTTAAACTT

GCCAAAGATGTCGAGAATTGTTGTTCAATTGAAAGAGATCGTTGGATCAGTTCCAACATC  
CCCAGATGAAACGTTCCCTAGGTTCTGTCCTCTCGTTGCACTGAAACGTCATCTCGTATGT  
TTGAATGTCCACTACCTCACGCATAGTTTGGTCCGCAAACTATCAATATACCATAAGAA  
TGTGATCATTGACATTATTTACCTATCGCCGTATCGTCATCAAAAATGGAGCCTTCTGGA  
GTCCTATTCTTACCATCTGGTGTGCATCACACCAAGTACTTGGTCTTGCTTTCTTAAGTCA  
CCATTTTTTCATCGAATCGACAAGTGCTTGCCATCGAACTTTGTGTGGGACAGCAAATTTG  
GTCCGACGACGAGGGATTTCAACCGCAGTGTGTTAGATGAAGACTGCTCAGACCCTTTC  
TGCGAGGTTATAACCACCAGACATTTTAGGGTCCGAATAGATTGTGCGCCACCGCAGTTATG  
CTAAGGAGGAAAGTCCGGACCTCCCTGAAATCAAGCTGGAAAACCAATACGGCGCCATCA  
GAGTCGCAGCTGTAAGCCCCATCGAGGCTAAAAGGTAGTTCTCGATGACCTTATCCTCA  
GTCACCAAAGTAACTATATTAAGTTCAGAGGTAAGTCTTTCGAGGACCTAAAGTGCCATT  
TCTGGGCCGCGTGAGGCAACCGGGTTTTGACCGTCTGTATCTTATCAATGTAGTTGTTT  
CGGATATGATAAACAGGAGATGAGTTCACCCTGCAACTTAAAGTAAATTTCACAACTTCG  
GTGACACCGTGGTCCCTAAACTTTACCTTTTCTTCACCTGCGTAGGATGGCCTATCAACG  
GTCCTTGTGTACAAGTGTGTTGATCAACGTCTAAAATGATTGATAGGTAGTTGGTGTAG  
TTTTTGTCTTGAGTTCTACGTTTCGCCC GGCGTGGTTCAGACCACTGGGGAAGAGGGTA  
TATTGCACCTCTTCGCTGGCTTCATGGGCTGTGTTGAACTTTGTCTCGACGGTATCCGTA  
GCCATATCCAAGTTCGGTTAGGAATAGTTGTTGGATGTATATGGTGTGCGTCCACCCATT  
ATACATGTTACGATTTTATCATAACTCTTAAGATAAAAACAATAACTAAGCGGGCGAAGCC  
CGGTTAAATTATTGCGGCACGCGAGTCAAAAACCTTGATGTTACCCTTGTTACTGCTTCC  
AGCTGCATGTCGATCATCTTCGTAAACTCACCTGCATCAATCTTGATTGTAATCTGTCAA  
TTGACAGGTTCCGGTCCGACTTACCATTGGAGTATTTCTGTGCGGGCCAGCACCCAGGCATC  
ATCTAGTCCTGGTTCAGGTACTTAAGTCTATTATGATCAGTCATTCCCCTCTGACCAGTA  
ATAAAGTCTCAAGTTTTACCAATCCGCGAGTTTTTGAAAAGATTACCACCTGCGGTTGTA  
TCTGTGCCGTATCTTAAGGCATTGGACGCTTGAACCTGGTTCGAAGACATAATTCCCCGCA  
AGCATACTTACTCCAGCACTCAGCCCCTACAGACCAAGCCAACGTGCAGCTTTACCCATC  
TTACCGTAGAGTGGACCATTTCTTTTCATCTTACCGCAGCCCTCGCCAACATCATCATCC  
CGCCCACCGAAGATCGTTCTTAAGAATTTTAAGCTCCGGATAGTTCAGCAATGTTTCGAA  
AGAACACCGAACCACGGATCAGA ACTGAACCA AAGGACAGAGCACCAACACCCACCCCT  
ACCCATTTCCATGCAGAGGATAAATCCTCGGCTTTCTTACGGAAGATCGGAATGTAACGT  
TCCATGAGGTCTTGGATCAGCAGAAAGGAATTGTAACGGCATCGACGATCTCCATGAAC  
GCGGCAGTGAACCCACCAACAAATTGACCCCGATTTTAGGCCAACTACCGGTGGAGTCA  
AGCATTTTTGCAAGTTCGATGAACGCCCTTCTTAACACATCCCCAAATCCGCTCTGTAAA  
ACTTTGCTCTGAAGCTCAATCCAGGTTAAGGTCCGTCTCTGCATCGCAACACGGTTGCTT  
TACAATGCCTTTTGTAAGCACCCACGTTAATTTGCAGCCTCGAAGCAATACTTGGCTAAA  
AAAAGTAGGACCTTCGCTGAATACA ACTCGCTATTCTGCATCATTTTCGAGCAACTTGGTT  
ACGTCTATGGTGGAATCATTGAAAGCCTCCTGGGTGCGCCTGAGGAACACCGGAAAACAT  
CCTGGAATACGTT CAGCAAGTTTCTGCACCATTACTTCCCTCCAGGATCTGTCCCTATCCC  
ATCATCTGCTGGATTACGGGAATACA ACTTTGGTATTTGACCGGATCAACCCGTAAGACA  
GTAGAGTATTCAGCGAACGCCTTGAAAAGTTAACCGTTCTGTGATTGACTAAGAACACGA  
TCCGATGAAATTGCCACTTAGGTGTAACACCGCGATGCAATCTTGAGGTCAAGAGCCGAT  
CGGTAACACTGTTCTCGACCAA ACTTGATCCGTTTCCCAGACGCTTTGGAGCTCTCAAGA  
ACCATTAGCATGGTGGCTTAAATGCCATGGAAGAACTGACCACCTTTAACAACCCCTTGCA  
GTGGCATTGAATGCACCGTAGGCTCAGCTAACGCTGATCCAGGTA CTACGAAGCTTTTTC  
CACCCCGCTGTCAGTGTAAGAGTACTCGTATTTGCCTTCATGCGTCGAGTCTCCAGTGCT  
TGAAGTTCAGCACGCAAATTTGCCAACTTCATAGTATTACTGTCAAGGAAGCGCTCTTTC  
AGAGAATCGTAACCTTTCAGTTTTGAGGCAAAAATTTTACCATATTTAGCACGGAGGTGA  
TGACCTGCGTTTTGTGACCGAAGGTACCTAGCCTGCAAGATCACGGGAATAAAA ACTTATCC  
TCAGCTTCAATTTTCTTAGAGGCCAGTTGACGGACGCGAAGTGGCTCTTTGGTGACTTCC  
TTTTCAACGCTTGTTCCACGTTGCATTTTATAAGCCTGTACAGCGTGTAGTGCTGGGTGC  
AAA ACTTTGTTTGGGTCACCAACCATGCCTATCGCATGTCCGGCACTCGGGCGTATTCAA  
AGTTACTCTTAGAGAGAGGCCTGACCTGCAGCGAAAATTACCGTAGTTGTGCCGTAACCA  
CAACCTGTCTTCTCCATCCCACGTAGACGAGCCTGTAGGCCATTGTAATCCCCTTGGGAT  
TCTGGAGATTAGTTTGCGGTCAGGTGACCAACAGCCTGCTCTCTACGGGCCTTTTGAATT  
TTGTCGATAGCTTCACGGGCCCAGCTTCTTTCTTAGCCTTTGCAATAGGGTGAGATGTA  
GATTTCCGGTTGCTCTGCGCCCTCCGTATGTTGTAACCTTTTGGTGACAGGAAGTGCCCTGC  
ATTGCAGAACAACTTAATGTTGCTGGAGGATCCGTGTTACTGGAAGAGAACGCCCTGCC

GCTTTTTCCCATTCACTCATCAAGGACTTCACAGCTTTCATTCCGCTACCGAAATTACTC  
CTGTCCACCTTACATGGGACTTTGTTGACCGTCTGGCTTACGATAATATTCGCCATTGGG  
TCCCTCTCAATAGAAAAGCGAGGCCCCCGAAAAGGAACCACGCTTAACATTAACCTTCTTC  
TACCACGACGCCGCCAGTTTGCAGCTTGTAGCTCTACTTTACTTTCTTCTCTCTCT  
CGTGGGCATGACAAACGTATTCTTCCACAGCGAGGTATTCTTTCATCTTGAGCAGATAGG  
AGCCATCAACAGATCCAAGGGAGCTACAGGGTTCCCCCTTGAAGTTTTTCAGAGCGCGAC  
TCCATAAGTTAGGAAACCCAGTCAGTGAGCTATTTTTCTTTGCATCATCCATAGCTCTCA  
GGACGAATTTTCGGAATTTTGGTCGGTAATACGCCGCAGCCATTTTCGATCGCTTGGTCCAC  
CGTGTTCACTTGATGGGTTTGAAGCAAGCGCCTCGGAAGTCCCTGAAGGTCAGCGAAACC  
GTCTTTCGTGAAAAACAGCCGTAGTTAATCTAAAGAACTTTAGCGACCCGCTTGATGAA  
GTCTAACATTATGTCTTGGAACACAGCGTCAGTATCTACTTGATCCGCCACACCATCAAC  
GGATACATCTTCAAGAAATAATGCGAAACGTGTTTTCGAGGTCCTTTAGCTCCGTCGGTGC  
AAAGAGGTATAGAATAGCCGTAGGGAGGGCATCAGAACTATTCTGGCCTCCCGTCAGCAT  
GGAACCAGAAATGGGTGCCACTGGGCCTGCAACATTACGAGCGCTCTTCGGAAGGTTTTT  
CATGATCTTCGTTGGAGAACAGTGCGGGATAAAGAAGTTGTGACCTCCGACCTCGATTTC  
AGTTGTCGGTCTGATATTCTTGTACGCTCCTGCGTCTTTGTGGTCGAGTTACACATGCGT  
GTATAAATGTGACATCCATGCGGCACACGGAACACTTAGACGATAACCAGTCGGGCCAGCT  
AGGCCGAAGCATGCGGAAGACAAAGTATCTGGGTTTAAAGAAAGCGTCAAGGACAACGATT  
TCCCGTCCATCTGGCTACCTTATGATCCGCAGGTCACGTCTTGTGTGTCTGAATCGAT  
CCGATGGTGCTGAGTCGCATCCCCTGAGAACCTTTAAGAAGGACAGCAAAGAAAATCAGC  
GTCGTGATAGAGACGTGTTTCTGCCGGCTTGACAGAGATTCCGTTCAAAGAAGAAGTGTT  
TAATGTGAAACCGTCATGACCCCAGATAGGTTACATGACAGCGCGGCCGATAGCTCACCA  
TCAACCCCCCTGTGGGGTAGGATGTTATCTGCGTTACGGGCAACCACAATTTTAGTATCT  
GCGGCGCCACCAGTCAGACGCTGGGGCATCAGGTCCAGTTTACTTTTTACTGTCATAA  
GCATACTGCGTCTCCATAGCTGTATCCGTTTATTACCCTGCTGCCGTTACAGTCTGACCG  
TTCCGCAATTAGACCCTGTTTTATCTAACAGAAAGGTCATGCGGATCTTAACGAAGTAC  
AATGGCGTGTGACACACAAGCTCCACTATCACGTTATTCAAATTACGATCAGCCAGATAG  
TTAGTCGGTATGACCAGACGATGCGGGATTGTGATCACCGCATCGTAGAACGCTTTGTTA  
TCGTCTTGGTATCCAGTTAGGATAGACCCGTTTGAATACCAACGTTGATCGGGTCATT  
ATTATTACAGCTTTCAGATAAGCAAGATCGCTATCTCTCATCTTCATGGAGAGACCCATG  
TTAGAACCGCGTGACAAGTATCGAAACAACTTTCTTCTGTACGGAAATTCAGCCCGTCA  
CCGAAAAGGACTACGTCAACGTACTTACCAGAAGCACACTTACCTTCGTTGAAGGAACCA  
ACACCGTTAATCATAACGGTAGAAGTTCACACTCTGGTCCCAAATGGTCATGCGATCACTC  
ACACTCCGACATGGAACGATCACACCTTCCATTGACTTCGGGTGGATTGAGTCACCATAA  
GAAGGGTCGTTGGATGACATTGCACCGATACTTCCACCCTCTGGGAATACGCTATCAGCA  
AGAGGCTCGTGATGCAGATGGTAGTAACGTAAGTGCAGCGCTTTATGTTGGTTAGCAATG  
GAGCTGCTCCCTACAGTCTTAACCAGTTCGTCAGAAATTGAATCAACGTGCGGCCTGTAC  
GTTGCAGCAGCGAAAGGTCTAGCACCGAGGATTGAAGCGTTGGTGTGAGAATCAGTACCC  
AGGAAGTACCCTTCTCAGTTGCAGTTAGCACTTGTGGCAGAACAGACGACACAGTAACA  
CTTGAGGAGTTGGTAATTGTCATATCACCGCTGTCACGTCCAATACTGCATGTGCCATAA  
TTTTTTGGAGGGATTGTTACAGCGCCTGAGCTTGCCCTAGCAGTCAGAACCGTTGTCAGA  
GGTGCACCACCATTACGTGCTGCTGCCAGGCCAGATGTCAGAGAGATTGGGGAGGATTCCG  
CGAGTCATTGAGAGGATATCGCTGGTCTGATAAGCTTCGGAATACGTTTCATAGCCACC  
GTGTTTCCGGTCTCAGTGTGTTGTTGTAATGTGACGGCCACGATGCGCTAGATAAACGCT  
TGACGACCAATGATCGGGTTCTGAGGAAGGAATGTACAAGGAATCGCTTTTGCTGCAAAG  
GTGTAAGCTGTGGAACCTGGAGCGACTCCGTCATCTTCAAGCTATTCGAGTTCGGTATAA  
GCCTGAATACGTTACGGAAGGCGCAGTCGGTAGCCAGGGACAACGGGGTTTTCAAACCT  
TTCGTTACCATTGGTTAAGCACCAGTGTGACTGTAACGTAACCAACTTGTCAATTATAA  
GCCATCGGTTTCTTTTCTTTATTTCTGTACATACAGTTATTCACCAGCACCTCTTTGTG  
CTGTATGCTGGGGGCTTGCCCCCTATAACGATCACTAATCAGCCAGAGCGTGTCTATAA  
GCGAGTGGTTTGTGTTTAGCCTGCTGCTGGGTCTGATAAACGAGTGCATCTTTGATCTTC  
TCTACTCCTTCGAGATCGCCCGTATTTGATTCGATGAAGGTCACGTTAATTGAGATCAAG  
TCTACAGCACTGGTCACAAATAGCTGCATATTCAATGGAACCTTTAAACGAGACACTGTC  
GAAAATGACGAATATACGAAAGGAGAGGTAAGGAAACATCTGTCACGAATGAACGGT  
AGGTGCATTGCTCGTAACACCCGGCTTAAAGGGGTTGGCAGCTTTACCATGATAGGCTGGG  
AAGGTGTAACAATCTCGTACTTATGCACCGTCCTCGTATTGCTCTGAGAACTCCACCT  
TCGTCAGACAGCCAGTCAATCTGGTCAACTGCCTTCTGGTTCATGAAGAATGAATTCAGCA

TCCACCTTGGGAATCTCATCTTCACCTGCCAACACAACGTGTCGTCCTGTGGTTTTTATA  
CAGACTGCTCCCCTTTATTCTTAAGGGGGTCAAAGATTTCTCGGAATTAGTGAATCCA  
GCAATTAACGCCTCTGTTTCGTCCCTTCGGGGCAGGATACTGCGAAAGCGACGAAACGGG  
CGATACCTGTAGTCTGATAATCACCAGATTTAATCATAGGTACCCACACCATTTCCCCC  
GCGAAGTAATCGGTTTGATTTGGGCTGCAAGTTCGTTAGAGCCTTCAACACGACATTTA  
GCATCACAGAGGGATAAAAGGCGTAGGAGTCATACTGTCTACCTTCTTCATGCATCAATT  
GTGATGTATAATCGCTTGTGCGGTTACCCGTTAACCGTTGGACAAGACCCTCTCGAATAC  
CAAACCTTTCATACTCAAGTTCAACTCCCTGGTTTTTCGTAAGTGGCTTGTGTCAACTA  
TTGAACATTCTCTGAGTCGCGCTGTAAAGGTTGAGCGACGTATTAATCTATTTTTTCCAA  
GAAGTCTGTAACCCGCAATTTTGCCCTCGACCCTCTCCTGTTGGATACTCTGAATGTCGT  
CGACTCTTTATGGTCACCATAGGGGTACATCGCCTCACTAAATCACGTGACATCGGCCGA  
CGCAACGGATACTGTTCTATTAGGATGCAAACCGGAGTCGATTACGAAGCTTATCTTTCC  
AGCACCAGCTTTGACAGTCTTATTCAGCATCGTAGTCGGATTACGACCGCCTTCAACAAG  
GTATCCGAAAAGTTCGGTCTGGAGTTTTTCCAGTTCCTTATTGAATGCACCTGGGCCGCT  
TGTATAAAGGTACGGGAAGGAAGACCGTTTTCTGTGCTCTTTATGGATTGTAGCGAGCGT  
TGCAGTGATATTACGTGAGTGGTGAGGGTCGTCATAATAACCATATGAAACCTGACGCGA  
ATCATGTTCTTGGGTTACTCCGCAAAGTTCTCAAACCTTGCTCAGATCTTGCTTACTTGT  
GAGTTTTGCTCTGATATCCACATCCGTTTAGTGATTTTACCCTTTATCTTAAAAATATA  
AACGACCAAGCGAGGGATAAGTAGCGAGTCCAGCGGTAAGGGTATCTCAGAGGAACTCCT  
GGTACAGCTGTCTTGGATACAATGCCTTCAACATCGATGGGACTCCTTGTTTTCCGTCTC  
GCGTACACACGCCAGTGTTCATCATGAGGTACACGACCAATGATGACTAAATTGGAAACC  
GTGCTGAGACAACCGTCCACATTATCAGGATTGGCACGAAACCTGCTCAGGATAGGTTTC  
CAGTTCGGGTATGTATAACCGGCTTTTACCTGGATGGTTTCGACGCCGATCTGTTTCAAG  
CGTTCGTGATAGATGACTCTTCAGAATTCACCTCTTGAAGGATCAAGCAACGTACCACA  
TCAACGAGCGTGGTATAAAGTACTCGCCACATGTCACAGGTTGCTGATTGAGTGTGGGC  
CAGATTGCCTTAACCTTCTCAATCGTAACAAATACCAGAATTCTTCCGTCTGATTAAGC  
TCTGGGGTATTGGATCCGAGGAGCAGTCGAATATACGCAATAATATCCTGGACTGTCATT  
TTCGCTCCTGTTGGATTGCTCTTGTATCTAGCAATATCTTGTGATAAAATTTCTTTTTG  
CCATTAGCAACACTTGACAAGACGTTAAGTTCGGTTCCTCTAAGTCATCAAACACAACCT  
GGAGAACATTTTATGAAACATACTAAGGCCGTTATCATTTC AATTATCCCTGGAGCACTT  
AGCGGGGCAGGAGCTTGTCCGTAGGTAATGAAAATTCCTGATGTTAATAACATCAAAGCA  
ATTGAATCAAGTTGTTTGTACCTGAAGAGAATACGGCCAGCGTCCATCGACTTGTTCGT  
CCCGGTTGAGACAAACGCTACAGGAAAGCGTTCTAACCTGGCGTCACAGTTGTTTAGTCA  
CGTCACATGGATGAGATAACAGAACAGACTGAAGTATACCAGTATTTGAATGATGTGGCG  
ATCCTTTATGGCACTGAGGGATGCTAAGGGGCGTACATCTGCACCCATTATAAAGACGGG  
AAAGACCTCGCGGCCAATCTGAATATGAAAATAGGAGTGCCTAAGCTTCGAGAATAAAAG  
GCGCCGAAGGGCCTTCTGTTACGCCAGAATCCAGCCGCTTTAAGCTTCGTAGGGAGTCC  
GTTAAAGTCTCTTAGCAAAGTTTCAACATCGGTGTCTACAGAATCTACCAGTCCAGAAGC  
TTTCTTAACACCACCGAACGTGCTAGTTGTTGCTGCGGGAAGAGTGTAAGCTGAACCGCC  
TTCCACGAGATCAGCAACAGTGATTGAGTTACCGGTACCAACATCGATAAATGTAGATGC  
ATACAGACGATCAGCTACAGCAGAAGGTGCCACATTTTATTTCCCCTGAGAGGAATGAGG  
AAGGTAATTGCGGAATATTGTCAACAGAGCTTGCCGGATCCAAACTATCAATGTAATTCC  
AGAAAGACTTCATCAACTCGTAATGAGATCTGGATACGCTGTTGATTAAAGCTGTCATTT  
CACTATTGATGATATCAGCGACGTAACCATCCAGGAACTGGAATCGAAAGACATTTGTGG  
TTTCCGCACGATCATCATCCCAAACATTCTTGATGCTTAACAAAGCTTCAAGATCAAAC  
TCCTGACGCGAACTTGGTACTCCCTGTCATCGTAAGGATAAGGGATACCAATGTCAATGT  
CCCCGCTAAGAACAGTTTGTGCATCTGCCTTTCTCTGATCCTATGGAGAGACAAGGTTGG  
CCGTACTTTCTCCTTAAGTGAATCACGTACAGACCAAGTTTGTGCCATTCTTGGGTTT  
GGTCATTAATAATGTGCAGCGCCTTCAGTGACCACATCCCGTTCAGGCATTTCTTTGGGAA  
TTACAGGGAAGTGAGCTACTTCGACACGGCTTTCAGAATAGAACCATGAACCGGTGCTCT  
CGTTCGGATTATTCGTTCTGAACTCACAAAGATCTACTTGATATTGCCCATCAGACCTTC  
TGATTAGAGGGATCTATGCGTAAACCACATTTCTCTCCTTGCGAAGGGGGCAGATGCC  
CCTTTATTAATTGACAGGCAATGCGGTTATACCTGTCAGGTCGGTACGGTCCCCGAGGAT  
AGGAACAACCGTGTGGGTAGTTCCAAGAGTAACCGCTGTGACGTTTAAACATGCTAGGTT  
GCCAGGCCACGTCAGTGACGCACATGAGCCAGAGAACACTATAACGATGTTTCAGTGCTCT  
GGGTGTACGTAGGTTAGTGAAGCTCATGGTTTTGTTTGTGTACAATCATCCTTGAAGTC  
TTGAGACACGCCAACATCGATAGCCCCAGTTGTAGATGTAACAAGAACTTTGTAACGATC

CAGTTTCTGCCACGCATTGTATACCCGGACACAATAGCCTGTATCTGCTGGTGCATCAAG  
TACCGGAACATCAACCCAGCCTGCATTTGTTTCGAGCTCGCGGAATGGTAGGGGCTCTATC  
ATAAACGTTTCCTCTACCCATGTTCCCCCGCGAAGCCAAGGCGCTAGCAGATGCTCTCTG  
GAAGTATTCTAATGTGGGTTTATTGATGAAGAAATCACCGATTTCGACCATCCGCTGGACC  
GGGGTTACCGGAGAAGTTTGACCAAAGTACACCTTCGTCTCCTTTAAAACCCTGGATACG  
CTGAATATCTTGTGGACCCTGTGGACCTTATGGTCCGACATCGCCGGGACAACCTTGGAT  
AGGTCCGAAGTTCTCATAAAGTGGTTTCCGTCCAACCCAGAAATCTCCGTACAGAAATTA  
AACCTGACCAAGCTATCCATTGGAAGTAAGTTCAGTGATATGGCCGAGTTTGCCGAGGGT  
TTCTAACCCAGCATCCATCTGACACTCCTGTCTTTTGGTCTTTGACGGCCATCTGGACC  
TGTC AAGTCCCCGATCGGTTCCCATGCGGTCGCGCGGTA AACATAAAAATACTCTTTGTT  
CCCACCGGAGGTTACTGAATAGATCCAGCCATGTTCTAGGTATTGACCCTCTAGCAGGT  
CCCATAAGTCGCAATAACACCTTTTGCAACGATACTTGGACCCATCGGTCCTTGGTCACC  
TTGGATACCAGGATCACCTTGTGGGCCACGCATGTCTCCAAGATTTACCCAGTTCGTACC  
ATCGAAAGCAAAGCTTCTCCAGTGTACACTGTGGTCTAGAGCTCTTCCGTTGCTGCGCC  
GGACGGCCAAGCTGCTTGGTTGGCTACTGTACCTCTGGCATTGAGAGAAACGCCCATTTGG  
ACCCTGTGGTCTGTAGCCCCTGCGGGTCTTGGAGTCTTCATCACCTGATGGCCTTT  
AGCCCCCTGTGGGATATCCGACCAAGTATCACATATGGGCATGACATCTCCTGTAGCCCC  
GGTGTACACCTTGTGCGCTTTTGGATAAACGTATGGACCTACGTTTATCCATTTAGCGTC  
AGCCGGCCTCCAGACGTATACGTTTGGTACTATAATCCAAGCTTCGCCTGGTGTTCCTGT  
TGCAGGAAGACCTGAAACAGCACCTTTAGTCCCAACAACACGATCACCTTTAACAGCCTC  
ACCACGATCACCTTCGGAGCTTGAGGTCTTTGTGGAACGCGAGGGACAGTTAAACAAGT  
ATCGCCCTTAACCTTGGACCGATAGGTCCGTGAATACCCTGTGGTCTTTTTGTTCC  
GGCAGGACCCTCTGACCCCTCAGGACCCTCTGGGCCTTGGTTCGCCTTTCTGACCTTTAGG  
GCATTGTGGGCCGACATCACCTTGGTACCTTTAGGTCTTGGACGGGAACAATAACTTC  
CCTAATGTCATCAGCTGACCAAACCCCAACGTGAATGCCCGTTTGAACAACCCAGGCATC  
AGGCACACCATTACTCAATTCAGGCAATACGTCAACTTTTGGTCTCTGTTCCCTTCAGTTT  
TCCAATACCGGCATCGTTACCTTTATTGCCGTTGTCATCTTTAGGTCCTTGATGCCCTGG  
TAAGTCCTGAATCCCTTGTATACCTTGGTACCTTCTTATCAACGGTCACCTATGTTGCC  
CTTAGGCATCTGCCGTTTCGGTTCGCAACAGTAGCCCCTTGTGGACAGGCAAGCGCTACTTG  
CTCTACCGGTTGTGATCCGTCTGCCTCGCCAGCCCAAACCCACATCTGGTCTTCACTGTT  
GTATGTATCGCTGTCCGAATTTTCGTGAGTTCGGAAGGAGTGATGTAGCAGTAACTGTACG  
CCTGATTACCAATCCTATATCAGTTTTCGCTTGGAGTCCAGCGAAATCGTCCAGATGAGC  
CCAAGTTACTGTGCAACTGTCCAGTAATGAGTTCCTATTTTCGTAAGTATCTCCCTCTGG  
CATGGTTGCCGGAGGAGGAAGTTGGGATGGGCATCCAATAATTCCATGGACGTAAATACC  
AATACCCGGATGACCTTGGTGACCCTTTTCGCCCTTATCGCCTTTTTCACCGGAAGGGAT  
AATAAGACCTTCTTACCAGGGTCCATCACTTCAGCACGATCGTTTCTGGTCGTGGTTGA  
AATAGGCACAATGATCTGAGGAGTAGCAACATAACAGCTTTTCGACCTGCCAATACGAGCAG  
GTTGTGACTGAGACCGCCAACCTCCGAGAGAAAGTTCCTCAGGGGCCACCTACAAAGGCCTT  
ACCGGCAGAAAGATCAACAAGAACAGCGGCCCTCAGCGGAGTAGTGGAGTTACCACCACC  
GAGAAGTGTTACTGAGGTCGTATCCTCTGTGTTGAATAGTTAATCGTACACAAAGGTTCC  
CCCGCCAGTACCTTTTCGGAAGGATTGGCTCCGTGTTGACGACCTTATAATTGTAATATGC  
CATCTTTACCCCTTATTGTACAGGCTAGAATTCTGCAAGTGCAGCCTTGAATTCAGCCAT  
CATGTATTGGAAAGACTCGTCTTTTCGCAAGGGTCATGACTTCGGTGGCGGCGAAGTCAGA  
AAGTTTTTCTTTGCTCGCTTTCTTGTACGCTTCGTGCTCACTGCTTCTGCTTCAGCCAG  
AATTGCTTGGTAACCAGCAACCTTCACTTTACCTGTTCACTTTCAGTCTTACTTCTTACCAGT  
AGAGCCTACAATTGCCCTCCGGTCCGTGATCCGGGACGATTCGGTCTGGAATAGGACTGTT  
GATGAATACGATGTATCTAAACATGCGGTGGGAAGAGTCTTCTGCATCCACATCAGTTCC  
AGAGATCTCAGCAAGCGCCTTGAATTACTCAACAGAGATGCGAAAAGCACTTCGTTTATT  
TACGACGCAAAAGCCGTTTCAGAGGAAGACGCGCAGAAATACGATCAGTCAGACCGGGTGC  
GTAAGTCCCAAAGAATTTCAACAATTCTACGATGGTAGGGAAAATACGATAGTTTTGATT  
AGCCATACATTCTCCATTTGGTTAACTTAGTAAAACCCTTACACCGTTGATGAAGTG  
GCTGTTATTAAGGCAGAGGAAGAAAAAGAGAGACGTGAATAATCGCTTCCCCCTCTTAGA  
GGTAGCTGTTACGCTGTCTATGCGAAAGCACCAAGTGGAGCGAACATCCAGATCCGGGCG  
GGTGTAAAGAGTCAGGAATGAAGTTTTCGCACTCACTTTTCTTCTCCAGATTTGCAGA  
AGCTAAGTACCGCAGGTACAGTCTTGTGCAGGAGTGTGTGCTTACGAACGCCATCTGC  
TGGTGCATAGTGAATCTGGCACATGTCGTAGATATCTTGCGGCAGAATGTAAGCTTCCCC  
ATCTGTGAAGTATTTGGAGATATCCTCGATGTAAGTTACGTTCTTCTGCACTAACATGCC



CTTGTTGGCTTTTTCTGCTCCCGGACCCGGAGGCCGAGGAAGCGGCTCTTGAGTAGAAAA  
GTAGTATTGATAAGCGATCATTACCATCGGATGAGCGATCATCACCGAGAAGCCCTTACG  
ATAAGCCAGCCCTACGATACCGTGGTTTTTGTATTGGCACACGGTTTGTCCATGATCTA  
AGCACGAGCTTCAGCTTCCAGAACCTCAGAAGTGTTCGATTGCAACATTTGTGAAGTCAAT  
GTATGCAGTATGCTGAGTAACACCCCACTCGCTGAGGTGGTTGTAAGTACTGAGCACTCGTGT  
TTGACGTGTCCAAGATTTACCCATGATCGCCGGAGAGACTGCTTTTTCTTTCAGTTGCTC  
ATGAGAGATGGGGCAACGACGAGCCACACGAGCAACAACCTTCTCCTACAGTCTTCGGGGC  
GTCAGTAGTGTAATACTTACGGAAGTTCTGTACGTCAGCCGTAATGATCTGACGCTCATA  
TGGGAAGAACGGGATGTTGAAGTTTTTCGGTTGCGCCTTTACAATCCCAACGTAAGTACG  
TTAACCTGACGACGACGAGTCCGGGAAGCAGGTTTCAACTTAGTGAACACGTTCCAAGT  
TGCGACAGTTCGAATCACCGTGGTACACTTTGAACAGGTTCCAGCTAGGCGACAAGACGGTA  
CTGAGGTGGTACGATTTCCAGAGTTGCGCCAAGTTATTCGTTCTGGAAGGCGTCAGAGCG  
TACGACTCCCTTTGTTGTTCTCCTTGGTGTATATTAGATAGACGTTACAGGGATCTCATC  
AGAGCCGTCCTAATATTACGCGGTGATCTTCGGACCTTTGGCCTCAAGAGCCGCGGTAGC  
AGAGGCGTTGTTTGCAGTAGTACCGCCAGTGAAAAACGGTTTGGCTTTGTTTCAGGGTAAG  
ACCCCGAACTGCCCAACTAAGTTGTAAGTACAACCAACCACGAAATGACGAGGAGTATC  
GTAAGCAGGACCCAGATCACGTTCCGGGATCACACGTAATGCGTCAGCAGCAACGGAAAC  
GGCCATTGGATCGCACGCGGCGTTACAATCAAATCTGCTTACAGACCAGTTACGAACTC  
AGTCGGTATTTCCAGGAAGCTGTGGCCCTGGTCAGAATAGCCCACTTTACCCTGAAAAAT  
GTCAGAGTAGTACCCATGGATTGTATTACCCATTAATTTAAAGCTCCTCGATTAGACGTT  
TAGTGCAGCAGCTTCACGAGCGCGATCTTTCGCTTCTCGATGTTAGCGTGAAGGACGTC  
TTTGCCAAACGTGTTGATGTCGTCGCCAGTTCGTTACCGTCTTTTCCGGGTTCTGCAGT  
GCCGGACGTTTTCTCACGTTTTCAACTTCTGTCTCCAGTTCGCAAAGACGTGCTTGGGC  
TTTGTCCAGCAGAGCTACTTCCGGACCGTTAGCAATTGCGATGATGACGCTGCCGGAGA  
AGCCTGGTCAGATTCTTCAGCAAACGTGAAACCTTGTGCTTTAGACAGAGCGTCTATCTT  
TTCTGCTTCAATAGCGGCCTTGGTGTATTTCATCAACAACAGCACCTTTAGCTTTGCCGTC  
GCCAGTTGGTTGACCAGGTCAAGGTATTCCTGTGGCTTAGTTACTTCAGGTAATCATC  
GGATACAGAGGTCTCCTTAATTTCTTTGGACGTATCGATTACAGGGCCAGGACCTGCTTC  
TTTGACGAACCCAGTTACCTGGAGATATTCGGACTCACCTTCGGAGATGGTCAGACCTTA  
TTGAATTACTCCCTTTACAAACAGTCGCTGAAGCTTCAAAGTTTCACTGTTTAAACAAT  
GTCGATTTCTTCTTGGCTGTGCGCTGACTTGGCGATTAAGATTGACTCAATACGCCCTTC  
CAGCCACTCCTGGTGCTGTGCGTTCCAAGCTTTGGCCCACGCATCGTCAGGGTTTTTCAGG  
GCCGCCATCTTCAAGTTCAGTTTGAAGCCCATCAGTTTTGCACGCAGTTCTGCATCGTC  
GCTCCACATATAGAAGATCTTACGCAGGAACCTTTCGAAACTCATGGCACCCGGTAACCTG  
TTGCGGCGCCTTGATAACGTCTTCGGTACCCATTACAGTTCAGGTCAGAATTGCTCAG  
AAGTGATACTGGACGGAGGTTTGCAGATAACCCTTGACTCTCATGGCAGAGTACGAAACC  
TTTTTCCAATACGGAATTGGCTTATGCAATTGTCATTCGCCAACTTCCTCAACACACTCT  
ACACGGAATTCAACGATGGTGATTTCTCCCGCTGCTTTATCGAGTGATCCGGAACACTGA  
ATGCTCAGGCCACCAACATCGTTGGTCTTTTTAAGGTCCCACAATACAGGGTTCGTTATAT  
TTAACTTTTGTACCCAGGCGCCAGCCCTGAGTACGTGCTCGGGCCGGATAACCAGTACA  
TGAAATTATTCCTGAATCCAAGAATACTAGACTGGGCGAGAGTCAGTCTCAATCACGTTG  
AAGTGATTCTTCTTACATTGCCAGCTTCGTTTGCCTTATGAAAAGTGTCTTGGCCTTA  
GCGATTTTCTCAGCAGACATCCATTCCGGAGTGAGCGTCCTAGGCATCTGTTCCGTAGATA  
ACTTCGTAAGAGATCATCTGATCGTCAGCGTCTTTCTGGATGCTCAAAACAGAGTTTGAC  
TTGCTGATTTACAGACTTAACATTCATTTTACATTTGAAATTTGGAAGCCTTCTCGCTAGCG  
GCTTCAGGAGATTGGCCTGAAAGAATCAGTCCATTTGTAATACACAGTACCTTGCTCTTC  
TGAACGAGAGACAGCTTAGATACCGATGCAGGCTGGTCAGCCATACTTGTGTATTTCATG  
ATTCACCCCGTTGTTAATTATTTTAAACACCGTTCAGTTTCTTTTGCAGGCTCTCTCAGTA  
ACTTGAATTAATTATCCCTATGGAATACGGTATAGTCTTTTTTGGAGGAGATTTTGCCT  
GTGCTATTAGAGTTAGAGCCTGCTGCCATAACCATACCCGGAGCGACTAGTATCTTGATCA  
AGTAGTTGCAAAGGTTGATAATTTGATATGTCGTCGGGGATCTCTTCGTCAACGCCACCA  
ACTTCAGGAATCTTGTGATAACTGTAGTAGTTTTAGGAAGATAACCAACAGCTCCGAAT  
CGCTGAACTAACTTTGAGAAGCCTTCCATCGCGAATTCTTGGATCAGGCCAGTTTTAAGT  
ATGAGCATGTCTTCGTCTGCAAGACGCAGGTCATTCAGAGACAGAAGTTGTGGGATCATG  
TCCGTGTTTAAAGCCTAGACAACGATGTTGATGTCACGTTGAACGAAATGCCCGTGGCTG  
CACTGCGTCGATTCAGATAAGCTGTAGGACCCCTGGCCATCGTTACCATGGCTGATCAAT  
CCATCGCCTAATCAGTCGAGAATTTCTTCTTTTCGAGAGCTCACCTGTTCCAATGTACTG

TACTGATTACCTGCACCGTCAATACCTCCGTGAGACATCTTGTACTGTTCCACCACGCTGA  
GCGTTCATGTCTGAAGGCAGGATGAAGTAGGTTTCCTCACCTGCGGTGGCTTTTGCAGCA  
ACCGCCATCTATCATTGAACCATTTCCGATTCTGGTGATTGCGGTTCAATCGCTGCTTTG  
TTCAAGATCTGAGCACGGACCTTGAATTCGATGATACCACCAAAATCTTTGGAAGCACAT  
ATTGGTTCGAGGTTTTCAATCAGAGTCTTTTCACGGAAAGCACCTTAACACCAAAACAAGA  
GGCGCAAGACCGTCAGGCGGTGACACTGTATCCCCAAGACTCATCACCATCAGTTTATTG  
ATAGGAATGAAAACCTTCATACGCAGAGGAGGTCAGATGACTAATCAGTATCATAGAAGTG  
GAGATTTGCGTCAGACCGATGTGGAATTTGGCAATGGCCATATTACTCTGGTCGTTCTCT  
TTCAGGGGGCGCCCATCCTCATCAAAAACCCAAGGTATCGAACGAGAAAGACGTGATGGT  
GGGTTAAAGGGAAGCTGATCACTGGTTATATACCCACCATATTTAGATCAGGCAGGTTCA  
GGGCGGTCCACCTTCTCAACCATGGAGAAACCATACTCCTTAAATGTTGCGACACTAATA  
GCCCTATAGCGATGAGTTTGCTGGTTGGCATGGTCCTTCAGCGCGTATTCTATAAACTCG  
GCTCCATCTTAGGATGCCTTACTATCACGATTATGCATGACTTTGATATCATTGAACGCT  
TTCGTTACGAAAACATACTTAGTATCAACCGCCGGGGCGACAGTATCGTCCTGCTTCATA  
GGCTCGACGTGTGCGAGAAAACAATGCCAGCGCAAGACCCCCACCTTCAGCAGTTGGGAT  
TCAGCACGAAGCTGTGAAAGAGCGACAGAACCTAGTTCCCCGGTATGAAGACGAATACCA  
ACCAGATTTTCGTTTCCTGTTGTCACCACCTCCGATGGTTCGTGCAAATCCTGTAGACACG  
AGTTTTCCCCTCTGTAATATTCAATTGTACAAGGTCGGAGGAAGAATTTTCGGGATAACT  
ACAGGACTGACGATATCCTTCTTATCCCAGAAATTAATAGCGGAGCCTACGGAATCCGCT  
AAATCATTTCGTACGGGTTCTTGTACTTCGCTACCAATAAACTTTTTTAGTTTCAAGTTGTT  
ACGGCTTCAATTTTCTTAGCATCGAAACTGCTTCTGACAATCCGCACCATTCTGACTGA  
GCAAGTATTGCAAAGGAGTGTAGCATGTGAGTTTTGAGTTAGTGGGTGGCGTCGGGGTT  
CTCTCAACCAGACACCTTTCAGCCAGAATCTTACGAGAGCTGGTTGTGAACTCCCTAATG  
CCTGCTTGACCGTGGTCAAGGCTGAAGATGATAAATACATTATCCCCATCGCATTGGGCT  
TGCTTTTTAATGGAATCATCACGTTACCAGCTTTCGTACGGGCTCGGCCTTGCGTTTGA  
GTGGAGTATTGACAATCGTCAACAAAGTCAGGGCAATAATCACCTGAACGATAATAACAC  
CGATCAGAGGCTTTACTTAGATTCACAGATGCGGTAAAGTCAGCGTTTCTGTTACCAGTT  
CTTCGTTCTATACATGCCTTGTAGAATCGTCTAACGGACGTAACGCCCGGTGGTGGGCAA  
GGAACGTCCTCGAGAAAAGATCGCTGGAAATATTTCTGACCTTCTGGACGAACGTGCCAG  
TTCCCGCGGAGTAGCTGTGCCTTTTGAATATCCACAAGACCCTCAAGGTAAGGAAGATAA  
TCTGGGTTGGTGTCAAGCAACGGTGGGTTAGCGAAGATAGTCGCACCCATTAATTAGAAG  
GTAAGTGGTTTGGGCATGTTACGAGTGTCCAAACCGTTGCAATGCTGCTCAATAAGTTCC  
TCTGCTGTATTTCCCCAGAGGAACTACCGTCCCAGGCAATGAACCAACGGATAATCTCG  
TCTCGCTCCGCAATAGGGAGTCATTCATCTTCGAGATACGACTCAATCCACTCTTTAATC  
TTGTGGTCTGGGTCCGGGTTGCGTGTGACGACCATAAAGCTTGTGTATATGGGTGCAGAA  
CGCAGACGAGACATGAGGTATACGATCTCAAGCCATTCATACTGTGTACCATCGGCAAAG  
CCAACAAAGGTGTACTGTAACCCCTGGTGAGAATAGTTGTCTTTCTCATAATCCATGTGG  
GACAATTTTACGTTAACACCAGATGGGGAAATTGGTTCCAGGTCTTTCTCCCTGAAGCGT  
GGTATCAATCCCAGATCAAGCTGTGTATAAATGCCACGTGCGGTATTCTGCAGACCACGA  
CCACCCTTCAACCAAGGGGTGTGTCTACGGAACATGATGCAGTTCGTTTCGTCGATCGTCG  
ATGATATTTATCGGTATTAATTGAAGCAGGTAGGATTTGCCTGATCTCGCCGCACCCCCA  
ATGATCACGATTCGTGCGTCTTTTCCAGTATCATTTCCTTGTAGGACAGCCAGGTCCG  
AATGTCTTAATCAAAGACCTCCATTTTAAAGGCGTAGTTAGGCCTATAGGACGCAGTTG  
ACCGTTAACCTAGACAAAAACACTGCCCTTATGACCAAGTAGGGGCCTCGTCAATCACTT  
TAGCGGATTAATAATGTTACGGAAGTATTGTTGCCGAGTCCTTAAACATGCTGCGGCCGT  
GGTAGCATTACAGGATGTTGGTTTTTCATGATGGCGCTGTTCTCAGAGTTTGAAGCAGCATA  
CTTAAGGGGAGTTGGCTCCATAAGATCAACCATTGCAGCAGCATGTAGTTGTGCAAGAAC  
CTTTCAGGGTCAAACCTTCTCAACTAGCGGAACAACATCAGGCTTCCCCTGACAACCAAC  
CCGTAGGGTGACTGCCATGAGCAGTGCCCTTAAATTCTTTATTCATGTCACCCACAGCTT  
TAGTTGTAAATGTCAACAAACTGGTTGGCAAGCCCTTCTTCTTGGCTGCACCAGACGTG  
ATGTAAACGTCTTGCTTTGCTCTAAGCTGTGCCTGCAATTCTGCAGTTTTTGCCTGCTCT  
TCTGCCATGGTCTGTCAAGGATATGGGTTGCGATCTGTTGTTACCCCTTGTAAGAATGA  
CTTTCATCTGTGGTTTGTGTTGCAGATCCTTCTATTTTCGATCGGTATCACTCACCCCT  
AAATTGTAGGACTGCGTGCTCTGGTTCGTGATACCAGTGCTTTGCAAACCTATCCCCCTCA  
ACGATGCTGGCAAGCAGTATGACCACTTCGATTACCCTTAGTGTGCTTTTCATAAACGTC  
AAAGCCATTTCAAGTAGTATCATGAGATTTCCCCATCGGTAAGAATTACCCGCACGATTT  
TGAGCAGAGTTGTATCCTCATCTTCGTTCTATAAATACCGCATAATTGTAGGCAATCCCGG

TAGGGACGCCACAGACACCTCAAGAAGGACAGAGCCAGGTAAGAGGTTTTTTCTCCCC  
ATCTCCCAGAGCTACCTTTCCCATCCCACCACTTGTCTACGTTACGGGCGTCCTGCCCCG  
CTAGCTGAAGGTTTCATCAAATCAAGGTAATCTTGTCCCGGTTTCTCGGCGGACTGCCAA  
CTTTGTGCTTTGCTCTACAGCGTGCAACAGGCACAAGTTGTCAGAAGGACAACTCCCC  
GCAGAGTTTTAGACTCTGGCCTTCGAGTATGCTGTCTGAGGCGTTGGCACAGGACAATGA  
TATGTACCTCTTCAAGACCTGTCCGACCAACTTAACCGACCTTCTGAGAGCCCCGTTGCAA  
TCACGGGGATGGTTTTATCTCTACCACTCTCCAGTTTATCAAATCATAGCTCAAATGAAA  
ATGGCCTTTCTTCATCGAAAATCTCTTCAACGTTCTGACCATCCATTCCAATCTGGAGGG  
AGTTGGCACGTTCCCAAGTTTCAAGACTGAGACTAGAAGCTGCAATGCCAAGCTCCCTGT  
TCACCCGGCGAGAGATTGTATAACCGTGAGCGGGGTACTIONTATCAGCACGAAGCATACTAC  
TAATCGGGGAATCCGTCTTGGGATTCTAAACCATAACCTTCTGAGCGATGTGCTTCATGA  
AACTTTAGTGATACTCCCCTGCTCTTTTGCAAAGCTGAATGACCGAATATTAACGTTT  
AGTCAAACCTTGTCAAATATCTTCTGTGCATCAGGGAAAACATGGAATGCGATAGATTGCC  
GAACTGGTAGCTATTTTATCGGTAACATGACACTATTTTTCGGTTATACCGATATTGTCA  
ATGTTGTCAATCTTACTCTCTTTAACCGCTTGGGTGAATTCCTTAAAAACCTCAACAGAC  
AAGTCTTTCAAGATTTTTGCCAAGGAATCAATTGACAGGCGAGTCATGCGTTTATCTTCA  
GCTTTGATCACCAGGAGAATGACATAATCTTTAAAGCTTCCCAGATCGTCAAGTTCCCTT  
AAATATTTGAATGACAGTTTGGAAATGCCTCAGTTCTCGGCCGCTTTGTGAGGGCTGAT  
TGACATTACAAGAGGCTACGATTAGTCATGTACGCAAGGAAAACCTCACAGGTAATCCCAT  
GAAGGGAATTAAGGTTTATCTCGCTTACTTCGCGGATGGAGAATAAGGATGTGATTGTA  
CGAACCGCAACTGGAATGTGCGAGGCATATACGGATGTCCATCAACCCGTTTGGAAATAAGG  
CGACGGAGGATCAGGTATTCACGTTGGTATGGTTCTTTTGGAAACATATATAGCATGGTT  
TACTCCTTTAGTAATCAAACCATTTGGAGTGTCCAGAAAAATAAAAGCCCCGCAATAGCG  
GGGCGAGCGATAGGAGACGAGATTGAATATTTATTATGATTAGAGTAAGACAAGTGGCGT  
ACGATCCTTTGCTCGTCAAGGATGTCTTATCCTTTCGACAGTCAAGGCCTTCTTTTGTGT  
CCGCTTAGTTATTTGAATGCGTGATCGGGACTCGTATCCGCAATCTTCGGCTAATGAGGC  
CAATATTATCTATATAGGCTTTTCACTCCCACCCAATTGTTTGGTGGGGCCGGGTGGACT  
CGAACACAGACCGTCTACTTATCAGGGAGGATGTCTGCCAACTGAGTTACGACCCCATG  
TAATTGGTATTTCTGATGGAAGTGTACCACAGACGCTTGCAGTGTAAAGACAACGTTAT  
ACGATTGAACTAAGGAAGCCTTAAAGTGTGGCCGTCAGGGGACTCTAACCTTAACATC  
CGACTTCTACGAACGGCACGTATACCAAGTCCATCAATCGCGCAAATACGTTGAAGTCCC  
ACTGTCATCCTTATCAGCCAGAATCCTTATGAAGCATTATCATCGGCCCTGTAGATGCTA  
TCATGAAGCAGCGCGTCAATGCCTTTGTTTGGTGGAGAATAAGAGATTTCGCATTCTCCTG  
ATATCCCCGGTGGAACCGATGTGTCGACTTCACGCAGACCCTTACCCAGTTGGTACAAT  
TACCCGGATTTCGAACCCCGATTCTCAGGTTTATAGGCTGATGCACTGTCCAGGTCAACTA  
TACCTGCATTAAGAATATAATGTTTTCTACCCTTAGGTCTAGCCAAGAAGCCAGGCCCT  
TTTGGCTGGCACTCAAAGTCTGAGTAATGACCATCGGCGATGGTCATGGTCCCTGATACT  
GCGGCATCAGAATCACGACAAGAGATTTGATTAAGGGGCATGATTTGTAGTCTTCCAATA  
TCACAATTTTAAATGGTCAGACCGGCAGGACTCGAGCCTGCCACCCGAAGCAACCAAGG  
CTCACACGCTCCCAACTTCGCTAGCGACTGTTTCTGTAAGCAATTATTGTCTCAGAAGCT  
TACAACCTGGTATCGCTAGCTAGGTAACAAGTTCGCTCAGGAAAGTTGGAATTTGCTATGA  
GGTTGTATGGCGAGGCCGATGGTTATTGAACCTTCATTTTCCGCATATACAGTGCGGCAG  
CATTCCGTCGTCAGCCACGGCCCCATAAATTTGGCGACGAGTAGAGGATTTGAACCTTCC  
TTGATTTGTACTCGCGGCTTAGCACGCAGTCGCCAACAAGTAGGCCAAATCGTCATTT  
GACTACATTATCAGTTATACAACCTTGCGCAAGAATAGTTTTCTTAATTTACAAATGG  
TGTGTCTGGAGGGATTCAGACAACCAAGCCTCAGATTAAGTAGGATGCTTTTGGCTTG  
CGTCACCACTTGGATACAGCACCGGTATTGGGAGGAGAGTGGAGGAATCGAACCTTACC  
AATTCCAGCACACACGCTTCGAGACTGCTCGTCCACCGTGGGACGTCCTCTCCTTACG  
AGAAGATGTCAGACTTTCAATGATTCACCCCTATCGGGGCTACTGTCTCTTTGGCAAGGA  
GATCCCATGACTGATTATGGTTACTCTTCCAGATGTGCCCCTGTACCAGGGAATCTAACT  
CTCAAGCCGTTTTACCATTACGCACGTTTCAAGGGGGTTTTCTCAACTGTTTGTGTTGCC  
TCTCAAATTGGAGGGACCTGTGGGTATGGCGCCCTCTTCCCCAACGACACGGGTTGAAC  
ATCACCTCATGAATGCTTGGGCCACACGTTGAGGACTGTCAAAGAAAATGTTTACGATTTG  
GGTGGGCGAGGAGCATTACACCTCCGTTGTCGAGTTTCGAAGCCCTAGGCATCTGGCCAC  
CTATGTTAACCCCTAGTTGCGTGAAGGTGAGGAATCGAACACCATATGACTGGTTTTGG  
AGGCCACCTTGACGCCACTTAAATTCTGTTACCTGCGCAAGGTTTCGCGCCCTATGCGGG  
GATCGAACCCGCAATCCCACCTAGAATGGGTGATGACTTTACCTATATGTCTAACACGA

CAAATTGAAGCGACATGCCGGATTCCCACCGACGCCACCGACGTGGAAGTACGGGATGCT  
GGACCGATAACACTAATGACCCATAATTTTGGTGGGAGTATCAAGCTAAACCCCTGTGAC  
ATAACGATTATAGGTCGAGCGCTCTACTAACTAACTATAGTCCCTTTGTTTTGGTGGTA  
CACCCGGGATTCGAAACAGGAACCCCGACGGGCACGGATTTTCAATCCGCTGCAAACACC  
ACTCAGGTTTTGAGCCAAAATCTTTATAGCGGTGGAAGCCCATCAGCACAGAAGCTGATG  
ATCTAAAACCTTAATCGCTCCGATAACTACAAATTTAGCAGCGCATGCTGCTGGTCCTGCC  
AATGCACCAAATCCCATAACTGCCCGATTAATGCAATAACAAGAAACATCAAACCCCAA  
TTGAAAATATTAGTATCCTCAGATTAAGAGGTTTCGATTAACATTTTCGTTTGAAGGGAT  
CGATGTCGGGAGTGAAAGGTTTTGATGGAGCCTTCTACGTAACCTTATTACGGTCATCAA  
CGTTTGTAGTTTTTTCTTCACTTACAGTTTCTACGTCGAAGTAATCAGACTTTTTTTCTT  
CGCCTTTTTTCGATGAAGAACCGGGCAATGTACTCTCTTATGGTGACCTTGCTGCTGGAAT  
TCATCATCAGGCCACGTAAAACCTGGTGTGCGTAAGGGATCACGGGAAACAACCTTTGTCT  
TCAGGTCAAGAAGATTTCGTCTCAAGGCGACTTGAGTTTCATTCTCTTCTAAAGGAAGCC  
CTTTCCACCACGACGCTTTGTAAGCTGTTGTTTTCTGCCATAATTAACCCACCCATT  
AATATTCTTATAGATGTATTTACAGACAAGGGTTATGTTAACATCTTTGACTTTGAATT  
CAAAGTCTTCGAGCACTGTGAGGGATTTGAGCCCTCGACATTCGTTATGAAGACTAAGAT  
GGTACCCTTCAGCAACAGTGCTTTGTCGAGGCAGCATGCTTCGAGCCC GCGTAAAGGTG  
TTTAGCAGACTGCTGCGTACCCGCTTGACTATGCCCCGACAATTCTCGTGCCCATGACGG  
GACTCGAACTCATGACCATTTAAGCAGGAGATTTTAAGTCTCCTGTGTCTTTCCATTTTC  
ACCATTCCTGCAATCCTAGTACCTGAAATAAGATACATCAAAGTTTTTTCCAAGAGAAGG  
TCCACCGCTTTCTATATGCAGACCATAATTTCCCTGAGCAAACCGCGAACACAAGTGAAC  
AGATTTTTTATCAGATCTGTTCTCGCTCTGTGATTTTGACAATGTAAAGGTATACACACA  
CCAAAGAAATTTGCAATATCTTTCTTTGCTCTTAGACCGCTCTTTTCTGCGTTAGCATT  
TCTTGTTAAGACTTGCAGATTAGTGATGAAGTTGTTACTCACATGACTGTCTATGTGGTC  
AACTGATTCTAAATCTCGAATAAGCTTTCTTCCAAGTCGCATCTCCATAAGAACTTTGG  
GTAGCTTGTTGTTATTTGAATACCGTCATAAAGGTAGACGATGACATGTTGCATGCCATC  
ATCCCTAACATGCCGGCCTAAAATTTTTCTACGCTTATCGAAATACATACGCCTATACCA  
GTATAGACCACGGACGCAAAAAATATTGTCAGCTGCCTGGTGACTCCACCTACCTCCGTA  
CACCAGAAATGGTGCTCTACGGCCCTAAAGCTTCTGATACAGGAACGTGGCCTGTGTCCC  
AGAAAGCCGATGTCGTGAGGATCATTCTCCGCACAGATGATTAGTCTGTGAATCAAATGA  
TATCAGCTAATGCACTTTAAAACACGATAAACATCTTATGTACGGGCTGAAGTCCTCAAC  
ATCGCGATATTCCTCATAACAAGTACCCCGTGTGTTGCGACACACCCCGCCTGGACCATTCT  
GTAATAATCGGCTCTCGCGATAACCAATTTGCGGAAGCACCCCCCAGTAGGTGTAGGAAG  
TTTTTAAGATTCTCAAACCCGGACAGCAGCTGTTGGGTACCGGATGACGGAAGCGACCCG  
GATGTGTCTTCTCCTCCTACTCCACGCTGGAGGGTGTGTTTCAGGTCTGGATGGAACCCGA  
CCTTGCCGAGGGTCTACCCGACATTGGCTCCTCGTAGAGGAGTCGTACCGATACTTATC  
GCGAATTTTGGGACTACACTACCAACCTTTGCTAAGGGGGAATTGTAAGGTCTTGCCGGT  
AGGAATCGAACCCACGGCTACGGCTTACATGGCCGTTACATCGCCACTTTTGCATTAGTA  
CCGAGAATGCTGTTTCCGATAAACTGATCCGAGGTGTGGTTAGCCATAGCCTGTGTGCCA  
ATTACTTTTGACCCAGGATTTTCGATAATCTTCCAGATTTTATCGATGTGTTTTGTAAGCT  
CCAATTTTAAACGTTAACCTTTGAAATTTAATCTTTGAGTGTTGAACTTTAGCCTATTAT  
ATCTCGCCATTCGATGTTTGATCCGTGCGGAGATGTTGTCCGAGGAGCAGACGTCAACGT  
TTCGTCCATATGGTTAAGTTCGATGGAGTCTAACCTCTGGCCTCGCTAAAGTCAAGATT  
TTCTCAACTGCGCTTACCAAAAACAGAAATTTAAAGAGTTTACCGGTTCAAACCAGGAATG  
AAAAGATCTGTTTCATAATTTCCGCAATTAATTATAGAGTGATCCCTCAATCTCTACTTC  
AGTCTTGGCATTGATCTCAGAAAAGGCAACGTCAACGTCCGGAAGTGAAGTCTTCGATCTC  
TGCTTCCAGAGAGGGGATGGTGTCTGCTAGACCCACAACGTCATCGGTAGACGCGGAGCT  
GATCCTGCGGGTAGGACCTTCTACGACCTGTAGTTGTTTCAGCATCCGGAGACTTGGCACG  
ACGAATGTACGGTGC GCGCTTCAGTTCCAGTTTCACGTAGA ACTCAATATGCTCCTTGGT  
CCGGCGAGCCGGAGCATGGTTGTA CTGGGCATTCAGCTTGGCAAGCAGAAGCTCTTTGTA  
CGGAATGGTGCGGTTGCGTGCAATCGCCTGCGCAACTGTCATCTCCTGGTTATTTACGGC  
AGCCTTGGGGGTTACGTCGCACTGTACAATGGCCGCTTTGAGTTCGTCACAACTTTTCAG  
GAGGTCTTGCAAGCCCTGATAGTCTGCTTTAGCAGCTTTCTCAAAGGCATCAACACTGAT  
CAGAGTACCAGGGATCTGACGCTAACCGTCCATTCTTTAGCTACGCTAACAGCGTTAAG  
CCGTTGAACACGTTTCTCGATTTACCCCTCGATCTTGATCAGAGTAGCCAAAGCGCGGGT  
CACAGACATCTTAGCAGACATATTATTCTCCCTCATTTAGTTTTGAATTTAGTATTTAC  
TCCAAATTTATTTGCCGACTTACTTGTGCGGCACAGTATATTTCGGTTTTGTCCGTGTTGACC

ACCAGGCCTTGGCGGTGAGGAGGTGCCTGAGAAATAGCGAGACCATTTTCACGTTTCAGAT  
TTAAGGTCAGCACAAGCAGCTTCACCCTGTTTCAGTAAGCATTGCGATACGATCCTCTCTC  
GCTTTACTATTACCAGTCAGTTCTGACATTTGAAATTTATGAGGAGATTCCAGGTTGTTT  
TTCGCTGGGTTTCAGGTCGATTGGGGCATGGCGCTAACATCAGCAACAGCGGCATTGATC  
GCTTCTTCGTTATTGTCCTGTGCAACAGCCAGTTCCTTTTCGCAGTTCTTCAAGAACAGAC  
GGATCCAATCCACCCAGATTCCGCGGTTTCAGCAGGTTTGAGATAAGGCTATCTGCGTTT  
ACCAGAATCTTGACCATCTGGTTGGATTGTTCTTCAGCCAGCATTTCGTTAAAGTGCAC  
TCCATCAGACCCAGTTCTTGTGTTTGAAGTGCATCTCCTGACTGATCTGCTCAGAGGCT  
TCCGCCAGGGCTTGAAGATCGGCACCTGCCTTGGAAGGTTAGTTGGAGCAGCGGTTACC  
GCGTTGGTGGCACGTTACGTTACGGAAATTACAGTTTTTCGAAGAAGAGATTATGTTCTCA  
TTTTCGTTAAATTAGGTTTCAAATACCACAATTACTGTTTGGGTTTGTTCGAGCGAATCTT  
TGACTGTTTCTTCGGTTGTCGGGTTGTTTTCGGACAACCACCAGGAATGCCAAAGTATGA  
TAACCGCTCAAATAACAAGCACTGTCAGAATAATCATGCCGCCGCTCATCGTACATCGTC  
CATTATAGCATCAGAAAATTCACAAACAACGTGCGCGTTCGAAGATACGATCATCTCATC  
GGCAGGGTGAACAACCTGTACCGCGACCTCCACAAAGGTTCTGCCCCAGTTGCCGAAAC  
AGCAACAGCAGTTACAACAGCATCAACATACATGTGTAACAGAGATTTCGAAAATTTATTT  
GCTCTTTTGTAAAGTTGGTGGGGCACGAAGGATCCGAACCCTAGACCCTCCGCTTAAGAT  
CCCGCTACACTAACAGCTGTGTTAATACCCCGAATCTGGCCCGTGTTTTTCAAGAGGTTG  
CCCGGCTTCGTCACGCTTGATACGGCGCTTTAGTTAAGACGCATCGCCGCAGCCAGCTT  
CGTCTATCCCATGCAGGATGAATTAATTCTTCTTTCTTTTCGACGCTGCAGCGCCAACA  
TCCTTCGCGACTTTAGCTTTAGCAGCGCGTTCACAGTTCGTCCGGTTCAGTGCGAACGCGA  
TGTGAGGCAGAAATCCTCTGACCACCTTTTAGGCGGGAAACTGATTCCCGGGTAGATACA  
ACGGTGCCATATTCATCAGGACGCTTCTTACGAATAGAAACCGTCTTTGTACACCCGCC  
AGACGAACATCATGAGGTGCAGACTGGGTCTGCGTGCAGTTTACTGAAGCTGGGACGAA  
TGTTTGAATACGTCGATTGCAGCAACGTTCTTGTGTTGCGGTTTTCTTAGCCATGTTTTAG  
TTCTCCTCAATTCGATAATGTCTCGTTGACGTTAGTAGTACTAAACTCACTCACTTCTC  
TGTAATCGTTTTTTAAATTGTTTTTCACTACTTCATGAAATCCAGTGAAGGGTCATAA  
CGATCATAGGTATCAACCGAGGTTGCCTAGATAGTATCAGATCGGCTGTTCCATGATTCT  
GACATATTAGGTGTTTTCAATGATACCAAAAACTCATATAGACGTTTCATTGCATCTCCG  
GCGCGGTAGGTGTAGCAGGAAATGAACCAGCCACCTCTGATCTATGGGGGAAGCGCTCTA  
CCCAACTAAGCTACATAACCATTCCGTCTTTGTGGGATGATTACTAATGGTTAAGGAAAC  
CGTTGTCAACACCAAAAAATGAAAAAAGCGCCAGCTTTTTATTTCCAGTGATGCTGGCAA  
TGCTTGCATCTGAAGTCGCCTGGTTGTCAAGACGCTGGTGAGAACATGCAGCTTCTCCG  
CGAACAATCAGAACACCCTGCTTCATCACACCAACGCCATATTGCAGGTGAACAACCTTC  
TGGTTGAGAGTTTAAATTCAGGCTGCTACTGTTTCATGACGCTGATTTTGGTGTCTAGTG  
CGCTCATTTACTGCCAGTGTCCCTTTTAGAACCGCGCCAAGAATAGCCTTTCTAAAATTT  
TTATTTCTCCTGTGTTATGTGCAGCAGAAGTATCTGGATGATCTATTTTACTGTAAGAGG  
TACAAATATAGTTCAGGAAATGTCCGTGACAGAACCATTTCAGTTTACTAACATTGCAGAT  
GGTTACCTTCTTTGGAGCCATGAACGGAAGTCCGCAGACATTACATTTAGTGTACTAATC  
AAAATTCGGAAATGTATCAGGGGGCCAGTCTCTGTCAATCTTCTCAAAGATTGAGTCAA  
AGTCTGGGCTTTCATCAGAAGCAATACCCTATCCTAAACGTACGAAAATATCTACGTCTT  
CAGACTGGGGAATGCCTTCACTGTAACCAAAAAATACGTCAAATTCGTTTTTTCATCTTTT  
TACGCCTTTTCGCGGTGGACGTGTAGTCTCCGCTTCAGCACGGCGCCGCTTGCAGTTTTT  
ATACTGTACGGAACATTCGGAGAGAGTACTTGAGTATGAAGTCACCGACAACCTGGGTAGA  
AATAGGATAAGCCGCCTTCTTTCCGAAGGTTGCCACGTATTGTCATGCTTGAATACCAA  
AGCCAGCCCTAGAAAAAGCCATGACTTTAGCTTTTGTAGTCGCTTCGTCAAGGGTCGGAT  
GGTGTGCATCGCGCTCAATGTATTCTCCATTATCTGATTGAAGAACAAGCTTTTCATTGAA  
ACATAGTGTCTTCAGTTAAGTTGTTAAGAATTTTCGAGTGGCTTCGATAGCATCGATCTT  
AGTAGTTGTAACATAATTTGTTCGATCAAACAATCCCTGTTGCCTTGACACCACGACGATA  
TTCCCCCAGAGCTAAAGTGTGGGGTCAAGCTCATGGTCATCTTCATTTCAGATTATCAAT  
CTCAAGGAAATGTTCCCTCCAGACCATCGAGGCTGTACGGCTCCCAACCCTTCTTCTGGTC  
TGTGTGTGCGGAGGCACGATCAAATCATGACGACTAACTGGATTTTCGCACCCAATTTCT  
CCTTTTCTCTATCTCGCCACATAATTGGATCGTCAAGGTTCCCTAAATGCTTTTTTTCTTT  
TATCAGTCCCCCTTTTTATTTTACAACATAATGCTCTCGTTTTTCAACCCACGTTCTGT  
TACCATGTCCAGTGTGTTGAAGATGCAGTGACATTCCATTGTTTCATTTTCGCGTGTGCTT  
TCTTCAGGTTTACCCCGCATTGTTGGTCGCTATCCTGTCAGCATGGTCAACAAGTTCAG  
GCATTTCTCCAGTCATATAGAGATGGGCAAGTGTATGAGCCAAGTGTAGATTTCATCAA

TACGTATTACAGGACAACCATGCTCGCCGACCCAAGAACAACACTCTTTTCCACCATGGCAGG  
TAGTGTCTTCTTTCTTAAAAAACCCCTTTTTTAACCATGTGAAAAGGCCTGTCTGCGGAT  
CGTGATGCAAACGGGTTACGAGAAACTCTTGCGTCAAACACTACGCGCTGGATTCTCTTCC  
AGATCAATGTTTCCGGGATTAGTGGGTAACACACCGTTTTACCCTTGCTCGCGTTCATG  
TGATGACCGCAGCCCAAGAAAAGGATGCAAGCGCCTGGTCCGAGGGCGTCAAGATAAGCC  
TCGAATTCTTGTTTACAGGCTTTGCACTGCATCATGAATGGTCCTACCCTATTAGCCTCG  
TCAATATCAAACGGGTTATTTGGTGTGTTATTACACGTAAGGCAATCTCGTACTGGTACC  
TCATACCAGTTGCGTGGTTTTTCCAAAGCCTACCTCTCAGAAAAGCCCCGAAGAGTCTG  
ACAATTTAAAGCTGAGAAGATGCCCGAACTCGAACCTGTGTCAGATGTTTCGTAAATCTCC  
AACTGACCCTTTGGGACGACACAACGGAGTTCGTTACCACGAGACTGTACCTCATGCACC  
TCTAGACTGTCAAGCAGTTTTAACTGATTGTGTCACCAGGAATATCGATCAAAAACCCCT  
TTTGCTGAGATCTTACCGAGGTCAGTCTACGGCTCTTTCTTAATTATGATCAGCTTGCCG  
TCGATATCTGCACCCGTTGATTTACAGCCATGCCAGTCAATCAATAGCAATGTACTGT  
GTTGTGTAAGAACCAACACAGTACACGATGTTACTCGCTGCAAAGCCACGATCTTTCAGT  
CGTTTAAAGATAGCTTTTGCACGAGCAACAACGGTAGAGTCACCGTAGACCAGGGCGAGA  
TGACAATAAAGTACCTTGTACCCTTTGGAGTTAATTTTCGCAACCAAAGATTTACAACATA  
CATTCTACGGCACCTTTTCCCTCATGATCTCCAAGAGCTGACTCCTGGAAATAAAAAGAAAT  
ACATTATCTTCATCCTCTACCAGAATGCGATAATGTTTACCCTCAATCTTCGCAACTCGA  
GAGTTTGCCACAGCCTGTAATGCTGTGATAGTATCGGACCAGTCGTCGACCTCTCCCCAA  
TAACGATACCCGGCAATAACTTGCTCAGGGATACCTGAGTCAGGTCGAAACACAACACAA  
CATCCACGTGAAAGAACTTCATGTTTCCAGATCTCTGGTGATTTAGTGATAATCGCTCAG  
AATTCATAGCTATCGGTAACATAGGAAACTAAACCGCTGGGAACAGTTTCCGTTATGTAG  
CGTTTACGAACTCGACTTCGGCAAGAGAACGTTTATGATCAAGGCTCAGGCATTCTTGA  
TTTACTGTGATTTCTTCAATCTTATTAATGATGACACAAGTATTGGTTGTTGGAACACTG  
TGTTTCAGATGCAGGTATACCCCCAGAAGCTATCCTACCTATCAGGTTGAAATAACGATTT  
GCATACACAATCGCGGGAATGGGATCAGTACCCATAGAACTGATCAGTTGACCAAATTC  
CTCTGTGCTGCATTATATGACCCACATTCACCACGATATGGAAAACAGTGGTTCTGGTTA  
GGAATATGCAGATTATTCTTAATGATTCAGGAGCCGAATTCTCAGACAGATTACGATAA  
TGCCAGAATGTTGTCGCAGTTGTGATTGATTCCCAGGTTTCTACTGCCATCACTCTTCC  
AGTAAGTTCAGCAACCAGTAAAAATCCGGATGGGTATTCTGAATCGTGAACATTGAAACC  
TGTACCATAGCCAGAGTGCCTTCTGGTAATCGACGGACTTTTAGAGGTACATAAACGATA  
TCGTGTAGCTTCTCATAACCCAGATTACCACCACACCCGCTCCAATACTCAGTGAGAAA  
ATTTCTTTATAGTCTGAAATTGCTTCCGCTTTTGAGTGTGTTGATAAAGTTTTTCATTA  
ATATCGATCAGGAACTTCTGACGGATCCGTGAAATCTAGCAAACATCATTACAGCGCTCA  
TTGTCTGCGCACTGGATAAAGTGCTTCGCGTTACCGGCGGTGATACTCTCCTGAACAATT  
TCAAAACGTTTTTCATGCATCGACATATGACGCGGCCTGTACAAATCAGCGAAAGTAATC  
GGGCTTTCTTTATGCCGCATATTCGCTGCATCTCTGTGAAATTTTTGGGTGCATACTAGC  
ACCCTTTTTATACTTTGCCAAGAAATTTAGACGTTTTCCGTCTAGTCGTGATATCCATA  
CATTTTATCTACACCACCATCAAGAGTGACCTGCTTGCCGGCTGAGAAAATACCGTGTCT  
TACCTAAAGGGTAACATGTTTTTAACCATTTCTCCTTCAAAGCTAGTTCAAGGGCGATGAA  
TATGCGCCCACCATCAGAGATGTCATCAACTATGACACAATCAAGACCCGTAACGTCCCC  
AAAGACAGCAGTACCTGTGATCAGGTTAGTTTTTACACCAAGGACCTTACCTGCTTCAAC  
AAGCGCACGCGGAGATCGTCAGATACCTACTGCGCTTGTAACGTAACCTCCGTCATCTGG  
TGAGATAATCGCAACATGCCTAACAACCAGATTA AAACTAAACCTTGCTGCTAGTTCAAG  
TTCGTGACGCATACCAACATTGTCCAGAAGTCGTGCAGAAACACCTCTGTGAGGGTCA  
TACGATAAACGTATCCAACCTAAGGGAGTTAACGATGGTTGCAAAAACCTTGATGGAGAA  
TGGCTCGTCAGGATGCATCCACAATCCTTTTCGCGCATAGGGGATGGCCGGCAGGTGAAA  
GAAAGACTGTGCATGAATATTAAGGTTATCTAGTCGAGAGCAAGCATGTGCCCTCAAAGG  
AAGAGCCTTACATCCGCAGAAGTCTTGAATTTGGCTGTGATTTTCAGCAAAAACCAAGTG  
ACCTTCTGGTGGATAACTTAAATCGATCTCAACCTGATTTTACCACCCTTGAATGCAAG  
GTGATCAACATGGAATATCAGGTGGTTCAGACGAAGTAGTAAACTCATTGTTTTCTACT  
CAATTATTTGAATAGCCTTTAAAAACTCTTGATTGTGGATTGTCTCTGTGATGTCGTCTG  
CTAACCAATCTTTTCCACATACAACTTGTGGGATCGCACTCAACCCAATGTGCGCAACTT  
TGGCAGCTACAGCATAAATTTTTAACAGATAGGAGTGCATCAGTTTGTGCTGAAACAAAC  
TTTCCGTTGATTGGTGGCGCAATCTTTAGTAAACATTAATGCTATAATAACTTTTCAGA  
TTGTGAGGCCGTGGCCGGCAAGCTCTTGCATATAATCGCCGAGGTTCTTTCAAATTTTG  
GATTAGTAGAATAACCAAACGAATTACTGTACTGAATACTCTCTGCTGCAATATCAGAGA

TGATAGTTTTATTCTAGATCCAAACCTTTTCATACAGAGAACATAGGGACCTCCCAACAG  
AGGCTCTACTCAACCCTGAGGAGTTTATGAAAGCTTGGTAAGCCTAAACCCGGACACGCT  
TCAACGTCCGAATGAAAAAAGAATCTTTGCAGAAGCACTTCTCTCATTTCGATTTTATAA  
CTTCACGCATAACATCCTCTATATCGTAAGAATTATGTGATGCCTGTGTTTTGCATGCCC  
TTTAGATTCTTGAAAACCGAAGCTATGCTGCGATTGTATCGAAGATCCTCTTTCTTTGT  
GAAGAGATCTGATACTTTCGGTTCAGAGTACTCAACCCAAAAAGCTTTCATAAAGA  
TGTTTAAGATGGAAACAATACCTCATCCGCACCATCAGGGTTTAAACTTTTGAAGAAATC  
ATACCCACCACAAATTTTATGAACGTTTGCACATGTTGTGGTGAGAAACGGTCATCTAA  
AAGTCACTGTGATGGGATAGTGACGTATGAACCGTCACTTATGTTAACAGCTTTATCACC  
AATCTTTATCTCCACCACCATCTCCAATTTATTCCACAGCGTATATAATTTCGATTATACA  
CCAAACTAACGCAGATGTCAACCTAATTACTCCCAACCGGCTATTTCTAATTATTCCTAA  
ATAGGAACACAATGCTAACCTATCAATTAACCTAAGTTATGATCTTTCAAATCAACACA  
ATAAACATAAGATCTATATTCAACATCTTTAAGTGGGATCTATATATTCTACGATTATA  
GAGTAAGTGGCTCAGTTTGGTCAGTTGGGTCAGTATGACTGAACATAAATCTGATGTCAA  
GATTTGACCTCTCGTTTTGTACATATACCGTGTTCCTATCTTTTTAGAAAGAGAGTGTAA  
CGTTGTCAATTAACCAGCTAAAGCCTTTGGAGACGTAGAGGGTGGTAAGAGGAGTCCTA  
AGCCGATGTTGACAGATGAAGAAAGTACACGATTGATGAAGGTACGTGAAGACTTTGATG  
AATGCAACAAGGATCAGAAAGTTTGTGTGCGAGTTAACAGCTGGCCAACCCGCGCAGGCGC  
TGTTTGCAAATTACTACGACTCTGTTTGCGGTCGCCTACGCAGACCAAATGTGGTGGTGA  
CTCAGATGAAAGACTTGGCAGTGGAGCACATCGATGGTAATAATTGTGTTCTCGATCCGA  
GTGAGATTCTCATAACGCACTGAGGGCCTGTCTGAGACGTTTTGTTGGTGTGGTCAGACA  
CTTTGGGTCCTCACATCATTATATTCAATTCAGGGCCACACATCCCACTGGGGGCTAT  
TGTGGAGGATTATTATGAAGCTTAGTACCACTTCTGGTGGATAAATCTGTATGCAGAGAGG  
CTTTTATGGCTCCCAAGAACATCATGGCTGTGCGTTGAAAGCGCTTCAATACGAAACAGT  
ATCTCGACAGCAGTCTGGATATTGGTCAGTCGTGGTTGGATTAATGTGTGTACGTTTCATG  
GTGATCGAAATGTGCAACTTAGTGTGCTCGAAGCTTATGATCTGGCAGCACAACATTC  
TGCCCCGTGGTAACCCATACATTCTGGACGAGTACGCTACGGAGGACATAGACAAATGAA  
AAAAGTCCTCAGGAAACCTGTAAGGGAAAAATTCGAGACAACGCCTTTTGCTTTCAATAC  
CAAGGTTGCGATCTTCAAATTAGCACTTCAACGCTTGCACGATCATGAGGCTGATCCTAC  
TGCAGAACCCTTACAAAAGATGAAATTCACAGGCTGCGTGGTTGGGAACAAAATCTGCC  
TGATCTGGAAAGGCGTGGACACACCAGTTTATGACGTTCCGGCCAAGAGAACGCCTGTTT  
AAGGCTGTATAAGAAAAGAACGAGAAGGAAGATTAATATATGACTAATATCGATCATGTA  
ACATCAGAAACACACTGGTGTCTTACCAGTATGGTTGGTCTCCCATCCTGTGATAAGTGC  
CGTAAAGGCCTCTACGGACCTGAAGAAGATGCAGCGAGTGTGTGAAGATTAATGACGAC  
ATGGTTAAAACAGCGAACAAACACGTGTAAACTGGTGTATGTTGTTGCACATTCACGTGTT  
TTTGTGATTACGTATGTTAAGCATGTTGCGCCGAAGCTTCGTGACATTCGTATCCAAATC  
TACGGAAAGATCTTTTCGGTTGTTAGCAACCACGACAACCAGACGACAAGCGGGTATTT  
CGTGAGTGTGGTCACGAAGTTGTTGACTATAGAAAAATTGATTTCCGCACATACTAAGAA  
AAAATTCCGGTGTGTATGTCGTAACCCGTATGCATCTTGGAAATAAGGCACACCACGGA  
GCAGTCATGGTCCACGGACATAGCCGCGTGTATATAAAGCACCTGGTGGACGAGTCCTT  
GGTGGGGGTTGGGATGTCCACGGTCGTCCATTGACTAAGCTTGGGGCCGTTTCTTAGTGC  
CTTAAGAAGCCTAATTACGATATTAATCGCTGTGAGATGGTAACCACAACCAAGAACGC  
AGTTTCTTTCTTAGAAAACATCATAATCTTTTAACGCCCCAGTACATATTGCTGGCAGT  
TACAACCATTCCGAAAATCTTTGCCTACACTGGGTGATGAGCGGAGCTTGAGTCCAGCAG  
GCCCTTGTACTGATGTTTATACCGGTGGTTCGGGAAGTCGGTATGACTGTGCGTATCATG  
CAGGATCCTCGCATTGCGGACAAGAACATGAAATTATTGACATGGCTGTTGAACTTGGG  
TCATACTTGTGTCAGAAATTATGCCAGGTGAGTTTCAGTGTGAGACACCGTATAATACA  
GCGTATTATCAGGTAGATGGTTATGAAAAAAGATCTGAGCTTCCCTCATGGTATCATTGA  
CTCTGATATAACTACACAGTGGGTGTTGATGGAAAAAGTATTTTACATCCTGCATATCT  
TAAGTGGCGTAAGTTGCTGCGAAGTTGTCTTCCAAAGCACAAGAATCACCCTATTATGA  
CAGAGCATGCGTATGTGCTAAATGAAATTACCTTTCTAATTTTATTACGTGGGTTGGTGA  
TACGGATGGTGTGCTGGCCGCACTTGGATAAGGGTATCCTCGGTGACGGAAATATATACTC  
GCCAGAGTCTTGTGCATTCGTAAGACGACAATGTAATTACTCCTTTCAAACGTTAAGAA  
AAATGGCAACTATATGATAGGGGTTTCCATAGAAATCCGCCTTGGCGACACCTATTACAG  
CCACTACAAATGGAGGTATATTCGTAGTTTAAAGAATAGAGACCGATGCTCAAATGCTTG  
GCAAATTAACAAGCGAAATCATGCCAATCGCTTGAATCACAGAACAGGATTGTATAAT  
AAGAGAAAAGCTGCACGATATTATTGAATAATTTGAATATGGCTTTCTAAACGGAGAAGA

AACATGCTCTTTAACGTAGACGTTCTGGTCGCTAAAAGGCTGGTCAACAAGAAGACTTAA  
ACTGAAGGCCCGCTCCGTGGCCTATCCGTTCTGAAGTACATAAAAACACTGTCTTCTGGGAT  
AATCTGTGGAACACAGATCCACGTCTCCTGGAATTCCGTGGCATGGTGGTTGATTAGGAT  
GACAATGTGGTTATGTGGCCTTTCACCAAGATTTTCAATTACTTCGAAAATGACACAGAC  
CTTCCGGCAGACAAGGTGGTTGATGCATTTTCGTAAGTAAATGGATTTATGGCATGCCGT  
GGTGTGTATCAGGGCCAGCTTGTGGGGTCAACTAGAGGAACTCTGGGATCAGACTTTGCG  
GTTCTGGCGATGAATCACATCATTATGAATGCAATGATACTGAGCACTTCATTAATTGG  
ACACTAAGGGCAGAGGTGAAGTACATCTTCGAAATCTCTGTTCCATGTGCTCCGCGTATT  
GTTGATGATGAACTTGGGGAGTCCCTGCTTGTGCTGGAATCCAGAACCCTGACGGCACA  
AGTTTCAGGCTGCATGAAGGTGGTCTTGACGGAATCGCCAATGTTACTAAATTCAATCGT  
CCTTAAGTTCGCCAGATGGTTATATTTTCCGATGTTGTTTAAAGTTCAAGGCATTGGAAC  
CACCAAGGTTATGTTGTGCGTGATCCAAATTATCCGTTACGCTTCTGTTGAAAATCACC  
TCCCCTCAGTATCTGTGCAAGAAGTTCTGGATGCGCGGTTGTAGTAACAAGGGGGATATG  
AACGGGGATCATCCATAACAACGCAAAGCAGCGTATTGATGAAGAGTATTACGAACTGCTT  
GACCATATTCGTGAGTACTACACCAAAGATGCTTGGTCATCTATGGAATCAGTGCAGCGT  
CTTATGTTAGTTGAAGATTGTTTTGTCATAGAAGATCTTTTTGACCGTGGGACTCGGTGT  
TAGGTTGGTGAGGCTCGATGGCTTAAAGGGAGCCATTAATTACGGCCGTCCATATGCTTT  
GTGGATAAAAAATTAGCAGGCTTTTAAATCAGTTTCTCGACAAGCGGTCAAACCATATCG  
GCGTGTACGTAGCGGCACTTCGATACCGATCTTAGAGGAGCTTCTGATCCTGATGGGTA  
TTAGTGTCTTCTGGCGTTCGAGAAAAAGATTGTCTTCGGAATGATGCTCTATGGCCGGGT  
CCAGCTGTTTCGTTGACACATCGAACCCTTCAGCTTGGCCTAAGTTAATGCGTGCAAAAAGA  
TAATTTAGCCTGGTATGGTGTAAACAGTTCCCAGAAAAAATTCCTGACGATAGCGTATGGA  
AAAGATACTAATCATCCTTCGTGGGGTGGTGGTGCGGGTAAAACAACCCTGGGCGAACT  
CCTCAAGAATGACAGCAAAGTACCGCCTTACGGAGCGAATAAGTTCCACTTTGTTGATAG  
AGGGTACCGGTGGAAGCAGGAAAACCAGCACAAGGCGCACTAGTGGTGCAGAAAAACGT  
TCACCTCGCAATGGAAATCGGTTATGATCGCGTGAGCGTCTCAACTACCTCAACCAGCGA  
GAAGGACTTTAAACCCTACGTTGAGTTGACTAAAGGTTATTGATATCAAGTATTTAGGTT  
GGTGGTTGAAGCCCGTCATGGTACGATTCAATTAACAGCGTTCGCGAGGAAACACTAGA  
TGCTAAAGAGCGTTCGCTGCGTAACTCGTGGAATTAATAAGGAGCAATAAGTGAGTCC  
GTTGATTGTTTCTTCTGGTCTGTTTCTCTACAGAGAGTGGTGTTCGAACTTTCCGTAC  
TCATGAGTCAACAGGTAAGGCGTGTGGGATGAAAACGATCTGGAAGAGGTTTGCAATCA  
CCACGAATTCCGTGGAATCTTCCGCCATAAAAACCCGCATATTTTACCGTAAGCGTTGTGA  
TGAAGTGCCTACTGTTACCCGAGCCTCGGTACCTCAGCGTTGCATACTGGTTTCAGTG  
TTATCAAGTGCAGGTTTTTCACTTGACCACCAACGTTGGTGTATCTTTGGACCGTGCTAG  
AGTGCCGAAAGAGGCTACGGTCTACATTTGTGGATACGTGAAGGAAATCATTGTCAAGGA  
CAACCCGAAACGTAAGACGGACATTATAGATGTCCGGCTATAAGGGGGTTGATCCTGATCC  
GTATAAGTGGTGTAACCCGAAGTTGTGTTCTTTAGTGAATTTGCACCAGAATATATCAG  
CAAGTATGACATCCTAAACACGGTCATCTACGAAGATATGGTGTATGGTTGTGCGATTCCC  
AAATACAGTCATCAACTTCAACTGGGCGTAGTTTCTTCCGTTTCTAAACAACCAAAGGT  
GCTTGTGGTAAACCCACGTATCAACTTTCTTGATCATGAACCGTATCATGCTCATGGTGC  
TATGTAATTCATTTGTGGTGTGTAGAGACTTTCAGCAACAACCACTTCATCGACACTGT  
GCAAGATCATGTTGAATGTAAGACGGCCTTCCAAGGCAAGGACATATAATGTCTATGGCC  
TTAGATAACCCAAACACGCTACGCCATTAACGAGGACGGAACCTTATCAGGGCTGGATAGTT  
AGCACAGAGGGCGATGAGGTAATTGTTGATTTTGGTATAGAAAATGGAAAGGTACAGCAT  
AAACGTAAAATATGTGGAATGAAAAATGTTGGTTCGTTCTTGCCGAACAACCTGCTGCATTT  
TAAGCTGCGCGTGAAGCTCGATCAAAATGGGAAAAGCAAGTACACCTGTTTATCGTGAA  
ACAAAAGAGGCTTTAGGGGCTGAGGAGAACTTCTCTCCCATGCTCGGACACGTTGCAACT  
ACCCGTTTAAAGCGCATTAAATTTACCCGGCTTATGTGCATCTTAATCTAGATAGGGTACGC  
GCCCTTGTAACCTTGTGACACCGGTGGTATCCCACTATTTAATAGTCGCGGAAACAAGAAG  
TTCCCTGTTCAAGGAGCATCGTTGCAGCTGAAAAAAGAAGTTCAGAGTAGACTGAGTTC  
GACAAATTGGAAGGTGAGCTATATATTCCTGGTGTGCGATTACCTAAGAATGTTGCTCTG  
TCTAAGAAGTGCCGTACACCTGAGCAGATCGGGGTTGTGATTGAAAAGGACTACCAATCA  
GATACGACACGCTATCTGAATGCTAGTGACAAGTATGGGCAAGTATGTTAAGCTTTTGAC  
GGTGTGACTACGATGCAAATATTGAACCCGTGATAAATGCAGGCCGATATGGCGTTTGC  
TCGAGAGTTTACCTTGAATATCACATTTTCGATATTCCTGTAAACGCAAACAGCCCTTGG  
CATTCAGAGAGCCATCATAAACACCGACTATCTGATCGTGCTAGCGTGATGATTTTACGA  
GATTGTGAGGTCGATCCAACAATCAAAAATGTTGTTACAGGGTGGGTTTGTCTGACTGAA



GGTGCGGTCACGCGGTTTCATTGGGCGATCCATGCAAGAGGATTGTAAAGGTGTTATTATC  
CCTAATTTCAAGGGCTTGTATGAATTCGGTCAGCGATCTTCTGATCTAGTGAAATGGACA  
CTGGTCCAGGATGGTGAAGCGCAGGTCTGGGACTCTGTGGAGGACAAAAACGAGTAGGAC  
CTACTTCTCTGCGAAGGAAAAGACGGACCCAGATTTAATTGCCCGATGAACGGGACGCGT  
GCAGAATGTTTCGCATGCAAGAATGTTACTTCTGGACGGTTAGTTAAGCAAGTTCACATGC  
CAGGCAAGGACTGACGACGGACTTGCTCAGTTCCATGAAGAGGAGAGTGAACGGGAAGTT  
AATTCATTAATAATGGGCCCCTGTATACTTATGGCATTTTATAAGGGGAAACCAGAAGAGG  
GGGAAGAAGATGTGTTCAATGGTTCTTGGCCAGGAGTTGGTCAAGTGACAAAGTGGATAG  
AGACTGGTGTCTGTCAAGACTAAGAGATTACAAATGAGACATCAGGAACATGGATGTGA  
ATGGGACCCAAGTTTTTCTGTTGCTTATATCGTTAAGGTTGGCGACGCATTTCATTACAA  
TCCCAACATAGTAGTTTAGCGACCTGTCTGAGCCTGTTACCGATGAAGATCGTCTACCTG  
GTGATTACACGGCTAAGAACGTGGCGATGTGTGATAAGGTTGAGATGTGGAGCAAATCAT  
ATCACGTCAAAGGGGACAAGGTAAGTGGTGATGACACCCTGCTTGAATCGACGATGGGC  
CCAATGTCCAGATGCGTGGTGAACAGCTGTAAAAGTCACTGAGGTTACGTGCATAATGAT  
CTGGTATGGCCTGGCGTTGCTTTGTGAAACAGTACTCAATGGTGGCGGGATTTATCTCCC  
CGACCGATTCCGTAAAGATAAGCTCGATGACTTTATCTACTGGACCTAGGGGAAGAATAA  
ACGTCTACTGATTGTCTCGGAGGTTGTATTGGGCCCTTCTGACGCAGGCCATTATCCAACC  
GTTGTGGAACCAAATGGCATGCCAGTTTGGAGGGCCTGGCATAACAAGATTAATACCTCCTA  
TCGGTGGTTTAAGAATGGGAGTTATGGAGATAAGTGTCGTTTCGTTGCAAAGAACGGGGT  
GCTGCTGACATTAAGAATTATCCCGATCAGCCTGATAGTGAGGATGCTACATATGTTGA  
TAATTAAGGAGGATAGATGATCTTCGGTGGAGCTTATGAGACCCTACTGTCAAGGACCCA  
CCCGAAAGATTTGGTGTAGTATGGTCTTCACGTAGCTCAATGGACCCCCATACCCCGTGT  
TGTTTCGTCGGGGCAAGGCGAGTCCGGTTGATCTGCCGTTCTCCTTCGTTGTTGAAGGGT  
CAAAGAGCTTATGAAGGCTCTCATCGCAGTTGACCGAGTTGACGTTGTTGATGGGGCCTG  
TGATCGGTTCCAGGTCTGATCCAATGCTTTGTGGCGGCCTGAATCTTCTCGTGGTTCGCTG  
GGAGAACTGTCTGAAGACAGCACGGGGTGTCTCAGTCCATCATCGGAGGGATGGTACAGCT  
TATTTTCGGTGCCTTGTATGTGGAATCAGTTGCTGCCATCCAGCAGCAGTGGGTTCGC  
ATTAAGTTTCCGCTGAGATATCATCTTGGTTTACACCATGCGTCAGGTGTTATTCACCAA  
CGACTCTAAGTATCCGATGATGACACAATAAGAGAGGCTCACCTTCTTTGACCTTATG  
TAGTTAAGATGACTTGCTTACTGCCGAATGCAAATCTCTTGTGAATCGATCCAAAAGTCG  
CTACTCTTCCGTGGACGCTGGACGTAGTGCTAAAGACATCGTGTTCCTCGATGGACACGG  
TAAGATCATCAAGCCAAGCACCGTCGTAGAACCAGAAAATTATTGATTGACAATAAAGAAG  
GGGTCAGTCTAATGGACCCCATCAAGACAGAGAGTAGTAATAAATAGGAAAAGGATTTTG  
ACGAAATTTGCAAGGACCTGTTACAATTGTCAAAGCGTCTTAATGTTCAAATAGTTATCG  
GCAACAGCCCGACATTCAGGCCGAAGAAATATATGTTCCGCTTCAGAACTATGCGTCGTT  
GGGGCGGTGTCAAGAGGTACGCTTCTGAATGCACTATCGAGAATCTTAAGACGTATGTAG  
ATCAAATCGAGAAAGCGGGCGGTTAGTTTATCGCCCTTCAAGAAAAGTGTTTGACAAAA  
AATCTAAATAGCTATACAGAATCGACTAGACAAACAGAGGAGAAACACAACACTATGCCAGG  
TATGCCCAAACCTCACAGTAGAGCTGAAAACCTACGCAGCCATCTGCCGCTGTAGACCGAGA  
GCGCGTGAAGAAAATTGTTAAGGTGGGTCTTGTGCAAAGATCGCACAAAAAATGAAGC  
CTGAGAGCTCAAAGACATCGTTGCATTTGAGAGAGAAAGCCACAACACTAGGACCCGAAGGT  
CATCATGACCCTGATCAATGCTGTATCTGACCACCAGTATCAGACAGGTAATAATGCGTAA  
AGATGTCTGAAGAGTAGGTTGAGCAGTTGACCGAAGATGATATTCTGTTGGGTTCGCGGGAG  
CAACTAATGTCATATTGCCTGAAAGGTGTTGGACTTTTGGTTTTCTTGTGCTTCATTTAA  
GGAGTCGCAATACCGACTCTGATTTTCAAGGATACTTTTGGTATGGGCCGTTT  
GCCTTTGTGTTCTCCGCCCCCGTTGTTGTATGGTACTAGGTCCGAAAGGTGTTTATTAAC  
AGTGGAGGGGTTAATGCTGCTTAATCTTAAAGCGTCCGCGTTGGAAAAGTTGCAGGCTCT  
CGCCCGTTACACGAATAACTCTGCTGCTACTTACTTAACAAAGAGGGTTGATGAGTACGT  
TGACGAAAACGTAAAAACTGAATACAAAAACCAACAGAAGAACCCTAACTAATTCTGAAGG  
ACCTGAAACTTGTACGGTTTGTGCTGGCCTGATCGTTCTGGGTGGAAATGGCCTGACTGGTG  
GCGAACCTGCCACGTGCCTGCGGGTTGCGTTGGCGTAAAGGGTGACCCGTATGGTGACA  
AGAAGGGTTTCGAGCAACAACAAGTTGGTGTGGTTCAGTAAAGGTTGACCTGGTACTAAG  
ATCTTTATCAGTTCCCGACATTCACCCGTTGAATAACTCTAAGCAGCCGTTCAACTCCG  
GGACCAAGGATTCGATGACGGTTTCCGCTAAAATCGGTGTTTAAATACCTGGTTGATCGCT  
ACGAGGTCACGATGATTTTTAGTCGCTCTGCAAAGGTGTTAAGGAAATCACAGATGTAA  
TCATTTGACAGAATATCTAGGATGCCTTGATGTAAGAGGCTGGCTCTATGGACTTTGGTA  
CGTTGGCTGGTGATGTTAAGAGCCAGTTATTTGAAAGTGTTACCAAGCAGATTCAGTCCA

AGCTTGGTCCGATTGGTATGGTGATCCAAAGACTATCAGATAACGATTACCCGATTTACC  
CAGCGCAGGTAACAGCGATAATCAACGCCAAGATCGAAGCAACTCAGAAAGATCTGCTGC  
ATGAGAACTAAATCCAGCATAACCAAGGCAGAAGCTCATGAAAAGATCGAAGCCGCGCGCG  
GCGAAGCTGAATCTTAGCGACTGCAACCTCAGCGCGAGGCCAATGCTATAGTGGCACAGG  
CAAAGGAAGAAGCAGCATCCCTTCGGATTTCGAGGGGATGCTCTGCTTAAAAACCCGGAGT  
TCGAGCAAGTGGAAGCAACTAAGTGGAAATGGCGATATCCTGGTATGTATGACCAGTG  
AAGCATAAGGCTCGTTCGTTTCTCTGCGAGCAGGTAAGTGATAGTTTACAAGAGGCCCGG  
TGATGATTATCGTCGGGTCTCAACATATCAAAGGAGATACTAAATGATACGTGTAAAAG  
TCATCATAGAATTATTAGCGCTCTCTTCCCCGTCGTTCCGACAGCCAATACCCACACCT  
TGGTGGACGAATACACCGCTGCAAGCCCCATAGTCTGCATTTACAGTGGTGGTAATCGCA  
TAGAATCCGTTGTTATGGATGTCGCTGGTCCCTGGCCTTCCAACAAGTCATTCCACTTAG  
TTGACTTTGTGAAAGTGTTCTTTGTTCTCCTTCTGTTTTATGCTGTAACGATGTCGTTGG  
GGTGGTATACGGGCACCCTCCTGTTTGTATTTTTCTCATGCACGGCCACGGTGGTGGACA  
TCCCCTGTTGAGTTTTAAGGGTTGTATCCTTAAGGGTTCTGGGTAATACCCGGTTCATGA  
CATCCAGGGGCAGAAATGAGAGTAACGGATGAGGTTGTTGCCTTTTTCACTCAATACGAT  
ATCTTTAGTAATCATTATCGCTGTGCCACCCTGTCTGGATTCCAAACCACCAAGCGGTT  
GGTGCCACGTTCTGGACGGTTGAAGACTCCATGACTAATGAAAAGGCTCTGCTGTTAGGC  
GATGCAAATATCGCCCTTGCTATTGCTACTGTTTATGACCCCCAAGATGCTAAAAAACTT  
GGTCGCCGGGTGAAGTATTTGACGGCAGCAAGTGGGACGCGTTTCGGGAAAATATCGTA  
GGGAATGGGCGTTATGCCAAGATGTGGGCTAATCAAACCAGTAAGCAAGCTGCTATCAAG  
CTTCGAAATGAAGGCAGGGTTTTCGTTGAGGCATCTCCCCATGATCCAATCTGGGGAAATC  
CAGATGGCTTCGAACGACCCAGAATAAGAGGACCCAACCAGCATGACTGGTCTTAAGCTT  
CTCGGAAATTGCTGGCACGAAGCGATGGATCGAGTAATTGGCACTATGGAGGTGGCTTTA  
AGTTAGAGATGGATATGGTTCCTAAACAGCTTGTTTTACTAACTTGCGCTCTGACTTCT  
CTAAGACCAATTGGGATGTCGTTAGAAAGAAATGTTATCCACAAGGTAATAATAACTATG  
AGATTTGGGGGGGAAAAGGACTCAAACACCCCGTAGAATGTCACGAAATCTGGGACTTTG  
TCAATGGCAACATCAGCCTAACAGGTCCGATCGCACTTTGCCATCTTACCGCGAAGTCA  
AACATATTGGTTTGGCGGGTGATATTGGTAGGGGGGAAATTGCTCTGAGTCACTTCATGA  
AGTTCCATGGTGTCTCCAGACAAATTGCAAAACAGTACGTGCAAGAGGCTCTCGTTTTAT  
ATCACGAACGTAGTAAACGGTAAGAATGAGAATTGAATGTCCGGCATTGGGACGACAATT  
TGAGTAACGATTGTGAGGGCTAGTGGGATATGCGTATGATAAAGATTGAACAAAAAAGT  
CACGAATGACTGTGTGATCGCGTCAGACCATGACCAGACTTGCTTTGTGTCTGCCGCTGG  
CGCTGGTGACCGTGCAATTAAGGCAACTCCCATCGCTTGTTGTTTCGGTCAAAAATCTTTAT  
AAAAAGACCAGAGTTCTGAGGTTCCACCTTGATGATGGTTGGTGGATTTTTGCAGGACAA  
GAACGGCGATATGGAAGTTAAGGCTAAAGATCAAGGCCGAGAGTTCACCCCTTGGGGAAAG  
CGATGACTTCTTAACCCAAGATATTCTAACGCCTGAAGCAGTAGAACAATGCCTGCTTAT  
CCTGAAGACATAGATTAATGCGTTCTTTGATCATGTGGTAATCGACAGAAGAAATGGCCA  
TGGTCTGCTCGACTGGGACAACAACCTACCGCCTGATGTTCCAGCACCGAAACGTTACCA  
AGGAAGAGGTGAAGACACCCTTCGTCCTGTGCTGTTGAAGGAATTCCGCGAGTATGACTA  
AATGAAGAATAATGCCAAGGTCATTGATGGTGTGAGGCAGATGTTTACCTGTCTGTCT  
GATGTATACCCGAACACTGAACACTTCCAGGCTACTGGTAAGATCAACTACCTAGTTGCGTC  
GTTTCGACAAGGGCCCGAAAGGAACACCGGGTTTACCTCTTGATACGATGCGTGAATGCCA  
GGTGAAAACGGGAATCGCCCGATCCCGATGATGATCGACGATTATATGCGTGACATCTG  
GGTGGAACGAAGCATCGTCGAGGGATGGGGACGTAGGTTGTTTGGCTACCAGATGCTTTG  
TCGTCACAGTTCAGTCAATATCAAGCCTGATCAATGCTTCCATATCTCTGGGCGTGTTGG  
AGACGCTGCTGCAGTCAACCTGATCAGGCATATTCGGAACGCCAAGTAAATGTGGACGGC  
AATCGGTAACCAGTAGATGATATGGTTACCTAAAGGGGTAGAGTTCACCTCCTGGGATGG  
TTTACAGCGCGAGACGACAGCAGGGAAATGGGCTTCAATCATCTTCCAGACGGTCTACAT  
GCCGCGAACTGTCAACGACCATACTACGCTCACATCTGAACTTCGTCGCGTGGGGGTTAT  
ATGATTGGTACGAAGATCATGGATGCTGTAATGAGGGACACCCACGCGCTCTCCGTGTCC  
TTTATGAGGCCATAATTCATGGTTGCAACAGGGCTGTGTGGACTGCTGAAAAAAGATAAT  
GGGACGATGTTGTCATCACGGCAGACTTCCTTGACCCTGACAAGGTATGCAGTGAGCTC  
CGTCTGCAGGATTGTGAGCTTGTGAGGGGGAGAAATTCCTTCTCCTTAAAAGCGACGCT  
TATGGAGAACGTGAGTGTTCTGTGGTGTGTTCCAAGGACGAAGCTGTAGGAGATTCCAAT  
GAAGTTGATGTCGGGACACCAAGGCCTAAATCACTGTGCTGACGTAATATGAGAACATGG  
TGATCCCGTTGGCAGGGACATGATCAGGACAGGATGAACACACAGTTAAGGGAAAGAGGCA  
GGAGGATGTTGTTTATTTTGACAACGTTTCCGAGCAAAGCTGTTATATTGTGAACAAGAT

AACAAGCTTGGCAGAGGAGCACAGAATTGACCACTACGTCATGGAAGCCCTCAGTCTTGG  
TTCTCTGGGTAATATAATTAGTGATGTGGCTGGCCGTTTTTCCTGCATTGTGTCCGCATT  
GTCCCAGTTGGGTATCTTAGGGTATGGTTCAATCCACACTGTTATCCCAACATCTGTGAA  
ATCTTTTGCAACAGGTCTTTTACCGATACAAGAGCGCACTGATGTGAAAGGAGAGGTTGA  
GACAGAGAAAGGGAAGAAGGTATCCACAACGCGCCAGGTGAAGAGGGCAAAAATCGCATAT  
GGTCACGGCTGTTGAGTCGGACATGCCTGGATGTTTAAACGGTCTTACGATTGCGGCTGG  
AAAGGCGGAATATGCTGATGCGTATTTGATCGGGAACAATTTTCATGGAGCGAGTATCCAT  
ACAAGAAGGGTAAGGGGTCTTGCATTAACACAAGGAAAGGAAGAAACGTGTCGTAGTG  
CGACTGACGCCAGGACTTTGGACAACAGATGCTAGTCAAATCGCTCCTTTCAGGGGCGAAA  
TTAATCCATGCCAGGGGGGTATTGATCGTGTGCTTGGGGCGCCACTTCGCAATTCTTGC  
TTGGACCATGACGACCACGATGGGAAATGTCGTGGAGTCTTGAGTCAGTGTGTGAAGACC  
CTCGAAGGATATGTGCAGAAGGCATGGATGAAGTACGGGTCTGCGTACTCAGCTACGTTT  
TTGTCCGCACCACTCCGGAGTCTGCTGACTATGTGGATAAGGATTTTGTCCGGTTCCCT  
ATCCATGCCGCATACAAAGAAGATATGCTGATGTTTTTGAGGGCGATGTACCAATGACATG  
ATCATTAAAAGGGGGGAGACTGACCTCAGCATGATCACGACCAAAGGTACTCAGAAGCAT  
GCTAGCATAACGATTTCCCTGGCAGAGTTAGGCAGACATAAGGGGGGAACATTTGCTGGA  
CAATTTAGCAAGCCCCTTAAGTTCTATTACGAGAGCTGGCGGAGTGAATACGGTGATCG  
AACTCTGATCGACCAGATCATGAGTTTCGGTACTACTGAGTAACCCAAAGAGCCGCGAGTG  
GATGATCAAAGCATAACGCTGTTGAGAGAGATGCCAACCGTGCCTTTGCTGTGAATGAAAT  
TCTTGAAGTTTTCCGAGAGGTGTAATGCTGAGTAGAGAAAAAGCCTTGCATTAAGCG  
AAAGGTGTGAGCCACCGTGAACCTGCTCGTATCTGGGGTAAAAGAGTAAGGAATCT  
CATATCCGTCTGATCCTGAATGTGCACCAGTATATTGCAGAGGCTGCTCAGGTAATCACC  
GAGGCAATTGTTCTCAATCCGGGCTCGTAGATCTTCCTTGGTGACGTTGAGTTATACCA  
AGGCTCCCTTGGGTCATTAACCGAGTTAAGGCGTTTGTAAACACCTTCCCACGTAGAATAT  
GAGCCTTATATGTACACATGGGCGAGAAAGTGGTGGGCTAACCTGCGATTATCAGTCGC  
AAGCTGCCGTTGATGAGACGTTCAAACCGATATCCACGACGACCGCGAACTGGTTGAA  
GAACTGAGCCATATCCTTGACGAGGGTGTGTTGTCATTGCACACAACGCACGTTTCGAG  
AAAGACTGGGCTGACCAACGGGTTGCTTTCCCGGTAAGAATCCGACGTGACCGTGCATG  
GTGCTCGATACGCTTGCAGAACTGAAGTCGGTTTTCTCCCTGCCGTCCATCGCTGTGGAG  
GCCGCGTGAATTTCTTCGATCTGGCTGCCCGTCAGCGCCATCACGAAGGGATCACATTG  
TGGATTCTTTGCTTCCAGGGTGTGAGGTTGCAGCATTTCGAGGAACTGGAGGTTGACAACATC  
GGGGATATTGCGGGACGTGAAGGTATCCACTTGAAAGTTAGACCTTTCAAGAAGAAACAC  
CCGGACTTGACGCTATATACTGACGATGACGACAACACTGTCCTTCGATACGTTTCGTTGT  
AACTCTGATAATGTACTGCCGATGGAATGTAAGGTGGGGACAGGCTGACTGTGAAATTC  
CAGGCATATCGTTGTGAATGCTTTGGTTCTGTTATGCGTGAACGTCGCAACATCCGTACC  
AACGAAGTAATGTCTCACATTCTTGTGAATATTATTTAAGGTCTTCGGCCCTTTGCAA  
GGAGAGAAGAATCAGTAGAGTTATCAGCATTCAATTCCTGACTCGTGTGATAATGACTG  
GTTGATACGGCATCTTCGTGATCTTGACATGCGTCTGGAGGAGTTGGTAGAATCGGAATC  
TGAGGCTGAGCGCTTAATAGGATCGGGGCTGTCTGGACATCATTAAACTATGCAACA  
ATATGCGAGATGCTGATGGATATCAACGTTTCGAATGGACCTCCGTTGAGCGGTAAAGAT  
GACGGCCCGTCTTATCTGTGCGATTGTCACCCAAAACACTGCACCACCAGGACGTTTAGGAA  
CTTCAGTTTGAAGTGGCTGGAAGGACCTCTGGCATCTCGACCGACCAGTGGTATGCTATG  
AAAACCTCGTCGTTACTAGGAGGTCCCCGGTCCCTTCCTGCTGATTGATGGTGACAGTCGA  
CCTCCTCGTCAGTCAATGATTCGATGCGCTCAGAAGGACATCAAACCACTCATCGGAAAT  
TCTACGTGTGGCAAGGCAGCGATTGCAAAAATCGAAGTAGAATAATCCGACCGCTAAGGT  
ATTGTTTTTCCGATGGTGGTTTTCCCGGGAGAGAACCGAGAGCTTTCAGATCACGAGCAC  
GCAACTGGCGGGCGGGTTTTTCCTTGTACGCATCGACCTGAAATGCAATGAATAGGGTAAC  
GCGATCAAGAACCGGTTATACCTTGACGGTACTCGAGGTTATTAGAAAGTCTTCGATAAC  
AATGAGGGTACGTTTACGCACTGCGCCGAATCTGTCTTTAGTGGGCAAGATCAAGCAGC  
TATGCATAGGTGCATGCGTAAGCCACTTAAGACCGGTATTATGGTAGACCTAACGCTCGC  
AGGTTACGCACACACCGGCTTAAATGGATGGAGCAGGTATACGGTGTAGCGGCAGAATA  
GAACCTGCCGCATGTAAACCCGCAGGGGATGGATTATTTAATCTGTCAAATACTGCC  
TCCTGAGAAGGTTAATCAGTTACCTCCGTATGAGTATTGCGAAGATCAGTTCCTGTACGA  
CAAACCTGCGTTCCTCCGCGCCGGGTCTGTTGATGCAGTTGCAGGTTGAGCAGCTGATGGACA  
CTTCAACCATTTCTGTCTCACTGAACGCAAGGCCATTTCTCGTCCAAGGTAAGATTCT  
GAACCGAGAGAAAGAGGCGATTTTCACGATCGAGCCTGGAAGGGGTCACGGCTTTTAGGC  
AACAAAACACAAAGCTAGTATTAAGATTTCGATTCATCATTGATGAGCGTGATGAGTTCT

TAACCAGTTGGGCCCTTAAATGATTAAGATCAAGTTCAAGACACCTTATGACCCACCTGA  
AGAGCTTCACATCTCTCTGGATCTTGAGAGGGATCACTGGAACCTGATCAAAGATTCCGG  
GCTAGTTACTGGTTAATGAAGTAATGCACCACAGGAGACTTCGTTGTCCACTATGAGTAT  
TGGGTGGAGGTAATCACCGTGGACGCAACCTTGCTCATATGCTTCAAAGGGACAAGTTTC  
ATGTGCCAGGACAGTCTGTACGATATCTGGTGTTTAAAGGCGGGACGGAGCCGGAAACA  
CCTTACCGGCTCAACAGGAAAGACCAATGAGTCTTATACCTGAATCTTGCGGTATCATCA  
AAAACGAACACTTAGTCGTGCATAAAAAATCCACAAGTGCTCGGGCTTGATGCTGTAG  
GGATCAATGCAGCAGATCTTGCGATCACCGAAGATTTTCGTTTCCCGTCTGCTCACGGAGG  
CGTACCCTGGAATATTCACCACCGACGAGGTACAGGAAATCGTAGGCCTCCAGCAAAAAT  
TCACAGATCGCAATCTCATACTTGAGAAAGTTAATGAGCAAGCGTTAGCTAGACTTTTAG  
AACAAATCATAGAGTCGATGTATATGTAAGTAAAGGAGCGCAACATTGAAAAAAGCTGT  
ATTTGGCCCTCTTGTCGCGAGTACTATTTACCCGCAGGGTTCGACGTATTACAACCTTTTGA  
GCTTGAGTACCCGCGTATCATTGACATTGAACTGATGAGTCACCGTCTGTTTAGTCGGAA  
CGCTATGAGTACCTGTGCAATGCCGGTCAAAAAGATGATGGAGCAGGTTTCAGACAGACCG  
TGCTAGGGCTGTTAAGTTTTGAAAGAATCACCCAGGGATGCTGGATACCGGTGAGCATGA  
CGCACTGCTTGGTGATAGGTATTCGGCTGAAGATTGGTGGATTTCGGGTAGGATTATGTGC  
GGCACGTTTTGCTTCTGAATTCGAAGATGCTGGTGACCACAAACAGATCACGAACCGCCT  
GCTTGACCCTTTCCACCAAACGAAATCGGTCTTGACAGCACCTGTCTTTGAGGATTTCCG  
TTGGTTGAGAGTACATAAGGATGCCGCTCCACCCATCTACGCTTTAGCTGAGGCCATGAA  
CAAAGCATTGGACGAATCAGTACCTGAATAACTGAAGCCAGGGCAATGACACACCCCTAA  
TGTTGATCACCTAGACACTGTGGGGAAGCAGGCAAGTGATGACACATTATATTACCGTGT  
TCTTGACAAGAAAAACAGACCAGTCATCTTCACAGGGGATGAAGCTAAGGCTATTTCTGC  
ATCTTCTTGCTCGGGTGTTTTATCCTGGGCTTAACAACACGAATGAGGAAGCCATAGA  
ACTGTATGGGAAACGTTCAATCGGTAGGTAGGATAACGCCTCTCCTTTTGATCATGTGTC  
AACCCCATGAAATGTGAATCTAGCCAGGACGGTTATGACCCAGGCATCAATTTGCCGGA  
AAACCCGTTTTCTTGGGAAGAAGCCATTACCCATATTGATCGCTAAACTCGCCTATGGAG  
TGGGAACCTACCGAGGCTGGACTCAGTTGCTTCAATGACTGCCTAATAACTATGTTGAAGG  
TTGATGTAGATGGATAGGAAGGAATTTATTAGGTAGATACTGATGCTAATGTTTAGTCTC  
TTGAAGGGTGGGCTGAGAAAAGTCGCCACGGAACAAGAACTGCGCCAAAGTTTGTCCCTC  
CATGGAAAAGAACGTGTTCTGAGCATGGCACAGGCTATCTGAGTGTTAGATCGGAGAACA  
ACGGTGTCTAAAAACCTTCAGGGTGCATAGGTCTATTGCTGAGGTGTTCTACTAAACC  
CACTCAACAAGCCATTTATGAATCATAAAAAGGGTGATAAGAGAAACAACAAGGTATAAA  
ATCGTGAATGGGTAAACGAGGAAGCGAACACTGTACATGAGATAGTAACAGGACTGCAGC  
GGGATAACCTGAGAGGACCCATGCCTGGACGTTTTGTGAGCTAACAACCTGTAAATGATGT  
AGTTTCTGGTTGACCAAGTTTCCAGCAATAACTATCTTGGATGGATGAATTACGGTGAGA  
AAATACTCCACGATTATATCCAGAATGGAGACTACATGATTAAGATAAAACGCAAACCAA  
CCCAACCTATTTCCGGTCAATTTGCTCTTTCTGAGAACCGTACCCGCATTTCGCTGTAACCC  
CGGATGGTAAACTCGGTGCTGGCCTTTATGCAGTAGGATTTCAAGTCAACGATAGTGTAG  
GGAATCCTAAGCTAGTAACAATACTTAACATGAAAAATGTACGATGTACGCACTAGCCCT  
AACTGTACCATAAAAACAGCAATTTTTGTTGGCGACACTCACCCAGGATTGTCAGTATGCAA  
AAATTTATGACGGCGTTGATATTCGCCATGTAGGGATTTCCCTCCGATCGCGACATGGAGT  
TCGCGCTTGATCACCCATAAGATATTCCATTGTATGCGAAGGTTACCAAGCGTAAGTACA  
CCAACGTGTAGATCGTCCAGATTCCGGTTGATAGTACGTTTCGATAGTGAAAATGGCGCAC  
CTCTCAGTGACGCTTGTGTCTGGGCGAATAGTGAGTACAGAGAAGACCAAGTGGCAAAA  
CCGTGGCTTGGTTGACAAGTATCCCTACGCCGGGTGGCCTTACTTCAATGGTTTAAACCGA  
TGACAGCAAGCTGTACGACGATGTTTAAATATCCTGAGCATTCTGGTAAATTAGTTAACGG  
CGCTCCTCCGGTTCAGGATGATAAACCACCAAGACGCTGACGAAGGTGATAAGCATAT  
TGATCGATACGGCGAATAATAGGGGCAAAGTTTGATCAATACAGTTGTAAAGGGTGTAGG  
AACGAAGGTACCGTTTGACCCAGAACGTCTGAACAGGTCTGCGATCTAGGGTGTAGAACG  
TAATCGTAATTGGTGACATATCTCTGAGGGCATCTACAAGCTGCCGTATAATGAATGCAC  
CACTCGTGAAGTAACGCAAGCATTGCTCGATGCCTACGTGAGCCGAACACACGACGCCCA  
TTCAAGGATGGCTGGGTGAATTCTGATCGGTCAGATCAACAAAGAAGCTCACGACGGTTT  
CAACAACATCCCTGCTCTTTATAATTTGTAGCCCGAGCTGTTTGACTCGGGTTATTGGGA  
AGCCATGGGTTATGGGCCGCTGGAGATTGGGGGACTTAACAGTGTGATTCAGCATTCCAA  
GGACCTTGACTACGGCTACACCGTCTGAAGCAAATACGTGACAAGTCCGCTATCAAAGA  
CGACATCAACGATGTTGTTTTTGTAGTCCCGTATATGATGTTGTTGGGTGTTGCAATGGC  
GGTTATTAAGCGTATGCGTCGAGAGCGTCCTACACAAGATGTGATTAAGATTAATACGTA

TCTGTGCGAACTGAAGATCAATGACCCGACACCGTAACTGATTGGAATCCGTACGGGACG  
AACTGAATGTGGTTCCTGCTGCTTTATCAAGGCTAACGATACAGCGAAATGCGTTGGTCA  
TGATCGTAAAGTTACATATATGATCACCGGTGCACAGTCTGGTATTGGCTATTACCGCTC  
CTCCCGCTCAATTGGTGACGGAGTTCGTGCTATTACGACCAAACACCTGGGTAAACTCCC  
ATATTACCGTGGCATGGATGCTGGGGTGAAGAACACCGTCAGACCCGCCGCGGTGGTAC  
TCACACGATCTCTTTTCGGGCACTTGACCCGCAGATCGGAGAACTGTTCCGCCTTAAGAA  
CCCGGAAACAGTTTCTACATTACGTATTAGCGCAATGGATTAATACTGCAATTTACGA  
GACTTTCATGAACCGTGTGGCGAAGAACCTATACTGGATGCTGGTATCTGACCAGGAAGC  
ACCACAACCTACCCGAAGGTATGTTCAAGATCATCATGCAGGAATTTGATGCAGAAGTTGC  
TCGTGTGGCAGCTGATACAAAGATCACTAAAACCTGGGTGAAGGCTCGCGAGCTACAAGT  
AGAGGTCGTTACCCAAAGACCAGAAACAGGTCACCTGTACTGAGACTGGCCTGACGAGAT  
GATCCGGTACACGCCTTTCCCGGAGACTATTTCTTACTCCAACTATTGCCAAGAAATTTG  
TCAGCCAACCATCGAAGACAAAGGAATGCGTAAACATCTTTGATATCCATGCAGACAATGG  
TAAGGTCGGTCTAGGCTGCGTGTGATCTCTCTTTGCTGGGCGTATTTCTCCGGATGCGTA  
CGAGGATGTTACTTACTACACCGTTCCTTATGATCGACCACATTACGGATATAATGGATTA  
TCCGTATGACGATATGGAACACACTGCCAAGGCCCGTCGTTCAATTGGTGTGGTTTGTGTC  
AAAGCTTGCTCATTACATTGCGATACACAAGGTTGCTTACTGCTCCGCTGAGAGCAAGCA  
ATTGGTTCATGACCTGGCATAGCTGCACACCTTCAGCTTACATATGGCGAGCCTGCATCT  
TGCAAAAGACCGTGGTTTTACTCCGTGGATGACCAAGACCAAGTACCCACTAGGGTAGCT  
TCCATTCGCCGACTCCAATAAAGGAGTTGATGGAGTTGTGAAGAAGGCAAGTCTCAAGCA  
GGATAGGGAAGTTTCACGGCAAGATATTATCCAAGTTTGTGGTAGCCGCAATGACGTCTC  
GGAAGATTATATGGCGAACGAAAGTTCTTCTCTGGAGACGAACACTAAATACTGACTTTA  
CCCGCTGAGAGATCACATTATCCTCGAGAAATCACGGCAAGGGTCTTTGCTGTTTATAGT  
TTCGGAGTATGAAGAAGTGAAGGATTACCAGACCTCTTCGTGGGATCTTAACACCAACTA  
CCTGATTGACATTTTCGCCGTCATTCGGAGGATCGCAGGGTGGGCGGTTAGTGCTGACCT  
CTACGTGACTATACGCTGTTAAAAGCCGGATAGCTCTGAATGATGGAGCCGATGGATTA  
CCTGATCCGTGTAAGGAAGCTGGGGGTGAAGACTGGGTACTACTTGAACGCGAAGGTTAG  
TGCTGGCGAATTACTCACCGCAGAAGTTAAGTCGAGTAAGCATGCATAAGAAGTTACCCG  
CAGGGATTATCCACTGATAGCAGACACCTCGGTTGAAGACCTTAACTGTGACGGTTGTGC  
ATTGTAATTCTTATGGGGCTTTGGGACTTATTTTTCTGAGGTGAATCTATAGCAGTAGT  
GAACGCTGAAAAGACCTATCATAAACTCGGTGATTATCTGCTGATCCTAGGGCAGCCAAT  
GCGTCTGTATGACACCATCTACAAAAAATACCCGGTCTCTGTTTGACCTGCACAAGGCTCA  
AAAGGAAAAGGATTGGTCTGAATACGAAGTTGAGCTAAATGAGTCAATAACTGACTTTGG  
AACCTGTAGCGAGTCCACGTCTGATGTCATGGTGCAGACGCCGATGTGGCAGTTCGAGGA  
AGATACCGTTGCAGCACAGGCGATTCTCTGTCTGTCTTCACCTTTCATCACAAACAGTGA  
ACTTTTCGGCATGATGCAGAAGCAATCTTAGATGGGAGATCTCCACGCGCCCACTTATTC  
AGATATCATCCGTCAGTGTGGCCAACTCTCAGCTAATTATTCAAGATATTTAAGACAA  
TCGGGGAGTTCTCGAACCTTCTGGTGTGAGTGTCAAGTACAGGCGTTAACTTGAACCTCT  
TTGAGCACTCTATCGTCCCGACCCTGAATCAGTAGATAAAGACCTGGTTCGGCGCTGTCT  
CCTACTTACATTGGTTCGCGAGTATCTATCTGGGAGCGATTGACTTTATCTCCAGCTTCGC  
GTGTACCATTGCCTTGGCGGAATACGGTGTGTTTGTCTGTTTCGGTTCAGCTTGCCCGGAA  
AATCACGATGGATCGAATGCTGCGAACCAAGATGTATTTTGACGTTAGTGATATCCTTCT  
GACATACCCGGTGTGGAAGGATAGGTTAATGCCACGAAGTACGAGATCAAGGAAATCCT  
TGACAAAGTGCGAACAAAAGAGTATGGTTGGGGTGATTACCTGTTCCGGGGATGGTTCGTGC  
AATCATCCGAATGAATGCGCCGCTCCTGAAAAATAGGAGTAACTGGAGCTGCGCTGCGAT  
TTATGGCTACTAGGGTTTCCCTAACGACTTCAAAGCTACCAAGCGCGATGCTCTGACGTT  
TACGGATATCAGGATGAATCCAAGCCGAAAACAGAACGCAAACCACTGGCAGACAAACAC  
GGATAGTCGTTTAAATGCGTCAGTCACCGATATATACGGTTAATTCTCGGACTTTTCACC  
AGTAAAATTGAACAATTCGATTTTTTGTCTCAGGCGTGCTTCACAACCCACCAAAATTCA  
TGCTACTTTCGATGGTGGGCGTGATATGGGCGTGGATAGGGATGTCAAGGTCTGGTGCTC  
GCGCCGTCTTACTGGTCTGGACTGTGACAAGGATTTTTTTCTAGGTCAAAGCCTTTGGGT  
TGTACCACTGAAAATGCTTCTGGGTGAGGAAGTGCGTAGTAAATTTAGTACACCGGAAG  
TGGAACATTCTAGGACAGTTGTACCTTTGTGGCTGATATGGTTGTGAAGGGTTATGTCGT  
TGATTATACTTGCAAGATCCCATTTTTTCGGTTTACCTTCGAAACGGAGAAAGAATGCGC  
ATCTGAGGCCACGTTTTTATTATGCAAGGCAGGGACCATTGCCAACGCTGGGTCCGGGCG  
AGAGAGTCCGCTAGATCCATAGGTTCGGGTGGTTATGTATCTGTCCTTCGAAATAAACTAC  
GCCCAAGACGCACCGGTCGGAAAATCCTCTCCAGTACTCCCGACAACCGTACCCCGTATG

TTTATGGATGATGAAACGAGCACCCGGCACATCGCAACAGCCGAAGAGTTCATTGCATAC  
GTGAATGCAAACATCTGAGGGGGTAGATGAGTGAAAGTAGTAAAACGCTATGGGCGTGTT  
GATGACTTGTCTCTGAAAAAAGTAAAACGAGCGGTTGAGGCCGCACGGTTAGCAACAGGC  
ATGGACCCACAAGCTGCCCATCATTCTGCGGTACAAATCGGTCAGCGGACTTTGAAGTTA  
TTCGTGGCGACACCTGTCAGAGATGTCGAAGATATCTATCGTGGAGTGGAAAATCTGTAG  
ATGGTAGAAAGTCCACTCCGTAACGCTGCTAGCGCCCATATTGAGTATCGCCATAATCGT  
CACAACGCGTGTTAAGTAAATGGAAAACCTTTATGCAGATAGCACCCGGCTTCCCGGACCAT  
TCCGCAGAAGTGTTACCCATTAGAATGCAAACAAACCAAGCACGGTCGTAAACACGCAC  
GGGAGCCTATTAGCCGGGATTTTGAGTAAACATGCGGTAATGTCTCAGTTACTGCCTAAA  
AACCTCGAGGAAGGGCATAACAGGGCGTTTTGGACATATTCACGCCCTTGATTACCTTGTA  
CGACGGCTGACGAACTTTTTCGTGGTAAACTACCGGGACATGCTTGAAAATGGTATCAAG  
ATCGGCAATGTTAAGATAGAGAAGCCGAAATCAATTGATGTGGCACACACTGGATTGACA  
CAAATCAACCAGGTTGTAGCGTCAAGCCGGTATAATCGACAGACCTCCTCTCACTTCGAC  
GAAGGTATGTAGCAATACTTTGAAATGAGCTTCATGAAGAATGTGAATCAGTTCAGAGC  
CACTGAAACGCCGCTGGTCGGACCAACAAAATGGTTCTTGATGCAAACCACATAATGCTT  
CAACTGGTCAATACACTGATGAGCGTAAATGCTCAGGCATGTTTCTCACGATCAGCGGT  
TGTTTGGTTAAATCAAAGTTCTGTAGGATGCTCAATTGTATTTATCTAACCGTCCACAAA  
GAGGGCCTCGGCGATGATAAGGTGACCCCTGTGTTACCGAAAGTTGTTATCTTCTAAAG  
GAAGGTTTAAACGTAAATCCAGGCGATTCGAATTATGGTCTGTCGTTGCGAGCTATGGAG  
TGTTATGCTGAGAGAACTAAGTCCGACTTGATCTCAGTTCGGTTAAACATGCAAGTGACA  
GGATATTCCACCGGCAGGGTGACGAGCATGGGTTGTCGAAGCTTTTTATCTCACTATGCA  
ACCGAAAATAGAGAACAGTACGATGAACGTTGCAATCTTGGCGTGGTATCCTTAAACTTT  
CCCATGATTACCGCCGAAGCAAAAGCCGGCAAAGTTTTCTTACACAACACTGATTGATAAG  
TATATTGAAATGCCTTATGAAACACAAATGCTTCGTCTTGGTCGTCGGATCGAGGTTACG  
GCAACCTAGAACCCGACATTGTTGAGGGAAGGTACTCTGGCAAGGGTCGGGCCTGATGAG  
AAGTTGAGGAACTCTTCTATGGAGGGCACCCCTCCAAGAGTATCCGGCTAGTCGGGCTTT  
TATGGGGCTGTCGCAATCCTTTCTGATGAGCCCGTACGCAAGGCGATGGCGATTAATATC  
CTGAAGTACACGAAGGAAATCTGTGCAGCGTTCGAGGATCGCAGTGAGTTAGGTTTCTGC  
TGGTATGGAACACCTGCGGGAAGCCAGTGTGATCGATTTGCAAGCAGGTTACAGGAGAAA  
CATCCTGGTTTTGATTGAAAGGTATTACCTAACAAACTATTCCCCCTAACCTGTGTTGCTC  
GCCTGCGACCCGTTCACTGCTGGAGGATTACGGATAAGGTTTTCGCAGAGAGCAGTAGCGGC  
GGTAATTTTCGGATACGTGGCAACCCCGAACCAGCATATTATGCAGGCTCTTGAAGCG  
CTTATTCTCTATAGCTGCGAGAGCATTAAATTTTTTCGGTATCATTACAGCCCGTGGCTAAA  
TGCCTAAAATGCGGATTCTGCGGTGAGTTGAAGACGACTGCAAAGGATTCCAATGTCCT  
TCTTGCTGGGACCATGAAGTAGGATCGATTTCTGTGATTCTCAAGTAACCGGATATCGG  
TCAGCACCAAACACTCACGACCCTCCAACACTATGGTAAGATGGCAGAGGTGCTGCAAGGGCTG  
AAACATGTATGCATTGCTGGGTTAATGAACTAACGGACCACGTGAACGAAGAAGGGATCA  
GGTGCTCCCATGGGGTGAGCGGTTGCAGTCACGGAGGTCGGGGCTGCTTTAACTAAAAG  
CGTGATCGTATATCCAAGATCAGCTTTCCACCAATTTGGAAGTTCACAGGCTCATCAAT  
TTATGGGAAGGCCTTTTATCAAGGGCTTGTCTTTATTCGGAGGTGAACCTCTTGACCCGC  
GCAATGTTGATGAGGTCGTCAAAGTTATTCTGCGTGTCCGTGTAGTATTCGGAGATAGCA  
GGGACATCATGCTGTGGCCTGGATACACCCTCGCAGAAGTCCCAGAAAGGGTTACATTAC  
TTGTAGTTATTAGGATGGACGGCAAGTCTGATGAGTGCAATGCTAAAACCAAAGGTTTA  
GAGGTTCTTACAACCAAAGGATGTCCGGTAAGAATAGACGGTGAATGGATAGAGGAGAAGT  
AGATCAGTAAACAAAACACTGCTTAAGGCATAACAGAGAGAACAGTCTCTGGAACCTCAGTG  
GCATAGAGCATAAGAACACGCGCCCCACCGAGGTCGAACGGATGGAACCTGGTATCTGACG  
TTGCTGCCTGTGGCAACGACAGAGGTAGTCCATGACTGAAGTTACTAACGAAGAACAGAG  
CTTGGTGCCACTCTCGCAGCTGGAAACGGTGCTGCTCGGAGATTCCGTGGAACCTGGCCCG  
TGAGTTTGTGGGCCTTGATTTCTAAGACTGATCAATCAGTTTACGGAACAAACTCATT  
TCAAATTGAAGCTCTCAAGCAAATGACCGCTGACCCTCGTAAAGGCCAGGATGGTGCGAC  
AGACAAGAAGCTTAATGCTGCTTAGGTTAATCTGAAGAAAGCGCTTACTGAAGAGTTTAT  
GCAGTAGGTGATGGATACGTTGGTTGACCCTCTGAATGGAGCGCTGACACAGTACGAGCT  
TGCTTACGCGATCTATTATGAACGTATCAGCATCAAGATTTCCGGGATTGCGGCCCGTCT  
TGAAACGGCTTTTGCAAGGGCGCTCGGAGAGGGCGAAGCCGAAAGGTAGTGGTCAATGAA  
TGCTGCGAGTCCGGAGATTATCCTAAGCTGATCGAAGGTGGGAACAGCGTCCGGCAAGTC  
TGATGGTGTGAAATGTGCCAACCCGTTAGAAGATCCGCACCCGCAAAGTGCATTGCACA  
GGCTACGACTGGAAACTATTGCGGAGGTACATAGAAACTCACCCGAGCACAACTGGACAA

AATCTTCCCCCTCGGTGCAAGTTCTTGGAAGAATGCGAAATTCCTGACGCCGCTCAAGGA  
CCTGTCTGAAAAGACAGAGATTATTGCTGTGAATCGGATTGCGGGGTGCCGGTCTTACCT  
TGATGTGGGGTCAGCGGAGTACCGGTAAGTACGTCGACTCGTTAACGGTGGCTACTTTGA  
CAAGTACGACACTGGTCCTATTCCAGAAAGTTTTGGAAACACACCCCAAGTACGATGGGGA  
TGGTGCCAACGGCCAGGAGAGGGCTCTGATCCAGGTGACCGGACTCACAACTGAAAGGC  
TCGCCGTAAAGCACTGGGTCTTGGCCTCGTTTACCACCCTGAGTTGAATAAACAGCCTGA  
GTATGCTGTTGCCAGCCCTGGCTCGTATTGGGACAAGAGACACATCAACCCGGCGTGCAT  
TGCTGATGATCTCGTGAAAATTACCAAGGGGGTAAACAGTGGTACAAATAAACTTACCGA  
GCGCACAGCCAATAACAAAAAGGCTTAATATGTGCTAACCTCGTAAGGAGATCCAATATC  
GGAAGAAGCACAGAGGCACGTGCATTAAACTTTTCGGCTCGCCAGCAACAACGTACAGAA  
AGACAAGTAAATAACCACCCGCAATTCGAGGAGGAACGTAACCGCGCCCAAGCTCCTGTT  
TGTCTGAATGTAAAGCAGCATGATTACCTTACATGTTGCAGACTTGCAAATCATAATT  
GCGAAAGGTATCTTCGGTACAGGCAAAACCTACCACGCATCAGCCGACGCTTCCGAGTTG  
CTACGTAGAAACGAACTGCACAACATCATTTTTCGCTCGGCCATGCGTGCAGACGGGTATA  
ACCTCTCGCTTCAAACCGTGTACTTCACTGGTAACGCTGTTACCCTATGTTTCGTAACATG  
CTGGGAACCATCCGCAAGCGCATGCCCGACGGCCATACTACAATGCTCTGACATAAGGT  
TTATATGGGCGTATCGCCGTTTCAGGAAATGGAAAGCACCCGTTGTCGACTATTGGACTAA  
AACAGCTTTCTACTGATCGCCGACGCCCGGCAGAGTACCCCGGAGGGAATGCTGAGTATC  
AGTACTCGTATTTCCGATAACTCTACACTCGTTGTGATGGGTGATCCAGTCAGAACGAC  
ATTTAAGGTCAGTCTGGCATGGAGTGGCTCATTGAGTTTAGCCAGCGACACAACCTTGCA  
GGTGTGGGTACTGTGTCCTTTCATGACCCCAATGGCGATATCGTTTGTCTGGTATGATT  
CGCGACATCGCTATTGGCATGATGGATAAACTGGACGCAAACTATACAAGCCGATGGCT  
TCTGAACAGGAGAAATACAGGAGAGTATGCAGGGGTAGGATCACGTGAAACACCCCCAGA  
GGTTATCAGCGTCATGTAAAACGCAGCTTCCCGACGAGCCCGGCTCGAATTCACTCTTTG  
GGGTGGGAACGCGGGAGGAGTGGATGCTTCATTTTCAGAGAGGGATGTAGAAATATCACGA  
AACTATTAACAATGGAAAGAAGACAGAGTATCCTACACGCTTGGCAAAGATTTACATCCT  
TGGTGGCGGCTTTGCTGGACAGAATTAAGACCTTTGGGACTTCTGTGGCTATCCCTTGAG  
TTACCATGATCATCTCATGCCTGAACAAAAGCATAAAAGGGATCATTCCGGTTGACGAAAG  
CCTTTCGAATTATGAGGCTCTGAAAACATAAAAGAAGTGCTATTGCACTCCATTCCCGTAA  
TGTGCAATAACTTCTGGAGGTAACGTCCTCGATCCAAAGCCACTGCCATCTGCCTTTA  
CTATGATTCAGAAGATAAGCATGGCAACCCAAATGGGGGAACTGCAACGGCTGTCAATCC  
CGCCAAAAGTATGCCATGAAGACGCTTAACCTAAACACTCCGGAGCGCTTGGTCTTGCT  
TGAGACGTTCCCTGACCAGTCTTGAGAGCAAGCAAGGTATGCAGGTTTAGAGACAATCGAA  
ATCAGTCCTACTGCCTTGTGAAGGTTGAAAGAAAGGGTTGGGTTCTAACCAAAAAGACGG  
GATAACGGATTTAAGTTACCGATGCAGGTCGGGAGGCTCGTTATGTTAGCACCACAGAGG  
CCACGAAACCGTTCAATCATCGGAGTGAACCTCTAGGGTACGAGTCCATGAAAACTCATG  
TGGTCGGAGAGACAGTCCAGCTGGACGATTACGCGATGTTTACATTGTGGATGAAGGGT  
ACCGTGGAGCTAACGGTGAAGTTAAGTACCTGTTAGCTCCATAGGAGAAGTATGACACCT  
AGTATTCATTGGGTGTTACCCATCGAAAACCTTATCAATCTGAAGAATGGTGTCTGTTGTC  
GAGCCTTGATTTTTTCGAGGAGGAAGTAACGAAGCTTTTTCACCTTTTACCGTAAGGTAATA  
GCACAGAGTTTGTATGGTCTGAATGATGGATATCGAACACGTATTATCTACTGCCTAGAG  
GGGGCTGACCTTGTGCTCATTGGATGTTTCCGGCCAGAAGTGAGCTACTTAATCCTCAG  
ATTTATCTGGATCATCAGGGGCGTATCTCGAGTTAGGTGAATATAAGTCCGAAGGAATTG  
AATCAGTTCACAATGCTGCTCACATCAGCGTTAGTCGCCGAGAGGGCAAGAAAAGTTCTC  
GGGACATTCAAGTACAGCAAACAAGAGCTGGTCGATGACGAGACAGGGTGCTACATTCAC  
TGGCGGATGAAGAATGCTTACATTCTGAAAGGCTACATTTCAAACGCTCTCCAGCAGGAG  
TAATTAGGAACAGTGCGAAAACCTTTTTTCGGTATGCTGCCGGGGATGAGTGGGAACATTTA  
TCACCACCCGGACCACTCTCATGATCAAGTCCTCTACATTGATGATCTGTATGGCTGGA  
AGACCATCAGGATCGTCTGCAAGTTATCCGCCCCGACAGGCCGTGGTGGAGACGACCCGGGT  
GGTGTGGGCTGTTCTGGTGGGGTAGTGTCTATTGCTTTGTCGTATGTAAGTGCGATCCG  
TGAGAGTCAGGCACCGAGCGTCACCCAGCCGAAGGCAACGTTTGTCTTCCGGGACAGT  
TTTGTGGTTGGCCTTTAAGGACCGCACAGTGGCAGGACTGACAGAGTTCATGTGCCCTAA  
TTAGCATGGCGGCACCTTTCGGTGTGGTGCAAACATGTACGCTGAGAGAGCCTAGCAGAT  
GCATTATTTGAACGTATGATTGCCGCTTCTACACCCGGGCTTCCGACCGATAGTGAGAG  
AGCAACCATCTAAGGTGGTGGCCAGGTGTGGACGGATGAGATCGGGATCGTTAAGCGTGC  
CACTGCGGTGCTGTTGGATGAGAGAAGAGTCGAAGGGATGCATCAAGAACAGAACCAAAT  
CAGTTTTCGGCTAGAATAAGCCTTTACAGGAGAAAAAGGTGCTTTAGAATGTAGACCTGAA

CAACCTGCCAGAAGATGTGCGTGAGAGCGTGTGTCTGAAGCGTGGTGTGACGGGGAAAT  
GTTTAAGTTCCATCTTTCCACGCTGAGTGCAAAGGATCTTGAGGTCTTCAATTAGGAAGA  
ACTGCAATCCATCCTGTCTCAGATCGGTGCGCTTGCAGCAGGCTCTGAAGAACTTCTGAA  
GGTTACCACTCCAAATAGCCAGGAACTGAATGGTGAAATCCTCAAAAACCTACGAGTAGAT  
CGTTGCAAGTACTCTGGAGCAAATGGGGAGCTAATGTCTCCAACCTTTAAAAAAGAAGGAA  
GACTGCAGGGCATAACGATGTCCTCGAAACCCCGACTGCGACTCTTGAGGCCATTCTTAAG  
GTTAACCCGAATGATTCCACCAACTCTTACTTGGATCGTTGAAGATGCTCCGCTGAGTAC  
TACAACTTACTGCATATGGGAAGCGCGTAGGGTAAAATCCGTCAGTGCGTAGGTGATCTT  
AACACGGGTTCCCTACCACGTATATATGGTTGCGCCCAACCCACCATGCTCTTTGGCGGAC  
AAATTCGTCAACCAGGCGTCTGGTGAAGCGGATGTTGTGCTCATCTTGATGAGACCAGGA  
TCCATTGAAGGCAGGAAGCGTTGTGAGTGGTGGCAGGAGAACCCAATCAGTTCTCTTTTG  
GTACTTTCTCAAAGGCCACCATTTTCCGACCATGGAAATACCGATGGCAGAGGTTATGCC  
TGGTTTGTGTTGCGGCAAGAAAAACAGGTTCCGACTGTAGCCATTTAATTTCTGGTGCGA  
CACAGTGATTAATGGCGCACACAAGATGCGAGAGATGGCTAACACGGAGAAAAGGAAAC  
ACTGGAGTCACTCGAGGAACTGTACGATCCGATAGTGGACGGGCTAGCGCAGTGTGCGAG  
GAACGGGAGGTACGGGATGGGACTTTCTCTCTGTTCCCGGAGGAGATGAATGATTATCT  
GCGCCATATTGTTAGCGATCTTCGTGGTGACGGTTTCACAGTCGGTGTTCATCAGCTACCA  
ACCAACAACAATGCACCGCAATAGCTTTTGTGCTAACATTGTAAATCTACCGGGTTCG  
GCGGGTTTGGTCGGTTATGTACTTTGCATTCACAAAACACACACTTAAGCTGTTTTCCAA  
CAGAGTAGAACAAACATGCGATTTTACATTTACTACCGTCTTTTAGAGACCATGCGCTTCG  
GAAAATACAGGGGCGACCTAATCCATATTTGACAGCGGAGTAGGATTATTGCCGTGACG  
GGAAGATTTTGAGAGTTAAATGTTGCAATCGCCCTGCCAGTGTGTATACTCGATTATTCA  
AGAGGTTGAAACACGGCGCGATCGAGGACGACATGTTTTAACCCTCGACGGAAATAGAT  
TACTAAAAGACCTGTTCAAAAACATGAACCAATGGGAGAACAAACGATTGAAACAAAGTCT  
TACCAACAAACAGGACACGATCCTGACCGGGTTCACAGGAATCCTTTGATGTTTCGTTCAA  
CCTGATTCACGAAGATGGCGAAAAGCGACTGGGCCAATCCTTATGAACGCACGAGTTCGG  
CAGTAAAGAGTTCTCCGCTGAACTGATGGATTACTAACGTGAAGACTTCATGGCGTGGTT  
TAAATCAGGGGAATGATGAGGACCGAACTCAATGCCCGTGGAAAACCTTTGGCGATAGCA  
GATTGGCTTGGTTGGCAAACCGAAGATCTTTCATGTGGCTTGAAATCCCAGAGGACGCT  
GTTAAGCGGTTCAACTACGGGCAGTAACATGGACACAGTTTCACGGAATTTGCTGACGAC  
GCGCAGGACGGTGAGGGACGCGGGTTGTTTATGTTCCGTAAGCCAGTACTGGGTTATGAC  
CCGATGGGCGACAACGCTTCTATTGTGGCAACCCTTGCGGAAGAGACGTACGACGCTGAA  
AATAAAGACATCGACCTCGTCTTTTACTACATCCGACAAACAGTGAGTAAAATGTACATC  
GCCGATGCATAATGGGAGTTAAAAGAGCAGTGCGGCCCTCCTCTAAACTGAAACAAAACAA  
GCGAAAATAATTGATTAATCAAACATACACCGTAGTAAAAGATCTGTGTAATGAGTACAT  
GGGACACCGACCACAGTAGGTGAGTGGTAAGCAAAATTGTAGAAGTTCCCTGCTCATA  
TGCAGTAGATGTGTTCCGACCAAGAATGCCAGTTTTGTTAAGCTCTACAGACCGTAGCGA  
TGTATTTTTTACCAGAGGTGGAATAACAGACACAGTGAGGGGGTTGGTGGTTCGAACCCCT  
AGACCGAAGTTTTTCGTTTCCGTGTCCACGGTATTTGGTAGGAACGCAACTATGCGTACAC  
CGCAGAAGAAGTGGCGATCATCGAATCAATCTGTACGCAAAATTGACGGACGCCAGAAAT  
GGTTGGAATGACGACATGGAAAAGGCCCGTGAATTTTTTAAAAACTCACGATCAGGAAGAA  
ATTCTACATGTTCCCTAAGATGCTAGAGACAGGTTCGCGCACCGAAGTGGTATCGTCTAAT  
GAACGGCAGGGTTGGTACAGTGTGCAATTTAAATTCTTCATTGTGGGTGAGACTGGTCTT  
GACGAGTATGTCATCTTCCCAACAATAAATCATGGAGTGACAATTATAAAAAATATATT  
CACGAACAATTCTAAGGAGAGAAGATGAAGGCATACATGTTAGGTGGCACAACACGTTGAC  
GGTTTGCAGGGCCGTGAAGTCCACGACCGTGACTACTTGGTTGTGGGTGCAACACAAGAC  
CAAGTGATTGAGGAAGGGTTCATGCAGTTTGGCGCTTCTTCTGGGACCCCTCCATCCG  
GAGACTCAGGAAGAATACGCGCTCGCTCTCACTGAACGTCAGGTTGGTAGCTGTCACAAG  
AGGTTTCTGACCTTTTTGAGCCCAGATGCAAGACTGGCAAAACACCGGTCTCGTCCGGAT  
CTAACTATCAATGCGATGGTTCAGGATCAGTAGCCTGGAAAAATCATTGACCCGTCCGGT  
GATCATAATGATATTGTAAGGAAGCTCCAGCGACACCCGAAGTTGACATTTCTAGTTGAT  
CCTCAGCGTATTCTGAGAGCTGACAGATCAAAGCGCATTTGGGTAATGAATCGGATCTC  
CATCCTGAGACAAAATCTCTTTGGTCCCAGAACTGTCACGAACCTTGAAAGTACCAATGGC  
GAGCGTAAATGCAAAGAGATGAAAAAGGCTCTCGGGACTTATGACTTTCGTACCTAAGCT  
GAAGCAATGGCAGAAGTGGAGGTTACCAGAAATGGAATCGCTGCGCGATGTAGAGCAA  
CCTCAGGAATACCATCCCGAAGGTCACGCATTTCATGCTTACACCGCTGTGCATAGATATC  
GCAGACCAGCAAGAATCAAACCCATACAGGAAGTTAGCAGACCTGTGTCACGTCCTTGGC



AAGGCGGTGGCGTTCTCCAAGAATGGAAACCTACTGCGTCATGAAAAGCCAGGGCGTGCT  
CCGGTTGATGAACTGTGTGAACGTATTCGTGTGCCAAACGATTTCTTGTTCGTTGCTCGA  
TACGTGACTGAGCAACATACGGGTGTTTCATGGCAGCACCCCTCGTAGAGTAATCAAGGGT  
GCAAACCGGGATCACTTGAGAAGCTTTTCGAAGCTGCTGGTAACGTCAAGAGTACCAAG  
ACAGCTATGAAAGCGCGGGCCCTGGCTGACGCATCTTTCTGTGATGCAAAGGCCGTGGC  
CCGACAAAGGCAGCGGAACCTTACCCCCAGGGCTACGTTCTGAAGGCTGCTTCCCAGGTC  
ATTTTAGCTGTTGTTACCAAAGTGATCTCCGCTGATGGTTTCAGCAAGGGCAAACAGGG  
ATTGAGATCGACGAAATGATCAGTGTGGCACGTATCGACGCAATCCGCAGGGTCACACAG  
GGTCAAATTGCCTGGTAAGGAGTGCTGGCTGAAGAATTTCGGATAAGGAAGAGTAGACATA  
CGAGAAACATCCCATTACGCTGACAAACACGCAGAGCAGCAGGTTTGTGCATGGAGCAG  
CCCCGGAGCTATAAGGAATAAGGATAGTACTGGTGCGGGGATCAGGGGTGCAATTACGC  
ATTCCATCCATAGTACAGAAGCGCCATGTCTAATTTACACACATAATTTTCGAGTAGGGGT  
AAGTAATGCCTATTGAGCCTGTAATTTATTTGTGCAATGGTAAACTGGCTATGCTGAAGA  
TTCTGTCGTTGAATTAGTTTTGTACGGATTAGATAAGTTCTTCATCCGTCAACATAGGGC  
TACTGGTGATAGTCTTTTGGTTTCTCCGACCTTTCTCTTTGCTGGGTGTCACCGTTGCCA  
CCATTTTTAAAGAAAATTTTGTATTGAAAGGAGAAAGAAATCAAGACACGTATGTCCAG  
CATGGCAAATGAATACATTACTGTCACGCACGCAGGTACCCAGGCAACGCACGCGCTATC  
TGAGATGATCTTGAATTACTCTCACAGCCGGAACACTGCTGGAGATTTCTGAGGGCTTG  
GGTGGACCGGGATAACACCCTCCTCGTGCTCGATGGGGGATAACCAGGCCACATTGCACGA  
ACTGTGTGAGAAGTTCAAGCCTCTGAGCAGCACTTATCCGTGGGCCTCTTTCTGTGATGA  
GCCGGATGCACGGAACGGCGCTATGACAGCCGTAGCTGAAGTATGGCCACAGTATATGTA  
AGGGCCGCAGGCTTAGGATGTGGTCAATCTGTACCAACTCGGTAAGTACATCGCCCCAGA  
GAAAATCAACCAGTACTGCGATAAAAATGGGCAATGAGATGCATAACTACAGAGAATTGGA  
AACAGACCTGATGACAATGATCAAATCTTTCCGACAGAGAGGATTATAAGATGTAAGTAG  
GTGAAGTTTACTGCATTCTGTTTATTGATATGATCTTTGCAGCTACGCTGATCGCTACTT  
CCGAGATCCGAACGATCGGGCCAGATAACAATAAGGATCCGAATTTCTTTGACCTTCCCC  
TGCGGGATGTGGTAAACGGTGTGTAACAACAACACTGTTAAAGGCTGCCGAATAATGATCTA  
CACAGTTTATACCCTATTCACCCTGCTTGGTGTGATATTACTGACCCGTCCCTGGATGAG  
CGGGGAAGATTTCAAGTTGACGGCACGAAGTTGCTCGATGTTTCGTCTGCCTTGCCGTTAA  
CGACGGCTTGATCATGGTAATAACCATGATCCCACTTTCTGCTGGGCTTTTTGCAGGACT  
GCTGTTTGGGATTGGGATTTGGAAACATATTTCTGCTGCCCCGCGGAATCTTGCGGGAGAC  
AGTAATCAAGAACGAAAAGATTCTTGTAGCCATCGGCCCTAATGGTTTTTTGTTTGTGCA  
AGTATCGTTCAGCTGCATGAGCTCAAGTGGATAAATGAAAGACGTTGGTGGATAGGCTTT  
GAAGATTGGTGCCGAGGGGTATACCTACTGGGGAGGCAATGAATTGCACGCTGGTAAGGA  
AAAACAAATCAAGGTGAATGAGGCGAAAATCCTTGTTGATTCTTGGCCTAATCACCCCGA  
TCCAGCACACCGTTATTCCATGGCGAATATGGAGTCGCGGGCGTGATGATCAAGGTAGA  
AGAGCCAACAGTGTGGTATCCGAACGAGGACGTTTTATTGATGTAGGAGATCATTACAGCT  
GAGAGACGAGGTGAAATTCTTGGCGGCGAAGATTGAGTACCAAGAGCTCTTGATATTCTG  
GGATAAAAACCGCAAATCCCATCTTGTTTTCTCTTAAGGAGATTTTTGGAAACTGTAGAC  
TTGTTGGGTTACTACTTTGGCAGCATCGCTTAAAGGACTAACCTCCGAACATTGCATGCC  
GAAATCCAAGGGCTTTTCAGTGCAGAAATGATGTTCTTCCGCACACCAGTCTGCACTTTC  
AAGGAGTAAACCCTAGCTGACGAAGAAGATGGGAATATTTACGAACTGACAAACGTCATG  
AAACTCTTCGTGTAGATGTACCCGAACATCATTGCGCTAATGTTTCGTAGATGAGGAGGAT  
ATTCTCCAAAATCTGATGCGTATAACTATCTACGTCAAACCGCACCCAGAAGGGCTATCG  
AACAACTGGCCTTTAGCCTCTCAGGCTACGCAATTCCAAAGGTTATTCGTATGCGTGGT  
CACTATAAGTGGTTCAGCACGCCACAACCTGAAGCAAAGCCAACCCAGAAGGAGGTCTTC  
CGCTGGGTGTCTAACGACAGCGAGCACCCGTTTCTGAAACGAGAGGATTTAATGCAGGCA  
CTGGACGGACTGACCAGCTTCTGCATAATGGTACCTTACGGTAACAACGTTAAAGGTGTG  
ATGGAGAACTTTAATAGTTCTGGACTATTCAATACTCACGAATCGATTGAAATGTGAT  
TAACGTCAAGTGACTACTGCGGTTAAAAAGCGTAAGCCTTTGTGGATCGTAAGATATCTG  
GAAGAAGAGCTCAAACCTGGCGAAAGAGAAGCACCCGGAACACTGGAAGTGGTAGAAAAGT  
CGAAATGAGGCTCGCCATGAACTCGAAGTCCAACCTCAGATACTATAACCGAATATGCGATG  
CACCACTGCGCCTGATGCGTAAGGCGGCAGAGATGTTTACTGACGGTAAAGGCCTGGTT  
AAGCGGCCTGACGGCAAGGTAAGTACTGCTTGTATCGGTGATGGCAAGTCGACCCCTGAACAG  
CATCCTGCACGGGCTGCCGAGAAAGACCGTTATCTTAGAGAAGACCTGTACGAAAAGACA  
GCTCTCCAGACACAACCGCCCTTCAAGTCGCCGCTCGTGTACTTATGACCGCGCAACAT  
ATCTGCTGGTCCAAGATCGATGCTTGAAGCAGTTATCGTTATACTTAGGGTTGCATATGA

TGTTATTGCTGTGGTATACACCATAGAGATTGAGAACGCTAAAAATGTCCGGCAGATCCA  
CAATGCCAAGACAGACTTTGATTGGTCCGAGGTTTGCATCGAGTACGGGTTTCGCTGGCG  
GCTTGGGCCACTGGCCCAATATTTGATGAGGAGAAGAAATGAGACATCATGGATTTATGC  
GAGGAATGATCGAGTTGGTTGCGGGATGGCAAATGAATTCAAAATGAACCGTAACATCT  
CTGATGAACCAGGAACTCGCCCGATATTCGACACCAGGAGGACGGCCTTGGTGATGTGT  
TTGTGGGGTTACAATGTAAGGTGTACGCATTATGAGTTGTGGTGTGTAGACGCCAGAGCA  
TGCGTAGATCTTACGTATGCGTATCCTCTTGCAAGAAGGAACAGGCAACGCGCTCAAAGA  
TATTTACAGAAATGTTGGAGTTGGTTATATGCACGATGCATGCCCGAATTTGGGTGGGAC  
ACGTATTTGTGATGATCGCCTGGGTCTGTCTGTTACGGCTACTCCTTCCGCTGCCCGAA  
GCATTCTTTCACAAGTTGATAGGCGGTAATTGCAATCCGTCAGGAGTTTGAAACTGTGTG  
TGATTGTTCCCTTCCCCCTATATAATGTTAGCCATGACAATGAAAAAATGCCGGTTAAAAT  
TATGATAGGAGGTCTTATCTCCAGAAATTGGTTCGTGAACACCCAACCTTACCAGAACA  
CTGGCAACCTCTGCTGGAAAAGAGTTTTATGCAACAAGGCCGTTAAAATAGCAGCCATT  
ACACCATTCTGTGTAGGGCGATTGCAGGTAACGCGTGGTGTGACACGCAAAACCCATGC  
CATAACGTTCTATGTTGGAGATATGGGGAAGCTCCATCCTCTTTGCTGGGAACAGTCTT  
TGAACCAGTGCGAGGGTTTTGAGACGGCGATCCGGGACTGGTATAGAACAAGCGTGCGCA  
TCATCAATGTGCACAAGCAGTCTCAGGGATGAGGATACAGTATAAGAGACAAGTTCTAGA  
ACCCCCAAACAAGGTATTCGTTGCCATTTTCATGATCTACGCAATAATCAGCTTGGTAG  
TGTGTTCTTATCCACTTTGAGGAGATTGAATGAGGTACAGAGGAGATTATAACAGAC  
AGTAGGACTCCCGGAGGCGTGAGACAGGTCGTCAGCGTCGATCAAACCAGAAGGTAAAG  
CAAGACAACCTGCAAATCAGACTTGATAGAATTGAGGCGGAGAAACGTGCAAGAATCACAA  
GTGAGTGGGACATGTTGGACCGTTAAGAGGTCAACCTTCTTTGCAGAGAGAGGATGCGTG  
ACACAGGCAATCCTTGGGGGTCTGACCACATGCAATCCCTCCGTGCAAAGAGAGTATCTT  
GCCTAAAGTGTTGTGGTAATATCAAATTATCCCAGTAAAATTGAAGCGTAGTAAGAATA  
ACAACATGAACTACATGAACCGACTGGAGTGGATTAAGGATTTGGACACCCTATGCCGGA  
AGAGTTAATAAAGCTTTTTGTAAAGGATACGACTCACATCGTGATCAGTAACTATAGGG  
AATTTCCAGGGCTGTGGCAAAGTGAAATCCGTGTCATAATGGTCAATCGTTGTCGTTGT  
GAAGGGTAACCTGAATGCGTATTCTGGTAGAGTGATTTATCCAAAGCTTACAATAAAGCA  
TACCGCCGTAAGAAACGAGCAAATCTTTTTGGCAACAAGAACAAGGATCAGCAAATCTG  
GATTTATACCGATCGTGTGTGCATCGGTGAGGTCGAGGTATACAACCGAGATATGTTTTT  
GGACTCAACATCCCCAACAGATGAAGAAGAACAATTGCCAAGAAAGAGCAAGGATGCGGA  
TCTTCATATCCTTATGAAACAATTCGGAAGAGTACCCGGAAGGATCTTGAAAGGCGGAT  
GTCTGGGATGTGTGTGGAGGAGTATGGCTCTAAGATCGAAGAAAGAGGGTTTTGTGTCAAT  
ACGTTAATGCCCCATTGCCGGTTTTTTTTTTAGCAGTCCCTTTGTCATTCTTTC AATGACA  
AGATTGTCAGAAGTCTCAGTAACTGTCAGGTGCTCAATAGTAATGTCCATCTTTGTTGGC  
ATCCCCCGTTCATGTCTTCGAATCGAATATGGTCCACCTGGCGAGGTTATCGCATTGCT  
CAAATCTTGGATCGTTCAGGAACATAACACTACCTGCCGTTTAGATGGACTGTGAGCCGG  
TTCTTGGGGCTGAATGCGGATAACGGGCAGGTGGTATCCCGGCCACACGTTGGACCGGC  
TCATTTCTGTTCCCGGTGACCGTCACTATGTTCTGTCATCAGCATGGTGTGCGCCGTAATGG  
TTTCTTTAAGACAACATCTTTGATAATTGTGCGTTAGTCAAGGGTTGACGAAAGATTTAT  
TTCCGCCATAACGGGGAATAAATTCGGATAGGTGGTTGATTTGTGTGTTAAGTATGGTGA  
TGCAGGGGAAGAACTTGGGACAATGATCTAACGGAAGCAGATCCTTGAAGATATCCCGAG  
TGATATCAACCTGTGTATCCAAATCAAGAATGGTGCTGAGAAAGGCTGCCAGGAAAGGGG  
AAACTGCTCGGTTCTTATCGACGCATTGATACACACTGCATAGGACATCCTGAAAAGAGG  
TCTTTAATGACGTACAGTATCTACAGCACAATGTCTATGTACCCACGCTCGCGCGGAGGA  
GAGTTGTACTGCCTGTAAAGTAAAGTACCGTCATAAAAACGGTAGAAGTAATGCAACAT  
TACAGAAAACTCTGTGATATGTTTCAGAGGAGACTTGAATGTGTGGATTCCGGGAAAAGGC  
GCATGATTTAACTGATCGGAACTTCCACTCCGACGGTCAAGTTGACCGACACTGGAGAAA  
GAGATCATGGACAATGGTTGTTCTACGAGTCTCGGAGGTCTCGCAGGTACTTCGAAAGTA  
CGGATGTACCGTGGTCAACGAGTAAAGAAAACCAACTTCGCGGGTACGCCGGCTGCAAGG  
CGGGTGCCGGTGCTGGGTGACTACGCGTACTTTCACACCAGTGCTGGTCACATAATGAG  
CTACCGAATCTTAAATATAGTGATCCATGCACGTGAGTTTTGCCTAGTGATGTCCGTCGT  
TTATACTGGGCTGGACATGTAGATTTATCCGGTCATGTACGCATGTGCTGCGGGTGCGTT  
GGTTGCATGCCGTTTATAACTAAGCATAACCATGGTAGATGCAAAATTCTCAGAAATGCC  
TATTCGTTTTTTCAGCCCTCATCTGGCTGGCATAATGGAAAGCATAACGCTACGAGATGCTT  
CGACGAGAGATCCCCAAGGACTCACTTTATGAGTGGTCCCTTTCCGATGAGCAATACTAA  
CATCGCCAGGAGAAAGAGATGGGCGGCGGTACAACCTTGTATTTCATCAAGCGGGAAGTG

TGGTAGGCTAGCGATACAGGGAAGTTGCGCTTCAATAACAAGGAGTTCAAAATAAAGGGG  
CAAGCATAAAAGGCCACTGTCCCATATATCAAGAATAAAGACTCTTGATTTTATGGTATA  
ATAGAGTCTTACACAACGCGAAGACATTATGTTACAAGTGCTCTTGTGCGGTAAAGCCCA  
CATCTCCGTCGGAAGCATCAGAGAGGCAATCGCTGGGGGTGCCTGTTGACTTGCCCTATC  
GGAGAGTGACCAGTGGTACGGTAATTGCGAGACGTACCCAAGTGTCATAGGAGTTGCCAC  
GAAGACTTGGCCATAGATTCTCGATAATGTAGAGGATTTTCGGTTCGGGCTTCAGGCAATG  
CATTGCAAACTGGAAGATGGGAGTTGGTTATTTTGGGGGCGAACTCCGTGGGAGCGGT  
ACCTATTGTACGGGCTGGAAGGCATCCGTAGAGTTTCTCCTGAGACGGGACAACAACCTA  
GATTCCCCGCACACAAATTGGTAATGCGGGCCGTATATGCTGTTGTTGCGATCATTCTGC  
CCCTACTCTGACACCGACCTTTACCTGAAGTGACAAACCACACTAGTGGGGCCTGATGG  
GGCTCCTGTATTCTGCCTGAAGAATCCCATGAATTTAGTTTAAAGCGGCAGATCAAATT  
CCTCTTGACGTAAACTCTCATCCGTAATACGATTACCAAAGCGTCTCAGGTTCAGAAGG  
TCTGCACGAAACCAACACCAAGGGAGCCTTGACAGCTGAGAATTCTATAGTTCTCATTCAA  
CAGTCTATACGGACGTATGTTGTTCTGCTTGTGAACTGTACCCCCGCTCCTGCGAGAAA  
GGTTGTGCATTTTATTAATACACAATGCCCGTAGCTCGGGTGAATGCATTCATTGCTCTG  
CAACACAACATGTTTAGCGAATTGCATTTCTACTACACAGGCAGCCTGAAGTGGCGATGC  
TGTAACATATCGCAGGGCGATTAGCCACAGGCTAACCTGTATAACGCACAACACGTGAA  
AACCCAATCCTCCGCCGCCCGGAGGGAAAGAAAAGAGGCCCATTTGTTGTATCGCTTGGGG  
ACGAAAAATATCCGTTGGCTCTAAGTTCGATGTGCTCGACGGACCATCACAGCCACCGAA  
GGTTGTCAAGAATCTTTACACAATATCCGAGTGGTCCGATGTCGATAACCTTGCAGTTT  
TTGGCTCGACGAGTGAATATGATTAGTTGTGTGACTTTTGATACTCTAATCAAACCTAGG  
ATGATTGGATTGATTTCGCCAGATTACTGCACGATTTCCCCTTGACGTGCTTACTTTTGTG  
TGGGTCTGTCTCTTTTACATAATACACGTTATGAGCACCACAGATCGGACTGGCGCATGG  
GTGATACTTGCACAATGTTACATTTTCATCAATGAGCAATTCCTATGACGTGGCACGGCC  
TGATATACGTTATCACTGTGAGAGTTTAAACCCGTTGTTATTCATTTTCTGGGGTGT  
CTAGATAATAATTCTTTTACATAAACCATGTAATTTTCGATTTTCAATTCATGTCTAAAAG  
AAAATCATTCCGCAAATACAAACATTTTCTGAATTTACAGAAAACACTTGACAGGGAGG  
GAAAATTGTGTATAGCAACACGCTGCATTTGTGCCTTTTGGCACATGATAACCGTTCCCG  
TTTTCGCCTGTGATGGGCCAGATTCCCAGCAATTCTAATACAATGAAATGGTTACTTATT  
GTAACCTAGTTTCTGTATTGCTACAGGCGGCATTAATAGACTTGACGTATCAAGAACACGC  
TTTACTCATGAGGCATCTTTTATGCTCAATAACAAGCCTTTCAGCATGCTTGCGGCCGGA  
CTTACAGATCGATTAATCATGGTTGGTCATCCATTAACGGCGATTTATTGCTAATAAAAA  
GATCTTGGCCTTCATCACATCGGGACAGTATAACACCAAGCCCTTACGGGGTGTCTCGC  
GACGGTAAACGATATCCAGATTGAACAAGGGAGTTAAGTGAATCTTCTTTATCTGGACAA  
TATAACACGACAGCGATCAACTTTAGTTGATCGATGTTATCCTGGTGAGTGTGATAATCT  
CATTGTGTAACCATTCATTTTGGATGAATTATAATGTAAAGGATTAGCCGTTGCGTAGTC  
AACTAAGTGATTATATCGTAGCGTCTACGAGCCACCATATCGCGAACACAGCTGATAAGT  
ATTATCTTTTACTTACTCTCGTGTATATCGTGTGCTCGTTAAGCTCGCGCCACTCCCCA  
CGATCAGGCGGACGATTATTTTATTGGACAAGATCCTATTCTGATGCTCACGCTAGACCG  
TTCACACGATCGGTTAGATGAGAACAGCTATCAAACGTGAGTTATTATCACGATTTTACA  
TGGAACAGTTTAAAATGCGTGTTTTATTAGTTGATAAAAAGGCGCTATCAATATTGAGGT  
ACTAGTGGGTCAAATACGATAAGCAATACCCTTTTAAACGCATTTTAAACGTGTTTTAACG  
GTGTCCTCTCGTTAGCCATGCCGTTATATTGCTTTCTGGGATATCTTTCAAATCCCCTT  
TTTGCATAAATTGCCAACGGGGTTAGTAAGAATCATTCTCAGTTGCGATATTGCAACTAAC  
GTAAAAGTGGGTAAAGATCTGGTGTGTTTGGGACACTCGTGTGATATGCAAAAGTCG  
CGACAATCCCTACCTCACTTACAACATGATATCCAGTGGTCCGGCAATGATGAACGGTA  
GATCATAACCATCGATCGGTTTAAAACCTGAGATATGCCACCACCCATAAAAACGCCAATG  
GCAAGGCGTCGATCAAGGTGTTACCTGTCCGTGCGGTGCGGTGACTTCGTACAAGGCAGG  
CAAAGCAGCCATAAAAAACACTTGACAAAACGGCCATAAATCAAGCCCTGGGTTTGTAAA  
GATTTTGGCATTACGGTAACGGTGCATTGATTGACTGAAAACCGATCCGCCGTCGAGGC  
ATTCCGCCTGCCTCATTGCGGCCACCCTGTGCAAAATTTTGCGAAGTACATATGCACAAT  
GACCGTTGAAGGCAAGCGCTTTTCTAATCATTCTCCTATAGTCGGACAGAACATAATGA  
TCAGGTAATCATGGGTGTCGTAGTGATTGATCCACGCTCTCACCTGCTCACATGCCAGGG  
GGCGATCCGTCTCGCTATAACTTGACGGTCCGAGACATTCAAAAGTGGTTACATTTCCG  
TCAGTTCACTGTAGGCGGTGACCTAGCCACTAGCCTAGAATTTTTCAGGATCGAATTGAA  
AATCATGTTGACCGCATGAATAAAGCAGATAGAAACCAGTTGCAGATATTCACGCTTCG  
TAAGGGTTTGTAGTGCCTATCCAGGCCGCGCCCTTTCATGTCATCGGGGGTTATTTTCAT

ACTTCATGAGCATTATCCTGGTTGTGTGGGTATGCGCCGTAAAGCCCCTCACAAATAAA  
ATCCTCGTCAAAATCGGCCAGGTATTCGAACAATTCAAATTCATAGCTACACCATGCTT  
GACAAGCTCACTACTTTTATATTCTTAAGGAAACAGGCAGATCGGCGAGTCACTATACAG  
ATCCGTTATTTTCGATATACTCCCCGACCTTTTGATCTGTAACGGTGTTTTTCTTTTTGGC  
TAAAATAACTTTTTACATGATCTGTGGTCGACAAGAATGATCGCTTGCGGGGATACAATCC  
GGTGTAACTATCAGGGCTTTTGCTTGCGGATCTCAAAGCTTAATTTCCGTTTGCAAACC  
GTGGTGCTCATTTTCCGCATTTCCGGATCGACGTTGTGATCCTTACAATACCACACCGAT  
TTTCCACCTGCAATGAGGTTGCGTAAAAAATTCAGTCGGACCCGTTGCATTATTAATCATT  
TAAGTTTACCTCTCAGAATACGCCGGGGATGTCCCCGGCTATGTTCTGATTAGTATTCGT  
TAGCATAATTTGTTACACGGTCATCTAAGGCGCTTTGAGCACCGGCACGATCCCAGAATA  
AGTCTTGATCTTGTTCTCTTCAATGTCTAACTGGTTATACACCGCTTGAGCTAGATATT  
CCATAGTCCAAGATAAAACAACCATCAACTCCATTAATAATGCTTCGAGATAAAACAAAATT  
GCATACTATCCTTTAACCTATCGAGCATGTACGGCCCCGCCCTTTCGTCCTGGTGGGGGC  
ATTATGCAGGCCAGATAGCCGGCTTTACATTTTGCAAATGGGCATTAAGATTTTTTAACGA  
TAATCCGCGAACCATCTTTTAAGATACCGATCAATGCTTGCAGTTTATCATTATTGCTGG  
TAGTGATGAAATTTACCATTGTCGTTTACCTTTCCGGCTTCTGGAGAACCATTATCCGG  
CCTCAAAAAGATTTTTAACCGATCCGCGCCTGGCCTGCAAGCTTTTTTTTTATTCTTCTC  
GCCGTAATCATCGCCAACATTGATAAAGTCCAGCATGTCACCCCCAGCGATCCGTAGCAG  
GTACATTTCCCGGGTGTGGCGATGCATATTGTCAATCCCCTCTGCCCTTCACGCCCCGAT  
CCCTGTTACGTCCAGGTAATCGCGGATCATTGGTTCGCTGTATGCGCTAATCTGTAAGCC  
GTCCCGGATATAGGGCAGGTCCTCCACCGATGACGCTTCACGTTCCCTCAGGGTGGGCCAT  
CCTTCTACCTGCTCACGTTCCCAAAGATGACCCAGTGCCGACCGCATGAGGATGACCA  
ATAAACAGTTTTGTTTTTCATAATTCTTGCCCTTCTATTATGCCCGGGGGCGATCCCCG  
ACTTTTAATAATACTTTATCCGATCCGGTTTTTAGAGTGAAACGGACCAACCTCATTAC  
CTTCCCAACGACCATGGCGAACACGTCCACAGATTCACGGATCGGCAAACCTCAGCCCC  
CATTACTTGGCCTTTCGCCCTTCAAGCTGATATGAGACGTGATTATCTTTTACTGCATG  
CTGTGGTGTGTGATCAATTGTTGTTTTCGCTGCCGTTCTAATGTCCAGGCAGTCCCCGTT  
CACAGTGTCAATTAAGTTGGTAACAATGAATTAAGGTTTTGTGATCGAAACGACGAAAATA  
ACACTTTGCATTCTCGGAACCAACCCGCCCGGAAAAAGAATCTATTTGCAAGTTCGGGCTT  
TAAACATCGCTTTAGATGGAAGATAATAACAGCAGGAAGATCACGACAGGCGACACAAC  
GCGACACATAAAGCGCGACTCTATGTAAAGCGGGTTTTTCATTAGTGTATTTCGACTTTGTA  
ACCTTACATGATTCACCTCTACCTGGTGACCGGGAGCCGTTGCCGGCCGTGTCTGGTAAT  
CATTCAACAGGATCGCCCATATCAAATGTTTTTATGGCATTGCTTCCACTTCTTGCGA  
AGGAAAATTGGCCGGATCGATTGACTCAGGGTTCACGGCGTAAACCACTAGCGGCGAACTC  
GCAGCACTGCTGATCATCGTATGATATAACAACACAATCATTACTTTGCATCAACATAGA  
CGCGCCATAAAAACACTTACACGCGAAAACCTCGAACGTTAGATTAAGCTTATTTTTTCT  
GGAAAAGAATTTGGGTTTAGTCGCTTTTTTTAGCGCCATCTTTCGACTCCGCAAAAAGGC  
CGAATTGCTCGCCTTCTGAAGAATATAGGGGTTTTTCGTACACGTGGCTAGCCTTTTCT  
CTGTAAAAGATTTCCTTTACAATCCTATCAGACTCCTATCCCATGGTTCGTAAGGGGAATGT  
GAAAAGCCATTACAATCATTCCGAACATGATCACTTATGCACTAAAAGACGTAGATAGC  
AAGAGCGGCAGGCATTGCTATCAAAAAGATACCCGAGCCACCACACACCACGAACACTAGT  
TTAATCCAACATTTAGTTTCCCCTCGTTTGTGCGTGGCACAGTTGCCGCCATGTAGAATC  
ATAGCATTGCTGCGCGGGAGTCAATCGTTAATTTTTGATCTAGTTTGTGTGGTTGTAAT  
CCTCATAACGTACAAGGGAAACCATGACCGCTAAATGCAAGAGGCAACCTACAGAGTCCG  
CCCGGGGGTCAAATTTCTTGAGATGCTCAGGGGTATTGGGGCGGGTAAACTTAAAACGCA  
TAGGTAATTTAAGCGGATCACATCCATCGATGCCGCTAACAACACCAAAAATCGCTTTGAC  
CGTAATTGTGGTAAACCATTTTAACCAGGATCTGAGATCCAAGCGGCGCGATGTCAGAGT  
TCACGTTTTGCATTTTATCTTCTTTGGTTTGTGTGGTTGGAAACATTGCCGCCCTACGC  
ATTAAAGATAACGCAACCACAGCAGGACGCAAGCTCTAATTTAAATTATTTTTGTTGAGA  
CGTATTCTCATTTCGACGATTTTGCATGATTAGCGACAATTAGGCGGATAGTTTCACTG  
CGATACTATATTTGCGGGAGTTTGTCCGTGGCGGCAGTATGTGATACCCCCGCAAAAACGCA  
CTAAAACGCTTTCTAAGCTTTTCAAGGGCTGACCCTGGCACGTGCATCACCTTGCGCATA  
TCTCCTTAAATTCACATTTCTCCATAGAAAAACCTTGGAATTATCCCGGGCTTTCGATTA  
ATCATCTTGGGCGGCTTGGCACTGGAAAGCGCGCGTTCTTTCGACTAACCGCTTTTTAAG  
ATATGGATCGTGGCGGTCCGGCGCCCAGGTTTTGGCCAGGCGCCCCGGCTAGTTGAGTTT  
GTCGTTTCCCTTGCCTCGCTCGTTTACTTCACGATATCCCTGGAGATCATGCTGGCTTGT  
CATCTTTTTCAGTGTGGCGCATAGTTTAAACCCTCGTTCTTTTATCGGTAGTTGTGTGCAT

GTTACAGATCCGGACATGTTACTCGGCTATTTTCATTAGCTCGCCTTTTCGATCATCTCCG  
CGATCTGCTCCTTTGCGCCTTCTTTGTGATACGTGACAACTCCGCCCCGCTTTTTCACTT  
CACACAATACGCCGTCACCATCGAGATCATTAAACGGGCCATATCGCCGGGTGTGGTAGT  
GGTGTGAGTGGAAGCTGTATCCTTAATAATGGTACAGTTTGCCGATCCTGTATTCATTAT  
AAGCCACAGCAGGCCCCGCCATCACCTGGCCGGGATATACCGGTAAAGAGCAGTTGCAG  
CCACCAAATCAGGATTTTAAACACTTTTAAATAATCCTCAAACCTTGTCTTGGAGTATCTC  
CAGGTCTTCAGATGTAAACACTTTCCGGAGTGCCTCGCCAGTCTTCTGACACGCAAGATA  
AATCTCCTAACCATTTGCTGCAATCCTCATCATGGCCCATATTAGACCAAAAATAAGCATG  
AGAATCAGATCCCAGATCAATATCTGATAGCAGGCAGGAAACAACCTTTGCGGGCGGCGGG  
TGTTGCCGCATAAACACGGGACCCGAAAGACAATGCTTTATTATCGTTGCGCTTAAAATC  
GTCGCGTGTCCAGTTATTTTGTGATCAACGATGGAACTTTAGTCTCAAATCAAGCTAATTC  
TTTTGCGTCCGTTGGGGTTAAGCCCGTGTGACGGCCTACACGGTGACGCTTTCCCGTCTT  
AACATCTGCGCGGAAAATCTTCCCGCCTTTTTTCGAAACTCACGAACACCAAATCGTCTTG  
CCATTGTGGATCCTTGTAAACGCCAGCAAATTCCTCTTTAAAATCAATCCCTTGTCTTT  
CACAAAGTTGAACACGGCAACATCTTGATCGTGCAGAAAGTGATTTTGTATTTCAGGATATT  
TAACCTTGACTTTGGTTTGGCACTTTCCGCCGGGGTAGTTCACATAATTCGTAGGGCTTTT  
CTTAAAGCCCCACCTATGTGTAGTCAATACTTCTTTAATGATTTCTTTCTCTAAATAATC  
GAAGGCGGGCATCACTTTCAAGCAATCAAATAATAGCTTAAACGGGGATCTTTAGATTGTC  
GATCCGTCGACCTGCCTCCTGCTTTAAGTCTTCAATTGTGCGTTTTGTAGTGTTAAGGAT  
CGTGAAAACCTTGTCCGTTATCCATGCCTACGACCATTTCACTGCCTTTAAATAATTGC  
TAGTAACCCGCTACACATGGAGATAAAGCGAGCATTTTAGTACGGGGCGCTTCAGTCCTTA  
TTTCATAAGCCAGATGATATCCCATTTTTTCAAGCCAGTACAGCATTGCACTCTGCCCTT  
CGTTGTATGATTATTTCCCGGTGACGGGGCGACTCCAGGGCCAGCAAATCGCAACCTGTGT  
AACCATTTTGGACCGATATCAGATCCGCACGGTGAGACGTGGCGCGATATTTCTTGGTTCG  
TGTTTCCGTTAACATCGCGACTAAAATAAAAAGGATGCGAAAACAGCGAAAAAAACCCCGG  
TTGGGGTTGTGCATGATAATCAGGTCAGGCGATTAACAGCGTCATACAGATTGATAGTTG  
TCTCAAACCGTGCCATTTTTTTTACTGTTTCAGTATAGCGGGAACCTCTTCCGCCTCGAT  
TAATAAGGTAACCGATCGACCGATGGTTTGGCAACTATTCGTTGAAGTTTATGAAATCTT  
TTTTACGCTTGTCTGGTCCCTTGGGTGACGTGGATTTTTAAGCCCTTCTCACTATCACACC  
GATTCAGGTGGCCCCATCCTCATCTTATGCAGGTCATGGTGTAAAGATATTTGATTGCAA  
CTCGTAAAGCGTCGGAACCGAAACCTTAAACGCAGCTCGGGCGACTTATACAGCGTCGGCA  
AGGTCTCGATCTCGGGGGTAGTGAACGAAAGCTCATTAACAAAATATGTTTTACAGTACA  
TATCCGCAAAGTCAAGACAATGAAAATTCAAAATAGCGGATTTGTTGTGTACTCATTTTT  
TGAAAATATCTATCATGGTTTCCATGTGATTACCTGCTTTCTTTTCGTCTGGGTATTAT  
GGTCCAGTCTCCCGGCGCTTGTACATGATTTATTATCGGGTCATATGCGCTGCTAAACG  
TGCCGCGATGTGGGAAGGCTTTTGGGTGATCTGGATCTGCTTGCCGTTTGAGTCCTCAAC  
ATAGGAGACCCGCGCGGCTTTGCCGTTACGGTAACCCGTTTTGATTACAGAGTAGCAAC  
CAGGGCCGGGGCGCTGTCCTTTGCAGGGCGTTGGTTCGGCGGTGTCCTGGATCGCTTCTTA  
CATAACGACGGGGATAATCTGCCACCGTTTACAAACAGGCGCGTTGGTGCCGTTGTCGAT  
CACTTTCACGCCGTTGGCTTGGGAATCAGTACCGGCCACGGCGCGAGAATCGAAATAAGT  
TTTCATCGTGTAACCTCGTTTGTGTGGTTGATTTATCTGGCTTGTCAATGTGTGGAGATT  
ATAGCCCCACACATTAGCCAGCGTCAACAATTATCTTACAGTTATTTTTTGACCTTTAAC  
ATTTATATAAGTGCGGCCGGCGTTTCTATATTGGTCAACGTATATCCGACGATCACCCGC  
CTGCAAATTAACGTCCAGTGTATAGGGATGTTAGTCCCCTACCCTGATCGGGTTTTGGT  
TAGCACCTTTCGTTGCCACCACTGAGGTGCGACAATCGCCTTCACTTCCACCAACAAAGA  
TCCGGCATTGGCAATATATCATTTTTTCCATTATGTTAACCTCTTATTGGTTGCTGGGCGC  
TTCCCCGGCGTTTTAGTAGGATAACAGATCCGGAGTAGGGGAGCAAGCTTCTACTAAGAT  
CTTTTTACGCCGTCAAAGTTTGCATGATCTCCCCGCCTGCCTTTTTTTCGGCGTCCAG  
TCCTTACCCTTGACCCCGTTGCCGTGGTAAACTTCTTTTGCCTCGGTATACAAATCACG  
TTCGTCTTGGTTTGAATCGGTAGAAATGCAACCAATAATCTCATTTTTCCAGGAGGGGGAT  
CACGTTTCGCACTGGCGGTCACAATCACAAATAATCACTCTCATTTAAGTCTCGCTCCAA  
AGCGTCTGTGGTGCCTCGTACGCGAGGCGCGATGGGTTATCATCACCACGGGCGATCAA  
GTCTGCGATCCGCTTTTACAGGCTATATTGAAACGGGATAGCAGATTTTTAACTATTGGG  
CTCCGCCTTAGGATCCTTTACAGTGACGCCGCCCTGGAGATCGGCGGTCAATTCCCACTT  
ATCGCCAAATGTATCATATGTATCACAGCATAACATCGTACGGCTACAATGCATGCTGTT  
TGCGGAACAATTGAAAGTTTCGATAGTGTCCATCTTTTTACCTTTTTCAGTGTGGGGCGC  
CGGTGTGTCGCCCTTATAGGATACCTAGTAAACGACATACTAACCCTGTCAATACCCCG

GGACAAAATTTTTAAAAAAGTTTTTCCTATATCCTGGTTGCATTCTGGGGGGGACCGCG  
TACTATATACCGACTGACACACCAACGGCGGGTAAAGAAAAAGGAAAACGTAACCGTGGT  
ACCAAGCGAAGCATTGGTGACCCATTTACCTGGGAAACATCAGCACATGAGTGTCTGTC  
TAGATTGGTGCCGTTGCCTGATGTCTCGCGAATGTTAAACGGCGGATTCTGCGGGGCCAA  
AGTGGTAGCGGCAAACGGGGAAAGTTTTAGCGGATGCCCTGTAAAAAATCTTTTGACGTGG  
GGCTTGCAATTTGCGCGGCCTTGGGTTAGTGTTGGTTCATAGAAGAGGAAACGCCAGCCC  
ATTGCTAAAAGTCGGGGCTAACGTACCGGGCGTTGGTGAATGTCGGGAGGTGCATCGAC  
GGCAGTTCGACCTGTTGTCACTTGTATAGATTTGTAAGGAAGCTTGATCAGTGGCGTGGT  
TATGCTATTAGTTCCACACGCCGACGGGTAACGGGAATCGCGAGACAAACACCGAAGCTG  
CCCGCAATTCTGCAAACGAGAATGATTTTCATTCAACAATAGACTTCTCTTGACATCTCG  
TGTGCGTGTGTGGGAACATTACATATCCCTAAAAAATTTTTCCGAACTGTAGAAAAAATA  
CGTTTTCAAAGTGAATACTCGTTTCGAGAACAGCGCGGAAAGATTTTTTCGATACACAGA  
AAAAATACGTTTTTCGATTTTGAGAAACCGATCGTGTACCCAGTGTAATCGAGAAAAAATT  
GTTAACGATAGAGAAAAAATACCACTTTGACATCCAAAACCTTCGTCGGGTACTCGGACT  
TACATCCCAAAAAAAGGGATTTACCATTTCTGGACTTTTGCCACAATTCGTGTACCGGGG  
CATGGAATTTCCATTGGTAAACATTCTGTTGCATTGGTGGGGTATGAGATAAGGGGGCTGG  
ACTATCCAAAATCTTAAATCACACTAAATTGGATATCCACCCCGGCTATGAGGGAAGCCC  
ATGTGAAAAACCATTGCGCATTTTATGTGGATTTCCCGTTCAAATTTCTACGGCAAATAG  
CAAGGGCAAACCTGATATCATTTTGAACACCGTACCGTTTCATAACAAGGTCTTTAAGAT  
AGATATCATGTGATTTACGGTTCGTCACACTACATATATTCTGAGACTCCCATGCAGCACGTT  
CATCTTCCTCTATGTCAAATTTCCCTATATACCTTCCCCTTTGGTCAATTTTTAGATCACT  
GGGCCTTTAACTTACAAAGTTATTTGTAAAATGTTACACCTCTTGCATGTGTGCGATTTC  
GAGCAATATACCTATTCAACCACACAGGGATGATCATAATGATCAGTGCCGTAAGCCT  
CGTTCCTTCTACCAGCTAATCTTTGTCAAGTACATATACTTTTCGATAATTATCGCACC  
ACGATGTCTGCAAGTTCATAAATTAATGCCACGTATGGACAACAACAACCCCATGATATG  
ATGGCCATTGACCGCTGTAGGTTCTGTTTATCATAAGGTGCCAATCCTTCCAGGACGAAT  
GTTGCGGTAGTTTTCCCTCTTTCCGCATACACCTGAAAAACGGAGCATCGTTTATCCCAA  
CACCACATACTAACTACTATGTTTTGTAGACGGTTTCGATTCCATATGCAAATCTAAAC  
TCATACCTTGCTCCTAAACGTACACCGTTGACATTTTGGCTTCTACCCGAAAGTATCTG  
TCCATCCGCAAATATCATACTCTGCGTGGTGCGACCTTATATACCTCCGGATTTACAGCAT  
GAGTTGGATTAATATCGTCCATGAAAAGATCCTACACCTCTGAGAGCCTGATGCGATAGA  
ACATTTTATCCTCAGTCAAGATGGTGGCAATGCTCCCATCGACAGGGTTCGATTCTTAATG  
TATAATCACCGTCAGATACACACAGTGTCTTACCGCAATGAGTCATCCAGTCCTGAACAC  
CAACAACCATATTGTTTGCAGAGCTCCCGTGCAGTGTAAGCTCAAAAACAGTAGAACCTG  
CGTAGCAAGTCTGTCTTCTGAATGATCCCGAGTACAAAAGCACGCTTAGACGTATTCC  
AAACGCGAGACTCAAGCGCGCTGTAAAGGCTGGAGGCTGTGTTAACTCCCTTACCGTTT  
CTCCCGGCATATAGAAATACTCCTCCTAGATGTCCGGTAAAGAACCATCTTGTTATCAACAG  
ACAAAATATCTTTTCTCAGGGTAACTCCCGGTTTGCCAACAGAGATCAGGGAGTCTGTGA  
GAGTAACGACGTGCGCTTCCCGTTGGTAGACATAATCCTTATAGTCACAAAGCTTTGAAC  
ACTTCGGTATAGCCTTCAGTTTAGAAGGCTCATACTACTTTCCCGTGTGCTGTGCGAA  
GCTATGCCTCTTCATCTTACCAGTTTTAAATTCAAGGTAAGATATCTCGTGCTCTGTGC  
GCTCAAATATCTTGAGTAACTCTGATTCAGATCCGGGTGCGCGTATTCGTTCTGGGTTT  
GATCGAGAATCTTTATGGTGTGGAAAACGGTTTTAATCTTAAAAGCTCCTGTAACGCCTT  
ATGAGGCGTAATAATAAAGAGCTGTACGTACGTCTACCTTGTATGGGAAAAACCCCGCAG  
TAGCGTTTCTACGCAAGATACGGGGCTTTGTGTTGTCAGGTCTTACCGACCGTGCTCTTG  
GCAGACCTTAGACTAAATGTATGCCATATTCATTTAAGCTTTACATCCTATGGGATTGG  
TAAGTTAAGAACATGAAGTAGCACAGGCCATATATCTTCGCTCATAACTTGAAGGTGTA  
GTAAGGGAACATCAACGCAATTCCAAAGGCTCACCGAAGTAGTTCTGGCCCTGCTTC  
CTCTGTAAGAAAGATCCTGTTTATCGAACACCACCCCTACTATGGGCGTCTTACCCATG  
AGGTCGATGTTGGTCAACTTTTCTTACGCAGTAGGGCTGCTGGTGCATGTAACAGTTTT  
ATTGGTAAGACCAAACCAGCCATTGACATGATATACTTGTTCCTCCCGGGCTGTCAACAATG  
TCGGTGTGTTGTAGCAGACCGCCAGGACTGAATCCGGTATACTGGATTTTCGAGGTGACGG  
ATCAGGTTATGTTCTGATCTTTTCGACTTTACATTCATTACCGTAATCGTGCTCATACCT  
GTATAGCATACCCATGTGTCTTTGTTATAAAACGCGGGGTATTTCCCTCTTTCCGAGCTTC  
GCGATACAGTCTTTCCCATTTTACTCTATCCCAAGGATAATACCCTGGAGGTGGGGTTT  
CATGGGGATCAATATAAAGAAATCATCGATCCGCATATCGGGTATCCTCCCCAGCTTTGC  
TCAGACAGCAGCCTTTTGGACGCCTCCCCAGAAAATGATGCCTATGTCTAGTCCCTCAAC

CCACCATCTGATCTCATCGTTCCTGCTAGTTTCGAATCGGAGTGTCAAGA ACTTCAAAGA  
CCTGTCTGAATCTCTTGAACAGAAGAGGGT GACGAACTGCGACCACCATTCCGGATCAAG  
AGCGAACGTGTCATCCAAATGAAGCGTTATACGCCTTACCTCAGATGATATCTCTAAGCC  
CCCATCTTCAATCCGATACTGACCCCCTTATTGAATTTATTGTCAATATAATTTTCAAGA  
CCACGCTGGACTGTTTCAGCTACCCCGTGCCGACAAGAATCGCGAGGTTTTATACAGTCC  
TGAAGCTGATGCATGTATGCGGGGACGATTGCACAGTTGGTCACATCGGCAACCTCTGCG  
ATTGCAGATACATCATAACGTTAAAGGCGATTGAGAGTTCGTGCCAGTTCTCCA ACTTCC  
TCTACCAGGTTTCATCAAGGCCGAAAAAGTAGTCAGGGCTTACGCCCGGACGGAGGACTGG  
AGCGCGCGTTCAGCGGTTTCGGGTCAATTAGACTCCTTCTCTTTTGCCTTCTCAGCTTCAG  
CGGCTTTTGCATCAGAATCCAGGTCATCGGCCTACTTCTTGATCCGCTCGTCTAGGTA CT  
TGATGGTGCGGTCAGCCAGTTGCAGAGTATGAGGTGATGCGCCGCAATCTGACCGACAT  
ACGCCGTCCGGCATT TTTGTAAGCTGTTTCTGTCTGAGGCATGAAGTTTGCATAGACAATAC  
CCAGGAAACATAACCACCTTACCGAACACAGCGATCTTAACACGACCTTTTGT CAGGTGCG  
CCTTAGGCACACTATGGCGCTCTGCTCCACGCTGACGAGGTGCTGTTACCTCCCCCGAAA  
CTTCGAAACGCAGCCAGCCAGAAGTATCACC ACTAGGATAACGTACCCTCATTGAACCAT  
CACTATCAATCCTGGTGACA ACTACCACATCTCGGGCGCTAGA ACTGGACCAGTCTCTGAT  
TCACGACAAGGTTCTGCCCCAGAAATCATTCAAACAGTTCCTTTT GACCTTCCGTCTCTT  
TGTC AATTTTCTGAACTGCATACATGATAACATATTCAAACGTTGAAATGAAGAGCAGGA  
AGCCCCAATCGCCGTA CT TTTCCATCACTAGTGAGTACCTGAATCGCGTAGATCAGAAAAG  
ACCATGACATCAGTTATTCTCTTATTTATAAAAATTTGGCACGATTGGCCAAGGACCATT  
TATACAATCAACGCTTGAGGACAGTGCCTCAA AAGCCATGAAGGAATCAATCTGGATCTT  
ACCAGCACAGGACTCTATCGCGCAGTCATATTCTTTGGCGTTATACCTTTTTTTCGGGCAT  
ATAACACCCTGTTAAAAGAATGGGTAAACACATGTGAGGTGAAGACATTTTTTCATTTCTCA  
TTGAGATCCGCAACCAGTGCCCCAACTCGTATGCTGTTGATCCCATTGATATTAGCAGGA  
TTGCCTGTCATGCCAAGTTGATTTTCGGCAAGTATCTCCTGCATCGTCTTACCCATCACC  
GGGAAGTGCTCCAGACCAAGGAAAGAACACCAGTATGCTTTTTTCCC ACTAGTCCAGCGCT  
TTAGGGCAGCTATCGTCTGTGTAGGTACGGAGTGCAGCTCCATAACCTGGCAGTCTCTCC  
ATAGTCAAGAACAGTCTTGGCATATAATCGCAAATGTCATCAACATGACAAGAGAAACTC  
GAGCTACTGGCCATCCCACGGTTCTTCGGAACCAGACGTTGACTAGAACGTTTAATATTA  
ACCATTTTTTCGGCCTTCGTGCCGCCACGGAGTAGATGGGGTAAATAAGTTTGCCCTGTC  
CCCAAACGTTACATTACATTCTTCGTCCGCCGACATCTGAATGCCTTCGCTATCGCTT  
CATCTCTTCTCGTGAAACCAATTATAGACTTACAAAATCATGAGTCACGCCTTCTATTCT  
TAGATTTTTATGTTTATACATTTTTAAAGACCTTATCTGTATTAATTCTTATATGTAATCAT  
ATGCAAATTTTGCAGGACACGGGGTGCAAATTTTGCATCGCAACACGGGTGTA CTCTGATG  
TGCTCATGCCTCTCCTTTTCGAGAGATAAGTTGCCGCGTGTGACCAAGTTTTTTTATAGAGG  
TTCTGATGGACCATTCAGAAACACCGGTGGCCACGCTTATTGTCTGTAACTTGGGAAAA  
ATTTCTGTGATTTTGTCTCTATGTATCGGGCTTTGTATTTTCATATGTAGCATGGCACGAA  
GATCTGTACACAACAAGATCTAGGCACGTA ACTCGTTTTTCATCACAAGCTACCCTCCTCT  
CGCGCTTTCAGGACTACTGTAACCTCCCCACAATAGACAGGTTATAAAAATCCATCGACA  
ATACCTACAAAGTTTTTAAAAGAAATGCTCTCTAAGAACTCTGGGCCACAAGGTTTCCCA  
AAATCCATCATAGGAATCTGCCACTTTATCATCGTTACTAAAGGCCCTGCAACGCCACTA  
ATCGTAAATGTCTACACAAATTACAAAGTGAAAACACTACCATATTGAGAAAGTTGCTTT  
TCCCTTTCACTAGGGTTTTTGCGTAATACCTAATTGACAAGCACCATCACGAAACCGTCCA  
ATATACTAAGACTTATTGTTACGACGAGGGCTATATAAGTAAGCATCATCGGCCCTAGTA  
ACTGTTTTATCTTCTCGATGAAAAAGCAAGAAACCTCTGCTCCCCAGGTTTCTCAGGCAT  
TGACCGGACA ACTCCCATTCCATCTTTCTGTCTAACA AACGAAGGTGTACAGGGTACTTG  
TTGCTATCTCTCCGGGAACCGAAGCATCTTTTCACCTTGCCGTAGCAATGAACATCAACC  
CCAGTCAATTCTTCATCGAGAGTATAGAGATCAGGCATACACATTTGCTTTGAATGTAAC  
ATTTTCATGCTCACC ACTTCAGATAATATCTTAGGAATTCAATAACATACTAGTTTCGCAT  
ATTCTTCTTCAA AATCATGATGCAACATGCGGGTAACAACAACCGCCTTAGTGTATAGAG  
AGCTCTCAAATGGTGA AATACCGGTTAAAAAACA AAACATAAACTCCTCATCTGTGGTCA  
TCTCCAGAGGATTTACCGTGTAATCTGGTGAATAATGGTCTCCCACTCTCCTATCTTGA  
ACTTGTAAGACTCGAGGCTCTCCTGTTTGAAGTTGGGAGCTGCTCGCAATTTTCA CAAC  
CATCCTTTGTGAAGCTTGTTCGCAAAATTGCCCCGGTGTACATGATAACCACATCCACAC  
CGAGACCAACGGCGACGATTTTATTTT GAGTGCTGATCTAAGTCTCCCGCCCTTCCGAAA  
GCTGTATCAA ACTTAGCACGGTTTCTACCGCAAAGGGCACACAGTGTTTCCATTTACAA  
CCCCAGTCATTTTTGAGACGACTGAATTCCTCAATATAACCATCAGTGAAGGGTATCACA

GATGTTGCCTTTGGGAGGTGATCATCCATGTACTGAAATGCCACACCTGCCAAAGTACCG  
CCTGTGGAGGTTACATTGTAGTCCAGCATCTCTTTGATGTTCTCCTGTGTGTACACTTTC  
TCATCACGAACCTTCGTTGATCAGCAAAATAATGTCACACGAAAAGTGTTATAACGCAGA  
CACGAGCCAATAAGCTCGATGAAGATATAAGTGATTGTCGTCTAAGATATAGAATATGAC  
ACAGTGAAACCCATTACCATGTAAATTGTAACCTAGTACATCCTTCGTGGCCAGAGGATA  
CTTTGCTTGTGGTATTGCACCGTAATTTTTTAACAGTTGCGTATCAGACCACGATCTA  
AAAGCAGGTTTACCGAACGAAAGATACCCTCCCAGCAGAGAAATCATTTCGTTGCCTGATC  
ATCTGCATGCAATCAAGATATGGTTTACGCTTTCTGGCTAACATTTCTCGTGCCTATTTT  
GGTCTTCAACACCCCGCAGCCATTAATGCTGCCTCTACGAGAGCCGATGACCATGCAAAG  
TTCGCGTCTTAAGCTACCGAACCTTGACACGAGTGTGGATTAGTGTACCCAATAAGGTCA  
CGATCTGGGTAATCATCCCCAATACGTGTACCCACTGAGTGACCTGAAACAGCCTTCGCT  
TTGCGAGTGGCGCGGTAAAGTTCTTCCGCGTCATCACGTTCGATAGAGAAAACACAGTAA  
CAGTATGCCCTATATCAGAATTCATAATTTTTATCAAACACTGTTTGCGCCCCACCAGGG  
TAAAATCGCATAACCCTGCGAACGTGGTCCAGGATCGATTATCACAATATCTATGTTGATA  
TACTCATCCGCACCAATATTGTCCAGTCTTGAATCGAAGACCTTACCACGAGATCTATGT  
TCATCGGTTATGTGGCGTGACTCATGGATGAGAATAACCGCCACTTACATTGTTGTTATT  
TTACGATAGAATACTGATATATTTTTTGTAGTGATACTTCCGTGCCTGAGTCATGTGC  
GGGTGTGAATCACTTCGGGAAAACAGCTTCTTCATCCGCTCTTCCGTCAAACCCATAATG  
AACTTAGGGTTATAATACAGGTTGCCGTGGTCAGTGGCCGCAGTAGGTAACCAACGGCAA  
TCAGGGATGTTCCGGCATCGAACTCAGCAAAGTCCCCTAAAATGGGAACTGTTGTAACAAT  
GCAATAAATACAGATTGAATGTCCTTGAGCGTATCTTTCAGAAGCATTTCATAAATCTCG  
CTTTCTTCTTAAAGCATATCCCTCTCGAAATAAAAAAGGCCATCCTTCAAGATGGCATCA  
GAATATGTGATTTTTGAATGCGGATCAACTCTTTTTCTTCAACGAAATAATCTCATCCTT  
CCACCCTGAATCCCCATGCACGTTTTTGCCTTGGCTCATAACGGGGTTGATGGAACAGCAA  
ACAGTACAATTGCATTCACCCTTCCCTAACGTGCTTAGACGATAATCGTTACCCACTCAC  
CAACTTCAATTGCAGGCTTGAAACCATAGGCCAGCTTCTTATGTGCAGGTGCCGTTGCTG  
GTTGGCCCAAGATGTGTTAATACATTATACCACCTTGTTTCAGCATCGCCGTGATTTTCTG  
GAGACGGATGACTGCCTGGATCATCAATTAGGTCCTTGCTGTTTGCAGTTTCTTAGATA  
AATGATCAAATCAGCTTTCACAGAGCCAAGTTTATGGTGGAGGATCAGGATTGACTTGGG  
TTTACCTATCAACTTCTCTCCTGTCATCGAGTTGGTGTACAGACCCATTTTTCTTGTG  
CTGTGAAAACGTCACACCTGCATTGATGCCTACATCAGAGGAGGTGCTGCAGTAGCTTGC  
ATACCCAGTGCTACCGGTACGTCATTCTGCAGTTATGATGGCTCCGCTGCTTCTTCTAC  
GACCTCCTCCACAGCCTCGGTTACTTCCCTCCGTAACCTTCGCCCTTATGCTTATGCTGTT  
TGCTTCCCTGGATCAGTGTGCTTGGATAGAAATTGTACCCTTCTCCTGTTGCGGGATATA  
ATTAGTTTTCAGCATTTCATGTGATCTTTTGGCATGTTCCGCATCATTGCCTGAACAAC  
CTCGGGATCAAGCGGTTCACTTATTGTGATGGCACTCTTGATTTCAACCAAATCTTGT  
CTATTTCGTAGGCACGTCGAGTCAGAACACAGACGTGTCGACGCACATAGCCATTTTTATC  
GTCGATACGTTCAACTGGAGGTTCTTGAGGGTTATAACCCGCCACGGTCCCCAAATGAAA  
CAGATTGTTGGTGTGCTTGAACACTACTCATAGCGAGTAACTTCGCACCAATCATGCCCTA  
GTCATCCAGGGTGCCTGAGAACTTGATACCACCTGTTCTTATACGCACAGACTTTGTGTG  
GTAACCTCTCATCGAGATTTTTCGTGCCTTTTTGCGTAAATTTTTATTTCCAGGCGATCGT  
GTAACACTGAGGTTGTTCCCGCTCTTGTGGGGTGACCTAGCTGGCATTTCATTAGGGC  
TCTCAACACTTGATTTCAAATTGTTTACAGTGTATGCTTTGTGTCCTTTTATCTGAAGGA  
AGCATAAAAATGAACAAATTGAACGTTGACGTTAAACAAGTAAACGCCCAAAGGTTACG  
GCAGATATCGACCGGAGCATATTAACAAAGACCATAACCACTCTCGACCTTATCGAGCAC  
TGGCGAAAAGAGCGCGGGTACCGTCAAATGGCAATGGTGGGTGTCTGGGATACGCCAAGA  
ATGAATACCGATGATTTTTCTTAAAGGGTTGAACCAAGCGTGACGGCAGACAATCCCCTG  
GCTGAACGACACCAGGGCCCCTTGCAAGGGGGGATACGAGACATAAACCAATTTTTCGTGG  
TTCTGGGGTGAAGACTGGGATGCTTATCTGGGGGAGAGCCTGAATGAGAGGTTTTAGGCC  
CGTCAGGCGCTTGATGTCAGAGACAGGGCCTCGAACTCATGCCCGTTCGAACGGGAAGAG  
GTCTCAAGAGTGAAGACTCTGCCAGTATGCGGGGGCATGGGCATGGGGATGACTTAACA  
AAGAGTTCTTCTTGGAGGTTTTCAAGTCGTTCAACGAAGGTAACACTCAGTTTGTGAGCCC  
CTGATCTGACAAATGGGACGTTGTGAACCAAACCTTTTAAATCAATGAAGTGTGCGCAAC  
TATGGCTTTGGTTAAAAGGTCACGCAGAGGTCATGAAACGATCCTCATGTTCTTGGGATC  
TCCTTATCTAACGTACCCCTTCTTGTATTTTCGCGACTTCAAGGATGGGGATAACTTCGAT  
TTGCAGTGCAACCGCATAGGTCACCGCGTCTGCCTCTTGCCTGATCGCCGCGTTAACGTC  
AAGAATGCCCGGGAAGGCTTGCAGATTTGCAATAAGGATGAGACATTATTCACCTTCCGT



TGGGAAGAAAGACTGAAATATATGGTGGGAGGAGGAACACCCAGCCCAGAGATAATG  
ATGATGGCAATGGCTCGATATACTGATGAGTACTTGCTTGCCTACATAGATGATTGTGAT  
ACGCTCAAGAACAACCTTTTAAGATGATTGAGCAACTAAGATGGCACGAACTCTTAATG  
CCACGACTCGAGTTTTAACCCCGGCGCAAGAACCTGCTCTGGCTATCAAGATTGGAGCAG  
AAGACCACCTGAATCAGAAAGACAAGGGTGGTGATCCTTACATCCTTCATCCCGTGAAGG  
TAATGCAATACATGATGACTGATGAATTTCAACTGATGGCGATTGCTGTCCTGCACGATA  
TGTTGGAAGATACCGATGAAACGCCTGCTGATCTGGAAATTCTGGGCTTCTCCAAGCGTA  
TTGAACATGCTGTGGTTATGAAGACAAAGAGTCCCAATCAAATACGGGAGTATAATTTCC  
AGGGCATTGTAAGCAACTATGATGCGCTCCGAGTAAAACCTGCAGACCTACGCCATAACC  
CTGATGTTTCGTCGCCTGTAAGGACGTACAGATAAGGATTTGTTGCGAGACCGTAAATACC  
ACGCCATGTATCTTCGTCTGACTAAAATAAAAAGAAAATCATGATCCAAATAACCTTTTGT  
CAGAATGATGAATCTCTAGTCACTGCGTCGCACAACTAGTATACTCAGAAAAAGATGGG  
CTCCCTGATGGGGATGCCCTCGTGGAGCGAAAGTAAGCATGTTATCAAGTTAGATGAACG  
TGGTAACAGTCAGGTAAGTAGCAGATGCCAATCGAGCGGGAGGGTGCCAAGACCCTTTTG  
TGTTTACGATCAAACACTTTACAAAGTGACTCTATTAAGGAGCAAAGAATGTCGAGAAAC  
GATTCCTACACCCACCAAGGCACACTCAAAAACCCCGCCTCGGCTGGGCGCGGACTGAG  
AACTACGCGAGACTTCTCCTTACTGGGTGTCTTACCAGCATTACAGACACAGGAAAAGCA  
ATGAATTATTGTACAACCTGAGGAGAAAGTGGCGGGTGGTGATGCCTACCTCGACCTGGAA  
GCCATTAATGAGCTTTGATGTTAACAAAAATTTACAAGAGGCTATCGAGTTAAGGTGTAG  
TCAAGAGCAGAGCGTTGCGACGATTGTGGACTTCTCTCGAAGCTGTCTGATCGCAAAGA  
GGAACACCTTACCTACTATAAAAATGTACCCTCTGAACTGAATTTAGCATTGATTCAGGC  
ACAGTTTGAAAGTGGTCATCGAGTAAAAGTCACAGTTGACAACATCATCAGAACATGCTG  
CGGAAATTCCTTTTATCATAACTACACGCGTTACGTTTATGATGGTAAATTCAGGCATG  
GGTTAAAAACCCTATCAAAAACAGTTTTTTACTGCGCCAGATCGAACACCTGCCAGGGAA  
ATTCATGCGGAGGTTATTCGTTCTTACCAAGAATTGCCTCGGATAAGGGTGGGGGTTGC  
TGTTGATAATCTGTTTGGTAAACGTCTGTATGAGGTAGATACAGACGGGATGTGGAACAA  
CTGTGGTGATAACATTGATAATCACTAAGAAGACGAAGAACAATACGTAAGTGGAGAACCC  
GGTTAAGTTTGCCTGATCTGTGGGGTCAACGTAATGGTGAGTGCCGCCCTCAAGAGTGGA  
CAGATAAGACTGTTAATGGGCTTACAAAAGAGATCTCACGTCGGAGAAAACGTAAATTC  
CAGAACACATGAACGACGGACGCGACTTGGATCCCCGTTTGACAGAGGTTACGCCATGT  
TAGAATAAGTACAGACTCTTAAAGAGCAGCTTGACATGCTATCCCCTCTCAGTGCAAACG  
AGAATCTTTGCTATGGTGAGATCTGTGAAATATCCAAAGAAACCGAGATCGCGCAGATCA  
CCGAAGCGATGGACCTGTGTTATGATGGGTGTGAATGTTGTTCTGTCTGGGTGGATAAGT  
GGGAGGTTTAGCTTTTACAGATTCGGCAGTCTGTCTCCCTCGTCACCGCTTGCCTCG  
TCGTGCATGGTATGCAGTCTTGGGTGCTCATAATCTAGAGACAGATTAATATATGTTCTC  
TGAGGATCTTGCAAAGAGGATTCAGACGCGAGCCAATGGTATTGCCCTGACGAAATTGA  
GGGAGAAGTTGCAAATCACCTTGAACCAAGGAAACAAACGCCTCTCGAGTCATAATATTG  
TTAACGATATCCGGATCGCCCGACGTGCGATCCCGGCTTAAATGCGCTTCTGTAACCGCC  
GTCGGCGCGCGCTAATGATCTCCGGTGGTGCCGGCCTTGGGAAAAGTCAGGCAATGAGGC  
AGGTCGGAAACTTCCAGTTCGGCGAACGAGACAACAACCTGATCAATTTCCGTCTGAGT  
ATAAAGAGCCTTACAGCTGTTGTGGGCGTACGTATTCCGGTCTCAGACGACAGGGGTGTTT  
CGCGCACCGATTATGCGACCGGTAACCTTCTAGCTGGAAGATCCTTGGCGGAAAGGTATCG  
TGTTCCCTGGATGAGCTTGTTCATGCGGAGCCTTACGTCGAGAACGTTGCACACCAGATCA  
TCCTGGCACGGTGTACTGCCACTTACATGTTCCCGAAAGGGGCGGTAGTTGCATGTTTCA  
GCGACCGTCCCGCCGGTGGTACGGCGGTACGTTTGTGGAAGCTCCTCTGGCTAAACGTG  
TGGTCTGGTTGAACACGATTACGATAGAAGTGTGTTGGCTGCAAAATCTGGCCTGCACC  
ACGCTGTTACCTCAGCGTTGTTGCGTTTATCGCTGCAAACCCAGGTACACTGGACAACC  
ATGAAGAGATGTTGGAAATCAACTCCCCTTTATATGCAACGCATCGTACTAGGGTTACCG  
CAAGTGATATCCTGGACGATTTTGTGATGCAGGTATCTTGTCCCCACGCCTGGCACAAGCCT  
CGCGACAAGGATCTGTGCGCAATGCAGTGTGCGTGGGGTTTTGGTACTATCATACCCCTA  
GTGCAACTATGATTCCTATCGAGGGGGTTATGGACGGATCTTTTAAAGAAGAACACCGGGA  
CAGAGACCTCAGTCGTGTTAATGTCCCTAGGCTATCATGGTTCAATCTGCTTGCCTAAGG  
CAATTCAGAACAAAAAGTCCACAGATTATCATGTAATTGACTTTGGTGCGAAGTTCTTGC  
AGTCCCTGTATGACAATTCGGTCAGCATGCTACGACATTCAACTGTGATTTTCGTGAGGT  
CTGTGTCTATGACGTCCACCCAAGAGAACTCTTTTGGTAAAGCAATCCTGTTGTGCGGGTG  
ATCGGTAGCGCTTAACTGAGAAATTGTTGGGAAAATAACCATTAGTAATGCAGATCATCA  
GTGAATACCTCAAGAATTTTGTGGTAGGTGATGTTGCACGCGTAAACTAATCTTTGACAA

CCCCAAGTGGGGCGATTATTCTTTGATCACGCAAACAAAAGCGAGGACTAACTCAATGAC  
CAAGTTTTAGTGAAAAGAACCTCAGCAAGCGATGCCTCAAGGAACAAAGGTACGCAACCT  
GTACTGGAATCCAGAGGAGTTCGTCGAGATGAAGAACGGGCAAATCGTGTGCTACATGGT  
ATACAAAATGGTAATTTGGTATCTTGGCGAGGGATGGCAGAATGAGGCATGGAACGTGAT  
TGGTGCCTCGTCTTGGCTTCGGGTATATTCATACGCTTGATAAACATGGTGATGAACGTT  
TGGTTCGTTTAGGCTCTCTGAACATAGAATATGTGACGGATCAGACCGGGCTGAACATAA  
AGACCTGCCCAAGCGGGAAGACTATGGTTTATGTGCGAACTTCCAGGATGGATAGAGAGA  
GTGCTGTGGCTCTCTTAGCCAGGATAGCGGAGCACGAAAAAGAATAAGGTGACTTTCCCT  
GGGGTTGCGAACTACGGAACAGAGTTTTTCTCATGAAAGGGCAACTATGGTACAAGACAA  
ACTTCGTCCAGTTCCTAATTATGACGATGTGATGGATGACTTTCATGGTATGGATCCGT  
AATATGCGGTGCCTTCATTCCTAAAGATAGAAATGGGTACCGGTGTCATGATAAAAATGA  
TGAGTCCAACATAAATCGCTGGTGTCCAGGTCCTGAATGGGCGGCTCACGTGCGATGATA  
CAATCTCTAATGGCATAGCTCAATTTGCCGCTGAAAGAGATCAACGAGGCTTGGGGGATT  
GATTGCATTGACATGGTGATGGCAGGTTTTACATAACCGCGTCAGTGTATTATGGTTGAC  
TGAGCTAGGCCCAAGGCTGATGGTCGTGATAACATGGTTCGCTTTGTGAGCGAGGAGTTAT  
GCATGAAAGTAAAAACAACTGCAACTACAGCGACAGCTTAGACCATTCCCTTCCTGGCG  
ACGTCCTCGGTGTTTTGGAAGACGTGTATAACGGGACGTTTCATTGAATACTATCGTTGTG  
AAGGGAAAGGTGCTGACCTTGACGTTTACCCATACCGCGTGTGATGAGGTGAAGAAGTAAC  
ATGAAACAGAGTGGATAGGCATTGCAGGCGCTTTAATCTTCCTTATCATGCTACCCTGAG  
ACATGTTTGTTCAGGTCTATAATCCCTCTCGCTCGTTCGTCATTTTGGCGGGGTTCCCTTG  
CCAAACAAAAAAGAGAGTCATGTAAGGCTTGGTGTCAAAATTCAGGTAAAGGTTTTTAA  
TTCTAGGCATACAGGGTTGCTGGGGCTAAGTATTCCGGGGTACGGCGCACTTACTTTATT  
GACCACAAGGACCAACAAAAAGATAACAACCACATTACAAACCTGAGAGATGTCCAGAAA  
TATGAAACCTTTTGTGATTATAGCAGGGGTAAAGTAGAAAGAAGCAGGTCTCCGTAAGTA  
TTCGTAGATAAAATGTGGACAACACTCAGATACCATGCCGTGTATAGCTAAACCCACCTT  
GGAACATTCGATTCTGCCAAGGAAACCAGTGAATGTTATCAAGCATAGGGAAAAAAGATT  
CATGACATTGTCAAGGAAGACAGATTATTAAGCATAAAGTAGGTTACTTGATTGAGGCTG  
TGAAATCTGGGTAGGTCAAGGTTTTCGCGCTTGGCTACAATTTTAAACACGATGGGAA  
GTGTAAACGCTTCTCTAATCAAAGAGGGGTTCAACAATGAACGCTGCCAACCGGAAAA  
CTGTGAGGGGCGTCAATTCOAAGCTGGGAACCTGTACGGTGGCCCTTTTGTATGATAGTA  
CTCTAGCAGGATTTAATCTATACTCACAATTCCACTATCATCATCGTAAACAGGGTCTCA  
GGGAACACGAATAGAATGACCTGCACGATTTCGATGGTTGATAATAAAAAGCTCTTACGAA  
GCCACACAGACGACCCTATGGACATCTATCGGATCGGGTTCATTCACTAGGTGCTGGGG  
TTGCAGGGCGTGACTGCAATTACCGCGGAGCTATGATGAAACCAATCTTCCACGATTGTG  
ATGTAACCTGTGTATATTGTACCTGAGCAAAAATGATGGTGGGGATTACCTGGCTTCCGGT  
AGCTATCATTGGATTGTACATCTTCATTAAGATGACGCAGAGAGAAATCGGGAGGGTTCGA  
TTGTGTGGATCGCTTTCGTGTTATATGCATGGGATGGCTCTGGCCTGTGTACTTCACTAA  
TCTTGTGATGCTGCGATTTATGACCGGCGACTGCAAATGAGTGAACATTTTCATGGAATG  
ATGGTCCACACTATAAGTGTGGACGTATCTGCAACAGATGGAAGTAGATTTACATACAGT  
TCTCCTCGTGGCTACAAAATATGCACTCATATCGATTACAAATGAAGATCATATAGATGA  
TGTTGACAATCTAGTAAAAGCTAATGTGTGGATTGAATCCCTTGGGTGGAAAAACGAGGG  
GGATGACTGAAGGAAGATATTGACGTTATAATTGATACCCACAATGCAACCTTCTGGAAG  
TCTGGTAACGACAAGACATCATGCCTTTCTGCGGGAACCGCTACGTCTGCAATTGGTTCA  
AGTCGATACGATCCGCTGCGTTGTCCGTACTCCCAGCAGGTCCGTATTGCGATCGAGAAG  
GTAACGACCGCAGGGGTGATTTTTTAGTAAGGACAGCGTGTACGTCAACCATGATAAATA  
GAATGGCTGCCTGTGGGACCAAAAAGCAAAGAACGGATGGATAAGTTGCGTTGCTGCTGA  
AAACGCCTGGAACCTTGGCAAGAAAATAAAAATTTGACAACCAGATTCGTTATGTTTTAAT  
TTGTGTTACGATCTTGTGGTTAAGTCTTTAATTGACGAGAAGAGAAACGACATTGAGTA  
ATTCTGTAGCAGGTATCTGCCCGACCGGACAGGAAGCGGTATACATTGGTGGTAACCGAT  
TGACTAGCGCACTTTCGATGCCCGTCTTTTTGCGGGCTTTGTTGACACGAAGGTGGTTC  
GGTGCAACTAAGGCTTTTTGTTATCGTGATCTGAAAAATCGCGGCTTCGATAAAGGCCATA  
TCCGAACCTCCGTTGTAAAAGAAGTATCCTTCATGAGAGTAACATCTACGCCATCACGA  
TGACCAGTGCTTATTGACTCGCCAACGTGTGCGTGCTGGCACTAGTTGCTTCCGTTGTGG  
CCCAACGACATCCTTAAGCTGCTTGATATGCAACGAAAGATGTTTATCATGAAGAGGGG  
TTTCGGTCCGTAGAGGGTACTCTGAGCTATCGTGTGGACACTGAATATGTCCAGGATGCC  
ACGAATCGTTTATCTCCCGCGAATGGGTTCTGAACCAAGCAGATTCTGTGAAGCGCACC  
CTGCAAGCCGGTAACGCATTCCATGTGGAGGAGAACTAAGTGACTAAAGCAGTCAACTCC

CCAAGCAATCGCTAGGCCCGTCCGGTGATGCGTTCGGTCCATGACCGGCTTAACTTTGAC  
GGTCTTGATCAAGCCGTGTGCGAACAACGCAAGCTTGTAACCCGACGGAGTTTATGCTG  
CCATACGTGGTGACTGTGAAGATACTGGACCCAGGTGAGCATTGTGCATTACTCCGAA  
GATGACGTCGTGTTTCAGTCCAAACAACGTGTACTGTCTCTTGAGCAGGAGAACAGCGGC  
TTCATGGCGTTCCTGGTGCGTGATGATAGTGAAGCACTGCCGGAACAGTAAAACACAAG  
TGCGAAATCAACGAAGTCCCGATAGAGTTCCCGGGTGAGCTCGCTGGTGAATGGGCTGGT  
CGCGGTATTCAGAACGATGTCGCAGTCAAGCAGGTTGAGCAGTTCGTTGCCATCTTCGGT  
GTTGCATTTCGGTCAGAAAGAAACCTCACTGAAATGGTTACCACCATGCGCATTCTTCGGC  
AACGGCCTGACGGAGCAGCGGATCTTCGATATGCTTGATTTTCGGATACTGGTGCGCGCTT  
ATCTCGCTCCACGAACCGCAAATGGTACAGAACGGTCCGACAACGCTGACCTTGCAGGTG  
GAAGGTCAATGCCGTGCTGGCAAGTTCTTCGGTTTTGAGGGTGGCGGTGAAGGGATCATC  
TGGTCTCAAAGGGCCTTGAACCTGGCGCAAGATTCGGTCTGTTGATCAAACCTGAAAGGC  
GAGATACTCTGTCTCGAATGTCAAGACCCTGACAGAAGCTGATCCGGTATGCCTACAT  
AATATTCGTGATTGTGTGCGAGTAAGCGGTCCTGCAAACAGTCTTGAGCAGGGTCTGGGT  
GAAGTGGCTCTCGACCAGCCCAAGATCCGTGAGTTCATCAGTTGGGTGAGCCGTGATAGC  
GACAAGCAAGGAGGAGATTTGCTGAAAGCGTATACCCTAACCATAAATGATGTTGCCAAA  
TTTATCAGCAACAAATAGCCTGGTTAATACATGCAACAACCTGAACGAGGGGGCTGTGTTGT  
CCTTATCGTATCCACAACCCCTGCGGTTAAAAACAAGCCTTTGAAGGGCGCAGTGTCAA  
CCTTAATCGTCTAGGATCAAGAACAGGCTAGACATTCGGTGGAAAGAACATGCTACCTTTG  
TCTTCTCAGTTCAACAAGCGAGGCTTGTCAAGAGTGGAAAAACCGAAACCCAAGTTTGG  
GTGGGAAAGAAATTAAGGGATCTTCTTAGCGGCAGGATACTAAGCATAATGAGTCGCTGT  
TACTTTAGTGGTTGGGTATACTCTTTCGATTGTGTGAGTATCTATTTGGAGCCAGAGGAA  
GATTTGGTGGCTGGACAGGGGACTGCGTGAGACGTTAAATGTGAAGACTAGACAAATGGA  
GGATAACGTGGTAATCTCTATGATTTTCAATTGCAATACCATCATGTTTCGGTAACGTTGT  
TGGTGGTGCTATGAACTTTATTTTCGCGTGGTGAAAACATTTAGATAAAGGTCGAGTTAAT  
TCACACCACGTGAGAAAAGAACAACACTGGGGTTATTCATGGTGGCAGCAAGGGTATTTG  
CACCGTTGTTGGTGATGTTAATGATTGAGGCGTAAATGATAGCAACGTCAAGACTACTTC  
TGTTTATTTACATATTGAGAACGGCGCACTGGGGGACGTTATCCAGTGGCCGGGGATGT  
TTATGCATAAATGCTCAAGGTTAATGTGAACACTGTCTCAGGGGACATCTCCCGCCGTTA  
ATTGATAGACCCTTCTTGGGGGGTTTTAATCTGGACCAAGATTTGAAACTAAAAGCCAC  
AATTCTGGCAACCGCCTGTGCATTTTCTCTGACTACAACACCAGTCTTCGCCAAAAAAAA  
CGAAGATAAGCCCAGGTTGAGCCGTCTTTGTAAAAAAGACGCTACACCGGTGAACACCTT  
GGCAAGTAATATGTATCGCGAAACCCTAGATGAAAGCCAGCATGGTCTTACGTGAATAGC  
TGATGTGCCGCTTAACCGAAAGAACAATGATAAGTTTCTTCGTACAGTGCAGAAGATTAT  
CTACCAACCGGGGCAGTTACCCTGGACATCCTACAGCACAGGCTTCTTAGTGTAAGAA  
AGATTCTTGGGTAAAGAGCCAGGAGTTCACAGAGGTGTTGACCAAGATACACAACAAGAA  
CAAATGCTCTATGAAGCCATTGAAATCACCAAGGGATCTAGGAATTATCTTCAAAGAA  
GGTTAGCCCTTACTGGATTAAGGCGATGATTCGCACGGTCAGTATTGATAACCACATCTA  
CTACCAAGAAAAGCCGCACTCCCAGGGCGCCTGAACTATTGAAGAATCTTATTGATGCTT  
TGTGTTAGAATTATCCCGCATCTTGTGGTACTGTCTATTACTCAATGGATCTTCTGCGTA  
CATGGGTGAGGAGCGTAGCTTCACGGCTACTTGGTAGGCATCTACATAGTGCGGAAAGCT  
CTCAAAGAAACCCCTTAAATAACCGCAAATAGCGGTGAGACGG

>NewGenomeName\_138

AGGACTAGCCATTCGATCGGCCAGTACTCGCGATTGATGTCGTCGGCGATCCATTTGAC  
TCCCGGGTTCGTCCACATGGTGATGAACACGTTGTCGCGATGGAGGTGACTGGTGCCTG  
TTCCAGGGCTTCGCCGATGCGCCGGACGGTGACGTGCGGGGAGTCCGCTAGATCCTCCGG  
GAGCTAGAGTCGGGCAATGTAGTACGCGATATCCATCGTCATGACATCCACCCGGTCTC  
GTAGTGCTGCTTGCCGGCAGCCGCGCCGTGCACCGTGGACAGGCGGGCGGAGTTCTGCTT  
ACGGCTGATCTCGCGACCGTCGTGGACGGCATGGGTGTCATCCATAGTACTGTGAAGTC  
CTTCTCGGACATGAGCAATGACCATTCAGAGGGGCGGCGGTGATGATGGCGAAGACCGACA  
TGATCAGGAACATGCCGACCATCATAACCAGCCCCCTACCAACGAGGCGGGCCGAGCAACA  
GCCACGGTGACTGGATCGGCACCCTGCGTAGAGAGTAGGCATGGTGGCTTTCCATAGCTG  
GGTTCTACTGTCAGAACCGCGGTGCGTCGGGGTTCTCGTAGACGACCGGCTGGGATTGCA  
GGTGCGGCCGCGGATCCGCTACGTCGCCACCATGCTCTCGGATTATGTACCCAGATTGG  
GCACCAGCTCCCGCCGGATCATGGCGGGGGTGCCTGCGCGAAGCTGCGGTGGGGCACGT  
AGAAGGTGCGCAGGCCCTGCCGAAGGACGTCTACATCGCCGACCTGACTGAGCAGGTATG  
GGTAGAACTTGGTGTGCGAGGCCCTGGACCTTGCTGCCAGCACGAGCCTCCCGCACCGAC

CGCATTTCGCACTTTCGCGGGTAGTTGGTAGTGAGGTGGGAGTCGTGCTGACGCTGCCACT  
TCTGGGCCTTACTGCGCGGGCAGGGCTACTCCACTTTCGCGCAGGCCGACGTTCTTCCA  
GACGGTCACCTCTCGGCGGTGGGCGACGTGAAACCAGGTGCCCGGCTCCTGGGCGGGCAT  
GAGCTGGCGGAGGTCGTAAGAGATGGTGCCGGTGTGGACCTTGGTCCCGACGTCGCCCTG  
GTACAGGTACGTCGCCAGCTCGTCCTTCAGCAGCTCTGGCCGGACCTCGATGGTATGCAG  
CAGGCCGACGAAGCCGCCGTCTACTGCCGCGGCTGCAGCTCACCCAGCTCGAACTCGGC  
CACGATCGCCAGCCGGTCCCCGGCTTTCACGTCGAAGTCCTATCCAATCATGGTGTGTCT  
CCTGTTCTCAGTCCCACAATCTCTCTCAACGCCATTTCGGCGTCTGTATTGTACTGCTC  
CTTGCCGGTACTTTCACGGGTCTGTAGGTGCACGCTTGTCTACCCGCTCCATGAGCTGTA  
GTAGGCGGTAGCGATGTGCGCCCCGTTGCAATGAGAGGCCTTGATGGTCAACTTCTCGTG  
GCGCAAGACCATCGGTCCCCAGATTCCCTAGGGGCTAGCGCGAATACTCGCTTGTCCAT  
TCGGACACACATCCTCCCGTCTTTCGTCTCGACCAGCGGGCGGAGCTTTCGACCCAGA  
CGTTGAGTGTGTCTCCAAGCCTGGTGCCAGGCCACGGGTGACGCCCTCATCGTCGGCAC  
CGGCCGTGAAGACGACGTGTCTGTGCAGCTCCTGTCCGAGGACGCTCTTGGTGACGGCGT  
GGACGATCGGTCCACCGTACCGGTTTCGCGCCGCGCTCGCCGACCTGGACCTGGGCGGGCGT  
CGTCGACCGTGAAATCCTGTGACAGCTGGGCCTCGTCGTCGAGCCACAGCGTCAAGTTCG  
GTGCGAGCTTAATCGCGTATACCGACGAGCAGGCGATCGCGTTGGACAACGCCCGTAGTG  
TAGCATGGTTCGACGCTTCCGAGGACGATGCGCTCGGTTCTGACATCGGTCTTCAGCAGGA  
CGGCCAGTCGTGTAATGATTCTCACCTTAGTCAGCTGATCGTCCTATTTTCGCGTGAGCGT  
ATCTACGGGGTCGGACTAGCCCCTGGCTTTGACGCCGACGGCCTCATCCTGGTCCGGCAA  
GGTGCATAGGCCAGCTTAGACCAGACGCACGGCAGTACGGCCGTAGTCCACCTGTAAGTG  
CCACACCTGGCCGGTGTGATCAACTGGTGGGAGAACGACATGGTTCGGCTCGTCGTCCAG  
TTCGTGCTGTTTCGAAGGCGATGATGCGGTTCGATTCCATGACTCATCGGTCTGTCTATCC  
GTGTGCGGGTCTTCTTCGGTTGTTTTACCCAGCCAGCGCCAGCAGCCTGGTAACGGCGA  
CCGGAGTGCTGGCGGTGTGGTGCCTCCGGAACAGGGCTTCGGCCTCGTCCTGGGCCTTCT  
CGGGGTTGAAGATGTGCTGGGCTGCGTCCACCTCGGCCTTGTGGGCCGAGGCCCGGTGG  
CCTTGCGGTAGCGCCGAAGAGCGGGGTCGTGTGCCAGGTACCGGCGGGCGGATGTGCTCGG  
CCGTCTCGAGTGCCCTCCTTCGGGTACCGCTTCGCGGACGGGGCCGGGATCTGGTACCCGA  
CTTCGGTGGCATTGGTGTGCTGCACGACGACCGGGTGTGCTCGGAATGACGCAGGACCC  
AGACGGTGCCATGCAGCGGGCCGGGGGACCATAACCTCTCCTTCTATGTGGCCGCGGA  
GCGCGACGTAATCCATCGCCTCTTTTCCGCGTACAGGTTCGATGGCGGCATCTCTGGCGAC  
GATCTCTTGGAGCATCTGACGGTGGCTTGGCGGCACGCCGGGGATGTGCGGCCACGACGAT  
CCAGCCGCCGTGGAACGTCCGCCAGGCGGTTCGGGGTGCCGGACGAACGGATGACGTAGGT  
GCGCGTGTGCGGGTGTGCGGCATGGAAGTTCGGCCTGGTGGACCTCGGGCAGGTGCGCCTAA  
ACTCGCCTCACCGATGGCTGAGCCCACCTGCAGGGGGCCGATTTCGGATCATATCGCGGCG  
GTCGATCGCCGCGGGCCCCCTCCGCGGCGCGGTTGCGACTCTGGCGAACTTTCATTTCGGTC  
ACCCCCCAGGTTCGCTTTAGGCGATGGTCAAGCCGACGGCACCCGGAGGGACGTTGATCT  
TCGTGCGGCTAAGTGATGTCTGCCTGCTCGCCGTAGCACGACGGGTGATAGGCCAGCAGC  
TGAGGAACGAGAAGAAGCCCTCATCGGTAGGCGTCGCGGTGTACGAGTCGGGCGCGATGT  
CGGCGGGGACGCGCGGGGTACGGGGGTTCGAGTCGAACATCAAGGGCAAGGTGTGCGGGG  
CGCGTGAGTGCTGCAAGGTGCTGAACGGGTTCGAAGTTCGCGGGGAGTCGACGCTGCGCTATC  
CGCCGTCCCCGACCGACCGGACCGCGCATCCGGCGAAGGCGAGCGTTCCGTGGGCGGGCGA  
CCTCGACGACCGTCTAGGGCCAGAAGCGCTGGGTGGACATAGTGAATCTCCTTGGTGTCTG  
TTCTGGAATTGGCTTTGAAGTAGCCCGCCAGAAGGCGGTGCAGCACTAGTGCTCGGGGT  
GAAATCAGTCGTCTCCCCAGATGGCTCCGAAGGTTCGGGCCGAGGAAGGATGGGGTGCTCA  
GATGGAAGCGATAGCACTCCTCCTGCGTGGGTTCGGTTCGACGATGATGACGGCGCCGTCGA  
TCTGCTGGAAGAGCAGGGTGCCGTTGGCCAGTAGCTGTGCCACTGGTCTCTCCTCTCAGC  
GGAACCAGAAGTCGGGGGGGTCCCGGTAACCTCCGCGCGGGTGTCTGGCGATGGCGGCC  
GAGGCTCGCAGGAGTAGGGCCGCTTACGCGAGCCTTGTGGGTCCCGGTTGCGGTCAAC  
GCTAAGCTCCGTGAAGGATGTTTACGGCGGGCGAGGCTGCTAATGAATCATGATCAGAT  
GCTCCTCTCGGCGGTTTTTGGCCTTGTGGAAAACCAGGTGGATGTGTACGATCATCTCGCC  
GCGGATGTGAGGCGGAGTAGGTCTTTCGGGGTGGCCAGGTTCGTGGCCGTCGTAGAAGTA  
GGCGTGGCGGGTCTCGGACAAGCGGCCCTTCTCTGCGCCGATGTAGGACCGGGACTGGTC  
GTAGGTGTCAGCCATCGGAATTAACAGTTGGTGGTTCGGATTGGCGGGCAGGATCAGG  
CTGCAGGTGCTGCAGGAGAGCACCTTGTGAGACCTGCTGGCGAGCGCTTCTTGTGATATGC  
AGGAGCGGCTTTCCTCAGAGGACGCGGGTCTCCGGAGGCGTGGCGGACAGCGTGGCGG  
TTGGCGGGCTTGGGGACGCGGATAAGCTGGCTCATGGGTTTCGGTTCGGGCAGTGACTGGT

CGAGGGCGTCGCGCTGGTCGCGCCCGTCGTAGCTGGTGGCCATCAGGGCGGCGCGGGGGCG  
CGGGGTCTACGGTGAAGTCGCGCCTTATCTGACGCGTACACCGCTGAGGCGATCATCGGGT  
TACGGCTGAACTGGCGGCTGAGCATTGGATCAGATCCTTTGCGGCACAACGTAAAGTGT  
GGTCAGGAAGTCCGAGCAGAATGCCGAGCCGGTGAAGTGAAGGGGTAGGTCTACATACAGGC  
CTTGCAAGTGGTGGCGATGGGCCAGCAGTCCGTTCTACTGGAAGTCGACGAGGGTGGT  
GGGGTCAACGATCGGTGCGGTTCATGGCAATCACGTCCAAGATGGAGTTGGAGTAGTTTC  
GGTGTTCATGCTGCTAGCCTGCGCAGGTACGGTGTTCATCGGCGACTCCACTCGCTGTCG  
GCCTTGTGTCGTTCTTGCACTCGCCGGTCCCGGTGCAGGCCAGGGTGTGCAACAGCTCA  
CCCATCAGGGCGGCGATGTGCCGGATGGGTACCTCGGCGATGGTCTCGACCGGCCGCTCG  
CCCGGCGACAACCTGGACGGATCCGGCCTTGGTGCCTGGGTAGACGACGGTGC CGCGCTAG  
ATGTCGACGACCTCGTAGTGCTCGGGGTTGAGCAACCTTGGCTGGACGCCGAAGCTGGTT  
TCGGTGC GGCTAGAAAAGACGGCATCTTACGGTCTGTGGCGGAGGTTATTGGTGGTGCC  
TGCACCGGAAGCGGAACCGCGGGCTCGCCGGCTCGGCAGGGCTGTGGGTTCATCAGGCCAG  
CACCGCCCGGAGGACGGTGTGTACCTTGTGTGTCGAGGGCCGTCAACTTGCCTGTGACGTC  
TCCCTCTGTGTGTCGCGCTCGGCGCGAGTAGCGCCCTTAACGGTGGACTGGTGTGATGTGCCA  
GGTGTGGCGGCGGGATGACGCCAACGCGGTGTGCTTCCAGGTGTTGGCTCGAACGTC  
GTGCCAGTAAATCGTCGTCAGCTCGTCGCGCTGGCAGGTGTGATGGCCCGCGCCCGGCG  
CTTCGCCTCCGGCACCGGTGCGAGGGCTCCATGAACTTGAACCACTGCCGGGCGGTGAC  
CGTGGTCTGGCCAAAATCGTAGAGGGAGTCGGTTAACTCGTCCGCCGACACCTCGATCAG  
GTTGATCGAGGAGCGGACCTCGTCGAACCGGTGGTTCGAGTACCGGCTGTGGCGCAACGT  
GACATGTGCATCCTTGGCCTGCCCGAGAGCGATGGCCCTCGTGTGTCGCAAACCGTGGC  
GATGATCGCCCGGTTCGTACGTGGTGGAAAGGCTCCCGTTGAGCGAGGTGGCGGCAAGCAG  
GTTGGGCGGTAGGCGAAGCCGGTGGCCTCGTCGTGGAGCGTCTCAGGGAAGGACTCCTC  
GCCCCAGGCCTGGACGCCCTGCCGGAGGACACCTGCTCTAGTGATCTTGGGGCTGTCGCT  
GAGGATGGAGTTGACCGCTCCGAGCAGCCGCCCGCGGTACTGGTGCCGCACGTACCCGTC  
GGTGAAGACCTTGGCGACGTGGTGGGTCTCGGAGCGGGCGATGGCGGCGAGTCAGGGGAC  
CGGCCGGGCGCTGACGGGGATGCCGTGCGCGTTGAGGCCAGTGATCTCGATCAGGTCGGC  
GGGGAACTCGGCGACGACGGGGATCTTGACGGCTTACCAGTCGAAGAGGCGATCACCGAC  
GTCACCGATTGGCCTGGCCTCCTCGTAGTGATTTCGAGCGCTCGCCTTTGTCCTCTGCGCG  
GTAGTCCCAGGCGTGGCCCCCGTTATAGGTTCATGCCGATCACGGTGTGGTGTTCAGCCA  
AAGGGAGGTTTCAGCGGACATTGTTCCCTACCTTTCCGGTTCAAGCTCCGATGAGTTCGA  
GTACGCGGGGGAGCTTATCGCAGGTGGCGTTTCCACCCCGGACGATGACCCAGTGCCGT  
TCGTTGCGGTGATGGCGGCTACGGGGCCGCTGCGGGTGAACCAGACGCTGAGCCGCTCGA  
CGCCTTGATCGAAGCGGGTGAAGGCTGCTTGTCTCGCTCGGGCGGTGGAGCTTGGACCATC  
CGTACTTGCTGGGGGCGGTGCGGACCTGCTATCGTGCGGTTCATGGCCGGGAATCCCTAGT  
AGGCGAATCGCTGTGCGAAGCGGGCGTACTGGTCTCGAGTTTGAGGATGGAGCCGTCGG  
AGTCGATGGGGCGTCCAGTGTTGGGGAGGATCCAGGCGATCGCGCGGGTAACGTACTCCT  
GTCGGCGGGAGGCCCCCGAGGTGGTGAAGTCCGGCCCCGAGGCCCAGATCCAGGGGTGGT  
TCCCCTCGATCGCGCCGAGGTCGTTGACATAGTCGTTGATGGAGCCGCCGCCACCGTGGG  
GTGTGGTGAAGTCCGAACGCCTCCTGGACTACCGTCCGGTACTCGTTCAGAACAGAGAAGG  
CGTCGCGGGTGGCGGAGGTCATAGCGGGTGCCTTTCAGATGTGCGGAGGTGCGGGTGAAGG  
GGATCCAGCGGGCCCCGACGTACCCGATGATCAGGATGCTTTCGTAGCCGTTTCATGTGCT  
CGGCTGGCTTCCAACAGCTGACGTCCATGGACTGGCGGACGATGTGCAACTCCGTCCAGG  
TGGTCTTGTGGATCGCTTGCCGTCGTAGGCGATCAGCGTGTGAGCATAAGTGCACGCTC  
AGTATCGGGGTTTCGTTGGGTGCTCCGCCGAGCCCCAGGAATCGGAGATGTCTGTGCG  
GACCTTGC GGATTGAGATCGGGGTGAGTTTTGGCTGGCGGTGCCGCCATCCAGGGCATCC  
TAAGTCGTGGCGGTTGTCCCAGGTGCCGCAGTCGCAATCCTTCATTGCCTGTTCTTTGC  
GCGGCAGTGAAGGCGGTGGCGGGCCGGTCAAGGGGAAGCTCGTCTCACCGGTCCGGCCGT  
CTCGTGTCCCCGCGCGAGCCTGCATCTTGCCGATCCTGGAGGGTCCGGCGATGCCGGGAC  
CTAGTAGTTGGTTACTCTGTGGAGTTGTCTGACGACTTATCCCTTGCCGGGTCCGGGCCG  
ACCATCCGGGCGGTGGTGTCCGCGTCTACCCGCTGTTGCTGGCGGGTCTCCTTGTAGCCG  
ACCCTTTCGGGGCAGGAGTGGCGCTCTGTGCAATTTCTCGGTGGGTGTGGGGGCTTTCCG  
GTGTTGCCGTTGTGATGACCACCTTTCCCTAGACCCAGCAGTTGGCAAGGGGTTTGGG  
GATGTTTGTACCAATCCGTTATCGGGTGGTTCGTTCCAGCCCCTTGATCAACAGGCCTT  
GGGGCAGGTCAGGCCGTACTTCCGGAGTCGGGAGGCCTTGTGGCCATTTCCGGGCAGATTC  
TGGGCAAAGTGACCCTGAATATCGGTACCAACTTCTGGCGCTCGTACGTCGGTCCGGTATG  
AGTAGCCGTTCTGAGGGCCCGCGGGCGGTTCATCTACACCCGAGTGTCGAAGGACCGCGCA

GGCGGCCGGTTCGGTGGCCGCGCATGACGCCGAGTACAGGATCGTCTGCAAACGCGGGTGG  
TGGTCCGCGGACGACGTGGTGTCCGACAACGACGCGGGTGCCTCCCGGTGGTTCGAAGGTG  
GATCGGCCGAACAACGAGCGGCTGAGCCGGATCCTGCAGGTCGGCGAGGTCCTGGTCACC  
TGGGAGCCCTCCCGCGCGCAGCGCGATCTCTCCGCGTACAACGACCTGCGGCGGGCTCAGC  
ACCGAGCGCGACATCCTGTGGTGTACTCAGGCCGGGTCTTCGTCTAGGGCGCTCCGAA  
GACCGGTTTCATGACGCTGCATGACATCGGCCTGGCCGAGAAGGAGGTCGCCACGACCCGC  
GAGCGGATCATGCGCACCCCTGCGGGCGTCCCCGCACGCCGGGACGCGCCACGGGTTCGGG  
CCGTACGGATACCGCTACAGCCGCGACCCCGATTCCGGCAAGCTCATCGGCCGGTTGCCG  
GACCGTGTGAGGGGGCCGGTTCGTGCGCGGCATCGGGGGCCGCTTCTGTGAGGTGTTCCG  
TTGCGGCGCATCGCAAGTGACCTGATCGCGTCCCGCGTCAAGACGCGAGCAGGTCGAGGAA  
TGGACGCCACCTTGCTCGGGAAGAAGCTGGAGCAGCCCGCGTACGCCGGTTTGCAGACG  
CACCACGGGGAGATCGTTCGGCCCCGGCACCTGGCCAGCGGTCTTACCAGGACAAGCAC  
TACTGGTTCATGGCAACCCTGAAGGACCCGGGCCCCCGGAGGCAGCGCGGCTCATCGCCC  
AAGTCCCTCGTCACGAACCTCGCGGGGCTGCGGGAAGTGCGGCTAGACTGTGCGCCGGAAG  
AAGAAGCCGGGGCGGAGGGCGTACGTCTGCCGGGACATCGGGTGCCTGACGAGGACGGCC  
TCGGACGTGGACGAGTACGTGGAGGTGTTGATGTTCAAGCTGATGTCCGTCACGTGGGTA  
CGGAGGCGCGCAAGCCAGCAGGGCGACCGCAAGGGCTCGGCGGGATCCAGGTCAAGATC  
GGCAGGATCCGTGCCCGTATGGACGAGTACGCCGTCGAGGCGGCAAGGAGGACAACAGA  
CCGCGAGCCTTCGCCCTCATAACAGAACAGTGGGTGGCCAAGTGCTCGGATCAGGAAAAG  
GTGGCGAACAAGGCCCTGATCCAGCCGAGCCTGGCCGCCTTACGCGGCCCGTACTTCGCG  
GCGGTCTGGGCGACTATGGACCTGGACCTGCTGCGCGACATCGTGAGGTCCACCCAGGAA  
GTCACCCAATACCCGCAGAAGCTGCAACGCGAACGAGATAAGCCGCCGATCGAAGTCCAA  
TGGCACGCATCGCAAAGACCCTGCGAGGGCGCAATGCCGGGCGGGGGTTCGATTTCG  
AGCTAGACGACGTCTGAGAGCGTTATGTCCTAGGCGAGCCTTTTCAAGGGAGTGTCTGA  
TCTAGCAAGTCCTTAGCGTCTCCGGTCTGTGCTACGCTGGCGCGCAGGCCCGTGTGAGG  
TTCACGAAGTGGCGCAAGTTCATCGCGGTTCGACCCCTGACGTGCGACGTCGTGGCGAGGCG  
GGCCGGCGTTCGGTGTGCTGTTGCTGGACCCCTGCAGCGTAGGTCGCGCCGGTTCGCAAG  
GGCTGTGGGTTTCGGGCTTGGCAGCCTCATCGAGGACCGGGTTCGGTTCGCGCGGTTCGAGT  
GTCCCTCGAACTACCGAGGCCCCACCCTAGCGCGGAGTCGATCGACTCGAGGATGCGCTC  
CGTCCGCCTGTCACCACCGCGCCCAACTTCGTCTGTGCAAGGTTTCGGAAGATATGCC  
GCCGGGTTGCGCGACTGCTTCTGGGTTAGCTCCAGACCCGCGCGGGCGTTGCTGGATGGC  
GTCGCCGAGGAGGCTCTTGCCTTCGGTTACCGTATGCGGGTTCGAGGTTCTTGTAAACGGT  
CATATTAACATCATTTCGGGTTTGCCCAATATCTTGGTTCGGTTGATTCACTCCTTCCAA  
CTTGACGTGTGTAACGCCCTGGGTTGCTGTTGGGATGTTGCTATGGTGCTCCACTTAAACA  
TGGGTGTGAGATTAGGGCTAAAGAATCATGCTCGGTTCTGTATGCATCCGGTAACAGAC  
CCGTCAATGGTTGCTCTAACCTTCGGGGATGCCAAAGGGGACGATTTGCGATGCGTTTGA  
AATGGCCAATGGCTTGCCCAAACTTCTGGGCTTAGTTTTAGTGGGTTCCAGCAAGCCAG  
CGGTTGATCATCACTACCGACGACCAGCTGGAACAAACCGATTAAGTGAGCGAGATCACT  
GGACGGAGGTCCAACACGCCCGACATGAAAGTGCTCTTGGTTCACACAAAAGACAACCAG  
TTCTTACTGCAGTCCCAGAAGTTGCACCCGGGTGCTTCATCCGGAGGCAGCCTCGCACCAC  
CAGCCATACGCAGAGCGACTAGGAGACCTCTGTGATCACCACAGCCGAGCAATCCCATCG  
CCGCGCCTACTTCCCCCGAGGCGTGCGCGGCGGAGAACGAGAATGGCTTCGTCCACCT  
GTTCCCAGAGTACAGGCAGATGGCCCGCGCATGGCACTTCCACGTACCTCGAACGACGC  
CATCTTGGTTCGCCCAGCGTCTTCGTCCAGCACCAGCTCGTAGCCGACGGCGAGGCCGG  
GGCCTGCCGGGCGCATGCGGAAGAGACCGTTCGAGCTGGCCGTCTACCGGGAACGTCAGGT  
CATCGCGACCGAGCACCGGTCCTAACCCCTCCACCCACAACCACGCGGCAGCCCAGCCAC  
CACCTATCACGAGGTCGGTACAGTCCGGCACAGCCCTGACGCCAGCCGGGCTCCCGTGCT  
TTTTTACCCTCCCTGCACCCGCCTTGGCCAGGAAGGGGACACTTCGTGAGGTCGCAAA  
TAGGCAGGGTACCCGCTCGAGCACTTCGACGGCGACCTGATCGCCGAAATAGTCAACTA  
GCAACTGGCCGGAGGAGGACAGAAAGGTGGCATTACGGCAACCAGGCGCTGCCGGAAGT  
CTGCGGCCACCTCAAGCAACCGCACACACGCTGGTACGTCTGCCCGGAGGACACCCGCGAG  
ACGGGTCAACGGGCACCTCTAAGACCAGTGCCCCGGAACCTGGCATTCCCGCCGAGGCCG  
TACGCGCCGAAATACCTGAACCACCAAGCACTAATAGACCGCCTGTTCCGAAACCACT  
CAGCGGCCAAAGCCACCTCATTCTCCGAGGAGCTTGATTATCATGGCGCAAAACACCTT  
CAACAAACCGGACGTCCCGAACTAGGTCCGCGACGCCCTCGGTTACGCTGATCGGGGG  
CATGGGCGTCAACCTGGAATTCGCTGAGGCGACCGGCGAGCCGACCCCGGCCAGCAGGT  
CGCGAGGGACTTCGCCTAGGCCGCTGGGCAAGTTGGCTGGCACCGCGCTCCCGAGAAGGG

CGCCCGCACGCTCAACGTCGAGAACGGCACCTGCGGGCGAAGACCTCGACGACATCGAACC  
CCCGGTGAATGGCACGCCGCTGGCGTAGGACATCGGCGCGATCAAGACCGCCGTCCAGCT  
CACCCGGACGTTTCGAGCGGGTCGCCTCCGAGACCGGGTGGGAGTAGGCTTGAGCTCCGGC  
GAGACCGGCCGCATGGTGC GCGTGCCCGCCGACCTGGTTCGAGACCAAGGGCGGGGCAACG  
TTCTCTCCGCACGCACCCACAGCGAGCACTGCGCGCTCGGAGCGATCAAGGAGGTGGCC  
GACGGCATCATCTTCGAGACCGCCAAGTCCGGGGCAGCAACGGCACGTCTCGCCCAGACC  
CTGCGCGATCGGGGCGTCGAGGGCGACCCGGAGCGCGACTACTCCAGGCTCGGCCCCAGC  
GCCTAGAGAGAGGATAACCGAGAAGTTGGACCTGGTTCGACACTGTAACGACGCCACGAC  
CGCACAGCGGCCGAGGTCCTCCAGGCCCTCCTAGAGGCAGGCCACGGATGACCGACATCA  
GGCTCTCCGGGATCAGCATCCCAACCACCCACAACCAGCCCTGGCGGGGGAGGGCGAAGT  
GTTTCGGCCAGAAGTGGAAAGGGGTACGTGGTTCGAGGAGATGCCGCAGGGCCGCAACGATC  
CCGGGACGAGAGCCATTCTCGCCGAGGCGAAGTGCTCCGCCTGCCCGGTCAAGGGTGAGT  
GCGCAGACGATACCCCGACAACCAAGACATGGGGCCGCATCCGGGCCGGTGAGGCCATCT  
CCGGAACCTAACGGATCCAAGGAGTACAGGCAGGCCGTGCGCAAGCTCGTGACGGCAGCGG  
GCCGGGTGCCCCCAAGACCAAGCCGAAGACGGTATGGCCTAGACAGAGGGAGCGCTGCC  
CCCGGTCTATGCGCGCACGCCAAACCACCCTGTACGAATTCCTGGGAGAATGACCCACG  
GGTCCGGAAAAATATGCGGCACAAGCCAGACGCGGCAGTGGCGCGCAGACAAGTAGACCA  
AAGAATCATGAGGGACACGACCGAGAAGATCCGCCCGAAGATCTACATGGATGCGTACCG  
ACACTCGATCAACATCCTGCAGTTCGTTCGAACAGGAGCGCGCGAAGATCAAAGCCCGGT  
AGAGGAGCTGAAGGAGGTTCGAGGGCGAGTACCCCTCGAACATCAAGGAGGCCCTGGGCAA  
GACCCGCGAGGTACCTTGCTCGACAACAAGCCGGTTCGTCACCCGGCTCAAGCCGAACCA  
GAAGCGACTGATCCAGCAGGTGATCAAGCAGCGGTACCCGAAAATTCACGATAAGTGCAA  
CACTGCGGTGGAGGTCCGGACCTTCAAGGTCGTGGTGTGAGCCGGACGCGGCCCTGCGCT  
GACTATATCGTGGTTCGACGACGATCACATGGGTTCGGAGCGGAATCGAGTGCCACCGGCTC  
AGGTCACACATGAGGTTGCACAAGGGATTCTGTGGGGGCTGTGGTATCGATGGTGAATC  
CCTGCGTCGACGGCAACGAGCGGCTCCGGTACGTCAAGCTGACTCGCTGCAAGCAGTGCA  
TGGAGGCACGCCAGGAGGCGCAGAGCGAATCCTACACCACGTACGGCAGCCCTGGATACT  
GTCGGGACCTGTGGATCGTCTGCTACAACGGCGAGATGACCAGCGGTCCGGCTCAAGCGCC  
TGCGGGACAAGCCGAAGGTCAATTACTGCAACCGTGGCGAAGAATGTCGCAGCAAGTGCA  
CGCCGAGACAGAAGCAGCGTACGTTCCGGGGCAACCTGTGCCAGAGCTGCTACGCCCGCG  
ACGGGTACCTGCGCATGAAGACGGAGAAGTGGGAAGCAAGACTCGAGGCCAATCGCAGGC  
TCCGCTCCAGAGCCAAGTCAGATGCCGAGGCGTCCAAGACAATCGAGCTAGAGGGGGAGG  
TGGGGAAGTATGTTAAGCCAAGTGCAGCGGCAGGAGTTGCGGACCAGCTGGGCCAACTTG  
GACCATGGGCCGAGGTTCGTAGAAGTGGTAGACGGTGGACCGAGCACCCGAGTGGCTGACG  
GAGTTCCTCATCGACGTGCTAGGGGGTGC GGAACGAAGCGCCGCGTACCGCCCGTCAAG  
ACGTCACGGCCGTTCGAGTAGGATCCAGTCTGGGAGTCGAGCTTTCAAACCACAGAACAGC  
TCGGCGAGTGGGGGCTGCTTTTCGAAAGCCGTTTCGCAACCGAGGAAGCGCGTGGGCGCG  
GCGTCGACATCTACCCCGAGCTTCACTTCATGGATACCCGTTTCCGCACACACGTTGTGA  
CGCATGGTCTCTGGGTTCGTATCTATCCGGGCTACCCGAAGTTCGGGATCATCTCCACCG  
AGAAGCTGAACGCGCAGTACAAGGAGAAGAAGAAGAGACCAACACCCCGCACGGAAAGCT  
GATCGACACCACCGGCGACGGCACCCACCCCAAGTTCGAGCCCGAGGACTTCCCGAACGA  
CGACCCGGTCTGGGTCTCGGTTACCCGAGGACGGTTCGGCCGCCTCGATGTTCAAGGA  
GTCGCGCCCGTGTGAATGGGCCCTCTCAGCTCTCCGCCGGATCGGGGCACTTCTCATGAG  
ACAGGCCGGATGGTCCGACAGCCTGGAATTCGACACACCCGACGACGAAGTCAGTGACTG  
ATGTTACACCCCGAAACACTATAGAAGCTCATAACCAAGCGATTCCACGAGTTCGGAGGC  
GTCATCTGCCACGCCTGGGCGCTCTTCCGGTGAAGTGAACACCACCTCGTGCGCACCTCC  
ACCTCTTCTGACCGCAACCCGACGTTCTGCCAGTTCGCCAACTACGCGCCAGGCACGGGC  
CCTGTCCGGTGCACGTTCCGCAACGTTTCATGACGGCGTGTACTTGTAGGAGGTCCGCCGA  
AGCGACGAGGAGGGCGACCTGCGGAGCAACTACGGGACGGACATCTGCAAGGGTACTTC  
CAACACACCGCCTGCAGAGGTGACCAGCGTGAGCAGATCCAGTCCGGGCAATACCACGCC  
AACCTAGACCGGGAAGACGTCTGCGGGACATCCAGCGGGCCGGAAGCCGCATCGCGGCG  
GACTACAGCCCTGACAGCCGGGAACTCGCGGTCTTCTCGCCGGAGACGCTGCAGTACGTC  
GTCCGACAGTTCGAGGAGCGGGGGATGTTAATGACCTGCACCATCTCGAGGGCCGTGCCG  
GACGGCTTCTGCGCTGCACTGGTTCGCCGAGAGCATGGTTCGCGCTTACACCCAGGAG  
GAGCGCTAGCCGCTGACGAACCAGCAGGCGGCCGAGGAGCGGGTCTCGAGGCTGCTGCCG  
GTATCGGATCCGGACGGCGAAGACTAGGACATGCTCACGGTGGACCGCGACGCCGTTTCAG  
CACCCGAGCCACTACCGGATGAGCCCCGAGACGATCAAGAGCCCGATTGGGATCGCGGCG

AGGGACGTCACCCGGGGGTTCCCGTTCGACGAGGGCAACGTCCTGAACTACCTTCTCCTC  
GCGGCCCATATGGGCGACCACCTGGAAGACCTGGGAAAGGCCAGGCAGGACGTGGACTTC  
GCGATCGACTTGGCTGAAGAAGCAGGAACCAACAAGGGGGAGAATGATGTCTGACAACAA  
GGCCTGCCTCAAGGAGATGCAGGGCGGCAAGGAAGTACCCAGCTGCCCCGACGTGATCCG  
AGACGAGTTTGCCGACATCCCGGACGACCAGACCATGTTCCGGTTCATCTCCAACACGCT  
CAGGGTCTGCGTGGAGCTGGGGATGAGCGTAGACTTTCGACGCTGCAGCAATGGCCAACGG  
CCTGCTATATCTGGGGTCAAATGGTGAACGCGGGAGTTCGGCCTCGGCAAGGAGTTGATC  
GACGCCCTCTCGCGGACGGATGTGGCGACGTACCGGTTCTCCGGCTTGTCCGCCGCGCGG  
CCGCTGATCGAGGGGTGGATTCCCGAGCAGGTCGAGATGCAGGGCCGCATGGTCCGCATC  
ATCTTCTCGTCCGTGCTCGGCCGCGCTGAGCAATCCAAAGGTGGTTCGGGGGAGGGTTCGTT  
GTATTCGCGAACCCGATCGGCAACACCGTGTCTGCTCGTGGCCGAGGACGGTTGGACG  
TACTCCGGGGCAAAGAACCAGATCGAAGTAAAACGGAGTGTGGGCAACACTATCGGAGC  
AGTTATCGTGCAGCCCGCGCAGCAGCTGGCCAAGGGCCTTCTAGGTATGGAGCGGGGCT  
CCACGAGATAGGCAGGCAGATTCACACCGCGGATCAGCTCGCTGGGCTGGAGATGCGCAG  
CAGCGAGTAGGGCATCGCGTACAGCGACGGCGAACATCTTACCCAGGTTGGCTGCAAGCT  
CGGTACCATGAGAGACCAGCGAGGCTGACTGCTTTCTCGACGTCGGCAGTGTGTTCCGGG  
ACTAGCTCCGGCAATCCCTGATCGGCGACGTAAATGCTTGGGAGCGTGCGGGCCCGCGCT  
CTCAGCATAAAGGAGATGGGGCCGACGCAGGCCGGTGTGGTGTCTGCCCGCGGTTGGCGT  
GGTCGATGTCCTCCAATCCACCTCGAAGTTCGAAGGGGCATCCGCATCCGTGATCGTCG  
GCACGTGATGCCCGGCACGATGGAAGAGGTAATGGCGCTCGCCTACGCTGACCTCGGCC  
GGGAACGATGGCTCACTTAGACCAAGGTCCTCGAGCCGCTCGCCGGTATCTCCGACTTCT  
ACGACAAAGAACCCTCGGTGATTGACTGGAAGTTCCTCCGGTCCAATGCATTCAAGA  
AGTACGGCACCAAGGGACCAAGCCCGGAGTACCGCAGCCAGGTCCCCACCTACGGCCTCG  
GCTACCGATACCTGGGCTACGAGGTGACAAAGGCCGGTATCATGTTTATCCCGCGAGACA  
GTCACCTCTGGCAGTACCTCAGGTGGATCGAGTACCCCGACCAGCAGTGGGCACTCGACA  
CGGCCGAGCGGCTGAAGAACATCCTCATGGTTGTCGACAGCCTCGAGATCGACAGGTATC  
CCGAAAGGGCACAGCATGTTCCGGCTACAACGTCGTTCTCGTGGATGTTTACGCTCGTGGT  
GGAACCCAAAGCCCCGCGGCACCGTGAATGCCCGGAACAGCGGGTAATCCGAACGGGT  
TCCTGACCGACACCGGGGGTGCCTGATGCCGTCCAGCACAGACCTCGCCTGCGTGGTGGT  
CACGGTCAACGGCACTACCGGCCCTGTACCAGTACGCGAAGGGCGGACTCCGCGACCCGCT  
GCTGGAGTTCGTCGCTCGGTGCCCGACCTCATGGAAGTCTACCGACACTACCAGCACTC  
ACCATGATGCTCTCCTTCTCGTTCTAGCCGCCCTCTCCTTCGCGGCCATCTCCGTCCGG  
CTGGAGCGGTGATGACCATCGGCACAGCAGAAACGATCGTCCTGATCCGTTGCATCACGC  
TCGTCGTACTIONGCTGCCATCGGAGCATAACGGATCGCTCATGTAGCTCCCCCCCCAAGCTCT  
GTCCCCGACCCTGTGGGGTAACCAACGGATCAGTACAGCTCACCAACATGAGCAGCTTCA  
ACGCAAACGACAACCTCATGGGCTCGGCCAAGTCCGTGTGCTTCCCGACCCCTGCACCA  
CGGTAATGGGCGTCAATTTAGCAGGAGCCGGAGGTCACGCAGCTGCGTGACTIONCGACTCCG  
GCGCGCTGGCTTCTTGGACAAGGACAAGCCCCGGGCCGAAGGTGCAGCTCGTTATCACCC  
TTCACACCTTGGAGCGCGACGTCAACGAGCTGCACAGCGATGGCGAGCGCAAGCTCTACG  
TGGCTAGCCACATCATGCGGAAGGCAATCGCGGCGGCTGTCCGTGCGGCCGGTAACAAGG  
GCCTGGCCGTCGTCGGTCCACTCGCGGTGACCTACACCCAGAACGGCTTCAAGAATGGCA  
AGGACAACCCGCCCAAGGAGTACTCGGCGCGGTAGGTCTTGCCGACGGGTGAGATGAACG  
TCGAGACCGGTGCGGCCGGCCCGGCCGCTGCACAGGCTCCGGCTCCTGCTCCTGCCCGG  
CACCTGCTCCCGCCCCGCTCCGGCACCCGGAGCCGGTCCGTCAGCTGGCACCCCGGCGG  
ATGCTCCGGCAGCGCCCGCCTTTGCCCTCTCCCCGAGGCGATCGCGGCTCTTAACGCC  
TGACGCGCACCCAGGGCGGATCTAGCCCACCTGAGGGGGCGGGTCCGGGATCTTGGGAGTC  
CTGACCCGCCCTTTAATGTACCAAAAGACAGGAAAGATCCATGGTAGGCAAGTTAATCC  
GTCGGCTCGCCGTAGAGATTGACGTAGAGGGCGAACGTCGACGATCGACGGCTACGGGTGGG  
CGACCGACGACCGCGGTGATATCGAGGGCGAGACAACGCGCTGGCTCGCCGGCAACGTCC  
GGCCGATTGTCATCCTCGCCCGGCAGGATCAGCTCGACTCGCCGCAGATCGTCGCCGTAG  
AGGTCTGGACGCACGAGCCCCTGGATCAGATCCTGATGACTACCCCGTACATCGCCCGAG  
GCCACGCAATGGACTCGTCCGAGGTGGACGACGGTGCAGGAGAAAGCATCCGGGGACGAGG  
ACTAGTCAGGACGCACAGGCTGAAGGTCAGCGACCACGAAGTCGTCGGCTGTTGCCGTGT  
CGAGTGCCAGCTCTGTGGAGCGAGACACAATGTCATTCAATGGACATTGAATCAGGAAAT  
GGGTGAGGCCCTCGTTCTCGAACGACATCTGCGTGCSCCGACGGAGGGGTTCGACCTAGGA  
GAAGGGGTCAACGTGCGGAGAAGACAGGAGGACTCCCTGAGCAGGAAGAACCGGCTCACC  
GGGGTCTGGACCGATCAGTGGCGCAACAACGAGCCAATCCCGCACTCATCGTTCGACGAA



GCGCGGGTGACGCTAATCAACATGCAGCGCCTCGAAATCATCTGGAACACGAATTCACGT  
GGGAATAGGAGGGATTGAGATGGCGACACCGGGTTCATGCACTCCGCAAGGCGATCGAACT  
GCTCAAGGCGGACGGCTTGATGCAGGGAGCGATGCACACGCCGCGCTGGTACTGCTCGAT  
CGGAGCGAGCCGTCAGGGCGAGCTGCACGCGCTCGGCGACGACGACGTCGAGCGCAATCA  
CCAGGAGTTCAATGCCGAGCTGTCGCTCCTTCGCGTGGAGACGGGCGGACTCGTCCGGGG  
TGTGATTCGCGACCGCTACAAGGAGTCCAGAATCGTCCACTGGAACGACGACGGGCGGGC  
AATTGTGTCCGAGTTACTCGACCTCTTCGAGACCGCACAGCAGCAGGCCGAACGATGAGC  
GGGTCGCTGCTGACGTGGGCCC GCCGGTCCGCCACTCTGCGCGCGTCGATGATCGCGGTC  
GACTGCCTCAACGCTCTCGACGAGAACGAAGGGGTGCCGTACTTCTACGCGATCCTGTTT  
GCCAAGCTGATCGTCAGCTGGTAGACGGAGCGGTGGTCTCTGAACGGCAGGCGCGAGTAC  
CAGAACAGCCCCGGCCATGGCTTAGCGGCCGGAGCTGGAGGTATGCGAGTGTGCCACTA  
CCTGTTCTAACACTTTCAGCAGCGCTAGTGCAGCGCCCTCAAGATGGCCACCGGCTGGCT  
GCAGGGGTAGATAAGTCCCTACGGAATCCCGTGCGAATGCACACCATTCGAGGAGTGATA  
CGATGGGTTACTACACCCACAGAACGGCACCGTCCGTTACTTCGAGGAGATCCAGCCGC  
ACGGCAACGGCGCACCGTCCGAGCGCGACGACCTCGTGCTGATCCCTGGCAGCATCCCCG  
AGAGGGTTCGTGACCGGCGTCGTAGGCTACTCCGCACGGCTCGTGTCCAGCGACGGCAGCC  
GGAGTTTCGCGTACGGGTGCACGCCCTGGAGACGGTCCCCTCGGGCTGTTGCTCAACAT  
CTTCGGCAAGGAGTTCGGGGTTCGTAGTCAGGGAGTCCCCGGCACCGGCCCGAGGGTTGA  
CCTCACCGAGATAAACCAGAAGGACGTACACATCACGCGAGAGCTGAACAAGAGCGAGCG  
GTGGCAGACCTGGCAGGGCCAACGCGACGCTTCTGGCGGGCAGTTAGAATTCGAGGCCAA  
TCCCCGGCCGATCCATAGATCACACACACGATGGGAACTGAGATCACACAGTCGTTGCGA  
GAGCGGGTGAAGGAGACGCCGGAGCAGCGATGGTTCGACATGATCGGCAACCTACTACTAC  
TGGGACTGCTGCGTCTGGCGAGCGACTACCAGAACGCCAGAAGCCACCAGGAGGACTAC  
GAAAGCACGGAGCACCTGTCGCCGATCTCGGACCCCCCTCGTCGGCGAGAGCGTCAGCAAC  
GCGGTCAAGCCCACCGGCCTGGCGGGGTTCTTCCAACAGACCGGGGGCTACGGGACCATG  
CACAAGCTTAACGTCGAAATCGACTACCCGGTGGTTCGCGATCGAGTCATCAACGCCCGGC  
CTCAGCCACCTGTGCATCGACAAAAGGAGCTGTCCTGGGCGGACACGCTCCGGGTGCTCC  
GTGTGCTGGCCTCGGTCGGCATCTTCGAGACGGGCTACTTGGACGCCATCGAGCGGCGCG  
GCTGCACACACCTGCGGGTGCCGTGGCTGAAGACGAAGTACCGCGCACCGCTCACGCCGA  
ACAAGACGGACTGCTGGCCGTGAAGCTGCCTGCCGGGGTGCCGCTGGTTCGACGAGGGCGA  
GGCAGGTGCACCGGCAGCCCGACTGCTGATCGTGAACCAACCAACGACAACGGCTGGGC  
CGAGAACGTGGACGTCGACTTGGGGCCGGACGAGACCGAGGCGCTCGGGTGGTTCGCTGAT  
CAAGAAGGCCATAAATCTGCGGGAGATTGGGGAGACGAGATGAACTCCCTGCCCTACCG  
CCCTGTGGGAAATTATGGGTGGAGCCCGAGAGGTCGGAGTTTCAGCAAGAGATCGTCTGC  
TTCGCCCCGGCGCAAGTGGCTACGGGTCTTCGAGATCGACGTCGCCGTCGGCGAGCGGCTG  
GAGATCGTAACGGTCCCGGCCGACGGCAAGGACCTCGTCTTCGAGAGTGGCGATATCACA  
GAACTGACATACTAAGTCCGATCTGGGCGTAACGGAGGGGAGAGATGAAGGGCAACGGG  
AAGTCCGTCAAGCTGACGACCCACGCGCGACGGCGAATGGCCGAGTTGAGTATCGACGAG  
CACGAGGAGCAGTTGGCGCTGAACTACGCGTAGGCCGTCGTCACGTCCCAGCAAGTACGCC  
GGATGTCAGAACTACCGGCTCGGCAGGATAGACGTCTGTGCGCGGAGCGAGGGCGTTCGAG  
CTGGTGGGCATCACGGTCGTCTGGCCGAGCCACGAACTGTGGCACCAGCATATCGAGAAG  
ACCTGCGACGGTCACGGACGAAAGCTGAATCCGTTGCTGAACATCTGATCTGGAGCTTGG  
CCCCGCTCCGGTGTTCGTAGTCGAGTGGTCGACCGATCACGGCGAGTGGGGAGGCCTGT  
GGACGTCGCTCTTACCTCGCTGTCTGGCTCGCCAGACACCGGCCGCTCACTACGTC  
GCATAATAGCCACGGTCTGCGTCAAATGGGCCACAAATTCGAAGGAGCTCATCATGTCT  
GACAGGCGGATCAGCCAAGCCGTCGTTACGCGGGCACCGTTCGCGTGGAGTTCGGACCC  
CTCCTGGACTTCGCGGGCAACCTGAAGTACAGGACTCGCGACGAGCGCGTCGACCACGTG  
AAGACGGGCGTACTGGGCGCGTCATACCTGTGTACCGCCGACCGGCCCTCCGTGCTGCCG  
CCGACGTCCGTACCGCCGAGCGTCGACACCAGGGACGTCGACAAGCTACACGTCAGCGTG  
ATCGCCAGCAAGGCGCTCCGGCTGGCCCGCGAGGGTTCATGACGTCCTCGGGCTCTTCACG  
ACCGAGCAGGCGATGCACGAGAGGGCCGCCTACGAGATCCGTGCACTGGGCGACCATGGC  
GGCAACGACTTCTGAGTCAACCAGGGCTGCCCGCGCTACTGGCCCGTGGAGTTCGCCGAC  
CGGGTGTCCCTGGAGGCGTCCGGCATGGCCGCGCTCGTCGACACCGGAGAAACCCAGGTG  
GGCAGGACGACAAGGAGCTAACGATGCCCGATTGCCAGCCTGTTGTGAACCGGTCTT  
GTTCCGCGCTGACCGGGTACGGCAACGAGATCGTGCTCGACGCCGCCCGGACCTCGAGCG  
TGGACAGGTGCTCTTCTACAAGGGCCCGCGCTCATCGTCACCCAGTCCGAGGGGTGGGC  
CGTGGTGGAGGCAACACAACCTGCCGGTGTACCGGCGACTTACCCTCACTCCCGCGAGTT

CTGGA ACTCCAAGGTCCACCCCAGCCAGCTGGCGGAGCATACTGAGAGGTGAATTGACA  
AGCCCGAGTGCAAGATCCAGGAGATCCTGGCGGCACGGAGGGAGACCGGAATCCCGGCCA  
ACGAGAAAGACGTCGACGAGTTCCTCGAGCACCTCGATGACGCGGGCTTCTACGTGTTGG  
GGACGGGGGAGTACTCATGAGCGACTCCATCGAATGGCTGGACAGTCTCAGCCTGGTCCA  
GTCGTACGTGCTGTTTCGATCTAATAGGGCTAGCGTTCGGCCTCACAGACACATTCGTCAA  
GGACACGGAGCCAGAGTACGGCGCCCTGAAGGACGACGCGCCCGGCTGGGCACACGACTC  
GTCAAACCGGGTTCGTCGCGCTGCGGACCATGGTCATCGTCGCCGTCGCCTCGCCGGTTCGT  
CACCGTCATCACGCTCTACAGGCTGACCGAGCGAGTCATCGTGTGCGGCGCAGCCACGTA  
CCTGAACTGGTCGACGCGCCGGTTCCTGCGGACACACGAGATCACCGACGAAGATCTCGG  
CGGCCTCGTCTTCAGACCCGCCCTCCACGACGACTCGGTTACTCGCATCTTCGACGCCGA  
AGGCATTGTGGTTAAGCCTGAATGGAAGTGGAACCATGTATAAGCGCAGCAAGGCCCAGA  
ATGCGGGCTAACCCGGTCAACTCGGTGCTTGAGACGACGTCGTACGTCTTCCATGACCCCG  
AGCCGCAGATCTCCAAGCGGCATGAGTGC GTGCGATCGAAGCAGCGGTTCAAGCAGGACC  
TGCCGCCGTACAGCCCGCTCGGGCAGCGTGAGCTGGACCCGTACGACGCACACGTGCACG  
TCCTGTACACCCGGCGCATCTCGAACCAGCGCCGGGAGCTCCGGCCCCCTGAACCGCGCAT  
ACCGTCGGCGCAACGACGAGGTGGGCTCGAAGGTCATGCTGCTCAAGGACCAGCGCAAGA  
TCTCGATCCATGCGACGCATGCCCGTAACTCAAGATCACGCAGCAGCAGGTGGAGATCG  
ACCAACTGCGCCGACAGCTGGCAACCGCGACCGACGGCGACCGACGAAAGAGGGGATTCC  
GATGGGCCGGACAGTGGAGCCGGGCCAGCCGTACCTCGCGCCCGTCAGGACTGCGGA  
CCTGCGCCGCGACCCGGCTTTGACCGAGGATCAAATCGACGAGTCCCTCGCGAAGGTAGA  
CATCAA ACTCGCACTATGGTAGCGGGATGCGTTGCTGCGTTTGAGGAATCTGAGCACGGT  
CGGGGTCTACATCGGCGAGCAGAACCTGCACCACATCGGCCGATGCGCCGGGCAGCACAC  
GGTGCACCTCCTTACTAAGGAACGGGCACTCGCCCTCGGACATGAGACGAAGCCCACCGT  
GAACGGGTTTCGAGGTCAGCTTGGCATTCCGGGACGGCGTGAGGCTGTGAAGCTGGTTCGA  
TTCACCGCGGTCAAAGGTAAACGAGGTCGTGCGCAACTCGGAGCACGTCGTGCGCCGGCCAC  
CGGTCCGGTCTGGACCACAGCGAGATCAACCTGATGAACGGGGACGATATGCAGGTATAG  
AACCTCAGCCCCAAGCAGGTCGGCCACCTCCTCGCCGAGGGGAGGCTGCCGTGCAAGTAC  
GTGTGACGCAGGCGAAGCACGCCCGCAGGGGTAAACCCAGGCGAAGGCAGGTGCAGTACC  
TGAGCCGGCAGTTCGTCTACACCCCTGAAACTTGGCCATGCGGGCGTCGAACACACTGG  
CTACCCTCGGAGGGCACACCAATGCCAGGGGCTGCTCTCGGTTCAACACATTAATGAG  
TGGGGAAGTGACCATGTTTCGCGAACGAGATTCGCGGATATGCCTACGCGTTCGAGGAGCA  
CTTGAACAACGGCTGGAAGTCGATGTTTAGACCGCCGAAGGGGCATAAGTTCCCGCCGCC  
GTCCCGGTACACCGGCTACGACGTGGCGATCCCCAGATAACCCAACGTCACGGCGTGGGC  
CGATGACCATCCAGACGCCAACCTCGGACTGCGGTTCCCGTCCAAGAGCGTGGGCCTGGA  
CGTGGACGCGTACGGCTAGAAGACCGGGGCGTCGACCATCGCGGAGGCCCTGAAGCGCGA  
CGGCCTGAGGCCGGCGCCGGTTCGCTCCACCTCGCGGACGGACTAGACATCAGGTATCCG  
CATGTACCGCAAACCCGCCGACATCCCACTGCACACGCAGATCACGATCCCCCGACACAC  
GAACGGCAATGTCGAGGTCGTCCAGCACCAACATCGGTACAGCGTGTGCTGGCCGTCCAT  
GCACCTCGAGGGGCGGATGTACGAGTGGCGCGACGAGAAGGTCAACGTGGTGCCGGTCCG  
TTCGTTTCGACGACTTGCCCGAGCTACCGCGCCCGTGGATCGAGGTA CTGCTCAAGGAAGC  
TCACGCCAGGCCACAGTGTACTGCGATCCGTTTGAAGCGCTCCGGCAGCTCCCCCAGGG  
GAAGATGAGCGAGAAGGTCGGCGAGGCGCTGCGGCGCGCAAAAACCGAACTCGACTGCGA  
GCCGGGGTACGTCACGACGTCCCGACCGTTAATGTCCTGCGGCTGCTGCGCCTGCCGGA  
GAAAGGGGAGCTGGGCGTAACCGAGGAGCCCGAGTCCCTGCGGTCCACCTCGTCCGGAT  
GACGGGGGACCGGAACACGGAGTGCGAAGTCAAGGACGACTTTAACCGGAAATTGTACGG  
CCAGCGCGGGCACGACCTGGTCGCCAGCAGGCCATCGCAGGAGAGCTACTACGCGGTTCAT  
CGGCATTGACGACAACGTCCAGGAGTCCGAGACCCTGGCAAAGCAGCGGGCGCAGGCCCA  
ACCGGACCCCATCGTCGAGTGGCAACCGCCCCCGTGGGATCCGGCCTAGCCGGCCGCGCC  
GTTCTGCTCGAGGAGGTGCCGATGACCCGTCACGCGAGTCAACCTGCTGGCGCGATGCT  
GGACGACGACGCGTTCCTGTTTCGGCATGACAGCGCGGCTGATCGCCAGGTTCGATCAGCT  
GACCGGAGCGGCGGCCGTGCGGAGATCGTGTCCGGCGGCGAGGCCACGATGCGGAGGAA  
GCTGCTACCGTTCGCGGGCCTGGCCAACGTGCGGCGGTTCGGAACCGCTGATCGACGGGCT  
GCTCTACCGGTGCACCACTCACAGCTCTCCGGCCCCGCGGGATCCTGTAAGACGTTTCGT  
CTCGCTCGACATGGTCTGCGCGCTGGCGTCGAACCGAACCGAATGGCACGGCCAGGACAT  
CACGTGGAGGCGCAAGGGGAACGGTGGATTTCGTCTGTACGTTCGTGGTTCGGGGGGGTCTC  
GGCTCCGTACGAGGATCAATGCGTGGTGTCTATTGCAGGGGACCGGCATCGACCCCTCG  
CAGCCTCAAGCTCCACGTCTACCCGTAGGCGTTACAGGACGGTGCGTACACGCAGATGGA

GGAGCAGACCGAACTCGCACGCTCGCTCGACTGCGTGCTACGGAAAACCTGAGCTGCCCGC  
TCAAACAGCACAGCGCGGACGTATTCCTCGGCGTGCCGTTCCATATCGCGAGCTACGCCC  
AACTGACCCATTTATTCGCCGAGAAGCTGGGACTGACGGTCGGCGAATAGATCTGGACCT  
GCGGCGACGTCAACCTGTATTCGAACCACGTCGAGCAGGCGACCGAACAACCTCACGCATA  
CGCACACTGGATATCCGTGGCTGGCGCTTAATCACCCCCACTCGATCTTCGAGTACACAG  
CCGACGGCGTGACAGTCTCGGCTCCCGCCCGCACCCGGTCATGAAGGCCCCCGTGCCCG  
TGTAAGGAGGTACGGCTGTGGCCGACAACCTGGACAATACACCCTGAAGCCACGCCAGAC  
TGGCGTTTCGAATGGATCTTCTGGCTCGAGCAGGGCGCGACGATAACCACTTCGACCTTC  
GACGTGACCGTCGGAATCGCAGTCGGCTCGACGGCGAATACGACGACGAATACGACGGAC  
TGTCTTCCGGCTGACGCCCGGCCACGACTAACGCGTCACGAATCATGTCATCACATCC  
ACCGGTCGCATTGAGGAACGCTCCATCACTATCCGCGTTCGAGGCCGGCAATCTAAGGAG  
CTTCAATGGAAAACAACAACGTGCTCTGGAACCCAAGCATCACCGTGAAAAAGTACAACC  
GGTAGTAGTTCGCGGACATCACCAGCAGCCTTAGGGCGCGCGCAGACGATGGAGGACTACG  
CCAACATCACGCCGGACGAGTTCGTCACCGTGGAGGGCAAAGTCTCTCGTGTCCGCTGGGC  
TCCAGGGCCTGGCCGACCTAATCATCGGCAACGGCAGCGTGACGGCGTTCACCGCGACCC  
AGGACCTCATCGGCGTCGGCAACAGCAAGACTGCATTCACCCGGGCCACAGCGCCCTGC  
AGGGCGCGTCCAAGCTGGTCACCCCGGAGGCCAGCGCCCGTTCGCGGTCCGGCGGTGTCCG  
TCTCGGCCTCGGCCCTGTCTCTTCCGCCAACGCCAACTTCTCCAGGGAGGAGTGGTGCC  
TCGCGATCGGCTCCGGCCCGACCGTGAACAACGCCGTACTGGCGACCGCAGGTCGTAGGT  
CGCACGTGATGCTGACCCGCAAGGTCGAGTCGCTCGGAGCGAAGGCCTTCGGCGCTGTCT  
GGACGCTCTCCGCGACGGTCACCCTGTAAGTTCGAAAACCTAAAGGCACCTGACTTGAT  
CCGCCGCGATCAAATTGGGAGCCTTGATAATTCCGGCTTACTGACCCGCGCAGGCAGTAGC  
AACAAACAACCCTAAGTAGGGGGGCCTGACATGGACCACAAGGGAAAGCATCGAACGCAA  
ACCAACTCCAACGCAAAGCGTTTCGTAGCGACAGGAACCGCCGTCGGGGCACTCGGCCCC  
GTCTCCGGTGACGCAGGCACTCCTGCCGCGTTCGTCGCACGACTGCTCCGGAGTCGCCAC  
TGCGGGTTCGTGCGGCAACTGGAGCATGAACACCAGCAACGGGTTCTACGGAGGCCTGCAT  
TTCTCGCAGTCCACCTGGGACGCGTTCAAGCCTGAAGGCGCGGCCTGGCGCGCTGATCTG  
GCCACGATGCCGGATCAGATCGCAGCAGCGGAAGCTACCCTGAAGGTGCAGGGCATCGGC  
GCGTGGAGGGTGTGTGGGGCGTACCTAGGCCAGGGTGTAGTCACTCCCGGCGTTGGGTCC  
GCGCCCGCCGCGCCGTCGTAACCTCGAGCCTGCGCCCTTCCCCCTCCCTCCGCATCGTGG  
GCGGAGCCGGGCACTGGCGCGAACGCGCAGGGCTTCCACGGTGGCCACAACGGGGTTCGGC  
AACTCTGCCCCGATTGGCACCCCGGTCTACGTAGAGGCGTCCCGGTTTCATCGACCTGATT  
GGGTTCAACTACGGCCGCGGGCGGCTACGGTTACTACATCCAGCAGGCCGCGACAATGGC  
GCGAAGATCCAGTCCAGCCATATCTCCTAGATCTACGTCAGCGCTGGCGACGAGGTCACC  
GCCGGCTCCTTGC GCGCGGAGGTCGGCAACCCTGGCTTCTCGACCGGTGCGCACCAAGCGT  
CTGCGGACCAGCGCCGAGGATCCGGGGCGTACCTGATCAACCAGGGTTTCCCGCTGGAC  
TGAGCCGGGCCACCGGACTGCTCGTCACTCCGGCACCGGCACCTGTGTCCCCCCTGGG  
GAAGAGGTGGCGGTTCGAGGCCATTCCGGTTCATACTGGCCTCGGCTCCCGGTGGAGGGCGAG  
ACGGCGAACGTGGTTCGGGAGACACGCTTTCGCACATCGCTGAGGTGTTTCGGGAACCA  
TCCTGGCAGACCCTCTCGGACCAGAACAAGGATGCGGTTCGAGAACTCGCATGTGATCTAC  
CTCCACCATTTGCTCCACCTGGCCTGAGAGAACGGGAGTAAGCGGCATGAGTAGCCGAAG  
CAACCTCTACTGCAGCACATCTCGGCCCTGGGCCACCGACTACCGTGGAGAGGAGGGCTG  
GGCACGGCGGTTGAGGAGGGAGCTCGAACGCCCGCGTCTCGACGTTTACTCGGCGCCGT  
GCGATACGACCTGGCCGCCACACCCAGACCAAAGGTAATCAGGGACGGCTGCCCTACTA  
GGTGCTCTACGTGCCAACTGATGACTATTCCTCGACCAAGTACTTGGACTTGCCCGGCTGG  
CGTCTCTCCGTTGATGTCAGGGTCTGGGGCGGCGGAGGCACCGGCGCGGGTGCAACCTG  
GTGCTCCGACAACGGCGGGCGGCCGATTGGGCGGTGCCTTTCGCCTTCAACAGGGCCCGCGT  
CACCCCGGATACGTCTACACCGTACAGTCGCCACTGGCGGCACCGGACAGGGTCAA  
CGCTGCAGTTGGCGGCGGCGCATCCTCGTTCGGTAGCACAGGCACCGTCCACGGCCCCGG  
CGGCAACGGCGGATCGAAGTGCCAGACCGGCACGGCCGGTGGGGCGGTCACCTCTGGGGC  
GATCGGCAGCACGGTCTTCTGCGGCGCCGACGGTTCGTCGGTAACGAGTCCGGCAACCG  
GTCCGCTCCGGCGGCGGCGGCGCAGGCTCGAACGGCTCAGACGGCCCCCGCGGCACGCT  
CTCTGGCGGCGTAACCGTACGGGTCCGGCGGCCAGTTTGGCGGCAACGTTCGGCGCGG  
CGTACCACCGACGAGGACGGATAACCCGACCGCATCCCCGGCGACGGCGGGCGCTGGGGG  
TCGTCGAGCCAGCAGAAACGCAAACGGCGGTGATGGCGGTTCGCGGCGAGATGTGGATGAC  
CTACGTAACCGACTTCAAGATCAACCAGTCCAACGCCCGCGCACGACCGCGTACGCGGA  
GACCGGCATCGCGCAGACCACTCCGACCGAGACCTTGTGGTTCGACGAAATCGCCCCGAG

GCTCTAGCCGTCGGCTACGCCAGATAACGGCGTCGTCGGCCACGTATCCGCCGATCCGAC  
ACCGACCGTCACCCAGGGCGGACACCGGCTCCGGCACTGACATTTCCAGCGCATTACCGG  
GCTCACCAAGCCTACTGACACCGGCCAGGCCGTCGATCTGGCCTCGGTTCAGCCACACGAT  
CGCCGGCTATACTGAACAGGGCACGGAGTCGACCAGATCTAAGGCCATCGCCCCGACGGG  
GAGGGACATCGGCTCCGGCACCGATGCCAGCACGCTGCCGGCGCAGGCCCTCTGCTGCGCC  
GGGCTCCAGCACCGCCGACGCCAACGCACACGCCAGCAACAGCGTGGGCAACGTCGACAC  
CGGCTCTACGGCCGACGGCACCGCGACGCTGCGAACGGACTCTGGAGACGAAGCCTGCGG  
GTCGGACGTAGCATCGACGACGCCGACCGTACGCAGGGCGATAACCGGAGCGGCGGATTA  
CACGGTCACCGGCATCCGGCAGCCGTCGACGGAGACCGCGGACGGGGACGATGCCAGCAC  
AGTGCGGGTTCAGCCCGGTTCGGCGACGCCGGCATCGGCACCGACTCTGTGCAGATAACGCT  
CACCGTTTTTCGACATAGACACCGGAGGCGGGGCAGACCTCTCCAGCGTCAGGCGGTTCTC  
GCCCGACGGCGGCGCGACCGGTTTGAACGAGAACTCATCCAGGGCGCTCAGCGGCATCCT  
CGACGCATCCCACCTGTTACCGTTCGCCCCGGTCAAGTGGACGCTGAAGATCGAGCGGGA  
GCGGCAAAGTCCAGTCGTGGACAGCGAAGTCCGGGTAGTTCATCCCTGTCAAACATCTGAC  
CCCACACACGACCAGGCCGCACCGCACCGGAGGATCGCTCGGCGCCAGCCAGGGAGAAT  
CACGTGCATCGTGAAGCGAGAGGAGTAACAAGTGTCTAGGAGATCACCGCCGAGCAGAG  
TTCCCTCGACCGAGAGGTCTAGTCCCTCGACATGCGTTCAGGCGCTCACCGGGATCCGTGA  
CTATTTGGGCCACAAGCTGGACGTCAACCGATGCCCGAAGTGTGCCATGTCACAGCTCCA  
GTACGGCGACAGGGCCTCTCTCGTCCAGCAGCGGCAGAAGATCCTCGAAGAGATCGCAGA  
CCTAGCGGAAGGGAAGAAGGCCGGCGGGAAAGACGCACCGACGACCCCCACAGCCCGGAT  
CCGCGCCCTACGCGCCGTCGGCGACGACGAACCCACGGGCAGCAAGGCATCCCCCGCAT  
TCAAGCGGGTACACGTCGGAGAAGCTAAGGAGGTGACCAGTGGCAGTCCGTCTAGGAGAA  
CAGTATCCACGGATCCTTCATGAGCAGACATCCTGGGGCGGAGTCACCTCGGCGGGCCGC  
GAGGCATTGGAACCTCGCGGCCGAGGCTGGCCTGACGCTCGATCCCTGGCAGTAGAAAGTG  
CTGCACGGCGCGCTCGCCACGCGAGAGAACACCGTCTAAAACCCATAACACAGATCAGCTC  
GCATAAAATGGGCCGCACGCGAAGTTCGGCCTGATGATCTCCCCCAGAACGGTAAAGGG  
TTTCTCCCCGAGCCCCGCGAGCTAGCTGCCCTGTCCCTCGTCGGCGAGCGCCTGATCATC  
CACGCGGCGCACCATTTTCGATACTCCAAGGAGGCCTTCCAGCGAATCCTCTTCTGATC  
GAGAACAACCAGGACTTCCTGCAAGAGGACATGCGGGTCGACCGGTTCACAGGGTGTAGGG  
GGCATCGTGATGGAGAAGCCGAAGGGGTCCAAACTTCCACCGCAACAACCTTTGGTTCAGT  
ACACGGATCACGCGCGGTGGCCGAGGCTACACGGGTGACACCCTGATCCTCGACGAGGCC  
ATGATCCTCGACGTCGACATGGTCAAGGTTCTGAAGCCAACCCTGACGGCCCGTCCGAAC  
TTGCAGATCTGGTACACCGGCTCGCCCGTTGGCCGGAAGTCCATGCAGTTCGGCCCCATG  
CGCTCCCGCGCCCTCGCTGGCGGGCAGACGCTGCTCGGGAACGGCGAGTGGGCGGCGGAT  
CTTTGACCCCCGCTCTGCCCGTCCGACTGCGACGGGCACCACAAGCCCGGCGACCCACGT  
ACGTGGGCAAGGGCGAACGTCGCCTTCGGGATCCGCATCCAGGAGGCGGGCATCGCGGCC  
ACATGCCGCTCAATGGACCTCGACTCGTTCGCGTTGGAGCACCCTCCGTCCGGCGACTGG  
CCCACCGAGGGGCCACGAGGGGTGGTGTTCGCTAGCAGTACCCGAAGAACCAGCGTCCGC  
AGCAACTCGCAGCTCGGCAACGACTTCGTCCACGTGGTTCGAATTCGCGCCGAACCGCAGC  
GAGGCTACGATGCTGGCTGCCGGTCCGAACCAGCAAGGCGTCGTTTCAGCTGAAGATCACC  
GCCTACGAGGACAACGGCTTCGGCAACCGGTTTCGGCGTCTTGTTCGGTTCGCTGGCGCGTG  
CTGCACATCTGGTGTACCCAGCGCCCCGAAGGCGGTAGCGATCGACCCCGCCAGCCAGGCC  
GGTGCCTGATCGAGCCGCTCCAGGACGCGCAAGTCAACGTAATCAACCCGACATCGCGC  
GAGTACGGCGTCGCCTACGGTGAAGTTCGCTGCGGCATTGTGCCGCGCAACGGTAAGAAC  
GGTACCTAACGCACATAAGCCAGGACGCTCGCACGGCGTCGATCGCGATCTCCGACATG  
CGGACCGCCGGTGACGTGTGAATGTGGAGCAAGTCGCTCTCGACGGCCGACATCACCCCG  
ACCGTCGAGGCCACGCTCGCAGCCTGGGGCTGCAAGAACACGCTGCTATAACGAAATCCGAC  
AGCCTCGCTACACCATGGGTAATAAGACGATGAGAGGCTGGACTAAATGAGGCGTATCGA  
TCTAAAGGTTCGTGATCCTGGTTCGCGATTGCGCTGGGCGGCACAGGCACGGTGGCCACCTT  
CGGAGCCTGGACCCAGATAGCCTGAGCGCCCGCAATTCTCGTTCGCGGTGTTCTTCTGTTGA  
GGTCACTGACTGATGGCAAAACTGTGGTACCACCTACGCGGACCAGGTACCCCAACGGAG  
CAGCGGTTTCGGACTCAACGTCCTGGCCAGTGGTACTGTCAGGACAACCTGCCCTGTTG  
GCCTAGCGTCCGGTGTACAGCAACACCGAGGCGATCGGCGACGACTTTGCGGGCAATGTG  
CTCGGCGCGGTCAAGGCCAACGGAGCTGTCTTAGCGGGAGCGCTGGCCCGGATGTTGGTC  
GTCACCGAGGTGCGCTTCTAGGATCCGCGGTACACCGACGCCGGCCCGCCCGGAGACCTG  
TACCGGTGGCCGAGCCTGAAGTTCCTCGACAAGCCCTGGCCGAACGGTGCACCGGTGAC  
CTGCTGGCCCGAGCGATAACAGGACACCGAACTGGCGGGCCATCACTACGTCGTCCGCGAG

GGCGGTAGATCGAACCCGCTCCTGCGCCGCCATCGGCCGGCCTGGGTGAGCATCATCCCC  
ACCTCGCCGCCGAAAAGGTAGTGCAGTCCGAAGTCGTCGGGTACCTGTATAAGCCCGGA  
CGCACCGAGAACAGGGAACTCTGGAAGCTGTACCCGGTCGATGGATCGGACGGAGGCTTC  
GCGCAATGGGCCCGATCCCCGATCCGGAGGCGACCTACCGTGGATTGAGCTGGCTGGCA  
CCGGTCCCTCCGCGAGATCATTCCCGGCAACGCGGCCGGCAAAGCACCAGCTGAAGTTCATC  
GCGAACGCGGCCACGCCGAACCTCACGGAGTAATTCAAGGAGACGGTGACGACTGAGCAG  
TTCAAGGGGTTTCATGGAGCAGCTCGACGACAGCCACGGCGGTGGTGGCAACCACTACAAG  
ACGCTGCACCTCGGCGGGCGGCTCGGACGTGCGCGCGATCGGCTCCAAGATGAAGGAGATC  
AATTTCAAGATGACGCAGGGTCTGTCCGAGTCGCACATCGCAGCGGGCGGGACGGAACCAC  
CCCGCGCTCGTAGGTCTTTCCGAAGGGCTGCAACTAAGCTCGCTGAACTAGGGCAACTAC  
AAGGCGGCGCGCAACAACCTTCGCCGACGCGACAATGCGGCCCTCTGGCGCTCGTTGCGT  
GCGGCGCTCTCGGTGCTGGTTGAGGAGTTCGACAACCTCGCCACTCTAGTACGACGCGCGC  
GACGTCCAGTCCCTCCGACACGACTTGAAAGAGTCGGATGAGATCACCGCGCAGAGCGCG  
TCCAGCATCTCGAAGCTCGTCATCCAGGGCTACACGCCGGAGTCGGTCCCAAGGCGATC  
GTCAAGGAAGACCTCCGGTGTCTTAGCACACCGGCCTTTCCTCCGTCCAGCTCCCGCCC  
CCCGGAACCATCGGCAAGGCCGCACTGACCAGAGAGACGCCAGCTACCCAGACGTACGAC  
GTCAAGAAGGTCTTGAATCATAGCAAGCACGACCGGAAGCCAGTGGTCGACGTCCGGAAC  
CCTAACAGCCAACAGTCACTCCGGACAAGGCGAAATGGCCGCGCTCCCAAGGGAAGGAG  
TGATAGGGAGAGGTTCTGTGTACTCGCTCGGTAGAGTTCGATCCAACAAGGCCGCTGGA  
GAGGGCGACGGCCGGACCCTCGAAGTGAACACGGCGGTCTTCGACCAGGACACCGAGATC  
AACTGGTGGGAGGTCCGGTTCGCCGAACGAATCGCCAATGGCCCGTTCAAGACGACCCTC  
CGTAGCGCAAGACGAACATGCAGTACGACCACGGCCGGGACTCCCGCGTCCGGTCCGGG  
ATGATCGGCGTTTACAAGGACATCCGCGAGTACGAGCACGGCCTGTTTCGTGTCCGGCCGC  
ATGTTTCGAGAACCCCGCCGTCGAACCGATCCGGCAGGTGATCGACTGCGGTGCCGTACCC  
GGCATGTCGTTCAAGTTCGCGTCACTCGAGACGACTTGATGTAAATGAACGGCAAGCGT  
GTTCCGCGCGTTCGAGATCAGCAAGGTCTCTGGGAGAAGGGCTACCGGGGTCCGCTGGCG  
CGTACGATCCGGGAGGTCTCGCTCTCCGAGGCTAGCAGCGTGTGACTCCAGCGTGCAGCA  
GGAAGCTCGTTCGGGGTACGGATGACCCAGCCGGATCTAGAGGATCTCGCCGCCGAGTAT  
CGGCTCACCATGGCCGAGGTGGAGGCCGCGCAGGACGTCGTTTCGATGGGTTCGAGGGTGGG  
GCCATCACTAGAACGATGTTCCGGACATGGATACACGCTAAAACCGAGTCCCATAGGGCT  
GTATCCGTCTGGCTAGCAGCCGAATTCGAATACAAGACTTCAATCGAGAGCGACGGCTAC  
CGGACGGGCACCTCAGCTCCATTGAGACTCCCGAAGCAGACACCGCCACTGCCGGGGC  
ACCTCCGATCCGGTAGACACGAACACCCCAACCCTCAAAGGTGCATTCCCATGACCCCC  
AAAGAACTGCGGGCGCGTCCGGCCGAGATCGTAGTCCGCTCTCCTACATCCGTACAGAA  
TACTCCATCGACGAACTCCCCGAATCCGAGCAGGCCAGTGGGACGGCCTGGACGCCGAG  
CGCGCCAAGGTCGCCAGCTCGCTCGAGTGCATCGAAGCCCGCATCAAGTGATTTGGTGCG  
CTGGCCGACACCGACAGCACCGAGCGCGACGCCACACCGGCACGCCGGGGTCCATGCC  
CGCCGCGACATCCACGACACCGACGCCATCCGCTGCCAGGCTCGCAGCGAAGAGGATTC  
GTCGAGAGCCTCCAGGGCAACACCCGCTGGGCCACGGAGAAGATGCACTTCTCGACGGAG  
GTCTCGCGCCACGACGCCAGGTGCGCATCGAGCGCCTGCTCGTCAACCTCGACTCGAAC  
GGACACCTCGCCAAGCGGATCCAGGTACCGGCACCGCGACGTACGACCGCGCGCACAGC  
ATGGCTGCACTCTGGCAGAGCCTGCAGGGTCTGACGGCCGAGGAGGCACGCGCCCTCGCA  
CTCGGTGCCAAAGTACGTCCGGCAGCATCGGGGGCTTCGCGGTTCGTCATTTCAGCTTGAC  
TCGACGATGATCCACACCGGCCCGATCGACATCAACCCGCTGCGTGGCCTGGCGCGTGT  
GTCCTGATCACCGGAAGGAGTGGCAGGGCGTACCTCCGCGAACGGCATCGTTGTCACG  
CGTGGCACTAAGGCCTGCGCCACTGACGGCTCCAGCCGAACCTCGCACAGCCCAAGGTC  
CGTGCCGAGCGAGTCTCCGCGTACGTCCCGTTCTGGATCGTGATCAAGCATGACTGGTTG  
GCGATGCGTCAGGAGGTCACCCTGATGCTGGGCGAGGCGAACGACGCGGAGGAGGCCGGT  
TCGTTCTGACCGGCGACGGCCTGGGCGTCAACCCGCTGGGCTTGCTCACGGGCGTTCGTT  
TCCGGTCAGGACGTCGCTTGCAGCATCTCGCCAGCCTTACCTCCGGTGACATCTACTCC  
CTGGAGTTGGCGCTGCCGAACCGCGACCGCGCGAACGCGCGCTTCTGGGCACGACGGCG  
ACCTACACCCGCGTCCCACAGATCGACACGACTCGTCGCGCGGACCTGTGGGAGCGGCTC  
GGTGCCGGGCTACCCTCGCAGCTCATCGGCTACCCGCTGCCGGAGGCGAGCAAGCTGGAA  
GGTACCCGAAGACGGCCGACGCCAAGCGCGTCCCTGGTCCCTCGGCGACTTCCACATCTTC  
CTCATCGTTGATCGCATCGGCATGAGCATCGTCCCGGTCACACAGGCCTTCGCGGACTCG  
GGGGGCGCTACCGTGTCCAGAGGCAAGCGCGGCCTCCTCGCCGTGTGGAGCAACAACCTCC  
GAGGTTCTGGTGCCGGCCGCTCCCGCGTCTCAAGACCAAGGCATCCTCATCCACTGAA

TCCCCGAAGTGCCGTAGCTCTGTCAAGGGTGTTCACCCCTTCGGCCGTCTGGGGGGCG  
GTAGCAATGGCACTCGGTGATCCATACCTACCAAGGACGAGCTGCGGACTACGAGCAG  
ATCCAATCGGACGTGATCCAGTTCGACTAGAAGCTGGCTGACGCCAGCGCCGCGACTCT  
GGCGAGGTCGAGCAGCACTGCGGCCGTGAGTTCACAAAGTAGGACAAGGCCACCCCCGC  
ATATTCAGATCGAGCGGCCGCAAGGTCACGGTTGAAGACTTCCACACCCGCGCAGGC  
CTTGTCATCGAACAGGGTGACGGGCTGGGCAGTTTGGAGCCAGTCGATACCTCGTGCGGC  
CTTCTGGTCCCCTACGAGGCGAGCGTGGACGGGCCGCGTGGCCCTACTACCGGCTCGAG  
TTCACCGGTTGCCGCTGAGTCCCTCGGATCAATATCAGGCCCGGTTCTCCGCGTTTCC  
GCGCAGTGGGGCTGGCCAAGCGTTCGGCGACGGTCAAGCAGTCTGCGTTCAGATCGCC  
GCGAAAACGTCCC GCCACGCCGAAGCGCCC GTGGGGATGACCGGCAACACGCTGTACGGC  
GGCGTCGTCCGCGTGGAGGATCTGCCGATCGCCGCGACCAAGCTCTGCTGGTTGGTACTC  
AATCCGATCCAGGTGGGGTGACATTACGACTCTCAGTGAGATCCGTGACGCGCTGGCGAA  
GACGATCAAGGCTGGCGTCGCCCGGCAGCTGCACGCGTACGAGACGGTCGAGGAGATCGT  
CTCCGTGCAGTGCATCATGATCGCGCCGTTAAACGCCGACCTCGAGGGTGC GTTCCAGGC  
CTGGAGGCACACCGGGAAGTTCTACGTCTTCGTGCTCGATTCTCGTGACGAGCTACTGC  
GACGCGGCAGAAGCGGGTCGACCAGATTGTCTCCCGCACCGGCACGAACAGCGAGGATCA  
GATCCTGAACGAGAATTACACGGTCTCTCTGAACGGCGTCGTGGCCAGTG GTTAGGGCAT  
GAAGGGCTATGGCGGCTCGTTGGACTCGGCCAAGGTCGACCGCGTCCGCGCAATCCTGCA  
GGTCCGAGTAACTGTCGATCCACACGTATAAGGAGCTGGCTGCAGCATGGCCGCTCTCAC  
TCACAAGGTTCTTCCGACGATGGGAGCGCGCCTACCCTCCTTACTCCCAACGCCTCGGG  
TCCCTCACAGGTCAGCATCGACCATAACACATTGCTGTACGTTAGCAACCCGGGCGGCTC  
GGCTGCTAGTGCGACGCTGACCCCGCCCGGCACGACCAGCTACGGCGTCGCCCTCCCGGA  
CAAGACGGTCTCCGTCCCCGGCGGGCAGGGCGAAGTATATACCGCTCCGGCGCGAGTACGC  
CGTCGATTCGGGCCGGGAGACAATCGCGGTCACCGGCAGCCTCGCGTACCTGAAGATCGC  
CGCCATCCGGGTGCGCTAATGGCCC GCGTGGACTTCCACAGGCTGCGCGAAGAGCAGGCC  
CAGGTGGCAACACGCCACGCAAGCGAGACCGGCTTCTACCAAGACGTGCGCAAGAGGGCC  
ATCCTCGTCGTGAAGCCCGGCAAGGTGGTACGGGTGTCGGTAGAGCACGCAGCGCGGCTG  
CTGGGGCCCCGGTAACTTCGAAGAGAGCAAGCAGCGGTGCAATACCGCTGAAGAGCCGAGA  
CACGAGAGCCTAAACGACACAAAGGATTAAGGGATCTGGCAAAGATCGTTCTCCGGGAAG  
GTTCTCGTTGAGATCGATGGGGTGGACTTCTCGGATTACGTTTCGTCCGTGGCGGTTTCTC  
TTAAGAATGCGGGCGTCGACACCACGACCTTCAGCCGCGGGCGGCAAGGAGTAGGGCTACG  
GTCTGAAGGATGACGAGTTCGAGTGAACCTCCATCAGGCCTTCGACGCCGCTCGGTGCG  
ACGCGAAGCTCTACCCGCTGTACGGCCTGGAAGACGAGTTCGTGCGGGAAGTAGCGCCCC  
GCGCCAGAGCGGCCTGGGCTACCAACCCCGAGTACAGCGCGACCTGCATCCTGCTCGAGT  
ACCAGCCCCTCGCAGGCAAGGTCGGCGACCTCCCAGGGACCAAGGTGAAGTTCCCGTCCC  
AGCGCTGCGGGATCCC GCGCTGGGTACCTGCCGAGCTAGCGCCATATAGCGATCGCACG  
ATGCCGGCTCACCTCTCGATGGATGTCATCGGCAAGCGCCTGTTCCGCGAGGGCCAGAA  
GGCGCACACAGCGGGGAACCGTTAGCTCCAGCGCGACATCGAGTTCAGCGTCAACGAGTT  
CGCAGACTGGCTGCGCGACGAGGCTCGGGATCAGGCTCTCCAGAAGTTCACGTGCTCGAA  
CTGCCACACCGGGCTTCGTGCGGAGGGCGCCGCTGGCGTGCAGATCATCCAGATCGAGAA  
CGGCGTCAACGTCATCAACTCGATGCCTTAATCCGACGAGCCGATCATCCCTCGCGGCCT  
CGAGGGCGTGAAGGGCTGGCAGTACCCCTCTTCGGCAATAAGGCACGGTAGGTCCGGCA  
GCGTCAAGGCTCCGACTCCTGGTCCCTCGAGACGATGCGGAACCGCCACGCGCCGCTGCG  
TAACCTCCTAGTGCGCAACATTAACGACACGAGCGAGAATAACGACGACGACAGCCTCAT  
CGGCTGACGAAAAGACCAAAGCTGTGGCCAGGTGTTGCTGTCGCGGGTCTGCGTGGCCCC  
AGCTCCCCTTTCCCGCTGCCCGCGAGATCTACTGCACGACAAACGAAAAGGAACCGCGA  
CATCTTGGCACTTCTCTCGAAGAACGACATCCTCTACGTGACGACCGCAAGAACGTTCT  
CGTCTCCGTCCCCGAGTGCGGTGGCGTGGTTCAGGTCCGCACCCTGCCCGGGCGTGAGCG  
GGCCGAGTTCGAGTCATAGACCGTCAAGACGAACAATGGCAAGCAGGAGCAGAACTTCGA  
GAACATAAGCGCCCGATTCTGTCGCCCTGTGCATCGTGGGCGAGAAGGGTGGGCGCCTTGT  
CGACACTCACGCTGAGGTTTCCGTGCTCGTCAACAAGTCCGTGCTACCCTGCGGGCGCCT  
TTTCAACGAGGCGCAGACGCTGAACGGCATGACCGACGGTGACGTCGAGGAGCTGAGCGA  
AGCGTTTGAGCAGGATCCC GACGAGGTTTCTACTTCCGCCAGGCCGAGACGCTCGGGATG  
ACAGTCCAGCAGATGCTGGCGGTAGTATCTAGTACAGAGCTGGCGGAGTAGGAGGCTTTT  
GAACGCGCCTTCTGTCCGATAGGGAAGAGCTACGAAGAGCAGGCCCTAGCCAGCATCTCT  
GTCACGCTTGCATCTTGCGCCGTCTGTACGGTGAGCAGTTCGACCGCAACCACATCCA  
ATTCTAGCAAGTACCCCGCCTGTGCGGGTGGTACAGGCCTGAGACCGTCCGGGACTCG

GTAGGTCAGGCCGAAATCGACAGCAGGTTCCGAGACTGACTGATTACCAAAGGGCCGTCG  
GCCGGTTGCCATTGCCTCAGCAGGTCGGCGGGCTTCTCTTGTAACCAACCAGTAGTTTT  
CGCATGGCAACGATCACCTCGCTCAACTTCGCGATCAGGATTAGTTGGGTCGGGACTCCG  
CTGAACAAAGGGCGTGATGAACTAAGGGCTCTGCAGGCTCAGGTGCGGACGATCTCCGGT  
GGCTCGCTGCACTTCACGGTCGTCGCCGACACAGAAGAGGAGAATGCCAAGATCCCAGCG  
CTGCGCGCACAGGCGCAGGACAGCCAGAACGGCGTCTACCTGGACGACGGCCAACCCGCT  
ACGGCGGAGGCCAAACTCGACATCCTGGCTCGCCATCCAGAAGTCGACGTGCGGGTGGAC  
AACTATGACAACGCGAACAAGATGAACCCGATTTCCGACTCCTTCGAGAACGCGTCCGGTC  
AGCGCGGTGGATTTCCGGCAAATCGATGAACCGTGCTGGCTTCATGCCTAAGGTAGGCATC  
GCGGCGTTCGCCACCGGTGTCTTCGTTCTGCCCGCCCTTATCAACCTCATCGGTGCATCG  
CTCACCGGCGCGATGGGTGGCGGCATCATAGCTGTCGGCGCGCCGGATCTCAAGGAGAAT  
TAGGAGATGAAGGCGGCCTGGGAGGCCCTGTGGACCGAGACGAAGGCCAGGGCCAGTCT  
GCCGCCAGCCTAAGCCGCAGCCGTTACTGGACCCCATGTCTATGGCCACGACGAGGATC  
GCGGAACCCAAGACGGAAGTACAGACGTGCTCGCGAGTGCAGGCCCGGCGATCCAGCCG  
CTCACGTACGGCCTGATGGATCTCGCCACAAACGCGATGCCCGCCGTCACGCAGGAGCTA  
GAGCAGTCCGGCCCGATCTTCCAAGGGTTCGACGTTGGCCTCGGTTCCGCTCGGCACACAT  
GTCTCGAACATGTTTCGTAGGGATGGCAGACGGCGTAGAGGGATTCGGTTCGAGTGTGGAAG  
ATCAGCTCTGATCAGGTAGGCCTGATCATGGCTCAGTTCGGCGTGGCTGCCGGGAGGATG  
TTCGCGACGGGCACCGACCTCTGGGATCGACTGTTGGACGGCTTCGACCAGTTCATCGGC  
GGCTTCCTCGACGGCCTCGTCGCCTTCACGGACGCAGTCCATAACGGGGTCCGGTGTCCCG  
CTCCCGATTTTGGGTCTACTCGGTGTCGACATGCGCGGCATGCTCGGACCGCTGGGCGAG  
CTGGTTGACGCTATCACGAACGGCCTCCTGCAGTTCCTCCACCGCACCGTGCAGGCGCAC  
AGCCTCGTCATCGGCGCACTGATGTCCGGCCTACTCCGGCGATCAACTCGCTCTTCCCG  
CTCAGCAGTACGCTGCAGCCGTTGCTCGTCATGCTCGGCCAGTCGCTGACCCAGGCGATC  
AACCAGCTCGCACCGCTCCTGCCCGGATCGAGGACGCGCTCGTCTCAGCGCTCATTAC  
GCGTTCAGGCGATCATTCCCGCACTGGTTCAGGTTATCGAACAGATCGCAGTAGGCCTG  
GAGCCGCTGCTGGAGATGCGGCCCGACGTGATCAACACGCTCTGCCCGATCGTCGTAGGT  
CTGGCAATCGCGTTCGGCATCATCACGCATTGGCTGTCCCGCTGTTCCCGCACCTCATG  
CACATGTACTTCTCGTGGAAAGCTGATATCGACGGCTATGGCCTTCGGGCGCGGCATCCAG  
ATCGCGTACACGGCAGTCCGTACGGCCCTCACGGTGGAGACCATCGCTCACACGGCGGCC  
GTCTGGGGGAACAGCATCGCGATGAGCGCGAACCCGGTCGTCTCGATCATCATCGGCCTC  
GGCGCTCTGGTGGCAGAGATCGCATGACACGCGACCGAGACTCAGTTCCTCCAGACCGTC  
TGGGAGGCACGGAATGTGGCGATGGCGGCTGTGTGGAGCTGGATGGAGGATGCGTGGGAT  
GCCACGGTCGGATTCTGGCCATGCGGTGGGAGCTGTCTCCGGCACGATCGTCAACGCG  
TGAACGCCACGCCGAAGGTGATCAAGGTAGCGGCACACGTTTTCTGGGGATTCTCTACT  
AACCCCTGGAACAAGTTCCTCTCGGTCTCAAGGTACCTGGGATGTCTGTCGCGCGTT  
ATCAAGGCTGTCTGGGACGTCTGGTGGTTCATACATGCGTGCAGTGTGCGGATCATCTTG  
GCGTGGCTCGAAGTCGCCTGGGGTGCCTTGTCCACTGTCCGGCGAGTCTGGGATAGC  
TTCGTAACGATCTTCCAACCACTTTGGGATGGTCTCTTGAAGGGCGTCAAGGTCTTCGTC  
GAGGCCGTTTGGGGACGAATCCAGATCCTCTGGGACGGACTGTGGAAGGCCGTTACGTCA  
GGCTGGAACGACTTCATGTGCTGGCTGCGTCCGATATGGGAGTCTTGTGGATAACCGTA  
AAGCAGTTCGCTTAATCCATCTGGAACGCCGTCAAGCTCGCCTGGGAGTTCCTGGGGCAT  
CAGGTCAAGCAGAATTAGGTCTGGTGGTCAACCTGTTCAACTCCGTCTAGCAGCCCTTG  
TTGAACGGGATCAATGGTGCAGCCGAGACCGTCTGGACGGGCTTCACTTCCGCGTAGAAC  
GGATTCTTGATCGGCGTCAAGGCGATGAGGGAGAATTATACAAGACCTGCGCGACGGC  
TGGTAAGCCTTCTGACAATTGGTGCCTGACTTCGCATATGGCGTCTGAGATACGATCACC  
AGCAACTGGGCCGAGTTC AAGCAGAAGTTCGAAGAAGTCTTCGGCACGATGGTTCGACAAG  
GCCCCGAGATCTGGGATAAGACCCGAGAAGCCTTGGAGAAGCCGATCAACTTCGTCATC  
CGCATCTGGAACGACCAGGTGCGCCGTAAGTTCGGTCTTCCGGCACTGGTCTGGATCGGC  
GGGTTCCGGTACCGGTTGTGGGGTCGACGGCTAGGTACGGGATCGTCCGACGACATCCGC  
GCACGGCTCTCCCGCGGTGAGCAAGTCTGGGCCGTAAGAACGTCGATGCGGATTGCGCA  
CACGGCAACGTCGAGGCCATGCGTCGCAAAACGGACAACGGTGTGCGCGCTACGACTCC  
GGCGGTCCGGCCGAGCGGATGATCGTCCAGGAGCAGAAGTGCACGCCTGCCCTCCAGGTC  
ACTACGGCTCAGCTGGACTCGAACGACTACCTCGGCCAGGGCAACACTGTCCACTTCTCG  
AACGGCGGAGACGCCGGTCCACCGGAAAGGATGGCCTTCGCGAACTGGATCGCAGACACC  
TGGGGTGATAACACGCTCGAGCAGATCAACAGCCCGTTCGGAGGGAACATCAAGGACGGT  
AACAGCTCCGCGACGGCATGGGGATCTACGGGGTTGGCACGGTGGCCCAGCACAGGAAC

CATGTCGCTGGACAGTTGACCGCCCCCTCATCGAGGACGGGGGTGGCCAGAGCCCCGCTG  
GGCAAGCTCTCGGGCGACGTTCGGTAAGTACACCGCCTGGCCCTAAGAGTAGCTGCCAAC  
CCGATCCCCGGAGCCATCCCGGATCCAGTCCTTCTGGTTGCGGTTTCGCGGTTTCGCCGA  
TTCTCGAAGGCAGCGGCAACGAAGGTCAGAGACGCGTACCTCGACAAGGTGCGCTGCGCT  
GAGGTTGCATCGGGCGGCACTGCCAGTGGAGACATCCAAGGCTTCATGCCCGACGGGGAC  
CGGCTCGGAATTTTCAACGAGGACGCGCGGACCACGAACACCCCGCCACCCTCATCGATC  
GAAGCCTGGCAGGGGGGCGCGACCACTCTGGTCACGCGAGAGTCGGGCTAGAACCCGGTC  
GCGTTCAACAACCTGGCATGCGAAGGTTGCGGCGGGCAACGCTTCTTGCGGTCTGGCCCAG  
GTGATCCACACGACGTTTCGATCCTCTCAAGGCGCCGTGCCACGTCAACATCGACTCGCCG  
GTGGACAACGTCGCGGCCAGATCAACTACATCAAGTCGCACTACAGCACCATCGTGAAC  
GTCCAGTAGGCGAAAGCCAACATGGCCCCCTCCGGGCTACCGCACGGGTACCTACTGGGCT  
GCGGCAGGGTGGCACCCCGTCGGGCGACGACGGACCCGAGAAGTTGAACTTCCGTGGCGGC  
GGGACAGGTCAAGACGTTAGCAGACATCATCCACGCCCTGAAGGACTCCAAGGCCGGACAG  
AGCAAGGAGCTGGAGTCTAAGCTGACGGCCTACCTTCGCAGGAGGGTGGAGAAGACCGTG  
ACCGAGATCAACACCTCCGGACCGCGGTTTCGAGCAGTATGTCGAGCAGGCTATTGACGGA  
GTGCTGACCTCGGCCGGTATGCAGCTCAAGCTCTCGATGCCGGTGCCGCAGATTGCTGCA  
GACCCAGCTGCGTACGCGGAGGAAGTCGCGAATCCGCTTCTCCCGCAACTCAAGATCATG  
ATCCGTCAACGTGTTGGCACACGGATATCACAAGGGGCGGGCTGGGGTTAACTACGAATC  
CCGGTCAGCCCCCTTACGCATAGGGAAACGCAATAGATCTGTTCAACTTTCAGCCGAGC  
GGCGACGGGTTGAAAGACGGGTGGACGAACATCGGCGGCATCACCGCCCTCTGGCAGGCG  
GTCACCGATCTCAGCGATGCCAAGTACTATCAGTGCCCTGCCGTCGAAGGCAGTCGAAGCC  
GTGTCTACCCCGTCGACACCACCAGCGTCTCCGACGGCGCGATCTTCACCTCTGTGACT  
GTGATGATGCGGGTCGGCCACGACACTGGCGCTGCACCGTCCGTTCATGTCCCCACCGATC  
ACGGTCGCAGTCGTCGCCAGGACAACACCTCGCGCCACCTGACGCGCACCATCTACCCG  
AGCAGCACCCCACTACGAGATCGCCAACCACCAGCGTGACGGGCTCGGCCTGGAG  
TGAGATGTACAGCGCGGAACAACCTTCTGTGCCGATACTCTCGTACGTCGACAACCTTA  
GACCGCATCCGTTGCCACCGACTCTGGTGTGGGATAAAGTACCGGCTGTGGCCAACCGTC  
GCGATCACCGCCCCGTCGGGCACCGTGACCACGCCGTCGCAGATCATCACGTGGACATA  
TCGCTGACCTACGACGAAGCGCAGAAGACCGAGGAATACAAGCTGTTTCGCTGCCGAGCAG  
GTGGCCAAGGTGTGCTACAAACCGGACACCAGCGCCGCGGCTTCCAGGACACGCTGCAG  
GGCTACCTGACGAGCGTGCTGCTGCCGACGTCGATCAACTCGAACAACAATTGGGTCTGC  
ATGCGGGTCACGACGACGATCGGCGCGCGCTCAGTGTGGGTGACCCGTCAGCTCACGGTG  
TGCGGCCATCGCCCGCGATCCCCGGTGTGACGACCCGACGTACGCACTCGGCAGCGCA  
GTGATCAGGGGGGAGCCGGACATCGAGTCAGGCCGCGCGTTCGCTACACATGCGCCACACC  
TCGACCATACTCAGCGCGCAGGAGGCGGACGCGGTGGCGCCGGCCGACCGCCGCACGATC  
TCCGCCACCAACCGAACGATCACCCGCGAAGCCGGCGTCACCTTACCAGGTGGAACGGCC  
TCGTGGACGGCCACGGCGACAGCCAGGATAGCGGCACTGGTCACGACGGACTTCATCGGA  
AGCGAAGAGTGGCTGCCGCTGACCTCGCGGGCTCAGTTCAGGGCGGCGGTCACCGGGCGC  
TACTGCCGGGTGGTGTGCTGCGGTTTCGAGGTCGACGTCTGCGCCGACATCGCGGGATCCGCC  
CTGAACGGCAGCTAGTTGACCGACTCGTCGAGCACCTGGACCGATGCCTCGATGTACGGC  
AACGCTCCGGCGAATGGGGTTTCAACGCCCGGCGCCGTCGCGCTTCCGTGCGGCTCGGCC  
AGCGAGGTGCACAACCGGGACCACCTCGGCGTCCGCTACGGCCTGAACACCCCGTGGTCC  
GTCGGCAGCCACGCCAGCCGCAACCTGCCCTCGACGTACGTCTCAACGCCTCAGGGGAGG  
CAGGTCCGTGCCGAGTTATGGGCGCCGGACGCGGCCCTAACGGCGATCCCTGCGGCGGCC  
GCCGGCATCGGGGCTTCTCGTTTCAACTGCTTCAAGACTACGAAGAACGGCGTGTCTCCG  
TCGATCGGGTTCGAGGTGTCTGCTCCGCGTGCCCGTCGCCACGTCCGGCGCGGACTTC  
CCGCTGTACAAGCCTGCGGGTACGGCGACCGGCGACCTCAAGCAGGCCTTCATCACGACG  
TCGGAGTTCTGCACGATCACGCCTCCGGCTGGCTGGACCCTGGTCAACTCGGGGAAGGTC  
GACGACGGCACCACGGACACCGGATGCTCGTCCCCAAGCGCACCGCCACGGCGTCCGAA  
CCAGCCTAGTGGACTGATGGCTTTCTGGCGACCAACCAGGTGAGGCGGTCGGCCGTCACG  
TTGGCGTACGGCGGGCGGAACGGACGTTCTGTCCGACACACAGGCCGCCACGGGTAAAGAC  
ACCCCCCTCGGCCTGCAGACGCCGCTCTCTGAACAACACGGACCCGAAAGGCTGGCGCGTG  
TATGCAGTCGCGGTGCCAGGCCACGCCTCCGGCAGAACTCCGACGCCTAAGCGGCAGTAC  
CCGTTTACGTTCCCGCAGATCAGTTTCGTCGCCTCGGCATCCCCGTGGTTTACGGCGAAC  
ACCGCAGGCTCGTACACGATCAACGAGCCGTCCGGCACTCAGTCCGGAGACGTGATAGTC  
GCGACGATCGGCTACCTCGGCAACGGCGTAACAGTGAACCCGCCTGCGGGGCTGGACCCTG  
CGAACTGCTCGACGGCGAGCAAAACGTGCGCCCGTCCATATAGCCTCGCGGTAATCTAA



CGAGTCGTTGGAGGGTTCGGAGCCGTCTCCCTGGTTCGGGCACTAGCAGCGGGCGGCTCGCTG  
TACCGCACGACGTTCGACGCACTGTCTCGCGTACCGCCACGTTCGACAACGCATCCCCGTTT  
ATCTCGCCGAACATCATCATGACCCTCAACTCGAGCGCGCTGGTAACGGGGCATGCGACG  
AACACGAACGCCCTGCCGTGGTGTGGGTTCGGCCTTCGGTGGTCTGTTCGGAGGGCGGCAAG  
GTCTTCGGCAGCACGAACGAGGGTTCGTCGAGCGCATGGACAACACTACGTGAAGTACTAGAGC  
CGTTTTGGCACCCGCGCTGGCAACGCAGTGTGATGGACGACTCGAACGTCGCTATGTCC  
TCGGGAACGTATGACCGGTACGCGTACTCGAGCAACGCGCTAACGCGGGCGTTCGGTTTC  
ATCCAGTTTCTGCGACCGCTCGGTACGCCTCCGACCCCGGTGGCCGACGAGACGGCACGC  
ACCGCAACCGGGCCAGTGGGTTCGGCGAACCCGTGCGACTCCGCGAGGGTCTTCCACTCG  
AACGGTGTCACTCCGGCGGGCAGCCAGTGGATCACTGGCATCTGGTCCCCCGGATCCGGC  
ACCGACAAGTACACGAGGGCTCGCTGGTTCGGCACCCCTGAGGCCAGCCCAGGCGCAGTCA  
GTCGGATACCCGACGGCCACGATAAAGCGCACGGTTGACGTTTCGGTGTCAAGACCGAC  
CAGATCCCGGAACCCGACTCCGTGACGGCGAACGCAACGTTACCCGGAACGACGGCGGGC  
ACGCCCTATCTGCCGGTGTCTTCTACCGCGTCAACACGCTGCTCGGCAGCCAGATCGGC  
TAGGGCACCGCGTCCGCCCCCGTTCGGGAGGACCAAGTCGTAGGCGACGTTCCGGAACCCG  
AGCTGCTCCACGCCCATGGAGATCGGCGTCTCTGTCTCGGCTTGCAACGTCGTCGACATC  
GTCTACTGGGATCGCGTCTCCCTGGCGTACGGCGTCTATGCGACCTCCGGGGCCGAGCACC  
TCGGGTGCTGAGCACCCGGTCTGGTTCGATGCCGCAGATCCAGTAGGCGGACGACGACGGG  
GCCTGCTGCTCGGACTGGGAGGACCTACCCAGCCTGAAGTCCATCCCGCCTGCGTTGCTA  
CCGCGCTCCTGCACGGCGCTATACTGACCAACTCCGATCACGCTGACCAACCGGAAG  
TACCGCGCTCGCAACATGCCGCTCGGCCTCGCTGGCGACTTGTTTCATGTCGGAGTGGGG  
CCGGACGGCCCCGGAGTTCACGGATGAGGGGAAAAACGACTGGCTCAGGGACATCTCGAAC  
CCGAACAACCACCTTCGGCTCAAGGGGGCCTGGGACAAGACGCATGTTTCTAAGACGAAC  
AGCGCCACAGTGTTCAGCCTCTCCCCGCGGATCTTCCATCGTTCTCAGCGAGGGCTAC  
AAGCGCGAGACGTTACCCACAAGCTCACGCCGCTCAACCACGAGGAGCGCGCAAAGCTG  
TGGAAGCTCCTTACGTCCGGCCGTACCCTGTTACTGCCGTTCGGACATCGACTAGGCCTGG  
TGGGAGCGCCCCGGACGGCGACCTGATCGAGGACGTGCTCCCAACCTCCAATAGGCAGTCC  
AAGCGGTGCGCGAGATGACCTGCCAGTCCATGCAGGTATCGCCGGCAGAGTGACAAGGA  
GATCCAAATGCCCGCGCGACACACCGCTTCTGACGCGATCCGAGGCAGCCACGCCGT  
CTACAGCTACGTGGACGGAATAGTTCGGACCCAGGAAACCCGGCGGCTGGTTCGTGATCGA  
CGGCGAGATCAACGTCGACCCGAGAGCCAGTACCGTTCGCACGTGTCGGATGGACTGCGT  
AGACCCGGTTCGGCAGCTTCGTGCCCCGTAGGCAACGTGGGCTTCCAGACGTCGTTTCGGCAC  
CGAGGTCTGGCCGTACCGGGGCGTGAAGTACGAGGACGTAACCGGGTAGGTCTACCCGCT  
GGGCGTGTTCGGGCTGGCGGTTAGCTCCTTCGACGCGTTCGTCGAGCCGGGGCAGCAACGC  
GGAAACCTGCATCTCCCTCAGCATGTTTCGACCTATGCCGTGAGGTGGCGCGGACAGCTA  
CAGGAACCCGGCCACGATCAACGGGGGCACGAACAACATCACGGCGATCAAGATGATCCT  
CGGCCGGACGTTCCCGACAACGAGTACGACGCGGTGTCGACAACGCTCACGACGACCAG  
CCCGGAGATCTACGCCGCGCAGGTTCGACCCGTGCGTGGTTCGCTCGGACCTCGCGAAGTC  
GAACGGCTGTACGCTGTACTTCGACGTCAACGTCTGGGCGGTGATCGCCCCGCCGACCGA  
TATCGACGCGATGCCGGACTCCGACTTGACACACATCTCGGAGCCGGGCTCCACGATGCT  
CGACCTAGCCGCCGAGTAAAAGGACGAGCCGGGCTACGACGTCGTCATCGACGAGGGGCGG  
GTCCACGAGCGACCAGCTGACCCCGTGGGCGCGGAGGACTGGGACTACGAACCCAGCTC  
TCCGCCGTACAGGTTGGGCCCGTACGGCGGGGAGCCGGATTTTCGTGCAGGACACCAACGC  
GAAGTTACAGGCCGACGCGCTGAAGCTGGCCGACGCGCTGTTTCATAGGCGACATCGGCTT  
CTCGGCCGCGCTGTCGATCTGCTCCTGTATGAACCCGGCGAGGGAGGCTGGGGACGTCAT  
CCAGGTTCGAGCGTGACTCCATCAACATCGCCGGCCCCAACACGGCCGAATTGTTCAACAT  
CCCGCTCAAGAAGGACTTCGTCCAGAACCTCAAGCGCCGGACACGAAGGGTTGCTTCGGG  
ATTGCAACCTACGGGCAACCGCCGGCGATCGTCCTGACCTGTGTAAACGCTACTCGTGCA  
AGCACTCTCGGATGTGAACGATGAGCGGAGTACCGACACCTGGGCGGACACCCCGCAGG  
GGGTCATGACCCCGGCTCAGCAGACAGTGGCGGCGGTCGACAGCCACGAAAAGGAGCGCC  
AGCAGATAAGGTTCGATGGCCTACGCGCTCTCCCCGACGAGGCCGATCTCCGCGCTCGTAT  
CGCAGGCGACCATCCTTCGCGTCGAGGGGGGCTACCCGCCAACCGTGACTATCCAGGTTCG  
GCGGGCAGACCACGGCCTCGATCGCGGCCGTCCGATACCTGGACAGCTACGTGCCGCTA  
CCGGAGACACGGTGTGTCGTCGTCGTCGTCGTCGTCGTCGTCGTCGTCGTCGTCGTCGTCG  
TGGCCAACCTCGCGGCCCTGGGTGAACGGCTGGCAGGCTCCGACGCTGAGAACGACGTTGA  
ACCCGAAGCCACGTTTCATGCCGATCCTGTACCGGATGGTCTACGATAAGGGGCGAGCGGG  
AGATCCAGTTACATGGTTCGCGTCAGGCAGAACGTCCTCCACACCGACACGACGCTGTTCA

CGTACCGGCCGACTACGGGCTACGCGTGCTGCGCGCCTTCGCGGACACCCGAGAGCACC  
TGACCAGCGGCGCGAACGCGCTGCAGCTCCAGCCGCACACGGACGGAACGGTGACCATCT  
CCGGCCATCCTCTCGAGAGCGTGGGCATGAGCAGCTCGGGCGGCGGCCTGACCGGCACGA  
CGAAACCAACCACTAACACAAGACGTCGGACATCGACAAAAATTGTGACCCGGTATTTCG  
TCGGCGGGTGGACGGACTGAGACGTGCAGAAGGCTTTGGGAACGAAGTGCGGCAGCCACA  
ACCACAGCAACCCGAATAACACGCACACGATGACGAAGGCGTCTCCCTGGATTGATCT  
CGCTCGACGGCGCGGAGTTGTTCCCTCGGACTAAGAGGTGCGGACGTTGGGGGGACACAAA  
GCATCTCGACGAGTTCAGCGACGCCGCGCCGGGTCCGAATAAGACAGTCGCAGTGCAG  
GCTCTGTACGGCCGAGACGGACAGGGAGCGCAGGCTTCGGGTGTCATACGGAATCTCGGC  
GCGCCAGTCAGACGCCATGCTCAAGATGTACGGCGGCGTTCGCGCCATCTGCGCCGAGCC  
ACCGCCTCCGGCGGGAGTGTGGCCGTCGACGACAACCACAAGCGCTGTCGAGGCAAGCA  
GACGTGTGGCAAGTGTCTGCGCGGCCTTCTCTGCCACGAGTTCAACATGGCTCTCGGCAA  
GGTCCGGAAGTCCAAACAGTTGCTGCACAAACGGATCGGGTACCTCGACGGCGGTCACCT  
CGATTTGTACCTACTGCTCGGTGAGGATCGGAAATGCATGTGATAGCCCAGACCAAATC  
AGCAAGAACAGGAGCGGGCGATACGGCGGCCGGATCCGGCTGTTTCGTCATAGACACCCAG  
GAGGACAACACTACACCGCGTGTCTGCTGGTGGGGTACCTGCAGAACCCCCCGTCCGGTGT  
AGCTATCACGGCTCGAGCGACAAAACCGAGTGCCTCGAGGTGGTCGACACGGACCGTTCC  
CCGTGGGCGGTACCCGATGCGAACGACTATACGAACAACCTGTGCTACGCCGGTAGCCGG  
GCCTCTTTGTACAGTGGAGCATGGATCGCCACGTACAGCAAGGCGATCGACTTCACTTGC  
TGGCTGATCGCACCCGATGCGAAGCACTACGGCTTCAAGCCCTATGTCATCAGGCAGCCG  
GAGATCCGCGCGGGCAAGCAGGGCACGACCGACCACTACGGCAACACGAAAGGCCTGGGT  
ATCGGGGGCCTCCCCGGCGTTCGGCGGCAGCTACAGTGGGACGTGCAGCGCAAGGCCATC  
GAGACGTTTCATGGGTTACACGGCGCTGTTGCCGCCCGCCCCGCCGCGATCGCCAACCGG  
ATCGACGCGTGTGGGAAGGCGAAGGTCTAGCTCCGCGACGTGCTCGATGGCCAGAGGCCA  
TGCCCGGACAAGCAGAGCCAGTTCCGGTACTTCGAGAACGTCGCGGTCAACTGGACCCCG  
GAGACCGGCGCGCGGGGGATACGGTCGGACCTGCTCAAGAAGTTCGCTGAGCTGCCGTGG  
GAGACCGGCACGGTCGGCTAGCCGACGAACGACCGCACCAACCTCAACGGGTTGAACCGC  
CGTCCGTGGGGCGGCGTGGTGGGATTACCGGCGGCAGCCTGTACCGCAAGTAAGGGACG  
CACGAGGCGTTCTGGACTCACGGCGAGATCGGCAACCGGTGGGGGCGTAGTGCATTCGAG  
AACGGTACGCTCGGCTTGCCCTGTTTCGACGAACCTGCCATTCGACGGCGGAGCCGCTCAG  
TACTTTGAACGCAGCCAGATCCACTGGTCCGGGACGCTCAAGACCATCGGGCTCCTGACC  
AACGACGGCTCGGAGACACCCCTGGCTGAACAGGGTAAGTAAGAGAAGGAGATCGTAGTG  
ACTCTGCGAGAGATGACCACTCACTACCGCGAGGCCGTCGGTGTGTTGGTATGGGTTCCGTG  
CTGATGATTCTGGCCGCAATCCTAGCGCCGGGCGATGTTCTGCCACAGGCCCGGCTGTT  
GTATTCACGACCACGATCGAGATCCTGACCACGGCTCCCGTTTGGCTGGCGAAGAACGCC  
GATCTGATCGACAACGTGGCCGACTCGATGGACGGACGGCAGCGCGACGTCCGGGGCCGAC  
GTGCCAACACGCGGGAAGCACGCTCGGCAGTGAGCGCCACGTACCTGGCACTTGTTCGTC  
CCATGGTTCGGACTGCTGATCGGCTTGAACGACATCACGTTGTGGCGCACCGAGCGGCTCC  
TCAAGAGGAGCCACACGGAGCAGGAGAAGGCCACGGCAGTCCAGGCTATAGCGACGGCAC  
ACAGCGAGAACATCGGCGCGGCAGCTCCGCTCCTCCAGACAGTGCTCGGACTGCTTGCCC  
CACTGCAGTCGCAGATCAACGAATACGCTCTGCTGCTCCGCGACGCGGTGACGTACATCG  
CCTAGCTGCGATCCGACATGACCCGATCCGGGAGGCCGTCACGACCTCTCCCAAGTTCC  
TGCAGGCGATCGTGAATGATCGAGCCGCCTGACGTTAGAAAAGACAAAGGCCCCCCAGCT  
GAAGTCGCTCAACGGCGCGGCTGGAGGGCCGATTCTTCGTTT

>NewGenomeName\_139

CTCCGGGCCTGCACTCACTCGTCGCATCAGTTACCAACAGCTAGGGACTGGCCACTGGCC  
GCGGTACGTACTAAATGACCCTGGCTGACGGTCAACTGACCGCCATCTCCTAGGTAACCTG  
CTCCATAAGAGGTTAGTTATGCCTAGGAGCCCACACGTAGGGCCCCTTGCGCGCTCAGCT  
GTGGCTGTCCTTAGTGTCTCCGCAGCAGGCTTAGGTTCTATCCAACACGTTCGAACGAAGC  
GTTACAGCGAGCATACTTCACTCGATTGGCAAGCCTAACGTCTTACCGGGCACACTGGC  
CCCAAGGTACGCTGAGGGATAGTCTACAGAGACGAACATTGCGCACAGCTGCTTCGCACG  
TACGCCAACTCAAAGCCGCTGCTGTTAATCGCACGATCAAAGTCCCACTGTAGCAGTCC  
GAGTTCGACGCGCTCTGCTCGTTCTACTACAAGTTCGGGCACACGTACTGCGCCATAAGC  
ACTCTGCTCAAGCTGGCCAACCAAAGTCGGTAGGACGAGGTAGGGCCGCAACTCCTTCG  
TGTCGTTATGGTGTGTTGGGAAGAAATGCTCCGTCCTGGCTAACTACTGCTACGGCGTTTAC  
ACTCGTCATGACAGCGAGGACACACGATGGTAAGGAAAATACTGATCCGGGTACTCCTTG  
CGCTGGCCTTTCTCAGGCTCGCTCTGGGCCTCTACTAGACGCACACGTCTGTATCCGAGG

CATGGAACTGCTAGAAGAAAAAAGGCTCGCTATACGCGACCTACGGGCTTCTGAGGCTG  
GCATGCAGGTTTCGGTCACGGCTGTGCGTGGGCTTGGCTCGCAGGCTGAAGCGAGCGTCA  
GCGATGCACTCGACGCGGAGCCTCGTCACCGCGCGACTCATGAGCATGCAGGCGTTGCTG  
ACAGTTTTGGTATGCGACGCCCTGCAAGGATTGACCCTAACGGACCGTGCCCTCATCCA  
TTCCTCTGTACGGCGTCCACAGGCGGGCTGGTGAAGGGGCCGGTGGTCTAAGGAGACTCG  
CTGGATAACTACAACGGTCCCCGGGGATTTCGGGCCAGGAGCTCTGACGCAAAAATGATTC  
CCACGTGCGCCGCCGTTCCCGGACATAAAGAACGCGCGGTACGCCCATCTGCCGTGGGCC  
GAATGTGCGGGCGCGCTGATTAGGGAAGACTGGTCAGGGCCGTTTATTTCTGCTGCTCTGG  
ATATCGACGGGGCCAGTATGGGATCGCTGTGCCGGGCTGTCAAGCAATTTGTTACGATGG  
CCGGGGCAAAGGGACAGGGCACGGCAATATAGGTTGTGTGGCGTAGAGATCACGCCCAGC  
GCGGCAATGCGACAAGCCCGGGCAGACACAAGTGCAGATGCTCTTCTTTTGGGTGCGCGG  
GATTGTGAGACCTGGGAGCGGTTTTCTAATTGGGCCACTATAGCAAAGGGAAACACGATA  
CCCTGCGAATGTTTAGGAGACTCGACGCGAACGGTCATATCTGTTAAGACGGGGCAACA  
GCACAGCCCGACCACGCAACAGACCACGATGTCAACACCACACTACCCTAACGAATGACA  
GTCCGTATCGGCCGACGCGGCCCCCGGGATACGCGGATCCCGGACCGCAGATTAATGACC  
ACGCAACGCAAGGAAGGAACATAGGGCCAACGATAATAAAAGACTAGACCGACAGGAATA  
ACAGTCTACGATGGGCACCACTGAGTCGCCAGACAGCAACAAAGGAGGAGAGTACGAAAT  
AACCGGTTTACAGAGACGAGAACCCTGTACACTGCGCCACATGTTCAATTAACGGACT  
AACTGCTACGGCTAGACTCTTCTAAGGCACTGGAAACTCGCAAGCCTAAATTGCTAGCTT  
GTCAGCGCGACAGGAACAGAGAGTGAACAAAGCAGGTTGACAAGCTACAAGCTTCACGGC  
AACATCCGCAACACATCACAATGTACACCAGCTTCAACGTCCCAAGCACACACAGCATG  
TTGAATGTGACGTAGACATGAACGTTGCCACGCAAGATTAGCGGCAGCAAGGCCAAAA  
AGGTCATTGAGAGCCGGGTAGTGCGGGAAGTACTAACAATTAGATGGTAGAAGACTGGAA  
TCTAATGAACGAGGGGATCAGCGGCACTTATCGACGATCCCAAAGTCTCGTGGTCCAATC  
CTTAGCTTAACCGCGGGTATTGCGAGAGACTCGAATGAGACCGAGATCCCATGGAAATAA  
CCGGGGCCGTCCTAGGCTCAGAGGTGGTACGAAACGATAACAGAAATACTGACTGTCCGG  
GTGATTGTCAACTAAATTAGGTGCATAAGCGAGAGAGACTGCCGATGCCCGTAGCCCGAG  
AGGAACCACCCGATATCACGGTGGTTCCAAAAGCCCCTTGTGGTTATAGTGACCGGATG  
GTGTGTTACACACGTTCCCTAGGCCGAGTCGGCCTTAGTATCTACCGTGTGGAAATCATG  
GGTAAGTATTCATCCACCAGTAAGGTGGAACGACAGCATCAACTGGACAACAAGAACTAC  
GGCATGGAAC TTCGCAACCATCTCTGTGACTACAAGTCTCTGCGGTT CAGGACAACCGAT  
CCTCTGTTGGCTTATGCGCGAGGTCACATAAAGATGGTGGCTGAGTTGTCCGATGCTAAA  
GGGGATGTCGCGAGTACTTCATGGCGCAAGCCCCGCGAGATGCTGGGTGTGAGATACTGC  
ACTGATGATGAACGAACGAGCAGGAACGCATGGGATACTAAGCAGACCACGGCTAAGCCG  
GGTCTGTCTAGGTCGGTCCGTGGTAGCACCACGAAACATCAACGCATTATGGCGGGGCAG  
TCCGCAAGCGACTCACAAGGCATGGGAATCTCATCATCACTAAGTAAAGTCTGATCCTTG  
ACTCAGCTAATATCATCCAGGGTATTGCATCCATCGGAAAGCGCGGCGCTAAGATAGACG  
CTGACATCCACCTGGCCGATGTGGCCATCCGCTCGCACTTCAATGACCACAACAACGTGA  
CACTGTTGAATAATCTGTATCCTTCGCTTCCGAATGGTTCCTGCAACAATGCCTTGGACG  
TGTGGGCCTTCGCTAACGTTAGGGTGAGCATCAATGAATGTGCGGACCTTCAGGACATGC  
GTTTCTTGTTTCGCTAAGGACATGGTAACGAGCATCGACTTTGCATGGGAGAAGCCTTCGT  
ACGAATACGCGCAGACGTCTGACCTGAGCCAGCGTTCGACGTGCAAGTGGCCATCGCTA  
AGATTCCGACGCCAGAGGGCAAGCCGCGCAAGGATGACACTTACGTGGAAGGCAAGGTCG  
TAGCCCAGCTAGTGTAGCTGTCTGGCATGTCCAATGCGACATAACGCCCCACTCCCGAC  
CCCAATCTGGGCACCGCTATCTCGCTGGGGCCCCAACCTCTGGCGTGCCTATGAAACTCG  
AAGTCAACGCGATGGCCTTACTCGCTGTTTTGGCGCTCGCTAGCTGCTCTATGAATGGCG  
TAGTGATACCGAACGTCGTTCTCGCCGTAGACAGCGCCGTGGACAGCCCAGTGGACGCAG  
CCGAAGTCATGAAAAACGGGGGGCTCGGTGACAACCAACGAGACGGGCGCCACGGCTGG  
GCATCTTGTGCGGGTGAGCCTGCCATCGGCGCGCAGTGCGTGTGCCCGTTGTCTTCCGTT  
CGGAGCCGTCCTGGTACTGGAAGGCGAGCAGGTGCAAGACGGTGAGCAGTACGGACCACT  
GTTTCGCATCAAGAGTCAAGAGACCATCGCAGCGGCCCTCATGCATGTGCCTGACTGGAA  
GCTCGCCAAACAAGAGATGCGTAAGGTTGAGGGCCACGTCAACCAGCTAGGTAAATGAAT  
GACGACTCCCCGCTGCACGCAACCGCAGCCAGTCTGGTGGACGCCTTCCAAGCTATGAGT  
GCTGTGTACCTCAGCAGGCTTGAAGGTGCAGCCTGGCAGCCGTAAGGGCGGACGGCACGCTT  
TCGGTGGCGCCGGAAGACTACACAACACTGTGCGACGTCTGGGCTGTTGGTCTGCGGATC  
GTCAGCAACCACCACAACGACACGGTGATCTATGGCGCGGCAGACAACATCGCCGTCGCT  
ACCATGCACTTCATCAGGCATGTGGTCCAGGGCCTGACTTTCTCGCAGGGTCATGACCGC

TTTCTGGTCATGTAGCAGTGGGCGCGGATCCGCAAGTACATTCACAACACGGAGTTGCCT  
GAGGTGTGCCGCGATCTGTTTCATGGACACCACGGCGATGATGTCGCTATATAACGAGCGG  
TATGATGCCTTTCCTTGTGACCAGACCGAGTTTTTGTGCGCTGGCGCGCTCAGGAGTGA  
ACAAGTAATGCCCATCTAATGGGCTGCATTCTGACTTCCTACAACCGGAAATGGCGGAA  
CTGATAGGAGATACGACATTGCAATATCAGCGAGTGGAATACCCCATGAAGGCCTCCGG  
CCTTGCCGCGGGCTCCATGGTGCCCGAAGTGGGCACGTTGACAGGGGACAGCGCGATGCG  
ATGAGCATCACGACTAATAATGGTAGCTCGCCGACGATTGGCGTTGACGACCCATCACAC  
TTGAACTTCGGCTTTGCTTATCGGTGGCAGGCTCAGAGATGGTGGTCTGAGAACGCACGG  
CGTCAAGCGCCGGCGAACATCTAAGCTCGTGCGGTCTACGAACTGCCGGGCGCTGCTGCC  
ATTCACGGTAACGAGCAGGTGCCATTTCGATCGAGATGTGCGCAAAGCTCTTGGACCATATC  
CGCGCATCTGAGTAGGTGAGAGGGAACCTCGATATGCCGTTGGCGGCGCATAACCGAGCAA  
TGCGTACAGCAAACGGCGGGGCCGCCCCAGCCGGAACATAACTTTGCACACGAACGACAT  
CCTAAGCCCCGCGGACTGCCATCGCACTTCATACGTCAACGCGTAGTGCGTGGCGGAACT  
CGCTGCCGAGGAGACGTAAACCAGATACGCAAAGACCCCGGCCGTTACGTGGATTTCAGT  
TTGGCTGCTGTAGTGTTTCATGCGTGACACGTTTCGATCTGGACCTTGAAATCGCCTAGAAA  
GCTTTCATCGAACTCAGGAGTACGTCCGGTGTAAAGACTTACTCGATTTCGATTGGGAGGT  
TGAAACAATGGCCGAGGCTTGTGCCTTGTCTGCGATGCACTGACGCACGCTGCTCCTCT  
CTGAGTAGTGCATCAGCCTACTCCGTAAGAGCGGCTGTACCGCGAAGGCTAGGCAGCCTA  
CACTGGTGTGGGTACCTCTCTGTCTGGTGCCACGACTCTGCCATGTCTGAGGGTAGCTT  
TGCACTCTTCGATTACGAGGACGCATAAGCGGCTCGCTCACGACCCACATAAGGACGCCG  
CTATTATGGCATCGCTCAATGTATTCCGTGTCATGACTGGCCGAATAGGAGTGCCTCTC  
GACGTGTAACGCGGTGTGTGTAGTTCGTTGGCTTCGAAGATAACTTCGTGAGCGTAATGT  
GGTACCGACAGACCTTCCACCCCCGAGCAACCGTGTCTTCCCTAACTGTTCTGCCCGAGG  
CAGAGACTGTTATAGCCGCTGAGATCACCGACCTGAACAACGTCCAAAAGAACATCCTGT  
CTAACCTCCTGCACCAACTGCGCGAGACTCGAGTAGGCCAGACCGTTTCCTGCCGGCGCA  
CCCACGCCGCCGCCGCGCCTTCGTGCTAGCCTACAACGAGTCCAGCTTTGGAGCGTTTG  
CCCTGCGAGAACTGGCCTGATCGTTCCGCAGAAGAACAATAACGGAGTCGCCTTGGGGT  
TCCAGCCCAGCATCGCGCACAGCAAGGCAGTCGTGCTGACCAATGCGCGCAGCAAATCTC  
AGAAGTGTCTGGTTGGCTGCCCGAGTTCGTCCAAGGCTCCGCAGGTTGCTCACTCCTGTG  
AGCATAAAGTGCTGTCCGTTGCCGACAGCATGGCGCGCAACTATCCGTGCCAAGTGTTCC  
ACGCTGTGCAGGTGCATGCGGTCTCCAGCTCAAGGCCGAGAAAGTCGCACCGACGAAGA  
TCGAAACTAATCACGCCATGGTCTAGCTGTAGCATGGCGCGCAGCACGCAGATCCTGAGC  
TAGCCTTCCCGTTCGTAATGCTCTGCGGGCGATCCCGAACCAAGGCAAGCACATCGGCCCC  
GACTTTGTTGGCCGGCCGTTTGAATATGCTAAGCTCCTCATCAAGGACGGGTTTCGGTCAT  
ATCACTGTGGACAAGGTACACTAAAGCTACTCGGCCACGTAAGCAACCGTGCCAAATTC  
GAGGAATAAACCATGCTCGTCAAGATCGCGCCTTACCTGATTTCTCTGGCCGAGTACATC  
GCCGAAGGGCGTGCAGAGCTGCACACTTCGGCCACAGATCATCTGCTGTCCCTGCATGGC  
CGCGAGAACTTAAAGGCGCTCAGCCAGTACAACGCCAAGTTCGCCAGGGTGCATGTCAA  
CTCAAGGGACGCAGCGAGCGTGCCGTGGGTCTGTTTCAGCTACCAGCAGGCCGCTGAGCAG  
CGGCGCGATAAGGCACTCAAGTTACTGGACGTTCTCAATTGCTGCGCACCGTGGCCGGGC  
GCATGCCAAGCGAGCCTTAGGTGCCTCGTTTGGAGGGGCCGAGTATCGATTGGATCGTCA  
CTGACTACAAGATAGCCGTGGAGTTCGAGGGCGCTTGGAGTCCCAGGTTGCCGTCTCTCCCT  
ACTTCCCCATCTATACGGAATCAAACCTATGAACCGACTGAACGTTTCGCGACCTGTACA  
AACGCTCCGCTGTACCGGCGACATCAAGTCCATAACCGCACCGTGCGCCGGGCGTCCGACC  
AGCTGGACTACAACGGTGTCTGTGCATCAAGACTAGCGCATCGAGCGACCGGGTAGCGAGG  
GTCAAGAGCTGGGCCGACTAGGAGGCGCTGGATTCCAGTTCAGTGGCGTCCGGTATCAACG  
CCGAGCTGATCATGACCAGGCTGCGAGCTGTCTATAACCTGTGCTGAGCTGTGCTCGCT  
AAGTTCCTCACGCGATGCATGGCTCGCCACTGTGCATACATCCGCAACGACGACCATAGG  
CAGTTACGCTTTAGGGGCAAGCACGCCATGTCTATGCGCAAGATGTTGGAGTACTGGCGT  
CGCTGTCACTGAGTACGTAATGAACATCTGCGGGATGTCCATTGCGCGAAATTGTGCGCA  
TCCAAAATCCATGTTGGAGATACACCATGTAGAAAGTACAAGCACTGATCACCGTAACAA  
ACGCCAACTGGGCAAAGAAGTCAAGCTGATTGATAATGTGAACAACCTGATCTGGAACA  
CCACCGAACCAACCGTGGCGCTGGCCAGTTCCTGCAAGAGCGGGCCAACGAAGCTGCAC  
GCTTGAACATCTAACGCGGCACGGAGAGGTCGTTTCGTGTTTCGGACATTCTGCCACTGCGC  
AAGAGGCAACCGGCAAGGTCATCGCCCTGGTCGAGCTGGAAGGCGACACCAAGCTGCCGA  
AATTCATGGCCGTTGAAGACGCTGCGTTGATGATTTACTACGTTGCACCGAACAAAGTTGG  
CTGCTGTCTGATAGAGCAGGTTCGAGGGCACTCCAGACCCAATTCAAGGCTCCCAAGTGTGCG

ACGTTCCGGCTAGCGCAGTGGTTGGCTTGCCACTCGATGTTAGCAGCGTTCTCGGCGGCA  
CCGACGCTGCCGCAGCAGTCGATGGCCTGTAATCCTTGATCGTTTCGCTGTTTGTGCCGAC  
TGTTGGCCTCTTGCATGAGGACTTGATACGGCAGCTTAAGGCGTCGGGGATCATGCCCGA  
CGGTGCCGCAGGGCGAGGCGGAGTTTACGTCCGGGAATTACACGATATGGAGCCCCGGTT  
CAATGCCGCAGCCGATCTTATCAGTCGAGAACGAGACTACGTGATCTCGATGCCGTACCT  
GCCTCCAAGGACTTGCGCAGCGTTGGTTTCGGGGGTCGTCCCTGTTTCGTCTACGAGAAGCA  
CGCCATCGAAGTACCCGACTGACAAAGGACAGAAGTAGTTCTCAAGCATGAATGCTTTTCG  
TCTGCACGCCTCGTTGCCAGTACTGGTTGATCAGGTTATGCTTTTCGGTTGCGCAGCGGT  
GTATGGCATAAGAGCTGGAGGTTTTGCCGTTTCATACAGCTTGACAGAATATCGCCCAACTGA  
ATCACGCTATGGTCACAGGCATCTCGAGCTTGACTCTGCCTTACTGTGGTTGTGGCACT  
TAGCAATGAGCAGGCTAGAGGCGGCACAGATGTTTCAGGCACACACCTGCTCCGCGGCCTT  
CGATGATCTTCAGTTGGCTACCGGATCGGCTCTGATCTTTCCGGGTAAGATGTTCTCCA  
CCGAGGCATGCCGGTATTAAGAGCGTGCCCCACTTGCTTGTGTTCTGGACTGAAGTGAA  
ATCAGAAATGAGTGGTTCGTCTTAGCCAAGAAATTGCCGGTGCGTGGCCACGCAATGCAT  
CCGCATTTCTGTGGTTCATGGCCCTCCGATGGTCGTGTTCCACGACGATACGTAATGGTCG  
GCGTTCTGCCACCGGTGCGTGAACATCACATCAGTATTCAAACCAATCCCGGCGTTGCAC  
GAAGGCATCAGGGCGGCGGAACGGGAGCGGCTTGAAGAAAGAGCTGTAGCAACCGGAATC  
CGGTCACCGATGCCAGCGTTGTATGACCTGGCCGAGTGGCCTCTGGAGGCACGGGAATCG  
TCTTTGAGAACTGGGCTATCCCACGCCGTGGTGTGTAAGAGTGGCGCCTACGATCATCCG  
CCAACCCGGCGTGTGGTGTCTCGGTATTTGAAGATGCGCGCTTGACTTTCTGGCAGTCC  
CTCAGCTTATACGAAACGAGAGCAGCAAAGTATCTTAGCCAGCGGAACGAGCCCGAGATA  
ACAGAACCACTGTTTCGCCGGTGGAAATGTCCTTCCGTTAGTCGAGGACAGGCGGTCTGTG  
TACAAGATCGGAACGGCGGGTTGTAAATCTTTGTGCCCTATCGGTAAGAAGCTACTGCCG  
AAAGCACGGGCCTAGTTGTCTGCTAACGCTCAGTACACGGAAGCGATCTGGCTTGACCCT  
GACGGGCCTAGCCGGAGTTGTGTGGCGGAAATCAAGGACTGACTATAGATGTTTCGGGATT  
GCATCCCAAGACTTCCTAACTGAACCTGACCTAAAGTTACACAGCAAGCGCGAGATTCGG  
AATGCCTTTGGACGTATCGCCTTAGCAATTGATGCTGGGACGAAAGGATTACGACAAGCT  
CCACTGGGTAGTGAACACGCGTTCATTGTATCAAATGAGCGCCACTAACATCACTGACAT  
GCGCAGTTACTCCAAGGCGGATCCCGAGTGTGATCTGCTCTCTGTTAGCCGGGAGATCCC  
CAGGTTCTTCAACCCGATCTGTTACCTACAGTAAAGACCCGGAGCTGGCGGAGGCGTACCG  
CCCTGTGGTCCAGCAGATCGAGAAGCCGATCGGGGACACTGCTAGGTCAATGATCATGGG  
CCTGTTGTGGGAGTACAACCTTGGTGAATGACTTGGACGACATCGCCGAGCGCTTTACCCG  
TAGTGAAGAAATAAACGTACGCGAGATGCAGGCGGACGGACTATCGACGTTTGAGCAGGA  
CATTGAGCGTAGGGTGAAGCTGCCTTTCGTGGCGCTTGACGAGTCGTTGTTTGACGAGGA  
CGTTAGCAAAGACGGGTTCAAGTGGCGCTGGGCTTGCTACGTCGGGACGATGAGGCCACT  
GCGCCGCGGCGACTTCGGCAACATGGCGGGGCGACCTGACAAGGGATAGACGACTGCTCT  
CAAGGACCTCCGCACTTACGGGGCACCCAGTGTTCGTTTCGTTTACCCGGACAACCCGGA  
GACGCACCAGATTCTGTGTCTCAATACCGAAGCGCCGGGCAAGCGCATCCTCAAGCGGAT  
GATCCAGTCGGCGTTCGGTTTCGGAACGGCTGGGCTAAATAGGTAGCAAACGGCTGTCAT  
CTTGCGGGATGAATACGACGTAGCGATTGACGGTGGTCGGGTTATGATGAACGTCATCGA  
CATGAACGCATTTACTGCGTGGCAGGTAGAAGAAAACCTTCGAGCAGGCTACTTCCGGCTC  
GATGATCTTCAACATGGTGGGCTACGTGAGCTGCGATGGGGGCTTGCAGAAAGGGGGACAC  
GATAAAAGAACGGGAGTTTGTGGCTAGGTATCATAGGGCGTGCAGCGGCACTATGCGATT  
CGACTGCAAGGTAATCGTTCCGTCGCAGATCAGGGCGGAAGGGGCCGGCGAACCGTATCC  
AACTCTACCGATGCCAGTGACAGCAAGACTGGCAAGCCAGATGCTGCCTTTTATATTAC  
CTCACTCGGAACGTGAAACGATCGTTCGCTTTAAGAGTTGCGTTTCATTGGGACGAACAA  
GAACAAGCTATGTCTTAAAGGCCAGCCAGACTGTCCGCGTGCAGAAAGGGTGAAGCACGC  
ATCAGTAGAACGCTATGTCCGGCAATAAATATCAGCCGCCGCGCATCCGCCCGATTGATC  
AGGCCGCGTTTGAAGGGATTCTACACTCCAGGCGGGAGGCGCGTTTGCATCCAACCGCTG  
ACATGACAAGGCCGGGAGGGATTGACATACGCGTGCCTGTCATCATCTTCCGGGGCAACA  
ACGAAGTGCCCACTGATATCGAGTTCCCGGTGGAACACTTCTCGCCAACAGCCCATGTGA  
TCGCCCAGAACGATGCAGCGCTCGTTAACTGAGGGCGTATACAAAGCGGTCAAGGAATACG  
GCGTTGAGTTCTCACTACGTGACGTTTCAGACGTGATCGCGTCAACCTTCAAGCAGAAG  
GTGAATCCCTTCCAGGAGAATTGGACGGTGGGGGTAGGTAAATGTCAGCACGTAAAAGAA  
CCTGGGACGATCAAGCACGATGACAAGCATCGTAGCAAGGGATGCCTGGCGCGGTTTATT  
GAACCCATCCCGGACTGCAAAGTATTCATTTTCTGCAACTTGAAGTTTGTGCTGCTGCGC  
GGGATCGCCGAGAAGCCCGATGGTCTGAATGCGTGGGGGGGCTTCATCAACCGGGGTGGC

GAAGTGTTCGACTGTCAGCTCGTCGAGTAGCTGCTGCGCTGTCAAGGCCCGTTCGGCTCAC  
ATGCTCTCGCGTGACGTAGTGTGAGTGGGTTCCGGCGGGCACACGAAACATGTTGCGGTC  
AAAGACGTGTGGTTCGTAGGGGAACGAGACACTCGACACTCCCGATGGCGCGATGAGGTAG  
TACCTGTCTGGGCGACATCGGGAACACCTGAAAGAGATTCTCGGCCTAGTGGTGGTGGCT  
CAGCAGCTCGGGCAATCCCAACGCATCATGCTGAACATGGGCGCGCTGGTCTTCACGGTT  
GAGTCCGAACGTAACGGCATGAATGCCGACTACTACTTGGGCTTGAAGCTAGCGGCGGAG  
CTGGAAGAAGAACTGGACTTGTGAAACTGCGGCTTGACGAGTACCTGACTGGCGGCCTT  
CCGGCTAAATTCAATTGGGGCAGTCGCATCCGGTTCCGGTTCGCTGTGGCTGAGTGCGGTT  
GTAACTAAAAGGCCCGCGCAGAGATTCTAAATAAAGACGTCAAGCCGACTTATGCACAG  
AAGACTGAACCTCACTCCCCACGTCGGACGGCAGCACTGTAGGACAGGACGAGTTGAGC  
GACTCTCAGCTCAGCGGTAAAGCTGTGCCGACACTTGTGTCCTTTAGCGGCGGCAAGAAC  
GCGCGTGAACCGTAGACGAAACAGCCTAAGGTCAACGACCTGTAGAGACCGAAGTGCGGT  
CTTGAAGACCGCACTTGCGGGTTCCCTGCTACACCAAGCCGAGCGACAAGTAGAAGACG  
GCCGCTACGGGATTGTACCAAGCTGGCTCTGCCATCATCGAAGATCGCTGCAACCGGGAC  
ATCGCTTTCCTCGACGAGTAGGAACGCCATGACAGACTCGACTAGGACGTCGGGACGTTT  
ATGATGAAGACCAACGACAAGGTTGTTTACAGACAGGCTGCTCGCGCTGGTTCATCCTGAT  
TGTCTGATCCAGCACATGAGTAACATGATCAGAACGGTAACGGGAGGTTTCAGTTCAAGT  
AACCCGAAGACGCAAACTTGCCGAATGAAGGTGAAGGCAAGTGCATCGCGAACGTTAAG  
TTCGTGTCCCGGTTTCGAGGCGAAAGGTGTGAACATGCAATGTGGCATCTCGTCACTGGAC  
AACGACATCCAAGCGATCCTTACGGATTTCAAGCAGATGATCACGGACTTGTGGCCGGT  
GTAAACTGACGTTGCACGGGTTTTGTGCGACTGCCGTGATGGACGACTTGGAAAGAGTAC  
CGACTGTGCCGCAATTTAGCTGGCGGGCCGTGCCGTTGATCTCGGTGAGTGGGTAGGCAAG  
CGGACGAAGGCTATGCTTCTCTCGGTCCAGCGAGCTTACGGCACAGGCGCAGCGTAGGTC  
AGCGAAGCCACTAGCTTCCCAATCGATGAGGTGTACGGACTGATCGAAACTGAGAACACT  
CGCTACCCTGAAATCGATCCGTTTCGATGCTGACCTAATGGAGGAGATCACGAACAGCAAG  
ACCGCCTGGCGCAAGCTAGTTCCACATCTGGACTTCCCGGCTAATCAGGTTGGCTTCGAC  
ACCCGCCCGTATCGCACACCAGACCCTTAGCTCTGCAGGTACCGGGAGCAGAGCTCTCCG  
ACGTTTCGTGGTGGAGAAGCCTGGTCCGAAGTAGTCGTTCTCGCCAACGGAAATCAACATC  
TACATCGTGAAGGGCAATGGCGCTGTGTCCGGCAGCTCAGCATCCTGGTTGTTGGTTTGC  
ATTTTCTACCGCCGCAAGTACAGGGGCTGGCTGGACCTTCTGATAGAGCAGGTACACGAC  
GCGGCAAATGTTGACGCGCATCCGTGAGTCCAGAACGTCGTGGCTGCCGTTATCTATGCT  
TACGTGAAATGTGCATCACCATTCATGGGGGCATACTTAAAGTGGGCGGTCCCACTGGCA  
ATACCAAGCGGAACAACATGGGACAAGAGCATGGCACACGAGAGCGCCGTCGAAGGCATT  
GACGAACCTGGCTTTACCGCTTCGCGAAGTAATCAAACCGCAAGACATCTAACAATATCTC  
TGAGAGGTGACACGATTCCCGAAGCAATCTATGACCAAGCCGCAATCGCAGCAGCCACCG  
CAGCATCAGTGGATCTAGAACCCTTTCATGAAGGAACCGCAGAAAGCCGGCGGCGGCTGGG  
TTCCACCAGCTGCTGCCGGCTGCATGGTAACCCTAGTCTGCTACATCCAAACCTGCATCC  
AGATCGTGTGCTGCCGAGCAAAATCAATCCCGTGAAGTCCCTATGGACCGGAAGATCAAG  
TCTATCTGATCTTCGGAAACAGCGTCAATGGACACGTATTGTAGGGGCTGGAGAACGGAA  
CCAAGTTTTATGTGCGCCTGACCGTAACGCTTAAACAGGCCTTGAACGAGATGTCTGGGGT  
CCTACAAAAACTCCAACACGCTGAACTATGACAAGACCGCGACGCTCTTCGCCCAACTGC  
TCGCCAAGCAATTCATCGCCACAATCAGCCTCTACCGAACCAGAAAGACCCGAAGTCGC  
CGTATGCTGGCTTCAAGTGCAAGACTGCTTGTGCTGCACCTTCATGGCTCAGACCTACAACC  
TGAACCCGATGGACATGATCGAGATTGCCGTCGTCCCGAAACCGGCGGTTCTGACTCCGC  
TTAAGCTGTTCTGCTGGACTACCCTTCCCAACCGATGTGGGACTCGCTGTTCTCTCGAAA  
CCAAGTGCAGACGACCACAAGGACGAGAAGTCTGGCGGCGTTACTCCGGGCCGAGCTAGA  
ACCAGTTGCAGAACAGGATTCTCGGCTCACAGAACTTCAAGGTTCCGCAATCTTCTACA  
TCGCTGGCGGTCCGGACATCGCCGAAACCGGAGGGCCGGTGGTACACGATACCCCGCGA  
CGGAGTCGGCTGCTGTTCCGTCTGACGTCGCTGCCGCGGCTGTATTGGGGGCGCTATAAT  
GGATTGGCTAGAAGCCGCAATAGCTACTGCTGGCGAGGAGCCAAGCCATGCGCGGCGAT  
CGCGGCCCTAGTGCCGAGACGACTTGTGGAAGTTGATGGTACTAGGCTGCCTACTTCAT  
GACGGGTAACGACGATGCCGATAGCGGTAAGGCGCTTCGCAACCTGATGCAGCGATTGAG  
CAGCATCAAGGAAATGACCGGGGCGAGCGGTGTGGTTCTCCACCTGTCCGGCCAGGGTTG  
TACCAAGGCCGACCGCCTCCTTATTGCGACCGTGCCAGCGTAACACGAACAGCGGACTGG  
CTCTGCCCGTTCTAAGAACTCGCGGAGCTTGCCTGAGTTCATGGAGAGCTACAAAGGCC  
GGAGTTCACTCCGAAGATTTGGGGAGACCGAGAATCCGATGACGCGATGGCTGACATGCA  
TCCGAGGTGGTTAGCCGAAAGCAAAGGCGAGCTGATCGTGACAGCTACACGTGACAAGGA

CATACGATAGTGTCCCAGGACACATGGACTGGATAACTTACGAACTCACCCACGTTCC  
GCAAGGGGCTTTCGAGGCGATCGGCGAGAACGACTTGATCTATGGGCCCAAGTTCCTATG  
GCTGCGAACCCCTGCAAGGCCACGGCGCGGATCACAACAGGGGATTGCCGTTCCACCGCAG  
GCCTACCGGCAAGTGAGAATAGGCCGGCGATGCAAGAGCGCTGGTGCGTATTGCGGGCAT  
CGACAACGACGACGATTCGTTCTGTGCAGTGGTGCGGATCTACTATACGTCCAACACACC  
GATGGCGGGGCTGTTCCGACTGCTTGAGACGTTGCTACCGGTATGGCTGCGGGCGTGATCA  
GAAGGCCCCCTTACCACGATGGTGATCCCGTTGCAAGTAGGGGATGTCCAGAGGGACCG  
CTTGAAAGCGTCGCTGTCGCATCATCTGAAACGGGTGGGTGTTATGAAAGGGGAGGTTAT  
GCAAATTGAAGCTAACCAAAAAGTCAACTCAAATCACTACGGGACCAGATTCGTTTCAGTCC  
AGATAGTTTGTGTGGGGATTGCAATTGGCATGGCCGTGTTGCTGATGCTGTCTTCGCTC  
ATTGCCACTAACACGGCCTTAATCGCGGTACGCTCCATCGAAGTAGTAATAGCCTTCTTC  
GAGTGCTGGAGAGCAAGCGCAAGCGCTTTGGCCGAGGCGACGTTCGCAGAATTAGCAGGCT  
ACATGCTAGGCGCGCGGGCCTAGATCCCGACGCACGCCACACCACAAACCCGGATGATCC  
ATCCGACATTCAGACCGAAGACGAGAATCGCTTGGGGCGGAACGCCTAGGCCCTTAAGG  
CAGGCGCCAATGCGAGCAAGAAGAATAAATAAGGCGCAGTTCCTGATGCGAATGTTTCAG  
CAAGAACAGGGACACCTAAATTCCTGGAGCCTTTGTTTGGAACGTCGGCGCGGCTGGGCA  
GTACACTCGCGTGCTGGGGACGGAAAGGCCGTTCAAGGTGTCTCGTCAGACCGTCAATGA  
CTGGCGTGCGATGATCATCGACAACGGCGGCAACAGGGCCAAGACGGTCCGCGAGCTGCG  
CGAGATGCGCGTGCTTCTCAAGCCCGATCCGTTGTATGCTGATCAAGACTTCGACAACCC  
GCGCGTGTCGAAGTCGACTCTGGTTGTACCGAACAGCATGCCCCGTACCATCACCGAGA  
TGCGGTGGCGTTCCCTGCAAGCTGTTGCTGAGGCGGAACAGCGGAACTGTCCCTCAACCT  
CGCCAAAGATCCGTACCACCATGCGATGTGCTTCCACGATAGTGCCGGAAATCCGCACAG  
CACAGGCGTTGAACTGGAGAAGGGCAGGAGGTGGTTGCATGAGCGGGCGAAGCTGTTCCC  
GGCCCCCTGGTTTTCGATTCCAGCCACGGTTATATCGCGTTCGGGAAGACCCAGGACCA  
CTGCTTTCGCGTGCCGTTGAGTCGAGGTTACCGGGAAGTTGAGTTCCTAAACGACGGCGG  
CGACCTCTGACATTGGGCCCAGAGATGGCGAGACAAGACCCCGCGGACGGACGTGAGGTT  
CAAGCATCAGCCGAGCGGCGGAATTGTGGTAGACGTGGCGCAAAGTCCTGCAGTTTGGG  
TGTGGGCTTCCACCACGGCAACTTTTCGGTAGTATACACGGCAAGAAGCAGGCGCCTCTA  
CTACCAGATGCACAGCGGATGCATGAGCTATTAGGACGCTTATGCTTTCGCCTACGGCTA  
GCACCCGCTGCGCAAACCTGTTATTGAGTGCATCCTAATCCCTCATGGTCGACCAACGCT  
GGTTCGGATGGTTCTTAACAAGAAGGCCCGCTGGTACGGTAGCTTGTAGTACGAGCATT  
CTGATATGGCCACTGACTACACTTTCGTAATCTGCATCGGCCCGTGTAAACGGACACACCG  
GCTGTGCCAAGCGAAAAACAGTCGCCGTACGTCAGCGAGGTGCCGGGTGAAATTTGAGG  
GTGGGACAGAACGCTGGTCGGTGCTTATCAGTCGCATGTCGACCGCGCTGGCCCTTGGCG  
TGGCCGTGCTTACCTTCGGCGCCATGAAATACGCGGCGCCAGTTGGAAGCAGGTGGGGA  
CCAAC TAGGAACGCTAGCCCGAAGCCTTGTATGGCCACTTCAGCGCAATCGTATCCGTTG  
ACGCACTTGACCAGAAGAGCAGCCTGCCGCACTGGCATCACGGGGCCTACAACGCTCTAT  
AGGTGTCCCGACGGGAGAGCGTCCAATGAGCGATCCGCCCTCGTGACTGAATTGGTGGA  
CGAGAGCCTGAGCGAAAATCTACAAGCAGCCATCGACACCGGCAACCAGGCGTAGGCACG  
GGTGATACTAGGTGGCCCAATTGACAGCATGATCAGCATGCTTGACCACGAAGAAGTGGAG  
TCAGGACTTTGAAACCGCATCAGGCGGTCTCGGGCACGAATAACATGGGAATGCCTTACC  
GTAAAATTCTCCTCCATAAGCGGAAAGAAACGTGTAACCTTGAGCGCTAAGGCCCTGGCC  
CGCTGCCGGAATTTGACTCCGGCAAGTAGGTGTTCCGGTTCGAACTTCGACGCTTGCTCGC  
TGATCATCATGGTCGGCCTAAACGTAGACCGCATCCTCTCCGGTTAGGCCACGGATCGCC  
TGAGTATGCCGCACACGCCCTAACACTTCAGAGCAGATCGGCGCGAAACAGGGTTTACT  
TCGGCGAGAAGTATGACCCGAATAATATGTTTAAGGATATTTTCGGCATGTTCCGCGCGC  
AGTAACACCTGTACGAGCTTGAAGCGTGGCGGTTTCGATGCAGTGAGGCGGCAAGAGTACC  
GCACCGGCGATACCAAGCGCCCGTATGAACTGCCGATGAAAGACTTGTGGCATGTGGCGA  
ACCTCGACTACGGCGTTATTCCGATGATCAAACGTCGCCGCGTAGCTGAAGTGTTCGCAG  
ATATCGACAGCGTCGTACACTATGGCTACAAGCCGGTGCTCGACGGCTTTTTGGCGAAGC  
ATGCGGACGGACAGTGAACCTGCCGGTGTTAACCACGAAGGCCGCACCATCCGGCTGAAAG  
ATCACGTCAGCGTTGTCCTTCCATTCGCCGGCATCTTTGAAAGCGTCGGTAACTTACAGG  
GCATCGTGGGCGCGATTGAAATACTGGGGCGCGGCAAGCACGGAGTGGTCAGCGGTGGAG  
GACTGATGAACGCCGAGCGATTAGAGCTTTTCAACGAGCTGCGCAAGGTGATCGCCACGA  
AGGCGGAAGTACATGCGTTCGGCATTACGCTTGACGGCAAACCTGCGGGCATGGCGCTACC  
AGCGCATCCAAGATGACAAAACCGAATCCAGCGGGTAATGAAGCAGGGCGAAATAGCACG  
GGAGATGGTAGACGGTGGGCGTCGTGCTGCGATGGCGAGGTTTCAAACCTCCGATGCGGC

GAATGAGACAGCGAATAATCAGCATCGTTCCGCGATATTCCGACACTTCATCAACCCTCT  
GTCAGAAGGTCAGGAAGGTTAACTGCACCCGGCAGTTCGTGGTGTGGCAGCAAAGTCGAA  
AGTGCGGTCACATGGTCAGGATACGCTGGCGTTGGCGTGCCTCACGGTCCGTGTTGTGAT  
CAAGCCAAGCCTCTCCGAAGGGGAGGCCGTATTTACTGGTGTGGCTATGGATATTGGCCA  
TTCGGGTTACAGCCAGGTTGCACTCAGGGAATATGAAGACCCGAAGCCTGATCTGTATTT  
CGCGTTGGTGCAGAACCTTTAGCGCCGCATGACCAGCAGCAAGCGACGCAGGTTGAACGT  
GGAGCGATCCAGTGCCGAGAAGGACGGGACGCGGCTACCGATTTGGGAGTCGGCGTTGAG  
AATGGACGTGGTCGCCTTGTGGCTGGGCGCGTCTCTGGACATCGCTATGCCCGAGACATT  
CGATTTATGGTTGAAAGGGAAGGGGACCAAACACCTCCGGCTGCACCCTGACCTTCTGGC  
GCTGGTTCGAGCAGATCAAGGGATTCTGTCTGCGGCGTCCCGTTTCGACCTCCGATGCGT  
GGGGCAGCAGAACTATGAGTTACACCGTCCGATGGCGGCTGGCAAAGGATGGCGATGGC  
TCGAACTGTGTCGTGCCTGATGGGAGGGTAAGCAACCCCGACCGCCGAGGAGGTTGGGCC  
GCGATTCCATAAAGCGCTGAGGAAGGTGCAGAACTTGGTGTGCGAAGTTAGTGAGCGGAG  
TCTGGAGATTACGAAGATCGCTAGGGAACATTTTCGACGTACAGGGTGTGTTGGTTAGCGA  
TCGGCGCGGCGACATGCCGGACAAGCCTCTGTATATACAGTCTGCTCCTGTCTGTTGGCGCT  
CGTTGACATGAACGCGTTTGTAGCTTGCACAATGCACCCAGTGGCAACTGGAGGCACGAGA  
AAGTCACCCGCAACTGAAGGTTAGCGTAGCGCATCCAAGCAGACCCAACGAAGCTGTCCG  
CGTGGTGAACAAGTCCAAAGGGATGGCGCTCGGTTTTGTCTTTTCTGTGCGCTATCGGAG  
CCGATTCTATGCCTCTGCCAGGGGCTCTCCCCACAAGGGAACCTACCTATCAATAGCGCT  
AATCCATTTTGCAGGCTCTGCACCTCTCAGAACTTCTGCTTGCCTACTCTAGTTCGGGG  
AGCCAGGGCCATCAATTGGGCGGCTAATAATCACGATAAAGGAGCCGGTCCGAATACCGGGC  
GCAATAGATGTTAGGCAATGCTGATTTTATATGCCGCATCGCTGATCGCCCGGCCAGCCA  
TCGAGAATGGACAGGCGCTGCTGTAACCTTCCAGTTCGGTGGGTTGTGCTTTGAGTACGA  
GTCTTCGTTACGGAATACTAGTTCGTTTTCGCACTCGGATCCACCTGGATAAGACGACTA  
TTGCAATGTTCTTCAACACTTCTCAGCGATGCTACGAGATGGGGTGAGGAGGCGAGCAAC  
GAACCTCATTCCCGACAGATTGCAGCACGACAATTACGGACTCGTTGCCACTGCAACCGC  
AGGAATCGTTCCGTCTGACATTGCCGAACGCGATATTGCCAGACGCTGGAAGTCCACGA  
ACTTTCACGGTCCCGTTCAAATGTAGTGTGATGATCCTGCACTACGGCTCGACACGTCC  
CTACTGCAGGGACTTCCCTCATGTAGGAGTGCATCGACATGGGCAGCAAGCCAGAGTTCGA  
CAACCGCGAGAATGAGCCCGCTGCGCCGTGGCTCTCGTACCGGGTGTGTGATGGCATCGG  
CAAGGTGGTTCGTAAGGGACGGCAGGCGATGGACTGGCCGCAGGCAGCATCGGCCGTAC  
GCGCGCCGCGAACGCCCACTCATCGAAGCGAGGACCCCTGCTGGGTTCCCTTGCGCATCA  
GCGCTACCATCATCAGTATATAGTCAGGGTGAGCGGTCGCAGCCTATCAGGCAAACGTAT  
CCGCATCAACGTCCAGACATTCAGGGATGAGGGCGATCCGCGGCGATAACAGGAAAGGGTT  
CGTGCCTACCTTCATGCAGCGCTGCGACGCGGCGCACCTCACGTTCTTACGAAGGACTG  
GGAGCACGAGGATGGTGGCGAGCACGCATTAGTCCACGACGACTATAACGCCTTGCCAGA  
TCAGGTGCCAAACTGCACAGAATCGTGCCTAGGTAGTTGGCGGACATCCACCTGTACCA  
TGACGCTCTTAAAGCACTGGCGGCGCAGGTGGCAGGGTTGCCGGGTCTTCCAGACGCCGG  
TGACTTGAACCTTGGTGGACGTATCCCGATCGGTTTACTTCTTCTGCTATTTGCGCCACTA  
TAGCGACGGGAACTTTTATACTGCAGAAAGCAGTGCAACCATTACCCGATTGATTATG  
GGCAGCGAACTCGCGGTTCTCCAGAACACGATTTGCCAGCCAGAACAAAGTAATAGAGTCC  
ACCACATAAGAACTGGCGGCCTCTCTATCACGCCCTCCGGATGTTCAAACCTGCGATCC  
AGTCAGGCATTCAATTAGCTTAACTCAAACAATCTGGAACGAGTATTCTTAATTCGTCCC  
AGCAGTCCGAATATTCTGCTTTCTGTGTGGGTAGTCACAGAGCATGCTCTGTTATGGAA  
AAGGAGCTGGTAAATGGTAAAGACCACACATTGGCTTAAAGGGGGGGCAGTACGGTGATGT  
CAGTGATGTTACAGTGATCTTTACGACAGCATGTAAGCCCCGGTTAACTTACGCCGAGT  
TAGCTATGTTGAAGCCAGGAAGAGCCAATCAGCACAGCCGAGGCAAGTAGTAAATTGAT  
TGACTTCAAATGATCATGGAGCTTGCCGAGACGTTCTGTGGCGTTCTTCTACGTTGCTGA  
GCCGTGGTTTCGTAGCGGACAAGTACCTGAGCGAATTACTGGTTGGCCCGCCACCGGGCAG  
GACGGGTGACGACACAGACTTCATTGCGGCTGGCGAAGCTGTTGGCCGCAAAGAGAAGT  
CTGGTATGTCGAGTTCGGAACGCGAGCCAATCCCCGGCAACAAGAAGTGGCCCGACCCTT  
TCGTCATATCGGTGTCCGGTTGTGGGCAATCACACTACAGAAGTTTAAATTGGTATTCGTT  
CTGGTAAAGCGCTACGCGAGGCCGGCAAGATCATCAAGAAGGATGACCCGCTGCGCTTCG  
GTGACGCCATGCGGGAGTCGGGGGGATTGCCCGCGCTGACCCGCGAATGCGGAAAGAACA  
TTATGGACATTAGCCAGACTGCCGCCAATCACGCCGCGAATCAACGAGACGAGCAGGCAA  
GACAACAGGCCGACGCGCCACGTCTCTGAGCCGAGCAACAAGCGGCAGCTGTTGGCCAGT  
AAACCGCAGCTGCTAAACATTCTGCCAGTCAGCAGATGCAACTCCAGGCCCGGCAGCTCC



ACGATTAGCCACGCAGGGCGCTCGTAACGCCGCGCTGCCATCGAGCCGCGCTTCAGGGCG  
AGCCCATCGGCAGAGTAGGGCGCAGCCAAGGGAAGCACGCCGAGTGTACCTACTGCCGCG  
GGGACCGCCAGCGCATCGACCCGGCGTAAGTACACCGCCAACGCCGCTGGCTCTTCCTAG  
ACCCCGAGCACCCGCAGGTCATTCTTAGTTTTTCGCTCAGCCGAATCCGTCTCGCAGCACC  
TACACACCAAGCGTAGAGGCTTACTGGACAGGGCTGAGGGCCTCGAAGAAATTAGCAATC  
TGAGCGTTTGCCCGGAGGAGCAGAACCGCGATGGGGCGCGACGCGCTCACTACCCGCGGGA  
CGTAACTGGGCGCGCAATTTGTCACTGCTCTGCCCAGCACACTTATGCTGGCGATGGGCC  
CGACACCCACCCATTCTTCCGGCTGGCGATGTCCTCTTCGGATGCGCCAACATTCGTGG  
CCGAGAACGACCTGCCGATGGAATTGATGACGGAAGTGCTCTCGGAGGCCGAGCGTGATG  
CTTTGCTGCAACTCGAAATGATCGGTGGCCGCGAAGATTTTTATGCGGCCACGACGTA  
CTCAGATTGTCGGTAACGTGGTTACGGTCAGTCGCATTAAGGACAAGCTGGCGTGCATCC  
AGTTCATGGGGCTCGTAGTACGTCGGGCGCGCAATCCTGACGTGTTGACCGTGATAATCA  
AGCAAGAGCTGGCGCACAGCGAGGTGATCGAAACCGTACTCGATCACATCGACCCATGGC  
GCGAAGGAGATACTGATCAGACTCGCCATCATAATACGCGAGGCCGGCGCGCAAAGGGCG  
AGCAACCCATCACAATGCACGTTGACCAGATCGAACTGCCGTAGAGAAGGTTCCGTTCCG  
CCTACGCTCGGGATTTCTGCCCGCTGCACCTGCTGACTTGACGTCTCCCGCTGTGCCAAC  
ATTACGGTGCGGGCCGAGTCGAGGTCTAGTTCAGGGCATCGGTACGCATGACGTGGTCA  
TCGAGGCCCTGAGCGATGGCTCGATCATGGCTCCGCAATTCGGGCGGCTCCAGAACCCAA  
CCGGGATCACCCGGCACGAGGACTTTCAGAACAGCAAACCGGCGACGTTATGACCGGCG  
CAGCGAACGACCTTCAACTGATCTTCGCCAACGTGGGACAGCAACGGAACACCGTGTGGG  
CAATCAGCAACAGATTCCAGCAGCGACGCGGCCAGGGCTTCCAGCTGAACTTCGTCTGTA  
CGCGGCAAGCTGAGCGTGAGACCCCCCAAGAAATGAGGGTGAAAGCGACGTACGTGGTAT  
CGACGCTGCGGGGGGTTTTCTCCCGAGCTGTCCGCGACCTCCATACCCCTTTAGCTAATT  
GGCTGATGAAGAAAGCCAGCTCGAACATCATGGGCACGAAACTGCTCCTGGTGGTGATCA  
CGGGCCTGGACCGATTTGGCCGTAAAGCCGCTCTGGTACGCGTGACGATCTTCCTTGCGA  
ACGTGACTCAATCGGAGCAAATCCAGCCGACACTCGCATGAAGCTGGAAGAATCCAACA  
TCATCACCGACGTCGCGCCACGGCTTGACGTCACCAACAAACGCTACGTTGCATCGGACG  
ATGAAATCCAGCAACGCATGCAACAACGCAAGCGCAACGCGCACAAAGGCGTGATGGGC  
CCGCTGTCGTTACCACTGCACAGGCATCCGCACAATTACCTTCAATCTGTTTGGCCGTAA  
CTACATAGAAGAAGCGTGCTCAGAAGGCGCACCCGGCTCGTTGCGCAGTAGCCGCCCCGGC  
AGCGGCCCCGGCGAGAACAATCACTCAAGACACATCACAGACTGCTGGCTCCGCGACCGA  
GCCATCCGCCGCATCAATTGCCTACGAGTCCACAGGCCACAGCAACGCTGCCAAGGCTTT  
GGGCCGTATCGTCGCTGCGGGTATCCGCCCGGATCACCCCTCCCGCCCTGGTCGCGCCGGA  
CCGCAGCTTCACCCTGCCGAAACGCGCCCTGGCGGCCAAGAGAATGCCGGGCAGCGATCA  
TACGGTGGATATCCTGACCGCAGCGGGAACCTAGGCCGCCGACGCCAGGAAGCCATCAA  
CCATCAAGTGACCGGCGACGTTTCATGCGCTGGCGGGTTTCACAGGGAGGTAGACCGCCGT  
GAAGGAGTGGGGCCCCGCCAACGCTGACGATGTTCGGGTAGGAAGCTCTTAACGATCTATT  
CGGTCGTCGGAAGACCCACAAGTTCGCGGCGACCGACCTTGTGTCCATGCGCAACCGCGC  
AGTGGGTGTGCACGAACCCGCTGCTGGCGTGGTCAACCTGGATCACCTTCGGCCCGGGC  
CGGTGCCCGTGTTTTLAGAAACCCAGCTGATCCGCTTACAGTTCTCCGACGAGGCGAAAGC  
ACGGCGCGAGAACTGGGCAATGCCTAAGTGACCTCGGCTGAGTACCAAGAACAAGGCCG  
TAGCCTCGTGCGTTTATGCTAAGCGGCCCGAAGCTATGTGGTCCACTAAAGCAACAGGGA  
AACCAAGTAACTATTTATAAGGATGACTCTATGTCTCTGGATAGCTTTATCGTAGTTCG  
ACCCAACCCTAAAATGGGAGGCACGGACCTGCTTGACCCCAAACCTCGAAGAATTCGGTGC  
TATGGCCGCAGGCACTCCGCAGCGTCGTTACGTCACCGACGGCATGATCGCTGTCTGGCA  
GATCAAGGGCAGTGCGACCGTCTCCAACAATGCCATCGGTGCAACCCAACTGCACGCAAT  
GCAGCCGGGCAAGACACCGAATGGTACAGCCGCGCAGTATTCTAAAAACACCGGGACGGT  
TGCCCGCACCCCTTCAGGCCCGCGCCATCCTGCCTTTGCGGGATGTGTGCCAAACCCAGTA  
CGATAACCGTGAGGATATCGCGTTCGACCACGGCAAGCGCAGTGCCAAGTCCAAAGCCCA  
AGGGTTCTGATCCAAGTTATCATGACGGCTCGTCTAACCGTGAACCCATAACGGCCGGCT  
GCCGGGCTACGCTTCTGGCGCCTGCGTACCTCTGGGCGATGCCGGTGTGGTGGCGACAC  
AGCGAACCTATCCTACGGCTTCGGACTGCTGTTTCGCGCAGATGACGGAGAAGCACGTTCA  
CCCAATCGTCAATGACATGTGGGTAATCGTTCCCGAACTGCTTTCTACGCATTGCGGTG  
AGAGGAACCGGTCATCATCGATGTGTACGTGCCTTCCGATGGCTCCAACCTCAAGGCTCA  
CACCTGGACCGCATGCGCCGTTTCGAGCCGTAAGTACTGACTCGGCACCTGCGGAACTGGTTTGA  
AGGAGCAACCGAGTTGCCTCACCGCGTCGCTGCACACGTGGGCGATGACTACGCTGGCGT  
CTTGACCTACGTCGTTGCGCTAGTGCTCTCGACCCTCGCCATCGTGGCCCGATCTAGCAT

CGGGCTTGAATCGAAGGTCTTCTTCGACGACGTGTCCAGGCACTAGTACTTGGATAGGTG  
GTAGGCATTGACTCGGCTCCAAACCTTGCCGAATTCCATGGCATCATCGGTTCTCCGTA  
TCGCCACTCTGGCCCGCAACGGGTTCCTTTACCGAGTGCCTGTTGTGGGCGATTTTCGT  
TGGTACGCGCGACTGACTTTTATTGCTGAGCTTGAAGTGGTAAATCGTTGCCTTGCCACG  
ATGGTTTAGCTGCCGATCAACTCGCTTGAGAGCAGCTGCAACCCAATTGTGACTAAGGCA  
CGGTCAGCGTTCAAAGACATTACGATCGAAGAACAGGGCCGTAGGTTGGTGGTTCATCATC  
GAATTCGTCAAATTGCTACCACAAAGAGCAACGCCCGGGGATGACGGCTGCCACCCACCA  
CGTACCAACTGGCTCTCGATCTCGACGCTGGATGATTACGAACCAGCAAGGGTTTCGCATC  
CGTGACCGAAAACCTGCACAACAACGGGCGATCGGAAGTACGCAACGGTCACGATCTGATG  
GAAGTCGTTAGCGTCCCACCTGGTCCGCTTGTC AACCTGCCGTACCACGCGAAATGGTTA  
ATCCGTGACAACCTGGTGTTC AAGTTCCAGGTGGACTACAAGGGAGAAGAGCTAAAGATA  
CAAGAGGCCTACAATTGCTCCACGGACGCCTATGT CATCTGGATGCCTGACCCCGTCCGG  
TCAGTCAAGGCCAACTGCTTCATAAAGGCACGTCTGGTTCAGCGTTTGTGCGCTCTCAC  
ATTCATATCGTACTGACCGGCCGTTGGAGGTGATATGAGCAAAGACACAGGCTCTTACGT  
TTCGGTGATCAAGGGCGAATCCGACCAGGTAGCCACCATCGAAATCCCGGACAGA ACTG  
GAAGCAAGTCAACATGTTTTCTGACCAAGTGC GCGGCCTTGCCCGTCGCCGGGGCTCTGT  
GATGATGTGGGAACATCGACTATGGGAAATCGCGTGCGACACTCCTTCCCGCGAAGACGG  
CAGGTCCTTTCGGCCAAGAGCCCCTGTATCTCCGCTTAACGAATTCAGCATCATCCACCG  
CAAGTGCGCAGTAGCAGGCTCGACCATGCCGATTCTGGTTGTGCTGACTAAGATAAGCGG  
CACCTTACTGCCAGTTGCCGCCGATGGCAATCTGT CGGGTTATCGGCCAGACGCATTCAA  
CAGCATCATCCCAGTCGTC AATCTGGTACTTTCGCGCGCCCAATGGCGTAGCATCACGGTA  
CTCCGCAGTCGATCAATTCACCAGGGCGCACAGCCGCTAACACGGTGGCCGCTATGGTGAA  
GGGCGGTTTCGTATGCCCCAGCTACCTGCTGTTTGT TAAAGCGAGTCAGCGCTCAGGACGT  
TAACACGGCGCAGTACACCACGTCGACCACGTAGTATCCGGGCATGCTTGACACCGAGGA  
CATCCCCGCAGTCATCGCCGACCCGGCGACGCTCAGCGAGACCAAGTCGGACCCGA ACTA  
CCAGAGGCTGGTGAACGCCACTGTTTACGATTACCAGAAATACGATAACTAGTAGGTCGG  
TACCACGGCCGCGGTGGTTCAGCCAGCGGCCATTGCAGCTAAGTGGCAAGCTTTGATCAG  
CCCGAGCTTCCCCGCTAGTTCCGGCCTAATCGGTTCCACCGTTCTCATCGACGGTAGGGC  
GAGCCTTAGCTGCGTTGGCGGCGGGACCAGCGTCCACATCGTCTGCGTGGCTCGTACATT  
GGAAGCGGCGGCGGATTTGACCACGGTTCACCGGACAGGCTGGGTCGTTATCATCAAGCC  
AACAAACGCGAGGTTCGA ACTACGTCAAGGCCATAGCCAAGGACGGCACCCACGATGCAAG  
GACGCAGGTGATCTGGGAGGAATAGCCCGGCGT TGTGATCTCGCCGACAGCAGTCACCAG  
AATCGGTGTGGTACACAACGGAACGTTCTACGTTGCCCTGTTACCAGCGGCACTCGCTGC  
GCCAGCCGGTATCAACGTGCCGCCATGGGAGCCGTCCTTGGCCGGCCGCCCTCGAAAGTCA  
ATCGCTGCAACCGTTCCTAGGCTGGGACACCAA ACTCATCCGCATGTTCAAAGACCGTCT  
GATCATCGTCGCCGCGGCTATCGTGTT CATGAGTAGCTCTGGTGAGTATTTCAACTGCTT  
CAGCTCGTCGGCCAGGAACATTGAGCAGAACGACCCGATTTAAGTTTACCCAATGGGACG  
CGAAGACGATGTGATCAGGCCAGGCACTTTGCTTGACCGACACCTGATCTTGTTCCAGAA  
GCAGTGGCAATCCGCAGTGCCGGGACGGGACGCGATCAGCCCACTTAACGCGGTTCGTTGC  
TGTACAGTCGGGCTATCGCGACAGCAACACCTGCCACTGGAGTCCAGCGACCAACTGAT  
CTACTTCGACCAGAAGCGCGAGGGCACGCTGT CGATTTCGACAAATGCAGGCCGGCGCTTA  
CGCTGCGAGTCTGGATACGTTTTAGTACACACAGTCCTTCAACTAAAACTGATTGACGA  
CCCCGTGCAGATTGTGGTGGTAACGTCACCACCCGCGCTGTTGATTTCGCACGACAGCCTA  
CGCCAGCCGCCTTGGGGTAAACAGCTACCCCGAATCACAGAACAAACGCGGAACGGTTATT  
CAATCGCTGAAGCAGGGGGACGTTAAGCAAGACTCTGGTTCGGTATGATGAGCATGACGCC  
GAAACAATGAGACCTGGACTTGAAAACGCTTCGT CATCACGTCAAAGGGTCGTGGTACGT  
TACGGATCGTATCACGATGAACACGGATGTTCTTCACTGTCAGCGCGACAGCCAGCGCCG  
TTACAGTGCTGCCGGATCCACGACCATCGGCAACGCCGACTATCCCGAGGTACTGAGCGC  
CGCCTACAACATAACCGCATCGCGCTATTGATTGCTCGGGGATACCTTCGTGAGCGATT  
GGAAGCGGTGCGGGAACAGATCGGGCCAACCTACGATCCATACTGCTGATCGGTGCGGG  
GTTTCGAGAGTTTCATGGTGCTGACCAACCGATAACAGCCGCGCAATGAACGGCCAGGCAAT  
TCTTGACGCGCGACTGAAAGTGGGCCAAATCGACATGACCGTATTCGAATCGTCAGCGAT  
GGACGTGATCAACTGGGACTTGGTTAACGCTGACAGCAAAACCTATGCGGAACAGCTGCG  
ACGGGTTGCGCGTACTTCTATCGATTGGGTACTGCACGTAGACCAAGTGGCCGAACCTGC  
GTCGGGCGTGGTAGGCGTTTACAAAGTAGTGC GAGACTGCAGGCTTATGCTGGCGGAACC  
TTTTTTGTTTCCCCTGACACTCTACGCGGTCTAATTGCACGGGCAGCTCTATACATGTGC  
GAGGCAGTAAATATTCTGGATTCCCATCATGATGGCCACTTTGGCGGTCTTGCAGTAAGA

TAAGCGAACTGACACATCAAGAACCATAACCGCATTAAACAAGGCGAACACCTTCGCAGC  
AGCCGAGGAGCAAGAAGGCAAGAGAATTCTGCCGTCTCAGAAGTATGCGCTTAACCGCAT  
GAACCAACCCATCCAAACGCCAGACGCTCGGACCGCCTTCTGGCAGCAGTACGCCTCGGT  
CGAAGCACAGCGCGCCCCATTTGGCAGGCTGATGACCACGGGCAGCTTTGCTAGCCGTGG  
GAACGCCGCGGAGCTGCAGGGCATAACGGGGGGCGCGGTTCGAGTACGGCAGGCGATAGCGG  
TTCTACGACTTTGATGCTGGAGGCAACAATGGTCTTGCAGGGCCGATATCCCGCAGCAGGA  
GATGCACCAGAAGGATTCCATTAAGCATTGGGCAATCGGCGACGTAGAAAATAACAACCC  
GTACGACCAGTATGGGATTTTACAACAACAGAAGTTGTTACTTGGCGACGTGGGACTGAA  
AGAAATTCAAGGCCCGCCGAAGATTCCAACGAACCTCCGTTGGTGACGTGCGGATTGCCTT  
TGCGATGGCATTTCATGCAGGCAGATAACAGTATGCGCACGTTTAGCAAGGGCGGCGCGAT  
GGATGCGCATAGCGTGGGCAGTAAGCACAAGTCTGGGTAAAGTCCACAAGGTGGCGGCTG  
TTTGCAGGGGACCGACGCTAGTTCGTTCTTCCCACTCCGAGGCAGGACGATATGGTAACA  
CAATTGGGCCAAGTCATTAGCGGAGGGCAACAACGGTATCAAGCCGGGTGGCGCCCCCA  
CCGCAGAAGGGTACCACCAGCGAGCTTCTGTCTAGGATGGCCCAACCTATCGTGCAGAAA  
TAACTGGAAGGATTGTAGCAGTTCGAAGATCGTGGAGGGCATGCAACGAGTCGCCACACGC  
GAGGCTTCTCAGGAGATCAAGAAGGAAGACTCGGCCCTGGCGCACATGTTCCGAACTCC  
GCGTCCGTAGCTGGCGCAGCCGAATCACTAAGCTCGAGGGTGTTCATGACTTCAACTCT  
CAAATGTATGAGGACAGGCAGCGTACGGCGAGCCTGTTCGACAGACGAGTTCGGGAAGCAC  
GCTGTGCAGGAAAGGCACCCCGACGTTACGGGCAATCCCGATGTGAATAACGTGGTGCAG  
GCCAAGATCGTAGAAGGCCCGGCCCGCAGATGAAGATACTAGACGAGGCAACCCACGCT  
TCGAAGCGTCAGCAAACCAAGAACAGCAGCAACGGTATGCTTGAAACTGCCGGTGACAAG  
CTCCATGGCACTGCGCTGCAGTTCGCATAGGGCTCTGTGAGCAAGGACGACTTCTACGTG  
GCCGAGGGCAGAGTGCTGCTATCCAGCTACCCTAACGCCGCCATGTCTGCCGCGAGGTCC  
AAGAAAGCGATGGTGGACAGTGCCGCGCTGGCTATGACCAGGGACAAGGCGTGCGTTGAC  
CGTGTCTTCCAGCGGACCGTGATGAACACCGGGCTTGTTCGTTGATACCCAGACCAAAATG  
ATATAGGTGCGGATTTCAGCAGCCACTAAGATCTATAACGAGTACGGTTTCAACAAGTAC  
AGCGCAGCTATCGGCGTGCTGATGCGCGGTTCCGGCTGGGCGTAGACCGGCAAAGAACCAC  
GAAATGGCTAACCAGATCAACCCGCGCTACTTCGACGGGACAGGAAGTGACACGGGCTTG  
CTCAATATGAAAAACGTGATCGGCATGGCTCGCAGCACGGGCTACCGCATGTTCAAGATG  
CAGGACAAGGTGGATGACTCGGTAAGCAAAGCGTACATGCCCGCACGGACCGGAGGTA  
CTGGCGCAGCGGACGACAGAGTTGGTTCAATCCGGCAAGGCCGACTACGCTCAGGGCATG  
GGCATTACGCGCCACAAGACGGACGTAGAGTTCTATGAGGGCTTCACATCAAAGGTGGCA  
ACTGGTAAACTGGAAGAAGCGATGGATCTGGCAATCGAGAATAACCCACGGTAAGACA  
TACGCTATACCGCTATTGCAAGGCACGCTTCTGGAGCCATTCAGCCAGATGATTGGCGGG  
GGCGTCCGGGGCCGGAGGTCTACCGCACCTTGCAGTTCCTTGACGCATGGCCCCGGCGC  
GAGGAATCCAATGGTTCGAGTGATGAGTACCTCGGTAGCTAGAACGTGGGGTAGCTGCAG  
CACTACCGGGATTCGCTGGTACGTTACTAGGCCACAAGCTACTAGCAGCCAAGGCAGCT  
TGGGTCACGCCCGTATTGTGTTGGCCTAAGCTCCGCTCGGTGGACAAGAAGCCGGTGATG  
CTGGAGGCGATACACAATCAGATCGAAGGCACGGGCGTAATGAATAAGCTGGAGCGCTAC  
TGGATGAACATGCCGGGCATGTCTCCTGCTGCGAAAGGCGTTGTGTTTCAGCGTCATCTCT  
GGTGGGGCGCACGTCAATGTATATAACCTCGGCATGGCTCCGCAGGGAGCATTACACAGC  
GCACTGGAAGGCTCTGGCAGTGCAACCGTTGACACTGTTGGCGCATGAGAGATCCCCAAC  
GAACCGAGCCAGCAGCACCTGGCTGCACTCAATGTAGGCGACGCCAGACTATTGAGCGA  
GTGTTTCAGAAGTAATTGGACTCCGAGCCTCGTAAGTACGGTGTGGCCGTCAAATTGGAC  
GTTGCCGACATCAGCGTGACCAGCAAGAAGGGTGGAAACAACACCATGGACTAAAGTGACG  
GACCCGACCAACTCGTACGGCGTTGCACACGCTGACGTGTCCCTGATACGCGTCCAGGAC  
GTGACCGACAAAAATGGCAAGGTTTACGGAGTCTACTAAGGCCTGCTCCTCCGGGACGTC  
AAGACAGCAACAGTGAATGTCACGACCAAATCCCTAACTGAGTACAACGAGAAGACACTC  
AGGAACCGCAACGCCATGACTCACAGCTTCCGCGAAGATGGGCTTTAATAGGAGGCATCA  
TGGCTGACAGTCTCGATTCAATCGAAACCTGGAAAGTAACAGTTGTCCCTGCGTCATCCT  
CTTGTTTCAGGCTCGCTTGGCGACACCGACCGCACACATGACTTCGGGCAGGAGAGTACAC  
GCTCGCCGTCTGACGCCAAGCCAATCGCCAACGGCCAGAAGCCCGCCAGCTCAATGCCT  
TTGAGATGATGTCTGCTTTCCAACAGGCAGAACACGGGGCCGACGCCAATGATGCCG  
CTATTTACGGGAGCAAGGCGCGGAAGCCGGAGCCGAGGTCTATCAATCGGTTAGCAAAG  
TCCCCTTTAAGAATTCAAGCACCAAGAAAGTCGTGCCAAGCACGGCGCTGACCGGTGTAG  
AATACCCAGCACGGGACGCTTACGTACCAGGAATGCTGGACGAAATCAGTTAGACGCAAG  
CCTGCAAGGAATGCTTAGGCCCGGTTCGATCCAATAGGCTCGGCCGTGCTGGAAACGACTG

GCACCCGCGCGGTTCGGACGGATGCTGAGCGACAACCTACCACGGTGTGCGCTCCTTCTAGG  
ACGACCCGAAGTTCGACGGCCGTGAGGGCCGAGAGATTTAGAGCCAAGCCTTGAGCCAAG  
AGGACCTCGATTGGGGGGCTAACGCCCCGAAGCGAAGGCAAACGGCAGAGCAAGCTGGCCA  
GTTTGCAGGTGACACGGGACCACTCCAAGAGTAACGGGGCGCAGGGCGATGGCGTTTGA  
CCGTAATCGGGCTAACTGGTGGCGTCCTTGATCCTGCGGGCTGTGCACTAGGTAGGGGCG  
CCGGTAAGGTTCGCAAAGTTGACCAAGATAGGCATGGGACTGGGCGCCGTCCAGCGCTGCC  
TGATCGGTGTGCTGAGGGTGTGAGGCTAACGTTCTTGTGGCAGCCCGTCTGCAGTGCT  
CTGTGAGCATGTGACGCCGGGTGACTACTCTACTCCGCTGGTTTTCGGAGCCCTGTTCG  
GTGGCGGCGTCAGCAGCATGACCCGGTGCCTGTGCGCTGAGCCCTCTGCACCTTAGGTTCT  
CTGCCTTCTCTGGCTACACCAAGGACCTCACAGAGTCTACATAGACGGTAGCCTGTAA  
TCCACGCAGGGCGTCTGGAGCACGCTGAGTACCGGGTTCCCGAGGCTAGAACGCCCCGAGC  
AGACCGCCGGAGCAGCGCGTGACGTATTCGACGAGCGCTCCAATGCCTACGGGCAGCAGG  
GCACACGGGGTATGCCAGACATCGAATGCCTCCTGCCTGAGGCAAACACAACCAAGCTGT  
AGGCAGACGGCCGAGACGAGTTGACAGGCACGCTGACGACGGATCTGGGAGGGCAGTTCA  
GCGACGTTGTCCGCCGGACGACGGGGGGCGATCAGCGGGGATTACCGCTGCGACTATCC  
CGGACAACGCCAAGCGCCTGATCTACACCTAGAAGATGCTGCCTAAACTCCAGAACCAGC  
TAACCGTTGATCAAGCCAAGCTTGATACCTTGATTGGCAACTGGGTTGCACCCATTGCGG  
CCAGCCCTAAGTTAGCAAATTTAGCATGCCGCAATTAGTGCTTTCTCACAGTGGGCATC  
CGATAATGAGGTGGATTGCAGCGAACTTGTGAGTCCCGTTCGCAAGCCGGTGACCGAC  
GCACTGCCGACGCAATAGAGCATGCGCTCCGCCAACGTGACTACAACAGCTTCAACGCCC  
TGTAACAACGCGGCGTATGGTGCTTGGCGCTATTGGACCGGCTGCTCGTTGGTCAAAGTCA  
TCCTCTTCAGGCAGAAGCACTTCGAGGAGTTCAACAAACTGGTAAGCACTGAAGGGCCAA  
ACAGCACAGCCGGTATCATCGGTGACGCGAATCCGCGCGTTCGTACAGCCGCCGACGCAA  
TGGAGGAGGGTTTTCGACCATCGTTCAACCGACCAGCGGCGCGCCAAGTCACTCGGTTCCG  
AGCTGCTTCCAGATTCCCGCATCGGCTACCCGCCGCGCATGCTGAAAACCCAATTCATCG  
AAGAACACCGGAAGCGCCGTGAGGCGATCCCTGAGGAAATCCGCAGCCAACGGCAGGACG  
CATAGGCGGGCATAACCGCGAGGGGCGAAATTCGCTCAAGAAGTAGCGGGCACGTACATGA  
ACCGCGCACGCGTTGAGGCGGCAGTCGGTCAGGTAACCACGGGGGATATGTCTGACCCGC  
ACGCATCAGGCAACCTGCGAGGCGCTTTGACTCAACACGCCATGAGCGAAGCAGACATCG  
ACCTGTACATGGTCTGGGTTGGATGTGGTGGCGGGAAGCAATCCAAGGTTCGGCTTGCTC  
TTGAGTTGGCCAAGAAAGTCAAGGTGCCTGGTTCCACCGTGTTCACCATGCGTGACGCAA  
TCATCAACGTAACCTCCGTGCTGTTCTGCTGCAACTCCCGCTACGTTAAGGGCGGCGTTC  
CGCTGAGCCGCTGTGGCATCATGCGCAAGGAAGGATTCGGCCAGCTCTGTAAAATACTGG  
TGTGGTCCAGTAAGGGCGCATCGGACAAGCGCTGGCCCAACGGGCAGAACGCCCTTCCACC  
AAGCCATGTCGGAATTTATGGGCAAGCCTTACGGAACCGTGCACCGACTGGCTGACAACT  
TCTGAATCCGGACCGGCGCCAGCCGGCTGGGCGTAGCAGTGATCCCTCAACTCTTCGCGA  
CTGGGCGGATCGCTGCGCACTTGGGCTCATTGAAGGCAACGCACCTTTGTCAAACACCTCG  
CACGCCGTGTGGAGGAGGTACGGAGAGGCAATAGAAGCGATCCCTTGTACTCGCTGGTGC  
AACAGGGCGTCCCCATCGGCGACGAAGACCTCGCTCTTATCCCTTGTGAGTCGTTTCGATC  
ACGTGACGTTGGCAGACCTGGACATTGCTGGTGTCTAGAACGCGCACTCCGTGGCGTAT  
CACAGGCACAGTACACCCCGACGGGGCACCGGTACGTTACAGGCAGTACAGACCCGAGGCG  
TACTGGAGCACATTTTCAACAAGGTCATGCGGTATGCGTACCACAGCACCTAGCACTAGG  
CCCGGCATAGCTTGGGCACCAACGACAACACGATCTCCGCCAGCAAAAAGACCTTCGCA  
CCATCTCCGAGGTCAAAGGCACTGGCGCACTCAAGGCATTCGACATCCGCCAGACTGACC  
ACCCTGCCACAATGCAGGAGGTCCCCAAGGTGACCGAGCGTGCTGCGAGCCCGATCATCC  
AGCCCGACTTCCTCGGAGAGCGACAAGCGTTCGTGCATGACTCGTTCAAGCCATCCTGA  
CTCAGTTCGCTCGTACTCCCTGAACCCGAAGTCAAACCAGTGAACCTCGTACACAGTTTG  
ACCAACGCACCGCGAAGGCTCTCGGTTTTGATGTTGGGCCCGAAGTTGGTGCCACTGCCGC  
TGCACCTTGCCACGTTGATAGCTATATAGGCTCTTATGTCCGCTGACCGCTCTGCCACT  
ACCGAGAGAACAACCTTACGCCCCGATCAGCTGTCCCGCGCCACGCTGAAATATGCTGCTC  
GGGCCGTTTCGCTGGGCGATACGGTGTATGCTTGCATGGGTCCGCTGGGCACACAGCTGC  
CCGGCGTCCGCTGCGGCTCTCAGGATGTACTCGCCAACGTCCCGGCGCTGGGCTACGTGT  
CCAAAACCGCGTAAGCGCTGAAGGATAAAGACGTGTACGGCATTATGCATGCATTGTCCG  
GTGGGAACACCGTGTTCAGCTGACAGCCGGACACCTGTGCACTGGATGCAGAAGGAGT  
GATGTAACCGCTAAGTTCGAACCGTTTTAATTGGGCCTCTATAGCAACTCGAATACCGATT  
TTGGACGCATAATGACAGACTACGTTTCTAACCACGAGTTCGCCGCAATGGTTCAATCA  
TGCAGATGGAAGTCAACTTAGCTGGCAACGACCCCGTCTGGACTCTGGTGGTGATACAT

ATTCCAAACCCGCTGAAGGGAAGCCTCAGTTCTTCACTCCCGAAACTGACACCACTCCAT  
GAATCGTGGAGAAGTACGAGCTGGGTTACGTCGGCTCAAGCACCTTCATCACCGTTGAGC  
CTGTACCAACCGGCAAGATTGTTGGGGTGTACCGCGAGACGGAAGACCGTTACTCGCTGC  
CCAGCTTCGTAGCGTTGCAGAACGTGACCTAGCGTGATCTTGACGCACTCGCCCGGCAGA  
CCGTCTTCATTGTTGAAGAAGCGAATGACGCCTCGCAGTTGGGAATCGACACGGACCGCG  
ACACAACACGATCTGCCCCAGGTGCAACAGACGTGGCGCGTGTCTCTCGCACTGGCAG  
CCACCGCACACCGCAACGCTACGGCGGCTGGGGTACGGCTGACGCTGCTTCTAACGATG  
CCAAGCTGGAGTTCGTCAACCCCAATAAGGCAGCACATGACGCCACATCGGCTGAAAAGC  
GCGCCGCCATCGTGGGGACGCTGGCAGCTGCTGCTCATAAGAAAGCTGACTAGGCTATCG  
CTGCGGCGAACCAGGCAGACGCCACGGCCAACCGGGCCGAAGGCAGCGCCAACGGAATTG  
ATGGCAAGGCAACCGCTGCTGTGGCACCCGCTAACGCGGGTACCGCCAGTGCTCAACGGA  
CTGAGTCCACTGTAAACGCGATTGACGGCAAAGCTACACAGCCTATCCACACCGCGAACT  
CAGCAACCACTACCGCGAACCATCCCAAGGCAACCGCCGATGACTTTGACGAGAAGGCGT  
AGCGAGCATGGGCTACGGCCAAGGGGGCCGCTGCTCACGTCGCAAGCGCTAATACTAAAG  
GTGATCAGAGAATCCAGACCTCCAACCTTATCAAGCTCAAACGCGGGTGGCAAGGTAAACC  
GCTCCGGTGATCAGATCACCAGAGATCCGGTGGTTGAGCCGCGTGTGCAGGCTATTGCCA  
AGGCCGACAGCAAGGCGATGTTTGAATGCGACGTTGCTGGGCAGACTGTGCGTATGGCAT  
GAATGGCGGGTGATGAGATTCTCCAATTTCGCTCAGACTTCTGGTGACGGTTCAAAGTGA  
ATCACTCCATGAACAGCGCATTACAGCAGCGGGAGCGGTTCTGTGAGGGTCAATGGCGGG  
CAGTTTCGCTGGTATCCGTCGATACCTATCACAAACGTCACCCCGCAGCCCGAAGGT  
AAATCAGTCTTCGGGATAACGTGTCCGCGTGCAGTACCATGACAGTCACACCTGCTATCA  
ACGGCAACAACACTACACTCCTACCCAAGGCTGTACAGTATCTACGGCGCAGTGCGGAAGTTG  
CAAACGCGCACATCTGCTTCCAGAACCAGCAAGGCGCAGCTCTTAGTCTGATCTATACCG  
ACTCGGGGTGTACCAGGCCTTACCGGAGAGACGGTGGCCGCGGTGCCTTGGCGCTCTATG  
CAAACAAGACCGCAGGCTTCAACGGTAACATCCGTGCTCGCTCTGCCACTATCTCCAGGC  
GGATCTCTGCCGGTGAATTGCCGTCGTGCGGGTCTGTGTTGTAAGCCAACGGGGCCTCGT  
GGCTTGCGAACGACGAGAACGTGTGCGGTGGGGTTTGTGGCCGCTAACTGTCCAACCTGGG  
TGAACACCGAACTCGTCACACGTGCCGAGTTTGGCGCTGCTGCCAGGCTAAAGTCGCAG  
CATTACCGCTGGCCAAGACGGCTCCTACTCCATGCTGCAAATTGGCGGTATGGTCAACG  
GCGGCCCGGATGAACTCGTCGATGGGGATCAGCTCGTCTGGGCGACCTGTGCCGGAGACG  
TCTCAGATATCGTCGGGTACGGCACTTTGCATTTAAAGGGCCGCTGTGTCCACCGGTATCA  
CGGTTATTTTTAGCCCTATTAGGATGAGGGTTAGCTAATGGAATTTCCGAAGACCTATCG  
GGACGGATTCACTGTGTACGGCGTTCGTGTCACGGGACGCCGCCGATTCCGGAAAGTT  
CATCCCCTCGGAAGTGATCTGGGGCCAACATAACGTGCCATTCGCTATCAGCGCTCTCGA  
CAATGAGCCTCGGGGCAAAGCGTTTTTGGACTATTGCTCGTCGCTTTGTGTGACCCCCAG  
GAAGCGTAAGTCCGACACCGAGCACGGAGCACAGGCCAAAGACGGAGCCGAGCGACAATC  
TATGAAAGCTGAGGGATCCGACCGGACGATTGTGGTACAGATTAACGTGCCACGCCAGA  
ACAACCTGCCCGGCCACCGCGATCGCCCTTAAACTCAGGCAGTAAGACATTGTCAGCAC  
TGGTGCTGCAGACATGGAGAGTCGCAATACCTGGACTGCGGTTCGTGCGGAGCCAAATT  
CTCCGACTCTGTTGTCTAGCTCCGCAACACTCCGGTTGTGCGATGGAAGGTGGGTATCTG  
GAATTTGATTACGCAGGCTTCTACCTTATCGACTCATAAAAGAAGAATCTATAATGGCA  
GCTTCTAGCGCTTGCCTCGGCAATCTGCACCCTTTGTTACCGCTTACTGGGAGCATCGG  
TTTGACGCTGTCGAACTGCGCGTCGTAGATGAAGACTGCGTCCCGCTTACGTCCAACGAC  
CTTGCTGTGACTGGGCGTTCTTTAGCGACAACAACATCACCGTCGAACCCGGGTGCCAC  
AAAGACTTCGCCTGACTGGGCGCTCAGCTTGCCGCCGGCCTGAACGGTTCGGTGAACCAA  
GTCGAGCTTGACGGTGTGCTAAAAGACGTGGTAGGCTGCATGTGAGTTCGGAACCTCAGGG  
AACTCAAGACGCCCGGCCACGCACAGTTGGCGCTACTTCAGCTAACATTCCAAAGCTTCA  
TGCCGTTTCTGAAAATCTGCATGAAGTTCTTTTGGTTGCGGCCAACCGCGATCCAGAAAC  
ACATCGGCTTGTAACCTTGAGCATGGCCCCAAAGACCTGATGGTTCAAGCGCATCGCTCTC  
AATCCTACTCCACCATTACCGCATTCTTCGACGTTTAAACACTGGTTCAAGACCAACGTT  
CTCGTGTTCGGAATTCTCGGCATGTGGTAAGCAGGCCAAACGAAATCCCGACGCTAACCG  
TCCGACTCAATATGACGATGGAATTTCTGGCGTGCTCCGAACTGACCCGCAACCAGATG  
ACCGTGTCTCCATGGAGAAGGTGACGTTACACAATGCTGAGAGCCTTGGATAAGTTCG  
CCTACGTGGCGTGCACCGTCATTGATGGTTACACCCAGCGTAACCGAGAAGCCTTGCTGA  
TTCCGGACGGCGAGCACTCCCTCCAGAACTCACCCACCGCCACCAACCCCGAAATTTTGC  
AGCAACAAAACCGTGCCGTCCAGTCCATCGCAGTCGATCCCGTGTGCGCATGAGTCGTTA  
TAGAACGTCGTGGCCGAGCCATGATCCCCGGGACACCGCAGACGGACGCTTCTCGTACA

ACACACTCCCAGCAGCACGCTATGGTTTTCGCGTAATTGGCCTGGACGTTACAGAACAGTCG  
AGACAAAACCGGCTTATGGCGTGCATCTGGCGCAGTAGATCAGACAGCGCATGAACCGTA  
ACCCTTATCTGCGGGCAGGCGTGGGGCTAACCGAACGTTCTTGCGTACCTGTCGATCATG  
AGCTGCAGGGCGAGGACGCACTGCTCTCCAAAGGGAACAAGTAGGGTCAAGCCAACTTCC  
AGCTCCAGCACATGCTGTGTACGCTCCTGCGCGACATCGAGCGCCGCCACGCGATGCC  
CTCACGTCGTCGTTATGAACCACGGCACGCTTATTCCAATGCACTTTGAGCGTGGCATCA  
GCGCTGAGCATCTGCGACAGTCTAAGGTCGGCTGTCTCAATTTACTGCTCGACGCATA  
TTGTCATCGGGCAGGGGTTTCGCTGCTCATGCATGCCGAGTGCGGGCAATCCACACCGCTG  
GGGGCGGCAAGAGCAGTGACGTAACCGGGGTAACCCTAGTTGACCAGCGCGGTGGTAACA  
TCGTCCTGCGCTCGGTAGAGGCTATCCACGGCGAGTACGTCGGGGACACGCCTAAGAAGC  
TGGTGGCGAACTGCAAGCACTGGGAGCCTCGGCCGACTCTTATAGAGATGAACATAGGCC  
GTGGTGCCTATACACAGGTTCTGCTTCTCAGCTACGTTCTGAGGGCATGCCCTGCGCTG  
TGCAAGTGGTGTACAACACCGCCCAGCAAGACGAGCGTATCGCCGACACTCTCGAGCCAG  
TCGCAGCCAGTGGCGAACTCATCATGGACGAAATCGTCGTCACTGTCTGCCGGGCTTCGA  
CCCTCCGCCAGCCTGCTGACAAGCGCGAGTTGTTTCGCCCTGCTGCACCAGATCATCAGAT  
TCACACGCGACAAGGGCGCACTGGTAATAGACGACTCGCTCGACGTACTGAGCATCTCCG  
TAGCGTACTTCATCAAACTCTTGCCCGAGACTCCGCACTCGTTGCGCAATCAGTCCGGC  
ATCAGGAGCTGGTCAAGTTCATGGAAAACCCGGTCAGCCACAACACCTACATCAGGGCTG  
CTCAAATTGGCTACCGGCAATCAGTTCATCCTAGAGCATGGTAAACAATACGACGAGATT  
CGCGACTCTGCCATCCCGCGGTAACTCCGCGCCGGCCAGAAGCACAGCCACTCCACTAT  
CACTGCAATCTCCGTAGCCGCAATCCACAAAGCCCAATCCGGGCTGAACTGCGGGCGCGCT  
GGTTGCGTTCGTCACCGCGGCACTGAACGCCACTCCGCGGGCTCCGGGGCCCGAACCCAGT  
CGTCGCATCGGTTACCAACGGCCAGATAGTTTACTGCGGCACGACCTCCGAACTAAC  
CGTAGGTGCTGGCCAACTGAACGCCTTACCGTAGTCGCTGCTCCTGAAGCAGTGAATTA  
TGTCTAGGTTCCCTAAGTAGGGCGCCTTTCGCTCTCTGCTGTGGCTGTCCGTAGTATCT  
TCGTAGTGGGCTTCAGCGTTCACCAGCCCGAAGAAGGAACTGTGAACCGGGTATACCTTT  
TTTTAAGTGGAAAGCTTCCCCTCTGCACCGGGCACACTGGCCCCGCGGTACTGTTAGGGT  
CACTCGACTGTGCCGAGAAGGCGCTGAGCTGCCTCCCACGGCCGCGAAGTCGGCTGGCG  
CCGCTGCTAAGCGCCCGATCAAAGACCCGCTGTACCAG

>NewGenomeName\_140

TTTTTGACTAACGGTCTTTTCACGAAAAATGCCTCTAAATAATCGGAGGTTTTACTACAT  
GCAACAACACTCAACCGCTTCAGACTTGTACCACAAACCAATCATCGACGCTATCAAACC  
TCTTGTTTAGACTGCTGGTACGCCAGTGCTATCTCAAACCTCGTAACCTCCGACTCTGGCA  
ACGGTGCAACAATCGCGTAAGACTGCTGGAAGAAACGCTTAATCCTTAGATAAACGGTAA  
TCGCCGTGGTGATAATGGTGACTTATTTCTGAACCCTGAATGCCAACTCGCCACTACAAT  
TGTTTATCGTGCTCACGAAAAGGGCCATAACCCACGCTTTAAACAGTACCCAGAGTCATT  
CATTCTGGACGATATTATTACAGGCAAACCGAGTCCTCAGACTGTCCTTTCTGAGCTTCA  
ACTACTCGTGAAGTCTGTGAGGATTACCGCATTAAATGTATTCTCGATAAACGAAGAGTT  
CGTCGAATGCTACAACGTCTTCGGACAACGTGATATTAATAAACTATAACCAAAAACC  
TATCGGTAACGCCAAACGCGACTTAATGAATGAACTTCTGTCTATAAACAATGGCCTGA  
ACTGGTAACAGAACGACCCGTTAATCTAGCAGAAAGGACTACAACCTGTGCTAAGGCTAA  
GGGTACCAAAAATGAGTGCTTGAAGGTCCTTGAGGCATCCACCACGCAATCCCGTTCGTGG  
CTTTACCGTTAAGGGATTGATGACTTCTATGAGTCCTGGCCAACTGAAGGCCGGTATGT  
AGTATTCGTTACTCTCACCTGAGCTGATCATCGTATCAAGGACTTCTATGCTAACCCCAA  
TGCTCTTCGTGACTATTTCCGTGATATTGACCGAATGGTTCTCACCGCCTATTGTCGCTC  
GGTCCATTTTTTCATCTACGGACTTCTATCAGTACTTTTATGTGCCTGAGTATGAAACCGA  
GCATGGGCCTTTACTCTTTCACGCAGTGCATCTTATGCACAACTTCCTTTGGGTTTCGAT  
CGACCATAATGTTAGTGAACCTGGGGCGTACTAAAGGTCAAATAAATAGCTGGAAACACAC  
ATGGCCTTATGGTTAGTCTATGGCTATCGCAGACCGGTATTCTCAGGATGCTTTCTCTCG  
CGCTGGATCGCTCTGGCCTGTCGGTACAAGGGGTGAAACCCTTAAATACACCTCGTACAT  
GGCTGTAGGCTTCTACGTGGCTAAACACGTTAAAGAAAAATTTGATGTTTACATTGCCGC  
AAAAGGCTGAGGGAATCGAAAATTGGAGGCAACATGAAAAACGCAGATGGCTCTTACACC  
AAAGAAGCTTTTTTCGAATTCGGATGCGCCGCAACTTGGGGATGAACTACTCCCAAAGAC  
GACGCTGACCGCCGAGTGTTAATCCAACCTTACGCAAGTGGGTTACTACGTGACCTCGTT  
CAACAACATCTTGAAGCAGAACGCCAAGTAAGAGCTACTATTGAGGCTGGCAAGGCAATC  
TGAAGCCGACGTTTTTGGAGGCGCAACCTGTGACGAGCGATCCGCTAAAATTCATGCGCAA  
TTTGCTTCGATCAATCGGAGCGTCCATCCTAGAGCGTGTTATCTCTTAAAGGACGCAGGA

ATTAGCAAATACAGATATTCCTGATGAGATTAATACTACGTTACTAATGCAGGAATTGC  
TGTTGCTGACTTGC GCCTTGCATCCAGGTGGACTGCTGGTGGAAAATGAAGAAATTC AAT  
CCCAATTTAAAGAACTCGAGGGCGTCTTCCTGTGCGACCTTTCGCCATAACCGCAACGTG  
GTAGCAAAGACTGACGCGCTTGATGATGACATGCGGCTAGATATGATCGGGCGCTATTCTT  
AAGGACTGGTTCCTCTAGCAACAACATTACGTGCATGGCAAAGAAGCGATTTCATGACATT  
CTAAATGGACGTCGCCTATTATCCACCTTGCCAAATGGCTTACCTTACAAGCGAATAAAA  
CATGACAGCAAATGATAACCCAGTAGCCTTTC AAACGGCTATTCTCTCCATCAA ACTTAT  
TCAGGCATCTTCTGTTCTTGACCTTACTGAGGACGATTTCAAATTCCTCACTCCTGAACG  
TGTATGGATTGCAACTGACCGCTCCCTAGCTCGCCGCACTATTGAGGCTTGCGTCTACGA  
AACTCTGGACATTGAGGGATACCCTCGCTTTCCTGCTCCTATTGAGTTTATTGGTTCTGT  
GAGTTCTTATGATGTTCAACCCATTTACATTCAAGCGGCATGGCTTATTATGGAAGGCC  
TCAACTCACCGAAACCGTCACTAAAGGGGTGATGCCCGGGTAAAGCCAGTTAACCTT  
CGCGTTTACCTCGCGTGTACTCGCCGGAATACTAAGCTTATCACTTAAGAAAAAATAA  
CGCGCGTGAAAAACGGCGCGCTCAAGGAGTGACGGATGCCTAAAAATTCTGTTTCGCCTCT  
CTGGGGGCAAATCTAAAGGTGGTGCCTCTGGTATGTTGGCGGGACACAGTTCGGATCTC  
TAAGGGGCTTCCTCCCCTCTATTTAAGGAAACAATACATCTATCTTACAAACTTCCGCTG  
AGCGTATTACGCACGACCTCTCACATCTGGTACCCGACGGTGCTAGAATCGGAGGGCTTA  
AAACGATCTCCTGGACTCCTGTTGTCGCTGGTGGTTCTTTCCAATCTGAAATGGTAGGCT  
CTATAAGTCTTTCTCCTGTCATTCGCGGTCTGGCTGTCGACTTTCGCGACGACGTCTTTA  
CTTTGGATATCCCTCAGCGTCATGTCTATGGTCAACAATGGACTCGCTTTATGAACACTG  
GTGTTAAGGCTACTCCTCAGGCTCCGGAGACTTGTTTCATCTGTCTGTGATTCTGCTGCCG  
GGCTTGGCACTATCCCGTAAACTGATTTGAAGATTCCTAAATCCCTTCATCAA ACTTATC  
TCAATACTCACAACAAGTACTTAAAGCCGCGGTGGTCTAATGGTCTCGCCTATGCTAAGC  
CCTCTAATATGCGCGCTGGGGATTATAACTGGGGCGTTCGTCTCGCTAACTTAAAGTCTA  
TCTGCACTGCGCCATGCCTCCTTATTCATTTTCAAGGCAGGAAGTGACTACTGGCGCTA  
CCACTATCGATATTATGGGCCTCCAAGCTGCCGATACCAA ACTCCACACTGCACAGGAAC  
GTGACAGTTTCAAGTCTCGCTACCGCGATATTATGAGTGACTTTGGCGGTACACAGTCCT  
ATTACCTTGATAACCGTCCCTTGTCTCCTGATGCGCTCTGAATGCTGGTCTTCTGGCTAGG  
ACCTCGCCGGTTCTGACCAACCTTCATTGGGTCAAGTCTATGGTTCGCGTCCAACAACT  
TTCTCAATAAAGTGCCTCGCTCCTTTGTTCTGGAGCATCGCGTACTTATTACACTAACTG  
TACTCGCTTCCCTCCTACTCACGATATGGAAATACACTATCTCGTCCGTAAGGAATCTC  
TGC GTTATACTGACAGTGTCTGTGACCCTCCTCTTATGTCTATCCGAGATCTGCGTGGAA  
GTTAGGTAAAAGACCCCTTTC ACTCTGCTGGA ACTGGGAACTTGAAAGTTGCCGAAGGTC  
AATGGTATCGTACTCGGCCTGACCGCGGGGCCTACCCTTATAACTCTCTTTACGGCTTCC  
CTTTCTATTCTAAACTGCCGTCAAAGGATATACACGAACGTGTTCTCGTTCGTACCGATG  
ACTATGGATAGATCTTTGAGGCAATGCAACTTGCACACTGGAATATGCAA ACTAAATTTA  
ACCCTCCTGTATAACGTCCAATGCCTACCACTCGTGATGGCCTCATGACGTGATAAACT  
AAACGTTGCACGGGTACTAATGTTAATTTGCGCCTGTTCTGGGTTGAACAAGCGAATCGC  
GTTTGCTAACCTACGTAAGGAAATTCTCTGGTTTCAA AATTATCTCACTAAACATGATGC  
TCCGTTAACTTCTCAGTCTATTACTGCTAGAAAAACACCTGGGGCTGCTGCTCCGAATAA  
GTCTACACCGGAGGTTAGACGCTCTACTATTGCCGCTGGCTTAATTCTGACTTCGGCCAA  
GCCACATTCTTGAGTAGCTCATGTCTTGCGTATTGACGAAACCAATCCTACTGACAATAA  
GGTCTTATCGGTTCGCCGCTTATTTATCTGGCGTACCGTCTGATGCTATTTCGATTGCAAT  
TCGCTCTGCGGTGATGACGTTACCGTCCCTACTGCTCTCCCTGCTCTTTCTCTCCTTC  
TCCGGTGGCATTCTTCACTTCTGGCGCTGTTCTGTCATTGGCAGATGCCGTATCTGTTCC  
GACGCATCCTGTTACTGCTGGTAATGCTGTATATGCTGGAATTATTAACAGGGGCAAATC  
TTGGTGTCTGACGTCGTGTCCGGCCTCTTATCTGATAATCAGGTCAACCGTGAAACAAC  
CATATTACAACCTCTAAAAGAAGGTCAAATCTATGTTTCGGGGCAATCGCTGGCGGTATTG  
CACCTCCCTTGCTGGTGGACTTCTGAACAAAGCATTTCGGGGGCGGTA CTTCCTACTCCC  
AAACTGGCGTTCAAGGTAATGTCCTCGCTACAGACAGTAATGTAATGGGTGCTAATGATG  
CTGGGATCGAATCCGATATTCAGAGTTCGATCATTCCAATTGTTAACGAGCTGCTACCG  
AGCCTATCTCGAGCGTTCTAGCCGATACTGGCAAAGACGTCCTAACTTCAATCACTGGCG  
TTGGAGTTAATTA ACTTACGGAAAAAATCGGAATCTCGAAAGCTGTTGCTGCTAAATGTA  
AGCATAACGCAACTATATTGCTTCTGCGTTCCCCGAACTTAACCGGTGGGAAAGTAGTG  
GCTCTCGTGCTTCTTCTGCTAGACTAGTCTATGCGAGATTCCAGACCCAAAAGGAATTAA  
CTCGAATGGAGCGTGACAGTCAAAAAGAAATCTCTAAGATGCAGAACTACACTTAAAAGT  
ATATCAACGATGTCCAGTCTGTGACTTCTCTGCAAAAATCTAAGGACTCTGTGTATGCTC

AAAAAGAAATGCTCCGATACAACGACAAAGAATCTATGTCACGTGTTGGCGCTATCCTCC  
ATAGCACAAGCCACACCAACAACCACAACTTCAGACATTGTGCGGCAAATGTCTACTA  
AGGCTCATACCTCAGGTCACCACTTTACAAATGACCAAATCCAAGATGTAAGTAAAGGG  
TCGGCGCTGATATCGATGCTGTTGCGTGATAACAATGATCGTACGCATGGAGAAACGGACC  
GCTCGAAGCAGGAGGTCCTAACTCTCGTTACGCTTCCTCACAAGTCGGTTAAACCGCCA  
AGGATGAATCACATGCCCTCAGTGACGCATCTTCTGGTATTGTTGATTATTGTAGTGGGG  
TAGATAAAGTTGTCGCGGATACGTAGAACGACTGTTTCAAAGATGACACGTGCGCATGGGT  
ATAGTTAAAACCAACCTACCAAATAA

>NewGenomeName\_141

TTGTTGACATTCCCTAAACCCTTATGAGACTCGTGCTTCAACGAATGAAGTAGGAGTCTT  
TATTATGAAACCCGCTTACCGCTTGAGTCATCCGATTCTCGGCTCTTGGTTGTTAAGTG  
CCCCGTTTATATCCGTTATGAGCAGCTTCATCACGGTCGTCTTATCATGGTTCGCGCTGT  
TCGTGATTTGTCCCCGCGTCAGCAGCTTATTGCTAACCTAAAAACTGCTTTTACGTTGT  
TATTGCTGAGACTGACGTTACTTATTGTACTGTCACTTATTTTGAATATGAGGCTGAGGA  
ATATACCGAGTGTGATTCAGAACTATGGATAATATCCTTGCTTATATTAAGTCTCCTCA  
TTCCCTTCGCTCTGAGGAGGATTCATCCGTTGATGTTGACGATATGGCGTGGTTTTATGA  
AATTGCGGAGTAAGTTATGGAACTGTCGTCGGAAAATTTATTACGTTGGCTGTTGTTGC  
TCCTATGCTGTATGGAATTGCCCGCTTAAATTGGGAGGTTCCCGTGAAGTATTTAGTCTT  
GTGGATGAACCTTATGCTTATTGCCCTGATACGAGGATTTTGACATTACTCGTAGCCGT  
GTTTCTGACCCTTGCTAAGAGCGTCGCTTTCTTACTGATCAGGAACATTTGCACTTTTG  
GATTGGTTGAAAAACGACCAACTTATATTAAGTCTTGACAGGCCTTTAAAATACCCCTCT  
ATATTGCCCTCATACGTTCACTCCGAGGGGTTTTTTGCATGGCTTCTGAAAGCTTCTCTG  
ATGTTGTTAAGTCTGTTTGGTCGCACGCTACGGCTAAGCACGCTCATCTTCGTATGGCTG  
TTCAGGTTGATAATCGTAGTCGCCTTCTTTATGCTTTGGTTTACCAGTGGGTAAAGCGCT  
TTTCCGAAGAGACTCATTGGATGATGAGACTTATGCCCTTATGAATCTCAGACTGGCC  
TTTTGGAAGATCATATGGCACTGTTTCGGACGTGTGCAGCCCAACTTGATAATAGTAACA  
CTATAGCGCACCGTACCCCTTTGGATGCCGAATGTGTTTTCTGTTTGAATGATTTGCC  
CAGGCGTTCGCTACGGTAAAACGTTGAATTCTCTTTGGATTAAGTATGTTGCTCAATGGC  
CTGAGAAGTTAATCCTCAAGAGTTAGACATGGTTAAGCCGTTATCCTTAAAGGATGAGG  
TTGCTAAGTAGATGGAGAAGATGCAGGAAAAACACGCAAAAATCGCATGACTCAAAAAG  
CAATTAATTAGATTCGTAGTGCTCACAAAACGGCTGGTTTTTTCGTATTTGATACGTTGA  
CACTTGCTGATGATCGTTTGCAGGCTTTTAAATGAAAACCCCAATGCTCTTCGTGATTATT  
TCAGGACTGTTGGTCGAGCTGTTCTGCGCGCTGAAGGTCGTTCCGGTTAAGAATTCCTACA  
ACGATTGCTATCGCTATTTTTGTGTGCCGGAGTTCGGAGGTCAGCACGGTCGTCTTCATT  
GGCATGTTGTGCATATGGTGCGGACGCTTCCTTTGGGAAGTTACGACCCTAATTTTCGTTT  
GCAAGGTACGTAATTATCGCCAGATTAAGTTCGTTCCGTGGCATGTGGCCTTATGGCTTCA  
CGCAACCGATAGCTGTACGCTATAAACGAGATTCTTATTCTCGCAAAGGTTGGTTGCGAC  
CTGTTGACAAATCAGGTAAGCAATCCAGAGTAAGCCCTATCAGGCGGTCGCATGGTATG  
TGACCAAATATGTAGCTAAGCAATCTGACCAGCGTCAGAAAGCTATTACTGAGAGACAAA  
AAAAATGTAAGAATCCACTTATGGCAATCTATCTGAAAAAGGAATTCAGAGTTCGCAGCA  
GCCGAAACTCGGAATGGAGTTACCGTCGATGGCGCTTCTCAGCAACAAAGTGCTTCTGG  
AGCTGAGCCGAATCAGCTTCGATTCCAGCCCTCTGTATCAGATAGTGAAAGAGAACGCCA  
AAAAGCAATTGACCTTGAACATCGGCGCGCTGCCTTTGCACGTCAGTTTGGATGTGCGCT  
CGGAAGTGAGAAGTATGTTGAAAAATATCCGTCGTTTGTATGAAAAAGACACCCGAGTTCA  
ATTGGCAGAGTTCTATCGCTTCAATGACGGTCACCTTAAAAAATGGGGATATTTCTGATG  
TAGCACGTCAATACATTATTGAGGCAGGAATTACGCCTTTTGATTTGCGTGCTAAAGCGA  
CTCAAACCTTAGGTGGTAAGTGACCCGGATTTTTCTCAGGAGAAGGTTTATGCTGAGCTC  
GACTCGTTACTACGCAAGTTATCGCGCTACTTTGACTAAGCAGCTGATGTTTTTACTAA  
AGCTGACTCTACCAATGATGATGAAAAATGGCTTAAATGCCTTTGGTAATTTGCTCCGTCA  
GTGGTTTCAGATTGAGGATTGGAAAGGCAAGCATAAAGAATTGCTTGACGATTTAAAAAA  
ACGTGATTACATTTGAGCTGTTTCAAGGTGTCTTACCATTAAATGTTAGGAGAATCTTA  
TGTCTAATCTTGTTGCTACTGATGTTAACTTTGCTACTTCTGTTGCTTCTCTGAAGTTGC  
TTCAGGCTTCCGCTGTTCTGGATATTACCGAGGCGGATTTTGATTTCTGACTGGTGATA  
AAATTTGGGTTGCTACAGACCGCAACCGTCCGCGTCGCTGTGTTGAGGCTTGTGTTTATG  
GAACACTGGACTTTGTAGGATAACCCTCGCTTTCCTGCTCCTGTTGAGTCTATTGCTGCCG  
TCATTGCTTATTATGTTTATCCCGTCCACATTCAGACGGCCTGCCTCATCATGGAAGGCG  
CTGAGTTTACGGAAAACATTGTTAATGGCGTCGAGCGTCCGGTTAAAGCCGCTGAGCTCT



TGGCGTACACCTTGC GTGTTAAGGCCGGGATTCAAAGAAACGGTTCTGAGCGCTGAACAGA  
ATGCTCGTCAGAAACATCGTGCAAGTGGAGTAATGTAATATGAAGAAAGCTCGTCGTTCC  
CCTTCTCGTAAGAAAGGCGCTCCTCTCTGGTGTGTAGGCGGTTCTCAATTTTAATTAACG  
GGGCTTCGGCCCCCTATAAGGATTCTTAAATGTTAAACGTGCAAATTTCCGCTGAACGTAT  
TCCTCACGACCTTTCTCATCTGGTTTTTGATGCAGGCAAATTTGGTCTGTTAAAGGTTGT  
TTCTTGGACTCCTGTTGTTGCAGGTGATTCTTTTGACCTTGATATGATTGGCGCTATTCG  
CCTTTCCCGCTTCGTCGTGGCCTTGCTGTTGACTCTTGTTGACCTGTTACGTTTTA  
TGTCCTCATCGTCATGTATATGGTGGAGCAGTGGATTGATTTTATGAAGCAAGGTGTTGA  
TGCTGCTCCTTTGGCCCCGTTCAGTGCTCTCGCGGTTGGGATAGTGATCAGTATCTTGC  
TACTATCCGCTAGTAACCTAAAGGTTGCTAAGTTTCTTCATCAAGGTTACCTGAACAT  
TTACAATAATTACTTTAAAGCTCCGTGGATGCATGGCCTGACTTATGCCAACCCGTCTAA  
CAGGGAGGGTGAAGATGTTTCGTTTTGGTGTTCGTGCATGTAACCTTGAAAACCTATTTGGAC  
TGCTCCGCTTCCCCCTGATACTGAAACCTCTCATTCTATGGAGATTGAAACCAACTCCAT  
TGACATTATGGGTTTGCAGGCCGCTTATGCACAATTACATACTGAGCAGGAGCGTGATTA  
GTTTCATGACTCGTTATCGTGATATTGTTAACGAATTTGGAGGTAGTACTGCTTATGATGC  
GGATCATCGTCCTTTGCTTGTATGCATTCTGAGTTCTGGGCTCAGGCTATGATGTTGA  
CGGCACCGACCAAAGCTCTCTCAGTCAGTTCTCCAGTCGTGTCGAGCAGACGTTTAAGCA  
TTCAGTACCGCGATTCTTCTGCCCTGAGCATGGCTCTATGTTTCACACTCGCATTGGTCCG  
CTTCCCGCCGACTCATGAAATGGAGATGCATTACTTAGTTGGTAAAGAAGATTTGACTTT  
GACTGATTTGGCTTGTGAACCTGTTTTGATGGCTAACTTGCCCTCCTCGTGAGGTTAATAT  
GTCTCCGTTCTTCCATTCTGGCAGTGCTAGTGCTAAGTTTAAGATCGCTGAAGGTCAGTG  
GTATCGCATGCAGCCTGATCGCGTTGCATTCGCTATAACTATCTTGATGGTTTTCCGTT  
CTATAGCGGATTCCGTCTGATGCTATTAAGCAGCGCGTCCCTGGTTATTACTGATAACTA  
CGCTGAGGCTTTGCTGTCTATGCAGCTTGCAGCTGGAATATGCAGACTAAGTTTAATTG  
CACCATTTATCGTAATATGCCGACCCTCGCGACTCTATTATGACCTCTGGATTATGTGG  
GGCTTCGGCCCCCTTAAGGATATTGATTATGTTTCTCGTTTATGTATCTAAAAATGTTG  
CTCCGTTACCTCTGTGAATCGTGCCTTTTCTATTGCCCTGCCGCAATCCCGAAGTTG  
TTAATTCTGGTGAGATTGTTGCAGGTCGTTCTACTTTTCGCAATGCTTCTTCTATTGCTT  
CTGCTTCCAATGGAAGTGGTTTTGCTTTTGTTCAGATGATGGATCCGAATTATCCTGATT  
CTCAGCAGGTTGTCTCTGTTGCTGCTTCGTTGTCTCTAATGTTGATTTCGAATTATATTC  
CTTGTATTGTTTCGTTTGGAGAGCACTGTTGCTCAGCCTACCAGCTTGGATATTGCAACCG  
CTGATTTTATTCCGTTGAGGCTTCTGCCCTTTCTCCTCGTGCGCTTAGCCTTCGCGAAT  
GTGTTACCGTTGATGTTAAGCCTCGTACTGAAGGCAATAATGTTTTTGTGGTGTGGTTT  
TCTTCTCTGCTGCCGCTAATGCTGGTAATGTCACTGGTGTGTTTCGATGGCCCAGGTTG  
ACCACGAAGTTACAGCTTTCAGCCGCTTAAATAAAAGGCTCCCGCACTCCCGGTTAGAT  
GCCTGCCTAGTGTAGGGCAGACCGAGCCGTACGGAGATACCCGCTAAACTAGGAACGCGG  
AAGGCGCAAGCCGCTTCCCTCCTGCTAAGCCCCAAAAGGAGTTACAGCGATGTTAGGTG  
CCGTTGTAGGTGGTATTGCTTCAGCCTTAGCTGGTGGAGCCGCTTCTAAGCTGTTTGGTG  
GTAAACCTGCCGCTCAAGCCGCTACCGAGTCCACTGGCCTTTGTAATGGTCAAGGCGTTA  
TTGGTATCGATCAAGATTCTGGTATTCAGTCAGCTGTTCCGGGCTCTAATGTTCCCAATG  
GTCAGATTCTGCCCCACGCAGACTGGTGGCGTTATGTCTGATGCTAAAAATATGATTA  
AGAAGGCTGGTAAAGATTTGCTTGATGGCGTTATGACCGCAGGAAGTGATCGCATTAAAGC  
AGGCATTGGTTGATAAGTTGAGTGGTAACGATGCAAGGAAACAAGGACAAGCAACCCGTG  
ATTACTTGGCTGCGGCCTTCTCTGAGCTCAATGCATGGGAACGTGCTGGAGCTGGTGCTT  
CCGGTGCCGATTGGAGTCTTCCGGCCAGAATCAGCAAAGGAGTTGATGAGTATGCAGC  
TGGATACTCAGAAGGATATTGCTAAGATGCAAATGCATAATAATTTGCAGATTGCTGGTC  
TTCAGTCCGCTACTTCTCGCGAGCATAAGAAGGATTCAGTTTATGCTCAGAATGAGATGC  
TTGAATTTAATCAACAGGAGTCACAGGCACGCGCTGAGTCTATCCTCGCCAACACTTACC  
TTACGGCTAAGCAGGCTGCCCATGAAATTATGAGAATCGCCCTTACTCGTGCTCAGGAGA  
CTGGTCAGCATTAACTAATACTCAGATTATGGCATTGGAGAAAAAAGTTTATGCAGAAC  
TCGGAAAAATTCATCAAGATACTCAAACGCTCGTTATGGTAGCTCTCAAGTTACGGCTG  
CGGCGAAAGATGTTACGAAGATGATTACCGATGCCACTTCTGGTGCTGCCGATTGGGTCT  
CTAACAGTGGAATTTTTTTTAAAGATGGCAAGGCTAATGGTATTCCCCTCATTACCA  
GAAAATAA

>NewGenomeName\_142

CAATTCACAGTGGTTACTATTCCATCACCAGTTTAGCCTTTACAGAGAAAGTCAAGATGG  
ACGAATCGCGCGACTTCGCTCGCCATTCGTTGAAGGCGGGGGCCGGAGGCCACCGGTT

GGCCCCCTCCACGGAGTGGCGCACGTTTCAGGGGGGCACGACATCCGTACAGGGGTGTACG  
TCATCCTTACACGAGGGTACGTACAAAGGGGCTTCCCTCGTACCGGGAGTTGCGGCACGC  
GTACACGGGGGTACGTACAGCCAATCAAAAGCTCCCACGTTGCGAAAGTGACGTTTCCC  
AAATGGGAGGCTCCAGCCTCTCTATACATTGAGCGCACATAACCGGTTGGCCGTAGCTATT  
CCCATGGCGATCCCGGTGGATGCACGGGAACGGCCGACAACCGGCCGCTGAGGCTAGGGA  
ATTGGCGCCTAGCGGAGAGGGGCAACCTGGGCCAGCTGAGCCGGGCTGGGGCAAGTAAT  
TTCAAAGAACGCTCTCCGAGCAGATACTCCACTAGGACCAACGACGGTCTTCAGGGCAC  
CAACAAGATCACGGGCGACGGAAACCCCTCACTGCCGCGAGATCCGGATTGGAATCGCTG  
GTATTACAGTCACTCTATCCCTGTGTGGCTACACGAATGCTGCCGCTCCCGCGCTGAGAT  
ATGGAACCTGCGGACAATTCCGAAAGTACTGGTTGCAAGCATGTCCCGGGCTTGAGGATCG  
ATAAACCAAGTCCTCCCTCGCAGACGCCGGCATGCCACCCCTCCGAGGACAGGGTACCCG  
GCATAAAAGAGTACTTGATAACCACTACTCCCAGCCGACCCCGAACAGCCAAAAGGCGTA  
AAAGACTGTGTGATGGCAAGACGAGCTCGCTGAACCAGAGGCAGAATTTACTCCTTCAGA  
AGGGGACGGTGGCACCACCACAAGCGACTTCTACGAAGATATAAATTTTCGATATCGGAGG  
AGTCAGCGGTATCGTAGACTAGGTTTTAGGAAGGCCTGTCACAACCCCGCCCGGTAAG  
TATAGTGTGAGGCTGCCGAACCCTCGATCTACTATGACTATCCGCTTCCAAGGGCTCTTC  
TGCCTCACGGAAGGACTCATTCTGCCTAAAAACAGCACAGCTGGGGCCGATGCAGACCAC  
ATGTACCGGGCGTGTGTGCGCAAGATATTCGTGAACCTGAAAGCGTTCCTGCTAGCCTCA  
ATGAACCTGACATCCGTGAGCAAAATCGGAGGCCCAACCCCGGTGAGTAGATTACGGAC  
GGGTCTAGATAACAAGCCGCGGACAATTGGCCTAATTGCTGGCTGCCGCTAGATAATAAC  
GAGTCTTCCGCTACACCATCGGCATTGTAGAGATGGGCCTTAATGAGGTTGCCGCCTACG  
GACTCTTGACGGTCTTTAATCACTCAAAGCGGGTGACACTGCAAGACATTGGTCCCGG  
TTTGGGGGCTGGCACCGGTTCCGACCCATTGAACCGCGGTTTCCGCACCTTGCCACTAAA  
AATGAGGGAACCTTCAACCCTGTGGCGAGTCTTCTCTCCACGGAGAGTACCGCACGCGT  
AGACATGATGTTATGTCCAGCAGCGATCACCAGTACTGGTCGCAAGGAGGCGGACAACCG  
ATGACGGGGGGCATCGCTAATACGACCGGGAAAATGAGACCCGACGTGCAGCAGTACCCT  
GCTATGCCCCCAGACCCCGATCTTACCGCTAATACAGCGGACCGCACGCAAGTTCGC  
TGCATTAAGCAGCACGCTTTGTGGTTCATGTCTCGCATATATGCGCTTCGCTATACTC  
ACAGTACACGGTGCACAATCGTCTTTTCCCTCCAGCGCAACGTTTCTTTCTAGACGGTCT  
TTCAACCACCAGACGGCGAGAGGAGCCGGGGAACCCAGGGGCAAGAGATGGCACATGCTG  
CTGCCGCTCGGCACGGAGACCATCGCCGACAGCTACATGCCAGCACCCGCATCAGAACTG  
GACACTAATTCCGTTACGTTGTACGTAGCGCAAGGCACAAATAAGTAGCAACAGTACAAG  
TTCGGCACAGCTCCCTACGCGCTAAAGGAGCCGGTACTGAACAACGATGCATGGGCCATA  
GTACGCGTCCAGTCTTTCGGGGAGCTGGGTAACCGACAGAGGCCATACCTATGGTACTTC  
AACTGGGCGACCAGCACCAGGTAAGTGCAGAGGACGCCCTGAAGAGTGGGGGGGGCTAAA  
GCCCCCCCCCTTAAACCCACCAGGGGGCGAATCCCCCCCAGGCCCCCCCTTTATATT  
GCACACAATAAACGCAGAAAATAGATTTATCGCACTCTC

>NewGenomeName\_143

ATTGCACACTTAATTTGAAAATGGCATGTGATACACCTTTTTATCTCAATAACCCTAGC  
TACCCTATCTACAGCAACTACCGGCAAGTTCCGGTTCCTTGTGGAAAGTGTTCAGCATGT  
TTGTCCAGACGCACTAGCGTCTGGACATTTTCGTTTAAAAACTCACGCAAAAAATGCTATA  
TCTTCTTATTTCACTACTCTTACTTACGATGCCAGATAGGTACCTATATCAAGTAGGGGT  
TTCCTTACACTCGAAAACGAGACGTTCAACTCTATTTTAAAAGGCTTAGGAACTTCAT  
TCAATAGATCACGAACCCCTAAAATATTATTTAGCAGGAGAATTTGGAAGCAAAACATTT  
CGACCCCATATCATATCATACTATTTAATGCCAACATCGACCTAATTCATAAATTATGG  
GACAAAGGAGAAGTACACCTAGGGGAATTAACAGAGCCTTCGGCCGCATACACTGCAAAA  
TATATAAATATAGGAAAAGTTTTACCAGTGCACAAAATGGTGTAGACTGCCAGAATTT  
AGTTTAATGAGTAAGAACTAGGACTTAACTATTTATCAGAAAAAATAATTCGATATCAT  
AGAAGCGATATTGAAAGAAATTTTCATCACATTGGAAGAAGGAAAGAAAATAAGCTTACCT  
GGGTACATTAGAGCAAAAATTTGGACAGAGCGAGAAAGAAGAATACAAGCAGATAAACTA  
GCACAAAATTTCAAAGAGTTAGAGCAACAAAAGAAACAGAGTACTACACAAAATCAA  
ACATTGGAAGGATATGGACAACCTTAAAGCAAATGGAAAAGCCCATAGAATTATTACACAC  
GAAAACGAGCCCGAGAAGGGCGCAATAAAATTTAGATCAAGCTTCAGTTATCAAGAAA  
AACAGAGGACCAGGAGGAGAAACCATCAATGGAACCAAGCCAAACAGTTACAGACATGAC  
TTTGTCAATTATCAGAACTAGTACAACGATACACCAGAGGACAATCAGTGGCAACCTTTAC  
ACCCGTTTATTACGGAGAAGAGGAAGAATTCGCAGACGCTAGCAGAATGGATCCTATTGA  
GCGCATAGAGTATGCTCGATTATTAGAGAAAAAACTCAGAAACCAGACACTCCCTAGC

GGAGCATCAAGCTGGCGACGAAGGAGCAGCCGAGCCGCGAATGAGCGGTGGGCAAACAA  
AATTAACAGACCACCCCCACATGTATAATAACAAAAGAGTAAAAAAGGGAAAGTTTA  
ACGGTACTACCGCTAAACTTCCCGATACGTGGCGCTATGGCAAACAACAAAAGCGCAAT  
GGCAATAGGCCTTCGAAGAGGAGGCCAATCACTAATAATCCTTGATATATTAGTGCTAAT  
TGACACGAAGTAAAAACGAGAGCCTGCGAGAGTAAAAACGCAGATAGAAAATTAACAGA  
AAAAACATAAAAGTTAATGGAACCAGTAACTACAGACGCAGCAATCACAGCCGGCGTCAG  
TGCCTATCGGGCGGAGCCCAAGCAGACGCCACAGGAAAACAAAACAAAAAATCTCGTGC  
ATTCTCCAGGGAGATGTAGGAAAAAACAAGGGAGACAATTTGATGTTTTGCGATATGCA  
AAACCAGTATAATTCACCAGAGCATCAAATGGCAAGATTAAAATCTGCCGGATTAAACCC  
AAATATGGTATACGACAAAGGCGGGGCTATTCAATCTGCTGGATATATACCAACACCAGA  
TGTTCAAGGAGGACAATGCAGAACTCCCGACTTTGCGCCAATATCAGGAGCTGTACAAGG  
ATATTTTGATACCAAATAAAAACAGGGTCAATAACAATAACTTAATGGCTGCAAATACATC  
AATTCACGAGAAGCTATTTAAAAGCTGCACAAACATTGACAGCAACAGAAAGTACAAA  
AGGTCAATCTATAGCCTATGCATTGGCACAACAAACTTTCAATATTCAGTAGAAGGAGC  
GAGATTAGCAAACGAGCAAACCAGAGCAAACACACAATATACACTTTCTGAAAATGAAAG  
AAAGTCAGCCTTACAGGCACCTTCTTTAGCAGCAGCAGTAGAAAATGTATTAAGAATCAA  
AGCAGAACTGCTAATAAAGTGCTGCAAGAGGACAAATAAACCAAACAATTAAAAACCT  
CCAACAAGATTATAGATTAAAAGAATTTGAAGAAGATTTAGCAAACAAGGGATATACAA  
AAATGACCCTTTATGGTCAAGGGCATTAGCTCAATTTATTGAAGGTCTCACTGGAGGTAT  
GTCTATGAAAGATTTAGGAAAAAAGACAGGAGGATGGTTAAACCAATCAGGATTTAAAAA  
TGCAACTATATCAACAATGTCATGGTGGATGCCCGAATAAAAACATTTACAAAAACGTGT  
GAAGAAATAAGAAAAGATGTAATGATTTGATAAATCAAATAAATAAATTAGTTTTAGAA  
AATGAATCAAATGATGCGGTAGCATTAAAGCAGATTAGATTCTGTATGTTCTTTACGACAA  
ACTACCCTTATTCATATTAATAACTTAAACAGCAAAAACCAATGCGCTACGGAAGAGGGCG  
GAAGATCCCGTAGAAAAGGCTACGGCCGACAGAAAAACAACACTTACTTAGTTAAAAGAG  
GAGGCATAAGACTACAATGGCACATGCAAACTTATTTAACTCGGTTACAGCTACCTAAAGT  
AGCGAGCAATGTATTCGACCTTTCACATGATGTGAAAATGTCGTTTAAAATGTGTGGTCT  
TTACCCAACATGTGTAATGGAATGCGTACCAGGTGACAAAGTAAAAATAGGCACTGAAAC  
GATGCTTCGATTTGCACCACTTATCGCACCAAGTAAATGTTACAACCTCA  
TTACTTCTTTGTGCCAAACAGAACACTATGGCCAAACTGGGAACAATGGATTACACGAAA  
CTTAGATGTACAAGCACCATGGTTTAGACTATTTCTTCCACCAGCTTCAGGAGGATTTCA  
TGTTAAATCTTTAGCGGATTATTTAGGATATCCAACCTTTGTTAACGCCAAACGCTATACC  
ATATCCTGAGCCTGGAGCTCAAGTAGGAAGCCCTTTCCCTGTAGCAGCTTACAACAAAAT  
TTATAATGAATACTACAGAGACCAAATCTTCAATCTCCAGTTTTAGATTCATTAACAGA  
TGGAGAAAATGATCCATTTAGGAACCTAGCAGCAGGACCTGTTAAAAAAGAGCGTGGCA  
GCATGACTATTTTACATCATGTTTACCATGGGCACAAAAGGTGACGCTGTAACCTATTC  
AATAGGAGATGTCACTATCAACTATAATGCAGCTGCTGGAGGAACTGTTATGCGACAGGT  
AGATGGCACACCATATATAAACCAAACAGATCTTAATTATTCAGATGCTGGAGGACAACC  
TAGAGCAAGAGGAGTAACAGGGACACGTTACAATTTTGATAACTCCATCCAACCTATCAGG  
AACTGCAGAAGCAGCAGATATTACTCACTTAGAAGAGCATTAGACTTCAAGAATGGTT  
AGAAAGAAATCCTAGAGGAGGAACAAGATACATTGAAAGCATCCTTGCTCACTTCGGTGT  
AAAGTCTTCAGATGCTAGACTTCAACGTCCAGAATACTTAGGGGGGTCAAAAGGTAAAAT  
GGTAATTAGCGAGGTATTATCTACCGCAGAAACAACACTCCAGTAGGTAACATGGCAGG  
ACATGGTATATCCGTATCAGGAGGTAATGAATTCAAGTCCAATGTTGAAGAACACGGGTG  
GATTATTGGAATAATTTCTGTAACACCAGAACCAGCATATCAGCAAGGAATTCATAGATC  
ACTCAGCAAATTAGATAGACTAAATTTCTGGCCAACCTTTGCAAATATTGGAGAACA  
AGAAGTATTAGGGAAAGAACTTTATGCAAATGGTATTAACATTGGAGAAACATTCGGTTA  
TGGTCCCCGGTATGCAGAATATAAATTTCTTAAAGAGCAGTGTAGCAGGAGAAATGCGAAC  
TTCACTTGATTACTGGCACTTAGGAAGAGAATTCAGTGCAGCACCAAACCTTAAATGGAGC  
ATTTATTAATGCGACCCTAGTACGCGAATCTTCTCAGTTGAACACGCAGAAGTTGATAG  
CATCTACGGACATATCTTTAACAACATTAAGGCGATTAGAAAAATGCCGAAAT

>NewGenomeName\_144

GTGTACACATCTCTATGGACACATCCCACGCTTAGCCATAAGAAGTGTGGTCAGCGTATA  
GAGTGCCGTGTGGCTTATTCGATCGAATTGTTAATCGTTTAACTCACGAGCTACAAATG  
CACAGGGTGTCTCATATGCTGAACCTCATGTATAACGATGATTTGTTATCTCAACATGGT  
CAACTTTTTAAAGATGACCTACAACGGTTTTTCAACCGTTTGCCTTAGGCTTGTTTTAAC  
TTTCGTTATGTTGCCTCAGGTGAGTACCGTGATCTTTTTTGAAGGCCTAATTATCAGTTT

GGGTTATTTGGTTTGGATTGTGCTCATGACCGTTGGCTGTTTGGCAGTTATAAATAGTGAT  
TATAGTTTTACTTCTGCAACCATCTCGAAGTTATGGCTCAGGTGTAATCATCCGATTGGC  
TCCCTTAAATTTGAATCCGCTGCATACACTGACCCATATATCTTGTAAGAGATTCATGGC  
TTGCAAAGCCTGAAACGGTTTACGTTTCAGGATTCAACTGCTGAAGTTGTTTTGTCTAGT  
CCCGAATTTTTGGTTGTGTATGAAGGCATTGGCCGTTCTTGGTTTAGGGATGGTTTTTTG  
TCGGATGAATTTCCGGCCTGCTTCTGTTATTACTGCCCAGGGCTCTAAACCCCCAGTTCCA  
CGTTTTTACAAAACCTTTGTTTAAGGAGGTTGGATCCGATCTTGCCTGGATATGCAGTAT  
AGGTCTTCATATCGTGGCGTGTGAGATCTCGAGCGTAGAGCTTATGAGGACCTTCCGTTT  
CGTGAGTGTTCGCGTTGTCTTGTGGCACTTTTAGAGCTTCACTTTCAAGACGTATAATT  
AAAAGGATTTGTCATGATCGTATTTGTTGTTTGTGGTAAAGACCGCGCCGCGGATGTTTT  
TCACCGCCCCATTTTCGTTCCCTCATCGTGATGTTGCTATGTGTGATTTCACTGATGGAGT  
GAATCGCGCATCTGGTGATAACCAATTGAATAAGCATCCCGATGATTTTGATTTTTATTT  
CATGTGCGCATTTTTTAATACCCGCGGCTCAGTTGTAAATAATGAGCCTCAGTTTCTTGC  
TCGTGCCAAAGACGTTTTGAAGTCGTATTGACCCTTGTGGGCCTTCGGGGCCATTTTATT  
GAATTTTCATGTTGGAGATTGTAAGTTTTACATTAATCGGTTGAACCACAAAATTCTGCA  
ATGGTCCCTCGAGCTGACACCCCCGTTCTCGATATTCTATGCAGAAAACCTTTAAGAGT  
ACGTTTGATGCTGGTCTTCTAGTTCCCAGTATGAGCGAAGATGTTTTACCCGGAGCCACA  
TTAATGTTAATGCCACCATGTTCCGGGCAGTTGTCTACACCCATTTTTACAGTTATGGAT  
AATTGCCATTTGGACTCGTTCTTTTTCTTTGTTCCCTAATCGTATGGTTTGAAGAATTGG  
GTCAAGTTTATGGGGGAGCAGAAAAAGCCTGCAGATTCTATTTCTTACTCTATCCCTCCC  
CAAGTCTCCCAAGCTTGTGGATACGCTATCGGGTCCCTACAGGATTACCGTGGTTTACCG  
ACTGTGGGTCAAGTTACGGCCGCTGCTAAGGTTTACAATCGGCGTTACCTACCCGCGCC  
TATAATTTGATTTCTAACCAATGGTCGAGGGGTGGTAATCAACAGAATTCGCGTGTCTT  
AATTAAGGTGACGGCCCTGAGTCAACACGCTCTACTGTTTATGCTTTCCAAGACGCAGT  
AAGCGGCATGATAGTTTTACGTCTTCTTTATCTGCTCCACAGCAAGATGGCACTGCTGTT  
TCTCCTCCTTAGGCCTCGTGAGCCTGTTTAGGGTACTGGAAAGACTCTGGGCTTTTTTC  
ACTGGTGTACTCATTAGGCGTGCATGCTGAACTCCTAATAACAATGCGTAATGCTTCT  
TCCTTTTACAATACCGATAGTGGTTCTACTCGTACTGGTGTAGGTGGTGTATCAGTAAG  
AATTTGGTGTGCTAATTCTGGTTTTTCAGGTATATATGCTGATTTGTTGGCTGGTACG  
TCTGTGACTATTAATCAGCTTCGTCAATCTTTTCAGATTCCAGACCAGCTTGCACGTGAG  
GCGCGCGGTAGTACTCGTTGCACTGAGATTTTGCCTTCTATTACGGCGTGACTTCGCAG  
GAAGTTCGCTTGCGGCGTCTGAGTATTTATATTGTGGCTCTACTCTTATTAGTATTTAT  
CCGATCGCCCAAACCACTGGTACTGGTATTTTTGTCCAAACTACGCCTCAGGGACATTTA  
GCTGCTATGGGTGTTGATCTGGCACACGACCATGGGTTTTGCCAGTCGTTTGGTGGTGAA  
TGTTGTGTTATTGGTGTCTTGTGCTGTTTCGTGTTGCTTAGACTTATCCGCAAGATTTACGG  
CGTCATTGGAGCCGTTCCACTACTAATGAGTGTACGTCCCGGCTTTTTGCGATTCTTGT  
GAGCAAGCAATTGTAAATAAGGAAATTTATGTGACTGGTGGTTCGTCTCATTGCAATTTT  
TTTGGTTATCGGGAGCGTTGCGCTCAATATCGCTAAAAGCATTCTGAAAGTACTGGTCTC  
TTTTGTTAATTGCCGAGGTACAGACGACCCGGGGGATTATGCGCAGGAATTTACTGGG  
GTGCCTACTTTGAATTCAACTTTTATTGAACATACACCACCTCTCGGTGCGACCTTGACG  
GTTGGCTCTGCTGCCATTGGTATGAAGTTTTGGCTTGTATGCGTTTTTTAATGGTAACGCT  
GTTTCGCTCTTCCAATGTACTCTTTACCTTGGCTTATCGATCATTTTAAGCATCTAGG  
ATTCTTTTCCGGGTATGATTGAGGGTCATGTTTTTATGTGTATGTTTGTATATTATTAAGC  
GTGGTTTTGATTCTATTAGCTCAGTGGTTAATGCCATTCTTCTCATATTGTCTCTGCTG  
CCGCTTCTTCTTGGGTTTTAAGGGTTATACTGATACCAATGCTTCTAATGATGCATTGG  
GTAATCGCCATATGGATTTCAAGAGCGTATGTCTAATAATGCTTATCAACGGCAAGGTG  
AGGCTACGAGGGCTGCTGGCCTTTATCCTCTGCTTGTTTATTTGAAAGGTGGTTCGTGCTA  
CTTCGCCTTCTGGTGCTATGCCTTAGGTTGTGAACCCTTATGCTGCGGGTGTGCAACCG  
GTTATCAGTCTGCCAATCCCCAGTTGCCAATAAGCAAGTTGGTATGGCTGGTGTGAGA  
ATGAGAATGCGGAGGCTCATACTATTAAGAAGCGTGCTGATACTTTTTATATCTCGCTG  
ATAGGCAATCGTCTTTGGCTTCTGCTGATGAGGAGCGTTCCTTCTTTAATCTACTGTCTT  
TTCAAGGTCAGAATAATGCTGCCTCGACTAAGAATATTGCTATTGAGGGTGTATCGGTTAA  
CTGATGGTATTAACAGCTTGCATCGTCTGTTAAGCTTAGTGAAGCGCAGACGTTAACCG  
AAGAGCAGCGTAAGCAGCAAATTTTTGCTCTTGCATTGGACACTCTGAATGAATCGGATT  
TGTTGGCTGCTGATTTAAAAGCTATTATACAAGCTCACAATGTGGGTACCAATTCTAGAC  
AGTATAAACCTTTGGTTGATACTGTTACGAACATTTTTCGTATGGGGCGACGTTAAGGTA  
TTTTGATGCTATTTGCTTCCGCTTATGATAATTTTTGATACACGTTCTCACGATTTTTGTTT

TGATGTGTTTAGAGGATTCTTTGACCCAGAAGCACTCACGCGAGGTGTCTGATATCAATA  
ACACTGTTGATCTTGTTACGAAGACTGGTCATTTACCTGATCCAGTCTCTATGCCCCAGT  
ATGTTGATTATTATGGCGTGTTCGATTTTCAGTCTGCTATGAATGTAGGTCGTCAGGAAG  
ATGAGACCTTAAAGCGGATGCACGCAAAAGTTCGTGCTAGATTCCCTAATTCCCCTCAGG  
AATTTTGGGAGTTTTTCGCTAGATCCATCGAATTCACAGAAGGTTGTGCGCATTGGTTTGG  
CTTTGCTAATAACCTAAGGAGACTCCTCCGATCGACGCACATCCTGTTGCTTAATCGTCTT  
GGGGCGCAGTTCGCTACTTGATGAAACGGTGCCTGTTGACAAATATTTGTCTTTGCGTTC  
TGCTGGAGTAACTATGAAGCCGATGCACCGTCACCATGCCAATGAACGCTCAAGCGCTTC  
TTCTTTTAGACGTAACCTATCAACGACTAAGCTGATTAATAGCACTGCTGGCCCTATGCG  
CAATGGTATACGCATCCAAGTTCT

>NewGenomeName\_145

ACCGGCCACTTGGAGCCACGGAGCCCCTTGCAGCTATGCCTCCGCAAAAGAGGGAAGCAG  
CCGCTAAGAGGTGGTGCTTCACGCTGAATAACCACACAGATGAAGACGTGTCCGCCGTGA  
AGGCGTGGATCGCGGGTGAGTACCATTTTCGCTGTCGTTGGACGATAAAAGAGGGAGAATG  
GTACGCCGCAATTTGCAGGGCTACATTCATCTAAAGACGAAGGCTCGGCTAAGCACTCTGA  
AAAATTACTTAGCCGTTCCCATTTGGGAGAAAGCTCGCGGTTTCGGACAGCGACAACGAGG  
CGTACTGTACGAAAGATGGGGCGGTGATACTTACCCTGGGCATGCCGGTGGAAAGCAACC  
GTAGCGATCTCTCAGGAGCTGTTGCCGCCGTGAAAGCCGGAAGTCGAATGGTGGATATCG  
CGCGAGAGGTCAGTGAAGTCTACGTCAAGTATGGGCGTGGCTTACGTGAACTGGCGCTTC  
TGATTGGACAGAAACAGCGAGATTTCAAACCGAATTTATCGTTGTCACCGGTCGGTCGG  
GCGTGGGCAAGAGCCATTATGCTAATGAGTATCCTGGCACTAAGTTTTATAAGATGAAAC  
GGGACTGGTGGGACGGCTACTTAACGAGGATTTTGTGCTTATTGACGACTTTTCTGGAT  
GGATACCTTTTTGTGAGTTACTGCGTCTCACTGATAGGTATCCACATAAGGTTCCCCTGA  
AAGGATCCTATGTGGAGTTTACGTGCAAGGTCATCACAGTGACCAGCAATACGCACCCCG  
ACTCGTGGTACAATGAAGAGAAGTGATATCTACGCGCGTGTATCGGCCGATAAATAAGT  
GGCTGACGGGGAATGCCATCCGGTTCGAGGATGCAACGGATTGTATGAAGAACTACCCTA  
TAACTATTGACTACGGCCCCTCCCTCATAGTGCCTTTCGAGGAAAGAGCAATCGCGGCC  
AGCCAAGGCGGCCGCGTTCACGGGACTTTCGCGAGCGCACCGTTCGCGAGCGAAGTTCCTT  
AGTGAAGTTCCCCGAGGAAAACACTTGAGCTGAGGCGATTTATAATTTTAACTTCATA  
AATAAAGACAGGAAACAGTATTGTGTGTCTGTACTTTATTTAGGGTTTTCGAGGTGGGTT  
AGGTTCAATTTGACTGAACTCAACATATATCGTCACTTTTGAAGGAATAGTAAAGCATCG  
TGAGCTGGGGCCAACTGATGGCGAGGCGTAGTGCTTTACTCTAGAGCCCGAGCTGGCT  
AAGTTTTGGTCTCCTTTCTTCATCAGAGGTATCCATGCGGATCTGGGGTTGGTTAGCCAT  
TGCGCTGCAGTAACGTTTCCCGCGTCCGGTGTCCGGAATTGAAATTTGGGGTTCGGGGTTCGG  
AAAAGACGCTTGAATCCTTTGCGGAGGTCCCACTGTCTGGCGGGCGTCCCAGTTTGCTAGC  
GGTTCTGTCTCCAGGCCTGGCTTCTTGAAGAAGACTTCAAGGTGGTTGTCTTGAATGGGC  
ACATTGTGCCCTATACCATGCCATGATCCCAGTTGTCTTTTAGTGGACGCCTTTCGAAT  
TTTGCCAGCCGGATCCTGTAGTCTTCGAATGGTAGCCTCCAATTAATTGTTCCCCAGTCG  
AGGAAGTCGTCCAGCATTATGTTGAGGCCGACGGCAGCCAATTTTCAGGGTAGTGTACCT  
GAGCCGGCGCATTCTTGTCTGTACATGCGGACAACTTGAATCGGTATACTCTGTTAGTT  
CTGTGACCACGCCTATTGGTGAGTCTGCGTCTGCGCCAGTCACGTCGTCGCCATCGCCGT  
CTAATCGCCTGTGTCTGTGCGCGTCTCCTAGCAACCTGTATGAAAGAGCCAATCACGAGC  
TGCCACGTAACCGTGGCTCCAAGTGGCCGTTGAGTATT

>NewGenomeName\_146

ACCGGCGAGCCGGGGCCATGGGGTCATCTGGCCCCTGGCCAAGCATGCGCAGTAGTGGCG  
CATGCTCGATGGCCGCGCAGCGGCCTTTATTTGCGGAGCATGCGCAGAAGGCCGCGCAGC  
GGCCGCTATTTGCGAAGCATCATGGCAGCACGGCGAGACAGCGGAGCCCGTCCGCTGGGGC  
TTTACTCTGAATAACTACACTGCCGAGGAAGAGGAGAGCGCTCGCAATCTGATTCATGAT  
GCAGATAAGTACGCGTTTGCATAATCGGCAAAGAAGTTGGCGAAAGCGGTACTCCTCAT  
CTGCAAGGCTTAATGCATTTTAAAGCAAAGCAGCGGCTTACCGCTCTAAAGAACTTTTT  
CCTCGCGCGCATTTTTGAGAAAGCTCGCGGCAGTGATCAGCAGAATGCTGATTATTGTGGG  
AAAGACGGCGAAATACTTACCATGATCGGGACTCCGAGTGATAATAATCCGAGTGATCTT  
GCGGGAGCTGTTGCCGCTGTGAAACGCGGAAGTCAAATGAGTGAAATCGTGCAGAGATT  
AGTGAAGTCTACGTCAAGTATGGGCGGGGCTCCGCTGATCTCCGGTTGCTGATTGGTTGC  
CCGCCCCGCGATTTCAAACAGAAGTCATCGTGCTGATTGGCCACCTCCCTGTGGCAAG  
TCAAATTTGGCCAATGAGATGGAAGGGTCTAAGTTCTACAAGATGAAAGGTGATTGGTGG  
GATGGTTATGACAATGAAAATATTGTCAGAATCGATGACTTCTACGGTTGGCTGCCGTAC

TGTGAGTGCCTACGTCTGTGTGACCGGTACCCTCACCGTGTGCCGGTGAAAGGTGCCTAC  
GTGGAATTCACCAGCAAGAAGATTGTGTTTACCAGCAATCGCCATGTGGATGGGTGGTGG  
AAAGGTGAAATTGAGAAGAGTGCCTTCTACCGACGGATGCATGTGTACAAGTTTTATGAG  
ACTGGTGAATCAAGGACATGCCCGGACACATGCTCCCGCACCCAATCAATTATTCGGCG  
CGAGATGAAAACACCCCCCTCGGGATGACAGTCGTTTTTCATCTCCCGCCCCCGAGTCGCG  
GAGTGCGCGAAGCGAACGGAGCGCGAGTGGCGCGCGAGATTGTGACGACCGTTCGCGCGC  
AGCGCGGAGGGAGGAGACCACTTGCTTTGAATTTAATATGCTATCTTTATTAAGAGATC  
CAACAACACACCTGTCTATGTCTTTTTTTCATTGCCAGTAATTGTTAAGCAGTCCCCGAAC  
TTTACAGGTCTTCTTCAGATTTCTTCAACATTATCTGAGCGAACTGCCTGAATGTTACAT  
ATATAGTTATTTCTGCATTATATCTCAGTGCCTGTCCAGGTGAAGGCCAAGAGAATGCCA  
GCCCCGTAGTGCCTACTCTTGTACCGTCCCTCTGGGTCCCTGCTCGCATTCTAAAGGTA  
ACCAGCCTGATCTACTGCTTTTCAGCCACATTGATGCTGAAAAGGTAGAGGCTGTCATAT  
CTGATATGGTTAGTTGAGGCTTTGGGAGTACCAGCCTCTTAAACCCCTCTGACCAAGTTCC  
ACGCCCTAGCCCCGTCCCCTTATCCAATGGGTCTTGCGTTTGATCCTGTAATTTTATAT  
CTTAAACTCTGGGGTTCGTGAACTGGGACTGTGTACCCCATCCCCTTGCAATTTTTGTTG  
TGACACCTTCAGGCCTCAGCACAACCTTTTGCTAAATTAATCCTGTAATCCTCGAACGGCC  
ATTCTGCCGGTATTTCTTCTTGACCTATAAAGTCATTCAGGTTGAAGGTGAAGAAATCTG  
AGGCCACTTTTTGTGGGTGAGTCTTGGATGGGAAGTCCACTGTGAATTGCCGTCTAAATC  
TGAACAAGTATATTCTGTTTCACTGTGTGGCCTCTTCGGTTCCGGGGCAACCTGTGACGTC  
TGCGCACTCGTCTGTGAAACCGCCTTCTCCGGAAACCGCGAGTAACACGCCTCCTTCTGG  
TTGCTGAGCGACGTACCTAAAATAGGATGGCCCCACGGCCCCGCGGTATAGTATT

>NewGenomeName\_147

CCCCACTACCGGAAGACCCGAGCGCCACATGCCCTGCCTCCGGGTCTCTTAGGGTGC  
ATACGCGGGGGAAATATCGCTTGCCTGAGCGTGCCTCGCGCATTGGCTGGTTCGTACCT  
GCGTATTCAGATTAGGGCGTTCGCGAGGTTAATATGTTCTAGATAGGTTTCGACCTTCTTG  
GGATTAGTAATTAAGGCGGACAGGTGGTTCCCCGGTGCCTTCACTCTTCTTCTCT  
GAACTGGGGTTCGGTCCCCAGGTGACGCATGATGACGCGACGCTCCCTAGGGCTGCCTGG  
CCCCGTCCGGCTGTGCCCCGCGCCGGCGCTCTCCCCGCCAATGCCATAGTTGTGCTGTTA  
GAGTCCGGCTCTTACCTGGTTACCGTCTTCAACGGCGTGTCCAGTTACCGCCGAGTC  
TCGGGGGCTTGGTCTTGTCCCCGCCCTCGCTTCTGTTTTTTTAGAGCGTGAACCTTG  
TAAATATAGGTTCCACTATGGTCTCTAATGAATGGTTACATAGGGGGGATACAATACGTCT  
GTCGAGTCCGCACGTATGTCCTGCGCATAAGCCAAACGCACTAGCTAATTAACGGGATG  
TGGAGGCTCTTGCCTAACGACGAGGCGAGGCGGGCATTGGTACACGGCAACTAGTACTCG  
CCCATCAAGGGACGCTGAAGGGTAGCCAAGCTTGATGCATCATCCGGACGCTGGAAAACG  
CGAGGCGAAACTCAGGATAGCCGCATGGAACCGGGCTCAGTCTGGGAGTTTACTAGCTAC  
TCTGTTTTCCCTAGGCTAAAGGCGCGCCGTCGGTGTAGGCGTTGCTTTGATAGAGCCGC  
TGGTTGAAGGTTCCAGGCATTCCTACGCTCAATGCGCGATGATGTGGGGACACGGAGGAC  
GGCCCTGCGAGATAACGATGGGCGACACCGTCACAGATATTTAAATCTTCGCGTCTCCCG  
TGGAAAGCCACTTATCCAGAGAGTCGAATAGACGCGGCCAGGCCATGCTAACATTACCC  
TTAACAAGAACGACTAAGGTAAGTACGATCGAGGCCAAGCTAGCATGTCAACGGGGCAGC  
CTTTCCATTTTCGTATTGCCGTGCTGAACGCCATCCATATTAATGCGGGTATCCCATCGT  
AAACCGACCTCCGTCCGGAGGGTTCCGCAGCTAAACTAAAAGCGGACGCCTACTTCGAG  
CGATGGACACCAAGCAGGCCCAACCCTGACGCGCGGTCTGGGGCCGGGCACTTGCCAA  
CATATGAGTAGCTTGCTAAAGAACGTCTAGGACTGATTTTAGTGCATAGGAACACTGAGC  
AAAGATTCAACTTACACGATTACGCAAGTCGAAGCGGAATTGGCCCGATGATATTGAACC  
TTTCGGAACATAACGGTTAGTGATCCGTGCCATAAATGTGGAAATCCGTACTCTCGAGTG  
AGTTCCCTTACCTCATTGGGGAAGCTCGGGTACGGCACGCTTATCCTGCCTTGGATCCAG  
GCAGTCCGGGAGTAATGATCTGCCGAGATGATGGAGAAGTGTGCAGAAGATCGAATACG  
GGCCATAGCCATGCAACTGAATATTCCGGTGGTAGATCGCAAGCTACGTCTCAAAGCGCA  
TCGTCAGAAGCGCAGAAACGCAGCTCTCCTGCGTGACCTGGGCGATATGCAGAAGCGAGC  
CGCACAAAGACCTGCGCTGTGATGCCAGCTCATTCCCGAATCTAACGAGGCCGCCACGAT  
CAATGAGCGGGCCGTGACACTGCAGGCCGAGTGCCATCCAAATGACCTGTGAAAAATCG  
CCTTAGCCGGAAGCGGGCCGGCTTCCGGAATTATAACTGCTGAAAGCCAACCTGTCCAAGC  
CAGCAGCCTGGAAGCGACAAGGTTTGGCATGGTGTCTGGACGCATCACCTCGCCCACGAG  
CTATCTAAGGTTATGCCAGGGGATATCACTTTGCAATAACGCCATCTATCAACTGGTTA  
CTGTGGCCTTACTACTACAAAACCCGGCGGATCGTTGTTTCAAGCAGGACACCCCCGGGCG  
TACTCAATAGTGCATGCGGACGGCCACGTACCATTTTATCTCATTATCAAGTGCATTGA

CCAACCTGTGTAACCGGTCGGCTTGGGTAGGCTCTGGCACGTTGGTGCTGACGGAGCAGT  
CAGTGTACCGGGCTAGCCCCTGAAGACGGTGCCCAAGGGCGCCCCTGAAAGGCAGTGGC  
AGAGGGTTTCCAGAACATCGGCAAGGCCACCGTGGCCGCGGTGAAGTCCTACACCAGGCT  
ATCCCCGCTTGTATTGTTCAAGGACTGCAGCAGCGACCGGGACGGCGCGGCACACAAGCA  
ATGGTGCAAGTGCATGCCATACGGAACCCCTGCACATGGAGTTTGAATCAACCTCTCGATT  
AGCGTAACTGCTGAACCATGCAGCCAAAGAGCAAGCGAATGTCATTAACGTCAAGGGTGC  
CGACTCCTTGTAGAAATGGAAGGGCTAGATCGGGTCTGAAACCATTTCAGACTAAATAGCG  
ACTTACCCACTACTTTCCGAGATTTAGCGATAGGGCATGTGTTGACGGTAAACACGCATC  
ATTAACGCAAGCGCTTCATCCGGAACGCTGATAATTGTTTTGAGGGTTCGTTAGGTGTACC  
TTGGCCGAGGCCGGCACGTGCATTTATGCTAGCACTGGTCGCATGGTTCGTCACCTGAG  
CAGGGCCACGTAGCCTCGCTAGCGGATGGTAACAAGCTACCACCGGGACGATGACCGCCG  
CTAACAGTCGCTCGCGGGGCTCGAAAAGCGGGAAGACGCGCTGAGTATGCTTACTGTAA  
TCGGGGACATCTGGTATTGCGCCCCGCGGGGCTCCCATAAGCAGTGGCGTGTAAACGAAGGG  
GCTGGAAAGGAACCGAATGGACCTACGACGACAGTGGCGTACGACCCCTACATTTCAATC  
CCGAAAGCTAACGTAATCAGAGAATGTTCCGCAAGGGGTCCAACCATCCATAGCCTGCAA  
GACATTCCCAGCGTCGTCATCGAGCATCAGACCTACGCCGTTAGCAACGAGCGGTTCGGAG  
ATCATGTTTTGTGCGATTTGCTTCGCTCTGGTGGCCCCGTGAGATCTGCCATGAAGAGAAC  
GGCGCGGCGAGTCGTACCGTATAAGGGTACCTTGATAGGTTGGGTGGCCTCCAGTAAGT  
TTGCTGTAGTACGCGATCCAGCGCATCCGCGCTTGTCCCGCAGATATGAGTGGTTCCCAA  
TAGGTGTCCGAGGCCGGTAAGACCTTCTGCTAATACTGGCGCGCGCACTCCCGAAGTGAG  
TACTAGCTTGTCCGTAGACGTTCAAGAAGATTTCAACAAAGGGATTTATGCCTGTCTGAA  
TAGGGCGGGCTAGGCCTGTGAGCAGATCATCTGCCGCGCCATATGGCTCGCATCTACTGT  
GCACCTCATCAGCTCCGACAATCGCTAGCCTGACAGGATAGCTATGGTGACCTACGTGCA  
TAGCATCCGCTCATTGGAGAACTAATTCGTTGGGGCACAGGACAGGAAGCTTCGGCAGGT  
CCCTCTACCGACGCCATGCGCTGAGGCATTCTAACGGAATTGTACTGGGACTCGGTGGA  
CCGCGCGGGCGGCGTAAGTGCTAGACTAGCATCCCGAGTTCCTCCTGGTGAAGAGATACC  
GATCGACTAGCAACTTAGACGAATTCTCGTACGTTGCGAGGAGGCTACCATCATAACGCA  
ATTGGGTATGCCAGTACTAAGGGATTCCTCATATTCAGAGTAGATCAGCATTCCGATGA  
CCCTTAAACAGTACACGCCAGCGGGAGTACTCCCAGCAGCACTGTAGACTCGATGTGAG  
TATGGAGCATGGGCTGACCAGCCTGTACAGCAATGCCCGGGCCAACTCATGGTTCAGGC  
CCTCAACGGCTTGGCGCCGATCGCGTACTACCAAGAGATCAACAACAAGGAGTAATTGCC  
ATTCGCGATGACCAATTTCCGGGAGCTTGAACCTCAACTTCAAAGAGGTGGGAGCCACAT  
GAGGCTGTTGGAACACATGTAATGACTAATCTCGACCGACACTCTAGGTGAGAGCCAGTC  
CTTCTTGCCGTCGAGAGGCTCTCGAAGAAACAGCTCGTTTTTCGTTCGGAACCTAGCCCCG  
AGCACAGGACTCGGAAGTATGTCGTGCTGAGGTGGCGCGAAGCATGCCTATAAATGTGAA  
TAACGACCTGTCCCTGGAGTCGGTGTAATCTATTAGTTCCTGTTCTTGCTAATGTGGAGC  
ATCTCCACATAGGCGCTAATCGGCATCCTCTCACATGTGCGGCCACTGCGTGAACGCGTA  
GACAGCCCTGTATTTCCATTTGGACTCAACAGGAGGCTGGCCGAACGGCGATGGGGGGTA  
GAACTTTGTCTCAACTTCATGGAATACATCTATGCGTAAACCAGTGTAAGCGTAGTTCA  
GCGGTTACTACCATGGGCGGCCCGGGGGCCCCGCTTAAGGTTCGTACCCCGTTTCCGCGA  
TCAAGACCATGCGAGCGTCCGGGCATAGGGAGTCGAGACCTGCCACGTTCTGTATATACA  
GGACTTTGGGGCACTAGGAGAGGATATCGTTGACGCCGTACGACCGGATGAACCCGGTCC  
TATACCGGTGAGCTCTCGCCTTCCTGGCGTTATTTTTCGCAATGCCGGGGAGCAGCTAAT  
CTACCACGCTACCTACCATTCTGTGAGGCACTATACGGGCCACTTAAACGAGGAGTCGA  
ACGGTAGCTACTTCGCGGCCAAAGGCGTTATTAACCCAGGCGTTAGAAGCACCCCTCATG  
AGACCGATCGCTTCGAGTGGAAGTGCCTCTCGGATACCTACGCAACGACGTACCGAGTCC  
TTATATAGGTAACACCTATTAGCGTTGTCACCGTGTAGCTGGTGGCGGCTCGACACATCT  
AGTTGCCCTATCAATGTCGAGTCCTTCCACCTGTGCAAACCGGTGAACGACGCCTGAT  
CTGGCGGGTCCGTGGATGAGACCGGGCTGCATAGAGCTTCCGAAGGCCACCTGGCCGACT  
TGGGGATAGCTGCTATATGTCTAGGTTATCATCACGTATTCGACCACAGTGGTGTGGAGG  
TGCCTTCTACTGTCTCGCGAGTTCCTACCAACATAGGGCGCATCACGGAACCTCGATGCTC  
TCGGATGACAGTATCGTGCTCGTGGCTTAGAAATCTAGCGCTTCTATGAGAGAGGAAGCC  
GCTCACCTGTAACGTTCCAGACTGGCGGGGGACTTCACAGGGGCAGAGCTCTTCAAGCGT  
CACGGCGGTTATGCATGGGTGGCCAACAAGGTGAACCTGTGTACGAGTCCGAGGGACTG  
GTGGAATGGCTGTAGTAGTCAGGTATGAACTGCGGCAGCTTCCAAGATGAACATAGCTGG  
GGTTCGTATGGTACAGAGAACATAAAGGTCCGACCTGCTTCGATCATGGTTCGGAGTATG  
GGCTGGGCGTGTGTTCCGGACGACGTCCCTCCTGGCGAATGATCGCTCCTGCGCGTGCA

CATGTATCGCAGTCAGAGACCACCCGAGCCTCCGCGGACTGTGGCGGCCAATGGAGTTAA  
TCCCGGGACCCGTCAAGTCACTGTGCGTCGTGAGTGCCCAACGGCCGGATCGCCGCACCA  
GTATCCGTTACAAGAACGAGAGAAAAGCCGGCTCAGGAGCGTTTATACTGGCCTGTGTAA  
ACACGAAAGTGCATGCTACGTGGCCCGCGTAAACCAGACGAACACTCAGCCCCAGACGG  
CCATCTCGGGACGTATCGTCCAGAACTGTAATGATCACGTACAATAACCCTTGTGTAGT  
AGTCGCGACTTATGACCAAAGGGGCTGTGCCCCCCCACGCAGTACACGCTGCTTTACCGT  
TGCATGTGGTCTCCGATACCCAGCTACTTAGTCAACGAGGTTGTGGTAAAAGTTGACGG  
CGATGGGAGTTTAGCAATCGCTGTGGGCGAGGTCGACAACGTGGCACCTAGTCTGACCAA  
GGGAACCGCTTTCAAGCTGTGCGCCGCCCTTAAATCTGGACCAGCCCAATTGTAGTGGCT  
AAAGCTTGGCGTAAGTGTAGCCGCGAGAACACAGACATCCGCCCCATCGCTGTCTTGTGCG  
GGGACAGTTTTTCAGTGAGAACCCCGTTTTTCAGTGCCCTCATGCCTTCGCCGCTACGTCGA  
GTTGGTGTGGTCCAGACGTTGGACTACGCCCTGAATTAAGTAGGGCGTATTAGTTGCT  
AGGGGGACAGTGTAACCAGCCAACGCTCGCCTGTTCTCGGAGAGTAAGCTAGACTGTG  
TGCAATGGTACCGTCACGTGGAGTAGAAGCTCATGCGCTAAGATGACCGCGGGCAAACG  
TCGACGGAGACCTGGCCGCCGCGTAATATATAGGCGTTGTCCTGGCGATTTGGGAGTGGC  
TCGGGGAGGAGTAGAAGATTCCAGTCTTTCATAGAGTCCGTCTAGAGATCTTGCGCCCT  
CGCCGTCTATCCCTCGGCTCTACCGCCAGGTCTCGCCTTCATCTGCAACCATATCCAAA  
AGTTAACGAGCAGCCGCTTACCGTCGAAGCCAAGTCGGCAGAGCCGATAGCTCAAGCCAC  
TACTCTTCGCATGTAGGTGGTTTTCCCTAGAGCGCACTCAAAGCATCGCCTAGAGAGATGC  
CGTCCCCTACCTCAGTGGCCGACAGGTCGACTAGATTATCATCAACGGCGTGGTCCCTGGG  
CGAGGCTAAGACGGACGACCGGAGGCAGAGACGAGTCTTCGTTGAGGCCTGCTTCCACAT  
CACTACGTACAGTCTCAAGTGTAGGCATATCTCGCACGGCCGGCGTCCGGAGCCTGGCGA  
GATTACTGAGGTCGCGGATTATCCTGGCGAGTAGCATCGGGTCTGAGTGCAGGAGGATGG  
CCGCGTCACCCACACCTATTGCGGGTACCAGTAACCGCGACACTCGGTGTTTCGATTTTCG  
TAACGACGAGGTGGGACCATGAAAGTTGTTAAGAACCTGAACGGCACTGCTCGCGTGGCA  
ATCCAAGCTGACGTGGAGGCGGATGACATGGTCCCGCGCTTGACCTTTGAGCAGGCGGGGA  
CGGGGTACCGAGGACCCTGCTCGCGTGCCTAGTCCGTGCACCGGTGCCCGGGGAAAAG  
GAGGGCTCTCGCAACGAGCTCGAGCATGCACATCGCCAGATCTCATGGCTAGAATGGAGC  
TGCAGTAAGCAACTCGACACGATCCATGCCATGGAGGGCAGGCAAGTAGACCAGGACGAG  
TTCGTGAAGAAGCCGGAACGGGACTAGGACGTAGTCGATGCCCGCTTTAGGACCACAAG  
AAGCCACTCACTACTTTGTATCGGATAGCCTGCGCCCTACCCGGTGCGGTAATGTGATTG  
GACTGCAAGCGATCACGGAAATTCGATTAGATAGAATCTGATCTGTGATCCTAACCCCGG  
TTTGTAAAGTCACCGTGAGTGGACAAGAGAGTCTTAGCCATATGTGCCCTGACGGGAATCA  
GATGCGTATAGACTGGGTAGAGCGTTCCACCTCTAGAGGCCCTCTGGTTTCCGAGGGGG  
CAGCGATGGTTCCGTAGCCCTGCACGCCGAGGATGGGGCCCTGCGGGCTCAGAATGCAA  
ATGGCAAAGAAGTCATCAAGATAGAAATGAGCCAGCAGTATGTGAAGGCGATTTCGATTT  
TCTGGCACTACGCATAGAGCTACAGGGGGGCGCGGCTAGCTGCGGAACAGGGACGACGC  
CGCGCGTAGTACCCACTCCAGCCAACGGGGGGTGGTAACCTTTCGACGCAGTGGCTAGCG  
CGTTGACTTATGAAGTGACCGGTTTTGTGGCCTCCGCTCAGGCGCCGGTAGGGCCTGGCTG  
CAGTAGGCGTCGGCTCATAATGTTTCGATCGGCTAGAGTTGCAGGCGGCAGTTCACTGGGA  
GTTATCGACTAGCGCCGACGAGGTTGTGAGCTTCGCTCCGCTTTATCAGATTAAGAGGG  
CGCGATCAGTTGGTAAACGGCAGGATGTTTTTCCCTCTCGACACGACCCCTCAGACACGC  
CCGTGGGTGCGAGGTCTCGTGGCGGCGAAAGAAAGAAATACTCGAGAATATAACCATTGGGC  
AATTCCGACGGCGAGTACGTCCGTATCGTAAGACCCAAGACAGCCCTATCCGCCCCCAGC  
CAACCGCAATCGGAACGGCTATCGCCGAGCACGAGTTTGTGCAAAGCCGCGAGTCGCTGG  
CCATCCGGCAAACCTCGCGCACTTACCATAGCGAGGAGAAACGTGAAAGCCCCGCGATCG  
GCAAAGCCATCGAGCGTTGGTGGCCGTAAGTCCCGCGCTGTCACGAGGGCGGGCAGCTGC  
CAAAGAAACCGGTCATCTTGGTGGCAGCCGAGCAGCCCCAGGAGGGCATTATACCTCGGA  
ATGACGATGCCAAAAGCGCAGTGAGCGACTCGCTGTCCCGCAGGCTGGACTGCAATCCGT  
CTGTCAAAGGCGTCACCCGTGTTTGTATAATGCTAAACGCCCCAGTTTAGATTACCCGCC  
GCTGTGGTAGCCTGATACACGCCATTGCGCAGCAGTTGTTTCGGCCGCGCCAAAGGCATAG  
TGTAGCCGGGGTAGTGCTCGTAGTCGAAACCAGGTCAGGGCCGGGCTGTGTTCCCACTTC  
ATCAGCCCGATCATCGTACGTGGCAGAGTGTGATCTCTGAGGCCTACTTCTAGCGAGTT  
AGATAAGGTGGTCATAGAAAGATCCGGAGAGTATCAAGATTGTGGATCTCAGGGGGTCGTG  
TGTACAAACGCCCGGCGGCTGCTAACCTACAATCAGATGGGGAGAGCAACGCCCTTGACG  
GGGATCAATCCGTGGTTGACGGGTGGCCAGCAGCCGCCGCCGCTTACGTGGCCTCGGCA  
AGTCAGGGCGAATCTTCAACGCCCCACTGTGTTTTGACCTTAAGGTTATCCGGACACCAA



AGGTACAGCAATTGATAAATGGCTCGCTCCCCAAGTGCGGAGCAAAAGGAAGATATCCAT  
CTCCCCCGCGCTGCCGAGGTGCAGGCGCAGCGCGAGTGCCTACGGTACAACGGTCCCCGG  
GGAGTTTGGCACCGGATGCGGTTCGGTTCGCGTAATGCAGAGATATCACTGCGGCTGGAAG  
TAGTTACGGGATTAGCTAGGGGCAGCCGTGTCGAAACGATCTACCTGCTCCGGTCTGGG  
TCAGTGATGATGGTAATGAGAGGCGGTTCGCGTAATACCGATAGCTGACCTAGGACGACC  
GCCCCGATCGTGTGGCTTTGGAGCAACTGGCACGGGTTCGAGCTTTCCCTGCCTTCCGGGG  
CCGATCACTTGATGATCCGATTTGATGACGATGATGAGTATGGCATCCAATGTTTTGATC  
CTTCATGCGCTCTTCTAGTAGTAGACGGAAAGAACGCTGATAGGGACGGTTCCCTCCGGG  
AAGCTTGGAACCGACGCGTAGTTCCTATTGGACTGGTATCCGATACCCAACCACGGGAAC  
CCTGTTAACGAGGACCCGTACACCGGTCCAATCGGTTGCCAGCTGAAGCTCCTGTGCGGT  
CACAGCCGGGTGCAGTTCGCGACGGAACGCACCCGATTACATAAGCCACTCCAGCACGTT  
GACCAGAACCCGATCAAGGCGGACATGAAAAATCTGCGAGGACGGGAGTTCGCCATTGAT  
GAGGGCGCTCCGCTCGCCCACCACAACACCGGGGCAGACGTTGCTGTAATATTCGAGCTT  
TGTCGCCTTATGCGTGAGATGTATCTCGGGGTGGACCACAGTAGGAGCTCCGAGTGATTA  
AGGGACAGCAACGAAGACAGCCCATAACTGGCTGAGAACGTCTCCGATCTGAGCTTCCTA  
CTTCATGTCTTGAATGCGCACATCTACGGCCTCCTAGGAGGCGCCTCAGTGATATAAACG  
GGGCGCTCCGAGAATGTTTAGATGATACTATTAGTACCCGTCCTTGCGCGCTTTGGGGCA  
TGGATAGATCGATACTCCGTCACGGAGCACCCATGATCTGGCTGAACACAGAGAGCCAG  
TGTCTGCGATTCCCTGCCACCGCTCTACGAGCCGCCATCGGGGTGGGCACCGACGTGTTG  
GTGGTGGTGAGCAACGCCGGCACGACGCGGGATGCAAACCTCCTTCAAGGTTTCGAAGTGCC  
GATCGTGTCCGTTTACCATATATGCATTCTGCGTGCAAGGATGATAGCGAGCAAGGCGTC  
GCAGCAATCAAGCCCGGTATGGTTCGTTTGGGCTCAGACGTCGATCTTCCGGCCGAAGCAA  
CGGCCAAGCGTAGGAACAAGGTGGATGAGGTGGATTAGAAGTAGCCAGCCGGCCGTGCT  
ATGTCGCTGCGACACGCCTTCGTCTGCCAAGGGACTGTCCAGATCAGCTAAGAGGGTAAG  
AGTATGCTTTAGCCAGCGTACTCCGCGCTTAAAGATAGTAAGACCGGTAGACAGGTCGCG  
ATCGATCTGATCGTGACCATCGGGTGGCTGGATGAGCCTGCGATCAAGTCGCTACGTGGT  
ATCAGCGCGCCGAAAACGAGGCTCCGGATGGCCAATCTACCAAGCCATATCACCTCGGAA  
CTATTTTTGGCTGCAAAGAGATGCGAATTCGAGCAAGGTACTTACACAGTGGAGACAAAG  
CGTCTCAGACCTTGCGGCACAGGCCGAGCCGTTGATATCGTATTCCGAGCGGAGCATAA  
GTGCTACCACGTTTCATTCAACTTAAACCGACGCCAGACCTGCCATTACGAACAGCTGGA  
CGACCGCATGAAAATGTACTTCAACAGTGTTCTGTACGAACTGAGTAGCATACTGTACG  
GCGCAACCCATTAGACTAAAGTGCACCCGTAGAGAGACTGATGAGGTGGACATTTTCATCT  
GATGACCCATGACTCCTTCCCCAGCGGTCTGATATTGACACCTCGTTAGTGGAATGCTC  
ACCCATTCCGACGCCGAGCGCCCGTCTGAGCACATCATCAGGCACGATCCAGCGGAACAA  
ACGAAATATCACGGAACTTTACGGTGGCCAGGTATGTCACCCGTAATTTGCCCGACCGC  
GACATAACGACCTAGACTACATGTTGGTCTTGAATGAGACCCAGGTAGGCAAGTACCC  
GCAACTAATACTCTCCGGACGTTCCGGTCTCGTGCAATGTTGCGGAGTAGCCGGATAGGAA  
CGAGTACGTGTCGGTGCCGTTCCACTGGGGACAGTTCGAACGGTATCCGCTTCTGCAACGT  
GACGTAATACCTACGCTGGTTTCTGTCTACAGGAATAGCCGAGGTATCGACTCTTACTCC  
AAAAGAGGACCGGATTGGCAAGCTTCGGGCATACGGCTGACGAATACCCAAACAGGCGCA  
GTCGATGCTTGAGCGTCCCCGTACCACCGATGCATCAAAGTCCCAGTGTTTCATCAACTA  
GACCTAAGATTCCCCCTCTGCCATGCCACCAAGCACCACTCGGTTGACGGGCACCAGA  
AGCCACATGAGAGGCGTGTGGACGAAAGCCATTCCACGCATGTGATAAAGTACTGGGT  
ACATAGCACTGCTCCGCCTGCCCTTCCAAGTGGATGTGGAGTGGACGTCACGCGAGGGCA  
TGAAATGGAGAAACATGTCTGGAATTCCAGTACACGTTTCTCGCACCATGTACACCTCAG  
TTACACCACCGCAGAAAGCTTTCGACCGGGAGGTCTCGCTCAGCGCGATGCCGTACAAGG  
AGCTGGCCGTCCCACTACGACTTTTTACGCGGCTGCTCCGCGAGTACCTGAAAGATCTAC  
AGGTCCTGGTGTCCGAGCTGGGAATAATAGAGGAGCACTAAGGAGGGCCCGAGGAAGGCT  
GTAGCAATGTGACGCAATTACCCGGACGTCGTCCCCTCAGGGGTTTCTAGATGCGGGCTC  
CATTCTACCCTGATCGATTGCCCGAGGTGCATGTTGACCTTAGAGCAGTCTTGACCG  
TCTTCACACTAGCTATTATCCGCGAGCTGTCCGTTCTGTGTCGGGCTGCCAGTGCGTGG  
GCCTGATCCTCAAGGTCCCCCTCCGCATAGTCCGCAACGGCAGGATCTCCGGGTGCTGGA  
AGGTGAGTCTGGTGGCCGCGACCCATTCCGCACTATGTTCTAGACGGATGGTACTGTCA  
TCGACGCCATCTGGGGAGTTCCCGCTGAGACGAACTGCGAAAATATCGTCCGGGTGCCTGG  
TCCGTATAGAACACGGGGCTGACATATACGCGCCCCGGGTCCACGCAATACTACGGGGCCT  
GAGACAACCCGATTTACCACGAAAGGGCGGATGAGGGCGGCCTATCGAAAACGCCCTACT  
ATTGCCGCACACGTAGCTCCCACTATACGGAGAGAACTAAAGTTGGGAGTATCCGCCCC

CAACCTTCGAGCAGTTTCGAGAAATCGTCAGGGGCTGTTGGTTTGATAGCGTGACATTGAC  
TTATATGTTGCGGCTTGGCCGTACGCCAAAGCTCCGGGTGGGACCATGGCTTGGCCCGTA  
TAGTTCCCGTCCCCGACGAGCGAGGAACGGCCGGCTGGATGGTGGGCAGTCCGGATCCGT  
GTCACACGGTGTTCGGCGAGTTGTTGTTCTTCGACTGGTCGCCAAACAGAAGATAACCGTGA  
ATAGATATGGAGCACGGTTACAAACCCTGATCCGGGCAGTTCGCGCCCCCGACCCACCT  
AGGAGGCACGTGGACAGGCCCGTTGAATGTGACAGCGGCCACGGCCACAGCCCTAGCAGG  
GTACAGCATCTGGACATCACCCCGCTGGGGAACGAATCCAGTGGAAATTGGTTCACAGTT  
GACGGGGTAGACCGTCTCATATCGCCCAAGGCTGGGCACGAGCTGTCCTGGATCGTGACC  
CGCTACGGCGACGACTTGGAGTGGGCCCGCAAACGTGCTGACCGGGTGTTTTGCACCCGG  
ATCGCTGAGTACTGCCTGTCAAACATCCCCCAACTTACACCAGCTTCTTGGAGACAGCG  
CCAAAGTACGGTTGTATACCCAAGGTCCATGCTGTGAAGCAAGACTGCAAGGAGGGGTAC  
CACATGAGGAAGATCGAGCCGGATCTGCGGGCCGAGTACGTGCGCCGGTACCACCGGTAAG  
GTTAACCTCACGCGCCCCCTCTTCTGCAGCCTGATGACGGTGTCTCCAGGAGCGCGTTCTG  
TGGGGGCAGTCCGGTGAAGGGCAGCGAGGGGCCACTGGCTTTTGCGGCCTGCGAGTGCTAC  
GACTAGTAGCTAAACCCCGAGGGTGCAGTGGCCAGACAGACTACTCAGGAACCTGTGTTG  
CCCGAGTTTTCGAGCCTCCGTACAGCCGCTCTTGACGGATCTGCCTAACAGTTGCGCTTC  
AACAGGGGCGGTGGCTACCATTGCATCCCTGTACTGTTCCGGCGTTCCGGTGAAAAACCGG  
GCCGGCATTTCGCGACCCAGGCTGGTGGCCGCTTCATGTACGAGAAATAGGTGTTTGAC  
ATTCTCGGTGACAAATTCATCGCTTTGTTCTACGACAGCGCCTCCGTGCGAGGTGGAGGTC  
GCACACCTGAGCCGGCAACATGCTAACCTTGATCGTTATAGGCCCGGCAAGAATAAGGTC  
CAGTAGAAGATTGATAATGAGGAATCAAATAACCCAAAGATGGCGTGTATTGACCCGGTG  
TTGGTGTCCCCGAAAGCATGTGTACTCCGCAACTGTCTCAGACGTCTTGGAGGAGTAC  
GCCTAAGACGGCGCGGACTCGCGCTGGAACGGCGCATGAACCGGGCCTCCGCGCAGCGGTGC  
GACATCAAGTCCGCGGTGTATAACGCCCGCTCGGAGGTTCCCGGGGTACTCGACTAACGC  
ACCTGCTAACCCGCGGATAAGCTTTAACCCACGGTACGCCTGGATGAGGATGACGGAACG  
TGGTACAGCTCTTTGGAGTTCCTCAAGGAGGGCTAGGCTATGAAAGTCAGTGGGACGCTA  
CATGAGCTCCAACCGGAGGGGCCCCGACCACAACAGCTTGAAGCTTTACGCAACGGACAGA  
GATGGCCTGTCCCTCTCGACCCGGCCCCCTCGCAAAGTCCCCTATCAAGCGAATGCAGG  
GTCAAGGTGAAGTTCGAGTCCCTCTTGTGGACAGCGGGGCGGCTAGTCGCAATGGACCAC  
TCAGTGTGTAGATGGGATAGTTGGCTGCACTAAGCGCCGACGAGGACTTGGTAGAGAAG  
CCCGCCCGCGGCTCACACTCTCCATGGCCGCGTATGGCCGCGAAGATCTGTGACCCCGAG  
GAGCAGGTCTTGAATATGCAGTCGAGAACATGACGGATGCGCCGCACCAGCGGTACAAG  
TAGGGGCCGACGTCCAAGCAGCCATATCGATCGGCTGTTCCGGTAAGGACCCAGTGCCTCG  
GGTATCGCAAAGGCCGCGGATCGATCTGTGCTGAATGCAAAGGATTTCTTGGAAAAGGAC  
GCGTGTCTGTTCCCGTTGTTTATGCTGTTCCGTGGGATAACGCTCGCTATGGCTGAGCGT  
AGCGGCGCCATGACGAAGGGCCTTCAACCAAACCAGGACCACGCCTCTGGGGCTGAAGGG  
TTCTACAGCGGCGTCTACTGGCAGTCTCCAGACGTAGCACGTCACAGCTGCCGGTAGTGG  
AGGCACTTGA AAAAGAAGTTCGGCAACCCGGGTCTCGACTCAATGGACGCTCTGATCGCT  
AATTCATGGATCCGGAGCCAGTCGTCCTAACTCATGGCTGTATCGGTAGTACGAGTACTA  
AGTTGGGTCTGATCCTGGAGAATCCTACCGAACTATGGGTGCGCCGCAAGCTCGCGCGTGC  
ATGATCAACAAAGCTCGCGATTCTGTATTGTGCGACGTAGTAAACTTGTCCGTACGGTTG  
GTGGCTCTCGAGGCTGAGGGATTCATACAAGAACAATAGACGTAGATAACCGCCCGCCTG  
CGTTCAAAGTTTCGCACTTCCCCCCCCAGCACCCGCTTAGGCCGAGCTCAACATGGCA  
GATGAGGCGTACTTGCCTGAGCAAATCCAATAACCCGACCAATCATTGGCCCAAACGGC  
TACTCGCTGGACGCAGTACCACTGGACGCTCGCCGGTGTGCGCCAGACCCGACTTCTAC  
TCGGGAAGGCGCAGGGTAGGGTTACCGTCATGACCCAGGCGGCCGAGGACCTCTCCGTCT  
CGGGGGAGAGCCTTCTTGGGGTACACGGCATTGACGTACCCACCTATTACGTGACGTT  
GGTCTGGCCCGAGGCGCGCGGCACCCCGCAACAGCCAGGCTAGGTGGCGACGACATAGAG  
CTATGGCTACCTAACCCAGCCGACGCCACGTTGCTACACCGTTCCCATGGGGGACGCCGA  
GATTGGGCGTTTGTACTTGTCCACATGAACGTGGTGGAGTGC GTTGGCGCGACCCCAAGT  
ACCGGATATATTATGTGCCCGGATCTTCCAGAACTACTGGCCCTTGCCAACTTTGTAGCC  
GAACCCACGTAGGTAGACCCGTGACAACGCTTCCAGGCCAGAGAGGGTGGTAAAAACCAG  
ACCGCAGCCTACGTCTCCGGCCGATTCGTGCTGTACGTCGTGTTCCGTATGCACGCACAG  
GGGACGCAGGGAACGGTGGCGGACCCTGGCCCGCATTACCACTTGGGCTTGACCATTGTC  
GGTGGGGGCACCCCGAACGTATTCGGCCTCACAGGCCTAGACTCGACCTAAAACATGACG  
ATATGTAACAACGTGTACCCGGCCACAATGAACATCTCCGGCAAGATGACCTGGGTGCGG  
CCGGGTAAGCCCTTCTGCAAATGGTCCGCGAAGCCGTCTCTGTGAAGAACCAGCACAAG

GTCGTCCAAGAATAGCCCGGGAACACGAGCAGTGTTCATGAAGCTAAACGAGAGCCAGCCG  
CCACTAGACATGAACAGCAAGAACGCGTACAGGACTCCCCAGCTTCTGGAATACCCGTTCC  
GCCCTCCTCCTGTGATCCCAGCCAAGCAAGGAAGCCTCTGACGCCATCTACATGGAGGGC  
ACAATCGAGACAACGAGCACGAGCAAGACCTGTTCAACTATACGCACCCTCGTGCTATC  
AACTTACCTCGCTCGGCCCTCGAGCGGTGCCTGTGAGGCAAGGGGAACTAGCCCTCGCAC  
GAGCAGCTCGACGCTTGGCTATCGGCGAAGCCCACGTTCTCCCAAACGCCGGGCCCGCCT  
AACATCCCGACAGCCCCGGCTACATCCGCCTCCAGTACGGGTCTGGCGCTTTCTGCGCGG  
CAGGTCCCACCAGGGCTACAAGTCGCCGCTGTGCCGCTGGTGGCGGTAGCGGCAGTCGTC  
CGGGACTTGCCCCGGAAGGCCGGTATCCAGGTGGAGCCGGAGGTACCGGTGCACTGGGGA  
TTATACGAGAAGGGGTGGTAATCGCGCACGGTGACTAGTTCGACCTGATGAGGCCTAATT  
GACCACTGCTGTTGGATGGCGTTGGGGTGCGGTACCGCTCTTGCGCCAGTGTGAAGGCTC  
GTAACACTGATGATCGATGGGAAGACAGGGTGCCACTCCCCGAGCAGTGACGCACCCGGTC  
CCATGGACTTGGGCTTAATCCTCGCAGGACAGGGGGGTGCGAAGACCCTGGAGTGAATGT  
ACCCGACTCGGAAGCATTACCACTGCACTCGTAAAGCTACGCTTCAGTCGGCGCCCTTTG  
CTCCGGAAGGGTGGCTTCTGTCTACGGCGAGGCTATTTCGACGATGGATTCCCCGAGAACA  
TCGTGATCCACCTTACCAGATAGAGGGGAGCCGGCGACGCCCTGGTCCAGGACGGCCTGC  
CCTACGGCGTTTCGCTCCGTCAGGTAGCCTGATGACAAGGACCTCCGGACAACACCCGCGC  
CCGTCTATGACTCGGAGAAGGGAAGGATCGTTGGCTCCCCGAGCTCGAACGCGTTGTTT  
GCATCAACGGCGGGTTCACGTCATCCCTCCCGCTCATAGTACGGGGCATAGGTGGAAGT  
TCTTCTGCCGCAGATGCTCATGGGCGAGACCGCGGATCACGTCCGCGGCTTGGAGCCCT  
GTACGCGTTGGAGCGTCGCGTACGCCGGTAGTGTGCGAGGTGCTAGGTGCGGTAGAGTACC  
AGTCCGAGGGCGAACAACCTGTATTTTTAGGACGGAAGTTAACATCGGCCAGGATACGTTCC  
CAAAGCCCATCTACTTCTACTGCACCGATCCGAACAGGTGTGTGCGTCCCCCTACCTCT  
GTGAACTGGACCTTAACCCAATCCTGCGGCAGTAACTGGACTAGATTAATCGGTAAAACC  
CAAGCGGCTACAAGCAGTAGATTGAGGAGCGTGATGAGTTAGCAGAATAAGACGGAGCTC  
AGGGGCTGGTGGTTCACCGATCAAATAAGCGCTGGGATGCCTCTGTGACCCATGTTTT  
ATTTCAATTGCCTCCAGCATTGGACGGCACGCGTAGGTGCGATAACCACCACGATACAGGC  
GAAATCAGGCGCGCCATCTACCGATCGTGTAATGCGGCAGGAGGCATTGTGACGAAGGCA  
GCCGGTTGGTGGGGTACCAAGAGAACTAGCTATGTGGCCAAGTTGGCGTTGCTGGAGAAT  
GGGTTCTCGACCTGAAAAGCCACGGGCCGGAGTTAATGTTCCAGGCCGCGATGCCACCA  
AATCAGGCCGCGGAGGCGAAGGGGGTAAAAAGCAGTCAAGCAGCACCAGTGCGCCCGGAA  
TCCGCCGGGGGCCGAAAGAACCCGCTTAAGGATACGGGCGACGTATCCACCTCGTCACAT  
AAATTAGTTTCGTGGACGAGTGCCTGCCCAATGCATTCTTGGTTGGCTGTGGTAACAAGC  
CCCACGCTGAACTGTAACCTCCGCTATAGGGGCCGAGGGGTAGTAAGTCGGGAACCCTGGC  
GCCAATGTGCACGACAGGGTAAACAGAAGTCTCGCACTTACAAGAGTGAAACGACGGGCG  
GGCCGGGCGGATGTTCCACGATTGCTGCGGGACAAGGGACCCCCACCATGGAAGACGGCG  
CATCTATTCAGAGCAGCGACATCGCGTCCCGTCCCATAGTAGGGCCAGTCAGTGGACTCT  
GGGAGCACAACCCAAGTCTTAACCAGTTCTGCCGGGTGTGGAACATCCGTAGCGAGCGGG  
TGCACAGGCTGGATGTTCCCTAACGTGTTTCGATTTTCGAGCTCGCCTGGGGAGAGAGCATTG  
GAGAGGACGGGACGCAAGTCGATGTGCACTTCAAGCGGGTACCGGAAGGAGAAGTTGTAG  
TGGCACGGAACGGTACGCGATTGGATCGACCGAAGAATTAAGCCCGATCCCTGTTGGATG  
ATTACAAGACAGCTCGCTCGCTCCTGGTGTGTTGGGAACCAGGGTGTGCGGAAGAAGCAGT  
CCGGTTTCAAGGGAAGAAAGCTGGAGTGGATGACCGAAAACCGGTTTACCACGAAGAAGC  
TCGAACATGTGAAATGCCCCCGTAAGGCGTTGTGGAACCAGTACTTGGCCGGCAAACGCG  
GAGCCATAGAGGAGATGCGGCACTCCAAGATTGTCGACTTCATCTAGGCAGAAAGGTTGT  
AGTTTAGGTTGCAACCCGGGGATCAGGGCTAAAGGAACTTGCCCTGTCTTGAGGACTGATC  
AGGGCATCGGCTGTCCGAAATGCGCCTGTCTCGGCCTGAAAGTCGAAGAGTAGACTCTCC  
CCTAGACCTCTAAGCACGAATTTTATCAGTGCAACGGTTGAGTCCGATACAACCTATAGAC  
GCAATCCTTAACGCACGAAGCCGTTGCGTTATTCCCACCCGTCCAACCTGCATACTCCAAG  
GAATCCGAGCGCTATATCTACACCATTCCCGAAAAACTAGGCCGCGGGTTCGCTTATGAG  
TACTGTAGGAAAGAGGGTTCTGCATGCGAGGGTAGGTACGGCCGGCCTAGAGAACCACAT  
CTTGTGGGGGGGAAAGCAGCGACACCGCCTACATGGCGTACATCAGCAAGTCTGACAGA  
ATAGTCCGTCTAAGCTACGCAAGTGGTTGAGGGCTCGCCTTGCGGGACGGGCTTCGTGTG  
CTGAATATAGCTTTGCATCCTATCCGTGAAGGTGGAAAGAGGAACATCCCGCATTATTAT  
CGCCAAGAACAGGATGCTCGCACGACCTAGCAGGATGCCCTAGCACTCCGCTTCCGCGAT  
AACCGCGACGCACTGACTCAAGACGGCTAGCAAAGCAAGTAGCTCTAGCACCAAGTTGCC  
ACGCCTGCACTGTTACTCGGGGTACTGGATAATCGCCAGGGGAAGAGTGATGAGTGAGTG

CATATCATGGTTGGGCGGCACTGGCAGCAGCAAACCAATCCCACGGAGAGGCGTCAATCC  
AGGACTACTCGACAGGAACGAGCTGGGCCCCTATCGCGCCAGGTGGCTAGCCCATCCCGG  
TGCTTTCGCGGTTGAGGATTTAGCGAAAACCTTCATCGGTCGTGTGTACCTCAAGCGCTT  
AGGTACCGTGACGACGGACCCGCGCGAAGCCCAGGTCCAGTTCACGAAGCGCTAACGCGG  
TCAGTCTAATACCCATCACCGGCGGAAATTTCAAAGGCCCCCGCGACTCGGCAGGGTTCGA  
TGAATTGCCTACGGTGTTCCTTTAGCGACTGCGCGTACGATCAATTGCGGGTTGCAAT  
GGATCCGGTTGTACATAACAAGCCACTCCGCCAGGAAAAGTTCTACGTCCCTAGCCCTG  
CCGGGGCCCGACAGAGACACACACCAGTCTGAGCATCGGCGGCGTACTGGAGTACGTTAT  
GCGTGAGGTGCGCCGCGTCAACAGCCAACCTACACAGCATCCTTCACCTCCTCGGGCGGGC  
CATCGCGCAAGAAGCATTGTGTGGGATAGATAACCATAACGTCCGCGCTATACCTCGGCCT  
GACTTGGGTGTATGTGAGTACAGGCGGCGCGCAGGAGAAAACCTCACCCAGACTAAGAT  
TTGTACTGTCGTAACAAAGTCCCGGTAGGTAAGTAAGGCGGGAACATAATCAACAATGA  
GTACATACGACTCGGCGATCAGGGCCCCCGGCGATCATTGATACTGGGGGGGGGGCGCT  
GCGGCGATAAAGGGCAGCGTGTACAGGACGAATGCGAACTGCGTCCTCGCGGCTGAGGTGCG  
TGAGCTCGTGGCTTACGTACTGTCTTGGATTATCGGGGACGCGCACTTGGTATTCGTTGT  
CCCTATAGCATGGGTGCGGGGGTACAGGCGGTGGGTCTTGCATAGGGCGCAGTGTGCTCTA  
CTTCCCCTGAGCCTTTTGACCCGACGTACTCGAGCGGCGTTTTGCCACGACTAACGGGA  
TAACTCGTGGAGATCCACCGAGTAGATCGCCTGGGCGAGATAGTTGCAGGCCGAAGTGT  
CGGCATACACTCGCCCAAGCGGGACGAGATCAAGGTGGTGTGAGTCAGCGGCCGCGGTGT  
ACTGGGTATGACTGAGCGCGACGCACCTCCCGAGGTTGCGTCCTCATTGCCAGACACCTG  
GGACATGGCCTGAGATCCCTAAATGAAGCTGACGCGCTCTACGGTATGGAAGCGTCATTT  
GCTTATCTCGCTGATGGGCAAGTTGGAGGAACACCAAGCGGACCAACCCGTCGGGCCGGC  
CCCCATCTCGCCGCCGCCCTTCTGCTCGAAAATGGCTGCCGACCTCCACCTACAGAAC  
TGGCCGGGGCGTGTACCGTGCGGTTGTAAACCGGCAGGTTGACCAGACATATTGGGAGCG  
GTTGCACCTCGACGAGACGCGCCCGATAGGCCAGAGACACCTCTAAGGGATTAAGGTGCG  
TGTGCCGCATTTATCAGGCCATTATAACGCAGGCTTCTATCAAAGGTCCGCCGTTGGTTCT  
TGTGCCCAAGGCTGATTTGTACCCCGCCCTGAAAGCTCCGCCTGCTACTTGCTCGGCCGT  
GGCCTACTCAACGCGCCGGTCATTCGCTGGCTAGTGGCCATGGAGGGTGGACCAGTGCGC  
CGGGAAGCTATCCCCAGACGGCCGTCGCTTGCGCATCAATAAGAAAGCGTCCTGCTTTC  
CGTGCTGGACTTATCCGCGAGGCGTACGACCCCGCGGGGCGGCGCCTACGATCCCCTCAA  
TGAGTGCCTTGGCGACTCCAAGGCGCACTCGTTCCTATAGATGGCCGAGGCGGAGGAGGC  
CCGGATCTGACTAGACGTAGCCGTACTGGCCGATACGGAGCGGCACCTGTCCAAGCGCTG  
GCCAAAGCGGGACTCTCTTACCCTGGCTAACGAGCCCATTGTCTACGTATTTGG  
ACACAAACCGCGCGGTGTCCCAGGACCACATCCGACTGCCGAAAGAGCAAGTTGAGAT  
CGTAACCGGTTGTGTTAGTATCTTAGAACCATCGTACCACTTGTCTGTGTTTCAGGCCTC  
TGCAAGCGAGCATGCTAGGCCGGGCGCGACCGCTGCAATGGCTTTGGTGCGGGAGCAGGA  
ACGCAGCGCCGCTGGCGTATACCCACGTTGAGGTTAAGGCCGGCAGGCCACGCGGGCGA  
GGACCATGATGGCGTCCCGCGAAGCACCGGTTTAAAATCGGGCCCTTGGGCCCCATTGA  
GATCGCGGTGGTGGAGGCCCGCTACCTTACCCGGGCCGAACGGCTGCATACTGCCGCGGA  
AGAGAACTTCGTGCCCTCCCTAGATGCACAGCGCGTAACCTACCCACCCCGAACGAAAGA  
GGATTGTGAAATGCAGTTGGGGCGCTACCGCGAGGTATCGAACACACACCTCTAGCGC  
CGATGATATGCACACTGCTATCCGCGAAGAATCCGTTCCGCTGTACTCGGAGTTCGATTT  
TGGCAATCTGTTCCCTAGAACGGCTCGGGCACGAGAGAGAAGAACCAGGGCGAAAGCGTA  
CCCGGATATGACCCTGTTCCGCAGCTCGCAATTTGGGTTCTGTGTACGCTCCCCTATAAC  
TGACCAGTAGGAACTCGTCCCACGGACAGCGCGGAGAGGTTGAGTGCCCATCAGACCA  
GCTCTTGCAGTAGGTCAGGATCTTCGGATCCCAGACCCTCGGGCGCTGGTTTGAACGAGCA  
CTCAGTCATGTACAGGGCAGGTAAGGGTAGCGTGATCGATGCATTTTTTCGCCAGTGGCCC  
AGCCCGGGTAACTTTTGACCTTCCCGACTTGAAAATACCACTGGCGGCAGCCAGCCGCAC  
GCGCTAACGGACGATGGTACAGGGATGAGTCGAAGGGGGAGTATTACGAGCAGCATTTTC  
CACCCCTTACGCCTGACATGCCTCGAGATCAGGACAGCGTGTGCTCACCCGAGCGGCTGG  
TGTCTTGGTACCATCTGTGCGAAGGCCAACCGGGATCGCTTTCACCACATCTGACGATG  
TTCTGCAAATAGGCGACTGCCTCGCGGTGCAGTGGCCGTACATCCTGCGTGAGTTCACGG  
ACGCGGACGTGTCGCCACCGTCCGCTCGCACGGAAAGGAACCGGGTGCGGCAACTAAACA  
TCACGACGAGGTCCCTTTCTTTCGGCTTATGAGAGGGCTTAACAGACACGGTGCAGGA  
GGTAACTGGCCAAAAGTAGTATAAAGGAAGTTGGTAGTGTGGTCCGTGTCTTAATTGGC  
GCTTGGCATAGGAGCGGTGGCGGCTTGGTTGGTGGCGGTGAGAAGGATTCCTCGATAGGA  
GCAATCGCAGCGTTGCTGCGGTAGCAGCGCCTTTTAGCGGAGAGTCTACACCTGGACGTG

AGCGAAGAGAACATTCCCACGATTGAAGCTGGTTGCAGTGGCGAGGCACAGGCAGAATCT  
GGCATTATGGATCGTGGTGGTCCATCCGTAGTCAACGCACGCGCCCTTGCCCTTAACGTC  
AGAAACCTATGTGCCAGTAAGCCCCTGCAATGGGGACGGTCCACCGAGAGTCGGCTGCAA  
TACAAAAGGCTTAGAGCTTCAAACAGTTGACCTAAGCCTCACTCAAGGAGTCCACGATCC  
ACAAGAAGTGCGAATCGGCAGTAATCGAGTACGTCGTGTCTTCTGCCAGCGCCTTCCTCC  
TAAACAACCTCGCCGGGCTAGGTGGCGGTTAGCCTTTTCCCATGTGGCCGTGGTAGCTCCC  
AGTTCGTTTCTCAACGAGACGCGACCAGAGATGGCAGCCACATATGCTATCGAACAGTCCG  
AACTGCACAGTCGCAATGTGACACGAGCACCCCTTTGCTCCGCTCCAGTGCGTAAACG  
ATAGCCTCTCGTAGCTGCACGGCCGCTCATGCCTCTGATAGACACAGGCTACGCAAGGC  
AATACCCCGTCGCAGACACCGGTCAGGATCCCTTCTGGCCCATGCAGCGGTACACGGAGC  
GCAGCAGCTCTTCCCTGCCACCCCGGCGTGATTGTCCTACGCCAGCAGATGCCGCTCCCGG  
AAGTGATTCCCGTGACCCATTACAGACGCCGAGGCGAAGCAGATTACCAAACGCTACTGGC  
ACAAGAGCGCCTTGTAACGTTTGATCCATGAGCAACCTACACCGAGCAGGAGACGCATCG  
GAGTATGGGACGGGCAAGCAGATTAGTGGGTGCGTCAAGGACTCTAGCCACCCTTCTTACG  
TGTATCCTTCTGTTCCCGATGCGTGGATCGCACCCAACGCCGATCAATTTCGCTGATGGCC  
ACTTAGAGCAGTACAGAGGCCAATTCTCTCATCTGCTCGCCCCAGCGGGGACCTTGGCC  
TGTGCTATTTGAGGAGGGGAGTATGGTTCACGCTGCGGAGGGGGCAAAGGGTGGCGGGG  
TGGACGTATAACGTGACACTAAGACCGATGACTTCGTCCCGGGCCATGATGATTTCGGTTG  
CGACGTAAGAGCAAAGCGATTATAACGTGAAGGTACAGGCCGTGGCCATTGTGAGAGCG  
GCGTGATGCGCCAGACCCGAGGGTCCATGTACACCGAGTAAGTACGATACACTGAACCCG  
TGATTGGAAAGGTGATTGGCACTGTTGCTAAGGTGTCACCGAACCTCCTGGGCGGGCGTGA  
ACAATCGGCTGTCTAATACGTTGTCGTAGCCAGGGGCGTAGCTGAGAACGCACGTGGCAT  
CGCGTAGAAACGGCGGCAAGCAGCTGGTTCGCCCAGAGCGTGTACCGCCTGAGCATGA  
GCACCCGTATAACGGCGCTGACCAAGGCCATGGATTCCAGCCGAATCTCCAGCGTAAGAC  
AGTAGACCAGCGCAACGCTTTGACGCTGGACCACCTTACTAAGCGATTTCGACTGTGAGA  
AACTCGTAAACCGTGTGTTAGCCTACATCTTTGTTGGCCTCTCAGTGTGTGCAAAAAACA  
CTACGGTAATGGGTGGCAAACCGTGCAGGGATCTACCTTGATAGATCAACTGCTGGCTG  
TAGAGAGCGGAGCGCGGATTGCCGAGAAATTAGTAGGAGTCCCTACCCTCTTGTGCGCCGA  
GCCACAAGCCGTGGTGTCCACGCCGGCTCCCAACGGGGAATCGACGCCTACTTCGGCGTC  
TGCTGCTGTAGCTGGCCCGGCAGCTTAGGTTGCTGGTGTGCTGCCGATGATGCTCAGGAGGC  
TTCGCACCAACGAGGAGAGTCTACGGCGGCCGCATCTGAACGTGGTGGCCTCGTCTTCCA  
CATAGGCGAGAACGTCTTTAGCGATCTGGCTGCAACCCTAAGTATCGGCCTAGTAAACCT  
TATAATGAATGGTAAGCTCGCGCACATCGGACGGGCTTTTTGGAAGCCTATCGGGGAGGA  
TGATCCATGCTTCACAGACGAGCGCTAGCTAATGAAGGTGCTCGGTGAGCAGCAGACCAA  
GTTGCTAAGCTCGGACGCTTGTAGCCTGCCCTCGCCAGCGATCCTTACTGGCGACCGCCT  
GCGTGATCAGTCGCTCAAGGAAATCGCAGGCTGAAAGTAGACCCTAGCGAAAGGGGTATA  
GGTGTGTATCTCTCTGGTGTACGAATCAAATGGCGCCGTGAAAGCTGACCTTATTAACAT  
TGGAGAACTCAAGGAACTGAAGTGCGGCTGCAAGCACATCAAGGACTTTGAGACGGCCTC  
CCGGCTATTGGTTCGTGTATAACACACATCCTGGGGGCAACCGCAGCACTATGGTGTGGCT  
TCTCCACGAAGCATATAATACGGACGTCGAACTGCGCAAACCTATCCCCGAGAATAATTA  
AGTACGGCGTGCCAGCTTAAGTCCGGCGTCGAGAGGGGGCCCGTGTGGAGGTGGACCCAC  
GGCGTCATGCTCTGCCAATCCCCCATTCGGTCGCGTCTGGGTGGTGGCGCACGCGGATGT  
TCGCTAGCACCTCGACGACTCCCTGTGCCTGTTGGAAGCTAGCTATAGGTCCAGCTCGAA  
GCGGAGCTCCAAGATGAACCGCCGCTCCCGGCCCGCGCCCTCAAACAGCCCGTCGACCG  
TGTATGGGCAAGCGCTATTGCAGGGCGAATCTCCGGGGAGGAGGAGATAATCATTGTAG  
CGTCACCGACAAGCTGAACCTTACCGCGGACTCTGTTTCGATACGCTAGACACTACCTCAA  
CAAGTCCGACGGTAGGAACTCAGACCTGGATGTCCGCAAGTAAACGGCCCGGGCGGACCA  
TAACGAATTGGACTGGCTTAACGGCCAAGCGTGCATCGTACGGCTCCAGAATGGCGGCTC  
CTTACTAGTCTCCGCACATCTCAAGCCAGCCTGTGACAATAGTATAGTGTGCTGTGCACTC  
CCGGTCTGGCGGAGCCCGTGATGTCATTTCGCGATGCCGACGCCTTGGTATTGACTACCA  
CCAAGGCGAAGAGGACCTGGGCTTCCACGCCATGGACGACAAGTTTATCTTGTAGGGTGT  
CACCTTCTAGACTTGGTGATCTTCTCGTTCCTGTTAGATAATCTTCGCCATCTCAACGT  
TGACTTCGACACCAACCATGGGGACGACGCCTTAGGCCTTGGTCGTTTCGTCATGCTGGA  
GGGCGCTCGTACGGCCAAACCCAGCGCTTCTAGCAGTCAGAGATCGACTCTAACGCCGT  
GGGTGCCGACTTCCCTCGTCACCGACGACGCGGTTTCGAAGTCAGAGAATGCACTACACAAC  
GAGGAAGGGCCCTCACACTGCCGGCGTGCACGCAGTATTCTCCAGCACTTGTAGGAGAA  
GAGAACTGGGACCACTTCCGGTGTACCGGCCAGGCGTAGCACATCGACCAGCGTCGGGG

CTAACTTGTAGGGTTTCCCGCCCGCACGGTCCCAATCCAACAAGGGCTGCGGCAATAGTA  
TTGACAGATCCTTCGACGAAGGTGCTTGTACTGGGCCTTCTGGCCGAGGAGCCTCAACAC  
AAGGAGAGCCGCATGAGTCTTACTTCTTTTGGAGCCGGTGAGGCTAGCCATATTTGTCCTT  
AGCGAGACCACCCGTACCTAGGAGGACGAGTCGTAGCGAATGCTGGCGCAGATTCTTACC  
ACTAAGGAACAGGCTCGCCTAAACACCCTGGCACAGGGTTAGCGATTGCGCATTTTGGCG  
GCATTCCCACCAATTCCCGCCCGGACTCGGGTAGTCCTTCAATACGCAGGTTCCCTTCGGC  
TTATATACGGAAGGTGAGGCGAAGCTCGCCTGCCCGGGGCGTTATGGCCGTGTCACTCTT  
ACAGGGTCTATGATGGATGCTGCTCTGCTGTAGGGGCCAAAAGTACTGGCTCCCCTCGAC  
TATGAGCTCCCGGAGTGTGCCCGTTATCCACAGTGTACCGCTGCGCATAACGCGGTGTAT  
GTAGCGGACCGAGGAGCGGATATGCCCGCAGAGCCATTGTGATCAAGATGTCCGCAGGA  
TCCCAGCAAGTGCGGGCCTTCCGCATCACGCAGTGGGACCTCACCCCTGCGGTAGCATACT  
CCGGCCACCCTAGTCTCAAAGCGAAGTACAAATAGTGAGTTACTTTTGGAGACCGGTCCA  
GCGTATACAGTTAGGAGTCTGTCAACAGCCTGCCAAAGGTGGCCTTATGGGACTGGTCAA  
GTCGCACTGGACCATACTCAGTGGCATGGAGCCAGGTCCCTGGCCGCCGTCATCCGGTAAA  
CCTTACCGCTGACCCAGAGCCCCTACCGAGCCCCACCGACATGCGAACAGCCTTCCCAT  
TATGTCCGGAAACGCGATCGTGCTCATAGGGGGCAGTCTGGACGGGACTCTGGCTATCCT  
CGGCGGTCCAAACGGGGCAAGACTGTTACGGGGACAAACAGCGTCCGTACCGGACGTAT  
TGGGATAAGTTTCGTATGCGCCACACTCCCTGACAGCGTGTTCGTGGTGCATCCCTAGGT  
TAACTCGCGCACCTGACAACCGTCAGGTGAGAGTTCGCTCCCGGACCAAACCGAGGTGG  
CTACCCGTAAGTTCGCGGGGCGTTGTGCAAGCAGAGACGCCAATCCGTAACCAACCA  
ATTCAAGTAGCTCGGGAAGTCCCGAGAAGTGTCCACTTCTGCAACACGGGCTGACAGTA  
TGTCGGGGGATTCCCTGGTACGCCGCTCCGACCGGCGTCAGATGCGGGTGTATCAATTGG  
TACTACTGCCTCCTTTTCGTGCTTCGATTACAGTGCAGGACCTGCACGTTAACGACCCTGA  
CGCAATCGCGGTGCTACTGACCAAGGCAGTCCCTTGCATCGAGCGCGTTATGCAGCCAG  
TATCAGCGACGCTGCTGCGCTGGCTGTAAAGCTACCTGTACATAAGGACGGCTTGGTTCAT  
CCCTATCGGCGCCCGTAAGAACGAGAAATACATCCGCCGAGTCGGTCTTGCGCGGTAGTG  
GGACGAGGCTGCGTCTTGGGGTGCACAAGCTGAGCTGGTGGACATGCCGAGTCGTGTCAC  
GTACTCGGGCCCAACCTGCACACCGTCTGCTTTGTACTACTACCGCTGCGCCTGTGGGTA  
CGCTCCGGCGAACCCTTCTCGGAGTGCCGCGATAAGGGTAACTTTGTAATCACGACCAT  
TCAGTGGCAGTCGGTCTTGGCTGGCCGGGGGTTACGTGGGCATGTAGCCACGGGGGAACCC  
GCTGCTGCGGGTACTGGTCTGTGTCAGGGCCAGAAGTAACAACACTACTATCGAGGTCGA  
GTCTGCTACAACAGTGGAGACCCCGTACGCGTAAGCTGTGGCCTACCACTAGGACCTGCT  
ACTCGGTGCCCAAACCCACTAGTTCTAGTTCGCGAGGACGAACCTCGTGACAAGTCGCAA  
CGGGACAGTGGGGGTCGTCAGATAGTCCAGCGTCCGGGCCCCCTGCCCGACTGTGGTCTT  
TGAGCCCAAAGCGTTCTGGGTCAATACCCGTAACCGTTCAGCGCGCAAGTAAGGAGAGCC  
GCTTGCCACCTAATACGCTCCTGCCCCAGAGGGACCGCGAGACAGTAAGTTGTACCTGCC  
GAAGTATATAGCGAGGCTGATACGCTTCTAGGCGCCTTCCAGTACACCGAAAGTCGGGGT  
CGTAGTCAGGTAGTATCTCCTCGATATGGTTGTGCACGGGTACCTCCGGCACCGTGAGGA  
GGAGTTTCACGGCGCGTTGTGCAAGAGGAGGTACCGGCAGGTTAGCACGGGTGCGCTCAT  
CGGAGCCGACCCCTCAGCTGGCGATTAGCGGTTACGGATCGGGTCATTCTCGGGGAGCT  
ATTCAAGGAACGCCTGCGGACTGCGGACACGATCACAGGAGACCTCCTGGACACGTACCG  
GGTCCGAGCTGCGAATGGGGACTATGGATCGCCAATCCAAGAGTTTCCTGAGGACGTATG  
CCAGGGGGATAGCTCCTTTACGTACAATCGACCAGGCCGGCGGCAGTACCTCGGCCAACA  
CTCTGGGGATCCTCCCGCTGACTGGGTCCCGGTGTATAGCAAAGCTGTCGCGACACCGGC  
GAGAGATCTATACCGCTGTGGCTATCGGCAACTCTCGGAGCTGGGTCTAACCTGCCCCAT  
ACTTGGGTACCCCAACGTCGTATCGAACACAGCATCACGCACGCAGGTTACCGAGAAAC  
GTTGTATCTCCATAATACCCTTGTAGTGGCCATCCGTTTGGCCGATCAGGCACGGAGGCC  
GTCAGCGCACACGAACAAGGCGATTTCGCCTCCACACTCGGGACCTGGGTGAGGGTTGGCC  
AGAAAAGCCAAAGGCAACGTCCGGCACCCCTGGTGTGTTGGACATGTATCCGACACATTT  
GTCACTCGAAAAGACCACGACTGCGAATCCACAATTACAGCCTTGGAATACGGATACCG  
GTACAACCAGCTCATTTCGGAGGTAGTTATGGCATTTTCAGCGCCACTCGCGTTCGGCGGC  
TGTTCCGGCTCCTCAAGGTATCTGTGGCTTATTGATACAAGGCGAGCAGACGAAGGCACCA  
CATATAATTAAGTAGGAAGCCCACCGCAGGAAAGTCATACAGCCCTTCCAGGCCAGGTGCG  
GCTATCGACGTGCCCGCAGGCAGGTACGCTCATAGACCGTCAACAAGTTTCAATTCTCG  
GTACCTGTGGAGATCGAGGTGCATGGCAGTCCACCCTCCGGCTAGGCCCCGTCGGGGGTA  
AAGGGGGGATGCGTTGGAACAACCCTGGAGCAGGTGGACTTTCAGCAGACCGGTGCGTTT  
CTTGGCCTACGTCAGCTGCACCGCGCGCAGGGGGACGACTGGAGCGACCGTATCCCGGAG

CTGTACATCTTCAACCATGCAGTCTTGGCGCGTCTCCTGATGGGTCCGTGACACCGGACA  
CACTTTCTAGGATACCCTGTGCAGGGTTGGCTATCATCAGGTGCCGCAAACGGCACTATG  
ACGTTCTCGCTAGGTAGTGTCTGGGAGCACATCGAGTACGTACGGCACGTACGGCCAAAGG  
GGTGTAGGTGTGTCCGCTCACGGTGGGTTCCGCGGGGGCGGCGGGCTTGCAACAAAGGAG  
AGACATATGGCAGAACGTTCCCCGCGACGCTCGGGTAAACCCAATGGCTACCTGGGCCAG  
GTGGGGCGCTACAACCCGTATCGATTTACACGCTTAGCGTGCCTGTGCCAGTTCAAGGGA  
GAACTCTCGGCGCGGACTATCCTGCTCCAGTTTCGCGCGGGTATGGTGCAAGGGACGTTT  
GATTACGTCGTGATGTATTATTACATGCAGGAGCTGCTGGTGCAGATGCACGGGCAGGCC  
CTAGAGGATTTGGAGGGCTATGACCACACGAGTCAGTTAAGTCGAGTCGTGCGTCACGAT  
GAAGACAAACGTATCCGCGAGGCTGACACTGCCAGCGCGTGTAGGAGTTTATCCGAACC  
GATGGTCTGTACTTGCCGCCTGAGGAATTCTTACAGGAGTCCTTGTGACAATCCCGGGTT  
ATCCTAGAGGGCATGCGTGAATGGCTGTGTAAACATGGCCCTGCCAAAGGCCCTCGCCTCC  
CAGAATCTTTTGGAGGAAGCCCTCGACGTTGCCCATGCTAAGGTCTGGGCGGGCAGGGCGT  
GTTGAGGTGGATCGTATGGGCAACTCTGCGCAAGGCCACACTATCCTGTAAAGCTACGGA  
GACGCCAAGCTCGGCTGTCACTTAGAGGGGGAGCAGCAGGACGACTTGCAGCTGGGATGC  
TTCCACAGCGACGTCGATGCCTTAGTTTACGGGGCCGAGGGCAGGGCGCCAGCTTCTAGCT  
GAGCAGTGCCTGCTGGATGCGCTTAGCGAAAATCATCGTAAACGTGGCCTCAGCTATGAAG  
GACTTGGACCCACTGGAGACCCGTGAGTTTCGTAATCCGACTAAGGCGGATCGAGGAGGGT  
CCAATCTCTGCGGGCTGAACCCGCGCGTTCACACCAGTTAGGGACCAGCGGCAGCACTGCT  
GAGTTCTTAGCCGTAGTCGAGCAAGGGGCCATTACCCCGAGCAGATGATCCGGTATACA  
GCGTAGTTTGTACTGCGGGGCGCATGACGACGAATCAGCAGACGGCCCTGTTGGACAAA  
TCGTACGCGGCCAAGTTGACCAAAGAGGGATGTGTGGGTTTTATAGAAGCACAGCATGCG  
GGTGCAAAGCAGGCCCTGGACGTACTCGTTTGTTCGGTTCCCGAGGCCCTTGCCATCGGG  
GGAGTGTAGGCGTAGCCCCAGAATATGACATGGGCTATTATGGCCGTCACGGCCCTGTGG  
ATCGGGGAGCGCCTCGGCACCATCGGGAAACCCGCAGCCATTGAGCTGAACGCAGCCGTC  
CGTAATTTATCCTGCACGCGAGCGCTGCAGCCCTAGCCATGGTCTAACTTGTTCGGGCC  
TGAGCGAAAGCGGCCGATCCAATTTCTCCACGCCCCGTAACGGGAGTCAACACTCCTT  
AGCGCCCTGGAACGACAAATCCACCCAGGTTTAGCCAGACAACAGGCAACGTCCCATAG  
GTCACTGTTCCGTTGCAGGTGTTTCGAGTTGCGCCTCTGGCCCAGCCTCCGTACGCAGCG  
CAGGATTTGACGTCGCGGCGAGCTTATTGCCGCAAGCTCGGGGAGGCTGTAGCGGGCGCG  
ATGCAGACTTGAAGATTCTACAAACTCTGGGGGCATGTCAAAGCAGGTAGCGGAACCCGG  
GAAGAGGGTCAAGCATTTCGTGCAGCATCCGGCTCAGCCGGCGTCGGAGGGTCTGGCCCCG  
GCTCGTCAGGCGCAGTAAGCCTATTGCGCCGCAAGTGGGATTGCCTTACTTACAGCCGCC  
AGAGACACCGAATACACTCTCGAATTCAGCCAGGAGGGGGGCGAGACCACGCGGTGAGAA  
CTTCCAAAAAACGTGGCAAAGAACGCTTACTAGATACCCCGATAGCCACAAAAGAACGG  
GGGTCGTCAGCAGCGTTGCCATCTTACCCGACTATAGCGAAATGATGCCGAGGCGACCCC  
TCTGCGACGGCGTAGCCTGGTGGACGATGCGAGTGTTTCGTTCGATTGTTGCACCGTATCG  
ATGCAGCTGTTGATTAGGCAGCACGTCATTCTGCCTATCAAATTGAGAGTGAGTAGACT  
GTCCGTTAGGCAAATCGTGGTGTCTGTTGGTCTCTCGTGATGCACGGCGAGGTCGAGCTG  
AGTATCTAATCTCAGTAAAGCACGATTAACCGACGGGACGATGGATTTAACCCTCCTC  
GATCTTGCTCAGCAGAAAGAGATTCGCCTTCTGTGTAATCGGAAAGTAACGGCCAAGAC  
ATAGACGTCGACGAGTGAGGCACTGGGAGCATGCCTTTCGTGATAACGATAACCGCCGAA  
TAAGCCGGATTGGGATTCCCTGGGGGGGTCCGACAGTGCACAGCCGGACGGCGAGCGAATT  
GCGCAAGAGTCGGAGTTAACTCCTGTATGATCGAAGCTTGCCCTTGGTCGAGCAGTGTAT  
GAGCTCGGTGCGCAAGGTGCCCGTGAGATCGACAAGACCTCCCATGCAATCCGCAACAAC  
GACTGCGTCACCCACTCAAGGCATAAACGGAACCTCTAGTAGTACAAGCAAACCCAGTT  
TGTGGTGACAACCTTAATCACCAAGAGAGAGGGGGACTGCTTAATAAAGTTACGTTGGCTA  
CATCACCACGGAACAACCCCAAATATTCTCTTTCCCCGAGTAGATCATGCTATCGGA  
CGCGTGTGCTGCCAACTTGGTTATCCAGGAAAAGCACCATGTCGTCCACGGCCCGGTTGG  
ACAGATAGCAGTGCTGCAGCAACTAGTTCTAGTTCCGCTGACGGAAGTCGAGCGTTTATA  
GGCTAATCGCAATACTTGGGCTAACTGGCAAGCCGGTCAGCCAGAGACCGAGAGCTATTA  
GTTGGATCTAGCAGACCAGGAGCAGCCGCACGAGAGGTTCCCGCTCCCCGAGTCCTAGTG  
CGTCTTCATGCGGGAGTACGGCGACACCCCTTCTGGCCCACCATATTCAAGATAACCGACTG  
CAATCTTACCCCCACGGCGGAAGGGAGGTTACGTGAGGAACCGGGCGGGTTCGCCACGGG  
TATCCCTGATACGGAGGTCCTCCCGGCTATCTTGGGCCGCCACTGATTCGTGCTCCTTAC  
GACAGGCAGGGGCGAACCACGGACTGCCCATGAGGCCAGCACAACTACGGTGTGACCAT  
GCCGCTACAGGTGGGGCGGCTCTGATGCGCTGCACCTGGGAGGTGTCCGACCCTCGGGGT

GTGTGACACGGCGTACTACGTCGGTAGGGATAAAGAGGGCCTGCATTACGCTATTACCTT  
CCGCGTGACCGGCTGTGCCCTTCTCCCAGGTGGATGGTTGTGGACTGGACTGTCCGTGTTT  
GTAACGACTGCCTCCTGCCGCGTCAAGGTGCATGTTCTGGGGTCTGACGAACCTCCTTTC  
AGCGATCTATAACCATATCTCCCCAGCCATCGAGTCCGCAGAAGTTCTGGCCAGTCTGCT  
AGACGATCCGCTGAATGGGGCCGGCATTGTAACAACGGACAAGGAAGCTCTTACCTTTCA  
ATTGAACTGAATCATTCCCTACGGCTACTTATCCAATGTGACGGTGGGTCTGGAGAGTAC  
AATCGCCCTGGTCTCACCCCTTGACACGTGAAGCATCTAATCGGAAGACAGTGGTTCTCG  
CGGAGCGGCGTGGGAGGCGGTGAAGCGCAAGATGCCAGAGGGCGCTTGCCCACCGAACTAG  
GCGCCTGACTCACGTGCGGTGCCCTCCACGGACTTGCTCCTCTAGCCGGACGCGCAGCGCCT  
GGACTACTTGGACTTTGCGATCATTTCACGGGGCCGGAGCTGGCGTTCAGCCACCGCCG  
AGCTCAGCTTGCGTAGTGCAGATCCAGCCCTGCCAGGGCCAGCGTGCCTGGAGCATGAT  
GAGGACGCGCCCTTTGAGGACACATACGGTCGCAAGACCGTTGAGAACATGCTCAGCGT  
GAGCATCGCGCGGGGTCTAATCCTCACCAATAAGGTGTCTGGGCGGATATGTACCGCGCT  
TCTGACCGGTACTCGTTACAACGCCGCCGATGTCCGGCCCCGATTTTCATGGCTGGCCCCGAG  
CAAGACAGACACGGATGCAATCAGCGCCTTGTCCGTGGAGGGCGCTACCGACGACGCGTA  
AATCAAGAGTCTCTTGAGGAGGATCAAGGTGTAAGTTTATGAGTCCGGCCCCGTCACAGGC  
CAGTGAGTCTCCCGTAACGCCTGATATGACCGTCAAGATGAACACACCGGCTGGCGGCGC  
CCTCTCCGTGATCCATATGATGGGCACAGAATAAGCCGCCTGGCTGAGAACTACAAGCG  
ACCGCTGGATGATCGGTCGGCCATCTTGGCAGGCGGTGTAGGCGGGGCCGACGCATCTAA  
ACAGGCCTTCCAGTGTGGTACTACGTCATCCGCGTGTAGGCAAGGCTCATTGATGGAAA  
CATTCTGGTCTTATGCTCCAGTTCAACCACCTAACATCACACCTTGCCGGCTACTACCC  
ACATGGCTGTATGTTGTGTACGATCGCGAAACGGGATACGAGCCATGCGCATCTCACTAA  
GCTGACAGCAACTTGGCTGTGGTAGGTAGCTGAATACTGCACACTGCCGTCTCCCCACGG  
AACCGCGGGTACGATGGTAGAGTCTTCAAACAGACCCGCTGCGAAGTCGCAATACACCC  
TACAGCGGATTGCGCCCCTTACTTATACTACGAGTGGTCTTCTATTGTTAGTCCCGACCT  
CGCTCTCAAGGTTCCGGGTAATAACCAGGCTCAGTCAGTACGAGACGATCCTACGCTAACG  
GGCCAACCTTGCTGCACGCCGGGCGTTACATGTGAAATCCGGGCCCGCCGAGCCCGATAGT  
GGGGAACATGTGCGACGCGAATCTGGGTGGCCTGAACTCAGACTTCACCATGTAGGCGAG  
CGACAGGGGGGGGAAACGCGAACGTCACGCGTTGCAGATGCCGTGCTAGTACAGCCTGGA  
AGATCCGTCCGGGGGCTACATGAAGGAAGCTGAGCATGAGAACTCCGAGTTCGACCGGCA  
ATAGGTCAGGATTAGGCGGTGGGCGAACTGGCCCCACTATGCAGACGAAGCACGATAAAG  
AGAAGAATCACGCATCACGGGCTAGACGTTCTGTTTGGTAGGTTTCGTTACAGGACACTAG  
TTTGGCAAGAAGCCCGCTCTGGGAGATACTGGGCAAGTTCACCGTTACGTGATATTCCG  
GCACAACAAGCTGTTACGCAGTACAATCGAGAATACTACCTATAACTGGTGTGGTAGTCCC  
TCTGACGCACCAGTAGCCAGGCACCACGAGGCATGGAGATGGCAACGATCTGCGCAAAGG  
CGAGCATGGGGACCTGGAGCCAGAGACGGGCCTGAGGAGGTTGGCGAGAAAAGACTGTGG  
CTAAACTGTGCGGTGTGCGCCTTATAGATGACGCAGTAAAGTTTCATTGGACAGAATGGTGG  
ACGTGGCGGGCTCTCTCCCCCTGCACCACGCATGGCCCCACTCCCCTGGTAGTATTGGTAA  
CGGGGCGGGGCAATTACTCGGAAGAGACGGTTCAGTGCTCTATGAAGTTTACATGCAAGC  
AGCCCGTACCCCACTCTCATTTCGTGGGTGTGATGGCGAATTCTGGAGGACGACAGAAATG  
ATTGAACAAGAAAGAACCATGGCGCAAACACCAAGTACGTGGGTCGACTACCTTAGGGAC  
GAAGTTGAGAATAACCGTCCACGACAAATTCCCTTACCGGACAAAGCAGAGAGGGTTTGTG  
ACTGCGAGCGGGGATCCGCAAACCTTGACAATCAACACCGGAGGTGGAATTCTACCGGCA  
GGGAATCAGGCAAAGGGGGCCGCAATCCCTGTACGGCGGATCGCTGAGGCAGTCCGACCC  
CGACGCGACTACGCCTATAGGGTGCCCTAACACCGCTATCCGTAGACGAGAATAATAAG  
CGGTCATCGTACTCTATAGTTGGTGCTCTGAATGCTACACATCACACTTCTCGCGAAGGT  
CTGGGTGACATAGAAGATGCCAGACGGATTGCGGAGGCGCCATGCTGCTAAGTGGGATCT  
GCCACGATTGACGCCGGGCGCCTGTTTCTTCTTGACCCCGCCGTCCCGGCTAAGGGGCAA  
GGGGTGGTAGGATGCGAACGAGGCATAAGGTATCGGGACGGGTCCGGTCTGAAAGCATA  
CGGTCTCTGGATAGGAACCTGAACCCACCATCGCGGAGTCGCGCTGTTGGTGAAGTCGCC  
AGGCACCCCTTTTCTCCGCTATACACGACCCTAGCGGTAGGTCAGATGGGTCATCCTCGT  
GCTTTGGCGCTCTAGGGCCTACTTTCCTCTGCCGCATTGCACGTTGTCGTGGATTACGGG  
GGACCTCCTCACATGCCCGTTGATTACAATCCGATAATCAGTGTTATGAGCCGGAATGGC  
TGTC AACAGATTTAGGGTGAGGGCGCTATATATATTTAAAGCTCGTCTTTTGCCTTCACT  
GATACTTCGGTCTGAGTTCTGGCAGGGAATTAGACCCCTCCCCGCATTTAGGCTCCGTG  
TCGGCTGGATCCCGCACAAAGGACTATGCCACCTGGCGTAATGTTGTTAATGAGAATCTT  
TCGATCTTTTATAATCCTCGTGATATCACCTTCACGGGAGTTCGAGTTAGCTATGGCGTG



GGAGAGTGAAGTGAGGTTAGGGAGATTACAGTGACCCCGTTATAAATTCGTTCTGCCCC  
TCTGCCGTGAAAGAACGGGACACGGTTGCGATCTAAAACTGGTCTTTGGTGTAGTAGAT  
ATAGCCAGCAGGCACAGCCATTGCTGGACAGTACCAATGAACGAACTGAAAGTCAAGGCA  
GTCGTTTTAGGTCGCGTCACTGACGTTAAGGTCACCATTGTCAACCAAGACGGTGTCTCT  
TTTGCCCAACGCTATGTCCCTAGGAGCACGATGAGTAAAACATCAACCCTCGTCGACCGA  
CGTGACGACTTTGGCTTCATGCTTGGGGACTCCCACCGCGTTGGCCAGACATCTAGCAA  
GTTTTCACTTGTCCACAGAGCGTCGACACTTTCGTCGGTGCAGAATTCGGGGCGCCTCCCG  
GTCCGTACCCTGCGTGTCTGTAGGTGCCACTTGGGAATGATATTGCCTTAGGTAACAG  
GAAGTCGAATTCAACGATAACGCGGAGCAGTTCGTAAGTACAACACTACAGGGTATACGGT  
GTTCTATTTTGGCAGGGTGCAGTTTCGCCCGTACTCACAGTGTAGAATGACTAAACGGTCG  
GGTGGCCGGATTCCCTGAATCCCCAGAGATTCTTAGTGATACCTCCCTTGTAGACCGCGGC  
CATGTGCACACTACCTGTTATCCCGCACCTGCTTGTGTGACTTTATCGAAGCAGATCGA  
AGCTCACGGGTCCTAACGCCCAATAACAATTCAACGGGGTGAATTCCTTATAACAAGGGGGC  
TGTCTGCGTACGCCCCATGAAGTAAGTCTCGTTAAGTACTGGGCGCACGTCTTGAAGGT  
AGGACAGTTACAGTAAAGATAACAATAAACTGCGCAGGCTCTTGATGCATGTTCTCTGGAC  
AAGCTACTTGAAATGGATATTACCTCGGTCAGTATCTCGGGGGTGTCTTGATTGTGCGAT  
ATTTAGCGGGGAGTGCACTCTGGATCACGCCGCTTTTACAACACTGTCGGTTTCGCCAAT  
GCCCCATGCTGTTGACTGTACTCCGTGGGAATGGCCGAGCAACTACGGTAACCAGTGCG  
AGTCGCGTACTCTCCACTAACGTACAGGTACATTTATTCCAGGGGCACAAGCTGCCAC  
GGCAATAAGCCGGACAGGAGACACGGCGGTAGAAGGATCGGCGGTGGCATCGCCAATACG  
ACCGCAGCGTCTTAAGCGACGCTGGGTCTGTTGAAGGAGCTCCCTATAAAGTTTAGCTCA  
GCCTTTCCTAAGCAGCTCAATTGCCTGCCGGCGAATTATGAGGAAATGTTGCGCAAGCAA  
CGAGTCCAATTCGCGGGGAATACCAGAGCCACGGGCGCAGCTTGTGTTCTACGAGCTGC  
GGTTATCCCGAGAACAGGAGCCACCGGTTCCCTTTCCCGACGGCTGTCAGGGCTACTATCC  
TAGAATACTTTAAGGTTCACTACTATTGTGTGCGAACCAACATGGACCGATGACCTAGGGG  
GGTTGCGCCAGCAGCGCCAGGCTAAACGTGATGGTAGCGTCACCCGCCACGCAACCAGC  
TGGCTATGGCCAGGCGATCCGTAGGAAGACTGGACGGACGTTATCCTATGAAAGTTCGCG  
GGCGATTTTACCTGGCGCTACGCATGTGGTTGAGGTAACGGCGTTAGAGGACTGCTCGC  
TCGGGGGACCGGCGTACACCATTACAGCAAGACTTGTATCCGGGTAGACATTGCAGAGT  
AGATGCTCTAAGGTCCTTAACCCTATATGGCCGCTACCAACGGTGAGAGTACGGGCGTG  
CCTTTATATGTCTGTTTCGGTCTGCGGGACGTGGTGCAGGACGCCACGGATCTTGTGTAT  
CACTCTGTAGCGACCAGCATAAGGCTGAGCGTAAGGCGAATGACATGCACCGGCTGATCC  
ACAACAGTCCACTGTTGCCCTACCTGGCAGCGGCAAAGTCCGCCGGGGACCGAACCTCTG  
TGCGGAAGTTCGTCTTGCGCAGGGCCTTGATGGGTGCCGACAAGTTCGAAATCGTGGCCT  
ATGTGGGTATCACCTGCTCCCTATCAGGGTGTGTTGCAACACGTTGATCCCAGGCGATA  
TCGCGACCCGAAAAACCGGCCATCGCCGACGGGCGTGCTAAGAACAACACGCTCTCGA  
CGGCGTCGACCTAGATTGCGGCCGAGAGGAACCGTTGGATCTAGTACCTGGGCCCAGCCT  
ACCAGCGGAAGTCTATTGAGCGCACCCGGCCTGTACGTGGCCTCATTGTCCGCGTATGGC  
CAAGCCGATAACCCTGAAGACAGCGAGCTTCAGAAGTACCATGATTAGCTCGGAGCCGGGA  
TTCTGTATAAGAGCGGGGTGCTCGGCGACTCCGGCCAGACGAGTCGTGGATCGTCTAGTA  
CTGGAGTTTCAAGGTCCGAGCGCGAACCGTCCACTACGGAGGCGATGTGTCTAAAGATC  
TGCCCCAGGCGCGGGACAACACTGCGCCCTGGCGTTCATGTTCTATATCTCCCTCTCAGACC  
ATGCACGTCCGCTTTTGCTGCTCCGCGAGCTGATCGTGGCCGACCCCTCACGTGAACAAG  
GACCCGAGCCAGGGGCTGGGCCACTGGCCAAAGGATCGTGGTTCGAGTTGCCCTAGTGT  
TACCGATTGAGTCAGTAGAGATAGCCGGCCCCGGACGCGTTCATGTACCATCCGCGCAGC  
TCAAGTGCATCATCCTGATCCTCAACCCCGTCCGGTACCGGCGGGAATGAGCCAGCGCGTG  
CCAACACTACGGTGTGTTGTGCTGTACATCGATGTGCTAGCTTGGTGCAGGATGGATGGACA  
GCGACGCTGAAGAGCCGCTCGAGAGGCTGATTCCGTTGTGGGATGATTTCCGGGGATAAGT  
TCCTCCACGTAGGGAAAACTCGTGCGGATATACTGTGACCGAGCTCTGCTATGAGCGTT  
TCCAGGGCTGTGGCCCTGAGGGTAAGCAGAGCCCTCTAGGTGTGGCGATGTACGAGCGGC  
ATAACACCTGGCTGAAGGCACTGCGAACCCGGCACGTGATCGATGCAGTGTGCGGAAGA  
ACGACCTCGTGCTGCATCGCATCCCCGTAGACGAGGACTGGGAGTAGCTCTAGCAGTATC  
CGGTGGAGCCACGCGATGTGCGCTCGGGTCTGTGCCGGAGGCACAACAACATCTCTGCCG  
GAGCCCCATGATCAAGGAAGCCTTCATTGATGCTTTTGTGGGTGGGGATTCCGGAACCTCC  
GTATTGCTCTGGGGTCCGACGCGATGGCCAAAAAAGAGCACACGATGCTCGACAAGTGC  
AGGTGTGCCAGGGTAAACCAATGGGCACGGCGCCGGATGTAAGCCGGGAACCTCCGTCGT  
GCCGGCGCGCGATCCGAAAGCGGTTGGGAAAAAGTATAAACATAGCGGATTTACAGATCAA

CGCGGCTCTGCAGGCTTGCATTGATTTTCCTATTACCGGAGTTGCCTCAGCTACTTCTCT  
AGACTAACGCGTGAGCGACTGCCTGGTGTCTTCGTGATGTGCTTTTTCCAGTACAGCCGCT  
GGCGTGGAACGTGCGGAAGTAGTTCCTGCTGGCGCAGGATCAGGCGGCCGCCTAGGTCCA  
CGGCCACATCGAACTCAGCCACCCATGCCCTGGTTTTTCGAAATGGCGACGTGTACATCG  
AAACTGTCTTAGGTCCAGAGGCCCCCCCTCCGCACCCTACTGTACATAGACAACGGGT  
ACGTCTGTACTTGATCTGATGGTCAGTCTGTGGGAACCCCTGATGCCCGGTACACGGACC  
AGGAGCGCGCAGGGGCCGGGCTGAGGGCTGTCCATGTGTACTGGCACGGGGACAGCTTGT  
AATAGACGCATGAGGACGCAGAGCGCGGCAAGGCGGCTCTGCTCTCAGTGCCGTTCAACA  
TGGGTGTGTATGGCCGGGCCCTGGGGGTTAAACGGTTCGGGCTCGCAGGGTCCCACCTCGCC  
TCCGGGTAGCACCGGCGACCCACGACTGTAAAGCGGCCTGTGACGCCATCCAGGCCGTGT  
GGCAAGGTAATGCCGGGGTAGCGAAAGGGTCCACGGTATCGGTGCAGGTTATTCCTGTAC  
GGGTTCTCGATCACCGTCGATCCGTCGATGACCGACTGTGTCCGGAGGAAGTGCGAAGAG  
TTTTAGGGTAGTGCTGAGCCTGGCCATCATTGTAAGTGGCGCGGGCGGGCCTTTTGGCTAC  
CCAGCCAGCGGGGCAGTGCCATTGTAATCCCGAGACCCTAGCGAAGATGCTAGAGCTAGC  
AGAGGCCCAAACCTGCGCAGATTCAACGAAAGGTGCTCACTATCGGGACCAGGGCCAAAGC  
AGAAAAACGACAGGAGCGTGGTGCCTTGAATCGACAACCTACTTGGAGAGATACTCCTCT  
GCCTGCTGCGGTTTCGTAGCAAGCTGTGCGCGTCTCAATGGATGTACCTGCCCGCCAAC  
CACATCCACTCTGCATGTGATGCCACCTCTGGAGTGGTCCCTCGGACTGCTAGCGTCTGC  
TACAGACAGTAGCACGGTGCAATGCCCTACACTGCTTCGATTACTTAAAAATAAACATCT  
GGGCATTGGTTCCCAACTGCTGGACACTTACGTACCGCCCGCGATAGTGCAGAGATGGA  
ACTACCGTGTTCCTAGGCGTCTCAGGGCGAGTAGGACCCGCTGAGTCATGCCATGGC  
TGCCACCTTGGTACCCGTTGTGCATTTTTTCCTGTATCTAGCTTGGTGGACTTAGCTAAG  
CGCCAGGTAGGTGCTGACGGACACGGGGACTGTAGTGGTTTATGGACAGGCCCTCAACGA  
TGACACCCCCACCGCCACCTACAGCTACAAATTGGCATTACAGTGTATGCTGACGCCAA  
CACCGCTTGGACGTTGAATTGAGGAATCGGCGTGCTCAGGGTGCTCTTGACTTCGGGGAC  
GCCTTGGCTGCGGGTCTGCTCAGGGTGGTGCATCTCACTGGCGCCTGGACTTCCCTGCC  
CCCATTCCGCCAGGACTCGCACTCCTTATAAGTCTAGCGAGCCCCACGGTCTGAGTTCG  
GTTATGTCCGCTTAAGGGCTGGAGCTATGGCTCGCGTGCTATGTTTCGTGTGTAGTTTCT  
CGCGGGTACACCTATCCGTCGACAGGCTTAGGGTACCGCGCGAGAGCAAGTTCTGGCGG  
GGAACCTTTTTTCGGACTAGTGAAGTACTAGTAGGCGGCCTAGTCTTTCCTGGCTCGTTC  
CCTACTCCCTCCCGCGGTTCCGTTCCATTGCGATGGCGCGACGTGGTTACATGCCTCCTC  
CCTGGGCCTGCCT

>NewGenomeName\_148

AGCAGGTGGGTGTAATACACCCCCCTGCTGGGGGGGCAGACCCGAATATTAATGGGAT  
TAAGACATAAATCGGCCCGCGAGTAAGCGTAAAGATCAGTATCTTCGTTATGGGCCTCGG  
CCAAAATTAAGCCAACGTGGGTGCTTGTGGGGTTGACCGTAGGTCCAGTTAGTAAGC  
GATATATTCCTTGCTTCTATACGGAGGAGCTGCGAAAGAAAAAAATCCCTGTTACACAT  
GTAAGAAGACTATTAGTTCGCAGAGTTAACAATACCCGTCAAGTTGGAGGGTGTGGTGC  
TCTCTCTTCTGTGCATACGGTGTGCCATGATGAAGCGCTTCGGGATGAAAGAAGGGCGG  
AGGTGGTAGCGCGGCCCGCCGTCCTCAGACGAAATATACGAAGGCGTAGGTATCTCA  
GGGCATCTATGGAAGGCTCGTATTCAAACGCGCTTGTATCATCCTTGTACTCGGGTATA  
CAAACATTTCAATACCAAACCTTAACGAATAAAATGTAAGCTTCATAAACTAAGACATGA  
CAATAAAAAAAACTATGATATAATAATAAACTCTATTGTGCCAACGTTGTATAATTAA  
GGTCTGTTTAAATACATATGTAAGTGAAGATTACAGTAATGTTTTTAAATAAATGACTTG  
GAAGGAAATTAATAATTATAAAGATATAAAATATACCGAATACATAAAAACGAGAA  
AATGCAATCAAGCCCTGTCACGTTTACGTATTTTCGAATATATTAAGGGCCGAATGCCCT  
CGATCGGCAAGTAAATCGGTGCTTCCCTTCGTGACGAAGCAAGCGTATTATTGTAACAAG  
AAAGGGTCTGACAACCTTTAGTAGAGGTCTCTATACAGCTATCATATGTTAGCTGGCTAT  
GGACCACTGGGCGGACTCCAAATATATATTAATATAACAGATCAAATATTTAGGATATA  
GGTATTAATATTAATTAAGAGAGGGAAAGAGAACCCGTGCGCGGCACACGACTGTGC  
TGGTGGGACAGATGTCCCGCGTTAGTTCCTTACGTC

>NewGenomeName\_149

ACGGGCCACTTGGAGCCAGGGAGCCACCACACTGGCACCTGTTAGAGCTGCTGCTGCAAA  
GAGCTGGGGCTTACGTTTAAATGACTATACGGCCGAAGGAGAATCTAACTTGAGGCACCT  
GCTCCCTGGTGCCTTCCACTTTGCAATATGTGGGAAGGAACGGGTGGAGCGGGGAACCCC  
TCATTTGCAGGGCTTTCTACATTTTAAAAAGAAGCAGCGACTTAGTCCCTCAAGAACT  
ACTTGCCCGATCTCACTGGGAGAATGACCGGGGCTCAGATCTTGATAACGCGGAGAAGTG

TTATAAAGAAAACGAAGTTATACTCACCTTAGGGGAGCCAGTTCCAGGTAACCGGAGCGA  
CCATGCCGCGAGCGGTTTCCGCCGTGAAGGACGAAAGGAGAATGGTGGATATCGCGCGAGA  
GTTTAGCGAGATCGACGTCTAGTATGGGTATGGTCTTAGGGATTGGGCACCGATGATTCG  
ACAGAAATCCCGTGACTTCAAGACGGAAGTGGTCGTAATCAGGGGGCCATCCGGTGTGGG  
CAACTCGAGACTTGAGGCTGAAATGGAAGGATCGAAGTGCTATAGGATGAAAGGTGACTG  
GTGGGATGGATATCCCAACGAGGATATAATCATCATGGATGACTTCTATGGGGGGGTGAT  
TATCTGGGAAATGTGGAGATTAATGGGCAGTAATCCACATAAAGCTTCCGTGAAGGGGTC  
TTATGCGGAGTTCATGTCTAAGAAGATTTTCATAACGAGCAATACGTAACCGGAAAGTTG  
TTACTGTCCGGATAAGTGTTATCTGGTTGCTATGTTTCAGGAGGATCATTAAATGCATGTC  
CTGGGATGGACTGAGATTTAAGGATGTGCCGGATGCTCTGGAGAAGCAACCGATCAACTA  
TTAACTCAGCCCCTAGGAAAAGAGCGTCTCGGTGGTGAATTAATCAAAAATGCGAGCGG  
AGCGCGCGGCGAAGGCCGAAGGCCGAAAGCCGCCAGAGAACGCGCGAAGCGCGGCCAGGCG  
CGAGCGACAGCGAGCGGGCACACCCCGGGTCCGCTAGGGGTCACCCCGTTGAGGCGCCA  
AAGGCCCGAAGAAAGCTATGCTGTACCCCCCTCAAATAAAAAGGCTCCAAACAACAAT  
TTGTTTGGTGTGTTAATTTTGGAAATTTCCAAGTGAGCTAAGATCATATGCCGGAATTCAG  
AGTAGTTGGTGACTTTGGCCCGGTGGTCCATCTGGTTTGGGGTGGGGTCTGGCCAACTGA  
TGGCTAACAGTTATGTGTGACCCTGATTCCGGAGCTCGGAAGGTTCTGATCACTTTTCA  
TAATAATCCATATCCAGGTGGAATTGGGAGTGTTGAGCCACAGGGCCCGCTGACGTTAG  
CAGCATCAGTGTCCGTCACGCTAAGTTGTGGTCTTGGTTTAAATAGCCTTTTCAAGCCTT  
TTCGGTGACCCCATTTACGAGCCCCGTCCAGTGCTCTAGGGCGACATCACCAAGTCTTG  
TCTTTTTGAAGAAGTCCCTCTAGGTGATTATATTGGATAGGTAGCTTGTGCAGGAACCCTT  
TCCGTGCCTCCCAGGTTACGTTGAGGGGTCTCATTTCACCTTTTGCTAACCTGACTCTAC  
AACTTCAAAAAGTAATCCCAATTGATAGTACACCAGTCCAGAGAGTCATACAGTATAA  
TGTTGATTCCATCAATTTCAAAAAGCCAGCTGAGACCCCCCTGTCCCTTTTTGTAGTACCT  
GACCGAAAACCCTAACAAATCTGAATCTATAGACCCTGGTGGTTCTGTGGCCCTACTGC  
TGGTATGTATCCTTCTCCTCCTCCYCCAGTACCGACTCCTCGATCTCCTCCTCCTGGGAG  
TCAAAAGTCGTCGTCTCCTAGCAGCCTGGTTAAAGGTTAACCACATCCGGGTTAATAATT  
AATCAGTGGCYCCAGTAGCCGTGRTAGTATA

>NewGenomeName\_150

TCGTTGTGAACACTTATTTTAGGCTTGTTATTAACATTTTATAAACTCCTTTATTGTTA  
TTTGATACCAATTTGATACCGTTTAATCAAATATGCTCATAGCTTGATGTTTTTTATCAG  
TATAAAAATGTGAGTACGTTTGACTCGTTTCTGTAATGTTAGAATGCCTCATTAATTCCA  
TTAATAAATACATATCGACACCATTATTAATTAATTTGCTAGGGTTCGAGTGTCTTAAAT  
GGTGTATTTTTAGATTCGGGAATGCAGATTTAAAATGACACGAATAAGTAACGTATCTAA  
TAGGTTATAAACCCCGAATATAAAAATAGTTTTCGTCAAATATTTATATCTTTTAGAAG  
ATTCATTCTACATGTTTTTAAGCATCTCTCTAATTAATTTGGTACAGGTATTATCCCTT  
TAGAGCTTTCTTTTTTAGATTATATTCAATTTTCTATTACTTAAAGTGATTTCCCTTAT  
TTACGTCAATTCGCCTTTTATTTATCGTAATCTTTCCACTGCAAACCTAAAGCTTCTC  
CTATTCTAAGACCAGAATAAAGTAACAGTTTAGTTAGCTGACGAGAAGTATCATTTGTGA  
TTTGTCTACTTTTTTCATCAAATTTCTTCACGAGTGATAAATTTAGCTTGTGGTTTTGGTC  
TGGGCATAGGAGTTACCGATAATGTTGGGTCGTATAAGAGCTTGTAATGCTTTTTGGGGT  
AATTGATAACTGCTTTAAAACCTGCCACACAGATCGTGCATAGTCCACAGAAAGACCTG  
CATCGTTTAAACAATAATTCCTGAAAGCAGTACATTACGTAGGAGTGCTTTTGCCAATAG  
GGATATTTCCGAACCTTTCTTTTACGTGAGTATTATATTCTGTAGTTCGCTTTTCTATTG  
AGCGTGCAGAAAGATTTTCATTTTTTAAACGCTCTAAAAATATATATTCAAAGGGTGGAT  
TGCCCGAGTATCCATATTTAACATTTTGTATAAATGCGCTTTCAGCTAGTTTGGCATCTT  
TCTTACGTTCAAAGCCACGCTTCATTTTTCGTTTGTATTACCGTATACATCTTTATATC  
TAATGGAAAAATAACCATTTACCTGTATTACCATCCATATATACTGGCATTTTACTTCTCC  
CTCCTCAAAAATTGGCAAAAATAATAAGGGTAGGCGGGCTACCCGTGAAAATTGTATAAC  
AAAAGAGAGAGCGCAGATGCACCCTCTCATGTGCAAAATATCTCAGCGACTTGTCTAATT  
TGAAGCTTGCCGCAAAATATTTACGCGGCTTGTTTTGTATATATGTAATATAACCATCAAAG  
AGAGTGTACTTCAAGCGATTTAATTAAGAAATCTAATTTTTATACTATTTTCAATTTTAT  
CTACTGTTTCTTTTGAATATGATATTTCTCCGGCAGGGTCATACCTATTAATTTTCGATA  
TTCTATCCTTGCTGATTGTAAGTATTTAGAACGTTAGCATAGGTCTTTTTATACTAGA  
ATCGCTCATATCTTTTGCGAACCTTCGAAGGTTTTTTGAAGTCGTCATTCAGCGATTTGT  
TTTCATCAAGTAATTTCTGATCGTATGGGTTTGTGCTTTTGTGACACCTTTTCAAGATTGT  
TCATGATTTTTTTAACTAAATCCTTACCCTTTACGTCCATTTTTTACAATACCAAAGGTA

ACAAATCTTCTTCGATATGCACATTGAATTTGCTTCTGGAAGATGTAAGTGGCACTACCG  
TAAATATTGGATTTTTATTTGAATCGTGATTATTGAGTACCATATAAAAATGGTTTCCAG  
AAGACTCTCTGCCAACATTAACACCTAACTTTACATAAATTATAGTGCCTTTTCTATATC  
TGGCGTAACGTTTGTCTTTTAAACAATCTAACTTCATGCAATAAAAATCTGGATATT  
CAAGACACCATGAATTCATATATTTAAATTTGTAATCTCGCTATGTTGAATCTTTTTAA  
AATTATTAAGTCTGTTTCTAAAGGTGCGCTTTCTTCCATCCCTCGTCTCCTCACGCCA  
CTCAAGCGTTATTAATCAATATCCAGTAATTGTTGATTTTTCTTATCGAACTCCTCCTGA  
GAAATTACTCCGACATCTAATAATTCTTTATATTTTATTCATTCATCAGCAACAGATAAA  
CTCATTTTTTTCAGAATTGGATGGTCCCATAGAACTTTCTCGAATAGAGATTTGTTCTTGT  
CTTGTTCGCGCCATTCTAGATACAGTCTTTTTTGATATGCTTCCTATAGCGATACTTGAT  
GAACCGTGATGTATAATTATTTGCGCAAAAAGAAGTCCTTTTTTATACGAAACAGAATTG  
AATTTCTCGAATGGAAATTCATGAAATTTCAAACCATATATCATACCTTTATCTAAGAAT  
ACAATCTCAGACTAGTACATACTCTTAAAGTAGGTATTATTATTGTACAATCCCGAAGTT  
ACATACATTATGCTTTCATTATCTTTTAAAATCATAGGTAGTTCTTTCACTTCTTTTTTT  
GTACCAAACAATCCTCTACACCTATTTGCGTGAATCTTTGGTAGATCTTAGATAAAGTTT  
TCGTCAGATTTATTGATTTCACTTTCAAATTTCACTGCTTTTCTAGGTTTTCTTTGGTAT  
GCTTTTAAAATTTCTCTTTTGTCTTCAACAGATAGTTGCTTGATTGCTTCTTTTCTTCT  
TTTGTTTTAGTTGCTAAATATTGACTCTCAATCATAGTTTCTTTGAACTTTAATCTGCTC  
TTACGTAATACTTTCATGTTCAATTTCTCCTTTATTTATATTTGTTTATGTTTAAAACTC  
TCAACGGCTCAAATGTAATCGAATATTCGCCATCGTGAGTTCCAATACCATATATCTTTT  
TAGATAGTTCTATTGCTTCTAATATGTATTCTTCGCTTAAATTGTAGATACTCAGACAAC  
CATAACAAGTTGCGTACGCCATCATTATAAGCTTCTACAATTTGCGGTAGCGGTACAGCTG  
ATATAAAGCCGTGTCGTCTTGCCTAAGTTTTCGAACTTGCCTGATTGTTGAATTTGATTGAT  
CTAAAAGGTTGCCATACGGCAACTTGTGGTGGGCAAGTTCTCATATAATACTTTTAAAT  
TGTTCTTTTCGGATAAGGTAGGTCTAATAAAAATTACCCCTTCTTGATACCAACCATCGA  
AGCCTCGAGGTACTCTTTGTGTTTCTTTCACTTCAACTTCACATTTCATAAGCAATTCTT  
CGTATTTTCCCATGCGCCAAATCCCTTTGGCGTCTTATTTCTTTCTATCTTTAACCATT  
GCATAAAATTTTCGATTTCTTCCCATTCTTCGGGAGCAAATTCATCTTTATTTGCATGAC  
CGGCTATAGTTTCTTGGTTAATACTTCTGTCTGCTGTAATCCTCGATTTAGGTACATTAA  
ATTAATCTGCCAATTGTTGGACTTTTGATAATCTAGGATATTTAAGTCCTTGAAGCCAGT  
TAGAGATTGTTGATTGACTTACCCCGATTGCTTCAGACAATTCTACTTGAGTACTGTCGT  
TCTCTTTCATAAGTTGCTCTAAGTTCTCTGATAAAAATTTTTCTAGCACTCTTATATTCCA  
TAATTTTCTCCTTTAGTATTACTTAATGTAATACTAATTTACCATAAGTAATATCACTTT  
TCATTACAAAATATTACCTTTTTGAAATAAATATCACTTTAGGTGTTGATATATTACTTT  
AAGCGATAGTATAGTTGTAATGTCAACAGGAGGTGATACGAAATGCCAGAAAATTTAAA  
AGAGTTCCCTGTAAAGCTCTGGAGCACTAATTCGAATATGACACAACAAGATGTGCTGTA  
TACATTCGGCGCTACTAGACAATCTGTAATAAGATGGGAAACAGATGACGCAGAATTTAAA  
AGGCTTACAATTGTATGCTTTAGCCATATTATTCAAGACAGAAGTTGATTATATAAAGGC  
TAAAAAAATTTAACATTAATATCACTTTAAGTGATAAAGGAGGAACTCAGATGCAAGCAT  
TACAAACATTTAATTTTGAAGAATTACCAGTAAGAACATTAACAGTAAGTGATGAACCGT  
ATTTTGTAGGGAAAGATGTAGCAGATATTCTAGGTTACAAAATCTGGCAATCGTGATATTA  
ACGCTCATGTTGATGTCGAAGATAAGCTGACGTACCAAATCAGTACCGCAGTTCAAAGAC  
GAAATTAACAATCATCAACGAATCGGGTTTATACAGCCTAATCTTCTGATCAAACTCG  
AATCAGCTAAACGATTCAAACGTTGGGTAACTTCAGACGTCCTAGCCGCGATTTCGAAAAC  
ACGATATCCACGCAACAGACAATGTAATTGAACAAACCTTAAAAGATCCAGACTACATCA  
TTACAGTGTGACTGAGTATAAGAAAGAAAAGAGCGCAACTTACTTTTACAACAAGAAA  
TTGGAGAGCTAAAACCCAAAGCAGACTATGTAGATGAAATCTTAAAGTCAACTGGTACAT  
TAGCCACAACCTCAAATCCCAGGATACTACGGTATATCAGCACAAAAGTTAAACAAACTAC  
TACACGAAGCTAGATTACAACGAAAAGTGAATAAACAGTGGGTGCTCTACTGAGACCACA  
TGGGCAAGAGTTACACAGAATCAGACTCTATAACCAATTGTACGCTCTGATGGTAGAGAAG  
ACACAGTTCTACAACCTAGATGGACACAACAATGCTGATTGAAAATACATGAAATCATGA  
CTCAATTAGGTTATGAAGCTAATTTAGGAGGAGCGTAAATGACACCACAACAAAAGAAA  
AGCTAAACAATATAGTATTAGCACTTTATGCAGTTAAAGAAAACATAATTCAAACATACA  
CACACAAAGATACTTACTGTAACATATGCAGGCGAGATTGAGCTCACTTACGAGGTCG  
ACAGAGAGACACACCTTGAATCAATGACTGAGTGGGCAATTGACCAAATCGAACAGCACC  
TTGATTTAGACGAAGAAGAATAACACACAATTGAACAAACAACCTTAAATAGTAGGCATTAC  
AAATGAGCGCACTATACAAAACAACCATCCTCACCACAAGGGCAATTCTGACGTCGAAGG

TTGTAAAGATTGAGAAAATCACAAGATTTAAATTTAGTAATTTTGATTATCCAAAAATTA  
ATAATGCTCAGAGCAAATCAATGTTGGATAGTGCCAGTCACGATCTAAAAGATATTTAAC  
TGTATTCAAACCTTTCATATATTGTTGAGCTTTTAAGCTTTCGTATAAAGCTATTGAATA  
AATAATTTTCGTAAGATACGTTTTTCAGGAGCATCTTCTTTCACTTATTTATTCTATCTCT  
AAAAAAGTCACGGTGACCACCGAATTCATTTTCTGCTTGATTACTAAGTTCACCAAAGAT  
ATTTTGAAAATCATTAAATTCATACTCATCACCTCCTTTCACTAGGAGATAACTAAATT  
ATACACAACACAAAAATAAAAAGGAGGAATAGATATGAGAAAAAATAGTTTGCAAGCTAA  
AGAAGTTGAAGTAATTTTATCTGTTTCGAAATCCAAAGCAGGACAAATAATAAGAGAAGT  
GAATAAAGTGCTTGAAGACGAACGTTACATTGCGATTTCGAGGCAGAATACCAGTCCAATA  
AGCTAGAGAAAAATGCCCTTATCACTGCTTGTGACGAGAGAGAACAATGGAGGCGTTGAA  
AAAAGAAAATGAGTAACATTTATAGAAGCTACCTATTATCAGTATTGTGCTTCACAGTCT  
TGGCGATTGTACTCATGCCGCTGCTATACTTCAATACAGCATGGTCAATTGCGGGGGTCTG  
CAAGTATCGCAACATTCATATTTTATAAAGAACAACCTTTTATGACAACAAGGAGAATGAA  
AAGATGTCAGTTAAAGACTTGATGGAAAAAGTTGACAAGAGAAGGAGAGACGAAGATTTA  
ACGGTGAGGGAAGTACTAGGATATTTGCTAGGTTTCTCTGATACTTATTTTATTAAGTTAAGA  
AATGGTTCAAGAAGAATTATCGATCGGAAGAGAGATAGAATTAATCGTTATTTAAACGGT  
GAATACGACATTGTAAAAATTCCTAAATATTCACGAGATTCTGAACAAGTAGCATATGAC  
AAGGTATAAAAACAAGCTTTAAAAGATTTAGCAGAATTTGTAATAATAAAAAAACTGCT  
ACATGCGACAACAAGTAACAGTGACAAACACTTCAGAAAAATTCATGGTCAATATAAAA  
CGAAATAAAGGAAGTGTCAACAATGTACTACAAAATAGGCGATGTATGTCAAAAAGTAAT  
TAATATAGACGGATTTCGATTTTAAATTAGCAGTGAAGAAAGAAGATTACAGCATTCTAGT  
GGATGTCTTAAATTTAGAAGATTGATTTATCGACGGTATAAATATAACCGATGAGAATGA  
TCTATACACAGCATTAGACATATTAATCAATTTCTTTCTGAATGGATTGAAGAGAACAC  
AGACGAAAGCGATAGGCTAATTAAGTACTGATAAGATGGTAGGAGGTCGCTATGAAGCA  
GACTGTAAGTTACATCATCCGTCATAGGGATATGCCAATTTATATAACTAACAACCATC  
TGATAATAACTCAGATGTTAGTTACTCCACAAATAGAAATAGAGCTAGGGAATTTAACGG  
TATGGAAGAAGCGAGTATCAATATGGATTATCACAAAGCAATCAAGAAAACAGTGACAGA  
AACTATTGAGTACGAGGAGGTAGAACATGACTGGACAAACATTATTTGAACAGTTGAACA  
GTAAAAACGTGAATGATCATAACAGAACAGAAAAATGGATTAAGTTATCTAGCATGGTCAT  
ATGCACACCAAGAGCTGAAAAAGATTGACCCAAACTACACAGTAAAAGTATACGAGTTTC  
CACATCCAGATATTAACACAGAAAATTATTTTGTACCTTATTTGGCTACACCAGAAGGAT  
ATTTTGTACAGGTATCTGTGACTGTGAAAGATAGTACAGAGACTGAGTGGCTTCCAGTAA  
TGGACTTTAGAAATAAATCGCTTCTCAAGGTAGTGCAACAATTTTCGATATTAACAAAG  
CGCAAAAACGATGTTTTGTTAAAGCTACGGCTGTAGACGGTTAAGGCTTAGATATCTACA  
ACGGGGAGGAACTACCAAGTGCAAGTGACAACGATATTACAGAATTAGTAGAGCGTATCA  
ATCAGTTTCGAGAACTTATCTCAAGAAAAAGGGCGAGATGCAACTATCGATAAACGATGA  
GATGGCTATAAATATCTAACATTAATAAATTAAGTCAAAAACAAATCGCAGAAGCACACC  
AAAAATTAGATGCGGGATTAACAACAATCGGATAGTGCGGAGAAACAATAATGTTAAACAG  
AGCAGTATTAGTAGGACGCTTAACAAAAGACCCAGAATTAAGAAGCGCGCGAAATGGCGT  
AAAGGTAGGTACATTCACATTGGCAGTAAACAGAGCATTACGAATGCTCTGGCCGAGCG  
TGAAGCAGATTTTATAAACGTAGTAGTGTTCAGAAACAAGCTGCAAAGGTTAAAAACTA  
CCTTTCTATAGGGTTCGCTGGCAGGTGTAGACGGGCGACTACAAACACGTAGCTACGAAAA  
TAAGGTGCGGCAACGTGTATTTGTGACAGAAGTAGTAGCGGACAGTGTTCAATTCTTAGA  
ACCGAAGAATAACAACCAACAACCAACATCAATAATCATCAACAAGACAAGCTCAAAC  
TGGTAATAATCCTTTTGATAATACCACTGTGATTACTGAGGATGACTTACCGTCCCGATT  
GGAATGATTAATGCCGAAAATTAAGTATATCACTCAAGACGACGGCACAACAACAG  
TTGTCATATCTGATGTTGAATTAGGTAATAAAGAAACATTAAGTATGATAACGGATTTG  
ATGTAGAAGTCGATGTAAGCGTCATACATACATTTTCGAATTACCGGCAAGCAACGCAAAT  
TGATATTCGCATTGTGTAACGATATAGAAGCTCATAACAGGACAAGCTCGAGATTATATGA  
GGCAAATGTTCCAAGATTATGTGAAGTTTTTGTATGGCCATGAAGAACGCATGTCTTTAT  
CAAATGTTCTCGAACTATAGCTAAGCAAATTATAGAAGCGATGTTTGAGTTGATTTTTA  
CAAATGCGATTCCATTAAATTATAAATCAAGTAAATTAATGAAAGAAGATAACAATTATC  
TTTATTGGGCAAATGTTACGCGTCATTGCATTAGATGCGGAAAGCCTCACGCTGACTTAG  
CACATTATGAAGCACTCGGCAGTGGGATGAACAGAAATAAGATGAATGACTATGACAAGC  
ATGTATTAGCGTTATGTGCGCAACATCACAAACGAGCAACATGCAATAGTTGTTAATTCGT  
TTGATGATAAATATCACTTGCATGACTCGTGGATAAAAAGTTGATGAGAGGCTCAATAAAA  
TGTTGCAAGGAGAGAAAAAGGAATGAATAGACTAAGAATAATAAAAAATACCACTCCTAAT

CGTCATCATGGCGGTAGAGATTAGAAATGATATGCATGCTGTAAAAGTGGAGAAAACCTTT  
AAAATCTCCGTTTAGTTAATACAGGTTTTTACAAAAGCTTTACCATAGGCGGACAACTA  
ATTGAGCCTTTTTTGTATGTCTATTACCCAGGGGATGTAATGTAACCTTTAATACTTTAACT  
TCAATGCCAGAAAGTTTACTTATTGTTTTCTACGTTGTGTCTGACGTTAACATTCTTTTA  
ACAAATTCTAACCCCGAAACAAATCTTTGTTTATCTATTATCTTATTAAGTGATTTAAA  
AACTGAGGAGCATAAAAAGTTATTATAAATTCGTTGTTTTGTTAAGTAAGACATGTCAAAA  
GTTTAATTTAACACCCCTAACCTTACTAGGTTATTAATTCAAATTTTCGGTTGATTCTATA  
TCTAACGGAGAGTTTTTTATTAACGTGTCCGATATATTCATACCGTCATTCTTTGGGTTT  
AAAACCGCTCTATATTTGACGGCAGGATCTACTTGGTGATTCTTTAAATGTTTTAAAAGA  
ATAGCATCATTTGGGGATAAATTGTATAATTGTTTCAACAAATGAATGGTGGGTGAATGAG  
TTTTTTCTGTCATCCATAGATGATGCTATTAGTTTTGCGAACATATTACTTAAAGTTTTT  
TCACTAAAGTAAAACCTTTGAAGCTTCTAGAGCAGGGACTAGAAGATAAAAATTGTGGTTCT  
TATAAATTATTTTCAGGTACAGAAGATATATCTTTTTTAAATTTGTTCTATGAATTTTTCA  
AATTCTACTTCTCTTTGATAAATAACTTTATCCCCATAAAGGGGGAATTTGCCAAAGACA  
AGTTCCCAAGTTTTAGAGAAGGTTTTCTACAGGCCCTTTGGATGCGCCTTCGATAATTTTA  
TCAATACCTTTACCTAAAATAGCATCCATAATTATTCACCCCAATCTAACCCAATAGCG  
ATAATAAAATTATACCAGAAAGGAGATAACGAAATGGCAACATTTAGAACTATAAAAGAA  
AGTGGCGATTTTTGTAACGTGTGCATAAATCGTTTTGTGTTTCGATAGTAGTTTAAAGTGCGAAA  
GCTAAAGGGATATTATTGTATTTCTAAGTCGTCCTGACAATTGGCAAATATACACGTCA  
GAAGTAGTTAAACATATGACTGATGGACAAAATTCATCAATAGTGGCGTTCATGAAGTT  
ATGGATAATAAATATGTTTCACAGAATACAAAAAAGAGCTGAAAACGGTGTGTTAAAAGGT  
TTTGAATACTTAGTTTAGGAAAACCAACCGAAATGCCATTTTCGGAAAACGGATTATCG  
GCACACGGGTTTTTCGGAAAACGGAAAACGGAAAACAGAAAAGGGCCTACTACTAATAAT  
AATAGTACTAATAATGATTTAACTAATAATAACAATACTAATAAAGATGGAAGTACATTG  
TCGTGCGGCCCGACTGTGTATTCCATTCCCTATAAAGAAATTATCGAATACTTAGACAAA  
AAAGCAGGAAAGCATTTTAAACAAAATAGAGCTAAAACAAAAGATTTTATTAAAGCAAGA  
TGGAATCAAGATTTTAGGTTGGAGGATTTTAAAAGGTGATGGATATCAAAACAGCTAAA  
TGGTTAAACACGGATAGGGATAAATACCTTAGACCAGAAACACTTTTTGGCAGTAAATTT  
GAGGGGTACCTCAATCAAAAAATACAACCAACTGGCACGAATCAATTGAAACGCATGAAG  
TACGACGAAAGTTATTGGGATGAGGGGGATATTATGAAACCACTATTCTGCGAAAAGATA  
AACGAAAGCTTGAAAAAATATCAACCTACTCATGTGCAAAAAGGATTGAAATGTGAGAGA  
TGTGGAAGTGAATACGACTTATATAAGTTTGCTCCTACTAAAAAACACCCGAATGGTTAC  
TAGTATAAAGACGGTTGCAAATGTGAAATCTGAGAGGAATATAAGCGAAACAAGCAACGG  
AAGATAAACAACATATTCAATCAATCAAACGTTAATCCGTCTTTAAGAGATGCAGCTGTC  
AAAACTAACAGCCACACAATGACAAACAAGTACACCCTAAACAAACAGCAATAGCGTAC  
GTTCAAGGCTTCTCTACAAAAGAGCCAAAATAGTCAATATTGCTAGGTTTCATACGGAACT  
GGCAAAAGCCACCTAGCATGCGCTATCGCAAAAGCAGGTAAAGCTAAAGGGCATAACGGTT  
GCTTTTATGCACATAGCAATGTTGATGGATCGTAACAAAGCGACAAACTACAAAATGCA  
GTATAGACTACAGACGAGCTAGTCAGGTTGCTAAGTGATATTGATTTACTTGTACTAGAT  
GATATGGGTGTAGAAAACACATAGCACACTTTAAATAAACTTTTTCAGCATTATTGATAAC  
AGAGTAGGTAAAAAAAACATCTTTACAACCTAACTTTAGTGATAAAGAACTAAATCAAAAT  
ATGAACTGGCAACGTATCAATTCAAGTATGAAACACAATGCAAGAAATGTATGAGTAATC  
GGAGACGATTTTCAGGGAGCGAGACGCATGCTAACCAAGAATTTTTGAAAATTAACCTTG  
AGTGTTTCAGATATGTACGCTCACAACTCATAGACGAGCCACAGGGCGATGAAAATAAGT  
TATATGACCTATTTATCCAAAACCTTGCAGAACGTCATACACGCCCCGCTATCGTCGAAC  
ATTAAGGAGTGTTAAAAATGCCGAATGAAAATATTACTTCTACCGATAAGATGGCACAG  
AAGATATTAAGGTCAACAAGTATAAAAAGAATGAGAATGAAGTTTATTTCGCTCACAGGAG  
CCCATTTTCAGCGACGAAAAGAAAATTATGACTGATAGTGACCTAAAACGATTTAAAGGCG  
CTCACGGACTTCTATATGAGCAAGAGCTAGGTTTACAAGCAACAATTTTGTTATTGAGA  
GGTTGAAGATGAATAAATAACGCTAAGAAAGTTGAGTACAAAGGAATTGTATTTCGATA  
GCAAAGTAGAGTGTGAATATTACCAATATTTAGAAAGTAATATGAATGGCACTAACTATG  
ATCGTATCGAACTACAACCTAAATTCGAACTGCAACCTAAATTTGGGAAGCAAAGACCGA  
TTACGTATATAGCCGATTTCTCTTTCTGGAACGAAGGGAACTGGTTGCAGTTATAGACG  
TTAAAGGTAAGGCGACGGAAGTTGCCAACATCAAAGCGAAGATATTCAGATATCAGTATA  
GAGAGGTGAATTTAACGTGGATATGTACAGCGCCTATATACACAGGTCAAGGATGGATGG  
TATATGAGGACTTAGTGAAAGTCAGACGTAAAAGAAAAAGAGAAATGAAGTGATCTAATG  
CAACAACAAGCATATATAACGCAACGATTGATATAAGAATACATCCCGTAGTTGAATAT

CAGCATTATGATGATGTGGATAAAGGAAAACAGACGCTGGCAAAGCGCTTAGATAACAAT  
CCGGACGAATTACTAAAATATGACAGCATAACAATAAGACATGAATATATAGAGGTGGAT  
TAAATGAGTATCCTAAAGATTAACGGTAAACCGTATAAATTTACCGAACATGAAAATGAA  
TTGATAAAAAAGAACGGTTTAACTGCAGGACTGGTTGCAAAAAGAGTACGAGGTCGCTGG  
GCGTTGTTAGAAGCCTTAAACGCACCTTATAGCATGCGCTTAGCTGAGTATAAAGAAATT  
GTGTTATCCAGAATTATGCAACGAGAGGCTTGAGAACGTGAAATACCTAGACAACGACTT  
AAAGCGGCTGAATTACGTGAGAAGAAGCCACATTAGTTTGTAGTGTACCTCAGAAACATTCA  
CGTGATCCGTACTGGTTTGATAATACTTATAACCAAATGTTCAAGAAATGGAGTGAAGCA  
TAATGAGCATAATCAGTAACGGAAAAGTAGATATGAACAAAACGCAAGACAATGTTAAGC  
AACCGGCGCAGTAAACATGCGGCAACATTGAAATTATAGATTTTACTGAACAAGTTACGT  
CGCAGTACCGACTACAATTAGCATTGCAATAGGTATTGCAATCAAATACTTGTCTAGAG  
CACCGTTAAAGAATAGTCATGAGGATTTACCAAAGCGAAGTTTATGTCCAGAGAGTAT  
TTGATTTGTGGGAGGGGTAACGATGGCAACGCAAAAACAAGTTGATTACGTTATGTCATT  
AGAGGAGCAATTGGAGTTAGAAAACCTGCGAATAATATACAGACGAACAAGTTAAAGCAAT  
GAGTCATAAGGAAGTTAGCAATGTGATTGAAAACCTATAAGCCAAGCATAAGTAATGAAGA  
GCTATACGACGAATGCATGTCGTTTGGTCTGCCTAATTGTTAAAAGGAGTGATGACCATG  
ACAGATAGCGCGTGTAAGAATACCTAAATCAATTCTTTGGATCTAAGAGATATCTGTAT  
CAGGATAACGAGCGAGGGGCACATATCCAGGTAGTAAACGGCACTTATTACTTTCACGGT  
CATATCGTGCCAGGTTGGCAATGCGTGCAAAAGACATTTGATACCGCGGAAGAGCTTGAA  
ACATATATAAAGCAAAATGGATTGGAATACGAGGAACAGAAGCAATTAACTTTATTTTAA  
AATGGCGGAAACAATGAAAATCAAATGGAAAAGAAATGAATTTACCTGAACTTTTCCA  
ATGGGCTTGGGATAACCCCAAGTTATCAGGTAATAAAAGATTCTATTCAAATGAAGCTGA  
ACGCAACTGTTGTGTGACTTTTGTATGTTGATAGCATCTTACGTAATGTGACTGGATACGT  
ATCAATTAACGATAAATTTACTGTTCAAGAGGAGATATAACAATGAAAATCAAAGTTAAA  
AAAGAAAAGAGATTAGATGAATTAATTAGATGGGCGCGAGAAAATCCGGACCTATGACAA  
GGGAAAATATTCTTTTCAACAGGACTTAGTGATGGATTTCGTTTCGTTTTCATCCAAATTCA  
AATAAGTGTTTCGACGTCCAGTTTTATTCTAATTGATATCCCCTTCATAGTTGATATTGAA  
AAAGAAGTAACGGAAGAGACTAAGGTTGATAGGTTGAATGAATTATTCGAGATTCAAGAA  
GGAGACTATAACTCTACTATATGAGAACACGAGTATAAAGAATGTTTATAGGGCAGA  
TGTGTGCCTACCAAAGCATTCCACATCTTTGACAATGACCTAACTATGACGTTAATGTGG  
AAAGATGGGGAGTTCCTAGTATAATGTTGAAATTTAAAGCTTGGGATAAAGATAAAAAAG  
TTATGAGTATTATTGACGAAATCGATTTTAATAGTGGGTACATTTTGTATTCAACAGGTT  
ATAAAAGTTTCAATGAAGTAAAACCTATTACAATACACAGGATTTAAAGATGTGCACGGTG  
TGGATATTTATGAAGGGGATATTGTTCAAGATTGTTATTCGAGAGAAGTAAGTTTTATCG  
AGTTTAAAGAAGGAGCTTTTTATATAACTTTTAGCAATGTAAATGAATTAAGTGAAT  
CGGACGATATTATTGAAATTGTTGGAAATATTTTGGACAATGAGTTGCTTTTGGAGGTTA  
TGAGATGACGTTACGTTATCAGATGAACAATATCAAATCTTTGTAATACTACTAACA  
GTTATTTGATAAACTTCACAAACCATTAAAAGATCGTGAAGAGTACAAGAGGCGACGAGT  
TGAGCTTATTGGGGATATAGCGAAGTTACGAGATTGTAACAAAGAAGTGGAGAAGAAAGC  
AAGCGCATGGGATAGGTTATTGCAAGAGCGTTGAAAAGATTTAATAAACGAATTCGGTAA  
CGATGATGAAAGAGTTAAATTCGGAATAGAATTAACAATAAAAATTGTTATGGAGGATCA  
CACTAATGAATAACCGAGAACAATAGAACAATCCGTTATAAGTGCTAGTGCGTATCACG  
GTAATGACACAGAGGGATTACTAAAAGAGATTGTGGACGTTTATAAGAATGCGCAAGAGT  
TTGATGAAATCCTTAAGGGTTTACCTAATGCTATGCAAGATTCACTCAAAGAAGATATTG  
GTCTTGATGAGGCAGTAGGGATTATGACGGGTGAGTGGTATATAAATATGAGGAGGAGC  
AGGAAAATGACTAACACATTAACAATTGATCAGTTAAAAGAGGTATTACAAATACAAAA  
TACTTTGACGATAGAATACCAACACCAAATTTACGAGATAGCAAGATTGCGTATGCGGTT  
GAATTCCTTGAATGGTTTAAACACATCGGAAACGTTCAAGAATTGGAAGAAGCAACCAGGT  
AAATCGTTAGACCAACAGCTAGACGAGTGAGCAGACATGTTAGCGTTTGGATTGAGTATT  
GCTAATCAACAAGCAGATAACATGGAAGAAATTTTGGTTATTTAGATCAGGGAGATTTT  
AACGACTATATAGAACGAGTTGAAATCGATTATAACGATAGTGATGTAGTAGATGAATTT  
ATGTCAACTATAGATGAAATGTATTAAAGTCCATATAGTAGCAACTTATTTTACCGTTT  
GCATTAGCGAACAATACTACCCTATCGATCAACTCATTGACGCATACAAAAGGAAAATG  
AAAAGGAACCACGAAAGACAAGATGGAACAGCAGACGCGAGGGAAAGGATACTTATAAAGA  
CATATTAGATCGGGTCAAGGAGGATTAGGGGAAGTGACACAATACTTAGTCACAACATTC  
AAAGATTCAACAGGACAACCACATGAACATTTTACTACTGCTAGAGATAATCAGACGTTT  
ACAGTTGTTGAGGCAGAGAGTATAGAAGAAGCGAAAGAACAGTACGAGGCACAAGTTAAA

AGAGATGCAATTATTTAATTAGGTCAGTTGTTTGGAAAATATAAGGGAGTGTCTGAAATGA  
CGGATGTTAAAATTA AAACTATTTTCAGGTGGAGTTTATTTTGTAAAAACAGCTGAACCTT  
TTGAAAAATATGTTGAAAGAACGACGTGTTGTAATGGTTATATTTACGCAGGTAATAA  
ACAAGCAACCAACGTATATTA AAAACAGATACGATTGAATCAATCACACTTATTGAGGAAC  
GTGGGAAATGAATCAGCTGAGAATTTTATTACATGACGGTCGTAGTTTGGTACTACGTGA  
AGATGAAGTATTTAACGAAATAGTATTTCTTTTGGATGATTTTAGAAACGATGATCACTA  
TTAACGACAGAAAAAGATTATGGCAGAGA ACTAGTATTGAACAAACGTTATATAGTTGG  
GATTAATGTTGAGGAGGCAGACGATGACTAAACAAATATTAAGACTAGTATTCTTACTAG  
CGATGTGTGAGCTAGGAAAGTATGTAACGGAGCAAGTATATATTATGATGACGGCGAATG  
GTGATGTAGAGATGCCGAGTGACTTCGCAAAGTTGAACGATCAATCTGATTTGATGAGGG  
CGGAGGTGTCAGAGTAGAAGATGTGGTTAGTCGTAGCAATTATATTACTAGGCATATTAT  
TATTTGGTGTGATGTTGCAAACCTGAACAGTTAATAGGCGATGTGAAAATTAAGATCGGG  
AGATAGAGATATTAAGAAGTAGATTGAGACATTTTGGAGATTAACATATTTGTACGGAG  
GGTATTCATGACTAAAAAGAAAGACGGATTA AAAATCGTCAACAGTTCGGAAATTAGAAGA  
CGAGTTTTGCGATTATCCTAATTATCATAAACA ACTTGAAGTTTTAAGATTTGAAATAAT  
GACACCGTGGATTCCAACAGATACAAAGATAGGCGGGGAGTCTGTACCATCTAATACATC  
AAAAACAGAAATGGCAGTAACTAAGTATCTTTGTAGTATGAGAAGAGGTAAAATACATGA  
GTTTAAGAGTGCAGATTGAACGTATTATCAACACCTCAAGTAGGAAAGAACGCGAATTCAT  
TCAAGAGTATTATTTAAGAAAAAGACTTTGATTGCGGTTTGTATGACATACACATCTC  
CGAAAGTACAGCGCATAGTATCAACAAGAAAAATCGTGTCTAACTAGCCGAAGAATTAGG  
AGAATACTAAATTTAACAGTAAAATGCCAGTTTTTGGACACCTCTAACGAGATATTATGAT  
AGTGTAGGATATAGACTATCTTACTGCGTTTCCCTTATCGCAATTAGGAATAAAGGATCT  
ATGTGGGTTGGCTGATTATAGCCAATCCCTTTTTTAATTTTAAAAGCGTATAGCGCGAG  
AGTTGGTGGTAAATGAAATGAACAAATTA ACTAAAAAGCGACGTTTGCTTGCAGAAGTAT  
ATACAATACCTGGTACTGAATGTTATGGCAATGCTACTAAGTCAGCTGTGGATGCCGGAT  
ATAGCGAAAAGACCGCTACTCACAAGGACAGCGGATGTTAAAGCATGGTGAAATTCAGA  
ATTATATCAAGGAGGTTGAAACAAA ACTCTTTGACGAGAATATTATGTCAGGTCAAGAAG  
TGGTATATAGGCTAACTAGAAATAGCTAGAGGAGAACACACGGAAGTTAAAGCTGTCGTA  
CTAAACTGGGAGACTTTAAATAGAATCCGTATACTGGCAAAATGCAATTAGTATACGATG  
AATACATACA ACTTGTACTAAGTCACCTAAAATAAGTGACCAAACAAAGCCTTAGAGA  
TGTTAGGTAGACACCACAAGTTATTTACAGACAAACAAGAAGTCGACCACAAATTACCGA  
TGTTTGTGATAATATTCCGGAAGATGATTAGTCATTTATGAAATACTTGATCTAAAAAA  
TAAAATCGGTGGTGGCTACAATAAGTTTTGGCACAACAAA ACTTTTACCGTGTGTGTTAA  
AGTTCAAGGGGTAGCAAGAAAAGTAAA ACTACCGCTAGTAATCTCATTATCGAATAAT  
TAAATATGATTGGGCAAATATACTTGTAGGCAGAAGATTTAGCAACACTAAGAAACAATC  
AACGTATACAGATTTAAAGTGGGCAACTAACCAATTAGGCGTTGCTCACTTATTTTAATT  
CAACGAAAGTTTGCCTTATATACTTATAAACCTACTGGACAAAGAATACCGTTTAAAGG  
TTAGACGACCCATTGAAAATAACATCGATTACTGTTGATACAGGCATTTTGTGTAGGGC  
TTGGTTTGAAGAGGCTTATCAATTAGACACATTCGCTAAGTTTGGCACTGTTGTTGAGTC  
AATATGTGGTAGCCACGATAGTCCGGAATTTTTCAAGCAAATCACAGTCACTTTTCACCC  
GTGGTCGGAAAGACATTCGTTGAAGCCTACATCTTTTGTGATGAAGAAACAAAATTAACAA  
TACTTTTTCAGATCCAACCACTTATAGTGTTAATGAATGGTTAGATACAGTCGCTATTGA  
ACGATATGAAGATTTGTATCTAAAGAGTCTAGACGTGCAAGCATCGTTTGTGATGGAGA  
TTGGGGTGTGTCAGAGGGGCTTGAATTCGATAATTTTAAAGTGGAAGACTTTGATTGTTT  
TGAGGACTCTAAAAGAACGCAAGAAATATCTCACGGAATGGATTTTGGATTTAGTCAAGA  
CCCTACACCAGTAGTTAGTACGGTTGTAGATTTAAAAAACAAAAGTTATGCATCTATGA  
TGAACACTATAAAAACAGCGATGTTAACTGATGATATAAAAACAAATGCTTATTA AAAAAGG  
ATTAGGTGATGTAGATATTGCAGCTGATTATGGGGCTGGTGGAGTTAGAGTGATCAGTGA  
ATTGAAATCTAAAGGGATTAAGGTATAAAAAAAGCGTTGAAAGGCGCCAATACTATTTT  
ACCAGGCATTCAATTCATTCAAGGCTCTGAAGTTATTATACACCCTTCATGTGAAAACGC  
TATTGCAGAGTTCAACACTTATACATTTGACCAAGATAATGATGGTAAGTGGTTGATCAA  
GCCTATATATGATAATATCCATATTATCGATGCATTGCGTTATACTCTTGAGAAATATCA  
TATCGTACGTAAAAACGTAAAAAGA ACATAGAAAGCAAACAAAAGTAGTTAAATATCT  
AGGATTATAGGAGGGAACAAATGTTAAAGGCAAACGAATTTGAAACGGATACTGATTTAC  
GAGAAAACAGAAATTA CTGTTTAACGATGAAGCTAATGTTGTTTACACATATGACGGGA  
TAGAGTCTGATTTATTACAAAACATTAATGAAGTAAGTAAATACATTGAACATCACATGG  
ATTACCAACGACCTAGATTA AAAAGTGTTAAGTGATTATTACCAAGGTA AAACTAAGAATC



TGTTT GAGTTAACACGACGCAAAGAAGAGTACATGGCACACAACCGTGTAGCGCATGTTT  
ACGCATATTATATTAGCGATATTATTAACGGTTATTTCTTCGGTAATCCGATTCAATGTC  
AAGATGATGATAAAGATGTATTAGAAGCTATTGAGGCGTTCAATGATTTAAATGATGTTA  
AGTCACACAATAGATCTTTAGGATTAGATTTGTCAATTTATGGCAAAGCTTATGTGTTAA  
TGATTAGAAACCATGATGATGAAACGCGTTTATACAAGAGTGAGGCAACGAGTACTTTTG  
TCATATAACAACAATAAATTGAACGTAATAGTATCGCAGGCGTTAGATATTTAAGAAATA  
AACCAATAGACAAGACAGACGAAGATGAAGTGTTTACAGTTGATATATTTACTTCTCAGG  
GTGTTTATAGATATCTTACCCTAGAAAGAAATGGATTGAATCTCACACCACGTGAAAACG  
GTTTTGAATCACACTCTTTGAAACGATGCCTATTAAGAATTTAGCAACAACGAAAGAA  
GAAAAGGAGATTATGAGAAAGTAATCACTTTGATTGATTGTATGATAATGCAGAATCAG  
ATACTGCTAACTATATGTGTGATTTAAACGACGATATGTTATTGATTAAAGGTAACCTTAT  
CATTAGATCCAGATGAAGTAAAAAACA AAAAAGAAGCTAACGTGTTATTTTTAGGGCCCA  
CCGTTTGAGAGAATAGGGATACAGGTATCGAAACAGAAGGTTTCAGTTGACGGCGGTTATA  
TTTATAAGCAATACGATGTACAAGGTACCGAAGCTTATAAAGACCGTTTGAACAGTGATA  
TACACATGTTTACCAACACGCCTAACATGAAAGATGATAACTTTAGTGGCACTCAATCGG  
GCGAGGCAATGAAACATAAATTGTTCTGCTTAGAACAACTACTAAAATAAAGAAGGAT  
TGTTTCTGAAGGGTTAAGACGTCGTGCTAAGTTGTTAGAGACAATAATTCAAATAACAC  
GGTCGATTGACGCTAACAAAGATTTCAATACTGTGAGATACGTATACAACAGAACTTAC  
CTAAATCATTAAATGGAAGAATTA AAAAGCTTATATTGATTCTGGCGGAAAGATTAGTCAA  
CACTTTAATGTCTCTATTCTCGTTCTTCCAAGGCCCTGAATTGGAAGTCAAGAAAATAG  
AGGAAGATGAGAAAGAATCTATTA AAAAAGCTCAAAAAGGTTATTTATAAAGAACCTAGAG  
ACATCAATGATGACCAACAAGATGATGATACAAAAGATACTGTTGATAAAAAGGAATGAT  
TGAAATTGCCTAACAAAACACTCAAGAATATTGGGAAGAACGCAGACGCAAAGCAATCG  
AGAATGAGTTGAAGCCTTATAAAACCAAAGCTGACGTAATAGACCGTATATTGAATATGA  
TGATTAGGCGCATTGAAAAGAAATCAATGCGTTTATTGTTAAGTACGGAGATTTTGCAG  
GCGTTACATTACAAGAAGCACAAAAGATTATTGATGAGTTCGATGTAAAAGCGTTTCAAG  
AAGAAGCAAAAAGATTGGTCGAAAACAAGGAATTAAGCGATAGAGCAAATGAAGAATTAA  
AGAAGTATAACACTAAGATGTATGTATCTAGAGAACAGATGTTAAATATTCAAATAGAAT  
TCTTATATGCTTATGCAACAGCTCAAACAGAATTATTGATGAGGGAATTTTCGAATCAA  
CAGCTTATCGTGTGTTCAAGGGATCAAGCGGGTATTTTTGGTGAAGGCGTACAAGTAGCTA  
AAGAAGTTATAGATACAGTCGTTGATACACAATTTTCATGGTGTGCGATTGGTCAGAGCGAT  
TATGGACTAATACGGAAGCGATGAAACAAGAAGTAGAAGAGATAATTGCTAATGTGGTAA  
TTAGAGGTCGACATCCTAATGAATATGTTAAAGATATGCGCAAGCACCTAAACAAATTCG  
AAGGCACAGCAAGACAAAAGACTGCAGCAATTAATCATTGCTTTATACGGAATCGCCAC  
GTGTTTCGCGCATAATCAAGTATTGACAGCATGAAAGAAATTTACCGGAAGGATATTATA  
TGTATATTGCAAAAATTGATAGAAGAACA ACTAAAGTATGCGAGGGGGTTAATGGTGAAA  
TATTCAAAGATAAAGACGCTAAAATTGGTGTAAATTTCTACCCTATGCATATCAATTGTC  
GTTTCAGATTGTGCATTACTACCTAAATCTATGTGGCCGAAAAACCAACCAAGAAACGAA  
AAATATAACTTTCGGAGGAAAAGTGAAAAGCGATGATTCATTTAAAAGTAAAAGTTTTT  
AAATGCAAGTTAGCATTGTATGATAGTAAATTAAGAGTTTGGAGGATATTGGTATGAGCA  
ATACTGACAGATACTTTAGAGACATAGCAAGAGAGTTAAAAGGTATACGTACAGAGTTAC  
AAAAGCGAAACGATACAGTTATTATTGATTCAA ACTTAGCCAGCGTAAGGTTCGGCAGTAT  
TAGCCAATAACTAAAACCGAAATATAACGTACCACTCTTTTTATAGCTAGCACTTAATT  
GTGTTGGCTATTTTTTATGTCCAAAACGTGCTGATGACATAAAAAGCACGCGTGGAAAA  
CAGTCGACAGACTATAGATGTAGCTATATCTCATGGAAGAAAATAAACTTAAGTTTGATT  
TGCAATTTTTTGCAGACCAATCAGATGACCCGGACGAACCAGGCGGAGATGGTAAAAAAG  
GAAATCCTGATAAGAAAGAACATGACGAAGGTACTGAAATAACTTTACGCCAGAGCAAC  
CAAAGGAAATTCATGAAATACATGAACGTCGTGTAGCCACAAAAAGAAAAAGCTGATG  
AGTATGCAAAAAGAAAAATCAAAGAAGCCGCTAAAGAAGCTGCTAAATTAGCGAAAATGA  
ACAAGGATCAAAGAAGATGAATATGAACGTAAACAATTGGAAAAAGAGCTGGAGCACGTAC  
GCTCAGAAAAACAATTAATGAAATGCGTTT CAGAAGCAAGGAAAATGTTAAGTGAAGTAG  
AAGTAGATTCATCAGATGAGGCTGTTAATTTAGTTGTACCAGATACTGCTGAACAAAATA  
AATTGAATGATGAAGTTGTTTCTAATGCAGTAAAACAAGCGGTTAATGAAGCGGTTACGA  
TGAACGCTAGACAATCGCCATTGACTGGTGGAGATTCATTTAATCACTCGACTGAAAATA  
AATCGCAAACTTAGCTGAAATAGCTAGACAAAAAGAATTATGAAAAATTAACGGAGGC  
ATTTAAATGCAACAAGCACAAAATTA AAAAATAAATTTGCAACATTTTGCAGTAACAAT  
GTTAAACCGCAAGTATTGAACCCTGATAATGTAATGATGGACGAAAAGAAAGATGGCACG

TTGATGAATGAATTCACAACCTCCCATCTTACAAGAGGTTATGGAAAACCTCTAAAATTATG  
CAATTAGGTAAGTACGAACCAATGGAAGGTAAGTACTGAGAAGAAGTTACTTTTTGGGCTGAT  
AAACCAGGTGCTTACTGGGTAGGTGGAGGTCAAGAAATCGAAACATCTAAAGCTACATGG  
GTTAATGCTACTATGAGAAGCTTTAAATTAGGGGTTATCTTACCTGTAACAAAAGAGTTT  
TTGAATTACAATTATTCACAATTCTTTGAAGAAATGAAGCCTATGATTGCTGAAGCATT  
TATAAAAAGTTAGGTGAAGCGGCTATTTAGAATCACGGGAACAATCCATTCCGGTAATTCA  
ATTGCACAATCCATTGAAAAAACTAATAAAGGTTATTAAGGTTGACTTCACACTAGATAAC  
ATTATTGATTTAGAGGCATTACTTAAATATGACGAATTAGAAGCAAATGCGTTTATCTCA  
AAAACGCCAAACAGGAGCTTGTACGTAAAATTTTAGATCCTGAAACAAAAGAACGCATT  
TATGACCGTAACAGTGATGCATTCGACGGTTTACCTGTGGTTAATCTTAAATCAAGTCAC  
TTAAAACGTGGTGAACATACTACTGGAGATTTTCGATAAGTTGATTTACGATATCCCTCAA  
TTAATTGACTACAATATCGATGAAACAGCGCAATTATCTACAGTTAAAAACGAAGATGGC  
ACACCTGTAAACTTATTCGAACAAGATATGGTGGGCATTACGTGCAACTATGCATGTAGC  
ATTGCATCTCGCTGATGATAAAGCATTGCTTAGTTAGTCCGTGCTGATGCAAAACCATC  
GTCAAATCCAGGCGAAGTTTAATAAATAATTAGGAGTGAACACATGCCCCGAAATCATTGG  
AATTGTTAAGTAGATTTTACAGATTTAGAAGATAACAGACATGTCTATATGAGAGGGCA  
TGGCTACCCTCGTAAAGGTTATGATCCTACGAATGAACGTATAAAAGCTTTAGCCAGCGT  
TGAAAATAAACGCTATTAGCAAATGATTTACATAGTAAATGACAAATTAACCAAAAAAGA  
ACTTGTGCAATAGCTAGTGTTGTTGGCCTACAAGTTGATGAAAAACAAACAAAAGCCGA  
AACTATCAACACTTTTGAGTCGCTAGAGTAGGTGGTTTTATGACTACGCTAGCTGATGTA  
AAAACCGTATTGGTCTTGAAGATGAAAAGCAAGATGCACAATTAGAGGAAATTATAAAA  
AGTTGTGAAAGCCAGTTGATATCAATGTTACCTATTGAAGTTGAACAATTACCGGAAAGG  
TTTCGTTACATGATTAAGAAGTTGCAGTTAAACGCTACAACAGTATTGGTGCTGAAGGT  
ATGACATCAGAAGCGGTTGACGGACGTAGCAATGCGTATGAATTGAACGATTTCAAGGAG  
CATGAGGCTATTCTTGATAATTAATTTAATGCTAGAACGAGAACTAAAAAAGGACGGGCT  
GTGTTCTTTTGAGATATGAAGATAGAGTAATTTTTCAATTAGGACAAGTAGCAAATTACC  
ATCCTAAAACCTAGCAAAAAAGAAAACGCACTAATCACTTATGATGCGATACCATGCAATA  
TTAACCCCTTTTCTAGAGCAAGAAAGCAACTTGAATTTGGCGATGTAAAAATCGAAGTAA  
CTGTCCTGAGGGTCAAAGGATCAATATCTTACCCTGTTAGCCACGTGTTGGTTAATGGCA  
TTCGCTACAAGAGAGTTGGTAAAAGGATATACAGACACGAAACGTCATATTATATCGAAG  
AGGTCAATTGATGAATATAGATGGATTAGACGCACTGTTAAACCAATTTACGATATGAA  
AAACAACATCGATGATGATGTACATAATACTTGACAAGAAAACGCCAAAGAATAGGTAGT  
ACTCGCTAAATTGAAAGCTAGAGAAGTAATGCATAAAGGTTATTGCACTGGTGATTTATC  
ACGCAATAATAGATATTA AAAAATCTGGCAATTTGCAATACACTATCACATCGCATGCAGC  
TTATAGTAGTTTCTTAGAGTTTGGTACTCGATACATGGAGGCATAACCTTTTATGTGGCC  
AGTATATGAGGTAATAAGAAAATCGACTGTAGAAGAGTTGAAAGCGTTGTTTCGAATAGGA  
GATAAAAGCATGACACCAAACCTTACAACCTTTATAATAATGTGTTTGAAACGCTACAAGGA  
TATGGATTCCCTGTTATTTCTCGTAAAGAGATGCAACAAGAGGTTCCGTATCCTTTTTTT  
GTAATAAAAATGCCGGAGTCAAACAGAAGTAAATCCACGTTTGATAGTTATTCTGGTGAC  
ACGAATTGAGTTCTTGATATTTGGTGTGTAAGTGATGATTTAGGACATCATGACGGACTT  
GTTAAAAGATGTATTGATGATTTAACACCTAGCGTTAAAACAAACGATTATGACTTTGAA  
GTAGATGATACTAACATCACACACTTAGTTGATGATACTACCAATCAAGAATTGCTACAC  
ACATCAGTAACGATAACTTACAAAACATTTTAAAAAACGGAGGAATATTGAATGGCAAAT  
ATGACAAATAGTAATGATCGTATTATTTTATTTATAAAAAGCTAGCGAAAAAGTAGATGCT  
ACTAAAATGCTTTTTTTAACTGAATACGGCTTATCACATGAAGCTGATACAGATACAGAG  
AATACAATGGACGGTCTTATAACACAGGTGGTTCTGTTGAGTCAACACTGTCTGGTACT  
GCTAAAATATTTTATGGTGACGGTTTTGCAGACGAAATTGAAGATGCAGTTGTAGATCGC  
GTATTGTATGAGGCTTGGGAAGAGGAAGGTAGAATACCTAGCAAAAATGGAGATGCCACT  
AAATTTAAAGCGAAATATTTCCATGGTTTCCACAATAAAATTTGAATTAAGCAGAAGCT  
AACGTTATTGAGGAATATGAATGTGAATATGGAGTGAATGGTCGTTTCCACCGTGGAATT  
GCAACACTACCTGAGGCTGTAACATAGAACTTAAGCCGACTGGATACAGATTCCATGAC  
ACTACTAAAGCAGATGCGTTATCTGGCGAAGATTTAACAGCTATTCCAGAACCAAAGGTA  
GATTCATCAACGGTTACACTAGGAGAGGTATAAAAATAGTGCGTTAAGCCCGAATTATTT  
TGTTTAAATTAATCATGAATGGAGATTTTATGTTATGAATGTATAAATTAACGGAAAGTC  
ATTAGAATTAAGTCTTGGTTTTAAATTTTTAAGAGAAATCGATAAACGATTAGGTTCAA  
AGTTGAGCAAGCTTCTATCGGTCAAGGTGTATCAATGTTGCCTGTAAGTTTAGAGAGTGA  
AAATCCTGTTGTGATTGGCGAACTTTAAATTGCAGCTACATCTCACTTAAAAAAACAAGC

AATTACTATTAATAACCTTGCTGAAGCGCTAGATGAAATCGCAGAAAATATCGGACTAGA  
AGAATTCGGTTCATATATTTTAACGGAGTTGGGAAAGCGACCAATGACCCGAAACCTAGT  
CGGAGTAATGGAAGCGGAGGAGAAACCAGCGGAAGCGTAATAACCTACGACAGAATCGTT  
ATAACTTGTATGCCAACACTTGGTATCACAGATTTGAACGTTATTGAGAAAATGACATTA  
ACAGAATATAACTATCGAATGTATGCGAAAGAGTATGAAATTCTAACCCAAGAATGCGAA  
CGTTACAACTTGCGTTTGGCTATTCGTGATGCTGCAGCTACAGAAAATGTTGGGACAGAA  
AATAAACCTCAAGAGGAATATGTTTTTAACACGGAACGACGTATTGCCTTATGAAGAA  
AATATCCAACCTGCTTAACGAAGAGAAAGATCTAAGATTTAGTAGCGAACGGGATGAATAC  
GAACCACAAAACAATGAATTCTTTAAAGTTATAGCAGAATTTAACAAGCAATCGAAAGAG  
AGGTGTTAATGTGACGGAATATAAAATTAAGCGACTATTGAAGCTAGAGTAGCCAAATT  
GAAAAGGCAAATCGTTAGTGCGGTTAAGTCTGTGCAAAGATTTAAACGAGTAGTAGATCA  
AACTAAATATGACGAATTAATGCTGATGATAAAAAATTACAAAAAACTATCAAAGTTGC  
TAAAAAGTCTTTAGATGCCTTTAGTAACAAAAAAGTAAAAGCTAAATTAGATGCTAGTAT  
ACAAGACTTGCAACAAAAGGTACTAGAATCGAATTTTGAAGCTGGACAACTAACTATAA  
AGAAGTTACTCCAGAGATTAATTACAAAAACAGAAATTGACTAAAGATATTGCTGAAGC  
AGAAGCTAAGTTAGCCGAAGTAAAGAGAGCGTGTCAATATTGACATCAATGCTGATAA  
CATTAGATTCAATCGAGTGTTAAAAGTATCTAAAGATAGTCTTGAAGCTTTAAATAGGTC  
TAAAGCCAAAGCTATTTTAGATGTAGACAGCAGTGTGCTAATTCTAAAATCAACCGTAC  
TAAAGAAGAGCTTAAAAGTATTCCAAATAAAACTAGATCTAGACTTGATGTAGATTCAAG  
GCTTTCTATGCCAACTATTTATGCGTTTAAAAAATCATTAGACGCATTGCAAAAATAAAAA  
AACAAACAAGGTAGATGTCGATACTACTGGTTTAAAGAAAGCTCATGGCTACATAATAAA  
CGGAAACGACAATTTCCAAAGACAGATGGGGAATTTAGCTAATATGTTCCGTGTGTCCGG  
TACTGTAGGTTCTAATATGGTTGGTGGATTACTAACTTCATCTCTTAGCATTTTAATACC  
TGTAATAGCGAGCGTAGTACCTGTAGAGTTTGCAGTAAACGTTATCAAAGTGTTAAC  
GGGTGGTGTACTTGCTTTAGGTTGTGCTGTAGACATAGATGGTGCAGTCTTTGTAGCATT  
TGGCGCAACGGCTACCAGCGCTATAAAAATGCTTAGTGACGGCACTTTACAAGCTAGCAC  
AGCAACAAACGAATACAAAAAAGCTTTAGATGGCGTAAAGTCAGCATGGACTGATTTTAT  
AAAGCAAATCGATCCGCTATCTTTACAACCTCTTGCAAATGGTTTAAATACTGTTAAGAC  
GGCAATGCAGCGCTTACAACCGATTTTATAGTGGTATTTCAAGCGGAACGGAAGAGGCGTC  
TCATAGTGTACTTAAATGGGCTCAAAATAGCGGTGTAGCATCAAGGTTCTTCAACATGAT  
GAATACAACCTGGTGTTCGCTATTTAACAAGCTATTAAGTGCTGCAGGCGGTTTCGGTGA  
CGGTTTATAGTCAATGCATTACACAATTAGCACCCTGTTTCTATGGTCCGGCTGATTGGTT  
GGATATATTAGGTCAATCTTTATCTAACTGGGCTAATAGTGCAGCTGGAGAAAATTCGAT  
CACTCGTTTTATTGAATACACAAAACCAATTTGCCTATCATTGGTAATATTTTTAACAA  
TGTTTTCGCTGGAATTAACAATTTGACGAATGCCATAAGTGGATCGTCAACTGGTATATT  
CCAGTCTCTCGAACAGATGACAGCTAAATTTAGGGAATGGTCTGAACAAGTAGGACAATC  
TCAAGGGTTCAAAGACTTTGTCAGTTACATACAAACAATGGACCACTAATAATGCAATT  
AATTGGGAGCATTGCAAAAGGATTAGTTGCATTCGCAACAGCGATGGCTCCTATAGCTAG  
TGCAGGATTACGCGTTGCAGTAGCAATAACTGATTGGATAGCTAACTAGTTTGAGGCGCA  
TCCAGCTACAGCACAATTAGTTGGCGTCATTATAACTTGAGTTGGTGCATTTAGATTTTT  
AATTGCTCCAATATTAGCGGTAATGGATTTGCGGGGGCCATTAGCAGCAAGATTAGGCGC  
ATTAGTAACTAAGTTTGGTTGGGCTAAAACAGGACCTTTAGTATTGAGTGACGCAGTGAC  
ACCGTTAAAAGGTCCAATAAAATTAGTTACAGCTATATTCCAATTGTTAGTCGGTAAGAT  
TGGATTAATTAGAAATGCTATCACAGGACTAGTAACTGTGTTTGGTATTTTAGGCCGTCC  
AATAACAATAGTAATTGGTGTAAATTGCTGCATTAATATCTATATTCGTTTTATTGTGGAA  
TAAATATGAAGGATTCAGAACTTTATTATAAATGCTTGGAAATGCGATAAAAGCGTTTAC  
GGTTAATGTTTGGAAATGTATTAAGCTGTAGCTTCGGTTGTATGGAATGCTATTTAAC  
AGCTATCACTACAGCAGTATCGAATGTTTACAATTTTGTAAATGATTGTTTGGAAATCAAT  
AGTCGCTTATTTACAAGGGCTATGGAATGGAATTATCGCTATTGCACCAACAGGATGGAA  
CCTTTTAGTTACAATCATTACAACCTGTTTTCACGACGATAATGACAATAGTTATTACGAT  
ATGGACAGCTATTTGGACGTTCTTAAAGTACAATGTGGAATACGATAATTACAATCGCTAC  
AACGATTTGGAATGTGTTGGTCACTGTAATAAGTACTATGTTTACAACAATCATGACTAT  
CGCAATGACAATTTGGAACGCTATTTGGACGTTCTTACAGACGTTGTGGAACACTATAGT  
AACTGTGGCAACTAAGGTTTGGAAACGCTATCACTACAGCTATCTCTACTGCGTTACAAGC  
GGCATGGAGTTTCATTTCTAATATCTGGAATACGATTTGGAGTTTCTTATCTGGTATATT  
AACGACGATTTGGAATAAAGTTGTAAGTATATTCACACAAGTTGTATCAACTATATCAGA  
CAAATGTCTCGAGCTTGGAACTTCATTGTCACTAAAGGTATGCAATGGGTATCTACTAT

GACAAGTACGCTAATTAACCTTTGTTAATAGAGTTATTCAAGGATTCGTTAATGTTGTAAA  
CAAAGTTAATCAAGGTATGACAAATGCAGTAATTAATAAATTAACGTTTTTATAGGAGATTT  
TGTGTCTGCAGGTGCTGATATGATCCGTGGTTTAATTAGAGTTATTGGACAAATGGGTGA  
CCAATTAGTAGATGCAGCTAAAAATGTTGCTAAGAAAGCTTTAGATGCAGCTAAAAGTGC  
TTTGGGTATTCACCTACTTTACCGTGAATTCATGGATGTTGGTATGTATTCAATGCTAGG  
TTTCGTTAAAGGTATAGATAATTATTCAAGTAACGTTATCCTTAATGTTTCTAATGTTGC  
ATATATAGTAGTTGATGCATTTCAACCTACATTAACCGCACCTGACATTTCTAGTATTAC  
AGGTAACCTAAGTAGTTTAGGAGGAAATATAAATGCGCAAGTACAACACACACATTCTAT  
TGAAACATCACCGGACATGGAACTGTTAAAGTTGACTTCGATGTTAATAACGATGCGCT  
TACTAGTATTGTTAACGGCAGAAATGCTAAACGCAATTCTGAGTAATACTTATAAAGGAC  
GTTACAAATGGACATAGAATTAACAAAAAAGATGGTACTGTCAACAAATTAAGTGAATA  
CCGGTTTATCGTTAACGATATAGTAATTGAAAGCATGCAAATCATCAACAAGTATCAAGA  
CAAAGAAAATATGAACGGTCGCGTATTAATCGGGAGCAATTATATCAGTAGAGATATAGT  
TGTTCCCTGTTTTTGTAAAGTAAAAAATCGTTCAGACATAGCTTATATGCGAGATATGTT  
GTATTCGTTAACTACTGATATAGAACCAATGTATTTACGTGAAATCAGAAGAAACAAAGA  
GTTGAATTACAGGTTTACTCAACCAACTTCTGATGATTACGAGAAATTAGATAAAAAACAA  
CTTCCCGGATTATGAATATTCAAGACACGAGCAACAAATTTATGTAAACGGTAAACAGTA  
TAAAGTTATTTTTGAGCGGAGTTATAAATCCTAAACACAAAGACAACAACGTTGCTTTTCGA  
ATTGAAGTTTGAACTACAGGATTACCATACGGCGGAAGTATTGGAACAAGCCTAGAGTT  
AGAAGAAAACAAAAGGTTGGATTGTGGTCGTTTGATTTAATATTGATTGGCACGCAGG  
TGGGGATAAGCGCCAGTATACATTTGAAAATGTTAGTAAAGATACAGTTTACTATCATGG  
TAGTGCTCCTAACCAATTCAACGTGTATAAAAAGATAGCAATTATTTTGTGCGAAGA  
TACAGAATCGTTTTGTCCGAATTTAACGCATGCTGAAATAATGAAAATCGAAGGTATCAA  
ACTAAAAGCTGGAGGCAAAATTGTTTATGATAGCTTCCGAGTTTATAAAAACGGTGTGTA  
AAGACGTACCGAAACGAATATAGCCCAACCAAAATTTAAATACGGAGCTAATAAATTAGA  
GTTAATCAAACGGTACAAAAGTTCAGTTTGATTTGAAATTTTATTATAAGTAGGTGTC  
AGAATGACAATAATTGTAAGACCACCTAAAGGTAATGGCGCACCTGTACCAGTAGAACCA  
ACTTTAGTAAAAAAGTTAATGCTGATGGTGTATTAACTTTTGATATTCTAGAAAATCAA  
TAGACTTATGAAGTTATTAACGCTATAGGGAAGAGATGGATTATTAGTCATGTCGAAGGT  
GAAAACGACAAGAAAGAATATGTAATAACTGTCATTGATAGGAAATCAGAAGGCGACAGA  
CAACTGGTTGAAGGTACTGCTAGAGAGATTCCCATAGACAAGTTAATGATCGATAGAATT  
TATTTTAAACGTCCCAGGATCTTTTACAGTAGAAAGATATTTTAAACATTGTGTTTCAAGGT  
ACTGGAATGCTTTTTGAAAGTCGAGGGCAAAGTTAAATCTTCAAAGTTTGAATACGGCGGT  
GAAGGCGACACAAGGTTAGAAATGATAAAAAAAGGTTTGGAACATTTTGGATTAGAATAT  
AAGATCACATATGCCAAAAGAAAGACAGATATAAGTTTGTATTGACGCCATTTGCAAAT  
CAAAAAGCGTCTTATTTTAGTTCCGACGAAGTGTAAGCCAACGCTATAATATTCGAGGAA  
GATGCAAGTCCTTTCGCCACCTTCATTAGAGGATATGGTAATTATTCAGGAGAAGAAACA  
TTCGAACACGCTGGGCTCGTAATGGAAGCTAGAAGTGCATTAGCTGAAATATACGGCGAC  
AGCCACGCAGAACCATTTAAAGATGGTAAAGTGACTGACCAAGAACTATGGATAAAGAA  
TTACAATCGAGGTTGAAAAAGTCGTTAATAACAATCTTTCTCTTTGGACTTTTTGGTGTTA  
ACAGAATCATATCCAGAAGCAAACCCACAACCCGGAGACATAGTACATATAAAATCTACC  
AACTAGGTTTGAATGATTTATTCGTATAGTACAACCTTAACACGATTCGGGGTATAAAC  
AATGTAATTGTTAAGCAAGATGTAACGCTTGGTGAGTTAATCGAGGACAACGATATATG  
AAAAAAGTTAATACTGCAGCTAACTATGTTTCTGGTTTAAACGATGTTAACCTTTCTAAT  
CCTAGGAAAGCGACAGAAAACCTTGAAGGCTAAAGTAGCGTCAATAGCTAAATCAACACCC  
GATTTGATGAGTAGAACTGATCTAATTGAAGACAAACAACGGAAAGTGAGTTCTAAGACT  
GTAAGTGCATCAGATGGCACTATCGTTCATGATTTGATAGATAAATCAAATATTAAGAT  
GAAAAAACATTTGGAACGATCGGCGATTCTGTAGCTCGAGGATCACATTCGAAAGCTAGT  
TTCACAGAAATGTTAGGCAAGAAGTTAAAAGCTAAAACGACCAACCTTGCATGAGGTGGC  
GCATCAATGGCAACAGGTCCAATAGGTAAAGAAGCGGTAGAAAACAGCTTTTATAGACAA  
GCAGAGCAAATAAGAGGAGACCTAATCATATTACCAGGTACAGATGATGACTGGTTACAT  
GGTTATTGGGCAGGCGTACCGATAGGCACTGATAAAACCGACACTAAAACGTTTTACGGC  
GCTTTTGTTCTGCAATTGAAGTTATCAGGAAAAATAATCCAGCTTCAAAAATACTTGAA  
ATGACAGCTACTAGGCAATACCGTATGAGTGGTACAACGATACGTCGTAAGATACGGAC  
AAAAACAACCTAGGGTTAACTTTAGAGGATTATGTCAATGCTCAGATATTGGCGTGTAGT  
GAATTGGATGTACCAGTATATGATGCCTATCATACAGATTATTTTAAAGCCATATAATCCA  
GCGTTCAGAAAATCAAGTATGCCAGACGAATTGCATCCGAACCAGAGGGGTCATGGAGTT

ATTATGTACGAACTTATTA AAAAATTATTGCCAGTTTTACGGATAGAAAAGGAGGAAGACA  
TGGATAATAAATTAATTACAGACTTAAGTAGAGTCTTTGACTACAGATATGTAGATGAAA  
ATGAGTATAACTTAAACTTATTTTCAGACATGCTGACGGATTTTAATTTCTCTCTTGAAT  
ACCATAGAAATAAAGAGGTATTTGCACATAATGGAGAGCAAATAAAGTATGAGCATATAA  
ATGTCACAAGTAGCGTCTCTGATTTTTTAACGTATCTAAACGGCCATTTTCAGCAATATGG  
TACTAGGTCATAACGGCGACGGTATCAACGAAGTAAAAGACGCGCGCGTTGGTAATACAG  
GTTATGGTTATAAGACATTGCAAGTACGTTTGAATCATGTTTATTCAACATTAGATGCTT  
TCACTAAAAAAGTTGAGAAAGCTGGAGATGAACACTATAAAGAATATCGAGCGACAGAAT  
ACCGATTCGAACCAAAGAGCAAGAACCGGAATTCATCACAGATTTATCGCCATATACTA  
ACGCCGTAATGCAATCATTGTTGGGAAGACCCTAGAACGAAAATTATTTATATGACGCAAG  
CTAGTCCAGGTAATCATTACATGTTATCTAGATTGAATCCCAACGGACAATTTATTGATA  
GATTGCTTGTGAAAAACGCCGGTCACGGTACACACAATGCGTATAGATACATTGATGGAG  
AATTATGGATTTATTCAGCTGTTTTGGACAGTAACAAAAACAACACTAGTCTATAACGTTTCC  
AATATAGA ACTGGAGAAATAACTTATGGTAGTGAAATGCAAGATGTCATGCCGAATCTAA  
TTAACGACAGATATACGTCAGCGATTTATAATCCGGTAGAAAATTTAAGGATTTTTAGAC  
GTGAATATAAAACCACAGAAAGACA ACTTAAGAATTCGTTGAACTTTGTTGAGGTTAGAA  
GTGCTGACGATATTGATAAAGGTATAGACAAAGTATTGTATCAAATGGATATACCTATGG  
AATACACTTCAGATACACAACCTATGCAAGGTATCACTTATGATGCAGGTATCTTGTATT  
GGTATACAGGTGATTCGAATACAGCCAACCCTAACTACGTACAAGGTTTCGATATAAAAA  
CAAAGAATTGTTATTTAAACGATGTATCGATATTGGCGGTGTGAATAATAACTATAAAG  
GAGACTTCCAAGAAGCTAAGTGTCTAGATATGTATCACGATCTAGAAACAGGACGCAAAG  
CGTTTTAATAGGGGTA ACTGTTGTACTTGGTAACAACAGACATCACTCAATTTATTCCA  
TAGGCCAAAGAGGTGTTAACCAATTTTTAAAAAACATTGCACCTCAAGTATCGATGACTG  
ATTAAGGCGGACGTTATAAACCGTTACCAATAGAGAACCAGAAATATCTAAGTGATATTA  
CGGAAGTTGGTCATTACTATATCTATACGCAAGACACACAGAATGCATTAGATTTCCCGT  
TTCCGAAAGCGTGTAGAGATGCAGGTTGGTTCTTTAATGTACTGCCTGGACACTATAATG  
GTGCTCTAAGACAAGTCCTTACCAGAAATAGCACAGGTAGAAATATGCTTAAATTCGAAC  
GTGTCATTCACATTTTCAATAAGAAAAACAGCGGAGCATGGAATTTCTGTCCGCAAAACG  
CCGGTTTTTGGGAACATATCCCTAAGAGTATTACAAAATTATCAGATTTAAACATCGTTG  
GTTTAGATTTCCATATCACTACTGACGAATCACAAGATTTACCGATTTTCGTAAGACT  
TTAAACGTATTGCAGGTTGGATATTAGAAGTAAAATCGAATACACCAGGTAACACAACAC  
AAGTATTAAGACGTAATAACTTCCCGTCTGCACATCAATTTTTAGTTAGAAGCTTTGATA  
CTGGAGGCGCTGGTAAATGGAGTTTATTCGAAGGAAAGGTGGTTGAATAATGGTAGTAGA  
TAATTTTTTCGAAACATGATAACTTAATCGAGTTACAAACAACATCACAATATAATCCGGT  
TATTGACACAACCATCGGTTTCTATGAATCAGATAGACGAACTGGTGTTTTTAAATTTTGC  
AGTTACTAAGAATAACAGACCGTTATCTATAAGTTCTGAACATGTTAAAACATCTATCGT  
GTTAAAACCGACGATTAGATCGTAGATAGAGGCGCTTATTTTCAGACGAATTAGCGAT  
AGTAGATGCAATCAATGGGCGTTTGCAGTATGTGATACCGAATGATTTTTTAAACATTC  
AGGCAAGGTGCATGCTTAGGCATTCTTTACACAAAACGGGCGTAATAAGGTTGTTGTTGA  
ACGCCAATTTAGCTTCAATATTGAAAATGATTTAGTTAGTGGGTTTGATGGTTTAAACAA  
GCTTGTTTATATCAAATCTATTCAAGATACTATCTAAGCTGTTCGGTAAACACTTTAACCA  
ATTCAAGCAAATTATGGCTGATACACAGACGTTAATAGCAAAAAGTGAAAGATAGTGCAAA  
AAAAGGCATTCATCAAATAGAAAGCAAGGAAAACGAAGTTATACAAGCTATTACTGCGAC  
GCAAAC TAGTGCAACCCAAGCTGTTACAGCTGAATTCGATAAAAATAGGTTGATAAAGAGCA  
AGCGATTTATGAACGTGTTAACGAAGTTGAACAACAAATCAATGGCGCTGACCTGGTTAA  
AGGTAATTCACAACAAATTGGCAAAAAGTCCAAACTTACTGATGATTACGGTAAAGCGAT  
TGAATGCTCTGAGCAGTCCATAGATAGCGTTTTAAGCGCAATTAACCCATCTAGGATTAT  
TCATATCACTAGCGCAACAGAGGCGCCAACATTTAAAGATATAGGCACTTTAGAGACGCC  
AAAAGAAGATGGCGTTGATGATGGTTCTGAACTTTTCAGCAACTACGAATAATTTAGGGAA  
ATCAGGCTTGTAGTTGTTTATGTTGTTGATTACAGTACAGCTAGTGCTACATGGTATCC  
AAACGATTCAAAAAGATGAGTACACAAAATATAAAATCGGTGGCACATGGTATCAGTTCTA  
TAAAAAAGTTGACGAAGAATTAACGAAGAAATTTGTTGAATAAACGGCTAACAAACGCTTT  
GAATCAAGCTAAGCAATATGTAGATGATAAATTCGGAACAACGAGCTGGCATCAACATAA  
GAGGACAGACGCGAATGGTCAATCAATTCAGTTAACTAAAATAATGCGCAAGGCGATTT  
GGGATATTTAACTGCTGGTAATTACTATGCAACAAGAGTGCCGGATTTACCAGATAGCGT  
TGAAAGTTATGAGGGTTATTTATCGGTATTCGTTAAAGATGATACAAACAAGCTATTTAA  
CTTCACTCCTTATAACTCTAAAACGATTTACACACGATCAATCGCAAACGGCAGACTTGA

GCAAAGAGGACAGTTCCTAATGAACATAAATCAACGGTATTGTTTCGACGGTTGCGCAA  
TGGTGTAGGTACAACAATCAATCTAACTGAACCGTTCACAACTATTCTATTTTGTGGT  
AAGTGGAACCTTATCCAGGTGGCGTTATTGAGGGCGTCGGACTGACCGCATTACCTAACGC  
GATTC AATTGAGTAAAGCGAATGTAGTTGACTCAGACGGCAACGGTGGCGGTATTTATGA  
GTA CTTACTATCCAAGGCAAGTACCCTACTTTAAGAATAGATAACGATGTGTACTTTAA  
TTTAGGTA AAACATCAGGTTCTGGAGCGAATGTCAACAAAGTTACTATAACTAAAATTAT  
GGGGTGGAAATAATGACAATCACAGTAAACGATAAAAACGAAGTTATCGGATTCGTTAAT  
ACGGGCGGTTTACGCAATAGTTTAGATGTAGATGATAACAATGTGCCTATTAATTTTAAA  
GAAGAGTTCGAACCTAGAACGTTTGTTTTCTACTAACGGCGAAATTAATAACAATAGCAAT  
TTCGAAAAAGAAGACGTA CTGAATGCATCAAACCAACAAAGTGCGTCAGATTTAAGTGAT  
AAGGAACTTCGCGGAATGGTTGCGAGTATGCAAATGCAAGTGGCACAAGTAAACGTATTA  
ACAATGGAATTAGCTCAACTAAGCGCTATATTAACACAACAGTTGACTGACCTGAAACCT  
AACAAAACAAGTACTGAGAGGGACGTTTAACTAATGAAGATGATTTATCCA ACTTCCAAG  
GACATTA AAACTTTTTATGTGTGGGGTTGCTATAAAAATGACCAAATTAAGTGGTACATA  
GACATGGGTGTAATCGACAAAGAAGAATATGCATTGATCACTGGAGAAAAATATCCAGAA  
ACAAAAGATGTAAAGTCACAGGTGTAATGCTTGTGGCTTTTTAATTTAACACAAAGTAGG  
TGGCGTAATGTTTGGATTTGCCAAACGGCACGATCATGAATGGCGAATTAGAAGATTAGA  
AGAGAATGATAAAAACAATGCTTAGCACTCTCAATGAGATCAAATTAGGTCAAAAAACTCA  
AGAGCAAGTTAACATTAAATTAGATAAAACTTTAGATGATATCCAGAGGGAAAGACAGAT  
AGACGAAAAAATAAGAAAGAAAACGACAAAAATATACGCCATATGAAAATGTGGATTCT  
CGGTTTGATAGGGACTATCTTCAGTACGATTGTCATAGCTTTACTAAGA ACTATTTTTGG  
GATTA AAAAGGAGGTGATTACCATCCTTAAAGGGATTCTAGGATATAGCTTCTGGTCGTGC  
TTCTGGTTTGGTAAATGTAAATAACGGTTAAGAGTCAGTGATTTCGGCACTGCCTTCTTAT  
TTTGATTGAAATGAGGTT CATA CATGGGATTACCCAATCCAAGACTCGAAAACCTACAG  
CAAGTGAAGTAGTAGAGGGGGCGTTGTATATTGCTAAAAAGAAAATAGCTATTGGTGTAC  
CTGGTTCTGGAATGGGGGCGCAATGTTGGGACTTGCCTAATTAGTTGCTTGAAAAATATT  
GGGGGTTTAGAACATGGGGAAATGCTGATGCTATGGCTCAGAAATCTAATTATAGAGGTA  
GAGATTTCAAGATAATTAGAAATACAAAAGATTTTGTACCACAACCAGGGCGACTGGGGTG  
TTTGGACTGGTGGTTGGGCAGGACATGTAAACATTGTAGTGGGTCCATGCAGAAAAGACT  
ATTGGTATGGTGTGGATCAAACTGGTATACAAATAATGAAACAGGAAGTCCGCCGTATA  
AAATCAAACACTCTTATCATGATCGACCAAGTGGAGGAGTTAAATATTTTGTGGTACCAC  
CATATCATCCGGAGAAATCTACGCCGGCACCTAAACCCGAAGACGACAGTGATAATAACG  
AAAAAAATAATAAAAAAGTTCCGATTTGGAAAGATGTAACA ACTATAAAGTACACTATTT  
CTAGCCAAGGGGTTGATTATCGAGAATAAATTTATCACTGTATAGTAGAAGGTAATCGAC  
GACTCGAACAACCTATAGGAATAATGATTAGAAACGCACAAACGATGAGCTCGGTAGAAA  
GTTTATATAACAGTAGGAAGAAATACAAACAGGATGTAGAATATCCCCACTTTTATGTTG  
ATAGACATAATATTTGGGCACCTAGCAGAGCTGTATTTCAAGTTTCTAATGAACCTGATT  
CTATACTTATAGACGTATGTGAAGATTATAGTGC GATTAGAAATGAATTTATTTTAAATG  
AGAATCACGCAATGGCTGTAGCTGTCGATATGATGGCCAAATATGAGATACCTCTAAGTA  
TTGAAAATTTAAAAGTAGACGACAGCATTTGCCGTTTCGATGTGGGAACATGTTAATTTGA  
ATATGATTGACAACGGTGTTCCTAAAGATAAATACGAAGCAGTAGAAAAGGCAATAC  
TTAATATATTTGAAAACAGAGAATAATTATTAATTTCTATAACCAAACCAACATTAACAA  
AATCTAGAATAAAAAGTTATGGTAGATAATAAAAACGCTGATATAGCGAATGTAAGAGACT  
CATCAACAACAGCTAATAATGGCTCGGCATCTAAACAACCGCAGATCATAACAGAAACGA  
GTCCTTATACATTCATACAAGCACTGGATAAACAGATGGCAAGAGGTAACCCGAAAAAAT  
CTAATGCTTGGGGTTGGGCTAACGCTACACGAGCACAACGAGTTCAGCAATGAATGTTA  
AACGAATATGGGAAAGTAACACGCAGTGCTACCAAATGCTTAATTTAGACA ACTATCAAG  
GCGTTTCAGTTAGTTCGCTTAATAAGATACTTAAAGGTAAGGGGACTTTGAAGAATCAAG  
GTAAAGCGTTCGCAGAAGCTTGTAAAAAGCACAACATTAATGAAATTTATTTAATCGCGC  
ATGCTTTCTTAGAACGTGGATATGGAACAAGAACTTCGCTAACGGAAAAGATGGGGTAT  
ACA ACTACTTCGGCATCGGCGCTTACAACAACAATCCTAACTACGCAAGGACGTTTGCTA  
GGAATAAAGGTTGGACATCTCCAGCAAAGCAATCATGGGCGGTGCTAGCTCCGTAAGAA  
AGGATTACATCAATAAAGGTCAAACACGTTATACCGAATTAGATGGAATCCTAAGAATC  
TAGCTACCCACCAATACACTACTGCTATCGAGTGGTGACAACATCACGCAAGTACAATCC  
CTAAGTTATATAACCAAATCGCCTTAAAAGGTATCTACTTCAAAGGGATAAATATAAAT  
AAAGAGGTGTATTAATGTACAAAATAAAAAGACGTTGAAACGAGAATAAAAAATGATGGTG  
TTGACTTAGGTGACATTGGCTGTCGATTTTACTAAAGATGAAAATACAGCATCTATAA

GAGTAGGTATCAATGACAAACAAGGTCGTATCGATCTAAAAGCACATGGCTTAACACCTA  
GATTACATTTGTTTATGGAAGATGGCTCTATATTCAAAAATGATCCCCTAAGTATCGACG  
ATGATGTAAAACGGTTCCTTACCTACAAAATACCTAAAATGGCTATCAGACACGCTGGTT  
ATGTTTCGATGTAAGCTGTGTTTAGAGAAAAGAAGAAGAAAAAATACATATCGCAAACTTTT  
CTTTCAATATCGGTGATAGTGGTATTGAGTCTGCTGTAGCAAAAAGAAATCGATGTTAAAT  
AGGTAGATGATGCTATTACGAGAATTCTAAAAGATAACGCGACAGATTTATTGAGCAAAG  
ACTTTAAAGAGAAAATAGATAAAGACGTCATTTCTAACATCGAAAAGAATGAAAGTAGAT  
TTAAAGGTGCGCGAGGGGATAAAGGCGAACCGGGACAACCTGGTGTGCGAAAGGTGATACAG  
GTAAAAAAGGACAACAAGGAGCACCCGGTAAAAACGGTACTGTAGTATCAATCAATCCTG  
ACACTAAAATGTGGCAAATTGACGGTATAGATTCAGATATCAAAGAAGAACCTGAGTTAT  
TGGATAAAAACAATATCGCAAATGTTGAAGGGTTAGAAGATAAATTGCAAGAAGTTAACA  
ACATCAAAGATACAACTCTCAACGACTCTAAAACGTGTACGGATTCAAAGATTGCTGAAC  
TAGTTGATAGCGCGACTGAATCTATGAATACATTAAGAGAATTAGCAGAAGCATTACAAA  
ACAACCTCTATTTTCAAGATGTGTATTGCAACAGATTGGCTCAAAGGTAGTACGGAAGATT  
TTGAGGAATCCAATCAAACACTGACTGATTCATATGCTTCAAAAAATCATTATCATGACG  
AGGGGTATGTTTTGTCTCTCAAGCTTTTACTAAACAACAAGCGGATAAGATATATCAAC  
TAAAAAGCGCATCTCTACCGACGGTTAAAATTTGGACAGGAAGATAAAATGAATATAACT  
ATATATATCAAAAAGACCCTAATACACTTTACTTAGTTAAGGGGTGATATTTATGGAAGG  
TAATATGAAAAATGTAAAGAAGTTTATTTACGAAGGTGAAGAATATACAAAAGTATATGC  
TGGAAATATCCAAGTATGGA AAAAGCCCTCATCTTTTGAATAAAAACCTTACCTAAAA  
TAAATATCCGGACAGCATAGAAGATTCAACAGCAAAATGGACAATAAATGGAGTTGAACC  
TAATAAAAGTTATCAGGTGACAATAGAAAATGCACGTAGCGGTATAATGAGGATTTCCGA  
AACCAATTTAGTGTCAAGTGATTTAGGAATATCTGGAGTCAATAGCGGAGTGGCAAGTAA  
AAATATCAACTTTAGTAATCCTTCAGGGATGTGGTATGTCACTATAAATGATGTTTATTC  
AGGATCTCCGACATTGACCATTGAATCATTTTAAACGACTAATTTTTTTAGTCGTTTTTTA  
TTTTGGATAAAAAGGAGCAAACAATGGATATTA ACTGGAAATTGAGATTTAAAAATAAAG  
CAGTATTAACAGGTTTAGTTGGTGCATTGTTGTTATTTATCAAACAATCACAGATTTTT  
TCGGATTCGATTTATCAACTCAATTAATCAAGCCAGCGCGATCATAGGTGCTTTCCCA  
CGCTACTTACAGGGATTGGCGTTACTGAGCCAACGTCAAAGGCGTCTCAGATTCAT  
CTATAGCACAGACATATCAAGCGCCTAGAGATAGCAATAAAGTAGAACAACAAGTTACGA  
GGAAATCATCACAGGACAGTAGTTTAAACGCCGAATTAAGAGCGAAAGCACCAAAAAGAAA  
ATGATACATCACAACCTTTACAGACCCCTCTAACGATTTTGGCTTTCATGTGAATGAGT  
ATCATCATGGAGGTGGACACAATGCAAGCAAAATTA ACTAAAAAAGAGTTTATAGAGTGG  
TTGCAAAGTTCTGAATGAAGACAATTCAATGTGGACTTATGGTATGGATTGCAATGCTTT  
GATCATGCCAATGCTGCTTGGAACGTTTTGTTGGGATTACTTCTGAAAGGTTTAGGTGCA  
AAAGATATACCATGTGCAAACAATGTTGATGGACTAGCCACTGTATACCAAAAATACGCCG  
CACTTTTTGACAAAAACCGGCCATATGGTTGTGTTCCGGTAGTAATTACGCTGGAGGATAC  
GGACACGTAGCATGGGTAATTGAAGCAACTTTAGATTATATCATTGTATATAAGCAGAAT  
TGGCTAGGCGGTTGCGGGACTGACGGAATCGAACAACCAGGCTGGGGTTGGGAAAAAGCT  
ACAAGACGACAACATGCTAATGACTTCCATATGTGGTTTATCCGTCCGAATTTTAAAAGT  
GAGACAGCGCCACGATCAGTTCAATCTCCTACACAAGCACCTAAAAAAGAAACAGCTAAG  
CCACAACCTAAAGCAGTAGAACTTAAAATCATCAAAGATGTGGTTAAAGGTTATGACCTA  
CCTAAGCGTGGTAGTCGCCCTAAAGGGATAGGTATACACAACAACGCACGGAGCAAAGGG  
GCGACTGCTGAACCATACCGTAACGGATTAGTAAATACACCATTATAAAGATTAGAAGCG  
GGCATTGCGCATAGTTACGTATCAGGCAACACAGTTTGGAAAGCGTTAGATGAATCACAA  
GAAGGTTGGCATAACCCCTAATCAAATAGGTAATAAATATAATTACGGTATTGAAGTATGT  
CAATCAATGGGCGCAGATAACTCGACATTCTTAAGAAATGAACAGACA ACTTTCCAAGAA  
TGCCTAGATTGTTGAAAAAATGGGGATTACAAGCAAACAGAAATACAATCAGATTGCAC  
AATGAATTTACTTCAACATCATGCGCTCATAGAAGTTCGGTTTTACACACTGGTTTTGAT  
CCAGTAACTCGCGGTCTATTGCCGGAAGATAAACAATTTCTACTTAAAGACTACTTTATC  
AAGCAAATCAGAGTGTATATGGACGGTAAGATAACCAGTTGCCACTGTCTCTAAGGAGTCA  
AGCGCTTCAAGAAATACAGTTAAATCAGTTGCGAGGGCCTGGAAACGTAATAAATATGGT  
ACTTACTACATGGAAGAAAGTGCTAGATTCTCAAACGGTCATCAACCAATCACTGTAAGA  
AAAATAGGACCATTTATCATGCCCGGTAGCTTACCAATCCAACCTGGTGGATATTGT  
GATTATACAGAAGTGATGTTACAAGATGGTCATGTTTGGGTAGGATATACATGGGAGGGG  
CAACGTTATTACTTGCTATTAGAACATGGAATTGTTCTGCCCCACCTAATCAGATATTG  
GGTGACTTATGGGTAGAAATCAGTTAGAATGACATAGTCATGTCTATTTAAGCAGGTGCG

TTACATACCTGCATTCTATTTACATTTAAAGATAAAAATGTGCTATTATTTTACTAGA  
ACTTTTTAACATTTCTCTCAAGATTTAAATGTCGATAACCGGCAGGTA  
CTACTACGGTACTTGCCTATTTTTTATGCTATAATGTAATTACATTACCAGTAACCAATCTGGCTTAGATCCACATTT  
CCGGTAGCCAATCCGGCTATGCCGAGGACTTACTTGCGTAAAGTAGTAAGAAGCTGGCTG  
CATATTTAAACCACGCATTCTAGTFACTGGGTGGTTGTTTTTCTTCGCCATTCTGTTCTG  
TCTACATCTTTTTGCGCAAGTTGTGTATTATGTATATATAGTATAAATAAAGGATATTTT  
AAATGGAAGATAATAAAAATTTTAGGTA AAAATGTATTCATTCAAAGCTTTATATTTTTTTA  
CTGCAGCTTTTGTAAATATATTGACTATTATAACAACAAAAAATTTTGAGGTCGCTATGT  
TAGCTGTAACACTTTATTTTATGCCTATTGTTCTAGAAAATTACATGAAGAATGTTGACA  
ATAAAGCAACTAAGATTTTGAGAAGAATAGGATATCTATCCCTACTTTATTCAAATTTA  
TAAACATTTTAATATTTATTTTATGTTATTATATGCCTACATATAAGTTTATCATTAGTA  
CAAATTGGTATGTTGGTGCTATTATAATAACAACAATACCATTAGTTTTTATTATGATAT  
TAGATATTTTTCTTTATGGACTTAACAACGAGGAAATCAAAGCTAGTAATGATACTAAAG  
AGTATTTGAGAAAGAACAGAGAACAAAGTAAAGA ACTAAAGATAAAGCCAGAGAAAGTAC  
TGAGAGAGAAAGAACGTCAATTTAAAATAGAAGGTTCTAAAAGAAAGGCATGATAGTAAT  
GGTTATAACAATTATAAGCGTTTTTGTATAAGTGCTATCTTATTATTTTATTTGTCAGC  
GGTAACTTTCACCGCAGTTAGATCTTCTTATTATAATGTTAAATTTAGTGTACCAACGCT  
ATTTGCAATACCATTAATTTTCGGTCAGTACACATCTAAAATTTACAAGACTTACAAATT  
TTGTGACAGTAAAAAGCCTTCAGAATGCTTTTATTTATATTTAAAAAATATCCGGTAGC  
AATAGCTATGTTTTAACTATCATTGCCACAAATATCGCTGAACAAAATGTTAAATAAAC  
AAGTGGTGCAACTTATAAGAAAAGAGAAAATTTATAGCAGAAGAAACGTAAAAAATGAT  
TAACAAGGTTCTTCAAAGTAATACTTATGGAGAAATGCTTTTGGGAATATAAAGAAGTTA  
CTTAGTATTTCTTGTGATTTTAATATAGTAGGTTTATTATCTTTTCCTGATGAAATTATA  
ACCGTACCCTTTAAGATGCGGTTATTTTTATTCTATAACAATCAACAAAACCACAACACC  
TATTAATTTAGCAGTATGGTTTTTTATATGTGTAGCTAAAATAACTACCAATGATACCAT  
TTTTGATACCATTTTGTGTAAAACAGAAAAACAAGGAAAATAAAAAAGGCAAAAAACG  
CATTAAATCAACGTTTATTGTCTCATGAAATTTAAATGTATATAAATTTACCTCGCATT  
CG

>NewGenomeName\_151

ACGTAGGGGGCGGGGCTTAGTATTACCCCCGCCCAAGATCAGCGGAGTCATTTACCCCTCG  
CTATAGGCCGTTAGATGTGTATACACGTGGACGATCACGATCTGTGCTTCGTGAAGCGAA  
TCTGACGAAAGATCGTCCGAAACTTCGTGGTAGGGCCCCCATGTTGCTTTATCTTTACTC  
TAATAAAGTAAAGTAAGATGCTGTCCCTTGCTTTATTCGTTGGATAGTTGTTTACAGCTG  
TCTTTGCTTCGCCGCGATGCAAAGGACATTCTCATCGTCTATAAAAGCTGTGTTCTCCGT  
TTGTAATTCGTCCGAATTATCGAGCGAAAGTCTCGTTCTTGTCTATGGAGGATTTCAAC  
CAACCAAAGCTCTCTTATGGAGAGATAGTTCAAATGAAGGAAGAACAAGATGCTTTCTGG  
AGTTGTTATCATGAGTTTGTCCGTCGCAATGAAGATGTTCTTGGAGAGATGTGCAGACGC  
CATGGAAGGAAATTGCCTGCATATCCAAAGCTCCCTACATATGCCCCGATACGGTGGGTT  
CTTAAGACTAAGGCAATTTATGATGTCAGAGTAGATGAACGTTAGTCATGTTTCGCATGAG  
GAAATTAGTAGAAGGGATTATAATCCCATTAAGAAAGAAGGTTTAAAAGACCTGTATGAT  
TCAGGTAATTATAGATATCAAGTGTATTATTCTTCATCGTGTAATAGAGATAAATCAGAT  
TAATAGATCAACAATTACAATTGTATTGTTTCTGCTATTGTTTATGTTTCATTAATAATT  
TATGTTTTGCAAACCAGAGCTATTCAGAGGTAGAAGACA ACTACAATGATACCATATA  
CATTACAGTGATATTTGAGAAATATATTATTTTAAATAACTCTGCGAAGCTATATGTCTG  
GGCCCAATAGGCCCAAATGCTCTGAAGCCCAATGAAATTAACACTGAAGTGAGTCAGCTG  
ACGTCAGCTGACTCCTTGATG

>NewGenomeName\_152

TGGTATTACCCCCGTGCCGGGATCAGAGACATTTGACCAATAGTTGACTAGTATAATAGC  
CCTTGGATTATATGACACGTGGCCGCTCAGGGTCCCTGAGGCTAGTGAAGCGGTTAAGCT  
GAACGAATCTGACCGAAGAGCGTTCACACTTAGATCTAGTTAGCGTACTTAGTACGCGTT  
GTCTTGGGTTGATAAATAGAGTGCTTCTGAACAGATCGTTCAGAATTTATAGCGAGATG  
AATTCTGGTGATGGTTTCAATACACTCATATGAAGAAGGTGGTGGAGATTCGAAGAAG  
GAAGTTTTATATAAAAATAGGTATTATTATGTCATGTATTGTAGGGATTGTAGGTTTATGG  
GTTTTAATTATATTATGTTGTGCTGTTCCCTCGCTATGCTAGATCAACGATGGACGCTTGG  
CTATCTTCGTCTTCTATTATGAAGAGGAAGATGGCTTCAAAGGATTACTGGTACTCCGTTT  
GAAGAACTGGTCTCATCGTGAAAGAAGATGGGCTGAAAGTAGAACTGAAGCGACGAAC  
CAGAATAATAATGATAATGTAAATAGATTTAGTGGATATGTTGTAATTCTATATGGAGTA



ATGAGAATTATTATTATTCTGTTCTTCGTCTGTGTTTTTTAAGCTGTTTCTGTGTTTTAA  
TCGCGTCTGTAGAGAGAAAGGAATAATTGTAAGGTAGACGACGATGTAGTGGATTACAGT  
TGTCTTTACTTCGCCTCGAAGAAAGACACATTTCAAGTTGTGAGTGTATTGCTTTTGAT  
GAAGCTTGCTCGAAGCAGCGTATAACTTTAATTTGAATTTGGTTTTGGCGCGTTAGTGAA  
ATTGCGGCTGTAAATGTGTCAAGTTGTGAGTGGCTGAAATAAGATAATAGATATATTATT  
ATTGTTTTAATTTAATTCCGCGAAGCGATATGTTAAGTGATATATGGAACGAAGCGTTTT  
GATGACGTCATATGTCTCCGTGCTTACGTCTGCACGGGGCT

>NewGenomeName\_153

ACGACTGAGCCTGGAGCATCGGAGTTCAGTTGGGGACCGGGAATGCATCCGCATCCTGAC  
TTGGACTCCGACGCGGGGAAGTCTCTCGCGCCCAACAATGTGGAGACGCTGCACGATCAG  
AATCGCGATCTGCAGGCGAGCAAGCGGACCAACGCCGCACGCGCTGGAGAGACGAAGCGG  
GACATGTACTTTGCACTCGGGAATCCGGATCGCTACGGGCCCAATCCC GCGCTTGAGCAA  
GGCGATGGCAAGCCGGAGCCTAGCCCCACGCCCGAGGAGTCACGGCAGACATTCGAACGC  
AAGCCGTAATCGTTTTGTGCAATAACAGATGTGCAGTCGGTCCGATTCGTGGCTAGGGCGG  
CCACTGCCGGCCGACAGTATTATTGAGGGACGAATCCGCGCCTGACAGAAGCGAATTGCA  
ATGCCACGAGGTGATAACCAAGGAGCTGACCGACCGCACCGTGGGGAAGCCCGACGGG  
CCAGAGGAGTTCCGCGCCGAGTTTGAATCAAGGTCGGGACGTTTACAATGCGTCGCAAG  
GATTTGGACCATCCACCTATCGCAGCATGCCGTGTCTGATGTTCCATGGGCCGTTGCAG  
TTCCGCGGACACTATCGTGTGGAACGTCTCGCGAACTTCTCGGGCGACCCGGACGACTAT  
CGAATCGACAACCACGGCTACCGGCTGTGTGAGGCTGAGACGCCGCGACGGTCCACGGGT  
CGCCTCAAGCGTGCAAGCAAACGACAGCCGTA CTGCGAGCAGCATGGCGCGCGCCTACAC  
CCGCTGGACAAGGTGCGAGTTGATCCCAAGGATCCCAGCACCATGACGCGCATGGAGCTG  
TTGACGCACGGGTACATTGATGTGGAAGACCTCACCGACGACGA ACTCAAAAATGAGCTC  
GTGGCTCCGGGGCGTGGTGGTAATGCAATGATCCACTTGCCCAAGGACGTGTGCACCAAA  
ATCGTCAACAGGCACTTTCACATTGCCAAGGAGCTGCTGCTGCAGGGGATGATGCCGGCC  
ATCAAGGTGCTCAGAAACATTGCAGAGAACACGCACGACATCTACGAAGCCAAAGACCGC  
GTCAAGGCCGCCACCTACATTGTGGACAGAGTCCTTGGTAAGCAACCAGATACGGCACTG  
GTGCTGGGTGGTGTGATGGCGGGGCCAGGAGCCCTGGCAGCAGATTGTGGCCGGGATC  
ATGGACAACACGCCTGCGGAATCCCGTGCGGCGCGCGCTCCCTCTGGCGGAGAAGGC  
GCTACGCTCAACCACAACGGTGAGGCCGAGGAGCTTCTCGATGTTGAGGTCGTGGAAGAG  
TCTGCGGCAGATCATGATTCAGCGACGCCGGAACGCCAGACGACACGGGACCTGATGCG  
AGCGCTCTCATCGCAGGCGTAGCTCCCAATGCAAAGCCCAAGCGCGCGAAGGCCAAGGCG  
TCTGCTGGCAAGAGTGGCACGAGTGGCACGAGTGGCACGAGTGGAAAGCCTGCCAAGGTG  
CGGGTCAAGCGGCCGAAGCGCGACGCCAGGTAAGCTTCGCGGTGCGGGGTGGACGCGAGG  
CTGCCAAGCAACCAGGAGTGGACCCGGGATGCGCGCAGATTCCCTTCTGTCCCGGGTTCAC  
TCCCAAGA ACTGCAGGACTGGCAAGGAGCTGAGCATGACGAAGCAGGGTGTGCGTCCGGGA  
CATCAACGGTCCCACCAAACAGGCACCGTCTGTCAACCAAGGCTGTGCAGCCCGCGCCGAA  
GACCAAGCTGCACCGGCCCAAGACATCCTAGGAGGGCACCATGGCCAAGGGCGTGAAGAA  
GCTTCCAAAGCGCAAGGGCACCAACCCATCCCGCGTGACAAGTGGAACTCTGATGACAT  
CGCTGGGGGTACGCCCTAGCAGGACCAGAAGCTCCA ACTCACCAAGGGTCCGCACAC  
CGGGACCAACGACAGCTTCAAGTAGCACCTCGCCATGGACACGCTGCCCGTGACGGTTAC  
CCGGAGTGGCACTGTCCAGGTGGCTGGGCGCGTTC CCGCTGGCGAGGCTGTGGTGTCTAGA  
GACCACGCTCCAGGTCTGGCGGGCAGCCAACAACCAAGTCGAGCGCGTGGCCCATGCCCT  
CGGGTTAACGGCGTGAACGGACCCGACAGAGTAGAATCACGTGCATGCCCAAGGAGAAGG  
TCACCGGAGCCAAGCTCAAATGGGGTAGCGCTGCC CAGAAGCGCGCTCAGCGAAAGGCTG  
CAGAAGCCAGTCCCCGGAACGGCGCAAACGAGGCCTGCAGGACATGCTGAAGCGCAAAA  
GGCACGCAGCCGGTAGCTTCTCCGAGGTTTCGCACGATCTCGGTCGAGGTTGCCAGGGAGC  
ACGACCTGTCCGGTACCGGGCACGGGGCCAACAAGGAGGCCTACCGTGCCAGTGCAGCCG  
AGAGCCGCAAGATCAAGGCCGCTGGCGGGACGAGCTCGGCCGCCCGCGTTTACAGCACTG  
CCCGCAA ACTCTAGTACACCGCGCCACGCGGTAAGGCAGGCAACCAAGGCAAGGTGGGCC  
TGAGCTCGCGTAGCAAGGGTTCGGCTCGTCTGTCGGACAAGTTCAAGCAAGGCGATACTG  
TCTATGCGGACGGCAAGTCTTGGACAATCAGGAGTTTCCGCGAGGCCAATGGCAATACCT  
ATGTCGATGCCAAGGCCGACAACGGAACCGATCTCTCCCTCGTCATCAAGGGCACCGGTC  
TGGACAAGAAGACCATCCGGACGGCTCTGAGCGATCGCTTTCGTTCCGAGTCCAAGACTG  
TAAAGCCTGGCGACAGCGCTGCTGCACATCGCGCCACGAGCTTCACTCAGAATGCGCGTG  
GCGTGTGATGGGTGGCCGAGGATCGAGCTCCA AAGCGCCAAGGACATGAGCAGCATGT  
CCGACCCCGACTTGCAGAACGCCATTCTGAACGCTCGGACCGCAGCCGACAAGAAGGCGT

ACTCCAACGAGTTGGCCAAGCGCAATCTCGACACGCACTTTCCCAAGGGCATCAAGAACG  
CCTCGACAGAAGAGCTGCAGAACAAAGGTGATGGACGGCACCCTCCTTCCTCGGTAAAGA  
CCGCCATCGACGCCGAGCTGGACCGCCGAGCAGAGGCGAAGGCACCCGCGAAGGCCCGTG  
GTGGGCGGGCAGCTGAGAAGCCGATCGCCCAGGTGATGAAGCCGCCCAAGGACGCGGTGC  
CGCTGGTTGACAAGAATGGCAATCCGACCCCTTAGGGCGATCCACCGATACGGGAACGGCA  
AGAAGGAGTCTGGCTATCCCGACGCCAATCATCGTGCGGCCTGGAACAAGCTCGTAGGTC  
GCGATACATAACCGCGACTTGAGAGACGACATGACACCGCGCCAGCGCGCCAACTACCGCA  
AGGAGCTGCAGCGTAAGCTGGACTATCCGCGCATCAGCGACAGTGTCAAGAAGCAGGCC  
GCGATGAGAAGGCTCTGCTGGATGCGCTCGACAAGGGGTCTGGCAGCGGATCCGCGAATT  
CGGGGGATGCGAGGGCACAGCGCATACTAGATCTGCACGACCACGAGCTGCAGGACCTGG  
CCAGCGAGATGGGTCCTCTGGACTTGTACAAGCGGGATCTCAAGGGCGAAGGACACTTCG  
ACCGGAAGCCTTCCGAAATCTCCAAGGAAGAGCGGTTTCGCAATGACATTTAGGGTCTGA  
TGC GTTACGTGCAAGAAGATCTTGGGTACGAGGTCGATTGGGACGAGCAGCGGCTCGACA  
ACGCCCTCAACAACGACCCGCGCATGAAGAAGCTGCGAGCCATCCTGGCCAAGCTGCGAA  
AAATGACAGGGCCGTCCGAATCCCGGTTCGGCCAATCGAACAGAAATCAAGGGTAAGTCTT  
CGGACGATGTGGATACGGCCATTGATGACCTCAAGGCTGCACAAGACAGCAACAAGTCCG  
ACGCCAAGGCTAAGGTCGCTCTGGAACGTATTCGGCACTACGACAGCCCCGCCGACTTCA  
AGCCTCCTCGATCTGCACAAGACCACAAACGCCAGAGTCAAGCCTCGTTCCGGGATGTGT  
CATCGGCGATCAACGGCTCACTGCGCTCTGGCGAGACTATCTCCAGGAACGCCTGGTAGC  
GTGGCGTTGTTGAGGATCTGGACAGCATGATCAGCGAGTCTACCCTCAAGCGGCCGATCA  
CCGTGCGCCGCTTCATCGGTCAGAGCGCTGGCGGAAGTGGTATTTCGTGGCGACTATGTAA  
GGGTCAAGAAGCAGCTCGAGTCTGGCACCTTCAAGGACAAAGGCTTTATGTCCACAGAGG  
CCGTTACGCCGGGATAGTCGGTTCGGCCAGATGGGACGGCTGTGGTCCAACCGAGGGGAAGC  
CCGGTGAGAACGATTTCTGCTGGAAATGGATCATCCCAAAGGTTTCAATGCGCTTGATC  
TCAGGATGGAAGACCTCGACGACAACCATCTCAGCGAGATCCTCCTGCCTCGGAACACCG  
AGTGGGAGGTGACCGGTACGCGCACCGAGGACGGCATCACCGTCTACAAGCTCCGGCCCA  
GCACCAAGCCCACGTATGACGAGGTTCCGTCTAAGCGACGCAAGAAGTCATGACCAGCAC  
AGCCAATCCGGCTGCTGCACAACCTTGATCGCTTGGAGATTTACGACACCGCGATCGAGGT  
CACCACCGAGCGCGGCCGAGAGCGCCGCAAGGTCTGGGACCTACACGTTGGTCAGCTCGC  
CATTGAGGAGAGCCCTGCGCGTAACAAGGTGGCCACCTGTGGGCGACGCTTCAGCAAATC  
GGACCTGGGTGGCAAGCGGCTGGTTCGCCCGCATTCCCGGCGTGCTACCGACTGGACCT  
GATCCTACCCACCAACAAGGCGATGATCTACTGTATTGTGGGGCGAGAGTACTCGGACGC  
CGAGAAGGAGTTCGCGTACTGTGGAACACCTTGGTATCATTGGGTGTACCCTTCGACAA  
GCCTGGCAGCTACTACGATGCCGTTGGCGGAAACATAACACCTGAGCGTGTGGCAGGGCGC  
ATACCAGGTGCATGCCAAGAGCGCCAAGTATCCCGACACGCTCGTGGGTGAGGGCTTGAG  
TGGCGTGATCATGGCCGAGGCCGCGAAGCAAAAGCCGTCGGTGTGGACTAAGCATGTGCG  
TCCGACGCTGGGTGACTTAACGGGCTGGTTCGCTTCATACGTCAACTCCTGAGGGCAAGAA  
CCACTTCCACGAAAAGTTCAGATGGGCCAGGATCCTAACAATCCGGAGTGGGAGAGCTT  
GCGCATGCCAGCTGGGCGAATCCGTACGTGTACACGCGCACGGGCCGTGTGGTTCGCGCT  
GGGCAAGCTTCTCCCGAGACGCCCATCCCCGACCACGAGTACACGCTCGACCGACACGT  
CACCATCATGCAGCAGCTGATGTGCGAGAACCCGACGGTGTCCGCAATTCAAATCGTTGC  
GGACCATAAGCTTCGGGTTGACCAGGAGGTGATTGAGCTCGCAGCCGACATGAGCATCGA  
GAGCTTCAACCAGGAGATCGGCGCGGACTTCACCGAGTCCGTGGGCAAGGTGTTCAAGGA  
CTGGGAGGAGGAATACCATGTTGCAGACCTGGTTGACTACAACGTCAAGCAGTTCGGAAC  
CTACTTCATCCCAATTACGAGACCTATGCAGCTGCGGACTACGGTTAGACAACCCCAA  
TGTGTGGCTAGTCATAAGATTGGCAAATGGGGCGAGGTCCACGTCCCTCCGCGAGATCTA  
CATGTCCGGGCTGACGGCCGATGCGTTCGCTGATGAGATTCGGCGTCAGATGTGCAACCC  
GCCAAACCTTCGAATCTTCTATCCGGACCTCGCTGACCCTATGTCGTCTGAGATGTTGAG  
CCAAAAGCTCGGCATCCGCGCCGCTGGCGGAAGAGGTGGTGTGAGAAGCGCATAACGCTCAA  
CCTGATTCGACAGTTCCTGAAGCGTGGGCGTACGACCCACCGACCTCACGGGTATGGG  
ATGGCGTCCGCAGCTGATGTTTGTGATGGGAGCTGTGCGAATGCGCGCCGTGAGATGGAGGC  
GTACCCCTACCCTGACAGCACGGACAAGCCGAATCCAAGCTCGCTGATCAATGAGGAGCC  
GCTCAAGCAGGATGACCGTGTGCCCGAGGCGCTGGGTTCGATTCTTCGTGGGGCACTACGG  
CGAGAAGGCGCTGGTGAACGAGCGTGCCGGCACACGCATTTCCAAGGCCAACATCGAACA  
CCAGCGGACTAACCGCGAGCGCCGTAGCACCAACGCGCCCAAGGACATCAAGTACCAGCG  
CCTAACGGATGGTGAACCTGATGCATAACAGTACAAGAATCCCGACGTGGGTTGGGGTAA  
AGAGCTGCTCGACTGATTCGGAGTAGGATAAACAACCATGGGCCAGGACAAACGCCAATA

CGGCAGTACGCAACAGCTGCGTGCAGGAGAAGCCAATTTCCCCAACGCCGTAACGGATTT  
CGACAAGGCGCGGCTGGCCAGTTACCGGCTGTACGAGGACATGTACCTCACCAACACGTC  
CGACTACCAGGTGATCTTGCGTGGTGGCGACGAAGGTGACCAGCGGCCCATCTACGTGCC  
CAACGGCGAGAAGCTCATCGACGCGAAGATGCGCTTCCCTCGGACAGGGGCTGAAGTGGGA  
GTTCTCCAAGAAGGATGCCAACGTCGACGACGCCATCAGAGTCCCTGTTTCGACCGGGAGAA  
CTGGGAGCAGAAGTTCGAAAGTCTCAAGCGCTGGACCGAAATCCGCGGTGACTATGCGCT  
GCTGCTGTTTCGGCTTCGACGAGAAGGACGAGGGATCCAGGCTCTCCTTGCACGAGGTGGA  
CCCCAGCACGTATTTCCCGTACGAGGATCCGCGTTACCCTGGCCAGGTGCTGGGCGTGTA  
CTTGGTGGATGAGTATCCGCACCCGGATTCCGAGAAGAAGAACGAGAAGTGTGCGCGCGT  
CCAGAAGTACATGAAGACGCTCGACGACGACGGGAAGCCAGTCCCCGGTGGCGCGATCAA  
ATCCACCGAGGAGCTGTACGAGCCAGGCAAGTGGGACGACCGTCCCGAGTCACCTCTCGA  
GCCCCAGCACAACAAGAAGCTGAGCACCCCTACTGAGGAAGAGCCTCTGCCCCAACAGAT  
CACGACACTGCCGGTGTTCATTTGCCCGGACACCCGATTATGAACGCGATGTTTCGGACG  
CTCCGGCCTGGCGCGGCTCGAGTCGTTGATTCCATCTGTTCGACCCAGACCATGACGGACGA  
GGATCTGATCATGGTATTTGGTGGACTGGGCTTCTACGCAACATACTCAGCTCCGCCGCG  
TGATTCGCGCGGCAATATGGTGCCGTGGACAATCAGCCCCTGGGCATGGTTCGAGCATGG  
CCAGAACAACAAGATCTACCGAGTCAATGGTGTGCAAGCCTTGAGCCTAGCCAGACTCA  
CATGAACAAGGCCGAAGAGGCCATGCAACAACAAGGGCATCCCCTACATACCTGTAGG  
CGTGGAGGACGCTGCGGTCGCCGAGAGCGGCATTGCCCTGGATCTCAAGCTCAGCGCAAT  
CCTCAGCAGTTGCGCAGAGCAGGAGCTAGAGCTGAAGTCAGTGCTCAAGCAATTCTTCTA  
TAATCTGGTGACGCAGTGGCTTCCGGCGTATGAGGGTATGGGGATTGACGACGCTGACAA  
GAAGCTCACCGTCACCATCACCTCCGAGATCCCAAGCCGGTCAACAACGAGAAGCGATT  
CGCACAACCTGTTGGAGTTGTGGGAGGCTGGGCTGATCCGTGCGAAGAAGCTCACCGGGGA  
GCACAGCAAGATCATGGGCTTTGAGCTGAACGAGGAGGACTTCAGGCAGGCCACCGAGGA  
CAAGAAGACCCAGGGCATTGCCCAAGCGGAAGCCGCCGACCCGTTTCGGGGCGCAAATGGC  
AGCAGAACAGGGTATCTCCGACGACGAGGACGACCAAGCCCTGAACGGACAACCGTTGTG  
AGGAGCTAGCCATGGCCAAGGGTAGGCGCAGCAGCAAGAAGCGCATGACATATGCCGGCT  
TCAAGTCAAAGAGGTTCGTGGCACTGGGCTTTTTCGACCAAGCAGCCCTGGGCACGCGAGA  
AGGCCACAAGACCAAGGGCGGACCCAAGGTCCGTTACCGTCGACTTCCAGAGAGCAAAC  
ACTCTGGTGCAGGCAAGAAGGTCTACAGAAGGAAGAAGCGTTGACGATCGAGCTGGAACG  
TCCTGAGGACGAGCAGGTTAGGATACGAGTTCGCGATGAGCTTCCCCAGGACGCGGTGGC  
TTGCCCGGTGCATATGTGTCAGCAGAGCCCCAAGGCCGAGGTCTGCGGCTTTATCACCGC  
GAGCCATGCCATCACCCCGATTCCAAATGTATCATCAATGCCGGAACACGAATTCGTCAT  
GGACCAGGGTCAGATGATGCAGGTGCTGTTTCGAGAGAAGGTGATCGGCACCTACCATTC  
CCACCCGACGGGTTGACCCTGGCCAAGCGCTTACGATACTGATCACATTGTTTACCTGTA  
CCAGCAGGGCTGCCCGTGGGATTACTACATCGTGACGAATGCAGGAGTGTTCCGATATGA  
GCACAGGGAGAGGCGCGTGGCGGACGACGTTGAATCCAGAGATGATGATAGTTCATGTGA  
TGCCGGTGGACGACCTGATTGAGCATGTAGAATCGCCGGAATGCCCGTGCGATCCGGACC  
TCGAGCTGATCGAGCGTACCGACGACCATTTTGGACAGATGTACAGCCACTATGCTGCCG  
ATGGTCGAAATGATGAGGCTGAGGAAGAGGATCTGGTTTTCGATCTCTCCACTCGAAGAGCC  
GTCAGTATCACCTCAGCGGCCTCGCAAAAACCTGGCTCCTGAGATACCTTGGAGTACAGGA  
GAAATACGATGCAATCATCGCAACAGCCCTGCTTGACGCTGCGGATGATGCGGAACACGG  
CATAACGCAAAAGCCTTGGCGACGACCGACTAGGATCGTCGACTCGAAGATATCAACTGCA  
GCTTGCAGTCTGCTGCACGTGACTCCCTCAAGCTGCTTTTCCGAAACGTGCATTACAGC  
GATCACAGCGGGTCAATCGGAGGCAGCGGTTCGCGCGGTCGAAGCAGGATTCCACGACGA  
TCGCCGCATTCTAAATCGCCTGTACCCGAACCGCGCTCGGCGCGGCAAGTACTAAGACTC  
CATGCGGCAGAGCGCATCCCGTGGCGTTCAGGCCATGATGACGCGTGTGCAACAGAGCAA  
CCGACCCCTTAGCCAGCGAGTTTACCACACGCAAGCCCTGGCCAACGGCACGGTTCGACCG  
AGTGATCAACTCAGCACTGGTGAAGGGTATGGTTCGCGCCGACATCGCCAAGGCCGTGCC  
CCAGAGTATCACCCCGGACGTGCCTGGCGGAGGCAGCTACGCTGCAATGCGCTTGGAGCT  
GACCGAGATTAACAATGCATTCCATGCTCAGGCGATTAACGACATCAACACCAAGCCATG  
GGTGGAGCATGTCGAGTGGCACCTGAGCAAAAACACACAAGGAGCAGGGCTGTCGGTGGCA  
AGTGTATGCTCGCATCAAACGCTTTCCAAAGGAAGTGATTCCAGACAAGCCCCATCCGCA  
ATGCCGCTACTATATCACGGCTTCGCTGACACCCTGGGAGGAATTCGAAAACAACCTTCT  
GATGGGAATGTACGACAGCTACATCGACAACAATTTGCGGTAATAGGGTAGGGTAATCCG  
CAGGAAGGAACCTCATGACTGACACATTCCTCGCATCGCTCGGCGCTACCGGCTTGACG  
CTGTCTGGCCTCGACGTCGATGGCGATGGTACTTCGATGGGTACGACGACGATTCGGAT

GATTCGGACGACGGTGCATCGGACCGAGGATCGTCTCGAAAGTCCGACTACGGTGATGAT  
CGCGACAGTGGCGATGACGCCAATGATGCTGACGACGACGATCTTCGAGCAGATCTCAAG  
GCGAAGGACAAGAAGATCGCCAAGCTCGAGCGGGACCTCGAAGACGCCCTCGAGATGATC  
GTGGAGGCAGAAACCAAGCGCCGCAGGGCAGGTGACGATGACTCCGATTACGACACCACC  
GAGTACCACGAGCTGCGCGACGAGAACGACAAGCTCCGTGCTCTGCTCAATGGTCCGTAC  
ATCCGTTTCGACAGATCTCGAGCTTCCGCGACAAGGACGGGAATCCCAAATGGGACTGTGAG  
GACCCGGAAACCGTGTTCGCGCTTCTGAAGACGGCAGACCACGAGGTTCGACGTCGAGACG  
GGCGAGATCGACGGTCTGGAGGAGCAGCTGCGAGATCTTGCACGGAACCAGCCGTTCTCTG  
TTGCGGCAGCGCAGCTCTCGTCGTGGCGCTTCCGGTAAAGTTCTCGGTGGCTCCAGCGAC  
AAGAAGAAACCCAGTCGGGAAGACCTCGCGTCCGACTTCTCCGCATTCAACACCATGATC  
TGATTGAGAGGTTGACCCATGGAGAGGTATGACAAGTACAACCCCTACGGCGGAGGTTTT  
CGAGCTCCGCTGGCAGCCGACTGGACTGACGCCGACGCTGGCAAGCTGTATGCCGTAGGC  
ATCAACAACGACGGGGCTGTCTGTGGAGGGCGCAGGCCAGTCCGGCGTGGCTGGCGTGCTG  
GTGCTCACCAAGGGGGCCAAGGCCGGATCCATCGTGGAAGTCATGAAGTTTGGCGAGGTC  
GTCGACTTCGGTCCCACCTCGGGCACCCCGGCACTGACTTCGGCGCTGCTGGTACGGCG  
TACTACGCCGACACCAGCACCGGCGCAATCAACTCCCCGTCCGGCGAGGCCAAGGTCAAG  
GTCGGACACACCATCGGTGCTCAGCGACTGATCGTCGCCGTGGCCGATGGCGTTGTCGAT  
CCTTCGCCGAACGAGGAGTGAGCCAGCCGATGAAAACGCAACAGAAGGAAGAGTCATG  
AGGGAGAGTTTTCTCGCGATCATCGCTGCGGTGGGCCTCTCTGGTCGTGACAACCAGGGT  
GGTACAACACTGCCGGTGACATCAAGTACAAGACCCCGATGGCGTGTCTGACGACAGC  
CTGTGGAACCTGTTACAGCAACGTCACGGACGAGTGGAACAAGCACAAGTCCAAGATGGTT  
CAGCTGATGACGTTCCCGGTCACCAACCCGACCGAAAAGGTGCCGCGCATCGGCCAGTTC  
GGCTTCGAGAAGGCCTGGGAGTTCGGCGTCCCCGAGAGCAAGCGGACCGAGCTGAGCTTC  
TACCAGCTCGCGTACGACTTCGAGGACTACGACCTGGCATTCCGATACACCTGGAAGTTC  
CAGCGTGACGCTCCGTCTCGCAGATCAAGGCGTACCACAACCAGGCTCTCCAGGCCGAC  
GCAAGCTCATCCACCGCAAGGTGATGGAGGGCGATCTTCGACAACCGCGAGCGCGAAGCG  
GACATCGAAGGCCTGCCCTACAAGGTCTATCCACTCTACAACGGCGACAACATAATCCCG  
CCGGAGTACAACGGCACGACCTTACCACCGGCCACAACCACTACCTGGTCTCCGGTGGT  
ACGAAGATAGACTCCGCCGATGTGGAGATGGCTCCTACCCACATCCGTGAGCACGGCTAC  
ACGGAGGAAAACGGCACCCAGCTCATCGCCTTCGCACTCAAGGCCGAGATCCAGGAAGTC  
CGTCGGTTCGGCTTCGGGCAGAAGAACAACAACCTCGGCCGCGGCGAAGTACGACTTCGTG  
CAGTCGCAGGGCGAATCGCCCCTGTACCTGCCGAACGCGGACGGCCTGCTCGGCTAGCAG  
CCGTAGTCGATGTGGAAGGGCTTGCAGCGTCAAGGGATCCTACGACGACGTGCTCTGGATT  
GAAGAGCCGACCATGCCGGCAGGCTACGTTCTGTTCCCTGGCCACTGGCGGTACGCTCGCC  
CAGCAGAACCTCGTCGGCTTGCAGCGAGCACGAGGACGCGGCGTGGCGCGGTCTTCGTCAG  
ATCCCCGGCAACCCGACCCGTTACCCGCTGATCGACGGCTACTACCAGCGGTCGTTCCGGC  
ACCGGTATCCGTGAGCGTGGTGGTGCAGTTGACCTGCAGGTCAATGCCTCTGGCACTTAC  
GACATCCCGACCAAGTGGACGAACGGTGGTGGATTTCGTATGAGCCGCGTAATCCCAGAGG  
ACGGTCCGCTGTCCGATGAGGACCGCGCATGGCTCAACGAGCGCAGCATGGGGTGGAAAGG  
TCGAGCTGATCGACCGCGCCTACCCTCCGGGGTTCGGACAGGGTTCGAGGATGACACCTCGA  
CCAAACCGTCCGAGCCGCAGGGCGATGACGACGAGGAGGTGTAGGTTCGACGAGGCCATCT  
CGAAGTACGTCGAAGACCTCCCCAACAAGGACGCCGTCAAGGAGCGCCTGATCCTGGAGG  
AGGTGGAGTTCGAAGACGATGCGAAGCGTGAGGAACTCAATGGCCTCCTCGCGATCCACC  
TGCAGGAACAGCGGAACGCCGGCAAGGACGTCGAGCTCGGAGACTGATTGTGGCCTCCGA  
AGCAGTTGTCCAGCTGTTCAAGACGCATCTGTCCGGCGTCGATGGTATGTGGGAAGATTC  
CGAGATTTAGATAACCATCGACGCCACGGGTCTGTCAGCAAGGCAGTGCGTGCTTACTG  
GTCCAAGGTGGTCAACACCACATACTGCTGACCGATGTGAGCGAGAGTGGCAGCTCGCG  
GAACGCAACCATCATCTACCGCAATGCCATGGAGCAGTTGCAACGGTGGGATGAGATCAT  
CAAGCAAGAGGACGCCAAACAGGAAGCCGAGACCGTCCGGTACTGTGAGGTTCAACCGACT  
TCCGAGGAATTTACGTCATGACCGTGTGACCCAGTGCAGCAAGGGGATTGGAATTCCTC  
CGTACTGGCACAAGCGCATTTCATCGACGATGATCCGACCACGATCGTCCTCAATCGTGGC  
CAAGCAACACGCGTCGAGAAGCCTGGCGGGGGATACGATTTACCCCAGGGGCTCCACGA  
ACTGCAGAGATCTTCAAGGTCATCAACCACACTGGCGACGGGTCCGGCACTAACCGAGGCC  
CAAGACGGCATCCAGCCGCCGGTACGCGAGGACATCCTGCTGGGGGCTCATGATTCTGTG  
GCCTTGGTTGGCGACTGGTGGGTCGACGGGAACAATCGGTACACAGTGACCGAATTCCTC  
GTGGCAAATGGCTACGAGCGCAAATGGCCTGTGCGCAGCGTGGGGCTGGAGCCCAATTAT  
GGCTAAGATCGAGTTCAAGTTCAAGGACATCGCGCTACGCCAGGGGGTGGAAAGACATGGA

AGCCAAGGTCGACCGCGCCATGAAAGCCACCAGCAATTACCATGCGGGTCGAGGGGCACGGC  
CCACATGAAGGAGCATGCTCCCTGTACTGACCGGACGGGTGCTGCGCGTGCTGGTTTGA  
CGCTGTGGCTAGCACTCCACAGCCCCGACCGCTACGAAATCGTGTTTGCCACACGGTGCA  
CTATTGCATCTGGCTCGAGATCGAAACAGCGGTTCGGTACGAGATCATCATGCCACAGT  
CCGTCACGAGGGCAAGCTCACGGCTCAGCGTCTTCGCGGCCTCCTGGGTAGACTCCGATG  
AGCAGAGCCGCAGTGCTAGATGCGCTCCGGGCCGATGTTGCGCTCGGGCAAATGCTCGCT  
CCGGGCAACATTCTGACGAACTACTCCAAAGAGAGTCCGCCGAACCATTTGGCTCCAGGG  
CCATTTGCAGTGATTTCGTTGGGGTGGCAAACGATTGACCCTGCGGTGAATCGCGGACCC  
AGAGGCGTGAGCATCTGGGGTCACATCCCAGCAACATCAAAGCACTGACTACACGCGGATC  
GATCGAATCCTCAAGCGCACCAAAGAGATCATGCTGTCTCTGGAAGACGTTGCTGGCGCT  
GATGGGGCCCACTTGGTCAGCACGCGCTTCTGGCGGAGAGCGATGATCTCGTTGACCCG  
GGATTCGAAACGATCACGCGCTACGCGACATTCAGCGGGCTCAGCAGAAGCACCTGAAGT  
CAAGTACGATAACCAACAGGAAAGGATGCTCTCATGGCGAATCGGATCACCCACAGCCC  
TCGGATGTCAAGCCCGCAGAGGCCCTCTGCACCCGAGGCCCAGGAATCGTCTCCTCGGGCAAG  
CGGAAATATCTCAAGTTCGTTGGCACGCAGAAGATCTCACCTTCGCATCGCGCCGGCAGT  
CACTACCACATCACCGAGGCACAGCTGGTGGAAAGCCGGTGTGCCGCGCGAAAGGTGCTTC  
AAGTCCAAGGGCTCTGGCAACGATGCGCTCGCGGTGACCGAGGTCACCTTCGGCCCCGAG  
ACTCAGCACAAGGTGCCGCGCGACGCCTTCTAAAAGGAGGACGCAGACCCGGCTGTTGCAG  
GAGCCGGACATCATCCTCGTTGAGGAGTAGGGAACGCGTGAGTGCAATACCGATGCAAGG  
GCAAGGTTACGGGGTGTGTCGGAAGACGGTCTCCTCGTGTTTCATGTGCTCCCACATCG  
CTTGACAGGAGGCAAGAAGCGATCGTTCGTCTTCACTACATGGACCCGAACACCCGGCA  
CCCTCAAATACACCTCGCGACCATAACCGGAACCCATTGAAAGGTAGGGAAAATAGCTATT  
GACACCGCATTGCCCTATGGTCTGAGGGACGTGAAGATCACACCCTATGCAGACGAGGGT  
GGCACCGTTCTCGGCGATACGAGATACGACATGCCGAACGCACAGACGTTTCAGCTTCAAC  
GAAACTGAGGAGTTCACCGAGCTCCGTGGGGATGACCGGCTGGTAGCGACGCACGGCAAT  
GGCGAACAGGTCGACTGTTTCGCTGGAGGTTCGGTGGCATCAGTCTGGTGATCTGGTTCGATC  
CTGACGGGTGGCCAGTTGATCCAGTCCGGGCTGACCCCGAATCGCAAGGAGATCATGCGG  
AAGCGCGGCACCGACGTGCGTCCGTACTTCCGCGTGGACGGCCAGGTCATGTCCGAGTCC  
GGCGGCGACATTGTGGCGCGCGTGTACCGCTGCCGCTGCAATCTCAACATCTGCGGTGAC  
TTCGGCGACGGTACTTTCAAATCACAGCTGCTCGGGTGTCCGGTCTGCCCTACTGGAT  
GAGGCGAACGACCTGCTGTACGACATCATCCGTAACGAGACCAAGACGTTCGCTGACGCTC  
ACCCCTGAGCCCAACCCGCTGCAGTCGCCTCAGAACCTGTCGGCCGGCACGACCACCGCC  
ACCATCATCGTCTGTGCTGGAGGGAAGTCGTTGGCGCGGACGAGTATCGGGTGCAGAAG  
TCTTCGGACGCCTGTGTCACCTGGAGCCTCGTCGACGACGTGGAGGACCCACCATCACT  
GTGAGCGATTGCACCGCCAGCACGGCTTACCATTTCCGTGTGGCGACCAAGGTCGGCAGT  
GCGCTGTCCGGTGTCTCGGCTCCTTTGCCGGTCTCCACGCCTGCCAAACCTAACCCAAG  
GCTCTCTGGGGCGCAGGGTGTGGCAACTCGACTGCGCCCCATAGAATTCAATCTAGAGCC  
CAAGGAGGCCATGATATGCCCGAAATCAGCGAGCAAGAGTTCGAAGAGCTCAGTCGGATT  
AGAGAACAGACTCTGGCGCAGGAGAATGCCCGCAAGTCTTCAGAAATCGAAGAACAGGCC  
AAAAGGGCCGCTCTTGCTGCCCTGGCAGAGGCCGCGGAAGACAAGTTCGCCGTCAAGGGC  
TGGGGCAAGGATGTGCTCCGTAAGACATTCGACATCCAATGTCCCAGCGGACAGTGGTGC  
CACGCCAAGACTTTAACCATCGAGGACGCGATGTGCGCTCGGTTTGTGGACAGCCTTGAT  
CTGTTACCATACGCTCATGGCTCCGATCATGGCCGACGACGAGGACAAGGAGCGCGCT  
GAAGAAGAGCGGAATGCTGGTCTCCTCAACAGCCTCAAGGATTCTGGCAAGCGTGCCAGC  
TTCTTCGGCACGGTGAACCGTGTGACGGCGCATTGTATGCTGAAGCCGCGCGTGGTCTC  
GAGGACGACGGCAACCTCCCCGAAGGCACTGTCTTCGCCGACGACATCCCGTTCGCTGAC  
AAGCTGCACATCTTCCGGAATGTGTTCCGGGGGAATGGGGAATTCCACGATGAACACGTTT  
CGCGAAGGACCGGAAGGCAGCGTGTGAGCTGAACCAGATGGCGCTCCTGTACAGGACGCG  
TCCGAGTGACCTAGTCGCTTTGGAGGATCCGTTGCTGCGATACTACGTTGATCGAGGGCT  
GCGGATCTTCGGCGTAACGGTGAAGAACAGGGTTCGATGATGCTGGCCATGCTGCGGGCCG  
TGGCGCCAAGAACAACCGGTATAGGGAAGCGCATAAAAACGGTGCGCGCAAGCGCACCTT  
GGCCAAGCTGCTGGGCGAGGACATGGTGAGTAGCTCAGCTGGCTTCCGAGATCCGGCGAA  
GGCGGTGTGACGTGCCAGATTACGTCCTTGGGCGTGCCCATGGCAAGATCGTCTTCGATG  
GTGACAAGAGTGGTGTTCGACGCGCCGAAGGCGCGAGGGACCGCATGGAGGAGTGGGCCC  
ACAGGTTAGCCGAGGGATTTCGACGTGGCTGAGAAGTCAACCTCTGCTTGGGAGAAGACCC  
ATCGCAAGGCTGTGGGCACCACTGAGGCTCAGGCGCGTGCCTCGATCGGTACAGCCGCA  
TTCAGGAGGAAGACGAGCGCGCTGCAATTGAGCGTCCAACGCCGAGAAGGAGCTCAAGG

AAATCCTCGATGCCGGTAAAGCTACCGAGGAGGAGATCCAGAAGGCCCTTCGAGAAGACCA  
ACAAGGCCAAGGGCAAAGCGCTACAGCTCGCCAAGGAGCGCAAGAAGGCTGAGCGCGATG  
TCGAGCGGGCTGCAGCTGGCCTGCGCACCGAGCACGAGACCAAGCTCAAGATCAACACCA  
AGGACGCCGATCGGGGCGTCGATCGTTTCTTCGCCAATGTTGATCGTTCGTGCTGAACGTA  
GTTTCGCGCGTCATCGCCAAGCTGGGCACAGGAACCAAGGCTGGTGCCGCGACGGCTG  
GCGTAGGTGCGCTGGGCGGGTTGCTGGGTGTAGCGCGGTTCGGGTGCTACCGGCGTTCGAA  
GCATCGGCATCTTTCAGCTTGGCGCAGCGATCGCTGATCTGTCTGGTGCCTGGGTGTTTC  
TGCCCGGCGTCGTGGGTGCAGGTGCCATCGCGATGGGCACGATGCAGCTCGCCACCGACC  
GATTCGGCGAGGCTCTTAAGGACCTCGGAACCGACGACTTCGCCGACGCGATCAAGGATT  
TAGCTCCGGCTGCACTGTATGTGGCTGTTGAGCTCAACACGCTTCTGCCCGGGTTTAAAGA  
ACTTCCATAAGAACGCCGAAAAGGCGCTTTTCGAGCCGCTCAAGGGTGTGACCACTGAGC  
TGACGACGACCTTCTGCGACGATCCAGGGTGCACCTAACCAGATCGCCAAATTCTTCG  
GTCGCACCGGCGCTGGCCTGGCGGAAGGGCTCATGAAGCCAGAACAGCAGCGCGACATCC  
AGAACTTCCTGTGCAACACCGTTCGAGGGCTTCGAGCGTCTGTTCGGATGCTGCTCAGCAAC  
TGCTGCAGGCATTCACCGACATCATGACGGTGTAGCGGGCAGTTCCTGCTACAGATCGGTG  
GTGCGATCGCTGAGGCTGCAAAGGAATTCGCTGGCTGGATCCGCACCATGCGGGAGAACG  
GCGAACTCGCCGCGTGGATCCGCGATGGCCTCGAGGAGCTGAAGACCTTCTTGGTGCGC  
TCAAGAACTTTGGGCTGGGCCTGGTGTACATCGGCCGATCGCCAACGAGTTCGGCAGCG  
GTTTCATCGCAATGTTTCGAGAACTTAGCCAGTCTTCTTCTTCTGGACGCACAGTGTTC  
AGGGACAGGAAGCCCTCACCAAGTTCTTCATGGCCACGAGTGAGGCCGCGCGTGTGCTCA  
TGCCGCTGCTTGAGAAGCTGGGCACGCTGTTGTTTCGGCACCATCGGAGCAGGATTGGCGC  
GCTTGGGAATTGAGCTCGCTCCGGCATTCAACTTCTGTTCGAGACGCTGAATGTCGGCT  
TCCATCATCTGATCCAGGTGCTGATCAACAGCGCACCCAGATCACCCAGTTCCTCACGA  
CTCCGGGAAGTCTTTTCGTCCACATCATCAGACAAGTCGGACCGCACTTCCGGCATTGC  
TCGGGACTATTGCAGATTTGTTCAACAAGCTCGGGCTGGCCATGGGTCCGCTAGCGAGCG  
CGCTGGTTCAGGGTGTACCCTGATCTTCAACGCTTTCATGACAAGTGGGACACCATCG  
CCAACAGCCTCAATGGCTTGGCGGCTTCTGTTGCGAAGGCGATTGAGTCTGGTGATTGGT  
CTGATGTCGTTGACCGCATCACGAACCTGTTCCAGCCCTTGGGCGATGCTGCGATGCAGG  
CTCTGCTCGACGCTATCAATCGTTGGACCAAGGATATTGGGGAAGCCAGTCTCAAAGTCA  
TGATCGCCTTAGCCGACGAGATAACCCCTGGATCGACATCAATGCCCCGATATGGGGCG  
AGAAGATCGTCAAGGGGCTGCACGACCGCATGGGCGGAGCTATCTCGGTTCATCCGACCGG  
TGGGCAAGAAGGTCTTGGGGCGCTGAGCGATTGGTTCCCGAGTTCCTCCGGCCAAGAAGG  
GGCCGTATTTCGGGTACCGGCTGTACGCCGTACCGTGGCAAGGCGTTGATGGAGGGCTTCG  
CCGAAGGCATCCTGGCTGGCGGAGCAAGCACCCAGAAGGCCGTGGGATCGGCCGTGGGAG  
GCGCGAGCTCCGGGATGAACTCCGGCATCAGCGACCTCGTCAAGGACCTCACCGAGCTCA  
CGAGCTTTGGTTCGGAGTGTGCTCAGCTTTGTCCAGGGCCTCAGCGACGTCGTGTTCCAGA  
CGATTAAGTTCGCCACCACAGACTTCACGACGGGCGAGAGCCCCCTGCCAAAGCGCTTCG  
TGCGCAATGTGAGCGATGAAGAGCTCGCCAAGCGTCGTGAGGAAAAGGCGTATCGCGACA  
GCCTCAAGGAGCAGAAGTAGAGCGGCACCGGTCCACGGGCGCTCTGTTCGCCGGAACCTC  
AGCGCCTGCTTGACCAGACGAATCCTGGTGGAAACAGGTGAAGCCGCAGTTCCTGTTGATCC  
AGAAGGAAGAGGGCACCTGGACTTCTCCGAACAAGGACTGGGCCAAGCTCATTACGCGTG  
AGTCGGGTGGCAACGCAACAATCACCCAAGGTATTCAGGAAGCCAACTCCGGCGGGATTG  
AGGCCGAGGGGCTGTTCCAGGTCACGCCGAGCACTTGGAAAGGCGTACGCCGGCACAGACT  
TTGCTCCGAACGCGAAGGCCGCCACTTCGCAGCAGCAGGCGATCATCGCTGCGCGGATCT  
TCCAAAAGATTCCGAGCGGGTCTGACTGGGGTGCGAACCTTCCGGGGCGTGAGGACCCCG  
AAGAGCTGCTGAGAGGCTTACGACTGCCAGCGCAACTAGCACGACGAGCAATCCATCGG  
CCAAGTTCGAAGGCCAAGGCTGCAGGCACCGAGGAAACGCTCAAGCCGGCGACTGGCCTCC  
AGATGGAGGCGATCGGCGACGGTTTTTTTCAAGGACACGAACACCGAGGCCGTCTGTTCGAG  
AGATCGATGGATCTTATTACAACGTCACCGATTTGGCCGTTCGGCAAGGACGGCAAGCCGC  
TCTTCAACGAGGACGGCAAGCCCATCGCCCGCACGAGCGCCAACAAGAGCGCGTCTCGGC  
CATCTGCGCCAAGGCACGGGAGCCGTATGGCCTCAAGCCTGGCACCGATACGCATGGCT  
ACGGGAATGGCAATGCCGATGTTTTCCCGGAGTCGGTTCATGGCTCTGGCCGCTCAGTTTCG  
GCATCAAGGCCAGCACCTACAAGGGTTCATCAGGAGTCTGACCGCAACGAGCCTGGCTATG  
CACCAAATCCGCAGCGCTTCAACCGAGGGATTGACAGGGTTCGGTCCGACTAAGAACCTGC  
AGGCGTTCGCCGAATATCTCGAGACGATACCGGACGCCCTGGAGCAGGTGATCTGGCAGA  
CCCCCGACACCGGCCGCAAGACCAGTATCGCTGGCGGAAAGATCAACCTTGGATACTATC  
CGCAGGACACCTATGATGTCCACGGCGGCAATGATCCTAGCAACATCCACGGTTCACAGCC

GGCAGTCGATGTCGAGCCCGTTGCCGGGCGAGGATTATGTGCCTGGTGAGACGCCGACCA  
GCACGGGTGATTTCGATCCTGGACGAACTCCAGAAGATCACGGCGAACACCGAGGAAAGCA  
GCAGCACCGAGGACAAGATGGTGCGCCAATTCCTCGATCAGAATCCGATACTGAACGAAC  
TCGTACGGCCGCACAGGATCCCAGCGGCTCGGATGAACAGGTACAGGCTGCCCTGGGCG  
GGCTGCAGACAGCCATCGACGCCAAAACCAAATGGACACGCCTGCCAGTCGGTATCTTG  
CCGATCAGCTGAGTGGCATGCAGAGCCAGATCATGACAGATCGTGGCTTCGGCGTGGCCG  
ACAATCGTGTTGATGCGGCACAGGGCATCGCCAATGGGGCGATGGGCCTGGTTGGCGACG  
TCTTCAAGATCATCGACGACACGCTCAAGTCCATTGAGTCGTCAAGCGAGATCAGCTCCA  
CTCTTGTTTCGCGGTATTGAGAATACCGAGGACATCATGAAGATCATCGACAACATTCAGA  
GCTTCCTCCAGATGGCGGGAACCATCGCCGAGACGGTGACAGACGGCCTGAACTTCCGGA  
GCTCGATCGCGAGCATTGCCGGCTGCGCACCCGGTGGCCAGGGTGCCGTGGGCGGTCTTC  
AGGCGGCAGCGGCGATCTCGGGAATCATCACGTCGGTGATCCAATCAGTCAATGCCGCAA  
TTGATCTGGGCCAGGAAGCGTACCGAATCACGAGCAAATACTACGGCATGTTCTCAGCT  
AACTGGTGGGTGCTGGCGAAGGTTCTCTGATGGGCGACATGAGACTCCTTCTGAACAAGA  
ACGATTGGACGCTCAAGGCGTGGTCCGAGGACAATCCCGAGGACAAGCGCAGCCATCAGG  
TTCCGGCCTGGCTGCGGGATGAGCGGAGCGTCGCGGAGCAGGGCGGCAAGATCCGAGACC  
TCAACATGTACATCGGGCCTGGCCCAGACCCGAATGAGGCCATGAACGAGGGCATGTGGC  
GCGTGATGACTAACCAGAGAGAGGTGTTACCAGTAAGTATTAATCTCGAACCTGGCCAG  
TACCAGATCGGAGATCTGGTGTTCGGCCGTGGCACCATTTATCCTGTACAAGCATTGAG  
ATCCAGAGCTACCAAGTGCAAGCACAGGATTTCCAGGTGATTCGCAGCGACGAGGTGCAA  
TTCGGGCAGGACAGCCTGCTGCCCGGCCAATCGTGTTCGAGCTCGGTGTGTATGATTC  
AAGCGACTCGCCAATGTGGAGCCGTACACACGCCGTGTCTTCAACGAGGAGCCCTTCAAG  
AAGCTCCTCAACAAGCTCTCAGCCGAGTGGCGGGGTGACGACGTCTGCCAGAACTGGGGT  
GCGATGAAGGCGCTGAAATGCTGCGAGCGTGATGGTAAGGTACTTGTGTGGTACGGACGT  
CCCGGCAAGTTTCAGACCACCAAGCGATCTCGGAAATCGTCTTTCTTCACGGTGACTGCG  
GAGTTTCGTTCGTGCAGACACGCTCATGTACTCCGACAAGGAGTCTGGCGTCGAGGTGCTC  
AAGGGTGATGGCCCGACAATCATCAATCGGGCTGACGGCGAGGCCAAGAGCTGGTTGCGC  
GTGGTGGGCTATGGCCCGCTGACGCACCCGGTACATACCATCGGAGACCAGCAGGTGCGAG  
CTTGACGTTGAGTTGGCAGATGGAGAAGCCTTCGAGGGCAGCTCGTATCCGTGGCAGCGT  
CGTGCTATCAACAAATCTGGACAGAACATCAGTTCGAAGCTGATCGGCGACACCCAGTGC  
CTCGACCGGCTGCAACTCCCTCCAGCCGGAGTTCCTACGCCGGTACGGTGGACCTCCGAC  
AAGATCAACACATGGGTGCGCCGAGCTGGGCAATCAGTCTTGATCGAGAAGATCGACGGG  
GTGAACAACCTTCAATCTTCCCAACACCTCCAAGACGATCCATGGCCGGGTGGTCGTGCGA  
TTTGATCTGTTCAATCCGGAGTTCGCCGAGAAGTTCATCGGCTCGGGCATGCTTGGCGGA  
ATCAGCGACTGCCTGTACACTAAGAAGACCTTCGCCACGCGGAGCCAGTACTGCGAAGCC  
AAAATCGTTGAGCCGTGGGGTGGTTCGGAGCGGCATCGTCATCATGAGTAATGCCACGATG  
ACCAACTTCGCGCTGCTCCAGGTGACTTCAGGACCCAACAACGACTACCTCAAGATCCGT  
ACTGGCAGCGCCTACAACACATACTCGACCGTACGGGACAGCTGGAAGAATCCGAATAGC  
TGGAAGAGACGGACGTGGTGGGAATCGGCTCCTCATAACGATGAGGACACCGAGAACACC  
ACCTACACAGCGTATTTCAATGGCGATCCGGTAGCTGAGTGGACCGACGAGGTGAGTGTC  
GTCGGCACAGCTGCGACCAATCGGTCACAGGGATTCAACTTCGACATGGACAGTCAGCTT  
CTGACCATCGGCACAGGGTTCAGGACATTCTGACCTACGACACTGGGACGGTGCAGGCT  
CCTACCGGCAGAGTGTTCTGTGCTCTGGCGAGATGCATAACCGGTGGCCTCATGAAAGCCC  
AGGACCGCAACCGATTTCATGATCGAGGAAGCGCGCACGGGCCGAATCCTCACCCGCGATC  
TTCACGTACAGAATCCGAAGATCCTCAACAAGCTCAGTGGCCCTTGCGTTATTGAGTTTG  
ATGTCGATCACCGACACCCACGGTCCAACACCCCCACGGCACTGACCCCTCCTGTTCA  
AGCCCTGGGGCCACTGGTGCCATGTTGAGCGCGAGATTCCGGGGCAAGCGCGTCATCATCG  
CCTCATCCCTATTCCAGCCTAGTGAGGTGACAGGAGACAGGCCTGCTGAAGGCGCAGT  
GGCAGGGCTTCTCGGGATATCCCAAAAACCTTGCCTGGCTACAGA ACTGAAATCCGATCC  
CGGTGATCCATTCGAGATCGTGCACCGCATCTGGAGGCACCTCCAGAGCTATAGCAAGG  
GCAATCTCGGCGTACAGGTGTA CTCTCCTGGGCCTGGCGGAACACGCGTCACTCCGCCAA  
ACAGCAACACCGAGCTGCTTCTGGATTCTCCTTCGATAGCCAGCAGTTAATCCAAGACT  
TCTTCGCCACCTTCATTTCGGCGCGTTGGCTTCACCGACTGCGGCGATCACATCAACAAGC  
TCGCTCGCGACATTCGTTTCGACTACTTCGGGGAGTCGGAATGGAACGAGGATCACACAG  
CCATCAACAAATCCATTCGGCTCGAGTATGCGCACGGGGGTGTATTCCAGGATAATCTGA  
CCTTCCGGGTGAACGAGAGTGTGATCCGGGGAAGGAGCAAGATCGAGTCAGAGATTGAGT  
GGACCAGCGACATTGGCATTTCGCGGCTGGTTCCCCGGCAAGGTCTACAGCTCTCAGATCA

GCAATGCCGACCCAAACCGCTACAGACGCTTCATCCTTGAAGAAGATGCTCGCATCAACA  
GCACCGAGCGGTCTGAAGCCTGGGCGCATCGGCAGCTGACCAGACGTCAATTCCCCCTCGT  
ACTGGGAAACAATCACCATCAATATGCATCATCCGAATGCTCCGTTCCGGTACGTGGGATG  
TCGGCGACCAGATCAGAGTACAGGGGCTGATGCCGTGGGTCGGATATCTTGACCAGGTGC  
ACAAGATCCTTGCCTGTTCCCTTGATGAGACGTCGGCTACATGCGAATTGACACTTCGAG  
CTGAAGGCGCATTCAACTACGATCCGATCTTCTTTCGAAGGCAAGCTTCCGAACCTTCTGG  
CGAATCCGAGTTTCACCGCCAGCATGTTCAACTGGACTGCCGCTCTGGGCTGCTGGTTCGC  
GTGACAGCCTGCGAGGCAAGGATTCTCTCGGAGCGGCTCGTGTCAAGTGTAACGGCCAAG  
AGAAGCTGCTCTTGAGCGATGCCGTACAGTTGCGGCAGGCGATGATGTAACGCTGAGCA  
CGTGGGTGTATTGGCAGAATCTCGTGGCCACCGACGAGCCGCTCGAGCTGATCCTCAACA  
CGTACAACCTCGGATGGCGAACTGCTCAACACCGTTGTCTTCGATAGCACATCGGGCTCTG  
GAGAGTCGCCGGGCTGGGTACAGCTCAGCAACGCATATACGATTCCTCAGGAGTCGCGT  
CGATGCGGGCTGGTGGACGAGTGACCGAGGACGCCAAGACCGGGTCTGTATGGTATGACG  
AGTTCAACTTCACGAAGGACGACTGATGGCCTACGAGTACGAGAGCAAGGAATCTCGGGC  
TCTGCGGTCTATCCAGAGCAAGAACTACCCTGACACCAACAAGGATTTTCGTAAGACTCT  
GAGTCGGCTCAACAGTTCTGCTGACTACATCTCGTCTTACATGATCATCATGCAAAAGGG  
CATTGATGACGCCAATAAGATCTTCATCGAGCAGATCCAAAGTTTCATCAATGATCTGAT  
CGTTCTGTTTGTGCTGGCGGACAGCCCACGGGCATCGAGCTCGGGCAGCTCAAGTACATCAT  
CCAGGCTCTGGGCGCGCTGTTCCGGCTTCAACGGGGCATTCCCGATGAGCTTGATCAACGC  
GGTGCAGCACTTCTGCCTCGGGTATATTGTTCCGCTGACACAGTTTACAGACGTCATCAC  
CGACACCATCATCGCTGCGCCGAAGAGCTCGGGCTGGACCCAGAGTTCGTTGATGCGCT  
GCGCGAGCTGACCGACGCCATCAATGTTCTTGGCATGAGCATTGGCGATTTGTTCCGCCAA  
TATCATGAGTATCTTCAGCATCTTTCAGATTCCAGAGCTAGGTACAGGACCGCTCGCCGA  
ACTATGGGATCTGCTGGCAGGCATTTTCGATGGCATCCACGGGAATGCGCTGCGGGCCGGT  
ACTCCTCGCCATCAGCAACTAGACCTTTCGTTTCATCGAAGGTCTCTCGTCATTGGTCAA  
CTATATGGACGACCTGGTTCGACGGCCTTGCCAACGGAAAGTTCCTCAAGATAAACTCACC  
GCTGAATGCGGCAAATCTGTTCCGGGGCTATGGGATCTAATCTTAGCAAGGTCGTTCTCTGC  
TGGTGCACCTGACCAATCGTTCGCGTTGAGCTACTCGATAATCCGCACCTTCACCGAGGATGC  
CATCGCTCCGGGCAGCGAGTGGGCCCTGGACATGCTGTGCTCCCGCACCGACAATGATGG  
CACAGGTAGCGCGACGGTGTGATCGCCAACGGTCAGCCGCACGCCCTCAACACCGGGGCAA  
CAAGCACGACAACATTCTGTCGGCCCCGGACAGCGTATTCCCTTGGGCATCTACATAAG  
TCATGACGGCGCTGTGCTACAGGACCGGCGATCATTCCGCAGGTTCCGGCGATTCAATGG  
CAACATCCCTATCGTTCGGCCTGTACGAAATTGGATCGTACACTCCTCCTGTGGAAGACCT  
GCCGTGGCCTGGCCACAAGCTCGAGGGTGTCCACACAGTTGAGGAGGATGTCACCCACAT  
CCAGGTGCGCGTGTACGTCACCGAAGCCGCCCTGGCGGGTCCGGTATCGCATTGCCGATGT  
GGATTTCCGCCAAGGTCCCCGACCTGGCCTTGATCTCTGGTCTGACACAAGCCTTGAGGGC  
GCTCGAGTCTGGCCAGCGTGTCTGTCAGCACGCAATCGCCAACGCTGTCACCAACATCCC  
GATCATCGGCGATGGGCGCGAGGATCTGATCAATGCGCTACAGAACTTCAATCCGGCCAC  
TATCGCTGGAACCTCTGGGCAGTTCACTGCTGAAGGGCGACCTGTTCCGGGATCATCCGACA  
CATGATCGCTGCGGCACGTGGTGTTCGGTGTTCGGAGGTAGCCGAGGATGCCACGCTCGC  
AGACCTGTACAACGCGATGAATGCGGCGCTCAAAAATGTGCGCCGGATACGACGAGACAAC  
CTTCGTCGATACCACGACATTCGTTCCGGTGAATGCGGCTTGGACCAACTACATTGATGT  
CATCGGCGTGGGCAAGGGCCAGGACGGCATGGACGGCCCGACGGTGCCGCCGATCCCCGG  
TGTGTTCCGACAAGGTGGGCACCTGGGAAAGGTGCTCGCCACCACATGGGTCAAGGGTGT  
CCACTACGACAATGATCTCACCGGCGTCCAGGTCACCTTCAAAGCAATGGCTCTGGGAC  
CTTCTCGATTCCCGGTTACAGCCTCACCTGTCTCTGCAAGCCGACCTCCGCGCCAATT  
TCAAATCGGAACAGGCTGGCACGCCAAGGGTCCGGGCACATATGTCTACAACGACCGCCC  
ATACGCTGCTGGCGGAACACAGAACCAGCCTGGAGGCAACGGAATTGTAAGTGGGTGGCTC  
TGGCGCTGGTGGTGGCGTGCTTCAGAGTGGTGGCCGAGGCGGATCTGCCGGCGGATGGGT  
GCGTCTGCGTGCAGCTGAAGCAGAGACTCCGTCTTCTGGATCAGACACGACGCCTCCGAC  
CCCTCCGAAAGTTAGCGTTGTCAATGCGACGAATGACACTCTGTATCTGCTCCCGAGCGG  
AAGCGTGGACCAGTAATGGCTAGTGATGTCAGCGGCTTGCCCGGATATCTGTTCTACCTT  
TATGACTCAACGGCACCCCTCAACGCAGAGACGTTTCTGCCGAGCCCTGGTCTGCCGTAT  
CCCATAACGAGGCCTTGACGCAAACACTGACTATAGCAATCGCATCTACGTCACGGCGATC  
GACAATGCTGGCAATGAGTCCGACCACATCCCCTGGAGGAAGCTCTCGACGAGATGAGC  
CCATTCCCCGCCAGCACGCTCAGCCCCACGCCAGAACAATCGCCCATGAACTCAACTGGC  
ACCACTGCCATCGACAACATCATCAAGCGATGCATCGCGGCTGCTGCCTGTCTGGTGTG



ACGGTGGGGATTACGAGCCCTTGGGGATACTACCTTGGGAAGCTTCGGTGAGGGCACC GG  
GTCGACCGACACTTCCTGATGGGCACCCAAACCAAGAGCTTCCTCAGCTGGGCTGTGATG  
ATGGCAATTGACGAAGGCCGTTTCTCCCTCGACACCACAATCAACGACATTCTCGACTCG  
CCGTGGAGTCCGAAACCGACCATTCAGCAGCTGATGATGATGCGGTCGGGCATGTACAAC  
TACCAATCGGACTCGGCATTCGGCCTGCAGGTGGCGATGAACCTGTAAATGTCGTACAGC  
CTACAGCAAATGATCGCCAAGAGTCGCAACGGCGCCAAGCAGTTTGAGCCTGGCGAGAAG  
TATGACTACAACAACGGAATCTCGTTCGCTCTAGCATTGATGCTCGAGGAAACGGACCCC  
GAAGGCCGCAAGATCCACGAAATAATCAAGCAGGACATCCTTGTTCCGCTGGATCTCGTC  
TACACGAATTTCCCTACTGTTACCAGCGGACCTCCGGCACCTTCTGCCATCCTGTACTCG  
TGGAACCTTCTTGTTGTCGCTCATCGGCATGAAGCTCTGCCAGAACGTGACCGTGCAGAAC  
CCCAACATCACATGGGCGGCTGGCTGTATGACCAGTGTCTGTTGGCGACATGCTGAAGTGG  
GGCAAGGAGCTTCGCCAGTGCACGCTGCTGTCACCAGAATCAGCCGATCTGATCCACCCA  
ACTCACAACATGTATCCGAGTGCACCCTATGGCCTCAACAAGGACGGTGCAACAGAATTC  
GGATACGGGTTGCACGGCCATATCAAAGTTGGCTCCTGGCGGGGATCCGACGGCAGTTGG  
ATCGGCTGCGACTCTGCGACAATGTACGAGCCCACCACCGGCACCCTCATCACGGTGTAC  
GAGAATTTTCAGACGCCGGGATTGCTTTCCCTTGCCACAGTTTGGCACGAATGCGCGGAG  
TATCTGATGCCGGGGTTCGGCGACGTATCCGGGCTACCAGACCGGCGAGAATGCGGCAGGT  
ACGGTCGGCACATCGCTGAAGAAGCTTGGCACGTTCTCCGAGGGTGCGGTGTGGCTCCT  
GGCACCGAAGGCGTTGAATTCGACAATGCGAGTGCGGTCAGCACGACTCGGGACGAAACC  
GCAGCATTCAACATCGCGTCCGATGCAAAAAGCATTGGTGGCCTGGGTTTCTGCACAAGGT  
AGCACGACTGGGGAGGCGCAGCCGTC AAGGCCAAGATTGATGGCATTGAAATGGAGAAG  
GTTGTGTCGACAACCGATGGCACTACCTCCGGGAATGGCCTGGTGTGCTTCCGTCTCCTC  
AATCCGCCGACCGGGGCGAACAAGAAGTTCACATTCGAAGGGATGGGATCTCTTGCACAC  
TATTATGCGAATGGCACAGCCTCGTACAAGAATGTCCGGTCCCTTAGGTGCGCCTGTGAAG  
AACAGGGGTTCCGGGGTTCGTTGCTGCGCAGCCTTACTGTCGGTGGCACAACATCTTTGGATATG  
GTTTTGGGCGGATACTACTTCCAGGGTGCAGCACAACCTTCAACAAGAATGTTTCGTGGT  
GTCAGAGGTCAGGCAGCATTCTGTC AACCAGGGCCTGTTGATCGGAGACTCTGCCGGTGGC  
GGAGACGTCACCTTGACCGAGACATTCACGAGCTCGATTCAAGTGGTCTGGGACGGCGTTC  
GTTCTTCGGGCTGAGGAGGGCTGATGGCTGTCGCATGGTGGGCTGAGAGCTTCTCGATAA  
TACAGACCGAGCTTAGCCAGCTGGTCAATGAATCTGTCGGTGACCAGAGCCAGTATGGCC  
TTGCTACCGTTGAACTCCAGAAGCTTCGAACCTCACATGGAGGCAATCGCTTACGACTATC  
TAGTGTGTCGTCGGCCACTGAGTTCATGAAACTCTCCACGAGCGCCTCTGCTGGACAAGTGT  
ATTTCCGCAACATCCAGACAGCCGTGAAGAAGCTCGTCACCCAAGCGCTTGCCGGAGTCC  
CAGCTCCGGTAACATGGCAGGGCACAGGCCCGCTCCCGACAGGCGTCCGGCATCCCTGTCC  
AGAACAACCTGGACAGCACCGGCTGGAACCGATGTGTTTCATCGCAGCCGTCATGGACCGCT  
CGGGCAGCTTCACCGGCGCGACATTCGGTGGCGAAGCGGGCACTCTGATGGAAGCATTGT  
TGCACAACAACAACGCTAGCACAGGACGTACGGCGTTGTGGCGTTTCGCAGGCAAGGGCG  
ACGGCACCAACAAGACCTTCTCCATGACAGGTAGCGGCTATGGTTGGTTCGGTGTGTGCA  
GCGTTGCCTTCTCTGGCGTTGTGTGCGGTCGGAACACCCGCGACCACGTACGGATCGGGCA  
CTTCGCCTTCGCAGGTGGTTCACGGAACAGGGGTGCAGATACTCGGACGAGGCGTTGGCG  
GAGCTGGTGTGCGCACACCGAGTGCCTTCTCTGGTGTGACCAACAGAGTCAACCAGAACA  
TCAACGGTTCGAGCCTCGCAGTCAATCAAGCTGAGGTGCCAGGAACAACAGGGGCAACCA  
CGCAGAATTACCTTATGGGTACTTCTTCCCTGCCCTCCGGAATACATAGGAGATCAAGT  
TGAATACAGAGTTGCAGGCGATCAAGGACCCAATGAATGCCCTTGACTTCGATACTGCGC  
GTGATCTGCCAAGTTGTATGTCGAGCACCATCCGGAGGAGTTCGTCGACTACTACCAGA  
TTGTGGAGGAGTCGGCCAACGACGAAGAAGCGATCGCCAAGGTTCGTGACGTCCATTGAGG  
TGTTGCCAGCTGCAGGCCTCACCCAGCAGCAGTATCGTGGTGAGACCTTCCATCTGTTC  
GCTGGGACCCGGAGAACATTGGCGCCACAACGGAACCTGTGGTGCGCAATCCAATCCCGC  
CGACTGTGAGGAATGACTGAACATGGCGAAGGCATATTCTGTACGCTGGATGTGGCCCA  
GGGAATGCTCGGTGGTAGCACCAGCTACGCCGTAGCTCTTGGGTCCCTCGCCAAAGATCAA  
GATTTACTCAGGCACTCCACCGGCCAATGCTGGGGCTGCGCTGAGCGGCAACACGCTACA  
GGCCACTCTCACATGCGCAAGCACGTCTATCGCCAGCCAGAGCGATACTGGCACTGCCGC  
GCGTGCAGCGTGGGCCACGAGCGCGTCTGCGGTGGCCGCAGCCACAGGTATGGCCACCTT  
CTTCCGCACCACCATGTCGTCCGACACAGTGATCGACCAGGGTACCATCGATACTACTGG  
TGCAGACCTCAACATGTCGACGACGTCGTTGACCGCTGGGTCCACCATCGCAGTGAGCTC  
GCGGACAACAGACTTTCCGTACGGCCCATAGGAGACAGCATGGCATTTCATCCAAAAGCAG  
GGCTACTGGAAATCCGAGAGTGGCGGGCGCATGTGTGACACAGCCGAATTGGACTACAG

GCTGTGCCGGGGACCAGCTTCAAGCTCGGCGTTCGCAATGGATCACCCAACATCATTCTC  
AAGGCACTGATCTGGCGTCTTGACAAGATCGAACCCATGATGACGTCGCAAATCGGTTGC  
TACACAGCCGAAAACCTCGATGGCGAACAGCAACCACAACCTCTGCGACGGCGATCGACTAC  
AACTGGAACAAGCACCCCTAACAGAAATGGGGGACATGGCCGCATCGTGCGGCCGTCGAT  
AAGATCGTCGACGATTTCCGCGGAATCATCGAGTTCGGCGGTGACTGGACCTCGCCGCGT  
GACGAGATGCACTTTGAGCTGCACTTCGCGGAGGGGCATGCTGGCACCGAGGCTCTAGCC  
AAGGTTTTGGCCAATGGCCTATGGGGTATCTGGAAGCCCGGAGCAGCCCCAGCCCCACC  
CCCGCGCCTGGCGGAGGGAACGACGGCATTCTGCGGATCGGCTCCGAGGGGGCCGGAGGTG  
CTCAAGATGCAGCGCGGTATGAACTATGTGTTCAAGAATTACCGCGCCATGCAGCTGTTG  
GAAGACGGCATCTACGGGGCCAAGACCAAGGAAGCTGTCGTCGAGTTCCAGCAGCGTTCA  
CTCATTGATGTGGACGGTGAAGTTGGCCCGCAGACCAAGGCGAAGCTCGCCGAGTACGGC  
ATCGTGCTGACCGGAGCGACTGCTCCGACCGCTCCGCCAGCCATCGTGCCGCAGAAGGTC  
TGGCCTCAGACCGCCGGTGACCGTGAGCTTCGGGAGTACATTGCGGGGCAGCTCGGGCCT  
GGGGACCCGTCGTGGCCGATCAAGCTCGGCAACAACGAGAAGGGCGATGCGCTCACGGTT  
CGCGATCGACTTGCCTTGACGGCTAAGGACATTGAAGAGATCAAGGGAAGGCTGTGCGAG  
TGAAGAATCTGTGCAATTACTGGAAGGCTGGCATTGCGCTAGTAGGTACGGCTGACACAG  
CCGTGGCTACCCTCGCAGCTGACGAGAATGTTTCGACCCGCGTGGGGGAATCGGGTGTCA  
CCTGGCTGGCTGTTGCCGGTGTGCGCCCTCACGACCGCGCTGACCTGGCTCAAGCGCAACG  
AGCCACGGTCACTGAAGCAGAAGAGATACTCTGCCGTGCAAAGGTACGCGCATCCTCGT  
CCTCCTATGCATAGGAGGCTGGGCGCAGTGGCTATGGTGTGTTACTCGTATTGACCTGT  
GTGTCGTGTCCGCAGGCTGAGAGCTCAGCCGACGGCAATGACCAGCACCATAGCCAGCTC  
TGCAGGGATGAGGAATACGCCAAAAGCATGCGGTTCGAGTGTGGACGGGTGCAGAGTGGC  
CCCATATCAATCACGCCTCCGACTGGCGGACACGGTGGGGGAGCTCGGTGCCGAGGTTTG  
ATCGGGGGGATCCTGGACAAAGTAGGGCTGGGAGGGCTCCTCTGATGTTCCGTCCAACAG  
ACTCTTGACGCTTGCAGCATATTACGCAAGCCTCGTCTGATTGAACACGGCAAAATTT  
ACGTGTGCTGTATGATGGGGCTCTGGGTGTGGTCTCTGTCAATTGCTGGTGATCGGACCTG  
TTCCGAACCTCAACCATCGACGAGCTCACAGACTATGTCCAAAACATCCTTGCTTCATGTA  
TCTTCATCGGCTCGTTCGTGTGTCTGTGCGGCATCTCCCTCGGCACTAAGTACGTCTCC  
CAAAGCGGATATCCGCTTGTGCTACCGCTTCCCGTTGTGGGGGAATCCCCGCCTTGGCAG  
GGAGCGTCGGAACGTACGCATGGGCCATCGCCCACAATACTGGCTCATTTTGGGTATTGG  
CGTATGCAGCTTCCATCGGAACATTCATCTGCCTCGGAATCGTCTGGAATGGGCTAGATT  
TGCTCTTCGAGATTGCTCGACTGAATGAGGAGATCAATTCCCTCAAATACGGTGCGGGCT  
CTGAAGAGCGGCTAGAGGACAGGGACGATGAACGGAAGTGTGATGTTGGCTGGATCCTC  
ACATTCGTGGCCATCGTGTCTGCTAGCGTGCCAGTGCTTTCCGTTGTCCTTGACTATCGC  
AGCCGCAAGCGTCAGGCGGAGGCAGAGGGCGAACAACAAGATGCCGATACCGGGATAAAG  
AAGGTTTCTGAGCAGGAACTTTCGCAACGCGTTCTGACAATGAATGATGACCGCTGGATC  
ACGCGTGAGAAGCGCTGGCAGGAGCGCGAAGACGCTCTCGAGCGCGAAATTCAGAGCAG  
CGAAAAGAGATGGATAATTTGCGCTCTGACATGAATGTCTATATTGAATTCATCGCCAAT  
GATGAGCAGTGGCGTTTCTATGACCGGATGCACCGCATCCAGAACGATCTCCCTGCGCCA  
CAGGATCGGATCACATTCCAGCAGTTCATGGAGTCGCGCCGAGAGGCAGCGGGGAGGATG  
TAACATGGAACCTAAGGTTGGCTCAAGCGACGCGAACACTGATGGTGAGATAACTCCCTG  
GCAGAACTGGGTAAAGCGGTATGCCGCAAGCTATTCCGACATCATGGGCCCCATCGATGG  
GTAATATGGCTACTCGGATGCCGACTTACCCGTGAGCTACAGCGCCTTCTGGGGCTGCC  
GATCACCGGCGTGTTCGATGATATGACAGCCCTGCACCCAAAGGTCAATTACCGCTGGAA  
GGGGCAAGGCGCTGGGGAAACAGCCGCACGCCGAAGATCTGGTTCTACTCCAGTCCCGG  
TTCGGGCTCAAACGAATTCGTTCGGCCATCGTTCGAGGTCGGCGAGTTCGCAAGAACGT  
CCTGAAGATCAACCACCAGCCAGTGCATTCCGGTCATCGGCGGATATCTCGGGCTGATGGG  
TGGCGACCCCAAGTTCAGCTACAACGACGTCATCTATGACCAGTACAAGTCGCTGGAGTG  
GTTGCTGGACAACAATCCTGACACCAAGGACCCAGACGTCGAGTTCGTTCTCGGGCTA  
CTCGCAGAAGGCCGACGGCCTCGAAGACGCACTCGAGATCTTGTTCGGCGATGGGGGATT  
CACCATCCCCAAGACTGGCGAAACCGTGGGTCCGGGTGAGTACCGGCACCTGCGGCCAAG  
AATTAACGGCACCATACAGTTTGGCAATCCCAGCAAGCAACCCGGCCCCACGCGCGTCGG  
GAATCGCCCACCCGGAAGCGGCATCTCCCGCAATAAGCGGCCGACGTGGCTCAGCATCCT  
CACCTGGGACATCGTCACCACTTGCCAGGGGCACCGGACTTTTACGCTGCCTGCGACGA  
TGACATCCGACCGTTGTTCTACGAGTGGTTCATCAAGGCCGACACCGAACTGCCCTTCGT  
CGTTTACACGGCGCAGATCATCATCCCGGCGCTCCTGAATCTTCTGGCTCCATTCTTGGG  
AGGCTTCGGAGGGGTGACGACCCCGCTGGCTGGCCGGATTCTGGCGATCGCTACCGGCTT

GCCGATGAACCTGCTCCACGGCCTGCTCAGCGGGGTGGCAGCACCCGACAATGCTCCGAA  
CCCCAAGCTCATCGAACTCCTCAGCGTGCGTGGTGTCTGACGAACATGCCGCAGCTCAT  
CAAGCTTCTGACCAACATCTCCGGCGTCCAGACGCACGGCGAATACCACCTTCCGAAGCA  
AGAGTTCATCGGCCGCAGCGGAATCCATGTCGGCTGCGACATCGTTGCGGGCTTCCGGCG  
ATAAGGAACACTCATGGAACGCGTGACAGTTTACCAAGACAGCAACAACGAATGGCGCAG  
GCGGTTCAAAGCCAGCAAAGGCCGGGTGATGGATCACAGCGGCGAGGGTTACAAGAACAA  
GCAGGACGCCCTCACAGCGATCGATGCTGTGTTTGGCGGGCTTGCGCCAGAGGTGGTGA  
TGAGGCTGGCGAGCAGCTCGGGGTAGTGCCGAACGACCCAGCGCTCGAGGCCGCGCAAAC  
GCTCCTGACGCTAATGACAGGGGACGACTGGGACCGCCCGAAGCTCGTGAAGTGCTCAGC  
GAGCTTGCGCCAGCACGCTTGCGCAACGCTCGTGAAGCAAGGTGTTGGCGTCCGAGAAGC  
AGAGGCTATCGTGGGCGAGCGGTGGGCCGAATACGGGAGCCCCGAACCAGCTGATCATA  
GCCTGTAGCTGCAACAGCCGATCGCTCGGCAGAAGCCAACGTAGCACCCAAAATGGATCT  
GTCTCCGGGAAGGCCTCCCACCGGCGAGGAGCTTCGGCTCAAGGCGCGCAGCCGTATCGA  
CAGATGGCGCAAAGAAAGAGCCGGAGCCCCTGAGAACTCCGGCTCCGATACTTAGCCAGA  
CTAGATTTCCATCGCGGGCTGCTCGTCTCTCTTCTTGAGTCTCTTGGAGTCTTTTCGAGC  
TGCCTTGACGGTAAACTTGAAGGCTTCGCCGAACCTCGCGATTTCCGCAGACCCGGGCCGAA  
GCCAGGTAGACGCTCAGCTCGTCCGTCATCGTACGGGTGCAGACGCAGCAGCTTCCGTA  
GATTGCGCCGAACCTCTTCTCTCTCTCGTAGCTGATCCGCTGCTCGGGCGGTTAGGCCTCG  
GAGCGGACGCTTGCCCTCGTACTCGAAGTGAGCGGTGAAGACGGTGCCAGCAGTCTCGTC  
GTGGCGGTTTTCTCGACGACGCCAGCGCTTGGCGACCTGGTAGCCGCGCTGGGTTTT  
GTAGACCTTGATAGTGGTACCGTCGGCGACGCGGTACATGCCATCCTCCAGTTCGTCGGT  
GGCAGGCTTCGCTTCTCGGGCACCAGGGGTGATGTGGGGTCCCTGGATTTCCGACCGTCTC  
ACCAGCCATCTCGGTGGTCCCGATGACCGGATCTGCGCCCTTGATGGTCATGCTCTTCAG  
CCAATCGATCAGGTTGCTGGCATCCTTCGAGCCGAAGGGCTTGTAGCAGAACTCGCAGCC  
GTCCGATGCACCGTGGTTGTCGACGACGTACGCCAGCGCAGCGTTGACGCGTTCGCCGAG  
CAGGTCGCTACTCATGGCCTTCTGATCTCATCCATGACATACGGGGTGCCGTCCACACC  
CTTGTCTCGCGCATGATGGCCCAGTCGATCATCAGGCGGATGGTCGAAGCGCGAGACAC  
AGCCTTGTGGCGGTAGTCGCTGGCCACGCGCGCTGCTCGAGCAGGTCCTTGATCCAGT  
GATCTGCTTGTGGTTCGCGGGCTTACGGTTCGCGGTCGCGTTCATTTGGATTCCCTTCT  
CCGGTGTCCGAGGCGCTTGGGGTAGCCTCGTTGACAAGACGAACGTTACGGCAGAATTTG  
CAGTGTGCTACTCCTTCCAAAAGTCAGCGCTCACGGTGCCTGGGTCCGGCTCGCCTACC  
AGGACAATCCTACTGCAGTTGCACAAGACGCACCTCGGCGTCCCCCAGCAAGCCGCATGG  
CCGCCAGCGCGCGGCTGGTAGTGCGAGGACCACGGGTGTCCGCAGGTGCACTGGTCTACG  
GCGTACCGGGCGATGCGGAGAAGCTTCATTCACCGCATCACCCACTGCCAACGCTCCATC  
AGGCGATGGCCCGGATCAGCGCCAGCACCGCGCGGCGCATGTCGTTCTCCGGCATGCCGG  
TGATGACCGCGACAGTCTTGCCGTCGCGATTGACGACCCACTTGCGGCTGTGCTCTTCGC  
CGACTGCGAGGGCGTCTGCCACCTGGCGGTGTCACGGTATGCCGTACGCTAGCGCGCA  
GCGTACGGACGGTGAGATCGTCTCATCGGTGTCATTGCCGGCCAACGCGGGAACGCTCA  
GCGCCTTACGATGCTGTCCACCTTGGACCTGAAGTTCGGGCTGTGGTCCGCGCTGCGGA  
CTGCCCCGTCAACCACCTTGTCCAGGTAGTTGTAGCGGACCAGAACTTGCTCGGCCTGCC  
CGCGCTGGAAGGTGATCGCACTGGCCACCTTTTTGTGCGGCGATCACCTGCTCGCGTGACG  
TCCATCCGAACCTTAGCGGCAACTTCGGCGATCTGCATACGCTGGTTGACGTTGGTATGG  
GCATGAGGCCTCCTGGGCTCGTGGGGATGATTGCGCCCCGAACGTTACGCCACCGCGCCG  
ATTCGGGCTACTGCCGTCTACATGCGTTCGTCGTAGGGGTGGCAACAATATTCGGCCAGGA  
GTAGCGCGAATCGGGTCTAGACTAGAGTAACGTTACTCCTGTCCGCCTCCCCACATCCCCAG  
GAGCCCCAATGAGCATCACATTCCAGCCTGGTACGAGGTCGAGGTTACTCCGGCGACA  
ACGTGCTGCACCCCGAGCCGCTGAAGCCCTTCTGGTATCGCATGGTTCGTCACAGACGGAC  
CCTTCGAGCTGAATACCGGCCACGAGGGGTACCGCGTCTCGGTCCGGGGAAGCCGGAGC  
CGTCATTCGACCAGTATTGCAAGGCTGCCAATGGGATGCGTTCGTCGCGGACGTCGATC  
CCGAGCTCGCTGCCCGGTACGACGCGTTCGGGAGGTGGGTGCGCAAGTGATCCGGCTGGC  
ACGCCGCACAGGCTACTGGGTCTGCAAGCGGTGCTGGCAGGGCAACCTTGGCGGAGAGAA  
GTGCTTGTCTGCGGGAGGGCCAAGTGAGCGAGCTGTGCGCCCTTGCGGGCACGAGTTC  
GAGGAGCACTACTCGCAGGGCGACTCGAGCGGAAGGCTGGTGTAGGTTGTGAGGCCGAT  
ATCAGCACACCCTGCCAGCCTACAACCACCGAGACCCGGAGCGTTGCGAGTGCAGACTAC  
GTTCCCTGCGTTCGCCCGGATTTCGAGAGCGAACCCGGCACCCGACCCCGACATCACCGAA  
ATCGACATGTACGACCCGGTAGGACGCTGATGAAGTACTTCGACGTGCTAATCACACGC  
ATAGCACAGACAAAAGCAAGGATCTGGCCCAGATCATCATGCCGACTCATATCGCCAAAG

ATCTTGAGGCTGCTGGCTGGACTGTCCGGAGACAATCGTTCTGGAACACAAGACGGGGC  
TGACGGGCAACTATCGCAACGAGAATGTTTCAGCACCGCCTCGAGACGGAAGCAGGACACT  
GAAATGGCCAAGGAAAGCATCATCAACCGAGTGCAGAAGCTGCTGAACCTCGCGATGGAC  
CAGAGCGCCACCGAGGACGAGCGCAAGCTCGCCCAGGAACGCGCGGACGCGCTGATGGCG  
CAGCACATGATTGACCAGATGGACCTCAAGCCCAGGACCCCCGGTCGGTTCGCGCTCACC  
AGCACAAAGTGGGAGTTCTTCTTCGAGTTCGAGTTCGCTGTGCAGCTAAAGGACTTGCTC  
GCAGCCGTCGTCCGGCACGCTACCTGCCGTGCCACGAGCACGCGCAGGATCGCCAAGGGC  
GGCGAGCCCAACATGGGGGTGACCATTGTTGGTACACCTGAGAACATCGCCTACGCCGAG  
CGCCTGTGGATGGTCGTTTTACCGAGCTCACCAGGAACATGTTCCCGAAGGTGGACCCC  
AACGAGAGCTTCGACAGAAATGTGTACAACCTTCGTGAAGGCTGGCTTTAAGTGGCAGGAG  
ATCCATGAGCTGCTCTGGCGGCACAAGGACGATCCGCATTGGATGGGATTCCCGTTGAAC  
GACCCGTATCCGCCAGAGAAGCAGAGCGAATATAGCTGGCATGCCAAGGTGTATGGTGGC  
GACGGCGGACGTCTGAAGCGTGCATACACTCGTGAGGTCAAGCGTTTTCCGGCGAAAGCAGC  
GCGCACACACACCACGCGACATGGCGTGCACCGCCGGAGCTATGTGCAGAGCTACTCGAGC  
ACAATCTCATTGCGGCTGCACGACATGCGGAGCAAGAGCGAGGACGCTGTGAGTGATCGC  
GACAAGTTCGCCCTGGCGGTGCGCAGCTCGCAGGACGAAGCTGACGCCGAGTTCTATCGG  
CTGGTCCCGCAGTTCGACCCGGAGCACATCCGCAAGCAGCGTGAGGAGATGCTCCGCCAG  
GAGCAGATCCGTTTGCAGAACATGACTCTCGAGGAGCGGGCTCGCGCTGAGAAGGAGGGC  
CTCAAGCGTGAAGAGCGCGCTGGCAAGCACTGGGAGAAGACGCGGGACAAGAGCTACCAC  
CAGGCTGGCTGGGCGAGCGGCAGTGTGTGGCCTAGAAGGTCAATCTCAACGACGACACG  
CAGATCCACCACAGCAAGAAGGAGATTGGGTGATGTGGATTGACGACTGGCTCGAGGCAG  
CCTACGAGGAGCGCTCCGAAGCTCCCGACGATCTGGACAACGACGAGTGGTGGCCGGAGG  
ACGATGGTGTGAGTGACCAAACGCTCAAGCTCGCAAGCGAACTCAACGAGGCAGTGATC  
GCCTTCCGGGACGGCTACGTCTACGGCAAGAGCCTCACCCGAGCTCTCGACAAGGCCATC  
CTCATGGCCGATGCGGGCCGACCGGCGGAACGGCCATCTCCTCGAAGTCATCAACGATCAG  
CAGTAGCAACAGACCTGTCCATCAGCAGCTTGGCTAAGCCTTACCTCGTCTCAGAAGGGA  
ATCTGACACATGAGCAAGACCACCTCAGCCATCGCCACAGGCAAGACCGCCGAGTCTCC  
GCTCTGGCGGAGAAGCACGGCTGGACGGCCGAAACCAAGGAAGACGTCAACAACGACATC  
ACCACCCTCAAGCTTACACGCGGCATGAGTGGGTGAGATCCGCTGGGAGGGGAACTCC  
TGCAAGGAGATGCCGACGGTCTGACACGAAGGGCAGCTCAGGTACGTCCGGAACGTTGCA  
GCTGCGAAGCGCGTCTCGAGGCTACTGCCGAGCAGAATGCGGAGCCCTTCCAGAAGCGG  
ACTGTGGCCAAGCAAACCTGCGCGAAAGACCACGCCTGCCAAGCGGCCTCGCCGGAAGGAC  
AAGCTCGTGGAGGCGATTCCCGACAGCGACGACCGGCAGATCAATGAAGCCCTCCTCGTC  
CGGAAGATCCTCTGGCGAAACAGCACGAGCGGCGAGTTTGGAGGAGGATGTGGTGTGGCC  
GGGAAGAATAAGAATGGCCACTACTATGTGTCCCACGAGGGTGAGAAACGCCAGATCAAC  
TTCATCGGCGCATATGGTTTTTCGAGCGGTGAAGATTTCTGCGATTTTCGAGGTCAGATAG  
GCAAAACGAGTAGCCCGAAGCGGGTCGAATAGGGTACGATTGTCTTATCCAATCGGGAGC  
AAGAGGGGAATCACAAAATGGACGTTTCGTACCCTCACCTCCAGGGATCGCAAGGTTGGCG  
CCCAGCTGGCCCAGCGGGCCTCTGACGACCAGCTGACCTACCGGACAGCCGAAGGTGCTT  
GTCGGGCCAAGATCGCCCGTACCGTGTGGTATGAGATGGCTGCAACTCGTGTGTCTGACG  
GTAGGCAGTACCCCTATTGGCTTGCCAAAGACTCGAGTAGCTTCCGTGGCTCATTCTGG  
ACGGCTTCGACCTGTAGTAGCGGAATCGGGCCGATGGGGTAACGTTCCGGTATGTCAACG  
ACGAAGGGAATCCAATCAGCGAGCTCAATGTAGGCGATCGAGCGCGAATCATCAAGGTCA  
TCGATCTGGACAACGACCGCAAGGTCATACCCGACCCCGCCGGGGCAGCTGCGCTGTTCCG  
GAGGGTACGGGCCTGGAATTGGCGATGTCGTGGTTCATCACCGCGAAGACCCTCGGCGGAC  
TGTACGACTACGAAGCCGAATGGGAGATGGAGAAGGGCCACAAGACCTTGAGCTTCTGG  
CGGAAGAGCTGGAGCCAGTCTAGTGAGTAAGCGCGAGTGGAAAGATCTGGTTGGCGGACGG  
CAAGATCGTCCTGCTGACCGACGGGTACGATCCGGCGGTTCGTGAGAACATCAAGCTGTA  
CTTGCCGACGCCGCGCTCGTTCCGGCGTACCACCAAGACGTGGCACGTCCCCCAGATGTG  
GGAGACTTGTGTGCGCCCTCCGCTAGCTCGCCAATCGGCATCGAGCTGACCTGAAGATAAG  
CGACGCGCTCCGGCTGTGGGCTATGGCCGAGAAGCTCCGGCTGGCGAGCATCCCCGACGT  
CAACGAACACAACGTGCTGCAGCCCATCGCGAACATTGAGCGCGAGCTGCCAGCCATGAC  
GGAGGCGCTGAAGGCACGCCCTTCCAGACAGTGGGCGTTCGGTTCGCCGCCACAGCGCG  
GAACGTTCTGATCGCCGACCACCCCGGTCTGGGCAAGACGCTGCAAACGATCGGCGCTGT  
GGCCGAGAGCGGCCTGAAAGGACCCGTCCTGGTAGTTCCCGCGCCGAAGTCGGCTGAGGT  
CATTACCTGGCCCAACGAGCTGCGGCAGTGGGTGCCGGACGACGTCGTGATCCCGATCTC  
GGGGAGCATGAAGCCTGCAGAACGGGCGGAAGCTGTCGAGCGCGCCAAGGCTTACGCCCA

GCACGGCGACAAGCGCGTCTGAGTCGTCACGACCCCCAACTACGTTTCGCATCCGGGCTGA  
GCTCGACACTTACGGCAACTATGTGTACGGGGGTGGCCAGAAGATTGTGCAGCCGGTACG  
CGAGGCTCTGCAAGGGCTGTTTCGACTTCGGGTGGTCAGCGATCGTTCGTGGACGAGTCGCA  
CAAGACGCTCGCTGTGGTACGGGTAACCGCAAGAAAGTGGTCTGCACAGCGCCTGGGCT  
AGAGCTGCTCCGGGTGAAGAAGGATGGGCTGCGGATAGCCCTGAGCGGCACACCCTTCCG  
GGCAAGGAAGACAACGCCTACGGCACCTTACAGTGGCTGCGACCCGACCTGTACACCGG  
ATTCTGGAAGTGGGCTTAGAAGCACTTCCAGATCTACGGCGATGGTTTTGGACAGATCGT  
GGGTGAGGTCAAGGACTCAGAGGAGTTCAACAACAGCCTCAAGCCAGTCATGGTGCGGCG  
CACCAAGGCCGAGGACGTCAAGGACCTGCCTCCGAAGATCTATGCCGGTGAGCACCTGGA  
CCCCGAGGACCCGAATTCCGCAGTGGCAATTTGGCTTCCGATGGAGGGGAAGCAGCTCAA  
GGCGTATCAGGCCATGGTCAAGGATGCAGCCGTCAAGCTGGAGAGCGGTGTCCTTTCCGC  
CAACGGCGTCTGGCGGATATGACGCGTCTGAAGCAGATGGCCTGCTCCTATGGCGATCT  
GGCTATTGCTCCGACAGGAGAGCAGACGTTCCGTCCGTTCGTTGCCGAGCAACATGTTTGA  
TTACCTTGTAGACCTTCTGAGCGATCGTGGCATCGGTAGTGGCGAGTTCGACTCTACCGG  
GAAGGTGATTGTCCAGCCAGTTCACCAAGCTGCTGAATCTGTTCTACGCCGAGCTGAA  
CAAGCTGGGCATCAAGTGCCACCTGCTCACCGGCGCGACTTCGGAGAAGGAGAGGGTCCG  
TATGGCAGACGCCTTCCAGAACACCAAGATTAGCGACGACACGCCGCACGTGTTCTGCA  
GAATACCATCGCTGGTGGCGCGTCTATCACTCTGGACGCTGCGGATGATGTTGTGACGCT  
TGACGAAACCTGGAACAAGGACGACCAGGAGCAGGTGCAAGATCGCGCTCACCGCATCAG  
CCGTAACGACCACACGGTGACCATCCACAACCTTCGCAGTCGGGGCAGCATCGAGGAGCG  
CATCGCCACGAGTGCCTTTGCTCAGTAGCGAAACATCAAGTCCATCATCGACGCAGCGCG  
CGGTGTGAGTTCGCACTCGAGCTCCTGGAAGGAGTCAAGGCATGAGCACCCCTCAGCGCA  
TGCTTCATCACGGCCATGCTCAGCGGGTCATCAATGTTCTTGCTGGCCTGGCGGATTCAC  
CGAAGCCTCTCACCAGAGAGGAGATGCGGGACTACATGGAGCGGTATATACACCGGGAG  
GCGGCAGAGCTGGCAGAGCGCCGTCTAAAGTCCCAGCTCTACAACGCTCGGCGTCGGGCT  
GCGCCGCATCCGGACGCGGGTGCACCCGTGCGGATCACGAGGGTGCACGTGGCTAGAAAG  
GGGAGAGGCGAGCGAGAGGAGTAAAGTCAAATAAAAAGTCGGAAAAATTACCGATTCCGAC  
CAAGAACCAGTAAGCTTCATTCCACGCCCAAAAACCTTCATAATCCCAACGAACAGAAGGA  
AAAACAATGTCCCCGAAGCCCAGACCAAAGAGACAAGCACCCCGCGAAGGCAAGGTG  
CGTTTGATCCTTTCGCCAATCCGGGCACCCTCGCCGAGCAGGAGGCCGCGTGGCTGAAC  
GAGCAGTTCGCCGCTGAACGTCAAGGCCAGCCACGTCCGTGCGGTCATCAGCAACCAC  
ACGCGCTCCCAGAAGTCCGACCTTCGCCGCAAGCGCGGGACGCCGAGCGAGCCAAGCTC  
GCCGAGGATCGCGAGGCGCGGAAGGCTGCCGCGGAGCAGCGCAAGGCCGACGCCGAACAG  
CGAAGGCAGAGCGTGAGCAGCGCAAGGCAGAGCGTGCGGCCAAGGCAGCAGCCAAGGCT  
GCCGAGAAGCCCGAAGCCAAGCCTGCTGCCAAGAAGGCCACTCCGGCCAAGCCGTGCC  
AAGCCTGCTCCCAAGAAGCGCGTCTCGCGTCCCCGGAAGCGTACCGGTGACGTGCCCGCT  
GAGGACGCATTCTGATCCACCCACCCCTCGGGGTGGCTGAGCCTCTGGGACATGGGGA  
TGGCCAGAGTCTCGGTGGAGGTTGAGCAAGTGCACCTCTGAGCACCGGATCTCCATCAC  
AGGACTCCCGTCAAGTCCAGGAACACTCAGCCTCCTCCAAGAAAAAGCTCACTGACAG  
AAGGGAATCTGCAAAGTGAAACGCATCAAGAAAGTCGCGATCGCCGCTGTGGTGGAGACG  
CAAGTCGGCCTCGGAATCCTCTGCGCCGACCCGGCGAACGCCACTATATGATGGGGTGT  
GAGCGAGTCCGCTGGGGCTTCTGTTTCAGTGGCTATCGCACCATCTGCGACGGCCCCAAG  
CGGCCGACGGCAGCTGGGACCGGACGCGTTCGTAATCGACCCAGCGCACATGGCTGGC  
GGATACTGCTCGAGCAGCAGGTATTACGTACGCTGCACCCCGAGCTACTGGGTCAACGAG  
AGCACACAACGCCTCGAGACCTATCCGGTCAATTGATGCCACTGTGTTGCCTGGCGAACC  
TGCAGGCTCCCTCCGGGCACGAACAGGATCCTCTGATCCATGGCACCCAAAAGCTCACGA  
ACATAAGGGAATCCCTGAAACTCAAGGTGTTGACATTCATTGCCTGCGAGCAGTGCGGCA  
CCCATTTCCGGTGGGCCAGAAGCTGGCGAATACGACTACCGAAATCTTCCGGGCAAGATGA  
CGATTGCCGAATATCTCGTCGAAGAAGCTCTAGCAAGTATGTGGATTTCGTGTCATCTGCG  
GAGACGACGACGTAATTCTGTGTGGCCCTGATTGCGTCAAGAGCTGGCTTGATGAGGTGG  
TGTCGCGTGGCAACTAGAATCCCGCTGCCCTGCTACGCAAGAGCCAACGCACCGTGTAC  
AAGAGGTGCCCGTGGAAAGTGGTACCAGAGCGTTGTGCGCGGCCCTCGTGCCGAACAATCAC  
CGCCAGTACGCGCGGTGGTTCGGTACTGGCATTACCTGTGCAAGGCCGCGTGGAAACGTC  
CCCGGACGCAAGCGTGGCCGCGACATGTACGAGACCTGGGACGAGTTCTCACAGGGTACA  
TTCACCACAGTCAGCTCGCAAGGGCTGGTGAACGACGAATGGGAGAGCGAGTGGGTTGAC  
GCAAACAATCTGGCGCACGCCATGATTGACACCCACCTACAGGCGTATGGGAACGACGAC  
AACTGGGAGGTGATCGCTGCTGAGCAGCCATTTTCGGTCTGATCCCGCACCCCGACAAG

ACAATCAACCATGCGGTGTGCCGGTACGTCGGCACCATCGACCTGATCATCCGCGAGCTG  
GACACCGGCGAGATTTGGCTGGACGACACCAAGACCGCCGCGCATCTATACCCACCAC  
CTGACACTGTTGGAGCAGCCTGCTGCGTACGTAGCTGTGGGCACGCACGTCGTCCGGGAG  
CAGGAGATGATTGGCCCCAAGGAGCGGGTCAAGGGCATCATCTTCGACTTCATGCGGAAG  
GGCTTCCGGACGATCGTCCTCGCAACGATCGCGGGCAGTATTGCAACAAGCCGGTCAAG  
TAGCACTTTGTCGTAGCCATCCTGAATTGTCCGGGGTATGAAGGTCCTCTGAACACCGAG  
CGAGATCTGCTTCGGCTTAAGCTCGACGAACTGCAACACATCGCCGATGAGCTCAACCTG  
ACTGTTCTGGGCGATGTCTCAGCCAACCAGGGTGCGCCCTGCTGTTGCGAGAGAACTC  
CTGAAGAGCCCCGAAGGAGTGCTCACGGCAGATCCGCAGGACCGGGCAGAAAGGTGCTACAC  
ATGAACGCAGTGCGCGCCGGTAAGCTCCCGATCCTCAAGACGCCGCAGGACGTCTGCAAC  
TTCTGCGATTACTTCGATCTCTGCGAGCTCGACGAGTCTGGCGGAGACACGGAGTATTC  
GCGTCGCAGGCATTTGTGGTTCGTGATGCCTACACGGATCATCGCGAAGGGCGCTGAGAAT  
TCGAAGATCAGCGTCAAGAACAACAAAGACAGGAGTGCAGTGAAGGTGGCCGGTAGCCT  
GAAAGATATGGGCTCAAGGAGGTTGCAGCCCTCAAGAAACGCGTGAACAGACAGTAGGC  
CCTCAAACGCATCAACGGTGGTGACCGAGACAACCTATTCGAGCTCATCAACAAGGTTGA  
GGCGTACATCATCAAAATGCCTGAAGGCAAACGAAGCATCCCCGATTTCTACTGAGAAAG  
GAAGGCTGATGGTCCAATCCAAGATCATCAAAGTCGCCGACGACGAGGACTACGTGAATC  
TCCTCGTGTATGGTAACTCCGGGGTGGGCAAGACGGTGTCTGCGGCAGTGACGAGAAGG  
TGATGTTCTTTGCGCCGGAAGACAACCTCAGACGGCCTGCTCTCCGCCAAGCTGGCGGGTA  
CCACGGCGGACAAGTGGCCCATCCGGGACTGGGGTGATCTCGTTGAGGGCGTACAACCTATC  
TCGACGAGCTCGCCGAAAGTCCATACTGATCGTGGTTCGACTCGCGGACCGAGATGC  
AGATCATGGCCATGCAGGACATCCTCGATCGTGCCGTCGAGGAGAATCCGAGCAGTGATC  
CGGACATCCCGCAGATCCAGGCCTGGCAGAAGTATTACGAAATGGTGAAGCGGATGATCA  
AGTGCTTGAACGCTTTGCCGGTCAACGTTATGTACACGGCGCTGTCGCGGCCGACCGAGG  
ACGAGGAAGGTACCGAGTACCTTCTCCCCGATCTGCAGGGCAAGAAGGACAACCTACGCCA  
AGCAGGTGGTCACTGGATGACCAGCGTCGGTTCATGCAGATCAAGCGCGTCCGTGTCA  
AGACGGACGACGACATCGCCAAGAAGATGAAGGAGGTGCGCCGAATCACCTGGAAGGACA  
CAGGTTTGGTGACTGGCAAGGACCGCACCAACGCTCTCACCCCGTACACCGACATCCGCG  
ATGTCACCGATCCCGAGGATGATGGCCTCACCCCTCAAGGACATCAGGCTCCGCGTCGAGC  
GGAAGAAGACCGGCTCTGCCAAGTCGGCAACCACCAAAACGTCCCGGCCAGAAAACTGCGT  
CGGCTCGTACTCAGAAGGAGAGTGCATAAATGCCCAAGCTCAAGCCATTCGGCATCGGCG  
ATGTCGAGGACATGATCATCGCCGAGAACTCCTTCAATACGGAGGTCGTGCCCAAGGGCG  
TGTACCAGGCGAAGGTCAAGCGCATGAAGCGCGCCACCATCCAGAAGGAAGGTCCGAACA  
AGGGCAAGAGCCGCTTCTGGATCTTGATGTAGGTCGTCGGCCCCGAAGTCGACGCCGAAGA  
AGTACATCGGTGCCTCAATCTCGCACAATATCAACGTGATCGAGTCCGGCGCTGGCTTCT  
GCAAAGACTTCCTCAACGCGCTGGCGGGACCGGAGCCCGCCAAGCAGGCCGCGCTGAAGC  
GTACGTTCTGGGCAGCCGACATCGTTCGTCGATTCGGACGGGCACGTCATGAAGATCGGCA  
AGAAGCGTGTCAATGGCGACGGCAATGGCGAGCTCGTTGTCACCGTCAAGACCAAGCTCG  
GCAAGGACCCTCGTTCGGGCGATCCGCAGGCACGGGTTGACAAGTTCCTGGTCCCGCAGG  
CTAACGACGACGACGATGACGACGACCTCTATGAGGACCTAGAGGACGACGATGATCTCG  
CCGATGTCGACGACGAGGATTCGGACGACAATGATTCGGACGACGAGGATTCGGGGCAGC  
AAGACGACGAAGACGACGAAGACGACGACGACGACGAAGACGACGAAGACGACGAAGACA  
ACGAGGACGACGACGACGAGGACGAGGAGGAAGACGACGAGGACGACGAGGACGAGGACG  
AGGACGAGGATGGTGAATCCGACTCGCGCCGTGCGGAACTCGAAGCCCTGACCATCGCCA  
AGCTTCGCGTCGAGGCCAAGAGGGTTCGGTGTGCCGCCAGCAACGATCAAGGGCCAGTCCA  
AGGACGAGCTCATCGATAACCATTATCGACGCCGAGGCTGACTCGGACGGCGAGGACGACC  
CGTTCGCTTGGGTAGCACATCGGGTACCTGACAGACGAAACCGTCAAGGCTAAGTCGTTG  
TAGGGACGTCCACAGCCGACTCCAACAACCTTTCAGCAAAGGAGCCATCATGGCCGATGA  
GCGTCGGTGCCTGCGGATGTATCATGGTCTGGTTCGAATGAAAACCACACATGGCTCTG  
CATCCACTGCGACCGCAACATCGAACTTCAGGAGTACGCCTCGTGAAATCTGTTGCCATC  
CTTGGTTGTGGGCTTCTGGGCTCCTCGTGGCTCATGCAGCCGCCATGCTCGGCTGGGAC  
TTCCGAATCTACAGCAAGAAGCGCAAGAACTTCTTGTGGCAGCCTATACCTACACGAG  
GCCACCCCGGCATGACAGACCCAGTTGCGGCGAGCGTGGCATAACAACCTTGTGGGTACG  
CCAGAAGGCTATCGGCAGAAGGTGTATGGCGCTGGCTACGATGGCAGCGTGTGCCAGAA  
GACCTCGAGCACGATCACTACGCCTGGAACATCCGCCCCACCTACGACAAGCTGTGGAAT  
GCCTATCTCGACGAGATTGTCGCCGTGGTGTGATCGACAAGCGCTGGGAGTCGGCCGAATTC  
TTCCGGAATGGCAGCACTGACTTCCGCCCCGACCTGATCATCAGCACGGTGCCTCGCAAG

ATCTGGGCCAATCCTGGCGATGTGTTTCGCAAGCCATAAAGTGTGGGCGATCGGGGATGCG  
CCCGAGCTAGGACAGACCGTTCGTTTCGAGCCCAAACAGGACAACACGATCATCTGCGAC  
GGCACAGCCGACGTCGGCTGGTACCGGCTGAGCAAGGTGTTTCGGCTACACCACCATCGAG  
TGGCCACACGACCGCAAACCTCTTATCCCGAACATGGGGGAGGTCGAGAAGCCGCTCTGG  
CACAACAGTTCTGGAGCCAGCGACTTCATTCACATCGGTTCGGTACGGCGCATGGGAGAAG  
GGCGTGCTGACGACAGACGCCTTCCACCAGGCCATGAAGTACCTCGGACAGGACAAGTTG  
GGCTGACCGATGATGGGCAAACCTGTTGTTGGACTTGACATTGATGGGACACTATTTCGAC  
TACCATGGGCACTTCTTGCCTTTGTAGAGGATTGGTATGGCCGACCAATGCCGGACCCG  
CAGGACATCAACCCAGGCCTGCCCTTACAAGTTTATGCGTACGTCGAAAGCTACGTAC  
CGGCAGTGTAAGCTGGCACATCGCCAGGGAGGCCTTGAGCGCAGCATGCCGGTGTATGAT  
GGGGCGTCGGAGCTGACCCGAGCAATCCGCCGCGCTGGCGGAGAAGTGTGGATCTATACG  
ACCCGTCCATATCTCAAGCTCGACACACAAGCGCCAAACACCATACACTTGTTCGGGCGC  
AACAGAATCCAATTCGATCACATGCTCAGCGGGCCACACAAGTATCGCGACCTCGTGATA  
CAGGTGGGTGCGGACCGAATTGTTCGGAGTGCTTGACGACCTGTCAGAGATGTACGAGCAA  
GCAGAAATGTTGGGGCTCAACCCCATCCTTTGGGACCAGCCGTACAACCGACACATCACC  
GCAACCCGCATCAATCATCTGTACCTCGCACAGATCTCATTCCTCGCGAGGATCGAAGTG  
TACAAAGAGAAACAGAAGGGAAACTGATGCGCTCGACATATTCATCAGACAATCCGTGCA  
GCTTCGCGCTGTTTCGGGCTGTCCCGCCACGCAGAGTGGCCTGTCTGGCGGAGGCTGGACT  
GGGGATAACCCATGCTGCACCTTGGTCCTGGCGATAAGATTGTCCGGGGCGCTGAGGAAC  
TGGACTACCCGGCATTTCGATTTTCGATGACCCAGAGATCAGCTTGGCGTACGATGAGGGGT  
CAGTCGGCGGTGTCATCGCCACGCATGTGCTGGAGCATCTGGCTGACCCACGCCACTCA  
TCCGGGAGGTGGCGCGTGTGTTGAACTTCGGGTGCCATTCAACATCCTGGTGCCTCACG  
GTCAGTCGCCGATGTATTTGCAAGACCTCGACCATAAGACACCGTTCGTGCTTGCCACGT  
GGAAGAACTTCCTGCACAACGGATTCTATGACAACAATTACGGCGAGGGCGGATTGCCGC  
TCAGTATCGGGCGCAACTTCAAGTTTGCCTCAAGGAGGGCAACGAAGCCATCATCACC  
AGCTCATCAAGGAGTGACAGTGTCCAACGAAAACAAGGGTGTTCGCAGTCATTCTGGAAGA  
GCTCACCTCCGAGTACGCCAGTCCGGTGGATGACTTGATCGCCAAACATCTTCCGCGCGT  
GCTAGAGCTGTTCCGGAGCAAGGCGCGCGACTACAGCGACCGCTCCGGCATCTTCGCGGC  
CGAGGTGTTTCGGTGCGCCGGGGCAGTTCGCCGAGATCTGGCGCAAGATTCCCAAGCTCAA  
AAAGGGCCTGTGGGACCAGGACGCGCTCGAGGACGAGACCGTCAAGAGATCATGTTTCA  
TCTGATCGGGCATTGCGTGCTCGCGTTGGACATGATCCAGACAGTATGCGGATCGGCCA  
GGCTCCCAGCGGACACTCATGGATACGAGGGTACGAGATCGGCCGAAGTCAGGCGCGTTCC  
TTCTGGCACCGAACGCTTCACTGAATCAGACACGAGTCCGATCACGGGCAAGCGCGATGC  
TAACGGTGGCGACTTCCGTGTCTAGGGCATGGGTGATCGGTGGCACGTCCGGCATCGGGA  
AGGCCTGCGCCGAGCGGCTCGGCCGAATACATGGTGACCACGAGCACCGGTCTACGAGAAG  
GGTATTGGGACGTCTCAGCGATTTGCGATCCATCTTCATACACGATGAGGTCGATACTC  
CGACCCACATCGTGTATGCTGCAGGCATCAACCATCTCGACTGGATCGGGAATGGTGC  
GGAGCCATGTTCGAAGTTATCGACACCAACCTGACTGGATTCAATTCGTCTGATGGACGGCC  
TGGTGCCTTTGGCTACTACAGCACTGGCAAGCTGGGTGGGTATCCGTACCACATAAAGC  
CCAGCATCGTTCGTGATCAGCAGTGATGCGGCTGAGCTACCGCTCCGAACCTCTATCGGGT  
ACTGCGCAAGCAAGGCAGGGCTCAACATGGCCGTCAAGGTGGCTGCCCGAGAAGTTCGGT  
CGTACGGCTGGCTGATCAATGCCGTCTCGCCGGAGATGACTGCGCCCACGGGCATGAGTG  
ATTACATCGACAAACGTGTTCCGGAAGTGCGAGGTTTACTCCGATCGAAGCTGCGCAGT  
ACGAGGCACAGCACGAGGTCGTCCCTGGACGCATCGATCCTCGAGAGGTGGCAGAGGTGG  
TGTTTCGATGTGCTACCGGACCTGAGCACCTCAACGGGTCCATCATTACCATCAATGGCG  
GGCGCTGACCAGTAGGAATTCGGCCTCCCCGAGAGGGGAGGCTGAATTTCTCCGAAAC  
ACCCCTATTTCGCGACGGTGTAGTAGGCTTCGGCCCAGTGTCTAGAAGGGAATATTGAGTT  
GAAGGACCTTGAGCTCAGCCAGCCAGACCCGATCCGCGAGAAGCGAATTGGTGTGGAGCT  
CTCTTTGTCCAAAACCAGCAATGGCTTCTCGGTGAGACCGATGAAGTTCGTATCGCTTCA  
CACCCACTAAACCTTCTCCTACGGCGATGGCTACGGACCAGTCAAGGAGCACGTCCAGCG  
AGTTGCGGAGCTGGGCATGGGCGCTCTGGCGCTACCCGAGCACGGCAACCTGAGCAGCCA  
CGCACAACCTCGAGAAGGCCTGCAACGAAATTGGAATCAGGCCGATCTTCGGGTGCGAGCT  
GTACGTTGCTCCGCCAGGCGAGAACCAGCAAGTGCCATCAGACGGTCCCTGGCGATGAACGA  
GGTTCGGGCTCCAGAATCTGAACCGCATCGTCACCAAGAGCTGGAAGAATTCTACCGCTG  
GCCACGACCAGCTGGAAGATGTTGGAGGAACACAATGAGGGGCTCATCGTACTTTCAGG  
ATGCGCCGATAGCGTACTATCATGCACTCTGCTGGGTGGTACGTCTTACGGTGACAAGCG  
ACTCACCGCAAGCAAGCGCGACATCGCTCGTGGCGCTGGGCTTATTCGACGGTACCAAGA

GGTATTTGGAGATCGATACTACCTTGAAGCCCAGAGATTTCCAAGACTTGATCGCACTTG  
CGCTCTCAATCCGCTCCTCGCACGGCTATCGGAACTCACCGGAGATCGTCTTGTTGGAAC  
GGCTGATGTTTATTATCCACGTGGATCCGACAATGATATGCAGAAGATTCTTCACGCGGC  
TCATCGCGGGTCTACTGTGGAGGCTACTGAGGGGTCTGGGAGTATGACATTCTCCTCAC  
TTACCCGGTATCAGGCCGAGAAATCTATATGGACCTGGTGGGTACGGGGCTGACCAAAGC  
CCAATCGCGCGAAGCGGTTGTGGAGTCTGGCCGAATCGCTGAGCGCTGTAACGTGATTCT  
GCCGAAGAACCAGCCGATCCGTTTCCCGAAGCCTACCAAGGAAGTTGACGGCACGCAGGT  
GCCGATGAGCGCCAACGAGCTGATCCGTAAGTGGCTCAACGAGGGCTGGCACTTCCGTAT  
GTCGACCAACCCGAACATGCGGAAGAACCAGCCAGGCATACAAGGCACGAGTCGAGCAAGA  
GCTTGGCATGATGGAGGAGAAGGACTTACGTGATTACTTCTGTTACTCAGCGATGCGGT  
CCGTTGGGCCAAAGACCACAAGATTCCGGTTGGGCCCCGCTCGTGGTAGTGCTGCGACGTC  
GCTTGTGTGCTACTTGTCTCGGATCACTGAAGTCGATCCGATGCTCTTCCCAGCGCATGCT  
GTTTGAACGTTTTCATTGATCCGACACGTACAGAGCTGCCCGACGTCGACCTTGACTTCTC  
AGACGACCGACGAATCGAAGTCAAGCGCTCCCTAGACGAGAAGTACGGTGCGGACCGTGT  
TGGTACCATCGGAACTTCACGCGTGTGTCGTGGCAAGAAGTTCGATCGACGACGTGGCTCG  
CGTGTACAAAATCCCCGTCTGGGAAACGGAAATCGTCAAGAACCTCATCATCGAGCGCTC  
TGGCGGTGACAGTCGTCTCAGTGATTCTCTCGAGGATACATTCAACATGTTCCCCAAGAC  
CGCAGCAGTTCTGGAGCGTCACCCAGAGCTCGCCAACGCGATTTCGCCTGGAGGGAAATTA  
CCGGGGGATGGGAGTTCATGCTGCCGGCATCGTCATTAGTAACACTCCCATCACCGATAC  
CTGCGCAGTGTACGAGCGCAATCGGCCGGCAAGACGACGCGAGGTCATCGCATAACGACAA  
GAAGGACGGCGAGTATGTCGGCATGCTCACGGCAGACTTCCCTCGGTCTGTCGACGATGGG  
CATGATCGGTATCGCCCTTGACATGATTGGGATGGAACCTGAAGACCTATATCGAATCCC  
TCTTGATGACCAGAAGGTGCTGGAGGCATTCCGGCGTGGAGACGTCACCGGCATCTTTCA  
GTTTGAAGGACGAGCTACGCGGATCGTGTGCAGTGACGTTGTGCCAGACCACTTCCAACA  
CCTGGCGGATATCAACGCACTCAGCCGCCCGGGTCTGCTCTTCTCAGGAATGACTGCGGC  
TACTGCGAGGTCAAGCACGGCCGCAAGACTCCAGAGCGGTACCATCGCATTCTGGACAA  
TCTGACTGACTGGACATATGGTCAGCTGGTGTACCAGGAGCAGGTTCTAAGCACCATCAG  
GGAGCTCGGAGGCTTCCCGATGAGTGAGGTCCACAGTATCCGTAAGATCATCTCCCAAAA  
GCTCGGCGAGGCCAGTTCTAGGCCAAATACAGGATGCTCGAGTACAATGCTTGACAGAA  
CCACGGCTGCACCCCGGAGCAGGCGCAGAAGATCTGGCGCTTCCCTGGCGACATCAGCCAC  
CTACTCATTCAACATCGCGCACTGCATCAGCTACAGCATGCTCGCCTACTGGCAGATGTG  
GATCAAGCAACACCACGCCACCGCGTCTATGCGGCCAGCTGCGCAAGGTCAACGACGA  
GAAGCTCTACAAGTTGATGCGGGATGAGGTGCGGCACAACACGTCTATCCTCCCGCCAAG  
CATCTACGAGTCGATGTCGAGCTGGTTCGGCTCCCGTCAAGGTGTTGTGCGCGCAGGATT  
CCTTCAGATAACGGGAGTGGGTCCCAAGACATCGGAGGAGATAGTCAATGGCGCAATCA  
GAAGATCAGGAAGGGACAGAGGGCAATCGCAGCCGGTGCCCCGACCGCATGTGGTTCGGA  
CCTGCTTGAGGTAAAGGGGATTGGCCCCAAGTCCATCGAGAAGATCGTGGCATTCTGCGA  
GTCAGAGGACCCATTCGGGCTAAACAGGGTTCAAGACCTGTTCAAGTCTCTGCGGCGGAT  
CATCAAGCCCGTCAATGGGTATGGGGTGCCAGCGCCTACGCATAACAGCGAGAGCATCAC  
GCGTACCGGCGACCACGACGGCATTGTCTGGATGGGCATCCCCAAGGCCAAGAACTATCA  
GGACTATATCGAGAACCAGCGGTCTCGGTACGGCAAGGAAGAGGCCGAGATTCTCGCTGA  
GATGAAGGATCCGCATCTGGTCAAGTGCTGTGTGGTGCAGTGCTTTGACGACTATGACGA  
CGACGTGACTGCCGTTGGAATCGCTGGCAGTTCCCAGAGTTTGAGAAGATGCGGGAATC  
GCTGGCCGTTGATGGCAGCAACGTCCTCATTGTGCGCGGTTCGCAAGCGTGAGGACTTCGG  
AGTGTCACTCCACGTGACGGATGCGTGGGTGCTTGAGTTGAACGAGGACGAAAGGCTATA  
GTATGGGCAAGAAGAAGAAGCGTGTGGGCAAGCCCCGACCCAAGCACAAACCCGCTGTAGC  
TGGTGGGTGGTGGCGAGGACTCGGCCGCACGCGTCATCAAGGTGATCCAGAACATGCTCA  
AGCCGCCAGAGACGGTGCTCGCGCACATCCAGCGCGTAGGGGCTCCGTTCTGGGTAGCAC  
CATTTGGAGTTTTCGAGGAGGGCGAGCAGTACGCGCGTCCGTGCCTGGTGGTGCCGTACG  
ACGACCTGATATCGGCCGAGCTGGCCCATCTGGCTGCTGGCGGGGAGCTTGCCGAGACGT  
ACACCGAGGAAGCCCGCAAGGCGAGTCTCGCGGCTGCGCGTAGTGTGCGAGGCGCACAGC  
CCAAGAGCGACCTGGACCCACAGCCATTCTGGCCAGGTCAAGGAGATGCAGCAGCAGG  
TTCACGGCGCACAGTCGCGGGTTGCTGACACAGCATCAAAGATCGAACCACCGAGCTTT  
CGGACGAGGAGCGCGACGAGCTCCTCCGCAAGCTGCGGGGTTAATTCCAACAACAAGAAG  
GGAATCACATCATGACCGGGAAAGAGATCGCCAACACTACGCCGACGTGGCGTGTGTTCAAGG  
CCGAGGAGATCGACCGCACCAAGGGACCGCTGGTGTCTCTGCTGAGCTGCAACAACGATC  
CGCTTGGGAGCATCGCGGCTGCTGCCAAGGCGTAGAAGGGCGAGTTCGTTGAGTCACTGG



CCCAGATCACCGACGACGAGCGCCGGTACTACCTCAAGGAGGTGCAGAAGTCGGTGCTTG  
AAATGCCTCTGGAGGCTGTCCAGTTCCACTTCCGCATCACCGGTGTGACTCGCGGGTTCA  
CCCACCAGATGGTCAGGCAGCGCACCGCAGCCTACTCCCAGGAGAGCACGCGCTTCGCCG  
TCAAGGAAGACGTCCCAGTTCGGATTGCCACCCAGCCTGCAAGACACGATGCGATGGAACG  
AATGGGTTCGAGGAATTTGCGATGGAGATCTATCCAGTTCGCAGCCAACGGCGTGCATC  
TTCAGGACAGGCGTGACCAGGCTGAAGAGTTCGCCGAGACGATGGCCGACAAGGTTACGC  
TCTGGCGTCGTCGGTGGGGTAGGGCTATAGGCGTCATCGAGGAGGAGTACAACGCTCAGG  
TCAACGAGGGCATGCCAGGCGAGGACGCGCGTGGATTGCTGCCGACGAACCTTCTGACCC  
AGATCAACTACATCACCGATCTGCGTGGCCTCAAAGGCCATGCAGGCGTGCGGCTCTGCA  
CGCAAGCGCAGTTCGAGTGGCGTCAGGTCTGGGCCCAGATCGTCCGGGCGATCCGTGAGT  
ACGGGAATACCCAGACGTACATGACTAACGACAATGTCCATGACATTCCGGAGAACCAGA  
AGTCGTTCGGAGTGGCAGTTCGATGCCTTGGCGGACATCTTCCGGCCGATCTGCAACTACC  
GGGGGAGCTGCCAGTTCAGGCAGACTTCGACCCGGCACTGCATAATCGGTGATCGCGTCCG  
AGGAGAATGCCGGTATCAATCGCCCGAGCACCGACTGGGACAAGGAATGGGTCCGACCGA  
AGCCTCTAAGCCCCACTGGCGCTGAGGGTTACATCGGACCGATCTTCCCGGCTGAGTGGC  
TCCTGGATCCCTCAGCGGCAAGGACGAAGTGACCATGGAGACCGGCGCATGCCGACTGTG  
TCGGAGGGTGGTTCGATCGGGCCGCCCTCACCCAACACTGGCTACACAGCTTCATCTGCGC  
GCGATGCAGTGAAGGATTGAAACGATTGAGCGCGAAGCTCTTGCCACGACAGGAGGGGA  
TTCAGTTGGGAATCATCGTCAATGATTTGGCCGAAGGGAGGTTCGCACCGTGCCGCTATGC  
GTAAGAAGAAGTGCAACAGAGACAGCGAAGCCGGAATCAACTATTCCACAGCACCGGTCA  
TCGCTGTTGATTCGGGCGGAACGACCCGGCTGGTCCCTCATGTGTGTGGAGCCATTGGCTC  
TGCACGACCCCGCAGGAAATGGTACTCGCGAACATCATCACTCATCAGCACGAAGAGCTCA  
GCCGCACTGTTCGGATGCAATGTTCGCGGAAGGCGTAGACCTCTGCGTCGCAGACCTGTATG  
AATTCATCTCGGCTTGGCCCCAGGCCGCTGTTCGTGGTGGAGGACTTCGTTATCCGAAGCA  
ACAATCGGAGTCGCGAATTCCTTTCGCCCGTTCGCGATTACCGCCAGACTCAAGCACCTGC  
TATGGGCCGACAACCCATACATCATCCGACAGACACCAGCAGACGCCAAGGTCACTGCGA  
GCGATGACCGGCTGAAGAGCTGGGGCTTGTACGACAATCATGGCAGTCTTGGGCACGCAC  
GCGATGCCGATCGGCACGCAATTACATTCCTGCGCAAGGCCAAAAGCAACCCGAAGCTCC  
GGGCGATGGCTTGGCCGCACCTATTCGTAGAGGAGCGTATTTATGCAGTCGAAGACGACG  
AACAAAGCTGGGGCTGATGTGCCCCAGCGTGGCTGGTTCGGTTGCTGGGCGAACACCAG  
CCGCAGATGAATGGGCTGTGGTGCACATGCTCTTGGAAAGAGCACGGACGCCTTCGGCGAT  
CCGAAGCACTACACAACCTTCTCTGCGGAACATCAAGCGGCCGAAGTACATCGCGCTCTG  
AGTGATGGCGTCGCAGCTCTTTGCGAGGAGGTTCCGGTGAAGCAATCGGACGAGTTCTATG  
CCAAGGCGTTGGTTCGCGCTAGGTGATGCAGAAGCTGCGCAAGCTCACCTCAAGGAGAGCT  
TCGACGACAATCACAACACCTTCTGGTCTCAGCGCGTACTTTCGCACTGTGCCTTGGCGA  
ATGCCTAGCTCAAGGTTCGCAGAGTGGGAGCTCGGCTTCGAGGTCTGGAACGGGAAGGAAG  
AGGACCAGTTCTCGGTGCTCACCTTCGGCACAGACGAGGTGGTTCGCGACGTTCCCCGACG  
ACATCGAAGAGCGTCGATGAGGCGCGCAGGCATGAACGACCTCAATCCGACAGTCGTCAA  
GAGCCAGAACGACGCCAATAACAAGAATCCAAATCCCAAGGACGCCTTCACATTCGGGCG  
CACGTGCCCGGACTGCGCTGGCGGGCTACAGTTCAAGTGGGACCGGATGAAGTTCGGGCC  
CAAGCGCAAGGGATGGATCTGTCTGCTGCTACGAGATTGAACTGGAAGGGCTGCCACC  
AATCAACACGGTTCGGCCCCGCATCGGAGGAGGATGAATGCCCCGTGGAGTAGCGATGACT  
AAGGAGCAAATCGCAAGGGCGGAGGAGCTTTTGAACAAAGGCTGCTCTTACCTCGAAGTC  
TCCCGAACCATCGGCATCGGCGAGTTCAGCATTGCGCTCAAGTTCCCCGGTTCGGGGCTTG  
ACACAAGAGCAGAAAGCCGAGCACAAACGTCTCAATGATCTGTTCAAGCGTCTCGACACC  
ATCTGGTGCTTGGAGAGGGCACAGAGAGGGCGAGAGGGCGCGCATCATAAGTTCAGTAGCCC  
GCATCGGCCCGAACCAGTACGATCAAACCGTAACTAGGTGGAACCATGAAGCTCACCGG  
AACTGCCCCGCGAACGTCGCGGGTGAAGCGGGTGGGTTCGAGCCAGAACCCGACCAAGCGTT  
CAAGGAGTATGCCCGGAGCTCGGCACCAAGACCTACCAGCCTTTCGCGCCGCGTCATCAT  
CCTTGGCTTTCGCGCAAGAGGGCTTCCAGATCGACAGCGAAGTGGTTCGGATGCCCGACAG  
ACCATCACACAGGAAGGATTGACCGATGAGCCGAGTGGAGGTGGCCCTTCGCGAGCGTAGC  
GCTGTCTGCGGCGATGCTCCTGAGCCAGGCCGCTACTGTGGGCGCAGAGCCCGAGCAGCT  
GTCCGGGAAGGACCAGTTGTACCTCACATGCCTAGTCATTGGCGAGGTGCCATACGGAAC  
GGCTGCAAATGCCCACTCCATTGCACGTCGTGTATGCCAGGCTACCACTGGCGGAGACTG  
GGACGCCATCTCTCTCGGGAAGCTCGGCCAAGAGATCATCCGCAACAACCCGAAGTTCGA  
CGCCGACTCGGCAGCGAACATCATGGTGTTCGAGCATGACACTGTACTGCCCCGAGAACAT  
CCCCGTCTGGTTCCACGCCGAGACGGCCAAGTCTCTCGCCGAGGACGCCGGTGTGGCTGT

CCCTGTGGCGACGAATCCTGGTCCCTACACACCCCTCCCACGCTAGGAGCTTCTGCCATG  
CACTCAGCGCCTTTTGGCGTATCTACCGCTGACTTCATCGTCTGGGGGATCACCTTCGCG  
CTCACGGCTCTCACAGCTTGGCTGCTGAAGCATGGTTGGCGCGTGAAGACTCCGCTAGAG  
CTTGTGCATCGCACCTTCAACAAGCACGGCATGCCACCAGCGGTATCTGCACACATGGC  
TTTGATCGTACGGCGCACCCTACGCGCTCCGAGGCTATGAGCAGGTGGAAACCCAGGGG  
TGCGGCGAATGCGTGAAGGAACTGACCCGAATCAATTTACCCACAGCACTAGCTGCCCC  
AGCTGCTGGTTCGTCGGGGCGATACCGTACGGCCCGATAGAAGAATACTTCAATCTCCA  
CCCGAGCTGACGATCTGGGTCGATAATGACGATGGCAGCGTCCATCTCCGCAAAGCCTTG  
GAAGAGAATGGGCCGAGACCAAATACAAGGTCTGGGGAGAATGGCAGCGAGAATGCAAG  
ACCAAGGACCTGAATCTGATCCGGGAATTTGCGGTGAAGCCTGTGGTGTACCGCACATGC  
CCGAGTTGCGCGTACACATGGTTTGGAGCACTAACAGCAGGGAATACATCATGATAATGAA  
AAACAGTTCGGAGGACGCACTGCGGAAGGCTACAGCTGCATTTGCTCTGCGTCAAATTCG  
TGAGGTCAAGGAGCGCGCTGACTACATGCTCGTCCACGGCCTGACCGAGGCCGACGTGTA  
CGAAAGCATGCTCGTGAGGGCTGGGAGCAGCGCGAGAATCTTGGTTCGCTGGATCATCAC  
GCCCAAAGGACTCAAGAGGGTAGTCCCAGACCCGGACGACGTCGTCGGCTGCGTGCCGGT  
TCTCGTTCGAGACCCGGACTACATTGGCGAGCACCGAGAGCGTAACGAAACGTTGCGCCG  
GTACTACGATCCTCGCTTCGGCAAGGATTGGTTCGGGCTACGTCGGCAAAGTTCCCTACCA  
GCAGAGGTTTCGGGAACACAAGGAGCCACAGCAATTACGGCACAAGCCCTATGGGTATCC  
GAACCCGGCCTGGGAGCTGAACTACTTCCGCGTCAACACCTTCGGCTGGACGCACTATGT  
CTGCCGAACCAAGCATGACGAAAGCTGCCGGTACACGAAGAGCCCAGAGGAGGTGATGGA  
CTGATGGACTGGAATCTCTGATCGGCGCTGCTATAGGCGCTGCGATGGGCGCGACGATC  
TATTTGGTTCGGATGCATCGTCCGATAACAACGTCGGATACAGAGCAGCCAAAAGGAGGCCT  
CACCAATGCGAGGCGTGAAGGGCTCTGGCCAGGGCACATGGGCAGCGCGCTACGACAGCG  
TGTGCTCGGTGTGCCCGCACCCAATCTTCAAGGGTATCCAGTCCACAAGGTGCACAACA  
AGGTAGCCCCCGAGGAGTGCCATGCGCTTGATGAGCGTGGCGGGTTCGGCCTTGATGTCA  
GCGGCATTGAGCAAGAGCGCCTCGACGGCCGATACGGGAAGGGCTACGAGGACCGGCCGA  
GCTACACAGTCCGGGGCCGACGCAAGCACGAACGCAAATGTGGCGAGTGTTTCCAGATAC  
ATGCAGGAGAATGCCCCGTGAACTCGAAGACACACACGGCGGATACGCCGGTAAGAGCTT  
GGCCGAGAAGATGCAGGACAAGCTCGACTCTGCTTACAACGCGTGGCGCGATGCCGGTGG  
CAGTGATCCTCGACAGAACTCGCAACAGGGACGGCACAACAGTAACTTCGGCAGGGTTGA  
GGGCTGTGCGGCGCACCTCGGAATCCTCAGGGGCACAAGTACAAAACATGAGATCGAGGA  
AGCGCAAAGGCGATACAGATGAGGAATCCCTTCAAGTACGGTAGCCCGCAGCGGGTTGTG  
TTGGCGTACTGGCTGATGCGGTGGGCGTACCGGATCGTTGAGAGCATTGATCGCGGTCCC  
GTCCCGAAGATCAGCATGTGGACCTTCACCTTTGAGCGTGGGAAGGGTGCGGTCGTTCCG  
AAGGACGATCGGGCAGAGCACTAGGGTTGCAGACTCGTGTACCTCAAAGATCGTGAGTAT  
GACCGTGCCTGGTTCGGAGAGTGCCTCGGTTCGGCAACGACGAGGACGAGGACCAAGACGCC  
TTCCGCACCCTGGATCTGCCCAGGAGCGGTAAGCCAAGTACGACAAGAAGTTCGGCAT  
CAATGCCGACTGGCGGAAGACCACGACGCGCGGGCCACGAGGAGCGTACGGAAGTCGCCC  
AGACAGCCCAGGAGACCCAGAAGCACCCAGTCGTAAGGGATTCGGGTACGCTGGCTGCC  
AGACGGCACTTGCCCCGGTTCGCGCAGGCACTGGACCTGCGTGTACCAGACGCGCGACGC  
AAAACGAAATCCCTTCGGCACCAACGGAAAACCTACCATACTTCTCACAAGACCACACC  
ATTGGAGGGACAATGAACGATCCAGTTCGCCGAAGCCGCACAACGGGCGATGAGGAAGGTG  
CACGACTACCAAGGCCCAACCATGCCCTGATCGTTCGCCGCCCGTGAGGGCGTTGAAGCCG  
ATCCGCGAACTGCACTACCCAGAACCTGATGACCGAGCCCCCTCCGCCCGGAATGCCTT  
GTCGAGTGGCCCTGCGACACCGCCAAGCTGGTCTACACCACCGAGGAGCTGGAGTGATGA  
TCTTATGGCATGCTCGGCGTGAACCTCGAGCGCTCTCGGAACCATCGTTTCCACAATCGGC  
CGGTGGACAAGAGTGTCCAAGCTATGTACACCTGGTGGGAGTACATTGACGAGATCGACT  
TGGTGAATGGCGAGAACGACACCATGCGCATCACGGTCATGGAAGAAGAGATTCACCCTC  
CTCCAGGAGTTCTGCTCCATGAAAAGCCCAAGGTCATTCGCGCAATTCATCAGAGGTTGA  
CAACGAAAATTAGCCTCGAGTACCAGATCAACACAGCGTACGTAGCCCAAAGCACCATCA  
GCCCCGCTCGAGGAGATCAGGGCCGACGGGTGGATGGCGCTCGGCCACTACAAGATCCATC  
GGTACTGCATCCGAGGCCGCATCAGGCCTGGCGGAGACGGTTACGAGCCATATCGCATTG  
TCATCTGGCGGGTGAGGTACGCCCTCCGGGCATATGGTATCCGTGGTCAGGACAGCCCG  
AGGACTTGCCGAATGAGGTACTTGACGGAATTTACCACGGGATGTTTATGGCAGATAAAT  
AGCCATCCCCAAAACCAAATACCATCCCCTCACAGAAAGACAGCACATATATTCTGTCCG  
TAGGAATCGCGCGGCCGCAAGAGAGAACGCGCGCATGTACAATCTCCGCAAGGTCTATGG  
CTACCTCGACGCTCTCAAGGAGCTACCACAGCCATCCAAGTGGAACCTCAACTGCGCGA

ATAGAAGGCGCATCTGGTGTCTCCGAGCGAGCCGCCGTGGACCCTCCACAGCTTTACCTG  
CTGGTTAGAGGGTGTAGGTGCTTTCGAATGAGCAAGAAAAACAGATTCCGCAAGACGAGTG  
GGTCAAGGAGGTCGATCGCGTACAGTCACGCCTAGACCGTCTCACGCGTCGTCGGAGGTG  
AACGACATGGATGTCGATCTCATGATGGCAGTACGTAACAGCGGGCCACATGGCCTCGA  
CGAGGTGGGTGGAAGCCGCACCCACCGACAAGCCCAAGGCTGAGCCTGATAAACGGTAA  
GCTATCTAGCTGCGGAAATAGGTTCGACCATGCGGGTCTAGGCCAGAGAAGAAGGGACACA  
TCGTAACGTGTCAACAGCGCGAAATATCAACAGCACCAAGCCATTCCGACGCGCGGTAGA  
AGCCTACCGTGAACGGGGATGGGCGGGAACGCTACTGCTGCCGCCTCGGAGCAACAAGAA  
GCCTCCAACAGGTTACACCGGGCACACAGCGCCGTACCCGAGCGACGATGACATCGCGAG  
CTGGCTGGGAATGCCAAGTACGCCAGGGCAATATCTGTCTCCACCTGGGTCCGGTAGA  
GACGCGTGGGCCGGACGGAGACCGCCTGGAGCTCATCGGAATTGACGTCGATGACTATGA  
GGAGGGTGGCAACGTCAAGGAGGGCGGCAAGCAGCTCGCCGCGCTTCAGGCCGAACCTCG  
GCCACTCCCCAAGACGTATACCAGCAGCTCGCGCACAGGCGTGAGCGGTATCCGCTTCTT  
CCTGGTCCCCGCCAGCACGCATGGATGGGGAAGGCCGCGCCGTACATCGACATTGTCTG  
CAAGAGATACCGTTACGCCATCGTATGCCAAGTTGGCACCCAGGCGTGGTTCGATGAGGA  
GACGGGGAAGGTCATCACGAAGGTGGCCAGTACAAGTGGCGCGATCCGCAGGGGCAGTT  
GCTGGATGGGCAAGAGGACACCCCTGACGTTAATGATCTGCCCTCCTGCCCGATGCGTG  
GGTAGAGCGGCTGAGCCGTGGCGGCATGAAGCTCTCGGACGAGGACGCCGAGATCGACAT  
GGATCTGAACGTAGACGAGATGTTCCGGTGGTCCGTGGGAACGTTGCCGGGCAGTGACGA  
GGACGCCAGCCCTGCTCCAAAGTGAAAGCGGTAGTTAAGTACTGGCAGGGGCAGATTGA  
GGAGGACGCTCTAGCCACGACAAGATCACCGGCTCGCACTGGAATCTGGACTGCTTCGC  
GACCGAGGGGCACACCGGCTGGCGGCAGGCCATGGCAGCTGTGGATGCGAGCGTCGCCGA  
AGACACCATCAAGAACCGTGGGAAGCGCGAAATCAGCGAGCTGCGCTCAGAAATCATGCG  
TAGCAAGGTGAATGCACTCCGAAAGCTCAAAGCCCAGATAGACAAGGGCAGGCGCAACGT  
GCTCACGGTGTGCACGTGCTACGAGCCCAGCGCAGACGAGCTCGACGCGTTCACCGCCAG  
CCTCAACAGCGCCAAGGCAGCTGCCAGCGAGCCTACCGAGGAGCGCGAGGTCGCCAGCGG  
CTAGGGGCGAGACGGATATTGGCGCGATGGCATGCCAATGGCCCCCGCAGGACCCCGG  
CGACTACGAGCAAAGCGACCAGGGCAACGGCGATCACTGGATCGACCTGCACAAGGACAA  
TGCGTTCTACGTTCCGGCGCTGGGCCAATGGATCATGTGGACAGGGAAGAGCTGGATCGT  
GGGGGATGGCTGTGCCGAGCGGAGGTACGGGCGCGTGAAGGCTCGCCAGAAGCGGTACGC  
CGAACAGCTTATGCGGCGCGCGGCTGAGCTCAAGGCTGCGCAGGATCCTACGGCCAACGC  
GGCTGTGGCGATGGCGAAGAGCTGGCGTAGCTGGGCCACCCGCAGCGGCGATGTGGGGCC  
GATTGCGCGTGCCCTCAAGGCCGCCAGCATGGAGATAGGCATAGAAGAAGGCGAGCTCAA  
CGAAATCTGGCGCTGCTCTGCTGCGAGAATGGCGTGCTCGAACTGGATCTGTCCGCCGCT  
CGACTCCCTGGCGGACGACTCCCAGAGCGCTGGGCGCAACGGGGATAGAGGTAGGCGCAA  
CGGACGCAACGGCACTGCAAATGTGGCTAGCTTGGCCGAGGACGACGAAGAGTTTGATCT  
TGACTACGAGGCTGTGGCTCCCAATAGCCATGTGCGCCTGCGAGAGATCCGGCGCGAAGA  
CTTGCTGACGCTGAGTACTGTGACTAACTACCTGCCCTGGCAGGAGCTGGTGGCCGGGGA  
GTTCCGCAAACAGGAAGCGCTGTATGCGAGCACGTGGGCACGAGCAGTAGAGATGTATCA  
GCCTGATGAGGAGGTGCGGCGGTTCCCTGCAGAACTGCTAAGGTACAGACTGCTCGGCGA  
CAACCGAGAGCGCATCGTCTGTTTCTGCACGGGGCAACGGGCAGTGGTAAATCCACCTT  
CCTCAACGCCACGCTGAACGAGCTCGGCGAATATGCGGATGTGGCTGACCTGGGCATCTT  
CAAGGGCGACCGGCAGACCAACCCAGCTCTGGCTTACGCCCTCCCAGGCGCATTGTGAC  
GTGCTCCGAGGCTAGCCAGCGGACCGTGCTGCACGCCGACATGTTCAAGCGAATTACGGG  
CGGTGACCGGTTGACTGCAGAACTGAAGTATACCAACGAATCTGTCAAGCGGAAGCCCGC  
ATTTGTACCGTGGATCGCCACCAACATCCCACCCAGCATCCCTGGTGCCGATGCTGCGGT  
GGTTGATCGGACGGTGGTGGTGTGATTCAATGAGCAGATACGTAACAAGACGTCAGCAT  
GAATGCGATGCTGTCTAGTCCGAGGGCCAAAACGGCTGTGCTCGCGTGGGCGGTCGAGGG  
CTGGGGAATGTATCGGCGCGAGGGGCTGAGGCGCGCAGATTTCCCGGCTGCAGTGAACGG  
TGAGAGCATTGAATTTACCAACCAGTTCTCCGATGTGAGCGAGTTTCTGAGTGAGTGCGT  
GGAGGAGGCTCCGATGAGCCTCCGGCGGAAGGCTGAGAGGCGCGCGTGGCGCGTGTGCGA  
CTGGCTCGAGGAATGGCACATAACGGTCAGCGAGGTGTACGACGTGTACGTCGCCTGGTG  
CCAGGAGAACCGCGTTGCGGATCGTAACATCATGAAGAAAAATGGGTTCTCGCGCCAACT  
GAAGGACTATGGATAGCGGGCCGAAGTTGTCAAGGAAGATGGCTTCACTTCGAGAACTTA  
CGCTGGCTTCAAGCTCAACTCTCAAATGCACGCGTTTTGAAATTGCAAAAAGACAGCTG  
ATTATTGGACAAGAATGGCTCTGAGACGGGGCTGTTACGCAATGCGTAACCCAATCAGTA  
ACTACATTTGACCTGCGGAATCACATCATTTTGGTTACTGGTTGGGGTTCGTTTTCACTT

AGGGCTATACCTACTCTCGTTCTTATACTTGTACCCTGTTTTCCCTACTACCTATTATCT  
AAAAAAGCGAAACGGGTAACCTCAGGAGGGTATAAAAATGCTGGTGGAGCAATGGATTTCG  
ATTTTTGAGAGGCCCGGATTGCGCTACCGAATAGGTAACCCGAACACAGGCTACATGCGG  
AAACATGTTTCGTTTCGCGTAATTTTCGTTGTGACGGATACCCTGGGAGGGTATCTAGGAGC  
GTAAATTTGTGGGATCAGAGATGGTTTGGACAGCAGCAATCAAGACTGATGGAATTGGAG  
GAATGGC

>NewGenomeName\_154

TCCCGACGCTGATCAGCCCACCCTACCCCGTAGGCCCTCCGCCTGGTGGGCCATCCTCG  
CCTTGCCTGGGTGTTGCCTGGGTCATCCCTGGGAGCTTCCGGCTTCGCCGGTGGTGC  
GGCTTCCCTGCCCTGTCGCCAGCCATTCTACACGGCTCAGCGGGAGTGTCAACCCTTGG  
GCTAGCGCTGTCGCTCTACCGGGCTTGGCCGTAGTACCTGGAGCGCTCCAGCGCGTCGCG  
GTGCATGGCCCTGGCTATCTCGTACTCCTGGGATGCCTGCCGCTTCCGCCAGGGTGTGC  
GTAGTGCCGGTGGTCTGCGCTGCCACTGTGCTAGCTGCCTCTGCCATGCCGCGTCTG  
CTGGTACCAGGCACGCTCACCTCTGTTCTGTCTGCTCAGCATCCTCTGTGCCTCCTGTGG  
TCCTGTCCGGTGGTGGTGTGGAGTGGCTGGCCTTGCTCACAGCGTAGCCTTGCCTCTT  
GTCGTGCCATGGCTCTACCTGGCTGCTCCCTGGGTATTCCCTGTGGTTGCCTGGGTGGTC  
CTGGCCACTCCCTCTAGGCCACGTACTCTACTCGCCTCTACCTGTCCTGTCTAGTCCTGC  
TCCCTGTCGCTCCCTGGGTGCTGGTCTGTCTCCCTGGCGCTGCACTGGTCTGCTGTCTT  
ACCTCGCCGCTCCCTCGCTGCTTGGTTCGACCTGCGGCGCTGATGGACTCCTATTTGTC  
CATTGCGTGTGACATAACCGCAGCCTTAGTGCCATGCGGGTTCAGGGCGATGGCCTAGC  
TGGCTGGGTGGACCCTGGATGTTACCTGGGAACGATAATCCTGGCTAGCTAGACTAAGCC  
TCGCATGCGTGGGTCTCTATACGTGCGTAGAGGCTCCAGGCAGGGCCTAGGCGGGGTGTT  
GACACGACAGGTAGGCGTCTGTACTATGCGCCGTGTCTCCACGCAACACCGCCTCTACAG  
GGAGCCTGGAGACAGGGTTGACACACTACCGGGACATCGGTAGAGTGCAGCAGCCAGAGGG  
ACGGAACAACGCAACCTTCCAAGCGCGGCACATGCCATAGGCGCAAGGGACACGGCTGGG  
ATCCAGGGCAAGACCCACTACGTGTAAGGCCGGCAGGCATCGCTGAGGGGATTGACAGTA  
ACACGCTCAGTCGGTACGCTGGGCACCACTCGGCAAGCCACGCAACATCAGCTACCGGGT  
TGACACGACAAGGCCGAGTCGCTAACATGGCCACCAGCAACAAAGCGAACCGGCGGATAA  
CATGGTCCGGTAAGCTCCAGCAAACGGGCTGGGCTGGACGGGTAAGACTAGTGAAGCTGA  
CAGCGTAGGCCCTTCGTTAGAAGGCAGCCAAGGTGGATCACGCACCAGAAGGTGAAGTGA  
GGAATCTGGCAGCGCCGTAGGACTGCCAGGGGGTAAAGGCTAACCCCGCAAAGAAACAG  
CCGGGCGTTAGGATCACGTCCCAGGAGCAGTGTCCGGGGGTGCATCTGGTCCAACCGACAG  
TAGTCGGATGCCTGCAAGCCGAATCAACGGCTGGCCTACGGGCTGGGCATCCCTCGCAA  
ATCGGTTGTATCTGGCAAGAGCCATCGGGTTGGCGGATGGGCTGCGAATGGGCAGCGATC  
GCTCTTGACCAGATTCAACCAACAGGAGTAACCATGAGCAAGAACGCCGCTGGTGCAGCC  
AAGGCCGCAAGCTACGGGCCGATATGAAACGCTATCTCGCTGGCCACCGCGCCACGAAG  
GTAGCCGAAGTGCATCGCCATCGGCGACAGCTCCGCACGGTCTGAACTGCGCAAGATGCGC  
GATGTTCCGGTACAGCACGGACAAGGCAACCACTCCCGGACACTGCTTCAATCCCAAGGGC  
AAGCACTTTGCCCGTGGTTCCGAAGGCAAGGCACGCAACATCCTCCAGGGCTTCAACGCC  
CGCTAATCCCAAGCAAAGGACTCTGCCCATGGCCAACCAACTGACCAACACCGTTCATCG  
CTTTCGTCGATAACCGCTGCCATACCAACGCAATCGAAGCCATCCGCGTTTCGTGGCAAGG  
AACTCGACGAGGCCTTCCAAGTACTGAGCTGACTGTCCATCCTGAACCACGTGATCTCCACG  
GCGACGTGACCGTAGTCAAGGCGCTGTACGAAGCCATGCCGAAGGGTAGCCGCCGCAATG  
CGCTGGTCGAGTGGCTGACCATGTTTCGGCAAGGTACAGGTGAACACCGAGAAGAAAACCA  
ACAAGGAGCATCCGTTCTGTACAACAAGTTTGGCAAGACCGATCTCGTCGACGCCACCA  
ACGAACCGTGGTACGGGTTCAAGCCGGCGAAATCGCTCGATCAGGAATTCAACCTCGCCG  
CCGCACTCGCCCCTGTCCGCAAGCAAGTGCTCCAGCCGCAGACCAAAGGCAAGGTGATCG  
TCGGCGCTGAACTGCTGGGCGACCGGGAAGTCTGGCCGCAAGGCCGCACCCATGGTTCG  
AGAAAGCAAAGCGCGCGATTGCCACTAACTAGCTCAAGTCGAGCGCATGCGAGGCGGGC  
GCTCCGCTGGACCTAGTACAAGTGGAGATAACACGATGACTTTCAAGCAACGTCTGCAAC  
GTCAAAACGCCGTGGCTCAGTACAGCCGGCCCGCCACTATCCCTACGGCGAGCAGGCCG  
TACAGGAGGCAAAGTAATGGATATCTGGATCGCTCTTCCCTTCTTCGAATTCGGCCTGAA  
CGTTAGCGAGTGGGCCGTGCAATTCACCTGGGCATGATCGCAACCGCCCTGTTTCATCCA  
TCTGCTGCTGAATCGGTGACTCAAGTCATGGCCCTGGAGGGCGACCCTCGCCTACTCCGG  
GGCCATCGCTGGACTCATACAAGCGAGAATAAACCATGCAAGCTTTGAATAATCTGTT  
GATCGCAATCCCAAGGACCCGGCATGCCGATTCAACGCAGCCGACAAGGCGCTGTGCGC  
CCATGGCTTCCCTTATGGGTGACCTGAGCCGCGCCACGTCCTGACCCCTGGCGGGTTCAT

CGTGGTAGGGCGCCGGCGTGACCGTCAACCGCTACGACGAAGCGTATCGCTTGAGCCGCGA  
TCTCGACTCCGCAGGCTTCGACGTGCTGCTGGTCCAGGGCAGCCCGCTGTCCGGGCACGT  
CACCTGCCAGGCGTACGGCTGGATCAACGCTGAGTACCACGAGGGCTGCGCGAACGGGCG  
CCCGATCTTCGACATTGCAGGAACCTCGTACCATGTCTCGCGTGATCCGTACCGTATCG  
GCCACCGCGTGGGGCTGGTGAACACAGCGACCGCTACCTGGGTACCGACGCGGCAGGCA  
CCCGGGGCATCATTGAAGCCATAACCCGTCCGTCCCGCTGTATGACGATCTACCACGTAC  
GCTGCGAGCGGACCCTGCGCCTTATAGAGGCCGAGGCCCGTAACGTGCGGTTTCATCAGAC  
AGTACCGACCCGCAAATGACGTGGCTCATCATCGCTGTCAGCCCGTCGGGCGGTTGCGC  
CTTGGTGTGGAGTCGCAAGCGACCGGCGCGTCCCTTGCATTCTACTCACGCAAGGCAGC  
TAAACGCTGGCTTCGCAAGAATCGCCGCACGGCCTTGCTTGGGAGCCGATTTCCTCATAGT  
GAATTGGAGCAAACGCATATGAATCCTACTTACGTTCGTCCGTCTCAAGGACGGAACCAGA  
CGCCAGGTGGCCGCGACAGCATCATACCGGCCACACCTTCGTTCGAACTCTGGTTCCCTC  
GGGGGCGCGGTCGCTATCTACCCGGCCTGTGAAGAACGAGAGGTGCATCGCACTGACCTC  
GTGAAGGAGGGCGAGTAATGACCGTCAAGACCGTGTATGTCAAGCCTGAAGACCCGGGCGC  
CACCAGTCTTGTCCGTAGGACGCTGTACCAGGTGAACTCTACAAGGTGGTGACGCTA  
GCTCGGCAGAGGGCGCCGTTGTGCTGGCGACCAAGCAGACGCTGCCCTCGCTCAGGCAG  
TCATCGTACTGCACAGCATGAACCCCGCGCAGTACTCGGTGGGCACGGCCATACTAAACA  
CAGACTGGCGGTGCCGCCCTAGGTGCCGGCGGGTACATCAAGCTCGTTCAAGGGGAGG  
CCGACCAATGATCGCTGCCCTGTTTCGTACTCGGCCTGACTGTTGCCTCGGCCTGCTAGC  
AGGCTCCTGCTACTGCATCGCAGTGGCGCCGCGTTCGAGAACCCTACGGAAGTGCAGTT  
ACAGGACGCTGCCCTGATCGGGTGCCTCCGGCACTTCGTGCTCGTAATCATGGGCTACCT  
AGGGTTGCGATCGTTCTTCTGTGGCGCTCTGGGTGGCTTGCGCCGCCATCGGTAACGTTT  
TCACAACAAGCGATAAGGAACTGCGATGATCCGTTCCCATATCCACGGCACCAACCGTGA  
GCAACCCCGACTTCACAAGCACACTGAATTGGAGGGGGGCGAGCTGTACCGAGTCGTGCA  
GCCCGAGTCCCGTCGGGGCACGCTGGTACTCGGCGTGGGGAGCACGACCGACCGTGGCGT  
CCGCACGGTGGTGGCTGTAGTCATCCACGATGAAGTTGAGGGGAACCTGTCTACTCCGAG  
TCCTACCGTGCTGCGTAACGACACCTGGCGCATGGTGCTCGTGAACAAGGGCACCCAACT  
GACACTACCGCCGAGTGTCCAAGGCGAAGGCTGGCGCGCCAGCCTTCCACCGTGGCCAT  
TCCTTGCCGCGAACCAACTCAACTGAGGAGCTACAGCATGACCAACGTCAGCACCAACCAC  
CGAGACCAGCACCGCTGCCGTGCGTGGGGCGCAAGCTCATCAAGAAGCCGGCTACCGTGA  
AGACTTCCGCAACTACGTGGTCTTCCACCACACCGCCCTGGCCAAGCTGACCGAGACCTA  
CAACGAGGCGGTTCGCTGCCCTGCAAACCGCCGAGCGCCTGTCCAGCCTCGTCGCCGGTGA  
CGTTATCACCTTCGACCACGGCAAGGCCGAGAAGGCCGAAGTGCTGAGCGGCGAAGTCAT  
CAGCGTGGTTCGCCGGCGTCTATCAGTTGCTGGTGCCTTCAGCGACAGCGCCCCGCCAA  
GCTGCTGGACGTGAAGGCTGGCGCCATCCGCGCCGTCTAAGCTCCGGCTGCTCCGGCTGA  
ATCCCTGGACGAAGCCATCGCCCAGGGCGAGTAAGGCCCGCACGTAATAGGTCTGGCCCT  
GCCGGGCTATTGCGAGCTAGCCATACCATAGGAGGAGTCAACGTGAGCAAGCACAAACC  
CGAACACATCAGCGGCCCGGTACGCAGCGTGAGCGTAGCAAAGTCTCCCGTCGTCTAGGA  
CCTGGGAGACCGCCTGGAATCCGGCCTGGCCGTGTGCCAGGAACGCGCCCAGGATATCGA  
CCCCCTGAGCCGCGGGCTCCAGGCTGCCGAGGGGGCAAGCCGCTGGGAGATCGACGAGAT  
TCGCAGCCATCAGGCGACGATCCGTCTACTCCCGAACGACTTGAACGCAGCGCATGATGC  
CCACGAGGCACAAGAGCGCCGCGCTCGCAAGGCAACCATCATGGCCTGGGTATGCCTGCT  
GAGCGCAGGTTTGGCCGTACCCTGAAGCTGGCAGGAGTCTGGCCATGCAGTACAAAGAC  
CTTTACACGAACCTCGCATCGGACATGTTGAGCGTACCGGGCTCCAGGTGACCCCGGAG  
ATGCGCCGCGTGGCCAAGAGCCGGGCATTGCGCCCTCGCTATACGCCAAGAAACAGGCT  
TCGGGCGGGACGTCCACCGCCCGTGTGAGCGGCGTCACCTGTGACGGTGGTAAGGTGGAG  
GTGCGCCTGGATAACGTGGAGCGCGTCAGCACCTGTGACTATGCCGATCTAGAGGCGCTG  
GTAACGGCCAGCTTGTGCCAGGCCGACGCGAAGCGCGCCGACGAGTACGAAAAGCTGCTG  
CTCAAGGCATTCCCGCTGGTATCGAAGAAGGCCGGCCCGCTGTCCGCCAAGGACTTCGAG  
GTACGTCTGCACGATCTGCTCGTAACCAAGCTGGCGGTAACCCGTGCCCTACGCGATTCC  
GGAAAAGAGATGGACGGACCGCTGCGCAGCCGGGTACGGAAGCTTGCGGACCTGAATAAC  
GAGATGGGCGCTAAACTGTTTCAGCCTCCAGCAGGGCTTGACCCGGCTGGTGGAGGTAGGT  
CAACAGGCCGGCCTGTATTGGGACGACGCGGAGACTCAGCGATTGCTGACGGTGGCCCCG  
AACAAAGGCCGTCTGTGCGGCTCATCAGCAAGCTGACCGGCGTGCGGTATGCCTCCCGCGCT  
TCCGTGGCGAAGGCTGAGGCCGAGGCTCGTGAGCGGGCGAAGGCCGGCGGCTAAGGACTCC  
TGGCAGGCAGCAACCTTCGACGCCACCATCGCCGGCGGCGTTCGAGGGCAGCGTGCTGACG  
TACCTGCTCGTCTAAGCGACCGGGGCTACTCCGGGGTCAAATCCGAGGGCGTTCCTAGA

GCGCCCTCTCGTGTGAGTCTGGAGGATCACGAACATGCAATACCACTTCACGCATTACAA  
CGGATACCGCTTCGGCGTTCGAGCTGGAGGACGAAGCCGTGTTCCCGTGCATCAACGGCAA  
GCGGGCGACCTGGGACAAGGTGGCGACATGTGCCGGTAGCCTTGTGCATTACATGGCGCA  
GGACCTGATTGACTTCGGCCAGCGCAAGTTGAGGGAGATCGAAGATGAGCAAGACGAGTC  
TGTACCCGCTGAACCTGAATCCCGGCCTGATACAGATCAAGACGATCCACGTATTCAGCA  
TCCAGGCGTTCGAAGGACGAGCCGAACCTGGTGGCAGTGGTTCCTGTGGCAGCGGAAGTACC  
ACCCACTCCGCGACAGCCTGGACACGGCGGGGAACTGAGTGCAGATATCGCCGAGTATG  
TCCACCGCCTCCGCCGGAATGGCTGTGAGATAGGGACATCTGGCGCAACAAGGGCGGGC  
TGCTGGCCCTCGGTGCCTTCAGCCTCGCCGGCGAGATGATTGGCTCCTGCCTCGTGGTGG  
ACAACGAAATCCGCGCCCTGTGCGTGGACGACCGGAACAAGGGGCAGGGTATCGGGCGCTG  
AGCTGGTGCAGCTGCCGAGCTGGCAGGTGCCGAGCGCCTGAGTTGCTTCGAATTCCTGG  
AACCGTTCTACGCCGGCTTGGGCTGGCACACCGAGCGCCGCGAGGCAAACCTGGACTGAAG  
GTGAGCCGGTTCGTGCTGCACATGAGGGCGCCCGGTTATGACGCATGAGGTGATGACATGG  
CTTATAGCGAACAACCGCTGGTCATCGGATCCGCCTTCAGTCTGGTGGCCCTGGGCGTT  
CTGATAACGCAGGACAACGGCGGCCCGCCTACGGCACCCGCATGACCTGGCACCTCCAGG  
ACATGGTTCGAGGCCCGAGGCGTGTGCGTCCCCTATGGGAGGAGTGGTATCAATGGCACT  
GCGCCGCGACTCCTGGCTGAAGCAGACGCAGGCGCTCGCCGTAGGCCAGACTGGCAGGGT  
CCGGCACGTCCCTGGGATGCAAGAGCATGAGACGGGGCGGGACCCACATGACCGTCAAGAC  
TCTGCCTGACCGTTGGGTGGCGTATTGCTACTCCTGCCAGGAAGGTGGCGTGGTTGAGAA  
AACGCATGTGCGGGGGGTGCAATGCGCGGATCAAGAACGCTTTATGCCCTGGCCCGAGGA  
TTCCTCGGACTGGACGCGGGCCGACTGCTATCAGTCGCTCTATGGTTTGTGCTGTCCAA  
GGGCATCGACTACAACGTGATGACCCAGGGCTGCCGCTCCTGTACAGCGGAAGGCAGCA  
TCGGCTTATCTTCCCTACCTACGCGGGCTGGATTGGGCGCGCTACTGCCGACCAAATCC  
CAAGTGGGTGGGCTACGGGTATCCTGCCCCGATTACCATGGATGGCCCCAGGAATTATC  
AATGGGCAGGCCATGGGTGCGGACGGAAGACTACTTGTGCGCGCTGAAGGTGCGGTGGGC  
CTGTCCCGAAGTCTTTGCTGTGCGTCTGAACGGTACAAGGCTGCGCGACAGGCTGGCGGC  
GATCATGTTGCAGCAGACCTCTAAGCGCGCCTTCATCTTCTTGGATGGCGACCCGGCAGG  
TGTCCGTGGTAGTGCAGTCGTGATGCGCCGGCTCCGGTCCCTGCTTATCGAAGGCCAAGT  
AATACCGACGCCGGGCGGGCTCGACCCCGAGGACCTGACCCGCGAGCAGATAAGGAGCCT  
AGTAATTGGACGTATTGACGCTACACGCACTGAGTGACAGGGACCGCTTCCGCACGTTGC  
GGAGTGTGGTGCCTGAAGGGATGATGGGGCCGGAGACGTGCTTTGTCATCGACTGGATCG  
AGCAATACTGGAAGGTCTACCCAGCGCATCAGAAGGTGGACCCGCGAGGCGCTGCGCGAAC  
TGATCAAGCTGCGAGGTGGCTACCAACCGGAACAACCTGGCGGTAGTCCTGAACCTCGTCA  
ACCAACTGGACAAGCCGGTAGACCCGGACTCGCTACAGGGAGTCGTGTCCAGCTCAACG  
AGCTGGATTTTTTCAGGGCGGGTGGATGCCCTCCTGGCGCAGTACAACCAGGGCGAGGACA  
TCGACCTAGCGTATGAGCTGCGCCGGCTGAGGGACGAGGCCCTGCGCCGCGAAGGGGTCA  
GCACGCCGACTGACTACGTGACGGACGACGTGTTTCGATATCCTGGCCGGGGAGCAGGGTG  
ACCACGGCATCAAGCTGCCGGGGCTGGTGCTACCAGCGTATATGAAGGGCCTCCACGCCG  
GGCCTCGGTGCTGGTGGCTGCGCCACCGGATGCGGGCAAGACCTCGTTCATGGCCTGGA  
TCGCCGTACACATTGCACCGCAGCTCAAGCGGTACTTCGACCCAGGCCGGCCATCCTAT  
GGCTGAATAAGGAGGGCAAGGGGGCGGCGGATCAAGCCGCGCCTGTACTCGGCGGCCTTGG  
GCATGACCGTGGGCGAGATTCTTACCGTGGACCCGGATGAGGTACGCAAGCAGTACGCCG  
ACAAGATCGGCGGCGACTCCGAGCTGATTCGCATCAAGGACTTCCACGGTGGGTCCCTGG  
CCCAGGCCGAGCAGGTCATTGACGCGATGAAGCCGGCGGTGGTGTGTTTGGGACATGATGG  
CTCACGTCACGGGTGGCCAGCGCAAGGACCAGAACCAGCACCGAGATGGAGTATAAGG  
TGGCCGAGGTCCGCGAGATGGCGGTGCGCCTCGACTTCATCAGCTTTATGACGTGGCAGA  
TCAGTTACGATGGCCACGACCAGTTGTTCCCGCCGAGTCCTGCCTCAAGGATTCGAAGA  
CAGCGGTACAGGGCGCCGTAGATGTGCAAATCTACCTGGGCCGCCTCTACGGTGCAGGATC  
AACAGGTCATGCGTGGCATGTCCCTGCCGAAGGACAAGTTCCAGATGGACGGGAAGCCTT  
CGAACGGGAAGGCGATGATTAACCTTCGACGCCGCTCGGTGTCGTTTCTTTGAGAGTGTAG  
ACCATGCAAGCTAAGCATAGCCGGGTGCTCGAAGGCACCAAAGAAATTCACCTGGCTTCC  
ATTGCACTGCCGACCGGGGTCAAGGCCCTGTTGCTGCGCCTGTACTCTGATGCACGGCCC  
GACGAGGGCGTCCCTGGCCGGTGGGTTCCCTCGCGACCTCATTCATGGCGCCACTCCA  
AAGGACGTGGACATCGCCCTGTACGGCATGGCGCAGTAGCACGCTGAAGTGCTCATCAAC  
AGCGTGCTTCCCTACCCTGGACCCGCGCTTCGCCCGGGACGGTGGCCGGAGTTCCGAGTAC  
GCCGACGCAGGTGAGGGCGGTATCTTCAAGGGCGTGTGCTGCCCTCGTAGGCTGCCGTGGC  
CTGGAGGGCATGGACGTGGATTTAACTACTACGACGCCGACAGCCTTGGCCGGGTGATG

GAGTCGTTTCGACTTCACCATCAACCAGGTAGGCATTGCGTACAACCTGGCCCCGACCCCGAA  
GGCGGCTCGCGCCTGGGTGCGTACCTGCACAAGGACGTTACCTGGGGCGTGAACAAGGAA  
GTCGGTGCAGGCTCACGTCTGCCGGAACGATGCGAGAAAATGCGAGCCAAGGCCGCGTAC  
TACGGATGGGGTAACGTGTGATGAGCAAGCGCGACGTGGTACTGGATATCGAGAAAGGCA  
TCTGGCGTGGTGTGACCAGAACGACAAGGCCGTCGAGGCCATCATCAAGAAGAACGGGT  
ACGTGATCGTCGAGCCTAAAATCGACGGGTGCCGTGCCATCGTCGGTGCATGGCGCGG  
TGTCCCGCAGCGGGCGCCGCTTCCCTGCCCTGGACGGCCTGGAGGATCGCATCATCGCGA  
AACTGTTACAGTCCGGCCTGGACTCCGGTCTGGTGTGACTGTGAGATGTACCTGGAAG  
GCATGCCCTTCAGTGAGGCGACCGGGCGTATGGCCCCGCAAGACCCAGCAGACCGAGGCCG  
AGCTGAAGTGCCTGCACTTCGCGGTATTTCGACGCCACCCATATCGGCGTGCTCCGCAAGT  
CGCGCAAGTCCCACCTCGTGTACGATGAGCGCCGCGCCATGGTCCGCAGCCTCATGGAAG  
ATTGCCGGCGGGGCGCCACCCCGTACTTCTTCCATGTAGCCGCACAATCCTGCCGTTCTA  
TGGAGGCGGTACTCCGCTGGTACGGCTACCACCGCTCCATGGGCTTCGAGGGGGTTCGATGG  
GGAAAGACCCGAGCCTGACCTACCGCAACGGCAAGGTTGCTGGCTGCTACAAGCGCAAGC  
CGCAGATCACCGTGGACGGGCGTATCGTCGGGTACGTGATGGGCAAGACTGGCAAGAACG  
TGGGCCGCGTCGTGGGCTACCGTGTGGAGCTGGAAGATGGTTCCGGCACCGTGGCCGCCA  
CCGGCCTAAGCGAGGAGCACATCCAGCTCCTCACCTGCGCCCACCTCAACGCCCACATCG  
ACGAGGCCATGACGAACTACGGTTCGTATCGTCGAGGTCTCCGCGATGGAGCGCTCGGCCA  
ACACCCTCCGCCATCCCAGCTTCAGTCGCTTCCGCGACCTGGCCAGTAACCCTGGAGTGA  
AGGTATGAAGATTCGAAAGTCCCATAACCGCAAATACCCGGAAGATATGGTATACCACGC  
CACCAACCGAGATTCGCTGCTGTATCGGAAGTACGTCATGGGTTCCGTGTTCATCAGCCA  
GGACGGAACATTCGCGATCCGCGTCATAGCAGGGACTTGGGACCACGCTGGGTCCGAAGT  
TCGGCATCATGCGCGGGACATCCAATCCCTCGGCGCCGGTCCGCGTAAGTTGCACCGGGT  
CATGCGACGGCTGCGTCGCAATCTGCGACAGGTAGGAGTCAAAGTATGAGAATGCCACC  
GAGGAAGAACGTATGATCCGCTGCTTGCTGGCGGATATCCACGAACCCTTGGGCTGCTG  
TCCCCGGCCTCCGCACCAAGGCCACATGGACCCTCAAGCGGAAGAGCTGTTCGATTCTGA  
ATTGACTACGACCATGCGAAGCTGGGCCGTATGGGATTCTGCCACGCGGTCTCCCTGTAC  
CAACTGACCATATGGGGACCTGAAGGAATGGTCCGCTACCTGATGCAGGAGATTCCCCGC  
CGTGTGCTGGAAGGTCTGCTGGTCAAGGCGCAGCAGTACAGTCAAAGCAACTGGTACAGC  
AAATGACGACTATCCGAATCCTCGACCTCGAAACCGAGAGCTACGAGCACAAGGGGCGCA  
AGGCGTCGCCCTTTGACCCCCGCAACTACATCGTCATGGCCGGCTGGCGGGACGATGTGG  
ACGGCAAGGTTCGGCCAGAAGGTGGAACATCGCTTCCGCAGCCGGGCCGAAGCCGAAGACC  
CGAACAACCGCTGGTTCAACCTAGACGGCGTGGATGTGATCGAAGCTCACAATGCCATGT  
TCGAATCGAACTGGTTCTTACCCGCTACCGGGACGAGTACCTGGCCTTCTGCGACGCG  
GGGGCCGGGTCTGGTGTACCCAGCAGGCCGAGTATCTGCTGAGTCATCAGACGTGGCTGT  
ACCCGGCACTCGACGAGCTGGCTCCGAAGTACGGCGGCACCCACAAGGTTCGACGGCATCA  
AGATGCTGTGGGACCAGGGCGTGTACCTTGGAGATGGACCAGGACCTGCTGAGCGAGT  
ACCTGTCCGGCCCCCTGCGGTGATATCGAGAACACCCGCCCTCGTATTCTACGGCCAGTTGA  
TGATGCTTCAGGCCCGTGGTATATGGGCAGGTTAGCTGGAGCGCTGCGAGGCCCTGATCG  
GTTTCTCGGCGATGGAGTGCGCCGGCCTGAAGGTGGACCTCGAAGTCGCCAACGTGAACC  
ACGCCAAGCAACTGGAAGAGGTGGCCGGGATCGAGGCTGAGCTGAAGAAGCTGATGCCCG  
ACTTCCCGGAATACTTCGAGTTCAAGTATAACCAGCCTGTATCACATGAGCGCATGGCTCT  
AAGGCGGCGAAGTGCGGTACAAGGGCCGGGTGCCCTACGAAGATGGCCGGTTGGAGAAAG  
CCGACTTCGTGCGCTTCGGTACGGCCAAGCGGGGGACACCAATCGAGAGTACCTCGGTGC  
GGGTCCCGCTCAGCGAGGTGATCCTGGACGACGACCACTGGAAGTACCCGGCCATCACCG  
AGCTGGCGACCAAGTACGGCCCCGGTCATCACGTTCCGCTCCGGCAAGAACAAGGGCAGCA  
CCAAGGTGTTCCGCGAGGACACGGACATTCCGGGGACCAATTGGGATGACGCCAGCGAT  
TCCGGTTCCCCGGCCTGATCAACCTGACCAACCTGCCGGAAGTAGTGCGTGAGAAATTCC  
TGGGCAAACGCCCGGAGTTCAGTGCGCCCTCACCTGGCGGATGGATCGCCCGTGTTC  
GCACCAGCGGTGACGCCCTCAAGGCTCTGGAGAAACAGGGCTTCGAGGCGGCCAAGCTGT  
TGATGCGCCTGGCCGAGCTGCACAAGGACAACCTCGTCGTTCTACATCACCCATACTACA  
ACAAGGATGGGACGATTATGGACACGAAGGGGATGCTCCAGTACGTGGACGACGACGGTA  
TCATCCACCATTCGCTGAATACGACGGCGACGGCGACAACGCGCCTGTAGTCCAGCCGCC  
CGAACCTCCAGCAGCTCCCGTCGAAGGACGAGGACGACCCGGAAGCCGGCAGCCGCGTGA  
AGGAGATGTTTCGTGTCTCGCTTCCGGCGCGGACGGGATGATCGGCGAGACCGACTATACCG  
CCCTGGAGGTGGTGTGTTGGCGGCCCTGTCGAAGGATCGGAACCTCCTGGCGAAACTGA  
TGCCCGGCACTGACATGCACTTGTACCGCCTGGCAGGGAAGCACACCAACTGGAACGGGT

TCGACAATGACCAGCTCGTGGCCATCAAGAAGGACCCCAACTACCCGTGGCACGGTTCGCA  
TGATGCAGGTTCCAAAGAACATCAAGCCCAAGGCATTCTCGGCGCAGTACGGCGCGAGTG  
CGGCTGGTATCGCATTCAACACCGGCTGTACCGTGGAAGAGGCCAGGAATTCCTGGACA  
ACGAGGCGGCCCTGTTCCAGAGTCCATCGCATTCCGGCAGATCGTCCGCGACAGTGCAG  
AGGCCACCAGCCTCGTCATGTACAAGGCCGAGGACCAGATGCCGGCAGGGCGCCTTCAGCG  
AGATGGGGCCGGATGGCAACTGGCGCCAGTACCGCCGGGGATTCTGGCAAGAGCCGGGTG  
GCACCTGTTACAGCTTCCGCCAACAGGAGCGCTGGGACAAGGAACAGCGCAAGACGGTCA  
TGGACTTCAAGGACACGCAGATCGCCAACTACTGGAACCAGGGCGAGGCTGGGTTTCATGA  
TGACTGTGAGCGTAGGGGCGCATCTTCCGTTGGATGCTGCATCGCCCAGGATTCATGGTTA  
CCGAGTTCCTGATCAACAACGTACACGATGCCGTCTACACCGACTGCCACAAGGACACCG  
CCGCCGAGGTCAACAATGGCCTGCGCGTCATCATGGCCGACGCTGCCCGCTACATGAGCG  
AGCGCCTGAGCTACGACATCGCCGACGTTCCGTTCCCGGCAGTGGCTGAGAAGGGGCGGG  
ACATGTTCAATATGGAGGTGATCCAGTGAAGAAGTGCACCCGCTGCACACGCCTGAGTT  
CGTCAAGACATTCCTGGACCAGACCGGGTGCCTGCCGGGAGTACGCCGTACGGGCCGCAC  
CACCGGCATTGCTCTACAGGCCATTGGAATGGCGATGTCCCATCCGAGGGAAACCCTGAC  
GTTTCGTGGACCACCCGGACGGCAGCGCGGCAGCACTGGTGGCCAGCATTGAAACCATACT  
GGCGACCTTGGGCTACAAGAACGTCTTCGTTCCGACCCACAACCCGTGCCGATGGGGCGCAG  
CGTGAGCATCGTCTGCAAGACGCTGCCGACCGCCTGATGACCCTTCCCTACTCCGGCCTT  
AAATCTTCATCCGACACGAGAGAGACCACGCATGACTCAACAACCTCAACGCTCTGCAAGG  
CGGCCTCGCCCTGGCCAAACATGGCTGCCGAGACCGCAACCATCGACATGTCCGAAACCTC  
CACCGGCGGTGGCGGGCGGTTCGCATCTTCCCGGCGGGCACCGCCATGGGCCTCTTCTGCAT  
GTACATCGAGCTGGGGGACCACGCCAAGGAATTCCAGGGCAAGCTCAAGAATCCGGCGCC  
TCAAATCCGCCTGGGCTTCGCATTGTGGGGCGACGTGAACCCGCAGGCCGGTAACCCGCA  
GAGCCGCCCGGACGACCTGTTCCACACCTACGAGGCCGACGGCTCGGTCCAGCCCGGCCT  
GTTCCGTACCTTCGAGATGACCCTCGGCAACAACGAAAAGTCCAAGACCAAGCTGGCCTT  
CGACAAGATGAACTGGAGCGGGCAGCATACCCACTTCGCTCAGATGCTCGGCCAGGCGTT  
CATCATCCCGATCAAGCGCACCAAGATCACCAAGGGCAACAACGCCGGTAGGGAACCCAA  
CGACATCGATTGGGGCGGCATCATTAAAGCCCTATAACCCGGTCGATGGCAGCCCGTATAA  
CGTGCCGGTACTGCCGATGGACCTGTTGCAGTATTTCTTCTTCGACACGCCGACCAAGGA  
GACCTGGGACGCCCTGTATATCGAGGGCACCTCGGACAACGGCAAGTCCAAGAAGTTCCT  
GCAAGAGACCATGCGCTCGGCCACCAACTTCCCCGGCTCGGCCCTGCACATCATGTTGGG  
CGGGGGCGACGATCTGATCATCAAGCCAACGAGCCAGGCCGACGGCAGCAACCTGCCGGC  
AGTGCCCAACGTGGCCGCCGATGCAGGGCGTAGCAGCAGCCCCTGCCGTCCCGGCAGTCCC  
GCAGGCAGTGGCTCAGGCGGCCCCAGCGTGCCCCAGGTGGCGAATGTGGCTGCCCTGT  
GGGAGGTAAGTACTGCCGAGGCGCAGAACGTGCTGCCTGACGTCCCGCAGGTGGCCAGGTGGC  
GGCTCCGGCAGCAGTCGAAGTGCCGTCCGTCCCGGTAGTCACGGAAGTACCGCAGGTTTA  
ATGCGGCTGCCATCGGAAGAGTTCCTGTCAGGACTATCCGAGCAGTTCGACCGTACCATG  
GCAGGCGGGACGTTGGTGTGTGACGCCGACGGTCCCCTTACGTGGCTTCGGCTACTGCA  
AAGACCCTGGACACTGCGCTCCGGCGATTCTGGAAGATCATACTGGAGCAGCAGTTCCTG  
GCGCACTGTACAGGGACACGGGTCCACCTCACGGCAGCAGGTGAGGCTAAGGCGTACCGC  
GACGTGTATCCGACCATGAAACCCTGCCAGGGCCAGCGCAAGGGGAAGGCAAAGCCCGCG  
CTGCTGGAGCCGCTGCCGGCGGGCTGTGGCCGACGTGTATGAACGAGGCGGGCGCGCCTGAC  
GGGATCGACGTTATCCTGCACACGCTCTTCGAGGCGGATGACGGCATGATGATGGATGCC  
TACGCCATGCAGGACAAGGCCATCATCCAATCCGACGACAAGGACTTGCGGATGACGATC  
TACCCGTATTGGGAGATCGATACAGCGTGTGTGAGCAGGATCGACGGGGGCTTCGGCTAC  
CTCAAGGAGGCGTATACGCCGTCCGGTCAGTTCAAGCTCAAAGGGCACGGACGCAAGTTC  
TTCCTAGCGCAGTGGCTCGGCCGGGATACCGCTGACAACATCCGAGGAATCGATCGATTC  
AACGGTAAGCTCTGCGGGATGAAGACGGCCTTCGATATCCTCCACCCGATCACGGACGAG  
GACGAGGCCATCGACATGATCCTGGAGGCGTACGCCAAGATTAAGCAAACCCGCTGGCA  
GAGGCCGAGGTGCTGTGGATGCGCCGAACGCCTACCGACAATGCAGCGCAGTACCTGTTA  
AGCCGAGACCTTCGTCCGGCCTTCCGACAGTGGATCATCGAGCTGGACGCCTACCACGAG  
GCGCTGTTCCCGAAGCGGAGGGAGAGTACTATGACGAGTGAGCCGAAGGTCTACCAAAT  
ACCGCGCAGCCAACGGCGCACCTTACCCTGAAGCTGTGGGCCGAGCAGGGCAAGCTATG  
CCCCTCTGCGGTAAGCCATCGATATCAGCGTGAAGGACGAGGCGGTGATGGACCACGG  
CCACGAGACGGGGCTGGTGCGGGGCGTCTGCATCGATCCTGTAACACCGCAGAAGGCAA  
GATCACGAACGCGGGCGGGTTCCTGGGGATGCAAGTCGATGAAATACACCGACATCATCC  
CTACCTTCGTGCCCTCCTGACGTACCTGGAGGGGGCCGAAGCAACCGCTGATCTACCCCT



GCACAAGACCGACGAGGAGAAACACGAAGCGAAGCTGGCCAAGCCCCGGCAGGCAGCCGC  
CAAACGCAAGGGCGGCGACGGCCGTCGAAAGCACAACGCGAGGAACGTATGAGCAAATC  
CGCAAGCAATTCACCAATGAGTACCTGCGCAACGTCTATGTGCGAGCTGGGTCTCAAGAAG  
GGCGCCGAGCATCTGACCAGGCATTCGCGCTTCGGCGAAGTGAGCCGCCAGTGCTTCCGC  
AACTGGTGCATCAAGCTGGGCTTCCACGACAGCAGGACACGCGGCACGTACGCCAAGAAG  
GGCCTCTGCACTGGCTGGGCCGAAAGGCCGCGAGGTAGTGCGCAAGTTCCTGGCGCC  
GTGGGCAACGTGGTTGGCCAGGGTCCGAAGGTAAGTACTGAGCCTGGACATCGAGACCTCGCCT  
ATCGAGGGTTGGGTCTGGTTCGCTCTGGAAGCAGAACGTTGGCCTCAACCAGATCAAGCGG  
GACTGGACCATTCTGTCGTTCTGCGCGAAGTGATGCACAGCGACGAGGTGATCTACATG  
GACTGCCAAGGTGATCCCTTGGACGACATTCACCTGGTGGTTCGCCCTGCATAAGCTACTG  
GACGAGGCCGACATCATCATCGTCCAGAACGGCAAGCGCTTCGACGTGCCCAAGATCAAT  
GCCCCGTTCTTCTGAACAAAATGCCGCCGCCGCGCCCCGTTCAAGGTTATCGACACCTTG  
ATCATCGCCGAGCAGCAGTTCGCATTCACCAGCCACAAGCTGGAGTACATGACCCACAAG  
GCGTGCACCATCAAGAAACGCCTCCACGGCAAGTTCCCCCGATTTCGACCTGTGGGCAGCC  
TGCCTCCAGGACAACCCGGAAGCCTGGGAGGAGATGCGCCGGTACAACATTGACGACGTA  
CGGTTCGATGGAGGAGCTGTACATCCTGATGCGCCCCTGGTTTCGTCGGCCATCCCAACGTG  
GCCGTGTACTTCAACGACGCCGAGCCGACCATCCGATGCCCGAAGTGTGGCGACACGGAT  
GTCAAGCGAGAAGGCTGGGTGCATACGACAGCCGGCAAGTACGAGCACTATCACTGCGGC  
GGCTGCGGTGGCTGGAGCCGAGGGCGGTACACCCGCAACACCTCGGAACAGCGCAAGGCC  
CTGCTGAGCAACTAAGGAGACACCATGATCGTCGACAAGTCGTATTAGGTCGCGCTAGCT  
GAGCTCTACAAGACGGGCGCCGCGCTGGACGAACGCAAGGTCGGCAAACCTCCCGATGCAC  
CTGGTGGTCGATGGCTTCCCCTGCTCAAGCGGGAGCTTGCCCGCATGATGCAGTGGGCC  
GCCGAGGTCAAGGGCTACAAGCCGCACGACTGGAAGAAGATGTTCGGTTGGCGAGTTCAAG  
GCCGCAAAGCATCGGCACGAGTCCAATCGCCTGCTGGACGGGCCGCTGGATGACGAGTCG  
GGCCTGATGCACCTCGTGCATGAGGCATTCAACGCAATGGCTGCCGCCGAGGTGGCCCTG  
ATGGATCGGGAGTAAGGCAATGAGTAAAATCTGTTGGTGTACCCGACCGCACGAGACCGA  
TGAAGGTGTTTCGGGTCATCTGGGCCTTCAACGAGCGGGGCATCGGGGTCAACTACGTCAC  
AGCGTACATCACGCCGGCGATGGTCAGCCATCGGGACTGGAGCGATGTCATACTCCCGGA  
CATTCTCCGGGAGATGGCGGAGCGCTGGAGCGGGAAGTGAAGCTGGTGGAACTGCGCTG  
GTTCCCTCGCTGAGATTCTGAGCTGCGGGGAATGGCGTACTACCGAGCGGTGACGCTGGA  
TGGGGCGGTTAGCCTGGCCGAGGCCGAGTGGGGTCCCAGGATATCGGGCGCGTAATCGA  
AAGACGATAGGAGACGGAATGGACCTGATACAGCAGCAGATCGCCACGAAGAGGCCTTG  
GTCGGGGCGGCGCAGAATGACGCCCGCATTCGCTTGGAAAAGGCGATGGCCCAAGGGTCC  
ATCGACCGCATCCCGAGGGCGCGCATCATGTTGATGCGGATGCTCCCCATCGTGACCGAA  
GCGATCTTCGCCACCAGGAAGCGAAGGCGGGCGGGGCCGAGCGAAGCTACGGCACCTG  
CTGCGGATCATCGACGCCAGGACCTCGCCGTCATGGCGCTGCGGGCTGGGCTGTTCGATG  
CTCATCAACTACCAACGATCAGAGCGACGAAGTATTACACCCAAATGGGCAAGATGCTC  
TGTCGCGAGATCGAAGTGCGGTTGGCCTTCAAGGTCAACCAACCCTATGACGACCGGACG  
CTGGACTACCTCAAGACCAGCAGGACTCGCAGCGTCCGGCACATCCAGAAGACGATGGAC  
GCTCTTCTGGACGCGGTGCTGCCCGAAGAGGCGCGCATCGACCTGCCCGATGGAGACTAT  
CTCCGCTGGGCAAGTTCATCGGCGATCCGCTCATCCAGTGCGGCCTATTTCGAGCCGAAC  
CGGTTTGTAGGGCGAGGGCGGCACCAAGTGTCCACCTGGAGCCGTCGCCGGAGGCCAAGGAG  
TTCCTACAGGACCCCTCGGCGGCAATGACCTGGGGCGGCCAGGGCGTAGCGTGATGCTG  
GCCCCGGCGAGACCCTGGCAGGACTGGTGCATGGAGGCTACTACAGCGCCAAGGCGCAG  
AAGCACCACGTAAGTGGTGCAGCACCAGCACCAGACCAAGCGGGCACGGCAGATGCAG  
CTCCGCCACCTGGGCCGGGACAAGATGCCCCGAGTCTACGAGGCGGTCAACGTGCTGCAA  
TCGATAGCCTACGAGATCAACCACGACGTGTACGAGATCATCGAGCGCGTCTTCACCTCC  
CGTGGCGGCGTGCTGGGCCTCCCCAGCGCACGTACCCGGACAAGCCTGAGTTCCTCGCTC  
GGCGACGAGGGGGCCAAGGAGAATGCCAGTGAGCAAGAGCTGGAGGCCTTCAACCGTTGG  
AAACGCTCCGTCCACCGGTGGTACACCGGGGAGCGAGAGCATAACCGCCAAGCTTCGCGAA  
TTTGCTGCACTCTACTGAGTTGTTTCGAGAGCATCATGGCAAGGCAGTGTATTTCCCGATG  
CACGTTGACTCCCGTGGCCGCATGTACTATTGGGGCACACCGAATCCCCAAGGGTCCGAC  
ATCGCCAAGGCCTGCCTGCGCTTCCACGAGAAGCGAGTGCTCGGCAAGCGCGGACTGTAC  
TGGCTCAAGGTCCACGTCGCCAACTCCTTCGGATGCGATAAGGTGTACTTCGACGACCGG  
GCAGCCTGGGTTCGATGAGCGATGGGATGACTTCCAGCGAGCGCTCGACGAGGGGCCGGAG  
AACTATCCGAGTCTCTTTCCCGAAGCCGAGTCGCCCTGTGCGCCATCGCAGGTCTGCTG  
GAGCTGCGCGCGGCTTACGCCTCCGGCAACCCCGAAGTGTACGCCAGCGGCTTCATCGTC

CACATGGACGCCGCTGCTCCGGTCTCCAGCACTACTCGGCTATTCTCCGAGATGAGATC  
GGCGGAGCCTACGTCAACCTCCTACCTCCAGGACTTGCCAAAGCTGACATCTACTCCCGA  
GTGCTCGGACTCGTTAATGAGGCTCTGGAGAGAGACTGAGCGGAAGGCGCGGATGGCGAG  
GCTCGGGGTTATGCCCTTCTATGGGATAGAGCTGGTCTGACGCGGAACCTGACCAAGAAG  
CCCTGCATGACGCTGGTGTACGGCACCACGTTCAAGGGCGTTCGTGGACTACTGCCTGGAC  
TACCTCGACGAGTCCGGCGTGGAGATTCACGAGGGTGTCCCGTCATACCGCCTGGGAAGC  
TACATGGCGACGCTCATACTGGACCCAATCCGCGAGACAGTACCATCGGCAGTCTTCGCC  
ATGGAGTGGCTCCAGCGGCTTGCTAAGGCCCTTCTGACGCATCCAAGGATTTGCACTGG  
ACCACGCCGCTCGGCATGCAGGTCTTCCAGTCCACCCGAAGACCGAGGAGGTGCGGGTA  
CGGCTGCGAGCCGAGGCTGTTCGAGTACGTGACCCTGTACGAGGCCAAGGACGAGCTAGAC  
CCACTGCGCAACGCCAACGGCATCGCTCCGAAGTTCGTGCATGGCCTGGACAGAAGCCAC  
CTGGGACTGACGGCCCTGGCCTGTGCGGCAGAGGGAATCCCGACCCAAGCCATCCACGAC  
AGCGTGGGGACCTAGGCTGGCGACGTGGACCGGATGCACGTCCACATCAGGGAGCAGTTC  
GTCACCATGTACAGCGGCCCTGCGTGTCTCGTAGAGCTGGCTCGACAGCTTGGGGTAGAG  
GCTACCCCGCCCCGTCGGGGATCGTTGAATCGGGAGGCTGTGCGGGACTCCTGGGCGTTC  
TTGTGCTGAGTAGATTATGTCACCCACATAGGAGCAAGTGCATCCGTCCAGAGGCCTCGT  
AGAGGAAGAGGGGTGAGGGAAGACCCAAGAGGAGGAGAAGTGAGAGAAGACGACTACCAA  
GGATTCTAGATAGAGTAGAATAACTAGCATAGGAGATATGGTAGATGGCTACTATGAAGA  
GTAAAGGGCCAAGGATTATGTCACCCACAGTGGAAAGGATCGAGAACAGGCAAGGGTAAGG  
CCCACCCTGTGACGTTACCTCTCAGGAGATCGAGTGGCTAGAACAGACCTTCCCCGAAC  
ATCAGATCAGTCTGGAACCACGATGGAAGACATCCAGTTTCAGGCTGGCCGCGCGATG  
TGGTGCGGGCTATCCGCCTGCGTCGCCGCGATGCAATCGCAGTGGAGCTTAAAGGATGAA  
CAAGTCACTCTGGCGAGTCCACGCAAAAGCCGGCGCCCCTTCCGAAGTATGGGGCTGTG  
CTGGCTGGCAGTACAGGAGCTGGAAGAGTTCACCCTCTTCCGCTCGAAGGAAGAAGCCCT  
GGAAGCTATGCTCGACAGTATCGAGGGCAATGATCGGAACGAGCTGCTGGTATTCCGTGA  
TGGCCAACCTGGCCGGCGGAGCCTGCATTGTGTTGAGGACGATCCCCACGTGCGCCCATG  
CGTCACCGCGCAGTGGCAGTACGTTTTGCCACGCTACCGCAATACAGGCGTGGCGCGAGA  
GTTTCATCCGCGAACTGCACCGGCAGGCCGGCTGGGGTCAAATCCCCCTCGTGTGCTGGGG  
CCATCGCGAGAGCGAAAGCCGGTATACGATCCACTACCGGAGAGCCAAGCCTTATGGGCA  
AGAAAGTGAAAAAGGTGCTGGGCAAGACGATCATCGGTAAACTCGCTGATGGCCTGCTCG  
GCACTGACCTGAGCGGCGCACAAACCCGATGCCCGCAAGATGGAAGAGCATAACCGCCTCA  
TGCAACAGCAGGCGGACCAGCTCGCAAGAAACCAGCAGGTGACCTCACCACCGAGAACG  
TGGCGCAGGTTGACCTAGGAGCGATGGCCGATGACACTGGCACC GGCAATCGAAGACGCC  
GGAATCAGGCAGGCACAGGCGTATCGCAAACCCTCGGTATCAACTACTGACGAGGTACGC  
CATGAAGTCTACCGCAGCAATGCTGTGGGAGAAGCTTCGGGATGGGAGCGTGGAGCAGCG  
AGCTATCGAGTTCGCCAAGACCACGCTACCCTACCTGATGGTCGATCCCATGTCCGGCAG  
CCGAGGAGACGTAGAGCACGACTTCCAATCTGCCGGTGCCTGCTCGTGAACAACCTCGC  
CGCAAAGCTGGCGCGGTGCTGTTCCCGACGGGGATTCCGTTCTTCCGTTCCGAAATTAC  
CGATGCGATCCGGCGCGAAGCCGACAGCCGGGACACTGACATCACCGAAGTGACTGCTGC  
CCTAGCCCGCGTGGATCGCAAAGCAACTCAGAGCCTGTTCCAGAACGCCTCCCTGGCGGT  
CCTGACGCAGGTGATCAAGCTACTGATCGTACTGGCTACGCCCTGCTATAACCGCAACAG  
CGACGAGGCCACGGTAGTCGCATGGTTCGCTCCGCTCCTACGCGGTGCGCCGAGATGCGAC  
CGGCCGATGGATGGACATCGTGTCAAGCAGCGCTACAAGTCCAAGGACCTGGACGGGGC  
GTACAAGCAGGACCTGATGCGTGCGGGTCGCAACCTGTCCGGTTCGGGCAGTGTTGAACA  
CTACACGCATGTTACGCGAAAGAAGGGCACGGCGATGGAATACGCCGAGCTGTACCACGA  
GATCGACGGCGTGCGTGTGGGCGAGGAAGGCCGCTGGCCTATGCACCTTGCCCGTACAT  
CGTACCGACCTGGAACCTCGCCCCGGCGAGCACTACGGTCGAGGCCACGTCGAGGACTA  
CATCGGCGACTTCGCCAAGCTGTCCATGCTGAGCGAGAAGCTCGGCCTGTACGAGGTGGA  
GTCGCTGGAGGTCTGAACCTCGTGGACGAGGCCAAGGGCGCGGTGCTCGATGACTACCA  
GGACGCTGAGATGGGCGACTATGTGCCGGGTGGCGCGGAGGCCGTCCGGGCCTATGAGCG  
TGGCGACTACAACAAGATGGCTGCTATCCAGCAGAGTCTCCAGGCTGTAGTCGTCCGGCT  
GAACCAAGCGTTCATGTACGGCGCCAACCAGCGCGACGCCGAGCGCGTACCGCCGAAGA  
GGTCCGCATCACTGCGTAGGAGGCGGAGAACACGCTGGGCGGCACCTACTCGCTGCACGC  
CGAGAATCTCCAGTCGCCCTGGCGTACGGCTGCCTCTCGGAGGTGGATGATGCGCTGCT  
CCAAGGCTTGATACCAAGCAGCACAAGCCGGCTATCGAGGCGGGCCTCCAGCCCTTTC  
CCGGTCCGCTGCCGTGCAGAGCATGCTCAACGCATCCCAGGTCATCGCAGGCTTGGCCCC  
GATTGCTCAGCTCGACACACGCATCTCGCTACCGAAGATGATGGACACGATTTGGGCCGC

TTTCAGCGCCGACACCTCGCAGTTCTACAAGAGCGAGGAAGAGCTACAAGCCGAGGCAGA  
ACAGCGGCGCCAGCAGGCGCGCAGGCCAGGCCGCACAGGAGACCTTGCTTGAAGGCGC  
TTCCGACATGACCAACGCACTCGTAGGAGTCTGATAGATGCAACAGAACGAATAGCAACT  
GCCACCGGGCCTCGCTAACCTGGTTGCCAACGTCCCGCCCGCCGCCACCGACCCCAAG  
TCATGTGCAGGTGATGCCGAATCCCGTCATCCAGCCGCAGCCCCAGTACGCGGCGCAGCC  
GGGACAGGCAGGGTTCGCCGCAGCAACTGGCTATCCCGACCCAGCAGCCGCAACCCGTTCC  
GACCAGCGCCATGACGCCGCACTACCAGCCGGTAGCGGTGCCCGCCGCTGGCCAACCCGT  
TGTACCGCAAGCGCCCGCACAGCCGGCTCCGGTAGCTCCTCCGGCTCCGGGCGCAGTTCC  
TCCCGAGAACCTGGAGGTTCCGCCGCCGCCGCATTCACTCCCAACGGAGAGATCGTAGG  
CACCTGGCGGGGAATCTGGAAGGCGACCCGCAACTGGCGCCGTCCATCAGCTATCTGGA  
AGCGTTCACCGACAAGATCGACACCGTTCGGGCCTTCGGTAAGGCCGCCGAGCACCGCGA  
TCCCGCTTCATCGACGAGCACTATCTGAAAGAAGCCCTGGGCGAGGCCCAAGCGCAGCA  
CGTCATAAACGTGGCGAAGGGCGTTCTGACCTATGTGGATGCTCAGACCCAGGCAGTCAT  
GAACCAGACCTATGCCGCCGTCCGGCGGTGAGGCTCTGCTCAAGCAGGCCGCCAGCGTCTT  
CAAACAACACGCTGACCCGGCTGCCAAGGCCGCCATCGGTGCGCTGATGGACTCGGGCGA  
TGCTCAGTCCATGCAATACGCCGCGAAGCAGATCGTTGCCTTCGCTCAAGGCTCCGGTGC  
CGTGGTTAAGGCAACCGGCCAACCCCTTGGCGCAGCGGCCCTGCCCTGGCGGCCATGTC  
CGCTGAGCAGTACCGTGCCGAGGTCTCGAAGCTCCCGTTGAACTCAGCGGAAGCCGACAT  
GGCCGCTCTGCGTGAGCGCCGCAAGGCAGGTATGGCGCAGGGTCTCTATCGACCCTGCC  
TACTCCGGCCTTAAACCAACATCCAAAAGAGAGAGAAACGCATGAGCTTCTGAACGACC  
TGACCCGTCCGAACCTACGCTGGCAAGAACGCGGACGTTGACATCCACCTGGAAAAGCACC  
TCGGCATCGTCGACAAGCACTTCGCCTACACCTCCAAGTTCGCGCCGCTGATGAACATCC  
GCGACCTGCGCGGCTCCAACGTCGTCCGCCTGGATCGCCTGGGTAACGTGCAAGTCAAGG  
GCCGTCGTGCCGGCGAATAGCTGGAGCGCAGCCGAGTCGTGAACGACAAGGGGAACCTGA  
CCTTCGACACCCTGCTGTACCTCCGCCACCAGTTCGATCACCAGGACGAGTGGACCCAAT  
CCTTCGACATGCGCAACGAAGTCGCCGAGCTGGACGGCCAGGAACTGGCCCGTATGTTTCG  
ACCAAGCCTGCCTGATCCAGGTGATCAAGGCCGCTGCGATGGATGCTCCGGTGGATCTGG  
AAGATTCTTCTAGCCGGGCGTGCTGGAGAAGCTGGACCTCACCGGCGTCACCTCCTCCA  
AGGAAGCCGCAAACAAGATCGTCCGCATGCACCGCAAGATGGTTCGAGTCTTCATCAACC  
GCGACCTCGGCGATGCCGTCTACTCCGAGGGCCTGACTCCGATGTCGCCTCGTGTGTTCA  
GCCTCCGGCTGGAGCACGACAAGCTGATGAACGTCGAGTACCAAGCCAGCGGCGCGACCA  
ACGACTACGTGAAGTGGCGTGTGGCCATCCTCAATGGCGTGAAGGTGCAGGAGGCTCCGC  
GCTTCGCCACCGAGGCCATCGCAGCACATCCGCTGGGCCTCCACGTCAACGGGTGCGCCG  
AGGAAGCCGAGCGCCAGATCGCCCTTTTCTCCCGAGCAAGACCCTGATCACCGCCAGG  
TGGCGCCTGTTAGCCCAAGCTGTGGGTAGACCACGATCAGTTCTCGTGGGTCTTGGATA  
CCTTCAGATGTACAACATCGGTGCCCGTCGCCCGGATACCGCTGGCGCCATCGAACTGA  
AAGGCATCAACGCCTTCGACATCACCGAGTGATGCCGCGAAACCCCGCACTTCGGTGTGG  
GGTTTCTTCAAAGCATAACGACCCGCGCAGATTCCCTGCGTGGGTTTTTGGCCTTTAGGA  
GAAACCCTATGCTACTACTCGACGCAGTGAATGTCATCCTGGGCAAGATCGGCGAGTTGC  
CGATCCCGAGCATGGATGAAACGTACCCAACCATGGCCATCGCCCTCCCCGAGTTGGAGG  
ACCAGCGCATCCAGTTGCTGACGCAAGGCTGGTGGTTCAACACCTGGTTCGAAGCACAAGC  
GAACACCCGACCCGCAGGGCCGTATCAACCTGTCCAAGGACACCTTGGCGTTCTACCCGG  
ATTCCCCGATCTCCAGTGGGACGGCCAGGGAGTGCGCGACGCCAACACCGGCGACGACC  
GTATCGGCAAGGTAGTAGAGGGCCGGCTCGTGCTGTCCCGTGAGTGGGACCGTATCCCCG  
AGATTGCCAGCGCGTCATAGCGCACCAAGCCGCCCTGGCCGTGTACACCCACGAGCTCG  
GGCCGGGCGAGACGGCGCAGGTCATCGCCCAGGAGTTGCAGGCGTACCAGAACGAACTGA  
GCCGCACGCACACCCGATCCCGCCCGCTCAACACCCAGGCCAAGCGCAGCTTTAGCCGGT  
GGCGGCGCAGCTTGAGGACCTGACCATGAGCTACAAGCAATCCGCATACCCCAACCTGCT  
GATGGGCGTGAGCCACCAGGTGCCGTTTCGAGCGACTGCCAGGGCAGCTCAGCGAGCAGAT  
CAACATGGTGTCCGACCCCGTGTCCGGCCTTCGCCGCCGTAGCGGTATCGAGCTGATGGC  
ACACCTGCTGCACACTGACCAGCCCTGGCCGAGGCCGTTCTGTACCACACCAACCTGGG  
CGGGCGCAGCATTGCGATACTGGTGGCGCAGCATCGGGGCGAGCTATGCCTGTTTCGACGA  
GCGGGATGGCCGCCTGCTGATGGGGCAGCCGCTGGTCCACGACTACCTCAAAGCCGCCGA  
CTACCGGCAGCTTCGCGCCGCCACGGTGGCTAATGACCTGTTTCATCGGCAACCTGAGCGT  
GAAGCCGGAAGCCGACCGCACTGACGTGATGGGCGTGGACCCCAATAAGGCGGGGCTGGCT  
CTACATCAAGGCGGGTCAAGTATTCGAAGGCGTTCCTCATGACCATCCAGGTAAAGGACAA  
TGCCACCGGTACGACCTACAGCCACACGGCCACCTACGTGACGCCGGACAACGCCAGCAC

CAACCCCATCCTCGCCGAGGCCCGTTCCAGACGAGCGTGGGCTAAATCGCGTGGCAGCT  
CTACGGCAAGTTCTTCGGCGCCCCGGAGTACACCCTGCCCAACTCCACGAAGAAGTACCC  
CAAGGTTGACCCCGACACGGCTACGGTACGGTAGCCGGCTATATCAACCAGCGGGGCGT  
GCAGGACGGCTACATCGCCTTCGGGGCGACGGGGACATCGTGGTTCGAGGTGTCTACAGA  
TATGGGCAACAACACTACGGCATCGCCTCGGGTGGCATGAGCCTCAACGCCACCCGACAGCT  
ACCGGCCCTACTGCCGGGTGCGGGTACGCCGGGCACTGGCGTGCAGTTCATGGACTGGGC  
CGTCATGGCCACTGGCTCGACCAAGGCGCCAGTCTACTTCGATTGGGATTTCGGCGCACCG  
CCGCTGGGGGGAGCGCGCAGCCTACGGGACCGATTGGGTCTTGAAGAAGATGCCCTTGGC  
CCTACGCTGGGACGAGGCTACCGACACCTACTGCTTGAACGAGCTGGACTACGACCGGCG  
CGGCTCCGGCGACGCGGACACGAACCCACGTTCAACTTCGTCACCCGTGGCATCACCGG  
CATGACGACCTTCCAGGGCCGGCTGGTCCCTCCTGTCTCAGGAGTACGTCTGTATGTCGGC  
GAGCAACAACCCGCACCGCTGGTTCAAGAAGTCGGCGGGCGGCGCTAACGACGAAGACCC  
CATCGAGATCGCGGCCAGGGCAGCCTGACCGAGCCGTACGAGCACACAGTCACCTTCAA  
CAAGGACTTGATCGTCTTCGCCAAGAAGTATCAGGCCGTGGTCCCTGGCGGGCGGTATCGT  
GACACCGCGAACGGCGGTATCAGCATGACCACGCAGTACGACCTCGATACCCGAGCGGC  
ACCCGCCGTACAGGCCGTAGCGTGTACTTCGCCGCTGAGCGTGCCCTGGGCTTCATGGG  
CCTGCACGAGATGGCCCCGTCGCCATCCACGGACAGCCACTACGTCGCCGAGGACGTTAC  
CAGCCACATCCCGAGCTACATGCCAGGGCCTGCAGAGTACATCCAAGCGGGCGGCCTCAAG  
CGGCTACCTCGTGTTCGGCACCAAGTACGGCGGACGAGATGATTTGCCACCAGTACCTGTG  
GCAGGGCAACGAGAAAGTGCAGAACGCATTCCCTCCGCTGGACGCTACGGCACCAAGATCAT  
CGGGACCTACTTCACCGGGGACAACCTGATGGTCCCTATCCAGAAGGGTCAGGAGATAGC  
CCTGGGCCGGATGCACCTGAACAGCCTGCCTGCACGGGAGGGCCTGCAATATCCGAAGTA  
CGACTACTGGCGGCGTATCGAAGCGACTGTCGAGGGCGAGCTGGAGCTGACCAAGCAGCA  
TTGGGACCTGATCAAGGACGCCCTGCCGTGTACCAGCTACAGCCCGTGGCCGCGCATT  
CATGGAGCGCTACCAGCTCGGCGTGAAGCGCGAGACCAACACCAAGGTGTTCCCTCGACGT  
TCCCGAGGCCGTTGACGGTTCGGTCTACGTGGTTGGCTGCGAGTTCTGGTCCAAGGTGGA  
GTTAACCCCGCCAGTGCTGCGGGACCACAACGGCCTGCCGATGACCTCGGCCCGTGCAGT  
GCTGCACCGCTACAACGTCAACTTCGGATGGACCGGAGAGTTCCTGTGGCGCATCAGCGA  
CACGGCCCGGCCAACCAGCCGTGGTACGACACGACGCCTCTACGGCTGTTTCAGCCGGCA  
ACTCAACGCCGGCGAGCCGCTGGTGGACAGCGCCGTGGTGGCCGTTGCAGGCCCGGGTCCG  
TATGGCGACCTCCAAGTTCGAGTTGAGCTGCCATAGCCCCTACGATATGACCGTGCGGGC  
CGTGGAGTACAACCTCAAGTCTTACCAAACCTACAGGAGGGTGTGATGGCATTCTGGCTA  
CCACTACTGGCCGCTGGCGGCATGTCGGCTCTCCAGCAGGGCCTATCCAACAAGGAAGAA  
CGCCGCAAGATCAAGGCCGAGAACAAGGCCCGCCTCAAGACGGACCTCGACAACCTGGGC  
GCCGCTGCCCGCGACATCGCCAACCTGGGCGTCATGGCTGCAAGCTACCGCAAGCAGGCC  
GTGGCATCCCAGGTCGAGGCCAAGCGGCAGGGCATGCTCGCCGGCGGGAGCGCCTCGGCA  
CAGGCAGGGGCTTCGGGGTCAAGGGTGCATCCGTAGATGCGGTGGCCCTGGACATCGAG  
CGCGAGGTGGGCGAGGCCCTGATCCAGATTGACGATAACCTGGACAACCATATGTGGAAC  
CTCGCAGAGCAGACACACTCCATCCAGGCCAGGCTAAGGCCGGCCTGCTGGGGCAGAAG  
AGCACACAGCGGGGCAACGCTCCCCGCTGGTTCGCCGGCCTGATGTCTGCTGGTTCCCTA  
TACGCAAGCCAATACTTCAAGTTCGGCGCCACGCCTAAAGGAGGCAACTGATGGCGGAAT  
CGAACGTGCTTCCCAGGAGCTTGGGATCAACGTCGGACAGACTCAACTCCAGCCGGGCC  
AGAGCGCCCGGCGCGGGGTGCGAGACTCCGAGGTCAACTATAGCGGCCCCAGCGTGGGT  
CGCACATTCTCGACGGCATACTTGGTGCCGGTCAGCAGATCGCTGGCAAGTGGTTCGAGC  
ACAACGTGCAGCAGGAAGTGCTTCGCGGGCGAGCGTGCCCGCATGGCCGGGGAGGCCGACG  
ACGCCGTAAACAGCAACATCCTGGCCAAGCCCTTCGTGAAGGGCGGCTGGCGCAAGCAGG  
GCTACCGCATCGCCAGGCTGACCTCAGCATCAAGAAGCAGCAGTTTATGGCCACCAAGG  
GCCGGGAGATGACTCCCAGGAGTTCGAAAGCACCTGTTCGAGGAAGCGGCCACAGTGC  
TGGACTCCACCGAGGGCATGAACCCCAACGACGCCCTACAGGCGCTGGCCAGCAGCAGA  
AGGCCGAGGAACAACCTTTCGGCATGCAGGCCAAGGCCTACATGGACTGGTCCATCGACC  
AAGCCGCCGAGGCTTCCGCACCCAGGGTAACAGCAGCCTGGACAAGGCCGTGCAGGCC  
AGGCCACAGGCGACGAGCTGTCCCGGCAGTTGATCCTGGAAGAGGCCGGCCTGTTCTACA  
CCAACATCATGACCTCCGAGGACATCCCGCTGGAGGTGCGCGACAAGGTGGGCATGCAGT  
TCTTGGCGGCCAGCCTGGATATGAACCAGCGGGGCATCTACGAGAGTCTGCGCGACGCCG  
GCTTCCCTCGACGGCATGGCCTTCGACGACCGACGTGCGCTCAATGGCCTCTACGAGAAGT  
CGAAGGCACAGACCCTGGCCAAGGACTCGATGGCCACGCTACGGGCCGACGCTGACTTCC  
AGCAGCGGGTGGCATAACGGTGCCATCACCGACCTTGCCGAGGTTCGAGGCGTATTCTCGGG

GCATGGTGGCGGAAGGCCGCTGGAGCGACGCACAGGCCGCTCCTTCATGACCAAGGCTA  
TGACCGGCCTGGGCAACGCACAGCGCATGCAGGGCATCATGGCGGCCCTGGAGGCCGGCG  
ACATCAACGCACTGCACAACCTCGGGACCCACGTTACCGAGCCCCTGGAGCAGTGGGATA  
AGATGCAGGCGGCCAACGGCTCCAGTCTCACCGATCGGTTGGTACAGGGCACGCGACTCG  
GCCTACGCCTCGGGACCTTCCCAGGACCTACGGCGAGTCCGTTGGCAGCGCGGTCCGCA  
TGATCCAGGCCGCCAAGGAAGGCGAGGCCAACCCGGAGTTGGTCAACACGCTGAACAGCA  
TCTTCGAGCAGCTGGCCTCCGCGCAGGAGATCAATCCATCTGCCGGCAACGTGATGCTCT  
CGGGTATCCCAGGAGGCCGAGCAGGGCGCCGTAGCCTGGGCACTCAAGCAGATGAAGATGG  
GCATCGCCCCGGCGCAGGCCCTGCGGGAGTTCAGCGCCAACGCGGAAGTCGTCAAGCAGA  
TGGACGAGTTTGAGAAGGGCCAGAACACCAAGGCCTTCAAGGACAACCTCGGTAAGCAGG  
TCAACGACAAGTTCGTGAACAACATCTTCGGTTCGGGCCTGGAACATGCTGACCGGAGAGA  
GCGACCTCAGCAACAACGAGGCCGTCCTAGGCATGTACCGCCGTGCAACCATCAACGAGG  
CCAACCTGGCTGGCAAGCGACCGCAAGCACGCGAGGACTCCTACCAGCGACACAGGCCGGG  
AGGCTCTGCTGGAGATCGCCGCCGCCAACGTCCGCAACCCGGACTATCCAGGTCGGTGAGT  
CCCGCCACCTCAAGGAGGGGGAGCTGTTTCAGCCGCCGCGACAGCGCGCCGCTCATCCTGC  
CGATATGCAATACCGCCGAGCAGCTATTTCGGCACCAACGACACCGAGACCGTCCGGCGCAG  
TCCTGGCCGAGCAGCACAAGCCGCGAGGTTGAGGGCCTCCTGGGCTACAAGTCCGTGGTGG  
CGTTTGAGTACGACCGCACCAAGTGGCAGCCTACTCGCCGTCGAGTATGAGGAGAACGGGG  
TGGCCCTGGACCGTACGCGGGTTCGATCCACAGGCCGTGGGTAACGAAGTGCTCAAGCGCA  
ACTCCGACAAGCTGAACGCTATGCGGGGCGCCGAGTATGGGGCCAACGTCAAGGTCAGCG  
GCACGGTCATTCGCATGAACGGCGGCAACAGCGCCGGCATGTTGAAGCAGGATGTGTTCA  
ACTGGCGTAAGGAGCTGGCACAGTTCGAGGCCATTCGAGGGGAGGCGTACAAGGATGCCG  
ACGGTTATAGCGTGCGCCTGGGTCACTACCTGGGCAGTGGCAATGCTGGGGCAGCAACTA  
CGGTCACGCCTGAGCAGGCCGCGCAGTGGTTCGCCGAGGACACCGACCGAGCGCTCGACC  
AGGGCGTGAGGCTGGCCGACGAGCTGGGCGTTACGAACAATGCTTCGATCCTGGGCTTGG  
CCTGAATGGCCTTCCAGATGGGCGAAGGACGTGCCCGGCAGTTCAGCAACACCTTCCAGG  
CGATCCGGGATCGCAACGAGGAGGCCTTCGAGGCCGGTGTTCAGGAACAGCAAGTTGTACC  
CGCAGACGCCCAACCGGGCAGAGGCATTCATCAAGCGCATGGCGCCCCACTTCGATACCC  
CGAGTCAAGTCGGGGTTCGACTGGTACAGCGCCGCAACAGCGGAGTAAGACATGGCAAAGC  
AATTCAGGGCCGTATGACGCCCAAGTATCCCCTCGACCAAGCACCGCTCGACGAGGCC  
AAGTACTGGGTCAGCTCGATGCAGTGTCCACCGTGGGGTTCGACGCCCTGACGGGCGGGCG  
AGATCGGAGAACGGAACGTGGCGGCAGGCCAACGTGCCAACGCTCGGGAACCTGGAGCGCA  
TCGTCGCAGACCAGAACATGCCGGCCCTTGACCGTGTCTTCTGCACTCTGGAACCAGTCCA  
CTCTCGTCGGACGCTGGGGCGTTCGCTCCAACCCGACGCAGACCTTGCGGCGAACAGCA  
CCGGCGAGGTGGACCCCAACTTCGACGCCGGGACCTACGGGGTCCAGGCGCTCCAGGCGG  
CTGGCATCCAGCCGACTGACAACCTCCAGATCATGGCCCGCGCCGGCAACGCATAGG  
ACACGGCCTACCTACTGTTCGAGGATTCACCGGTATGAGCAAGACGAGCAAATCGTGCGGG  
ACAACCCGTAACCTGGAACCTTCGCAGCGGGCATGCTGGACCCCGGCTGCGCTGGCAGTTCGATG  
CGTTACTTTCGGTGTGGCCGTGTTCTACAGCTCGGTCTGTGCTGGCATGGCTGCTGTTG  
GCGGCGCTGGCCAAGTCGGGTATGTTGCTGGGCTGGATGCCGCGAGGTGCCGACGTGGATG  
CCGGAACCTACATCGTTCGCTGGCGCTCTCGGTGCTGGCGTGGGTGCTCTGCTGGGGTCTG  
GTGCTGGACGCATTGCCGCCGAAGCCCCAACGCAACCCGCATGTGCCCGAAGTATCGGCCG  
CTACTGTCCGGCTGCCAGAAGTAGCGAAGACCGCCGAGGAACCCGCGCTCGTGGCTTCA  
AGGCAGGCGATGTGGTGGACCTGCTGGACGAGGGCACTGTCCTGTCCCGGGTAAACTCCC  
GAGTGGAGCAGGCCGAGATAACCGGCTATCCCAGCGCCGGGACACTGCCTTCGGTGACGAGC  
TGCACGGCCTGTCCGGGCCGAAGCTGTCCGAGGTGGTGGACCACCTCAAGACCCACGCCG  
AGGTGCCCAAGCCGTTGCAAGGCGTGGCCGCCAAGGTGGCCGAGACGTTGAAGACCCTGT  
AGGGCCTGGGGCAGCGCAACATGTTCCGCGTGGTGCAGGGCGGGGATACCGCCAGCTCCG  
CCTTCTCAAGCCAAGCACGGCGGGTCTGCTTTCGACGCAGGGATTGGACACTCTGGTCC  
AGGTGCGTGGCAGCACGGCGCCGGGCGGTGGGCACCAACCCGGTTCAGGTCCTCCACG  
AGGCGGTTACGCCGCCACGGTAGGCGTGATGAAAACCGCCCTGCGGAATCCTGGCGCGA  
TCACTCCAAGGTGGCCAGGCCATGCAGACCCTGGAGAACGTCCGGGGTAAGGTGCTCA  
ACGCCTTGAAGCAGGACCGGGGCGCCGGTCCGGCAACTGTCCGAGTTCGAGGAAACCCTGC  
TGGCGGGCAACTCCAACACCCTGGCGAACGTCAAGGAGCTGGTGGCCTGGGGCCTGACGG  
ACACCCGCTTCCAGAAGACCCTGAACCCGGCTGCGCTACGGGGACGGCGGGAAGGGCCTCT  
GGTCCCGGTTTCGTCGAGGGCATCAGCAGCCTGCTGGGCTGCGGCCTGATGCGGACACGG  
CGCTGAGCCGCGTCTGGCGGCCTCAGAGACGATCATGGACGCCATGCCGGGGTACACCA

AGGCCAGGCCAAGTGGGCCACCAAGGGCGCGCCAGTGACCGAGGAGGCCAGCCTGGAGA  
ATATCGTGCATCCACCCGGGAACGTGCCCGAGAGGGTGCCGGCTTCGTGAACCGATTCT  
TTAGCGAGGCCGACCTCCTGGCACAGCCGGGAGAGGGTGCGCGGCGACTCCTGAGCCGTC  
TTATCGACGGCCCGGTTTCGTGCGGGATAGGTTTCAGCACGAACGACAACGCAGCGAGCTATT  
TGCGCCGCTACCGCAACGAGTTCGAGGGCTACGTCAAGTCCTACGACGAGATGATGGCGA  
AGGCGATGGCTGAGCAGGGCGTGGGCCTGACCGCTCGGGCACTCAACTCTCGCCGCGCTA  
TGGCCGTCCGGGATCAGCTCAACGAGCAGGTCACCCGGGAGCTGCTGCGCTGGGACCGGG  
AGTGGACCGCCTATGGCAGCGTCCGCGTAGACCCGAACCTACCGGCCACCATCAAGGCC  
TGGCGGACCACTCCGACGAGATTCACGGACTGATGGGCCAGCGTGCCCGGGAGGCCGGCG  
TGCGTGGGTTTCGAGA ACTTCGCACCACGCCCGGGTACCTCCACCGCTCGTGGA ACTGGT  
CGAAGATGGCGCAGATGGACGAGGCCGCCAGGCTTGGCTCGCCGCGCTATCAGCGAAG  
CCGTATCCGGGGCATCCCTGGATTGGAACGTGCGGATGCTGACACCATCGCACAGGCCA  
TCGTACAGCGGGCACGAGACCGGGCGACCGGTATCCGCTCCGAGTACATGGATGCGATGG  
GCGTGGCTGATACGGCCTTCATCCGGCAGGCGCTGGAAGAGGCCAACGTGTCCCTGGCCA  
AGTTCGTGAGCATCATGGCGAAGATCGAGCAGAAGCAGTCCGACCAGGGCACCGTCAAGT  
ACGGCAAGGGCCGGCTGTCGCTGGACATGACCGGCGAGATCAACCACAACGGCACCGTGT  
ACCGCGTACAGGACCTGATCGACCGGGACCTCAACCGACTGATGTAGA ACTATTTCAGGCA  
GTATGTGCGGGCCGCTCGGCACTGGCTCGGGCAGGTATGCCGGGCGACTCCGAGGTGAGG  
CGTTCATCCGTGAGTACCAGCGGGAGGCCGCGCACCTGGGCACCGACAAGGTGCAGGAGC  
TGACGGGGCAACTGCGGGGCGTCTTCGGGGACTTCACCGGCAACGTGCCGCGCGAGCACC  
AGCTCGGCCCGTGGCTCAGCGGGCCAGCGGGCTGACCAGCGCCACCATGTTGGGGTCT  
CCGGCGTGTACCAGCTTGCAGAGCTGGCCACGATGGCCCAACGCGAGGGCGTCTTCAACG  
TCATGAAGGCCATGATGAACTTCCGCCTCGGGGACTTCATAGGCGCCATGCGCCGTAACC  
CGGACCTCGCCGACGAGATGCAGACCGTCCCTCGGCCTGAACCTCGCCAACGACATCCGCA  
TGAGGCCCTGGAAGCGGCAGTTCGACACCTTCCCTCGCCAGCCAGGATACTTCATGGATC  
GCTTCTGACGCGAGGTAAGCAGGCTGTCCCGGTCCTCAACGGCATGAAGTTTATCCACA  
ACTGGCAATCCCGCATGAACGCCAACCTCACCTTGAACAAGGTGGCGCGGGCCGCGCAGG  
GGGATGAAGCAGCCCTTCGAGTGCTCCAGCAGTAAGGGAAGGACGTGGACTGGACGCCAG  
TGCTGGCGGGGGTTCGCGGTTATGTACATAACAGAGGAAGGAACGCCAATCCATGAATT  
GGGGCGCCTGGAGCCAAGCAGACGTGAACACCGTCATGAACACCGCACTGCGGATCATGG  
ACGACTCGCTGCTGTATGGTAGGGTTCGGTTCAGAACTCGGGCTTTGCCCGGTCACCTGTG  
GTCAAATCCAGGGCCAGTTCGCGAGCTTTCGTGGCCTTCGCGCACAACAAGTCTCCTCCGGG  
GAACCTACGTGAACTCCGGCGTGCTTGGCGTGGCCTCGCTCCTCGCATTCCAGTATCCGC  
TCACAGCGCTGATGATGGGTGCCAAGGCAGCGATCAACGGCAAGTTCGACA ACTGTGATG  
AAGGCATCCGCAAGATGGCCATCGACGGCATCGGCTACACTGCCGGCCTCGGCTTCACCG  
CCGACATGTGGGGCGTAGTCACCGGGCACTCCCGGATGTCCGCCCAGGTCTTCGGGCTGG  
GGGAGCACTCCAACGAGGTGTTCCGTGGCGTCAAGGACCTAGTAACCGATGACGACCCCG  
CAGCCGCCACCGGCGATATCGTCAGCGGCGCCCGCAGGGGCACTGCCTGTGCTCAACGTAT  
TCCCGGCGACCAAGTTGCTGCTGGAATCCATCAAAGGGGAATAACGTGGCTCGGTTCAAG  
AATCCCGAGACCATCCACGTTGCAGATGGGGTTCGAGGCTGTCTTCAGTCTCGACTTCCCG  
CTCCTGCGGCGTGAGGACGTATTCGTCCAGATCGATAAGATACTCGTCACCGACTATAACG  
TGGGTAGACGACACCAACATCCAATTGGCCGTGGTGCCGAAGAAGGACCAAGAGGTCCGC  
ATCTTCCGCGACACGCCCGCCAGGTCCCGGACACACAGTTCAGCCAGGGCATCCCGTTC  
CTGCCTCGATACATCGACGCGAACAACAAGCAGCTCCTGTACGCTGTGCAGGAAGGCATC  
GACACCGCGAACCTCGCTCTCGATGGCGTACTCGACGCGATCCGTATCGCCGAGGAGGCT  
TGTCGCCTGGCGCAGGAAGCACTCGACGTGCCAATGAGGCCCTCGCCGTGCCCTGGGC  
TTCGCTGAGATTTCGCACCGTGACCGAGGACTCGGATATTGATCCGAGCTGGCGGGGTTAC  
TGGAACCGCTGCATCACTGCCGACAAGCCTCTGACCTTGACGATCCAGATGGAAGACCCG  
GATGCACCGTGGGTTCGAGTTCAGCGAGGTTCACTTCGAGCAGGCCGGTGTGCGTGACCTA  
AACATCGTAGCCGTTCCCTGGCGTTACCATCAACCGTTTGCACAACACCACCATGCAGCTC  
TACGGGGAGAATGGCGTGTGTACTCTCAAGCGGCTGGGCGCTAACCACTGGATCGTGTTT  
GGGGCCATGGAGGACGAATAATGCGCGGCATTATCGCGGGCATCATGGCCTCCCAAATTC  
GACGGCCCAAGCCATCCTAGCGACCTACCCGTATCCCATCATGGAGGCGGATAATCGCT  
GGGCTGCTCGGCCCAATATCGTGGCAGCTCTGACCAGGGCACTCTGAAGCAGGTCCGGC  
CAGAAGACACGCTGGAGCACTACAGTGCAGCCACCGCTGTACTGGCCGCCAGCATGCGCA  
GCCTGACACAAACGGGCTACGGCGGGGCTGGCCGTACCAGCTCGTAACAGGTGTGGCAG  
ATACCACCCTCCGGTTCGCTGGTGAAGTCTACTACGGTTCGAGGCTCAGCCCTATATAGCCA

CGCCGGCGATCCACTCGGCGGACCTGCGGGTAGTGCTCATTATCTCGGATTACGAGGTAG  
AGTCGTTCCATTACACCCTGACCAACAGCCTTCTACAGGCGGAGCTGAAAAATGTTTAAAG  
ACCGAAGTAAAGGGACGTTACTCCCTGATTCGCCGCAAGGCGGACGGCACTCCGGTGGAG  
ACTCTGGAGTTCGACAACATCATTACGAATGCGGGCCTGGATTGGATCGCCGCTATGGAT  
ACCGACCTCATGGGCGAACTCGTAGCGGTGAGCACTTCTACGGCCGATCCCACCCCGAGC  
GCACCCGCCATCCCGGAGGTTGTGCAACGCACGTCCGCATCTGCCCTGGTGGAGGTACT  
ACGTCGGGCTGGATGGCGACTGGCTGTTTTGGCGGAAGCGTTGGAGATTCCCGCAGGGC  
ACCCTAGCTGGTCAAGTCCTGGCCACCGTGGGCCTCATCTGCAACTCGGATCGTCGCTTC  
GAGAATAACACGGGTGAGCTGATCCCGAAGGATACCCCGCTGTCGTACACTCGCATCAAG  
GACGCCGCGGGCACCTACTACTCTGGTGGTGGCCGCTGACGAGATTCTGGATGTCCAG  
TACGAGTTCGCGAGCCGGCCCGCAGGAACGGCTGAGGCCAAGTTCGTGATCTCCGGCGTG  
GAACGCACCATCCGGCTGATCCCACAGCCTTTTGCGAACCGTGCTAATCTCTCCGGGGAA  
CGCTACATCTTCTACAACACCAGCCCTACATCAACGGCAAGCACCCCTCCGGCGGCAAT  
GTCCGAGACGGTCAGTGGCAGAAGAAATATCCCAAGTACGTGCGCGGCTCCTACAAGGCG  
CAGATCACGCTGCTGGCCAGGTCCAGAACGGCAATATGGCTGGCGGCATCACGGGCACC  
GAGGAACTCCAGATTTACAATGGACGTA ACTATGTGCTCGATATCAACCCGCCTGTTGTG  
AAGAACAATAACCAGGAGTTCACCGTGACCCTGGAGTTTACGGTGGCGAGGGCATAACCT  
ATGGCACTGATCTACGACTTCAACCCGGACCTTGATCCGAAGGCTAAGTCCAAGTTCGTA  
GGTGC GCGAGGCCGTAGGGACATCAGCGACGTGCTGGACTTCTGCGACGGTGGTGTGGCT  
ATCCAGGACCCGTCGAGGGCATGTTGGTCCGCGTGTGGCGAACAGAGCTTCCCAGGAC  
GGGACCTACCTGGGTACGAGGACGGCTCGAACGAGATTGCGATCAGCGGAGGTATCGAA  
GAAGGTATCTCCACGATGTACCTCGACTTCGACAGCAACATGAACTACGTGTGTGCTTTC  
GTACGAGCCGACCGGACTGGTGAATCTCCTACTTCAACGTGCAGCAGGGCCCGGCTC  
CTCGTGGAGCTTGGGCAGATTGACGATGCCAAGGTGGCTCTGGACGACAAACGTCCGGGG  
GCTACCGCCTGGGCGCAGGCTATCGTGCCCTACACACGCAAAGGGAACCTCTACGTCCGC  
ACGCAAAATGATAACTACACCGAAGAGCACCTGGAGGTGGATAACGGCAAGGTATTCCGG  
TCTCTGGTGGAAATGCGGTATGGGCACCAACCTCCGCTTCCAAGTCCAATTCAGAGGGCAC  
AAGTAATGAGTAAAACCCAGACCGCGAGTGCTGAGCGGCTGGGCCTGCTTCACGAGCTGG  
TCTGCACCGCTATCGAGCGCAACTTCAAGTGGTACATGGACAACGACATCCCGATCCCCG  
CATCGGATATCGCTGCCGCCACCAAGTTCCTCAAGGACAACGAGATCACCTGTGACCCGT  
CCGACACCATCAACATCGACCGTCTCCGCGAGGAGATGCGGCAGGCGCAGGCGGAGAATC  
GCCGAATTGCCTTGGAGGGCTTCATCGCTGGCGAGACCGACGACGAGATGGAACGCCTGT  
ACACCCACTAAGGAGGCAGCATGCCGCCGAAGAACAATTACAGATAGCCACGAAGTGC  
GGGATATGTACCCGCGCTTCCGGGACTTCTGCCTGGACGCCATGCTGTTCCCTCGGGATCA  
AGATGACCTCGATGCAGCTCGACATCGCCGACTTCATGCAGGACTCGCCCAACAAGGCGA  
TGGTTGCTGCCAGCGTGGCGAAGCTAAGTCCACCATCGCCTGTATCTACGTGGTCTGGT  
GCATCGCGCAGAACCCGGCCACCGGTGCCATGCTGGTCTCCGGCTCCGGCGCCAAGGCCG  
AAGAGGACGGCCAGTTGATCACGAAGCTGATCATGCATTGGGACCTGTTGGCGTACCTGC  
GCCCCGAGGCCCGCATGGGCGACCGGACCTCGGCTACCAGCTTCGATGTGAACTGGGCGT  
TGAAGGGCGTCGAGAAGTCGGCCTCCATCAACTGCATCGGGATCACCGCCGCCCTCCAGG  
GCTACCGGGCTGACATCCTGATCCCTGACGACATCGAGACCACGAAGAACGGCCTGACCG  
CAACCGAGCGGGCCAAGCTGACGCGGCAGTCGAGGAGTTCACCTCCATCTGTACCCACG  
GTATGATTCTGTACCTGGGCACTCCGCAGTCGCGGGAATCCATGTACAACGGCCTGTCTT  
CGCGGGGCTTCCCTCATGCGCATCTGCCCGGGCCGGTTCCCGACCCTGGACGAGCAGAAGC  
GCTACGGCGAGTGGCTGGCCCCCTCTATCGTGGACCGTATCGCCCGCCTGGAAGAGAAGG  
GCCACAACCCCGCACAGGCAAGGGCCTGGACGGCACCCGGGGCTGGGCCGCTGACCCGC  
ATCGCTACAACCAAGAGGACCCGATCGACAAGGAACTGGACCAGGGTGCCGAGGGCTTCC  
AGCTCCAGTACATGCTGGACCCAGCCTCGCCGACGAGCAGCGCATGCAGCTAAAGCTTC  
GTGACCTGCTGTTTCATCGACGCGACGCACGAGAGCGTACCCGAGCAGGTGGCCTGGGCTG  
CCGACGAGCGCTTCAAGCTCGAGTTCGACGCCACCGATTCCCGGTTCATCAAGCCTGAGC  
TGTACCTGCCGGCGCTGATGGCTGGCGGCTGGGCACCGCTCCAGCAAATGACGATGTTCCG  
TGGACCCTGCCGGCGACGGTGGCGACGAGCTGTCGTATGCCGTGGGCGGGACTCTTGGCC  
CGTACATCCACGTCGTGAGCATCGGCGGCTGGAAGGCCGGCTTTGCCGAGGAGAACCGGG  
AGAAATGTATCGCCCTGGCTGCGCGCTATGGCGTCAAGGTGATCTATGTCGAGAAAAACC  
TCGGCGCTGGTGCAGTTGGACAGCTCTTACGCAACCACATGCGATCCATCGACCCGGACA  
CCAACAAGCCCCGCTATGAGGGGATCGGCGTAGAAGACCGCCAGAAGTCCGGACAGAAAG  
AGCGTCGCATCATCGACATCCTGCGGCCCATCATGCAGCGGCACCGTCTGATCTTCCACG

TATCGGCGATGGATTCCGACCACGTGGCATGTCAGCAGTACCCAGCGGACAAGCGCAATG  
AGCGCTCCGTGTTCCAGCAGATTCACAACATCACCACCGACCGAGGCTCACTGCCGAAGG  
ACGACCGGATCGATGCCCTTGAGGGCCTTGTCCGCGAGCTGACACCATCGCTCGTAAAGG  
AGGACGAAGCCGCAACCCGCGCTCGTGAAGAGGCTGCCAAGAAGGAATGGCTGAACCACC  
CGATGGGTTACTACTAAGTCTGTCTTCGGTCTCTCGGCATGGGGCCGGGAGCGTCGCAAGG  
GCCGCCAAAAGGACGAAGACTATGATGATTGATACCGCCACGGAGGCGGGCAAAGGCAC  
CCTCGCCGTCACCGGCGTGGGGATCGCCGTTTACTCGCCCTATGAGATCGCCAGCCTCTG  
TGCTGCGGTACTCACCGCGCTTACGTGGGCGCCAGCTCATCACCTGCTCCGGAAGAT  
GCTCGATAGCATCGCGGAGCTTCGCCGGAGGTTCAAGAAGTGAACAAGCCCCTGCGCGGC  
GCAGCCCTTGCGGCTGCCCTCGCCGGCCTTGTGCCCCTGGAAGGCAGTAAGACCATCGCC  
TACCGGGACATCGCCGGCGTCCCCACCATCTGCTCTGGAACTACTGCCGGGGTACGATG  
GGCGACAAAGCCACACCAGAGCAGTGCTACCAGATGACGATCAAGGACTACCAGCGCTTC  
GAGCGCATCGTCTGGACGCCATCAAGGTGCCGCTGAACGTCAACGAGCAGACCGCCCTG  
ACGTTCTTCTGCTACAACGTGGGTCCAGTCTGTACAACCAGCACAGCGTTCAAGCGCTTC  
AACCAAGGCCGCGCCACTGAGGGCTGCCAAGCCCTGGCCATGTGGAACAAGGTCACGATC  
AACGGCCAGAACGCCGTATCGAAGGGCCTCGTGAATCGCCGCAACGCGGAGATAAAACAA  
TGCCTCGAACCATCGTGGCAATACTCGTCTTGTGTTAGCCCTGGGAGCCTCGTACG  
GCTTCGTCCAGAGCTACCGGGCCTTGGGTATCGCCCAGGAGGAGATCAAGCGGCAGACGT  
CCCGTGCGGAGGCCCTGGAGGTGCGCTACGCCACCTTGCAGCGCCACGACCAGGAGGTCT  
CTGCCAGGACCAACACCCAGCGCCAGGAGGTTGACCATGCCCTGGACCAGAACCGCCCGT  
GGGCTGACCGGCCTGTGCTGCTGCTGCTGCTGTTGGCAGCCTGTGTAACCGCCCCGGCGACC  
GCTGTGCTGTGCGAACACCCACTGATTGACCCTACCACCCAGGCTGGCCTGATCCGCGCT  
GTAGCGGCCTATCAGGACGCCCTGGACCTATGCAACGCCCTGAATCAAGGAGATTGACAT  
GGCGAACACCCGCGAGCAGTACCTCGCTGGCCGTAACACCGGCCTGACCTTCTACCAGGT  
GTGCCAGCCCGGCACCGACAACCGCATCGCCCTACACGACATGGACGAGGCCGATGTCAG  
GGCAAAGGCCACCGCTGTGATCGCAGCAGCCACTGCCCTGGGCGGCGAGGGCGGGCGCTAC  
CCCACCGGACCCGCTCACCGCCTACAAGGTGGAGAACGGTGACACCCTGCCCGTGGACGG  
CGGTGGTTCCGTGAAGGTGACCATAGCCAACGGCGCCATACCAATGTGCTGTACACCGC  
ACCGGCGGGCTGAGCTTCAGCCCGTCCAACCTGACTCCATCCGTAACACAAGGAACTGAT  
CCATGGCAACCTTCGCCGCTGCAACTCAGAAAGACCTCAGCGCCTTCGCCGGCACCATCG  
AGAACCTGATCCGTCCGCTGGAAGAAGCGGCCCTGGGTTCTGGCTACAACGAGACCAAGC  
TGCAGGCTGAGCTGGTTCGCACACCTCGACGAGCTGATGGCTGCTGTCGAGACTGCCAAGG  
TCAAGGTCTACGTGTAGTAGTTCAAGCCGAGCACCTGCATAGTCGGGTGCTCCACTGGAA  
CTACTGGAATTTTTATTGAGGGTGTGTGTGGGCTGGGTTGGCTGGTGTGGGCGGGAGTAG  
TACTCCGGGTCTAATTTTGGTATCGTTCGTGTGAGAACCCTCCCGACTCTGATCAGCCCA  
CCCTTCCCCCGTAGGCCCTCCGCTGGTGGGCCATCCTCGCCTTGCCTGGGTGTTGCCTG  
GGTCATCCCTGGGAGCTTCCGGCTTCGCCGGTGGTGCAGGTGGGCTTCCCTGCCCTGTGCG  
CAGCCATTCTACACGGCTCAGCGGGAGTGTCAACCCTTGGGCTTGGCCTGTGCTCTACC  
GGGCTTGGCCGTAGTACCTGGAGCGCTCCAGCGCGTTCGCGGTGCATGGCCCCGGCTACCT  
CGTACTCCTGGGATGCCTGCCGCTTCCGCCAGGGTGTGCGTAGTGCCGGTGGTCTCTGCG  
CTGCCACTGTGCTAGCTGCCTCTGCCATGCCGCGTCTGCTGGTACCAGGCACGCTCAC  
CTCTGTTCTGTCTGCTCAGCATCCTCCGTGCCTCCTGTGGTCCTGTGCGGTGGTGGTGCG  
GGAGTGGCTGGC

>NewGenomeName\_155

TTAAAATTTAACATTCTTAACCAGTTTCATAAAGTCTTGTGCGAGTTTGTGCTTATGCAG  
AATACGATAACCAGTTATCTACAATATCATCCAGTAACGGGCTATTCTCTTTAAACTACGC  
ACAAACTGCTTTAATTCGTTTCGTTTGCTGCCGTGAATTTTTTCATCACAGATCTTTTTAGT  
TGCTTCGTCCACAATCCAACGAGTATGAAGGAGTAACTTGAAACCTCGTTATTATAATG  
ACCACGGGACAGTCTGTCAATAAATTCTGGAATACAGCGTTCTAGTTCATCGTCATGAAA  
CAACATAGTGATCACACCCAGATATTCGCCATACCCAGATGATTGGTCTTACCCTTCTT  
CGCCAGACCAGTCCGCTTACCGCGAACAAATTTAGCGCACATTCCAATTGTTCTTCAAC  
GAGATATTTTTGTGTCTCGTTTCGAGTAATAATACTTTGTTACCCCGAAGTAGTCAAG  
CGCCGTATGTAATGTATTTTCACTATAGATCGATTTACGACTACGGCTTTCGAATGCATC  
ACCTACGCGGAACATGTGCAAGCCTGATAACTCGCGAATCTCCGCCGCTTTCATGTGATG  
GCTGGTTTTATGCCAACTGTCACCAATCTTTCCATGATATACACGTTAGCCAGCATGGG  
AGCCGCTTACGTTGTGTACGCTCGGTCTACTCCGGCTTAACTGCTTTAGCACGCATCTC  
ATCGGCCACAGAACTTTAATCACGGTCAATTCAGAATAATCAAATACTGTTTTGATGTA



CGCGATATTCTCCATATGTTTTTCGTTGCGCTGACGGAACACAAGTACCTTTTTATTGAT  
GCCGTATTCCTGGACCATGCCGTTAATAGTCAGTGCACGCAATTCGGGTTATCAGTAGC  
ATCAATAAGACACATAATATCTTCTTTCTGCATCCATACAAAATGCGCAATATTGTACTG  
ACTGCTAACGAAAGCAGGGCGCAATTTGCTGATTGTGAGACGAGTACGATACAGAGTATA  
CACCTGACCTTCTACCTCATTAGGCGAATCTTTACTCGCATTACAAACTTATTATAGAT  
TGCTACCGGATCGTCCATTGTCCGAACCTTACCGATCTTGCTAATAATATTGCGTTGCGT  
CGATGAATACTCGCTCATAAATTGAGAAAGATTACGCTCTGGTTTAATGTTGGCGATCTG  
TTCTTTAACCTTTTCCAACATCACTTCATTGATTTCTGCAATGCGTTTCTCGATGTTTCG  
TTTAGTCTCAATTGACAAGTGAACCTTCTTACGCGATGGCATCAGGTCCAGATCACCCAA  
CTCAAATTAATGTAAATGGTCTGGTGTGGGGGTTTATAGCTTCTAACCATGTTCCGCG  
AACATATTCATACGGGATCGGATACTGGATCTTACTCATGATTGCATATACTATATAGGA  
ATTGTTATCATGCCATTACAAACATAAATAATTATCAAAGCTAGGGAAATAACTAATTCC  
GATTGCATTGATATTGCGTTTGTGTTCCCCAAAATGACGCAGTACAAATTGCGCTTGTCG  
ATGCCATGTCTGAATGTCTTTTTCTTTCCCGGAATAGTGATTTTCAGTCCAATGTCTTC  
ACAGTTCGGTACGTCGACAATCTGCACCAATTTTCGGCATAGAGTTTTGCACAAAATGCCGT  
AAAGCCATAAAGCGCGACCATTCTAATAGTTTACGATTGTAAAGGTGTCGGTATAGCTATA  
AGCAGACTTCGCACCTAAACCAAAGATCCGATATAATCATTAGTCTGGTCTTTTGTGTA  
TTCAAAGTAAACCGTAAACAGTTGTTCTAATTCTTTCTTAGACCGGAATACCAGTACCATA  
ATCTCGCACAGAAAAATACGGTTCGATTGCAGTCGGTAAATGAATATAAAACGGACGATC  
TAATGTTCCGGCTTCTTTGTGAGTGTGGGTAGCATTACATGAATACTCCCGGACGCAAGC  
ACGCTCACATTATTGATAAGTGTTCTTAGAAAGCACCATAAAAGCCTTGCTACTTGCTTT  
CAATGAAAAATCAACCGCACTGCTCATGTCACTGCCAAATACTTCTTCATTATCAATAAG  
CATTTTCATAATATAATCCTCACTTAATTAATAATCTGCTTAGTCCATCGCTGCGTAGATT  
ACATCCCACGCCATAAATCAATAAACGCATTATATGTCACGGTGCAATCGTTGTCAATT  
ACTTCTTTCGCATATTTCTTGATGTTTTCGTAGGAACTTGC GGATCAATTTTGTGTTA  
CGAAGGTGTGCATTTTCATACCCCAAACATTTCAATAAACAGGTACATTGAATTCTTTTCT  
CGATGGCACTTGGCGATCAGATAACCAAACCTTCGACTCATTCTATTCTTATACAAG  
TTCAATCACCCATTGCAGATGGGCTTCTGCGTCAACCAGTTCAGCGCGGCTTTTCTCTAA  
GCACTTGCTGTATTCTTTACGTTTCGCACTCCGCAATTTTCGGTTTTTCAGGACGTCTTCATA  
GTAAGCAATTACGCCTTTCAGGTCTGAAACTTTACGGCTTGCCAATTCGATGTAATGGTT  
ACGCAATTTGCTTCTCCTTAGTAGTATCTCGTTTCGATGGGGACATTATGATCTATCCCC  
GATCCAGTGTCAACAGATTTTTAATCTTTTTTCAATGCATCCATTACTCGCTCTGCGATC  
AGATCTCGTAAGCACTGATAACCATGATATTTGATGGCAATGTCACGCAGATCATTAACC  
AGTTGCGGTACTTTATGGTCTTTCAGATCGCCTCTGTATTTTCGATTTAACCGTGTCTTTA  
GGTGGATTGTGGATAACCTGAAAACCTTGTTTCGGCAATCACTGCGGCTTCGCGCTGGCGT  
TCATGCTATACTGGATTTTTGATCAGGTCTGCTTCCATGAAGTTTGCCATACTCATCACC  
ATGTTATTCTTTTTGCTCATTATTAATCCTCAGAATAGAAAAGGGAGACTCCCATTATA  
GAGAATCTCCCTTGATGTCAACTAAAATTTAAAGATGCAAACCTCCCGTGGTGAATTTT  
TGCATATGCATCATATGCTCTAGCGGCTTCCCTCCGGAGTCGCAAACGACCCTATGTATTT  
TCTGTCTCCGTTTATCCTTATTTGTGCTTGCCACGGTCTTTTGTCTCGATCCTTTGCGATG  
AGTAACACCATTATATATGCTCGTGACCCGTCATTTTCTTTTTATTGTACATGTTTTG  
TTGTTGTGTTGCCTCCCGTAAATTTGGTGGATTGTTGTTTTCTGGATTCCCGTCTATGTG  
GTCTATTACCTTAACCTGTGTTTCGATATTCAAGAAACCAGACAATTCTATGTACAAGATA  
TGTAGATGTTCTATTTTTAACCTTATTGTTAACATCTATTGCCAAATGACCGTAATTTAA  
ATTTTTGTTTTTACTTTATCCCCGACTTGGTAAAAATATCCCTCTGGCAGACCATTAAA  
AGACGGACTATTTATTTTGTAAATATAGTACACCTTCCGTGTGTCCTAATCTTCGTTTTAA  
TTCTCTTGAATTTCTCAATTCAAAATTTTCGCACTTATCATATTTTGACGCCATCTATA  
CCTTCTCATGTCTGAATCTTCACTATAGAGTATATCAAATAGCTCTTTATAGTTTTCCG  
GTAACGTGATGATCTCCATGACAGGTTTCGTTGATCACGCGATGATAGTCAGATTCTGTGA  
GCGATGCTAAACCTTTGATATATCGATTGTTGTAACCTTTGATATTATCTCGGTCCTTCT  
CGAAATCTTCTAGGTCATAATACCATCGAACATCATCACCTTTCTTTGGTTCAGCAATGA  
TAATAGGTGTTTTGATAAAGCGGATTCGTCCATCTTCGAACAATTCAGGCTAACGTGCAA  
AGAAAGACCTCAGACTAGATTTAATAGACCCGATCCCGTCAGTATCATCGTCCGGTCATAA  
TCGCAATATTTTTGTATAACGTAACCTTCCAATGCATCTACACCTAATTGCAAGCCAGTGA  
TAGCCATGGTGTAAAAATTTTCGGCGTTCTTAAACAATCATTGCCTCCGGTTGTTCCACG  
TTGTAAGAGTTTTGCCTCGCAACGGGAAACCTCCATGTAAATCTTGATCACGTACAGAGA  
TCAGATATATGATCGCGGAGTCACCTTCCGTCAAAAACAGGGTAGTTTCTGCGTCACTGC

CAATATGCTTAGCTTTAACGTGTTTTGCTACCTTAGCCCGTTTTGCTGCCTTTGCTGCCT  
TAGTCGCTGCCGCTGTATCTGCTGCCTCTTTGCGTGCCAGGACTACAGCAATAATAGGCA  
TGATAATGTTTTCTTTCTCCCAATGACTTTAGCCAGCTTTTTAAAATCAAGATCAATAT  
GACGCATGATATCACCAGTTGGGTTAGTCAAGCGTCTCTTGTCTGTGAATCAAAACGAA  
GGTTAGGCAATTCACGAACAAGCAAAATACAGGTCAATCCAGACTTAACCGCAGCTTTAG  
TAACATCAACCTTATATTCTTTCTTGATTGCTTTACAATCTCTTCACAAAGATCATCTG  
CCACGTAGTCTAAGTGTGTTCCCGGTTTTTGGTAAACAGACCGTTAGCAAAGGATACTG  
ATTTAAAACCTTCTCCCTCGACCGCCGGGACTAGGGCAAGTGAAAAGTTTTTATCTTCAA  
TGACGAACAGATCATCATTCTATAGGTTAGCATAATCCTTGAACCTACTAACAATACGTT  
TACCGTTAAACTTAAACGTGATCTTAGGAAATATTATGCTCAATGATTGCAGACAATCAT  
GAACAATATCTAAAACAGAGTTGGCCATCATATACCCTTCGAAGTGGTTCGAAGTCTGGGC  
AAAATGTAACCTTTGTTCCCTTCACTTTTGATGGTGACGATGACCATGTGATATTTTTAG  
CACCGTTTGTACATAGAAAGGTCATTTCTGTTTCGCCGTCACAGGTACACACCAGCAAACC  
AATCGATAAAGAAATTTGATAACGACGACCCAACACCGTTCATCCCGTGCCTTAATCGGT  
TGGTATCATCAAAGTTAGACCCTGCTTGCCTTCGTGTCCATGCGGATACTGGTTGCGGAA  
TCTGCGTACCCTCTGGGGTAGTAACCATATGTTGAGGAATACCGCGACCGTTGTCTGTTA  
CCGTAACAATATTGTTTTGGATATCGACGCTAATCATACTGGCAAAGTCAAATTAGTGC  
GAATCGCCTCGTCTACAGAGTTGTCGATGATCTCATCAATGATTTTACCCCGTCCAGGAA  
CATATGAAATTTTTGTCCATTTACCGAACAGGAAACGTTGATGTTCTTCGTAAGCTGTTG  
ATCTTAAATACATTCCTGCACGCTTAAGGACATGCTCACGATCAGATAACATGCGAAACT  
CACTCATTATTAACCTTTCATAACATAACCATAACTTACGGCAACCGCCACGAAGACG  
GCTGCTACAATCATATTA AAAATTGAGTGATTGTGCGAGTATATGACTCATGACACGCGCA  
CATTTTTATCACAGTAGCCGCCATTAATACCGCGCGGGGGAGTTAATCCCTGTTGGCATT  
CTTTACCACATTCAGGGCATTTCGGTCTTTTACGTTTCGGAAATTTTGC GGATTTTCTGAA  
ATTGACCGTGTCTTCACAAGAATAATCATAAAATGGCATATTATCCCTTTGTTTCTTA  
ACTGAATTTGGATCTGGATTTTCTGGCAAGTCTTCCAGACCCATAGCGTAACGTTGTGCA  
TAGATTCGCATAAGAATATCGCGAGCGCAATCATGCATTCCGTCATGCGCGATAAATGCG  
TCTAGCGTACTCATTGGGAACGGGCATTACCCATAACCACGATGCATCAATGTACGCTCA  
ATGGCGGTGCGAACATCTCGGATATTCCAGAATCACACAGGTTCAAGGCTGAACGTCTCT  
CGAGTATTGTGTGCACGGCGGATCATATCAACTAGTAACGGAATATCAAACGCATCACCG  
CGTGAGCACATTACGGATTTAACCGGATCTACTCCTACGGCTTCACAGAATGCGTTAAAA  
CGCGCGAAACCTTCTTTAGTTGATACTTCCGTACCATTTGTGATTAATTGCTTTCTCATG  
CCTTCTGAGGCGGTATTCTTCCACCATTCAACCACACCATGATCAAACACCCTTACACCT  
TTCTGGGAAGGAATATCAAATTTACCAGAAAGGAATAGTCAACCAGTTATTTAAGTGTA  
GGTGGATTGTGCGGATTTTCTTTAAATCCGGTTGCCGCCATATTGATAACCGCCCCAGCA  
GGCGGATAACCTAATCTTTCAATGTCAATCATTAAATCCACTGGAAGCATTTTAAATACC  
GTCCGCGATATGCCGGAACAACCTCCAGATCGTTTTTATCCAGAATGAAACCGCTACAATC  
AATAATGCCGTTACCGTAATTATCGGTTAACAGTCGTTCCGTTGCCATGTATGCGCGTAC  
TTTGTGTTAAAATTCATTACATGTTGTGCATAATCACAATGAATCTTTTGACGGTTCCA  
CGCGACAATTGATTCTAGAGTTATTACATTAGCCACATTATTAATAACCACCATTTCAA  
AACCTCGCTTAGTCAAATGCTCGAACATTTTATTGATACATGCAGCCTCACTATCGCCGG  
ACACGTTCCAGCCGTATAGACCCCATCTAAAGCACATGGTAAAAGTTCCATTGTGACGGC  
TTCCGTCACATCATTAAATTCTCGGATACTTCGCATAATCATAATAATTTCTCAAATA  
TAGTCTACTCGATACCGGGCACGGGTAACACCAACATATAATAACTGCATTGCCAATTCA  
AAGTCAACATTGTCTGTACACATGCAAGGAGTACACAGGAACACGCGGTGACACTGATC  
CCTTGTGACTTATGAATGGTGAAGCTTGTAATGCATTTACATTCCAGAACATACGGTGC  
ATCGTCCAGAATGAATCCCAATCTGGTTTAAATTTTGGATTCTCTTTCTTCATTTGCGGA  
TATTGTCCGGCGACCGTATTCAGATAGATAGAGAAAATTCTCTTCTGACGTTGTTCTGTT  
AGAATATTCATTTCTATTAATCCGGTTTATCTGTAGAGATTCCGTCTGCATCTAAACCG  
ACTTTCTGATTTAGAATCTCTTTGTCTTCGTCATCATCGACGCTTTCCACTGTCAGATTA  
TATCCTAAAACCTGGTTGCGGATCTACCCCGTACAAAGTAATGTACCTTCGCGCGGTATA  
ACCTCTTTAACTCGGATCATCTCACCATTGTTAAAATAAACACTAGGAATCTTCTTCCCG  
CGTTCATCTCGCAGATATTCGATCAATGGTTCCTGAGTAACCAGAATGTCATCTACAATC  
ACTGCTTCATCGGTGTTATAAACGCGCTTACGGACAATTTCAATGAGTTTTTTCGACGCTC  
TTGTTAGTGTAGGCCAGAATACGGTTTCCCTAGAAGGTCTTCCGGCGTTTTAACGGTTTCG  
AATTAATGGTTCATAAACTCCGGCAGAGTTGAGCTATGGAATACACCCTCGTTACCGCAC  
TACGTTTCGAATCCCCATTTACCATTACAGACTGCGGTTCGCCACGTCAATTATTGGCGCA

TTAGATCGTTTAATCTCTGTATGTTCTACATTCTGAAACCTTTCATCCGTGAAGAAAGGA  
GAGATCGACGTTGCACCGCTCGGATCAACTGGTCGTAAGTGGAGCGGATCGCCAACTGCA  
ATAATAACGATTTCGACCGTTGATACTCTTCATGAGAATATCAAATAGCTCCTTCTCGACC  
ATACTCGCCTCATCAACAATGATGAGCTGAACATCATCTAGCTTAGGAGTATGTTTTTGC  
TCAAATAGTTGAGTATCTTCATAGTTGGTCGGGTTTAGTCGCAGTAGTGCATGTAAAGTA  
AATGCTTGACGACCTACAGCTTTACTCAAACCTTTTTTAGCCTGGTGGGTAGGCGTTGCC  
AAAACCACACCAGTTACACCACGGCGGACCATTTCTGAACCTATGAATTTTATCATTGCG  
GTTTTACCAGTACCCGCCGACCACGGACAGTTGTATGCTTCTTTTGTTCATGCGTTTC  
ATTAGAACATCAAAGCATGTTTTTGTCCCGTCTGTAAACATATCGAAAGTTAAACTCTG  
CTCATTATCCTAAAACCCTCACCTTGCGAACACAGATAGTTTTGAGTTCTCGCCGTACCC  
TTTCTTTTTTCATATTCAGGAATTTTATATTCGATACCATCCCGAACAAATTCAGAAGACC  
GGATTGTGCCAAATTTTCGTTTACGTACAACCTTGTATTACGGTTCACCCGCCAATAGCC  
TCTCACAATAATCTATCTGATCACTCATTGACGCTAACGCAGCATCATCTGTTTCGCAAG  
TTAGGACGCGACCCTTCGCGTCCACTGAGTATTGAAAGAATCCGTCTTTATCGCGATAAC  
ATACAGCTAATACATGCATTATAAACCTACCTTCGCTTTCATCAATTCAATCCACGACGC  
ATCAATCGGAGGCCCGTATTTAAAGCGTCTTTTTGTGCTGGCGGTAAGTTCTCATACTT  
AGAAAGAGATTCAATCAAACGCTGGTATATTTTAGCACGACTTCGGTATTGTTTGAAT  
AGCCTTAACTTTTTCTTCTTTCTTGTGATTTCGCTAAGGGCTTGCTTGAGATCTGCAAT  
TTTCTGATAACGTTCTTCCATACGGAAGAGAGTATTTCTAATAGCTCGCTCGACTGCCTA  
TGCTTTCTACGGTTCGTTTTGCTTTTTGTGGCGCTCGATTGCCAATTTCTTTCCTTCGAT  
TGCTATTTCTGATTTTTGATGCGATTCTCGTTAAGTTCAATCCACTCTAAGTACTTCGG  
ACGTAGGGCAATTTTCATCATAAGAAAGTTACCGTTAGTTCCTAGTTCATGGTTCTCTTT  
AAGAGATTCGATAGTGTGATTGCCACCGAAAGAATTGTATTTAGTTTAAACGGGCATTAC  
ATTGCCATCAACATATCCCAGATTGCAATCAATGCGCTCTAAGGAGAGTGCATCATCAGC  
TTCACCGAGAGCCTCACCGGAATAGGCGTAATGAGTCTGTCGGTAAATGTTACGCACAGT  
GACTAAGCTCATAGAGAAGTCTTTGTTGCGACTTGAGGCACCAGCCATGATAGAGTTCAG  
ACGGAAAACAACCAACGCCAATTCTTCGTTAGATTTAAAAGCAAACAGTTTCATAATTGA  
GTCTCCTTAGTTGGTATGTGTGATTATTGTCTATCTGGTTTTGTGCTGTCAACACTTAAA  
TTAAAGAAAATTTGTCAATCTCAATCAGATCGCCATTACACGCGTAAACTTCCTCGATCT  
CATCAAGGATCGTGGTTCGTCCTGTCTTGTATATGCATTTCGCGCTCATCTGCCAACATAG  
CATACAAAGGCAGTCGCGAAGTCGGATTGTCATACTCTTTAGACACCACTCGGTCAATAG  
CATGGTTCGTAATAATTCATGCAAGGCTTGGTAGGTTTTATTGCAATAATCTTTCCTGTTG  
CATAAACATCTGATGCAAAGTCTCTGCTGTTGATTGCAGTGGCGTAAAGTTCAAAGGAC  
GCTCTACAATGACAGAATCACCTACAATTAAGGTATCCAGCTTACGGCCTTCTCATTGTC  
TCATACCGCGATAACAAGGCTTCATGATGCACTAACCGCTCAGTCTTTTCAATCAATCCAT  
TACGGATAGACTTATCGGTATTTTCTTTAGAGTTCATCACCTCATCAATGATGTTAAGTT  
CTTCTGGTGTAAATTGCATAATAAAAAAGCCTCCAATCTTTCGACGGGCGGCATAATTAA  
ACCATTGATTGAGTTTGTCAATCACATAGTGTATGTGATCTATAAATAAGTTTGTAGAA  
CTAAAGGAGATCACAAAATGAACTATAAACGTATTTATGATAACCTGATTGAACGTGCTA  
AGACTAGAAATCTCGACGGATACACAGAAAAGCATCACATCATAACCACGTTGTATGCATG  
GAAGCGATGACCCCAACCTAGTAAGACTTACACCTGAAGAACATTTTATGGCACATC  
TTTTGTTAGGTAAGATATAACCAGATAATAATAAACTGATATATGCCGCTTACATGATGT  
GCGTTTCTTGTTCATGGACAAAGACAAACAATTAAGCGTCACGGATGGTTGCGTAGAAAAA  
CGACGGAAGCGCATAGTAAAAGAATACGAGATAGTAAGGAGAACGATCCAGAATATAGAT  
CTAAGGTTTTCGGAATGGGCTAGAAAAATGGGTAAAGCCGTGAAAGGCGTTAAGCGAGGAC  
CGGAATTTAGCAGAAAGTTGGCAGTAACAAACAGAAATACCGGGAGGAGAGAAGATACTA  
AACGTAAGATCGGGGAAGCCAACAAAGGAAAGAAACGTACAGAAGAATATAAAAGAAAAC  
ATAGTGAAAGGTATAACGGTGAAGGTAATCCGATGTATGGTAAACGAGGAAAGGACCATC  
CCGCATATGGTACTAAACCGTGGAACAACCAACATCATTGGTTGAACATAAAGCATGGT  
GGCGGTTTGTGCTGGCATGTTTTATGACTGGTATCGGAGAGATATTGACCGTGGAACACATA  
AACGCCACGGTCATAAGAGAATCTTGGATGAGTTAGGTATCGTTGGTTGGCGAGAACAAG  
AGCCAGCCGCCGCAAGAAGATCAATTGAGATGTTTCGCTAAACGCTGGAATCCTTATGATG  
ACCAAGCATGGTTAGATTATGTTAATACCCGCTTTCCAAACGACGAGAGTTTTCCCGTT  
CTTCAACATATAACAAGACAAACAGATCCTTCGCAGTAAGCCCAAGGCCAAGAAATTACA  
CATAATGAAATGGAGTTGGTCGACGGCTTCTAGGTATGTTTCCAACGATGCGCCGCAGA  
TAAATCACTAAAGAGGCGGTTTTCGTGCTTCGATATGAGTGGCTTTCCAGTGTTCACAC  
CGCGCTAGCGTCTTCCCGTTAGACATAACCACCAACGCAGTGTACAGTTCTCGCGTTTC

GTCGTC AAGCGC ATTATC ATTAGCTCGAATAGAATCTAAAATCTCTCCACATGTTTTCAA  
TTCATCAAGTTTTGCGAGCCACGGACGGTCAGTTGATACCTGGTCTTGTAAGTGCTTTCTG  
CATGTCCATCATGTGTTGAAATGGGTTATCACAGTTGGCGATAATCTCTTTATATTTTTC  
TTGTGCAAAATTCAGAGTTTCCGCCTTTACTAAGTGTGCACAAGAATTA AATTTCTAACAT  
ATTCACCTCATTAATTA A AATTTACAATATTTTCATAAACCGCATTTTAGCCATCAGACTT  
TGTACGGTGTCTCTTTGATAAATTCCATGATCTGGTCGCGTGTGGCTCCCTCGTCCTGA  
ATCATGGCATTAAACGTCTTTAGAAAGCCGTGGGCAACGATCGCACAATAACAATCTTTTCC  
CCTGCATTGATAAACTTTTCCAGTCGGCGCATTGTATCGGCCGATCGTGGATCCGCATCA  
TGTA CTA ACTCTCGCTGGTCTGGGAAAGGTATTTTCATCTAATCCCAAAGTACCGCCAGTA  
ATTGCACACCCGTTATCAATAAACAATGAATCGATCGGACCTTATAAGAAATACACTGGT  
T TACTAGGATCGGCGCGTTCATGACCAGCGGCCTTACTCGCTGACTCATGAGTTTTAATC  
GTCATATATTTGGTCTTTCCGTAATCCTTTCTCAATGCTCGCCCCTGAATGGATTCTATC  
TTGTTGTCTCGGTTAAAGATAGCAATCACTAAACGCGGCTCAGGTTGTGGATTCTTGAAA  
GTATCAGCCTTAATGTGATTTGCTACCATTGCCATTTTCTCGTGAAATACAGAAGATCC  
CATTTATCGTGGGGAATGCAACGATCACTGACATACTTTCTTATAGGATGATTAGTCGGA  
AGAATATCTAATCTCTCGCAGAAAGGCAATGTTTGCACCTTTCTTAATCTCCGGCTTTACT  
ACTTTTTTTATTGGCTTAAACGTGGTGTCTTGTGGTCGCCTTGTTCCTTCCGTCGTTCC  
ATAAGCCATGCCCTGAATAAGGCAGGCTAATACTGTTTGAGAAATTCACCTCACGGCTGA  
TTGTAGTTACAGTTGAAACAACCACAACGCAA ACTATCCTTATGGGTATTGATACGGAAT  
CGCGCTTGACTATGATTTTTCTTTGAGTGACCGCAGATCGGACA ACTACAGACCACCGTA  
AATGAGCTAGTATGCAACCGTTTAAAATTTTCGTTTCGCCGTATAGGGCTTTTTCCGCTATT  
TCATAATCTACGTATTAATCATACTAACCTCTTATAGCTCAAATTTTCATGAAAGTTCCC  
ACACTTTCAATTTGCATTCTCTCCGTCTTCATCTCAGCCAGATTTGTAGACACTTCCACCT  
GGCGATATGTAAGAGAATACTCGAATACGCCCTACCGGGTCAAGTTCTGTAAATTTCTTAT  
TCTTTTTTCGGCTTCAAAAAGTGCATATGCGCTTTTAAAGACATTTTCATCGTAATCATTAA  
GCGCCACCGATGAGAACATGATAATAATACCAGAATAGAGAACAGTCTCAGACATTTTTTT  
CTGTTTTTTGTCTTTTATCCAGACAACCCGAAAAAGACAACACCCGAAATAGCCGTCACAA  
GCCCGATAATGAATATAATAAACTAACCATTGTCTTTCTCCTTTTTGCGTTTATCTTTA  
CGCGCTACACTAGGTCCACGATTGGTAATAGATCCGCTCGTTTTCCCTGCTGCGATCTTC  
TCAGGATTGCCGCCAGCATCGCCAGCGGT CATATCTTCTTTGAGTTTATTTTTCTTCAACC  
AACTGTTTAAAACCAATCATAGAATAATCTCTTTCAGTAAGTCAACAATCTGGTCTTTTCG  
TCAGTTTATCCTGATTTTCTACAATCTTGATACCCCAATTGTTAACATCTTTGCGAGTCA  
CGCGGGACATCGTTTTAATACGATGAAACGGTTCGTAGAAATATACTGCTTCATTATCGG  
GCGCAGCAATTTTTTGACGCATTTGATCTTTATCGGCCATAAAAACAATTGCAATTTTCG  
GACCTACACCAGCCACAGCATAAAGTTCGGCGACTCCCCAGCGTCCTCCCGGTTCAATCA  
TCCCAGCGTGTTTACCGTTAATAAAGATAAGAATGTCTCCGTTATTTGCGGTTAAAATG  
CTACATCTTCCGGCGTAATCATATTCTTCATAATATCGTCTCCTTAGAGGCTCATTATAG  
ATCGAGAGAACGTAGAAAGCAAATGTTTTATTTCTTTTAGTTGTCGTTAAAGGTCTTTGC  
GTTTCTCTTTCAACTGTGCTTTAGCATTGTTTCGTTGTTTTTCAACATTTTTTATCAATGT  
GCTTAGTACAATTACCAATATCAGCATAAGTTGGCATAACCAATTCTAGACCTAATGCGG  
TTGGATCCAGGGTAACAGTCCATAAACCCTAATCTTCTTAAATACGACTGGGTGTAGTG  
TACTATCTACATCGTCCGGTGTACCTTTTTGTCTCTTTCAGTGGTGGGATCTTGT CAT  
ATGGCTCCAATGAATTTACTTTAATATCAGATACCTCATCAAAGGATCCGCGTACATCCG  
CAGGAAATACACGAGCTATTTCCAACCGTGATCACACAGAGAAGTAATATTTTTCACTC  
CCCCACCATGTGTGATGATTGATGTGACATTGCCATCGAGGTCCACAGAATTTACGAGAA  
ATGGCTTATCGTCTGTCAGATCATTATAAACTGTGCTTCGGCTGTAGTCATCTCCAGAA  
ACTGATCTCGGATCGGACGACCATCAGGTGCGTTACTTTCCTTGAGAGTATAGAAGCGAC  
ATACGATCCATTTTGTGCGGTAAGCTTTAACGATCATGTTATATCTCCTATCAGATCATT  
CACCAGCGCCCCGAGGGCGGATTGTATTAGAAAGTCATGTTGTTTGCTAGCTCGTCGAG  
TTTTTCTCGTTTCTCGGCTTGCTGTGCGCTTTGTGGTTTAACTTGTGCATTCTCCTGATC  
TGCGATCTGGTTTGGTACTTCATAACCAACGCTGATTGCCTTTCTTTCAGACCCACGTTAAA  
CCGTGAATAATAGTTTTTGTACCCGTAAAGAGACTTGATCTGCTTCATGAGTTGGACGCC  
CATTTTAGCCGGGTCTTCCGTTTCGATCACACCCACACAAAGTCGGCAGTAGCTTGAAG  
ACCCGCTGATTCAGCGGTATCACTCATGTTAAGGTTCGGAAGCATCCCAACCCGCGCGGGT  
AGTCTGTGCCGAGTCCACCCACAGCATCCC ACTTAACAAAGAATCCTCGTAGTTCTTC  
CGAATCGCCTTAACTAGTGTGTAACAATTTTCAAAGTATACACGCAAGCGAGACGATGC  
GCAAATCCCCAGATAGTCAACAATCACAACATCAGTTTTTAACTGTTTCTTGAGTCGCAA

TTCATTCATTCACGCCTCAAACCTCATTGGAGTTCGCGCCACCAGTAGGATACTGCTTGAT  
CATCAATTTTCCAACCGGAGGATCTCCGATCTTCTTCTTCTTAACACGCTTCATGCGTGC  
GGAAAATTCCGGTAAAGAAACATTACCATTATCCACTTCATCTAATGTAATGTAAAGCAA  
GTTCTCGGCGATACGTATGGCTACGACATGCTCTGCCATCTCCATTGCGATATAACAAGAC  
ATCATAACCACATTCATATAATGCGCAGCATGAGAACAACAAGCCAAGCGATTTACCAAC  
GTTTACACCAGCAAGCAACACATTTAGCGTTTTTATTTCCGCCCTCCTTTTCGTGATTTT  
ATTCAACATCGGCATCTTAAACGGGATCTTATTCGCCTTAGTCTGATATAGCAAGAATCG  
TTTTTCAAAGTCATTAACAGTCATGACCTACAGCAGAATCAAACGTCATGGATAGTGC  
TTCCTGCATGATCTCAGGAATAGCACCCTCACTAGGCAATTTCTTATTCTGGTTCTCTTT  
TGCTAGTTTTGCGTTCGCCTGAAACTCTAGCGCCCGTGACATTGCATTATACACGGCAG  
GTCACGAAAAAATTTTTCGGTTTCCTTCATTAACCAATCAAGGTCTTCCGGTGTATTCTC  
AAGCGAATGAAAAAGAGTTTTAGCCCCTTCATATGTTGTCTGATTGCCTCTCTCCTTGT  
TAAAACAATCTGTAATGCAGTTGGTGTAGGAAAATTGGAATATTCGTTTACGTGCTTTTT  
AATCAGCCTATAAATCAGTTTTTCTTCGTCTTCGGTGAAGTAGTCAACTTTATGGTGAGG  
CCATACATTCGTAAGAATGCGCCATTGTATATCAACTGTGTAAAGATAGTTTTAATCAT  
ACATATCCCCCAACTACACGCATAACAAAGGTCTTGAGTTTATACCAGAAAGTTTCTTTT  
TTCAACTTGTTTTCTGCCTCTTTGATCTGCGCTGTTAACGCCCTAATGACGTGTGGATAT  
ACCACATCACGATCTGACGGCGTGGAGTAGTCGACCACAATACCTTTAGTGTCTGGATCG  
TATTCAAGATTATGAATATAGACAATATGATGTTCTCCCTCTTCATCAACAAATATAAAT  
TCCTGAATAACTGTCTTCATTGCTTCTTGAATCAAGCCGTGTGCTTCTTCTAAACTTGTT  
GGTTTCTTATCCATAATATAATCCTTTCTAGATATGAAAAAGGGGCACGTAGCCCCTTA  
CTACCATTGTTATGCTAACATATCTTAGATTTCTTCGTCAACTGCTTCGTCACTGATCAC  
TGGCCCCAGCTTATAATGATCGTTGATTGCTTCGTTAAACTGATCGTTTGTGAGAAGTGG  
TTTCCAGAACTCAATACTATTGGTTACTTTAGCACAGAACTTGCGTTCCTTCGGTTTCCAT  
CTCTCCGGTCTCTGTATTCAGGATTGAACGAGGATACCAGCCGTTTGACGGTCTCACTAC  
CCAGCCTAAGTCTACAGCCAAATCCAGCAAACCGGAATAAGGATCGATACCTCCGCTATA  
TGTTACGCTAATCGGCATCATAGATTTTTCTTTAACGGTTCGTGATTTTTCCGCATTCAG  
GATAAAATCATAACCAGTAATTTCCGGTTCCTTCTTTCCGGCTGACGACGACCAATAATGAA  
AACTTCATTGGCTGAATACATCGCGCCCGTACCGCCGGACATAACGGTCTTACTAAACAT  
TGCTTTCGATTTCGTAACCTGTGGTTAATAGCGAAGCACGGGATATCATTTCATAGTCAGATA  
CGGCGTCACTATACGGAACAAGCCTTTAAGTACTTTCGCTCGCGTCATATCCTGTGCGGA  
TTTCTCATTAAATCGCGTCTTCAACTTCTTTGTTACTTGCTAAGTTACCGATTGAGTCAAT  
AAAGATGATCACTTTATCTTCACGGGTAATTTGCTCAAGCTGGTTCATGATTTCTAATGT  
AAGTTCTTCGACGTTCTAGATTGGAACATGCACCACGCGATCAGGATCTACACCATAAA  
TTAAAGATAAGCGGGTGTATACCGAACTCAGAATCAGAGAACAACACGCCGGATCAGC  
ATTCTGTTTCATGTATGACTAACACAAGTTAATCTCATGTTTGATTTAAAGTCCCTTAGA  
CGGACCAGCTAAAAAATCAAACCAGATTGAAAGCCTTTCTTAAGATCACCTGAAAACGC  
AATATTCAGCATCGGGATCTTAGTGCGAGTATTTGGTTTTTCGTTAAAGAGGCTGGATT  
AGACAGTACCGCAGTAGTTTTAGGGTAGAGTTCTTTTTTCAGTTTTTCCAGTACAGACAT  
TATTAATACCTCTATTCAGTTAATCCGTAATACTTTAATAGCTTCATTGTTATTAGATCT  
TTGTAGTGCTCTTGAATTAACTTTTTTCATGGCATCAACATTGATCGTCACAAATACTTCG  
TTGCTGTGATTTCCGTGAACTTTCTTGAAATGCTCTATGCCTTCCCTCACATTCACGTTA  
ATCTTTTCAATGTCTCTCATAGTATATTTCTCACGTTGGCGGGTATCGTCACCAAACACC  
CGCCATTGTACGCACTTTATCTTAAATGTCAAACATGTCCGTCAATGAAGTAATTTTTTC  
ATATTGCAGCTTCGCAGCCGTGGTAATGTTCTCCAGTGGTTTGACGAAAGTCTTATTA  
CACCAAAGGCCAGTCCAACCCCTCCAACACCTCTGATTCAAATTTCTCGCGGAATACGCGT  
ACCCGACAACCAACCAAAAGTGGTTTTCTCAAACGGATTTCCGTCTTTAAGCGGTACAAT  
CATAACCTTCTCGCCTTCACGAATCGGATCTACTCCGAATTTTCCAGCATTACGATTATA  
ACACAATACTCTTAACCGCATAACGGACAACCCTTAATCGGATAACCGTTTGAATCGCT  
GTATTTCCGTAGGTTGTTTGCAGATAATACCGCAGCAACATCAAGATAGTCAAGTTTTTT  
AAATTCTAGCTCAAATATAACCGTAGTATTCCTGCAATGACTCTTCACCTTCCTGCAACAT  
ACGGCGAATACATTCTTTCAGTGATTTCTGGCATGCTTTAGCGGTGGAGCTACGTTGCGT  
TTGCAAGGCCATGAATTTTAGCTTAGGTTACGCAAAGCGCGTGCCTTGCATGTACCAAAC  
ATTAAGAGCATAACGCTTTTTAGCAGTCCAGAATCCACCGATACCCACAGATTTCAACGG  
AGGACCAGCAATTGCCTCACGGTCCATAAACATCAAGTGCTCATAGTTGTTTCATGTACTC  
GCATAACTCGCGATATCCCTTGTTGATAATAGGTTCCATTTCGATGTTTACCGAAATTATC  
AAGGAAGTCAACAAGTTTTTTCGGTATCGTCAACCGGTCTTCCCGCCAACCTTATCAAT

AACATTGTTAACCAGCACATAAACGGAGTCAGTATCACAATAACGAACATATGCAAATC  
AGTCGTTCCGCAAAGATCCTTTAAGTATTCGTTAATCCTTACGCTCAATCCACTGAACTGC  
AATCTGACCGAACAGTGTGATCGCACTAGCGTTACGGGGATCATAAAAACGGAATTTAGG  
ATTCCCAACGCACCATTAAGGGAGTTGATCAAACTTTACGAGCAAGCTGGTTTGTATT  
GCACAAGATCGACTCGTCTTTACATTCTTCCAGTAATTTCTCTAATGCATCTTTACTCAA  
TTCAGAAAGCATCGATTTAAACGCTTCATCGAAGTCGTGACGCACTTCAACGCTATAGCT  
AATGGTTCCCCCATAAACATGATTTTCATCGTGTAGAATCGCTTTACAGAGTTCAGCATT  
GCGGTCACATGCCAACATCATGTTTTTGTACTGCTTACGCTGATCGAATACCTTTTTAAT  
CTCAATCGCTACGATACCGTGAACATCTTTTTCTCTACATCCATCCGTGAGGCGAGCAAGA  
ATACTCATCACTCGGACATGGTGCAGTTTTATTGATATACTCGTGCATCGGTGCAGCATC  
AAAAGACCCGGCGATTGTTGCCGGCTAAATTTTAACTGACGGATGATTGATGGATACCA  
TTATGTTACAGCGTGGTTCGCTACTCCCAGCGCCCGTTCTCTTGCCTACTGCTACATGTCAC  
CATGTAGATCAGACTATATCACATTCTCATAGAGAATCCTGCCATTTTCAATCGTTTGAT  
TCTACTCTACTCGGTTTCGTTCCCTTTTCGATAGTCGTTGAACAACCTGCATCTTTAAGCTT  
ATTTTGGTCAAACGGAGTTCTCTTACAGTATCCGCTATAATTCTTACCCTGATACGGAT  
TAGACTCCAGTTAAATGTAGTCGTTAATGCTTCTCGTTATGTATCTCGTACTTTTCATA  
AAATGTCTTTTATCTCGCGCCTCCAATGTATATCAATATCTATATAACATTATAAGACAGG  
TTAGCTCAAATGCAACTGCTGCTGATTGTCTCCTTAGAGATTTGCCAGCAAATAAGCAG  
GTTATTCGATCACTGTCACCAGTGAAAGCCCCATATCAGTTCAGGGAAGTAAGGTCAAAG  
CTCATATCCAGCGGTAAGCATTTCGGAACAAGTTCTTTTACGAATTCGCCCGGATAAGTC  
TGCTTAGGCTGTATCTTGTTCTCTGGTACTACTTTACCCTCACCTTTCAGAGATCCGAAG  
ATAATAGCATCCCATACTTTCATCGGGTTATATACATGGTTAAATTTAATCTTTGCGTGG  
AAACATGTGCTATACACCAGATCGATAAATCCGCGCTTTTTATCAATCGCCACACACGG  
TCAACGTCACCGATGTTATAATCGATGTAAAGTTGATGGTTGTCATCTCGCAATTTGTTT  
AACGGACCATAGTAATCAACCATACCGATTCTGTCTCCTATTCAGCAACATAATCTAAC  
GCATATCTTGGTTGAGTCGTAAAGCTAAGTTTCTTGTACGGGTCAATATAATCAAGGCTT  
TCGATCCCATGATCGTCAATGCTTCACGATAGTTGCCAAAATCATCCTGTGAGATTCGG  
GATTTAATCTTACCGCACGGGCTTAGACGGTTAGCGGTTCTACTTCCGAACCTTATTACTG  
ATACGTTAATGATATATGGAATATCGAATGTTTCTGTGTTCCAGCCAGTGAAACCAACG  
GGTCGGTTTTCTCAAAGAATCGGATGTATTCTAACAGCAATTCATCTTCTGTGTCATAG  
ACGTTATAAACAACGCGCTCTACAATGTCAGGCCGAAGAATTGACTTGCTAGGTTCCCAG  
ATTTACCGTTTTTTTCTTTCAAATGAAATACGAAGAAACGATCATGTACAGAAACATAA  
TGCGTAATTGCATCGATAGGATATTTGCTTCTTCTGGTTTAGGAAATTCTGGGGCAGTG  
ACCTCGATATCAACCCATGCAACACAGATTGTATTTTGTCTTGTGCAATCTCGCCTTTA  
TACGTATCAGACAGATAGGAGGTGATAAAGTCACCCATCCCTAGCGCCTCCTGCCCCATT  
TCTCCTATCTTTTTACGCCGTTTGTGGCCTCGTTCGTAGATGGGAATTTTTTAGCAATT  
CAAGTCTTGGCATAGATATGTTTATAATTCGTAACCATACCAGGCGCGGCATGATGAAAT  
AAAGTTGGCGTATATTCAGCGTAATGCTCTTGTCTTGTCCAGCATCAACAATATAACGC  
TCGTAGATCTTATAACCCACACGCACACCTGACAGAAAATACATAATATAAACTCCTTCA  
CTTATGAAAGACACTCATTATAGGGGAATCGACTTAGTTTTGTCAACACCCCTATCCCATC  
AGTATCTTAGCGTCCGATCTGATATTTCTCTATCAGCGTCCACTCTTCTTTTCGGTTTGAA  
AGACAGTACACGGAAATTATTAACCTTCGGTAGTTTCAAATCACTATCAATCAGGGTACG  
CAGACTCCACTGCGCAAGAAGTTTTGCAATGTTATTACGGCGTAATTCATCTTCCCACGT  
CATTTTAACTACGACCATCTAATTTCAACAACCTCCTGAAATGAACGATGTAATAGCG  
CCGTTTCTTTTGGAGCATATGACAAGACTGATTCAGTGTGTTGGTCTCGATTGTTGGCAAT  
GCCGCAGCGGGTTAAAGTTTCTTAACTTTAAGGAAGTTTTTCAGGACTAATCAAATTAAT  
GTCAATCATTTTACCACCTTCTATAATCTTTTTAAGTCGTTTCTTTCTGTCTGATTCT  
TAGTAACACCCGCCAAAAGGTCATCGGTCGCATACGGTTTATTGTGCTTCAATAACTTGT  
CCATATATCCCTTTTTCATTAGCCAAATCGAGATAAAACCGGGCGTCATCCATATTTACAC  
AATATGCGTTCGCCACTGCCATTAACCAATTTTTGGTCCAGTTCTTCTGTTTGTGTTAG  
CCCGTTTACTGTATCGTTTCCCCTTAGAAATCTCTGTAAAAGATAATCAAATGCATTT  
GATATGGGAGGCTAGGACCGATTAAATTCATCACATACGCGCTATATAGGCAATCTTCGT  
GCTGGGCAAGAGCGGTGTTAATCCATCTCTGATTATATGGAGAATTGTTTCCCACATTAA  
CACGCTGTTTATCTAAGGTGATATGATCCATGAGAGCAAATTATGCATTGTCGGTTTTCT  
CGGTGAATGTGACAGCTAATTCAGACACCTTTTCCAATCACGAGAGCGCCATGCAATTT  
AATGCTCGTCTAATCGTGTATCATCTTACCAGAAAATGACCTAACATTATAACCAACTC  
CAATTCACCATTAATTGCATTAACAAACAGACAATGTGAATCTCCTGATAAGCCGCGTG

CGCAAGCATCTGATTATTTTCACCGATAATCTCAGTGAGACGAATCATAAAAAGCTGGCTT  
AACTTGAGTATACTCACTCAGTATAAAGTTTCTTGACAAATTGAGCATATGTATTGGTATA  
GAGTGGTGCAGTTTACGCACATTAGCAAACCTGTTTAGTTTTAAGTGCTTCCACCACATC  
GGTTCCTTCAGTATTGCTACTTTTCGATAACCATGCTCAATACGCAAGCATCAATTTTAGC  
ATGTTTAGCGTAGCGGTCCAAAAGTTTCATTACGCGCCGGAAGTCTGGGAAGTTCTGCTT  
AACCAGTTCGCTAATATGCGCATTTCTTCTACTGGCACACCTTCTTTATCAAGAATTGC  
GTTACACCGGACGATCATTGTTTCAACATGCGAAGCTGATCGTCTCTAGTCGGGGATCC  
AAACGTGATGGGGTCAAACGAGAGCTTAACGCTGGGATAATACTTCTAGATCGTTTGC  
TGTGATAATGAATCGCAAATTGTTTGGAGTATGCCTCAGAGAACTACGCAAGAGTCTTTG  
AGCGTCAGCCAACCCCGCTCGGTCATACTCATCGATAATAACAACCTTTGCCCTTCTCTCG  
TTTATCTTCATTGAGTGATACCCTCTGTGCAAAGTGTGTAATCTCATCGCGGATAAAAATC  
AATCTTACCATCTGCGCCGTTGACAAACAGATAAGCAACACCCACATCTTCGCAAAGCGC  
CTTAGCAACGGTTGTTTTACCAGTACCCGGCGAGGGGCTATGCAGGATCATAGAAGGGAT  
TCGGCCTTGCTTAACAATCTGCGGAAGATCTTATTATCTGCTTCCAGCAGAATACATTC  
AGAAATTGATTTCCGACGGTATTTCTGTTCCACTGGAACCTATTTTCATTAACACTCAG  
CATGTAATCACCTCTCACAAATTCATCATTAAAATGGGGAGCATTACACTCCCCACAA  
ACATTATAATAGTCGGTGTAGCTGGCGTCAAGGTCACACGCGATAATATAAGATATGGTT  
TCGCTTGACAGCCATACAGCCTTACGGCGAGTGAGGCTCAGTTTGTAAATCGCCGAAGTCC  
GTAGCAACCAGTTTCATGTTATCTTTACGAATAAAGAAATGGAAGTCTGCGTTTCCAGTA  
TATTTGCCCATATCAAGACAAAACATCTCATTAGGCTTGTTTTGTCAATCTCTTCCCAA  
CCTTTGATCATCAGACGACCATCAATCGGTAGAAAGTTCAAGGCGATCCACTTTAAGCTGA  
TTGCTCATTTCATAAGCTGTTTCAGATCGTCGTTCCCTCAGTTCGTAATCGACATCGCCT  
GCAGGTGGAGTAACTCGGCCTTTCCGGTGATACGATAGTAGCAGCACTAGCACCAGGATAA  
TTAATTTTGAGACGACCATTAGACACACGAATGTTTCCGGTGCGGTTATCAACCGTAATA  
TCTGCTTCATCGCCCACCAGATTCAGAATGCCCAGGAAAGAGTTAAGATCATAGATCCCG  
ATTCGTGTTCCAGTTCCTTGATTACAGAGTCGCTTACCATATAACAACGTTTGTGCTGTTT  
TTGGTGATTAGGACGTTTCCTTTTGTACGATGATACCCGGGTTAATAGCGGTAAAGTTT  
TTCAGGGTAGCAATGGTTTCTTTAGTCAGTTTCATCAAAGCACCTTTATCATGTTAATCA  
ATTAATTACGGGTTTACTTCGTGCTCATTTTGAATCTTTAGCATTCTTTTCGATAAATTTT  
TTCTCGGCTTCCTTATCGGATGAGTGAGTATACTTCAATCCAATGTAAGCTGTCAAGTAT  
TGTTGACGAGCATAGACAGTAACAGGATGCTTTGCGGTCTTTTTTCCGTCGAGATATACC  
AGATCACCACGAACATCAAACGCAAGTTTACGACGAATCACATCATCAACAAATTTATCT  
AGGACCAAACACCACTCAATACACTCTATCCCGTGACGGTAGTTCATTACATCATTATCT  
TTGATATAGTCAAACGGAATATGACATAATTTACTATTTTGTAAAGATGAATAGCATTGT  
TCTGTTAAGCTCATAACGTTTCATTCTATCACGTCCCATCGGCAAATGCGATCAGACGAGT  
TACTACTACGCTAGCGGCTTCAATCAGCAGTTCATCAGTGTCAATTTGATAACCCTTTTC  
GAGAATATCTTTACCTCGAATAGTATTAGTGCCTTTAGCAATTGAATCATCGTAATACTT  
GCGCATGGCCGCGAGCCATTTTTTTTGCACCATATCATCAATATGTGCGTACAGTTCAA  
GCGTGCGTGCTGCGGGATAACCTTCATTGTAGGTTTCTCCCTTTCTGGCATTGGTAGTAC  
GCAAGCTTTACGGATCTTGCTCATTGCTCGGTCAAATTCGAGACTGGTTTTCTTGTTCTG  
AATGTCTGCTACACTAATTTTAGCCAGGTTTGCGGAAGCAGTCATAATATTAATCTCCAA  
AATAAAATCAGTATATTACGTTCTAAAGTTTGTGCAACTCCAGCATCAGGGTAATCAAG  
TTTATCAAAGTTGGGGGCCAGCATAAACTCATGATGACGACAAGACAACATTTTTGTAT  
GTCCGGATCGCTGTATATGCTGTTTTTCATATCCCCATACTAACTACATATTCTTCACC  
GGAATATAGATTGATTAATGTATACACTTCTAACTCCGGCTGCGTTACTCCGTCAAATGT  
TAACTTTCATTTAGTGTATCGCCCACGTTTACCCATTTTGAGATGACGGCTGAAATCAT  
CAGGGTTATGGTCACGATGGCAGATAATATACACGTTATCATCTAACTTGTCAATGATGG  
AATCAAGTTCTTTTGCGCCCTGAACGTCCGTAGCCCCATCATAAATTTGTTGAGTACCA  
ACAAAGAAATATTAGTACCTGATACTTTACCAGCAACATCACGCCATGTAAAGAGCATCG  
CAAGCTCAATACGTGCCTTTTTCGCTTACTGAATGATTTATACGAAAACGATTGACGCC  
CCCGTGATTTGATTGTTTTCGATAAACTCTTCATCTAGCGTAAAGATATCATCCGCTTCCA  
TGTGATCAAGATAATACGAAATCCGATCATTGAAATATGCAATATATTTCTTGACGATAG  
ACGCTTAAACACCGGAATCCTTCAACATTTCTGTTACAAATCCACGGTGTTATTCTTCAA  
GAACTAGCTTTGATTTTTACGAGTAATCTCTACCAGTTCGTGTTCCAGTTTAGCAAGTT  
CTTCGGAAATGTCAACCCTTCCTTTTTGCAGTTCCTGCTTTGCTTTCTGGATCTGTTTAG  
CCCGACCAACAGATGCCGTTAAATTGGCTCTCGGTGACTCTATAGCGCGTTTAAATTTCCA  
AGACCCTAGTTTGTGCTGTCTGGAAAGAATTGGCCTTCTCTGCGTATTCTACGCGTTTCT

CGTCAATCAGAGACAGTTTATGTTCTGCTTGTGCTTTTTGTTTCGCGTACAGCTTGATCAA  
TGCCTTGAATGATAGGTTGTGTGCACGTAGGACAGGTCCCGCTTTACCCGTGCATATGGA  
TAAAACGGTTGAAGTTCTGGATCTGCGCACCAATGTGTGCGATAGCCGTATTAATTTTCAG  
CCAATGCCGCGCTAGGATCTCCCGGCATAACAACAGCCAATAGCGCATCGGTCAAGCGCA  
TTTCTTCGGCTTTAACTGCTTTAGCCGATTCTACCTCTTTATCATAACATATTATGCAAAC  
GCTGTAGATTCTCGGCACTAGCCTTGCTCGCGTCCTCTATGTACTTTTTCTGAGTGTGTA  
TTTGTGATGAACGTGATTAACCTTTCATTTCTGCATCTGGATATACTGGGTAATCTCGC  
GTACATACGCTTTATTCAGTTTATCCATTTTCGCCTAACGTAGCAATATCAAGCAAATCCT  
CGACCAGTTTACGGCGACCCGCTGCCGGACGACTCATAAAAGAAACATAACCAGCAGTGC  
CTAAAACAACGATCTGTTTAAAGCTGGCTAGGTTTCATTCCTAGGATACCTTCAAATAAT  
CCTGAAAGTCTTTGGTGCTTGCCTCTCGTCGATCTTTTGACCGTCTCCATGCACTTCGA  
ATACTTCCGGTTTTTGACCACGTTTGATATAGAACGCTTTCGCGGCCAGTTCAAACCAGA  
CTTCGACTATCAGTTTCTTTTTGTTGACGCTGTTAATCAATTGGCCTTTCTTGATACTAC  
GAAACGGTTTACCGAACAACAAGGCAAAGCGCCTCGATCATGGTTCGATTTACCAGCAC  
CGTTAACACCAGTGATTACTGTCTTTTTGAATCCGTCTAGGTGAATCTCAACAGGGTCAG  
CACCCACTCTCATTATTTTTGATAGCGCAAGGTTTTAAAATTTAACTTTGCCATTAAGC  
CACTCCGCAATCGCACATTCCATAATATTAAGTGTATGACATCTTCATCAATGTTGTAA  
ACACATGCTGCCTTCACTTTAACTAATGTGTCTGTGCGATCAGGCAGCATGATCATATAA  
TCCAGTGTGCGCAGGATCATATGTCATAAAGGATCAACATAAATCCCTTTATTCAATGCC  
AGATATTCGCGAAGACCTTCTATAACCCTGTGTCTAAGGTAGGTCATCGATAGAATCATT  
GTAGTGTATGTTCTCTAAAAATTCTTCAATTTACCTTGCAGGTCTTCCGCTTGCTTTT  
CCAGAATATCGCGAAATTCACCTACAGGCAAGCGGTAATCACATTTACCAGTCGTTGCG  
GGAGAATATAACCCTTTATACATTGACTCTGACGCTTCTAGGAATACCCCACTATGCATGA  
CAGAGGTCCAACCTGTTAACGTGAATGGAGTATTCGGAAAATAATACTTGCTGGATTGTT  
TCCACTGGACGAAAGCACCATATAACAATCGGATTATATTCACCAACCACACTCTTAATAA  
TGGATTCCACTTCGTCTTTTACAAAGTCGCCAATGCCAATAGTCACCATCAATTTCTGTG  
GGTGAATCACTTTAAGGAAACGAGGGTAGCCGTCATCATACCACAGCTTAACCACTGGCT  
GACCCACATTTTAGCAATACGCGCTTTCAGATAACCATAGATCGGATTCTTGTAATATG  
ATTGTTTTAGTGGGTACGCGTGCATCAATTCATAAAAATATTCATTGCTATCGAATCAG  
GATCAGCCGCGACCATAGTCGTATTCATAATATGTTCTCTCGTTCAATTTCATATTGTTTC  
AGGTCTTATAAAAAGTTCATCCACTGCTTGTTCAGCACATGACGCAGCGTAAAGTAATAG  
CTTTCATAAAAATTCTATTTCCGCGCGAGGAATAGATCGAATCTTACACTCAGCAGTAGTA  
TCGGTGAGTCGCTTTTCGACCATCATCCGAACTTCTTCATGCTCTTTGGAATACCATAA  
TCAACGGAGATTCCCTTGCGTTCGAGCAAACATAGGCAATGCCGCATTAATTTCCATCACC  
TTTTGTGCAAGTGTTTTTCATCATAACAGACTCCATAGACCCACGAGCAATAATATTCTGGG  
TGATACCAGCAACTTTACTGGATACGATATTTGTTAGCCCCTCTTTGGTGATATTTTAC  
GATCAAATGGGATTTTCGTCATGAGTCCACAAACCATAGTTAGACCGATATGATAGCATAT  
ACTGACCATCTCGCACAACTCAAATACATGGATCCTAGTGAATTTTCGACAAAACCTTCGT  
TGATTTCTTTCAGTGTCTTAGCAATCTTAACAACCTTCCAATCAATTTTAAGAGAGTATAA  
CGGGGATTTCTCCCGCGTCAACTAACTTTTTGCTTTATTTACTTCGGCTAAAAGTTCAT  
CAGAAATACGCTTGACCGCCGCAAGTCTTCCGGTTCTAGGTTTTGTTCTTCCAGATATT  
CATAGACCATCTGAATAGTGCTTTTAACTTCAATAACACCTGTTTCCCTGTGATGCGATAC  
TCTCCAGTTTATGGACCACCTTTAGCTTGTGTAACCGCCTCTAACGCGCTTTCTAACT  
TAGTTAACCCATTATCAGCGACCGTTGCGGTAAGACGCACACTAAGCCCTTAAAAGCGTT  
CTACATCGATTTTATCGTCTGACGGGTAAGTGCTACGCACATGATAAGTTTTGTCATTCT  
GAATAAACTCTTTTTTGTGTGTAACGGTATAGAATACCCAAAGAGCACGCGGATCGTTA  
CGTCACCCGCGGTTAGTGTGTATGGTGGACCAATATACGTTACGTTACCGCTATCACTGA  
GAGTATCAGAGTGTCCCGAAAACACCTCACGGTATTTCTTGAGGAAGTCCGCGCTATAAC  
CTTCGGATTTTAGCCCTTTATAGACATAGTAGCCAGACAATTCCCAATGGCCTACACAAT  
ATTCGCTGAATGAGTTTTGAATAAACTCTAAAATCTCTGATTTATTGTCATCACAAAACC  
ACGGGAACAGGTCAAATGATACACCATCAAAGGTAACCTGGTTCCGGTTTATCGATATCCT  
TAATGCAATCATATTGGCTTAACTTTCACGCGGTGCGTTAGGCTGGATCTTATGACGTT  
TGAATAGATCATGGTTCCCTACGGTACATAACAGGTGATTCCAGATTGTTCCAGTAACG  
GGATGACCTTAGTACGGTTACAACCTCATCGTCGATGAGTAATAGCTTTTTCGGCAATCAA  
ACCAATCCCCTGTTTGAATCCATGCTTAAAGATCATGATCTTTAGAGTATTCAACCGCTT  
TCTTGATGGTATCAAGAATACTCATGCACCCACGGATCATCGCCACCGATACCAGTAT  
GCAGATCACCTAAAAGCAAAAATTTTACAGTCTCTCTCTCTGCGTTTTTCGATGCTCTC



ACTATATCACAGAAAATAACAAGGGAAACCCCTTACAGAGTCTCCCGTATAAAAGCCAT  
TACAGCATACTTAATATCGTTTGCCGTGTAATGACCCACATAGCAGAAGTTAGTTCTGGC  
GTGTGTGACTGTTTGTAGATATCACGTAATTTTCCGATAGCGTAGATCTTCGCATCACGA  
TTATCATCGATGGTAGCTTGTTACGCCACCGCTTAAGTCGTGAAATCTCTCTCGAGTTC  
TTACGCAAGATAATTTCCGCTTCTTAGCGGCTTAGCCTATAGTTCTGCTTGTACTTTG  
TCTACTTCATTCACTGCAATCTTGTCATGCTGTTTCATCGTAAGTCATGTTATTTTACCTC  
TGGGATATAATCACTTATTAAGAAAATTCATCTTCTGATACATTATAGCTATGTGAGAT  
TGGACCCGTCAAGACCTCAAGATCCGGTGATTTGATATTGCACGGATAGATACCCACCGG  
AACGCCGCAGTCTGTTAAAAATAATTTGGCCAGATACGGCACGAGGTCAGTTACAAACTC  
TGCTCCTTCCAGCAAACGGGAAACGTTAATTTCAATCTCATAAAATTGGTCCAGGCTAG  
GCAATTCCTCAGTCAATACATCTTCAACCTTTGGCGCTTTCGGTATATTGACCGATTCTC  
CGTAGTTGTTGATTTTATCGCAACTGCCCTGTATGAATGCCTCATCAGCAATCTAGCACA  
TATCAGCGTCGCGTTCGTCATATACATGATGCACAAAATATTTGTATTTCCGGGGCTGTG  
CTGTTCTCTCTTTTTTAATGCGCTGTACAAATGCATTAAGCACGCTTGCGTGATGTAAG  
CATCAGGATTTTTATACTTTGTCTCGTCAAATTTATTCAAACCCTTGACCGCCGCTTCGA  
TTCCGTCGTCGATCATTTTCGTCGCGCCATGTTTACTATAACCAGAAAAGTTAAAACGAC  
GTGATAGATTTTTAGACATTCGCATAATTGCTAGGCCGATTTGATCGCATATTGGAACTT  
GCCGACCTTCTGCTGCAATTTGTTGTTTCCAACGGCAAATTTCTTCGTAAAGCCCTTTAT  
TGTTTACATAATCAGACACTTCGCACCGTCGCTATTATTTAGGAAATAACCCTTTCGGGC  
TATTCCCCATTTGCCATGATACTTTCTTTGCTTGGTTATCCACACTCTAACCATCTCTACT  
GATTCACCGTCAGACCGATCAAGAGTTTTCCCTTTTTACTTCATGCGGTACTTAAATCCG  
TTAAATCTTGCATTCTCTTACTCGTTAAAGTCGAACATCTTTTTAAATGATTTTCCGCCCT  
TTACGCTCACCACATTCTAGCGGAATCATTCCGGTCTGTTATTACATTGGCATTAGGTAGA  
ACCGTTTTTAGATAATCTACCGACGCCAATCAGGAACATATAGATTAATATTCTCCTTG  
CTCTCGTTGTCTCTCAGGTTCAAACGCAAAGATAATAGAAATGCTGGTTCCAGATAATCA  
GACACATGACGCGCTTTGACAAACTCGTTTCTCGGGAGATCGCAACTATTAGCAAGACCT  
TTTTAAATATCAATCTCCCATCGTTGAGGGTTAAAGCTGAACATCACAGCAACATTTTTA  
TGATGAATGTAAGAGTTAAGACCATAAGAACCGTAAGGTATCCGCTACCAATACCATT  
ATGCACGCTTCTCGGTCCCGATTACCGGTATAAATGAAGTCATCGCGACATTCATTTTA  
ACCAAATCAACAAGACGTTCAAAGGTATTGTTTGTCTGACTGGTGACGCGACCAGCGT  
TCGGAGTCAGTCATTAGGATGATGTTAACTATATCTGTATTTTTATACTCTTTGAAATAT  
AGTCTGGATTCTAGCGCACTCGGAACAAAATCGCAATTTGCATAGTATCGTAGATACTTC  
CCGCTATATGTATCAAAGAAATTTGCACATGCTATCGTAAACCTTTTTAAAGTCTCCCCAC  
GTGCCGGGTTTGTATCGTTCAAGAAAACAATTTTCGACCCATTCTTCCGGTGTCTTTCG  
TTATTTTTTACCGTAACGGTGATTTTCTTCTCTAATAACGCCTCATAAAGCCCTCGAAGA  
GAAGAATCGATCATATCAGTACCATCCTTTGCACTTTCTATCTTTTCTTTGATAGCGGGC  
GTCTCAGAGTCTTTTAGAGCTAAGTTCTGTAGGCATTCCGATTTCGTCGGCGATTGGTTTC  
CAATGCTTCGTGATAAGTTCAAGATTAGACTTAAACGGGATACTCATTAAATTC AACCAAT  
TGAGGAAATTCATCAATGTAAAGAGCATAATCACCAAACATTTTTAAACGTTACATATTA  
GATAACGCTGTATGTGTAATGAATATCACATCAGCACCGTCTTTAACTGATTGCATTATC  
GACGCTTGCAGTGTCTTAAAGCCTTCTTAGTCTTGGGCTATCGATCACGACAGCACGACCG  
CCCATTCTTTTAAACTAATTGTAAGATTGTTCACTTATAACACGAGATGGCGAAGCAATA  
ACCGCTTTTTCTTTTGTCTCTAGGACGTGGGAAAGTATAGCATCAGTTTTCCCCGCCACT  
TGCAATGCGATTAATGTTTCAATCTTCATTAGAAACCCTTACGTCGTACTTTCTGGCATT  
TCTTGATCATTTTATCAGAAATTGCGCGCCTAGGTGCAATCTTTTCACACCGAAAGCCC  
TAATGCCAAATTCAGAGAGAATATATCAACTAACAAATTCACGCACACGCGCTTTACCGA  
TATTCACGCCGTTATTTTTCTGATATGTCTGGCCTTCGACTTGCATCAGATCTAAATCTG  
CGTCGGCAATATTGATGTCTTCCATGCGCCCAAATCGAGAATAAAACATGTGTGCGATTG  
CATTGTGTACTAACATAATATATTCTCACTCAAGAATTACTTAATGATACTTCCTTTAC  
CAGATCCGTGACAATGAGCACAACACCTATCACCACTCAATCCTGTTCCGTTACAGTGTT  
TACAGTTCTCCAACGGTAAAGCCATTATAGCAAACAAAGCAATAATGATCACCGAAACTA  
AATTCTCAATAAGCATAGTTCTCCCGAAGTTCTTTATAGCCTCCAATGTGCTCGTTGTCA  
ATGAATATCTGGGGGTATACAAATAGGAGGCTCTTTGAGTTCAGCCTCCGCGCCAGTTCT  
TCAATCATATCACGGTCGGGAATAATGTGAACCCCAACCGGCTTGAATACTTGTTAAGT  
GTATACGGAATACCCAGATCATCCAGTAGCGTCATTGCACTAATAACAACCATAACAATGA  
TAAGCCTCTTTCGGTATGCCGTATATCTCGATCATTCTCAGCCTTTAATCGTTCTAGTT  
CTTCTTCCAGTTCCTTGATCCGTGGGTCACGTTCAAAGTCACACTGCAACTTAGTGGCGA

ATACTCGTTTAAACTGATTGTAATCATCGAATTTACACACTTCATCTTCGCCATAGCGAC  
GTACAGAACTTCGTAGTTATTGAAGAATTGTTGCATCATTGCTACGGCTGATAGTTCTG  
CCGATACTACTTTAAAATATTGATCTTCTGTAGGCGAAAACCACTAGCAAGCATAAAGAT  
AAACCTATTCATTGTCTGGACACTGGTAAGCCTTACCATCGAATTCATCACAGAAACAT  
GATCAGGTTTAGTCGATGAATGAATAGCTAAGACTTTAAACGAACGGTCCCCGATAAACT  
CGGAGATCACACGATTTCGCATCACTGGTTGCAAATGCTTTACGCGGTTGTTCTGTTTACC  
ACTGATAGGTCATACCAACAACAACATATTACTAACCTCGCTCCTTACCAATCAAAAAT  
TCAACTTCACGACGTTTAAATGTCTTCTGGAAGGTCTTTAATCTTCTGGGGATCTTGCATT  
ATTTCTGTCATCTTGTCAAGTGATGCGATGAAATCATCGAAACGTTTCGAAGGTTTTACCT  
TCATTTGCTTCGCCAAATTTAACCAATTGTCAGGCCGTAACGACTACTAAACAGACGTTTT  
AACTGTCCAACGAATTTAGAATCAGTGGTTATAACTTCCAATTCTTCTACTTCACGAAAG  
AATTTTCTATCAGAATCAATAAACCAGCTAGTTCCCGTATGGTTCGCTATCTTTTGTGCG  
CTCATTAGAGTATGGTCTTTACCATCAATTTCAATTACATCAATTTGCCACATGGACTA  
ACATTTTTAAGAGTAAAAGGTCTATAATTTATTGCTCGAGCAATAACATAATTAAGGTTA  
GATACGTTTTTCAGCATAATGGCAGAAGTCTGTATAGCATTGTCATCTTTCCAAGTATAA  
GTTTTACCATCTTCCATTTCTGGGGAACCTTCATCAACTTCACGAAAGAATTTTCTATCA  
AATGGACTAAAGAAATATGTTGCAGTCCAAATGTCTTTTCTGTAGCCGTTTTTCGCCGTA  
AGATAAACACCGTCTAGCTCTATTGCATCAATCCAACGTTACCCTCGATCTCGATGATG  
GTAAATGGCTTGTACCAATCGCTGGACTAATATCGCTGTTAAGTGCAGAAAGAACACCT  
TCTCCGTTAGTAATAAACTCAGTTTCAGCGTTTTCTGTCTTTCCAGGTGTAAGTTTTACCA  
ATTTCCATTTTATAATATATCCCTTAACCGATTTTGTCAAGTTCGTTTAAATGCTTTC  
TCTGCTTCTGCATAGCTTGCACCCCTTCCGGCATTTTGTCAAGAAAATCTTTAAACTCT  
TTAAACTGGAGATATGACGCAAGGCGTTAGCACCGATAGCCGCATGTGATTTGGATTCA  
AAGCGGATTTTATAATTATCCATCGCCAATTTGAGAAGATCAATTAATTTATATTCTTCT  
GGAATAATAATTTCTTCAAATCTGCTACGGTCTTGATCCAGAAACCAACAAGATAGACCT  
ACATCGGTTGAACTCATATAAGTTCCATCATGAAGATAAACAGACCGCACGTATCCTTTT  
TTCGCATCAACCGACGCAACTTTAAACGGTAATCTCAGATATTTCAAATAATCAACATCA  
TACCATTTTAAAATTGGTTTGCATCTTTTACATCTTTCCATGTATAGGTCTTACCAACT  
TTCCATTTTATAAGATCATCTCTCATTTTTTGGTACGTGCTTCTAATTGGATCATATGGTC  
GCGCGTTTGTGTTTTCGCGGATAGCACCGATCCGGCTAGGCATACCATCAAGCATGCT  
CTTAATACCTTCTAGGGTAGTAATTTTGGCAATGCTATTATGTTACCCCATCTTATCGAC  
CAACTGAATGTCGTAGGCTTCCATAAGCAGACCCAGGCGTTCTAAAGTTAGGTCTTCTTC  
TGTTTCTTCCGATTCTGGAGTCTTAGGTTCAATCGTAACTTCGGTAAAGAAACGTCGCTC  
AACCGACCATAACCACACACCGGAACAGCCAATATGGGATTCTTTTAAACGTCATAGAGTC  
GAAATTAATAACAATAATAGTAATTTCTCTAACATCACCTTCATCGTCAAGGTCTTCTAC  
CCTAAACGGTCGACCAGCCACCAAGTCCACAATACATCTGTTAATAGACGACGAAAATTT  
AGTAAGTTCGGCTTTTCGTTGCTTCGCATTCATCTTGTAAGTTTTACCAACTTCCCATTC  
CATAATAATCACCTCAAATAATGTTCACTGGAATACTATTAACAATCTTGAATTGTAATT  
GATTGTCAGACCCCCGCCACGGCTTCTTTCGTTGGCATATCTTTAATATAACGCCCATCGA  
GGAACATGTCAACTGATTCTACAATTTGTCTTTGCTCATCATTCAATTGGTCAAGAGTAT  
AACCGGACCATAGCCAAAATCTTTATTTGGCGTCCATGATTTTACTTCATCGATGATCC  
GCTGTACACCCTTTAAATTGCGTTTAGACAACGGATCACCAGCTAAGAATGTTAGCCCCT  
GCATAAAATCAGGTCTAAGCAGATCCAGAATCAATCCCATTGTATCATCGGTGAATGGTT  
CCCCGTTCTTAGGCTTGAGTAGGCTAGCATTAAAGCAACCTTCAAATGCGTGTGAACATC  
CGGTAACGTACAGGGAGACTCTCACTCCCTCACCGTTAACCATTTTACAATCTTTAATAT  
CGGCATCGCGTAGTTTGCCGTATGTATCAGAATCATAGTCAATTACCCCGAACTCGTTT  
ACAATCTGGGCTTTATAGTAACCACCGCGAGATGCGAATTGAGAAGCTGGGCTTAGGTAT  
TCGTATTCACGGATTTCTACTTGTGCGTTTTTCAGTTTCCCAAATCAGTAAAGACCACATA  
TTTGATTCTCCTGTAAAGTTGTATCTCGTCTTGATGAATATAGTATAGGGGATCTCGCGA  
TCCCCGTCAAGCATTATTTAAATTTTTTCGAGAGATTTCTACCACAGGCGGCCCTGGTAGG  
TACTCTCCGGCAAACATGAAGTGGTCATCTGGATAAGAACGCAGCATACTCAAATAAAC  
TTCCGGGTCTTTCGTAATCTTTACGTTTACGATAAATGACATTCTCGCCAGTACCGATC  
ACACCTTATCTGGATCCATGCTCTTTACGCACAAACCATTTGTACAGTATCTTTTTTAACC  
CGAATCACAACAGGTTCCCAATACCAGCGCATCCCGCTACACCACACGAACAGGTGAGG  
AAGTATTGACCTTTTGTCTTTGTTTTCTCCACCCGATATTAACCGGATGCCATTCGTGA  
TACTAGGCTAAAGCATCGTGTGTCGCTTCGATCTGTTTATTGTCAATTCTTACCGTAACC  
AGCCATACAGGGATCTTATTTGTTGGTTCATCATTATAACAAGAATCATCATCAATGTGT

TCTAATGTCATGTCAACATTAATTGATTTTTGCGTGTTCATGTATCGTTGTGCTTTACGC  
TTACGATACAATAATTTAGACATATTCACCTCACATTATAAACGAAATTGTACGCCATCA  
AAATGAGAACTTGCATTACAGCTATTATAGATAATAAATACTGTATCTCGCGCTTGTACT  
ACAAATTGACTTGCCTAACAGCGGCAACAGTAAAAATACGATCCGTGAGACTATGTTTA  
ATTTCTGTCCCAACTTCCAGTGGGGTGTACTCTTCTCTTCGGCCCCAACACCAAACAG  
CCTTCTTCATGGTACGCCTGAATCTTTTTATCACAATTACACGGTTCAGCAAATCAAGC  
GTATAAATTCACGAGAGTTGTGAGTATAAACCAACACAGATTGATTATGATAGCGAATC  
AAATACAGGTTATTATCTTCGTCACCGACACAAAACACTACGGATTCGTGTGCCTTCGCTT  
TTACTCCAGCAGATATTAACAACCGTTCACATAATAAAGAACTTTCTTTTGTACCAAAG  
CTAGCCAGTGTGCTAGCGTGCATTTAACAACACTACACCATCACCAATTACTAATTTGCGA  
ATTTTAATTTCTTTATTCAATATACAAAACATACTGTTGTCCTCTCTTGTTTTCGATGTG  
AGCATTATACACGAGCTAATCCGGTTGTCAACACCCCAAAACGAAAAAGCCGGGCCTTTC  
GGATCGACAAAAAATTCCATGTGCTTAACGCGGTTTACCATGACGGAGTGTTCCCGTGG  
TTAAATGGACGCAGATCAACAGATCCAAGATATCCACTAACGCGACGGATAACATTCATC  
TTTTCCAGATAGTCATTTCCGCAATGAGTGCAAACAAAACAGACTCGGTTCGCTCTCATT  
TCCTTATTAGATCCGAATACATGACATACATCAGAAGGAGTATTAACACCGAAGTACTGC  
AACTTATCCATTGCATAGTCTACAACAGTTTCAAGACCTTTCAGGTTGTTTTTCATGTCT  
GGAACTCAACATAAGAGATCATGCCACCGGACGCCAGCCAGTGATAAACTTTCTCAAAG  
TCGATTTTCTCAAATGGTGTCACTTTCCGATCTACGTCAAGGTGGAATGAGTTGGTGTAC  
CAGTCATTATCGGTAGCACCTTAACAATTCCAAATTGCTCTCTGTCCAGTCGATTAAC  
CGATAGCAAAGGCTCTCGGCTGACGTACCGTAAAGACTAAACCCAGGTTCCGTTTCGTCC  
TTCCATTTTTTCAGTATAATGACGCGTGATGTTAAGAATATGTTTACCGGATCGCTGCGCA  
TCTTCCGAATCACACGGATGTACTCCAAACAGGACGTTTACGTACCTCATGTAAACCAATA  
TATCCAAGAGAGATCCTAGCGCGACCATCTTCCAGCAGTTCCAAAATTTTCATCGTTTTGA  
TGAATACGCAAAAATGCACCTTCTGTATACGGTACAGGAGCAACATTGGCTTTAGCCCCT  
TTAAAGCGCCTACGCGACTCATAAGCGCATCAAAGCAAATAGGCATACGATTAGCTAGC  
TCTTGTTCGAATAGGTCAATTCTGCGCATAATAGACGCTTTCCAGTACGACGCGCGGCA  
ATAAGAGCAATACGCGGAAGATTACAGAGTCACAACAGCCAAGTTATTACGTCCGTATAAT  
ACTTCTCGCCTTTGTCAATTATGCCACACACCCAGGAACTTCTACACGTTATTTGTTGA  
GGGTAGGTCGCTAATCTACCCCGCCTTTCGGCTGCTACATGTGCGCCAGGCAGATCAGAC  
TATATCTTCTATCTTTTCGATAGTCTACCATTTCCGGATCACATGATCCTACGCCGCAACCT  
TCATCACGGCTAGTCGTTAGGCATTTTCATAGCGGAACTCATATTCATAAGTATTGGTTTT  
TTTACCATCAAGAATTGCAGATACATTTTTCCGAGGCAAGCCCAATGTTTCAGAAAGACT  
TCTCACGCTTTTGAATCTCTGCTCTTGTCCGGTTTCTTTATGGATCGCAGTAACCTCATA  
TGAACGACGTTTGAACCTTATAGCACCCGTGTTTCGTAACCTTCTTTCGTGTTTTCGCTGTT  
AGTCCCCACTTAAGGTTAGATGCATCGTTTTATAGTTTTATCGTCGTTTTTATGTTTCAC  
ATATCGATAGCCGTTAGGATTCGGAATCCAACATTCAGCGACAATAACATGAACACGCAA  
ACATAAAGGTTTCTTGTCTCTCCTTACCCTTACTATTGTATATCCGGTATTGGTTTTCTAT  
CCAGGTACTCAACTGTTTACCTTTAGGAGAAAACACCCGGCCATCTTTCGCTACCATATA  
TTCGGTATCACGAATTTTTCTAAGTTCGATAATATGTCCTCTTATCCACACTGGCGTAAA  
GAGAATATGACCGCTATGTTTAGCACGGGATTGTCTTCTAGAGAGTTCCCCCGTTTAGGC  
AGATTTTAAATGAGCTGTTTAAAGTTTACCCAACGGGCTAACCGGAACACTAGATCCAGT  
GATGCTACGGTTATTCTACGCAGAGATATAATCAGGGTAAAGACGCTTACTAGAACATTC  
CAATGCAAGTTGCTTAATGTCGTAGTTCGGATCTTCCGGTTTAAAGTTTAAATCCTTCTTC  
TAAGAACATCACCGCTTAGCAAACACCGGAGTTATACCGGCTTACCTAAACCTTTAGT  
TCGAACCTTCAGGATCGCTTTCTAAATCAGTTTTTCTCCCCAGCTAGTACCCATACCAA  
GGTTAAAGTCAAAAAGTTGTTTGACCGTTGGTAGAGAACAAAGTGTTGATCTCATATTC  
CAACGACTGAAATCCGTCTAACGTTTCTTTTTCTGTTTTCTTGTGCATAGAGAGTATC  
AGCTTTGATTCCGCAGCTTTCGGCATCAGCAAGGTATTTATGATATGTTTTCTTAAACATA  
CGGCGCTAACACCTGGTCGATGCTTGCAATTGTTGTCCCGCCATATTGAAGACTTACCAC  
CTGTGCGATAATTTGAGCGGTTACAGCACATGCAACACCGATCGATTTAGGACTTTCGAT  
TTGTGCGCTACCCAATTTAAAACCATTTCTCTAACATGTCTTTGAGATTAACAAGACAGCA  
GTTAGTAAAAGGCATAGCTGGTGCATAATCCATATCATAATAATGAACATCACCGTCTAC  
ATGCGCTTTCTAGATGTGCTCAGGTAACCCGGTTTTAGCAATATGTGTAGACACAGCGCC  
AGCAATCAGATCTCGACGTGTCGGGAATGTTTCGCGCGTCTTTGTTTCGCGTTCCTTTGCT  
TACTTCGTTTTCTTACCCGTTGCGATCTCTGTAATGTCTTTGATTTGTTTTTCCATTGT  
ATCACCCATGAAAAAGCGGGATTTCTCACGCTCGTTGATAGTTATTTTACCAGTTCTGCT

AATCCTTTTTCTTTAGCGTCTAGTTCAGCTTTAACCTGTTAATCTCTTGTCGCTTCTTA  
TTAGCGGCTTCCTGCTTACTATTTCCGGATAACCTGATCTAGCTAGAACTCCCAATCCGGA  
ATATTTTTGATAACGTATCCGTCAACATTAATTGGTTGGAGATTCTGTACAGCTTCCTGT  
TTAGTTGCAAAAACCTTTCATTGCTGGGGTGAAGTATTCATTTTCGTTATCTTCAAACCAA  
TAACCTAGACTTGCATTCTCAATACGAAGATGAAGTTAAGATCAAGGTCTTTATCATCG  
GTATATAGGTCTTTTACACACCCCATAGAATTAACAACAACCTTTAAAACGAATTTTATCT  
ACACTACCAAAAACATCTTCAAGAATATCAGCAATTGAGCGATTAGCGATAGAATGGTTCG  
CTGAATGAGTCAAGGTTTTTCGTTAGTTACAGTATACCTAACATCTTGTGCCACATAATA  
TAATCCTCTCGTTGTTAAGTGGGAGTATTATAGCATAATCCCTTCGCATGTCAAGCACTA  
ACTATTTTCTTTACTGCTTTACCTTCTGGAGAATTACACGAATCTCTTCGATCTCTTTT  
TCAGTCTCTTTAACAATTTCTTTGCGATTCTGAATATCTGTATCGAGATTAGCATCAAGT  
TTAGGCAGCATGTCAAGCAAGAACTTTTTAAAGTTTTTCAGGTTTCGGATAACAGCACCT  
TCACCCATTACCACCACACCAACACCGTCCGGCATATCACCAAACAGTTTAAACAAGTTCA  
GACAGATGATCATGGTCTTTTAAATGCTTCCCTCCGTTTCAGATGGCAGTTCAACAAAGTTA  
TGACGTTTCATCATTGCTGATCAAGTGTTACCAGCAAAGCCCGAAAGATTTTCGGTGTATAT  
TCTACACCATCAATTTCAACCGCGTCTACACTTCCATAATCATCTACTTTAGTTAGCTTA  
AATCCTTGTCCTGCTTTTGAACAATTTCAACAACATGACTTGATACAGTTTCAGCGGTA  
AACCAATATGGCAAATTATGCTGATTTGGCTTGTAGCGTTCACCTACTTTAAATCTCTTA  
CCATCCGCTTGCATAGCATGAAATTGTTGTTTCGTGATTTCCGCGAAGTATTCAAGTTTCG  
CCACCATCAAACACACAAGCCTATTGATCACAAAACGATCTCCCTTAAACAGTTTCACCT  
TTCGCGGTGATCATGGTAGCTGATCCGTGCAATTCTTCTTGAACATAAATAGCCATATTCG  
ACAAAACAACAAGTTTCATAGCTTCTTTGTGATCTGGATCATGCTCGCCCCAGAATCGC  
TTAAATTCTGGCAAACCTTCTGGTGTAAAAGAATAACATTTACCTTATTCAAAGTAAGTC  
GGCATAGCATCATCTTTCTTGTTCATCGCTTCGTATGCCTCTTTTGAGATGCGTTTAAAG  
TATTTACGCTCATTGTGCATAATCATAGTCGCCCAATAATAAACGATATCCTCAGCGGAA  
TAAACTACCTCTCCAGCTTCAATAGTAATAACATGACCGTTGTCATCTTTTTCTAATACT  
TTAAAGCCCTTTTCGCCGATTTTCAGCAACCCGAATATGACCACGGCGCGAAGCATTGGTC  
AGAATAATTGAATAGCGAAAAAGTCTAGAACTCATCTTTACCACCTTCACGGAATGCA  
TAGTAATGACCTTCAAAGAATTAAGCCATAATAATCTTCTCGTTGTTTAAATGGGAGT  
ATCTTACTACTCCCGTTTCATCATGTCAAGCGTTAAATGACTTTTTGGATCTCTTTCAGT  
TCAGCTACTTTATCGGCGCTGAATTTAGCGTAGATATCATGTGCAATAATTTCACTTTCA  
AGAAAGGTTTCCAGCCGAGATCTATTTTCAATAATGAACTCTGTCAGATCTTCCGCGTTC  
TTGATAAAGATTTTATTGGCAGTAATGTCATCTTCAATCGCTAAGGAGATAGAGCGAACT  
TTACCAAACAAGTTCAGCAGTTCCTCCAGCGATTCTTCTTTCTTAACTGGTTTCATTCT  
TCAAACCTGCTTTTTAGTGATGCGTTTAAAGTATTTACGCTCGCTTGCATGAATCATGATT  
AACGCACACTCATAATCATGATTTACTTCCAAATACACTTTACCATAACATTAACCGTA  
AGAATTTAAAGCCCCTGTGAAGCACACCATAACAGGAACCTTGTTATTTTGTGGATAGCGT  
TTAACCAATTCCTCTGCGGACTCAGCATTACGGAAAGTGTAATAACGACCTCGTTCAAAA  
ACAGCATCATTTGAAGACTTAGCTGGTTACAATTTATACGTTTTCTGTACCATAATATAA  
TCCTCTATCATTTCACTAATTGAACTGCACGAGACAGAATGCGGTCACACGGAAGAAGCA  
TAAATACCCAACCTCGGATCAAAGTCTTTAGCGGTATATGTTTTCCCATCAACCGAGATT  
CACCTACATAACCATTAGGTGAACTTTAAGAACAGTAAACCCATTCTTGATGACTTCGT  
AGGTATCTTTCAATCCTTCGTAGTCATCCTCTAGGAAGTCTTGACTTGCTTGCTCAGATT  
TAAAAACATAGGCCACACCGGATTTAAACATCTTACGCATTGTTGATTCTCCTTCTTGAT  
TAGATGGGAGTATTTACTACTCCATTTCTTATTGTCAACTACTATCTTAAATCTTTGTA  
TAAATTGTTTCTTATACTTCTTCGTGATCACTTGTCTTGTATCAGCGTCACAGTAATCGA  
AACCTTCTTCGTCCATAACAGCAACCACTTCCGCGCGTGTCAAGCGTGAAAATCGTTTTC  
CTTTATCAACAGCATATTGAGGATGTAAATGATTGTTGGTGTAGTCGCCTCTGATGTAAT  
TAACATAGTTTGTAGCCCAAACAACGTAATCGGCTCCTAAAGCACCTACACCAAACCGTT  
TAAAGTCTCCGGTCAACGATCCCTCTAGCCGGTTGCAACACGAATGAAGCAATCCCCTTA  
AACGGCCTTGCCCACTCCCATCTAGATCGTGGTTCGTGGGCAAGATGGTTTTTGTTCATAT  
CCTCAAAAAGTGGAAATTGTCAAAGGGGGCAAATACCCCCCTGTTTTTCGAATAGTTCTT  
GTTTGTACTCTTTAGCACTCTTAGCAGTCAGTAAACATAAATTCATCCTCCAAAGAAGGTA  
TTAAACCATGAATCTTGTTTTTGACTACAAAGGATCGGAACTCATCAAAGCCACCAATAT  
AATCACCATCATAGAAAATCTGCGGCATGGTGGCAATATCTTCTACCCCTGCACGATCCT  
GAATGTGCGCAATGATAGAATCAATCTTTACAGGGCGACCGTTTTTCGTGGAGACCATCAT  
TGACAGGAATATAGATTTAAGGGATCTTACGCGACTCGTAAAGGCGCTTTGCATTCTGGC

AATACTTACAGTTGTAACCCTCAAACCCAAAAATTTCCACCATGATGTACCGCAATCTAA  
GTTAGTTACATAAACTTCTTGTATATCAGAAGACTTACCATCTGAACGATCTAGACAAGA  
GGTCTTATTCAACAGGACCCAGTTTAAATCATTCCCCTTGATAAAGTCAAGGAGTTGATC  
ATTTACGTTTCCTTTATGATGTGTGACATTACTGATACCAGACCGAAAACCAGTTCCAT  
AATAGATTCTACCCACTGATAGAATTTAATCTCTTCCCTCGTCACTCCAGAATTTATTCTA  
TTCCGCAGAAGTGATAAGGTCAGGCGGGTCCAAATAAACGAAATCACCTGGCAAGATCTC  
GATCTCGTCATAGCGACAAGACGTA AAAACTCATTTCGACCGTCTTTGTTTTCTTCCTTAAA  
ATTCAGGACACGCTCAACCGCGTTTTTCGCTAAAAGTCCGGCGACCAAAATTAGAATTTAAA  
TTCTCCCTTCGTGTTATGGCGGTTAATGTTGCTAAAAGTGTGCTGAATCAGAAGAAACAG  
AGATAGCGGATCTGGATTCTCATTATACTTCTTACGGAATGCCATGTAAGCATCTTTATC  
TTTGCGAGGCAAACCAATTCTCGGCAATAATCCGCTTGATCGTACAAACCGGGTCTGGACA  
CTCGTCAATCGCTTTGTACGCGTCAATTAAGCGGTGATCATAGTCATGAGCCAGCACATC  
CCCTTCGACGTACAGAGACACGCTCAAGCCGCCACAAAAGGCATCAACAAAGCGGTTATA  
GTGCTCAGGGAAATACTTACTAACACCATGCTATAACTTTTCCTTATTGCCAGTATAGGT  
AATTAACCTACTGCTTTCTTCATTATCCCTTCCCTCAATTGAGTTCTCTCGATCTCTACC  
AGTTTCGATAAATTTCTTGCCAATCACACGGAAAAGTGCAGTTTCCGAAATGATCCTCTTTG  
TAAAGTTCTTTACCGGATGGGAGCTTAATATCTGTTACGCTATAGTATCCGCAACAATCG  
CCATCACAATCTGTATATTCTGTTTTAGTCGGAATATCCATCATTGCCAGATACAAAGGT  
ACATCGTCTTGCTCAAAGTTCTTGTAACCTTCATGGTCGCATGAAACATAGTTATCATGA  
CCACCGAAAGGCATATAATGGACATAATCGGTTACAGGGTGACCGGGTAATTCCCATACT  
ACAATTTTAACATTACCACGAAACTTTATACCCATAATTTACCAAGAAAATGAGTATCG  
TCAATGTAAATCTTACTAGGGGTTGAATAAACCATTATATAATCCACATACCTCAGAGAA  
TAGAATCTCTCTTAGCTTCACTGACTGCTCTCAGAATGTTAGCGTATACTCGAAAGGAAA  
GTCAATACCCAACCTTCAAAGAGAATAGCCTACCGCCTCTTTATGCTTATCGGTTAGGGC  
GATCCTAACCAATTTCCCGTTGAATCTCTTTAGGCGGTGAATGGAGAGTAACACGTGTATC  
ATGCAATGTGAGTCACCATTACGAATCAGGATTAACGGTTTATCGTCATTGAAGATCGC  
CGACCCCATACGGTCGGTGAGTGTTTTATACTAACCATCAAATTCTAAGTAATATTCTG  
GAACCATATAACCGTTAAAGTCGTTACACTTATAAAAATGGGGTGCAATTTAAGGCTGGAG  
GAGCATTAGTAATGAGTTTACCCTCTAGAAACAGAATGTAATTAATAGGTCTAATACCTA  
CAGAATCAGGGGCTAAACCTTTTTCTTTTTCAGTTTCAGCGAGCGGTAAAAGTTCGTCAGATC  
GTAAGTTAGCCATGATTTTCCCCCAATTCATCAAGGTTATGTGCGCAGCATTTCAGAGTAT  
TTTTCTACTTCTTACTCTTACTGTGGATCTCCACGATCTCATCTTCACTATGAGAAAAGT  
TTAGTGGCAATAGCGGCACTTCCCTTGACCCGTCTTGATCGCTTCTTTTTCAGTTCAACCAAC  
ATTTCCGCGTGTTTCAATAGCAATTTCTTCACGTGGAACATAAGCGACGGTCAAAGCCTCA  
TCAGCGATTTCTAAAGCATTTCAGCACCAACAACCAATTTTACGAGTAGACAGCATA  
AATTCACCTCACATTATTTACGTTAAAACCGTAATCAATCCAGCCGACACTATTTGGTT  
TAACAGTTTACCATAGGATGCATACTTAATCAAGCAGGGTTAATCATTACCAAATC  
TTCCTAAACGTACTCCCAAATCACGAATATCCATGTATGCGGCTTTATATCCCCATGTAC  
CGTGTTCAGGATCAATCTCAACCGGACGGCCTTTACAAGCATACACTACATCGTGACGGT  
CAACGATAACATAGCGATAGCCAGCCGGAAGATACACAGTATCGCCGTAACCTTTAACTG  
GAGTAGCAGAAGAGATAAACATAAATAATCCTCACATCGTTCACTTGATGCGGTCATTA  
TATGATAACCGCATTTTTTATGTGAACAGTTTTTTAAAATCTTCTTCCGGCTGATATCGA  
CCGTCATCGACTGGTTTTGGACTGAATCCTTTATGGGTGCGCGGCTTCGCGTCCGGTTTA  
CCAGCAGTCATCAAACCAAACATTTTCAGCCCCTTATAACACATAACATTATCAACCACG  
GTCCAAGTTATAGGCCATACGATTGCAGCAATACAAATGCTCCTGTATCGACCTCTTTG  
GTGTCCTTGTTCAATCTGGCGTACAAGCAGAATACTAGATACGAGCTCATTGCACCAGTA  
GTCCAGATATAAAGCACATTAACAATATCTTGTTTTTGTCACATTATCCTCCTTACATGTC  
TTGCAGTGCACAAAAGCATTTTTCTTCATAGTCATAGAAAATGTCTAAGTATGCTTTTTTC  
CACATACTCGCCATTAATCCGAGCGGCAGTAACAATCAGAGTGGTCCAGTTAGATCCGCT  
CTGAACGGTAAAGGTTCTAATACCCAGCTTCGCTGCCAAGTTCGAACGCAAACAGGACGCA  
ACCACGGCAGGAAGTGATATTGGAAGTTTTGATTTGAAAGCCACCGCGAGTTTTAGAAAT  
TTCTACTTTAGCGAAAGACAGGTTGCTCATTTTGATTCTCCTTAAGAAAGTCTGTTTCGT  
TTTGATGTGTGTAGTATAGGGGTTACGTGATCCCCTATCAACAAATTTTTTATGAGTTTA  
GTTAATTAACCACTACATCAAATGATGGACAGAGCACACCTTATTAACCACATACTCAT  
CGTGTTTAGGAATAGCGCCTAACCGCTTTATTTTCGCTCGCTGACACGATAAACCGCTTAT  
CCGGTGCATTTACCTTACATGCTTCAACAACGCACGGGAAACGCGTTTCAGAGAGTTCTG  
GACGGTTTTGTGAATCCATCAGGACAATGAATACCCTGTTACATTGATTGTAGAATCCTG

TTTTGATTCATCAAGTTTTCTTCTCTGTACAATTCGTGCAATCTTCCTTTTATGATTT  
CGTTGGTTCGTGTCTTTACAGTTTACCCATTCAACAAGATCTTTACCCAATTCGAAAGCC  
CATTCTCGGTCTTCCTTTACGTTTTGTAGGTAGGGACTTTCGGACAGTCTACGAAGAGAT  
GTTGTCGTAACAAGAATGATCCCAGGAATGGTGGGATGTTCCTTTCCATATAACAATAGGA  
CGCGAGTCACTATCAATACCTTGTAAGCAGGTGTATCCTGAATCACTTAGAATCATATAC  
TTTTTCATTTACACATCTCCGTTTCCTCAACCAGTTATTAGAGCGACCAAACCATGACG  
CTTTTCGTGCTTCTTTTTCTTTATGTGCACGCAAACCACTGAAACACCATTTCATAATCAT  
CACCGAATCATGATTCAACAGGAACACCCGCATTTTCGTAGTTCTCTGGTCTTTGTCATAA  
ATCCTTGACATAAGGGTCGACCTTCAACAATGATAAGAAGTTAACTTTTTCTATGAAAG  
TATACCAGCACGGTCAATAATTTCAATTTTCATTTTACATTATCTCCATAGATCTTTGC  
GGCAATATCAATTTACACCAGCGCGAACATCTAGGATAAGATGCGGTAGGTGTATGCAGTT  
TTCCCACCCACTCGCTTCATTTCTGAAACGGTGACGTAAGCCCATCCGTTTCGCTGTAAT  
AAAGTCTACTTGAACGTTGAGAGGAAAGCAAGACTTTTCTACGTCTTCAAATCCGATAAC  
GTGTTTTGTGCTTGAATATGGAATATATCCGCTGATCATTTTGTGATCTCCTTATACTCA  
ACACACCATAAGCAGGTTCGCACATGATAAACGCTCAAAACGCTGGCAGATATGGGACCAT  
AGATATTGTGCACTGTTTCGGCATAATTTGAAATATGCGATTTCTCTCAAATTTACGAAA  
TAAGTATTCGATTTTGTGTTCTCGACCGGAGTATATCCGAAAGCGGGTTCCAACCTCAACA  
TCTGAACTAAATGCCAATTTAACAGAATTTGTTTTCCGGACCGCTGTCAGGTTTCCTTCT  
GGGTACAGCACAGCAGGTTTAGCGCCTAAGGGGATAAACTCAGTATTTTAAATGAACAGA  
ATAGCATGATACCCGTTATATTCCGACACTTCCATAGTAACAGGAAAATCCAGATGGGAT  
AAACCTGGTAGATCTCGCATATCATGAAAGGTCCCATCAACTTTTTCTTTCTATATTCC  
TCACTCTTCTGTTTCATGTCTTTTATATGGTAATATAACACGATTAATACAGCAAGCACC  
AATTACGTTATGAGCCCCACAAGTTAAACATTTATAGTCATGGAACCTTTTAAAGGAATCG  
ACCAAACCTCATAACCGACTAGCGCCGCGTGTACTTGAGTCTCGATCTCATCCATATCAGC  
CAATGTTTTAACCTTCATAGTATAATCCTCCAATGGTAGTTTTGCGAAGATGGTCATTAC  
ATGCTTTTAAACGCATCACTCGCGGTGTCATAGCGAGTATTATCATAGCACCAGTAACCAT  
CTGTCAACTGATAAGTCAATCCGTCCTTTTTGGCTTCAATGAAAGACAATTCTTTGAAAG  
TTTCTACTTTCTTTGCTGATACTCCACGGTCACGGCTTTTAGAGAGTTTAGCCAAAATGC  
GTTACAGCTTGTTCCTTTTATTGCCAGACAGATCCCAGATGATGTTTCTTATATGCTTGA  
TTAATTGTTCAAGTGCATCTTTGATTCTCCTTAGTTGGTCTGCGTGCATTATAGCATTG  
TGATTATCTTTGTCAACACCCAAACACAAAAAAGGCTAGCCCGAAGGATAGCCACTAAAA  
TTACACGCGTGCACCGTAGATCGTGCCTACTTTAAACCCAGCGTGGAGCATTACCAGAAAC  
GGCTTTACCAGCAGCACCACCGTTATATTCTGTACCGTTCCCTGAGTATTACATCTTCC  
TCCAACAGCACCAACGTTACCGCCCGCACCGCCGGTATATGCACTAAGAGACCCCTCACC  
ACCAGATCCTTTACCAGGAGCGGAAATATTACCAGCAGTTGCACCGGAACTCATATGAGA  
GGAAGACCCTCCAGCGACGAATGGGCGACCACCCCAACCAATACTAGTCGACCCCT  
GTTACCGCCGCCACCGCCGCCACCGCCGCCAGCGATAGCACCGTTATTTGTAATTCGCAG  
ACGTGTACCGATAGCGTTATTGATTGCGTTTCCACCAGCAGCGCAAGCAGCGTTACTACC  
ACCATTACCCACAGTCCGTAGGCAGTCACACCAGAGTTAATTATCAATGTTACATATTC  
GTTTGTAAACGAGCGAGGGAAGTCAAGACAAGCAATGCCAGTAGATTGGGAAACAATATC  
ACCAGTGATAGTAATTAACAGGAGTAGATCCTTGTGCTTTTCATCCAGTTAATAATAGT  
GTCTTGATTGTAAGAGTTACTAGCACCATGCTTTAATGAATCTCTTTAGAGCGTCCGAC  
CATTGCCGACATATACGCCGGACGACTTAAGCGTACAGCTTCCATTGCGGTACTCATCCA  
CCGTTGACCAGTCTCGGACACAGCAGATGATCCCACCCATCCAGAACATATTGCCATAAA  
ATTTCTCACAAGAAAAGCCCATTTAAGGTGCATTGATTGATAATTAATTAAGTTGAT  
CTCTGCTTACCATCCAAGAAGAAAGACTATGTTTTGTTAGGATAGCGAAGCGCCCATGA  
TTCGGCAGTTTTAACACCAGTTTCGAACAATTGACGGCTGGTCACTTTAGCCATACCATC  
TTCGATGGCAACGCTTTCAATAATGATCGGGTACTTATCGCCACGCATGAAACCGCAGCC  
AGCGGAAGATTTGATAATTTTAAACAGGTGCCATTTTTGATTCTCCTAGAAAGTGTAGTGT  
TTCGATGGGCGTATTACGCAATAACACCGGATCGCTGTCAACACTTTCCAAGAAAAATTT  
TTAAACTAATCGAATATAGCCCAGAATTTACGCACCTTTAGCCAGTCCATAAACTTCCA  
TTTAAAGGTCGCCGTAGTCATAATTTGCAACCATCAACTGACCATTTTTTCATGCACCAATC  
ATGAGAGAAAATTTGCCCGCATAAACTACGATAGTAATAAGCTTTCCTCATTCTGGCGG  
TGTGGAAGACAAAGCGACCATATGACCATTGAGCATAGTAACCAGTGATGGAACAATAAA  
ATTCGGGCTAACCTTAATACCGTTAAATTCGTTTTGTGCTTTTCATGCCAGACCTCGCAA  
ATACTAATAGCATAAACATGCTGGTTATTCATAATATCAATTGCATTGTGATAACGAGCT  
AAACCATCAAGGATAAGTTCTTGTTTATCCTGTTTCAGTTTGGTATCACGCGCAGCCATA

AGAGCATCAAGAACAGGTCCAAAGTGATTATCTAAATCATCTTCGGTTGCAATGTTTCCT  
ATTACCTCGTCTATCCGTGATTCTAATGCTTGCTTTTAGTTGATCACATGCTGGGTATAT  
TCCAACACATCAAGACTATCGCGGGTAGCGTCGCCATGTTAAGGTATTCCC GCATGAAGA  
TGTTCAATTAGGCGTTGTATGTCAATCTTCATTTGTAACCCTCCTCTGAAAGCACATCCC  
AGATCGTTGAGTCAAGCTGCATTAAATTCCATATAATAGAGTCATAACTACCGAAGCCAG  
AAGTAAAAATTACAACACACAGGCGATATGTCTTATGAAAATCGGTGGCTGTCTCTGCAT  
CAATAGGCATATCGTTACCTGAAACCACCAGACATTTTAGAATCATAACTATGCTAGCCG  
GTGGCGCTTGCTTAGTCTTTACAGCATATTTTTTCGATGATCCGTCTTGCCTTTTCTTCTT  
TGTTACGTCCAGACCAACTCCGGTTTCGGTATTGATTCATAATAATTTCAATCACATCAT  
TTCCGATGCTTCACGGTCTCCATAATGGTTTTGTAAGCCAGTTTAAGACGATCACCGAAA  
AACTTTGCGGTGTTACCCTTCGGATCGCGGAGCATGGTTTCTACAATCTCATCGGCAGTA  
ACAATTTCTCCTTTCTTTGCTGCATGTTCTATCATATACTTCAAAGATTCTACGGAAGCA  
AGTGCTGCGGCTACTGGATTAATCATTTTTGATTCTCCTTTGTTGTCGATGTGTGCATTA  
TGCTATACCCTATTCCGGTTGTCAACACCTAAAAACGAAAAAGCCACCCTTTCGGATGGC  
TTTTTGATGATATTTTATTAGCTCCATTTGTATAGTAGCTTTTGAATCGACCTATGCTA  
AACTAGTTAAACATAGTAACCAATTCACCATCCCTTTCCAATGATAACCCTTCTCGTCT  
TAGACGGGTCTTCCGATTCGGTAGTAATTGAACACGCGAAAGTGTAAGGAAGCCAAATAG  
TTGTGTTAATGCTAGTATGCTGTTACTTCTGGTATGCATCCACGGTGACTAACATTAAG  
CCAGTCGAGTGAGTTTATAAATTGTTTTCAAGCATAGAGCTTTGGTATCGTCTAAAACGC  
TCTGGGACGAGCTATCAACATCATTATAAATCTCACTAGCCATTTGCGTTAACTCTTGCA  
ACTAGGCAATTTGCTAATCTCCTTGCGGACGACCAACTTTGGCTGATAACGACCAGTGA  
TCCCAATATTGCTTTCAGTGAAATTATCAACCAATTCTTGCACCTCAAGATAGAAGTGT  
CCTGAGCCTTATGTTTTGCATAAGATCCAGGACAAGTTACCCCAAATGCGCAGCATGCG  
TATAAGCAACACTTATCAGACATTCCCCGATAAAGCGGTCAACTTTATTAGCCTTTCCCT  
CTTCGGACGTCTTTAGAAAATCACTGAATTTTCATGTTCTAGATTCTCCATATTATGCGAC  
AGAACAAATTGTTGTGCTGCATATCCCCCATAATAAAACACTGCCTAGAATCCATACGT  
TACTACGAGCATAACATCTTCTAATATGGGCATGAAATTTCTAGCTGGTTTCAATGGAA  
GGAGATATGTTGTTTACATATACTATCATTGCGCCGTCGTAATAATCAGTAAAGTCACCA  
GTTGGATCATATTGATCAGTACCGACACTTCGGACCGCAGTCAAGCATATTGCCGCTGTT  
AGAGTTTTACGAATATATGACATAAGTCATTCCCCCAGAGTGAAAATATACAGTTATATT  
TATAATCTGGGGCTTTATTTATGATTAACTCTTATTTGGTAGTACCTTCAATAAAAATGTT  
TACTACACACAGAAACATATTTATCCTCTGCACCAACTTCTATTTGAGCACCATCGCGAA  
TAACATTACCCTCTTTATCTACACGAAGGCCATTGTTGCTTTCTTGCCACAATGACAAA  
TACCCTTCATTTGACCTGTTTATCAGCAAATGCCATTAATGCCGCAGATCCTTCAAATA  
GATTGCCCTGAAAGTCAGTGCGAAGCCCAGATCACAGTACAGGGATATTAGCATCATCAA  
CAAGCGCACACAAGCCTAAAACATGCTCTTTAGTCATAAATTGGGCTTCATCTACAAAA  
CCGCATCAGGACGCCAGCGATCCGGTCTACGTTACCTAACGATTCACGAGAAACCAAAT  
CGAAAAGATCATCCGATTTAGTGAAGGTGATCGCTGGGGCATTAGGCCAATTCGGGAAA  
CGACTTCACTTTATGAATCTCGATTATCAATCACTGGCTTAAGAATTAATACTCGCATAT  
CACGTTCTGTACAGTTATAAGCACTTTGTAACAGAGAAGTTGATTTGCCAGCGTTCATAG  
ATGCATAGTAGAAATATAATTGCGCCATTAATTAATCTACAAAAATCCAACAAGACCTAA  
ACCGATATAAGTCCAGATACCAATCAAAAAGAAGTTAATGCACATGGCAAGGATAAACC  
TTTCAACGTTTTGGGATACCCGACCCAATATTCCCTACCATCTTCAAACCGGATCAGTTT  
ATTGCATTGAGAGACCATATCAACCACAACATGTTAATTTTCGAGATTGTAATAGATATTG  
TTTTACAATCTCTACACCCGCCATAATAACAATAACGAAAAATAAAGACCACACAACAAG  
ATTAATGATAGTCTCAAGCATTTTCTATCACCTCCACCCAATCAGGTGTTCCCTGAGAGA  
CTCCTTCTCCTTCATGATGGTTCGCAACCTTTATTGCTACAATACATCCACCAATCCCACA  
TTCGCTACGGAAAACGCTGCATCTCGTCGTTACAGCAAGTGAAGATAATAGGCCAACCAC  
ATCTAACACATCGGCAGTTTTCTTTTCATGTGAGCGGTATTTCGGCTTCTTCATAGATGACT  
CCAATATAATCGACATTTACATTTAGGGCAATGCGGTTCTTTAATAATAATACCCGTCTGT  
CTTTGGAACACTAACAGGAGCGGTTTTTATATTGTATTTCAGTGAAACAACGAAAACACGC  
TACGTTTTCTACAGACTGACGTTTCACCCAATCACCGGAATATAGATCATTTTGATTTGT  
CATATTCAACCACCACAATGTTAATGTCTGGAGTTGCAAAATTAATGATCTCCTCTACAC  
ATTCCCCTCAAGGCCACCGATACCGCAACCGATTTTAGGAATATAGCAAGGCTGTATAG  
CACCTTCAAAAACGTCATTGATAGTCTCAAATCCTTTCAGGATAGCACCATATTCTGCTT  
TTGGACCCGGTCGGAATTGGGTATATAGATTACCCCGCATCAGTTATAACCAATAACTT  
GATGCGTCCAGACACTAAACCCACCCAGCTTTTCTACCTTACCGCGATAAGTTTGTGTTG

CAATCTCTAACGCTTGCGGGAACCTCTGTGCGGATCTTTGCTGCAATACCAGCACCCATAG  
TATGAAAACGATGACAACCATGAATTAATGATCGTTTCCTTGTTTAAACAGGGCGATGA  
GTTTCGCCCTTTACAGTATCACTAATCATAATATAAACGTCTCATTAGTCACGGGAAGACA  
AACCGGCCATAAAACGGCTTAACAGAGTGTGCGGATAAGCATAGCATAATTGCTTATCAG  
GGGAGTATCACAAGGTTGCGTTTTGTCTAGCAAACCTGGCAATACGCAGATCCCACG  
CTGGATTTTTTCGTTTTTCGTCTCGACCTTGTGGATGCTTAGTCGAGTTCAAGTGCGA  
TATAATCCCTACACATGTTATCATCATCACAGAAAGTTTTAATGATCTTTTTTGTGATCT  
CAAATCCTTTGTATTTCGAACCTTTGGATAAGGGGCGCTCATTACTACCTAGCACACCAGCCG  
AGAACATCATAGCAATCACAACAATTATGGTCAACTTCTTCATATATTCCTTAATAGCGT  
TTAGTGTTAAGGATGCCTTTACTCTTTAGATGTTTAGCCTTTTTTAGTACACCATCAGCA  
TAACCTAACCCAGCTTTATAGTTCCATCCAGCATTGTAAGAAGCTAGCGCGAGTCGGATA  
TTACCGTTTCGAACATCAAGCCAGTATGCTAACTCATCCATCGCGTAGAATGCAGAAACC  
TCGCAATTCATGATGAAGATGATAGTCTGGCGATCACTCATTTAACACCCGCGCTTTGCT  
TTTTTCGCTTTCACCGTTTTTAGGTAATTTTGAATAATCCATAAAGCATGATGATTTTTTC  
TTTCGTTCTAAGTTTGCACCCGCGCTTGATTCTTGCCATGCGATACCCGCCAGGATGTGA  
CCTAAACCCTTTCGTTTTAGCGATTATCCGGATGGTCCTTTTTCAACTTACCGCTTTTT  
TTGACTTGGTCGCCGTGTTGATAGTCGAAATGTAAATAATCTAGTTGGTATGCTGTAAAG  
TTGTCTATCGGCCCTTTTTGATCGGTACGCTAGTCGATGCGTGTGTAGCATCAACGGCT  
AGTGACAGACTCAATACTATCGCTTTTAGAACTTTTAAACATTAATTTCTCCTGTTTGTCT  
TAACTTTCTGATTCATAATATCGCCCTATCACCAGAAAGTCAAGCATTATTTTTAACCA  
ATTTCCATTATAGGTCTACCTGCAAAACAACCGCCGACATTTTACCCGCCAGTTGTTTTG  
GATTCTCTATAATCATTCCGGCTGCATAGACCCGGGATATGGCTTACCCTCTTCGAGTAGAT  
CAACTGTCATCCCGATCAACATGTTACCGTCAGTAATTTCTAATCGATTCCGGTCCGTCTT  
CCATTTTCAAGAAGTTCGAAGACCTCCGCCAAACGAGTTTCTATCTTCTTGAATAGTTCCA  
TTGTCTTATGTGCATCGAAAAGACGATCGGTTAGACGGTCGATCATAACGGACTAAAGC  
GAATGAAAATATAATCACCGTAACCATCATTCAAGCACTTGTCTTTGATCTGCGCATTGG  
TTTTGCGCATTTCGGTTTTCGAAGAATCTACGCAGCTTACTACGGCGAACATGTACGTTAA  
TTGTTTTCCATTATATTATCCTTTCTTAAACAATTTGCGTATCCAGTATAACAACCGGGATT  
TCTTTAAACTTGAATTTCTCTATAGTTAATTTCTTTAGTAGCAAGATGAATACCTTAAGCA  
TCATGTGTAACTATATGCCATTTTGTATAGCCCAAATGTAAACAACCGTCTGGATCTAGG  
TTAATAAGAGCTTCTCGCTCACTAGGATTATTTTTCCACAATTTTGTAAATAGGATCGCAC  
ATCATTTCGACCTACCGTACCATGAATAATCTCACAACGGTAAAGTTTTTCCAGCAGTGAGA  
TAGGCGCACCCGTCATACTCGGTCTAAACACACACTTCTTTAACACTCATTTTAATACTC  
CTTTGTTGTTTCTCTGGGGGTATATTGCTCCCCCGATCATGTGTGTCAACTATTTTTTC  
AAGATTTTTTTTGTATTGCATTCCAAAGACCTTTATTTCCAGGTTGTTTTGGTTCTTCGAT  
CAGTGTCCATGTCCGACCGTCTAAGTGTGCGCAACGTTTAAAGGCAAAAAAAAAATCTGGTG  
TCCCTTATCAGCACGGCTATAACCACTATTCGCAAATCTTTCATGTGGTGTATATTCATA  
CAGTGTATTAGGTGTAATATACTTGCGGTACTATAAGGCGTCATCACGTACATCATGGT  
ACTAACTCCCAACGATCACCGCGAAGATGAGAACATCCACCATCAAGAAGTATCGTAATA  
CGATAACCTATATCATCTATGATGTAACCGATTGTGCGGTGGATTTTCGTCGGCTAGGGCC  
GGGGTAAGATCATACTTTCCGGGGCGTAATATCTTGTCCCTTATTGGTATTGGTTTAA  
ACTTGCATTTTCTTAATCTCCTATATTAACCTAACCGGGTATAGTGTTCAGAACACG  
GTCAGATGAATATATTCTAATAGATCTTTCCAAAAGTCAACATCTGGTTCGTCGGGAATA  
CCGTTTTTCTTTGCCTTTCACGCGCGAGTTTAAACACGCTCGTAGAGATCTTTCCATTCT  
TCCCGCACATTATCAAAGGTTCTTTACCTAACTTACACGCTAAAATAGAAGAACTTCGC  
GCGAGAGGGAATTGTAGATCACCTGTCTGACAGATTTCAAGTAGCTGATAAACAACATGC  
AGAGCATGAGAAAGATCTTTCCAGTACTGAAATACTTTTTAAGCATTGGCTACCTGCTTT  
TTGAGATAGCCAGACAAACCCACATACGAACATGTTAGAATTTATCTCGATGTGTTCCG  
ATGATTTCCATTCTCTGGAGGATTCAACCAACATGTTACTAGGCGCCTGCACCATATCA  
ATCGCGCCGATATCGCCTTTACATGCCAGATTAATAAACCGTTTTAGTCTGAAGATATTA  
ACGTCAATATCGTCTTTGGTGTCTTGTATCCCTTGACCGCTAGTGCTTTGAGCATAGTGT  
TCTTTCATCGATCCTAAGATAATTTCTTTTCGAGTCGGAACAAAGGTACCACGATAATCT  
TTATCGGAATTTTCAGTATCAAGGCCGTATAAGTGAGATCCGAAGACCATTTTATCCATT  
GTATGCATATTTAAACCCTCATTAGTATTTTACGTTACGTCGAACGCCTTTTCGAATCTG  
ACAAATAGCAGACGGTGCAACATTATATATTCTTGCAAGTTCTATACCCTTCATACGGGG  
AGAAGATAAAATCTGTTCCACTTGGTCGCCGGTAAGTTGTGCGTTTTCCGTGGTTCTCTCC  
CCAATTTTTGTTTAAATCCTTCTTTCTTCGCATGAACAAGATTTCCGGGTAGCTGTGCTCCA



TTCAAGATTATAAAGGTCATAGTTTTGTTTGTTCCTTCCTTATGATTAACACTACACGGTA  
GTTATTTGGATTCCGAATAAACGCAACCGCCATAGGTTTATGCATGTTACGGTTTTTCT  
AAATCCATCCGGCTTATAACATACTGTAAATTTAGAATAACCAGTTTTCCCGTAAACACT  
AATATAATTTCCGGTCTCCATATTTCTAACCTACCATGAGAGCTAATCTCAAATTGAGT  
GTAGGGCAACAGCGCAACAATTACTTTCCATTCTTCTACAGGATGGTCATCACAATATGT  
TTAATCATCATACCACCTCATTAAAATAAAGCCAACCCTTTCGGATTGCCTTAAAAATT  
TACATTGCTTCCGTAAAGGTGCGCGAAATAACGTCACGTTGTTGGTATGGAGTCACACTA  
TTGAATCTTACGGCATATCCGCTAACGCGAATGGTTAGTTGCGGATACTTATCAGGATTA  
GCAACCGCATCGAGAAGAAGATCGCGACTCGTAACACTGGAATTAGCGTGCTGACCACCT  
TCGACAACCGGAGCACCATTATCTACAATCACCGGACGGAAGCTAGTTGTGTGCAGTGCC  
AGAGAATCGACGTCTTCTGCGTCGATCACATGCTCTTCTGCGAATGTTTTACAAACAACT  
ACTTTATCGCCGATCAGTGCTTTCGGTTCGGATACCAGAATCATAGGCGCGAAGTGTCCA  
CCAATAATAGTACCTTTATGCTCACCTTTCATGATTTGAATTGCTTTAAATTCCATAATT  
CACCTCTTATAGATCAGGACGTTTCGTCATTAATTTTACCAACCAAAACACCATAGAGTTT  
ATCAGGTTGGACTTTCAGATTCTTTTTAATGGTGGCACGGAATCGACGAGCTACGCTAGC  
TTTATTTTTCTTTAGTTGATACGTAAGCCAATGACAATAGGTTGGTCTTCTACCTTACCC  
ATCCCAACACTAAGTCGATTCAATTCTAAAACTGCAATACGCTGTCAGTAAATCCGCGC  
ATGGTAGTATCTAGGCTAAAAATTGTTTTGTCAAGACTACGACTTCGCCTTGTGATCGGA  
TTCAGGAAAGTTCGGATAGATGTACAATCTACATCTGAAATATTTACATTTTGACCGCGA  
CCGCGATCTCGGATCGTTTTGGCATGTTCCCGCGTCGTTGAAACGATAAAGACTCTATAG  
CCTTTTCGCGTATAATGGTCATATAACTTGATTGTAGCGTCTGTATGCCCTGTCTGACGG  
CCTAAATTGATTGAGACGATGGAATCAAGGTCATCAGCAAATTCGCTCGCTCACGGCGT  
TCTATGATGCCATTTACGGCAGATTCACACGCAGCATAAATCAAATCTTTACTTTCTAAT  
TTTACATCAGTATTCATGGTAAAGTCTCCAGTGAACGGGGAGAGATCCTTAGATTGTCTC  
CCCGTTGATGGTTAATATTTTTATTTTGGATCTGGGAAATTCACTAGAGCATATTGTCCAT  
AAAATTTCCCTAGCTGGATTATCATAAGCGATTGCAGCTTCGATTTCTGTGTCATATTGTC  
CAAGAACATGTCTTTGGAGGTTGACCATGATACTAGCTCTCCATTTCTTACGCAAATCCT  
TCCTGTTATACTTACTAACACCCTTATACACACTAGAAAACTTTTAGACTTTTTCTTTC  
TATTATGTGGATTTTTCGCGTCGGTTGCCTCCCTAAGATTTGGAGGATTGTTATTAGCAG  
GATTACGGTTCGATATGATCAATTAATCTAACATGCGTGCCATGTTCTAGATACCAAACAA  
CCCTATGCACGAATAGATGAACTCTAGGAAGACCGCCATCTCTACTATAGCAAATCAA  
GATGACCATCTTTATTTGTTCTGACTTTAACTAAATCACCGTGTTTATATCTACTCCCTA  
ATGGTCGCTTTTTGATAGCTTTACTATCGACTCTATAATATAAGATACCCTCTATATGAG  
CATATCTAAGTTTCATCTCGTTTTGTAGGGATTTCATCCCAATATTTAAAAGCCATTTTAT  
AATCCTCACAAAGCCAGCGATTAAGCTGGCTTTATTTTAGTTATACCGGGTCTGGATATA  
CCTTTTTATCGAGTTCCATCTGCGGTCCGTCTTTAAAAGTAACCCAATCAACACCGCAGA  
TAACAGGAACACCCAATTCTCGACCAGCTTGTTTATATGCATCAGCGATCATACGGTAGT  
ATTCATGTTCCGTGTATCCTTATCTTTCGGATACGCTACGACGTCAACCGCGAAACCGT  
GAAGATGACGAGATGTCATAGTCTTAGATTTACCTTCCGCAACATATTTCTTTTGCGTTT  
CTAGACTACGTACACCTTCCGTAATACCAAAGTCGACCGGAGTCAGTTCTAACGCACGAT  
GAACTACTTTTACCCGGTCAGGATGCACACCAACAAGCCGATCTTTGCTTCTTTGAGATA  
ATTTAAACATTATTCACCCCCTTTGTGAGTGATAATATTTAGATCCCGACGATCCTGCAT  
AGAGTGCTTGTATTAGCACCAATAAGGAAAGCATTAAACGACAACCATTTCGCAACCAACC  
CACTGATTATTAGAAATGCTAAATCCGCTTGCTAGGCCAAATACAAGCTTTCCGGTACAC  
ATACTCAGAGCAATAATCAACATCTCTGTAAAACCAAATGCAAATCTCATTTTTATTTCC  
TTTTCACTGTATACGTTTATAAAAGTAATACATTACCTCATCGCGTCCGGTGATCCAACA  
TGCTAGGGCGGTAACAGGTTTACAATTCCCAACACACCTACTGACGCAGCGCTGTCAAC  
AGACATAGGAACAGTAAAGGCCTTAGCTAACATAGCAACGCCACAAATGACATTAACCAC  
AATTATAATAACCCCGAAGAAAACCATTGTCAATCCTCCGACACAAGAAAACCAACAATC  
ACGCCAGTGATAAGACATGATGCGCCGCTAATCAGACAACCCGCACCACGTGATTCCAC  
CAGATCAGAGAAGCGACAATAACACAGAATCCCCATACTACCGCAATCACAACATCGGCA  
AGGGTCGCCCAAACATATATTCGTTTATAATAAATCCCATTACCAAACAATAAGAAA  
AAAGCCATATCAACAGATACGAGGCAATTGACGCGGCAAGCAAAGGATATTAGAGAATC  
CGCCGTCTATCCAGGCGACAAAACAGAATACGCCAGAATAGAAGCATAAACCAATTACAA  
AGCATATTATAAGTAACCATAGATAAAACGCCATAGAAAGCCCTCCATCGAGATAAATTA  
GTGCGGGTAGCACATTACCCTACTCGCATTGTTAGCCATCGCAGAGCGTGTACTAGAACG  
ATTCCAACCAACCGCTAACCACACCCAAACACACAGCAACAAGCAGATTCATTCCGGTCT

TTTGGAATCATCGCAAACAGAACCACACCCACACAGAAAGCCATTACCATTGAAGTTAAC  
ATTTGTTCAACGATTATCACACCTTTAAAGTCATAGACGCATAAACATTAAGGTCAGGCC  
AGTTAGGTTTCGAAATTATACTCAACATCCCACAAATATAGCGGTTTAGATGTATCAGCCA  
AGTTTTTAAAATCTTCTACCCACTTTTCAAGGCTATATGATGGATAAAACAAGGCCATCAT  
ATCCGCCGTTACGTTGGCTTACTGGTCGGTCAGTAAAACTACCTCAAGATCCGGTAATT  
CTTTTTCAAGGATAACCGCCAGCGCATAAATCAGACGGTCTTCCATGTTACGCTGCTGAA  
GGACCGTTGTAAGTGGGTTTATCTGGTTCCTAGCAAGCACCTCCACATTTTACAGAAAT  
GAAATTTTACAGACACAATTTTACCATAAGTGAAGAATGAATATACATTATCGAGATAT  
TCAACGTCACCTACAATCACATCAAACCTGCGGATCAGCAACCGGCGCTACATATTCTACC  
AGTTCATCAAGAGAATGCAACTTAATTTTCATCAATTCGGCCGTATTTGGTGGCATCTTTG  
ATTTTAAAACCACGTTCTTTTCAGCTGATCCTTAAGAATTTTACGCGGAGTTTCAAACAGT  
TTTCTCATAATATAATCCTCACATAGTTAATCAATGGTCAATAATCTTGTACATTATAAC  
AGAAAGAACAAGACCGCAACCCACATATAGATCCCAGCTATCAATGCAATTTCAATAAC  
ACAATATCCAAGATATAACAACAGGAATAAAAACAAACATACAGACCCGCGCAAAGAAACT  
AGCAAACACGCTAGAAAATCCGATAGCAGTATTAGTAATATTCATATTAACACTCCACGC  
GGCTTAAGTCAACAGCAGTTGCATACAGCATAATGAATATGCTAGCCGATCCGAGAATCA  
ATGCACCCTCACATTTTGAAAGTCGCTCATCAAGATGTAACATTATCCATCCGAGGATGT  
TAAAGGCGCAGACCGCACCTATGTTTCGCTAACCAATTAATCTTTTTTCATAATATATGTTA  
GAAAGACACAGTTTTCAAGAAATCCAGATTTTTAGTACCGAAAACAGAAAAGTAGTGTTT  
TCCTTTTTTCGGTTTTTCGAGAAAGCGATTGTCTTCTACATGGTGACGGAAGCCAGACAG  
ACGATCACCCAGGTCAAGCCGGCAAGCGTAAGTAGTGCCGTTTTTCGAAAGTAACCTCGAT  
TTGAGTTTTGTGCATATTCGCTCTCATAGGCTTTTGCTACCGCTTCCGTGTGCTTTACGCTC  
GAAGTCTTCGAAGTGGTATACTTTGTTTTGCGTTATCGAATACAGAAGATTCAGAGAAGAT  
AACTATAACAGATACTGGTTACATTTTGATACTCCTTAGTAGTTCGTGTTTCGTTTCGAT  
GGGTGTATTATGCAATACACCCTCTCTCGTGTCAACAACCTTTTTAGTCTTTTTTCAAAT  
TTCTAGAGCAATTTCTACAGCAGCTTTCCAACCTTCCCATATAATGGACATAGTAAGGAA  
GTTAAAGCACCCGCAGGAATCAACCTTTTTAGAGATAAACCATTCTACAAACGCTTCGCT  
CATACCATGCTCTTTAGCGGGTTCGCGTAATTGATCAATTTGGTCTTCCATAGTATCACC  
TCAACACTTAACGTTATTCAAACGCAAACGGTCTATTCATCCTATTGTAAGTACATAC  
AACAAAGCGTAGTTATGTTTTGGTTGTACCGTATCAGATAGACACGCTTTTACAGCCTCAC  
GGTCCGCTGGGTCTACACCCTCAGCTTTAAGTAATGCTAAAATCTGGTTATAGCGTACTC  
TTATTTTTACTAATGGTTTAGCCACCATATTACTCCCTTATAGTTGATCAGCGATGTAAG  
CGTGACAAGCGCGGAGTTTCATTAATGCACTACCTTTCAATTCGCCTACGATGTTTCATAA  
CTTCTAAGTGGTTGGATGGATTCATCTTAGAGCACCAGATCTGGTTAGCCAATTCCGGTT  
TACTCATATTTGGTTCCATCTCAAAGAGTTCAAGCTCAAAGTCAATAGTTTCTTTTGCTG  
CGTCTTTAAAGTTAATCATGTAGATTCTCCCGTTTCGTTGATGGTTGTATTGTAGGGTAG  
TTATCCTCCCCTGTCAACACGTTTATCCGAAATATGCAATATAGTTTGCCGGTCCGACAG  
AGTCATCATTCGGCATTGCTTTTACTGGCAGATCCAACCCTGCTTGAACCTTATATTTAG  
CGGATTCTTCGTTATAACCCAGATTACCAGAATAGCTACTACGTTTTCTTTGCTTACTG  
CTTTCAGTGCTTTAGTGATGCGACGTGCCATAATTTGATTCTCCGTTTAAAGAAAGTGTGT  
TTCTTTTCGATGGGTGAAATATGCTATAGGCCGGATCTGGTGTAAACAACCTTTTTTTACA  
AAAAATTTTTAGGCAATAAAAAAGCCACTCCGAAGAGTGGCTTATAGGGATGGTAGCGAA  
TCTTCCTTGTCTCCAACCTGCTAGCGGCCTAGCAAGTGAATGCTTTAGCGTACCGGATCG  
CCCATACGCTGCAATAAATGCAGCTAGGTGACGTCAAATCATTCTAACCGCGCTGTCTT  
TAGTTGACTATTATTTATATCGCTTTTCGCTCGTGACGTATTTGATTCTCTTCCTTGATAG  
AGTTAAATGCGTCAAAAAGACACTTGACACTAATAAATAAACATAACCGTATTTTCTACGT  
TATCCCAGTGCTTCGCATCAGTACAGATACCCCAAACGGTAAGAAGTGGCAATAGTGCAG  
AAGAGATCACAAGCATGATACTTGCTAAGATATAAAAACTCATTTTCATGGTTTTACCTC  
AATTCTTCGATATTCATCACACATCCACGCCGTAAGCAAGAATCCTACCACATAAGCAAC  
AAAATACGTTAATGCTGCGTCTGGTTCTGTGCTGTGTATCATCATTAACCAGCTAGAAC  
GGTCTTAACAAATACATTTAAAATAAATTAGCCACGCGAATAATTTTCATCGTTTGCCCCAT  
TTCGGTCGAGTCTTTTCAAACCTTGACATTCCGTAACAATCTCGAATTATCCACGTAACA  
AGAGCACCAAGTCAACACAGACAATAACAGAAAGATGTAAAACGGTCCAGTTGCATTATGA  
ACATGAGCAAGCCATGTACAGAAAACACATGCTAAGAATGTAAAGAACATCATAAAAACAC  
AAGAAAGCAAATATTTTATGCTACTCGTAGCGCCACCCTACAACAGATCATAAGAAAAC  
CCTACGCAATAAGAATTGCATCAAATATAGTGACCTCAGGTCCACCTATCAACGTCCTC  
GTTCTGTTCATTCATAGATCACAGAGCCATTTACAGCACCACATAAAGCGATCAAAG

ACTAGGTATAAACGAGATTACAACAAATTTACAAAAATCATCTAAGGTAACACCGGAATA  
GCTACCTACTGTAACAACACCGATCATCAGCCACAGAAAGAAAACAATGCAATCAGAAA  
CAAAGTATTGCTAAACAGTTTATTGATCATTAGACACCCCCACGACGATCACTTTCAAAA  
ACTTTTTTACCATCAACGAAGCATGTCACAACACTGCCTGGTTGACTTCCGCAAATTTGTTGT  
GTCACCCACTTAAGGTCAGAGCGAAACAATGTTTCGATTAATAACAAATTTTTTATCGCTC  
TTATCCTTACCCACAAATTTTGCTTTAACCATCTCCAATACCATATTATCACCTTATTTG  
CTAATCGCTAAACCCAATCCGAAGAGAGCACCCGATGCTACAGTATACCTGAAAGTCTCA  
AATGCAGTAAAGATATCTTAGCCACCAGCTAACAGAGTTGCAGGAAGCAGAGTACCAGCT  
ACGAACATAAAAATTTTTACCGATAAGTTTCATTTTGATTCTCCTTTCGTTTATTTGTGGG  
GGTATCTTACTACTCCCGTTTCATGTTGTCAACTGTTTTTAAGAAAACGTTACTTCGTCT  
ACAACGTTTTTTCATGACATCGATTTCCATTGCGGTGAGAACACGTTGGAAAATGTGCTGC  
ACATACGCTATCAGGTATTCATTTGATGGCTTGCTATCGAAAAGTCTTTTTAGTGTAGTAG  
TCATCACCGAAAGGTAAGTACATTTTCGTCGTCGGTCCAAGCGATATAAGCAAAT  
TTCCCGTTATCCCGGAAGCGAGCACTAATTGCTACTTTTGTTGAATCGAATCCCACTTCG  
CTGTGAGATTCAAGAATACTTTCGCTACCAGTTTCTTTATGAAAGTAGTAGCGGGATACT  
AAGGCAAATACGGGTGTAGTGACATTCGAATTTATCTTTAAACATCATCATTTTGATT  
CTCCTAAGTGTGTTTCGTTTCGATATGTGCATTATGCCATAGTCGTTTATGGTTGTCAAC  
ACCTAACAAACAAAAACCCGGAAAAATTTTCGGGGTATAAAATTACAGTTTGGTTCGTCCA  
CTCCAGGTCTAGATCTACGACATACTCATGAGATCGGACAATCTCTAAATCGAACTCTAG  
GTCAGTGCCAAATTTCCGCGCAACAACATCATAAGAAGGCGTGATATGCGGTACATATTC  
AGGATAATCCACGTCGCGCCTAAAGCAGTGCCGATATAGTGTCGGAATTGCATGTAGTC  
GCTTTCAAATGCCAACACAAGCGCATTAGTACCGGATTGAGTTTCTATCACTTTCAGATG  
GCATAGAGAGCCAAAAAACTTTTCACCCTCTTCTGGGATAAACGGAACGTAGACACGAGA  
ATATAAGATAGTGCTATGCAGTTTATCACGAGGAACGGCATTAGGCAGATCGGAGAACTC  
CTGCAATTTTTCAATGCGGTCTACGGTATCCTCAGTGCATTTAAGAGCCGCATATCTACC  
TTAACGGATTTCGCGAAACGGGGTAATAATCAAGCCTCCGGGATCAGTTTCTACTCCCTCT  
TCAGCCTCTTCCGCTTCTTCGTCTTTAGGGAGAAGTGCTTTCCTTCTTCGACACTAGCA  
TCAAGGGAAACGGTCCCGTTTTTCGTCTGGCTGAATACCCAGTATGCGTACCAGTTCATC  
AATACACGCTCACGATCTTTCAGTTGGCCTTCTAAGAATGCGGCCTTTTCTTGAGTGTC  
AACAGACGTAATTCAGGACATTAATGATTTTTTCATGCTGATTGGACATATTCACATCT  
CCTACTTGTGATAACTTTTTATTATATGTTTCGCGTGAATCGCGCTTTCAAATTCTTCTA  
ATGTACAATTATGTATGATAATGGTTTAAACCGTCAATAGGCAAATTCCTTTCTCGGTGG  
AGTGGGTGCGATAGAATACCAGTATCACGCTGAATATGCAACATCTTAGCACCCATAGCAC  
GCACGAGAGCAATTTCAATTGGCTGAAGCACATCAACCACTACAAATTAACCTTCTTCAT  
TTTTGCGCTTCATAAACTCATTACGAATAGATTACACCAATAAAGCGGATTGATCAAGT  
TAACCATTATATCAGTACCGAGAGTGGTTAACATGAGACGAATAGACCAGACGTTATTCT  
GTTGTTTCGCCAATCTCATTAAACGACCTGGTAAATCTCAGCCAGACGATCACAAGTAAAGA  
AACTACCGCCATACCTCGAATCTAGCATAAGCTGACACTGAATAAACCACTTATGCGCGG  
TAAGGGTATCAATACCTAGATCGGCTTCTCTGTCTCGCCCTAACCCGTCAAAGTCAAGAT  
AAGTCAGACCTTAGTCTGGTTAACATTCGCACAATATATCTTTGATGGGTGCTGCCAGTT  
GATAACTATGTCCATCAAAGATTAACGCGGCAGTAACTTTTCCTACTCGTTTTTACTAC  
AAAGTGAATCAATTTTCATGATATAAGCCTCTTAGTACTTTCTAAAAGCAGGGTGCATCG  
CTGTAATACCTTGCACCCTCTGACGATCCGCCGCTGAATTGCTGGGCGAGGAACGATCA  
GTTGACCAGCACGTTTCGATGCTCATTGTTTTAAAGGGAAGAATTGCAGTACACACCAGAG  
TATCATGCATATTATCGGTGTATGTTAACTCAAGTTCCCCCAATCGTGAACACCAACAAC  
CATAAAAGTTAAAAGTGCAAACAATGTTACGTCGTTTCGTTGTCCATCATGTGAGCTTGAA  
CGGCTTCCGGGATTGAATCCTTCCACGCAGTGGAGTTACCGTTATTGTAGTCTACTATAG  
AAAGCCTCCATGTGTAAAGGTTTAGATAGCCGTCTAAATGCTCATCGACAATAAACCGGA  
CTACCAACGGGTCAAACCTCCACATGACTAGACGGATAATCACCGACCGCAAACCATTTT  
GACCAGCAACTTGCTTAGTCGATGGAATGGTTATAGCCGGAAGTGTAACACCTTGAGCAT  
TTAAAGTAAAGCCTTTTGTGGTTGTCCATCTCGAATATTGATCTGCCAGGTGCTGGGGT  
TAGCATAGCTAAAGAGATTATACATTACTGATTCCTCAAATGAAAATATTTATTAACAAT  
TGTCGCTTTGCGACGTGCCGGAGGCACTGACTACTTTTTAACCGAAACAATTTTCTATT  
ATTCTAAAGATCTTCTTCGTTTTGGTTATGTTTTAACCAATAACTATCTTTTTATACAG  
TTATTAATAAAACGGGTACTATACGAGGACTTCTTATGACAGATGACATTTTGTAAAAC  
CCTATGCTCGTCTGGATAACGAATTAGCAACATTGCGGGGTGAAGTTCTCTATTTGTATA  
AATGCAATACAGATCTGCTTAAGCAGATTGCTGAAAAGGATGATCAAATAGAATCCCTTT

CAGGGGCATTACGTGATCGCGACAAGGCATTAGAGATCATACAGCGTGTTACCAATAAAG  
AAGAATTAAGACTTCCTACATGGTTATGCTCGTGCCATCGATCTATAATAAAAATCCC  
CGTTATTGACGGGCTTAATGTTAACTATTGATCATCCCAATGACGTTTTGTAGCTCTGAT  
ATGGTTAGCGTTTCTGTATATCCATCTGGCATATCTACTTTACTAACATAGAACCCTTTA  
TACTTTTTCTTTATTGCACATTCCATAGAACGAGCATCATAACCGTTATCGTATTTTTTA  
TAAAATGTCAACTCATGACGAAATATAGATTATGAAGATTGGTTTTGTCTTCTTTTTATT  
AATCTGTTGTTGGTTATACCAAATTTTATAGCAACCGCAACATTTTCTTTGTATAAAGTT  
TGTACATAAATGTATGCAGGTTTATTCCTCTTAAAGCCATGATTGCTACACTTAGGGCAA  
CCGCTTTTTTTTTGATACGCAGTCTCCTAAGTTTGGCGCAAATTCATGTCCGCTACTACAA  
CGCATTAGCAATTTTGTTTTTAGGATTCTCTATACTCACCGCCAACAAAATCAACAAAT  
ATATCACCTTTATCAATCGCCTTATCTGCTATTTCTTTACTACTTGCTCAGTTGACTTC  
TTGTTTTTACCTGAACATATTTTACATCCAGCTCCATTAATAAAAACGAGTGACCGGAT  
GCAGTATATACATGTTCTTTAGGGCATTAACTAAGATATTTCTTTTCATAAAAATCTTTA  
TAATCAGACACATAGCCAATGACTTCGGGGTCTTTTTGTTTTCTTCTCATCACTGTTAGC  
AACTCTTCGCTATCCTAGCGTTTACCCTTAAACGCAGAGACAACCATGACCTTGATAAAGA  
TATATAAATATCCTAGTAAAGTTTTTGTGCAATCAGGACAAAGCATTAGTAATTCTGTC  
ATTTGACCTGTATATCCTTTAGGAATATCGATCAATGTGCATTTTCCGCATCTTGTCGTT  
AATGCATCATCTATTCTTTCATTGGTCCAGCGTAAGCGACCAGTGCATTCATGACCTTTT  
ACAGCCAGTCTAAGAGTATCTAACTAAATATAGTTGACGTATGTCCTTTATCACATTTT  
AACTTAAATCTATTATCCTTTGTGTTGGTGTATTCTCCGACTAGACCATAACCATTCATAA  
CAAGATGGGATATGTTCTTTTACCTTCTCTGGATATACACCGAACGGTCTAGGAACTGAA  
TTGGGTTTTCTTTCTTTAGTCATATTTTTATATCCTGTAAATTGAAGCGCCGTCACCAGC  
GGCGCTATTTTTATAATCATTAAAACAATTTCCACACCTTACGAGCATCATATTTCTGT  
CTTTGCTCATAAACTGGTAGAGCGGAAGATACACAGCCGTGCTCAAATCTCTTGGCGCGA  
TCTCAATCAGTTTTGTTTGGATTTGTCCAGGCAAATATGCTTTGATCATGTGGCCTCCGC  
CTCTCATATCTTTAACATCACTCCATTTAATTTTTAAACGAGTTTTATTACTAAGAGTAG  
GTGTACTCGCGGATTGTGCAACAACGCTTCTAGGAACTGCTGGCGAGCTGTAGGTGGCG  
CAAAGTGCAAATTCAAACCTAGCATAATCTCGTTTCCCGCTTTAGATGTACCAAATGCTA  
GACAGATAATCAAGGGGTATCGGTCAAATAATGGCAAAGAATCCCGATGTTTTGGGTTAT  
ACGCATAAGTCTAGATCCGTCCCACTTGTGGTATTACTACCTGATGACCTTTTACACCAT  
CCTTGATGGTCTTCATAAACCCTCCTATGATTTTTCTTTAGGACGACGCTTCGATACAG  
GACGCATAGACGCACGAAAATCATTAAATCACCATCATTTCGCGTTGCTGCATATTGAGAT  
CCTTTGCACCTTTCCCTTTTAGTTTTTCACTTCTATTGCTGTTTTAATTTTCGCTGGTAT  
AACGAGACATACTTTTAGTGAAAGTAGCATAGGCTATTCCCTTAGAATCTGCAAATGCTT  
TAGCTGTCATGCCTTTGGCCTTTGCTTTCGCAAATCCTACACCCAATTCGACCCACTGTT  
TAGAATTTTCGTTTTTGGGGTAGACGGCTTTTCGTGTTCTGTGATAATTTCAAAAACGCTC  
ATAATATTATCCTCTATTTGTTAAGCCCTTTAAACCCAAACACTTTCTTTAATGCATGCT  
CGGTGATGATCTTAAACTCCATGTTATGCTTTTGGCATAATTTACGGCAGCTAACCATT  
TTTCAGTATTTTTTGTGTATGTTCATACTTAAAGCATATATCGTTGCTTTGTCTTCGCGG  
TCATTCTTTTTGGCTTTTCCGGTGGCCTTGTCTCTTTAGCTGCTTTAACTTCCATAAAG  
GCTCCTTGCCACCAACAATCTTAATGTAAAAATCCATAAAGTATATGTGTCTTTTTCCGT  
CTGTTGATGGCTCATAAGGAATTACTACGGTCTCAGATCCCCATTTTGCAACTCTAGGAG  
TGCGGTCTAGCCACTGCATGATCCATCTTTCCAGCTTGAACGGTATGTGATCTTACGTA  
TATCCCCTTTATACTTTTCCCTTATTCTCAGGAACATACTTGCCCTTATAAGTGTTATATT  
CTCCCATTTTAGCACCATTTATTATAAATACATAATACTATTTATCAATTGAGGGTGATA  
AAATGCTCTTTTCTTTCTTCCAGACATTGAATACAACGGCAAGATGACTACTGACATTG  
TGCGCAATTACCGCGCATATTTCAACGCTATAATTTCTGATTATAACATAACAATCATATT  
ACATTCAAGGTAGTCCACGACCGGAACAAGGTGCATATGAAGTAGCCGGAAACCAACAAC  
TTTACTGGATCTTGCTGATGCTTAATGACGTAAACGATCCGTTCCATGACTGGATCACC  
ATCAAGAGACAGCATATGAGTCAGCCGAACAACGATATGCTAATGTCCGGAGGAAATCAAG  
TATTATACCACATTGATATTGACGGAAACAAGTATCGGAATCTTACCGAATATCCGAAG  
GATCAAGCAATTGGTATGAAAAAGGGGATATTCATCCCCGTCATTTGCAGTTTCATGGTG  
CATTGTCCGGCAGTGGACACACTGGAAGATGCGATCCTCCGTAATGAGGAACGACGCAAGA  
TCAGGATCATAGCTCCTACACAAATTAACAATTTATTAACGAAGTCGTTTCGAGAAATGG  
AAAAGGCTGATGTGTAAGGTGATTAATTATGCAAATGTTTAATAACACCGTTAAAAGGTT  
TACCTGAATTGGAGAAAACAGGGAAGACCCATTAATGCTGGGGGGTGTTCAGGTTAGGAT  
TCATGGTATACATCCCTCGCTATCCGCGCACGGTGACATTCAAGCTTCCGACCGAAGA

TCTATTATTGATTACGCCGGTACAAGATATTACAAACGCGGGCGATCTCCGGTAGAGGTCA  
AAGCCCTACTGGTATTGTTGAAGTTCAATGGTATTTGGTTTGGCTTTAGATAAACGTTA  
TTTATACTGCGTTATTCGGGGTACTATTGCCGGACAATATACAGAGAAACCACACTAC  
AGGAGGTTTTTTCGACCCCTCTGGTGCATATCCTCGTTATATTGGTAATGATGTTAATAT  
TCTTGCTCGTTGCGGTATTAACCCAGAAACCGGACAAACAACAAAACCTGACAGTGTCTA  
TATTAGTGGTGC AACACTGGAGTTGCAGTAAATCCAGACGACGAGCCGTTAGACCAAAT  
TCCCGTTGATGATAATCCTGATGTTACATTAGAGAAAATGCTGAGGGGCGATGAGGGATA  
TCGCGTGAAATGGTATCTTGATTCAGAAGGATATCTGACCATAGGCATCGGGCATTGAT  
CATTTATAAGAAAACCAGCGATCTGGGTATTATCAATAATCAACGTTCTAAGCTGGTAGG  
GCGTGAAGTTACAAACGGAAGACTCACCGCCGAAGAAGTTAGTAAGGTATTTGCTGACGA  
TATAGAAAGGACTCGTCGTGATATGCGCAAACATCCACGAATTGCACCTGTCTATTATGA  
ATGTAATGCCTCTCATCGTTGGTCATTAGAAAACATGGCGTGTCAAATGGGTGTTGGTGG  
ATTCGGTAAATTTAAGAATAGTCTTGCTGCGATCTTAGCGGAAGAATGGAAACAAGCCTA  
TGATGGATTACGTCAATCTGTATGGGCTAATCAAACCTCCAGGACGGTCAAGCCGTGTTTC  
TAAAATTATTCTTACTCGTAACTTAGAATCATATGGCGTAATTGCTCCAAAGAAAGAGGA  
ATCTGTTTCTGATGATCCGCGAGCACGTTGGAGAATTGCCCGTATTCTGCCTATAAGAC  
GCAGAGAGCAGAAGAAGACCAGAAGCACCGTTTACCCACAGGACACACGAATCATTTT  
TAAAGAGCCTACGAATTCGTATTCTGCGAGGTATCCTTATAACCATGTGTACTAGTCAGA  
GAGCGGTCATATTATCGACATTGATGATACTCCTTCTCATCAGCGTTATGACCGCAAACA  
TCCTTCTGGTACATTTGTAGAAACCAGACCGGACGGAACGAGGGTAGAAAAGATTGAAGG  
TGATGATTATCTAATCGTTAAACAAGGCCGGAAGTAAACGTTAAGGGTAATTTGCAAGT  
TGTTGTTGAAGGTGACGCGCAAGTTTATTATATGGGTAAATGTGATGCAAACCATCGATGG  
TAACGTCACTGAATTTATTCGTGGCAATGTTAATCAGACCGTTGAAGGTACAGCTAACAT  
GCATGTTGTAGGTGATGTTACCGCTCAACTTGACGCTAATTTAACGGCTAATGTCAAGGG  
TGATGCTGAATTAATGATCGAGGGTAACACTACCGAAACAATTAAGGGTAACCTATGATTT  
AACCGTTGAGGGTAATTTAATATGACCGTCAATGGCACTAAATCAGATCAGGTTAATGG  
TGAAGTGGTCCCGTAATTGTGGTGCAAGCGTTAAAGATATTGCATCTGGTACAGTTCAAAT  
TGATGGTAGCCGATTGATTTTGGGTGAGGGAACCTATTGGTTGTAATCTTCCGATGAAT  
TCAAATTTGGAGGATATCAGCGAGCGAGAAATCTTTGAGGTGGTGTCTCTTATAAAGCA  
ACGCCACCGGATGCAAATACCACATACACAATTAAGAGTTTAAGATCAGCGAGTATCGC  
CTTAACAAGGGCGTTACCGTTGAAGAACTGAAATATCTGGTGAAGTATCGGGATAGTTTT  
TCGCTTGGCGCGGATTCTCTTAAATATAGAACGAAAGATAGAATTAATAAATCTGCTGGA  
AGTTTTGATGAGTTACCAGATCCAACCTACCGCAGATCTATATTTTTTTAACGCTCCTACA  
CGGCTACAGGAGGTTTATACTTATAAAGTAACCCTAACCTATATCCAATCTGTTTCAGAG  
TCTTCTGGTGGTCTGGTGAAGGAAATAGTGGTGGTTCCAATAGCCGGGAGGGTGCTGGA  
GAAACTAATCCTCCTCCGGTAGTAACCGAACACAGAATAGAGAAAGTTTATACACAAACC  
GTTTTTGGAAATTGGGATGTGTGGGAGCAGCAACTAAGAGTTTATGTACATAGGGGTGTT  
TAATGGCTGGATTATCCTACGATAAAGTTAAACTACAGGGCACGGAAAATACCCACCTA  
CGGTAATTAATGCAACTCAATCAAAGGTATTTGTTGAGGGTATCCCTGTATTAGTCGGAG  
GAGACGCAATTACACCACACACAAAAACAACAAAGCCTTATGATACACACGGGGGAACTA  
CGGTCGCCAGTACCCCGAAAGTATTTGTTACCGGAAAGAAAGCAATTTAAATGGCAGATC  
GTATTAGCTGTTGCGATACCGTCGCTATGGCATCACCGAAGGTATTCATAAAATGACAAA  
GCAAAAAATTACACAAATCCCTGATATTTTTAATGCTGCTACATTCGATGAAATTAAG  
CCCATTAACAGACTGGATGAGAAACCAGAAAAAATTTAAAGATTTTGATTTTAAATGGTGC  
TGGTATTAACGTATTGATGGACTAGCTCGCATATAACACTCTGTATATTCAGCAATTCGC  
TAACGCCGCGCTATATGAATCTTTTATCAGAACGGCAATTACGCGTAGTTCAGTTGTTGA  
AGCCGCGCAAGATTTAGGATATTTGCCAGCAAGTAAACTAGTGCATCGACTACAATTAT  
GTTGCACGTAACACATGCTCGAAATCCGGCAAGTATTCGAATCCCACGAGGAACTAAATT  
TATTGCAAGTGTGATCGCCGGACGTGTTATCCGTTTGTGACTACAGAAGACGTTTTGAG  
CGTTTTAGGTTCAAATGGTTTATATACGCCTATGCTTAAAGTCGCACACGGTTCGTATTGT  
TCGTACAGAAATGTTATTTAATCCGAAGAAACAATTTCTGATCCGCGATCCTGATATTGA  
CCGCGCTCAGGGTAAATTGTGGGTAGACGGTGTGAATGGAAAGACTGGACACGAGAAAG  
CATTGTTAACGCAACTGGTGCAGCAATATTTTCTATATGCGTGAAACCGTAGACGGTCT  
TACAGAAATCTTCTTTGGTAAAGGTGAATCAACTTTATCTACTGCTGGCGGTGCACTGGA  
AGCAAATTATGTTCTGGACTTAAGCCTTCAACTGGTGCAGCAATATTGTTATCGAATATAA  
CAGCACCAAGGCGCGGAAGCTAACGGATCTGTCAATTTTACATACGCGGATACATTGGC  
ATCTATTTCTATTGTTAAAATTAATGAGAAACCGACAAATGATCGTGATTATGTCCGGTGC

AGATGGTGGTGGTGGTATCCTGAATCAATCGAACGTAAGCGTGAACCTTGCTCCGGTAATGCG  
TGAGTCTCAGCGTCGATGTGTTACTGCTTGTGACTGTGAGGCTTTTGTATCTAGCCGTTT  
TGGTAGTATTATTCAGGCGGTACAATGTTTCACCGACCGAGAAAAACCGGGTAAGGCTTT  
TGTTGCTGTAAAGCCTAAATCTGGCTTGCCTTAGACAACCTGCTCAAAAAGAAGATATGCG  
CGATTATCTGGCAAAATATAATCTTGCCCTATCACGCTGAGCATCATTGACCCAACTA  
TCTGTATATTAACAGAATATTAAGTTCCTATTCAATCAATGACTTGTGAGAATCAGT  
GCAGTGGTTGCGCGGTGCGGTTATTGATCAGATCGATGCATACTATACTGACGTAGTGGA  
AATTTTAAACCAGACCTTTAGTAAGTCTAAAATGCTTGGTTCGATTGACAAAGCTGATGT  
ATCTTTGATAGGTTCTAGTGCAGAAATCGAGATTGTGCGAGAGTTCGACAACCTTCTATAA  
AGCACCTATGGCTGGAATCAAGTTTTTAAACCAGTATAAGAGCGGAATCAAGTCTAGTTC  
ATCCAACCTTAGAAAAGGACTACAAGCAATATCCGATCCATTATGTAAGTACAGAAATGAA  
CAAAGAATCCGGTTTAGCTAAATTGCTGGTTGGACCTTCCCTGTTGGATCTGCAATCGC  
TTTACGGCACTATTCCGGCACTGATTTTGATAAAGAGGTTGTCGACGGTGCGGACCTATA  
CTTTGAGGTTGGAGAGGTTGAGCATTATGACGACCTAATTTTCATGGGATCTGGGTAACT  
GAATATCAATAGCGATCGCTTTACTGGTTCATATATTTAGTTGACAGCTAAACCGATTGC  
TGATAACATCTTTACTAAAGACGGTCTTTGATCGTGTGTTGAAAAGGATCTCCGTCCTCA  
GTACACAACCATTAGTCTGGAGGCAATTGCTCAATGATTAGAGCGCCTAGTGTAAGTACG  
TTGACAATAGAAAAGTGTCTGCTAATCAGGCGTATATCACATGGGATGACGTAGGCGAA  
AACTGCTTTTATTTTGTGTAGTTAGCCGAAACCAGAACACGAGACGGGGAGATCATCCCC  
GTCGATGAGTTAAGCTGGGTAAACCTGGGATATACTGCCGAACAAAACCTGGTTTGAGGAT  
AAAACCTTTTTCCAGAATATTAGTACAAATTTTCGTGTAGCAGTAGCCGCAGAAGGATTT  
GAACACAGTAAATGGACTGAAACCGAAGAGTTACAGACATTTAACAGAAACGCACATAAT  
TTTTCTATGATGCCAGAGTTCAACCCTGCAAACGAGTTTGTAAACAAAAGAGTACATAT  
GATAATCGTGATTATATTAATTTCAATAGTGATTTAATTCAAGCATCTTTGATGAAGGAA  
GATTTTGTCTTTAGTCCTGAATATGCAAACATGACAAATATCTCAAACCTACATTGTAGTT  
GATGAGAACTTACATGAAATACAGGATCACATAGAAAACGTTTGTATTGATATAAACCGC  
ACCATGTTAGCGGAAATGAACGGTGTGTTTGTAGCTTTTCGAACGGTTCAGCCGATTGTG  
AAAGTGTCAAATGATAACGGTCAATCATGGAAAGCATGCAAGGCTTTTAATGACGGTGTA  
GGCAATCCGGTTTCCAGTACGTGCGTTTATCAGTCTAAAACCACTACTTACGTTTLAGGA  
TTTGACCGAATCCTTCACAGACGACACGCTAGAGATACTCGATCGAGCGCGGACGATGTT  
CGATTTAGTGATGATACGATCATTTTCGCAAAGGTTGGTGACGAGAACGATTTAGGCTTT  
GCCGTTGAGGTCTTTGGTGTATTCTCCAGATTGACAGGTGACACCACAAAATACGCCGAA  
GCTATGGCATGCAGTGCCGATTATTTGTGGTTTGGTGCTAAAGATGTTATTCGCCGGATT  
CGTCTTAAGAATGCTCCTGTTGATACGGTACATGGTTCGCTACGTTTGGAGAAAAATA  
TTCGAACCTGATGTTATCCGAGTAACAGGAAATGATAAAGCTGTCATTCAGAAGATGGAT  
GTGATCGACGGTAAATTGCTTGTATTTGTTACGGGTGAAGTTAAAGAGCGTTATCAAGAT  
CCAACCTAAACCAGAAAAGGTTGTTCCGTCGGATGATACGGGTGTATACTTAATAGGGAGA  
GATGGTCTGTCTCTTCAGAGAGGATTTGGCAACACTCCGCAGGAAAGGGAGTACATTCAG  
CATGGGTTTCAGTAATATGTCAACCAATGGGGATGAGGTGTTTCATAAGCAATTATCATCAT  
CACTTTGAAAGCATTTTACCTGAGCCAGAACTGCCGCGAAATATGACTTAGGCGAAGCT  
GTGAAATATTCTCAGGAGCCAACCTTATCTAACTGATAAAGAAAATACATCAAACCTACTTTC  
AGAGCAATTTGTGATGATTTGCGTATTTGGGAGTTGGGACCGCAAGCGTATTATAATGAG  
GCTGATTATTCATGGATGCGTCGAAACGGTGTCCGTGTGGGGATCACAAATGATAATCGC  
CCGTTGGTTGTTTATCCAGAGGTTATCTATACTCAGGAAGTTGATCCATCTCGCATTCTT  
GACCAAAATTGGGTCAACCGAGAAGTTTATGGTAAGGGGACCGTGACCTGTTATCTTAAC  
AATGTTAAATTTGAAGGATTCAAACAATATGCATCCGGTGTAATGTTCCATAAAAACACG  
GGAGAGATCATAGGATTCTAGCAATTTAATTATCCTGTTGGTGACCAAGTTGATGTATAT  
TGGCAACCTACATATGTCGCATTTGTTGGTGAATTGCAAATCAGGTTCCGGACGTTCCC  
TGGGTTCCCTGTTTATTATGACAGTGAGCAAGATCCAGAAATTCGGCCTTTACTGAATAAG  
ATGACGCCTGATAGCTTTTTACTTGAGAACGAAAAATTCAGACAATTCTCTGAATATTAT  
CTGCAATTCCTTAAGTGTGATGGTTCAGGAACATATTATAATAAACTAAAAAATCTGATTA  
AACAAATATCCACGCGAGCAAGATGCATATGAGTATCTTTGGTCAGAAATCAACAATCGA  
AACATCTATGCAGATAAAAACAAGCTAGATGCGGTCGTAAGATTCTTTGAATCTCGCAA  
TCAGATTTTTATTCCACTAAGGGCGTGGAGGCTTCTTACAAGTTCTTGTTAAGTTACTT  
CATAATGAACGTGTGAAATTTGAGGTTGAATCACAAGCCGGATTAGAGAATGATATGGTT  
GTTAGTTCAACGAACATTGACGAGGATATCGTAGGACGGACGATCTATACTCCAACCGGA  
CTGGCTAACGTGACTTATCTTGAAAGGGAATATGAAGTTGGACGTCTACGCTGGCGAGTA

ACCATTCATAACCTGATCGGGCGGTTTGTCTGAAGGTCAAGTGATCAAATCAGAGAAAACA  
GCGTTTGAGGGGATAATCCTTGTTGGTGTACGTGGTAAAGAGTTGTTGTGTAGTTCAATC  
GACTATATCAACCGCTCGCGAAGCCAATACACCATGAAGATTAAGAGTGCATTGCCAGTT  
TCGCGCTATGAAAATGATGAAATGCGATTTCGTTTCATCTGGCTGCTTTGGTTTCATAGGT  
GTTACTCGTCTTACAATGTTTATTAATAGCGGGTTAAGTATGAGACACGTAGAAACTATA  
ATTCAATCTCTGAAAAATTATAAGGTTGACAGCGGATTGCCTAGCGTGTGTCCTGATCGT  
GTTGCTGATCTTGATGTTGATGGAAATATTAAGATTGACCCACTAACAGGGAAACCATTT  
TACTTAACGTAACCGACAATTGGCGAAGAGTTTCCTGTTCTCTGAATATGATCACGAG  
AACAGCGAATTGTTCCACGGACTTAAAGCAAGCGAACGAAGATTTGCAATGAGTCCACTG  
TTTGACCAGTCGGCGGTAACATTCTATATGTTCCGTCAACTTGTAGATAAACGGTTGAAG  
GATAATATAGGGAATCCACGCGATCCGAAGAATCCGACACAGAGGAAAATTAATTGCTAA  
TGAAAATAATGTGATCTATCGCTCAATCATTACTAGCAAATTCAGAACAGAAAACTTCT  
GAACTTCTATAATCGTGTAGGCGATGGAACAAATCAAATTACAATTTATGGAACGTTTGG  
ACGTTTCGGAGCCGTGGTCAGAAAACGAAATAGAGGTGGGCTTTGCCCCACCTTATCCGAC  
CGATTCTACGGCTGGTGTGTTGACATGTGGACCCATATGATGGGGGCGGTTAAGATTAA  
CAAATCACTTCTTGATGCGGTTATCCCTCGTAAAGATTGGGGTGATACCGGACAGGATAA  
CCCGCGCACCTTCTTTATCAATTACATTGTTGTTGTCAACTCAGCACCATATAACCGAAC  
TGATGTCGGTAGCGGCTGGATGGTGTATGGCGTACCCGATGTTCTGAACGCGGTTACTG  
CTCGATTTCAAGCATTGACGCTTATGTAGAGTGTTTGAATTTGTCCGGAATGTGGACCCA  
CACTCATGAATCAATTGCGCCACCTGTAGGAAAGGGCGATTCAATTGATATGGGTGATGG  
ATATTGTTGGGAATATCTGTACACAATTCCACCTGATCCGGCGATCAACCGTTGCACCAA  
TGAACATATTGTTGTACCGTTCCCGATGAACTGCGACAAGATCCGGAGCGTTGGGGCTA  
TGACAATGTGATGACGTGGTATAATGACTATAATCTTCTTTATCGGCTCAAAGTAGTAAC  
TTTGCGTTTTTCAGGCTTATATGGACTCTGCGCAATTCCCAACTACCGCGTTAGTGAGTAA  
TACTGGCTTCCGTCAGTTAGGCATTATCCTTAACCCATTGGAAATGAATGCACGCCCTAG  
CGATCCAGATGTTAAAGCGGTCAAAGATAAGTACCGACCGCAAGACTAAGAGCCCACTC  
AGGCGAAATGATCTACATGGAAAACCGACAACCTATCGTTCGGTCATTAGATCAAACAGA  
ACTTGTTTCTGTTTTGTTGAGTTCTAAGTGTATGATTTTAAAAGCCAATTCGAGAGAGT  
TGACTTTTCCCATTTTGGAGTTGACGATCTTATTTGGTAAGGTACAATACACACATCTA  
AACATCTGAGGATAAAAATATGGCACGTCGTAAATTTACAGATACTTGTGAAGATATTCAG  
GTATCCCCTTGCGGTTGGGATGTGATCGCGAACGGTGAAGATCGGCGAGCTCATCGAT  
CATACTCATTCACTAGCCGATTACACCGATGAACTATGGGAGGGTATCAACTTCATG  
AATGACACTAAACCATTCAAGACTATCGACGAAGCTATCTAGTTCGAGTATAATCCA  
TTCGGTATGTGGGGAAGTACAAATGGCACGCGTAAATATTAATTGCATTACACATTGA  
ATAAACCTAAGTTCCCAATGCAAAAAGCATTACTATGGTCTACGTGCACAAGATCCTAAC  
TCTATGGTACTCATTGGTTTTGTAAACATGATAACCAATGGCACACATGCGAAGAAATGC  
ATGAGATGATGAAACAGGGTATTGAATTTAGTTGTTCTAATTATGACCATCGTATAACTT  
GCATTTCGAAAATTGAAACGATGGATTTCGTAAGAATCCGCAATTTAAAACCTTTGTGTTG  
TTATGTATCATGTTTATTTGGGACATAGCGGCACCGTCACAGCAATGGTTAAATAATGGC  
ACGACTTTCTACACAAGAACAATAACACGATCGGATGATGGAGTGGATTTATTCAGG  
TCGCCCATTAACATATGAAGAAAAAGAATTTTGCTATAATAACTATCATGGCGATGGTCT  
AGGCGGTTTCAGGTGCATTCTTTACCCCTGAAGGGCTTGCATCGGATTTACCATCGATGC  
ACATTGCACAGGAAAAGTATTAGATCTTTGTGCTGGGAACGGTCGCTTATCTTTTTGTAT  
GTTACATCGTTGTAAGCCAGAAAAGATCGTATGCGTCGAACTCAATCCAGAATTTGCGCG  
GATTGGCAAGATACTCTTACCGGAGGCAGAAATGGATCACCAGCGATGTGGTTCGAATTTGA  
GTCAAACGAAAATTCGGTGTGGTGTATCAGCAATCCACCTTTCGGGAAAATCAATACAAC  
GGACACAAAGGATGTATTTGAGTACACTGGCGGCGAATTTGAATTTAAGCTTATGACATT  
AGGCCAGAAGTTTGCCGATGTAGGTTATTTTATTGTTCTGCTGGTTCGCTGGTTTTGC  
TTATTCCGGCAGACCTTATGATGAGGTGAGCATGAAGTATAATAAATATCTAAAATGGAG  
CAAACAACTGGTTTTGGTACTTACGCCGGATGTCGGATCGATACATCAATCTATCGCTA  
TGAATGGCATAAGTACCAACGTTTTAACGGAAGTGGTTGAGGTTTGGTATTACGAGAAAGA  
AGCTGTAGAAGCGCCTAAATCACGTCCTAACGAACAAATAGAAGAAAGTGAGGTGATTAC  
CTTACCGAAACAGGAAAGCGAGTCTGCGACGCTCTCAGATTTGTTTGACATTTAATTATA  
AGCCGTCCTTGTGGGCGGCTTTTTTGTATGTATTCTATAAATAATACATCATAACATGAG  
GAATTAACAATGGCACAAAGTTCCAAAGATAAGAATAGACACAGGTAAGTGTGCGGCAATCC  
CAGCACCGGGGACAACCTCTATGACGGCGGTAATAAAAATTAACGATAACTTTGATTCAAT  
ATATGACGCATTTTCTGATCAACGCTTTAAAGACGTAGACCACGGCGTAGGAAGAACGGT

TGTTTCATGTGACCGGATACTATCAGAAACATCCACGTCAAAGCTACTCTGGTTCCGCTGT  
TGAGATTGGGAGTCTACACGATATCGATACAAGTCAACGCGCACTTATTGCTATTCTACC  
TAAAGCAAAGGTCGGTGAGGCTGTTGTATTCATAAATAGTAACGGTAGCCTTTCAAAGAC  
TACACCGGTCAATATTCGAACTCAAGCAGGTGTTTCTATTAGCGGGTATTCCGGTGATGC  
TACAATAACACAACCATTTTCAAAGTCACTGTTTGGTGTACTGCCGTTGAAGGTAGTCG  
CGTAACATGGCCATTGGGTATCGAAAGTATGTTTACCGATACAACAACGCCATTAGATAA  
AACAGTTAACGTAACCTGGAGTAGCAACAACGTTGCTATTGCCGCAAAAACAGAATACGT  
TTCCATCAAATTATGAACTACCGCTAGCAATACATCCGGTTCAAAAATGCGTTCAAGTGA  
AACGCTAATGATGATCGATTCTAAAGCCGGAAAAGTATATGCGACGGAATATGCAGTTTT  
GCCGAAGACAGAAGACGAATTATATACCGTTCGTTATTTTCATCGGTTCCGGCGTTAAAGT  
ATATGCAGAGTATAAGGCTACTGGCGAAAATATTCGTTTAGCAGTTAAAGCCGTAGACAC  
TATTA AAAATCGGGGTTGCGACATGAAACAATTAATTGATATCGGTAACGTTGTTGATGAC  
GGTACAGGTGATTATCTAAGAAAAGGCGGTCAAAGATTAATGACAACCTTTCCTGAACTT  
TATACTAAGCTGGGGGATGGTGATATCCCTCATGCATCCGGCGCGTGGAAAACCTCACACA  
CAACCAGTATTAGAACCAAATTTTGGTGATGCATGGGCGATTAATACA ACTAACAACACT  
GTTTCTTTTGAATTGCCTAAAGGTGGAGTTGGTGATTATAACAAGACAATTA AACTTCGT  
GATGTTTGGCGCTCGTGAGCGTCTCATAACGTAACACTGAAGCCAGCACAAAGGTGATACC  
ATTAAGGGATCTCTAATCGGCCGTGAGTTGTATAAAGGTTTTATGGATGTTGAACTGGTT  
TATTGTGCGCCTTGACGCTGGGAATATATCGAAAACAAGCGAGTTGACACGATCACCACG  
TCTGACCTAAGCACAGTAGCTAAGGAGATTTATATCCACAGAAGGGCAAACAGATTC  
CCTAATGTATCTGGTTCTAACACATATAACACTCGAAATGTTGAAGTATATTATTGAGGA  
AACCTTTTATATTATAGCAAGTATGTTAGTAATGACTCTAACTATGGTTTAATTGGTGAG  
GATGGATCACTTGTTGAACTTGAAGGCAAAGCATTAAACTTCGTTTTCTTGTTCGGCT  
GGGGATCCGGTCCAAATTATTACATACTTGGACGGAATTGCATCATTCCGATCTAGTTAC  
ATCACACACATAATTAGAGTGTATGATACCGGAATGACCGCACTAGAACTATTCTTGGT  
GAAGTGTGGGTAGGTGATTTATCGACGAAAAAGAATCTACCAATGCTGATTTGGGAGTT  
AGTAAACGTGATATAATTAACCCAAATTCATTTGAGTTATTAATAAATGGTACTCAAATG  
ATTA AAAACTGGTGATTCTTATCTTCTTCGTTTGTGTTGTGAAGGTGATGACTGAGAAACC  
GAAGAGAGTTGCGCACTTGCTGGCGGTAAGTGGGTACAGTCTGGAGCTGATTATCCACTG  
GTATTTGATGAGAATAGCATTGTAACAGGGATTGAATTATCTAAAGGGTTGGACAATAGA  
GATACTATAACAATTCGTTGGTTTAATTACGATATCGGAACTCTTTTAGAATGGGATGGT  
GTCGGCGGAATTAAGAAAAAGCAGACAAGATTTATCTCTATAACGAAGACGAAGTTAAT  
TTAACAAAACAAATTGAATATACCGACTTCCAGAATCCTAGCCAGAAAAACACTCGTCCG  
GAGGAAGAGTATTCAGTTCGAATTATGGATATATAGGCACTGTTTGATATTTATCATCCG  
ATCGGCACTATATCTGAAAACGCACATAACCAAGCTAACCCAGCGAAATATATGGGTATT  
GGTATCTGGGTTCCGGTAGGCGGAAGGAGAATTTCTTGCTGGTTGGTCTTCCGATGCCACC  
GTCCAGGATTTTGCATTAACAATATCGATCTTGATATTCATGGACAACCTACACACACC  
GCTGGTGGTACTGGTGGTGAAGTTGCCTATCAATTC AAGAAAGATAAGATTCTTGAATTT  
CAATCCAGCGATCGTGT TTTGGTGA AAGACGATACAGGGTCAATTATCATTGGTGGTTGT  
CAAGTTGACCCTGATGCGGCAGGTCCAGCGTTTACGAAATATAGAGAGGATATCGTAAAA  
GTTAATACTGGAAATGCTGATCCATCAATGGTGGGTATTCTTCTCCATATCGCACCGTT  
CATCGCTGGTGAAGGGGAGGTTAATATGATTTCTCAAACGCGTTCTAAAGCAAGCGTATT  
TTCTAGCGACGCAGCCTTCATTTCATACGATCCAGGGTCTAAAGACCCCATTTATTGGTGA  
CATTCGCCCAATTGGGGGATTAACGTAGACCAATCTCGCAAAGGTTCTTTTATTAACAA  
CGACAATCAGCCATTGATGATTTGTATAGCATTCTATGCTTAATGTCGGTGCTGTATT  
GGTAACTACAAATTC AACTCCACCGGAAGGGGCGGGACAAATAGAACTCTTCTTTCAC  
TGGAACGGTAACAATAAACACGATCCAGCCGCGAAAAAAGTTGTGATTGAAGTTTTGGG  
TTATCCATTTGTTGTTAATGTTGGAACATCGAATGTTGCATTATGCGAAATGGTCACAAG  
AAAATTTACTGAATTGGGAGACAAAAGCATCCTGTTCTTTAAAGTTCAGAGGAAAGGCAC  
TGGCAACGATCGAATAGAGATTCAGTATATTGATTCAAACGCACACGACGCAACGGTAGT  
AGAAAAATATGGTATTAGCGTTCGTGGGGAAATAAATCCCTGCTTGTATGGTTATGG  
TGCATGGGCCAGATTGGGAACGGGAGAAAAATTTGATTCAACACTAGTCTATTTTAATCG  
TATTGCGTAAGGTCTAAAATTATGAATAACACTATTAATCCCGTAAAAGACGATGCACAG  
TATGTTAAGTTTGACCCTACCGGAAATTGTCCTAGCAATATAAAAAACGTACAAGCGGCA  
TTAGCCGCTCTT CAGGGATTTGCTATTGCAGGTCTTCCAACGGCAACCGAAGATACAGCG  
GGTATTGCTGAAATTGCTACTCAACAAGAAGTAGATGATGGGTTGGATGGA ACTAAAATT  
GTTACCCCAAACATTGGCTGTTAAGCTGTCAAGAACGGACGCAACAAA ACTTGTCAA



GGGATCACTCGCTTTGCTAATAACGATGAAGCTATGGGCGATACTCCAAGTATTGCAATT  
GGTCTGATACATTAACCCATGTTTTTCGAGAATAAGAAAGCAACGGAACTGTACAGGGT  
ACAATTA AAAATCTGTTCTATGGATGCGGCAAAAATCGGTAGTAATGACACTATGGCGGTC  
ACGCCTAAAAAGATGCACGCTGCTATTGCTCAGAATGTTACTGGGTTGATTCCAGAACAA  
AACACGGCGACCGAGTCCCGTCAGGGTTTAGTTCGACTGGCGACAAGCCACCAAACGCTT  
GCTGGTACTATCAGAGAAGGATTTGCCGCTAGCCCATATGCATTTTCCAACGCAAGAGCC  
AATGAAAATCAGGCGGGTACTGTTAAAATTGCGTCATCCCAACAAATGATTGACGGTAAT  
GACAACACAGTAGTAGTATCAGCACAAAAATTTGCGAACACTAAAGCAACCAGTGGACAA  
TTCGGTGTGTTAAGCTAACAGATAACCCAGGATCAGGCGAGGCAAACACGGCACTGTGC  
GCAAACGCTCGTGTATCGCCTCTAAGTGATGGTATCGTACTTGTGATGTGTATCATCAA  
AGTGGAGGCGACGGAAACCAGTTTATCATTAAAAATGAACTGGATGGTCTTTGTATGCC  
ATTGGTGGCATCATGCTTACAGCATTAAACAGTTCCGACCACGCACACTTCAAATCTGC  
AACGGTCAATGGTTAAATAAAAACCAGTATCCAGTATTATTTTCACGAATCGGTTTCACT  
TACGGCGGAGATGGCGGAGACAACTTTGCTATACCCGATATGCGAGGGCTTGTTGCTAGA  
GGTTGCGACCACGGTCGAGGACTAGACCCAGGTCGTGGATTTGGTACTTATCAAGACGAC  
ACCATGCAACATATGACAGGTAACCTCCCTGTAACCAACCGTTGGCGAGGTTGGACTGGT  
GGTGTATATGCCATCACAGGCGGTCAATGGACCACGAACTATCAAACCGGTGGTGGTGAT  
GATTGGGGTAGTATCGTTACCTTTGACAGCGCAAGACAGGTTAGAACGTGTGGCGAACT  
CGCGTTAAGAGCCTTGCAATAAACTACATGAAAAGGGTACAATAAGGATCGAACAGTTAA  
ACATTCGAAAGATCCCTAACGTCGATGGTGTCCCTGTAGACGGACAGAATTCTATTAGCT  
GGATTA AAAATGGTGACTGTCTAAGCGCAGGAACCACAGAAACAGGACACGAGGGGACGC  
TTAACCGCGCTCCTTATGCGATTCAACAAAATATAGTTCGTCTAGATGAAAATTCTAAGA  
CAACGATAACAAAAGTTAACGAAGTTGATACAGCAGTGAATGATATTA AAACTACTTTAG  
GCGCGGTTGCTGATGGTAGTATTATTGATATTGTCAATCACACCATTGCAAAGGTTGATT  
CTGTAGAAGAAAATATATGAGAACTTCAAAGATATTACAAACCACAGTAGATGAACTGG  
CAGAGGCAGGAAAGAAAATTGGTGTTCCGTCGGCAGCAGCTCCGATTACACGGACAATAT  
ATGATGATATTTCTTTCATCTAACGAGAATTGGGCGCTTCCCTACCTTCAATATCAACG  
ATTCTCCAGATCCGGGTACTTCCGGTCCGGTATCAAATATCGAGTTATCCAGAATACGG  
AAGCATTAAACAACCACGGTCAGCGAATCCGCCGACTAGAAAACGACCGGCAAGATTCTG  
AAGTTGGAGAGCTACCAAAAACAAGTTAACAAAATGCGAAGCGAGCTAGGAGATACATCAC  
TAGCAACACAGGACAATGTTTATCCTCGTCTTCGCACAAATACTCGCAATTTTCGCTAGTA  
TATCAAACGAAGTTAAGGAAGTAAAGAAAGCGATTCTATTTGATTAAATTCCTGATATCG  
GGACTAAAGTGACTAAGCTACAATCTGATTATACACAGCTAAATGATGAAGTCAACGGCG  
TTGACGCTGGTATCCGTCCCTCGTTTAACTCTTCTGGAAAATAATAATGGCAGTCCTCAAG  
CCGCTGGAAGTATTGATTATCGATTGACTAATCAAGAACGGGAATTTGTAGATCGTAAAT  
CTGTTGTCGGTGTTAGTGGTGCTGTCGGTCTACGTGGTGAGGTGGCACGAATCTCTAACA  
CAGTTGGTACTGATAGTGAGCGTCATACTATCGCAGGTCGTCTAAAAATTGTCGAAAACA  
CACAGGGACGACTAGAAGCTAGCGTAAAGGTTATCGAGCAAATGATCGGGCAGTCCGAGATT  
CCGGTCTAACCGCCGGGGTTATTTAGCTGTCAAGCGCCATGTACGGCAATCCAGAAGGAA  
GCACGCAGCTTGAAAAAGATGGGATCGTCAA AACTGTGAAGGAATTGAGCACATCAGATG  
CAACCAAGGTAGCAGACGTTCCCTGATGATGGTTTCCATTATCTACGTAAGCACGGGGAAT  
GGGTTCAAGGTCGGATGGGCGGCTGGTGCATTTAAAACACCGCTCAGATTGATTTACTC  
TCGACGGACAAGATCAATACAAGGGAATCCCACTAAACCAAATGACCGAAGAAGTTCCTG  
CACGTGCAATGGTTAATAGCGAATCTCTTGTTACGGTTAACGACAAAGGCTTATTCCGTT  
GTGATTTCCGTTGTTCTGTAAATGCGGCACATAACGCTACTTTTCGTAGTCGTTATTCAA  
AACATGGTCTGATTGTACATGAGGTACGGAATGGTCATTATGGACCTGATGATTTAATTA  
GCTATTCTACCAGTGTTTTCCCTAAATATTGAAAAGGGCGACCGGATCGATATTTGCATTA  
AGGGCGTATCCGAAGAAGCATTAGCGCAACAGCTACAAATTAAGAGTTTCTCTTTGGAA  
TTTCTCCGGTATAAGAAATTAAGGGGGCGTTAAGCCCTTTTTATTTTATAGGTGATATT  
ATGTCAGGATATGTAACCAATAACCAAGAGAATTAAGACGCTATTCTGCGTCGTTTA  
GTGGCACCAGTAATTAACGTAGAAGAAACAGAAGACCAGATTTACGATTGTATTCAGAGA  
GCATTAGAACTCTATGGGGAATATCACTTCGATGGTGTGAATAAAGGATATAAAGTATTT  
CGTGTTAGTGCAGAGCAAGCGCTACACGGGGTATTTCGACTTAAGGGATTCTGGAGTATTC  
GCAGTAACTAAAATAATTCGTACAAACGTAAGTAGCGCGGCTACGATGGATGGTTCGCC  
TTTTATCCGTGGTTTACTGACTTTCAGTTGGGTTTAGCGGGTTTAAATGGCGGTTTAGTA  
TCTGGCTGTAGTAAATTTTATAGACCAAATGCAATGGGCGGTGATCTAGGATATTTCGAA  
CAGCTTATGAGCTATCGAGCCGCTATGCAAAAATATGCTTAATCCGCAGCCAGATTATTGG

TATAATAGCGCAAACGGACAACCTTAAGATAACAGGAAACTTCCGAGAAGGTGATCTCATT  
GTTGTTGAATTATATGTTAAAAGTTATGTTGATGTACCTGATATGATCGGCGCGGTTGCT  
GGTTATGCTCATGCGGGAGGATGTTCTACCGCTGGCGGGATTAGCGCCGTTTATGATGAC  
CCAAGTGTGTTTAAAGCCGATTGTTGCTGCCATGGGACCGACCCGTGATAACAAGCAG  
GTCGCACATAATGACCGTTGGGTTAAAGACTGCGCGACTGCGTTTACTCGTTAGCTATGG  
GGCAGATCTTAGCTAAACATCAAGGGTGTCAATTACTAGGTGGTGGCACTGTTGATGGG  
GGCGGAATCGTCAAGAAGCACACGCGGATATTGAGAAATTGCGACAAGAAGTACTTGAC  
TTAGATCCTCCGTTCCGGCATCCTCATGATTTGATTTATTGGGGGAGTATTCCCCATTG  
GAGTAACATATGTTTAAACAAGACTCTTTTTGCTCGCCTTGAATCGCAAAAGGTTTATGAG  
AATAAACTACAAACCGAGATTCTCAATCCTTACGTAAATTTCAACCGTCATACAAACACC  
CAGACGTTAGCCGACGTTATGGACGCCGAAGCTATTCAGATGCGAGGTGTAGAATTATAT  
TACATCCCTCGTGCATTTTTTACATACCAGATATGATCTTTGGTGAGGATGTTCAAAGCAA  
TTTACTAAAGCACGTAAATTTGCTGCGTATATAACCTCTTTCGACGGGTAGGAAGGTGCA  
GGAAACTATTTTCAATCTATGGGTTATACGGCAAACGACGAATTAACATATGCGGTGAAT  
CCTAACCTATTCAAGCATCAAGTAGATGATCAAGATCCAAAATCAGTTGACTTGATTTAT  
ATTCCAATGAGTAATGATCTCTTGGAAATTAATCCGTCGAGCCATATCAGCCGTTTTTT  
CAGGCTGGCAAAAATGCCATGCGTAAAATTATTGCAGAGAAATTTGTGTATAGCGGTGAG  
GAAGTGCAGACCAGAATTACAACGCAATGAGGGAATTAATGTTGATGAGTTTACGGATTG  
GATCTTGCACCGATCACTAATCTGGACGCGTTAACAGATATCAGCTTAGATCAGTACAAA  
GAAGATAAGCAATTCAGAAGCGAAGGACAAGCTTTTATTGATCCGTTTGATCCTATTAAT  
GGCAAGGGTTCACCTTTCTCCGATTTTTGATAAATACTTGTATTGAAATAATATTCGGAT  
CTAATGACTAATGAAAAACTATTATCTATACGAAATAAAGAACAATATAAATGGTAAGAT  
ATATGTTGGCATTTCGTGGGTATGATGGTGACATAAGTCAAGCTCCTTATATGGGTAGTGG  
ATTGACGCTTAAGAGGTCTATTAACAGAACGGGATTGAAAACCTCACAAAAACAATTCT  
CAAAACGTTTGACTCATGGAAAGAGGCAAGGAAAGCAGAAAGAGAAATAGTTACAGAGGA  
ATTTGTAATAAGAGAAGATACCTATAATGTTTCGGTTGGTGACAAGGTGGAAATACTCA  
CGCTGGGATCAGCGAACAACGAAGAAAACCTTTCAAGCGAAAGACACGCTGAAGCAAACCG  
AAATAGAGTACGGAAGCAAGAATCTAGAGATAAGGTTAGCGCAAGATTCAAAGGTCATAA  
GCTATCACAGACGCAGATAGACGTTCTAAAGAAGGCAAACACAGGAAGAAAGTTCACAGA  
AGAAAACAAGTTCAAAATAGGTAACAGTGGCGAGGAAAGAAACGACCAGATATAGGAGA  
AAAGGCTGCGGCAACATTAACAGGGAGAAAACCTACCCCAAGAACATGTGGCAGCAATAAC  
GCAAAATACACCGAGAGGAAAACAACACTTTAGGGCCAAAAGATTCTTCGTCGACGATAT  
GGAATTTTTTATTTTGAGTAATGCAGCTAGAATGTTTGGTATAAGTTATAAAACGGTTAG  
AGCTAGACTTCTCTCAGATAACTTTCCTACATGGAGATATGAATAAATGTTTTTACATTT  
TTACAATTCGTCAATTCGAAGGTATATTGTATTGCTGTTTAATTTAGTCACCGGCGTACA  
AATTAAGGGTGCAGTAGTGACGGCGAGCGTTTTAGTAAAGTTCCTATCACGTACGCAAA  
GAAAGAAAATTCATGACGAGTCCGGACAAATATAACAATATCTTAAGCGAGGAAGACGT  
CGCAAAGGTAGAAACTATTCAGCTCGTATGTGTCTTCTTTAATTGGTATGACGTACGC  
CCACAACCTTAAAACCAATATTGCAGAAAAGACAGTACCAAAATATACGGCTGATGGAAT  
CAGGAGCGTAACACAATATAAACCTGTATCATATAAGTTTACTTTTCGAGTTAGGGATTTT  
TACGCGTAACGAAGATGATATGTTTCAGATAATTGAACAGATTCTTCTTACTTCCAGCC  
TCATTTTAACTGTAAGATTAAGAAGTACACGGTAATGATGTATGGATTGATAGAGATAT  
TCAGGTCACAATTAGTTCTATTACTCCAGATGAACAGGTAGGCGAAGATAAGTTTTCTCG  
TCGTCGTCTTGAGTGGACCATTATGTTTGAGTGCATCGGGTTTATCTATCCTCCAGCCAC  
CGACGTTAAGGGGGAAATCAGAACGATTTATCTTGATTTTCATGCTAATCCTCGTGAATT  
AAATCCTAGCGGTAATATTGAATCAGTGGATCATGAAGTTGTTAAACGTGATGGTGAGCA  
AGAAGAATGGGACGGAACATCAAAGAATCATATTCTGGTGATACTCGTATAACAGTTGC  
ACCGACTCCACCGGGTCCACGTATTGTAAGAGAATTTGATGAGGTAATTTATTATGTGAG  
ATCTAGCCTTAGAAATGATGCAATTAATGAATTTGAAAGTCTAGGTCTTCCGGGGTCAT  
TCGACGAGGAAGAAGATCGAGTGGGCTATGATCCGATCGTCTTACTCCGGTTCGAAAGCC  
ATCCAGAAGATCGTAATATTGACTTACAACGAGCTTATAAGGAGGCACGTCAGAATATTC  
ATTTTCATAATCAGATGATGATGGACGCCGAAAAGATTTATCTTGAACCTGGTAAAAATA  
GTGAGTCTCCGAGGTTCTACAGGCATTTTAAAGCCTCATGAAGCCAATGAACAACAACA  
ATAAAGAATTGCTGAACATCCATAAGGATATGAAGAAAATCACCGAGCAAGCTGGAGAGA  
AAAAGAAAGATAATACCCAGCCGCACCAGTTAATATCCAGAATGCGACCGTCTTTATGG  
GTTCCCCTAGTGATTTAATGGATGAAATCGCAGACGAGGAAGCGGAGTTATTGAAGGCG  
AGACAGTATGAGCGTGATTGAAGGGATTAACGCAATGGCGACGGATGAACACCCGCTACA

TTTAGCTCATCCGCTCCACTAGAACTAAAATTGATTCTAATGGTATTGAATGGATTTT  
ATCAAAGCATGATGATAAATGGTATCCTAAAAAGTTTTCTGACTATCTGAAATTAACAG  
ACCGCAGAAAATAAGGATTCAAAGCACTGATCCAACAAATTATAAATTCTATAAAGATAG  
TGACAATATTCGCACGCGGTATATGCGGTTAAAGAATTTGCGAAGGGCGAATATTA AAC  
TCAGTATACCCCTGAGATGATCGCGGAGTGGAACGATGCCGTAAAGATATTGTATATTT  
CACAGAAACCTATTGCGCAATTACACACATCGACTACGGTACAATCAAAGTACAATTGCG  
TGATTATCAGAAAGATATGCTTAAGATCATGGATGAAAACAGCATGAGCGCCATAAACT  
CAGTCGTCAGCTAGGGAAAACCTACCGCTGTAGCAATATTCCTTGCTAACTACGTTTGCTT  
TAATAGAGACAAAGCCGTAGGTATACTGGCACACACAGGATCAATGGCAGTTGAGGTTCT  
AGAACGTATTAATCAAGCAATTGAACTATTGCCGGACTTCTTACAGCCTGGTATTGTAGA  
ATGGAACAAGAAATCTATTGTGTAAGAAAACGGGTCTAGTACGGGCGCTTATGCATCGTC  
ACCAGATGCTGTTTCGCGGAACTCCTTTAGTTTCATATACATAGACGAGGCAGCCTTTTT  
TAGTGCGTGGCAAGACGCATGGTTAGCTATTCAACCAGTTATCTCATCCGGTCGTGAATC  
TAACTGCACTTGCCAACAACCTCCGAACGGGCTTACTCACTTTTATGACATTTGGCAATC  
AGCCATTGATGGTAAACGCGGTTATGCACCTTATGAGGCGGTTTGGCATTCTGTTAAAGC  
ACGTCTTTACAATAAAGCTGATATATTCGATGATGGTTATGAGTGGTCTCTCAGGCGAT  
GTCCGGATCTAGTCTTGAGCAATTCCTTGAGAAACATAACGCTGAATTTTTTCGGTAGTTC  
CGGTACTCTGATCAGGGCAACCACACTATCAAGATTATCATTATTGACGTTGTTAATGA  
CAACGGGTTTAATCAGTTTGAGAAACCGAAAGAAGGTAGAAAATATGTTGCTACACTAGA  
TTGCTCAGAAGGTCGACGACGGGACTATCATGCAGTGCAAATCATTGATATTACTGAATT  
TCCTTATAAGCAGGTTGCAGTATATCAAAGCAATACTACGTCCCATTTTATATTACCGGA  
TATTGTCTTTAAATATCTCATGATGTATAACGAATGTCCAGTTTATATCGACCTAAATAG  
TACGCGTGTATCTATTGCTAAGTCTCTTGCGATGGATCTTGAATATGATAATATTATTTG  
CGACTCATTCATAGATCTAGGGATGAAACAATCCAAAAGATCTAAAGCATTGGGATGTTT  
GGCAATAAAAGACTTAATAGAAAAAGATAAGCTGATCATTAAACCATAACGGAACTATTCA  
GGAGTTGCGCCCATTCTCCTAGAAGGGAGTAGGCTGGGCGGCAGAAGAAGGTTTTACGA  
TGATTTGGTTATGAGTCTGGTAATATTTTCGTTGGTTAACAACCTCAAGAAAAATTCGCCGA  
ATACGCAGGAAAAGACGAAATTCGGATCGCCTCCGAAATATTCCGAAAGAAATTAATGA  
ATTGGGGGAAGAATACGCGCCCGTGGTAATATATGACGGTGCAAACGGCATCGAAGCATA  
TAGGCTGCGTGAAGGCCTAACAATGATATAAGTACGATAATGGATAATAGGATGAGGAAA  
TTCTGATGACTCTATTATCACCGGGTTTCGAAACGAAAGAACTACTCTCTCCACTACCA  
TTGTGCAATCTGCGACTGGTCGCGCGGCGCTGGTAGGTAATTTCAATGGGGTCCAGCTT  
TCCAGATTGTTCAAGTAACTGATGAAGTTGAATTAGTTAATAAACTTGGTCAGCCGGATA  
ATAACACCGCAGACTATTTTATGAGCGGGGCTAACTTCTTCCAATATGGCAATGACCTGC  
GTGTTGTACGTGTACTCAATCAAGAAAAAGCAAAAAACGCAACTGCCCTAGCTGGTAACG  
TAGAGTTTGAAATCACAAACGAAGGTTCAAACCTATGAAGTATGCGATACCAGCAAGATTA  
AACATAACCGTCAAGATATTGAAACGGCAGGTAAGTAACCAAAGTTGATGGTGATGGTA  
AAGTTAAGGGCGTATTTATCGCAACTGGTAAAATTATCGCTCACGCTAAAGCAATAGGCG  
TATATCCAGAACTTGATGGCGGTTGGACGGCAGAGTTCACTTCTTCGTCAGGTAACGGTA  
GTGCGTCTGTTGTGAGTAACTAAAATTGTTACCGATTCCGGTCTTCTCTTAACGGATCTGG  
AACTTCCCGAGCCAATATCACCAATCAAGATTTTTTTGACAAAGCTCAAAAAGTATGATA  
TGCCAGCGGTAATGCAATCTATGCTGGTGAGCTGGGCAACTCTCTGGAAGTTGAAAGTC  
CGGCACGTAGCTCGTTCAGTGGCGCGGTAGCACCTGAATTAAGTATCCGTTCCGGCG  
GAACTCGTGCCCCAGCACGCAACCTAATTCCATATGCACCGCAGAATGATAATCAATGTG  
CGTTTATTGTTTCGTCGGGATGGTGTGTTGTTAGAAATCCTATGTACTGTTTACTCTGAAAG  
GGGTTAAAGACGTATAAGGCAATTCTATCTACATGGACTACTTCTTTGGTTCGTGGTTCTA  
GCCAGTACTTCTATGCAACCGCTCAAGGGTGGGTAGATGGTTTCAGTGGTATTACCTCTC  
TTGCTGGGGGTGTGTCTGCTAGCGAAGCCAGTACGGGCGACCGTGGAATGATCCGTTCA  
TTGGTGCGATGATGCAAGGTTGGGATCGGTTTGCTCAACGAGAATCTATTACGTA AAC  
TGTTGATTGCTGGTGATGTGCTGGCGAAGACGTTGCGTTCTCTACCGTACAGAAACATG  
CTGTTTCCATCGGTTATGATCGTCAGGATTGCTTAGTAAGGGTTTTCTCCGCCGCGTAGCA  
CTGTTGTCAATATTCCGGTCACTACCGCCTTCGATAATCTGATCGCATGGCGAGAAGGAA  
ATAGCAATTAATCAGACAACAGCATGAACATTAATACCACTTACGCGGTTATTGATGGTA  
ACTACAAATATCAGTATGACAAATAGAACGACTTACACCGATGGGTTCCGTTGGCTGCTG  
ATATTGCTGGTTTGTGCGCTCGTAATGAAGCTGTATCCAGCCGTGGATGAGTCCGGCAG  
GTTCTAACCGTGGTCAGCTCATGCACGTGGTTAAACCGGCTATTGAGCCTCGCAAGGCAC  
ACGGTGATCGTCTGTATCAGGCTGCAATTAACCCGGTGATCGGTGCTGGTGGTGAAGGGT

TTATTCTGATGCGTGATAAAACCGCTAGGACTGTTCCCTAGCCCGTTTGACCGCATTAACG  
TTCGTCGTCTGTTAACATGCTGAAAAAGAATATCGGGCATTCAATCAAATACAACTGT  
TTGAAAACAACGATAACTTTACTCGCGCTTCTTCAGTATGGAGGTTTCGCCATATCTCA  
GCACGATTCGCTCTCTGGTGGCATTATGACTTCCTAGTAAAATGCGTCACCACGAACA  
ACACGTCGGATGTAATTGATCGCAACGAATTTGTTGCTGGTATGTTTCATTAACCAGCAA  
AATCGATCAGCTATATCATGCTCAACTTCACTGCTGTGGCAACTGGTGCTGATTTTGACG  
AAATTATCGGTCCAGCTAACCAGGCATAATCAGTAAATTAGCATGCATTA AAAAGTTAAAT  
CAAGCGGGGATTTTCTCCCCGCTCTATTAAGGAATATCAATTATGGCACTCGATTTGAAT  
GATATTACACGCGGTTTAGAGTCTGGCGATTTTGCTCGTCCTAACCTGTTTGAAGTTGAG  
ATCCCGTATCAGGGGCAAACTTTAAGCTGATGTGTGAGGCTGCGACTGTCTCGGCTGCT  
ACCGTAGAAATAATTGCTGTAGGCTATCAAACCGTAAAATTAACATCGTTGGCGACCGT  
GTATACGACA ACTGGACCATCACTGTATTCAACGATGACGCACACAAGATCCCGTGATGCT  
ATCGTTGCATGGAGCGATCAGACACATGGCACAGGTGCGGGCGATCACTGGTGCAACTCCT  
GCACAGTATAAGAAACAAGCTATTGTTCTGTC AACTTAACCGTAACACCGAATCAACTAGC  
GAAAAAACATTGTACGGTATTTTCCCGACCAACGTTGGTGAAGTAACCCCGATTGGGAA  
CAAAACAACGCAGTTGAAACGTTTGA ACTTACTTTTGCTATCGATTGGGTAGAATAAATA  
TATTATCATGCGGGGAGAAGTTCCCGCTTAATTTCTCCCAATTCGAGGGGAATAATGTT  
TAGTAGATTA AAAATGCTTTCGCGGTTGGGCTGATTTTGACAACGACAAATACGAAGATCA  
AATTAAGATAAAGCAGCGTCTATCGCCGCACCTAGAAACAATGATGGTGCTACGGAAGT  
AGAAATTAATGATAATTCACCTGCTAGCGCGTGGAACCTATTACCCAGCAATTTTCCAG  
CACCGACCAGAAAATGAGCACA ACTAAGCAATTAGTTAACACATATCGCGGGTTGATGAG  
TAACAATGAAGTCGAAAAGCTGTACAAAATATCGTTAATGATGCGATTGTATTTGAAGT  
AGGTCATGAAGTTGTTTCATTA AATCTTGAGGCGACTGGCTTTAATGAATCCGTAAAAGA  
GCGCATTTCATGAAGAATTTAAAGATCTTTTAGACACTATCCAGTTTGATAAGCGTGGTCA  
GGATATGTTCCGTCGCTGGTAGGTCGATTCGCGTATTTTCTTCCAAAAAATCATCGGCAA  
AAATCGAAAAGATGGTATCGTAGAATTACGCCAGCTTGACCCACGAAATCTTGAATACGT  
TCGAGTGATCGTTACAGAAGACACACCGGAAGCTAAAATTTATAATGCAACAAAAGAATA  
TTTCATGTACTGTAGGCAATAGCTCTTATTGCGCAGGTGGTCAAGTATTCTCTCTTAA  
TAGTCGAGTTACAATCCCGCATAGTGCTATTCCATACGCTCACAGCGGCTTGATGGATTG  
CGATGATAAATATATCATTGGTCA TTTGCTTCCGGGCTGTTAAGCCAGCAAACCAGCTTAA  
ATTGTTGGAAGACGCAATGGTCGTTTATCGTATCACGCGTGCACCGGAACGCCGAGTGTT  
CTGTATTGATACCGGAAACATGAACAACCGCAAGGCTGAACAGCACATGAACTCAGTGGC  
ACAGTCTTTTAAAAACCCCGTTGTTTCATGATGCATCGACTGGTATACTTACAAACCAGCA  
ATCAAATCTATCAATGACAGAGGACTACTGGTTACAGCGTAGAGATGGTAAAGCAATCAC  
CGACGTTACTACTTTACCGAGTGCATCCCGTAGGAGTGATATCGATGTTATTCGCTACTT  
TAACCGTAAATTGTATGAAGCGTTGCGTGTGCCATTGTGACGTAGCAATCTCTCCGATGC  
TAATATGGTGATCGGTGGTGATGGTTCAAAAATTA CTGCGATGAGTTGGAATTTTCGAA  
ATTGATTA AAACTCTGCAATCACAGTTTTCGGAAGCAATGCGCGATCCTTTGAAATATAA  
TCTGATTCTCAAAAATGTACTTACGGAAGATGATTGGGATCGTGAAATAAATAATATCAA  
GGTGGTTTTCCATCGGGACTCTTACTATAACAGACGTTAAAGACGCGGAAATTTTAGAACG  
TCGAATCGGTCTAATCGAACGTATTACACCTTACATGGGTAAATATTTCTCTAACCAGAC  
ACTGATGCATGACATTCTGAAATATAACCGATGACCAGATGGACACCGAGAAGAAAAAGAT  
AGAAGTAGAAGCGAACGATCCGCGCTTTAAACAAACTCCCGATGAAATAGAGGATTTTAA  
AATGAAACAATTTATGGAAGCAATTA AAACTCGCGATCTAACGCTGATCGAAAAAGATT  
TGATAAGATCATGCAGGCTAAAAAAGCCCAGATCATCGAATCCAGCGTATCGAAATCGC  
ATCAAGTATCATGATCGAAGGTGAAGAAGAAAAAGTCCGCGATGATGAAGAAGATATGGA  
AGATGAAGATCAGGACGACGAAGATCGCAAAGACGATAAAAAAGACAAAGAAGACGACGA  
ATAATAGGAAGCTAACATGATTA AAGATTTTACACCTAAAGCTGACTTAGAACTTTTCT  
GCCGGAAGCACAGGAAAAATTGGACATGGGGACTATGTTTGAGTCAGAAGAACTATTGAA  
AATCGTTGAAGGTATTTCTTAGGATGAGCCGGA ACTGGCTGTAGCAATGCTGTCTATCAT  
CGACCGAATTACTGTAAATGAAGCAATGGTTAAACATGTAAACGCACGCGGGGAAGTTGA  
ACGTAAGAAAGATCGCAAAACCCGTGAGCGTAATGCTTACATGACTACTGGCCTAAGCAA  
AGCTAAACGCCGTCAAATTGCCCGTTCGTGCTGCACAAACCAAACGTGCAAATCCACCTAT  
CGAACGTCATGCGGAACGTAAGCGCAAAAAAGCAATGCGTAAACGTAAGGCGTTAGGATT  
CTAACAGGAAACAACATGGAAAAGAACGAATTACTGATCGAACAATGGGGCGTTCCTTGT  
GCTCGCGGTAGTTTCGTCATTGCTTGAATCATTGGATGATAAGGCTACAGGAAATCTCTAT  
ATTCAAGGGATTTTCTGCAAGCCGAAACGGTAAAACGTAATAAACGCTGGTATCTTCGC

AGTGTTCCTAGAAAATGCGGTTACTAAATACATACACGAACAAGTTGAGACACATCAAGCT  
CTAGGCGCACTTAATCACCCAGCAAGAGCCATGCCAGATACATCTAATGCTTGCATCATG  
ATTGAAAAATTGTGGTGGGAAGGTAATAACGTGATGGGTAAAGCCCGTGTTATTGATGGG  
GATAAAGGCGCAGGTGATAAACTTGCTGCACTGATTCGCGCTGGCTGGATTCCCTGGCATT  
TCCTCCCGTGATTGGGTTCGGTTGAAAGACTCTGGTCGCGGATACAATATTGTACAGGAA  
GGTTTTGTGTTGACGGTTGGTGTGATGTTGTTTGGGGTCCGAGCGCACCCGGATGCGTGG  
GTGACTCCTGTGTTTGTGAGTCAACGGATAGCGGATCTAGCGCGTAAGACGCACCAGAAA  
GATAAAACCGAAAAAGTGACTAACCTACAGCCTCACAAACAAAACATCGTTCGAATCGAAT  
AATATCGCGTTTATGGCGCTCGCAGAATCGTTATCTAAACTCTATAAAATAATAACGTCGT  
TATCAACAAGAAGGTTATAACCATGCTTAAAGTAATGATGCTCGAAGAAGCAAAACAGAT  
CACCGTAGACGTTGTTCTCGATGACCAGTTTGAATCCGTCGAACTGTCGCCGGAAGTAAA  
AGAAAATTTTGCTACTATCTACGCTCAGGCGGTAAGGCTAATGCTGTTGCTCTGGCACA  
AAGCCAAATCGAAAAATCGCCGCTAAAGCCGATGAACTGTTAGAATCAAAGGTCGAAGA  
ATCACGCTCCGAGATTAATACCAAACCTGTACGAAGATGCAGATAAATTCCTGAATCCCTT  
AGGCGTTCAATGGCTGGCAGAAAATAAAGAAGCCGTACCCCGAAATATTAAGCGGATCT  
GTGCGAATCCCTGATTGGTTCTCTGAAAGATGTTTTCGTTACTACAATGTTGTAGTGCC  
GGAAGAATGTATAGACGTTGTTGCTGAACTTGACGAAGCACTCAAAGAAGAAACAGAAAA  
AACCTCCGAACTCTTTGATGCCAAACTGCAACTTGAAAGCGAAATTTGTGGTATGCAGCG  
CGAACAAGCGATGAATGACAGCACTCGTGATCTTTCCGATACTCAAAAAGAAAAAGTAAC  
CGCGCTGATTGAAGGTTTGGAAATAGAGCGAAACTTTGATAAGAAATTAAGTCAATTGT  
CGAAATGGTGGCTAAGAAAGAAGACAAACCAGCTAAGATTGAAGAATCACTAAATAATGA  
TGCCGACAAGCTGAATGTCATTGCAGAAGCTGTTGAAGAATCAGAGAAAAAAGCATCTGT  
AGATTCGGCTTATCTCGCTACCTGAATTTTCATCTAATGCGATTCAAATCCACTAATAAA  
TACTTTAGGTTAACAACAACAAGGTTTAAAGAACATGAAAACCTACCAAAAAACTGATGG  
AAAAATGGTCCCGCTGCTGGAGAACGAAAAACAGCCGGAATCGCAACTGCGTTTAAGC  
AGAAACTGGTTGCTAAAATTCTGGAATCTCAGGAAGCGGAATTTGCTGTGGATCCGATCT  
ATAAGGATGCAAAAAGTTGTTGAAGCATTTCGGTGGCTTTATCGCAGAAGCCGAAGTTGCTG  
GCGACCACGGTTATAACGCATCTAATATCGCGTCTGGACAGACTACTGGTGCAATCACCA  
ACGTAGGTTCCGGTGTATCGGCATGGTTCGCCGGGCTATTCCTAACCTGATCGTATTTG  
ATATTTGTGCTGTTTCAGCCGATGAGCACTCCGACTAGCCAGATCTTTGCAACCCGTTCTG  
TATACGGTGGCGACCCGCTGGCTGAACACGCTAAAGAAGCATTCCATCCGATGTACTCTC  
CAAATGCGTTCCATAGCTCTCTGGCTGCTAAAGATGCAACGACTGTTTCTCCTACTGGCA  
CTGCGTTCCGGAACGCACTCTCAGTACTCCTATTGCCGAGGTGATATTGGACACCACA  
CCTTCGCATAAACTGGCATCGCATATCTGCAAAACGTTACCGCAGAACAAGTAACCCCGA  
CCAAAGCTGACAGCGAGTCAGATTATGAAGTTGTCATGAAGCTGCTGGAAGAAGGTAAC  
TGGCTGAAATCGCTGTTCGGTATGGCTACTTCCATCGCTGAATTGCAGCAAGGGTTCAATG  
GTTCTCAGAATAACCCGTGGAACGAAATGTCAAGGCGTATTGACAAACAGGTTGTTGAAG  
CGAAATTTCCGCAACTGAAAGCCCGTTATTCTATCGAAGTTGCGCAGGATCTGCGTGCTG  
TTCACGGTATGGGTGCTGATGCTGAACTGAATGCTATCCTGGCTAACGAAGTTCTGCTGC  
AAATCAACCGTGATATCGTTGACGTGTTCAACTTTACCGCTCAGGTTGAGAAAACCTGGTA  
TGACTCAGACCGTTGGTTCTAAACCTGGTGTATTTGACCTGCAAGACTCGATTGATACTC  
GCGGTGCTCGTGGGGCTGGTGAATCCTTCAAGTCTCTGATCTATCAGATCGACAAAGAAG  
CTGCTGAAATCGCTCGTCAGACTGGTCGGGGTGGTGGTAACTATGTTATTGCTTCCCGTA  
ACGTTGTAAACATTCTGGCTTCTGCTGCTCAGGGTATCAGTCTTGCTATGCAGGGTGCTG  
CACAGGCTCTGAATACCGACACCACTAAAGCTGTTTTCGCTGGTGTCTGCCTGGTAAGT  
ACAAAGTATTCATCGACCAGTATGCTCGTCAGGACTACTTCACCGTAGGTTACAAAGGCG  
ATAACGAAATGGATGCTGGTATCTACTATGCTCCGTATGTTGCTCTGACTCCGCTGCGTG  
CAACTGATCCTCAGTCTTTCCACCCGTTCTGGGCTTCAAGACTCGCTACGGCATCGGGA  
TCAACCCGCTTGCTGACGGCGAATCCAGGCGCCGTCCGAACGCATCACCTCCCGTATGT  
TGAGCACAGACAGCGTAGGTA AAAACGCATACTTCCGTCGTGTATGGGTTAAAGGTTGCT  
AATATAAGCCATTCCCTGAAAACCTCCGGGCGGGTGGAAATACCCGACTTATCATAAACCTTA  
TGACAGTGTAAGTGCTAATTCCAACGGGAAGACTCGAAGGGGCCTACCCTTTTTGCGTA  
TTATAACCCGTCATAAATTAGGTTGAAAGCCTATACTCTATTGGGAGCTAAAATAGATAT  
ACACAACAACAATTCGACCAGTTTCGTAGTAACCTGCATGGCAAAGGGACCAATGACTG  
AAATGAACGTTTCATGTACATATTGGGTCCGATAGATTTAGGAGATAGACAGATCTGGTGT  
ATGCCGCCCTTGTATGACATTCCAGCGTGACGCTAGCGGTACTTTTGGTTTTTGGTACGC  
TGTTCCCTGAATTAACCCCAAATTCTCCATAAGGAGGAAATGCATGAGTAAGAAAGAAAC

CAGCTATGTTATGACTCGTAAGGAATCCAACGAATTGAAGTTAGCATTAGCTTTTGC AAT  
TATTCGTTCTGATCATGCAATTAATCTGGTAAACAAAGTTAACCGTAGCGTTGATAATGT  
TTCTAGGAAGAAGTAAGTTTATTCTGGAATCCCTCGGATTCCTTTTTCTATTTGTATAAA  
TATGATATATCCATTAAGGCAAATACAGGATTCATAAACATGACTCAAATTTTTACAGAA  
CTGTTGCGGGAATCTACTTCTTCAGTAGCTAACCAGCCAGCGCGACCGCAACTATTATCA  
ATAACTCGCGCGGTAAACAACCTGATTTTCTCTGATCTGGTAGCAATCCAGTCAACGGAT  
CAACCAGTACCTGCATTGTACGGCCTACGTTATCTTAATCGTGATGGTTAGATGGCTTTC  
CGAAATGCTACAACCTACGGTGGCCCGGCTGGTGATCGCACAGAGATTGAAGAGTTTTCA  
AAAGAAAAATCTTATGACGAAGGCGCACTGTTCAAATCAGACAATGTTGTATGCGAAGTT  
GTGACCGCTGGTACAGTCGGTGCAGATGCCGAAACTCCAGAAGCTGCAATCTTTAAAGGC  
ATAATGACAAACAAAATTCGTTTATAAAGCGATCGTGTATCGGTAGAATACTTTGAAGAT  
AAAAGCACCGAAATATCGTCTACCTCAATGCAGTTTGATAAATGGAAGGTTAATGTAGGT  
TCTCGTAAACTGAAAACCTCATTGACGACCGAATTGATGCAGGATCTTGAGGCAAGCCAA  
ATCAACTCTGAAAACCTCTGTAATTGATCTTCTGGCTACGGTCGCTACAGAAGAGATCAAC  
AAAGATATTATTCAGAAGTTGATCACTGTATCATCTCGCTATAAAATTAAGGGTTCACC  
CCTGACGGCGTACTTTCTCTCGTTAGCGTTCAGGATGCACCAGCACAAGCACGTGAACTT  
TACCGCTATGCTGACGAACTGAGCTATCAAATGTTGCGGACTTCCTCCTTTTTCTGGTACA  
TACGTTTTGGCGTCTTCTCGCGTGGTTAGCCTCCTACAATCTACCGGATGGATGGAAGAA  
ACCGACAATGCTCTAAGCGAAGGTCGTCTACGTTGCGGGCTGGAAGTGTACGCAGACACG  
ACAGCACCTTTCGATTATATGCTCGTTGGTTGTAAGCACATGATCGGCGATATGGAGAGT  
GTAGGTTCTCTGTTCTACTCCCATATACAGAAGCCGACGGCGCTGGCGCGTATAAGAGT  
GTCATTGACCCTAATAGCTTCCAGCATCATGTAGCTATTATGAATCGTGATACACTCTCT  
GTCAACCCATATACATCAACAGTTAATCAGGAAGAACACCAGGTCATCAAGGGTGACGAT  
TGGGGTACAATGGCTGGACCTTCAGAAATGTCCTACATTTTAGGAATCGAACTGCCACCG  
CTTGAGATTGACAACGCTTCACTAAATATCTAACCAAGATAAGTCAGATCCGTCCTAGAT  
TTTTTCGACGGCGGATCTATTTTCTTGATGATATAAGTTAAAACATGGTATCCCATGTCT  
ACGGGCAACATAAACAGCAATTATAGTTCATCCCGCAACGATTCCATTAACCTCTTTTCGC  
CCAGAATATCACACAATCTACAGGATCATCAAGGGTCTCACCTAAGACTTGAGCAACATT  
TCTAGAAAACAGATTTTGCATGAATAACGATATAGCACGAGGATTATCATAAACGTGTTC  
TAATTCATCCATCTCCTAATTTTTTTGTTCTAAGGTTTGCCATGCAATAATATCATGACC  
GTTTTGCTTGTGGTCATAAAACTTCCAGTTTGGAATCAAATTTTTATATAATCTGGATC  
GTAATACTTCATGAAAGCATTGTCCATACCGTAAGCCTCTCCAGAATCCGCTACAACGCG  
TTTTTCTGACAATACCCTCCCAATGGTACAAGCCATTATCAAATGTCGCTAGGCCCTTT  
TCTAGAGCCTATTAAAGCACATCTACGAAGTTGTTTTACTCCAAACACATCATGTAAGT  
GTCAAAGATAATATTTCTCCATAGAAAGCCATATCATACTACAAGTTAATAACAAATAC  
AAGTATCCGCGTAGCGGAAGCGAGCACAGGGAGCAATAAAACACTTCCAGTAATTGATTA  
ATAAATGTTTCGAAACAAATTTTTATTATTCTATAAGATAAGTTTTTCGTTTTGATCATTAT  
TTAATCACACATGTAAAACTCCACAAAAGGATATCGCTTCGCGAACTCCTACGGAGTAT  
AACATTTGTGTTACCATATGTAGTGATTAATAATTAACCAAACATACATTTTCTATGTTC  
TAAAGATCTTTCTTCGTTTTGATCATAATTTAATCAAACAGTATTAGTATTGTGCGCTTG  
TAAACTAAAATAATGTCAATAACAGACAACAAAAACGCCGACCCGAAGGACGGCTAAAG  
TTAATTATTTGTTGATAACGATTTGATTTGCGCGAATGGTAACATTACTCTTAGAGATGA  
TCAGATCATCCGGCACTACGTTAGTTTTGTATGGCTGGGAGCGAACAAGCATCTGATTGC  
GTCTAGACCCTTCTTTAATCTTGATTTCTATCTAGATATTGTTGCCAACGTGAGCAACCG  
CAATTTAACCTTTATTCTCATAGACCCACTTGCTGGTAACGTCTCCTGCAAAAGCCTTAG  
TAACTTGCAATGCTTTGTGCTATGCGTTAGAGCTGTGAACTTTCAGAAGGCCAGCCGTAG  
CAATACGGGAGAAGGTGATCGCCGGAGATTGCCAAACATCAACATTAATTTGCTGGATCA  
GAGTAACACCGCCCTGATCAACTGCTTTTAATGCTTAGAACCTTGCCTTTTTTCATTGCTA  
CGTGGTTGTTACGTAATTTTATAATTAGTCACCTCTATTGATTAGTTATTCAGAATATTA  
ATTACAAATCAGGACATTGCCCGTTTGAATGCGTCCAGTATAACAGTGTTATTTGGCTTG  
TCGACACGTTCTTGAACCTTATTTTTAAATTTTTTGTGATGTGGTTTTTACGATAAACA  
ACCTTTTCACGGCTGGCGTAAGCCTCGCCTGCATCCTTTACCATCAATCATGCCTTAGCC  
GCATCTTGTCCGCTGATCCCGCCAATCTTCTTAGCAATATCAACAAAGTTAAAACCGTGG  
TCTTCGAGTAGCATGTAAAGCGTTAACGCTGTTTTCTTGTCCATCACTTCGCCCGTTGA  
CGATTAACAGGATAGTTATCAGTACCGGAAACTTGATCATGACAGTACAAATAAACCGGC  
TAAACGCATTTTCTGACTTCCACACATGACATGCGACTAGCTGATAGCCATTGTTGCAA  
CCAAAGCCAGAAAATACATCTAGATTGGTGCTTCTTTGATCAATCGTACAATCTCATTCA

TACTACAACCTACATTCATAAACACAACAACGAAAAATACAGTAACAGTTATTCACGC  
CATATTCAACCCCTATTTCATAATATTTTCTTCGCTTCACTATTGACAGTAGCATGTCTGA  
TGCGTGCCAGTATAGGCATCTAAATCGCTCTGTCAAGCACAAAAACAAAAAGCCACCCC  
GAAGGATGGCTGATAGATTTCTTTAAGCAGGATGCGTTTCACGAATGCGTAGAACTCGCT  
CTGACGTATCTCGGTCCGGTTTATGTAAATCTTTGGAATGATACATGAAACCATTGCGAG  
ATTCCATGCACGTGCAATCACTATATTGTTCTTCCGCTGCCGCGATTGTTTCCAGATCTT  
TGGCGTACTTGCTGGTTGAATAAACTTCTTGATCACGCCACTCTAACCCAGCCTCATTGA  
ATTTGACAATCTCGTCAAATACCCCCAACCAATGTAGATAAATGAAGTTTTGCGCCACG  
GGATCGGGTGTACGTAGCGAAACATTTCAACAACCTTCCATTGTACATTTTTCGGCTTGTAC  
TAGCTGCAACTCGTACTGTTTCATTTTCGATCTGCTGATATAGTTTGTAGCAACACACCAGA  
ATTTGGCTGTGTCATCGTACGTAGCACTCTCTTTGAACAGATGACCGTCTGGCATGATAG  
AACTCCTTCCAGTGCTTTCGCGTCTCACTACCGATTAGAGTTCGGTGACAGTTGCCCTT  
CGCGCTGCAAATACCAGTTATGTTTGTTCGTCATTCAGGCATACCGCTAGAATCGCCTA  
CAATGTCTCTGACACAACATAATTAAGTAAGATCTCATTACCTAGTGCCACGGTCTTTG  
ATTCCACCACATCCTGTTCTACGTTCAATGTTGCCAGCATGATGTTAGTCGATGCGCTAT  
CGGCTGAATTTTCCGACTCACCCACACTTTTACAGTATACACGCCGTTTTTATCTGCTG  
TAAATTTTTTGATTGTATTCTGTTTTGGGTCTATAACTTCTTCGCCCTTACTCCAAC  
TAGAATATAGTTCATAGTTGTCTGCTGGAGTCTTCCCACCCGAAAAATTTACTGTTGCAT  
GTAATTCTACATCGTTTTTTGATGATTCGAAGAATTGCGGCGGTTTCGGTGAAATTTATAA  
TTAATTCCTTCTTCCATGAGGAAAACCTCAGATTCTACTGATTCCATCGTATCAGTAT  
CTTGTACCTTGACTTTATAGCTACCCGCATCTTCACTTGTTCGCGCTTCTACAGTTAGCG  
AAGCTGTGTTTCGTTTGTATGCTGTTGGTTCGTTTGTCCATGTATATGTCAAATGCTTG  
GTAATGGATCGTCACCCGCTAAAGTCGCCATTAAGGTGAAACCATCTCCAGCAAGAAAAC  
ATCTTTTGTAGAGTGGATGGAGAGTGTGAAAGCCATATAAAGCCACTCCCATAGAAAAT  
CCGAATTTAATTAATGGAAATAGTTGATTGCCACCAAACAGATAACTATTGCGCTATTCC  
AATACATGAGTATTAGAATAATGAAGCAACCAGGCCGAAATAGTCTCGATCTCGTCTGGG  
TATTTGTTCTGTTTGTATGTAATACATTGATTTTGTAGGCATGTAGTATCCTCTTTTTAA  
TTGCATAACGGAACACTACAATTATAATTATAACAAATATTTTCAACTTTTATCACCCAAA  
AATTACTTGAGTGTGTGGAATTGACTATGTTTAGTCTCTTGCACCTTGACAGACCCATCG  
CGTTTGATATTATAGATCAGTGACTTGAGGGTGTTCGCGTACATACGCGTGCGGGAAACGT  
TCTGGATACTTCTTCCAATCTGGAGTATTAACGATCCAGTCGAAAATCCACCAAGGGCAG  
GAGTAGTAACCCCGACCGCCACCGATCAAGCAAATGGTCTGACGGAAGCCAGTAAGATCG  
CAAATTGAATCAGTGTATGTGCTAGGGAACGATGCTCTGCATCGTCAGAGAAAATGTTT  
GCTACCGGAGATTTCACTTTAACTTCCGGTGCTTCTTCAACATCTGACTTAACTTCTTCG  
ACCACTGTTTCAACTGCTGGAGATTCTTCTTTTGTTCCTTCAATGACGATCTCAGGTTCT  
TTCATTGCTTCAACCAGAGACGGATCAAATTCGTGCAATACTATTTTATCATCTGCGGTG  
TCTTCTGCCTGAATAAGATCGTTAATACTGGTTCCCTGCTGCCGGAGTTTATTCTTCCATT  
TCGGAAGCCAGTTTTGTTAATTCGGTCTCTACGAACTCGATCATGTTCTCTAGTGATAAA  
GTCTTTTTGACCTTAATATCAAATTGTTTTGCGTAGTGAGCTAATTCTGTTTTAGCTGTC  
TTCTGTGCTTCTTTGTGTCGGATGCCGCAATAGCGCGGAGTTCTTCGAAATATTCTTTA  
TCAAACATGTTATTCTCCTGATTGGGGGTGTTGTATAAATATTTGTATAATGTATTTAT  
TGAGTGAGGCTATTCGCTATGCAAGACATTAATAATCACTTTCTGAACTATTTCCATGTT  
CAAATTGAATGTAGCGATTCAATTTTATTAGAAATGCGAGATTATTTTAGTTTTGAAGTC  
GAGGAAGCGCGTTTTCAAAAACGAGTAAAATACGGAGGCTGGGATGGGCGTATTCGTCTT  
TTAGTGTGCAACGGAAAACCTGCCAATCGGCCTAACTAAAACCGTGGGAATCTTCGCGAAA  
AATATGGGCTAAGGTGTATGGGTAGATCCTCGCGTATTTCGAAAAGAACAACCTTACAGAA  
GAAGGAATTGCAAATGGTGTATGCCTTAGAATTATATTCCGGTGCTAACAGGATCAAC  
CCGCAATGATATCAATCTTAGGCTGTCTTTGAAGGTATCCATCATAAACGCCGTATGTTA  
GTTTTGCCTACGTCCGCTGGTAAATCTGCGATTGCTTGTATGTTGTCTCGCTGGTACTTA  
GAGAGCTACGAAGGGAGAGTGCTTATCATCGTTTCTAACACGTTGCTAGTGGTGCAAATG  
CGTGATGACTTTGTTGATTATCGCAAGTTTCTTATGAAGCAATTTATACTATCATGAGC  
GGTACTAGTAAACACGTAGGTGATCGCCTGATCGTTGTTAGTACGTGGCAACCTGCATGT  
AAACAACCTCGAGAGTGGTTCCAGCAATTTGGGATGGTTATTGGCGACGAATGTCACAAA  
GCCACTGCTAAAAACCTGCTAAGCATCGTTACTGATATGGCTCATTGCCAGTTTAAAGATC  
GGCATGACTGGTTCACCTCGTGACGGGAAAGCTAACAGGATGCAGTATGTCGGGCTTTTC  
GGCGATATTTCTAAGATCGTGAGTATTGACCGCCTGATGGAAGAAGGGCAGGTGACAAA  
CAGAAAATTAACCTGTCTTTTCTTTCGTTATACCGATGAGGCATGTAGCGCGGTAAAGGGG

CGAGAAGATGCGGAAGAGATCAAGTATATTACATCTAACCCACGACGAAATAAGTTTGGCT  
TGTAATTTGGCGCTAAAACCTCGCTAAGAAGGGCGAAAACGTATTCCTTATGTTCCGCAAC  
ACTAAGCACGGAAAACCTTATGTATGACGCGTTACAGAAGGTACACGACAAGGTTTAGTAT  
ATTGACGGTGGAGTTAAGACAGAAGAACGAGACGAGTTCAAAAAATTAGCGGAAGGGGAA  
ACAGGGATCATTGTGTTGCGTCTTATGGTGTATTCTCTACTGGTGTTCATTAAGAAT  
TTGCATCATGTTATTTTCGGTCATCCAGTGAAGGAATCAACTATCGTTCGTCAGAGCATC  
CGTCGTGCATTGCGTAAACATGGTTCTAAGTATATTGCAACGGACTGGGATGTTATCTAT  
CTTTTGGCAGCTAAGACAAAGAGCAAGAATGCTAAGAAACAGTTTAGCCACCTTAATTAT  
GCTCTTAAACATGCGCTTGAAAGAATAAAAAATTTACAACACCGATCAATTCGAATATGTC  
ACGAAAACAATCGAGATCTAATAAACAGGGGCTTTAATGTCCCTTTAATCTACGGAGATT  
AAAAATGATTAGCTTTAACCATTTTTTTGGTTGAGGCGGCTATTGACGGTTTCATGAGTAA  
GATTTATTCTTGTAATACTATCGAGGGATTAATGAACTTGAGGCATATCATGAGAAGTG  
CAAGAAAGAAAAGAATTCAAACCTGCTGATGACATTTTCGATCCGTGATGCTATCGCTGG  
ACGCCGTAAGCAACTGGATGCGGACAACGAGCCAGAAGAGGAGCCGGAAGAGGATTTTTA  
AGATATAAAAATGCCCCATCAATGATGGGGCAAATAAACCAATTAATAATCGGTTATCAA  
CAAATTACAATAACAGCAGTGTGTTGCTCTACGAGTTGTTCTTGTCTTCGCCGTTCCGAT  
CTTCACTAATCGAACGTTCTTTTATTAGCTGTAAGCAGTAGCCAGTGTGCACAACGCCGT  
TTTGTGTCTGGACGGATAACGCAACCTCGACAGGTTGTTTACAACAAATACAGATTTTCA  
TAAAAATTCCTCCTGCATGTAGTAAGCGACCAGATTCCAGCATAACGCAATTCTATAGCAT  
TCTTGATCGCAAATCCACGAGATTTAACGATATCAAGTGCGGGACCAGCAAATCGATTA  
CCATCCGGTAACATGCAATTTTTGTATCAAGCGGTAAGATCTCGTCGCCTGCCGCCATGA  
CAACTTTCATTTCTGATTTCTCAGATTCAGCACGACACCAGTCATCACTACGGTTAGTGT  
AAAAGTCAAGACGATTTTTTCATAGCCTTTTTCTTTTTAGCCTGAAGAGCAATCGTCTCTC  
TTTTCGCCTCGTTGTAAATCCTTAACCACTTTGAGTATACTACCGGATTATTCACCGCCT  
CCCATTGCAACTTAGTCGCATCGATCTTCGTTTCAGCTTCTAATTGTTCTTTCAAATCGT  
TTAGGTCCATTATATCCCCTTATTCACACTACGACCTATATTATATCACACAGAAAATCA  
CTTTGCAAGTCTTAGGCGTGGTTGTTCAAGATCATCTGGGTTATCTATTACTGAAAAGTA  
GATTGATACTATGATTGAGTTATCGTCGTAAGTGCAGGTTACTTCTACTGTCAGGTTTCG  
GACCCGTGGTTCATAGTTTCGGGTCGCCTCATTGATGTTTTTTGATACGGTATCCACTGT  
CATTGGGTTTCATGTTCTCAAACAGTGATTTATTGAGATCGCATCCAAACAGTGGATCAA  
TGGACGAGATCCCTTGCGAGTAGTCACGATCGGTAGAATAGAATCTTTAACCGCTTGAAT  
CCCTATGTTCTTTTTAACGTCATGATTCCACGATCTGGATATATTGACATCCGAATCAGT  
ATACATCTGATTAATAGTTGCCATGTTATAGCTCAAAAAATTTTAAGGAAACTCGATAGA  
ACTGATAATGAATATACACCAGATTCCCCGCATTCGCACTTGATCGGTACTGCCAGCGTG  
ATTTGATTTCTTGTTAGCTCGTCGATCACTTCTTCCACTTTATCCGTGGTAAGCATATCC  
AGCACGCAGTCAAAGTCCTGTGCGCTCAGGTCGTCTATATTGAATTGCTGATCGCCGATC  
ACGATATATTCGATACTTGCAATTACCATCTGCATAATATCAGCATCTTCTGTAAACTTA  
GGTTGACGAAACTTGATTTTTACTTGTCTAACTCCAGAATATACGGTTCAACTTCTGGT  
ATCTGTGTGTGTGAAACATCAAGAGGGTATACTTTCTCTTTATTGCATACACCACACACC  
CAAGTAGCATCAATTTTCATCTTTTTGGGGCTGTGACACCATAAGAGAAGAAAATATAT  
TCTGCTTCGCATTTCTCTAGCTCTAATGCATTGATCCCCGTACATTCATGTATGATCTCT  
ATAACAACCTCTGACAGGTTGCCAGTCTCTTTTGCTGCTACCAGTTATCGAAATTCGCCG  
AAGGTGAAAGCATGGGCGTGTATAAACTTTTCGCCTAATTGGATCTTGAAAAGTATTGG  
ATAATAAACTACCCTTTATAAACACAGAGAATTATCTAGTATTCTATAAATACCCGAAAG  
GGGATTATACCATGAATATTATCCGAATAAACTGCCGGAAGATGTGCAGAGGTTTAAA  
CCATTCACGGTAAACGATTATAGTGATTTCTTCTGGTGTCAACTTAAATTAAGATGAAT  
CCAGAAGAAGAACAACGATTCTGGAAGAGCTATTAAGAAATATATCGAGAAGTAGAT  
CCGTCATTTTCGAGAAAATATTTCCCTGAATGTCTTTTCTAGCTCAATTGGTAAAACAAAG  
CTACCGCTTTGTTTTAGTTGCACGACTTGCAACAAAGAAAGAAAATGTTGCTTAACTTA  
CAGGTTGAAGCACTAAAACCAATCGTTCTAGAGGCCGAGGGCTCAAATAACTTTCCGA  
TATGTTAAACCATCAACCGACTATGCAAAAACGTTTCTGGATGCGATAGAGCGTGTATCT  
GATGGTATTAATGATTATCTATGGACTGAATTACCGGCAGAAGTTAGAGAACAGGTTATC  
GATTCATCTCATTGTGCTGTTTTTGAAGAAGTTGTTAAGCAGATGCACACAATCCAGATC  
GAACAAAAGATATGTTGTTGTGAAAGTCATGACCTGAAATACATAGGTCTTCTTCCATTA  
TTCAAATTGTTGTTGAATCCAGATGAGTTATTCATCTTTTATCGAGTAAACCATCTATTG  
GCAAAATCAAATTAATTCTATCAGTGTTCTTATGGATATGTTACCGATTGAGAGAAACATT  
GCACTGACACTGGTCGAGAAAGACGTAAAAGAGGCAAATAATGCCAAGAACGGGGTTTCC



TAATGTCTAAATAAAACTTTATCAGGATTATTAGGCATGTCTAAATCATCGCTTTATAGA  
GTTGGGTGCTACCTTTGTTACAATGACTCTGCGTGATTTCGATTTCGTGGCGTAAATGAAGG  
ATTGTTGCAATTCTATGATAATAAGGCGATGCATACAAAATTAACGGGAGAGAGATCAT  
TCAGATTTTCGGTATCCACTGGTAATACAGCTGAAGTGTTAACGGAGTATATTGGATCTC  
TCATAGTAATGTAACAATTGACCAAAAATCCGTCAACTTTTTAACATAACCAGTTAAAGAG  
CTATCACGAAACCCTAAACCTTAAATTTTCTCGCTCATTGAAAAATAACGCGGCTAATAA  
CGTAACTAGCATGATTGATGCCATCTATACGTAAGTTCCTTTATGGAAACCTCCTATAAA  
GGGTGATAACGTTGCTATTCCTTGTGTCTGTTGGTTAGTACCATTAATGCCTATATGTA  
TTTTGTTAGGGCATAACGGGCAAAGCGTAGAAACCGAGTCTATCGTGTATTGCTGGGAAGC  
TTTTGATAGTATAACGATTGCTGGATACGATACAATATTAATAAAATGAGCCGATACCAGC  
TATAATCTGTTAGCCAAGACTCATGGGGCAATTTATTGATATGTCGCCTAATCTGATCGT  
TTTTAATTTTGGAGCGGCAGACTAAGCGCAATGCTAAAGTTAAAAAATTCATTTAGCAATG  
TGACATACACCACTATTGATTTTGTACTAAGGAGTATAATAAAATTATTGGTGGTAATG  
GGGATAATATTGCACACTTTGCTCGTGGTGGCCCTTATGGCGATTTAACTTATAAGAATG  
CGTTTTTGGAAAGTCTAAACTTGCCACATTAGAACAATATGCTTCATATGCTACCGCCG  
TGTGTCACGGTAATTTTTCATTGCGCCCCGGTATGGTTATTCGATTCTTTGATGAGAAGC  
AACAAAGCACGCAATGATTTTATTGTTGACGCAAGTGGTGCATGAAATTAGCCGAGAGCAAG  
CAATAACTCCCCTGTATATGATCGGTAACAGCGAAGAATAACAGCAAGTCAAATTTGAAG  
GTAAGATATAATGACAGAAAGTAAACCTATGTTAAAATTTGTTGTCCCTGTAAAAAATT  
AGAGATAAACGGGAAACATATCAAGATCCCAAAAATGGGTATTAAGCAACATCGATTATT  
AAAAGATGTTTCGTAGCTGTGATGAAACATTAAAGAGTCTGCTTGATTCAATCTGTGCTGG  
GTTAAACGCAGCCGAGACTGCGTTGATTATGCTTAACTTTGTGCGTTTAAATGGTAAGTG  
TCTGGAAGAAAAAGATGGTCTTACGTTGTCTGATGTATATATTTGTACAGAGACTGAATT  
TACTTTAAATGGTAAAGCCTTTAAATTTAAAAATCCAATGTATAGATCTGACCCCATAT  
CGATGACGCTGATTTCTTGAGTCATCATTATCACGATCCTTGCGTAGACTTCCATGATTT  
CCCAGCTTTTATTATGGATGGGGCTACAGGATTAAGAAAACTATTGCACTGGACACACC  
GGAAAGTACTATCTATGGCGGAATTAACATATTGGGTGCGCTATCATGAATGACGCATTA  
ACATCATTTTCGCGGGATGCGGAAGGAAGCTGAAGAAAACCCGATTGATAAACTTAACAAC  
TTAGATAAACTTAATTTCTATTGATAATTTGCAAGCCGCTACCGAACTGGTGGCAGAGACA  
GTAGAGCAAAATTCTAATGAAGTTGTTGGTGCAGGATAACACCGGAGCCAATGAA  
TTGACGGCAGAAAATACACAATCTACCGCTGGCAATACCCAAAAAACTTATGAAGAATTG  
CCAAATCTCAATAATTACTCTTCTCAGATGAATGATAAATTACGTTGTTTTGGTGTTTTG  
ATGGAACATAGACTTGGTGTGTCAGTGAAATGGCTAGCGGTATTGGTGGCATTGAAGAA  
GCATTGAAAAAACCGGAACAACCGCAAAAAATGCCATCACCTCAGCCAGTTTTGCCTACT  
GTACCGGTACAGCCTAACAATGACAATAACAAGGTCTCCAAAGAAAAAACAGATGCT  
GATGACCGAAAGAAAAAGATCGCCACAGATAACCGTAATGCTGATTCTATGGAAAATCTT  
CTTAAAGTTGTTTCGTGGAGGATTTAAAGAAACCATAGGTATCTTAATAAGGTCTTAGGG  
ATGTTATTTAAGATCACTTTGACCGCCATGGCAGAAGCAGCAAAATGGGGTGGCTTTTTG  
ATGGGTATTGTTTTTGTCAATTGATACCCTGATGGTTCATTTTCAGAGATTGGAGTGATTTA  
TTCGAAACAAAATTCAATGAATTTATGGGTAAGGTTCGGAGGATGGGCTGGTCTATTAGC  
GATATTTTAACTACTGTTAGTCAGGTGCGAGATTATTGGTCTAAAGGCGAATATGGAGAG  
TTAATTAATCTCTTGTATGGGTATTGGTGTGATTCTACAAAACCTTTATCCAATT  
GATCGAATTATCACTACGGGTATTGCTCAAATTCCTCGTATGATCCCTGGCATGGGTGAT  
TATGCCGATAAGTTAGAATATGGTGCTTTAAATCTGCTGTGCTCAAGGCTATACGCCA  
AATGAAAGAGAACTCGAATTGAAGGATAAGGTTCGAGTCTGAACACGAAGAAGACAAATAT  
GGAGAGCGCGCAGGGTGCACCGGAAAAGCCCGGGATATTGCCGAGGCCATAGGCGGATCT  
ATTAAGGTTAAAGTTAACGAAGGTCTTGTAGTCTGGGCTGGAGAGAACAAAAGGATGTT  
GACGCAGAGAAACGACAAGAAGAAATTAACCGCGGAGAATATAAGTCTGTTTCTGCTGAA  
CAACGATCTACTAGTCGTAACCTTAGAATTAAGCGAGGGCGAGATCAATAATATTACT  
GAAGTTATGGAGAATTTGATCGGTGACTATGAGAAACAAAGACTGGGAGAGTTGAAAAAG  
GATATTGAGGTTTACCGTGAGCAAGTTCAGATCCTACATTAGTTGAAAGTGATCCTTCT  
CAGTTAGAGCATCTTATTGAAAAATTTGATGAGATGTATGCTGATTACACTAAGGGTGTG  
GTTCCAATAAAGCTTTTCCGGCAACTGAAACGGAAACAGCAAAACAAGCAGAACGTACT  
GAACAAATGCTGAAACAAGCTACAATCCAGCAACAACGACAAATCAGACCTCAAACGTA  
AATAATACACAAATTGTAACGAACAATAGAATTAACAGGGTGCACCAACAACACTAGA  
ATTGATGCCCCAGGTACAATTAATATGGGGTACTTTTAAATGAAAATTAGTGTTATCAATG  
ATGCCGTTGATAGCTTTAATGCGCGGGTTAAACCTCCGCTGGTTTTACTTCAAAAAATA

AAGGGAAAACATTAACCGCTCAATTCCTCCGCTGAACGTGCTAGAGGTAATGATGCTAGCG  
GTAATTATAACAACGACTTATATAACAATGGTCTGTTATTCCTACTGCATACGATTACACAT  
CCCGTACTACTGGATCGTTGCGTGATTTTCAGGAAAAAGAAAAATGTTGCTAGCGGTTTTG  
GCGGTAGCGTTAATATCGCTGGTTTTGATTTAAATTTGGGTGGGAGTAATGCTGCATTTG  
ACCGAGAGGCAATTGCTAATATTCTACTTCCTCGTAGTCAATCTGACGTTGACGCTGCCA  
GCCACAAGTTAATGATGTTGGTGAATCTGTTATTTCTCGCGGCGGTGGTACTTTAGGCG  
GTGCTCTTTCTAATATGCAATCTCCTGCTGTTTTTTGTTGGTATCGAAAGTATTCCTGGTG  
GATACCTTGCCGTTACACGGTGAACAGATTTCTAATACTGCGCGAAGCATGTATGCGGGTG  
CTGACGCACGAACGAAAACTACGTATGGCATCTAACCCACGTAGTATTGAAGACCTTC  
TCAATCTTCTGATCTTATACGAAACGTTTCTAGAGTTGTCTTATGGTTCTAGTGGTATTT  
CCAGCACCGCAAAGAATTAAGAGCGGAAGTTGATGCGTGGTATAAAAATACACTATTGA  
GCAAATCCACTCAAGCTGAGGCAAAGAGAAATGATACGCTGTTGGAAGGAATCACCGATT  
TTCTATCCAACGTAATTAATCTATCTAACCCGACAATATGGATGATCTCTAACCTCGGCA  
AGCGTACATCGTTTGAAGGGCGTAGCGATGCATTTGGTCCCCTCAGATCTCAAGTGTAC  
GTCTGGACAAGTCGCCTGATGGTAAGTTTAAATGGCCTTGCTATTTCTCCTAACTTGCCGA  
GTACCTTTCTCCGGAAGTATCATTAGAGAGATCTTGACACTTCCCCGTGGTACTATAT  
TTGGGCGGGCGGCAAAATGTTGATTTAAATGACTTTAACTAACAAGCCGCTAACCTTGA  
CTTTCAGCGATCTAACTTATTCTGCGTGGCATTGTCACCCTCCAAGTAATAAGACACA  
AGCGGTCTAGAAAGTATGGCTGGTGCGGTATATGATATTATACCAAATGCATTAAATGA  
CTATTTCCGGGTTACTCGTGGTGATTATACCTACGCATTAACAAATCTTGCTGTACAGGG  
TGTTAGGCGTGCTGTTGATTCATCTGGTGTCAAAAAGTATCTTTAGGTGCAATGTCATC  
CCGCGTAGTTCAATCTCTACTGGGGCAATTTGATGTTGATCCATATGAGCTTGGCTGGTT  
CAATATGGCATATAAGACAAGCGGTCTTCTGGTGTAGGCTGATAAGGTTCCAGAAAACAG  
ATTGAATTATGAAATGGACCGAAACCACAATGCGCCCAACATTCGAATTACCGGACGTGA  
TTTTGATCCGCTTGTATTGAGCTTTAGAATGGACTCTAGCGGATCAAACCTATAGAGCAAT  
GCAGGATTGGGTTAACTCAGTAGAAGACCCCGTTACAGGGCTTCGTGCGCTTCCTGTTGA  
CGTTGAAGCATAAATTCAGGTCAACTTACATAACCGAATGGGAGGGCCTCACACGATCAT  
GATGTTTAAATGGTTGTGTTCTGTTGGTGTGAGTGCACCGGAATTAACCTATGAAAACCA  
CAACGAAATCACAACATTCGATGTTACTTTTCGCATATCGTTCTATGCAAACCTGGTGCTGT  
AGGAGAGCATGCCCGCGAGAATGGATTGAGGATAAGGCCATAAACGCAATAACAAACAC  
TTTCGGTAATAATTTACTTGATAGTGGGTTATCTGCTGCTGGTAATGCTTTATCGCGTCT  
AAATGGCGTTGGTGGGCGTGTGGTGAATACTGTCACTAACTGGTTCTGATAATCGAAAGG  
CGGGGATAATCCCCGCCTTTTTATTTTGCTAAATCATTGCAATATTTTAGTGCCTTACTT  
TGAAATTCTGCGCTGTTAAGTTCTTCATAACGGGCACAATAACCGTTTAAATGCTGCCTTT  
CTTGCTTCTTCTCCATCTGCATGTCAGACATGATAATACAGCGATCCCTTGCTTTCATC  
TTCTCCAGTTGTATAGACTCTTCTTTCTGTTTGAGCAATCTTCTTGACGCTTCTTTTCT  
TCTCGTGCTTCTTCTCCGCGCTTCTTTGATTGCATCCTTGAACATCTGCGTATGTGGT  
GCTAAACCAACTTTAACGCGATCCACGTCTGGACGTTTCATTTTAGAAATAAAGCATGAA  
TCGATCTGATCATCACTTGCATATGCTGCTTTCATTTCACGAAGCAAGAAAACCGGATCT  
GATTTAGCATTATCATAGCTTCCATGTTAGCACAAACCAGTAAGAATGAATTCAGCCGCA  
AGACCAATCAGTTAATCATTTCATTTAGTACCTCACCGAAAATTGTAAATTGTCTAG  
GATTCTCATCGCCGAAAGATTCTACTACGTCGTTTACCTTGACGCAAGTCCCGCGCGGTA  
AAATTTCTTACATTCGCAAGGGTTCATGCAATGGACCCAACAACAAAACCTTTATGAT  
CTTTTACATCAATCAACCATGATACATTACAAGAATTTTGCATCTTTCCGGTAATCGATT  
AATATCGATTCTCACAATAAAGGCTAGTGCTGTTTGATAGCCATTCTCAAAGATGATCG  
CTGTCATGCTGGTCGATAAAAAGTTTTAAAGGTAAACTGCTTATCTTCAATGATGCGCT  
CTATTGTCTGAATGTCAAGATGTGGACCGCCATAAAGAGTACCGTTTAACTTTTCGGCTT  
TATCCATGACGCAAACGATCAAATCAACAATCTCTGATATCTCATCGGTCATGTCTTCTT  
CGCCTAAGAGAGCACCATTTACCCATTCGTATTGTTTCAGACACATATTCACACATTGCAG  
TATATTCGTCTGGGGTTATGTTGTCATGTTTGAATGTTTGAATACATTATCTCCAAAGT  
CTTCGGAGTGTACTTCATACATCGCATTAAATGATTTTCTTGACAAATCCATAATCTTGTG  
TCTCACGCTCAAGGAAGCGGATAACCTTCACATAATCATCAAAGTTAATCTGATCGCTGA  
TCATCTCATTGATCATTAAACCATTATTCTCCTCAATGTCATATGTTTCGATGTAATTAT  
CCATACGTTCCATCATTGATTTCGCGTGATTCTTCCGAAAGACGAAAATCCTGTAATTGTT  
TGAACATTTTAAACCTCCATAAAAACAGAGAACGGGCCTAGTATAAACTAGTCCCCGTT  
TGAGTCAACCATTATTTCTAAAAAATTACATTTTAAATTTATCTGGCATTGCGTCTACAG  
ATACCAGATCAGCGATAAGCTGACGTAGAGTTGCCTTATCTGCTTCTTACGTTCCGGTTT

TAGCTTCGCTAATGAAGCTGGAGAAAGACAGGTCAGAAGCAGGTTTAAACAACACCTTCAC  
GGATGAATGCATCACCGTCTGCGATCATCGCGCCAGATTCTTGTGAATGCTGCCAGTTCAT  
TTTTGTTTATAATATGTGCCTCAATGTAATGAGTTTCTTGTGAATCCGTCGATGCCGTAG  
CACGAGTTATCGTATGAAAGGATAACACAACACCGCGGGGAAGTAAAATCTCGCATTCTT  
TGTAAGTAAAGGCTTTGTTACCTACTGGCAATACAGGGATGTTTTCCGCGCCAGCAATGG  
AGAAAGCAACATTAGCGCGACCTACAAGGCGAGAGCCAGCCATAGAGTCAACAACAGCAA  
CGGCACTAGCCACGTTTGCATTCCAGCCGCCAAAATGTTAGGTGCAAGGGAAGTGCTCA  
CATAGTTTTTAAAGTAAAACGTTTTTGTCTTACGTGCAGTTTCCCACATTTGCGACCGGA  
AGTCCATAACCACGATACAGAATAGTACCCGGATCAAGTTTAAACGCCACAGTTGTAGAAGG  
CATTATCGAGTGCATCGCACATCTTGACCAATTCTTCTGGATCTGAGATTCCTTCAAAC  
CTTCCAGCTTACGGTTCGGGTAGGAAGTTGTTTCATATTGATGTATGCTGCATCGGCATATT  
CGCTCAACGCAATACCTTCCGCGCCAGGCAGATCAAGATCAATATTTGCCATCATTTCAC  
CCATGTTACTAGCAATTGCTTCAAACATACCCGGAATCAACATTACGTAGGGCATCGGTTT  
TAATCTGGGTGATATTACTACGCAGCATTTCAGCTTTTACATCTGCTGCCATAGACTGGT  
CTACTTGATCCATTGCCAGTGCAGGTGATCTTGTCTTTCGAATACTTCCCTCGCGCATGATTT  
CTATTAAGCGTTTGTTTAATGCTGCGATAACTTCCGCAGACAACGGATCATATTGATCCT  
GAACTTTTACCAGTTCGCTTACTGCGTATTTTGCATCGGCTTCGCTTTCAAAAATAGTAC  
GCATGAAACCATAGCGAGTGATAATATCACTAGTCCAGTCATTCAGAGAATGGGCGGTTG  
AACGTTATAAGGCTTGACGATCAATCAGAGTATTAATCTGTTTCTTAGGTTCTGCTCCGG  
TGATATCTCCTTCCGGTTTAAAGATTAATTTTTTCTGGATGATTCACGTAGTCGCTTTAAT  
AGGTCGCTTGAGTTTTTCAGCATTCTTCTTTAGTCGTACGAGAATGAGCCGCTACGCGTT  
GTTCCGCTTCCGCGTTTCGTTCTTCTTCTGACACAAGACTAGCCGCATACGCATCATCTT  
TTGTCAGAGATTCACCAGTAGCCTTAGATACCCAGCGACCAGCTAAATCATTTTCTACTT  
TAGTGAACAAGGAATCATCAAGTTTAAATCCCTTTAATCTTATCAATCGCCATACCGCGAC  
GATTGACAACAATAAGCGATCTTTGTGCTCGTCATTACTTCCCTGCTGGAATACTTCTA  
ACTTCGGTGTACGACGCACCAAACGCTCTATAACGCGCCTAACCCAGTTCGGTCTTTCCCTT  
TCATGCGGGATGCGTTAAAACGGAACATAACAGCGTCTAGTTGCACTTTACGGGCTGTTT  
CCATAACCACGTCAAAGCACTTAACATAACTGCAATCGGGATATCGCCTAGACCATTCT  
TAAGCTGTACAATACGACCCGCGTTTGTTCATCTCGCACAGTACAACATGTGCGCTCTTGT  
CACCCATACGAATGATTTTAGGTTGTTTTGTTTCGTGAAGTTACAAAGACGGACAAACACAT  
CTTTATCGCGTGTCTGTACTGCAAAAAGCTGTTTAGGATTCTGCTTGGGCTTTCAACACT  
GTACCGGGGCAATACTACCAAAGTATTCTTCCCTTTTCGTCAACAGCCATTTGTCGAAAG  
ATTCAATCATTAGATCGACGATTTCTAAGTTAAACATTTTATATCCTCTAGTTGATAACC  
TATAAACCTATATTTATGAAAACGGGGCTTAACGCCCTTTCTATTATAATGCACCATTG  
AGCTATTGCTCTAAGGTGTATCCTGAATAGTCTTTCTCAATCAGGATATACTTTCCTACT  
CGTTTAATAACAACCGCGCATTTCACCGTATTCTGCGTGGTTGATGGTACGAGTTGTTCAA  
TCTTCCAGTAATGCAGTACCGATTTTCGTTAATGCGGTCATAAGTTACGTCCGTAATGATG  
ATTCGATGTTAGCCATTTGATACTCCTGAGTAGTTCGTTTCTGTCTGGGTTTATTACGA  
TCTACCCCTCTGTTATGTCAACAACCTTTTAGAACATTTTTGAAATTAATTCTGCTTTTA  
TTTCGCAGAGAACATCTAAAGATTTCTCGTCCCCCGTTTTGCTGCTTCTGCTTGTATTT  
TTGAAATTGCTTCAATGTGAGAGCAATTATAAGCCGCTTGAACCTTLAGTGATTGCGATGA  
TTGCCGCTTCGATGGTTAAGTGATTCATGATTGACTCTCCTTTCGTTTCCGGTATGTGTGT  
ATTATAGGGGATCGATGATCTCCTTTCAACAACGTTTTTLAGTTATTTTTTAAATGCTCAT  
CTTGCAATAGGGCAATCACATGCTGGCGATGTTCTTCCGATTGAGGCACACCGAAAAAGT  
TTGTTTTGTAGAAATACTCTAATCGGTATTCTCGTGAGCTCTCCTCCATCATGATCGCGG  
GTAGTCCGAGATTTCCGAAACGTCGCTTTTCTGCTGGCGTTAAATCACTGTAATACAACA  
TAGAATCATCATTACCCGCAATGCTAAACTCGTCGTTTATAAAGGAGAATATTGCGTTTA  
AACGCTGTTTACCGTCCACGATTTTCGATCTCATAGCGAGAGCCATCATCAATCTTAGCGA  
TTGCGATAGCACCAACCGGAAAATCATTAAATCAGGTTTTTCGATAAACATACGTTTGTGTT  
CTGTGTCCCACTAAAGGACGCTGATAATCTGGGTTTCATGTTGATATAGCCTTTTTTCTA  
ACCATCCATCATAAACAGAGATGACAACGTTTTTLAGTATTGGTATAGTAACGGCGTTTLAG  
GCGTTCAAGGGTTCATGTTATAGTCTCCTGAATGGATCACCACGTAAATCAATATCTTTT  
AAGAACTCATCCATGAATGCCGGATATTGTTCTTAATTCTCCAGATAAGCGCAGGGATT  
CAACGCTCTCCCATCTGGAAGTAAGGATCATATGATCCGTATGCCCAATATGCTACTACA  
ATTCCACAATCAGCGCAATAGTATTCTATTTCACTTGCTGGCGACCAAAGTCCAACAAGA  
TGATCGGTGATCTTGTCTTCGATTTTACGGCTATGACAATCAGGGCAACGGATGCAATGA  
CCTTGTTTATCGTAATTTGACGTTAGCGAATACTTAAACAATCTCATTATAGATCCTTAT

TTGCTTCAAATGCTGCCTTTTCGAATCCTCACGGGGTGAGTGACCTTAGACTCTTTTTTT  
TCGTTCCCTTTCCCGCCTCGCTTAGAATGCTGTTACTGTACCCTTAATTATTCTGCAACG  
GTTTCTTTTCTGGCATTATAAAGCCTTGTCCGGACCATAAGCAAGTCTTTTTTCGGGTACA  
TATCACGGGCGGCAATATACTCAGGAAACGTAGGATGCTTATCATCTTCCGGCAAATAAC  
CGCCATATTCCCACGGATGGAACACATAATCAGGGTTACGCCACATGCAAGAGATGACCG  
TTACAGGATTCTCTATCATGTAGGGAACCTTAGCCATTCACCCAAATATGCGGTTATTT  
TTGCTGCCCCTACATCATGAACTTGAATCAATGGTCCTTGTCTCTGTTTCTTTCGTTCAA  
AGTGTGCAGCGCCAATAACAGCTAAATTGGTGCACGGTGGGACTGAAAAGATAATATCCG  
GTTTCCCCCATTCGAGGTCCATTGCTCTTTCCAGCCAGTTCAAATCAATCCAGGTGTTTA  
CATAGGTAATGTTTGGATGTTCAAATCTGGTATTATACTTTTTGTATGGACCGTGGTCCG  
CGTCATCCGCATTAAGCAGACTACCTGATGACCTGCTTTAGCCGATTCTAGCCCCATTA  
TCCCCGATCCGTCAAAGTTGCAGAATATTAATATTTGTTTCCCGCTGCCCCCATTTGGTTT  
GATAGTAACAGAATCTAAAAGACCTTTGTTAGCCAGTTCGCGGCAAGTTTTTCAGATCCGC  
AACTTCCCAGCCAGCCGCAATCAGGTTATCAATGAGGCTGTTAGCAACTTCTTCGCTCAT  
GAAAGAGCACTGTTTGGCGATGGTGTAGCGTACACGCTGTAATTTTCAGTTTACGGAGGCC  
TCTAACGTTTCAGGTCTTTAGCGATTTTCTTTGCGGTTTCGATGTTAGCCATTGTTTGATT  
CTCCTAAGTGCTATCTAGTCTTGATGGTTGTATTGTAGGGGAGTTATCCTCCCCTGTCAA  
CACGTTTTATAAAATTATTGGTTAATTTCTTTTTCGTTGCTAGGATAGTAACCTTCTTTA  
ACTCCGAGATATTTTCGCAACCATCCCTACAATCTTCTGTGCTACTACAAAGTCAAATTTG  
AGATAATCCTCGCCGTGGGTTTCAATGATATATGCTTACATACTGCTTTAGTCTCGAAC  
ATTTTGATTCTCCTTTTTTCGTTTCGGTATGTGTGATTATAGGGGATCAGTGATCCCCTG  
TCAACGACTTTTAGCGACGGCGACGATGTCTTATGCGAGTTGCCTTTTTGTACGCTTTAT  
ATGCCTTTTTACCCTTTTTATATGCTTTTTTGGTAGAGGATTGATTTATCTTATTGTTTT  
TGTATGTTTCCCGGTGAGTATTAATTTTCGTTACATTTCGACGAACCGGTGTCGATGTTCTT  
GTGGTATGATCAAACATTTATCATAATTAACCATTTTCGTTTTTCGTTGTTAGTGGTTTCT  
TTGGTGTGTTGTTTGCCTAACAGACCCAGCAAAGAGAATGAGTATAGCGCTCATTAAACG  
AAAACATTGTTTTCTTAATCATAATATTCTCCTTTAGTTCCTGCGGGAGTGTGAATATAA  
CACTCCCTTAATATTTTGTATTATTCGTGATTAGTTTCGATGTTGTGCATTTTCCACCAG  
TCCAGCCAATCGCCAGATCTTGGTGGTTAATGCTTTTAGCTGCTGCCCTCGATTTTGTC  
TTGATACCCATATGTGCGTTATGAGTAAGCATTGTTACAGTGAGCTCGATTTTATCGTCT  
TTCCCTTAAACATCAACCCGTTTGGTCCACTGACTACCAGCAACGCGAATGTTCATACT  
ACGATGTTTCCGATGAATGCTTCTTTGTTCTTCAGGATTTTCGGTTGCTTTGATGAATTT  
ATTTTTGATTCTTCAGTTCGTTTTGGTATGGGTGATTATGCTATGTTCTTACTTTGGTG  
TAAACAACTTTTTTAGATATTTTCGGAAACATATTTTAAAACCTTGACGTAAATGTTTCT  
CATCTTTGATGGTATCCGGAAGTTCTTCTTTTACTTCTGTGCAAGATAGATATTTCCGT  
TCCAAGTGAAAGATCCGTCTTCGTTTACTCGATAGATGTTTCATCCACTCGCAATCATTTT  
CGATTTTCATATACACAGAGAAGGGTGTAAAGCGTGAAAGCTATTGATTTCAAGGTGCAAGC  
CGTGACGTTTTGCAAAGTTGGTAGTGGTTTTAGTACAGTACCATTGTTTGGTTCTCCTAAG  
TGGTATCTCGTCTTGATGGGTGTATTATGCTATACACAGGATCTGGTGTCAATGCCTTTT  
TTAAAATTTTATGCAATAAGAAAGCCGACGCTAAGGTTCGGCTAATAAAAATCATTTAGACA  
AATAATCATTTCAGTGCAATCCGGTTCGGCGTATGCTGGTGTACGTCAAGCGCAATCACTT  
TCACGCGTGCTTTCTCGCGACCTGGGTATTCTCGTTACCAGTGCTCATGACCCTGAACAT  
TTTATACTGCGATGCTTCTTGGAGAGTACGGACCCGACAAGGGTAATCAGCGTAAAGGAT  
CTCTAGCTCTTCGGTGTGTAACATATTCATCATGATTACTGGTCTCTAGTTTAAAGCCG  
AGACTTTTCGGAACATTGGGAGATTTTCGCGGGTAAATTCAAAGATATTATCTTTCATACT  
ATTATCCACAATAGTTGGATGAAAAGGGGGCTTAATGCCCCGTATATTAACCCGTCCT  
TCCTGTACACCGTAGTAGAGTTCATCGTTGATAATTGCATTAATGCGACGGTGTGCATAT  
TCCTGATACGTGCAGTTGTCAGCAAGTTCTACCTTGGTTTCGCCATCATGGGTGCATTTA  
GTGATAACTTTACCATCGGCAAATCTGTAGTTGAACTCTTTAGCTACCGCATCGCGTACC  
AGACGTGCAAACCTTATTGTTGCGGCATGCATTGTCGTTTCATGTGCAGCGTGAGCGTAT  
TTGTTAACTTTCAGAGTGATTGTAATGTATGCCATGATTTGATTCTCCTAGTTGGAAAGT  
GTATCTCGTTTCGACAGGTGTATTATGCTATACACCCGCTCCATTGTCAACGCCTTTTTA  
TAAAATAATTTTCGATATCTATATGATGTTTTTCTCGTGCTTGATCTGCCTCGGCTGGCG  
ATACGTAGGAAGCGATAATCTTCACTACTGTTGCACCTTTTTTCGGTGTATGACACCCAAA  
GATTATGGAAACCGCTATTATTAACACTTGATAATAAAATGATTTAATGTTAGGGAAAT  
TAAAAGTGTAATAACGTACCCTTAATTCTGAATCTAAGTTTAGATAGATCAACGCACCTA  
GATAGACCGTCTCCCTCGTTCGGTCAACTAACAGTAGAGTATTTCGAAATTCTTCTAATT

TGCTTTTTGTAAGGAAAATCATAGTATAATCCTCAATTAGACCAAATTAACTTTGGTGT  
GTGGTGCTTTTCTCGTGCGTCGTCGCTTCTTCCGGTGTACGTTACGTGCGACGGCAAT  
AACCTTGCTGCCTCTCCGTGATGATAGATCTCTACCCAAGGCTTATGATTTGCGAATCC  
GTGGTTTATTGCGTAAGCGAACGGCTTAGACGTCCAGTAGAACTATAATATCGTACATT  
AAGTTCGCCATCAATGTACAAATATGTGCTGTCGTTTACATTGCCACTAACAAACAAAAC  
AAGACAATTGCGAAGATCGGACAATATTTTGTGTCAGTCAATTTTATAATGTGACTGTTAAT  
AATTCACACCACTCAAGAGTTTTTGAACACATCTATCCATTGTTGAGTATATGCGGTT  
TCTTTCCATGACAGAATACCAGTCGAATAATGGTTTTTGTTCAGTAAAGGACGGGCAT  
TTTGATGCATCTTCCATCATCTTTTCGGCGAATTCTGGTTCGTATACCCGCGAGAATCTGT  
GGATATCCTTTGTATTCTTTAAATTTGCTCATAATCATTCACTACCTTATCAGCTTCTTT  
TGTTGCTTTTACATCAACTGCGATAACCCGTAAGCTTCGTCATGGTTCCACCAATAATC  
GTGGATATCGGCTTGTGATTTATCACCAAAGGAATCACGAATATCATTTGTACATTTATA  
GTTAATGTGACCGTCATAGTCAACATAAAGGTAATTATCGAAAATCGGCGTTTTTAAGAG  
CATACCGAAAAATCTTTCTTCGTGCTCTTATCCAGTGTTGCAGTAATTCGCCTCATAAT  
ATATTCCTCTTAGAAAGGGATGGTCATTTCTTGAGCTTGTACATTCTCGTAAGGATTA  
CTTCATCCAACCGATATTGTCTACCAGCATATGCACATTTTTATCATATCCTACGTGGGT  
AGTCAATACTGTATGTGCTTTACCTTCTACGATGATTTCCATGTACTTCTGAACACTACGAT  
AGCTTTCATATTGATTCTCCGTTTGTGTTGCTTGTGATGGGAGTATCGTACTACTCCCTATAA  
TCATTGTCAACTATTATTTGGGAATTTCCGGTGCGTTGCTCGGCTAGTAGCCTTCTATAA  
CACCCAGATATTTGCAACCATTCCGGTGATCTTCTGTGCTACTACGATACCGAATTTCA  
GGTAGTCATCACCGTGGTTTGCCACAATGTATGCTTCGCATTCTGCTTTAGTCTGGAACA  
TTTTTTATTCTTCTATATCTCGTTGGTATGTGTGCATTATAGGGGATCCCCGGTCCCCTG  
TCAACAACCTTTATAATGCTTTATATGCGTATTTCTAAATTTGTCTGCCACTTCATTGGG  
ATGTTTCAGATTCTACGCCTGATTCGAGAACAATAGCTATGTCGGTTTCGTCATTCCAACC  
GTACCAATGATTTGATGTTTCGATTTTTTTCAATTGGAAATTCGTCACTTTTTATCTGTGCG  
ACAAAATACATCTAACTGCTCATCGATGTAAAAGATCCAATCTTCATAAAGAATAACGGG  
TATTAGCAAGATTTTTATTGCCTTCAACGAAAATTTCCGGCTACAAACAAATTAGGATGTT  
CCATAGTAATTTCTCAAATTTATACAGCTTCGTAAACTTCCCAATGTCCAACACCAGCA  
CGCTTAACGAAAAGGTTTTCTTTGATGTTATTCATAAACGTCTGGATGGATTTAATGCGG  
TTTGAAGGTTTCCATTGTTTCGATGGCATAGCGGCGATACATAATAACATTACCAGTTCGC  
TTATATTCAGCAACCACTTTAAGACAACACATAATAATATCCTCAATTTGTGGGAGAGTA  
TTTCCCCTCCCGATGTTCTTAGATTACATTACACAAAATGGCGTGTCAATGCTTCTTTTG  
CGGTTCCGCTAAGACTTTCGATCTCGCTGGCTTAACAGCAACCGCCAGAACTTGTACAA  
CATCCTCGGACCCTAACCACTGAGTATGGCCTATGTAAAACCTTGATAAACAGACTACCT  
CCTCGTCCCATTAAACGCTATCGCTAGCCCACCACACATCACGGTCGATAAAGTTGATGT  
AAAGCACACTACGCCACATTGAATTAATTACTTTCAATACTGCGACTTTCATCTCTTCCA  
CGGTATGGTCATCCATTTTGAAGACCTCACCTACCTGAACTTTTGCCATGTTACATGCTC  
TGAATATGTTGAGCTGCATCTTCCAGTTCGTCGCTACTGACACTGTGTGCCAGTAAGTGT  
ACTGGTTGTGGTTCTTACCTTCCATAGTATTGATCAGTTTACCGTTTCTGGGTGGAAT  
GTATCGTTGCCGTTCCAAATAGGATACACATCATCTTCTGTTACGTAGATAATAAGTCCA  
ATCGGTGATTCTGGTAATAGAAAAATTTTACCCTGCATCTTTGCGATTGTTTACGATA  
TCTTTTATTGTCTTCAATTTAGTTACCTCTCGTTAAATTACATCACAATCCTGCCAGCCGT  
TGAAAGTTGTCGTTTCAACTGGGCATTTTCTGCTACTGTCAAATCAATGATTTCTTGTGA  
CGCGGCAATCATATAGCCATTGGTTACATTGTTTTGCATCAGTTAAATGGTTTCTTCGTT  
GTAGCGGATTTTAGCGATGATTTTCGTTGAAGTTCATGTATGATTCTCCTAGTTCGTTTCG  
GTATGTGTGATTATAGGGGAGTTTAACTCCCCTGTCAACAACTTTTTAAAGTTTTTC  
CTTGATAACGGTCATAATTACATCTTCTGCGCGAGCGGTCAGATTATCAGCGTCAGCATG  
TGGGCGGTTGGTTGTTACAGAGATAACACCGTTGCGCACTGGTTTGATATTGATATCAAG  
ATGATCCGCGAAACGTTCCGACGTTACAGAATGAATTTTGGTGTAAATTCTTTTGCCAG  
TGCCTTGCTAACTTACGAATCAGGATAGCGTTTTTTCAGTTGGTTCTCCGCGCTCATGGT  
CTTCTGGGTGTGCATGGTTCCGTCGAAGTCAATCATTGACAGCATTACGATGTGTTTCAT  
TTTTGATTCTCCGTTTAAAGAAGGTGCGTTTTGTTTTGATGTGTCTAGTATAGGGGATACG  
TGAGCCCCTGTCAACAACCTTTTTTGAATTAATTGTTTCATGTGTTAATGGCTTCTCCAT  
AGCCAGCACGTTTCGATAGTTAGGGTATCGTGTTAGATCGTCATACATTCCGTTAAGGGT  
GGAAACTTCTCAAACCTCTGGGTTTTCTAGATACAGTTGAACATATTGTTTCTTACCAT  
CTCGCTCTTAGTTTGTCTGCTTGTTCCTGTTTATGATTTTCGTTGGACCCAACACCAA  
CAAATGATAAAGGTGATCAACGGGCTAATGATCAATGATAGGATAACATAACCGATAAC

GCTACGGTTTAAACGGCTTGCGTACATGCCTACCAGGTAACAGAAAGGACATAGATAAA  
GAGAAAGAACATATAATAGTGACTCCTTATTTTCGCGCTCGTACTTTTCGAAATAAAATT  
CTACTGGCTGGTCATGACTTGACAGCAAGCCAAAGCGTTTAGCCGCTCGCAATCCCATAT  
TGCCTGAAATATACTTCTGGAAGTTCTAGCGTATACACTTACGCCAGTATTCTAAGCCCA  
TACAGCTTTTATAAAGATTGCATTGTACGCACGCCGGTTTCATGTTATCAAGTATCTCAT  
GTTCCGGTTTATGCATTCCCTACGACCTTATACTTCCCCGATCCATCATCATTACGGGCAA  
TTCGTCCATTTTCATCATAGACTACCTTTGAGCGTCTCAGTACTGGTTTGATGTGGTCTG  
CGTGCAAGCGATCCCCTAGTTCCCTCGCCACAATAGGCACAACGTCCACCATATTTTCAATT  
TCAGTATCTGGCGATGCTCTTTCTTTGACAATTTTTTAGGTTTAGGGGCTTTCGCCCTT  
CATTTTCACACATCGGATACCTCTTTTACTGTATTGGCAGTGGGCTTGTGCAAGCGAGTA  
CGTTTGATGATTGGGAGAAATAGAGAGACCTCCGGTTCATCTTCTTTACCAGATTTGCTG  
CGGATATACCCGTTGCATGTCATCGCAATGACTTCTCCAATCAGGTTTTGACGGTCAGCC  
CATAACATTTCTCGGTGAGTTCATTTTCGACGATCGAACGGAATTACACGGTCAGTTCCA  
TCATCACCTTTTTGGGTTGTAGTGTGCGGTAATCCCGATCCGGTGTAGTCCCTCATTCTG  
CCGCACGCACTACGGACAGTAATACCGCCTACCTTATTGGGGTCTTTACTATGCGGATAT  
ACATCAATAAATTTCCGCGGCGAAGTCAATCACTTCTTTAAATTTAACCTGATCTTTACTA  
CGGCGCTCTTCAAATACACCATGTAAATTTTTAAGGATAATACCTTCGAAGCCCATGTTT  
ACATAGCGATGTTATACTTCGCGAGCTTCATCTATATTGTTAACTACAGTGTTTTCGATT  
ATCTCAACACGAGGATCGTTAAGTTCTTCAACAATCTGTTTTAGTTCTTCGAATCGATCT  
TTATATTGCTTCGTTGCTTTCTCGTTTCCGTAATACACATCACGGTCGATAACATCCCAG  
ACAGTGTAACAATAACATTGGGCTTCTTATTTTGGAAATTGTTCCCTTTCAGTGATTTGTTG  
AGGATACCATTTCCGGTCTGACGATCTGCAACAACCGATTCTTTTACTGCTTCCGCTACT  
GGCGTTAATGGCATTTCCTCTTCTTCAAATATCCATGACTGAGTACCATCATAAACGCTT  
TCAACGAAGTTCTGCGCTGGGGTTTGCGAAAGGGTAGGCATATATACCAATTCCACCTCT  
AGAACAATCCCCCGCCTAGCAGACGCTCTAAAACAGCATTCAAATCATCCAGCCCCTGA  
TAGGTATTACCTGAACGGGTATAGATTGCTAATGTTTCCCGTCAATATCAGCCATCCCA  
CCAGCGCCATCGCTTTTAAGTTGTGCATACGCCAGATACTTGATATTAGCAATAGTCTTA  
TCAGAACATGACGATGCAAGGTGACACGGTTGCTGGGGGATCAGTTTCTTCATAACTTG  
TTTGCAGGGGTAGCTGAGCAACCGAATTCAGATCACGATTCAGGACAATCATTGCACCT  
TTAGCATCCTCCTCTGACAAGCAAGTCAGAGTATCGGTAACCTAGCTGTAATGCTGCATTA  
CCAGTACTTGACGCGTGGCAAGTTTATTTTTAAAGACCTGTAATGCACCGGATAAAGAC  
AATACAGACGAATAACGCTATGGTTTATCGTATTTCTTTACGCCAAACGTAACCTGTTTG  
CAATATGCCAGATAAAAACATTCTTTTCAAGTGTGCTTGTGCTGAGATTCTTTTCAAGGATC  
TTTTGTTGACGCGATCTTTTGTCTGTTGCTGCAAACCTGGTTAATGATATTAAGAATTCAC  
ATTTTACCAGGTTTTGTTAAGCGTTCACGAATATCATTGAGGATACTACAAAATTCCGA  
ATCAGTCAATATGGTCTTTAACGGATCAATTCCACCTATGCTATGACGTAATTTCTTATT  
TCTGTAGCGAGTAATGCTTTACAAAATTCTGGGTTATTCCGTGCCATCGTAACAAATGC  
CAGATGTACCAGTCTGTAATAATGCTCACTCATACGATGAATCGGGCGAATCTTAAAATT  
TAACATGTGAGTCTCAATCTTATCAGTTCCTCCGGATCTTTTTGATTTGCCACCGTTCAT  
CAAAAAGATTTCTCTTTGTCCCTGAGGGTCTTAAATCTTAGCCCCTGAAAAATCCTTC  
TGTGCTGTTAATATCGCAACCAATAGACGGAATGGTCTTTTATTAATATTACTCAATTC  
ACCCGATGGATAAGGTCCACCCGCATAGAGATTAATTTTCAAGAGTCAATTGAAACTAATCT  
CGTAATCAGAGAGAACGGATCACAATCGTCATTAGGAATATGGATAGTAATCGAATGAG  
GATTTACCCATAGACCAAACCTGGTCTTGTTCGGTGAAAACCTTCGGTATGGATTTTCGCGGA  
TGTTTACATTCATAGTTTTTCAAGTAAATTTCTTAAATAATCAATAACTTACAAAATCAT  
ATAGCCAAAATATAGGCGGGATTATTTCCCGCGGTTTAAAATCATTAAACCGTAAACTACC  
ACAATATTCTGTTTGTGTGTTACAGTCCATGTCAGGTGATCTCTTCTTACTTATTAACG  
CCGTTAATAACGTCTGGGTGAGGAACTTTATTCATCTTGCCATGTGGCAGTAGAACAGTT  
TAACCGAGCAATTCTTTATCTACAGTCTCGCCAATATCAATAATCTTACCTACCAGCGGA  
ATCTCGCCCATAGTGCCTTTTGTCTCAATAATGACCCCATAGAGCTTTTTAATTCGGTC  
CCTGCGCTTTCCGTTTTAGCTCCGATAAATTACATAATCACCAGTGCTTTAGGAGTTTTA  
ACGGTCTTAATTTTATTACCTCTTCAAATCAATACAGTTTAAATGATGAATTATTTATAAA  
TTTCGACGATCTGCGCGGGAGTCAACCCATCTTCAATTAATCAGACCATCAAGCCAAAAC  
TACGGAAACCTTCAACTGCAATTTTCATATACTGGCAAAGATGTTTCTGATTCTTTACGCG  
GTTTTTCAACATTCGGAACCTAACCACTTTTCGTATATTTTCGAACGGCATCAGTGCCGGAT  
CTCGCGTGGCGATCAACTCAAGGACAGTACCATCTTTCTTAAATAAACTGCAAAGAGTAAG  
TACCGACCGAAAACATTTTCTTTAGTGCTTCGCGAAGTGCGATATTATCAACTTGTTTCAG

TCATTATCGATACCCTTCAAATCAGTCAATAATGCTTTTTGGAATACGCGCGATCGTAATA  
TCCGCATTATTCAGAATATCAGCCCAATCACGCCAACAGTTCGATCGTATGTGTGCGCAA  
TACTATAGATGTTTAATTCCACTTTTTGCAATTGCTTTAGCGCAATCTGGACACGGTGCA  
GCAGTACACCACATACTAGCGCCTTCAATCGATATAACGCTACGGGCAGCAAACAAAATA  
GCATATAGTTCAGCGTGGATCTCGTTTTTCTGTGACCATGCACTATACTCTGATCGTTTT  
TCTGGGATCATTGTCGCTATCATCCAGCCAACCGTTTTTATGGGCATGACAGCTACAA  
TTTACTTGCCCTGCTGGAGTTCCTTTAAATACAGTAGAAATGATTCGCCCGTCTTTTTTCG  
ATCAGTGCGCATACTTCCCTCGAAACACATTTAGAGTTCCTTACGATTAGATAGTCGATC  
TGCATGTAAGTTTGTGACAACATAAATAATCCTCACATATAAATTAACCGTATACGCGA  
AAGAATTCGACCGATCCGTCGCTATACTGTTGTACATTGAATGTATTACACCATGATCA  
TTGCTCATAATGACATATACTCCGACGCTCATCAGCAAACGGGTAACTAGTTCGGGT  
TCAATTTCAACATTAACACCGTTTAGCAAGTGCTTCGCCTAAGTGCTTGAGTTTATCG  
GTAAACTTTAAAAGTCTACGTAGTTAACCTGAAAACATTCTACACCAATTGAGCGGTACA  
TGTC AACACTTGATCACGGTCATCTACTGCCAAAACAACATGATAACGCGGTGCACTTT  
CCGAGAAGAAGATCTCTTTCTTCACTTCATGGTCTGGACGTCGATCATTAGTTTCACGCT  
GGAAGTGATCGCTAGGTTCAATACCCTGTTACGCAGCCATTGCAGAGTATCTTCTTCGC  
AACATCCTCACGCCCTGAGCATGTAATGATACGATAACCATTATCACGATACAGTTTAA  
GCATTTGATCACTTGCGTACGCGGTTTATCTTCTTTGACCTTTGTCCAGTCAAACGGAT  
GACGACCGCCCTCATCCGCTAATGTCCGATCAATATCAAAGATCACCGCTTTCGGTAGCA  
TGGTATTCGGTTTGTATACTTCTTGACCCATATAATCCTGCATAAAGATATAATTGGTTGC  
CCAGATGAGAAAGTGGAGTTGCTTCTCGCCGCGATAGAAATTACGTGTCTTTGGTGTCT  
CAAACGATTGATTGAACACTTGCTCAATATACACCCGCGTTAAATTTTTTTGCAAGTTCTT  
TGTAGAATACACGATGTTTTTTCGTTCAAGTTGGTATCAGAGATAATGATACTCAATCCGC  
GTGATGGAGTCACGCGAGCAATCATTCTCTGAATAGACTCTACCAGCTTTTCTTTTTCT  
TAGTATACTTGTGTTTCAAAGTGCGTCCACACCAAACAACATAAGACGAAGATCATCAC  
GATTCACATTACGATAATTACTAAACCGTTTACATGTTTCCGTAGCCATCTAGTTTTAC  
CGGACACAGAACAAACCAACGGGTAAAATCACATCACATTTTCGGCAATATTTCTCCTTCGG  
TGTGCACCGTTGCTCATTAAGTCCTTTGCGATAATAACATATGATCAACTTACTTTCAAG  
TGTATATCTCTTAATATCAGCCAACCAGACCCTAAATTTTTGGGAGTCCTCCACGCCAT  
AGAAACTCTAGGTTTACCGTATTTTGTATCGACTTTCAGGTCAATGTCAACTTTTTCTAT  
TGGTGCTGGAAGTGGAGATGTCATGTCGGTTCCTGTGAATAATGGTCCATTGTACACGA  
AGAAAGAGCAAATACAATAGGTACAGCGAAGACCTGGATTATGGCGGTGTGAAAATTCTT  
ATGTGCTTTCTTAAACAACCAGTGTTTACGAAAATTGAAAACACCATAATGATAATAAT  
GCTTGCACCTATCCCCAGATAATCACCCAGATTAATAATTGCTTATCTGCTCTTGCGTAGG  
CAATATTTCTATGCTCATTTAGTAGCCTCCTTTAATTCTTTCGGTAAACTCCTTCAATGAA  
TCATTAAGCTGTTTCTTACCAACTTGGCTTTTTGTGCTGCTCCATAGCCTCGTGTAGCG  
TATTTCAATTGCTTTGTTGTGTTCTTCTGCAAACCTTAGGTCATATTCCGTACATCTCCTTT  
TGTAGTGATTCTACGACCATCATCTTTTCATCTGTATTTTTCTTATACTCTGTAAATTCC  
TGATTGAATCGGTCCACCTCCTTTTTATTTTCCACCACATATTGCCTCCTACCCCCAGC  
AACACAGATATGATAACAATGTATATCAGCTTTGACATATTACCCCCAACGACAAAAGGC  
GGGGAAGTACCCCGCTTATTATTACCACTCAATATTATCAGCCGGAATCAGTTTCTTAT  
AATTCCGTAGATAGTAAGTTTTTCAATTGAAGCCAGAATACGGTCATAATCAAGGCCATCAA  
ATGCAAGCACCAGACACATGAAAATATATGATTGTGCATCACCATGTTACCGTGATTGCA  
TAGTCGCATTGGATGCATGTGTCTTTCTGTCTTCTCCCGCGTGCGCGTTACAAAATTCTG  
TTGCTGTCGTAAAGGCATTGCGATGAATGGACCTGAATGCTTCCCTCGAATAGCTCAATTC  
GGTCCAGTGCTTCCGGTTCGCCCTCATATGCAGCACACAAATCATCGGTTTAGCCTTCTA  
CGACATAGTAGATCAGGTTATTAGGAAACATCGATGTGTTTTTAATGTTATGCACACCAA  
TATACCATTCACTCTTACCTTGAACATTTGACCGTCTTTAGTGCGTGCAACAATCCCTT  
CGATACCTTCTGCGGCCCGAACTTCAATCAAGAATATTGCTAAAACGCGCTGAATCAACCT  
GTAACGCATTTACCAGATGAGGACGTAGGATTGCGTCAGCAAATAGCATTTGATGCAGTA  
CGTACTCTCCTGTGACGATATGGCGTACATTCAGAGGTGTTAGCGACGGTTCAGGTTATT  
CTACAACAATTCGGTTGCTGGGTGCTGTTTATTCAAAGTTGAAATTATATTAGACCCAA  
TATCGGTGATCTTAGCGCGTAGATCCGCATACTTCTCTGAATACAGAAGACCGTTTGCTC  
TCTCTTCCCTGGCGTGAGTACAAGGCCGCTTTAGACTTCAACTGAACATAGCCGTTATCAA  
TGTATGTGCTTACTAGGCTACCCTCCATTTTGTCCATGACAATTTCCACATCTTCCGGCT  
TAAAGCGAACGCGATCATTCTGACGCAAATTAATAAAACTTCTCCATAGGACGAGATGCAA  
TGCGGACAGGTCGGTCTTTATCATCGATTTCAAACATGATCCCGCGACACTCTAAAGCAT

CTGGTTTATTCCACATATCCGGTTTGTCTCAAGTACAGGTAAGTAAAAATGCGCATAACGGG  
TTTGCATCGCCGTAATTTTCATCTTTGAAATAGAACGTATCAGATCCGTCACATAGTGCCA  
TCAGATGTTTGAACAATGCTAAAACCTTTTTTGTCTGTTTTCTTTTGTGACATAATTTGT  
GTTCCATTCTGGTTTAAATTTGGTGATCAAAACAGGTTCTTCGATATCGGCAGTGCTTAT  
AATATCTTTACCCGTTGGATTCTCGATGTACAACCTCAAAGCATTGGGCGCTAATAGAATGT  
TACTGTCTTACCTTCTCTAGCGCCTTATGAATATTCTTACTCTGACGAGTATCCGCTGT  
TGGTGTGTTGTCTGTTAATGCTCGTCCGGTATTAATTGATCCGCTTTCTGAGATTAACAGT  
GTTACCAATGTATACCAATTCATCATCAACCAGAATAGAGTACAGAACATTTAAACGGTC  
TTTCTGAGGCGGTAGAATCACATCATCTTTACTCTAAACGTGAATATTTAACGAA  
TCCATAGTTTTCAATTAGCTCATTAAATCATTATCCTTTCTCACGTCACAACAAAGGCGG  
GATTTCTCCCGCCACCTTATTAACCTTCCAGATTATCGCGAGCTTGGTTACGCTCCTTG  
ATGATTTTTCAGCACAAATTCAGTTTCTCTTTGTTTCAGTGGTCCGTTTTCCATTGCTTCT  
TTGACGGTAAACACTCCGCCACCTTGCCCGTATACAGTGACAGTGATTTACCTAACATC  
GTGGTATGACAACCGCCAATTTTCGGTGATTTCGAAAGAAACAATCACCTCACGGATAGTA  
TTGCCATCGTTGATTTCTTCCAGCGTAATATCGCTATTGTAAGCGGTTGCGTTTACCATA  
CGGATCAGCATAGTCTGATCTGGGGGGCTGGTCATTTTGTCCATTGCATGTTGCAATGGA  
GCGTAACCGAAAACCTTAAACGACGTCCAGACCGTCTTTGCGAGTTTGAACCTTTGATCATC  
TTGATACTCCTTAGTACGTTAGTTTCGTTTCGATGGGGTATCTTACTACCCCGTTTGAG  
GCCGTCAACTACTTTTTAATGTAAAGTTCGAATTTTGCTACCTTACGTCCTCGTTTATTG  
AAAGAAACCCACGGACAGTTTTCAATGTAGAACAATTCTTCGCCTATAATGAATACTGAC  
TGATTGTAAGGCGACCCATCAGGTCAAGCTGGCGAATGCTAGTAGATTTCGTATACGTCG  
CCTACCACAAAGTGTTGCTGATAGAGTCCGGTGCAAGTAAATTTTCAATTTTGATTGTCCTT  
TGTTTCGTTTCGATGGGGGTATCTTACTACCCCGCTAGTCAGTGTCAACTACTTTTTTA  
CTTGTCTATTTCATTCCACCATTGAGTGAGCTTATCAATTATTTTTGTGTTTCTATCCAA  
CTTATCCCACCATACTGAGGGTTTAAACAACCGGAATAGGTAAGGTGTACGTGTTAAGTG  
AACTCGGTCATTGTAGTAATTGATGTAATGCTTTTCAATTCTAAATTTTCATATTTTTACG  
ATGAAAATAGGCAATGACTTGTTCTTCTGTTTCCATATGTTCCCTCCGTTTCGATGTGCGT  
AATACGCTATGGTAAGGTCTGATTGTCAACACCCAATAACAAAAAAGTCGCCACTATTG  
GCGACTTTGAACAAACATTAATCATGACCGTGATTTGCAATATCCGCTCGTGTGCTGTCT  
TTGTGATTACCTACGTCAAAGATACGATAACCATTTTCACGAAGAACTTTAAACACTTCT  
GGGTTATCCTCAAAGACTCCGACAACCTTCATCTTTATCAAAGGATTTAATTACCTCTAAT  
TTGATGTGATAGTCTTTACGGGAATCATTGCGACCTCTCATAAAGATTTTATCGAAACAC  
AGATCATTAGCGATCAACCATTCCACCGTTGCCATGTAAGAATGTGAACTTCGTCCGGTG  
AGGAAGTAAATCAAATGCCCCTTGTGCGAAAGAGCATTGATAACACGGATTACATCGTAA  
ATGGGGGAATCTCACCCACATTTCGTGGTTATATTTCGATCCACGACTCGACTTTATCAAGA  
TTTTTCGGTTGGCATCTTTGCTAGTCGTTGGGTTGGATCTGTGATCGTAAAATCTAAATCG  
ACAAAATATATCATAGATATTTCCCGAATCGGTTGTAGTCATCGTCTGTAAATCGGTAT  
TAACCTGAGACACCAGATACATAATCTCTACTTCTGCGCTGCATTCTGCACCTTCGTCAG  
AGTTGAACCACTTACGCATCCACGGTGAAGGATGACGACGAACACTAAACGGGCTTTTCA  
GTCCGGCAGCACGCATACGGGAATGTGCCAGGTTATTCTACATAGGTTTTTCAGAATTTCCG  
GTTAGAGGTTAGGAATTGCCCCATTGCGAGTAGGTGGTCTACCGATCCTTTTTCTTGCT  
CGACAACATCCAGAAAGATTTTCGTTGCTTCGCCTTCAAGTTCTTCCGCAATCTGTTTCC  
ACTCATCACCATCAACCCCGTTTGCCATTGACGAATAATGTATTGTGTGCCATTTAAGT  
GAAGTTGTTTCATCACGCGCAATAAATTTTCATGATCTTTCGCGTTACGTTCCAGTAAACCAC  
GTTCCGGCAAAGCTGAACCTACATGCAAAGGCCACATAAAAACCTAATTGCATCCAGTGCGT  
TGACGCAGTGTGCACACAGATAAATCGAAGCCATCAGATCTCATTGTTGATCTTCAAAA  
ATCTTCTTGATAATCTAATGCTGTCTGGTTCGTCTAGTTCTTCCCAATAGCGGAGATCTT  
CTTTTGCATTCTCATACTTACGTATCCAATAAAGAACATCATCATAATATTTCCCGAAAG  
ATTCCGCTCGCTTCATGATAGCAGGGTTATCGATGATCTGGTTCGAACTCACTAGCCGGAT  
CAATGAGACAGTTACGCATAATGTGTGTATAGCTTCGGCTATGAACCGTTTCGCTGAATG  
TCCATGTTTGCACCATCTATCGAGAGTTGGATCAGAGACAATTGGACCAAATGCTGCGG  
ACGGTGCAGGACCTTGAATTGAATCAAGTAATGTCTGATACTTCAAGTTTTTCAGTAAGCA  
AACGCTTTTCAACGTCACCCATATTAAGATATTGAATGCGGTGGGTTACAAGTGATTTTT  
CTTCTGGACGCCAGAAAAACGACAGAGATTTTTCAATTAATTCTTCAAATACTTGATGAC  
GCTGAATGTCATAACGAGCGATACCTAGACCGCAACCCAGAAACATCGGTTCCCTTCATAA  
TATCAACGTGTTCTCGATTAAATACCGTATTACCCATTCACATATTCCTCATTTTACAGT  
TATCAAAGCGGCATCGTCGAGCATTGCCTTTTTTAGTAATTTTACCAGCAATGCGGACAAG



GATGTGCCATTGTTGCTTCCTTTGTCCGTTGTGAAATCAGCTTTCTCATTTCCTCGCTAT  
TTGGTATTCCTTGAGTTGGCGATGGTTTCCCAAACATAGGATTTTTACTTCCCATTCTAG  
CTTTTCAAATGTTTAAACGCGTGCTCCTTTGTTTTTGGCTTACGCATTTTAGCTTTTGTCT  
CTTCTGATTTCAATTACACCTTTCGAAGATTCGCTAATCTTTCTTCGCGTTTCTTCTTTCA  
TCGGCTTGCCCTTTCTTTGTTTCAGAGATAAGTACCCTAGCTTGTTTCATGTACCCTAGACG  
AAACAATAAACTCTCTTTTATTGGTCTTCGCATTTTTTTGGTAAACACAGCATAACCAATG  
CTTGTGCCATAGGTCCACCATGAATTTTTGGCCTGCAGATGATGAAGCACGAAATGTTCTT  
TTGCTGTCAACTCAATCAGGTTATCAACTTCATCACCGCCACCCATAGATCGCGGTA  
TATGATGTGTTGCCTTATATCCTTCAACGGTGCCTCTGATCTTTGCTTTTTATATGATTG  
CGTCATGTAGTATTTGTAGGTTTCATGAATTAATCCTCTTTTCTGTATACCATTATTTATC  
AGGTATCCAGAAGAAGGATTAATTCACCTCACTATTATCCGACAACCTCAAACATTTAT  
CATCAGGAAGAATAGCCCATTCGACGCGGTATTAATCCTCAACGTAGTAGCAAGTCCCAT  
CATGTCGAGCATCATATTCATCACCGACAACAAGCTATCAGCTAGCTCAAATCTACAG  
CAACACATTTTAATTTTGGCATAATAACATCCTCACTTGATTTTGTATGGTTGACTTATAG  
CGGGGATTTCTCCCCGCGTCAACACTTATTTTACAGCTTGTCATGCTGAGCACTCGCTAGC  
GTCTTCCGTACCATCTGCACCGTCGCGAAAGTTTCGCATAATAGATGGTTTTCTGACAGAA  
ATATTGAGCAAACAACATATCATCTAACACATCAGCAATATCGACGTTTCCAGTCTTATA  
AGTGCTTGGATCGTATGATGTATTGGAACATAATCGCCTGATCCACAAACTTCTGCATGAT  
CGCTGCCGGTGTGAGATAAGGCTTGTACCTTTTTTGTATCAGTGTCCAAAGCAGGTCAAT  
AACATCAGCATTATTCTCCACGTTTCGGAATAACCTGATAAAAATTGCACTTCTTTTCGATCC  
TTTAAACCGATACAATCCCAGCGAGGCGGTTCAATACCGTTGGTCTGTAGATACTGAGA  
AGACGACTCACAAGGCATCAGCGCCGACCGTGTACTGTTACGATGGCCATGTTTTTTCAG  
GTCTTCGCGCAGTTCTCCCAATCCATCTCATAACCGCATCCACCAGTTCATCTACTGT  
CATTTTGTACCAGTCGATAGGAAGTTCACCGCGACCATAGCGTGTTCGTGCATCAGTTC  
GCAAGCACCTTCTCTTTAGCCAGTCGCACGCTAGCCTTAATCAGAGCATATTGCAAGCG  
TTCAAACGTTTTATGCGTAAACTCGTTAGCGTCTTCATATGTGAAGAAATTATCTGCTAG  
ATATGAGGCAAAGTTAGACGCACCAACACCCAGAGAGCGACGTTTTTTGGCTGTCAGCGC  
TTGTTCTACAGGATAAACCTGATAATCTCGCAGGTTGTCAAGAGCACGCACCATATCCAG  
AGCAATGCGTTCTACTTCGGCCATATTTTCGATATCGAAATTACCTAAAACATATGCTGC  
CAAAGTACATAGGCTAACTTCTGAATCATCACGACCCATCGGTCTTGTAGGCAGAGCAAT  
TTCACAACACAGGTTAGATTGTTAATCGGCGCTCTATTACGAATAAAGGCCCCCGTGATT  
GTTTCATGTTGTCTATGAACGTTGGGTAGATTCAACCAGTGTAAAACGTTCAATTGCCAC  
CGTAAAAACATGTCTTCAGCGTTAACACGAGTTTTACGAACACTCGGGTCTTTTTCCAG  
TTTTTCGCAAAGCTGGCGGAAACCTTCCCTCGTCTCGGGAGTAGAGATCCCAACAAGCC  
ACCCGCAACATCTGGACTAAACAGAGTAATGTAATCCCTTTTAAAGGAATCGCTCTACCAT  
CAGGTTATTAATCTGTACGCCGAAATCTAGATGACGTATGCGGTTATCTTCCACCCCTT  
ATTGTTCTTTAACACAATCAGACTTTCAAACCTCTAAATACCATATTGGGTAATAGAGAGT  
CCCCGCCACGCCACGAATGCCGCCTTGTGAGCATGACTTAACGGCCGTCTGAAAATGTTT  
CCAGAATAGGATAACGCCAATATGACGAACTTCCCATGCCAATCTTAGATCCTTCCGG  
GCGAATCATGCCAGCGTCGATACCGATACCGACGCTTGCTAGTATACTTGATGATTGC  
ATTTGCTGTTTCGTTGATGCCCTGCAATGAGTCATCACTTTCGATCACCACACACGAACT  
AAATTGGCGTGTGGGGTACGCACACCTACCATACTCGCAGTAGGTAGAGAGATTTGCTT  
ATTCGCAACAGCATTATAAAAATCAATCACATTTTCAAGTCGATTTTCTGTCTCTTCTTG  
AGGCAATCACATACCGATCAGCATATACGCAAATTGTGGTGTTCGATGATTTTCTTAGT  
GCTGCGATCCTGTACAAGATATTTCTATTTTACTGCATCGCACCAGCATTGGTCATTTT  
AAAATCAAGTTTATGGTCGATGAATTTCTCCAGATATTCCACTTCTTCATGGGAATACTT  
TTGCATAATTTTCGCGATCATATTTTCCGGTTGCAATATTACGCTCAATATGGCTGTAAAA  
ATCAATCGGTTGGAACCTACCGTATAGTGATTTGCGAAGCGCGAACATTGCAAGGTTACT  
TGCTACATATTGATAATCGGGTGTCTTCTATAGTGATGTTATCTGCTGCGACCTTAATCAA  
TTCTTTCTGGATATCATTGGTGGACATACCTTCTGTCAGAATTGGTTCAACCATATCAAA  
CAATTTATATGGATCAACGTTATGACCTTCGGCTGCCGCTTCCAGAATTTTCATTACTTT  
TTCTTTTTCAAACGGAACAGTCAGACCGGAAGACTTAACAACATTTTAAATCATATTACC  
TCACTTTAAATTTTAGCAGGAACAAGTTTATCCTCCATATTGGGGGCCTTCGCCCCCTTT  
GTTATACTGCCATTTGAGCGGTGATCGCTGGATGGCTTTGATAGTTGTGAATTTCAAAT  
CTTTCGGAGTCTTTGTCAATACCTCATCTAAAGATTTAAAATCCGGCTACTCAATTATTG  
GTTTAGCAAACGGAACACGGCTTAACTGGTCCATAACTTGATCAAATGGTTTTTGTAAA  
TGTGGCAATCCCCACACTGATAAATCAGTTCGCCAACTTCTAATCCGCAAATCTTCGCGA

TGATATACGTTATCAGTGCATAGCTCGCTACGTTGAACGGATTCCCTAAAAAGGGATCAT  
CCGAACGCATGAAAAATAAACAACCTCAATTTGTTGTCGTTGGAAACATAAAACTGTACAA  
TCCGATGACATACACCTAACACAGCATTATGCGTTTCCTGTACGTTCCATGAATCAATGA  
ACATTCGACGACCATATGGGTCATTCTTGATCATGTCACCTAACTTTTTGTAACCTGGTCC  
CCCAAATCTTCGGGCGATAGACATATTCTTCATCGTCTTTAGTGCTTGATGTGTCTGCGT  
CCATACTAACAAACATCGTGGTATCAGGTGCTATAATTTCCCCACCCAGATAATCACTAT  
CAAGCAGATAACCGAATTCACCATCATCTACCCATTCTGCAATCCCCGCTAGCAATATG  
CATCATTAAACAAAATTAGATTGAGTCTTCCAGTGGTCTGCTCCCAGAATATAATCAAACC  
CTTCATAACGCATACCACGCCAGATAGCACATAAACGGTCTTCTGTTTCATTGGTTGGTG  
TAAAGTATTCTACCCACGGGTGCTTAAATGTATGTGTATATTTGCTCTTTACGCGCTTAA  
TTTTGATTTACCGTGTGGATAAATCGGTTTTTCGTCGCCATGCCATGCTATACATATTAC  
CGACATTATAATCATTGAATCGCAAGGGATTCTTTTCTTTCATATCAGGACAGTTGCCGA  
GCCAAATATCAAAGGCTTCCTCGTCAAACCTTGCCGCGTGTAATTTCCCGTAAGCGACGGC  
GGTCAAGTGATCGCTCCATAAACCATAGCAATTCGCCAATTACAGAGGCTGTAGCCACCT  
TTTTTGTTGGTCAGTAAGGGGAACCCCTTGCTTAAATCAATTCGCATTTCTGCATCGAATT  
TAGAGAGCGTACCTACCCAGTTCGGTCTTCACGATGCCAGCCATTTTCAAGAACATCAC  
GCAATAGTTTCAAATATTCTTACATCCCACACCACCTTTTTCTTAGTGATTGCTTTCTTA  
CGCAGTTTTGCTACTGTCTCGTCAATGCCTATAAAGATAACACCACGGTCCGAATAGAGTT  
GCAGGTCTTGAGATATCGCTATTTTCTTGACAGTAAGCCACGATGCGCTCGCTTCATCA  
TAGAGATATTGTAAACTGTAATTATCTACGGCGACTGCCTTGTTTTACTAGGAGCCGTC  
CATAATTGAATAATACCGACTTTCATTATTGTTCCCGTCCACAATGTAAACACCGACTAC  
CAGCAAACATCCAAGATTCAGCACAAATGTTTTCACTCATAATCTGTCAGGATTTTCCAGT  
TACGCCTTCTTACGTTCTAAAATGTGTTTCGCTGATCAGGTAATCATCAAGGAAGTAATTA  
TGTGCTTCTTTTGTGCAAAAATCAAAAATATAATTCCTGAATGATTTCTTAGAGATACCA  
ACATCATATTCGAACGGATCATTAAATTCCTGCTCGTTGAACATATGTAAACACAATACGG  
TCCGCAAAGTGCACCGCTTTTTCAATCAGGGAAGGTCCACCAATAACGCTTACCAAACCT  
TGCAATTTCTCTATGACTTCTACTAATTCCTTAAGCCCACCATCATTAGTAATCGCGGTA  
TACACATCTGGTTGGTCGCCGTTACTTGCTTTCGGTGTGGCTTACTGGTATCGGTGCTA  
AGAACCACATTCACGCGACCTTCCAGTGCTTTAGGAAGACTTTCAAAGGTATTACGTCCC  
ATTACCTCCGCCGCAAATCAACATCTCCCATAGTGCGCATTTTAAAGTTTTCCATGTCC  
TTTTTGATTGGACGACCCACGCTAAACCGCCTTTAAAACCAAAGGCCAATTTTCATCT  
GACATGTTAGTGTCACCAATCTCAAATACACATTGAATCATAGTATTAATCTCCTATCAA  
ACCAGCTTGAGATAGTTTTCGTTAATGTTTTCTTCTGTGATGTCGGTTTTAAACTTAATA  
CCAACATCAGGAGAAACATAATAGCGTTCGGAATATTCACGCCACATTTACAGTAGGCTG  
ACACCAACATTAACACCATTTTCCCAGAAACGGAACATAATTTTATTTGCGGTGTGGCGG  
TAATGGCTTTGAATCAAACCTGCCATCACGGCGACGTGGTTCATAAACCGTAATACAGTCT  
CGGTTAGCGGCTTTAAGACATTCTTCAATAGTGCCGCATGAGATAATTTTCGTTTGAGTCG  
TTTACGATTTGTTCTACAGTCCAGATAATATAATCCTCTCTTTGTTTCGATGTGTGTATT  
ATACAGTACCACACAAGCATGTCAAACCTTTTTTCATAAACTTTTAGGCAATAAAAAAGC  
CCCCCGAAGGAAGGCTTTAAAATTACATCCCTAACAGAGCGTCAAGATCATCCAG  
ATCAGAAGCGGAGGAAGTACCGCCATCCAGATCCTGCGATGCCATCAGGACAACAGCGGA  
AGAATCTAACGCCGTGCTAGCTGCGTTAATACCAACTACAGTGCTAGCTGCGTTAATACC  
AGCATCGAATGGATTCAGCTGTGCGTCAAAAACGTCAAGCTGGCTTTAATCGGTGCCGC  
AGCACTGGAAGCCGACGACCAGCTACCATAGAAACGCCCATAGTTTTCTTAAATTTGGT  
TTCCCGTTCATCGAACGGTATAAACTGGATAGGCGCAACAATCTCACTCAGGTCAACCAT  
GTTTTCCATCAGATATTTCTGATATGCTTCGTTCAATTTTCGAACGCTGTGATTGCTG  
CATGAAACTAGAAGCATCATAGTTCTGGTGTATAAACCCTGCTTAGCTTTCAAGCGGAA  
GTTAGCACCGGAGAACACACAAGTTACATCTACCGGAACCTTCGTCCATATCGGTATTCAC  
GTTACCATTTGCAACGATCTTATCATAAAATTTTCTGACCGAAGCGGAATTTGAGTACCTT  
ACCTTCATTTTCTGGTGCTTTAGGATCTTTCAGTACCAGAATATTTGCGTAATAAGAGGC  
TTTACGCTTAATCAGTTGACGTTTCGGTTTTATCGGTATTATACAGATCTTTTTTCGTTAAT  
ATATTTGCACACAGGGCAAGAATCAAATCACCGTGGGTGCTGGAGCAGTTTTACAATA  
CCATTTGCCATTAACCTTTGAAGGAATGGATTACCAGTTTACAATCGGCAGACCGTCTTC  
TGTCATAGACGGCAGGAAGCGAATCAGGGCTTACCGTTACCGGCTGCATCAGTCTTAAT  
CTTCCACTCTTTCGGATCTTCTTGGAGAAACCGTTGCCACCTTTCAGTGCGGCCAGTTG  
GGCTTGACAGATTGGAGGAATCTTGGCGTTTAAACATATTCATAATTCCTTCTTTTGATTA  
ATTTACTAGACTATTATACAGAATTATAATTTACTTGTCAACTATTTGTTTCAGTATTTAA

TGGGGATATTTCTTTACTCTTTAACTACTTTAATAAATAATGCTCTTGCTTTTGC GGC  
GTCAATAACAAGTAGTTTCTTGCACGCCTGCATTTTAACTATAAGTTTTCCAAATCAA  
GTCTTTGGCTACCTTGTCTGTTTCGACGGTTATATTTAGAAAGCTATCTAACAAATAAA  
CGACTCAAACGATATAATCCGATTTTGCAGTAGTTTAAAGATACCGTAGTTTTCGGTTGC  
GGGATTGTATGTAATTAGCATTTTAAGAGTAACCCCGCTTTCTCGGAGAAGTATAACCAG  
ACTTTTAATGTCATCGTCAAATCGTGTGCTGCATCGGTTATCTTTCCTATGTATTCCGT  
ATAAAAGCCGTAAGCGTCAACATCAGTGATTTACCTACCCATGCATAGGTATTAGCTAC  
CAGATTGCTTAGGAATAGGAAGTATAATTCTCTTAGATGGTACTTTTCCGCTAATTTTGC  
GAAATAACGTATCTCTGCGTTTATTGCATGCGGCATCAGACAACCGCATCCTCTAATT  
GTATTTTACGGAATCATAACGTCCGTTTCATGTGAGTTTTCTCATGCAATATAACATATA  
CACAGATTTAGCATTAAATTCGCATATCTGGATCTGGAGGAAGACGGTTTCTGATCATA  
TACCCCTTAAATATCGAGAGTGCTGGTCCGTTTCGTCGATCACTCCCTTCTGAGCGTTCT  
ATTTACTATAACATTCTTGAGTGATCTTGTCATAATGGACATCGGAATATACATCTGATA  
GTGACCATATTCGATAGAGTTTTCTCTTCAATCTGCGTTGTGCTTCAAGAGAAGACAA  
ACTTTCTTCAACAACCAGTTTTTTCGATTGCAAGACCGTTTGTGTTTTGTTTCGCGGTTTT  
TACCGCATGTTTCATTAAGCATTGAACACCCGATAAATAGCGTTCTACCGCTTCGTCGCGTT  
CTGCTTCGAACGTTTTTCGCGCGGTTGCTGGTGATACAGTTTAAACAGAATGCCCCACATT  
TACCATCGACGCCTAATTCTTCTTTCGCACGCTGTTTGATCTCTTTGATCTTATCGCCGA  
ATGCTTCTGAATGGTTTTCTGATCGCCGGCTTCTTTAATGAGTTGTGCCAGGGTATTTCC  
CGTGCACACTTTCGTCAAATACTACTTTTTCTTTTTCTGTTTCAGTGAAAATATTAACCC  
TCTTTCGTCATTAATTGAACACCACGTTTCAGCTTTTGAAATTCGCTAGGACTTAAATCG  
TCACCAACATATTCTAGCATCATATCTCGGAGAATGTCTAGTGCTTTTTTCATCACCTGAT  
TTTAACTCGAACTCAAGTTCATTGTGAGCCTCTCCCAACCTTTCGCCGACTTTGCAATAA  
TAGAAAGTGTCTTTGCACATTTCCACTATAGCACCTCAAGGTCAAGTGTCAATGACTTG  
CGGTATGTCATTACTTGAATAAAGGAACGATAAGGTCCGAGTTTACGCCGAGACTATCA  
ACATAATCATAGAAATCATAACATTGTTGAAAAAGTGATTTCTTCTCGGTTGAATAGTCCA  
GATTCACTAACACCTATTTTGACCATAATCAATGATCTATTAACGTCAAGTCGAGCATAA  
ATTTCTTTTCTACGCATTCCATGATCTTCGGTAGCATAATAAAATTCGTGTTTTAGCGTG  
TTAGCACGATCTACTAGAGTGTTCGGTCATACATTGCTACCCACAAATCTCAGTTTGT  
TCGACGCCAATTTGTGAGTGTGCATAGTATCTTAATTCAAGTTATTTTAAATGTCAACCC  
TTAGAATTCACTAACTTTCTGCAACATTTTAACTAACGCATTGGTTACAAAATAGTTATA  
AATTTTACCGCGTGGTGCTGGTTTTGATTTCTCCCATGCTAATAAAATTTTCATATTCGAT  
GTTATCAGGAATAAATTCAAAATCAATAAGTTCGCGGTTCTCGTCAGAGCGTAGTGCTTC  
TTCCTCTGTCATCAAAGACTTTGGATCTTCGGCATCTAAAATTTGCTCTATCCATTTGGT  
TGCAATTGGTTTAGCTCGTTCCCTTCCAGTCGTGAGATAATGAAATCACTAGGGCACTT  
GATAGGAGCTACATCGTCTTTGAGTCACCCTTAAACACATTTTACCATAAAGGTCATTGTA  
AGGGCTAGCATAATTTGCATTTCTTCTTGTCTTCTGTACTGGCGCCACTGTTTCACGTT  
TTTGTATTTGTGCAACTGTGTGTAGTACCATCGCCGGAGTAGATTAGCACCTGGCGACC  
TTCTACAGAAAATTTTTAGTTAACACAGCGATTGTATCATCTGTTTCGACTTTGGCAAC  
CTTAATAACGTGATAAAGGCATGTGCTCTTTAATCTCTTCGGTGATCTTATTGATCGCCGC  
AAAGATCATCTCCCAATCATGTGGATCTGCGTCTCGTTTTTCTTACGGTTGCGTTTTATA  
GTAAGGGGCGATATCACGTGCCAGTAACCTTACTTGAATCAAAGGCAAGTACCGTAAT  
TGGGTATTGCTCTTTGAATTTTGTATATTATAACGCATGGTCTCAAGGATAAGATGACG  
AATCAAGCCTTAATTAATAGGACCTTCCGGTTTAAAGGTATGCGAGATAGTAGCAATCAT  
AAGCTGCGACACATCAATCAAATGCACACCTTCCGGCAGTTTATCATCTGGATCATCGAA  
GAAGTCATTAAGTGTAGCGGTAGTTTTTGTCAACGGGTTATACGTCATAATTAAGTTCAC  
TCCACTCTCACAACAACATATTTGCCAAACGAGTTAGATACTTCGCTATCATAACCCGTAT  
TTCTCCATAACTCGCAGAATTGCATTGTTTAAATTCGGCACGGAAATAATTATAATCCTTA  
TCAGGGATTCTGTCAACTATCCACTTTGCACCTTCAGACGAATCAACTTTAACCATAATA  
TATCATCCTCTTTTGTCTTATCAATCCTCATTTFATAAATATGAACATAACCATAAAAGG  
AGACCCACTAATGGCAGATTTTCTTCAACATTTCAAGGCCACATTTGGCTTTGACGCTGG  
TAATGAAAAGGTCCTCAATGTAGCATAACGAGATTTAAACACATCAACGAATGCGGTCAA  
CGTTGAATTTTTCAATTACCATAATGGTATTACTCAGTATGACACAACCTCGCGGTTATGA  
TCAATACGGAACATAATCGATCAAACCCGTCGGTATTATGCAAAAAGAAGATATCACAAT  
GCCAGCAGGTGATTTTGACCCGACTAAATGGCAAGCACTGCGCACGGACCCACGTTGGGA  
TTATATTGCAGCAACTTCCAGTGATACTCCTTTAAAGTCTGGTGATTATATCGCAGCAGA  
TGGTCAATTTGTAAACTTGACATTCTCTATGCCAACTATCCAGCAGAGGGAGACTAT

AACAGTAAAAGATATCGGTGGCATGTGTGGTGTAAACGACTTATCGTTCTTGATTTTCATG  
ACATGAGTTTTACTATAACGGCAATGTGTACAACCGAAAATGGTATTGCGCTACCCCGTA  
TGCAATGAACTATTTTCATCTTTGTTTCGGAATCGTTGGCATGTTTATCATAACGGGAACAGA  
GCCGCGCGGTGTATACGCACAGCCAGCGATTGATGCTATTCAAATGCGGAATGGTGATCA  
GGTATTTTCGTCGTAAGTTTCGTTGGGTAGTATTACCTTAGTGCTTCCTAAGTTTGCCAACAA  
TGGCGACTTGATCCAGACTACTGACCTTGACGGATTAACCGCAACCAACCACGTTACGGT  
TAAAGGTCATGCGCACGCAGAAGAACAATCAATTGGCACGTTTCGGTCTAAAAGAGATTAT  
CCGTAAGCGTAGCGGTTCATGTTGTATTTCATCTTTGACAAGACGGAAAAATTATGGCGTTT  
GTGGGATGGTGATCAGGCTGTTTCGTTTAAACCGATCATCGATGGTACTCGCTTGCGACC  
TAATAGATATGTTGCTGTATTTGGTGGTTCGTGATGGTACTCTGACGCTCCCGACCAATGT  
CGAGCCGGGTGATCGTATTCAAGTTTCTATGCAGTATATGCAAGGAAACCAGAATTGCTG  
TATTATCACCGCCACAGAGGGTACAAAGATCCTTATGCAGAAAAACATGGTTCAGTTTCC  
TAAGCGTAGCGAGTACCCATTCAATGGGACTGATACATTGTTCGCGAGTCTCTGAATTGTC  
TTTCAACGCTGCAAATGATTATGTACCTTATTTGGAATTCTCTTATTTCAGAAGGTGATGA  
TGGTAAGAAATACTGGTTGGTGGCACATGCTCCCCCGATTGTAGAACGTGTAGATCCGAC  
TCGTAAAGATCGTGTGGTGTAAATTGCACTGGCTGCCCAAACGAAACGAATAAAAACCA  
TGAAGAGAATCTTACCGACGAAGTTGCAGTAACACCAAAAATGTTGGCTAATAATACCGC  
CAACGAAACTCGACGCGGTATTGCTCGCATTGCGACTCAAGCGGAAACGCATCAAGATAC  
TGTTTCCAACCTTCTGGATGATGTTATCGATACGCCTAAAAAGTTAAATGACTGTGTTCC  
TACATAAGCCCGTCGTGGTGTGATGGAAATTGCAACCCAGCACGAAACCAATGAAGTTTT  
AGACGATACCCGCGCTATTACTCCTAAGAAATTAGAAGAACGTCGCGCTTCCGAAGATCT  
CGCTGGTATTGCTGAAAGTGGTTCAGGCTGGCGGCAGTGCGGCCGCTCGACGTGGCGAAGC  
TGGTACAGGGATCTATAACATCAATGACCATGCTAAAATTGTTACGTCTAAAAACATCAA  
CGAAGTCAAGGCGACCGAACCTTCCCGTGGTGTGGCTATCTGGCAACTGACGCGGATGT  
GCAAGGGGCTACAGAATCAACCCCGCAAGATGCTTTACTCATCACGACTCGCACGCTAAC  
GGAACGTACTGCTACCGAATCGCGCACTGGTATCGTTGAAACTGCAACTCAGGAAGAAAC  
AAACTAAGGTCAAAGTGATAACGATATCATCACGCCTAAAAAGTTGCATACTCGCCGCGC  
AACGGATACTTTACACGGTTTAGCCGACATCGCAACTCAGCCGGAATTTGACGCAGGTCT  
TAACGATGCTCGCATTTCTACCCATTGAAGATTAACCTTCTGTGAGCATGCACAGCG  
TTTGAAAGTTCGATCCGACTCTGGGGCTTAACCCTACTGGTGATTTGTGGCAAGGTATCAC  
GATTCGCGGTTTGGATGCAACCGAAGATACAAAAGGCGTCGCTTAAGTTGCTACTACTCA  
GCTTACGGATGCTGGTCAAGATGATACTACAATCATCACGCCTAAAAAGCTGCAAGCCAA  
AAAGGCCACCGAAGGTAAAGAAGGTATTATCCGAGTTGGTACTCAAGCCGAAACCGTGGC  
TGGTGCCTGACTAATGTAGCAATGTCTCCGACGAACTTCAAATATGATGTTTCAGACAGA  
GGATACACGGAAAGCAACCGAAGCGCGTCGTGGTTTCTTGAAAGTTGCTGATCAGGAAAA  
CTGTTTTGTTGGTGATACTCTGCAAGTTCTACTCAAGAACTAGGAAACTACCAGCATGA  
AGGAATTGCTGTTACCCCTAAAGGACTGAACTACGTACTTGCTAATTTCTTACCTAAGAT  
GGCAACCGCTCAGAATAGTTTCGAATTGGGTAAACGTAGAGGCCGCTAAATGGGCGCGTAG  
AGACATTGACCAGACCATAGAGAGCAATTACACGTTTAAATAAAAACGTTAACGTGAAGGG  
CGATTTAGAGTGCTTAAAATCAGGTTTCTTTGAAACTCTGTCTGTGACTAAGAAATCAAC  
CGACGATCCGAGTAATGGTTCATCTGGTGTGGGTGAGCGTGGAGTTGACGGTACACCCGG  
AATTACTCTGCATGGCACAACCGCATCGGAAGGAATGAAAAACTCGTGGTCTATTATCGT  
GGGTGGGACTGGAACAGCGCAAGATGTTGATAGTGATGCTATCGCTTTCGGCAAAATCAA  
TGATGGTGGAGGCGTCTAGCATTACGCCTTTGCTATGGAACACAATGGCGACGCGACAGC  
ATATAAAGACTTTATTGCAGGTCGTAACCTGTATGCGAAACAAGGCGGTTTATACATCGT  
TGACCAGTCTAATCCGTCAATGACTAGTTCCCCAGATGCTATGCCGAATATCGGTCACGG  
TGGAAGTGTTAACATCAAAGCAGGTCATCAAACGTTAACTACAGAGATCGCCGGACAGAA  
ATATCAGATCGTACACGCAGGAGACGCTGATGAAGTTCTTAAACCGCCCGTTTGTAAAGAA  
TGCTGGCGATAACAATGGTTCGGTAAGCTGACTATGGATAATGCGCCTATTGGTTCTGTAA  
GCATGAAGCTAGCGCGGCAACCGCTCCGGCAATCAGCGACATCGGTTTCTGGAATATGCG  
CGTACTACTCAGAACATCAAAGAACTTATCCAGAGAAGAAAAACGGTACTCTGATGCA  
ATGGGGTACTGACGCGGACGGGCTTACCCAGCTTTGGTCCCCAGATGGTACTCATAAACT  
TTATATCCGTTCCGGTACTGGTGGTCCATGGACCGCATGGGGTGAAATTTATACCATA  
GAATAAGCCTACCGCTCAGGAAATCGGGGCAGTAGTTGCAGAAGGTGGTTTAAATGAACTC  
TATGACGGTGCAGACTGGATCAAAGTTGGTAATGTTTAAATCATCGCCAATAATCTGAC  
TCGTACCGTAGACTTTATCTGGGAAGACTAATTAAGGGGGCGAAGCCCCCTATGGGGT  
TATTATGACACAAGATATAGAACTACGCAACACTGGAATGAGGTTTGCGCATTTTCGACGA

AGACTCTGCGACCTTTACCAGCATTTCAGAAAATAACTCTGTGATGTATAAGCTGGAAGT  
GCGCGGATCTAATGCGGATTCGACCAAACCAGCAAGGGTTAGATTTAATGGAGTGGAGAT  
CGTTGGCACTGGCTATGAAAATGGCCTAAGTTTTAAGGTTCTTACTCCAACCTGGACAAC  
ACACGAAGAAAAGGTGTTCTATGGTCGCGGTGCTGTTTTGGCAATGCGTGATTATCTTGA  
TTTGCTGAAAGGTGACTATATCATTGCGATGGCAACACATTGAGAATTGTTTGCACATCC  
GATAAGTGATGATATATTTTCTAAGCTGGGATCTGTATCATTCCCGAATCACATTTTGT  
TCAGCAAATGCCTCGTGTATCCTATTCAGCAATTTATTCTACTAAAATTGGTAAAATTGT  
GTGCGAAGGGATGCAAGCAACGCACGGAGAAGGTCAAGATTCGTCTATACAAATTGAAAA  
AGTTTATGATACTATAGACGATCTTGCGATAACAGGAACACCACAACGATTTTTAGATTA  
TCCGGTTGAATATGTTAGTGAAGATGCCGCACTTTTAGAGCTAATACAATGGCCTCAAGA  
TGAGATCAGCGCACGCCTTGAATATCTTAGCATAAAGGCAGGGGACAACTATCAATATC  
CTTTGAATTGTTCCATGATAGTGCCGCAGCCGCAGCCAACGTAACAGCGCGTTTCTATCA  
CAACTACTTCAATGGTGGACGATATCAAACCTAGCGTTCGTTATAATACCAGCCAGAAGGA  
TCAATGGGAAAAGTTTGAAGCCGTCTATACCGTACTGGGATGAATTGCTAGTGTTACCAC  
TGGTTGTATCAGATATCCAACCAACTCAAATGAAGGTATTGTTAAAACCTAGAAACATACT  
AATAACGCCGATCAGCGGAGTCGTCAAACCTACTGGTCCGACTTCATTTGGTGTAAATGG  
TGTTAAAAAACTCATATTCAGGATAACGGTGATTTTACTAACCCGTGAATGAGTATTCT  
TAACTGCCTAGAGTTAATAAACACAACACATCCAACAACCTTAAAGAGTTCGATGTTGA  
TTAACATTTTTAACAAGCCGATCCTCGTGGTCCGCTTTATTTTTATACACTTGGTTAAAA  
CATAACCGAAACGAAGAAAGACCTTTAGAATAATAGAAAAGTTGTTTCGGTTAAAAAATA  
GTCAGTGCCTCCGGCACGTCGCTAAGCGATATTTTGTTAACATTCTATAAAACTCGGAA  
CTATAACTAATTTTTGAGGGTGCTTTATGGCAGATTTGAAACATGGATCTACTGTAGGCG  
GATCTCCCATTTGGACGCAAGGAACTTGTCGAGCCAGCCAGCGGGGGAACAGCTTTTCT  
ACAAAGGTCATAAAATCTATACCGCTTTTGATACACCTTCGCCTGCCGATTTTGATGCTG  
TTAGTGCTAACGACGGAGGCACCTTTCATAAGCAGGTCCATTTTGAGGAAGGTGAAGCG  
TAGGTAGCGCATCGGCTGGAGAAACCAAAAAGAACGGGATCTTTAAAGGAAATAGATATG  
CGGCCACTTTGATGGTGTATGTTGGGGTTTGCATTCGTGGAAATCTATTGGTTTTGTTA  
ATGCCCGTGATGGCGTTATCATGGCTTATATTGACACAACCACGGGTGATCTTAAAAC  
AAGGGACTATCGAAGGGACAACCATTAAGACACAGGTCAACGCGTCTATAGCCCTGTTA  
ATAAACCAACGAATAATGATTTAGATTTGATATCTCGTCCGCGGTGATACCCACAAAGGAA  
CATATAATTTAAACACTGTCACTGTAAACTATCGGTTGATTCGAAATTAATTGCAAGGT  
AACGTGATTTAAGTAATTTTGATGCGACTAAGATCTATTATGGTTGCGTTCCTTGATACGT  
TGGTCTTCCGAAGTAAAGATGAGCCTGCCATTTTTGTTAATGGCTTAGAAGGTGTTTTT  
ATCACGCCAACATAACCCAACTAAAGCCGATGTTGGGCTAGCCAATGTCACCAATGACG  
CACAGGTTAAACGTGCTGGTGATATTATTGAAGGTAACCTGCAAGCGCCTAGAATGTTGG  
CAACAAACGATCCGGATGGTCCTAATGAATTGGTTCGTTGAGCTACTTTGAGAGAAAAT  
CAATGGTAGCAAATCCAACCATCTTTGGCAACGGTGTGGAACTCTTATTGATAGCG  
GCATCTATCGTGTGAAAATGCTGGGTCAGGTAATAAACCGTCTGATAGGTATTATA  
ACGGTGTTTTGATGGTATATCGCCCAGAAGATGCGGTCCGTTACTCGTCGAAGTGTTCAAG  
TGTATTATCCCGAATCTATTGACCATCCGATGTGCTGGCGTTCGTGTTCTGGTGAATCAT  
GGACTGCATGGAACCTATGTAGATCACCGTAAATTAGCCGATATTCGCTATGTTAACGTAA  
CTGGCGATACCACGACAGGACCGTTAACTGTTCCGGCTGCAAACGGTGTAGAACAGCTA  
GAGGTGCACATAATGGTGATAACTACTATGCTGCGTTAATAGTGCCGATGGCACGACCA  
TGATTCACCGTATCAGCGATATTAAGCCACTGAAAAATTGGGTATTTACATGATTCGA  
AAGCTGTTTTCGTTAACTCGCGTGGAATACTAAAGCCACAGACCGCTATAAACTTTACC  
ACGAAGGGCATCAACCTACCCCTGCCGAAGTTGGCGCGGTTCCACGTAATGCGGTGATTG  
ATTTTGGTACTTTCTAATTTTAGCGGGGATTATCTCCCCGCCTTTCTAAATAATATTATT  
CTAATAACCGGTTAGGGATTTTATAAAATGGCAGATTTAAACAGAATCCAATTTAAACGT  
ACTAGCACGAAAGGTTGTAAACCTGATGCTACTACAATGACGCAAGGTGAACTTGCTATC  
AACCTGCATGATTATTATTAGTTTACAAAAAATGACTCTGGTTCTATTATTTACTTAAGC  
CGTCCTCCGATCTATGACAGCGATGTTACCATGGCTGGTAAAGTAAAGGGAGATTTTTAC  
ATTTTAGGTAACCGCCAATTATCATGAAGCGCAGACAGCGGGAGACCTTAACCGCTTT  
GGATCATTCCGTACCAACGGTCTAGATGGATTTTTAGATTTGACCTTGCATGTTCTCAT  
TCTGCTGGCGTTCAAATGGTTCGAGGATTTACTTTCCATTATGCGACTGGCGAATCTCGT  
GTTGAAACATATGGGTATAATACACAGGGACAAAAGCATTAGCTAGAAAATGTATCAT  
GAAGGTGATAAACCAACTCCAAGAGAGCTGAACGTTTCATAGCAAACAAGAAGTAGATAAA  
ATATGTGTTAAAAACGTTATACTTTCTACAGGTTCTGGTGATATCGTTGACGGGTATTT

AAATTAGCGACTGCGATGATTCCACAAGACGGTCGTAGTGTATTTTTCCGCATTCGTTGT  
GGTAACGGATATAACATTACTCCATACGATCAAGTTGATATTGTAAAAATTGTTATTCGC  
AGTGGAAATAATCGTCCTAAAGGTGTTAACGTTATTGCATACCGCCGAAATACAAACAAA  
GCATTTGATGTTTTGGCTGTTAATACTTCTGGTGATAACTATCATATCTACGTGAAGTAT  
CAGCGTTACACTTATAACGTTATTGTTGAATTTGGTAAAAATCGTGACGTTAATCTGGTA  
GTCCATGACGTTCCAGACTTTGTTGTTGATCGTCCTGTTGGCGATAATGTTATTGGGGGT  
CGCGCGGTAACCTTTTTCAACACCGAAAACAAACGAGGTGTGTTGAGTTTTGACGACAAT  
ACACAAAACAGCTATGATATTGTTACATGAGTAATGATAAAGCTACTGGAAGAAAATAT  
ATTCGTAAATTCCGTAGTAACTATAATGAAATGATCTGGCATGAGACGGTTCAAGGTAAC  
GTATATCGTTTAGCTGCTGGAACCTACCGACGCAAACGAAGTTCTCAAATTACCTACCGC  
ACGTTGCAAACCTGGCAATGCGGTTTTTGACGGTGGTAATAATAACGTTTCGTTTACAGCGT  
AAACCCGGAAAAATTAATCTGGAATATTATGATGCCCGTGACGGAGCAAATAAACGT  
CAGGGATATATTGCGTATGGCGATGCCACAACCTAACAGTTGTCAATTTTTAACGAACGC  
TCCGAAGGTAATAACCCGATTTTCTTTAACGAGACAGGTCAAATTTCACTTAACGTAGGA  
AAGACAAAATTGTTTCATAGCATGGGACAATATATTACTACCAACGCCGATAACTATCGC  
ATAATTTATGGTAAGTATGGAACATTCTGACGAAATGATAGCGTTAAACGTTATCTCATG  
TCCACTGCCGAAAATGATAAATGGGGTACTTGGAAATAGCTATCGACCATTCAATTTACAAC  
CTAACAGCGGGCGATGTTCAATTAGGTGGTGTAGGTAAGCATTCTGCATTAACGTTAGAA  
TGTGCTTCTCGTGCCGCTCGCTTTAGTAATGACGTTTACATTAATAAAGGGCTTTTGACT  
TTCGACGCTGGGCGATTAGGATCTCGCGATTATATTAGATTTAACCATTTGGGGCGATAGC  
ACTAACGGTCCGAAAACATCCTACAGAGTCAAGACAGTCAGGACGCACATCTTACCACT  
GTACGTGCTATGGGTACTGGGAACATAATAGCACGTTTTAAAGGCTTTGTTTCGTGTTGAC  
TCTGGTGTAGATTGCATTTGATGCTAATCGGGGGTCCGAGTCTCAATTTACCTTACACACA  
TGGGGTAACGAGCAAAGCAAACACGTTTTTTGAATGTAAGGATGCTACAAGTTATACCTGG  
TATACAGAATGTACTCAGGGTGGCACTGGACCTATTCTGTTTCGTTATGGCGGGTAGTCTA  
AACGTTGGTAGCAATATCACACCAACTGGTCCGGATATTACGTTTTAACGCGCTGGCAAT  
AAACACATCTGGTTTAGAGATCCAAACGGCTTAGAGTTAGGCCTCATGTACTGCGATGAT  
GCTGGTGTATTTCGCTGCCGTGGTTCAGAAACAAGCCAGGCGTGGAAATTTGCAGATAAA  
ATGATCCAGTTGGAACTGGCTCTGTATCCGGTGGCGGTGATGGCCTGATTCGTGGTGAG  
GTTGCTAGCGGTAGTTGGGCTAGCTGGCGTGATCGTGCTGCTGGCCTTATGGTTGGGTCT  
CCTCAATCAACCAATTCCGCTCATAACATCTGGAAAGCTACTCATTGGGTACGATATCAC  
AGTGCAGCAATGGGTGTACATGTTCCAAACGTTTCTATCGGTGATGCTATAGCTCGCCTA  
AACGTTTCATGACGCCAACTTTGACTTTAGCGCCTCCGGTGGCATGTCGGCAGGGCGTAAC  
GGTTCGTTTAAACGATGTTTGTATTTCGTTCTGATGCTCGCCTTAAAATCAATAAGGAAGAG  
TATAAGGAGAATGCCACTGGTAAAGTTAATCGCTTGACTGTGTACACCTACGATAAGGTT  
AAATTTTTAACTGACCGTAGTGTTATCGCCAATGAAGTTGCTATTATTGCTCAGGATCTT  
GAGAAAGAATTGCCGGGACCAGTAACAACCTTCTAAGGTCGGCGACCCAGATAAACCCAGAA  
GAGATCTTAAACAATTTCTAACTCTGCTGTCAACGCTCTTTTATTTAAGGCGTTTCAGGAA  
ATGAGCAAAGAAATGAAAGCCGTTAAAGCTGAACTTGCGGAACCTTAAAAGAATTAAGGA  
AACTCCCAGGGAAGGGAACCTACTAAGGAGAAACGGCTATGGTCTATAATATCGTCATTGG  
TGCTTTGTCTAATTTTCGGAGTCAAATTATAGTCAAAGTTAATTAGTGAACAGATGCTCAC  
TAAAATTTTCTTCTATTGCGCTCTTCGTCTTGCGGCTTATACCAATACGCCAATTGATGA  
TCGTTTTGTGGAAGAACATTATAAGGAGTTTAAATAAAGATCAGTCTGAAGATAGTAACGA  
GCAAGATAAACCTAGTGATAGTCAACTACCTAAATAAGAGTACACGGTCATAGTTATCAT  
AGGGCATTATATGAAAGTTTCTGAAAAAGGGAAAGCCTTTGCTATCTCAAACGTCCTGCG  
CGTATTTTCACTAAAGCACGGAGTTGCCCGTACTTCGTGGTTTTGCTGCAGTCGT  
GTTGTCCATAGTGGCATTGTCGTTTATAGTAAAAACGAGATATTTGCGCTCTATAAAGA  
GCCTCGTTATGAGACTTATGCTCACCTTCTCCAGGTAGAGAAAGACCGCAATTTTGATAA  
TGCAGCACAGGAGCAGTTACAGATAGTTCATGTATCGGCTGATGAGGATTTTTCTGCTGT  
TTTTAGTTTTTCGTCCGAAAACCTAAACTATTTTGTGATTTGGTGGCATATGAAGGAAA  
GCTGCCGCATACAATCGATGAAAAGAATTTAGGCGGATTCCCTATCAATAAAACGAGTGA  
AGTATATCGTAGGCATCTTTTAGGTAAATCATATTTTACCGATAAAGATTTCCAGTACAT  
TCCATCAAAGAAAAGAAATTAGAGAGTATCGATATAGGGGTTATGTATTCTTGTCTTAT  
ATTCAATTTTCGACAATGTCTATGCTGGTAGTATCTCCATTGCATGGAAGAAAAACCGGG  
TATTGACATTGAGAATTTAGACTCTCTTTGCAATCAATCTGCCAGAATCCTCGGAAGGAT  
CAGATACCTTACAGGGGAAGGCTTTAGGCCTCCCGTTCTATTTATTGGCGCATAGAAGCC  
CCTGAATCACATTTTGTGCTGTATGATGAAAACAGGTAGCCTACCAGTCATCGGCTTGT

TCGTCTTCGTCAGAAAACGCGTAATTGCGTTGTATACCGCTTTCTACTTTGACCAGTGCA  
ATAGGTCTTTCTGGAAGATCAATCGATCGGGCAAATCACTATCTTCCACTCTACACGA  
GCAATATCATAGCCCATCTCGAAGTATACAATCGCTGGTTCTAATTTGATTCTGGAACT  
TCCCGTAAACATTCTCTGCCAACTTACGTGCATCTTTTACAATATCTTACATGTAATGAC  
TATAATTCTTAGCTAGATCAATGATGCAATCAACAAAGAGGTAATAGCGTCCGAGTGCTT  
CCAGCACAAACATCTTCAAGACGACCCTTTTCTCCAATCGCTGAAATGTGTTGAAATTCCT  
TTAGGATCGCGTCCATCGCTACAATAACTTCTTTTATAGTATCTTTCGTATTATCTGCAC  
CTCGGCTAATCAAATTTTGGTTAGGTCTTCTGCTTTTTCTTGAAAGTTGTCAATTTCAA  
ACTCAATCATAATCACCTCTCATAATTGCACGCAGTTGTTTCAACATTTTTCTGTCGTTT  
GCTAATTCTAAACGTTGTAATAGCATAACCAGTGCAATTTTCATTGATTCATCATCTTTC  
ATAATCAAATTTACCGAAAATATTCTCTGTCATAATTCCTGCTTCGTCGATAATTTTCG  
TCATGTTTCATGGTGTAGTTATGATCATTTAGTGCTTTAATAACAACGAGCAAGGAATCTA  
AAATCACTCGATACAGGGTAAATTTTACGCTATTTGTGAATACCGATGTTCTCTCGACTT  
TATCGATCAGATAGCCTAAAATCGATAGCGCCTCGTTTATTTCCCTTGTTACTTTATCGG  
CGCTAAACAACACCGGATAAATACGCGGTGTGATTAACCGCGCCGCCTCCTTCCATTGCA  
TCGCTTTCCATGACTCATATTTATCATAGTTAAACATTATATAATCATCTTACAGATGAA  
AACCTGTTACGATACCGCATCGATCATAACCGCTAGGTGTAACGGTTCGCCCTCTTTGA  
TTTCAACTTTGAATCGACTCCCTTTCGCTAATACTTCTTCCGGTACCCCCAGCGATTTCGG  
CGTCTGCATTAGTTTCATCCATAATCCAACCTAGGCTGCATGAGCGCATAGTTTACATAGT  
CCATTTCCGGGGTTCATGTCATCAATGTTAATATAATTTGCAGTTGACGCGTTTACGAATTT  
CAAATCTTTATTATCAACCTGTACCATGTATAATTCAGTAGTTTCTGGGATCAGTTCCC  
ACACAATCAGTACATTTCTCATAGTTCACCTCACTTAACAAAGATTTTCTTTAATGCTTT  
CAGGATCGCTTCTTCCGGTGCTTCTTCCGGTGGAGGAAGCAGTTCTACCACTTCCTCTTC  
CAACTCGAGATAGTCTACCAAATATTCTACATAGAATGCAAGTGCTTCCATGAAATTAGA  
TGCTACATCCGATTCACCAGCAGCGTCTACACGCATTGTATCAACATCACTGCGATCAAG  
TTTGTGGATGCTTCCCAGATAGTTTCGGTCTACCAGACTTCCCACACTATCAGCTTTC  
GGTTTTGGTTGCTGTTTTATAATCGGTTTCGTAATGATGCAATTGCCGTTGAAAATAATT  
GATAATAACACATTTTTTCGTAATTGTTTTGAATTTCCATGATGTAATCCTCACTTATCGT  
GAAGAAGTTCTAAAACCTTCTGTACATACTTTGTCAATATTAGTTGAATCAAAAACCTGTAC  
GGTATCCCCAGCTTTGACCGTATGATCGCGAGCAATCCCCATATCCCCAGTGTTCAACCT  
GATAGTATTCAACGAATGGGTGCTGCCGAACCTATCACACCATCGCGATTAAAAATTACCA  
TAATATAATCCTCACGTCAACAACCTATTTTTCGGCTGTGCTTCTGCCACTTTCGGTAATA  
CTGTTTGTAAAATTGTTTTACGTTTTGACCATCTTTACTATACGTGTTATCTACCATCAA  
GTCAAAAGAGCTCCCGGTATCGGGTAGTTCCTCACTCGGATAAGTTCTTTAATTAAGT  
GCCCTGATGATCTTTGTATACTACGTTAATGATGGTCTTTTCTGCTTCTTCGTCCCGAC  
CATCCGGTGATTAGCTTTCATCGCATCCCAACCTCTTTTGTGATCTTCATGTTATTTAAA  
TTTCATCACTTAACCTCTTCGCAAGTATACTCCACTCAATACGTTTATCGTTTCCACCG  
CGCTCAGCATCTAAGATATGACGGAATGTCAATTTGCTTTCATCATCAACATGTTTCTTT  
CCTTCGAATTTAGCGCCATGTTTTGCAGAAAATATCGATCCGATTTTATAATCTTCGCTG  
TTGATCATAGTTCCGCTATCTGTGATTTCAAATCCCTAACTACAGGGTCTTGCATTGTG  
CTGGAGATCATGATTTTAGCAATGTCACCTCTCGTAGAACTTTGATCTTTGCATTTTCGT  
TTGATAATATCATCATATTCTACACTCATGCCATTGATTGTAGTAATTTTAAACACTTTC  
GGGCAAATGTAGGAAAACGTGGTTCTCTTTCGGATTGATGACTTCCGGCTGTTACTCTTCA  
ACCTTCGGTTCTTCCACCCTTTTTCTTCTGTTTCGGTAGTTCTTCTTCAACCTTCGCA  
GAAGTCTCTGAATCGCTTCTAGTGCTGTTTCTTCTTTATGTAATACATTCATCGTGT  
TGAATTTGAGCGTTACATACAGCCTCCAGCGGCTGAATCTGCCCCGATATTGATCATTGTA  
TCACGAACAGTTTTATTCCAGTTGCGTTACTGATGCTTCAGAGACGGATCAATCGTAACA  
GCCTTAACATACACCTCATGAAGTTTAGCGTCCAGTGCGGAGATTGACCCATTAGCCCAA  
ATAAACTTCTCTGATTTGTTAGTAGCTTTAGTGCAATCAAAGGACGCAGCGTTAACACCG  
AGAGCAGTAGCAGAAAGAACGATAGCAGCGATAATGTTTTTTCATAATATATTCCTCAGTG  
TTTTGTCCTAATGGGAGTATCTTACTACTCCATAATCCGGTGTCAACTACTTTTGTACA  
TTTCTTCTACAGTAAAATCCTCAATGTTGTTGTGCTCGGCGAACGTTGCAAGACCAGCAT  
TCCATGCATCATCCTCAGAGAAGAATACACCGTAACGTTTCATATCCTTTAGCGCCTTCAC  
ACTTAACCATTAATTTATGAGTATGTTTCATTTTATTTCTCCTTCGTTGTCTTGGTGAGT  
TTAGTATAGGGGATCGCCGATCCCCTGTCAACAACCTATTTTTTACTTTTTACCCGCTCGT  
GCATTAATACGCATTTTCTGCATAGCCATGATCTGGCTTACTACTTCTTCTTTACGTTCT  
TGCGTGATAACGTGACCAGATTCCGCAAACCTCCCCCTCAATTTCTTCTACGATCTCGCGG

ACTTGAGAACGTCCAAAGATGCCGTTTCCTTCGAAGCTCATGAATTCTGTTACTACTTGGC  
TCGATAGACTTCATGTGATTCTCGTTTTCGTACGGTATGGGAGTATACTACTACTCCATT  
TCTTTACGTCAACAACACTATTTTAAATTATTTTCGACCTTCACCCATTCCGCGTATTCTTG  
CGCGGCTACTTTTCGGATTTACGCCGTCTTCGTACATTGCTTCAAGTAATTCTTCGTCCGGT  
GGGCTTATAACCCTAGATAAAGCCTCCACCTGATTTTTCCAAATTTTATAACCAGTTCATATT  
ATCACTAATCAAGAGCGCGTGTCTCTGAATCGTCCCATGCTTGATCCATAACAGCCTTGA  
AAAGATATTCTAGAGTCTCATCTTTATGGAATCCGAAGACTTTAGACGGAATATCTTCAA  
TTGCTCCTCCAGCAACTTCTGCATTACGAGCTTGGCAATAATGCAACTCTAAGTTATCGA  
GATAGCGACCGCCTAATTTACCATATCAGCCAGCATTTCAGTAACCTACTTTATTTG  
CAATTACTAACACTTTGCTGTTTTCGTTGCTAATCTTTGATTCTCCTTTTTGTTTGGTGTG  
TGTGTATTATGAGAGTCTTTATTCGTGAAGTCAATAACTTTTTTAAAATAAAAAAGCCGAC  
CACAAGGATCGGCTTGATAATCAGTTACTTACTAAATTTTCATTTTGGCTTCGTCTACCGC  
ATGAGATGCGAGTACCGCAGCCGCATGTGCAGTTTGATCTGTGTAGCGGAGAACGCCAG  
ATAAACATCACGCCAAAGGTTAATCATCTCGTAGATCATATCAATATCATTTTCTTGTTT  
GTTTCGCGATGCTATTCGTTCGTTGTCTGGTAAGGTAACGGCTTGATCTGTACTGGTTCCGC  
CATCGGGCTAATCGGTTTCGGATCAGTCAAAATAGGTGCTGTTGTGGGTGGTGTCTCCA  
TATCCCATTATTCCACGGTTTAATCGTTGTGTCGTAAAGTTTATAAGGATTTTTGTCTGG  
GTCAACCATCCATACATGATGTGTACCCAAACCATCTGAAGTGATGCGTCGTTTCAGTCAA  
TATTTATTTCTCTCTGAAAATTCTTTTCATCAAGCTGTCAATCTGTGCTCTGGGTTCTGG  
TGTGTTTGTATCTCTGCTAATTTGCTCAGAGATTCAGTGGTATCCGGTTGGTTTCTTC  
CAGTGTTC AACGACCATTTGGCACAATCTTTTTATTTTTGTACACAAATGCAATATAACC  
GCCTTCTGGATATTCTTTCATAATCAGCCCTGCTTAAGTTCTTTAAGATCTTCCTTATAT  
TCCTTCATTGCGGTCGTCTTTGTCCAATACTCATATTCACTATGATGTTTATCGGGATGT  
GTGACCATTTCGATCATACTCTTCTTGAGTAACGCTATAACAATGGCATAGAAAGTAGGTTA  
TCGGCGTATGGACGCAGTTTTTCATGTCCATTGATGGATTGCATTACCTCGGCCTTTTAC  
TTGCCCTGTAGCTCGATTTTCGCCCTTAATTACGCGATCGATATACTCGGCTTTAGCCATT  
GCATAATTGTATGCTTTCAGCGTTTCGGCTTGCATCAATTCAATGCGTTTATCGACATAC  
CCTAATCGGATTTTCGACGAATTCGACGGACCGATCGCTGGCTATCTCGAATACTTCTACT  
AAACCACGTTCAATTAACCACTACTATATTGTGGGCTACTAACTGTGTTAGTTTAAAATCC  
TTCATGATTTGCTCATGTTCGAGCGGATTCATCTTCGCTTTTGAAATAATCGCGTTTCAGT  
GTTACTTCAAATCTGAATCCATCCTTAGAGCAACGGTTCAGTATACGATACAATAAGATCT  
TTGCCTTCCAGTACAGCCAGTACCGCTACCTATTCTTCGCGGTCGAACTTATAAGGAACT  
TCTGATACTGTCAGCTTAGTCTTGCCGTTTAGTTTCATATGTACCCTCAAGAATCACACCA  
TCGCGATCATCACGAGGGACAACCTTTCCCGCGAATTTTCGAGAATTGAACACTAGGTTCT  
TTATACAGTTTTTCGGCAAGTGCTAGCTCTGTGCATTCATTAAGGCTTTCCAATGAATGC  
AGTAAAATGTCAGTTTTATAACCATGTAGCAATACCACTAATAACCATTAGCCAATAGCATA  
GGCACAACCTCGCAAGTAGAACGCTGGCGGGATGTGTACCAGATCTTCGTGCTTAGGTGCG  
CAATTCATATCTTTATAGATTTTAAAGAAGTTTTCATGCACACGAGCAAAGATATAACGT  
GTCGCACCTGCTTTCTGGACTAAACGCGAACC GAAGTTACCATGACCGTCAAGCAGTGGA  
GTATTATTGATCCATGTATTTCGCCATGAGTGATCCGGCTTCTACGGCATTAGGTTCCCGG  
TGGTGATAATCCAAGTCAGCAACAGCACATCCAATATCTGCCATCGTACGGAATTTCTTA  
CGGTGCGCTTTACTCTTTTGAAGTGCGCACTCCAGAACAAGCGTTGCGCTGGTTTAAAT  
CCATCCACCAATTGAGGAATCCCGCGTTCCCTCGGCAAAATAGATCGCGTATTCCTTAGCA  
TCAATATGCACAATGCTTTCAAGGCTGCGGTAAGTAAATGTGTTTACAATTTGACTAATT  
ATATCCATCTTCACCTCATAACGCTTACAAATCACATTTCTTACTTTATCAGACTTATC  
AGCCCAATCCAATAGCCATTTTAAACGGAACGATTGACACAATAAACGGGGCAGCAATCAA  
AGCAAACAGGGTACACCTGATAATCAGGAAAACGCAAGTGACAAAACCTAGCGATAGTGAT  
CCCGACAAAACAAAATACCATACAAAAAAGAGTAATGAGATAGAAAGGCCAGAACACCCA  
CTCCCGCAGCTTAAACGCCTTTGTATGCTCTGAATTGCTTAAATTATACAAAACACCTCTCG  
GATAGACGCGTACTGGACCGAAAAATCATCTTTCATTGCTCGGCATGAGCAATCTTCTAT  
TTTAGAATTACCTAGCATTATTAACCGCCTTTCATCATTGATACAGGAATTGTTTTCTGA  
ATTGTATATAATTGGCCTACTTCAATTTTTTCTTGAATCACCACGACGTTACAATATCCA  
CTGTCTTTAAGTCTTCTGACAATGACTCGCTTGTGTTTCGTTCGGTGATAGCATTGACTGTT  
CTACCAATTCACCGCAAATAATAGCACCACCTTACAATTGCCAGTAACTTTTCATGCTA  
CGACCGTGAACAACAACCACATCACCGTAAATCACATTTTCGTTCGTTCGTATTTGGTAATA  
ACCGTGACCCTCATAATGTATTCCCTCTAAGAAAGGCCGCCAGAGCGGCCTATGTTGAT  
TATTGTTCTACAGTATAACCGATGTTTTCAAGCCATGCAATAACAATCTTTTCGCCAATT



TCACCGAGAATTCATCAGCGCCGATTCTTTAATGAAAGTAGATGTACCATTATTTCTT  
ACTACGTGCTGGATCACAATATGTTTCAGGAATTGCGTCTAGCAGTTCACTATGATCATT  
TCATTAACGATATCTTCGACACTAACATTATTAACCAAATCAACATCATCCATCGTCACA  
GTAACGCGACCGGACGGACGCAACGAATATTGTCTAGTTTCAACTTCAACATGTGCACTT  
TCGCAAGTAACTTTCAAATCAATCATAATTAATTCCTCTGTTAGTAATGGCTAAACCCCT  
CGGTCACATCTTCAACCACATAGTAACGATGACAGCGCAGTTTGGCATTTCGCATAATCTT  
TCGGGATACTAACACGTGACGCGGATCAACTTTACATTTAATGATGCGGCCTCGCCCAC  
CGCCATAGTGCGGAATATAGTGTTCGATGCAACGTGGAGGCCATTAGAGCAAGTGAGAT  
CATCATCTGGGTCAACGTCTTTACGATTCATTTTAACCGTGCGCCCTGGGCAATTATCAA  
ACGTATGAGTAAAGAAATCTTTATAATCAACATCAACACGTTTCCATGCATAGAAACAAC  
CATCTTCCCCGATCTCAATGTCGTTGTGCTCTAAGAAGTCAAATAGACGATCTACCGCCT  
TACGGCTAGGGTTTTTCTTGCACCTATCAAAGAAATACAGATAGTGCGTTTATGGCTTAT  
TCTCTTTAATCGACTCAACAACGCGACGAGTCAGGTTAATATCAATAACAATATTATGAT  
AATACACAATACCATTTTCTAAACGGAAAGCACCATGCTGATATACTTCAATCGCTTTCT  
TAATGACCATCAGCGTAATAGCTTTGATGAAATCATTATGTTTAATCGCTTCCAGTGCTT  
CTTTAAAGTTAACATGCGACGGATCAGCAGTATAAACGATGTCACCACATGTAATAGTAA  
TAACTTAGTTGAGGCTTTTGCTACGATTTTGTAGTAAAGTAGTCACGGGCTCTGTTGCGC  
GTTACCCCCCTTTTCTTTACTGGTTTTACGGCGTGCTTTACCTTTTTCTAGTGCCTTGC  
GACCTTCCGCTACAGCGTCTTTCTGAATGAGTAATACGCTGGAGGCAGTACTACGAGTTA  
CCCCAAATGCTGCCGCAAGTGCTTCGCGGGTAGTAAACTTACGTTCCGCCGACTGTATAG  
CCAGTTTGATTTGTTTCGCAGAATCCAGGCATTGAACGCTCTCGGTCAGAGACGGTAATTT  
TGGCTATAGACATAGTATTCATTCCTCTATTAGTTGGGCGACTATCGCTGCCCGATTAC  
ATCATTATAACCAGAATTATTTTGCTTCGACAACCTTGCGGATTGTGCGGTCTGCTACATT  
ATAGATTCGTGCCAGTTCGCCTTTAGTCAAGCCACGAGCGTATTGTTTACGGATGGTTTC  
TTTCTGGATAGCGGTGAGTTTAGTCATAACATCAACGC

>NewGenomeName\_156

ACCCCCGCTCCAGTTTTAGCGGGGTCAACGAGGGTCCGTCACCGGTTTCATTGAATTGT  
CACGTGTACAATCATGATCTGTGATTCGTGCAGCGAAGCTCACGGAAGATTTTACACACC  
AACGTTGGTCCCGACAATGCTTTTTCTACTTTTTAGAAAGCAAAGAAAGATTCTTTTTA  
TTATGATATTACATGTAATTTAGATTATCATTGCATCGTCATGAAGCAAAGAAGTCTCTC  
TCTCTATAACTTCCAGTCCTGTTTTTGTGTGCACACAACGAAAAATGGTCAGCAATTGG  
ACTCGGACAGGCAAAAAGGGTAGCACAACGCCTCGTCGTTGTTACACCTGGGCTTCCAAG  
TCGGCTGTTCCCAACCCCTAGGAGTCGTTACCAGGCAGCCGATTGAAGAGAGTTGAC  
GTGTCCGGTAGCGAAATTAAGCCTGAAGGTGCTGTTGCGCGTTACAAAATTCATAAGGTG  
ATGTAGAGTTGCACCATGAGGATACGACCGGCAGAGTTGGTGAATTCTCTGATCCCCAAG  
TGGAGTTGACCTGTTGTCACTGCGTCTGCAGCTTTCACGGCGCCTGCTCAAATTTGGAAA  
GAGAGTTTATAAGATACGGTACTATCATAGTCAAAGTTAAAGCGGAATCTGATTCTGTA  
GCTGGATCAGATTGTACAAAATCATTCAATAAGTTCATCGGATTTGGGGCTGGCATTAGT  
CATAAAAACATTTATAACGTTATAACGCTTACCAATGGAGCCGTCAAGACTGTATTAGAA  
CATAGAGTGTATCTTGAAGTTTAATGCCACTGTGTAAAGAGGAACATATGATTATCGAGT  
AAATATTGCGTTTGATCTATTTACTCCGGGAAGCGGTATGTTTTGTCGTTTGATTGTCCA  
TATATACCCTTCATTAATGAAGGGATAATGTCTTTTTCCCTTATGTGACGTCATTGGT  
TACCGTGCTGTGCTGGGGCGGGGCCTCGTATT

>NewGenomeName\_157

TACCCGCGAAGCCGCTGTGCGGTCCGGTGGGGGGAGAAACCGGATAAAACACGCGCATT  
ATGCAGATATCGATTGAATTTGGTTCTGCTGTGTGAAATCTGCACAATCACAGCGGTCAT  
TGTGCATCAATTTAGACACGGGACGTGACACCCGACATGGCAGAGCTGGAATGGTGAA  
AGCTGGATCCGGCATTCCGATGCCAACATGCCGACACGGGTAATACTTGACTACACTGGT  
GGCGGAAGAAAAAGATTAATTACAACACCAGCAGAACCCGTATACATCTCGGCAAAATCT  
ATCATGAAAGTGATCATAAAAACGCTCACGAAATAGATCATGAAATCTCAGATGAAGTAC  
CCAGCAATGACGCGGGTTCCGGCGATACAAGATGTGCAAAAAACTCTGAAATAAACAGCG  
CAAATTCGGCAGAGACGAAACGGCATGGTAGTTCCCGACTTTTGCCGCCTTCAAACGTTT  
TATTTACAGAAAAACCCGACGCCGACGACACCGTGGGTATGCAGAGTATCTTGAGGCCG  
AAAACCTCATGGATGATGCGTCCGACATGCTGCTATTCGTTGAACTGGTGTTACCCGGG  
CCCGCGCACTGTCAGAAACTAAGGCGCTTAAAGGGATGTGGGCCGACTTGGAAGAGGCAA  
ATGACGTGAAACCCGAGTCGCTCTTTACGACATAATACACAAAGCTGAAAAGGGCCATG  
ACCGGAATATTGACCGTATCGAGTCAACCGTACGCTCATTGCTGACGCGGGACGTCTTAG

GTGAGACACCACCATAACTACGTGCTTACCGGGAAGGAAGCGACGCTGCAAGAGATAAAC  
TCACAGCTGAAACAAATATTCTGACCAACCAGCGTCGGGGCGTTGTTACGCCTCTCAGGG  
ACATCGTGTTCATCGCTGGTTGAAATGAGTAATTCGAGGAGACTGGATTACATTCCGGACT  
AACGGACCGCGATGAGATGAGCCATCAGAAATTACCGAGACTGAAACAACGACCGTTCATC  
ATGACTAAACTCAACAATCCCAGGTGGCCGCTCAATCATCCCTTCAAGATACAGAACGAA  
AAAGGTGAACTCCTCACCTTCAGAATGGGGTCCACGCAGCGCCAGTCATTCCGGAGCATA  
CACAATAAAGATATGATCCTGAAAGCGCGCCGGCTGGGATTTACCACGGCCATTGATATG  
TATCTTCTCTACCAGCCGCAATTCATCCCGCATCTCAAATGCGGGTTCGTGCTCAGGAT  
AAAAAAGCTGCCATTGAATTTCTCCGCACAAAAATTGCTGTACCGATTGATCATCTCCGT  
GATTGGCTAATAGCGTCATTCACCATCGTTGAACGTACAGCGGTGCCAGCGCTGGCTCT  
AGCCTGTTTGGACACGGCTCGAGTATCAAGTGGGCATTCTCATTCCATTTACGTACGGTG  
CCGCGCCTGCATATCGAAAATCAAGGTAAAATTTGCGGGAAATATCCGGCTAAGGCGAAA  
GAACTGGGAATCGGTACTCTTAATGCCGTCTCTGCTGAAGGCAACACTGTTGATCGGTCA  
ATAGCTGAAGGCGTGGGTGGTGTTTTTTACGAGATGTGTAACCGCACACAGGAGATCACT  
GCATCAGGCTGATTGTTACCGCCATAGGATTATAGATTCCATGTTTACACCTGGTCGCAG  
GATCCTCAATACAGCCCCAGAGTGCCACATATCGGGCTGAAGCTGTCACGCGAACAAAGG  
AAGTATTTTCTTCGGTAGGGAACGCTATGAACATCACGCTTACTGACGAACCGAAGCAG  
TGTAACATCAATAAGGAACTGAATAACGTGAGGACAGGAAGCAGGCGTTTCCCTCAACG  
GCACGGGACGCGTGTCTGACATCCGAACTACGGGTTTTCTGTGCCGAAAGTATATTGCAG  
GTCGAATCAATCTGATCGCCGGCCATGATTGTTTAGGACATTGAAAATGTTACAGGAACG  
AGGACTAAAGCACAGTCTCAACGTGAAGGAAATAAAAACGAGTTGCCGCGGACGCTGATG  
AATGATCTGCTGGTAGGGGAATTTCCGGATCCGGAGGAAGCTTCTGTTTGTGGAGCAGAC  
GGTGCAGAAGGGCTGGCGCACGGAGACCGCTCATCGCTGTATGTTGTGAAACGCAGTAAT  
GACGAGCAGGGTGCTCAGTGTCTGGAATCTCGATGCTGGACTTTTTCTCACCTAATT  
TCTCAGGACTGTGCTATGTTTCATCAAAGCGTCTTTGGGGCCGGAGCGCAATAATCACGGA  
AATGCACTTAGGCTGAACTCGCCGAGCTCTATCCGCCGCGTCATATATACAACGAATAG  
CATCTTGACCAGCCATATGACGACGATACTCCCCGCCCTCGTTGGCTGACAACCCGTCAG  
AGCAAACCTGTTCTGACCGAATCAAGAACAACCTCTCCTGAATAATGGAATATCAGGGATC  
CGCTGGTCAGGCACATTATCGGAAATGAACAGCTACGTTTATGACCCGAAAGGCTGCATG  
ACTGCAGTAGAGGGATTCTTCGATGATCAGCTCATGAGGCTCATGATCGCCCCGGTGAAG  
CGCGCCAGAGTGCCGGCGTGAGTAAAACCGTCTACGGATACACGAATAACCACACATTGG  
ATGGCTCACTGATGTAATAAATAAATAAATAAATAAATAAATAAATAAATAAATAAATAA  
CGCCGCGATTTTCTCAGCGCCACTTTCAGGCGCTTTGTTCTGCCATTGACAGCCAGCCTA  
TATGGGGTGATGCCCCAAACAAGGTCTGTGCGTATTTTCGATGGCAATCAGCAGCCACCGG  
AAGTCCTTCGGGTCTTGAAAGATCGCGGTCCGGCGATGACTATCCATAACCTCATCGCGC  
CTACGGTCGATGGCCTTCTGGGAATGGAGGCCATTACACGGACTGATCAGTCCCTTATGA  
CAAACGAGCCAGACGATGACTATGAGAAATTGGCTGAACCTAGGAATGCTGAATTTGCCG  
AGGCACGCCGCTTGGCCATATGCATAAAGTCCGCTCGCATGCCTATGCGGGGCTGATCT  
TGTCGGACCTCAGTTGTATGGAGGTCTGACGAAACAGAGACCCGATAGAGCCCTAATTTA  
AGGTGCTTACTCTCAGCCGGAATGAGCTTTTCTGCGACGGGCTGAGCATGGAGGCTGATT  
TAAGTCACTGCCGATGGCTGATTCGTGCGCTCTGGGTGGATAACCGTTGAGGCAGAAGCCA  
CATTCCCTTAGAAGGGCTCAGGTTATCGATTAAGCCATTGATGAAAGCCGTGGTATTGTCG  
ATACCACGGTTGCTGAAGGCCATCCCTGTCCGTTTATGAGTGCATGACACGAGTAGCAGT  
CGTGGGATCGAAAGCCGAACAAATGTCTCAGAGTGAACGCCGACGAGTGCAGCTTGATG  
TGCTTTATTACCGTACATTCGAGCGTCTCCGGTGATTGAACTCAGTAAGGGACGGGTGG  
TGGCCTTTGCTAAAGCAAATCTGACGCAGGCGGTAGCAGTGGAGTCCGGGTAGGTTCCGGG  
TGAAAGCCGGGCGGGAAAGGCGTAGTCGTGAAGCGTGGGTTATCGGCCACACTTTATTG  
TGGATCGCCTCTCTCGTGCTCCGCATGGGATGTTTCCGCTGTTTCCCTTTCGGTGGATAAC  
GAAAGGATAAAACCGGGGAGTCAGACGGGCTAATTTCCGGCGCCATTACGGCACAGGACG  
AGGTGAACTTTCGTGCTATCCACCTGACCTGGTTGCTGCCGGCCAAACGCGCGATTATGG  
AACAGGATGCGACCAAGTTGTCAGTCAACCACCCAATCCAGCAGATCGAACGTCCGGATG  
GCACTATTAATTGAACCCGGTCCGAAAAAATCACAAAAGTGTGCGCAGATGTTTTTCGGC  
TTGAGCAGGATTTTCAGGTTGACGACCAGCAGTTTCAGGTCATGCATGAATCGTTAAAC  
TTAATCAGGATACCGTGGGAGTTTATCCCGCCTTTCTTGGGCCGGATTCATGAGCGACGT  
CAGGCATTGCTATCAGTAAACTGGTTTCGCATGGGGCAACCCCCCTTGCTCAAATCGACG  
ATAACTTCCAGTTTCCAGCCAGCAGGTGTGACGACAGTTGCTACCTTATCTTCTCGATG  
ACCTGCAAAAACCTCCGTAATTATGGAGTGGTGATTACTCGCGATGATGGCCAGCGTGGCC

AGACCATCCTTCGTAATGCTGATGGTGAGAATGTTGAACTAACCAATGCTATTTCAAGGT  
TATATAAACATATTGCCCTGGCGAGTGTTGGGCAGGCTCCAGCGTTTAAGGCACAGCGTG  
CACCGCGGATGTCTTAGGTTATTCAGGGGTAGAAGCCGTAGGTGCAGGCTGCTGTGCTGG  
ACCTGTGGGTTAATCTTGTGGATGTGCCACAGAAACAGGAGGTTTTTGC GCGTATTTCGTT  
CCGCGCTGGGGACACCAAAATCACCGGAGGAAATGACCCCGGAAGAACAGGCAGTAGCGG  
CCACACAACAGACACTTCAGCAACAACAGTCCGAACTCCAGATGCGCGAGATGGTTGGCA  
TAGTGGCTAAACAGGTAGCCGACGCCGCCAGGCCCATGCCGCTGCACACCGGGCCAATG  
CCAGTGTCCAGCGGGAAGGCGCACTGAAACAAGGTCACCGTTATGTGGGAGCGCTTCAGC  
ATGCACAAACGGCAGAAATTATTACTGGCGTACAGCGTATGGAACAGGAGCAGTACGACC  
TTCAGTAACAGATGCTGTAAACGTTACAACAGCGAGCGAGCGAAATGTCGCTCCGTAAAT  
TCTGGCCTCAATTGCACCACGTGATAGTACGGGGTTTTTTGATTTCAGGAGGTAAGCGTTC  
CGGGAGCGGTGCGCTTCTTCGTGGGGGCGGGCATAAGCCTTATGTACTGAATCATCCCGA  
TCTGTCCGATACTCGGACCATGGGGAGTTATTTATGGATTTTTGACTTACGGGGTAAGAA  
AGCCCGGAACAACACTAGAAAAACTGCTGGCAAGACTTGGGGGTGTGGATATAGGCACTCCC  
GCTCAAGAATTCGTCACGGAAGCTACCACTGAAAAACATGCGGATGAGGTACCACAGACT  
CAGTCGGGCGATAACAATGTGGCACCGACGCCCGATGCCACTGTCGAGCACACGCAGGGC  
GTGAAGGTTCCGGAAGCGAAGGTGGGGCTCACCCGCCACGGGAAACACGGCATTACCTAT  
GAAGTCTACAGGCTGAACCTTCTGTATTCTACGAGCCGTACACGAAGCCGCACTTCTC  
CGTGCGCAGAAAGCTGGAGAAAAACGCAGGGCGGACCTGCTGACGTTTCAGATCCACCAT  
GCCGGTATGAGCCCCACACCGTTACCGGAGAACGAAAAAATTTCTGATTAGCGGATTGCC  
CGTCTCTGGGTGACGTATCGGGAAATTTGTGACGCGATAGCTTCTCTCATCCATAATAAT  
AGCTATATCCAGTCCCGTGTTACCAATCAGCACCGTATGCAAAGGTATTGGTGGTGAG  
GATTTGTCAGCCGTTCTTAATGCGATGAATGCCGTGCGCGTGCTGAAAACGTCGAAGGAG  
GCCGATTCATATCGCTTCTCGGTTGCTGTATCCAACGACGGGAAGCTCCAGAATCACAC  
GCATGGAAGGACAATACTCCCTGAACGTGTGCTGAAGTGACCCCTCGTACCCATTTT  
GCTGTCAGAGAAGTCAGTGAGTCGTCGGCTGACAACAAGAAAAACAAAACGGATATCCTG  
TAAACGGCGGAAGAGAATGTGAAGACCGCTGAAGAGCTGTAGCCAGTACTAGCTTCCCC  
TCAGATTTAGGCACCACGGCTTCCGGCGGAACCGGTAATAATTTTGAAGGGTACTTGGC  
GCTTGGCATTTCAGAGGCAAAGGCGATTATGCGCGGTGAGACGAATGCTGAGGTAGACGCG  
CTTCAGAAGAAGCTCGGGTAACCTTGCTGAAGAAGAAGTGAATAATGACGCCTGTAACAT  
CAGCCCAGTTCGAATAAGCAGCCTCAGGTGGCGCATCTTACCGCTGGCAACCGCAACCACT  
CGATCGTAAATATTCTCACTTAACAGCCGGACGCGCCAGACGCCGTCTAGCCGGACAAGA  
AAAGCACTAAGCAGTCCGGCATGAGCGCGCCGGTAGTCCGTGTCACAAACCTTAACAAGG  
AGACCGGTGATGAAGTGACCATCAGCATCAAGCACAATCTCTCTAAACGTTTCGACGATGG  
GAGATGAGCGTGTGCAAGGTGGTGGTGAGGATCACAGGGATGCTGACTACTCCCTGAAAA  
TCAATCACGGACGTCACCTGGTGTATGCAAACGGTCATACGAGTCAGCAGCCCACGAAGG  
TTACCTGGCATCCTCAGCCAGAACGTTTCTGGGGACGTAATAATGACCTGCAAGACC  
ATAGTGCCATAGTGGCTCTTGCTGTAGCTCTTGCTGATTATGAAGCTGGGTGAGTAGTCT  
GCCTACAGCGGAGCACGCGGAATTCAAAAAAGCCTGACCAACGATGTACTGCCACCGAC  
ACATCACCTCACTCTTTTGGCGGTGATGCTGCAAGCTTTGAGCATATAGAAGCGGCAGA  
TCAATTTTCTTTTACGAGGTTGACAAACTCATGCTGATCAATGACGAAATGCAGAGTGC  
GTAATTGCCGTTTCGTTTGTCCGGTGATGAACTTTACGGAGAAGACCCATATTACGTCCT  
GTCCGACACACCGTGTGAGGGGAACGTGTGGTACACCTCGAGGTCCGGTAAGGACTGGGA  
CCGGGTGAGGATTCGTGCCGTGAAGCGTGCGAAAGGCGTTAACCAACCGCTGTTCTAAGG  
TGAATGTGCTATTCAGTGCATAACCTGTATCGTAAGCGAGCAGGAATGCGGAACCGTTT  
CTTTCAGTGGTCAAAGGTTCTGGTATCAAAGAATAACCTGACGGCAACCGCGGAAGAGGT  
CTCTGTTGCAACCAATCTTGACGGCGCCATGTTACCGGGGGCTCACGCGATGACCACTGC  
TTACGATCAGAAGGCAGGCGGTCACTTCCGCATGGTTGAGAAGAAAACGGATACGGGTAT  
CCTTACTAAGATAGCAATCATCTTGATCAACGGTCTCACACAAATCCGTTTGCACGAGAA  
GAGCGCTAAGATGCCGGGTCCCGGCGTGATTTCCGTTGATGCAGCCGTGAAGCTCTGATT  
ATTCCTTTACCTATGCCGGGCTCTCGCGCGGCTTTTTCTGGAGCCAGTTATTGTGGAAA  
AGACTATCCTTGCCCCGTCACCGAGTGAACGGGCGTATACGTCTACGCACGGTATTGAGT  
AGGTGTCAGCAGGCATATTTACGGTGAATCCTGCGTAAGCGCAAAGTGTATTTCATCCTG  
TCTCACTGCCAGTGGGCATCCGTATCAACTCGCTCCAACCTGGTCTCGACGGGTGGTCTGG  
CTCCTGCAACCGTCAGCATTCAAGTCCGGTGAGTATGCTCTCATCGATAACAGCGATGTTT  
GCTCTGCAAAATTTGCCAGAGATGTGCCCGTGGAGCCGAACCCACCCCTGCGTGACGGGG  
AGCTGGTTATTGTCACGCTTAAGATTGCCGTTTCAACTGGCATCCTGAATGTCGTGCTGC

GTAAACCGTGGTGGGAGACTAATTA AAAACCGTCCGGCCCCGAGTCATGCGGGATTTTTGT  
TCGGGGAGTCATGTGAGTAAAAAACACCCGATGTCTATATCGGCCCAAACCCGATGACA  
GAGCACACCATTATCGGTGGTCGCACGCTGTTTCGCACGTTTTGAGCCGGTGCACCATGAC  
AGCGCGACAGCTTCGCAACAGCTGGGGTTTCTGATGTCTGATTGCCTCGAGAAGAGCTT  
GGTGATGCTCTGAGTAAGCAAGAAAAGAATGATCAGTTTTCGGCAGGCACAGCAGGCCGAT  
GAAAGAGTGCTTGGTGCCTGGCAGACTCGCATAACAGTTTTTGTGTTTCTGTAAACGGC  
CAGGAGGTGAATTCAAGTGAGCTCACCTCAGCACTGCTGGCGACGGAGTGTGACGCATAA  
CAGCTGCATATTCACAAAGACCCGGAGGGGACCGCTGAGGCATTTTCGTACCCGGGTGCGT  
TAGGCATTACGCCGTCGTGATGCGGAGACTGCTCAGCATGGCGGAACAAAGTGACTTTTT  
ACCGTATGTCCGTCGCAATATGATCGGTCCATTGACCATTATGGTGACGGATCCTCTGTA  
TATCACTGGCTTGCCATTCAGCCGCCAGTCGTTAGTGTGCCGTCGGGTGATTACTCTTCT  
ACCAGTAGCCGCAAAGA AACTCGTGCTTACGTACACAAAGACGCTGAGGAGTGC GTTCA  
TATCGTCCATATCTCTGGAGATGATCATGAGCTTTTTGTGTTGGTTCGGGATGTCTCTGTCAG  
CACCGGACGCTCCCCGCGATTTGCCTGTTCTCCCGGGGAGGTGATCGTGCTTCATGGCGT  
GGCTCCTAAAGCCGGCCGAGCCAGATACCGGATGACCTCCTCACATGGCCACGAGAAGT  
GGCTGCGGGGGCGCTTGACCGTGTGTGCATGCAGTCTGGTGTACATGGTCCACATCCGTT  
ATGCGCAGAGCATT TTTCTGTGCAGTTTTCTGAGGGGTTTTCTGCGGGCATAGCGACATAC  
AAGGGCGCCAAGCCCGTTGTCATCATACCGCAACCCTGTACTTAGGCAGAGGTTTTTCTG  
ATGACGTCGGTGACAGAAAGCATCGGACTTGTGCATACACA AACTGGTTGACCCGGTGTTA  
GTTTACTGGGCCCTGCACGAAATGTGCGATTAATACAATGATGCTGTGTAGGCAGGGATT  
TTGGCGAGACTGGATGCTCGCGGAAGACTGGAAAAATAAAGTTGTATTCCCGGCGACCGT  
CTGGTTTTGCCAATGGTGTATTACACCGTTTTTGCCGTGATATGCCTAAGTCACGGTAGT  
TCAGTGAGTCCTTTATCCAGTGATGTACTGGATGCCAGTATCCTGAGTGGCCACAATG  
GATGGTATTCCTGAATGTGTTATCAGCAACC ACTTGTCCCCGCGCATATTCTTGCTGTTT  
CCTGCGCCTGACAGAAAAATAAGTAATGATGAAGTGGGGAGCCGGACAAAGGAGGCGCTG  
TATGTTCTGACGCAGGACGATGACACGCCAGTACC ACTGGATGAGGCTTATGTTGACCCA  
CTGGTGGAGTGGAAGTTGTTTAGTGCATTCAGTTATGATGGGGCCGGTGGCGCAGATTAG  
GTGCGGGCTGCGCAGCATTATGAGAGTTTTTTTTGAGCAACTTGGGATCCTGCAGGGGGCA  
GACAGTGCTTTGTATGCCCGTAAAAAAGTGT TTAACGGTGATTGAGAGTGAGTGTTGATG  
TTTCGGAGACGCTGAAAGGTCCTGCTGGCGCGGCCATATCAGGAGCAAATATTACCACGA  
CGGTGCTGACAGTTTCACAGGAAGCGCTCAGCGGCACCAGTGCCTCGGCAGCGCCTCCTG  
AAGGGCGATATTACGGAATGTCGATCGATCCGGAGGAGTATGCGGGTTCGGGGACGGGGC  
AAGTGCAGACTGCCGTCTACGGACGTGTGCGTATTTAGGAGGCCAGAAGATCGGTGACGC  
TCAATATGCGGTGATGACGAAGTCTTGTAGCGGTAAGCATAACCCGGAGA ACTGATGACAG  
ATTTCCGGCAGATACAGAATAATGTGGCTGATGACCTTGGCACTATTCGTGCGCTGAGTG  
AAGACACGGGGACGAAATACATAGAGGACACACAGGCACAACGAAGTGAAGCAGCCAGCG  
CGAAGTGTGCATGTGACAGTGCTAAGAGGGCAACCAGCAGGGCCGGCGGAAGCAGGACTAA  
AAACCACTGATGCCACTGAGGCCCCGATCAGTTGTATCACACCACCCGGGGAATGCAGAGG  
AAAGCTCGACCCGTGCCAGATACTCTGAAAAAGCTGCCGCAGCTGATGCAGAAGAAGCCA  
GACAGCTTGCTCAA AAGGCCAGCCTGGCGCAGGAGTGCGCCGGAGAGATCCCTAAGCGGG  
CAGAGCTTAGCACTGTGAGTGTGAAAGAGGTCAGACGTATTGCTGAGAATGCACGCGGGC  
CTCGGGGGCCTCAAGGAGAACTGCTCCGAAGAGAGATTTTCGGTCTAATGGCGAAAACG  
GTCCAGTGGGCCCTCAAGGGCCCGCAGCGCCGAAAGGAGAGCGTGGTGACGTTGGTGGTC  
AGGTGGCTGTAGGGCCTGCTGGTCCGCGGGGTGAGAACGGCGAACATGGGGGGTGAGGAC  
CGCAGGGAATCTCTGGCCTGAAGGCGCATTCCGGAGAGCGGGGGCCTAAAGGAGACCAGG  
GGGATATGGGGCCAAAAGGCGAGAGCGGTGATCGGGGAGCTCCTGTAGTCCCTCAAGGTC  
CTAAAGGGGAAAGAGAGACGCCGGACCACCAGGACCGATCGAAGCACGAGGTCTGCTTG  
GGTAGACTGGCCTCCGAGGTGACCCTGGTCATACTGGTCCGAGAGGGGGAACGCGGAGAGA  
CCGGACCTCAGGGA ACTCGTGGAGAGCCATGTCCGGCGGGCAGCGCTGCATATGTGGGAG  
ATGCAACGACCCGCACAGAACGGAGTTGTGGAGTTAAGCAGCGCAACGGTGAGTGATGATG  
AAACGAAGGCTGCCACCCCGAAAGCGGTGCTAGCGGCAATGTATGTCTCAAATTAAGCGA  
AAACAAAGGCAGAAGATGCTGCAGCAGAAGGTGGTGT TCCCGGTTCGGAAAGGAAATAAAG  
GGGCTACGGGGCCAGGACGTCTGGCTGGGTAGGAGGGTGATAAGGGAGAGCGCGGTGCCA  
CCGGTCTGTTGGGGCCCGCCGGCAA ACTGGGACCGGCAGATGTTACTGGTCCGGCAAGCC  
CGCAGGGGCTGCTTCGTGACAGGGGAGAGCGGGGAGAGACCGGTCTGACGGGAAATGCCG  
GTGCACAGGATCAAAGAGGGGATAACCGGTGCGGCAGCCCCGGCAGGTCCACATGGACCAA  
AAAGAGACAGAGGTGTGGCTGGCCCCGTGCGGGCGACCTGACCTCAGGGGCCGAAGGGTG

ACGCGAGGGATACCCAAAGACGGTTCGGTCTGGGGCCGGGAAACACTATTGAGAAAAACA  
GCCATGGCTGGTTCCCGGATACTGATGGCTCACTCATCACGGGAGTGGCCTATCTTTACC  
CCGAAGAAGCCACCCCTGTTTCAGGCTTTTTTCTAGTATTTGCACGTCAGGTTTCGTGACG  
GGCCGCGGCAGGATGTCAAGGGGCTAGATGAAGAGGGCAGAGGTACAGGCAGAACAGGAG  
AATGACATGAACTTTTAGAGAAAGCTTGTGCAGAGTCTGTCCGGTGGCGGATAGGATGAT  
CACTGTGAGAACAAGAAGTCGCTGACAGCACAACCTGCGATTGAGACCGGGAGAGACTCTG  
GCGTCAGATGAGAAGGGCATAATTCCGGAGCAGGACAGAGCAATCACACAGGTAGCGAAA  
CTAAGTTCTAATAATAAATCCGATACAGTGTGTGAGAAGACCGTTGCTAATCTTGCCTGCT  
GACGGGACGTGGGAAAATATTGGCGGGAAGAAAAAGCCGACAGCTTCAGAAAAACGGTAG  
CCCTGCTCGGTTTTTTGTTGTCAGGTATAGGGGGGGGTTACCAGAGAGTGAAGGAATAAA  
TATGTTAATAGGACGGTTTGAAGGATGCCGTGTCATTCTGGTTCAAGAGTTTTTTATGCC  
GGGAAATCGCAGGACGATTGTTGATAGTATAGAATCCTGGTTAATAATCTGTGCTAGTCA  
CATGGGCCCTTAAATGCGCAGAATGTATCATGGACGCCGTTTTATTTCAGCTGAATCTGGA  
AACGTTGAAAGTGGAACATTGTGTGGCCTTGCAGTTAATTGGGAATTCCAACGAAGACG  
GCGAATAGCTTTCTTTATACGGGAAAGGGTAAAAGTGGACGGTAAGGTGTGAGTGTGTAA  
CTTCTCGTGTGTGCGGAGTGATGCTTCTCGTTGCTACAGCGGCAAAGATTATGCTATGGA  
AAGTGGGGAGGAATATGCGGCCCCAAACCTAAAGAAAATTGCAATTATCAATGAAGTTCT  
TTAGGCAGCATCAGAATTTTCATGCAAGGCATATTGTTACAGTGATGCCGATCGCGATTTT  
TGCGAAGTCCATCATATATCCCCAGATGTATTAGCCTGATGCCGTCGAAGGACTTTTTAT  
GCCCTATATCGATATCACCAAGATGCGTGTGATGATGCCGCGCGTTGTGACCTCCATGCT  
GTCCGAGCATTACGCTGTACTGGCGGAAGACAGGCATTTCCGGTATGGTGGTATTACACC  
ACAATGTCGGATATTAGGGGTAGAGAAAACATCCACAATTAGGCCAATAACCATTTTACA  
GTAGCATGTCACCTTCTCGTGTGCATGGCCGGATGAGGTGGATAAGATCCGCAGAACTGT  
CGCTCAGGACACGCATGAGGGATTTTACTACACTGACGGGCGTATTCCTAAAGTGACTGG  
TGCGACTATTGCCACAAAAGGAGCGGTGAATTACCCGACATCATAGTATCGTATGGGGAT  
CCCCGCGCCTACGACAACCTCCTGTATGTCCTGGTCAGCAGGGCGTCGATGTTCCGACGA  
TAACCCGGAAGATGATGAAGCCCGTTTTCTACGGAAGCCCTTGACCTAATTTATGGAGA  
CGAAGGTGCGCCAGGTCTGGCGACTGTAGAGGCGACACTCCGTAICTCGGGGTACTGCGGT  
ACACATGATGCAGGCTCCGGTGCCAGTGCAGAAATTCGAGTATTAACGTCGCTGGATTTA  
TCGCTCTGCATCAGGTGGGGGGGAGGCGGGTTTTTTCCTTGTGGCTGAGTTGTATGCATC  
CGTGTTACAGTTACACGGACAAGGTACCGGCGATAAACCTCGCACCTTCGCTGGCGACACG  
GGATCACCTGCTGCCACCACAGAATATGACAGGCCTTTGCCTGATGGCATAACGGTATAGC  
CGCCGGGTTTGCCGGTAATGAAGTGATGTTTTTCGGAAGCGTATTTGCCGGTACCATCGTC  
GGAAGTGAATCGAGACACATCCACAGAAGATATTGTAGCTATCTCTCAGCTGGGATCGTC  
ACTGGTGGTGGTTACAAGTGGGGAGCCGTATTAGTTCAGTGAGGTATCACTGTACACAAT  
TTCTGGTTCCAAAATCCCTTCAATGCAGGCGTGTGTGAGCAGGCGGAGTATGGTCCGCGAT  
GGCCGGGTTTTCTGCTTTTTGAAGGAACATCTGCCCTAGTGTGTGTTGGTACAAACGGGAA  
AGTCACGCTGGCGAAGGAACAGATTGTTTCACCGGAATACGGGCAGAGTCAGTTTAATCC  
TGCCTCCATTGTGGGTTATCCCCGGCGTGGTGTATTATGTAGCCCGATAACAAGAAACCGGA  
TGTTAAGCAGGATGTGGTTGTAATCCGTCCGGTGAACATGGATATCCGTTATCACAGTAC  
ACCGTTTGGGTGCGCAGGACTTGATCTCTCGAAGGATATGATGCGCGTGGTGACAGGAGA  
CAAAAAGTCAGTGCTTGCCGGGGAGGCTCTGCCCTCCAGGATAAGGTGGGATCTACAAAT  
TTATTTATACCCTGAAAGATTCTCTTCTTCTATATCAGGGTGACATCTCCAGCGCCTGA  
GCGGCTCTTGATCACCATTATGGCTGATGAGGTTCCCTGTGATTCATTTTTCGCGCCGGGTGC  
GTTTAAAGGAAGTGTGGCGAGACGTCCGGCGGTAATCGGGCAAAACTGGCAGGTGATAGC  
ATCCGGATTCCGGCAGGTGCAAGAAATAACCCTGACTACATCAATGTCGGAGATGCCGGT  
ATGTCCAGAAAACCGTGGCGTGCCGGGAAGGATTGATCCACTGTTGTGGAGAGTATGGAA  
ATTGGCACCGGGCAGCGCGGTGAAGGACGTCATGCATTTGTGACCCTTGAGGAACTGATT  
GGTCTTAAACGCGCCCGCCGACGAACATCGGGCGGCGGCTCATATGCACTGAATCCGCGT  
GTAAAGACTGACAGTACTTTAATGTCTGTTGATTTTAGAACAGACCCGCTGAATTTTCAC  
GCGACCGGTAGACCTGCCTCGGTTCTTCTTGTATAGGACATGCCTAATTAGCCCGGACAT  
TCACTGACTGAAAATTAGCGGAGTACGGAGCATGTCCTTCTGATGCAGTGCTGGTTACC  
ACGACGCCGGGGCACGTTTACGGAGATCCGGTTGACCCTGGCTGGTCCGGATTTTATTAG  
ATACGTTCTGGTAATGCGGCAGCACTGAAAGGTGCAAGGAATGCAGAAAAAGGCACTCCC  
GCACAACCACAGATCGGCGTGAAGGCCATTAGTAGCCAGATCCGAGATGAGGCTGCAGAG  
TCACCGGTTGTGTCCGAGCTGCGTCAAGAAATAAAAAATGCGCAGGTGCAGGAGGTAAG  
GATGCTGCAATTAAGACAACCGAACTTGGAGGGACTCTAAGGCAAGAAACGACAAGAACA

AGGGGTGGTATTGAAACGCGCATTAGCACACCGGATTCCACAACGAGTGGATCACTTTAT  
GAGGTCCACAAGCGCATCACTAAATTGGATAAAGAACGCGATAAAGCTTTTCTCGCAATG  
TGGTCAAAAAAAGCTGGAGTTGATGGTATCACGACGGGAATCGGGATTGTCGCCGGAAAA  
GACAGCCAATCCCGACCCGTAAGTAACGTTACACTTTGTACGTCGCCGTTGTTTGTCTA  
GATGCGAATAATCCGGTTAACAGAGCCTATCTGTGTGCCGTATCAAGTGGCAAGGTTGTG  
ATCCCGAAAGCGATGATCTAAGAGGCGCTGATTGAAACGCTGTTGTCGAGGAAGGTTGTG  
GCCTATCAGGTAAGCCGTTTTAAGTATCACTCAACCCGTTACCCGTAGTGCCGTTATA  
CAGAACGGGAGCCTCCATGTTGATTCTGACGTTAACCTGAAGGTTATAGGCCTTTTATGT  
ATTACGTCACAAGGGCACCTAACCTTCGTTACTCTAATCAGAATGTAGGATTGGTGATC  
CGCAATGATAAAGTTGAGCTGTATGACCAGTAGGGACGACTTGCTTTACGAATAGTCAGA  
TAAAGCTGATCAGGAGGTAAGTAGTGGAATACCGTTTTGCCATTTATTACCGAAATAATG  
TTAATGTCACGGGCGTGCTGACTCCAGTAATTTGCCCTCGACAGATTTACAGCGGAGGCTT  
TCTCAAAGCCGTACTCTAATAAACCTGACGGGAACCTCAGTGCTGGCTGTATGTTGTGCAT  
TTCCCTGGTTTTGATTTATTTGCGGGTTCGGAAAGTTCCGAAGCTGACCATTAATCACAATA  
CCGTGACGTGGTTCGAATCTTGAGCAGGGTTTAGGATCTTACATTTATACATTTTGGGGAT  
AAGTGTCTGTACGGTTTGGAGATTATGAAGGCGGGCGGCAGCGTATGGTTTAGTCCAGG  
TTTTGCGCCTCAGTGTCTGATCAAAAAAGGCACCTTGCCGGCGAGTGAAAAGTCTTTCTT  
GAAAACATAAATCACGTCAACCAAAAGACGTTTTCTTCTATCAAACAGAGAAGAAGGC  
GGAAGTCATGTACAAATATGGACAGAAGGAAGGGCATCATGCACTGAGGTTTCAGGTAAT  
TGCCAGGGCGACGACCCCTCGTTTCACGACGGCTTATGTTTTCGCGAATATGTTTACTCC  
ACCTCCGAGTATGGGATCGCCATGTAGAACCTGGTCGGTGAGATGATTTATCATGGCGA  
TATGATGCTGCTTGACGCGAAGATAAATACCCGTTGGGATCAGTTTTGAAAAGGACATTGG  
ATATCACTACGCACTCATGCCTGCACAAATCGGGTATTATGACTGGAGAAGACCTCCTTA  
TGATCGACCGAATAATATGTCATCCTCTGGAGCTACGAGAAATAAATGATATTCCTGTGA  
GCAATCTGCCGGTGGTGCAACAATGGATATTCGAAAGCCGTATATAAATAAGGGCCTGGT  
TCTTAAAACGTCAGTATATGATTAGTTGAAGCGAGTCTTTCATGTTTATTGAAAACGTCT  
ATACAGATGTATTAATAAAAAGTTTAGCGTGTTATCTGAATACACGATATCTTGTATGAA  
GAGTATAGCAAACTGGTTGTGTCGGCAATCTCCGGGATTGCCTGTGTAAATTTACCTGC  
ACTTGCAGCAGAAGGAGAGCATACAATTTCACTGGGCTAAGCGCACTTTCAGTTTCCGGC  
ACTGGAGGATTTGGTGGAGGATTCGACCGGTCATAAGAGGGAGTCTTTTAGTCATCTCGG  
CTACAGAACTAGTGTTTCATCATTGGGCGAATATACAGATCGTCATGTCAGTAGACATCA  
AGGCAAGGATATAAATCCTCAGGGCATTGATCACAGTTCTAGCTACGAGATAACGGATGA  
TTCTTGCGTTATCTGCTCTTTTACATAGACGCGTGCTGTCACTCACTCACAGACATTTAT  
TGATGTGCAGTGAGTCGATCATTCCAGGCAGATTAAGGAACCGGCAGCTTCTGACAGCAC  
GGATATCAGCGCGAAGTACTGGAGTCTGTTAGCGGGGACTTCATGCCGTGTTAATCAGTT  
CGTGAGTTTAAATGCGAGGGCAAGGATGGGCTTTGCTAAAGTTAGCGTTACCTGAAAAT  
TAAGTACAAAGTTAACAGTAGTGTCGGAATTTCTGAAAGCAACAGGACGAAAAAAACTC  
CCTTGCGTGTGCTGCATATGCACAGTTTAACTTGAATGAGAGTGCCACACTGGATGTGGC  
TGAATAAGGCTCCGGCTCTAGAGACTGGCGCATGCATGGGGTTACCGCTGGCATTCCGGCT  
GAGCTTCTGACCTGTATGCGATAATCGTCTACCCCGCTGTGAGGGCGGGGTGTTTCTT  
GCCCGAACAGGGAAACAACCTTAAATTATGTGTGGGGGCTTTTCGGCTGTTGGCTGGAGG  
GTGAACCTGATGTCCTGATGTGAAAGGGCCCCGATACGAGTTAACGTTGACCCAAGGCC  
CAACCCATATTAACCTTAAACCAAGTAGATTGCTAGCGCCTCTCTGTAAAAGGAGTCAGGCG  
CTATGTTGCAAAAAGCGATTATGACCGTCACAATTTGCATGACGGTTATCTTACCATCT  
GGATGTTGCTCGGTGCACAGTGTGAGTTCCGGCTGAATCAGACGGGAGCGGAGATTGCGA  
GGTTCTAACAGCGTAAGCAGTAGGAACAGTGCGACGGGGAACAGAGTCCCCGTCAACTGG  
TTGCTGAGGGACAGCCGATTTGCCACGCGTTTCCGGTGAGAGCATGAACGATAAAAATTCT  
CTGGTATAGGAATCGTGTTGTGAGGAATTCCCGCAACTATGAGTTTATGAATGAAGTTCA  
AGACGCCGGCCTTAAAAGCAGGCGGTTTGTGTTGAGTTACCTGATGGTTCTAAGGTGCT  
TCGTTCTGTACACAGTGCTGATCGTATGCCTTCTGTTCCAGTGTTGTTGGACGTGTGTT  
GGGAGAAACAGCGTTAGTCGTTACCTGCCGGAGGTGAAGACATTATCCCATCTGGCTGA  
CGGACACTGGGATGAGTTCCATACGGCAAGGGGAGGTTTTGTCCGGCTGGGAAAACCTAGT  
GGGCTTTGAGCGAATGCCGGATGAAGAAGATGGTTCTAAGGTATTCCGGGATGGCGGTCTG  
ACTGCTAAAGCTTTCTTCAATTGTGTTAAATCCAACATTGTAATTCACATTCTGCCCTGC  
CCCGCAGGGTTTTCTGATATCCAGCGGTTTCATGATGGGTGGAAGTCAAGGCGGTGGTGA  
TACTAAGGTAATAAATCAACCGCAGCGCAAATAGCACAGGAAGAAGTGGAGTCGATAGAGTG  
GCAGGATTACAAGAAGATCCTCGGCCCGCCCGCAGATAACTTCATGGGACAAGTGGATGA

CCTGAACTGTGAGAAGCAGTACGACAATATCGCTGCCACCCCAAATCTGGGGTATTAGAA  
CCAGTTTTGACAAGCAAGGCAGGTTCTTGCGAGTAACCTTCCTCAGTCCGACGTCGACCC  
ATCGAGTGGACGTTTTAAGGCGGTAATCCATGCGCACCCACAGTGACCCGGCAACCGGGCA  
GATTGACACACCCACACGGGGGAGATATCTCAGGCAGATAAGTATGTTGCCCGGCTACG  
GGATGTTGCTGCTCTGCGTGCTGGTCCGAAGGCGGATGCGTTACAGAGTTTTACCTCTCT  
GACAGACTGCAGTCTGGCAAAGCTTAATGGGACGCACTGTCGACGTTTACGAAACACCA  
GGCGCGCGCTCTCTCGTTGGCGCTGGTCTGGGTGCGGCAGGTTTCATATGCGATGCATGG  
GGCTGGCGGACGGGGAGGAAGGTGCGGTCTAAAACACCCGGGACCAGGGCTAATACCAT  
TCATCATCAGGCTCAGACTTGGAGACTGTGTTTATGGTGTATGGCAAATACGAAACTCTC  
TCATGGGCAGGATATTCAGGAGCATCCCGCCCCAGGGTGCCTGGCAGACGTAAGCAATG  
CTGACACCCCAACAATACGACGACTGGGGAATCAGATTTTTGCCCCGCTTGGCAAGGCTG  
GCTGAGCTTGTGGAGAACAACATCCTGATGAATGCACATCTTGACAGGGTTCGGAGGACCT  
GGAATTCGCGTCTCCGTACAGCTCAGATGGCGCAGTCTCACCAGATGATGAGAAATGGG  
GTAAACCGCCCCGATAATCCCGACTGAAGTACGCTGGGGTTACGTAATGCACTGGCAATT  
GCTGGCGCGCAGCATGCTCTACGATAAGCTGGACAGGATCGACCGATGACTATTCTGACC  
AGGGCCCCTGCACAGGGGAGACAGAAAGTGAGTGTTGCGGGCCGACTGGTGGAAAGCATAA  
GACGGAGATATGGGATACGCTTAAGAGGATATTGCAAATGTGTCGCGGCGCGAGGCATTA  
CAGGGAATAAGTGACGGACACATACGACGTGAAGAAATTGAGGCGGCGTACAAAAAGATG  
GCGACGCAACACAACGCGCAGAACAAGCAGAATATCGGTACTGGGATTAGTACGAGAGCG  
GCTATTGTGCGATCCATCGGTGGTCTGTTGGTGCTGCTCTTGGAACAGTAATTGGCGGC  
GTTTCTGGTTCTTGTTTTTAAGGAGTGGTCAGCGAGCGAATTAGAACAGGGGGTACTTGC  
AGAATTCAGCAGCTTCGACCCCGCAACGACCCTTCGTAAGGAGCTTGGTGTGCGTGAAGC  
ACAGTTTGCACGGCTTCAGAAAAATAACGAGCGCGATTTTGCCTTTGCGTAGTCTCAGTT  
TGAACATAATAAAAACGGTCATCCGCGGAACTTTGATTACAGAGCCAAAGTTGACGACCG  
TAATCATTCACTGCAGGAGAGGGAGTTTAACGCTATGCAGAGTTACCGGAACGCGTCACT  
GCGTATGGATCATCAGCTACTCCAGTTGCCGAAACACAACCAGCGACGGCTTGAGTATAC  
CGATATGATTGCCATAGCCAGGCACTAATGTAAGGGCTAAGAAATGCAATTGAGGATGT  
CGATCAGGTGGCTGTAACGCTTCAGTTGTGGCAGCTGCCAAGGGGACAACCAATAATTCT  
TATGTCGTACGGAGGCTATACATCGCTAGGGGGTGAGGCCGTATGCAACCTGCAAAAAAG  
CTTTGGTGATAATGTAGACACGGCGATCGATTTCGATGAAGAGCCCGGAAAATCTCGATGT  
GATGTCTGGGGTGTTTGCCCGCAACTACAACAGAATATCGACATGCCTGATTCAACCGG  
TGACAAAACGTTAAAAGAGGGCCACGATTGGCCGTATCGTACCGGCACAGCGGTAAGGGAA  
CGTACCTATCGGCCTTGATTTACACACAGCTATGCCTCGACCGCGCATAAGGCTGTAAC  
AGAGTACGGCAGTGCGCGGCCTGATGATCAAACCGTCTTGGCGCTGCCTGTTGAAAAGGC  
TTTCGCTCAGGTCAGAGATCGCCGCAAATTTGCAGAGATAACGAAGAATAATGGGTATCA  
TATGCCGACCCGGCACGGACTTTATCTGAAAGCGCTTCAGAAGGGGGCCAGCGACGTAGC  
GTCGGACGCGCTAACACAGGCGGAACTGCGCAGGCGGCGGAGGATGAATATAATGCTGC  
GCCGGGGTACCACCGCATCAACAGAAAATGGAACAACAACCATTGCAGCAGTGGATTTT  
CAACTGGGCGGGCAATGATCTTGATAAGCTGTCATTGGCCAGTAATGTAGCGGGACGTCA  
GCCTGCAACGCTCGATCCCAGAATAGGAGATTGCTGGGGAACGGGTGTTGCAATTTTCT  
CGGTATTCAAACGCCAGGGGGGAACAGGCCAGAGATGAAAGCGCTTCCTCGGCATCTCA  
ATTGATACGTGGACTGAGACAGAGTTACGCCAGTAATTCACGATATTCCATTAATACCA  
TTTCCTGTAGCCCGGCAATGTGCCGGGTTTTTTTTTGGACTCTGTATTGCCATTACG  
GGAACAGCGTCTGAGGCGCAACTCGGTAACCAGAAAAGTAAAGGCCTGAACATTCTGCA  
ACCCGCCAAAACACTGACAGGACTGAAGCATTTTTCTCTCAGACGAATCGCTGGAAGGATAA  
CAATACGTCGTTACGCCTGGGTGATGCATTGCCAACAATGGGTAATGGTTTCGCCAGTC  
GGTCCGGGGGATAACGGAAATAACCCATGGACTCGGTCATGCGATGATTACAGAGCTCGGT  
CAAAACAGGGGCGCGTCTCTTAAATGAGTTCAGCCGTATGGGTCTGCCCGGTGTCCCAAC  
TGTGCAGGATATTTTTGCCGGTGGCAGCAGGGGGGCTGATGAGATACTCGATACCCTCCC  
TAATGGCAAAAACGCGGTTACTGATACTTTCGGTAAAGGTATCAGGGCAACCGGTAAGCC  
TGTCAGTGCTAGTACCAATGCCCCAGATGAATGGCTGACTGGTAAGATGTCGCCGGGTGC  
AGATCGTGCGCTGAATGCGCCGATGACCGAAGGCTCTAAAGAATCTGCGGTCTGGGTGGC  
GAAGGGTGTAACCGGATTGGTGCCGTTTTACCTGATATGGTTGCTGGCCGTTTGGCTAG  
AAAGGTGGGTGACTGGCCACTGCGAAAAGTGCTAACCGCCGGGCTGGAGTAAAAATGCCT  
CGCGGCAGGGATGCAGCTGGAAAGAGCCACGACACTGGCAGCAGAAGCTGTCGATAATAA  
GCAGCCGGATTTATTGTAGGCGGGACTGATCACCATTCCACTATGAGTGCAAAGGGCCA  
GCGTGCAATAGCGGCATCAGATGCTGTTCTTAATGCTGATTGCTTTGAGCCGGCGCAGTC

ACGGAATATTAAGCAGACGTTTATTTCCATTGAATCCGACCCGACGACGCACAGCTTAC  
CGAAAGCCAGAACATGGATCTGGCAAATAGCGTGTTGCAGATAAGGAGCGCAAGCCGCT  
GGGAACCGATCCTGAATTGAGTGCTGTGAGTGCCATGGCGGCATGACTGGGTGACGCACA  
ACTGTTTAATCTAGTGACACGAGGGACAGCGAAGACCGGTAGAAGCCGCAGTGTGAGAAC  
TGCCACGGGACATGGGGCGATTAATGCGGGCGATGGTCCGGCTATTAACGGTATAAGCAAAA  
CACGGCATTGCGTGGGACCGCCTTCATGGGTGTATCACGGTTCGGAAGGCGCGGCTGATGC  
CACGAGCGAAGGTACTGCCTTCGGTGCTGCGATGGGCGCTCCGTTCCGGTGAGCTTGCCGG  
ATATCGTGGCTTACGTCAGGCCGCTGAAGAACTCGCATGCGTGATAGTGAACCATGCC  
GGAGGACGTCGACGCCTCCCAACCCGAATCTGTTGCTCCGGTGGCGCAGCAGCATGAAGG  
CATGAAGGGAATGGATCCCGAGCAGCTTCTTGAGCAGTATTCCGATCCGGATGTGGGTAC  
AGAGGCTGACGTATCCGCGGCTCAACGCCGGGATGCTCCCAGACAGTTGTGGAACGAACT  
GGACGAACAGCAGTAGCGACAGGCTGCGTTGAATGAGCTTAAGGCTAGGCCGCGTTCTGA  
ACTGCGTGACGCATACGGCAGCTTCAGCCAGAAAGAGGGGGCGCACCCAGACTGAAGAAAA  
ACAGTTTCAGGGAATAAGCGGACTCATTCCGCCACAACATTAAGCCACGGCGGAAGCACA  
GTCACAGCCTGAAAATGCGGAGGATCGTAACGGGAGCATTACCCGACGGTGCGGTTCCG  
GGATCCGAAGGAAGTCCCCATTGTAATTAACGGGAAAGGAGCGTCCAGACCAGTCGAACC  
CATTGAGAAGGAGCGTCCGAAGAGACGGCATTTCACGGATAAGAGAAGGGCCATGGGCAG  
TGATGTTTTCCGTAATGCCACCGCGACCGGCCTGATACCGTCCGTAAGTGAAGAAAGGCGA  
GAATCAGTATGCCGTTGAAATCGACAAGCCTGCGTTCACTGAAGTTGTGGCAACGGAAAC  
CTTTAACACCCTGGCTCACGACAAGCATATTGCTGAAGCCTACCCCATGCAGCAGCCGGC  
GTTTCATGCGCAACCAGCGATTCCGAAGTTTCACCGGCGATGACACGGGAGTACAGGCATG  
TCTTGCTCCGTCGCAACGTGCCGACGGCATAGGATCTTGTAAGTTCCCAGATGACTGAAGA  
TGATGCCGGACCGAAAGCACAGAAGTTAACAGAGAGTCCGCCCCTGCCCGTTCGCAGCGA  
TATTCCTCCCTGACAGGGATAGCCGTTCCCGGGAGGAGTGGCGCATAACGTCGGATTAAGA  
TCACGCCGGACGTGGTGATCGTTTTATCACAACCGGTGAGGTCAAGGGCCAGAGGTTCCA  
GAAATGACGAGCTTGGGCGCCGAAAACGTTCGATAGTCGACAGGGGGAAACACTCGAGGG  
TGACCTGGTTTTGTCGGGTTCTGCCGTCACCCGATGCGCAGAAAGCGACTGCGACCGTACG  
CGAACGGCTACCGGCTCCGGACATTGCGCGTAATGTACGTATGCCACATTCTGAATCGCT  
TACCCGCGCAGAACGGGACTCACTTCGTGAGCTTGCCCGGACGGCGGAAGGTCCCGACA  
GGCCTGAGGAAATCGTGAAATCCCGCAGCCTGAGCCAATCGCACTTGCTTCTAAACCAAC  
TGTCCCTACTGATAGGGAAGCTACAGTGCCCGGCAGTGAAGTAAGGGGCAAGAAAATTGA  
AGACTTTGGTGAAGACATTAAGGGCTCGGCAAAACACCTTTGTGCTCAGCTTGCTTAGAC  
ACTGGGTAAAAAGCTGGAAGACAGGGATTGGGTCTCGCAGCCGCACAGCTAACGGTTCCC  
GAAACCGGACTACGTAAACTGGCGAACAATGGTGCTGATGCTGATACTCTGGGTGTGAT  
AGCGCTGGATCGGAGCGATATTGCGGCGAAGAGGAAACACAATACGGCAGTATGGGGGGA  
GAGGATAAAAAAAGTACGACACAGTATTTTCGTGAATAATGCACGGAACGGTCAACGCGAA  
ACGGGTTCGAGAAATGGATGGAAGTCAATATGCCCTCCCGTTGCGCCGATACCTGTCAACT  
GTTACGCACTCTGCCGACCCAACAGCTAGAGCGGGCTTCTGCTTATCTGGTGTGACCGGG  
TGTGTATCCAGCGGGACGAGTGCAGCGGGACCAATCGACACAGAACTTTATTCCTGCG  
CAATAAGGACAGTAAGGGGAGTAACATCTTCTTCCCGGAATGCAGGGATGAGTTACTAGC  
AAAGGCAAGATTCTGGTTTCATGAGCAGGAGGAAAAATCACAGGCGAAAGGTGGTGAAAA  
AACAGCACAGTCATCGTGTGACAAAATCAGCTTTAAGGTGTTACCGAATATCCTCAGTGG  
CGATATTTTTATCGTTTCAGGTAAAAACAAAATGAAGGCGAGAGGTGTCTTTAAGTCAGC  
CAGTGAGGCGCGTAAGTACATTGATTCTCATCGTGATGAGCTTGTTTCGTGATCTTAAGGA  
GAAGCGGGGAATTTGCGGTGAGGAGGAGCGAGACCCACGAACCGCTACCGTACTGGACC  
AGAACGCCTTAAGGGGAATGTTTCACCGGAGCAGTTCAGTGCTGCGTTCAGTTACCGGCG  
TGTGCAGTTTGGTAACAACGTGGTAGGTCCTCGTTCGTTAGGCTGATTTTAACCGGCATTA  
TGACTCGCTGCATTACCTCGCGGAAGTAGTGAATGTACCGACAATAGCGTTTTGCTTGAT  
CGGTCGTCTGTGCCTTGCATATGGTGCCAGTGGTAAGGGTTCAGGCCGCCCCACACTAGGA  
ATCAGGTGACGTGGCCCTAACCTGACAAAAGGTAACGGACCGGGTGTGCTGGGGTACGA  
ATGGCTCCATTCTCCGCATAATTATTTTGGTCGTTATGATGTTTCCAATTTCCGGGAAAAT  
AACGTCAGGCTGCCACTTGATGACGGCAGCACAGCGCCTCCGGCGCATATTCAAAGACGT  
CATGTATGTTGGTGTGTAATAGCCGGTACTTCAGAAGGTGTACGACGCCGTTAAAGGTGT  
GATTCAGGCCATTA AAAACAGTGACATGCCGCGTTCGTTCTGCGCTTCTCGATGAGGTGCG  
CTAACACCTTACTGGTCAACGGATGTTGAAATCGCGGCACGTGCCTTTGAGCATTATGT  
TCAGGATCAGGCGCGTATGGCTGCCGTGGAAAATGATTATTCGGTCTATATCCGAAACGG  
ACCTGAGCACAAACACAGAGAACACCTACGATTATCCCACGAATACCGAAATGGATGGCGG



TACTCGTGAGGCATTTCGATCACCTGTTCCGCACCCTGAAAAACCATGAGCCGGACAAGGG  
AGATGCGTATTATTCCGGCAAGGGCGTTACCCGCACACCTGAGGGTAATTTTCATTCCGGA  
TGTTGACCGTAGAGTAGAGGCCGAAGACAGCCCGCTACCGGAGTTTGAAGCGGTTGCCCCG  
TGGCGTGATGGGCGGCATTATGGACAGTCACCTGAAGGTGCGTGTGGTGACGTCACAGAA  
AGAAGCTGAAGCTCTGGCGGGTGAATTGTTCCAGGGTGCCGGCAGGGGGCGTTCATTCTA  
TCGTCCGGATAAACGAAACATTGTCCTGGTGGCGGATAACATCACGGACGGGCGGACCGC  
TCGCGAGAAGATGCGCAACGAGGTCATTTCGTCAAGCCGTGGAGCATGTTTTTACAACAGC  
GGACCATCAGACCATTATCAATACCGCGCTGCTAACTCGAGGAAGTGATAACGTCGCCAT  
GCGTGAAACCTGGCCTAGGGTTAATGCTTGCTAAGGTCAGGAATCTTCTGAACTACATGT  
GGGTGAATTTCTAGCACATATGGCGGAGATACTGCCCAATAAATCTGTTGCGGCATGGCA  
GCATTTTGTGCCCCGGGTTATTGGGGTACTGCGTCGTACGGGGTCACTGAAACCGACTAA  
ACTGAACGATATCGGTCTTGTTCACGCGAATATCCGTACGTTAGGCCAGCGTGTGAGGCA  
AGGTTACACGCACCGTGAGGATGGCGCGAGTGCATCGTTTCAGTACTCATGTGCGTTGAAA  
ACGTGACCCGTTCAAAGTGCCGGGAGTTGAGGGTGAGCGTTATCGTAATGACCTTGCAAG  
AGTGATGAAATGTCTGCGCACACAGTTTTAACGGTAAACATCGGGCGGACGCCGCCGGT  
ATTGCGAGACCTTAGTGCACCGGACTTGACGCTGGTACTTTCCCGGCATACTGCGCGGAA  
GGTCACCAATGGTGTGAAACATGGGGTGCCGATGGAATTTATCGCGAGACTACCGTAACT  
GATGCACGATGCGTATGTAACCTTACAGCTCAGCGCCAAAAAGGAATGCGGTTGTTATCCT  
ACTTGATGACGTAGAGAAAAATGGTGATCCGGTGGAGTCAGTGGCAGACATGAAGGCTGT  
CCGGTAGCGTGTGGAAATCAACAAGGTACCTTTTATTTTCGGTACAGAAAAATGGAAAAAA  
ATTTCCGGAGTATGGAAATAACAGGGTTAACGTTGGACCGGAGCGAAGAATTAAGCCGCGC  
TAATCTTCGGCACAGAGGTCTCCAATTGCCCAAACGGGCACATTCTAATAGCGGCTCTTC  
GAATAAGAACTCTATCCAGAAGATGTTTCGGAAAGGGCCGCATTACTCCCGAACCCGCAG  
TCAGACACCGGGAGTGAAAAGTGCCTCGCGTTTAGTGCGCCAGATGCAGGATAAATTCCA  
GGCGCTGAAAGTCGTTCCGGGACAAGATCCGTTAAACCTGCGGCAAAGTGAGCGACAGTAA  
CAACGCTTAGAAGGGGGGAAGAACAATTCCACGGGAAGGGCGGAAAAAGACCGGAACGTGAT  
GAAGGAGCGCTTCGTTACCCACTGGCTAAAATTCTGGCGGAGTACAAAATTGCGCAGGC  
TGATATTGATGGTTACCTCTACCCCCGTCACCCGCTGGAACGCAACGCTCATAACGCGTA  
AATCCACACGAGAATGCCGGACGGCACTTCCGAGATGCTCTACGCCGAGGAGGCAGAAAT  
CGTGCAACGTGGATATTACAGAGGCAAACAGGCACAGTATGTCCTACAGGCAGGGATAAT  
TGACGATAAGCTGGCCCATCGCCGTGAGCTTCTCCATTAAGACGGACTAGAAAAGACCGT  
TACGGTTCGATGACTGGCAGGACGCCTACCGTACTACGAGCACCTGTAAGGTCAATATGT  
TGACGTTACGGTGTCACTGCCACGCACAGGTAAGAGCTTCACTATCTGCATACGTGAAAG  
CAAGCAGGCTATGGGCCGTGCATCCCTGGGACTGTCTCCGTCCACTCATGCGATACATGA  
CCTGAGCGAATCGGTGCTCCGTTCATCGCAAAAACGATTAGGGTGACGCCTTCCTGAAACC  
GGTGAAGGATAATCCCGACAAGGATTACTGGTAGGTATTCCCCGATGACAGACCGGATAA  
CATCCGAACGGTTCTAGAGCGCAACGACCAGGAAAGTTGTGAAACCAGTCGCTCGGTTGT  
CGGACGCCCTGTACCGATGGCAATGATGGCAGACCCGTACTTCACCACCAAAAAGAACGA  
CAACTTGTACTACATCAAACCTCACGATCCGCTCTTGATCCGTTTCGATGCAGAGTAACGG  
ACCGGAGACCATCAATTCCTTTGGTTCGTACGGTGGGGAAAGTTAACCGCTGCCTGGCAAC  
GGTAAACACGTCGTATAGCCCGGAATGGCTGGTCAGTAACCTAATCCCTGACGTGCCTAA  
TTCCGTGATGAAGCTGAAGGCGGAGCAGGGGATGAGCGACGGTAAACCGAAATGGCTGGA  
TAACTTATCCCCGCGGGCTGTGGTGAAGGACAGCCGTTCTTCTAGTCAGCCATAGACGC  
CAGTCTGCTTAGTAAAACCCTCACTGGAAAAGGGGCACAGTGGGAAAAAGTGTGGAAAGA  
GTTTGTAAAGGACTGCGCGATAACCGGCTGGTTTAAACACGGGTCAACTTGAAGGCCAGAA  
GAAGGAAATGGATCGCTTTGCCTCACTGGCGATGGGGGGAATGAAAGGCCAGATAATCGG  
GGCGTGGAATTCGCTCCTTAACTGTGAGGAGGCTGCCAACGGTGCGGTTGAAAACGCTCT  
GTCATTTCTGCCTATAAGTATGCCCGTGATGCTTGATTGTAACGCCACCAGGCGGCGAC  
CCTTGACACAAACATGTCGGTGGACTTTAAGCATAAGTGGTGAGCAGGGAGCGCTGATGAA  
TCCGCTTCAGATGTTCCGCCAGTGCCAAACATTCAGGGAACGGCAAATCTGGTGAGAACGCT  
CGGACACCTTAATGGTGAGGGACCTTTATTGGAGCCATTTCTTGAAGGATCTGAATGT  
TGTGGAGACAATCGCGCTTGCCACTGTGGGCGCAGGGAATCTGTTTGACTCGTTTCACCG  
CAGTGAGGCGGGTGAGGATGACTATGGGGTAACTGGTGTGAAAAGGTTCCGACTCATGT  
CAAAGAGCCTTACCTGGTCATTATGAAATCCGTGTCCGGGGGAAATGCCGGAGAAAAGTA  
GAGTATGCCTCTGTCTTACGGGTACAACGTTTTCTTCTGCTCGGGCATACTGCTGATAG  
TGTGGCGGCGGGTGACCTGACGGCGTCACGTGTTGCCTGTAATGTTGTTCTTGGTGTCT  
CGGTGCACTCAGCCCGATTGCCAGTTAGACGTCGAAAACACTGTCCTGGGCACTGCTGAA

AAATGCAGCGCCGATCATTCTGCGTACGTTTGCTAACCTTGCCATGACTGAAATTGTCAA  
GCGGGCTCACTAGTACCAGGAGAACATGCCGTTTGGTATATCAAAACCTGGCAGCCAGCT  
GGGGAGACGTTCAACGCCAGAAGCATAAAAGGCCTTTGCATCGTGGCTTAATGCGTGCTC  
AGGTGACAGCCAGTACCGTCGCGGGGCGGTGGATATCACACCGGAATCGCTGAAATTCTG  
AATTGATTATACCTCCGGCGGGACAGGGCGCTTAATTTCCAAAACCTACGATTGCGGCGGT  
TCCATCGCTGAATGGTATTGATCTACCGGAACAGCAAGTGCCCTTCCTGTGGAAACCCCC  
GCTAGAGGTGATGCCGTATGCAGACCAGATGAATATGTACGACCGTATGTTCGGAGGTTGC  
GTAGTCTCACGCAGAGCTGAGCAGTCTGACCGTTGCAGAAAGGACAACGTGCACTGGATA  
GTACAATGGAAAATCGTCAGTGAACGGGCTTATGTATGATACCCGCCAGAGACTGAAGGA  
TGTGCGTAATTAGCGTGATGCGATTTACGCCGACAGTACTCTAAGTCTGTTCGCAACAGTG  
GGCCTAGGTGATATGCGTAGTTTGGGATATGCAAATTGCCGTGGATCGGTTTAACCGCGA  
GTACAACAAAAGAGTGGGAGTGGATTAACAGAAAGGGCCCCGGAGGGATTGCGGGACTG  
ATTAAGAAATCAACACTCATTGACCTGTAATAACCGGAGGTATTAACACATAGTTAGTTG  
AGCATTTCATGTAATGCAGAGAGCGGATTTATGTTAATGAAGAAAAATGTGCAGAAATG  
GTAGCCTATTTGCTGAAAGAGCATGGCGGATTTATGTGTTTAACTAAGCTGAAGCAGGAG  
CGGTAATGGCGAATGGCATTGATGAGCTAAATAAACTTGATAGGTTAGTAAGCAATCTGA  
CTTAGCCGAGAGGATGTTACCCCTTATCGCCAAGAAACAATACCGGCCAGCAGAATTAC  
GGATGGAACCTATTCAGGCCACAGATGAGGTCGATGGGGAGTTTTTTTACCCAGTATTGGA  
TCGGTTTCTTATATCCAAAGATAGGCCATTTGACATCCTCCACGCCCTGAAGGACGGAGA  
ATAACTGCGCAGCGGATAAACTCGGTGTTTTGTTGAAAACACCTGTGCTAACTCACAGA  
AAACCCGTCAGTAAGAGGGGCTTAGTAAGCTGGGACGGTACTTTGATAATTTCAAGTGCC  
TGTACATCAACTTTGACACTGCTCAAGCCTTTATCAATTTAGCCCTCAATTCCTACTTGG  
TTTTTCGGAGAAACATTCTGCCCGGCCAATTGCTGTCATCGGAATATGTGACAATTGTC  
CCGCTATTGTCGCGAAACTCATAACGTTTATAACCCACTTTTTTCAACGATGCTCACTTCA  
AGGATACCCCATGGCTCATCCTTGAGTTTTTTTTGCCTGCGCTACTCTTGAACGCTCTGCT  
TCAGGCCGTTGGAATCGCCCGGCTGTGCAAAGCGCCAAAAGACACAGCAGAGATTGGT  
GCTGCACCCAATCCCTTTTGCAGTCATAGTTTTCTTGCTGAGATGAACATTCACACAGAA  
TTCTCAGTATTGTAATGCTCGGGTGCCTTGACGATGCCTGACACATCAGTGGTGGTGAGA  
GATTACTCCCTGCTAGGTCAACTACTTGCCAGATGCGTAGTCTACGAAGACAGCGACCT  
CCGGCGGACCGGTTCTGATTCGAACCTCGCAGACGTAATTCCTCGTTACCAATGGCGTCA  
ATATGACGGTTAACCGGATGACAAGCAGAGCGATTTACATCGCCTTTTGCTGCTTCATTT  
CCTGCTTCTCCTTGCCCTCCGGCACGTAAGACTAATCTACATGTGTTAAGCAGGGATT  
GAGCCTCAGATTACTGTTAAGCGTCTTGCCGGATCCGTAATGTAAACTTGGGCTTTTTGTA  
TATCAGCCATAGGTGTTACGCCCGAAGGGGATAGCCTCAAGCACCCGCAGCAATTCTCC  
TTAACTTTCTTTTTCCGGCAAGACGTTTGTATCTCCAGCGCAAATCGAATAAACAACAT  
GCAGCACTGCCATTACTGTTCCAACATCCGCGAATCCTTCAGGCCGGGTCATTGATTCAC  
CTCTTTCTCAATATTTTAAATGTCAATGTCCGCATCCAGGATTGCAGTTCATGCTGCCCG  
CACCCGTGTTTTGGTGTCTTTGCTTAACGCTCGAGACTGGCAACAGATTCTCGGAGCTG  
ATCGTTTCTGTTATGAAACTGTCTAATGTCTCTCACCCTGCCTCACCATCGTTGGAACA  
CCGCAGGACGTAACGAAATGGGTGACAAACACATCCACACTAGAAGCACACGAATACATG  
ATCCTGTTTATGATACTCAATGGCGCGATTTTTAAAGCTCTGTTGTCAGTAGTTTTTTCT  
GCCAGTTAGTGCTATGTTTACGCCGTTCTCTTCATCGCGCTTCGGCTGCACCAGTGTGAT  
GATAGTATCGTCTTCATTTTCGATCAGTTCACCTCCGGCGGGGTTTTGATAGGGGCATC  
CAGTCTTACGGTTTCCACGTCTCACCCGGAAGTACCACCCGTCAGTAGCTTCAGGATGC  
CCCGGCATGAAAGGCGCCCACTTCACTCGCCAGTCACCTTTCTGTCAAACCTCCACGGCA  
ACAAGAACGGCTGTCCTGGCATTCCGGCACTCGCTCAGTTCGAGTTAACCAACCATGCGCA  
GTCGCCGGACAGTTGCCAGATAACCCATTCTGCAACCATTCCAGGTCGACGTATTCCTCA  
ACCAAGTTTCCGTCGCACGCCTGAAGCCATTGCTCAGCCTTGAGCGCATCAGTATGAATG  
GCCCAAGTTTCGACCGACGTCAAATTGCATTTTCGAGGGGTCAGCAATCTGTTCAAGCTGC  
GCGTGTGGTAAGTTGTATATTTGGCTTACGAGTTCGGCTTCCAGTTCTGATATACGCCTC  
TCTGATGCGCCAACATAACACACGCCTATCGCGTAGCGGTTCTTCCAGTACGGCAACATGG  
CATTCACTATCAATTAGGTCGTTCTATGCTGTCCCGAGCTTAACTCTCAGGTTCCCATAC  
CTAAGCGCAATCTCCTCGATCTCCTGGTTGCGGCGTTCCATGTATTGCTCCTTTCTATCC  
CTTTCATCCAGCAGTTCCAGCACGGTAGCCGGGTTAGCCTCTGCTATAAATTCAGTGTG  
CATAAGCCTGCGCATCTGATTCAACCATGCAATTAACATGACATTCCACTATCACACCAC  
CGTGTTTTAGTCTCCGTTTTTGGGAAACAAACGCTCCTGTTACATGGCCGTGCTCGTTAA  
CAGATGGACGCCCTATGATATAGCTTCCTTTAGTTGCTTTCTCTGCCCTTTAACGCATTA

CCTGATAGTCAATCTTGCTCATTTTACTCTTCACTCCGGTATACAGGGATTACTACGCCC  
CCTCTTCTAATTGTGCAAGCTGGATCCCCTGGTTCCATGCCGTCAAACCTAAGGCTTCC  
AACAAATTCATCCATTTGCGTATCCCGTTGCTCCTGCTCTCCGCGTTTATTCCATTTTTTC  
AGGGACAAAAGTGTACGCCAGCCTCCTCTGCAGAACATGATCTAGACATAATCCAGGAGA  
GCTAGGCCGGTGTCTCAGGGCTGTAGTGATGGTTGTCTGGTGTTTATGTTACGTCATCC  
CTCTGTGTCTGTTGATAAGTTCAAGATCCTGCTTGCAACTGGCGCAAGCTCTGCATCCAC  
GAACAGCCAGGCGTCGCGGCTCATCTATCGGAGCGGCACACTCGGAAACACGAATAGCAG  
ATGGGGTATTACTACTGGATTTGTATTTTCGGAGGGAGAGATTGCGCTCATGTTCTTCGA  
TTTCACCAGCGTTGTCTGACGAAATCTGCCGATTTCCCTTTCCTTCAGGCATGAAACAACGA  
GCTGAAGCTCCTTTGTTGTTAGTATTCGAATTGCCTTGCGCGCAGGCTTTTCAACATTGG  
TCTGGCCCGCTGAGCTACGAACCTGGACTGCTCAAGCTGTGCAACGTCACTCAGTATCAC  
ATATCTGTTGTTCTGTCGAATGTAGGGGGTCCCATAACCAATGTCATAACAACCTTGTTCTGT  
GTAGGAGGAGTTGAGCTCTTTCACGATCGGGTACAGGTGATTGCTGAGGTCCTGGACTTT  
TTCCACCCAGAGTTGCATATAGCAGTGAGGATCATTTCCTCGTCTGTGAATTTTTGCTG  
TAATGATGCTTGTGCTGACTCCATGTTGCGCCGATTTTGTACCCTCGATGAAGTATCT  
GCGTATCTGACGGTCTTTTTTCGTTACGATCTAACACTGCGATTTCTTTGGTTGTATCGAG  
GGTAAGGCGTTGATTATTTTTCCCTCGCCCATAACCTACTTACAGCTTCTGGGAAAGAGC  
TATATAGTCCTGGTTTTCTACTAATCACTACTATTCAATACGTTCTGTAAAGCCACGTCAC  
AAAGCGTTAACCTACTCCAAGAAAAGGAAGTCTATCACGGGCATTAACGAGAAGGGTGT  
TTAGCGGGCGATAGTACCATTGATAACGGGGAGGGGTTGCCTGGACATGATGACCTCCGT  
ATATGTTTAGTTTATAACCTCCCGTTAGTAGCTGGCGGTCGGGTGTCAATTGAGCTAAAT  
AAGAAGCTCAGGGCATATTCCCCTTGCAGGGGTTATATTACGCCTCTCCACCCGGCTCTA  
GTACGGATGTGACTATGCCATATTCCAGGCGTAAAAAAGCTCCAAGGCTACGGGGTGCAG  
AGCCCGCTTATTTGTTTCAAGTGCAGTAAAGTATGCGCTGGCTTTGGAGGTGTTGTCAATCGG  
CGGAATATTGATGAACGGCGAACGGTAAATGCCCATCCAATAACATTAACGCAAATTCGC  
ATCACAAACTTGCCTGAATTATCGGAAATATAAAGTTAAATCCCCTTAAATGTATGTGTC  
ACTATTGGGGCAAATGTGGTTGTTTGGGGCACATGTGAGGGAAAAACAACGGATAAAG  
AACGGTGTAAACTTTATATCTTCATGGTCAAATGAGGTGTAACCTGATTGAATAAGGTAT  
GCTCTTGGACGAGGTTAGGTAATTCTGTGTTTTAATGCTTCTTGGTTTTCAACACGCTA  
AGGATATGGTTTATCATTTTGAAAAATGTAATATGATTTTCATCCTCCTTGTACGTTGGG  
TAACGTTTGGGGCACGGGGATTACTGACATTATTCAGCATGGGATCTTGACTCACGCTCC  
GCTCAGGCATACATGCACCATAGACATTGTAGACCATGCTAGCGCTGGAGTGCTCCATCC  
GTGATTCAATAACCGTCGGGTTTGTCTCGGCAAGATAAAGGCCAGGACGCATAAGTATGGA  
GTGGCACATACGCTTACGGGATAAGATAACCCGCTCTTTTTATTGAGGAATCGCATGTGG  
CACCGATGGTGCTTTGCGCGTAGGTAATACCCGCCGGGTGACTTTTGCGAACGAATTGTG  
GACAGAAAACAAAAGTGCACGCGTGCAAAACGGTTCATACGTAACCTCGCGTAAATGTAGAT  
TGATCTGCTGCTGCCAGGAAGAGTAAGCATCGCCTGCTTTTTAAGCGCTTCACTTG  
CTGGTGCCAGAAGATGTATGACCCGGTTGGTGCCTAAGTCGGTCTTTGGTAGGGTAAAT  
CGCCGATTTTTGTAAAATTTTCGTCGCACTGTTATAGTGACAGCCTTCAGGTCCATAGCAT  
CCCTCGTAAAGTGCAGCAATTTACCCGTGTCGCATCCGTGTAAAAACAGCCACTGCTCAGC  
GGGGTTTGGTCTGTTTGTATGGCAGGCATGCATGAGGCGGCTAAACTAATCTCTGGTCA  
GTGGATATGGCACTGGTTTTAGTTTCCTCAGCGGTGTTCTTAGAGTAAAGGGGTTTTTCC  
CCGGATGACCGTTTTCGGCAGCACAGCTGAACATTCCCTTCTGTTGTTGTACGTTAGCAGT  
TCGCTGTGGGTATGGTTCATCCTTTTTCGGGACGTGCTGGTTTGCCTGCCTCCCTCTTCC  
CGGTCAGTAAATCTTTCCTGATACACAACAGATCTTCTTATGTAATCGATGACGCCAGCC  
TCTTAGGACCAAGCCTCGGTAACATATTTGTCCACACTGATTGATAATGATTTAAGGCGT  
TACTACCGATTACCATTTCTTTCAGGGTAAGCCATTTCTGTGCCAGTTCACCGACGGTGA  
TATCTTATATTACCAGGCCAAATAGCTTCAGGTGAGGTGAGACGTGGAATCGATCGGCAT  
AATAAGACGTGCTCGTTCGGTCTCAAAGCAGACCGTAGCCCTCAATTATCCGGCGATCT  
TTCTGTTTTGCGGTGTATGGGGCACGCGAATAGTTTCGCGCGCTCGTTTACCCTGTACT  
CAAACGTTATTGGGAGTTTTCCCTCCGAAATTGTAACGCCTGTTAGATAGGCTGTATTCCG  
CCATTGTTCCCTCCCGCGTCCAAGAGAAAGCTCAGTTTATACTCTTATGGATAAAGTTTAC  
ACACCCTGAGATAGTAAGGGTGAGTTTTCGATCCAAGTGGTGGTAGTACGAAGATGTCAG  
AGAGATTCGCTGTTTTTCTTTGGCGTTCGGTCCGGGGGCTATTTGTTTATATTCTCTGCCG  
GTCATCCACGCACTGTCCCTGACGCGTAATATTGTACTTTTACTCACCCCTGATACCGCC  
ACTGAGACCTCCAGTGTTACCAAACCATCCGATTTTATCTCAACGACAGGTGTCATGACT  
GGCTGAACGCGATGGTTCTGTTGCATGCATCACTCACCCATTAGTGGCCTCTGCATGTGC

AAGAAAAACCCGCCATCGGGGGGCTTGGTGTGCTTTTAGGTTTTCAAGTCGAATCTTGGT  
TACGACTTCTTCGAGACGAACACCGGGTTTTTCGTCCTTTGATATTGCTAAGTTATCAAT  
TTGCGCGGCACTCTACCCTTCTAGCATCCATGAATCTAAGGCGCGAACAGCCTCCCTACG  
CTTTTTAACTTCTCGGCATCTTTGATGTGCGACGAGGACATCAATGCAATTTAAGGAAAT  
GTGGAGTTTGACTTTACATCCGATCATGACTGCTTAGAGATCTTTTCCGCCACAGAGTGA  
AGATAAATCTTCAGGGTCTGGCTGGTATTTCTATAACGTTTCGAGGGTTGAATGTTGAACA  
CGCCATCATGATCTCCATAAAACCAAACCTCGCCGTAGCGAGTTGAGATAAAAGAAATCCT  
AGCGAGTGCAGGATTGTTAAACAGTTGATATATTCAGCTCTATAGCCAATCGCTTTGCC  
GGTTTATCGCCGAAGAGCGTATGTGTCATTGTCATGATTTTCATATTCCTCATAACGGAACA  
TCAATTCTTCGGCTGGAATCGTCGCGCTTCGGGCATCCCTTTCTGGTAATCATGAGGTAA  
TACTCGCGAACATAGATCGCTTATTCCAGTAGTTATTAACCAGGCGATCCTCTTCCGTT  
TACTATCCGGGCGAAATGGCCTCGAAGCATTACCTTTAACTGCAAGTGGCAGGTTAGCC  
CCGGTTAGCCTTCTGCGGAGGTTCTGGTAGCGGAATCCAGGGAATTGCTTGCTCAATACC  
ATCACCCCGCTTAACCGTTCGCATCTCCGCACCGAAAGGTGATTCGGGAGTACCGTGCCGA  
CCATCTTAGCGGTTTAAACCAGACTGCTATCGAAATTCAGTAAATAAGCACGTTCTGGCC  
TTTTTCAGGCGGTTCGAGCACTACAGCTTATCGAACTAATAAGAGTTACCGGAGAGTTTCC  
TGCCTCATAAGCGGATTTCCGGCCAGTGCATAAGTGTTGCGTTGCTTACGCATAACGCAAGC  
AACGTTTGTGTTTTTTTTTTTTTCTGACAACCTTTCTTGGAGTCAACGCTTGGCAGTCCG  
GCTTGCCGCATCCATCCGTGGTAGGCAGATATATAGTGGTACATTTCCCGGCGTCATCGT  
ATTGTCACGACAAATAAACGTGATACAACCATTTTTAACGAGCTCAATTACCGCCGTGTC  
GTTAGGGGCGAATTATTCAGTGGTCAATACAGTCACCGTCATTTCTGAAATACGGCGCTT  
AATATCATATGGCAAGACCATGTTTCCGATTCGCTCATGGGTTTCTTAAGTCATTTCTTT  
CTCGATGAACGTTGTCATGTGTTAGTGCTACTCTACTTTAACGCAATTTTTTCAGCGTCAA  
GCCGTTCCATTTCTTGCCAAACTGGTTAACCCAGGCGCATGACTCATAGGCATATAGAC  
GCTTGCGGTGGGGAAGACCTTATCCTTTTCAATGCTGGCAACGTGCTCACCGTTGTATGC  
GCTCAGCGTGTCTAGGACACGATAAAAACCTTCCCTCCGGCTGCCCTGAAATACTTTACTGC  
CTTCCCAAGACGATCCTACGCTTTTTTCCGGTTCAGGCGTCAGGACGATTAATTCCTGCAA  
GGTTGCTATTTTCAGTTTTCTGTTCTATGAGTTAATTTTATTGTGCAGTATGTTGAACGACG  
CCCATAACCACCTCATTATACAACTACTAAGTCCCAATTTTGGCCGCTTGCCGAGA  
CGAAAATTTGCGGGGATATCGGTGTCATCGGCACGATAAACAGAACGAGACAGAAAATTT  
TTGTCGCTATACTTTTTTCGCGGATATTCTTTTGAGAATATTGTATGCCCATCATTCTCCT  
TTGTTGCTCCTCAAAATTTTATGGGGTGGCGCAGAATCACGCGTTTTTGTCTTGCTTATT  
GGACAGCGATCCTTGCGCGCCTCTTTTGTACTTCAAGCCCATGACCTACCGATATAGTCA  
CCGAAGCCAAGCCAATTATCTCTGACATCGGTATAGTGGAGGCAATCACTATAGGGATGC  
ATTGTCTAAGTTGCAGAAACAGACATATCACTCCCTTTTAGTGCGCAAGTGGTTTTACTT  
GCGGTTTTGCCCCGCGGTGGGCTTTTTGAAAAACCAATCCATCATCCCGAACTATCT  
CATCACGGACTTCCGTCGTTGCGTGAGTACACCCACTGCCAGACGCCAGGGGCGTTTTCT  
ACCAACTAACAGAATTTGGCTTTACGGTTTTTCATCGCTTGCCCTTGCGGCATCTGTTT  
GGTGCTCGGTGAGCCGATGTAATACCGGTAGGGCGGCGCTTTGGCCTCGGGATGATGTTT  
TTTGCAATTAGCCGAGAAGCCCGGAAACAAGTTCGGATACGATAACAAGCAGATACATGCC  
ACACGCACGAGTCACCTCTTTTGATGCGACTGCCAGCAGCGAGCTCGGCTACACTTTGTT  
CCCAGAACCCTTGTGAATCGCCATAAGCTTGTAGTCAATCGGTGCATATTTGCGATTAA  
AGTAGGCCGGAGCATCATTCTCAGTTTCGTCAGGTAATTCGCCAGTGCCAAAAGATTGT  
TCGAAATGCATATGAGTCCGTTCTTAGCGTCGCCAGTTTCTGCCATTCGATAATGGCAT  
CCTGCATGAACAGAATGCTATTCCCGGTTAATAGGTCCAGCTTTTTGTACCGGCTGTGGA  
TGTTTCCATTCTCGCTTGGGACTTTTACGTTGCACTTTTCTGAGCCTTCAAGTAACACCA  
CCTTATCGCGTAGAGCTTCTGCCAGTTCAGCAACATGGCATTCACTCTCGATAAGGTTGT  
TCTCTGCTGCTTCAAGCTCAACACCCAGCTTCCCCGACTTAAGCGGAATCTACTCGTTCT  
CATTGTGCGGCGGTGTGATGTATGGAAGGTTTCTTTCTGTTTCTCCTCGCAGTAACAGCT  
TGGAAGCCGGGGCAGTCTCTGCCATGAATGCAGCTTTATCATAAGCGTGATCATCTGCTT  
CAATCAGGCGGTTAACATGACGTTTCGGCAATCACGCCCCCGGGTTCTCTTTTCCATTTTT  
GGCAAACAAAAACTACTGTTAAATTACCATGCCGGTTAACGGATGCATGCCCTAAGAGGT  
AGCTTCTTTGGATGGTTTCTCTGCCTTTTACCCAGTCCCTGATAATTAATTTGCTCC  
CTTCGAACCACTTTGTTTACTAATATGCTACAGCTCCTCCTCACAAATTGCACAAGTCCG  
ACAACCTTACACGGTCAGGCGTTTCCGTTGATCTAGGGAATCGCCACACTCACAACTG  
GGTGGCAGAAACCTACTGGTAGTTCAGGGGGCGCAATTTTATTGCCGTGTTTCGCTGTGA  
TTCTTTCAGTTTCTGATGTTGAATAGATGAGGTCTGCAATCTGTCATTAATCCCTGAAGTG

ATCATGAATCCGCTTGAGGGTGAAAGCGAATAATACAGAAGGAGCCTCCAGCTCCATGGT  
GATTTTGGCTTTTCATCGTCTCCGATCCTTAAAGACGCCGTTTAAACACGCCGAACGCAAGA  
CTTAAATGAGTTGGTGTGAGTCCCATTAGCGTTATCGTCTCGCGGCGCTACTTCAGAACG  
CTTCGGGAAATGCCATGGGCGTTTTTATCCGGAAACTGCTTTCGGGGCTTTTTTGATGTCA  
GTATTTGCCAAACGAGCAATGCTGCCAAGGGCGTTTTCTGCTCAGGTGTCATTGAACAA  
GTCCCGTGTGCGCAAGCCTCAGCAAGCAGAATAAAAAGCCTGCTGCCAGAAAAATGCATT  
CTGTTGTTGTTAAGCCGGGTCTCTCTAGTTTGTCTGCTTTCTCCGCCAGCCTTTCTAG  
CTTTTGTGAAAGGAATGTGTCTGACGTATGAAATTCTTAGCCAGTTTGTACTGGTATTTCG  
CACAAACCTGACTCCAATTTTAGCGAGGCTATGTGCCGTCTAGAAACTCGTTCTTAACTC  
AACGGCAGATGCTTTGTCTAGAGAGCTGCCTGTCTATTATTTATCTCCTCAGCCAGCCGC  
TGTGCTTTCAGGTAATTTCTGATAACAGAAAGGACGGAAAGTACACAGCGTCGCTTTGTA  
ATGGAGTGGACGAAAGCGCTCTAACCTACCCGGATATTATCGTGAGGATGCATTCTCGCC  
ATTACTACCAAATACAAAACCAATTTTAGCCAGTGCCTCGTCCAATTTGTCAATGAACT  
ACCGCACCATCTCGTCAAAACTTGCCATGTACATTTTCATCTCGGTTAATCACGACAGAAT  
GCAGGCCTTCACGCTTCTACGTGGGTAAAAGTTGGCAAATACCAGACATCTTCTCGTG  
TCACCCACATGCTGGACTGCACCTGGACCCTATAAGCCGGCTTTATGGCCTCGAAACCAC  
GGAGCCGGAACCTTCTTGAAATCCCGGTAGGTAATCAGGCATTTTCAGTTCCATGCCATTTG  
AGGCACTGCATAAACCATCGGGAGAGCAGGCGGCACGCATACTTTCGTCGCGATAGATGA  
TCGGGGATTCAATAACAGTCACTCTGGAAGTGAACCTCAAACAGGGTTCTGGCGTCGTTCT  
CGTACTTTTTTCCCAGGCCAGCGCGTTAGCGTTAACTTCCGTAGCCACACCCGGTGCAA  
CTTCGGCAAGCAGGTTGTGGCAGTAGGAAATTTTCATGTCAGGCCACTGCGTTCCAGAGC  
GGGACTGTGCTATCAGGTTGTGAACCTTCTGAAGCGGTGATGGCGCCGAGCCGTAATTTGT  
GGCATGCATCACCCCTTTACGACAGGTCTGACGTCGGTTCCGGTATGCTGCAGGAAAA  
AGACCGGTGTCATGCAGACACCTTCTGCTCAGAGACTTTCTATTTTCAGGAATCCAAAAAC  
TTCCACTGGTTCGTCCTGTGTCAGTTCTGACGATGCGCGAAAGTCCATGAGAAATATCTG  
GGTACAGAGCGACAATAAGTCGTCATCACATGTTATATCCAGGGCGAACGGCAGAGCGTT  
AATCTCCTGCACGGGTTTCATCGTTAACCGGAGTGATGTTGCGTTCGGGCTGGCGTGCTGC  
AGTGTAGGCAGTATTTGCGACAATGCGCTCGGCCTCATCCTTGTATAGATACGAGCCAA  
TCCGAAGGCCAGACGGGCACACTGAATCATGACTTTATGCCGTAACATCCGTTTGGGATC  
CGACTGCCACGGGCCGGTGATTTCTCGACCTTCGCGGGTTTTGAATGGTTTCGCGGCGGCA  
TTCATCCATCCACTCGTTAACTCAGATCGGATAATTACAGTCGATGCTGTAATCCGGGA  
TGTACAGGATTCATGGTCTGCTCAAAGCCTTAGCCATTTAACTGCCGGATTTAATTGAT  
GGCGCGGGGCCAACCATCAACGCCACCACCAGAACGATGCCGTTCTGCTTATCAGGGAA  
GGCATAAATTTCTGTAGTCCACGCATTATGTCCGTACTGGTTAGCGACGATCAACAATGC  
TATGAACTGCGCCTCGCTGGCATCACCTGTAATGCCGTCGGGCGAGAAGTGGTGAACAG  
TTCCACTCGGTTGGCAGAATCCATGCTGGAACGTTTCATGCAGCTTCCCTGCCAGCAGTGC  
GAGTGATGCACACTTCGGGTTTTAACTCTGAATCAATATCAACCTGGTGGGGACCACTT  
GTTTCAACCATGTCCTGGATGTGTCCTGCATTGCGTTCCTTAACTCAACAATGTCATCA  
GACGCACGGGTAATACCTTTTTTGCAGCCCCGAGGCGTTGCTAATGATCCCTGCAGAGT  
GATTCGACAGGTGCTGGGGCAGACCCATTCCCAAGTCGTCTGCCAGGTCTGCGTCTTTC  
TCTTCACGGGCGCTCTTCTGGTAGTGTGCGTCCAGCGCTGAGCCTCAACACGACCCTGA  
ATGGTATAAGCGTTCATGGCTGAACTCCTGACATAGCGCTGATAAATCCCCCGCGTAAT  
GCCGGGCTGATTAGGAAAACAGGAAAGGGGTTTTAGTGAATGGTTTAGCTTGATCTCAGTT  
CCAGTATTACTATCCATTTTTTATAAGCGTCGACCGCCTCACGAAACATCTTTTCATTGC  
TAATGAAAGTGGCGGTAGTGACTTTAGTCTGGATCGCCATAAGTGTGTTGATCCATTTTTG  
GGGACTACTGGCTGGTTTAGTCTGTGATAAGGCGTTTCTATCCTTCACCTAATTTACGG  
GTGATTTCGTTCAAGGAAACATTCGGAAGGGCAGCCAGCAACAGGCCACCTCGCATTGGCA  
CAGTACATGGTGTGCTCCTTATATATACATGAGAAAAACCGCCTCGAGTGAAGCGTTATG  
GGTATGCGAGAGCGCTGCGGTCAGGCGGCTTCGCTTATCACATCATCTGAATCAAAGATA  
ACTGCTGTATCGTTATCGGTAAATCTTATTCTTCGCGGCCATCCATTGGAGGCCATGCT  
TCCTGACCATTTCCATCTTTCCAGTCGAACCCACACAAAACACCATATGCACTTAAGTAG  
CTTGAAATAGCTATAAGCAGAGCACCTTGCGCAAGCCTGATTAATACAGCAGTTAATAGA  
GAGCCTTGTTTATTGAGTTGGTAATCAGAGTCTGACCAGACATTATTAATCTGGTGAAGT  
TTTTCTCTGCCAGTACGTCATGGTCGTTTGAAAATTCTATACATTTCTTTTCACTCGTAA  
TCAATGATTTATTGTTTGTGTTGACATCTGTTTCATATCCTCCCGGATAAAAATTTCCGCC  
CTCACATCGGAGGGCGAAGAAGATTATCAATAATCAGAACAAGTGGGCTACTGTTTAATT  
GCGAGCGAGAATGCTCCGTGTATTCCTCGTTGGAATGAATACACAGTGCTGTGTTTATT

CTGTCATTTATGCTAAAATAAAGGCGACCATCATCAAGCCGTGTTGTAGATGTTGCAGG  
GACCAAGGAAGTGATTGGATGGAGCGCCATAAATTATGAATTCATCGTATGACGGGTCCA  
TCTCAACCTCTTGTCTATTGACATTCTTGCGTGAGTGTGGTCAGCGGAGAAGCATAAAA  
CAGCCCAGTCCCCGATTGTGTTAAAAAGAACTGCATTGGACGGTGGTTTTACTGCATTTG  
AGTTAACGCGATAATCACAAATCGCGGTTTCATGAAATTCATATATCACCTAAAATCAG  
CGATTTGCTGCCCAATTTTCGCTTTATGGCGACCAACACAAGTCATCTGGCTGTCAATTTGT  
TTGGATTGCCGGTAGCCTGCGGCTTAAAGAGGTACATTTGGAAGACAAGTTGAGTCTTCA  
TATTTCTGATCAAAGTTGTCGGTGTATTTCTTCTGCTCTAATCGTTGGTTTTCGCTTCG  
CATTGTAAGTCCACTCGTGATGGGGTGGGCCTGTATAGTTTGAGGGAGATAATCGCCTCC  
TGACTTTGCATGTTTTCGCTGACGAGCTCTACGGCGAGAAGCTTCGGCGCCATTACATTTCT  
GATTTTCGGGAGTTTGATTCTCTCGAACAAACGTTGTCGATGCCATCTCGAACTTCATC  
CTGAGTCGGGCGCTTCTGCATCGCACTCCACAGCTTATGTGGTTCGGTGATATGGCTTTT  
CAGCTACGTAGTAGATAATTAGCCGTTGTTTAAAGAGCCTCCAAGTCTGTTTCACTTGGCA  
TGCAGCGTCTGCTGATGGTTAACCGGAACGATATGCAATTCACTTGGTCAATACAATGT  
GTTCTAATACGGGGCGTTTGTGTTGCAACGCTTCGTATTTAATATTATTGTTTTGTAGCGT  
GGGTGCATTGCCTTGGCGATGTAAGGAAAGATCCGAACCTTCGTTGTTTAGTGTGTGGTAT  
CTATTTACTTTTCGAATAAATAACAATTGATTATGTGTATGTTTGGGCGAGAAGAAAGCAA  
ACCATGCATGGAGGCCGGGTTGATGATTACCCGTGTGGCCTTGACCGATAATGCCAGAC  
ACATGTTCAAGATCTCAATTCATAACCGATCATAGTCATTCAACTGAACTGCTCAAACG  
AATTGGTCATTCATTTTGTATGTAGACATCTGTTTTTCTCATATTGGCCGCACCCCAAC  
AAGCGTTGAAAAAATGTGCCAGAGTCGCTAAGGTTACATCGCACATAATTATGTACCTTT  
ACAATGACTCCTTCTGGAGGCTCTGGTTAAACTGCATGAATGTCGGACTTCGGAGTTGGA  
CATTGTGCAGAATGCTTTTTTCATAAATTGAGGCCGTACGTAAACTTTCCGCATTGAAGAGT  
TGCCTTAGGCTTCTTCGTTTGTGTTATGGTTAGGAATGCCCTTAATCGTAACCGTAACCG  
CAGATTCGGGTTGAAAAAGTACTGGAAGATCATAGCTATGAAATGGATTAGCCCTGACTG  
AGACTTTTGTTCGTTTCGCTCGTCAAATATTTTCTCTACTGGAGTCTTAGTTAATCGTAG  
CGACTGGGACTGCTTCACCAGAGTGAGCAGCTTCAAACCTTTTGTATTCCTTTTTCATGC  
GGCTTTTATGTGCAGTCATTCTGCTGTCGCTAGTCTTTGGCTCAGTTGCGTTGATGTATC  
GCTCGGCAAGCTCATTGACATCAAGTTGTGCAAGATCACCCATTTCTCTTCTTAGAGTA  
CCGTTTCAGAGGGGCGCGAATGAGTTTTATTAATTTTCGAGCGGTTTCATATTTCACTATGT  
TCAGCGACAGAAGATCTTCAAGAAAGTCCTTGAAGGCCTGCTCGCTAACGGTTGAATTAG  
CCATTTGCTCTCTCTCAGTTATTGCCTCAGAAAGTTTTGATCCCCTAAGTGAATTGCA  
TGCAACACTCAAGTCTTGTGTGTTTCCCTGCCAGATCCACTCTCAATAAAACAGGCCGCA  
GCTCTGCGACTTTTCACCTCGTAAATATCTTTTATACTACCTCCAGAAACCGCAGGCTCG  
GTGAGCCCTAACAACTGAAGCGCATCGGCCAAAGAAAGCTCGGTGCAATACGGGTGTTT  
TTTCATATCTTTCTGCAGCCAAGAAATTTTCCATCTGTACAGCGAGCGTATCCACCTGAT  
TATGTTTGTATGGCAGGACGTTTTTCCACCTGCCTCACCTGCAATACAGGACGCTGCACC  
CCGATATTTATCCGCCGGTCATTCATGTTATAGACAATATCAAGCTCATTACGGATATAC  
TCACATGGCCTTATGCTTTCAATCAACAGGTGAACTTCGATTTGACCGCTTGATACTCAT  
GGCGATTAACCTCCAGCTATCCTCTTGACCAAAGGTCTCTTCATGGCATTGGCTGACGA  
TAACTTTTCGCCCCAACGGAACCACTCTCAGTGCATGGGATCGTTGGATATTACGGGTTTA  
GTGGTGGTAGAAAGAGCTGACCGTTATCCCTGATCAGTTTCTTGGCTCTAAATCCATCAC  
CACCAACTCTGGCGATGCAGATATCGCCGGGCTCAACATCTTCTGAGGGTCAACCAGAA  
TTAACATCCCGTCATGAGATCTAGATTTGGCACCAGTTGTTGCGGTCATTGCGTTACCTT  
CAACCTCACGCGAGACGGCAGAGTCACTGGCACTTTTGGTTGCGCTTACTAATCACTCCG  
CATCACCTTTGGTTAAGATGCCGAGTTCTGGCGAGAACATCCAGGCTAAACATGAGAAC  
AGACAGGGTACTCATATGGTGTCTTAACTGGGGGCCACGAGGATGCTCCAACAGGTGCAA  
ATGTCCCGTCGTGGTTAAATGATATGTTATCAAGACCTAAGTATCTCAACACCACCCCAA  
ATTCGCTAAGAGATAGATGACGAGACCCTCGCAATCGCTGTCTATTCCACCGTCCGGCA  
TACCTAGCCTCTCGGCTCACTTCTTGTGATTGATGCCGAGCACTTAAATTCTGAATCTAG  
CCAGTTCATAACCATTTCAATTTTCATGCCCTTACTATTACGCTCGCTACAGGAACCCCTCCA  
TGCACAACGTGTATTTTTACTTGTCTTTGATAAGAACATATTATTTTTTTTATTGGTGG  
ATACTATAGAGGGCATATGAGCTACTTACGAAAAAATCGAAGGTCACTGAATATCTCTCC  
TACAACACTTGCTAAGGTAGTTGGATGCACACGGTGAGCGATCGGACACTGGGAAGCTGG  
TCGTCGCTTCCGATCCCTTAAACATGCCGTGCTCTTCTTGTGTGTCTAAATAACATAGG  
CGAAAACAAAGTCGTGCTGACGTGTTCCCGCTGGAGCAAAAAGCGGCTTCATAAGCAGA  
GCAGCTCTTTGTAACAACGGACATTCGTTCTATATCGCTGAAAGGCGAGTCCCGAGATAT

CTGACCAAGTTAGGCCATATGCGTTGCCACTTATAACTCTCAACTAGCTATTCCCTATCT  
TAAATCTTTAGAAATGGAACCAGCAAATTACAGCAAATATCACAGCGAGCAATTGATCG  
CGCTGAAACTGATTTACTCAGCAATCTGGCAACGCTTACCCGGCGCCGTCTGGCAAAGAT  
GATTGGGTGACAGGAAGCGAAGATAAGGAGAACGGACTGGAGATTTATTGCTTCCGTCTT  
GTGTTCTTTCGGAATGGCATCAGACAGAAGTCCGATTAGCAGGGCTTTC AAGTACGCGCT  
TGATGAAATCACAAGGAAAAAATCCCCCGCCGCCACCGAGGATTTTAAGCAAATTAATTT  
GCAATTCTGAGGGAATTACTGGATCACGCCACAGGAGCAACTATCACAAAACAACCTCAGT  
GCTGGCCAGGACAAAAGCCACGAACACTTCTACGTGTTTCGCTTACTGTCCAGCTTCAAT  
CAGCCTGGTTCGATTCCGGGCTGAGTTGGAAAAAGTGAGGCTGATGCTGAAGGATAGTGGT  
GATGGGTGACACATCTAATCTAGCGGAAGCCAGAGAGGCAAGAAGTCTGCAACAACCGTA  
TCAAAGCAGCGGTAAGGGGTATTCTTGTTCACCGTAAAAATATGGATGTGCCGCTTAA  
CAAGTACGAAGAAACAGCGCATCTGTGGGTCCGCTTAATCCTCAAAGCAAACATGCGCC  
TGAGTATGTAATGACTCGCGCAGGAGAAGTTCTGGAAGGCAAAGGCATGCTACGTGGCGG  
TAGAAACTCTCTGGCGCTTGGAAACAGAACC CAACCAGACCGTTTTTCGGTAATTGCGTGG  
AAAGTTCAAAAAACTCAACGTGAGTGCTTGGGTTTTACATGGTACATACTCACTTTTCTA  
GGGAGAGGAATATGCCGATTATCGCTCATATTTTGTACCAGCAGATTCCCAGCAAATTAG  
CACCTCAAAGCCAGCAGTACCAATGCCAGCAAGCAATACAGTACCTGCAGATTACCACCA  
AATTAACACAGATGAAGAATATGAGCATAATATCTCTAAGACTCACGTATTAGAGAGTGC  
CACAGAAGTCACAAAGACTGCCAAGGAAAACCCTTCCGTTAGCTGTCAGGCTATTGTCGA  
TGCATACCACGAAATACTTCCGGAAGGGCAAACAGCTGCGCACTGAATGACAAGCGTAA  
AATCGAGATGCGTACGTTCTGGCGCAAACCCGGAGATAGAACC CGCCAGGTTGACGTGCA  
TCGGTCTACGATGCAGGACTGGATAGATTATTCGAGCTACGAAGGCGAAAATTGCCGCTC  
GATGTTTCGAAGAGCGGCAAACAATCACCGCTGTACCGTCTCGCACAAAAGGGGTTTAA  
GTTCTCTGTTCAACGACAATACCGACTTGAAAGTTTCGTGTGGGTGAAAACGATGACCGATA  
ATTTTTATGCGCCGCCCATAGGATCTAGGCAGAGCAGCCAGTGATTGGTGGATTGCTTC  
TGGATGATGACAGTGGTGAGCGTGTCCACTAAGTTCTGGCAATGCTGCTGCCTGATTCAT  
ATTACAGCCGAACGAACAAAATCATT TTTGGAGAAATAACCAGAATGCATCTGGAGCAA  
GGACAGTAAATGGCCTGACGATTTTCGATGAACTGGAGCCTAAATCGGTAACGGTGACTT  
TGGGCGGTTTAGCTTATATCGCTAAGATCGCTAAGAACACGCCAAGCGCATCAAACCTCG  
TTGCCTATGCAATGGAGGTTTTGTGAAACCGTAATGGATCGCTGCGCCATCAACCGGAAAA  
CTGAAGCGTTCGGAATTGCACTATTTCCCGCAACGGAATGAGTGCCCCGCAAATCAACGTAG  
TTATACAGGCGAATATCTCGCAACTGACAGACCATGCAACAACAGGATCGCGTTGCGGCC  
TTCGCTCATTTGGAGAGATCATGGACGACTGTGTCAGGGACCTTAAGTACCGATTTAACC  
CGTCAGGCGAACAACGAGCTATGACCACAGTGATCCCATCGTTGGACAGAATGCTGTCAC  
CGAAAGGTCTGGTCAAAGGCTCTCTCTTTTTCATGGGCGCTCGCCCTAAGATAGGGAAAA  
TGACGCTAAACAGCCAGATGGCAATCAATTTCCCTGAGCATCGGACAAACCCCGCTCTGA  
CATTACGCCCTGAAATGCTAGGTGATTAATAATCTGGAACAACCTGGTAGGACAGAAGTCAG  
GTGTTAACCTAATATTCTTTACCTTCCGGCGACAAATGAAGCCGCTAACGGCTACCAGG  
GTGCTAACGATGGCTACTGCAAGGGGGCGATCGAAACAGCTAATCGCTTGAGTGAAATCG  
ACATGCATTACATCGACGACACATCGGTATTCTCTCTGGCTCAAATCGTCAGCGAAAGCC  
GTCGAATCAAACGAGAAAAAGGATGCTTTTGCATGATTCTGGTCGATTAAGTAACACTAG  
TGACCGCTCAGAAAGCCGCTCGCACCAACCTTGGTTACGGCATAATCACC AAAGGACAGA  
AGAACCTTGCCACTGAGCTTGATCGCGTTGGTGTGCTTCTGACGCCTCTTAACCACGCAC  
TGCAAAGCCGAACCAATAATCCCACACTATCAAGTGAGTTACGAGATACAGGCGAGATTG  
AACAGGATTGCGATTATTAGGTGAGGATCCATCGAGAAGGTGCTTTTTATGACAGTGTAC  
CACCTGGTGAAACCGAATAATCCTACTTCTAAATCGTCAAGCCAATTCCGGCACTGTGT  
ATTGCATCCAGTCACGTGGCGCTATTTGCGACCCAGACCAGCCGTCTCCTGAAATGCGCC  
GAGGTCAACGCGAGGAACCGGCGTCCGAGAAGAAAGGACGATTCTGATGAATAAAACAAA  
ATTAGCCTGTGCGGAAAAGGCATGGGGTGGACAAATATACTTTCGCTTTCAAAGAGCAGGC  
ACTACAACCAATCCAGACCGAATCGAAAATCGCCAGGCAGTTACGCGATGGCGGATTCCG  
GAAAGAAATTTAAATTACGCGCCAGAGGATAGCGTTTAAAGGGAATGATATAAATCATCA  
TCGAATAGCGGCGTATTGCTCCCATCTTCCCGATGACGTTGACGTTGATGAAATGGTTAC  
GGTGACCAAGCCTTGACCACCCACATCACTGAGCTAATGACAGGCCTGCCGGTAATCGCA  
GGCCTTTTTACTTGGGCGAGAGGGAAGTCAACGATAGCTACGGTCCGTTTTGAAAAATGGG  
GGTCAAAGAGGAAAGCCAGTTCACGGGAGATGATGTATTATAAGAGTCTGCCTGGGTGA  
TATGTAAGGCATCGCGCGCTGCTACTGAACTGGATATCGACTGGCCCGAAGCGAATCCCG  
ACTTTTAGTAGGAAGGTGAGGAAGGTGCTTCTGCGATGGGTTATGATTATGGGCGTGACA

AAACGGTAATTGCAGTAATAAAAAGTCAGCAGCGCCGAGGCTTCAAAGCAAAGAATTCCG  
ATTAAGCAAATAACAATGCAATAAATCACTTTTTAGGCATCACACTCGCGCTGTAGCGAG  
GTAAAAGCGGGCAAGGCAAGCCAATAAGCAGCGAGAATGCATGTGGCGTCAATATGGGTG  
TGACGAGGCGTTAAGAAATGATTACGTTAGCTGAGCTTGTGAGGGCTGAGTTTCGCTAAG  
AGTAGGCGCGTAGGTAGCGGTATCGTTCCTCGTCCGGTTTGCCGTCGGATGATGATTATG  
AGCAATAACCTGTAGCACGACTCTATCCGCGTGTGCCTGTTCTTTAACGGTTGTTCAAAC  
TCAACATTGAGTTTAAGCGCAACAGAATTATCCGGAGTCTGGATTA AAAAGTGAAGGAGTG  
AGCATGAGCGACCGATGCTTAACCCACCAACGCAAAAAGAATGTCCGTTTTGCGGCGGT  
AATGCTGGTCTGTGGTTTTGGGGCCGGAATATATGTTGAGGTGTGGAGCTATGCAGTATGT  
GACTTCTGTGAAGGCAGGGGGGCATGGGCACCAACAGTTACTTCGGCGGCTGAACTTTGT  
GGCCGTTGAGCCGTAGATGATGCAAACCTTTCTGCTTCGCAACGAATCAATCAGAAACAC  
CGCCATAGACGCCATTCTCTACTA ACTATAGACGACAAGTCACCCCGCGAAGACCACGT  
CAAAGAACCAAGCGCACCAAAAGCCCAAAATGACCGTAAGTGGCCGATGCTGAACGATAT  
TTCTCGTCAGGTGCAATGGCATGGTCAACGGCTGGCGCCGGAAGACTGGAAAGACCTGTA  
CACTGCCCTGTGCTTAAACACGAAAAAACTGGAGCAACGAAGTGTACTCGGCATCGACAG  
TGGCGTTGTCATGCTGGGCGTGCCTACCAGCAAAATGCGCAATGCCAGCATGGCTGCGCC  
AATCGCAATCATGTTCTGGTTCGGCTCATAGCACAACGTGCGGTGGAGTGATGACTGCC  
GCGAAAGTATGAATGGTCAACGAAAAAGTAGGGACGCTTGACTTTCAAATCAAAAACG  
CCAGCACACGACACGGAGTGGTGGGAAACGCCGCTTAGGCTTTTTGATGCAATGGATGTT  
GAGATTGGATTCTCGCTGTATTCAGCTGCGAGCGACAAAAACGCTCTGTGTGCTCCCTGG  
CTAACTGAGGCTGACGACCCGTTAATTTCTACGGGGATCAGTCACGGTGCTGTCTGGAAT  
AACCCATCGTCCAGCAATATCAGGCCGTCGGTGGAAAAAGCCGCAGAGCAGTGCATACAA  
CACCCACAGACGGTAGTGGTGAATCTGCCAGAGGATATGTCAGTCGCATGTTTTAGCATG  
GCTCTGAAGAGTCTGGACGTCGTTTCGCATCATCGCTGATGGACGCATTACTTTTTATGGAG  
CCGTCGACAGGACTGCAGAAGAAGGGCACCAAGCTAGGGCTGAATGTTGCTGATTTGGCGA  
CCGTTTCATCAGTCCTCGACGGATGTTTACTATCGTATCCAAAGCGGCATTGACGGCGAGC  
GGGCTGGGCGTAAGGAAGGCTGTATAAGGCCACAGCTCCGAAGTCTCACAGACATCATCT  
CCGAAAACCTGCAAATGCCTCCCAACGAAAGGATTGGGAAATAAACGCACGCCAATCCCAA  
AAAAATTTGACGTAACAACCTTCAATTACACCGCTCAGCTGTCGGATATCCGGTGGCTAA  
GACATCGTGCAGATAATGACAATGCTTTCAATTCAACCTGGATTTGGAGTTAAAATCAA  
AAAAGGCCACATGTTTGGCGAGAAAGCGTCACAACGAAAAATGGCGTCTATCCGGTTCCT  
CTCTATCAGTACTTATAGGACAAACGGGGAGGCAACAAAGTATTGGTATACATGCGGCAG  
AGCAGCATTTAATGACCCAGACTGGTTTGTGAAAAACCACCGCGCAGTGCCTTAGGCAAA  
TAGATTGACCAATATCACAGACATGATGGCGTATCAAAAAGCATGGAAAGAGCACAGCGA  
TCGGTAGCAACAAGACATGGGAAAGCTTAAATCAGTAAACATGGA ACTAAGATGAAAGCT  
CGGTGAAGCAATACCAGACATTGATGCCTACAATCGATGTGTAAATGGTGACCGGGATGC  
TTAGCCCAACCAATCACTTCAATACCAGAGAGCAAGTGTGAGCGGGCTTTAAGGTGCG  
GTAACAGCGGTCAGACCCAGCATTGCTTTAAGCTCACAAGTCTGGGTAATGCTGTGCAG  
ATCTGATTAGTGATCAGGATACCTCATTGTACGAGGAAGAACACGATGGCCAAACCTGTT  
CGAGGGA ACTTCAATATATGGAAGGAGTGCTTTTACCCGGCATTCTCACATCAGCGCTGG  
TACTGCCCGGAACACGGA ACTCAGTTAGCACTCAA ACTAGAAGGTTAACAGCTAAAAAAA  
GGGAAAAAAGCAGCAGCGGAGAAACGACGACGAGAGCAGCAGAATCAGCAAGATAAAATG  
GATATACGAAAGATCACCTTAAAGGCCACAGTTACTGAATTAACAAGCCCAACAAGCC  
GGAAACGCCTGCATCAGAGAATGACACCGCTACTTACGATGTAGCGCGCGCGGAACGCTA  
ATGTGTGCTCAGTCGGATGCCGGACATTACGGCACAATTTCTGCGGCACCTCAGCTCCTA  
TGTAATGAAGGAAAAATTCGCAAGCAGTGCCTGGAGTGCAACCAGCATAAAAGCGGAATT  
CTCATTCCCTGTGCGCTCGAACTGATTAACCCAATCGGGCAGGAAGCTGTAGACCAAACC  
GAATCCAACCACACCCTCCACCGCTGGAGTATCGAAGAGTGCAGGGACATTACGGCCGAG  
TAACAGCAGAACCTTAAAGACCTGCGGATCATCAGAATTGAGGCCGCATGGAGTTCTCAG  
GAATCACCATTCTGAGATTCTCGTTGAAACACATGAAAATTAGACCGACATACGCAGAA  
TACTGAACTTTAGTCGCAACTCTGCCAGTAAATACAAGGGCGATAAAGAAGGAAAAAAGAT  
TCGCTATTACCATCGGTGTTCTTATAGTTCATCGCGGATGGGGTAAATTTACGGAGGCGT  
GATATCCGGCAGGGTCATGAGTGCTGGGGGGTACGGGCGGCAAATAACCTGAGGCTGTG  
ACCGGGTCACCCATTTCCGCTGGCTTTAAGGGACTGACCCCGAAAAAGTAAAATCTCGC  
CCGCAATACTGTGACGATGATGGGATGGTGATATGCGGCTGTATAGCCCGCCTTTACCGG  
AACAAATCGCGATCTGCATGTCTTGCTGGGTGATTATTACCTGCTGGGGAGGACGGTCATG  
GCGCTGGCACCGACGCATGGGTGCTCTGTCCCAAGATAGGTAGTCGCCGTCACAAAGCG



GAGCGAATCGTTGAAGACCAGCTGAAGATACTGGGATTCAGGCTTTACGTGGATCTGTTT  
GTTGAGTGATAATACCCGGGAGGGTGAACATCTGTATTTTGTACGCGACACAATACTTGA  
CGAACGTAAAATTCTGCATATCAAGATAAGAGTGGTTACATTGCCACGCTCCAGCACCCC  
TCGATACGCGGGGTTTTTGGTTTACAGTATCCTGTGAGCTAGACGAAAAGTATGCAGAAA  
GGAAGGTGCGACCTCAATTAATAACAAAATCTTAAAAGTTGCACATGGCACTATCAATT  
TCTATATATTGTGTATATTTTAGATTGCAGGATGATCGTGTAACGAATTTCCGTAACAG  
CATTTTCGCTCTACGAGTTTGCCAGCCTCCCCAATTGATGGCTTTTTTATGGCCCTAACA  
TACTGGGTATCAGTAAATATTGTTGTCTACGTACGTCAAGCCGCCGATTAGATCTCACC  
AGATATGTTAAGGTTGCAGCGCTCTCTGAATAGCATAATCATTCTCATTACGTTACTGTT  
ACGTTTATCCGGTGCGCCTTAAAACGCCGTCCTTCAGCGGATGAAGGATGGCAAGACTAT  
AGGTATCGGACGGGTCTCAAGGAGTAATGTGTATCATGAAATTAATTATTTTAGAATGC  
TCGATTTTTCCTTTGTTATCTTTTCAGATAATCGGGTTTCCAAGGAATTTACCTTAGACT  
TCTCGACCGAAAAGACGTATGTAAATTCTCTGTATGTCATACGCTCTGCAATAGGTA  
CATTAGAGACTAGTACTTCAGAAGATACGTCTTTACTGATGATTGATAGTGGTCCCAGGG  
ATAATTTGTTTGAAGTTGGGGTTCAGAGGGATAGACCCAGAGGAAGAGCGGTTTAATAATC  
AATAGCTTAATGGTGATCGAAATCATTAAAGATGTGGCCGGGCTTGCTAACAGGACTAATA  
ATGTTTTTTCTCGGTTTACTGATTTTTTACATGTGACCTTTCCAGGTACAACAGCGCTTA  
CAGTGTCTGGTGATAGCAGCTATACCAAGTTACAGCGTGTTGCAGGTATCAGGCGTGCGG  
GGATACAGATAGATCGCCTTTCTTTGACCACTTCATATCTCGGTTTTATGTCACATAGTG  
GAACCTCACTGACGCAGACTGTGTCAAGAGCGATGTTACGGTTTTGTTACTGTGACAGCTG  
AAGCTATGGGTTTTTCGCCAATAACAGAGGGGAACCTCGTACAACACTGGATGATCTCAGTG  
GGCGTTCTTATTTACTGACTGCTAAAGATGTTGATCTTACATGTAACCTCGGGAAGGTTGA  
GTTGTGTCTGCGCAGAGTATGATAGACAAGACTCTGTTTCGTGTAGGAAGAATACCTTTTG  
GAACCATTAATGCAAACCTGGGAAGCGTGGCCTTCATCCTGAATCGTCAGCATCATGCAT  
CACGAGTAGCCAGAATGGAATCTGTTGAGTTTCTTCTATGTGGCCGGCAGATGGAAGAG  
TCCGTGTGATTACGCACAAAAAATATTGTGTGATGCATACGCCCTGGGGGCAATTCCGA  
GGCGCTGTAGCATTAGCAGTTGAGGGGCTTAAATGAAAAAACATAATTAATCGCTGCGT  
CGCTTTCATTATTTTCAGCAAGTGCGCTGGCGGCGCCTAATTGTGACGACGGAAAAGTGG  
AGTATACAAAATATAATGATGACGGTACCGTTACAGTTAACGTGGGAGCTAAGGAATTGT  
ATACCAAACGAGGGAATCTTCAGTCTCATCTTCTCAGTGCGCAAATTACAGGGCTGACTG  
TAGCCATTATAGCTGCTGCCTGTCATAGTGGAGGGGGATTTAGCGAAGTTATTTTCTCT  
GATTTACAATAGCTCAGTGATAATAGCAGACTGGAATTCATAAATGTGAAATACATCTCA  
AGTCAGTCAGATGTTGCCGGACTGATGATGGATGTCTTAGAAAATTTCTGCATGCGGAAG  
CCCCTTGTGCGGAGCGGGCAGAGGTGAACGGTTCAGATCTCCTTGATGACCGTAAGCGAGA  
AAACGCGGGTTTAGTGGCACCAGGCCGAACCTCACCGGGAGGCTCCCGGCACTATGCAATG  
GCACATACCGCCACTCTCCGGCCCCCTCCAGAGGCGCTGTCTTTTTGACAGCAAAAGCC  
CGCGCAGGGAGACGCTGGCGGGCAGCAATAAACACACACAGTGAAGTAGTATTTACAGCT  
TACCTATAATATCCGACAGTAGTCACTCTGCGCAATACCGCGGCCGTTTTGATATTGCGG  
GTTGTTGTCTATCTTCTCGCCTCGTCCTGTAGCTTCCGCATTTACAGCACGCTCATTAGTT  
TATACACAATATTATCCCGGCCGGGACGATTTCATGACATTGCCACACTAGGATGCGGTCA  
TGGCGGTGTGCGGCTCAGACCTTGCTGACGCCCTTGCGCGAAAAAATTTCTGAAGGATGGC  
AACCATTCGGTGTGCCGTTTTCTTCGTATACGGATGATTGCGCACGACAGATTCAGGGCA  
TTGTCACAGCAGGACATGTGCGCACACCTGTTGTGCTGTAGCTGAGAGGTGGGGAAGCTG  
CAGTAATCAGCGCCACCAGTTACCCCGGGTATTAATTTGTTGTGGTTCTGGCAAGGCAGT  
CAAACGCCATGTGGTATGGTGGAGGTCTTCTGCTTCCGGAGACATACGACCGTCCGCACC  
CGACCATAAAGCAGTTGTGCGGTCGCAGTACGGTGACACCGGGCGGTGTGCGCTGTAAAT  
ATAACGACATCGTTCGTCGCACCCTTTTCTGCATGATGTGCAGGACATGGGTGCGCTTA  
GCCTTCGGAAAGCGGACCTGTCAAAGGGGCAATACGGAACCGTGGGGCCGGGGCTACATA  
TCGCCAAAAAATCGCAGCCGTTTATACCGGCGAATCCGGGCATTCGGTTGGTTCCGTA  
GTCGGGGTGGTTAAGCCTTACCACCGGAGGCGCGGGCGCAATGAGTGACGCGAGTGATA  
CCTCGGAGAATTC AACCCGCTGAGGTGTGGACAAGCCGTTGTATAAGGACCTTATCGGAC  
TAACGAAAGCAGCAATGAAGAAGTATCCGAAATATGTTCTTATTGCAGTGGTGAGGATGC  
AGGGGGAATTTGATTTTGGCTGTACGCCAGCTAGTCACGCAGCATAGTTTGGTGCGCTCA  
TTGATAAATTTTCGTGAAGACCTGGGGGAAATGACAGGTTCAGTGCTTCGTTGGCTATCCTG  
GGTTGTTCCCTGGACATGCGGGTACAAGACGTATTTCTGGAAGCAGAACAACCGCTCCT  
AGTACCAGACCGTGTACGGCAGCTGCAAAAACAAAACGAAAAAGAATATCCATTTTCGTAC  
CGTTCATGACGGTTGAGAATTGGGTGCATGTGCCGTCGAACCCACCGTATGAAAACCTGG

ACATTGCGGGTATCGGATATTGTGGTTCGAAATGGCGTGACAGTTCTGCCACCTGGTCCT  
CACAGGACAGGGCGAGGCATTTACAGCGCCTGGGCACGCCGTCCGATTATTTCCGAACGCAC  
TGGCAACGGCTATTTTTCGCCATTCCGAAAGAGTGGCGCTAAACGCGGGGGCATCACCGA  
CAGTACCAGAGGTGCCCGACATCGCCTTCCGCTACAGAAGCCACAGCCGTACAACAC  
TGCTCTCTTACCTTGGCAGCGAGCCAGAGGGTAGCCTGAAAGTACAGGGGTGGTCAGCTC  
GTGGCAGGAGGGGTCCAGTCGTCGCCTAAGCGGAGGGAACCCGACAGGTTAGGCAGTGAAGG  
TGACCAAGGAAGACGGTAAAAGGAGCGGGGTGCTGGTCTACGCCGCGGGCAATGGTGCGG  
TTCTGTTACAGAAAGGGTGGCTGATTTCGCTTCCACTTTTAGGTTTCGGAAGTGCTAGCTG  
CGAAGCAGCATGTTTTGGCGTTTTATTGGCCGGTATCTTCACAGCCACAGGGCGTTGCGC  
TTACCAGAGACGGGTGCAATAACCATCCGGCAGCGTTCTACATCATGACAGATCCAATAG  
AACTGAATGTGACGTCCCACAATGCGAAAGTAGCGACAAACAACCTGATGCAGGAAATCT  
CTGGTGCAGTTGCTAACGCATTGCGTACGGTGGCGTTCCGCCTTGCCGGGAATAACAGCC  
TTCAGGCGACGCGGGTTATCGACGGTCCGGGCTGGCGTACCTTTCAGCTGACGCAGTCAC  
CGGTCAGTGCAAATCCGGCGGATAGACCCGCATGTGACAAACATTTCCAAAGGTGCGACTT  
ACCTGGTGTGATGTACAGCATTGCTGTGGAATTGACCAACACAGACACCCCGGCATGAT  
AAAAAAAACCGTCAGCGACAGGAATCCGCGCTGGCGGTGGTAATACCTATGGAGAAATAA  
TAAAGGAGAGAAACATTCGTGGCATGGTCTCTTAAATCAAAACAGTTCATATTGTTCCAC  
ATCACGGAAAGACATTATGACATTTCTGAACCAGTTAAAGCTGTACTTATGTACGGTGGT  
CTGTGAGTTGTATCTCCTATCGGGTGGGGACTCGGCCCTGCGTAACTTGTGCGCAGACG  
GATCGCCAAAATGTCCGCTGAGAAAGTAAGTGCCAGTCAATCAGCCGGAAGGAAGCCCGA  
AGTACCGCTCATTTAGCGGCAACTTCTTTAGTACATCTTTTCGAGGAGAAAATCCCCTGT  
TAGGAATTACATCCCTGGTCACTGCTAAAGCACTGAAGGAAGACCTGGGCCCTGGTGAAG  
TCCGGAGCTGCTTGAAACAGATACTTCGGCAAACCGTGGAAAGGCGTCTTGATGCAGAGG  
TTAATGCCATTCTGCATGAGCTGCGGGCCGCACCGGCAGATCCGGAGCCGGCGGCCATCT  
CGGGTGAGGGGAGTGCTTTAGATCGCGGTTAACCCACACCGGACAGCGACATGATGATGT  
AAGCAGGCGTCAGGGACCACCGTTGTGTGCCGGTGGTCTTTTTTCTTGGTGAGTCCTTCC  
GGATTGCGCGAGACGGGTCATGTACTTGATGGAAAAAATCACAACAGGTGTCTCGCACAC  
CACGTAAGCGGAGGGAATGGGCTCATGGTTCCTGCAGTTGCTGTACAGGGTTTCCCCGTC  
TCAGTGGGCGGCCATAGGCGTGCTGGGGATTCGGCTGTTGGGCTGCTGACAAATCTGAC  
GAACCTACATTTAAAAATTA AAAAGGACCGGCGTATGGAGGCTCCGGGAGAGTTATGTGA  
TGAGCAGGATACTCCGCTATGGTTTATCGGCTGCCGTTCTGGCGCTGATTGGCACAGCTC  
CTTCTGAGCCTGAAATCCTTGACCAGTATCTGGATGAGAAGCGAGGTAACCATAACCACGG  
CATCCCGTGATGGCGCGGGTACCTAGACCATCTGGCGTGGAGAGACCCGGGTGGCGGGTA  
AGCGTGTTATTCCTGGCATGCAGCAATCCAAGGAAAAATGCGACCGGGTGAACGCCATTG  
ACCGTGATAAAGGCGCTGGCATGGGTGGAGGAAAACGTCAAAGTGGCCATGACCGGTCCCC  
GGAAAGCGGGGAGCGCGTCATTCTGGCCGTACAACATTGGACCCAGTAAAGTGTTCCTT  
CCACGTTTTACAGACGAATAAATTCAGGTGATCGAAAAGGTTTCATGCGAACCCATTCGCT  
GGTGGATTAAGGACGGTAGCAGATACTGCCGACTTCGTTCAAACAACAGTTACGGTCAGG  
TATCCCACCGTGACCAGCAGTGCTCTCCGGCTTGCTCGGGATTCAACAGATAAGATGAAA  
ATTCTGCTGGGAAATGATGATTGTTTACAGGTACGGTTAACACGGAATCCCGCAAATTGC  
TAAAATGTAAGTGCATAAAGTTAAAACAGTAGTTTAACTCTGGCACCGTAATGATGCC  
TCTGTCATTTCTGCGTATCTCATGCGCATCTCCCAACTCAGAACCCTTTCAGGATGAGGCT  
TCAGTATACCGTTTTATCTGTGCGGTGCCTTTCTGGGGTCTGGATTCTGTGAGAGAAGGT  
TCGTCACTAAAAGCAAGTAACCCATGAATACGATGGCCATGCCGTTTCACGGCAACTCTC  
TTTATGTACTTAACCATAATGGCCAACCCTACGTTCCCATGAGACTTCTCGTTGCGGGGA  
TCGGGGTAGCCTCTAAATCCCAGGAGTGTAAGTTAAGATACCGTTTTGCGTCAACTACAA  
CGGAAATCGTTATGGTTGCTGAGGCTGAGAAACAACGCAATGGGCTGTCCATGCCACGTC  
GAAAACCTTGCCGCCTGCCACAAAACATTAATCCCAACAGAGTAAAACCTCGAAATTCAT  
ATAGGGTCATCCGGTATCAGGAAGAGTGCAGCATGTTTATTACGAGTACTGGACGAAGG  
GTTTTGTCGTTTCTCACCGTAAAATGAGCGTGATGGTAAAACCTCAACCAGGCTTGTGCGG  
ACAGAAAACGAGATAAAAACCTGGCCAGTGTGTTTGTACCGGGCCGGATGAGTGGAAATC  
AGGTTTATGCCACGCATGTATCAAACTCCGAACGCTGGTTGACGGAGCCACTATGCTGA  
CTGATTTTTGTCCTGGGTGATACAGGCAAAGGGAAAATAAATAAGGCGGATTGTTTGGGTG  
GCCATGATATCAGATAAACTCAGAACGCTAGTGAACAGCCTCTGTGTACTTAACTGCAT  
TTCATTTTTAGTCCTCCAGGTTGCCAATTTCTTCTCCACCGCCTGGCGAGTCCTGACGTA  
CTAGGGACTGGTGGGGTCCAACCGTGATGAAACCTGATCGGTGGGTGGCGATTATTGTCC  
TGCGGTTGGGTATGTTGCGCTGTGGCTGGCAATAAACCATGACGGTGACAACGCGCTCA

CCTATAAGGCGCAGCGCTATAAAAAAGCCAGACAGATGGAACAGGCGTATGCCAGCGTTA  
CTGACATGAATCTTCGCCAACGTGCTGTGGCTGCGCTCGATGATAGACACTCGAGGGAGT  
TAGTCGATGCTAGTGCTGAAACTGAAACTCTGCGCGCTGAAGTTGCCAATGGTCTTAAGG  
GGCTGCGGATAAACGCCACCTGCTCCGGTACCGTGTGTGTAGCCACCGGCACCTCCC  
TGGATAATGCATCCGGCCCGCGACGGGCAGAAAAGGCCGAACGGGATTTTTTCGTTCTCA  
GAGAGCGGCTGGTCACTATGCAAAAACAACCTGGAAGGAACCAAGAAGTATATTAACGAGC  
ATTGCAGATAGATTTGACGATGTCGATGGGCAACTCATGCCATTATTGTCAGCAATACCC  
CCGCGCTTTCCGCGGACTAAAAATTCTATAGTAATAAAAAGCGTGCAATCCATTTGAGGT  
TATTCGCTGCGTTTTAGATTTAACAACCTTCTTAGTGCTGCCACAATTTTCGGCTACACC  
TACAGTTTTCTGCTGCCATTTCCAGAAACGAAGAAGTATAGGTGATTGTTTTCTTTGG  
TGCAACTGCTGTCTCTCCTGTTGAACAGTAAACGTCTGTTGAGCCCTTCTGTGAGAAG  
AAGGGCCAGCGCAGTAGCGAGTCGCATTTTCTTCATGGCGTTATTCCCGATGCTTTTTGA  
AGTACGCAGAATTGTATGTGTGGAAAATTCAACAAACCCTAAACAATGAGTCGAAATTT  
ATATTGTTAATATTTCTAAATGTATGTCAGGTGCGACGAAAAGATATTGTATCCCCGGGT  
TAACCATGTCCGCAGCCATAACGGGGAAATTCTCTGCGGGATTGTGCGGGGATAAAACAAA  
ACCGCTGCACACCGGGTTTACTCTTTTTTTCACGAGATGGGAGCGAT

>NewGenomeName\_158

CAGTCGGTGAAGCTGCAGATATTATGAACTGTGTTTGTGACATCCTGTATTTGCAATACA  
AGGCAGATTATCCTGAACTCAGTGAAACTCAGATTGTGGATTTGATTAAAAACGAATTGA  
ATTTCCAACCTCAATTTGAAAGCTGAAAAATGGATGATGAAAGCATGTACCAAGTAATTTT  
TATCGAAATTCTCATAGTCGTCCTTATTGCGTGTACATGTCCATGTGGGATGACTATTG  
GAACGGTAAATGCAAAAACGAAATCACTGAAATTAACGCATGGCTCAAAAAGTATAATAT  
TACACTGTGGCCAAAAGACCGGAAAGCTGGTCCATTTTCAAAGTGGGTAATTTGTTAGTT  
GACACTTTGAAAGACATCAAATAAAGCCAATGCCAGTGTATCAGTATCCGAAAATTGTAT  
AAAGCTCTAGTTGAAATTCGCAAAGACGATATTGCTAATCCTGATTTTCGATCAAACCTGGA  
AATTTGATGTCTTTGCTTTACAGATCGCAAATGAAAGATGTTAAAAAAAATCCATTTGGG  
AGGACTGAATCTCAACTGCAGCTGTCATTGCGAGTATTGTGCTCATGTTTCGCAAAAACAC  
AAAGTAGTGATATAATGGCAACTACTCTATTAATTCATTTTGAGGAATATCAATGTCTGA  
TGAATTCAAATTTCAACTCCTCGCGAGCACGTAATTCTTCGCCCAAATATGTATGTAGG  
TTCTGTGCGCATATTAACCACATGAGCGATTCTTGTGTTGGTAAGTATCAATCCGTTTCCTA  
TGTTCCGGGCCTGGTAAAAATCATCGATGAAATCATCGATAACTCGGTTGACGAAGGTAT  
TCGTACCGTTTTTTAAATTTGCAAATAAGATTGATATTCGCTTTGATTTCTTGAAGGTTCT  
TCTGACGGTAGCGGATAACGGCCGAGATATTCCTCAACCTCTGGTAAACACTCCAGACGA  
AGAAATCCCTAAGCCTGTGGCTGCCTGGACACAACTATGGCAGGCTCAAACCTTAATGA  
TACCAACCGCGTATCAATGGGGATGAATGGCGTAGGTTCTTCTCTGACAACTTCTGCTC  
CAAGACTTTTATCGGTGAAACGTGCGATGGCAAAAACCTTCTCACTGTCACTTTCTCTGA  
TGGTGCATCTCAAGTCAATTGGGAAACCAAGCCGGGTAATATCAAAGAAACGTCGGTATA  
TTGCATCCCTGATGAAAAGCACTTTGAAGGAAAAACGAACGATCCGCAGATAGTAGATAT  
CATTTAGATCGAATCACGGCATTGTCTGTGGTGTCCCGAAGATTAAATTCACCATCAA  
CGGTGAAGTGGGTTCAATGAAGTTTGCAGAATACGCTAAAATGTTTGGTGTATGAATCTCT  
CATTCTCGAAAATGATAATTTTAGCCTCGCATTCTGCAATTCTCGTGAAGGATCCGCTCT  
AGTCAGTTATGTCAATGGTTTGAATATCAAGAATGGTGGTTCCACATCGATTACTTGAT  
AGATGGCATTGCCGACGAACTTATTCCATCAATCAAACGAAAGTATAAAATTGAAATAAG  
CAAAGCTCGAATTAAGAATGCTTGACAATGATTGTGGTTGTTTCGTGGAATGAGTAATCT  
TCGGTTTGATTCTCAGACAAAGGAACGTTTGACCAATCCGCTTGGCGAAGTGAAATCACA  
CATTGAGCTGGATTTCAAAAAGTTAGGAAAGCAAATCATGAACAATGATGCTATCCTGAT  
GCCAATCATCGAGGCTGCTCTTGCTCGTCATCTGGCTTCAGAAAAGCAGCATTGACGAA  
AGCCTAAAAGCAGCAGCAAAAACCAAAGTCGCTAAGCATATAAAGGCCGGTTCCTGGGG  
TGACATTTCAAAGAAACAACCTCTGTTCCCTGACAGAAGGTGATTTCGGCCATTGGTTCTTT  
GCTGAGTGTTTCGTGACAGCGAGTTGCATGGTGGATATGCTCTTCGAGGAAAGGTTATGAA  
CACTTGGGGAATGAAAGGTTCTGACGTGCTAAAGAACCGAGAATTGGCTGATATTTGTGC  
AATCATGGGTCTCGATTTAGCTAATCCTGATGATGTCGAAAATCGTAAAGACAAAAAAGT  
TGCAATGATGACCGACGCCGATCCAGATGGCCCAGGCTCAATTAACCCATGTCTACTCGC  
GTTCTTTAGCCGTTAGTCAAAGTTGTATGATCTCGGTTGCGTACGATTTGTAATACTCC  
GGTAGTCATCCTTTCTAAAGGAAAGCAGACCAAGTGGTTTTATACCATAACTGAATTTGA  
TGCGCAAAAATAAAAAGTACAAAGGTTGGGAACTTCGATATATCAAAGGATTGGGTTTACA  
TCGCGAACACGAATATTCCGAAGTTGTTAATAACCCTCAGTACGATATCGTTCGATCTTGG

ACCCGATTGGGAAGAATTGTTTCGAAATGCCGGTTGGCGATGAAGCAGAACTTCGAAAATA  
AGGGATGTCACAATGAAAAGGGCTCTTCGGAGCCCTTTGTTGTTTTTGA AAAACAGTGTA  
CAACGCTTAATGTGAATGGTATTATGGCTCCATCAAATCAACCAAGGAGTACATCGTGAA  
ATTCGTTTCGAGTTAAATTCAAATCCCCGGAACATCGTAAAGCTTTTGCTAAATCTGCCTC  
GTACAAAGCCGAATTTGAGAAGTTCATGCCAGACGAATTTTGGACTAGGCTTGACCAACA  
CAAAAATGTTCAATATCGTTTTGGTCGATTCTGATGGTGTGATGATCGAGCTGCCGGAATC  
AACTGGTGGTGGCGGAATCATTTCGGCGACGAAGA ACTTCATTATTTTCATGGAAATTAT  
TGAATAATTTCAACAACAAAGCAGTTTACAATCGTGAGGCTATGGGATACTATAGCCTCAA  
GTAAACGAATCAGCAAAAACATGGAGTATTTTAAAATCATCAACTTCACCGAAGCATT  
GGCAACGTTAACTCCCATGCGATGTTCTTCTCCCCGATCTTGATACCTTGATCAGTGTT  
TACGGTGTGAAACTGATTCATCGTCAGTCTTCATGTACAACAAAGGCACAAAGAAAGCA  
TAGCGTCTCGGCGGCAAGAAAGCTGCTTCATACATCGAATACGTTCAAATTGAATTGGCG  
ATAGGAGAATAAAATGAAAGCACGTTTCAAATCTGAAGAAGCACGTCAGCAGTTCATCGG  
CTACGGCGAAAAGCGTTGGGCAATTGGTCCCTCTGGGCGACACAAATAACAACCGTTCGCAT  
CGCTCGTCATTTAGGAATGAAAGAGTTCGATGTTGTCAAATCGATTTTCCATTTGCTGG  
CTGGTTCGACATCGTCATTGATGACATGGTGTTCGAGTCTATCGCTAGTGACGAAGTTTG  
CTTCTTCGAGTTCATTGATTGATTGACTGGCCTGGCAGCCGCCCGGCTTTTTTGTATCAA  
AACAGTTTGAGGCTTTACCTATTCGATCGAAGCTCGAATTTATCCTTTTAGTTGTAATAT  
CTATTAAGCCATAAAGGATAAAAATATCTAGTTCGACTGGGTGGAACCAGGTAAACCTGG  
CTGAACTCAATAGTTTAGTCAATAATACATTCACATAAGAATAAGGTATCATCCAGGTT  
AACCCAGTTAATCCAAAAATTATTTAACTTTAACTGTGTCAATTGTAATGTTTACTGTGT  
TAGGATAACACCAGTAGAAAAACAAAGGAGGTCATTATGACCCTGCATGAAGAAATATCT  
GAAGCTCTGCTTCGAATTTGTTCGCATCAACGTACGATTCATGGGTGATGAAGAAACAGCT  
GATGAACTGAGCGACGAAGTTAACCCAATTATAGCTAATATCAAAGCTGGTATTGCAACC  
CGCAAAGAACTCGGCCGGCTGTGTCAATTTGGGTCTGTGCACGAAGCTAATCTTTATGGT  
TCCGATTGGGGCAAATTTGTTTCCAAAATGGA ACTCCGCATGAAAAGGAACATAGTTAT  
GCAAATCACCTTTAAATCCGAAGAACATCGCAAAGCATTTCACGTATTGCCAAATGCAA  
TGAATGGATTGCTCACACTCTCGGTATGGACACATGGGAATGCCGAGAAGAACCGGCAGA  
TGAATATGACAAAACCCAGTATTCGCAGTTCCTGACGGTTTGGGTAAATCAGGTAGCCGG  
AGTGTGTTGTGTATGACGGCGGTGAGTGTGAAGATCATGCAGGGATTTTCTGGGCTGAGCG  
CAAATATTTTCGATATTTCTGAATAAATGAAACAAATAATGATTTTTCGGTTCTAACGAACA  
AGATGTGATGATTGGTAATGCACCTTCTAAACGGACCGGGTTTAAAATCCAGGCTGGGCG  
GAAGGCCTTCCAAGTACTTTCTGAAAAGCGTTATAAGGACAAAGCTGAAGCAGTTTTACG  
TAAGCTTTCGTGCAACGCGGTTGATATCCATTGCGAACTTGGAAGGACATATTCCGTT  
CAACGTCACTCTCCCAACTTCAATTTACCCATGGTTCGTAATCCGTGGTTTTTGGAACTGG  
GCTGACGCAAGAGCAAGTTGATGAAATTTTCACTGTCTATTTTGCTTCCACCAAAGATGG  
TTCCGATGATTC AATCGGTGGTTTAGGCCTTGGTTGCAAGTCTCCATTTGCATACAGCGA  
GTCGGGTGGCGGTTTCACTGTAAAAGCTATCAAATGGCCTGTGTACTGTCTACAACAT  
GTATATGGATAATGGAGAACCATTTGCTACACCGATGTTCGACTACTCCGACGCCCGAAGA  
AGATGGTCTCGAGATTCTCGTTCCTATCCCTGAGCACGAACATGCTCGCTGGAAAGTACT  
AGCTCGCAAAGTGTACCGGGAATTTGATGGCTGCAAACCTTACATCACAAATATGGATGC  
AAGCAGCATTGAAGAATTTCCGAATCAAGATTCGTTCTTCAATACTGACGAATTCGCCCG  
TCTAGGAGCGGTGTATGCTGTAATCGGTGGAGTAGTGTACCCGATCCCTCAACGTCTCCT  
GGCATCCGATATGGTATTCCGATATGCTGGTAAAGCTGCACATAACCAAGTGCCCTATTGG  
CTCAGTTGACATTGCTCCTTTTCGGGAAGAACTGTCGTGGACCAAAGAAGGCGAAGATTA  
CATTATTGGTCGACTTCGTGTTTTTTCTGATAACTTTGCCGAATCCATAAAGAAGGAATT  
TGACGGAATAACCGACAAACGAAAAGCCGTAATTAAGCCAGTCGATACAACA ACTATGT  
TCGTCAAGCTATTTTAGATTTGACCATTGATGGCGAGCGAATTAACGATCTTATTGATCG  
ATATACGGATATGTCAAAGCTTAGTGACATTACCGTTTGCGCATATCGTGGCGGTAGTTT  
GCGCCAGCATGTTACGCGTTCGGGATATTCGTGGAGAAGTTCCAATATAGATGCAAAAAGA  
AGTCTTTGGCATCAGTCGGCGTAAAGTGCATGTTCTCATCAAAGATACACGTGAAGGTAT  
TCCGAATATGGTTCAGGCGTATCATCCTGATATTGGTGATACCATTCAGTCGTTGTGTT  
GAACAAACCTCGCAA ACTAAAGAAGAGTGTGTACGCCGATATGGACGAACCATGAAAGC  
TATTTGCGAAAAGTTTAGCGTTGACGAACGCTCAATTCTCAAATTTAGCGAAATGAATGA  
TGTTTCGAAAAGCATTACCCATACATAAGCGCAAACGCTCTACTTCTCTCGATGCTAAACC  
AAACGTTCAACGTCATTACATCAATGACTCCGACCTTCGTGACGTTGAATTAATTTACAT  
GACATCCGCTGAAATAAAAGCTCTTGAAGGAATTGCGGTTATTTTCGTATAGCGATACATT

TGACAGAATTGCGCTTAAAGCTTCGCAGTATACAATGCGTAGTGCCCTAGCAAATTGAT  
AGAGCTTGGAGCAACCGAAGTTTACGTCATCGATAATGGAAAGCGTTCTACCCGCTGTGA  
AGGCTCCTGGTTTGAAATGCGGTTTTAAGTGGGCATATGACCAGTACAAAGTGCCGAAAG  
ATGCTTTTGGATATTCTTAGTGCCGAGTGCCCTAATACCGGAGACTATGAAGAAGCAACTC  
GTCTTAAGCAAATGGGCATACTTGGAAATTGATATAACCGAAAAGTTTGACGAAAACCATG  
ATGATTTCTGAATGATGCATCCCAATGGGTTGAAATCGGAAATCCCGATTATGCCGATT  
TTGCTGAAATCAAAGAATATGTTGATGAACAGAATATAAAGTATTCCGAAATGTTCTATG  
ATCATAGGGAGTCATTGAAAATTAACGCCCGCTATTGTTTGCAGTTGCCGTTAGTGGTA  
TAGAATTAAGTCTGAAATCATGAAAGATATCGAAATTCTCCGGGCTCAGTAAGAGCCCT  
TAAAACAAAGAGGTATGATATGGCTAAGGTTAAAATTGTTAAGTGTTTTGATAATGAAAC  
CAAGCAACAGATTTTTGACAAATATTCTCTTGGCAATGTGTCTCAAGCTTATTTGGCAAG  
TGAATACTGCGTATCGGTAGATAACAATTGCTTGGGTTCTGAAAGAAGTCCGAAATTGGGA  
TATCTCTGCTGCAACGTCAGAGGATTCAGCTGCGGAGGAAGAAATTGCTGATAAGCTGGA  
ATGTACCTGGATGGCCAATTCCAAGTTCCTTTCTGTGACCATCGGCGCCGAAACTTATAA  
CGCATCTGGCGATCACCCACAGTTCATGGAAATCATCAGTCTTCTGCGCGAAGAAAAATA  
CGATGAAGCAATGGAAATGTTGAATATCAAGCGTGGTCTTGAGCGATATGTCTCTGGCGA  
TCTGGTTATCGAAGGCGGCACACTGAAATGCAAGGATCTGATCATTGATTCTGGTCTTAC  
TCGTCGCCTCGTCGGAAAGATGCAAAACGGCGAACCTTTCGAGGCGCTCGTTGCATTCTT  
TGCAAATCTGATGGCTAACCCGAGTCGTCGAGCCGTATATCAGCTGTACGACTTCCTGGA  
ACACAACGACATTGAAATCACCGATGATGGTTATTTCAATTGCTTGAAGCGTGTAACAG  
CAATTTCAAAGACATGGACAGTGGCAAATTCGATAACTCTCCTAGAACAGTGGTTAAGGT  
TAATCGCTTCCAGATTGACGAAAACCCTCACGTTACCTACTCTCACGGTCTTCACGTTGC  
TGCCAAGTCTTATATCACTCATTATGGTGGTGGTCTGGAAAAGTGATTGCATGCAAGGT  
CAACCCAGCAGATGTGGTCGCTCTTCCAACCGACTCCAACAATGCCAAGATGCGTTGTGC  
CGGGTATTAAGTTCATTAGGAAGTAACTTCTAACTTCAAACAAATGAAGCACTACTAATT  
TTCATAAGCCCTCTTCCGGAGGGCTTGTTTGTAAAGGGGTTGTATGAGCTCACCATTTAGCA  
TTATATTTTACAAAGACGATGACATTGTTGGTTCGGGTTATGGAAATCATAGTTGGATT  
CGCCGAATGACTTACAGTACGCGAAGAACATAATTGCAGTTGTTGAAGGAACATCTTGGC  
AGTTACGACCATTCGAAAAGAATGGACTCATTTCAATTGCTGCTGGCCGAGTGTTTTATG  
CTCAAGATTACGAGAAAATGAAACAAATCCTTTCTCTTATAGAAAGCTTGGATTTATCCG  
ATTTTTCAATTGTCATCTTCTGACATTGTGAGGAAATTGTAATGACGGTACCGATGAACGT  
ATCCCATGACGAATTTATCGCCCTTAGTCATATCCAGCCGTTTGACGCGGATATTATTCG  
TCTTCAGATCTGGGACCAACTCAAAAAGCATCCTGACACGAGGGATGAGCTTTTTGAAAA  
ACGGAAAAGGAGAGATGACGATACCATCCAATACGCTCTCGATGAAGCGGCTGGGAATGA  
TATTCCTCGGCAGGAGGTCATTGATAGAACGGTTCATTCCTGAATGCCGAAATGGGTGT  
CGCATATATCCTGGGTGGTGTCTGGGGAGTGTGTTGACTGGTTAGACAATGACAATATCAC  
CTTTGATGTGCCAACACCTGGGTTCAATCTGGTAATAAAGACTTCTTTTGCGAAATGGCC  
AACTATGCATACCGCTGGTGCTAAACCGTATGGCAAATCAGAAGGGCTGTGCTTGTACGC  
TGGTTTGCACGGAGATGCTGATGTTTACTTGGTATTGAACATCAATGAATATGCTGGCCG  
TATCACATATAGGCCGAAATACTTCTTCAAAAGCGAGCTATGGAAAATTATCCGTATGT  
GATCTACGTTCCCAAGCGCGGCGGTGGAGCATACTACTAGACAGCAGAACAAATTTGT  
TTATTTTTATAACAAGTGGTGTACTCTGATTGTGCGTGATAAAATGCTCCTATCAACA  
ACACTGGAGCATTTTGCATCTAGGAAATGAAAATGAGAACTCACGATTTTCTGAAAAAAC  
GCGCCAGGCCAGGCTGTGCCGAGCAAAAGACAGAGCTGATAGCTGAGCACAGAATGCTTT  
GCTCACTGATAGATCATCACATCATGTGCTATGACCGCGAAGACTCACCTGATCTCA  
TTCAAACCAAGAAAGACCGCGATGCAATCGAAAACCTCCTAATGGAGATTACTAAATGAA  
AACTAATACACATCACGTCACAGCTATTGATGCCAGTGTGTTGGCGCTTTTGAACCTTGA  
ACCGGCAAACTTGCAGGATTCAAAGTACACTTTCGAAGATGTGATGCATAGAATCGGTTA  
TACGATGATTGATTCGTTAGCAACGCTTGAAAGCTCCCTGGAAGGTATTAAGCACTTGT  
TTATGAAAACATGATCACCTTCCCCTGCTGGGTAAAACGGGTTGGGAATCACTTCGATGA  
AATGTATGACGTGAACTGGGTTTTCTTTGATTTTGTTCCTTCTGAATAAAACAAGTT  
TACAACTCGTGGCTATAGGTAACCTATAGCCTCAAGTTAAACAAATAAATAAACACGGAG  
TAATTTTATGCTCAACTACACTTTCAAATGCGAAACTTCTACCGAAGCCTTCAATTATGT  
TGTCGGCACCAAGCGTGGTAAAGCCTGGGCAAATAAACTCTTCGCGATTATCTGGACGA  
AACTGGCGATAAAGATGCCACTATCACCTCATGAAAGAAGAAAACTGTAAATTGAGCA  
AGTTATGAAAGGCCCTAAAACATTCGACAGCCAATTCAGGTCTCGCGGGGGTTTTGCGTA  
AGACATGAGCAACGGCGAAATCAAGAACGAGCCAATGTTTTTCACTCAGACTTGGAAAT

CGCGTACGAGAACGGCGGCCCTATCACTCGCAGTTTTATCGAGAATCTCCCGCTCGATAG  
GAAAAGCATTGTGATTTTCGATTCGCGTGTTACATGCTTATGCCTGGGTGGTACCCCGC  
GATTTCCGGATATCACCATGATGACGTGCCGCGCCCGCGATTCCGGTAGGCCAGCACTT  
TGCAACTGCAGGACAGCCAGACTATGACAATCCTCGTTATCTGTCTCGCCATATCCTTGG  
TTTGGTTAACCGCTATAGCTGCCCTACTCATTTTCCAGTAGGACGATCGGAATTTAGCCA  
AATTCCTGATGGTGAACCTTATCTATCGGCAATGGTATCAGGAAGTCATGGCTAAACTCGA  
AACTGGCGAGTTAAGTAAGCATATTGCTCCTGATCGAACTCTTGTAGAGTATGACTGGCA  
AACCTGGCACACTGGGTCAAAGCGGTTAGAAACGGCTGGCGTTGGTTTGGTTCGAGTTTC  
TCGCGACACTGATCGAGTTCTGGCACCGTCGAATGAAATTCGACGTCAAATTCAGTTTA  
CGTGGAAATCCCGATGGAGGGTTGGTATGGTTAAGTATCGTTTTGTTAGTGAAGAGCAG  
TTCAACGCATGGGCCAAGCAAATTATGCACAGGAATTCGCATTTGCTTTTGATTCATGG  
GATACAATCTTCGAAATGGAAGACATCGGGCGTAAAGTTTGTCTGATACCACCAAATC  
GACGGCGAAATTTACATGAGTACTCAATGGTACCCATTCAATATAACAGACCGTGGCAAT  
CGCATCATCGAGGTAAAAGAAAGAACTCTACTTCTTGCAGCACATTGAAATCAAATAGC  
TGGCACGAATTCTGCGAATTTGAAATCGGAAATTATGGTACAAAAGATTATCACGTTATT  
TGCTTAACAGCTGTGTTAGTTTAAAATACAAGTCAACCAATCGAATAGAGAAAAATATCA  
TGAAAATACTTACTGCTCAACGTATTGTAGTTACTGGTGCCCAACGTGTTGGTGCAT  
TTGAATTTGACGCAGGAAAATTCCTGGGTGCGAAATTCACTTTTGCGCCTGGCAAAAATC  
GTGAAAGCATTAGCAAGCCCAGCATTATGTTATCGCTAAAGATGATGTTGCTGTAGCTC  
GTAATTTGCTGGCCAAACAAGAAAAGAGTGTGGTTTTAACGAGACCATTTCGCGAGTAA  
TTAGCTGCTGTTGGAAATATACTGACGGTCGTCCACGGAAGATCTACCGCTAAGTCACAG  
GTCAAAACAAGACACATACGGTTTACCATATCCCGATGTCCTTGGTGCCAAGACTGTTGA  
ATATGCAATATCTTGAGCTGTTTGAAGATAACACCACCAAATATCAGTCGCTCACTGCTG  
TTTCGCATCAACTGTTTAAAGGTATATAATTTTCAATATCAAAAACGATAAAGGAATACCCA  
TGGCATTAGTTTAGATGATTTTTTTGATCAAGAGCCGATTTTGCCCGTTCCAAAACCGG  
CATCTAATCCCGAAACTACGCCTTGGAAATGAAAGCAAAGATGATGAATTGTTTCTCCGC  
CAGGAATTACCATCAACCAGGTCACCGATGAAACGGTAATCGAAACTGAAGTACTCGATT  
CTTAGAATGTTAAAGAAGTCGATGAAACTGAAGTACTTGAAGAGCAAATTCGGCAACGCC  
AATCTGAAATTGATTCTGATATTCGGCATGGAAGAAAACCGTATTGCAAAGTCATTTAA  
CTAATCTGCATAATCGACATCTGCCATCGATCATCAACAATGAAGCTCTTGAATTTGCGA  
TGTATACACTTGAAGAACGTGCAATCCCATCTATCATCGATGGCTTTAAACCGCTTCAAC  
GCTTTTTCTTGTATCGCGCATTGGAATATGTCAATCAAAAATAAGACCAAGTTTAAACAAG  
TAGCAGCGCTTGCAGGCGGTGTTTCTGAGGCAGGTTATCACCATGGCGAAGGTTCTGCCG  
CAAGTGCTGGACAACCTATTGCAAATACATGGAACAACAACATTCAGTATTGGAAGGAT  
ACGGAAACCTTGGTTCTCGTCTTGTTCACAACAGCAGCTGTACCACGAAATGTGTTTTGTC  
GTGTCCATCAGAATTTCTGGGGCATCTTTAAAGACGTTTCTCTTTCTCCGGTGCATCCAG  
ACCCTGAGCAATTGCCGCCCCGTTTTTATCTGCCTGTTATTCCTATGGTTCTCGCGAATG  
GCGTAAAAGGTATTGCCACTGGCTATGCTACTACAAATTTCCCGCATTCTTACGAGAGTC  
TAGTGAAGTGCACACTGGCTGCGGTAAGGCGAAGAAATCCCGAGCCGGAAGTGCAGT  
TCCCATGCTTTAAAGGTATTGTTTCGTGCAATCAATTCAAATCTATCGAAATCGAAGGTC  
TATTTGAGCTAGTTGGACAAACCAAACCTCATTATTACCGAAGTTCCAGTTCGATATGATC  
GTCTTGAGCAGGTCAATATTCTCGACAAGCTCGAAGAACAGGGGAAAAATCGTAGGTTACA  
AGGAACAACAAGTGAATCCGGTTGGAAGTAACTCTCAAACGTCAGGATAAACTTG  
GCGAATTCATGTAAAAAAATCCGGAAGTTGCACATGAGCGTATCATCATAATGTTCAACC  
TTCGCCAAAATCTTTCGCAAAACATCACCGTTCTCGGCGAGAATGGAGAATTGGCAGAGT  
ATCAATGTGGCGCCGTTCTGATTCGACACTTTGTGGAGTATCGCAAAAATAACACCAATC  
AGCGTGTTATCTTCGAAAAAGAAAAGGCAGAATATTTCGCGTGATTTGGCTTGGGCCAAAT  
TTGCCTTTGTTAATGAAGTGATTGAAGCAAAAATTGTTCTTCGTGGAGAATCAAAGCGC  
AACTTATTGCCGAAGTAAAGTCCAAGCCGAATATGGCAGGATTTGAAAACGAACTAGTTA  
GCATGAGCATTACCGTCTAACTGAAGGCGAAACTCATAAACTTCAGGAAGAAGCTCTGA  
AACAGACCAAAGAATACGACTACTGGTTGAGCACTACTCCAGAAAACGAATATGTTAAAG  
ACCTCGAACTTTAACAAAACAAAACAAAGGTCTCTTAGGAGGCCTTTGTTGTTTCTAG  
ACAAAAGTGTGTACAAATGCTTTAGATTGTATAGAATAGCCTCAAGCTAAACTAACTGTC  
ATGGAGCATATTATGATTTCAAGCGCTGAAAAACAAAAGCAGCATGTATTATGAGGAA  
CGCGTACAGTGGATGCGCGAAAATCATATCGTTGACGTTCCCACTCCAAATTATACTCTC  
AAGTTTACAAATCACAAGGGTTATATTGGTCAATGTCATTACTCTAACCGTGAAAACAGT  
ATTTACAGAAAACAAAATCAATATGCAACATGGGAGTCCATTAAAGAAACAATCAACCAT

GAGCTGGCTCACTGTGCAACCATAGGTCATGGCCACGGTGAAGCATGGCAGCAAATGGCC  
GTTTCGTCTTGGAGCAACTCCTGCGAAAACCTGCACCCTTGGCCAACCTGCAAAAACCGTAT  
GTCATAATGTGCAAAGGCAAAGTTGTTGGATATTCTGAGGTATTGCGAGTTGGTTCAGAC  
GCTGCCACACGATACATCAAAGGAAAAAAGAAACAAACTCTTGGATTTTTGCAGTATAAG  
GTAATCCAGAATTCATCGATAACTCCCCTGGTGCGAACCAAGTGTGCGAAATGCCAACA  
CGAATCAAAAAGACAAACAGCATTATCGCCGATTTTCTCAGCGATCTTTGAGGAAAAGCA  
TGAAATTTTCAAATAATGCAAAAACCTAGTGTACTCCGTTTGGTATGGTGATACTATAGC  
ATCATACCAAACAACCTGATTAAAAACAACGGAGTATATCAAATGTTCAAATCACCAA  
ATCCAAGTAATGCAGATCAACCCCATGAAGTAAGCTGTTGAAAATTTCCAAGGTTTTGAA  
ATCAACGCAGTAATCATGAATCCGCTCAACAAAATGATGAACAACGAAGTTCTCGATAAG  
CGTGAAATGAATCGTTGCGAACAGTTCTTCAACGACATTATTCAAGACGATCTGATGTGG  
CAAATGCTGATTGGGCTAAACTCGCAAAATCCATGAAGCGTAAACTTGCTGCAGCGATG  
AAAAAAGCTTAAGTTATTTCAACAAAGCGGTTTACAACGCTAAACCGCTTGATTAATA  
GCTACAAGTTAAACAAACTACCACAAAGCAAACGGAGTATTTAAATGACCATGACCAA  
ATCGAAGCTATCGCAAAAGTTCTGAACAACCTCCAGCATCTCTGAAAACGCTACTTCTGTC  
TTCTTTCAAGTTGCCAAGAAAGCTTTCGTTACTGCTGTTGAAATTGCGGTAGCCACTAAA  
ATGAACAAAAACGCAGTTCCTCAATATCGGCGTGATGATGAAAAAGGGTTTGATCGAC  
AAAGCTGGCGACGGCTACGTACCCACCGAAAGTGCTGATGCCATTTTCATCGAAGCTGCC  
GAAATGTGGAAAGCTGCCAACCTGAAGTTGAAGCACCTAAAGTAGAAAAGAAAAAAGGA  
ACTGGTAAAGCTCGCGAAATCACAGTCGAAATGACTAAAAATATCGAGCTCGTCGAGCGG  
GTTCTGGCTAACCTCGGCATCGAGCACAAGCAAGCAGTCATCAATCGCCAAAACCTACGAA  
ATAACTCTGAACAAACGCCACGCTGATGCATACCGCAAATTCGAAATTCTCAACCGCGGC  
ATCTTCCGTATCGTTGGTTACAAAGTATCTGAAGAAATCATCAACAACCTCAAACCTTTG  
GGTTGTGAAATCAAGCAAGGTCCGGCAAACCTGCTACATCGACATCACCGCGAATGAAAAC  
AACATCGTTCGTCTGATGGAAGAAATTCAGCCGCTAACTAATGCGACTAATTACAAGCA  
ACTAAGAAAACCTATCAGCGATCGCATGTTATAATGTGATGGTTGATTTCAATTTGAGCAA  
AATATGAAAATTTTAATTGTTGGTACTGGTTTACTGGAGCAATTATTGCGCGTTGTCTC  
GCTGAACAATGGCATGACATCACAGTCATTGATAAACGGAAACACATCGGCGGAAACTGC  
TATGACGAAGTTCGAAATGGTAAACTAGTACATAAGTACGGACCACATGTTTTGCGTCAT  
AGCGACTTGGGTGTGCACAATTTCTTTACGCTGGACTTCCCTGGATTCCCTAGGAGCAC  
AAGGTAAAAGTCGAATGTAGAGATACATTAATCTCATTCCCCGTGAACCTGAAAACACTC  
CAAGAGCTCTATGGTATTGAAACGGAGCAAGAGGCCATCAAGAATTTTGAAAAGGTTGCA  
GACACGAAATCTCCACCAAGTGTGATGAACTTTTCGATCATTCCGTAGGAAAAGACCTT  
GCCGATAATTTCTTTAGACCATACACGAAGAAAATGTGGGGCACTGATCCTAAAAACATT  
GAGTGTGCTGTTGGCGCAAGGATTCCCGTGAGCACCTCTAATGATGACCGATAATTTAGT  
GATAAGTACCAATATATGCCCGAAGGCGGTTACTCTAAGATGTTTGAAAGAATGCTTGAC  
CATGAACGAATTTAGGTCAAATTCGCACGCCATTCCAAAAGGAAATGGAAGCTCAATAT  
GACTTCATTTTCAACTCGATGCCTATCGATGCGTACTATGACTTCAAAGTGGCAAATTG  
CCGTACCGTTCTTTGCGCATGGAAGTAAAAGAAGAGAAGCATGATCATGGAATTACTACC  
GTGAATAACTCTGCTTCTGAAGAAGGTCATACTCGTTACACCGTTTCGAAGAATATTCCA  
GGCCGTGGCGATGGTGACATGGTGACTTACGAGTACCCCTGCGACTACGATGGCACAAC  
GAGCCGTATTATCCAGTGACTCACGGAAAAGAACTCTATGCTAAGCATGCTGAGCATGCA  
AAGAGTGATAAAATGATGTTTATCGGCCGTCTGGGTGCATATCAGTATATCGATATGTGG  
AAAGCAGTTCGCACTGGCCCCGATATCGTTTCAGATTTCAAAGCATAACTCATAGCCGGC  
CGTTGGCCGGCTTTTAAAAAGGAAATAAAATGAAAATTTCTTGTAAGTGGGACTAATAACT  
ATCATGCTCGCCCCAACTGGCATCTGGAAAACGTTCTCGCTATCGTCTCGTGCCCTGCGA  
CTACCGGTCTCGTCGAAGCTCTCAAAGATATGGGCCACGATGTTGATCAACGCTTCGTTA  
CCCCAGGTGAAGACCTTAGTGGCTACGACAGAGTCTTCACTGCTTATTTGATTCTACTG  
GCGGTATGCAACCAGGTGGTTATTGCGTTTACTGGCTTCTGGCAAATTGTCCCGACGCGA  
TTATTGTCATTGATGACTGGCACACTCCCGAACGTTTGATGAAAGGCTTCAAACAGTCTG  
CCACTCGCACCCGTGAACAATTTGAAGAAGTTCTGTTCCGCGAATGTATGCTGAACGACC  
AGCACAAAGAAGCTACTGATGCGATCACTCCTGACCCTTCGCTGAAAGAAGATATCGTCC  
GGGTTATGCTAAGAACGTCTTCGATTCTCACCGAATTTCTGCATTTTCGATTTCGACAAGT  
TCGAAGTTTCCAAGATTTTCGATTATCCACATGAATCTTATTCGTTCTGTCCCGAATCCT  
ATGTTCCCTAACCCAGATGATCGGCTGCGCGAAATGGGTCTGGCACGTCAAGATATTTTGC  
GCGAACGTAAATGGATTTTCGCCGGTATCGATGGTCTTCTACAAAGAAAGCACGTAAGA  
TCATAGACAACCTCAGTTGGGATGTAGAAGTATTTGGTTCGTGCAACTATCGACGTTGATG

CCAAACTTGCAAGAGAGCCCGATGTAATTCAAGCTTACTCGGGTGCCCGCGCTGTTTTCT  
ACCCAGACAAAAACAACACTAGGGCTCCAACCTGGTGGCGCAATCGACCACGCCAATGCGCTG  
ATATGGGTGCTGTTCTCTTTATGATGTCTGATGAAGAAGCTTCTTTGTTGGGCCCATCTT  
AAATGGGGCTTTTCGATCGAGAAGTTAGAAGCCATGACTGACGAAGAGCTCGGTGATCTTG  
CTGCTCGTCAGAAGGCCGATTATTACAAGTCAAATCCTCTGGACAAAGAAAAAGTTAAAT  
CTTGTCTTGATTTGATTATGGCGTGATGAGTTTTACCAAAGCGGCTTCCGACGCGTTTTTC  
GGGAATTTTATGAAGCAAATTATCGTAAGGCTGTTTCAGCCCGATTTTCACGCGACAAGAAA  
TCACACAAAATGGCCTGGGCACGAGTGTGGCAAGCTGCTATCGAACACCACACTGGGTTT  
CCATGTGAGTTGATGCATGAGGCTAAACCATGGTCAGAATATGATCGGGTCTATGTCTAT  
TTCAATCTTGCGCCGTATGACAGATTGAGTTAGTTTGGCGGTCCTCAGCCACAATACGCT  
GAGTTTATTAATGTGCTGCAGGATTCACCGGTGAAGTTGTTGCATTAGACAAACCTTTG  
GCCCGTTTTGGTGAATTCTGCAAAGCACGTTGTTTCAACAAACATAGTGAACCCAACATG  
AAAGTTCCCGAGCTATGGAGAGGAATTGATTGGGGTTCCATTCAAGCGCAATTTGACAAA  
GCCACCTGTTTAAACGATGGCTTCTTTGCCGCTTGAAGATGTTACACTCGGTGATTCTAAC  
AGTATTTTCAGTGTGGCAGCCAGGCTATACGGCTTGTGCTGCGGCGCGCAAACATTACGT  
GGAGCTTTGAAAAGGGGATTGTCAAGTATCCTCCCTGATAAAGTTCGGAATTTGACAATT  
TATTTTGAAAACATCGACGTTCCGGTATCGTTTCCGGTTTACAAAATAACCCGATTTCCGGAT  
GTAAGTGTGAAAGCTCGACGAGTATGAAAACAACACTAGTCCGACTAAGGGAGTCTGGACAA  
TTTACCGGAGAAATCGAACTTGTGCACCTGCTTTCCATTGATGATGAGTCAAGAAAAATC  
CCAACAAACAATATGCTTAAACGGAAAATCGTTTAAACGGCAGTTGGGCTGAAAGAAATTCA  
TGGATGAGCATTTCATAAATGGATTATCGGAAATAGCATTCAAACACGGATTCAAGGTT  
CATACTTGGCCAAACAGCTGGTATGTTGAAACGTATAGAGACCCAAAATCATTCTTTACT  
CGTTGGAAGCCATGAAAGGTTTGCATCTTGCCTTACCATTCTATCGGTATGAAGGGTTT  
AAAGATAGCAACACTCTAGAGTTGTTTGACATCTAAAGGCCTTCGGGCCTTTTTTTGGGAT  
AAAAGTGTGTACATGTGTTTTTTTTGCTCGATATTATGGCATTGCTTGATAAAGGAGAATT  
GAAAATGTCAAACGACCATCATGTTATAGCGACAATTAACGGCTCGAATGCAAAGTGC  
GCTGTATCGCTGTCGTGCCATGGGGCTAAAGTTTCCGGGAACCGAAATTTGTGAATTTGT  
CAGTGTGAAAGCATAACGACTGGCTGAATCGTGAAGATGACGATGGCCTAATGAAATA  
TGAAGGCAAATTCGATCCGACCCACCCGTTTCGTGTAACAGTCACGCAGGCTGGTTCTCG  
GAAAATCTATGTTGATATCATCGGCGAAGAAGGTCAACCTTTGGTAGATTGCGAGTACTA  
TGCCTTTGTTCTGAAGATTTTCAGCCTCATTTCGAAAAGTATAAAGGACATAGTAGGCTTCA  
GAAAATGCGATAAAGAGTGAAAATAAATGTGTACTACAATGAGGCTATTGATACTATAG  
CCTCATCAAATAAACGAATACAGAAACACGGAGTATATAAAATGCAAGTAACCATCAAAA  
ACGGTCTTTACTTTTCGTAATGTTGTTAACGGTACTTTTGAAACTAAGGGAAACACCTGGT  
GGGATGCCAGCGACAACGATCCCCGCGAAGGTAAGTTAACGCCGTGCTGAAAGGCAAAT  
CTCGGATGGTTTGGGTAAATCGCAATGACATCGTGATTACCGAAAGTTTTGATGGTATTG  
CTCAAACCTGATGTCGCTGAAAAAACTGTTGACGAAATGCGTTCTCGAGTCGCAAAACGCT  
TCGATGTAATTGACAAAATGACCTTAGGACTTGTTAAAGGCACCATTTCGTTCTCTGATTA  
TCTCTGGTGCTCCTGGAATCGGAAAGACCATCAGCTCAGAGAAAAAGCTGAAACATGCTG  
ATGAATTTGGCGGCATCTCTTTCTCTTCCATAAAAGGAAAGTGCTCTCCCATCGGCCTCT  
ACATCCACCTCTGGGAAAACCGTGATGAAGCCTGTGTTGTGCTGCTGGATGACGTGATG  
TGTTCTCCAACGAAGACACTCTCAACTTAATGAAACCTGCTCTTGACACTGGCGAAGAAC  
GCATCATCACATGGGGTACTGCCAGCAACTCCTTGGCAGAACGCGATATCTCCAACAACCT  
TCGAGTTCAAAGGTTCCATCGTCTTCATCACTAACGCAGATATCGACGCTGAAATCGATC  
GTGGCACTAAACTTGCACCCGCACCTCGAAGCTCTGCAGTCTCGCTCCATCTACCTAGACC  
TTGGGGTTCACAATAGCCGCGAAATCATGGTTCGAGTGAATACGTAATCACTAAAACAG  
ATATGCTGCAAAAACGCGGACTGTCTGAAGCACAATTTGTCAATGCGTTGGAATGGATGA  
AAGAGAACGTGGACCGCCTCCGCTCTGTATCTCTGCTAAGTGCCCTCTACCTCGGCGATT  
TCATCAACACTGATAGTGATTGGGCCGATGTTGCTGAAGTTACACTCCTGAAGTAATACG  
GATGAGCTGGAGGAATTCCTCCAGCTCCTTAATATTGTTATTCGTCTTTGTAAAAACAAT  
CAAGCTGGTTCACACTGGTTAACCCAAATGGAGAAATGAAATGAATCCGAAAAAATGGTC  
TTATCATGAAATATTTTGGGAGTGAAGAAGCAAAGCCCCAAATTCCTACGGTTGAAGGTA  
TTCGAGCAAATGCTCTTGAAATTTTCAAGCCACTCGAAGATCGAATCGCTGCTGATTTCG  
AGACTCTTGACCAAATGCTACTCGCCGGCAAACGAACTGCAAGCGCATGAACTTGCCA  
TCAAGAATTTGATGGAACGTCATTCCGGCCATAATGAACAATTTGTCTGCTGAGCAAACCTC  
AAGTGAGTGACTACATCAAACCTGCTGAAGTTATGAAGGCTAATATTGCTCAAATTTGCT  
AATAATCAGAAGGCTCCTGAGGAGCCCTCGTTTTTTGGAATCAATATGCAATACAGTTTT



GGCGAAATCACGACTTTGGTATTTGCACTAATATTCATTATGTGGCTTTTGTATAAAGCT  
CGACATTTTCATATTGGATATTTTGGATGCGGTTTGTTCGCACGTTTGATTAGGAGAGATTT  
TGAATCCAGTTGCTAAACATGACTTCAAGAAAGGTGGAGCTCATGTAGACAAGAAACGAT  
GCTTAAATGAAAAGCGCAAACAAAACATCAGAAGGTGTACAATGATCGAACCAATTATT  
GATGTTTGGAAAATTGTAAGCGTCGCAATCGGCGCATTATCATCATGCGATTGATCGTA  
ATAGCTTCAGCTAGCAAAGGCTTAATTTCTGCAAGCGACCAAATCTAAGAAATTTTAGAC  
AAATGGCCAAGTTTCAAATCTTCGGGTCAAGAGTTGTTTGGTAATTACCGCATTGTTGTC  
ACCCCTTTGGTCATTGCTCTCCTTCTTGTTTTGGTACTCTGTTTTGGCCAATTGTGTTG  
CTGTATATTATCGCAAATAAAAAGGTATGTACTTTTTGAAAAGATTTTTGTAAAATGTA  
ACATATCAAATTTGCCGTATTTATAAGAGCAACAATATGGCATAACAATGAAACAATAAA  
AGAAATCATTTCATTTGCGTCAGTTCTGATCAAATTTGGCTTTGAAGACATTCCGAACAA  
TCAAGAATTTTCGTATCGTTCTTGAACGAATTGGGTTTAAAATCACCAAGTGGAGAAGT  
GTTCACTCGAGCTGGGTTTAGGACAAATGATGAAGCGTCTACCAGCTGATCAGCGTGAAG  
AATTAGTAGAAATGTTCAACCAAGGTCATCGCGACATCAATCACCAATGATCATGTATC  
CAAACAGCAACTATGGAAATATTATGGAAATCGAAATCGAGAAAAAGTACCGTGTAAATCG  
ACGCCTCTCGTTTTGAAAACGAGCACGGCATCAAAAATGGCCATGAATTCTTCGTGGATT  
CGCTAGATGAGGATGGAGATAATTAGGTCTCGCGGAATTGCCTGGAATGGAGTAGACGGCG  
ACAGCAACGATGCTCCATACGCCGTTGGGCATTGCTGATGAAAGGCTATCAAGATCATT  
GTCCAGAAACACCAGCGGATTACTCAGGCGCTATTGAACAAGTATGAAAAAAGGGAACCG  
TAAGGTTCCCTTTGCTTTATCTAGCTCTACTCTAAAAGTCTTTCGGCTTGATTGCAAATA  
ACGAAAAGATTGTTTTCATTAATTACTGGCTTTTTACGCCAAAACATCGATACTACCCCA  
GCATAAACGTTGTCTAAGTTCACAATCGGGCAACTGTACATGTATTCAAACTCATTGTGC  
CCCGCAGGAAGAGACGCAAATTCCTTGTAAATTGCTAAAATGTCTTCCTGAAAAATGGACC  
ATATATTCATTAGATGTTTTGTTTATTGGATACCCGCCCTTTCCATATCTACAAGTTC  
AACGGCGTTTTCCCTACGTGGCGACCATTTCAACGAAATAGTTCAAGTTTCTAGGTCTA  
AAAGAAAATATAACTGAAAATCTGCTCGACTTGAAACATATGCTATTTCAAGCTGTTCT  
TGTGTCGCTGCCTCAAATTTTCTATCGCGTTCGGCTTGAAGAATTCCTGGTAATTTTGA  
AACCGAGTATCTCGATAAACATTGAAGATTTTCGTCCTTGATGTACCAATTGAAACCAAGT  
ATGAATACAAGGATCAGCAAATTTGCCGATAAAATACAACTTCGCCGGTGATAGCGTCT  
TTGAACAATCGGTCCAGAATTTCCATCAGAATCCCCGCACGACCAGGGGGTTGAGTTCCC  
TGCCTTTGGTTTCTGTACTCATAAAGTTGTTACTCCTGTATAACAGCTCTATTTAATGC  
TTTCGGCACCTAACGGTGCCGAAATGTCATTTATAAGAATCCATTGTGCCAGTTAGTTCA  
TCTTTTGCAACTCGCATTGCCCTGTTGGGGGTTTGTCTTGCCCAAGATGAATCAGGCAAT  
TCAGAGTATGCTTTAGACCAGTCCTTATTGGCTATGAATGCGAGTGATATTTTGAATCCA  
GATAGACGAGGACCTCCATTTGGAACATTAAGTTACAAATAGCATTTTTTTCTAATAGGG  
TCACAAGGATGATATCCTAATTTGATATTAGGATATTTCTTGATTTCACTTTTACTGTT  
TGAACATCAGAGCTAAACAGTGCCTGCACTCAGAGATTACCCCGTTCACCTGG  
CAACCAACTTGTTTACTCAATGTATGGTTTATCAAGGCCATATCGGTTGTCTTCTGAGGT  
ATAATCAGGTGACCTATCCCAACGGTAGGGTACCCTAGATGGTCCACTACACTTTCAA  
ACTCTTCCCTCATCGTAGATGTGCATGTCTTCTAACGTCATATGCATTCTTCTTAATTAT  
TTCCGAATATTGACGGGTTTGGTGGCCAGAAAATGATTTAAACAGCTCGCCGTTATACA  
CCGCAAGATGCCCAGCACCCGGCAAAGCCATATCAAATATGGCGACCATGACGAATTTT  
GACCTCTATCACCCACATCATGTTGATCAAATCTCCATAGTTTCCAACACTTCAAATT  
GTATTCGGCCTCGGCCGTTGGATGCGTGAAGTTGAAAGTACGTGAGCCATAACCAATCGG  
AAACATATTGATCTGGTGGCGTGTATACTCGAGTTTCTTACCACGGCTGGTTATCCCATC  
TCCATCGTAGATTAACGTATCCGAGATCTCAGCCGCGATGAGACGCCCGGCCAGTTCCGA  
TGTATCCGATTTTTATGGTTGCACGTTGTACTTGAGTGAATTCCGTGTAGTAACTGAAAT  
TCTGATTTCTGTTGTACGGATATCTAAAGCCAGACCTCATGTAGCACCAGCGATGGCGATT  
TGCTTTTATTGAAGTAACTCGATAACCAACAATTTATAGGTGACGTACCTTGTCCATAAT  
AAAACGCCGAAAGTTGTGGGTCTGCCGCGTTGCCAGCGGAAGATAGTCTGCAAATCGCC  
GGACGTTGGTAATCCAATTTGGCTTTTTGATATCACCGGTATAACCAATCGCGTTATACC  
CAATGCTCCAAAATCGCCATGGCGTTGAGACATTTTGCCTCCTAATGTTATATAAAGTT  
CAACGCAGCGTTCACAGTATAAACTATTGTTCCGCCTTCAGTGGCAGCGAACTCGTAAGT  
TTGAGATCTAACTGTTCCCTTGTTTGGATTTAATACCCCGCGGTGCACACCATCTACTTG  
ATACCATCGACCCTCTGTGCAGTTGATATATGTGATTCCACCATTTTCGTATACGCACCCA  
TGCCCTGCCGTCCAAAATAGGGTAAGATTTAACGGTTGTGCCATCTATATAAGTGTAGAT  
TGCTCTGACGGGTTGATGCCTTATAGCTAACGTCGCATATGGCGGTGTATTGTTCCAGT

GACAACGGATTGTGTAGCTGCAATCTGCTTAAGACTAGCCATTCAGCCAACTGCCCCGAG  
TAAACCTGTTGTTCCAAGACCGGCTTTACACAGAATGTTGGAGGCCCATCCATTGGCCTG  
GAACTCGGTGTTTGCCTGAGACAACCAGATGGGAACGTTAGGTACGGCCATATTCCA  
CCTTCACCTTCTCGGAGAGTTCTTACTGCCCCACCAGTAGCGCAAACAATGCGGAGT  
ATGATAGCGTCAGGATTCGGTCCCCTTTCGTTCTTGAATCCACTACTCGAGTAACAG  
CTTCGGGTAGCACCTGCTCGACGTTTGTGCAATCAACCCGACCTCTTTTTTGTCTACT  
CAGTGGCTTCAAGCGTCTGCTTCTTGTCTGAGGAGTAGGCGGTCAGTGCTGACACTATCC  
GTAGCGCGTCACGTACTTCCACAAAGTTCTTCTTAAGTCGCCGGTATGACCGGATGTAAA  
CGTCATTCGCGTTCACATTCCTTGTCTACTCCCTGCATACGAAGCGAGTCCTTGTGTGT  
GGAAGAGGAAGTCCCCTCCCCTCCACAAGTGTAACTGTAACGTAAGTGGCAAAGCGGCCTGCCATGT  
GGAACCCGACGCCCGGGCGACTGTCGATAGCGGGGTTACCGTTCACCTCGATAGCGCACT  
GGTAGTAGTCGTTTCCACGGCATTATTTACCACAAACCTGTCGCCTTGTTTACCAGCT  
CGAAAGGCCCTTCTGGGCACCGGCCACCTGTCCGCCAAACCACGCTTTAGTTCCAGCAA  
AGTTGATAGCCAAGTATCCGAAGAATCCTGCTGCGTTTCCGTGAGCTTGTTGAAGAGAT  
AAGTCCATTAGTATTCGGAATGCCCGCAATGTTGGGTCCTTGAAGAATCCAGATTGTC  
GACGGAGATTACAATCGCCCAAACTGTGGAATGCCAGTTCGTACGTCCCAAGAGCAA  
AACCTGCCGGAGCCGCACCAACATCCGAGGCAGTCGGCTTGTTCCCTTAATGGTAAATCT  
TGCAGATAGCCCCACGTCCGCCACTACGCCATGTGAGAGAGTTATCAGCACCTATCGTGC  
CCCCAATCCACAGGCGTCTCGCTCAGAGCCATCAGGTGCGCTCCACACGATCTCTGCCG  
TGTCACTAGCAGAGTGCCCTACAAGGTCAAGTATCCCTGTGGCTCCTAGCATCCCGGATA  
CAGTCCCACCAGCAACAGGCAGAGCCCCAATTCAGACAGGGACCAACACACGTCACCCG  
CACCGTTAACGGACATAGCAGCGTTGCCGATAGTCAGGGTGCCGGCTGTACCCAGTTCCG  
CCGTGGTCATGTTGCCGGAACCGTCAAAGTTCGTGCCGTTAATCTGGCGAGCCGTAGCCA  
CCTTGGTTGCCGTGGCCGCATTGCCAGCAAGAGCGCCCGTGAAGGTCGGAGCGGTCACCC  
CAGCAGCCACGACAAGCCCTGTAGGGTTTAGTGACATCCAATCGGTAGTGTTCCGCTCCGT  
TTACTCTGCCACTTGAAGTATTCGTTACCGTTATCCCCGGTTTTGAACCACATGTAGC  
TGTCGGTGTCTGTCGTCAGAGGCATTCATGAAACCAATCTTAGCGGAATCAGAATTGAAGA  
CCCAGCCCAGCTCGCAGGCAGCATCGACGAACGTAAGCTCACCGGTCATTGCATCGCCAG  
CTTAGCAACCGCACCAACGTTAGTTGCAGAAATCGAAATATTCGATGTGCCATCAAAG  
GAACACCTGCAATACGTCTAGCTGTCTGTAATCTAGATGCCGTAACGGCATTTCATTGA  
CTGGAAGAGCTCCTACTGCTTCTGGAGTTGGGTTATATCCGTTATCCTAACACGATTGC  
TTCCGTTATAAGTACCAGAGCCTTTATCAAATTCGCAAGAACAATGGTTTTTGTATCTC  
CAATTAATTGGCCATTAACCGCAAAGGTAGATGTTCCATATGTAACATCAGTTGCACAGG  
CGGTGACGGCTGTTTCGATATCGACATTAACCTCATATCGGGAAAGCACGTGTTTCAACGT  
AAACAACAAACCCATCTACGGCCTCAGATGGTCCGTGGGTTGAGTAAATTGCTCTTTCTG  
ATGTAGAATAAATCGTAAACTGGCCTACGGCATAACTTGCACCGTCACCCATTCACTGG  
CGCGAACATTACCGGTAATGAACAATTGTTTATTGGAAGTGTGTATGGCCAGATAAAG  
TATCGATAAAGACAAATGAGTTGGATGCACCATTTGTTGCAAAAAGAACTGGAATATATC  
CGGAAGCAGGTGCTCCAGCAAGAAGTGTGATCGTCAGATCTTTCACACCTTTACCTGAAG  
CAGTAACAGTCGATTCAACCAAATCACGACGTGCCACAGAATTAGCTTCGGTGCCTTGCT  
CGGCAGACAAAAGAACTTTTGGAAACAGTCAAATTGCCAGACATAGTGTCGCCGATGTTTT  
TAACGTAATCGGAGCGTGTATGGCTGTCGTTTGTACTGTCACTGCTAGAGAACCATTTG  
CACTGCCGTCGAACGATACTGAGCCAGTTGCGTCTCCGGTCAAACACATAGTTCTTGCGC  
TTTGCGACTTTGATGCATATAACAGCATTTCACCGGCAGCTAATGCACCAATTTCTGCAG  
GAGTAGGTTTATCAGCTTCGGTATAAATCTTTTGGTTTGTCTAATTTAGTGCTGCCGAGT  
CGTATGCGTATGTGTACATAACCAAACCGATACTTCCGTAATCGAAAGTTATACTACGGG  
CATTCGCACCGTTACTGGCCGTTGGATGAGAAACGTTAATAGTCAATCCACTGAATCCGGC  
CCAGACTGTTATGTCTGAAGAATCCGGAATAGCCATTGACAAGTTATGAGGTGTTCCCA  
TATCAGACGATTTGCTCAGCAAGTGTCCATTTTTTTCGCAGTATAGGTGTTTCACTCAGATA  
AATCGTGCATCAGCCTCGCTCTGGTTATAGTATGGATTATCGATAGCAGATCGTTGGATA  
AGACCGGTGTCGCTAATCAAAGTCCGCCCGTTCGTAATGTATACGGCGGAATCAAAGCGA  
ATTTTAGTGGTAGTCATTCCATCTTGGGCATAACCGAGTACTAAATCAGTTCCACCAGGT  
GCGCCAATATAACAGGTTTTTAGACGAGTTTGTCTCGAATGAACTGGACACTTCCATACTTT  
ATCTCAAAGTTTCCAGTATTAGCGGACACCAACGCTCCTATCAGAGAAACATCACCATTT  
AGATTTAGCGATTTTAAAGTCCTTCAAATGCCCATGCGCCGTTGGTGTGAGTCATTGCCAC  
TTTTAAAGTACCAGCCGCATCAGTTCCAACATATGACTGAGGCGTATTTCCCTTTGAAAA  
ACGAATATAAGCAGGACCACTAACGCTTACTTAAGCGCTAATGGGTAATCCGTGGAAGT

TTCGATGTACAGAACACCCGAGATAGTATCGCCAGCACGAGATACTACTTGGAGTTCATT  
TGC ACTTGGTTTATCGTTTTCCGAATAAATTCTTGGACCCTTGTACAGGATAGCATTACC  
GCTTGGTACCAGCGCAAGATTTCTTGGTGCCAAACAGGTGAACCAACGATCGTGGTTCC  
AACTTTTAAATCTGCCATATGGGCTCCCTTGTTTAACGAATGATTGGTGATTTCTTATTA  
TATTTAAAGCACTCAAATTAAGCAATCCTGGCTCCAGGTTCAAGCTTGCCTGAACTTA  
TCTGTTTATCCTTTTAGTTATAATATCTATTAAGCCATAAAGGATAAGTTTTGGCAGGGC  
CAAACCTGGAAGCCAGGAATTGATATTCTATTTAAAGCAAACAAAGGGCCAAGAGGCC  
TTATCTTTTCGTTAAAATCGTTTGAGTTAATGATATTCTTTTGTTCAGATTCAAAGCTG  
TAATACAGGATTTGTGTAATTACCGGTATTGCTGATGATATTAGCTCTAATACCATTAC  
ACCAATGCTACATCCGCCACTTTATCATCATCGTCCCTTGTAACCCGCGTTATAGTGAC  
ATTTGCACTGCTGTTCCAGCACTGACGCTTGACGGATATCGGTATGCTGCAGAAGC  
AAAATCTTCGCCCTGAGCTTTGCGTTGGCAGTTTGAATAACCTTCAAATTTTGTCCA  
CACACCTGGGGCCGGTGTGTGCGTTCCCTAGCCATATACTGGTTTTCCATATGCCTGAAGA  
GTCTTGAGTCCATACATAAAAAAACATCTTCCACCGGCGGTAAGTGTCTAGTGCCT  
GTGCAGCTCGCATTGGATATGATATATTGATTCCCATTGAGTTGTTATATTTTCAGACAA  
ATAACGCTTAAATTCGTATTGATTCCCCACTGAGAAATATTCATTTATGTCATCGACATT  
TCTTGACGGTAATCCACACGCTCCAATATCGACACCGTTCGTCAAAAACAACCTTGCAAATA  
GGCATTGTGTCTTCTGCGAACTGTTAGGATTATTCCCAACAAAATTCTCGTAACAAAA  
GCGCTTAAATGTTGTATTGAAAATTGCAACGTACGAACTTCTCTATACTCTCGGAGTAAA  
AAGAGCATCGGATTGTGATTTAGATAACTAGAAACAGGCCACGACATAGCTCCATATTG  
TTTCATGAATGTGTCAAATCCTCTGACGATCTGATAGCATCATGCGAACTAGTACTAC  
TATATTGTCAGATGGTGCAGACATTAGATATGTTCTTAAAGTGTCAAGATGCTCGCGTCT  
AGAATATATGTCCAACGTCGCAAATTAGATGCTACTCCGGTTGGAGAAATAGTGATAGC  
GTTACACCCCTCCCGTACGATGGCAAACCGAAACAACATTGATTTTGACATACGGCCC  
TCTGACACTGGAGTCATCATTGACTCCAAGTGCCTTTATCATATACTTTATTGCGTTATT  
TTCACCTAAGTGATTTGATTCAACGTAAGATGGCCAAGATGGGCCATAAATTGTTCTGT  
CATAACGATTCCTTATTCTTCCAGATAAACTCAACTGTCTTGGTCAAGTTGTTGGCAAC  
GATTTTCACATTACCAATTTTGTTCGAATCTCTAATCGTTATATTATTGGGAGATGAACC  
TGTAATATCAACTGGACCTACGTCTTGAGCAGTAGGTTTGTACCCTTGTGATAAATCTC  
GTAATCAAGTTTCCGATCCTTACGATTGGATTCTGATCCGTATCAAGACACACACGGCC  
ACTCGCTGTATCGGTATTTCCGAAAACGAAGTCATTTGACGAGAGGTAATGTAACGATT  
TGAGTTGTTGAAATGCAAATACTTAACATAGTCACCAGTGTTTGACAGAAGCATTGCTAC  
AGTCATAGTCGATGCACCATCACGACGAAGATATGTTGGGTTGAGATTTCTCTGAGCGTT  
GGCAGTATGAATTACCGGTGATCCAATTATTGTGAAGGCATCAGTAGAGCTTGCCAATAC  
AGCCATTGTTGAACTAGCATTACCAACTATGAATCCGCCTGCAACAGATTGTGCATATTG  
ATTCGCCGCTACTTCGGTTTACCCAGATAAATTCTCGCACCTATGTTTTCCATAACAAG  
GAAACCAGCAGTTGATTTGATATGTTGTGCAATTCGTACATCACCGGCTCTATTAACCTT  
CAGCTTACAAGAGAAAGTTGAACCGTCTTTAGTTGCAATAGCAATATCACTGCCAGAAAC  
TTCAGAACCACCAACGCCACCTGCAATAAATGCCAATCGTTTATTGCAGCATCACTTCC  
AGCCACTATGGTTATACCAATTGGCTCCATCAGCAGCTCTATTTTTACCTACTTGAACAGA  
GTTTGTGCGACGTATTATCGTTAATCACTCTTGGGCTCGTTGTGTCGATGATTGGTAATATC  
GGCAGTACCATTGCGGCAGTAAAAGTCATTCGCGATGTTACGGTTTGGAGCAACAGTTTCG  
ACGGTCCAATCGTTAGCAACAACCTCCACCAAGTTTCAGTGAGTTCTGGGCGGTTGCCAT  
TTTCGGCATATAGTTTTGCAACGCATAGTTCAGACTCACTGGACTAACGGCCAGCCCATC  
ATTTGAATATGATGTGTACGCTTGGGTTGAACCGACAATATCGTGACCAACGAAAGTTGA  
CTCTACTGTTTCTGCTTTGACAAACCCACGGCGTGTTCATTTCTGACCAAGTCGGTTC  
AGTTTGCCTATATATATGAAGTCTTCTGGACTAACAGCCAAATTAGTTGCTGTTCCAGT  
TCTAACTTCAGCGGTTGTGCAACCCGGATAAATACCGTCCAGAGTTCTTGTGCTTTTTCT  
TCCATCGAGTTTCTTTGGAGTTACGATGGTATTGTGTGAACTAGATCCATTGCGCTTAAAG  
TTGGGTTTAAACACGCAATGTCCAACATTGAGCTTCTGTAGCAAGACTTATTTCAAACAGA  
GACAGTGTCCAAATGGTTCCAGATTGGGTCAAACCATCAGTCGTGTTTACCGAAATTCT  
TGCCGTATTGTTGAAACGATTCTTCAATTTCAATGGACTGACGATAGTTAAATCGTTTGT  
CGCAGTATCTATTTAGATGTGTCGTGGCAATACGGGCAATACCTGCGAGAGTTTCTGTTGA  
AGTGCATCATTCAACTTTTTGGGAGTAATAGCACGGGTATCATCTGTTCCGGCATTTGT  
TTCAGTCTGGGTTGCAATCTCAATCAGACCATGATTTGATTCTGTGCTCGACGAGCTCC  
CAATCTTTCGGCTGTTACAAGCAAAGGCCAAGTGGATCAGATGATCCCCCGTCAACTTC  
CGCCTGTGTGACAATATAACCTATCCCCTTAGCTGTTTCGGTAGCCTTGAATTCATCCAG

GGCTAACGGTGTGACAGCTTTCGACTGATCGGCTTTGTTATAAACAACAGTCCCAGCAGC  
TGACCGAGTTGTACCAGCTGTTCCATTTTTAGAAACCACGGCTAAGATACCGGTCAGAGT  
TTCTGACGCAATACGATTATGCAACTTTTTGGGAGTCACAATTGTTATGTCGCCAGTTGA  
GCCGTTTGCTTCTGCTTGAGTTGCAATCTCCGCTAAACCACACCGAGGTTCCGGTAGCAGT  
TCTGTCATTTAAGTTTTTCGGAGTGACGATAATGTCATCAAATAAAGTTGAAGTGCTTAA  
CTGATTGACTTCAGCGGCTGTTGCCAAACGGGCAATGCCACGACGAGTTTCAGTAGCAGT  
CTTATTAGCTAATGTTTTTGGAGTGACAATAGATTTCGTCATTCAGGTTATCTTCGTGATT  
TTTGTTTACTTCTGCTTGATCCGCGAGAGAAGCCACGCCAGACGATCACGACGAGTTGT  
ATCAACACGTTCAACTTTTGGTTGAACATTTCCGATCATCCATCCGTAATGCGAATCAGT  
AACACCCACCAGGGACGGGTCTAAGTGTGCGTACATTAGCTCGACATATGGAACGTAATC  
TGTGTCAGCACTTATAGAAATAGATGAAACCAATTCCCACCCATTTGTCATCCGGTATTC  
CCAACGACGCTGGAACCTGCATTTGACCTGTCGACCAAACAATCAGCTGATTTGAACCTGG  
ATTTACTCTGATTGTACAAGTTTGACCTTTTCTCAGATGATCCATAGTGATTTGAACACG  
GTCACCTATGGCTACTTGCTCTGGAAGAGTCAGCACGGTGGTCTGACTTGGCAAATTACT  
GTTGCCAGTCACCAGAATGTGTTCAATCGGCAGCAGTTTTGTGTCAGTTTTGGTAACACG  
AATGCGTGTCTTTGGTCTCCATCCATACTTTCCGAGTCAAAGAAGGAAAATCGACTAC  
GACTGATCCGTAACCAGAAGTGC GCGATTTCGATTTTGGTAACACCGGTTTCATTAATATT  
GTGACCTGAACCTGGTCAAGTCTCAAGAGTCGAGTGGTTAATCGGGTTCATCCCATCAAT  
ATCATGGGTCGTAATTACATCGCCATGCCTAGTATGTTTTGGCAGAACAAGACGAATTGT  
TCTTGCCGACGTACGTCTCCAGGTAACCATCCCTGACTGCAACTGTAATCCTTGAATCCA  
TGGCTCAACAAAATAACTGTTTATTGCTGTAGCTGCTACATCCACTTGCCATCTGTTTCC  
AGCTGCTTTATCGTCGAACATATATTGGCATAATGGGACAGTTGCACGGAAGCGAGCGCC  
GACTGCTGCCTTATATTCGATGACTGCTGTTCTATAGATACAACCTTCCAGATCGTT  
AACACCTGGCTGACCGCCTACGTCCTTTATTACTAAAGTATCGCCATCGACTGGTGATGT  
GGGCTAGTTGAAAACCAGATTGTTGAATCTATTGTCAGCAGTGATCTATTGACCAGAACT  
CAACTGAAGTGAGGGCCCCGTCGAGTTAATGAACTGCCATGTTGGGTCAACACGGAGACC  
AGTCCATTTTGTGACGTCGAAAGCTCGAGCCGGGGAAGCAATATCTGCTTCTGCGTAATA  
AATTCGACGCTCGAAAATTACAGCATGTTTTGCATCATACCCACTGGTGCTGTCATATTC  
GTAAATTGTGTTATATTTGTGGAAAATCCATCGCTAACCCATCGGACAAAATTGTCTG  
ATCGGCCATTGCAACGTTGATCAGTTTTTCGCCAGCTTCATCAAGGCCGCTTGTGGCGCG  
AAAGGCTTGTCTAACATTTTTGAAGCTCTCCTTTTTCTAACTTAGTTATTTATGTTAGT  
ATGTCTAGGTGTTCAATAAGAGAAATTGAAATGAACTTAAATGATTTGATGGGTGAAACC  
ACAAAGGATGCTGTCATTATTATTGACGCATCTCAATTAATTATCGCGACAATAATGGCT  
AACTTTACTCCTGAAGATGTAAATGAGCGAATGCTCAGACATGTAATTCTGGATACGGTT  
CGAAACAACGTCATAAAGTTCAAAAACGAATATCCCGAACTATTATCACATTTGACGAT  
TTTGCCAATGGTTATTGGAGACGTGACATTGCTTGGTATTACAAATTAACCGAAAGGCT  
AATAAAGAAGAATCTCCATCGGATTCGGAACCTTCTCTTTAGTATTATCAATAAAGTGGTC  
AACGAAATGCTTAATATCTACCCAGGTGTTAAGATGATCAAACCTTGATAAAACTGAGGCT  
GACGATATTATTGCAGTTTTGGTCAAAAAGTTCACCGAAGAAGGTTCGATGTGTTATGATT  
TCATCTTCTGACTCTGACTTTACTCAATTGCACACATAAAGGGTGTCAAGCAATATACA  
CCTGCTCAGAAGAAAGCAGTATAGCCAAAATATGGTAGTCCAAAGCATGACCTGCTTGT  
AACTGATTAAGGGTGATGCAAAAGATGCTGTTTCGGGAATAAAAGTTCGTGATACATTT  
GTCCTTGATCGTGTGCAAGGTGAACGTGCTCCACCTTGTCTACCAAGTGGATTAATTCA  
ATCGTTGAATCTGAAGACCCTCGAGCTGCATTGGAAAATGAAGAATGGCAAAGCGTTGG  
GATATGAATGTTTCGGTTGCTTGATTTGGATAAACTTCCAGCACATGTTTCGGATCGAATC  
ATTCAAGCTTATAATTCTTCAGTAGTCAATCCTCGTGGTAGATTGTACAGCTATTTTGT  
AAAAATGGCTTGGTTAACTTCTCCATGAAGTAAATCAATTCTAAGGCAATAACATGAAA  
GAACAGACGCAAAGAACGAAACAGTACGAATTCAACCCGGCTGTTTCATGGCGAACGTCT  
CCAAGAAATTATTACCAAGCATCAAATCTGCGCACCATGCGAGAATCTTATGCTGAAAA  
GGTAAAAGAGCAGCTCAACATTGCCACTACTGAATGCGGTGTTGACGGCAAACCTGTTCAA  
TCAGCTGTTCCGGATTTACCACAAGCAGGAACGTGAGCAATTTGAAGATGCTGCCGATGA  
AGTTACTTCAGTGTATGACCAAACCTTTAAAGGCCAATGATGTCAAATCCGAACAATCTG  
AATGATAAAACCGCAAACGGGATAGAGATAGAAAATCTGGTTAAACTGGATTGACATAT  
CTGGAAGCATGTGTTTCAGTGGTTGGAAGAAAATCTTTAGAAAATTAACCTCGTGCCACAAA  
TATATCCCGCGAGCGGTAATTGACAAAACCTTTCAAAGAATGTGTGCTTTCCGACATGCTT  
AGACCTTCCATTGCAAAAATCGATGACACGAAATAGTTTGGACTTTTTGATGTGAGATTTG  
TATGATCCCTCTCCGATATCCGCCTAGAGCTGATAGATTTATTAGTGCAAAGGGCGCGTT

TATGCTTTATTTGATGATGAAACAACGTATGGCTGGAAAATATGACATAATCAAATATAG  
TTGGAATATGAAAGTTACTGATTCTGCGTTTAATAAACGCAGAGATAAGTACTTCTTTGA  
TAAGACGAGCGATAAATTTACCTTAAAGACTTGACAGAGATATTTCTGGCAACGTTTTT  
GGAAAATTGAAATGGCTGGGCCGGAGATCTTGTATGAAGATGCAATGGCAGCCCATCG  
AGAATTGTTGGGAAGATACATCAGATCCCTGACAGATACAGGGAAGACCTGAAAAGCCA  
GGTGTATTTTTTGCAATAAAGTCAATGTTCCGATAGGTAACCTATTGGAGTATAATGAAA  
AACAAACAACGAGCCCAATTTTCAAATTACTCCAATCTGTCCTGATCAAAAACAGAAACAT  
TTTTGGTTATTGATTCATTCCTTCGTATAATCGACAAAATCGATGAGAAAGTGTGAGCTG  
ATAAAATCTTGCAGAACTGGCATAACCAATTGGTCAATTACCGGAAATTTGTAGTAATAA  
ATAATGATATAGCTAAAGCCAAGTTTATTCAACACGTAAAAGAGTTTAAAGCTGAAGTTT  
AGCTATATCAAAATTGATGTAAAATGTAAAAACGCAAGAACAACCTGTCACAAATAAGATA  
GGAAAATAAATATGTTCAAGCGCAGCAATCCTTCTCAACTTCAAGCTCAACTGGCCGCAC  
TGAACCATAATGCAGGTGGTTTTCGGTGGAGATAAGAATGAATGGAAACTGAAAACCTGATG  
CAGCTGGTAATGGTCAAGCAGTAATTCGTTTCCCTCCCGGTAAGGTGATGAAGGTCTTC  
CGTTTGTTAAGCTGATTAACCACGGCTTCAAGAAAAATAACAACCTGGTATATCGAAAATT  
GTTCTTCTACCCACGGTGATTTTGACAACCTGCCCGGTTTGCCAACATCTCAGCCGCGATG  
ATTCTTACAACACCAACGTTGAAGAATATAAGCTCCTGAAGCGTAAGACTTCTTATTGGG  
AAAACATTCTGGAAATCAAAGACCCTGCCACTCCTGAAAATGAAGGCAAGGTGATGAAGA  
TTCGCATTGGCGCAAAGGCAATGGAAAAAATTACTGCCATGATCAACGTCGACCCGGAAA  
TGAGCGAAACCCCACTAGACGTAACCTTGCCTTTTCGAAGGTTCAATCTTCGTTTACAAA  
CCAAGAAAGTTGGCGGTTTTACCAACTATGATGACTGCGAATTCTTGGCTCAATCCGAAA  
TTGCAAAAATCAACGATCCCGAATTCCAAAAGTTCCTCACTGATGGCATGGAAGATTTGA  
GCAAAAATCCTTGCTCCTTCCGAATTCAAGCCTCTTGAAGAAGTGGAGAAGAAATTCAG  
CAAGTAATGGGTAGTTCATCGCTGCTGGCTCTTCCGCTTCTGCCGAATCTTCTCTGTCT  
AGCGAACTGAATGACTTCGACGAACAGCTTAACTCGTTCGACACTGATGTAGTTCAGCCA  
TCCGTGCCTAATGCTTCTTCTGATCTCGATGACGATCTGGATGCTCTTCTCGGCTAATAA  
AGAAAAGCAACCTTCGGGTCCTTTTTTTGCATCACAATCTTTCAAAAAGTAGTCTACAAC  
TATGCCGTACAGTGTAGAATGTCTCCATCAAATCAACCAAGGAGTAATAAAAATGAAAGA  
CATTCTCGATTATCCAGTTGACACCAAGGGTTCGGATTTGCCACAAGAATTTCTCGCTTT  
GCACGTAAGTCGTTGTGAAAAGCCGGTTGCCGCGTTTGGAGGTCAAGATGAATTTTTCGA  
ACTCATCAACACTAAAGCATGTGGCGGTTGGGTTTTGGACTATAAGGCCATGTTTGAAGA  
AGTAAATGGCGTCAAATTTCCCAGCAATATCAGATTCGAATTATAAGGAAAATTGAAATG  
TCAACGAACAAAGTTCTCATCAAATTCAAATCTCCTAAAGCTCGTGCTAAATTTGCAGCT  
TCCTCTGCAGCTAATAGCGCAATTGCTGAATATATGCAGCATTACGAGCTGATTGCTGTC  
AATAAAGGGAATGGCGATATTGTCATTTCGCGAAGATGGCAAAGAATTTGAGCTCGATGGA  
TACTGCAGTCCCAGGATTTTTATGTCAGAGCGTCGATATTTTGACATCGAAGTGATTTAA  
CTCAAAACAGTGTTCAAAGGAAATATTATGAATGTTAACTAAATGTTGGCACTATCG  
TTTTCTGAATTCTCACAACACAAATATCGCGAATCTTTATGCCCGTATTTCTGGAAAGT  
CGTGTTTACGATCGCATCGATCACCGGCTCGATTTTACTGCTCATTGCTCTTTTACATC  
TATTGGTGCCAGAATCTTCGAAGGACTTGGCTTTGCCCTCGATAATATGGTATAGTAATG  
GAGCCTTGCCGCTGTACTAGGTACTGTCACCGTCACATCTGCTATTGTGCTGGTTGTCGC  
AGTAATATTCGGATTTGTTTGGGCCAAAGAAAATTTCAAGCCACCAACAAAGAAGAACC  
GTTGATTATCACCTTTGTCAAGAACAAAAGTCTAAAATTTGCCACGCTCTGGAATTTGA  
AGACATGAGCAAAAAGACTGAAGAATAAGTTCGCAACCCGTTAGGTTCGTGATAAAATTAC  
CTCACTAAAATAAAACAATATCCGGCTTATAATGTTTCACTAAGTAAGGAATGATTAATA  
TGATTATTAATAATGAACGTCAACTGGCTTCTATTCGCAAAATTTCCCGATCTTCAGCCGA  
TCCCGGGTGTGATGCTATCGAATGCGCAACCATCGACGGCTGGGAAATAGTCGTGAAGA  
AAGGCGAATTCGCAATTGATGATGATTGCGTATATTTGAAATTGAATCCATGCTCCCGA  
CAGATAATCCTGCTTTACATTCTTGAATCCCAGGATGTACGAAGGCAAAATGC  
TAGCTCGAGTGAAGACCATTAACTTCGCGGCCAACTTTGTCAAGGTATAGCATTGTCCG  
TTAACGCGTTTACCATCGGAGAACTGGTCCGGTGTATGAAATGGACCAAGTCTTGACC  
AAGTGCTCGGTATTATCAAATATGAGCCGGCTCAAGACGGTCTGGCTGTAACCCGGCGG  
GTACTTTCCCTGGTTTCAATCCGAAAACCTGATGAAGAACGCTGCCAAAACATTTTCAGCA  
AATACAGCGCTCGTTACAAAGATGTTGTGTTCCAAAAGTCGCTGAAGCTGGATGGTAGTT  
CTATCACCATGGCATGGGTAACAGATCCTGACCTGTCCCTCGCGCTTGGAAACCGAAGATG  
AACCATATGCTCACGATTACGACGACGCTCACTTTATCCTAGCTTCTCGTAATCCGGTTC  
TCCGCTATAACCCCGAAAGCAAGTGGTGGATGGGTGTTGAAAACCTACCAATCATCGAAC

AACTGAAGAAGTTGGGCAAATCTGTCGCAATTCAGGGTGAACCTGATGGGTCCTGGTATCC  
AGAAAACCCGCGAAAACCTTCGACAAGTACCGGATTTTCGCATTACGTGCCTGGTTTATCG  
AAGAGCAACGTTTTGCTACCGACGAAGAGTTCCACGACCTGTGCCGTGCTCTCGGGATGG  
AAATGGTGCCGCAGCTTGGTCGTTGCAAGCCGTTTGAACAATATGAAACTGTCAAAGAAA  
TGTTGGCTGATGCGGATATCCGTCCATCAACCACACGATTGCTGACGGTGTCTGTTATA  
AGTCTGTTGACCTCGTAGATGGCTAGATGAATCACTTCAAAGCAATCAACAATAAATTCT  
TGCTGAAATGTGAGGACTATCATGAAAATTAAGAAATTGCAACCTTTACAAGTCTTGTGT  
CCGAAATGCTGGATAATTGAAGATTATTGCTACTGCTATTGAGAATTCTATGTCTAATAG  
ATTGGGGCTGAAATGCCCTATTCTCTTGAAGAGATGAAACAGATATCAAGTCATTTAAC  
CGAATCCAACACGGAGGTCCAGTGTGATTAAAGTCGTATTTGCTTTAGGTGTACCGTCCG  
ATTTTCATAAGCATGGAGTTTTGGTATTTGGTAAAGATGGCGATTTACCATGGCCATCGA  
TCCCCGAAGACTCTAAACTTTTCAGGGAAAAAACCGATGGCACTATATGTGTTATGGGTG  
CAAATACATTCCAGTCGCTCCCAAAGAATCTTCAGGGGAAGGGTAATGGTTGTTATTGGCG  
ATCCTAAGCGTGAGTGCCGGAACAAATCAGGTGAACCTCCTCATAATTTGTCGAATCTTG  
ATATTGACTGGATTTCTGTGGAAAAAGAACTATATCCAGAAAATGATATATCGATTATCG  
TTGGCCTTGGTCTGATTCTGTGTCAGTCGCCACAAGTGTGATGAACTCCATATCAATTTTC  
ATATGCTTACTTCTGACTATGATAACAATTGACCCAACAGTTTATATCACTGATACCGCAC  
TAGGAGTTTTCTGTGTAACGGAAAATGAATACTATCGCGTATCGAGTTGAACGTGAAC  
ATTGCACCAACATTAAGCAGAAATTTGGAAATGATTCAATCCACCGATTTAGTATGCGA  
TATTATCACCAATCGGCGAAAGAAGACAAATCGCACTGGAGTAGGCACCCGTTCCGGTATA  
CGGTCGAATGCTTCGCTTTGATCTCAGCAAAGGCTTCCCGGCCACCACATGCAAATGTCT  
AGCATTGTTCCAGTCGTGGTTAAATTGCTGTGGTTTATGCAAGGTTCAACCAATGTCTGA  
ACATCTGCGCAAATCGACCTATGGCGAAAACCTCTGATCGTTAAACCATCTAGGATGATAA  
CTATAAAAAGCAAGCCGTTGATCGTGGATATTCTGATGGATACCGTGGTCCCGTTTATGG  
CACGCAATCGCGTATGTTTCGGTAAGAAAAACCCGGTCGATCAACTGCAAATGTGATCGA  
TCAAATCAAAGCAAACCCCGACAGTCGTCGTCTTTTGGTTGTTGCATGGAATCCTGAAGA  
TATCGAAAAATGGCTTTGCCTCCATGTCACCTTTGCGCTCCAGTTTGAAATATATGAAGGC  
AAACTCAGTTTGATGTGGAGCCAACGTTCCGTCGATGTTGGTCTTGGTCTGCCATTCAAT  
ATTGCGTCTATGCGCTTCTTGTCCATATTTTAGCTCGAATTTGCAATTTAGAAGTTGGT  
GAATTGGTATTCTCTGGTGTCAATTGTCCACATTTACGAAAATCACCTGAGTCATCTCGGC  
GGTATGCTTTCTCGTGAAGAACGCCCTTTGCCTACGTTGAGTTTCCCGGATATTGACAGT  
TAGAGTGATCTGCGTTTACTGGAAGCAGCCGATTTCCGTCTGGACGCGTATGACCCACAT  
CCAACAATTAACCTCCGATGGCTGTGTAATGACTATATGCACCGTTGTAAACGTCAAG  
CATGAAAGATGTGACGTTTCGTATACAGCGAGGCACTATATGGGGTAATCCAGACGGAGAA  
CCCATTGGAAACGGCAGGATTATCTTGACAATTACAAAAAGCATTTTAAAACACCAAATA  
AAAACCTGGGGTTACTCTTGCCGATTTAGAATCACTACGAGGCAAGAAATTGGGGTGT  
GGTTGCAAACCATGCCATGCCACGGAGATATTCTTTCTGATCTAGTCAATCGCATGTTT  
AAGGATGTGTCAAGCGTAGATGATTTTCATATGACATTAAGAAGAACACGGATTCATTCAGA  
TAGCAGAATTGACCATAGGTA AAAACGGACGTATATCCCGAGATTTTGTCTAAAGACCCA  
TCACTACAACACATCATTTATTTGTTTACAATTGATGATGAAGTTGTGTATATTGGTCAA  
ACTAAGAAGTTGCACAAACGAATGGACTCATATGCTATTGGCAAGTATTGGAAAAATACG  
AACAGTACATATCCAAAAATCCAAGTTTCTGGAAGAAGCAGTAAACTCGGGTAAGAGA  
GTTTGTGTTTGGATAAAGCATTGCTTCCAATCGTTATAACCACTCCTGCTGGGTCAAAC  
GTTATAGCTGACCTAGACGCGGAAGAGAAAAATTTATCGGGATTTTTAATCCTGTTCTAA  
ATTCAAAACTGAAGGTTAAATTATGAGCAGAACAACTGAACTTTTTAATAACTTGATGTC  
TGTTGTTGAAAAATCCTAAAAGGGCAATTTCTACTTCAAGGACGTCATTACGAGTATGGG  
GACAAAAGCTCGAATTTACAGCTATTTTATCGCTTCATATACCGATTGGGTGCAAGATGA  
TGCTTTGGAATGTCGAGGCATTATGTTTGTGCTAAATGATAAAAACGAGCCAGTTTCGAAT  
CATGGCTCGCCCAATGCAGAAGTTCTTCAATCAGAAAGAACACCCCATGACCATTTGGGCT  
CGATTAAGCTAAGATGATCGGTTTCGATGGAAAAACCGGATGGGTGCTGCTTAGCAGTTA  
TCATGATCGAGGCTACGTTTAACTGAAATCTACAGCTGCGGTTTTCTCCGATCAAGCCAA  
TAAAGCAATGGTGTGTTGAATTCGCCTGCTTAGGAAAAATTGCGCGATGCAATTGTACG  
AGCCGGTCCCGATTCTACTTTCAATATGGAATATGTTGGCCCAAGCAATCGGGTTGGCCT  
TCCGTACGAGGAAGAAGAATTGATTGTTCTCAACGTACGTCACAATGAAGCAGGTCAAAA  
TGTATAATTTTCTACTCTGCTGGATGACCCAGTGATTCGTCATCATATGATCGGGGTTTA  
TCCTTGCCCGGATTGGAGTAAAGTTACACCCGAAGAATGGGAAGCTGAGACTCGTGCCGA  
GACCGATGTTGAAGGAGTTATCGGTATTATGCCAGATGGCCAGCTGTTCAAACCTGAAGAC

CGACTGGTACTCCTCTTTGCATCGTACCAAAGACTCGATCAATAACAATAAGGCATTGTT  
CCAAGCCATCAAAGAACGTGCTTCCGACGATCTTCGTGGCCTGTTTTCCCATGATAATGT  
CGTTTTGGCAAAAATCGAGGCCTTTGAATCCGCTTATATTGATACTGTAGCTAAATACCA  
CAAATTTGCGCAGAAGTGTTTTACGATTTGCGAGGTTTTGACCGTCGAAGTTTTGCTAT  
CGAAGCACAAGCGAGAATGAAAGAATGTCGGTATCTCTTTAACGTAGTTATGCTACAGCA  
CGGCCGCGATTGGGACGGCGAACTCGCTGTCGAGAAAATCGAAGAACACATCATCAAAGA  
ATACGCAACATACGTTCCAATGGCGTACCGTTAAATAAAGTTGCAAAAACACTGTGTACATT  
TGACGTTGTAATGCTTAGAATAAATCCATAATCAACATGGAGTTAACCGAATGAATCATT  
ACAATTACACCGTCGAAATTCTCATCAACACGTACGCTCTCGGCCGGCAGTTCGGATGGAA  
TTCGAATTTCCGACAAAAACGGTAAAGTTGTAGGGTATATTACTGATTTGCGCAAAGCTG  
CTCATTCTGCAGCCGAAAAGAAAAGAAAAGCCTAATCGGACTCTCGGGAATACTATGAAC  
AAGCTAAAACATAACATTGGCCCAATGGTCAATGAAGTTGTGAACGAGTTGAAAAATGTTT  
TTGCAGGCACACCCGCAAAGGTGTTTATTAACGAAACGATGCCGAATGTCAATTCATGG  
GAGCCAAGTTCTATGTTATCTTGTCTCCACTGACTGACAAAATTCGTGTATACATCACTC  
ATAAAGATGCATGCCGCATGAAGTATGTTTTCCCGCAAAAATGCCAAACTTGATATACGTA  
AAAGCGGAAAAAGCATTTTGACTGATGGTTTGACACAGAGCGAAGGCATCGCTCTTGTCG  
AAGGATTCTGCGGAAATGTTGTTAACTTTGAGTTCTCTGCTCGGTTGGCTAAAAAGAAAT  
GCGTTATATCTCATCATAATGGTCTTAATGGCCATTATGATGAAAAATCAACACGACGAA  
ATCTCTACGATAAAAAATAGTTTAGAATCGATGAAATCATTCCAAACTAAGTCGTATGAG  
AATGCAAAACCCGTCACTGAGGCCCTGCAGAAATCTCCAAAAGCTACAAAGCAAATGGAA  
AAAATTGCGGAAAAGAAACCGCAACTATTTGAAAAACGAATGAATATGGGCTTCCAGAAG  
TTAGCTGATCAACTTCAGGAGAGTACGAAATGAGGTATATCGTCATTCTACTCGGATGTC  
TCCTGATCACATCCTGTGCATCTAAGCCCATGTTGCCAAAACCATCGCCGCTACACAAAC  
TCGATATAACATGGAAAGCAACCGAAAATGGAGCTTTACTAAGTTTTGAGGATTACAATA  
AGTTGGGTGTATGGCTAACCCATGTCAACAGATATATCAAAGATCAAAAACAAATAATTC  
AAATATGTGAGGATACAATTAATGACTGAACGCTTCGCATCTCAACAACACTCATTTTGACT  
GTTGGTCTACTTGTTCGGAAAAAGCACCTGGGCAACTGAGCAAGTTTGGACAAATCCT  
ACGAAATACGTTAATTTGACTCGTGATGATTTTCGTTTTAGCCTTTTTGGCTGCCGAAC  
TGATCTGACTACAAGTTCAATAAGCATAATGAGCAACTGGTAACGAATGCTATCCAAAA  
GCAGCGATTGAAGCTATTGCCATGAGCAAGACTATCATTATTTCCGACACCAATCTGAAT  
AAGACGACTCAATGAACTTGGAAAATTTTCGCAGATACTCATAACGTTGAGTTTGTGCTGA  
AATCTTTTGCGCCGGGCCTTCTGTCTACTCTCATGGAGCGTAACCGCTAGAGGGCAGCGG  
GCTTTGCCTGAATTCGTTGTGAAGCGTCAATATGTCCAATATATGGTTGACTTTGGAGGC  
CAGCGGGTTTATACACCTGACTTTGCAAAACCTCGGGCAATCATTTTTGGCCTGGATGGC  
ACCCTGTTTGATAACAGCCAACGGCATGCCTTCGATTGGTCGAAAGTTCTGGATGACACT  
CCCCGTGACTCTGTCTGATAACTTTTCAGAACGTACGTTGATCGCGGTTATGCTTGCATT  
ACCGTTTCTGGCCGTGATGGTGTCTTGAAGCAGATTCTATCAAGGCTCTGAATAACGCC  
GGTCTTTTCCCTGCTGCCATTACCAACGCGCTGCAGGCGATTCTCGTTCTGATGATATC  
GTAAGAGGAGAAATTTTCTGGCAACAGATCGAGCCCAATTGGTGTGCTGTTTCGTGCAATC  
GATGATTGTCAAAGGTTGTTGATATGTGGCGTCGAATCGGGCTGGAGTGCTGGCAAGTT  
CAACCTGCTGATTTCTGATTCAAAGGCCCTTTCGGAGCGCATTTTTGTAAGAAATCAAT  
AAAAAGTGGTGTACAGGTCGGTTTAGTGTGATAATATAGTCACATGAACAGAATGGAGTA  
AAAAAATGTTTTTTGACACCTACGACACTGCGCTGGCAGAGTTGGAAAAGCGCTGCGGCG  
AATTCGGAACAAAGTTAAAGCTCGCGACAAAATGCGATGGTTTCAATAACTCAAATTA  
GCATCAACGAATTTGAGTTGATCGTCGCCAATGGTGCAGGCGGGCGTGACAATTATTTGT  
TTGCAATTTTCGTTGACACAACCTCCTGTGCCGAAGTTTATCATCAGCTGCTCTCGGGTAA  
TCGCATGAAAGATACAAGTGTATTACAACATGCCTATATCGTTGCACAAAATCTCATTG  
TGTTTTCGTGGAAGTAGGTGCTATCATTTTCGAAAGATGGTTCGAATTATTTTCGACCGGTTA  
TAACGGAACACTGCTGCTGGTTGCAACCATGCCAATTGTGATGACCATGCGAAGCAAAGTGG  
TTGGCTTGATTCTTACGGTAAGCTGCGAGGAATGTATCGGCAAGCACACAGTGAATGGTC  
AAAGGCAAATGAAATTCACGCAGAATTGAACGCCATTCTGTATGCCGCGAAAACCGGGCA  
AAGTATCGATGGTGTGAAATGCACATTAAGTCTTCTCCGTGTGCAGATTGTGCAAAAAGA  
CATAGCTCATTCGGGGATTAAGCGAGTCGTCTATAATGGGTTATATGATTGTAATCCGCC  
TGGCTGGGATGACATACTCATTAAAGTCTGGAGTAGAAGTAGTGAAAAACGAAAAGCCTCC  
CAACATTATCAAGAAAATTTACACCACCAGCAACCAAAAATTAAGGAATTTATTATGATCG  
TTGAAGTCTCTCCTAACGCCGAAGCACTTGAAGTCAAATTCCTTTGAAGTTAATAGCGTCG  
CAGAAGCTGCCGTTCTGGGAATCGATCCCGAATGGGTTGACGATGTCAAAGCCGTCGTCC

AAGTTGACAGAAACCAACCGCTGTTTGGTTATAATCCGTGCCTAATCGGTTTTGTCACTG  
GTCATCCGGATTTTGC GGATGGTAAAGTGATTTCGCACTTCTACTGTAGATATGGTAATTC  
ATACTCGTGGTGAGTTCGAAGAACGTA CTATCGTTTTCACTCGCAATTCTCGTTATGAGG  
TGATTAATGAACATTCAGCTCGATCCTAAAGCACTCGAATCACTTTTCCCCGAAGGTTTC  
GGAGGCTAGTGTAGA ACTGCAAAATGCAGTTATTGCTAACTTCGCAAAAGAAAATGCAAGA  
AAAGCATCTTGAAGATGTAACACGGGACCAGATTCGTACAGCTGTTCAAGAGGCTGGTGT  
TTCGATGGATACATATTCCATTGTTCTGTGACATGCTGAACAAAACGATCACCAACAACGG  
TTGGGATGCATCAAGTGC GAAATTGAAGACCAATTCCAGTTTGGCTCGTGGTATTCATAA  
CTATGCCATTCAGCAAGACCTGAAATTTATGAAGGGTATGGAAGCATGGCCCAATGAAAT  
GGTTAATAAAGAACTTGGAAGCGCGAAGAAGCTGGCAAAGGTGTCGTTGAGGATTACAT  
CCAAGAAGCTGAAATGAATAGCGCAAAAGCAAAGAACCAAGCTTTTCCGGAAAGCGAATC  
TCGGATTGTTGCTGCCTGTAAGCAAAATATGCCGGAAATCATTTCGTCGTGAAATGGTGAA  
TTATCTGAGCAAACCAATACTACTGTAAGGAAATAAGATGTCTAAGCAATATGTA CTTC  
ACAAATGCTGTTCTCTATATTGGCTGACGGCGAACATGAACTGATTTTTCGAAAAGCAGA  
CGATTTCGCATCGGGTAATGCTTGCTACTCGTGACACTGTCCTGATTGAGGTTGCTGAAAA  
AGGTGATAAAGCTCTTACGGCAACAGAACCTGAAGAAAAGAAAGAACGCAAAGAATGTAA  
TATTTTGAACGTCGTCGTTAACGATTTGGAAGCAAGAGCTTGGCGATCGTTCCGACTCGA  
TCGACTCGTATCTATCAACGGTACTGGTATGGCCACGCTGGCATCTCTTATTGGTGCTCA  
ACATCGCAATCAACTGAATATGGGCCACATCGAAGAGCGTTACGTTTCTACCGAAAGCAA  
GGTTATGTGAATTTTAAATACGTTGACCCCGATGCGTTGAGCGATTTGGTCGAAA ACTC  
TTCGCGATTTGAGCTTTTGTGACGACGAACACGGTACCAATACATGGTTCCTTGTAGAAGA  
CGAATCCAATTTTTAATCTGTGCTGAAGTTTGC GATACGATGGGATAACTTATAATTATC  
CCATCAATAAAACAGTTAAAGAGAAAATCATGACTAACGTAACACCTATTGCTCAATTTG  
AAAGGATTATTCTTGAATCAAAAAATTTGGCATCCGCAGGTGATGAAATCATTTTCAGATT  
CTGAATTTGTTCTTGGA AAAACGCGATCTTCTGAAGTTCTCTCACTGCAGAGCTTATCT  
CAGTCGGTAAAGACGTACCGAACCATTTGAAAGTAGGTATGCAAGTTTTGATTCCAAATG  
GCCGTATGCACAATTTACCCGATCCTCGTTATCTGTCCGGCGAAATCAGTGCGAACAATA  
GTCGAAAGCTGTCAGCATGCCACGGGAAAGATATTCAAGTCTGTATGCTTAATTGAGTG  
TCAATATAAGATTAAACAAATTAACAAAAGGAAATGAGAATGGCTAAGAAAAAGAAAGC  
AGTTGAGAAAAAAGTAGAAGCTCCGAAA ACTGGCCGTCAAGGTTACAAGCGTAAATCCAA  
CAGCCGTGTTGATCAAGTTGGCGATGCTCTGGTAGCTCGTGTTAAGCGCCAAGTCAAACA  
TATTGATAAGTTTGGTCAGCCTAAGCACGAAGGTCGCAAGCGCCAGAAGTGATTAGTGGG  
ACCTTCGGGCCCCATTTTATTTTGA AAAAGCGGTTTAAAAAGGAAATATAAAGCAATACGA  
AAGACCGATTATTTTACTTATGTGACGGGGTTTTGGTTCAATGGACATCTGGCCTCGC  
ATATTTGCTCAGAAAAATGGCATTTCGGACCGACGAAATTTTGA AAACTCTGGTCGACGA  
ACGATTCCGCACTGGTGAAGAATTGTTTCGGTGTCAACGCGCGAATTGCAAATATCTTGAT  
GCGCGAGTATAACAACTCAGATTTTCGTCAAATATTTTTCTGGATATGTCGATGCAATCGA  
TGTTGTAAATCGAATGAAAGATCCATATGACTTTATTGCCATTACTGCGCTAGGTGATT  
TAACCAAGCTCTGCTCAACCGGTGTTGCAACCTGAACACACTTTTCCC GGGCCCGTTCAA  
AGATATTCTGTGTGTTGACATCGGCGAAACCAAAATGCCGCATTACATTTCCGTAAAGCA  
AAAATATAAAAATCGTTTGGTTTGT TTTGTGATGATTTGGTAAGTAATCTCCAAGATTG  
TCATGATGCGATGTCGCAATTGCCTCAAATTCATATGCTTTCGAACTGAAGGCGGGCGTTA  
AGTAACACATGATATCAACAAATACCACACTGCTAAGAATTGGTACGATGTTGAAAAGCT  
ATTAGATCAACTTGATCCAAAACCAATA CAATCAATTTGTACATCATTCCACTTGGCA  
AGGTAAACCTACCGTCTCTGAGGTA AAAATGAAATGCATATTTTAGACATTCTGAACGAAA  
TTTCCTCAACTGATTCGTCAA AAAAGAAAAAGAAAAAATCCTGAATCGCAACAAAGAAAAT  
AACTTTCTCAA AACTGTTTTACCCCTTGC GTATAACCGTCAGTTAACGTACGGCATTACA  
CCAAAAGGTTTGAATTTCCGGCGGTACGGTTGGACCTATGAGTTTGGCAGGTTTCTGCGTC  
GAGCTTGTCAAAAAATATTCCTCCC GAAATTTGACAGGTAACGCGGGTATTCACTACATG  
CAACAGATGCTTGATAGTATGTCAAGTTCTAGTTGTGAAGTTGCCAGACGTATTCTTTCA  
AGGGACCTCAACTGTGGAGCATCTGTTGCTCTTGGTAACAAAACATGGCCC GGCATCATT  
CCTGAACAACCTCAGATTCTTGCAGCACCATA CAGGGAAAAGAATTTGAAGAAAATCCGT  
TGGCCTGCTATTCCTCAATTGAAAGCCGATGGTGCCCGTTGCATGGCTCTCGTATCTGCG  
GATGGCTCACAGGTATCAATGGTTT CACGGAACGGTAATGAATCTCTGAAGTTGTATGAC  
ATTACATCACAGTTGAAGGAACTCGCTCAGGTTGT CAGAGAGACTCTGCAATATTATGGT  
GATTTTGTATAGACAGCGAATTGATTCATCGAGCTCCATTCTCTGCCTCCATTA AAAACG  
GCTAAACAACATACTACTGGATGATCTGTTTGG AATTCCTGAGACAAATGATGAAGAAGAA



ATCGAATCAGATCGACACAAGTCCTATGGTTTAAAGTAATAAAGCTCTAAATGGAACAATT  
AGCGGCGTTGAACAATCAGAAGTGATTTTAAACGTATGGGATATTATTCCGCAGGAAGTT  
TATTACGAGCGCGAAAAGAGCACATTGTACTACGAGAATCGATTTGCTACTCTTGCTTGC  
CTGACTGAAGCTTTCGATGGTACCCAAAAATATCAAAACATTCAACCCATTGAATCCGAA  
GAAGTTGAGACATACGAGCAAGCTATAAAAATTTATCAGAGATATGTTGATCAAGACCGA  
GAAAGTATCATTCTTAAATATAAAGATGGCCTGTGGGCAAACGCTAGAACAACCTGACCAA  
ATCAAGTTCAAGGTAGAAGTAGAAATTGATGTGAAGATTGTCTGAAGCTTATCCTCATGGA  
AAAGATGCGTCTGAAGGTAGGTGGCTTTGTTCTGGAAGATTCTTCAGGTCAAATCAGGGTT  
CGTTGCTGTTCCGGCTTAAAAGACACAACCCATAAAAAGGTAAATGGCGCTAAAGTCGAG  
ATTCTATCAGCGAAAGGCATGAATAGGACCGCGAAGCGCTTATGCTGATAAAAAATGAG  
TTGATCGGCCAGATTGTTCAATGCAAATGCAATGGATTGCAAGAGAGGCAGGGGCGTAAG  
CCGAATGAAGCAAATTCAGCTGTTTCTTCTTTTTTCCACCTCATCCGACGTGACAAA  
TCAACACCAAATCATACCCATGATGTTTTCCACATGCTATTCTGGACTGAAAAAGGCCT  
TCGGGCTTTTTTTCGTTTCTGTTGTGTACATGTAGATTTCGGCTTTGATAGTATGAATACG  
TACACAACCTATTGTAGAAATTCACATGATTGTTAAAGTTCGATACAATTTGGAAGAACAC  
ACTGGCGAAGCCGACGACGCTCAAACCGCTTTTGAGAAATCAACTGAAGTTATGCTGTCA  
CAGCTTCCCCAAAACCAGAAAACACGTTTTACGCCACTGTTCCAAATGAAAGCCCTTTA  
GGCAGCGGTGATATTCGTGCAATGAAAGTTATCCGTATGACCCGTGTTGACCTCATGGCT  
GTTCCGGGCGGACGACTTCGAATTTCCGTTTTTTGTAAAAGTATGTGAATAAGCTCCTTCG  
GGAGCTTATTGGAGTAAATTATGCTAAACCCTTCAACTGTTGTAAGTGTGGCTGTTGAAA  
AGCCCATATTTTTCAAATCACATCCGTCATTCGGCGGATCTACCGCGGACACAATAAATT  
CCCCAATAACTTTTTGAAGAATTAGAGTGGGCATGTAAGAACGTAGAATACGCTCATGATG  
TTAGCAGCCACAGAAACATGCCATGGATGAATTTGGAATTGGGGTCATATGAGCAAGTGC  
GGCTAAATTTTACTATCATGGTAAAACTCCACAGATATACTCAGAATGTGCAATCGTA  
TAGCGGAGCAACGATACACCGACAGTGGCATGTGTATTTTGAAAAAATATGACGACGACG  
TGTCTAGCTATTGCGATGAAGAATTTCAAACGTTTCTGCTGCTTTGCTGTCTGGAATAT  
TCGACGATGCAAATAAAAAATTCGTAACCGAGTGCATACGACGGAAGGATTCACCTATAG  
CAGAATCTGAAAATTTTAAATAAATCTGTATGGAGAGGAATGTCTCTCAATAAGGCAAATT  
ATATTAATTTAAAGATAGTGGGTCTATTCTCTTTAAAAATTCGGTATCGACATCATT  
GCCCGCTTTTTTCAATTACGGGATTGCGCAATGCAGACATCTCGATTTTAAACGAAATCA  
CACGCGAAATTGTTATCGATGGCGACCCACATCGACCTGTCACTATAAACATGCACATTT  
ACTGTCATAATGTGAAACACCTGATTCCGGGAAACCTTAGTCCCTACCCGGAGGAGTGCG  
CAGTAATTTTGGAGAAAATGACTGTACTCGTAATAGATGAGACTTTCGAATATGTGTTTC  
ACGTCGACAGTTTTTGTGTTTAAAGCGAAAGCGGTTCCGTTAAGTCAATTCACTGGAA  
CAACATTAATAGTGTAATAACATTTTAGACCTATAAGGAAAACAAAATGATGCTATTTG  
AGATGACAAATGAGCAATTGGACGAGGGATTCGACGGTGGAGTTGGAAAATACCGTGTGG  
TCAATCTTTTGCCAAAGACAAAAGTTCCGGATGTATTAACATCCAAGTTCCCTGGTTCAG  
AAAATCTGGCTTTGCGATTCTGTAATTTACTTCAAAGGGTGATTCCGCGAAGCAGGTGA  
AACCTGGCGACAAATTCATGCAAACACAGGTCATCCAGATTTAGAAAAGGAACACCAC  
AGGTTCTGAGAGATGCTCTCGGTAGTGACCCCATTTGGCGCAATGAATATGATAACTGACA  
AAATCGTTAATATGCTTCTCAGGTATAGAATGGATCCAACGCTTCTGATGTTTCCGACAA  
AGGCACTGAAAGGCCAAGCTAAAAATATTGCGCGAATTGCATCCCGGCTTTTGCAAAAAC  
GATCAGGTAGAAAGTTTGTGTTTGGCAGAATTGTTGGAAAGAGGCAAAAAATATACAT  
ACATTATGATTTACCGAAAATCAACAAGAAGCACTAGTGTCAAAGGATTGGAAACTGATC  
CTGAGCTTTATACGGTTTCATCTACCAGTGTGGGCGATGTCTGTCATTGATGTGAAAAC  
GTGAAATAGTCACAAAGGCAGAAGCTATTGCTGGGTTAATTGAAAAGTGAGAAGAAAAC  
GCTCTACTAAGTAAATGACAGACTTCAAATTACACGTGGAGATTTGATCAAGGCATTCA  
CAACCAGTATTGCCTCTTCGGACAAGGAAAACAATTACTACGACCACTTTGGTGTTGGCC  
CAGTCGAGAAAAAACCGCAACTAGCGAGGCAGAGGAAGCAGATATCAATGCTTCTAACA  
CGATAACCAGAGAACAATAACGGAAATCGCATTATTACAAATTCTCTAATTTAGCCGCTG  
CTAATTGTCTTGACAAAATTGACATCGACAAATATGATGCGTCAAGCCATGAATTGCTTG  
CTCTCTATGCGGAGACGGTTCGTCAAACGTCAGAGAAAGCCGCACAGAAATGGGTAGATG  
AAAATATTCTGATGAACATCCGGGTGTGAAGAAAGGAAAAGTTCGATTTTATGGTTTATA  
AGGAGGTGAGACGCGCTATTATGGAATTGGCGAATTATCTTGGTAACAAAGTTGATGATA  
CTGTCGGCAGTGTTAATATGAGAAAAGATTGCCACCTGAATGTGTTGATGCTATACAAA  
CTTACACTTCGATTGACTATCGTAAGATTAATAATGTTTTTATCGCCAAGGTAAAACCAT  
CAGCTAAAACCGTAAATGATATACAGAATCTCGACAGAGCTTTTGACATTGCAGGAATTA

AACTTCCTGAGAATCTCACCTTTGGCGGGCGTATAACATGCCCAAATTATCCATCGAAAAG  
TCGATTTGGAAAATAAAATGTTTTATTTTTCTAACTACGTGTCTTGTCTGCTGTTCCCTA  
TTGTATTGTTAGGTGGGTCTATTGCCGAGCATGACATTGACATTCTTACTGCTAAAGAGA  
ATGATGACGCGAAGGTTCGAAACAGCCAAAAAACACGGGGCTCATTTCGCATTTGCTACC  
AAAAATGTCCAGGTCCCAGCTCTTATAGTTAACGGGATGTTCGAATTATACGAAAGAACGC  
GAAATTGTTCTTCCACGAGGAACAATTTTTGAATTTAAAAAAGTCAGTAATGTTGGTGAA  
TTTACTTCAGGAAAAAGGAAATATCTGATAGATTGTTCTGCCGTTTTTCAAAGTCAAATC  
GACGAATCCACAGAGATTTACGACGGTGATTTGCTAATGCAAACAGGCGAAGTCAAATCG  
ATTGAAGGTTTTTCTGGATTCATGAAATCTCGCGAAGATGAAGAAAAAGAAAGACTAAAA  
GCTGAAAGGATACAAAGAGACAATTATTAGTCAACTCTCATCGACTTAGGTGGAGAAAGC  
AAATTTGTCCAGGTAGTAGAATAAAAAAGGGAGCCGTATGGCTCCCTTTTTGTTACCCAA  
ATGAACCAAATTTTGACAACCATCCACCAGGTTGTTTGCCGAGTTCAGGTAATAAATCAC  
CCTTAAGCCAGTCTTTAAGCAGTGCTTGATTAACCGCACCAATGTTTCATGACTCGATACG  
CGAATGTAACGTCAAACGTTGTAATAGCATTGTTATCCTCGTAGCTAAGTTCAGGTGCTG  
ATACGCTAACAGGTATGGATCCATTAAACATCGTTACAGTGTGGGGTATACCGTCTCTCG  
AGTGCAAATTCATTTGTCTATCTTCTTCAACATCAGCAGGCAGTCAACGCAGTCCGGTGA  
CAGGGTCTTCGACCGCATTTACCCAATCCTGCATAGCCCGTTCATTGGCAGCCTGATGGT  
CCATTCTGAAACTAATTATGAGAGGATCATACTCGCGCCCATCAATTTGATGTTTGGAG  
CGTTGTGAAATTTGTCCATTTACATAATTTAGCCGGTTTTCTGGCATTTTTTACAGAATAAA  
CCGTTAAACCAGTATGTGTATTGCCAGCATTCAAAAAGTCAAGCAAACACGTAGCGACTT  
CAAATGACCAAGTAGGGACTGTATAGTTCGAAACGTTCATTGCGCCGATCAAGTATCTCG  
AAATACCTGATTTGCGTATGATACTTTTGTGTGCCTTGAACATGACTTTGTTCAAGGTG  
CTCGAAAGCATACTTGTGTCAACCCGGCAAATCTTTCCCAAATGGAAGATTGTTATAG  
AGATATGCACCGAATCCATCAAGCAAATCGGTTTGTTTTAGATGATGGGGTGTGTCGAA  
AACAAACAGAGAACATATTTGTTCTCTGAAAGTCTTTATTCAATTTTTGTTGAAATTCATC  
TAATGTATACATGATTATTCCTCATCATATAGATTAGATCGATTGCGGGCAAGAATCTCT  
CTGAAAGTGACTTCAAGTACAAAACCTTGAAGGCAAATTATGTGCTATTGCTAAACCGCCG  
AAAAGACCGTCAGGGCTCTTATCGAGCCGTATACTTTGAATTTGCGCTGGTCCAAATAAA  
TCAGACCGCATATCAAATGAACTTGTGCACCGAAATTTCTGATAGTCCAAATAATTGGA  
TTAGAAACAACGTTAACATTACTCAAAAATGATGTTATTCTTTCAAACATCGTAGTTGA  
CCATGAGTTGCTTCTGGTGTGAGTGCGTTAATGAATGTTCCCTTGTATGCTTCATCAAGA  
GTGCTTTTTATTTGACTCGCCGTTTTTACTTTTTCCATTGCTCCGTACGAGTAATACGAG  
AGCATTTCCTAAATTATCAAAAATTTGCATTAGGTCGTATACATTAGGAGGCGTTAATTGC  
CAGGTATATGTTTTTGTACGATTCTCAGCGCCAGCGTACAGTGCCCTGGATGCGATGTAT  
ACTTGCTCACCACGGTCAGCAAATGCTCCCTGGGTAATAGACTCCAATCCGCCATACAAT  
GCATGAGAAGCCATCGAGCTCAGTGCCCCGGTCTCAGAAGTGTGCTCGCTCGTTCAACCAAGT  
GATTGCTGGACATCATTGAAGTTATGGCTAATTGTATCTACATCTGTCTGTCCCCGAGGC  
ATCAGGATGTTAGCTATGGCTTCCTTGACAACACCCTTACGATAATCGCCAATGTTATTT  
TGACCTGATCTGAACGGACGCAAATCCCAGTCTGTCTGCCGGCATAGTTAAATGCTGAC  
AATGTCAAACCGTTTTTATAACAGATCATTAAACATTGAAATCTTGCGCAGAGTCATTGCT  
GAATTTGTCTCGGCAGGGAATTGGGCTATCGCAATTTTGCTAATAGGCCTGCGAGGTGAA  
GAACCCGTTGCCGGGTTCTCTCCTTTCAATATTAGGCCTACAACAGCCTGAGCCCCGCCG  
TCTAAAAGTTCAGTTACTCTCATAAGATGTTATTTCTATAACGAGGTCCAGGCGAAGATG  
TTCTTGGAGCCTGGACAAATGTTTGATTCTGATTTTTGACAATGTTAGCCTTTGTGTGAT  
CGTTGTTTTGACTGACTGCCTCTTGCTTCTTCAACTCTCTTCACTTCTTTGTCGA  
TAGATTTAACAGTCGAAAGCTCTGGTTCAGGAGCAGGTTTTATTGCTGCTGTCGGCACAA  
CCAATGTTTTCTCATGCTCGGCCAAGAATTTAGTCTGTTTGTCTATTTCCACTCTAAGTT  
GTTCATAAGATTCCTTAGTCAAATTACCTTCTTGATAAGACTGTTCAACTTCATTTCGAAC  
GATCATCGAGCAGCTCGCGGTGTTTGTTCATAAATTCAGGCGAAGTTTCATTCTTTTTAG  
CAGTAACGCCAACATGGTTTATTTCCCGCTCAGAACGTTATATCTGGCAAATTGCTCTA  
CTGTAGTATTTTTGGCGATTACCATGCGTTTTTACGCTTTTTCTTCTCGTCAGAGGTCT  
CTTCATCTTCCCCATTCATTTACCCCATAGCTTTGTAAACCAATGAACTTCGGTGTTAT  
TTGCGTCTTCAGCTTCGCGTCTTCTAACCCGGCCGATTACTTCTTCTTCTTTTGAAG  
GAGTATATCCGACATCTGATGCAGCAACTGATCTTGCAAGGATTTTCGAGCGAATCGGCTT  
TTTCATCTGCACCGAGAGCTCTTAATATAGTTGCGCCAAGTTTGGCCAACCGAGCTTCA  
TCATATTGACCATATATTTCAATTTGGTCAAAGGCACCTACGGCAAGACGAACAAACATTT  
TTGTATATTCATCACTCTTGAATAATTCATCAGGTTCGGTTATAACTCCATGAACATTTT

CCAACGGTGTGCTAAAGAGCCCAACTGATTTTTAAATTCGGCGTAATTCTCTTCAAACA  
TTTTAGTGCAATGAGTATAATGACGAGATAAAACGTCAAATGTCATAATCAAGGAAAGCA  
CGAGTGGAGCCATTTTGGCAAATTGAGAACGGCAGTCAAAGTATATTTGAACAACATTG  
AACTTATTGAATCGGCAACGCTAATAGTTTTCTTAAAACCATGATCGACTGACGACACAA  
TACGATCTCCGATTCGGTCAATCGCACGTTCAACATTTTCTTCTTTGTCTGGTTAACTT  
TATCCTCTTTTTTTTTCTTCCCTTTGGCTTATCGTTTTTTAGGAATTTGATATCTTCAGAAA  
TAGTTTTCAAATACCCTAAAACCTGGGTTATTTTTGGGTGTTTGTCTTCTTCTCTACTA  
TCTTTTTAGCTGCTTGGTCACTAGTGTGTTGTTGCCGTAATTGGATTTTTTTTACCATCCG  
CTAAGAAATTAATTTTTAGCTTTTTCAGCAAATTCAGTTAGTTTGCTAAATGTTTTGTTGG  
AAGTATCTGAGATCTCTTTCAAGTGCTGATTAGAAATTTCAAGTGGCTTCCGCGGAAAGTT  
CTGTAGCAGCAGCAATATTTTCGGTTTCAGAAGTGTCGTTAACTATTTTACGAAGTTCTG  
AATTACCTTGTTCAACTGTTTCAGCTATAAGCTCAGATGAAGCTAAAAGATCGCCAGTGT  
TGTCTGGCGGATTTTCCAAGCAGTTTTGATATTAGATTGCTCAGAATCTCTTTGCCTAT  
CTCTTCTCAAGTCTCTTAGTGTCTTTTGAGTAGCCATTGAATTATCCAATAATGTTTGA  
GCCACCATTTATTTTGCCAAATGGTGTATCAAGTGAAATAGTAGAAACTATAAAATCTGC  
CCAATCCAATACAAGCGCAGATGCATCTTCGAATTTAAAGTCAAACCCGCTTTTTTCTTT  
GTAGTATTGCTTGGTCACTGTCCAATTTTCGATACAAACGTATCAGTTATCATGGGAGG  
TTTGAAATACAGAATATTGCCGTTTAGCTCGAATTCATATTTTGCCTAATATAAGCTTT  
GTCAATATCAATGTCAAACCGTTAATGGTTTGAACGGTCGGCAACTTTTTGTTGAATGC  
CAGCAGATGCAAATTACCATATCTGGTTCAGCGGCAGTCAAACCCGAGCGAATAGAATC  
AAGCAAGTCGATCATAATGAGTCTACACCCTCCATATCTTTTCAGCAATTTGATATGCCT  
GAAACCAAGTTTTGGAATTGTGATCTCTTTTCCATTGACTTTTATAGTCTTAACTGCAGG  
GATAATGTTCAATTTGGGTTTCATGTTATTTGCCTTTCGTTAAAATCTGTATGAGCTTTC  
GAGTTGTTGAAAAGATACATATTTGTTATAGATTGCTCTCTGCTTATTTTCATATATAACT  
GCATCAACGAAATACTCGCCTCTAAATTGATTCTTTTTCGATCGTAGAATTTCAAACGCATG  
CCTGGTACGAGACAAAATTCTCCGTATGTTTTTGTGTGCAATACGCATCGGATTCTGAA  
AATATTAGAGACCTATTGTAATCTTCGGCACCAGGGCGGCTTATTTGGTCATAATATGCA  
CCAGAACGGCTATTACAACTGAATTTAGCCCTTCGCCAGTAACAACCCGAGTTTGCATT  
TTGTTTATGAATGAGTGAGTATAAAACGAGGTTTCTCGTATGGGTACGGGTATACGCG  
TTTGCTTTTGTCAACCATTCAAATCACAGCATATTTTTTTATCTACCATCGCAATAGTT  
TCACCAAACAAACGCGGCTCCGTACGACGTATTGAATTGGATCATTTTAGCTAATAGAT  
TCAAAAACCTGACATATGAATGCCTAACATATCTTCCCAGACGAATGGAACACTTTCGTAT  
CCAGTCGTTTGGCCATGTCGGCTAACAACTTGTAGTATGCATTTATGTCCAACACCCAA  
TCTGTCATTGGCACTCTAGTGCCGATCGAATTGATTGCCGGCGCGAGTTTGGGAGTTCCT  
GAATACCAATAATCAATCATCTCGTTAACGGATGCTACAGCATCATTGTAAACATTCTG  
CAAACCTTGAGATTACGTACCGAATGTAATGAACCAACTGGACTGTTATGATGTTGTGCG  
CCTTTCATATCTACGTTTGGAGAAAGATGTTTGTATGCCATACAACCGGTTATAAGTTATA  
TCAGTGTTTCGCTGTTTTGAGAGATGTTTGGATTATTTTCATCACCAGTCAAACGTGTCTGT  
AAACCGTTTGGAGTCATAAATTTGCAGCAGACCTTCATTTATACCATTGGTTAGACCATCT  
CTCATGGTCATGGTAATAAAAGTTGCTGCTAATTCAATAAACCTATTCTCCATCCAGACA  
TCATAATTTCTGGTAAAGTTTTACAGAGACATTGGGATAACCAGCGCGTTGTAACATTAAT  
TTTTCTCCTTTAATTCTTTTTCCACCAGGCTGAGAACAATGGACCTTTCGACTGGTAGCA  
TATTAACATATGTCTGCCAGAGAATAGTCATGTCTTACTAGCGCTCTGTTTATCTTGTA  
AATTGAAAATTTTCATCAGGACTAACCAAAACCTCAAAGAAATGGAGCATATTAGTAAAAG  
TGATGTCATAATCTTTACAACATTTGATTTTTTGGATTTACTAAAATCGGGTTGAATGATT  
TTGATAGTTCAACAAATTTCTCGTTTGAATCATATCAGCCAATTGACTGCGCTCATCTT  
CACCCAGTTCATCCCAGGTGTATTTCGTTGTGCCCGTCATATATCCTATCAACAGTCTCAA  
AGAAGAGTTCGTCGGGTGAACCTGATTTACGAGGCATACGAAATTTGAACGTTATGTTGT  
TTACCGGCAACTCTGGAGTTTTTGTGGCTCTTGTGTGAGCTTCAATCTAAGATTGTGCA  
TCGACTTGCAGTGCGGGCATGTGAAAGTTGCGTCCACAAGTGATTTGCCCAAACCTTACAG  
AAAAAATATCAGAAAAATATGTTACGTTCAAACGGCGTATAATCCGGATACATTTCTT  
CGAGCAAATCGAAAAATATCTCAGGTTTCTCTAAAGGCTTACTTCTCATCTCCTTTCTGA  
TCAATAATAAATCACGATATTTCTGAAGCTGTTATCGGTTTAAATCTGTGTGTGCCGCTCG  
GAAGCTTTATGCGGATTATATTCATTATAGATACACTACTTTTAGGTTGTTTAAATACAT  
TTAGGAGGACTGTATGGACATTAATAATCACAGTTGGAAATAAGCAAGTAGAAACTACCAT  
GTTGTGCGGTGCGCGAATATCTGTCTATCGAAAATGATGCAGATGAAATGATTCCGACAAT  
CATTTTAAATAAAATAGGTCAGCCGTTACCGAAACATCTAACTGAGCAAGCTCTCATCAA

ATTGATAGCGATCTAAAAGAAAAAAGTCATCAAATGACATCAGAGTGCACGCGATGTCA  
AAAAGAAAATAAGTTTGAAGTGCATCCCGATAATGTCTGTGTTTCTGACGGATTGGGGCT  
ATCGCATGGCGCTGGCGGAATGGTTATCAATATGAGATACCCGATGATGTTTGAAGATCG  
GGATATGTTTGAAGATGATAGACAGATGTATCGTGTCAATTTGAATATGCAGATCAGATATT  
CAAGTGGGAAGATTCAACAGAAAACGAAAAAGACACTTTATTTAAGCATTGACGTTTTTC  
AGATATTGAAGCTATCGTAGAAACACTTCAATCTCCACAGGTATATGCTGCAGTTCCAAT  
CGACTGTGAATGTGGAAAGCAATACCCAGCGGTTATAAATGGTGCTAGTAAATTGTTAGA  
TTCACTGGGGGTAAAATGAATATAAATCTGCTTTATTCAGATCTTGACCCAGATTTCAAC  
AAATCGTGGGACAATGATGTGTCAATGACACTAGGAGCTCGTGCCGTAAAAAAATTCTATC  
ATAGGGATTGTTTCTACTCCCATTGGTGCGAGACCATTAAACCCATACTTTGGCTGCGAC  
TTCCCGGACCAGCTATTTGAAAACATTACGCCGTTGGTGATAGACACGGTTAGACGAAAT  
ATTCATACGGCTATACGAAACTTTGAGCCACGTGTATACAATCTTCAAGTCGACTCAACT  
GGAAATTACGATAATAACGAACTAATTGTTCGCAATTCGATTTTCAATTATCGATAATCCA  
GCAGTAATAGACGAAATAAAAAATGAAACTATCAAATTAATTTAGCGCTCTTCGGAGGGCT  
TTTTTGTACGAAAATGCAACAAAAACGTCACTTGGGAAACAGCATAAATAAAAAAGTCAGT  
TGAATTGCTGAAAAGAATAAGATACTCCGGGAAACGGGATGTAAAAATCAATACTGGAGC  
CCATGGCTCCAACGATCTTGCTCGTTAATTCTTATCCTTTTAGTTATAATATCTATTAAG  
CAATAAAGGATAAGTTTTGGCAAGCCCAAACCTGGAAGCCAGATTTTACTGTTCAACTA  
TCGATTTATAGTGTTATACTTGCCTCATCACTAAAGGAGAGTAAAACATGATCATCAATA  
AAATTCAGAAGTTCGTATGTCTTGTGCGAACTTTGGCTCTGATGGCGCTAAAGGTGCAA  
CTCTTCTCGGTCTAGTAATTGGCCAGGTCCAGCAAACCTCGAGATAATTCCGACGCCGCGAG  
TTATGAAAGTAATCAATTCCCTTTTGAAGGGAATTCGCGAGCGTATTGCTCCAAAACACA  
ATCAGCACGACCTCGGCAATGCATATCGAGAAGAAGCACGTCTTCTCAGTTTATTCTC  
AAGCCATTACTGACGAACAATATAACGCGGTCGTCAATGGTAAAGCTGTACTAGACCTTT  
ATCCGGTGCATGGCCCAAATACCAATCTTATCACTGGAAAACCTTATGGCACAGCTGTCAG  
CCGGTGTGAAAGATGGAATTTGGTCTATCCCTGACGCTGCTTCGTTGAAAAAACAGATCG  
AAGTATACATCCCTATCGCTTTGGACGTAATTGGAGAATAAAATGAACGATGAAATTTGC  
GTGGTATGTAAACAGTTAGTTCCTAAAGCTCTTGCCGTTTACACATCTTTTGGACCAGCG  
CATCCTGGTCCATGTGCCATTATGTTGAACTTTACCTCTTTCAGAATCTACCGGAATT  
ATTGAAGAGACCGAACTTCTGGTGTAAAATAAAAAGGCCTGCATACGCAGACCTTTGTTT  
TATCAGAAGTCTTCAGGCGGTTTCGCTTCTTCTCTGGCATTTCGAATTCCTCCTACGG  
CCAGCGATAGCATCTCCACCGAAATATCATCGGTGGGTGTCAATTCAACTTCTTTAACT  
CGTTGTTGTAATATTTTTCTAGCTCATCTAGTACTTCTGCTGTTTGACACGCGGCAATT  
TTAGACATAAATGAATCCACTGTTGATTCTGCTATAAATTGCTGAAACATTCCCATTGCA  
TCCCTCCTATAACGAAATTTTATGCAATGTGTAATTGCATTTTTCTGACACATATCTTTC  
AATACGTTCTATTGCGTGTGTCAGGGCGTAATTTTTCTTTGTGTATTTCCCATGAACATT  
GATTATCCCAATATCGTCAAAAATGTCCATACTGTAGCAATATTCTTGGATGAATGCTG  
TCTCAAAACTCGCCCAACAGTTTGGAGAACAGTTACCTTTGATTTAACAGGCTGTGCAA  
AATGATATGATGCAAATTTTTGATTGACACACCAGTAGAGAAAACACCATATGAAGCTAC  
GAAAACATGACCAGTTCCACCTTCGGCGATGATTTTCATTTGATCACGGATTTCCGGTGT  
TGTATCTCCAGATATAAAAATGAACTTTACCTGAGTCATGAATCTTTCTAAGCGTATTGTA  
CAAAGCCATACCTTGCGCTTTCAGGCGAAACATAACAAATGCATTTTCATTTTTGTCTGC  
GATTTTTTTAGCCATCGAACATACAACTTTGTTTCTTTTCGTATGACTCGTGATAAATTT  
TACTTCTTCATCAGAAGAAAATTTACTGGCAGAAGTTCGATCTTCGCTCGAATAACCAAG  
CTGAATTGCTTTAACTTGCAAATCACATACTTGGCCCTCTCCATTAGCTGTTTTGTTGT  
TACTGGTCTAAATATATCCCCAACATGCCAACATATTGCAAAATGTTTGCTCTTCCATC  
TCGCAGAGAACCAGACAAACCGTATTTAAACGGTATATGATCGACGGATTCGATGATTTT  
CTTTTTTGTATGTCCCAGTTGATAGATGACACTAGTCGTTTATAACACAACCGAATTGGTC  
AAACCATTCTTTTTTCTGCTTAATGGCAGATTGCCAAGTAGAAACATAGATCAAAGCATT  
CGACTCTTTTACGGTCCCCTTTTTATCCCAAGCATAGCTTCTCGAGGGAAAAGACGGTA  
ATCGACAAAGTCATCAATCATTGTTGACAAGAGATGTCGTTGGAACATTGACAAGAAC  
TTTGCTTTGTAAATTTCCCAATACCACAGAGACAGCAATCCTTGAATCAGCGATTTACC  
AGCAGAGGTAGGCAAATTTAGCAATATTCTTCTTGCATATCCCTCATAACAGCATC  
AGCCTGATACCAGTGAGGAGTGATTTTGTGTTACCAGAATAAATATCTTTGCTGTTTAC  
CCATGCATCAAATTCGGAAAGTGAAATACTTTGTCTTTCCTGATCTACGGGTCAACAAC  
TATTTTATAATCGTTCTGCTCGGCAAACCTTTATTGCTTGTGAGTGACTAGTCCATAAGGAAG  
CAAATGATCATATCCTAGCAGGAATATGTCACCAGACCAACCTCCACACTTGAAACGCGG

AGAAAATTGATAGCCATCTGCTTTAAATGAAAAATACTCCCGTATTTTCATAGAAGATCGA  
GTTTTCGCAAACAACCCTGGCAAAGCTGTAGTTTTCAAATACAATATTTACCATTAACG  
TCTCTTAAATAAGTCATATAGTTTTATTTATATAAAGGAATCACCATGAAACAGAACTT  
TTAGTCGCTCTGATATCGAATCTCAGATTTGTTCTCTTTCTGCCGCAGAAGGCAAGAAA  
AACTAGCAGATTATGCTCACAAGAATTACGACATTAAACTCGTCAGAAACAAGTCGTTT  
GAAAATATGATGAACGAATTTGAATCTGCTGTCAATGCCAAATTCGAGGCCGCTCGTGCG  
GAAGCTGAAGATGCTGAAGAAATTATCGATATGGGAGAACGTGTTGACATATCAAAGGGG  
ATTGAGCTTGACCCTGATAAAATGGATATTGAAGATCAAACATCTGAAACAACAGAGCAG  
CCTGTTGTTGCTGAACCATCGGTCGAGATTGTCGATCAAGACCAAGTAGAAGAAAAACCG  
GCCATCCCATTTTCTGAGTTGAAAATTGAAGCCCCTACAGCAACTGAGACAACCTACCTAA  
GTAGAAGAAAAACCGGTTTGTGAGTTTGTGTTTGTTCATTCCCTGAAGACTATCCGCCAAA  
TATCGGCTGGTCGGACCAGAAGGCCGCGCATTATTATTGTTCCGTATTGGATACACGAT  
TGGATGGAGGGAAGAAATTGGAAAATTGAAATTGCAGAATGTCAATATGACAAAGAGCTG  
TTGAAGTCATTGGCAGTTTACATTGAGCGAGATGGTTCTGTTGCCATTCGCGAATCACGA  
AATAGCAAATTCATCGTTATTTTCATAAACCAGGGGTCTATGACCCCTTCTTTTGTTTAAGG  
AAAAAACTATATGGCAATTACTGCTTCTATCTCTCCACTTGATCCATCCGTTTCGGAAGG  
TAGTATTGTTGACTTTACCGTTACTTTTATCGGGGATGACACGGTTAGGGAAGTTGTTGG  
TTACGAATGGCTTGTGACGGCGTTGCTCAAAGCGGAGAAACACCAACTACTTTTATCAA  
AACCTTTGATTCGGCCGTTTCGTTTACTGTATAAGGCAATGTGACAGATGCTCTTGTTGC  
TGACGACGGTGCTGAGCCAGTTGTTCTTGGAGCCGAGAGTGCTGTGACCGTCGAAGAAGT  
ACCCGCACTTGATGGAAAGCATTGGTACGTTACCCCTTGGCTTTCAAAAACCTCGAGTTT  
CTCGTGGGTTCCGTACTGGGTGCACTACTGCATGGTAGCGAGTCCAACATGGCGTCCAAC  
ACCGGTAGAAAGTCCTTGGCTAATCATTACTTTCTCGATTGACCAAGCGGTGGAGGAATA  
CGGCGAATGCTTGATGAAAGAATCCCGTAATGGGTACATTTACAAAGCATCTGCTTATAC  
CAAGTAAAAGGAGCCTTCGGGCTCCTTTTTTGTGTTACATTTCTAGAAAAACGAATTATGA  
TGGCTTTGCGAACTTTGGGCAATTCACCAGTTCCGAATAATTAAGGAATCTTCCTAATC  
GAAAGTGAGGAAATTATGCTGAAATCGGCATTAGAAAATGTGATTTTGGAAAATAGTCAA  
GCCATCGAAGGCAAGGTGCTTGTACCGATGCCAAGAAAATATTCCTGACCCGAACCTCG  
CCAATTCATCACAGAGCCAAGAACCGTGATGAGCGGTTTCAAATCCAATTTTCGTGATTTG  
ATGTACACTGCAACAACCTTATCCAGTTGCAATTGACGGCCCGATATGGGAATCGTCGTCT  
TCCCTGATGTATCCGATGATTCTGCGTACCCATTTTGGTGATTTTAACTCAATGGCCAT  
AATTTACGTGACGTTCTTGATACTCTGCTTGAACCTCAGGCGTGAATTCAAAAGAAAATG  
GCTCTTGCGCATCTGGCAAACCTGCGTGACTGTCCGGATGACGGTGTGATTACAACAAA  
GCACAGTGGTACACTAAAGCTATTTTATGTTTGATGTATGATCGATTTGCTGATGATCGA  
GAATTCGACATCGAAAAAGTTGTAAAAATTGCAAAAAGCGAATACAATCGAGCCGCAATT  
TCCATAATCTCATCCGGTGGGATTTTGTCAATGCCTCAGTCGATTCATATGTTTATGCT  
TCCGCATTACCGATTACTTTTTCTGTGACACAACATAACGACAAATATTCAAAGATAGTG  
ATTTCTGAACACGGATACGTCGCTGACCCGGGCAAAATGCATCGAGTTCGTCTGCTAACA  
GAAAAAATCAAAGATCGGCTGATCAAAAACCAGCGTCAACAATTCATGAAATAGTTGTAC  
AGTGATGGGCTCTGTGTTATGATAGTCCCATCAAATCTACCAAGGAACATATCATGAGAA  
CAATCCACTGCAAAGACGACTATGTGAGTTTTATCATGGCTCGTGTACTCTCGGCCTTA  
AAGGTGATATGTTTCTCCGCTGAAGCAACAACACGATTTCCGAAAAGGGCCGGAAAA  
AGAAGTTGGACCGTGTGTTTTTACCAAAGACCGCGGTCAAGCCAAGGTTTATGCTAGAC  
GTGCTGCTCTATCTATTAGCGGCGAGCCAACTCTATTTTCGAGTTATTGCACCGGTTGACA  
CGGTGTTTATGTCTGAAACGCCGGGCGCGACGGTTTACCATGCTGCCTGGGCTTTTGTG  
AACAGATTCCATTTGGTAAATTGAGCGACTAGAAAGATGAAATTCACGACAACCTACTTC  
AATTTCAAACAACACCGTCCGGACCATATCATCAGCGGTGCGATAGTGCCAAAGACAAAA  
GAAGAAATTAACGAAGGCATCAAGGCTTACGTTGATTCTATTTGTCCGGTAGAAGATCGG  
ACCGATGAAAACGGAAATGACACTCTCAAATCGAAGAGGGTGCCCGACTCCCAGAGTCG  
ATGCGTTCGCGGCCAATTCAGTCACTATGAGGTAATCGAAATGAGATATACTCAAAGG  
ATCTCGGAGATGCCATTAGCTTTGCTGTGGGCGTTCACATTGATCAATTTGACAAGCGCG  
GAAATCTGTATATTTTGCACCCATTGAAATTGCTGCATTGGGCCTGACATGCCAATGAAG  
ACGTTGATGGTCAAATCTGTGCATGCTTCATGATTGTGCAGAGGATAGTTTCGCTGGGTG  
TTGCAGAGACACTGGATTTGATCGAGATCGCTTTTGGCACCGAAATGCGTCAACCCGTTG  
ATAATCTGACGAAGCGTGATGGTGAAAAATATGAGGCATATCTTGATCGAATCAAATTGA  
AGGTCTGATCCGCGAAAGTGAAGTGATTTGATCTTAGACACAATGCTGATCTGCGCCGAC  
TGAAAGGTATTACAGGCAAAGATCAAGAACGTACCTTGAATACCAAGTCGCTTATGCCA

AACTGAATATTTGGATTCAAGAGCAAAGGAAGAAGAAAACGCGTAATATTTCTGAGCTT  
TCGTCAGCCAAAAGGTACAAGTGCATTTTCATGTTTCGTGAAATAAAGCATGGATTCGTA  
CAAATCGCCAAAATGTATGACATTCGCGAGACAAATGTCATCGATGTCGTCAAAGAAGTT  
GATGAAATGCGCGACAATCATCTGGAAGCTCTTACCCGAGAGCCGGTAGTGTATCGGAAG  
CGCATTGTGAATCCCACACGGCATCAAAATGATGGTCGCTTCAAACCTCGGAAGCGCGCT  
AAAGGCGAAGCTTTTGAGACTTTGCCATCTACATTGACTCCCAGAACTCGCTTGCGATT  
TCTCAAGCCTCGGCCAACATGCCCGTCAGGCCAACAAATAGAAGAGCTTGAAGCTTTGTTG  
AACAAATTCACACAAACTGATGTACATTCTCCGCGATTCTGGTTAAAATACTCCCATAA  
TGAAAACCGAAATCACGGAGTATTAATAATGTCATCTAGAATGGATATGCTTATACGCTA  
CAATGCCATTGCTTCGGCCTCAGTCAAAGTTCCTGAACCTGTCAAAAACCATCATTTTGA  
AATTCTTCGAGGGAAGCGCAGCACCGAAATCGAAGAAAAAATTCAAGCTGAGCGCGATGA  
AGTTGCTCGTCAAATTGAATACATGGCTTTCTTCAGCGCAAATAAGCGTTACTTGAACC  
GTATCAAGTTAAAGTAAAAGCTGCGGAGAGCGCCGCTTACAGCGGCGTCTAACTTTTCA  
ACAATTTGTTGAATTGTTGAAAGTCGATAAATGTGCATACACTGGTACTGTTTTCCCGAA  
AGACCACGGCCGGTCTATTGAGCGCATAAACCCCAAAGTCGGATACACGATGGAAAACGT  
GGTAATCGTCACTGCTCGTGCAAACAGCCAAAAGGCTCATCTTGACCAATTTGTTACGA  
AGAGCATATCCCCGCTGATATGAAGGTCAAACCTTTTTGCGCAAAGCAATTTATCAATTGG  
AGAAAATACAAAATGAATTGCATTAACGTTTTGAAAACGCTATAGTACATGACGAGTA  
GATGGTATTTCCGAGAACTGGACAAATCAAAGTGATTTTGCTGCCAAAATCATCGAATT  
GTTCAATGAAAATACTAAACATGGTGGATCCGCTCCAATAGTTGAGCCAATGGGAAATTG  
GCCATCTAAGAGCTATCTTAGCAACATGCCTCGTTTGTGTATGTTGAAACGCTATGGATG  
GGAAGTGGCGCACGATTATCGTCAATCGTGCAAAGACAATCCTGGCAACATTTTGACTGT  
CGAAGTATTCGGCTCCCCTGAAGCGAAATATCCTACAGCATTATGATGAAATACGAAAA  
AGGATTTAAATTCAAATTGTTTTGATAAAAAGAAAAGCCCCGACGAGTCGGGCCTTTGTTG  
TATTTGCAATTTGTAAATTGATCAGATTAGACCGGAATGATTCTGGGTAATTTACACCT  
AACATAGATGACATATCAGATTGACCTACCAAATCATCCAATCATTGCCTGTTACATTA  
CGTTCACCGGATTGACCTATACGTGTAGTGTACGGGTTAAGGGATAGACCATAACGAAGC  
ATAATGCCAACAGATGGTTGCAGTGATGTTGAGTCATTGATAATTTTATAAGCATCCAAA  
TCATCTGCTTCAATATACGGTGAATAGAACAACGAACCTACGTGTTAAATATGATTGACG  
TAATGCTTACAGCCAGTGAACAGATAGTCAAATGGCGATACCGTATCAACACACACTTTC  
AGTCCTTTGCGCAGAGTTCCTGCTGAAAGAGGATCTTCGTTTCGCATACATTCATCCGGAT  
GCTTCAAGCATAGCAGAAACGCGAGTTGTACAGAGAACATAGGTCGCTTCATATGATGTG  
TTTCTCAGCATCTAATTTTTTTCAGTTCGCATGCTCGTTGATACAGAGTTCTTCCAATAACC  
GGGGCGTCATTGCTAGCGGTTAAATCCAGAATCCCATTGAGAAATATCTTCTACCTTA  
TAGCGGCGCGAAACGGTTATCAGAGTCTGAATAATGTCTTTGTTAATATCATCAGATATC  
ATAGTTGACAGGACATCATCGACTACGCCAACACCATCCATTTTATTTGCTTCCAAATCC  
TACATCAATTCAACACTTATATTTGTCTTAAGTTTGCGTGTGGGAACTGGAAGTGTCCAC  
CGATCAAACCTGAAATCAGTTGCGACAAATGATGATGCACCTTCAAATTCTTCTGCTAAT  
GCTGCTTCAGACTTGATTCTCAGGTTGACGAGCATTACAGCAGCACCGATTGCATCGGCA  
ATGTTGCCAGTTGACGATGTCAAAGTGAGTGGGTTTGTGGCGGTGTAACCACATCATT  
GAATCGTTGAAAACATACCCCTTAGCCATGGGAGTGTCTAGTTGCGCAAGAGGAATCGAA  
TCCCGATATCCGACTGACCCCATGTAAGTTGCAGCGCTGGAGAATGCTTGATTACGGCA  
GGATTCATATATTTACACCATAACAGTGTGGAGGTTGGCATGTTAGTGTCTTGAATTGCT  
ACCATTTCCGGTAAAATCAAGTTGTTTTCGGCCCCGGTCAAGCCGACAAGAGCAGGACGG  
CTCGGACTATTTGCCCCGGTAGTTGTTGCTTCAGAAATCAGATCGTTAATGCTGCTCATA  
TTTTTCTCTCATTGTTCTGCGATTATACGAACTCGTGTAAATCGTGAAGTTTGACGTTGAT  
GAAACCAATTCCAATGCACCACCATTTCGTGGCAAATTTCCGTTTTTATCAACACTTATG  
AATGAGTTGCAGTTGATTGTCTGCGAAGCATGCCAGATATTCTGACGACAGTCAATGTA  
TCAATATTTACGCCTGCATTAACGGTGAGTTCCAACGAGTTTGCAGGTTCTGCATACCA  
AATGAGCCAGTGATGGCTATTTTATATTTAAGTGACCTGACGCGCCACTTGCAGCTATTT  
GGCATGTCAGTATTCCATTTTGAAGATTTCATGCATAGAGGACATAACTGGAATATTTG  
ATTTTATTAGCAGCATATATTTTCTTATGCAGAAAAGGGAGCCCGAAGGCTCCCTTAA  
CCATTCCTTGGTTGTGGAACCAAGTCCTTTTGAATTACAGACCTTTAACCCATACACGCC  
GGAAGTAGGCATTTTACCAACGCTGTGAGCACCAGGCATAACCATTGCTGATTGACTGG  
TAGGAGATTGGGTGCGTGATTACAGCGAACGTGTTAACACGGATGGCGTAACGAGTCTTGA  
AGCCATGACCGGTTGGAAGTTCTTCGGATCAGAACACGACGCGGGGTTAGTGCGAAGT  
ATGGGCAGTAGTAGATACCGGCATCCAGGTTGTTGGGACCGCGGTAACCCATGGTGAAGT

AATCTTGACGGGCGTATTGGTCTGTGTAGACCTTGTAACGACCACCCAGAGCACCAGCGA  
ACACACCATTGGTAGTATCAGCGTTCAGGCCAGAAGCCATACCTTGAGCAGCTGGGGTGA  
TACCAGTATCAACCAGAGCCAGGGCAGAACTACGTTACGAGAAGCGATGATGAAGTTAC  
CTGCACCACGACCAGTTTGACGAGCGATTTTCGTGAGCTTCCCTTGTCGATTTGGATCAGCA  
GAGCTTTGTAGCTTTCACCAGCCCAACGAGCACCACGTACATCGATCGGGTCTTGGAAGT  
CAAACATACCGCCAGCAGAACCTAGAGTTTGAGTCCAGCCAGATTTACCAACTTGAGCGG  
TGTAGTTAATCCTATCGATAACTTCACGGTTGATTTCCAGCATAACTTCGTTAGCCAGGA  
TTCCGCTCAGCTCGCTGTCAGCATCCATACCATGAACAGCGCGCAGGTCTTGGGCCAGTT  
CGATAGAGTATTGAGCTTTCAGTTGACGAGATTTTCGCTTCGACGGTTTGCTTGTGATAC  
GGACGCTCATTTTCGTTCCAAGGGTTATCGGTGGTTCCGTTAAATCCTTGACGAAGTTCGG  
CGATAGAGGTAGCCATACCTTCAGCAATTTTCAGCCAGTTCGCCAGCAGCAATCTTGGCAG  
TAACCAGGGCATCCAGAGCAGCACCAGTTTCGTTGGTACCGACAGTCACGTTCCGCCAG  
TCACGTTCTGCAGATAAGGTGAACCAGACTCGTAGAAGAAGTGATAAACGATATCACCGG  
TAGCAACAGCTTGACCAGCAGTCAGCGTAGCAAACGGCGCGCCATCGTCTGCACTGCTAG  
CACCTTGGCACCCAGACCTGAATGCCAAGCATCAGGAGCATAATCGGGTGGAAAGCCT  
CCTTACCACCGGAAGCCAGAGCGTCTTTGCCGTAACAGAACGCAGGGCAAATACTTGGC  
CAGTAGGACCAGTCATCGGCTGTACAGCAGCGATATCGAAGGCGATCAGGGATGGAATTG  
CGCGTCGTACCATGCCGATAACAGCAGGGCCGATGTTTGTAAATTGCTCCGGAAGTGTGGC  
CAGCAGCAATATTGGTAGGATCGTAACCGTGATCACCAGCAACTTCGGCTTCCATCAGAG  
ACTGACCGAATGCTTCAATCAGTTTGTTCATCGCGATACACCGGATCGGTTTTGGAATCTT  
TTTCCTGAGCTTCGAGA ACTTGGGCTACAAGAGCTTGTCTGTTTTTACCAGCAATTTCCG  
GCAGACCTTCACCTTCCAGCAGCGGAGTCCATTTGTTTCAGAATTTCTTTGGTATTTCAGAG  
ATATTGTTATAACCTTTATTTAATTAAGAAGACATGCGGGAAGCAACGGCCAGATAGGCG  
GCCCTGGAATTATTTGCCTGCTTGTATCATTTTGTCTCAGCAATAACTTCGGGTTTCAAG  
TTTACCAGCAGCTGCAGATTCATCAATATTTAATGCTTGTTCCTGGATCGGTTTTTGTTC  
TTTTGACCAGAATTACCAACCATTTTCGACAATCGCAGACAGTGTGGTGAATAACTATCA  
CCATATTCCAGGCCTTCTACAAGACTCAGA ACTTTGTCTTTCTGTGACTCGGTTAAAGCT  
GCAGTAGCTTCTGAAATAGCTTTTTCTTTCTTCAGTGAAGAAATTTGCTCTTCCAGAGCC  
AAATTTTATCAACAGCGATTTATTTTCAGCTGTAGATTCATTCAGTTCAGCATTTCAGTTC  
GTCTATAACATCTACTGGCTCTTCTGGTACAGAGAGGTTATTTTCGATGAACAGTTCCTT  
GAGACCGGTTGCAAATGATTCGAACAGCTCAGACTTGATGTTTGTCTTCACTTGCAGCGC  
ATTATCTTTAAGCTATTCTTTACCCAGATGAGTTAAAAATTTATCAGCATCTTCGTAAAG  
TTTTGTTTCAACTTCTTCACGGGCTGCTTCAATTCCTTCGGCCAGTTGAGTTTTCGGCTGA  
AGAAGAAATATCGGCAATGTGAGATTCTGCAAGCGGGATTACAGCCGATCGTACAGCCTG  
CTCAAACGCAGTACTGACATTTTCTTTTACGCATTCGTCCAGCTGAACAGACTCGAAAAT  
ACTGTCCAGTTCAACGGCTACCGTGCCAGTTTCTCGCTGGATTCAGCCAGCAGTTTATC  
TTTAAGGGACATTTGGTTTTTCTTTAGTTCAACATTGAAGCCTATGTTTTTAGCCGATT  
GGCTGAACCCTTCATTAAGTGTCTTACATTGTTATTTATAGCATCTGTATGAGCTTCAG  
ATTCTTGTCTTTGCTCTCTCTTAGTGGTTTAAACGTACGCTTGTGGAGCAGATGGCCTTC  
AAACAACATCAACCGTACTGTGAGGCGATAACCCTCCTGAACAAAGCCACCTTTAACTT  
GCCCCGAGACCAGTACTGATACTCCCGGAATCCTACCAGCTCGTATATTGGCGGCAAGTT  
TATCACCTGGACCAAAAATCACCTTCAATTACCATGGCAGACCCAGTGCATTATCGCCTT  
CCCACCATAGTTTTTCTACTATGATTGAAGCCAAATTGGGGGCAGGCATCGGCCTTGCAG  
GATGTTTAGTTTTCGCCGAGTGATTGTTTAGAATTCATTTGGGTAGCAATATAATCGTCGA  
CAGCTATGGCAAGAACAGCTTTAGGATAAATTCTCCCGTTTCTACTATTAACGTTAGCTT  
GCATAAAGATGCCTTCAATATACAAAGCACCTTTACCATCATCCACTGATTGGACTACAA  
GTTCCGGAACAGGTGCCGCCGGGAAGTCCCATACTACAATTAGCAGCTCGTCTTCCATCT  
TATAACCCCAAAGCTTCACGCCGTTTCAAGGCACGTTTGTTTTTGCGCTGCGCCTTTATCC  
CAATGAGTGGTTGAGAGCGCTTAGTTTTTTCGCCGCTTACGAGCAATTTGTCTACGAGTA  
GCAGCAGTTAGCCAGTAGTTTTAAATGCATTGCGATTCCGTGTTTCTCGATCTTAGGTA  
CGAGTTACTTTCACCTTTCGAATTAACATGTTTGCACAATTGCTTCTGAAATGGAAATATTT  
TCAACTGCAGCAATCATTGCCAATGACATATCTGTTTCGTCAAGTGAATGATTAGAAATA  
ACACCGATAAATTCATCGGTGCTAAATCCGGCTTCTACGAAGGATTTAACACGAATCACT  
GCTTGCGCAAACCTGAGATTCAATGACTGGTTGATCTGCTGAATAGCCGGATGGAATAAGC  
ATTTATTCCTCCTCTTCATCTTCATCATCTTCGTGCTCATTCTCATCATCTTAGTCTTCC  
TCGGGTTTTTACCTTCGGTAACA ACTGCGCGAGCAATGGCCTGTTTTTCTTCGGCGTAT  
ACTGACTCTTTCACAAGAGCCATTTTCGCATTA AATTCACGTTTTGCTTCATTCAAATCA

CCTGATTTGATAGCATCGATCAATTTTTCCATTTAGAAATCATCCTCGTTATCAGTGTTC  
TGGAATCGTTTCACATTCGCCTCTTTTTCTATTTGCTTTTTCTCTTGAGCAATTTGCTCA  
TCAGTCATCTGCAAAATGTTTTTCATGACATAATCATGCGAGACATATTTACCTACATAC  
GGCTCGATTTGCGAAAGGGCGTCAACTCGTTGTTGAAGAGTTTCAATATCTTTCAATTCG  
GTATAATAGGAATCTTGATGGAAATTAACCTTTATGTTATTTATTTGCTCTTCCCATTTCG  
CTTTCTAACATGATTTTTCTTGTAATCAAATTTGGTTTTGAGCGGGTCAAGGAAAATTTCT  
TCAAATTTGTGTTGAAGCTGAACAATAAATTTTTCTGAAATCTAATTCATCGCGGGTGATA  
GCCATATCTTGCCACCAATTACCATTCCGGCATCGTCGCGAGGCATCCGGGACAAAGGA  
ATTCTCAGAGCTTCACAGAGCTTTTTATTGAAGTACGGAACGTGATCCATTTACCCATT  
GCTTGTGCGCCTGGAAGATAAGTAACTTCGGTAACAGATTTACCATCTCTCCGCATCAAC  
CAATAATCTTCAGTCATTGAAAGATTGCGTTTTTGATTTTTACAGTACCTGTATTCGAA  
TCGTATAACAACGATTTTTTCAGGCTCTGCATGATGCCATTCACGTATTCAGTTGCTTTG  
CGATTAGGCATATATCCTACGTCAATGTAGAAAACACGTCTTTCCGGAGCACGCGTAATA  
GGATATATTACCAAAGCATCTTCTAAGAGTTTTAATTGGTTTGCAGGCTTAACAGCATT  
TGCAAATAACCGACAATGCCACTATCAGAACAATCCTGAAGGCCTGAATGCGCATATACA  
AAGGCACGTCTCGGAATTTAATCCGTGTGTTCCGGTTCAAGCAGTCTCCCGTTATAGGCG  
TAACCTTCGCTGCCGGCGGTATAAACAATAAATTCGCGATAGCCTTTTACTATAGAAGTA  
CCACCGACGTCAGCCGTAACGATTTACGATAATATTCGACATGACGTGGGTCTAACCTG  
CGTAATTCAACAATGCCTTCTTTAGGATTAGGCATTATTTTATGGAAGAATATGCGGGAG  
TCAACATAACCATCTGCAGAACAACGTGTCCGGTCTGCGAGATACATTTAGCAATCTGCAA  
ATATCATCAAATCTTCAAAAATTATGTCTTGGATAGATGAACCAAATTCAGTATCATCC  
AAATCAAGCGATACTACCTTGTGACCCTTTTCATAAACAGCAGCTTCATTTCCGATATTT  
GCTACAGCTCGCTCAACTTCAGGATTATTCATGAGTTGGCGATATGTGTTTATGAGGTCC  
TTGGTACCGGAAATGTTGTTATCGATATCAAAAATTTGTTGCATTAGAGCGTTATATGAT  
GATTCTCCGTCGCGAGGTTCAATCTCGGTGGCACCATCATCTTCTTTAGGACACGCAATC  
GATTCGTGGCCTTGTCTGAGCCGCTCGTCATATTCATTTTGATCGACACGATCCCAAAT  
TTAAACAAATCTAAAACTTCAGACAAACTCCTAATCAGGGAGCATTACTGGTGCCTGTA  
TTTATTATCCACCAGTCGAGTGCAAACGTAGTTTCAAATGTAGAAACTGTGTTGTTAT  
CATCCCAGTCGAGAGTAACTTCACCAACGTTAGTTGGGAAAAGACCGACAATGGTATATT  
CTTTAGATGTACTGCCAGTACGATCTTTTTGACGAACAATGCCAGGCTTTTTTATATGCTT  
CTGGAATATCGCCAGTGATTTTCATTGCCATTCCATGAGTCAAGGCATTCCAATCGACAA  
TTGCCTGTGAGTGTTATGGGCCGAATCGTTATAAATCGTAATCGTCCAGTCGTCAAAAA  
TACGGTCACCTGCAACATTAAGTTTTCGGGTCGTGTATCCAACCGGGATTTTTTCAACAG  
TGGTTGCCGGCATTGTACCTGCTTTAGCTTTAAATATGGAATTTTGGCCCAGGTATGGGA  
TTTCAATTTCAAACCCGTTAGGGCGGGCGAAATCACCGGACTCAAAGCCCTGAGGACAT  
CAGTTACGTCGATTATCAACCTCTATGTTTATTTATGCGCCCATATTTGGGCCCAACGCT  
GAATTATGCTAATTAGGCAGGGCCAATTAACCTCGTCAAAGTTAGCACCAGTTGATGTGCG  
TACAAAGTTCAGAGTGATGTAGTTAATTGAACGAGGAGCTTTGATATAAATCGTAGCTAC  
AACTCATTACTGTCGATGACTTGCAGGAGTGTGTTTGTGTTGATCACAGACAACGCGGAA  
GTCATAAACACCACCCCGTGACCTGATGTTGCCGAGAAATTGCGAAAGTTCCATACGGAA  
CTCTGACGAGTAAATGCATCGTTATTTCAAACAATTCGTATTTAGAAGTATCACCTATGT  
TTTTCTTCAACATGTTGAAGATGCGACGAACGTTAATTCGGTCAAATGGAGATGGAACCT  
GAGTTGCCATTTTTTCTACAAAGAGAACAATCCGTCACCGCCGGCAAACCTGTAACCG  
GGTTAATTGACACTTGATACATGGTATCACGCAGCGATTGCTTCGGTTCAATTGCCAGTT  
TGATGGTGTGCAAGTTGGCCGCGACGATATCCAGCAGGGGACATCGATGGATGTCCTA  
CTTGATCGGTGTAGGCACACAATCTGGCAATATCGGCAGAAAGAGGAACCCACCGGTTAA  
TATCATTGTATTTGTCATACTGATATTTATAGTTGCCTGAAATAAAAGCATATGTTGAGC  
TAATATTCATGTTATTGTGACAACTTCACCACCAAATGTCACACCATTTTCGCCATTCGA  
CAATATTCTTAACCGCTCGAGTGGAAGGAACACCAACAAGTTATTCTGACGTAGGATTGA  
CGCATGCTACACAGTCTTGGCGGTCATCTGCGAGAGCAACGACATGTTTCTGGACAGTTG  
GTGCAACAGCAGCACCGTCAGATGCACATGCTCCAGCAATCATCAGGTTGAAATGCAGAG  
CTTCTCGGTGAGCAAACAGATCCCAACCCGCAATCAATTCATCTGAACCAACAGCATCAT  
TTGCCGAAGCGCTCCACCGAGCCGGATGAGACCGGCAAAGCCAGCGTGCCAATTTACAC  
TAGAAGCATAAATGAAATTAAGTGAACCAATTACGGAAATAGTCGGCCATGAAATGTATTT  
CCATAAACATCTCGGTCTCCGCGACGAGTGGACAACACAGTAGATTCGACTACGATGCCG  
TCTCGACGAACAATAATAGCAAATTTGGTCATCAGTAATCGGGCCGTATTGAATGACGCTT  
GCGCTTTGCTAGTGCAGTACCACCAAACGGGTAAATTTGGCCGGGCTGCACCCTTTGGA



ATGCGGCCTTAGAAATTATTTCAACTTCGACAGTTGAACCGATTTCCCCGGGATAGACGG  
CTGAAATGAGAGGCATTCCTTATTTGGCAAATTAGCCAGCACTTTGGTAGAAGTCATAA  
CATCTGGAGCTTATTCCGAATTTCCAAAAGTTACTCCAGAATCAACTACGATATTACCCA  
AGGTTAAAGCAGCAGCAGATCCGCCAGATGCGCCCGATACTTCTGCGCGCCAGTTATTT  
CTAAGACAGGATATGATCCCAGCTGTTTGGCTTTTGCAATTAAGTGCAGCTGAAGGAACA  
GCAAAGCCTTAATTTTACCGTCAGCATCAACTTTAGTTACTTTTCCCTTCTTCTGTAACAG  
TTGTCGTGTTATGCTTAATAGAAACGGTATCACCTACGGTATAACCTTGTCTTCCGGTAG  
TAATTGTAACCTTCGATTTGGTTAAACAATGGAGATTCGTTTTTAGCTTGCTCCATGTCAA  
TTACGAGCACGAGACGAAGATCATTACCATACTGCAAGAAGTTCATAACCACTCATGAAAT  
ACGGAGCAGTGACATCGTCTGGGCTACCAAACATATCAACCAATTCTACTTCATTTGTTA  
CTTGACGAATTTTCATAGGCAGGACCCCATGCGAATTTGCTGACTAATGCGGCACGGCCTA  
GAGCTGACCGAACGACAGTTGAATTGATGGAAGTTTCCCTTCATTTCAATGCCAGGGCTCA  
GAAGTGCCCTATTTTGGTTCCTTGGACGTTAGTTTAAACACATGTTTAAATTATTCCTTTAT  
ATTTACACGAACGACATAACCATTACTGGCAACTTCGAAAGTTTCTTCTCCGCTGTCAACT  
ATAACGACAGGCGTATAGTCGTCATATAAATTTTCCATTCCCTGACGAAATATTTTCATTC  
GCCAATCGCTTGTCTCTCTCGGTAATAATCAGAAAATCTCTGTTGGGCAGTAAGCCAT  
GCAAATATTATCAATGATAACCACCAAGTCATCATGGAAACCGTCTTCGGCTGCGCATGAA  
ACACCTTTTTATGAAAATGTTCTCAGTTCCATTATCGTGCCTTTATGGTAATGCACTAAT  
TTTTCTTTTTCGAATAAATCCTTAAGAGTAGAACAACCTAGGGCTTTTGACCGTTTAGTT  
TGCTTAATCCCGAGGTCGTTGTACGAGTCACATATAATGTTTTCGTATTCCGGTTCGGAA  
TACAACGACTAAGCTATGGATACACCCGTGGCATTTCAGCTCAATATAGATGTATGGCTGA  
TAATACATATTTAAGTACTTGAGCAACACATCAGGGAGTATCAGGTGTGACGTGGTGTG  
CTGAGAAATACTGCGACCTGTTTCGTACGGGAATTCTGTTATGTCGTATATGTGCATAGCA  
TGAGAATCTTGCCACGACCTTCAGCAGAGTCAAGTGTGAGATATATTTATGACCTTCA  
ATTGGTTCCTTAAACATCGTGAAATTGTCTGATGCTGGAACCTTCTTCCACGTCATTTTT  
GATAGTTTGAACCTGTTGATCAACGTTCTAGATGTTCCCTGGAAAGCAGTATTAAGCTCC  
TGTTGAAATGCCTCAAGGCTAGAACCGGCGATTGTCTTGGCTGACCAAGAATATCCGTCG  
TCAAATATGAATCGATGCCATCTGTTTTAGAACCATCCGAATACATGCGCTCTTTAACG  
GACGACCATGTTGCGGTATACGGAACAAAACAGATTTGCTTCCACTTCTATCCAAATTA  
GGGGTAATTGCAGCAGTCCAGATATCGTACCAATGATGAAGCCCGTTCGGCGTTGTTGTC  
ATCAAATCTTCGAATGACGACCTGATGATATAACTGGCTGGATTGCTAACCACGCGTCG  
TTGAAGTTGGGAATAAAAGCAACTTCGTCGATGTAATCAGCGCAAACGAGTTACTCCGC  
ACAGCATCAGTGGAACTGAAAAATGCACCAAGCGCTCAACCATTTCCAAGAGTGATAGAC  
CCTTTATTCCATTCAACTATACCAGGCTGCAGAAAATCTGGCAATAGCTCCCATGCCTAC  
TTTGTCTATGAAGAACTTCCGCTGACATGGATGCTTTATGCACAAGGATACCAACATTT  
TTAGCCGAATTGAAGCAAACAATAATGTGCCAAGAAAATAGCTACTACTGTCGTTTTTCCG  
AGCTGACGAGACAAATGTGCTGCCATCAGACGATCGCCAGCTATTATTCTAAGCATATCT  
TTTTGGTAGTCACGCAATTGGACCCGGATAATGCCATAGTCAATATGCTCAATGCAGCAA  
TAGTTTTCGGCGAAAGAAACGATATCTTCTTTGCATCTCTTTCGCTCGGCTAACATCTCC  
TTTGTACATTTTAGTTTAAATGTTAGCACGTTTTTGATTTCGGCAAACCATTATATCTAGAA  
CGCTTGTGTTTTATCTTTAAACGTTTTAAACATTGACGGGTCGTCTGCTTGGATTTTT  
ACCCTCTTACTCCCTGTGGTTTCAGATATCTATCAAATGTCGAGGGATACCACTTATCA  
TCGTGATTTGATAAAAATCCATTCCCATCTTCGCGGATTTCTCTCTTTAACGTGGATGGA  
TAGGGCATGTGCAATGGGTAATCACTTTCGAAATTATTCATACTTCATCACCCAATTCCA  
GTTCAAGCAATTCATCAGGAGAACCTTCGAATTCTAAAATTTCTCCGCTTTCATCATTTT  
GAACTGTGCCGAGTATGGATGGTTCTGACGATGTTAGTTCTTTCATTTCCCTTGTGCATGT  
TAATGAATCTTTATTGGTTGAAGTCATTTGACCCATTAGCTGAGAAAATACTTCAACCA  
TACGTGGACTATCGGCATTTTTTGGCATTTCCTTCCAAATGCAATCTTTGCCATGTCCATCATCA  
TTTGAGTTTGAAAATGCATGTTGCGTCTAACAAGCGTATACTCATCATCCGGGTCAATTT  
TTCCATTGTTTGGATTTGATGTCGGTCTTGTAAAGACCAACGGGGCGTATACCTGCACGT  
CTTCCCCGGTGAGTCCTTTCGATAACCAGACGAATCCTTGAGTCTAGTGAAGTCTAAAAGAT  
CATTTATAGAGTAATTCCTATTGTGGTTCGAGGCGGTGATTCTGATCGGTATTGTTTGTG  
CATACTTCCATCGAACTCCCGTCCCAATCTTGAGCTGGCACTGTTTTTGGATCAACTTGG  
TGATCAACTGATTCAAAATGAGTATCTTTGTTTATTTCTCTTTCATTTGCCAAAGAACTCA  
AGATAAATCGTTCTAATTTACCTGCAATATTTTTGGTGTGTTGGATATAACCAACCAGTG  
AAACTAAACATGATTGACCATTCAATACGGCGTCGTTGTTTCGCCAGGGCCATCTAGCTGC  
TCATCAGGCGTTATGGATGTGATAGTTATATTGATAACCCGCCCTTTAATTATTATTTTCG

TTGTCATACAGCTCGGTTATTGTGCATGAAAAATGTGGTTGAAAGTATGGTAATATATGT  
TCAACTATTTGAAATGCATCATCTTCATGTCTGGGTCCATATTCCTAGTTCAAACATGAAT  
GTGTATGGCACAGGGTTAGATTGCGCCAACGCTTCCCATTTGGGTTTATTTATCCATTTA  
TTTTGAGTATTTCCAGTTTTTACCATTGAGTTATATTGCATATCGATCAAGTGCAAAGTC  
ATTCTAGGAAGAATTGCTGCGACTTTTGCAATGTTGAATTCGGAAGTTGGCATCGTAATA  
TCATCAATAGACATTACCAATTTTTCTTTACTTTCGCTAGGTGATAGGAACATCTTGAAAA  
TAATGCTGGCCATCTCGAAAACGAGAACTTGAATATGACCAAAAAGTTCCATTAGCATC  
AATACATAGCGGCGTATTGAGCTGTTATAAAAATGATTGCCAAACATTACTCTCCCTCAA  
GCCGCCAAATGGACTATTAAGCTGTTCACTGGGTTTGTACCAATTGGATCAAATGGCT  
CAACAAATGGTCTAGCTTCCTTTTGCCCTGAACACTCTCACCAAACTGAGCGATTTCTT  
GATCGATTAACCATCTAAATTCAATATTGGCTCCAGGTCTAAACCATTATACGGATCC  
TCAATTTGAGGTTTTTCCCTGGAAGTGGAGCCAATTTTTTACCAGAGTATATGAATTT  
CTGGGCAACAATTACCCTGATTTGATTTTTTCCCAACTGATAAAACGGCGTGTAAGGTT  
TACCCATGTTATCTAAAACAGGCTGTTATCCATTGGCAAATAAATCAGATCACCTAGTTT  
AGGTTCTTTTCCATTTACTTGATGCTTGAAAAGGCCTGGGTTGATATAAATTCTGACTTC  
GTCATTTTGTGATGGCCAAATTTAGAAAAGAACTCTGTTGTCCCTCATATGACTCGAA  
GCTATTGAGCCATGCCGCAAATTTCCATGCTTTTTCAATTTCTGCTATTTGGGTCTTCTCC  
AAATACAACGTCCAAATTTGTACATTCTCTTTTCGAGATAATAAAAAGGACAAGCCTCTCAT  
TTGAATAGATTCGGCAACTAGAGTGTCGTGGAGGGCCTGAGAGCCCTCATACCGATTGAA  
TTTGACTTACGGGTTTACAGAAATTTTTGCTCATTTCGTTTGTGATATCCGCTTCTGTTTT  
TAAAGTAGCGAATAGCGACTTATCCATCATAATTTACCCCATCATAATAGGTGGAGCCCC  
ATCCAGCAATTCGAGTTCTTGTCTAAGCTTATCGGTATCTATTCTAGCTTCTTCAATTAG  
GCGTATTCATCGAGTGTTACACCACCTGGAAGCTGCATACCTCGATGTTTCGCTAAAAC  
TTGGCCGTTTAGTTCTTTCTTTTTGCTTTTGCCATGACTTTTACCAGCGATTATTGT  
ATGACTTATCTTTTGTACATACCATTGGGTTGGCCTGCAAAAATTTGGCCATGTGACATAT  
TAGGATTTGCGTGTTTTTGCGCCACTGACGGCAAGCTATCGTCATCTGACATGGCAAAC  
CATATCCAGCCGAAGTGCCTGAAAGCATTGAGTCAACTTTCGCATACGATTTGCAGTAAA  
CCTCAAATACCAGCAAATCTCCTTTATGAAATTTGCCAGCAACTCTCATATTTCCGGTAG  
TACTGTTGAAAAGAAATCAGGCAAAGAAGAAAGCATGTCTCCCATCATGTCTCGATATG  
ACATCAATTGAGTGAAATATCCGAGATCTGCGCCAAAAGCATTAGGCCCATACCATCGGC  
ATTAGCCGCTAATTGAAGCTCCAGTCATACCATAACAAAAACAGTAAACCACGGATAAA  
CAGCCGTGCCGTCCATGGTTATAATTGACCAATATTGGTTCGAATTACCTGAGTAACTG  
CTAAATCATTGCCACCTCCAAAGCTAATTACACCAGTTTTAGCTTGTCTTTCGTTTAATA  
GTAATGTTGCATATGTTTTGTGAAATCCATCGTAGTGATATTCACCGTACAATTCAGAG  
CTCTAGATATGCAATCAAATACTTGTGCTCTGTTACTTCGACGTGCACGATAGGTGCC  
CTAGACGTCTAAGTATAGCGTCCTTAAATTCTAACGGGTTATTAGTGGTATATGACATAA  
GTGTCTCCTTTATGCTTTTTAAGCAAATTATGGCGGAGCCTTTCGAGCTAGCTCGAAAAT  
GTTATCCTTTTAGTTATAATATCTATTAAGCCATAAAGGATAAGTTGTTTTACAATAAA  
GGCTCCCGAAGGAGCCTTGAAGATTATGCTGGGACAATATCAGCAGACATTTTGCCGATAG  
TTATCGATTTAGCTGAACTTGAAGTCAAGTGCTTTGACATAAATTGCGATAGTATCATCCA  
AAAATACATTGTACAGCCAGTTATGTGCGTAGAGTCTACCATTTGATCTCAGGGTAAATT  
CTTGCAAATTTGGTGTATGATGTAACCTCCGCCGCTTGTATGAGCTATTGAGATATCCAGAT  
TATCTGTTTCTAACAACTAGATGTTTCAATTTTCGATGCTTGCATTAATAACTAAACCGCCAT  
CAGTGAATTTCAATTTGTACGGATTCAAATATGCAACCGTTTGCTACGGTCTGATCAAAT  
CACCAAATGGAATAATCTTCGACGTTTCAGTTGTAGTTATTTGAAAATCTCTCTTTTCAA  
CAGCAACCATGATGTTAGTTGCTTTAACCCAAACACCGTTTTTCGCAATACCAGCGACCTA  
CTGCAAGTGGCTTATCTAACTTAAGTTGAAGAGTTTCGCTGCTTTCTCTGTCAGTTTGT  
TAATACCATCTCTTTAAAGTTGTGTAATTTCCCGCCGATTTCCATAAAGTCGGTTGTCA  
TCAGAATGTTTGCAGAAACAAGACCTGAATTTTCATCACCCACACGTGAAATAACGTCAT  
TCAACGATAAAGACATTTGGTTGTGATTTGTCTGTAAAATGTACAGTCGTCCATTTATAG  
GTGATGGTTCTCCGATAGAGCCAATAGCGGCATTGAGATCTGAAATATCCCCATGAATTC  
TACTGGAAGTGTCTTCCCCTAAAATCTGCGTAATTGTTGCAATATTAGAGGTATTTTCGAT  
TGATGTCGTGCAAAATTTGATTTTTGCGTATTAACATCACCGATTTTCTGCTCTACCGCTC  
CAAGACGAGATAACACACCTGTCACAGGGGTATTCATCGTGTTCGCGAGAGAACTCAACG  
CACTTTCATTCAACTCCACCCTTGACGCTATCGACACAGGGTTGGAAAAATCGATTTTTA  
TCTTGATTTGATCAACGTATCATTACCACCACCTAAAGTATTTTCGATAGCGGTCAATC  
TGGTATAAATCGGAATTCCTGTACCAATATTAGTATTGCCGACTTCCATCCTCAAATCAT

ATAAATCAGACGTCAATTGACCTACATCTGACTGCGCCCATGAATTTTCAAGCGCGGGTA  
TGGCTGGGTGTTTACAGAGACACGGTTTGGTTTACTTACTGACTAAACCGATACTTTAATCCCG  
AACCTATCGAAGAAGGAACAGAATTACCGTTTATGTCTGAAGCCTGGACATGCACCTAATT  
CGGTTTTTATCCATTACAAATCACCATATACAGATCGACCGGTGTCGTCTTTGAGATATC  
GGTGGCCAAGCATTCCGATGTTGATTCTGAAAGAGAAAGAACACCTGCTAAATTAGTTT  
CAACCTCGGAATATCTTGCTTGATAGCTAAAATATCATTAAAATTAGCAATGATTTGGT  
CAATTACCGTATTATCACCGCTTACACCCAAGTTATCTTGGATAATATTTACCGCATCGA  
CAATCTCATTGATTTTTAGGAATGACTGTGCTTGGTCTTCGTCTAGCTGAACAACGTTCT  
GTTGAATATTAAGTGGAGCCTTGTGTAAACACCGTCGCAGGCTGTTTGGGTGGAAGCGG  
CCGAAAGCCGCTCTCCGTTTTTAATCCAGCCAATTCGAAGTTGACCATCACCTGGAGTAG  
TATCAACATAAGGAATAACTCCTTTCGTGATTTTGTCTATCATGTTTTTTCCTCGAGTTT  
TTCTAATCTGGATTTAAGCTCTTATTAGCCTCAATCAGTAATGCAATGAGAGACATTGG  
AGAAACAGTAAGAGTTCGTCGTCAAGTGTGGACGCTTCTTGTA AAACTATTTGCAA  
TTGCTGTGCCAAAATACCTGCCTCTTGCCTATCACGATATTGTCAGTCAAAGATTTATG  
TTTTGTGTA AATCCCAGCGTCAAGGCTATCTATTTTTACGAGTGCATCTTTGATAGGCTG  
AATATCAGTTTTTAACCTGGTATCGCAACGAACATACATATCGTTAATGTCGATGTTTCC  
GGCTAGCCATAAATGACCACCTGGCCTAAGCGTAGCAATTGTGGTATCTACGTCATTGGT  
GCGAGTTGTCCTTCTAAAATACTCGTTGTTATTGTCTCCAACAGCAAAAAGCAAATACGA  
ATTCGTGTCAACGTCACTATCGTTTTTGAATGTTATAGCAGCCAAAGCGGCATTTCTTTT  
CCACAAAATTCCTTGATTGTTTGTCTGTAAAATTGATATTACCAGTCATTGTGCCACCTGA  
GCGATACAACACCTGGGCATTAGCAGAAAGAGCCGATTTCGCTTTGAGCTTTCAGTATT  
AAGAAGGCGA ACTAATCCTTTTTGAGTGCTAGTAGCATTCAATATGGAAAGTTTAGCTAG  
ATTAATAACGACAGTGTTATCAGCTAATGCTAATGTTTGCGAATTTGTTGCTACTTCAAG  
CAATCCAGCTAAGCTTTCGCTCCCTGCCATTCTTGATAAAAATATATGGACTAACAGCATA  
GCCATCTCTAAGAAGTCCTGCTAAAGCTTGAGCCAATGTGGCCAAACGGACA ACTCCGTC  
TGAGCTTCTGTTGCAGTTCCTCATGATTCTGAGCAATGCGCAATGGCCTGCTTGGTCTT  
AAGAGGAGTCATATCAGTGGTATCGTCCGTGCCAGATATTGCCTGGGCAGGAGTCGATAT  
AAGGATTGTTCTCTTGGCCGTTCCGGTAGAACCTTTATTTGCAATGACATACCCCAAGTTT  
CGTAGGTGTTATTGCAGCGGTATTAATAGATAAGGCCAAAGCTCCGTCATTTGATGCGTG  
AGGAGTATTACCAATAATGGCGTCCGTACCCTGCTGCGTCTGCACCGCAATCCGCAGAAG  
ATTAGGAGTAATAACAGTATTGTCACTCATGCCAGCTGCGGCTTCAGCTTCAGTAGCAAT  
TCTAATAATGCCAAGTACAACCTCAGTTGCTATCGGCAGGCCATTAACAGTTAATGCCCA  
TGGCGCTATTTCAATTCAATGCGTCCGATACGGACTCAACTGAACTGGGCCAATCTGTCCC  
AGAGAAAAGTACCGAATCCGCTGAATCCGAAATATAAATTTGATATTGTGATTCATTAA  
TCAATCCTCTTGAAGTAATAAAGATCAAATTAACGGGTTACTGACCCACCAGTAAGAGTT  
TTTGACTCTTTACCCATATATTCCCAATTACCATATCCAGGCTTTCAGGAACAGTAATT  
TCACGATGAACAACAATTCCCAACTGCTAAA ACTTTTCGATATTCCCATTCTCAGCCGAA  
TCAATGAATTGCACTTCTATGATGGGAGTTGTTGTGCCAGATTGGCTTTGAACAGAATAA  
AATAACATGCCGGCATCTGGCATTCTTCAAATTTTGCCAAA ACTATGTTCGATACTGCA  
TCAGCGTTAGTTCAGCGGCAATAACGAACGGTATACCGTAAACTGTAATGACTGATTTG  
TTAATTCAGAAGGAAGAACACTTCCGCTAAATGTAAGTATCCCAGCTTGACGAAGACCT  
TCCGGGGAAACTTGAACATCTGAAGTATATATCGCGTTCATAGCCAACATTGTCAGTGTT  
TGGAGTTCGTCGATAGCAGATTGCACGTTTGGATCGTTCACATCGTCAATAAATGGGTCT  
ACCGTCGGCCACCTATATTTCTGGCACTCATTACTTGGGTGCCCGGTTTGGCCAGATAC  
TCGATATGAGTTGCTTTTCTAAAGATGTTGTGTGCACTGTCTAATGTTTTTGAATCATT  
TTCCAACCCTTACCCATTTGTATGCTGTAATTATCGGAGGAAGAATATTGATGTCTCCTG  
GCGATGTGTTTCTTTATTTACAGCAAGAACTGATTCTACGTATTTTGTATAGCCAGGAC  
CAGATTCATCAGGGTCAACTTGGCAGCCGCAATGATGATATTTCCATCGTTATTTGCGA  
CTAGAAATTTATTGCTTGAAACAAGCTCAGGCACATTTTGAGGAATTAGTTCAACAGATT  
TTGAACCGTATGTTCCACCTGCGGTATGGCTTGGATTACCCTGAATGTCGATGTCGTTAT  
TGTTTAAACCAAATTCGATATCAGCCTGATTTCGATGTCCATCCTGCGACCAAACGCCCTT  
CAGCATATCTTTTCCATACACCAAACCCCATGTAATCACGTGGGTTGGCAGGGTTGTTGG  
CATTCTCATATATTGTCCCAATCGGATAGAAAGCATCGAACA ACTGTTGGATATTTTCAA  
TTCTTCCGCTGAAAGTGCTGGAATAATTTGTGACGTACGCTGGCCAGGATTGTCAA AAT  
CGGTGTATTTCGTTTTGATTTTGGCTTATTAATTCCTGCTCGGTGTTGAGGTAAACAGAAT  
CAGCTTTTTCTTTTATAACCATTTGTACCTTTCCAATCCAACAGAGTACCAATATCCTTAT  
TGAACCATCAGAGGGT GATCATTTACCCGGATTCAACTGTTCTTCCAAAATTAATATCGG

TACTATTGCCGTTGTCATCCACTACGATAGAATAATCAATAGACGACGGAACCCAGTTTC  
CACCATTATCCCAACAGATTTGTTGAGTATCGCCATTTGCATTCTCGCAGAAGAACATCG  
GCAAATCGCCCGCCCCTGCTCGATTAAGCATCGTGCCATTTAGAAGAACTTCAAGCGAAT  
TTGGATTTATTCTATTGTTTGGCTGAATATCGAATTCGTCAATAGTGAAATCAGTTTTTC  
TCGAAATATCACCACCCAGATTTACCAGGCGATGACGTTTTTTGTGTTGTTGATGCAT  
CAAAAATCTGAATATTCTTAAGGTTTTATGAACTCCGGTAAGAAGCGATTCCATCCATGT  
AGGTGACAATTGTTACAGTATCACTTTTTTGAAGTCCATATCACGAATTCGAATACTTC  
TTCCATCTAATGGCAGCACTGATGTCGAATTGGCTGGGTCGCTAGATCCATAGTTCGAGT  
TTTCGTTTAAAGTGTGCGCGTAATACAGCAAGTAACCGCGTAGATAGACTTCGAGGTTTG  
CAATATTGTAATTTGTTGTCCCGAACACATTATGAAAATCCGTTTGACCATCAACAGTCA  
CAACTATTTCTTTTCTGGCAACAGTACTCAAATCGGATGTTGTAATTTTATCCACACGCT  
TGTTCTCTACGATTTCCCATCTGCCTGGCGAACAAATATACAAGCTCAACGTCCATCAAAT  
TTTTGTCAAGATTACGAGATTTGGCGAACCCCTTAAACGAATCTCCCGTAGCAACAACCA  
AAATTACGTTTTGACTTGCCCATGTGCCCAAACATCTCGCAATTTTATTGCTTTATTGT  
AGTCGAAACAGATCATTTAGGCAAATTGACAGTAATAGAACCAGCGGTGGTGTTTATTG  
CCCATGAATCTCCGAATAATGGAGAAAGAGCTCCTACCGAATGATTTTTCCACGCACCTA  
GAGCGAATGGGCGATCTCCGTCGCCAGTTGAGAATAGAGTTCGGTAAAGTTGTTGTTGA  
CTTTTTGCCACCACGGCGGAGAGAATCGCCTTGGCCATCCTCAACAACGTTTCCGATTT  
TGATTCTTTCCATTATGATATTGCCCAATATTAATTGTGTCAATGGCTTTTATTGAAA  
ACGTATTTGCCACTGAGAGATTTTACTTCAACGTAGACGTTGTCGCCCGCGCCAATAAA  
GAAACGAATTGTGCATAATTCGTTAGAGGTATTGTAAAGAACAGCATACTCAGTATTTAA  
AACCGCATTTGTAACCGTATCTACTGATATCAAGTATTCGGAATTTTTAAAACTGTGCC  
AGCAGTGTTCGGGCAGCAACCATCAACTTTATCGCAGAATATTCGTTTTTACCAGCAAT  
ACGAATATTACTTGCAGTAGTTGTGGCCAAAATAGTTTTTTCAACTGGCATAATAGAATT  
TCCAAACATTGGGGTTATTCCGTATTCCCAATATTTTTCTGATCCTTCGTTCTTTGTGCA  
CCAGACAAAACCTCTGGCGTATGGAGACGTTATAATAAGAGAGCCAGATGTTCCTAAGAT  
ACTTTCGCCCGCTTGAGTGCGAATTATGAGAGGATTTGACGGAGAAATTGATCTATTACT  
ATTTATAAAGATCCAACCTTCCCAAACCTTTCGATTTGGTAGAGTCATGGTCAACGCGCC  
GCCTGACGTGTCTGCGTCATGCATAGAACCAATATCTATCGCATTCCCGGCATAATATTG  
TTGCGATAATCTCTGGTAATATCCAGTGTCGTAAGAATTTCGAGAGTCAGCTCCTTCAGA  
AGCTGACGAATAAAGTCTATAATCACCAAATGTGTTATAAAGCGCATCAATAATTTGGTT  
GAGTTTGACACCACGTCATAGAGTATATCACAGTTGAAGGATTACCTATAACGCCTAC  
ATCAATTCTCTTTTTTGGTAGATTGTAACATTTGTATACCTTTAAATGAGAAAATGATAT  
TGATTTCTTCTGTCTGATTGAGAGCTCGAGTGATAGGCTGTCTATTTTCCATGTATATCA  
TTTCTCCTGAATACTTTTCCAATTCTTCAGGTTTACATGCTATCAGGGTCGCTTTAACAG  
CTGGATCGGACGGAAATGATTTTTTAACTAACGGGTTGATGATTACTCTCATCTGTGGAA  
AACCAGTGTTCCTGGGAGTGATGCCTCAGTGAAGTATACTGAGTCCATATACGCTCGGA  
ACCGGAGTGTGTCTACTTTAATCCGGTAAATGAGGTCTAACTTATCCGGATACCATAGAA  
TAGCGTGTTTATACCCCGATCTCGCAGGATCGTCAGAAAGTTCATCCGGGAAAGGCACAA  
CATTATGTTCAATTTGTGCATCTGTGTATTGATACATCGGGCGGAATAGTATACAGATAGT  
CCCACACATAGCCATCACTCATGTCGATTGCCATAGCCGTCCCGCGAGGTGGTTCGACTG  
ATTCATGAGTTGCAGTCCATTTTCCACCTATAGTGATACACTCTATGTTGTAATCTATTC  
CCGAGATAGAACACGAACCAATAGAAGGAACATCAACACAGCGGTAAATCATCCAGCCAA  
CCGAACGTGTCGGTACGATTGTAGGTAGCTGAGTTGACTACGACGATATCGACGATAAAAA  
ATGTCCTTTGGATTGTCATATCTGATATCTCCCAAATCTTTACGCGGAATTATTGCGTCCA  
GTAGAGATTTATTAATTTTTACTGCACCTAGCATGTTTGTCCACAGGCCAACACGCCAT  
CAACCGAATGATTTGGATATGGAGGTGCAAAGCCGACATCGGTTTCATTTCGTTGACCAG  
GAGTAGCACGTCCAAGTCTGGCGTATATTGTGTTTTTTGGTGGGCTCGGCGCCACCATGT  
CGTAAAAGTTTAGCAAATTTTTTTTTCTAAATTTACTACTAGCAATAGCACGATAGAAAT  
TACTCATCTATTTTACCTGTGTTGGGTTTTGTGGATCACGAGGATTTCCAACGTCTATCT  
TTCAGTCGTTTTTTAACTAGTCGTCTAAATTGTGAAAACGTCACAGCCGACTGATCAAAC  
AAAGGACTCATTGCAAATCTTCGTTCTGATGGAAGTTTTCTAACCATGATTCTTCTTCA  
GTGTCATATTCAGGAGGAGGAACAAATGGTTCGCCAGCATTGCCCCAACCAAGTCTAAA  
GCTTCTCCGGTGGCAGAGTCATGCTCAATATTTCCGTCAACGTCTAATTTGGCTACACGA  
CCGTATTGCTCCGTTGGGTAACCAGCATCCCATCGATACGTTTTTCTAAATTATCGATGAT  
AGTTTCTACTTGTTCATCGATACACCAGATTTGATGAATATCGTGAGAAGTGTTATTCC  
AACAAATCCAAAACCAACTGGATGAACAAAACGGAGAACCTTTCGCATATCTAGACGC

CGGAAGAGGTGACTTTATAGTCATGGTGTAAATATGATCTACCTCGATTGATATAGTCAAT  
CGAATCGCTCATAAGCTCCTTTCCTCTAACCCCTACCAATATTTACCTACGAACGAACT  
AGTTTCGGATTTTATTTGCTGGCCTTCAAAGAATTTACCAATCGTATTGTGAATGGTTTT  
TCTCCACTTCAATTGGCCTTCAACATACTCACGATCCACGTATGAGACGTTTGCACGTCC  
TGTAGGAGTATATATGGTTCTTCCAACAATGTCTTGGCTTAGATTGGTTGAATAAACTAC  
GATGGTATATTCTATTCCATGCTTTGGCTCGATGTCGATTTCAACATCTTCGTTATAAAG  
CAATTCGAAAAGGAATTTATTTGATTGTTCAACCCCTTTCGTGGAATTAATAATCGTAGGC  
CCGAGATTCAAAAAATCTTGCACAGAAATCTCTCTCAGCTTCGTCCATATAGATGTTTCT  
TCTTAAACTTCTTACCAAAGATAGTCATACGCATATTGCTCGCGAGGGTATTTGTTTTT  
TATCAAATTGAGCAATTTGTTGTAATATGCCCGTTTCTGTCCGACAAGAATTGCAGATA  
ATATTTGCAAATGCACCAAATTTGGTATCTTCGTCCAAACAACCTTCAGGCATCATT  
AGTAACAAGTGGCTCAAGGTCAGGATCCTTTAATCCAACAATGGACCAGTTGTCCACGG  
AACTTCACGCTCTTGATTGCGCAGCTCAGCTACCATCATGACGTTGGCCGGCTTCCAGAA  
AATGCATATAGTATTTCTTACCCGATATGGGAATTCATAATACCCAAGCCTTTCACCAGT  
ATTTTTATGGAAAAGTACCCCATTTGGCATATTGTTTGAAAGCGGTAAAGTACACGTTTTT  
TGCATACAGTGTTACAACGCCTTTGTTGTAAGTTTCTCTGTTTACCCTTTTATCACTTTC  
TGTTCCCTTCGTCATCGATTGAGAACGAATATTCGATTTTTTTGGTAAACAACAAGAGCTCT  
GTCGTTGTGTGTTATCCAACACCTTGTGCTAGAACGAGCCATCCATGTGAACGCTGCTTC  
GTTATAGTATTGCTGAGGGCCAAGTTTTCACTCTGAATCATCGGTATTGATACTGAATGT  
TCCCATGTGAATTGGGATATCGAAATTATAACCTGGAGTCAATTCGATTTTTACTGCTTC  
AAATACGTTGTCATATTTGTTTGGTAAATCTAGATCTGGCAAAGTACCTGGATATTTGAA  
GTTTATCTGAGAAACAATAATCTCTTCTCCATTTGTTGACATATTGCTATATTCATGCGA  
TATAAAAGTATGGTCTTCGCCAATACCAAACATATCGCCAAGAAGTACCATCGACCTC  
ATAAACTCCAGCTATTGGGTCATGGACAGCATTTTTTGGGGATTGTTGGGTCTAGACCTGC  
CTCAGTAACTACGCCAGTAATCAAAGCATAAAGCTTGCCGTTGGATGTATCAAGCTTTGT  
CGTAACAGCCCGTGCCTTTGCTGTTATATTGAAAGACGTTGGGTCAAAAAGTTTCTCACC  
AAATATCGGACTACCTGGATCAGTTTCAATCGGGGCATTAGATGTTTTGATTCTGCGCAA  
CTTATTTCTAGCTGCTACATATACCCAATCGACATCGGCAGCATTATTTTTCTCCCTTC  
TAAAAATATCACCAGGAAGCCGAGCGTATGAGATGAATAATTCAACATCAGAACCAAGAT  
TCAGTTCATCGCCAGTTTTTTGAGAATGTCAAACATCTGAGCTAAATCTCAGGTCATCAG  
CTGACCATCTGACATCATTGCCCCGACGACCGTAATAGATGTTTTAATATCCAAGAAGAT  
ATGTAGTAGTGCTAGTTTGATAGGTTACTGTTCTACTAACTGGGTGCGGAAACGCCCGT  
TGCAAGCTTGGTAATATTTCCAGTTTTGCCCTTTGTCATTCGACACTTTGGCCATTGGCT  
GAAAACGCTCAAACAGATACAACACGTCGTCATTTTCAGCTAGCATTGTTCTATTTTTGT  
CAACACACAGTTGCTCAATAAAGCCTTGTATTTTCGTGATAGTTTTTCATCTGAAACTATTT  
TGTCATAAAGATGCGTCGGATCAGTAATTTGATTGCTGAAAACGATATCTTCGCTCATA  
GCGAAGCCATAATTACATCAGTATTGAAATTGACGTAGTTTCCGTTCTTTTTAGAGAACT  
TTTCTCTCAAAAAGGAAGCGGCATGTGTGGATTGTTTCATGGCAGAAATGTAGTAGGCAT  
TTTCCGAATAGGTTTGAAACTCCTCAGTTTCTACCCAATCAGACATCTCAAATCCGGTTC  
CAGAAACGCGTACTCGCATTTTTGTAATATGTGCCTGCTTGTATAGATGTGTCTTCAAACC  
ATTCTTCGACCGATGTTGCACCTAATTGACCCCAACTGCTTCCGGACCCTGCTCTAGTCT  
GAAGAAGTTCGGCAATATAGTAAAAATTTGAACCTACATCGTCCCAAGTCAAATATACTT  
GATTCGCCGATAAAATTTTGATTTAAAGGCTCGTTACGGCCGGTGCTTTTTATGATCATAA  
AATCTCAAAGGGCGGTTAGGCCCTTATTGTGAAATTGCTTCAAGAGTAATAGCAGTGTA  
CTGTTGACGTAAATCATTCTCAAATACGATAAGAGGTCCATCTTTCGCAAAGATAGCGTC  
ATCAACTGGTAATGCTTCTATTACTATATATGCTCCAGCAAATGATTCTGCTGGTACTGG  
TAAAATTCCAAGGTCAAAGTTTATAAACTGATAGCATAGTCAACTGTTACAACCTTCATA  
TTACTTGTCTTCCACCCACTGTTGTTTTTTGTGAAATCATTACAAGAGTACTCTGATGC  
AGGAATATCGCCATCAGCAAATGGCCCAATCAAATTTTACCAGTTTGTGACGTAGAAAC  
GTAATTAACCTTCATACGTTACGTTATTCTTGGTGAGGTTGATTGTAGAACTATTGACTGA  
CCCCTTTTTTATTAGCATTATGGAAAGATATTCCAGCCATCGGAGTTTTTGAAGAAATTAT  
CTGCTTCCCTGACAAGCGATATTTGAGCAGAAGAGCAGATAAAAGAATCATCCGACGAAT  
CTACACGTGTCAACATCTTTGATTTAGAGAAGTTTTTGTGAAAATTTCAACCTCATCAG  
TGTAATAGAGTTCAATAGAATCAATTATTTGCCCGCGAAGCCATTCGTCAGAGTTATACA  
ATTCTGAAAGGATATATGTCACCTTTGATTTTTGACTTGATGTACATGTAATTTGGGTCTA  
TTACTGCAGGGGTAATAGGGCGCGAGATTATATTGTGACAAATAATTTTCAATGTCTCCT  
TTTTGAACAGTTGTTAATCTAAGCCCTTGTTTTTGGCTTAATAGCGATGAACGCGTATCCT

CTTTTATCACTGTCAGTGAAGCACTGAACGGCTTGAACAACCTGAACCAAACCTTGTGAGAG  
ACGAATGACTCGTAGTCGGTTGTAGTAACACATCTGTGCTGAGGTTCTCTCTTAACCGGG  
GAACAGTTCGCGGATTGTTTCGATGTCTTCGGGATCACCACCAACCTGAGTACCCACAAT  
ATCGGGGTCATTAGTCGGATTCTCAATCAGATCAGTTATGACGATATTTTGAAGAGTATC  
GGTGTATGCGAAATCTCTTGACGCATTTGCTGGCTCAGCACGAGTGCTCAAATATTTCGAT  
CAGGATTGTTGACACGATATTCGGTTTGAGCCCGCCAATGTAATTTGCTACAAGAGCCCC  
GCCAGCGATTTTCGGTGCTAGCTTCACCTTCGCCAAAGAATATCTCAGTCGTCTGACCAGC  
GGTCTCACGCATATAAATTACGTTAGAAAGACCCGAAATATCAACCATCGAATTACTGGT  
CCAATCGACCCAAGGTGAACCATCTACCATAACGAACCTTAGATCTGTGCGATATTGGG  
GTCACGAATCAAATATGACTAATTCCATCAAATTTCAACTCAGTTCGAACTATTCGTCC  
TTGATACACGCTTACAAGGGATTTCGTAAGTATTATTCTGACCACGAAATATTGTACCATC  
GTCAAGAGGAACGAATGGGTAGTTATCAGTACGTTCCACCGTACAAACGAATTTAGTTCC  
TCTCGGAATACGAATGCCGGTAGGCTTCAACGGGTTTGTCGCTTTGAGCAGTAAAGTCGT  
ACTAGAAGCAGTACGAGAATCTGGCCTATATCCCATGTCCTGAGCATGTTGAACAACCTGA  
AGTTCTTAATACAGCGGTTTCGCATAAACTCTCGAATAATGCTGAATTTGAAAATTGCTG  
AATATAGAGTGTGCAATATGCCAGAAAATCGGTTAAAACGTTAATCTTGAACCAATAAA  
GTCATAGTCTTTAAATTCATCCTGGTTACCTAACTAGTCAATGAAGTCGCTTTTGATTTC  
GTCAGAGGTAGCGCCTTTAAAAAATATCTGGGATATTTGTTTTCAAGTTCATGGTATAAA  
CACCTTACTAGATGATTGTGCAATTGTGTCTCCGCAAGATATTGGATCACCAATTGATAG  
TGCGGGTTTTCCACCAACAAAACCTTCGCCGTAGTGGGAATAACGTAGCCGTCATGAAC  
ATCATAAGGCTCAACAGTATTTTCGATGAGGTATTATTCTGTGCGCCGTCAACGACGACCTT  
TATACCGTCAACAAAAGCTTTTCCCTGCGTGGCTTGTATTTGTGTAGGAGGATAAGTGTC  
ATGGCCAGTTGTCCAAGCCATATCGTATGTCAATGCAGGCATAAAAGGCCCTCCTATGTG  
ATTCTATTTAAGAGCTCCCGGGAGGCATTAATAAAAATAAACAGGAGTGTAACCTATATGA  
TTTTTTTCATTTTTTGTACCCAATAGATTATCAGGGTAAATCTACTACTGATATTTTTAAG  
AATTACAGAGCGTATTTTTAAACCTGTTATCGTAAAATACAAGCCTGAAGTGTATTGGATA  
AATGGTTCAACAAGACCTGAAATGTTGGCAAATGAGCTTTATGGCAATCAACAGCTATAT  
TGGGTTTTGCTAATGCTAAACGATGTATATGACCCATTTTTCGGGATGGATAACTTCACAA  
GATGCTGCATATGATTACGCGCAGCAACAATATCCAGTAAATAAGGTCGTATATCATGTT  
GATGCCATTGGTGAAAAGTATTGGAATTTGGTAGAAGACCCAGATTTCCCGAGACATTGG  
TATGATGCTGGAGATACATCTAGATCACATATTCAATATGTTGGAGCACTTCGGGCCGTT  
GATTCCCTTGAAGCTCAATCTCCTGTCAATGAGCAGAAAAGAAAAATTCTGATAATTAGC  
GAAGCTGATATCAACTCGTTCCTAAACGACAGGATACGTGAAATGGAAAAGGTTTAGGGT  
GCATAATATTTAAAAGGTATTGATAGATTTTTTACTGACGTCGTAGAAGATCGTAAGGATC  
CGTACATGTTAGTAAGGGTGAGAGTGCGTGTACACGGTATTCACCCACAACAAAAGGTTA  
TAGCAGACAACCTATGGTTTAGCAACCGATGATTTGCTGTGGATGTCAGTAACCATGCCTG  
TAACATCAGCGTCAGTTTCGGGTGGAGGCCAGGCTCCAGTAGGCATAGTGACCGGTACTC  
ATGTATACGGTATTTTCTTGGATGAATTTTATCAAATGGCCTAGCTCTCGGGACATATC  
CAGGCATATATCCTATGATGCCTGATTTCAATAAAGGTTTTCTGACCCATCAAGAGAAT  
ATCCTCGGTACGTCGGTTCAGATGTGAATATTTTGGCTAGAGGTGGAAAAGACATACAAA  
TTTACCAGGCCCAATTGTAAGAGAAAACCAAATTGTTCCAGTTGTCGTAGAAGATCAAA  
ATCTCAACCGAGATGTTGCACAAGGTGCATATAGAACACCAAATGACGAAATACACCCAA  
ATCCAGATCCAGACGTAACAATAGAGGATATGTTACGTTATGACGAAGGTATTCGTGTAT  
CGTTTTATTGGGACAGTGAAGGATAGCCAACCTGTTGGAATAGGGCATTGATAGTTCACG  
AAAAAAGTAAATATGACAAGAATAAACCAAATGCTCAGTCAACTAGTAAGCAGGCAGG  
TTAATGGGAGAATAACCGAAGAAGAATACTCTATGCTGTTTCGAACACGATCTTTCCAGCG  
TCTATTCTAGCATATCAAGTAATTACAAGGTTCGGCCCGGTATAATCGATGCTAGACGTTA  
GTCGTAATAATGGCAATCGTCAATATGACGTTCCAAATGGGTGTTGGTGGCGTAGCAAATT  
TCAATATGATGCTTGGATACTTGGCACTAGGCCAATACGATAATGCGGCTGATGCTGCTC  
CCGATTCTTTATGGGCTAGACAACTCCATCACGAGCTCGTTCGTGTGTCAGAAGTCATAA  
GAAATGGAACTTGGTGCCAAACGCTGGGTCACAAGGACCTGCGCCGTCATTGCGGACGA  
TGAGAATGCTCAAAACGGCAAGTGTATCATCAACCGCCCAAGCACCCCTCGTTCACCGTGC  
CTGAATCACCTTTCTCGGCTGTATATCCATATAACAAAGTATATGAAAGTAAGTCTGGTC  
AAATCCAGGAATTTGATGATACACCCGGGCATGAACGCATAAGAACATATCATCGGACGG  
GTACGTGTGAAGAAATACATCCTGATGGAACAAAAGTACACGACAATTATTGGTGTGCTT  
TCTACATTGTCAAAAACGATGGGAATGTTCTTATCGGCGGAAAACCTCAAGATCGTTGTAG  
ACGGGGATGCTGATATTTTTCTTCTACGCGATTCTAATAGCACAAATATCTGGAAATGCTA

CCCAATTCGTTTCGTGGTAATGTTGACGAGCGAGTAGAAGCGAATGTCAACCAGTATGTCA  
CTGGAAATTCATCGGCCGTGAGTAAATGGAAATCTAAATGCAGATGTTGATGGAAACGCCG  
ATATTAAGTTATGGGTGACTGTTTTAACACGATTGATGGAAATTACACTGTAAACATTG  
GAGGAAATTTTTCTACCGAAGTTGGAGGAAGTAGGACAGATGATGTTTCTGGTAATTGGA  
ATAGACAATCGGCCCATGTATCCGATGTTGCACAAGGAACATTCGCAATTGATGGTTCCA  
GAGTAAACTTGGCGCAATTCATGTCAAATATATTACCAGCATCAGCCGTTTTGCTTGTTA  
AAAGGGAAAACGAAATAGTATCGCAGACATTTAGCGCAAACCTAACTGAACCACGGGCAA  
CCCTGGTTTTCTTTGGAAATTAGTGCTATAGATAAAAATCAAGGAATAGTTATTGTCAACA  
ATGGATTTTCAGGACAATATACTGGAGCTTTTACCCTTGACGGTGGTTTATCATATCGTT  
TATAAACCGGAGAACGTGAATCAGCAAATAGATGGGACGATTTGCCTGACCCACAAACAA  
CGGATTTGTATTCTTTTCTTGCGCCCAGAGTAATGGAAAAAGAATATTCATACCTTGTTG  
TTTTAACATACGACGTTGTTACGCCAACTAGAGCCAGGTAATACTCCAAGACTAACCCGT  
TAGATATGTGATAAGCAAGACGTATACACAAAAATTAGTTGGTAAGTGGAACACATGGGC  
TAACAATTTGCGAGATTATGTATATAGGGGTAGATAATGGCATATTTTGAAATTTAGGC  
TAAAAACATCGAAGAATACAAGGGCAATGCAGATAAAATCACGTATAGGTCCAGTTGCGG  
AGCGTGGGTCATGAAATTTTGCATCAGTCGCCTTCAGTTTTAGCATGGAATTCTGAAGA  
AGGAATAATCCCGTGCTTTTCGAATGCTGACGGAAAAAGACGAAGGTATTTTCATGGATT  
TTGGGTCAAATGTCAAACGGCCAAGTATTCCTGTTTGAAGTAAAACCCGAAAAGGAATG  
CAGACCTCACCAGATGAAGTCTACGAATACTGCGAAAGCCAAAAAGCGATTTATGGCAGA  
AATGTACACATGGCAAGTGAATACAGGTAAGTGGAAAGCTGCTAATGCCTCCAGTATGGA  
AAAAGGTTGGAATTTCAAGATAATAACTGAAGATTCTCTTAGAACTCATTTTGGAGGGAG  
AGGACAATGATTTTTGACTATATCAATGAAGCTCCACAGAAAAAGTCAAGAAACCAATGG  
GTAACATTTGGGAATAGAATGGAGAGAAGCAAATCCATAGGTGTATCGGGAAAGGATTTT  
GCAAATCAAATGGTCTAAATTATGACAAGTTTAGACGGACTATGCTTAAATTTCCCAAAG  
CAAGTTGATATTGCCACAGAAGTCGAAAGTCTAAAAACTAAAGCAAATTAATGCACGC  
GTAAAAGCATTAGTCATGATAAATGACTTTAGAAGTCAATTACGTTCTAGAGCAGCTGAC  
ACTGGAGCAGCAAACACTAATTTATCTCAAAAATGGTTCAATGATACGGTCAAAAAATCA  
ATTCGTGGTCACATGGTATCAAACCCGAAACCAGGGAGAATTTACACTTTTGCATATGAG  
GCAAAGCACAAAGATACTCTCGAATATTGGGATAGATTCCCGCTAAATTTCTTTTTGGAA  
ATAGGCACATGTTTCATCAGGCCCTTAATGTATGGCTTAAACTTGCATTATATTCCTCCAA  
AACCTAGACAAAGCTTTTTTAGAAGAATTGCTAAACAATTATGCAAGCACCGAACGACTAT  
CCAATAAAACGACTCTGAAAATAACATGGTCAAATGTTGAAGTAATGAATGGTTCCGACG  
TCATGATAAAAGCATACTACCAGCTCATTTAAAAGGTTCAATGCTAGAAGTGAACCTA  
GCGACTGGGTGGAGCTCATTTACATGCCGCTGTAGCAGTTTATGTGCGAAAGGCCAAACGAT  
AATCTGCCAAAAAGGTATGGGCACGTGCTTAATGGTAATGGCCTGGACTTCGTCTGGGCC  
ATTTTATTTTATGGATTAATAAACCATCTATCTCGACGTAATGAGTTTAGCAGGGTGATC  
CCGGATAAACCTGTATGCATCCAGTTATATAAAGGTTACTGGCTTGCCAGATTCAAGCT  
TGCTTGAATCATTCAATTTTTATCATTCTGGTTTAAATAGATATTATAACTTAAAGGATAA  
AAAGATAAGTTTGAGCAAGCTCAAACCTGTAAACAGGTGTTAATTTTTATGGAGATTTAC  
AATGGCTTTAAACAATCAATCGAATATTACTAACTTTACGCTTGATATACCGTCATCTGC  
TGGTATTAAGACCATGCTCATGAACGTGCAATCAGCATCAATACCAGGTTTTTCGTATACC  
TCCGACAGAAATGCCATTAATTTCTCAGGGAACTGCTAGACAAAACGTGCCAGTTCAAC  
AACCGAATTTGATCCGTTGATTATTCGAGTGTTGCTTGATGAGGATTTTGAAGCATATAC  
CGAGATGTACAGATGGATGCTTTTACGTGAATGACTATGCTCGGCAAACCTCCACTAAATG  
GGGAACGGTTAATCAACTGCCAGCAATAACGCTTCATGTTCTTAATAACTCTAAGCGTGA  
TATAATTGCCTCATTCAATTATCTTGGTGCTTGGCCATCTGAAATCGGTGAAATAGAGTA  
TTCTTACCCTGAAGATGGTGATGTTTCTGTGACATTTACAATTACCTTTTTCTTCAAATA  
TTTTGAAATTGAAAAAGATGGTGAATTACTACAACCTTTGAGAGTATAACAATGATAATT  
GCGTTAGCGGCCGAAAAAGAGATGTGGAAAAGACAGAGTAGGCGATCTATTGGAAAAAGAA  
GGTTTTCATAAGTACGCTTTAGCAGAACCTATCAAGATTTTCTGTACCGTGCAATCCAA  
GATGACAATGGGTTCCCACTGTTTGTCCAATATTATGATATGAAGGATTTTAAACGGTATT  
GGTTATGACCGTGAAGAATATTTGCCCTTTTCTAATTCGGATGTTTTGAGAATTATGCGA  
TCTGCATGGATGCTTGTGAGTGATGACCTTCAAATCGATTACACGTATGCGCATACCGGA  
TTTATTTTCAAGACAGTTCATGGCAATAACAAAGCATGGTCAATTCGTCGACTGATGCAA  
ACATTTGGAACCTGATATTGGTTGCGCAATAGATAATCGTATATGGTTGCAATATGTAGTA  
AATTTCTATTGAATCACGAAAATGTCGTTGTTGCTGACTGTCGGCAAGTCCATGAAATG  
TCAGAAATGCGAGAATTGGGAGAAGTCGTTGCTCATATTATTCGTCGTAATGATTCAGTA

GATACTCATTCCACCGAAGCAGGTCTTCCTATCCTGTCTGGTGATCATATAAATGATAAT  
ACAGGAACGCTTGAAGATTTGCATGAATGCGTTAACAATTTTCGTAAAAACACTAAACCCT  
AAGGATATAAAATGAACGCAGAACAACAAACCATCGCTTCCCTGAAAATTCGAGTTTTTG  
ATCTGAGCGAGCTACTTGTGCTACTCAACAACAAGCAGAAGAATTTTTAGATGCGCTCA  
CCAAAATCGTCCACCTTTTGGGTGTGACCCCGCCGATGGTGAAGATAGCACAGCCCTTT  
CTTCTATTGTAGAAGCAGTAGAAGCTCTGGTTCCTTCTCAAGAAGTTGAAGTGGTAGTAG  
AATAATGTTTACAGACAGCTTCGTAGGAACATACGTTGCTTGTAATTTAGTGATGAAAC  
GCTGGATTTTATCCACCGTATTCAAGAAGAAGCTTAGATTGCCGAATCCTGTTCCCTCGAGA  
CGAACTTCATTCTACTATCGTTTATAGCAGAGAATATGTTCCATTTATCCCAGACGATTC  
GCCTAGACATTTGGCCGATAGTTGCTATCTGAGAATTTTTGAAACTCCAGAAAAGAATTT  
TCTTGTCTGCGGTATGATTCTCCGCACATGCAAAAACGACATGCGTACGGCCAGGTCT  
TGGCTCGTCAGCTCATGATTTTGACGAATACATTCCTCACACCACGATTGCAAAAAGACAT  
TGGTCTCTTAAGTATGAAGGATCATAACGACTTCCCTATAGTAACAACACACGAATATGT  
GGAAGAATTACGTGAAGATTAAGCAAAAAGCAGTTAATGTTCAAAGCTGCGAAAATTGA  
TGACTATGAAATTCATGAACAAAACATTGTTTCAGAAATGAAAACCTAAGCAACCTTAAGG  
AAAATAAAATGCAAAAAGCAAGTAATTCTGTCCACTGGTTCTACCGTGACTGCATCCGGCC  
GTGCTGTTTCTGTTGAAGTAGGCCCTGTTTTACTGCCCTTGTCAAAGGTGAAGGTGAAA  
AACGCATAGTAGTTGCTGAAGTTCGCCGTGAAGTGGGTGATGTTATTGTTTCATGACCCTC  
GCCGCCTGGGTGAAGCTGTGAGGCTGCTGAATAATTTTCAAATGCCCTATTCGGAGGGC  
ATTTTTGTAAGTATAGGAGAAGTTATGGAAATCTTTGTGTTTTAATTTGTGATCACATAT  
TTGGCAGCATGTATAGTTTTGGCTATTAACGTGATAAAGTATAACAACATCAATCTTCAGA  
TGGAATTTTGTCTGGACAAGTGGCCAAATATGCGGAGTTGTATTGACAAGTGTACTATGC  
AGCTACATTATTCCGTTTCGCGTTTATACAGATACAATTGGAAAATAAATGACAGATCA  
GCAAGAAGAATTTTTACCTACGAAAACATCCGAATTAGTTAAAGTCTGGTGTGAATATGA  
CATAAATGGCAGTTTTGGAGGAAACAACAACGAAGAAGTTTGTTCGTATCATGTTTCCATC  
AGATACGCCGCCAGATGATTATTCTGCTCATATTAGCATCAAGGTTATGAAACATATGAA  
AGAGCAATCTGGCTCAGATGAAGACGATCTTGATGGGCCTATTGGATGGGACTACTTTAC  
GCCTTTGGAATTGTGATGGAAAACGTTGGCATTGCAAGAGTTGTCAGAACAATTGAGTTC  
GATTAACATAAAGCATAGACTTGAGGTATAGAAAATGAAATTTGCACCCGGAAGTGAAT  
TCCAGAAGGATACGTCATTAATAACTTCCCTGGGAAAATGATGGTGAAGACTACGATCA  
TGTCATTCATACCGGCAGGCCAATGAAAGATATCGAATTCCTTTGAGAAAATCAAACCGAT  
TTTCAGTTCATCCCACCACCAACAATAAAGGCTATGGCAACAAGATTATAATCCTGG  
GATGGCCGCCGATTTGTTTGAGATTTTTGTAGAAAATAGGCATTTGTCTTTGCAATTCAA  
ACGCTATCTAGGGTTGACACCAGATATGTTTGATCCACTTGATGGCGATTTATACAAATT  
CATTCTGCCATGACAATTTCTGCAAAAATGCTGAAAGAAAACATCACCGGTTATGCCAAC  
AGTATTACTTCGATTTAATTTGTGTGGTCGAGTCAATTGAAATCGAGTATAACCAGTCTG  
AATACGTTTTTCCAAAATTACACCTCGTTAAAATTAAGGTTATCTAATGCAATTTTTAT  
TTGAATTATTTGCAGCTAGCGTTCAATACACTGCTGTTGCACTGATTGTATATGTTTTGC  
TATATGGTTATGAATTCCTTTGACGAATGGCGGAAAGGAAAGCCCGACTCAAAGTTTCCAG  
CAAAAAGCCTATCAACCAGGCAGATTTATGGAGCCATTGCAGCAGCATTGCTACCTGTAG  
CTTTTTCTTGCTATGGAAGCTAATTGAATTCATTTACGTCAAAGTAGTAGTCGATAAAA  
TTTACAAAAGTAGTGTATATTGATGGGACTATGTTTTATGATAGTCCCATCAAATCAAC  
ACGGAGTAATTTAAATGAAAATCTATCACGCGCAACATATCGCGAAAGTTAACGGTATTA  
CAAAGTTGACATGATTCGCGGCCATAAACTCAAGGATTTTCATTGCTATATCATGTTTA  
AAGATGGCAAGGTCATTGATTGCGCCTTCAAAAATGTCACGGCACAATTCCGCACTATTG  
AAAAGATTGCTCGTGAAGTAGCAGCAGAACAACAATACACTCTGTGAGAAACAACACTGT  
TCTGACAATGGGTTGACTATAATACCCATCAAACCTTGGCCGTGGAGGGAATAAATAACGC  
GTGCCGAAATACTAATAACTAAGGGGGTAAAATGAAAAAAATTTGTTTGGTTTTGGCTCT  
GCTTTTGCATCTTCTTATGCGAGCGCAGATTCAACCAATTTGATAATTGGTGGTTTTTTC  
AAAACATTACCAAAATGATGAAATGAATGAAAACATCCGGCGATAGGGGTGCAAATTGA  
CAACTTTTCAATAGTATATACGTCGAAAAACTCGATTCATAAACCTTTCGTTTCAGTTGGC  
TTATTCTGACACATTTTACACTTATGGAATTTTTGATATTGGTTAGCGCGTTGGTTTTAT  
GCCCGTTATCGATATGGAACCAAAATATGCCAATATCCGATGGTATAATGGTGTGATTT  
GGGTGCCGGGATAGCCCCGCTCGCCGCCATTGATATTTCCGGTAGATACCCCTATTCGAG  
AGTCAAATTTGTTACAAGCGTAACACCAGTTGTTACGATGTTCCGATTAAAGATTGAACT  
TTGGTAAATTTGAGAACGCAAAATGAAACTATTTACCCGAATGGTAAAGAAAAAACTTTC  
AAATCGTGAAAAGCCTGAAATAGTGGCTGTACGCTAATTTTGATTCGTGGGATGCTGAT



ATATTAGATATTCCATTTAACTCGACTGTACATTGGGGTCTGTGCCCATTTGATCAAGAT  
ATCTACAATGGAAACGAAACGTTTGTGTTGGAATTTCTGCAAACCCTTTTAGAACAGGAA  
CTCGAGAGCCGAGCTGAGGAGATTTGAATTGGAAACCTTCGTGGTAAAACCTGCCCGCTCA  
TCTAAAAGAATGGTTCATTCCTTATATGGGCGATACGGGTGAACAGCATTTCATGGAAGC  
ATGGCATGATGAAGGCATCGAAGGCGATCGCGTTCGATTTTCAGATATCCATATTATTCTCG  
AAAGCGTAGCGAAGAAGTTGACGAGACCGCTGATCTCGTAGTTACTGAGTATAGGTGACT  
TATTGCGAAACGTTTTTAAAGTTATCGCTGAAATCGAGCCAAAATTCACATAACAGGCACC  
CATAAATAGATATAACAAATAACAAAAGGTCGAGCGCGATGCGGTAAAGGAAGCGAAGCGG  
CTAGATCCTTAATACTGAACCGATTAAGTTACGGCGGATGTACTGGGCTATCGGTAACG  
GGGAGCATAGACCCGAGCACCTGGCGTTATTATGCAAGTAAGGTGGAATTGGTATACAC  
TGGAGGCTTAAAACCTCCCGCCTTCGAGATTGTGGGCTCGAGTCCCAACTTGCACCAA  
ATTCAAATTCCTAAAGCATATTGTTTACACGCTTTGGAAATAAGATGTTATTAACCTTATC  
GAATCAATTCACGCATTCAGTCTTGAATGGGATAAATGGTGAAAAGCCATGGTTTTCTCG  
GAGCAAGCCTTAAGTGGACAGAACTCTCATCCTAGTGACGCAGGAAGTGTTTTGTTTTGA  
AAAGAATTCTGGAAGATTGGCCCGAGTTGGTTTAAAGGCACCAGTCTTGATAACCGGCGAT  
CGTAGGAATACGGTCCATCCGTTCAAATCGGATATCTTCTCCTCAAATTGTGGTGCTGTGA  
GCCGAGCGGCTTAAAGGCGGTCCTACGGCAGGACATACGAAAGCGTATCGTTGGTTCGAAT  
CCTACCAGCACCCATTAATTCCGAAGCAGATTGTTTCAGAGTTGCTGGAATGAGATCTCA  
TTGTCTCATCGATTAACAAGTTTATTTTGGGGTGATGTAGCATAACGGTCATGCGGCC  
GGCTGTTAACCGGTGAGGAACTCTATGTTGGTTCGACTCCAACCATCAGCGCCAAAATT  
AATTCATGTAACGTTCCGGTAATGGTATCCCAAGCGGCTGTAACCCGCTCGCTCTGGC  
ATTCTTGGTTCGAGTCCAAGGCGTTCACCAATTTAACATGAGAAATATATTTTATGAAG  
CAAGATCTATTTGATAGATACGGATCCCTCTGATTCAAAGAAGGAATACACGGTGATTTT  
GAAATAACTGATGATTTAGTTCATTCGATATTTTTCAATCATATCTATCAGACGAATAAA  
TTGCCATTTATAGGAAAAACGGCAGCTGGGTTGAGAGCATTGCGCCAGATGAATTACG  
TTAGAGTATCTTCTCAATTTGAAATATTAACGATCTGGAAGCGTCCGGGAATAAATG  
AAGGTTTTGTTTATCTGATAACAAATCCAGCTTGGCCACATCATTTTAAAATTGGAAGTA  
AATTATCAATACATCCTCGATTATCATTGTACCATATTTATTCACCGAATCGGGATTTTG  
ATATCGTCTCTTATTTCTTCTACATCTCGTTTTGCGAGATGAAAAGCTTTACACTATT  
TGTATGAAGCTGATGGCGAGTGGATTTATGACAAAACGGGACATAAAATGAAAGAAGCTC  
TGCAATTCTTCAATCATAAGCGCAAATAGATAAACGAGTTTTACTAGCATCTCTAACTC  
AATTGGTAGAGTAGCGGACCTTTAATCCGTCAAGTCTGAGTTTAAAGTCTCAGGGGATGCA  
CCAAATAACGGAGAGGTATTGCGGTAAAGAGCCGTCCTCCGGCATGTAAAACCGGTACCTTA  
CGAGTCTTGTGGAATCGAAACCAACCCTCTCCACCAGTTATGCAGTAAAGAAGTTATAA  
TGCCTTGTATCAGGCACTTATGCGGAGTAACGTTTCGAACCATAACGGAATGATTCCAGG  
GTGCTACCATTTGAGCGGCGAGTGGATGGCCGAGCACACCACCTTTTAGGCGCCGGAAGA  
CGCGTTCGAGTCCCGGACCGCTCACTGTAATTAATTTCAAGTAATCATTGGTGTGACCTT  
AGTACTAATGGTAGCTATCCTGGATGTGACCCAGGGAGTACGGGTTTCAACCCCGTGGGT  
CACCCCAATGATTATTTTCGCGGTTAAGGTGTTTATGGATACATGCTAGCCTTCCAAGCT  
TGAGTAGACCGGTTTCGATACCGGCTACCCGCTCCACACACAAGTCACAGGGCGCTATATT  
CCTAGTCAGTTTCCCACCCCTGGTTGATGCACTGTCCATTATTGCGCCGTGACTGGAGCC  
GGCGAGTTGGACAACCGTATTGTCTCCGGCCCTAAGATGACCGGCTTTAACAAGATAAAT  
CGGGAGACGTCCCGTAAAATCCTCGGACAAAACCTTCAGTAGTCACTCCCGTCATTTTGC  
CGGTGAAACGAGGAAGTATAGACGGGTAACGAATTCAATCTCAGCGTAGGCAAGAGGTAT  
GTCGTTCCGTTTGGGACGGAATTTACGGGTGTTTCGATTCACCCCGCTAAGACCAAATTAC  
GTAAGCGGATACTTGGTTGCAAACAAGTCCGTAAAGTCCCTCGAATGTGGTAACATCCTCT  
CCTGGCACTATCCAGTGATGCGGTTATCCAGAACGGCGCAAACCTGAAGAATTGAGTCAC  
ATCCGTAAGGCCCTGACTCCAATTTCTCAAACACTCTTGTTTTATGTGGCGGTTCGAGACAT  
CCCACGTTCAAACCTGAAATGTCGATGTCCCGAGCTGCAGCGTTAGGGAAGAGTGTTTG  
AAGGATTGAACTAACTCTGAGGAACATGTTATGAATGGTGTCAAATTAACAACCACGCGC  
GATGTCTGTTGTGATCAAACCAATTCATTGGTACACATGAATTCTGCTATGGCCCATGT  
GATGCTGGTGATGGTTGGATTGCTAAATGTGCGGTTTGTGAAAAAGAATGGGAAATCGAT  
AGCAGCTGTAGTACCTACGTCGTTAAGACTTAGCGTGAAATTGAAGTTGACACAAACAAA  
ATTCGCGTGACCTGACCGTTGGTGATTTGGTTCACATTTTAAAGCAGATTTGATTTCCAT  
ACTCGAACTGATCGCATTTCGACTGAAAAGTTCATCTAATCTTGTATTTGCTTCATCTAAC  
GAAGATGGCGTAAATATACATGTTTAAATTGCCGGTTTAGCTCATCTGGTAGAGCACAGCC  
TTTGTAACGCTGGGATGGTCCGTTTCGAGTCGGGCAATCGGCACCAAATTTGTAAATGAGG

AAAATATTATGTTATTTGCTTATGAAGTTATTGCTGTTATCTTCTTTATTTGCTCTTTCT  
TGGGCGACTATAAGCGATATTCGGATTCCCCTTCCGAAATTGCGGGTAATTTGATTGGCT  
CTGCTTTTGCAGGTGGTTTGTGGTCATTGACGGTACTTATCCATATTTTTTGCATCGCAA  
ACCGCAATCGCTAAATAAATAACAAAGGAACGGACTTCTTCGGACCCGTTTCGTTAAGTAAA  
AGGGAAGACCATCTGGATATGACGAGGGCGTCGGCCTGTATCATATCTTGCTTGCCCTTG  
GCCTCCCTCGAGGTTTTGTCTGGAAATGGTGCGCCAGCCCCTTCAATATGACATTGGT  
GTTAGCGGTAGCATGCCGGTCTACAAAACCGTGCGGCCAGGGTTCGAATCCTTGATGTCA  
TGCCCATAGTGGATTAGCTCAGTAGGTAGAGCACTCGACCGATAATCGAGAGCGCATAGG  
TTCGATCCCAATATCCACTACCAAATTTTTAGGAGAAGTGGATGAGCGGTTGGAATCTCT  
TCCCTGCTAAGGAAGTAAACCGAAAGGTTTCGAGTGTTCAAATGTCTCCTTCTCCGCCAA  
ATGTATCATGAAGCATATTGTTTCAAATTTCTCAATGAGTGATATTATTAACTCATACCA  
AAACAAAGTTTAGAGCGGAGACATAGTTTATTTGGTTAAAATAGTCCCCTGTCACGGGAC  
ACCACCGAGTCCGATCCTCGGTGGCTCCGCTCCAAATTTTGACGCGATGTAGAGGAGAGG  
TCGTCCCTCGTGGGGCTCATATCCCGAAAATCATCGGATCGAATCCGCTCATCGCTTCCAA  
CTTCAATCGCTTGTGAAACGGGGGAAAATAGCAAAAATCTTGAAAGGGTTCGCGAACCGGG  
ACCTTAAAGTAGCTTTCTAAGTACTTGTGTCTGGCAGTTCACACATACCTATATTTGTG  
ATGGGTTTCGAGACCCTAACATGCGCCCGAATAACAACGCCGCGACCAATCGAATGATCG  
TTATCGGCTTTTTTTCATCTGACGGCCCTGTAGCTAGACGGTTCAGCAGGGCGGCTCATAAC  
CGCTCGTAGTACGTTTCGATTCTACCAGGGTCCACCAATTTGGGTTCTTCGTTAATGGGA  
AGACCGTTGGTTGCTTTGCATCCTGCTGATGCTATTTTCGATACTGGCAGAACGCACCACT  
TTGAGGAAAATACTATGGATATCGGATCCGGCGCGCCTTGGCCATCGTGTGCATTGAGTA  
ATTTTGCTCCGCATTAATTCGTTATCGATGGGATTAATGTTCCCTCAATGGAAGGATTCC  
TTCAGTCTCTCAAATTCATTTGCCTGAAATGCAAGAACACGTTTGCCTCTGGCTGGTA  
AAGCCGCCAAGTTTAAAGGCACAAGGAAAAAGTGGTGGAGAGCTCAGACTCTGTACTGGA  
AAGGTAAACCGATGCGGCGGCAGAGCGATGCTTATTCTGATTTAATCTACCGTGCGTACG  
ACGAAATTGCGAAGAATTCCGGATTTCAACGAGCAATCCTAGCCACCCGGAATTCCTCGT  
TAACCCATTCAATGGGTAAAAGTAAACAGAATGAAACAGTTTTAACTGAACAAGAATTTT  
GTTACAGCTGTATCGTATTCGAGATAAACTCCAAGCCGCTTGATTGCGGCTTTTTAGTC  
ATATGGTCTCTTAGCTCAGTTGGATAGAGCAGCGGCCTTCTAAGCTGCGGATCATTGGTT  
CACATCCAATAGGGACTGCCATATTAAGGTGATGTCATGGCGATGATGCACTAAAAATC  
TCATTCCCGAGAGGGAAGGGGCAGTGGAAATGCACGAAGCGAGAATTGCTATAATTCTCC  
ATTCTGGAAAAACACCGGCCCAAATAGAAATCCCGGAGTAGTAAAAGTACAAATTCAGA  
AGATCAATTAAGTATGACAGAAAGCTTCGCAGGCGTCAACAGGAATTGCTCAGATGAAT  
TTATTAAGTAATTAATGTCTCTCATTACAAACGATGAAAGATGAGCTGAGTGAATTGG  
GTGTTTCGACTGAATAAGCTCAACGATTTCAATATCATGTCTGATATTTACAAGACTCTTG  
ATCCTGATGAGAAGTTTCTCATGGAACAACAGTATATCGCGATGGACAGGTATTACGATA  
TGCTCAAACGGCGAACTATGCGTCAATCATAATTAGGGCTCCTTCGGGAGCCCTTTTCGT  
ATTCTCTCGACGAGGTTTAAACATGAACAAATATTACAATCATAACTCTTCTTCGTAAA  
TGCAATGCGTGTTGGTTCGGTCATTTACCCACCGGGGTGCGAGATGGAGGTATTGAAAGA  
TCGATCAGATTTTTTAAAATCCAATAGAACAATACCCATAAATGTTTGTGCGCAAACCGG  
TAAAAAAACTTCAATTTATCAGGCTTGGTAACGAATTAAGCAATCATGCCAAAGTCGCAAT  
GGTAGTCATGAACACCCAAAATAAGAAAATGACCAAAGTATGGGAGCTAAATTCGATAT  
TCTGACTTTTTAATGATATTAAGAGACAATTGCAGATTCTGGATTTAGAAAAAATTCAAG  
TCATTATGGTTAACGAGAGCGAATTTCTTCTCTTTGATGAGAACAGGGTGCACGATTTTT  
ACAAATGGGCAAAATAGTAAAGGCCGAATTTGTAATAAAACTTGATGCAGTCTGTAA  
ATTATTCAAGCCGAGTGTTATTATTGCCATATCAAATAAACACACATTGCAAGGATTA  
AATGTCTAAAGCTACTCACACTATCGATTTCCGGTTTTGGTAAAATCGTTGCTCAGAAATC  
TGGTCATTATATCAATGTTATTGAGAGTCATGACCCAATGATTCCCATAAATACCAAATT  
TCCAGTCAATGACACTTTGGTTCTGGAAGCAAAGTAATCGAATTGGAGTAAGCGGCCTT  
AACGCTTATTTTTCACTATGGTAAAAGACATAATGACTGAGCACTACAATCGCGATAGTG  
CAGATGACCCAATCAAAGTTGTTAAAACATCGGGCGTAATTTATACGGCCAGTTTGATGC  
ATAAATTATCTTACGATCAACTACCTGGAGGAGCGCTGATCGTAGCAGACAGAGATATTG  
CACATGACCTATGGCATGCATGTGATAAACCGAAAATGTTAGATACTTTGTCAATTTGCA  
AAGATAAATGCATTGTGAGCTTTTGCATTGGCCTCCAGTAATCATATTTGTAACCTCTG  
CCAATGTAGAGAGCATAACGCACTGCTTTATTTTCAAAGACTGGGTTTTCAAATCTACCG  
AATTTACGGCGTATTACCTCGAACAATGTGACGGTTATCTCCAAAACTGAGAAATCTTA  
TAGGATTTTAAATGTACTAACTTTACAAAACCTTCCGATATATTAAGCCAAGAAGGTT

GGATTATAAAATACCTGAGTTTGCCAAATTGGCAGTTGAGCAAATGCATGCTTTTTGGC  
CATGGGATGAACCGTATTACGACCGTTCTTAAACTGTTTACAATTTACGAGCGCAAAGTCG  
GCGAGTTGAACGGTATTACGACCGTTCTTAAACTGTTTACAATTTACGAGCGCAAAGTCG  
GGGAAGATTATTGGTCATCAAGAAACGCTCGAACATTCGGTTCGCCCTGAAATCAAACGCA  
TGGCAACTCTATTTGCCGCCGTAGAAGGTAACCTCGCATGCACCTTTTTACAATAAAGTTA  
ATGAAGTTCTTTATCTGAATTACGAAGCTTTGTACTTCTTGGAAAGAAAGCGACGACT  
TATCTCGTCGCATTCAGTTTGTCTGGTAAAACGGTATCAGACGCCGATGATGCCAAATCTT  
TTGCAGCTTTCACTTTTCATCGAAGGTGCCGTACTTTATTCCAGCTTTGCATTCTCAAC  
ACTTCCAAGCCCAGGAATGTGGCAAAGACTTGATGCGAAATCTTTGCCGTGGTGTGACC  
TTTCAGTTGCAGATGAACATCACCCTCAATTGGTGAAGCAATCTTGTTCCAAACACTTT  
GCCGTGAAATGAAAGAAAAATATGGTGAAGATGTCCGGGCAAAACTGAAAAATGCCATTA  
TCAACATGGCATATCAAGTGTGGATCAGAGTCTGGCATCATCGATCTCGCTTTTCGCTG  
AACCAATTGATGGTATAACTGCTGACGAGCTACGAGTTTTTGTCAAATCTCGAATTAATC  
TTTGCCTTGAAATCTTGGTTATGAGCCATCTTCGAAATCGAAAATAACCCTATCGCTG  
ATTGGTTCTATCGCATCTTAATGCCAAGAAATCCATGATTTCTTCACTGGCTCAGGTT  
CGGAATACAACATCAATTGGAACCGAGAAGGTTTCTCTGATTGCTGGTAAAATAATTCTG  
CCCTGGTAAACCAGGGCAATCTTTTTAAAATCATGGTGCTTTAATGTCTAAAATTTCAA  
ATTCGTATCTTTGTGACCCGAACGCAAACATATGCACTCAATAGGCGAAATGCCAGAGTG  
GTTTACAACGCAGGGCTATTCGATGTTCCGGAAAAATTATCAGTACAAAGGAGAAACCGT  
TCGTGGTGCATTCCGGCGAGTCGCTTCAACACTTGCAAAGCATGATATCCGGCCAGAAGC  
TCAAGAGCGCTATTTGACCTTGTCTGGTCCGGTAAGCTGGCGATGGCTACCCAGTTTT  
CTGTAACACCGGCACAGATCGTGGAATGCCTGTTTCTGCGCAGGGAGTTAGGATGGGGA  
CAGTGTCTTGACTTCTACGAAGGCCAAACGGAAGTCGCAATGCTCGCTAAAAACGGTTT  
CGAACTGCGTCATATCTTGGAGACATCCGACCTCCTGGGTCCGATGTCTCGACCAGCCA  
CAACAAAGCAGAGGGACTCGTTCCTGATTTGACAACCTTCGTTAACACCAAAAACAAGGT  
GGCAGCTGCTGGCCGACGTGGTGAATGGGCCGGTTACGTTGACTTCTCGCATGGTGATTT  
CTGGGAGCTTTAGGGGTATGTGTTGAGAAACCCGGCTTCTGCACACGTTGGTTGGGTATT  
TGAGAAAGAAGATTACGAAAAGCTTCTGGCTCGCGATCCTGAATATATGGCACGCTGGAA  
TGAAGTCTTTATATGCGCGCTCGTACTGGTAAGGGCTATATGTGGAAGAACTGGATCGC  
TAACGATCTTGCTCCACAAGCAATCAAAAATTCAGCTATCCGTATTCGTTCAAGCCAGCT  
GTGCACCGAAATCGCATTGCCATCTGACGATATGCATACTTCTACCTGTATCCTGAGCTC  
ATTGAATTTGCCTCGTTGGGATGAAATTAGTGCTGAAGATATCAAATGGGCTGTTCGTTT  
CCTTGATTCCGGATGCTCAGAATTCCTGGAAAAAGCGAAAAAACTCCCGTATGACACTCT  
TCATAAAGTTATCAGATTTACCGAAAAAGCACGTGCGCTCGGTCTTGGTACTATGGGTTT  
CCATACCTATCTCCAGATGAATGATACCGCGTTCGAATCTGGCGCCGCCCCATTCTGAA  
CAATCGCATTTATTCGCAAATCAAGGTTTATGCAGAAGCTGCTTCTCGGGAATTAGCAGA  
AGAGCATGGTGAACCAGAAATGGTGTGTTGGAACAGGTATCCGTAATGCTACATTGATCAC  
TATTGCTCCAAATATGAGTCTGCTCTATTGGCTGGTGGTGTATTCAGGGTGTGAGCC  
TCTCGTATGTAACAGCTTCATCGAACAGTCAAATGCTGGTGATTTTGTTCGCTCGAACCC  
GGTATTGGCTAAAGGATTGTCCCACCGTCTTTCTGATAAGGAAATCAAAGACCCCATGGA  
AAATATTGCCACCTATCATAATGGTTCTGTTCAACATCTGGATGTTTTGACAGACAATGA  
GAAAATGGTGTTCAAACAGCTTATGACAGTGACCATCATGCGATCATAAGTCTTGCTTC  
AGCTCGTCAACGGCACATTGACCAAGCGCAATCAATCAATTTGTTCTTCGATGCTGATGA  
AAAACAATCAGTCGTTACGTCCGTCTTAGAGCGTTTATGGATGACCCTCGTCTGAAATC  
TCTTTATTATTTGCGTTCCGAGCGTGGAGTAAAAGCTTCAACTGGTGAGGCGGAGTGTTT  
AGGATGCCAGGGCTAACTGCAAGGGGCGAAAGCCCTTTTTATAGAACATATGTGACAAA  
TTTGAAACATCATCAGGTGAGAAAATTTATTGTGGTATGCATAAAAGTACGCATGCTAAT  
CCTTTATCGGACCCCTGTTGTGGGTCTGGACTAAGTTTAAAGAAATGCCATATTAATAAC  
GGTGTCTTGTGATAAAATCGGTTGAGTGGTTTGAACATTCAACCGAAGAAGAGATGATT  
GAAGCGGAAATTTTGTAAATTTCAAGTATGGTTGATAACCCGAATTGTAGTAATATCGCA  
TACGGTGGTTTTGGTGGAAATGCTTTACGGTATGCTTCCGATGAGAGAAAAGAAGCATT  
CGCGAAAAATCACGCCAGAAAATGATCAAGCGATATAAAGACAGTGATGAAATTAATAAG  
CACAGCAAGCGCGTGCAGATTGCATGTAATCGACCGGAAGAACGGCAAATACGAGCTGAG  
CGACATGCTGAACTATATAGCCCCCTGGTTAATACGAGCGGATGTCGGCAATACAAAAT  
GAAACGCAAGGCCGCCCTGACGTCAAGGCCAAAAGGCTGAAGGTGTAAGAGCGGCGAGA  
AAGGCAATAAAATCTTAAAACAATTAATATGTCGGACGTAATAACTATTATAGATGGG  
CGATTTGTTGATAAATTAACACTCGCGCATGAGTTGTCAACAAAATATGATATCAAATAG

ACCCAAATATTTTGAGAATTATCGACCTGATCTTAATTCATTGCTGGGATAAATGTGGCT  
ATACTAATTTTATGCGCAATTGTTGTCTATGCCAATCCGCTTTTTGGATTTGGGTATATA  
ATTCAAGTATTACTTTCAACTGGGATTTCTTTCTTTGTTTTGGAAGGAATTACTGCAATA  
GCTTATTATACAGGAAAAATAAATGATTTATTATTTCCGCGCTGACTGGTGTGCAAACCTG  
CAAACCTCGTAAAACCTATGCTTGCCAATGTTGACTATAAATATATTGATGTCGATTCTGA  
TGAAGGCATAGTTCTAACAGCAAATAACGCAATTCGAGGTTTGCCTACAATGATTAATGT  
AGAAACAACCGATCGTTTTACGGGAGTTCGGAAAAACGTTGCGGAATTGAAGCAAAAAAT  
GGGAATTTAACAAATGGGCTCTTGGGAGCCCATTTTCACTTTCATTTTATGGTGCACATCG  
CGAACAAATCCATGTTAGAATAAGTTTGAATCAATAACATATGGAATATTATCATGAATCG  
CTACAAACTTCGGGAGAACCCTCGAAGCAGAGTTTAAAGAAATCAACAGAAAAATCGAAGA  
AGATCGGTTGGCTTTTTGGTCATGGCCTCCGTTTTTTCATCTGGAATACACTTATCATTTCAT  
AGATGTCCTTTTTGCTTCGCAATATCAATATCGATGATGCGCTGAGCTCGAGCAAAGGTTT  
GAAGGAAAAAATACACGAAGTTGACGCATACATGTCTCTTCCGTATCCTCCGCATCTTGA  
CGAAAAACGAATCGAAGGTGTAGAATATCGACCAATTCGCTTAGAAATCACTAATGGATC  
ACTTTGGAGTGAATTACACCTTCCAAAATTCAGCCATCATCAGAATACAGTTCTTCTTT  
GACATGTCGAATGGTAATAGTCAATTTACGACGTTTAACTTCAAACGTAACACTACAAAAGT  
AATTAATAATGGAGGGGTTATGTGGCTATTGATGATTCTCATGATCGTATTTGCCACACAT  
GTTTATGCTGGTCCGTCGGTAACAGATTTTACGGACACTCAAACACTACAATTTCTCGTAT  
GCTTACTACTATGGAAAAGCTTATGACTTGACGGGAGAATTGCGAGATATCAATAATCCG  
AATTACTGGAACGATCGTCATCTTGGCACACTATTCGCAGCTATCGCATGGGAAGAATCC  
TCAGCTGGAATAAACACTGGTAGATATAAAAACGGGTCATCATGCGTATGGGATGTTTCAA  
AATCTTTACACAACGGTTACATCTAAACTCTAAAATAGAGGAATTACGTACAGACATTGG  
TATCTGAAAAGCGATTTGGAGCGTAAAAGTTCTTCTGCCGAATGGGCTATGGATGAACTC  
TCATACTGGCTCAAGGTTCCAAAAGGTAGCATTGCAATTGCTCTGGCTTCATACAACGCA  
GGTTGGAATTACCATGATGGTTTGAAGCTATGCCGATCGTGTTTTCGCAAACAATCAAGAG  
CTCAAACAACGGACTTGATTTACAAATAAATGTTTACATTTTTGAGGTTATGGGATACT  
ATAACCTCAGTTAAACAAACCAATCAAATGTGGAGTAAGTTATGGACTTCATCATCAATA  
AGTTCTGTATCGCGTTTATTGTGGCTGTTGAAGTTGATCGCGCTAAATTGGAAGGTTGCC  
GATTTTTCAATTCACTTTACGATATGAACGTAGCTATGCCAGAAGAATCTATCGGATACG  
AGTTTTTGATTACTCGCGATTCCCACGATTCCCAAATTATGATTCAGACCGATTACCGAA  
TTATGATTCACACCAATTTTAACTCGTCTGAAGTCCGCATAGATACTGAAAGATTCATTC  
GGTAGTACTGTCTATGAGGTAAGCGCAATATCTTCTTTTGTATTGCTGGGCGTCCATA  
CGTGGACGCCGTAGATATCGAATTCAATCGTATCCATTACAGCAATGGAAATGACCGTTA  
TGGCTTGGCTCATTCGGGTGGAGTCGGCTTCCAGAGTTATGATTTCCATGATGTTCTCGC  
ACACGAGGGTGAAATATGAAAAAGTCAATAGCAGCTGTTTTAGCACTGTCAATTTATGGT  
TGCGGCGCGGCCGCTCCTGCAGTAGCAAACATGAACGAAACGTTCTGGTTTCTGAAAAA  
TCTGGAGTAATCAAAGAATTCACCGATGAAAATGGCACGTATGAATCTGCTCTGTCCGTT  
TCATGTGATATGCAATACGCACAGAAACGTGGCGATTGCCTTGGGATTATTTTCAATAGT  
GTTTATTGGATAATTGACTCTGCACGATCTGACGACAGTATTTTATCTGGGCTGGGCGA  
GTTATGATTAACCTTCTACGGAGTTGTACAAATCGTTGACTATGTTTCGGACTGGCTCCGCT  
ATCGTTATTTGGCGTAAAGATAATCCCGATTTCAACCCGATAGGCAAAGTAATGTCAATT  
ACTACACCTTCCCGCAAACGAGAGTTCACAGTATGATCGTTAACACAGTCAAAGGCAATG  
CAATCAGTCTGTTTCTGAACGGCGAATATGACATGTTTGCGCATGGTTGTGACATTTTTA  
ACCGAATGGGTTCTGGCATTGCTAAAGAAGTTTCGTGAACGCCTTCTGAGCTTTGGGCAC  
TCGATCAAAAAACAGTCGAAGGTGATCGTTCCAAGCTTGGAACGATCTCGGCCACAAGTT  
ACCCCTATGCTGGCCTTGCTTCAACTTCTATACTCCGGCGAGTTACTGGGACCCTAGCG  
ATATGTTGTCCTATGATGCGGCCCGTTCATGCTTTGAAACCTTGAACACTATGTGTCAAG  
AAACTGTAGATTTTGGCCTCGGTAAGCCGACTATCTGTATCCCTAAAATAGGTGCTGGTC  
TTGCCCAGGTGAGTGGGGCAAATTTGAAGCAATCATCAACGAAGTAACTCCAAATATTG  
ATATTACAGTGGTGGAAATTCGATGGCAGTCGGTAAATGGCAACAGTGTGGTCCGGTGATG  
AACCGTATCTTCGAATGTGCAATAGTCGAATGACTTGGCGAAGTATGTAAAGGTATTATA  
ATACACTCATATCGTGACGCCGGGATGTAGTTCTCGTGAATTACGAGTTGATGTACCAC  
GGCCGAGTGTATTGGTCAAACCTCAATGGTGTCTTAATGAAATTTCCAAAAGCATTTT  
TGATTGAACGCATTGGCGAATCGCTGGAAATCATCCAGGAGAAGGTAGTCGATCAGAAC  
TGTGTGGCAAATATGAAACTTCAGTAAGCGAAGTTGTGACCCGCGGGCGCTAGACTGTTT  
ATTACGACTTTGTTTTATCCTTTGAAAAGGATGGAGTAAAGCGCTATTTCCGCGAACCAT  
ATGAAGTCGGTGCAACAGAAGAGCAGTACAGCCCGATTTGGGAAAATGAACCTGATCTGC

TGGATGTCAGTTAAGTCGAACCGTATGCAGTGACTACAATTGCATACAAGTGGAGAATA  
ATGGCTAAAGAAATAGAACGTAAGGCTTGTAAATTCGTTCCATACAAGAATTTGGAG  
CAGTTTCCTCATAAGCAAATTGCACAATTCTACTTTGCTGGTAAACGCTCTCGAAGTGTG  
ATGGAACTGGCGTTCGTTAAAAATTCATAGAAACAGTGAAAACCTGGCGCCGGTTTGGTT  
CGCGAAGAGGTCGAAAACGAAATCGACAAGAATACTGCATGGGCAGCCCATGATGCTGCC  
GGTTTACTAACTTGTGTTGTTAAAAACTGGGTACGAAATCCCGCATGGTCATGGATTAAC  
GATCGAACTCGATATGTTTGTGTTGGGGAACAGTATATCGAGATCGAACTGGATAACGT  
CGAAGATGCCAATGCATTCATTCCACCGTGTGTTTCGGCGAAGAAGTTTCCAATGATGA  
ATATCACACCACCTATGCGCTTTTCAAGCGGCTCAACGAGGTCTAAATGGCAAGTCTTCA  
TTTTCACTATGCTGCAATTAATTCTGGCAAAGCACACATTTGCTTCAAGTAGCACACAA  
TTACGAAGAACGTGACATGCGTTCTATTATCATAAACCCCTGCGATAGATACGCGTGATGG  
TTCAACCGTATCCTCAAGAATTGTTATATCGCGGCCTGCTATTATGGTGAGGCCAAAGCTA  
TAGTTTGACCCCTTAATCAGCAAAGAGCATATTGGGCAGCACATTAGTTGTGTTATGGT  
AGATGAAGCGCAATTTCTGCTTCCAGAACAAGTCAACCAGTTTGC GGCTGTTGAAGACGC  
CCTGGACATTCCAGTAATGTGCTATGGATTGTTGTCTGATTCAAATTGTAACATATTTCC  
GGCAGCAGAACGACTGATGGTTTTGGCAGAAGAAAAGGTTGAGCACAAAACCATATGTTG  
GTGTGGCACCAAAGCTACAATGAACATGCGAATCGATGAGAATGGCAAGAAAGTCTGGGG  
GCCAATTGTTTCGATAGGTGGCAATGATCGCTATATTTCAAGTATGTGGATAACACTGGAC  
ATTGGGAAAATCTACAAAATAATTTCAAAAAGATGTTTACAACAAGATTGTTTTGTATAG  
AATATCCTCAAGTTAAACGAAATGAGAAACACATTATGAAATGTTCTGATGTTTTTGGCC  
AAGTTCAACTTGCTCAAGCTTTTGAACCTGAAGAGTTGAGACGCAGATTAGCTCCGGTTG  
GAAAATTCATTGCCGACGAAATGATTTCAAAAACGAGTCTTTACAATCACCTTCGCGGGCG  
ATAAATTCCTGGAATTTACACCAGAGATACCGTTGACTATCTAAGAACTCTTGGATATG  
AGATTCACACCGAACCTCATCGTAATGAAAGCTATATCATCGTAACTGCAAAAACCTAAT  
TCAATCAAAAAGGAAATATAATGCGTACTATGTCCACAACCTCCGAAAATTACCATGAAAAT  
GGGCCTTTCTATCGCAGCCGGTCTGCTGACCGCAATTACTGCCCTGAATACCTTTACTGT  
GGTCGATGATGGTTCCGTTGCAACCACCTCTTTCTGGGTAAAGTTAGCCCGAATATCAT  
GCAGCCCGGTCTGAATATCATCAACTCGCTGGCATCAGTTGATAACCGATTCAACTCGTGA  
TCTGAAGATGGGATTCTCAAACGTACAAGTTCTTCTCAAGATAAACTGAAAACCTTCTGT  
CGAAATCACTCTGATGCTGCGATTTCGACGGTGATAAAGCCCAGATGGTTCGCATCAACGG  
CGGTACCGAACGTCAGGCGATTGATAAGTGC GTTGCGAAGAAATTCGAGAGTACTGTTCCG  
TGAATCCGGCAAAAACATCAAGAAAGCGCAAGATCTGTTTGGCGATGCTACCACTCAGTC  
CATGCTGCAAGACATGATCAAAAACCTGAAGTCAACGACTATTCCAAGCCGTTTGGTTATGA  
GGTAACCGCAGTGTTCTGCAAGAGATTACTCTGCCGAAGCTGATTAAGACCAGGTTGA  
GCAAACCAAAAATTCGTGAAGAAGCCGTA AACCAAGCCCAAGCGGATCTGGATAAAGCCGA  
AAAAGTGGCACACAACAGGTTAAGACCGCCGAAGGCGCGCCTGAAGCTCGTGAACAAAA  
CGCGGTTGCTAACGAGCGTGATGCTGATGCTAAACTGTACGCCGCAGGTAAGAAGCTGA  
GGTAACGCTCGGCTGCAGAAAACCACTACTCCTGAAATGATCAAATGGCGCCAGCTGGA  
AGTCGAAATGATTCATGCCAACAAATATCATGGTGGTGTACCGCAGACTGTGGTTCGGCGC  
TGTTTATGATGGCCAAATGCGCATGGACATGCGTTCCAAGTAATTCAACTCGGGCTCCTT  
CGGGAGCCCATTTTGATAAAGATAACTTGTAAATTGGAATATATTATGTTTAGCCGTGGT  
TTTACTTTAATCGAATTGATGGTATTAGTGGCGATTGTTATCATTCTGTTAGCCATAGCA  
ATACCGGCTTTTTTCGGATAACGAAATTTATAATCCGATCAATTCAGTATGCCCTCATGGG  
TTAACAACCGCAATTACGCCAAATGGCGAAGAAATCTTGTGTTGCCGAAAAAATCAAGTG  
ATCAATAAACAAACACTAACAAATCGGAGAATAAATGCAATAGCAACTCAAATGGGCATC  
ATGGCGGCATTCGTAGCAGCAGCACTTTCTGGTTGTGGCGAGCAACAGTCTGATGCATTT  
TCTTATGATGGTCTCGGTGGAGAACCTAGGCCTACCGTAACACCGACTTGGGCAGAGCAA  
TGTCAGAAGTGGGTGGTGGTTCGACGGAACAATGCCAACTAGCATTTAGGCAAGCAAAG  
GATGAACACACCTCAGCTGCACCGAAATTCAATGACCAAACATCATGTGAATCTGGCACA  
GGTGCTGTATGCACCCAAACACAAATTCAGAATTCGGATGGTTGTTTCAGCGACGTGTTT  
ATTCCAGCTATGGCTGGTATGATTGTTGGCCAATTGATGTCAAGCAATGCTCCCCGATG  
CCAGTATATGCGCCAAGTCGACCCGAAGATCGTCGAAATGGCTTCGTC ACTGCGAATGGT  
TCCTACGTTCTCCTGGA AAAAGGTTCTATCGGTGCAAACACTTTCAAAAACCTTCTTTTGC  
AAGGGAAGTTTTGCCAAACCGGTAGCATCTTCTAAACCTGTTGTGAGAATGTCATCAGGC  
GGTTTCTGAAAATCCGGTGGTTTCGGCTCTTCAGGTGGTTAATTTCAAAAAGCGGTTTAC  
AGTGATGGGACTATGATTTACTATAGTCCCATCAAGTCAATAAGGAGTACATCATGATTT  
ATGCTGGCCAAAATATAGAATCACCAGACCTGTAAGCGAACAGCACATGGTTGGTGTG

GTGATATTATAACAATCTCCCAAATCACTAGAAAAAGGCCTTCGTTCTATGGATATTTCT  
GTTGACGATGATGGAATTCATATGAAGGAATTCTAATGTTTGAAGGCCCGTACAATATC  
CAGGAGTACTGGGAAAAAGTCGAAATGTGCATGGGGGCCGTTTAAATGATTGACGGAATT  
TATCGGATTATTGGCGAAATCTCTATGAATCATCGTTGCATTAGCCAAGGTGACGAAATT  
TATTTGAAAGAAAATGAATACGGAAATATCCGCGGTCCATCAGTTGACTGGGACGGGCAT  
GAAACTGAAATTGGTTACATTTTGTGCCAGACGCGGTGGAAGAAATCCCGGCAAACT  
TACCACGAAGCTTACCGAATTTGGATTGACACTGTTTTGGAGAAAGTAGAATGATACGCG  
TCTCTATTGAAGCTCGTAAAGATTGGTTGCCACAGTTGACTTCTGAAGGTGTTTTGTGGA  
CCACTACTGACGAAGGTCCTTATTGGGCCGAAGCAATGGTTCAGCCCAAGTATTACTCCT  
TCACTCGCAAAGTGCAAGAGCAACTCGAGAAAGCCGCTAGCAAAATCCATGAAATGTGTC  
TTGAGACAATGGAATGGCTGTTTACTAGCGACGCCAAAAATCAAAACGAAATTTTCAACA  
TGTTCAATTATCCCATACGATTCTCGTGATCAAATCATAACGCAATTGGCGATAAACTCAGCTTTG  
TGGGCCTTTATGGACGATTTGATTTTCATCATGACCGAATACGGACTCAAGCTTGTCGAAT  
ATAATGCCGATACCCCGACCATTCTCATTAAATCTGCAATTTCTCAATGTTATTGGTTCA  
ACGATCAACGCGAAAAATGCCATCAAGAAGCTTTTTCAATTTAACGAAATTCATGAATCAT  
TTGTTAATCACTGGCGTGACATGAGCACTTATAACGCAATTGGCGATAAACTCAGCTTTG  
TAGCTACTACGCAAGTTGTAATTTTGTCTACATTCGCATATATGGCTGAAACTGCTTCAG  
AAGCTGGACTGAATGTAAAAGTGTTCGATATGGCGGAAATTCAGCTAGGTGATGACGGTA  
ATTTTTATGACATTGAAGGCCAGCATATCGACACTTGCTTCAAAGTGGATCCATTGGAAT  
GGCTGCATGAAGACGGTTTTGGCAAAGCCATCGATGGTTTTCAACACAAGGTTTATTGAAC  
CAAAGTGTAAAATGCTGCTTTCCAACAAATCACTTTTGGTTCTCCTTTATGAGCGTTATC  
CTGATTGCGAGTGGTTGGTCCCAGCCTACACAGAATATGATTTTGACCGATTGAATCTGA  
TCACATATGAAAATCCGAAATGGGTGTCAAAGCCTATTGTTTCTCGCGAAGGATGTAATG  
TTCATATTTTTGAATATGGCGGAGAAAGTGAATTCACCGATCGTAATTACCCCGAAGAAC  
CGTGTATCGTCCAGCAATATATCGAATGGAAAGATTTTCGATGGCTGCTACCCAATGCTTG  
GTGTATGGATGGTAGGTAGCGATGCCGTGGGTTTGGGTATCAGAGAAGATGATAGCCGAA  
TTACCGGTAATAACAGCCGACTTATAACCGCACGTCGTAGAAAATTGACACACAGCAGATG  
ATTTAAACCCTCTGTAAGGCGTTAAATATGACAGGAGTATAAAGCCATGGATTGGCCATA  
TGCCTTGTCATATTGGTTAAACCAGTATGCGCTTCAGACAAAGGCATCAAATAGGCTTTG  
CCTTTGTTTAAATACCATCAAGGAGGGGCCAATCGCCCATTTGTTCGTATGTTAAACACATT  
TTCAATAATCACATCGGTTTTAGCTTCTATGCACTTCGTAGAGGCGGACCCTGAAAATGG  
GTCTTATGATGAGTACATGCGTGGCGCTTTAATAATGTATAGCAACGAAGTTGGGCCATC  
TCTAGATAATTCGGTTGAATTTCTTAAGCATTGTAACGATAAATGGAAATCTGCTAAATG  
CTCTTCGAGTTGTTATCAAAGTGGATATCTTGAAGCAAAGACATTCATAGCAGAAAGAGA  
AGGTCATGGAAGTAAGATTCCGGTGTCTTGTAAACCGAGAAAACAAGCATTTTTGATGAGT  
TTATTGGTGCGTGTTTAATGTCAAGCACATATGCGCATTCCGCGCACTTTTATGACAAAG  
TCGTATGAAAAGCATATAGCATACGAATATTGCTATGCCAATATGCCAGGGCTGATTGAT  
ATTTTCGCTGAAGCGTATATGGGTTCCAGGATTTACATATCGGCCGCGACTGTCCATTTAT  
AATGGAACCTTTGAGTCATTTGTCAAGCAACTTGCCAGATGGCGGAAAAGGTATCTGCC  
AGTGCACCTAATACGGTTCTCAAAAACACCTAAGATGATATCCAAGAGCTTTGTTCGTATG  
ACAATGTATACTACTATCATTGCACTAATTAATAATGCCCTGGTGTGAACCAGGGCCCTTTT  
GTATCCGTTTGAATAAAAATCCAAAATGGTTGTACTCTTACGTTAAACGAGCTTAGAATG  
TTATCATAATCAACCAACGGAGACAACCGATGAAACGTGTTAATGAAATGCCAAAAGTG  
GTCAGCTTGTAGTTGACTCGGTATGTGACGGCAAACCTCTGGTCTGAAACCTGGCGCTTGA  
ACAACGGGGTGGTTGAAATCCTCATGGATGATGACACTGGTGATGAATGGCGTACAAACG  
ACTGTTATTACGATGATGGTTATGAAGATCTCGAACTCAACTATATTGTGATTTAAAAAT  
GTCTATAATTCAGGAAATCGACAAGCTGTGCAAGCAGATAGGTGTGGAAGCATCAGAATT  
CAAGATTTTCGCCTTTTAGGAAAGTTGTGCGCAAACCTGAGTGGTCTTATGGGCTTTCACT  
TGAGCGCGAATTCACTATTTACGAACATAAAGAAACGGGCTATACTATCGCAGTTCATTC  
TGAGCGGCATAGAGCTCAATTTGTCAACGAAAACATCGAAGAGGTTATGGGTTTCGCTGA  
AAGGATCGTTTCTGTGAGCGAAGTAGAACCTACAATAGCAAACATGGCACACGTTGGCA  
ATTTGTGTAACGCTTTAGTCATTTTAGTGTATATTACCAGTACAATGGTTTAGACTAAAA  
AGACTGGAAATAAAAACCTCGAGCGAAGCTCGAACGCGAAGCGATAACTAATTGGAGATCA  
TATGCAAATTATCCTTCAGCCTGCAGGCGCAGGTAACCGCCGAAACAATCAAATCTGC  
CTTTATGGCAGCAATGAATCACCATGTTCTTAGCGTTTGTCTGTAGAGCATCCAGCTGT  
ACTGGAGCATCGAGTTAACATGTTTCAGTATTCAGAATCCTGCTATGAAAACCGCTATGA  
CATCGTTACTTGTGGAACCTGCAACTCCCGAAATGTTCAAAGATCTTGGCTATGTCGA

CCGTTTTGGCACCATTATTCTGGATGTCAACTTCGCAATGAGTCGCGGCCCTTGGATTAG  
AGTGTGTGCCGAAGTTCGAAGCATATGGGTATGAAGTAATTGATACTCAAGAACTTGTTAA  
ACCTGCGCAAAAATCCCACAAAGTGTATCACTGATATGATGGTGGCCCCTTAAAAGGGGC  
CATTTGGAGGAATCATGAAAAGATATCGTTTTAAATCTGAAGAAGCTCGACATGAATTCG  
CTGCCATAAGCGACATCAATGCTGCTATTGCTAATAGCGTATGCGATCGTGTGTTTTACG  
AAGCTATGCCACGAAATACAATCGCTGAGATTTTTCTCGAAATCAACGGTATTACTTTGT  
TTCCCGAGTATTTTTCTTTTTTTCTTAGCTAACGAAGTAAAAGAATATTTGGAAGAAGTAA  
GCGCTGGGGATGTTGCTCACGAGATATCCAGAAGATATTGGATAATAACGATGTTGAGC  
AATTGCTTGCAGAAAACGCGGCCCTGCGGTAACGCATGTCTAAACTTGAAAATCGTCTTG  
AACGTCTTGAACGGTTGGTATAAATGAAATCTACAGCTTTCGCGAATGATCTTTGGTTTT  
TTCTGGGGGGTTTTGGTAGTCACCGTTACTACACCAGAAATTATGTCACCGGAGTTATTT  
GGTTTTTTACTTGCAGTCTGTTTGGTCTTGGCTGGTTTTGTCGACTTTTTTATCACAGCAG  
GATTAGTCCGACGCGCAAACAGTGAATGGCGCCAAAATCAGATAGAAATTAATACAATGA  
TTCGTCGAGGTTATTGACATAGTTTATAATTATGATCGTGTGTTGTTATTGGCCGCTTT  
TTCCAGGTTTTTCCACCGTGGACATGAAATGCTGATTTACAAAGCGCTTCAAACCTGCTGA  
AACTGTTGCTGTTGTCTTCGGGTCATCTCATTGTAATCCAAACACAGTCAACCCACTTCC  
AACACTGGTTCGAATCAGAATGTTCAAAGAATGGATGAGTAACAATATCACTCCTAGCGA  
ACAGGCCAGAATTGTTTTCCGTAATGTTCTGACTACCGCTATAACGAAGCTCGCTGGTA  
AACACAAGTTCGTGAGGCCGCGCAAGAGCAACCGGGCGAGCGTGTGCGATGATTGCTTA  
CGATAAGGATGAAGATTCTTATTGGATCAAACCTTTGGATGGGACCATATTCAATGCAT  
GGGCGTTCAGAATCACGGAAAAGACATCTCAAATACCCCAATGCGCAATGAATTTCTTCG  
AACCGGTTCTATCCACGACGATTTCCCTATCAATCCGTCAGTGCAGTCAATTTCTTTTGA  
ATTTTGAATAGTGAAGGTTACGAAATACGCAGCCGGTTGACGGAAGAAGTGCATGTG  
GGAAAATGAACATGCAAAGGTTAAAGATAATCCATACGCTGCTGCTCTCAACTGCAATAC  
TGCTGATGCCGTAGTAACGTGCAACAACCATATTCTGGTTATTACCCGCAAACATGCACC  
AGGCAAAGGTGCTCTTGCTCTTCCGGGTGGTCAACAAGAAATCCAATGAGACCTTCCGCGA  
TTGTGCAATTCGCGAATTGTATGAAGAAGTTCGGATTGATGTCGATCGTCAAAAAATCAT  
TGGTTCTATAAAAAGCACACGAAGTATTTGATCACCCAAATAGAACGGCAGAGTTCTGCAA  
ACCGACGGTAGCTTATTATATCGTACTTCTACCCAAATGACGACGGGAGTTTGACTGAAGT  
TCGTGCTGATGATGATGCAAAAGCAGCATTTTGGATGCCAATGCATGAATACAAGAGAAA  
TCGGGCAGGTATGTTTGACGATCATGCTGAAATCATTTCACGCTTCACCGGTATCTAGGA  
TACAATTACGGAAAATGAGGAAACATCAGTAAAGCAGAACAAAAATGAAAGTAATCTGCA  
TTCGCAAGAAAATCAAAAAGCAAAAATTTGCGCGCCCTACACCCGGTGATGACGTGCGAT  
ACCAAATTGCTCGTTGGGAAGTTGCAACAGTTTGTGTCATCACTGAAAATCCAAAGATTA  
TTTTACGCAAAAAGATGAGTCGAATCCATGTTATTATCGAACTTGCCACTGACCGCAGCG  
AAATGTTTTCCCAGGTTAAAGAAATTTCTCCCGAAGGTACTACCAGCTGGGGTGAAACGT  
CTGAAACTTCCGAAATCAACTTCGTGAGTGGTCAATTTCCGGCGTGATGAAAGAAAACGAAG  
AACTGTTTACACCCCGATTCCACTCGGCGACGAATTCATCCATCGTAATCATGATAAAC  
GATACGCGGTTAAATTCATCGCAGAAGACGGTCTCTAATTTCTTGGGATTCAGATTATC  
ATAGTTCAGTTTTTCGTTAACCGCAACGATCGTGATCAACTTAAAGCATATGACATGAAAT  
TTTCTTAACGTGGTAATTATGTA AAAAGTAGTTTTTTGAGGGCCTTCACGGCTCTCATCTT  
TACGGTCTCAATACTCCTGAATCTGGCCTGGATATGAAAGGCATTTTCATCCCCGATCCC  
AAAGACATTCTGCTTGGCCGAGCCAAAAGAAGCTTTTCCATCACAACCTGGCAACGACAAG  
TCCAAGAACAGCATGGATGATGTTGATATTGAAATGTTTTCGCTCCAGCAAATCATCCTG  
GATGCGGCCAAGGGTGAAACCTATGCGCTGGATATGCTGCATTCTCCAAAAGACAAAATC  
ATCACCGACTCGTCTGTTTGGCAATGTATCCATCAAACCGGTCTGCTTTCTACACGACC  
AATATGACTTCCTATATGGGTTATGTTAGGAAGCAAGCGGCAAAAATATGGTGTAAAGGT  
TCTCGTTTAGCCGCATTACGAGAAATAAAAACAGTTCATGGATGCTCTTCAGATTCACGAA  
AACCCAAGACTGCGATACCTAAAAGATCATCTGCCACAAAACGAGTTCGCTTCTGGACT  
CACGTTGAAGACAATCCCGACACCATCTCGTATTACACCTTGATGGGCCTTAAGTACATT  
GCTGGTGTAAAGATCGGTGAATTCTGCGGGGCAGTTGACAAGCTCTGGGCCGAATATGGC  
GATCGAGCTCGCAAAGCCGAAGCAAATGAAGGTATCGACTGGAAAGCTCTAAGCCATGCG  
TTGCGAGGCGGTCTTCAATTGCTTGAATTTACAAAACCTGGCGATTTGAAGTATCCATTG  
GCCGATGCTGAAGAAATCAAACCTGGTTAAAGCTGGCAAAAATGTCCTTCGCTGTAGTTCAA  
GAACGACTGGAAGAAATCGTTGAAGCTGTTGATACGGCCGCAAAAAGAGGCATCTAAGAAC  
GGAATGCCCGATAAAGTGGACATTGGACCATGGGAAACGTTTTGTCGAACAGGTTTACGCT  
GAAGCAATGAAAGAATATCTGGAGAGCAAATAATGAAATTGATTCGCTTTAAATTCAAAA

GTAAGGAAATGCTGATCGAGTCTACTACTCGGTTTCAGACGCCATATTTGGGCGGTAGGTT  
TCAGCGCAAACACAGTTTTTTATTGCCAGAATCAACAAACGTGGCCAAGTCAAAGTAATT  
TTGATGGTAAAACCTCTTAAAGAAATTGTTTCTTCGAAAGAAGGTTGGCTTCCTTTTGCCT  
CCTTTGAGTTTGAAAAGTTTTGTGAAAAAGTAAGCTAAACGGTTTACATTGATGGGGCTG  
TGATTTACTATAGTCCCATCAAATCAACAAGGAGTACGTCATGAAAATCACTAAATCAAC  
TAACCTGCAATACATGGATTTTCGTTGGCCGTGTCGTTAAGGCAGCGACAGAAACCAAAGA  
GGTTAAAAATCTACCCCGATTTCGAAACCATTGCTGCCGGTATTACCGTAGGAATCGTTGG  
CGCATGGGCTGCAATGTGCTATATTGGCGATATCGATATGGCTCGTAAAATCTACATTGC  
TGGTATTATCGCTGGCGCAACTTTCCTCGTTATGAAAAAGGGACTGATGAAGTGATTA  
GCTGCTGAAATGGCATAAATGGTTGCACAGAACTCCGCAGAAATCGTCAATTCCGTATCT  
GTGCATTTTGTGATGATTTCTTCAATGATAATATGAAGGACACAATGATTGTCAAAGGCGGC  
TATATGTGTGAAGACTCGGGACAATTTTTGCGTAACCTACGTGAAAAGCAGCCTTTTACT  
CATTTGCATAATGATGACATTATCAAACGTTTTATTGCAGAACTGCGGGGATTGGGCTAT  
AAAGCAGAACTGTTTTGTCCACCTATGAGCCCTGATTACATTTTCAGTAGCGTTAGTAACA  
AAATGCTCGTTTTTGGGGCATTAAATGGAGCTGAACATCGTTAGAGTATACTTGGAAAGCA  
CACTCCAAGTTGAATCGCTCATCGGTAATAAAGTCGGTGAACCTTGAGATTTTCGCTAAAG  
AATATTGGCTGGTGAAAGACGGATTTATCTTTCAGCATGACGGGCCAGGTATTTCCAAAA  
ATGATTGTTTCGCTCTGTTATGAAATTCCTCCGGAATGTCACGTTTCTGATGAAATCACGG  
TGTTTATGGTAGACGATTATGTTTCCGAAAGCGCCACGGCTATTGTAGTTATTACTGATA  
AGGAAGACAAATCATGAGTGGATAAATCTACCTTTCGTTCTCAACGTAAACACCAGCCCC  
GACGTCACAACGACAGTGCTCATGTTTCGCAATTCTATGAACACCTTACAATCCGAGCAGC  
ATGATCGCGATTGGTTCAATCTGGTTTTCGGAATGTTCAATGTGAAAACAATGGTGAAT  
GGGATAATACGTATCAAACATAGCCAGGATTCCGGCGTGGTTTTTGGTACAAAATTGACC  
GAATTATGAGGGAAAACCATATTCCATGGTGTAAAGCCAACACTGGTATAGCCATATA  
TTCATGAGAGAGGCGTCTCGCGAGTTCGCGCGTTGGCGTTTTCTACCGACAAAGGCGTAT  
TGGCGCTCGCACGGCTTCTTGAATTTGAAGTTCATTCTCTGGTATGAATTTAGTTTTGC  
CGGTGTTGAATCGCTATCGGAACCGTTCGGAATACCGAACTTCGCAAGAAAATGGTTCATC  
CTAAGCCTCAAACATTCATTATGCGACTACCGAAGAGATTGATAGCATGAGAGATACTA  
TTTGCATTGATAAAAAGGTTAAAAGAAATCCCAGCAATCGAGTCACGAATCAGCGCTCTG  
CTCGCAACTTGCCCAATTGCAAGATAAACTCCAAAATACACGACAAGATGTCCGCGATT  
ATCTTTCGAAAAGGTATGGTATTTGATTGAAAAGTTAGTGTACAGTGATGGGAACATTGG  
TTATAATGTTCCCATCAATAAACGAACGGATTACTTTAAATGTCCATCAAACCTGCTGCA  
ATCAACATTGGGTGCATAGCGTCATTTGCATTGTTTTATTTCGATGTATATCGGAAATGCT  
TATGCCGTCCTCGGATGTGCAAGGGCAGATATCGGTTCAACCATTATTGCGGAGAATTTGC  
GAAAGAATTATTATGCGACAGTTAAGAACTTTTTGGAAAATCGTCGGGATACTTCCAATA  
ATCACTTTAAAACCTATAAGCCTGTAGCTGAACGGTTGACAAATTATCACCCTTCATGA  
AGTTGGTATATGAGATTTTGGCGAATCTGATGCCCGCATCGCCTCTCGGTAAACACAATG  
GCATCTCCAAAATCAAGCCAAAGTACTTTAATGTTGATGCCAAAACAACGTCACGGCTA  
AAGGAATTATTTGGCTCAACACAGTGTTTGAAGCAGATTGTTTTGCAGCGAGACTGGAAC  
TGCTTAGGCGTTATGGGGCTGCCGTAATATTGATATTTCTGAAAATGGCAGAAATCAA  
TAGTTAGATTTAGCATCATCTTGAGCGAAATTAACCGTGTGAAGCTTGTTGCTGAAGATG  
CAAACATTGTCTAAGAGGCACGATCGGCAGAACCTGTTATTCTCGAAACGGAAAAAGAAA  
TTAGCGAAAGCATCTTCTTTTCTGAAGCGATCGGAAAAGCTATCAACATTGTTTCGAGGTG  
CACTCCACTTTGGCTCTAAACGTTTGAACGAAATTGACAGTTAAGTCGCCAAGTTGAGAG  
CACTACGTAAAGAAATCGAATACAGCATGATAATCATCAAAAACCTCAATTGGGGCTTAAT  
TAAGAATATGATCCGTCCACACATCGGCGTGACAGGTATCCCTCTGATCGCAGTGACTGA  
TCATTGCAAATCACCCATTGGAACCAGATGCCTGAAGGTACCGAAGAAGCAGTTTTCTA  
CGTCGAAGCTCGTGGTGGCAAATTCGATGAAATCGTTATCGGTGGCGTGAAGTATCTACT  
GACCAAGTTTGCAGAAATCATCAACAAAGATGATATTGACGAAATGGATGCCATGAGAAA  
GGCTCAGTTTGGCCAAGACGTATTCAACCGTGAAGGTTGGGAAGCAGTCCGCTACTATCA  
AGAACAGCATGGCTGCCTGCCATCCAAATCGATGCTGTTCTGGATGGTTCTGTTGTCCC  
AGTCAAGCATGTTGTGCTGACTGTTTCGTGTCAAAGCACCATTCTGTTGGCTGGCGGGCTG  
GTTTGAAGCAATCATTTTGAAGAGCAGTCTGGTACACTTCTATTGTTGCCACGCTGAGCCG  
CGAATGTATCAAATCTATTCGCCGCCACCTGATTGAAACTTCTGACCTGGAAGTAGGCAG  
TCCTGATTTCAACTTTGTGCTGATGACCCGACTACATGATTTTGGTTCTCGCGCCGTTAG  
TTCTGGTGAATCTGCTGCAATCGGCGGTTGTGCTGATCTGTACAACTCCATGGGTACTGA  
CACTGTCGAGTCGCTGTATTTGCATAACAGATGTTTGGCGCTGGAATGGCAGGCATCTC



TGTACCAGCTCGTGAGCACTCCACCGTAACCTCTTGGCGTGCCGATCGCGAAAAAGACGC  
CTACCTCAACTCGGTTGAACTCTTCGGTGCGGGTGCATATTCCATTGTGTATGACTCTAC  
CGATTTCAAGAAGGCAATCCGTGAAATCGAGAGATATAAGGACAAAGTTATCGCCGAGGG  
TGGTACTCTGATCGCGCGACCTGACAGTGGTGATATGATCGACAATATCAGTTTTGCTCT  
GGAACTCTGGGAGAAATCTTCGGTTATGAAACCAACAGCAAGGGCTACAAGGTTCTGAA  
TAAGCATTGTCGTATTATTCAAGGTGATGGCATCGACGGTCCGGAATTTTTTCGACCCGCT  
TGTGACTGTTATGAAAGCTCGCGGGTGGGCTGCAGAGAATATTGCGTTCGGTATGGGTGG  
CCGTCTTCTGCAAATGGTTAATCGTGACACCTGCAAGTGGGCCATGAAAATGTCTGCCAT  
CAAAATCAAAGGTGATGGAAAGACGTATTCAAATGCCAAAAGGCGCTGAATGTAAAGC  
TTCCAAGAAAGGTCAGCTTAAGCTGCGAATCATGGATGACGCCCGCTATTACACAGAAGG  
AACTATTGAAGGTGGTCAAATGCAGTACGGCGTAAGCACCAAAGACTGTTTTGTTGAACT  
TATGTTCGAAAGATGCATTCGTCTGTATTATGACGCTGAAATGGGTCAAAAATTCTAGAG  
CAATCTGGCTGAAATCCGGCAGCGTACTGCAAGTAACTCATCATTCAAATGCCCTCCGAA  
GAGGGCATTTTTTATTGTAGAAATCAGGATCAACAAAATTATCAAGTCGTATGAGCAAGA  
ATGGCTGTACAAAAGAAAATAATCTATGAATGGGAAAATTCATACCTGGTAAAATATTT  
TTCGATTGACCGAGAATTTCGGACATATTCCATCATGTTGGGGCCAAATGTATGACGGATA  
TAAGTTAAATAGTTTACGACTCTTTATTGTTTCTATTGAATGGGGTCATATCGTTATGTC  
AAAAGGGGCGTGGGAAAGTAAAGCAAATCGAACTGACAAGAAATGAATTCAAAAAGCTC  
TAGAAAATAATGACCAATACGATTATCCTCTGCACAATGAAACAATCAACCAATTGCGTT  
CAGTTATTTCTGTCCCGCAAGTTGAATATGTTTATTTGTCAATTTCAAGAATATCAATCCA  
TTTTACCCATAATACCTCATGACGCGAGTATGTATGCGCATAcataatCATGCCAAAGAA  
TTCACCAGGGTGATCGGTGGCAATATCAGAGTTAATCTTTTGTGACAAATCATGAACAA  
ATCAAAAACACGATATATTGGGCATTTCCAGATATAGAACAAATTGAAATTGGAAATTTCG  
AAATATTTTGGCCAAAGACGGTAAAATATATAACGCAACAATAGACTAGAACACCAAATAG  
GTTATAATGGTGGCAAATGACCCTAAAGTTTAGCAAATTCTAAGCCAAAGACGAACGTA  
ATATGTTTAAAGTTACCACCAACTTCAGCGACAAGTTTGATGATAAAACGATTCATTGGG  
AACTGCCAGCTGTTAATTTAAACGAAGCTTCTATTGAAATTGAGCGTCTTGCCATGTTCC  
TGGAAACATGCAAAAATCGATACCCAAACTGTAAGGGTGGTCTGGACGATTTACCGACA  
TTCTCGACTACTATTGCTATTTCTGCGAAGAGGAAGAAAGCATAGAAATCTGGGAAAAAT  
ACGGTGTGAAACGCTATGGTGGCCACGCCATGATGGTGAATATCATAAAAACCTTGCCA  
GCTATGAAATCGTATATACTGATAACGATAACGTGAAGTACAGTGAACCGTGTAAATTA  
ATAAGAGCATATGGAGGAATCTTTATGCTCTTAAATTCCAAGTCTGCTGATGAATTA  
CAGAAATTGTTTGAAGAACACAATAAGTGTGTAATTGTCTGGATACGAGTTTGACGGT  
CCATACAATAAACAGCATTGATCAGATCAGTATTGCAAGGCCCGAATGCCGGAAAG  
ATTCGAGGTCTACTTTTCAGTAGATGCAATCTACTTGAAGGCATAATGAAACACAAATTT  
ATACGGTCATGATTAAGGCAAAGGATGTTGATTACATCCAATGGATGAGATCGCAATTA  
CAATATGTAGATTCAGATCATTCAAACAATCCAATGCACCCGTATTACGCTTCCGACATG  
ACCAAAAATTTCTCGCGGAAAAACTTGAGTGAATGAAGGCCGAATACGCGAACTAGGA  
TCTGAATTTGATGAAAAAGGTCAAAAAGCTGTTTTAGTCAAAAATGCAGGAAGCAATTT  
AAGAAGGCCATTCAGTGACTACCCGATCACTTGTAAGCAATTAGTAGAAGGCCAATCTG  
GCCTGCACCACGAAAATGAGAATAAAAACGCTGACTTTATCCCGGCCATGCGAGATATGA  
TGGCATCTATCTCCTTATAGGATTACGCTGAAAGCATTTTGCCATCTCACTTAATCGAAG  
CACATGATAGTGGAGATATTCATATTCACGATCTAGATTATGCTTTTACTCGTCCAATGA  
CAAATTGTCGCTTGGTTAATCTCAAAGATATGTTCAAAAATGGCTTCAAATGGGTGATG  
CACAAATTGAAGAGCTTAAATCCTTTGGTGTAGCTTCAGCCATTATGGCTCAAATTACCG  
CACAAGTTTTTTCCCCCAATATGGCGGGACTACTCTTGCCAACGTTGACCAAGTCCTTG  
CGCCATACGCCATAATTTTATGGAATAAGCATTTTTCTGTGACGGGAGTTTCATCAGCG  
ACAAGGATAAAAATTGAAAAATATGCATACGAGATGACTGCTAAAGAAATCTATGACGGTA  
TGCAAGCTTTGACTACGAAGTCAACACGATGTTTACCACAAATGGCCAAACCCCGTTCC  
TGACAATTACATTTGGGATGGGAACTAACTGGTTTCGAAAAAGAAATTCAAAAAGCTATTT  
TGAGAGTACGAATCAAGGGTCTTGGAAGAATGGCATCACACCAGTATTTCCAACAATC  
TTTATGTTTATGGAAGCTGATATAAACTTAAGTCTGGAGATCCAACTATGAAATTA  
CACCTTGCTCTGGAATGTTTACGCCAAGCGAATGTACCCTGACATTATCAGCGCGAAAAAC  
AACCGATCCATCACTGGTAGTAAGACTCCTGTTAGTCCAATGGGTTGCCGGTCTTTCTG  
ACTGGTATAAAGTCTGGGAACTCGATGGTAGAAACAATTTAGGTGTTGTCTCTGTCAAT  
ATTCCCCGATTGCTATCGAAGCAAACGGATCACAAGAATCGTTCTTTAACTACTTCAA  
GAACGTTTTGAATTGTCAGTTGAATCATCTCTGGAACGAATTAACACCTAGAAGGTGCT

AAGGCAAAGACCGCCCAATTCTCTATACTGAAGGGGCCCTTTGGTCTATATCTTAATCC  
GGAAGAAGAGTTTTTTGCCGCATTTGAAAGAACGAGCTTCGATTTCAATTGGTTATATTG  
GCCTTTATGAAGATGCTCTGATTATGACTGGCAAATCAACAGCCAATGATCTAGAAGCAC  
GCAATTTTGGCCTTTTCGATTGCAACATATCTCAATTTTTCATGCGCAAAAAGCAAACTCA  
ACACCGGATGGAACCTTAGTCTTTATTCTACTCCGTCTGAATCGCTGTGCGATAGATTCC  
GCCAGCTGGATCGCAAGAAATATGGTGTATATCGAAGGAATTACGGACAAAGATTGGTATA  
CGTATAGCTTCCATATTCCTGTTGATGCCAGTTGAACCCGTATGACAAAATAGATGCGG  
AAAAAGAATTTTCATTGGATTGCATCGGGGGTTCATATCAGCTATGTCGAACTACCCAATA  
TGTGAAACAATCTCGAGGCCCTTGAGCAAATTTGGGATTACGCGATGGAAAAACTTTACC  
TATTTTGGAAACACACACCTGTTGATAAATGCGACGAATCCGGTTTTGATGGTGAATT  
CAAATGCACCTCGAAAGGATTTAGTTGCCCGAGCTGCGGTAACCACGAGTCGGCAAAGAT  
GTCAGTTATCCGAAGAGGTTGTGGGTATGTTGGTGCTCCGTTGGCGAGAGGATTCAATAA  
AGGCCAACAGCCGAGGTTTCATCACGTGTCAAGCATGTGAAATAATTTTAAAAACTTG  
TTTACATTTGTGCAGATGTGTGTTAATATACATCTGCACAACTAAACAGCCCAAATGAG  
GTTATTATGTCTGATATTAAGCAAAGTATTGAAACCTTTGAATAGAAATTCCAGGATATT  
AAGTCCCTCCTGGAAACCCCAATGGATAAAGATGAAGCTCAACAAGCAATCCACAACTG  
AATTGTATGTCTGAGGAATTTGAATCAATCGCTCAAGCTGTTGCTGATCGATTCTGCATT  
TCCTTCTCGACTGGCGATTATGGATATGGCCGTACCTATTATCCTAAAGGTAACCGTTTT  
TGTTCAAGAAAGCAACGCCGAAGAGTATGGCCAAGGAACCGAGAATGGCTACTGGCTCAGT  
TCCGCTGATATCTGTTAAGGATAAAAGCAATGGCTAGTCCTAATGAATTGGTAGAAAAGG  
CAGTTCAACTTTAAAACTTCTTGATGAAGTTGAAGCACTGGCAACAGAACATGCTTACG  
GCATGGAAATCAATGGCAATGAAGTTGATTTTCGACGACTGGCTGTCAAGCAGTTGTTATG  
GCGAAGGTTCTGAAGCATTGTCATTAATGCAGATGGCTCCGTGTGGATGGGAAGTAGTT  
GGTAATTAAGGGGCTCTTCGGAGCCCCGATTTGAGGGTTTTGTTACGATTATTGTTGGCT  
ATCGAGCTTTTCAATCTAGGCTAACTCCGTTTGTGCTCCTACAGTAAATATGGACCATG  
ACTTCATTGCATACGAAGAAGAATGGAACGAATATCAAGTCAGAATGCAAGGTCGGACTA  
TTGAAGTAAAAAGCCCGAATGTTTCGAGCTTTCGTCGTCGTTGATGGTAAATCTCGTTGCT  
GTTATCACGAAGCATATATCGTTCAACCTGGATCGTCCGATGAAATAATTTACAACTCA  
TGGATGCTGTTCCCGGTAAGACGTATATGCCACTCCCGAAATTCCTTCTCGCCATGAAAA  
TGGCTCATCAGTTCAAAAACAACACTCGCAATTTTCATCAAAACCATGATGCACATTCGTG  
AATTGCGTGAATTTGGTATAGTCATGGGGCCTGAACACGTGGAAATTTTCAAAAAGCGTG  
AAAAAGAATCTCTGAATTATGGCCACCCGAACTTAACGTCGGCAAAGGCGCATTTTTCA  
AAGACGACATCTACACCTATGATCATGACACAATTCACGAAGCAGTGGCGGTTGAAGGTC  
TTCCAGCATATCGATCATAACATGGTTGATGGCGCTGAAGTCATGACGTCAAAAGAAAAAT  
TCTTTAATTGTTCTCGTCGTATTCAGTTGATGGGTGTTTATGAAGAATCTTGTGATTTGG  
CTCTGGAACGTTGTCTTATTCCTTTCCAGGAGAAGTTCAACCCTATAAAGCTTTTCATA  
TGGCCCTTGAGAAAGTATGCACTACTATTACATCTGGCTGGTTCCGTGAATTTGCGTGGA  
AAAATTATTGTGACGTTATGAAAATTTACCCCGATCAAGTCAGGGCTGTGACTCATAACG  
ACGAATTGTTCAAACGAAACCAGCATCTCCTGAAAATTCACAGTAAGTAAATACGGATTT  
TCACATAGGAGGTATACTGTGGAAGGATACATAGTCCAACAAAAGTTTCGGCAAACTGAC  
AGCCCGAAACCAGAACCAGGAAAAAGAGGATGAATCCGAAATTCCTAAAACAGACGAATAA  
AAGCTGTTAATAGTTTATGCCCATGTGTTATAATGACCCTGGGCATTTTTGTAAATTGAAG  
AATGTAGTGGATATTGAAATGCATATTGAAGCACAAAAAAGATTTCGAGAAGCTGAATGG  
TCTGTTTCGCACAGCAAAACACGATCGAATGCGCGAACTGCGAACCAGCATATGGAGAAGAC  
AAAGAAGCTGGCCGAGTCGAATCCGAACTTATTTTCAGAAGATCATGTTGCTAAAGCTATT  
TCGAGTTATTTGAAGTCGAATGAATATGACGTAATGCTTGACCGTAGAAAAGACGTCGCA  
AATCAAAAATTTTCGTTATCCATGTTGCGATACCGATCAAATCCAACCTTGTTCAGGGTT  
CATAAAGTAGTTGATCTTCGATGACGCAAATGCAACCGGAAATTTATTTGAGAGTCTCCG  
ATATGATGTTTGGAGAAGCTAAAGCGTTAATAAACCAGCCCTCCTAAACTTTTCTTTGGTA  
AAGAATATGATGGGACTCATGTAGGCAGTATTTTGGAAAAAATACAGAAATAGAATGGTC  
CAGGAGATGCTTACCTAATGGAGTATCGGGTACTGCTAGACGGCGGTGATGTCGTAACCTA  
GAGTAGGAATATCCAATTATAACTGGATAACAAAAGTTGGCTACAGGCCTGATGTTGAAA  
TAACAAGAATCAAACCCACAGAGGCGACGTTAGACCGATGGAGATGTATCTATTCGGAGA  
AATGGCATGATTGAAATATAAGGAATTGTTGCAGAATCGCACAAATGCCCGGCATGCGAC  
TTTATTGCCAAACGTCTTGAAGAAGATGGTATAGAATATTCATAAAAAACTGTTTTGCG  
GGATGCAAAAACCTGATCTCGGGTTTGTAGTACCAGCGAGACGTCAACGATGAACTCAGGCG  
TCGTATAGTGCAACCCAAAGGTTCCCTGGAGCTTCCCAAGGTTTTTGTTCATGGGATATC

CATCGGCGGTGCCAAAGCTCTCCTGGATTATCTGGATTTCATAGGCCTCGTTCGGAGGCCTT  
TTTCGTTAAAGTAGTGTACAAGGTGTTTTTTGCGATGATAAGATAAGTCACAAGTCAAGTG  
AATGAGATTTACATTATGATCGATATACCGAATATTATTGAAAATATGAACAAAATGTTT  
GCGATTCTTGGGTATAAGCCCAATAACGGCAAAGCGTGGACAGTCTATGTTGACGCAGAA  
GGCATAGGCCGCCAACCAATCAATCGCCAAACTGCTAACATGGTAGGCTTGAACATCTGG  
ACGCCGCTGTGCCAGCACGAGAACTGTTTGAATTATTGCAACTCCGCAGCAACTTGAC  
GAAGTTCGCAAGTTTGAACAGACAACCAACGAACAATTGGTTGGTCAAATATGCTGGTG  
CATGACAAAAAGAACAACAAAATAGAGCAATGTGTTTATTGCTAATCCTATGTCAACT  
ATGTGAGAAAATACTTCGTCTATGAAAAATATTGCCGCATTTATTTCGTACAAAAATCAAC  
TCGTTTGTCAAGAAAAATACTTCTGTGCAAGACCAATATGCGAAAGCAGCAGAACAAGTG  
ATTAGCCAAATCACCAGGCTGGAAACGACAAATGTGAAACCCGTTTAAGAAGAAAAAAGG  
TTGAGCCAAATATGCAAAAAGATAAGCAAGTTGAGGGGCGGCGAAAAGATAATGAAATTCGT  
ATGCTCATGGACCAAATCTTCCCATCGAAACTCAAGTTAAACTTGCTATTCTGTACCGT  
CGTACGGCAGATGCGCTGAATGCCAAAGCTGATGAGTTGGAAAAAATGCGGGACGAGATT  
AAGCTGGCGGTTGTTGAACTCGACAATTCACGTTTAGACTTGGCTGCCAAACTTGAGTTT  
ATCCGCGAAAATCGCAGTGCAGAAGCGCTTTGTATTTCTTGTCCGAAGATGTCATCGAA  
TTGGCTGGTCTCACCAAAGTCGATGTCAACGATGTTATGCTGCGTATCGAAACCTTGAAC  
GGCTATAAACAAACAGCTGTAACAATTAGCGAAATTGAAAATTATATCAATGGTCTGAAG  
TAATTA AAAAGGCCTCATTGGAGGCCCTTTGAAAATGGAGTATGCTAATGATTTGCTCA  
ACATTAGTAACTCTAGCCGATCCAACCTGGAATTCGAACTAACTATTGGTATAATCCGGTG  
ACAATCGTATATAACAACACGAAAGGCGAACCTATTGACGCATACACCGCTGATTCTATG  
GGATATACTATAAGCCGAACCGTAGAAGCCAAAGACACGATCGATTTCGTTTCTCAAACCTG  
TCTAATGCCGAAATGAAAAGAATTATCGCGAAATGATAGGTAAAGATCGTCAGATTGAA  
CGAGAAGAGCATGATGGCAGTGCTAAAATCGATTACGAAACTTTGGCTAGAGCCACTGAA  
ACTGCTGATAGTCTTATACTCAATAAGATTA AAAACGAGTGATCTTTTGAATTTGAAGGCG  
CAGTATCTTTCAACTGTTTCTGGTATGTGCGGCTGCTGCGGCTGCCGTTGAACAAATCTCC  
GGTGGTATTCAAATTGGAGTAGAGCGGCGACGGAAGCGGACTTCGGAAGCCAGCCACGGT  
GAAAAGTATATCGCGCATTATAGCATTTCCTGTAGCAGATTTTCAGAGCCGTTGGTGAC  
GCAATCAAATTGGTCAAACCTCTGGGGTCTGCACATCCTCAGTGGTACATATCGCTTTT  
ACAAAATTGGCTTACACTAAAATGGCTTTAAACAACCGCGAAAGTGAAGTAAAATTTGTC  
AAAGAATAGAATAGCCATTTACCGAGGACGTGCTTATCAATATCATGCTGGAAAAAGGC  
TATAACATGTCGATCAGCTGCCCAAATCAAATATTGCTGTTGGGTGAGTTGTCGAATTAT  
TCCATTCCTGAAATATCGCGAATTGAAATGTTTGTAGACTATTGCCGCCGAACTGCTCCG  
AAGAGAGACTGAAACAGTCTACAATGACCGTCGATCGTGATAAGATAATATAGCTGAAAC  
AAGCTTTCAAATTGTCGAGAGGAATTCAAATATGTCTAATGCATTCATTGCGGTTTCGTAA  
CTTTGCTGTACACGCTGCTGCCGCCGAATTCACCGCTGACAATATTCTTGGTTCGTGAAAT  
CACCGAACAAATGATCGACAAAGTTGAAAACACAGTATGGGATGCTATGATGGAAGCGGG  
TGTTACCGGCATTGGACGCCGGGCGATTTCGCAGTGTTATTGTGCAATATATCGCAGATGA  
ATTCGGTACCCAGCCGCTTGGCCACACTCCTACACACGCAGGTTACAAGTTAGTCGCCGA  
AGACGCGTACAAGAAATATCAAGGAAAAGCTCGCAAAATCCGCCAAGAAATGTACGGCAA  
CAAGCGATAATTTTCTTAGCTCCAAATAAAGTATCTGAAGGCTTTTTCGCAGTCTTCCGAA  
ATAGGAATATCACAATGGAATTCAAAATATTGTTTCAAGCCGTCATGCTGGTCCGATTG  
ATCGCTATATTATGGATTTGAAAATATCGACCGCGTTTCTCCGGGTGGTTGCGAAATGC  
ATATTTTACGTA CTACTTCTGGTGCTGATATCATTTCATGTTGACGCATATGACCCCG  
GATTGTCCAACGAAGTTCACCGGCACGTTTACATTCTGAATGCCATTCGTGTGCCGG  
CTGGTGACACG TAGTCGGAGTTATATCACGAGAAATTATAGCCGCCAGGCCGAGAAAGC  
TGTTAGCGAATTTATCTACATTGAATAATTA AAAATGAATTTCAAGGGCTTTTATGCTGGT  
GTAGGGAGTCGCGAGACTCCC GAACATATTTGTCGTTTGTATGAAAGATATCGCGGCGATT  
GCTGCGATCCTAGGATATAACGGACGTTCTGGTGGTGCCGATAAAGCAGATGACGCATTT  
GAAACTGAATTTTGGCAGTTGCTGATAGTTTAGCCATCGATAATATGGCTGAATTTGAT  
GTTTATCTGCCATGGAAACGATTCATTGGCCGTTTTGCACCAAACATGCTCGTCAAC  
CTCATTTTACCAAGCGCCAATGAGTGGGAGGCCGAGCAAATCATGAAAACGGTCCACCCA  
ATTTACTCGAAAGGAGGTA AATTGACTGGTGGTGCTCTTGCATTTTCATACACGAAATGTG  
TATCAACTTCTAGGTTATAATCTGAAAACACCTTCAGAATTCCTTGGTGTGTTGTTAGGTT  
CCAACGGATAACGGAGTTTCTGGAGGAACAATACTGTGTGGCAGCTTGCAATGTGTCAT  
GGTGTAGAGTGTTATAATCTTTACAACCAGTTTGACATTGAGCGGCTCAAGGAATTTTGG  
GATCTGTGAAACTTTACTCTCTCCGCTATAACCAGCTGCAGGAAAAACTGCAGCTATTA

TAAATCATATTGTTGAAAATAACGAAAAGGCAAGTATAGCCAGCATATCTAGACAATTGA  
CGAGGCAATCTTTTCGAATACTTTGTCCGGTCTGGGCAGAGAAGGCGAGTTAGTTGACACCG  
ATAACCGTCGAGGCCAAAAGTCGGTACACGAAGCAGTTATCAAAGCATCCGAAGAATTTG  
ATGTGATTTTTATAACGCACGCGGCTTTAATGGTTCTTCGAGATATTGATGCTTTAAAAG  
ATTTAATCTGTATATCGATGAGGTTCCAGAATTAACAAGCTTCGAGCGATTTACTTTCA  
CAACATCAGTCGAAAGTCACATACTCGAATTGTGCAAAATAGATGAAACTGGACTATTAG  
AGCTGAGAGATGAGCATCGAAAATCAGTCCAAAAAATGGCAATAGATGGCTTTAGTGGA  
ATGATGACTTTTATTCAACTCTTTTCCCGTTGTATAAAGCACTCCTGACAGGTGTCCCTG  
TCAGGCTGTGAGTAGAGGGAGGTGTGACGCAATGTTATTAAGTGAATGACGCGTGAAATG  
ATGATTGGGCAAAATTCAAGTTAATAACTGTCCGTTCTGCAAAATTTTGAGCAGACTTTTA  
CTGGCATGATTATGAAGCATTTTAACGGATGGGAATTTGAAGAGTCTCCGCTAGTTGAGC  
GGTAAGCTTTCCGAGATTATCCTAAAACCTGCTCGCGTAAAAATTCATGTAATGTTTGATG  
ATGTTTGGTCTCGTTACACAGCCGACAAGGAAGTAGATGGGATTTTCGAATTACACTCGCA  
TCGAAAATACTCTCGACACAATCATAAATGGCGATTTCAATTACAATCGAAATTCTTATC  
GGCCAAGAATGCCAAAGGGGACTGAAGTTCCTGATAACCCGACGATCTAAACAATTATT  
CTGATTTAACCAATGTGGTTGTGATGTTTTCGTATAATCCGGCGCCTTGGCAAGTTCCAC  
TTTTGAAAGAACTCGCAAAGTCGGTAGGCTTAGATGAAAGTGCAATGGTTGACGCGTACA  
TAGTTTCAAAGTATCTTGAACCCGCATCTCAACTTTGCACAAGATGTGATATCCGAAATG  
AACATTCGCTAAAACCCATCAACCTGTATGTTCTGATATGAAATTAGCTCAATATATGT  
TGAGATATTTGCCGCACGCTGAGATATGTGACGGTAATTCATCAAAAATCACAAACAGG  
TAAAAGAAATCGAGAATCGTATCAAGCGCTATACCAAATGACCGAGAAAGAAATGTTCA  
AATACAAGTATCTGCTAAGAAAACCTGGGGCGAATACTCGATATCAGTTCTGCGAAAGACC  
AGGAAATTATCCAGGACTGGATAATCACAACGCGAGAAAAAGCCAAAAAGAGGGCCTCTA  
CATGAGGCCTTTGTTCTATGCACATGATAACATAGGGATCACTCTGGGGTTATCAGGAAT  
TTTTGATGATAGGTTTTTAGTCTAATGACCTTGTTTAAACCTGGCTGATTATAGAACTCC  
TGGTTCCAGGTTGAAGCTTGCTTGAACCTTATCTTTTTTATCCTTTTAGTTATAATATCTA  
TTAAGCCATAAAGGATAAGTTTTGGCAGGGCCAAAACCTGCACGCAGTAAAATTAATAA  
GTTTAGCAAGCTTATTAGTATGATATAATCAATCATAGGAGGAATTGCCCTATGAAATAT  
GTTGACAACGAAGTTCTATACCTGAATATTTGCAAATGGAAACAAGATATGCGTGATGCA  
GGGCTTCACATCAAGATGCCAGATGCAATTGGTATAGACATTATGAAGATTGCAAAGGT  
TTTACCGGATATTACAAATTTGCTGGATATACGAAAATTGGAAAGACGGAATGAGATCT  
GATGCAGTCTATGCTGTTGTAAAGGGATCAGTAAATTTTCGATGAAGAAAACCTACAAAAA  
CCCCATGCTTATATCACACAGGCTAGTTACCGCGCCTTTATTGGACGCATCAAGTACGAA  
AAACACGAAATGGCTATCAAATACCGGTATTTTTTGACCAACGTGTATGACGAGCATGAT  
GAGGATATGTCACGATTGGTTGATGAAAATTTTCATCCAAGACATCCATGGCAAACCTAGTA  
GCCTATGATTCATCCCTTAAATCTAAAAGGAAAGATAAAGAGGATGTTCCCAATTTGGAT  
TCATTCTATGAAGACGACCCTGAAGATTAATCTTTTACCCCTCATTGATTCAACATGCGG  
AGAAATAGAATTATTAAGCGTATCTCGTAAAACCTCCAATTATTGGATTATAATATTCCTG  
TAGTTTTAAAATCCTGCCCATATTTTCATGGCAGCCGTTTCGAAGTAGAACTAGGCCAACT  
CGATTGGCATATTGATGTAGACACAATGTCAATGGAGATTTTCATATGTCGCCTGATTACG  
AGGTTGACCTTAGCACTGGTGCAGAAGCTCTGAGTGAAGTTGATGACCCTAATCTCATGG  
ATTTACAAGAAGATCTACGAAAAACAAGCTGAAGAAAAAAGCCGCAAAGCATCTTAAAC  
TCACTGGAGAGAAATTAAGCGGCTGAAGAAACATGCTGAACGAGCTCTATTCGCAAACAA  
TAAAGAACAGTATGCGTATCCTATCAGTAAAGTTCGTACCGTTTACAAGCAAAGCAACT  
TCCGCATTCAGCAATGATCACTATGTTTGAAACTAGTCGTCAACAAATGTTGACATGGC  
TAAAGCATATGCTACTGCCATCCAACCGGCAGAAAAATAATCAAGCAAATCGCAAACCTG  
TTCCAGTTTGTCTATTTGCTCTATTATAGGCTCCACGGAGCCGATTTTTGTATTAGGAT  
TTAAACATGAATCTTTTGCATCCCGGTGATATGCACAATAGCGTAAAAGATGATGACCCT  
TGGCATAAAAACATCACTGAACACATAATTGACCAGGCTGTTGAATATTCTAAAGCAAAT  
GGGATAACTCAATGGCTTCAGAGTGAGGACTTTTTTTGACGTTAGAAAGGCTGTAACACAA  
CGTACAATGGAATTCGTCAGGACTTGAATTACGCCCAAATGAAAGAAGCTGGTATTATT  
TGCTATGTGATCGTGGGAAATCACGACATGAATAAGAAGGATAAAAATACATCCACATAGC  
GTAAGCGAAACTCTGGGTAAAGATGAAACGTATGTCGTGATTGAGAAACCGACGACGGTC  
AATATCGAAGGTCTTGATTACGACCTTATCCGTGGTTTTGTAAAGAAAATGCATCAGAC  
ATTTTCGAGTTTGTCAAAAAGTCAGAATCCGCATGGTGTCTTGGTCATTGGGAACTAAGC  
GGATTCTATTTCTACAAAAATATTCCGAGTTCGGGATACAGTGGAGATTTTTTTGAAAAAG  
TATGAAAAAGTTGTCTCTGGACATTTTCATACTCAATCAGATGGTGAAAATATTCACTAC

ATCGGCACTCCTTAAATGATTACAGCCGGTGATGAAGATGACCCTCGCGGTTTCTGGGTT  
CTTGACACAGAAACCCGTGAATTTGAATTTATTCCGAATTCCAAACATGGCACAAACGA  
CTGACTTCTCCTGGTGCTACAATAGAAGAAATTCGAGAGTGCTCCGGTTGTTCTGTGCGT  
TTGATTACGAATGAAGTTGATGAAGGCTTGACAAAAGTTGAATGTCTTCTGGCTAAAATT  
GTTTCATGATTTGAGAACCATCAACAAATCTGCCAAAATTGAGGTTGATTCTTCATCTGAT  
ATAACCGATGACGGCGAAACTCTTACTGTTTCATCTATGGATACTTCTGGTCGTTTCGATG  
ACCATAATGGGATTATTCGCTGAAAGGGGCGCAAATTCAGCATCGGTGCGGAACATAAA  
GAAGCAATCGTAATTATGGCAAATGAACTTTATGCTGAGGCTATTGCATCATGATTGAAA  
TTAACAAGAAGCAGCTTGGATTTATTCTAGTTCGCTACAAAACATCATGTCCGTAGGCG  
ATGATCCTATCGATATGTGCTTAAACAAATATGCTAAAACATGGTGCCTGGCAAAAATG  
GCGCCGAAAATCGACAATGTAGGAGGCAATTTATTTTGCCTATACGGTAAGCCTTTTC  
GAGATATTACAAAAACCAACTGCTGAATTAACAACTGGCAAGAATTTGTTAGTGGAAAC  
TTTGGTTGGAATACGAAGAAAAGGTTTTTCACATTACACGTGGAATTATGCATAATAAGT  
TCTCGATAACTTGTGACGGCGTGGCTATAGATGCTGCAGCATCAGTTAAAGATTTTCAGT  
CATATTTGGAAGAAATGATTGGAATGAATTCTACCAGTTTTAAACAGATAGTTGTTTTGG  
GCACTGGTGACTATACGCCGTTTCTGCAACTAACAAGCGCCGAAAGGCGCAAACCTGGTG  
GAAGATTCGCTGGAAGTATCCGTCTTAGCTCAAATGGGTAAAATCAATAAAAGCCACGGA  
TTAAAGAGTTAAACCAGGATATCACTTCAGTTGATATGGAAATAAACCATATAAACTCAC  
AGCTGAAAACATAACCAGGATCACCAGAATAACTCTAATGCATCCAATGCTGCTGCCATAT  
CCGACCATCAGGCATTATATGACACTGATCGTGAAAAAGGAAAAGAAATCAAGTCGGCTA  
TTGATTTGCTCACAACGCAAATTACAGAATTCGTGATGCCTGATCCCCTGCATCCGATC  
TTGGCAAGTTTACAATGGCTAGAGCAAAAGCCGCGCAGCGCAACATGAACAAGTTTCCGGTA  
TTGCTCATATGCGTGAAGATGGTGGAACGTGCCCAACATGGATGCAGCAATTTGACGATC  
CTGAACTGCTAGTGAAATTGCGTGATAAAATGTCGCAGATCCAAGGTCAACTGGATAAAG  
CCGATATTCGCATAAATGAACTCAACCAAAAAATGATATAGTTCAATGAAACAGCTGTTA  
ATTTCCGCGATCTTCAGAATAAGTTAATCAACGAAAACAGTCTATTGATCTTTATGTTA  
ACCAAGCTAAAGCTGCAAAAGCTGCAATCGTGCGTCTGCAAAATGAAAGAACAGATTACA  
AATCGGTAATCGACCAACTCGGGAATAACCTACGTCTAAAAATAAGTGCTAAGTCTGATT  
TAGAAAAAGAGAAGCACCGTAGGTCTTTGATAGCTGATCTTTTGAAGGATTCCGGGAATTA  
AAGCCGTCATCATGGCCCGCTATATCCGTATTTCAAGAATCGCATCTCTCATTATCTTG  
ATATAATGGTTGCAGATTTTGGATTTACTCTTGATTCCGAATTTAAAGAAGTAATAAAAT  
CTTCAGGAAGAGGCACATTCAGTTATAACAGTTTTTCTCAAGGCGAAAAAGCTCGTATTG  
ACATGGCTGTCATGTTTGGCTTGGCGTGATTTAGCATTTGAAGTTTCTGGTGTAGAGGTTA  
ATGCGCTGTTTATGGTGGAAAGTATTTGACGGTCTTTATGATGGTGTATGCACAACGCTCAG  
TGTTTTCAATCATAGAAAACATGAAAGCCAACGTGTTTATCATTTCGCATGGAGAACACG  
ATCCTCAGAAATTTGACAGACCCATTGTAATGTCAAAGCTAGGGCGAACTAGCGTAATGA  
ATGAGGTAATTTTGGATGTTTATAATCTTCCAACAACCTGCTCTTGAATTTAGAAGTTAT  
AATTTAACTGATGAAAATGGTCATGTTAATTTGATTGTCCTGATGAAGACCTGAACCAG  
GACTTCAGCGAAGAAGATATCCGCAAGTTGAAATCAAATCGCCATGCTTATTACAATTTA  
GTTGAAATTTTCGACTAATGATTTGCGTGAATAGAAATTATATTAGAATGTCCCTTGTA  
ACACACTGAGGAATATGTATGCGTAATCAGGCCGTTCTTTTTGTACCAGCCGATATCCGC  
CCTATGAGCGATAACGTGTTTGAAACTCAGTTAAAATTCTAAAAGCTTGGGTATCATT  
ATCAGTGATATTAGTGCAAACCAATTGCAAGCTCTTGAGCAGAAAATTCGGTTCGAAATA  
TATGCCGAAATTTGATAAAATGGTTCGAGACATGGATATCGACTTGCTCGTACGCCGCCGA  
GAAAACATTTGGCCATTGGCGGATATCATGTTAAAGGAATGAAGGCCAAAAAAGTACTG  
GCCAAACAATTTCAATACGACACTGACGAACTAATTATTCAAGCTGCTCAGACTGTCATG  
GCAGATTCCTGATAAGCTATATCGTAGTTGTGTTATAATATTTCAAATACTGAAAGGAAT  
ATGAAATGAACTTACAAAAGAACCCTGTCCGTAATGAAGAATTTTGCAGCTATCAATC  
CATCTCTGCGACTTACGCCTGGCAATTTTCATCATGACCAAGTCGGTAGATGGTGTTCAT  
ACGCTGAAGCTACAATCGCTGATGAAATTGATTCCGAGCGGAACATTTATGGCCTGCCTA  
ACTTCCTGTCAATTTCTGATCAACTGGGTGAAAGTTCTGAAATCAATCTCTCAAACGGGG  
AAATTGTCATCCATAATGGTCGGGCAAAAGTAAAGCTGCCTGATGCTGAATCTTCAGTCA  
TCGTGGTTCCGAAGCAACGGCTGCGTATGCCACCGGCTGATGTAGAGTTTGACCTGAAAG  
CTGAAGATTTAGTAGAAATTCTCAAATCTCTCGAGCATTGTTGGTGCAGACCCGATCGCGA  
TTACTAATCGCAATGATCATATTGTTATTGATGCGTTTGCCATCGAAGACGGCGATAATG  
CACGAACCCGATATTCTTCGACCGTGTGTCTTACGAAGGCACCAACAACCTTCAGTTTCG  
TTATCAACCTTGAAAACGTCAGTGTGCTCGTTGCCGAATACAAAATCAATATTTCTTCCA

AGGGCGCTGCTCAATTCCAGGGAATTAATACCGCATATGCATTTGTCCTTTAACCATCTT  
CAAAGCAGACTTCTAATATATCCTGGTGTGATATAATGCGGGCGTAAAAGCCCGCTTTC  
TTTTGAGAGGAATTTTAATATGTTGACAGTTAATGACGGCGAATTCATGTTTGAAAACAA  
ATATCGCCCAGGAACAATCGATGAATGCATTTTGCCAGAATATCACAAAAGATTTTCAA  
ACCTCTCGTTAAAACCTTGTCGTATCCCCAATATTATTCATCATTCTCCTTCCCAGGGAC  
AGGTAAAACCTACCGTCGCCAAAGCTCTGGTATCAGAAGTTGAAGCCGAGGTTCTGTTTCGT  
TAACGGCGCAGAGGCAAAAATGGACTTAGTTCGCGATGTTATGACTCCATTTGCAAGCTC  
TAAAACCTATGGCAGCAGGTGGAAAAGTAGTTATCATCAATGAATTTGATCGAGCAGGTCT  
TGCAGATTCTCACCGTCATCTTCGCTCATTCATGGAAGCTCATTCCAAAATTGCACATT  
TATCATTACTGCGAATGATTTGGGTTGAATTATTCCAGCACTTCAATCACGGTGTCTGTTG  
TATTCAATTTGGTAAAGCCGATCAATCTGATAAAGTCAATATGATGAAACATATGATTGT  
TCGTGCCGAAGCAATTTGTGATGCTGAAAATATGGAAGTTGAAGATCGCAAAGTTATTGC  
CGTTTGGTTAAAAGAAGCTTCCCTGATTTCCGTAAAACCTCTCAACGAGATGGATTTCGA  
TGCATCCGAAGGTAAAATTGACAGCGGTATTCTGAGTCTGGTTCTCAATACCCGCAATGA  
TATCGAACAAGTCATTGATGCACTTAAAGCTAAAGATTTGAAATCGCTTCGTGCAATGGC  
TGGTCAATACACGACTGAGTACCCTGGTTTTGTTGAACGTCTATGTAATGCGCTGTACCC  
ACTCGTTAATGGTCCGGCAAAAATTTCGCATGTACGAAATTATCGGTGAAAACAACCAACT  
GTTTGGCAAAGCCGCAAAATATCGAGTTTCATGTTCAATATATGTTTCGTTTCAGCTTGCCGT  
AGACTTGCATGGTAACTGGCTGTAAGGAGTTCGATATGAATTTGAATTTCTTATGGGTG  
ATGATGAGCAACTCAATGAGCACGAAATTGCTTGGAAATCGAAAGATTGGGATGACGTAT  
CAGCATTAGCTGATTCGTTCAAAGAACCCTGCCGAAAACAATGCATTTCGATTGTTGGATG  
ATATCACTTACACCAAACGCAAAGATGTGTATCAAATAGTGACTATCCGGCATCGTTTA  
TCAATAATGCTCTTTCGATGCATGCCGAAACACTGTATTCCGGCCTACGACACGAATCTTC  
TGTCAGCATTGCCGGCCCAAGCGCAATACAATTACCTGGTGTCTATGCAAGAAAAGGCA  
AGATTTACGGCAAATGGCCTAAACTAGATGACTCAATCAACGAAAAGCTTTATATTGCCG  
TTATACAAGCAGCGAATAACGTTGATTTCCATACCCGCAAAGATGTATATGCCAATCATGT  
AAAGGCGAAACACTTTGGATGATTTTCTGAAAATCACATATTTATTGTAACTCCAGCTT  
TTGTTAAAACCTGTTCCGAAAACAGCAAAAAGATCAAACGCAGATGCTGAAGTTGGCTAAAA  
AATTCTAAGGTTTTCTTATGATCCAAATCGATATCAATCATCCTGATGATTTTCTGAAAA  
TTGCTGAAACACTTACACGAATTGGCATTGCATCTAATAAAGAGAAGAACTTTATCAA  
GCTGCCATATTCTTCAAAGCAAGGCAAATATTTTCATCGTTTATTCCAGGAAATGCTGA  
AACTAGATGGTCTACCAGTATCAGTTTCCGAAGAAGATATTTCTAGACGAAATAACATTC  
CTTCATTGCTTCAGTCATGGAATTTGTGTAATAACTAACTCCTATTGAATTGTCATCTC  
ACAATAATTTAGAGTTATTGGCCACAAGCAGAAGGGCGAATGGCGACTTTTCGCGAAGT  
ATCAATTTGGTTAATGAAATGGCCTCAACAGAGGCCACTTAGAAGGACATATTATGCAGC  
ATTACACGAACATCGAAGTTATTGGAAATACCATTTTGGAGCGTTACGTTAAAGACGGTG  
TAAGACTATCGCGAAAACAATTTCTCAGCCAACACTCTTTCATCATGCCGCCCCAGGTG  
TAGAGATGAAGCACAAAGACATCTCTGGGCGTTTTTTCGTAACGAAGAAGCATGAAAATA  
TTTGGGAAGCAAAGCAATGGCAAAAACGAACGGCCGAAATTGGCCAAGATGCCATGGGTA  
TGGACGACTATTGTATTTCTACATCTCCGATAATTATCGCGGATTTATTGATTTTGATC  
GTGACAATCTCATCATCGTTGTAGTCGATATCGAAGTAACAGCTCCAGAATTCCTGATC  
CCAAATTTGCCAATATGAAATTGCTATGATTTCCCATGTGCGTTTGCACGAGGGCAAAA  
AGACATATTACATTTTTGACCTTGTTAAAGATGTAGGCCATTGGGACCCATCTAAGTCTG  
TTCTAGACAGATATATTCTTGACAATGTCGTTTACATGCCATTTCGACATTGAAATTGATC  
TTCTTCTCAACTATATTCAACTATGGAAATCATCTACCTCTGATGTGGTGTGGTTGGA  
ACAGCGAAGGCTTCGATATTCGTACATTATCACTCGAATTATCAACATCTTGAGTGAAA  
GTGCGGCTAACCAATTAAGTCCGTACGGCAAGATCGGCTCAAAAACAATTACAAACATGT  
ACGGTGAATAAACGATCTATCGTATCCATGGTGTGCACTGATGGACTATATGGATGTTT  
TCAAAAAGTTTCAATTTTCACTGTTATGCCTGACTACAAGCTAGGTAACGTTGGATATCGCG  
AAGTTAAAGCAGACAAATTGGAATAAGACGGCCCAATTAATAAGTTCCGAGCAGCAGATC  
ACCAACGATATGTCGATTCCTGTGTGCGAGAAACGGATATTATCCTGTTGATCGATGGCC  
GTCGATGCTTTATTGATCTTATTCTGTCTCTTTGTTATGACGCGAAAATTCGTTTCGAGG  
ACGTATTAGGAACTATTAAGTTTGGGATTCTATCATTTTTAATTCGCTTGTGAGAAAA  
ATATAGTTATTCCGATGGCGAAAGCTAGTCCAAAGCAAAGTTTCCCTGGGGCATAACGTAA  
AAGAACCTGTTCCCTGGTGCATATCGATATGGCATGAGCTTTTACTTCACATCTCTGTATC  
CGAGTATTCTACGTCTTCTCAATATCAGCCCAGAGATGATTGCCGGAATGTTTGCACCTG  
CACATCTTGACGACTATATCAATAAGACTGCTCCTAAACCATCTGAAGTTTATAGTTGTG

CCCCAAATGGCATCATGTACAAACGGGGTGAAGTTGGTGTACTGCCAGCTGAAACTGAGA  
AAGTATTCTTGC AACGTAAAGCCGAAAAGAAAATGATGCTTGCAGCTATACGCAATCAGG  
AAGCAATTAAGAAAAATTATGGCTTCCAGGGGCGAAAGGGTAGACCACTAGTGTTCCGCT  
TTCGTATGGGTGTTAAAGTATGCACCCATCTTGGAGGAATTACATTATGTGGTACAGTTA  
CAAATAACGAATGAGCTAAACGGCAAATTTACGTTCGGGGTTCACAAATCCGAAGACAT  
GAAAACGACCCTTACATGGGTT CAGGCGTAGGTGTTAAACGAGCAATCGCCAAATATGG  
TGTTGAAAATTTCACTCGGACGACGTTGTACGAATTTGCGACAGCCGAAGAAGCTTATAA  
TATGGAAACCGCCATAGTACTAAAGAGTTTTTCAGCCGTCAGACGTCTACAACGCAAT  
GGTCGGCTGTAAAGGTGGTTGGGCCCATATCAAAAAGCCCGGGCAGCATATGAAAGACCC  
CGACATGGCTGCTTACATTGGGTCTTTCGTTTCGCCGCGCATATGAGCAAGACCCGAATAA  
AAAGCTTATTAACATCGCCAATTTCAACAAAGCGTCGGAAAGGGACCTTGGCAAGAAACA  
TTCAGATGAGACTCGCCAAAAGCGGTCCGACTCGCTAAACGATTTCTACGCGAATAACAC  
ATCTGTTTTAACAGGAATCCCAAAGTCAGCTGAGCATCGCAAGAAAAAGAAAGCCGCCTG  
GACTGAAGAACGCCGCGCAAGCCAAGCAGAGCGTCGAAAGGCTCTAGTAGCCTCAGGTAA  
TGACGCATTCGCTAACACAGGCTGGGCAAACTAATAGCGAAGAAACGAAGGCTAAGAT  
GTCCGAAGCGAAAAAAAACACTGGGTTGAAAAGCCAAAAGTTATTGTAAAATGTTTACA  
CTGCGGAATAGAAGGCATCAAGCATGCCATGCTCAGATGGCATTTCGACAATTGCAAACA  
CAAAGAGGCATAATTATGGAACCCGAATTATGCCGCGACTTCAATGAAGATGAACTCGCG  
TATTTGAATACTCTTCAACGGATGAACTTCATACCATGATCGGTTCGTTGTGAAAAAGAA  
GAACAAAACGCAACACCAACCAATTGAACCGCCAAATTTGATCAACTCGCTTACGGA  
GCTTTTTAACACTACATTA ACTTGGAGCTCCTTAAACCCGGTGA ACTCAGGGAACCGCTC  
AATGAGACAATCCTGAGCCAAGTCTCGAAAGAGAAAGGTGCATCGACTATGGAAAGGCGG  
GTAATACCGAACCGAGTAGAGTACACCCAAGTGGGTGGAAGCGCCGGGGGTGCAGCAATG  
GATATGATATAGTCTGCTCTGCATAGCGATATGCAGCTGTGAGTAAAGGTCGCGACGACA  
TATCCAAGGTCTTTGATTAACGACCCAATGCGAACACCTGGTAGGAAACAACCTCTTAC  
GATCCTACGATTTGCGAACTGCTGAAGCTATTACA ACTTACGGTCAATCGGCTATTTCGGT  
GGATTGAGCGTAAACTGAACGAATGTATCAACAATCTTGTCAAACCAATTAATGTTGATT  
ATGTGTGTTATATTGATACTGACTCGGTGTATCTCAACATGGAAGCAGTGGTTACTAAAG  
TAGGGATTGACAAATTCGGGACACCAACCATCTTATTGATTTCCCTTGATAATCTCGGAC  
ATAAAAAGCTCGAGCCATTTATCGACGAGTCATACAGAGAACACGAGGAGTATATGAACA  
ATGAGCAGCATCCCTTGCTCATGGAACGCGAAGCAATTTTTGGAGCTCCGTTGGGTTCTG  
ACGGAATTGGTGGTTTCTGGACAGGTAAAAAGCGATACGCTTTGAACGTTTACGATATGG  
AAGGCACTCGATATGCTGAACCGCATCTGAAAATCATGGGTCTAGAACTCAACGATCAT  
CCACACCTTTGGCTTGTCAAAAATCGTTAAAAGAGTCAATTCGTTCGGTTGTTGCAAGAAG  
GTGACTCCTCTTTGCAAAAATTTTTTCATTCAATTCAGAATGAATTCAAACAATCGATT  
ATCAAGAGATTGCCGCAGTGTCTTCTGCGAATAATATCGCCAAAACGCGGATTTCGGCAG  
GATATCCA ACTAAAAGAGCTCGGTATCATGTGAAAGGAGCCCTTG CATATAACCGGATTG  
CAAAA ACTGACCAAGCAATTCAGAGATTGTTCAAGGCGAAAAGGTAATGGTTATTCCTC  
TTCGTGATCGCAATCCATTCAATGAAGCGTGT TTTGCTTGGCCGTCAGGAACACAAATTC  
CACCTGTCGTAGCAGCCGATGTTTTGAAGTTTATAGATATAAATAACCTTTTTTGATAAAA  
CATTCGTTAAACCCCTTGCTTCAATTTGCGAAGCTACTAAAACAGATTATGAATTCAGGA  
ATAATTTGTTTGCCATGTTTGATATTTGAGGAAATAGTATGTGTAATATGACAGTTGAAG  
ACATTCGAGACATCATGGTGTCAAATAACAAATCAAATTAATTTTTTACTGACAAATCCG  
AGGTTAAA ACTGTGCAAATTGCCCCAGTAATGTTTAAGGCCGATGAAGATCTAATTTTCG  
GTAAACGTAATCACGATTATATTGGGCGAGAGTTGTCTTGGTATTTGAGTCAATCTCGTT  
CTGTTGCTGATATTCAGGTA AAAACCCAGCAATTTGGGAAGCTGTTGCAGATTGTAACG  
GTATGATCAACTCCAATTATGGCTGGGCTATTTTCAGCGAAGAAAATGGAAATAAGTTTG  
CAAATGTTGTCAAACATCTAATTCAAAATCCATACACTCGTTGCGCCAACATGATTTATA  
CTCGACCGTCTATGCATACTGATTACAATGCAAATGGTATGTCCGATTTTCATGTGCACCA  
ATAACGTCCAATACCAGATTCGGGATGGAAA ACTGAATGCAGTCGTT CATATGAGGTCCA  
ATTACGCTATTTTCGGTTATCGGAATGATTGGGCGTGGCATGATGATGTTTTGTCTTAAC  
TGGTTGATACGCTTCAATCCCATGAAATCATGGTAGAAAAGGGTGATATCTAATGGTGTG  
CTTATTCACTCCGTGTGTATGAAAGACATTTTGGCCTGATGGAACAATATATTGCTCAAT  
AATTCTCAATTCAGCATAGCGAGCATAATGTTGCTTGTCTATGTTTAGAATCTTTATAGG  
GTTGATATAATGTCAGCACACAAAGGGAACATTTATGGCATCTACCACTGAAGATGAAAC  
TCCCAAAA ACTTAAATGACGCTCATGCTCTTATACAGCATGCTATGGAAAACGTTAAATA  
AGAGCTGCTGATAATCGATAAATCAGGCAAATCACAGCTTGTTATATTTTTGATGCTCAT

ATACATGATGGAAAACCTGCATGTAGATTACAAAGCAGTTAATGAAAATGATGAAATTCAT  
CAACTTGTTTCATGCAGCTATGAATGCACAAGTCAAACAAATTATGAAAGATAATGAGGCA  
CAAATTGGTTGAAACAATCCTTGAAAACCTTCCTCTTCAACAATACGTACTTTATTTTCG  
GCGTACCCGTACATAAAAAGAAGATTATTGCGACCGTGGGCCTTACCGCGAGATTTTTAAA  
CTCATCCAAAAACAGTGAATGAGTACAATACCAACCAAAAACCTGCACTTGCAATC  
GCACTTGACAATAAGTCTATCGATCAAGTAACTCATGACGGTGTGAAGGAAGTTTTGGTT  
CGTCTGTCTTCTAAACCAGAAGATCATGCATGGTTAATTAAGGAAGTGAATCTTACTGC  
AAAGTCCAAGCGATGTATAACGCGTTGTCTAAGGCAATCGAGATACAGGAACATGCGGCC  
AAACCATTTGAAGAAGGACATAAGAAATTGCCGGATTTTGGCGCAATCGAAGATTTGATG  
AAAGAAGCATTGGCTATTTCAATTTGGTGGCTCAGTCGGACATGATTGGTTTGAAGATTAT  
GAACGACGTTATATGCTTTATCAATCCAAGCTAATAAAGTCCCGTTCATCTCAAACATT  
CTGAATAAAATCACCAAGGGTGGTGCAGAACTTGGCACGCTAAATGTTATCATGGCTGGT  
GTCAACGTTGGTAAATCTCTTGGTCTTTGCTCTTTGGCCGCAGATTATCTGCAAACCTGGC  
AAAACGTCGTTTATTTCTCGATGGAGATGGCTGAACATGTTGTTGCGAAACGTATAGAT  
GCCAACTTGCTTGAAGTCACGCTTGACGAAATAGATGATGGCAACATGAGCTTGGCTGAG  
TATAAAGCTCGGATGGAGCGTCTGAAATCCAGTAATATGGGTCGTTTGATTATAAAGCAA  
TACCAACTTCTGGTGCAAATGCTAATCATTTCACGCGTTTTTGAACGAGCTGAAGCTG  
AAGAAAACTTCAAAGCAGACGTTGTCATTGTGGACTATCTGGGTATCTGTGCATCCACA  
CGAATTCGTGGAGGTTCTGAGAACTCGTATACTTTGGTAAAAGCTATTGCCGAAGAATTA  
CGTGGCCTGGCTGTCCAACATCAAGTTGTTCTATGGACTGGTGTCAAACCACCCGATCT  
GCATGGGATTCGACCGACATCGACATGTCAGATGTAGCCGAATCTGCTGGCTTACCAGCA  
ACTGCTGATTATATGCTTGCAGTGATGGAACTGAAGAGTTAGCTCAAATGGGTCTCCAA  
CTGATGAAGCAAATAAAATCGCGGTATGGAGATAAAAATTGGATTAACAAAGTCAAATA  
GGGCGTTAAAAAGAGCAACCAGAGATGGTACGATGTAGAAGAAGAACAATCAAGGCCAGG  
AACGCCAAACACACCTTCTCCAAGACAAGCTGACAATACGAAGGGCAATAACTCAAGACA  
GCATCTTGACGAACTTGCCGCGACAAGGCATTTCTGATGGCCTAACGGCCATCTTCATAG  
GAAACTGATGATGAAAACATTTCTAGAGTGTTCTGGTAAACAGAAATATCATGTCAATAT  
GGATATACAGGTTGTGCAAGACCTTGTGGCTGGTATTCTGCAGGAGACCCCGTCAACTT  
CGCAGCTGGTAAAACGTCAGGCGCAGTTATTTCCCCTGGGCCTAAACTGCTTCTAAGAA  
GGACCAGAAGAAGAAATGATTACGTTGCAAGCCGCTCAAGAAGCGTGCGAGGCTTTAGGT  
CATGTAGCCTTAAAGAATCTTAGCAATCAACCTCATCTTGATATTCTGAAGACAATCTAC  
ACGAATTGTTGTCCAAGCATGATGAAGGATGTCATGTATGAGATGGCTGTTAATCCTGCA  
GAAATTGATTCGTACTIONGGTTACGCAAGGAAAGCCATTCTCTCGTTTAGAATATGCTCAA  
CACCGTGAAATTCTGTTGGAAGCATGTCGGCAATTGGATGCTAATTGATTTTTGTCGTAG  
TATAATGGGGCCAAGAGCCCCATTGGGAGCTATTATGCTTGTGATTTTTCGTTTGCCGA  
ACGAGCAATGATGCATTTGCCAATATTCAAACGAGAGAAGGGCAAGGTCAAGTCAAGATG  
TCCAATCTGCGATCATTCCATGACGGACATGAACAAAGACCGCTTTTGGATGTATGAGAA  
GTAGGGCGAGTGGCAAGTTCATTGCTTTAACTGTGGTTATCATAGCAATTTGGGCGGGTA  
TTTAAAGGAGCGAGAAGAAGTACTTTCTCGTTGATGGCTATTAGAAAGAAGGAAAGAAAG  
CACTGTCTTCAAGCCAGAAGCAAACCCAGAAGAAAATCTCCTCACCAAAAAAATGCCGGT  
GATTGAAAAGTTAAATTTTTGTGAACGTCTAGAATTGCTACCAGCGAACCACCCTATAGT  
CAAATATGTCGCAAAAAGCAAAATACCAGAATCAGCATATAAGCGGTTATGGTTTACTCG  
CGAATGGCAGAAATTGGTAAATTCTATTTACCAGATACGTAGACGCGCGAATCACGGGA  
AAATAGATTGGTTCTACCGATATTTGACAAAAACGGTGAAATCCAGTCGTTTCAGGGAAG  
AGCTCTATCAGCCAGTCCAAACAAATACATCACCATAAAGGCTCATGAAGATGCATCAA  
AATTACGGAATGGATACAGTTGATGGGAACCGAAGTGTATGGTTTATGGCAGGACCCATT  
GACTCCCTTTTCATTCCGAATTCTGGAGCTATCACTGGCGGTAGTCTCGCATTAAAGTCAA  
GTTCCATTCAAAGCACTCGAGTCTGGGTTTCGTGATAGTGAACCATTTTCATCCTGATACG  
TGCAAGCGACTGTCTAGACTAATTGATGCAGGTGAACGACTTGTGATGTGGGACAGGTGT  
GCTTGGGCGTCCAAAGATGTAAACGATATGATAATGAATGAAAATGCAACTGCCGAGGAT  
ATTCTCCAGTATTGCAAGGACAACGTCGTGTGCGGGTTTGAAGCAAAAACCTGCGTTTTTCGC  
AAATGGAAGCGTTGCTAAGGCCTCTTCGGAGGCCTTCATTGTTTTTTATTGAACGATGACG  
AACAAAACAGTGTACTATCTCTAAAGATGATACTATATCATCATACCAAACAAACTGA  
GTAAAACAACGGAGTATATCACGACAAGTATAAATCTCGAACATCCTTCTCTATTGTGCA  
ATGCTCACCTCATAGGCGAATGGTAGGAGAATCCTCGCGTTGCGAGCATTGATCAAGA  
AAAACGGAAAGACTGGTAAAATTCCATCAAATTTACCGTTGGCACAATAGAAACTCTC  
TCGGCGGTCGAGGGCATGTGGCTTTCTTTTACAACAAATTGGCTTGGGTACGCGATCGAT



ATCTGATGCTAATGGAAGAAATGACAAAACGCGGCTATTCGGGGACTGACAATTGGAAAG  
TTGCAATTTTCTTCCCTGAATACGCCCATTTGTTTGGTGAATGGGAACCGTCAGACGATG  
ACATCTCGGTGAGTCGCACAAGCATTCTGAGATGATTCCCGAAAAGCACAAGTTAACTG  
AAATGCAAATTCACAACCTTAAGCAGATTGACGAATATAAGGAAAAAATGAACGAAATCT  
GAGCTTTATAAACGTAGATACAAGTGGGCTTTTACTTTAATGAATTTGATCGCCGCGCA  
TTGGAGAATGTCCGCGATATGCAAAATACGGAGAACAAAACATGAAAGCTCTGACTATTG  
CTCTATTATTCGCTGCTACTACAGCTTCAGCTGCTAGCTTCGATTGTCAAGTAAAAAATG  
TGAATGCCATCGAGAAAGCTATTTGCGCTGTTCCAGAACTTCTTTGCTCGATGATCAA  
TGGCAGAAGCATTCAAGGCAGTATCTCATATTCCGGAAGTTAAGGCTGACCAAAAAGCTT  
ACTTCAAAGAGCGCAACGCATCAACGTCTTTGTCTTCGCTTAAGGACAATATGACTGACC  
GCATCATTGAGTTGCAGATTATTGCCGAATTGGAAGGTGTTTCAGAAAAAACCGCATTCTG  
AAATTGTCCGAACCGATTTTGTCTAAAGCTACAAGTAATCGACCCGTCGAAAAAGACACGG  
TGGCAGATCTCACCTGGCAAGCAAAGCAAGGGGATGAACTTAGCTTGCCTGGAAAAATCG  
AGCTACACAGATTACCGTGACAAAAATGCTCCAATTTGGATACGCGACTGTGCGTACAGG  
ATAGTTCGCAACGATGTGATGGGCAGATGGGTAGCTCAAGCTCGTTCTGCTGGTCTAATT  
AATGAATTCAACTCTGTAGAGTATAAAATCGAAACCGGTTTTATCAATATGCCTATTGAT  
AATTTGAAAATTAATATTCAGCAGGGTCGTCAAGTGTGCGAACTATGGCAATAGGATCA  
ATGAGGTAATACAAAATGTGGATTCTTATTCTCACCATAGTTGGAACAGGGATGTCTTCT  
GTTCAATTCTATCCCGTTTAAACACGTATGATTCTTGTGAAAAAGCTCGACTCGTGTGAATG  
AAAATACTCCTGATTCTAGGTAATACTGCTGTCTGTGTCGAAAAGTGATATAATGACT  
ACAATAACATAGGAGAGCAAAATGACACCCCAATTAATGAATGCGCACAACCTAACCGA  
TAGTATGGATAAGGCAGTAAATGCACTGTATGATTGCCTTATTGCCAACGATAATCCTCT  
CAATCGAATGATTGACATGCAACGTCAACTTCAAATTGAGCTCGCACAACGGCATCCAAA  
ATACAATCGCGACCCACGAGAGCTTAAACTTGTGGCGAAAGTCTTGACTGGTGTCAAAC  
TCAGGACGATGATATTTCCGACGATATTCGCGAGCAGTATACTGCTCTAGGTGGAATGAG  
TAACCTCAGGCCGAATGCGATCTGGAACCATGGCACGCTGAACATGCCGAATATCGCAA  
TCGACTATTTTCTGAATTGTCGCCGGAAGACCTACTCGAAGCAAAATTCGAGTTGATTGA  
CCAAATTCACTTTGTTCTTAAACAAGATGATTGCGATGGGCATGGATGGCGATGAAATCTT  
CAAATCCATTATTTGAAAAATGCCGAAAACCTTTACACGGCAGGAGAATGGATACTAATG  
CTTGAATAAGATGAAATTGATGAAATCAATCGCTTGCGCAAACTAGATGTTGAAGAAGGA  
AGGGCGGATATTTACGCCCATATATACCATTTCAAACAATAAAAATATGAGGATTTTTAT  
TATGAATGAAGTCAAATGGATTGGAATTAACAGAGACAATCATGGCGTAACATTTGCTAT  
GAATACACCCAACGGCGTTCTAATCGGTGTTAATTACACTTTTAAAGCGGAGAAGTTTGA  
TATGACATTCATTCTGATATAAAAGTTGTCAATAATCCCAATGGAAATGGATATATTTT  
CTGCCACGGGTGATACATGAAAAAATATGTAATCCAATGGAAAGACGTCGAAGGATTCTG  
TCATTTTCTGGATGGCAATTTGTATGGCTCATCTAGTGGTGTGCTATTCCATAATTCATG  
GGAAGATGCCAAAATAATATGCAGAAAGCGAAAGAAGCCATAACAGAGTATTTGCAAGG  
AACAAAAGACGTCAAAAACGACTATTTGGGCCTCCAACGATAGTCATAATCAACAAGCC  
GTCGGAATATTTGGCCAATGCGCATAAACGAATGTGTGATACAATGCATATCGTTGATCT  
TAATGTGATCCAAAACAAATGAGGTAAAAATGGTAACATATGATGATTTGACTGTTGGC  
CAAAAAGATGCTATTGAAAAAGCACTACAAGTAATGAGAATAAACGTCATATTACAATT  
CGAGGGTCTGCGGGCTCCGGTAAACTACTATGACCCTTTTTCTGCTTGAGCGTCTTTTC  
CAGACCGCCTACAAGGTATTGTTCTCACAGCACATACGCACCAAGCAAAGAAGAATTG  
TCCAAACATGCCTTGCCCAAGTCATATACACTTCAGTCAGTCTTGAAGATTAACCCAAGC  
ACTCTCGAAGAAAATCAAATTTTTGAGCAGAAAGGTAAGTCTCGTACTTCTCCAAAACACGT  
GTGCTTATCTGCGACGAAGTATCGTTTTATACGCGCAAATTTGTTGAGATTCTGAGGCGA  
AATGCTCCATCTCATTGTGTTGTTATCGGCATTGGAGAGAAGGAGCAAATTCGGGTAGTA  
TCAGAAGATGATACGCATGAACTCAGTCCATTCTTACAGACAAGCGATTTGAACAGGTT  
GAATTGACGGAAGTAGAACGTCACCAAGGTCCAATCGTTGAAGTTGCAACAGATATCCGA  
AATGGCCAATGGATTTATGAAAAGCTTGACGATTCTGTTAATGGCGTATAGCAATTTTCA  
ACGGTCAAAGATTTTCTTTCAAATATTTTCGAAAGAACAAAACGCCCAATGACCTACTT  
GAAAATCGCATAATGGCTTACACAAACAATTCTGTTGATAAGCTAAATTCCGTTATCCGC  
AAACAGCTATATGGAGCAAACGCTGCGCCATTCTGACGGATGAAATATTTGGTCATGCAA  
GAACCGCTCATGTTTACATAGACGTTGGTGGCCAACTCTAAAAGAAGTCATTTTCAA  
AATGGGCAAACGTCAGAGTTATAAACGTTAAACCTTCTCGCAAACGCTTAAACCAAAA  
GGTGTGCGCGAAATTGAAGGCGAATGCACACTGCTCGAGTGTGAATCTTATGTAGAAGAT  
GAAGATGACTATAGACGAGCGTGGTTTACGGTTGTTTATGACCAAAAATACTCAAAATGCA

ATACACGAATTTTTGTCTATTATTGCTGAAAAATATAGAAATCGTGAAGTTTTCCCAAC  
TGGTAAGACTCCTGAGCAATACGCAATACTTTCACCAAAGTTCGACCCTTGGGTGCAATG  
ACATTTCATAAATCACAGGGTTCAACATTCGATAATGCATATCTTTTTACTCCGTGTTTG  
CATCAATATTGCAGAGACCCGGATGTTGCACAGGAATTGATTTATGTTCGAAATACTCGT  
GCCCCACAAATGTCTGTTTCGTATAAGTATCCTGATAAAGCGATTTATAGACCAGGTCA  
ACTGGTCTATTTTATCAAAAAACGGGTATCGCCATAGCGGAACCGTATTACAATACAAAT  
TCGGAGGTTATCGTATATTCAGTGATGCTTTTGATATGGTATTGCACATTAACCAAACC  
AAGTGAGAGTAGATTAGTATGAGCAAAGTGACAGCTTTTATAATTGCCTGCGAAACAAT  
GGTAAATGCTCCTGATGGTGCAGTAGTTGACCTTGCTGTTTTGTTGTTTGAGCATGACCC  
GTACAAACTGCCTACGTTTGAAGATCTGTGTAACCGCGGGCGTCGATTCAAATTCATCT  
CCAAGAGCAAAAAGGCATGAGATTCTTTGACCAAGGAACAATCGATTGGTGGAAAAACA  
AGATGTGCAAGCTCAAATGCATCTTAAACCATCGAGCGAAGATGTCAGCGTCATGGAATT  
TTATGAAAGCTTCCCTGGATTTTCTTGCAGCACAAGGGTTTGACAAGAAAACAGGTCAGGG  
CTGGTGTGCGGCGTCACAGCTTCGATTTTCCTATCATGATCGAGGTTATCCGCAAAATTA  
CAACGCTCGTGAAACATTCAAATACGAACCATGTTTCTTCTGGCAGCAACGTGATGTTTCG  
TACTACTGTAGACGCTACTCTGCTGATGCGAGATATGACCATGTGTCCTATGCCGAAGGG  
TGTGTTGGATGGATTTGTAGCTCATAACGCAATTCACGATTGTGCCAAGGCTGCGCTAGA  
ATTGCTTTATTCCAAGCGATATGCTCCCGGTCACGACGATATTCCCACCGGTGATGATGT  
TGACCCGCGCAGTGTCCGCAAATGATAGTTGCTTTTGGAGAGGGGTAGAAAAAACCCCTT  
CTTTTATCGCACATCACCTGGCGAGATGACAAAATTC AACGGGCTTATGTTATTAACGGG  
GCATGGGAATTAACAGGGTTAATGGAGTTTTGTGTGTCGAAGGTGATGTTAATTCTCCA  
ATAGAAGAATGACAAATTGCAATAGATGTTCCCTCAGGCGTTTGTAGTGGTGATTACATT  
GTAATCCTCGAATGGGCTAAAAATGAGGTATCAGAATGATTTACTAGCATTACAACGCAG  
ATAGCTTCTGGGGTACAACGATCCAAACAGCAATGGAAATCCGAAATCGGTTGAATTCAA  
CGATGGTTCCGCGGTTTGTCAAACGAAAAGATTATAATGCGCGATATGAAGCGTTGACTA  
AATCTACCGGTGAAATGCTTGGGCAAAGCATCCGACGGCCAAAACCTGGGTAGCAAAC  
CGAATCCTTTCAGGGATGGTGTACTAGTGGAGATTCGAAAGTGAAACAAAATTGCGCTTG  
GCTAGCATATCACTTCGGCTTGGTTCCAGCAAATGCTTGCAAATATGGCACTCGCGGATG  
TACGTTTGCTAACAATAACCCGCACTTTCGATAATTCATTTCAACTGAAGATTTTTGTGC  
TATTTTGCAGTTCGCACGACACTGCATTCTTAAGGGCCGCGAAGTTGCCGTTTCATGATCA  
TGACAAATTGATTTACGGCTGCTTGTCTGGGGCGGATGAGCGTTTTATCAGAAGTCGAGA  
CACTCGAAAGCTGAAGTTTTCAGTTTTGGCTATCAAATCAGCGACTCATCATGTTTTGAA  
CCGGGTCATCAACACTGATTTCCGATGGATTCAACGAACAAAACGAGGCCCGAAATGGAT  
CAGCAAGTAAATGAAGAAGTAGTTGTTTCTCTGGATATTGACGGTGTTCTCAATACGCGG  
GATGATCACATAGAATGGAGAAGTACAAGAACAGTCACCTGTGTCGTGTTTCGCCATAC  
AATCGTGGCGATATTGTCAGGAACCATAGACTCAGTTTGCTGAGGGAATGGCTAAAGAAA  
CATGATGCTAAAGTGGTTGTAATTCGCTCGTGGGTTGTTTTGCGTGATACTGGAAAAATG  
ATATGTGATTTTCTCGAACTTCCGTATCATTCCGAAGCATACTGACTGGCGGTGGAAAA  
TCTCGTGGCACTGGTGTCTTTCGTCATGTAGCCGATCATAATATCCATAGATGGGTGGTG  
TTGGATGACGCCAAGTGCATGCATGATCACGATGAGGTCCTACTTAGGCACCTGGTTCAT  
ATCAAAGCTGGTCTCAATGAATCATACTTATAAGAGGCCGACTTCATTCCGTGACACCTG  
GTGGTCCCGCACCGAGAGTCGTCTGGGAAACAGCATAAATAAAAAGTCAGTTGAATTGAT  
AAAACAACCTGAGTGACTCACTGGAATAAAAAGAACCGGGCTTCGCCCGTCGTGCTTGCCC  
GAATCCAGTTTGGCGTTTCATCTGATTTATATAGGAGCTCTTCGGAGCCCCTTTTTTGTT  
TTCAAACGAGTGTACAAGATAGTGCTTCATCATAAAATGACTTCAGGTTCAACAACCTAG  
GAGTACTGTTATGATTTACGCGATTAACAAATTCGGTGTAGCATTGCGATTGAAGCCAA  
CATTTGTGCTTATTTCGATTGCTTCTAGAGGCTGCCAAGTTTTCTCAGGTGCTGACGATAT  
GTATGCAGCCATGGATCCTCAGGTTGTCGGTTAGGAGTATCACGTCAAGCAAGATGGCGA  
TGCTATCATTTGCGAACTCGAACAGACCAACGTTTCGCGTAGAAAAAGATTTTGCTGAATT  
TATCTCTGAGTACGAAGTTAAGTGTACAACCTGATGTGGCTATTTCATAATGGCCACATC  
AAACAACATGGAGTAATGAAAATGCGCATTTC AAGGATTTCTTCTCGACGTAATGTT  
TTCAAACAAGGTTTCTGTTGTTGAGAAATCCCTCGAAGAGCATCTCTGCTATAACCACTCT  
TCTGTATGTTTTCGAAGGCAATACTCGAAGTGCTGTTCTCGAACGTGTTATCTCCGCCGA  
AGGTACCAATTGGGTTCTGAAAGAAGGTATCTACGAAGAGCTGAAGGGTAAAATCTGATG  
GAGGCTCCGAATCATAGACTGCTCCTATGCGAAGAAAAAGTCATGGAGTTGAAAAGGAA  
TTGTATGACCTTTTCATCGAAATGAACCGTTTTTGGTGCAAACAATCAAGACACTTGGGGC  
AAACTCTTTAAGACTAAGGCATACAATGAGTCTCAAGCTCAAATGGCCGAGTATAAAGAG

AGAATTCGCAAAATCATTGCGATTAATTTTCAGCAATCTGTACGTACGCGTACGAGCTG  
ATTGGTTTGGAGGGAATTGTGGATGTTTCCATGAAACGTGGACAATGACTTTTAGTGAAA  
CTGCCATACGAGTAATAAAAATGAGAATTCGTCTTGTTCGATAAGTAAGGTTTCTTAAATG  
CAAACCGCCAAGACAGTCAATCCTACAGATTGGCAAGGACCATTGTTGAATTTGCAGAAT  
GGAGGCAACTCTGTGTTATAGGCAATGATGGTCCCGAATGGCTTCTCAATGTCTACGGTC  
CATGCTGGCGCGGTAGAATTTCTGCAAACACTACAGACAATATTTTCGAGCTTCAAATGAAA  
CTTAAATTGAAAATCCCTCTCTCCGAATATCAACAACGTTTTTGCAAAACGGAACGGCAG  
AGGTTGTGGGCAAGTACGCTTGAACACTGAAATCCAAATCTGGAGAACTTGAAGTTCTCGAA  
ACAATGCCGGACGGGACATTGAGAACAATGCTACTTTCCTTGGATACCACATTGGAATT  
CCCCTCGAATAACAACGATATTTTGAATTTGAGGAGCAAAAATGATTGATGACGTTAAAA  
TCGATATGACTACCAGCTTTAACGCTAGCATGGCTGTTCTCCAAGATCAATGGGTTTTG  
TGCTGGCCAAGCTGATGGAAGAAGTAGGTGAATTAGCAAAGTCGCTGAACCAGCCAGATC  
GGTGCATGAACGCC

>NewGenomeName\_159

CTCTCTCGCTACTTAATATACTTTTCAAATCAAATGCCTGTCAAATGGGTTTTACCTATC  
AATAACATAGCAAATTCCTATCAATGGAGGACACTGTGGAGGATGTAGTACGAATATGGT  
TAGTTCTTTTACTTGGAGGTTTACTATCTGTAGTTTGGACAGGTCATAACAATGGCAAAC  
AATAAATACGATGTACTAATCCAAGACAAATACTTGGAGGGTATTACGGTCACAATAGTC  
GTGTTACAGCGTTTTGGTAGCGTTTCGTGTTTCGTAATCGTGTATTACAACATTTGACTAAG  
AAAGCTCTCATGGTAGAAAATAGAGGGCACAAAGACGTGCTTGGAGACTGCCAAGACATT  
CTTGATTCGGCTGTATAAGAACAATATCTAGATGCCCATCGGCAATACATTGAATGGGCA  
AATGCACGAGATAAGGAACTAAACATGGAGGCTATCCCAAATGGATTATAACCTAGCAGC  
TATGTGGATTATGATCAAGATCCTATATATGATAAAAAAGAGAGGGCCAATTAAGGCTCT  
TATCTTATTATCGTTTGGCCCACTTCGGACGTGGCATTAGCCAGCGAAATATGGCTACTG  
CTGTCATCAAAAAGAAGCCTAAGACTCCCACAATGAACCACGATGTTGGAACATTGGTCT  
GCTTGTTTAGTTGGGCTTTATTCCTAACGTGATCCGTACTTACTACGTTCTCAACCTTTT  
CAGCTTTCACCTCGATATTAGAACCCATAGAGTAGTCTTTATCTCCAATCTGAGTATCTA  
CTTGTTAAGCAGCATTCTGGGCAGGAAGTAAAACACCCTTAGCAATCTCTCCTGGAGACA  
GAGAACTACACCCATTAATAGCTAGGACCAGCACTAAACCTGTCGAGACGAGTAGAGATG  
TCATCCTGCTTGTTACGTAGCTCATCAATACCGCTCCGGTAATATCTCATCTCAGGCTGG  
ATAATTACTAAGTTCTCATTTCATCTTTCTAAGTTCGTTAACTAACGCGTTGTTCTCTGAC  
TGTTGGCTTTGCAACTGACGGACCTCAGTTTGAACACTGACCAACCTCATAAGACTAAGAA  
AGAGTAGTACCACCAATAGCCACTCCAACAGAGAGGAAGGTATTAATTAGAGCAGACTTC  
CAATCGTTTAGCATAACTCCCTCCCATAACCGTCCAAATAGGCTGCAACAATATTCAGGCA  
CATAGAGTAAGTATTGTAATTATCGACAATGCCTGAGCTATCGTAGATTTGGAGATAACG  
ATCCAACGGTATCCCTTCATATAAAAGAGAAAAAATAGAAGTGTAGACCTTGTGGTCATA  
ACATCGGATGAGAGAGAGGCCCAAGGTAGGGCCATCTCTAATGTGGAACGTTGCGAGTAA  
GAACAGAATCATCACCAAGAGTTCTATAGCACGTTTTATACGTAACCTCTATAGTATTGT  
TCATACTTACCTAGCATATCCGAAGGGTCCATGAACTCTGGAGCACCTTCGTCAACCTTA  
CCAGATTGTGGCTCGTTGTATCCAAGTCCTGCAAAGACAGTGTTCAGCGCGTCTGGCCTA  
ATAACTCGTTGTCTAAATTCATCGAAGGCTTTCTCTTCTTCTTCTTAGACAACATCATGGTA  
CGTTTTGGAGCACCATCTCGTAGTGGAGCATACTCTAGCGAGTCTGCCTGCTGGCGTTTA  
ACCTCAAGAGGTTCTTTCCAGTCGATAGGACGTTTGATTAACAGCTCTAAGCACTGTTCA  
GGAGATGCAGCAAAGTTCTGCCAAATATCAGGATTTTCTTTCAATACGTTGTACGTATCA  
ATCAATCGAGACTTACCATAAATATCCTCCACACCATTAATAAACACTTACTCTTTACCA  
CCAGGGCCAGTGGACATACCACCACGGGCTCGCTCGAGACGGTATTGTGAACCATAGTAG  
AACTTATCTGGCTCAGGATTCACTAGAATCTTAATCTCATCTAGGTTGTCCATTGTTGCT  
ACCATACGTACACCTAACGCACTGGTAACTACATATAGCGCGTGGTCGATAGTGGTTTTT  
ATCCACTCTTTATGTCGTGCATAAGTAGCTTTGTACTGAGGAGTTAACCATCGCCTAATG  
TTCTCTAGTGTAGACCACAAATCTCTGTTCGATAACAGGTTGTGCAGTAGCAATATTATC  
CGAATCATATCTAGGTTATATACCGCACACCCTTGCTTGTGTTTGGAGCTAGTGTAGTA  
GGAACAACCTTCTCAGTCTCTCCCGCCTTTTCACTCTCTTTCTCTTGTTCAGAGTTGGCA  
GTAATACCCACCATTTCTGTTAGTAACCGCACCATTAAGCTCGCTATAAGCTGTATCCCAAG  
TTCTGAGATTTAGCCATTAGGTCTGACAGGAATGGGTTGCTCTTAATCAGTGCCTTAGCT  
CGTTCATCGCCAGCCATAGACCAGAACATGGACTCCGTAATTGAGTCTGGAATAGCGTTCG  
TTCTGGGCTAAGTAAGTTAGGCCACCATAGCTCTGGCTACCCACGCTGTCACCATTTCC  
GCAGGCAAATCATTCTGAGCTTTAACCCATTTTCATAGGTGTCTGGTCACTCATCGACGTC

TTCATGTTTTGTTTGAACGTGTTAACTTGTAAGTCAATAGTTTCAAACGTGTCCTTAGTA  
ATCGCACCAGGGTTAGTAGCAGACAGCATTAAAGGTATTCTGTAAATGGACAGCAATCCGT  
TCTATTCCAATCTCTAGTGCACGTTATTGGTCCCATCCTAATGTACCAGCTGGAGAGTTG  
AACATGGTTCCGAAAATATCATCTTGAGCACGAATAGTCCCGTCATTAACCGCCCCATAT  
ATATCATCTGTGAAGTTCTCAACATTGAGTTGACGAATCTCACTCTGCCGCTGTGATAGA  
ATCAAGTTCATTGCAGTTTGTGAGATACACCCAATACTGAGTCTGTGTTACCTTC  
ACACGATAATCATTGAGGGCTTTCTCTTCTGTAGATAGTTCCATAACTACCTTACGCAA  
CTCGAACTAGATGGACCGATGCCAAACAAAGTAGCACCACATTCACGAATTTATTACCA  
AAGAATGGATATCAGTTGATAGCTTCTGTGCATGATGGCACGGGCTTTAACGAGTGCCTCA  
CGGCGTTGCATACCAGCTTTAACCTTATCTGCTAATCCACCTATACGGTCTAAGTACGGT  
TGCATCTCAGTATGGATTTCTATATCTTGTGGGTTATATAGAATGTTTCGAGTATCGTTA  
ACAACATTCTGAGAACTACATCACCACCAATCTTGTGTCCAAGGCTCCCGACGCCCTGA  
ACGTGTGCTGCGAGAGTATCATCTTGAATACCAGCTTGATTTGGAGTGTGATAAGCAGCA  
ACTGCCTGAATAGAGTTGCTTGTGTGATAGATTAGTTGCCATATAACCTTATTCTCCG  
AGTAGTGTATCAATTACATCTACCTTCGAACGGTCTGATGAACTGTGGAAAGAATCACCT  
GAGCGAAGTTGTTAATAATTGTGTTTTCGAATGAACTCTTCTTTTGGTTCGCTACCACTT  
AGCAGCTAATCAATTACAGCTTGACGTAAGTGGTATAATCCTTCGGGGTCATCTGCAAGT  
GAGCTATCAACCCAGTTCATAACTGAACCAGTTGATCTCTCTCCAGCCTCGTCGTAATA  
TCCCACCCCATAGCCATTTTGTAAATAAGGTTCACTGAAGACTGTTCTTCCGTACGTTTT  
AGGTCGCTACGTGCTATCACTGAATCTTGTGCCTCATAGTATTCACTCACAGACTGTGGA  
CTAAAGCCCAATGCTTTTGGTAAGGCTTGAGCCCCACAACTTCTGGCTGCCACAATGCT  
TGTGCGTTAGCATTGATGATTGCTTGTCCGTTATACCTCAACCACGGACCGATTTAGTTA  
CGAGTTGATGTTGGAATCTGTAGCAATGATTCCGCCCTAAACTGAACCTTGTTAACACCA  
TCTGTGAGTGTAGACCGTCCGCAGATAACGCCACTTGGCCATAAACATCATGTTCTGC  
AAGAAGCCAATCTGGGGAGTACGGGAGCCAAATACACGTCCGTCCCCACGGCCTGCCGCA  
CCTGCCGCAAATTCTGGTAGAGAGTAATCCCCACTAAAGAATCTAGTGAGAGTCTCCTCT  
ACAGCATTCAAGTTTCCGAAGCGAGTAGCCAAGTATGCATTCACACCGAAGCCTCTTATA  
GCTAATCCAATATAGCCTCCTTTCAAAGTCACTATCACCATTGGTTTTAGGTATTGTGGC  
TCTATACCTGCCACGATAAATAAGAATCAACTAACAAATTTACTGTAAGGAATACCACCA  
GGTCCGAACAGCATTAGCTGGCCTGGCACTAGACTAATCTTAGCTTGGGTGGACAGGGTA  
GTGCCTAACATCGCCTCGAGAGATTTAGTAGCAACCTGTTGGAAATGGAATGGAATTGAT  
TGCCAACCTTTCAGGGATCAAGCACGGTTAGATTGTGACATATTCAAACGGAATACTTCT  
GTACGAGCAAGCACTTGTGCAATGTCATATCGTCAAACCTTAGCTCCCTTGTTACCTCCC  
TTACTCTTCGTAAGCGAGACCAAACGAGATACGAGAAGTAACCAAATCACCTTGTTCA  
AAGAAGAATCGACCTTTCTCTTTGAATCGGCTGAACATGGATTGTGTTACTGGTATGCCA  
CTAGCCGCAATACGTTAGTCACCTTGACCAGTAACAACAGAATCGTATAAGCCTGACATC  
TTGCATCCTTCGTAGAATTCATGAATATCCGGTAAAGTTTTCCCACTACGTCGTAAGTGA  
CTCTCAACGATTCCCTGGATCTTCCGCTAAGTCTAAGAAGCCTCACTTAGGCATTGATCA  
AACCTTTCAGTGAGTGTTCCTTACTGATTGAAGCTTCTGCAGTAGAACCCATAGCCTGT  
ACCAAGAACCGGGCAGGAGACAACAAACCTAGCAGGAAGTTAAACGCAGCTCCTTTGATA  
TTCCGAATTGGTTCGGATTGGTTAAGACGATATAACCCTTCTGCCATTTACGATTGTCC  
TTGCGGTTTLAGATACTCTGCTAGAGCAATCGCCATGTTGGACATATCACGTTCTTCCCTTA  
CCCATAATACTCATCATCTGAGTTACCCGTTTCGTGAGCGATCAATAGTTTGTGACGACCT  
AGCGTATCATCTAGCTAGTCAGCCACAATATCGCGAGCAGCTTGGAAATCCTGGGTACGA  
ATATCATTACTTAGATACTTACTATCTTCGTTTCATCCAACCTGTCGTGTAGTGCCAGTCAC  
AAATCGCTAGTCGGGTAACGAGTTGAGATGTTACCGAAGTATTGGCCTACCGCTTCGATT  
AGAGAAGTGAACCTCAGCCTCTACGCCTTCTGGACCAAACCTTGATACGATCCTCAGCACGA  
GCGCTACGGGACTTACCGCCGTACACGTTGATAATATCTGTATCACGTTTCAGCAGCATCC  
ATCTGAGGGTCACGGAAAACATTGTTATTCTTGGCAGGGGTACGTTCTTTAAGAATCTCA  
GCATATCGTTCGGCATCCACTACATTACCAAGGAAACGGATTGTCTTGTGTTGATGCACGA  
GACTTACCATCTAAATTAATTGGAACCTTCTTAAACCAAGTGGTAATCATCCTTGTAG  
ATAAGAGGCATACATCCATTACGACTATTTAGAACCAGTGGGTCAAGGTCACGGATATAT  
TCACGACTAACGATAGCGTATTTCAAACCCTGAATACCTTTCATCCAGTACACGTTTGGC  
GTATCTAGATAAGTCAGTTGATAACGTGTCAGGTAGAAACCATCCAACATTTCACTAGTC  
ATGTCAGTGATGATTCCGGTCAGGAGGGGGTGCATACACATAGTTCTCGATACGACCTTGG  
AAACCTTGTATAGCACTGGTCGTGACTTCGTTAGCTTTAGAATACGCAGCCTGTTTACCA  
AGCTGTACAGTTTTGTTCCCATAGCAATTAATCTGTCTGAATACGTCCTCATTCAATATC

GGCCACCCTTGGTCAGCAATCTGGCGCATTGTGTCGTATGATCTGCACTCAGAATCGTTA  
AGTTGAGGTAATCAGGTCTGTCACCTTTACTATATCACGGTGTGAATATACTACATCA  
TTCAGTGTGCCTTTCTTTAGAATCACATCTAGTTATTGTAATCCCTCTATATTAACACCT  
ACCATACCTTCATTCATAGCTTTTTGGTATCCACTACGAATCTTAGCACGATGACCCGAT  
AAACGACTGAATGTATACACACAGAATGCACGGTCACGGTCTAGGGACGTGTTGGACTC  
ACTACCTTAGCCATAGTCTTAGCCATTATGCTAATCTTGTGTCAGTGTAGAATCAACCACAT  
ACTGCATCTTGGTTGTACTCGATAATTTCTGTAGTCACGTTACGTAGTTGTCTTGCACCA  
GTCATAGGGTTACCAATGTCACGTTTGAACCTCACATCCTTGTCCGTAGTTTCTAATGTC  
AGGTTAGATACTTCGTGTCGCTCCCCAATACGCTCAGCAATTTTCTCAGCAAATGCTTGT  
TGCTCCTGTGGAGTCAGTGGAACGCATTTCGCGGGCCCCGTTCTTAGTTTCAGCAAGGATA  
GCATCAACAGTTGATCAACGTTTCTGAACTTCGTGTGCAATCTCTGGAGCAGCACCTTCT  
AGGATAACTCCCATTCTTGAATAGGAGCAGCAGTCGTAGCTGCATCTAAACGAGACATT  
GATACCGCACAAAGCGGCATCCCCCGTACGCGAGGCAACGTCTACAACGGTAGCGGCAACA  
TCTGGAGCGTGCAGTACATTCCGCACAGCAAACGATAGACGTTTTAAAGACGACACTGCT  
TTGATTCCAGTGAATCCTAGAGTAGCTGTATCTACCTTATCTAGAATAGAAGCTAGTTGA  
GTGTTGGATTGAGTCTCTACGCCAGTAGCAGACATTACGAATACCGTCTGATGAAACTCT  
TTATCTTCTGCTTCTTGTGTCAGCTTACGCGACTCTTAAATTCACGAACACGTTCTTTA  
GGAGGTGATCCCATAAAACGTTTTCTAGGTCTGCTCGGACACCACCGGAAGTCATAACC  
TCAGTGAACCAGTTACCTGCGTCTAGAGTGATTGCCTGTAGGGAATCAGCAGATGGAGCG  
CTGGGATAACCCGGTAAGAACATAGCAGTTAGGGCATCCAAAGAAGTCATAGTTTCCCAC  
ATACCTTCATCCCTCACCTCACCGATTTACGACGAACCCATAATTGAGTTGTAACATCT  
TCCCGTTCGTCTGGAGTGAGGTTAGTGTTCCGGTCAGTCTACATAGGCCAGTTCAGCACCT  
AGTTCACGGTTATAACCTACAGACGCATCGTTAGCCATCTTATTGAGTTCTGCAGCAGAG  
TTAGCTATTACTCGTGGATTATCTCCAGCTAGCTCATCAATAGCCATTGCTGTACCACTT  
ATCGCCGCTTGCTTAGCTTCTTGTAGAGAGTTAGCTAGACGGACAATTGGGTCAGCATTG  
TACGCTTCCATATAACTTTTCAGAACGTCGCTATCACCAGTACGGAACTTACTAGTGGAT  
TCACCAATAGCTACCTCTTTCTTAGATCAAATACGTACAAATTGTTGCTCTTGTCCCATT  
TCGAGTGGATTGGAATAGACAAATTCTTCTGCAATTGGCATCTCTTAGCTCCTTATATGA  
TTCTATAACGAACTGACCAAAGTGAGCATAATTGCATTCCAATGTTACCAATAGGGCCAGC  
AGTATTAGGTCGGCTAGATGCATTAGCAGCATTATGAGAATAACCACGAGCTTCTTTAGA  
TAGCTGACGGGTTTGGGCTAAGAACTCACGCTAGCATTAGTGTGCGAGCTAATGGACGC  
AACATCACCAGCTTCACCCGAGCTACCCGACGTACCCGTTTGGAGCAGCAGTATTCTCAAT  
TCTTGCTCGTTGGATTCCGGCTTGTGTAAGCACGGTTACGTCTACGGGTTTCTCTCAAC  
ATCTCCAATCCGACATTGGACATCTTGTGTTTTCTGTTGTTCTTTAGATGATTTGCTAGA  
TTGGGCATTGGATACGGCTGTACCAGCGCTATCCGCACCAGCAGCAACAACCTGAGCAGC  
AGCTACAGCAGCGGCAGTTGCCATATCACACCTCCAATAGTTTACTGTAAACGATGTTAT  
CAACGTGATACCCATATCGTTCTATAGAGGAGGTAGTGCGAGTTAAGCCAATGTGGAGAA  
CTGTTGCTCTGTACCCGTGTGCGGAACTGTCAGCAACATCCAACATTCTCTTGAACACCG  
CCCACCGCGATAATCTGGTTTTGGGTACAAACAAATAGTAGATGCTTCACATTCTGGTC  
TGAATTGGTCTTTAGGAACTACATTGTAATCACGTATCCGATTGGAGTTTCTCAGCTT  
TGCCACAGAGATTTTCATAATACCCGCCGCTAGGAGAAGATAGCAACGTTCTAGATGCA  
ACTCGAAGACTGATTTAGTTGAACGAGGTACCGGCTCAAGAAAATTATCCTCAGACAGAC  
CACTAATATAACAATACCTCATGAATTTCCGGTTTACTTTCCATGTAATTGTTGATCATT  
CTTAGTAGCTCCACTAACGGTTACTGCCAACCTTACAACCTTATAATCCTTGTGTTGGCTC  
TGTTCTGAACTCAAACCTGGAATACCGTTCCCTGAGCCTCTAAGTCGCGCTGTGGCCGTGAT  
TACTGCATAAGGGTACACATTGATACACTGTTTGAAGATTCATCGCTCTACGGCAACGGTA  
GCACTGACTGTGACGAGTAGTATCAGTCCACTTCTTGGCCGTAAGATCGTCGGTAACGTA  
CGAACGAATACCTAACAAACATGTTAGATTTGTTTGTATCGGAACTTCTCCATCGACATC  
TTTGAACCAGGTCTCAGTTCTCATCATGTTAGTTGCTAGACGTGTAATTTGTGCACGGGG  
TTGAGGATCGTCTAATATCTGTGGAGCACTTAACAGCTAAGCCTATGCATCAACTAGGCC  
GAAGTCTTTAAAGTCATCTTGGTTAAACGATTAGAATCCAAACGAATCATCATCACTTTT  
GATTGTTAGATACTCAGTATCTCTCAACTCTTCATCCCCGATTCTACGTCCCAATGGGAC  
TGTAACATCAGAAGACTCTACTTTAACTCTATCTATAAAGCAACGGTAAATTAATCACT  
AACCACCTTATTACCAATATCGTTACGCTCTGGAACATGTCCGGTAACTCTTTCTGCTAC  
AGTAAAGTCACTCTTGAACTGTTAATGAAGAATGCAACATGACGTACGCTTAAGGTACT  
CTCTAGGTGGAAGTTACTTGGATTGGCATTTCCTACTAAGCAGCGGACATATTTACC  
TGACGTTCTTACGTACATACCGACGTAACCTTACTGGAAATAGTTATCTCATTCTATAA

TGATTGAATCGTTAGTTCTGTTAGATTCTGTGCAGAGTGTTTTCCAGTTGTTTGGTCTGG  
AGATAGGACAATGATTCCTTCCTCTGCCCAATAGAATACGGTATCACCATATGCCACAAC  
AGAACATGGAGACAGACAACCGTAGTCAGTATTCTCGGCTACGTGATAACCAGTAGCAGA  
GAACAGACCACCTGACGTACCACTCTTCAACCACACTCCATTTTCAGCAATGATGAACAG  
ACCACTGGTAACTTCTTCCAGTCCAACAATCTTACGATTTGCGATAATTTTTATGAAAAC  
ACCATCTGTATGAACAAGAGCACTGTCTACTTCACTTGTGGGGTCAGCAAACCTGATAACA  
CTTGTTAATCTATGCGTTAGATTTAACTAACTGAGAGAAGAATACGTGGTTACGGAAAGC  
AGGACGTACATCATCAATTTTTCTTGGGGTGGCTTGGAACTCTTGCATAGAATACTCGACC  
TGCGAATATTTGAACGCCATAAGGTTTACCCTAGTTATCACTTGTGATGACGCTACCGT  
AGAACCACAAGGTGCAGGAGTGTTTTACGTTTCTTACCGGTACCCGTCGTTGTGCTGAC  
TTTCGTCCGAATTGGAGTAACTTTCCAATTGCGTTTACGTCTGTACCAGCAGTTGTTTT  
AAATAACCACCAAATCTGGTACTCACTTGGATAAGCACCGATTGTCGCATAAGTTGAGTT  
ACTCTTTTTACTATCCCAACCTTGATTAATTAGCTCTGACCGATAATCTGACGATAAGGT  
TTTTGGCCGTTCTTTATTTGGAGCCGAACGTCCCCAGACATCACGAGTTTAGAAGAAGT  
AACCTTCCTAACTACTACGATTTAACTACGGGCCGTGATTGAGTCTGATTGAAAATCCAT  
AATCTGGAGCGATATAGGGTCTGCATCCTGAGTTACAATTACAAAGATACCCGCTACCGA  
AGCGCCACTAATAAGATCCTCTCTTGTACCTTCTGTGCTTAAACATTTCTTGGGTGTTTCAT  
TAACAATTTCCCGTTAGATAACGGGTCAACAGAAGTATCAAAGAAATTTAATTTATCACC  
GAACTGTACTACTAGAACTTCTAGAATGGCACTATAGTCAGTTTGCCATACGTGAACACT  
AGATACTAAAGTTTGGTCTGAGAAGTCTACGTAGGAGGGATACACAGTACCTTAATGTTT  
CAAACCCAAACCTTTGCGGCTTGCCCAAGCGTTAGCTTTTGAGAGGATGAAGTTCTCATC  
CTCTCTGAAAGCATCCATAGGCAGATTTAGAATGTTCCCTTCTGTGATTAGACCAGACTG  
ATACTGATTGTATTTCCCGATTAGCCTGTCGTCTTGCCATTTGCTTTTGCTCCTCGTTTT  
CAGCAGCTAGGTATTGTTTGATGCGTTGCCAGGCGAATGCTCTTGAGATGTATTGCCCTT  
TAAGAACTCTGGTAGTTGACCACCGCCGTCTAACTTAGTTTCGTATAGAGTACCTTCGT  
TATCTGTAATCTCTACTTTAAAATCCTTTGTTACTGCCATTTAAAATCTCCTTGATAAGAT  
TTCTCGAAAGATGGACTACGACGATTTGGGCAAGTTGAAGATGTTAGTCTGGCGTAGTTA  
GGGAATCGAATACCACCTTTGGCTTGCCGACTTTTGCGACTCATATGACGACGGTGGCTT  
GTAGCCATTGTTTCGTCTTTAGCTGAGTCCATTTGTCTAATCTTGGCACTGAATGCTACC  
TTCGGTTCACTTATTAGGCGTGGGAGCAGGTCAGCAGGTAAGCAATAATTCAATCCTAT  
TCCATCACAACTTAGGACTAATATAAGCGATGCGTTGAGTTTTATCTTTGTGGATTGTA  
GATTCTACGTCTGTGTTGTAGCTATCCAATACAAGATACTCATCATCAAACGAAGTCCAG  
AATCGTGGAGCTTTATCGTTTTGGATGAAGTACACAATGACGTAGTAATCACGGACCTTC  
TGTACGTTGGACTGACCTTAATTGATAGTAGCTCGGCGAGCTTAGAACTCATCTGGATAC  
ACGTACCTTAACTCAGTGTAAGATACTGGACGCACCTTCATTGAGGAGTCTTATGGCAAG  
TACGTCATCTCTTGAATGTTGTCAGCTAGCTCTAAGTAGTTGGGTTTATCCACATCACTG  
ACTCAATCAAACCTGTACTCCACGACGAAAGTAATCAGTAGTGGAGTAGGTGATTAGGTTG  
TCATACGAAGAACGAAGGATGTACGCCGCTGTAACGACTCAGTGGTATCATCAATAGAG  
TTGACGTTATCACCATACGTATCACTCAGCATATCTTGAACAATATGAATAACAGTATAT  
TTCATTATCGTTTTATTGTTACTACCACCACGAGCCTTACCAGCTCTGTCACCAGATTTAC  
CACCATCGGAACGGTTGCCACTTGCAGAACGTACTCGTAAGTTACCATCACCATTACCGC  
CACCGTGTTCGAAAGTTCTTTTGTGATCTACGTCTTTCCCGTAGCCCTTACGCACCTTTC  
CCTCACGATCCATCTTACGACGAGCCGCATTCCCTTTTGCCGATTTCATCTTTTGTCTG  
GAGTTCCCTGGGACTTGTGCTTCTCCTGTCTGTCATTACGCTTCTTTGCCATTACTGAAG  
CTCCGAGATTTTAAGAATTACCGTTTCATCTTGACGAACAACCTCCGAATTGACCGGCTAC  
ATATTTCACTTTACCACCAACGGACAACATGTAGTCAGTACCGACGGGAATGATTGCGCC  
ACGGTAATCGATAAAATCATTCTGGTATTCAGACGGCCACCTACTGAGGATTTGAACAG  
AGTGAAGATGATTGACGACCTCCGATTGGCGTATATACAGCAGATTTGGCAGAAGGGTC  
AATAGAAATTCCTGTTGGAGTTGGGAATGACTCATTGTTGAGTGGGACAACCTCAGTAGT  
CCCATCACGTTTGGCACGTAAGAATGTGTTAGTTGGACCATTAACAGCTCATTTTGCTTC  
ATGTAAGTATTCATCTGGAAGACTCTAATGTTGTATATCAGCCATTGGAAGGACACCTTG  
TACTAGATAGTAATTTAATTAAGCATAATTCCTTATTGTATCATGTTATCCATTACTGG  
ATTAATACTCGTCTTCGCCGATACCTGTCAAGTCACCCTAGAGCAATTAGTTCTTAAT  
CAAAGTGTACACGAAAATATCCTGGTAAAAGAAAGCCCCCGCAGAGGGCCTTGATATTA  
GTGTTGTAAGTACTAGGGATACACCTAAGGTAACACCAGCCGTTGTTGGGATTCAGCAATCGT  
ATGAGGACTACTGATGATTCCAATCTGTTTGGAGCTGTCAGATGTATACTGTTTGAATCG  
TACTTTCTCACGAGCCACGACACGCATTGGAACAGTGTAATGAATGAGTTTATCATCACC

GGAATCACCACCAGTCAAAAATCAGCAATCTTGCAGTTCAGACACCGGACTCCATGAGAT  
ACCATCCATTGATGTTTCTACATACATTCCCCACAATACTTCTCCGGCACCTCCCGTTGC  
TCGAATGACCTGTACTGACATAGTGAACATTGCCTTCGCACTAGCGACGTAAGTTAGTAC  
TCCAGATGTTAGGTCTGGTTGTACAAAATCACTGGCAATCTGAGTAACGATGAATGTACT  
TACAGAACCAACGTTTTGATTTTCTCACCAGTTGTTAACC GGTAAGGAATTAGGAGTAGT  
GTAGCTGATTCTTATAATGTCCTCTTTGAACTCCGGTAAGCCTTGGTTGTCCCACTGATT  
TTATGTGAGGCTATAAATCAACACCTACCAACCGTTTGGATAGAACAACGATTAGCAC  
ATTATCTAATGACTCTAGAGTGTCTGGGATAAACACAAAATCACTCTCAGAATCGTTAAC  
CGCCACTAGTTTATTACCCTGCCCTACGTAAGAGTTGGGGCAATCTAACAACCTCGACGAA  
AGTCTGTTTTCCCTGAGGCTTCCATCAACATACTCAACAGTTGCTACTTCTTATCTAC  
CCACGGAAGCATCCATAGAGAGTAGGCTTGGACACCATCACTGTTGCCTTAAACGTACAA  
GTCTTGTCCGATTCCGTAAGCTATTGCAACTCGAACTGCACCTTGTTCGTAATCAACAGG  
CTTCCGTGGAGTGAAAGTAGTCATTTCTACAGATTGGCTGCTTCCCTTATCTCCATCAAA  
CACGATGGAGTTGTTGTACGTTAGTCTGAAATGTACGTTAGGAACCTCGTTAGTCCAATA  
CAATCCACTTTTAAACACAGTCTCACTGTATGGAACATTTACGACAAATTCACGGTTGAT  
TAGACCCTCAGACACGTTTGTAGTTCTAACACGTAATTCGAGAGCGCCATGCACTCGCCT  
AACAGCGGTAAACTTACTGTCAGAAATACCCACACCATGCCAAGATGTTAAATAAGA  
TCTTCTGTGGGCTTGTCTAGAACCTACGATCTCTCCATACTACCGAGTTTATGTAC  
AGCCTATGACACTGAGTTAGATGAAACATCGAGTTCACCCTCAGAAATGGGGAATACACC  
AGTGTCCACGAAGTTCGATGTATCCACATCCACTTAAACCATCTGATTGTCAGAACTCC  
TCCATCAATTACTGCTTCTATATTATTATCAATGCAATCGACAGTAACACGATTCGCCTT  
GCTAACACCAGCATTGATACTATAATTTGGGTTCTTATCTAGGTCACTTTCAATTTGGTT  
GGGTTAACCTTCTGGGTTATCCCTGAATGGAGACTCATCATTGTGTGCGTCCTTAACTCTT  
CTGGAAATTACGATTAATTGCCACAGAAGTACAGGAGGTAACATCACTCAAAAACAATCTT  
AGCCATACTATCTCCCCAGTATTA AAAATTTTTGACCTATAAAAAGAACAGGGGGAGCCT  
AAGCCCTCCCTTGCATTCGTTCCACCTATCTTAGATTGTACCTTAACTTTTCGCACCAGC  
AGCGGCATCAAGATTGATACCTACTTTCACATAACGAACAGTTACACGAACCTTAACTGC  
ATCATTACAGTAGGCGAAGTACCAGCGAGTTTGCAGGTAACCTTCGGTATCAGCAGTTAA  
AGCACTTGCCTATGTACCTTCTGGAGTTGGTCTAACAACACCCACTGCTTCCCTTTGCGC  
ATCTATCAGTTGATCACCGTTGGTATCTTCTGAACCTT TAGGACCTACTGCAATAACAGG  
GTCAATACCACCAAGAGCAAACACCTCGGATACGTGAGCATAAAGCATCAAAA ACTAAAGC  
ACCTTTAGGCAGAACTACTTTGTTTTATTTCAGCTTCGTCTTCCGAGAAAGAAGACACCCA  
AATATCAAAGGTCAGTTCCATAAAGGAACTTTACGTCTTAATGCCACCTTTTGGTGAGCG  
TGTACCACGAGCCCCATATGAGTTGTGAGTACCGAGACCAGCCGAAGTTTAAAGGCCCAT  
AATAAGCTCCGAAGATTA AATCTAGTAATGAACCGAAGGAGGGACAATCCCTCACTCCGG  
TCATATTAATTA CTGTAAAGCAGTCTAAGAAGCGAGCAGTGCAAACAGAGTCTCTTTACC  
TAGGATACCAAGATCATTACGACGTTCGAGCAACGAACCCATCACCGGCAAGGTCTTTGCT  
ACGTTTCAGACTCAACACGAGGAGCTTGACGTTTCAGCGTACATTATAGGTCTCGAGTTGTC  
ATCAGCTACACACACACCGATCCACGCAACGCCGTTGGTGATTGTCACACCACCTACATG  
TTCACTCACGATACGTGGCATAACGGTTAGAAGTGATAATGTTCCAGCCGTACAAGTTGGA  
AATGAACTCCTGGTCTCGAGCAAACCGCCGTTAAACAAAATCAATAGAGAATGGGTTAGA  
GTCGATAGCACTAGCAGCGACTTGGA ACTTGGTATTCAGAGTTGAGTCAACGAATGGGTC  
AACATACTGAATAACACCACCTAGTGGAACGTTTCGCCTTGTTCAGTCGCAAGTTCCAGGTA  
CATCTACTCTTCACGTTTCGATAGTCTTGTAGTACCTGTAGCGATACGCTTGTGAGCAA  
GCCGTTAATCTCGCTAGCATCAGCAGCAGTTAGACCTTCGTAAGCTACTTGTAGATAACG  
AGTTTCAAAGTTTTCTTGCATCGCATGTGTTGACTCTT GAGTACGCATTGCCATCAGAGT  
GTCGATTAGAACACCGTCTTGTTCGTTATTTGTCAGTAACGGACCAATCATGGCCGTTACA  
GTCAGTCAAACGCAACTGTAGGTTACCAGTATCGATTGGTTTGTAGAGAAGTAGAGTGTC  
TTCTTCCACATCCTGAATAGTTACTGTACAGACAGTTCTAATGTTT TAGCACTTCAACCCG  
AGCAAAAATCTAAGACGTTACGATACATCATTGCTCGCAAGAAACCATCGTGTAGGTTTTC  
CAGAATGAATTTTGAATATTGTTAAGCCTCAATAAAAATGGCGTCAGTTGCCATTATTTTT  
TGAACCCGTAGCACCAGACATATGTAAATCTCCTTAAAAGTTAGTGAGCGTGATAAACAT  
CTTGACCACCTCTAACAGCGAAACCATGCACGGAAGGCAGCGACTAAGTCATGATTAG  
AACCTGGTGAACCCATTTTGAAGTTCAGTTGTGGCTCTGGCAGGGTCTGAAATTACGCCG  
TGGTTGGGGTAGCTGTTCGAAGTAACAGTTCGAAGTAGTTGGCTTAGATTTCGACATTA AAT  
AACTTGGAACTGCTTTAGGTGATTTAGCAGCCAGGTCTTTCAACAAATAGAAATCTACTC  
CTAATTTAGCAGCCCTGGCCTTTAGAGCCTTGGTTCGCCCTATTGCTATTGCCACATTTAC

CAATCAGGGCATTAGTTACCGATACTTGGTTAGCTTGTGCTTGAGCTCGGGCATCACGTG  
TGTTCAAGTTATTCCCACATCGCCTGTTTCATGTACACCTGCTTGCACCTGTGGTGCAGTTG  
GTAGGTGACTTACAGTAAGAGACGCTACGACGTCCGCCAGATCGATAGCGTTCGCTAGGT  
GAGCATTCAAAGTCTCATTCTTGTGTATACGTTGGTTTTTCAGCTTCGAGATTAGCAA  
CATGCGATTGAGACTGTGGAATACTAGCTAAAGCTGCTTGAAGTTTAGCGTATTTACGAC  
CTTGACCCACATAAGCCGCAACTTCTTGAGCCATATGAGGAGCCGCAGGGCGCAGCCCGTT  
GTACAGCTTGTATGGTTCTTAGGCTTGTGGCTTGTGAGCCTGTGCGAATAAATTTGCTT  
GGTCAGCCATTAATTTCTCCTTATTTAAATTCCTAAACGTGATTACGAAATAATTCTAAT  
AACTTAAAGTTATAAGTCAATAACTTCCAGTAAAGTTTTTTCTTTACTATTATATGCAGC  
CTGTTTGATGCCCAACTAGGTCAGTCGAAACCATCCATTTTGATTTGTTGTTCTTGATT  
CTCAGCGAAACGCTGTCTTAGAATTTCCATCAGTCTTCCCTGACTACCTTACTTCCAGC  
GTGATCGTTGGCGAACTGTACCCTTTGTACGCCTTTCATTCTTGCCTCCAGACAGTTTT  
TATACTTATCTCCTTATACTAACGGCACTTGTGCTCCTTCTTCGATTTGGGCTTGAGATT  
GGTTAACAAGTGCAGAGGTTGTCTGTGCGTCAATAGCTGCAACGTTAGGTTTGAAGAT  
TCCAACCACCTAAGCTTAAGTTGTGTTCCAACATGTTAGCCAAGTTCTCAGTAGGCACAT  
GAGGTTTAAATTTTTGCCAAACTGGAGTATTAGCAATACCCATTAGGCTTTGTACTACTT  
GCGCCAGTTCTGCAAAGTGTGAGCACCTACAGGACGTAGACGACCTTTTGTGGAATAC  
CGTCTTTGTTAACGTTTCATGAAGGTTGGCGCTTTATCACCAGAGTTAAACACACGAATGG  
CTTAAGCGACGTCTAAATTACGACGAGAAATCTCTAACATCGCAGTCAGAACCTTATCCA  
CCAACATTAGCTCAAAGTTCATACTCTTATCTTGGAAAGATACGACCCGCGGGCTTTTGAA  
GTTGTTGAAACTCGAAAGGTGTGTAATCAGGGGAGTACGAATACCCATAGCTTCAAGTG  
GAGCACCTGCAAACCTTTGGATCTTAGCTTCAAGAATCTGAATCTGCATACCTGCTGGTA  
GAGCTTGAGTGTAAGGGGCCATCACCGGTACATCACCATCACCATTGATGTATATCTGGT  
CTATTGGTCCCCAAAAAACTGCTCAACATCACCTTTAACTTTTATTGAAGGAAAAGCGA  
TTAGGTAACACGTCAGCTTTCAAGTTCCGAAGGTGGTCGATACGATAATGCATACCTA  
CTAGGTTATGTAGTGGTCCCAAAGCGTACAGGTGATCTTGTGCAATACGCCAACAAAT  
GGAAGATTCGAGCTTGTGCAAACCATGATGGATTCTCTTTTTCTCGATTACAAACATGC  
GGTCAATGAATATGACTGTCTTATTACGCTTAAATGTACCTGACTGAGTATCGTGGTAGC  
CACCATAGAATGTCAGTACCTCAACGTAAGGACTTTGGGAGTAGTAGTAAAGGATGCCAA  
ATCCGCCCATAGAGCAGCTTACAGCCTTTTCAGAGTCTTCCCTAGTGTAAGTGCCTAGCC  
CACGACAAAACCTCTCGTCTAAGAGTGACTCAGGAAGCGAGAGAGGCATTCTCTGGCTCGT  
CCAGTTCCAGTTGTAGTTATTCAGCCTCATTCAACACAGTACGGATGATTTTTTGGAGAGT  
GCGCAAAGTCTACAGCTACGGCATTAAATAACAATATCTTTTGGGTCGTTGCGAACTGCAC  
GAGGACCAAATAACGTATCAGGAGTAGCGCCAGATTCCCTCATCCTTGGTGGGTTCCCTTCT  
CATACGGGACGTTGGCAAACAGTTGCCGTAATCAATGTAGTTCAATAGGAGTTGACTGA  
TGATTGTGCGGAAGTCCGATTCCTTAACTTGTATGCATGTATTGCTTAAATAGCTTCCC  
GTTTGGCTTCTTCTGTAGGCTCTTGCCTACCCGCTTCAATCACCGTTCATTAGGACACA  
ATGCACTAATGTAGTTCGAGTGTAAGTTATCTCGAATCTGACACAACCTTAGGTAAAGTAG  
TTTTGTTCTTCCACACTAACGTGCTGTTAGTCGTCTTAGAGGTATCATTAGCAAAGATGT  
ATTTAAGTAGTTCACGCTTTTGACATAACACACCTGCCGCTGACTGTTCCAGCTCTGCC  
AAGTATTAGCATTCTATTTCAGCCAGACCATCACGAGTGTAGTTTAGCATCTGTTGTAGTT  
CGAGAACCTTGAGTGTACAAATTAATTTCTCCAATCCGAGGGTTAAATTGAATGGCGTT  
GCTTTCTCGGTTAGCGCATGCAGAAAGTTGCAGTGGTTTTACCGCAATCAGTACAGCAGA  
AGCTATAGTTTCTTCAAGTCATCGTGAGGTGGACGAGCCAACACAAATTCTTACTCAAG  
CATTGGAGTGTAACCACCTTTTCTATCCACATAATACCTTTCTAATACCGTGGTGCCAA  
TACAGCAGCCGAACGTTCTTCTTAGAACCAAGCGCCTTAGATTGTGCAAACTCGTCGAT  
AGTAATAGTCATGCCTTCTTGCCTAACGTCTCTTAAATATCGTTTACAATGATTTGCTG  
TGCCACAGGAACCTCGGGACGAAGTTTCTTATATTCCCCTTACTGTGCAAAGCTGAGAT  
TAGGTCATAGTAATCATTAACTTATCTGTCTTGAATTGGTCAATAACCGAAACGTAGAT  
GTAACCTTCTGAATCAATCCCAATAATAACGATAGCTGTAAAGTTGGCATTCTTAGATAA  
ACTGACTGCAAAGTCCACACCAGCACAGATATTCAAAGGTCTGTCCTTAAACCAGTATCT  
ACCTTCGCTAAACGTAACGAATAGCTTATAGTAGTATTGGAAAGTGCTATAGTTCAAACG  
GGCTGATTCGGGGTCGTTTGGGTCATTGTAGTACTGCGCAAAGAAATGAACACGGTCAAC  
GTATTTAGCTTTCTTCTTAGCCAGAACACTCTTCCCAAACCAACTCCTTACCTTCAGA  
ACCCCGAGGAGTACGAGGCCACACGCATACACCATCTTCTTCTACTACACGCTCAAAAAT  
ATCCCAAACGGGTCTTCTCTCCAGTCGCTTCTCCATATTCGTGCAATACGGATTCATC  
CTGATTCTTCCATGTGTGCGTAAATATCAGCTGGATGATACAGAGTACCACAAGCTTTGAC



AATACCATCAGCGTTTAGTATAGATCCCATCTGAGAGATAGCAGCAACTACCTTGCGTCT  
ACTACCCTCGGGATATGGGTTATCTGGAACACTACAACGTCATCAGAAATAATAACATCAGC  
GTGCCAACCAAGTGGTGTAGTGGTGAGGCCAGCAGTCTTAATAGTAAAGTCTCGGATGCC  
TTACATCTCACGGTTTGGGTGGTCAACCACGATTATACTGGCAGTCCTTTTCTCACGTTT  
ACCCTCCTCCTCATTAATCATATCCGGCCAGTCCC GGCGATAGAGTTTGGGAGTCATGAT  
TTTCTTAATATCCTATAAATGCATTT CAGCAAGTTC ACTGGTAGCAGAGATATACAGAAT  
GGTTGGCTCTGGATGCTTACTCACACACCAAGCTACCCGAGGAGCCAACATGTGAGATTT  
TAGGTGACCACGAGGTAACAGTACCAGTTGGTTCGTAATAATTACTCTCAATCCACTTTGC  
CACTTCCTCGTGGACCGCACCGTAAACGTATTGTGGAGTAACCAATCGTCAAAACATCCA  
GAAGTGAGACTCAGCAGCTTCTCTAACTTCGTCAATCTGACACACTCATACCTCCTAGTG  
GTCGGTCATAGTCTTCTCAAGTGCATCCCTAACCCGTGTTGCAATCCGTGGCTCACGAA  
CAATTTCTTCTTGATTGGGCGTCTGCCCCACGTTTCTCATATCCTACTTCGGCATGCC  
ATGTGGCAGCTGCAAATGACTTGCCATCTCGTGCCATTTCCATTGCACTGAGTACACCGA  
TAGAGCGATCTTGAATCTCGGCTTCTTCATTCCATTCCCTCGTACATAGCGTAAAATGCTT  
GGTTAGCCTTGATCTTCTTCTAGTGTGCCACCCACCTAATCCTTCTTCGCAAATTTAA  
TCTCATTTGGGTCTTCGATGTACTTCACGATAAACAGCCGTTTAAATGCTTAGGGAGTTCT  
CATCTTTGAGCGTACGGTTCGTCATCATGAAGCGTGTAACCTGAGCTTGACTTGAATCCCT  
TCTCTAAAATAAACCCCTGAGTAATCCATCTACCCATACAGTCCCTCAATTCCTTCTCA  
TTGGACCTCCTTAGTATGGCTTATTATAGGGGTAACATACAGTAAATACTTTACTAGTCC  
AAAGGGTATTTTAAATTTAATGGCCTTAAACAGCAGGCCTCCAAGCCATCTCGGCTTGGCGA  
GTCTTGTCAATCTGCCACCCCATACATAATGGGTCACTAACTACTCGATAGGCCGCTTGT  
CTACGTTTTAGATTATCTTCATTTATATGTCATGGAACAATTTCTAATGGGTTTCCAAGT  
AGTTCTTCTTTATTCACAAACGTAGAACAAGCTTCATCCCATACCCATTTACCGGAGGCA  
AGTTCTCCTCCGGTGTGATTGTAGTTTAGACATGGAATCACCTTCGTTGATTAGACCACCT  
AACAGTGTACCAGCATTGACAGAGTTAACTTTAGACGTACCATCGACGGCAGCCCCAGCA  
GAACCTCCAGCCTGTCCCCGGAGTCCAGGAGACTGGTTTCTGATGCACCGGGGGCTCCA  
GTTGCACCTGCGACGCCAAAAACACCACCTTAGCTCCGTTACCACCTCGACCTGCGTCA  
GTCCCACCGATAGCAACGGCAAGACCGTTTGTGCTGCTTGTGAGAATCCTTAAACGTTT  
CCCCATAACCAGCGGCACCACCGGTAGTGTATGTAGTATTGGTCACTGTTATAGTTCCG  
TACATTGCGATAGCGTTCAAAACACCCACACCCGTCACCGTAGAAGTTGGAGGCATAGTAC  
GTCCACCCTCCCACGGCTATAGTGATACTGTAGGTAACAACCTGTGCCAAAGTCTGGTCCA  
GACCAACGATAGATCTCGGAGTTACACATACGGAGGATACAGTTACGAGCACGAAATTCG  
CTTTGGTTCCCTGTAGCGTATGTCAAAGTTGCAGATGATGGGTACGCCGTGTAGATTGA  
GTAGTAAAGAAAGCGTTACCACCTGTACCTCCTTACCACCACCACCGCCTCTACCTGTG  
ATTGTGCCATTGTTGGTTAAATTAATCTTTTATGAAGTCTGTACTCGTAAGGCAGAGCCA  
CCAGCTTGCCCTACTCCAGTTCTAACAACACCCTTTGACCATAGATATTACCATTCTTG  
ATGATGTTAATTGTTTTTCTACAAAGCCGTTTGGCATCACAAATTGCTGGAGGGCTGGCG  
TTTCTTTAGTACACACTCACACCGGAGTTAATCACTAGATTAATGATAACATCTTCTCTA  
CTACCTACAGCCGTAGCTAGGTTGAAACTTGCAGTATTCTGACGGCTTGTGTAAGCACAT  
TCGGGGTTTTGGAATTTCTTCCATTCCCCGTTTTTTCGGAACCCAACCAATCGGATATTT  
CAAACCTCCCCGAGATTAACCTCTCATTGTAGCCTGTCTGTAAGTACCAGAAACATTTACT  
CCAATGGCATGGTCCCTGCTTATGCGTACTGTAGCCAAATATCTCCATCTGCACCACCA  
TAAGGTGCGCTAGACGATACAGCAATCTGTCCCTTCTATCTCCGGCTACATCTGGATAA  
GAACGGTCATCAGTGCCATCATCATATGGGGCTTTTACACCGGCAGTGGCTGCATAAGTA  
GTAGTACTTGTGTGGTAGTAGCAGTAGATGCTCCCCCATCGTTTACGTTGCTTAAACTA  
ACCTCAGCTTTAGTAGCCCGACGAGTTGCGAACTCCGGAATGCCTGTAGTCCCCGACCTT  
GCTGGAACATAACCAATAGGTTTGTATCTCGCATCAGTCTCCCCTTTAGAATAGGCAGTA  
CATGCTAACTCCAATCCAGTTCTAGAAGCTGCAATAACTTGGGCCATAGTACTTCCTTCC  
AACTTCTCTGAATTTACATCCGTAGCGGTAGCACCTAGAGCACCTCTTCCGTTGGGGGC  
GTTGTAAACCCTGTGTGGTAGATTTTACGCCATGGGCGAGATTTCCACCTTGTCTTATTA  
CCAGATTTGAAAGATAAAACCTCGCTATTCATTCCATACCCGATAAATAATTGGAATGCC  
GTATCTGCTGGAGGTGAAAAAATGACAATAAGTTACCCTAATTTGTTCTCTCTTGCATA  
TTTGGACGGTTGTTACCCAGGCTAACAACACCAGTTAGATGTGGATATTGAGTCAAATCA  
ACAGTGTTAGACGACGACGCTTACATCACACGGTTTCCCCCATCAACAGACGGAACAGCT  
CCAACATTTTAGGCAGCGGGTGTATTACTTGGAGAGTATATCCTAACACTACCCTCCTAT  
AGTGGGGTAGATGACACCCTTTATCGCGCAGTTTTGTTACTGATGAGGTTGCTGCCTCA  
TGTATTACTGCAGTTCCAATAACTACCTTATCATCTACAACCTGACCAGCATTAGTAATA

TACACACTGCCTCTATTACCAAACACTCTGTACCCATCGAACTTTGCCACGCCCTGGTTT  
GGAGTGGTGTTTGCAGAATCGGAATCGATGAGCAACGAAGCACTCATTTAAGCTCGAGCT  
ATATTTACGGCTCCTAACTCTGCGGGAGTTGGTTTGTTCGTATCCGAGTTGAACTTAGTA  
TCCGCTTCTGATTTAGAGTGCACAGAGTTGGCTTCGGCTAGGCCGGTGACATTACCTACT  
CGACCATTAACGGACTGTAGTCGAGTGCCACTCTCTACAATACACCAAGAGGAACCAGTC  
CAAACAATCTGGTCACTGTGCAACACTATTTCGTGTTTCACCTGTGATTTGTGTAGATACG  
CCATTTGCGTTGTTAGTAACTTCAACATAGGCGGCACCGTTTGGTGATGGGCAAGTTGGA  
GCCATACCTTGTTTGATTGTTGGGTCGTCTGGGTCTCCCGTCACAACGATGCTTGTTTGA  
GTGGTAAAGACGTTATCCATTTTTGCCTCACCTTAATACTGATAGGACCGGCCTACCG  
GCGAGCAAGTCACTTACCAGAACTTTCTCGAACTCTTTAGTAGATTTATTTTGAATCGTT  
ACGTATTCAGAGTTACTGATAGACCCCTTTGGAGGGGCCAAATCTGCGTCGATTACTTTG  
GTTTGAATCATATCAACCATCGAAATCTCCTTGTGCATTCAAAGATACTACCCTAAATAA  
AGCACCAATAGCGGTTACTCTACTTAGTTTGATGTTCCCTTCCCGGAGAAGTTACGTAAGC  
ATTCAGGATACCTTCAATAGTGTTCCCTCTCTAGGAGAAGGAATAGTAAACGCCCAAGT  
GCCTGCAGAAAAACCATAACAAGTTGTATTATTTTCGTGAACATAGGCACGTCTGGAAGA  
CTCAGACACTACGGAACCGTTTACACGAATACTCCAAGTGATTTGAACATCAACCAAGGC  
TGATGAACTAAACGAGGGCATCAAGACTAGTAAATCCTCCAAGCTCGCCATTGCTGAAGT  
CGAAACGGGGTACTAATCACTATGAGGCGAGCACTAAATGAACGTGCGTGTTAAGTGT  
AGTACCTATTCCACCAAACGTTCTACTTGACAGTGCAGTAGCTGACCCAATGTATAACTT  
GGTAGCACTTACACCATTCACTTAGATTCTCAAACCTTGAACCAATTCCTCCTGTTC  
CCACACTCCAGAACCATAACACGCGACATTCTGAATTTCCGTGAGGTTTGTGTACTG  
GATACCAACATCATAACAACAGGGTTTGGGTTAATATCGTTAATCAACACTTAGCTCCA  
CCTAGTGCCTGTGGTTTCAATATACCTCTCGAGAGAACCACGTTGACCTTGGTCCGCTTG  
TGGACCTTTGTCACCTATTGGAACCGGTGGTCCGATTAGACCTCGTGGGCCTTCCGGCCC  
TTGTGGCCCGATAGGGCATTGAGCACCCGTTAGTGCTACTGGAGCTTGCGGACCAATAAT  
ACCTTGATGACCCTGTGGCCCTTGTAGGCCTGTTAAACCCTTATCCCCTCGAAGGCCCTT  
GTCACCCTGTGGGCCACGTTCCCTTTAGGGTCCTTGGATACCTTGAGGCCATTGGACGCG  
TTGCACTCCCGTCTCGCGTTGCGGACCCGCGTGCACCTTGTGGACCTTTAGAGCCGATGGG  
TCTTTGCTCAGCGTGCGGGCCTTGTGGACCTTGACCAAACGCAATAGCTGGAGACCAAAC  
ACCAGACGCTGCGCACAACCTTTCTGAAGATAGCACCCCTTAGTGACAAGTAAAGACTGGAT  
ACGTACTGTGATGCGGGCTACAGTTTTAGAAGCTTTATCACACGTTAGAACGTTTCCAGC  
TATCTCAAAGATATCTAGGCACTGGTATGAGTAGCCTTGCCAAACATATAAGTTACTCTT  
CAAGTTTGGAGTGAACATAAAGTGAACCTTTTGTAGAGCCACCTCCAACAGACTCCTG  
TTCTTTAAATGTAGAGTCAAAGGAATAGTCTGTTGCAAAGTAGATAAATAGTGGAACTTC  
ATCATCATATGCAATGAGACCACTAAACAACCTTGGAGCATCGATGAACAGAGAGTCGCC  
CTTATCACCTTTCGGGCCAACTGGACGAGTAGCACCGGTAGGGCCTTGATGACCCGTTAG  
GTCTTCGTAGTACACCCACGTACCTTTAGGGTTGCGGAATCTGAGGATTGCACCATCTCA  
TTCATACTCTCGAGATAAACCTTGTGGGCCTGCAGGAACAAGAACACCCTGCGGACCTTG  
AATGTTACCCATGGACCCCACTCAATAACTACACCAGTATCTGGGTCAAGCTTGTGGC  
GAATCGAATGGATGTGGTAGATTGAGTTATGCCGTCACCAAATTGGTGGAGTGGAGTACG  
ACCTACTTCTCCTTGTGGTCCCTGCTGGGCGAGAATACCTTGTGACTTTGAATACGCAG  
TGGACATTGTTATCCAGTAGGGCCTCGCGGACCCTCTGGCCCCGGCCGGGCTGCCGGACC  
AACTGCTTCATGTGGAGCATATGAGTAAATGTCCACCTTATCTGGAGACGTTGGGACGTG  
GTTAATGAATTGTACCTGTGTGCCACTGTAGTGTATTCCACTTCTGGAAATAGACGGAT  
GCCGTTTAGATACACTTTGGTAGAGAAAGGACCTGCAGCTAACTTAGTACCGCTGTCGAG  
GTCAAAAGAAAATCCATTACCAGTATCTCAAATCACCGTTTGAACAATAGGATAGACATC  
ACCTTCTAAGGGTTCAAGGTCTTCCAGTTCGAAGAGGTTGGGTAGGCTTAATTGGTGCAGG  
TTGGTTAATTAGACCGTTGGAATTCACATCAAACCTCATGTTCAATTTGATTGGAACCATT  
CTTAACTGAGAGAACATTCTAGTTTLAGAGCCTCTTCAATCTTCTCAAATTTGGAGTTTAA  
TGTGGAGGTGTTAAAGCCTCCTCTTACTTCAGTAAGAGTAATAGTCATAGTTATTTAAGT  
TCCAGAAGATTTATAGTAATAGGTATTATGTAAAGTAACTATACTATGGAACCTGATTAAG  
TATTAATAGATTGCAATATAGACACCTATCAACACTAAAGAATCCCCCGTAGGTTACGC  
AACTACGTTGACCGGGTAGGTCGTATTCTTTCTTACTGAGTCTCCGTTGGCATCAACT  
ACGCAAGTATTCACATACTGAGCTCCTTAGTGACTACTCATACATGAAAGATACAATAC  
CTAGAATCTTTCGGGCTGTGGTGGGGCCACGACTTGTTTATTATAGAGTATCGCCCCGTA  
AAGTGATGCCGTATAGACGTTTLAGAGCACAAATATTTTGATTTCTGCTAGCTCTTATAAA  
CGACAAATAAGCAATCTGGAACGCCATGATTCCTGTGGGAAATTTTTGTGTGCTATGCA

AACCAAAATGGCACGCCGCGCGTCCCCCTCTACCCATCTTCGGGGATGTGCATGTACACC  
TTTTTATCTTTATGTGCGCGTTTAGCCGCACTGACCCGTTCTCGATGGCTTGTATCGTTG  
AGCATTAAACATTTCAGCAATCTTCTCTACAATTAGCAATCTCCCCACGCTTGCACGATTAC  
GTGTCCGCACAGCGATTCCGGTGCCTAACATATTCATTTATCGATTATTGGGATTAGCTG  
AGCGTTCTGTATATAGCTGTACATGATACTGAAAGCTAGATATCTACCAACTTGGTGATA  
ATACGTTGTTTATTTGTGCCTTATACACGTATATAAAGAGCCCATTACCGATTCATATCT  
ATGTTTTAAAATGTGATGTACGTCACCTTGTAGTCCAGTTTGGCTTGGTGTTAATTTACAC  
CCCGACGGTAAGGCAACAGCCTAACGATATGGAGATAGATGGTTACAGTGTTTATCTCT  
CTCTATAAAAATGTGGTTGATAATGAATACTCATTTAAGGTAATCTTCACAACGTCAAAT  
GTTTGCGGTGATACGTAGTCCAGAGTTGCTCTGGGTTGATCGAGGTAAGCGACGTTACCG  
ACTACTATCAAATACCGTTCTAGATGTCCCGATCAGGAAGCTAGCCGACAACGCCTGACG  
AGGTGAGGATGATTGTGTTAACATGGTCACCAGGCTCTGAGGAGCAATCGAGTTTACCGC  
ACGGTGCTCAAAAACGTTCTTTAATACTTCGGCTATTGACACTTATTTACATCAGTACTG  
AGGTTGATGATGCGACGTCTCGCGTAACTGTGCGAGGTTAGACTCTGAAGGGCATAGAGC  
TACGGTTCGCTCGGTTGCGATTCTGTGACGCTTTATCTATAACTTATCCAACATAACTAA  
CGGGCATGTATATGACTACAGTGCGGTTGACGTTGATATGGTTGAATTTTGAATGCTGAG  
TGTTGATAAGCCGTTACGTAATGCGTGTCCACCGTGAAACCAAAAATGTACGCGACAGTAA  
TAATCAGCACGCCAATTAGTCCGGCGTGATTAATGGTAATAGGACTGTCTATTTAAGGCC  
ATTAGATAGCTAATTAATAGTGATCTATAAGTTAATTAGTAATATCGGCTTGAGCTAAGG  
GTTGTTTAGTGCTCTAAAATATTTATGGAGAGGGGTTAACTTATCTATTGTGTATAATCG  
TTAATACTGCTACCCAATGTGATTGAGTTCTATGTGCTCCGTGTTCAATGTTTGCTCAC  
CAGATCGCAAGTTAAGTGTTGTATTGCCTTTATTGTATTCACTAACACGCTAGGTGAAAC  
AATGCCAACTCGAATTACAATAACGATTTACCGGACAAGGTAAACCGAATCAATAGCCT  
GTTAGGTATTGAAATCAATGCGGTAGGTCAGTATGTAGTGAAAGCTTACCAACAAGGTTA  
TAAATTGGATCAAGTTATGTGTGAAGCATTCTCTATTATGCCAGTCTCTGACTACCTAAC  
CGGTAAAGAACTAAAGGTGTTTCATGACTGGACTAATCACTGGTCTAACTCAACCTTACAA  
CTAAACACATGGATGATTATCATGGCACTACAATAACTGAATCTAACTTGAAAGCTAAA  
CTAAACAATTGGGTAAAAGTCAGCAAGTCTAGGCGTGATGAACTGCAAGAATTTATTGTG  
TTCGGTGTACTACATACCCACAAAATCGACAAGGTTTTTACCAAACCTGTCTGAATAAATG  
GTTGCTTGTGAAGATGTGAAGGCATTCCCTAACCCACGATGTATCAGACTAGAGCAAGAAA  
GTAATGAACGGTGTAGCATTGAATGTTAAGGGTAAAGTGTTCAAGAAAGCTAACAAGAAA  
GCGTCTCCTGAATATAACATTGGCTACCTAGAATCTTAGGCCTGCTACGAGTTTAGCAAG  
TCTACCAAACCAGCAAAAAGTAATGGATATTATCAATGCTGCTGCACGTTGGGCTAAACAA  
CTGCGTGAGGACATTGATAAAGGTTTGTTTAAAGACGGTCTACAAGATAACGCCGAATAC  
CTGCTAAATACACTGGTTCAGTTTGTAGGGCAGTAACTAGCAGCCATTCCAAATGAGGG  
GTTGTTATGGTTATTGTCCATCTACTAGATGAAGGAGACTATTATGACTATTAAGATGCG  
TCCCTTTGCTTTGTCTCAATTAACCTTTACTGATACTCCGTTTGTGGATACGAGGGTGC  
TTACGAGTACATTAAGACTGAGGACAAATGGATTGTGAGTGCGATGGTTCTTTGACTCTT  
AGAGGCGTACTCTTGGTAAAGTGTAACCTTTTAAAGACGCTGAAGGCGTTAAAAGGCCA  
TTTGTGCGTGTTCAACTACAACGGTGATACATTCGTAACCGGTGGTCAAGATTGGTTTGT  
CGTGAGTTCGAGCAGTACGATTTTGAAAAACCTGTTTGACCACATAACCAACCATCGAACT  
ACTCCGGCCAACTAGCTGACAGCCACCAGCATTGCTATGACACTGAGTTATTTACTCA  
AGGCTATCTGATTAGGTAGCCTTTGTTAGTTTCATTACGCATCCATTGGAGAATATAAT  
GCGTATTAGAAATATTGTAAGCAACGCCGTAGTATCTAACGCAGACCAAGTAGCACAGGA  
CGATAGCCTGTGCATCAATGGTACTACCTATGTTCCATGTTGATTCTGGGTGAGTGGGT  
TATTGATCGTAGCGATAAGGTGGTGGATGCGAAGACAGCACACGTGCCAACAACCGTCGG  
AATGTTAGCTCTGATTGTGTAATACTAGGTGCGAAAAGTACTATCATCATCATTCCCTCA  
GCGATATCGCGACAGAAACATAAAAACAACGCAATCCAACTGGGCCCATAGTCCAGTACG  
TTTGATGTTTACAAGCAAACAGCAGACGTTGGACTAATCAAAGTGGTCAATATAATCTC  
TCGTGGCACTGGTGGTGCGGTGTATGGTGGTGCCTTGGTTTTATCTGTGGGGCTATTAA  
ACAGGACGATGCAAACATCCGTAGTCTGTCAACGTGCGAAGCATTCCGCCAAGTGTAAGA  
CTTAGCAACCACAATGGCTATTGTCCACCATCTGAATAGGTATTCAATCATGTTCCATAC  
AATTACTCTGAGTGTAGCCGTGCTGGTTATGGGATTGGCCATTCTCTTAAAGAGTCTAGT  
GCTAATCCGCTCTATCTTAAAGCCCAAGTCACTAGCCCACTGTTTAAAGATTATTACACT  
TGTGCTTAACATTTTCGACGCTTGTGGCGTGGTTCATTAAGATGCCAATCGGAGCATGATT  
GATGCTTTTCGGTAAAGTCTTGCTCTGAATCCTGCTCATTGACGTACTTTTACGGAGAAA  
ACAAACTATTTGTAGTCTAGTTCCTGGTCTGTGGATGCGCAAGAACGTTTACAAAACGC

TTACGCTAGTGCTACATCCCGTAGCGCTGTTATCTTCCCCAACGAACGCAACCGGACGGG  
TACAGCGCCCCGTGTTAAGTCTGGAAGTACTAAGACTTATCGAACAGCCACAACCTCCTCG  
TGGCTTTAAGCACTTAAACCGAATAAATAGTAGGAGTCCATTATGTAACGTACGATCGCA  
TTAGGCGCTTTTTCTTTTCGTTGCTACTCCTCGTGAAGACGATCTAGCCGTATCAGATATC  
TTCGATCGGCGTGAACGAGACGCGATTGACTTCAATCCAAAGCGTGACGAGCCTATTGCT  
GTCCTTTTGGCTAGTCAAATTCGTGCAGACGATTTATTTTCGGCAACACTAACACTGCGT  
GAAACAGCATTGATGGTCGGTATCGGTGCAGTAGTATTGGATGAACCAGTACGTGACGCC  
TTCCTTGAAGCGGGAGAGAAAGCAGTCGAGCAATTGATTGTCGATGCTGATTCATTCCAA  
GCAACTAACCATTAATCCCCTAACAGAAAGACCTAACATCACGTTCCCAATAGAAGGA  
ATCATAATTATGTCTATTATCTCTAACAAATTTTCACTATTTGGTTCAACTGGGGTTAAC  
CAAATCAACACTCAAACGCTCGTTGGCTTTACCATTGTTGACGGTGAAGAAATTGTCGAA  
GGTACTTTGAAAGACCCACCGTTGGAAGGGGCAATGGCTGCATTTCGAGCCGTTACAGCGAA  
AACCACGCAAAAGGTGAGGCTCAATTGTTCAAAGAAGCTAAATTCTTCCACCAGAAAATG  
ACCACCAAGATATCCTTTGACTGCTTGGGCGGTATCATGAACGTTGCAATGGTTGCTCCA  
TGCGAATCAAGCCGTGAGGTAGGTTGCGTTATCTCCAAGCGGCGTGACGAAGATGGTGAT  
TGCGAAGTTGTTACCATGAAATGCTCAACCTAGTTGACGATAGCAGTGTTCGGACTTG  
TTGCACAGCTACAACCAAGGTGCCGCGGAACACTAAGCAGTGTCTCTAATGCTGACTGGT  
TCGCTAGGCTTTACTAGGTGTAATGAATCTAATCGGTCTCCTACTGTGGATGTGGGAGCC  
CTTCCACTCACTCAACTTGAAAGAGAGAAATACCTTGAAAGGCATTCTTTAAATCAACA  
GATCCGTTCTGAAATGGTTAGCAACGTGCTGTAAACTTGGGCTATTGAGAACCCAAATCC  
CGTGTGTGTGGGCGAACCTAGCATAAACACTTTGTTAGATGCCGCATACGCCCCATGTTA  
GAAAGGCAACCAACTGGATATTCGATTTAGTTGAGGTTTGAAAGACGAAATTCTAAACAA  
AAAGACCTAAGTCTCTACGTGTTGATGGTAAACACGGCACTGAAATCATCTACGAAAG  
GATGTACTTGAAAAATGCAGGAGGTAAAGAACGAGCGCCGACGCTTCTACCAACTTGTGC  
TCTACAGCCAACCTACCTCTTACCAGGTGGACATCGAATGGAAGAAGCAACATGATCAGTT  
TATTCATCAACACGAGCAAGTGAAGAAGTCGAAAAAAGCTCGTGCCGACAGAGCCACGGA  
AATCCGTTCTGTGCTAGAAAGTGTGAGGACCCCAACAATTGCGTGAAGCATGGGCAGA  
GCTTGAACGCTTTATGCCAAGTGGTTATGTTGACCCAAGCAAAGTACAACCTGCCAGCAAG  
CCTTCCAACCTCACCAACTGGAGAGTAAACCATGCATTCTTTCTACTGAGTGCATTCTT  
GATTCTATCTTTGTGCGTATGGCTTCCCTCAGAAACTGAACTAAGTCCTAATGTTACAAG  
AGCTGCGTTTGTAGAATACAATGGCAGTTGTATCACTGATGGATACATTGCAGCGGCTAC  
GCCTTACGGTAAATTCTATGTAGACTTTATCTTAGCAACTAAGAAGTCACAGATTTATTA  
CGATAGACTAGACCGAGCTGAAAAACAATTCATTTTCAGTTTATATGTGGGAATGAAAATC  
TAAATCTATTCGTGCCAAAGCTTGCAGACTAGCTCTAGATGCCATGCAAGAAGGCTCAGA  
TGAAATGGCTGCCGCTTTGGTTTATGTAGAAGGTCTGTAGTGAATAAGTCAAGGGTATCT  
AATTGGATGCCCTTTATCGTGTTCCTTAATCCGTTGGCAACTGTTATGAAATACTATATT  
GAATCCCTTTTACACACTATCCTAGTATCTTTCCTAATGTGGCTGCCGTA TAGAACCT  
TTGTTTGCCGCTCTGGGTAATGGTGAGGATACGAACAAAAAAGGATACGTCCGAGGCAAT  
TTGCAATGTGGGGAATCGTATAACTTTGGTGAGCCTGTCCCCGTGACTCATATCTATTCA  
TGGTCAACGACAGACGAAGTTAAACCCTTTTCGTAAGTCTACTGGAAGCTGTGATGTTGGC  
TTTAAAGACGCTGCCCAATACTTCATAGATTTTGTAGGTTAACTCCAGACGAGAATGAA  
GGTCTCAAACCTTGGGAAGATAAATATTGATGTTGTCAACAGTGTCTACGTAATACGCCA  
ACAATTACTGACGAGTACGAATCTCCCGTTCATACCGATAAATTCTTAAGCAAGTTAGAT  
GGAGCAAAGATTACTAATGAGCATGGCGGATGTGACTGAACCAAAATGCAACCAAAATTCA  
GTTTGAAGAGTGTGGTCCATTGATGTTCAATGGTCAGGGTGCCCTGATTTTGTAGAGACA  
GAAGTTCGTGTAAGTTGGTATGGTTTTGACCTAGGTAAGGACCACTACTTCTGGAAAACA  
GAGGGAGAGGATGATCTATTTCGACCGCTAATCAAATATTCACTTATGGTTGAAACACAAA  
GGCGTACCGGAGGGAGAACAGGTTATAGTTCATTGGTGGTGGTAATTTTAGTGATAAGA  
AGACAGTAGTTTCCAGTTCTCTCAATCATGTTCAATTGACTTAATAGGAGAAAATAACGTG  
AAACGTTTTGCTAATGCTTACACTGCACAAGATGGCAGTAATACTAAAGTTACTGTTTTT  
TGGACTAATGCGCAAGACAAAGAGATTGCTATATTCCATTTCAAATAATACCGCGAAGCG  
CAAACCGACCAACACATCTTCAATGGTTACTAGCTGCACCAAACTACTAACTAAAGAAGG  
TACTATATTCATGAGCACACCGCATAGAAGGCTAACACTGGAAAACAAAACCGATGTTGC  
CAACGGACAAAGAGTCACAGTAGTGACCCACAACAATAAGGATTATGATGTTGAGGTGTT  
AGCTCACGAATCTGATCGTTTTTGGCTCTTAACCAACCTGTAGACACATTGAAGACGACTC  
ACAATTGTGTTCTGTAGTCACCCACTCTAGTTCTAGTAAGTGTCTTATGTGGGGTTCGG  
TGAACGGGAGCTAGTCAGTGTGCTGGAAAAATGTCTAACTAATACAGGTAATAAGATGC

AGCTTGAAATAGATGCAGGGCGATTACTTGCCCCGTGTAATTGCTGGAGATTGTGGCATCA  
AGCTAGTCATGCGCGAGGACCGTACCGTTCCAATGACTGACCGTAAGACAATAACAATAC  
CAGAGCTAGGTCCCGACTGGGATGCTCACAGGGCCAAGGCGCAGCGTTGGTGGGCAGGAC  
TTTGTACGAGTGTACCACCACAAGGGAACCTCTTTTGATTTTAAGTTACTGCGTG  
AATTGAAAATCGACACCAACAAATTCATTGGTATGGTACTCATCATGGTTGTTGACCATG  
ACATAGAATCCAAAGAGGATGAGGAACTCGCGGGTGTCTGTTAAATGGATGGATGCTTTAT  
ATTCTGAAAGGTACATGAAAATCAGCAGTATGTCTGGTACTTATCCAGTAGAATCTAAGG  
GAGCGTGTGCATTAAGAGCCCTTGTTCCTTTGACCCACATTGCGCTCTCAATGGAGTG  
GCATTGTTAATCTTCACTTAGAGGAGGGACTAACTACTGAACTTGCCCCGCACTATGTTCC  
AACTCTGATGGACAAAGCACACGGCCTAGACTTAACCCAACGTGATGGTGGTTTGCCTA  
ACCGGCTAGTATGCAATGAGTTGATGGACTTGTAGACCTGAAAGAAGAAAAAGGTGGAG  
CCAACCTAAAGCAGAGGGTTCATCCGACACTAAACCAGGACAAGGTGGATGTAAGCCCA  
GCGACGGTGAAGGCCAAGGTGACGAGGGAGAAGGCGCAGGGAGTGGCTCAGGACCGCCTA  
GAGAGGGCGAAGGTTAAGCAGGTGAAGGAGACGTACCTCAAGAATAATTGCGTTGGTCT  
TCGGGGATTCTGGGCGTACTCCCGACGATTGTAAGCCTGCTTCTGGTACTAACGTTAAGC  
TAACTTACAATTTGGATGCACTAGATACGCCTCGCTAACGTGTGGTAACTCCTGAAGAGT  
TCCAACCTAAACTCTTTGCAGGGCGCCGCGTAATAATGGCGTTGAAAATGTGCTGTCTA  
TCTTCATTTTACTCTGAGTGATAAGGTCAGAAACATCCTCAAAGTTATGTCGCAAGTCA  
AATGGCAGCGTGGACACCAGCGAGGCAAGTTACATAGCGAAGGTGTGGCTAAAGTATCGA  
CTGGCAGTGGTGTATCTTCCGTCAAAGGAACAGAAAGGTTGTATTAATAACGGCTGTAA  
CTGTTCTGTTACATAGCTAAGGCCCTATGTCTGGATGTAGCCAGTACCTCCACGGTCTGT  
TGGCATGTTGTGTGTTGAATGATGCTTTGAACAAAGTCGTCATGCCGATTGAAGTCCAG  
GCTTTACTCAAACCTTGCGAAGGCGCCAACTAATAACAACCAACATCTCATTACAGTACCGT  
TCGGTCTGTTGTGATACGGCTCGTCACTTGGTAGAGTCAATGGATGGAGTTGACTTAGCTA  
ACAATGAGCATGGTGTCTATTATGTGGGAACACTCTCGTCTAATTCGCCACAAAGCTA  
CACGTAAAGTCTTGATTGTGTTAAGTGCTGGTAGCCCTGCATGTTTGCAAGCTAACTCTT  
ACGCATTCACTAAGCAAGTCCTCGAGGAGATTGAAAAGGAATCTCCAGTAGAAATCTACG  
GCATCGGGATTATGGACGATACCGTTAAACGCATCCACTCACAAAGCGAAGCTATTAGAC  
CACCAGAGCAACTAGACTAAGCACTACTTAATGTCGTTAAATCTAAAATTCGCGTTAAT  
AAGGAAAACATAACATGGCAACAATGACAACAGCAACATCAGAAGCTCTGCGTTCTCCTG  
TAGCGGAGGCACTGGCAGCACGGATGGCTAATGAGGCTCGTAAAGATGAGTATGATGCTA  
CAGCTTAACAACCAGAAGCTGCAAAGAAACCTACTCTCTTTGAAGATGAGTTTTACAAAC  
CATCAGGTGATGGTGTAAAAGACTATGCTTACATCATTGGACATCCTCATCCAAACGGTG  
AGTTCGATTTCCGCACCTACTAGACGGAACATTGGACGGAAGAACGACAATGTCTGATTC  
CAGAAATCGATGCACCCATGGAGTTTGTATGATGACCTCGCTCTTGCTATTCTTATGGCCA  
TTGAATACGACAAACCCGTATCCGATGATAGAGACCCCGGAGCTGGTAATTCAGTTACTC  
CAGAACAAATCTGTGCTGGTATCGGGTACCCTTCCATCTTCTGTGCTGGTATGGGTGGTA  
CCGAGACTAGCGACAACGGGGGTTCTCCATTGGAAAGTGTGCGGCAGCATGGGATGGAAAC  
ACGGCCCAAGGTCTTACGCTGTACGTAAGGTGTCTTCTTCTGAACGATGTGCCATTCA  
AAGCGTCTGGACAAACTAACATGTGTATCCCATCACTGGTAGATACTCGTCTGACTGTGA  
AATTTTACGGTCATCCTCACCCGTGCAAGGATAACTTACGTGCTCATGGTAGCTTCTGTA  
TCATGCGTGCTGATAACGTCCGTGGTGTGAGACCAGATGGATAAGTTTGCGGCAGAGA  
TTGAAGACCAATCTACTCTGAACCGTATGGTGTATAAAGTTCATGTACCATAACCAACTG  
AGAAGGCTGAGAAAGAAATTCCACGCCGTAAGTTCCACAACACTAGCTGAACGTTTGGCTA  
ATAAGATTGTTTCTTAGCTAACATGAGTCATAAAGGACGGGAGCATGGGAATATCACCA  
TGCCTTACTGTGTACGTGATTCCCAAGAACTGGCTGAACAATCACTGCGTTTACGTAACC  
CTGCGTATGCTTTAAAATGGCCTACTTTCGATGCTGTCAATGCCGAAGTTGCGAAGAAAG  
AGCTTGAGAAAATGTGGAACCTGGTTAAGTTCGACGAGTACAAACTCTAAGGAGTTATCA  
TGCTCTATAATGGTCTCGTCCGGTCTGTGTGTTTAGCACAGACCCCATTAACCTAGCCTATC  
CTCGTTATTTGTTTGAAGGAGGATGACGTCAACCACGTCGAAATAGGTAGTGGTTCAA  
CTAACTTCGTCATAGGCGGTAGAGAATGTTGGAGAGACACCGTATCCACGGCCACGAGA  
GGGAAGCAAGTGACGCTCTAGAGTGGATGTTTAAATCAGATGTGTTAAAGGGCAGTGGGT  
AAGTTTATCCACTATTCATCAACTTAGATGAGGAGGTCAGCGTTGAGTACTACTTCGTGT  
AGTAGTCTTGGAGTAGGACAATATCCACTCTAGTCGTTGATGTGTGCCACGTTTCTGAA  
CAAGTTTATGGAGAGGCTATCAAGGCTATTCTTGAAGTGTGGGAATCAATACACCTCGT  
ACATACAGTTTACAAAAGAGAGCTGTGGATATTGGATCTTACGAGAGATTATTCCTTCT  
CACTACCAGTTAACTCACACTGCAATTGCACAGATGGCAGAGAGGTTGCAATCAAAGAAAG

TGTTGATTCCAACCCACAAACCAGTGACTACATTATTGTTAAGCTAGAGGAGTTATTGAT  
ACGATTGATTCTCCTTGGTTACGCTGTAAAGCCTGTGATAAAGAAATCCAACCACATAAT  
TTTCGTGCTCTCTGTGAGGATGATGAAAATTAAGAGGTTTCGGAAAACCTGTGGCCTGAG  
TGTCGTGCTAAAGTACCACATTGGTACGCTAGCACTGAACAATGCAACAATGATTCATCA  
GGGATTTCGATTACTA ACTCCAGTATGGGAGATTCACTTAGTGAATTGCTTCACTCATT  
CATAACGGAGCTTTTACTGGTGGCAGTTTTAATTCCGAATACCGAGATTAAGGCCACAT  
AGACGACAATCCAGAGTGAGTTATCGGTGAAACGAGACATTTCTTTTACTGTAGGGATGG  
GCACAACAACAACCGATTCTATGTTACCCACGTACAGA ACTGTGTTTACGTTGGCAACTG  
ACATGCTTACGGTGGTAAAGGTATCTATCGTGAGAAGTTTGCCCGTGTTTAAAATAAACT  
AGCAGGA ACTAGTCCTATGAAAATCCTCCGTGATTATAAACTTCCAACGACTACTACCAC  
TTACATGCCAGAGTGGTCGTCAAAGGATAAAGTGTGGATGTGGAAAGCCATGCCCAAGGA  
TGCTGAAATTAAGATAGAGGTTTCTGTTACATTACCGAATCAGGTCGTGTGTGACTTCC  
TACGTATTTTGATGGTGAGTATCAGGGATACCTCTCTCGCAGAGTGGAGGATAACGATGA  
AGCGAAATACTTGGCAATGTCTAAAGACCGAGAAAATTATGCGCTGTATTCAAACCAAGG  
CACTTGGCAGCTGTACTGTGGTGGAAAGATGCTCTATCTTTTATAACCCATCTGTAGACACAC  
CAGTTGCGTCTGACTTTTTGGTACATCGATAACAGTCAATGTTCTAAATCTTATTTCGCGG  
TAATCCCAATAAGTACAACCTCTGGTTAGATAATGATAGCCGACAGGTCAA AATCAAGCT  
TCTCCAGCTTGAAGCTAAGTTGGTGTGTTTCGCTCCGTCCGAATGATTAAGACAGACAA  
AGAGCCTAAAGAACATTCTGCCCTGAATTCAAGGAGGTACAATGCCTTTAAACATTACA  
GTCGGGTATACGGTTAAAGTTGTAGATAAAGGTGCTATCTGCACATCTCAGTCTATGTAT  
GGTGCAAGACACCCTGCGTGGGTGAATGGCGCTACTCCGAGACGCCTCACTAAATACGAA  
ATCATTGGAGTGCATCAAGATGCTACTAGTAGAATCGGTGTTGATAATCTATACGCGATT  
CAA AATCCGAGTGGTCAAGTGTAGCTATGCGGCGAGCGAGATCTGGA ACTAGATGCACCG  
ACTGTCAGTGCTCCAGTATCTGCAATCGCATCAACACCGGTTCCGTCTGTTTCAGAGTCA  
TGGATGCGTATTGATGGGTCTGAACACGATACAATGCGTGGTTCGTGTAGTTGATGCTCGT  
AGGATTGGCATCTCCTTTAAGGGTGGTGTGTTGGCCTGTGCGTGATGACCACCGTGACGGT  
TTGGGGGGGACGTGCAATCAAGCATTCCGCAAGTTAGAACCTTTAGATGCGGCAGAAATG  
TACTCAAATTA CTAGACATTACATCTGGAGTGAATCATGGGTGAAGTGATTTAGGTTG  
GTGATTGGGATCGCTATATTACTTCTGGTGGGCCTGACTTAACTCACAACAAAGAGTACC  
AAATTATTCAGGTCCACAGGTCTGATGCCACTTACGGAATGATTCCGGGTTTTGGATGATG  
TGGGTGATGTTACGACTTGATGGATTTGGAGTATGAGTGGTTAGGTACTCCTAATCCTG  
ACTGGATTCTTGTGTTCCAGAAAGGTGATACTACTCCAAACGGAGGAGAGTGGGCAAGCT  
TCACAGTCTTCGACAATGAAAGCCAGTGGTACTCTATCCGAACTTTTGAAGGTGAGCGAA  
GGTTTGTGAGTACTCACCTGCTACCAAAGGTGCGTTAGAAACAGATCGTGCTGCGGCGT  
TGTTATTAGTCTTTCCTGATGAGGAGGCTAAATTGTGAGTTTAGACTTCTTGAAAATTTT  
GGAGAGCCGTGAGAAGTACGAAAGTTACTCTCCATTTGTTGGTGAACAAACGGTAGACCC  
TCTTGTCTGGAAGGGCATCCACGCGAGTTAAACTTGGTTTAAAGAGGATGAAGTACGTGA  
AGACATTGATCCGGGTTCTTTCGACTCGGTTCTGTGCTATTACGTATGGTCATTTATC  
TAGTGACAAGCTTGATATATATCGTGCTATCTCTCATAAAATACCGGCTCAAGTTGTTGA  
TGCTACCTGGGAACGCAGTATCGTTGATAGCTTTATCACTCGCGGTAGGTGTACTGCATT  
GTCGGATAAAGCTCTCCGAGGGGCGGAAGGCGGGCCGGTACCGGTTTATGACCTTGTA  
AAATCGTAGATGATTTGACCAACGAGTTAGGTTGAGTTGATGAACTTGGTTTCTTTGATCT  
CGAAGACTCTATCGAGTATATTGTTAAGCGTATCACCCCAAGTGGCTACGATGGGCTTAT  
CCAATTCATAAACAAGTCCGTTAGGGGTCTGCCAGAGAAAGGGAAGCTGGTTGTGATTGT  
AATTCGTCCTAACACTGGTAAAACAACGTTACAGCGCTTATAACGTGTCTGGTTTTGCTTC  
TAAAATGGCAGAAGAAAAGTTGTGTTGCGGTTCAACAACGAGCAAGATGGCGGTCAGGT  
CATGTTACGTACTCTCCAAGCTGCTATCAACTGGGCTAGTGCGGACATTGAACTTGTCTCC  
TTCTGGTGCAGTGTCTGCTTATGTTCAATTATTTGGTAACCAAGATAAGATTAAGATTAT  
CGACAAGGCTGACACTACTGTCCACGATGTAGAACAATCGATTTAGAAGTACAATGTAGG  
CTTGATTGCTATTGACCAGTAGTGGAAGTCCACGGGTTTGAACGTGAGCCAGCGATTGA  
AGTAGCTCGTCAA ACTAAAATCTTTAAATGGGCGCGTGAGATTGCTAGGAAGTATGCCAG  
TGTTATGGTTACTCACCCAGGTGATGCGCAAGCGGAAGGTCAGAAATAGTTGGATATGTC  
CATGATGTACTGCAGTAAA ACTGCTCGCCAACGTGTGGCAGACGCAAGAATTATGATGGG  
ACGTACTAATTAGGAGTCTGAGAAAGCTGTTTCGATTTCTCACCATTGCTAAAAACATA  
TGCCGGTAAGTACTGATGTAGACCCTGCACTACGTGAAGGCCCTGCCGAGTTACGTATCGT  
TCGAGATACTGACGAATCTGAGGAGATCTAAATGTGGTTAGACCATTTTCGATGACCCTAC  
TGAGGTTTTTGCTACAGCGGTGTCATTTCGACTGTGAAACAACCATAACGTAATCATCATAT

TGGGAAGTCACAAGCTTCTCCTTTCCATCCTGCAAATAAGATGCTGTGCTTTGGTTGCAA  
AACGTTTCGACGCTGAACCTCCAGTACTTCGGCCAGAACATGCTGACTTCCCAACACTCAC  
TCGTGAGAATGGTGTGTTGTTGTTAGGCCTCAACATCAAGTTCGACTTGCTGTGGAT  
GATGCGAACGTATCCTGGTTTCCGTGATATTTTACCTAACCTATGTTTTTCGGATACACA  
ACTTGCTGAGTCGTTGTTAACTGGACAAGACCACAAGATGGCGCCTCTTAACGAGTTGGC  
TATGAAGTATGGAGTTACATAAAAAAATGACCGTATCGCCGAATTTTGGAAAGCTGGCGT  
TGATGCTTCTGACATTCCTTTCCCGATGCCCGAAGAGTATCGGAAATATGACGTAATCAA  
CACACATATTGTCTTCTAGAACAAAGTTGACCTAATCATTAAAGGAAGGTCTTCTTAATCT  
TACTATGTCTCAGATGGACGCTCTAAAGGCTACCACTGAGATGCAATGGCATGGTATGAA  
GTTTCGACAAAGACCTTGCTTTGGATTTAGCTAAACCTCTCCAAGCTGAGATGGGAGACAT  
TAAGGGTGCTGTATCTTCTGTGGTGAAAGCTGTATGTTTTCTAAAGAGTCAATAAATCT  
GGTCAGTTACTCCAGATTAGTGCTCTTATCTTTGAGGGTGTGGTCAATTACAAACAGAA  
ACATTACTTCTACAACCACGAAGGTACGATTCGTACATTCAAAGGGGGTGCTCGTGCTGC  
CCAACCCAAGACCAAAAATCCTTGAACGCCCAAGCGTATTGAAGGTAAGTGTAACCAAT  
CCCTCCGAAAGGTAAGAGCGGTTTCGTATCCAGTAGGCGACGACTCTCTATCTAAAGTCAA  
AGCCAAATACAAAGGTGACGCTGTTGTTGAACAGTCCGGTCCGGTGACATCCATAAATTCG  
CCAATTGGAAAAGGATGTTAACACCTACTATATTGGCCACGCTTCTCAAGTGTTCCCTGA  
TGGTTGCCTACATGGTAACTATAACCACACTAAAACGGCTACTGGTCGATTGTCTTATAT  
TTCGCCAAATATGCAAAAATATCAGCAACTAATGTTTTGCAAGTTATATGGTCTGTTGTAT  
ATTCTGTGTAAAGACTATAGGAGGTACGTTGTGGGTAATTGTGTAGACAATAGATTAAT  
CGAATATACTGGGCGATGGAGGGCCTTTGCGAGTATCCTTAGAATGTTTCGTTACTCTCGT  
TATGGTGGGAGAGGGATTTACAGTAGAGTTCAAATGTTACCGAGAGTTCAGAGAGTGGGCC  
TACCAAGATGGGTACTCGCCAACCTGAACAAAAAATAGAATATACAAGGTCAAGAGCTCC  
AGTCCCGAAAAGTGTGGATGGATAACTTACTATGATAACACGCAACTTGGTTCCTTGAAG  
TATTGGAATCAGATTGAAAGGGTAGATGGCTCTATAGGGTATGCAACTAACAATCTTACA  
GAATTTTGTAGGGTGCATTCCTGACCTAAGAGTGCTATAAGTAGACTGAGAAAGACCTAC  
AGAGGAAAAACAACAAAACAATACAAAGGTTTCACATGTCAGATATAAAGCGATGTATAA  
TCTCCAGATTTCCCAATGGAAAATTCATGGAATGTGATATCTGTAACTTGAGGTAGTTG  
GTGGGGCGGTGTTAACTGGCGACCCAATGATAATGAAAGATATTGTTGATGGTGTAGATA  
CTCACCGTATGTCTGCTTCTTGGGCAAATCCAAAAAATCTCGTCTGAGCAAATCTTAGCAG  
GGTACAAGGCAGAAGACCCTTTCTTCCCATACTACATAAGAATGCCAAGCATGTAACT  
TTGCTTTGCAATACGGTGCTGGTGCTGAGGCTGCAGTGGAGAACGAAGGTATCGAAGTAG  
AACATGCTCAAGCAATCATTGGAACTACTACAATCGTTTTTGTGTGTTGAAGCAGTGCT  
AAGATGATGTAATCGGTCAAGTTAACAAAAGTCTTCAACCCTCTAGTCGTCGTAAGTAAA  
TCGGTATGCCGGCTGGTCGTGGTGAGTACCGTAATCCTGCAGGACGTATCTCTACTTTCT  
ATGAGTACGATGCTCTTACTTGTCTTCTCGACGTGGACAGCTGAACTCATTCTCCCCCA  
CACACTGTGTGAGTTAACGGAGTCAATTTTTTGCACCTGCTGATATTGTTCTTATGATGT  
TGGGACATATCTACCAACTACTGCTGACAGACTAAACATTACGTGATAAGTGCCTGTAA  
TTGGTACAGTACACCATTCTGTAGTGTGAAATGTTTCATCCCGACATTCTGGATTATGCAG  
CAAAGGCCGTTTCGTGGGTTGTTGTTACGTACTCTTGAATCCGAGGATCGTGAAGTTAGAG  
TTCCATTTGATATGCCTTTGCCTTGTGACGTTGACATCGGCGAGGGCGCATGGTTTAATA  
TGCCTGGATACAAGTGTTAGGAGGTTCCATGCAAACAGTAGCACAGAAAAGATGGTACGA  
CGAAAGCAAAGAGCACCACCGTGATATGGGAAGAAAGCGGCTATAGAAAATCCAGAGTAC  
GCTTCTCTAAATAAGCTACGCCACAGATTAAGAAGAAGTACGCCATTACACTAGAGGAA  
TACAACCGTATGGTTGAATGCTGTAGCACCCAATGCCAAATCTGTGGGCAGACTCCTGAT  
GGTAGTAAGTTGGACACGCGTCTTAGTATAGATCACAACCATGAAACTGGAGAAGTACGA  
GGATTGATTTGTAGACGATTTACCCTAATGTTAGGCTATGCTATAGATGATCCAGTGATA  
CTAACCAATTCAATTAATAACCTGCTAAAATATCTAAGCAAACCTTCCATAAATCTTAATA  
ACAATAGGAGATATTTCTATGACGACTATGACTGGTACGTTACGTTCTAAAGCTCGCACT  
GGTAAATCAATTAACCTAGGTGACGGTAACTGGTACTCAGAATTCGCTGCTTGTGAGAGT  
CCGGCTGAACTTAAAGCAGGTGACTCAATAACTTTTGAATATAAAGAGAATGGCCGTTAT  
CGTAACATTCAAGGTAACGTTAAGAAAGTAGGTGGTTCTGCTCCTGCTGCAAGTGGTGGAA  
AAAAGTGGTCCATCTTCCGGTGGTTGAGGTTATCGTGCTAACGGTGAAGAAGGTGGTTTC  
CCAATCCATCCACTAGCGTATGAACGTGCTCTTGACCGCCGCAACGCAAGTGCTGCTCCA  
AGGACTATCATCGCTTCTCAGATTGCACATGGCACTGAGTTTGAAGATATTGCTGAGGCT  
ACACTCCAAGTACAAAGACGTTTCGAGGCATAATCAACTGCCGATATGGAACGTGTGGCT  
ATGGATGATATGACTACTGGCGACTTTGAATAAGTTTGATAGTAAAACCTTTGGCTCCT

TCGGGAGCCTTTCTTTACTTTGGAGGAAATATGTTAGAGAAACATGCTCGTTTACTTCGT  
ATTCTTCTTGTTGTGCTACTCTCGCTAATGTTGACCACTTCTTTGACAAGACCAAGTCAA  
CAAGACATTAAGGTTCCACGGAAAGTTGTGAAGGGTTACACGCACGAATGTGAGTTGATT  
GGCCAAGCTCGAGAACGTCAGAAACGTGCAGAAGAACGTCAACGTCTGGCAGAGAACCGG  
ACCGCTAAAATCAACGACCTGTTAGGTGAATAATTATGAGTTTAGATGAACTATTATTTA  
AGTTTGTAGACGAGATTGCTGAGAAAACAATCCAATTGGCTGGACCAAATTCACCGATG  
TAGGTACGTTAGAAGCCTATCGCAATGTTTCAGGCTCCATCGAACAAGGATGCAGTCTGG  
AAGACCTAACTCAGAACTTCACAAGGTTATCGACAGGGTGGAAACCCGGTTAGAGCTAC  
GCAATGAAGTTCGAGGCATTTCTACCACCTCCTAAAGTGGCTCCTTCGTTCAAATGCAGT  
AACGAACAATGCACCAACTTATGGCAACCCTATCACGGTAACGTAGGCTTCTATGTTCT  
GAGTGCTACGATAAAACCCCTGACCATGTAAAACAGAAATATTTGGAGACAAGAATCATG  
GATACAATCAAATTATCTAAAGATCTAACCGCTGAAATCGTTTCTACCAACACTGTTAAA  
GTTACAACCTACCAACGTGTTACGGTGGTGCTTCTTGTAACCTAATCTCTTCGGCATT  
ATTGCTTCTAAGTTGGGTTACAAGACTCTTCTGATTGAGATTAACCAGACGCTTCTTGT  
CATGTTTCAGAAGATATTCGTACAGCTATTCGTAATGGCAATCTAATGGTTGATCACCTA  
GGTTTAGAGGTACATGAGGCTTAATATGACTACATTAGCAGGAACTGGTGCAGACACTCC  
AGCGTTCGCTTCGGCAATTAGCTTTGAACATTACTACTATGGAACACCGGAGGGTGATTG  
TTATCGACGTAAGAGTGATGCTCCCCAGTCGCTACACGACTCTCTTATTCAAGTATGGGA  
GGCCACAGCGCCTCGACTATTTGCTGTATCTAGTTTTGAGAAGTTTACCCAAGAGATTCT  
AGATGATGCTCAATGTGACGATTATGTGTTGTTTATTTGTGGCGGGAATAAATACCGATA  
TGATTTTGGACATTATAGAGGATGCCCTTACAACGGCAAACGCACCGACATGCACAAACC  
TTTCTATCTTGATGAGTGCAACAACCTATCTGATGGAGTGCCTTCCGACGATTGTCTGTGA  
CGGCTACGAAGCTGACGATGGTGGCGCCATTTTGATGAGTGGGGGTATGGAAGGTTACCA  
TGAACGTATGTGATGTGATATTGATAAATATATGGATATGATTGAAGGTAATTACATGCG  
TTGGAGGCGTAACATCAATGGTAAAGACTTCCCTGCTGATTTCTACACGGTGAAAAAAGT  
AGAAGCTCTACGACACTTCTATCTCCAACCTGCTTTATGGTGACCCGACTGATAATGTTCC  
CGGCTACTATAAGTTAACTGGTAAGAAATTAGTTGCTGGGATCAAATCTGGATTGGAATC  
GCTGACAACTGAATTAGATATGCGGACTCACGTCCGCCAAGTCTATGCTAAAGCAGGTAT  
GCGTGACTAGAACATCCTTATCCAAATTGGTTCGATTGCTTAGGATTCAAAGTAAAGAAAG  
TGCAATGTCCAACCCTCCTACGAACGTTTTACGGCAATAGCAGAAAGTGCCGAATAGCAA  
CAGTACACTATAACCTATAAATTTGGAGCTCATATTATTATCAGACTAACCCACAATGAT  
ATGTATGCTGTGGCTCATGTAACCTACAGCTATATTGGAGTCTCTTGAAAATGAAGACTTG  
CTAGCATATATCGCTGATTAATAAGTTACAGGCCTTAAAGAAGCTAACGGAGAATTTAAA  
GATGCGTAATACTGAACACAAGAATCGTCAAATGCACAAAGCAACTTTCCTAGAAAAAGC  
TCGTCATCGCCAACGTGCTGAGTACCATCGTCGCCAAGAAGAGCACAAACTTCGTGCAGA  
TTACGCCGAGTATGTGTCGTGTGTCGAAATGTCACGAGGCCCGCAAGTCGGGCTTCCGTA  
GCGGATTCGACTATGACTTTGCTAGAACTGTCCAGTACCTTATGACGATGAGACAGGGT  
AATTACCATATCCACATACGTTAACTAAGTATTC AATGCCTCCTTTTGTCTTGATTAGGA  
AAGACGGGCGTAAGATGTATCTTGAATTGAAGGGTTCGGTGTACTGCTTCTGACCGTGTTA  
TAATGAAGCGTCTCAAGAATTGTTACCCGACTTTAGATATTCATATAGCGTTCAGATGT  
GCACTAACCGGATTACTAAAGTTGCCAAAACAACGTATATGCAATGGTGTGCTAAAGAAG  
ATATCCTTGCATAGGATTGAAAGGGTAAACCAGCACACATTCCAACCTGAGTTGTTAGAGG  
AGTTGAGATGAGCAAGTATAATGATCCACATCCAGTACCTTGAACCTGTAAAGACCTTAA  
AGTTGCTTGGCAATATACAAACAAAGTTGATTGTGTTTCGTATGCTCCGCGAGGAAGCACG  
AAACCTAATTTACGTAACGGTAAGCCGTTATATAACTCAGAAAATGTACCGGAGGCAAT  
CTCCGATGCAGAAATTTATTGTGGGAGTTGGGAAGAGTCTATATCACACTGTCGTTCCCTG  
TGTCACTGCACTTAGATCCGTTGATGGTGGTAATGTTTACTCTCTATTTCCCTGTTGTTGT  
TAAACGTTT TAGATT CAGGTATTGATATCAATCCAATTTCCGAGGATATTAATACTGCATT  
GAGTCTTGT TTTAGCTAAGG TACTCGAGGGTTTAGTTAACCGTGAAATTGATGGTAAAGG  
TACACTCTGCAAAGTGAAACCTAACGAGCTTTACGATGTCCGAGTCATTGGTATGGTAGA  
GGTAATGGTAAACATAAAGGGCGTATTGGAGCACTACTTACTCCAATGGGTAATGGTGG  
TACTGGATTCACTGATAACGACCGTGAGTGGTGGTGGTCCCAATATCCAAGGTTTGAAG  
TACACCGCGTAAAATTAGTGAAGTTGAATGTTGGGAATTGACTACATCTGGTCACTTCCG  
TCACCATCGCAGTATTCGTTTACGGGAAGATAAACAATGGCCTTTGGACCTAAAGGAGTG  
GGTCCGGCTTATATAGCAATGGATGAGATAAAATAGTACACACTTGGTGTGCTAGGGCT  
GCATCTGAACAGATTAAGTCTACCTTGTACGGTGTTCCTCTCGTTGATATATTAGCATT  
CATTCCCTATCACAAGCTACTAGTATGAAACGAAGACATTGTAATGGAGTACTAGAAGAA



TCAATTCTTCCAATGATGGAGTTGAGAACACAATTATGATTAATACATCAAGCAAAAATG  
ATGCCTTACCAACAACACTGTTCAAAACATTACTTTGTGGCATTATGAAAAAGATATTGTTT  
ACAACGGTGATGAGAACGTCCAGCTTATGAAGCTGGAAGAGGAGTTGTGTGAGGTCATCG  
CAGTGTGCTGTGAGGGTCTCAGTCACGAACACTGTAAGGAAGAAATCGGATATATGATTG  
TGGTCTTAATCAATCTGTGTGAGCGCCGTGGTTATTCCCTCGGTGTATGTGATAACACTG  
CATTCCAGAAGATTAACAAGCGCAAACGTCAATGCATTAGTGGTGCTTTTTTTAAGAATG  
AGAATTTGAAGTAATGGGTAGTTCGTACTTACTAGAACCGGAAATTAACCTGGATGGTAC  
AAACATCATCCTAACCCTGGAGCTATGGGAGGCGGTAAAACGGCTGCCCTTATTAACGC  
AGTAGAACAAATTGAAAAAGAAAGGTCCGAATAACTGTTTGATTATTAACCTAGAGATGGA  
TGCTCGTGATGAAGGTGTACGTGCACGAGATGGACAAACTCGACCGTGTACCCCAATTGG  
AACCCAGGAAGAAGTTGTTCCGGTAATTTCTTTGTCTGGCAGAATTAATTTTTTGTCTCGT  
TGATATGGCACAACCTCTTAGTCACGACTACATTAAGCCAATCTGCCTTTAAGCAAATCT  
CCACAACATCCCTAACGTAGGACTCTTCAGTTTAAGGACTGGTTATCTCGAAAATACGTT  
CGTGGGATGGAAGGAGATTTCCAAGTACGTAACCGGATGTATGAGTAACAACACACTTG  
TGAAATGTGTGGTAGTCAAAATCCGGTACACAAAATGCGTATTTCTGGTGGTGATTCTTT  
GATTGAAGTTGGTACTGATAATTATCGAGCTGTTTGTCTGTATGCTGGAGTAAGGAGAA  
ACGAGTAAGACGTTCAAAAGTGAAAACCTGTGGTGGCAGGAGCCTGAAGGGATGAAAATCGCA  
GCAAGCCCAACTAAGCTTGAGTAAGGTGGTACTATCTCATGCAAATCTAAAGTTGTTCT  
GAATGCGGTGGTTGCTCCAAGGCTATCAGAGTAGATGAGGGTAATTACGTTTATTTGCGA  
GAAGATGCTTACTGTGCACGCGGCGCTTGCAAAATCTGAGATTAGTTCCTGTTGTCACCG  
CCTGTGCGATAATCGCGGGGTAAATGATTACATCACACACCTTGAGAATGTGCTTAAAA  
ACAACCTAGAAGAAATTGAGATGCTTAGGGCGATGATTAATGAGTACATTACTGAGTAAC  
CTTCAGCAATTATTGGTAGTAAAGCTGACTCTTAGTACTACGTAACAACGCTAATAAGC  
ATGCCAACTGTATCCACGTTATGCTGAAGTCCACACATTTACGTAAGCAAAAGGAATT  
ACTTCACCCTTACATCGATGTATTATGGACTCATTCCCAAACGATATCTCGTGCCTGTTG  
TGGTACTAACTGTGTACTCGATTAATCTCATGCCTGTAGCTCTCATATTGATGCAGTACC  
AACTGACCAAGGCTTTACTTGTCTAACTGTGGCTGTCACGATAGCCGGCGGAAGTAGAC  
TCAGCGATTCTGTGGTTATCGAGGTAACCAACAGAACGCGGATTCAAGCATGGGAAGCA  
GGATGAGGTGATTCCGGAGAGTTAAAAGTTGTTGATTGATTAATGGCGGAGCTCGTCTTA  
TGGCCTCTCCGCTTGCTTATTGAGGTGATAACATGGAACAAGTAGACCATGATGCTTTCG  
TAGAACCTATGAAGGCGTTAGTTAATGAGTGATGTAATTGGTATCGGAAACGCTGCGGGC  
AACCCAGACAACGTGTTGGAGATTGCCAAAGGTACTTATGAATCTGTAATTGTTCTTTGT  
TAAGACAAAGATTGTTACTTAGATGGTCCGGCAAGTACGAACCTAACACGCGCGAAAATC  
TTATGGTTGCTTGAGCAATTCATCAAAATACGTACGTAAGGTTCTAACGAGGTCGTG  
TGATGGGAGAGAAATTGAGGGGAGAAGCGTTCCCATTTGGGCCAGACTTCTCAGTAGAAA  
TTGCTCTAGAGATCCTGGCTGATGCCGCAGGTGTAGATACGGCCAGTCCACAGTAACCT  
CTGTCGGATTTACCGGACAGACTTTTATGGCGGGTTGGGGTTTCCGTGAGGATTACTTTC  
TCATATACAACCTCTTAAGAAGATGGTAGGTATATGAGGCAGCGAGCAGCAGTTGAGAGAA  
TGGGTTTAGTAGTAATTGATGTGGAAGCTAGGGCAAGCCCCACAAAAGAAGAACAGTTT  
GGAGTTATCTATGATTGTTTTTCGTGGAAATGAAGTACACGCTGGAGATGAGGTAGTTGC  
TACGGTGCCTCGTGGCGAACGTTCCAAGGAACTAATCAGACGATTGGTTAGTAAGATTAC  
TCCTAAGAGAGTGGAGTTATATCAACTAGGTATCGGAGAAGGGGTAATTGATATTAGTAC  
AATCAATGGTGTGAAAGTAAAGCAAGTAGAACATGAAGGAGTAGTTAAAGTGTATACAGA  
TAATATTGAATTAGTATGATTAACCTCTCTATCTACTCAATATTCTATAACCAAT

>NewGenomeName\_160

ATGTATCTTTCTCGCAGACGTCACCTCAGGAAACCAGACAACGATTACTACAAATATAAC  
GGAAAGCTACGAGCGAACAAAAGACGAGTGAGCACATGGAAGACCGTTATTTTTTTACT  
AAGTTAGCGTCAAAACATACAGGAGATAAACTCTGAACTTATTTTGTGCGATAATTTTATA  
TACAATCCTAAAGGACATCTCAGATCACTTAGTTAGGATACCTATGATAAATGGAGAATA  
CACCAAGAGTCTTACCCTTATAAATTGAAACAAGAGGTAATGCTTTTTCTCGATGATTAT  
GTGTTACCATAGCAGGAAGCTGTTTTAAGAATGTTCACTCACTTCTGGACCGCATCCA  
AAAAACATGAGCTAATATCGATCTGGAGAGGTCTCATTAGAAACATTGGTTGGGTTTGCA  
ACAGGTTTAGGGTTGATTTAAAATTTTGA AAAA ACTTTGTG CAGATCCTATCTGAAAAAAT  
GCCCGAATGAAGGTCGTGACGTATAAACCATTTCTAGAAATTAATTACGTAGAGTATAAG  
TCGGTAATCTTAGATACCATTCAAACAAGTTATGAGTTCGATTTGTGCGGTGCCAGCAAG  
TCCAATAAGATCTAAAATCAATCTTTAATTTTTATAAAGACTTCTCAGCCGAGACAGTAC  
GTATACGAATCATGGCTAAAGAAGAGATACTAGAACACATTGAAGATTGTCAAGCACTTA

TTGATAGACAAAAGACTTTTTATACAAGGTTGCGTGTAGCATCTAAAGATGATAAAGACG  
CAGCAGACATGAAGAACCGAGTCAATGCTATAATTAGTGCGTTTCGTTGTGAGGACCTTA  
TCGAGTGTATGGGTGCAATGGTTGGTACACTAGAGGCGGCAGCAAAGAGGGAGGATCTAT  
GATAATTATTATGATATCTGCTGCACTCAAGATAGAATTAACAGACCTTATCATTGACGT  
TTTAGAAGAGAGAGAAGTTCATAAAACACTAGACGGTCCTTACGACGTTGCAGCAGATAC  
GGATTGACAAGCAGATGATGATGGTCTTGTATAAGAATCATATTACGAGGGATGAGAAGT  
TAAAAGATTTTATAGAGAAATGGAAGAAGCGCTTAGGCTTACCCAACTGCCACCACCAC  
GAAGTTGCCCGCATGGCAGCACCTATATACTATCATACTACACTACACAGTAGTATACTAA  
CAACTTACACACTAAAACACTGAGAATACGATTATGTCTTTCGCATTACTTAAGAAAGCATT  
TAGCACTAGAAATACTTCCTCTAGATTGACTAAGGTTATTGTGAATCTGAACCCATCAGC  
TCACGGTAACAATGACGCAGACGAGAGTCCTTTGAAACCAGAATGGGACATGACAGGTAA  
CGTCTGCTGTTATCAGATTCTTGCCCGCACCTGATGGAGAGGAAGTCCCTCTCGCTAA  
GTCCTGATCTCATGCCTACAAAAGTTCTGGGGGTCAATGGAATATTGAAAACCTTTTGCC  
ACCTCTTGGTAAACAAGCGCCTGTTTCAGAATATAATGCTGAGGTCTGGAACGCTGCAGG  
TGAGGGTTATTCTGAACATGCACGCACCCGAGCACAGAAGAGAAAACCTTACCTACTCCTC  
TAACATTTACGTTGTGAGTGATCCTGCCACCCTGAGAATGAGGGTAAGGTATTCCTATA  
CAGATACGGTAAACAGATTTTCGATGAACTCGTTGAAGTAATGCAACCTCCATTGGCAA  
CGAGATTCCAATCGATCCTTTCGATTTCTGGAAGGCTGCTGACTTCAAATTGAAGATCCG  
GAAGGTCGTTCTGTTACTGGAACGATGATAAGGCTTAACTTACCCCCCTAATACTACTAGG  
TGATTATGATGGTAAACGTCTAGAACAAATTTGGAAGAGGGCGAACTCTCTTGCTGAGTT  
TGAAGTCCCTTAGTACTTTAGGTCTTATGAACGACTTAAGAGACGTCATTGTTTAGTCTT  
GGGCAGCACTGCGCCAGTAGCACGACCTTATTAATCTTTTGAAGCTGTTAAACCTCAGAC  
TCCAGATTGCGGAGCAGAAGTTAAAAAAGTTCGTGAGAAAGCAGTTGCCTCTGCTCATGC  
CGAGGATGCCGTAATGTATCCTACTTTTCAAACCTTGCTGAAGAGGACTGATGATAAAC  
TGGCACAAGGAGCGTTGTAATGGCCCTTCTTTTCTAGTATAATTAAGATACACAAGGT  
ATACCATGAAAACCTGCCCTAGCTGCAATCAATTTCCATCCATCTGTCCCAGTAAATGCTG  
AATGGATTGGAGACACGAGGTCTCGACTAGCGTAATAATCCTCTAGATGATATGCATACG  
AACAAAAATGCTATCGTTATGAATCTCGATAAGAGTACGTACTTGGATCTGCTAGATCGC  
CTGGTTACCTCCCACTTAACGAGCAAACATTGCAAAACCATCTTTCTACGGTGATCATA  
GCAGAGCTTCAACTACCCCTTCGAGAGTTACATAAATCCGTCAGCTGTTGGTAATGAGT  
GTAGCGGAGGAGCAAGTCTTGGAGGAATCATAGTAGGAGATGCAGGTGCAGCATGATCAC  
ACGGAGAAGGCCGTTGGTGCGCAATACCTTTGGGAATTGTTGGTGGAGGTATCATCAGTT  
GTGATGTTGATGGATCTTAGTGATCTCAAAAACATAAACTCATTGAAGCAAAGAAGATGG  
CCATGATATGATTGAGTTTGCTAAAAACAGACACAATCGTAATGCAGGACTCATCAATAT  
GGTCTTAGGATATCTAATAATCGCACTCTTAGCAGAGGGATACTGTAGAGTTATCGGAGA  
GAGACCTCCATTTATGGGTATCGATGCTGATACAATCTAAGGGATAATGGAAATAACAAA  
GCAGGAAGTATTAAGCACTTTCAATATCATGAACAACATAGGATTAGGAAGTGTCTTC  
TGGAGAAGATCGTCAGTAGATTTACTAGCAATTATCGGCGTCTTTAAAAATAAATGGAAG  
ATGTAGTATTAGTAATATACTTGACTTTATATGTTAAGTCATTTCGCAGCGACCTTTGCAT  
ACGTGGTTAGGTTTCATGGCTTCTACGTTGGATACTTTTACCAGGGCATCAATTGATCACC  
CCGAGTTGCCAGGTGTTAGAGAAGGCGAACAGTTGTTAGGAGGTACTTTCAAGGGATATG  
AAGA ACTATCACTAGATGAAGTAGACAAAAATCCCGTAACTGCACAAAGAGACCATGAGT  
CCCTGGA ACTCTATCCCGATCTGCAAGATCGTAAGGATGAACTTGAAGATCAAGACGGTG  
ATGTTGATGACGATTGTGATATCCCTGCTAGACCGTACGTCGGCTCTGGCACCTGAAATT  
GACCTTTAGTCCCGTGGACCGACAAAAA ACTTTCCGCCAAAAAGGTGACCCCTGAGCT  
TTTTATGAGTGACATACGTTATACAAAAGGCCGAGTCTCCCGGAACAAACATGGTGTTAT  
TCTTTGTGACATACATAGAGGAATATAACGCGTCCGACTTAGTTGTCCCTGAATGTCC  
TGCTCAATCTCGTCCACCTGATTGTGTAGGGGGGAAACAATTCTATTTAGATTCTTTTCA  
GGATTATTAATTCAGACTTGTATCAGGCACTAGGTTGTCTGAATTAGTTAATTATGATTG  
GAGATTTCTTATCTTCTAGCGCACCTTGATGTGCATGGTGGTACATCAATTTTCTCCTCG  
TGGAACATATCAAAGCTCTCAATCAGGAGAAGAAGGTTCTATGGTATTCAGTCAAGCAA  
GAGATACAGTGGATTTGATGCTAGTGCAGAGTTCTATCCTGTATCTTGTGCAGAGAACGT  
CCA ACTATATAATGTGTGAAAGAATGATAAAGCAGGAATACATCCTTTAGGAGAACGACT  
CAA ACTTATCACCTTTATCTTCAAGAAAACTCCTCTTTGAAAATTTGACAAGAGAGGAA  
TTTACTTCAAATGGGTAACACTCTATACTACCTATTGTAAAGATAACATAACGTATTCC  
ATAGCTTACGATGAAGCACGTGCTCTGGATCCCTCTTTTTAATTATGGTTGAAATTCTAC  
T TACTAGTGCAGCATTTCGTAACGTTGCATTTTATATTTTTGCAATTGGATTTGTAGTTG

CACTCGACCCAGAGCTTTATTCCCAGGTCAGACCCCTGTCTGCTGAATCATCGACGAATG  
AGAGAAATGCTTTTATAGTGCAGACTCATAGAAATTAATGTTGGCGAAAAGGATCGGTAG  
TAAAGCTTTTTTGGTTCGTATGTACTATACCATTGTTTGTATATCAAGGAAAGTGCAA  
CACCTCAAGATACTGTCTAGAACGGTATATGAAGAGGGATTCAAAACAAAGTGAGTATGT  
TAGGGAGAGAATGGATTACTCCAGAGCGTTCATCGAGTCAGTGCACCAGCAGTTGTAAT  
GAAAGCGTAGGGTAAAGATGAATAAACTTTTGCAACTTCTCTTATTGGATCAGTTGCCT  
GGCGCACTGCTGCGCAAGCTTGTATACATCGTTGGGATCGGAGAGAACCTTATTGCCCTT  
CAATTGATTAAGATTTTTACCAAATCAAGAGATGAAGAGTGAACCTTGATGTTTACGTTA  
CTATTCACTGGATAGCTATATAAGGTTAGTTTATCAGTAACCAAAGTTGAGAACAGATAG  
GAGGCATTGCTACTCATGCTACTCACGCAATAGCCAAGCGATTATTTCGATTTTTGGAAGG  
AGGACGGAGTCTGAACGACGAGCGGAAGTTTCCTGCTGGCAGCATAAACAAAAGTGTATC  
GCTATGTTTCGCTACGATTAACACTAGCTACATATATGGTAGAGTCGATGGAACA  
TATTACTGGCAGCATTGTAGAAAGTAAGCGAAGGACGACCTCTACGTAGATGCTGATGGG  
TTGCAACTAGAACTTCCACGTGACCCTGTGCTATCTAAAGAATGTATCTTTAAGACCATA  
TTTTACTAATATCCGCCACGATATCCAGACAAAGAAGAGCCGTAAAATCTTAAACTGGAA  
CTGCTAAAGCCAGAGGAGGAAGTACTAGATGAAGAAGTACTACAGGAAGTTCGAACAGGTTGAA  
CTGGTTCGAAGTGGTGGATCAGTATGCTGGTTGGTACTGACATAGGCTACGTTGCTAGTG  
GTGGCTGTAGTAATTCTTGCTGGGGTTGGCGAAGTATTACACCTCGCGTTGCTCTCGTG  
GCAGAAGGTCCGTTATCGAATGACCTCACTACAGTATTAAGTGAAGCTGAAGAAGCACTA  
CCACAAAGATAACCAACTATCAAAGTACTAGACGCAATAATGAGAGCTGACTTCTTA  
TTATTTACATCATCTAATTGTGAATGAGGAGCGCGCAATCAGAGTTTCAAAGTCTTGA  
CTCCTTCTATCTACAATTCCTCTGTAGGAAACTTAAATTCATCTTTGTAATTCATTAAG  
TTATGCTCATGCTCATAATTAGATACTGGATCTATTGAATCGCTCCCACGTTTTGGAGTT  
CCTTTTGGTCAAAGTCTTCTGTAAGTGGATACACTTGAATTCCTTATTGACTAAGACT  
CTTTCATCATATAAAACGTCCTTGTTCATAGTGATGTAATAATTTCTCGATCGTCATAC  
TTTTAACAACCATAAGTGTACATCTCCTGCACTTCTTGGCCCCTGCACAAAAAATCA  
GGAATATTGTGTACCACTAATAACAACACTCTAAAAATGGATCTTCTGTTTCTACTTCT  
GCAATCATTGGGAGAGTTTCGCTTTCTACTGACGAATATGATGCAAAGAAGGTTGTATAT  
TTCTCTAGGTAGTCTATAACTGTAATGCTACGTCATAAATTTTATGCTAAACGATATTCG  
AAGGGTTCGTGATTCTTGTACCCCTCGCCAACACATACGTTTGGTAGAAAATTAATAAT  
GCCATTTGTATCCGTTTATGATGTCTGATCCACTGAGGGGACGAACCTCAGTAAATTGTA  
CTTGTAGTTCATCAGCAAGAAGTACTGCTTGTCTCCCGTCATTTCTTTTTATTGAAGTAG  
AATGATTGTCTGTTGTATAAATAACAGATGACCCAGAGGATACACATGTATCCTCTATAA  
AATCTTAACTCGTCTTAGTCGCATGTGCAGCAGTGCTTGATGTGCCTAATGGAACACTAA  
ATTCACCTGACGTGGGAGGCATTTCGCATTAATGCCAGTTCCTATTGATGAGGAAAACCAA  
AAAACCTAGACCGTGACATCACTCCACCATTATCACTGACAAATTTTTTAAAATGATTCT  
TCATTTGATCCTTATCACCTGTAGTATTTTCATTTTTTTAGATTCTTTTATATCTGATT  
ACTTTAAACAATCAATTTCTTGACTTACATTGGCACCTACCTTAGGGTTAGCACCAGCCT  
TTACGTATTTAGTTACTTATCTGATTGCTCGTGCTTCTTTGTAGTTTCTTGCAAACATTT  
TAAAAGGAAATGAATGTTTTCTAAAAATTTTACTGACTAAAAATCTGATCAACATGACTCT  
TTCATACTTTCCCTTCTGTTCAACCTCTTAGTGACTCCATGTTTAAAGTTCCTCGTTTCGC  
CTAGGAAACCAGATAAAGCATTAGCACCTGATGCCATAGCAGAAGAGAAGAACTCTGGAA  
GGACAACGCTTCTAGCATCTTTGAGGGAACCTCACACGTTGTCAAGAAATGTTCCACTTT  
GAATTGCATTGATCGCAGCCGCACCCCAAATACCTAAAAGTGGTTGATTATATAGTGGTC  
AGTGCTGAGCATTAAACCAACAGGAATCGCAAGATATGATGGTGAAGATTGAAAGTTTG  
CTCTACCTAAGCTTCTAGGATAATTATTTTGCCCGTAATAATCTAATCCTCAATCATGAT  
AACTAGTTTTCTTTCTTTCGAATTCTTAGGGATGCTGTCTTTCCAGTAATACCATCACCTG  
CATCTGCATTAAAGTCTGACTCCATTACAGGCGCCTGTAAGGGATAACATAGGGTTGATA  
TACCGTTATCTCTGCCGTCAAAAAAGTCATTTGCCAGGACTTCTGCCTGTATACTAACAT  
GGTCTCTCTGTATTTATGAGGTATCATGGAAAAATCGACCAAACGTTCCAAGTAAGTAT  
AAAGGTGAGCCAAACAACCTTATTCATAGATCGTCGCGGGAGTATAAGTTCATGAAATTG  
TGTGATATAACCTCCACGGTTCAAGAATGGGGTATTGATGAGATTATTATGCCCTATATT  
TCCCCAGTTGCTGGTCAAAGGCACAGATACTTCTCAGATTTCTATGGAATGTTAGAAGTC  
AGGACTTATTTGGTTCCAGTTTATCCATTGAGGCAAACAAAAGAACCTAAAAGTCAAGAAA  
CGAGTGCCAAAACGTTATATTAATGAAGTTCGTGACTTGGAGTGGCAATCAAGCAAATGG  
AAAGCAGCATCGGAGTTTTGCAAAGATCAAAGTGGTAATTCTTGTGATAACCGAAAAG  
GAACTTAAAGTATAATGGCAATCAGTAACACAGAACAGGCACACTAGCCTTCATATAAAG

AGTTCCTAACGTTCTCGAAGAACGAAGATAATCATACTAGCTTTAGTGACCTGTTCTCGG  
CTTATTTTCTGCACCTAGATTTTTCACAAAATAATTTGGGACCTTCATTAGAAGGCAGTA  
AAACAACAAGATTCCAACCTAGAGACTCCTCAACTCCGGATCCTCTTAAATTACTTTGCGT  
AGTCCACAAACGTTCCAGTAAACACATGACTACTGGTCTTTTCTAAATGTAGGAACAG  
CATTTAGGTATGCGACAGCTCACGCGTACAGTCAGATGACTACATCTTTCATTATGCCAC  
GGTCCCATTGAACTACAGCATTGATTGTAGGGTGGACTCCAATATTTTCCGCTCAGTCAA  
ATCAATATGTAGAAAAGTTAAGATGATTATGTTTCGTGGATCACTTAGATTATGTAAATCGG  
AGAGAGTTGGAGAAAAATATGTAGTGCAAGGTGAGAAAAGGAGAAAACGTTTTGAAGGATT  
CAGGTGATCCTTATCTAACTGCAAAAACATTATAGAGTCACCGCGGTATGGGAGATTAGAA  
ATGCATTTCACTTTAACATTGGATCAATTCTATAAAAACAATGACACCTCTCGAGCGATGA  
CACTGCCAGTTGGACTCTTATAGGAACGCTATCGTCTCACAGTGGCGGCTGACTTCAGTG  
ATCCCGGCACATATGAGTTTCTGGTGAATGTAATCCATTTACCTCAAATTTGCCTGAGC  
TTGATAGATATAATAGTGCGGTCTTCTAAAAGTAAAATCGACTATTAGTTGCCAGATAAC  
CGAAAAAATATCCCGCTAAATATTTGACCCGAGGGGTTTTTACTAAATAACAATACTG  
AATTGGCCTACTGCGGAATTACCTACGTTAAATGTACCAAACAACAACCTGAAACTACCG  
TCAGATGGTAGTACGGTGAATTATAGACGATTCCTTTGCAAAGAAGAGAAGTTTTACTT  
CTCGCAACTCAATCTCAAGAGCACGAAGAGTTAATTGTTGCTATTAAGTTATCATTGCT  
GCTAGCACAGATGTCAGGGATATTGATAACTTGACAACCTTCTGACATTGTATACCTTGTC  
GTTTACAGATCAGTACTAAATCTGTTGGTGACACTATGAAGCTCTTTTTGATCGGCCCTGAT  
GAAGGTGAAACGACTGTGGAAGTAGATATTTGCCTCAATAAAAATCAAAGTCACAAAGACT  
AGAGGTCCAAAAACCGGTCTTCGCATTACTGACGAAGTCACGGTTAATATGGGGTAACCC  
AGCTTAGAAGCTTTTGTAAATATGAACTTTGTTGTTGTTGGTACGGAATTGGGTGTTGAT  
CAAGCATTGAAATGGGAGGAAGTTGGATCAAGACAGTTTCTGATCCAGTACAATTTTAT  
TGCTGTCAGGACATACCAAAAAAAGATTTTCAAGCCTCCTCTGAAGGTCTGGACACTAAA  
CAGTTCCACATGGTCCAAGACTTTTTTGAACGATGCCAAAGGTAACCTCACTCAGTGAAG  
GTTACGAATCCCAACACAGGTGTTGAGATTGATGTAATTCTGCAGGGATTAGTAAGTTCT  
TACGCATAGCCCTTATGCAGATGGACTTGACGACATATTGTGAGTGCAAAGTGGAGTTAA  
TTCACGACCCAGGTGGAATAGTGAATATATTGACAATCTCATGCCATGGGAAAAGGAAG  
TCTATATGAATCTTCTAATTAACCTTCTTAAAAGAAGAAGGAAGACGTATGACGGAGCAA  
AGGCACAAGGTGGCTAAGATACAAGTCTCTAAGTTAAATTATCCAGGATTGGCGACTATC  
AAACATCTATCGGTTGTTGCTGCGAGACAGACTATTCTTGCTCAAATAGTCTTGGTGAG  
TCAGTAGAGGGCGTTGGACCTAAAGTCCTTGAATTAGAAAAAATCTCCTACTTGGGTCTA  
GGAATACAAAAGAACACGGATGCAGCGGATAAAACACAGGACCAGACAGAAAGAGGTGCT  
GAAGCTGAAGAGTTGACAGACAAAGGTTTATCAGAAAATTTCAATAAAAAGGGCAATGAA  
GCTAAAAAATTTAAACCAGATAAGAATCCCAAGAGTGCCTTAAGTAAAATGCTTGGGTGG  
GTAGGTTCATCGGCTACCTCCATTTGTAGATCTAGCAAGAAAAATATGTAGTTTGTCTTA  
ATTAAGAATTATTAGAGTATACTGCAGATGAGGTCAACTTTAAAAAAAAGCGACCTTC  
CTAATGAAGACCCACTTTGTCTTTTGGAAAGATATATGGCTTTCGTAAATGGTGAATTAAG  
GATTATATCGCAGATGGTATGGTCCAATTTTGGAGATGATACAACATTATTAGGTAGA  
CTTGGTGAAATCGAACAGTTTATGTAAGCTATCATTTCGGTTGAATTACTGATGAACCCA  
TTCAGTGGTATAGCTGATATTATGTTTCTAGCAAATCTTATTATTGCCAGTAGATTATTG  
CCAGGTAACGGTAGATCTTTACGGAATATTAAGTCTTACGGACCTAATTTAATAGATAAT  
AAGATGAACTTGTGCAGTACAATTAGCGCTGGGAAACGGATGATACCTGGTGCTCTCATT  
GGAGTAAGAGAGTGGCTTAGATAATTCGGAACGACTGTAGGTAAATAAATTACTCAAAGC  
ACTAAGACAGGTATAAACCTTCTTCTAAGACTTACACATAGGTGAAAGAGAGTTCTTAGA  
TCAAACGACGATACTCAATCAGGAAGTAGTAAAATTTTACTACAGCAGTTGATATGATA  
AAGAGTAGATTAAAATAAACTAAGACTTCAGGAAATGAAAAACCGAATCTCAATTTGAAG  
GTGCAACCAACCAAAAATAAACATCCCAAATCTATTATGGTAATACCTAAAGCGGGTGG  
AGACCAATGGGCGCCCGTCTAGCGAATGATCTTGATATAGGAAGACAAGCGGGATCTGGT  
TTTATAGTACCGGAGAAATCTCAATTTTACCTCATAAAGTTTGTGCCAATGAGTAAGGGG  
GAACAACATAAAGAAATTCAACTGAGAACC AAAATAAAGAGATTATGCTGAATCAAAA  
ACTATTGGTGCCTACTGTTTTTTTCAAGAAATTGTTACTGGAGGTGGATGGTTAGAGACGAAT  
TAGGATAGACAACTTTGCAGAGGGAGACTAAGTCTCTGAACGCAAACCATTAGATAATC  
GGAAGTGTGACAGTTCTGCTATGAATATTAATGAGTATAAGTAGTTCTATGAAAACATA  
AAACCTGTGAACAAGGATACTACTAAATTTGATGATCTGCTTCCAGAGAATGATATAATA  
GGGTGGAACCCGACAACCTTGGTCTAAGGCAGAAGGTGGTTCGCTGACCAGAGTTCTTTCTC  
GGTGGTTTTATTAGAGCAGGTAAAACCTGTAGCTTGAGTTGTAGTTCACTGTTACTAGC

GTTGCAAAGACTGTATGGTATGGTGTAGTAAGATTGCTTCAAACCCAATTGTATCTGCT  
CTAGCGTCAACGATTACTGGTGATAACATTATCGTATCTGCTCTCAACGCAGTACATGCA  
CGTACTTCTGGTGTATCTTGGGTAACAATGAATCCACTTGGTGGTAACAGAAATTT  
GCTAGTATCAATACAGTTAATGCTATTAATCAGCCTACAAGGATCCAAAACCTTGAGATTG  
AGTATGAGTGGACATAGTGTCTCAAACATGTATCATGGTGCAGTCAATGCCGTATCCGAC  
ATTAGTAGTAGATTTAAGGGTTCTTTAATATGTCAAGAAACAGCACGTTTGGTAAGAGG  
GGTATTGAAGGCTTTAATGGTCATATTTGTGGTGTCTATTGGAAGTATAGTAGCAGAGATG  
TCCAGTTTCTCCCGAGGTCTTGGGACTTTTGGTGTAGGTTGAATAAACTAAATTAGAG  
CGTAACGTTGGAGAAGTTGCTGGTCTCGGAGGTTAAGCAACTAAAGTCCCTAATATATTG  
TTAATTCCAGGCATGCAATCTATCCTAGATAAACCAAGCGACGGTTTGGTGCATTAGGT  
GGTATTGGTAATATTGCTGACAAAGCAGCTATGAATGGTGTATAAAAGCTATCATGAGT  
GGTGTCCATCTGGAAACTTTATTGAAGGATTACCAGAACTTGTCTGCTGATATAGGCGTT  
CATCCGAAAGTTTTAGGTGGACTGAACTGATGACGGGATTTATTACCGAATAATCCGTTT  
AAAACAGAGTGCACAATGAAGAGCGCTATTGACTTAATACCTGTTCCGATGATCGTAGAA  
AATATCGTTGCCGCACCTACTCCTGTACCAATAAGTAGCGGTGATACCCAATGAGAAGCA  
CCATCCTCTACAATAAATGATATTGGCAACAGATTACAAAGGTGCGAAACGCGATTTTT  
ATAAGTTTGTGGACTCTAATGCGGCAGCAAGCACTACTCCTGGCGCTAATGCCAAAGGAA  
GAAATAGACAATTGACAACCTGCTATGAAGCAAATTACACGAGCTATTATTGGTATGGGTA  
GAGTTGTGACGTCTTGGCAGCACTATAGTTTCTATCACAGACGTGCAGCTGAGGTTGA  
TGTACATAGATGAAGAGAGATGTAAGACACGATCATTATCATATCCAAATATACGAAAATAC  
AGCCTCCTCGTAAAACGTACGCTTTTGTAGTTTATTAAAGGGGAAAATACCAGGTGTCG  
TTCAAATACTTGCAAAAAACGCAAGTGCCTTGGTAAAGTATGTCTTCTTCTTCTTCTGCAC  
TTAAATGGTTATTTAATCCTGAGAACCAAGCTAAGGTTGTTAAAGGAGTCGAAGTTCTTG  
CTACAGTCTTTGTATTTATTCCATCTGTTGCTACAGTTGCCTGTGTTAGTTCTATAGAAG  
GCCTGCACGATCTTTTAAAGAAGATGCTACGTGGATGGGCCGAATAGGTGGTTTTACGA  
GCGCACTTGCAGGATTTGGAACCGCATTTCGTGGCATTACGTGTCTTACAAATCCAAAAG  
GGGCTATCATAACCTTATCAAGCGTGCTATTATTCTTTCACCAGGGTGGCCATGCTGCCT  
TCTCCAAACTTGCTACCCATTCTTTGATTGCAGGTGCAGTCGGGCTTCTTCTTACAAAAT  
ATTCTGATCAAATTCCTGGTTAGTCTAGAACAATGAGGGGGCGATTGCAGAGGGTTTAG  
AAACAACAGCAATTGCATCTGATGATATCATCATTGCAGAATCTGAGGAAAAAGCACGAA  
GAATCGCTGACCTTAAAAAACAAAAAGAAGATCTTACCCTTATTATAGGTATGTTGGTA  
AACGAAAAGGAATTGAAGAGTTAATTTCTCACTTAGAAAATGGTAAACTAAAAGTCATG  
GATTTTTTGAACAGCGAGGCTATTTAGATGGTTCTGCTAAGGGGGGTTGGATTTCTGGAC  
CTCTGTCAGGGTGTCTGTATCATGAGATGGTAAAAACCTGATTATATTGGACATGCAT  
CTGATTATGCTGCACACGAGTAGGTTGGGGGTGCATTTATTGTTCCGTTTGATACTCGTG  
CAACCAAAGAGGATCCTGATCTAACATCTCGAAGAAGGACTGAAGCAACACTACTTGGAT  
TTTTCGAAGAAGGTAGTGGGTACGATTAGATTGCTAAGAGAATAATTAAGATTCAGTAGG  
GCGTGAGACCAACAGCAATACCTGAACCTAATGGTGGAATGTCAATTGTCTATGGTTATG  
AACTAAAGCTTCTGATAATTGCCATCCACTATTAGTAGGGCGTTTGCAAAGCAGCTGT  
TCTAACAAGATTATAAAGATCATGAAAGTGCTGCTACGAAAAACATGGTTTCGGCAAAT  
CGGGTCTCTACAAACAGCAGCATTGGTTGACCTCGCCTATAACCAAGGTGCAGGATGGC  
ATACAGGAATCCCCAAGTCCATGGCAGGGTTCAGCCAAGGTGAATATGATATCGCAGGTA  
ATCAATTAGAACATAGTCTTTGGATTAATAGAGTTGGATGTAGAGGTCCTACAATTTTCA  
ATTTGATGAACAATAAAGTTTTGGGACACGGTATGGGACAAAACCTTTTAGAGAGAGGTT  
TAGTAGTCCCAATGGAGGAGCCGAAATCAAGTAAAGGATTTGACTGGACATTTGGATTGG  
CACAAATTTTTGGTGGTGCACCTGCTGCAGCAGCAAAATTAGACTCTAATATCAATGAGA  
ATAGACGTGATGGTTAGGAGACTATTACTAAAGGTGATTCATATAGAGACGTGGCTAGTT  
AACATGCAGATACTGGTCTTGGATGGGGTATTGAGGGAGTTACCTATAAATTTGCTCGTC  
CTCTTGATTCGCCCCACCTGCTGCTTAAATGTCTGCTAAAATGATGCAAGAATCAAATG  
GTATGGTAAAAGGTCATGATGTTGCAACCAAGGGTAGATCAGCATCCAAAAATAAAGTAG  
TTGACGGTCAACAACACTCACTTCATTGATTGGGAGAAGGCATACACATGTCTGGTGCTT  
CAAATTCATGGATGACTAACAATGCTGCTAGATTTGGTTGGAGTTATGGAGAGAGTTACG  
GACCTCGGAGTGGTCACTATGATTACGAGGGGGAAGGTGCAGCTTAGACTCCGATCTTAG  
GAACAGCTAGATCTCCTTATTATTGGTTCATAAATTTACAGCAAGAAAACGCGAGTAAAA  
AATTACTAGATTCCGGTAGACCATCTAGATTAAGTTTATATGTTTACAAAATGATCAAC  
AAGGTTCTGGAAGACTATTTCTGACGTGTTCTGGCAAGGAACATTTGGTAATATGGGAG  
ATTTCTTACAACCCATGGGTATCAACCAAACAGATTGAATTCTCAGAATAGTGAGAGTT

TTGCACACAATAATAGTGAACCAATCGGAGCCCAGAAAGTAACTGATCAAAGATACCGAG  
CAAGAGGAGCAGTAAATGCACAGGCTTCGGAGATTGTGCAGATGGCGTTAGCTGTTGGTG  
AAGTGCAAAATCGTTCCAATAGGCAATTCATTTGACGGCTGAGTCGGCGATTACGAGTT  
TATTTGGAGCTCGAGAACGGGGAGCTACGGTCGCTAATGTTGGTGTAAACACCAGGACCAG  
TATGACGGACTTCTGTTCCCTGACTTTACTTCATTTACTAATCCTTTAAGAGGTATCTTCG  
AATGAGTAAAAAATCTTCTAAAGTAGGGACATGTGTTAGAGGACAGCGAGGTCAGATAGA  
GGTAACTCTATCCATTTACAGAAATGCAAAAAGAGTGAAACTCCAGATGGAGCATATGA  
TTTAGTTACATTTTTAAGAGGTTTTGAAATTTATAAAAAGGGGTGCCAATCCCTGCATGGA  
GGGCCGTATCCGTTTAGAAGATGCATGAGGACTTATAGGATCTTTAATAGGAAATGAGGC  
ATTTACTATTCAAGTTAGACGCTCTATCAGATATAGAATTTACAATTTAGATTCTAGCA  
AATTCATCAAGAATTAGGACTAGACAACTAGTGAATCTCGTCGAATTCCTGCGCTTC  
TGCTGAATATTGAATCAACGAACTACACATGTATTTAGCAACTTTGAACCCATTTTCAA  
GAATGAAACAGAAGCTCGTGCTATCGTAGAATAATTATGACGGAAAGCCTTTATAAAACC  
TGAGAAAAAATATAGATTGAAAATACTATTAACACACTGTCTTTTATATCTGCGAACTG  
CCGAGTATTTGATTTAATTTATTGGGTTTCACAAAGTAGTATGCGGGAAGCCAGGAAAAA  
GGGTCTTATGTACAACGCGGTTGCTTTTTTTGAAAATGAACTTGGATTTGACTTCAAAAC  
ACTTGACTCTATGATTAAGGATAATGTTAAACGATAGGAAACATCTGAGACATATATATC  
ATCAGGTAAAACAAGAGTAACTCATATCGTTACACACCTAAATGAATGGGCGCAGCAGC  
TGTTTCATCAATTTAATGTGGATCTTAGAGCGTTTCCTGAGGTGAAAAAGTTTTTGGATTGG  
TTTCCGACTTGGGTCTTGGTCAGGATATAGTGTTCGTTAGGTTCCCTGTAATCATAACCTG  
ATCTAAAAGGGGAACCAGCTCAGATTGATATGCAGACGCTTGTCGCTATTCGTACGCTGA  
ATGATGGACAAGAATGGCACATTTGAAGGGTGGCAAGGCGATAAATTTCCAGCATAAAAT  
GAATAATTTCTCTAAAAATGCTGCTAATTTTCCTAAACGAGTAAGAAAATCAATGCTTGC  
AATTAATAATTTTTGATGCTACCTGTCAAAAAAATCAGGAACGAAATTATGAAGAGCTAGT  
TGAATTACAAGAATCTCATTGATGCGTATGGAGTCTTCACAACAAAATCAAGTTACTAT  
CATCTTTCCTGGTAAGTTTGAATTTATATGTGGGTTTCGGGGGTTAAGTTAACTACTCCTCC  
GACTAATGAAGAGTATGACACAGCTGAAAGAGAGCCTAAGTATAATGGTTGATCGTTGAT  
TGCTGCAGTCACACATAAGGCAGTAGGTTTAGACTTTCAAACGGTACTCGCTCTAACGAA  
AGACTCGGATATGCCGAATCTCTCACACAACCAAGAGGAAGGCATAGCATAACTTAACCT  
CGAGACTCACATTTTTTACAATATAATTATATATAATAATGTATCAACGGGGAAAACAAA  
TGGACACTATATAACAACACATAAAAAAAGAGAAAGTTCTATCCGGAAATTCTCTGACAA  
CACTTTCCGCTCGTAGAGAGTTTAAACAAGAAATACACGAACTAGATGAGGATGTAGAGC  
ATCACACAACCTGAAATTGAAGGAGGACACCATCACGATCCAAATGCAACTGTACTATCTT  
GTGATGAAAACCCAGAAGAACCAGAAAGCCTAGTTTACGACGATTAATTGTGACGGCTAA  
TATACAGGAGTTTGTGACTTTTCCTTATAGTGATATGAACTCAAAGATTTCAATTTGTAT  
GTGGGATAAGAAAGTTCCAGATCAATTATGTGATACAACCGTAGATTATCTTGTGTATCA  
ACCGGTGCATACAAATATTGGCATGGATAACGCATTGAGAGCCGATCGAAGTAAGTTTCT  
TATCGAAATTAACCACAGCATAATGGAAGGCTTGGACATCTTAACGATTGCCCAACCCC  
TGCAGTATCATAATATGCAGATACATGGGGCGCTTTAAAGGGTACCTATTTACCGAACAG  
TGATATTAACAACAAAAAACATTGTCTTGTGAGGGTTATCATGTTTTCGCATTATCAAAG  
ATATGGGATGCAATCTGGAATGAAAGAATTGGAATGGACTATCTGCTCAAATCAGATGCC  
TGAGGGTGAAGGAGAAACAGCATGTTTATTTCAAAGAAATAGATATCAACCACAGAAAGG  
GCACATCTAGATCATCCCTGCATCTTTTAGTCATACTCAGAGAGGCACACCTCCATATAC  
GAGAACCAAATATCTTGCAACTGGTTGGTACCTTTGTACACCACCTGGCGGTATTCATAT  
TCAAGTACCTGCAGAGTAAGCGGGGAGACCACTAACTACAGTTACTGATCGACATTGCTA  
TACTTCACCTGGTGGTGTATACATGAAAAGACGTTTATATACCTTTAAATTCTAGAAT  
ATCCTCAAGTCAACGATTAGGTTAGGCTACGTTCAAGGCAGTTCAACGCCAAGAGGTCAT  
TTAACTGTCAGAGGAACAATTAATCGGCTGCCGGCCGACACCCATCTCCTAATACAGAT  
GTAACCTTCTGGTGTGCTGCGGACGAAACGCTGACTGTAGCAGTTGTTGTTATGACACCTGCA  
ATTCAAGATTTGTCAGGTAATATGCTTGGTGTAGTCAACTTTTACAACCTGTTCAAAGG  
CTTAGTAACTCGTACGCTGGGTTTTGTAGCTCAGGTTAACCGAACAACTAATGACTTA  
ACTGCTATTGGTGATTGGTATAATGAGATTTGACTAAAAAAGCAAACCTCTAAGATTTTCG  
TGTCAGATCAAACTAAGATGTATGGTCCTAACACACGGCACCAATAAGTCTAGTTAAGA  
AGATGAATAGGTAAGTGGTGTGATGTACGTTATTTTCATGCCTATAGATCAAATATCACA  
AGTGAACATTTGCAAGCATTCACTGCCAAAATCGCATCGGTGCTATTCAAAGAGAGTAC  
TTCTTAGCATTATGATACGCCAAACCAATCTGCACGGACGTCCTTCGTTTCCAGCAA  
TGCATAGGATGTTGGGCAGGAGGAACTATCGAGTTCGGTAGTAGTGATGCTAGCAACGAT

CGAAACGCTCGTGGTATGGTGGTTTTGATCTGCTATGAACTTGCATCTTAATTTTTAGTT  
ACAATGACACCTCCAGTTCAAATCGTTATAAATCCATGTGAGGGATCTGCAAATTCAAAG  
ATTAGACCTAATTGTGTATGGATTATCTATGAAAATGATCTGTGAACTCTTGAATGGTCT  
TCTGAAAGTACATAGCCTAGACCTACTGCTGCTGAAATAGTTCCCTAAATTGCCAGTCAC  
ATGACTGCTTTGAATGCCAAGCAAATAAACTTGATGGACAATCTGAGTAGCCAGATTTG  
TAATCACAGGTCGACATGTTGTATCTAGCCATCAAGGACAGTACGTTAGGTAGTAGAACA  
TGGATTGCTGCTGTTGAAGCAGTAAAAGCAAACATCATAAACCTAGATGATGGAAGGTT  
ACTTTCTAGCACACTGGACAAAAGATCTCAAGCGCAATCAACACCTCACCATTTTTCTA  
GTGTTGAAACTATATGGGAGAGGTTAGAGGGTGGTTGTCATTCAAATAATTTTTTGAGAA  
GAGTCGGTGCTAATAAACCATATAGAGTAAGATATCACAAAGTTGAAGTAACTTGCGTTG  
CTAAATTTATTTTTCACAACTATACATTAGACGGGACAAGACCAGAGAATTGTGAGATGA  
TATTCACATCCAATGGTGAAGCATGGCATGGACACCTAATACGGGATAAATGCACTGGTC  
TCAAACGCTATAAGATTGTATCTGCGATCACTGTTCCGGGAATCGACTGCTTAGGATGG  
GTCTAGTATAAGATGATAAAGGTAACATGATATGGGGTAGTGAGGGCATTATAAAATCA  
CTCGCTGTTTCGACACTAAAGAAAAGTTTTAGCAGTCTCTAATACACGCAGACCTTTGTTG  
GTATTGTAAATAAACTTACGGTCGATCTTGTAGGAAAAGATGGATTTTTCTGGAGGGTTT  
GTGAAGCAGGACATAATGAATATCCTTTTGAATTAGGTAGGGTCAAAGTCCGTGTGTTTC  
GATGCGTTACTATCGTAAGACGCGGAACGACTACCGCTCTACCTACAGAGAATTTACCGT  
GGGCGTCAAGTTTGCAACATACTGGCCTGGCAGGAACTGACGGACAAGGTCAAAGTTCTG  
GACAACTTTAACCTGTGGCAATCGCTAGTGCATTCTTTATGGATAGCAATCAGGCACAGA  
TCCCTATTGTCGTGGGAGCTCTGCGCATTAGAAATTAACGAACTCAAATTTAACACC  
AATTTGCTCTTACTGGTCAAGTAATGGATCCAGGTCTTCTGGTTAATGCATCTGCATTAC  
AGCCCGTAAAACCAGACTCAACAATGGCAAGAACTAGAGAAGGGGGTTTTCTGACGAAAG  
GTGCAAACAACATAGTTTGCATTCCTGGCAGGAAAACATGTGAGGAACGAGGACGTGTTT  
CTCCTAGGCATCTTGGAACTTCCGTCGATATGAATGCTAGTGTAAGTAGTACGGTGAAC  
TGTGAGATCCCGTAAAACCAATACACTCTGGCACCGGTGTTGGTGGAGCTTGGAGATCAC  
ACGAATATCAACTTTGATATTTGATTGAAGATATTGGTGGTCAAGCAGGAACTCTCGTAA  
AAAATGAAGACGGGGACTTCCCTGGATCTGATGACGGGAAAATTGGAAGTCAAGTCAGC  
TAACTGCTAAGGTGCAAAGTTTCAATAGTCCGATATTTAAGCAAGTCGTTAGTGATAGCA  
GGCGAACTTCGGCAAACCTAGCACTACAATTAATGTTATAACTATACTTGCAGGTGCAA  
CTGACATTCTATTTCTCACTTTTACTTCTGTTATTGCTACAGATGAAAAGATTTTGAGTG  
CTCTTTGTATTGTTACATACAGATCATTGAAGACTCATTCAATCTGCTGTTGATAGTCTGC  
TTAGCATTGTTGACAATTCCCTGGAGGGTATCATCTCTCAAGCACACATGGTAATGGACA  
GTTTTCAGAGAGTCATTGATGTGATTGTTAGATCTGTTCAAAGTATTCTTAACGGAGCAC  
CCGGGAATGTAATGATGAATAATCAATTGTCTATGCCAGCGAACATGGACGAGAATTCA  
TTAAAACACGGGAACAAGGAACACACACTATGAACGATCTTTTAAGTTTATTCTAAAATG  
CCATAACTAACTTAACTGGATTCATGGCGTCCTTTCTCAAGTTTGCAGGAAGTAATTATA  
ATCGTAAACTATCTGGTGCTGAAAATGATAAAGGTGAGTATCCTCTATTTGGTACAATA  
ATTGCTCACCTTAGGAACTCGCTACTATCAACTGAATTGGAGGAGGACATAGAGGTGATT  
GTGGCGAAAAGGTTAAGGGTTGCGGAATACTTGATAATATTATTGCGCGAGCTGATCCTT  
ATTTGTCGGCTGCTTAAAGGTTTGTAAATGGTGCATCTAAATTATATCTTGGCACACCAG  
GTCGCTTAGGAATCATAATCCGGAAAGAAAATGGAAGTGCATTTTCCCTCAGTCAAATAA  
GTCAAATAGCGAAGGCTAAATATACTTTCAAGAAAGCATTGCGTAGAGATAAACCATATA  
TCTCTGACGATAAAATAGGAACACAATTAGTTGAGTACAGTAAGAGACCAAAGAAAAGA  
ATCATAATGTTCTGGTTGCAGATCACGCAACGTACGTTGTTGACAGCCCTAAAGAAGTCC  
ATTGCGATCAATGCGCAGCAATTGATGGTTCACAGGGTCTTGTATTGAGGGTGACTATC  
TATTAGACATGACAGGTGATTGTCATATTTGTGCTGGTCGCTCCTTTAAGCTTAATGCTC  
AAGGTGCGCCTAAACAGGCAAGACATGATGGAAGTCCATCTGATGAATAAAACGTTAAAG  
ATCATTCAATTAACATTTGGTTCCGACGTTGATATGAATATATCAGATGCTGAATGTACCT  
ATGAAGGTTGAGGATTTAATATGGGTGCGGTCCTACACAAATTATTGGACCTAACTTTT  
AAATTTCACTACAACAACACTACCATTGCTATTGGTGGAAATTTTATGAACTGCTGTAACT  
CTGTAGACATCACTAGACCAGCGCTTGTAGAATTAATTAATTTCCCTCCTCCTCCCATT  
CTAAGGTTAAAACCTGGTAGTCTTAGAAAAGTTGGGTGTTCTATGGAAACATATATGACAC  
CTGGTTTAGCTGCTGAAGCTGCTGTTTCGTAAAGATATTGTTGCACAGCCGGCAGGATATG  
CCTTTGATCCAAATGGTTTGGCATAACAAACGTAGTTATTACAGGACCAGGGCTGGGAA  
CGGCTAGAGCAGGTCTTGCTAGTTCAACGGCGGATGCAGTAGTAAATATCACTGCAGGGG  
CTGCGATGTACATCAATGCAACAGGAGCAGTAAACATAAAAGGGTTGACGATATTCCTAA

AGTAGTCCTCTACTATGGGAGTATACGCGAATACCCCTCTGGGTTTGGTGCACAGCACCT  
CCGCAGGACGACAGTAGACCCCATGCAAGACCCTCAGGATGAGAACACTTTTCTTAATTT  
GTCTAGGACATTTAGCAAAATCCGTGGTATTGAAGGGTACTACAAAAAATAGAATGGGG  
CTGGAATGAGGAGGGAGCGGCAAGTTATGCAGAAATATTTCTCACCTTTGTGTTGTCCA  
TGACATTGACCTTATTACCAATCGGTTTGCAGTAACAGAATGATTGTTCCACATTTCAAT  
TTTGATCCCAACTTTACATTTCCGATTTCTTTTCGCAGTAATCACTGTATTGTTTATCTTC  
TCTCGTATGTACATAGGTTGCTTTGCAAATGAAGGTTTGCAGGCCCATGTGGCGACCAC  
GACGCTTTAAAGTATGATTGGACCTATCGTCATTAGATTAGATCGAGCAGATCAAACTT  
TCATTTTCATGATTGATCTAACTGCAAATAAATAGTTTGTGCAAATCTCACCAACTAA  
GGGATCTGTTTTGAAAGTTCCTGTAAATGAACTTGCTCCTGTATCTGCTGAAATTCAAGA  
TCAAGTAGAGCAGTTTCGTTAAAGTATTGCGAAGTAAGACGGCGCCTGAAACGAGATATG  
CCATGTAAATGCTTTTTTCATTCAAACGGATCTTGTCAAAGCAGCAAAGCTGCTGATC  
TAACTAATAAATAAATCAAGATTACTTTCAATGAATACTGTAATTTCCATGAACCTTCCG  
ACCTGGCATCAGCACTGAAAAAATGAGGAAAGGAGGCATTTTAATCGTCAATCCCTTGGT  
GCTGCTAAAAAAGATTACAAGCATTACAGAAAAAAGCTGGCAATTTGGCGGAATCGGTAG  
ACGCACCAGACCTAAAATCGGTTGGTCTTGTGCCCATGAGAGTTCATGTCTTTGTACTCC  
CACTGTCTGGGGGAGACAAAAGATCTCTCTAGACAGAGTGCCTCCCGTCAAACATAC  
TAAGATAACATGACGGTATTAATCAGCATCGTTGTACTCATTGAATTAGCGGGAGCTCTT  
ATAGGGTACTACGATCCTTATTAATGAAAGTTCCTCCAATACGGAACTGTTTCAGCTC  
TTGTTTAGTGAGGATTTTATCCAGAGGAAGAATTGATCCTAGTTTGGTGAGAGTTAGAT  
ACTTATCAATCTAATAGGTATATACTTGATGCAAATACTAATCCTCCTGTGACAAATGAG  
GGAAAACAAAAAAGTAAACAAGGAAACCTTATTGATAATGTTTTCCAATTGAGAGAG  
TATTCTCATATATTAATCTTTCTAGAAAAGTATTAGAACCTAGTTTGATATGTCGTA  
GATCATCTTTTTCAATGGACATATTTACAACTGGAATATATCACGCTTTATTTTCCTAT  
TATTATGATGGTGCAGATTATCTACCACATCACGATAACTCCGTAGTCAGTGTGATATCA  
TGCTTATAGAAAGTACCTAAATGTTTTGAAGGTGGGGATTTTGTGTTTGAAGGTTATATA  
ATGCCTCCTAAATGTAGAAACAACAGTGCAGTTGCACTTCCTGGCACTACCAGACATTGC  
GTCACTCCTTTCAAGATGGAAGATCAAATAAAGATCTAGGTTTAGTTAGCTATTCCTA  
TCACATTCTTTGAATTTTAGATAATGGCGTACTTAGTTCATCCCTGACCACCCCGAATAG  
TTCTGGTCTAAAAAGAATATATTCAGAATTTTGCACGAGCTCATTGAGAACATATACCTG  
GAATTTGGGTCTCAGTGAGGAGTATCCAAGCAAAGGCAGTATATGTTCCGACATTGCTAA  
CTGCTTCAGATGCACTCTTCGATAAGTTACCTCTCTGTGGAGTTGTATGGAACTATATA  
TTGGTTGGTATGATCAGTTGCCATTAGATGTATTAACAACATACGGATTGTTTTGATTATA  
ATATTACAGTTGTAGCAAACCTATACTAGGTAGATGTCTGATCTTTGGTAAGGACAAA  
AGGTGCTAGCAGTAGAGTATCAGTTTACTATTGATACTGCACCCCGGAGGCCTCTGTCT  
TAGATGTAACTTTTCAGATCATGAGCCGGAACATAAGAGATTTAACAGCATTACTCTAG  
ACACTGGAGTGTTCGCGCACTAGTTAATAACAGATGTCAGTTCTCCGATAATAGATCGC  
TAGTTATTGATAAAGTTCACAAGACTTAAGTCAAAGTATCCAAACAAAACCTATGCAGTAG  
AAACCCTACCTAAGTGGTGGTCTGTAGGTCACACAGATGAGTGGGCATATATGACAGGAG  
AAGAAGAGAACGAACAAATAGACCGCACATGCGGTTGACTTTCTTTAAAAAATAGACCTAT  
AACAAAGTCGTGGGACTATCTGTGGGAACCCGTAAACTATCTGAGTTGGATAACAATATAAG  
ATGCTTACGTATCGCTGGAGGCAATTGTAGCCGTGGGCGTGTGTTGACCCTTTAGTTCCTA  
ACCGAAAAGCACAAAGAAAATCAACTCTTTCGTGGAGCTTTACAAGGAACTAAGGCAACGC  
CAGGTCTTCATTTTGCTTTTGACAGGGATAGTGTGCTATACTAATGAGCGTACGATTAAA  
TAGGTGTTGCATTTGGAGCTGGAGGTTTATATTTTCAGTAGAGGCAGCAATACTGCAACTA  
GATCTCCGCTTTTTGTAAGTCTGTTGATGATAGTGCAGTAATAACGGGCATTGTTCTCG  
CAGCGTAAGTAACGGGAACTGTCAAAGTTACGGGTCTATTGATTATCGGTGACGGTTCTT  
TGATCTTAGAAGATGCACAAGCACCTCAGGCCAGATTTTCAGGTAATTAATGTAGGAACGG  
GAGCTAATACTCGTATCGTTACACTAGCTGCCATCAAATCTGGTGATCGAACAGTCTAGA  
TTGGTGAGGATACACCGAAAAAATACTACAAAATAAAACCATTCTTATTAACGAGGATTATC  
TCGTTACTACTATTGGCATTGAAGTGGCAAACCTTTCAATTAACGAGGGTAAAACATCAA  
CCGCTAGAAGATCATATTTTCTTCTGAAGCGGGCACTGCAATATCTACAGTAGAACCAA  
CTGGACCTGCATCTGAACTGATCGATAGAAAGGCAGAACAAACAGCCTTCAATAAGGTTT  
TTGTTAATCTTAACTAGCACAAAGACGCTGAGGTTGAAGCCAAGCGGCCACAGTTCAAGA  
CGACTTCTCTAACTGCTAATTGAAGTCTTCATGGTCTGACTTATCACTTACTCGTGGTT  
AGAGTGAAGCTACTCGATTATTACAAAACAATACTGTTGATCATTTCATTCTTCAAGAGT  
CAACGGTTATGACAAAGAAGATTACAATTTCAATTTGCTTACTGAAATAGTGTTTACTACG



TAACGTGTTCAAATACCTTGTACTGCAAACCTAAATAGCACATGACCTCCTGATACTTC  
CAACAGAGGCTCCTACACAGGAGCTTACAAATAAAACATCGATTAACCCTGTGCTGAAGG  
GTGCAAGATCACAACTGTCCGGTAGTGTTACTCTTTCTATAGCTAATATGACAGCAAACA  
GAAATTTACAGGTTCCCTGTTTCTGATGCAACTGTGTTATCTACAGAAGACGTTAGAAGT  
ATGACGTTTTCAATTTGCTGCAGGTATTAGGACAGCTAACTGAACTTGTCCAACCAGACAAC  
AAATTTTGTCTACGCAGGATTTCAACGTAAATTGGCTACTCAAGGTTTACCTGCACGAA  
ACCAACCGGCAGCGAACACGAATACGTTCTTCTATCCTGCTCATGTTGCTAAATCTGCAA  
GGAAGATTATCAACGTGGCTAAAGACGGCACAGGATCAGACTTCGCAGTTGCTCTTAAAA  
GTTTTGACCAGAAGTTAGTACTAAATGGTTCCGCAGAGGCTTACAATTTACATGAGCATC  
GCGTGATCACTCCATATAAGATGACAGTAGACTCTGCCTTTGTCCCTGCAGCACAGGGTT  
TCACTGGCGACCGTCAAATTAGGAGTGCTGAGAATGAATCAAAGTTTAGATATGAATCTA  
CAATTATTCCTGATGATATAGAACGTTTTGTAACGACTTTTGTCTATCAGGGAGAGCAACA  
TTCAAAGTGTTACTGGTAGGTTCTCTGTTGGTTATAGTATTACCAAAGGTTCCGGGGTGTG  
AAAAAACTACTGAAGTAATCTACGGTATTAAGGGAACCTTCCCTTCATGTAGGTTCTTCTA  
CTATTCACGGGTCTGGTGCAGGATTTGCTGCAGATGACAGTATTCCAAACGGTGCGGGTG  
CATCAGCTACAGTTGCATGTGGTGGTATAGGATCAGCACATAATAAATTACTATTCTCTA  
GCACATCAGACGAACTTCCGACCACCGTTTCATTTCTGCAGGAAACGGTTTTGAACTAT  
TCAACGATAGATCATGCACATTTTCATATTGCCGACTCTACTAACTCAAGTCAAGTTTTTG  
CTTCATCAACAACCTAGTAATGGTGAGTGGGGTACTGACGGAACAACAGGTAACCTCTGATG  
ATGGAACCTGAATATCCTAGTGGTAAACTACTAATGGCACCGTTTATACTAGTGGTCCAT  
GCCCTCAAATGCTTTAAGTATCACTTCACATACTGTGTTAGACTGATATAACTCTCTTA  
CTGTACTGGCTTCGACCATTAGTTCTGGTGCATCAGAGGCGTGTCTTACAACAACCTTCTA  
CCCCTTCGCTCATTGAGTTTTATATCTATGAGCTAGAGGGCACTTGAACCTAAGTCTAGGT  
CTATCTTTGTCCAGAACAGTATCACATATACTGTTACTGCTCAATCTTCTGGAGCGGACG  
GTTATGTTTCGTAGTTACAGTTGTAATAACTTATATGTTATTAAAGGACTCCTATCAGCAG  
ACTTTGCAGATTCAGATACAATCTTAGATAACCCCAAGTCATCTATGGCAACAAGATCTC  
CTGTGACTGTAAATAGAGTTGCTTATGCTACTACTACTGTGGAATATAATTACATTATTA  
AACGTGCAACTAACACTGAGCATGCAGTCGCAAAGAATACTTCTGGTGTGTTGGACCTG  
GTGATAGATTGATTATCAACTGCCCTACACAAAACAACACCTAGAGCTTTATACGGATTT  
AATATTCCTCAACCGTTTTCAATCCCCGGACATTCGGCAGTTAATTAGAAAAAACCAAAG  
CGGACGGGTAATGTCGCTAAGCAGACTTAAGAATATTATTACGTCCAGAAGTGGTTGTTG  
CATATATTTCAACCCCGTCGATTTTCGATCCCTTAGATGCTATAGATAACAGGGGAACCTC  
AGCTTTGCGTCCGTTCAAAGGTTTGCAAAGAGTATGCTTAGAAGTAGCAAGATTTTGATA  
TATAGTTGGTTGGAGTAAAGACGGGTTTGATGCTTTTAGTATCATGCTTTACCCTGATGA  
ATATATTGTGGACAGCAGGCCAGGTGATGTTTTATTAACGAGGGTTGCGTGTATTGATGC  
GAGATCAAACCTTAGACTTAACCTCTCATAACGAATGTTCTATACAAAATATTTTCAGTGGA  
AGCTGGTATAATCGTTACTAGAGGTTGTTCTTCAGGTGCAACTGACCCTCGTCGTACAAA  
CATTATTCGAAAATATGTTCCATATCCTACAACGTAAGATGCAAAGGCATTAAGACCGA  
AGAGCAAGTTCCTCCCCGAATTGCAATCTTCAAAGTTTCTGGTGGTTCTTATTTCTCGCA  
ATTTCGCTTCTTAGACGGTCTTGAAGAGGTTGTATTCTTCAAACCCGATTCCACTGAATC  
ATTAGCATCTCAGTCTTCACATCATAGACCGACTTGTTTAGAGTTTGCTGACGTTCTTAA  
TCCATTATCCACTCTTACGTCACAAGGAACAGGCCGCTCTGCTGATTACTCTGCTGTGTC  
TAATATCCTGCGGAGAAAAGATTGAGAGATTTATTACCGGATAATGTGGAAATATTTTCG  
CACTATCCATGATACAACTGTAGATCCGCCAACTGACCAGATTCAATCAAGCGTAGAAGA  
AAACCGTAGTGACAGGTTCTATCTCCGATGAATACCGCGTCTTCGGAACACAAATAAAGG  
ACAGACCGCAACGGCTGTCAGTGTGACGAGTTGGATAAACGCAGGGGCCACGGCGTTTC  
TGTTGGTGTAAACATCAACGTTGGTGGTGTACAGAATCAACTGGATCGCAATCCGTTCT  
TGAGGCATGAGTTTATAACGGGTCTTTCCTACTGTGACTACGGCATCGGCCAACGTCTTAC  
TTGCCAGATGCAAACATTTCTCCTAAGCAAACGCAGGCGGATCAAACATACCTGTTTAGTC  
TGCGAATGATACTGCTGACTCAGCATCTTTGTCTGTTTTAATCTTTCACATCGAGCAGT  
GCGGGGTATGAATGGTGTGCACGCAAACGGTCCAAAAGAAATTGCTTTCACATCAATGGT  
TGTAGCACAGTTTTCTGGACTGTCCCCACAGACAGACGTAACACTATTTGTAAGATATAA  
CGTTTCAACTAGTAGGGATGGCGTAGCTAGAGCAGTTGATGGCGCACATTTGGATTGTTT  
TGCTAAATGTTGAAAAGGATTGGGTCATGATCCCATCAAGTGCAGTGACAACTCCTTCAT  
ACTGGCACTGTACGTGTTTCGCTGTGGTATACCAAGGTCATTTCACTGCACTAAGCGGCGG  
TGACATGTCGAGCACCAACTCTAAGTGTAAGTTTGGTAACACTACTCTCAGATCCGCAGC  
ATTCTAAACAGAAGCATTCTATAAGATACAGCGGGTACGATTACAAAGCTCATTCCCCC

AAAAGCACTTAATACAATTCCATCAAGAGCAACAGGTACTAATGGTCCCTTTAATGATAC  
TCTTGCTAATGATGGATCAGTGAATGGTCTGATTCCAGTTATGACTGTATCGGGAACAAA  
TATTGCTACTGGTGCAATCTTCAGTTCACTGATCACAATTACCAGAGTAATTACACTTTC  
TGGTGCAAATACGGGCACCGTTCCCGGGATCGTAATCTTTGGTGAAGACACATTTGTAA  
CGAGGTAAACATTGATATTCAAAGAATAAAGTACTTAATACTGATCATTCTGGGCAAGG  
TGGAACCTCCCGGCAGAAGACTACACTTATATTATTATACTGTTGAAACGTCTCCTCCAAC  
CTGGAGGGTTCAAGGTTTTTAAGTCGGTGCAGGACCAGACGGGACAAGTAATAGTTGGAA  
AGGAGATAAAATTAACAGCTGGTTAGTTGCACAAGGTGCATCTTCTTCAACGGTACAGTC  
AGCAAGCATATAACCTTATGTTCCCTGCTGTATATTGCCTTGCAGCTGGTGTGACTGGATC  
TCCATGACAATATGTTAGTAAGACAGCTACCAACAATGGTGTGCGGGTTCAGTCGTTGG  
TTGGTATCTACGTGTTTCTATACTAATAACAGTATGTACGAAGCGTTTGTGAATAATAC  
ACCATACAATCCAGTCCGTTTCACTCATACTACGTTCCCTCAAGAGAATCCGTGATACGAG  
AGACTTACGAGAAAGAACATATCGTGTACGTTATGTAATAGAGAGGGAAAAGACTAATTC  
GATCCCGAGAGACCCTATCAGTGTTCGTATTACAACCCGTTAACAGTGATACTACAAC  
ACATAACTTACTCCGTGCATCTTATATTTACGAGATCGAGACTGGTCAAAGTTCGTAAG  
AGGTGTTAGTGAAGGAATACCTTTTCTCACATTACTCTGCGGTTCTCTAACACCTACTTC  
ATCTAAGTTTGATGATAGGAAGTCCTAATAGAACGTTAATGAAGTATGTCCTGCCTTCGA  
CAGACATAATCCAGTAGCTGCTGGTCCCTTCTGTAGACTGTGAAGCTACCAATGTTATCAT  
ATGTCTTGTTAATTCTAGTCATTGGGCAACTCCAAGTCTGCACTTGTCCCGAGAGATT  
TTTTACCAAAGAAGCAATTATAGTCTTACTGATTGATACTGGTTGGCAGAATCGCGGTTG  
AACTCCTGAGTACGATTTAGCTAACAGAAGTCCTCCAGGTATTGAACAGACTGCAGGGGG  
AGGAGACAAAGAACCCCGGAAGATTACTATTAGAGAAGATAAGACTGGAGTGGTTTCACC  
ACTCTACGTAGAGTTTAGACGACACTGAATCATGCGTTCTGGTAACCATAACCATCGACTA  
TGTTGGTTTTGGTCCATGTAACACTCCACAGCCTTCCCTCAAACGTAGGTAAAAACATT  
CTCACCTGAGCAGTTCAGCTTTTCCAGACCATTAAAGAAGAAGGAGGTGTTGCATTCTA  
CTCTGGTTTTCAACAGGAATCGTGAATGACACATTGGTAACTAGGTGACTAAAAGTGTGAC  
GGTTCAGATCACGAACGAAGATACTGCAAATTTGAATGTTGTTGGTGAGGAGAACACAGC  
CATTGTAACGTTCTCAGAGTTAGTATCGACTGGTAGACTGACTGTGATTGGTTCGTGCATC  
TAACGTAATTGAATACTTCTTTGCAGATCATGTCACATTCCAAGGTCTATCTACATTTAT  
AGACATCATAACCTCTAAGAAATTAACCTGTAATAGCCAAGATGGTACAGTTACTAAACA  
AACTTTACTAGCACCAGAAAAAGCTAGTCGAGTCCCGATTTTAGTCATATCTCTGGATA  
CGACACCCCTGGTGTGGTGTATTTGTTTCCAACAGCAATTGGTTCACCTGGTAAGTCTCA  
TGGTTGGATATATTACGGAGCTACGTGGTATCGGTGTGGGATCGCGGATACTGGTCAAAT  
CACTGTTATTAATGACTCTCGTGTAACTAGGATTGGTCTTGATGTTGCTCCTAAGTATCC  
TTCCAGGGCAAAGTCAACGGTTCAGCAAGTATTGATGGAGACTTATTTGTTACTGGCAC  
TTGTGGTGTGACAGTGGCTAACTATAAAAAGAAGCAATACACAGCAGACGGTAACCAATT  
AACTTTAGCTGTTGGCACATTCACCGGTGCCATTCAACACAGTGAGAACTCTTTGATAGT  
ATTCATAAAACGTTTTTGCACAAATTCCAGGCACTACGTATAATGTCGATTACATTGTGC  
AAATGTGGTGTTCAGTGGTGGAGACGCACCTCTTCAACCTATATTTTGGAGATCCTCGA  
ATTACCGATCAAATCACGAGGAAGGTTGCAACAGAGCATGGCTATTACAAGAATTAGCG  
GAAATCAAATTTAAGACACGACAAGTGAAATCATCACCACATTAAGTTTCTTAAGCACTA  
ATTCAGTGTGAAGATGACCTGGAGGTTCAACTGCAAACAGACCTACAGTTCTATCTGTTC  
GAACTAACGATTTCACTTTCAGTAGATTCTGAAGAAATATGTAAGGCAGATAATGGAA  
CTAGATCCGCCGAGTGGTACCTGTTTCAGGTGGTGTCTCCTTCTCCCGGTACGGACACTA  
GTATCAGAACTAACACTTCACCTATTTCAAGAAAATATTACTGTGCGGTCTTTCAGCCGGAA  
ATGAGTTAGGAAACGCAACGTCGGAAGGACCATTCACAATAGAAATTGGTTATACACTTA  
CAGTAGAGCCAGGTGGGTGATGGAGTGTAGTCTAAATGAAAATCAAGGTTGGGGAAATAA  
AAGGATTAATGGCAAACAGTTCTAATATAAGCGTTCCTTCATAGCCTTCAATTAGTCTTG  
AAACAGGAGCTTAATCGACGGGTACTTCTTTATGAACCAGTCACATGGTACTTCTTGTG  
GCACTACTACAGAGTGAGATCCCCAAGTAAGAGTCGAACAACAAGATTTTTTTGAATGGAC  
AAATGCGCTGCAACACAACAGAGCCTCACATCCGATTTTATTATAAAAGTTGAATGTAAA  
CGGTGTCAAGAAGTCTGTAGGAGATATCAGGAGACAAACAAGCACTACAATAGATGGAA  
ATGCAATATATAGAGCAGGTAAATAAAGTGGTATAGATTGGATTCAAGCAGAAGGACACG  
CCGCATACCGAATGTAGGTTATTCATGATGATAATGGAGGTGATTGGGTATTATGCGTTG  
ATGCACGGACATCAACCTCTCGAGATCATATGAGTTCAGCATCAGTCATAATTACCGGAA  
CTACAGGTCTAGAACCAATAATACATCTTCAATTAATAAATGACGGACAGTTGGATTCTAG  
CATGACGCACTAGTCCAGTTAGACTGGCACTTCTGTATATCGGATGCACGCATCCTATC

TCGGTCCTAGCCACGTTTTTCATATCGGTACCAGCACCTGTAAGTTTTGACTACTAGTGCAT  
CCGAAAAAATCCTAGAACTCGAATCTCTACTACATATCAAGGGGGTCTCTCTGACAGAG  
GACCTAATACAGGAAGTAGAGGTTTCAGAGAGCACCATACTCCTGGTGGAACATATTTTG  
AATTCGGTAGCCACGGTGATTGAGGTAAGACTGTGGATCCAGAGAATATACTAACGGGG  
CATCAAACCGATACTAATGGGTAAAGTAAATTGAGTAAACTAACTCTTGAAGCTTTGGGT  
GGTAATTCGAACACCATTGGACAGGAAAATTTACCTGCAGGAGATACTTTGAGTGTTGAA  
GGTGCCATATATCATCATCACAAGACTGGTGAATGAATGTGCCTACAGGCACGACTCCA  
CAGAATCCAAATAGTCCAGCTGTAGGTGTCGTGAGATATAATACCGGTCAAAGTTACTTA  
GAGGTTTGTAAATGGTAGTATATGGAGTGATCTCAATGGTCCGACTGCTGCTGCTACTTCT  
AATTCGGAACTCAATTACACCCTGCTATTAGTGGTCTGGCACTCAAGGGCGCCGAATTA  
CCTTCTGGTCTTTATTGGATGAAACCGAATGGGAGTGTAATAACAATAAAATGTATGTT  
GAGAATGATCGGAATGGTGTGGTTGGGTTATAGTTCTACATGTTAGGACATCAACCTGT  
CAAGATCACATGACTACTAGTGCTGTTTCGTATTAGTAATAGTATAATTCATACATTTGGT  
AACACAAGCACTACTAAAGTTGAAGACTCATGGATGAAAGCTATGATATCTTCATGCACC  
TACGCTGGTCCCACACTATGGTGGTTGGAAGCAAAGGATTCTGGTCACCCTGATGAGAAT  
AGGTTGATCGATAGTGCTGCTCCTGCATCTTTAGCATGAAGTGCTAGTAATCAGATCGCA  
AAAACACGAGATTCTTTTACGTACGAAGCTAGTATCTGTGAGAGCGTACCTAGCACAGGA  
ACTAGAGCTTTAGGTGATCATCATACTTGTGGTTGTACCTATTTTGCTAATGGTTGACCT  
CCAGAACAAGGCAACAACACTGCGGATTTAGGTCTGACAATTTGGGTGCATCAAATGGATAC  
TTTTGGTTAAAATCAAGTGAGCATTAAATAGTCAGCGAATTAAGGTATCTACGGAGAA  
CGACCGAGAGATTAGAATGGAGACCAGTAACAATCTTTTAACTGGAAATCTTATTA  
TACTCCTTTAAGTAGATTTCCATTTCCCATCGGTACCACTGAAGAAACACAAAGTAGTCC  
AGCTGCCGGTCAGGTAAGCTGTAGCACAGCGTTAGGGTATGTTGAGGCTTATAATGATAG  
TGCATGGTATTGTGCAAGTTGGGGTGTGTTTCGAACTGTAGGACCTGGGGAAAGTCCCGC  
TAAAAATTCTCAACAACCTCGCATGACTACGTTCTGGTTCATATAGTTTCCCGCCACGTGG  
TCGCTCAAATATCAAATGTATGTGGATAACCGTATATTTGGTGGAGATTGGGTCTCGAT  
GGCAAGTGTTACAAAATCTACAGGTAAGAAAATAGGGCTCAAGCTGCTTTTCGTATTAG  
AGCTACGAATGGTAATAGCCTATATAAGACATAAACATCTAAGATGGCAGACGCATTGAT  
CAATGCTTTTGTCTCTGGTGCTAAGAATACAGGGTCTACTAGATATTGGATAGTAGCCAC  
TGAATTCTATAATAATTTGTTTATTGATTGTACTGCTACTTTAGATTTACTCAGTTCTCC  
TAGTAATCAGAACGTAAGACCAAGATTATCTAACTGCAATATAGTAAGTTTAGGAGACAG  
AGGTAGTAACACAGGACCTAGAGGAATTGGAGATTACCACACCTCTGGCGTGACGTA  
CGATTATGGTAGACACCCTGAATCAGGTAACAACCGCGGATTTTCGAGAAGCCACTTAGG  
TGCATCTAATGGTTACCTCTGGGTAAAACCTAAATCGAAACATAACCGAATTTTAAAGAC  
ATATCTGATATTAAGTAGATAACGTTAAAGCAAGAGAGGCACCCGCAAGTGATTCTGAA  
GTCAGCTATGATTCGTCTGTAACATATCTTTTGCAGCCAATATATCATTTACTGGTGAT  
GTCACTGCTGATGCGGTTATTGTCAACTCCTTACTTCTTTTGGCCGGATATGCAACGACT  
GCTTTACCTGGTAGGGCAACTACCGGAAGTACTGCATGGGAAACATATGAAGAAGTGATT  
AAAGTTTGGGACGCAACGGAATGGAGGAATCTTGGTAGGGCAGCAGGCATATCGGCTAGA  
GGTGGATCAGTTTGAACCGCGGGAGAATATACTATCCATACATGTAAAAGAGGTGTAGCA  
TTAACTATTGATGGAAAAGGAACTGTTGATGATCTTTTAGTTGGTTGTGGTGCAGATGGT  
GGAACGAGTGTTGCTGTTCTTAACTCTGGAAGAACTGACGAAGGTTCCGGTGGAGGAACA  
GGTGATTGGGTTCAAGTAGCAGGGCTGCCTATCACGTCTGGAAGTTATGCAGTTAGTATT  
CGTAGTGACGGGAATGCTAAGAAGTCTGGGTAAAGTCCTGGTCTAAATGGTTCCGCCCTCC  
AAATTTAATAGTATTGTAGCATGCGGTCGAGGATCAGGGGCCCTCAGGTCTCTTAATAGA  
CCAGGTGGTCCCTGGTGGATCTGGTGGAGGAGCAGGAGGAGGTGGAGGTTCAACTTCTCAA  
GGTGGTTCAGCACAAACATCTGCACCTGGTCACTGCTGTTCTAATGGCCATGGAAAT  
CCTGGTGGTCCCTAAAATAACCCAGAATGTTACTGCTTCTGCTGCAGGAGGGGCAGGA  
AGATCTGCTTCGACGGCTGGAAACAGTCGTCAGTCGCCTGGTGGAAATGTAACATCAAGC  
GGATATTGTGGAACATAACTCTACGTAGGAGGCGGAGGAGATGGCTGTGGTGCATCCA  
GGGTCTGGTCTGTGGACGTAACGGAGGTTTGGGTGGCTGAGGTCACGGTGGTTTTGCTTTT  
ATCCGTACGAATAATGGTTATGGAGGTGCAGATTAACCTGGTCAAGGTGCCGGTGGCGAA  
GGAGGTGCAGGAAATCCTTGGCCAAATGGGTCAAGTGGTAATGACTGTAATGCTCTTGTG  
ATTTTATAGGAAACAGAAACCCGGATTCAGCAAAGTATGTCGCATCAATCTTCGATAGCTT  
CAAAGTTTAAATAGCATCAACAGGAGATTAAACAAGGCATTCGCCAGCAAGGTTACTGGA  
TATATTGAACAAGATATGAGTCCCTGTTGCTTCAAGGAAACATTTAATCAGCCGATAGTA  
AAGATCATTTTTTATTGGGAGTCAACGTCTGAACTCTACAATTGTGGTAAGCATGAGTTGC

ACCAGGAACCTCATCTGATGTTACCTTGGCCGCAGACATCATCTAATGACTCTCCTCTAA  
ACTTCTGATATCAAAGTAATCACTAGCATATTCTGACATGACTGTTGCAGAGAAAGGTCT  
AAACTCACCGAGTCTCCTTACCCGATTGCCTATTTGTTTTGCTGCACCGTTCCGAGGGAC  
ACTCAAGATGGATCTGTCTTCTAATGCACTAGGCCAACTTAGGATTAACCTTGATAGAT  
TGCAATTATTTTTGCATCAGCTTTCATATCAGCTACTTCAAATGGTGTAGTAGGTCTAGT  
GCTTTCCATATACAACCGAGTAACTTGTCTTGGACAGGCCCGTGGTATAAACTATACAA  
TGGTGGCTTTGTTTTGTCACCAGGACCTTCATGCTGAAGAAGTTTTGCTGCTCCAATCGA  
CGTACCTGCTTCACTTGTTCAGGTTCAATGTATAGGTTAACATCACGAAGTAACACACT  
CAAATAGAAACAGTTTGGAACGCAATTCGGAAAAACCCCCCAGAGAGCCAGACGTTCTT  
ACACCCTGTTTGTTC AATTTCAATTGAGAATATATTGTGCGTCGTGTTCTTGTGTTTGTTC  
ATGTAAGGAGAAAACTAAATCTGCGTTTGAATTAAGATCACGAAGCAAAAAATTTTATCC  
TGCATTATGTAAACCTTTACCGATATAAATTAATTGATTGTCTATTAACCCATTATCATA  
TATTGATATGGGTAGTTTATCTCCATAAGATGCTAAACCCATAACTTTACCTGCATCTAG  
TTCATGAGACCCAAATGCCATGGATGTATTTTCGAAATGCCGTAACCTCACCAAGATTGAT  
ATAGATCTGAGTCCCAGCAAACCTTGTGATAATTTTAAAAAGGTACAGCAACGGCTTTATC  
TACAATGGTAAAATCAGTAGCATTGTTGGTGCTCAAAAAGTTGTCGATAATTCTGTACCATA  
AGTACCAGATTGAAACATATCTCCTACGATAGGTACGCCGGATCCCATTCCGCTTTTTAC  
AATAAAGATTGCTTCCTAAGGTCCACAGTTATAAAAAGCGTATGCTGCATGGAGTTTATG  
ATGTGATAGTGATAGGTGATGAACCTCAGTGTTATCCTTTTTTTCTTTCGTCTTTACATA  
TAACTATCTGGCCCCCTACCAAAAATAACAGTCAGCAGGTGTCAACTTGCTACGCCAGC  
AATACAAATATTACCAAGTTTAAAGTTTCCAGAATAGTCATACATTGAAATGAAAAGGT  
ATGATACTTTCTATTAGATCATCGTTCATTCTCAAGGGGGTAGACAATTCGCTATTTTG  
TAGTAAAGTAGTAGAGGTATTGTGAACTCTACTGGCTCCTAAAATTCTCATAGGACTTCT  
TGATTCCTGCTACATTTATTGTAACATGTTTTTGTAAATTATGACATTTACCTCAGTGTGG  
TAAGAGCCCGATATACCAAAGGAATTTTTGAGTCTCATAGAGAGAGAATGCGCACCGTAT  
GATCATATAGTTAACGTAGCGGGTGTGAGACAATGAGAGATATTTGCTACAAGAGATAAT  
CAAACAGCTTGGATTCCTGCAGCTAAATGGGTGAGAGCATTCTGTCCCTCTTATGTACTG  
AAGTCGATCAGATATAACTTTATGTATGATATAGAGGGTATTGTTGGAAATGGAATCCAA  
CATACAGCGTAGGATCAAGGTCGGTTTTATTTTCGCATCAAGTTGAAGAGCATGACTCT  
GCAGACGAAAATGGTATGTTGAGAAAACCTGTCATTTATGTATCACCCCTCGTCCCTGAA  
GGCTATCAGTGTGGTAATTTTGAATGAAAACCAATAATGATGATGTCTATCTAGTGCCT  
AGACGTAGAGCTCCGTGTATTGTCTTTGCTATTAGAACCCTCATTGAGCCACAGAGGTT  
TCTGGTTTTATTCTAACACTCTGGTAAGGTGGGTAATTGTACAGAGGCGGGCGATGATTC  
ATAACAAAGATAGAAGTCTTATTCAACTTACGTATTTGGCGATTCTCCTCCGGCGTTAGTTG  
AAGAACCCCTTTTGAACGTAGAAAATTTGGATATGATAAAAATGGCAGAATTGAACTT  
TGTCTGAACAAGGACGAGTTCCACCTAGTGTTGCACGATAGAATCACCCGACGTATAAAG  
AATTATACAAAGATGTTCCATCAAGTCTTGCACCAATCTTACGGGATAAGTTATATCCGA  
CATATTACTTTAATAGATTTTATTTCAAGGGTCAAGAATTAGAGAAACATCATGATATAC  
CTGCATGTGTATTCAGTGTCTCTAGGAATATTAGGACTATCCCAAATAGACCATGGCCAA  
TATATCTTGAATTTCTAGCGGGGATGGTTTCGGAGCGTTACACAAAGCATGATGATGCTG  
AGTTATATAAGGGTATGGAGTTAGACCATTAGCGAGAACCATTAAAAGGTACTCCAAAAG  
TTTACGATCACCAAATTTTCATGCACTGACTAGGGTCCAGACAGATATCAAGCCGACTATG  
CTTCTGACACCCAGTGCTAATTAATAAGGCACAACCCGACATATCCAGGACATTGTTAC  
ATTGCGCTAGTAAAAATGATGACAAGATTGTTCGAAAGAGTACACATACTTGACGACTTTT  
ATGAATGGACGGACACAGTTGGACAAGATGAACAACGTGCTATCAATAGTCTGAGATAGG  
TTTTTGGAGACACACCTAATTCGGTTAAGACCTCAGACAATGCCAACTTTTCGTGGTCTGA  
TTGCGTGTCCGGGGGATATATATCGTCCAGTTTTATATAAGTATGTATCTGCAAAACCTG  
CAGGTTTGGACTCGAGAGATTTAAATGGGGAATCCCTACAGTGATAACCCCTATACCAA  
TGCCCTTGGTAACGAAGATCGTAATTGGGAGTGAATGAAACAACAAAAACATGGGACG  
AGGAAAAGCAATGAGAAAACCTCTATGAATTTACCTCTTTTGATTTAGCACGTAATTTATT  
GAGACTTCGTGCTAAATGGTCGATAGATCATGATAAGTTTTTATTGGAAAGACCCTACATA  
TTGCCCAACTATGGCAGGAGTTGAAGTTTACTAAACAAAATCAAAGAATTTGAAGCAAG  
TCTTCCATATATTCTGTTTACTGAAGATCAATAAGCAGAAGCAGATACAAGACCAGATCA  
CGAATTTATCGCGTGAATCATAACGCACGATCTTGACGAGAGAGATGTACCTGCAGGACG  
AAGAAAAGAGCGAGCAGAAGGGAAAGGTGCTAGAGGTGGTGTAGATCCCGAGTAATTTAT  
GTGTGTTTATTCTTATCATTACAGCTGGACTGAGATACAAAATCCCAATCTGATTTTCA  
AACTGCAGTTAATGATTCTGGCTTAGATTGCCTCAACCCCTCATATCTTTGATATATCAAC

CAGTTTACAAGGTAGGCAGTATCATTTGATGGAAGAGTTAACTCCCATCTCTTAATAC  
CAGCATAGGTCAAGTTAAAGATATGCTAGTAGATGATGTTGAAGCACAAAACCTCAAGTA  
AGTCTCTGCATGGACAGTCTAAGGGGAAGAAGGAACATCTCATACAAAGTATCAACACAA  
CACTGACAATGATATTTGTAGTGTGTTACACTTAGAGATAGAGTAAGAAATGTTCCCTGC  
AAAAAATAGATCTATTTATTATTTCTTGGACTGATTAAACTATTTCCGCCAGGTGTAGG  
AGACGTTTGGATATTTCCCTGCAACTCTTTGGCATGGTGCATACCCTAATAAACTAAAAT  
GAGACATGGCTTGCAACTTGATTTTACACATGAAACCAGATTTTAGTATTCAATTCTACT  
ATCTATATAGAATGCCTGCCTTTGATATTCTTAAACGAAAGGATAGATAACAATTGAAAAAT  
GTAATGCCTCATATTTACATGGGGAGCCCTCTGTATGATTGAACGTCGCTCATACAATG  
TAACTGATTCCCTTTGATAATCTAGTCAAACGTCATCGTTTAAAGTCTTGTGATCTTATTG  
TTAAATTCAATCCTTAGTTATTAAATCATTGGACGAAAAGATATAATCGCGCTGTATGTC  
CAGAGAGACATTATCATGTTGTTTGTGACATTGAAGGAGTGGTTTTTTAAAGTGATGATG  
AAGATTTATCAAAATGTTATTTCTGGGACGCTCACCATACATCATTTAATAGACCTTGA  
TTAAGATACTCACAAAGATGGAGTTGTCTAACTTATACTATCCGGAGGCCAAAGCGGGGG  
ATGTGTTTTTATTTCCCCACAACCTGTTGCATGGTATTCCCCTCATAATTCTGAAACAA  
TTAGAAAGACATTTTCAATTTACTGTGGTAGTAACAAATGAGGAGTGAAGTGTATCTAACT  
GATAATTTCTTCAATGAGAACATTTATAATTGGTTCATGACATTTTCATCACACTATGTTT  
GCTTTATATTGATCAGAGTTTGTGAGAATAAAAGGAATATAAATTTGGCATAACTAACTGAC  
GTTCTCTCTACTAAGAATTCACCTTATGATGTAACAGACCATCTAAAGCTACTCCAAGCC  
AACGTGACTACAGAGTTAGGAGGACTCACCTATAGCAAGTCCTAATTATATACATTGC  
ACCGAGTGGACAGCTCCAATATAGCTACCAAAACACACAGATTTTGATGAACACGTTGGG  
ACATCTATTCTATACTTAAATGATACCTTCCCAGGTGGCCATCCTATTATTGTGGGTGAA  
AAAGTACCGCCAAAAAAGGAAGTATTATCATCTTTAAAGGAGAGTTAGCACATGGAGTT  
GAACAAGTCACAGACGGTGTGTTATACTATTTCCGGTATGGTCTAAAAATAAAATAGGC  
GTAGACAAATACAGATAATAATAGATTTATTCCGAAAATCTATTTGCATGGATCATTTTA  
ATTTAGCCCCGAAGATCATGCAAATCTTTCTCAAGTAAGACTTAGTAGAGACAGAGATC  
AATGTGCATGGGTGCATATCACATATACTTTTTCTTGATTGATAACAAAGTATTCACTTTT  
AAGTAAGAACTACGTTGAATAGTCCGTTTATCATGACATAGGTTTGTAGTAGAGGATATC  
ATATACGATGTCATGGTGCATGGTGAACAGCAAGGACAAATGGGATTTCAAAGAGAAAT  
ATAATCATTCTAGTTCACTAATAAGTGGTGGATATTTTTTGTCTCTCAGTGAGCTAACAG  
GACGTACGCAATTCGGGGGTGCTAAACATGGTGTGTCTGGTAGATATTTACCCGTTTCGA  
ATTTCACTGAAGCTAGCACTACAAATTTCTCAGAGAGCAGACGTAGAATGTAAGAATCGAA  
AGATTGTGTTATTTCCCTCAAGTCTAAAGCATAGCGTTGCACCGAACTATAGGAAGAAC  
GTAGATTCTCACTAGCATTTGACTATCCATTAGAGGGTGTGTTTGTGCAATGGTGAACA  
CGGTGAACTATGTGCCAGTCAGATGAACGGTCCAGAGGCTCTCCCCTTCAAAAAAAGAGT  
GTTATACACATAGGTTATCGAAAACGGAAGAATGCCAGCTTTACACTTATTTGCATAGA  
CGAAGGTGAGACTCATACTAAAAGAGTTTGTGATGCCGACATTCCTGATGATGTTGTCAA  
AAGAAGTCCGACTTCCCTACATGGAGTAGGTTATTGTTTCGAGGATCTTTCATCGGAAGT  
GTATCCAACCTCAGGAAACCTGATACATACTACACGTACTTTCCTATTTTACAGACTCAA  
ATGGGTAAGCCATTTTGGCGAGGTCGTCGCGAACAAGGTTCCCTCACTCATGGTAAATCA  
ATCCGAGACAAGCGCCAAACAAAAGTAGTTATTAATAAAAAATCGAACATGAAAACACAAGG  
GAAATAAAAAATGAATGATCAACACGCAATACGTCTGAATGAATCCTCTGATGTAACATA  
TCATAGATCTTTTCCCCTTTTTACCGAGTCAGTTATGAAACCAGACCCAGATTTGCGTGC  
GTGTGCCTATAATCAGGATTGTTCTAATGAACTGATGTACATGAGGCACCATGTTGTGAA  
ATATCTTTCATCGTTGATATCAACCCAAAACCTTAGTTATTACAGCTGAATCCGATACAAT  
AGAACAAAAGAAGTAGGAACCTCACTTCCCCTATATCTAAAGGGAGATCAATGTATATTA  
ATCTGCTTTGTTAACTAAAATGCAATAAGAAGTATCGAAAGAAGATCTATTGTCATACGT  
TTGAAATTTAAAGAAACGATACTATGGGGATAAAATTATTGAAGAATCTCATCAGCTGAG  
TAACATTACAGAAATTCAGAATATGGATGATCAACTACATGTACAGGAATTATACACATA  
ATGTTTCGGAAAGAAATTAATCTCTTGAAGCCAGCAATCAAGAACGGTCAGGAATACCAA  
TTTCTATACTGCGAAGGGGAGTTTCATAGACTCAAGAAGAACTTAGGCAATTCAGGCAG  
TGGAGGACATCGACTATTATAGCACAGAAGGGTGGAGCTGGATCGGGAGTGTGACAGTTA  
AGTTAGTGTACACCCCCTATTGACATTACTTCCAATATCGTTTATATTGGGAAGGTGCGAA  
ACAAGCCAACGTGAAACTTGCAAGATAACGCATATCCAGAGCAATACGTTTTTAAAGTCGA  
ACGTATGTAGTTGAGTTTTGTTTCGACACACCTATTAATTTTCGACATGGAAGTCCACGC  
ACATGGTAACGAGTTTAAAGACATTGTAACCTTGTGAGAGTACTGGTCTAGCAATGAAAGA  
ATATGCTGCTATACATAAGAATGGTTATACCTCATCTTTGAGCTATGGAACGGTCTTGA

GGTAGAGGAAGATGCTAGTACTAAAACACTACTGGCAACAATACTACTTGC GGTTCTGATGT  
TCTAAAAATGATTAGACATGATGATTACAGACAGATTGTGGGGTGCTACGATCAAGCCGG  
AGATCAAAGAATACTTCACACACTGTCTGAGTATTTTATTGAACAAAAACACTACCTAAC  
TTCATGCGGAGACATGGATTTTGCAACCGTAGAATTGTTTGTAACTATGTTAAGGGTAG  
TCCAGAGGGAGCAGAACCAGGACACGCTTCTAAATTGGTTAGATATAATTAACAAGAATG  
CGTCTCTTGCTATAAAGCATTATATACTATCAATCCAAAGGTAGATAGTAAGAAACAATG  
AAGCGTTCAATGTTGATTAACACTTGACGAAGCAATTGCGAGTGGTGTAGAATATGAACA  
GAAAGATATATTGTTAAACCTAGAATCTGCAAGACGTAAGTTTCAGAAATGATAGCGTTT  
TGCACACCGAAAAGTACACCTCATAAAGATATCGCGATCCCGCCTGATTATCTTGCTCAG  
GTAATCATTACTCATTTC AATCCTACTGGTAGAAGTCCTCACCTAGGAGTGGAGAAGGT  
GCGTTTTATGCTAATCACTATAACGACAATAAAGATTTCGTGTGAACTACTAGAGGGAAGA  
AATTGGTTACGATATCAAATAAAGTTGATTGGAATAGTACTACTCTGCCTTGGTCTATG  
ATGCAATGATTTCTAGTGCATAGCATGGAAATGGCCGACAAGACTGTATATCGAACAACG  
ATCTATCGGACTACTAGAAAACGTGCAATAAAGAGTGTTGAGACCATATAGCTTTGCAATT  
AAAGAGATATATACTGTTCCCCCACCTACAAATCCTTGGACACAACCTAGGGTTTCAACTA  
GCTCCTGTTTCATGCAAAGAGAGATTA AATAGGAAATATTAAGTTTTCTTGTACTCCTGAT  
CTTACCTGATACAATATGACTACATACCTGTGTCCATGGTACGAATGATTTTTAGTACCG  
AATCAGGGCTTTACAGATTA ACTGTTATGAATCCAACTAGAGAAGTAAGCAACGTCTAA  
ATATTGCTGATTTATATTATCATGAGAAAATTATTACAAAAGATCAGAGGCATGATGAGT  
GGGAAGTTTGCCCAATACAAAGAGACCTCCAAGGTAGAGCAAGAAAACCAAGCGCAGAG  
ATAAGTTCTCTACACCAGAATCTTCAA ACTTAGAAGTTGATGGTGCAGTATTAACAAAAG  
ATTTTTACGACGCAGAAAGGTATAAGCCATACAAGGAAGGAAGTAAGTTAAAAATAACG  
GACATACTTGAGACGGACACTGGGGGTCAGATTATCCTCACGATTAGCAACGCTGACAGG  
TTCGTGCAAAGTCTGAAGTACACGAAGCCATTAATCCTTATACAAAGGTTACTTCATGT  
AGGACAAACCAGATGACGCTGACATTGAATATAATAGGGAACGTGAGAAGTTTCGTCCTG  
TATTTGGAGAGAGGAATATTGTTATTAAGATGGTAAGCTGTACGAACATGAACCATTAC  
ACCACGCAGCTTTCCTAGGTATTGCTAACTAGTATAACGTGGCGAAGAAGACAAATGCTG  
TTTACCTCAAGATGTGGTTTAGTGATTTTGAAGAGGCGGTTTTATGGGGTCGTAAAGCAT  
AGCTTGATTCTGAATTTAATAGTTGGAAGAAAACAACGCTGCCACACTATAACAGATTTA  
CTTGGGCATTTCTTCTTTCTTATATCAAGTGTAAGGAAGTTGCAGAATAACTCGAAAAAC  
TAAAGGAAGTGATATTCCGAGGATCCAATTGTCATGTGGTAGTTGACCCCTTAAATGGAC  
GTGAATATAGATTTTGTGCTATAAATGTATCATGGAGAGAGTGGCAACAACCTCAAAGTTG  
GCACGTCAAGTTTTGTTTCAGCCCTCAGCGATAAACGGAAATCGGCCCGCTAAAAACATGA  
AATCCTTTACTACTATTGTGTATTGATAATTTAATGAAGGTATGTATTTTAGTAAGGACG  
GTAGCATGAGAGGTGTTATCTGGAACGTATACTTAGAAGAGTTGCAACTTGCGTGGAAAG  
TAGTGCATGGTAGGGCAGCACCCACGCTTTCGTATGCGACATTACCAATAGGGATTGTCC  
TCGAAGACGAAGTCTTGACCAATTAGGATAGTCTCACAACTCTGGACAGAGGGGCTTTT  
TTTTGTTATACCGTTTGTATTGAAAGCTTATTATGCAACTACGTCCACACTAGACAAGGG  
CATCAAATGCTATGCAAGAGAGGAACAAGGGTTCAATCATTGTTCCAGGTGGTTGTGGCA  
AAACGTCCATCATTATTTCTGACACTTTTTATAGATTTACGTTACCATTTGCACAGACTA  
CAGCTGTAGTTGAACCTCGTATCTTTCTTGCTAATCAACGTTGCGCAGATTTCCCGGAGC  
ATAATCTAGATGGATATCATAATCAACAGTTCGATGTCGCCCATGTTCTCCAGGAGAGA  
CTCACCATTTCAGCACAACAAATCCATACGGATTA AAAACTTGGGTTAACAACAGAAAGT  
ATCACGTTTTGATACTTACCACCGATCATTCACTTCGAAACGTCGTTAGTGGAATTTATG  
TAGAAGTTCATACTATGTTCAATGATGAAGCACATAATGGTAGTGGGAAGCACTTCCACA  
TTGCTATATCTCAAATTTGTCAGTATGAAAAAAGGAGCTACTTCTAGACAGCTACAACCTC  
GCATGGGTCGTGGTGTATCACTTGACAGAGGTATGAACAACACCACAGTATATGGAGGTC  
TGTTGTAGAATGTTCCCGTACAGGGACTTATCAAGTGTGGTGCTAGTGTTCCTCCCTAATA  
TTATGCCCTTCGAGACTCGGAACTCAACCACTCTTGACAAGTATAACGCTCAGGAGATTG  
ATGCTCATAACCTCAGAGATTTTATCGATACATGCGATGAGAGTCAGACCAACAAGACTG  
TAGTGGCATCGCATAGTCCAAGAGTGTTGCGTAAAATGCTCGGACTTACTAATGTTATTA  
AGAATTTCAAGGACAATGGATATGACGTTATGCACATCACATCAAAGTTTGATGATATCG  
TCAGTGGCACA AAAAGTTGATAGACAAGAGTTTTTTTACACACACACAACCTGGGGTCCGG  
ACGATAGTAAAAGATTTGTTATTTTCAACTATACAATACTTTCCGAAGGTATCCACGTTT  
CAGGTTTGACTCTTACAGTTTTGTTGAGAACCCTACATCTCATGGAGTGGGCACAAACTA  
TTGGTTCGCATCATTTCGAGTTCAGCCTGATTACCGTGAATCAGTTGGTGTATGGTACATTC  
CTGCAGGTGCATTTCAATTATTCTAATAACAGTTTGTACAAGTAAGTGTTCCTACTGGAC

AAAAAAAAATGGAGACGCAATTGGAAAAAAACTGCAGAATCTAGTCTACCAAATTGTTGCTG  
CGGGTGTTCACCTAACGCTTTTTGCTACTGAAATTAGGACCACAAAAAGATACAATATT  
CTATGGGAGTCGTAGGAATACATTTCCCACTATACATGAGAGACACCAGATGTGAGTAAC  
TTCCCCCGTTTTATTGACTAAGGGAGTATGGTGGAGAGTCATCACAAATAGGACAAGA  
ACAAACACCCGAAGAACATATTGAAAAACTTGTA AAAAGTATTCAGAGAAGTTAAGAATGT  
TTTAGCAGATGATGGCACTCTATAGGTAAACATAGGGCATAGTTATTATAGCTTTAGCCA  
TGGAAAAGATCGATCACATCCAAAACAAACAGTATCTAAA ACTGTACAAGCTGTA ACTGA  
TCAATCAAACAACTAGGTAACAAGTTAGGCGGATTCAAAGAGACAGAGCTTATTGGTAT  
TCCTTGGTGGTTAGGGCTTGCAGTACGCACAGATGGGTGGTATCTTACGCAAGTTATTAT  
CTGGTATAATCCTAAGCCAATGCCAGAAAGTAGACGAGATAGGTGCCGCCAAAGCGCATGA  
ATAAATTTTATTATTCTCTAAGAACAAGCAATATTATTACGACAATGAAGCACTGAAAGA  
ACCGGCACAAGATTAGGGACCTTGAGGGGAAAGTAAATGAAAGTTTCATGGGAATGGAAC  
TGGATTA ACTCCTCGTAAGGGACTCACAAAGAGTTATCCTACGAGGAATAAAAGGTCAGT  
ATGGTCCGTA ACTAATAAACCATATAAGTGA ACTCACTTTGCAGGATTTCCGCCTGACTT  
AATTAACCTTAGCTCCTATCAGGGAGAGAGCAAGGAAATTTAATACGTGACCCATTTAG  
GGGTAGTCGCACTACAGCAATGGGATCTAAACAATTAGATAGGCATTATATTGGTTGTCA  
ATTGCTTGAGGAGCATATATCGCTGATAGATTCAAGATTACCAATTACAGCGATTAGTGA  
CTTGATGGATTGTGACCGATAAAGTACTCCACACTATCGGTTGCATATGACCCGATAGTC  
ATTCAGAGTATATTCATACAACAGATTTTTTATTAATCAACAATCGCTAGCCTCGCACTC  
ACAATTTCTAAAAACCTTGGCTTCAGTTTATCATCATCGGGACGGTTATCCTGATTGG  
TTTGATGCACTCCTACCTGAACAGTATAACAACTAGAGTCAATTATTTAACTTCTACCA  
GGTGGCGGCATGAGATAACGTTGGTCAGAAATTGAGTATGACATTGAGTGAAACGAATTT  
GTAAGACTTGACCCTAATCATACTTACTACTGAGAGACAGGAGAGTCAGCGCCCCCTAAA  
ATCGTACACTCAAATACAGAGTTCCTAGATCATTGTGGCCACTGTAGTGGAGAATTCGGT  
TATGTCTATGATAAGGGAGAGTGGTTCGGTAATTACACTACACACCGCACTTTAGTTGGC  
ATTCCAGAGGAGATAGCAGAATGAAATTTATAGTAACAAACAAAGAACTCTATTTAAGTG  
AAGCAGGAGACGGAGTCCCTGATTTCCAATTCGCAGACCAGGATGACTACGTAATGCACC  
AAAGATGTCTCAGTAAATGGACCGCAAGAAATGAAAAACATTTCAAATAAATGATTTTTG  
ACTCCATAGGTTATCATCTAGCGTTTATTGAATCCGAGGTAAATGCAAGACAACTACCC  
ACTTCCGAAGGTGCTACAAAGACATGGTATTGAAATTATCCAGATGAATGAAGAGCAAAG  
AACATTCTAGATAGAGGACTTCATAAACATACACCCAGATTTTCCGTTTCGACAGCATGGT  
GTATGACACCCACACACGAGGCACATACCTCCCCACTCCCCTCAATCGTACCCTATAGT  
GAGAATAGTTGAAGAAACAAAGCAATACATTCCTTCTACCAGCACCCCGAATCGCCTC  
TTCTCATTCAATAGAGTTTTTCGGATTGCAGTCGCGTTCGTCACACTTTACGTCGTTACTG  
TAAAGTATTTGAATAGTCCATTCAACGAGGATAACA ACTAATGCTAGATTTTTTATCAGG  
TGTCTTAGGGGATTTTTGCTCTGAAAATGATCTACACCACATGGTTGCAGATGACCTATT  
ATATATACCTGCAGAGTCAGACATCAATATTTCTCAACCTCAAATAAATTGGTTCAACCA  
TTATATTGATGGCTGGGATATTATCCAACAAATTTCTTAATGGGATCGTTATCACGACAA  
CTCAAGAACCTGACATTGAAATTACCTAAATGTCTACGCACTTGTTTAGTGTGATGCAGA  
CCGGAGTAGAAAAGGACAGGCATCTAGGTGCCCTATCAGTTTGCAGAGGAGTGGGTAGTAA  
ATGGCAAAAACGCTAAGGACAAGGAATCAGAGTTCAGTATAATTACTAACACAACCTTTG  
GCGTTTGGACATGTGAGGTCTGACAGTACGTTTAGTGTACATAGGTTCCCTATTCATAT  
CCATTACTCTCTGTAAGGATGCCATGACTAAAACAACCCCAAGAGAAAAAACCATTATGA  
AGTTGATGGA ACTGGTTATTGACACACTTAAGTATTGTCATGATCTTGATGACCCCGCAT  
TTGAAATGAATGACGTCGTGAGCCACGCATTTGATAAAGAAGTTCGCTATCCTATACTGT  
TTTAAATAATGAATCCAAACGACAAGAACAACTCGAAAAATTCGGTATGACTCAA AATG  
AGCTGAATGAACTAAGATACCATTATGTTGACAGATATCTTGAAAATATGTCAACTCAGG  
ACTTAGTCTAGTATATCTTCCATGACTTGCTCAATAATGTTTCAGATTCAATCAGATGTAA  
AATTTGGTAATGAAGCGCTAAACTATTGGGATCATCCCCATGCTGATGTTGTC ACTGACA  
TCAAAGAGTATGCAATAGTGATTTTAAAACCCCTTAGAGGGAATAAGAAACAATGACT  
AGATCAAGACTATAAAATAA ACTTATCAATTTTGTATAGAGGCTAATCTTGATGCTACA  
TTTGTGCAACAATCTGAGGGATTATCTTATGTTTCGCTTGACAGTAGAAGAGGATTTTGAA  
GAATGACAAACACTGACCTAACAAAAGGACATTTCAAGAAATCTATGATCCAGTTAGGG  
ATTTACGTGATGAAATCAGAGAAGACTTAAA ACTTGATGGGGAAGATCCTGATACAGCAC  
ATTTAGATTTGTTTACTGGTGTGATGACCTTGCAAGTATTCATAAGTCACTCAACAAC  
AATTAAGCAAGTATAACTCAATTC CCGAGATTAGGAGTGACTGTTAATTATCTGCCACA  
CACTACTACGCATGGGTTACCAAATACCGTAGAATACGAATACGCCTACACAGAACAAAA

AATGATTCTAGAACCATTGCCAGTTCACATTAGTGGAGATCAACTCAATTACTTGGTAAA  
ACTCTAGAATCTACTCAGAGACATGAGTTTTCAATTCAGAACCGCACAGATAGAAGTGTT  
CCCGAATATTCAAGGTTCGAGAAGGCAACGGAGGATTTGTCTAATGTAATCGGTTACATCA  
CAAGTTACGATCGGTTTGGATATTAATAAACCTGGAGCGATTTTCGAAAGAAGAACATATC  
CAAAAGTTAAAAGATTAGAAGGATGTATGTTATGGTATATACTTAATCGATCAAGAGATA  
ACAATTATCGAAGAGGAAGAAACAATTCATCTTTAACAGAGGGCATAATGGAAACTAACT  
TACATCTATTTGCGCATAGCCCACAGGACGAGCATTACATATTTCTAACAAGATATGGG  
CTGGACGTGATCGGGCTGGGATTGAACTAAATCAAGATGCAGCATTATCAAGCCGCATTT  
ATGATGCAAACATGATGGTGTATATGATGGGGAAGAGTCTGACAGTTAAACAAGTGTC  
CGTACGTTTACCATTACACTCTATTATCCGTTATAATAATGATAATTTAACATTTTTATT  
ATAAACTGTATTTAATTGAAATCCCAAATATACCGATCTGAGAACCAGTGAGCCGACTT  
TGCAATGACATACTATAAGATATTGCACAACAATAAGGTCATGCGGTATTACTATGCTAT  
GCTAAGAATGGCACCACACTGATGCAGGGCATTATACAGATAAAGATTAATCTATTCAT  
TCAAAGGAGATTTCTACAATGGGTGTTAAATTTGACGTGTGCGCTAATTCATGAGACT  
TATAAGCAAGAAATGGAATTCCTAAAGTTTCCGATCATTACATTCATGATTATCGACCC  
GATCTTTATTACTATTGGGATAGTGCAATAGATGAGGATTATAATTTGGAGAAACGACTTT  
CCTCAAGCTTATTGTATGTACGAAATCTGTTTTGATATAGGATACGCAGAATAGAACATC  
AAATGGAATTTTACGGTGTAAAGGGTCAAATAGACTCCCTATTCCTATACATTTACC  
TTTATAATATTAGTATCTTCAAAAACCATCATGCTCAACGTTAAAGTATTTTCGAGAATAA  
CGTGAGACATTCTACAACCTCATGACACCCAGATGTTTTATATCATATTGATGCGTGAATT  
AGTGAAGAATTAGCCCTTGCTACACTCACATACCCCGAATAGTGGGCATCATCTGCGGGT  
CAAGTAAACTGGGGATAATGAGATCCCTTAGATCATGACGGAGTCCGAGATTTTGTTTAC  
ACAAGGAGGACAAAAGCATGAGGAAATTTAAGCTTCTAGAGAGAGGGGTAGGTTATAATG  
ATGTAACGATCGAGTCGAATAGCGTAGAGGAAGCTATCCATCTTTTTTATCGTGGGCAAT  
CTCCCGAGAGTGCAGTAGAGCAATACTAGTTGTTTTACGATTTTGTATTTAGAGATATCT  
GTCCAGAACGATGGAAGATTCAACAGAAAAAGAAAAGTGGCTCATTCACTTGACAGAGGT  
AAAAAACGAATTGCACTATTGCCAATAACTGATGACGAACTAATAGGAAGATACCAGAA  
TTTTGACGTTATCACCTACGACGACATTTTTAAACCATTAATGTACAGTTCCAAGACTGT  
CACATATTTTGGACATTCGCTTTATTATGGAATATGCTAGTAGCCTAAACAAAACGGATT  
TATGAACACCCTTATATAGTAACTGATGCCAAGATGAGAGTCATCAATGTAGTGCTCAC  
ATATTTGTTCAAGTCGGGAAGCAATCCAAATTACAAAACCGATTTTCAAACCTTTTTTGT  
CTATACTCAAACAAACGGAGAACTATTCTTAGCAGAGAAAAATGTCAACATCACATCCAG  
AGAGCTTTGTGCAAAACAAGAGATCATGATTCATGGACTGACTACGCAAAAAAGCATAGTC  
TTACATACGATCAATTTACAACACTTGCGCACAATTCTCACAGCGGGATTCTACTAGAGA  
TCGAAGCAGAATCAAGCAAAACATGTAAGGACTTGAGCCAGTAGGAATACGGTCACAGAG  
TTCCCCTATTCAACCCACCTATCCATTATATTAAGACTTACTACACTCAAATCAATGAGA  
TTGACTAAAAGCAAGCAGTTCAGCAATTTAGATGGGATTTGTCCGATTTGCTAAAATCT  
AACCCGAGTTGTAGGGGGGACAAAACCTGACAAGAGGTCTGTTTATAATGATTATGTAGAC  
GCTATCAATAAAGATTGTCTAGTCCCAGATTATCAAGCGTATAACTACTCAAACCCATGC  
TAAGGGGATTTTTTAAAAATGACCAGTATTGAACTTGTACAGGAGTCACTAATGCCATTAA  
AGATTATCAACTCGGGAATTTGAAGAGGGATCCGAGCCACCCTAGCAACAAATGTGACT  
ATACCGTTGTAGTTCCAGATACTGATCTAGGTTATCATGCAAACCTTAAAACGGATTTAA  
ACGCTGCAAATAGAAGAGTAAGTGAGTGCGAAAGCGACTACGGTCGGACTTCTGTAGATG  
AACGTGACCTAAAACAGTATTTCGCTGTGCGGTAGTGTGACAGTTAGATTAGTGGCCCAT  
AGTGACCCCATGCCACTAGTCTACCGTTATAATAATAGTTTATGAAACGAACTTCTAAG  
AAACATGACAATTTTAGAATACAAAAAACCTCACTAAAACGACACTCGTATGCTCGGTCT  
TGTTGAATCTGAACAGGAAAAATCCAGATTAGTCAAAGAATCCACGAAGTTGACAATTT  
TCAAATGTTGCTTGTCTCTGTGCAGACTGCTCAGTATATGTAGGAGAGTAGGCAGAGTG  
GGTTTTTGATGGGCGTTCTAAGGTCGTTTTTCGATGACCATGATCTAGACATTGCTTAAAC  
AGACAGAATTATCAAACCTTACGACGGATACATTAGGGGAGTGTAATGGAACCTAACCCCT  
AAACAACCTGAGTATATCATCGGTAGTCTCAATTTCCATTATGCAGAGAATGAGCATATC  
AAAAAGCGCATGATAGAACTTAATGCTAGTATATGTAGTCTAGTAGCACACCATCCACAA  
GAGACTTACAAAATGACTAGAGCAGAATACGAGTAAGTTTTTGAAGCATATAAAAGCTA  
GCGAGTTTGTATCTCAGATGAGCAAGAAGTATTAACAGACTAAATTCTAGACGATCTTAT  
GTATCCCGAAGACGGTCAACTAACGGTAATCGAAGCGAACGCAGTAGTTTTACCAGTTTT  
AGACATTCCTAAGGTATCGGAAACGAAACATCTGAATTTAAACCACTTGATTTTGGATA  
AGTCAACGTACCTTATGACACTTTGATTCTGGGCACCGGGTCTCCGCATTTGTGAGCCGC



CAGCCCTAAAGTCATAGTATAATAAACACCGAAACCTTTTTATTAGGGGCAACGTCTAAG  
CAACAATGAACTCAATGATACGCAACGCTGTAGCATGGTACTACTTGCCTACT  
CTTACGTTAATGATGAATATTGCCTAGTCTACCTTCATCGCAAACCTGTGGTAACTATAG  
GCGACTCATTCTGGCAGTCTTTAACGGAGTTTTTCAATCAAACACAAGTAAGGCTAGAC  
TCCACGCTTTTTCTACACGAATTCAGACCGCAAACAAAAGTAAACGATAAAAACTTTCAAT  
GGTTAATCAACGCACATAATATAGCATTGCCATTTATCACAGAGGGTTCAGGTATAATGAC  
AGTATTGTATGGATTTAAAAAAAAGTTCAACAGGGTCCACTTTCCACACTTTGGGAGAAC  
ATTCTGGATCGATGACATAAGCAACGTATGTTTCATGACCAACTTATTAATATGGTTCTAC  
ACATTGGCATCAATGGGATTATGCTAGTGAGTTGAGAGTTTTAGAAAGGGTTCAGCTCGA  
GAAATTACTTGATGTTGATAAACTTGTCTAGAATAAGAATAATGATGGTACGGAGGATTT  
TACCTAGTGCCTCATGTTCTTAACGAGTAGTCGGAATTAGTTGAAATTGATAACCAAGTT  
ACTCATATAGATAAGGGAATCGACGTCACCAATCATGCAATTAATCCTGTAAACCTAACC  
GAGAACAAGGATTATACAGAGTCACTATATAGAGTTCCATCGGAATTGATTAAACAACCTC  
AATGACATTCTAGCACAATTCCCAGATTATTCAGAACAATACCAATATGGGATATAATCA  
CATTTATAGGAGTGAAGGGATTAATCACTTTTTAAATATAAGGACTATCTCTCCTTTTGCA  
ATCACCAGTAGGAATACACAGATGTGGACAGAAAACACTGCCGAAGACAATACTTACAGG  
ACAATGTTCTCTTTTACCGACAAGAACGGGGTATCCTTCAAACCACAGAGGATGTATGTA  
AGGATAACGACAAGAGAATTGACTTTAATATTATGAGATAGTTATCGGAATTATTGGATA  
AGACAGCGGTGAGATACTAATGCGGAAAATAAACCTATATTGAAAGAAATCTAAGTGTGC  
GTTTTATCTGTGCGTCAACCTCTCAGAGTCATGCACCCTCAGCACGCATCTCAAAGTTG  
TCAAGTCATTCCAGGATATCCACATTTTTCTATTACGCGGTGAGATTATTGGGAGTTAT  
GCCTTATAATAACACTGTAAGGGTTTAAACAAGTCAACTGCTTGCCTTCAACTAAGTCTAA  
AATGATCGACTCACTCGATAACGAAGAGCCTAGATAACTAGGACAGTTCTCTAGTATATA  
CGGAATGAAGTTATATGTTTAGGATCTCAGAGTCGAGAGAGACAAATCGTGCGTACGGAA  
GAACCAGGTTATAAGCGTATTCGATTATCTCTAATCAATCGGTTATACTTGGGATTGTGT  
CACTAGTTCTCAGGTAGGAGAGAGTTGACAATGTAATTACCCTATGCTATAATATGAGTA  
AATCGGAGGTTATCCAATTGTAACACGTAGAACAGTTACTGTTTATTAAAGAGGCAGTCT  
TATAAGACCCCTAAATGTTAAAGTCGCCCACTTCCCTAACGATCAAAGGTTCCCCGAGT  
ACTTGATAGATAATTCATAATTTTCAATTTACATCAATATTAAAAAAACTTTGGAGAATAAA  
AATGCCCTAGAGGGCGATCTAAAAACAACAACAATTTAGTGGTTCGAGAAGAGCGAAT  
AATATGGGCGAGTGATCAACTAGTCAGACTGGAAGGGTATGTAGGTAACGGAATGTATGA  
ATGTGTAGGACACGGTGCCTCTATCTACAATTTAATGAATAAGGATTCATATATTTCACT  
GTGAACGGATTGGAAATGGAATCATCCCACTACATATCCCCCTAATTACAGACTATGGAT  
CAAGAATTATGTCCCACGAATTTACATAAAGACTCGCGGAACATGATTATGGAGACTTAC  
TACTCACTATCCCCTATGAATTGTGTCAAGAGATGGGTTGGCACGGTGGAGCTGTATTAC  
AATATGTAGGGAATGTTTTTGGAACAGGTTTTTTTTTCAAGAATGTGAATGACTGAGAAC  
GATCAAGACGTAATTTCTACAGCGTTGAAAGCTAATAAGGAAAGTTTACTTGATCTCAAT  
AAAGGATTAGAGGCAAGAAAGAATCATCTTTCCGAATTACCAACGCCAGACAAAACATAT  
TACAAACCAGAAGGTGAAGGAGAGTACCTAAAAATCATACGTAACTATGCCCTGATATAT  
AAACGTCTTAAGAACTGCAACACGGTTTGTAAAGATGACTCCTAGAGGACAGAACCATAT  
CTGTAACCTAATTTCCCTTGACGATACTCTCTGTTAGACTTACGATCCTGAGGCAACAGG  
GCAGGTTTTGATCACTTACAGTGGATATCCGACTTCAACAATTCAGATAAATACCCAATA  
TTACGTATCTGCAAGAGAAGATAACTTCCCTCATCTATAATGTTGCCGAAGTATGTCGGAA  
CACTGGTCAATCATATACTCAAACAGCAGGTGCATGTGGTAGGGTATTTAATGGTCATAG  
TTGTGTCAATAAATAATCTTGTAGATTATCCTTTGATCATATCCCTTCAGACCTTTGTTT  
TGAGTCTGCACACTCTGACGTATGTTTCTCATACTGATATGCTACGTCTGTTAAAGATGG  
TCATGTATAAACTCCTGCGTATTATGTTGTAGATGGGATAAAAAAAGGAGTGGAGGATC  
TGGTTCTGTGTATGGAGGTGATAAACATACCTCTTAAACTAAATTTTTCACTTGCAGGTG  
CCAATTTTGTGTCACCGCAGCGACCACAGAGCTTACGTGTACCGCTCCCATAGATCATA  
GGGCGACCCCGACTGCCCTCACCACACTATATTGGGGTTTGGAAACACATCTCACCACAT  
CGTTTTCAAGAATGATGCGCTATGCGCACAGATACCAATTGGGGAGATGGACTTTGAGGT  
GGCAGAAATGGGTTTCTATCTGTACTGGTACAAGAAATGAGAACCAACCACAGGGAAT  
TCCATTCCTTTCCACTGCAGATAACAACCTGGGTAGTGGATGCTGTAGCAGGTTTCCAGGA  
TTTTGAGATACATGACCAAATGGAGCACAGATGACCTGGGGTTCTATTAACCTATATTA  
TCATGCAACTAGAGAACTTAAGTTAATGTTTCGTATTACTCCTAATCTTCTTGATGATCG  
CCCCCTAACGGTACTAATTGGGAGCTAGCGGTGGTTATCAGCAATCGATCAGGATAGCC  
AGTAGTTGATACATTGAAGATCTCCTATTTACATATCCATACAAGCGGAAGCACAACCTAC

AATTCAATTACAAGTTAGGGCAAAGCTGGAGGATAAATCAATTGAATATGTAGTTCATC  
AGGGTTTGACCTACTGAGAGCGATTGATTCTATGAACGGACTTCCATGACCCGCGTGTT  
CCACACAGATCGAGAAAACCTTCAAGTTTCATGTCGCCTACTTAGAAGGAACCGGTTATAA  
TGTTGCAAAGATACTCAATATCACTCAAATAGGGGCGACCAAATCACCACAATAGCAGA  
AAAAGGCATTCCCGACCGGATATCTTGAATGGAAGGTATGAGCTTATCGATAAATCTAG  
GCAACGTGTCCCCGACGACGTAGATCTGGACGACACCCGACATCTATAACTCCATAAAACA  
ACCAGATGTAACACTTACAATAACACATGGACGCGTAACAGGCACTAACTTGTCAATGG  
ATGGACGGGTTGGGACCCATTGGAGGAAGTACCTGAACTTCTTGTACCCGCAACAATCAT  
TGAGAGTGGAACAAACGCGAAACCGAAGGTTACGTGCTCTAGAGGAGTGCTCACAGCGTA  
AAAATAACAATTGCAGGTAAGATATGACGCGAGATAATGCTCTATTTCGCACGGAAGCG  
CAATATTTTCAAGGAACTTCCCAAACCTCAAGACAATCTTCCCAAGGATGACTTTACTCC  
CAACACTTCTACGCAACAAGTTATCCAAATTTGGAATAATTTACCTAAAGCGGGGGTGA  
TCCAGGGGATGTAGACCAATGTGCGACTGCTCAACCCGAACTTAACAAAGTTTGATACA  
ATTAGGTCTTACAGATAGTGAGATTAGAGGAGTCTTACTGATAATCAGGTAAAACGCGT  
ACAAATGGACGCTTCTAAGTCTCCAAAAGTGACACAAACCGAATTTGCGTCTCTAGATGC  
GACTTTAGACATCGAAGAAAGGCATACTTCTACTGAATAAGCAACTCGTATCAATATTAT  
GTCAGCACCAGTCAGTCGTAGAGTTCAAAAACCTAGGACTATGAGGTTATTCCGCTAGGTC  
TTTGGATACTCTTCGTTATCCTACACGAAAGGATCAGTATGGTTCGAGCTTCTTGTACGA  
TGCTGAACTTCCCGACATGGTAAAAACCTTTTTGAAAGATGATAAAGAGCAAAGGGTTGC  
AGACAGAGATGCGGTTCTCGTTGGACTGACATAAAAAGTGAGTCCTGAGTATACAAACTG  
TAAAGAAAACCTTAGTTGAGACTGGTCAAGGGCCGTTGGTCAATCTTCTGAGGCAGACTC  
TGGGACTAAATATCTGATGACAAAGTTAGGTGCGGACCCTACGTCAAAGTGAACATAAA  
CGTTAGACTTTATATGACACCAGTAAAGTCGTATAATTCCCATTTTACTTGTAAACCCTCC  
TGCGACTTCAACAGGTGGAACAGTCACAGGCGGAAATGGTGAAACTATTGTAACATCGTA  
ACAAATGTCAAGTTTACACGGCCCTGGTAGTCGAGCGAGGAGTTGTAGCGGAACGTTATC  
TGTTCAACATGAACATGGACGGGCAGGTGATAATGCTGCCCGTGCAAGAGCAGCCTACGG  
AAATCCTTGCACAATGATCTACTGGCATTCTGTACCAACAGCATCAGGGGGACTAGGTTGT  
GTATTATTCACGGGAACATACTGGACCCGGAACGGGAACAGTGCCATCACATCATCCT  
GGTCTTGGTGGGGGAGTATTAATAAGTTCTCCTTGTCCACAAACGCCTCTTGATCAAAGC  
ATTTCTCCCAAATCACTAGATGCGATGGATGCTACAGCCATATGGCCTCCGCATCCGCAA  
TTACCTTGTCTGCATTAGTGCGCAATGGGATTGTTAATGGTATGACGCCTAGAAAGGCT  
TTCGCTCTTCTTAGTACTACCCTACTCCAACCTCTCATACTGTCAGAGTTGTTAAACCA  
CTTCCAAATGGTGTATGTGATGAAGCTACATCTTCTCCTGCGTGGGACTGTACAGTAGGA  
ACTACGGGTGGTAGAGAATCAGCACCAGGTCATGCTGTAAAATTACTCCCTACTAGTAAG  
ACCGTATTCCTCAATGGTTCGTGGAGCAGGAAGGTTTGGTGATCCTCTAGGTGGTCATA  
GTAGCGTTTCCGTGCAATTCGCGTGTTGAGGGTTGCAGACCAAATATATTACAGGAACT  
TAATTATGGCATTGAGTTTTTACTTCGGTAAACACCATTGAGCCAACCCCAAAGAAAACAA  
GACCAGGTAGAGGCCAGCATAGAAAGTATGTAGCGCCCTCTCGTAACAAATCAACACAGA  
GGTATCCTTGCCAAGGGAAATAGAATTGTAGACGGTAATGGTAACCCAAACAATCCTGTA  
GACGGGTGAGATCATTTTTGTGAACATTAATATGAATAGTGTCGTTATTTGAGTACTGAT  
CTATGTTCTGTTAGATCCATTAGTAAAAAATCTGATGAAGACACGAAAGAATACTGGCAC  
TTCTCGTAATAGATGCCGTTAAAGAAAGGATCAGATAAGGAACAAACGAAATCGTGCTCC  
TTTACGGATCTCGAACTTGGTATGGTGGACAATGTGAATACACAGTATGTGGCTGTCGTG  
AAAAATGAAAATGCAATTATACAGGCGAACAAAAATCGAATAATGACCACACCTCGTGAA  
AAACCATATACCTCTGGGAGGAGCTATTATATCAAAATTATGAATTAACGGGTAGAC  
GATTATACAAGTGCTTCTATCTACCAAGAGATCATAAATACGAGTAATCGGTTTAAACCT  
CGCGTACGTTTGACAGGAGTTAGAGTACAACCTCGGCATGTTACAAATACATTCAATGTA  
GCGATTGCGTTCAAACAGTTGGACTCCCAATGAACGAACTATCGCGTACGTATTAGAG  
AGAAGTGAAGTGAACCAATAGCCTCACAGCATTAGACTTTGCAGATATCAAAGCAT  
CAATCAAATCCTATCTGAGAAGTCGCAACGAATTTACGGGTTATTACGGCGAAGTATCTT  
CTAATCATATCTTATCGACACATTACCGTATAATTAATATTATTCTGCATGTAATGCCA  
ATAAGGCGATGAAAGAGGCAGTTCTGACTTCTGCTACTATTAGAGATAATGTTGTTACG  
ATGCAAGACTTTTAAATTACGTTCCACGTTCAAGTACTTCATCTAGAGCATGCTTAAAC  
TCGATGTCCAAACAACACAGTCTGCAGGAGCATATCCTTGCAGTATAACATTAAAAATAG  
GTGCTGTTCCAGCGGGTCGAAATTATATGATTAACATTTTTCAAGATCTTAGTACTACTA  
TCAGACCTAGCACAGTGATTTGCACTTTTGCCGATGTAAAGATCATGGAAGGTAGTATAG  
TTACCTTCTATACATTGTAAACACCTTTACAACCTCTGGTGTATAAAGTCTCTTACGAAG

ACGCAGACCTATCTACTCTTGGTGTAAGAGGAAAAGATAACACATTATCTAAAACATCAG  
ACTTAAACAGTTTGACTTACACAATCACTGATTTGACTTGAACCACCCGAGCAAACCTCC  
TCAGTGCAGGTGGACATAAGCGTTAAGAGGTAAAATTTGGCGATGTTACTGCAGGTAGAT  
CTTTAAACGTTGGAGAAATCGTACTTTTAGAGTAGTTGGTCCCTTCTGGAACAGAAGCAA  
ATGAAATTACAACATTTTCGTTTCATAGGACAGATTACAGACAATATCGGAGGTCCATCTA  
GTGGCACTTGAGTCATTCTGAGCATGAAACAGAAGTCACAACCTCGGTGCTGCCGCAGCAG  
CTAAAGAATCTAGTAAATATATTGCAGCCAGATTCTACTCTGCACAATACAGAGCAGTAA  
CAGCACAAGATTACGCTTGAATTGCTTGAAGAGATTTCTAACGTTGATTCTGTTGCTG  
CATATCGTGGGAGCTCTTTAAATCCCCCAATTTACGGAAACGTCCTTATCGCAATCCAAA  
CCCAAACCGGTTATTTACTTATCGACACAACAACAAGACAAGTTCTGCAGATTTAAGAA  
AAAATGCTATGGCATCAATCTATCCCGAAGTTATTGACCAAGAACAAGTGTATTGGAATT  
TGAAAGTCTTTGCACAATACGATAGTGGCACTGCATCCACTACTGCCAACATTTAAAACGA  
ATATTCAGAACGGAATTAACGATGGGGCAACACAACTCAGAGTATTCACATCAATTCTA  
CTTTCAGACCACAAGTCTTTGAAAACGCGGTGACTTTATCCGATAATAGTATGAGTGATG  
TGTCTTTACAACGTTCTATCTTAAAATACATCAATCCAAACACAAATCAGACTAAGACTT  
ACCGTAATGCTACTGGTGCTGATTTATATGATAGTGCTGCAAGGAACTCCGATGGAAATA  
CTTGTA AAAAGGGACCTATATTTGTTTAGGACTTGTTAGGACCGTAGGTAGAACAGAAA  
TTGATCAACAGTTTGAAGATGATGGTTTTGGTATCCTAAGAACACTATATAACACCGCTA  
ATAGGCAGGTCTCTACAAATAATGTTGCAGGAACTCTAAAGTATGCTACACGTGAAATTT  
CATTTGCTCCTGTTAATACATTTGGTCCATGTGCAAATACACCTCCAACTGGATTTATAT  
CAATAACAGATTCAACAACCTGGTGCAGGTTCCGTAATAAATGCCGATCTAGTTCCTACAG  
TTCTTCATATTCCTGTTCTATTTATTCCTGCAAAAGTTGCGCCTATTCCAGCGGCAACAC  
CAGGAACAATTAACGCTATAATAAACCCAGAGGTTACCTGTGTCCCAGGATGTTTCGATAC  
CACCTCCAAACGTTACGTCTAAACAGTTTGGCGCCATCAGTGGTTAATATGGTTGCCACTC  
CTAGTACACTTGCTGACATCTCAGACGCAGGTGATCTTACATCCTTTTTTTGCTTCTCGG  
TGTACATGAACGTTAATCAGGTCTCTCAGTCAGTTGATTCACATACTCCAGATTTTATTG  
GAAACGGTTATCCATTTTTCAATGAATATATTGAAGATTACTATCGTTCTCAAGAAAACA  
CTAGTATAGGGCAGAATATTGTGAGTGGTTTTTACAATTTCTTGATATTGCTAAACGTA  
ACATCGATAGTCTTGTGGTGCTACAAAGTTGGGTGAATCGACCACTAAAACCTGCTCATT  
AGATATTAGTTGAACACATTGACAGTTTTTAACTACAGATGGCTCTGTTTTAATTGTTA  
ATGAAATAGTTTACTATGAATAGACTACAGCATCACCAAACATTACACTGTGCCCAGGTA  
TTTCTTAAGAGCAAGTTATATTA AATTGGACACCTCATGCAAGTCTTATAGATTCCTTTG  
ATGGCACTACAGTTATGTATACTCAAACCTCTCAGATCAGTCCAGTAGCAGCAACTTCAG  
TACTGCCTAAATCCTTTCTCTTTAAGGAAGAATATCATCCCCTGGTATTGATTACACAG  
TTGATGGCACTGCTATTGTCTTGACTATTGTTCTAGGACAAAAATTCCTGCAGCTAACT  
TCCCTTAAACTAAGATTCGATCAAAGTGGTGTGGTTGAGAATAAAAATTCTTGAAATAA  
AGAATTCATCTGGTTCTTTCCGTGACGTGAAGAGACAGTTTACCATGACAAGTAATGTTT  
CACCTTATGCACCTGTAGTAGGTGAATATGTCTTGGCAATTTACAATCAACGTCTAGTAG  
TTCCTAAAGTGTCCATCTTTACTTAAAAGATCGGTTTCTTGTACTTACAGCACCCTCA  
ATGGAAGATTTCTCTCTATGCTGAATTGAAGCACCTATTCCTGCATTTGGTCCTGATG  
ATTTGGGGTACTCTCGTGTGACCATAATGGAACCTTAACTTGCGTTTCTGTAGAAGAAA  
ATGGTAGTAATTCTCGTTTTCAATACCCTCCTCAATTCACTCTCAAGTCCCATGCGGGTA  
GCGGTGCTCGTGTGGCTACCCTAGTAAATGGTATTGAGACTTTATCACTTTTAGATGGTG  
GTAAAGGAGACAGCGCTACTAACCCTCGTTTTATTCCAGTGCAATCACCACAAAACCTG  
GTTCTGTAGCAGGAACTTGTAAGCACCTGTA ACTATCGGTAGTGTGTCTGGCATAGAAG  
TTATTAGTTCTGGTAGTGGATATACATTTACCCCTACAATCAATTACAAGCAACCTGGCA  
GCGCTAGACTAGGCACCTGTCCTGTTGTAGGAGGTCAGGTATCAGGAACTATTCTATCC  
CTTATAGCGGTTTCGGATCTACTACAGTCCTCACCCTTATATTGATGAAGCAACGGGGG  
CTAATCCTATTAGAGCAACTCTAACTCCTGTCTTGAGGGTTGGCGTAATAACTTGTATTT  
CAATTAATAATGCCGACAAGGTTACTTCACTACTCCTAGAATATCTCAAGGACGTCCAG  
TTGGTACACCGGTCTTGTCCACCACTGTTGATGCTAATGGTCTGCTTGTAGGAATTTAGT  
TATTAGATGCTGGTTGGGGATAGGATGACGTACCCTCTGTTTATGTCTTAGCTATTAATG  
TCGATGGCACAGAAGCGTATCCATGCGGAACTGCCGCTACTGCAACTGGTGCTATATTCA  
ACGCCAGA ACTACAGATATTCATAATTGTGCTTTTGATTCTGGTTATAGTGTTCCAAACC  
ATCCTCAGATTGATATTCAAGCACCTGCTCACGCATAAGCTTCTGCAACAATGGGTCTTA  
ATGAAGTTACTGGATTTGAATTA AATCAGTCAGCTGAAGGATATTCCAAATCAAATCGAG  
GCGGTAGTGCAAGGGCTGCGAGTTGTATTACTTATTCTACTGAAGATGGTAATGCTGTGT

TTACAAATAACACTACAGCAGCAGCACATGGGATTAGTGCCGATGTAAAGTGTCTATGTG  
CTTTAATTGTAGAACGTTTACTAGACAAAAACACTTAAAAGTTGTTAGCTTATGTTCCAT  
AACTCTATTATAAAAAAAGTGATGTTAGAACAGAAAACAAGATTATTAAGACTTCTATA  
CGGACCAAGGAACATCGTTAAGTGTTAGTTACATCTGTAAACTTCTATACGGTGAACAGC  
TAATTATTGCATATCCAAAATAGCAATTTACCAATCCCTCTGCAGCAACATGTTTTACAG  
ACACTATTTTGCCTGCAACTTTGGCAAGAGGAGATCCTACGAGTATTAGAGACGGATTAT  
TAACTCAATATGCTGATATTACTTACGCTAACGTGGTTGGCGCGAGTGCTTTCTTTGGAA  
ACTCTATGTCTAACATGACCTCTGCCGTCGAACTTGTGCAACTTGTCTATCTGAAGACC  
ATATTGCCTCTTCTTTTACAGTTCCTTATAAAAACAAAACCTTGCTGAACCTTTAGGCTCTG  
AACACAGTATTATCCCTGTCCCCTCTACAATTGATTGGCCAGAGCGAAACGGTTAGTTAT  
TAGTAGATAATAGTGAAGTGGTAAGATATAAAGAAAGTTCGCTCAACCAGTCTGGTGCCT  
ATACACGTTATGTTAATAATAATGTTGAAGATTGGGATTCTGCTACAGAGGGTGCTTCTA  
ACTTCTCTGTTTTTCGTTAACAAGGGCAATCCTCAGGAAGTTGTCTTGACAATTCTTGGA  
TTGTTGATGCTTAACGAACAACCTTAGTCATACTGGTTCAGTTTACTTACCTGGTGATC  
AATAAACGGTCTCTAAGTTGGGTGGAATAGGAACTAATGCGGAACTTACAACGTGGTGTG  
AGAACGTAAAAAAATTAGTTAATATCAGTAGTATTAAGTTTGATGGTGAAGATGATCAGT  
CCGCAACTGATACTTGTGATAATCATCATGGTTTGTAGTTGGGGAACAGGTTAACTTAT  
ATTATGCTAACCCAATCCTCTATATTGGAACCTTCTCACTTACATCTAGAGATAGTAATA  
CAGTATTCCCATATGAATTACCACAACCTGCTATAATCTTATCTCAATGTAATTTTCTTG  
AATCTGTTGTCTCAATAAAGGTAAGTCGGATGATACAGCTGTTTTAAATTGTATCGGAC  
GTGACACAACCTAATCTTCAAAAATCCTTTTTCTATAAATACTACGTTTACGTTCCTTTTA  
CAAATATACCCAACGAAAAGTACAGCCCCTTACCTGGTTTTGCTAATTTGCCAGGTAAGT  
AACGTAAAGTTAACTTTTTTCCCATTAGCAGTAACTACAATTTCTACAAAGAATAATATTT  
CACCCGGTCGTATTGGAACATGGGTAAATGGTGTGCTATATGGTCATATAAGTCTACAA  
TCAAGAAAACCTTTCGGGGCTTGTACTGATCTCTCTATTTCTAACGGAGGTTACAGGATATA  
ATGCTGCGTCTCATCCAAAAACACATTTTCTGGTGGTTCGAGGAACTGGTGCCACATCTG  
GTGTAACCTGTTAATGGGTCTGTTAAAGTAATTACTCTAACCGCAGGTGGATCTGGATCTA  
CTTCTTCTCCTCTAGTTTCTATAGCAGAGGGTGGTGGATCAGGTGCTTCTGCATCTGCAA  
TCAAACTAAATGTGATGTATCTAGATTCTTGATTAAGTATGGTGTACAGGATATGCAC  
CTCAACTCACTATTACTATGGTTGGTGTATGGAGGAACTGGTGCTACTGGATCTGCATCTG  
CTCGAGGTCTTCAAGCTGTATCTGTATCCAATGGTTGTGCGTCATATACTTAAAATC  
CTACTGTCACACTAAGTTCTGTTAGTGGTGTGTTGCTCCAGAAATCGTTCGGAATGGTC  
GTATTATCTCTATCGCTGTTTTTTCTGCAGGTTCTGAATATACTACTGAGACTACAATTG  
ATATTGAAGGAGAAGGTTTCGGTGCTGTTGCCCGTGCAACGATAGATGTGGCAGGTGAAA  
ATGCAGGTAGAGTTACTAGTATCTAAATATTCAACAGAGGTATCTGCCATGTTCAATGTA  
CGTTTTTATCTAATTTAACCTCTGTAGGTTGACTGCTACATCTAAGGCAAGCGTAGTCC  
AATGGGCTTGAACTTACAAGAAAGATCTACCCTCGATGCTGCAAAAGGCGAAGTGTGTTG  
AAGGATTTAATAACAACATGGTGGTAAAAATGCTCACTTATCAAACCCACAAAGAGTTA  
CATATCTTCTTGATTATAATTTATTTGAAATTAATGCAGGGCTAGTCAAACAGCAAGAAA  
CTCAATTAGCACACGCAACTATTATTGGTTGAGCATTGGATGGTAACCCAGTTTATTGTC  
CATATCGTTACTCAGATCGTACTGTGCTGCTTTCTGCTATTGCTAAACTAAACATACTT  
AACAACTAAATGCAGAAGTCAAATAAATTGCTGTTACAAACCAACATCCTGTTAGAACAG  
CAGGTCCTCTTCTTTCTGCAGAATCTCGAGGTGGGGATTTTGAAGATTATCAATCTTTTT  
GTGGTCAGGCTGACTCGGATCATTATAAGGGGCCTTTGTGGACGACACCTGAATATCCTA  
GTGGGAGACGTTGCTATTTTTCAACTACTGATTCTACAGCTGATCGTTATCCTCTTTTCC  
CATATGTTGTTTCGTGCTCGTTGTAACCTCTGCTGTTGATACTTGTAATTTAAGTGCTCATG  
CTGTTCCACATACTATTTCTATTGCTGTTTTTTAGATATCGTTATCCATATGAGAACCCTG  
TTATAGCCGTTGAGAGGGCACCAAATGCTTCTACCTACGCTATAACCCTAGAGACGGGTG  
ATTTAGTACTATTTGATGTGGAAGACGAAGATTGGAGTGGTATCAGTTATCAGAAGGAAA  
CTGACGATCGATATCAGGTTCTTGATGAACGTCTATTTCAATTATTTGCATATTTGCCTA  
AAGTCAAAGTTGATTCTAATTTTGAACATTGAAGCTGAGACAACCTGCTACATTTAAGATG  
TATCAGTAACAGGATTTACTATTTCAAATGTAAGGGCAAGTTATCAGGTCAATGACAGAT  
TATTATTTTATAACTGATACTGATGGTTCTGGGGTTTTTGTCTCGTGTCTTCTACGATCC  
AATGTGAATCAGCATTATCGTGAGGTTGTGAGGATACTAGTAGTATAAATTGTGGTCCAC  
TTAAAACCTACAATCCTCATAATTTAGTAGCAGGTGATACCGTATTTGTTGATTATCCC  
CTGTAATCGACAATACTAACAAGTCTTATATCGTACCTCAAAATCAAGGTATTTAGGATG  
TTCAAATTAATCATACGGGATCTGGCTACAACACAGATATTCCTCCCACAATCTTTATTG

TTGGTAACGGATCTGCGGGTAGTCTTGCAGCGGTTGTTACTAGTGAAGGTTCTGTCGACA  
CTGCTAGTTTTCTTAATTAGCGTGCTGGATATACTTCCAACCCTAGAGTAATCTTAACTC  
ACCCACAGGTATACAAAAAGCCGATAACTATGTTTCATATATTA AAAAATGAAAATTATG  
CATCGGTAAATGATGTAAATGTGAATGTTAATACGGACGTCTACAATTGTTCGTA AAAAGTG  
ACAACATATCTGATTATCTTGTGCTTATGATGCAAAACTTTCTGCAAGTGGTGTAAAG  
ATTGGGAAGCGACTTTAGAAGTA ACTGTTGGTATCGATAATGCCGAATTCCAAAAGTTAT  
ATGTTGATGGGAAGGATATTTGCGGTGCAGGTAGGA ACTATCCTAACTCTCGCCGTTTAA  
ATGCATCCTATCCAGATATTATCTTGGTTAAGTATGTTTAGGCAGAAAATGGTCTTAGTG  
TAACACTGAATTTTCAAAGAGCCTATGCAGGTAGTTGTGGATCTACTTGAACAGATGAAA  
GTA CTGCACTAAAAAATCCCTGATATTAGATTTTTTATTTGTAGATATACAAATACTA  
ACACTGCTAATCCTGACGATGATTTTATTGCTCTAGTTGATAACTGGA ACTTGTGCTA  
TTAAGAGAAAATTTACATCAGCAAATAGGTCTGAAAAGGTTACTGAGCTTGTAGTTAATG  
TAAGTGATGGATATTTCTGTCTGGAGATTGCATCTGGTGT TTTCTGCAACTGCAGTTAACG  
TTGCTTTTGGTAAAGCAACTATGAGAACTAGTGCAATTCCAATT CCTCATATCAAACGGA  
TTAGTAATCAAGTGTATGCTGTCTTAATTTGTAGTCTTGAAATGGATGAGTTTGAGGAGG  
CATATATTACTGCTGCACCTAGACACATATCTGCTAATACTACA ACTGACTGGCTTGTGGG  
TAGGTATATTTAATAAAACTAGCGATGTA ACTTACGATAACGGATATACTGTTGCAGGTG  
GATCTGCCTCTGCAGCAACTAAGTGTGATATTGTTATGTTTGGT GATCTTCAGGTAGCAG  
TTATTA AAAATTGCTACA ACTGATTCAGTGCGAACAGCAGAGTGTATTTAAATCGGTTATA  
CTGGCATAATTAAGTGT CATACA ACTCAACATTTTAAAATTAATAAAAATTGAATGTATTA  
CTGTA ACTTCTCTTGCTGTTGATAACTCTGGAGATGTTCTTCTATCTAGGCAAAGTTGCT  
GGAATAGGAATGAATTTATTTTCTCATT CAGATCTGGATCTACCACTGACACAAGTGGTC  
ATTATACTTTAACTTGTACATTA ACTAATATGTGGATCAGTTATGCTGATAATGTGGCTA  
ACATTAATGGCTACAACCCTGCAGGATCTAACTCTACTCGGGTAAATTAACATCTTAAAA  
TTACTTCTTCTCCGTTAGGAACAAATTTAAATTAAGAAGCGGACTAGTGAAGTTCGACTTT  
ATAAACAAGCAAGTTGATCTAAAACATTAACCCAAACAAAACAAACATTAGTTTGTAGTG  
TTGATTCTGAAGACGCGCCAGGGGGTATTTTCGTTATGCTATGATGTTTCTAGTGGAAAAC  
TGAAATTAGTAGTTACAAATGACACTACTAAATTA AATTAAGCAGGCTCTCCACTTCAGT  
CTACATTA ACTACAATGATTGTTGATAACACACTGCAATACATTGGACTTAAGGGAGAAC  
GTAATCAGTCTACTGCATATGTA AATGGAATTCAAACTTTTACAGCAAGTGGTTCCTTATA  
CATCACTAAACGGTAAAGATCTTCTTGTGGTCAAATTACTGGTAGAGAAGGAACTGCAG  
GAACTGTTTCGTAAGAATAAGCACGGTCAATACTTTAGTGATACTCTCAA ACTTTGAAATA  
GAGCAGCCACTCCTGGCGTACCTCCTGATTTAACTTATTACCAACTACAGGTGCTTTTG  
CTTTTGCATCTCCTTGGGTTGATAGTGGATGGTTTACTACTAACCTTACTCAGTATGATT  
AAATTTATTACATTGGTTGGGGTCTTAAGAACGATAAAAATGCAGAGGCTGCAACAATCG  
GAACTCAA ACTGTTCAA ACTAATAGTTAAGTTGGAATTGTTTGAACAAGAGTAAGTGCTG  
TAACAGGAGTAGATATTACTGTGAATAAGACTCTTTATGCTTCAGGTGATGCAGGGTATC  
AAAATCTAGACCTTTATGTTTCAGCACCAACTATGAATGCATGC ACTGAGTCACTCACTT  
AGAAGCAGAATATCTGGAGTTCTAGA ACTCCA ACTGTACCTTCACCAGGTTCTAGAAAAT  
TTTAGGTTCTTTCTATTGGTAGAGACAGTGATTAGTTTAAAGTAATTCCAACATCTAAGA  
TTCATCATATCAAAGA ACTTACATTTAATCAAACAGTTAACTGTACCGTAGTAACAAAAT  
TAAAATTAGTAAATGCAACTCCTGAAGCATCTTTAAAGAGTGGTTACATTATTTCTACTG  
ATAATGTTAATAATAGAATACTCCTTCTGCTAATAATAATGGTTGGTCTGAGTATCTGA  
ATCAGGTTCAATTAGTTCTGAGCAATTTAGTGAACAGACTACTTCTGGCATTATAGATC  
CTATTCCTGCAGATGTTAATGAAATTGAAGGATATAAATTTGCACAGCTAAATAACACAA  
TACCAGGCGCTTTAGATATTGATTCTGACAAGTATAATTAAGATAGA ACTTATAATGCTC  
CAGGTGGACGGTAATTAGATATTTATGTCAAATTCAAACCATATAGTGGTATTGAGTATG  
CGATTAGAATTGATGAAGCATCTACATCAGGATCTGCGCCTATTGTTGTATCTGTAGTCA  
CAATCACTACCGCTGATATCAGTTTTAATTGTGCATACTCTACAGGAGAACGGACCAACT  
TAACTGGTGGTTCACAGCTCATTTTAAATTGCATAATTA ACTTAGATTTCACTAGTTACTG  
CAGTTACAAATCGTGATCTAGTTTATGTAATTACAGTGACTAATCATTACCTATCTACTG  
GATCAATCATGTTTAGAGATGGTAATCCTACTCAA ACTTTTGGTTATATGACATATGAAG  
AATATGATGGGTCTCGTCCAGTTTCTCAAATTGTGACTGCCAGAAAATTTGTATATTAAC  
TTCTAGTGCTGCATTA ACTTCATCGGCTACAACAGTAGTAAACGTACGTATCTACGTTA  
AGTCTCCCGTTCTTAAAATGTATTATAAGGATCAATACCTGTGTGAGGTCCGTGATTCCCT  
AGATTAGAGGTGATAACTAATCTTTCTTGTAAAGTTCCTTTAACA AATTAGATTATTCCT  
TCAACTCTATTGATAGTGTGGGAACA ACTCGTCTGACGGGAGCAGGAAATCCTACTCCTA

CTGTGAAACTTAAAGTTGATGAGGGTATCGGTACATATATTGCGGATTACATTGATCTCT  
CTAGATCTGGTGGTAATTGTCCTGTTTCTGATGGTTGTTATCTTGATGTTTCTGACTCTC  
CTGACAAAGGTACGTTCTCAGTTCAATCTGTTACGGTTCTAACGTTACTCGGGGTGGTG  
ATGTTTCGTATAATCCCCCTTATGAACGAACCAGAAGCAGCTGCTGAAGTAAACTACGCAT  
CTTATCCTACATGTTCTGTTAAGGCAGTTGGTTAAATTGGTGCTATGCGTGTTGTTAATC  
CCAGTGTTTTCTATATAATTGTACCTGTTCTTTCACGAATGCAATCTTCTAGACCATTG  
AAAGAGTTGCTATTAACGCACGCGGCACAGAATATGCTGTAGGAACCTAGACTGTTGTTC  
CCATTGGTGGTGATGGTGACGGTGCATTTCGTAGAAATTAATGTTACTGAGTGAACATCATG  
CTACCGGAGTTACTATTCCGGGTCAAACGCAATCATTGAGGTTATATCACCTGGGAAAA  
GTTATACTCCAGCAACTATTGATGCTGAGACAATACCTGGTATTTTTGGATCAGGTTTAA  
GTCGTTCTGGGGCAGAGCTAGAAGTTGTTATTCTTGCGCCTGGAACCTGGTGCAGCTTTTT  
TCACTCAAGGTGATAAAGTTGGTAAGATTATGAACTTAAGAAGTATGACTTTGGTAATG  
ATTATCCTCATGACTCTACACGACGTCCTGAGATTAGATTCTGAAACAATGTTTCAGTTAA  
CATCAACCAGTATGCTAGACAGTATTACAGTGACCGATCCAGGATCTGGATGTTACATT  
CACATCCAGTTGTGTTTACTGCTGGTGGCGAACAGGTGCTGTCGCTGAATCAACAATA  
ACAATTGTCGTTGAGATTTAATTATTGAGTAAGATCCTGGCGGGGGTTCTTCTTCTACTC  
CTGCAGTTGCTCTTAGGTATGCTTTCAAATATGTAGTAAAACCTTGATTTAGGCCTATTC  
AGTATGCATTCCCGCTTGGTACTGCTAACGGTTTTGTGGATACACTTAATGTTTCGTGATA  
CTCCTGACGGTACCGAATATCCGCTTGCTACAACCTGCGATCGGTGCTGTGAATGGAACATA  
CAACTTATTACGCAATTACTGGTTCGAAAACCTCTCTGGGACCAGATCAATTAACCTTG  
CTATGACTGCATCAAACACAACTTAAGTGATGCAATATCATATGTCAATGCGGCGTCAG  
GTCTTCAACAATTACTCACAGAATCTTTGGTGGTGTGCTGCGACAGCATAACGTTATTACAT  
CTATCTTCTAGAAAGGAGAAGTTGTTTATAAAGGTGATCTTTTAGCAAACCTAACTGATC  
AGGGCTATGTTTCTACAAATAATCGTTGGCAGATAAGACCTCGAGTTCTAACATTGTAG  
ATTATACTGGTGACATTATTGAAGGAACAAGAGCAACTGGTGTAATATCCAAATCTTAGG  
CAACGATCAGTGACTTGAATATTGTTAATGGTGTGTTGAGATTGGTTCTCTACTAAGT  
CTACAGGCCAGTGTTGTGATGATGTTAGTAAACCTTCGGAAATCATCGAAAAGATTCAGA  
ACTGTTACTATAAGCAAGATCTCTCTTATGCTATTAAGTATGCTGTTTCTACCAGTGAGT  
GGAAAGACATTCTGATCAAAAACGTGCAGCATGCATCCCTCAAGTTATTTAGTGAATTAG  
ATGTTTCTGATTACGGACTGGTTCGGACAAAAGGGACGGATTTCCAACCTACTAAATCTG  
TTGACTTGCTAAACAAGCCATTGTTTATAAAGGTGATCTTTTAGCAAACCTAACTGATC  
TATATTCAGAACTCAAAAAGACTGAAATACATTTCCGTGACAAGGGCCTTACATCTTCTG  
AAAATATGCTGACATATCTAGTTCAACGTATTGATTATATTTCTACGTTATCTGATGCTG  
ATAGCATTGCATTCGCACCAACAGTAGGTGGAACATAATATTGATGCTAATGCTAATCAAT  
TGATGAGTGTTTTAAATGGTGTGTTTTCAGAATCCTGGGACATCTTCAAAGTTCAAGGAG  
ATTCGATTGTATTCAACGCACCGCCAGAACCCCTCCAAGTCCCAAGTACGTTAACGTTA  
CTATTCAAAATATGCCTACAAAGAAAATTTTATTTGATTAGATCGGTGGTATTTTCCCAA  
ATCGTGGTAATGAAAAGGTTGGAACAGCATCCGGACATCGGCTGGTCCGTACCAGGGATG  
TAGGTAAGGATGTATTTTGTGCGGGTCCGGCAAGGTACTACATGTATTCTAGTGCATATG  
TTACAGTTGGTGCAACAGGGTTTGCTTCTTATCTTGGTGCAGTAATGGTGTGACCGATG  
GTCAAACCTTCGGAATATTTTATTTGGTGAGAAAATTAGTGACTTCCAACGTGATACTG  
CTTGAGTCGAATCAATCAACCGACAGAATGGGAAAGAAAAATGTATAGCACAATTAAGAT  
ATACTAAGGATCCGTCTATTACCTCATTGAAAGTAGTTGCATATAAACTTATGATAGTG  
TTGCTGCTGCAACTGGTGCTGACGGAAAATTTACTAATGGCCAATACTATCAGTTTGGTT  
CTGAAATTTTGTACTGAAGCGTATTACACAGGGTTCTGAATCAACAACCTTTTGGAGTTA  
CAAGCGCACAGCTTGGAACTCTGCCGTATCACAAACAGCAGATCATCCGGTTAATCGAA  
CTCAAATTTCTGCCAATTTTCAACTAACTTGAAGTGAACAACCTGGAAGATATCTCTCCA  
CTCCTGGTCTTTACGCCAACAGTTAAGTAAAGTTATTATTGGTGTCTATTTAGTGGAG  
TTGCTCGTGTTACTACAACCTTCTACATATCAAGATTCTGTAAATCACGAATTTATTAGTC  
AGGTTAATGTTACTGAATGTTCTTCTTCTTAGGTCTATTATACAACAGGTTTATATCTC  
AGACCTATCCAACACTGATCTTGATCATATTTCAAATCTCAGGTCAGAATCTTGATT  
TTACAGATAGTCGAGCAGATCACCATTATCAATTCCTTCTACTGAAGAAATTAACAATT  
ATGTTATTCCTTACGATTATGCTTCGGTACTCTACAAAATGAGTTTATCAGTAACTACC  
CATTAGAGAATGGTAATGATAATGGTGAATTTGCTACTCGTGAAGGTGCTGAAGTGCTTA  
GATTCACCTTCTGGGGAGACACTTGAATATGTTTAAATCTGTCCTGGTCAAATTATCTGAA  
CTCGTGAAACGAAGGTAGAAGATATTGATGCAAACCAAGCAAGAAAAACTGCATATGATG  
GTAAGGTCGGTAGATTTCTTAGAAACGGTGGATATTAGCATAACATTCACAAGTTGTAATG

CATACCGAAATGCATCCAACCACAAGTATGTTGATGAATCTTTAGGTCCTTCACCGGGAA  
CTAAAGAACATACTTTTGTAAATGGTGTGCTGATTCAAACACTTCAGGTGGCGGTGCAA  
CAGGAACGTTTACTGCTGCGACAGGAACTACCTATAATGGGTTGAAATGTGATCTAGTAA  
CTGAAATTCGCAATCACTCTTGAACAACAACCTCGCTCAGTTCTTATCCCTGACAACAGCC  
TTGGTTCTGCTTGTGCGCAAGGTAGTAATACCTCTACTAAAGCATATCCTCGGAGCACTG  
ACCCTGCATCACGATCTGCTCGTAATATAGCTGCAGTTACACCACCGACGATAACAGTAA  
ACGTAGGTGCATCTACAAGTGATGGAAGTTTTGCAGTCGCAGCTGCGGATGAATTTGGGT  
TTAGCACTGCAGCGATTACAATGGAGTGGTGGATCACTCCAATTACTGCGGGTGGAGGAA  
CACGATCTATCTTTGCTTTCAGGACTGCTGCAACTGAACTGTCACCTTACTTATATCTAG  
AGGCTGCGTATCTAGAGGATTATGTTTAAACGCTTAATAGTCATTCAAGGAACAGCAAACA  
TATTTCCGACTCAATGGACACACGACGCTATTAGTACCTCAAGTTCTGTAACCTTGAATGG  
TTGTAACCTGGTGTTCAGGATGGTCTTATTTACAGCGAGACCAACAACGACGGAACAAACA  
AACCAATTAGAATTGGTGTGATACTGCAGGTGATAACCACGTTATTGGTTTAAATGGATG  
AGTTTAGAGTTTCTGCTAATGGAAGTTATACAGCGTCATTTACTGCACATACAGATATCT  
TCCAAGGTGACTCAAGCGCTGTAATCCTGATTCATTTTGTGATGGTGCAGAAGGACAACAGC  
CAACAGATGATTGTTTCGGCATCTGCATCATTTACCAAGGATGAATGGTTCAATAATGATG  
CAATTCATACACCTCTAGAAAGACTGCCCCACCTGCAGGGTTGGCGGGTAGTGCGTACA  
GATACTATAACGCTGCAGATAATCGCGAAGGTAACATCGACTTGATCAAGAACAAATTTA  
TATATTAATGAGACAGAGATATCCAGCACTTGTTATTTTAGGAACTAGTTTCACTCCAA  
CTACAACCACGTATGACTCTGTAACCTGGCCTACTGTTAGTGACAATGACTAGAAACACAA  
TTCCTAATGGTGGACAATGTACCCCTCACTGTGCATCAAACAATGCTTCGAGTGGAATAT  
TGACTATCACTCATATTACTCACGTTGGAACAAAAGATAAGAGCCTTAATATTAAGTTC  
GTGGTATCACATTTACATGCTCATAAGATAGTAACCCTACTTATAATCCAATCCCCGTA  
GTACAGATGCGGTTGGAGGTAGGTGGTTGCCAGTTTCTAAAGCGACTGCAGATACATTTA  
CAGTTGATGTTGCAACCTCTTCTCACAGTACTGCTCTTACTTTCGGATGTGCCTTAACTA  
TTGCAGTTGCTGTTGAGAAAGATACACTTAAGATTTTAGGTTATTCTTTAACATTTACTT  
GCGCTATTGATGGCCATACGGCAAATAAAACTTATACTCGTACAACAGATCCTGCACCTA  
AAGATGTCGCTCTACCAATCGTATCTTCCAGTTCTACAAATTTAACAGGTAATGTAACAC  
CTTCACCTTTAGTTAATTTCCAACCAACTAACTCAAGGGACGATCCTGAAACTGGTGCAT  
TCGTCATGACGACTGCTAATCATACCATCAATGTTGGGACACAAGTTAGATTAAGTCAA  
ATTCATAACATTTACTTGCCACAAGATGGTAACAGTACACAGAAAACGTCTCCTCGAG  
AGACTCCGAGGTATGGTCAACCTGATCCGTCATATAATACTGCTCGAGTTGTATCTGTAG  
TCGAAACGTCTACACCAGATATTAGTAGTCCAGCCGATGTTCTACAACAGCTATTTTAA  
CAGTCAATATAAGTGGTAACCATGGATTATGTACTCACAATAGCATTCAAATTTGCTGAGA  
ATTCATTAACATTCACGTGTGCTTCTGATTGTAACGCGACAAAGCAGACGTATCCAAGGC  
AGACTGAGCCTATTAGCAGTGAGTGGGTTCAACTTACCGTTGTTGATTCTGATACATGTA  
CTATTGATATTGGAACATCTAGTGATACTTCCGCAAATTCATTTGTTTCTGCGGCTGCAT  
TTGTACTTACTAAACAAACTGGAAGTAACTATTAACGTCCGTGTTTCTCCTGACGCGG  
CCCAATATGATCATATTTTTGTATCTGCTGCATCAAACGCGGTTGTTACAGATGGTACCT  
ACTTACAAGCATTTGTCTCAGCTACAAATAATGCAGTGATTATGGACGAAGGTATTACTT  
GAGAAGAAAATATTCGTGAAACATTGAATGCGATCATTCAAGATCTGCGCTATGGTCCTA  
ACAAACTTGTTTGGGATGCTGCATCTTACGCTGTTAAGATAACTGTTAACACAGTTCAGA  
TTTCGGAGATTGAGCCTGCTTTTAAAGAAACATTATTCGCTTATAAAAAAATTGATGATA  
TGGTTCAGCATGTCATTACTTATGCTCTTTGTCCAGTTCAGGGTAATAATGGTTTAACTC  
GATTTACTGACGTTTAAAGTTACTGGTTCCTTTCAATACATTGAATCAGTTAACACCTA  
CTGATGCAACTTATCATCCTGCTACTGGTGATAGGGTATTGATAATTGGATCTCATTCAA  
AGACCACATCATCTATAGTTAATATTGCCGTCGCTCCTATCACATCTACATGTCCCAAAG  
ATGGCAATGAACGTCCCTCCTTCATATCCAAGAAAGACTGATGCTGCCGATAAGGCAGTTC  
TAGCTGTGCGAGCCGTTGGTGGTGGTATCTCAACTAGCACAGATAACGTAGGTAAAACAT  
CTGCATGAGATCAATATACGATTATATGTTTATCTGCAGTAGCTAATTCAGTCACTGAAA  
TAACTTATACCTCTGGTGACTGTGCAATGTCTATTCAACTTTTGGTAACTTAACTAACA  
TCATTACAGAGAGAAATACAACCTGCTTCTGCATCATCAGCTGTTGATCATTTGGCAAGAG  
TTACTAATGTTGAAGCTGCATATGAGTCCGTTCCGGGAACAGTAGATGGCTATCTAGAAA  
CAACTTGAGCAGTGGATTATCATAATGCAGGAACTGGGTTTTCTGATACAAATCACATTG  
CTCCTGAAACACAATAGCGTTTTCAGAGATGCTGCAAACTCAGTCAGACTCAATCGTACAG  
CAATCGTTGATAAAGAACCGTACCATTTGCTACAACATTTTCTACGTTGGCACAAACAC  
TGCCTAGAAACCAAGGTGGGGCAAGCACTGACGGAACCATTGATTAAGACTGAATTAG

GCAATTCTTTTGATGCTATCGCAAATGATTCACAAGAAGGTGGTAATCTTGAAACTACAA  
CAGGAACCTCGATTTCGCTCTCTGCCAAGATGGAGGAATACGTTATATTCGTCTTCAGGTAT  
TCCACTTAGTAGATAATCATGGAATACTTGCTGATTATATCAAATAAGCAGTTTAAGGAA  
CCTTAACCTGACACCTATACTAATAGTATTGTTGTTGGAGACAGGGCAGTTACTGGTCCAG  
GTGTTTCAGGTTACTTTAATGCTGTTACAGCTAAAATTAATCAGCTCAATCCAAATATTA  
ATGACATTATTGCTCCAACACGTCCAGCCTTTAAAACCGCTGCCGATAGCTTATCCTTTA  
ACATCCAATTTATTAGGGAAGTAATTAACGGTCTGGTTCAGTTTCGTCCATATGTCT  
TAAACGGTGTAACCTATAATGCAGGTGCTTGGACTGATGAATTAGAGTTTGTAGGTTCAA  
TTTTACTCTTATTTCTGATTTACTGGCTGGTGGAACCGATAGCACAAATCAAGAAGCAA  
GCCCTTAACCTAAGTCTTTTCTTATTATTTAACTATTGACAATGTTCTCCCTGTATCAT  
TATATGCTATTGGGCAAATTGGAATCATTGGTGACTATGCGATTGAAAATGGATTATCAC  
CTCATGCAGATGCTCGAAGTGCAGACAGATCTACTCAATAAGCCGCGCAATATACTGATT  
AATCAGCATAGAGAGATTCAATCTCAATTTACAGGGATTAATGATGTTGTATATGCATGGC  
GATACTGAATTGAGATCGTTAAGGTTATGTTCTCACCTGGCGAACTAGTATCAAGATCCG  
CTGACAAACAATTATAATAAACCGCAAATTATCACACTAATGCCTAAAATGAAGCCGTTA  
CCAGTCAATTTGTATCTGGGGCCTGGTCAACTGATCAAGGAACTTTATAGAGGGCATGG  
TTGGAGACATTGTTTCATGATCTTATTACAAATGATACTTACGATAAATCCACCGCATATC  
CAATGACATTAATTGGAAGTTCGGGGACGTTTGGTGATCGAGAATTTGTGACTGCCAGTA  
ATGGTGGCGAAGCAACTGTTCTTGAATCGGACGATGTTAATAAAAATCCTTGATGTCAGTT  
CATTTAGTTGAAGTGGATGTCTTGAACATAACATTATCTGCTCCTTGCGGTGCTACAG  
GAACCATGGCATCTGGTTGAGTAAGTTCGCATACCATTCTGTGAATATTCCATCTAACG  
TTAAGCTTATTGATAGAGCAAGAACTTTAAATCTAAGATTGAAGGTCTTGTTTCTACTA  
CGTATATTTCCCTGATCCCGAAAATCTTAATACTACAGGTTGGACTCCATCAGAAACAA  
CATCTTCAGTCGAAGTTACTACTGCTCCTGAGGAAGCACAAATCAGCTGAGAAGTAACTG  
CTTCAACAATAATACTGAGCACTGCAAGGGTAACAATTTCACTCTAGGTTCTTTGAAGA  
CTTTTACTAGTGATACTTCTAAATTTCACTCTACCCTGGAACAGTAGGTTACTGGCTCTG  
CCGTTGATGCAACTACTCAATCATTACATATCCAATCTTTGTTAAAGCCGCTGTGTATA  
CTTAGACTTGTATATAGCGAACCCTTGATGACTCTCTTGCTACACCGCAAAGAGCATTCT  
TTGATATTGATTTATCCGAAGGAACTAAGGGTGAATCTTTACTACTGATCTTGCCATAA  
CTGTAGATGCTTTTGGAGTAAGGCCTAATGGTAATGGATGGTACCGCCTCTATATTACAG  
CAATATTCGGATTTGGGTTCTCTGAACCTTCGCACATAAGTTTATACTCGAGGTCCTAACG  
GAGTACTAGGACGCACAGGTAATGTATCTCATGGATTATTTGTTTGGGTTTATAAAAATCA  
ATAGTGGAGCCCTTCATCCTTATATTGCAGTATCTGGTACATTATTCTAATAAAACACTG  
TTTATAATATCAAGACCTTTGTTTTGGATAACCTTCCAAAACCTTATGCGTACCGCTCTTG  
ATAACTTTAACATCGCATTTCGCTCTTGCATCTTAATATACGTTTTATGATGCTTATC  
TTGCATCAGATTACAATAAATCTATTATTCAAAGATGTATCCGTTATGACCTAAGTGATA  
TTAGCAATCAGTTAGCCCCGTTCAACTCATTATACAGCTATTAATAACAACGCTGCGATCA  
CTGTTCCCTACTATCAAATGAGGTAATTCGGAGATGCCAATTGGACTTAGTTCGCTGTGTTG  
ACCATAATGATTACCTCTATGGTTTACTTAGTGACGCATCAGCCGAACCCGAAGCCGTTA  
CAGAGAATATTGGTGAAGAAGTTCAAGTTTATAACAGATTGAGTATTGATGTTTACCTAA  
CTCATGGTCCCTTTCACAGTGGGTGAACTGTAGCTGACGAGTACACAGGTGGTTTTATAG  
GTGTTGTATACGGTTTTTACAACATGCAAACTATTGGAATTTTGTATGTTTCGGGCAACCG  
GGGGGGTGTGTGCAGTTAATGACAATATTTTAGGTGCATAAAAACCTTTGCAACCGCTCAA  
CTTGTGCTCTTGAAGATCGTGTTCAATTTAGCGATGTCCAAGGATTGTTTCGAGAACGATT  
TTCTCTCAAAAAGATATACATCTGGACAGACAGCAGAACCAACAGGATTCTATCAAAAAA  
ATCCAGCGGTTACAGTTAACTCTTAAGTGTGCTAACAGTGGATACTGCAAGTGTAAGT  
GAACATTTGATGCCAGTCCAGTGGTATATCCCCAGACCAGTAGGAAGTTTATTGATGTCA  
CGAAGAGTTATAGGTTACATGTTAAGGTGGGTGATTTATTCGCATCCATAGGTAATATTC  
GTCATGGTATTAAGATTCTTAAGAATAAATGTATTTACCGAAGTTATTAGACTGTATT  
CAACTTGGGCAGGTCATTAGCATAACCAAGTAGTTAGATAGTTCTAGGATAGCTCTGGCAA  
ATAATTTCCCTAGACCTCATTCTCTTGGTGGAGTTCACCTTCAATTAGTGATATTCTTG  
GTGACTACGGAACAGGAGCCTCCGTACCTGTGGGACAAATTCAAGTTACGACGGTTGCTA  
CAAATACAGGTCGGGGTGCTGCAAGAGTTCAAGATATTGACAATATTGGATTGAATAAGT  
GATTATATCTCTCGTCTGTTGTTAGTTTCAATTAATAACAATGATGGTATTGAAGGCCCG  
ATAATTCTGCTTCAGCTATTCTTAATGTTGATGAGGATAAAGCTAGTGTCAAACGTTCCCT  
TAAGAGGATTTGATGGAGCACAAACATCATCCGAACCTCAGTACACACAATTGAAGTCTGT  
ATCTGCTTGACCTCGCAGGACTCTTGGTCATTTTTGTTAATGGTATCCTACAACCACCTG



GTCCAACTAATGCAGACACAGCGTTCAATGATACTATTTCAGTTCACTAAAGCACCCGAAT  
TACCAGCATTATTTACATGATTCAACGTTGGTAAACTAAGACAACCTTGATAATATTATTC  
TCGAGTTTGACCCATTAAGACAATTATTCAACTTGAGACGTAATCATGTGTTCTATTCAT  
TAACTCTAACTGATGGTGATCAGTAAAGCACAAATGAGACCCGAAGACAATATATGCGTTT  
CACTTAATGGTCTGATTCAAGAAGCGGGTATCGGTTTTGCTATTGTTGGTTCTAGAATAA  
TCTTTACTGGAGTTCCTCGAGTTAGTCCTACATTGGTTGGATCCTCTTATATTGGTTCTG  
GGCAGACGTTGATGTTTCGGTGGTTGTTCCCCCAATTGTATCAAATGACTGTATTGACA  
TTCAAGGGGAGACTATAGATAGATAAGTTGCTTTTATTTAATCATCAAACCTGTCTTATTA  
CATTTGTTTATATTGGATCTGTATTCCGACTGAACGCTACCGGAACCGCAGCTCTAACAA  
CTGGATTTATTAAGAAAGTTGAGGTAACCTGGTGTGGTTTCAGGGTAGACTTTCAGACGAG  
CGGTTTCGTCTTGAGGCTATCGCAGGTTTTTAGGGTAATATCCGGGCAGTAGTTGGTGTTT  
CGGGTGTGGAACCTCAGTGCAACTGGTTCAGGACAGAAAACCTCCTTCAGAAGCCGTTGAGA  
CAACTGTCGCTGATGATTATGTCGCACCAAATCTTGCAGATTATGAAGATGATCTAATTC  
ATCCTCATATCCTATACACAACCTAAAACCGTAGCGAGTAATGGCTATACAAGTACTAGG  
TCTAGGTTTCAGCAGAAAATGATTACTCAGGTGACACTCTGACAGCTTGTGGTGACAAGAT  
CAATGACTAATTTACCGCAATGTAGGGCGCCGTTGCTATTGGAACACTGACTTTCAG  
TGTTACAAACCCTGCTGTTGGTCAGATACCTAGATATAACGGAAGTACATTTTTCACCTTC  
TACTGTACACTACTTACTTCAGCTTTCGCTGTAAATGGTAACAATATTGCATCCTATTT  
TAATGGTTATATCGTTATTGAACCTAACGGAACCTGGCGACGTAACCTATGTCTAATGGAAC  
TGTCACCAGCACTTTAATGGCACTACTGGAATAGTAGACTGTACTACAAGAATTCCGTA  
TAGGAATGAGTTGACAACCTGTTGGTGCTGCTCCTGCTGCAGCAACAAATACTTGGTATTT  
CTTTCCTGTAGATGACGATGATAGTTTCACATCTGAACATTAACATAACAGCAGGTGGAGC  
GGGCGCTGTAAGATCAAAGCCGGCAACTGAATATTGGAGCGGTGGGTTAATGAACGATAC  
TGAGATTACGTGTGCAGCTCCAATAATAGCCGAGGCTTAAACAGGAATGGAACCTAAGTT  
CGTTCCAGCTGATGGTTTTTCAGGGAAGTTCAGGAGGTGCCACTCAACAGCGCTTCGCTAC  
CATCTTTGGTGACAGTGGTAGCACTGCGGTGACTACTTCAACAGACTATTTAATAATTGC  
AGGTGGTACTAAATTCAGTCTGCAGTTTTTGGGGACACTTTAACAGTGAACCTTCTCTAA  
AACGTTGACAACCACCTTATCATCGTTAACAGACCCTGATACGTCAGCTCTTACTGAAGG  
TGATACATTATTATATAATGGAACCTAATTGGGTTGATACTAGATCAACTATCACATAGTG  
GGAACCTGGTGCTACTGGTTATGCACACCCTTACGTTCAATGGACTTGGTTTCTCTGC  
AACAACTAATGAAGCTCAGATCTAGATTCAAAGAGGAGCAACTTATGCTTTCGATAACTG  
TACTAAAGGTGGCGCACACCCAGTTGGAATTTAGAGCTCACCAGGTTTAGGAGTAACACT  
ATTCACCACTAGTCAAAGTGGTAGTGGAACCTGCAGTCCTTAAATTGGACTGTTCCCTTGG  
TGCGCCTGGCACACTTTACTATCAGTGCACGATCTATTCACAAATGAGTGGGGCTATCAC  
CGTTGTAAGTTAATAAATGACAAGAAGTGTGCCCGGGACTGGTGCTGTAATCGAACCAAT  
AGTCGGTGAAATATTTGGTGCTCCTGCAGTCAAAGTTTCAAATGGAGGATCTTGGGACGC  
ACCTAATGATCCGCCACGCTTGCAGTCACTGGTTTTCCGAACTCCGGATGAAATAGCGTT  
ATTATATCCAGTCATTCATGCTGACTATCAACGAATATCTGACGTCAGAGTTTTGAATAG  
GCAAAGGGATATGATCCTGTAATATTGCTAACTATTCCTGAGCAGGAAACAACACGCGT  
GGTTACTCGATTTGATGTCAATAGAGTATGGCAAAGTCATCCTAACTCTCCTACAACAGG  
TACTTTCACACCTGATAGATTTAGATTAGTTAGTGACAATCACCTAAACCAAGTCAGCA  
TTTCTTAAACGGAAGACAGGCAGCTAGTTCTACAGTTCTCGTTCATAGAAGTTTTGATCA  
TACGATAATCTACCGTGGTGGAAATGGATGGTCCTGATGTTGGTCAAGGAGATTTTCAGAA  
AAATAAAGCACTTCGCAACAAGACAACCTGGTGTGCTACTTCATACTCCAGCATGGGAATC  
AGCAGCATGGGCTCGTACACACTTCTTTGGTTATACTTTTAAATACGTTTGTGTAAGAA  
TACTAATTATTATGATGAGGTATATGTTAGAGGTCTTTAAGATTATCAAACAAGTAAAT  
CGTAAATGGGTTTTGATCTTGATAATGGTGAATTTAAGGGGGGTGGTGAACAACCTCTACAC  
TTGGAATCTTAAAGTATAAACAGGAAACCTTGTAGTTCGTGTATCTAACTTATATGAAAC  
ACTTGGTTCTATTGAAGTTGGTAGAACTGTAGATGAAGACTCAGGAACGGGTTGAGATGA  
TATTGGTAAGATTGTTAAAGCTGAACAGAATAATGTGGCTAGAGTTTATATTAGCGCGTT  
AAAGGGGACTGCCCTCGCAGTCAATTGTCTTGTGTTAGATGCCAATGGTTTTGTATTTAG  
ATTCCGTGGTGATCCAATGTCAATCAATGCTGATTAAATTGATTTTGGAACTGACGCCGC  
AAAGTTCTGTCTTTCACACATGGGCAATTATGTATCCCTTCTTAAATATTCAACAAAC  
AGCAAATTATCTAATTAATAAATAATCAGTCTAACGAACTACTCAGGCATTGACAGGAAA  
CACTATCAGAAGTGTGCAACTCCTGATGGTACGTTGAATAACGGAAAAATATACTACAA  
TAGCACTGGTGTATCTAAAGCACCTGCTACAGATTATGAACCAATTTATGCTCCATTATG  
CTTGCTGCATAGTGTGCAAAAAACAAGGATTTATATCTTTTGTGCTTATCACAAATATAT

GGGAGGATAGAAAGGTGATGAAGATTACATGACCCTCAATACATCTGCGGAAACATATAC  
TCCTACGATCCATTAGTATGCTAGGGACTTTTATCAAAGTAATAGCAGTGATCCCAACAC  
TAAGGTGTAGTCTAGATATATTGATGGATACTCAAAAATTATAGGGGTGTCTTTTGATGG  
TACTCTATTTACGGACCGTGGGGATATAATTCTAGTGGTGCCGTAACAAGAGAAACGTC  
TCTTTATAGACTAAGGAGCACTGCTGAATTAGCGGCTGGTCGTCCTAAGGTAGGTAGAGT  
GTCAACGCTAACCTACCCTCTTACCCTTCTAATGGGCAGTTCCTTTTTGGAGCTTCTCG  
TCCAACTTTTTAGAATTTTATCGCGGAAAAACACACGTTTTTCGATCAAAACGACGCATC  
TAACGACAGTCAACTCTTATCAAATTAAGTACGGGCCATGGTTGACATCGGCAACACCC  
TGTTATCATTGGGAATACTCCAAATTGGGATTCTGGCAATGGAATCTAATATTGTATTGA  
CGAGAGCGAAGTACCCTCTCAAGCATATTGCTCATGTTTTAACTTGGCAACATCTCGTGA  
GGTACCATTTACATTGCCTGTGAATGCACCTATTGCGTTATATTTGTTTGCATATACAAC  
TGCAGGTCATGGAATTGGAACCGTTCAAGAAGTAGAGGTTCTAGGAGACATGGTACAAGA  
TTATAAGTACGATTCTTCTGTAGGACCTCATGTTCAATTTACCGGTATATTTGCTGTAAC  
ACCAGAGTACCCTAACGGAACTATTCATTCTTCATGAGTTAAGAGACTGGTGGTAATCC  
TGCATATCCGTATGCTGTGCGTCTGAGTTTTACTGAACACTATGACTCTAAGGAGGTTT  
TGCACCTGCACAACCAACTGAATTCCTAACAGCTGCAGAAGATGAAGACGTTTCATGCTGA  
TGATGGTAGGGTTTCTTATATCAAGATGAGGTAGTACGGTGATAATCTCTTTGGACCTGC  
AAAAGCAAAGGTGTTTGGTGGGGTAGGATGTGGTGTGCTGGTGGTACTCCTACTGTTCTACA  
TGTGACTAGTTTGGCACTACTCGATGGTGGTTGCAGTTATGCTTCTCCTCCAACACTTAT  
CTTTGAAGTTGATGGTGGACAACGTGCACAAGGTGCTGATCAAATGCATACTCTAGGACA  
AGTTAAATCTAGTGCAAATACAGATCCTGCTGAATCCTCCCAAGAACCCCATTTACTTG  
TACTACAGGTGGTGGTGGTATTGGTGCATGGCACAAGCAACTGTTCGATCAAGGTGTTAT  
AACGGCAATTAACATTACGGATCCTGGTTATCGATATACTTCAGATCAAACTTTGTCTT  
TAAAAAATTAGTAACACTGAAGAGAAAATCTAGAGCACGTCAAGCATTTCATCATCAA  
CAGTTATTTGACTGGTCTTGTTAAAAAAGTTACCCTTAATGATACTGAAATATATGTTGA  
TCCTACAGATGCATTTCTTGCTACTTGTGATGACTCTTCATTATGAACCACTCACTTA  
TACCTCAAATCAGCAGTTAAGTTTGGTGGTTTGACAAGAGGTGTAACCTTTCAGTATCG  
TCTACGGGTTATTCTTGACGCCGGTCAAGATGATCCAAATGGTGGTTCAACCTATTAGTT  
GAATGTTGGTGATAGGGCGATCCGTAAAGTTGAGAAGGCTAATAACAAAGGTGCAAAAGT  
ATTTGACTGCAATCCGTTTACACGAGAACTACTAGTTACTTTTGACGTTGATTAATGAGC  
ATTTATTGACGGTGGTATTACTTTTACTGAAGATGCTAACGTACAGTAGAATGCAGGATC  
TGCTTCTAGTAAATCTACTGGATTTCGAATTTCAAACCTGTTCTTACAACACTACTGGATCTAA  
GATTTTCTTATTGAGTGGTCCCCCTTCTCTTTTGGCAGACAGATCTCTCCAAGATATTCT  
ATCAACAGCAGCAGGTGGTGGAAATCGCTGACCTAGATATTACTCGCAGTGATCATGCTCA  
TCAAATCAGTGTTGATGATGGTATCTTTAGAACTTTAAATGGTATCGAAGAAAATCAATG  
TGGACCAAATACAACACTACTACCCTTAGGTGATTATGTTAAAGCTAGAACTATTCTATT  
CAAGTGTGCAACAGTTCTGACTGCATGTGCTTTGAGTGATCGCGTCGAACACAATGCACT  
TCAAACCTATTACACCGGTAGTAGCAAGTGGTAATGGTCTGAATTATACCGTTACTGAAGT  
TGTTACAGGAGCAGCGTCTCTAGTGAGTGGAAGTGTGTTTCATATGATCGAACAACGAC  
AACGGTAGTTGTAGGGAGCATGGTCCGACTTAATAGTGGTAAGATAAATGTTGGTACGGG  
GGGATATCTTAATTAGGTCTCCGCTAGTGGACCAGTAGTTGATGTTAATATAAAGAACT  
TGGCACAACCATACAGCTGCACCGACTGTAACGTTTGAAAATGTGGGTAACATTCTAGC  
GACTGGAAGTGAATTTCTCACAGCTTTAGGAGAAAAAGTTCCTTCTATTACTATCAATAA  
TGGTGGATATGGTATTCATCAATCTGTTGATAACACATTTAACCTACACCCACAGTAAC  
GCTCGCTAATGCAACTGGTGTAAACACTGGTGCGGGTGCAGTTACTCAAGCAATTCTCGC  
AGGAGAGGCCCTCGTAGTGATCCGTTGTGGACGCCATAGAATCAAGAGTATTGAATATCA  
TGCAACTATTCGCTCGTAACCCTCATATATAAACAGGACTACGTTAGTATCCCAAAAAGG  
CAGCCCTATTAACCTCATCTATCTAGAATATTTTGTGCAAAGAAATTCTTAACTGCACTGG  
AAGGGCCTGACGCAACGCACAGTGAGGATGCAGCGGCAACTTCCCGTGATCGTTTGTATC  
TATTCATTGGTAGAGCCCAGATTTGGGATAATGAAATGGCGCCCCCTACAGTCAGTAGACG  
CATGCTCCGAATTTTTTGGATCGTACGATGACAGGATATCGATGAAGAGAGTCTCTCGCTT  
CTGACACGATTCAGGTCTTGCGGTGAATTGACTGCGTTTCCCGAGAACAACGACAGGTG  
GACTAGGTTTTAGCTAGGACATGTATAAAGATGACAATTCCTACCAAACTGCGGCTT  
CAGGTGCCACCAAATTATATGACACAGACCTTTATGTTGTGAAATCACAATATCAATGTT  
ATTAAGCCACCTATACTGAACTCATCCTTCAGATCCAAATGGAAAACCTTCTACAGTTG  
GACCTACTGGTACTTCAACTTCAATTATCGCTATTGGTGCAGGTTATCGTTGGGAAAACG  
TGCTCGAATCCCCGTAGCATCGGTTGTTAAATTTTTCTCACATGAATACAAGCCTGTCT

TCACCAATACATCGGTAAGACAATGCAGTTGCAGGTGAAATTGATACGGTTGGTCTCA  
ACTCTGCAGTTTCTGGTTACAACAACAGAGCTTATGATTATGTTGGTGTACTCGTGATG  
GAACTGGTTGCCGTGAGTGTATTGTTGTAAGGATCGTGAGATTAGTTCTGCAGCTGTTA  
CTTCTGGTGTACAGGATATATATTTTGTAAAATAAGCGTTGACCGAATCTCGGGGATTG  
GAACAGGAAGTATAACACACTTGATGCTTTAATTCCCTGCTCCAGGCGGACATGAATCTG  
AAGCAGATGTTGAACTGGGTGCGTTCGGGTACACTTCAACGCCACACTATCATGTGATG  
ACGGTGCAAGGGAAGTCTCCAACGCTAACGAATATCATCGTATCGGTCTTGTACTAATC  
CTTTAAATTTTCGGCACTTCTGAAGTGATACCTGATATAACGGGTCTGCGCCAAAGCCCG  
CATTCTTCTCCACTACATTCCAGGGCAAGTCTATGCCTGATGAAACTATTACTCATAAC  
GAGTCTTTGGCGGACCCACGTTACTGGTCTGTTCTTTTATTTCTTGGAAATGGCACA  
CTAAAGTTTCGAAATATTACAAGAACGCTATTGATGGTATCTTCCCGGAAGTTACAGGGA  
CACAAATCGAGTTTGAAGCTTCAAACGGCATCAATGGGGCAACTTCTGGTGCTGGTGCTC  
AAGCTCAACCTGACGTTAATTTTCTGATGTTCCCAACTCTTCTTCTAGAGCAATCAAGA  
ACTCACAATGTGATTTGGGTACGAAGGTTACGAATGGTTATTCGAAAACACGGTATCCGT  
CAAATAGCGGTCAGGTACTTTTCTAGATAATAGACGAGCAATCAGTCGTGCTAATTACC  
AAGTAGAAGACATCAAAATCGTAATCGAATTCTAATGGGACAAATTACCAACCTTCACGT  
CACACCATATCAGCCAACTCTGATACGCTTACAAACATCTATCGAGGTTTGAGTCGTCA  
TGGTTTCCCTATTCAAGCGAGGGTACTTACTACGATGAAAAGCGTCATGGAAAACCACGT  
GGAGAATGTTGGTGCCCTCTTGTTTAAAGTTGTTGCCAGAGGTATTGCACGTCAAGTTGG  
TTATGACCTAACTGTTGATTGCATCCTGCTCCAAGAATCTTTCATAATTGCTAATTTTGA  
AATTTATAGAACCCAATGATAAGACAAGATCATCACTAGTCTAGCTACCGGTGAAAAGGC  
TACTGTTCTTTACAGTATTCCTTCTCCAGAACCTGATAACGGTTATTCCACGCTATATGT  
AATGGATATTGAGTCTGTTGAAGCTCACAGCACTCAAGCAACTCTCGCAAAGACTGAAGA  
ATTTGATACAGATACTGAACTCACTTTTCGGAAGCACTTTGATTTAAGTTGGTTCTCCCTT  
CGCACCATCACTGCCTCGTGGTTCTTCTTCAAAAACGTGCTGTTGCTCATGCGCAATCTGG  
TGAATGGTTCATCAGAGGATTCTTTGCTGTGGTTCGCATATCAATACATTCTTTCAGATCA  
CGATGGAAGCAACCCCTCATATCGTATCGGACTTGATATTCTAGAATCAATCGTTACCCC  
AGAAGATCACCTTAGACTCAACGATAATGCTGCAGAACTACTAACTCTGATGCTTCTAG  
TGCTTATAGATTTAGATTCAACACAACTGAATTAAGAGACTTATTACTGTTTATGCCGA  
TCAAACTTTATCGAACTTCTTCCCTAACAAATGAATCACCGGTAGACAAAGTTCTCGCTAG  
AATTGCGTATGCTGAATTAGTCAATAGAGTTGAACTTGGAAGTTGTGAGGCGACTGGAGA  
TTACGTTATTCAAGACTTTAAGGTCAGTGTAGAGAAAGACCTGGATGATGGTTTTAACTC  
TGGTGTATATTCTGGGGGGGCTACAACCTTCATATGGTGGACTTGCTTCAGAATCAAAATT  
CCCAGTTGCATTTGGTGAACGTGGTTCGTATGTTAGAGGATATAGACTGAAGAGATTATC  
ATCACCCGCCGATGACTCAGACAAACCTCCGGAAGTTAAGCAAGCGCTCAACACGATAGT  
TCCACTTGAAATAGGCAACATTACAACCTGTAATATATGTTTATCGATTCCCGTAGCTTGT  
GGTTCCTACAATCGCTAATCGATATCAAACCTGTAGAATCAAGAAATGGCTTGACAACACTAC  
ACACGGTGATGCAAAATGGTTATGTAATTGGTTTTGCTCGTATTTCTTCTATGGGGCACAG  
CGGTGATCCTGATGATATTTTTGGAAGCGTTCATGATCACTATAAGTTCAGTATCTTCGA  
TGCTCAAACGTTACATTTTTAGAACTAGCATCTGCTCAAATTTATTGCAGCAGGCTCGGT  
AGTTCTTGGTGAACCTCAGGCTATAGAGAATAGCTCGTCAATGCTATTTCTAGCGGTTA  
TTCTCTCATTATATATCAAGTAGTAGGTAGTTTTGGAGAAGTTGAGATGGTCACCGTTGA  
TGGACAAGCAATTGATACTATCTGTGCATTACATAGTTATACATATTCTCATACTTGTC  
GTATGTCACCAGAGATGAAAGCACTAATGCTGTTTACTTAACTGAAGATGCAATCTTAGA  
AGATGATTTATCTGTTTGGGGTGGGGCCTTACATACAGCACTACCGCAGGGAAGGGTCT  
AACTACCAATGCCGTCAGTGCAGCTGATGGGGAAAGCACTGCAGGAACCTTAGGCTATAGG  
GGCATCTGACTACACTAGTGTGCAACTGTAACAGGACCAACATTCTCAACCGTAATAGA  
CCGTTCTGGTCTTCCAACAATTACTAATCTTAAAGGGTGGTTTTGGGTACATTGTAGATGA  
AACATCTACTCTAGCAGACGCTAAACTTGGAGGAGGCGGTGTTGCTGTCTCACATTTCA  
TGGTGCTACAGTTGGTCTTCTATTGAGGGGATACAATCAAACCTTTGCTTTAGATTTAAG  
ACCTGGCGATCAATTATATTTTACTTCCCAGAAATTTGTTACTGTGCACACTGTAATCT  
AACTGCATTCCCTACTACTAATACATCAATCATCTTTAATTATGGAAGACAGCTTGTAAG  
TGTAACAGCTGGATGTGCCGCTCCATCTGCAGACACTTTTGTGCTGCAGTTCGATTAAG  
AACTAAATTGTATGGCTTCAATAATGCTCATCTTCTTCGCGATAAGTCTAAGCTATATGT  
TAAGAGTCTTTCTCATGTAGCTTTGATTGTTGGCAGAAAATTTGCTGCTGAGACTGATGC  
TTGTGACTATATCTCTATTACTTGTCTGAAAACGAACAGTTCAGTCATTTAGTGATGA  
GGACTATACAATTACAGTACTTGCAGGATCTCACTCTACTGACCCAGTTGATGATTAGAT

CAGTATCAATACTACTGACTCTGGTGCTGCTGGATCGACACCATTCTCACGTTCTGAAAG  
AACAACTTTATAGATTGTTAACTTATCAAATATTACTTCTATTATAGTAACACCGACTAT  
TTCTAATAACGTTTCTACTACAAAACAAAATCTGCTAATCAGATGTTTGTTTTAAAGT  
TAATAAAACCACTCAAACCTTTGCTTACCACAATGATAATTTAACATATTCAAATCTTTA  
CGGAAAAAGAATTCTCGATAAAGACATCCCCCTTTGTTTAGTTGACGGCTATCTTCTCA  
CGTTGATATCAATCTCGAGATGAAAATAATCCTGTTAGTCGATCCGTAACCTTTAGTCGA  
ACCTACTAACTTTGCCACCGGTAGTATCGTAAGTGGTAGAACTTCAACAGCAAGGGCAA  
AGTTGTTGCTTGTCTCTGGTACGCTGAAAGTTGATGTTGTTTATCTATCTGGTATATT  
CCACCCTGGTGAACCTCTACATCGTTTTGACGGTAATTATACTGAAATCAATGAAATTAT  
TAATAATCGTGCAGGATCTGTTGATGTTCTGTTCAAAGTTGTAACCTGAGAGTTACTTCAG  
GGAATCAAGACAACTGGTTTTATGGAGCGAATTTATAAAATTGTTGGAACCTACGTAA  
CGCTGAGCCTGTTAGAAAATTAATAATTTTTATTGTCTACTAAAGTCCTACTCCACCGGC  
AGATTATTTTGGTAGTCGATCTTACTTCGGTAGCTCATAACAGCGATATTCTTTCTTTAA  
GGTTAAATTCCTTGCTGATTACCTAGACTTTAGACCATGTGCAAAGATCTTGTTTAGTAG  
AACAGGCCCGGTAGCATCTCCTGCATTTGTAATGATCCTACATTTGACTTTCAGTCAAG  
AGTGTTAAATGTATCTTGTGCACCTATTGCTACAGTTTTTGTATATTACAACTTAACAAG  
TAATTTCCGTTGTGATCTTGATTGGTATCTACCTAGACTTGACAAATGTTTTGTCACGCT  
TACTGGTTAGTTTCATATTCTTAAAGGTAAATCTTCTGAAAGATCAAAGAACCTGATTC  
TCTAAAAGATGGTATGCTTAGAGAAATCATATCACATAAACCATATGGATTGATCCACT  
TGCAGATGGATTAATTAATCGTTCTGTGAATAAACATTATACCATGCTTGATATCGGTGG  
TTTAGAACCGAGATGAGATCAGGTTGAATTTTATACATCACTCAGCATGCTTGAGACTAA  
TACAATTTATACTCAAATTCCTGAGGCTAATGGTAAGTATCTTTCGAAGACTGGATTTAT  
TGTTGGTGATTTTGGTGATCATAGGTAGTCTGAGGTGGCAGATTAGGATGTACCTGCTTC  
GCCTGACTTTAGACGAGGGTAGGCGCGTCACTATTATTACACAATAACGTTCTTTCTGT  
AAGTATTATCACTTTGTCAACTTAGAGTCAACTAACTGGTCTCTAATTAGGTGACCGTA  
TACCGAGGAGGCGATTGTTGAGCAACCTTTGATTCTGGTGTTAAGTGTTTTAACGCATT  
TTACGTCTTTGTCTATATCGGTCTGATTACTTTACCACCTGGTTCTGATGATTGTTTGA  
TGCTAATAGCCTTGCTGCATCAGTTCAACAGGTGAAGGTGATTTGACCAAGATTCTTC  
TGAATCAAATGTTGATCAGAATGGTTTTCTCCAATTGAATGGGGAGCATGGTATACTAC  
ACGGACAGATAAACAAGTCATATGATCGGCGGTATCGAAATATTTTCATTGGTTAGGAGA  
AGATATCGGTAGATGACCTAGACTTGATGTTTGGGAAGGTCTGTTGCATGCATCGTGATAT  
TCAGTCTTAAACAATCGAAGTTAGTGCTGATCATGAAATGTCTGGTGTTTCAACGCAGAT  
TATTCCTGGAATTGAACGCCAATGTTTGGGTGATGCTTTTTTTTTCTAGCACACCTATTCC  
TTGGTTTCGTTCTAGAAACGTTGTTGCAAATGTTGCACGTCTAAAACGAGGAACACGTTT  
CTATTCATTCTTTGATGGAAAGTCAACTACTTATTGTTAGATTCCTATCATTATCGAAAT  
GATTAAGATCCTACAGTTTATAGTAGAACAACTCTACTCCCTTTTCGTATTTGACAAAC  
CGAAACAGGTGAGATTAGTGGTTATAAGTTTACGGTGGCTGCTCGTGATGATTTTTATCA  
GTTGTATTCTTATGAGGATACAACACTTCCTACTACAGATGCATCTACCACTGGATTCTT  
GAACATTGATACTACTGCACATTCTAAGCAGGCAATCGGTCTCATCTATGGAAATATGCA  
GGATCAAGAAACATTAGTTGGAACCTTCTGGTTCTCGTGCTATTGTTAAAGATCATCGTCA  
AATTTCCGATCGTTTTGGTAAATTAATACCTTCATTCTTTATTCCCAATCCTGGTGTATA  
TACAAACCCAAGATGGGCAACACGAACATAACTATGAGACTTTCCAAATCTGATTTTCA  
TTCAGGTATTGCTGGTGCAGTGGCTTCCTCTGCTCGAACTATATAGCAAGCAGGAGGTTT  
GCTTAACACATTTCAAGAAAATATCTTGACAATTCGTAAGGCAGGAATAGAGGATGAAAC  
TGTTACTCAAGCACGAACAATTTAGACAATACTAGAACTTTTAGTAGACAGATTGGTGGGTA  
AGACGCTCTCGACAATCCTTCTTTGTTGATCAAGCCGGTGCTCGTTTCTTTCTTCAGT  
TGATTTTTACTTCTTTAAACAGGATGCAAACGTTTCAGTTTCTATGCAAATCAGAACAAC  
GCTGAATGATTATCCTACAACGACCATTTCTACCTTGATCCGATGTTACTCTCGAACCTGA  
TCAGGTTGAGTTATCGGAATCTTCTGCAGTTGCAACTAGATTCCCATTTGAGTCCTATGT  
ATATATTCCTCAACCACAAAATTTTTGTTTTGGTCTCCTTTATGACTCTAACTCATATCA  
GATTTGGATTTCCGGACTGGGCGAGATTGATATCTCTGGTTGCAGAAGAATGTCCAAACT  
ACCTTACGAAGGTGTTCTACTCCAATCTCAGAACGCTACTACATGGACTGCATATCAATA  
TGAATATTTAAAGTCTAATATCAACGCTGAATCCTTCTGTAATACTGGACGAGCTAACT  
TGAATTGAACAATGCAGTACTAGGTAGAGGAAATGGTGGTAAGCGAAATCTTCGTTCTGG  
TGCTATTCTAAAATGCCAACCGAATCAGTTCTTACACTTAAATCCACAACATTACCTTA  
CAACGTTGGTTGTCGTATCTATCAAAGACTACTTTGTCAGAGGCTACGAATACTGCAAG  
GTCTGTAACAGCAGGTGGTATTACATAACTATTAATGCTATTAGTGGTACTGGCCAGC

AGGATCTAATAGTGGTGGAGTAATTGCTAACCGTGTGCTTCTTCTAAGACATTAGCAAC  
TATGGTTGTTACTGCTGCTTATGTTGGCTTTAAATTCGGTGAAACAATGACAGGTGACTC  
CTCTACTACTTCTACAGCAGAGGTTGTAAGTTGGACTACTGGAACAAAGACACAGACT  
TAAACATGTGTCTTCTGCGTTTACTCCATCATAAGAACTATTATTGGTGGAACTTCAGA  
CAGAACTAAAACAGTCAGAAGAATGACTTGCCCCGGGGTCCCTGTGGAGTCGGCTGCAAT  
CCAACCTTGCTACCCATCAAAAACGCCAACTAGTCTACAAATCAACGAACGATTTCGTGT  
GTATCGTAGTAGTGTCCGTATGCACAGTGCATCTAACAATGGGTTTCTTGAAAGCGCTTA  
AACTGAGGTTTCTGATACTGCTTTGACTGCATGTAAATCTGCTACAGATCCTAGTATTGC  
TGTAGCAAACGCTACTCCATTCCACAAGAATATATACGGTGCTGCTATTGTAACAAGTAA  
CGTTTGTGACATTAACATTAATGATGAATTTATCTCTTATAGTGCAATGTCTAGATATAA  
CAACACTATTGCTGCTCATGATCGTAGTCATGGAGAAACAACCGGAGTATCCCATGCCGA  
TGGGTCTGTAGCGGCGAACTGTGACTTAGATGGTATACGTCTAATCGGAATTAAGAAAAC  
TCTTGAAGGACTTGGAGATCTTACTTTAGATTACGACGAAATTTCCACATCATCTATTGC  
TAGCTTAGGAAATCTTGGTGGGGGAGGAGGTATCATTGCAACTCAGAATATTCAAACCG  
CACTCGTGTACCTCAGATTCAGAAGGTTTTGGTTCTTAACACTGACATTACAGCTAGAAT  
CAACACAATTAGTGGTACGTCTATCAATGATGGCTCTACTTTGTTCCAAGGATAATTCTC  
AGATGCTGGTGTGCTCTCTGATATTATTTTACGTCAGGATAATGAGTTGATTCCACCACA  
ATTAGTTTGTCTGCCATCAATGAATCATCTGAACTTAGCGGTGCTAGGTCATTCCGAAT  
GGAGTTTACAATGACTACTGAAAAGACTATAATTTCCCCTGTCATTGGTACATATAAAAC  
GTATATAAGTTGCGTACCTAACCGTATCAATACTCCTTCATATTCTAATACGACAAAAC  
GTCAGTTGGTGTGATGATGACTTTATATGACTAAGACTGGAACCTCAAACCTAATCC  
TTCTGCTTCAATCAAGGTTCTTTTGGCGGGATGTCGCCACCCAACAGTGAGATTAAGGT  
GCTATCCAGAGTGCGTCCTTTTGGATCTTCTGTTCTTATTGAACAACCTGCGATTTGATTT  
CTTCCCAGCTGCAAGTACTAAGGTTCTGCAACCACAGAAAGAGAAATCTATTCAGCTTA  
TGACTAGGAAGTATCTGGTTTGGAGTATTGATCAATATCAAATCAAAGTAATGTTTCTTTC  
TCCTAAACAGGCATTAGTCCCACTTATCAAAGATATAACACCCATTCTCTTGGCTGTATA  
ATGAAAATTCCTGTAAAAGACAATGCAAATCGGTTTCGGGACTCCTATGCGGGTTCGGTG  
AAGTGTGCTGATAAATCTCTGTATGAGAAATAGATGGCAGCACATAAAGCAGAACAAGTT  
AAGGAAAAGGGATTTCTACTTTACTAAATGAAGTTTCTGAATTAGAAAGAGATATAAGT  
AAAATAAAATCAGTTTACTTACGTTAGTCTAATACAAAACAACCTAATGACTGTTGACA  
AGGTGTCACAAGAATACATGAATTCTCAAATCAAGGAGAGATATGCACAGGTGCATGATG  
AATATCGACAATTGTCTGCCACAATTAAGAAAAACATGTTAGACAACCTGCAACTATTGG  
GTGTTATTGGAACCATAGCATATTTTACAAAGGAAGAGGAAAAGACCGCTTCTTCAACTC  
CTGATCCATTTACATCAAAGAATGTGAAGGGCGGACAGTGCCCCACTCTTTTGGCATA  
AATAATAAATGAAGCATAACATAATCGAGTCGTCATAACATATAGCCAATATAATTCAAT  
TAAGACGAGGTGGCGCACAGGAATGGGCGGACTCAAACCCGACCCTTGCAACAAGGTTAAT  
TATGTATCGAAGTTGCCAAGCGTCGTTTTAAGATCGGTGATGGTGTATCTGCATGGACCT  
AATTAAGGCAAGAACGACCTGTACAGTCTACATCTAATCCTGCAAATACTTTAGACCAAT  
GGGACGCTGATGGTGACTTCACTGCAGATATCATTACTTCTCCTGTTAATGGCTACTCGT  
CTATTGTCTCTAGACTTGCTTCATCGATACAGATCCCCTCTTTAATGAGGTTACTGCTT  
GTGTTGTATATGCAGGTCCTCAAATCTTGAACCTATCCGCTGGATTAGCACTGATTTGTG  
CTCACCCACATTACGATAGTACGTCATCTCCATCAGCTACTCACAATAAGGTAACCTGTTG  
ATGCTAAAGGTAGAGGAACTGACGCACAAGATTTTACTGCTTTTACAACCTGACTCATG  
CTGATTATGGTTTTGATGGAGCCAATGGCGGAACATCTGCACAACCGTATGATCTAGAGT  
TATTTGCTGTCGCAAATTTGACCCCTTCCGGTATAATCACTAGTACTGCTTGTAAACTG  
TAGCAACTAGAGCAATTACTGGAACCTCCACAAGTATTTCTGTAAAGTAAGGATTCAGGTA  
ATTCGAGTTACCCAACCTATTAATATAATCGCCACTGCTGTTACAGCAGGTAACCTATAACA  
CAGAATCCCCGACATGTGTATCTGGTGCAGGTGGAAATGCTGAACCCATTGGAACCGCTA  
CAGTTAACGTTACTTAGTTTACTGTTGTTGCCCATGGTAGATTAACAAGACTAACAATG  
TGCCTATCACTACTGCTGCAGAAGGTAGTAAGTATGCTAGCTATTACTTACGTACTACTT  
CCGTTAAATACGACATCATTGATAACGTATCGAAAGATTGCCGATCCACCACCGACCTTG  
CTGTAGGATTAGGTCCTAGTTCTTATAGCAGCGGTGACTCTGGCGGGTGGAGATATCTAG  
CTGACAAAGCACCAGATCAGAAGGGAATGCGTAGTTTTGCACAAGTCGATTTCCACGTTG  
ACGCGAACTGGCACGTCACCATCACCACCGCAGGAGTCGAGAATACACTAAAACAAAAGA  
TTTAACTAATGTTCACAAATGCAACTGATGTTGGAAATTTTGTAGTAGTTAACAACTTT  
CAACTTCTACCGCCAACAAAGATTTTGTATAAATTGAACTGTATAAAGATCAACAATCCTT  
CTGGCGGTTTACTTTTTGGACCTTATAATAGTAGTGACATTAGTGACAGAAAGATCGATG

TAAATGTACTTACTTACTTTGACGGTCCTGCTATTACTTTAGATGCGTCAGTTGCACAAT  
CTCTGAACAAAGCTGGTATGGTAATCTTACTTTACCCTTCTCAAAGCTCATCGTGTG  
CATGATTTTTAACAGTTTAAGCATCAATCGCTGGTACCGGAACTAGCATGGTTACAATCA  
CTGCAGAAGGTAAAGTTGATATTGATGCCTCAGATTCATACGGAAAAGTTCATGTCGAAG  
ATTATAGATACCCATATAACAACATTGCTACGTCTGATGCCGCTATGGACGTTAATCCTA  
GTGATGATCGTGCTACCAGTGGCTCACTTCGTGTTAATGCCGGTGTTCAGTTAGAGGGCA  
TGGCTACGACAATTAATTCAACAGTTAAAACAATTGATGATCTCGTAATAACTTTTGGTG  
GCGATACTGTTCAAGGTAGTTATGAAAATAAAGATCGCGGAGTTGAATTCACATACTACG  
ACAATCAAGCAAGAATTGGATTCTTTGGTTACGAGGATTCTGAGTCCCTCCTCGGAGGAC  
ACTTCGAAGGATATACATTTTTACGCCACGACACTAATAGTCCAGCGGTCTCTAGTGGAT  
CTGCGTCAGGTATAACTCCAGGGAATTTTAACTTTCAACAAATACTTACTCAACTTCTA  
AGAATCCAGGAAAGTTAGTAGTTCCTCGTGCTGTTGATCTTGGAGATGATGTTAATATTC  
ATGAATGGCTATATTGCGATGGCACATTCAGTGCTAATAGCACATCTAGACTTGATGATA  
ACATTGTATTGGAAGGTGCTTCTAAGACATCATCATTGAATAATGGTAATGGCACGACTA  
AAATACAACCTTACCCTACTACAGGAAATGTAGAAATTAGTGGAATCATAACAAATACTG  
GTGCTATTGACGCAAACAGCACTTTAAATGTGCGATCCACAGTACCTTTTGAAGACGCAG  
ATGTACCAACTGTTGCACAGAACAGTGGAACTGGTATTTATGAAATTCATAAAAATGACT  
ATGGTGCATTTAGATTTGATGGCGGTGGGTATGTTGAAGGTGATGCAGTATTCAATTGTG  
ATTTTATTAATAACGGTGCTCAAACCAAAGAGACAGTGCAACAGAATCATTCCGGTAATA  
GAACTATGAGAACATCAGATATAAAGTACGTTGTGGTTCAACTGCAGCTTAACTTCTC  
CACACGCATCTGATCATACTTCTTACCTTAGAATCAAGCGTGGTGCAGGTATTCAAATG  
ACCTCCATACTGGTGTGATCATTATATTGGTAGATTGAATTATGGTGACAATGATTCCCT  
TCCAAGTATTAGGAGAGTCAGGTAATCGAACTACTCAAGGAACATTAACAGTAGTAGGTC  
AGACAAATATTAATGACTCTCTATTTGTAAATGTTACGAACGAAAACCTTTGAGGTTCAAG  
ATGGATCTGCAGCAAATAAATATACAGTGTATACTGATAATGTTACTAGATTAAACGAAG  
TAACACTAAATGTAAACAGTGTAGCTGATATTGGCGTAGACTCCGCCGTTAGAAACGGAA  
CTACTGATAAGATCTTCGTCAAATCTGCCTCAGATTATACTCAAATAAAGCGCAATTTGA  
CAGCTGATGGTCATACCGAATTAATTAACACTTAATGTTGATAGTAATACAACACTTG  
GTTCAACTTACAGTAACTGGTAACTCAGAGTTCTATCGAACTGTAGTTGCTGAGACAA  
ACTTACCAGTCAGATCAGCAACTACTGATAAGATGACTGTTGCATGTTCAACAGGTCCCG  
TAACAACCTGATGGAACCTTAGTTGTTGCAGGTCTCACAAATATTAATGTTTGTCTAAATG  
CTCAACGTGATAACGGAGTAGTTAATATAAAGAATGGTTCCGCCACATCTTAGTTTAGCA  
ATGATACTGATAACGGTAAGGCAAGTATGATAGGTAAATTGACAGTTTCGGATGATACTC  
AACTTAATACTACCCTTGGTGGGCCTATCGTTGTGACCTTAAACAAGAAACGCTCAGCAA  
CTCTGACAGGATCTTATTCGGCTGATGGTCCCTTCAAACCTGACTAGTGGTTCAGGTATCG  
GAAACAATCTTGCTGTGGGGAAAGGTCTAAGAGTATATGGAAGCACGGAACCTTACTGGTG  
CTCTTGATAGTATTAATAGTGCTGCTATATCTGGAGACTTAGTAACTCATGATAGTGTGA  
CTGTCACTGCAGACAATATGATGTTCAAGGAGCAGATTGAATGTGCAGCGAACAAGTTA  
CAGTCGATCGCGAGTATGGTAGCACCGGCATTCAAGGAACATTGGATCCTGCAGGTGGTG  
TAACTACATCACCTGACCTTACATTCTCTGGAAATCTTAAAGTCACCGGAATAACAATA  
CTTTCTATTCTCCGGTCGCAACAATCGATGAGCCTGTTATTACTTTTGCAGCTGATACTG  
CACGCGCGTCTAATGATGAAATGGATCGTGGTATTGAATTACGTTATTACGATGGGTCTG  
CTAAATGCGGTTTCTTGGGTTTTGATAGATCATCCTCCTAATTCCAATTCTTAAACAAGTC  
CAACAACCTACTTCTGAAGTTCTCTCAGAAACAGATGGTGCTCTAGCGGCAGGTGTTTTTA  
ATCCTACTCGTGCGGGCACATCTCTTGATTTTACGCTAATGCAAACATAGATGCCACAA  
TGACTGGAGATGTTCTTGGTGGTTTCAACAAGTATCTGCAGGTGCTGTTTTGTTATCCCAA  
TAACATATAAGATTAATAATTTTAACTCAGACGTAATAGATTGTGCTACAAACGCAACTG  
CTGCAACTCCATCCCCAGTTTTTGTTCGTACTTCATCTGGAGATTGTGCTGCTCATCAA  
TCACTGCTGCTAGTGGTGCAAGTTCTGGTGCAGGTTTCTTAGAAAGCGCATCCATTGCCG  
ACGCATGGAAGACTGCAAGAACAACCTCAGCCCTAGCGGTGTTGTATCTGGTTTTGTCGTCG  
TCGATGGAAGTGAATTGTAGCACTTACAGGAACTCGTGTTGATGCAGACATCACTGCTC  
TGGCAGCGATGAATGTAACCTGGTTATGTCGTAAGGACTGCTGCTAACGCTTATGCCAAA  
AAAATCACCAAGTCACCGCAACGCCTCGAATTACTCTTACTAACGTTGATGGCGTTGCTG  
GTAATACTACATTTGACGTCGCTAGGGCATCTTCTAATTCTGCAAACAACCGCGTCCCAA  
GAGACGGATCTGGTGACTTTGGTGCAGGAACTATTAGTCGTTCTTATCTGGGAATGACA  
CAGGTAATGTAACCTGGACATGTAACCTGGTCACGCATCTGATATTTCAAATCATGATAGTA  
GTGATCTTACTAAACGTCCTAAACTCTACTACACATATGAAACAGTTGACGATAGAGTCA

ATGCTATTATCACTGCAGGAATTTTTATTACTAGGATGTACGCTGACGCCGCAAATACAT  
ATATACTGACTGTAACCTCAGTCAGATCTCTATACTGATATTGTTACAGAGGAATCACCAA  
ATCAATTCACAACCTGCTGCTAGAACTAGAACTCGTTTTACATATGGAACTGGTATCACAC  
AAAGATCCGGGACTTAATCATTCACTCAGTCTGCTATTAATACCGACAACGTATCTGAAG  
GATCAACCCAGCTCTTTACTACTGCTGCTAGAACAAAGAACACACTTTACATACGGAACTG  
GTATTACACACAGTTATGGAACCTTACCAGTTACACAATAAGATATCAACACTGATAATA  
GTAGTGCTGGTTCTACAAAACCTATTCACTACTAATGAACGAGTTGATGAGAGAGTTAACG  
CTTCCACTCTTGCTACAACCTGGGGTAAGCAAGACATCTGATGACGCTGGAGGAACTCTAT  
CTTTAGCAGTTGGCTCTAGTGAGTTAATACTGGCATTTTTACAGAGGGTTCTACCCTTT  
ACTATACAAAACACTCGTGCTCATGCAGGGGCAGACTTGAAAGTTGATGTTGCATCAGGTT  
CAAACCTTGATCTTTCTTCTAAGTCTACTTCCGTTCTTTCTGGAGGAACGTCTCAATACG  
ATACAGAAGGGAGAGTTACGTA AAACTTGACAATGAATATGAGCAACCAAGGGCAATGT  
TAACTAACCTCGGATCTAGCAGCACTCAAGATCTTAGCTTGTCTGGTGATCGTAGACCTG  
GGGCAGTTGTTACCACTGCTGTTAGTGTTGTCCGGTGGCGGTGGAGTTACTCTACTAACTG  
CGGTTGTTTCATCTCGTTCAGCATCTGGATCTGGATTGCCTGTCAATACTACGGTTGATA  
GTGATGGAAACATTCTACAGCTGCGGTAAGTCCAGGTGGTTCTGGATGTCTAATTACTG  
ATAGTGTCACAGTCCCTGACTGCAACGCAGATAAGATTCTTAAATTGAGCTTGGGAACAT  
TATCAGGTGGATCACGGTATTCATGTGCTACTGTAGCAGCAGTGACTGGGGGGGACGGTT  
CTGCTGCTACTGGTGTCCGTA CTTCATCTGCAGGTGCTTCCAGTCACGTAACCGTTAATA  
ACGGTGCCACAGGATCCGCAGCGTGTACTCCTATTAATGTTGCTAATGCTAATGCCACTG  
GAGTTCAGAAGCTATGGCCTATTAGTGCTGGACGGCCTGGTTACTCAAAGGAACTGCCA  
TTGCCCATCATCGCCCGCAACAGGATCTGGAGCAACATCAAATATCACTTCTGTTATTG  
CTAGCGGTCGTATCACTACTATCGCAATCAGCGATGATGGATCTGGTGACGGTGAATCTG  
GACTCAAGACAATTACTAATGATAACACATCTAATATCGTAACAGTAGGAAGCATTGGTG  
CTGCTTACGCATCAAGGTTTGCAGGAACCTATAACTTAGGCACATCTGATTATGGAACCG  
AAGAATCTGGTGCGAACGTA ACTTTCACTGTTGTTGTTGATTCAAATGGTACTGCTTCTC  
TCACCGTAACAGATGATTGTAGCGCATTTAGCGCCAATGAAACTATCAGACTTGCTGATG  
CTCAAATGGTGGTGGGGGTGGTGC GGCTCCTACATTCGATGTAACAGCAATCTATCGTA  
GCACGGCCACATTTCCAGTATCTGCGATTTATGGGAACCGTACAACAGTTTATGTCGCTA  
CCGTTGCAGCAATTGCAACTCTTACAATAGTTGACAACCTCAACGCTGCAGGTTGGATCAA  
GAATTACATGCGCTACTTCTGGCACCACACGTATTAAGACTGATCTGGGAACTGACCAGA  
TCACTGTCAATTACCGTTGACGGATTCTTCATGAAAGGAGAAGTCGTCACTGCTAATGCTG  
TAACTAAACTTACGTTCTCCTCATT CAGTTAATACGTTTTTGTCCGCCATTAGATCCGTAA  
ATAAACTGAACTACGGGACATTCCTCTACGTCGTT CAGGATGTCCACTATGGCCATTA  
ACGATTCTACTGAGCAAATAGATGAGTTGATAGAAGAATCGAAGCATTCTATCAACAGT  
TTCACTCTGCAGGTAGTCACACATACTTCATGTTTATTGAAGTTACAGATGCTAATAAAA  
CAGCAGTAAAAAGTGCAACCCAACAAGGATCTACCAATTGGTGTGAGAACAACTATG  
TTGCATTACGACCTAACATCTTAGGAAGCAATCAGGTATAGCCACAGATGGGTGCGTCTA  
GTATTGTGCCTCGTAACACGTGCAAGAAAAAGTATCCAACCTTTGTAATGGCATATACG  
CTATGGCCCATGGTCATATTCTTCATTACTTTATGATCTTTCAATACCTTGAGGCACTTG  
ATTATGTAACAAAGTCTAGTCGAAGTATAATAGTAAGATATAACGAGAAACAAAGTAGCT  
TGTATCTCGATATAGATGGGGATTCATTGGGAACAGGAGACAAAATTTTAGTCGAAGGTC  
TCGTACGTCCAGATGAACAAATGTATACAGCATTATAAAATGATATCTCGTTAAAAGATT  
ATGCTTAAGGATTGTTTCAACAACAATGCGGTAGAAACCTAAGTAAGTACGATGGAATTC  
AAAATTTAGGTGGCGTCATACTCACTGGCCGTCAAATTCGGTCCGACGCAAGTCAACTCC  
AGAAGGACCTTGAAGATAAAATATGTGATACATGTGAACTAACTCCCCTAGACTTCGTGG  
GCTAATCTCTATAGTTATTTTCGCAACTCACCTGCACAAGGTTTTGTTCAATTCGATTCATT  
CTAACGCAGAACGCTACAAAGCAAACGGTTCTGCACTGGAACAAGAATTTATTCAAATTC  
TATTAGTTGCAAGCATTGGAATCTATGGGCTAGATATTTACTATGTTCCGGCGACCGTTTG  
TCAAGAAAGATACGGACTTTGGAGAGGACTCAAATTCACAATTCGATAGTGCGAACGCGA  
TTAGAGCATATGACAATAAAGATGAAGCATTGCAAGGACACGGTAAGCTACTTAGGAGAT  
TGGGAGTCCGTATCGAAGAGAAGACAACCTTTTATATTGGTCCGTGAGAAATTTAATGAGC  
AGCTGGTCGATAGTATCACGCTAAGCGTCAAAGGGAGACCAAACGAACCGGACTTAACCT  
GGTTTCTACAACAAGCATTATTTGGCAAACAGTTCTTCGAAGCATAAAAACCATATT  
ATCAATTAGGAAACGGATGTGATTGGGAATTT CAGTGTGGACTCTTTGAATGTATGTACG  
AAGACCTTGCCACAGGAATCGCATGGTTCGATGCAAGCGAAGCGGCCTTTGCTAACGCTA  
TTACAGTTAACTTGGCTACTGGAGGGTGTAGCGATTT CACACTTGCTGGAATTGATGCAG

GAGGTACCAGTAGAGTGACCGCTAAAGTAAAACCATGGGATTATGCAGCTAGACCTTTAC  
AGGTCTTAATTCATTCTGGTGTCTTTACGTTACTTGAAACAGGTACAGGACAGACCTCAG  
GTGCTGATTGCGCAACTGCATCATACTACTACTAAATAATTTGAAGACCGCTAACTCTA  
TTTAAACAAGACACAGAATTTGAAACAATGGATAACGATCTTATTGAATTTACCCAACTA  
ATCGATTCCGGTACAATTGGTTCCTTGACTGACACCACAATCTAATGTTAGGCACTTATTC  
ATATCACGAAATTTTTAGGAGGGCTAACGTTGCTTTTGGATCGTAATTCGATAATAGTGA  
ATTACCTAGGACTGACGAAGTGATCCAAGTAGCTTTATGGAACGGTGCTGAACAAAAATT  
CTTAGCAAGGTTAGAACAAGTTTCTGATCCAACAAAACAAAAGAGTTCAACTTACTCTAGC  
CAGAACTTTTTTTGAATTGAACGGGGTAGCATATGTTAGTGAAAGAAATCGTGCCCCCAC  
ACAAACCAAAAAGATGGCAAGCAGTTCTACTTCAACTAAGAATGTGTTTCATGCCTGTGCT  
TTATATTATTTGTTTGGAGCTAGCAATCATCTCGAAAAATCAAGAAGATTGTTGACAAGT  
TTTAGACCAGATACTAACAAGACGCCAACATCATCTCAATTTGGCAGTGAACTATTGTC  
GAAGATGACTGAGATTAGCGACATTCAGTCGTCTCAATGGCTTCGAATATGAACATGA  
CTATGAGGGTAACTTTACTACAAGAATAGCGATCATTTATCCCTTACAATATACTGCAAG  
AACTCATCTGTACGGTCCCGTATCAGAAGCACAAGTGCACAAAAAGGCATATATATATTA  
CTATACGGATACTACTACAAGTGTATCAAGAAAAGTAAGGTTAATTGTTGTTCTCTAA  
TCCTCACTCAGCAGATGCTGATGATGATTCTGGATTAGGAGATACTACTGCAGTCTTTAC  
AGCTAACACGAAAAGTAAGCCTGCTAGAGGTGCTGACGAGGCAATCCAATCCTTTCAACT  
CCTTTTCGATGGTTCCTACGATGCTTGTGGAAGTGAACCCACAAAACCTTCTAAACCATGTG  
AAAAAAGTAAAACCAATTCTGTAAAAAACAGAGACTGAAGATGGGAAACAAGTCTCGGAG  
AAATCACGTGCTACTGCACATAGATTAGTGATGAAAGGACAAGAAGCATTAGGTTGTATA  
TTGAAAGTAGCACAAGCATCAGATCATCCTCGTCCGTGAGCAGGCGCTCCAACAACGATT  
AAGAACGTAGCCGATACTGCTGACAAACCAATTTACGTTTCAGAAGAAGGTGACATAGTCG  
GATGCTGATAATAAAAAGAATGTGCCTTTTACAGTAAACAAGATGATGTTTGGTGGTTGC  
CCTGTACAGTTACAGAAAATGGTAAAGCTGAAAAGGGAAATAAACAAAATGGAAGAGCAA  
TATCAACACACGATATGTCAGTATTAAGTGTGCTTTGCACAAATCCAGTTGCCGTAGATG  
CAACAGAATCTCAAGTAATTAACACAGGATATTACAGAGTTCGTTCTATTCCAGGTGATC  
CTGCTGTGTCCCTTGATGGTGCTCCAGCAGTCACAATTGTCTAGAATGAGGGCATTCTTG  
TCAAAGGTGGTAAACCTGGTCGGGCTAGAATTGTAGGAGCCGTATCGGATTCTACTACTA  
ACTATATCCTAGGTCAGCACAATTATTCTACAGGTGACGCACATCCATTCTCATCCGGTG  
ATGTTGTCGCAATTGTAGCTGATAACACATCTCCTGCCATTCATTGCAACTTCCGCTCTG  
CAGGTTCTTGAGGTA AAAAAGTTACTGCTGTCACAGCCACAACAATCGCGACTTATAATG  
ATTCATCAGGTGTCTCAGCAGATTACACTTTTGCCTTCTCAGGCCCTCGACCATTTGTTA  
AAGGATGAAGTAAAATCATTGCCGCTACAAGCGCAGTAATCATAGAAGAAATTCAAGTGG  
ATGGTGGTCAAGTGGCCCGCTGGAATCAAGCGGAAGTGAGAATACTCAACGGGATGAAG  
AGGAATCGTTTTTCGCTTTAGGAAACTCCATGGAGATCGAGATAAAGGAGTGGTGTACGCT  
ACTGCAGAGAAGTTCGCCCGAGAAAGAACAAATTGAATGTTATGTTCTATCAAGATTTCAAT  
AAACGAGTCCAAGGTAATCTTACGACAAGGATGCTATCGATAGCAAGGTCAACGATTACG  
GGAAACATTTATGCTGATCGTGGAAGTCCGAAAAGAAGACTTGAGAAAGTAGAAAGTCT  
CTTGAAAAAGATCTTTAGAAGTACCGTATAAATTATAATAAACGTGTAGAGCCGTATAAA  
TAATCCTCAGGTGAGGGAACAGGACTCGATGTTTCTACCAAAGAAGTCGTAGCAAAGGA  
GTGTCTAAGAGACGTTTTGGTAAGACCATGCGTCGTCTAGGAAGATCGCATGGTCCAGAA  
TAAGTGGTAACTAAGAAGGCAGGTAACCCTGCTAGACCAGGTGATGCGTAGTTTAAACAA  
CTACCTACGTCAATACACTTACGTAGAGCAAAGGCACGGAAAAATCCTGCTGGTTTCGCA  
GAAACTTCTGGTACTAAATACAGAGAAGGTGAACTCGGTCAAACCTCGCTAACCTCCGGTG  
CACCATGGCAACTAATGAAAGTATTGAAAAGAATAAATGTGGTTATAGTTCTTTGCACGA  
CTGGATTTCTAAGAATAAATCTTCTGATGAGTAGGCTGTTAGGGTTCAGCTCGGTGAGAA  
ATACTTAGGTAAACCCTGCGCCAGACAACCGGGACAAACGACCAAACACAGGAGCGGTTTC  
CAGTTAGATGACAAGAAACCTAAATATAAAAAGAAGAAGATAGTGGCTTACGTCACAAAAA  
CAAGCAAGATCCTAATCCAATCATAAAAGGAAAGGCGATCAAAGTGAGAACCGAATTTAA  
ACAAATACACGAAGACGAAAAAGTTTCATGTTAGCATAAGGTAAAATCTCGCAGGTGAGT  
TTGGCCAAGTACCGATGCTAGCGGTGCACTTGTGAAATGCCGAAAAGGTCTGAAAAAAA  
TTGGGGAAACAAAAGAAAGATAGAAGATATTGATATGAAGGTAAACGAATTCAAAATTT  
CAAACCAGAATGTTAGAATAACCAGAAAAGAGTTGGTATGAAAATGAAGTGTGGTAAGCT  
AGTAAAGGATTTTCGCCCAAAGAACGAAGCAAATGGATACAGAGGGCCAGACAAAACAGA  
CAGAAGACTTATCCAGAAAATGGATAACCCTAGATATGCTAAACAGTAAGCAGACAAAGA  
AAAGAAGATGGATCTTAAGAATCGACAAACGCTTATGGATAAAGCGATTAAGGGGATGAA



GTTTACTCACGAAGAAATAACCAAAGATGGAAAGAAGTGTGGCCAGATGTTGAGATAAG  
GGAAACCCAAAAAGCATTTCGTCAAACATACAACCACTGTGTCTAAAACGAAGACTTAGC  
GGATGCCAGAGAAAAAGCGGCAGCCGGGACTAGGAAAGCAGGAAAAACCAATCAGGCGG  
ACCTAACGACAAAGGCAGACAAAGTTACGAACGAGAAAAATCCAGGATCTGACCTTAATGC  
TACTCACAAAACAATTGGAAACCCCCGCAGAGCAACCTCTGCGCTAGAATGAGAGGAAT  
GAAAAAGAAATTAACCGCAAAGGAAACAGCCAGCGATCCTGATTCAAGGGCTATCCAAAG  
CTTGCGTGTCTAGAAATTGTCGATATATAACCGACTGTAGTCCGTACTCTTAGACTACAAA  
TCTGACCGTTCTGTAGTGCTACATGGATCGGGGAACAGTTTTATGGGTCTCCTGTAAAAG  
CGGGGTGCCCTTATGATCTTGCCGACTAGTACGTAATAATCAAAGAGATGAGACTTGTA  
TTAATCCATGTAATGTATCCACTAATTGTCAAAGATGCGGATATCGTCATGGAGTGATTG  
ACGGTTTGACGGAGGGGTATGATAGAGATTATTGGTTATGTATGTTATCAATTTGTATTA  
GATTTTCATATTTAAAACAGCAGCAAGAAGAATAACGTTGCATTAGAAGTTCTCTATGGGA  
GCAGCGTTCGATAAGATGCTTGCAAGATAAGATGTTGTAGAAAATGGTAAGAACAAGAT  
GCTTCGCTAGAAAGTCTTGCATCTTAAATTTTGTGCAAGTATGGGAAGCAAGTAATAGA  
GGACTACTCATACCTGAGATATTTTATGCGAGTGTGGCAGTAAAAGATAAACATAGAAAA  
GATAACGTAGATGTAGTTGGCGCGAACCGAAATGATAGCTTTAAAATTATGGGCTTCTTG  
AATGGTGACTTGGATCCGAACACGACGGGTGGTTCGAGTTATGCATGGTGGTATTAATAAAT  
AAATTGCATACTACCCACTTTTGTATTTGCGTTCCAAGGACACCTCATGCACCAGGGGAT  
CTAATCTGTGCTTACTATAGGTTTGCCAAGGATCTCTCCGTTAAGAAAACGAAACAAGCG  
CGCGACGTCAACAGCTATCAACGATACTATAGTGTAGACTGTAAAAGGAGAACGAGGTTT  
TTTGCATTACACCCGTCTGTTTATACTTTAGCAGGCACATTGGTACAACAACCGGATATA  
TTGTATAACCCGACACTTCTTAGTTCTCTTGGGTCAACAGCAGTTCCTATTCGTGTGACT  
GTATCCGTTATAGCGAGCACGAGAAAGAGAAAACGCATCCGATAGATGCCTGAGCTAAAC  
CGAAATATATTGATCGCAACCGTTGCCGTTATTCATTTATTGTATAAAGATAGAGACTGC  
CAAAGATTTTGGGTGCTTGTGGAGATAGGTTCGAGCGCCCCATTTTGCTTTTTTGGGTGTC  
TTACTTCAAAGAATCAATGGGAGCACTAGGACCAGAACACATCTATCTAATGGAGGAG  
CATTTTGGACGAACACTTAACGAAACAGATCGTCTTGAATATCTGGAAAGTCGGTGTCTT  
AACTCTGATTAGTTTGATCGTCTCTCGCCAACCACCTCGTCTTATCTACTTTTGGCTC  
ATGGTGGTGTATTATGGGTGAGATGCTGTATCTGCTTACGACCTAGATCATAAAGTAGAG  
TGGCATGCCGCACATGGAGATGAAGAATACCTAACACGTTTTCCAGATGACGGGTGCATC  
ACTCGAATCAACGATGCGGAAGTTAAACATGTAAATGAATTATCCACAGGAATGAAGTAA  
ATAAAATGAGAACCAGCACCAGAAACGAGTATAAATTAGTATTAGAGGCTCTTTGTAAAC  
GTCAGCGTTGCTTTATTGTAGGTATTAGAATGTTCAAAGAATGCGAGAAACCTATTGAGG  
AGTTTCAAAGGCCAGTGTTTCGTGACTACGAGATCAGACTTAATCTCAATGAATTAATT  
GAACGCAGGAGCACACCCCGTGATTTGCTGCTTCCAGACGACCCGCGTATCGGAATGTCCA  
GTGGCACATATAGCACATGTTATTAATATGGATTTAGACTTGCACCCAATCTATCGTCAG  
ATGGCTGATCACATCATTACATATTTATAGGCAGCAGAAAGTGGTACTCAAATCACTGG  
GTTGCGAAAGAACTATTTGATTTCAGAGTTATTAAGGGAATGAATACTAAAGAATCTTCTG  
AACAACTGATTCCAAGTTTTACCAAACGTACGATGCAGTTACCAGCAAGGACACGAGAAC  
TTGCAACTGCATATGATGAGTATGTAAAATTAGAAGGAGATCCGAATTCATTTGAAGGTT  
CTAAGTAAGCAATTGAATATGTTGCTTTTCGACAAATTACCAGGAGATGGTAACCATTCTC  
GTATGCAAGACTACTTTCCAAGTAAAAAATGGCGGCGAGGCACGAACTCGCATTAGTCG  
AATTAAGATCTCGGTGCAATAACCAGATTGCTGCACCCTGGATGGAGATGAAATTATCAT  
GTCCCATTATACTGCAGGTTATCACGATAAACAAAATCAACATTTTGAACCTATGTGAGTA  
CGCTGAACATGCTTATCATACTCTCAAACAAGCAAGAGAAGATTTAGAAGTATTGAATAA  
TCCCACTCAGCAGAATATTGTATCATAGAAAATCAAATGGTGGGCTTGGGTTTCATATG  
GATAGTGTTTATAATCCTTGAATTCGTGCTTGGTATATCTACTATCTACTTCGAATGGC  
ATACAAGTAGATGGTCGATGGCAGCGATTTCATCCAGCGAGCAGTAAAAGCTGCTATAACT  
TGAGAGTGACGGAGATTAATCGTGTGTTGACGCCATACTATTGAAGTCAGCATTATT  
GGGGGTTTCTATATACATGAAAGAAAGAGTTAGAAATGCAGGAGTTGATAGGCAAGAGA  
GGACAACAAGAGAACTGGACGACAAGGCATTGGGAATAATAGATACTAACTGGATGAAA  
GAAATTTGGAGGATGATAGTAATGGGGATGCTGAAGTTACTATAAGAACTGAACTGAAAG  
GTGGGCTTTGTACGTATGGTAGGTTGCTTGGATGGTTATACGATGGCGATGATTATGCAG  
CCCTCAGCGGAAAACCTGAGTGTGCAAGGATATGCATGGTGGTTCGACGGTGGAAACAACC  
AAAAAAAATTCCATGAGCTCCGTGAAATGAGACGTACCTTCGGAACCTTGCTCTAGTCTA  
GCATCTCTGGTTAGAATAAGAGATCAAGGTTACGACATTTAGAAAAAGTTGTTTCAGGT  
TATGATGAGGTTACATACAGGTTATGCATCCATCTATAATTGCGTGAGGAATTCTAAGGGT

TTAAGAAAGTTACATCTAGAAGCAGCAATTAAGTTAAGGGGATTGAGATATTACACTCT  
GTACTAGTTCCAAATCCAGAGTTCCCTATTCCCTATCTTTGGATGTTATATCGTAGAGGTA  
TGTCGTAATTATCCTGCTGCTTTAGTTGATGTGTCCCCAGTGCAAAACGTAGATTATAGT  
TTATGTAACATAACATATAATTTTAAAAAGAGCAGGCATCTTCCAGAGTATGGTGACATA  
TTCTCGCCATGGTGTAAGTTTGTGATATTGGCAGAGGATGAGTATCATGATGTTTTAATA  
TTGTGGAGTGAATACTCAGAGGTATTCTGACACCTAGAAAGAACAGCAGAAAGAGAATCT  
GACTTGAGAAATACTAGGAGGAGATATGTTCGATCTGCGAGGGTAGTGGACATCGCAGATG  
AAGAACAACAAAAACTGGGGCGGTGCTACTCCAATGGTTCGATAACCCGTGGGCATCTAAA  
TATATACAGAACATCCTATTCGACAAAACCGGACCTATGAGAACAGTAATGTTGGAAGCTC  
TCAAGGCACTTGCCCTTGGCACCCCTCAAGAAACCAGAGAAGAACGTGGGGGTTTACCTTA  
GGAATCCTGTTGGAATTGGTGAACCTCAGATGTTCTTGGTGCTATTCGCGAACAAATTG  
ATTAGATTGCGAAAGAGGAGGAACGTTTGGAAAGTAATTCATAAGGATTTGGAAGTAGGAA  
TGATCTTTATGATGGATCTGAATGATGGATCAGTAACGCCCTCAACCCAAATATAACAAA  
AGTAAACACATCGATTGACTTCAAACCAGCAGAAGTTTCTGAGCTATTGAAGAGTCATGG  
TGATCTCATATAATTTAACAAAAATTATATCAAGATCGTTCCTCTAGATGAAGGTCTGGT  
TCAACTTAACATGTATCACTTCCAAGATGAAAAGGTACCTAAGTCTTATGATCATGGATA  
CAATATCGCTAAACTGCCTCGACAGTGTGCAAAGTTTACCATAGTTACGGCATACTTAAT  
TTGCTATGTGTTATTCAATGGAACCGACATCGTAGCAGTCCCTTGCAAACGAAGCAGTAAC  
AGCTAGCGAGATGCTTAAATGATTAAATTTCAAGTAATAAAAACCTCCTGAACGGGATGTA  
ACAAGGCATCCTCCAACGGGACAAAGCTTCTCTGGAACCTGAATACGGCAGTAAAATCAT  
GGCTGCTTATATTAACGCTGCTGCTGTCAGGGGTAGGCCATTTAAAGTTATATTTCTGGA  
TGAATTAGCGTTCATTTCGAATCATATGGCTGATCAGCTTCCAAGTTCATTTATCCAAC  
GATCTCCTCGGGGTAGTCTACGAAAGTTAGGATCATATCTACTCGTCACGGAATGAATAC  
GTTCCACAAACGCTGGCTTGATGCAGAGCGTGTGACGAATGAATATGTGCCTACGGAAGT  
CCTCTGGTCAGAAGAGCCAGGTATAGATGCTGTAAGAAAAGAGCAAACGATTAAGAACAC  
AGCGGAATCTAAAGTTCGTGTTGAAATTTAGTGTGAGCTCGTAGGTTCTGGTGATAAAGT  
GATCGCTCCTAGTTAGTAGAGAATCATGCCATATCATGACACACTTACATCTGCTTGTAG  
ACTTGCAGTATATAATCACGTGTTTCCAGAACATAATTATATTTTCACTGTTACCTATC  
GAGAGGTGTCGGTCATGATTACTCAGCAGTTTATGGGATCGATAACACAACCTATTGCTTA  
TAATATCGTTGCCAAATATTATAACATTGAAATTAACCCATCGTTCGACCAGATAGTAT  
CGTAGAGATTGCAAACAATTATAATAACGCATACATCTTATGTGAAGTAGATGATATTGG  
TGGACGAGTAGCAGATATTATTCAGTCTGAGTTGGACTATGAGAATTTGTTGATGGGTGC  
AATGAGAGGTTCGTGCAGGTTACTAACTAGGTCAAGTTTTTTTTTTGTTAAGAAAACCCA  
TCGATTTAACATGTAAACGGCAAATAACGAGTTCGATGCTCTATCCTTAAAGAATTAAT  
TGAAGAAGATAAATCGCTTATCACTGATTATGACACGGTTGCGGAATTAACACCGTTCCG  
TGCGAAAGATCAAATATTCCAAGCGGAAAAAGGTTGTAATGACGACCTTCCTATCTGTTT  
AGTGATTCTTGGTAGGATGGCAATACAACCATACTTTACAGAGAAGTCCGATAATCACGT  
ACGTCCGCGCATCTATGAACAACATAAAGATACTAGAGAAGTCCGATGGCACCATTG  
TTTTGTAACCTGCCGAAGGGAAGATGATTATTTTGCGTACGCACGGGGCTAGGTGTGGAA  
ACTCGTGGAATGCAGGGATAAATCCTACGCGGGGGAGTTTAGATAAAGTTTTCAAAAAAAT  
CACTAATCCTATACATCTGATGGTGGAAAGCACCCTAGGAGGAAATTCACCACGGCAGCTA  
ATCAATTATCTCCAGGTGTAGCTGTAAAGGTGAGAGACCATAGTACTATTACCTCATTAT  
CGACCGCTAAGATTGCTGTGATCGCTGCACTTTTTTAGCTCGGAACCTGTTGAATAGATCG  
TCGAAAACCTCCCGTGAAAGCGATCTTGCAGCGCAATTTTGATAACTGAATGAGTTAACT  
ACGATAATTGGTATATTGCAGCAAACTTCGGCGCTATGGAGGACTACTAACACGGTTC  
GTGTTGACTCGGAATCTCTCAGAAACGCAGATAGTAATGGAAGTACAGTTAAAGTTCGAGG  
ATTTAAGTGAGTATGAAACCACTTTTCGATGGTGTACTCGGACGGGGCAGTGGGCAGCAC  
AACTTCTGGAACCTATAGCAAACCCTGACAGCGTATTTGTAACCTGACGCAGGTCCAGATC  
ATATCGCTGTTGCTCCTGCTACTAGCTCAGGAAACGATCGCTAATTCGTTGCAGATGAAG  
CTCTCTCCGAAACATGAGGGCCTGCAGATGAAGTATTCAGATACCGCAGCGTATTGACAG  
TCACATGTGTTGTTTCGCGACCTCGTTTCTGGCTCCCCTACAACCTGTTGCAATTTGTGGTT  
CTCACCAGACGGTTACAGTGCTTGATTGGTATCCTACTAACAGGAATCTTGAAATGGGTC  
TTCTTCTGGTGGTAGCACTCCTATCCTTGGTGGTGCAGACTGTAACCTCGAGGATCTT  
ATACCTGTGATACTGCATCATCGGGTATTGAAAGAAGAGTATATATTGGATTAACAAAG  
GGAGTATGGAATTCTCTGCGGCTGATATTATCGCTGATACTAACTCAACTGCTGTATCGA  
GCATTTATTTTCGTTCTGAGTGTGCAGAGCGAGAGAATCGTTCCTGGTGCAAAATGGATTA  
GCGTTCCTGCTGGTCCCTAGTGCACCTCTATGCAAATAATGCAGGTGGATTTACAGATG

AAATTCACGTTCTAGTTATGTATATCCATGGATCTATCGCTGGATCAACTCGTGCTGTAC  
TTGCGCCTTTCATTGGTGTTTCAAAGCACCTGACGCTAAGACATCTGTTAGTGGAGCAA  
ACTACTACAAAGAAATAATCAAGCCACAGTCAGAGTACATATAATGGGGTTTACATGAAA  
CGGGACTATTGAATACCACTGCTCCTGCTGCTGCAGGAAACTGGAGTTTAGCTGCTGCTT  
CTAGACAGTTTAACTTGCAACGCTCTCCAGACGGTTCTACTGGTAATCCTCAGGGACGCA  
GCACTGTAGGTTCTAAGGACAATGAAAACACTACTATATGTTAACTGGTGTTTTTCGCT  
GCGGTACTTCTGGTGGACTTTACGGTGTAACAAACACATCTGGTGCAACTGCATATGGTG  
TACTGATGATCCTAAGTCACAAACGATCGACTTAATTATGACTTGCCTTCTTGCGCAT  
ATGATGCATCTGTAACCGCTAAAGTAAATTCTCTAGTTAACATTGCTCAATAAAGATGAG  
ATTCGTTAGTATTCGTTTCACCTCGTCGAGGAAACGGAATCGGAGTACTTACTCTAATA  
CTACAACCTTATGATATCGTTATCATCTTCGATCTATTACCGTGGACGTCTTACATGGTAT  
TTGATTATGGATACAAGTCTATCTACCCTAATTATAACGATAAATAACAGATACGTTCAA  
CCAACGTTGACATTGCAGGTTTATGTTTACAGAGACCTTAGGTTAAAGCACCATGGATCT  
GACCTGCAGGTTTTGAACGCGGTGTCTTAAGAAGTCTATCAAACACTAGCATGCACACCAA  
CTAAGACAAAGAGAGATCGCTTGTATGCAAACAGAATAAACCTGTGCTTTCATTCCCTG  
GTCAACGCGTGGTCTCTTTGGTGACAAGACTGCTCTCGGATTTGCATCCGCGTTTGATA  
GCAATAAGGGATGTCGTCTAGTCCTCACGATCGACCGTGTGATCTCAGGTGCTGATAACG  
CACAACGCTTCGAGCGAAACGCTGAAGCACAGAGATCACTATTGTTGAATATCCTCGAAC  
CTTATCTGAGGGAAGTGTAACGACGTCGAGGCGTCACTGACTGCGTAGTTAAGTAGGATT  
CTTCTAACTACCCTCCAGAGGTAGTCGATCGTGGAGAGCTCTACGCGGAGAATTCGTGA  
AACCAACACGCTCCCTCAACTACAGTACCTTGACATTAGAAGCAACTAGAAGTGGTGTA  
CCTTCACCGAAGTAGCAAATTAATAAATAAACACGATTTTCAGAGGGTATACACATCG  
GTACCCCTGAAAATTTTTATTGGTCTAAATATAACTGACGGAGACACCTCTAGATATGG  
GAGAAAGAGGAACGATTGACGATGCTGAGGCAAATGCAGCATCAGACTTTGCTCGTCCTA  
ACCTATTCCAAGTTGATTCACCATTCCCCCTGGAATAATTTATAATTCAGATCTGCTAA  
ACCTTCGTATCTTCACAGTTCATGGAGAGAATGGTCCTTCTTCCAGATTGGTGTTATTG  
ATGTTCTTTTCAGAGGACATAATCTAAAACCTCGCAGGAAACAGGTCGTTTGAACCGTGCA  
CCATCAGCTTTATGAATGACAGTAATTATGTTCTAAGATCCGCATTTTAATTGTGGACAT  
AAAGCCTTCAAGAATACAATCAGAACATCACTTCCACATCAGGTCGTGGACACGCAGATG  
ATTCAACTGGATTCTTTTCTGACTTGAAGCCTCATCAATTAGCTAGAGATATTAATCAG  
GCGAGAAATCTAAAGTTCTCAAATCATATAAGTTCTACAACATCTTCCCTAGTGCTATCG  
CAGCGATTGATCTAGATTACGGAAACAACGTTGCAATCGAAGACTTCACCGTTGAGATGC  
AGGCTTAGTATTGGACTCCTCTAGCAGACTCCAACGACTAACCTTCAAATAAAAACATGA  
CGATTAATTAACATTTAATAGTGGCCAATCAGCTCTCCGGTTTTTCACTCGAGAGAGC  
GAAGAAGGTTTCATATAGGACCTTCTTTTGTTCAAAAGGAGAGTATGGATGGATCGCATCC  
TATGGTAGGGGGCTGTGACTATGCACATTCGGTCGATGTTGAGGGAACGGTTGGCAATGA  
GAAAGAATAATTACGGCTTACACAGAGATGGTACTACAACGACCGAGGGCTAGTGCGGT  
TGAAGACATCGTGGATGATAATATGTGTGCCAACTTTGACGGCGTGCCCGTCAAAGTCGA  
GTTGTCTCACTTGTAACAATCAAACAGCATTATAAAAATTAACCAGGGAAGAGTCCCATAC  
AATTCTACGCTTGCTTGAGTACGATAATAGATCGCCCGATATTTACCGGCGTTGGTATGT  
CGTTGGAAGATTAGTTCATAAAAAGGTTATCGATCCAGATAACCCTCGAAATGGTCTAAC  
TGAGTTACCATATTTTGACCCTCGTATCATTTGAAAGGTTACCGAGCATGATTTGAAAAC  
TCCCAATGTACTTACTGTTCTCGATCTGACGGCTCAACTTATACGAAAACTGCACATTA  
TTATCTAGATACTGGTAAGGGTTTGAAGAAGTCTGGATCTCAGCATGGGATCCACAGTGG  
TGCAGCTTCAATGACTTGTGACATTTTGGTATATAGGATATCTATAAGAAGATGACATT  
AAGTCATCTCCATATAGCAATCAAAGAGGTTATCCAACCTCCGTATGAGTGAAGACTCATT  
GGTCATCTATGGATTGTCAAGAGCACCATCAAGCAGAATTGCCTACATCCATGTAGGTAA  
CCTTCTAAGAACAAGCGGGACAATACCTCCGTGAAGTTATGGGAAGGTATCGTAATAC  
ATTGGTGTATGATGCAGACACTCTTGAGATTAAGGATGACAGGAAGTGCATGTCCATGTT  
TGAAGTCTTATGGTCACCTCGACGTGAAGACGGTAGAGGAACTCAGATATCCACTCTTCT  
TGGCGTACACAGAATTGATGTACTAGAAAACGGTAAATATATCCAGAACAAGTTATACAG  
AATCCTGAATGTACCGTCATCAACACTTGAGAATCAGACTACCTTAAACATAGGACGTGC  
GGCTGAAGTTACTAGGGACCAAGCCAAGTTCTAAAAATTTATTGCACGTCTCCCCAAGAG  
AATCTACAATTGTTTATGTATCTCCTTAAACACTCAAGTTGTTCTGAAGGGCACAATGGC  
ATTTGAGGCTCGGGAGGATATCAAAGACGATATTTAATTTGAATTTATAGCTGACAAC  
CTTCACTGAAGTGAAGGAAATTGTAATCTGCAATGAGAGCCTGAAGGAGGTGAACACAAT  
GGATCCGTACGTTAGAAAATTTCTTCTCCTGAGTACATGCGTTGTCAGGTTCTAAAACA

AACTGAACAGGAGATGCATGAAATTGAATAACAAATGGATTCTTAACGAGAAGCAGGTCT  
TATATTTGATACAGAGCAAGCAATGGATCCCGCTATGGATTCTCGCGCTTCCCTCAATGG  
GGAAGAATCTCCACAAGGCAATCCTCAAGGATACGCGGGTGAGGGGAAACGGGGAGATAT  
CTAAACTATAATGAATAAATGTGAGAGTAAAATTATGCCTATTGAAATGGCAAAGCAACT  
AGTTCCCAAGTCTGCCGTAACGGAAAAGGGAAAGCAGCTGACTCCGTGAATGATGCCTT  
GGCCGCTCTGCATATGGTGCCACTCAAGCAAGGAAGGTTGAGTTCGCTAATAGTATGGG  
GTTTGAACGAGATGCTACCGCACCGGTTGCTGCAGATGTAATTCAGATTACCAATCTTA  
CGAACTGACGAACCCGAATCTGTTGAACTTGAAGGCGGCAGACCTGAAGATCCTACAGC  
AGTACCCGAAGTACCCGTTGGTGACGGAACACCTTATTCTGTATAAGAACCTATCGAGGA  
ATCAACCGATGGGACTAATAGCTAAATTGACTACAAAAGTTGGTTTAATCTGCGAAGATA  
AAGAAGGCAAGAAAGAATACTCCATTGAAGGTGTCTTTCTACAAGCGGAATGAAAAA  
GCAACCATAAAAGGTATCCCGTCAAGACTTCATACAAAGAAGTCGTTAAATGTGATGCGA  
ACTACATGCGAAAAGGGCGTGCTCTTGGAGAATTAGGTTATCCTGATGGGCCGTCAATTA  
ACCTTGACCGCGTTTCCCATAAGGTACTTTCTCTACAGGAAGAGGGATACATCTTCATAG  
GTTGACTAAACCTGATCGAAAGACCTATGGGTGGGATCGCAAAGAACCCTTAGATGAGG  
GTGTCAAACCAGGTGTTTCATCTAGAGGAATGGGTTTCAGTCCGTAAAGAAGACA  
ACTGTAATGTTGTGATGGACGACTTTATGCTGGCAACTGCAGTAGTTTAAGTCGCCGATA  
ATTACG  
GTGCGCATGCCTGTATCAATGGAGTTATGGAACGAAATGAGTGGGTTTGTACAATGGAG  
TCCTAAAAGCTACTCCTGGGGCAGTAATTAACAATAAATGGGTCAAGCAACTCTAATTA  
ATCTGCAAGAACGGAAGTTTCCATCATGTGAGGCGTTTTTTACGAGTTTGTGATTGAAA  
ATAAATACAGACAACGCTCATCGATAACGGAGCTTAAAGAAATGGCTGAGACCCTCGATA  
AATAGATAGATAACATAGAGCAAGTGGACTAGGGCTTCGCTCCTATCACCAATAACACAA  
AACCGGGTGTGAAGAGGGACACTACCAAGCAGGAAGTCCAAAATAGTCCTCATCGTAG  
AAGGACGTGTAGATGCTTCAATGGAAGGCGAAAAGGAACTAAGAACGCAGGTAGTTCTG  
CTGCAGTTGCAGTGAACCTTGGAGGTTATAATTCTCTGAGCACAATAACGAGGGCTGCAT  
GCGCAAACAAGAGGAGGTAGAAACCCAAAATTGCGAAACAGAAGAAATAGCTGAAACGA  
AGTACGACTTTTCTCAGGATGTTACGTTCTTATCACAGGGGAGGAACTATGAGAAGAGT  
TCCGAGTAAAAGTAGCTACTATTTTTGAAGCAGCTGATACTGCCAAAGTTAATGACGAAG  
TTAAAGCGATGCAAGAAGCGTTTGAAACTACGCTGACTAAACACTCTCAAAGTGCATA  
GAGAATTGGCCGAGGAGGTTGACGATTACTTATTTTAGGCTGCCGAGCAATCGTTGATGG  
AAATGAGACTGCAAATCGAGGATCGCATCAAGACTGAGATGGCAACATGGTTCTTCACAG  
GTCTAGAATGTCTCTTCTTAGAGCACAACGTTACAGTGCCTGAGGAGTAGTTTAGCCTGT  
TAGATGGAATCGCAGGTGAGCTTCATGATATGGAAGCTGAACTATACGAGCAAGTCAACA  
CTAATGTTGCTCTGAACTAGCGCATTGGTGAGTTTGTAAATATGGAAGTTGGGAACGACG  
GAGCCACTGGACTAGCAGAAACACAAGAGGAGAAGTTAGCATCATTGGCAGACGGTGTTG  
AGTTTAGTAGTGAAGAAGGATATCGCAAGAAGCTCGAAACGTTGAAGGAATCATGCTTTA  
CTATGAATGCTGAAGTCCCTACAAATGCAACTGAGAGCGCAGAAGAAAGTGTCTCTCCGT  
TATTAGAAAATACTAACAGCCGTAACAAGTCAAATAACGTTGATGCACTCGGACATTGGT  
CCAAATAATTAATACTAATTCCAAGAGGTAAATTTAAAATGTCTTTAAATCAACTTCAG  
GCGAAGTGGCCACCCCTTCTAAATCACGATTCTCTACCTGAGATTGATGATGCACAGAAG  
CTTGGCGTGGTATCACAACACTAGGGAAACCAAGAAAAAGCATTACTCGCAGAAGGACAA  
AGCCTTACAGAACTCTACGAACTGCAGTTAAAGGTGCTTTCGGTGGCGGTGCCACTGCT  
GCAGATCCTGCCCCAGGTTTTGACGCCTTATTGATCATTCTTATCAGACGTTCAATGTCA  
CAAGTAATTGCAAATAATATTGCTGGTGTCCAGCCAATGACTGGTCCTACAGGTCTTATC  
ATTGCAAATAGAACCAGTACCGTATTGAAAGAGATCCTTCCAGTGGCAATTACAGAGAA  
ACCTTCTCAATGAGCCTAACGTAGGGTTCTCTGTTACTGATGGTAGCCGTCTTGCCGAC  
CACGATCCAACCTGCTTCTGGTAGGCCTGCCATTAACGATGATGAATGTGCTATGCCAGGT  
CTTCTTAATCATACCCCTGCAGGAACATGTGAGTGGACAGGTGATGCTCAAAGAATGAAC  
ACCACTGCTCTTGAAGCAATTACGGATGCAGCTGCAGCAACTGCCTTACAGCAATGGGT  
TTCTCAATCGAGAAAGTTAGTGTTGCTGCTAAAGCTCGCGCTTTAAAGCCAGAGTACAGT  
ATTTGGCTTGCTCAAACTTGAAGCAATTCATGGTCTTGATGCCGAGCACGAGTTCCCA  
AAAAGTCCCTCCACCTAAAATCCTCGCTGAAACAATCAGGGAAGTTGTGAGAACAATCTAC  
GTTAACGATCTTGAAGGTGCTTAAAACACTACTGCTACCGCAGGTATCTTCGACCTTAC  
GTTGACGCAAATGGTAGCTGGTCTGTTGATAAACTCAAAGGACTTCTGATCCAGATTGAA  
ATAGACGCAAACGCAATAGGGCATCAGACAAGTCGGGCATCGGGTAATATCATCAGCGCC  
TCTCCTGAGGCTGTATCCGCTCTTTCTATGCCTGGCGTTCTTGATTAGGTTCCCGGTATT  
CAACGTAACAATGGTCTTGTACGCGTTGACACACCTTGAACCTTGTGGAATTCTTAAG

CGAACGATCAACGTTAACGTTGACCCGTATTCAGCCAACGTAAGTGACAAGCACTGCTAA  
GTTGAAGGCTACAAAGGAACGTCCTTCTTCTGGCGCAGGATTATTCTAGTGCTAATATGTA  
CCTTTTCAGCAAGTAAGAGCAATCAACCCCGACATATTCCAGGAAAAAATAGCATTTAAG  
AACAGAAACGGTATGGTTTTTATTCGATTCGCTCAAGGTCTTAACCAAGGTTCTTGTGCA  
CCTACTGCTAAGAGTACTGAGTATTACAGAAGAGTTCAGGTTGTTATCTTTATGTAATAA  
GTCTTATTACCTAACTTTCTCGAGGGTGTAGACACCCACTATTTCTATGCGATACTCTA  
TTTGTGTTGGTCGTATCACTGGGAGTGACTGAATAATCTTACTGGCATATAGCTTGTTACGG  
AGAAGCGACAGACGAGGTGCTCGAGGTTATAAAATGCAGAATTACAAACCAAGTAGGTCA  
TATGCAGAGTTGTAACCTCAACTGTAGAATGGTCCTCCTTCTTAGTATACAGGTATA  
CAATCCTCCCGTTGAGTTGTTTTGTAGAAGGGTACATTACCTAGTAAGATTTTCAGGCTT  
CCCTTATAAGTAGCAAAAGGGTTAGGGTCAACTAGATGAACTAACTTTCCCTTATTACTC  
ACTTAAAAAGTGCTGAGAGATTAATGCACAACCTAGTGTCTATACTCAATTAGCAGGTT  
CTTCCCAGGAAGACCACGACACACGGCAAACAGAATACTTCGAGTCTTAATCGAAGGAG  
ACCACCAACGAAAGATCTGCCAAAGAATTTGCTAAGAGGTTGCTTATGTAAGACCTATTCCG  
GGAAGACTTAGAACGGGGCAGAGATGCTCCCTCTTTTATGTGCTACATAGCTCTATCAC  
AATGGAATTCTTTAATTGATTATAATCCACATTTCGCTGGGTGGCATGGAAAAAGGTCTC  
TAATGGAAGCACTTTTTTAATACCTTGACGATTGCGATGAGAACTATATCATTATAAATG  
GCCTCATTGATAGCCTACTCAGTACATCTGATGAAGCGTACAAAGAGTAGACTAACTCA  
ATCAGCTATCAGCCAACTCAGTTAAGAACAACAATTGCTTTCAACCAAATACCGCTTCC  
GGCTTGAGACTATCTGAGGACATATCGGAGAGGGTGAAATTGTCAAACCTAGAAGACATGA  
TTTGGGCACAAAAACAAGCAAAAAGACATGACACTGTTGATCCATGGAAGCGGCCAGAAC  
GACTGAAAGCAGCAAATCATGACATGAATAATGGAGGGACTGACAATTCTCTGAATAAGA  
TTGGGTTAGGAGAACACCACGCATCGGATGATAGAAGCGGGTTCAATGAAGCAGATGACA  
TTGGTGAATGGTATAACAGAGTTAAAACCTGATGGCCGGAGACAACGAGTGTAATGGCAA  
CTCGTTCAAAGACCAACTAACGACTAGAACTTTCTTTCCCCTATAGGATATCTTTTCT  
ATTAGGTAAGGCAAAGACGGTGTATTTTTTATGTCAACCAGCAGAGATTCCATCAATACA  
TTTAAATGATGTTCTTATTCTACTGAAGGATTAGTCCCTTTACCTAGAGAAGGAAACAT  
ACGCGATGATGATTTGACCACTGAAGTTAACGTAGATGAAAATGTGAGAAACCAGGTACA  
ACGCCACAACCTGTCTACGTGGTTTAGGAACTCCCAATAGGATAATGAGCGTGTTCATG  
GGGACGAAGTCTCAACACGCACTATCACAAGAGGGAGGTTTCTCTGACAATACTCTTCA  
AGTACCAAACAACAATTAATTAGCAAACCTTTGATGTAGTCTATAAAGATTTGTTTCTTAC  
AGAACTATCAACACTCTCACTTGATGTTTCACTAGTTGATAATTCATTCATGACTCCACA  
GGCAACCTTTAAATATACTGTATACGAAATCAGATACGTATTTTCGAGATCTAGACGATG  
AAGACGTTCAACCTATTCAAATATGAGCATAACATGGGGTGGGAAACATATCTGGTATACT  
AAATCTTCTAGCTTGGCGATGAAGCAACCATACCCAGAAAGAACTTAATTACAGGTTTT  
ATCGAAGGGTGGCGTTTTTCAGTGGAATGATGGTAAAATGATTTTGGCTATTGACGACCTT  
GATGGTAAGGGAGATAATATCCAAACCCAGTGGGAAGCAAATAAGCAACAGACAAGACAC  
ATAATGGTGGCGACAGGAGTTATTTGAGATGAAGGCTGGTCTATCGAAATTACAAATCCG  
ATGGTTGAAAGATGATCCTCATCAACTAGCACAGGCATTATTACTCTAAGCCATGCGCAA  
CGACTACAAGAACTAAAGGGGTTCAAGGAACCACCTTGTATCAGTCAGGATAACAGAT  
TTCAATGAAGGAGTGGTTTGAACGTGAAAAGGATCAGGTTGTGTGTATCTTGAGCAATTT  
CAAGAAATGTGGAAAAAGGATAGTGTAATTGACCGAGAAATATACTGCGAAAAATCTGCA  
AAAAGTCGACAACCTCATTACAAATATTTGGAGTATAACAACAGTTTCTGTCTTATGACA  
AAAGAAAGACAGTTTGAACCTAAACGTCTCATAAAAGAAAAATGGTTAGACTATAAAGGT  
ACAGCAACCTGCTGAGTATACATAGGACCACCTTTGATTTTAACTTACTACAAGAGAA  
GAGAGCAATATGTGTATTGATGTAGATGAAGCTATCTGCAAACCTACTATTAAGATAGAC  
TACATAGAACAGTGTCTCTTATATCTTGATATTTTGTGACGAATGATAAACAATCGTTAT  
TTTCAAATTAAGAATGCAATTGAAAGGGAAAAATTTAAGAATGGTTTGTAAATGAATGACG  
GATTGACCCACAACGAAGTAATCGTCAATACAAAGGAACAGGTTAAAGTCGACAAGGTAA  
TTTCCTATAGTGATAATTGGACTAGAGGACAAATTCGAAGCGGCGTCCAATCAAATAGCA  
GTTGATAGAGAGCCTGGTTAGGAGAAAGAGATCTCCGGTTCGATGCTTCTTCGTATGATTA  
AGAAAAAAAATGCAGACGCTCGATGGAATCGAAAGATTACAGGGGGCGGACCAGTTCAGT  
ATGGTGGATATGGCGAAGGTGATTTTGTATGATTGGCACATTGATCAGAACCCTCACCCAG  
TAAAGGGATTAGTCCCATAGGTTAGTATGACACTTTTCTAAATGAAAACCTTCGAAGGAG  
GCGAAGTTGGTTTGGAGATGTATCCACCAGAGACAGATCCGAGACATAATGGTTTCAAGT  
AAAATGCCGATCTGCTATCTTTTTCCAATGTGATCGATGGCACACCGTACGGCCTATGG  
CATCTGGAACCTCTGAATGTATAGTAGCATGGGTATATGGACCTCCTTATTCGTAAAAAG

AATGAAGTCTATCTTAAGATTGAAGCACAACCTCACATTCACGATGAGCTAGCAGATGGA  
TTTACCCTCCAGGGCGAGTCTGCAAAATTTATGCAGCAGACGAGAAGGTATAAAGGATGG  
GAGGGAAAGATTAGTTTGCTTTCTCCCGCAACAGCAGAGATAGATCGTGGTCTTGTCGAT  
TACTTAACAGACTGGTCGTAAGCAAAGGGATATGAATATCAAATATAAGATGATGAATAC  
TTTGGTCATCCTATCACAGAGAATGAACTAATCACTCCCTAGTCGGTTGTACGGTTTGT  
AAATCACTGCGTCTTCCCCGGACTCTACCGGTAAGGGAGTATCAGTAAATGGCAATTCAT  
GAATCACTAAAATGGAAGAGACTACTCTTCTGTCCCAGCCAGGGTCGGGACTATCTTTG  
ATGATTTATCCATTGGTTAGATATCATTTAACCGTTGGTCGTAATGTATTAATTGTAGTC  
CCCAATGCCTACCTTGTCGATCAAACGTATATGGCCATTGTAACATATGGTTAGATGGAA  
AAGAAAGATGAACATAAGATATATGGAGGGCATGACAAGTATACAGTTCACAATGTGATA  
CTCACGACTTGGCAGTCAGTATATAAAGAACC  
AAAGATTTGGTTTGTAGATTTGACTGC  
GTGATTGCTGATGAAGCGCATCAGTTCAAAGCAA  
ACTCGCTAAGTAAATTTATGGGTATT  
TGCCATGATTGTA  
AATACCGTAGGGTTTTTACAGGA  
ACTACATGCTGGCAATGTCAGA  
CATCTTGTATCAGAAGATTTGTTTAGT  
CGATGTACTCAAGTTACTAGA  
ACAAATCAATTG  
ATGTAGTCGGGGCACATCGCTAAATTA  
ATAGTCAAGGTGGTTCTTTTAA  
AACATGAAGAT  
AAACTATTTGAAGGATATCGAAAGCAA  
ATTGATTATCTAGTTGAATACGAAGGA  
ATGAAT  
AAATCTATCCGTTAACTTGCGGGTGT  
ACTCCGTGGAGATGCGCTTG  
TGCTTGACAATTAT  
GTAAAATGACATGGTGAGCCTCTTTACA  
AATTGATAAATCGTTACAGAGACAGAC  
CCGTG  
GTCTTTGTT  
CATGGGTGAGTATATGCCGATGAGCG  
CGAAGAAATTCGCATGCTAACAGAG  
GCATCTAA  
CAATGCGATCATTATTGCATCGTATGGG  
ACGTTTCGCTACTGGCATCAATATT  
AAATGCTTACACAATCTTATTTTCGCTT  
CACCTTCGAAATGTCGGATTTCGTAATTT  
ATAG  
TCTATTAGACGAGTCTTGCGGAAAGGTT  
ACAATAAATGAAAAGCCACTTTATATGAG  
AGT  
GCGGATGATATCTCCACAGACAGGGGCAG  
TAACAACACGTTGAATCACTTGATTGAGAG  
A  
GACAAGAGTTATAATGTATAGAAATTT  
CAGTATGAGATCAAAGATGAAAAAGTAA  
AAGAT  
TATTAGTAACTAAACAAGAAACGAGGAG  
GAACTTCACTGTATATTCAA  
ACTGGGTAGGGG  
GGAGGAGATCCTTGCTTACGCACTTATGA  
AGGGAGACCGTGGAGAGAGGTTAATGTT  
CTT  
GTCTGATCCTGTTAGCGTATTGCCAACG  
ACTAGCGACGTCGTCGAGCAAAAATCATA  
AAC  
AGGTCTGGTTTTT  
CAGTCCATGGATTCTATGTCTGACTAC  
GAATTTTTTGTTTAAAGAGA  
GAAGCATATCAAGCTCATGGCAACGATG  
AGTAGAGCCGTC  
AATATCATGTACGATGCATA  
CATCTTCGGCTAAGATGCCACTGGAAAG  
CAAATGAAAGAACGTGAAGGTCCGGCCT  
CGAT  
CGCCGGAGGATATCAATGACACATAAAAC  
ACATCCGTGCCTTGATAGAAAAATTGTAT  
GA  
GGAGGAAGTTTGATTTTTT  
CATGAACACTTACAGTATGAGTATAGTT  
GTCCTTAACAGTTT  
GGTCAAGTGTTTTTATACTTAA  
AACAAAGAAAGATATGTACGAGGAAATCT  
TCCCCCAA  
AAGCGCTAGCATTATGTA  
ACTAATCCAGAGCTTCATGCTGGTATTAT  
CAACTATATAGAG  
AGAGTAGAGCATGCAAAATCTAAGGGACT  
TCCAAAACCTCGTGTCAATACTTACAATGG  
T  
AGGTGCTTTTCAAAGATTGCTGCTCATCT  
ATTGGACAGGCCAACTGTATTAATTACATG  
TTTAAAGATGGTATGGTGTGTGATGGTAT  
CGAGACTTGTAGACATTATTAATAACTTT  
GATGCTGCTAAGAGTACAAACCCCTTTG  
CGTATTTTACTCAAATCGTATACCATGCTT  
AC  
CTAAAAGAATTGCTAAAGCGAAAAGACTA  
ATGGATTTTCAAGAATAAGTTATAGTAA  
AA  
TCTGGATACTATCATGTATACAGAGTTG  
ACGGAGACGCAATTT  
CAGAGTAGAGTCAA  
ATT  
AAATCCTCTGCCGAATAGCATTCTACACG  
ATTAAGATTCTCTTGATAACTGATCAAC  
ACT  
TTGGAGTTAGCATTGACAAACATCATTTT  
ATCAATCATTACAAAAAGTGT  
CACAATGATA  
TTGTAATTCCTTTTTCCAGAGCATCGGG  
CATTAAACAGGTCGTTGGTCTTGGAGATA  
CCT  
TTGATCGTCGTAGATTCA  
TTAAATATATGTCTCTAAACGAAACAA  
ACGAAATGTGGTTTTG  
ATCCAAGGAGAGATATCGGTATCCCAAT  
GCCCATGCGTATTGGCGACCATGACATTT  
ACT  
ACAAAAATACTCCTCGAGCTTTTGC  
CCGAAATGAATTAATCAGAGCGTACGAA  
AACATCA  
CAGTCATTTGTGATCACGATACTGTC  
ACTTTTTGATGGTCAACCTAGTCGCCTC  
CTGTATT  
GGATTTGTCAAGACAATCGCGAACGATTT  
ATCGTAGTTATCCAACAACCTGGTGCCCT  
TG  
TCAGTTTGGGTCATTTGGAGCTTAA  
CGTTTTGAGGCTCTTCCAGGTCAAGTGA  
TAGAAG  
GTGGGATGGATCCCAATGTTTTTAGTAA  
ATTTAAAGAGTATTCTCTGGACACTATC  
ATC  
AGAAATCTACTAAAGGTAATATCAGATA  
CTTAGCTAAGCCGGATCAAATTTATTGGA  
ATG  
ACTACGCAGCGAAAATAGGTTTTACGTC  
TTTTGATACAGAAATTCTAAAACTACTTT  
TT  
ATAGGAATAGCTTTGGTATTGTTTAGAA  
ACTGTACTATAAATCTGGTGTGTCTTTCC  
CGT  
ACGCATCAGAAATCAGAGGAACATGGG  
ACAAATTATTGGTAGAAGATACAGGAG  
ACTATC  
GGACGTTTCGACTACAATGTAAAACGC  
ATACGGGA  
ACTGGGTTGCGCAGGTCTTGAGATTT  
TTCAGGATCTTAGCGTGGATCTGGGG  
AATTGGAGAGAAGCGTTTTAAACCGCAG  
AGACTA  
TTACGTTGTTAGACAAATACACAGCTG  
AGATAGATCTAAGAGACAGTAAACCTA  
ATGTTA

AGTTTGT CAGGCGTGCATTATATCTAGAGGCATCAGAACGGTAATGTTTGTCTAACTGA  
GAAAACA ACTCGGGGTGTATATGCTAACTCTAAGTCCTGCGACTAACATGGTAAAAAGAT  
CGTGCTTGGTTTGGGAGATAAAGACGATGCAGAAAGATATATCATACTTCTATAGGGATA  
TGAATTTAATCAGGAACTTAACCCCTTTGGAATAAGATCCAGAATTCATTGCCGTGTATTG  
TGGTAATTATGCGTATTCATCTGCTACAGTATAAGCTAGTGACTTACTCATACCAAAAA  
CAAATTTGATAAGTGATTGTTTTTGAAAATATTAAGTCTACGAATTTTCTTTGCCATTGT  
GATCAATG GAAAGAAATTTGTTTGAATGAATCTCCATCAACTCTCATTGTTGGTGCAAAC  
GATGCTGGTAACTCAACTCTCTTAGATGCGTTGTGTTTTATTTTATTCAATTAACCCCTCT  
CGAAAAATGAGTACAGGACAGTTAGTAAAGAGAAACAATGAACAAGGTCTGGAGGTTGAA  
CAATTATTCTCTGTTTCTGTTGATGAGTATCGCGTCTTTTCGGGGAGCGAAACCTAATGTA  
TTCTGGGTCTACAAAACTATAACATGGTTGTCCAATATGCTGCTGCCAATGGCACGCAG  
AACTATCTCGAACAAATCGGGGTGTCAAACCTCACATCTAAATCCCATATACAGGTCGTCATC  
TTGGGTGCATCCACGTTTGTACCTTCATGCAACTCTACCCACCTGTCAGCCTAGAGGTT  
ATTCAAGATTGACTTCACATCAACATATTCCCCCAAATGAAAGCGATCCTAAGAGATCGT  
GTTAGAAATGCAATGTAACAACAACGTGATTGTGATCATCTCCTTCAAACGCAGAGGCA  
CGTGTAACAATCAAGAAAGAATTGTTAGCCCTCTTGATGATGTGAGTGTACCTCGTCAA  
AAAGATAAGAACAGTCAAATTAACACTCTAATGAAAAAATAAAATCAGAAGACGAGCAA  
CGTGATCAACTGATGGAAGAAGTGGAGACTTTTACCACAGGTATGAAGACTGTAGATAAT  
CATAAATCTGTATTAGTTGACCTACGTTAAGAACGATCTGATATCATTTTAGAAATATAA  
TCTTCTGCCAAACAACCTCCGTTTTTTAAACCGCATGCTGAATGTCCTCCGTGTTCTCCG  
TAGATTCAAATGGAAGTGAAGACAGCAGTGATTGGTAATTTTCGAGAATAAAGGTGAGCAT  
CTGACAATAGATTTCACTGGGTTGATTAATAAAATTGCTGATGCAGTTAGTGTTGCAGAG  
AAAAAGGAAATTGTTTCCAGAAATATAATTGAAACACGTAGTAAAGTTTCTCTGCAGAG  
AGAGAAATCGCACGTTGATAGACAGAGAACGTTAACATAAAATGGAGTGATATTAGAATTG  
CAACCAAACAGACCTAAAATTAAGAAGTAAAAGTCTCTTTAGTTCTGTTTCAAAAAGAA  
TTATAAGAAACACCGAAATACTGTGGAAAGATTCATCCGACTGTTGATGAAGTTTAAGTC  
ATAGGTAATTTGTTAAAGGACGCTGGTATTAAGAGACAAATTATCAAGACGTATGTTACT  
ATTTTTAATAATTCAATCCATAATTATTTGCATAGCATGTACTTCTTTCTTAAGTTCACA  
CTTTATGAAGAAGTTTAAACAAGCAATTAAGTAGGTTTAGAGATGTATTTTCATATGCA  
TCTTCTTCAGAAGGTGAAGAAGGAAGAGTTGATTCAGCAGGGCTATTTACATGAAGAGAA  
CTTGCTCGCATGAAAATAAAGGTGCTACTAATGTACTCATCCTTAATGAAGTGTTTGAT  
AGCTCTTTGGACGCAGATGGAACAAATGAACTCTTGAAGAATCTTCATGCTTTGGGTATT  
TCAAGTATCATATTTATTATCTCTACTAGGGTGATGTCTTATTACACACATTCCTAAGG  
ACAGCTAGATTTGAAATGAATTATGAAGCCTCGCGGATGAGAGACGACTCGTAAATTTG  
GAGAGTATGCGCAAAGCACTTGGAGACA ACTCTGGAAACTCAGATCAAGAAGCGGATCG  
GATAGCTTTAATCCCTACATTTAGTTTCATTAAATTAGTTGTTACTAACTGTGTTATCGT  
AGCAAGTAAGATAAGACACTGGAACGATCATCATGTACCGCCACTATATCATCGAGAGCG  
AATTA AAAA ACTGGGACAATAACTATCACATTCTTAATTGGTCTGCTATACTAGGTATAT  
ACGAAACACAGCAACATGATCATTCAAGAAGTAAAACGAAGACTCGCTAAACTACTGGTG  
ACAGAAAACCTGATGGTAGAGCACCGTCAGGTTACA ACTGGATCCCTCGATTTTGAGACT  
CTCGTTCTTTGCCGCCCTATCTGTAAGTCGGCCTAACACACTGGTTACGATCCACGTGTA  
GGTCGCGTGGTAGGATACGCACTCTATTCTCCTGCAAATGGATGAGATAAAAGTGTTCTT  
CAAGCATTCAATG TAGTCGCAGATGCTCGTATTGAAAACCTAATGAAACATACCTAT  
CCTGGTCTACGTGAGTCTTTCTTTGACGGATACGACGAACTAAGGAATCAAGATTTCTT  
GGTGTCGAACATGAGGGTCATGAGAGTCGATCGCTGATCGATCGCATCAATCTCTACTTC  
AAAGGCAA ACTTAATATTCCTGTCTCAGCTGAAGAGACAGTATGGGTAAACTGAACTAGA  
AATACGGAATCGTTTCAAGAAGTAGAAGACCTGTCCCAGATCTGTACGGCAGCGCTCAA  
GAAAAGCAAGCAGAGAACGAGCAAGAAGATATGGAACCTGATGTTGAGGTTGGTCATGGC  
GATGGTAATATCATTGGTGGAGATTCTGACACAGAAAAGGAAGTCAAAGATAAAGATTAT  
TCTGAAGAAGAAACATGTGCACCTGAGCTTGATGCTAATCAAGCACGGGATACTTCAGAG  
GATCTTCTTGACAACCAATCAGAAGGTCCCAATACATACTTAGAACCTATCAGTGGCGAT  
AGATCTGATCTATTCGATGACTATGATCCAGTGCACGAACTGAGCGTACTACAGATGAA  
ACACTACAAATATCATTAGAATCAATATGTGAAGATGATGCTAAGGAGTGGGTTTACCTT  
GCTCTTCTATAGTAGAAATTGGCACACTTCTCGTTTCTCCCTCGACAATTCAACGCGAT  
CTTGAAGGATTGTTCTCTTTTTACACAAACAGTGACGAAGATGCGGAACCCTACACGCGA  
GAGTGTGCCAGTATGCACATGATCACTACAACAAAAGGAAGACAGATGCACAGCAATCT  
GTGAAATATCTTGTCAAACAGGTTGAGATGCGACAGTCTGCTGATGATTACAATCGAGCA

GCAGTCTCAACGACAGGAGTTGTCAACACTAATTCTCTTCAAACACTACAACTAACTGAT  
GACATCTTCCAGATAGTCACAACCTGTTCCCTGAGTGCAAGAATTATGGTTCGTATTTTACAT  
TTTCATTGGTCTGGTTCTAGGCAGTAACAACGCTTGGATACTGTAAAGCAATTATTCAAC  
TTGGTATTGCTCTGTCGTAAAGCACGCATTCCCTTCCATCTCTAGGCCTTCCAGAGTTCA  
TAGTATGGTTATAATCATAGTAATTGCAAACAATGGAATCCCCTTCTGAGCCTAAGGAA  
CGTGACATTGGTATTGCAAAGAAGTCAATTTCTTGAATTACTCTCTACTATGCAAGTT  
GCTGATACGCTTGAGACTTCACTCAGACAAATTTACAGACAAGTACTTACTATCGGTGGA  
GACCGTAAGTCTACTATGCCCAAATCCAGTCTTGGTGGAACTCCACTTACTGAAGATGTT  
TTCTGCAATCGTCAGTTGGTATAAGATCTCAGGAAGGTAGATAATGTGACGAACTAAAT  
GTAGTATGCTTAAGAGATGCCGAAGCAAATCCAACGTCAGACTGGACAAAAAGTCCTTAC  
ACCACTATCATGCAGTAGATTGGTGAGGAAAAATTCAGACTTGCTGAAATCTTTCCTCA  
CGAAATAGAGTATACATTCCTTATGATTTTGACGCTGGTTATCAGCGCCAAATCAATGGT  
TGTCTCATTAAGCTACAAAAGAGATTGTAAGTTACCTGAAAGAAGTACTGATTACAAC  
TGGATTGGTACCAGACTCTGCAGTACAGGCGAGGTATCAGGATTGATTTCGTCTGCTCGGT  
ATGTACATAAAGGTCAAGACGACCTTGGCAAGCAATAGAAGAAAGAAAGGTTTGCTTAT  
ATCAATAATTAAGTTGGATTCTTACAATCTTTGTATTTGCCTGACAGGGGCAATGGCGAA  
GGACCTCAAGACCATACTGTAAAACAGAAAGACTAAGTTGCTACCCAGCAGAACTACAA  
CGTGCATTCAAAAAACGCATGGGTTATAAGACCACAAGCAAACACGCCTCAAAGCAGTC  
ATTGAAGAGCTCGCGTCAAGTCTAAAGTCACTCTATTTAAAGCTGGAACAATCTTTGAAG  
TAACTGTTATCGCAGTGGCTTATGAGGTTGAAAAAAAAGTTGTATTAGCAACCAATCCTA  
ATTTTACAGTATTGAATGTGACTTCAGTGTTCGTATAAATAACTGTCCACTTGCTATAGC  
ACTAAGCAGACATACCTGCTATAACACATCCATAGACAAACATAGACTATTACTTTTGAG  
CCCAACCCTGAGACAAGTGAACAACCTTTTTCAACACCTAACTGATAATGTAGGAAGTAA  
CGCGAATGCAAAGACATTCCTGAGGCAGCAATGATACCTAAAATATCTTATGCAATTGAG  
TCTAATGGACTTCAGTCTTATAAATCAGGTTTAGGCAAGTGGAATCGATCCATTCAGGAT  
ATTGAACGTGCGTACGACGCACCTGCTGCTAAGGAAATAACAAGCGATGTTCCCGATAAC  
GTTTCAAGACTTATGCTACGATTGGTAACTTCACTTCTGTACAGAAAGTTATCTCATTGGAG  
AAGGTCTATCCTCTAGTCATTACATCTCCATCTGGAAACGGTAAGACTCTATCAGCTCAA  
CAGGCATGTGATGCAACTAATAGGGGGTCAATCTTTGTCAACATCAAAATCGAAACTGAC  
GGGGACGATCTTATTGGTGGCGTTCGTTTTTTGAATCGCGACAATGTTTGGCACAGCGGA  
CCTGTGGTTGAGGCTTTGGACTGGCTAGCTGTATCTCATCTAGATGGGATCGACCTAGCA  
TCTATCAAAATTTTTTTTATTGGAGGCTGGGCTTGAAGGTAAAGGTGTATTTCGATAAGATG  
ATTGGTAGGTATGTCATACCTGCTCAAGGATATACTGTTATCGCTACTGCTAACACTAAC  
GGCACAGGTTCTGATGATGGTAGATTTCGTAGTCTCAAATTTTCTCAACGAAGCTTTCCGT  
CATAGATTCCCAAATACATTTGAGCAATAATATCCTTCTTCTACTATCGAGACTAAGATT  
TTGATCAATCAGGGATGTGACAAAGTCTCTGCAGAGAAATTAATCAAGTCGGCAGAGGTA  
TTACAGAAGACTTTCTTGGATGTTAGTGATGATGAAGTTATCACAAGTCGACGTTTGGGT  
CACATTGATTCAGCATAACCACATCTTTCGCGATAAGTTGACAGAAGTGAGAACTGTGTA  
AACCGTTTTGACGATGTTAAAAAATCATCCTTCCTAGTTCTTCATACAATAGTTGACGCC  
GGAGAAGATTCAAGATATACTGAGAATCACGAACTCAATCATCCAGTTAATTATGTAGA  
ATCGTGAAGAGGATTTCTTGAAGTTCTCCGACATTACCTAGAGAGCACCTACTCTCCAC  
ACTATGCTAGTGATAAGATTTAAAGTCTTGATGTAATCGATGCATGTGGCAATGCTACAG  
CATTTTGTAGAAGTAACATTTACAGGACACTTCTCGCTACGATCGAAAAAGTAGTGCTA  
GCCAAGATCTCTTAAAGGGGCTACACTATGGATTTTTAATCATGCACTTTTCTAGAAGAG  
TTCAGGCAAATAAGCCGACAAATTTTGCAGCACAAGGAGTCAAATTC AACATCACAG  
TAATTCCTAAGCCACAATCGCAGCACTTAAATACTTTTGTTAAATAAACACGTCTGTTG  
ACATTAACCTGGCAATACGATTTCTACGCTCAGGATTA AAAAAGAATATTCTCGCTATTG  
CCCAAGTGGTAGAACAATTTGATTGGCAAATTCCTATGTTTGT TTTTGGAGTCCCTCCTTG  
GAAGGTTATCTCTGTTGAGTACCAAAAATCGATACTCCTGAAACAACTACGTCACAG  
TAAGCGACGTACAAGATCAATCCATGACACCTGATTTTCGACGCTGATCCTGATATCGTCA  
CTGTGGCACCAGTTAAAAAATCAACTTGACATCAGAGAAGGTGGAATTTAAACTTGAGT  
GTATAAATCTTATGATATTACAATGTGCTGCTCTGGTATATCAACTCTCTGCGCTTTGTT  
TGTATGGTGATAGAGAACTATTCAGTTATGTATGACAGGTAAACAGAATGATACTTCCA  
ATAATTATTCAGTAGAAGATGGAAGTACTATAGATGAGTTTTTTTGTGTTTCAAAGATG  
AACACTTAAACTTTTATCTGGGGACTATGACGTATTACTGACTAAGACAAACGTGGCGT  
TGTTCAAAGATGACGGAAGCAAATACTACATTCCGCTTTAACATTACACATGAGATGTTG  
GCACTGTGACACCTATCAAATCTGGGGTGGTAACATCGATCGTCCTTATGCAGAGGAGTA



TAGTTTCGTAACACTATGCTACACTGCCCTATGTGCGATTCCCTACGTAGAAAGTTTATAAACC  
TAAAAAAGATGAAAAAATTGATAATCAACTGGACTATGAGAGATTTGTTTTACAGAAA  
AGGAGACTCGTAAGCTGTATCCTTTTAGCCGAGGGGATCACGGGGTTCGTCTGGTTCACC  
ATTGTAAGTACGATATTTGTTCTCATTGGAGATTCAAAACCTCACACTGATGCAGCAAAAT  
CTTCCAACCATTCCTTTGCTATGTAGCTTGGGTATCTTGATTA AAAAAGAAATCATCGGTA  
TGGATATGTGTCGTAAGTTCCGTGAAAGGGGTGTTACTAGACCAAGGCGAAATGCCACTC  
ATAGGGACTGTAAAAAGTATTATAAAGAAGCTAATGTAAAACCCCAAGAACCAGATCATG  
CTACCTGTTATTGCGCTGAGTCTGCTAAAACATTTAAGAAGGTTTCGAGATATTGTTGCGA  
AGAATAACACATATGTTACCATGAGGGGAGTATGGAGGGGATCTGAATGAACATTGTCGT  
AACTGATCCTTCCCAAACAAGTCTGCTCAAGTATTACCTGACACCCACATCGTCAAGAT  
GGCACTAAAGCCATATCAGATGCTTTCTATTGGTGCCTCTGATAAATGGGGTCACGTTAT  
TGGTTCTCGACTTAACCTAGATGCCACACCATACAATATAGATAAGGGGGCCTTTCATAA  
TAATCCCTACACTGGATGGGCACAAGATAATTGGACATGGTTGATAGTCCAAGGTCTTGC  
ATTCTAGTTTGAATATGCTCTCAGATACGGTAAGATACATACTTCTTGATCAACTATCGA  
ACGTGCTGAAAAAATATTTCCCTGCCCAGGATACTGCTCGAACACAATTTGTTTTACATC  
TCCTGATCACTCGAAGCGTGATAAGACTATTGACATTTTTATTGCATCCAAGTATTATTT  
CAATACCAATTAATGGGTACCAGATAATTATGCAAGGTTTCCCTGATACCAAACCTAACTG  
GGTTAATTTAGGATTAGAAATGAGTTGTTGTAGGTTCGAGAAGTAAGGGCGTAAAAACGTA  
GAACAATCCATCTTGCCCGAAACTGTGAAGACTAACTTCCACAGTTTTATCCAGCAGGGT  
GAGATTCCTAATCTCGTTCTATCTGGGACAGCAGGGGTAGGTAAAACAACCATTTGCTAAA  
GCACTTTGTCTGGAAGTACTAGGAGAAGACTATTATGATATCAATGGATCCGATCCTGAACGA  
TCACTTGACACCGTAAGAATCCAGGCCAAAAACGTTGTTGCAACTGTATTTCTTACAGCA  
GAAGCTAAGCACAAAGTTCTTATCATCGGCGAAGCGGACAACACTACAACAGACGCTCAA  
CTCTTACTTCGTGCATCGATAGAAGAATTTCAAAGTATTGTAGATATATATTTAGCAGT  
TAGTTTAAATATAAAATTAGTGAAGTTCTACACCTTAGAACAACCTGTCTTAGAGTTCAAC  
GTTTCGTGAAAAACTAAACAACAACCTTGCAGGAGAATTTCTTTGTTGGATGTTAAGGTATT  
CGGCTTGCTGAGGATGTTACCTTCTCATAAAAAGTTGGAGCAGAGGTGGTTCTGAATTAT  
TTCCAGACTTCCGAAGGACTCATAATGAGTTGCAACGATATGCGAGCACAGGATGTTAT  
AATTCTGGAATTCAAGCACCCTACGAGACACACATATCGATAGTCTAGCTGAATCATTG  
AAAGCAGAAAGTTTCAATGATGAAATGAAATGGGTTACCAAACACGTTAGATTCCGGATCCT  
GTTTCTACCATGACGAAACTCCAAGATAATGCTTCTAATCAAATGACAGGTCCTAGTATT  
TCAGCAGCAGTTTTAATCGTTGGTGCACATCAATACAAGTATGCTTTCGTTGTAGACCAG  
GCAGTCTCTACTTGCATGGTTAACTCAATTGAAGCTTGAATGCGAATTCAATTAACAC  
CCAGTGACCCTTACAAAGTGCTACATGAACCAGTCTTAAGTCCCTGATTTTCCCTTGGCATT  
GGTCTGACTAAGCATAACCATCATCATGAGGTTTCTGAAGGTAGAATTAATTTGGTTGCT  
TCTCACATGTAGTCTTAGAGAGACCTGGTTATACATAGCTAACTACTAACATAAATTCTC  
ATCAATTTTCATTGTTTCATGATTCATTTGTTGAGTTCAGTAGAGACAATAACACTGACC  
CTAAAGTAATTTACAGGATCCATGTTAATCTGACTACTCACACACACCCCAACAAACATG  
GTTCTGACCACACAGACCAGGACTTTCTTCATAAGCATAGGTTAATATACTTAACAGGAA  
CGCATGGAGGTCTTACTAAAGTTGGAAACACCAACTACCCTTGTATGCATAATGACACAA  
TTGTTTTGGAAGATGTTACGCTCACATAGAACAACGCTGGTAAGACGAGTAGTTCTTG  
TGTACACATTTTTATGGTTATGACTAACAAATTTATTAGAAAACGTGAGAGGAATGGAGC  
ACAGGTGAAGTCATGATCCTCCTAGTGGTTCTGGTGTGCTATGGCAAGTGCTGTTGTAGG  
TGGTCAATTATATGTTGGATCTTCATACATACAAATGGCCAGATCAATGGATAGGTGGTG  
TGAAGAGGCCATTGTGATCGTACAACCTACCACTAACACCTCCAACGGCAGGCATGCTGGT  
TGTTGCAATGGCTCATCTAGATTTCTCTGGGGATCCTATGATTATCAGATGAACTCTTTG  
AAGACACCACTGAGCTATTCTGGCGATAAATCTCATGCTAGTAAAACGATGGGACAATAT  
TTTCCAGACTATAGAGACCATAACCGAATTCGGTGAACCTATTCTTGTAGGTGGATCTGTA  
GGGTTCTACGCTACTCAGATGTATCATATTTGGAAATCTGGGTCAATGAACGATACTAA  
CGTCTGTATACATTTAGGAATCAAGCGCAAATGCATCGTGATGATCTTGGGAATTAAGCT  
GTTCAACTCAAGTAAAAATATCCAGATCCGTCACCGGCAAACAATCTTTTCTTACAAACC  
AAAGAGTATCTTACTAGACACCCGATTGATTGCGATCTTAAGGGTCGTGCTGCCACGTTT  
TATCTTGATAACAAGTTCTCTTTAACTGGTCTCACTGAGTCCTTCTCGTTCAGCGAACAA  
GCGTCTGATTCAAAATTTTCGATGCGACGAATTGAAGAAGTACCATACTAGGGGAAGACTT  
ATCAAACGTTGGCGAATCACTAATCTGCAATACGAAACATTATTTACAGATGATACTAAT  
GCATTCGTATACTGATATGCTCAGTAGGATATCAAGGGACACTTGGCTGGAAAGAGAGGC  
ACAGTGGATATTGGACTCGACGACGATTCTTTTCCAAGAAGTTGTGATAGAGTCGAGTGT

GATCAAATGCTTTCTTATAACCCTTCTTGTGTAGTAAAGGAAAGATTCCAAGGTTTCGATA  
GCACAACAATTCGATCCGACCGATAATAAGAGATCTGTTGGTGACTACACGAAAGATCTA  
CGAGAACGCAAACAACCTTCTACCTTTAAATTATGGCCTATGATGAGAGACTACTCCTAGA  
GGACTATCTATACTTAATCAACTTCCTAAAAGATTATTTGATGGAGGATTATCCTGCATG  
GGTGAAGAACTATCCTCCATAAGTAATCAATAAATGCATGTGCGCTCATTGGGATACGAT  
CATGTATGCTAATAAAAAGACTATACATACCCATGTAGATAAATGTGTGCAATATGATTT  
TTATATAAATGTCGTGAGACCCCGAAAGAAATTTTCTCCTAGCGGTAAGAAACAGAAAGT  
GAAAGATCTTGACCTTGTTAAAAAATACTATGGTTATAGTAATAATAATGCATATCAAGC  
CTTATAGATCTCAACTTCATTCAAACCTTAATTACATTAAGCATAAACTGAAAAAAGAAGG  
GAAGACCAGATGAATGAAGTTAACGAAGTCCAGCAGACTAAGACGGGTTTGGTTGAAGGG  
AATTTAAAAGTACCAAACGATTTTCTAAAGGTACGCTAGACACTTACACGGATCGGTGAA  
GCATCTCCTAAAGAGAAAAAGTTATACCAAGTGTGTCAACTTCGACATAAGTAATGCAA  
TACTAGACTGTGCAGTTCAAAGAATCATTTGCTCTTCATGGTAATAAAGCAAATCTATGA  
GTGAATGATGTGCAACGTAAAAACAGAATTGTTAAATTCCTGTACGACTGCGCACTAGTT  
CAAATTGTAAATGTATCAGCACTCTCCGACCCTGCTCCATTAAGTGAAATTAAGTAATG  
GCATACAAACAGAAAGGAGATTGGACGCTTGACTCAAGATGTAACACCGGGAAAAACGT  
CAAGTCACAGAATGATATATAGTTTAGTTCTATTATATCAGCGTAAAGGCAAACGCCACG  
AAAGTAGAGGATTAACCATACGGTGTCTATGAAAACCTCAAAGAGGTCAGTGAAGATATA  
GTAGAACAACCTTGCTGTGCTAAGTACATTCGTCCGCCTGGGTATTTGGACCTGGAGTGCT  
GGTATCTTACCTTTGGGGTACGTTACGATACCTGGTTGGGAACAAGAAAAAATTAATCCA  
ACTTAGATAGTTTCGGTCGTACGGGTGTTCCAGCTACTATCTGCGTACAAGCGGGAGGG  
AAGAAAAAGAATAGAGACAGTGGTGGTGGTGTAAACATCTCTATGAAAGACATGGAGATG  
CTGATTGAAAAAGCAACTCACGCAGGACAACTCAAAGTATTAAGTTAGTAGTTCCTACC  
GTTAAATTTGCTAGATATAACCATGCAAAAAATTATGAACGGAATCGCTAGCAACTCAGC  
TGTTGTGGAACCTTGTTTTAGTAGGACTAGGTGGATATGTTTACATCCGTACGGATGCTAT  
CATTTAAGACATCAAACAGAAAGCAATCAATGGAGCACTTCCTCGAGTAATTGACTCGCT  
ACTGGACATGGTAGATACACAACCACCTCGTGTAACCTGGTGCACCAGTTCCTTATTTTC  
ATTACCATGAATCTTAAATGGATATAAATCGGTGTAGTTGGTAGTAATTTCCGGAGCGTCC  
CATCTGGGAATGATGGGTATATTTCCAGTAGAACCACCGAGAGTCAGTTACCTACGATA  
GATGTTCCCTGTAGGTGGCTATACTACATATGTCATCTTACCTGATAAGGTTGACTATAAG  
AAAACCTTACTCAGGCAACGATCCTTAGACAGCATTATATTAGTGAGTACATCAAAGAGAAA  
GGTTGTTTCTTAGCACTAGCAAATGCTACTCCTAATATCACTGAAGAATACTTGTTAGAT  
GGTAACATTAATCAAGGCGGTACTGTATCTAACATGAGATATTGGACTTATCAACCACCC  
CGCTTGACTGCAGCACAATCATCAGAAATACTGGCTGCTCGAAACAGAGAACCCTGTATC  
AAAGCAATCGGATCAGCAGAGGGTACAGGACGTCGCGTTGGCACATATATTTGTGCTGCT  
GCTGCTCCTTCTAAGTAGCATCTCCTTTGTTAGTTTCGTTCCGGTACTGGCTGGGTGGTA  
ATGTGTGGTGGCAATCACGGAGCTGATATAGGTGGAAATATGGGGGAGGATATCACTAAG  
GATTGTTAATTCCTTCTTCTTCTTAGGGCGTTTCTTCCGGAGGTAATCCTTTCTTCTGACGA  
AACTTATAACAATTTAACTCATTACGAAATAAACTATTTGCGTCTTTAGCGAGGTTCTTT  
GGCTTGATCGTAGTGAGTTTTTTAATGAGTGGCTTTATAACTCGCCACAGGAATGGTGT  
GCGGCTGCAGATGCTGTAGCCACCACTGCGATAGTTGCTGTTAACTGACTTGCTTTGTG  
CTTGGTAGAAGTCTTTGAATTGCTGTAGTATCTTCATACTACACTACACAATGTCCACCT  
CTAACTGCATGAGCTATCACTCTTGTTCACCATTTTGAGTTGCATCACCTACTCTAGCT  
TTATTGGGTACAGGAGACACGATCTCTTTATAAGTTATTGGTGTCCGGTGGCACCTCTGGT  
GTATCTAATTCATATGTATGTGGTGGTTTAGCGAGAGGGGGTGGCGGTGCCTCTATGACG  
ATCTGTAATTGATGAGGCTGATTATCCATCGCACCATATGTTGGCCCACCTGCATCGCAA  
AATACTAATACCTCATCTTCCTCGTCTGCAATTATTTGATGATTCTTGTCACTCTGCTGG  
GGTGCTTCCACACAACCAGGCATCTGCCTGATGCCTTCACGTATGTTTACGGTAGCAGGA  
GGTACGAACGGTATTGAGTGAAAAGGTTGTTTAGTTAACCAATCTGGGATATCTCTAACA  
AATAAATCGTTGTTTCGTTTGTCTCGAACAGTTGCGTTATTCACTTGTAGCTTTGGTGAA  
TCCATACATCATGGGTTTCCATTGATATATCTTCTCAGTTATTTGCGTATGTGCTGGGG  
ATCTCATCAGCATGAGGGGCAATGACATTAACATTCTGCACAACAACGCCTGCACCAATA  
CCATAGTATGGTGTCTTAGGATGGAATGGAATACCCTCTTCATCAAATTTCCAGAATTT  
TTCAAACCAGCTTTTTCAAAGTCAAGGCTCTTATTTGTAACCTGTTTGATTCGTTAATGCG  
ATTTTTTCTGCAACTACGTCTTTACCGTGTCTGGTATTTTCTTATCTAATGGTCTAGAC  
CATGTTGCACATAGACCAACTGAGAAATTAGAATTATCTTTCTTATCTGTTGTTGTAGTA  
ACATGGTATAAAATATTACCTGCATTCTCCTATACACCGTCATCATTCAAATCTCACATA

TCACACACAGTATACAAATAGTATGGTCCTTATGGTTTTTTGTGCTGAAGCAGTTCCTGTG  
ATGTACACAGTAATATACAAGGTAGCACCTTCACATTGAATGCCTTTACCATATGTGATT  
GTTATCTGCGGACCTTATAAAGCTTGTATTGCCTGGTTCGTCACCTGAGACTGCTGAGTTG  
GCGATTGGACCTGCAGTCCCGCTGACACCACCCACTGTCTCTGCGTTAACACTCGAAACA  
AAGGGTGTAAATCCAGTAACGGCAAATAACGCTATTTACTGAAGATACTTGTGTATCTG  
TTACCGAAGTTACCGTTGTTTCTGTTTTGTATTGCCGTGAGGTTTCGAAAGACCTGTTCCCA  
TGCAGGTTTTCGGTGGATTGAAACTCTGTGCCTGGCGTCTGTATCGCGAAGTTGCTTTTTGT  
CGCGTAGACCCGTCATTTCGAATTTTCTGCTTCAATAGTAATCACTTGGGTTGAATTAG  
TGAGAGATAACTAATCATCTGTAGTTACGGCGTGCCCACTGACCGACCAATGATAACCGG  
AGTTATCGTCCATCGAAGTCATGGTCCGCCACCACAGTTGAGGTCGTTTTCCGTTTGGGTGG  
TCATCGAGCTCTGTTAGCTACTCGGCACCAAAGGAACTGTTATGACTGGCTTTTTAGCAC  
TACACATAGCTATTAATAGGTATAACTTATATGTATTGCTCATGACAATTCGTCAAAAAT  
ACTCATTTTCGCTAACAAATTGAGCCGTCACCTGAATTACCTTCACCGAGAGTTCCTACTGA  
ACTTGTGCCCTGATTAATAGTGCTAGTATGACCATTTGTGATTATTCCTGGTGTGCCTAA  
TCCAGCTGTTCCAGCACTTTGTGAGGTGAAATGACCCCAACTTGCTGCTGCCCCAGAAGA  
TTTGCTACTCGGTTGCCATGATTGGGCAAATGAGAATGATCCTATACATGCTAGGTCATC  
CTCTGCAGATGATCCTGAGCTGGGGTTTTGAACTCCAGTAATTGTTCCAACCTGTTCCCTAC  
GCCTCTAGTAGGACCCTAGGGCTTAACACCGATACCACCATCTACCGGGCTACCATTCGC  
CGGTGTACGTGTTGAGATCACGTTTTTTCCAAAGATTGAATAGCTTTTGCCATTTTCGTTT  
TTGAGTTACGATTTGAGGCTCCACAGTTAGCTGTAAACTAGATTGGTCTCTACTCTGTGC  
TCCGCCCGCATATGCGGCTGTGTGCAAGGTCACAAGAATAATGGTTAGAATAAATTTTCAT  
CAATGTTTTACTCTTTGCCAATCTTGCCTATAAAGGTGTGCAAAACCTTACACATATGT  
TCGGTATGTACCATTTCTGACATCTCACTCTATGGTTAAATAGTAGTGTGCGCTTCGGG  
GAGAAAAAGAAACACAGGGTTATTTAAGGAGCAACATGGCTAACTTATCACAGTAGACAT  
CGTAGTATGTCGATCCAATTTTTAGCGCTGCAATCGTTACAGGGTAGGATTCGATGATG  
GGTCCGTAATAGTACGCGAATACGGAACAGGTTACCTACGGGACAAAACCTCCATAAA  
ATAATTGGAAAGAATCCGCAGAGAAGTGGAGACTAGAACTAGCACTCGAAGGATGGTCAA  
CAGACCGAGAAGAAGTACCTAAAAAGCAGAACATACTACTAGTCAAATAAAAAGAGTAAG  
ATCCTAACTCAATAGAAGAACCACAAGGTGATATAGCTGTAGCATCGAGAACATGTGCTA  
GTGGATTTAATCTATCAGATTCCGTAGAACTTGCTAAAGGAGCCTCTGTTAATGCACTCC  
TAACAAGTTAGCTACAAAAGGTATTTCCAGAACACCAGAAAAGACGAGTCTATGACGTAG  
CTTATCTAAAACCTTTCGTAGTGCTGAACCTGTTGTTCAAGATTCAAAACTATCACTTATG  
CTATTTCAAGTGGGCGTTATTTTTTTTTAAACAAATGAAAGCAATAGCAATTGCATTGCTT  
CCTTACTATTACAAAATGGTTGTACAAATGCAAGACCAAGGTTGAGTGGTGCAATTGCA  
TCATTCCAATCTAAAATCTATACTCGTTGGTTCTCAGATGTATCAAAAGCTGGTGGAGAA  
AGAGTGAACCTTCTGGCAGTGGGTTCTCGTAGTGGAAGAAAAGCATTATTGACGAGACC  
GTAGACTTCGGTGCCTGATGATCCTATGTAACAAAAGGATATAGACAAAGTAAGAGGA  
GGATTAGTTCAGATACCAATGACAGGAGGAGCTATTGCATTTGGATATAACAATCCTGAT  
CGTGATCTAAAACCTTACACAACAACAGGCAGATGAAGTTGCCATGCGTATCATCACTTAC  
TGAACGAAATTGGATGTGCTGATCAGAGGATGACTTTGGCACATCGTTCAGATGATTCT  
AAAACAACCTTAGGCATTTACAAGTGGTGTGCAAGCATTCTCTCTACACGGAGACTAGGC  
AAAGGATAACCAGCAGCGTGTCTAAAAGGTGTGGGAGGTAAGGTAATGCAGGAGTCGCA  
TGAGAAATTAATAAATGCACCTGGATCAATTGGTTAGGTAATCAATCTCATACTGAGGGT  
CTTTAAGACCCGCAGCACTACAAAACAAGTGTGGTCACTTTGTAGAAAAATCAGTTGAC  
GCAGGATCAAAGGCACTTAACGGTAACCCTCTTCATGAGAACCTTGCAGGTACAAAGCCA  
AATCCAGAAGTAGGAGCAGCGTATCCGATTGCAAGTTTGACTTGGATACTAGCACATGAA  
ACAGGTAAGGTAAGAACATAACTGCAATCAAGACAACCTTATCAGCTCTATTGAGTGAG  
GAGTATCAAGATGAAGCAGGTAAGTTAGGATTCGTTCTCCTAAAGGTGACATTCCTACG  
ACGGTAAGAGCAGCAGATGACAAGATCGGCACATAGTTTTGTAAATATAAACGTATCGTAA  
TTATAGTATGAGTGCAAGAAACGTACGATCGAGAAACGGTGAAGATGTTATCTGAAACCT  
TTAGGCGGGCAGAACTAAAGAAGATCCAAGTAATACAGTAGCATTTC AACATAACAATCC  
ATATATTTTACAGTTGCAAGGAAAGAAAACCTGCAGAACCTCAAGTTCTTGGTGATGATGA  
TGCAGGTAACATTGTAAGTAAAATCAAAGATCCCGATATCTAATTGCAACCTCGGATTCC  
TCTGTCTTCTAACAAACCAAAAATCTTATCACGGTAGAGGATGTGGTGACCGCATAACGAGAC  
CTATGCAGAGGTCATCTCAACAAACAACACATTAATAGATGCAGATGGAGGAAAACCAAA  
GCAAACCTCCTGTTCTTGAATCAACGAAGTGAAAACACTATTCGAGAGGTACCACAGTTAT  
ATGAGGAACGTAGTATCCTTATCGAAAAATGCTATGAAGTGACCGGTGAGGATGCAGTGA

TCCCGTTACCAGAATACAGTCCACAACGTCTTGTCTTCTTGCCAACTGAAAAATTCTTGA  
GTATACTAGATCCGACTCAAAAACCTGTTGCAAATCTACAATATATTCTAAATTCTTTCTT  
CGCTAACCTTCAACTAGCTCGTTACACTATACTTTACAGAGAGTATGAGAATGGAGACGC  
TTATCAATATCGCTCATCCTTTTCTCCTACCATTTATGTTTTGTCTAACAAAAAAGAAAA  
GTTTCGCAACACTAGCTTGGAGATAAGTGTCTCCTGACAAGCTTTACAATGCAAGAGAAGC  
AAGAGATTTTATCAAACAGTATGAACATGTAAATAATTTTGAAGACCATGGTCACGAAAG  
TTTTGTCTATAACTTCAATCGTCAGCAGTCTCCAGATGACCTTGACTCCCACATATATCA  
GATGAAAATTTATGCATCGCACATCGAGGTTCAATGTGTGAGTAGATTCTAAAAGGAGA  
AGCAGCAGCAGTAGAAATGCTCTCAATCACCATTAACGATATGGTGACGACAAAATATTG  
CTGTTGGACTACTAGGGTGTGTTGATGCACTAAATAATCTAGAGTTGAATGTCTCTTGGAC  
CGATCAAGACAGGCTTACAAAACCTTTATTACATGGTGGTCACCGAGCACTCCAGACATTCT  
AACTGGTTGGAAGGATAACTTGTACGTCGCCCCATACCTTGCTCGTTGAGCCACTCGTTT  
TCTCGGTGAGAAATGGACGAAGAAATTATCCCCATGGAATCGTCCAGATGCAAGGGAAGT  
TTACGTCCAAGGTATGACGAATTACTCGTATGATATCTCTGGTGTAAAATTCTTGATTA  
CATCGAACTATATGATAAGTTTACATACTAAAATCAGGAGTCATATAGGCTCGATCACAT  
TACCTGTCTCGAAATAGGACAAAGAAAAGCAACTCATGATGAGTATGAATTTCTCAAAGA  
CTTATAAACAGCTGATTGCAAGAAGTTTATGAGATAACAACATGCACGATGTTGACTTTAT  
TGACCGTCTGGAAGATAAGATGAAGTTGCTACAACACTAGCAATTACAATGTCTAATCAGGA  
CCAGGCAAGCTTAGAAGACGGGTAGCTTCAGGTCGGCTAGTGGGATACGATGATATATAA  
CTATCTTACAGAAAGAAACGTTGTTGTTCCCCACATAAAGGAGCGAAGAAAGATGATAA  
ATACGCAGGAGCGACTGTTACAGAACCGCAACCAGGATGCCATGATAGGTTTGTGAGTTT  
TGACCTCAATAGCCTGTATCCTCATCTTATTATGAAATACACTATCGCGCCCCGAAACTCG  
CAGGGGGACTATACATCGCATTGCAAGTTTTGCGCGAATGCTCAATCAGAAGTTGGAGAT  
AGAGGAAGACTATTGTCTATGTGCAAACGCTACCATGTATCGAATAGATATTCATTGGTG  
CGTGCCATAGATGAAGCGGAAGATCTACGATGAACGAACGATCTAGAAAAAGAAAATGAC  
GGCTGCAAAACAGCAACAAGAAAACGCACCATCTCACAATTTGATGCTGACATTTCAA  
GATCACCAAATCCTGATGGCAAGAAAGATTCAACTTAAGTCTGCCTATGGTTCTATCGG  
AAATCAATACTTGCGAACTACATTCTTGCAAATGCTGGGTAAATTAATCTGTGAGGGTA  
AGTTTCACTCCGTTGGATCGAAAACGAAATGATCGAGTATCTCAACAAGCTAGTCTAAC  
GACAGGACAAGATTATGTTGTTGCTAGTTATACTAATAGTATTTACCTCAATCTGCGTCT  
TCTGGTTCGAGGCTGTATAACAAGGGGAGAGAGGCCACTGATTCGAGCATCGTCGATCACAT  
TAATAAGGTCTGTTAGGAGGAACTTGCATAATATATTATTTGTTTCGTATGAAGCGGTTGG  
CACATATGTAACTCATAACGACCTGAAGATGGTCATGAAGCGTGAGAATATTGCCAACAA  
AGGTATCTGAACTGCCAAGATAACATATATTCTTATCGTTTGGGATAGTGAGGGAAATTCG  
CTATGGGAAACCTAATCTTAAGCTAATGCGTTTCGAAGCAATTAAGTCTTCTACACATGC  
AGCCTGTGCAACATATATTGATGATTGCCTAACAGTTATCATGAAGGAAGCTGAAGAGTC  
TGCACAATCCTCTATTGGTGAATTCAAAACCTATTGTTCTTCTTTACCTAATGGAGACAT  
CTCATTTCTAGAGATTGTAATAATCTAAATTAGAGGTCGAACCCTATAACGAGCTATCG  
CAAAGGGACTAATATACATGTGAGAGCGGCACTCGTATATAACTTTTATAATAAGGGAAA  
CAAGCTTACTCCCAAGTATCCCTTAATTCGAAATGGAGACTAGATCAAATTCCTCTATTT  
GAAAACCTCCAACCAAATCAACGAGAACATTGTCAATTAGCTTTATTCGGTCTGAAATA  
GTTTGGACTTGGCAAAAAGGTGGATTATGAGCTACAAGGTTAGCAGAAGTACTTAGACCC  
CAGCAAAGTGGTTATGGTCCTCATTGGTTGGCAGCCCGAAAGAATCGCTTCATTGTAGTT  
GCGCTTTTCATGAAATATTATTTTTCATAACCAAAAAGCATTGTTGATCCCAGACAAAAGA  
GAACAAGTTTTCCACGATGAGTCAGAGGCAAGATGGTTTGAATGTGCTTGGAAAGCCTACG  
AACTCTGTAACCTAAGATTATGGAGGTTTACGAGGGAGTTAACTGAAGACCGTTCTATAGG  
AAAGTGGAAATGAATTTCCAGGCCTTGTATCAACCGGAGTTTTTGCAGGTAGTACAAAAG  
ATTTTATTGATACTGGTTCTTATGTCTTTAATACCTTTGTTTCTGTATCAGTTTATCGTG  
GGGTGCCACGCAATAAGATCACAGGGATTGCTGGTGAATGAGCAACTGGCACAACCTTTCT  
TTTGACATGGCATGGTGCAACACTTTCAAGATTCTGACCGTGATGCAGGTGAAATTGATT  
TTAAATCTTCGCCGGCTATTAGCAACCAAGGATTGTGGATAGAGGTATTGAGGCAGATT  
GAATGATGATCGTTCCTGTCCATCCTATCGAAGAGTTTCGAGGTCAATGCTGCAGGATTG  
TAGACAAATATATGGACCAGAAATGAGACTGATCGCAAACCTATGATGGTTGTATTAGATT  
ATGGTGGGATGTTTGTAGTAATAAAGATGTTGAAGACTTTGGTAGTGATAACAATGTAA  
GGGATATGACACTCAGTCACTTAATTAATAATTGCTTTTCGTGATCTTACGCTAAAATTAG  
ATAAAGCGAACGTTCCCTATGCCCGTAATGACTCATAACATATGATGTTATAGTAAGTTTTA  
TTCCAACCTCAATTTATGAGACGTGGAAGTAGACTCAAATACGCTTCTTCAACAATAGTAT

ATCTATCAAAGAAAAGGAAAAAGATGGTACGGAGGTTGTTGGAGCTAGTAGCGCATGTA  
AAGCCCAAAAATTCCTACTAAGCAAAGAAAATTTCTCTTGTAGAGACACGGTTATATTACG  
GTCGTGGACTTGATAGGTATTATGGATTACTAGGATTATGTGACATGCATGGAGTTTTAC  
CACGCAAGGGTAATCGTATTTAGGTTGGTCAAATTTCCGTATATCCTACATCCATCCTGG  
CTGATCCGGAAAAGTATATTACTGATACAGTCATGGAAGCATTAGACGAGGCAGCAAAGA  
AGGAGTTACAATATGGTCACTAATCTTACTGACCACATTATATGCTATGATGATATGTTT  
CTAGGGGATGTCGATAAATCGGTAAATAGAACATTCCTGAATCATATATAGATGTGAGT  
CGTAAAGATCGAGCACAAAGACCAACCTTTAATGAGGTGAGTATCTCACAAAGGTTTCAG  
GCAAAGCTCTTGCATGGTTGTGTATCCAGAAACATACACAGTTAGTCTTTATTGATATT  
GTCAAAGTTTATATGATAGCTTGTCTGTGATAACCAGATTTTCCTGTAACAGATCTTTTC  
GGAGCGTTTAGAATTAACCATATTCGAATGAAGGACTAGATCAATTTAAAGATCATGAA  
GTTGGCGAAGTTTATAATTTCTTCTTCTTAGATTTTTTGTGAAGTTGTTATATCAGAATGAC  
GTTGATGATGGTGGACAATCTAATTTAACTAGATTGTGCTATGCAGTTTCACCTAAACGT  
GGTAGAATATTATTGTTTACAGCAACATGGCAGAATCGTCCCTGAGGATAGCCACCTGAG  
TCTGACAAACAGTACATTGTTGAACTTATTTACACTACCTATGACTCTCGAATTCACGA  
TTCTATGTAATCGCTTGTATAATAAGGAGTATGCACGGGAGGTTCTTGCTTTATTGAAGG  
TTAATTTTTTTTACCGAACGTTCTTCCCTGATTATTTTTCTTGAACACTACATGAATACCTTA  
GTCCGTATGATGCATTCTGATCTCTGAACCCACTTAGTATTGAATGTCAATAAAGAAATG  
ATCTTACACAAGATCAATTTCAACAGATCGTTGAGGTTTAAAATGTCCTTTCCGATGACC  
CCAAAGACCACGACAGGCTCGTAAATTTCTAGAGAAAATCGGTGTCAGGAGCGTGCATGT  
ACTTATCGCTTATGGAATCTGTTAGGCTAGCTGACGGTCATGATACCAAACGCAATAAGG  
GTGCCATTCGCGCAGAGTCTTTCAGAAGCATTAGGAGTATCGTTTGATCAACATGTTGGTC  
ACGATTATGTCGAGAAGGCTATTGATTGTCTTGAATATTATCATTATAGGAAACCAAGA  
AACCTTTTGTATCTGGAGTCTTTTAATAAGATCCAGACGGCTGGTTTAAAGAAATAAATCAC  
TGAACATCGTTCTTGCAGGAGCAGGTGGCGTTAAATCTTTGGTCATGTGTCACCTTTGCTG  
CATCAACTCTATAGCAAGGTAAGAATGCTTATTACATTACTTGTGAAATGGCAGAAGAAA  
AGCCTGCAGAAAAGTATTCATGCAAACCTTTAAAATGTTTCTATTCAAAGGTCGCTGTTT  
TACTATATCCAATCTTTGAATAGAAGATCAAGACATTAGCGCAGAAAACACAGGGGAAAT  
TTATTATCAAAGAATATTATTACAGCGGGAGCACCTGTAGGTCAGTTTAAATCGATTATCA  
ATGATCTTGCATTGAAGAGAATTCTTAGACCTGATATTGTCTTGTAGATTATCTAAACA  
TTTATGCTTACAGAGATACTAGGGAAGTATTGCGAATTTTTATACTATGTTAAAGCAA  
TTGCTGTAGAACTTAGAGTACTTGGGGTAGAATGAGACGTCCCGATTGTCTCGGCGACAC  
GAACGACTCGCTCTGGTTCTGAGTCTACTTATATTGATCCCACGGATAAGAATAAATCCT  
TTGGTATCCCTGCTACTTCTGCCCTCATGTTTGCTTTTATCTCGACTGAAGACCTTTAGG  
GGATGAATACAATTATGGTCAAACAACATTAATAATCGCAATAATGTTTCGTGCTATGAATC  
AAAGATTTTGTGTAGCTAATGGCAGAGCGAAGATAAAGGGTGAATGACGTAGGAGAGTCTG  
CGCTAGATGGCCTTGTTTCAATTCTGGTCGAGACGAAGCGAAGGTTGAGCTTGTACAAAGAT  
TGAAATCAAAGAAAACCTTAAACTGCACTAAAGTATGGGTGATTTTAAAGAAGAATAGTGAA  
TTTGAAAATGCTGTTATATCGAAAGAGAGTAAGTATAGTGGCCATTTCCAAGATCGTTTA  
ACAAAATTAGATTATAAAGACTTCTCTTCACTTAGAGCATCAACTGCCGAGTCGGACTA  
TGTGCTGAGTCAGGCGAATTTACTCAGATAGTAAAAAAGCTATTATTTCAAGGTAAACCA  
GTTACTGAAGAGAGACTATTTTCAATATGGAACGTGAACTAGTCGACGTCGTTTGGAAATTTT  
ATACAGGCATGTATAGAATTAGATGTCTATCCAGGAGAGGTTATAGAAATGAAAGTAGAT  
AGGTTGATGAGTGGATATCCCCGTGGAGAGATTGTTGCCCTCTATTCTGAAAATCGTAAA  
CAAGCAGATGTTTAAATGGTAGGACCGGGTGAATACCAGGCATTTGTTAGTGATCTTGCTA  
GCGCATACACTACTGTTGAATGGAAAGATACTATTCCATGTTTCATTTGTACAATTGGAC  
TTTGTGGATTAAAGTCAAATCGATACAAGTATAGGACTTGATAGAAAAGAAAACAAGAG  
CTCCACAAAATTTGATTGCTGATGCAATAGATGAAGGCCATGAGTAAGAACACAGATCCT  
GATGTTAGGTACACTTTATCCAGATGAAGGGATTCTATCTGGAAAAAAGGTAGAACCCTAT  
GCAATTTACAGCAGATTTAATTGCTGAGAATAATTCTGCTTTGGCACATACAAATAAAGC  
TGGCACATATAATTGGTTGCCTACTGATGAGTATGAAGTTCATATACCAGGTAGGTTTGC  
TGCCGACAGATTTATTCTTATCAAAAACAAAATGAAGAATCTACTAATCTCGGCAGAACC  
TCATCCTTACGTTGACTATGAGAAAAAAGTCCCTTACCAAAGATGGTAGGGAGTGGTATAT  
GAAAGAGTTTAAAATAAAGAAAGATCAAGATCAAAAAGAAGATGGCGACAAACGCAAGCG  
AAACTGCGAAACAAGAGGATGGTTCTAGAGTTATTCTCCAATCTGTAGTCACAAGAAAGA  
AAGAACCATCCTTAAAGGAAATGGTAAAAGTCTACGAAGGATCCGGTCTGAAATGGATAT  
CATCATATGTGGAACAGGATTCAGCATTCCAAAAGTTGATAGGATATAATGAAGGGTATG

AATATTCCAGAGGAACCGGACTCAGCCCATACATTGAACACCATTTCGAAGAAAGAGCGTG  
GTGTTTGGAGTAAAGCATCCTTGGAAACCCTATGGATATTGGATTGGTTAAGAAGAGTGCAA  
AGAGAGTAGTCGAAGCAACTATAAAAGAAATTACTAACATTGCTGGAATGAGTAAAGATG  
CACGCTTCGGTCAACTCAATGCGTCTATCCATGTAGCATGGATCTCTAACCGTTTAATTG  
TTATATCATCTAAAGCAATTGCAGCAAAGAAAAATACTGCTAACGCAGATCTTTCCAATT  
CAGGTAGAACAACCTGGTCAACATACAATAAGGAACAAGGTTCCCTAACTCTTTGAAGTGTA  
CGTTAACTTTAGGGAAGAAAACGAATTAACCTATTTGATACTGGTGAAGTTGGGTGTGACT  
TGGTGACAACGTAAGGTGGTAAAATACATGGTCACTCACGAAATTTTCAGGATTCTAAGG  
AAAGCAAATTAGTTCAAATAGGTCCCCTCCCAAAAATAAAGACGCAGGGGCAAACTTG  
GTAAAGTATCTAGGGTTACGTTAGTTCTATTGCTAGGAGATTTAAGCTGATCCCGTTCGAA  
ATTCTGCAACAAAACATAATCATCTTCCAATAGTTGGTGGATGGATGGATAGAGATAAAT  
AACACTGGAATGACTTGTATTAACCTTTATAACAGCTCGTGTGATTGTTTTTGGAGGAA  
TCGCTGTGTATGAATTTATCCAAAAGGTTCGCTCAAGATTTTCGAAGCAGTTATAGCCTATG  
CAATTTAATAAACAACGCGTTCGGGCAGATTGAAGCTCTGCAGGTAGATTCTCTCCTGAGT  
TGAGAGCTATATTATGGGCACATATTTGTAAGCAGACTGCTCAGATTAAGAAATTGCAAC  
AGTCATGTACAGCGCTATACTATGGTTCGTAAGAAAGAAATTCGGCAATGCAAACGGACCTT  
TTCTAAAGATAAACTAGTCCAAATGACTAAGTGTACACATTTACTCGCATTACACTCTCA  
GCCTGCTATAATATTATATATAGACAGAGGACACCTTGCTAAACAACACCTTCAACAC  
CTTGAGCATCTGATCTTTTCGTAACGTAAGGAAGCGGTGGATGCAGTATGGTATGCACTT  
CACAAACCAGACCTGGGTGTTAAGTGGGATGGTGCACATGCTATCCTTTATGGCACATTC  
CCTGCGAATGGCAAATTGTACGTTTCGAACAAAATCCGGTTTTATAAAACACAAGTTCAGA  
ACCTCTTATGATCAAACAGATAGTGACGAACTTTACTCTGACAACCGTTCGGGACATTCTC  
CGCTAATGTCTTTGGAAGCTTCCTCGTATCTGTGGAATTGTCCAGGCTGATTACGTCGGT  
TTCGGAGGGGGCAGTGTAGCGCCCTAATAGTTTTTCGTATCGTCTTCCCCCTCCGATC  
CTAACGATATTGTCCTTGCTCCGCATACTTCTAAGACCGAAGTTAGTCCAAAAGCTGTC  
GGCAGCATTTCGCCACGATCTACCTTCTACATTATCCAATTGTTACTCTATAGGTAACCAA  
GAGGCAGATGCATCGGTTGCAAAGTCTCCTTTCTTCAATTGGGTCTCGTCTCTCAGCCGG  
GTGCCTAAATGTAAAATGCGTAGCGATAAGGTACGTGCTGAAATTGAGAAACATATCAAC  
AGTTTTTTCCTTTGTGATATACCAATTCCTGCAGCAGATTTTTTGGATACTACTTTACCT  
GATAAATATAATTATGAACTTAATGTTACCTCCTTCAGTGTGTGGCATAATGTTGTTTCCA  
TTGCAGCAGAGTTAATGAAAACATCGTTGTTGATGGAAGTGTGAAATGCTACATCTAT  
GGAAAACCTTCAGAACAGCAGGGTTTTCTAACTGTTAAGATTCTCCCGACAAAATTGTA  
GATACATTGACATTTAGTAAAGCGAACTTCAACCTTAGTAAAAATTGGACGAATTAACAG  
ATTTATCGATTTTCTAATAGAAGCACCGAGAACGTTTGCTGCTAAAGAAGCGGAATAATT  
AAATCTTACAAATGGAGGGTACAGTAAAGACGCCGACCCATCTGGGAATGTGATTCACAT  
TTCTAAGGATGGTAAGCTTGTAAAATTACAGCATATGATGCAGCGAGGACGCAACAGAA  
TGGAGGGGAAGAAAGGGAGGGTTGCGAAGGTTCATGTCGGTCAAGGATCATTATCTATTAG  
ATTTGGAAGATTTAACGCACCGACTATGGGGCACGAGAACTTCTCAAGAAAGTAGCAA  
AGAATCAAGGTCTGGTGGAGGGGAGTATTAAGTATATCCCTCAAGAACTCAAGATCCCAA  
GAAGAATCCTATTGATTCTGCAACTAAGATCAGACGTATAACAAAAGCCTATCCAGACCA  
TGCAAAGCGATCATTGACAATGAGCACATGACAACGATCTTGAATGTTCTTACTGCCCT  
TGACAATGATGGGTAATGTTGAGTTAATATTAGTGGGGGTGGTGTAGACAAAGTTAACT  
TAATTTATTAACATCGTTTTTCTACGGTGACTTATATACATTTGATCCGATTAATAAAC  
CTCAGCAGGAGGTAGAGACCCTGACTCTGGAGGAGCAGAGGGTATGTCTGCATCTAAGAT  
GACAATGGCAGTGATGGACGGTGAACCTAGATTCCTTCAATTAAGGTATCGCTCATGCGAT  
GTATGAGGAAGAAAAGAAGCAATGTATCTAACAGTCAGATAATCAATGAATGTGCAGGA  
GTCATTTTCATGACTCGGCAGATGCATCATATCATCTTTATGAGATCGCTCCTAAGTTAGA  
TCCACGAGGTTTGGAGGAAACATAATAGGATACTAGAATCTTAGAAGTAGGTACGTATGT  
TGAAAATATCAGTACAGATATTGCAGGTAAGGTCGTAAGTTGTGCTAGTAACTACACCAT  
TTACATTGATCAGCATGATAATCTCTTGGCCTAATGGTTGAAAACCTTGTGGAGACTAA  
GGACTATGTTTATGGAATCGTGGTTAGACCTGCAGGTCAGATAGGAACCAACAAATTAGC  
TGCATATTATCGTAGAATGACGCCTGGTGCCTGATGAGAGAAGATAAATAAAAAAGTAAA  
GGTTCCTTAGTAAGATTGATTTACCGAACTTACCTGTCAGAAGTGCTTGACACCAAGAGG  
GGCAGGAACAAGCCACGACACTAGATCCCGTTGTAGAAGAAGACGGTGAAGTAGATAATG  
ACGGTGATAATGACCCACCTGATAAGTATCTTAGGAAGCGTTCGTTAGGCATTTGCGAAAG  
CTATTAAGCACGAACATCATCAAAAAGATGAGAATGGTAAAGTCATCAAGCATGATGTTG  
AAGGGGAAGAAGTAAAAGCAGCATATCCAGTAACGAATCCTGATAACTAGGGTGACACCT

AAGCCTATCAGAACTTTCAAGCAAGTCTGAAGGGAAAAGATGGTTTACCATTATACAGAG  
CAGCAGATCACATGAAAGAGATTCAAAAGATTTCATCCTGATGGCAACAATTAATCATCTG  
AAGAAGTAGAGAAAGTAGCAGATCACACTAGAGCCAGGGGTGCTAAGTTGGGAGAGGGTT  
ATGGCGAGGGGATAGGGTATTCTAAAGGTGGAGAGGTAAGGGCTCCAAGAAGGCGGAAAG  
GCGCTGTGGCATATGATGGTTCTAACAAGGCAGCAGGTGTAGTAAAGGGTAGAAACAAAG  
CTAAACTAAGGCAAAATGCGAAGCATTGATAAAGTAATGTTATTTTTCAAACACCGATC  
TGAACAGAAAATAAAATTAATACTAAATCCGACGAAGGAGGATTTTCATGGAGGGAGCTAA  
AACCTCACTCATGGCGAAGCTTGCGGGTTCTTGAATCACGACACAAAACGCCACATTGA  
TGAAGTTGGCGACTAAAAATCAGTATCTACCGAACAAAAAATTAACGACAGGAACACAGA  
AGTCGCAGAAGAATGCACTGAAAGCAATGCGCAAAGCGACAACCTCTGAATAGAACCTGTT  
AACCTTCAGTCAATTTACGATGGATCATCTTGTAGATTTTAATAAGGATCAGGTAAACC  
ACCACGTCCAATGGCTGCCTTTGACAAACCATCTAAACCTAACCTAAAATAATAAAACA  
AAGAGTGAAGAATATCAGTGTAGGCGAACAGACTATGTATGAAGTTATGAGTAAAGAAAC  
GTATAAGAATGCACATAAAGACTTCAGGGCTGGCACTATGTAAGGAGCTAGGGTATCAGT  
TTAGTATCTCGAAAAGAAAGCAACTTTATGAAGATCTCTTAAATTCTCTGAAGCGAAGTA  
TGAAAGTGGTGCCTCAAAGCATGGTGCCATGTCTATCAAAAATAAAAGAGCATTAGGTTT  
CGGTGGGAACGCCACAACCTCCAGAGGGCGAGAAGCAAGGAACATGATGCGAGAATGAAGAA  
GTATAAAGCATCCCAAATGAAAGAAGAAAAGCATAGAGCTAATGCACTTGATGGTCTAAA  
GAGATCCATCATTGCCAGTATGGTACAGGTGCTACCAAAGAACGGGTAGCAAGAAACA  
GAAAAAAGACAGAGGTGCTAAGTCTATTGCAGGAACTGTTAATTATACGATGATGTCAGA  
TCAGAAAAAGCGCACTGCTGCAGTCGCTAAGAAGCATGGATTTAAGTCTGGTCAGAACTA  
CACTAATACCATGGCTCGTTATGGTGGTAAAGATAATTACGACAAGGGTAGAGGATTATG  
GTCATGAGCACACCCCGTAACCAATCTAATTGTCCAGATGCTCAGTATTATTGCTTTGAT  
GATGGGCACTGCAAACCAATACCCAACAGTAAGTGAGTTGGAAAGAATGGTATGTTGGCC  
AAAAAACGACAGTGTTAAAGAACGAAATAATTGCGAAGGCACAGAAAAAACATACTATG  
CCAAAGTCAAAGAATCTCAAGGATGACATGGCATAAGGAAAAAATGCAAAGACAAGTCC  
TATAAGACTACTAGAGCAAAAGGCGTACGTTTCAATGACAAGATAGATTCTGATCCCATT  
AAGGACGATAAAAAAATAACGTTTGATACCCAATGTGCCGAGTAATTACATAATCAGAT  
CATGAAGGGAAATTTTTTAATGCCAATGCCAGACAAAGTAATCTATTATGTGGTCAATAA  
TATCCCTGATGAATCAGGACTTGGCGTGGAACTACGCGATGTTTCTTTATTCGTTATTGG  
CAAGGCAGTGAAACTCACCAAGACGACCGCTGCCAACGCTCTATTTGAATAAGTAATGCA  
AGCACTTGCTGCTAAATAAGTCGCGTTTGCACCCCTGATAGTGAGGTCTCAGAGACCGCT  
TTTTTTATGAAAAAATACAGGAAAAAACAGAATTTTATGAGTATAACAATGGCACTTTAC  
GGCGTAACGGACGCAGCCGATTCAAAGCCCATGTGGGCTGTGAGTGTTAGCGGTGTAGAC  
CCCCTAAAGATGTTTGCACCCGCTGATGGTTGGTTTTTTGGTCATTACAAGAACGCCGCG  
AAGACAAAGGTTTGCCTGAAATTTTAGCCTCAGATGATGGGCTTGTAGGGGCAGGTTCT  
CGTGGAACCAATACCGTGCCTGGTGCAGATAGTGCTGCAGTAGTCTTTGAAAAGGGAGTT  
TATGCAGGTGCAGCAACAGGTTCTCTTGTGTGATCTGTAACAAACAGGTTACGTCACA  
AACGGTGCACCTTTTCTCTTGAGAAATTCTACTGACAGTTCCAACATGACTGCAACTGCT  
GCAGCACAACCAGGTGTAACCCGTGATCAGTTTGCCTGCACTGCTGCTGCAACTGGCAA  
GCACATGCTATCCAAGCACAAACAATCTCTGGAACAATCGTTGAGTCCGGTGGTGGAGTA  
GCACCAAGACGGTATGTGTTTCTGGTGATTTAATTGGCGCAAGGGGAAGGGGTTGTACC  
GCAACATTAAGTCAAGTTAACTAACATATGAAAATTGACGAAATAAATGAGGATACATT  
TCTCATGTTGCTATTAAGCAATATGAAAATCCTCACTGTGTGCCTCGACAGAATTCTGA  
TGAAGATTTAAAACGTTCAAGAATCTTCAAAGACTCTTGGAGCGTTATGTGAGAAGTGC  
ACCGTTAAGGACTCCTCTCGTCATCAATCATATAACCATCTTATATAATGCTATTAGTGA  
AGCTGCAACTCCTCTTATTTACCTTAAATTAGAAAGAGAATATTTGAGTTTAATAAAATC  
CCTACAGCTCTATTTGATGAAATATGCAGTCGGGATGCTTCCAGACTTGGAAACAAACCC  
GGTTTTTGAAGAAGAACTTAAACACGTAAAGCCTATGATGAAGGCAGGAACAAGCGGGTT  
TAGTGGTACCGCAACTGCCAGAGGTCCTGTAGCGGGTTTTGAACCTGTCATGACAAAGAG  
AGGTAACCTTAAAAAAGTAAGGCACAAAATCTAGTTGCTGTTAAGAAACAGATAGAGT  
AAACCATCAAGGTCCTTCTATATTATTCATGACAAAATTAACGTGGCTGAGGTTGGTGA  
ACAATCGTGATTGCGAATAGTCTACTGAACTCAGGATGAAATTAAGGATGGTAATCAT  
GCCTAAGTATAGGTCTGGTACTACTATTGAAAGAATCATGCCTGGTGGGGCTGCCAAATA  
CTTCATGGACAAGAGAACGTAGCACAAGAAGAATTTGAAGGATGCGTCGGGGCAAAGAA  
AGCAAATATAAACGATAAGACTACTAAGAGCGGTCGTAACATAACTCATCATGTGGATAA  
GAACGACGGGGCAGTTGCACAACCCGCGATGAGGAAAGATCTGAAATACATTGTTGATCA

GACTATAGTACAAGGTATTAATGAAGCCGCAGGTGATCAGCAGTGGAAGAGTCAATTGAA  
TCAGCAAAGATTTCAGAACATGAAGAAGAGACTCCGGTTAAAGAATCGAGAATTACAAA  
ACACTTACAACACTGAAAACATAACAACCTTAAAAACAAGCAGGAAGTGGAGCAGAACAAGA  
CGCAACAAGGTAATCTCGGACCTTAACACCGCTATTATTGAGCGACCCGAAAAATATGTC  
GATTCAATGCAGGAGAATGCTGTGAAAATGGCTCTACTTCTTGCTGTGCACATTA AAAAG  
ATTGATAACAAGTAAAGATCGATCACGTTTTGTCTGACAAGATTGATAGATTGTATGCC  
GGTAGTAATAGAGATACAGAACAGAAAAAGAAAGGTTTCGAAAGAGACACCCGTAAGATA  
GATGCTCGTCTAAGATTGATGGAAAAGAAAATGTGGACTATATTTGGAGCAGTTTAAATC  
GCAACCATCCTTGATCAGCTCGAGCACAGGCAGCTCAGAAGCAGTTGACAAACAATCAA  
AATCCTAGTTTGATTTACCAGAGATTACTAGGTCTATGTGATTGACAATGCCTTTTCGA  
ACCTAAACTCTGACCGTCTTCACAGACTTAAGCAGTTCACGGAGGGGACCTACAACCTGTA  
GGCATCCCTATTGAGGTGACTCCCAATAACCAATAATAAAGCACGAGGTTATTTCTTCA  
CTAAGAAAATTGGTCTCGTTTTTAAGTGCCATAACTGTGCGAGTAGTCATATCGTTTGGGA  
GCTTCCAAAAGGACCAAGCGAGTGACCTTCATGAGGAAGACATCAGGGAGAGATACAAAG  
CAAGTCTCCGTGCTAAAGGTAGGAATGTAGCAGATCCTGACTTTAATTAATAAAAACCAA  
TCTTGAACAAGAAGGGAGGACTACAAAGTATTTAGAGCTAAATATTTTCGCACTAAGCAT  
TAGCTGACATAACCAAACGTGGTAGACCGAGGTAACCTTTAGCGAGTTGATACTGTGTAC  
ACGAGTTTTGCCTATCGGTCAACACACAGAAATCTACCTTCCGAAATGTCTCAAAGGATC  
ACCCGAGGATTATTATCCTTTTATTGATGTAAATGGCGAATGGTTTCGATTTCCGGGGGA  
GGTGTCTGAATCCACCGATAAACTTAGGTCTCTATCTATCATGTTGGGTGGAGATCAA  
CTAATATATCTGGTCTTGATCGTATCAGCATGAACAATACCAAGTTTATTACTGAAAGTC  
CTCTCGAGAGTCTTCATATCGACAATGCGATGGATCTGGAAGGTGCTGATGTTGATAAGA  
AATTAATAGATGAGTAAGATGTAGTCTTTGCCTACGCTAATGAAAAGCGAAGCTAGGAAA  
ATATTTACTGTATTGAGAAAGCAATTGATATATGATATGAGGTAGTGTGTGGCCTTGTT  
GTCCGCAAGAGAACGATCTAAATCCCTTGTTCTATTCTGGACACGACGTGCAATCTACGA  
TAGAATTTTATACATACTCAGGATTAGAAGCAAAAATTAATTAACAGAATGGAACAAGT  
TATGAATAGTCCAGGCTCACCCAAACCAATCAACGACACAAAAAGGAAAGGCGATATGAC  
ACCCTTAGACGTTAAGAGGGTTCATAAGATGGTAGCACTGACCTGTGAAGGTATTGCAGG  
GGCAACTGAACCTGCTGTAGAGACTAACAGTGGTCTTCAATTTTTAGCCGGAATTAAGAC  
AGCAGACAATCAAGAAATACTTAATCGTTCAGCGTATGATCTGTACTCTCTTGATCATCG  
TAACTATCAGTATGTTGCTGCAAGATTGCAGCTGTTCCGGTCTTAAATAAGCAGTATCTAT  
CGGTCCCACCGATGGTCAGCCTGCTTTACTTAAGCATCTCAAGCAGTGTATAGACAAAGG  
TGCGTACGATGGCACTATTGCTTCCAAATATACGGCCGACGAATGGGAAAAACTGAATTG  
GTATATTGATCAGGACAGAGACTTTTTGTTTACATATGCAGGTATTTCGTCAGGTCGTCGA  
TAAATATCCCGTACAGGACCTTTCATCAGGGGA ACTATAACGAAATTCGCGAGTTCAAGTA  
TATGATAGTGGCGATTATCCCTCCCAAGACGATCATAAATTTTATCCCTTGAGATATGT  
ACTACAATACTATGTGCAATCTCAAAAGTCAGACTCAACATTCACCGCTTAATATGGG  
AGGTGTGCGTACGGCACTCAGACAATTTGCAAGCTGTGTTCTGGGTGTTGTTGGTGACAC  
CCTCCATAGCATTTTTAGCAGTGACATTGCTATGTGAAAGAATGTAGCGCAAAGGGCGGG  
TATCGGTATCAAGGCGGGTAGATTCCGTTCTGTCAACAGCAAAATCCGTAGTGGAGATGT  
AGTACATATAGGTGTTCTATCTTTCTTCAACCAGTTTGAAAGTACGGTCAGATGCTGCAC  
TCAGAATGGCATTAGAGGTGGAATAGCGACTGTCAACTTCCCAATCTGGCTCCACGTAAT  
GGCAGATATTCTTGTTCTAAAGGATAATATAGGGACGGAAGACAATAGAGTGTGGACACT  
AGGCTATAGTATTCAGATTAGTGAGTTCTTTACTCAAAGATTCAATTGAAGAGCGCAGGAT  
CCCTTTGGTTAGTCCACATGATGTGCCTGGTTTCTTCGAAGAATATGGAACCTCCTGAGTT  
TCATGATCTATGTGTAAGTATGAAAAAATCGTGCTATTTCCAGAAAGACGATGAACGC  
AGGGAACCTCAGCCATGATCTATAGAGGGGGATAGCAGCAACAGGTGCGCTTTATATCAT  
GAACATTCATCACTGTAATGGTCACAGTTTAGTCAAAGATAAAGTAAAAATGAGTAACTT  
GTGTGAGGGGAATACTCTTCCAATAGACTGTATTTCGACATATACATGCTTCCAGTGAGTT  
AGTTTTGTGTTTCATATCTACTCTGGACGTCGGTAGGTTAACGGACCTTGAAGATATTGA  
TGA ACTATGTGACCTTGTTATTCGTGGTCTTGATGCATTGACAGATTTTCAACAGTATCA  
TGTC AATACTGCAAAGCAAAGTACATTA AATCGGAGATCCCTGGGTGTTGGTAACATTGG  
ACTAGCACATTATCTTGCTAAGAAGGGTCCTAAGTATGATTCGTAGAAAGCATTGATTT  
AGTTCGTAAACTTACAGGAATATTACAGTATGCTATCCTATTGGCGTGGAATCGGATGGC  
AATGGATAAAGGTCTTTCGGTTCATTACGGTAGGACCAAGAATGCTGATGTAATTCGTCC  
TATCGATACAGATAAGAGTGAAGTAGATGAGCTTGTCCGATTGACCTATCATGTGATTG  
GGAGTATTTACGGTTCAGGTTCAAGTAGTATGGACTCAGGCACAGCACCTTGTGCCCCCA



GATCGATTTCGGAGAGCAGTTCGGTTGTGTCAAATGCCACAAACGGAAGCGCGCCTCCTAG  
AGGCTACCTGTCCGTAATAACTCAAAGAAGGGACCCTAGAAGGGGATTGTACCGTCTTA  
TAACTCTCTAAACGCAAACCTATTCGCTGTTATGGAATATGCATATCATTGATGCTTACAT  
CCAAGTAACTGGAGTAATGCACAACCTGCTTCGATCAGGCAAGGAGTGGTAATTCGAGTTA  
GAATCCAGAGAATTATCCTGACGATGAAGTGCCTGAAGCTGTGTTGGCAAAAGATCTTTT  
GTCCTCATACAAATATGGGTGGAAGACATGATACTATTAACACACATATGATGCTATAAA  
AGATTTTGACGACGAACCAAAGGTCGATGACTTTATCAACGACATTCCCACCTTCTGAGGA  
AAAGGACTGTGACAGTCGCAAGGTCTGATGCAGAATTAACAGGAATGACAGTATTTTACA  
AGAACAAAGTAAAGACAAAGTAACAACCAATGTTTTTTGTACAACCATTAGGAGTCCAAA  
CATATGATGCGTATAAGTATCCAGTCTTTGCTTGACTTACACAATCACAACCTAGGATATT  
TCTGCAGCCCCGACGAGGTGCTCTCCAGAAAGATAGATCAGTCAATCAAACCTCATAAC  
CAGAACAGCATCACAACCTTTACTTCTTTCTTGAGGTATCAAATCATGGTTGGCACAGTTC  
ACAGTAGAGGAAAAGGAGTGTCTTTGATTCCCTACTGCTCTCTTCTGAGTTCGAAGCAA  
GCACGTCGTTAAGGGAGTTTAGGGAAAAGATCCATAGTAGTTCCTATACAGACGTCATCA  
AGAATGGATATCCAGATCCTTCAGAGGTATTTGATACTATCTTAGATGACGATAATGTAC  
ATTCTCGTGCACCAACAATGACTAAATATTACGATGAATTTATAAATTAAGCAGACGGGT  
TTGATAATTGTCAACCATGGGATCTAGCTAGACAAGGAAATTTAACCGGATCACAGGAAA  
GATGAGAACTCAAAGAATACTCTATATGGCACTTGGAACGTTAAAATTCTTGAAGGAA  
ATCGTTTCTATGTCACCTTTGCGTGTTCTTTTGTCTTTTGGCGAAAATAAACTTATGGATG  
GCTCAACTAAGATTCACTCTCTAATCGCTAGAGATAGTAGTCAACACGTGGATATCTGAC  
AAAATAAGATCAGGAACTGGTCAAGAGATGACGACTCTGAAATGGCAGAAATCGCAAAAAG  
AACAAACAACCCGTCGTCGTAGATATGTGCAAGAGAGCTGTTGAAGTGGAGAAGACTTGGG  
CAAACCTATTTGTATAGGGAAGGTAGTATCATTAAATCCAACGTTTCGCGTGCTAAATAATT  
ACATTGAGTGGAGTGCCAATCGGAGATTGAAAGCAATCGGATTAGATCCTGTGTTGGATC  
AAGTTGATAGAAACAATCCTTTGCCATGGACTTGACACTGATTAAGTAGTAAGGGTCAGC  
AAACCGCACCAAGAAACGCAAATTGAAACTGATGTCGTCGGCGGAATCAAACAAGACG  
TCGAAGGAGACTCCTTTGCAGGATACTCTCTCTTTCACAGAGGGGTTAGTTAAAACCTTAT  
ACTGATCTAGTTGAGCCAGGAAACCACTACGGTCTACATATTACTGACAAGATCCGGACT  
GCTGCTAGGAAGGACGAAACTAAGAGTTTGCACGAGGACTTAACAAAAGATAAACATAAG  
GATGAAATTTGTTAAAGTGTCTCGTACTAAACTACCAATGGCAGGAATCTATGAGCTAAA  
TATAATGGAAAAGTCACTTGCATCAAACGTTTCATCCAATCCAGGGAATCGCACTACT  
GGTAGTGATGTTTGCCGAACACGAAGCTTCCCCTGTGTAGTATGATGCTACGAATTGAA  
TCAACAAAGAATTGAGATACTCAGCGATCAGATCCTTACTTCCGGATGCTTATGAGTAACT  
TATGGATTACTTCTATACGACAGTATCAGAACCGAATTATGAAGCTTGGCAACTTGGACG  
CAAGTGATTTCGCCGAACGAAGCGTTTATCGCATGAGCCCTATTTTAATTGCTACTGCAGT  
GACGTGTTCTTATATGCAGTCAGTAATCGAGCTGGCTCTAATTTATGAGTGAATTGATGA  
ACAAACAAGGCCAGAAATCATGGAAATTTATCAGGTAGATTTTACCAATGCTGTAGGGCT  
TGAGTGCGATTGGCACACATACGAATCAAGGATCGGACCTAAAACAAGTCTCTCACTTTA  
GGAGTAAAATCTTGACGACAATTACTTACAGAGGCATCAAGTATGACGCTGAAGCATAACA  
AAGGAAAGGTTCTTTCAGAGCAAGCAAGTAGCACCCGTAACAATTTAAAGTATCGGGGTT  
TGAAGGTCGAGTGTAATTCGCATCCCCGTCTACTCATGACAGAACTACAACCATCGG  
GGTCACATACCTAGGGTCTGCTGTTTGCATGATTATGATCTATCTGGAACCTGCGTCTTCT  
GCCTGTCAAATCACTAGATGTTGGTAAAAGTCAATTTTGAGACGGTCTATGGTCTTACCG  
AATATGATTCCACTAAACACGATGCCGTCAAGACCTTCGCTTTTTTAACTCATCGTGGAG  
TGCACCTTGTGCGGTGGGTTTACCTCAAGGAACCATTCGGTCGTACACAACCGTGCAACA  
AAACATCTTAGCTATTTTAATATACACACTTGATCCGATGTCCGTTACGACTGGGGTTAT  
ATATGTTAGAATAAATATTATGAATGATGCGATGGAGCACCATGAAAATGTGTCCGCATT  
ATGCTCATGCCGACACGATCTCTATTGCCTTTGAGACAGGTTAAATTGACGCTGTGACAA  
CCAACGCATGTCTTAAGTTAAAAGCAAGACAAGATACTATGGAAGCCATTACGGTAATTT  
CAAATAGATGTCCATTCCATGCTACCATCTCCGCCGAAGTGCTAGGTGATTATGCCACTG  
AACGGTTATATATGGCAGAGAACCATATCGACATTGGACCAAACATCTGACCTAAAGTAC  
CATCCACACCAGAAGGTCTTATGGCATGCTGAGACCTCACCAACCAAGAAGTTAGTGTA  
ATGTCACAATAGTATTCTCAGCAGCACAATCAATTCTAGCATTAAAACCGGAGCAACGT  
AGGTTTCTCCTTTTGTAGCGAGAGTATACGATACGTCATCCGATGGACTCCAATTTGTTT  
AGGAGACTGCAGACGTATTTGCGACGCACGTATGTCACACAAAGGTTCTCACTGCCTCAG  
TTAGGGAAGTTCAACAAGTATCATGTGCCCTAAGAGTATGAGCAGATACATACTCTCC  
CTGTTTCTGTTTTCAAGCAGATGTATAATAACATTCCTACAGATAAAGGATTAGGACTGT

ATGATAAAAAGTGGAAAGGAATTGCAAGGATGTCTGAATAAATCAATCGTAATTATCCTCC  
CATTCGGAGAGGTCAAATGAGAAAGAACGATATCGAACCCACAATCTTTAGTTTCAAACA  
CGAACGCTATACTGAACATGGCGGGCGCAAGTAATGCCTCGACAGCAGGTGCAGACTATTC  
ACTCGCAAGATTTCTGCAAATCCTACAAGAATATTACTCGTGAAGAATAGAGGTTTAAAA  
ACATTGATACATGACCTTGAGGATGCAGTAACTGAGCTAAAAATATGCGGTTTATCCAGAC  
ATTGGGGCATAGCGTATAAGTAGCGATAATGACACCAACACTAGTTGTCTGTCATCCAG  
GGCGAAGTGGGACTTTGCGATTGCTTCTGAAAATCCCTGGCTATGTGCAGGTACAACCTT  
TACCTCTATCGATATTGGCGATTTCTTCGGTTTAGACTACCGTCTTATACATAAGGTTAA  
TGAGAGATTCTACAGCCGAAGAAAGTAATTGTATGCCTTTAGAACACTGAAGGGAAATAA  
AAGAAAACAAAAGAAGATACCGATTGGAAGAAATATTTTGTCTCTTGTCTAGAATTA  
AGAAGCCATAAAGGTGTTAGGAAAGGAAGACTTTAGACGAAAGACTATAAGTCTACTGAA  
CTCGAAGGGTCAATGAAATTATGAGGAGACCCGACAAGTGTTTTTCAATAATGTACTTAA  
GGACCCATCAAAGATGGAAGCCCTGCAGTTCACACCTCGAACATACTTCGCAGCTACAT  
GCTTCAAGATTATTTCAATGCTTGACCACTGCTGGTATCTCTTCTATATTCTCCAGGTAC  
TTAAGCGAGGTCTCGTAGGGTTCGTAGAATTCCACATTACAGATTTCGATGATCTACATCAT  
AATCGATCAGCGGCATACATGTGCTGAGCTCGAAGAGGAGGCCCTTGTAACAGTGGGA  
CAGTAGCTCCGCTGACAAAGAACTACCTTGTAAGGAGTCGGTCGTAGGTTCAATTCATA  
CCTGGCGCGTTCCCTTCGGGCCAATCGGTATATACAGGTTAAAAAGATTACTACAGTATA  
ACGCTTCTCGTCATGTCTGAATATGCTTACGGACTCAGTAGGCCGACAGATTAACCTTGA  
CACAGAACATCCTATCATATTTAATCAACTAGTAAAATACTATGAGGATAAAAAGTATACA  
ACTATACGGTGATGTAGATGAGGATTACGAAATGCTTTTATCCAACTTGAAATCAATCT  
TTAGTATGAAACGTGAAACCCTTTTACAACGGTATCCATACCGTTGGGTGTCTGTTGGAC  
CTGTGCCAAGCAGTCGTTCCATACTATCGTATCCAGAAGGTTACGAATGGAGACACCGCC  
ACAGAGACATATATCTTCATGACAATTAAGCTCAACAGGGTTATGCAATTGAAGACGCTG  
AATATGCCAAATGGTTAGACCATGATCCTGAGCTCCCTGCGTACGGCGGCAAAAGGGATG  
TCGTTTCCGCATACATTTGCTGAATTCGAATTGTTATTGAGGATCTACAGAGCAGTGAC  
TAATAAACCTGTTTCTTCTAAACCAATCCATGTGCATATCCTAACATATGGATAAATGCC  
GGCTTTGCCATTAGACGTTGAACTAGATGGTTTCAGGTGCGAAATCAATTCATAGTCCTA  
CTCGTAATGTGCGGCCTTTTGGGTGCTTTTAAATTTTCTTTTATGTTGACTCTGAAATCTT  
AATATTACAAACGCTTGACAACCTGTTGAAACTTTATAGATAAATGTAACAGTCCTTAATA  
AAATTACACAAAATGACAACAAACACTGAATTAGGCGGAAGACATAATATATATCCAAC  
GGAGATCGTCCTCCCATTGATAAGAACTATCGAGGATACGGAAAGAACCCTGAACCTCAC  
AGTGGTCGCTTGGCGATGCTTTGTTTAGTTGCGGGTATTTTCTCTTACGTTACCACTGGT  
AACTTCTCTTGGGTGGTTCGTTGTTTAAACCATCGAACTTATCGAAGCAATTATAT  
ACACACAATCAACACACAACAGGCACGCTAGCTGAACTCCAGAAGCATAAAGGAGTAAATG  
GTAGGGCAGCAATGCTCGGTTTCGTAGTAGCAGTTGGTGTTTACGTTACAACCTGGTCAA  
TCACTCCAGGTATTACTGATGTATACATCAAAGCAATAGAAGTAGAATTACAGAAAGA  
AGTTGGTAAGAACTTAACGGTAAATTAGCAATGCTTGGTATCAACGCAGGTATATGAGC  
TACTTAAACAGCAGGTCAACTCATTCCAGGTTTCGTATAATGAAACATGGGCGTTTCGAA  
AAGAAATTAACCGGCAGACTAGCGAAGATTGGTAAACTCGCAGCGTTAGTGGACTAAGAT  
TGCACAGGTAGGATCGAACCATGTTTTTTCCAATGGACTATCACGACGTCACGGAGGCGT  
CTAAGAGATCTATATCTGTACGTTACATTCCATTCTATACTTTATTATTTCCACAGATT  
TAACAGCAACTGCTCGAATAGCTGTCTACGCTCACGGATTTATTTAATGTTTATAGATCA  
ACGAGCTTGGATTCATAGAATGTTGTGTCCGTTTATGCCTGTCATAACGCTCTTTGTTGT  
TAGTGTCTCATGCTCGGTGATCTTCCCTGGGACGATGATGACGATGATAATGATGCTGC  
CGGAGGAGTAATGACGCCAATTTGTAACCTATGAACCTCAACGAGCATATGTACATTACAT  
TCTCAGCATCAGGTGTTACGTTGCCAAATCCTAGATCACTGTATCAAGATATGGAGATT  
CCCAACGTGCACTATGCAGAGTTACTATCTTATCCTGGTGCAGAATTAGGGTTTAAAGCA  
GATTGCAGTGACAACAGCATAGTTATAACAATCTAAAGAGGAAGCTTGACTTCTCTTTTT  
TAATATATAATTTTCATGATAGCGTGTCACTTATCATGGCAGCATATACAAACACTACTTC  
GGTATGGGTAGGGACCCGAAGGGCTGACGATTAACCTAATTGACTAGTTGGTTTCACCTAC  
TCCGTGGAACCCAGACAAAACAATCGCAAGGATTTTTGACGCTCCAGTAGCTGCCAGAAA  
GTTTCTTCAAGAAGGGGGTATGAAAGGTACCGTACGAAAACATTCATGACAATTACTGCA  
TCAGACAAATTACCTTATGATGGATGGTCTGATGGCAACCCTTAAAAAGGAACAAAATAC  
ATAGGAAAACCTCTTACGAATCAGGCGATATTTCTATACACCAACAGAGGTCTGACATC  
TGAACAAGACATCTGAGTAGAATATGTGCAGCAGAAAAAAGGTATTATTACTCATCTTTA  
TCACTCAACTTATTCGTAAACATATATTCCTATTAATAAATCGACTGGGTGAGGAAATCC

TTACCTTTTCTATGTGCACCCGTTTAACCGACTCCTATGGGTTCGGTAAATTACGTCTCTC  
ATATGCATAAATGAAGGGATTGATGGAAATATGGTATCGATCTACCCTTTGAGCCCTACT  
GAATAACCTCCTATTGACAAGTCTTTCAAGACAAGGCAGCCAAGGCGGACTCCTACAAGG  
AATGCCAGAGTTCTGCGAATAGGTAACAAGCACTAACAACAGACTTTATGTTGGTTCGGTT  
CGGTGTCTTAATGATCCCATGTTTATTACCAGCAGCAAGATCTTTCATTATTACCTTTCT  
TGCAGCACCCACTGTTCGATATCGACGGAATCAGCGGACCTATCTCAGGCGCTCTAATACA  
TTGAAGCAACATCATCTCAGGTGCAGTTGTTCCAACGTGCAAACGTACGCGGTCTACACTT  
CGCCCAAATTTGGGCAGCAGCTACAATCGATGAGTGGGGAGATAATGGCGGTCTAAACA  
GGTGGTAATCTTCCACTTCCTAATCGAAATATCTGCCTACATGGGTAGACAGTGGGAGTT  
ATCATAACAGACTAGGTATGGGACTTTGGATCTGTGTTGCTTATACAGCTCCAGTATCTGC  
ACCGTTTGCAGTATTCATTGTATATCCACTTGGTCAGCACTGTTCGCTCTGATGGTATTCTG  
TCTAGAAATTTCTGGAACATTCAACGTCATGTTTCGTTTTCCAAGCAGAGCACAACATTCT  
TATGCATCCCTGCCATATGGCAGGGGCAATAGGTATGTTTCGGTGGTTCTATATTCTTCGC  
ACTGCATTGTTCACTTGTAAACACCTTCTCTTCACGGAGCGACCCTGAGGAGAAATCTCT  
GAGCTATGGTTACAAGTTCGGTCAATAAGAATAACCCGATAAATATGGTTGCCGTACATGG  
ATACCTCCGTAGCGTAATCTTCCCGAATGCAGGTTTCAAGAAGTGAAGAAGTCTTCATTT  
CGTCCGAGCAGTGTGCACAGTTGTATGTGTGTGGTTACCCTCTATGGATAGCCGTAACAT  
TGCTTGCAACTTGAACGGATTTAATTATAGCCAATCAGCTGTAGATGTTAACGGCAAGAT  
CATTCTACATGGGGTGTTCGTGCCTAACAGAGCAAACCTAGGTAGGGAAGAAGTGCATAG  
GCGTAACGCTCCCAACTTCCCACTAGACGTAGCATCTGGTGAGACTACAGAAGTTGATTT  
CAATGCATCAACAATCGGTTTAAATAGTACTTTGGAGCATAAGCACAAATGACTAAATTT  
CTCGTAAATACGTGGGATACTTTTCAATATTTGACTTCATGTTCTTCATTGCAATAGGT  
ACGACCTTAAGACCTGTCTAACCTAATTTAGATAGAGGGGTAAGACCCCTCTTTTTTTTA  
TGGCATTTTATTATTCATAATGTAGTTTTGGTTCGTGTATGAGATCTACCTAACGCGGATG  
CTGATATAGCACAGACGGCACGATTTGCTGTATCTCATATTGTGCGTTTAGGAAAAGACT  
CTGAACGTGTTGATACTCTTGATTTGACAGGTTTCTATGATAGTATTCAAGAAGTTTTTG  
GAGAAGTGCCTCCTTCTATAGGCGTAGAAGATGGAAACAAAGACCGTTGCCTGACCGCA  
CTATAGAAAATTACGATTGTTTATGGGAATATCAAGGTGCCCTTGGAGAGACTTATTATA  
GTTGTTGGGATTCTGAAGACGCAAAAATGAAATTAGTTTACCTAATACTTTTCCCAAC  
AGAAATTATCTCCAACAAGTAGTTCACAATATCAACGCGATATTAGTATTAGACCTCTAA  
CTTTCTTCAATGCTAACGAAACTGTAGTTACAAAACTGTTTCTGAAGGATCGACTCCAG  
CCACGTTTACAGTTCAATCTGAGTAGCCATCGACTTCTGAAGCAAATGAATAAGGTCTAT  
GGCCGAACATACGAGCGAGTACGTTACCTCTCGCCCCTCAAGCATTAAACATATAAACTTC  
ATATCACAGAAGCACAACTTATGGATTTACCTTGGCTTCTGATGAAACTGAATCTGAAA  
CGATTGGATCAGAGACTACGGCGTACATCAAAAATAGTAGTGGGATGACTACCACTGGGA  
TTCCCACTATTGCTACACGATCAATGTCAGTGGGTGTCTATTAGTGACAGTGATATGCA  
CGAATGAGGTAGCTATTTCCCAACGATAACAGATGATGAATCTCTTTGGAGAAATAATC  
CTGGTGGATGGTATCTCAAGATATGTAAGGGTGGAGCACGTGGAAGTGAACCAGTATTT  
CTTGGGTAACCTCACATCCTCATCCCCGAGGGTCATCATTGATGAATACTTACGCAGTAT  
TCCGACGCGATAATTATCCTTTACAAGCTCCCTCTCAGACAGCAACTTATTATATAAATA  
TTCCAACAGCATGTAATTATGATTTTGCATGTCAGGCAAACAACACCGCTGCATTCTCAC  
TTGATGGAACACACATTGCGACGTCCAGTTCATACGCAACAAGTAGGATCGCAACACTTT  
CTAACGTGAGTGCGGGAATGCATACTTTAGTTATCTCAGTTACTATAACTACAACATCTG  
GTAACGTAGCTAATACGTGGACAGATAGTCCTGGTGGTGTAGCATGAACAATTTCTCAAT  
CTGGGGTTATAATAGCTTCCCTCATTAAAGTCTATCTGCACCTGCTGACGGAAATCTTTTCT  
TGCACACTCCAAAGGCAACATGATATACATACACAATCCCAAAATGGAACCTCGGCAAAAT  
CCCAAACGATCAACTTCCCTCAAGGGATAAAATAACATATAAGTGATGCTGATTCACACGT  
TGATTTAGTTGTAGATCCTCCGGAAATCCTTGTTCGTACCATTAGACACAGATGAATACTT  
TGAACGAAAATATAAAGTGCAAAAAGTGTTAATTGAAAACGCTAAACGAACACACGAATA  
CCACAAATCCAAAAGATACAATCCAAGAAGCAAAAAGAAACAGCAAGGAACGCAAGATTG  
ATAAAAATTTGTGGATTAGACAAGATGATTTCTGTTCCAATGAATCAATAGAAGTGTGA  
AGAAAAATGGAGGGAAGAAAACACTTGACATATCCTAAAGAAAGGGTTAGTATAAATAC  
TCGAAGCGAAGGCCGCAACGCGAACAAGAGTTCCGCAGGGCTTCATTACTCCCGGTCCG  
TCCCTACAGCTAAAAACCTAACAAAGAACGTCGAGTTCTCTAGCATCTGTAGGTATAAC  
GCTGTAAGAAAATAAGAACAACAATGATTAAATCAACCATCGCTGCAGTCGCTGCAGCC  
CCTCTCCTAGGAGCTGGTGCAGCTTTTGTGCTGTTCTATATGTTAACTTAGAGACCACTGGA  
TCATATCCTGATGCAACATACTCATCCGGGGGTTTAGAACAGTTGTATGATACGAGGAT

GAAAAATCTGGAGATATCGGTTGGCACATATCTGGTGCTCCTACTGTAACCTCATGGGAAA  
CTAACTGATGAGTTCGGAGACGTTTAATTAGTAGGATACCCTGGTGCATCTTACGCTAAG  
TGCTCCGCAGAAATCTCTGGTGTAACATAAATCAGATGTGACATTGAGTTCCTAGTAAG  
GCACGTGTTAAGTTCGTTTTCTAAACGGATATCCATAAGATTAATAACAAGGGACTGTATG  
AGTCCGTTTAGTATTCGTCTAAACTATTATGATTTTTACCCCTTACACACGAGACCGGTG  
TTCTTAAACCCCTGAAATCAAACAAGTTTTAGAACGAAAAAATATAATTATCGGGAATA  
CAGATTAGGGGTAGACTTGTAAACGAGAATCATTCTATAATCAATTTGGGGAGGGATCAAC  
TTCCCTTAGGGTGGTATAGGTCCCACCAATCTTGGTGGTTCGCACCGATACATTTGATA  
CTTCTCTGATTACAACCAATCGGATGGAAGAATTTACGGTCTTGTGAGTCTGTTATA  
GATGCTCCGTGTGAAAAGAATATGTCTCTCTTCTATCCGTATAAATTCTTTGCCTCACAAC  
AAGATTAACGTAATGAATACAAGAGTTCGTTGATAGCACAACTGCAAAAGGATTAACA  
TTGATTAATTCTGATCTAGCTGCATAATTCAAGAGTGTGTCTGACTGTTATTATCAGTTA  
CTTCGTATACCATATGGGCATCTCGGTGAACCAAAAGAAAGGAAAATCGCAAAGTACTTG  
TCACAGATTTTGATAGATGGTCTGCAATACGAATTGTATAAAGAGACCAGGTTCGTAGTAAA  
ACCCCTAAATAAGAAAAGCTAAGGGGAGTCCCATTGATATTGCACTTGTAGAATTTTCAA  
CAATCGATGTTTTTATTCTTGGCTTAACCGTCTCTTGGTGGCGAAAGGATACCCTGAGG  
ATTAGATCGAAACCGCTGCCTGTGTAATGCCGTCCAGATCCTGGGATGTTTGATGAAG  
CCGGTGAAATTACTCCTGAGGAACCTAAGCTATATTGGACCAGAATATAGGTTGTTACATC  
ATGACGATGACCGTGACGATTATGATTAATAAATGATGCCTAAACGATCTATTGAAAACA  
GTAGCTCTAGGCTACTAATTAGTGAGATCCTAAGAAAGGGCGCAAATGCTAAAACCTCACA  
ATGGAAAAGTTGAATTGCTGAAGATACACCTCACTCCCGCACTACGTCAACTGTTGATCA  
TCAACTTTGATGAGAGAATTCTATCAGAACTCCCCAAGGTGACGTTCCATACAATCCTA  
CCGATGCCCTGTAGGGTCAGATCGTGCTAGATTTAAACAAGAATAAAGAGGACTATTCA  
GAATCTTCAAAGAGGTAACAATCGTCGCAAGTATTTGAATAGAGAGTCCATGTATGTGC  
AGCTTTTAGAAGGAATGTCTGCTGAGGAAGCAGAAGTGTCCGGCTATATGTAAGGACGGTA  
AGATGGGAGTTAAGTATAAGAGAACCACTAAGGCAATAGTTTCTGAAGCATTGCGATCTA  
TTGAATGGGGAGGCAGAAGTCGAAAGAAGTTCGAGTTTGCGAAGGAAAATGCACTCCCGA  
TGATGCAAAGATCAATCATTACTTTACACCGTGTATTTGATTGCGTATAAGTTAGATGA  
TAAACCCGCGGTTGTAATTGCAATCGCAACTACTGCTGTATATCTTTTTGCTTCTTACTA  
AGATCTTTAAAAAAGGAGCTTTGTAGAGTTTACTCAATCAGAAGGTAGAATTAACCCCTAA  
ATTATGGAGAGATCCCACACGGAAGAAAGGCAATCGGAACCAAAGATGAGCGTCCACTTT  
GTGCGTAGAAAAGAACGCGACGCAGAGGAAATGGAAAAGAATGAAGAAGCAGCAAAGCA  
GCTGCAAGATAAGTTCAATTGTTTGTCCAGCCTGCAATTGTTATGGCACTATGCAATTGG  
GTGATGCCAGGATTGTTTGGTCTTGCCACTATACGATATCTAAAAAAGTTTGCTTTGTAT  
CCGATGGCTAGGATTTTATTTGGACAGTGTGAATGAAGTATGTTTGATATCTGTAACCTCC  
TGTTGCAGACAAAGCTATCGGGTGTGTTGCTAGGGTGAGTGTCCGAAAACGCAAGAAAA  
CCCTGATGTCCGGGGGATTACTTAAGAACTGAATTAAGAATAGTCATTGGGTCTTCTTTGA  
GCAAGCGTTCATGACTCGAGATATTAACACGTCTTGTGCTCTTGCTGCTCATGTCCCTAAG  
GGATAGGTGGTGCACATAGCAAGAACTTCACAGAGGTACGCTGACTCTTCTCTACTTGC  
AGAAAGCAACTCTATTCCAGAGCTAAGTCGTCAGGACGAGAAGCGTAGACATAATGGTAT  
TGACGATGTGGATCCATTCATGCAACAGGACTACGAATTAATAAATGCAAAGCGTTTATT  
GGATGTAATGCAACTCTATAAATAAATGCTTCACTCAGGTATTGCGAAAATGGGTGCTAG  
GATGGTATTGCCTCTAGCAACACCAACTTAAATGTATATGAGTGGATCACTTCGCTCATG  
GGTTCCTGTCATTCATCTGCGTTCTGCTAGTCGAACACGGAAAGAATTTATGAAAATTAC  
CGGACAATCCACACTACATCTTATATGTCAGATCCCAACCATCTCCAAGGCATTTGATTG  
GGGTCCTGTTGATGATTGTAACCTGTTCTGATGAAGACAATAACAATGATCTACCATCGTG  
TTCGAGGATAGATTAATGCCTCCTTAACCCGTGATAAGCAAAAATACTGAAGAGAACAAA  
GGACTCCACATGACCATGAAAGAATATGATCAGTGGAGGCAAGCTAATCCCTGTAGGGAT  
AAAGACTCGCACGCAGGTGTGGAGGGTATGTCCGATGGTCAACATCGGATGGAAGACGGA  
TTCAAACAAGTCATGTGTAAGTCCAATCATGACATCCTAAAGCCAATCTATCTCGTTTC  
GCATAAGGGCATAAGCAAGATTAGGAACTAACTCTCCACACATTTTGCTCAATGGTATGT  
CGGGGTAACATATGCAAAGTAAGAAAGCTATCGACTCTTCATACTTGACAGAGGATAAGT  
CTCTGACAACTCTTCAGACACAAGCATTGCTCAGAATGCGGAAGGGAGGAATTTGTTAC  
TGCATGTTGCTCCAGGAAACATGAGAACTTTCATTACTTTATATCTGTCTTTGCAAGAAG  
TGCTTGAAGACAACACTTCGTATGTTAAAAGATACATTCTAAGGTCTCTAGTTCCTACTA  
GATAGATTGGTTTCCAAACAGGTGACCATGAAGCTAAACCTTCACTGTTCCAGCTTCCAT  
ACAAAACCTATGGTGAGATCTCTGTTTATTATGCCTGATGTGCACTTCGTTCAAATGATAT

GTGATACCTCACGTGCACAAGAAAACATTCCGCTTTCGGCTGATACTTATATTCGTGGAG  
TCACTTTTATTGATTATGCTATTGTTAGTATCGATGGGATCAGTAACTTAACTTTTGACCCAT  
TGGCTTCTATGATTGCTCGCATAGGGGAAGACAGCAAGATTGTCTTCTGGGGTGACATGA  
CCCAGACAGATCTTACATGAGAGACTGATAAGTATGCTATCTCAGACTTTATAAAAATTC  
TACAGCAGATTAACGAGTTTTGATGCATCGCGTTTGATATCAATGATATGGTTCGCTCAG  
GACTTGTTAGGTCTTATCTCTTGTCAAACATAATCTTGGTTCCTATGTTTAAAGGCGT  
GCATGTCGGTAATATTTTACAGCTGATGTAGAAGTAAAGATGGATCACGTATGTA  
TCCTATTCGTGATTTCGGATAAATATTATCCTAGCGGCACCACAATCACAGCGTTTAAAGAA  
CGCAGAGTTTTTCAAAGATTGGAGAACCCGCATAGGTGCGGACGAGGCGAATTGCATCAG  
TGCTAGAGCATCTCATCGATGCAGGGCATCTCATAACATAGCGGAAGATTATGACAAAGG  
TGAATTACACCTTGACAGATACTTGGAAAATATTCCATTGTCTGTAAGATTGTTTCAATC  
AGCACCGTCTACACTTAAACGAATCTATACTAGTCATTGAGTAGAGAAAATTTCTCTATTC  
ACACCATCTTGGATTAGCAGTTCGAGTCGATTGCATTGTTGATTTCGCTGGCAAGTTAGC  
AGAGACCGATTTTATTACGTCTAGTAAAAAAGGAAGATCATATCGAGATCTAATG  
TTTTCTAGAAACAGCATCCGCAGCGAGGTTTCTAGAAGGTTTCAAGGAATTGAGGTCATGAG  
AATTGTCACCCTTATGGCCACTTAAAGAAAGGATCTTGACACGTATTTGAGAAGTATAATCG  
TGATGACTATGTACTGTTTCGTCAAACATACATCGAAGAATTTGTTAGGCCAGACAGGC  
CTCATGAACCACGTGAGGGGGAAGTTTTTACACCTACCAAATTCCCGCAAGAGATCGAAA  
GGTGATTTAATAAAGTAAAGGTCTCCTTAGATACTTTGAAGCAGTAGTTACATTCCGCC  
TAGAGAGTGAGGTTGAAGTAGAGACAGATCCCAAAGTATTTTCGAGATCGATGAAAGAAA  
CTACGCGTCACGAAGGACAACATTTGAATTATATGAAAGCATCTTCTAGTGGACTATGAC  
AACTGTGACAGGGTTTGAAGTGTATAAG

>NewGenomeName\_161

ATGATGACCCAAAGTGACAAGGAGAAGCTCTAAGTATCTGGTAGTGTACAGCGCTATCAT  
GCTGGGATCGAGATTAATGCTGAGTCCTTCAGTATTCTTATCGACTCTATTTAGAACGAC  
AAAGTTCTTGCGGCGGTGCGTGAACCGCTGTTCAACGCTGTTGACTCACACACGGAAGCT  
GGTTGCCGAGATAAGCCGATTAACATTCCTCCCGACCGACCTGGATCCTTGGTACTCC  
GTCCGGGATGGTGGTTCAGGTATGGACTTCGAGATGGTTCACACAGAGCTTCATTATGTAG  
GGGACCTCCACTAAGCGAGACTCCAAGGAATTGATTGGGGCCAAAGGCATCGGCTCTCAG  
GCTCCGTTACCCGTGACCAACACGTTTACGGTCCGCGCCGTCAAAAACGATATGAAAAC  
GTTTACCCGGTGCATAAGCATGAGGGTATTGAGGAGGTTGTTTCTTTCACGAGTCGAAG  
GCTACAGAGGAAAATGGGGTTGAAATTAATAAACAACGTAGATCCTTCTGAGAGCTCCAAA  
TATCGCACGGCAATCGTCAAGTGCCTGCGATATGCAAGATTCCCGTATGCGATCAAAGAT  
CCTTTTGTGTCGTCTGAGATCAATGACCGAACCTATCCGGATCAGTGTGCTTATGAGGAC  
ACAGAAACATGTCGGATGCTGGAAATGTGCACGTCCGTATCCCGCAATGCAGACAGCGTG  
GTTGTGATGGGCCAGCAACCTTATCGGGCCAACTATCTGCCAGTAATAAGAACTGGCCT  
ATGATGATGCTTCTTATTCTTATTGGGGATTGTGACGTGAACCCTTGTGCTGAATGGGCC  
ATTGTAGGTAAGAATGACATTGGTGTCCGGGATCGCCTCGAAAAGTTTGTTTAGGAGGCT  
ATTTATAAACGAGCTCAGGAAGTCGTGAAAGAGATTAAGCAGCTACCTACACTGACAGAA  
GTGCTGGAGTGAATGAAGCGTGTGCGGTGGCGGCTTATCAACCCGTTGCGGGTTCGGGGGAT  
ATCGCCGACAAATTCCATGACTGCTTTGGTACTTTTATTATTGAGAAGTAAATAACTTAT  
GGTGAGCAGGTTACTCGTTGCGAAACTGACAAGACTTTCGGTTTTGCTGACCTAATGAAC  
GGTTCGCCACTGGTTTACAACGACGACGGTAAGTGCATCCCCCCTAATGTAATGTCTG  
TCTGTAACTGCTTAAAACGTGTCTACGTTACGGAACCTTATTGAGGCGCTGGAGATCCTG  
AAAGACCCGTTCTTCGTTGGAATGGTGCATAAACTTTCCGACCTTGAGAAGGGTCTCTGTC  
GTGAGGGGTGAGAAGAAGTTAGGTGGGTATGGCTTGTACGAACCTGGTCACACAGTGTGC  
GTTATCGACCAAGCTTGTACTATCAAGAGCGGCCCAAATGCTCGCGCCGTCTTTGAGGAT  
ATCGAAACCGCCTTGTGTTACACTGGTGGACAGGTCAAGGATATTTGGGCTCTTGGTGTCT  
TTTCTGTATCTGCTCCGTAACAACAGCACGAGAGTTTCTTAAAGAACTTGGGGGTCGAG  
GGCAAGATGTATATTGTGCCTCTTAATCGCAATGGCTGGCTACCAGATGAAACAAGGATC  
AATACCAGAGATGAACCTTTTTGAACTTGCATAACAGAATCTCATGGAGTATCATCTGAAC  
CCTCGTACCAATTGCATGTCAACTTACCGCCAATTGGGGAAGGAGCTTGGTTTTTTTTGGG  
TTTAAAGTTGAAACCGACCCTGATTATAAGCCTAAAGTAATCCTGTCTGATCTGCTTTTCG  
CACAAACAAGGGAAATTACGCTCCGGAGAAAAAGGCTGAAAGGATTGTGAATGCCAGATC  
CGTATTGGTAAAAGTTTTGGGTAGTTAAAAAATCTCGATACCCGCTGCTCTGGTATGTT  
GACCTGAAGCACTTCAACACACCAGAGATGAATGAGTATCGACAACTTATCGATAGCAAA  
GGAGAACTAAATGAGTCAGTTATTCGTATCCCCATGGGCAGCGCGTATCTTTGCAGCCG

ACTTCGGCTTGAAGGTCGCGGACCGTGGTTTGTCTCCGGCTGAACTCGCAACCGGGCGCT  
GGATGTTTGTACCAAAGACAGCCAAGGGGCATCTAGGCCCCAGAGGTAGATATGAGTT  
TCACCCCGGAAGCCAAGCCTGCTCCGGCTTCACAGATCTTCGCAGGCCGTGGTAATATCA  
GTGATTCTGCAAAAGGGAAAAAGAACGCGAAAATCATTGATCCGGCGAAAAAATCCGCTG  
GTCGTGATAAATACGAGGGTGTGGATAAAGACCTCGGTAAGCAGGGGAAGCGCTGGGCCG  
TCGTCTTCGAGGTTTCCGATCTGTATATCGAGGCCACTGTGACCCTTTTGCCTGGACCAC  
ACAAGGTTTCTGCGATTGTGGTTATTGAAGAGACCGCGCCTAAGTCCTACTTCGACGAAG  
AGACTGTTGCCAAGAATGGACCAGCGGTCATCATGACTCCAGGCAATGTTTGCATCTCGA  
TGCCTTATGGTACTCCGCACACCATCAACCGTGACGATGCTATCTGCCTTGATGTGGGTC  
TACTGCTGATTGGGGGTTCTATCGAAGGGGCACTCGCGGTGAGCGAAGCAGCTAAAGGAG  
CCAGGGCTGAAAAGTCGGTCGATCTCGGCCCTGACCTTAAATTACTCGATGCCGTTCTGT  
ACTGGCATGGTCAGAAAACAGGAAAGCACCCCTGGCTGATCGCATTCTCACCGACATTATTA  
ATGATACGTTAGATGACAGTTATGTTAAGTTCATGCAGAATCTGGTGCACAACCCGCTCTT  
ATGCGTCTGTGAAAATGCTATATGACTTTATTCAGCACAAACGTTCTTGAGAATCTTGAGA  
ACGGTGATATGAAGGCATATAAGAAGATCACCATCATAACCGAGGAACCTCGCGATAGCT  
ACACACGAAAGGTTCCCTAACTATAAAGGGCAAATCATTTCATGCTTCGAAACATGGTGG  
ATGATTACTCTAACCAAACCTTGTAGCCAGAGTATGCATATTACCTCTCTAGAGTAGGATG  
GTGGGCTTGGTGTCAACGGACTGATTGAGGTTGCGGGTAACGCTGCTGATGTGATCAGTG  
TACCTTACGACTACAACCAACAGAAGAGTCGTTGCTGCCGTTATGAAGTCCTCACAGGGCG  
CTGAAAACCCAGTTGGTGCGCCGGATGTGCTGGTTATCGGGACGATGGTGGAAAGTTCAGG  
AAGAGATTTAGCTGGAAGAGGAAACTAAGGAGGATTGATGTCAGATTTTGGTGTGGGCGT  
TGAAGCTGCCCTTGGTCCTGTCATGTCGGGGCATATCATCATCGTTACGGGACCCGGTGG  
TAGCTGCAAAAGTTAAACCATTGAGAGCATGCAATCGGTCTATGCAGGTCCGGTCCCTCAC  
AGTAGACCCTACGGGGGCTGCTAACATTAACGCCAGTGGAAAGACTGGACAGGGGTGCGTA  
GGGGCTTACAATGGGGGTTGCGACCAAAAAGGGTACTGAAGACATTAAGCCAAAAGTGAA  
TCGACAATTGAAGAGTAAAGCGCTCAAGATCATCATCATTGATGAGATCAGTATGTTTCAG  
GGCTGACAAGTTGTGGGAAATGGATATGAAATGCCGACGCGCAAGAAAGCTACCAAATAA  
GCCCTTTGGTGGTTGCCAGAGCGGCCTGTTTGGTACTACTTCCAGAACCTGCGCGTCTCT  
GATAGAGGCAGAAAAGCAGGCGGAGTTCCAGTTCCATTACACAGGAGTGCATACTTCTC  
AGATGCTTGGAAAGACCTCAATCCGTGTCCAATATTACTTGAGATAGTTTATTACCAGTG  
CAGTGTCCGTTTCTCAACGATGCTTTATCGTCTGCGTCGTGGACAGCGAAGTCCAGAAGT  
TGTTAAATTCATGCACACGCATTGTTATGATCATGGCAAGCTTCTTGATGCCATAACGAA  
CACATCTGCAAATGCTGCTGCGGATAAAGTAAACAAGAAGCGTTTTTGATGAGGTCTGTGG  
GTTGCCCTAAGTTATACAGTGCGAAGACATCTGGTGAGTTTGGCTCAAAAACGTTTTCTGA  
TGAGCCTGACCTGAAGGAAGGAGCACAGGTAAGTCCACAGTTACCGACCGTAAAGCCTT  
TGCTGAGCCAGAGTATGTCAATGGTTCCCGTGGAGAGATAATCGAACTGGTTATGGATAG  
TGTGGAGGTGCGTTGGGAATTTGGTTGAATAGTTGATGTCGATGTCTATGGGTGGGAGAA  
TGTGGAATATATACCAATCAAGGTCAGGACTTCTGATGGCACAACAACCGAAGAGTTTGA  
GAAGGTCACTTTCGGTGAAGACCGTGCTATGCCTATCCGTTTGGGCTGGGCTCTCACAAT  
CCATACGGCGCAGGGCTTGACTTTACCTGAAAAGAATATAGACCTTCGATATGGCACTTT  
TGCACCCGGTATGTCTTATGTTGCTATCAGCAGAGCTACATCCGCTAATGAATTAAGACT  
ATTGAACAACGTCAAAGAAAATGATATTAATGTTGACTAACGCCTATTAAGATTTTATGA  
AGAGACTTTCCAGGGAAATAAGAGATAAAAATATGGCATCATACTCTCGAAATGGGTTA  
TTCAAGAAGTTCCAAAAGGAACTTGAAGATTGGAACAACACCCAGACGTAAGTGGGGTG  
AAGCCACCGAAGGATACTACACATATCCAAATGGCCTCTCTTGATAAGATGAGGTCAGCA  
TACGGCTACGTGGCTCGTCGAGTTCCACAATATCCGAACATTACAGCTGGTCGTTTTGAT  
TACCTGTCCCTTTCTGGGAATGATTTTTTCTACCTGGAAGATTGGGTGTCATACCACAAT  
AATGCAATGGTCCGTGGTAACACTGTCAGAAGGATTCCAGATCATTTTCAGCTTCTCTCAT  
CATAACCGTATTGTGGATCAGCTGACTGTACAGCATGATAAATCCCGCTATGCAGGTGGT  
TCAGGTTTTAAATCTCAGAAATTATGCGTGAAATTTTTCTGACATTTGAAGTTAAAGATTT  
TTCTGATCTGAAGATAGTTTGAACAGAAAAAATGTTGAAACTTGGTGCTGTGGCTAATGA  
TAATTATAACGAGGCCATCGTCACATGACTAAAGTCTTGTTCATTGGTTCGTCATTAA  
AGACGAACTGGAGTTGCGAAAAAATGCGGAAAAAATGTTTAACTGGCTGTTTGCAAAACA  
AGGAAGAACCTCAACGTGAAGTTAATGTGTTTCGATTTTCGCAAAACGTGAAGCAGTGGATG  
ATATTACTCTTCGCTTGAGTGATGTTGGGGAGTCTGCAGTGGCAAAGGATTTCCCTTCTA  
TTGATCAACAGGCACCGGGGGTGGCGACTTTATTGTTGTGAAGCTTGTACTATCCTCTA  
TGCAGGAAGAGGTTGATTACCACATGTCCGTTGTGGTTGAGTCTGTCACTTGAATTACAG

CGGGTATTCGCGAGCTAACCCTAACCCAATACGAAGGTGCAGAAAATGAGTAAGTCCTGT  
AAAGTCGAGGCTGAACCTTGCCTACATGAACCCAACCGAAGGTGTTGATGCAGTAGAATCA  
CTTTATACTGTTTCAGTACCCCGAGTTTGACAGCAAAGAGAACGATTTGGATTACAATGGT  
TTTCAAGACTAAGAACACTCTGCTGTTCTCAAAATCGGCACCCAGATCCTCGTTGACAGA  
CCAGATGATCTCATGGACCATCGCCTACGTGAGCTTCTGCGTAGTGCAGAGACCGAAGGT  
TGTTCCCATCGTGAGGAGGCATTCTAATGGAAAAGAGTGAAATGAAACTAGTTAAATTCA  
TTATGAGGCAGACCAAGAAAGAAGAGGCTGATGAAATGCTGGCAAGTCTCATTTATGAAG  
GTTTTGTCAACATGGGGCAGAACGAAGCCGCCGGTTGGGTGAATTTTACAATGGTACAAT  
CGGATAAGTCACTAATCGTTGTCCTTAATACTGATGGCGGCCTTACAGCGGCTCCCAAGT  
TCCAGGTCGTCAATGGTGCACCAGAGAGAGTTCCTTATTGAGGTCGGTATGAATAAAGTG  
GTGTGGAGCCTTTTCGATGGCTGCGGCACCATGGGGTGGTAGTAGGCCAACAATGCTTCT  
AAGTCATACTGCTGCAAGGTTAATACTGGGGAATATGGTGGTTAAGAGGTGGTCAGGGTT  
AACCATCCTAATATTAAGTATGTCAATTTTTGGGTCCCTGAGGCTTTTGATCCAGAGAAA  
GACGGGATCCCTAAGCCAGATGTTATCTTGGCATTGCCACCAAGTACCGATATGGCAGTT  
AGCGGCGCTGATCATTTTGCCTCAAAGGCAGGCAAAGACCGTCTTATTCCGGTCACAGCC  
CGGAATACAGCTTAGGTTGCAGCAATGTTAGGAGATAAGTACGGGAGTCCATACATGATA  
GAGAACCCTGTGAGTGTTCTGACCTCCAAATGGAGGAGTCCGAACAACATGTTCCATCCG  
TATGAGCATGGCGGATATCTACCGCATGATGATGTTTCATCCTTTCTTCTTCTGATTATAAA  
AATCCGCGAAACTCATAACCCTAGAAAGACGTGTCTTTGGACGGGTCATGGTTTTGAACTT  
CCACCCGCAAAGCCCGTTCCGGTAGCGAAGGGTTACGCAGAACAGCATAATAAGCTCGGC  
GGAATGACTGCCAAAATAATACTGATACGTTCTTTAACACCCCGTGGTTTTGCTGCAGCG  
GTTTTTTATGCCAACCAGTAAGTGAGGCCACGTGAAAGAGTGATTATTAGTTGGGTGTCG  
ATCAGGGCCATCGGATGAAGATAAACGTATGTTCTTATACGCTGACAAAGTGTGTGGCAT  
CTACCCACAGATCAAACGAACCCGCCGCGAGCATTAAAAAGTTACGGCACCCCTGCTGG  
ACAAAGTACGGTGAAGGCAAAGTTCTGTCAATATTCGTTTACTGCTGCAATGGTGGTTT  
TCAAATGTCGGGAACAGTAAAACCTGTTCTTGCCTTTGCATATGGCGATCCTGACACTAA  
TGACTTTTGGTCGTACAACACGGGAGTCGATAGTGCAACCTGTTGGATGTACTTTAACAC  
AGGAACCTCCTCCTGTTTAAAAACCGATCAGTCAACTAGTTATCTGCAGGATAACTCTGC  
TTCTGTACAGATTTGTCCAGTGTACGAATACCGACGAACCAGTGGAACCACATCGCGAT  
TGTTTACTATCGGACAAATCTCCAGTTCTATGTGAACGGAAACCGCATTGTATCGCAAGC  
ACCTGCTGGCCGCTGGAGTACAGCTTCAACATTTGCAAGGGTGATGGATTGTGGTGGACA  
AGCATATTGTTTCATGGATCAGTTTCGAAATTCTGGTGTTAGGAGGTAGTCAGGTAGTTC  
ATTCAGTGTACCTTCCACACCTTTTGATATGGATTAGGACCAAAGTTGAAAAATGTGGTG  
ATCGCAAACGCTTCAACCGTACAAAAGTTTGATCATAATATGAATTTCTTTTTTGATAAG  
GGATATCACATCCAAGGTGGTATTTGCTCCCAGGGTGTACTTTATATTGGTGTGTTGTT  
AGGTCGTGTTAAGGAGAGAAATTGGGGAATGGTGCAGGATTGGGGCAACTTTGTGGACTAC  
CGAGACGGAAAGCGATACTGCAAAGTATACACCTTGTGAGGTCCAAACCACAATTGTCCA  
GCGCCAGTTATTGGCAAGGAAGCTGGATCAATATCTCGAAAAGGATATTGCTCTATACGC  
ATTCAAGGGTACAGGTGTTATATGCATCCCATCTGGTGGCTGGTTCACCACGGGCGAATC  
CCATTAGGTTTGCAGGTTGAGCATATCAAATCGATAAGGGAGACGGGCGGTGTTTCCGAT  
GACCGAATAACGAATTTACAACCTTACAAGAGGTACAAATAGTCGTGAAGGTGGTGGC  
AACATGCCAAATTCTTCCAACAAGTCTTCTCGAAGAAGCGGAGTTGCTTGGGATAGAGGA  
TATCCATCAAAGCCTTAGATGGCAAGGATACCCGTAGACGGCAAAGTTCTCCTTAAAAAT  
ATTGAGAGTTTCAATGAAGCCTCTCAGCGAAGAGGGTTGTGGGAAAAAGAGCATTGCTAT  
GGAGGAGTAAGAGTTATTTTGATCTTTCGGCTTATCGACAAGGTGGGCAAGAAAACCCGA  
AAGCACAAAGGTTTGGCAATAACGGCAATCCTGGAGGAAGAGTGAGTGATCAGCAGGGAG  
AAGAAGAGACCCTGGAATCCGTAGTCGAGGGCACCCGTATTCTGGCCGTTCTTAAACTGA  
GTCTCTCGCTTGATGCAGCGAAGTATTTACAAATCGGGTCTGCTGTTTCATCAGGCGAGG  
GGGTAACCATTATAGCAACATACTTGCCATATTAGCATGAGTACGGTAAGCTTACTGGTT  
ACAAGACACGTGACTGGAACTACCAAAGCGGACGAAGGGACAGTTCTCTGTGGTTCGGCA  
CTTTAAACGCAGCATCTCAGTTCTTAGTCAGAATGAAGCTGCTATGGGCGCTGGTTCGTA  
AACAGATTTTTGTTCTTGATGGTGAAGGTGATGTGACCACTGGGAGGCAGGGGGCTTTCG  
ATCCTGTCAAAGCTTTAGTTGCTATCCCAATGACCCGAAAGGGGTGGAGGATTGGGCGG  
CAAGCGTCTGACAGGTATCATTGCCTTTCATGACGGTGGCGAAGATGCAGGTATTCCGA  
CACTGCATTTTGTGCGGATTCCACTGTGGCCCAGCTAACGCAGTTGATACCTTTCGCTAACT  
ATGAGATGTTTATTCGTGGTCACGAAAAAGTAGTTCTTGGTTGTTAAAACGATGAAGCAA  
CAACGCTGAAAAAGGAACGTAAAATCAAGAAAGGTAAGGTAGCGACAGATCATGTTGCAG

GATTCTTGATGTCAGACAATATCTTTGTAGTTGGTTACCTATTGAACGTCACGATCAGG  
CTCGTGTTAAAGATATTCGAGATATGTACGATGCTGGTAAGGCTCGTGAAAACCTGGAGCA  
TGTTTTCCAAGGCAGAAGACAGGTATGCCCCTGTCTAACCGATCATTCTGAGCAATATAA  
CCATTCAGACCCTTCGTAAGAAGAAGAAAGATGGTGTTCATCAGCAGGTATGCGTCGAC  
TTTATGAGTTGAGAACAGGCCACGTGCTGGAGAGCGGTGGACCCTACCTGGACCAGGTG  
GCGGGGTTTGACAAACTAGCCCCTTCAAGCAGTGGTGTATGAAGAAAAGCTGGTGAATTC  
GGTGAAAACCTTAACGTGAAGACGAGGGCAATACCGAGCGAAGCCGACGCGTCTCTCCTT  
GTATGAGGAGGGATTATGTGGAACAGTATACAAAATTTTGATTGATACGTAGTTTCTGAC  
AAATTTGAAGCAGGAGGGAAGAGAGGGTAGATTACAAAACCTGATAACAGTGGCAGATAC  
TTGCGTGTAGCCTGTGCTGAGAAGGGAGACTTACTCGGTGGATGGTTCACCGTCTTGTA  
GCGTTTACATTTTTGGACCCCATAGAGGGTTAACATTATGTGAATCACACAAACTGTGAA  
AAAGCGGGTACCTCAGTTGACAATCTTTAACGGGTAAACCCTACGCGAGAATCAAGAACAA  
GCTGTTTTAACAAGCTTGTTCCTCGTGGTGAGGAAATATAGACATCTAAAGTCACAGTG  
AGTGAAGTTCCTCAGATGGCAAAAACCTCTGCAACAAGAACTCCCAGAATCTGAAGTGCCA  
AGGAGATTCTCCGTGCTTTTTCGGATTGTGACCAGAATTAATACAGAGAAACTTGGGAA  
TCATTAACGTGTGAATACGAATTCTTTTCAGGCAGACCAAAAATAACCCGGCTTTCGGGA  
TAGCGGCAACAGATATACGCCCTGTTCAAGTATGGCTTCCCCAGCAGAGAGGTTGCTAAT  
CTGTGTGGTGTTTCTAAAACGACTGTAGTAAACGTCAGGAGAGACTTTTCGGAACCTGAA  
ACGAGTAACCGTGAAGAAGGTAACGGTGTACATCCAAGTGGGTGAATGCGCAAGGCCTCC  
TGAAAGGATGATGATAAATCTGTTCTGCATGGAAACATACAGCAGACCCCGATATGAGA  
TAGGGGTCGGGCAAGGATAACGAACCTTGCTGTGCATAAGCAGAAGCCCAATTTCTCGC  
AAGATCGAGTATGCGATTGTGGATTATCTTCGAAATATGGATATGGCTCGTCTTGACGGC  
GGGAAGGAGCGAGAGAAGATTGCAATCATCCGTCTTGATGAGGATGATGCGGAGTGAGTA  
GAGAGCCTGTACGCTGAAGAGTTGCAGGTGGACCCTAAACCATCTGATGCCCATCCTTAA  
CAGTTACTCACAGAAGAAGAACACCTTTCCATTGACCAACGGTGGATTACTGAGGACAAG  
ATTCAGATCTTTGACCACTTCGGTGTACCCTGGATTGATCAGTTAAGTCAGAAAATGAAA  
CAAATGGTGGGCCTTTATGGTTGTAAGTGGATTATACTTGACCACCTGTCAATGGTGATC  
TTCGGTTTTACGTCAGACAATGAACTCAGAGATTTGGACAATACCAAGACCGACCTTGCG  
GCATTCTGTAAGCAGTATGATGTGTTCAATCTCAGTATTTGCCACATAAAGCGAAAGGAG  
CTTCAGGTACCGAAGTATAAAGACGGTAATATGTCCCCTTCAGGTATCCTGTACGTA  
GAAGACCTGCGTGGTCTGCTGCACTGTAACAGCTTTCCTGGATTTTCGTGGGTGTGGAG  
CCAGAAGAACAACCAGACCTCTCTCGTGGTCTGTCCGTGTGGTGTGCATGAAAAACCGC  
CCACACAAAAGAATCGGTGTAGCAGACACCATGAGCATGGCCGAAAACGGACAATTCACG  
GATGCGTGTGGTGGGATGAGGATGTTCAAGCTGGACGGGAAAGCCAAGCTT  
CGTCCCGTAGGTTTGGTTCAAACCTCTACAACACGATACTCCGGTGGGTGAGGCCAATGTA  
CCAGCACCTGTCGTGGAGAATCTCGTGCACCTCCGGTCTTCAGCAGACATGAATGAGGCT  
ACACCGTTTTGATGATATCAACCAACTGCGAGGTGGGTGTCGATGAATACCAACCCAT  
CTCGTATAGAAGGAGCATGAAAGGTTTGTCTTAAAGGATATCGAAGCTCATGGCCTGTT  
AGAGGAAGTACTAAGTACCACTGTACCCTTCTTAAGGAATACGGGGTTAACAAGTGAA  
TTTGTCTTAGATCCTGCGCACCCAGAGTATGAGAGCGCCGTTAGATATGATCGCAGCAA  
GACAGACGCCAATCTCACTATCCGGTCATATGACGAGCTTAAGCCGTTCTGAAAACCTCG  
CCGTGGTATAGCGTGTCTCACCCTTTTTGGTTATGTTCTTCGCCACTGGAACAAATTACC  
AGGCATTGAGTTGGACATGTTCAAAGCCCCTAAGTCTCTCGGGACGTTTGGGTATACCCA  
AGTTAACCTGTCCGATGCTTTGTCTATGAGCCGTGTAATTTGTCCTGACCGCCAGTACC  
AAATGGCTATCCCGATTCAGTTTTGAACCCGGTAACCGGAAACGTGACCGAGTTGGTCC  
ACGTGGCCTTATGGCTTAGGACTTTCGTGTGGCGAACTAGAAGGTTTCAGATAGATGACTG  
GCGCAAGTAGAAGCTCTGGGAGTCCGTTAACCGTGTGTGCGAAGGCGTTCCTTATCATGGA  
ACTGACGTGGAGAGCATTGATTGAGAAATCCACTGTTCCACGGTGGCCCGATGACAACCA  
GTTTCATGTACACGGCTAAACCCGAAGGTATTCGCCAGATTAACCTGGAATAACGCTCTTCG  
TCGCAGTATCCTGTAGGATTACCTGATGATTGCGCAAGAGATTCAGAGTGTTACGTTCAA  
CAAGCATGAGGCGGAAAAACTCCGATATCTAATTGAAGGTATGCTGAAAGAGATCGACGA  
AGACGTGCAACCGTTACTTCTATGTAGGAGATGGTAAAATCTTAACAACCTCAGTTCCC  
GTCTATCGCGTTTTGATGGTGTGTTAATAACTCCCACCACGCATAGAACTGGTTACAGTA  
CAAGCTTGGGTATCCGGTTAACCGCGAGGCACTGGAGTTAAGGGCCCTCCAAAAAGCGC  
TTTAAAAAGTAATGGTGTAGGTCACACCGGGAGGAGAAAGATGCTTCATCCAGAACTGTGT  
TGAAGACCCTATGCACTTCGGGGATTTTGTGCGGGTACAAAGGAATAAAGAGAATAGCCG  
GGTGCCTCGGGCACCTGACCTGATGGAGAAGGCCAAGGAGGCTTTGAGGAATGGTAAGAT



GCCTGACCACATGGTCCCGATGAGGCTCTCGAACCCAGGACTACATCAACAAGTACCTGAT  
ACGCGATGCTGACTGAACGCCTACCATGTTCGAGTGTTAAAGATGTTACCAAGGATCAGTG  
CAAGAAGGCGAGAAGTACCCAGAGATTGACGGATTAGTCAGACCCTACATCGAGGAGCT  
TGGCGAATCAGAATATAAGTCGTTGATTCTAGAGCAGTTAATTAACAACGACGACAAAAT  
CAACACCTCAGAGCGCCAGTTTGATCAACGGCTAGCGTCTGACAAGGCGTAGGGCGGACAT  
ATTGAAGAAGTTCGGGCGCAAAGCTCGTCAGTTCCCAACTTCACCACACTTGGAGTATAA  
CTTCGCCAAGCTACGTCCGAACCTCGAACGTATTCATGTTCACTTCGCAAAAATAGATCGT  
TACGTCGTTGTCACTGCGTAACCGTCGCTCAGTCCGCGACCCGATTGATGAGGATAACAA  
TGACTAATCTTTGCTCTACCACTCTCGCCGTGAGATTGATGGGACGCTTCCTGACCATTT  
TTCTGGAATCACGAACACCCGGGCGTTGCCAGCACACCATTTGTGCACAGATTCCTAAGAC  
AGATCCGAAGGTGCTGCTCGGAAAAGAAAATGCGAGGATTGTGGGTGTTACTGGAGGGTA  
TGATCAGGTCCGTATCGAGGGCTCAAACCTAGAGGGCAAGATCGCCGCACGGGGTGCATC  
CCAGTTCGATGCCGCTGAATACTTCCGGATCAAGGATATCGGAGATGCTCACGCGCGAAA  
CGGAGAAGCGTACACCAAAGCTTCAGGAACCCTCGTTACAAGTAACGTGGGGAAAGGTGT  
AACCTACAGTTGCATGTTCCGGGACAAAGGCGGTGGAGATTGCAGCGATGTTCAACATCTC  
CCTTGACAAAGCTCACGCGGTAATGGTGCTTGGTGGGATAGCAACTTCGGTTTGAAAGG  
TCGTAAAGAATGGCTGCAGAACTTCTCGGAAGCAACAGGAAAGCGTTATATTCCTGGATT  
GGAGGCTCGCAGTCTTTGGACCAGTTCTAATCACTCATTACGGAATGCTTACATGCAGCT  
CGGCGGTGCATTACTTTTTGACCTTGTTGGCCGTCTGCTACACTTGGACCTGGTGAGGCG  
TGCGGGGTATGATGAGGATGAACGTCGCCTGAGCTCCTACCATACGTAACATTGTCGCTT  
TGTGAGGTAACATCGAATAACTCGTTTATTTTTCGGTAAGGATATGGCTGAAAGTT  
TTGGTAGACTGTAATACTATGATCACCCGGAGCGAAGCTTGTGAGGAATTTTAGAGACAA  
GAACGTTTAGAGACGAATTCACTTAAAAGAATCCAGCTATATGCAAGAAGATACATGACA  
ACTACCAAACAGAATCGAGACATGCTGCTTGCCATTACACTGGGCGATGGATGGATATGC  
AAGCATGGTCATCACGAAGTGTGGCACTCTATCCACCAGAAATAGAACACATTGATGAAA  
TATGATAAGATTAAGAAATTTTGTCCACTTGGAAATTTTATACCGGAAAACGGCTTGGGC  
AATGGCCAGGTCCGTATTAGAACTAAAATATCACCTTTCCTAAAATTACTTCGTCGTATT  
TAGCATCCTGAGCGTTAAACACTCTTCAGAGGGAGATTACTAATGAGACTTGGACCAGAG  
CACTTGGCAAGATTGTGCATGGACGATGGAAATTTAACAACCCTGACGAGTAAAAGGTT  
GTTAAGTCATCCTGCCGATATACGTTAAATCTCTGGACTCGCAGAGAGCATGGTTTGCTA  
GTTGTAGACTGGATAAAAATCTTACTGGCGTATGCCCTTGGACAAGAATTGTCACGGGA  
GGTAAAGCGTTCCTCCATGTATTAGACCCGGGCAGGGGAGGATTTTCAGCCAAGTAATA  
CGACCATTCATGTGAAAAAGCACGATGTATAAGGTGTGCCATGATTAATTCCTGGGTAAC  
CGAACAAAGTGGCGTTGAAAAAGACAGCATCCCTGTGGATTGATAGATAGTCCGATACTA  
AGGGAAATCGTATGGCAACACGTAATGGTGTGGGCGATATAAATGACCTCGCTAAACTTT  
AGGTTGAATACCAGCTAGAGGTTCCCTAAGATAAACTTTCAGAAGTGGGAGTGTGATTCCC  
CTGACGATGCTAAAGCTTTCGTCAAATAATGGAGCGCGCAAGGCCGGGTATTTGACGGGC  
ATGAGTGTAGAAAGGCGGTAAGACGACAATGGTGAAAATGTCAAGGATGCCGAACGTA  
ATCCGGTTTAAGAGGGCCTCTTTGGTGAAGATGGGAAGATAGACATCCATTATTGCCCTG  
TTGGTCAGATGGTTGTGAAATGTGGTGAGAAAGCTGCTTGTATGATGGGTTCTCCAGTGC  
ATATCACAGGTACTIONTCCATGGGTAAAAAGAGGACTGAGTGTCACTAAATTTAAATGA  
GCAGAAGCCCCTGGTCTTGCACTATAAAAGTATGAGATGATTGTTGCTACAATGGGAA  
CAAAGAAATCTATTCCTGTTGGTAAAGTGGAATACACCAAATATCTTCATCCCACAAT  
CATCGACTGTCCCTGCCAATGTGGAGGGGTTCAAGTTACTTCGTGTAGGTCAAGGAGGTG  
CAGCACAACTAATCCACCTCCAAGACGTGGAGGTGCGAGTGTAGACTTAGTGTGGAGCC  
ACATCATCCCAGTTTTTTCCTGGAGAGATTTTACAAGTGTTCACAACTATTGCAGATA  
GGACGACGGTTGTAGGTTTGTGTTTGTGGTTCTGTACCACTAGTGGCTGCTGTTTTCCGGT  
CAGGAACTTACCCTTACACGGGGCTATACCCAGAAGCGGGTGATGCAGTCATAAATAAAG  
GCGGCGAGGGTGGGAATAATACCCAGCCATTGAAATAAAACGTTGCAGTGGCTCAGGTG  
GGGCCGAGGGTATATGCGGAAAGGTGGTAAGGGCGGTCATGCATACGTAGCATCAACAA  
TGTAATTTCAAGGCCACGTTTGTGAGGGAGGCGGTGGCAGTGCATGTGGCTATTACT  
TCTCTGGTTCCACATCTTGGGAGAACTACGGTGCCGGTGGCAGTGTCCGAATCCAGGGCG  
TTGGGGTCAATAGTGACGGAGGTAGAGGTGTATAATCACAAAGGATAGCAAGCTGCGGGT  
CTTGGGGGGCAGACCCTACAGGTCCAGGGTGGTAAATTTGGGGGTGGGGCTGGACACG  
GATCTTGAAGCTGACTTGGTTCTTCAGCGGTGCGGATTATCTGGGGAAATGCAGAAAAGA  
GCGCATTCCCAATCAATGCCCGAAAGGTATTAATAAATAAGAGGAGGATCCATGATTA  
GAAGGTCAAGTGGTTACATTGAAACCAGGTGGCCCTGACATGGTTGATGTGCGTATGTTT

AAAAGACCGCTGACCTCCAACGGGCTAATCAGAGTCCTTAAATATGCTGCCTACTCATGG  
ATGAACGAAAGCACTGTGACAGAGGTGGAAGCCTTGGCTTTTCATTCTCTTTAAATTATC  
GGAGAGTGATATGAACGTAAAAGGCGCCCAAACAACGGTGCAAACCGTGGACGTGGAAC  
AAGAGAAGCTGCCCTCAAGTCGGTTGTTTATGGTCAGACGATCGATTATCTTGCAGATGC  
TGTGGAGGATAAACTTTTGTACCGCTTCCCTCCACAACCTCGCCACCGAAGTTTACGTTAA  
AAGGACGAGCAGGGAAAGTTACCGTCTGGGACTACCGGTACACTAGCGCTGGTGCAGT  
GGATGCAGACTGGATTTACGCCAACGATGCGGCACAGGACAAGGAAGTTGGTTTATTGAC  
TGAAGAGGAATGGGAACGTGACAAAGAGCTTTCTATTATCTCCCATGTAATTAAGACTT  
TCACAAATAACGAAAAAGTTCCTTGACTAGTTGGTTAAGGGGCTTTATTTTTAGGGGAGA  
TAAATAACCTGGGGGGTGGTGGATGATCGAGGCAATCAATTATTTCTGTATGATGCTGGG  
GGCATTGACATATGTGTGGTGTGGCTTTGGCGCTGTCTTTCCAAAAAATGAAACATAGCG  
CGCTCTGTACTTGGTTTATGAAGTAATCAATGGATCCTTTACGGTGCATATCGACAGTAT  
TGTCGTATGCAAAGTCACATCCCTGGGATTAACCCTTGGTGATTGGCGGATTTATGGTT  
GGTGCGGTGTTTATTGTTGTTGACATCGCAGATACCTTCAGTCATAATTGTAAGCTTAAC  
GGTGAGCAACGCCTCGCAAACGGCCCTGATGAAGTTGTAGCTGAGAACAACGGAGCTGC  
GAAGGCAATCCCGCGAAGTGCTCTCGTTACTAACCCCTGAATTAATACTCACAAAAAGAGA  
TCCAAATGATAAAATTAACGATTGCTCTGCTGGGTATGGAGTTTGTTCATCTGCCCATG  
CGGAAGAAGATGATGATTTCCAGATCGTACCTATGTGAAAGGTTGAGGAGAGCTACAAGA  
TCGAGCGTTTCTTTCTGCTCATTTCGTCTCACAAGAAGTATCGTATGGGAGAGACCTGTT  
TAGACACGGTGATCCCAAATAGCAGGCTCAGGAGGGGAACGTACTGTGCGAAGGGTCTC  
GCTGGTATCAGGGGTCAGCTATCAACAGAACCAAAAAAGTTGTGACCCGTGTGACATTAG  
TCTACAAATGTCAGAAGGGGAGGTCATGAAAAAGATTTTCCCTTGCCACCCAGCTCGCTCT  
TTCTTGCTCTGTCCATGCTACAGAGTGCTATAACCGATATCTTGGCAAAAAGTATCGGAGA  
TGCAGGCAATGCTGATGTGCTGGATGCTTACAAGCAGGGTCTGGAACGAGCAACGGCTAA  
GATACCAGTGGCAGAACATGAAATTAACATTTACACTTTCAAGTGTGAGCTTCAAAAAGT  
GGAACACCAGATGATTATCCTCACAAACGCTGTTGAAGAAATGGAGAATAGGAAATGACA  
ATGCCTCCTGGCCTTATCTTCGGAAAATTTGCACCGCTGATCAACGGGCTTGTTCATTT  
ATTCGGCAGGCGGCTTCTCAGGTGAGTAGCCTGTATCTGTTCTTGTGATATGACCAGAAA  
TTTGTGACGCACAACCAGAGTGTATTCGTCCAAAGATGGGTCTTGCAGATCGCTATCGT  
GACTTGCTGGATGTTAATACCGATGAGGGTCTGGATAACGTTAAGGTTGACTAGGTTGAT  
GAGTCGAATATACCCGGAAACCTGCAGGAGGAGCTGCTGACGCAAACTGATCCGTGAA  
AAGCAGCCTTTCGTTAAATACGACTCTGCCTTCTGTTCTGAGCCGGAGCACGAATCTTAC  
TTCAGTGAGGTCTTCCCTGAAGCGAAGCTTGTGTTATAGACTGAGAACGAAAAGCTGTT  
TTTATCTTTGCTACGATGATTCTTACCGACCGGTACAACACTTTCTATAACCTAGCATGG  
CCTGAACGGAAACGCTTCATGTAAGGTCGCCGTTGTTGGTGTGACAGGACTGTTAAA  
ACGACCTTGACACATCACTTGGCATAACAGATTCGGTTCACCTTGGACTCCTGAAATTGGA  
TGAATGATTTCTGAGCGTGAGTATCACTCGAGTGAGCTAGCGATGAGTCGTGAGGATTAA  
CTACGTGTCGCAATGGAGCATCTCTTGAAGAGATGGCGGTGGCTGGTTGGGGTGACCGT  
GGGGTAATGTTCTCCAACACCACGAATCTGATCACACACTTCTGTGGAGTTAGTGCAGAT  
AAAATCTCCTACTCCGACCTGTAGTTACTGACACTGAGCCGCGATGAGAGCTACAACCTG  
TACGATCTGTTCTTCTTCCACACCAGAGGTTCCGTGAGTTGCTGATCCTCCTCGTTTG  
CAGCATGCACACGAAAAGCGTAAAGAAGCGCATTCTTAGATTTAGACAATGATCAGGGCA  
TCTTATGAGACAAGCAAGGTGGTGTCTATCTCCGGCAATGATTACTAACAGCGTACTCAA  
AAAGACGAAGAAGCTGTACGTAAATAGCTGAATATCCAAGGAGAATAAAAGGAACGTAAC  
TAATTAAGCATGAAGCAGGCTATTGGTTTTATGAAAGTTATTTTAGGAAAGGCCTCCGA  
TTTGGCTCAAGGTCTTCTGGCTAACGCTAACTGTCGTGAGCAAGGCTTCTCTATAAACAA  
GTGGAATCACAAAGTGTGATAATGACCTATCGAGGCGTGTTCCTTTCAGCGAGTGTGCTGA  
CAGTGGTCAGAACAAATGTGTACTGGCGCAGACCAGGAACTTCCACTACCACACGAATGT  
GGCTGACGACGACACGTATCTTTCTCCTCGATAATACTTTGGTTATGAGGAGTATGACGA  
AGCGGCAGACTGGATCATCGCGCAGCTGAAAAGTGACTTAGATGGATCAACATACGCAGG  
CTTTGGTCTGGAAAACCCAAGAAGGTAATGTTTTCCGGATCACCCATATGTCTGACGAGC  
AGTTACTGAATGCAATCATCTGGCTACTGACAGACTCGGGTCTTGTGTTGCCAAAACCGAAA  
GTGTGGTGATAACTACGTGAGTAGAAGCAACGGCTGTGGTGTAAACGGCCATATGGATA  
GTAATGGCTAAGGTTCTTAACCTTTACCAGTTTGCTAAGGCTATCCCTGAAGGTGCGGTC  
TACATGGGCCGCACCATGAAGAAAATTACCCTGGTGGGTCATCAGCTAGCCAACCCACTC  
CCGGTTGAGAAAGGTGGTGGGAATAGTGATGAGGTCATAAAAAAGTACCGTGGGTGCTTG  
TGGGAGAAGATCCAGACAGGTGAAATTACTTTGCAAGAGCTTGTACTTGGACGGGAAA

GACCTCGTATGCTTTTAGTTACCGAAGAGATGTCACGGTGTATGTAATCTTAGCTGCAATA  
GAATGGAACAAGGGGAGGGTTACAAAATGAGGTTGAAAAAGGATCACTCTTATGTCGAGA  
TATATAATAACAACGCTGGAGGTAACCTGCCTTGTGATCTCTGATGATGCCGCAGGTTATC  
GTCTGGCAGGTTCAAAGATAACTGGTCAACCGATAACCCGCTTGAAGTTTCTGTTGAAA  
AACAGATGATCGCCGTAATAATCACCAAGGAGAATAACATCGTTTATGGTAGAGGTGCA  
AACGACTCAGATTCTCCCGGTCAGATTTTCAAGTGGGTAGATGGTAGACAGGCTTTATAA  
TGGAGATGCCCTTACTATGAACGTTGGATAGTGATCTTGTACAGATGTTATTCAAAGAAG  
ATCCACAAAAGACAGCTTAACTATGCCGGATGCCAAGTGGCGGATGGCTGGTTAAGGATT  
TCTGTCTTCATAGAGTGGGTTACTCAACAACCCCTGCGCGACAAGTGGCTGACTAAGGAA  
AGTCATCTCCAATTTGACAAAGACACTCTTTTGGAGGGAAACAGAAATTACACTCCTGAA  
GGACGTGCGTTCGTTCCAATATACATAAATACCGCAGTCCCCTATGTTAAGAACAGCCGC  
CTAGCGATGGGGGTAACCAAAAAGACAACAGGAAGGTCTATGAGGCAGGGGGCAGGGTG  
GACGTGAAAAGAAAGTACTTGGGCTTGCTAGCAACCCTCCTTGCTGCTCATTATTATGG  
CAAAGCAAACGCTGAAACTCTTCAATCTGTGATCGACGTAAACGCCTCATCTGTATTG  
TATAATGAGCTTACTGCGAAAGACCTGCAAAAAGAGTTGACAGAAAACCTAAGCGACCTC  
CAAATGGAGAGGGAAACAACCTTACTTATGAAGATAAAAGATTACATGATGAATCTATACG  
TGAGAACAACCTGGACCGATTATTATGGTTGGTCGAAAATTGTACATCTATGGCTGTTCA  
TCCGTTACGCCTCCATCGCTCTTGTGCCGATCATCATGGGCTGTGGGGTTATTGCATTCA  
TCGCGTCTGTGACAGGTATTATCGGAGCGTTCGTTGGTGCAAAAGGTAACCCTTCCAATT  
ATTATTGGGGGTTTGTGGCGACAGTGTGGTACGCACACATCTCCTTACGTACAACTCT  
ACGCTGAAACGATTAGGTACCCTCTGCTATCACTCTGTTGCAGGTGATAGGTGGGATAC  
TCTGGGCGAACAACCGGGCTGTCTCGGGAGACGATGAACTTGCAGGTGCTCTCAAAGAGT  
ACCTCAACACAATGCAGCAGTGGTAGGTTGGGATTGTGACGTTGGTTGTGATCGCCTTGT  
ATGCAGAATTTTTAAGCCGTCTCAAAGAACGTATGCCTGGACTGGATTCCGTAACAGCGT  
TCCTCTCTGTTCTGGCAGCCTATCTGATGATGTTACGTTAAGCTGAACAGTCGTACGTGT  
GGATCATTGTGAACGTAGTCGCAGTCACCTTGGAGATTACAGACATCACTCCACCTTAAA  
CTCAGGGGTGGGCTGTACTTGCAATGTGGATCACTTTCCTGTTAAACTCTATTTATGGTG  
CCTTCCGATGATGGATAAACGAACGAGCTCTGTAATGAGTGGATTTTGGGAATGGTTGAC  
GATTCGCAATAACTGGGTGCCGGTACTGCCCTTGTACTACGATGTTTGGTTGGGCCAC  
TGTCTTATCTGTCAGGGAAACAAGGAAGTATAAAGTTATGGCATAATTAATGCTGGTTGT  
CGTATTTGGTACCCTATTGAAGCCCTCGTCAACTATGACTGGTGGTTATCGCATGTATAC  
AAATGACAGGTCCACTTGTGCACAACCCGACGCTGTGGCAACATTCTATGTGGTTCGATGC  
ACAGAAAGAACGGTGCTTTTAACCAGTACTGGGGTTTGCACCTGTAGATGAGATGCAGGT  
GCAGACCTTTACACCAAAAACAACCTTAGACAGGCGAATGGTTATCAAATCTGAGCGAACA  
GGTCAAAACTATGTAGAATTGTACGAATCCCGTTCAGGCGAAAATCTAAATCTGGAAGAG  
CAGTTGGTCATGGTATACTTCAAGAAGAATGTTGAATATCTTTATGTAGATTAGGCTGAT  
GCATCCAGTTTCCATTAAGCCTTCCGTCAGGTCAATTGCTGAAATTAGGGTTATCCAGAT  
CTGGTAAACTGGGGCCTAATCTCTGGTTGTGAATTGCACACCATCGGGCCTTACTGGAG  
GAGTTTTATGCGTAAACTCTTTAAGTGGGTGCTGAGCCTGTTTAGTTCAAACCTCTATAGT  
GGCCATTGGCGGTGGTAACACCATCACAGTGATCCAGACCTCAATTGTGCATTTTCTGCA  
GGGACGTGACCCAGAGGGGGATTATAAGTACGAGCTTAAACCCCTGACTGGAAATGACAT  
CAGGCATAATGCTAAAAAGGTACTGGCAGATGTAGGAGCTAAAAAGCTGCTAACAGAGGG  
CCGAGAAGAGCGGCGGAAAGAGATAATGTAAGATTTGGCTCGGCACAGTAGGACCCGTGG  
CCCACCAGCGCCTCCTGCACCCCCACGTCGCTGTGTGGTTGTGGATGATGATTCTCTCGC  
AGGAAAGAAACGCAGTGAAACACGTTACAGTCATGACGATGACGATATCATTGTAACCAG  
CGTTTTTGTAGCGTCTGATGTTTATCACTCGTCAAGTAGTGACGATTGTGGAAGTTATAT  
CAGAGGCAGGTGGAACCTCCGCCAGTTCTTCTGGACGTTGTGATTGAAAAAAACAGAAACG  
TTTTTTTGTTCAAACGGTCATTCCACTACCTCAGTCATAGAGCACTTTGTACCGACGAGT  
GATTGTGCCAAAAGTGATGTAAGCCGAATATGTAATGGCACTGGAGGATGGTAATATG  
GTCACAGAAACAACGACTTGTAGCTTCCCAACGTGGATGGATGATCCTTTTATTAAACCT  
TTCAATGTAATAAAGGAGTTTATATAATGAAATTTTTTTCTGCACTGGCGCTCTTATTAA  
TCGCCTTGAAACTGTGCGGTGATATTGCATGGTCATGGTGGTGGGTCTTGGCACCATTCT  
ACCTTCCGTACGCGATTTGTGAGGCGATCATGATTTTGTTTTTCGACAGTGTCTTTGGTG  
TTGCAGGGGGCGGCTGCTCTTCTGGAGAAAATCTAATTAAGTAAGAAAAGATTACGCAAAC  
TGTTGTCATACAGAGTAGAAAGGGGTAATATACCCCTTCACTCACAACGTTAGGATTGAT  
GACTGAGGCAGGAACCCCTATCGGAACCCAATCAGGAAAAGATATACTCTTCTCCGCGA  
ACTCGACGAAGCTCAGTGTGGAACGAATGTTCTTCTATCCAGTGCCGGAGCACAGATGGA

TCAGTTCATAGGCTCAGAGCGAAGGTGTTATGAGATGCTGAAGGTTATCGAAAGCCGCAA  
CATCACTACTTTGGAACAAGTTCTTGAATCGGTGAGTGGACACCGCAAGAACCTCCTGCA  
ATGAAACGGTTCATCGTCTTTTGCCCTGAATCTACTGCATCAGGTTGAAGGTCTAGTGAT  
CGATAGACTTTTGGGTGTTACAGTGATACCCAACAAGAAGAACTACGTAATAAGAGAG  
AGAATGAGCGTAATTAACGAATTCAAAGATCCGATGACGGGCAGTGTAACCCTTTGCA  
GAGCGCAGTACCAAATTCAACAGCAGCAAACCTGCTAAGAATACAGATCCTGATAGAGTG  
AAACGTACCCAGATCCCAGCGCGAAATGGTCCGCCTGCAAAGCTTATAGAATCACCCGAT  
ACCCTAAGCTTCTTTATGCCAGAGGTGGACGAGGAATATAACGTTTTTGTATCCTCAAAGC  
CAGGCTGAGTGGAAAGCCATAGGGGAGAAGAAGCTTCATGCAAGCCACCCCGACAAAATG  
CAAGTTAAGCTGGACTCTGGTAACAAAGACATTCTGCCGGGTATGTTTGCATCTTTCCCG  
CTGAAAGTGAGCACGAACGGCGATAAGCCCTATGTCAAAGGCTCTCTGAGTGGCAAGTCT  
TTCGACATTCTGGACGAAAGCAAAGCAGGTCAACACGCACCACGTCTGCAGCCGCAGCAA  
AGTGAGCAGGATCAACAGTCTGGTGGTGGGGTGAAAGTTTACGGCGAGATCACCGCCATT  
GCAGGGGATCTGGCGATTGTAATGATGAGAAGTACGGCCCTAGTTATGTTGTTCTGTCT  
GATCCGCAACTGGCGCAGATACACGTTTCTGGTCGCCTGACAGCCTTTGTAAATCTTGCT  
GATGGCACAATCCTGAACGGCTTTAAAGAATACGCCGGAGGAGTTCGAGGAAGTGGCTCC  
GGTAGTTTGAGGTCTGGTGGCAATTATGAACCTAGTAGTGTAGCTTGCGGTACGGTATC  
AACGGCCTTAAGGAATTGATGGGTGCAGTATACAAAGTGAAGGATGAACTGGAACAGTA  
AAAGCCATTCACCTTGCAACTGTAGACATGAAGGTTTTCGTTGCGGCGCGTAATGGTAAA  
GATGTTGAATCAAACGCGGTTGGAGCAAGTGCAGGTAGTGCAATCCTTGTTGCATGTAGC  
CGATTAATTCCAAATCGGAAGTCACTTAGGCAACGATCCTGGAAATCGCCTAGAACGTG  
TATGTAACGCTCTCTGAGCCGGCTTATGAGTTCCTGACTACCGATGGCATGCCTGCCGAT  
AAAACCTCAGCCACAGACTTCTCGGGAGCGTCTGACCTACACTGGAGAAGTACCACCTATG  
TAGGCTTACGATCCTCCGATGGACTTTGACGACGATATACCCTTTGCCCAATCGGTCTG  
CAATATGATAACAACCTTCATCCATTGCATTTTATAAATAGAAAAGGAGCCTTTTCGGCTCA  
TTTTAGGTTTATTGCGGTTGAGCAGATAGAAATGGTTCGCCGGGGTCCACAGGATCTGGT  
GGCCTGAGAAGTCTGAAACACTGACACACGAATCATCGAACGCCTCAACCTCATCCTCC  
TTTCAATTAAGACGAACACCACAACGGCCATCACTAACTGCAATACATGATAGGAACCCT  
TCCTCATCAATCCGCAACATATCGGGATTTGTAGTTGTTCAATTCTCCGTCTATGAAGTTA  
ATATGAATAATGGCAGGAGAGATTTCCATTCCGACAACGTTCCGGACCTGGTGTATAGTAA  
GGACTGTTTTTATCCATGAACACGAACACATCACCAACCTCATTTTGTGGGATGGAATCG  
GTACTCACAGACAAGATGAAAACATAACCGCCAGAGGTATCCGTGAACGATTACGCATCC  
GCGCCAGACCCTGTTTTAGCAATCATTGTGATGTCAAACCACCCGCTTAAAGGAAGCTC  
ATGATACCACTTGAGTCGACAGTTGCGATCTTAGGAGTACTCCATGTGAACGAAATTTCA  
TAAACTCAGCATCTGCTGGCTCAACAGTCCACGTAACCTGACTTCTCGGGCCTTTGATG  
GCGTTTCGGATAGACCCGGTGGTGTGATTGCATCCGCAGTTGTCCCCCAAACGATGCTTGT  
GGGATGTTTGTGAACTACCGGTGCTATCGGTGACCCGAAGGAACTATAAAGGTTACCA  
GCGGAATGAAGGTTCCCCACATGCACCATCCAAAGGCTGATAGGGTTCCTCGTTAGGG  
ACATGTTTCTTCATCTATAACAATGGAACCTCAGCTTCGCAAGCTCTCAATCCCTTCCTGTA  
GGAACCGGAACATGGGTTGGCTCTAACACCATTGTTGAGGGTGTGCCAAGGCCAAGTTGA  
GCACTTAGGTCAACCAGACCGTAAAGCTTGTTACCCAGAATCAGGAAATGCGACTGCCCA  
CCGTCGATATCCGTGATTGTCTCCAAACGACCCATACCCTCTTTCTTAGAGTATTGAGCT  
GTCCCGATACCCCCGTATATAATTAATGCTGTTTATCATCAACACCTGTAGAGGCGCTA  
GCCATTGAGTTTGTTCGTTTCGCTAACCTCTCTTTAACACAGACGGTTTAAAGTCACATAG  
GCAAACTATCATCGATAAAGTTTTGTTTTGTGTTGTTGAAGTACCATCTATCTGATGG  
ATGGCCCCAAAACACGCCGAAGTCAAATATTGTTTCAGGTATGTCTCGCAAGCATTCAAG  
CTGTAGGATCTCAAAGTGGATGCACTAATTCTTCTTGGGATCGATATTCCGGTAGTATTA  
CCAGAACCAAGGCATCCATTTGAGTTTGACCTGCATCCATTAAGTCTTCCATCTACCACC  
GGCCAGAGTCTGCTACCGAGAGCACAAGAAACACTGTGTAAATTTGAGAGGGATAGTGTG  
CCTGTGATTGATGAAGGGAAGCTTGACCAAAAAGAATTGATATACAAACTACCAGAGAAT  
TGACTGGAGTCCACACAATACTACCAGCCACCATTGTTGTCTTGGACAACAAAGGCTCTA  
CCACTACCAAAACCATCACCAACACCAATACCCGCCAAGTGCCACTGAGCCTTCAACGGG  
CTTATGTTCCCGTTTTCGGGATTCACACCACGCATAATCCCCATGGATATAGAGTCTCCCA  
TCAATCAGGAGGAGCGCCAATAATCTCTTGGGAGCACCACCAACCGGATCACGGGTAAAG  
GCCACCGTCTTACCCTGCCTGGTGGTAGGGGTTCTGTCCGTCCATCCAGAAAATGTGAAG  
AAGAGACAAGGATTAGGATACAGTAAAACCTCCTAAAACAAAGGCTGCCCGAAGACAGCC  
TTGAATCATTACGGACTACCAACGATTATAGTGTGATAACACCGCATTCAACACCATCA

TAGATAAATTGAAGTATAGTCTCCGAATCAACCGTCTCGTTAATTGTTTCGCTGTTTAAA  
ACCAAGTAGTTACGATCTAGAGTCACAGTGTGACGGCCAGTACAATCTTGAGTCAGGTAA  
TTCGAAGCAGAAAAAGGATCTGTCTGTTTCATGCCAAGCACCGATTGTTAAATCCGCATCC  
ACTGTTACGTTGTAGATGTTGGAATCTCCACTTGTGGACCATGCCGCTGTATAGATATCA  
ATCTCCTCACCAATAAGTGTGACGAATTCTACACTTGCCTTGGACAGGATTCCCGAATCT  
TGTAACGTAAGGCTATTGGCACTTACTGCACCGGTAAAGGTGACAGATCCCACATGGATG  
GTATCATCTGTCATTTACCGGAAAGACCTGTAACCGTACCCTGCATAACAAGGTTGTTA  
ACTGTAGTTGTTCCCGTCGCGTTGTAGAGGTTGACATCACCGTTTACGGTCAGGTTTTCC  
TGGACTGGGACATCGGCAAGCACGCTAAGATCCTCAATAAACTCAGACGTACCTGAAATA  
GAGAGATTTTCGACAATTGTCCCAACTGCTGTTCCGGGGGTAAATCGACCATATAGACTG  
GTTAACCAACCCACTGTGAATGGACCAGTGACGTGTACGATCGCCGCCGAGAAATCTTCG  
AGGGTTGTATTACCTTTTTCGGGTCAGATCTCTTGTAATATCAAGGCCACCGATTGTTGCG  
CTTTCAAGGTTGCTAACACAACCTGACCTGTCAGTCACCATCAACAGTGAAACCGCCAGCG  
GTTTTAACAGAGTTTGGTGAAACATCAAGTCCGTCGAAAGTGAAGGTGATACCTGTTACG  
TTACCTGCAACCTTCAGGGTTTCTACCTCAGTTGTACCTGACACCTTAGATCTGGGTGAT  
GTAGGATCTTTACTTCTTTACCAAGGAAATGCACGTAATCGCAGAGGTTACTACTCACA  
CCTGTGAGAGACATGGTTGTATCATCTTCAGCCACTGTTTCAGTTGACAGTAATGTCCATC  
TGGAGCCATTGGGCTACTATCGCATATGGCTTAAGGCGCGTCTTAAAGAATGGCGGGTTA  
TCTGCGTCTGTAAATTCGAAGGTAAGACTTGTACCTCCTGTGTCAGGATCAGTTTCTGG  
CAACGACCTGTTGGGTTATCTTCGTTTACAGGGCCATTAAAGTCAATTGTCTCAACAACC  
ACAAAATATTGAGTGTTGTAACACACGTTTCAGACAATAAGAAAAGGTAACCCCTACCA  
CCTGAGATGCATGACAAGGCGATAGCAATAGCCGTTGTAACAAAGGCAGTTGTGGCAATT  
GTTGGACCGTTGGTGCTAGCCGGAGGGGGTGGAGCCCCTGGGCTTCATGTCAGGATCTGG  
CCGTTGATAGGTGCAGAGATAGTTGACAGTGCCGATGCGTCGTTGGACAATCTTCAGTTA  
ACACTGTTAGCTGGGTTTTATGGTTAACCGTAAGCGGAGCGTGCTGTTGCGGTTGGTACA  
TTCCACGATTGAACCCCATCTGTGCCATTAAAGAATAAAGCTCGTTGAATACTGTGGTC  
TGAGTTCCCGCGATCCACGGCATAGGTGGTATTTGAAAGAACAGGTTATCAAGAAGAGCT  
TAAGTAGCCGCTGGAAAGGTGCTACGATCTTCAGTACCGACAGTTTCGGATGCCGATCCG  
TTGACAACCTTCTGGAGGAGTTCAGAGTCTTCGACAACCTGATCGACAGCCTGTTCAAAT  
TGAGTCATGTCTGGCACACGATTCTCCTTGTCCGCTGACTATGGTTCTGTACGTTGGGC  
TTCTTTTACTCCCAGCGTACAGGTATGTGCTTACTGATTAGTTGAGGTGCAGCAACAGT  
CTGTCCAAAATCCACATGTACCACTCGGTCAACGTTCCATTGAATCCCAGTAAAGGAA  
AATTGCGGTCATTGAAGCCAAGCCGATGTTGCTCCAAAACCTTTGTGTGAGAAACCCTCTC  
AGGGTCTACTGATGATCTCACAATATCTCTAATAGATTTTCATCAGTGATTTTAAACATATT  
TGCTCAGTATTAACAATGAACTAGCACGGGTGCGGACCTTGAAGAACCACAAGGCTTAC  
AACAGTAGCGGTTTTTAGCCACTCTTTAACGGTATTGTCTTTAAAAGATGCACAGAGGAT  
CGAAACTTCCATAACGGGCTCGTATGAAGATTTGATGGCAAACTCAATGCAAGAGGCAA  
AAGATATGGAAATTGCATGAGTATTACCTGGCAGAAGACCACAGGCACGGATACGGAAAG  
CATCAGCTTCTTCTCCCATCCCGATCATAACACACTGTGGCAAACAGGAGGGTTATCTC  
GAGCTACCATCATAATGCCATAGATAGAGACAGGTCAAAGAACTGGGTATGAACTGAAAA  
CTACCATTACGGACTGTTCTCCAGCAGGATATGGATCATAACCAGAAATAGACGTGATCCT  
TATACGCTTGCTGTCAGTAAGCAGCAGCCCTGCAAATCATAATAAATACAGTGCCGAAAT  
TGTCATCTACGTTGATTCTCCATGAGTAGGTTGAACAGATTGCTGAGGTCAGCACGAAGA  
TCGCCCACGTCTTCTTTAGTGTCTTACGCAATTCTGAAATTTTCATCATTAAACCGTTTTG  
AGTTTCTTATCGAGAATCTCGTTAAGTATTTCCATAGCGACCCGCTCCGCCTTAATCCTT  
ATGGTGTCTCTATGAAGTTCAGCCAGGCGCTCTTGCGTTTTTTTTTAAATCTGAGATTGTC  
ATTCTCAGGCCACCAATTAACAACATCGTGACAACACCACAATCAGCTTTGAGGATGGCA  
CATAAGTCAATAGACAATATAGAATCCTTTTGTCTTGTACTGGTCTTTCAGGCCACTTGA  
TATTGGGCTCATCCTCCGGGTCTGTTGCTAAAAGATCAATACGGTATGTCTTTATCTCCT  
CGAGATACGCTTTCTTGGAAATCCAAAGTATATCCACTGGATACCAAAGCTACAAGGGCTA  
AACTCTGGTTTTGTAGCCCAAGACACTTCACTGTCCAGAAGAACTTCGGCCTGAGCAATAG  
CCTCTTTATTGAAATCTTTACACTCCCCAGAGATGAATTGCACAGCCCGTAAAAGCGATT  
CAATAACGTCAGGAACTTCATCAACAACAGCAACCCTCATTGTTGTTGGGAGGTATGTTG  
CTGGATCAGATGACACACAACACGACATCACCGGAAGACAGAAGAAGTAACTTGGTCC  
GCTCTCTCAATTTTGTCTATTCTTGCCTATGTAGTACCAATCTGCCCCGTCTTAATCTT  
TCACGAAAAATACACCAGACTCAATGTGTGAGGGGTTCTTGTCCGCTCTATGTTGGGGTGT  
ATAATCAAAAATTCGCCATATACCGTAGTCATAAATCCTTCTTAGTACAGGTTGGAAACAG

GTACCCATTGTCAGTTACTGAGAACTGTAGTGGTGCAGTGTAGTAAGTTCCGCCCTCA  
ATTCTTTCTTGTTACCGAATGCCTACCCGGTGATGACGTGACCTGCATAAAATCTGGTTT  
CACTCAGACCTGTGACAACCCAATTACCTAATCCGATCTGCTGAACAAATCCACACAGGT  
CTAGTGTGACGTTAGCGTTACCATCTGCCGTTGCACCATTGATAGCACTACAACGCTTC  
GTGCACCAACTGCAGCGGTGTTGTTGCTGACAACAAGGGAGTTAACCTTACACTGTCCGT  
TTACTGTTGCTGTGAAGGTCCCTGTCCTGGTTGTTGAGGAATGGATAGTTGGATCGTTTA  
GCGGACCGCGTACGGTAGTGTTCGTGAAGTGTGGAGAGGAGGCATTGACGAATGCACCGC  
TTCTACTTCCGCTTGCATGATGGTACCAGATACCCTACACAGTGCGGCAGTGCCACTAA  
TAGCATTGAACTGCATCATTGTGAAAAATGAGCTACCAGAAGTGACGGAGCGGAAACGCA  
TACAATCGCTGCTCGACGTACCTGGATCATTACCGATATTATCACCAACTACAAAATCAA  
AGAATGTGGTGTGTGCTGCGGGGTTGGTGGTCGTGATGTAAGCGTAATCGGATTCCGGATG  
GTTGGAGGTTCCGGCGTGGAACAGATAATTAAGCAGACATGGTGTGCGCTGAAAAGTTCC  
CATATATGGTATCAGACTCTGTTTTACTCCAAACATCCGGGTTTCTTCTTGCTGCGGCCT  
TTTCTGTAAGGTCTGCATGGTTCCGATTCACACGTAAGAAAGGACTGTCGAGACCAGCGA  
TGTGCTCACCAATGAGATACTTGGACTCCTAAGTCAGCATATTA AAAAGGTAGTTAACT  
CTTTGACTGTTGGCTTTTCACCAAGTCCCAAAGTTTGTTC AACAGGTCATCGATAGGAC  
GTGCTTAGTCTAAAACATGGGTGATAGGTAGAACAATATCTCCATAAGCCCAAGTCTCAA  
TAGGTACTGTTGGCACTGCCACGGTAAGATCCCTTAAATCAAGGTATTCTCTCCATCAGA  
CACTCACGTCAAGTGAGCAAGACCACTCTGTCCCTGTTGCGGTTCCCTGAGTGGATAGATCC  
GAATCCAAGTGCAGGTTTATCGGCTGCGAATCCAACAGCCCTACC ACTTGTCTCTGTTAC  
TCTCAGGTGTGTTGGCATAGGCGACATGTCTGGAACCTCCTGGATAGCAGTCTCCACCAT  
GAAACATGTTTTCGAAATGTTAATATCGAAGCGGTAGTTATCACCCCTTGATGTGGTAAA  
GTTATCTTCCCGAACA AATGGTTAAGGCAATCGGTAATTT CAGGGCTAGTCACGTTCTT  
CTCAGCACTTGCCAAAAGGATGATCATGATAGCACGACAGGTCATATCGCTCAAGCCATC  
ACGCTCTATCCCGACATGCTTCCCTATCTCACCAAGTATGCCCCCTGTCGCATTTTTCCG  
TAATCTGTCCTCAGACAAGTTGACCCACATTTCAACAAGCTTTTTGAGGCGTTCAGATA  
ACGCGTCAGAACTTTGACAAGGTATTCTTTCTTTGAGATAATCACCAGGGATATATTC  
AAAACCTCCCGTAACGAAATGTGGCAGAGTATGGATGTGGTTCACATCCTTGAAATAGTC  
TTCCATACTAACCTCGTTAGATGATTTGCTGGAATGTAAAGTCGTCTGTATCTAAAGCAA  
AGACTTCTGTCATTCCCTGCAACAACCTCGGTGTTAGTATAAGCACTGTCAGGTTGGTCAG  
TATTCTGAAAATCCACCCACAATTGCGTGAAGCCCCCTGCTCTAATAGAGGAACCAACTG  
CACATACTAACCTGGATATTGTAAAGTGTATTTGCAATGATGAGTAGATCAACAACGGCTT  
TCCGAGCAGCTTTGCCAGTGTTTTGCTCTGTGACGGACAGGAGCTTTCCTTTGTAACGAA  
CACGGACTGCATGCTCACGAGCCTGTGCTTTGCTGTGATAGAACCGATCCGTCTGATCAA  
CCTAAGTGATCGCATCATAAAAAACGTCAGTATAAGTTGCTGTGGACAATGGGATTATGG  
TATAACGTTCTTCACTGATTTCTTTTGTGGAACCAACCGCAA ACTATAGACTGAACTTAT  
ATGCCGATACACCAA ACTGGTCCGTTTCCCTGTTTTGTTTTAG AATACACGAACCTTGC  
TGATGCCCTCGACGTTTGAAACGGCACAACAACGGCAGGTCTAGTGGCATCAGCACCTG  
CTGCGGTGCTCTGTGAAGCACGAAGCTTGTAATCAGTGTCTGTCTAAACATCGGAACCGT  
CATCAAAGGCCGTCATGTTGGAGATGCTGGTTACACCGCTTGGTCTCGGTGTGATATTTG  
TTACAGTATTGGTTTCACGAGAATTAGCCCTGCTTCAGTAGCAATTACTTCAATGGTAA  
TTGATCTCTGGCCCACTACGGGTGATGAACGTAAATCGACACGACTGTTAAGTGCCTCA  
TTTTCTAGATAGCATCATAACCAGATCAACATCGCTCCACCCGCACAGTCAATGAAGATCC  
TGTCTTCGTTTATCTGTGTGGAGTTGAAGACAATGTAATCCTTAATCTATGATATGAACG  
CATTTAACTGAGCGCTGTTTGACACCTTATTTTCGTTGCGACAAGTCCATTGGTCTTGTG  
AACCATAGTTCTGATTAATCATCTAGAACGTATAGTTACCAAGAACCCAATCTTGGTTAA  
GTATTTGTAGCGCCAGGATCTTCCCTGCGACAGTAGTGTCTGCTGCATACGTTAGTTAC  
CACTGTCAATGCTATATGATGAAGAACTGTAAATCATGCTGTAAGGGACGTTGTTGTTAA  
CAACCTTGTGATAGTCCCTGATGCTCTGGTTTTACCACGACGATAAATACCACGACGTC  
CAATCAGTTAATCTAGATGAATAATTTCTGCCCTGCAGGTTTCTGTACAGAATAGAGAG  
CCGCAGACAGAAGGATCAATCGATCTTCTCTTTCATTAAAAAATTGTGGTAAGTTTGTCAA  
CAACAGTGTTCACCTAAGTGTGAAAGTTTTACCAA AAGTTCCGGAACAGCGACTTCTTGG  
TATCTGCGATTTAATTATGCAGGGGTGGGAGCGCAAAGCCGTGGTTATTTAATCCATATT  
ACTCAGGCACGAACGCCTCCTCTTGCTAGATTGTTGCTCTGAGATGTTGCTAATTTATCA  
TATTGTCAATTAATTATAAAGGCTTATAATAAGAAAAGGGCCCGAAGCCCATGGTTATTT  
AAGTCCTTCCGCGGTCTACTACGGGATTTGTGCAACAAGGGCCGTGTTATCAGGTGAGG

CTGTCTGGATTGGATTGTCAGTGACCAGATAGAACGGGGTGATCGAAGCACCTTTTTGAT  
ATGGCCCTCTCATAACCATTGTCTGGAGCTCCCCACCACCGGGGCCGGCCTGGCTTAG  
TTAGTTGCAACCCAGCAGATTTACATGCACGGGTAGCCCAGGCTAGTCGGATACTTGATT  
ATGCTGCACACTAAAACGTTTTTGGAGCCAAGCACAGTTGCCTTGGTGAAGTCATTAGGT  
CAATGTAAGAAACCCCTCTCGTAACAACAAGAATACCAGCGGTCTTCTTCAGAATGATGT  
GCCATTCACCGAATTCCCTTTCCTAGAAGAACTCATCATTATCAGACATGCAGGTCTTAG  
CAGAATTAAGCAGTATGGAACCTCTGTTCCCGTTTGTCTTTGAGTGCTGAACCACATCGA  
GGTAACAACCGTCTGTTGTTAACTGGTCAAAGCCTACCTGGCCGATGTTAGCGTTAGCGA  
AACCATTATCATCAAGGCTATTGATATTAATGATCTCAGCAGAACACCAAGGCCAACGGT  
TCATCCCCTCGCCTGCCTCTCCGTGTCCAGCCTCATACTCGCCAAGACCATCGAACTGTT  
TACTGCGGATGTCAGCAAGACGAAGTTTTGAGACAAGACCCCGATATTTAAAAGTGTGGC  
ACTCAATGTCTCAACGTTACGTGGTTGGTCCGGTCATCCATAGCACTAACTGGATTGT  
CTACCAGTCCCGGTTGAGAACGTAGAATTCGCATTGTAAAGTCACTGCACGGGGCATCAA  
AGGTTCCCTGGTTAACACCCCAAAAATAAATGAGTGGGCTACCACCGTTGACCATTT  
CGCCACGAACACCATCAATGGCATAGTCTTGGCAATAATAACATTTCGATGCCACCGGATG  
CCTGCAGTATCCCGTTAGAAACGGATGCATAAGGGTAAACCCCAAAGTTCTCGACTTTAA  
CGTCACGGCAAATCTTGAAGAGCATCCATTGACGAACTCGACGCATCATAACGTTACGCG  
TGATGATCCCCTCACAATTGGTTATCTGAGGCGTTAGAACCGTACGGTACCTGCCGCG  
CAACACCGATACAGAGACCACAGTTAGGAGCGTTAGCTGAATTGTTGATGTTGTCGTTGT  
TAATATCTTCGATTGTCAGGCAACCCCGTTATAGCGGCTCGGCATAACTTTATGCTCAA  
TAGCATCGCCTGTCAAATCGGTAAAGTTGAGACGGGCAATACATGCCCGTGTAACAAGAG  
CGCCTGTACCTTGCTGAGGGATAACAATATTTACAACCGTTGGAATCACTATACAGAACGT  
CAAGTGTACCTTCTATAGCGAGGGTATGTAGTACCATCTCCGTGGTGTGACATTGATAA  
CCCATGAGGAGTCTGTAATGATACGACGCCACCAGAATGGCATGTACAAACACTTCTGA  
AGGTAACCCAGCGGAAAGTGATGTTTGCCTCATTCATGTACTCGTTGCCGCCAGTCTTGT  
TAAAGCTTCCACCATAACCATTCAACACCGTCGATATACACACTTCTCACAAGACCATGGT  
TCCATCACCATGCAGGAAGAGCTTTTTTGGGCGCTTTTGCCTATGCAGCTAAAGCTGTTA  
CCCCCTCTGTCTTGTGGATATTTTCGACATAAATTGTGCAGGGGTAACATAACCATAGA  
GTGAATGAGCCCCTGATTCGGTCCACCGATAAGGGTTGAGCCATCAGCACCTACAA  
GGTTTCCACGTACAGATGGACCGTTGGCTCACCACGCCCTTCATCCAGACCACCTGTAG  
TCTCCGGTTTGGAGTCGGCAGGAAGGAGTGTTTGGTATACCACTGTCTATTGATCGATAA  
TGTTGGTAGATCTGTGCATCACCAGTTCTTCTGGGGAGACGAGCGTCCCCCTTCTTAAA  
AGGAAAACAGTCGGTCCAACCCGAAACGGGAGAACATATTTGACCATGTTTATTCACGAG  
TGGCATCCGACAGGTCAACAACACTAGGTAGTCTCCCTCGAAAGAGTCTGTGCGCAGTCGGTA  
AGTCTTAGAATTTGAGGCTAAGTAATAGATCTGCCAGTAGATCCTCATATCTTGTACGGT  
CTCCGTACGTACCATAACAGACCAAATCCTCTTAACCATTCCCCGGCGTCAAAGTCAAAGG  
ACACCCCATTTTCAGCATCCGCATGATGAGCCACAAACCAACACCCATTTCATCGGATAAT  
TCGGAGTCAGAATGATGTAGTTCTTGGAAAAGATCGAAACAACGTTCTGCTACCAGGT  
CGATGTTAGGGATACGATCACGCATTCCTGCCATCCCAAACATATAGCCACCATCCATGA  
ACAAGGCTGACATGTGAATGGTAAAGTCATATTCAGGTGCAAGCACCGTTCGATCAGGGT  
TAAAGATTGTAGGAGTTCTCCATTTCGTTGTTGTCTTGGAAACATTTGAGATAAACGACCC  
AGTTCTGCCATAAGCGAATAGCTTAGTTGGAATAGCTTCACCACGCTGAGACAATCCTT  
AAACGCAACGACATACATAGAAGAATACACGGGCTTCATATCCATCCCAAGCCTTTTCGT  
TCCAGTGCTTCATTGTGAAGTTGTTAGCTCACCTAAATTCTTCGCATCCCAACGATCTT  
ATACAAATGCGTGCGCCATTAGTCTAGGCATGACCCGGTTTAAAGAGTCATAAAACCACA  
TCGGCGAATCATAAAGGAGGTCAATGGTGTATTCAATGTTGTCCAGGCGGTGTTCTGAC  
CTTTGAAACAATACGGCGTAGGGTACCTATACCCAGGGTACGGAAGACCACGTCAACCAT  
CGTACAGTGCCGGCTTCGTGTCAGTACTGATGTTGGAGACCGGGATGAGACCTGGGGTATAGT  
GGAGGCTGTTTGTCTTAAAATCAATGATCGTACTGTCGCCAAGCTTCGCAGGACCTGGGT  
TGTGTCCGTACCCAGTGATGCGGAAATGCATAGTATAAGCGTAACCATCTGTGGAGGTGA  
ACAACACAGGGACAGCATTCACTCAGTACCAATCGGTCCGTTCTCTAACACCATCAACAG  
GGTCGATTTACAGGTGCCAGGTTAATCTGCTTCAGATTATGGAGACCGATTAGGATTCGTC  
GTGTATCTGTTTCCGGATGATCTCGTTGATAACTACTTAGTACAAAACCTGGATGTCGTAA  
GCGGAGGTGTAGTCCGTCGACCGTTTGTGGCCCCGATCATGGCCCACCATCTCCAGTTGT  
TTTGATCCGTAATCGTAATGTGCGAAGTTATAAGCGTTAGAGCGATATGTAAACGCAGAAA  
GGTCTGCTGTTTCTCTATCTGTCAGCCAGAAAACAATCGTTCGAACCTGCATCCGCTTGTG  
TGATGTTAGTGCATGGTTGTTCACTCCTTCCAAGAATCCCAGTCTGGTACTCAAAGT

CTACAACTGTGTTGTCACCCCAATCCACAACCATACGGGTGTCTGCAACAATGTTCGAAAC  
CACTACGCGGAGGTGCTAAACGAACGAAGGTTGACAGGGGGATATCGATGCAAACAATCG  
AGTCAGTACCGCGAGGCAGACCACAACGGTATGTCACCTCGCCTGTTTCAGACTTCGTTT  
TGTTGAGGTCTAGTTCAGGTCTGAACAATAGCCCATTGCCAAGATCGTTCTTACTCGCAG  
ACTGACAACGCTACTTGGATTTACCGTAAACACTGAACTAGATCGCCTGCTGTTTCGAGGG  
TTGTCTGAGCAGATACTGCCCGATGAATACCAATATACCCTTCCGGGTCACGACTATGCC  
CAGGGACCGCTGTGGAGGGGCAAGAGTACCATCAGCTGATCCCGTCTCCGAACGGAATGA  
TGGCATAGGTGTATTTGCAGAAAACCTTATCGGAACGGTCATTGTCAGTATAATGGTCAC  
CAACCCTCAAAGACGCCTGCCAGCAAAGCCAGCATTCTTCTGCTCAGGTGATCTGACACA  
TAACATAGTTGGCAGCACATCACAAGTTTCAGCATCAGAGGGCGTTGGCCCGAACTCCCA  
TCTCAATACGTAGGTTGACTGGTCCGTCATGCCATATCGTGTTCGGACCCTCTAGTACC  
CACCATTCTCTACAGGGTAGCAAGTTGCATAGGTGTAGTTGAACTTTTCGTGTTACCGTGG  
TAACATTGAGCTGAACAGTCCCCCCTACGCCTATGGCAAACCCTCTACAAGAATAATAC  
CGTCCCCATCAACTTATCTTCCGAGTCTGTCAATGATCCAATCGAGATCCCACCGAGACC  
CATTCTGATCGCAATTTGTCAGACCATCTGCGTTAGCAGCATATACTGTGCCGCAAATGC  
GATCCCATCCAAGATTAACAGCAAAGCTGAACCGAGCCTTGTCATGGTGTACTCCCAAT  
GAGGATCACCATGAGGAATTAACGTCTTACCATTTGACCATGACATATCGCTACCCTTAC  
GCCATCGTGGGTTGGGTATCCATCGTATGTCAGTCGGTAATGTCCAAGCCTTGGCTCAT  
TCCCGTTTATGCTCCCGTTCGGGCGATACACTGCCGAAGCGTCTGGGATTGGCGGACCAG  
CAGAGTCCGAGTCGATCAGTGCTTGCCTGAACTTTTCTGCTAGTTCCAGATATTTAAGGT  
CGTTGGTTGCAAGATATGCATTTGCGCAACCGAGGATCAAGACAGACTGACCCTCGGTAT  
TTGCATCACCGTTAGGCTGAGATTCTTTAGGCGTCCAGTTGATAAAGTGCCTGTTGTAAG  
CCAAAACATTCTGTAACCTCAGGATGTAGTGCTGAACTGTCGGGTCAATGGTCTCTCCCT  
TGTTTCTCTCAAGGAAGTGTATGTGACCATCGATCAATTGAAAAGCATTATCAATGTTGT  
GGTGTAAGTGTACCACGACTCAACTCAAGCCATAATCAGGGAGCCAAAAGTACTATTCCC  
ACCATCATTACTGACGAACTGAAAGATGTCTCGGAACCCGGTTTTACAAGAAAGAACTGG  
AACACACCCATAATTACAATTGATCTTCTGGCCCATGAAACCAAATTCGTCCCTGTACC  
CTGTGATAAGGACTAGGTAACGACGGTGATACATCCTGAGCCTTTGATGCATTGGTAAT  
TATGACCATGCACTGACCTCCTGTGAAGTTGGCAACCAAAGAATCACCCCTGTTTAGGTT  
ACATGTTGGTGTCCCTTGATCATTGCCAGGATTGAGAACTTACCTGGTCAACGGCTGCC  
ACCACTGGCACCGAACTCATGCCAGGCGTTCCTACTGGTGCCTCATTGGTTGACTGGGA  
AGATGAAATTAGACTTCTCTTCCGAGAACCACCATTCGATCTGTGATACCTACCATCCGT  
GTCAAAGAGTGCAAGGTCATTCTTGGATTCAAGGAAGTCAACCCTCAGAAATGAAGACAAC  
CTTCATAAGACCATAACGAGTCATGATGGTGCCAAGAGAAGCTTTCCTGGTTGTGTCTGC  
CTCATCCATAACTACATAGTCACCACCAGATACGGTGACGGCGGTAGGAAGGTCAGAGAC  
CTTACCCTGGAAAGGAAAGTCTGCCATTCTTACCCCTTAGTGGTTATGGTTGATGG  
ACCAGCCATCCTCTGTGGTGATGATATTCTTAACATCTAGTAAACTACCAACCGGAA  
TTGGATTATCCATATCATCACGAGACCAAGTATTCCACCATGTAGCATCGCCAGTGCGAG  
GAAGACAGAAGTTGATCTACTAATAAAGTTTGTAGCCCAGGTGATCCAACCAGCGTCAT  
CAAAGGAACGATTGCACCTTCATGAGGGGTTGGGTATTAATCACGTCTTGACCGACCA  
AAGAGAGTCTTACCACGTCCTGTTCTTTGGTTGTGACTTCATAAAAGTCTTGATATCTAC  
GGGTTGTCCTATCCATAGTTGAATAGCTAGAGGTGATTTCAAGAATGGCAGTTTCAAGAG  
GTGTTACTTCTTGGAGCTAATTGTCAATGACAGTCTTCATTACTTTTTTGGCTTAAATAAG  
CTGGCAGTGGGAAACCAAATGTCTCATAATAACACCAGTTACCAGCACAAATCTTGAATC  
ATGGCCACAGGCGCTGACGATGGCGGGCCTGGTTTAACTCGATAAACTTCAGCCCCGAGC  
ATACAACAAGGTCTCCTGTAACCTGGGTCCATAAGGAGATCTGAGTAAAGAGTTGCCATTT  
AAACCTCTTATTTGTTGGGTGGGTTGGTATTACGAGAAGCACAAATCATCTGTCCATGCGT  
AGACGTGATTATGTCGGACAAACCAATCATAGAAATCATTATCATACACCACGTGCTG  
TAATTAAGTTGCCATCTGCTGTGACTTTTGGCCCGTTGACACCAATTTTCCCATCCACCT  
GTGAAGTCGGTGTGCTGCACCATTTGGTGTGATCGACATTTGATCAGTCTTATCAACAATGA  
ACGTTCCAACCAGAACGGTTAATTTAAAATCACCTTCACGCGTCATGGAGAGCTGAACTT  
GGTCGTTCCACAATTCAAGTTTGTGGTCTATAGTGATGGGGTTGCCATCACTTTGAA  
CAACGATAATGGACGACCCTCGAAAAAGTCCGTGGGTGTTCTTATAATTAGCGTCGCCTT  
CATTGCGCTCAGAGAGGGAGATAACAACAACGTCACCTACGCTATACATTAAGCGTCAGGC  
GAGCCTTTCCTCCGTTAGTTGAAGGTATGGCAAGCGGGACTTCGAAAACCGCAGGATATG  
CGTCTACGGTGCCATCGTCGAAATTCGTTGAGGCTAAGCGTTGGACAGTGGCTGAAGGGA  
TTGTGTAATCCTCATCAACCCTCTTGGCCCTAGTCCCTGCGTGCATGTGCGGAGCTTGCC



ATGCGAACCATGGGTTAAGCGCAGCTTCCATACAATGATTTGGTGCCATTATTCCCCAC  
TACTCCACCACGGGCTTCTGCAAGACCGAACTCAGCCATCCAATAACCACCCTCAAGGTG  
CCCTTTGTGGGGCAGGTACACAACCTTTATAAGACCCTGTGTATTTTTGGCTTTTCAGGTA  
ATCCCTGCCTACAGGAATGATCGCACCCGTAAGCTCTGTCTCCACAACGAGACGTGCGTC  
TTCTCTGGTCTCGGAACGACTGGGACCTTTGTTTCGATCTTGGTTTCTCTTTGGCTGTTCT  
GTTCTTTTCCAGCATAACCCTTTACTGGTTCAGGGTATTGCGGGGTAGGTCACATCATGCAT  
ACCTGTCTCTCCACTGATCTCAAAAACAGCCGTCTAAAACCTCATGCCTTGTGTTGTCCA  
GAAAACCTGCACCATCTTGAACACTGAATCTTGAGCCAGTTTTCTTCAACAGCCTTTCAAG  
ATTGATCGCATCGTTACTTGTGAAAGCGGTTGACTGCTGGCGAGTCTTACCACCGAACTT  
AATAATCTCCGCACTTGGTATTCTCAAGTCTGAGATAAAGGTCGTTAACACCTGTATCAAG  
AGGAGTCTCCTTGTATATGACCTAGCGATCTTTGCAGTCATATTGCTGGTCGTTGCATC  
CCGTAGGAGCTTCGTTGTTTTCTAGTGTATCCATCCCATTTATCGTGGACAAACTCACC  
TGTCCTGTAAAAATCATTGGTTTTCGCCATCAAACTCCGTCTCAGGAACATTGTCAAG  
AGACTCCCCCTGGTTAGATTCAAGATAAGTAACTGTTTCGTCACCTCAGGTTATAAAGCGT  
GTCATAATTTTGATTCGGGTCTATGGTGTATCCGTCTTCCCCTCAAACCTCGATATATGC  
AGTGCCTGTTTCGTTACTGAGCACATAACGCGTCTTTTGTATTTAGGTTGCTCTAATGAGC  
GATGTTCTTTGGTTTCTGTCCAATATAAACAGGGTTGACAATGGTGGGTCTGAATGAACG  
TGATCAGTAAGTCCGCATCTGTTACTCCGCGTCTTCAGTAACCTCGTCGTCAGGAGATGA  
ATAAAGGATTTGCATGTCAGACAATAACCCGAGATGGTATCTCCCGACACGTTTGGTTGA  
CGGGGTGTATGAGAAGACACACAGTTGCCCTGAAGAAATGATTTCCAAATATTTAAAAGT  
GGCAAAGATGTCGAGAATAGTTGTTTCATATGAAAGCGATCGTTGGACCGATGCCAACATC  
CCAAAATGAAACGTGCCGAGGTTGGTCTCTCTGGTTCCACTGGCACCTCAACTCGTATGT  
TTGACTGTCCAGTAGCTCACGCATAGTTTGGTGAGCAAAACCATCAGTATCCCATGAGAA  
TGCATCTTTGACATTATTTACCTACCGCCTTATCCTAATCATTAAATGGAGCCTTCTGGA  
GTCCTAATCTTAGCATCTGGGGTCCTAACACCAACAACCTCGGTCTTGCTTGCTAAACTTT  
CCATCATAACATTGATTCAGCAATCGTTCGCCACCGAACTTTGTGTGGGCCAGCAAATTTG  
GTTTCGACGAGCAGTGACTTCAACCGCTTTGTCGTTAGCTGAAGACTGCTCAGTCCCGTTC  
TGCTAGGTTTTACCACCAGTCATTTTAGGGTCCGAATAGATTGTCGCCACCGCAGTTTTG  
CCAAGGATGAAGGTCCGGAACCTCCCTGAACTCAAGCTGGAACACTAATACAGCGCCATCA  
GAGTTGCTGCTAGAAGCCTCCATCGAGGTTAAGATGTACTTCTCGATGACCTTATCTTCA  
GGCACCAAGGAAACGATCTTACGATCAGTGGTAAGACTTCCAACGACCTAAAGTGCCTTT  
CCTGGGCGCGTGAGGCAACCGTGTTTTGACCGCCAGTATCTTTATCAATGTAATGTTT  
AGGATATGATATACACAAGATGAGTCCACCCTGAAACTGAAAGAAAATATCCCATCTTCG  
TTGACACCGTAGTCACTGAACTTTACCTTTTCTTCACCTGCGTAGGCTGTCCATCAGCG  
GTCCTTGTGTACAAGTGTTGTTTCATCAACGTCTAAAATGATTGCTTGGTTGTTGGTGTAG  
TTCATGTCCTTGAGTTATACGTTTCGCCCCGCGTAGTTCAGACCTCTGGCCAAGAGCGTA  
TATTGTACCTCTCCGCTGGCTTCTTGGGCTGTGTTGAATTTTTTCGCGACGGTAGCCGTA  
GCCATACCCTGGTTCGGTTAGCAATGGTTGTTGGATACAAAGGCTATGCGTCCACCCATT  
ATACATGTTACGATTTTAGCATAAATCTAATGATAAAACAATTAATAATGGGGGCGGAGCC  
CCGTTAAATTATTGCGGCACACTAATCATTAAATTTGATGTACCCAGGTTTGCAGCTTCG  
AGCTCCTTGTGCGGTCATCTTCTTAAACCCACCTGCATCAATCTTGATTGTAATCTCGCCA  
TTGACAGTTTCGGTTGGAATTACCATCGGAGCATTTCCTGTGCGGGCCAGCACCCAGGCATC  
ATCGAGTCTGGCTCAGTTAGTTAAGTCTAGTCTGATCAGTCATTGCCCTCTGACGAGTA  
ATAAAGTCTCAAGTTTTACCCATCCAAGAGTTTTTGTAAGTTTACCACGAGCGGTTGTA  
TCTGTGCCGTATCTTGAGTCACTGGACACTTGAGCTGGGTGGAAGACATAATTCCACGCA  
AGCATAATTACTCCAGCAATCAACCCATACAGACCAAGCCAACGCGCAGCTTCACCCATC  
TTCCCGAAGAGTGGATCATTCTTTTCTTCGTAGCGCTACCCTCGCCACCATCATCATCC  
CGATAACAGAAGAACGTTGTTAGGAATTTTTAAGCTCCGTAGGGTTCAGCAATGTTTCGAA  
AGAACACCGTACCCCCGGATCAGAACAGAACCAAGAACAGAGCACCCGACACCCACCCCT  
ACCCATTTCCATGCAGCGGATAACTCCTCGGCAGTTTTACGGAAGATCGGAATCTAACGT  
TCCATGATGCTTTGGATCAGCACAAAGGTATTGTAAACGGTATCGAAGATCTCCATGAAC  
GCGGCGGTGAACCCAGCAACGAATTGACCCCATATTGGGCCAACTCCCCGGTGGAGTCA  
AGCATTTTTGCAAGTTCGTTGAACGCCCTTCTTAAACACATCCCCAAATCCGCTGTGGAAA  
ACTTTGTTCTGAACTCAATCCAGGTTAAGGTCGGTCTCTCCATCGCAACACGGTTGCCT  
TACAATGCCTTATGTAAAGCACCACTTAATTTGCAGCCTCGGAGCAATACTTAGCTACA  
AAAGGTGGGACCTTCGCTGCTTTCAACTCGCCATTCTTGATCATTTCGAGCAACTTGGTT  
ACGTCGATGGTGAATCATTATAAGCCTGTTGGGAAGCCTTGAGGAACACCTGTAAACAT

CCCGGAATACCTTCGGCAAGTTTCTTCTACATTTCTTCCTCCATGATCTGTCTTGACCC  
ATCATCGGCTGGATTACGGGAATACCACTTTGCTATTTGACCGGAGCAACCTGTAAGACA  
TTAGCGTATTCAGCGAACGCCTTGAAAAGTGCATCCTTCTGTGATTTACTAAGAACA  
TCCGATGGGATTGCCATTTGGGTGTAACCCCGCGATGCAGTCTTGAGGTCAAGAGCCAAT  
CGGTAAGACTGGTCACGACCATACTTCATGCGTTTCCCAGCGCCTTTGGAGCTCTCAAAC  
ACCATTAGCATGCTGGATTACATGCCATGAAAGAACAGACCACCTTTAGCAACCCTTGCA  
GTGGCATTAAATACACAGTAAGCTGCGCTAACGCTGATTCAAGTGCTACGAAGCTTTTTTC  
AACCTGGCTGTCAGGGTATGAGTACTCTTACTTGCCTCCAAGAGTCCAGTCTCCAGTGCT  
GGAAGTTCAGCACGCAAATTTGAAAACCTCATAAGTATTACTGTCAAGGAAGCGCTCTTTC  
AGAGAATCGTAACCTTTCTGTTTTGAGGGATAATTGTCACGATAATTAGCACGGAGGTGA  
TCACCTGCGTTTGCAACCGTAGGTACCTTGCCTGCAAGATCACGGGGATAAAA  
ACTGATCGTCAGCTTCAATTTTCTTGACGGGCAGCTGTGCGGACGGGTTGTTGCTCTTTGGT  
GACTTCCTTTTCAACGCTTGTTCACGTTTCATTTGACGAACCTGTGACGCTTGTAGT  
GCTGGGTCCAAA  
ACTTTGTTTTGGGTAACCAACCCTGCCTGTAGCCTTTCCGGCGTTCGCGCGTATTGAA  
AGTTGCTCTTGAGAGCGGCTTGACGTGCAGCGGAATTTGCTGTATTTGTGCCGTAATCA  
CCACCTGTCTTCTCCATCCCACCTAGACGAGCCTGTAGGCCATTGTTATCCCCTTGAGAT  
TCTGGAGATGTTTTGCGTTCAGTTGACCATCAGCCTGCTCTACGGGCCTTTTGAATT  
TTGTCGATTGCTTAACGCTCCCTAGCTTGTTCCTTAGCCTTTGCAATAGCATGCGGTGTA  
GTTTTCGCTCGCTCTGCACCCTCCGTATGGAGTAACATTTTGTGACGAGACGTGCCTGC  
ATGGCAGAACGTCTTAATGTTGCTGTTGTATCCGTCTTACTGTACGAGAACGCCCTGCAA  
GCTTTATCCCATTCACTTTTCAAAGACTTCACAGCTTTCATTGCACGACCGAAATAAGTT  
CCGTCCACGTCCCATGTGACTTTGTTGACTGTCTGGCTTACGATAATATTCGCCATTCCG  
TCCCTTTCAATAAAAAGAGCAAGGACCCCGAAAAGGAACCAGGCTTAAGATTA  
ACTTGTTC  
TACCACGACGCCCGCTGTTTTCAGCTTGTTTAGCCCTTGCTTTACTTCTCCTCTCTTT  
CGTGGGCATGAGAAACGAATTCTTCCACAGCGAGGTATTCATTCAGCTTGAGCAGATAGG  
AAACATCAACATATTAAGGGAGCGACAGGATTTCCCCTTGAAGTTTTTCAGATCACGAC  
TCCATAAGTATGGGAACCAAGTCACTGAGCTATTTTTCTTTGCAACATCCATAGCTCTCG  
GGACGAATTTCCGAATTTTGGTCCGGTGTACTCCGGAGCCACTTCCATCGCCTGATCCAC  
CGAGTGCACCTGATGGGCCTTTGCGAGGCGTCCCAGAAGTCCCTTAAGGTCTGCGAAACC  
GTTTTTCGTGAAAAACAGCCGTAGTTAGTCTGAAGA  
ACTTTAGCAACCAGCTTGATGAA  
GTCTAACGTTTTGTCTTGAGCACAGAGTCCGTATCTGCTTGATCCGCCACACCATCAAC  
GGATACACCTTCAAGAAACAATGCGGAGCGTTTTTCGAGGTCTCTAGCCTCATCCGTGC  
AAAGAGGTATAGAATAGCTGTAGGGAGGGCTTCAGAACGGTTCTGGCCTCCAGTCATAAA  
GGAAGCAGAAATGGGTGACACTGGGACTGCAACATTACGACCGATCTTCGGAAGGTATTT  
GATGACCTTCGTTGGAGACCGGTGCGGGATAATGAAGTTGTGACCTTCGACGTCGATTT  
AGTTGTCCGTCTGATATCCTTGTACGCTCCTGCGTCTTGGTGGCCGAGTGATACATGCGT  
GTATAAAGGTACATCCATGTGGCACACGAAACACTTAAACGATACCAGTCAGGCGAGCT  
AGACCGAACCCCTGCGGAAGATAGAGTATCTGAGTTTAAGAAAGCATAAATGATACCGATT  
TCCCAGTCCATCTGGCTGCCTTATGTCCCGTAGGTCAGGTCTTGTGCGTCTGAATTCAA  
CCGATGGTGCTGAATCCCATCCCCTCAGAACCTTCAAGAAGGACAGGAAAGAAAATCAGC  
GTCGTGATAGAGGCGTGTCTTCCAGTTTGCAGAGTTTCCGATACAAGAAGAAGTGTCC  
TGAAGTGAACCGCCATGACACCAGATTGGTTATGTGACAGCGCGGCGGATAGACCACAA  
TCAACCCCATCTGGGGGCTGATGTTATCTTTCGTTAGGGGCAACGACAATCTTATTATCT  
GCGGCGCAACCAGTCACACGCTGGGTACATCAGGTACAGTTTGACTTTTTTAGGGTCATAG  
GCATCCGGCCTAAGGATAGCAGTATCCGTTCAATTACCCTCCTGTTGTTACAGTCTGACCG  
TTTTCCGGAATTAGACCCTGTTTTATCTACCAGAACGGTGATCCGGATCTTAACGAAGTAT  
ACTGGTGTGTTGTACACAAGCTCCACTGTCGCGTGTTCAGATTACGAGCAGCCAGATAG  
TTAGCCGGTATGATCGCACGATGCGGGATTGTGATCACCGCATCGTAGAACACTTTGTTA  
TCGTCATCGTATCGAGTGAGGATTCAACCGTTTGCATAACCAACGTTGATCGGGTCGTT  
ATCAGTACAGATTTAGATTAGCAAGCTCGTCATCACTTATATTCATGGAGAGACCCCTG  
TTAGAACGGCGAGGCATGTATCAAAACACACTTTCTTCTGTACGGAATTTAGCCAGTGA  
CCGACACGGACTACGTCAACGTAGTTACCAGAAGCACACTTACCTTCGTAGAAGGAACCA  
ACACCGTTAATCATAACGGTAGAAGTCCAGATTCTGGTCCCAAATGGTCATGCGCTCAGTC  
ACACTCAGACTTGGAACGTTAACATCTTCCATTGGCTTCGGGTGGATTGAGTCACCATAA  
CAAGGGACGATGGAAGCCATTGCACCGATACTTCCACCCTCTGGGAATACGCTATCAGCA  
AGAGGATCGTACATGCCGATGGTAGTAAGGTACTGCAGCGCTTGCAGATGGTTATAAATG  
GAGTTGCTCTCAGCCGTCTTAACCAGTTAGTCAGCAGTTCAATCAAGGTGCAGCTTGTAC

TTTGCAACAGGGAAAGGAGCATCACCAAGGATTGAAGCGTTGCTGTGAGATTTCAGTGCCC  
AGGAAGTACCAGTTATCAGTTGCAGTCAGGACTTGTGGCATAACAGACGACACAGTTACA  
ACTGAGGAGTTTGTGATTGTCATCTTACAGCTGTCACGTCCAATACTGCATGTTCCATCA  
TTTATTGGAGCGCTTGTTACAGCGCCTGCGCTTGCCGCAGCAGTCAGAAGAGTTGTCCGA  
GTTGCACCATCATTAAGTGCCGCTGCCATGGTAGTTGACAGAGAGTTTGGGGTGGATTCA  
CGAGTCCCGGAAAGAATATCGCTGGACTGATAAGCTCCGGAAACTCCGTTTCAGAGCCACC  
GGGTTTCCGGTCTCAGTGTGTTTGTCTGTGAAGTCCGCGATGGGATTGATAAACGCT  
TGAGGACCAATCATCAGGTAAGGAAAGGAATGTAGTAGAAATCGCTTTTGTGCAAAG  
GTGTAAGCTGGGGAACCTGGAGCGAATCCAACATCTTCAAGCTGATCGAGTTCGGTATAA  
GCCCCGAAAACGTTTCATGAAAGGAGTTGTGGATAGCCGGGACCAGCGGGGTTTCAAACCT  
TTCGTGTCGAGTGGTTGAGTACCAAGCGTGACTGTAACGTCAACCAACTTGTCAATTATAA  
GCCATCGGTTTCTCTTTATTTCTGTACATAAACTTATTCACCAGCACCTCTGTGTG  
CTGTATGGTGGGGGCTTGCGCCCTTACAGTCACTAATAAGCCAGAGCGTGGCTATAA  
GCGAGTGGTTTGTATACCCTTCTGCTGGGTAGTGATAAAAGAGTTCATCGTTGATCTTC  
TCTAGTTCTTCGAGAGCACCCGTACCTGGTTCGACGAAGGACACGTTAAATGTTCTCAAG  
ACTACAGCACGGGTCTCAAATATATGCATATTCAATGGAACCTTTAAACGAGAAATTGTC  
GAGGATGGCGAGTATGCAACAGGAGAGTTACTCGGGAAACATTTGTACATATGATCGGT  
AGGTTTATTGATTGCAATACCCGGCTTAAAGGCGTTGGCAGCTTTACCACCGTAGGCTGTG  
AGGGTGTAAATCAAGCTCGTTATTATGCACCGTCATGGCATTGCTCTGCGTATCACCACT  
TCGTACGGCTGCCAGTCAATCTGGTCAACAGCCATCAGCTCAACAAGAATGAATTCACCA  
TCCACCATGGGAATCTCATCTTCCCCTGCCAAGACAACGTTTCATCCTGTGGTTTTTTTA  
CAGAATGCTCCCACGGTATTCGTAACGGGGTCAAAGATTTAATCGGAATTGGTGAATCCA  
GCTTTTAAATTCCTCCGTTAGTCCCATCGGGGACGCATACTCCGTAAGCTCTGAAACGGG  
CGACACCTGTAGTCTGATAATCATCAAATTTAATCGCAGGGACCCACATCATTACCCAC  
GGGAATTAATCAGTTTGATTTTGTCTGCAAGTTCGTTAGCGCCTTCAACACGACCATTGA  
GCATCACAGAGGAATAAAAGGTGAAGGGGTCATACTGGCTACCTCCTTCCCTGCAAGAATT  
GTGATCTATAATCGCTTGCCGCCTTACCTGTTAATGGTTGGCCAACACACTCACGAATAC  
CAAATCTTCATACTCAGGTTCAACCCCTGGTTTTTCGCACGGATTGCTTGTGTCAACTA  
TTGAACATGCTCTGAGTCGCGATGTAAGGGTTGGGCGGCGTATTAATCTATTTTTTCCAA  
TAAGTCTGTAACCAGCTATTTTGCCCTCCACCCTCTGCTCTTAGATACTTTGAATGTCGT  
GGACTCTTTAAGGTCACCATAGTGGTACATCGCCTCACTGAATTCCTAGACATCGGCCCA  
CGCATCGGATACTCTTCTATTAGGATACTAACCAGAGTCGATAACGAACCTTACCTTTCC  
AGCACCAGCTTTGACGGTCTTGGTTCGGCAACGGTGTAGGATTACGACTGCCTCAAGCAAG  
GTATCCGAAAAGTTCCCTCTGGAGTTTTTCCCTGTTCCCTGCTTGAATGCACCTGCTCCGCT  
AGTCATACAGGTACGGGCAGGAAGACCTTTTCAGTGTTTCATGATGGATTGTAGCCAGCGT  
TGCAGTATTAAGACCTGAGTAATGAGGGGAGTCATAATATCCATATGAAACCTGACGCGA  
ATCATGTTGTTGGGTTCCCTCCGAAAAGTTCTCAAACCTGCTCAGATCTTGCTTACTTGT  
GAATTTTGGTCTGATAGCCACATCCGTTAGTTATTTTACCACATTATCTTAACAAAGTC  
AACGACCCAGCGAGGGATAAGTAACGAGTACAGCGGTAAGGGTATCTCCGAGGAACTCCT  
GGTACACCTGTCTTGGGTACAATGCCTTCAACATCGAACGGACCCCTTGAGTTCGGTCTC  
ACTTTCACACGCCAGTGTTTCATCACGATGGACACTCCCCTGATGACTAACTTGGAAATC  
GCGCTGAGTCAACCGTCCACATTATCACGCTTGGCGTGAAACCAGCTCAAGAAATCTTTC  
CAGTTCGGGTATGGAGACCCACCTGCTACCTGGATGGTTCCGTCACCGTTCATTTTCACG  
CGTTCTGTGATAGTACTCTTACAGGACTTACTTCTTGAAGGATCAAGCAACGTACCACA  
TCAACGAGCGTGTATAAAGAAGTCCGACATGTGGCAGGTTGTTGATTGACCGTTGGGC  
CAGTTTGCATTAACCTTCTCATTCCTAACAATGCCAGAATTGTTTCGTCTGGTAAAAGC  
TCTGGGGTAGTGGATCCGAGGAGAAGTCGAATATACGCAATAATATCTTGGTCTGTGATT  
TTCGCTCCTGTTGGAATGCTCTTCTATGAATCAAGATCTTATTACAAAATATGCTCCTTG  
TCATTAACACCACTTGACAAGACCTTAAAGTTCTGTTATCTCTAAGTCATCAAACAAAAC  
GGAGAACATTTTATGAAACATATTAAGGCCGTTATGATTTGAATTATCGTTGGAGCACTT  
AGCGGGGCGGGAGCTTGTACGTATGTAATGATGAATCCTGGTGTAAATTAACAGCAAAGCA  
ATTGAATCAAGTTGTTTGTCTCCTGAAGAGATTACTGCCAGCGGCCATCGACTTGTTCGT  
CCCGGCTGCGACCAACGCTACAGGTAATCATTCAAACCTGGCCTCACAGTTGTTTAGTCA  
GGTAAGATGGATGAGATAAAAGAACAGGCTGAAGTATACCAGTATTCGAATGATGTGGCG  
ATCCTTTATGGCCCTGCAGGATGACAAGGCGCGTACATCTGCACCCATTATAAAGTCGGC  
AAAGACCTCGTGGCCAATCTGAATATGGAAGCAGGTGTGCGTAAGCTTCTAAAATAAAG  
GCCCGAAGGGCCTTTTGTGACGCCATCATGCCAGCGGATTTACGCTTCGCAAGCACGCC

GTAAAGGTCTCTTAGCAGAGTTTCAACATCCGTTGCTACAGAATCTACCTGTCCAGAAGC  
TTTCTTAGCACCAACCGAACGTGGTAGTTGTTGATGCGGGAAGTGTGTAACTGCACCGCC  
TTCTACGAGATCAGCAACAGAGATTAAGTTACCGGTATCAACATCGATAAATTTGATTGA  
AAACACACGACCAGCTGCAGTAGAAGTTGCCATATTTTATTTCTCCTGTTAGGAATGCGG  
AAGGTAATTGCGGAATATTTTCAACAGAGATTGCCTGATCCACACTATCAATGTAATTCC  
AGTCAGCCTTCATCAACTCGTAATGAGATCTGGATACGCTGTTGATTAAAGCTGTCATTT  
CACGATTGGTGAAATCAGCGTTGTAACCATCCAGGAACTGTAATGGATAGACAATTGTGG  
CTGCAGATCCATCTGCATCCCAAACATTCTTGATGCTTTACAAAGTTGCAAGATCAAAAA  
ACTTTAAGCGAACTTTTTACTCCCGGTTATCGTAAGGATACGGGATACCAATGTTAATGT  
CCCCGCTAAGAACAGTTTGTGCATCTGCCTTGCTCTGTTCTTATGCAGAGACAATGTTGG  
CCGTACTTTCTTCTAAGTGAAATCACGTACATCCCAAATTTGTACCCATTCTATGGTTT  
GGTCATTGAAATGTGGAGCGCCTTCAGTGACCACATCCCGGTCAGGCATTTCTTTCGGAA  
TTACCGGGGAGTAAGCTAACTCGACACGGTTTTTCAGAATACATCCAAGAACCCCGTGCTCA  
CGTTCGGATTATTCGTTCTGAAGTCAGAAAGATATGCCTGATATTGCCTATTTGACGTTG  
TGATTAGAGGTATCTATGCGTTAGCTACCATTTACTCTCCCTGAGAAGGGGGCAGATGTC  
CCTTTATTAATGGACAGTCAAAGAGGTTGTACCTGTCAGGTTGGGACGGTCCCCGAGGAT  
AGTAACAACCGTGCGGGTGTTCGAAGAGTAACCGCTGATCCGTTTGAACATGCTAGGTT  
GCCAGGCCAGGTCAGTGACGCACCTGAGCCAGAGAACACGATAACGATGTTCAAGTGCTCT  
GTTTGTACGTAGGTTAGTGAAGCTCATGGTTTTGTTTTTCAAGTACCATCCACCTTGAGGTC  
TTAAGACACGCCAACATCCCTAGCCCCAGTTGTAGAAGTAGCCAGAAGATCCTAACGATA  
AAGTTTGTGCCACGCATTGTCTTACGGACACACTAGGCTGTACCTGCTGGTGCTCCAAG  
TACCGGAACATCACCCACCCAGCATTGTTCGACCTTGCGGAATCGTAGAGCCTCTATC  
ATAAACGTTTCTCTACCAATGTTCACTAGTGAAGCTCAGGCGCTAGCAGATGCTCTCTG  
GAAGAATTCCAATGCGGGTTTATTGATGAAGTAATCACTGATTCGCCCATCAGCTGGACC  
TGGGTCACCGGCGCAGTTTGACCAAAGTGCTCCTTGGTACCTTTAATAACCTGGCTACC  
CTGAATACCTTGTGCTCCCTGTGGACCTTGTGGTCCAGCATCGGCGGGGCAACCTTGGAT  
AGGTCCCAAGTTCTCATAAGTGGTATCAGTCCATCCCCAGAAATCTCCGTCACTCAATTA  
TCCCTGACCAAGCTCTCCAGTAGAAGGATGTTCAAGTGATATTGCCGAGTTTGCCGTGGGT  
TCTTACCCAGCACCCATCTGACCTCTGGTCTTGTGGTTCGTTGATCGGCTTGTGGACC  
TGTC AAGTCACCCATCGGTTCCCATGCGGTCCTGTAACATAAGAATACTCTTTGTT  
CCCACCGGAAGTTACTGAATACATCCAGCCTTGTCTGGGTTTTGAACATCAAGCAGGTC  
CCTATAAGTCGCAATAACACCTTCAGCAACCATAGTTGCACCCATCGGTCCTTGTTCACC  
TTGGATACCAGGATCACCTTGCGGGCCACGCATGACGCCAAGATTTACCCAGTTAGTACC  
GTCTAAAGCAAAAGCTTCTCCAGTGTCCACTTTGTTGTGAAGATCTTCATTTGCTGCGCC  
TGACGGCAAAGCTGCTTGATTGGCTACTGCACCTCTGGCAGAGAGTAAAACGCCCAATGG  
ACCCTGTGGTCTGTAGCCCCTGCGGGTCTTGACCTCCTACATTATCCTGATGGCCTTA  
AGGCCCGTGTGGGACATCCGACCCAGTATCACATTTGGGAACGACATATCCTGTAGCCCC  
GGTGTACCCCTTGTGCGCCTTTAGGACGAACGTATGGACCTACATTTATCCATTTAGCATC  
AGCGTGACTCCAGACGGAAAGGTTTGGAACTGTAATCCAAGCTTCGCCTGGTGTTCCTGT  
TGCAAGAAGATCTGAAACCGCCCTGTTAGTCCCAAGAACACGAGCACCTTTACCAGCTTC  
ACCACGTTACCCCTTCGGAGCTTCAGGTCTTTGTGCGACCGAGAGGGCCAGTAAAACCAAGT  
ATCGCCCTTATCTCCCTTTGGACCAATAGGTCCTTGGATACCCAGTGGTCCCTTTTGCTCC  
AGCAGGGCCCTCGGACCCCTCAGGACCCCTCTGGGCCTTGGTTCGCGCTTTTGTCTTTAGT  
CCATTATGGGCCGACATCACCTTGGTCACCTTTAGGTCCTAGGACGGGAACAATGTGCGCC  
ACAAATGTGCGTCAGCTGACCAAACCCCAACGTGATTGGCCGTTTGAACAACCCAGGCATC  
GGACACAACATGACCAAATTCAGGCAATTCGACAACCGTTGCTTCTGTTCCGTTCAAGTCT  
TCCAATAGCGGCATCGTTACCGTTATCGCCCTTGTACCTTTAGATCCTTGATGCCCTGT  
TAAGCCCTGAATCCCTAGTATAACCGTGGTCACCTGTCTATCAACGGTCCCCTCTGTGCGCC  
TTAAGGCCCTGAGGTCCGGTGGCAACAGTCGCCCTTGTGGACAGGCAGGGCCTACTTG  
CCCTACAGGTTGCCATCCGTCTGCCTCGCCAGCCCAAACCCACATCTGATCTTCGATATT  
GTAGGTATCGCTTTTTCGAATTTCCGTTAGTAGGAAGGAGTGATGTGTCAGTAAATGTACG  
CCTGATCACCAATCCTATAACCATTTGTGCCTTTGAGGTCCAGCGAAATCGCAGAGCTGAGC  
ACAAGTGACTGTGCAACTGTCCAGTAATGAGTTCATATTTTCGTAAGTATCTCCCTTTTG  
CATGGTTGCCGACGAGGAAATTGGGATGGGTCTCAAATAATTCCTTGGATGTAACCTACC  
AACACCCGGATCACCTTGGTGACCCTTGTGCGCACTTATCACCTTTTTTACCGGGAGGGAG  
AATAAGACCTTCTTACCAGGGTCGGGCACTTCTGCACGAACGCTTCCGGTCTTGGTTGG  
ATTATGCACAACGATCTGAGGAGTAGCAACATACAGCTTTCGACCTGCCAATACGAGCAG

GTTATCACTGAGAGGGCTAACCCCGACAGATAGTTGGACAGTGCCACCTACAAGGGCGTT  
ACCGGAAGCAGGATCTACAACAACAGCTGCCTTCTGCGGAGTAGTGGAGTTACCTCCACC  
CGGTAGTGTTACTGTGGTCGTATCCTCTGTGTTGATTTGTCCATCGTCCACAAAGGTTCC  
TCCGACGGTACCTTCCGAAAGGATTGGTTCCGTGTGCGCGACCTTATCGTTGTAATCTGT  
CATTTTTATCCCTTATTTTCCAGGGCGCTAATTCTTCAGTCGCAGCCTTGAAGTCAGGCAT  
AATGTATTTCGAAAGACTTGTTTTTTCGGAAGGGTAATGCCTTTGGTGCCGGCGAAGTCCGC  
AAGTTTTCTTTGCTCGCTTTCTTGTGTCAGCTTCGTCGTTACGGCTTCTGCCTCAGCCAG  
AATTGCTTCGTAAACAGCTGACTCCACTCTCACCTCTTCAGTCTTGACTTCTTCACCAAT  
AGTGCCTACAATTGCCCTCCAGTGCCGTACCGCAACGTTTCCGGTCTGGAAGAGGACTGTT  
GATGAATACGATGTATGTACGCATGCGGTGGGTAGAGTCTTCTGCATCCACATCAGTTCC  
AGTGATCTCAGCAAGAGGCTTGAATTACTCAACAGAGATGCGGAAAGCCCTTCGTTTATT  
TACGAGGCAAAAGCCGTTTCCAGAGGAAGACGGGCAGAAATCCCATCATGCAGATCGGGTGC  
GTAAGTACCAAAGAATTTGAACAATCCCACCATGGTTGGGAAACTACGATAGTTTTCAAT  
AGCCATTAAATCTCCATCTGGTTACCTTAGTAAAAACCACTTGACACCGTTGCTGAAGTG  
GCTGTTATTAAGGCAGAGAAAGAAAAACGGAGAGGTGAATAATCATCTCCCCCTCTTAGA  
GGTAGCAGTTACGCTGTCTTATGCGATAGTACCAGTGGAGCGAACATCCAGATCGGGACG  
GGTGTACACAGTCAGGAAGGACGTTTCCGGACTCAACTTTCTCTTCTAGCAGGTATGCAGA  
AGATGAGTACTACAGGTCCAGTTCCTGTGCAGGAGTGTGTTGCTTTCGCGAACGTCATCTGC  
TGGTGCATAGTGAATCTGGAACATGTCGTAGATTACTTGTGGCAGACTCTAGGCTTCACC  
ATCAGTGAAGTAGGTGGAGATATCCTAGATGGAAGTTACGTTCTTCTGCACGTACATGCG  
GTTGTTGGCGTTCTCTGCTGCCGGACCCATGGGCCGTGGAAGCGGCTCTTGAGTAGAAC  
GTAGTGTGAAATGCGTTCTTTACCAGCGGGTGAGCGATAAGCGCTGAGAACACCTTACG  
AGACGCCAGCACTACGATACCGTGGGTGTTGCCATTGACACCCGCATTCTGGAAGATGTA  
AGCACGAGCTTCAGCTTCGAGAACGTCAGAAGTGTGATGGCAACATTTGTGAAGTCAAT  
GTTTGCAGTGTGCTGAGTAACACCCCACTCGGTGAAGTAGTTGTACTGTGCACTCGGGTC  
TTGTCGTGCCAAGATTTACCCAGCTCGCCTGAAGCCCTGCTTTTTCTTTCAGTTGTTT  
ATGAGAGATGCGGAAACGACGAACCACACGAGCAACAACATCTCCTACAGTCTTCGGGGC  
GTCAGTAGCGAAATACTTACCGAAGTTTTGTACGTCTGCCGGAGTGATCTGACGATCAA  
TGGGAAGAACGGGACGTTGAAGTAATTCAGTTACGCCTTTTCAGTGCCAACGTAGTTACG  
TTAACCTGACGACGACGAGCCGGGAAGTAGGCAGCAACTTCGTCAACACGTTCAATCTG  
AGCAACAGTCGAAACACCGTAGTACGCTGAGAACAGGTCCATTTTGGTGATAAGACGGAA  
CTGACGTGGTACGATTTCCAGAGTTGCGCCAAGTTCCTCGATCTGGAAGTCGTCAGAGCG  
TACCACTCCCAGTGTAATTTCTCCTTGTGATGTTAGATAGACGTTACAGGGAGCTCATC  
AGAGCCGTCTAATATTTCTCGGTGATCTTCGGACCTTTGGCCTCCAGAGCCCCGATAGC  
AGCAGCGCTAATTGCAGTAGTACCGTCAGCGAAAAACGGCTTGGCTTTGTTTCAGGGTAAG  
ACCACGAACTGCCCTAACTAAGTTGTAAGTACGGCCAACCACGAAGGCACGAGGATGTTT  
GTAAGCATGATCGAGCTCACGGTCCGGGATTACACCTAATCCCTCAGAAGCAGCGGAAGT  
GGCAATTGGTTCGCACGCGGGCTTAACACTTATACGTGCTTACAGACCAGCTACCAACTC  
AATCGGCATTTTCGAGGAAGCTGTAGCCCTGGTCAGAATAGCCCACTCTACCCTGAAAGAT  
GTCAGAGTAGTACCCATGGATAGGATTATCCATTAGTTTAAATTTCTCGATTAGACGTT  
TAGTGCAGCAGTATCACGAGCGCGATCTTTCGCTTTCTCGCTGTTAGCCTGAAGGATGTC  
TTTGCCAAACTTGTTGATGTCGTC AACAGTTCGTTACCGTCTTCTCCGCGTTCTGCAGT  
GCCGA ACTCTGTCTTACGTTTTCAACTTCTGTTTCCAGTTC CCAAAGACGTGCTTGGGC  
TCTTTCCAGAAGAGCTACTTCCGGACCGTTAACATTTGCGATGATGAAGCCTGACGGAGA  
AGCGTGGTCAGATTCAGCCTCAAACGTGAAACCTTGTGCCTGAGTCAGAGCGGCTTTCTT  
TTCAACTTCACTAGCGGCTTTGATGATTTTCATCAACAGCAGGAGCTTTAGCTTTGGCATC  
TTCCAGTTGCTTGACCAGTTCAAGGTATTCCTGAGACTTAGTTACTTCAGTTACATTATC  
GGATACAGAGGTCTCCTTATTTTCTTTGAATGTATCGATTACACGGCCAGTACCTGCTTC  
TTTGGCCACCCAGTCTCCTGGACATCTTCGGACTCACCTTCGGAGCTGGACAGACCTCA  
TTAGATTACTCCCTTCACACACAGTCGCTGAAGCTTGAGAAGATCATACTGTTTAAACAAG  
GTCGATTTCTTACCGCTGTGCGCTGCCTAGGGGTTAGAGATTGACTCCATACGCCCTTC  
CAGCCATTCCCGGTGCTGTGCGTTCCAAGCTTGGGCGAGCTTATCCTCAGGGTTTGGAGC  
GGCCTCATCGCCAAGCTCAGTTTCAAAGCCCAGCAGTTTGGCACGCAGTGTGCATCGTC  
GCTCCACATCTAGAAGATCATAACGACGAACCTTTCGAATCTCATGGGACCTGTAACCTG  
TTGCTCCGCCCTGATAACGTCTTCGGTAACCTGTTTCAGGTTTCAGGTCAGAATTGATCAG  
AAGTGATACTGGACGGAGGTTGGCCGAAAACCTTTTCTCTCATGGCAGAGTGCAGAAACC  
TTTTTCCATCAAAGTATTGGCTTATGCATTTGTCATTCGCCAACATCCTCAACACTCT

ACACGGAATCCACGTTGGTAATTTCTCCAGGTGCTTTATCGATTGATCAGGAACACAGA  
ATGCTCAGCCACCAACAACGTTGGTCTTTTTAAGATCCCACAGTACAGGGTCGTTACCT  
TTACCTTTAGCTACCCAGGTGCCAGCCTTGAGTACTTGCTCGGTCCGGATAACCACTACA  
TTAAATTATTCCTGAAACCAAGTCTACTCGATTGTGAGAGAGTCAGTCTCAATCATGTGG  
AAGTGATAATCTGCAACATTGCCACCTTCGTTTGCCTTATCAAAAAGTCTCCTTGGCCTTC  
GCGATTGCCTCAGCAGACATCGATTTCGGCGTGAGCGTCTAGGCATCTGTCTCGTAGTTA  
ACTTCGTAAGATATCATCTGCTCATCAGCGTCTTTCTGGATGTTCAAAACAGAGGTTGAC  
TTGTCGATTTCTGTCTTAACATTCACTTTGACATTGTCTTTGGAAGCCTTCTCGATAGCG  
GCTACAGGAGATTGGCCTGAAGGAATCAGGCCATTTGCAATACTCAGTACCTTGCTCTTC  
TGAACGAGAGACAGATCAGATACCGATGCAGGCAGGTGAGCCATACTTCTGTATTTTCATC  
ATTTTCCCCGTTGATAATTATCTTAACACCGTTCATTTTCTTTTGCAAGCTAGCTCAGTA  
AGTTGAAAATAATTATCCATATTGAATACGGAATAGTCTCTTTTGGAGGAGATTTTCTCT  
GTTCCAATACAGTTAGAGCCTGCTGACATAACCATCACCGGCGCGACTGGTATCCTGATCA  
ACTAGTTTCAAAGTTCATCATTTGAGATGTCATCGGAGCTCTCTTCGACTAACCCACCA  
TCTTCAAGAATCTTCTTGATAACTGTAGGAGTTCTAGGAAGATAACCAACAGCACCGAGA  
CGCTGATCTAACTTTGAGATGCCTTCCATCTCGAATTCTTGGATCAGGGCTGGTTGCAGT  
ATGAGCATGTCTTCGTCTGCAAGACGGAGGTCATTCAGTGCCAGAAGCTGAGGGATCAGG  
TCCCTGTTGAAAGCCTCAACAATGATGTGATGTCACGCTGAGCGAAACGTCCGTGGCTG  
CACTGCTCCGATTCAGATAAGTTTTAAGACCCCTGGCCATCGTTACCAAGGTTGATGAAT  
CCAGCGCCAGATCTGTCAAGAATTGCCTTCTTGCAGAGCTCACCTGTTCCAATGTACTG  
TACTGCTTACCTGCACCGTCAATACCTTGATGAGACATCTTGTACTGTTCCCCACCCTGA  
GGGTTTCATATCTGACGTCAGGATGAAGTAGGCTTGCTCACCTGCGTTGGTGTTCCTGCA  
TCCGCCTTCAATCCTTGAACCATTTCTGTTTCTGGTGATATCGGTTCAATCGATGCGTTG  
TTCAAGATCTGAGAACGGATCTTCAGTTCGATGATACCACCAAAATCTAAGGAAGCACAC  
AATGTTTCGAGGTTTTTCGATCAGAATCTTTTCACGGAAAGCACCTTAACAACAAAAAAGA  
GGCGCAACACCATCAGGTTGTGACTCTGTGCCCCCAAGAATCCTCACCATCAGTTTATTG  
ATAGGAATGAAAACCTTCATACGCAGAGGAGGTCAGATTACTAATCAGGATCATAGGACTA  
GAGATTAGCGTCAGACCGTTGTGGAATTTGGCATTAGCCATATTACTCCGGTCATTCTCT  
TTCAGGGAGCGCCATCCTCCTCAAAAACCCAAGGTTTGGAACGAGAAAGACTTGACTGT  
GGGTTAAAGGCAATCTTATCACTGTTGGTATCCCTAGCATGTTTATATGAGGCAGATTCA  
ATACGGTACACCTTCGCAAAGATGGAGAATCCATACTCCTGAAATGTTGCGGCACTACTA  
GCAATATCGCGCTGAGTTTGCTGGGTGGCAATTTCTTCAACGCGTATTCTATAAACTCG  
GCTGCATCTTCGGATGCCTTACTGTCAAGATTATACAGGACTTTGATATCATAGAACGCT  
TCCGTTACGAAAACGGACTTAGTATCAAGCGCCGTGGGGAAAGTATCGTCCTGCTTCATA  
GCATCGAAGTTTGCCAGAAATCAATGCCAGCGTAACTCTTCCACCTTAATCACTTGGGAT  
TCAGCACGAAGCAGTAAGAAAGCAGCAGAACCTAGTTCCCCGGTACGAAGACGACTACCA  
ACCAGATTTTCTTTCTGTCTTAACCACCTCCGATGGTTGTGAAAATCCTGTAGACACG  
AGTTATCCCCTCTGTTATATTCTCATGTACAAGGTCGGAGGAAGAATTTACGGGATAACA  
ACAAGTCTGACTATCTCCTTCTTCTCCAAGAAATTAATACCTGAGGCAACGGAAACCGCT  
GAATCATTGTAACGGGTTCTTGTGCTTCGCTACCATTAAACTTTTCCAGTTCAGTTAGT  
AAGGCTTCAAATGTCTTAGCATCGAAACTGCTTCTGACAATCCGCACCATTCTGTCTGA  
GCAAGTATTGCAAAGGAGTGAAGCCTGTAAGTTTTGAGTTAGTCCGTGGCGTCCGGTCT  
CTGTCAACCAGAAACCTTTCAGCCAGAATCTCACGAGAGCTGGTTGTGAACTCTCTAATG  
CCTGTTTAACCGGGTCAACGCTGAAGATGATAAGTACATTATCCTCATCGTATTGGGCG  
TGCTTTTTAATGGTATCATCACGTTTACCAGCTTTCTTACAGATACGGCCTTGCCTTGA  
GTGGAGTATTGCCATCATCAACAAAGTCAGGGCAATAATCACCTGAAAGATAATAACAC  
CCATCAGAGTCTTTACTTACATTACAGATGCTGAAAAGTCAGGGTTTCTGTTACCTGAT  
CTTCGTTCTATACCTGCCTTGTGAAATCGTCTAACAGACGTGACGCCAGTGGTGGGCAA  
GGAACGTCCTTGAGAAAGGATCGCTGGAATAAGTTCTCACCTTCTGGACGAACTTTCCAG  
TTTCCGTGAAGTAGCTGTGCCTTTTGAATTTCCGCAAGACCCTCAAGGAAAGCAAGATTA  
TCTGGGTCGTTGTCAAGCAACGGTGGGTTAGCGAAGATAGTCCACAGATGAATGAGAAA  
GACCGTGGTTTTGGCTTGTACGAATGTCCAAACCGTCCCAACACTGCTCAATAAGATCC  
TCTGCTGTATCTCCCAGAGGAATTGACCGTCACGACACATGAGCTAACGGATAATCCCG  
TCTCGCTCCGCATTAGGGAAACCATCATCGTCGAGATACCACTCAATCAACTCTTTAATC  
TTGTGGTCTGGGTCCGGGTTACGTGTGATGACCATACACCTAGGGTATATGGATTCAGAA  
CGAAGACTAGAGATGAGGTATAAGATCTCAAACCATTCACTACTGGGTACCTTCTTCAAAG  
ACAAAAAAGGAGTACTTAAACCCTGGTGAGAATACTTGTCGTTTTTCGTAATCCATGTGG

GACCATTTTACTTTAGCACCAGAAAGGAAAATTCATTCCAGGTCTTTCTCCCTGAAGCGT  
GGTCTCCATTCTGATCAAGCTGTGTATAAATGCCACGTGCTGTGTCATGCAGACCACCA  
CCACCCTTCAACTAAGGGGTGTTTCGACGGAACATGATGCAGTTCGTTTCGTCGATCGTCG  
ATGATATTTAAGGGTATTAATTGAAGCAGGTAGGATTTACCTGACCCCGCCGCACCCCA  
ATGATCAGTATTTGTGCGTTGTTTTCCAGTATCATTGCTGGTAAGGGCAGCCAGGTCCG  
AATGCTTAATCAAAGACCTCCATATTAAGGGCGCAACTTGGCCTATAGGAGGTTAGTTG  
ACGATGAACCTTGATAAAAATAATGCCTTTATGACGAAGTAGGCGCCTTGTCAATCACTT  
TAGCGGATTAATAAATGTTACGGAAGTATTGTTGCCGAGTCCATAACTTGTGGGGCCGTT  
CGTAGCATTAGTATGTTGGTCTTCATGATCGCGCTGTTCTCAGAGGTTGAAGCAACATA  
CTTCCGGGGAGTTGGCTCCACAAGATCAACCCGTGCAGCAGCAGGTGGTTGTGCAAGAAC  
CTTTGCAGGACCAAACCTTCTCAACTACCGGAACAACATCCGGCTTCCCCTGAGAACCAAC  
CAGTAGGGTGACTGTTATCATCAGTGCCCTTAATGCTTTATACATTTACCCCAAAGCTT  
TACTTGTAATGTCAACAAACTAGCTGTCAAGCCCTTCTTCTTGGGTACATCAGACCTG  
CTGTAATCGTCTTGCTTTGGGTTAAGCTGTGCCTGCAATTCTGCATTTTTTGTCTGCTCT  
TCTGCCATCTTCCAGTCAAGCATATGGGTTGCGATCTGTTGTTACCCCTTGTAGACTGA  
CTTTCATCCGCGGTTTGTGTGGCAGATCCTTCCATATTCGGACTGTATCACTCACCCCT  
AAATAGTAGGACTGCGTGCTCTGCTCGGTATACCAGTTCTTTGCAAACATCCCCCTCCA  
ACGATGACGGCAAGTAGTATGACCACTTCGATTACCTTTAGCTTGTCTTTTCATAAACTTC  
AAAGCCATCTCAATTTGTGTCATGAGATGTCCCATTTGGTAACAATTACCCGCTCGATTT  
TGAGCAGAGTTGTATGTTTCATCTTCGATCTCTAATGCCGCATCATTGTAGGCAATCCTCG  
TAGGGTGGCTCACACACACCTCAAGAAGGACAGCGACAGCTAAAGAGGTTTTCTCCCTCCC  
ATCTCCAGTTCTACCCTTCCCCCGGACACTTGTCTACGTTACGGGCTTACTACCCGT  
CTAGATGAAGGATCATCAAATCAACGTCATCTTGTCCCTGTTTCTCGGCCAGAAGGCCAA  
CTTTGTGCCTTTGCTCTACAGCTTGCATCAGAACGAAGTTGTCAGAAGGACAAACTCCA  
GCAGGGTGATAGAATCTGGCCTTCTAGTATTCTTTCTGACGCGTTGGTACAGGGTAAAGA  
TATTTACCTCTTGAAGACCTGTCAAATCACCTTTACCGACCTGCTGAGAGTCCGTTGCAA  
TACCGCGGATGATTTTAACTAGCACCATCCAGTTTATCAAATAATAGCTCATATGAAA  
AAGGCTTTTCTTCATCGAAAAGCTTTCATCGTTCGTACCATAACATTCAGGTGGG  
CCTTGGCATCTGCCTAAATTTCAATACTGAAAGTAGAAGCTGCAATGCCAAGCTTCATAT  
TCTCCCGGCGAGAGATTGTATAACCTTTAGCGCGGTACTTATCAGCACGAAGCATACTAA  
TAATCGGGGAATACGTGTTGGGATTCAATACCAAACCTGCTGAGCGATGTCTTCTTGA  
AACTTAAGTGAAACTCCCACTGCTCTGTTGCAAAGCTGAATGACCGCATATTAATCGTAA  
GCTCAAACCTTATCAAATATCTTCAGTGCATCAGGGTAAACATCGAGAGAGATAGCTTACC  
GAACCGGCAGCTTTGTTATCGGTAAACATGACCCTTTTATCGGTCTTACCGATATTATCG  
ATGATGCCAATCTTACTCTTTTTAACCCTTGGGGGTATGCCGTAAAATCCTCAACAGAC  
ATGTCTTCCAGATTTTTGCCAAGGAAAGAACTGACAGGCGGGTCATCGGTTTCTTCC  
TACTTGATCACCAGGGGAATTACATAATCTTTAAAGCTTCCAGATCGTCAAGTTCCCTG  
AAATATGTGAATGACCGTTTGGAAATGCCCCAGTTATCAGGCGCCTCTGTCAGGGGCTGAT  
TGACATTTCAAGAGGCTAGGATCAGTCATGTACGCAAGGACTCCTCCAGTTTATCCCAT  
AAAGGGAATTAAGGTCTATGTGCTTACTTTCGCGGACGGAGAATAAGGATGTTAGTGTA  
CCAACCGCAAACGGATATCAAGGCGTTTAAAGGATCTCCATCAACCTGTTTGGAAATAAGG  
CGACGGAGGATCAGGTATTCCCGTGGGTCTTCTTCCCTTTGGAAACATATGCAGCCTGGTT  
TTTTCTTTAGTAATTAACCATTGGAATGTCCCTGAGAAAAAAAAGCCCCGCAATAGCG  
GGGCGAGCCAAAGGAGACGAGATTGACTATTTATTATTATTAGAGTAAGAAAAGTGGCGA  
ATGAACCTTTGCTCGTCGCGGGTGTCTGATCCTCTCCACAGCCAAGGCCTTCTTTTGTGT  
CCACTTATTTATTTGAATGCGTGATCGGGCCTCGAACCCGCAACCTTCGGCTAATGAGGC  
CTATATGATCTATGTATTCTGTTCACTACCACGCAATTGTTTGGTGGAGCCGGGTGGACT  
CGAACACAGACCATCTAGCTATCAGGGAGGAAGTCTAGCAACTTAGTTACAACCCCATG  
TAATTGGGTCTTCTGATGGAATCGGACCACCGACGCTTACAGTGTAAGACAGCGTTCT  
ACGATTGAACTAAGGAAGCATTAAAGTGGTGGCCGTCAGGGGACTCGAACCTTAAATC  
CGACTTGTAAGGACGGCATGTATACCAATTCCATCAATCGCCCAAATACGTGGTAGTCCC  
ACTTCTTCTGATCCGCCAGAGTCCCTATGAAGCATTATCATCGGCCCTGTGGATGCTA  
TCATGAACCAGGGAGTCGATGCCTTTACTTGGTAGAGAATAAGAGATTTCGCACTCTTCTG  
ATAGCCCCGGTGAACCGAGGTGTGGACTTCAGTCAGACCCATTCCGCAATTGGTGCAAG  
TGCCGGGATTCGAACCCGATACTCAGCTTCATAGTATGATGCTCAGTCCAGGTGAACTA  
TACCTGCATTAATAATATGATGTTCTTCCCTTAGATGAAGCCAAGAAGCCATGCACTC  
TTTGGCTCGCACTCAAAGTCTGAGTAAGGACAGTCGGCGATGGTCATGCTACCTGCTATT

GGGGCATTGAGCCACGACAATCGATTTGATCAAGTGACATGATTTGTAGTCTTCCAATA  
TCAGATATTTAAAATGGTCAGACCCGCAGGACTCGAGCCTGCGACCCGAAGCAACCAAGG  
CTCCCACGCTCGCAACTTCACTACCGACTGTGGGTGTAAGTATTATTTGTCCCAGAAGCT  
TACAACTGGTATCGCTGGCTAGGTAACAAGTCCTCTAAGGAAAGTTTTAATTTGCAAGGA  
GGTTGTATGGCGAAGCCGAAGAGGATGGAACCCCTATTTTCCGCATAGACCGTGCGGCAG  
CATTCACTCGTCAGCCACGGCCCTATGAATTTGTGCGACGAGTAGAGGATTTGAACCTTCC  
TTGAGTTGGCACTCACAGCTTAATAGGCCGTGCCCCAACCCTAGGCCAACTCGTCATTT  
AACTACATTATCAGCTAAAACAACCTTACGCAAGAATAATTTGCCCTAATTTAAAAATAG  
TGTGTCTGGAGGGATTCGATCAACCAAGCCCCCGATTATAAGTCGGTTCGCTTTCGGCTTG  
CGTCACCCTTGGTTACAGCCCCGTTATTGTGAGGAGAGTGGAGGAATGGAACCCCTACC  
AATTCTGGCACCACAGGCTTCGAAACTGCTCGTCCACCGGGGGACGGCACTCTCCTTAGA  
CGAAGATGTCAGAATTTGATGAATCACTCCTATCGGGGCTCCTGTCTGTTAGCAAAGA  
GATCCCTTGCCTGATTACGGTTAATCTTCCAGATGTGGCGGAGAACCAGAGAATCTAACT  
CTCAAGCCGTTTTACCATTACGACCTTTCCAAGGGGGTTTTCTCAACTGTCTATTGGAA  
TCTCCAATTTGGAGAGAGCTGTGGGTATGGCGCCAGTTCCTCAACGTCCCCGGTTGAGC  
ATCATCTCATAAATGCTTGGGCCACACGTGAGGACTGTCAAAGACAATGTTCCAATTTG  
GCAGGGCGAGGATCATTCAAACCTCCGTGGTTCGAGTTAGAAGCCCGTTGCATGAGGCCAG  
CTATGCCAACCCCTATTGGCGTGAAGGTAAGGAATCGAACCCCATACGCATGGTTTTGG  
AGGCCAGCTGGCAGCCACTGCTATTATGTTACCCGCACAAGGTTTCGCGGCCTGTGCGGG  
GATCGAACCCGCAACCCCCACCTTCAAAGGGTGCTGACTTTACATATATGTCTAACACGA  
CAAATCTAAGCGCCATGCCGGATTCGCACCGACGCCACCGACTTGGAAGTACGGGGTGCT  
GGACCGCTAACACTAATGACGCATAATTTTGGTGGGAGTACCAGGCTATACCTCTGCGAC  
CTCTCGATTATCGGTTCGAGCGCTCCACTAACTTAAGTCCCTTTGATTTGGTGGCC  
CACCTGGATTTCGAACCAGGAACCCCGAAGGGCACAGATTTACAAGCCGCTGCAATCACC  
ATACAGCCATTGAGCCAAAATCTTTATAGCGGTGGAAGCCGATCAGCAAAGAAGCTGATG  
ATCTAAAACACAATCGCTTCGATAAATAACAATTTAGCAGCGCATGCTGCTGTTCTGCC  
AAAGCACAAAATCCCATAACTGCCGCGATTAATGCGATAAACAGAAACATCAATCCCCAA  
TTGAACATTTTAGTATCCTCATATTAAGATGTTTGGGTAAACCATTTTCGTTTGAAGGAA  
CGATGTCGTGAGTGAAAGGTTTTGATGGAGCCTTCTCGGGAAACTTATTACCGTCATCAA  
CTTTTTTAGTTTCTTCTTCACTAACATTTTGTTCGTGCAACTAATCAGCGATCTTTTCTT  
CGCCTTTTCCGATGACGAAACGTGCAGTGTCTCTCTGATGTTGACGTTGGTCCAGAAAA  
TCATCATCAGGCGACGTAAAACCTGGTGTGCCTCAGGAATCATCGGGATCCCCTTTGTCT  
TCATGTCCAAAAGATTCTTCTCAAGCCGAATTGCGTTTGACCCTTATTCTAAAGGACGCC  
CTTATCCACGCCGACGCTTTGTAAGCTGTTGTTTCGCTACCATAATTAACCCACCCCAAT  
CATATTATGAGAGATGTATTTACAGTCAAGAGTTATTTAACATATTTTACTTTGAACT  
TAAAGCTTTTGAGCGCTGTGAGGGAATTGAGCCGTCGACATGCGTTTTGTAGACGAACT  
GTTACCACTTCAGCAACAGTGCTTCGTTCGAGGCAGCAGCATTTCGTACCCGCGTAGTGGAG  
TTAGCAGACTGCTGCGTACGTGCCTGACTAGGCCCGTTAATTCTGGTGGGCATGACGA  
GACACGAACTCGTGATCATTTAAGCGAGAGATTTTAAGTCTCTTGTGTAGCTCTAGTTCC  
GCCACTCTGGCAATCCTCGTTTCTGAAATAAGATACCTCAAATCTTTTCCAAGAGAAGG  
TCCACCGCTTTGTATATGCATACCATATTTCCCTGAGCAAGACCCCGAACAAAAGAGAAC  
AGATTTTTTATCAGATCTGTTCTTCTCTGTGATTTTGACAATGTAAAGGTATAACCACA  
ACAAAGAAAGTTCCAATATATTTCTTTTGTCTTATAGAGCGCTCTTTTCTGCGTTAGCCAT  
TCTTGTTAAGACTTGCAGATTAGAGATGTTGTTGTTATTACATGCCTGTCTATGTGGTC  
GACTGATTCTAAATCTGGATCGAGCTTTCTTCCAAGACGCATCTCCATAAGATACTTTGG  
GTAGCTTCTTGCTATTTGCGTACCGTCATAAAGGTAAATGATCATATGTTGCATGCCATC  
AGACCTAACATACGGGCTTAAAAGTTTTCTAAGCTTATCGAAATACATATGCCTCTACCA  
GTGTGGACCACGGACGCAAAAACATATTTTTCAGCTGCATGGTGACTCCACCGACCTCCGTA  
TACCGCGAACGACGCTCTACGGCCCTAAAGATTCTGTTACAGCAACGTGGCATCTGTGCG  
TTAAAGTCGATTTTCGTAAGGATCATTTTCCGCACAGATGATTAGTCTGGGAATCGAAAGA  
TATCAGCTAATGCACTTTAAAACACGATAAACAGCTTTTGTACGGGCTGAAGTCCTCAAC  
ATCGCCATATTTCCCATAACAAGTATCACGTGTTTTCGCGCCACACTCCGCCTGTACCATTGT  
GTAATAATCGGCTCTCGCGACAACCAATTTTTCGGAAGCGCCCTCCGTAGGTGGAGAAAG  
TTTTTAAGATTCTCAAACCCGTACATCAGATGCTGGGTTCCGGATGACGGAAGCGAACCG  
TATATGTATTCTCCTCCACTCCACGCTGGAGGGTATCTCCAGGTCTGGATGGACCTCGA  
CCTTGCCAAAGGTCGTACCCGGCATTGGGCCCTCGTACAGGAATCGACCCGGTGCTTATC  
CCGAATCTTGGGACTACACTACCAACTTGAGCTAACGGGGAATTGTTAGGTGCTGCCAGA



AGGAATCGAACCCACGTATTCGGCTTACAGGGCAGCTTCATCGCCACTTTTGCTTTTCGGA  
CCGAGAATGCTGTTTCCGATTA ACTGCCCGGAGGTGTGTATAGCCATAGCCTGTGAGCCA  
ATTACCTTTGATCCAGGATTTTCGATAATGATCGAAATTTTATCTATGTCTTTTGAAAGGA  
CCAAGTTTAAACGTTAACCTTTGAACTTTAATCTTTGAGTTTTGAACTTTAACCTATTCT  
ATCTCGCGATTCAATGCTTGTTCGGTTCGGAGATGCTGTCCGAAGAACAGACGTCAGCGT  
TTCATCCTATATGGTTAAGTTCGACGCGGTTAACGTCCGTCCCTCGCTAAAGGCAAGATT  
TTTTCAAGTTCGCTAACCAAAAAGCAGCATTTAAAGAGTCTACCTGTTGAAAACAGGAATT  
ACAAGATCTTTCTCATAATCCCGCAATTAATTTTAGACTGATCCCTCAATCTCTACTTC  
AGTCTTGGCATTGATCTCAGACAGTGCAAAGTCAACGTTGGAAGTGAAGTCTTTGATCTC  
TGCTTCCAGAGAGAGGATCGTGTCTGCTAGACCCAGAGCGCCACCGGTAGACGCGGTGCT  
GATCATGCGGGTAGGTCCCTGCTACGACCTTCAGTTGTTTCAGTATCCGGAGACTTGTACAG  
CTCAATGTACGGTGCAGCGCTGTTCAGTTTCGCTTCGAACTCCATATTCTCCTTGT  
CGGACAAGCCTGAGAATGGTTGTACTCGGCTTTCAGCTTGGCAAGCAGAAGCTGTTTGTC  
CGGAATGGTGCGTTTTCGCTGCAATCGCCTGCGCATCTGTTCATCTCCTGGTTATTAAGTGC  
AGCCTTGGGGGTTGCCGTGGACTGCACAATGGCAGCTATCAGTTCGTACGAACGTTTCAG  
GAGGTCTTGCAAGCCCTGATAGTCTGGTTTAGCAGCAATCTCAAAGGCATCAACACTGTT  
CAGAGTACCAGGGATCTGACTCCGACAGTCAATTGCTTTAGCCATGTTAACAGCGTTAAG  
CTAGTGAACACGTTTCTCGATTTACCCCTCGATCTTGGTTCAGAGTAGCCAAAGCGCGGGT  
TACAGACATGTTAGCAGACATATTATTCTCATCTCATTAAATTTTGAATTTTATAGTTAC  
TCCAAATTAATTTGCCGACTTACTTGTTCGAGACAGCGCATTAGGTTGTGTTCAGTGTGACT  
ACAACCTTGGCGACCAGGATGTGCCTGAGCAACAGCGAGACGGTTTTTCACGATCAGCT  
TTAAGGTCAGCACGAGCAGCTTCTACGTGTTTCAGTAAGCATTGCGTTACACTCCTCTCTC  
GCTTCACTATTACCAGTCAGTTCTGACATTAGA ACTTTGTGTTGAGATTCCAGGTTGGAC  
TTCGCTGGGTTGAGGTCGATTGGAGCAGTACGCTTAACTTCAGCAACAGCGGCATTGATC  
CCGTCTTCGTTATTTTCCTGTGCAACAGCCAGTTCATTACGCAGTTTTTTCAACAATAGAC  
GGCTACATTGCAACCAGACTGCGAGGTTTCAGCAGGTTTGACAGAACGCTTTCTGCGTTT  
TCCAGAACCCTGATCTTCTGTTTGTACTGTTCTTCAGCCAGCATTTCGTTAAACTTCACT  
TCAATCTGACCCAGTTCTTGTGTTTGA ACTACATCACCTGACTGATCTGCTCAGAGGCG  
TCCGCCAGGGCTTGTAGATCGGCAACTGCCTTGGAAAGGTTGGTTGCAGCAGAGGTTACC  
GCGTTGGTGGCACGTTGAGTTACGGAAATTACAGATTTAGAAGCAGCCATTAAGTTCTCA  
TTTTCGTTAACGTAGGTTTTAAATGCGACAATTACTGGTTGCGTTAGTCGAGCGAAGCTT  
CAATTAATTTCTTAGGTTCTCGGGTTGTTTTTCGGACCACGGCCAGTAATGCCAAAGAATGA  
TTATCGCTCAGAGGACAAGCATTGTTCAGAATAATCATGCGGCCGCTCATCGTACAACGTC  
CATAATAGAATCAGAAA ACTCACAAACACCGTGCGCGTTTGGAGATACGATCATCCCATC  
GGCAGGATGAACAACCTCTACTGCGACATCCACAAAAGGTTCTGCCACAGTTGGAGTAAT  
AGCAACAGCAGTCCCAACAGCTTACCATA CATGCGTAACAGTGATTTCGAAAATTTATTT  
GCTCTTTTGTAAGTTGGTGGCGCACGAAGGATTCGAACCGTAGACCTTCGGCTTTAGAG  
GGCGCTACACTAACAGCTGTGTTAATACCCCGAATCTGGCCCGTGTTTTTCAAGACGTTG  
CCCGGGATCATCACGCTTGCCACGGCCCTTTATTTTAGGACGCATCGCCGCAGCCAGCTT  
CGTCTATCCCATGCCGGATGAATTAATCTTCTTACCTTTCGGCGCTACGGCTCCAACA  
ACCTTAGCGTCTATAGCTTAAGCAGCGCGTTCACACTTTGTCTGCCAGTGCGATCACGA  
TGTGAGGCAGAAATGACCTGACCACCTCTTACGCGGGAAACTGATTCCCGGATAGATACT  
ACGTTGCCATATTCATCACGACACTTCTTACGAATAGAAACCGACTTTGTTACACCACC  
AGACGAACATCATGAGTGGCAGACTGGGTTCAGCGTTCGACTTGGACTCAA ACTGGCACGAC  
TGTTTGAATACGTCGATTGCAGAAACGTTCTTGTGTCGTTTTTCTTAGCCATGTTTTAC  
TTCTCCTTTGTTTGCTAATGTCTCGCTGACGTTAGTAATACTAAACTCTCGCACATGCTT  
TGTC AATCGTTTTTTAAATCGTTTTTAACTAATTTATGAAA ACTAAGTGAAAGGTCGTAA  
CGATCATAGGTATCAACCGAAGTTGCCTTGATAGAATCAAATCTGCTTTTCCATGATTCT  
GACATACTAGGTGTTTCAATGATACCATGAAACTCGTATAGACGTCTCATTGCATCTCCG  
GCTTGATAGTTGTGGCAGGAATTGAACCTGCCACCTCTTAAGTATAGGGGAAGAGCTCTA  
CCCAACTAAGCTCCATAACCATTCCGTCTTTGTGAGATGATTACTAATGGTCAAAGAAAC  
CGTTGTCTACACCACAAATGGGAAAAAGCGCCAGATTTTTTATTTCCAGTGCTTCTGGCAT  
AACTTGCGATCTGAAGTCGCCTGGTTGTCAAGACGCTTGTGAGATCTTGCAGCTCCACCG  
TGAACAATCAGAACATCTTGCTTCATCACATCAACGTCATATTGCAGGTGATCAACTTTC  
TGGTTGAGAGTTGCAACACAGGCTGACAGTTTTTTCATGACGCTAATTTTTGTGGCTAGTC  
CACCCAGTTAGTGCCAATGTCCCTTTTAGAACCGCGCCATGTATAGCCTATCTAAAAATT  
TGATTTCTCCTGGGTTATGTGCAGCAGAAGTATCTGCATGATCTATTTTACTGTAAAAGG

TCCCAATTTAGTTGAGGAAATGTCCGTAACAGAACCATTCTGTTTACTAACATTGGAGGT  
GGTTACCTTCTTTTCGATCCATGAACGGAAGGCCGCGGACATGACGTTTCAGTGTAGTAATA  
AAAATTACGGAATCTATCAGTGGGCCAGTCTCTGTGCTCATTTCAAAGATTGAGTCAA  
AGTCTGGTCTTTTCATCCGAAGAAATACCCTATCCATAAGCTACGAAAATATCCACGTCTT  
CAGCCTGGCGAATGCCTTCACTGTAACCAATAAATCCGTCAACTTCGTCTTTCATCTTTT  
TACTCCTTTTCGCGTTGGACGTGTAGTTGCCGCTTCAGCACGGGGCTGCTTGCGGTTTTT  
ATACTGTCCGGAAGATTCTGAAGAGAGTACTTGAATCTGAAATCACCGGAAACTGGGTATA  
AATAGGAGAAGCCACCTTCTTTTCCGAACGACGCAACGTTTTTGCCATGCTTAAATGCAA  
AGCCAGTCGTAGAAAAAGAGATATCACTAGCTTTTGCATTTCGCTTCGTCAAGGGTTGGT  
AGAGTGATACGCGCTAAATGTACTCTCCATTATCTGCATTAAATACAAGCTTTAATGTAA  
ACATAATGACCTACAGTTAAGTTCTTAAGAATTTTCGAGTGGATTTCGTTAGTTTCGATCTT  
AGTAGTTGTCACTATATTTGTGATCAAACAATCCCTGACGCCTCGACACCATGACGGTA  
TTCTCCTAGTGCTAAGGTCTAGGGGTCAAGCTCTTGGGCATCTGCCTTCGGATTATCAAT  
CTCTAGGAAATGTACCTGCACACCATCAAGGTTGTCCGGCTACCAAGCCTTCTTCTGGTC  
TGTGGGTGCGAAGGTACGGTCGCAATCATGACGACTAACTGGATTTCACACTAAATATCT  
CCTTTTCTCTGTCTCTCCAAAATAATGCATGGTTAAGGTACCTAAATATTATATTTTCGTT  
TATCAGTTTCCCTTTTTTCTTGTCAACAATAATGCTCTCGTTTTACAACCCACGTTATGT  
TAACATGTGCAATGTTTGAAGATTCAGTGAGATTCCTATTATACATTTTCGCGTTTTGCTT  
TCTTCAGGTTTACCCCGCATTGTTGGTCGTTATCCTGTCATCATGGTCAGCAAATTCAG  
GCATTTCTCCAGTCATATACAGATGTGCAAGTCTATGAGCCAAGTGTGCTTCCATCAA  
TACGTAGTACACGATAACCGTGCTTTCCAAAGCAAGAACAACCTTGTCCACCAACGCGGG  
TAGTGTCTTCGTTTCATGAAAAACCCTCTTTTAAACATGTGAAAATGCCTGTCTGCGAAT  
CGTAATACAAACGCGTTTTTCGTGGAACCTTTCGCTTAAACTAAGGGTTGGATTCTCTTCG  
AGATCAATTTTTCCGGTATTAGTGGATAACCACACCCTTTTAACTTGCTTGCGTTCATG  
TGATGACCGCAGCCAAAGGAAATGATGCAAACGCCTGGGCCGTGGGCGTCAAGATAAGCT  
TCAAATTATTGTTTACAGGCTTTGCACTCCATCATGACTGGCCCTAACCTATTTGGCTCC  
TTAATATTAGACGGGTTTTTTGGTGTGTTATTCCACATAAGGCAATCTCGTACTGGTACC  
TCATGCCAGTTGCGCGGTTCTTGCAGTACCTACCTCTCAGAAAAGCCCCGAAGGGGGTG  
ATACTCTAAAGCTGATAATATGCCCGATCACCATCTGTGTCAGGTCTTCGTCAATCTCC  
TACTGAGCCTTTCGGGAGACACAACGGAGTTCGTTATCACGAGACTGTACCTCAAGCTCC  
TCCAGACCGTCAACCAGTTTTAAATGATTGTGCGCCACCCGAATAACCTACAAGACCCT  
TTTGCTGATATCTTACCGAGGTCAGTTTTTCGGCTTTTAGTCAACCATGATCTGCTTGCCG  
TCGATATCTGCAACCGTTGAGTTCACAGCCACACCAGTGAATCACGAGGAGTGTACTGA  
GTTGTGTAAGAACCAACACGGTACACGATATTACTCGCTGCAAAGCCACGATCTTTCAGT  
CGTTTAAAGATAGCTTTTGCACGAGCAACAGCGGTAGAGTCACCGTACCCAGGCCGACA  
TGACAATCAAGAACCAAGTACCCTTTGTAGTTAGCTTCGCCACCAAGGATTTCCAACAAA  
CATTCTATGGCACCTTATACCTCATGATAACCAAGACCTCACTCTTGGAAATAAAAGAA  
GCATTATCTTCATCTCTACAAGAATGCGATAAAGTTTACCATCAAACCTTCACACGTTCA  
GAGTTTGCCTCAGCCTGTAATGCTGTGTGAGTATCTGACAAGGCATCGATCTCAACCAAG  
CAGCGATACCCGGGAATAACTTGCTCAAGGATACCTGAGTCAGGTTCGAATCACAACACGA  
CCTTCACGAGAAAGAATTTTCATGTTTCCAGATTTGCGCTGATTTTCGTGATAGTCGCCAG  
AATCCATATCTATCTGCAAAGTAGGAAACTAAACCTCTGGGAAAAGTGTCCCTGATGTAG  
CGCTTCACGAACTCGACTTGGGCAATAGAACATTTATAATCAAGGCTAAGGCAGTCATGA  
TTTACTGTGATCCCTTCAATCTCCTTAATGATGACACAAGTATTGGTTGTTGGAACACTG  
TGTTACATGCAGGGATAGACCCAGAAGCTATCCTACGTTTGATGTTGTAATTACGAATT  
GCATACACAAGCGCCGAATGGGATCAGCAGCCATAGAAGTATCAGTTGACCAATTTCA  
CTCTGTGCTGCGTTATGTGACCCACCTGCACCACGATATGCAAAAACAGTGGTTCTGGTAA  
GGAATATGCAGATTATAACCATTTGTTTTAGCAGCCGATTACTCAGACAGTTTACGATAT  
TGCCAGAATGTAGTAGCAGTGGTATTGTGTTCCAGGTTTCTGCTGACATCACTCTTTCC  
AGGAAGTTCAGCAACCTGTTAAAAGCCGGATGGGTATTCTGGATCGTCAACATTGAAACC  
TGCACCGGAGTCAGAGTGCCTTCTGGGAGAGGACGGAATTCCAGAGGAACATAACCAAGA  
TCGTGTAGCTTCTCATAACCCACATTCCCACCACACCCGCTCCAATACTCAGTGAGAAA  
ATTTCTTTATAATCTGAAATTGCTTCTCGTTTGAGCGTTTGAAAAAGTTTTTCATTAAC  
ATATCGATCAGGAACCATGAGGGATCCGTGAAATCTAGCAAACATCACACGGAGCTCA  
TTGTCTGCGCAGTGGATTAAGTGCTTTGCGTTACGGGCGGTCATACTCTCCTGAACAAAT  
TCGGAACGTTTGCCATACATCGACATATGACGCGGTTTGTAATAATCAGCGAAAGTAATC  
GGGCTTTCTTTATGCCGCGTTTTTGTGCTGCTGCACTTTGCAATTTTTGGGCGCATTCTAGC

ACCCGTTTTATACTTTGCCAAGAAATTTAGCCGTTTTCTGTCTAATCGTGATATGCATA  
AATTCCATCTACACCACCTCAAGAATGACCTGCTTGCCGAATGAGAAAATACCGTGTGT  
TACAGAAAGGGTAACACGTTTTCAACCATTCTCCTTCAACGCTGGTTCAAGGGCGATGAA  
TGTGCGCCCACTATCAGAAATGTCATGAACGATGACACATTCTCGACCCGTATCGTCCCC  
GAAGACAGCAGTAAGTGTGATCTCGTTAGTTTTTATATCACGGACCTTTCCTGCTTCAAC  
AAGAGGAAGGCGGCGATGGTTCGGAACCTTCGGCGCTTGTGAGCGTGTCCGGCATCTGG  
TGAAATAATCGCAACATCCCTAACAGCCAGTTTAAACTATAGGTTGCTCGAAGTTCAAG  
TTCGTGACGCATACCAACTTTGGGCAGAAGTGGAGCAGAAACATCACTGTGCGGGTCATC  
TACGATAAAATTATCAAACCCAAGTGAAGTAAACGATGGTTGCAAAAACCTTGATGGAGTA  
TGCCTCGCCAGGTTGCATCCACGACCTTATCGCGCCTAGGGGACGTACGGCAGGTGAAG  
GAAATCCTGTCCATGAATATCAATGTTATCAAGTCGAGAGCAAGCATCTGCCCGCAGAGA  
AAGAGCCATAACATCCGGAGAAGTCTTGAATTTGGCTGTGATGTCAACGCAACCAAAGTA  
ACCTTCTGGTGCATAACTTAAATCGATCTTAACTGTTTTTACCACCTTGAATGTAAG  
GTGATCAACATAGACTATTAGGTTGTTCAAACGAAGTTCTAAACTCATTTTTATTTCTCT  
CAATTATTTGAATAGCCTTTAAGATCTCTTGATTGTGGATTGTCTCTGGGAAGCCGTCAG  
GTAACCACTCGTTTTCCACAAACAAATTGTCGGATGGCACTCAACCCAATCTGCTCTACGT  
CGGTAGCTTCAGCATAAATTTGAACCGCTTGGAGTGCATCAGTTCGTGCTGAAACAAAC  
TTTTCTTTGAATGTTGGCGCAATCTTTCGAAAACATTAATGCTATAACAACCTTTTCATA  
ATGTTAAGCCGGGGCCGGCAATCTCTTGCAGATAATCGCCGTACGTTCTGTCAAATTATC  
GATTTGTAGCATCACAAACGAATTACTGTACTGAATACACTCCGCTCGAATGTCAGGGC  
TGGCGGTTTTATTCTCGATCCAAACCTTTTCATACAGAGAAGAGAGTGACCTACCAGCAG  
TAGCACTACTCAACCCTGTCAAGTTTATGAAATCTTGGGAAGCATAAACCCCGACACCCT  
TCAACCCCATAAATCAGCAAAAGAACCTTTTCAGAAGCACTTCTCTCATTTCGATTTTATAA  
CTTCACGCATAGCATCCAATCTGTAGTAAGAATTATGTACTGCCTGTGTTTTGCATGCC  
TTTAGATTCTTGAAAAACAGAACGTATGCTGCGATTGTATCCAAGATCCTCTATCTTTGT  
CAAGAACTGTGATACTTTCGGTTGAGATTTCTCACTCAACCCAACAAGATGTCACAAAGA  
TTTTTTAGATGGAAAGAATACCTCATCCGCACCATCAGGGTTTAAACTCTTGAATAAATC  
ATACCTCCACCACAATTTTATCCTCCTTTGCACATGTCGTGGTGAGAGATGGTCATCTAA  
AAGCGACTGTGATGGGATAGTGACGTAAGGGCCATCCCTATGTAAACAGTGTTATCACC  
AATCTTTATCTCCACCACCATCTCCAACCTATTCCACAGCATATATAATTAGATTGTACA  
CCAACGTAACGGAGATGTCAACCTAATTATTCCCAACCGGGAATGTCTAATTATTCCTAA  
ATAGGAACACAATGCTAGCCTATCAATTAACCTAACTTATGACCTTTCAAATCAAACA  
ATAAACCATAGATCTCTAAGAAATATCTTTAAGTGGGATCTATATATTCTACGGTTATA  
GAGCCAGTGGCTCAGTTGGGTCAGTTGCGTCAGTATGGAAGAACAATAATCTGTTGTCAA  
GATTTGACCTCTCGTTTTGTACATGTACCATGCCCTATGGTTTTAGAAGAGAGTGTTAA  
TGTTGTCAAGTAAACCAGCTAAAGCTTTTGGAGATATGGTGTGTGGTAAGAGGCGTCGTG  
AGCCGATGTCTACAGATGAAGAACTACACGATTGATGATGGTACGTTACGTCTTTCATG  
AATGCAACAAGCATCAGAAAGTTTGTGTGGAGTTAACAGCTCGCAAATCCGCGCAGGCGG  
TGTTTGGAAATTAACGACTCTGTTTACGGTCGTCTACGCAGACCAAATGCGGTGGTGA  
CTCATATGAAAGACTTGACAGTGGAGCACAGCCGAGGTAATAATTGTGTTGTGGATCCGA  
GTGAGATTCTCATAACGCACTGAGGGCCTCTCTGAGACGTTTTGTTGGTGTGGTGATACG  
CGTGGGTTCCCTCACACCATTTTTATTCAATACAGAGCCACTCAGTCGCTCTGAGGGCTAT  
TGTGGAGGATAAATTTGAAGTTTAGTACACATCTGGTGGACAATCTGTATGCAGAGAGG  
CTATCATGGCTCTCAAGAACATCATGGCTGTGCTGGAAAGCGCTTCAATACACAACCTGG  
ATCTCGACAGCCGTCGGGGTATTGGTAAGTCGTGGTTGGATTAATGTGTGTACATTCATG  
GGGATCGGAATGTCGTTCAACTTGGTGTGCTTGAAGCTTAATACTTGGCAGCACAACAGTC  
TGACCCGTGGAAACCAATACGTCCTGTACGCATACCCTACGTAGGACATGGATAAATGAA  
AAAAGACATCAGGAAGCCTGTAAGAGAAAAATGCGATACAACGGCTTTTGTTTTGAATAC  
AAAGGTTGAGATCATCAAATAAGCCATTCAACGCTTGCACGATCATGAGGCAGATCCTAA  
CGCAGAACCACTTACAAACGATGAACTCTAGTGGCTGTGTGGGTGTGAACTAAATATGCC  
TGAACCTGGAAAGGCGTGGAATCACCCAGTTTATGACGTTTCGGCCAAGAGAACGCCTCTTT  
AAGGCTGTATAAGAAAAGAACGACAAGGAAGAACAAGAAATGACTAATATCGATCATGTA  
ACATTAGATACACTCTGGTGGCTTACCAGTATTATTGGTTTCCCATCCTGTGATAAGTGC  
CGTAATGGCCTGGACGGACCCAAAGAAGATGCAGCGCGTGTGTCAAGATTAATGACGCAC  
ATGGTTAAAACGTGCAACAACCACGTGAAACCTGGTGTGATATTGTAGCACATTCACGTGAT  
TTTGTGATTACCTATGTTAAGCGTGTCTGCCGAAGGTGCGTGACATTCTTATCCAAATC  
TACGGAAAGATCATTTTCGGTTGTTAGCAACCACGACAACCATAACGACAAAGCGGATATTT

CGCGAGTTTGGTCACGAAGTTGTTGACCGTAAAAAAATTGATGTCAGCGCAGACTAAGAA  
ACAGTTCAGGTGTGTATTTTCGCACTCCCCGTGTGCATCTTGAATAAAGGCACACCACGGA  
TCAGTCATGCTCCACGGACAGAGCCAGGTCTCATATAAAGCACTTGGTGGACGAATCCTT  
TTTGGGGGTTCCGATGTCCAGGGTTCGTCCTTACTATGCTTGAGGCCGTTTCTTAGTGC  
CTTAAGAAACCTAATTACGATATTCATCACTGAGGAGATGGTAGGCACACCCAAGAACGC  
AATTTCTTTCCTAAGAAAACATCAAATCTTTTTACGCCCAATACATATTGCTCACAGC  
TACAACCAAGCGGTACATCTTTGCCGACACTGGGTGAGGAGCGGAGCTTGAGTGCAGCAT  
TCCCCTTGTACTTATGTTTACACTGGGGGTGTGGAAGTCCGTATGACTGTGCGTATCATG  
CAGTATCCTCGCATTTAGCGACCAGAACATGAAATTCTTGACATGGCTGTTGAACTGGGG  
ACAACTTGACTCAGAAATTATGCCAGGTGAATTTAGTGTGAGACATCGTATAATACA  
GCGTATTATCAGGTAGATGGTTATGAAAAAAGATCTGAGCTCCCCTCATGGTATCATTGA  
CTCTGATATAATTACACAGAGGGTGTGATGGAAAAAGTGCTTTACATCCTGTATATCT  
TAAGTGGCGAAATTTGCTGCGAAGTTGTCATCCAAAGCACAATCAACACCAATATGATGA  
AAGAGTATGAGTATGTGATAAATGAAATTACCTTTACAATTTACATTACGTGGGTTGGTGA  
TACGGATGTTGCTGGCCGCCACTTGGTTAAGGATATCCTCGGTGAGGGAAAAATATACGC  
ACCAGAGATTTGTGCATTTCGTAACACGACAATTCAATGACTTCTTTTAATCTGTTAAGAA  
ATATGGGAGCTATATGACAGGGGTTTCCATAGAAACCCGCCTTGGCGACACATATTACTG  
CCACTGCAAAGGAAGGTATATTCGTAGTTTCAGAACAGAGACCGATGCTCTTAAAGCTTG  
GCAAATTGAAAAAAGAAATCATTGAGAATCGCTTGAATCACAGAACAGGATGTTATACT  
AAGAGAAAAGCTGCACGATAGTATTGAATAAATTGAATATGACTTCCTAATGGGAGAAGA  
AACATGCTCATTAAACGAAGACGAACCTGGTTCGCTAAAAGCTGGTCAACAAGAAGACTTTC  
ACTGATGGCGCGCTCGCTGGACTATCAGATCTGAAGTACATAAAAACCTGTCTTCTGTGAT  
AATCAGTGGAACACAGATCCACGTCTCCTGGAATGCCGTGGCATGGTGGTTGATTACGAT  
GACAATGTGGTTATGTGGCCTTTCACCAAAATTTTCATTTACTTCTAAAAGGGGACAGAG  
CTTCCGGCAGACAAGGTGGATGAGGCATTTTCGTAAGTGAATGTACTTATGGCATGCGCT  
GGTGTGTATCAGGGACACATTGTGGTGTCAACTACAGGAACTCTGGGATCAGACTTTGCG  
GTTCTGGCAAAGAATCACATCATACTGGATGCAATGACATTGAGCACTTCATTAAGTGG  
ACACTAAGCTAAGAGGCGACGTACATCTTCGAAATCTGTGATCCAACCTGATCCGCGTATT  
GTTGATGAAGAGCCTGGGGCGTACCTGATTGCTGGTTCGAATCCAGAACCGTGACGGCACA  
AGTTTTATGCTGCCTGAAGGTGGTCTTGTTCGGAATCGCGAATGATAGTAAATTCAATCGT  
CATTAAAGTTCGCCAGATGGTCAAATTTTCCGATGCTGTTGAAATGTCAAAGCTTTGCAAC  
CACGAAGGTTATCTTGTGCGTGATCCAAACTAGCCGTTACGCTTCTGTGGAAAATCAA  
TCCCCTCAGTATCTGTGCAAGAAGTTCTGGATGCGTGGAGGTGATAACAAGTGGGATATG  
ATCGGGGATCATCCATAACAACGCAAAGCAGCGTATTGATGAAGAGTATTACGAACTGCTT  
GACCATATTCGTGAGTACTACACCAAAGATGCTTGGTCAGCTATGGAATCACAGGAGCGT  
CGTATGTCAGTTGAAGAGTGTGTTTGGCATAGAAGATCTGTTTGAGCGTGGGACTCGGTGT  
TCTGTTGGTGAGGCTCGATGACTTAAGGGATCCCTTTAATAACGGCCGTCATATGCCTT  
GTGTATAAAAAACTCGCAGGATTTTATTAGTTTCTCGACAATCGGTTCGAAACCATATCG  
ACGTGTCACGGATCGGCAGTTCGATACTGATCTTAGAGAAGATTCTGATCTGGATGGGTA  
TTGGTGTGTTGCTGGCGCTTGAGGAGGAGATTGTCTTCGGAATGATGCTCTTTGGCCGGGT  
CCAGCTGTTTCGTTACACATCAAACCCTTCAGCTAGGCCTAAATTTATGCTTGCAAAGA  
TAATTTAGCCTGGTCTGGTGTAAACCATTCTGAGAAAAAATTACTGACGATAACGTAGGGA  
AAAGATAATAATCATCCTTTCGTGGGGTTGCTGGTGCGGGTAAATCAACCGTGGGCGAACT  
CCTGAAGAATGACAGCAATGTTCCGCATTACGGAGGGGATATGTTCCACTATGTTGATGG  
ATAGTAACGGTGAAGCAAAAAAACCAGCACAAGGCGCACTAGTGATGGGAGAAAAACGT  
ACGCCTGGCAGTGGATAACGGTTATGATCGCGTGATCGTCTGAAGTACCTCAACCAGCGA  
GAAGGAGTTTAATCGGTACCTTGAGTTGGCTAAAGGTTAATGATAACAAGTAGTTAGCTT  
GGTGGTTGAAGACCGTCATGGTACGGGTCAATTCACAGGGTTCCACAGGAAACACGAGA  
TGATCAAGAGCGTTCGCTGCGTAACTCGCTGAAATTACAATAGGAGCAATAAGTGAGACG  
TATGATGGTTATTTCTGGTGTGTTTCTCTATTGAGAGTGGTGTTCGAACTTTCCGTAC  
TGATGAGTCAATAGGTAAGGCGTTGTGGGATGAATACGATGTGGAAGAGGTTTGCAATAA  
CCTCGCATTCCGTGGAATCTTCGGCTATAAAACCCACATATTTTACAGTAAGCGTTGTGC  
TGAACCTGCCTACTGTTACCCGAGCCTGGGTACCTTCGCGTTGCAGACTGGTACCAGCG  
GTATCCAGGGCAGGTTGTTAACTTGACCACGAACGTGGATGATCTTTTGGAACGTGCTGG  
AGTGCCGAAATAGCACACGGTCTACATTTGTGGATACCTGAAGGAAATCATTGTGACGA  
GAACCCGAGACGTAAGCCGAGATTATTGATGTAGGCTATAACTTGGTTGATCCTGATGA  
GTATAAATGGTGTAAACGCGAAGTTGTGTTCTCTGGTGATTTTGAACCAGAAAATATCAT

GATCCATGACGTCCTAGACACCCTGATGTATGAAACTATGTTGATGGTTGTCCGATGCC  
AAATACAGTCATTAACCTCAACTGTGCGTTGTTTCCTTCTGTTTCGTAAGGACCAAAGGT  
TCTTGTGGTAAACCCACGTATCAACTATCATGAGCATGAACAGTATGATGCTCATGGTGC  
TATGCTATTCCATTGTGGTGTGAAGAGACTTTCAGCAACAACCATTTTATCGATACTGT  
GCGAGATCATATTGAATGTAAGACAGCATTACAAGGTAAGGACAAATAATGTCCATAGCT  
TTAGATACCCGAAGACGCTCCGCAATTAACGAGCACGCAACATATGAGGATTGGAATGTT  
AGAACAGAGGGGGATGAGGTAATTGTTGATTTTCGTAAGAAAATGGAAAGGTACAGCAT  
AAAGGTAAAAAATGTAAGAAGAAAATGTTGGTTCGTTCTTATCAAACAACCTGCTACATTA  
TAGGCTGTGCCTGAAGCGCGATCAAAAATGGGAAAAGCAGATACCCCTTCTTTATCGTGAA  
ACAAAAGAGGGCGTTACGGACTGTGGTGAACGCTCTCCCCATGCTCGATCACGATGCAAAT  
AACCGTTCATGGGCATTAGTTTAGCCTGCTTATGTGCAGCTTAATCTTGATGGGGTACGC  
GGCCTTGTAACCTTTGACACAGGTGGTATCCAGTATTTAATAGTCGCAGAAACAGGACG  
TACCCTGTTCAAGGTGCATCGTTGAAGCTGAAAAAAGACCTTGCAGAGCATACTGGGTTT  
GACAAATTGGAAGGTGAACTTTATATTCATGGTCTGACCTTACAGAAGAATGTTGCTCTG  
TCTAAGAAGTGCCGTACACCTGAGCAAATCGAGGTTCTGATTGAAAAGGATTACCAATCA  
GATCTAAAACGCTATCAGAAAGCTAGTGACTACTGTGAGCAAGTATGCAAAGATTTTGAT  
GGTGATGAATACGATGTAAGTATTGAACCGGTGAAAGCTGCTGGCCGATATGGCGTTTCC  
TCAAGATTTGACCTTGAATATCACATTTGCGATACTCCTGTTACCCAAACAGCCCCTGG  
CATTACAGAGAGCCATGATAAAAACCGACTATCTGGTTCGGGGTCGCGTGATGTATTCACGG  
GATTATGAGGTCAATGCACCAATCAAAAATGTTGTTTCGGGGTGATTTTGTCTGACTGAA  
GATGCGGTAACGCGGTTTATTGGGCGATTCATGCAAGAGGATTTTGAAGGTGTTATTATC  
CCTAACTTCAAAGGAGTGCATGAATTCGGTCAGCGATCTTCCGATCCAAAGACCTGGACA  
CTGTTCCAGGATGGTGAAGCGCAGGTGTTGGACTCCGTGGAGGACAAAACAGTGAGGGC  
CTTCTTCTCTGCGAAGGAAAAGACATAACCAGATTTAACTGTAAGATGAAGGGGACGCGA  
GAAGAACGTTCTCAAGCGAGAATGTTACTTCTGGTTCGGTTAGTTCAACAAGTTCACATGC  
CAGGCAAGGACTGACGACGGTGTTCCTCAGTTCCCTGTAGGGCAGAGTATACGCGAAGTT  
AATCCCTTGATATGGGACCCTGGGTACTGCTGGGATTTTATAAGAGGAAACCTTAAGAGG  
TGGAAGCACATGTGTTCAATGGTTCTTGACAGGAGTTGGTCAATTGACAAAGTGGATGG  
ATACTGGTGTCTGGCAAGACTCAGAGATTCACAAATGAGACATCCGTAACATGGATGTGA  
ATGGGACCCAAGCTTTTCTGTTGCTTATATCGTTAAGGTTGGCGACCCATTCCCTACAA  
TCTGAACACAGTAGTTTAGCGACCTGTCTGAGCCTGTTACCGATGATGATCGTCCTCCTG  
GTGATTACAAGGCTAAGAACGTGGTGTGGGTGATAAGGTTGAGATGTGGGGCAAAGAAT  
ATCTCGTCAAAGGAGTCAAGGTAAGTGGTAATGACACCATTCTTGAAATCGACGATGGGT  
CTAATGTCCAGATCCGTGGTGAACCTGCTGTAAAAGTCACTGAGGTACGTGGATAATGAT  
CTGGTATGGACTGGCGTTGCTTGGTGAACAGTACTCGCTGGTGGCGGGATATATCTCCC  
CCACCGATTCTTAAAGATAAGCTCGATGACTTTATCAACTGGACTCAGGGGAAGAATAA  
GCGTTTACTGATTGTCTGGGCGGTTGTATTGAGCCTTGCAGACGCGGGCCCCTATCGAAC  
GTTGGGGAACGCATTGTCATGCCAGTTTGAGGGCATGGCATAAAGATTAATACCTCCTA  
TTCGTGGTTTAAAGAATGGGAGTTATGGCGATAAGTGTCTTTTCGTTGCAAAGAACGGAGT  
GCCGCTGACATTAAGGAGTATTCGCGATCGGCCTGATGGTGAGCATCCTTCAGATGCTGT  
TAATTAAGGAGAATATATGATCTTCGGTGTAACTTATGAGACCCTACTGCCAATGACCAA  
CCCGAAATATATGGTTGAGGATGGTAGTCATGTAGGCCAATGGAACACCATAACCGCGTAT  
TGTTTCGTCGGGACAAGGCGACTACGGTTGATCTGCAATTCTCTTTTGTGTTGAAGTGGT  
CAAAGAGCTTATGAAGGCTCTCAGGGCAGGTGAGCGAGTTGAGGCTGTTGATGGGGCCGG  
TGATCTGTTTCGAGGTCTCATCCAATGCTTTGTGGCGGCTTGAATCTTCTGGTGTTCGCTG  
GGAGAACTGTCTGAAGCCAGCACGGGGTGTCTCAGTCCAACCTTCGGTGAGATGGTACAGCT  
TATTTTTGACACCCCCTTGTCTGTGGAATCAGTTGCTGCAATCTTGCAGCAGTGGGTGGC  
ATCATGTTTCCACTTAGATATCAACTTTGTTTACACCATGCGTCAGGAGTTATCCTCCAG  
GGACTCTCAGTATTCGATGATGACACAACCTAAGAGAGGCTCACCCCTTCTGACCTTATA  
TAGTGACGATGAGTTGCTTACTGCCCAATGCAAAGGTATTGAGAAACGATCCAACAGTCCG  
CTACACTTCTGTGAACGCTGGACGTAGTGGTGAAGAGATCGTGTTCCCTCGATGGACAAGG  
TAAGATCATGAAGCCAAGAACTTACGTAGAACCAGAAAATGATTGCTTGACAATAAAGAAG  
GGGTCGGTCTCATGGACCCATCAAGACAGAGAATAGTATAGAATTGGAAAAAGATTTTG  
ACGAAATTTGCAATGATCTGTAAGAATTGTCAAACTTCTTAATGATGAAATAGTTATCG  
GGAACAGGCCGACATTCAGGCCGAAGCTATATATGTTCCGCTTCACAATGACGCATCGCT  
GGGGCGGTGACAACAGGTACGCTTCTTAATGCACTCTCGACAATCTGAAGACGTATGTAG  
CTCAAATCGAGAAAGCTGGCGGTAAGATTATCGGCCTCGAATAAAAGTGTTTGACTAACA

GATTTAAATAGCTATACTGAATTGAATAGACAAACAGAGGTGAAACAAAACCTATACCACG  
TATGCCTAAAAGCAAAGTAGCAGTGAAAACCTACGCAGCCTTCTGACGCTGTAGATCGTGA  
GCCCCTGAAAAAAATTGTTTCGGGTCGGTCTTGCTGCGAAGATCGCCAAAAAGATCCGGC  
GTCAGAGCTCAAAGACATCGTTGCATTTGAGAAAAGAAAGCCACAGCTAGGACCCGAAGGT  
CATCAAGACCTTGATCAATGCAGTATTTGACCACCAGTAGCAGACAGGTCAAAGCGTAG  
AAATCTGGAAGAGCAAGTTGAGCAGATGTCAGAAGCTGATCCTCTGTTGGTTCGCGGGAG  
CAACTAATGAAATATTACCTGAATGGTGTGGACTTTTGGTGTCTTGTGCATCATCTTA  
GGAGTCGCAGTACCGAGTCTGGTCTCAGCAAAGGATACACTTTTAGTCATGGGCAGTTTC  
GCCCTTGATTTCTCCGCCCCAGTTGTTGTATGGAAGTGGCTCCGAAAGGTGTATAATAAC  
AGTGAAGGGGTTAATACTGCTAAATCTTAAAGCGTGTACGTGGGAGAAGTTCAGGGCTCT  
CGCCCGTTACACGAATAAGTCTGCTGCTTCTTACGTAGCAACGATTGTTGATGAGTACGT  
TGACGAAAAAGTAAAAACTGAATACAAAAACGAAGAGGAGAACCAAATAATGCTCAAAG  
ACCTGAAACTTGTACTGTTTGTAGCCTGATCGCTCTAGGGGGCAAATGGCCTGACTGGTT  
GCGAACGTGCCAACGTGCCTGCGGGTGGTGTGGCATAAATGTTGACCCGTATCGTGACT  
AAAAGGGTGTCCAAAAACAAGAAGTTGGTGTGGTAAGTATAGGTTGACCTGGAACGAAG  
ATATTTATCAGTACCCGACATTCAACCAGTTGAAAAACTCCGAGCAGCCGTTTACCTTCG  
AGACCATGGATTTCGTTGACGGTATCGACTAAAAACGGTGTAGAATACTTGGTTGATCGCT  
TCAAGGTCACGATGATTTTCCAGACGCACTGCAAAGGTGTTAAGGAAATCACAGATGTCA  
ACATTTGACAGAATATCTAGAATGCCTTGATGAAAGAGGCTGGCTCAATGGACATTGCTG  
CGCTGGCTGGTGATATTAAGAGTCAGTTGCTGGAACGTGTTACCAAGCAGTTTAGGTCCA  
AGCTTGATCCGATTGGGATTGTGATTTCACAACTGCGAGATAACGTTGACCCGATTGTC  
CACCGCAGGTAACAGCGTTAATCAACGCCAAGATCGAAGGAACTCAGACAGGTCTCCTGC  
GTGTGAACGAAATCCAGCATAACCAAGGCTGAAGCTCAGGAACAGATCGCGGCCGCCCGC  
TCGAAGCTGAATCTTAGCATCTGCAAGCTCATGGCGAGGCCAATGCTATAGTCGCACAGG  
AAAAAGGAGACGCGGAGTCGCTTCGGATGCCAGGTGATGCTCTGCGTAAAAACCCGGAGA  
TCGTGCAACTGGAAGCAATTCAGTGAATGGCGTTACCCTGGTATGTATGACCAGTG  
GAGCACAAGACTGTTTCGTTTCTCTGCCAGCAGGTAAGTGACAGGTGACAAAAGGCCCGG  
TGATTTTATCATCGGGTCTAAACATATCAAAGAAGATCCCAAATGATCCGTGTAAAAG  
TCTTCATAGCAGTATTACCGCTCTCTTACCCGTCATTCGCCACAATTAACAACCTCACCT  
TGGTGGACGAATACACCGATGCAAGCCCCCTAGTCTGCATTTACAGTGGCGGTAATCGCA  
CCGAGTCCGTTGTTAAGGATGGCGCTGGTTCCTGTCCTTCCCAATAGTCATTCCACTTAG  
TTGACTTTATGAACGTGTCCTTTGGTCTGCTTTTGTGTTAAGCTTTTAGGATGTTGTTGG  
GGTGATACTGGCACCCCTCCTGTGCGCATTTTTACATGGACGGCCACGGGGTTGGTAA  
CCCCGGATGAGTTTTGATGGTTGTATTCTTAAAGGGTCTTGGTAGTACCGGGTTTATGA  
CAACGAGGGGCAGACATGTGAGTAAATGATGAGCTTGTGCTTTTTTACCCGATACGAT  
ATCTTTAGTAATCATTATCGCTGTGCCATCCTTTCTGGATTCCAAAGCAGCAAGAGGTT  
GGTGCCACGTTCTGGACGGTAGAACACTCCATGATGAATGAAAAGGCTATGCTGTTAGGC  
GATGAAAATATCGCGCTGGCTATTGCTAATGTATATCACCCCGAGAAGCTAAGCAACTT  
GGTCGGCGGGCGAAGTACTTCGTCGGCAGCAAGTGGGAAGCGTTTCGTGAAAATATCGTT  
GGGAATGGTCTTTATGCCAAGATATTGGCTAATCCAACCATTAAGGAAACGGTTATCAAG  
CTTCGTAATGAAGGAAGGGTTTTCTGTTGTGGCATCTACCTAAGATCCAATCTGGGGAATC  
AACATGGCTGAGAACGAGCCAGGATAAGAGTACCCAACCAACTTGAAAGGTCTTAACCTA  
CTCGGACATTGCTGGCACGAACCGATGGACCGAGTAATTCGCACTATGGAGGGGCCTTTC  
AATTAGAGATTGAAACGGTTCCCAATACAGCTTATTTTACTATCTTACGCTCTCACTTCT  
CTAAGTCCAATTGGGATGTCGTAAGGAAGAAATGTTATCCAAAAGCTAATTATTAATGTG  
ACATTTGAGGGGGAACAGGAACCCAACACCCCGTAGAATGTCACGAAATCTGGGACTTTG  
GCAATGGCAAGATCAGCCTAAAAGGTCTGATCGCACTTCGCCATCTTACCGCGAAGTCA  
AGCATATTGGTTTGGCGGGTGTAGTGGTAGGGGGGAAATACCTCTTCGTCACTTCATGA  
AGGTCGATGGTTTCACCAGATAAATTGCAAACAGTACGTGCAAGAGGCCATCGTTTTAT  
ATCACGAACGTATTAACGGGAAAAATGAGAATTGCATGTCGGGTATTTGGACGAGTATT  
TGAGTAACGGTTGTGAGGGCTAGTGGGATATCTGTATGATAAAGATTGGACAAAAGAGT  
CACGAATGACTGTGTGCTCACTTTAGACCATGACCAGACTTCCTTTGTGTCTGCCGCTGG  
CGCTGGCGAGCGTGCTATGAAGGCAACACACATCGCTTCGGGTCCGGTCAGAGATCATTA  
AAAAGACCAGAGTTCTAAGGGCCACCAAGATGGTGGTCCGGCGGATGGTTGAAGGATCA  
GAACGGCGATATGGAAGTTAAGGCTCAAGATGAAGGCCGAGAGTTCACCCCTTGGGGAAAG  
CGATTACTTCGTAATAAAAGATAGTCAAACCCCTGAACCAGTGGAGCACTGCCTGTTTAT  
CCTGAAGACAGAGAATAATGCTATCTTTGAACATTTGGGAATCGACAGCAGAAATTGCCT

TGGTGTGCTCGGCGGGGACATCAACTTCCGTCTGATGTTACTAGCACCGGAACGTTACAA  
AGGAAGCGGTGAAGACACCCTTCGTCCTGTGCTGTTTACGGAATTCCGCGAGTATGACAA  
GAAGAAGTATAATGCCAAGGTCATTGATAGTGAAGAGGCAGATGTTTACCTGTCTGTTCT  
GATGTATATCGGAAGTGAACACTTCGAGGAGACTGGTAAGCTAAACTACATAGTTGCGTC  
GTTTCGACAAGGACCAGAAAGGAACACCGGGTTTACCTCTTGATAAGATGCGTCATTGCAA  
GGTGAAAACCGGGAAACACCCGATCACGATGATGATCGAAGATTCTATGGGTGAGATCTG  
GATGGAAGGAAGCATCATCAAGGGATGGGGACGTAAGTTCTTTGGCTACCAGATACTGTG  
CCGTCACAGTTCAGTCAATATCAAGCCTGATCAATGCTTCCATATCTCTGGGCGTGTTGA  
AGACACTGCTGCATTCCACCTGATTAGGCATCTTGAGAACGACAAGGAAATTTGGACCGC  
AATCGTTAACCAGTACAAGACATGGTTACCGAACGGGGTTGAGTTTACCTCCTGGGATGG  
TTTACAGCGCAAGACGACCGCGGGGCAATGGGCTTCAATCATCTTCCAGATGGTTTACAT  
GCAGCGAACTGTCAAGGACCATACTACGCTCACAACCTGAACTTCGTCGCGTGGGGCTTAT  
ATGATTGATAAGATGATCATGGATGCTGTAACGAGGGACACCGAGGCCATCTCCGTGCCC  
TCTCTGACGCTATAATACATGGTTGCAACATGGCTGTGTGGAATGCCGAAAAACGATAAT  
GGGGACTATGTTGTCATCACGGATGAATTCCTTGACCCTGACAAGGTATGCAGTGTGCTC  
CGTCTGGAGGGTTGTGAGCTTGTGGAGGGGGAGAGATAATTTCTCCTGACAAGCGCCGCT  
TATGGAGACCTTGAGTGTCTGTGGTGTGTCATGGATGAAGCTGGAGGAGACTCCGAC  
GAAGTTGATGTCGCTTGACCAAGGCCTAAGTCACTGTGCTACCGTGATATGGGACCATGG  
AGATCCCGTTGGCAGGGAGATGATCAGGACAGGATGCACACACAGTTAAGGGAAGAGGGC  
AAGGAATGTTGTTTATGTTGACAGCGTTTCGTAGCCCAGCCGTCATATTGAGAACAAGAT  
ACAAGCTTGGCAGATGAACACAGAATTGACCACAACCTCATGGAAGCCCTCAGTCTTGG  
TTCTCTGGGTAGTGCAACTAGTCATGTGGCTGGCCGTTTTGCCTGTATTGTGTACGAATT  
GTACCAGTTTGGTATCTTAGGGTATGGTTAATCCACACTGTTGTCCCAACATCTGTGAA  
ATCTTTTGCACGAGGTCTTTTACCGGAACAAGAGCGCACTTATGTGAAAGAAGTGGTTGA  
GCAAAAGACAAGTAAGAAGGTATACTCAACCGGCCAAGTGAAGATGGAAAAATTGCCTAT  
TCTCAGGGCTGTTGAGTTCGACATGCCTGGCTGTTTACGCTCGCGCCTGG  
AAAGGCGGAATATGCGCATTAGTATTTGATCGGGAACAAGTTGATGGAGGGAGGATCCGT  
AGAATAAGGGTAAGGGGTCTACATCAAGACCGAAGGCAAGGAAGAAACCTGTCCGAGTG  
CCATTGACGCCAGGTCTTTGGGTAACAGATGCAAGTCAAATCGCTCCTTTCCGGGATAAA  
TTAATACTTTGGCAGGGGGGTTTTGATCCTGTGCTTGGCGCGCCACTGCGCAAACCTTGC  
TTGGACCATGACCACTTCGATGCTAAATGTCGTGGAGTCTTGAGTCCGTGGGTGAACACC  
ATCGAAGGATTTGTGCTGAAGGCATGGATGAAGTACGTGTCTGGGCACACAGATACGTCA  
TTGTCCACACCGCTCCGAAATCTTGCTGACTACTTGGAGAATGATTTTGGCCGGTACCCT  
ATCCATGCTGCGTACAAAGAAGTTATGCTGATGTTCTTGAGGAGATGTACCAATGACAAG  
ATCATTCAAAGGGCAGAGCCTGACCTCCGCATGATCAGGACCCAAGGTAATCAGAAGCAT  
GATAACATAACGATTAACCTGACAGAGCTTGTGACACAAACCGGAGGAAAGATTTGCTGAA  
CAATTTGAGCAAGCCCTTTAAGTTCTATTACATGAACTGGCGGGGTGAATTCGGTTATCG  
AACTCTGATGGACCCGGATCTGCGCTACGGTTCCTACTGAGTAACCCAAACAGCCGCAGTG  
GATGATCAAACATACTGTGTTGCGAGAGTTGCCACCCGTGACTTTGCTGTGACTGATAT  
TGTTGAAGTTTTCCGAGAGTTGTAATGCTGCATGGAGAAAAGAGCCTTGCATTAAGGCG  
AAACGTATGAGCAACCTTGAACCTTGTCTCATCGATATCTAGGGGAAAAGAGTAAGGAATCC  
CATATCAGTCTGATCCTGAATGGGCACCAGTATGTTGCAGAGGCTGCTCAGGTGATCACC  
GGGACAGTTGTTGGCAATCTGGGCGCGAAGATCGTCCTTGGTGACGTTGAGGTATCATCA  
AGGCTCGCTTGGGTCTTTAACCATTCAAGGCGGTTGTAGCAACTTCACACGTAGAACAT  
GAGCCTTATATGTACACATGGGCGGGGAAGTGGTTGGATAACCCTGCGATTCTCAGTCTC  
AAGCTGCCGGTTTATTAGACGTTCAAACCGATATCCACGACGACCGCGAAGTGGTTGAA  
GCACTGCGGCGAATCCATCACGGGGGTGATGTTTTTATTGCACACAACGCTCGTTTTCGAA  
AAAGAATGAGCTAACGAACGTTTTTGTCTTCCCCAGTAAGACACCGCCGTCACCGTACATC  
GTGATCGATACGCTTGAAGACTGAAGTCGGCTTACTCCCCGCCGTCCAACGCTCTGGAG  
GCCGCGTGTAATTACTACGATCTGGCTGCCCGTCAGCGCCATCACGAAGGGATCACCTTG  
TGGATTGATGCTTCCAGGGTATGTTGCTGCATTCGAGGAAATGGAGTTTTACAACATC  
GGGTATATTCCGGCTCTTGAAGGTATCTACTTGAAGTTAGACCTTTCATGAAGAGACAC  
CCGGACGTGACGTTCTATAATGACGATGACGACAACACTGTCCTTCGATGCGTTCCTTGT  
AACTCTGATAAGGTAATGCCTATGGACTGTAAGGTGGGGACAACCTGACTGTGAAAATTC  
CAGGCATATCGCTGTGAAAGGTTTGGTTTTGTTATGCGTGACCGTCGCAACATCCGTACC  
AAGGAAGAGATGGCTCACACGCTTGTGAATATCATGTTAGGGCTCCGGGCCCTTTGCAGA  
GGAGAGAAGAATGAGTAGAGTTATCAGCATTAAAGTCCCTGACTCGTTTGATAATGACTA

GTAAATAAAGCATCTTCGCGATCTTGACATGCGTCTGGAGGAGGTGGTAGATCCGGAATC  
TGAGGCAGAGCGCTTTAATAAGAACGGGGCCTGTCTGGACAGGGTTAACGCTATGCAAGA  
ATATGCGAGGACCTGATGGATATTTACGTTCTGAATGCACCGCCGTTGACCGGTAACGAT  
GAAATCTACACTTATCTGAGCGATTGTCACCCAAACCTGCCCCACGAGGACGTTAAGGAA  
CTTCTGTTTGAAGTGGCTGTGAGGACCTCTAGCATCTCGCCCGACCGGTGGCACGCTATG  
TACACTCGTCGTTTCTCGGAGGTCCACGGTCCCTACCTGCTGATTGATGGTGTCAATCTA  
CCTCCTCGTCAGTCCATGATTCAGTGCTCTGAGAAAAGTCATCAAAAACACTCTTCGGCAAT  
TCTGCGTATGGCAAGGCAGCGATTGCAAAAACCGAAGCAGAATAATGCGACAGATAAAGGTT  
ATTGTTTTTCTGATGGAGGTTTACCGGAAGAAAACCGACAACCTTTCTGATCAGGGGGAT  
GCTACTGGTGGCGATTTTTTCTTGCACGTATTCACCGGAAATGCAATGACCAGGGTAAC  
GACAGCAGGAACTGGTTATACCTTGACGGTACTCGAGGTTATGAGATAGACTTCGGTAAC  
AAAGAGGGTACGTTTACTCAATGCGCCGAATCTGTCTTTAGTGGGCGAGATCAAGCAGC  
TATGTATAGGAGTATGCGTAAGCCACTTAAGACCGGTATTGTGGTAGTCCTAACGTTCTG  
AGGTTACAGGCACACCCGGGCTTGAATGGATGGAGCCGGTATAGGATGTAAAGGCAGATTA  
TAACCTGCCGGATATAAAGCCGCAGGGTATGGCTTATAATAATGTGCCAAAATACTTCCC  
TACTGGGAAGGTTAAACAGTACCCTCCGTATGAGTTTTGGGAAGATCAATACCTGTACGA  
CAAACCTGCGTCCCTGCGTCCGGTCCGTTAATGCATTTGCAGGTTGGGCGGGCTGCTGGACA  
CTTCAACGATTTCTGTGCTAACTGAACGGAAGACCATTTCTCGACCAAGGTAAGATTCT  
GAACCGAGAGACAGAGGAGTTTTTCAGCATCGAACCTGTAAGTGGTCACGGCTTTTAGGC  
CACAAAAAACTAGGCATGTATTAAGATTCAAATCATCCTTGATAAGCGTAATGAGTTCT  
GCAGCAGTTTGGCCCATACGTGATTAAGATCAAGTTGAAGACACCTTATGACCAACCTGA  
AGAGCTTCGCATCTCACTCGATCTTGAGAGCGAAGCCTGGAACGTCATCAAAGACTTCGG  
GCTGGATATTGCTTAATGAAGAGATGCCAGACAGGAGACTTCGTTGTCCACTATGGGAAT  
TGGGTGGAGGTAATCACCGAGGACAGAACCTTACTCATATGCTTCAAAGCAACAAGTGAC  
ATGTGTAAGGACATTCTGTCACGATATCAGGTGTTTAAAGCCGGGACGGACCCGGAAACA  
CCTTACCCTATCAAGAGGAGAGGCAAATGAGTCTTATACCAGCTGCTTGCGGTAGCATCA  
AAAACGAACTTCTGCGTCGTGCCTAAAAAATCCCACAAGTGCTCGGCGTTGATGCTGTAG  
GGATCAATGCAGCAGATCTTGCATCAACGAAGATTTTCGTTTCCCGTCTGCTCACTGAGG  
CATACTTGGTAGATTCACCACCGACGTGGTTGAGGAAATGGTAGCCTTCCAGCAACAAT  
TCATAGATAGCAATCTCATTCTTGGGAAAGTTATTGAGCAAGCGTTTGCCTGAGTTTTAG  
AAGAAAACACAGAGTCGATGTATTAGAGACTGAAAGGAGCACAATAATGAAAAAACCTGA  
ACTTGCCCTGTTGGCGCGGATAGTGTTTACCGCAAAGTCGACATATTACAACTTTTGA  
CCTTGAGTACCCTCGTATCATTACACCCGAACTGATTACACATTGTCTGTTTCAGTCGGAA  
CGCTATGAGTAGCCGTGCAATGCCGTCAAAAGATGATCGAGCAGGTTACAGAGAGATCC  
TGCTATGCCTGTCAAGTTTGGAAAGAATCAACCAGGGATGCAGGATGCCGGTGAGTATGA  
CGCACAGCTTGGTGTATGGGTATACGGCTGAAGATTGGTGGAAACTCGCAGGATTAAGTGC  
GGCACGTTTTGCTGTTGAATTGAAAGATGCTGGTTACGACAAACAGATCACGACCCGCCT  
GCCTGAGCCTTCCAGCAAATGAAAACGGTCTTGACCGCAACTGTCTTTGAGGATTTCCG  
TTGGTTGAGGCTAGTTAAGGATGCCGATCCAACCATTTACGCTTTAGCAGAGGCCATGCA  
CAAAGCATTGGACGAATCAGTACCTCAATAGCTAGAGCCAGGGCAATGACACACCCCTGA  
TGTTGATCACCTAGACAGTGTGGAAAGCTGGCTAGTGTAGACACATTTGATTACCGTGT  
TCTTGACGAGAACAACAGACCAGTCATCTTACAGTTGATGTAGCTAAGGTTATTGCTGC  
AACTTTTTGTGCTCAGGTGTTTTATCGTGGGCGTAACAACACGAAGGAGAAATATATAGA  
ACTGTATGGGAACTTTTAAGCGGGTATAAGGGTACGCTTCTCCTTTTGATCATGTGGC  
AACCCCGATGAGATGAGAGTCCAGGGAGTGCGGTTATGACCCAAGCATCAATTTGACGGA  
AAACCCTGGTTCTTGGGAAGCAGGCAATACCCATCTTTATCGCAAAGTTCGCCTATGGAG  
TGGGAACTACCGAGGCTGGACTCAGTTGCGTCATTGACAGCCTAATAACTATGTTGAAGG  
TTGATGTAGCTGGATAGGAAAGGATTTATCCGGTAGATACTGATGGCACTGTTTGGTCTC  
TTGAAAGATGGGTTGAGAAAAGTCGCCACGACAAAAGAACTGCGCCACAGTTTGTCCCC  
CAAAGAAAAGAAAATGTTCTGAGCGTGGCACAGGCTATCTGAGTGATAGATTGGCAAACA  
ACGGTGTCTAAAAGGTTTTCAGGGTGCATAGGTTGATTGCTGAGGTGTTGCTACCAAACC  
CACGCAACACTCCATTTGTGCATCATAAAAATGGTGATAAGATAAACAACAAGGTCTAAA  
ATCTTGAATGGCTAAACGAGGAAGAGAACTGTACATGCGATAGTGACAGGGCTGAAGC  
GGGATAATCTGATAGAACCCATGCCTTGCCGTTATGTAAGCGAACACCTGGAAAGAATGT  
AGTTTGTGGTTAACCAAGTTTCCAGTATTAAGTATCTTGGATGTATGAATTGCGGTGCGA  
AAATACCCACGATGATAGGCAGAATGGAGATTACTTGAGTAAGACAAAACGCAAACCAA  
CCCAACATATTTCCGGTCAATTTGCACTTTATAAGAACCGTACCCGCATTTCTGTAAACC



AAGATAGGGGACTCCGTGCTGCCCTTTAAGCAGTAGGCTTCCAAGTAACCGATGGTTAAG  
GGAATCCTAAGCAAGTAACAATACTTAACATGAAAAATGTACTATGTGCGAACTTGCCCT  
ATCCGTACCGTCAAACAACAATCCTTGTTGGCGACTTGCGTCCGGATTATCCGTATGCAA  
AAATTTATAACGGTGTGAAATTCTCCACGTAGGGATTTACTCCGAGCGCTACATGGAGT  
TCGCGCTTGATCTCCATAAGATATCCAGTGAATGAGAAGGTTAATACGCGTAAGTTCA  
CAAAGGTGTAGATCGTCCAGATTCGTTTGGTAGGAGGTTTCGTTAGTGAAAATGAAGCAC  
CTCTCAGTCACGCATTTGGTCTGGGCGAATAATGAGTACAGAGAAGACCAAGTGGAAAGA  
CCGGGGATTGGTTGACAAGTATCACTACGCCGGGTGGCGCTACTTCAATGATTTAACCGA  
TGACAGCAAGATGTACGACGATTTGTAATATGATGAGTATTCTGGTAAAATAGTTAATGT  
CGCTCCTCAGGGTCAGACTGATAAACCAAACCAAGACGTTGACCTAGGTGATAAGCCTCT  
TGCTCAATACGCAGAATAACAAGGGGAACGTTTGGTCAATAAAGTTGTAAAAGGTGATGG  
AACGAAGGTATCGCTTGAACCAGGACGCCTGAACAAGTCAGCGATCTTTGGTGATGAACG  
TAATGGTAACTGGTTACATATCTCCATGGGCACCTACGAGCTCCCGTATGATAGTTGCAC  
CACTGGTGAAGTAAAGCAAGCATTGCTCGATGCCTACGTGAGCCAAACAGACGACGCCCG  
TTCAAGTATGGTTGGGTGAGGTCGGATCGGTCAGATCAACAAAGAACTTACGACGGTTT  
CAGCAAGATCCCTGCTCTTTATAATGTGTAGCGCGAGATTATTGAGTAGGGGCATTGGGA  
AGCCATGGGTATGGTCCGATGAAGATTGTGGAACCTTAATAGTATGATTCATCATTCCAT  
GGACCTTGACTACGGCGACGGCGTCTGAAGCAATTGCATGACAGGTACGGTATCAAAGA  
CGACATCAATGATGTTCTTTTTGAGTCACCGTATATGATGTTTATGGGTGTTGCAATGGG  
GGTAATTAAGCGTATGCGTTCGTGAGCGTCCAATAAAGGATGTGATTAAGATGAATACGTA  
TCTGTCCGAACTGACGATCGATGCTCCGACACCGTATCTGAACGGACTCAGCACCGGACG  
TACTGAATGTGGGTCTGCTGCATTATCAAGGCTGACGATACAGCGAAAAGCATTGGTGT  
TGATCGTGAAGTTACGTATTCGATCACCGTCCACAGTCAGATATTGGCTACTACCTGCC  
CTCCCGCTCAGTTGGTGCCGCCGCTTGTGGTGATACGATCCAACACATGGGTAAACTCCA  
GTATTACCGTGGCATTGATGCTGGGGTGAAAGAAAACCGTCAGACCACCCCTGGTGGTTC  
TGCCACGACCTCTTTTCTGGCCCTTGACCCGAGGATCGAAGAACTGTTGCGCCCTAAGAA  
CCCGCAAACAGTTTCTACATAACGTATTAGCGCAATGGATTAAGCCACTGCTGTAACTA  
GTCTTTCATGAACCGTGTGGCGAAGAACTTTTACTGGATGCTAGTATCTTACCAGGAAGC  
ACCTCAACTACACTAATGTATGTTCAAGATGACCATGCAGGAATTTAATGCTTAAGTTGC  
TCCTGTGGCAGCGGATACTACGATCAATAAACCCCTGGGTGAAGGCTCGCGATCTAGAAGT  
AGAGATCGTTACTCAAAGAGCCGCAACAGGTCGCCTGTACGTATACTGGCCTGACGAGAT  
GAACCGGCACCCGCTTATCCTGGAGACTATTTTCGTCCTCCAGCTATTGCCAAGAAATTTG  
TCTGCCTACCATCGGATACAAAGATACGCCGAACATCTTTGATATCCTTGCAGACGATGA  
TGAGGTGCTCTTGGCTTCCCTGGCATCTCTCGTTGCTGGGCGTGTCTCTCCGTATGCGTA  
CGATGATGTTGCTTACTACGCTGTTCTTATGATCGACAACGTTACGGATTCATGGATTA  
TCCGTAAGGGGATATGGAACACACTGCCAAGGCTCGTCGTTGAATCGGTGTTGGTTTGAC  
AAACAATCCACATTACATTGCGAAACACAAGCTTGTACGGCTCCGCTGAGAGCAAGCA  
TTTGATTCATAACCTGGCAAACTGCACACCTTCAGCTTAAATAAGGCAAGCCTACGTCT  
TGCAAAGAGTGTGGTGTAGCTCCGCGGATGAACAAGACCAAGTACCCACAAGGGTTCGTT  
TCCAATCGACGCCTACAATAAAGGAGTTGATGGACTCGTGAAGAATCCAAGTCTAAAGCA  
GTCTTGGGAACTATTACGACAAGATATAATCGAAGTTTGTGGTATCCGCAATAATGTGTC  
GGAAGCTTATATGGCGAACGAAAGTTCTTCTCTGGGGACGAACTACAACTGACTTTA  
CCCGGTGCGAGATCACATTATCCTCGAGAAATCACCGCAAGGGTCTTTGCTGTTTGTAGT  
GTCGGAGTATGAAGAACTGAAGTATTACTACACCTCTGCGGGGGATATTAACACCAACGC  
CCTGATTGACATTTTCGCCGGCATGCAGAGGATCGCAGGGTAGGCGATGAGTGCTGACCT  
CTACATCGACTATACGGAGTTGAAAGCCGGATAGAGCTCAATGAAGGCCAGATGGATTA  
CCTGATCCGTGCAAGGAAAATGGGGGTGAAGACTTGGTACTACTAGAACCGCAAGGTTGG  
TGCTGGCGAATCACTCACCGCAGAAGTTAAGTCGAGGCAGCAAGCAGAGGAAGAGACCCA  
CAAGGATTATCCACTGATAGCAGACACCTCGGTTGAAGACCTGAACAGTGAAGGTTGTGC  
ATTGTAATTCTTATGGGGCTTTGGCCCTATTTTTCCGGAGGTGAATCAATAGCAGTAGT  
CAACGCCGAGAAGACCTCTCATAAACCTGGTGAGTATCTGCTGCCCTCGGACAGCAAAT  
GGGTCTTTATGACACCATCTACAAACAATACTGGTCTGTTTGACATGTACAAGGCTCA  
AAAGGAATAGGATTGGTCTGAATACGAAGTTGAGCTAAATGAGTCAATCACTGATTTTGC  
AACCTGTAGCAAGTCCGCTTCTGATGTCATGGTGCAGACCCTGATGTGGAAGTTCGAGGC  
AGATAGTGTTCGAGCACAGGCAATCATCTGACTGTTTGCACCTTTCATCACAACAGTGA  
ACTTTTCGCCATTATGATGAAGCAATCTTAGATGGAAGTTCGACACGCGCATACATATTC  
TGATATCATCCGTCAGTGTGGCCAACTCTCGGCTAACTATTCAATAGATTCAAATAA

GCGGGCAGTTCTCGGACCTTCTGCTTTGAGCGTCAAGTACATGCGTGAACCTTAAAGTTCT  
TGGAGGACTTTATCGTCTCGATGCTGAAGCAGTAGACAAAGACGTGGTTCGACGTTGTAT  
CCTACATGCATTGGTCCCGATGATCTATCTGGGAGGGATTGACGTTATCTCCAGCTTCGC  
GTGTACCATTGCATTGGCAGAACACGGTGTGTTTTGTTTTGTTTCGGTCAGCTGGTCCGGAT  
AATCATTCTGGATGGAATGCTGTGCACCAAGCTGGATTTGACGCTGAGTGATAACCTTCT  
GACAGACCCGGTGGGGAAGGCTAGTTTTAATGCCATTAAGAACGGGTTCAAGGAAATCCT  
TGACGAAGTGCGAACAAAAGAGCATGGTTGGGGTGATTACCTGTTAAGTGATGTTTCGTGT  
AATAATCGGAATGAATGCGACGCTCCTGAAAGATTGGAGTAACTAGAACTGCGCTCCGAT  
TTATGGCTACTACGGTATTCCAAATGACTTCAAAGCTACCAAGCGCGATACACAGCCGAT  
AACGGATATCAGGATGAATCCAAGCAGAAAGCAGAACGCAAATCAGGAGCAAACAAACAC  
GGATACTCGTTTAATTGCGTCAGTCACCGATATATACGGTGAAGTCTCGGACTTTTCAGC  
AGTAACATTGGACAATTCGATTTTTGATATCAGGGTTGCTTAAGCTCACACAAAATTCA  
TGTCACTCTCGATGGTGGGCGTGGTATGGGCTGGATTGCGAGGTCACGCTTTCATGCTC  
ACGCCGTCTGACTGGTGTGGACTGTGCAAAGGACTTTATTCTAGGCCAAAGCCTTTGGGT  
TGTCCCACGCAAAAATGCTTCTGGTTGAGCAAGGGCTTTAGTAACTTGGGTACACCGGCAG  
TGGACCATTCTAGGACAGTTGTAACCTTTGTGGCCGATCTGGTTGTGAGAGGTTATGACGT  
TGATTATACTGGCAAGATCCCAGTTTTTGTTTTTACCTTCGAAATGGAGTAATAATGAGT  
ATCAAAGACAACATTTTCAGTATGCAAGGCGAGGACAATTGCCAACACTGGGTCCGGGCA  
AGAGAGTTCGCTAAATCCAAAGATCTGGTGTATTATGTATCTGACCTTGAAAATAAACTAC  
ACCCAAGAGGGACAGCTGGCAAAAATCCTCTCCAGTACTCCCGAAAACCGTACCCCGGGTC  
TCTATGGATGATGAAACGAGCACCCGGGATATCGGAGCAGCCGAACAGTTCATTGCATGC  
GTC AATGCAAACCTATTAGGGTGTAGATGAGTGAAAGTAGTAACAGGCTCTGGGCGTGT  
GAATACTTCTCTCGGAAAAAAGGAAAACGAGCGGTTGAGGCCGCCCTGTTAGCAACAGGC  
ATGTACCTACAAGCAGCACAGCAAACCTGCGGTCAATATCGGTCAGCCGATTTTCAAGTTA  
TTCGTGATGACACCTGTGAGAAATGTCGAAGATTTCTATCGTGAAGTGGAATTCTGTTG  
ATGGAAGAAGGTCCACTCCGTGACGCTGCTGGCGCCTATATTGAGTATCGCCATGATCGT  
GACAACGCGCCTGAAGGAAAGGGAAAACCTTTTTGGATATATCACCGGATTCTCAGACCAA  
TCCGCAGTAGAGTGCACCCATGAGAATGCAAACAAACCAGGCACGGTCGTAAACACGCAC  
AGGAACCAACTAGCGGGGATTTCCAGTAAACATGTGGCATTGACTCATTACTTCTCTAA  
AACCTTGCGGAAGCGCATAACAGAGCGTTTTGGACATATTCACGACCTTGATTACCTTGTA  
AGCCCGCTGACGGACTGTTGCGTGGTAAACTACCGGAACATGCTTGAAAATGGTTTCAAG  
ATCGGCAATGCTAAGATTGAGAAGCCGAAATCAATTGATGTTGCAACCACTGCATTCACA  
CAAATCATCCAGCCTGTAGCGTCAAGCGAGTATGATTGACAGACCTGTGCTCACATCGAC  
GTAGGTCTGAAGCAATGCTTTGAAATGAGGTTCAAGAAGCATGTTAATCAGTTCAGAGC  
CACAGAATCGCCGTTGGTCCGACCAACAAAACGGTTCATGATGCAAACCAGACACTGCTT  
CATCTGGTCAATACCCTGATGAGCGTAATTGGTGAGGCACGTCTCATCACGATCATCCTC  
TGTTTGGTTAGATCAATGTTCCGGTAGGATGATCAATGGTAATTATCTAACCGTGCACAAA  
GCGGGCATCGGCGCTGTTAAGGTGACTGCTGTGTTCCCGAAAGTCGTTATCTTCTTAAAG  
GAAGGTCTATACATGAATCCAGGCGATTTCGAATTATGATCTATAGTTGCGTGGTATGGAG  
TGTGGTGCTGAGACAATCTACCCCGACTTCTTCTCAGGTCCGTTGAACATGCGAGTGACC  
GGATATTCGCACGCAAGGGTGACGAGCATGGGTTGTCGAAGCTTTTTATCTCACTATGCA  
ACCGAAAATGGAGAAAAGTACGATGTACGTTGCAATCTTGGCGTGGTATCCTTAAACTTA  
CCCATGATTACTGCCGAAGCAAAAAGCCGAAATGGTTTCTTCACACAACCTGCTTGATAAG  
CATATAAAAATGCCTTATGAGACACAAGTGCTTCGTCTTGGTAGTCTGATCGAGGTTACG  
GCATCCCAGATCCCAGACATTGTTGATGGAAGGTA CTCTGGCAAGGCTCGGGCCTGATGAG  
AAGATCAGTAAACTCTTCTATGGAGGGCACGCCTCAATGAGTATTGGGTTTGTGCGGCCTT  
TATGAGGCTGTAGAAATCCTTTATGATGAGCCAGTACGCAAGGAGATGGCGATGAATATC  
ATGAAGTACATGAAGGAAATCTGTGCAGAGTTCGAGGAGCGCAGTGGGTTAGGTTTCAGC  
CGGTATGGAACACCTGCGGAAAGCAAGAGTTATCGCTTTGCAACCAAGTTACAGGAGAAA  
CATCCTGGTTTTGATTGAAAGAGATTACCTGACAAACTCTTACCACCAACCTGTGTGGCTC  
AACAGCGACCCGTTCAGTATGTAGGATTACGAATAAGGTTTCGCAGAGATAAGTAACGGC  
TGTGATTTTCGGATACGTGGAAACCCCGAACCTGGAGCATATTATGCAGGCGCTTGAAGCT  
CTTGTTTTCTGTGGGTACGAGAACATTAATTATTTCCGGTATCAGTCAGCCAGTGGCTCAG  
TGCTTTAAATGCGGATTTAGCGGTGAGTAGAAGACGACTGCAAAGGATTCCAATGTCCT  
ACTTCTGGGACCATGACGAAGGAACGATTACTGCGATTTCGTCAAGTTTCCGGATATCGG  
TCAGCATCAAACCTCACGACCCTACATCAATGGTAAACTGGAAGAGGTGCTGCAAGTGGTG  
AGACATGTATGCATTAGTGTGTTTATGAACCCACAGACCTTGAACGAAGAGGGGGTCA

GGTGCTCCCTTTGGGTTAGCTGTTGCAGTCACGGATGTCGCGGCTGCTTTAACCAAAAAG  
CTTGGTTCGTATATCTAAGTTCATCTTTTCACCAATGCGGATGTTCTCAGGCTCATCAAAC  
TTATCGGAAGGCCTTTTATCAAGGGCTTGTTCGTTACTAGGAGGTGAATCACTTGACCCGC  
AGAATGTTGATGAGGTCGTCAAAGTTATTCTGCGTGTCTTGCAGTATTTCGGAGATAGCA  
GGGTATGATGGTGGGTAAGTGGATAACACCTTCGAAGAAGTCCCAGAAAGGGTTAAAAAAC  
TTGTTGACATTAGGATGGACGGCAAGTATGATGAGTGCAATGCTAAATCTAGAAGGTTCA  
GAGGTACTGACAACCCGAGGATGTGGGTAAGAATAAACGGTGTATGGATAGAGGACTAAT  
AGATGAGTAAGAAAACACTGCCTAAGGCATAACAGATAGAAGTGTCACTGGAAGTCCGTG  
GCCTAGGGCATAAGAACAAGCGCCCCACTGAGATCGAACTGATGAACTGGTATCTGACG  
TTCCTGCCTGTGGCATCTACTGAGGTACTCCATGACTGAAGTTATTAACGAAGAACAGAC  
CTTTGTGCCACACTCGCAGCTGCACACGCTGCTGCTCGGAGATTCCGAGGATCTGGCCCG  
TGAGGTTGTGGGCCTTGATTTCTAAGACTGATCATTAGTTTTCGCGAACAACTGAGTA  
TCAAATTGAGGCTCTCAAGCAAACGAATGCTGCCGCACGTAAAGGCCAGGATGCTGCGAT  
GGAAAAGGAGCTTAATGCTGCTTAGGTTAAGGTGAAGAAAGCTCTTTCTGAAGAGTTTTT  
GCAGGCGGTGAGGGATACGATGGTTGACCATCTGAAAGGAGCGCTGACACGGCACAAGCT  
TGCTTACGCGATCTATTATGAACGTCTCACCATCAAGTTTGGGGGGATTCCGGCCCGGCT  
TGAAACGGCTTTTCCAGAGGCGATCTGAGAGGGCTAAGCCGAAAGGAGGTGTTCAATGAA  
TGCTGCGAGTCCCGAGATTACGCGTAAGCTGATCGGAGGTGTGGTTAGCGTCCGCAAGTC  
TGGTGCTGATGTAATATGCGGACACGCCACAAGATCCGCACTGCAAAAGTGCATTGCACA  
GGCTACGAGTGCAACAATTCCGGAGGTAAGTAAACTCACCCAAGCACAAGTGGACAA  
AATCTTCCCCTTGGTGCATGTTCTGGGAAGATAGCAAGATTCTTGACGCCGCTCAATGA  
CCTGTCTGAAAAGACAGAGATTAATGCTGTGAATCAGATTGCAGGGTTCCGGTCTCAGCT  
TGATGTAGAATCGGCGCAGGTCCGGTATGTACGTGAACTCGGTAACGGTGGCTACTTTCA  
CAAGTACGACACTGGTCTATTCCAAAAAGATTTGGAAACACACCCCAAGTAAGATGGGGA  
TGGTCCAAACGCCAAGGGGAGGGGGCTGATCCAGGTGCTCGGACTGACAACTAAGAGGC  
TTGCCGTAAGGCGATAGGTCTTGGCCTCGTTAACCACCCTGAGTTAGTTGAACAGCCTGA  
GTATGCTGTGCAAGCCCTGGCTCGTATTGGGACAAGCGACACATCAACCCCGCTTGCGT  
TGCTGATGATGTCGTTAAAATTACCAAGCTTGTAACAGTGGTACAAATTAAGTGGCGA  
GCGCACAGCAATTACAAAAAGGCTAAATCTGTTCTAACCTCGGAAGGAGATCCAATATC  
GGAAGAATCACAGAGGCTCGTGCATTAAACTTTCGGGTTCGCCAGCAACAACGTGCAGAA  
AGACAATTAAGAACCACCCGCAATTGGACGAGGAGCGTAACAGCGCCCAGGCTCTGGTT  
TGTCTGAATTTAAAGCTGCAGGATTCCCTTACAAGTTGCAGACTTGCAGAATCATAATT  
GCGAAAGATATCTTCGGGACAGGTAAAACCTAGCAGGCATCCGCCGACGCTTCCGACTTA  
CTACGTAAAAACGAACTCGACAACATCATTGTGCTCGACCCTGCGTGCAGACGGGTAAC  
ACCACCGGCTTCAAAACGTGTACTAGACTGGAAAAGCTGTTACCCTATGTTTCGTAACATG  
TTGGATACCATCCGCAAGCGCATGGTCGACGGGGCATATTACAATGCTCTGACAGACGGT  
TTAAATGGCCTTATCGGAGTACACGAAGTGGAAAGCACCCGTGGTTCGACTATTCGACTAC  
AACTGCTTCTACTGATCGCCGAAGCCCGGCAGAGTACCCAGAAAGGAATGCTGAGTATC  
ATTACTCGTTTTTCCGATAACTGTACATTTCGTTGTGATGGGTGATGCCAGTCAGATAGAC  
ATGTAAGGTGAGTCTCGCCTGGAGGGGCTCATTGAGTTTAGCCAGCGACACAACCTTGAA  
GGTCTGGTACTCTGTCTTTTCATGACCCGAATGAGGATATCGTTCGTCCTGGTTGGGTT  
CGCGAAATCGCTCCTGCCATGATGGCTGACCGTGACGCAAGACTGTACAAGCCGATGGCA  
TCTTAACAGGAGAAATATGGCATATTATGCATGAGTAGCATCACGCGAAACACCCCCAGA  
TGTTATCAGCGTCATGTACAAGGCTGCTTTCCGTCTCGTCTGGCTCGGATTCCCACTTCG  
GAGTGGGAACGCTGGAGGAGCGGATGCTGCATTTAGAGAGGGATGTA AAAAGATGACGA  
AACTCTTAACAATGGAAAGAAGCCAGAGTGTGTCGACACGCTTGGCAAAGATTTACATCCC  
TTGTCGCGGCTTTCCTTGTGACAAATAAGACCTTTGGGACTTCTGGGGTTAACCTTGAG  
TTACCATGATCATCTCATGCCTGAACAAAAGCATAAAAAGGGATCAGTCGGTTGAGGAAAG  
CCATCCGAATTATGAGGCTCTGAAAAGGAAAAGAAGTGTCTTTTGCCTCCAGTCCCGTAA  
TGTGCAACAAGAGCTGGGGGCAAACATACTTGATCCAAAGCCCCTGCCCTGCATTTA  
CGCTGATTCGGAAGATAAGCATGGCAACCCAAAAGGCGGAAGTGCACCGGTGGTAATCC  
CGCCAGATTGATGCCATGAAGATACCTAACCTAACACTCCGGAGCGCTTGGCCTTGCT  
TGAGCAGTTTCTGACCAGTCTTGAGAGCGAACGAGGTGTGCAGGTTTAGAGACAAGCGAA  
ATCAGTCCCTACTGTCTTGTCAAGGTTGAAAGAAAGGGTTGGGTTCTGGCAAAAAGACCG  
GATAACGGATTTAAGTTATCGATGCAGGTGGGGAGATTTCGTTATTTTTGCACCACAGATG  
ACACGAAACCGTTCAATCATCTGACTGAACCTCTAGGGTACGAGTCCAAGAACAATCATG  
TGGTCCGAGATACAGTCCAGCTGGACAATTCGGGATGTTTTATATTGGGGATTAAGGGT

ACCCCGGACCTAATGATGAAGTTAAGTAACTGATAGCTCGCTAGAAGCAGTATGATAGCT  
AGTATTCATGGGGTTGTTGCCCTTCGAAAACCTTATCGATCTGAAGAATTGTGGTGTGTC  
GAGCCTGAATTTTTCGAGGGGGAAGTAACTAAGCTTTTCACCTTGTACCGTAAGGTAATA  
GCACAGAATTTGCATGAGCTGAATGATGGGTTTCTTTCACGTATTATCCACAGCTAAGAG  
GGGGCTGAACGTGCAGCTCGCTGGATGTTTCCGGACAGACGTGATCTACTTAATCCTCTG  
ATTTATCTGGATCATCAGCGTCGTGTATAGACATATGTCAATATCAGTCCGAAGGAACTG  
AATGCGTTCCCAATGCTGCACACTTCAGCGTTAGCGTCCTAGAGGGCAAGGAAAGTTCTC  
GGGACATTCAATTACACCGATCAAGTGCTTGTGGATGACCAGACAGGGTACTACATTGAC  
TGGCGATTGTAGAATGCTTCCATTCTGAAAGGCTACATTGCAAACGCTCGCGAGCAGGAT  
TAATAAGGAACAGAACAAAAACTTTTTCGGTATGCTGCCGGGGATTAGGGCGAACATTTA  
TACTTACTCGTACCACTCTCATGATCAAGTTATCTACATTGATGATCTGTCATGCCTAGA  
AGACCATCTGGACCGTCTGCAAGTTATCCGCCCCGCAAGCCGTGATGACACTATCCGGGT  
GGTGATTGACAGTCATGGTGGGGTAGTTTCTATCGCTTTGCCGTATGTCAGTGCGATCCG  
TAAGAATCAGGCACAGAGCGTCACCCCTACCGAAGGCAACGTCTGTTGTGCCGGGACAGT  
TTTGTGGTTGGCCATAAAGTGCCGCACACTGTCACCACGGACAGAGTTCATGTTCCATAA  
TTATCAGTGCCGGACTTTTCGGTGAGGATACAAACATGAACGCACAGCTTGCATTTCGAGAT  
GCATTATTTTGTACGTATGTTTGACGCCTTCTACACCGGGCTTCTGACCGATAGTGAGAG  
TGCAACCTTGAAAGGTGGTGTCTCAGGTGTGGATGGATGAGATAGAGATCGTTAAGCGTAC  
CACTGCCGTGCTGTTGGATGAGAAAACAGTCAAACGTATGCAGCAAGGTCAGAACCCAAT  
CATTTTCGGCTAGATGAAGCCTAAACAGGAGAAAAAGGGCGTTGAGAATGTTGACCTGAA  
CAACCTGCCAGAAGGTGAGCCTGACAGCGTGTGTCTGAAGAGAGATGTCGACGGGGAAAT  
GTTCAAGTTCATGTTTCCACGCTGACTGCAATAGATCTTGATGTCCTCAATGAGGAAGA  
ACTGCAATCTATCCTGTCTCAGATCGATGCGCTGCCTGGAGGCTCTGAAGAACCTCTGAA  
GGGTACCACTCCAAAAAGCCAGGAACTGATTGGTGAGATCCTTAAAACCTGCGAGGAAAT  
CGTTGGAAGTACTCTGGAGCAAAGGGTGCGCTAATGTCTGCCCTTTAAAAACAAGGAA  
GATCGCAGAGCAAACGATGTCCACAAAACCCCAACTTGGGCTGTTGAGGCGATTTTTAAG  
GTTTCCCCGAATGATTACACCAAACTTACTTGGATCGTTGAAGACGCTCCGGTTGGTTC  
TACAACTTCTGCCTTTGGGAAGCGCGTAGGGTAAAATCCGTCAGGGCGTAGGTGATCTT  
AACACCGGGTTCTACCACGTAGATATGGTTGCGTCCGACCCACCATGCTCTTTGGCGCAA  
AAGTTCGTCTCCCAGGCACCTGGTGAGGCGGAGGTTGCGATCGTCTTGTGAGACTAGGA  
TCCTTTGAGGGCATGAAACGTTTTGAGGGGTGGCAGGTGAACCCAATCAGTTCTCTTTTG  
GAAATTTCTCAAAGGCCATCATTTTTCAGACTATGCAAGAAGCGATGGCAGAGGTTATGCC  
GGGTTTGTGTTGCGACAAGAAAAACAAGCTTGGACTGAAGCCATTCATTTTCTGGTGCGA  
CACAGTCACGAATGTCGGAAACCCGATGCGAGAGATCGCAAACGACGGAGAAAAGCAAAC  
ACCTGAGTCACTGAAGGAGCTGTGCGATCAGATAGTGGACGGGCTAGCGCAGTGTGAGAG  
GAAGGGGACGTACGGGATAGGACTTTATCTCCTGTTCTGGAGCAGATGAATGATTTTCT  
GCCCCATATAGTTGGCTATCTTCGTGGTGACAGTTTACCGTCGATATCACCAGCTACCA  
ACCAACAAAACAATGCACTTCAATAACCTTTGTGCGTAACATGGTAAATCAACCGGGTTCG  
GAGGGTTTTTTCGTTTTTGTACTTTACATGGAGAATACATACACTTAAGCTGTTTTTCAA  
CAGAGTAGTACAACATGCAATTTTACATTTACTACCGTCTTTTLAGAGACCATCCTCTTCG  
GAAAATACATGGGTGACCTTATCCATAGCTCGACAAAGGAGTAGGATTATTGCCCTGACG  
GGAAGATTTGGAAAGTTAAACGTTGCTATCGCCCTGCGAGTGTGTATACTCGATTATTCA  
AGATGTGGAAACACGGCGCGATGGAGGACGCTATGGTTTATTCACTCGTCGGAAACAAT  
CACTAAAAGACCTGTGCAAAAACATGAACCAATGGGAGAACAAACGAATGAAACAAAATCT  
TACCCAAGAACAGGCGCTGATCCTGACCGCGTTCACAGGAATCCTTCGCTGTCCGTTCAA  
CCTGATTCACGAAGATGTCGAAAAGCGACTGGGCCAATCCGTATGAGCGCACGAGTTCGG  
CAGTAACGAGTTCTCCGCAGAAATGAAGGATGATTAACGTGAAGACTTCATGGTGTGGAT  
TTACAAAGGGGAATGATGACGACCGAACTCAATTCGCGGAAAAACTTTTGGCGCTAGCA  
GATCGGCTGGGTGGCAAAACGAAGACCTTTCAATTGGCTAGAAATCCCCAGTGGACGAT  
GTGAAGCTGTACAACCACGGGCAGGAATATGCAGACAGTCTCCCGGAATTTGCAGACGAC  
GAGCAGGACGATGAGGGACGCTGGTTGTTTATGATCCGTAAGGCAGCACTGGGCTATCAC  
CCGATGGGCGACAACGCTTCTATTGTGGCAACCCTTGGGGAAGAGAATTACGACGCTGAA  
AAAAAAGACTCCGACATCGTCTTTTACTACATCCGATAAACAATGAATAAAAATGTACATC  
ACCGATGCAGAATGCAAGTTACAAGAGCAGTTCGGGCTTCTCTAAACTGAAACAAAACCA  
GAGAAAATAATTGATTAATAAAAACATACACCGTTGTAAAAAACCTGTGCAATGAGAACAT  
GGGGATACCTCCCCAGGTGGTCAGGTGGTAACCACAATTGTAGAAGTTCCTGCTGATAC  
TGCTGTAGTTGTCTTCGAACAAGGAGGCCAGTTTTGTTAAGCTCTACAGTCCGGAGCGA

TGCATTTCTAACCAAAGGTGGAAAATCCAGACCCGGAGAGGGGGTTTGTGGTGGAAATCCT  
AGACCGAAGTTTTTCGTTTCCGTGTTAACGGTGTTCGGTATGAAGGCAACTATGAATACAC  
CGCAGAAGAACGGGAGATCACCGATTGAATCTCTCTGCAAAATTGACGGACCCCCAGAAT  
GGTTGGAATGACGACATAGAAAATGCCCGTGAATTTTTAAAGACTCACGATCAGGAAGAA  
ATTCTTCTTGTTACTTAAGATGCTATTGACAGGTCGTGCACCGAAGTGGTATTGTCTAAT  
CAATGGCATGGCTGGAACAGTGTGCAATTTGACTTCTCCATTGAGGGTCAGACCCGGTCTT  
GACGAGTATTTTCATCATCCCCAACAAGAAATCATTAAAGAGACATTTATAAAGAATATATG  
CACGATGAATTCTAAGGAGAGCAGATGAAGGTATATTTGGTAGGTGGCGCAGTAGGTGAC  
GGTTTGCAGGTTTCGTGAACTCCACTCCCCTGACTAATTGGTTGCGGGTGAACACACGAC  
CAAATGATTGAAGAAGGGTTCATGCGGTGAGGGGCCCTCCTTCCCGGTATCCCTCCATCCG  
GAGACTCAGGAAGAATACCCGGGCGCTCGCGCTGAACGTAAGGTTGGAAGCTGTCAAAAA  
AGTTTTGACACCTTTTTTCAGCCCAGATGTAAAATGCGCAGAAGACCTGTCTCGTGGGTAT  
CTGACTATTAATTCGATGGCTCAGGATCTGAATAGTGGCGAAATCATTGACCCGTTCCGGT  
GATCAATATGATATCGAAAGGAAGGTCCAACGACACACGAACCTTGGCATTTCCTTGATGAT  
CCTCTGGGTATTCTGAGAGCATATAGATCCACAGCGCATTGTTGGGTAGGGAATCGGATCTC  
CATCCGGAGACAAAATCTCTTTGTTACGAGAACCGTCACGAACTTGAAAGTACCAGTGGC  
GAGCGTAAATGCAGAGAGATGAAAAAGGCTCTTGGTGCTGATGACTCTCGTTCCTATGCT  
CAAGCAATGGCAGAACTGGGCGAGTTACCAGAACTGGAATCGCTGCGCGATGTAGAGCAA  
CCTCAGGAATACCATCCCCAAGGTCACGCATTCATACACACGTTGCTGTGACTAGATATC  
GCAGACCAGTACGAAGCAATCCCCTACACGAAGTTTGCAGTCCTGTGTACGACCTTGGC  
AAGGCCGTGGCATTCTCCAAGTAGGGTAACCTGCTCGGTCACGATAAGCCAGGGGGTGT  
CCGGTTGATGAACGGTGTGAACGTTTTTCGTGTGCCAAACCATTTCGGTGTCTGTTGCTCGA  
TACGTGACTAAGCACCATACGGGTGTTTCATGGCATCAGCCCTCGTAGGGTAAACAAGGGT  
GCAAAACCGCGATCACTAGAGAAGCTTTTTCGAAGCTGCTGGTAACGTGAAGAGTACCATG  
ACAGCTATGACGGCCAGCGCCCTGGCTCACGCATCTTTCTGTGGTGCAAAGGCCGTGGC  
CGGACAAAGGCAGCGGAACCTTACCCACAGGGCTTCGTTCTGATGGATGCTTTCGGGTGC  
ATTGTCGCTGTAGATAGCAAAGTAATCTCCGCTGAAGGTTTGTAGTAAGTGCAGAACAGGG  
ATTGAGATCGGGGAAATGCTTAGGGTGGCACGTATCGAAGCAATCCGCAGCGTCACAGAG  
GGTCAAATTGCCTGGTAAGGAGTGTGTATGAAGAATTCGGATAAGGAATAGTACACATA  
CGAGAAACATCACTTTTACGCTGACAAACACGCAGGGAAAGCAGGTTTGTGCATGGAACAG  
CCTCGCAGCTATAAGGAACGAGGGTAGCGACTGGTGCGTGGATAATGGATGCAATTACTC  
ATTGCATCCATCGTACAGAAGCGCCATGTTGAAGTACACACAATTTTTCAAGTAGGGGAA  
CAATAATGCCTATTGAGCCTGTATTTTTATTTATGCAATGGAAAATGTCTAGGTTGACGA  
TTCTGTCGTTGAATTAGTTTTGGATGGATAAGATAAGTTCTTCATCCGTCAACATCGGGC  
TACTGGTGACAGTCTTTTGGTCTCTCGGACCTTTCTCTTTGGCGGGTGGCACCGTTGCCT  
TCATTTTTAAATAAAATTTTTGTTATTGCAAGGAGAAAGAAATCAAGACGCGTATGTCCAG  
CGTAGCATTACAATACATTGCGGGCATTAAACGCAGGTACCCAGTCAACACACGCGATGTC  
TGAGATGATCTTGAATTACTCTCAACGCCGGAACAATTCCGGAGACCTGTTGAGGGCTTG  
GACTCACCGCGGTAAGACCATCATCGTCTCAACGTTGGATACCAGTCGCCATTGGACGA  
ACTGTGTGAGAAGTTGAAACCTCTGACCAGCACGTATCCGTGGGCCTCTATCTGAGAAGG  
GCAGGATGTACGGAACGGCGCTATGAGATCAGTAGCTGTGGTATTGCCACAGTATATGTA  
AGGGCCGCAGGATTCCGATGTGGTCAATCTGTACCAACTCGGTAAGTAGCTCTCCCCAGT  
GCTAGTCAATCAGTACGGCGATAAAATGGGCAATGTGTTGCATAACTACACAGAACCGTC  
TACAGACCTGATGACAATGATCAAATCTTTCCGACTGAAAGTATTATAAGATGAAAGTAG  
GTGAAGTTGACCGCATTCTGATTATCGATTTGATCTGTTTCAGCTACGCTGATCGCTACTT  
CCGAGATCCGAACGATCGGGTCAGATAACAATAAGGATCCGAATTTCTTTGACCTCCCC  
TGCGGGATGTGGTAAACGGTTTTTGAACAACAACCTGTTTAAAGGGCGCCGAATAATGATCTA  
CACAATTTTTACCCTATTCCCCCTGCATGGTGTGATATTACTGACCCGTCCTGGATGAT  
CGGTTAAGATTTAAAGTTGGCGGCACCGAGTTGCTCGATATTCGTCTGCCTTGCCGTTAA  
TGAGGGCTTGATGATGCTAACAACCTGATCCCACGTTCTGATGGACTGTTTGCAGGACT  
CCTGTTTGGGATTGGGATGTGGAGACATATTTCTGCTGCCCCGTGCAATCTTGCATGAGAA  
AGTAATCAAGACCGAAAAGCTTCTGGCTGCGATCGGCCCTAATGGTTTTTTGTTTGTGCA  
TGTATCGTTGAGCTGCTTGAGCTGAGGTGGATCAATAAAAGACGTTTCGTGGATAGGATTT  
GAAGATTGGTGACGAGGGGTATATCAACTGGGGAGGCAATGAATTGCGCCCTGGTAAGGT  
AAAACAAATGAAGGAAAATGAGGCGAAAATCCTGGTTGATTCTTGGCCTAATCACCCCGA  
TCCAGCAAACCGTTATTCCATGTGCAAAATGAAGTCGCGTGAGTGCCGGATCAAGGCAGA  
AGATCCAAGCGGCTGGTATCCGGACGAGGACGTTTTATTGATTTAGGAGATCATTCCGGCT

TAGAGACGAGGTGAAATTCTTGGGGGCGAACATCGAGTACCACGAGCTCTTGAAATTCGA  
GGATAAAAACCGCAAATCCGATCTTCTTTTCTCTTAAGGAGAATTTTTGAAACTGTAGAC  
TTGTTGGGTTGCTACTTTGGCAGCATCGCTTAAAGGACTAACCTACACACATGATATCCC  
GATATCCAAGGGGTTTTCTGTGCAGAACTGAAGATCTTCCGCACACCAGTCTGCAATATC  
AAGGAGTAAACCCTTGCTAAAGAAGAAGATGGGAAGATTTATGAACTGACAAACGTCATG  
AAGCTTTTCGTGTAGATTCACCTCGAACATCATCGCGCTTGTGTTCTGTAGATGAGGAGGAT  
ATTCTCCATAGGTCTGATGCGTATGACTATCTACTTCCAATGGCACCAGAAGGGCTATCG  
AGCAAAGTGGCCTTTAGCCTCTCAGGCTACGCAATGGCACAGGTTAATCGTATGCGTGGT  
CACTATAAGTGGATCAGCACGCCACAACCTGAAGCAAACCCACCCAGAAGGAGTTTTTC  
CGCCTGGTGCATAACGACAGCGAGCACCCGTTACTGAAACGAGAGGGTTTCATGCAGGCA  
CTGGACGGACTGACCTGCTTCTGCATACTCGTACCTTACGGTATCAACGTATACGGTGTG  
ATGGAGAACTTTAATAGATCTAGCCTATTCAATGCTTTTCGGATCGGTTTCGTAATGTTCGAT  
TAACATGAACTGACCGCTGCGGATAAAAAGCGTAAGCCTTTGTGTATCGTAAAATGTCTG  
GAAGAAGAGCAGAAGCGGGCGAAAGAGAAGCACCGGAATTACTGGAAGTGGAAAGGAAAAT  
CGAAATGAGGCTCGTCATGGACTCGAAGTCCAGCTCGGATACGATACCAAACATGCGATG  
CACCACGAGCGCCTGATGCGTCTGGCGGAAGAGATTTTTACTGACGGTGAAGGCCTGGTT  
CAGAGGCCTGACGGTCAGGAAGTCTTATTATCCGTGGTGGAAAGTGGACCCTTGAACAG  
CTTCTTGCTCGGGCCGGTGAGAAAGACCGTTTTATCCAAGAAGACCTGCACAAAGAGACA  
GATATCCCAAACACATCCGACCTTGAACCTCGCCGCTCGTGTGCTTGTGACCGCTCAACAT  
ATCTGCGGGGCAAGATCGATGCTTGAAGCAGTAATCGGCATACTTAGGGTTGCATATGC  
AGTTATTCCTGTGGTATACTCCATAGAGATGGAGAACGCTAAAGTTATCCGGCAGATTCA  
CAAGACCAGGACAGACCTTGATTGGTCTGAGCTTTGCTTCGCGTTCGGGTTTCGCTGGCG  
GCTGGGGCCACTGGCCCAATATTTGATGAGGAGATGGAATGAGACAGCTTTAATTTCTGG  
GAAGAACGACCGAGTTGGTTGCAGGATGGCAAATGAATACAAAATGAACCGAAACAGCC  
CTGATGAACCAGGAACTCGCCCGATATTCGACACCAGGAGGACGGCCTTGGTGTATGTGT  
TTGTGGGGTTTTCAATGTAAGGCGTACACATGAGGAGTTAGGGTTTTGTAGACGCCAGAGCA  
GGCGTAGATCTTACGTACGCGTATCCTCTTGCAAGAAGCAACAGGCAACGACCTAAAAGA  
AATTTACAGAAATGTTGGAGTTGGTTCTATGCATGATGCATGCCCGAATTGTGGTGGTAC  
AGGTATTCGTAATGATGGCCTGGGTATGTCTGTTACGGCATCTCCTTCCCCTCCCCGAA  
GTGTTCTTTCACATGTTGATAGGCGGTAATTGCAATCACTCAGGATTTTGAACCTTTTTG  
TGATTGTTTCTTCCCCTATATAATGTTTGCCACGACAATGATAATATGTAGGGTATTAC  
TATGATAGGAAGTAGTATGTTCCAGGAATTTGTTTCGTGAACACCCTACCCTACCAGAACA  
CTGGCAAACCTCTGCCGTAAAAGAGTTTTAATCTACAGGGGTGGTTAAAATAGCAGCTATT  
ACACCCTTCGTGTAGGGCGATTAGAGGTAATTTGTGGGGGTGAGAGGCAAACCCCTATGC  
CATAACGTTCCATGTTGGTGTATGTGGGTATGCTCCATCCTGATGGCTGGGAACAGGCTT  
TCGACCAGTGCAGGGTTTTGAGGCGGCATCCGGGACATGTATAGAACAACCGACCTCA  
TCACCAATGTTCAACAAGCAGTCTCTGGGATGAGGATACAGAATCAAAGACCGGTTACAGGA  
ACCCCCAAACAAGGTTTTCGTTGCCGTTTTTCATAATCTAGGCAATAATCAGCGTGGTTG  
TGTATTCTTATCCATTATTTGAGGAGATTGAATGAGGTACAGAGGAGATTATAACAAAC  
AGTATGCCGCACAGAGCCGGGAGACACGCCGTCAGCGTCGATCAACACCAGAAGGAAAAG  
CAAGACAATTGCAAATCAGCGTTGAAAGAATTGAGGCGGAGAAACGTGCAACAGTCAATA  
GTGAGTGGGACATCTTCGTCCGTCGAGAGGTCAACCTTCTTTGCAAAGAGAGGATGCGTG  
ACAGAGGCAATCATTGTGAGTCTGACCACCTGCTGTCCCTCCGTGCAAAGATAGTATCTG  
GCCTAAACTGTTGTGATAGTATCCAAGTTATCCCCGTAAAATTGAACCGTAGTAAGAATA  
ACAACATGATCTACACGAACCGGCTTGAGTGGAAATAACGATTTGGTCACCCTATTCCGGA  
CGAATTAATAAAGCTTTTTGTAAACGGCTACGACTCACATCGTAATCAGTAAACTACAGTG  
AATTTCCAGGGTTGTGGCAAAGACAAATCCGTGTTCGGATTGGTCAATCGTTTTCTGTTGT  
GAAGGGTAAACACGAGTCGATTCTGATGGAGTTCTTTATCCAAAGCTTACAATAAAGAA  
TACCGCAGTAAAAAACGAGCAAATCTATTTGGTAACAACGAACAGGGTTGTGTAAATCTA  
TATTTATACTGATCGTGTGTGGATCGGTGAGGGCGAGGTATAACAACATAGATAGGTTTTT  
AGACTCAACATCCCAAACAGATGAAGAAGACTAATTGCCAAGCAAGAGCAAGGGTGCAGG  
TCTTGATATCCTTATGAAACAATACGGAAGAGTACCCGGAAGGATCTTGGAAGGGGGAT  
GTCTGGAATGTTTCGTTGAGGAGTATTGCTCTGAAAGCGAAGAAATAGTGTGTTGTTTCAAT  
ACGTTAACGCGCCATTGGCGGGTTTTCTTTATTTGTCCTTAGTCATTCTTTCAATGACC  
AGACTGTCAGAAGCATCAGGAAGTGTGAGGTTGCTCAATAAGAATGTCCAACCTTTGTTGGC  
ATCCCCCGGACATGACCTTCGAATCGAATATGGGCCACCGGGCAAGGTTTTCGGGTTGGA  
CGTATCTTGGTTCGTTCAAGAACCTAACACTACCTGCCGTTTAGATGGAATGTGAGAGGG

TGATAGGGGCTGAATTCGGATAAAGGGCAGGTGGTATCCGGGCGCACACGTTGGTCTGGC  
TCATTTTCGTTCCCGGCGAACGTCCTACTATCTTCTGTCATCAGCGTGGTGTCTCCGTATTAG  
GTTGTTTAAGACATAATCTTTGATAATTGCGCGTTAGTCAATGATTGACGAAATATTTAT  
ATGTGCCATAACGGGGAATAAATTCGGATAGGAGATTGATTCGTGTGAAAAGTAAGTTGA  
TGCCATGGAAAACTTGCGACAATGATCGAACGGAAGGAGATCCTTGAAGAAATCCTCAA  
TGATATCGACATGTGTATCAAAATGAGGAATGGTGTCTGAGAAAGGCTCCAGGAAAGGGC  
AAACTGCTCGCTTCTTATCGACGCATTGATACACACTGCACAGAAGATCCGGAAAAGAGG  
TCTTCATTGACGTACAGTATCTACGGTACAATGTCTATGGACCCATGCTCCCGCGAGGGA  
GCGTGGTACTGCCTGTAGAGTAAAGTACGGTTTTACAAGACGGTAGAAGTAATGCAACAT  
TACAGAGAACTTGCCGATATGTTCACTGGAGACTTGAATGTTTGGATGCGGGAAAAGGT  
GCAAGCATTACTGATCGGCACCTTCCACTTGGTCGTTCAACTGGACCGACACTAGAGTAG  
GAGATCGTGTACAATGGTTGTTCTATGAGTCTGAGACTTCTCGCAGGTACTTCTAAAGTA  
CGGATGTACCGTGGTTACCGAGTAAAGAAAACCGAGTTCCTGGGTACGCCGGCTGCAAGG  
CGAGTCCCAGTGGTGGGCGAATTCGCGGTACCTTACACCAGTGATGGTGATAGAATTAT  
CTACCGAATCGTAAATATAGTGAGCCATGGACGTGCGTTTTGCCTAGTGATGTTTCGTCGT  
ATATATTGGGCTGGACATTAAGCTTTATCCGGTCATGTAAGCATGTGCTGCGTATGCGTT  
GGTTTCAGGCTGGTTTCTAACTAAGCAAATCATGGTAGATGAAAAATTCTCAAAAATGCC  
TTTCCGTTTTTTCAGACCTCATCTGGCTGGCATAATGGAAACCAGACGCTACGAGGAGCTT  
CGACGAGAGGTCTACAAAGACTCACTTGATCAGTGGTTCATTCTGATGAGCAATACTAA  
CATCACCAGGAGAAAAGAGATGGGCGGCGATACAACCTTGTATTCATCAAGCGGGAAGTG  
TGGCAGTATAGCGGGACAGTGAAGTGGCGCTGCAAGAACAATGAGTTCAAACTACAGGTG  
CAAACATAAAAGGCAACAGTGCAATATTTCAAGATGAAAAACTCTTGATTTTATGGTATA  
ATCGAGTCTTACACAAGGAAAAGACAATATGTTTCGAAATGCTCTCGGCCGGTAAAGCCCA  
CATCTCCGCCGGAAGCATCAGAAAGGAAATGGCTGGGGGTGCGTATTTACTTGCCCTATC  
TGAAAGCGATAAGTGGTACGGTAATTGTGGGACGTACCCAAGTGGCATTGGTGTGCCAC  
GACGACTTGGCCTTAGATTCTCGAAGATCTAGGGGATTTTTGTCAAGATTCAGGCAATG  
CCTTGCAAAACTGGAAGATGCGAGTTGGTCGTTTTGGGGGCCAAACTCCGTGGCAGCGGT  
CCCTATTGTACGGGTTGGAATGCATCCTTAGAGTTTATCCGGAGTCAGGACAACAACGAC  
CATTCCCCGCACACTAATTGGTAATGCGGGTTCGTATATGCTGTTGTTGCGAGCATTCTGC  
TTCTCACTCTGACAACGACCTTTACCTGAAGTGACACACCACACAAGTGGAGCCTGAAGG  
GGCTCCTGTATTCTGCCTGAGGAATCCCACCATTTGAGTCTAAAGAGGCACATCAATTT  
CCACCTGACGTAAACTATCATCGCTGATGCGATTACCTAAAGAGTCACAGGTGCCGAAGC  
TCTGCACGAAACAACACCAAGGGTGCCTTGCACCTGAGAATTGAATAATGCTCATTCAA  
CAGTCTATACGGAAGTTGGATGTTATGCGTGTTAACTGTACCCAGCTCCTGCGAGAAA  
GGTTGTACATTTCATTAAATACACAATGCCCGTTGCGCGGGTGAACCTCGTTCATTGCTCTG  
CAACACAACATGTTTAGGGAATTGCATTTCTACGACACATGTAGCCTGCAGTCTCGATGC  
TGTAACATATCGCAGGGCGATTAGCCACAGGCTAACCCGTTTACCGGTAAACATAACAA  
AACTCACCCATCCGCCCGGAGGGAAAGAAAAGAGGCCATTCTTGATCGCTTGGGG  
ACGAAAATATCCGTTGGCTCTATGTTTGATGAGCTAGACGGACAATCACAGCCACCGGA  
GGTTGACAAGCATCTTTACTTAATATCTGAGTGGTCCGATGTCGATACCTTTCGAGTTA  
TTAGCACGATGATTGCAAGATGGTTTGTGTGACTTATGATAGCTTAATCAAACATG  
ATGATTGGATTGATTAGCCAGCTTACTGCACGATTTGCCCTTACTTGGCTTACTTTTTCG  
TGGGTGTATCTATATTACATAATACACGTTATACGCACCACAGATCGGACTGTTGCATAG  
GTGATTGTTGCACTTTGTTCCATTGCATCAATTAGCAATTACTATGACGAGGATCGGCC  
TGCTATATGTTATCACTGTGACAGTTTACACCCGTTATTATTCAATTGTGTGGGGTGT  
CTAGATAATAATGCTTGACATAATCAATATAATTTGGATTGTCATTTCACTTCTAAATG  
AAACTCGTTCGCAAAGAAAATAGTTTGGTAATTTACACAACACACTTGACAGGGAGG  
GAAAATAGTGTTTAGCAACACTCTGCTTTTGGAGTATTATACCACATAATAACAATTCTCC  
TTTTGCCAGTGATGGGCCAGATACCCGTCAATGCTAATGCATTGAAATGGTTACTTATT  
ATAACTAGTTCCTGTATTGCTACAGAAGGGGTTAATCGACTTTTCGTATCAAGAAAAAAC  
TTGACACATGAGGGATCTTTTATGCTCAAAAAAACGCCTTTCAGCAGGCCAGCGGCCGGA  
ATTACAGATCGATTAATCATGGTTTGTCCATTAACGGCGATTTATTGCTAATAATAA  
GATCTGGGCTTTCATCACCTCGGGACACTATAACACAAAGCCCTCACGGGATGTTTTCGC  
CACGGTAAACAATGTTTCAAGATTGACCAAAGGAGTTTTGCGAATCTCCTTTATCTGGACAC  
TATAACATGAGAGCGATCAACGATAGTTGATCGATGTTATCGTGGCGAGTGTGCTAATTT  
CGTTGTGCAACTGTTCTTATGAATGAATTATAATGTAAAGGATTAGCCCTTGTGAATC  
ACGTATATGATTATAGCGTAGCGTCTACGAGCCACCATAAAGCGAACGAAAATGATAAGT

AGTATCATTTGACTTACTCTGGTGTTATAGTGTGCTCATTACGCTCGCGTCCCTCACCA  
CGATCAGGCGTACGATTATTTTATTGGACAAGATCCTATTTTTATGCTCAAACCTAGACCG  
TTCACACAATGGATTAGATGAGAAAAGTTATAAAATGAGAGTTATTATCACGAATTAACA  
TGAATCGTTTTAAATGCGTGTTTTATTCAGTTGATGACATGCGGGATCAACTTTGAGGT  
GTTAGTGGGTCAAAGGCGATAAGCAATACCCTTTTAAACGCAATTTAACGTGTTTTAAC  
GTGTCTTCTCGTTAGCCACGCCGTTATATTCCTTTTCTGGGATATCTCTAACATCCCTCC  
TTTGATAAATTGCCAACGGGGTGTAGTGAGAATAATTCTCAGTTGCGATATTGCAACCAAC  
ATAAAAGCGGGTAAAGATCTGGGGTATGTTTGGGGTGTTCGTGTGATATGCAAAAGCCA  
CGACAATCCCGGCCTTACTTACAACATGATAGCCAGTGGTCCGGCAATGGTGAACGGTA  
GGTCATAACGGTTCGATCGGTTTAAACTGAGATATGGCATCACCTATAAGACGCCAATG  
GCAAGGCGTCGATAATGGTGTTACCTGTCTGTACGGTGCCTCACTTCGTACAAGGCAGG  
CAATCCAGCCATAAAAAACACTTGACAAAACCGCCATAAACCCAGCCCTGGCTTTGTAAA  
GATTTTGGCATTAAATGGTAACGGTGCTCTTGAGGATTGTA AACCGATGCGCCGTCGAAGC  
TCTCCGCCTCCCTCATTGCGTCTACTATTTTCGCACATTTTACGAAGCCCATATGCACAAT  
GATCGTTGTAGTAAAGCGCTTTACTAATCATCTTTTCTATAGTTGGCCAGAAGATAAAGA  
CCAGGTAATCAAGGGTGTCTAGTATTGAACCACGATTTTCGCCTGCTCACATTCCAGGG  
GGGATCCGTCTCGATAAACTTGACGGGCGGAAACATTCAAAGTGGTTACATTGTCCA  
TCCGTTCACTGTAGGCGGTGTTCTAGCCACGAGCCTAGA ACTGTACAGGATCGAATAGAA  
AAACATGTTTCGTCCGACAGAAGAAAGCAGATAGA ACCAGTTGCAGATATTCACGCTTTA  
TAAGGCTGTATCGTGCCTATCCAGGCCGCGCCCTTTCATATCTTCCGGGATTATTTTCA  
ACTGCATGCTCATATGTCCTGGTTGTGTTGTTATGCGCCGTAAAGCCCAACACTATTA  
ATCATCGTCAAATCGGCCAGGAATTCGAGAAATTCAAATTCATAGCTACGACATGCTT  
GACAAGCTCACTTGTTTTATACTCTTAAGGAAACAGGCGGATCGGCGCGTCACTATACAG  
ATCCGTTATTTTCGATATACTCCCCGACCTTTTGAGCGGTAACGTTATTTTTCTTTTTGGC  
AAAAATAACTTTTTACATGATCTGGGGCCGACAACAATGACCATTTGCGGGATCGAATCC  
GGGGTAACTATCAGGGCTTTTGCTTGGCGGATCTTAAAGCCTATTTTCGGTTTGCAAACG  
GTGGCGGCCATTTTCCGCATCTCCGGATCGACGTTGTGTTTCTTACAAAACCACAAAGAT  
TTTGCACCCGCAATAAGGTTGCGTAAAAATTCAGTCGGACCCGCTGCATTATTAATCATT  
TAAGTTTACCTCTCAGATTATGCAGGGGATGTCCCCGGCCTTGTTTAGATTAGTATTCGT  
TAGCATACTTTGCTACACGGTCATCAAAGGCGCTCTGAGCATCAGCACGATCCCAGAATA  
AGTCTTGATCTTGCTGCTCTTCAATGTCTAACTGGTTATACTACGCCTGCGGTTTCATATT  
CCATAGCCAAAGATAGACAACCATCAACTTCATTAATAACGCTTTGAGATAAAACAAAATT  
GCAAACATCCTTTAACCTTTTCGAGCATGAACGACGCCGTGCTTTTCGTCTTGGTCCGGGC  
AATTTGCAGACCAGATAGCGGGTTTTACATTTTGCAAATGTGCATAAAGATTTTTAACGA  
AAATCCGCGAAACATCGTTTAAGATTCCGATCAATGATTGGAGTTCATCATTATTGCTGT  
TAGTGATGAAATTTTCCATTTTTGTTTACCTTTCCGGCTTGACGGGGAACCATTCCCCGG  
CCTCAAAAAGATTTTAAACCGATCCGCGCCTGGCTTGCAAGCTTTTTTTTTGTTGGTCCAC  
GCCGTAATCATCGCCAACGTTGAAAATGTCCGGCATGGCACCAGCAGCGATCCATAGCAG  
GTACATTTCCCGGGTGTGGCGATGCATATTGTCGATCCCGTCTGCCCTTCACGCTCGAT  
CCCTGTGTGCAACAGGTAATCGCGCATCATTGTTGCTGTATGCGCTTGACTGTAATCC  
GTCCAGAAATAAGGCAGGGCCTCCACTGTTGACGCTTCACGGTCTCAGGGTGGGCGAT  
CGTTCTACCTGCTCGCGCTCCCGAAAGATCAGGCAGTGCCGACCGCATGTGGATGACCA  
ATAAACATTTTTGTTTTTCATAATTCTTGGCCTTCTATTATGACCGGGGGCGATCCCCG  
GCTTTTAGAACTTTAACCGATCTGGTTTTAGAGTGAACCGGAACAACCTCATTAC  
CTTCCCAACCGCCACGGCGAACACGGCCACAGATTGACGGATCGGCAAACCTGTCAGCGTG  
AATTACGTAGCCTTTGGCCCTTCCAGCTGATATGAGACGTTATTATCTTTTACTGCCCG  
CTGTGATGTGTGCTCAATTGTTGTATGCGTCCGGTTCCTAATTTCCAGGCGATCCCCGTC  
CACACCGTCATTATCATAGCAAAAATTAATTAAGGTCTTATCATCGAAACGAGGAAAATC  
ACACTTTGCATAATCGGAACCGCCTGCCAGGAAAAAGAATTTATTTGCAAGTTCGGGCTC  
TAAAACCTCGTTCTAGATGAAGGGTAATAACAGCGGGAAGATCACGAAAGACCACACCAG  
GCGACACATAAAGCGCGACTCAATGTAAAGCGGGTATTCATTAGTGTACTCTACTTTGGA  
ACTTTTATGATTCACCTCTACCAGGTGACCGGGAACCGCTGCCGGCCGTGTCGGTTAAT  
TATTCATCAGCGGATCGCCATGTCAAATGTGTTTAGGGCATTGATTCCAACCTCTGGCGA  
AGGAATACAGGCCGGATCGATAGAATCAGGGTTACGGCGTAAACCTCTAGCGGCGAACTC  
GCCAGACAGCGGATAATCTTATGATTCAACAACAAAATCATCACATCGCATCATTATAGA  
TGCGCCATAAAAACAGAGACCCGCGAAAACCTCAA AAAATTTGATTAAGCTTATTTTTATGT  
GGAAAAGAATTTGGGTATAGTCGCTTTTTTTAGCGCCATCTTTCAACTCATCAAAAAGTC



CGAATAGCTCGCCTTTCTGAAGACTATAGGTGTTTTTCGTACACGTTGCAAGCCTTTTCCT  
CTGTAAAAGTTTCCCTTACAATCCAATCACACACCTATAACCATGGTCGTAAGGGAAATGT  
GAAAAGTCATTACAATAAATCCGAACATGATCAATTACGCAATAGAATGACATACCTAGC  
AAAAGCGGGAGGCATGGCTACCATTAAGAGATCCGCGCCACCACACACCAAGAATCAGT  
ATAATCCAATATTTAGTTTACCCTCGTCTGGGGGGGCACCGTTGCCGCCTATGTAGAATC  
ATAGCATATGCGGCGCGGGGGTCAATCGTTAATTTTTGATCTGGTTTGTGTGGTTGTAAT  
ACTCATAGCGTACACGGGAAACCGTGACCGCTTGAGGCAAGAGGCATCGTACACGATCCG  
CCCGGGCGTCATAGTGTGAGATGCTCAGGGGTATTGTGGCGGGTAAACTTAAAACGCA  
AACGTAACCTCAGCCGATCACGGTTATCAATGCCGCTCACCACACCGAAACCGATTTGCC  
CGAAATTGTGGTAAACCACTTTAACCAGGAACTGAGATTCAAGCGGCGCGATCTGAGACT  
TCACGTTTTGCATTTTATCTTCCCTTGGTTTGTGTGGTTGGAAACATTGCCGCCCTACGC  
ATTAAAGATAACACAACCACAACAGGACGCAATCACTAATTTAAATTCTTTTTGTTGTGA  
CTTGTCTCATATGCAGCGATTAAGCATGATTAGCGACAATTACGCAGATAGTTTCACTG  
CGTTACTAAATTTACGGGCCTTTGAGCGTGGCGGGATTATCTGATAAACTGCAAAACGCT  
CTAAAACGCTTTCTAAGCCTTGCCAGGGCTGACCCTGGCAAGTGCAGCACCGTGCGGACT  
TCTCGTTAAAATCACTTTTCTGCATAGAAAAACCTTTGAATTATCCCGGCCTTTCGACTA  
ATCATCTTTTACGGATTGCCACTGGAAAGCGCGCTTTCTTTCGTCTAACCGCTTGTTAAG  
ATGTGGATCGTTGCGGTCCGGCGTCCAGGTTTTGGCGATGCGCCCCGGCTTGTTGTGTTT  
GTCGTTTCGATGGCGTCGCTCGTTTACCTGCCCATATCCCTGGAGATCATGCTGGCTCGT  
CATCTTTTACGCGTTGCGCATATTAACCCCTCGTTTTTTTATCGGACGTTGTATGCAT  
GTTGAAAGATCCGGCCTTGTTTCTCGGCTATTTCAATTAGCTCGCCTTTCGATCATCTCCG  
CGATCTGCTGCTTTGCGCCTTCTGTGTGATACGTGACCACTCCGCCCCGCTTTTTCACTT  
CACACCGTAAGCCGTTACCATCGAGATTATTTAACGGCCCAGATCGCCGGGTGTGGTAGT  
GGTTTCCGTGGAATCTGTGTTCTTAAGAATGGTACACATTGCCGATCCTGTATTCAATTAT  
AAGCCACAGCAGGGCCCGCCATAACCTGGCAGGGATATTCCAGTAGAGAGCAGCAGCAG  
CCACCAAATCAGGATTCTAAACACTCTTAATAATCCTCAAACATCTCTCGGAATGTCTC  
CAGGTCTTCAGATGGAATCACTGTCCGGAGTTCCTCGCCAGTCTTCTGACACGCAAGATA  
AATCTCTGAACCTTTGTGGCTATCCTCATCATAGCCCATATTAGCCCATAAATCAGCATG  
AGATTCAGACCCAGATCTATATCTGACAGCAGGCAGGAAAGCACCTTTGCGGCGGGCGGG  
TGTTGCAACTTAGACACGGGAACCGAAATCCAACGCTTTATTGTGCGTTGCGCTTGAAAAC  
GTCGCGTGGCCAGTTATTTTATCAACGATGGAAACCTTAGTATCAAATGTAGCTTATCC  
TTTCGCTTCGTTGGGGTTAAGTCAGTGTGACGGCCTACACGGTGACGCATTCCCGTTTT  
AAAATCGGACCGGTAAATCTTCCCCCTTTTTTCGGAACCTCGCCAACAACAATCCGCTTG  
CCATTCTGGATCGTTGTTAACGCCACCTTATTGCGCTTTAATATCAATCCCTTGTTCTTT  
CACAAAGTTGAAGACGGCAACATCTTGTTCGTTCAAAGTGATTTTGTATTTCAGGATATT  
TTACCGTTTGTGTTGGTTTGGCACTAGTGCCGGGTTATTTCTCTTAATTGGTAGGGCATAT  
CCTAAGGCCCCACATATGTAGAGTCAATAATTTATGATTTCTTTCTCTAAATAATC  
GAAGGCGGCGCTCACTTCAAGCAATCAACTAATAACTTAACGGGGAGCTTTAGATTGTC  
GATCCATCAGCCTGCCTCTTGCTTGACGTCTCAATTGTGCGTTTTTGCACTGATAAGGAT  
CGTTAAAAGTTGCCCGTTATCCATGCATACGACCCTTTCACACCGCCTTTAAATAAATTGT  
TAGTTAACCGGTACACATGGAGATAAGCGCGCTTTTTAGTGTGGGTCGCTTCACTGATTA  
TATCATAAGCCAGATTATACCCATTTTTTCAAGCCAGTAAAGCGTTGCGCTTTGCCCTT  
CGTTGTGTGATTATTCCCGGCGACCGGTGACTCCAGGGCCAGCTCACCGTAACCAGTGT  
AATCATTTTGGACGAATATCAAATCCGCACGTTGGAGCGTGGCGCGATATTCTTGATCG  
TGTTTCCGTTAAAAGCGCGACTAAAATAAAAGGAAGCGAGAACAAGACAAAATCCCCGG  
TTGGGCTCGTGCATGATAATGAGGTCAGGCGGTTTACAGCGTCATGAAGATTGATAGTTG  
TTTTCAAACCTGTAACATTATGTTTACTTTTTTCAAGTATGGCGGGAACCTCTCCCGCCTTGAT  
TAATAGGGTAACCGATCGGCCGATGGTTTGGCAGCTATTCCTTGAAGTTTTTCAAATCTT  
TTTTACGCTTTTCTGTTTCTTGGGTGACGTTGATTTTTAAGCCGTTCTCACTAGCCTAGC  
GATCCAGGTGGACCCATCCTGATTTTATACAGATCATGGTGTCAAGATATTTCAATTGCAA  
CTTGTAAGCGTAGAAACCGAAACCATAGCGCCGCTCGGGCGACTTATACAGCTTCCGGCC  
TGGTGGCGATCTCCCGGGTAGGGAACAAAACCTCATAGACAAAATTTGTGTTAAAGTACA  
TATCCCTAAAGTCAAGTGAATGCAAATTCAAATTTGCGGGTTTGTGTCTACTGATTTTT  
TGAAAATATCTATCATGTTTTCCATTTTCGATTACCTGCTTTCTTTTCGTCTGGGTATTAT  
GGTCCAGTCCCCCGGCGCTTGTCAAATTAATTTTTTACGGGCCATATGCGTCGCTAAACG  
TGCGGCGTTGTGGGATGGCTTTTTGGTTGTCTGGATCGGCTTGCCATTTGCGTCCTGTAC  
ATAGGAGACCCGCGACGCCTGGCCGTTACGGTACCCCGCTTACATTTCTCAATAACAAC

CAGGGCCGGGGCGTTGTCCTTTGCTGCACGATGATCGGGCGGTGTCCAGGATCGCTTCCTC  
CTAACGCCGGGGATAACCTGCCAGCGTTTACCAATAGGGCGCGGTGGTGCCCTTGTTCGAT  
CACTTTTCCGCCGTTGGCTTGGGAAGCAGTACGGGCAAGGGCGCGAGAATCGAAATAATT  
TTTCATAGTGTAACCTTTGTTTGTGTGGTTGATTTGTTTGGCTTGTCAACGTGTGGCGATT  
ATAACCCACACATCAGCCAGCGTCAACAATTATCTTACAGTTATGTTTTGACCTTTCAC  
AATTATATAAGTGCGTCCGGCGGTTCTATATTGATCAAGGTATATCCGACGATCACGCCC  
CTGCAAATTAACCTTCCATTGTGTAGGGATGTTAGTCGAATATCCTGATCGTTTTCTGGT  
TAGCCCCTTTTGTGGCCACCACTAAGGCGCGACAATCGCTTAACTTCCGCCAACACAGA  
TCCGGCATTTCGAATAAATCATGTTTCCATTATGTTTACGTAGTGTAGTTGCGGGAGGC  
TTGCCCGGCGTTTTAGGAGGATAACAGATCCGGAGTTGCTGAGCATGCTTTTACTAACAT  
ATTACTCACGCCGTCAAAGTTTTCGATGATCTCCGCGCCTGCCTTTTTTGCAGCGTCCAG  
GCCTTACCCTTGCATCCCGTTGCCGTTGTAACCTTCTTTTGCCTTCGGTCTACGAATCGCT  
TTCGTCTGGTTTGAATCGGTAATAAATGCAACCAATAAACTCATTACCCAGGAGGGTGAT  
CACGTTTCGCTGTGGCGATCACACTGACACCATAATCACTGTCATTAAAATCGCGCTCGAA  
AGCGTCTGTGGGTCTCTCGTAAGCGTGGCGCGATGGGTTATCATCACCACGGGTGAACGA  
GTCTGCGATCCGCTCTTTCAGGCTGTAGTGTAAACGGGATAGCATATTTTAACTATTGGG  
ATCCGCGTTAGGATTGTTTACAGTGACCCCGCCCTGGTGATCGACGGTCAATTCCAATT  
ATCGCCAAATCTAGGAATTGTATTAGAGCAGACATCGTCAACGGTACAATGCATGCTGTT  
TTCTGAATAATTGAAAGTTTCGATACTGTCCATTTGTTTACCTTTTCTGTGTGGGGCGA  
CGGTGAGTCGGCGTGATGTGCAACATAGTAAACGGCATACTAACTGCTGTCAATCCCCA  
GGAGAAAAAGTTTTAAAAAGTCTTTCCTTTATCCTTGTTCATTCTGGGGGGGATCGTG  
TACTACATAACGCCTGAGACATCAACGGCGGGTCAAGAAAATGGAAAACGTAAACGTAGT  
AACAAAGCGAAACATTTGTGACTCTTTCACCTGGGAAACATCAGCAAATCAGTGTGAGTC  
TAAATCGGTGCCGTTGCCTCATGCCTCGCATATGCTTAAACGACGGATTCTACCTGGCGAA  
AGTGGTAGCGGCAAACGGAGAAGTTTTAGCGGATGCCCTGTAAAAAATATTTGGACCTGG  
GGCTTGCAATCGGCGCGGCCTTGGGTTAGAGTGAGTTCATAGAAGAGGAAACACCACCC  
ATGGCGACAAGTCGGGGCTAACGTACCGGGCGTGGGTGCGATGTCGGAAGGTGCATCGCC  
CGTAGTTCGACCTGATGACAATTGTATAGATTTGCAAAGACGCTTGATCCGTGGAGTGGT  
TATGCTTTTAGTTCCACACGCCGAGGGGTAACGGGAATCGCGAAACAAACACCGAAGCTG  
CCCGCAATCCTGCAAGTGAGAATGATTTTCATTCAACAAAAAACTTCTATTGTCATCTCG  
TGTGCGTGTGTGGTAAAATTCCCGATCCCTAAAAAATTTTTAGCTCTATAGAAAAAATA  
CGTTTTCACAACTGAATACTCGATCGAGAACAACGCGGAAATATTTTTTCGATACACGGA  
AAAATTACGTTTTTCGATTTTGAAAAACCGATCGAGTACCCAGTGTTATCCAGTAAACATT  
TTTTAACGATAAAGAAAAAATACGATTTTGAAATCCAACACTTCTCGGGTACACGGAGT  
TAAATCCCAAACAACGGAGTTAAAATTTCTGGAATTTTGCAACAATTCGTTTACCGGAG  
CATGGAATTTCCATGCGTAATCACTCTGATGCATGGGAGGGGTTTGTGATAAGTAGCTGT  
ACTATCCAAAATCTTAAATCACACTAAAATGGATATACACCCCGGCTATGAGGGAAAAAC  
ATGTCAACATCCATTGCGCATTTTCATGTTGATTTCCCGTTCAAAAGTCTATGACAAATAG  
CAAGGGGAAACAAATCTCATTTTGAAGCACCGAACCGTTTCATAACAAGTTCTTTAAGAG  
AGATATCATGTGATTGCAGGTCGTCATTACATATATTCTCAGATTCCCATGCAGCAGGTG  
CATGTTCTCTATGTCAAAGATCCTATATACCCTCCCCTTTGTTTCAATTTTTAAATCTCT  
GTGCCTTTAACTTACAAAGTTATCTGTCAAATGTTACACCTCTTGCATGTGTGCCATTT  
GAGAAATATAACTGTTCAACCACACAGGGATGTAATACATGTATCAGGGCCGTAAGACT  
TGATCCCTTCTACCAGCGAATCGTTGTCAAGTACATATACTTTTTGATAATTATCGCACC  
ACCATGTATGAAAGTCCATAAATTAATGACACTTATGGACAACAACAACCCCTGATAAG  
ACGGCTAGTGACCGCTGTAGGACCTGTTTATCATATTGTGCCAATCCTTCCAGGCCGTAT  
GTTGAGGGAGTTTACCATCTTTCGCGAGACTCGTAATAAACGGTGCATCGTTTTTTGCCAG  
CACCACATACGAAACGACCATGTTTTGTAGATGGTTTTCGATTCCATTTCTAAATCTAAC  
TCATACCTTTCTCCTAAATGGCGCACGGTCGTCATTTTGGATTCTTCCCGAAAGTATCTC  
TCCACCCACAAATATCATACTCTGCGAGGTGCGACATTTTATACTCCGGATTTACGCCT  
GAGTGGGAGTCATCTCGTCCATGAAAAGATCCTTCATCTCTAAGTGCCTGAAGCGATAGA  
CCATTGTATCCTTCGTCAAGATGACATCAATGCTCCCATTGACACCATCTATTCGTAAGG  
TACAATCACCGTCACATAAACACAGTATCATATCGCACAGAGTCATCCAGTCTGAAACAC  
CAACAACCATATTGTTTGCAGTGTTCCTCAAGCAGCATAACCTCAACAACAGCAGAACCTG  
CGTAACCAGTTCTGTCTTCTGAATGATCCTGAGAACAAAACACGCTTAAACTTATTCC  
AAACTCGAGACCAAGCGCGCTGTAAAGGCTGGGGTCTGTTTTTAATTGCCTTACCGCTT  
TTCCCGACATATACAAAAATTAATCCGAGATTTCTGCAAGTACCAGCTCATTATCAACAG

CCAAAATATCTTTACTCAGGGTAACTCCCCGTGTACCAACAGAGATCGGGGAGTGCCTGA  
GAGTAATGACAAGCGCTTCCAGTTGGGCGACATAATGATTATAGTCACATAGCTCTGAAC  
ACTTCAGTATAGCCTTCAGTTAAGAAGGCTCATACTACTTTCCCGTGTCTTTGTAAA  
ACTCTGCCTCATCATCTACATCAGTTATAAATGCAAGGTAAGCTAGCTCGTGTCTGTGC  
ACTCTAATATCTGGAGTAACTAGGATTCAAGATCCGGGCGCGGGTATTCGTTGTGGGTAG  
GATCGAGAATCTCTGTGGTGTGGAAAACGGTTTTAATCTTAAAAGCTCCCATAACGCTTT  
GTGAGGCGTATTAATAAAGAGCTGTACGTTTGCCAACCTTGTATGGGAAAAACCACGCAG  
AAGCGGTTTTACGCAACATGCGGGGCTTTGTGGTGTGAGGTTTACCGACCGTGATTTTG  
GCCACCTTATACTAAATGTATGCCATATTCATTTTTATGCTTTACAACATAGGGGATTGG  
TCAGTTTCAGAACATGAAGTAGCTCAGGCCATATATCTTCCCTCAGAACTTTAAGGTGTA  
GTTAAGGAACTACATCAACGCCTTCCACGGGCTCACTGAAGTAGTTCTGGCCAAGATTC  
GTCTGAAAGAAAGATCCTGTGTATCAAACACCACCCCAACTAGGGTGTCTTACGCATG  
ATGTCGAAGTTGGTCCACTTTTCTTCACACAGTAGGGCTGCTGGTGCATCAACCAGTTTC  
ATTGGTTAGTCCAAACAAGCCATCGACATGATATACTTGCTGCCCGGGCTGTCAAAAATG  
TCGATGTTTGCAGCAGACCGCCACGACTGAATCCGGTAAACTCGATTTCAAGGTGACGG  
ATCAGGTTCTGTTCTGATCTGTGACTTTACATTCCTACCGTCATCGAGCTCATAACCCT  
GTAAAGCATAACCAGGTGTCTTTGTTATACAGCGCGGGGTATTTCCCTCTTCCCGAGCTTC  
GCGATTCAATCTTTCCCACTTTCCCTCTATCCCAAGGATCATAACCCTGGAGGTGTGGTTA  
CATGGGGATCAATACAGGGAAATCATCGTTCCAGATATCTGGTATCCTCCCCAGCTTGGC  
TCAGACAGCGGCCTTTAGACTCCACCGCAGAAAATGATGCCTATGCCAAGTCCCTCAGC  
CCAGTATTTGATATCATCGTTCCCTGGTAGTTTCGAATCGCAATGTCACGAACCTTCACAAA  
CCAGTGTGAAGCTCTTGAACAGAAGAGGGGAACGAACCTGCGACCACCATTCCGGATCAAG  
AGCGAATGTGTCATCCAAATCAAGCGATATACGCTTTCCCTCAAATGATTTCACTAAGCC  
CCCATCCTCAATACGATATTGACCCACTTATTGAACCTTCTTGTCAACATAATTTTCATGA  
CGACGCTGGACTGTTTCTTCCACCTCGTGCCGATCAGAATCGCGAGGTTTTATACAGTCC  
TGAAGCTAGTGCATTTAAGCCGGGACGATTGCACAGTTGGTCACATCGGCAATCTCTTCG  
ATTGAAGATACATCACAACGATAAGGGCGATTGAGAGTTCATGCCAGTTCTCCAACCTCC  
TCTACCAGATTCATCATGACCGAAAAAGTAGACCGGGCTTGCGCCCGGACGGAGGACTGG  
ATTGCGCGTTTAGCGATTCCGGTCAATTTAGACTCGTTCTCTTTTGCATTCTCAGCTTCAG  
CGGCTTTTGCAGCAGAATCCAGTGCATCGGCCTACTTCTTGATCCTCTCGTCTAGGTACT  
TGATGGTGCGGTCAGCCAGTTGCTCAGTATGTGGTGTGATGCGCCGACATTCTGATCGACAT  
ACGCAGCCAGCATTTTGTAAAGTTGTTTCTGTCTGAGGCCTGAAGATTGCATATAACAATCG  
CCAGGAAACATAACCACCATACCGAACACAGCAATCTTAAGACGACCTTTTGTGAGGTGCG  
GCTTAGACACAGTTTGGCGCTCTGCTTACGCTGACGAGATGGTGTACCTCCCCAAA  
CTTCAAAACACAGCCAACCAGAAGTATCACCATTAGGATAACGTACCCTCATTGTACCAT  
CATTATCAATCCTGGAGACAACTACCACATCTCGGGTTCTAGAAGTGGACCAGTCCCTGAT  
TTTCGACAAGGTTCTGCCCCAGAAATAATCCAAACAGTCCCTTTTTACCATCCGTCTCTT  
CGTAAGCCTTATGAACAGCATAACATGATCACATATGCAACCGTTGAAATGAAGAGCAGGA  
AGCCCCAAGCCCCGTAAGTTCCATCAGCCGTGTATACATGAATCTGGTAAATCGGAAAAG  
GCCATGACATCAGTTATACTCCTATTTATAAAAATGTGGCACAATTGGCGAACGACCATC  
CATACAATCTACGCTTGAGGACAGTGCCTCAAACGCCATGAAGGAATCAATCTGGATCTT  
ACCACCACAGATCTCTATCGCCCAGTCATATTCTTTGGCGTTATACCTTTTTTCGGGGAT  
ATAACACCCTGTTAAAAGACTGGGTAACAAATGTGAGGTGAAGACATTTTTTCATTTTTCA  
TTAAGACCCGCAACCAGTGCCCCAGCAGGTATGCTGTTGATGCCATTGATATTAGCAGGA  
TGGCCTGCCATGCCAAGTCGATTTTCGCAAAGTTTCTCCTTCATCGACTTCCCCCATCACC  
CAGAAGTGCTGCAGACCAAGGAAAGAAAACCAGTATGCTTCTTCCCACGAGTCCACCGCT  
GTAGGGCAGCTATCGTCTGTGTAGGTCCGGTGTGTAGCGCCGTAACCGGCCAGGCCATCG  
ATAGTCAAGTACAGTCTTGGCATAACAATCGCAACTGTCATCAACATGACAAGAGCAACTG  
GAGCCGCTGGCTATCACACTGTACTTCGGAACCAGACGTTGACTAGAACGTTTTACATTA  
ACAAGTTTTCGGCCTTCGCGCCGCCACGGAGTAGATGGGATAAACAAATTTGCCCTGTC  
CCAATCGGATCCATTACATTGAACTTCCACCCAAATCTGAATGCCTTCGCTATCGGTC  
CATCACTTCTCAGGAAACCACCTATACTCATAAAAACATGAATCACGGCTTTTATTC  
AAGAGTTTTTGTATGGTTGGTAAAGACCTGATGTGTATTGATTCATATATGTATTCAT  
TTGCAAATTTTGCAGGACACGAGGTGCAAATTTTGCAGCACATCACGTTGTATTCGTATG  
TGCTCTAGCCTCTCCCTTCCAGAGATAAGTAGCCGTGTGTGACCAAGTTTTTTATACAGG  
TTCTGTTGGACCTTTCAGAAACACCGGTGGCTACGCTTATCGTCTTGTAATTTGCGAAAT  
ATTTCTATGATTTTCTCTCTATGTATCCAGCTTTGTATTTTATATGTTGCATGGCACGAA

GATCTGTACACGACAGTATCTTGTCATGTAACCTCGTTATAATCACAAGGTACCCACCTCT  
CGCGCTTTCTGGACTACCGTAACCTCCCCACAATCGACAGGTTATAAAAATCCATCGACT  
ATACCTACAGACTTATCAAAAGACTTGCTCTCAAAGATCTCTGTGCCACCAGGTATCCAA  
AAATCCATCATTGGAATCTGCCACTTTACCATCGTTTCTAAAGGCCCTGCAACGCCCAA  
TTCGTAAGTCTACACATATTCCAATGTGAAAACACTATCATATAAAGAAAGTTGCTTT  
TCCCCTTCACTAGGGTTTTGCGTAATACCAACTTGACAAGCACCATCACACAACCTGCC  
ATATACTAAGACTTATTTTTACCACCAGGGCTATATAAGTAAGCATAATCGGCCATAGTA  
ACTGTTTTATTTCTCGATCCAAAAGCAAGAAACCTATTCTCTCCAGGTTTCTCCGGTAT  
TGACTGCAAAACTCCCATTCCATCCTACTGCCTCAGAACAGAAGTCGTACAGGGTACTTT  
TACTATCTCTCGGAGAACCGAAGCATCTTTTTACCTTGCAAAATCAAGGAACATTATCC  
CCGGTCAATTTTTTCAGCGGGTGTAAGAGATCAGGTAAACACATTTGCTGTGAATTTAAC  
ATTTTCATACTCACCTCCCCAGATCATCTTACGAATTCAATAACCTACTTGTTCGCAT  
ATTCTTCTTCATCATCATTATGCAACATGCGGTTAATTACGCCACCATAGTGTACAGAG  
AGTTCTTAAATGGTGATAGTCCAGGTAAAATACTAAACATAAACTCCGCATCCGGGGTGA  
TCTCCTGGGGATTTACCGTGTAAGCTGGTGGGATAATGGTCTCCCACTCCCCTATCTTGA  
ACTTATTAAGACTCGAGGCTCTCCTGGTGTAAGTTGCGAGGTGCTCACAATTCTCACAAC  
CATCCTTTGTGATGATTATTCGCACAATTGCCCGGGTGACATGATAACCACATCCACAC  
GGAAACCAACGGCGACGGTTTTAATTTGAGTGCTCATCTAAATCGCCCCGCCCTTCCGAAA  
GCTGGATCAAACCTTAGCACGGTTTCTACCGCAAAGGACACACAGTGTTTTCCATTTACAA  
TCCCAGTGATTTTTGAGATGAGTGAGTTCCACAATATACCCATCAGTGAAGAGTATCACA  
GCTGTTGCCCTTCGGAATGTGGTCATCGATGTACTGGAATGCCACACCTGCCATAGTACCG  
CCTATGGAGGTTACATCGTAGTCCAGCATCTCTTAGATGTTCTCCTGTGTGTACACTTTC  
ACATCACGAACCTTCGTTCCACCAGCAAATAATGTCACACGGGAAGTTTTATAAAGCAGA  
CACAAACCAATAATCTCGTTGATGATAGTGGTTATTGTCTGCTCAGATATAGAACCTGAC  
ACATCACAACCCTTCACGATGTCGATTGTAACCTATTACTTACTACCGGGCAAGATGATA  
CTTTGCTTGTGGTGATGGCACCGTAGTTTCTTAACACTTGCGTAACAGCCCCGCTCTA  
CGAGCAGGTTTACGGAACGAAAGATACCCTCTCACACGAGAAATCATTTCGTTGTCTTAGC  
ATGTGCATATAGTCAATGTAAGGTTTCCGCATTCTGGCTACCATTTCTCGTGCCTCTTTT  
GGTCTTCAACACCCGCAGCCTTTAATGCAGCCTCAACAAGAGCCACTGACCATGCACAG  
GTCTCATCTTTAGTACCAGGCGTTGACACGGGTGTGGATCAGTGTACCACAGAAAGTCA  
CGATCTGGGTAATAATCCCCGATACGAATACCATTGAGTGTCTGAAACAGCCTTCCCG  
TTTTGAGTGGCGCCATAAATTTTTTCCGCCGTGATCACGTGGATAGAGAATTCACAGTAA  
CCGTATGCCCAAATCAGAATTCATTATTTTTATCAAAGACTGTTTGGCGCCCCACCAGGG  
TAAAATCGCATACCCTTAGAACGTGGTCCAAGATGGCTTATCACAATATCTACGTTGATA  
TACTCATCGATATGAATATTGTGCAGTCTTGAATCGAAGACCTTACCACGAGACCTATGT  
TCATTGGTTATATGGCTTGACTCATGGACGAGAATAACCGCCACTTCCCTTGGTATTTTT  
CTACGATAGAATACATTGATATATCTGTTGTAGTGATACTTCTGTTCCCTGAGTCATGTGG  
GGGTGTTTATCAATTCGGGACAACAGCTTCTTCTTCTGTTCTTCCCTACACACCCAAGATT  
AACTTAGGGGTATAATATAGGTTGAGGTGGTCTGTGTCCGCAGTCGGTAACCAACGCCAA  
TCAGGGATGATCGGCAAAGA ACTTAGCAAAGTCCCGTAAAATGGGCGCTGTTGTAAGAAT  
GCAATACGAATAGATTGATTGTCCTTGAGAGCATCTTTCAGAATCTTTTCAATCATTTTCG  
CTTTCGTCTTTAAACATATCCCTCTCGAAATAAAAGGGGCCATCCGTCAAGATGGCCTCA  
GAATATGTGAATTTTGAAGTGCAGGATCAACTCTTTTTCTTCAACGAAATAATCTTTCCTT  
CCACCCTGAATCCACATGCACCTTTTCGACCTTGGCTCATAACCGGGTTGATGGAACAGCAT  
ACAGTACAATTGCAACCACCTTTCCATCATGGGCTTCGTCGATAATCGTTACTCCCTAAC  
CAACTACAATTGCAGGCTTGAAATGATGATCTAGCTTCTTCTGTGCAGGGGCCGTGCGCAT  
GTCGGCCAAGATGTGTTTCATACATTATACCACTTTGTTTCAGCATCGCGGTTATCTTCGG  
CAGAATGAGA ACTGCCTGCATCATCAATGGGGACATTGCTGATTCCTTTTTCTTGGATAC  
AACGATGAGATTAGCTTTCACAGAGCCAAGTTTTAGGTGGAGGATGAGGAATCACTTGGG  
TTCACCTGTCAATTTCTCCCCTGTCATCGAGTTCGTGTTACGGACCCATTTTTCTTGA  
CTGTGCAAATGTCACACTTGCATTTCATGCCTACATCAGAGGAGGTGTTGCAGTAGCTTGC  
ATACGCCAGAGCCACCGCTACGTCATGCTGCAGTTATGATGGCTCCGGTGCTTTTTCTGC  
GTCCTCCTCCACAGCCGCGCTTACTTCTCCGTTACTTCGCCCTAAGTCTTATTCTTTTC  
TGCTTCCCTGGCTCAGTGTCTTTCGATAGCAATCATCCGGTTCCTGTTGTGAGATATA  
ATTAGTCTTCCGCATTTCCCTGTGGTCTTTTGGCATGGTCCGCCAGCATTGTCTAAACAAT  
CTCGCAATCAAGCGGTTCACTTATTGTGATTGCACTCTTGTTTTCAACCAAGCTATCTAT  
CTATTTCGGAGGCACGACGGGTCACAACACAGACGTTTCGACGCACATCGCCTTTTTTATC

GTCGATACGTTCAACTGGAGGTTCTTTTCGGGTTATAACCTGCCACGGTTCCAATTTGAAA  
CAGCATGTTGGCGGAGTTGCAAGTACCCATACCGAGTAACCTTCTTACCCATCATCCACCA  
ATCGTCTAGGGTGATTGAGAAGTCGATACCACCTGTTGTTGTACGCACAACTTTGTGTG  
GTAACCTCTTTCGAGATTTTTCGTCTCATATTGTGTAAATTTTTATTTCCATTTCGATCAT  
GTTCTACTCCTGGCATGTTCTGTTCTTGTGGGGTGACCTTGATGGCTTTCATTTCGGAGC  
TGTC AACACTTGATTTCAAATTCTTTACAGTGTATGCTTTGTGTACTTTTACTGAAGGA  
AGGATAAAAATGAATAAATTGAACGTTGATGTTACAGAAGTAAACGCCCAAAGGTTACA  
GCAGATATCGACCGGAGCTTATTATAAAAATGACCAGACCACTCGCGCGCTGATCGAGCAC  
TGGCGAAAAGAGCACGAGTAGCGTCAAATGGGAATGATGGGTGTCTGAGATACCCCAAGA  
ATGTATACTGATGATTTTCTTTCAGGGTTGAACCCAAAGATGATGGAAGCTAATCCCCTT  
GCTGAACGACTCAAGGGCCTGCTTGAAGGGGGGATTGGAGACATGGGCCATTTTCGTGG  
TTCTGGGGTGATGACTGGCAGGTTTATCGGCGGGAGAGCCTGGATAAGAGGTTTTTGGCC  
CGTCAGGCGCTCGATGTCAGAGACAGGGCCCTTAACCTCAATCCCGTTCGAGCGGGAAGAG  
GTCTCAAGAGGGAATGACTAAGCCAGTATCCGGGGGCATGGGGATGGGGATGCCTTTACA  
ATGAGTTCTTCTTGGAGGTTTTCAAGTCGTAAGGAGTTACTCAGTTTGTGTAAGCCC  
CTGATCATACAAATGGGGCGTTGTGAACCAGGCCTTATAATCAATGAAGAGTTACGCAGA  
TACGGCTTGTGATCAAGAGTCACGCAGAGGTCATGAAACGATCCTCATATTCTTGGGATA  
TCCTTGTCTCACGGACAACCTTCTTGTGTTTTGCGACTTCAAGGATAGGGATAACTTCGAT  
GTGCAGTGCAACAGCATTGGTCACCGCTTCTTCCAATTGCGTGATCGCGGCGTTAAGGTC  
AAGAATGCCCGGGAGGCTTTGTAGATTTCCATTAAGAGTGAGACATTATTCACCTTCGCT  
TGGGATGAAAGACTGTAATATATGGTGGAAAGGAGAAACACCCAGCTCGGAAGAGATAATG  
ATGATGGCAATGGCTCGATATATAGATGTGTTCTGGCTTGACAACATATATGGTTCGTGAT  
GAGCACAAGAACAACCTTTTAATATAATTGAGCAACAAGATGGTACGAACTCTCAATA  
CCACACCTCCAGTTTTAACTCCGGCGCAAGAAGTTGCTCTGGCTATCAAGATTGGAGCAG  
TGGACCACCTGAAGCAGAAAGACAAGGGTGGTGATCCTCTCATCCTTCATCGCCTGAAGG  
CCATGCAAAACCTGATGACTGATGATTTTCAACTGATGGCGGTTGCTGTCCTGCACGATG  
TGTTGGAGGATACCCATGAAACGGCTGCTGTTCTGGACATTCTGGGCTTGTCCAACCGTG  
TGGAACATGCTGAGGTTCCGCTGACAAAGACCCCAATCAAATAGGGGAGTATAATATCC  
AGGGCATTGCAAGCAACTATGATTCGGTCCGAGTGAAACCTGCAGACCTACGCCATAACT  
CTGAGGTTTCGTCGCCTGAAAAGTCGTACAGATAAGGATTTGCTGCGTGACCGTTAATACC  
ACGGCCTGTATCTTCGTCTGACAAAGATAAAAAGACCATCATGATCCAAATAACCTTTTTT  
CACAATGATGAATCTCTTGACACTGCTTCGCACAAGCTAGTATACGCAGAAAAAGATGGG  
CTTCCTGCAGGGGATGCCCTCGTGGAGAGAGAGTAAGCTTGTCTCAAGTTGGAGGAAAG  
TAGTTACATTCAGGTAAGTAGCCGATACCAATTTAGCGGGCCGGTGTCAAGATCCTTTTG  
TGTTTCGGATCAAATCTTTACAAAGTACTCTATAAAGGAGCAAAGAATGTCGAGAAAT  
GACGCCTACACCCACAAAGGCACTCTCAATAAACCCCGCCACGGCTGGGCGTGGACTGAG  
AACTTCGCGATACTTCTCGTTACTGGAGGTTTACCAGCATCCAGAGACAGGAAAAGCC  
GTGAAGTATTGTACAACCTGAGGAGAAAGTGGAGGGTGGTGATGACTACCTCGACCTTAA  
TCCACTTAGGAGCTTTGATATTAACAACATTTCCAAGAGGCTATCGAGTGATGGTGTAG  
TAAAGGGCAGAGCGATGCGGCGCTTGTGCACCTCCTCTAGAAGCTCTCTGATCGCAGAGA  
GTAACACCTTACCTACTGTA AAAAATGAAGCCTCTGAACTGAATTCAGCATTGATTCGGGC  
ACAGTTTGAAAGTGGTCTTCTAGTAAAAGTCACCGTTGACAACATGATCAGAACATGTTG  
GGAAAATTACTTTTATCATAACAACACGCGTTACGTTTATGTTGGTAAATTCAAGGCATG  
GGTTAAAACCCTAACAAAACAGTTTTTTACTGCACAATATCGAACACCTGCCAGGCAA  
ATTTTCATGTGGAAGTTGTTCTTTCTGACCAAGAATTGCCTCGGATAAGGGGGGGGGTTGC  
TGTTGGTAATCTGTTGGTAAACGCCTGTTTGCAGTAGACAAAGACGGTATGAGGATTAT  
CTGTGGTGATGCATTCATTAGCCCTAAGAAGGCGAAGAAGAATACGTAACCTGGAGAACCC  
GGTTTAGCTCGCGTGATCTGTGGGGTCAACGCAATGGTGAGTGCGGCCCTCCAGAGTGGA  
CAGATAAGACGGTTCATGAGCTTACAAAAGAGATCGCACGTCGGAGAAAACGTAAATTTT  
CACAACACACGATCGACGGACACGACTGGGATCCCCGTTTGTGAGAGGTTTCAGGACATGT  
TAGAATAAGTACCGACTCTAAAAGAGCAGCTTGACATACTAGACCGTCTCAGTGCAAACG  
AAAATTTTTGCTATCATGCGATCTGTGAAATATCCAAAGATAACCCGAAGGCGCAGTACA  
ACTAGGCGATGGACCTGTTGTATGATGGGTGTGAAAATTGTTCTGTGTGGGTGGTGAAGT  
CAGAGGTATAGATTTTTCAGATGCGGCCGTATGCCGCTCCTTCGTCACCGCTGGACTCG  
TCGTACGTGGTAAGCAGTCGTTGGTGCTTAAAAGCAGGAGCCAGATTAATAAATGTTCTC  
TGAGGATCTTGCAACGAGGATTACATACGCGATCCAATGATATTGCCCTGACAAAATTGA  
GGGAGCAGTTGCAAATCTCCTTGAAGCAAGGAAACAACGCTTCCCGAGTCATAATATTT

TTAAAGATAACCGGATCCCTCCACGTGCCACCCCGGATTAGATCCTCTTCTGTAAAGCGCC  
GTGGGCGCGCCCTAATGATCTCCGGGGGTGCTGGGCTAGGGAAAAGTCAGGCAATGAGCC  
AGGTCGGAAACATGCAGTTCGGCGAGCGAGACAACAACCTGATCGATTTCCGGCTTGAGG  
TGAAAGAGGGCGTCAGATGTTGTGGGCGTACGAATCCCGGTCCCAGGCGACAAGGGTGT  
CGGGCACCGATTATGCGATCCGTAACCTTCTTGCTGAAGATCCTAGCCGGAAAGGTATCA  
TGTTCTGGATGAGCTTCTTCATGCGGAGCCTTACGTTGAGAAGGTTACATAACCAGATCA  
TGCTGGCTCTCAGTATTTCCACCTACATTTTCCCAGAAAGGGGTGGTGGTTGCATGTTGAG  
GCGGCCATCCCCGCGATGGTAGTGCGGTAAGTATGCTGGAAGCACCTCTGACTAAACGTG  
TGAACCTGGTTGAACTCGATTACGGCCGACTGTTTGGCTGCAAAAATTCTGGTCTGCACA  
ACGATGATCACCACAACGTTGTGGCGTTTACCGGTGCAAACCCAGGTACACTGGACAAC  
ATGAGGAGATGTTGGAAGTCAACTCCCCTTAATACGACACGCCTCGTACTTGGGTTACCG  
CAAGTGATATCCTCGACGATTTTGATGGAGGTATCTTGTCCCCACGCGTGGCACTAGCCG  
CTCTACAACGATCTGTCGGCAAAGCATTGACGGTGGAGTTTTGGTATTATCACACCCGTA  
GTGCAACCATGGTTCCTACCGAGGGGGTTATGGACGGCTCTTCAAGAAGCACAAACGGGT  
CAGAGACCTCAGTTGTGTTAAGGACCCTCGGCTCCCAGGGTCTAGCTGCTTGCATGTAAGG  
CAATTCAGAGCAAAGAGTACACAGATGTTACGTTATTGACTTTGCTGCGAAGTTCTTGG  
AGTCCCTTTATGACAATTTGGTCAGCATGCGACGTCATGGAACCGTAATATCGTGAGGT  
CTGGGTCTCTGTGATCATCCATGAGAATCTTGTGATAAAGCAATCCTGCTGTCGGGTG  
ATCGTTTGCCTTATCTGCGAAATTATTGGGTAAATGACCGGTAGTACTGCTGATCCTCC  
CAGAATACCGCAAGAATTTTGTGTCAGGTGTTGATGCAGGCGTAAAAAATCTTTGACAA  
CCCCAAGTGCGGCGGATATTCTTTGGTCACGCAAACAAGCGAGGACAAACTCAATGAC  
TAAGTTAAACAGGAAAGGACCTCAACAGGCCATGCGTCAAGGTAAAAGGTACGCAACCA  
ATACTGGAATCCAGAGAAGTTCCTCGAGATGAAGAACCGGCAAATCGTGTGCGAAATGGT  
ATACAACATGGCAAGTTGGTATCGTGGCGAGGGATGGCAGGATGAGGGATGGAATGTGTT  
TGATGCGTAGACCTTGCTTCGGGTATTTTTATATGCTTGATAACCCTGGTGTGTAACGTT  
TGGTCCGTTTAGGCTCTCTTAATATAGAATATGTGTAGGATCCGTACGGCCCAGACGGAA  
ACACCTGCCACATGCGCGAAGACAATGGTTTTTGTGCGATCTTCTGGATGGCTGGAGTGA  
GTGCTGGGGCTCTCTTAGCCAAGATAGCGGAGCAAGACAAAGAATATGGTCACTTTCTCT  
GGGATTGCGAACAACGGAACAGACTTGTTCTCATGAAGGGGGAATATGGTACAAGAGAA  
ACATCGTCCAATTCGTAATTGTGACAATGTGATGGATGTACATTCATGGTATTGCTGAGA  
AAAACGCGGTGCCTTCATTCCTCAAGATAGAAATGGGTACCGGTGTCCTGATGAAAATTA  
TGACTCCGACATAAGTTGCTGGAGTCCAGGTCTGAATGGGCGGCTCACGTAGCATGGTA  
CAATCGCTAATGGCAAAGCTCAAATTTCCGCTGAAAGAGATCAACGAGGTTTGGCGGATT  
GATTGCTTTGGCATGGTGTGATGGCAGGTTATACATAACCGCGTCAGTGTATTATTGTTGTG  
TGTGTTAATACGAAGGCCGAAGCTCGTAATAGCATGGTTCGCTTTTTAAGAGAGGAGTTAT  
GCATGAAAGTAAAAATAAAGTGCAACTACAGCGACAGCTTAGACCATCCCCTTCTCGCG  
ACGTCCTCGGTGTTTTGGAAGACGTTAATAACGGAATTTACATTGAATACTATCGTTGTG  
AAAGAAAAAGAGGTGTCCGTGACGTTTACCCATACGAGTCTGATCAGGTGAAGAAGTAAC  
ATGAAACAGAGTGGATAGGCATTGCAGGCGCTTAAATCTTCTTCTCATGTTACCCTGAG  
ACATGTTTGTATGTTTAAAAACCTCTCGCTCGTCGTCATTTTTGCAGGGTTGGTTGG  
ACAAACAGAAAAGACAGTTATGTAAGGCTTGGTGTAAACATTGAATGTAAAGGTTTTTAC  
TTGTTGGCACACAGGGTTGCTTGGGCTTTGTATCCCGGGGTATGGCGCACTTACTTTATT  
GACCACAGCGATCAACTAGATAATAAGAACCACATTACAAACCTAAGAGACATCCAGAAC  
TTTGAAATCTTTTATTATTATCGCAGGGGTAAAAGGAAGGAAACTGGTTTACCTGCTGTA  
TTCGTAGATAAAAGGTGTACAAGACTCAGATAACCATGCCGTGTATAGCAAAACCCACCTT  
GGAACATTCGACTCTGCCAAGTAAACCAGTGAATGTTATCATGCATAGGGAAAACACATT  
CATGACGTTGTTATGGAGGACTGATGATACACCATAAAGTAGGTGACCGGATAGGGGCTG  
TGAAATCTGGGGAGGGCAATGTATTCGCGCATGGCTCCAAATGTTAATACACGATGGTAA  
GCGGAAACGCCTCTCTAATCATAGAAGCGTGCACAAAAAGGTACGCTGCCGACCTCAAAA  
CGGAGAAGGGCGTCAAGACCAAGCTGGGAACCTCTACGGTGTCCCTTTTGGCTGATGGTA  
CTCTCGCAGGATTTAATCTATACTCAGAATACGACTATAATCATCGTAAACAGGGTCTCA  
GGGAACTCGATTAGGATGCCCTGTACGATTCGATGGTTGAAATTAAGGCTCTTACGGA  
GCCATACAGACGACCCTATGGACAACCTATCGAATCGGGTTTCTATACTAGGTGCTTGGG  
TTGCAGGGCGTGTCTGGAAAGACGTCGGAGCAATGATGAAATGAATCTTCCACGATTGTG  
ATGTACCGGTGTATATTATACCGGAGCAAAAATGATGGTGGGCATTATCTATTTTCTCGT  
AGCTATCATTGGTTTGTACATCTTCATTAAGAGGACGCGAGAGAAATTCGGGCGGGTTCG  
TTGTGTAGATCTCTTCTGCTATATGCATGGGATTGCTCTTGCCTGTATACTTCACTAA

TCTTTTGATGCTGCGATTTATCACAGGGGACTGCAAATGATTGGACTATTTTCATGGGCTG  
ATGGTCCATGATAAAAAGTGTGGATGTATCTGCAACAGATCGAACTATATTTACATACAGT  
GCTCCTCCTGGCTAAAAAATATGCACTCATGTCCGGTGTCCGATGAAGATCCTAGATATGA  
TGTTGACAATCTAGTAAAGGCTACTGAGTGGATTGAATCCCTTGGGTGGAAACCCGAGGG  
GGATGATTGATGAAAAAATTCACGTTATCATTGATACCCACAATGCAACCTTCTGGAAG  
TCTGGTAACGACAAGACATCATGCCGTTCTGCGGGAACCGGTAAGTCTGCTATTAGTGCA  
AGTCGATACGAGCCGCTGCGTTGTCTGAACTCCCAGCAGGACCGATATACGATCGAGAAG  
GTAACCATCGAAGGGGTGATTATTTAGTAAGGACAGCGTGTACGTCATCCATGAGAAGGA  
GAATTGCTCCCTGTGGGACCATAAAGCAAAGATCGGTTGGATAAGTTCGCGGCTGCTGG  
AAACGGCTGGAACCTTGGCAAGCAAATAAAATTTGACAACCAGAATCGTTATGTTGTAGT  
CTGTGTTTCGGAAACTGGTGGTTATGTCTTTAATAGAGGAGACGAGAAACGACAATGAGTA  
AATCTGTAGCAGGTACCTGCCAGACCGAACAGGAAGCGGTATAAATTGGAGATAACCGTT  
TTGCTGGCCCACTTACCAATGCCCGTCTTTTTACGGCTTTGTTGACACGAAGGATGTT  
GCTGCATCTAAGGCTTTTGTATCGTGATCTGAAAAATCGCGGCTTCCACAATGGCGATA  
TCCGAACCTCTGTTGTAAAAGAAGTATCCTTCATGAGCGTAACATCTACGACATCACGA  
TGACCAGTGCTTATTGACTCGCCAACCTGTGCCTGCTGGCATTTCGTTGCTTCCGGTGTGG  
CGTCATGACATCCTTAAGCTGCTTGCAGATGCAATGAAAGATGTTTATCTGGAAGAAGGG  
GTTCTGTCCGTAGCGGCTAATCTGACCTATCGTGTGGCCCTAGAATCTTTCCAGGATGCC  
AGGAAAAGTTTATCTCCCGCCGAATGGGTTGTGACCCAAGCAGATTCTGTGAAGCGCACC  
CTGCAAGTCGGTTACGACGTCTATGAGGAGGAGCTTTAATTGACTAAAGCTGTCAAATAC  
CTAAGCAATAACAAGTCTCGTCCGGTGTGCGTTCCGGTCCACGACCGGCTTAACTTTGAC  
GGTATTGAACTAATGGTGTGCGAACAATGCAAGCTTGTTAACCCGACGGAGTTTATCCCG  
CCATACGTGGGGACTGTGAAGATACTGGACCAAGGTGAGCTTCGTGCTGTACTCCGAA  
GATGACGTTATGTTTCAGACCAAAGAACGTGTACTGTCACTTGAGCATGATAACAGCGGC  
TTCATGGCGTTCCTGGAGTGCGAAGATACTGAAGCACTCCTGGAACAAGTAAAACACAAC  
TGCGAAATCAACGAAGTCCCGATCGAGTTCGCGGTGGAGATCGCTGGTGAATGGGCTGGT  
CGCGGTATTCAGAACGGTGTGCGAGTCAAGCAGGTTGAGCAGTTCCTAGCCACGTCCGT  
GTTGCAATCGGTGAGAAAGATACCTCACCGCAATGGTTACTACCAAGCGCATTCTTCGGC  
AACGGCCTGCCAGACCAGAGGATCTTCAATGTGCTGGATTCCGGTACTGGTGCCTGCTT  
ATGCCGTTCCACGAACCGGAAATGGTACAGAGCCTTCTGACAACGCTGGCCTTGTGGTG  
GAAGGTCAATACCCCGCTGGTAAGTTGTTCCGGTGTGAGGGTGTCCGGTGAAGGGATCATC  
TGGTCTCTAAAGGGCCTTCAACTGGCACAAGATTTCCGGTCTGTGGTTCAAAGGCAAAGGC  
GAGATACTCTGTATCGAAGGTCAAGACTGTACAGCAGCTGATCCGGTACGCCACAT  
AATATTTGTGATGTTGTCGAGTAGGCGGTCCTGAAAACCGTGTGGAAAAGGGTCTGGGT  
GACGTGGGTATCGACCACACCCAGATCGGTGAGTTCATCGGTTGGGTTAGCCGTGACACC  
GACAAGCAAGAAGGTGATGTGTTCAAAGCGTATGCCCTAACCATGAATGATGTTGCCAAA  
TTTATCAGCAACACTTCGCCTGGTTGGTACATGCAAAAATTGAACGAGGGGCTGTGATGG  
CCATTATCGTATCCACAACCCGAGCCGTTAAATACAAGCCTTTGAAGGCGCAGTGTGAAG  
CCTTAATCTTCTAGGATCAAGAACAGGGTAGACATTCTCAGGAAGAACATGCTACCTTTG  
TATTCACAGTTCAAAAAGCGAGGATTGTGAACAGTGGAAAAACCGAAACCGAAGTTTGAG  
GTGGGAAAGAAAGTAAGGGATCTTCTTAGCGGCAGGATACTAATCATAACTAGTCGCTGT  
TACTTTAGTGGTTGTGTATACTCTTTCGATTATGTGAGGATGTATTTGTAGCCAGAGGAA  
GATTTGGAGGCTAGACAGGGGACTGCGTGAGTCGTTAAATGTGAAGATAAGACATATGGA  
GGATAACGTGGTAAACTCTATAAGTATCACTTGCAATACCATCACCATCGGTAGCGTTGT  
TGGGGGTGATATGAACATTACTTCGCGTGGTGATAACATTTACATAAAGGGCCAGTTTGT  
TCACACCACGTAAGAGAAGAGCAACAGTGGGGTTATTCATGGTGACATCAAGTGTATTC  
AACCGTTGCTGTAGATGTTAATGATTAAGGCCTAGATGCTGGCAAATCAAGACCACTTC  
TGTTGATTACCATGCTGAGAACGGCGCACTGGGGCACGTAACCACAATGGCCGGGGATGT  
TTATGCATAAATGATCATAGGTAATGTGAAAGCTGTCTCAGGCGACATCTCCCGCGGTTA  
ATTGATAGACGCTTTCTTGGGGCGTTTTAATTTGGAGCAAGATTTGAAACTAAAAGCAAC  
AGTTCTGGCAACCGCCTGTGCATTTTCTCTGACTACCACACCAGTCTTAGCCAAAGAAAA  
CGAAAATAAGCCCAAGGTGAGTCGTCTTTGTAAAAAAGATGGTACCGTGGTTAAGACCTT  
GGCATGTAGTATGTATCGTGAATCCCGTGGTGAAAGCCAGCAGGGTCTTACGTGAATAGC  
TTTTGTGACGCTTAACCGAAAAGACAATGATAAGTTTCTTCGGACGATGCAGAAGATTGT  
CTACCAACCGGGGCGAGTTTCCCTGGAGATCCGACAGTACAAGCTTCTAAGTGCAAGAGAA  
AGACCGTTGGGAAAAGACCAAGGAGTTAACAGAGGTATTGACCTAGATACACA ACTATAA  
CAAAATGGTTTATGAGGCCATTGACATCACCAAGGGATCTACGGATTATCATTGAAAGAA

GGTTAAGCCTTACTGGATCAAGCCGTTGATTTCGCACGGGCAGTATTGATAACCACAACCTA  
CTACCAAGAAAAGCCGGACCCCCAGGGAGCCTGAACCTTTTGAAAAATTTTATTGATGCTT  
TGTGTTAGCATTATCCCCCATCTTGTGGTACTGTCTATCACTCAATGGATTTGCTGCGAA  
CAAGTGTGAGGAGCGTAACTTCATGGCTACCTGGTAGGCATCTACATAGTGCAGAAAGCT  
CGCAAAGGAACCCCTTAAATAACCGGAAATAGCGGTGAGAAGG

>NewGenomeName\_162

AGGACTAGCCATTTCGATCGGCCAGTACTCGCGATTGATGTCGTCGGCGATCCATTTGAC  
TCCCACGTTTCGTCCACACGGTGTGAACACATTGTCGCGATGGAGGTGACTGGTGCGCGG  
TTCCAGGGCTTCGCCGATGCGCCGGACGGTGACGAGCGGGGAGTCCGCCAGATCCTCCGG  
GAGCTAGAGTTCGTGCAATGTAGTACGCGAGATCCATCGTCATGACCTCCAGCCGGTCTCT  
GTAGTTCTGCTGGCGGGCAGACGCGCCGTGCACCGTGGACAGGCGGGCGGAGTTCTGCTT  
ACGGCTGATCTCGCTACCGTCTTGGACGGCATGGGTGTCATCCATAGTACTGTGAAGTC  
CTTCTCGGGCATGAGCAATGACCTTTCAGAGGGCGGGCGGTGATGATGGCGAAGACCACCA  
TGAACAGGAACATGCCGACCATCATAACCAGCCCCCTACCAACGAGGCAGCCGAGCAACA  
GCCACGGTACTGGATCGGCACCCTTCGTAGAGAGTAGGCGTTGTGGCTTTCCATAGCTG  
GGTTCTCCTGTCAGAACGGCGGTGCGTCGGGGTTCTCGTAGACGACCGGCTGGGGTTGCA  
GGTGCGGCCCGGATCCGCTACGACGCCACGATGCTCTCGGATGATGTACCCCGGCTTGG  
GCACCTGCTCCCGTCCGATCATGGCGGGGGTGCAGTGCAGCTGGAGTGGGGCACGT  
AGAAGGTGCGCAGACCCTGCCGAAGGGCGTCTACTTCGCCGACTTGACTGAGCAGGTATG  
GGTAGAACTTGGTGTGCGAGGCCCTGGACCTTGCCAGCACGAACCTCTCGCACCCGAC  
CGCATTTGTCCTTTCGCGGGTAGTTGGTAGTTAGGTGGGAGGCGTGCTGACGCTGCCACT  
TCTGGGCCTTACTGCGCGGGCGGAAGGGCTACTCCCCTTCGAGCAGGCCGACGTTCTTCCA  
GTAGGTCACCTCGCGGGCGGTGGTGCAGCTGAAACCAGGTTTCGCGTTTCTGGGCGGCGAT  
GAGCTGGCGTAGGTCCTAAGAGATGGTGCAGGTGTCGACCTTGGTCCCAGCTCGCCCTG  
GTACAGGTACGTCGCCAGCTCGTCCTTCAGCAGCTCTGGCCGGATCTCGATGGTATGCAG  
CAGGCCGACGAAGCCGCCGTCTACTGCAGCGGCTGCAGCTCACCCAGCTCGAACTCGGC  
CACGATCGCCAACAGGACCCCGGCTTTCATGTCGAAGTCCTATCCAATCATGGTGTGTCT  
CCTTTTCATCAGTCCCACAATCTCTCTCAACGCCACACGGCGTCTGGCTTGTACTGCTC  
CTTGCCGACTACTTCGCGGGTCTGTAGGTGCACGATTGTCCACCCGATCCAGGAGGTGTA  
GTAGGCGGTAGCGATGTGCGCCCCGGTGCATTGAGAGGCCCTTGATGGTCCACTTCTCGTG  
GCGCAAGACCATGGGTCCCCGATTCCCTAGGGGCTAGTGCGAATACTCGGTTGTCCAT  
TAGGGCACAGATCCTCCCGTCTTTTGTCTCGATCAGCGGGCGGAGCTTTTCGCCCCAGA  
CGTTGAGTGTGTCTCCAAGCCTGGTGCAGGGCCACGGGTGACGCCATCATCGTCGGCAC  
CGGCCGTGAAGACGACGTGGCTGTGCAGCTCCTGTCCGAGGACGCTCTTGGTGACGGCGT  
GGACGATCGCTCCGCCATAACCGTTCGCGCCGCGCTCGCCACCTGGACCTGGCCGGCGT  
CGACGACCGTGAATCCTGTGGCAGCTGGGCCACGTCGTCGAGCCACAGCGTCAAGTTTCG  
GTGCGAGCTTAATCGCGTATACTGACGACCAGGCGATCGCGTCGGACAACGCCCGTAGTG  
CAGCATGGTTCGACGCTTCCGAGGACCATGCGCTCGGGACTGCCATCGGTCTTCAGCAGGA  
CGGCCAGTCGTGTCATGATCCTCTCCTTAGTTCAGCTGATCGTTGTAGTTTCGTGCGAGCGT  
ATCTACGGGCTCGGACTACCCCTGGCTGTGACGCCGACGGCCTCATCCTGGTCCGGCGG  
GGTGCAGTAGGCCAGCTTAGACCAGACGCACGGCAGTACGGCCGTAGTCCACCTGTAAGTG  
CCAGACCTGGCCGGTGTGATCAACTGGTGGGAGAACGAGATGGTTCGGCTCGCCGTCCAG  
TTCGTGGTGTTCGAAGGCGATGATGCGGTTCGATTCCATGGCTCATCGGTCTGTCTATCC  
GTGTGCGGGTCTTCTTCGGTTGTTTTACCCAGCCAGCGCCAGCAGCCTGGTGACGGGGA  
CCGGAGTGCTGGCGGTGTGGTGCCTCCGGAACAGGGCTTCGGTCTGGTTCTGGGCCTCCT  
CGGGGCCGAAGATGTGCTGGACTGCGTCCACCTCGGCCTTGTGGGCCAGGGCCGGTGG  
CCTAGCCGTAGCGCCGTAGAGCGGGGTCGTGTACCAGGTACCGGCGGGCGGATGTCGTCCG  
CCGTCTCGAGTGCATCCTTCGGGTACCGCTTCGGGGACGGGGCCGGGATCTCGTACCCGA  
CCTCGGTGCCATTGGCGTTCGTGCACGGCGACCGCGTGTGCGGTTCGGAATGACGCAGGGCCC  
AGACGGTGCATGCAGCGGGCCGGGGGACCATAACCTCGCCTTCTCTATGTGGCCGCGGA  
GCGCGACGTAATCCATCGCCCCCTTCCGCGCAGAGGTTCGATGGAGGCCTCTCTGGCGAC  
GATCTCTTGGAGCATCTGACGGTGGCATTGCCGCAAGCCGGGGATGTCGGCCGCGACGAT  
CCAGCCGACGTGGAACGTCCGCCAGGCGATCGGGGTGCCGGACGAACGGATGACGTAGGT  
GAGCGTGTGCGGGTGTGCGGCATGGAAGTCGGCCTGGTGGACCTCGGGCAGGTTCGCTAA  
ACTCGCCTCACCGATGGCTGAGCCCACCTGCAGGCGGGCGATTCGGATCTTATCGCGGCG  
GTCGATCGCCGCGGGCACCTCCGCGGGCGCGGAAGCGACTCTGCCGAACCTTTCATTCGGTG  
ACCCCCCAGGTTCGCTTAGGCGATGGTGTAGGCGGACGGCACCCGGAGGGACGGTGTATCT



TCGGCGGCTAAGTGATGTATGCCGGCGCGCCGTAGCACCACGGGTGATCGGCCAGGACG  
TGAGGAACGAGAAGAAGCCCTCATCGGTAGGCGTCGCGGTGTACGAGCCGGGCGCGATGT  
CGGCGGGGACGCGCGGGGTAAGGGTCTCGCAGTCGAACATCACGGGCAAGGTGTCGGCGG  
CGCCGGAGTTCTGCAGGGTGTGAACGGGTGCAAGGGCGGGGTGTCGACGCTGCGCTATC  
CGCAGTCCCCGACCGACCGGGCCGCGCATCCGGCGAAGGCGTGCGTTCCGGGGGCGGCGA  
CCTCGACGAGCGTGTAGGCCAGAAGCGTTGGGTGGACATAGTGAATCTCCTTGGGGCTG  
TTCTGGAATCGGCGTTGAAGTAGCCCGCCAGAAGGCGGTGCAGCACTAGTGTTCGGGGG  
CAATTCGGTTCGTCTCCCAGATGGCTCCGAAGGTGCGGGCCGAGGGAGGATGGGGTGTCA  
AATGGAAGCGATAGAACTCCTCTACGTGGGTGCGTTCGACGATGATGACGGCGCCGTCGA  
TGTGCTGGATGAGCAGGGTGCCGTTGGCCAGAAGCTGTGCCACTGGTCTCTCCTCTCAGC  
GGAACCAGAAGTCGGGGGGGTACGGTAACCTCCGCGCGGGTGTGGCGATGGCGGCC  
GGGGCTCGCAGGGGTAGGGCCGTTGACGCGAGCCTTGATGGATCCCGGGTGCGGTCAAC  
GCTAAGCTCCGTGAAGGATGTATACGGCGGGCAGGCTGCTAATGAATCACATGATCAGAT  
CCACCTCTCGGCGGTTTTGGCCCTTGTGGAACACCAGGTGGATGTGTTTCGATCATATCGCC  
GCGGAGGTTCGAGGCGGAGTAGGTCTTTCCGGGGTGGCCAGGTCGTTGCCGTCGTAGAAGTA  
AGCGCGGCGGGTCTCGGACAAGCGGCCATTCTCTGCGCCGATGTAGGACCGGGGCTGGTC  
GTAGGTGTCAGCCATCGGAATCACTTACAGCTGGTGGTTCGGATTGGCGGAGAGGATCAGG  
CGGCAGGTGCTGCAGCAGACCACCTTGTGAGACCTGCTGGCGAGCGCTTCTCGATGTGC  
AGGAGCGGCTTTCCTCAGAGGCTGCGGGTTCCTCCGGAGGCGTGGCGGACAGCGGGCGGG  
TTGCCGGGCTTGGCGACGCGGATAAGCTGGTTCATGAGTTCGGCTCGGGCAGTGAAGTGT  
CGAGGGCGTCGCGCTGGTCGCGCCGGACGTAGCTGGTGGCCATCAGGGCGGCGCGGGGCG  
CGGGGTCTACGGTGAAGTCCCGCCTTGTCCGCGCGTACACCGCTGAGGCGATCATCGGGT  
TACGGCTGAACTGGCGGCTGAGCATTGGATCAGAGCCTTTCGCGCACAAACGTAAAGTGT  
GGTCAGGCAGTCCGAGCAGAATGCCGAGCCGGTGAAGTGAAGGATAGGTCTTCATGCAGGC  
CTTGCAGTGGTGGTGGCGATGGTCCAGCATTCCGTTCTTCTGGAAGTCGACGAGGGTGGC  
GGGGTCAACGATCGCTGCGGTCATGGAAATCACGTCCAACATGGAGTTGGAGGAGTTTTTC  
GGTGTTCATGCTGCTAGCCTGCGCAGGTCCGGTGGTATCGGCGCCCCACTCGCTGTCTG  
GCCTTGTTCGTGCTTGCCTCGCCGGTACGGTGCAGGCCAGGGTGTTCGACCAAGTCA  
CCCATCAGGGCGGCGATGTGCCGGATGGGTACCTCGGCGATGGTCTCGACCGGCCGCTCG  
CCAGACGACAACCTGGACGGATCCGGCCTTGGTGAAGTGGGTAGCCGACGCTGCCGCGCTAG  
ACGTCGACGACCTCGTAGTGCTCGGGGTTGAGCAACCTTGGCTGGAGGCCGAAGTGGTT  
TCGGTGCGGCTAGACATGACGGCATCCTTCGGTCTGTGGCGGAGGTTATTGGTGGTGCC  
GGCATCGGCAGCGGAACCGCGGGCGCGCCTGCTCGGCAGGGCTGTGGGTTCATCAGGCCAG  
CACCGCCCGGAGGACGGTGTGCACCTTGTGTCGAGGGCCGTCAACTTGCTTGTGACGTC  
TCCCTCTTTGTGCGGCTCGGCGCGAATAGCGCCCTTAACGGTGGAGTGGTTATCTGCCCC  
GGTGGTGGCGGCCGGGATGACGCCAACGCGATGTTCGATCCAGGTGTTGGCTCGGACGTC  
GTCCCACTAAATCGTCGTCAGCTCGTCGCGCTGGCAGGTGTTCGATGGCCCGCGCCCGGCG  
CTTCGCCTCCGGCACCGGCTGCGAGGGCTCCATGAACTTGAACCACTTCCGGGGGGTGAC  
CGTGGTCTGGCCAAGCTCGTAGAGGGAGTCGGTTAACTCGTCCGCCGTCTCCTCGATCAG  
CTTGAGCGAGGAGCGGACCTCGTCGAAGCGGTGGTTCGAGTACCGGCTGTGGCGCTTCGT  
GACCTGTGCATCCTTGGCCTGCCCGAGAGCGATGGCCATCGTGTTCGCAAACCGTGGC  
GATGATCGCCCGTTCGTACGTGGTGGGAGGCTCCAGTTGAGCGAGGTGGCGGCAAGCAG  
GTTGGGCCGGTAGGCGAAGCCGGTGGCCTCGTCGTGGAGCGTCTCAGGGAAGGACACCTC  
GCCCCAGGCTGGCCGCCCTGCGGGAGGACACCTGCGCTGGTGTGATCTTGGGGTTGTGCT  
GAGGATGGAGTTGACCGCTCCGAGCAGCCGCCCGCGGTAAGTGGTGGCCACGTAACCGTC  
GGTGAAGACCTTGGCGACGTGGTGGGTGTTCGGAGCGGGCGATGGCGGCGAGCCAGGGGAC  
CGGCCGGGCGCCGACGGGGATGCCGTCCGCGTTCGAGGCCAGTGACCTCGGTTCAGGACGGC  
GGGGAACCTCGGCGAGGACGGGGATCTTGACGGCTTACCAGTCAAAGAGGGCGATCACCGAC  
GTCACCGATTGGGATGGCCTCCTCGTAGAGATTCAAGCGCTCGCCTTTGTCTGTGCGCG  
GTATTCACAGGCGTGGCCCCGTTGGAGGTCATGCCGATCACGGTGTGGTGTTCAGCCA  
AAGGGAGGTTTCAGCGGACATTGTTCCCTACCTTTCGGGTTCCAGCTCCGATGAGTTCGA  
GTACGCGGGGGAGCTTGTCCAGGTGGCGTTTCCACCCCGGACGAAGACCCCGTGCCGT  
TCATTGCGGTGATGGCGGCTACGGGGCCGGTGCGGGTGAACCAGACGCTAAGCTGCTCGA  
CGCCTTGATCGAAGCGGAAGAGGCTGCTGGTCTCGCTCGGGCGGTGGAGCTTGGACCATC  
CGTACTTGCTGGGGACGGTTCGCGACCTGCTATCGTGCGGTTCATGGCGGGGAATCCCTAGT  
AGGCGAATCGCTGTGCGAAGCGGGCGTACTGGTCTCGAGTTAGAGGATGGAGCCGTCGG  
TGTCGATGGGGCGTCCAGAGTGGGGGAGGATCCAGGCGATCGCGCGGGTGCAGTACTCT

GTCGGCGGGAGGCCCCAGATGGTGAGGTCGGCCCCGAGGCCAGATCCAGGGGTGGT  
TCCCCTCGATCGCGCCGAGGTCGTCGACATAGTCGTTGATGGAGCCGCTGGCACCGTGGG  
TGGAGGAGAGTCCGACCGCCTGCTCGACTACCGTCGGGTA CTCTCAGAACGGAGAAGG  
CGGCGCGGGTGGCGGAGGTCATGGCCGGTGCCTTTCAGATGTTCGGAGGTGCCGGTGAAGC  
GGATCCGGCGGGCCCCGAGGTACCCGATGATCAGGATGCCTTCGGAGTCGTTTCATGTGGT  
CGTTGGCTTCCAGCAGCTGACGTCCATGGACTGGCGGACGATGTTCGAATTCCGTCCAGG  
TGGTCTTGTGGATCGCTTGCCTGTCGTAGGCGATCAGCGTGTGAGCATAAGTGTCTCGCTC  
AGTATCGGGGTTTCGTGATGCGTTCGCTCCGCCAGCCCCAGGGATCGGAGATGTTCGGTGC  
GCCCTTGC GGATTGAGATCGGGGTGAGTTTTGGCTGGCGGTGCCGCCATCCAGGGCATCC  
TAAGTCGTGGCGGTTGTCCC GGGTGCCGCAGTCGCAAACCTTCATTGCCTGTTCCCTTTGC  
TCTGCAGTGGAAGTGGGTGGGGGGCCGGT CAGCGGAAGCCCATCTCGTCGGTCCGCCCGT  
CTAGTGTCCCCGCGCGAGCTTGCATCTCTGCCGATTCTGGAGGGTGGGCGATGCCGGGAC  
CTAGTAGTTGGTTACTCTGTGGAGTTGTCTGAGGTCTTATCCCTTGCCGGGTCCCTGGCCG  
ACCATTCCGGGCGGTGGTGC CCGCGTCTACCCGCTGTTGCTGGCGGGTCTCCTCGTCGCCG  
ACCCTTTCGGGGAAGGAGTGGCGCTCGTTCGAATTTCTCCGTGGGTGTGGGGGCTTTCG  
GTGTTGCTGTTGTGATGACCACCTTTC C CCTAGACCCAGCAGTTGGCAAGGGGTTTGGG  
GATGTTTCGTTACCAATCCGTTATCGGGTGGTTCGTTCCAGCCCCTTCATTAACAGGCTTT  
AGGGCAGGTCAGGCCGTA CTTCGGAGTCGGGAGGCCCTTGTGTCCATTTGGGGCAGATTC  
TGGGCAAAGTGACCTTGAATATCGGTACCAACTTCTGGCGCTCGTACGTTGGTCGATATG  
AGTAGCCGTTCTGAGGGCCCGCGGGCGGT C ATCTACACCCGATCGTCGAAGGACCGCGCA  
GGCGGCTGGTTCGGTGGCCGCGCATGACGCCGAGTACAGGATCGTCTGCAAGCGCGGGGGG  
TGGTCCGCGGCCGGCGTGGTGTCCGACAACGACGCGGGTGC GTCCCGGTGGTTCGAAGGTG  
GATCGGCCGAACAACGAGCGGCTGAGCAGGATCCTGCAGGTCGGCGAGGTTCGTGGTCCACC  
TGGGAGCCCTCCCGCGCGCAGCGCGATCTCTCGGCGTACAACGACCTGCGACGGCTCTGC  
ACGGAGCGCGACATCCTGTGGTTCTACTCAGGCCGGGTCTTCGTCTCTCGCGCTCCGAA  
GACCGGCTCATGACGCTGCATGACATCGGCCTGGCCGAGAAGGAGGTCGCCCCAGACCCGC  
GAGCGGATCATGCGGACCCTGCGGGCCTACCCGCACGCCGGGAGGCGCCACGGGTCCGG  
CCGTACGGATACCGCTCCAGCCGCGACCA C GACTCCGGCAAGCCCATCGGCCGGTCCGCCG  
GACCCTGTTCGAGGGGCGGTCGTGCGCGGCGTTCGGAGGCCGCTTCCGTTCAGGTGTTCCG  
TTGCGGCGCATCGCAAGTGACCTCATCGCGTCCCGCGTCAAGACGCGAGGTCGAGGAA  
TGGACGCCACCTTGCTCGGGAAGAAGCTGGAGCAGCCCGCGTACGCCGGTCTGCAGACG  
CACCACGGGGAGATCGTTCGGCCCCGGCACCTGGCCAGCGGTCTTACCAGAGAACGAGCAC  
TACCGGTTTCATGGCAACCCCGAAGGACCCGGCCCCCGGAGGCAGCGCGGCTCATCGCCC  
AAGTCCCTCGTCACGAACCTCGCGGGCTGCGGGATGGGAGGCCCGACGGTGCGCCGAAAG  
AAGAAGCCGGGGCGGAGGGCGAACGTCTGCGGGGACATCGGGTGC GTGATGAGGAAGGCC  
TCCGACGTGGACGAGTACGTGGAGGTGTAGATGTTCAAGCTGATGTCCGTACAGTGGGTA  
CGGAGGCGCGTAAGCCAGCAGGGCGACCGCGAGGGCTCGGCCGGATCCCAGGCCAAGATC  
GGCAGGATCCGTGCCCGGATGGACGAGCACGCCGTCGAGGCCGGCAAGGAGGACAACAGC  
CCACGAGCCTTCGCTCTCATA CAGAACCAGTGGGTGGCCAAGTGCTCGGATCAGGAACAG  
GTGGCGAACAAGGCCCTGATCCAGCCGAGCCTGGCCGCCTACACCGGCCCGTACGTTCGCG  
GCGGTCTGGGCGAATATGGACCTGGACCTGCTGCGCGACATCGTGAGGTCCACCCAGGAA  
GTCACCCAGTACCCAAAGAAGCTGCAACGCGAACGAGATAAGCCGCCGATCGTAGTCCAA  
TGGGACGCATCGCAAAAGCCCCTGCGAGGCGACAATGCCGGGCGGGGGTTTTGCGGTTTCG  
AACTAGACGACGTCTGAGAGCGTTATGTCGTAGGCGAGTCTTTTCAAGGCAGTGTCTGTA  
TCTAGCAGGTCTTCGCGTCGTCGGTCTGTGCTACGCTGGCGCGCAGGCCCGTGTGAGG  
TTCACGA ACTGGCGCAAGTTCATCGCGGTCTACGCTGACGTGCGACGGCGTGGCGCGGCG  
GGCCGGCGTCCGGCGGCTGCTCCTGCTGGACCCACTGCAGCGTGGGTTCGCAGCGGTGCAAG  
GGCTGTGGGTTCCGGCTTGGCAGCCTCATCGAGGACCGGGTCCGGTTCGGCGGTC AAGGT  
GTCCCTCGAACTACCGAGGCCCCACCCTAGCGCGGAGTCCATCGACTCGAGGATGCGCTC  
CGTCCGCCGGTCACTCCGCGCCCAACTTCGTCTGTGCAAGCTTACCGAAGATATGCC  
GCCGGGTTGCGCGACTGCTTCC TGGGGTAGATCCAGCCCCGCGCGGCGTTGCTGGATGGC  
GTCGCCGAGGAGGCTGTTGCGTTCGGTTATCGTATCCGGGTCGAGGTTCTTGTAACGGTT  
CATATTGAGCATCATTTCCGGTTTGCCCAACATCTTGGTTCGGTTGATTCACTCCTTCCAA  
CTTGACGTGTGTAACGGCCTGGGTGTCTCGGGATGCTGCTATGGTGCCCCGCTTAAACA  
TGGGTGTCGAGAGTAGGGCTAAAGAATCATGCTCGGTTCTGAATACATCCGGTAACAGAC  
CCGTCAATGTTTGTCTGACCTTCGGGTATGCCACTGGGGACAATTTGCGATGTGTTTGC  
AATGGACAAGGGATTGCCCAA ACTTCTGGGCTTGGTTTTTAGTGGGTTCCAGCAAGCCAG

CCGTTGATCATCACTACCGACGACCAGCAGGAACCAACCGAATAAGTGAGCGAGATCACT  
GGACGGAGGTCCAACACGCCCGACATGAAAGTGCTCTTGGTACACAAAAAGACCACCAG  
TTCTTACTGCAGTCCCAGAAGTTGCACCGGGTCCTTCATCCGGAGGCAGCCTCGCACCAC  
CAGCTATACGCTGAGCGACTAGGAGACCTCTGTGATCACCACAGCCGAGCAAACCCATCG  
TCGCGCCTACCTCCCCCGAGGCGTGCGCGGCGGAGAACGAGAAGGGCTTCGTCCACCT  
GTTCCCAGAGGACAGGCAGATGGCCCCGCGCATGGCACAGCCACGTCACCTCGAACGACGC  
CAACTTGGTTCGCCCGCAGCGTCTTCGTCCAGCACCAGCTCGTAGACGACGGCCAGGCCGG  
GGCCTGCCGGGCGCATGAGGAAGAGACCGTTCGAGCTGGCCGACTACCGGGAAGTGCAGGT  
CATCGCGACCGAGCACCAGTCTAACCCTCCACCCACAACCACCCGCCAGCCAGCCAC  
CACCTATCCCGAGGTTTGAACAGTCCGGCACAGCCCTCACGCCAGCCGGGCTCCCGTGCT  
TTTTTACCCTCCCTGCACCCGCCTTACCAGGAAGGGGAGACTTCGTTCAGGTCCGCATA  
TAGGCAGGGCTACCCGCTCGAGTACTTCGACGGCGACTTGATCGACGAAATAGTCAGCTG  
GCACCTGGCCAGAGGAGGACAGAAACGTGGCATTACGGCAACCAGGCGCTGCCGGAAGT  
TTGCGGGCACCTCAAGCAACCGCACGCACGCTGGCACGTCTGCCCGGAGGACACCCGCAG  
ACGGGCCAACGGACACCTCGAAGACCAGTGCCCCGGAACCTGGCACTCCCGCCGAGACGG  
TACGCGTCGAAATACCTCAACCACCACAAGAATAATAGACCGCCTGTTCCGAAACCACT  
CAGCGGCCAAAGCCGCTCATTCTCCCGAGGAGCTTGATTATCATGGCGCAAAACACCTT  
CAACAAACATGACGTCCCGAAGTCCGAGCCGCCCTCGGTTCAAGCCTGATCGGGGG  
CATGGGCGTCAACCTGGAATTCGCTGAGGCGACCGGCGAACCGACCCCGCCAGCAGGT  
CGCGAGGGACGTCCCTAGGCCGCTGAACACGTCGGCTGGCACCGCGCTCCCGAGAAGAG  
CGCCCGCACACTCAACGTCGAGAACGGCACTTGCGGCGAAGACCTCGACGACATCGAACC  
CCCGGTGTAGGGCACGCCGCTGGCGTACGACATCGGCGCGATCCAGAGCGCCGTCCGGCT  
CACCCGGACGTTTCGAGCGGGGCGGCTCCGAGACCGGGTGGGAGTAGGCATGAGCACCGAC  
GATACCGGCCGCATGGTTCGCGCTGCCCGCCGACCTGGTTCGAGACCAAGGGCTGGGCAAGG  
TTCCTCTCCGCAAGCACCCACCGCGAGCCCTGCGCGCTCGGAGCTATCAGGGAGGGCGCC  
GACGGCAGCATGTTTCGAGCCCGCAAGTCCGGGGCAGCAACGGCACGTCTCGCCAGACC  
CTGCGCGATCGGGACGTCGAGGGCGACCCGGAGCGCGACTACTCCAGGCTCGGCCCCAGC  
GCCTAGAGAGAGGATACCGAGAAGTTGGACCTGGTCGACACTGTAACGACGCCACCGAC  
CGCACAGCGGCCGAGGTCCTCCAGGCCCTCCTAGAGGCAGGCCACGGATGACCGGCATCA  
GGCTCTCCGGGATCAGCAACCCAACCACCCACCACCAGCCCTGGCGGGAGAAGGCGAAGT  
GTGTCGGCCAGAAGTGAAGGGGTACGTGGTCGAGCAGCTGCCGCAGGGCCGCAACGATC  
CCGGGACCAGAGCCATTCTCGCCGAGGCGAAGTGCTCCGCCTGCCCGGTCAAGCGTGAGT  
GCCAGGGCGACACCCTCGACAACCAAGACATGGGCGGCATCCGGGCCGGTATGGGCATCT  
CCGGAACCTAACGGATCCAAGGAGTACAGGCAGGCCGTTTCGTAAGCTCAAGACGGCAGCGG  
GCCGGGTGCCCCCAAGACCAAGCTCAAGACAGTATGGCCTAGACAGTGCGGGAGCTGCC  
CCCGGTCTGTGCGCCACGCCATACCACCTGTACGAATTCCCTGGTAGAATCACCCACG  
GGTCCGGAAAATATGCGGCACAAGCCAGATGCGGCAGTGGCGCGCAGACAAGAAGACCA  
AAGAATCATGAGGGACACGGCCGAGAAGATCCGCCGAAGATCTACATGGATGCGTACCG  
ACACTCGATCAACATCCTGCAGTTCGTTCGAACAGGAGCGCGCGAAGATCAAAGCCCGGCT  
AGAGGAGCTGAAGGAGGTTCGAGGGCGAGTACCTCGCGATCATCAAGGAGGCCCTGGGCAA  
GTCCCCCGTGGTTCACCTTGCTCGACAACAAACAGGTCGTCACCTGGCTCAAGTCGAACCA  
GAAGCGACTGATCCAGCAGGTGATCAAGCAGCGGTACCCGAAAATTACGATAAGTGCAA  
GACTGAGGTGGAGGTCCGGACCTTCAGGGAGGTGGTGTGAGCCGGCCGGGGCCCTGCGCT  
GACTATATCGGGATCGACGACCATCACATGGGCCGGAGTAGAATCGAGTGCCACCGGCTC  
ACGTGACACAAGAAGTTGCACAAGGGATTCTGTGGGGGCTGTGGTACCGATGGTGAATC  
CCTAGGTCGACGGCAACGAGCGGCTCCGGTACGTCAAGCTGACTCGCTGCAAGCAGTGCA  
TGGAGGCACGCCGGGAGGCGCAGAGCGAATCCTGCACCACGTACGGCAGCCCTAGATACT  
GTCGGGACCCGTGGATCGCCTGCTACAACGGCGAGATGACCAGCGGTTCGGCTCAAGCGCC  
TGCGGGAACAGCCGAAAGTCTATTACTGCAACCGTGGCGAAGAATGTCGCGAGCAAGTGCA  
CGTCGAGACAGAAGCAGCGTACGTTCCGGGGCAACCTGTGGCAGAGCTGCTACACCCGCG  
ACGGGTACCTCCGCATGACGACAGAGAAGCGGCTAGCAAGACCCGAGGCCAATCGCAGGC  
ACCGCGCCAGAGCCAAGTCAGATGCCGAGGCGCCAAGACAATCGAGCTAGAGGGGGAGG  
TGGGGAACCTATGTTAAGCCAAGTGCAGCGGCAGGAGTTGCGGACCATCTGGGCCAACTTG  
GACCATGGGACGAGGTCGTAGAAGTGGGAGACGGTGGACCGAGCACCCGAGTGGCTGACG  
GAGTTCCTCATCGACGTGCTAGGGGGTGCGGAAACGAAGCGCCACGTACCCGCCGTGGAAG  
ACGTCACGACCGTCCAGAAGGATCCAGACTGGGAGTCGATCTTTCAAACCGCAGAACATC  
TCGGCGAGTGGGGGCTGCTTTTTCGAAAGCCGCTTCGCAACCGAGGAAGCGCGTGGGCGCA

CGGTCGACAGATAACCCCGAGCTTCACGTCATGGATAACCCGTTTCCGCACACACGTTGTGA  
CGCACGGACTCTGGGTTCGTCATCTATCCCGGCTACCCGAAGTTCGGGATCATCTCCACCG  
AGAAGCTGGACGCGCAGTAAAAGGAGAAGAAGAAGTGACCACCACCCCGCACTGAAAGCT  
GATCGCCTCCACCGGCGACGGCCGCCACCCCAAGTTCGAGCCCGAGGACTTCCCGAACGA  
CGACCCGGTCCGGGTCTCGCGTTCACCGAGGACGGTTCGGCCGCCTCGATGTTCAAGGA  
GTCGAGCTCGTACGAATGGGCCCTCTCCGCTCTCCGCCGGATCGGGGCACTCCTCATGAG  
GCAGGCCGGATGGTCCGAAAGCCTGAAACTCGACACACCCGACGACGAAGTCAGTGACTG  
ATGTTACACCCCGAAACACTATAGAAGCTCATAACCAAGCGATTCCACGAGTTCGGAGAC  
GTCATCTGCCTCGCCTGCAGCTCTTCCGGTGAAGTGAACACCACCTCATGCGCACCTCC  
ACCTCTTCTGACCCGAACCCGAAGTTCGCCAGTTCGCCAACTACGCGCCAGGCAAGGGC  
CCTGTCGGCTGCACGTTCCGCAGCGTTCATGACGGCGTGTACTTGTACGAGGTCGCCGAA  
AGCGACGAGGAGGGCGACCTGCGGAGCAACTACGGGACGGACATCTGCAAGGGCTACTTC  
CAACACACCCGCCTGCAGAGGTTGCCAGCGTGAGCAGGTCCAGTCCGGGCAATAACCACGCC  
CACCTAGACCCGGAAGACGTCTGCCGGAGGTCCAGCGGGCCGGACGCCGCATCGCGGGC  
GACTACAGCCCTGACAGCCTGGAACCTCGCGGTCTTCTCGCCGGAGACGCTGCAGTACGTC  
GTCCGACAGTTCGAGGAGCGGGGGATGTTAATGACCTGCACCGTCTCGAGGGCCGTTCCG  
GACGGCTTCTGCCGTTGCACTGGTCGCCGGAGAGCATGGTTCGCGCTTACACCCAAAGAG  
GAGCACTAGCCGCTGACGAACCAGCAGGCGGCCGAGGAGCGGGTCTCGAGGCTGCTGCCG  
GTATCGGTTCAGGACGGCGAGGAGTAGGACATGCTCACGGTGGACCGCGACGCCGTCCAG  
CACCCGAGCCACTACCGGATGATCCCCGAGGCGATCAAGAGCCCGATTGGGATCGCGGGC  
AGGGACGTCAGCCGGGGGTTCCCGTTCGCCGAGGGCAACGTCTGAACTCCCTTCTCCTC  
GCGGCCCATATGGGCGACCCGCTGGAAGACCTGCGAAAGGCCTGGCAGGACCTGGACTTC  
GCGATCGAATTGGATGAAGAAGCATGTACCAACAAGGGGGAGAATGATGTCTGACAACAA  
GGCCTTCTCAAGGAGATGCAGGGCGGCAAGGAAGCACCCAGCTGCCAGACGGGATCCG  
AGACGAGTTTGCCGACATCCCGGACGACCAGACCATGTTTCGAGTTCATCTCCAACACGCT  
CAGGGTCTGCGTGGAGGTGGGTATGAGCGTGGACTTCAACGCTGCAGCAATGGCCAACGG  
CCTGCTATATCTGGGGTTCAAGTGGTGAACGCGGAGACGGCCTCGGCAAGGAGTTGATC  
GACGCCCCGTCGCGGACGGATGTGGCGGAGTACCTGTTCTCCGGCTTGTGCCCCGCGCGG  
CCGCTGATCGAGGGGTGGATGCCCGAGCAGGTTCGAGATGCAGGGCCGCATGGTCCGCATC  
ATCTTCTCGTCCGTGCTCGGCCGCGCTGAGCAACCCAAAGGTGGTTCGGGGGAGGGTTCGTT  
GTATTCGCAACCCGATGGGCGACACCGTGTGCTCGTCTGCTGACCGAGGACGGTGGACG  
TACTCCGGGGCAAAGAGCCAGATCGAAGTAAAACGGAGCGCTGGGAAACACTATCGGGCG  
AGGTTTTCGTGCAGCCCGCGCAGCGGATGGCCAAGGGCCTTCTAGGTATGGAGCGGGGCT  
CCACGAGATAGGCAGGCAGATTCACACCGCGGATCAGCTCAAGTGGCTGGAGATGCGCAG  
CAGCGACTAGGGCAACGCGTACAGCGACGGCGAACATCTTACCAGGTCCGGCTGCAAGGT  
CGGTACCATGAGAGACCAGGGAGGCTGACAGCTTTCTCGACGTCGGCAGTGTGTTCCGGG  
ACTAACTCCGGCAGTCCCTGATCGGCGACGTAATGCTTGGGAGCGTGCGGGCCCCGCGCA  
CTCAGCATAAGGAGATCGGGCCGACGCAGGCCGGAGTGGTGTCTGCCCCCGGTTGGCGT  
GGTTCGATGTCCTCCAATCCACCTGGAACCTCGAAGTGGGATCCGCATCCGTTCGATCGTTCG  
GCACGTCGATGCCCGGCACGATGGAAGAGGTAATGGCGCTCGCCAACGCTGACCTCGGCC  
GGGAACGATGGCTGACGTAGACCAAGGTCTTCGAGCCGCTCGCCTGTATCTCCGACCTCT  
ACGACAAAAACACCCGGTCCGGTGAATTGACTGGAAGTTCGCCGGTCCCAATGCATTCAAGA  
AGTACGGCACCAAGGCACCAAGCCCGGAGTACCGCAGCCAGGTCCACACCTACGGCCTCG  
GCTACCGATACCTGGTCTACGAGGTTCGACAAGGCGGGGATCACGTTTCATCCCGCGAGCCA  
GTCACCTCTGCCAGTACCACCTGTGGATCGAGGACCCCGACCAGCAGGGGGCACTCGACA  
CGGCCGAGCGGCTGAAGAACTTCCGCATGTTTGTGTCGACAGCCTCGAGATCGACAAGCATC  
CCGAAAGGGCACAGCATGTTCCGGCTACACCGTCTGTTCTCGTGGATGTTTCAGGTAGTGGT  
GGCACCCAAAGCCCCGCGGCAACCGTGAATGCCCGGAACACCCGGGGGATCCGAACGGGT  
TCCTGCCCGACACCCGGGGGTGCCTGATGCCGTCCAGCACGGACCAGACTGCGTGGTGGT  
CACGGTCAACGGCACTACAGGCCTGTACCACTACGCGAAGGGCGGACGCCGCGACCCGTC  
GCTGTAGTTTCGTGCGCTCCGGTGCCTGACCTCGTGGACGTCTACCGACACGACCAGCAGTC  
ACCATGATGCTCTCCTTCCTCGTTCTAGCCGCCCTCTCCTTCGCGGCCATCTCCGTCCGG  
CTGGAGCGGTGATGACCATCGGCACAGCAGAAACGATCGTCTGATCCGTTCCATCACGC  
TCGTCGTACTIONGCTGATCGGAGCCTACGGATCGCTCAAGTAGCTCCCCCAAGCTCT  
TTCCCCGACCCTGCGGGGTACCAAGCGATCCGTACAGCTACCAACATGAGCAGCTTCA  
ACGCAAACGACAACCTCATGGGTTCGGCCAAGTCCGCGTCTGTTCCCGACCCCTGAACCA  
CGGCGATGGGCGTTCATCTACCAGGAGCAGGAGGTCACGCAGCTGCCTGACTTCGACACAG

GCGCGCTGGCTTCTTGGACAAGGACAAGCCCCGGGCCGAAGGTGCAGCTCGTTATCACCC  
TGCACAGCTAGGAGCGCGACGTCAACGAGCAGCACAGCGATGGCGAGCGCAAGCTCTACG  
TGGCCAGCCACAACATGCGGAAGGCAATCGCGGCGGCTGTCCGTGCGTCCGGTAGCTAGG  
GCCCCGGCGTCTGTCGGCGCACTCGCGGTGACCTACACCAAGAATGGCTTCAAGACCGGCA  
AGGACAACCCACTCAAGGAGTACTCGGCGCGGTAGGTCCTCCCGACGGGTGAGATGAACG  
TCGAGACCGGTGCGGCCGGCCCCGACCGCTGCACCGGCTCCGGCACCTGCTCCTGCCCCGG  
CACCTGCTCCCGCCCCCGCTCGGGCACCGGAGCCGGTCGTCCAGCTGGCACCCCCGGCGG  
ATGCTCCGGCAGCGCCCCGCTTGTACTCTCCCCGAGGCGATGGCGGCTCTCAACGCC  
TGACGCGCACCCAGGGCGGATCTAGCCACCTGAGGGGCGGGTTCGGGATTCTTCGGAGTC  
CTGGCCCCGCCCTTAAATGTACCAAAAAGACAGGAAAGATCCATGGTAGGCAAGTTAATCG  
CTCGGCTCGCCGTAGAGATTGACGTAGAGGGCGAACGTGACGATCGACGGCTACGGGTGGG  
CGACCGACGAAGCCGGTGAGATCGAGGGCGAGACGACGCTCTGGCTCGCCGGCAACGTCC  
GGCCGATCTTCATCCTCGCCCCGGCAGGATCAGCTCGACGCGCCGCAGCTCGTCGCCGTAG  
AGCTCTGGACGCTCGAGCCCCTCGATCAGATCCTGATGACTACCCCGTACATCGCCCCGAG  
GCTACGCAATGGACTCGTCCGAGCTGGACGACGGTGCGGAGAAAGCATCCGGGGACAAGG  
ACTAGTCAGGACGCACAAGCTGAAGGTCAGCGACCACGAAGTCGTCCGCTGTTGCCGAGT  
CGAGTGCCAGCTCTGTGGAGCGAGACACAATCTCATTCAATGGGCATTGAATGGGGAGAT  
GGGTGAGGCCACGTTCTCGAACGACATCTGCGTGCGCCCGCCGGAGGGGTTCGACCGAGGA  
GGAGGGGTCAACGTGCGGAGACGACAGGAGGACTCCCTGAGCAGGAAGACCCCGCGCACCC  
GGGTCTGGACCGATCAGTGGCACAATAACGAGCCAATCCCGCACTAATCGTTCGACGAT  
GCGCGGGTGACGTAATCAACATGCTGCGCCTCGAAATCATCTGGAACACGAATTCACGT  
GGGAATAGGAGGGATTGAGATGGTGACACCGGGACATGCACCCCGCAAGGCGATCGAACT  
GCTCAAGGCGGACGGCTTGATGGAGGGAGCGATGCACACGCCCCGCTGGTGCTGCTCGAT  
CGGAGCGATCCGGCGGGGCGAGCTGCACGCTCTCGGCGAGGCGGACGTCGAGCGCAATCA  
CCAGGAGTTCAAAGACGAGCTGTCCCTCGTTCGCGAGGAGACGGCCCGACTCGTCCGGGG  
TGTGATTCGCGACCGCTACAAGGAGTCCAGAATCGTCCACTGGACCGACGACGGGCGGGC  
AATTGTGTCCGAGATACTCGACGTCTTCGAGACCGCACTGCAGCAGGCCGAACGATGAGC  
GGTCTGCTGACGTGGGCCGCCGGTCCGCCACTCGTCGCGCGTCTGTTGATCGCGGTC  
GATTGCCTAACGCTCTCTCAGAGAACGAAGGGATGCCGTAATTTCTTCGATCCTGTTT  
GCCAGCTGATAGTCAGCTGGTAGGCGGAGCGGTGGTCTCTGAACGGCAGGCGCGAGTAC  
CAGAACAGCCCCGGCCATGGCTTAACGGCCGGAGCTGGAGGTGTGCGAGTGTGCCACTA  
CCTGTTCTACCACTTTCAGCACCGCTACTGCGACGCCCTGAAGATGGCCACCGGCTGGCT  
GCAGGGGTAGATAAGTCCCTAGGGAATCCCGTGCGAATGCACACCATTTCGAGGAGAGATA  
CGATGGGTGACTACACCCACAGAACGGCACCGTCCGTTACTTCGAGTAGATCCAGCCGC  
ACGGCAACGGCGCACCGTCCGAGCTCGACGCCACGGGCTGATCCCTGGCAGCATCCCCG  
AGAGGGTCCTGACCAGCGTCGTAGGCGACTCCGCACGGCTCGTGTCCAGCGACGGCAGCC  
GGAGTTTCGCGTACGGGTGCAGGCCCTGGAGACGGTCCCTCGGGCTGTTGCTCAACAT  
CTTCGGCAAGGAGTTCGTTGCTGTTGCTGTTGAGTACCGGCACCGGCCCGAGGGTTCGA  
CCTCACCGAGATCAACCAGAAGGACGAACACACCACGCGAGGGCTGAACAAGCGCGAGCG  
GTGGCAGACCTGGCAGGGCCAACGCGACGCCTCCGGCGGGCACTTAGAATTCGAGGCAA  
TTCCCGGCCGATCAAGAGATCACACACAGGATAGGAACTGAGATCACACAGTGGTTGGGA  
GAGCGGGTGAAGGAGACGCCGGAGCAGCGATGGTTCGACATGATCCGCAACCTACTACT  
TGGGACTGCTGCGTCCCTGGCGAGCGACTACCAGAACGCCAGGAGCCACCAGGAGGACTAC  
GAAAGCACGGAGTGCCTGTCCCGATCTCGGACCCCTCGTCGGCGAGAGCGTCAGCATC  
GCAGTCAAGCCCACCGGCCTGCCGTGGTTCTTCCAAGAGACCGGGGGTACGGGACCATG  
CACAAGCTTAACGTCGACATCGACTACCCGGTGCTCGCGATCGAGTCTCCACACCGGGC  
CTCAGCCACCTGTGCATCGACAAAAGGAGCAGTCTGGTTCGGACACGCTCCGGGTGCTCC  
GTGTGCTGGCCTCGGTCGGCATCTTCGAGACGGGCTACTTGAACGCCAGCGAGCGGTGCG  
GCTGCACACACCTGCGAGTGCCGTGGCTGAAGACGAAGTACCGCGCACCGCTCACGCCGA  
ACAAGACGGACTGCTGGCCGTGTAGCTGGCTGCCGGGGTTCGGGCTGGGCGACGAGGGCGA  
GGCAGGTGCACCCGCAGCCCCGGCTGCTGATCGTGAACCAGACCAACGTCAACGGCTGGGC  
CGAGCACGTGGACGGCGACCTGGGGCCGGACGAGGCAGAGGCGCTCGGGTGGTCGCTGAT  
CAAGAAGTCCAGACAACTGCGGGAGATTGGGGAGACGAGATTAACCTCCCTGCCCTACCG  
CCCTGTGGGAAATTATGGGTGGAGCCCGAGAGGTCGGAGTTCAGCAAGAGATCGTCTGC  
TTCGCCCGGCGCAAGGGACGACGGGTCCCTCGAGTTCGACGTCGCCGTCCGGCGAGCGGCTG  
GAGATCGTAACGGTCCCGGCCGACGGCAAGGACCTCGTCTTCGAGAGTGGCGATATCACA  
GGACTGCCATACTAACTGCCGATCTGGGCGTAACGGAGGTGAGAGATGAAGGGCAACGGG

AAGTCCGTCAAGCTGACGATCCACGCGCGGGCGGCGAATGGCCGAGTTGAGTGTGACGAG  
TACGAGGTGCCGTTGGCGCTGAAGTACGCGGAGGCCGTCGTCTCGTTCCGCCAGTACGCC  
GGCTGTCAGAACTACCGGCGCGGGAGGATCGACGTCTCTGCGCGGACCGAGGGCGTTCGAG  
CTGGTGGGCATCTCGGTCTGTGGCCGAGCCACGAACTGTGGCAGCAGCATATCGAGAAA  
ACCGGCGGGCGGTCACGGACGAAAGCTGAGGCCGTGGCTGAACATCTGATCTGGAGCCTGG  
CCCCGCTCCGGTGTTCGTAGTCGAGTGGTTCGACCGAGCACGGCGCGTGGGGAGGCCTGT  
GGACGTGCTCTTCCCCTCGCAGTCCTGGCTCGACGAGACACCCGCCGCTACTACGTG  
GCATACTAGACACGGTATGCGTCGAAATGGGCCACAAATTCGAAGGAGTCTATCATGTCT  
GACAAGCGGATCAGCCAGGACGTGTTACGCGGCCACCGTTCCCGCTGACAGTCGGACCC  
ATCCTGGGCTTCGAGGCGAACCTGAAGTACAGGACTCGCGACGAGCGCGTTCGACCACGTG  
AAGACGGGCGTACTGGGCGCGTCTGACCTGTGCCACCGCCGACAGGCCTCCGTGCTGCCG  
CCGATGTCCGTACCGCCGAGCGTCGACACCAGGGACGTTCGACAAGCGACACGTGACGCTG  
ATCGCCAGCAAGGCGCTCCGGCTGGCCCGCGAGGGTTCATGACGTCTCAGAGTCTTCACG  
ACCGACCAGGCGATGCACGAGAGGGACGCCTCCGAGATCCGTGGACTGGGCGACCATGGC  
GGCCACGACTTCTGAGTCAACCAAGGCTGCCCGCGCTACTGGAGCGTGGAGTCTGCCGAC  
CGGGTGTCCAGGAGGAGTCCGGCATGGCCGCGCTCGTCGACGCGGGCGACACCCACGTG  
GGCAGGACGACAAGGTGCTCACCGATGCCCGATTGCCAGCCTGTTGTGAACCGGTCCT  
GTTCCGCGCTGAACCGGTACGGCAACGAGATCGTGCTCGACGCCGCCCGGACCACGAGCG  
TGGACAGGTGCTCTTCAACAAGGGGCGCCGCGTTCATCGTACCCAGTCCGAGGGGTGGGC  
CGTGGTGGGCAACACAACCTACCGGTGTACCGGCGACATTACGCTACTGCCGCGAGTT  
CTGGAACCTCAAGGTCCACCCAGCCAGCTGGCGGAGCATAACCAGAGAGGGGAATTAACA  
CGCCGAGTGCAAGATCCAGGAGATCCTGGAGGCACGGAGGGAGACCCGGAATCCCGGCCA  
ACGAGAAAGACGTTCGACGACTTCTCGAGCACCTCGATGACGCGGGCTTCTACGTGTTCC  
GGACGGGGGAGTACTCATGAGCGACTCCATCGAATGGCTGGACAGGCTCAGCCTGGTTCA  
GTCGTACGTGCTGTTTCGATCTAATAGGGCTAGCGTTCGGCCTCACAGACACATTCGTCAA  
GGACACGGGGCCCGAGTACCGCGCCCTGAAGGACGACGCGCCCGGCTGGGCACCCGACTC  
GTCCAACCGGGTTCGTCGCGCTGCTGACCATGGTTCATCGTTCGCCGTCGCCTGGCCGGTCTG  
CACCGTTCATCACGCTCTACAGCCTGACCGAGCGGGTTCATCGTGTGCGGGCTAGCCAAGTA  
CCTGAACTGGTCGACGCGCCGGTTCCTGCGGACACTCGAGATCACCGACGAGGATCTCGG  
CGGCCTCGTCTTCAGACGCGCTCACTACGACGACTCGGTTACTGGCATCTTCGACGCCGA  
AGGCATTGTGGTTAAGCCTGAATGGAAGTGGAAACCATGTGTAAGCGCAGCAAGGCCCAGA  
ATGCGGCTCACCCGGTCAACTCGGTGCTTGAGACGACGTCGTACGTCTCCCATGACCCCG  
AGCCGCAGATCTCAAGCGGCATGAGTTCGTGCGATCGAAGCACCGGTTCAAGCAGGACC  
TCCTGCCGTAGAGCCCGCTCGGGCAGCGTGAGCTGGACCCGTACGACGCACACGAGCACG  
AGCTGCTCATCCGGCGCATCTCGAACCAGCGCCGGGAGTTCCGGCCACTGAACCGCGCAT  
ACCGTTCGGCGCAGCAACGAGATGGGCTCGAAGGTCATGCTGCTCAAGGACCAGCGCAAGA  
TCTCGATCAATGAGACGCATACCCGTAACCTTAAGATCACGCAGCAGCAGGTCGAGATAG  
ACCAACTGCGCCGACAGCTCGCAACCGCGACCGACGGCGAGCGACGAAAGAGGGGATTCC  
GATGGGCCGGACCGTGGTGCCGGGGCCGACCCGTACCTCGCGCCCGTTCAGGACTGCGGA  
CCTGCGCCGCGACCGGCTCTTGACCGAGGATCAAGTCGACGAGTCCCTCGCGAAGGTAGA  
AATCAAACCTCGCACTATGGTAGCGGGATGCGTTGCTGCGATTGAGGCATCTGCTCACGGT  
CGGGGTCTACATCGGAGAGCAGAACCTGCACCACATCGGCCGATCCGCCGGGACGACAC  
GGTGCATCGCCTTCCTAAGGAACGGGCACTCGCCCCCGGACATGAGGCGAAGCCACCGT  
GAACGGGTCCGAGGTCAGCTTGGCATTCCGGGACGGCGTGAGGCTGTGAAGCTGGTCGGG  
TTCACCACGGTCAAAGGTAACGCGGTTCGTGTCGTAACCTCGGAGCTCCTCGTCGCCGGCCAC  
CGGTCCGGTCTGGACAACAGCGAGAACAACCTGATGAACGGGGACGACATGCAGGTATAG  
AGCCTCAGCCCCAAGCAGGTCGGCCACCTCCTCGCCGAGGGGAGGCTGCCGTGCAAGTCC  
GTGTTACGCAGGCGAAGCACGCCCGCAGGGGTAAACCCAGGCGAAGGCAGGTGCAGTTC  
TGAGCCGGCAGTTCGTCTACACGCCCTGGAACCTGGCCATGCGGGCGTTCGAACACACTGG  
CCACCCTCGGAGGGCACACCACAGCCAGGCGCCTGATCTCGGTTCAACACATTAATGAG  
TGAGGAAGTGGCCATGTTGGCGAATGAGATTCGCGGATATGCCGACGCGATCGAGGAGTA  
CTGGAACAATGGCTGGAAGTCGATGCTATGACCGCCGAAGGGGCAGAAGTTACCCCGGC  
GTCCGGGTACACCGGCTACGACGCGGCGATCCCCAGCTACCCCAACGTTCATGGCGTGGGC  
CTATCACCATCCCGACGCCAACCTCGGACTGCGGTTCCCGGCCGGGAACGTGGGCCTGGA  
CGTGGACGCGTACGGCTAGAAGACCGGGTTCGTTCGACCAGCGCTGAGGCCCTGAAGCGCGA  
CGGCCAGAGGCCGGCGCCTGTGCGCTCCACCTCGCGAACGGACTAGACATCAGGTATCCG  
CATGTACCGCAAGCCCGCCGACATCCCACTGCACACGCAGATCAAGATCCCCCGACACAG

GATCGGCAATGTCGAGGTCGTCCAGCACCACAATCGGTACAGCGTGTCTGGCCGTCCAT  
GCACCTCGAGGGGCGGATGTACGAGTGGAGGGACAAGAAGGTTAACGTGGTGCCGGTCCC  
TTCGTTTCGACGACTTGCCCGAGCTACCGCGCCCGTGGATAGAGGTAAGTCTCAAGGAAGC  
TCATGCCGAGGCCACAGTGTCTGCGATCCGTTTCGAAGCGCTCCGGCAGCTCCCGCAGGG  
GAAGATGAGCGAGAAGGTCGGCGAGGCGGTGCGGCGCGCAAAGACCGAACTCCACTGCGA  
GCCGGGGTACGTCACGACGTCCCGAACGTTAATGTCCTGCGGCTCCTGCGCCAGGCGGA  
GAAAGGGGAGCTGGGCGTCACCGAGGCGCCCGAGTCCCTGCGGTCCCACTTCGTGCGGAT  
GACGGGGGACCGGAACACGGAGTGCAGGAGTCAAGGACGACTTTAACCGGAAATTGTACGG  
CCAGCGCGGGGACGACCTGGTCGCCAGGAGGCCATCGCAGGAGAACGACTACGCGGTCTC  
CGGCATCGACGACAACCTCCAGGCGTCCAAGACTCTGGCAAAGCAGCGTGCAGGCCCCA  
ACCGGACCCCATCGTCGAGTGGCAACCACCTCCGTTCGGATCCGACCTAGCCAGCCGCGCC  
GTTCTGTACGAGGAGGTGCTGATGACCCGTCACGCGAGTCAACCTTCTGGCGCGATGCT  
GGACGCCGACGCGTTCCTGTTTCGGCATGACAGCGCGGCTGGTTGCCAGGTTCGAGCAGCT  
GACCGGAGCGGCGGCGTTCGCGGAGATCGAGTCAGGCGGCCAGGCCACGATGCGGAGGAA  
GCTGCTCACCGTTCGCGGGCCACCCAACGTGCGGCGGTTCGGAGCCGCTGATCTAAGGGCT  
GCTCTACCGGTGCACCCACTCACGGCTCTCCGGCCCTCCAGGATCCTGCAAGACGTTCTG  
CTCGCTCGAAATGGTCTGCGCGCTGGCGTCGAACCGAACCGAATGGAACGGCCAGGACAT  
CACGTCGAAGCGCAAGGGGAACGATGGATTTCGTCTGTACGTCGTGGCCGAGGGGGTCTC  
GGCTCTGTACGCAGGGATCAATGCGTGGTCTCATTGCTGGGGACCGGCATCGGCCCTCG  
CAGCCTCCAGCTCCACGTCTACCCGTAGGCGTTACAGGACGGTGCGTACACGCAGATGGA  
GGAGCAGACCGAACTCGCACGCTCGCTCGACTGCGTGCTACGGCATACTGAGCTGCCAGC  
TCAAACAGCACAGCGCGGACGTATTCCTCGACTTGCCGTTCCATATCGCGAGCTACGCGC  
AGCTGACCCATTTATTCGCGGAGAAGCTGGGACTGAAGTTCGGCGAATTGATCTGGACCT  
GCGGCGACGTCCACCTGTATTTCGAATCACGTTCGAGCAGGCGCCCGAACAACTGACGCGTA  
CGCACACTGGATATCCGTGGCTGGCGCTTAATCTCCACCACTCGATCTTCGAGTACACAG  
CCGACGACGCGACAGTTCCTCGGCTCGCGCCCGCACCCGGTTCATGAATGCCCATGTGGCCG  
TGTAAGGAGGTACCGCTGTGGCCGACAACCTGGACAATACACCCGAAACCCACGCCAGAC  
TGGCATTTCGACTGGATTACCTGGCTCGAGCAGGGCGAGACGATAACCACTTCGACCTTC  
GACGTGACCGTTCGGCATCGAAGTCGGCTCGACGTCGAATACGACGACGAATACGAGGGTC  
TGACTTTCGGCTGACGCCCGGGCCACAACCTAACGCGTCACGAATCATGTCATCACATCA  
ACCGGTTCGATTGACGAACGCTCCATCACTATCGGCGTTCGAGGTAGGCAATCTAAGGAG  
CTTCAATGGAAAACAACAACGTGCTCTGGCACCCAAGCATCACCGTGAAAAAGTACAACC  
GGCAGCAGGTTCGCGGACATCACAGCAGCCTTGGCCGCGCGCAGACGATGGAGCACTACG  
CAAACATCACGCCGGACGAGTTCGTCACCGTGGAGGGCAAAGTCTTCGTGTCCGCTGGGG  
TCCAGGGCCTGGCCGACCTGATCGTCGGCAACGGCAGCGTGACGGAGTTCACCGCGACCC  
AAGACCTCATCGGCGTCGGCAACAGCAATACTGCATTCACCCCGGCCACAGCGCCCTGC  
AGGGCGCGTCCAAGCTGGTACCCCGGAGGCCAGCGCCCGTTCGGGGTCCGGCGGTGTCA  
TCTCGGACTCGGCCCTGTCTCTTCCGCCAACGCCAACTTCTCCAGGGAGGAGTGGTGCC  
TCGCGATCGGCTCCGGCCCAGCGTGAAGAACGCCGTACTGGCGACCGCAGGTTCGTGGGT  
GGGCCGTGATGCTGACCCGCAAGGTCCAGTCGCTCGGAGCGAAGGCCTCCGGCGCTGACT  
GGAGGCTCTCCGCGACGGTACCGTGTACTGATCCAAAACCTAAATGCACCTGACTTGAT  
CCGCCGCTATCAAATTGGGAGCCTTGATAATTCGGCTTACTGACCCGCGCAGGCAGTAGC  
AACAAACAACCCTAAGTAGGGGGGCTGACTTGGAGCACAAGGGAAAGCATCGAACGCAA  
ACCAACTCCAACGCAAAGCGTTTCGTAGCGACAGGAACCGCCGTCCGGGCACTCGTCCTC  
GTCTCCGCTGTGCGAGGCACTCCGGCCGCGTTCGTCGACGACTGCTCCGGGGTCCGCCAC  
TGCGGGTTCGTGCGGCAACTGGAGCATGAACACCAGCAACGGGTTCTACGGAGGCCTGCAG  
TTCTCGCAGTCCACCTGAGACGCGTTCAGCCTTAAGGCGCCGCTGGCGCGCTGATCCG  
GCCACGATGCCGGATCCGATCGCGGCAGCGGAAGCTACCCTGAAGGTGCAGGGCATCGGC  
GCGAGGAGGGTGTGTGGGGCGTACCTCGGCCAGGGTGTAGTCACTCCCGGCGTTGGGTCC  
GCGCCCGCCGCGCCGTCGTACGTCGAGACTGCGCCCTTTCGCCACCCCTCCCATCGTGG  
GCGGAGCCGGGCGCTGGCACGAAAGCGCAGGGTTTCCACGGGGGCCACAACGGGGTCCGGC  
AACTCTGCCCCGATTGGCACCCCGGTCTACGTAGAGGCGTCCCGGTCCATCGACCTGGTT  
GGGTTCAACTACGACCCCGGCGGCTACGGTACTACATCCAGCAGGCCCGGACAATGGC  
GCGAAGATCCGGTACTTCCACATCTCCTAGATCTACGTCAGCGCAGGCCGACGAGGTCACC  
GCCGGTCTTTCGCGCGCGGCGGTTCGGCAACCCTGGCTTCTCGACCGGTACTACCAGCGT  
CTGCGGACCAGCGCCGAGGATCCGGGCGCGTACCTGATCAACCAGGGTTTCACGCTGGAC  
TGGTCCGGGCCAGCGGACTGCCCGTCACTCCGGCACCGGCACCTGTGTCCCCCCTTGG

GAAGAGGTTGCGGTCCAGGCCATTCCGGTCATCCTGGCCTCTGCTCCCAGGTGGAGTCGAG  
ACGGTGAACGCGGGTCCGGGAGACACGCTTTCGCACATCGCTGAGGTGTTTCGGGAACAC  
TCCTGGGAGACCCTCTCGGACCTGAACAAGGATGTGGTCGAGAACTCGGATGTGATCTAC  
CTGCACCATTTGCTCCACCTGGCCTGAGAGAACGCGAGTAAGCGGCACGAGTAGCCGAAG  
CAACCTCTACTGCAGCACATCTCGGCCCTGGGCCACCGACTACCGTGGAGAGGAGGGCTG  
GGCACGGCGGATGAGGAGTAAGCTCGAACGCCGCCGTGCTCAACGTTTACTGCGCGCCGT  
GCGATACGACCTGTCCGCGACACGCCGACCAAAGTTACTCAGGGATGGCGCCCTACTA  
GGTGCTCTACGTGCCAACTGATGTCTATTCTCGACCAGCACTTGGACTTGCCCGGCTGG  
CGTCTCCCCGTTGATGTCTGGGTCTGGGGCGGCGGAGGCACCGGCGCGGGTGCAACCTG  
GTGCTCCGACAACGGCGGGCGGCCGATTGGGCAGTGCCTTAGCCTTCTACACGGCCGCCGT  
CACCCGCGGATACGTCTACACCGTGACCGTCGCCACTGGCGGCACCGGACAGGGCTCAA  
CGCTGCACTTGGCGGCGGCGCATCCTGGTTCGGTAGCACAGGCACCGTCTACGGCCCCGG  
CGGCAACAGCGGATCGAAGTGCCAGACCGGCACGTCCGGTGGGGCGGTCACCTCTGGGGC  
GATCGGCAACACGGTCTTCTACGGCGCCGACAGGGTTCGTCTGATAACGAGTCCGGCAACCG  
GTCCGCCTCCGGCGCCGGCGGCGCAGGCTCGAACGGCTCAGACGGCCCCCGCGGCACGCT  
CTCTGGCGGGGCTGACCGTACGGGTCCGGCGGCCAGTTTGGCGGCAACGGCGGCGCGGG  
CGTAACCACCTCCGAGGACGGAAACCCCAACCGCAGCCCCGGCGACGGCGGCGCTGGGGG  
TCGTCGAGCCAGCAGGAACGCAAACCTGCGGTGACGGCGGTTCGCGGCGAGGTTTGGATGAC  
CTACGTAACCGACATCAAGATCAACCGTTCGACGCCTCGGGCACGACCGCGGACGCGGA  
GAGCGGCATCGCGCAGACCACCCGACCGAGACCCTGTGGTTCGACGAACTCGCCCCGAG  
GCTCTAGCCGTCGGCTACGCCAGATAACGGCGGCGTTCGGCCACGTATCTGCCGAGGCGAC  
CGCGACCGTACCCACGCGGACGCCGACTCCGGGACTGACCTTTCAGTGGATTACCCGG  
GCTCATCAAGCCTATTGACACCGGCCCGGCCGACGATCTGGTCTCGGTTCAGCAACACGAT  
CGCCGGCTACACCGAACAGGGCACGGAGTCGACCAGATCTAAGGCCAACGCCCCGACGGC  
GAGGGACATCGGCTCGGGCACCGATGCCAGCACGGTGACCGCGCAGGCCTCTGCTGCGCC  
GGGAACCAGCACCGCCGACGCCAACGCACACGCCAGCAACAGCGTGGGGCGACGGCGACAC  
CGGCTCTACGGCCGACGGCACCGCGACGCTGCGAACGGACTCTGGAGACGCAGCCTGCGG  
GTCGGACGTAGCATCGACGACGGCGACCGTACGCAGGGCGATAACCGGAGCGGCGGATTA  
CACGGTACCCGGCATCCGGCAACCGTTCGACGGACACCGCGGACGGGGACGATGCCAGCAC  
AGTGCGGATCAGCCCGGTTCGGCGACACCGGCATCGGCACCGCCTCTGCGCAGATCCTCGT  
CACCGTTTTTCGACATCGACAACGGAGGCGGGGCAGACCTCTCCAGCGTTAGGCGGTTGTC  
GCCCCGACGGCGGCGGACCGGTTTCGAACGTGAACTCATCCAGGGCGCTCAGCGGCATCCT  
CGACGCATCCACCTGTTACCGTCCCTCCGGACAAGCGGACGCTGAAGATCGAGCGGGA  
GCGGCAAAGTTCGAGTCGTGGACAGCGAAGTCCGGGTAGTCATCCCTGGCAAACATCTGAC  
GCCAGGCACGACCATGCCGCACCGCAACGGACGATTGCTCGGCGCCAGCCAGGGAGAAT  
CACGTGCATCGTGAAGCGAGAGGAGTAACAAGTGTCTAGGAGATCACCGCCGAGCAGAG  
TTCCCTCGACCGCGAGGGCCAGTCCCTCCACATGCGTTCAGGCGCTGACCGGGATCCGTGG  
CTACTTGGTCCACAAGCTGGACGTCAACCGATGCCCGAAGTGTGCCATGTCACAGCTCAA  
GTACGGCGACAGGGCCTCTCTCGTCCAGCAGCGGCAGAAGATCCTCGAAGAGATCGCAGC  
CCTACCGGAAGGGAAGAAGGCCGGCGGGAAAGACGCACCGAAGACCCACACAGCCCGGAT  
CCGCGCCCTTCGCGCCCGCCGGCGACGACGAACCCACGGGCAGCAAGGAATCCCCCGCAC  
TCAAGCGGGTACACGTTCGGAGAAGCTAAGGAGGTGACCAGTGGCAGTCCGTCTAGGCGAA  
CAGTATCCACGGATCCTTCATGAGCCGACATCCTGGGGCGGAGTCATCTCGGCGGGCCGC  
GGGGCATTGGAACCTCGCGGCCGAGGCTGGCCTGACCCTCGGTACTGGCAGTAGAACGTG  
CTGCACGGCGCGCTCGTACGCGAGAGAACACCGTCTACAACCCATACACGGATCAGCTC  
GCATATAGATGGGCCGCACGCGAAGTTCGGCCTGATGATCTCCCCCAGAACGGTAGAGGG  
TCTCTCCCGGAGCCCCGCGAGCTAGCTGCCCTGTCCCTCGTTCGGCGAGCGCCTGATCATC  
GACGCGGCTCACCATCTCGATACTCCAAGGAGGCCTTCCAGCGAATCATCTTCCCTGATC  
TAGGACAACCAGGACTTCCTGCAAGAGGTTCATGCGGGTTCGATCGGTTCACAGGGTGAATAG  
GGCATCGTGATGAGGAAGCCGAAGGGGTCCAACCTTCCACCGCAACGACTTTGGTTCCGT  
ACACGGATCAAGGGCGGTGGCCGAGGCTACACGGGTGACACCCTGATCCTCGACGAGGCC  
ATGATCCTCGACGTCGACATGGTCAGGGTTCATGAAGCCAACCTGACGGCCCGTCCGAAC  
TTGCAGATCTGGCGCACCGGCTCGGCCGCTGGCCGGAAGTCCATGCAGTTCGGCCCCGTG  
CGCTCGCGCGCCATCGCGGGCGGCGACACGCTGCTCGGGAACGGCTAGTGGGGCGGCGGAT  
CTTTCACCCCGCTCTGCCCGTCCGCCTGCGACGGGCACCAAAGCCCGGCGCCCCACGT  
ACGTGGGCAAGGGCGAACGTTCGCTTCGGGATCCGCATCAAGGAGGAGGGAATCGCGGCG  
ACCTTCCGCTTAATGGACCTCGACTCGTTTGCATGGAGCACCTCGCCGTCGGCGACTGG



CCCACCGAGGGGCCACGAGGGGTGGTGTTCGCCGAGCAGTACCCGAAGAGCCGCGTTCGAC  
TGCAACTCGCAGCTCGGGCAGCACTTCGTACACGGGGTTCGAAGTCGCGCCGGACCCGACGC  
GAGGCTACGATGCTGGCCGCCGCTCCGAACCAGCAAGGCGTCGTTTCAGCTGAAGATCACC  
GCCTACGAAGACAACGGCTTCGGCAACCGGTTTCGGCGTCTTGTGGGTGCGCAGGCGCGTC  
CTGCACATCTGGTGTACCCAGCGCCCGAAGGCGGTAGCGATCGACCCCGCCAGCCAGGCC  
GGTGGCGTGTATCGACCCGGTCCAGGACGCGCATGTCAACGTAATCAACCCGACATCGCGG  
GAGTACGGCGGGCCTACGGCGAGTTCGCTCCGGCATCGTGCCGCGCAAGGGTAAGAAG  
GGTACCAAACGCACATAAGCCAGGACGCTCTCACCGCGTCGATCGCGGTGTCCGACGTG  
CGGACCGCCGGTGACCTGTAAATGTGGAGCAAGTCGCTCTCGACGGCCGGCATCACCCCG  
ACCGTCGAGGCCACGCTCGCAGCCTGGGGCTGGAAGAACACGTGCTATACGAAATCCGAA  
ACCCTCGCTACACCATGGGGAAAAAGACGATGAGAGGATGGACTAAATGAGTCGTATCGA  
TCTGAAGGTCGTGATCCTGGTTCGCGATTGCGCTGGGCGGCACAGGCACGGTGGCCACCTT  
CGTAGCCTGGACCCAGATAGCCTGAGCGGCCTCAATTCTCGTCGCGGGTGTGCTTCGGGGA  
GGTCACTGACTGATGGCAAACCGTGGTACCACCTACGCGGGCCAGGTCACCCACCGAG  
CAGCGGTTTCGGACTCGACGACCTGGCCAGTGGTACTGTGTCAGGACAACCTGCCCTGTG  
GCCAAGCGTCCGGTGTACAGCAACACCGAGGCGATCGACGACGACTTTGCGGGGCTATGTG  
CTCGGCGGGGTCAAGGCCAACGGCGCTGTCTTAGCGGGAGCGCTGGCCCGGATGTTGGTC  
TTCACCGAGGTGCGCTTCTTGGACCCGCGGTACACCGAGGCCGGCCCGCCCGGAGACCTG  
TACCGGTGGCCGAGCCTGAAGATCCTCTACAAGCCCTGGACGAACGGTTCGACCGGTGAC  
CTGCTGGCCCGGGCGATAAAGGACACCGAACTGGCGGGCAATCACTACGTCGTCCGCGAG  
GACGGTAGCTCGAAACCGCGCCTTCGCCGCCATCGGCCGGACTGGGTGAGCATCATCCCC  
ACGTCGCCCGCCGGATAAGGTAGTGCAGTCCGACGTCGTCGGGTACCTGTACAAGCCCGGA  
CGCACCGAGATCAGGGAAATCTGGAACCGTACCCGGTCGATGGATCGGACGGTGGCATC  
GCGCAATGGGCGCGGATCCCCGAGCCGGAGGCGGCCGACCGTGGATTGAGCTGGCTGACA  
CCGGTCCCTCGCGAGAGCATGCACGACAACGCGGCGACAAAGGACAAGCTGAAGTTCTTC  
GCGAACGCGGCCACGCCGAACCTCACGGAGTCGTTCAAGGAGACGGTGACGACTGAGCAG  
ATCAAGGAGTTCATGGAGCAGCTCGACGACAGCCACGGCGGGCGGTGACAACCACTACAAA  
ACGCGGTACCTCGGCGGGCGGCTCGGACGTGCGCGCGAGCGGCTCCAAGATGAAGGAGATC  
AATTTCAAGTTGTGCGAGGTTCTGCCCGAGTCGCACATCGCAGCGGCGGGACGGAACCA  
CCCGCGCTCGTAGGCCTTTCCGAAGGGCTGCAAGTAAGCTCGCTGTACGAGGGCAACTAC  
AAGGCGGCGCGCAACAACCTTCGCCGACGCGACAATGCGGCCCTCTGGAGCTCGTTGCGT  
GCGGCGCTCTCGGTGCTGGTTGAGGAGTTCGACGACTCGCCACTCTAGTAAGACGCGCGC  
GACGCCCAGTCCCTCCGACACGACTTGAAAGAGCTGGCTGAGATCACGGCGCAGAGCGGG  
TCCAGCATCTCGACGCTCGTCATCCAGGGCTACACGCCGGAGTCGGTCCACCATGGCGTTC  
GTCAAGGAAGACCTCCGGCTGCTCAAGCACACCCGGCCTTTACTCCGTCCAGCTGCCGCC  
CCCGGAACCATCGGCAAGGCCGCACTGACCACACAGACGCCAGCTACCCAGACGTCCGAC  
GTCAAGAAGGTCCGGAATCATGTCAAGAACGACCCGAAGCCAGTGGCCGACGTCTGGAAC  
CCTAACGGCCAACAGTCAGTCCGGACAAGGCGAAATCGCCGCGCTCCCAAGGGGAAGAAG  
TGATCGAGAGAGGTTCTGTGTACTCGCTCGGTAGAGTTCCGATCCAACAAGGCCGCTGGA  
GAGGGCGACGGCCGGACCCGCGAAGCGAAGACGGCGGTCTTCGACCAGGACACCCGAGATC  
AACTGGTGGGAAGGCCGGTTCGCCTAACGAATCGCCAATGGCCCGTTCAAGACGACCCTC  
CGTAGCGCAAGACGAACATGCAGTACGACCACGCCCGGGACTCCCGCGTCGGGTCCGGG  
CCGATCGGCGTGTACGAGGACATCCGCAAGTACGAGCACGGCCTGTTCTGTGTCGGGCCG  
ATGGGCGACAACCCCGCCGTCGAACCGATCCGGCAGGTGATCGACTGCGGTGCCGTACC  
GGCATGTCGTTCAAGTTCGCGTCACTCGAGACGACTTGCTGTACATGAACGGTAAGCGA  
GTTCCGCCGCGACGATATCATCAAGGTCCTCTGTGAGAAGGGCTACCGGGGGCCGCTGGCG  
CGCACGATCCGGGAGGTCACGCTCTCCGAGGCTAGCAGCGTGTGACTCCAGCGTGCACA  
GGAACCTCCTTCGGGGTAGGGATGACCCAGCCGGACCGAGAGGATCTCGCCGCCGAGTAT  
CGGCTACCATGGCCGATATGGAGGCCGCGCAGGACGTCTTTCGATGGGTCCGGGGTGGG  
GCCCATACAAGAACGATGTTCCGGACATGGCTACACGCTAAAACCGAGTCCCATAGGGCT  
GTATCCGTCTGGCTAGCAGCCGAATTCGAAAACAAGACTTCAATCGAGAGCGACGGCTCC  
CGGATGGGCACCTCGGCTCACATTGAGACTCCCGAAGCAGACGCCGCCCGCTGCCGGGGC  
ACCTCCATTTCCGTAGACACGAACACCCCAACCCTCAAAGGTGCATTCCCATGACCCCC  
AAAGAACTGCGGGCACGTCCGGCCGAGATCGTAGTCCGCCTCTCCGTCATCGGTACAGAA  
TACCCCATCGCCGAACCTCCCGAATCCGAGCAGGCCAGTGGGACGGCCTGGACGCCGAG  
CGCGCCAAGGTCGCCAGCTCGCTCGAGTGCATCGAAGCCCGCATCAAGCGATTTGGTGCG  
CTGGCAGACACCGACAGCACCGAGCGCGACGCCACACCGGCACGCCGGGGTTCCATGCC

CGCCGCGACATCCGCGATACCGACGCCATCCGCTGCCAGGCTCCCAGCGAAGAGGATTTC  
GTCGAGAGCCTCCAGGGCATCACCCGCTGGGCCACGGAGAAGATGCACTTCTCGCGGGAG  
GTCTCGCGCCGTGCCGCACAGGTGCGCATCGAGCGCCTGCTCGTCAACCTCGACTCGAAC  
GGACTCCTCGCCAAGCGGATCCTGGTCACCGGCACCGCGACGTACGACCGCGCGCTCAGC  
AAGGCTGCGCTCTGGCAGAGCCTGCAGGGTCTGACGGCCGAGGAGGCACGCGCCCTACAA  
CTCGGTTCCAAAGTCACGTCTGGCAGCAATGGTGGCTTTCGCGGTTCGTCATTCAGCTTGAC  
TCGACGATGATCCACACCGGCGCGATCGACATCAACCCGCTGCGTGGCCTGGCGCGTGTG  
GGCCTGATCACCGGCAAGGAGTGGCAGGGCGTCACCTCCGCGAACTGCATCGTTGTCTCG  
CGTGGCACTCAGGCCTGCGCCACCGACGGCTCCAGCCCGAACCTCGCACAGCCCAAGGTC  
CGTGCCGAGCGAGTCTCCGCGTAGGTCCCATTCTGGTGGCTGATCAAGCATGACTGGTTG  
GCGATGCGTCATGAGGTCACCCTGATCCTGGGCGAGGCGAAGAACGAGGAGGAGGGCGGT  
TCGTTCTGACCGGCGACGGCCTGGGCGTCAACCCGCGAGAGCTTGCTCACGGGCGTCGTT  
TCCGGTCAGGACGTGCTTGCAGCTTCTCGCCTGCCTTACCTCCGGTGACATCTCCTCC  
CTGGAGTTGGCGCTGCCGAACCGCGACCGCGCGAACGCTCGCTTCCCTGGGCACGAAGGCG  
AACTACAACCGCGTCCCGCAGATCAACACGGCTCGTGGCGCGGACCTGTGGGAGCGGCTC  
GTTGCCGTGCTACCCTCGCAGCTTATCGGCTACCCGCTTCCGGAGGCGAGCAAGCTGGAA  
GGCTACCCGGAGACGGTCGACGCCAAGCGCGTCTGGTCCCTCGGCGACTTCCACATCTTC  
CTCATCGTTGATCGCATCGGCATGAGCATCGTCCCAGGTCACACAGGCCTTCGCGGACTCG  
GGGGGCGCTAACGTGTGACAGGCAAGCGCGGCCTCTTCGCCGTGTGGAGCAACAACCTCC  
GAGGTTATGGTGGCGGCCGCTCCCGCGTCATCAAGACCAAGGCATCCTCATCCACTGAC  
TCCCCCGAAGTGCCGTAGCTCTGTCAAGGGTGTTCGCGCCCTTCGGCCGTCTGGAGGGCG  
GCAGCAATGGCACTCGGTGATCGATACCACACCAAGGACGAGGTGCGCGACTACGTGCAG  
ATCCAATCGGACGTGATCTAGTTCGACCAGAAGCTGACTGACGCCTGCGCCGCCGACACT  
GGCGAGATCGAGCAGCACTGCGGCCGTCCGTTCCACAAGTAGGACAAGGCCAGCCCCCGT  
ATATCCAGATCGACCGGCGGCGCAAGGTCACGGTTGAAGACTTCCACACCAGCGCAGGC  
CTTGTAATCGAACAGGGTGACTGGCTGAACAATTTGAGCCAATCGACACCTCGTGCGGC  
TTTCTGGCCCCCTACGAGGCGAGCGTGGACGGGCCGCGGTGGCACTACTACCGGCTCGAG  
TTCCCCGGTTGTGCGCTGAGTCCCTCGGCTCAATATCAGGCCCCTTCTCCCGGTTTCC  
GCGCAGAGGAGCTGGCCAAGCGTTCGGGCGACGGTCACGCAGTCTGCGTTCAGATCGCC  
GCGCAAACCTTACCGCTTCGCCGAAGCGCCCCTGGGGATGACCGGCAACACGCTGTACGGC  
GGCGTCGGCCGCGTGGAGGATCTGCCGATCGTCGCGACCAAGCTCTGCCGTTGGTACTC  
AATCCGATCCAGGTCGGGTAACATTACGACGCTCAGTGAGATCCGTGACGCTCTCGCGAA  
GACGCTCAAGGCTGGCGTCGACAGGCAGCTGCACGCGTACGAGACGGTCGAGGAGATCGT  
CTCCGTGCAGTGCATCATGATCGAGCCGTTAATCGCCGACCTCGAGGCTGCGTTCAGGC  
CGGGAGGCACACCCGGAAGTTCTACGTCTTCGTGCTCGCTTGTGCTGCAGCAGGTACCGC  
GACGCGCCAGAAGCGGGTCGACCAGATTGTCTCCGGCACCGGCCCGAACAGCGAGGATCA  
GATCCTGAACGAGAACTACACGCTCCTCCTGAACGGAGTCGTGGCCCAGTGGTACGGCAT  
GAAGGACTAGGGCGGCTCGTTCGACTCGGCCAAGGTCAACCGCGGCGGCGGAATCGTGCA  
GGTCCGACTAACTGTGATCCACACGTATAAGTAGCTGGCGGCAGCATGGCCGCTCTCAC  
TCACAAGGTTCTTTCCGACGATGGGAGCGCGCCTACCCTCGTTACTCCTAACGCCTCGGA  
TCCCTCACAGGTCAGCAACGACAATAACACATTGCCGTACGTTAGCAACCCGGGCGGCTC  
GGCTGCTAGTGCAGCTGACCCCGCCCGGCACGACCAGCTACGGCGTCCGCCCTCCCGGA  
CAAGACGGTCTCCGTCCCCGGCGGCGAGGCGCAGAACATACCGCTCCGGCGCGAGTACGC  
CGTCGAGTCCCGCCGGGAGACAATCGCGGTACCGGCAGCCTCGCGTACCTGAAGGTGCG  
CGCCATCCGGGTGCGCTCATGGCCCAGGTCGACTTCCACAGGCGGCGCGAAGAGCAGGCC  
CAGGTGGCAGCACGCCACGCAAGCGAGACCGGCTTCTACCAAGACCTGGGCAAGAGCGCC  
ATCCTCGTCTGAAGCCAGGCAAGGTCTGTCGGGCTGTCGGTAGAGCACGCAGCGCGGCTG  
CTGGGGTCCGGTAACTTCGAAGAGAGCAACCAGCGGAGCAATATCGCTGAAGAGCCGAGA  
CACGAGAGCCTAAACGACACAAAGGAGTAAGGGTTATGGCAAAGAGCGTTATCCGGGAAG  
GCTTCGCCGAGATCGATGGGGTGGATTTCTCGGATTACGTTCCGTCCGTGGCGGTTTCTC  
TTAAGAATGCGGGCGTGCACATCACGACCTTCAGCGGCGGCGGCAAGGAGTAGGGCTACG  
GTCTGAAGGATGACGAGTTCGCAGTGAACTTCCACCAGGCCTTCGATGCCGCCTGGGTGCG  
ACGCGAAGCTTACCCCGGTACGGCCTGAAAGACTAGTTCGTCGGGAAGTAGCGCCCCC  
GCGCCAGAGCGGCATGGGCTACCAACCCCGAGTACAGCGCGACCTGCATCCTGTTGAGT  
ACCAGCCCCTCGCAGGCAAGGTGCGGCGACCTCCAGGGACCAAGGTGACGTTCCCGACCC  
AGCGCTGCGGGTTCTCGCGCTGGGTACCTGCCGAGCTAGCCCCTTATAGCGATCGAACG  
GTGCCGGCTCACCTGTGATGGATGTAATCGTCGAGCTCCTGTTCCGCGAGGGCCAGAA

GGCGCTCACAGCGGGGAACCGTTAGCTCCC GCGCGACTTCGAGTTCAGCGTCAACGAGTT  
CGCACACGGGCTGCGCGACGAGGCTCGGCATCAGACTCTCCAGAAGTTGACGTGCAAGAA  
CTGCCACCCCGGGCTTGGTCGCGAGGTCGCCGCTGGCGTGCAGATCATCCAGATCGAGAA  
CGGCGTCAAGGTCATCAACTCGATCCCTTAATCCGACGAGCCGATCATCCCTCGCGCCCT  
CGAGGGCGTGAAGGGCTGGCAGTACCCCTCTTCGGCAATAAAGGCACGGTAGGTGCGGCA  
GCGTTAAGGCTCCGACTTCTGGTCCCTCGAGACGATAACGGGACCGCCACGCGCCGCTGCG  
TAACCGCCTAGTGCGCAACATTAACGACGCGAGCGAGAAGAACGACGACGACAGCCACAT  
CGGCTGACGAAAAGACCAAAGCTGTGGCCAGGTGTTTCTGTGTCGCGGGTCTGCGTGGACCC  
AGCTCCCTTTCCCGCTGCCAGCCAGATCTACTGGACGACCAACGAAAAGGAACCGCGA  
CATCATGGCACTTCTCTCGAAGAACGACATCCTCTACGTGACGACCGCAAGACCGTTAT  
CGTCTCCGTCCCCGAGTGCGGTGGCGAGGTTCTGGTCCGCACCCTGCCCGGGCGTGAGCG  
GGCCGAGTTCGAGTCATAGACCGGCAAGAACAATGGCAAGCAGGAGCAGAACTTCGA  
GAACATAACGCGCCCGATTTCGTGCGCCTGTGCGTCGTGGGCGAGAAGGGGGGGCGCCTTTT  
CGACACTCACGCTGAGATTTCCGGTGCTCGTCAACAAGTCCGGCGCTACCCTGCGGGCGCGT  
CTTCAACGAGGCGCAGACGCTGAAGGGCATGACCGACGGTGACGTGCGTGGAGCTGAGCGA  
ATCTTTTGAGCAGAATCCCGACGAGGTTTCAACTTCCGCCAGGCCGAGACGCTCGGGATG  
ATAATCCAGCAGATGCTGGCGGTAGTATCTAGTACAGAGCTGGCGGAGTAGGAGGCGTCT  
GAAAGCTCCTTCTGTCCGATCGGGAAGAGCTACGAAGAGCAGGCCCTAGCCAGCATCTCT  
GTGACGCTTGCGATCCTGCTCCGTCTGTACGGCGAGCAGTTCGACCACAACCACCTCCA  
GTTCTTAACAGTACCCCGCCTGTGCGAGTGGTACAGGCCCTGAGACCGTAGGGGACTCG  
GTAGGTCAGGCCGAAATCGACAGCAGGTTCCGAGACTGTCTGATTACCAAAGGGCCGTCG  
GCCGGTTGCCCGCGGCCGACGACGTCGGCGGGCTTCTTTTGTACCAGCCAGTAGTTTT  
CGCGTGGCAACGATCACCTCGCTCAACTTCGCGATCAGGATTAAGTTGGGACGGGACTCCG  
CTGAACAAGGGGCGTGATGACCTAAGAGCTCTGCAGGCTCAGGTGCGGACGATCTCGGGT  
GGCTCGCTGCACTTCACGCTCGTCGCCGACACCGAATAGGAGAAAGCCAAGATCCCGGCG  
CTGCGCGCACAGGCGCGGGACCGCCAGAACGGCTTCTACCTGGACGACGGCCAACCCGCT  
ACGGCGGAGGCCAAACGCGACATCCTGGCTCGGCATCCAGAAGTCGACGTGCGGGTGGAC  
GGCCATGACAACGCGAACAAGATGAACCCGATCTCGGACTCCTACGAGATCCCGTCCGTC  
AGCGCGTTGGATTTCCGGCAACTCGATGAACCGTGCGGGCTTACACCCTAGGTAGGCATC  
GCGGCGTTCGCCACCGGTGTCGTCGTTCTTCCCGCACTTATCAACCTCATCAGTGCATCG  
CTCACCGGCGCGATGGGTGGCGGCATCATAGCTGTGCGCGCGCAGAATCTCAAGGAGAAC  
TAGGAGATGAGGGCGGCCTGGGAGGCCCTGTGGACCGAGACGAAGGCCGCGGCCAGTCT  
GCCGCCAGCCGAAGCCGACGCCGTCACTGGACCCCATGTTTATGGCCAAGACGAGGATC  
GCGGAACCCAAGACGGAACCTGACAGACCTGCTCGCGAGTGCAGGCCCGGCGATCCAGCCG  
CTCCCGTCAGGCCTGATGGATCTCGCCACGAACGCGATGCCCGCCGTCACGCGGGAGCTA  
GAGTAGTCCGGCCCGACGTTCCCGGGTTCACCGTTGGCCTCGGTTTCGCTCGGCACGCAC  
GTCTCGAACATGTTTCGACGGGATGGCAGACGGCGTAGAGGGATTCGGTTCGAGTGTGGAAG  
ATGAGCTTTGATCAGGTCGGCCTGATCATGGATCAGTTCGGCGTGGGTGCCGGGAGGATG  
TCCGCGACGGGCACCGACCTCTGGGATCGACTGTTGAGCGGCTTCGACCAGTTCATCGGC  
GGCTTCTCGACGGCCTCGTCGCCTTACGGACGCGAGTCCACAACGGGGTTCGGTGTCCCG  
CTCCCGATCTTCGGTCTACTCGGCGTCGACATCCGCGGCACGCTCGGACCGCTGGGCGAG  
CTGGTTGACGCTATCAGAACGGCCTCTTACAGTTCCTCCACCGCACCGTGCAGGCGCAC  
AGCCTCGTCATCGGCGCACTGATGTCCGGCCTCACTCCGGCGATCAACTCGCTCTTCCGG  
CTCAGCAATACGCTGCAGCCGTTGCTCGTCATGGTTCGGCCAGTCGCTGACCCAGGCGATC  
AACCAGCTCGCACCGCTCCTGCCCGGATCGTGGACGCGCTAGTCTCGGCGCTCATTCCC  
GCGTTCCAGGCGCTCATTCCCGCACTGTTTCAGGTTATCGAACAGATCGCAGTAGGCCTG  
AAGCCGCTGCTGGAGATGCGGCCCGACGTGATCAACACGCTCAGCCCGATCGTCGTAGGT  
CTGGCAATCGCGTTCGGCCTCATCACGATTGGCTGTCCCCGCTGTTCCCGCACCTCATG  
CAGATGTACGTCTCGTGGAAGCTGATATCGACGGCTATGGCTTTCCGGGCGCGGCATCAAG  
ATCGCGTACACGGCAGTCCGCACGGCCCTCACGGTTGCGACCATCGCTCACACGGCGGCC  
GTCTGGGGGAACAGCATCGCGATGAGCGCGAACCCGGTCTGCTCGATCATCATCGGCCTC  
GGCGCTCTGGTGGCAGCGATCGCATGACACGCGACCAAGACTCTGTTCTTCCAGACCGTC  
TGGGAGGCACGGACTGTGGCGATGGCAGCTGTGGGGAGCTGGATGAAGGATGCGTGGGAT  
GCCACGGTGGGATTCCTGGCCATGCGGTGGGAGCTGTCTCCGGCACGATCGTCAACGCG  
TGGGACGCCACGCCGAAGGTGATCAGGGTAGCGGCACACGTTGTCTGGGGATTCTTCACT  
AACCCCTGTAACAAGTTCCTCTCGGTCTCAAGGTCACCTGGGATGTGACTGCGGCGTA  
ATCGAGGCTGTCTGGGACGTCTGGAGGTTCTACATCCGTGCGAGTGTGCGGATCATCTTG

CGGTGGCTCGAAGTCGCGTGGGGTGC ACTGTTGTCCACTGTCAGGCGAGTCTGGGATAGC  
TTCGTAACGATCTTCCAACCACTGTGGGATGGTCTCTTGAAGGGCGTCAAGGTCTTCGTC  
GAGGCCGTTTGGGGTCGACTCCAGATCCTCTGTGACGGACTGTGGAAAGCCGTGACGTAA  
GGCTGGAACGACGTCATGGGCTGGCTGCGTCCGATACGGGAGTCCTTGC GGATAACCGTA  
AAGCAGTTCGATTAATCCATCTGGAACGCCGACAAGCTCGCCTGGGAGTTC CCGGGGCAT  
CAGGTCAAGCAGAAGTAGGACTGTTGGGACAACCTGTTCAACTCCGGCTAGCAGCCCTTC  
TTGAACGGGATCAAGGCTGCAGCCGAGACCGTCTGGACGGGCTTCACTTCCGCGTAGAAC  
GCATTCTGGATCGGCATCAAGGCGATGAGGGAGAACTTATACAAGGCCCTGCGCGCCGGC  
TGGGCAGCTTTCTGGA ACTTGGTGC GTGACTTCGCATATGGCGTCTGAGATGCGATCACC  
AGCGCGTGGGCCGAGTTCAAGCAGATGTTCGAAGAAGTCTTCAGCACGATGGTTCGACAAG  
GCCCCGAGATCTGGGACAAGACCCGAGAAGCCTTGGCGAAGCCGATCAACTTCGTCATC  
CGCATCTGGAACGACCAGGTCGCCAGTAAGTTCGGCCTTCCGGCACTGGTCTGGATCGGC  
GGGTTTCGGTACCGGTTGTGGGGTCGACGGCAATGTCACGGGATCGTCCGACGACATCCGC  
TCCCGGCTCTCCCGCGGTGAGCAAGTCTGGGCCGTAAGAAGGTCGATGCGGATGGCGCA  
CACGGCAACGTCGAGGCCATGCGTCGCAAAACGGACAACGGTGTGCGC GACTACGACTCC  
GGCGGTCCGGCCGAGTGGATGATCGCCAGCAGCAGAAGTGTGCGCCTGTCTCCAGGTC  
ACTACGGCTCAGCTGGACTCGAACGACTACCACGGCCAGGGCAACACGGTGCATTTCTCG  
AACGGCGGGCAGC CCGGTCCACCGGAAAGGATGGTCTTCGCGA ACTGGATCGCAGACACC  
TGGGGTGATAACACGCTCGATCTGATCCGCAGCCCGTTTCGGAGGGAACATCAAGGACGGT  
AACAGCCTCGGCCACGGCATGGGGATCCACGGGCTTGGCACGGTGGCCCAGCACAGGAAC  
CATGTCCGCTGGACATTCGACCGCCCCACATCGAGGACGGGGGTGCCCAGAGCCCGCTG  
GGCAAGATGTCCGGGCGACGTCCGTAAGTACACCGCCTGGCCCTAAGAGTAGCTGCCAAC  
CCGATCCTCGGAGCCATCCCGGATCCAGTCCTTCTTGTTCGGTTCGCAGTTCGCCGGA  
TTCTCGAAGGCAGCGGCAACGAAGGTCCGCGACGCGTACCTCGACAAGGTGCGCTGCGGC  
GAGGTTGCATCGGGCGGCACTGCCAGTGGAGACATCCGAGGCTTCATGCCCGACGGGAAC  
CGGCTCGGCATTTTCAACGAGGACGCGCGGACCACGTACACCCCGCCACCCTCATCGATC  
GAAGCCGGGCAGGGCTGCGCGACCACTCTGGTCACGGGAGAGTCGGGCTAGAACC CGGTC  
GCGTTCAACAACGGGCATGTGAAGGTTGCGACGGGCGACGCTTCTTGCGGTCTGGCCCAG  
ATGATCCACACGACGTTTCGACGCTCTCAATGCGCCGGGCCACACCAACATCGACTCGCCG  
GTCGACAACGTCGCGGCCCAGATCAACTACATCAAGTCGCACTACGGCACCATCGTGAAC  
GTCCAGTAGGCAAAGCCAACATGGCCCCTCCGGGCTACCGCACGGGTACCTATTGGGCT  
GCGGCAGGGTGGCACCTCGTCGGCGAAGACGGACCCGAGAAGGTGAACTTCCGTGGCGGC  
GAGCAGGTGAAGACGTTAGCAGGCATCATCCGCGCCCTGAAGGACTCCAAGTCCGGACAG  
AGCAAGGAGCTGGAGTCTAAGCTGACGGCCTACCTTCGCAGGAGGGTGGAGAAGACCGGG  
ACCGAGATCAACACCTCCGGACCGCGGTTTCGCGCAGTATGTCGAGCAGGCTATTGACCGA  
GTCCTGGCCTCGGCCGGTATGCAGCTCAAGCTCTCGATGCCGGTGCCGCAGATTGCTGCA  
GACCCAGCTGCGTACGCGAACGAAGTCGCGAATCAGCTTCTCCCGCAACTGAAGAACATG  
ATCCGGCAACTTATTGGCACACGGGAATGACAAGGGGCGGGCTGGGGTTAACTACGAATA  
CCGGTCAGCCCCTTTCACGCGTAGGGAAACGCAATGGATCTGTTTAACTTTCAGCCAAGC  
GGCGACGGGTTGAACGACGGATGGACGAACATCGGCGGCATCACCGCCCTCTGGCAGGCG  
GTCACCGATCTCAGCGATGCCAAGTACTTTCAGTGCCTGCCGTGCAAGGCAGTCGAAGCC  
GTGTCTACCCCGTCGACACCACCAGCGTCTCCGACGGCGCGATCTTTACCTCTGTGACT  
GTGATGATGCGGGTTCGGCCACGACACTGGCGCTGCACCGTCCGTCACGTCCCCACCGATC  
ACGGTAGCAGTCGTCGCCAGGACAACACCTCGCGCTACCTGACGCGCACCATCTACCCG  
AGGAGCACCCCACTACGAGATCGCCACTACCAGCGTGACGGGCTCGACCTGGAG  
TGGGATGTACAGCGGCGGAACAACCTTCTGTGCCGGATCCTCTCGTACGTGCAACTTA  
GACCGCATCCGTAGCCACCGACTCTGGCGTGGGATAAAGTACCGGCTGTGGTTCGATCGTC  
GCGATCACCGCCCCGTCGGGCACCGTGACCACGCCGACGCCGATCATCACGTGTACATAAC  
ACGCTGACCTACGACGAAGCGCAGAAGACCGTGGAATAACAAGCTGTTCACTGCCGAGCAG  
GTGGCCAAGGTGTTCGTACAAACCGGACACCGCGCCGCGGCTTCTCCTGGACACGCTGCAG  
GGTACTTGACGAGCGTGCTGCTGCCGACGTCGATCAACTCGAACA ACTATTGGGTCTGC  
AGGCGGGTCACGACAACGATCGGCGCGCGCTCGGTGTGGGTCGGGCGTCCGTTACGGTG  
TGCGGCCCGACGCCCGGATCCCCGGTGTGACGGCCCGACGTACGCACTCGGCAGCGCA  
GTCATCAGGGGGGAGCCGGACATCGAGTCGGGCCGCGCGTCCACATGCGGTACACC  
TCGACCATGCTCAGCGCGCAGGAGGCGGACGCGGTGGCGCCGGCCGACCGCCGCACGTTCC  
TCCGCCACCAACGGAACGATCACCTGCGCAGCCGGCGTCTCCTTACCTGGTGGAAACGGCC  
TCGTGGACGGTACGGCGACAGCCAGGGGAGCGGCACAGGGCACGACGGACTTCATCGAA

AGCGAAGAGTGGCTGCCGATGACCTCGCGGGCTCAGTTCAGGGCGGGCGGTACCGGGCGC  
TACTGCCGGGTGGTGTCTGCGGTTCTACGTCGACGTCTGCGCCGACATCGCGGGATCCGCC  
CTGAACGGCAGCTCGGTGACCGACTCGTCGAGCACCTGGACCGATGCCTCGATGTACCGC  
AACGCTCCGGCGAACGGGGTTTAGACGCCCGTCGCTTCGCGCTTCTGTCGGCGTCCGGC  
AGCGAGGTGCACAACCGGGACCACCTCGGCGTCCGCTACGGCCTGAACACCCCGTGGTTC  
GTCGGCAGCCACGCCAGCCTCAACCTGCCCTCGACGTACGTCTGAACGACTCAGGGGGCGG  
CAGGTCCGGTGCCGAGTTCTGGGCGCCGGACGCGGCCTTGACGGCGCTCCCTGCGGGCGCC  
GCCGGCATCGGGGCTTATCGTTTGAACGCTTCAAAAATACGAACAACGGCGTGTCTCCG  
TCGATCGGGTCCGAGGTGTCTGCTCCGCGTTCCTGTTCGACACGTCGGCGCGGACTTC  
CCGCTGTACAAGCCTGCGGGTACGGCGACCGGGACCTCAAGCAGGCCTTCGTGACGACG  
TCGGAGTTCTGCACGATCACGCCTCCGGCTGGCTGGATCCTGGTCAGCTCGGCGAAGGTC  
GACGACGGCACCACGGACACCGCGATGTTTCGTCTCAAGCGCACCGCCACGGCGTCCGAA  
CCAGCCTAGTGGACCGATGGCTTCTGTTCGACCAACTCGGTACGGCGGTCCGGCCGTCACG  
GTGGCGTACGGTGGCGGAACGGACGTTCTGACGGACACACAGGCCGCCTCGGGTAACGAC  
ACCCCTCTCGGCCTGCAGACGCAGTCTCCGAACAACGCGGACCCGAACGGCTGGCGCGTG  
TATGCCCTCGCGATGCCAGGCCACGCCTCCGGCAGTACTCCGACGCCGAAGCGGCAGTAC  
CCGTTACGATCCCGCAGATCAGTTTCGTTCGCGTCCGGCATCTCCCTGGTTCACGACGAAC  
ACCGCAGGCTCGTAAACGATCAACGAGTCGTCCGGCACCCAGTCCGGAGACGTGATAGTC  
GCGAAGATCGGCTACCTCGGCAACGGCGTACAGTGAACCCGCCTGCGGGCTGGACCCTG  
AGGAACAGCACGACGGCGAGAAAAACGTGCGCCCGTCCCTATAGCCTCGCGGTAATCTAA  
CGAGTCGTTGGAGGGTCCGAGCCGTCCTCCCTGGTCCGGCACTAGCAGGGGGCGGCTCTCTG  
TACCGCACGACGTTCGTCAGTGTCTCGCGTACCGCCACGTTCGACAACGCATCCCCGTTT  
ATCTCGCCGAACATCGCCGGGACCCTCAACTCGAGAGCGCTGGTAACCGGGCATGCGACG  
AACACGAACGCCCTGGCGTGGTTTGAAGTCGACCTTCGGTGGTCTGTCGGAGGGCGGCCACG  
GGCTTCGGCAGCACGAACGAGGTTCGTCGAGCGCATGGACAACACTACGTGAAGTACCAGAGC  
CCTTTCGGCACCCCGCGCTGTCAATGCAGTGTCTGCTGGACGACTCGAACGGCGCTATGTCC  
TCGGGAACGTATGACCGGTACGCTTACTCGAGTAACGCGCTCAACGCGGGCGTCCGGTTC  
AACCGTTCCTGCGTCCGCTCGGTACGCCTCCGACCCCGGTGGCCGTCGAGACGGCACGC  
ATCGCAGCCCGGCCGGTGGGTTCCGGCGAACCTGTGGGACCCCGCGAGGGTCTTCGACTCG  
AACGGTGTCACTCCGACGGGCAGCCAGTCGATCACTGGCATCTGGTCCCCCGGTTCCGGC  
ACCGCCAAGAACACGAGGGCTCGCTGGTTCGGCACCCCTGAGGCCTGCCAGGGCGCAGACA  
GTCCGGTACCCGACGGCCACGATAAACCGCACGGTTGACTTATCGGTGCTCAAGACCGAC  
CAGATAACGGATCCCGACTCCGTGACGGTGACAGGAACGTTACCCGGAACGACGGCGGGC  
ACGCCCTACATGCCGGTGAACCTTCTACCGCATCAACACGCTGCTCGGCAGCCAGATCCGGC  
TAGGGCACGGCGTCCGCCCCCGTCCGGGAGGACAAAGTCGTGGGCGACGTTCCGGAACCCG  
AGCTGCACAACGCGCATGGAGCTCGGCGTCTCGGTACGGCTTGCAACGTGGTTCGACATC  
GTCTACTGGGATCGCGTCTCCCTGGCGTACGGCGTCTATGCGACCTCCGGGGCCGAGCACC  
TCGGGTGCTGAGCACCCGGTCTGGTTCGATGCCCGAGATCCAGTAGGCGGACGACGGCGGG  
ACCTGCTACTCGGACTGGGCGGACTTACCCAGCCTGAAGTCCATCCCGCCTGCGTTCCTA  
CCGCGCTCCGGCACGGGGCTATACCCGACCACGCTCCGATCACGCTGACGAACCGGAAG  
TACAGCGCTCGCACCATGCCCTCGGCCTCGCTGGGGACTTGGTTCATGTCGGAGTGGGGG  
CCGAACGGCCCCGGAGTTCACGGATGAGGGGAAAAACGACTGGCTCAGGGACATCTCGAAC  
CCGAACAACGACCTTCGGCTCGAGGCGGCCTGGGACAAGACGCAGGTGGCTAAGTCGAAC  
AGTGCCACAGTGTCCAGCCTCTCGCCGCCGGTCTTCCCGTCGTGCTCAGCGAGGGCTAC  
AAGCGCGAGACGTTCACTCAAGCTCACGCCGCTCAACCACTAGGAGCGCGCAGAGCTG  
TGGAAGCTGCTTACGTCCGGCTGTACCCTGTTCTGCGTCCGGACATCGACTAGGCCTGG  
TGGGTGCGCCCGGTCCGGCGACCTGATCGAGAACGTGCTCCCAACCTCCAATCGGCAGTCC  
AAGCGGCTACGCGAGAAGACCTGCCAGTCCATGCAGGTAGCGCCGGCAGAGTGACAAGGA  
GATCCAATTGCCCGCGCGACACACCGCTTCTGGACGAGATCCGAGGCAGCCACGCCGT  
CTACAGCTACGTGGACGGAATCGTTCCGGACCAGGAAACCCGGCGGCTGGTTCGTGATCGA  
CTGCGAGATCAACGTCGACCGGAGAGCCAGTACCGTTCGACCGGGTCCGGATGGACTGCGT  
AGACCTGGTCCGACGCTTCGTGCCCGTCCGGCAACTCGGGCATCCAGACGCCGTTCCGGCAC  
CGAGATCGGGCCGTACCGGGGCGTGAAGTACGAGGACGTAACCGGGGAGGTCTACCCGAT  
GGGCGTGTTCGGGCTGGCGGTTGGCTCCTTCTCGCGTTCGTTCGAGCCGGGGCAGCAACGC  
GGGAACCTGCATCTCCCTCAGCATGTTTCGACCTATGCCGTGAGGTGGCGCGCGACAGCTA  
CAGGAACACTGCCACGACCAACGGGGGCACGAACATCATCACGGCCATCAAGATGATCCT  
CGGCCGGACGTTCCCGACATCGAGTACGACGCGGTGTTCGACGGCGCTCACGACGACCAG

CCCGGAGGTCTACGCCGCGCAGGTCGACCCGTGCGTGGTTCGCCTCGGACCTCGCGATGTC  
GACCGGCTGTGCGCTGTACTTCTACGCCAACGTCTGGGCGATGATCGCCCCGCCGACCGA  
TATCAACGCGATGCCGGACTCCGACTTGACACACATCGCGGAGCCGGGCTCCACGATGCT  
CGACCTGGCCGCCGAGTAAAAGGACGAGCCGGGCTACGACGGCGTCATCGACGAGGGCGG  
GTCCACGAGCGACCAGCTGCCCCCGTGGGCGCGGAGGACTGGGATTACGAACCCAGCTC  
TCCGCCGTACAGGTTGGGCCCGTACGGCAGGGATCCGGATTTTCGTGCAGGACACCAACGC  
GAAGTTACAGGCCGAGGCGCTGAAGCTGGCCGACGCGCTGTTTCATAGGCTACATCGTCTT  
CTCGGCCGCGCTGTCGATCTGCTCCTGTACGAACCCGGCGATGGAGGCCGGGGACGTCAT  
CCAGGTCGAGCGTGACTCCATGAACATCGCCGGCCCCTACACGGTCGACTCGTTCAACAT  
CCCGCTCAAGAAGGACTGCGTCCAGAACCTCAAGCGCCTAACACGAAGGGTTGCTTCGTG  
ATTCGAACCTACGGGCAACCGCCGGCGCCCGTCTGACCTGTGTAAACGCTACTCGTGCA  
AGCACTCTCGGATGTGATCGATGAGCGGAGTACCGTCACCTGGGCCGGGCACCCCGCAGG  
GGGACATGACCCCGGCTCAGCAAACAGCAGGGGCCATCGCAGCCCAGGACCAGGAGCGCC  
AGCAGATCAGGTCGCTGGCCTACGCGCTCTCTCCGACGAGGCCGATCTCCGCGCTAGTAT  
CGCAGGCGACCATCGTTCGCGTCGAGGTGGGCTACCCGCCAACCGTGAGTATCCAGGTGCG  
GCGGCGACACCACGGCCTCGATCCCGGCGGTCCGCTACCTGGACAGCTACGTCCCGCCTA  
CCGGAGACACGGTGATCGTCGGCAAGCAGGGGAGCGATCTGTTTCGTCTCTGCCAGATGG  
TGGCCAAGCTCGCGGCCTGGGTGAACGGCTGGCAGGCTCCGACGCTGAGGACGACGTGGA  
ACCCGAACCCACGTTTCGTGCCGATCCTGTACCGGATGGTATACGATAAGGGCGCGCGGA  
AGATCCAGTTACATGGTCGCGTCTGACAGAACGTCTCCACACCCGGCACGACACTGTTCA  
CGCTAACGGCCGACTACCGGCTCCGCGTGATGCGCGCCTTCGTTGTCACCCGAGAGCACC  
GGACCAGCGGCGGAACGCGCTGCAGCTCCAGCCGGACACGGACGGAACGGTGACCATCT  
CCGGCCATCCGCTCGAGAGCGTGGGAATGAGCAGCTCGGGCGGCGGCCTGACCGGCACGA  
CGGAAACCAACGGCTAACATAAGACGTCGGACATCGACAAACCTTGTGACTCGGTATCCG  
TCGGCGGGTGGACGGACTGGGACGTGCAGACGGCTCTGGGAACGATGTGCGTCAGCCACA  
ACCACAGCAACCCGAATTACACGACGCGATGACGAAGGCGTCCTCCCTGGATTGATCT  
CGCTCGACGGCGCGGAGTTGTCCCTCGGACTAAGAAGTGCGCACGTTGGGGGGTCAAAA  
GCATCTCGACGAGTTCAGCGTCGCCGCGCCGGTCCGAACCTAAGACAGTCGCACTGCAG  
GCTCTGTACGGCCGAGACGGACAGGGAGCGCAGACTGCGGGTGTGTCGATCGGATTCTCGGC  
GCGCCAGTCCGACGCCATGCTCAAGATGTACGGCGGCGTCTGCGCCATCTGCGCAGAGCC  
ACCGCCTCAGGGGGGAGTGCTGGCCGCCGACGACAACCACAAGCGCTGTGAGGCAAGCA  
GACGGGTGGCAAGTGTCTGCGCGACCTTCTCTGCCACGAATTCAACATAGCTCTTGCCAA  
GGTCCGGCAGTCCAAACAGTTGCTGCACAAACGGATCGGGTACCTCGACGGCGTGCACCT  
CGATTTGTACCTCCTGCTCGGTGAGGATCGGAAATGCATGAGATAGCCCAGACCAATATC  
AGCAAGAACAGGAGCGGGCGTTACGGCGGGCCGGATCCGGCTGTTTCGTCATACACACCCAG  
GAGGACAACGACACCGCGTGCTCGCTGGTGGGGTACGTGCAGAACCCCCCGTCCGGTGTC  
TGCTATCACGGCTCGATCGACAACACCGAGTGATCGAGGTGGTCGGCACGGACCGTTC  
GCGTGGGCCGTACCCGAAGCGAACGACTACACGAACAACCTGTGCTACGCCGGTAGCCGG  
GCCTCTATGTCACGTGGAGAATGGATCGCCACGTACAGCAAGGGGATCGACTTCACTTGC  
TGGCTGATCGCACGCGATGCGAAGCACTACGTCTTCACGCCCTATGTCATCAGCCAGCCG  
GAGATCAGCGCGGGCAAGCAGGGCACGACCGACCACAACGGCAACACGAAAGGCCTGGGG  
ATCGCGGGCCTCCCCGACGTCGGCGGCAGCTACCAGTGGGACGTGCAGCGCAAGGCCATC  
GAGACGTTTCATGGGTTACACGGCGCTGTTGCCGCCCGCCCCGCCCAATCGCCAACCGG  
ATCGACGAGTGTGGGAAGGCGAAGGACTAGCTCCGCGACGCGCTCGATGGCCAGAGGCCA  
TGCCCGGACAAGCAGAGCCAGTTTCGGTACTTCGAGAACGGCGCGGTCAACTGGACTCCG  
GAGACCGGCGCGGGGGGATACGGTCGGAGCTGCTCAAGAAGTTCTCTGACCTGCCGTGG  
GAGACCGGCACGGTTCGGCTAGCCGACGAACGACCGCACCAACCTCAACGGGTTGAACCGC  
CGTCCGTGGGGCGTCGTGGAGGGATTTAGCGGGCGGCAACCTGTACCCCAAGTAAGAGACG  
GACGAGGCGTTCTGGACTCCCGGCGAGATCGGCAACCGGTGGGGGCGTAGTGCATTCGAG  
AACGGTCCGCTCGGCTTGCCCTGTTTCGCCGAACCTGCCTTTCGACGGCGGAGTCGCTCAG  
TACTTTGAACGCCCGCCAGATCCACTGGTCCGTCACGCTCAAGACCATCGCGCTCCTGACC  
AACGACGGCTCGGAGACGCCCATGGCTGAACAGGGTAAGTAAGAGAAGGAGATCGCAATG  
ACTCTGCGAGAGATGACCACTCATTACCGCGAGGCCGTTCGGGGTTGGAATGGGATCCGTG  
CTGATGATTCTGGCCGCAATCCTAGCGCCGGGCAATGTTTTGCCCACTGGCCCCGGCTGTT  
GTATTCACGACCACGATCGCGAGCCTGACCACGGCTCGTGTTAGCCTGGCGAAGAACGCC  
GACCTCATCGACAACGCGGCCGACTCGATGGACGGACGGCAGCGCGACGTCCGGGCCGAC  
GTGCCAACACGCGGGAAGCACGCTCGGCAGTGAGCGCCACGTACCTGGCACTTGTGCTCA

CCATGGTCGGACTGCTGATCGGCTTGAACGACATCCCGATGTGGCGCACCGAGCGGCTCC  
TCAAGAGGAGCCACACGGAGCAGGCGAAGGACATGGCAGTCCAGGCTATAGCGACGGCAC  
ACAGCGAGCACATCGGCGCGACAGGTCCGCTCCTCCAGACAGTGCTCGGACTGCTGGCCC  
CACTGCAGTCGCAGATCAAGGAATACGCGCTGCTGCTCCACGACGCGGGGACGTACATCG  
CCTAGCTGCGATCCGACATGACCCGATCCGGGAAGACGGCACGACCTCTCCCAAGTTCC  
TGCAGGCGATCGTGAATGATCGAGCCGCCTGACGTTAGAAAGGACTAAGGCCCCCAAGCC  
AAAGTCGCTCGACGGCTCGGCTGGAGGGCTGCTTCTCCGTTCC

>NewGenomeName\_163

CTCCGGGCCTGAACTCACTCGCCGCATCAGTTACCAACCGCTATAGACTGGCCACTCGCG  
TCGTTCCGTAATAATGACCCTGGCTGACGGCCTACTGACCTCCATCTCCTAAGTAACTG  
CTCAATAACAGGGTAGTTATGCCTAGGAGCCCACACGTAGGGCCCCTTGCGCGCGCAGCT  
GTGGCTGTCCTTAGTGTCTCCGCAGCAGGCTTAGGTTCTATCCAACACGTGCAACGAACC  
GGTCAGCGAGCATACTTCACTCGATTGCCAAGCCTAACGTCTTCACCGGGCAGACTGGC  
CTCAAGGTAAGCTGAGGGTTAGTCTACAGAGACGAACATTGCGCACAGCTGCTTCGCACG  
GACGCCAACTCAAAGCCGCTGCTGTTAATCGCACGATCAAAGTTCCACTGTACCTGTCC  
GAGTACGACGCGCTCTGCTCGTTATACTATAAGGTCGGGAACACGTACTGCACCATAATC  
ACTCGGCTCAAGGTGATCAACCAAAGACGGTAGGACGAGGTAGGGCGGCAACTCCCTCGC  
TGGCGTAATGGCGCTGGGAAGGAATGCTCCGTCCGGGCTAACAACTGCTACGGCGTTTAC  
ACTCGTCATGACAACGTGGCCACACTATGGTAAGGAAAATACTGATTCGAGAAGTCCTTG  
CGCTGGCCTTTCTCAGGCTCGCTCTAGGCCTCTGCAAGCCGCACACGTCTGTATCGGAGG  
AATGGAAACTGCTAGAAAATAAAAGACTCGCTATACGCGACATACGGGCTTCTGAGGCTG  
GCATGCAGGTTTCGGTACGGCTGGGCGTGGGCTTCGCTCGCAGGCTAAAGCGAGCGTCA  
GCGATGCACTCGACGAGGAACCTCGTCGCCGCGCGACTCCTGAGCATGCAGGCGTTGCTT  
AAATTTTTGGTCCGCGACTCCCCTGGAAGGATTGACCCTAACGGACCGTGCCACATCCA  
TTCCTCTGTACGGCGTCCACAGGCGGGCTGGTGAAGGGGCCGGTGTCTAAGGAGACTCG  
CTGGATAGCTACAACGGTCCCCGGGGATTCCGGGCCAGGAGCTCTGACCCAAAATGATTC  
CCACGTGCGCCGCCGCTCCCCGACATAAAGAACGCGGGGTTCCGCCATCTGCCGTGGGCC  
GAATGTGCGGGCGCGCTGATTAGCGAAGTCTGGTCAGGGCCGTTTATTGGTGCTGCTGTGG  
ATATCGACGGGGCCAGTATGGGATCGCTGAGCCGGGCTGTCAAGCAATTTGTTACGATGG  
CCGGGGCAAAGGGTCAGGGCACGGCAATATAGGTTGTGTGGCGTAGAGATCACGCACAGA  
GCGGCAATGCGACAAGCCCAGGCAGACACAAGTGCAGATTGTCTCCTTTTGGGTGCGCGG  
GATTGTGAGACCTGGGAGCGGTTTGCTAATTGGGCCACTATGGCAAAGGGAAACTCGATA  
CCCTGCGAATGTTTAGGAGACTCGACGCTAACGATCATATCTGTTTAAGCCGGGGCAACA  
GCACAGCCCGACCACGCAACAGACCTCGATGTCAACACCACACTACCCTCACGAATGACA  
GTCCGTAACGGCCGACGCGGCACACGGTATACGCGGATCCCGGACCGCAGATTAATGACC  
ACTCAACGCAAGGTAGGAACATAGGGCCAACGATAATAAAAGACTAGACCGACAGGAATA  
ACAGTCTATGATGGGCACCACTGAATCGCCAGACAGCAACACAGGAGGAGATGAAAT  
AACCGGGTTACAGAGACGAGAAACACTGTACACGGCGCCACATGTTCAATTAACGGACT  
AACTGCTACGGCGAGACTCTTCTAAGGCACTGGAAACTCGCTAGCCTAATAGGTAGCTT  
CTCAGCTCGACAGGAACAGTGAGGGAACAAGGCAGGTTGACAAGCTACACGCTTCACGGC  
GACATCCGCAACACATCACAATGCTACACCAGCTTCAACGTACCATGCACACACAGCATG  
TTGAATGTGACGTCGACATGAACGTAGGCACGCACTAAGATTAGCGGGGGCAAGGCAAAA  
AGTTCAGTGAGAGCCGGGTAGTGCGGGAACCGACTAACATTAGATGGTAGAAGACTGGAA  
TCTAATGAACGAGGGGATCAGCGGCACTTATCGACGATCCCAAAGTCTCGTCGTCCAATC  
CTTAGCTTAACCGCGGGTATTGCGAGAGAGTCGAATGAGACCGAGATCCCATGGAAATAA  
CTGGGGCCGTCTTAGGCTCAGAGGTGGTACCAAACGATTACAGAAATACTGACCGTCGGG  
GTGATAGTCCACTAATTTAGGTGCATAAGCGAGCGAGACTGCCGATGACCGTAGCCCGAG  
AGGAAGCAGCCGATAACCACGGTGGGTCTAAAGCCCCTTGTGGTTATAGTGACCTGATG  
GTGGCTTACACACGTTCTAAGCCGAGTCGGCCTTTGAAACGACCGTGGTGGAAATCATG  
GCTAAGTACTCATCCACCAGTAAGCTGTACGACAGCATCAACTGGACGACAAGAACTTC  
CGAAGGAACTGCGCAGCCATATCTGTGACTACAAGTCTCTGCGGTTTCAGGACAACCGAT  
CCTCTGTTGACTGCGGGTTCGAGGTCAAATCAAGATGGTGGCTGAGTTGTCCGATGCTAAA  
GGGGATGTGCGCAGTGACTGCATGGCGCAAGCCCCGCGAGATGCTGCATCTGCGATACTGC  
ACTGATGATGAACGAACGAGCAGGAATTCATGGGATACTAAGCAGACCACGGCTAAGCCG  
GGTCTGTCTAGGCCGGTCCGTGGTAGCACCACGAAACATCAACGCATTCTGGCGGGGGCAG  
TCCCCCAGCGACTACAAGGCATGGGAATCTCATCATCACTAATTAAGTCTGATTCTTG  
GCTCAGCTAATATCATCCAGGGTATTGCATCCATCGGCAGGCGCAGTGCTAAGATAGACG

CTGACATCCACCTGGCAGATGTGGCCATCCTCTCGCACTTCAATTACCACAACAACGTGC  
CACTGTTGCATGATCTGTATCGGTGCTTCCGAATGGATCCCGCAACAATGCCTTGGCCG  
TGTGGGCCTTCGCTAACGTAAGGGTGAGGATCAATGAATGCTCGGACCGTAAGGACATGC  
GTTTCTTGTTCGCTAAGGCCATGGTAACGAACATCGACCTTGCCTGGGAGAAGCCTTCGT  
ACGAATACGCGCAGACGTCTTGCCTGAGCCAAACGTTTCGACGTGCAAGTGGCCATCGCTA  
AGATTCTGACGCCAGAGGGCAAGGCATGCAAGGATGACACTTACGTGGAAGGCAAGGTAG  
TAGCCCAGCTAGTGCAGCTGTCTGGCATGTCCAATGCGACATAACGCCCCACTCCAGTC  
CCCAAGCTGGGCATCGCTATCTCACTGGGGCCCCAACCTCTGGCGTGCCTATGAAACTCG  
AAGTACCGCTACGGCCCTAGTCGCTGTTTTGGCGCGCACTAGCTGCTCTATGATTCTCC  
TAGTGATAGCGCACGCCGTCTCGCCGTAGACAGCGCCGTGGACAGCCCAGTGGACTCAG  
CCGAAGTCATGAAAAACGGGGGGCTCGGTGACAACCAACGAGCCGGTTCGCCACGGCTGG  
GCATCGTGTGCGGGTGAGCCTGCCATCGGCGCGCAGTGCATGCCCCGTTGTCTTCCGTT  
CCGAGCCGTCTGGTACTGGAAGGCGAGCAGGTGCAAGACGGTGAGCTGTACGGACCACT  
GTTTCGCATGAAGAGTCACGAGACCATCGCAGCGGCCCGCTTGCCTGTGACTGGCTGGAA  
GCTCGCCAAACAAAAGATGCGCAAGGTTGAGGGCTATGTCAACCAGCTGGGTAAATTATC  
GACGAGGCCCGCTGCACGCAACAGTAACCAGTCTGGTCGACGCCTTCAATGCTATGAGT  
GCTGTGTACGTGAGCAGGCTAGAGGTGCAGCCAGGCAGCCGTAAGGCGGACGGCACGCTT  
GCGGCGGCGCGGGGAAGAATACACAACACTGTGCGACGTCTGAGCTGTTGGTCTGCGGATC  
ATCAGCAACCACCATAACGACACGGTGATCTATGGCGCGGCAGACAACATCGCCGTCCCT  
ACCATGCAGTTCCTCAGGCATGTGGTGCAGGGCCTGACTTTCTCGTAGGGACATGACCGC  
TCGCCGGTCATGGAGCAGTGGGCGCGGATCCGCAAGTACATTCACAAAACGGAGTTGCCT  
GAGGTGTGCCGCGATCTGTTTCATGGACAACACAGCGATGATGTCGCTATATAACGAGCGG  
TATGATGCCTTCCCGTGAGACCAGACCAAGTTTTTGTATGTGGTGGCGCGGTGAGGGGTGC  
ACAAGAAGTGGCCATCTAAAGGTCTGCATTCTGACTTCTACCCCCGGCAATGGCGGAA  
CTGAAAGGTGATACGACATTGCAAGATCAGAGACTGGAATACCCGATTGAAGGCCTCCGG  
CCTTACCGCGGGCTCCATGGTGCCCGAAGTGAGCAGGTTGACAGGGGACAGCGCGATGCG  
ATGAGCATCACGACTAATAATGGTAGCTCGCCGATGATTGGCGTTGCCGACACATCACAC  
TTGAAGTTCGGCTTTGCCTATTGGTGGCACGCTCAGAGCTGGTGGTCTGAGAACGCACGG  
CGTCAAGCGCCGGCGAACAGCAAAGCTCTTGCGGTGTACGAACTGCCCGGCGCGGCTGCA  
ATTCACGGTAACGAGCAGGTGCCATTCGATCTAGATGTGCGAAAGCTATTGGACCATATC  
CGCGCATCGGAGTAGGTGAGAGGGAACCTCGATATGCCGTTGGCTGCGTATAACGAGCAA  
TGCGTACTGCAAACGGCGGGCCGGCCCCAGCCGGAACATAACTTTGCACACGAATCACAA  
CCCAAGCCCCCTCGGACTGCCATCGCACGTCATATGTCAAGGCGTAGTGCGTGGCGGGACT  
CGCTGCCGAGGAGACGTAACACAGGTAAGCTAAGACCCCGGCCCGCTTACGTGGATTCACT  
TTCGCTGCTGTAGTGTTTCATGCGTGACACCTTCGATCTGGACGTTGAACTCGCCTCGGAA  
GCTTTCATCGAACTCAGGAGTACCTCCGGTGTAAGACTTACTCGATTTCGATTGGGAGCT  
TGAAACAATGGGCGAGGCTTGTGCCTTGGCCTGCGATGCACTGACGCACGCTGATCCTCT  
CGGAGTAGTGATCAGCCTACACGGTAAGAGCTGCTGTACCGCGAAGGCTTGGCAGCCTA  
CACTGTTGTGTGTACATCTCTGTCTGGTGCCACGACTCTGCCATGTCTGAGGGTAGCTT  
TGCCTGTTTCGATTACGAGGACGCATAAGCGGCTCGCTCACGACCCACCTAAGGACGCCG  
CAATTATGGCATCGCTCAATGTATTCCGTGTCATGACTGGCGGAATAGGAGAACAGTATC  
GACGTCGTAACGCGCTGTGTGTAGTAGTTGGCGACGAAGATAACTTCGTCAGCGTAATGT  
GACACGACCAACCTTCCACACCCGTAACAACCGTGTCTACCTGACTGTTCTTCCCGAGG  
CAGAGAGTGTTAAAGCGGCTGAGATGACCGACCTGAACAACGTCCAAAAGTACATCCTGT  
CTAACCTCCTGCGCCAAGTGCGCGAGACTCGAGTAGGCCAGACCGTTTCCGGCCAGCGCA  
CCCACGCCGCCGCCCGCGCCCTCGTCGTAGCCTACAACGAGTCCAGCTTTGCAGCGTTTC  
CCCTGCGAGAACTGGCCTGATCGTTGCGCAGAAGAACAATAACGGAGTCGCGTTGGGGT  
TCCTGCGCAGCATCGCGCACAGCAAGGCAGTCGGGCTGACCAATGCGCGCAGCAAATCTC  
AGAAGTGGCTGTTCCGGCTGCCCCGAGTTCGTCCAAGTCTCCGGACGTTGCTCAATCCTGTG  
CGCATAAAGCGCTGTCCGTTGCAGATAGCATGGCGCGCAACTATCCGTGCCAAGTGTTC  
ACGCTGTGCAGGTCCATGCGGTCTCCAGCTCAAGGCCGAGAAAGTCGCACCGAAGAAGA  
TCGAAACTAATCACACCATGGTCTAGCTGTAGCATGGCGCGCAGCACGCAGATCCTGAGC  
TAGCCTTCCCGTCGTAGTGCTCTGCCTGCCATCCCGAATCAGGTCAAACACATCGGCCCC  
GAATTTGTTGGCCCGCCGTTTGTAGCTGCTAAGCTCATCATCAAGGACGGGTTTCGTTTCAT  
AGCACTGCGGACAAGGTACGCTATAGCTACTCGGCCACGTAAGCAACCCTGCCAATTC  
GAGGCCGAAACCATGCTCGTCAAGATCGCGCCATACCTGATGGCTCTGGCCGAGTACTTC  
GCCGAAGGCGCTGCTGCGCTGCACACTTCGGCCACAGATCATCTGCTGTCCCGCGCTTGC



CGCGAGATCTTAAAGGCGTTCAGCCAGTTCAACGCCAAGTTCGCCAGGGTGCAGGTCAAA  
CTCAAGGGACGTAGTGAGCGTGCCGTGGGTCTGTTTCAGCTACCAGCATGCCGCTGAGCAG  
CGGCGCGATAAGGCAGTCAAGTTTCTGGACGTTCTCAATTTCTGCGCACCGAGGCCGGGA  
GCACGCCAAGCGCGCTTTAGGTGCCTCGTTTGCGGCGCCGCAGGATCGATTGGATCGTCA  
CTGACTACATGATAGCCGCGGAGTTCGCTGAGCTTGAGTCCC GCGTTGCCGTCTCCCCCT  
ACTTCCCCCATCTATACGGAATCAAACCTATGAACCGACTGAACGTACTCGACCTGTACA  
AACGCTCCGCTGTGACCGGTGACATGATGTCCCTACTGCACCGTGCGCCGGGCGTGCACC  
CGCGCCACTACAACGGAGCTCTGCATCAAGACCAGCGCATCGTGCGACCGGGTAGCGAGG  
GTCAAGCGCTGGGACGACTAGGAGGCGATGGATTCCCGTTCATTGGCGTCGGTATCAACG  
CCGAGATGATCATGACCAGGCTGCGAGCTGTCCTCTACCCTGTGCATAGCTGTGTCGCT  
AAGTTCTTACGCGATGCCTGGCTGGCCACTGTGCATACATCCGCAACGACGACCATAGG  
CAGTTACGCTTTAAGGGCAAGCACGCCATGTCTATGCGCAAGATGTTGGAGCACTGGCGT  
CGCAGTTACTGAGTACGTAATGAACATCTGCGGTGAGTCCATTGCGCGAAATTGTGCGCA  
TCCAAAATCCATGTTGGAGATATACCATGTAGAACGTACAAGCACTGATCACCGTAACAA  
ACGCCAACGCTGCCAAAGAAGTCTCGGTGATTGATATTGTGAATAACCTAATCTGAAAGA  
CCACCGAATCAACCGTGTGCTGCTGGCCAGTTCCTGCAAGAGCGGGCAAACGAAGCTCCAG  
GCTTGAACGTCTAACGCGGCACGGAGAGGTCGTTTGTGTTCCGGTTCATTCTGCCACTGCTC  
AAGAGGCGACCTGCAAGGTCATCGCCCAGGTCGAGCTGGAAGGCGGCACCAAGCTGCCGA  
AATTCATGGCCGTTGAAGACGCTGCGTTGATGATTTACTACGTTTCACCGAACAAGTTGC  
CTGCTGTGTCGAGCAGGTCTAGGGCACTCCAGACCCAATTCAAGGCTCCCAAGAGTGCG  
ACATGCCGGCTAGCGCAGTGGTAGGCTTGCCGCTCAATGCACGCAGCGTTCTCGGTGGCA  
CGGACACTGCCGCAGCAGTCGCTGTGCTGTAATGCTTGATCGTGGGCTGTTTGTCCCGAC  
TTATGACCTCTTGCATGAGGACTTGATACGGGAGGTTAAGGCGTTGGGGATCATGCCCGA  
CGGTGCCGCAGGGCGAGGCGGAGTTGACTTCCGGGACTTACACGATATGGATCCCCGATT  
CGTTGCCGCATGCGATCTTATCAGTCGAGAACCAGACTTCGTGATCTCGATGCCCTTCT  
GCCTCCCTGAACCTGCGCAGCGTTGCTTCCGGGGTTCGTCCTGTGCGTTCACGAGAAGCA  
CGCCAAAGACCTACCAGACTTACAAAGGACAGAAGTAGTTCTCAAGCATGAATGCTTTGG  
ACTACCCGCCTCGTTGCCAGTACTGGTTGATCAGGTTATGCTACCGGTTGCGGAGCGGCT  
GTATGGCATAAGAGCTGGAGGTTTTGCCGTTTACATACAGCTTGCAACAATATCGCCCAAGTGA  
ACATCGCTTTGGTCAATGGCATCTAGAGCTTTACTCTGGATTTACAGTGGTTGTGGCACT  
TAGCAATGAGCAGGCTAGAGGCGGCACAGAAGTTCAGGGACACACCTTCTCCCTGGCGTT  
CGATGATCTTCAGTAGGCTACCGGATCGGCTCTGATCTTTCCGGGTAAGATGTTCTTCA  
CCGAGGCATGCCGGTTATTGAGAGCGTGCGCCACTTGATTGTGTTCTAGACTAAAGTGAA  
ATCAGAAATGCGTGGTTCGTCTTAGCCCAGAAATTGCCGGTGC GCGGCCACGCTATGCAT  
GCGAACTTCTGTGGTTCATGGCCCTCCGAGCGTTGTGTTCCCGACTATGCGAAATGGTCG  
GCGTTCTTCCAGCGGTGCGCGAACATCACATCAGTATTCAAACCAATCCCGCCGTTGCAC  
GAAGGCATCAGGGCCGCGGAACGGGAGCGGGTTGAAGAAAGAGCTGTAGCAACCGCAATC  
CGGCCACCGATGCCAGCGTTGCATGACCTGGCCGAGTGGCCGCTGGGGGCACGGGAATGG  
TCATTGAGA ACTGGGATATCTCACGCCGCGGTGTTCTAGAGTGGCGGCTGCAATCATCCA  
CCGACCCGCGTGTGGCGTTCTCGGTTCTTGAAGATGCGCGCTTGACTTTCTGGCAGTCC  
CTCAGCTGATACGGAACGAGAGCAGCAAAGTATCTCAGCCAGCCGAACGAGCCCGAGTTA  
ACAGAAACGCTGTGCAACGGTAGATATGTCCTTCCGTTAGTCGATGACTGGCGGTCTGTG  
TACAACATCGGAACGGCGGGTTGCAAATCTTTGTGCCTTATCGGTAAGAAGCTGCGGCCG  
AAAGCACGGGCCTAGTTGTGATACGCTCAGTACGCGGAATCGATCTGGCTTGAACCT  
GACGGGCCTAGTCGGGGTTGTGGCGTGGAAATCAAGGACTAACTATAGATGTGCGGGATT  
GCATCCCAATGATTCTGACTGAACGTGACCTAAAGTTACACAGCAAGCGCGAGATTCTGA  
AATGTCTTAGGACGTCTCGCCTTAGCAACCGATGCTGGGACGAAAGGATGGCGACGAGCT  
CCGCTGGGTAGTGAACACGCGTTCATTGTATCAACTGAGCGTCACTAACATCATTGACCT  
GGGCAGTTACTCCAAGGCGGATAACGAATGTGATCTGCTCTCTGTTAGCCGGGAGATCAT  
CAGGTTCTTCCACCCGATCTGTTATCTACAGTAAAGACCGGAGCTTGCGGAGGCGTACCG  
CCATGTGTTCCAGCAGATCGAGAAGCCGATCGGGCAGAGTGATAGGTCAATGATCTTGGG  
CCTGCTGTGGGACTACAACCTGTTGAATTACTCGCACGACATCGCCGAGCGCTTTTTCCG  
TAGTGAATAAATAAACGTGCGCGAGGTGCGGGCGGACGGACTATCTACGTTTGGAGCAGGA  
CATAGAGCGTAGGGTGAAGCTGCCTTTCGTGGCGCTTGACGAGTCGTTGTTTCGACGAAGA  
CGTTAGCAAAGACGGGTTTCATGTGGCGCTGGGCTTGCGACGTGGGGACGATGATGCCACT  
GCGCCGCGGCGACTTTGGCAACATGGGGGGGCGACCGGACAAATGCAAAACCACTACTCT  
CAAGGACCTCCGCACTTACGGGGCATCCCAGTGCTAGTTCGTCTACCAGGACCACCCGGA

GATGCACCAGATTCCGTGTCTCAATACCGAAGGGCCGAGCAAGCGCATCCTCAAGCGGAT  
GATCCAGTCGGCGTTTCGGTTTCGGAACGGCTGAGCTAAAGAGGAAGCAAACGGCTGTCAT  
CTTGCGGGATAAATACGACGTAGCGATTGCCGGTGGTCGGGCTATTATGAACTTCCTCCA  
CATGAACGCATTTACGGCGTGGCAGGTAGAAGAAAACCTTCGATCAGCCTACTTCCGGCTA  
GATGATCTTCAACATGGTGGACTACGTGAACTGCGTTGGTGGCCTTGCGAAGGGGGACAC  
GATAACAGAACAGGAGTGTGTGGCTATGTATCAAAGGGCTTGC GACTGCACTACGAGATT  
CGACTGCAAGGTACTCGCTCCGACTCAGGTCAGGGCGGAAGGTGCAGGTGAACCGTATCC  
AACTCTACCGATGCCAGTAACAGCAAGCCTGGCAAGCCAGATGCTGCCTTTTTTATTAT  
CACAGTCGGAACGTGAAACGATCGTTCGCTTCAAGAGTTGCGTTTCATTGGGACGACCAA  
GCACAAGCTACGTCTTAACGGCCAGGCAGAAAGTCCGCGTGC GAGAAGGGTGAAGCACGC  
ATCAGCAGAACGCGATGTCCGGCAATAAATATCAGCCGGCGCGCATCCCCGCGATCGATC  
ATGCCGTGTTTGAAGGGATTCTACACGCCAGGCGGGAGGCGCGTTAGCATGCAACCGCTG  
ACAGGACAAGGCCGGGAGGGATTGACATACGCGTGC GTGTCTCTTCTTCCGGGGCAACA  
ACGAAGTGCCCACTGATATCGAGTTC CCGGTGGGACACTCCTCGCCACCAGCCCATGGGA  
TCGCTCGAACGATGCGTCACTCGTAACTGAGGGCGTACACAAAGCGGTCAAGGAATACG  
GCGTTGAGTTCCTCACTACGTGATGTT CAGACGTCCATTGCGAAAACCTTCAAGTAGAAG  
GTGAATCCCTACCAGGAGAATTGGACGGTGGGGGTAGGTAAATGTCAGCACGTAGAAGAA  
CCTGCGGCAATCAAGCACGATGATAAGCATCGTAGCAAGAGATGCCTGGCGCGGTTTCGTT  
GAACCGACCCCGCCTGCAAAGTATTCATTTTCTGCAACTTGAAGTTTGGCGTGCTGTGT  
GGGATCGCCGAGAAGCCCGCTGGTCTGAATGCATGGGGGGGCTTCATCAACCGGGGTGGC  
GAAGTGTGGGACTGTCAGCTCGTCCAGTAGCTGCTGCGCAGTCAAGGCCCGTCCGTACAC  
ATGCTCTCTCGTGACGTGGTTTGAGTGGGTTTCGGCGGGCACACGAAACATGACCGCTTC  
AAGGATGTGTAGTCGTAGAGGAACGAGACAATCGACACTCCCGATGGCGCGATGAGTTAG  
TACCTGTCAGGCGACATCGGGAACACCTGCAAGAGATTACTCGGCCTAGTGGTGGAGGCT  
CAGCAGCTCGGGCCATCCCAACGCATCATGCTGAACATGGGCGGGCTGGTCTTCACGTTT  
CAGTCCGAACGTAAGGGCATGAATGCCGACTACGCCTTGGGCTTGAAGCTACCGGCGGTG  
ATGGAAGAAGA ACTGGACTCGTTGAAGCTGCGGCTTGACGACTAACTCACTGGCAGCCTT  
CCGTCTAAATTCAATTGGGGCAGTTGGATCCGGTTCGGTTCGCTGTGGTTTAGAGCGGTT  
GTTAACTAATAGGCCCGAGAAGCGATTCTAAATTAAGACGTCAAGCCGACTTATGCACAG  
AAGACGGAGACTCACTCCCCACGTCGGACGGCAGCACTGTAGTACAGGACGAGTTGAAC  
GACTACTCGGCTCAGCGGTAAGCTGTGCCGACACTTGTGTTCTTTAGCGGCGGCAAGAAC  
CCGCGTGAACCGTAGACGAAACAGCCTAAGGTTAATGACCTGTCGAGACCGAGATGCGGT  
CTTGAAGACCGCACCTGCGTGTACCCCTGCTACACCAAGCCGAGCCACTAGTAGAAGACG  
GCCGCAACGGGATTGTACCACGCTGGCTCTGCCATCATCGAAGAACGCTGCAACCGGGAC  
ATCGCATGCCTCGACGAGTAGGAACGCCATGACAGACTCGGTTAGGACGTCGGGACGTTT  
ATGATGAAGACAAACGACGAGGTTGTGCAGCCAGGCCTGCTCACGGTGGTTCATCCCGTT  
TGTCTGATCAAGCACATGAGTAACATGATCAGCACGGTAACGGGCGGTTGCAGTTCAAGT  
AACCCGAAGCCGCAAAATTTGCCGAATGGAGGTGAAGGCAAGTGCATCGCGACCGTTAAG  
TTCGTGTCCCGGTTTCGAGCCGAAAGCTGTGAACAGGCAATGCGGCATCTCGTAACTGCAC  
ATCTACATCCAAGCGATCCTTACGGATTGCAACCAGATGATCACGGACTTGCTGGCCGGA  
GTTGACACGGACGTTGCACGGGTCGTGGAGACTGCCGTGATGGACGATTTGGAAGAGTAC  
CGACTGTGCCGCGTTTAGCTGGCGGGCCGTGCGGTTGATATCGGTGAGTGGGTAGGCAAG  
CGGACGAAGGCTAAGCTCCTCTCGTTCCAGCGTGCTTACGGCACAGGCGCAGCGTAGGTC  
AGCGAATCCACTCGCTTCCAATCGATGAGGTGTACGGACTGATCGAACAGGAGAACACG  
CGCTACCCTGAAATCGATCCGTTTCGATGCTGACCTAATGGAGAAGATCACGAACACCAAG  
ACCGCCTGCCGCAAGCTAGTTCCACACCTGGACTTCCCGGCTGATCAGATTGGCTTCGAC  
ACCCGCTCGCATCGCACCCCAGACCCTTAGCTCTGCAGGCACCGGGAGCAGTGCTCTCCG  
ACGTTTCGTGGTTGAGAAGCCTGGTCCGAAGTCGTTCGATCTCGCCAACGGA ACTCAACAAC  
TACATCGTGAAGGGCACGGGCGCTGAGTCGGCGACGTCAGCATCCTAGTTCTTCGTTTCG  
ATTTTCTACCGCAGCAACTACAGGGACTGGCTGGACCTTCTGATAGAGCAGGTA CTGAC  
GCGGCAAATGTTGACGCGCATCTGAGAGTCTAGAACGTCCTTGTCTGCTGTTATCTAAGCT  
TAAGTGAAATGTGCATCACCATT CAGGGGGGCGTACTAAAAGTGGGCGATCCCACTGGCA  
ATACCAAGCGACACA ACTTGGGACAAGAGCATGGCACACGAGAGCGCCGTGGAAGGCTTT  
GACGAACTGGCTTTTCCGCTTCGTGAAGAAATCGTACCGCAAGACATCAAAAAATATCTC  
TGGGAGGCGACGCCATTCCCGAACCAATCTACGACCAAGCCGCAATCGCAGCAGCCACCG  
CAGCATCAGTGGATCTACAACCTTTCATGAAGGAAGCGCAGAAAGCCGGCGGCGGCTGGG  
TTCCACCAGCTGCTGCCGGCTGCATGGTAACCCTAGTCGGCCGCATCAAAACCTGCATCC

AGATCGTGC GGAAGAGCAA AATCAACCCCGTGAAGTTCCCCTGTGGTCCGGAAGATCAAG  
TCTATCTGATCTTCGGAAACAGCGTCAAGGGACACGTATTGAAGGAGCTGGAGAACGGAA  
CCTAGGTTTATGTGCGCCTTACCGTAACGCTCAAGCAGTCGGTGAAAGAGATGTCTGGGGT  
CCTACAAAACTTCAACACGCGGATTTTTGACAAGACCGCGACGCTCTTCGCCAACAGC  
TGGGCAAGCAATACATCGCCAACATCAGCATCTCACCGAACAAAGAAAGACCTGAAGTCGC  
CGTATGCGGGCTTCAAGTGCAAGACTGCTTGCTGTACCTTCATGACTCCGACCTACACCC  
TGAACCTGATGGGCATGATCGCGATTGCCGTAGTCCGGAAACCGGCGGTGCTGACTCCGC  
TTAAGCTGTTCTACTGGACTCACCCGTGCAAACCGATGTGGGACTCGCAGTTCCTCGAAA  
CCAAATGTGACGACCTCAAGGACGAGAAGTCTGGCGGGGCTACTCCGGGCCGCAGCTAGA  
ACCAGTTGCTGAACAAGATTATCGGCTCACAGAACTGTCAAGGTTTCGCTTTCTTCGACA  
TCGTTGGCGGTCCGGACATCGCCGAAACCGGAGGGCCGGTGGTACCGGATACCCCCGCGA  
CGGAGTCGGTTGCTGTTCCGTCTCACGTCGCTGCCGCGGTGCATTGGTGGCGCTGACT  
GGATTGGCTAGAAACCGCAATAGCTACTGCTGTCGAGGCGCCAAGCCCATGCGCGTCGAT  
GGCGGCCCTAGTGCCGGGACGGCTTGTGGAAGTTGATGATGACTAGGCTGCCTGTTTCAT  
GACGGGTAACGACGAAGCCGCTAGCGGTAAGGCTCTTAGCAACGTGATGCAGCGATTCCG  
CAGCATCAGGGAAATGACCGGGGCGAGTAGTGTGGTTGTTCTCCTGTCCGCCAGCGTTG  
TACCAAGGCCGACCGCCTCCTTATTGCCACCGTGCCAGCGTATCACGACCAGCGGACTGG  
CTCTGCCCGTTCTAAGA ACTCGCGGAGCTTGCGTGAGTTCATGGAGAGCGACAAAGGCCT  
GGAGTTCGCTCCGAAGATTCCGGGAGTCCGAGCAGACGATTTTCGTGATGGCTGACATGCA  
TCAGAGGCGGGTAGCCGAAAGCAAAGCCGAGCTGATCGTGACAGCTACCCGTGACTTGG  
CATAAGGATAGTATCCCGGCAGGCACATGAACTGGATAACTTACGAACTCAACCACGTTCC  
GCAAGGGGCTTGCGAGGTGATCGGCGAGAACGATTTGATCTATGGGCCCAGGTGGCTATG  
GCTGCGAACCCCTGCTAGGCCACGGCGCGGATCACTACCAGGGATTGCCGATCCACCGCAG  
GCCAACCGGCAAGTGAGAATAGGCCGGCGATGCAAGAGCGCTGGTGCATTTGCGGGTAT  
CGACAACGACGCCGATTCGTTT AGTGAAGTGGTGCGGTTCTACTATACTCCAACACACC  
CATGGCGCGGCTGTTGCGACTGCTTGAGACGTTGCTACCCGTATGGCTGCGGCGTGATCA  
TAAGGCCCGCTTCAGCGACGTGCTGATCCCGTTGCAAGTAGGGGATGCCCAGAAGGACCG  
CTTCAAATCGTCTCTGCCGCATCATCTGAAACGGGTGGGTGTTAGGAAAGCGGAGGTTAC  
GCAAATTGAAGCTAACCAAAAGTCAACTCAAATCACTACGGGACCAGATTCGTTTCAGTCC  
AGATAGTTGGTTGTGGGGATTGCAATTGGCATGGCCGTGTTGCTGATGCTGTCTTCGCTC  
ATTGCCACTAACCGCGCCTTAATCGCGGTACCCTGCATCGAAGTAGTAATAGCCTTCTTC  
GAGTGCTGGAGAGCAAGCGCAAGCGCTGTGGCCGAGGCGACGTCGCCGAAATAGCAGGCT  
ACATGCAAGGCGTGCGGGCCTAGATCCCAACGCACGCCACACCACAAACCCGGATGATCC  
ATCCGACATGCAAGACCGAAGACGAGAAGCGCTTGGGGCGGTCCGCCTATGCCCTTAAGG  
CTCGCGCAATGCGAGCAAAAAGAATAGATATGGCGCATTTCCTGATGCGAGTGTTTCAG  
CAAGAACAGGCACCCCGGAATTACTGGAGCCTTTTTGTGGGACGTGGGCGCGGCTGGGCA  
GTACTACTCGCATGCTGGGGACGGAAAGGCCGTTCAAGGTGGCTCGTCAGACCGTTTATCA  
CTGGCGTGCGATGATCATCGACAACGGCGGCAACAGGGCGAAGACGGTCCGCGAGCTGCG  
GGAGATGCGAGTGCTTCGCAAGCCCGATCTCTTGTTTGATGATCAAGACTTCGACAACCC  
GCGCCTGTGCAAGTCGACTCTGGTTGTACCGGATCAGCATGCGCCATACCATCCCCGATA  
TGCGGCGGGCTTCCCTGCCAGATGTTTATGGTAAGGAACAGCGGGATCTGACGCTCAACCT  
CGGCAAAGATCCGCACCACCATGCGATGTCGTTCCACGATAGTGCCGCAAATCTGCACAG  
CACCCGCGTTGAACTGGTGAAGCGCAGAAGGTGGTTGTTTGAGCGGCCCAAGCTGTTCCC  
GGCCCCCTGGTTTTCGATTCCAGCCACCGTTATGTCACGTTCCGGAGGACCCAGGACCA  
CAGCTTGCGGGTTCCGTTGATCCGCGGTTACCGGGAAGTTGAGGTCCTGAACGACAGCGG  
CGACCTCTGACATTGGGCCCTAGAGCAGGCGAGACAAGATTCCGCGGACCCGACGTGAGGTT  
CAAAGATCAGCCGAGCGGCGGAATTGTGGTAGACGTGACGCGAAGACTCCTGCAACTTGGC  
TGTGGGCTTCCCCACGGCAACTTCTCGGTAGTATACACGGCAAGACGCAGGCGCCTCTA  
CTTCCGGATGCACAGCGGATGCCTGAGCGATTAGGACGCTTCTGCTTTCCGCCACGGCTA  
GCACCCGGTGCGCAAACCTGTTATGGAGTGCATCGTCATCCCTCATGGTCGACCAACGCT  
GGTTCGGATGATTCTTAACAAGTAGGCGCGCTGGAACGGTAGCTTGTGGTACGGGCATTT  
CTGATATGGCCACTGACTACACTTGCGTAATCTGCATCGGACCGTGTAACGGACACACCG  
TCTGTGCCAAGCGAAAAACAGTGGCCGTAAGTCAGGGAGGTGCCGGGTTGAAATTTGAGG  
GTGGGACAGGCCCTGGTCGGTGCTTAAGATTTCGCATGGCGACCGCGCTGGCCTTTGCCG  
TGCCGCTGCTTACCTTCTGGGCCATGAGCTACGCCGCGCTCAGTTGGCAGAAGGTGGGGA  
CCAACAGGGAACGCTACCTCGAGGCTTTGTATGGGCACTTCTGCGCAATCGAATACGTTG  
AGGCACTTGACCGGAAGAGCAGCCTGCCGCGCTGGCATCACGGGACCTACAACGCTCTAT

TGGTGTCCCTACGGGAGAACGTCAAATGAGCGATCCGCCCTCGCAACTGAATTGGTGGA  
CAAGAGCTAGGGCGAAAATCTGCAAGCTGCCATCGACACCAGCAACCAGTCGTAGGCACG  
GGTTATACTAGGTGGCGCAATTGACTGCATGATCAGCATGATTGACCACGCAGAACTGAG  
TCAGGAATTTGAAACCGCATTAGGCGGGCTCGAGCACGAGTAACGTGGGAATGCCTTACC  
GTAATATTCTCTACAAAACCGGAAAGAACCGTGCAACTTGAGAGGCAAGGCCCTGACCA  
CGCTGCCGGAATTCGACTCCGGCAAGTAGGAGTTCGGTTCGAACTTCGACGCTTGCTAGC  
TGATCATCATGGTCGGCCTAAATGTAGACCACTGCCTCTCCGGTTAGGCCACGGAACGCG  
TGAGTGTGCAGCACACGCCCGAACACTTCCATATTAGATCGGCGCAAAAACAGGGTTCAGT  
TCGGCGAGAATTATGACCCGAATAATCTGTTTAAGGATATTTTCGGCGTGTTCCCCACGC  
AGTAACCCAGTACGAGCTTGAAGCGTGGCGGTTTCGATGCAGGGAGGCGGCAAGAGTACC  
GCACCGTCGAGACCAAGCGCCCGTATCAACTGCCTATGAAAGACTTGTGGCATGTGGCGA  
ACCGCGAGTACGGCGTTATACCGACGATCACACGTCGCCGCGTAGCTGAAGTGCTCGCAG  
ATATCGACAGCGACGTACAGTATGGATAACAAGCTGGTGCTCGACGGTTTTCTGGCGAAGC  
ATGCGGACTGTCAGTGAAGTGCCTGATTAACCACGAAGGCCCGCACCTCCAGCTGAAAG  
ATCACGTCAGCGTTGTCCTTCGATTCGTCGGCATCATTGAAAGCGTCGGTAACTTACAGG  
ACATCGTGGGCGCGATTGAAGTACTGGTGCGCGGCAAGCACGGAGTGGTCAGCGGTGAAG  
GACTGATGAACGCCGAGCGACTAGAGCTTATCTACGAGCTGCGCAAGGTGATCGCCAAGT  
TGCGGGAAGTACATGCGTTCGGCATTACGCTTGACGGAAAACACTGCGGGCATGGCGCTACC  
AGCGCATCCAAGATTACACAACGGAATCCAGAGGGTAATGAATCAGGCGGAAATAGCACG  
GAAGATGGTAGACGGTGGTCGTCGGTATGGCGAGGTTTCAAACCGCCGATGCGGT  
GAATGAGACAGCGAATAATCAGCATCGTTCGCGATATTACGACCCTTCATCCACCTTCT  
GTCAGAGGGTTCAGGGAGGTTAACTGCACCCGGCAGTTTGTGGTGTGGCAGCAAAGTCGAT  
AGTGCGGCCACATGGTCAGGATTCGCTGGCGTTCGGCGTGCATCACGGTCCGTGTAGTGAT  
CAACCCAAGCCTCTCAGAAGGGGAGGCCGTATTTACTGGTGTGGTTATGGATTTTGGCCA  
TTCGGTTGACAGCCATGTTGCACTCAGGGAATACGAAGACCCGAAGCCGGAGCTGTATTT  
CACGTCGGTGCAGAACCTCTAGGGCCGCATGACGAGCAGTGAGCGAAGCAGGTTGAACAT  
GGTACGATCCAGTGCTGAGAAGTACGGGACGCGGCTACCGATTTGGGAGTCGGCGTTGAG  
AATGGACGTGGGCACCATGTTGCTGGGCGCGTCTCTGGACTTTGGTCTGCCGAACTTT  
CGATTTAAGGTTGAAAAGGAAGGGGACCAAACACCTCCGGCTGCACCCTGACCTTCTGGC  
GCTGGTTCGGACAGATCAAGGGATTCGTGTCTGCGGGGTCGCCGTTTGACCTCCGTTGGGC  
GGGGCAGCAGAAACCATGAGTTACACCGTCCGATGGCGGCTGGCAAATGATGGCGATGGC  
TCGAACTGTGTCGTGCCTCATGGGAGTGTAAGCTACACCGAGCGCCGAGGACGGTGGGCC  
ACGATTCCATAAAGCGCTGTGGAAGGTGCAGCACTTGGTGCGCGAAGTTAGTGAGCGGAG  
GCTGGAGATTACAAAGATGGCTAGGAAGCATTTCGACGTACAGGGTGTGTTGGTTAGCGA  
TCGGCGCGGCGACATGCCGGACAAGCCTCTGTTTATACAGTCTGTTCTCTGTCGTCGCGCT  
CGTAGAAATGAACGCGTTTGAGCTTGCGCAATACACCCAGTGGCAACTGGAGGCACGGGA  
CAGTCACACGCAAGTTAAGGTTAGCGTAGCGCATCCAAGCAGACCCAACGCAGTTGTCCG  
CGTGGTGAACAAGTACAAAGGGATGGCGCTCGGTTTTGTCTTGTCTGTGCTCTATCGGTG  
GCGCTTCTATGCCTCTCCCCAGGGGCTCTCCCCACAAGGGAACCTACCTAAAAATAGCGCT  
AATCCATTTTGCGTGGTCTGCGCCTCTCAGAACTTCTGCTTGCCTATTCTAGTTCCGGGG  
CGCCAGGGCCATCAATTGGGCGGCTAACAATGTCGATAAGCAGCCGGTTCGAATACCGGGC  
GCAATAGGTGTTAGGCAAAGCTGATTTTATATGCCGCATGGCTGATCGCTCGACCAGCCA  
CCGAGAATGGACAGGCACTGATGTACCTTTCCAGTTCCTGTCATGGTGATTTGAGTACGC  
GTATTGGTTACCGAATACTAGTTCGTTTCGCACTCTGATCCCACCTGGATAAGACGACTA  
TTGCAACGTTCTTCAACACTCCTCAGCGATGCTACGACATGGGGTAAGGAGGTGCGCAAC  
GCACCTCATTCCCGACAGTTTGCAGCACGACAATTACGGACTCGCTGCCACTGCAACCGA  
AGGAATCGTTCCTGACATTGGCGAACGCGATATCGCCAGACGCTGGAAGTCACACGT  
ACTTTCACGGTCGCCGGTCAAGTCTAGTGTGCTGACCCTGCCGTAGGGCTCGACACGTCC  
CTACTGCCGGGACTTCTTCTGAAGGAGTGCATGGACAAGGGCTCCAAGCCAGAGTTCGA  
GAACCGCGAGAAGGAGCCACTGCGCCGTGGCTGTCGTACCGGGTGTGTGGTGGCATCGG  
GAAGGTGGTCGTAAGGGGACGGCAGGCGAAGGACTAGCCGCAGGTAGCATCGGCCATCAC  
GCGGGGCGCGAACGCCCCACTCATCGAAGTGAGGACCCCTTCTGGGTTCTCGCGCAACA  
GCGCTACCCTCATCAGTATATATTCAGGGTGAGCGGTTCGACGCTATCAGGCAAACGTAT  
CCGCATCAACGTCGAGACCTTCAAGGATGAGGGCGATCCGCGGCGATACAGGAACGGCTT  
CGTGCTACCTTCATGCAGAGCTGCGACGCGGCGCACCTCACCTTCTTACGAAGGGCTG  
GGAGCCCGAGGATGGTGGCGAGCACGATTAGTCCACTACGACTATAACGCATTGCCAGA  
TCAGGTGCCCAAACCTGCACAGAATCGTGCGTAGGTAGTTGGCGGAGGTCCACCTATACCA

TGACGCTCTTAAAGCACTGGCGGCACAGGTGGCAGCGTTGCCGGGTCTTCCAGACGCCGG  
TACTTGTACTTGGTTCGTTCGTAACCCTATCGGTTTACTTCTTCTGCTATTTGCGCCACTA  
TAGCGACGATAAACTTTTACACTCCAGAAAGCAGTGCAACGATTCACCCGATCCATTATG  
GGCAGCGAACTCGCGGTTCTCCAGAACACGATTTACCAGCCAGAACAAAGTAATAGATTCC  
GCCACACAAGAACTGGCGCCCACGATATCTCGCCCTCCGGATGTAAAAAACCTGCGATCC  
AGTCAGGTATTTAATTAGCTTAACTCAAACAAGCTGGAACGACTATTTTTAGTTAGTCCC  
AGCAGCTCCGAATATTCTGCTTGCTGTGTTGGTAGTCACAGAGCGTGCTCTGTTATGGAG  
AAGGAGCTGGGGAATGGTTAAGACCACACATTGGCTTAAGGGGGGGCAGTACGGTGATGT  
CAGTGATGATCACCGTGATCGTTACGACAGCATGTAAGCCCTCTTAACTTACTCCGAGT  
TAGCTATGTTGAAGCCCCGGGAAGAGCCAATCAGCGCAGCCGTGGCAAGTAGTAAATTGAT  
TACTTCAAATGATCATGGAGCTCGCCGCGACGTTTCGTGGCGTTCTTCGACGTTGCTGC  
GCCGTGGTTTCGTAGCGGACAAGTAACTGAGCGTAGACCTGGATGGCCCCGCCCCGGGCAT  
GACGGGTGACGACACAGACTTCATTGCGGCTGGCGAGGCTGTTCGGCAGGAAAGAGAAGT  
CCGGTATTTTCGAGTTCGGAACGCGAGCCAATCCACGGCAACAAGAAGTGGGCCGCCCTT  
CCGTCACATCGGTGTACGGCTATGGGCAATCACACTACAGAAGTGTAAATTGGTATTCGTT  
CTGCTAAAGCGCTACGCAAGACCGGCAAGGTCATCAAGAAGGATGACCCGCTGCGCTGCG  
GTGACTCCATTCGGGAATCGGGGGGATTGCCCGCGCTGACCCGCGAATGCGCCAAGAACA  
TTGTGGACATGTGCCAGACTGCGGCCAATCACGCCGCGAATCAACGAGGCGAGCAGGCAA  
GACGACAGGCCGACGCGCCGCGTCTCTCAGCCGAGCAACAAGCGGAAGCTGTTGGCCAGT  
CGACCGCTGCTGCTAAACATTTCTGCCAGTCAGGAGATGCACCTTCATGCCCAAAGGCTCC  
ACGATTAGCCACGCAGGGCCATCTTTACCCCGCGCTGCCAGCGAGGCGCGCTGCAGACG  
AGCCATCGGCTGATGAGGGCGCAGCCAAGGAAAGCACGCCGAGTGTACCTACTGCCCCG  
GGCGCCGCCAGCGCTTCGACCCGGCGTAAGTACACCGCCAACGCCGCTTGCTCTTCCTAG  
ACCCCGAGCACCCGCAGGTTATGTTTTGTTGTCGCTCAGCCGAATCCGTATCGTAGCACC  
TAAACACCAAGCGTAGAGGCTTACTGTACAGGGCTGAGCGCCTCGAAGGAAGTAAACAATC  
CGAGCGTTTGCCCGGAGGAGTAGAACGCCATGGGGCGCGACGCGCTCACTACCCGCGGGA  
CATAACTGGGCGCGCAATTTGTCAATACGCTGCCAGCACACTTATGCTGGCGATAGTCC  
CGACATCCCACCCATTCTTCCGGCTGGCGATGTCCGCTTCGGATGCGCCAACAATCGTGG  
CCGAGAACGACATGCCGATGGGATTGATGACGGAAGTGTCTTCGGAGGGCGAGCGTGATG  
CTTTGCTGCAACTCGAAATGATCGGTGGCCGCGAAGATATTTATGCGGCCACGACACACT  
ATCACACTGTCGGTAACGTGGTTACGGACCGTTCGAGTAAGGACAAGCTGGAGTGCATCC  
AGTCATGGGGCTCGCAGTACTCCGGGCACGCAATCCTGACGTTGTGCCCGTGATAATCC  
AGCAAGAGCTGGCGCACTGCGAGGTCAGCGAAACCGTACTCGATCACATCGACCCATGGC  
GCGATGGAGATACCTACCACACACTCCATCATAATACGCGAGGGCCGGCGCGCAAAGGGCG  
AGCACCCAATCACAATGCACGTTGACCAGATCGAACTGCCGTAGAGCAGGTTTCGGTTCGA  
CCTGCGCTCTGGATTTCTGCCTGCTGCACCTGCTGACTTGACGTCCCCCGCTCTGAGACC  
ACTAAGGTGGGGGACGAGTCGAGGTCTAGTTCCAGGGCATCGGTACGCATGACGTGGTCA  
GCGCGCCCCTGAGCGATGGCTCGATCATGGCTCCGCAATTCGGGAGGCTCCAGAACCCAA  
CCGGGATCACCCGGCTCGGAGACTTCATAACAGCAAAAACGGCGACGTTATGACCCGCG  
CAGCGAACGACCTTCACCTGATCTTCGCCAACGTGGGACAGCAAGGGAACACCCGCGGGGA  
CAATCAGCCACGGAATCCAGCTGCGACGCGGTCAGGGCTTCCAGCTCAACTTCCTCGTGA  
CGCGGCAGGCTGAGCGTGAGACCCCCCAAGAAATGAGGGTGAAAGCGACGTAAGCGGTAT  
CGACTCTGCGGGGGGTTTTCTCCCGCACTGTCCGCGACCTCCCTACACCTCTAGCTAATT  
GGCGGATGGAGAAAGCCAGCTGGAACATCATGGGCACGAAACTACGCCTGGTGGCGAGCA  
CGGGCCTGGACCGATGTGGCCGTAAACCCGCTCTGGAACGCGTCGCGATCATCCTCGCGA  
ACGTGACTCAATAGGAGCAAACCCAGCCGACACTAGCATGAAGCTGGAAGGATCCACTA  
TTATCACCGACGTCGTGCGACGGCTTGACGTCAACATCAAACGATACGTTACATCGGACG  
ATGAAACTCAGCAACGCAGGCAACAACCTGCAAGCGCAACACGCACAAGGCGTGGATGGCA  
CAGCTGTCGTTACCACTGCACAGCCATCCGCATAATTACCTTCAATCTGTTTGGCCGTAA  
ATACATGGAAGAGGCGTGCGCAGAAGGCGCACCGGCTCTTTGCGCAGTAGCCGTCCCGGC  
GGCGGCCCCGGCGAGAACAATCACTCAAGACACATCACAAACTGCTGGCGCCGCGACCGA  
GCCATCCGTCGTTCAATTGCCTACGAGTCCACAGGCCACAGCAACGCTGACAAGGCTTT  
GGGACATATCGCCGCTGCGTGTAACCGCCCGGATCACCTCCCGCCCTGGTTCGCGCCGGA  
CCGCAGCTTCACCCTGCCGAAACGCGCCCTGGCGGCCAAGAGAATGCCGGACAGCGATCA  
TACGGTGGCTATCCTGACCCGACGCGGTAACCTAGGCCGCCGACGCACAGGAAGCCATCAA  
CCATCAAGTGACCGGCGACGTTTCATGCGCTGGCGGGTTTCACAGGGAGGTAGACCGCCGT  
GAAGGCGTGGGGCCCCGCGCAGCTCTGACGATGCCGGGTAGGAAGCTCTGAACGATCTCTT

CGGACGTCGGAAGACCCACAAGAAAGCGGGCACCACCGTGTCCATGCGCAACCGCTC  
AGCGGGTGTGCACGACCCCGCTGCTGGCGTGGTCAACCTGGATCACCTTCGGCCCTGGC  
CGGTGCCCGGGTTTTAGAAAACCAGCTGATCCGCTTACAGTACTCCGACGAGGCGAAAGC  
ACGGCGCGAGAACTGGGAAATGTCTACGTGAGATCGGCTGAGTACCAAGAACTAGGCCG  
TCGCCTCGTGAGTTAATGCGAAGCGGCCCGATGCTATGTGGTCCACTAAAGCAACAGGGA  
AACAAAGTATCAATTGCATATGGATGACTCTATGTCTCTGGATAGCTTTATCGTAGTTTCG  
ACCCAACCCTAAAATGGGAGGCACAGACCTGCTTGACCTCAAACCTCGAAGAATTCGGTGC  
TATGGCCGACGGCACCCCGCAGCGTTCAGTCACCGACGGCATGATCGCTGTCTAGCG  
GATCAAGGGCAGTGCGACCGTCTCCAACAATGCCATCGGTGCAACCCAACCTGCACGCAAT  
GCAACCGAGCTAGACGCCGAATGGTACAGCCGCACAGCATTCTAAAAACACCGGGACGGT  
TGCCCGAACCCCTTCAGGCCCGCGCCATCCTGCCTTTGCGGGATGTGTTCCAAACCCAGTA  
CGATATCCGTGAGGAAATCGCGTTCGACCACGGCAAGCGCAATGCCATGTCCAAAGCCCA  
GGGGGTCCCTGATCAAAGTTATCATGACGGCTCGTCTAACCGTGAAACCATAACGGCAGTCT  
GCCGGGCAACGCTGCTGGCGCCTGCGTACCTTTGGGGCGCAGCCCGTGATGGTGCCGACAC  
AGCGAACCTATCCCATAGCGTCGGACTGCTGTTGCGCGGAGATGACGGAGAAGCACGTTCA  
CCCAATCGTCAATGATTTATGGGTACTCGTTCACCCCAACTGCTTTCTACGCATTGCGGGT  
AGAGGGACCGCTCACCATCGATGTGTACGAGTCTTCCGATGGCTCCAACCTCAAGGCTCA  
CACCTGCACGGCGTGCGCCTTTCGAGCCGTACTIONACTCGGAATCTGCGGAACCTGGTTTTA  
AGGAGCAACCGAGTTGTCGCACCCGCGTCGCTGCACTCATGGGCGATGACTACGCTGGCGT  
CTTGATCTACGTCGTTGCGCTAGTGCTCTCGACCCTCGCCATCGTGGCCCGAGCTAGCAT  
CCAGCTTAAATCGAAGGTCTTCTTCGACGACGTGTCCAGGCACTAGTACTTGGATAGGTG  
GTAGGCATTGACTCGGCTCCAACGTTGCCGAATACCCTGGCATCCTCGTTTCTCCGTT  
ACGCCAATCTGGCCCGCAACGGGTTCCATTTACCGGGAGCCTGTTGTTGGCGAATTTTCGT  
AGGTACGCGCGAGTGACTTTTTATTGCTGAGCTTGAAGTGGTAAATCCTTGCCTCGCCACA  
ATGGGTTAGCTGGCGATCAACTCGCTTCAGAGCAGCTGCAACCCAATTGTGACTAAGGCA  
CGGTCAGCGTTCAAAGACTTTACGTTCAAGAACAGGCCGTAGGTTGGTGGCTCATCACC  
GAAGTAGTCATATTGCAACCACAAGGAGTAAGGCCCGGAGATGACGGCTGCCACCGACCA  
CGTACCAACTGGCTCTCGATCTCGACGCTGGATGATTACGAGCCAGCAGGGCTACGCATC  
CGTGACCGAAAACCTCTACGACAACGGGCCATCGAAAGTACGGAACGGTCACTATCTGCTG  
GAAGTCGTTATCGTCCCACCCGGTCCGCGTGTGAACCTGCCGGACCACGCGATATGGTTA  
ATCCGTGACAACCTGGGGTTCAAGTTCAGATGGACTACAAGGGAGACGAGCTCAAGATA  
TAACATGCCTACAATTGCTCCACGGATGCCTATATCATCTGGACGCCTGACCCCGTCCGG  
TCCATCAAGGCCAAACTGCTTCATAAAGGCACATCTGGTTTTCGCGTTTCTGCGCTCTCAC  
ATCTGTATCGCACTGACTGGCCGCTTGGGGTGATATGAGCAAAGGCACGGGCTCTTACGT  
TTCGTTGATCAAGGGTGAATCCGACCAGGTAGCCCACCAGCGAAATCCCGGACAGATCTG  
GAAGCAAGTCAACAAGGTTTCTGACCAAGTGCGCGTCTTGGCCGTCGCCGGGGTTCTGT  
GATGATGTGGGAGCAACGACCATGGGAAATCGGGTACGACACTCCTTCCCGCGAAGACGG  
CAGGTCTTTCGGCCAGGAGCCCCTGTATCTCCGCCCTAACGAATTCAGCATCATCCACCG  
CAGGTGCGCAGTAGCAGGCTCTACCATGCCGATTCTGGTTGTGCTGACTAAGATAAGCTG  
CAACTTACTACCAGTTACCGCCGATGTCCATCTGTGCGGGTTACCCGCCAGACGCATTCAA  
CAGCATCATCCCAGTCATAAATCTGGTACTTTCGCGCGCGCAAGGGCGTAGCATCACGGTA  
CTCCGCAGTCGATGAATTCACCAGGCGCACAGCCGCTTACACGGTGGCCGCTAGGGTGAA  
GGGCGGTTTCGTTTGGCCCCAGCTATCTGCTGTTTGTAAAGCGAGACAGCGCTCAGGACGT  
TTACACGGCGGAGTACACCACGTCGACCCGGTAGTATCCGGGCATGCTGGATAACCGAGGA  
CATCCCCGCAGTCATCGCCGACCCGGCGGGCCTTAGCGAGACCAAGTCGTGCCCGAACTA  
CCAGGGGCTGATGAACGCCACTGTTTACGCTTACCAGAAAGACGTTAACTAGTAGGTCCG  
TACCACGGCCGAGGTGGTTCAGCCAGCGGCCATTGCAGCTAAGTGGCAAGCTTTGGTCAG  
TCCGAGCTTCCCCGGAAGTTCGGGCCTAATCGGTTCCACCGTTCTCATCGACTGTGGGGC  
GGGCCTTAGCTGCGTTGGCGGCGGGACCAGCGACCGATCGTCTGCTTGGCTCGTACATT  
GGAAGCTGCGGCTGATTTGACCACGGTTCACCGGACAGGGCAGGGTTCGCAATCATCAAGCC  
AACAAACGCGAGGTTCGAACTACGTCCAGGCCATAGCCAGGACGGCACCCACAACGCAAG  
GACGCGGGTGAGCTGGGAGGAATAGCCCGACGTTGTGATCACGCCAACAGCAGGCACCAC  
AATCGGTACGGTACACAACGGAACGTTCTACGTTGCCCTGTTGCCAGCGGCACCTCGCTGC  
GCCAGCCGGTATCAACGTGGCGCCATGTGAGCCGCTTTCGCCGGCCGCCCTCGACAGTCA  
ATCGCTGCAACCGTGCCTACGCTGGGACATCAAACCTCATCCGCATGGTCAAAGACCGTCT  
GATCATCGTGGCAGCGGTTATCGTGTTTCGTGAGTAGCTCTGGTGAGTCTTTCAACAGCTT  
GAGCTCGTCTGCCCGGAAGATTGAGGAGGACGACCCGATTGAAGTGTATTCAATGGGACG

CGAAGACGATGTGATCAGGCCAGGCACTTTGCTTGACCAACACCTGATCTTGTTCCAGAA  
GAAGTGGCATTCCGCGAGTGCCGGGACGGGACGCCATCAGTCCACTTAACGCGGTCGTTGC  
TGTACAGTCGGACTACCGCGACAGCAACACCTGCCACTTGAGTCCAGCGACCACCTGAT  
CTACTTCGTCCAGAAGCGCGAGGGTAAGCTGTTCGATTCAAGAAATGCAGGCCGGCGCTTA  
CGCTGTCAGTTTGGATACCTTTTAGTACACACAGTCCTTCAACTAAAACTGAGTGACGA  
CCCCGTGCAGATTGTGGTGCTAACGTCACCACCTGCGGTGTTTATTCGCACGGCACCCGA  
CGTCAGCCCCTTTGGGGTAAACAGCTACCCCAATCACAGAAAAACGCGGAACGGTTATT  
CATTGCTGAAGAAGGGGGATGTTACTCAAGACTCTGGTCGGTATGATGAGCATGACGCC  
GAAACAATGAGACCGGGACGTGAAAACGCATGGACATCACGTCAAAGGGTTCGTGGTACGT  
AACGGATCCTATCACGATGTACTCGGATGTTCTCACTGTCAGCGCGACAGCCAGCGCCG  
TTACAGCGCTGACGGTTCGCGACCATCGGCAACGACGACTATCCAGAAGTACGGAGCGG  
CGCCTACAACATAACCGCATCGCGCTATTGGTTCGCGGGCGATACTTCGTTCGAGCGATT  
GGCAGCGGTGCGGGAACAGATCGGGCCAACCTACGATCCAAACCTGTTGATCGGTGCGGG  
GTTTCGAGAGTTTCATCGTACTAACCAACCGATACGGCCGCGCAATAAACGGCCAGGCTAT  
TCTTGTGCGCGACTGAAACTGGGCCAAATCGCCATGACCATCTTCGAATCGTCAGTGAT  
GAACGCGAGCTACTGCTACTTGGTTAACGCTGACAGCAAACCTCTGCGGAACAGCCGCG  
CTGGGTTGCGCGTACTTCTAGCGGTTGGGTACTGCAGGTAGACCAAGTGGCCGAACCTGC  
GTAGGGCGCCGTAGGCGTTTACAAAGTAATGCGGAGACTGCAGGCTTATGCTGGCGGGACC  
TCTTTTGGTTCCCCTGGCACTCTCCGCGGTTCGAATTGCACGGGCAGCTCTATACATGTCG  
GAGACAGTAAATGTTCTGGATTCCCATCATGATGGCCACTTTGGCGGTCTTGCCTAAGA  
TAAGCGGAACGGAAACATCAAGAACCATAACCGCCGCAACAAGGCGAACACCTTCGCAGC  
GACCGAGCAGCAAGAAGTCAAGAGGATTCTGCCCTCTGAGAAGTATGCGCTTAACCGCAT  
GAACCAACCCATCCAATCGCCAGACGCTCGGACCGCCTTGTGGCACCAATACGCCTCTGT  
CTAAGCACAGCGCGCTCCATTTGGCAAGCTGATGACCACGGGCAGCTTTGCTAGCCGTGT  
GAATGCCGCTGAGCTCCAGGGCATAACAGGTGGCGCGGTTCGAGTCCGGCAGGCGCTAGCGG  
TCCTGCGACTTTGATGCTGGACGCAACCATGGTCTGCGGGCCGATATCCCAGCAGGAGGA  
AGTGCACCAGAAGTATTCCATTCACCATTTGGGCAATCGGCGACGTAGAGAATAACAACCT  
GTACGACCAGTATGGGAATTTACAGCAACAGAAACAGTTACTTGACGCCGTGGGACTGAA  
AGAAATTC AAGGCCCGCCGTAGATTCCAACGAACTCCGTTGGTGACGTTCGCGATGGCCTG  
TGCGATGGCATTTCATGCATGCGGATAACAGCATGCGCACGTTTAGCAAGGGCGGCGCGAT  
GGATGCGCATAGCGTGGGCAGTAAGCACAAATCTGGGTTAAGTCCACAAGGTGGCGGCTG  
TTTGCAGGGGACCGACGCTAGTTCGTTCTTCCAACCTCGGATGCAGGACGTAATGGTACCA  
GAATTTGGGCCACGTCATTAGCGGAGGGCAACAACGATATCAAGCCGGGTTGGCGCCCCCA  
CCGCAGAAGGATAACCACAGCGAGCTTCTGTCTAGGATGGCCCAACCGATCTTGCAGAAA  
TAACTGGAAGGGTTGTAGCAGTCTAAGATGGTGGAGGGCATGCAACGTGTCGCCACGCGC  
GAGGGTTCTCAGGGGATCAAGAAGGAAGACTCTGTCTTGGCGAACATCTTCGGAACCTCC  
GCGTCTTAGCTGGCGCAGCCGCAATCACTAAGGTTCGAGGGTGTCTTGACCTCAACCCT  
CATATGTACGAGGACCGGCAGCGTACAGCGAGCCTGTTGACAAACGAGTTCCGGAAGCAC  
GCTGCGCAGGAAAGGCACCCCGACGTTACGGGCAATCCCGATGTGGATAACGTGGTGCAG  
GCCAAGATCGTAGAAGGCCCGCCCGCAGATGAAGATACTAGACGAGGCAACCCACGCT  
TCGTAGCAGCAGCAAACCAAGAACAACAGCCACGGTATGCCTGAAATTGCCGGTGACAAG  
CTCCATGGCACTGCGCTGCAGTTCGCATAGGGCTCTGTGAGCAAGCACGACTGCTACGTG  
GCCGAGGATAGAGTGCTGCTATCCAGCTGCCCTAACGCCGGGATGTCTCCCAGGAGGTCC  
AAGAAAGCGATGGTGGACAGTGCCGCGCTGACTATGACCAGGGACATGGCGTGCGTTGAA  
CGTGTCTCCAGCACAACGTGATATACACCGCGCTTGTCGATGATACCCAGACCAAAATG  
ATAAAGGTGCGCGATTTCAGCGGCCACTAAGATCTATAACGAGTAGTGTGTCAACAAGTAC  
AGCGCAGCTATCGGCGTGCTGATGCGCGGTTTCGGCTGGGCGTAAACCGTCAAAGAACCAC  
GAAATGTCTAACCAGATCAACCAGCGCTACTCCGACGAGACAAGAAGTGACACCGACTTG  
CTCAATATGAAAAACGAGATCGGCATGGCTCGCAGCACGTGTTACCGCATGCTCAATATT  
CAGGACAAGGTGGCTGACCTGGCAAGCAAAGCGTAGATGCCCGCACGGATCGGAGGGAAA  
CTGGCGCAGCGTGCGACAGAGTTTGTTTAGACCGGCAAGGCCGACTACGCGCAGGGCGTG  
GGCATTACGCGCCACAAGACGGATGTAGAGTTCTACGCGGGCTACACATCCAAGTTAGCA  
ACTGGTAAACTGGAAGACGAGATGGATCTGGCAGTCGAGAACTACACCCACGGTAAGACA  
TACGTTAAACCGCTATTGCCAGGCACGCTTATCGAGCCATTCAGCCAGATGATTGGCGGG  
GGCGTTCCGGGGCCGGAGTTCTACCGCACCTTGGAGTTCCTTGACGCATGGCTCCGGCTA  
GAGGAATAACAATGGTTCGAGAGATGAGTACATCGTTAGCTAGAACGTGGGGTAGCTGCAA  
CGCTACCGGGATTTCGCTGGTACGTTACTAGGCCACAAGCTACTAGCAGCCAAGGCAGCT

TGGGTCACGCCCGTATTGTGTTGGACTTAGCTCCGCTTGGTGGACAACAAGCCGGTGATG  
CTGGAGGCCATAACAATCAGATCGAAGGCACGGGCTTAATGAATAAGCTGGATCGCTGC  
TGGATGAACGTGCCGGGCATGTCTCCTGCTACGAAAGGCGTTGTGTTTCAGCGTCATCTCT  
GGTGACGCGCACGTCTATGTATAGAACCTGGGCATGGCTCCGCAGGGAGAATTCACCAGC  
GCACTGGAAGGCTCTGGCAGTGAATCGTTGACACTGTTGGCGAATGAGCGATCACCAAC  
GAACCGAGCCAGCAGCACCTGGCTGCACTCAATATTGCCGACGACCAGACTATTGAACGA  
GTGTTTCAGAAGTAATTGCACTCCGTAGCTCGTAAGTATGGTGTGGCCGTCAACTTGGAC  
GTTGCCGACAGCAGCTTGACTATCAAGTAGGGTGAACGACACCATGGACTAAAGTGACG  
GACCCGACCAACTGGTACGGCTTTGCACACGCTGACGTGACCCTGATGCGCGTCCAGGAC  
GTAACCGACAAGGATGGCAAGGTTTACGGCGTCTACTGAGGCCTGCTGCTCCGGAACGTA  
AACACAGCAACAGTGAATATCATAAACAATCCCTGACTGAGTAAAACGAGAACACCCTC  
AGGCACCGCAAAGACATGACTCACAGCCTCCGCGAAGATGGGCTTTAATGGGAGGCACCA  
TGGCTAACAGTCTCGATTCAATCGAAACCAGAAAAGTAACAGTTGTCCCTGCCTCATCCT  
CGGGTTCAGGCTCGCTTGCCTACGCCGACCGCACACATGACTTCGGGCAGGGCAGTACAC  
GCTCGCCGTCTGACGCCAAGGCAATCGCCACCGGCCAGAAGCCCGCCCACTCAATGCCT  
TTGAGATGATGTCTGCGGACCAACAGGCAGAACACGGCTCGGTAGCCGCAATTGTTGCCG  
GTAATTCCCGGGAGCAAGGCGCGGCAGCCGGAGTCGAGGTCTATCAAGCGGTTAGCAAAG  
ACCCATTAAGAATTCAAGCACCAACAAAGTCGTGCCAAGCGCGGGCCTGACCGGTGTCG  
CAGACCCAGCACCGGACGCTTACGTAGCAGGAGTGCTGGACGCCATCAGTTAGAAGCAAG  
CCTGCAAGGAATGCTTAGGCCCTGTGCATCAAATAGCCACGGCCATGCTGGAAACGACTG  
GCACCCGCGCGGTTCGTACGGATGCTGAGCGACAACACTACCACGGTGTGCGCTCCTTATAGG  
AGGACCCGAAGTTCGACGGCCGTGAGGGCCGAGAGATTTAGAGCAAAGCCTTGAGCCAAG  
AGGACCTCGGTTGGTGGGATAACGCCCCAGGTGAATGCAAACGGCAGAACAAAGCAGGGCGA  
GTTTGCAGGTGACACGGTACCCTCCAAGAGTAACGGGGCGCAGGGCTATGGCGTTTGCA  
CCGTAATCGGGCTAACTGGTGGCGTTCTTGATCCTGAGGGATGTGCAGTAGGTTCGGTGCG  
CCGGTAAGGTTCGAAAGTTGACCAAGATAGGCATGGGACTTGGCGCCGTCCAGCGCTGCC  
TGATCGGAGGCGCTGACGGTGCTGCAGGTCACGTTCTTGTGGCAGCCCGTCGGCAATGCT  
CTGTGACCATGTGACGCCTGGTGACTACTCGTACTCCTCTGGTTTCGGAGCCCTGTTCG  
ATGGTGGCGTCAGCAGCATGACCCGGTGAGCGTGCGTTGAGCCCTCTGAATCTTAGGCTG  
CTACCTTCTCTGGCTACACCAAGGACCTCACAGAGTCTACATAGACGGTAGCCTGATAA  
TCCACGCAGGGCGTTTGGAGCACGCTGAGTACCGGCTTCCCGAGCCTAGAACGTCCGAGC  
AGACCGCCGGACCAGCGCGTGACGTGTTTCGACGAGCGCTCCAATGCCTACGGGCAGCAGG  
ACACATGGGGTATGCCAGACATCGAATGCCTCCTGCCTGAGGCAGACACGACCAAGCTGT  
AGGAAGACGGCCGAGACGAGTTGACAGGCGCGCTTACGACGGATCTGGGAGGGCAGCTCA  
CGGATGTTGTCCGCCGGACGGCGGGGGCGATCAGCGGGGATTCACCGCTGCGACTATCC  
CGGACAACGCCAAGCGCCTGATCTACACCGAGAAGATGCTGCCCAAACCTCCATAACCAGC  
TAACCGTTGATCAAGCCAAGCTTGATACCTTGATCGGCACCTGCGCTGCACCTATTGCTG  
CCAGCGCGAACGTAGCAAATTTAGCATGCCGCAATTAGTCCTTTCTCACAGTGGGCATC  
CGATAATGAGGTGGATTTCAACGAATTTGCTGGAGTCGCCGACGCAAGCCGGTGACCGAC  
GCACTGCCGACGAATAGAGCATGCGATCCGCCGACGTGAGTACAACAGCTTCAACGCC  
TGTACAACGCGGCGTATGGTGTCTGGCGCTATCGGACCGGCGGCTCGTTGGTCAAAGTCA  
TCTTTTTACAGGCAGAAGCACTTCGAGGAGTTCAACAACTGGTAAGCACTGAAGGGCCGA  
ACAGCACAGCCGGCACCATCGGTTCATGCGCACCCGCGCGTTCGTACAGCCGCCGACAGAA  
TGGAGGAGGGTTTCGACCATCGTTCAGCCGACCAGCGCCGAGCCAAGTCACTCGGTTCCG  
AGCTGCTTCCAGATTCCATCATCGGCTACCCGCCGCGCATGCTGAAAAGCTAGTTCATCA  
AAGAACACCGTAAGCGCCGTGAGGCGATCCCTGAGGAAATCCACAGCCAACGGCAGGACG  
CATAGGCGGGCATAACCGCGAGGGGCGAAGTTCGCTCAAGAAGTAGCGGGAACCTACATCA  
ACCGCGCACGCGTGGAGGCGGCAGTCGGTCTTGTACCACGGGGGATATGTGTGACCCGC  
ACACACCAGGCAACGTGCGATGCGCTTTGACTCAACACGCCATGAGCGAAGCATAACATCG  
ACCTGTACATGGTCTGGGTTGGCTGTGGTGGGGGAAAGCACTCCAAGGTCGCCCCGCTC  
GCGAGTTGCCAAGGAAATCAATGTGCCTGGTTGCACCGTGTTCGGCATGCGTGACGCAA  
TCATCAACGTAACCTCCGTGCTGTTCTGCTGCAACTCCCGCTACGTTAAGGGCGACGTAC  
CGCTGAGCCGCTGTGGCATCATGCGCAAGGACGGATGCGACCAGCTTTGCGAACTGCTGG  
TGTGGTCCGGTAAGGGCGTATCAGACAAGCGCGGGCCCAACGGGCAGAACGCCTTCCACC  
AAGCCATGTCGTGATTTATGGGCAAGCCTTACGGAACCGCGCACCCGACTGGCTGACATCT  
TATGCATGCGGACCGGCGCCAGCCGCCTGGGCTAGCAGTGATCCCTCAGCTCTTCGCGA  
CTGGGCGGATCGCTGCGCACTTGGGCTCATTGAAGGCAACGCACCTTTGTCAAACACCTCG



CCCGCGGTGTGGAGGAGGTACGGAGAGGCAATAGAAGCAACCCCTTGTACTCGCTGGTGC  
AACCGGGCTTCCCCATCGGCGACGAGGACCTCGCTCTTATCCCTTGTACAGTCGTTCTATG  
ACGTCCAGTTGGCAGACAACGACGTTGCTGGTGTCTAGAACGCGCACTCCGTGGCGTAT  
CACAGGCACAGTACACCCCGACGGGGCACTGATACGTTTCAGGCAGTTCAGACCCGAGGGC  
TACTGGAGCCATTTTCAACAAGGTATGCGGTATGCGTACCACAGCACCTACCACTAGG  
CCCGGCATAGCTTGGGCATCTACGACAACATGATCCCCGCGAGCAAAAAAGACCTTCGCA  
ACATCTCCGAGGTTCGACGGCACTCGCGCTGTCAAGGCATTCGACATCCGCCAGACTGACC  
ACCCTGCCACGATGCAGGAGGTCCCCAAGGTTACCGGGCGTGCTGCGAGCCCGATCATCC  
TGGCCGACTTCCTCGGAGAGCGACAAGCGTTCGTGCATGACTCGTCCAAGCCATCCTGA  
CTCAGTTGCGCTCGCACTCCCTGAACCCGAAGTCAAACCAGTGAACCTCGTACTCAGTTTG  
ACAAACGCACCGCGAAGGCTCTCGGTATGATGTTGGGCGAGAAGTCGGTGCCACTGCCGC  
AGCACCTTGCCCGCGTGATAGCTATATAGGCTCTTATGTCCGCTGACTGCCCTGCCGACT  
ACCGAGAGAACAACTTACGCCCTGATCTGCTGTCCCGCGCCACGCCGAACCTATGCTTCAC  
GGGCCGTCCGCTGGGCTTTACGGTGTATGCTTGCATGCGTCCGCTGGGCAGAAAGCTGT  
CCGGCGTCCGCTCCGGCTCTCAGGATGTACTCGGCAACATCCGGGGCGTGGGCTACGTGT  
CCAAAACCGCGTTAGCGCTGAACAATAAAGACGTGTCCGGCATTATCCAGGCAATGACCG  
GCGGGAACACGGTGTGCGTGCTGACAGCGGGACACCTGTGCGACAGGATGCAGAAGGAGT  
GATGTAGGCTCTAAGTTCGAACAGTTTTAACTGGGCCTCTATAGCAACCCGAATACCAATT  
TTGGACGCATCATGATAGACTACCTCTTAACAACGAGTTCCCGGGCTATGGTTCCATCA  
TGCAGATGGAAGTCAACTTAGCTGGCAACGACCCCGTTGTAGACGCTAGTGGTGATATAT  
ATTCCAAACCCGCCGAAGGGAAGGCTCAGTTCTTCACTCCCGAAACCGACACCACTCCAT  
GAATCGTGCAGAACTAGCCTCTGGGATTCGTCCGGCTCATAACCTTCATCACCGTTGAGC  
CTGTACCAACCGCAAGATTGTTAGGGTGTACCGCGAGACCTAAGACCGTTAATCGCTGT  
GCAGCTTCGTAGCGTTGCAGAACGTGACCTAGCGTGATCTTGACGCACTCGCCCGGCAGA  
CCGTCTGCATTGTTGAAGAAGCGAATGACGCCTCGCAGTTCGGAATCGACACGGACCGCG  
ACACAACACGATCTGCAGCAGCTGCAACAGACGTGGCACTTGCAGCTCTCGCAATGGGAG  
CCACCGCTCACCGCAACGCTTCTGCGGCTGGGGTCACGGCTGACGCTGCTTCTAACGATG  
CCAAGCTGGCGTTGGTCAAACCCACTAAGGCATCACATGACGCAACATCGGCTGGACAGA  
GCGCCGCGCTCGTGGGGACGCTGGCCGCTGCTGCTCATAAGAAAGCTGACTAGGCTATCG  
CTGCCTCGAACCAAGTCAGACGGCAAGGCCAACCGGCCCGAAGGCAGGGCCAACGGAAATTG  
ATGGCAAGGCAACCGCTGCTGTGGGCCCGCTCACGCAGGTACCGCCAGTGCTCAACGAA  
CTGAGTCCACTTTAAAAGCAATTGACGGCAAAGCTACTCCGCCGATCCACACCGCGAACT  
CAGCAACCACTATCGCGAACCAACCCCAAGGCAACCGCCGATGACATTGAGGAGAATACGT  
CGAAGCATGGGCTACGGCCAACGGGGCCGCTGCTCACGTCGCTAGCGCTAATTCAAAAG  
GTGATCAGAGAATCCAGACCTCCGACTAATCAAGCTCAAACGCGGCTGGCAAGGTACGCC  
GCTCAGGTCATCAGATAAGCGGAGTTCCGGTGGTTCGAGCCGCGTGTGCAGGCTATTGCCA  
AGGCCGCTGCAAGGCGACGTTTGATTGACACGTCGCTGGGCAGACGATGCGTATGGCAT  
GACTGGCGTCTGACGAGATTCTCCAATTCGCTCAGACTTCTGGTGACGGTTAAAAAGTGA  
ATCTCGCAATGAACAGCGCATTACAGGAGAGGGAGCGGTTCTGTGAGAGTCGAATGGCGGG  
CGGTTTCGATGGTATCCGCCGATACCTATCACAACACTACGTCCACCCGCGAGCCCGAAGGTT  
AAATCAGTCTTCGGGATAACGTGTCCGTGTGCGGTACCATGACAGTCACAACCTGCTGTCA  
ACGTCAACACCTACACTCCTACCCAAGGCTGTCAGTATCTACGGCGCAGCGCGGAAGTTG  
CAAACGCGCACAGCTGCTTCCAGTACCAGCAAGGCGGGGATCTTATACTGATCTATACCG  
ACTCGGGGTGCACCATGCCTTACCGGACAGACGGTGGTTCGCGACGCCTTGGCGTTCTACG  
GAAACAAGACCGCAAGTTTCATCGGTAACCTCCCTGCTCCTGCTGCTGCTATCTCCAGGC  
GACTCGCTGCCGGTGAATGACGGCGAGCGGGTCTGTGTTGTAAGCCAACGGCGCCTCAT  
GGCTAGCGAACGACAACAACGTGTACGGTGGGGTTTGGGGCCGCTAACTGTCCAACCTGGG  
TGAACACCGAACTCGTCACACGTGCCGAGTTTTGCGGTGCTGCCCAGGCTAAAGTCGCAG  
CATTCACCGCTGGCCAAGACGGCTCCTATTCCATGCTGCAAACCTCGCGGTTGGGTCAACG  
GCGGCCCGGATGAACTCGTCGATGGGGATCAGCTCGGCTGGGGGACCTGTGCAGGAGACT  
TCTCGCATATCATCGGGCACGACACTTTGCATTTAAAGCGCCGTGTGTCCACCGGTATCA  
AGGTTGTTTTTAGCCCTATTAGGATGAGGGTCAGCTAATGTAATTTCCGAAGACCTATAG  
GGACGGGTTCACTGTGTACGGCTTTTCGTGCTCCACGGGACGCCGCGGATTCCGGCAAGTT  
CATCCCCTCCGGAGTGCTCTGGGGACAACCTATAACGTTCCCTTACGCTATCAGCGCTCTCGA  
CAATGAACCTCGGGGCATAACCTATTTGGACTATTGCTCGTTCGCTTTGTGTGACCCCAA  
CGAGCGTAAGACCGACTCCGAGCAAGAAGCAGAGGCCAAAGACGCGAGCCGAGCGACAATC  
TATGAAAGCTGAGGTATCCGACCGGACGATCGTGGTACAAATTAACCGTGCCTCGCCAGA

ACAAC T GCCCGGCCACCACGATCGCACTCAAAC TCAAGCAGTAAGAAATTGTCTGCAC  
TGACGCTGCAGACATGGAGATTCGCAACTG G GACTGCGGGCGTTCGGCAGAGGCCAAGT  
CTCCTACTCTTTTGTCTATTTCCGCAACACTCCGGTGGTGCCATGGAGGGTGGGTTGCTG  
GAATATAATTCACGCAGGCTTCAACCTTTTCGACGCATATAATATGAATCTATAATGGCA  
GCTTCTAGTGCTTGCCTCGGCAATCTGCACCGTTTGTTCACCGCTTACTGGCAGCATCGG  
TTCGACGCTGTCGAACTGCGCGTCGTAGATGATGGCGGGCGTCCCGCTTACGTGCAACGAC  
CTTCCTGTGCAACGGGCGTCTTTAGCGACAACAACATCACCGTCGAACCCGGTTGCGTC  
AAAGACTACGCCTGACTGGGCGCTCAGGTTGTAGCCGGCCTAACGGTTCTGTGAACCAA  
TTCGAGCTTGACGGTGTGCTCAAAGACGAGGTAGGCTGCATGTGAGTTCGGTGCACAGGG  
AACTCAAGACGCCGCACCACGCACAGTTAGCGCTACTTCAGCTAACATTCCAAAGCATCA  
TGTCGTTTCTGAATATCTGCATGAAGTTCTTTTGGTTGCGGACAACCGCGATCCAGAAAG  
AGATCGGCTTGTACCTTGAGCATGGCGCCAAAGACCTGATGGCTGAAGCAAATCGCTCTC  
AAGCCTACTCCACCATTACTGCATTGTTCGCCGTTTAGACACTGGTTCAAGAACAACGTT  
CTCGAGTTAGGATAATCTCGGCATTTGGTAAGCAGGCCAAACGAAATCTCGACGCTAACCG  
TCCGACTCATTATGACGATGGAATTTCTGGCGTGCGTCCGAACTGACTCGCAACCAGATG  
ACCGAGTGTCCATGTAGAAGGTCGACGTTACACCATGCTGAGAGGCTTGATAAAGTCGC  
CCTAAGTGGCGTGCACCGTCAATTGATGGTTACACGCAGCGTAACCGCGATGACTTGCTGA  
TTCCGCACGGCGAGCGCTCCCTCCTGAACTCACCCACCGCCCCAACCCGGAAATCTTGC  
AGCAACAAAACCGTGCCGTCGAGTCCATCGCAGTCTATCCCCTGGGCGCAAGCGTCGTTA  
TAGAACGTTGGGGCCGAGCTATCTTTGCCGTGACACCTCAGACGGACGCTTCCTCGTACA  
ACACACTCCCGGCAGCAGCTATCGCATGCGCAAGTGGCCCGGACGCTACAAAACGGTGC  
AGACAGAACCGGCTTATGACGTGCATCTGGCGCAGTAGATCAGACATCGCATGACCCGTG  
ACCCTTCTCTCCGGGCAGGCGTGGGGATAACCTAACGCTCCTGCGAACCTGTGATCATG  
AGCTGCAGGGCGAGGACTCACTGCTCTCCAAGGGGAACAAGTAGGGTCTAGCCAACTTCC  
AGCTCCAGCACATGCTGTGTACGCTCCTGCACGACATCGAGCGCCGCCACGCGATACCC  
CTCAGCAGCTCGTTATGAACCACGGCATGCTTATTCCAATGCCCTTTGAGCGTGGCGTCA  
ACGCTGAGCAGCTGCGACAGTCTAAGGTCGGTTGTCTCGATTTACACGGCTCGATGCATT  
TTGTCATCGGCAAGGCGTTAGCTGCTCATGCATGCCGACTGCGGGCAATCCACACCGCTG  
GGGGCGGCAAGAGCAGTGACGTAACCGGGGTAACACTAGTTGACCAGCGCGGTGGTCACA  
TAGTCGTCCGCTCGGTAGAGGCTATCCCCGGCGAGTACGTCCGGGACACGCTTAAGAATC  
TGGTGTGCAACTGCAAGCTCTGGGAGCCTCGGCCGACTCTTATAGAGATGAAGATAGGCC  
GTGGTGGCCATAAACAGGTTCTGCTTCCTCAGCTACATACTGAGGGCATGCCTTGCGCTG  
TGCAAGTCGTGTACAACACCGCCCAGCAAGACGAGCGTATCGCCGACACTCTCGAGCCAA  
TCGCAGCCAGTGGGGAACCGATCATGTGCTAAAACGTCGTCAATGACCGCCGGGCTTCGA  
CCCTCCGCCAGCCTGCTGACAATCGCGAGTTGATCGCCCTGCTGCAACAGGTCATCAGAT  
TCACACGTGACAAGGGCGCACTGGTAATCGACGACTGGTTGGACGTA CTGAGCATCGCCG  
TAGCGTACTTCATCAAAC TCTTGCCCGAGACTCCGCACTCGTTGCGCAATGAGTCACGC  
CTCAGGAGCTGGTCAAGTTCATGGAAAACAGGTCAGCCACAACA ACTACAACAGGGGCTG  
CTCAAATTGGCTACCGGGAATGAGTTCATCCTAGATCATGGTAGACAATACGACGACATT  
CTCGACTCTGCCATCCCGCGGTA AACTCGGCGCCGGCCAGAAGCTCTGCCACTCCACTAT  
GACTGCAATCTCCGCAGACGCAATCCACA AAGCCCAACCCGGGCTGAACAGCGGCGCGCT  
GGTTGCGTTTCGTCACCGCGGCACTGAACGCCACTCCGCGGGCTCCCGGCCAGAACCCAGT  
CGTCGCATCAGTTACCTACGGCCATATTGTGTACACTGGCGGGCGTGACCTCCGAACGAAC  
CGTGGCGGCTGTCCA ACTGAACGCCTTACCGTAGTCGCTGCTCCTGAAGAAGTGATTTA  
TGACCAGGTTCCCCAAGTAGGGCGCCTTGCGTTCTCTACTGTGGCTGTCCGTAGTAACT  
TCGAAACGGGCTTCAGCGTTCACCAGCACGAAGGAGCAACCGTGAACCGGGTATACCTTT  
ATGCAAGTGGAAAGCTCACCATCTGCACCGGCCACACTGGCCCCGAGGTACAGCTAGGGT  
CGCTCGACAGTGCCGCACAAGGCGCTGAGCGGCCTCCACGGCCGCGAAGTCGGCTGGCG  
CCCCTGCTAAGCGCCCGATCAAAGACCCGCTGAGCCGT

>NewGenomeName\_164

TTGTTGACTATCGACATTTTTCACGAAGAATGCCTCCTAATAATCGGAGGTTTTACTACAT  
GCAACAACACTCAACCGCTTCGGAGTTGTACCACAAACCAATCATCGACGCTATCAAACC  
TCTTGTTAAAAC TGTGGTAAGCCAGTGCTATATCAAAC TCGTAACCTCCGACTCTGGCA  
ACGGTACAACAATCGCGTAGCACTGCTGGAAGAAATTCTAAATCCTTACAAAACCGTAA  
TCTCCATGGTGATAATGCTGACTTATTTCCGACCCCTTAATGCCAACTCGCCACTACAAT  
TGTTTATCTTGCTCACGAAAAGGGTCATAACCCTCGTTTTAAACAGTACCAGAGTCATG  
CACTCTGGACGATATTATTACAGGCAAACCGAGTCCTCAGCCTGTCCCTTCTGAGCTTCA

ACTTACTCGTGAAGTCTGTGAGAATTACAGGATTAATGTATTCTCTATAAACGAAGAGCT  
CGTCGAATGCTATAACGTCCTTCGGACAACGTGATATTAATGACACTCTACACCAAAAACC  
TATCGGTAACGCCTAACGCGACTCAATGTATGAAACATCATTCTATCAACAATGGCCTGA  
ACTGGTAACAAAACGACCCGTTAATCTAGCAGGAAGGACTACAACGTGTGCCAAGGCTAA  
GGGTACCAACAATGAGTGCTTGAAGGTCCTTGAGGCATCCACCATGGTATTCCCTCGTGG  
CTTTACCGTTAAGAGATTGATGAATTCTATGCGTCTGCCCCAACTGAAGGCCGGTATGT  
AGTATTGACACTCTCACCTGAGCCGCTGAGCGTCTCAAGGACTTCTATGCTAACCCCAA  
TGCTCTTCGTGACTATTTTCGGTTATATTGTCCGAATTGTTCTCACTGCCTATGGTCTTTC  
GGTCCATTATTCATATACGGACTGCTATCAGAACTTTTATGTGCCTGAGTATGACACCGA  
GCATGGGCCTTCACTCTTTCACGCAAGTGCATCTTATGCACAACTTCCCTTTGGGTTCTAT  
CGACCATAATGTTAGTGAGCTGGAGCGTATTTAAGGTCAAATAAATAGCTTGAAAAACAC  
ATGGCCTTATGGTTATTGTATAGCCATCGCAGACCGGTATTCTCAGGATGCTTTCTCTTG  
CGTTGGATCGCTCTGGCCGGTTCGTGACAAGGAGTGAAACCCCTTAAATACACCTCGTACAT  
GGCTGTAGGCTTCTACGTGTCTAAATCCGTTAATGAAAAATTTAATGTTGACATTGCCGC  
AAAAGGCTGGGGGAATCGAAATTTTCGAGGCAACATGAAGAACGCAGATGCCTCTTTTACC  
ATAGAAGCTATTTCTAATTCGGAGGAGCCGCAACTTGGGGATGAACTACTCCCAAAGAC  
GACGCTGAACGCCGAGTGTTAATCCAACCTTTCGCAAGTAGGTTACTACGTGTCCCGTT  
CAACAACGTCTTTAAGCAGAACGCCAAGTAAGAGCTACTATTGAGGCTGGCAAGGCAATC  
TGTAGCCGACGTTTTGGAGGCTCAACCTGTGACGAGCAATCCGCTAAAATTCATGCGCAA  
TTTGACTCGATCAATCGGAGCGTCCATCCTAGAGCGTGTTATCTCTTAAAGGACGCAGGA  
ATTAGCAAATACAGATATTCCTGATGAGGTTAATACTACGTTATTAATGCAGCTATTGC  
TGTTGGAGACTTGCGGCTAGTATCCAGCTGGACTGCTGGTGGGAAATGAAAAAATTC AAT  
CCCAATTTAATGAACTCGAGGGCGTCTTCCCTGTGCGACCTTTCGCCATAACCGCAACGTG  
CGAGTAAAGACTGACGCGCTTGATGATGACATGTGGCTCAATATGATCGGCGCTATTCTT  
AAGGACTGGTTCCTACTATCATCAACAGTACGTGCATAGCAAAGACGCGATCCTTGACCTT  
CTAAATGGACATGGCCTAATATCCACCTAGCCAAATGACTTAGCTTGCAAAGGAATCAAA  
CATGACAGCAAATGGTAAGCCACTAGCCTTTCAAACGGATATTCTCTCCATCAAACCTTAT  
TCACGCATCTTCTGTTCTTGACCTTACTGAGGACGATTTCAAGTTCCTCACTACTGAACG  
TGATGGATTGCAACTGACCGCTCCCTAGCTCGCCGCACTATTGAGGCTTGCCTTACGA  
AGCTCTGGACATTGAGGCATACCCTCGCTTTCCTGCTCCTATTGAGTTTATTGGTGCTGT  
GAGTTCCTATTAGGTTCAACCCATTTACATTCTAGCGGTATGGCTTATTATGCAAGGCC  
CCAACCTACCCAAAACGTCATTAATGGGGTCGATGCCCGAGTAAAGCCAGTTAACTCTT  
CGCGTTTACCGCGCGTGAACCTCGCCGGAAATATTAAGCTTATTACTGAAGAAGAAAAGAA  
TGCGCGTGAAAAACGGAGCGCTAAAGGAGTGACGGATGCCTAAAAATTCGTTCGGCTCT  
CTGGGAGCTAATCTAAAGGTGGGTGCCTCTGGTATCTTGGCGGCACACAGTTCGGACCTA  
TAAGGGGATTCGTCCCCTCTATTTAAGGAGACAATGCATCTAGCTTACAACTTCCGCTG  
AGCGTATTACGCACGACCTCTCACATCTGGTATTTCGACGGTGCTAGAATCGGAGGGCTTA  
AAACGATCTCCTGGACTGCTGTTGTGCTGGTGGTCTTTCGCAAACCTGAATTGGTAGGCT  
CTATTAGTCTTTCTCCTCTCATTTCGTGGTCTGGCTCTCGACTCTCGCGACGACGTCTTTA  
CTTTGGAGATCCCTCAGCGTCATGTCTATGGTCAACAATGGACTGACTTTATGAGGACTG  
GTGTTACGCAACTCCTCTGGATCCGGAGACTTGTTCATCTGTCTGTGATTCTGTCTGCCG  
GGCTTGGCACTATCCCGTACACTGATGTGAAGATTACTAAATCCCTTCATCAAACCTCATG  
TCAATAATCACAACTACTTTAAGCCGCCGTGATCTAATGATCTCCCCTATGCTAAGC  
TAACTAATATGAACGCGGAGGATTTTAACTGGGGCGTTCGTCTCGCTAACTTGAAGTCTA  
TCTGCACCGCGCCATGCCTCCTTATTCATTTTCAAGGCAGGAAGTGACTACAGGCGCTA  
CCACTATCGATATTATCGGCCTTCAAGCTGCCCATAGCAAACCTCCACACTGAACAGGAAC  
GTGACAATATCAAGTCTCGCTACCGGGATATTATGAGTGAAGTTTGCCGTCACACGTA  
ATTACGATGATACCCGTCCTTTGCTCCTGATGCGCTCTGAATGCTGGTCTTCTGGCTAGG  
ACCTCGCCGGTTCGACCAACCTTTATTGGGTGAGTCTATGGTTCGCGACCAACAAACCT  
TTCTCCATAAAGTGCTCGCTCCTTTGTTCTGGAGCAACGCGTACTTACTACACTAACTG  
TTCATCGCTTACCTCCTACTCACGAAATCGAAATACCCTATCTCGTCCGTAAGGAACTC  
TGCGATATACTGACATTGTCTGTGAGCCTCCTCTTATGTCTATCGGAGATCTGCGTGGA  
GTTAGGTAAAAGACCGCTTTCCTCTGCTGGAACCTGGGAAAATCAGTGTGCGCGAAGGTC  
AATGGTATCGTACTCGGCCTGACTGCCGGGCTTCCCTTATAACTCACTTTACGGCTTCC  
CTTTCTATTCTGCCCTGCCGTCAAAGGATATACTCCAACGTATTCTCGTTCGTACAGATA  
TCTATGGTTAAATCTTTCAGGCCATGCACCTCGCACACTGGAATATGCAAACCTAAATCTA  
ACCCTACTGTATTACGTCCAATGCCAACCCTCGTCATGGCATCATGACGTGACAAAAC

AAACGTTGCAGGGGTACTATTGTTAATTTGCGCCTGTTCTGGGTTGAACAAGCGAATCTC  
GTTTGCTAACCTACGTATGGAGATTCTGTGGTTTTAAATTATCTCAATAAACATAATTC  
TCCGTTAACTTCTCAGTCTATTACTGCTAGAAAAACCCCTGGGGCTGCTGCTCCGAATTT  
GTCTGCACCGGAGATTAGACGCTGTACTATTTCCGCTGGCCTAATTCTGACTTCGGCCGA  
GGCAAGTTCTAGAGTCGCTCATCTCTTCGTATTGTGCGAAACCACTCCTACTGACAATAA  
GGTCGTATCGGTGCGCCGCTTATTTATCTGGCGTACCGTCTGATACTACTCGTATTGCAAT  
TCGCTCTGAGGTGATGACCGTAGCGTCCCTACTGCTGTCCCTGCTCTTTCCTCTCCTTA  
TCCGGTGGCATTTCGTTACTTCTGGCACTGGTCTGTGATTGGCACATGCCGTATCTTTTGC  
GACGCATCCTGTTACTGCTGCTAATGCTGCATATGCTGGTATCATGATCAGGGGCAAATC  
TTGGTGTCTGACATCGTGTCCGGCCTCTTATCTGATCATCAGCTAAACCGTGAAACAAC  
CGTATTACAACCTCTAAAAGAAGGTCAAATCTATGTTTCGGGGCAATCGCTGGCGGTATTG  
ACCCCTCCGTTGCTGGTGGACTTCTGAACAAAGCATTTCGGGGGCAGTTCTTCCACTCCCC  
AACTTGC GTTCAAGGTAATGTCGTGCTACAGACAGCAACGTAATGGGTGCGAATGATG  
CTAGTATCGAATCCGATATTCAGATTTCCGATCATTCCAATTGTTAACGAACCTGCTCCCA  
AACCTATCTCGAGCGTTCGAGCTGATACTGGCAAAGACGCCCTAACTTCAATCACTGGCA  
TTGGAGTTCATTACCTTACGGAAAACATCGGCATCTCTGAAGCTGTTGCTGCTAAAGGTA  
AGCATAACGAAAGATTGTATTGCTTCTGCGTTCTCCGAACTTAACCGGTGGGAAAGTCGTG  
GCTCTCGTGCTTCATCTGCTATACTAATCGATGCGGGATTCCAGACCAAAAAGGAATAAA  
CTCGAATGGAGCGCGACAATAAAAAACAAATCTTTAAGTTGCAGAACTACACCGAAACCT  
ATATCACCGGTGTCCAATCTGTTACTTCTGGGCAAAAATTAAGGACTCTGTGTATGCTC  
AAAAAGAAATGCTCCGAAACAACGACAAAGAATCTATGTCACGTGTTGGCGCTATCCTCC  
ATAGCATAAGCCTCACCAAACAACGACAAACTTCAGACATTGTGCGGCAAATGTTTACTC  
AGGCTCATACCTCAGGTCACAACCTTACAAATGGCCAAATCGAACATCTTACTCGAAGAG  
TCGGCGCTGATTTTCGATGCTGTTTCGTGATAAACTGATCGTACGCATGGTGAGACGGACC  
GCACGAAGCAGGAGGTCCTAAACTCTCGTTACGCTTCCACACGAGTCGGTTAAACCGCCA  
AGGATGTATCAAATGCCGTTTCGTGACGGATCTGCTCGTATTGTTGATTATTGTAGTGGGG  
TAGATAAAGGTGTCGCGGATACGTAGAACGACTATTTCAAAGATGACACGTCGCATGGGT  
ATAGCTAAAACCAACGTACCAAATAA

>NewGenomeName\_165

TTGTTGACATTCCCTAAACCCTTATGAGACTCTTGCTTCAACGAATGAAGTAGGAGTCTT  
TATTATGAAACCCGCTTACCGCTTGACTCATCCGATTCTCGGCTCTTGGTTGTTTAAAGTG  
CCCCGTTTATATCCGTTATGAGCAGCTTCATCACGGTCGTCTTATCATGGTTCGCGCTGT  
CCGTGATTTGTCCCCGCGTCAGCAGCTTATTGCTAACCCTAAAACTGCTTTTACGTTGT  
TATTGCTGAGACTGACGTTACTTAATGTTCTGTCACTTATTTTGAATATGAGGGTGAGGA  
ATATACCGAGTGTGATTCAGAAACTATGGATAATATCCTTGCTTATATTA ACTCTCCTCA  
TTCCCTTCGCTCTGAGGAGGATTCATCCGTTGATGTTGACGATATGGCGTGGCTTTATGA  
AATTGCGGAGTAAGTTATGGAACTGTCGTCGGAAAATTTATTACGTTGGCTGTTGTTGC  
TCTTTTGCTGTATGGAATTGCCCGCTTAATTCGGAGGTTCCCATGAAGTATTTAGTCTT  
GTGGATGAACCTTATGCTTATTGCCCTGATACGAGGATTTTGCACATTACTCGTAGCCGT  
GTTTCTGACCCTCGCTAAGAGCGTCGCTTTCTTACTGATCAGGAACATTTAGCACTTTTG  
GATCGGTTGAAAAAACGCCCACTTATATTAAGTCTTGACAGGCCTTTAAAATACCATCT  
GTATTGCCCTCATAGGTTCACTCCGAGGGGTTTTTTGCATGGCTTCTGAAAGCTTCACTG  
ATGTTGTTAAGTCTGTTTGGTTCGCACGCTACGGCTATGCACGCTCATCTTCGAATGGCTG  
TTCAGGTTGATAATCGTAGTCGCCTTCTTTCTGCTTTGGTTTACCAGAGGGTAAAGCGCC  
TTTCCGAAGAGCCTCATTGATGATGAGACTTATCCCTTTATGAATCTCAGACTGGCC  
TTTTGGAAGAGCATATGGCACTGTTTCGGACGTGTGCAGCCCACTTGATTATAGTAACA  
CTATAGAGCACCGTACCCCTTTGGATGCCGAATGTGTTTCCCTGTTTGAATGATCTGCC  
CAGGCGTTCGCTACGGTAAAACGTTGAATCCCTTTGGACTAAGTATGTTGCTCAATGGC  
CTGAGAAGTTAATTCGTCAAGAGTTAGACATGGTTTACCGTTATCCTTTAAGGATGAGG  
TTGCTAAGAAGATGGAGAAGATGCACGAAAAAACACGCAAAAATCGCATGACTCAAAAAG  
TAATTAATAGATTCGTAGTGCTCACCACAACGGCTGGTTTTTTCGTATTTGATACGTTGA  
CACTTGCTGATGATCGTTTGCAGGCTTTTAAATGAAAATCCCAATGGTCTTCGTGATTATT  
TCAGGACTGTTGGTCGAGCTGTTCTGCGCGCTGAAGGTCGTTTCGGTTAAGGATTCCTACA  
ACGATTGCTATCGCTATTTTGTGTGCCGGAGTTCGGAGGTCAGCACGGTCGTCTTCATT  
GGCATGTTGTGCATATGGTGC GGACGCTTCCTTTGGGAAGTTACGACCCTAATTTTCGTTT  
GCAAGGTACGTAATTATCGCCAGATTA ACTCGTTCCGTGGCATGTGGCCTTATGGCTTCA  
CGCAACCGATAGCTGTACGCTATAAACGTGATTCTTATTTCTCGCAAATGTTGGTTGTGAC

CTGTTGACAAATCAGATAAAGCAATGCAGAGTAAGCCCTATCAGGCGGTTCGCATGGTATG  
TGACCAAATATGTAGCTAAGCAATCTGACCAGCGTCAGAAAGCTATTACTGAGAGACAAA  
AAAAATGTAAGAATCCACTTATGGCAATCTACCTGAAAAAGGAATTCAGAGTTCGCAGCA  
GCCCCAAACTCGGAATGGAGTTACGGTCGATGGCGCATCTCAGCAACAAAGTGCTTCTGG  
AGCTGAGCCGAATCAGCTTCGATTCCAGCCCTCTGTATCAGATAGTGAAAGAGAACGCCA  
AAAAGCAATTGACCTTGAACATCGGCGCGCTGCCTTTGCACGTGAGTTTGGATGTGCGCT  
CGGAAGTGAGAAGTATGTTGAAAAATATCCTTCGTTTGATGAAAAAGACACCCGAGTTCA  
ATTGGCATAGATCTATCGCTTCAATGACGGTCACCTTAAAAAATGGGGATATTTCTGATG  
TAGCACGTGAGTACATTATTGATGCAGGAATTACGCCTTTTGATTTGCGTGCTAAAGCGA  
CTCAAACCTTCGGTGTTAAGTGACCCGGATTGTCTCAGGAGAAGGTTTCATGATGAGCTC  
GACTCGTTACTACGCAAGTTATCGCGCTACTTTGACTAAGCAGCTGATGTTTTTACTAA  
AGCTGACTCTACCAATGATGATGAAAAATGGCTTAAATGCCTTTGGTAATTTGCTCCGTC  
GTGGTTTCAGATTGAGGATTGGAAAGGCAAGCATAAAGAATTGCTTGACGATTTAAAAAA  
ACGTGATTACATTTGAGCTGTTTCAAGGTTTCTTACCCATTAATGTTAGGAGAATCTTA  
TGTCTAATCTTGTGCTACTGATCTTAACTTTGCTACTTCTGTTGCTTCTCTGAAGATGC  
TTCAGGCTTCCGCTGTTCTGGATATTACCGAGGAGGATTTTGATTTCTGACTGGTGATA  
AAATTTGGGTTGCTACTGACCGCAACCGTGCGCGTCGCTGTGTTGAGGCTGGTGTATG  
GAACACTGGACTTTGTAGGATAACCCTCGCTTTCCTGATCCTGTTGAGTCTATTGCTGCCG  
TCATTGCTTATTATGTTTCATCCCGTCAACATTCAGACGGCCTGCCTCATCATGGAAGGCG  
CTGAGTTTACGGAAAACATTGTTAATGGCGTCGAGCGTCCGGTTAAAGCCGCTGAGCTCT  
TGGCGTATACCTTGCCTGTTAAGGCGGGATTCAAAGAAACGGTTCTGAGCGCTGAAAAGA  
ATGCTCGTCAGAAACATCGAGCAAGTGGAGTAATGTAATATGAAGAAAGCTCGTCGTTCC  
CCTTCTCGTAAGAAAGGCGCTCCTCTCTGGTGTGTAGGCGGTTCTCAATTTTAATTAACG  
GGGCTTCCGGCCCCATAAAGGATTCTTAAATGTTAAACGTGCAAATTTCCGCTGAACGTAT  
TCCTCACGACCTTTCTCATCTGGTTTTTGATGCAGGCAAAATTGGTCGTTTAAAGGTTGT  
TTCTTGGACTCCTGTTGTTGCAGGTGATTCTTTGACCTTGATATGATTGGCGCTATTCG  
CCTTTCCCGCTTCGTCGTGGCCTTGCTGTTGACTCTTGTGTTGACCTGTTACGTTTTA  
TGTCCCTCATCGTCATGTATATGGTGAGCAGTGGATTGATTTTATGAAGCAAGGTGTTGT  
TGCTGCTCCTTTGGCCCTTGTTCAAGTCTCTCGGTTGGAATAGTGCTCAGTATCTTGC  
TACTATCCGCTAGTAACTTAAAGGTTGCTAAGTTTCTTCATCAAGGTCACCTGAACAT  
TTACAATGATTACTTTAAAGCTCCGTGGATGGATGGCCTGACTTATGCCAACCCGTCTAA  
CATGGAGGGTGAAGATGTTTCGTTTTGGTGTTCGTGCATGTAACCTTGAAACTATTTGGAC  
TGCTCCGCTTCTCCTGATACTGAAACCCCTCATTCTATGGAGACTGAAACCAACTCCAT  
TGACATTATGGGTTTGCAGGCCGCTTATGCACAATTATATACTGAGCAGGAGCGTGATTA  
GTTTCATGACTCGTTATCGTGATATTGTTAACGAATTTGGAGGTAGTACTGCTTAGGATGC  
GGATCATCGTCCTTTGCTTGTATGCATTCTGAGTTCTGGCCTCAGGCTATGATGTTGA  
CGGCACCCACCAAAGCTCTCTCAGTCAGTTCTCCAGTCGTGTCGAGCAGACGTTTAAAGCA  
TTCAGTACCGCGATTCTTCTGCCCTGAGCATGGTTCTATGTTACACTCGCATTGGTACG  
CTTCCAGCCGACTCTTGAATGGAGATGCATTACTTAGTTGGTAAAGAAGATTTGACTTT  
GACTGATTTGGCTTGTGAACCTGTTTTGATGGCTAACTTGCCTCCCCGTGAGGTTAATAT  
GTCTCCGTTCTTCCATTCTGGCAGTGCTAGTGCTAAGTTTAAAGATCGCTGAAGGTCAGTG  
GTATCGCATGCAGCCTGATCGCGTTGCGTTGCCGTATAACTATCTTGATGGTTTTCCGTT  
CTATAGCGCGATTCCGTCTGATGCTATTAACCAGCGCGTCCCTGGTTATTACTGATAACTA  
CGCTGAGGCTTTGCAGTCTATGCAGCTTGCGCACTGGAATATGCAGACTAAGTTTAAATTG  
CACCATTTATCGTAATATGCCGACCACTCGCGACTCTATTATGACCTCTTGATTATGTGG  
GGCTTCGGCCCCCTTAAAGGATATTGATTATGTTTCTCGTTTATGTATCTAAAAATGTTG  
CTCCGTTACCTCTGTGAATCGTGCCTTTTCTATTGCCCTGCGGCCAATCCCGAAGTTG  
TTAATTCTGGTGAGATTGTTGCAGGTCGTTCTACTATTGCGATTGCTTCTTCTATTGCTT  
CAGCTTCCAATGGAAGTGGTTTTGATTTTGTTCAGATGATGGATCCGAATTCTCCTGATT  
CTCAGCAGGTTGTCTCTGTTGCTGCTTCGTTGTCTCTAGTGTTGATTTCGAATTATATTC  
CTTGTATTGTTTCGTTTTGAGAGCACTGTTGCTCAGCCTACTAGCTTGGATATTGCAACCG  
CTGATTTTATTCCGGTTGAGGCTTTTGCCCTTCTCCTCGTGCGCTTAGCCTTCGCGATT  
GTGTTACCGTTGATGTTAAGCCTCGTACTGAAGGCAATAATGTTTTTGTGGTGTGGTTT  
TCTTCTCTGCTGCCGCTAATGCTGGTAATGTCACTGGTGTGTTTCGATGGCTCAGGTTG  
ACTACGAAGTTCAGCTTTGCAGCCGCTTAAATAAAAGGCTCCCGCACTCCCGGTTAGAT  
GCCTGCCTAGTGTAGGGCAGACCGAGCCGTACGGAGATAACCGCTAAACTAGGAACGTGG  
AAGGCGCAAGCCGCTTCCCTCCTGGTAAGCCCCAAAAGGAGTTACAGCGATGTTAGGTG

CCGTTGTAGGTGGTATTGCTTCAGCCTTAGCTGATGGAGCCGCTTCTAAGCTGTTTGGTG  
GTAAACCTGGCGCTCAAGCCGCTACCGAGTCCACTGGCCTTTGTAATGGTCAAGGCGTTA  
TTGGTATGGATCAAGATGATGGTATTCAGTCAGCTGTTTCAGGGCTCTAATGGTCCCAATG  
GTCAGATTCCTGCCCCACGCAGACTGGTGGCGTTGTGTCTGATGCTAAAAATATGATTA  
AGAAGCCTGGTAAAGATTTGCTTGGTGGCGTTATGACCCGAGGAAGTGATCGCATTAAAG  
AGGCATTGGTTAATAAGTTGAGTGGTAACGATGCAAGGAAACAAGGACAAGCAACCCGTG  
ATTACTTGGCTGCGGCCTTCTCTGAGCTCAATGCATGGGAACGTGCCGGAGCTGGTGCTT  
CCGGTGCCGGGTTGGAGTCTTCCGGCCAGAATCAGTAAAAGGAGTTGATGCGTATGCAGC  
TGGATACTCAGAAGGATATTGCTTAGATGCAAATGCATAATAATTTGCAGATTGCTGGTC  
TTCAGTCCGCTACTTCTCGCGAGCATAAGAAGGATTCAGTTTATGCTCAGAATGAGATGC  
TTGAAGTTAATCAACAGGAGTCACAGGCACGCGCCGAGTCTATCCTCGCCAACACTTACC  
TTACGGCTAAGCAGGCTGCCCATGAAATTATGAGAATCGCCCTTACTCGTGCTCAGGAGA  
CTGGTCAGCATTAACTAATAGTCAGATTATGGCATTGGAGAAAAAAGTTAATGCAGAAC  
TCGGAAAAATTCATCGAGATACTCAAACGCTCGTTATGGTAGCTCTCAAGTTACTGCTG  
CGGCGAAAGATGTTACGAAGATGATTACCGATGCCACTTCAGGTTCCGGCCGATTGGGTCT  
CTAACAGTGGAATTTCTTTAAAGATGGCAAGTCTAATGGTATTCCCCTCATTACCA  
GAAAATAA

>NewGenomeName\_166

CAATTCACAGTGGTACTATTCCGTCACCAGTTTAGCCTTTACAGAGAAAGTCAAGATGG  
ACGAATCGCGCGACTTCGCTCGCCATTCGTTGAAGGCGGGGGGCCGGAGGCCACCGGTT  
GGCCCCCTCCACCGAGTGGCGCACGTACAGGGGGGTACGTCATCCGTACAGGGGGGTACG  
TCATCCTTACAGGGGGGTACGTCACAAAGGGGGCGTCTCCTACCGGGAGTAGCGTCACTC  
GTACAGGGGGGTACGTCGCAGCCATTCAAAGCTGCCACGTTGCGAAAGTGACGTTTCCC  
AATTGGGAGGCGCCAGCCTCTCTATATATGGAGCGCACATAACCGTTTGGCCGTAGCTATT  
CGCATGGCGCTCCCGGTGGATGCACGGGAACGGCCGACAACCTGGCCGCTGAGGCCAGGGA  
ATTGGCGCTTAGCGGAGAGGGGCAACCTGGGCCAGCTGAGCCGGGCTGGGGCAAGTAAT  
TTCAAAGAACCCTCTCCGAGAAGATTCTCCACTAGGACCATCGACGGTCTTCAGGGCAG  
CACCAAGATCACGGGCGACGGAAACCCTCACTGCAGCGAGATCCGGATTGGAATCGCTG  
GTATTACAATCACTCTATCCCTGTATGGCTACACGAGTGCTGCCGCTCCCGCGCTGAGAT  
ATGGAACCTGCGGACAATTCCGACAGTACTGGTTGCAAGAATGTGCCGGGCTTGAGGTTCCG  
ATAAACCAAGTCCCTCCCTCGCAGACGCGGGCGTGCCACCCCTCCGAGGACAGGGTACGCG  
CCCTAACAGACACCTTGCTAACCCTACTCTCAGCCGACCCCGAACCGCCAAAAGGCGTA  
GAAGACTGTCTGATGCCAAGACGAGCTCGCTGAACCAGAGGCAGAAATTTACTCCTTCAGA  
AGAGGACGGTGGCATCACCTCAAGCCACTTCGACGGAGATATAAATTTGACATCGGAGG  
AGTCAGCGGTATCGTAGACTAGGTTTTAGGGAGGCCTGTCACAACCCCGCCCGGTACG  
TATAGTGTGAGGCTGCCGAACCCCGATCTACTATGACTATCCGCTTCCAAGGTCTCTTC  
TGCCTCACGGGAGGACTCATTCTGCCTAAAAACAGCACAGCTGTGGCCTATGCAGACCAC  
ATGTACCGGGCGAGTGTCGCCAAGATATTCGTGAACCTGAAAGCGTTCCTGCTAGCCTCA  
ATGAACCTGACATCCGTGAGCAAATCGGAGGCCCGAACACCGGTGAGTAGAATACGGAC  
GGGTCTAGATAACAAGCCGCGGACAATTGGCGTAATTGCTGGCTGCCGATAGATAATAAC  
GGGTCTCCGCTACACCATCGGCATTGTAGAGATGGGCCTTAATGAGGTTGCCGCCTACG  
GACTCTTGACGGTCTTTAATCACTCAAAGCAGGTGACACTGCAAGACATGGGTCCGCGG  
TTTGGGGGCTGGCACCGGTTCCGACCCGTTGAACCCCGGTTTCAGCTCCTTGCCACTAAA  
AATGAGGGAACCTTCAGCCCTGTGGCGAGTCTTTTATCCCAGGGAGAGTACCGCACGCGT  
AGAGATAATGTTAAGTACAGCAGCAATCACCAGAACCGGTGGCAAGGAGGCGGACAACCG  
ATGACGGGGGGCATTGCTAATGCGACCGGGAAAATGAGACCCGACGTGCTGGAGTACCCT  
GCTATGCCCCCAGACCCCGGATCATCTCCGCTAATACAGCGGAAGGCACGCAAGTTCCG  
TGCATGAATAGCACGCAAGCTTTGTGGTTCATGTGTGTCATATATGCGCTTCGCTTACTC  
ACAGTACACGGCGCACAAGCGTCTTTTCTCCAGCGCAACGTTTCAATTTCTAGACGGTCT  
TTCAACCACCACAAGGCGAGAGGAGCTGGGGAAAGCCAGGGGCAAGAGATGCCACATGCTG  
GTGTCGCTCGGCACGGAGACCATCGCCTACAGCTACATGCCAGCACCCGCATCAGAGCTG  
GACACTAATTCCGTTACGTTGTACGCAGCACAAGGCACAAATGATTGGCAACAGTACAAG  
TTCGGCACAGCTCCCTACGCGCTAAAGGAGCCGGTAATGAACAGCGATGCATGGGCAATA  
GTACGCGTCCAGTCTTTCGGGGAGCTGGGTAACCGACAGAGGCCATACTATGGGACTTC  
AACTGGGCGACGAGCACCAGGTACTGGGAGAGGCAGCCCTGAAGAGTGGGGGGAGCTAAA  
GCCCCCCCCCTTAAACCCCAACAGGGGGCTAATCCCCCCCAGGCCCCCTTTTAAATT  
GCACACAATAAACGCAGAAAATAGATTTATCGCACTCTC

>NewGenomeName\_167

ATTGCACACTTAATTTTCGAAAATGGCATGTGACACACCTTTTTATCTCAATAACCCTAGC  
TACCCTATCTACAGCAACTACCGGCAAGTTCCGGTTCCTTGTGGAAAGTGTTTCAGCATGT  
TTGTCCAGACGCACTAGCGTCTGGACATTTTCGTTTAAAACTCACGCAAAAAATGCTATA  
TCTTCTTATTTTACTTACTTACTTACGATGCCAGATATGTACCTATATCAAGTAGGGGT  
TTCCTTACACTCGATAAACGAGACGTTTCAGCTCTATTTTAAAAGGCTTAGGAACTTCAT  
TCAAAAGATCACGAACCCCTAAAATATTATTTAGCAGGAGAATTTGGAAGCAAAACATTT  
CGACCCCATATCATATCATACTATTTAATGCCAACATCGACCTAATTCATAAATCATGG  
GACAAAGGAGAAGTACACCTAGGGGAATTAACAGAGCCTTCGGCCGCATACACTGCAAAA  
TATATAAATATAGGAAAAGTTTTACCAGTGCACAAAAATGGTGTAGACTGCCAGAATTT  
AGTTTAATGAGTAAGAACTAGGACTTAACTATTTATCAGAAAAATAATTTCGATATCAT  
AGAAGCGATATTGAAAGAAATTTTATAACATTGAAAGAAGGAAAGAAAATAAGCTTACCT  
GGGTACATTAGAGCAAAAATTTGGACAGAGCGAGAAAGAATAACAAGCAGATAAACTA  
AAACAAAAATTCAAAGAGTCAGAGCAACAAAAAGAAACAGAGTACTACACAAAAAATCAA  
ACATTGGAAGGATATGGACAACCTTAAAGCAAATGGAAAAGCCCATAGAATTATTACACAC  
GAAAAACGAGCCCGAGAAGGGCGCAATAAAATTTAGATCAAGCTTCAGTTATCAAGAAAA  
AACAGAGGACCAGGAGGAGAAACCATCAATGGAACCAAGCCAAACAGTTACAGACATGAC  
TTTGTCAATTATCAGAACTAGTACAACGATACACCAGAGGACAATCAGTGGCAACCTTTAC  
ACCCGTTTATTACGGAGAAGAGGAAGAATTCGCAGACGCTAGCAGAATGGATCCTATTGA  
GCGCATAGAGTATGCTCGATTCATTAGAGAAAAAACTCAGAAACCAGACACTCCCTAGC  
GGAGCATCAAGCGGGCGACGAAGGAGCAGCCGAGCCGCGAATGAGCGGTGGGCAAGACAA  
AATTAACAGACCACCCCCACATGTATAATAACAAAAGAGTAAAAAAGGGAAAGTTTA  
ACGGTACTACCGCTAAACTTCCCGATACGTGGCGCTATGGCAAAACAACAAAAGCGCAAT  
GGCAATAGGCCTTCGAGGAGGAGGCCAAACACTAATAATCCTTGATATATTAGTGCTAAT  
TGACACCAAGTAAAAACGAGAGCCTGCGAGAGTAAAAACGCAGATAGAATATTAACACA  
AAAAGCAAAAAAGTTAATGGTACCAGTAACTACAGCCGCAGCAATCACAGCCGGCGTCAG  
TGCGCTATCGGGCGGAGCCCAAGCAGACGCCACAGGAAAACAAAACAAAAAATCTCGTGC  
ATTCTCCAGGGAGATGTAGGAAAAAACAAGCAGACAATTTGATGTTTTGCGATATGCA  
AAACCAGTATAATTCACCAGAGCATCAAATGGCAAGATTAATAATCTGCAGGATTC AACCT  
AAATATGGTATACGATAAAGGCGGGGCTATTCAATCTGCTGGAAATATACCAACACCAGA  
TGTTCAAGGAGGACAATGCAGA ACTCCCGACTTTGCGCCAATATCAGGAGCTGTACAAGG  
ATATTTTGATACCAAAATAAAACAGGGTCAATAACAATAACTTAATGGCTGCAAATACATC  
AATTCAACGAGAAGCTATTTTAAAAGCTGCACAAACATTGACAGCAACAGAAAGTACAAA  
AGGTCAATCTATAGCCTATGCATTGGCACAACAACTTTCAATATTCAGTAGAAGGAGC  
GAGATTAGCAAACGAGCATAACCAGAGCAAACACACAATATAGACTTTCTGAAAATGAAAG  
AAAGTCAGCCTTACAGGCACCTTCTTTAGCAGCAGCAGTAGAAAATGTATTAAGAATCAA  
AGCAGAAACTGCTAATACAAATGCTGCAAGAGGACAAATATACCAAACAATTA AAAACCT  
TCAACAAGATTATAGATTAAGA AATTTGAAGAAGATTTAGCAAAAACAAGGGATATACAA  
AAATGACCCTTTATGGTCAAGGGCATTAGCTCAATTTATTGAAGGTCTCACTGGAGGTAT  
GTCTATGAAAGATTTAGGAAAAAAGACAGGAGGATGGTTTAAACCAATCAGGATTTAAAAA  
TGCAACTATATCAACAATGTCATGGTGGGTGCCCGAATAAAACATTTACAAAAACGTGT  
GAAGAAATAAGAAAAGATGTAAATGATTTGATAGATCAAATAAATAAATTAGTTTTGGAA  
AATGAAGCAAATGATGCGGTAGCATTAAAGCAGATTAGATTCTGTATGTTCTTTACTACAA  
ACTACCCTTATTCATATTAATAACTTAAACAGCAAAAACCAATGCGCTACGGAAGAGGCG  
GAAGATCCCGTAGAAAAGGCTACGGCCGCAGAAAAACAACACTTACTTAGTTAAAAGAG  
GAGGCATAAGCCTATAATGGCTAATGCAA ACTTATTTAACTCGGTTTCAGCTACCTAAAGT  
AGCGAGCAATGTATTCGACCTTTCACATGATGTGAAAATGTTCGTTTAAAATGGGTGGACT  
TTACCCAACATGTGTAATGGAATGCGTACCAGGTGACAAAGTAAAAATAGGCACTGAAAC  
GATGCTTCGATTTGCACCACTTATCGCACCAAGTAAATGTTACA ACTCA  
TTACTTCTTTGTGCCAAACAGAACTATGGCCAACTGGGAACAATGGATTACAGGAAA  
CTTAGATGTACAAGCACCATGGTTTACTACTATTTTCTTACCAGCTTCAGGAGGATTTCA  
TGTTAAATCTTTAGCGGATTATTTAGGATATCCA ACTTTGTTAACGCCAAACGCTATAAC  
ATATCTGAGCCTGGAGCTCAAGTAGGAAGCCCTGTCCCTGTAGCTGCTTACAACAAAAT  
TTATAATGAATACTACAGAGACCAAATCTTCAATCTCCAGTTTTAGATT CATTAAACAGA  
TGGAGAAAATCATCCATTTAGGAACCTAGCAGCAGGACCTGTTAAAAAAGAGCGTGGCA  
GCATGACTATTTTTTCATCATGTTTACCATGGGCACAAAAAGGTGACGCTGTA ACTATTCC  
AATAGGAGATGTA ACTATCAACTATAATGCAGCTGCTGGAGGAACTGTTATGCGACAGGT

AGATGGCACACCATATATAAACCAAACAGATCTTAATTATTCAGATGCTGGAGGACAACC  
TAGAGCAAGAGGAGTAGCAGGGACACGTTACAATTTTGATAACTCCATCCAACACTATCAGG  
AACTGCAGAAGCAGCAGATATTAACCTCACTTAGAAGAGCATTAGACTTCAAGAATGGTT  
AGAAAGAAATCCTAGAGGAGGAACAAGATACATTGAAAGCATACTTGCTCACTTCGGTGT  
AAAGTCTTCAGATGCTAGACTTCAACGTCCAGAATACTTAGGGGGGTCAAAGGTTAAAT  
GGTAATTAGCGAGGTATTATCTACCGCAGAAACAACACTCCCAGTAGGTAACATGGCAGG  
ACATGGTATATCCGTATCAGGAGGTAATGAATTCAAGTACAATGATGAAGAACACGGGTG  
GATTATTGGAATAATTTCTGTAACACCAGAACCAGCATATCAGCAAGGAATTCATAGATC  
ACTCAGCAAATTAGATAGACTAGATTATTTCTGGCCAACCTTTGCAAATATTGGAGAACA  
AGAAGTATTAGGGAAAGAAATTTATGCAAATGGTATTAACATTGGAGAAACATTTCGGTTA  
TGTTCCCCGGTATGCAGAATATAAATTTCTTAAAGAGCAGTGTAGCAGGAGAAATGCGAAC  
TTCACTTGATTACTGGCACTTAGGAAGAGAATTCAGTGCAGCACCAAACCTTAAATGGAGC  
ATTTATTAATGCGACCCTAGTACGCGAATCTTCTCAGTTGAACACGCAGAAGTTGACAG  
CATCTACGGACATATCTTTAACAAACATTAAGGCGATTAGAAAAATGCCGAAAT

>NewGenomeName\_168

GTGTAAACATGTCTTTGGACACACCCACCCTTAGCCATAAGAAGAGTGGGCAACGCATA  
GAGTGCCGTGTGGCTTATTCGATTGAATTGTTGAATCGTTTAACTCACAGCTACAAATG  
CACAGGGTGTCTCATATGCTGAACCTCTTGTATAAAGATGATTTGTTATCTCGACATGGT  
CAACGTTTTAAAGATGACCTACAACGGTTTTTCAACCGGTTGCCTTAGCCTGGTTTTAA  
TTTCGTTATGTTGCCTCAGGTGTGTATCGTGACCCTTCTTGAAGGCCTAATTATCAGTTA  
GGATTATTTGGTTTGGATTGTGCTCATGACCGTTGACTATTTGGCAGTTCTAATGGTTAT  
TATAGTTTTACTGCTGCAACCATCTCGAAGTTATGGCTCAGGTGTAATCATCTGATTGGC  
TCCCTTAAATTTAAATCCGCTGCATACACTGACCGATCTATCTTGTAAGATTAAGGGC  
TTGCAAAGCCTGAACCGCTTACCTCAGCACTCCACGGCTGAAGCTGTTTTGTCTGAT  
CCTAAATTTTTGGTTGTGTAAGAAGGCATTGGCCGTTCTTGGCTTAGGGATGGTTTTATG  
TCGGATGAATTTCCGCCTGCTTCTGTTATTACTGCCGAGGGCTATAAACCCACAGTTCCA  
CGTTTTAGCAAACCTTTGTTAAGGAGTTTGGACCCGATCTTGCTCCGGATATGCAGTAT  
AGGTCTTCATTTCCGGGGCAGTCAAGATCTCGAGCGTAGAGCTTATCAGCGCCTTCCGTT  
CTTAAGCGTTCGCGTTGTCTTGTGGGCACTATTAGAGCTACACTTTCAAACGTATAATT  
AAAAGGATTTGACCTGATTGTATTTGTTGTTTGTGGTTAAGACCACGCCGCGGATGTTTT  
TAACCGCCCCATTTTCGTTCTTCATCGTGATGTGCTATGTGTGATTTCACTGATGGAGT  
GAATCGCGCATCTGGTGATAACCAATTGAACAAGCAACCCGATGATTTTGAGTTTTATTT  
CTTGTGCGCATTTTATAATGCCCGCGGCGCAATTGTAATGATGAGCCTCAGGTACTTGT  
TCGTGCCAAAGACGTTTTGCAGCCGTATTGACCCTTGTGGGCCTTCGGGGCCATTTTATT  
GACTTTCATTTTGGAGATTGTATTTTTACTTTAAATCGGTTGAACCACACTATTTTGCA  
ATGGTCCCTCGAGCTGACACCCCGTTCTCGATATTCTATGCAGAAAACCTTAAAGACT  
ACGTTTGATGCTGGACTTCTAGTTCTAGTATGAACGAAGATGCTTTACCCGGAGTCACG  
TTAATGTTAATGCCACTATGTTCCGGGCATTTGTCTACACCAATTTTACAGTTATGGAT  
AGTTGCCATTTGGACTCGTTTTTTTTCTTTGTTCTAATCGTATGGTTTGGACGAATTGG  
GTTAAGTTTGTGGGGGAGCAGCAAACCCTGCAGATTCTATATCTTACTCTATCCCTCCA  
CAAGTCTCCCCAGCTCATGGGTACGCTATCGGGTCTTACAGCATTACCGTAGCTTACCG  
ACTCTGGGTCAAGTTACGGCTGCTGCTAAGGTTTACAATCGGCGTTAACTACCCGCGCC  
TATAATTTGAATTCTAACCAATGGTTCGAGGGGTGATCATCAGCAGAATTCGCGTGTGTT  
AATTAAGGTGCCGGCCCTGAGTTTACACGTTCTACTGGTTATGCTTTTCTAAGACGCAGT  
AAGCGGCATGATTGTTTTACTTCTTATTTATCAGATTCACGGCAAGGTGGTACTGCTGTT  
TCTCTTGCTTTAGGCACTCGTGAGCCTGTTTAGGGTACTGGCTAGACTCTGGGCCTTTTC  
GCTGGTCTTACTCATTTACGTTTTCATGCTGAAACCCCTAATACAATGCGTAATGCGTCT  
TCCTTTTACAATACCAATAGTGGTTCTACTCGTACTGGTTTAGCTGGCGATATTAGTAAG  
AATTTTGGTGTGCTAATTCTGGTTTTTTCAGGTATACATGCTGATTCGTTGGCTTGTACG  
TCTGTGACTATTAATCAGCTTCGTCAATGTTATCCAATTCCAGACTTACTTGCACGTGAT  
GCGCGCGGTGGTACTCGTTACACTGAGATTTTCCGTTCTCATTTCCGGCGCTACTTCCGAG  
GAAGTTCGCTTGCGGCGTCATGAGTATTAATATTGTGGCTCTACTCATAATAGTATTTAT  
CCGATCGCCCAAACCACTGGTACTGGTATTTCTGTCCAGACTACCCCTCAGGAACATTTA  
GCTGCTATAGGTGTTTCTCAGGGACACGACCATGCGTTTAGCCAGTCGTTTGTGGTGT  
TGTTGTGTTATTGGTGTGTTGCTGTTCTGTTGGTGTAGACTTATCCGCAAGATTTACGG  
CGTCATTGGAGCCGTTCCACTACTAATGAGTGTACGTTTCCGGCTTTTGCCATTCTTGT  
GAGCAAGCTATTGTAAATAAGGAAATTTATGTTACGGGTGGGTCTGCTGATTCTAATGTT



TTTGGTTATCGGCAGTGTGGGGCGGAATATCGCTAAAAGCCTTCTGAAAGTACTGGTCTT  
TTTTGTTCAACTGCCGCATGTACTGACGACCCGTGGGATTATGCGCAGGACTTTACTGGG  
GTGCCTACTTTGAAGTCAACTTTTATTGAACATACTCCGCCTCTCGCTCGCAACTTGACA  
GTTGGCTCTGCTGCCATTGGTATGCAGTTTTTGGCTTGATGCGTCTTTTAATGGTAACGCT  
GTTTCGCTCTTCTAATGTACTCTTTACCTGGCTTATCGATCATTGTTATGCACCTAGG  
ATTCTTTTCGGGGTATGATGGAGGGTAATGTTTTTCTGTGTATGTTTGATATGCTTAAGC  
GTGGTTATGATTCTGTTAGTTCAGTGGTTAATGCCATTCCCTCCTCATATTGTCTCTGCTG  
GCGCGTCTTCTTGGGTTAAAGGGTTATACTGATCCCAATCCTTCTAATGCTGCATTGG  
GTAATCGCCATATGGATTTTAAAGTGTGTATGTCTCATAATGCTTACCAACGGAAGGGTG  
AGGAAACCAAGGCTGCTGGCCTTAATCCTCTGCTTGCTTATTTGCAAGGTGGTTCGTGCTA  
CGTCGCCCTCTGGTGCTACGCCATTGGTTGTGAACCCTTATGCTGCGGGTGCTGCAACCG  
GTTATCAGTCTGCCAATCCCCAGATGCCAATCAGCAAGTTGGTAAGGCAGGTGCTGAGA  
ATGAGAATGCGGAGGCTCATACTATTAAGAAGCGTGCTGATACTCTTATATATCTCGCTG  
ATAGGCAATCCTCTTTGGCTTCGGTTGCTGAGGAGCGTTCTTCTTTAATCTACTGTCTT  
TCCAAAGTCAGAATATTGCTGCCGAGACTAAGACTATTCCTATTGAGGGTGATCTGTTGA  
CTGATGGTATTAACAGCATGAGTCGTCTGTTAAGCTTATTGTAGCGCAGACGTTAACCG  
AAGAGCATCGTAAGCAGCAAATGTCTTCTATTGCATTGAACACTTTGAATTAATCGGATT  
TGGTGGCTGCTGATTTAATAGGTATTGTGCACGCTGACAATTTGGGTCACCATTTTAGAC  
AGTACAAACCTTTGGTTGAAGCTGTTACGAACATTTTACGTATGGGGCGACGTTAAGGTA  
TTTGTATGCTATTTGCTTCCGCTTATGCCAATTTTGTATGGACGTTCTTACGATTTTGT  
TGAAGTGTTTAGAGGATGCTTTGACCCAGAAGCACTCACGCGAGGAGTCTGATATCAATA  
ATAATTTGAGCTTTTACGAAGACTGGTCATTTACCTGATCCAGTCACTATGCCTCAGT  
ATGTTTCATTAGTATGGCGTCTTTGCTTTTTCAGTCTGCTATGCATGTAGTCCGTCAGGAAG  
ATGAGACTTTACTGCGGATGCACGCAAGAGTGCGTGCTATATCCCTAATTTCCGTCAGG  
AATTTTGGGAGTTTTTAGTAGATCTATCGAATTCAATGAAGGTGGTGCGCCTTGGTTTGG  
CTTTGCTACTACCTAAGGCGACTCCTCCGGTTCGACGCACATCCTGTTGCTTAATCGTCGT  
TGGGCGCAGTTCGCTACTTGATGTAACGGTGCCTGTTGACAAATATTTGTGTTTGAAGTTC  
TGCTGGAGTGACAATGAAGTCGATGCACCGTCACCATTCCCTATGAACGCTCAAGCGCTTC  
TTCTTTTAAACGTAACCTTATAAACGACTAAGCTGATTAATAGCACTGCTGGCCCTATGCG  
CAATGGTATACGCATCTAAGGTTCT

>NewGenomeName\_169

ACCGGCCACTTGGAGCCACGGAGCCCCTTGCAGCTATGCCTCCGCAAAAGAGGGAAGCAG  
CCGCTAAGAGGTGGTGCTTACGCTGAATAACCACACAGATGAACACGAGTCCGCCGTGA  
AGGCGTGGAACGCGAGTGAGTACCATTTTCGCTGTCGTTGGACGATAAAAGAGGGAGAATG  
GTACGCCGCATTTGCAGGGCTACACTCATCTAAAGACGAAGGCTCGGCTAAGCACTCTGA  
AAAATTACTTAGCCGTTCCCATTTGGGAGAAAACCTCGCGGTTCCGACAGCGACAACGAGG  
CGTACTGTACGAAAGATGGGGCGGTGATACTTACCCTGGGCATGCCGGTGGAAAGGGAACC  
GTAGCGATCTCTCAGGAGCTGTTGCCGCCGTGAAAGCCGGAAGTCGCATGGTGGATATCG  
CGCGAGAGTTCAGTGAAGTCTACGACAAGTATGGGCGTGGCTTACGTGAACCTGGCGCTTC  
TGATTGGACAGAAACAGCGAGATTTCAAACCGAATTTATCGTTGTCACCGGTCCGTCGG  
GCGTGGGCAAGAGCCGTTATGCTAATGAGTATCCTGGCACTAAGTTTTATAAGATGAAAC  
GGGACTGGTGGGACGGCTACTCTAACGAGGATTTTGTGCTTATTGACGACTTTTCTGGAT  
GGATACCTTTTTGTGAGTTACTGCGTCTCACTGGTAGGTTTCCACATAAGGTTCCCGTGA  
AAGGATCCTATGTGGAGTTTACGTCTGAAGGTCATCACAGTGACCAGCAATACGCACCCCG  
ACTCGTGGTACAATGAAGAGAAGTGCTATCTACCCGCGTTGTATCGGCGGATAAATAAGT  
GGCTGACGTGGAATGCCATCCGGTTCGAGGATGCAACGGATTGTATGAAGAATACTACTA  
TAACTATTGACTACGGCCCCTCCCTCATAGTGCCTTTTGGAGAAAGAGCAATCGCGGCC  
AGCCTAGGCGGCCGCTTACGGGTACTTCGCGAGCGCACCGCCGCGAGCGAAGTTCCCT  
AGTGAAGTTCCCCGAGGAAAACACTTGAGCTGAGGCGATTTATAATTTTAACTTAATA  
AATAAAGACGGGAAACAGTATTGTGTGTCTGTACTTTATTTAGGGTTTTCGAGGTGGGTT  
AGGTTCAATTTGTCTGAACCTAACAGATATCGTCACTTTTGAAGGAATGGTAAAGCATCG  
TGGGGCTGGGGCCAACTGATGGCGAGGCCGTAGTGCTTTACTCTAGAGCCCGAGCTGGCT  
AAGTTTTGGTCTCCTTTCTTCATCAGAGGTATCCATGCGGATCTGGGGTTGGTTAGCCAT  
TGCGCTGCAGTAACGTTTCCCGCGTCCGGTGTCCGGAATTGAAATTTGGGGTTCGGGGTCCG  
AAAAGACGCTTGAATCCTTTGCGGAGGTCCCACTGTCTAGCGGCGTCCAGTTTGCTAGC  
GGGTCTGTCTCCAGGCCTGGCTTCTTGAAGAAGGCTTCAAGGTGGTTGTCTTGAATTGGC  
ACATTTGTGCCCTATACCATGCCATGATCCCCAGTTGTGCTTTAGTGGACGCATTTTCAAT

TTTGCCAGCCGGATCCTGTAGTCTTCGAATGGTAGCCTCCAATTAATTGTTCCCCAGTCG  
AGGAAGTCGTCCAGCATTATATTGAGGCCGTCGGCAGCCATTTTCAGGGTAGTGTCACCT  
GAGCCGGCGCATTCTTGTCTGTACATGCGGACATACTTGAATCGGTATACTCTGTTAGTT  
CTGTGACCACGCCTATTGGTGAGTCTGCGTCTGCGCCAGTCACGTCGTCGCCATCGCCGT  
CTAATCGCCTGTGTCTGTTCGGCGTCTCCTAGCAACCTGTATGAAAGAGCCAATCACGAGC  
TGTCACGTGACCGTGGCTCCAAGTGGCCGTTGAGTATT

>NewGenomeName\_170

ACCGGCGGGCCGGGGCCATGGGGCAATCTGGCCCCTGGCCAAGCATGCGCAGTAGTGCCA  
CATGCTCGATGGCCGCGCAGCGGCCTTTATTTGCGGAGCATAACGCAGAAGGCCGCGCAGC  
GGCCGCTATTTGCGAAGCATCATGGCAGCACGGCGAGACAGCGGAGCCCGTCGCTGGGGC  
GTTATTCTGAATAACTACACTCCCGAGGAAGAGGAGACCGCTCGCAATCTGATTCATGAT  
GCAGATAAGTACGCGTTTGGGATAATCGGCAAAGAAGTTGGCGAAAGCGGTAGTCCTCAT  
CTGCAAGGCTTCATGCATTTTAAAGCAAAGCAGCGGCTTACCGCTCTAAAGAACTTTTT  
CCTCGCGCGCATTTTGAGAAAGCTCGCGGCAGTGATCAGCAGAATGCTGATTATTGTGGT  
AAAGACGGCGAAATACTTACCATGATCGGTACTCCGAGTGATAATAATTCGAGTGATCTT  
GCGGGAGCTGTTGCCGTTGTGAAACGCGGAAGTCAAATGAGTGAAATCGCGCTAGAGTTC  
AGTGAAGTCTACGTCAAGTATGGGCGGGGCTCCGTGATCTGCGGTTGCTGATTGGTTGC  
CCGCCCCGCGATTTCAAACAGAAGTCATCGTGCTGATTGGCCACCTCGCTGTGGCAAG  
TCAAATTTGGCCAATGAGATGGAAGGGTCTAAGTTCTACAAGATGAAAGGTGATTGGTGG  
GATGGTTATGACAATGAAAATATTGTCAGAATCGATGACTTCTACGGTTGGCTGCCGTAC  
TGTGAGTGCCTACGTCTGTTTGACCGGTGCCCTCACCGTGTGCTGGTGAAAGGTGCCTAG  
GTGGAATTCACCAGCAAGAAGATTGTGTTTACCAGCAATCGCCATGTGGAAGGGTGGTGG  
AAAGGTGAAATTGAGAAGAGTGCCTTCTACCGACGGATGCATGTGTACAAGTTTTATGAG  
ACTGGTGAACCTAAGGACATGCCCGGACACATGCTCCCGCACCCAATCAATTATTCGGCG  
CGAGATGAAAACACCCCCCTCGGGATGACAGTCGTTTTTCATCTCCCGCCCCCGAGTCGCG  
GAGTGCGCGAAGCGAACGGAGCGCGAGTGCGGAGCGAGATTGTCGAAGACCGACGCGCGT  
AGCGCGGAGGGAGGAGACCACTTGCCTTGAATTTAATATGCTATCTTTATTAAGAGATC  
CAACAACATTCCTGTCTATGTCTTTTTTCATTGCCAGTAATTGTTAAGCAGTCCCTGAACT  
GTGACAGGTCTTCTTCAGATTTCTTCAACATTATCTGAGCGAACTGCCTGAATGTTACAT  
ATATAGTTATTTATGCATTATATCTCAGTGCCTGTCCAGGTGAAGGCCAAGAGAATGCCA  
GCCCGTAGTGCCTACTCTTGTACCGTCCCTCTGGGTCCCTGCTGGCATTCTAAAGGTA  
ACCAGCCTGATCTACTGCTATTCAGCCACATTGATGCTGAAAAGTTAGAGGCTGTCATAT  
CTGATATGGTTAGTTGAGGCTTTGGGCGTACCAGTCTCTTAAACCCTCTGACCAAGTTCC  
ACGCCCTCGCCCCGTTCCAGTTATCCAATAGGTCTTGCGTTTTGATCCTGTAATTTTATAT  
CTTTAACTCTGGGGTCCCTGAACTGGGACTGTGTACCCCATCCCCTCGCAATTTTTGTTG  
TGACACCTTCAGGCCTCAGCACCACTTTTGCTAAATTAATCCTGTAATCCTCGAACGGCC  
ATTCTGCCGGTATTCCTCTTGACCTATAAAGTCATTCAGGTTGAAGGTGAAGAAATCTG  
AGGCCCACTTTTGTGGGTTAGTCTTGATGGGAAGTCCACTGTGAATTGCCGTCTAAATC  
TGAACAAGTATATTCTGTTTCACTGTGTGCCCTCTTCGGCTCCGGGGCAACCTGTGACGTC  
TGCGCACTCGTCTGTGAAACCGCCTTCTCCGGAAACCGCGAGTAACACGCCTCCTTCTGG  
TTGCTGAGCGACGTACCTAAAATAGGATGGCCCCACGGCCCGCGGTATAGTATT

>NewGenomeName\_171

TCCCCTACCGGAAAGAGCGGACCGACCACATGCAGCTCCCTGCGGGTCTATTAGGGTGC  
CTACGCGGGGGACATCTTGCTCGCGCAGTGCCTGCGTCGCGCATGCGCTGGTTCGTACCT  
GCGTCGTGGGGTTAGGGCGTTCGGCAGGTCACTAGGTTCTAGATAGGTTTCGTCACTCTTG  
TGTTTAGTAGTGTCTGAGGCGGCCAGGTGGGTCCCCGGTGCCTTCTCTCTTCTTCTCT  
GAACGGGGGTTCGGTTGCCAGGTGAGCCCTGATGACGGGACGCCTCCCTAGGGCTGCTTGG  
CCCCGTCGGCTCTTCCCCGCGCAGGCGCTCTACCCGAGCAATGCTATGGTTGTCTGTTA  
GCGCCCAGGGTCTCTTCCCTGGTTTCCGTCTTCGACGGCGTGCTCCAGTTACCGCCGAGTC  
TTGTGTGCTTGGTTTTCTACCGCCGCGTCGCTTCTGTTATTTTAGAGCGTGGACTCTTG  
TAAATATAGTTACCACTATGTTCTCGAATGAATGTTTACAGAGGGGGTTACACTACGTCT  
GTCGAGTCGTCACCTATGTCCAGCGCATAAGCCATACGCACTAGCTAATGCAAAGGGATG  
TGGAGGCTCTTGGCGAACGATTAGGCGAGGCGGGCAGTGGTATACGCCAACTCGTACTCG  
TCCATCAAGGCACGGTGAAGGGTAGCCAAGCTTGCTGCGTAATCCGGATGCTGGAAAACG  
CGAGGAGACACTCAGGATAGCCGCATGTAAGCGGGCCCAAGCCGAAAGTTTACTAGTTAT  
TCTGTTTTCCCTTGCTTAAGGCCTACCGACGGTGCTAGCCTGTGGATAGATAGAGCCGC  
TGTTGAAGCTTCCAGGCATTGCTACGCACATTTTCGAGATGGTGAGGTGACACGGAGGAC

GGCCCGGCGAGATAATGATGGTTCGACACCCTAACAGCAATTTAAATATTCGCGTCTCCCG  
TGGAAAGCCACTTCTCTAGAGTGTGGAATATATGCCTCCCAGGCCAAGCTAACATTACCA  
TTATCAATAACGTTTAAAGGTAATTACGATCGAGCCCAAGCTATCATGTCAACTGGGCAGC  
ATTTTCCCTTTCTTATTGCCGGGCTGACCGACATCCACAATAATGCGGGTATGGCATGGT  
AAACCCACCTCCGTCGGGAGCGTACCACAGCTAAACTAAAAAGCGAACGCTGACTTCGAG  
CCATGGAGACCAAGCAGGTCCGAAACCCTGACGCGCGGTCTGGGGCCGGGCACCTGCCAA  
CGAATGATTAACCTTGCTAACGAACGTCTACGACTGATTGCAGTGCACAGGTACACTGAGC  
AGAGAGTCAACTTACCCGCTTACGCAAGGCGAAGTGGCATTGGCCCGATAATATTGAAAC  
ATTCGCACCGACGCGGTTGGTGACCCGTGCCTTAAATGTGGAAAACCATACTCTCGAGTC  
AGTACCCTTACCTTATTGGGGAATCTTTGGCACGGCACGCTTATCCTGCCCTGGATCAAG  
GCAGTCCGGGAGTATTGATCTGCCGCAGATCATGGAGAAGTATGCACAAGATCGAATACC  
AGGCATAGCCATGCGAGTTAATATTCCTGTGTTATATAGCAAGATACGTCTCAAAGCGCA  
ACGTCAGAAGCGCCGAACCGCAGCTCTCCCGCCTGACCTGGGCGATATGAAGAAGCGAGC  
CTAACATTACCTGCGCTATCGATTCCAGCTCATTCCCAGCTCTAACGAAACTGGCAGGAT  
CAAGGAGCGGGCCGTGACACTGCAGGTTGCGCGCCATCCTCACGACCTGTGCAAAAATCG  
CCTTAACCGGAACGGGCCCCGGCATCCGGAATTATAAATGATGATAGCCGACTGTCCGAGC  
CAGCAGCCTGCTAGCGAGAAAGTCTGCCAATGTGTCTTGACGCATCACCTCGCCCACAAG  
CTTTATAAGGCTATGCCTAGAGGATATTACTTTGCAATAACGCCATCTATCAACAGGTTA  
CTGTGGCCTTATTACTACAAAACCGCGCGGCTCGTTGTGCAGCAGGACATCCACCGGGCG  
TACTCAATAGTACCTGCTGACGGGCACGTACCAGTTTGAGCTCCTTATCAAGCCCATTGA  
CCAATCTTTGTAATCGGTTCGGCTTGGGTAGGATCTGGCACGTTGGTGCTCACGGAGCAGT  
CAGTGCACCGGACTAGCCCCTGAAGACGATGCCCAAAGGCGACCGCTGAAAGGCATTGGC  
ATAGTGCTTCCAGAACATCGGCAAGACCACAGTGCCAGCAGGAAAGTCCTACACCAGGCT  
TTTCCCGCCTGTATTGTTCTACGACGGCTGCAGCGACCGAGACGGCTCGGCACCCAAGCA  
ATGGTTCAAGGGCATGCGATACGCGACCCTGGACGTGGCGTTTGACTTAACATCTAGGTG  
AGCGTAACTGCAGAACCATGCAGCCGAAGAGGAAGCGAATGTCATTGACGTCAAGGGTGC  
CGACTCCCTGTGCGAAAAGGAAGGGCTAGATCGGGTATGACACCATCCAGTCTCAAAGCG  
ACGTTCCAGTATTTTCCGAGAATTAGCGATATGGCATGTGTTGACGGTAAACACACATC  
ATTTACGCAAGGGCTTCAGCCGCAACGCTGATAAGTGTTTTGCGGGTGCTTGGGTGTACG  
TAGGCCGAGGCGGGCAAGTGCATTAATGCAAGCACTGGTTCGCATGATCGTCCCTCCTGAT  
CCGGGCACCGCAGCCTCGCTAACTGATGGTAACAACCTACCAACGGGACGATGAGTGCCG  
CTTAACAATCGCACGCGGCGGTGCGAAAAGAGGGATGACGAGCTGAGCATGCGTACTGTAA  
TCGGGGACAGCCGGTATTGCGCCCAGGGGCTCCCGTAAGCAGTCGCGTGTGACGAAGGG  
GCTGGAACGGAACCGAGTGGACCTGCGACCACAATGGCGCACGCACCCCACTTTTCAAAC  
CCAAAAGCGAACGTAATCACGGCATGTTCCGTAAGGTGTCCAACCTATCCATAGCCTTCAA  
GAAATTCCCAGCGTCGTGATAGAGCATCAGCCCTACGCCGTTAGCAATGAGCGGTTCGGAG  
ATCATGTTTTGTGTGATTTGCTTCGCTCTGGTTCGCCGCTGATATCTGCCATGACGAGAAC  
TGCGCGGTGAGTCGTGCCGATAAGAGTCCCTTGATAGGTTGGGTGGCCTGTCAGTAAAG  
TTGCTGTACTACGCGATCCAGTGCATCCGCGCTTGTCCCGCGGCCATGAGTGGTACCCAA  
TAGGTGTCCGAGGCCGATAAAGCCTTCTGCTACTACTGGCGCGAGCAATCCCGAAGTGGG  
AACTCGCTTGTCTGCAGACGTTCAAGATGATTTCAACGAACGCATCTAGGCCTGGCTGCA  
CTGGGCGGGCGAGGACCGCGAGCTGATCATCCGCAACGCCCTATGGCTCGCACGTACTGT  
GCCCTCATCAGCTCCGACAAACGCAAGCCTGCCAGGATCGCTATTGAGACCTACGTGCA  
TAGCACCTCTCATTGGAGAACTCTATCGTTGGGGCAGTGGACAGGAAGCGTCGGCAGGT  
CCCTGCGACCGCCGATGCGTGGAGGCATCCTAATAGAATTGTACCGGAACCTCGGTGGA  
CCGCGGACTCCGTAATGCTGGACTCGCATCCCGAGTCCCCTCCGGGTGAAGACATAACC  
GATCGATTAGCAACTTAGACGAATTCGCGCACATGGCGAGGAGGCTAACATCATAACGCCA  
ATTGGGTATGCCGAGTACTAAGGGATTCCCCATATTCACCGTAGATAACCAGTCCGATGA  
CCCTCAGACATTACACGCCAGCGGGAGTACGCCGAGTAGCACTGTAGACTCGACGTGAA  
AATGGAGCCCAGGGCACACCAGCATGTACTTCAATGCCAGGGGCAACCCACGGTGCCAGGC  
CCTCAACGGATTGGCGCCGTTTCGCGTACTACCAAGAGATCAATAACAATGAGGAATTGCC  
AGTCGCGATTACCAAGTTCGGGGAGCTTGTTACACATTCAAAGAGGTGGGAGCCCCCAT  
GAGGCTGTTGGAAGCAATGTAATGTCTAATCACGACCGACACTCTTGGTGAGAGCCAGTT  
CCTCTTGCCGTCCGAGAGGCCCCCGAATGAACAGCTCGTTTTTCGTGCGAACCTGGCCCGG  
AGCACAGGACTGGGAAGTATACCGTTCTCAGGTCGTGCGAAGCATGCTTATAACTGTGAA  
TAACGATCTGTTCCCGGAGTCGGTGTGATCTATTAGTTCCTGTTCTTGCTAATGGGTAGC  
TTCTCCACATAGGCGCTAATGGGCTTCTCTCAGCTGGGCGGCCACTGCGAGAACGCGTC

GACAGTCCTGTATATCCGTTTGGACTCAACAGGAGGCTGGCCGAACGGCAATGGGGGGTA  
GAGCACCGTCTGAACTTCATGGAATACATCTATGGGTA AACAGTGCATAGCGTAGGGCA  
GTGCTTACTCACCATGGGCGGCCCGTTGGCGCGCTTAATGCAGTACCCCGTATCCGCGA  
GAAAGACGATACGAGCGTCCGGGCACAGGGAGTCAAGCCCTGCCAGCCTATGTATGTACA  
GGACTTTGGGGCACTGGGAGACGATATCGTTGACGCGGTACGACTGGATTCACCCGGCCC  
TATACCGTTGAGACCTCGCCTTACTGGCGTTATTTATAGAAATGCCGAGGAGCAGCTAAT  
CGACCACGGTACCCACCAATCCTGTGAGGCAGTATACGGGCCACTTAAACGAGGAGTCGA  
TCGTTAGCTACTCAGCTACCAGCGGCGCAATCACCCAGGCATTAGAAGCATCCGACATG  
AGACAGAACGCTTCGAGTGGGTGTGCCTCTCGGATACCTACGCAATGACGTA ACTAGTCA  
GTATATAGGTA AAAACCTAATAGAGTTGTCTCCGTGCAGCGGGTGGGGGCTCGATACT  
AGTTGCCCTATCAGTGTGCGAGTCCTACCACCTGTGCAAACCGGTGTACGACGCCTTGC  
CTGACGGGACCGTGGATGAGACCGGGCTGCGTACACCTTCCGAAGGCCTGCTGTCCGACT  
CGGGGATAGCTGCAATATGTCTAGGTTTTTCATCACGTATTCGACCACAGTGGTCTGGGGG  
TGC GTTATGCTGTCTCGCGGGTTCCTACCAACATAGGGCGCATCGCCGGACTCGATGCTC  
ACGGATGACGGAATAGTTAGCTTCGTTAAGAATCCTACGGTTCATGAGCGAGGTGGCG  
GCTCCCCTTGAACGTTCAAGACTGCCAGGCGAGATCACAGGCGAGGTGCTATTCAAGCGG  
CACGGCGGTTATGCATGGGAGGCCGCCAAGGTGTACCTGTGTCACGAGTCCGAGGCACTG  
GAGAAAGGGCTGTGTTAGTCAAGTATCAACTGCGGTAGCTTCCAAGATGAACATGGCTGG  
GGGATCGTATGGTGCATAGAACATAATGGGCCGACCTGGTGCAAGATTGGGCGGAGTATG  
GGCTGGTCATGCCTGTTCTGCCGACCTCAACTGGGCGAATGATCGGCCCGGCGCGAGGG  
CATGTATCGCAGTCAGAGACCACCCGAGCCTCCGCGAAGTGTGGCGGCCAATGGAGTACA  
TCCCGGTACCCGTCAAGTCAGTGTGCTCGAGAGTGCCGAACGGCCGGATGGCCGCACCA  
GTAACCGTTACAAGAACGAGAGAAAAGCCGGTTCAGGGGCGTTTATACTGGCCTGTCTCA  
ACAGGAATGTGTATTGCTACGTGGCCCGAGTAAACCAGACGAACACCTAACCCAGACGC  
CCATCTCGGCACGTATCGTCCGGAAACTGTAATGATCGCGTACACTAACCTTCTGTAGT  
AGCCCCTACGGATGACCCAAAGGGGCTGTGCCCTCCCTCGCAGTACACGCTACCTTATCGT  
TGGATGTGGTCTCCGATACTCCAGCGACTTAGTCAACCACGTTGAGGGATAAGTGGGCGG  
CGATGGAAGTTTAGCAATCACGGTGGGCGAGGTCTGTGAACGTGGCACCTATCCTGACCAA  
GGGAACCGCTTTGGAGCTGTGCGCCGCCCTTAAATCTGGACAAGCGCGACTGTAGCAGCC  
AAAGCATGGCGTAAGAGCAGCCGCGAGAACACAGACATCCGCCCCATCGCTGTATGTCT  
AGAAGAGCTCTCCGTGAGAACCCCGTCTCAATGCCCTAATGCGCTCGCCGCTACGCCGA  
CTTGGTGTGGTCCAGGCGTAGGACTACGCCTTTAATTCAAAGGATGGCGTATTAGTTGCA  
AGGGGTACGCTGTAGA ACTAGTCAACTTTCGCGTGTCTCGGAGAGTAAGATAGACGATG  
TGCAATGGTAACGGGACGAGGAGTAGAACTTATGCGCTAAGATGACCACGGCCACAACG  
TAGACCGAGACCTGGCCGCGGCGTAATAGATAGTCATTGTCTGGCGATTTGGGAGTAGC  
TCGGGGAGGAGTAGAAGAAGACAGTTTTTACATAGATTCCGACTAAAGATATTGCGCCAT  
CTCCGCCTATCCCTCGGCTCTACCGCCAGGGCGCGCCTTAACTACAACCATATCCAAA  
AGTTAACCACCAGCCGCTTACCGTTCGAAGCCAAGGCGGCCGAGCCGTTAGCTAAAGCCAC  
TGCTCCTCGCATGTGGGAGGTTTCCCTAGACCGCATCCAGAGTATCGCCTAGAGAGAAGC  
CGTCCCCTTCGTACGTGGCCGACAGGGCGACAAGATGATTATCAACGGCGTGGTACTGGG  
CGAGGCTAAGACGGAGGACGGGAGGCAGAGACGAGTCTTCGTTGAGGCCTGCTTCGACAA  
CGCTACGTACAGTCTCAAGTCTAGGCAGATCGCGGACGAGCGGCGTCCGGCCGTCTGGGGA  
GATTACAGAGGGCGCAGATTATCCAGGCGAGTAGCATCGGGTCTTAGTGCAGGAGGAAGG  
CCTCTTAACCCACCCCTATGGCGGGTACCAGTAACCGCGACACTCGGTGCTCACTTTCGT  
TAACGACGAGGTGGGCCATGCAAGTTGTTAAGAACCTGAACGGCGCTGCTCGCGTGGCT  
GTCCAAGCTAACGTGGATGCTGTTGACAAGGAGCCGCGCATGACCTTCTGGAGACGGGA  
CAGGGTACCGTCGACCTGCCTCGCGTGCCTAGTCCGTCCACCGGTACCCCGCGGCAAAC  
GGGGGCTCTCGCAGTGAGCTCGACTATGCACAGCTCCAGATCTCATGGCTAGAATGGAGC  
TG TAGTAAGCAACTCGACACGTTTCACGCCCTGGAGGGCAGGCAAGTAGACCAGCACGAC  
TTCGTGAAGAAGCCGGATCGAGACTCGGTTCGTAGTTCGATGCGCCGCTAAAGGACCACAAG  
TAGCCACTCACTAGTTTGTAGCGGTTAGCCTACGGCCTAGCCCGTCCGGTAGTAGGATTG  
GACTGCAAGCGATCACGGCAAATCGATTAGGTAGAACCTGAGCTGTGATCCAAAACCCGG  
GGTGTAAGTACGTTGAGTGGACCAGAGAGTCTAAGGCATATGTTCCGTGACGTGAATCA  
GATGCGTATAGACTCGGTAGAGCTTTCACCTCTAGAGGCCCCCTGGTTTTCGAGGGGG  
CACCGATGGTTCGACGCCCTGTACGCCGAGACCGAGCCCTGCGGACTCAGTATGCAA  
ATGGCAAAGAAGTCATCAATTGAGACATGAGCCAGCATATTGTGAAGCCGATTCGTATTT  
CCTGGCACTATGCACAGA ACTGCAGGAGGCCCGCGGATAGCTGCGGAAGAAGGACCACGC

CGCGGGTTGTGCCACTCTAGCCAACACGGGGTGGTGACTCCTTGACGCAGTGGCTAGCG  
TGTTGACCTGTGAAGTGACCGATTTAGTGCCTCCGCTAAGGCGCCGTTAGGGCGTGGCTG  
CAGTACGCGTCAGCTCACAATGTCCGATCGTAGGGAACGGCAGGCGGCGGTTCACTAGCA  
GTTAGCGACTAGCGCTGACGAGGTTGGGAGCTTCGCACCGCTTTATCAGATTCTAGAGGG  
CGCGAAAAGTTGTTAAACGGCAGGATGCTTTTCCCTCTCGACACGACACCTCAGACAGGC  
CCGTACGTACGAGCGCTCGTGGAGGCGAAAGAAAGAATACTCGAGAATATAACCATTGGGC  
AACTCCGACGGCGAGTACATCCGTATCGTAAGACCCAAGACTGCCCTATCCCACCCAGC  
CAACCGCAATAGGTACGGCTCTCGCCAGCACGAGTTTGTGCAAAGGGCGCAGTCGCTAG  
CCTTCCGGCAGACCTCGCGCACTTACCATAGCAAGGATAAAGGTGAAAGCCCCGCGGTGCG  
GCAAAGCCATCGAGCGTTGGTGGGAGTACTGCCACCGCTGTCACGAGGGCGGACAGGTGC  
CCAAGAAACCGGTGCTCTTGGGGACAGACGAGCAGCCCCGGAGGGCATTATACCTCGGA  
CCGACGTTGCTAAACGCGCAGTTAGCGACTAGCTGTCCCGCAGCGTGGACTGCAATCAGT  
CTGTCTAAGGCGTCACCCTGTTTGAATACTGCTGAACGCCCCCGTTTAGATTACCCGCC  
GCTGGCGTAGCCTGATACACGCCATTGCGCATCGGATGTTGTGCCGCGCCAAAGCCATAG  
TACAGCCGGAGGATTGCTCGTAGTCCATCCCAGGTCAGGGCCAGGCTATGTTACACCTC  
ATCAGCACGGTCATCGTACGAGGCAGAGTGTGATCACTGAGGCCTACTTCTGGGGATTT  
AGGTTATGTGGTCTCAGAAACATCCGGTAGGTATCTCGATTGCGGCTCTCGCGAGTCGTG  
TGTACAATCGCACGGCGGCTGCTACCCAGAATCAGATGGGGTGAGCAACGCCTTGGACA  
GGGATCAATCCGTGGTTGACGGGTGGCCAGCAGCCGCGCCCGCTTACGTGACCTCGGAA  
AGTCAGTGCGAATCTTCGCCGCCCTCTGTGTCTTGACCTTAAGGCTATCCGCTCGCCAC  
AGGTACGGCAATTGAAAATGGGTCGCCGGCCAAGTGCGGAGCAATAGGAAGATATCGAT  
CGTCCCCTCGCCGCCGAAGTGACCGCGCAGCGCGAGTGCGGACGGTATAACGGTCCC  
GGAGTTTGGCACTGCATCGGGTTCGGTTCGCGTAATGCATAGATTTCACTGCGGCTTGAAG  
TACTTGCGGGATGAGCAAGGAGCAGCCGTGACGAAACGAACTGCCTGCTCCGGTCTCGG  
TCAGTGATAATGGTAAAGAGAGGGCGGTTCGCGTAATACCGAAAGCTGACGTAGGACGACC  
GCCCGTATCGTGTGGCCTTGGAGCAACGTGACCGGGGCGAGCGTTCCCTGCCTTCCGGGG  
CCGATGCCTTGATGGCCCGATCTGGTGACGGTGATGAGTATGGCATCCGATATTATGATC  
CTTCAAGCGCTCTGCTAGTAGTAGACGGAAAGAACGCTGATAGGGACAGTGCCCTCCGGG  
AAGCTTGGCACCAAGGCGCAGTTACTGTTGGACTGGTATCCGTTATCCCACCACGGGTAC  
CCTGTTAACGAGGACCCGTACACCGGTCCAATCGGTTGCCAGCTGAAGCTCCTGTGAGGT  
TACAGCCGGGTGCAGGCAGCGCCGGAACGCACCTCTTTACAGAAGCCGCGCCAGCACGTT  
GACCAGAAACCGATCACGGAGGCGATGAAAATCTGCGCGGGCGGGATTTCCGCCAGCGAT  
GAGGGTGCTCCGCTCGCCAGCACAAAGACCTGGGCAGACGTTGATGTAATGTTGAGCTC  
TGTCGCCTTGTGCATGTGATGGAGCTCGGGGCGGACCAGAGTAGCAGCTTCGAGCGGTTT  
ACGGACAGCCAAGACGACAGCCAAAACCTGGCAGAGAACGACTCCGATCTGCGCTTCCCA  
CTTCCTGTCTTGAATGCGCACATCTACGGCCTCCTCGGAGGAGTCTCAGTGATATTAACG  
GGGCGCTCCGAAAAGTTAATATGATACTCTTCGTAACCATCCTTGCGCGCTTTGCCGGA  
TAGATATATCGATACTCCGTGACGGAGCACCTATGCTCTGGCTGAACACCGAGGGCCAG  
TGTCTGCGGTTCCCTGCCACCGCTCTACGAGCCGCCATCGGGGTGGGCACGGACGTGTTG  
GTGGCGATGAGCAACGCCTTACGCCGCGGGATGCTAACTCCTTCAAGGTTGCGAGTGCG  
GATCGTGTCCGTTTACCATATAGGCACTCTGCGTGCTGGGATGATAGCGAGGAAGGCCTC  
GAAGGAATCAAGCCCGGTATGGTTCGTCTCGGCTCAGACGTCGAGCTTCCGGCCGAGGCAA  
CGGGCCGAGCGTAGGAACAAGGTCAATGAGCTGGATTAGAAGCAGCCAGCCGGCGGTGCT  
ATGTCGCTGCGCCACGCCTTCGTCTGCCAAGGGACTGTGAAGATCAGCAACGAGGGTAAG  
AACATGCTTTAGCCCGCTTACTCCGCGCTAAGGGACAGCAAGACCGGTAGACAGGTCCCG  
ATCGATCTGTTTCGTGACCATCGGGAAGCTGGAGGAGCCTGCAATCAAGTCGCTACGTGGT  
ATCAGCTCGCCAAAACGAGGCTCCGGATGGCCAATGTACCACGCCATATTACCTCGGAA  
GTATTTTTGTATGAAAAGAGAAGTGAATTCGAGCAAGGTTCTTACACAGTGGAGAGAACG  
CGTCTCAGACCTTGCGGCATAGGCCGGGCCCGCTCATATCGTGTTCGAGCGCGGGACAA  
GTGCTACCACGTGTGATTCAAATTAGCCGAGGCAAGACGGGCCATTTGGAACAGCTGGA  
ATACCGCATGAAAATGTACTTCAACAATGTTCTGTACGAAATGAATAGTATGCGTGTACG  
GCGCAAGCCATTAGACTAAAGTGCACCCGTAGAGAGACTGATGAGGAGGACATCGCATCA  
GGTGACCCATGACTCCTTCCCGGGCGGTCTGGTATGGTCACCTGGTTAATGCATGTGCAC  
ACCCATTCTGAGGCCGCGCGCCCGTCTGAGCACATCATATGCACGATCCAGCGGAACAA  
ACGAAATATCACGGGAACCTTACGGTGGCCAGATATCTCACCCGTAATTCGCACCACCGC  
GACATAACGACCTCGACTACATGTTGCTCTTGAATGAGACGCAGGTGGGCAAGTACCC  
CCAATAATACTCTCCGGACGTTAGGTCTCGAGCAATGTTGCTGAGTAGCCGACTAGGAA

CGAGTATGTGTTGGTGCCCTTTCTCAGGGGACAGGGGAACGTTATCCTCTGCTGGAACGT  
GACGGAATACCTATGCTAGTTTCTGTCTACAGGAATAGCCGAGGTATTGACTCTCTCTCC  
AAAAGCGGACCGGACTGGCAAGCTTCGGGCATACGGCTGACGAATCCCCAACAGGCGAA  
GTCGATGCTTGAGCGTCCCCGTATCACCGATCCAGCAAAGTACCAGTGTTTCATCAACTA  
GAACTAAGATGCCCCCCTCTGCCATGCGACCGAGCACCAATCGGTGGACCGGCACTAGG  
AGCCACACGAGAGGCGTGTGGACGAAAGCCCGCTCCACGCATGTGACAAAGTGACTGGGT  
ACAGAGCACTGATCCGCCTGCCCTGCGAAGGGGATGTGGAGTGGACGTAACGAGAGGGCA  
TTAATTGGAGAACTAGTCAGGAATTGTGGTTCACGTTTCTCGGACCCTGTTACCTCAG  
TTACGCCACAACAGGAAGCTAACGTACGGGTGGTCTCGCTCAGCGCCATGCCGTACAAGG  
AGATGGCCGTAATACTACGACTTTTTACGTGGCTGCTCCGCGAGTACCTGGAAGATGTAC  
AGGTCCCGGTGTCCGACCTGGGAATACTAGGGGAGCACGAAGTCGGGACCGAGGAAGGAT  
TTAGGAATGTGCCGCACTTAGACGGACGTCCCTCCCCTCAGGGGTTTCTAGGTGCGGGCGC  
CATTCTTCCGCTGATCGAGTGCCCGAGGTCCCTGTTGACCTTAGAGCAGTCTCGGACCG  
TCTTCACACTAGCTATTATCCGGGAGCTGTCCCTGCGCGTCCGGGCTGCCGAGTGCGGGG  
ACATGATACCAAGGACCCCTCCGTTCACTCCGCCCGGGCGGGATCTCCTTATGCTGGA  
AGGTGAATCCTGAGGGCCGCGCCCCATTGGCGACTATGTTGAGGGCGGATGGGACTGTCA  
TCGACGCCATGTGGGGAGCCCCGGTGAGATGAACGCGGAAAATATCGTCGGGTGCGTGC  
ACCGTATAGAACGCGGGGCTGAAGTATACGCACCCGGGTCCACACATTACCTCCGGGCCT  
TAGGCAACCAGAGTTACCACCAAGCGCGGATGAGGGCGGCCTATCGCAAACGGCATACT  
ATTGCCGCGCACGTAGCTTCCACTTTAGGCAGAGAACTGAAGTTGGGAGTATCCGCCCTA  
CAATCTTCGAGCGGTTTCGAGAAATCGTCAGGGCTGATGGTTGGGTAGCGTGACATTGAC  
TGTTATGTTGCCGCTTGGCCGCACGCCAAAGCTCGGGGTGGGACTATGGCTAGTCCCCTA  
TAGTTCCTTCCCCGACGAGCGAGGAACGGCCGGCTGGATGGTGGGCAGTCCGGATTCCG  
CTCCCTCGGTGTAGGCGAGGTTTGGTTCCTTCTACTGGTGGCCTAACAGAAGGTACCGAGA  
GTAGATGTGGAGTACCTTTACAAACCCTGATCCGGGCAGTTCGCGCCCCCGCCCCACACT  
AAGAGCCAGGTGGATAGGCCCGTTGGATGTGGCAGCGGCCGCGGCCACATCCTTAGCCTG  
GTACAGCATCGGCACATCACCTCGTTGGGGAAAGAACCCTTGAAATTGGTTCATAGTT  
GACGGGGTAGACCCCTCATATCGCCGAAGGCTCGGCACGATGTATCCTGGATCTTGACC  
CGCTACGGCAACGACTTGAGTGGGCCAGTAACTGTGCTGGCCGGGTGTTCTGGACCTAG  
ATCGCCGAGTACTTCTAGTCAAACACCCCCCACTTGCCCCAGGTTCTTGGAGACAGCG  
TCCAAGTACGGTGTATTCCCAAGGACCATGCTGTGAAGCAAGAGGGCAAGGAGGGGTAC  
CACACGTCGAAGATCGAACTGGAGCTGCGGGCCGAATACGTCGCCGGTGCCACGTGTAAG  
GTTTAGCACACGCGCCCCATCTTCTGCAGCCAGATGACGGTGTCTCCAGTAGTGCGTTCTG  
TGGGGGCAGTTGGTGGAAATGCAGCGAGGGCCACTGGCTTTCGCTTCCCTGCGAGTGCTAC  
GACTGGTACCTGAACCCCCAAGGTGGAGTGGCCAGACAGACGACTCAGGAACCTGTGCTG  
CCCGAGTTTCGAGCCTCCGTACAACCTGCTCTTGCCGGATCTGCCTAATCAGTTGCGCTTC  
AACAGCGGCAGTGGCTACGATCGCAGCCCCGTAAGTTCGGCGGTCTGGTGAAAAACCGG  
GCCCGCTTAACCCGCACCCACGCTGGTGGCCTCTTCATGTACGAGACATATGTGTTTGAC  
ACGCTCGGTGACAAATTCATCGCTTTGGTCTACCACAACGCCTCCGTGAGGCGGAGGTC  
GCACACCTGAGCCGGCAACAAGTTAACCCGGATCGCTATAGGGCCGGCAAGAATAAGGCT  
CAGGAGAAGATTCATAAGGTGGAATATTACTACTAACGTCGTGTATTGCCCCGGTG  
TTGGCGTCCCCCGAAAGCATGTGTACTCCGCAACTGCCACAGACGTCGTTGAGAATTAC  
CTATAAGACGGCGCCGACTCGCGCCGGAACGGGGTATGGAGCGGCGCCCGCCTGCGGTGC  
GACGTCAAGTCTGAGGTGTATAACACCCGCTCGGAGGTTACCGGCGTACCCGACTAACAC  
ACCTGCTAACTCGCCGAGAAGCTTTAACCACGGTAAGCCTGGTTAAGTATCATGGAACG  
TAGTACCGATCTTCGGAGTTCACAAGGAGGGCAAGGCCATTAAAGTCATTGGGACGCTA  
CATTAGCTACAAACGGACGGGCCCGACCACAACAGATTGAAGCTTTACACAACGGATACA  
GATTGCCTGTCCCTCTCGAATCGGCGCCTTCCGAACGTCCCTCCAGCAAGCAAACGCAGG  
GTCAAGGTGAAGCTCGAGTTCCTCTTGTGTGTCAGCGGGGCGGATAATCGCAGTGGACCAC  
TCAGTGCTGAAGATGGTATTGTGGGCTGAACTACGCGCCGACGAGAAGTTCGTAGCGCAG  
CCCGTCCGCGGCTCACACTCTCAAGCCTGCATCTGGCAGCGAGGATCTGTGAACCCGAG  
GCGCAGGTACTGCAATATGCAGTCGAGAACAAGCCGGATGCGCTGCATAAGCGGTACAAG  
TAGGCGCGGTTCGGACAAGCAGCCATGTCGATCGGCTGTTCCGGTAAGGACCCAGTGCCGCG  
GGTATCGCAAATGCCGCGGATCTATCTGTGCTGAATGCAAAGGATTTCTTGGAAACGGAC  
GCGTGCTGTTACCGTTGAGCATGCTGTTCCGTGGGATAATGCTCGCTATGGTTGAGCGT  
AGCGGCGACATGACCAAGGGCCTTCAACGAAACCTTGAACACGCCACTGGGGCGGAACGG  
TTAACAGCCGTGACTACTGGCAGGCTCCAGACGCAGCACGTACAGCTGCCGGCAGAGG

AGCCACGTGAAAAAGAAGTTCGGCAGCCGGGTTCTCGAATGAATGGACGGTCTGATCGCT  
AATTCCTGGATCCAGAGCGAGGTGTCCGAACCTCATGGCTGTAGCGGCAATACGAGTACTA  
AGTTGGGTCTGATCCGGGACAATCCTATCGAACGAGGATTTGCCGCAAGCTCGCGCGTGC  
TTGATCAACAGTGC GCGGATTGGCTATAGTGCGACGTAGTAATATTGTGCGTACGGTTG  
GTGACATTCGAGGCTCAGGGCTTCATCCAAGGCCAGTAGACGAAGAAGACCGACCGCCTG  
TGCTTTGAAAGTTCGCGCTTCCCCACCCAGCCCCGCTTAGGCTGAGCTCAACGTGCCA  
GATGAGGCGCAATGGCACTGAACAACCTCCACTATCCCCACCAATCACTGGCCACACGGC  
TTACACATTGGAAGAAGTACGACTGGACGCTCGCCAGTGTCCGGCCAGACCGACTTCTAC  
TCGGGCAGGCGCAGGGTAGGGTTACCGTCATGACCCAGGCAGCGGAGGTAGGCTCCGTCA  
CGGGGGAGAGCCTTCCCTCCGGGGTACACGGCATTGACGTACCCACTTGTTACGCGTCGCT  
GATCTGCCCCGAGGCGCGCGGCACCCCGCAACAGCCGGGACAAGTGCCGACGCGATTCCGG  
CTACGGCTACCAAACGCAGCTCACGCCACGTTGCTACACTGTTCCCTTGGGGGATGCCCA  
GATGGGGAGTTTGTACTTGTGTCGATCGTGAACGTGGTGGAGTGCTTTGGCGCCACCCAGT  
ACCGGATAGATTATGAGCCCGAAACTTCCAGAACTACTGGCCCTTGCCAACTTTGTAGCC  
GAACCCACGTAGGTAGAGCTGTCTCAACGCTTCCAGGGCAGAGAGGGTGTAAACACCAG  
ACCGCAGCCTACGTCTACGGACAATTCGTGCTGGACGTCGTGTTTCGTTATGCACGCACAC  
GGGACGCGGGGAACGCCCGCGGACCCTGGACTTCAATTACCACTTGGCATTGACCATTGTC  
GGTGGGGGGACCCAGAACGTATACGCCCTCACCGGCCTCGACTCGACCTGAAAAATGAAG  
ATATGTAAGAACGTGTATCCGGCCACAATGTTTCATCTCCGGCACGATGACCTGGGTGGGG  
CCGGCCAAGCCCTTCTGCAAATGGTCCGCGACGCCGTCTTCGTGAAGAACCAGCACAAG  
GTCGTCCAGGAATAGCCCGGGAACACGAGCAGTGTCATGAAGCTAAGCTAGAGCCAGCCG  
CTACTAGACATGAACAGCAAGAACGCGTACAGGACTCCCCAGCTTTCGGAAGACCCGTTT  
GCCCTCCTCCTATGATCTCAGCCGACCAAGGAAGCCTCTGACGCCATCTACATGCAGGGC  
ACAATCGAGACCACGAGCACGAACAAGACCTGCTTCAAAGATTCGCACCCGGCGTGCTATC  
AACTTGCCTCTCTCGGCCCTCGTGCGGTGCTGTGCGGCACGGGGAAGTACCCCTAGCAC  
GAGCAGCTCGACGCTTGGCAACGGGCGACGCCACGCTCTCTCGAACGCCGGGCCCGCCT  
GATATACCGACAGCCCCGGCTATCTCCGCCTCCTCTACGCACTTGGCGCTTTCTGCGCCG  
CCGGTCCCACAGTGCTACAAGTGCCCGCTGTGCCACGGGTGGCGGCAGCGTCAGTCGTC  
CGGGACTTGGCCGATAAGGCCGATATCCAGATAGAGCTGGGGGGACCGGTGCCCTAGGGA  
TTATACGAGACGGGGTGGTAACCCACACGGTGACTAGTTCGACCTGAGGATGCTTGCTT  
GACCACTGCTGCTGCATGGCGTTGGGGTGCGGTACCGCTCTAGCGCCAGTGTGAAGACTC  
ATAAACTGATGAACGATGAGTCCACAGGGTGCCTCTCCCCGACCAGTGACGCCCCGCTC  
CCACGGACCCGGGCATAAACCTCGCAGGCTAGGGGGGTGCGGAAGACCCTGGAGTGACTGT  
ACCCGACGTGGAAGCCCTACCAGTGCACCTCGTAACGCTACCCCTCAGTCGGCGCTCTTTC  
ATCCACAAGGGTGGCTTCTGGCTACGGAGTGGCTATCAGATTATGGATTCCCCGAGAACA  
TCGTGATCCACCTGCACCTATAGAGGGGAGCCGGCGAGGCCCTGGTTCAGGACGGCGTGA  
CCTAGGGCGTTCGATCCGTCAGGAAGCCTGATGACAAGGACCTCCGGTCAACACCCGCGC  
TCGACTATGACTCGGAGAAGGGAAGGATCGTTGTCTTCCCGGAGCCCGAACGCATTGTTT  
GCATCAACGGCGGGTTCACGTCATCCCTCCCGGTCCGAGTCACGGGGCATAGGTGGAAGT  
TCTTCCAGGCGCAGATGCTCATGGGCGAGACTGCGGATGACATCCGAAGCATGGAGCCCT  
GTCCACGTTGGAGCGTCGCAGAAGCCGGTAGTCTCGAGGTGCTAGATGCTGTAGAGTACC  
AGTCCGAGGAGACTAACTGTATTTCTAGGACCTCAGCTAACATCAGCCAGGACACGTTCCG  
CAGAAGCCCATGTACTTCTCCTGCACCGCTCCGAGCACGTGTGCGCGTCCCGCTACCCCT  
GTGAACTTACATTAACCCAAACCTGCGGAAGTGACTAGACTAGATTAATGGCTAAAACC  
CAAGAGACTACAAGCAGACGATTGAGGAGCGTGATGCGCTAGCAGAATAAGACGAAGCTT  
AGGTGCTGGCGGTTTACGCGATCTAACTAAGGCGCTGGGATGCCTCTGTCCGCCAGGTTTT  
ATGACAATTGACTCGAGCATTGCACGGCACGCGGTGGTCCATAACCACCACGATAAAGGC  
GATATCAGGTGCGCCATCTACCGAGCGTGTAATGCGGCGGGAGGCCTTGCCAGCAATGCA  
GCCGGTAAGTGGGGTACCACGAGAACTAGCTATGTGGCCAAGTTAGCCTTGCTCGAGAAT  
GGGTTCCCTGGACCTGAAAAACCACGGCCTGAGTTATTGTTCCAGGCCACATGCCTCCC  
AATGAAGCCGCGGAGGCGAAAGGGGTAAAAGCAGTCAAGCAGCACCAGTGCGCCTGGAA  
TCCGCCGGGGGCCGCAAGAACCGGCTTAAGGATACGGGCCTCGTATCCACCTGGTTACAC  
CTATTAGCTTCTGGACCAGGCCCTGCCCAAGGCATTCAGGGTTGGCGGTGGTAACAAGC  
CTGTGCGCCGACAGTAGCTCAGCTATAGGGGACGAGGGGTAGTAAGTCGGGTACTCTTGC  
GCCAATGTGCACGAGAGGGTAAACAGAAGTCTCGCACTAGCAAGCGTGAAACGACGGGCG  
GGCCGGGCGGATGTCCACGATTGGTGCAGGATAAGGGCCCCGCACATTGGAAGACGGCG  
CATCTATTCTGAGCAGGGACATCGCTTCCCGTCCCATAGTAGGTCTAGTCAGGGAACGAT

AGGAGCAGACCCCAAGTCTTAACCAGTTCAGCCGGGTATTGAACATTTGCAGCGAGCGGG  
CGCACTGTCTGGATGTTCTAACGTGATCGAATCCGAGCTCGCCTGGGGCGAGAGCATTG  
GAGAGGATGGTACGCCAGTCACTGTGCTCTTCAAGCGGCTGCCGGGAGGACAAGTTGTAG  
TGGCACATAACGGTTCGGATTGAATCGACCGAAGAATTAAGCCCAATCCCTTTTGGGTG  
CTTATAAGACACCTCGCCAGCTCCTGGTGATGGGAACGAGGGTGATGGCGAAGCAGGAGT  
CCGGTTTCAAGGTAAGGCTGTAATTGATGACCGACAAACGGTTCACCACGAAGAAGC  
GCAAACATGTGAAGCGTCTCCGTATTGCGTTGTGGAACAAGTCCTTGGCCGGCAAATGCG  
GAGCCAGGGAGGAGATGCGGCATTTCAAGATTGTGACGTGAACTCGGCAGGGGGTTGT  
ACTCTAGGTTGCAACCCGGGGATCATGGCTAAAGGAACGTGCCTGTCTTGATCAGTGAGC  
AGGGTATTGGCTGCCCCGAAATGCGCCCCGATCGGGTTAAAAGTCGAAGAGTGGACTCGCC  
CCAAGACCTGTAAGCACGCATTTACGCGTTGCTACGGTTGAGTCGCTTACAACATAAAC  
GCAAACCTAACGCTCGAAGCAGTTGCGTCATTTCCACCCATCCAACCTGAATACTCCAAG  
GAAGCCGAGCGCTATATCAACACCATTCCCGACAACTATGCCGAGGGTTCGATTATGAG  
TACTCTAGGAAAGAGGGTCTGCATCCGAGGCTAAGTACGGCCGGCCTATAGAACCACAC  
CTTGTGAGGGGGGACAGGAGCGACACCGCCTACATGGCGCACACCAGCAAGTCTGAACGG  
ATCGTCTTCTAAGCTCCGCAAGTGGTGGTGGGCGCGCCTTGCGGGCCGTGCTTCGTGTG  
CTGAATATCGCGGTGCGTCTATCCGTGAAGGTGGAAAGAGAAACAGCCCGCATTACTAC  
CGCCAAGAACTGGACGCTCGTAAGACCTAGGAGGATTCCCTGCCACGCCGCTTCGGCGAT  
AACCGCGATTCACTGACTCACGACCGCGGGCAAAGCAAGTAGCTCTAGGACCAAGTTGCC  
ACGCCTGCTCTGTTACTCGGGGTACTGGATCATCGGCAGGGGAAGACTGATGAGGGAGTG  
CATATCATGGTTTGGCGGCACTGGCAGCAGCAAATAAGTGCACGGCGAGACGTCAATCC  
AGGAGTCCTCGACAGGAAGGAGCTGGGCGCGTATCCCGCCAGGTGGCTGGATCATCACTC  
TGCTCTCGCGGCTGAGGATTTCAAGCGAAAACAACATCGGTCTGTGTAGGTCAACCGCTT  
ATGTCCCGTGACGACGGACCCGGGCCAAGCCCAGGTCCATTGCGCGAAGCGCTAACACGC  
TCAGTCTAATTTCCATCACCGGCGGAAATTTCCAAAGGCCCGCGAATCGGCAGGGTTCGA  
TGAACCTCCTGCCGTCTTTCACTTTAGCGATCGCGCGTACGATCAATTGCGGGTTGCAAT  
GGATCTGGTTGTGCAGACCAAGGCACGCAGCCCAGGAAAAGTTCTGCGTGCCTGCCCTG  
CCGGGGACCCACAGAGACTCCCGCCGGTCTGAGCATCGGCGGCGTACTGTGCGACGTTAT  
GCCTGCAACCGCCGCGTCCCCAGCCACTCTACACTGCATCCTTCACCTCCTCGGACGGGC  
CATCGCGCAAGAAGCATTGTGTTGGATACATACCATAACGTCCGCGCCATACATCGACCT  
GTCTTGGGTGTTTGTGCGTACAGGCGTCCGCGCCAGGAGAGGCACCACCCAGAAAACGAT  
TTGTACTGTGTAACAAGTCCCGGTAGGTAAGTAGGGCGCGAACATAATGAACAGTGA  
GTATATACGCCTCGGCGAGCATGGCCCCCGGCGTTCATGGATACTGGGGGGGGGGCGCT  
GCGGCGACAAGGGTACCGTGTCAAGACGAATGCGAACAGCGTCCCTCGCGGCTGAGGGGCG  
GGAGGTCGTGGCTAACGTAAGTCAAGTTAGCGGGGCCGCGCACATGGTCTTCGCTGT  
GCCGATCGCATGGGACGGGGGGTCAAGCGGTGGGCTTTGCATCGGGCGTAGTCCGCTCTA  
CTTCCCCTGAGACTTTAGACCCTCCGTAAGTTCGAGCACCCTTTCGCGCGACGAACATGA  
AAACCCGTGGAGATCCTCCGATTCGATCGCCTTGGCCAACCTAGTTTCAGGCCGAGGCGTT  
CAGCATTCACTCGCCCAAGCGGGAGGAGATTAAGGCAGTGTAAAGCCAGCGGCCGCGGTGT  
GCTGTGTATGACTGAGCTCGACGCACCTCCCGAGTTGGCGTCCCCATTGCCAGACACCTG  
GGACTTGGCCTGAGATCCCTAAATGAACCGGAAGCGGTTTACGGTATGGAAGCTTCGTTA  
GCTCGTCCGCGCCGATGGGCAAGTTGGAAGGCTACCGAGCTGACCGTCCCGTCCGGCCGGC  
CCCCATCTCGCCGCCAGCCCTTCTGCTCGGAAATGGCTGCCGACCTTATCCTACAGAAG  
TGGCCGGGGCGAGTACCGTGCAGTTTTATAACCGCCGGTGGACCAGACATATTGGGAGCG  
GTTGCACCTCGGCGAGATACGCCGATTGGCTAGAGACGCGTCTAACGGATCAAGCTGCG  
TGTGCCGTATTACCCCGGCGATTATAACGCACGCTTCTGTCAACGGGACGCCTTACTTCT  
TGTGCGCAAGGCTCACTTCTACCCCGGCTGTAAGCTCCGCCTGACACGTGCTTGGCCGA  
GGCCTACTCCACGCGCGGGTCAATTTGCTGCCTAGTGGCTATGGCGGGTGGACCAGTGCGC  
CGGGAACCTATCCACTTACGGCCGTTGCTTGGGATCAATAAGAAAGCGACCTGGTGTGT  
CATGCTGCACTTATCCGCGAGGCGTACGACCCCGCGGGGTGGCGAGTAAGTTCCCGACAA  
TGAGGGCGTTCCGCGCATCCAAGGAGAAGTCAATCCTCTAGACGGCCGAGGCGGAGGAGC  
CCCGGTCTACCTCGACGCAGCGATACTGGCCGATAAGGAGCGGCACCTGCCACGCGCTG  
GCCAAAGCGGGACTCTCCGTTCAACCTGTCAAACGAGCCCGTCCGCTACGTATTTGG  
AGACAAACCGCGCGGTGTACCGGAGGCCAAATCCGACTGCCTGAAAGAGCTGGAGGAGAT  
CGTAACTGGTTGTGTTAGTTTCTTTGCACAATCGTACCACTTGCCTGTGTTTCAGGCCCTC  
TGCAGCGTGCATGCTAGACCGGGCGCGACCGCTGCAATGTGTTTGGTGCAGGAGCACGA  
ACGCAGAGCCGCTGGCGTCTACCGATGTTGAGGCTAAGGCCGGCAGGCCAGCGTGCGA



GGGCGATGACAGCGTCGCCGCGCAGCACCGGTTTAAGATCGGGCCCTTGGGTCCCCTGACTGA  
GATCGCGGTGGTGGAGGCCCGCTACCTTACGCGGGCCAAATGGCTGCATACTGCCGCCGA  
AGAGAACTTCTGCACTCCCTAGAAGCACTGCGCCTAACCTACACACTTCGAACGAAAGA  
GGACTGTGAAATGCAGTGGGGGCGCTCACCTAGGGGTATGGAACACACACCTCTAGCGC  
CGATGATATGCACACTGCCATCGGGGAAGCGTCCGTTCCGCTGTACTCGGAGTTCGATTT  
TAGCACTCTGTTCTAGTAGGGCTCGGGCATGGGAGTGTAGGACAACGGGCGAAAGGGTG  
CCCGGACATGACTCTGCTCAACAGCTCGCAATTTGGGTTCTGTGTACGCTCCCCTATAT  
TGACCAGGAGGAACTCGTCCCCAAAGAGAGCGAGGCAGAGGTTAAGTGCCCATCAGACCA  
GCTATAGTAGTTGGTCAGGACCTTCGGATCCCAGACCTTCGGCGCTTGTGTTGAACGGGCA  
CTCAGTCATGTACAGGGCAGGTAAGGGTAGCGCGATCGATGACTTTTTTCGCCAGTGGCTC  
AGCGCGGGTAACTTTTTGACCTTCCCGACTTCGAAATACCACTGGCGGCAGCCAGCCGCAC  
GCGCTCACGGACGATGATACATGGATGACTCGTAGGGCGAGTATTACGACCAGAATTTAA  
CACCCCTTCAGGCTGTCCAGCCACGTGCTCTGGAGGGCGAGTGCTCAACCGAGCGCCTAG  
TGTCTTGGGCACCAACTGTTGAAGGCCAATCGGGATCGGTGTACCCACACCTGACGATG  
GTCTTCAGATAGGCGACGGCCTCGCGGTGCAGTGGCCGTACATCCTGTCTGAGTTCACGA  
ACGCGGAAGTGTCCGACCGTGAGCTCGAACGGAAAGGAACCGTGCCCGGCAACTGAACA  
TCACGACGAGATCCCTTTCTCTCCGGCTTGATCCGAGGGCTTACCAAACCTCGCACAGGA  
GGTTGACTGGCCAAAAGGATTATAAAGGAAGTTGGTAATGTCGACAGTGTCTCAATTGGC  
GCTTGGCATTTCGAGCGGTGGCGGCTTTGTTGGTGGCGGTTAGAAGGATTCCTCGAAACGA  
GCAAACGCAGCGTTGCTGCAGTAGCAGTGTCTTTTTGGCCCCGTGTCTACAGCTGGACCTG  
AGCTAAGAGAACATTCACGATTGAAGCTGGTTGCAATGGCGAGGTACAGGCAGAGGGCC  
GCCATTAAGGTCCGTGGTGATCCATCCGTAGTTAACACACGCGCCCTTGGCCTTAACGTC  
AGACACCGATGTGCCAGCAAGCCGCTGCATTGTGGGCGGTCCACCAAGATTTCGATTGCAA  
TACAAAAGGCCCAGGGCTTCTAACAGTTGACCATAGCCTCACTGAATGCTTCCACGATCG  
ACAAGAAGCGCGAAACGGCAGTAATCGAGTACGTCTTGTCTTCTGCCAGCGCCTTCCTCG  
TAAACAAGTCGCCGGGCATGGTGGCGGTTAGCCTTTTCCCATCTCGCCGTGGTAGTTCCC  
TGTACGTACTCGACGAGACGCGACGAGAGCTGGCAGCCACTAACGCCATCGAAAAGTCCG  
AACTGCACAGTCACAATGTGACCTCGAGCACCCAGTTGCTCCACTCCAGTTCGTAAACG  
ATGGCCTCTCGTAGCTGTATGGCCTCCTCATGCGTTTGATAGACACTCGCTACGCAAGGG  
AACACCGCGTCCCAGTCACCGGTCAGGATCCCTTCTGGCCTATGCAGCGGTACACGGAGC  
GCAGCCGCTCTTCTGCCACCCCGCGTGATTGTCTACGCCAGCAGATGCCGCTTCCGG  
AGCTGATTCCCGTGACCCATACAGACGCCAGGGCGGAGCAGATTGCCAAACGCTAGTCAC  
ACATGAGAGCCTTGTAATGTTTGATCGAGGCGCACCCCTACCCCGTGCGGGATACGCATGG  
TAGTAGGGGACGGGCATGAAGGTTACTGCGTCGGCCCCGACTCTAGCCACCCTGCGCACG  
AGTATCTTTCTGTTCTGATGCTTGGATCCCACCAGACGCCGAGCAATTCGGTGATGGCC  
ACTTAGACCAGTACAGAGGCGAATGCTCTCAGCTGCCCGTTCCCAGCGGGGACCTTGGTC  
TGTGCTAGTCCGAGGAGGGGAGTATGGTTAACGTCTTGGACGGGGCAAAGGGTGGCGGGG  
TGGACGCCGAACGTGACACTAGGACCGAAGGCTTTGTCCCGGGCCATAATGATTCGGTTG  
CGTCTAAGAGCGAGGTGATTACAACCTGAACGTACAGGCCGTGGCCATTGTGCGAGAGCG  
GCGTGATGCGCCAGACCCGAGGGTCCATGTACACCGAGTAAGTACGAAACACTGAACCCG  
TGATGGGAAAGGTGATTCGCACTGTTGCTAAGGCGTCACCGAACCTCCTGGGCCGCGTGA  
ACAATCGGCTGTCTGATACGTTGTCGTCGCCAGGGGCGTTGCTGAGAACGCACGTGGCAT  
CGCGTAGTAACAGCGGCATGCAGCTCGTTATCGCCCAGAGCGTGGACCGCCTGAGCATAA  
GCACCCGTATCCCGGCGCTGACCAGGGCCATGGAGTCCAGCCGAATCCCCAGCGTTAGAG  
AGTAGACCAGCGCAACGTCTTACGCTGGACCCACTCACTAAGCGATTCGACCGTGACA  
AGCTCGTAAACCGTGTGTTAGCCTACATCCTTGTGTTGCTCTCAGTGTGTCGAAAAACA  
CTACCGTTATGGGTGGCCAAACCGAGCAGGAATCTACCTTTGCAGATCAACCGCTGGCTG  
TCGCTAGCGGAGCGCGGGTTGCCGAGAGATTAGTAGAAGTCCTACCCTCTTGTAAGGCGA  
GCCACAAGCCGTAGTGTGACGCGCCGGCTCCCAACGGGGAATCGACGCCTACTTGGGCGTC  
TGCTGCTGTAGTTTGGCCGGAAGCTTAGGTAGCTGCCGCTGCCGAAGTTGCTCAGGAGGA  
TTCGAACCAACGAGGTGAGTCCACGGCGGCCACATCTGAGCGTGGTGGCCTCCTTTTCCA  
CATAGGCGAGGACGTGTTTCAGCGATATGGCTGCAACCGGAAGCATCGACCTGGTAAACCT  
CATGATGAGTCGTAAGCACGAGCAGACCGGACGGGCTTTTTGGAGGCCTATGGGGGAGGA  
TGATCCAGGCTTCATCGACGAGCGGAGCTGATCGAGGTGCTCGGTGAGCAGCAGACCAT  
GTTGCCAAGCGGGGAAGCTTGTGCGCTGGCCTCGCCACCCATACTTACTGGCGACCGCCT  
GCGTGATGAGTTGATCAAGGAAATAGCTGGCGGTAAGTAGATCCTAGCGAAGGGGGTATA  
GGTGTGTATCTCTCTAGCGGAAGAATCAACTCTGGCCGTGAAAGCTGACCTTATTGACAT

TGGAGAACTCGAGGAACTGAAGTGCGGCCTCAAGCAAATCAAGGGCTATGAGACGGCCTC  
CGGGCTATTCTTCGTGTATAACACACAACCCGGGTGCAACCCTGGCACTATGGTGTGGCT  
TCTCCACGAGGCATATAATACGGGCGTCCATCTGCGCAAACCTCTCCCCGCAGAATAATCA  
AGTCTGCGTGCCCCGCTTAAGACCGTCGTCGAGAGAGGCCCGTATGTAGATTGACCCAC  
GACGTCATGCTCTCCCAATCCCCCATTCGGCCGGGTCTGGGTGGTGCGAACGCGGATGT  
TCGCTAGCACCTCGTCGAGTCCCTGTGCCTGCTCGAAGCTAGCTATAGGTCCAGCTCAA  
GCTCAGCTCCAAGATGAACGGCAGCTCCCGGCCCGGCACGCTCAAACCTGCACGTCGACCG  
CATATGGGCAGGCGCCAGAGAAGGCCGAATCTCCGCGTAGTAGGAGATAATCGATTGTAG  
CGTCAGCTACAAGCTGAACCTTACCGCGGACACTGTTCGATACGCTAGACACTACATAAA  
CAAGTCGGACGCGAGGAACTCAGACCTGGATGTCCGCAAGTAAGTGGCCCCGGGGAGACCA  
TAGCGAATTGGCCGGCCTTAACGACCAAGCGTGCGTCTTGCTGCTCCAGAATAGAGGGCG  
CTTACTAGTCCCCGCACATATCAAGTCAGCCTGTGACAATAGTATAGTGTCTCGATCTC  
CCCGTCTGGCGGTGCCAGTGGTGTCAATCACGATGCCGACGCCCTCGCAGCTACTCACGA  
CCAAGGCTAAGAGGACGCGGGTTGCCGCGCCATGGACGACAAGTTTATGTTCTAGGGTGT  
CACCTTCTAGAGTTGGTGATCTTCTCGTTCCTGTTAGAGAACCTTCGCCATCTCAACGT  
TGCCTTCGACACCATCCATGGGGACGACTCTTLAGGCGTTGGTTCGTATCATCATGCTCAA  
CGGCGCTCGTACAGCCACAACCAGCGCTTCAAGCAGACAGTGATCGACTCGAACGCCCT  
GGTTGCCGACTTCCCTCGTCACCGACGACGAGGTTTCGCAGTCAGAAGATCCACTATAAC  
GAGGAAGGGCCTTCAAAGGCTTGCGTACAAGCAGTATTCTCCAGCACTTGTAGGGGAA  
GAGAACTGGGACCACTTCCGGTGCATCTGCCAGGCGTAGAACATCAACCTGCGCCGGCC  
CTAGCTTGTAAGGTTTCCCGCCACACGGTCCCAGTCGAACAAGGGCTGCGGCAATGGCA  
GTGACAGACCCTTCGGCGAAGGTGCTTGTATCAGTCCCTCTCGCCGAGGAGCCTCAACCC  
CAAGAGTGCCGCATGAATCTTACTTTTTTTGAGCCGGTGATCATAGCCGCATGTGTCTT  
AGCGAGACCCCTGACCTAGGAAGACGAGAAGTACCGGATACTGGCCCAGATTCTAACC  
GCTAAGGAACAGGCTCGCCTAAACACCCTGGCACAGGGTTGGCGATTGCGCATCTTGACT  
GACTACCCTCCAATACCCGCGCCGACTCGGGTAGTGCTTCAATCCGCTGGTTCCTTCGGC  
TTATACCCAGACGTTGAGCCGAAGCTCGCCTGCTCGGGCCGTTGTGTCCGTGTCACTCTT  
ACAGTGTCTATGATGGATGTTGCTCGGCTGTAGGCGCCATACGAACTGTATCCCCCGAC  
ACCGAGCTCCCGGAGTGTGCCCGCTATCCACAGTGTACCGCTGCGCCTACGCGGTGTAT  
GGAGCGGACCGCGGTGCTGACACTACCGCAGAACCCATTGTGATCAAGATGTCCGCAGGA  
TTCGTGCAAGTGCTTGCCTTCCGCATCGCGCACTGGGACCTCACCTGAGGTAGCGTACT  
ACGGCCACCCGAGTCTCAAAGCGAAGTACAAGTAGTGAGTTAGTTTTGAGGACCGGTCCA  
GCGGATACTGTTTGGAGTCTGGCAACAGACTGCCAAAGGTGGCCTTGCGGGACTGGTCAA  
GTCGGCCTTGAACATACTCAATGGTATGGAGCCAGGTA CTCTCCGCCGTCATCCGGTAAA  
CCATAACGTTGACCCGAGAGCCCCTACCGAGCCTAACCGACACGCGAACATCCTTCCCAT  
AGTTTCGGGAAACGCGAACGTGCTCATGGGGGGCAGCCTGGACGGGACGCTGGCTATCCT  
CCGCCGTCCAAACGGGGTAATAACCGTTCAGGGGGACAAACAGCGTCCGCACCGGACGTCC  
TGGGAAAAGTTTCGTATGCGAAACACTCCATCACAGCATGTTCTTGGTTGAGCCCTAAGT  
TATCTCGCGCACATGGCAACGGTCAGCTGCGAGTTCGCCCCCGGACCACAAACGAGCTGG  
CTACCCGTA CTTACTGCGCGGGGCGTTCTCGAAGCAGTGACGCCTATCCGTCACCAACCA  
ATTCACGAAGCTCAGGAGGTGCCGAGAAGTTTCCACATCTGCAACACAGGCCTGGCAGTA  
TGTCGGTGGATTCTGATCACGCCGCTCCGACCGGCGTCAGATGCGGGTGTATCAATTGG  
TACTAATGCCTCCGTGTCGTGCTTCGATTCCAGTGCTGACCTGCACCTAACGACCCTGA  
CGCAATCGCGGTGACTGCTGACTAAGGCAGTAACTGGCATCGTGCTCGTTATGCAGTCAG  
TATCAGCGACGCTGCTGCGCTGCCTGTAAAGCGACCTTTAAATGAGGACGGCTTCGTCAT  
CGCTATCAGCGCCCGTTAGTACGAGAAATAACAACCGCTGAGTCCGGTCTTGCACGGTGGTC  
GGACGAGGCTGCGTCTTGGGGTGAGCAAGCTGAGCTGGTGGACATGCCTAGACGTGTCAC  
GTA CTCTCGGCCCAACATAACAGACTGACTTCTTTGTA CTACTAGCGCTGCACCTGTGGGCG  
CGAACGGCGAACCCCTTCGTCGGAGTGCCGCGAGAAGGGTGACTTTGGAATCACGACCAT  
TCAGTGGCAGTAGGTCTTGCTGGCTGGGGGTTAAGTGGGCATGTAGGCACAGGGGAACCC  
GCTCCTGTGGGTA CTAACTGTGTGTCAGGGTCCATAAGTAACAACATAACTATCGAGGTGCA  
TTCTACTACAACAGTGGTGACCCTGTACGCGTAAGCTGTGGCCTACGACTAGGAGCTGCT  
ACTCGGTGTCCGAACCCACAGGGTCTAGTTCGCGAGGAGAACCCTAATGACGAGTCGCAA  
CAGGAGAGCGGAGGTCGTCAGATAGTCCAGCTTCCAGGCTCCCTGCCCGACTGTAGTCGT  
TGGGCCCGACGCGATCTTGGTCAATACCCGTAACCGTTCAGCGCGCGAGGAGGGAGTGCT  
GCTTGCCACCTAATACGCTGCGGCCCCAGTGGGACCGCGAGATAGTCAGTTGTACCTGCC  
GAAGTATATAGCGAGTCTGATACGCTTCTAGGCCCTTCGAGTACACCGAACGTCCGGGT

CGTCGTCACGTAGTATCTCTAAGATATGGTTATGCACCGATACCTCCGGCACGGTGATGA  
GGAGTTTCACGGCGCGTCTGTACAAGAGGAGATTCCGGCGGGTTCAGCACGGTTGCGATCAT  
CTGGGCCGACCCACCAGCTGCCGATTAGCGGTTAGGGATCGGGTCATTCTCGGGGAGCT  
CTTCCAGGATCGCCTGCGGACTGAGGACACGATCACAAACGGCCAGCTGGACATGTACCG  
TGTCCTAGCTGCGAATGCGGACTATGAATCGCGAATCCAAGAGTTTCTAAGGACGTGTG  
CCAGAGGGATAGGTCCTTAACATAACAAGCGGCCGAGCCGGCTGCAGTAACTCGGCCAACA  
CCCTGGGGATTTCGCCCGCTGACTGGGTACGGGGTATAGCAAAGCTGTTCGGGACACAGGC  
GATAGATCTATAACCGCTATGGCTATCGGCACCTCTCGGAGCTGGGGCCAACCTGCGCCAT  
CCTACGGTACCCCAACGTCGTATCGAACACATCAACACGCACGCAGTATCACCGAGAAAC  
GTTGAAACTCCATAATACCCGTGTAGTTGCCATCCGTGTGGCAGATCAGGCACGCAGACC  
GTCAGCACACACGAACAAGGCGATTTCGCCTCCACACTGGGGACCAGGGTGCAGGTTTACC  
AGAAAAGCCAACGGCAACGTCCGACACACCTGTTATGTTGGATAAGTAGACGACGCGTTT  
CTCACTGGCAAAAAGACCACACTACGATTTACACTTACAGCCCTGGCATAACGGTTCCCG  
GTACAACCAGCGCATTCCGAGGTTAGTTATGGCATTACCAACGCCACTTCGCGTTCCGGCGGG  
TGTTCCGGCTGCGCAAGGTATCTGTGCCTTATTGCAACAAGGCGAGCAGACGAAGGCAACA  
GATATAATCACCAAGGAAGCTCGCCGCAGGAAAGTCACACAGGCCTTCCAGAGCAGGTCG  
GCTATCGCCGTGCACCGGGGGCCGTTAAGCTCATAGACCGTCAATAAGTTTTAGTTCACG  
GGACCTGTGGTGATCGAGGTGCGTGGCAGTCCATCCGCCGGCTCGGCCCCGTCGGGGGTG  
ACGGGCGGATGCGTTGGAACAACCTCTGGAGGAGGTGGACTTTCAGCTGGCCGGTCTGTTT  
CTTGACCTACGTCAGCTGCACAGCGCGCAGGGGGACGACTGGAGCGACCGTATCCCTGAG  
TTGTTCCTAGGCAACCATGCAGTCTTGGGCCGTCTCCTGAGAGGTCCGTGAAACCGGTCA  
CACTTCTAGGATTCATGTCCAGGCTGGGCTATCATCAGGCGCCGCAAACGGCCCTATG  
ACGTTCTCGTTTGGTACTGTCCGTAGCACATCGAGCGCGTGCCCCACGTACGGCCAAAGG  
GGTTTAGGTGTTTCCGTTACGGTGGGTTCCGCCGCGGTGGAGGGCTTGCACCAAAGGAG  
AGACATATGACGGAACGTTACCCGCGACTCTCGGGTGAACCTAATGGCTACCTGGGCCTG  
GTGGGTGCTACAACCCGTATCGATTGCACGCTTTGCGTGCAGTCCAGCTCAACGGA  
AAACTCTCGGCGCGGACGATCCTGCTCCAGATTCGCGCGAGTATGGTGCAAGAGACGTCC  
GCTTCCGTCGTGATTTATTAGGACATGCAGGGGCAGCTGGTAAACATGCACGGGCAGGGG  
CTAGAGGATTTTGGAGGGCCAGCACTACACCAGTAGGTTAAGCCGAGTCGTGTGCGAAGAT  
TAAGACGCTCGTATCCGCCAGACTGACACTGGCCACCGCGTGCAGGAGTTCATCCGAACC  
GACGGTCTGTTGTTGCCGCCTGAGGAATTCATACCGGCGTTCGTTGTGACAATCCCGGGTT  
ATCCTAGATGCCATGCGTTACTGGCTGTGTAACATGGCCCTGCCAAGGGCCTCGCCTCC  
CAGAATCTTATGGAGGAAGCCCTCGACGTTGCCATGCTAAGGTCTGGGCGGCGAGTGGT  
ATAGAGGTGGAGGGTATGCGCATCTCTGCACAAGGCAACACTATCCTGTAAAGTTACGGA  
CACGCCAAGTTCGGCTGTTACTTCGAGGGGAAGCAGCAGGGCGACTTGCAGGATGGAACGC  
TTCCACAGCGACGTCGATGCCTTAGTTTCCCGGCCCGAGGGCAGGCGCCAGCATCTAGTT  
GAGCAGTGCCTGATGGAGGCGCTTAGCGAAAATCACCGTAAACATGCCACAGCGATGAAG  
GACTTGGACCCACTGGACACCCGTGAGTTAGAAATCCGAATAAAGCGGAACGAGGTGCGT  
CGAATCTCGGCGGGCTCACCCCGCGCCCTGGACCACATCGGCACCAGCGGCAGCACTGCT  
GAGCTCTTAGCCGTAGTCGAGCAAGGGGTTCATTACCCGCGAGCAGATGGTCCGGTATACG  
GCGCAGTTTGTACTGCGCCGCGCAATACGGCGAATCAGCAGACGGCCCTATTGGACAAA  
TCGAACCCGGCCAGGTTGACCAAGGAGGCATTTGTGGGTTTTTTGGGAGCACAGCATGAG  
GGTGCAAAGCAGTCCCTGGACGTAATCGTCTGTTTCGGTTCCTGAGGCCCTTGGAGTCCGG  
GGAGTGATAGGCGTACCCGCATAATATGAAAGGGCCTACTATGGCCTTCTCGGCCAGTG  
ATCGGGGCCTGCCTCGGCACCATCGGCAAACGCGCAGTAATTGTGCAAGACGCAGCCGTC  
CGTATTTTATCCTTACGCGAATGCTGAAGCCCCAGCTATGGTCTAACTTGTTCGGGCC  
TGAGCGAAGGCGGTCGCTGCAATGTCCACCACGCCCCCGTAAAGGGAGTCAACACTCCTT  
AGCGCCGTGAAACGACAGATTCCACCCAGGTTTCAGCCCGACAACAGGGTCCGTCCCATTG  
GGCACTGGACCGGTGCAGGGGTTAGGAGCTGCGCCTCTGGCCAGCCAGACTGCGTAGGG  
CCGGAGTTGACGTCGCGCAAGCTTAGTGCCGCAAGCTCGGGGAGGTTGTAGGGAGTGCG  
ATGCAGACTGGAAGATTCTCCAACCTCTGGGGGCATGCCAAAGCAGGTAGCGGAACCCGG  
GACGGGGTTCATGCATTCGTTTCAGCCTCCGGCTCAGCCGGCGGCGGAGGGTCTGGCCCTG  
GCTCGACTGGCGCAGTAGGCCAATTTCGCCGCAAGTGGGATTGCCCTACTTACTGCCGAC  
AGAGCCACGGTATACACGCACGAAATCAGCCTGGAGGGGGGCGAGATCACCCGGTGAGAA  
CTTCCAAAATCGTTCGACAAAGAAGCCTTACTAAATACCCCCACAGCGACAAAAGAACGG  
GGGTCGTCAGCAGCGTTGCCATGGTACGCGGCTATTGCGAAATGATGCCGAGGCGACCCC  
TCTTGCAGCGGGGTAGCCTGGTGGACGATGAGAGTGTACGTCGACTGTTGAACCGTATAG

AAGGATCTGTTGATTGGGCAGCACGTCATTCTGACTCTCAAAAATGAGTGTGACTAGCCT  
ATCAGCTAGGCGAATCGTGGTGTCTGTTGGTCTCTCGTGATGCACGGCTAGGTCGAGCTG  
AGTATCTAATCCCAGAAAAGCACGAGTAACCGAGGGGACGATAGGTTTCACTGGCGCCTC  
GATCTAGCGCAGTAGAAAAGATATTCGCCTTCTGCCTCCGCGGAAAGTAACGGCCAATAC  
ATAGACGTCGGCGAGCGAGGCACTGGGAGCATGACTATCGTGAAAACGCTAACCGCCGAA  
TAAGCCGGATTGGGATTCCTGGGCAGGTCGCGCCAGTGCACAGCTGGACGGCGAGCGCATT  
GCGCATTAGTCGGACTTAACTGCTGTGTGATCGAAGCTCGCCCGTGGCCGAGCAGTGTAT  
TAGATCGGGGTGAAAGGTACCCGTAAGATCGACAAGACCTGCCAGGCAATCCGCAAAAAC  
GACTTCGTCACCCACTCAGGGCACGAGCGGAACTCCAAGTAGTACAAGCAAACCCAGTT  
TGTGGTGAAAATTTAATCACCAAGAAAGACGGGGACTGCTTTATAAAGTTACGGTGGCTA  
CATCACCATCCGAACAACACCAAATCTTCTCTCTCCCGGGAGTAAATCATGCTATCGCA  
CGCGTGTGCTGTCAACTCGCTTATCCAGGAAAAGCACCATGTATCCCCGGCCCGGCTCG  
ACAGATAGCAGTGCAGCAGCAGCTAGTTCTAGTTCCGCTGTTCGGAAGTCGAGCGTATAAA  
GGCTAATCGCAGTACTTGGGATAACTGGGAAGCCGGTCACCCAGAGACCCGAGAACTATTA  
GTCGGAACAAGCAGACCAGGAGCTGCCGCACGGGATGTTCCCGCTCCTCGACTCCTAGTG  
CTTCTTTCATGCGGCAGTACGGCGACACCCTTCTGGCCACCATAATTCAAGATACCGACGG  
TAAGCTTGCCACACGGCGGGAGTGAGGTTTTGTGAGGATCTGGGCGGGATCTCCACGGG  
TATCTTTGATACGGAGGTCCTCCCGGCTATTTGGGGCCGCCACTGATTCGTCGCCTTCAC  
GACAGGCAGAGGCGAACCCTGACTGCCCATGTGGCGAGCACAATCTACGGTGCAGCCAT  
CCCGCTGCAGGTGGGGCGCCTCTCGTGCCTCTACCTGGCTGGTGTCCGACCCTCGGGGT  
GTATGCTATGGCATACTACGTCGATAAGGATTACGAGGGCCTGCACTACGCTCTCAGCTT  
CCCCGTGACCGTCCGGGGCCTTCTCCAGGTGGATGGTTGTGGACTTGACGGGCCGTGTTT  
GTAAGGCGTGACTGCTGCCGCGTCTAGTTGCATGCTCTGGGGTCTGACCAACTTCCTTTC  
AGCGATCGATAACCGTATCTTCCAGCTATCAAGTCCGCAGAAGTGCTGGCCAGTCTGCT  
AGACGATCCGCTGAATGGGGCCCGTATTGTACCGACCGACAGGGAGGCTATTACCTTTCA  
ATTGCACACAATCATTCTCGACGGCTACTTGTCCATTGTGACGGTGGGTCTGGAGGGTAC  
TATCGCCCAGGTTTAACCACTTCCCACGTGAGGTATCTAGTCGGAAGACAGTGGTTCTCA  
CGGAGCGGCGTGCATGCGCTGGGGCGCAAGGTGCCAGGGGCGCTTGCCCCCGGAGTAG  
GGCCTGACCCACGTAGGTGCCTCCAATGACTTGCCTCTAGACGGAGGCGAAGCGCCT  
GGCCGAAGTGGAGTTTTTCGATCATTTCAGGGGGCCGGAGACGGCGTTCAGGCACCGCCG  
AGCTCGCCTTGCTTACTGCATATCCAGCCCCGCTACGGCCAGCGCGCCTGATGCCTGTT  
GAGAACGCGCCCCTTTGAGGACCCATAGGGTAGCAAGACCGTTGAGAGCATGCTCACCT  
GAGCATCGGGCGGGGTCTAATTCTGACCAGTCAGGAGTCTGGCCGGAGATGTACCGCGCT  
TCTGATCGGTACCCGTTACAAGGACGCCGGCGTCCGGCCCGATTTCATCGCTCCCCTGGG  
CAACACAGACACGGATGCAACCAGCGCCTTGTCCGTGGCGGGCGCTACAGAGGACGTGTA  
AATCAAGAGTCTCATGAGGGGGATCAAGGAGTAAGTTCATGAGTCCGGCACGTCACACGC  
CAGCGAGTCTCCCGTAACGCTAGATATGACCGTCAAGATGATCACACCAGCTGGCGGGCG  
ACTATCCGTGATGCACATGATGGGCACCGCACTAAGCCGCCTGGCTGAGAAATACAAGCA  
CCAGCTGGATGATCGGTGCGCAATCTCGGCAGGCGGTCTAGGCGGAGACGACGCATCTAA  
CCTGGCCTTCCAGTGCCGGTACTAGGGCGCCCGGGTGTAGGCTGGGCTCATTGATGTA  
CAATTTCTGGTCTTACGCTCCAGTTCAACCACCTAATATCACACTTTGCCGGTACCTACCC  
ACATGGCTGTATGTTGTGTACGACCGCCAAACGGGATACGAGCAATGCGCATCTTGCAA  
GCTGACAGCAGCTATGCTGTGGTAGGTAGCTGAATTTTGCACACTGCCGTCTCGCCACGG  
AACCGCGGGTACGACGGTAGAGCTCTTCAAACAGACCCCCTGAGAAGTCGCGTTACACTC  
TACAGCGGATCGCGAGCCTTACTTGTACTACGAGTGGTCTTCTATTGTTTCGTCGCGACCT  
CGCAGTCGCGGTTCCGGTAAATACCAGGCTCAGTCAGTACGAGAGGCTCCCACGCTCACG  
GGCCACCTTGCTGGACGCCGGGCATTCCATTTGCAATTAGGGCACTCCGATCCCGAAAGT  
GGGAAACTATGTGACGCGAACCAGGGAGCGCCTGAACTCCGACTTACCATGTAGTCGAG  
CGACAGGGTGGGGAAGCGCGAACGTCACGCGTTGCAGATGCCGTGCTAGTACCGCCTGGA  
AGATTCGTCGCGGGGCTACATGAAGGAAGACGAGGATGCGAACGGCGAGTTCGACTGGCG  
ATAGGTGAGGAGTAGGCGCTGGGCCAACTAGCCCGACTATGGAGACGATGCACGATTAAG  
AGTAAAAACACCCCTCATGGGATAGAGGTTCTGGTCCGTAGGTTTCGTTACGGGCACTAG  
TTTGGCGGAAGCCCGCTCTGGAAGCTACTGGGCCAGTACCACAGTTACGTGATATTCCG  
GCACGACAAGCTTTACGCACTACAATCGGAACTCGCCTAAACTGGAGTGGTAGACCC  
TCAGACGCAACAGTACCGATGCACCACGATGCATGGAAATGGCAACGATCGGGCGAAATG  
CGAGCAAGGGGACCCGGAGCCAGAGACGGCCCTCAGGAGGTTGGCAAGCAAAGAATGTGG  
CTATACTGTCGGTGTGCGCTTTATTGATGCCTCAGCAAGTTTCATTGGACAGAATGGTGG

ACGTGGCGGGCTCTGTCCCCCTGTACCACGCCTGGCCCACTCCCCTGATAGTATTCGTAA  
CGGAGCGGGGCAATTACTCGAAAGCGATGGTTCAGTGCTCAATGAAGATTATATGCAAGC  
GCCCCGTACCACGCTCTCATTTCGTGGGTGTGATGGAGAATACTGGACGACGACAGAAATG  
ATTGATCGAGAAACAACCATGGGGCACACCAAGTACATGAGTCGACTACCTTGCGCAC  
GACGTAGAGAATAACCGTCCACGTCAAATTCACTTACCGGACACAGCAGAGGCGGTTTTTG  
ACTGCGAGTGGGGATCCTGAAACTTGGACATTCAACCCTGAAGGTGGAATTCTACCGGCA  
GCGGAACAGGCAAAGGTGGCCGGAATCCCTGTACGGCGTATCGCTTAGCCAGTCCAACCC  
CGGCGGACTACTCCTATAGCGTGCCCTTAACACCGCTATCCGTAGACGAGAATAATAAG  
CAGTCATCGTACTCTATAGATGATGCTCTGAATGATACACACGACACTTCTCGCGAAGGT  
CTGGGTGTCACAGAAGATGCCCGACGCATTGCGTAAGCGCCATGCTACTAAGCGGGATCT  
GCCACTATTGACACCGAGCGCCCCTTGCTTCTATACCCCGCCGTCCCGGATAAGGGGCAA  
GGGGTGGTAGGATGCGAACGAGGCATAAGTCATCCGGACGGGTTCGGATGCTAAAAGCATA  
CGGATTCCGGATATGAACCGGGACTCATCATCGCGGATTCGCGGGGTGGTGAAGTAGCC  
AGGCACCCGTTTTCTCCGCTATACACGTCCCAAGCGGAAGGTCCGATGGGTTCATCCTCGT  
GCTTTGGCTCTATAGGGCCTACATGATTCTGCCGCCTTGCACGTCGTCGAGGATTCAGGG  
GCACCTCTTCATATGCCCTTTGATCACTATGCTATAAAAAGTGTTATTAGGCGGAATGGC  
TGTCTACAGATTTAGGGTGACGGCGCTAGACATATTGAAAGCCGGTCTTATGCGTTCAAG  
GATACTTCGGTCTCAGTTGTGGCAGGGAATTCCACGCCTCCCCGAATTTACACTCCGTG  
TCGGCTGGATCCCGCACAAGGGACTATGCCACCTGCCGTAATGTTGTTAAGGAGAATTTT  
TCGACCGTTTATAACTCGCGTGACATCAGCTTCACGGGAGTTCGGGCTAGCTATCGCGTG  
GGAGAGTTACGTGAGGTCAGGGCGTTTACAGGGACCCGGGTATAATTTCGTTACAGGACCA  
TCTGCCGAGAAAGACCTGGACACGGTTGCGATCTAAAATCTAGTCTTTGGTGTGGATGAT  
ATAGCCAGCTGCCACAGCCTTTGCTGGACAGTACCAATGTATGTACTGACAGTAAAGGCA  
GTCGTCTTAGGGCGTGTGCTTACGTTAAGGTCACCATCGTACACAAAGACAGAGTCTCT  
TTTGCCACCGCTGTGACCCTAGGAGCGCAAAGAGTAAAACATCAACCCTCGTCGACCGA  
GGTGACGACTTTGGCTTCAAGCTTGGGTACTCTCACCCCCGTTGGCCAGACATCGCTAAA  
GTGTTCACTAGACCACAGAACGTCGACACTTGGCTCGGTGCAGAATTCGGGCGCCTCCCG  
GTCCGTACCCTGCGTGCCAGTAGGTGCACGCTTGGGAATGATATTGCCTCTGGTCAACAC  
CAAGTGGAAATCAACGTTAACGACGAGCAGGTCAGCAAGTACAACCTGCAGGGTCTACGGT  
GGTCTGTCTTGGCAGGGTGCCTTTTTTCGCGTACACACAGTGTAGAATGACTATCCGGTCCG  
GGTGGCCCGACTCTTTAAGCCCCAGAGACTCTTAGTGCTACATCCCTTGTAGACCGCGGC  
AATGTGAACACTCCCTGCTATCCCGTCCCTGTTTACTGTGGCTGTATCGAAGCAAATCGA  
AGCTCCAGAGGCCTGACGCACAAAACAATTCAACGGTGTGAATTCCCAATACAAGGGGGC  
TGTCTGCATGCGCGCCAATTAAGTAAGTCTCTGTAAAGTACTGGGCGCACGTCTGGAAGGT  
AGGACTGTTCCAGTAAAGATACAGTGAAGCGCGGAGGCGCTTGTATGCACATTCTCTGGAC  
AAGCCACTATAACTGGATATTACCTAGGTCATTAGCTCGGGGGTGTGTTGATTGTGGAT  
ATTTTAGCGGGGATTGCACGCTGGATCACGCCGCTTGTACAACAGCCGGTTTTCGCCAAT  
GCCCCATACTGTTGATTGTACTCCGTGGTAAGGTCTGAGGAACTAAGGTAACCAGTGTG  
AGTTGCGTACTCTTCCACTAAAGTGCAGGTATATTTATTCCAGGCGCACAAAGCTGCCAC  
GCCAATCAGACGGACAGGAGACACGGCGGTAGGAGGATCGGCGTGGTATCCCCAATACG  
ACCGCCGCGTCTGAAGCCACGCTGAGACTATTGAAGGAGCTGCCTATAAAGGTAAGCTCA  
GCCATTCCTAAGCAGCTCAATTGCCCTGCCGGGGAATTATGAGGTAATGTTGCGCAAGCAA  
CGAGTCCTAATCTCGGGAAATACCAGAGCCACGGGCGAAGCTTGTCTTGTACGAGCTGG  
GGTTATCCCGAGAACAGGAGCCACCGGTTCCTTTTCCGACGGCTGTTAGGGCTGCTATCC  
TAGAATTCTTTAAGGATCACACTATTGTGTGCGATCCAACCTGGACCGATGACCTAGAGT  
GGTTGCGCCAGCAGAGCCAGGGTAAACGTGATGGGAGAGTCACCCGCCACGCACCCACC  
TAGAGATGGCCAGGGGATCCGTAGGAACACTGAACGGACCTTATGCTATGAAAGTTCGCG  
AGCGAATAAACC CGGCGCAACGTGTGCGGTTCGATGGACACCGCGTTAGTGGACTGGTTGC  
TCGGGGGACGGGCGTACACCCATTGCAGGAAGCCGTGTATCCGGGAAGACATTGCAGAGT  
AGATGCTCTAAGGTCTTAATCCTATATGGACGCCGACCAACGGTCAGAGTACGAGCGTG  
CCATTACACGTCTGTTCCGGCCTGTGGGACCTGGTGCAGACGTCACGGATGTTGGCGTCT  
CAGTCTGTAGCGCGCAGCATAAGGCCCAGGATAAGGGGAATGAGCTGCACCGGCTGATGC  
ACAACAGTGCCTGTTGCCCTACCTGGCACCTTAAAAGTCCGCCGGGAACCGAACCTCTG  
AGCAGAAGTTCGCCTTGCACAGAGCCTCGATGGGAGTCGACAAGTTCGAATCCGTGACCT  
ATATGGGTATCACCTGCTCCCTTTCAGGGTGTGTTGTTGCAACATGTTGATCCCAGGCGTTA  
CCGCGACCAGAGAAAACCGGCCCATAGCCACCGGGCGTGAAGGAACCTCACGTTCTCGA  
AGGAGTCGACCTCGATTGCGGCCGACACGCACCGTTGCACCTAGTACCTAGGCCACCCT

AACAGCGGAAGTCTATTGAGTGCACCTGGCCTGGACGTGGCCTCATTGCCCGCGTAGGGC  
CGGGCCGATAACCTGTAGACAGCGAGATTCATAAGTACCATGATTTCGCTCAGAGCCGGGA  
TCCTGAATAAGAGCGGGTACTCGGCGACCGCGGCCAGACTAGTCGAGGACCGTCTAGTA  
CTGGAGTTTTAACGTCCGAGCTCGAGCCGTCCACTGCGTAGGGCGATGTGTCTAAAGATC  
TGCACCAAGCGCGAGGCAACTGGGCTCTGCCGTTTCATGTTCTATAACCTTCCTCTCAGACC  
ATGCTCGTCCGCGTTTTGCTGCTCCGCGATCTGAACCTGGCCGACCTCTCTCGTAAACAAG  
GACCTGGGCCAGCTTCTGGGCCACTTGCCCAAGAATCGTGGTTGAGTTGTCCCTAGTGT  
AACCGATTGAGTCAGTGTAGATAGCCCGCCCCGGACGAGTTAATGTACGATTCGCGCAGC  
TCAAGTGGATCATCCTGTACCTTAACCCCTGCGGTAACGGCGGGAATGAGTCTGCGCGTA  
CCAATGATGGTGCTGTTTTGCGGTACATCCATGTTCGTAGCTTGGTGCGGATCCATGGACA  
GCGACTCTGCAGAGTAGCTCGAGAGGCTGTCTCCGTTGTGGAACGATTCGGGGATAAAG  
TCCTCCACGTAGGGAAAACTCGCGCGGATATACTGTGACCGATCTCTGCCCTGAACGCT  
TTCAGGGCTGTGGTCTGAGGGTACGCAGAGCCCGCTATGCGTGGCAGTGGACGAGCGGC  
ATAACACCGGCCGGAAGGCACTGCGAACCCCGCCGCTTGATCTATGCAGTGATGCGGAAGA  
ACCACCTCGTGCTGCATCGCATCCCCGTAGACGAGAACGGGGAGTTGCTCTAGCAGTATC  
CGGTGGAGCCCCTCGATCTGCGCTTGGGTATGTGCCGGAGGCACAACAACATCTCTGCCG  
GAAGCCCCATGATCAAGGAAGCCTTAATGGAAGCTTTTGGAGGGTGGGGATTCGGAACTCC  
GTATTGCTCCTGGTGACCGACCCGATGGCGAATTAAGAGCGCCACGATCCTCGAGAAGTGC  
AGGCTTGCCAGAGTAAACCAATGTGCCCGGCGCCGGATGTAAGCCGGCAACTCCCGACGT  
CCCGGCGCGCTATCCGAAAGCGGTTGGGAATAGGATAAACATAGCTGATTTACGATCAA  
CGCGGCTCCGCAGGCTAACATTGACTCTCCAATCCCCGGAGTTGCCTCAGGTCCTTTTCT  
AGACTAACCCCTGAGCGACTGTTTGGTGCTTCGTGATGTTCTCTTTCCAGTACAGGCGCT  
GGGGTGGAACGTGCGGAAGTAGTTCGTGGTGGCACGGGGTCAGGTGGCCGCATAGGTTCA  
AGGCCACATGGCCCTCAGCCAACCATGCCCTCGCTTTTCGTAATGGCGACGTGTATCACG  
AAGCAGTGTCTTAGGTCCAGTGGCCCCCTCCGCACCCTACTGTACATGGACAACGGGT  
ACGTCAGTACTTGGTCTGATGGTCAGTCTGTGGGAACCCCTGATGCCCGGTACGCGGGCC  
AGGAGTGCAGAGTCCGGGCTGAGGGCTGTCCATGTGTACTGGGACGGCGTCAGCTTGT  
ACTAGACGCATGAGGACGCAGAGAGCGGCAACGCGTCTCTGCTCTCAGTGCCGTTCAACC  
TGGGAGTGCATGGCCGGTCTTGGAGTTAAACGATCGGGCTCGCTAGGTCCCCCTAGCC  
TCCGGGTAGCCCCGGCGACCCACGACTGTTAAGCGACCTGTCACGCCATCCAGGCCCCCGT  
GGCAAGGTAAAGCCGGGTTACCCGAACGGGCAAAGAAATCGGCGCAGGGTATTCCTGTAC  
GGGTTGTCGCTCACCGTCGATCCGTAGATGACCGACGGTGTCCGGAGGAAGGGCGATGAA  
TTTTAGGGTAGGGCTGAGCCTGGCCATCGTTGTAAGTGGTGCGAGCGGGACATTTTGCAAC  
GGGGGCGGCGTGGCAGTACCAGTGTAACCCGAGACCCTAACGTACAAGGTAGTGATAGC  
AGAGGCCCAAACCTGCCGATATTTAACGAGGGTTGATCACTGTCGGGCCAGGGCCCCGAGC  
AGTAAAACGCCAGGAGCGGGGTGCGTTGAATGGACAACCTACTTGGAGAGATTCTCTTCT  
GCCTGCTGCGCTTCGTAGCAAGCGGTGCGCGTAGCTCAAGGGCTGTACCTGCGCGCCGAC  
CATATCCCACTCTGCAAGTGATGCCACCTCTGGAGTGGTCCCTCGGACTGCTAGCGTCCG  
TCCCGACAGTAGCACGGTGCAATGCCCTGCAATGCTTCGATTACTGAAAGATAAACATCT  
GGGCACTGGTTCCCAACTGCTGGGCACTTCCGTACCGCCCGCGAGACTGCAGAGATGGC  
ACTACCGTGTCAACTAGGCGTCGCACAGGGGCGAGTAGGGCACGCTGAGTCATGCCTTGGC  
TGCCACCTAGGTACTCGTTGTCCATTTTGCCCTGTATCTAGCTTGGTGGACTTAGCTAAG  
TGCCAGGAACGTGCTGCCGGCCACCGGGACTGTCGCGGTTTATGGACAGCCCCTCAACGG  
TGACACCACCACCGCCACCTGCAGCTACACATTGGCCTTTACAGCATTCTTCTGGAGCCAA  
CACCGCTTGGGCGTTGAATTGAGAAATCGGCGTGCTCTGGATGCACTTGACTTCAGGGAC  
GCCTTGGCTGCGCGTCGCTCAGGGTGGTGGGATATCACTGGCGCCTGGAATTCCTGCG  
CCCATTGCAAGCAGTCGCTCTCCTTCTAAGTCCAGCGAGCTCCCCCGGTCCCAGTTCCG  
GTTTTGTTTCGCTTAAGCGCTAGCGGTACGGTTCGCGCGCTATGTGCGTGCGTAGTTGCCT  
CGCGGGTACGCACATCCGTGACTCGCTTAGGGCCAGGGCGCGTGGGCATGTTCTGGGCG  
AGAACTCGCTTCTCCGACTAGTACTTAGTAGGGCGCCTAGTCGTTCACTGGCTCGCTC  
CCTACTCCATCCCCGGTTCGGTTTCATTTTCGATGGCGCGACGTGGTAACACGCCTCCTC  
CCTGGGCCTGCCT

>NewGenomeName\_172

AGCAGGGTGGTTTACTATTAGCCCCCTGCTGGGCCGGGAGATCCGAATAGTAATGGGCT  
TAATACATGAATGGGCCGCAAGTAAGCGGTCAGTTCAGTATCTTCGTTATGGGCTTCGG  
ACCAACATTAAGCGAACGTGTGTGCTTGTGGGTTGGACCGTAAGTCCAGTTCTAAAGC  
GATATAGTCATTGCTTCTATACGGAGGAGCAGAGAAATAAAAAAATCGCTGTTACACGT

GTAAGAAGGCTATTAGTTCGCAGAGTTTAAAAATACCCTTCAAGTTGGAGGGTGTGGTGC  
TCTCTCGCTTATGTCATACGGTGTGCCATGATGAAGCGCTACGGGATGAAAGAAGGGCGG  
AGGTGGAGGCGCCGCCCGCCCGTCCCTCAGACGAAGTATGCGAAGTCATAGGTATGTCA  
GGGTATTTATAGAAGGCTCGTATTCGCAACGCGCCTGTATCAGCTTTGTATTTGAGTATA  
AAAATATTTCAATACCAAACCTTAATGAATAAATTATAGGATTAAGAGACTAAGACATGA  
CAATAAAAAAAACTATGATACAATATAAAAACCTTCTTATGCCAACGTTGTATAATTA  
GGTCTGTTTAAATCTACATATATATATGTAGATTACAGTAATATTTAAAATAAATGATTTG  
GAAGGTAATTAATAATTAATGGTAAGAAATAAAAATATCCCGAATACATAACAAGGGGAA  
AATGCAATTGATACCTTTCACGCTTACATGTTTCGAATATATTAAGGGCCGAAGGCGCTT  
CAATCTGCAGGTATATCGGTGATTCCTTCGTGACGAAGCAAGGCTATTATTGTAAACAAG  
AACGCATCTGACAACCTTATATAGTGGTCCCGGATACAGCTATCATATGATAGCTGGCAA  
GGACCCTTGGGCGGACTCCAAATATCTATAAAAATAACATATAAATTGTATAAAGGTATA  
CATATTAATTAATTAATAAAGAGGGCGGGAAAGAGGACGCGTGCCCCGCACGCCCTGTGG  
TGGCGGGACAGCTGTCCCGAGTTAGTGCGCTAACGTC

>NewGenomeName\_173

ACGGGCCACTTGGAGCCAGGGAGCCACCACACTGGCACCTGTTAGAGCTGCTGCTGCAAA  
GTGCTGGTGCTTTAGGTTTAAATGACTATACTGCCGAAGGAGAAGCTAGCTTGAGGCACTT  
GATCCCTGGTGCCTTCCACTTTGCAATATGTGGGAAGGAACGGGTGGAGCAGGGAACCCC  
TCATTTGCAGGTCTTTCTACATTTTAAAAAGAAGCAGCGACTTAGTCCCTTCAAGAACT  
ACGTGCCCAGCTCACTGGGAGAATGACCGTGGCTCATATCTTGATAACGAGGAGAATTG  
TTATAAAGAAAACGAAGTTATTCTCACCTTACGGGAGCCAGTTCAGGCAACCGGAGCGA  
CCATGCCGCAGCTGTTCCGCCGTGAAGGACGAAAGGAGAATGGTGGATATCGCGCGAGA  
GTTTAGCGAGATCGACGTCAAGTATGGGTATGGTCTTAGGGATTGGGCACTGATGATTGG  
AGAGAAATCCCGTGACTTCACGACGGAAGTGGTTCGTTATCAGGGGGCCATCGGTTGTGGG  
TAACTCGAGACTTGAGGCTGAAATGGAAGGATCGAAGTGCTATAGGTTGAAAGGTGACTG  
CTGGGATAGATATCCCAACGAGGATATAATCATCATGGATGACTTCTATGGGTGGGTGAT  
TATCTGCGAAATGTCGAGATTCATGGACAGGAATCCACATAAAGCTTCCGTGAAGGGGTC  
TTATGTGGAGTTCACGTCTAAGAAGATTGTCATCACGAGCAATACGCAACCGGAAAATTG  
ATCCTGTCCGGATAAGTGTTATCTGGTTGCTTTGTTTCAGGAGGTTTCAATTAATGGATATC  
CTGGGATGGACTGAGATTTAAGGATGTGCCGGATGCTCTGAAGAAGCACCCGATCAACTA  
TTAACACTCAGCCCCTAGGAAGAGAGCGTCTCGCAGGTGATTAATCAAAAATGCGAGCGC  
AGCGCGCGGCGTAGGCCGAAGGCGAAAGCCGCCAGCAACCGCGCGAACCGCGGCCAGGCG  
CGAGCGACAGCGAGCGGGCAGACCCCGGGTCCGCTCGGGGTCACCCCGTCGAGGGGCCA  
AAGGCCCGAAGAAAGCTATGCTGTACCGCCCCCTCAAATAAAAAGGCTCCAAACAACAAT  
TTGTTTGGTGTCTTTATTTGGGAGTTGCCAAGTGAGTTAAGTTCATTTGCCGGAACCTCAG  
AGTAGTTGGTGACTTTGGCCTGGTAGTCCATCGGGTTTGGGGTGGGTTCTGGCCAACTGA  
AGGCTAACCAAGTTATGTTTGACCCTGATTCCGGAGCTGAGAAGGTTCTGATCACGTTTCT  
TAATTATCCATATCCAGGGGGAATTGGGAGTGGAGAGCCACAGGGCCCGCGTGACGTTAG  
CAGCATCAGTGTCCGTACGCTAAGTTATGGTCTTGGTTTAGATAGCCATTTCAAGCCTT  
TTCTTTGACCCCTTTACGAGCCCCGTTCCAGTGCTCTAGGGGGACATACCAAGTCTGG  
TCTTTTTGAAGAAGTCTCTAGGTGATTATCTTGGATAGGTAGCTTGTGCAGGAACCCCTT  
TCCGCGCCTCCAGGTTTCGTTGAGGGGTCTCATTTCACCTTTTGCTAACCTGACTCTAC  
AACTTCAAAAAGTAATCCCAATTGCTATTACCCAGTCCAGAGAGTCATACAGTATAA  
TGTTGATGCCAGCAATTCCAAATGACAGCTGAGACCCCCCTGTCCCTTTTTGTAGTTCCT  
GACCCAAAACCTAACAAATCTGAATCTATAGACCCTGGTGGTTCTGTGGCCCCCTTCTGC  
TGGTATGTCTCCTTCTCCTCCTCCYCCAGTACCGACTCCTCGATCTCCTCCTCCTGGGAG  
TCAAAAGTCGTCTCCTAGCAGCCTGGTTAAACGTTAACCACATCCGGGTTAATATGT  
CACCAGTGGCYCCCAATAGCCGTGRTAGTATA

>NewGenomeName\_174

TCGTTTTGAATACTTATTTTAGGCTTGTTATTACGCATTTTATAGACGGCTTAATTGTTA  
TTTGATACCAATTTGACACCGTTTAAATCAACTATGCACATGGCTTGATGTTTTTTATCAG  
TATATAAAGGTGAGTACGTTTGAATTGTTTCTGTAATGTTAGAATGCCTCATTAAAGTCCA  
TTAATAAATACATATCTACACCATTATTAATTAATAAGCTAGCGTACGAGTGTCTTAAAT  
GGTGTATTTTTAGATTCGGGAATGCAGATTTAAAACGATACGAATAAGTAACGTAACATA  
TAGGTTCTAAACCCCGAATATAAAAATAATTTTCGTCAAAAATTTATATCTTTTTAGAAG  
ATTCATTATTCATGTTTTTAAGCATCTCACTAATTAAGTTGGTACAGGTCTTATCCCGT  
TAGAGCTTTCTTTTTTTAGATTATATTCAATTTTTCTATTACTTAAATTGATATTCTTAT

TTACGTTAATTTTCGCCTTTTATTTTATCGTAATCTTTCCACTGCAAACCTAAAGCTTCTC  
CTATGCTAAGACCAGAATAAAATAACAGTCTAGTCAGCTGACGAGAAGTATCAGTTGTGA  
TTTGTCTACTTTTTTCATCAAATTCTTCACGAGTGATAAATTTAGCTTGTGGATTTGTTC  
TGGGAATAGGAGTTACCGATAATGTGGGGTCGTATAAGAGCTTGTAAATGCTTTTAGGGCGT  
AATTGATAACTGCTTTAAAACCTGCCACACAGATCGGGCATAGTCAACAGAAAGACCTG  
CATCGTTTAAACAATAATTCCTGAAAGCAGTACATTACGTAGTAGTGATTTTGCCACAAG  
GTATATTTCCGAACCTTTCTTTTATGTGAGTATTATATTCTGTAGTTTCGCTTTTCTATTG  
AGCGTGCAGAAAGATTTTCATTTTTTAAACGATCAAAAAATATATATTCAAAGGGTGTGAT  
TGTCCGAGTATCCATATTTAACATTTTGTATACATTTCGCTTTTCAGCTAGTTTGGCATCTT  
TCTTACGTTCAAACCCACGCTTCATTTTTCGTTTGTATTACCGTATAACATCTTTATATC  
TAATGGAAAAATACCATTTACCTGTATTACCATCCTTATATACTGGCATTTCACTTCTCC  
CTCCTCAAATTTGGCAAAAAATGATAAGGGTACGCGGGACACCCGTGAAAATTTGTATAAA  
AAAAGAGAGAGCGCAGATGCACCGTCTCATGTCGCAAATATTTTCAGCGACTTGTGCAATT  
TGAAGCTTGCCGCAAATATTTTCAGCGGCTTGTTTTGTATATATGTAATATAACCATCAAAG  
AGAGTGAAGTTCAAGCGATTTAACTAAGAAATCTAATTTTTATACGATTTTCAATTTTAT  
GTACTGTTTCTTTTGAATATGAGATTTCTCCGGCAGGGTTCATACCTATTAATTTTCGATA  
TTCTATCCTTGCTGATTGTGGTGATATTTAGAACGTTAGCATAGGTCTTTCTATACTAGA  
ATCGCTCATATCTTTTGCGAACCTTCGAAGATTTTTTGAAGTCGCCATTCAGCGATTTGT  
TTTCAGCAAGTAATTTCTGATCGTATGGGTTTTCTGCTTTTGACACCTTTTCAAGATTGT  
TAATGATTTTTTTAGCTAAATCCTTACCCGTTACGTCCATTTTTTCCAATACTAAAGGTA  
ACAAATCTTCTTCGATATGCACATTTGAATTTACTTCTGGAAGATGTAAGTGGAACTACCG  
TTAATATTGGATTTTTATTTGAATCGTGATTATTGAGTACCATACAAAAATGGTTTCCAG  
AAAATCTCTGCCAACATTAACACCTAACTTCACATAAATTATAGTGCCTTTTTTATATC  
TGGTGTAATTTTTGTTTTCTTTTAAACAATCTAACTTGATCCAATAAAAACTCTGAATATT  
CAAGACTCCATGAATTCATATATTTAAATTTGTAAATCTCGCTATTTTGAATCTTTTTAA  
AATCATTAACTGCTGTTTCTAAAGGTGCGCTCTTCCATCCCTCATCCTCCTCACGCCA  
CACAAAGCGCTATTAATCAATATCCAGTTATTGTTGTTTTTTGTTATGGAACCTTTCCTGA  
GAAATTACTCCGACATATAATAATTCTTTATATTTTATTAATTCATCAGCAACAGAAAAA  
CTCATTTTTTTCAGAATTGGATGGTTTCATAGAACTTTCTCGAATAGAGATTTGTTCTTGT  
ATTGTTTCCGCCCTTCTAGATACAGTGTTTTTTGATATGCTTCCTATAGCTATACTTTAT  
GAACCGTGATGTATAATTATTTCCGCAAAAAGAAGTCCTTTTTTATACGAAGCAGAATTG  
ATTTTCCCGAATGGAAATTCATGAATTTTCAAACCATATATCATACTTTGTCTAAGAAT  
AACAACTTAGACCAGTACATACTATTAAGTAGGTATTATTATTGTACAATCCCGAAGTT  
AGATACATTATGTTTTCAATTATCTTTTAAAATCATAGGTAGTTCTTTCACTTCTTTTTTT  
GTACCAAAACAATCCTCTACACCTATTTTCGCTAAATCTTTGGTAGATTTTAGATAAGTTT  
TCGTCAGATTTATTGATTTCACTTTCAAATTTCACTTCTTTTCTAGGTTCTCTTTGGTAT  
TCTTTTAAAATTTCTCTTTTGTCTTCAACAGATAGTTGCTTGTATTGCTTCCCTTTCTTCT  
TTTGTTTTAGTTGCTAAATATTGACTCTCAATCATACTTTCTTTGAACGTTAATCTGCTC  
TCAGGTAATTTCTTTCATGTTTCATTTCTCCTTTATTTATATTTCTTTATATTTAAAACCTC  
TCAACGGCTCAAATGTAATCGAATACTCGCCATAGTGAGTTCCAATACCATATATCTTTT  
TATATAGTTCTATTGCTTCTAATATGTATTCTTCGCTTAATTGTAGATACTCAGACAAC  
CACACAAGTTGCGTACGCCATCATTATAAGCTTCTACAATTTTCGCGTAGCGGTACGGCTG  
ATATAAAGCCGTGTCGTCTTGCCTCATTTCGAACTTACGATTGTTGAATTTTCGATTGAT  
CTAAAAGGTTGCTATACGTCAACTTGTGGTGGGCCAGTTCTTCATATAATACGTTTAATT  
TGTTCCTTTCGGATAAGGAAGGTCTAATAAAAAATTTCTCCTTCTTGATACCAACCATCGA  
AGCCTCGAGGTACTCTTTGTGCTTCTTTCACTTCAACTTCACATTTCATAAGCAATTCTT  
CGTATTTTCCCATGCGCAAACCCCGTTGGTGTCTTATTTCTTTCTATCTCTAACCCATT  
GCATAAAATTTTCGATTTCTTCCCATTCTTCGGGAGTAAATTCATCTTTATTTGCATGAC  
CGGCTATAGTTTCTTGATGAATACTTCTCTCTTCTGTAATTTCTCGATTTAGGTACATTAA  
AGTAATCTGCTAATTGATGGACTTTTGTATTTCTAGGATATTTAAGTTCTTGAAGCCAGT  
TAGAGATTGTTGATTGACTTACCCCAATTGCTTCAGACAATTCTACTTGAGTAATGTTGT  
TCTCTTTCATAAGTTGCTCTAAGTTCTCTGATAAAATTTTTCTAGCACTCTTATATTCCA  
TAATTTTCTCCTTTAGTATTACTTAATGTAAAATAATTTACCATAAGTAATATCACTTT  
TCAATACAAAATATTACTTTTTTGAATAAATAATCACTTTAGGTGTTGACATATTACTTT  
AAGTGATAGTATAGTTGTAATGTCAACGGGAGGTGATCCGAAATGCCAGAAAATTTGAA  
AGAGTTCTCTGTAAAGGTCTGGAGAATAATTCGAATATGACACAACAAGATGTCGCTGA  
TAAATTAGGCGTTACTAAACAATCTGTAATAAGATGCGAAAAAGATGACGCAGAATTA



AGGCTTACAATTGTATGCTTTAGCCAAATTATTCAACACAGAAGTTGATTATATAAAGGC  
TAAAAAATTTAACATTAATATCACTTTAAGTGATAAAGGAGGAACTCAGATGCAAGCAT  
TACAAACATTTAATTTTGAAGAATTACCAGTAAGAACATTAACAGTAAATGAGGAACCGT  
ATTTTGTAGGGAAAGAGGTAGCAGATATTCTAGGTTACAAAACCTGGCAATGGCGATATTA  
CCGCTCATGTTGATGCCGAAGATAAGCCGACGTGCCATATCAGTCCCGCAGGTCAAAGAC  
GAAATCAAACAATCATCAACGAATCGGGTTTATACAGGCTAATCTTCTCATCAAACTAG  
AATCAGCTAAACGATTCAAACGTTGGGTAACTTCAGACGTCCTACCCGCTATTTCGAAAAC  
ACGGTATCTACGCAACAGACAATGTCATTGAACAAACATTA AAAAGATCCAGACTACATCA  
TTCCAGTGTTTACTGAGCATAAGAAAAGAAAAAGAGCGAACTTACTTTTACAACAAGAAA  
TTGGAGAGCTAAAACCCAAAGCAGACTATGTAGATGAAATCTTAAAGTCAACTGGTACAT  
TAGCCACA ACTCAAATCGCGGCAGACTACGGTAGATCAGCACAAAAGATAAACAACTAC  
TACACGATGCTAGATTACAACGAAAAGTGAATTAACAGTGGGTGCTTTACTGAGACCACA  
TGGGCAAGAGTTACACAGAATCAGATACTATACCAATTGTACGCTCTGACGGTAGAGAAG  
ACACAGTATTACAGACTAGATGGACACAAAAGGCAGATTGAAAATATATGAAATCATGA  
CTGAATTAGGTAATAAAGCTGATTTAGGGGGAGCGTTGATGACACCAGAACAAAAGAAA  
AGCTAAACAATATAGTATTAACACTTTATGCAGTTAAAGAAAACAAAAGTCAAACATACA  
CACACAAAGATACTCTTACTGTGACATATGCAGGCGAGATTGAGCACACTTACGAGGTCCG  
ACAGAGAGAAACACCTTGAATCAATGATTGAGTGGTCAATTGACCAAATCGGACAGCACC  
TTGATTTAGACGAAGAAGAATAACACACAATTGAACAAACA ACTTAAGAGGAGGAATTAC  
AAATGAACGCACTATACCAAACAACCCTCCTCATCACAAGGGCAGTTGTGACGTCGAAGG  
TTGTAAAGATTGAGAAAAACACAAGATTTAACTTAGAAAATTTGATTATCCAAAAATTA  
ATAATGCTCAGAGCAAATCATTGTTGGATATTGCTATTCACGATCTAAAATATATTTAAC  
TGTATGCAAAAATTTTCATATTTTGTGAGCTTTTAAGCTTTCGTATAAAGCTATTGAATA  
AATAATTTTCGCAAGATACGTTATCAGGAGCATCTTCTTTCAACTTATTTATTCGATCTCT  
AAAAAAGTCACTGTCACCACCGAATTCTGTTTCGGCTTGATTACTAAGTTCACCAAAGAC  
ATTTTGAAAATCATTAAATTCATACTTATCACCTCCTTTCACTAGGAGATAACTAAATT  
ATACACAACAAAAAATAAAAAAGAGGAATAGATATGATAAAAAATAGTTTGCAAGCTAA  
AGCACTTGAAGTAATTTTATCTGTTCTAAATCCAAAGCAGGACAAATAATAAGAGCACT  
GAATAAAGTGCTTGAAGACGAACGTTACATTGCGATTCGAGGCAGAATACCAGTCCAATA  
AGGTAGAGAAAAATCCCTTATCACGGGTTGTGAGTCGAGAGAATAATGGAGGGCGCTGAC  
AAAAGAAAATGAGTAACATTTATAAAAAGCTACCTATTAGCAGTATTGTGCTTCACAGTCT  
TGGCGATTGTACTCATGCCGTTTCTATACTTCACTACAGCATGGTCATTTGCGGGATTCCG  
CAAGTATCGCAACATTCATATTTTATAAAGAATACCTTGATGACAACAAGGGAGAATGAA  
AAGATGTCAGATAAAGACTTGATGGAAAAAGTTGACAAGAGAAGTAAAGACAAAGATTTA  
ACGGTGAGAGAACTAGGACATTTGCTAGGTTTCTCTGATACTTATTTTATTAAGTTAAGA  
AATGGTTCAAGAAGAATTACGGATCGGAAGAGAGATAGAATTAATCGTTATTTAAACGGT  
GAATACGACAATGTAAAAATTCCTAAATATTCACGAGATTCTTAACAAGTAGCATATGAC  
AAGGCATATAAACAAGCTTTAAAAGATTTAGAAGAATTTGTAAGTAATAAAAAAACTGCT  
ACTTGCGACAACAAGTAACAGTGACAAACACTTAAGAAAAATTTTCATGTCCAATATAAAA  
CGACATAAAGGAAGTGTCAACAATGTACTACAAAATTGGCGATGTATGTCAAAAAGTAAT  
TAGTGTAGACGGATTTCGATTTTAAATTAGCAGTTAAGAAAACAAGATTACAGTATTCTAGT  
GAATGTCTTAGATTTAGAAGATAGATTTATCGACGGTATAAATATAACCGATGAGAATGA  
TCTATACACAGCAGTAGACATATTAATCAATTTATTTCTGAATGGATTGAAGAGAACAC  
AGACGAAAGAGACAGGCTAATTA ACTTAGTCATAAGATGGTAGGAGGTCGCTATGAAGCA  
GACTGTAAATTACATCATCCGTCATAGGGATATGCCAATTTATGTA ACTAACAACCATC  
TGATAATAATTCAGATGTTAGTTACTCCACAAATAGAAAATAGAGCTAGGGAATTTAACGG  
CATGGAAGAAGCATGTATCAATATGGATTATCACAAAGCAATCAAGAAAACAGTGACAGA  
AACTATTGAGTACGAGGAGGTAGAACATGACTGGACAACTTTATTTGAACAGTTGAACA  
GTAAAAACGTGAATGATCATAACAGAACAAAAAATGGATTAAATTATCTAGGATGGTCAT  
AGGCACACCAAGAGCTGAAAAAGATTGACCCAACTACACAGTAAAAGTACACGAGTTTC  
CACATCCAGATATTAACACAGAAAATACTTTTGTACCTTATTTGGCTACACCAGAAGGCT  
ATCTTGTACAGGTATCTGTGACTGTGAAAGATAGTACAGAGACTGAGTGGCTGCCAGTAT  
TGGACTTTAGAAAATAAATAGCTTGCTAAAGGTAGTGCAACA ACTTTTCGATATTAACAAG  
CGCAAAAACGATGTTTTGTTAAAGCTACGGCTGTACACGTTTAAAGGCTTATATATCTACA  
ACGGCGAGGAACTACCAAGTGCAAGTGACAACGATATTACAGAATTAGAATAGCGTATCA  
ATCAGTTCGTGAACTTATCTCAAGAAAAACGGCGAGATGAACTATCGATAAAAACGATGA  
GATGGCCAAAAATATCTAACATTAATATATTAAGTCAAAAACAAATCGCAGAAGCACACA

AAAATTAGATGCGGGATTAACAATTGGATAGTGCGGAGAAACAATAATGTAAACAG  
AGCAGTATTAGTAGGACGCTTAACAAAAGACCCAGAATTAAGAAGCGCGCCAAATGGCGT  
AAAGGTAGGTACATTCACATTGGCAGTAAACAGAGCATTACGAATGCTCTGGCCGAGCG  
TGAAGCAGATTTTATAAACGTAGTAGTGTTCAGGAAGCAAGCTGAAAATGTAAAAACTA  
CCTTTCTAAAGGGTCGCTGGCAGGTGTAGACGGGCGACTACAAACACGTAGCTACGAAAA  
TAAGGTCGGGCAACGTGTATTTGTGACAGAAGTAGTAGCGGACAGTGATCAATTCTTAGA  
ACCGAAGAATAACAACCAACAACCAACAACAATTATCATCAACAAAGACAAGCTCAAAC  
TAGTAATAATCCTTTTGATAATACCACTGCGATTACTGATGATGACTTACCGTCCTGATT  
GGAATGATTAATGCCGAAAATTACTAGTTATATCACTCAAGACGACGGCACAACAACAG  
TTGTCATCTCTGATGTTTTATTAGGTAATAAAGAAACATTACTACTTGATAACGGATTTG  
ATGTATAAGTCGATGTAAGCGTCATAGATCCATTTTCGAATTACCGGCAAGCAACGCAAAT  
TGATATTCGCATTGTGTAACGATATAGAAGCTCATACAGGACAACCTCGAGATTACATGA  
GGAAAATGTTCCAAGATTATGTGAAGTTTCTGTATGGCTATGAAGAACGCATATCTTTAT  
CAAATTGTTCTCGAACTATAGCTAAGCAAATTATAGAAGCGATGTTTGAGTTGATTTTTA  
CAAATGCGATTCCATTAATTATAAATCAAGCAAATTAATGAAAGAAGATAACAATTATC  
TTTAGTGGGCAACTGTTCCGCGTCATTGCATTATATGCGGAAAGCCTCACGCTGACTTAG  
CACATTATGAAGCAGTCGGCAGAGGCATGAACAGAACCTAGATGCATCACTATGACAAAC  
ATGTATTAGCGTTATGTCGCGAACATCACAACGAGCAACATGCAATTGGTGTTAAGTCGT  
TTGATGATAAATATCACCTGCATGACTCGTGGATAAAAGTTGATGAGAGGCTCAATAAAC  
TGTTGAAAGGAGAGAAAAAGGAATGAATAGACTAAGAATAATAAAAATAGCACTCCTAAT  
CGTCATCATGGCAGAAGAGATTAGAAATGCTATGCATGCTGTAAAAGTGGAGAAAATTTT  
AAAATCTCCGTTTAGTTAATACAGGTTTCATACAAAAGCTTTACCATAGGCGGACAAACTA  
ATTGAGCCTTTTTTTGATGTCTATTACCCAGGGGCTGTAAAGTAACTTTAATACTTCAAAT  
TCAATGCCAGGAAGTTTACTTATTGTTTCTAGGATGTGTCTGACTTTAACATTCTTTTA  
AAAATTCTAACCCCGAAACAAATCTTAGTTTTTCTATAAACTTATTAAGTGATTTAAA  
AACTGAGGAGCATAAAAGTTATTATAAATTCCTTGTGTTGTTAAGTAAGACATGTCAAAA  
GTTTCATTTAAAACCCCTAACCTTACTAGGTTATTAATTGAAATTTTCGCTTGATTCTATA  
TCTAACGGAGAGTCTTTTATTAACGTGTCCGATATATTCATACCGTCATTCTTTGGGTTT  
AAAGCCGCTCTCTATTTAACGGCAGGATGTACTTGGTGATTCTTTAAATATTTTAAAAGA  
ATAGCATCATTTGGGGATAATTGTTAATTATTTCAACAAATGAATGGTGGGTTAATGAG  
TTTTTTCTGTCATCCATAGATGATGCTATTAGTTTTGCGAACATATTACTTAAAGTTTTT  
TCACTAAAGTAAAACCTTTGAAGCTTCTAGAGCACGACCTAGAAGAGAAAATTGTGGTTCT  
TGTAAGTTATTTTCAGGTACAGGAGATATTTCTTTTTTCAATTGTTCTTTGAATTTTTCA  
AATTCTACTTCTCTTTGATAAATAACTTTATCCACATAAAGGTGGAATTTCCCAAAGACA  
AGTTTCCGAGTCTTAGAGAATGTTTTTACAGGCCCTTTTGATGCGCCTTCAATAATTTTA  
TCAAGACCTTTACCTAAAATAGGATCCATAATGATTCACCCCAATCTAACCCAATAGCG  
ATAATAAAATTATACCAGAAAGGAGATAACGAAATGGCAACATTTAGACCGATAAAAGAA  
AGTGGCGATTTTGCAACTGTGCATAAATCTTTTGTGTTGATAGTAATTTAAGTGCTAAA  
GCTAAAGGGATATTATTGATTTCCCTATGTGCTCCTGACAATTGGCAAAAATACACGTCA  
GAAGTAGTTAAACATATGACTGTTGGAGAAAAATCAATCAATAGTGGCGTTCAAGAACTC  
ATGGAAAATAAATATGTTTCACAGAATACAAAAAAGAGCTGAAAACGGTGTGTTTAAAGGT  
TTTGAATACTTAGTTTAGGAAAACCAACCGAAATGCCATTTTCGGAAAACGGATTATCG  
GCACACGCGTTTTTCGGAAAACGGAAAACGGAAAACCGAAAAGGGCCTAGTACTAATAAT  
AATAGTACTAATGATGATTTAACTAATAATAACAATACTAATAATGATGGAAGTACATTG  
TCGGGCAACCCGACTGTGTATTCCATTCCCTATAAAGAAATTATCGAATACTTAAACAAA  
AAAGCTGGAAAGCATTTTAAACAAAATACATCTAAAACAAAAGATTATATTAAGCAAGA  
TGGGATCAAGATTTTAGGTTGGAGGATTTTAAAAGGTGATTGATATCAAAACAGCTAAA  
TGTTTAAACACGGATAGCGATAAATACCTTAGACCAGAAACACTTTTTTGGCAGTAAATTT  
GAGGGGTACCTCAATCAAAAAATACAACCAACAGGCACGAATCAATTGGAACGCATGAAG  
TACGACTAAAGTTATTGGGATTAGGGGGATATTATGAAACCACTATTCTGCGAAAAGATA  
AACGAATGCTTGAAAAAATATCAACCTACTCATGTCCA AAAAAGGATTGAAATGTGAGAGA  
TGTGGAAGTGAATACGACTTATATAAGTTTGTCTCTACTAAAAAACCCCAAATGGTTAC  
GAGTATAAAGACGGTTGCAAATGTGGAATCTATGAGGAATATAAGCGAAACAAGCAACGG  
AAGATAAACAACATATTCAATCAATCAAACGTTAATCCGTCTTTAAGAGATGCAACAGTC  
AAAACTACCAGCCACACAATGAAAAACAAGTACACCCTAAACAAACAGCAATAGAGTAC  
GTTCAAGGCTTCTCAACAAGAGAGCCAAAATAATTATTATTGCAAGGTTTCATACGGAAC  
GGTAAAAGCCACCTAGCATGCGCTATCGCAAAGCAGTTAAAGCTAAAGGGCATAACGGTT

GCTTTTATGCACATTGCAATGTGGATGGATCGTATCAAAGCGACATAACAACAAAATGCA  
GTAGAGACTACAGACGAGCTAGTCAGATTGCTAAGTGATATTGCTTTACTTGTCTAGAC  
GATATGGGTGTACAAAACACATAGCACACTTTAAACAAAATTTTCAGCATTATTGATAAC  
AGAGTAGGTAACAAAACATCTTTACAACCTTAACTTTAGTGATAAAGAATAAATCAAAT  
ATGAACTGGCAACGTATCAATTCAAGAATGAAACACAATGCAAGAAAAGTAAGAGTAATC  
GGAGACGATTTTCAGGGAGCGAGACGCATGGTAACCAAAGAATTTTTGAAAATTAACCTG  
AGTGTTTACAGATATGTACGCTCATAAAATCTTAGACGAGGCACAGGGCGATGAAAAGAAGT  
TATATGACCTATTTATCCAAAACCTTGCAGACCGTCATACACGCCCGCTATCGTCGGAT  
ATTAAGGAGTGTTAAAATGCCGAAAAGAAAATATTACTTATACCGAGAAGATGGCACAG  
AAGATATTCAGGTCATCAAGTATAAAAAGAAGGAGAATGAAGTTTATTCGCTCACAGGAG  
CCCATTTACAGCGACGAAAAGAAAATTATGACTGATAGTGACCTAAAACGATTTAAAGGCG  
CTCATGGACTTCCATATGAGCAAGAGCTAGGTTTACAAGCAACAATATTTGATATTTAGA  
GGTGAAGATGAGTAAATACAACGCTAAGAAAAGTTGAGTACAAAGGAATTTGATTTGATA  
GCAAAGTAGAGTGTGAATATTACCAATATTTAGAAAAGTAATATGAATGGCACTAACTATG  
ATCGTATCGAACTCCAACCTAAATTCGAACTACAACCTAAATTTGGGAAGCAAAGACGGA  
TTACGTATATAGCCGATTTCTCTTTGTGCAAGGAAGGGAACTGGTTGAAGTTATAGACG  
TTAAAGGTAAGGCGACTGAAGTTGCCAACATCAAAGCGAAGATATTCAGATATCAGTATA  
GAGATGTGAATTTAACGTGGATATGTACAGCGCCTAAATACACAGGACAAGAATGGATGG  
TATATGAGGACTTTGTGAAAGTCAGACGTAAAAGAAAAAGATAAATGAAGTGATCTAATG  
CCACAACAAGCATATATAACGCAACGATTGATATAAGAATACCTACCGTAGTTGAATAT  
CAGCATTTTGATGTTGTGGATAAAGAAAAAGAAACGCTGGCAAAGCGCTTAGATAACAAT  
CCGGACGAATTACTAAAATATGACAGCATAACAATAAGACATCCATATATAGAGGTGGAA  
TAAATGAGTATCGTAAAGATTAACGGTAAACCGTATAAATTTACCGAACATGAAAATGAA  
TTGATAAAAAAGAACGGTTTAACTCCAGGACTGGTTGCAAAAAGAGTACGAGGTGGCTGG  
GCGTTGTTAAAAGCCTTAAACGACCTTACGGCATGCGCTTAGCTGAGTATAAAGAAATT  
GTGTTATCCAGAAGTATGCAACGAGAGGCTAGAGAACGTGAAATAGCTAGACAACGACGT  
AAAGAGGCTGAATTACGTAAGAAGAAGCCACATTTGTTAATGTACCTCAGAAACATTCA  
CGTGATCCGTAAGTTGATAATACTTATAACCAAATGTTCAAGAAATGGAGTGAAGCA  
TAATGAGCATAATCAGTAACCGAAAAGTAGATATGAACAAAACGCAAGACAATGTTAAGC  
AACCGGCGCATTAAACATACGCCAACATTGAAATTATAGATTTTATTGAACAAGTTACGT  
CGCAGTACCCACCAAATTAGCATTTCGCAATAGGTAATGCAATCAAATACTTGTCTAGAG  
CACCGTTAAAGAATGGTGATGAGGATTTAGCAAAAAGCGAGGTTTTATGTCCATAGAGTAT  
TTGATTTGTGGGACGGGTAACGATGGCAACGCAAAAACAAGTTGATTACGTAATGTCATT  
AGAGGAGCAATTGGATTTAGAAAACCTGCGACAAATATACAGACCAACAAGTTAAAGCAAT  
GAGTCATAAGGAAGTTGGCAATGTGATTGAAAACCTATAAGGCAAGCATAAGTTAGGAAGA  
GCTATACGACGAATGCATGTCGTTTGGTCTGCCTAATTGTTAAAAGGAGTGATGACCATG  
ACAGATAGCGCGCTAAAGAATACCTAAATCAATTTCTTTGATCTAAGAGATAACTGTAT  
CAGGATAACGAACGAGTGGCACATATCCATGTAGTAAACGGCACTTATTACTCTCACGGT  
CATATCGTGCCAGGTTGGCAAGGCGTGCAAAAAGACATTTGATACAGCGGAAGAGCTTGAA  
ACATATAAAAAGCAACATGGTTTGGAAACGAGGAACAGAAGCAACTAACTTTATATTTAA  
AAGGGCGGAAACAATGAAAATCAAATTTGAAAAGAAATGAATTTACCTGAACTTATCCA  
ATGGGGTTGGGATAACCCCAAGTTATCAGGTAATAAAGATTCTATTCAAATGATGTTGA  
ACGCATCTGTTGTGTGACTTTCGATGTTGATAGCATCTTATGTAATGTGACTGGATACGT  
ATCGACTAACGATAAATTTACTGTTCAAGAGGAGATATCACAATTAATAAAGTTAAA  
AAAGAAATGAGATTAGGTGAATTAATTAGATGGGCGCGAGAAAATCCGGTTCTATCACAA  
GGAAAATATTTTTTTCAACAGGATTTAGTGATGAATTCGCTCGTTTTTCATCCAAATACA  
AATAAGTGTTCCCGTCAAGTTTTATTCTAATTGATATCCCCTTCATAGTCGATATTTAA  
ACAGAAGTAACGGAAGAGACTAAGGTTGATAGGTTGATTGAATTATTCAGATTCAAGAA  
GGAGACTATATCTCTATACTATATGAGAACACTAGTATAAAGAATGTTTATATGGCAGA  
TGTGTGCCTACCAAAGCATTCTACATCTTAAACGATGACCTAACTATGCCGTTAATGTGG  
AAAGGTGGGAGTTGCTAGTATGATGTTGGAATTTAAAGCTTGGGATAAAGATAAAAAAG  
TTATGAGTATTATTGACGAAATCGATTTTAATAGTGGGTGCATTTTGATTTCAACAGGTT  
ATAAAAGTTTCAATGAAGTAAAACCTATTACAATACACAGGTTCTAAAGATGTGCACGGTG  
TGGAGATTTATGAAGGGGATATTGTTCAAGATTGTTATTCGAGAGAAGTAAGTTTTATCG  
AGCTTAAAGAAGGAGCTTTTTATATAACTTTTAGCAATGTAAATGAATTAAGTAAA  
ATGACGATATTATTGAAATTGTTGGAAATATTTTTGAAGATGAGATGCTATTGGAGGTTA  
TGAGATGACGTTACCTTATCAGATGAACAATATAAAAATCTTTGTAATACTTAACAA

GTTATTAGATAAACTTCACAAAGCATTAAAAGATCGTGAAGAGTACAAGAGGCAACGAGA  
TGAGCTTATTGGGGATATAGCGAAGTTACGAGCTTGTAACAAAGAAGTGTAGAAGAAAGC  
AAGCGCATGGGATAGGTATTGCAAGAGCGTTGAAAAAGATTTAATAAACGAATTCGGTAA  
CGATGATGAAAGAGTTAAATTCGGAATGGAATTAACAATAAAAATTTTTATGGAGGATGA  
CACTAATGAATAACCGTGAACAAATAGAACAATCCGTTATAAGTGCTAGTGCGTATCACC  
GTAATGAAACAGATGGATTACTAAAAGAGATTGAGGACGTATATAAGAAAGCGCAAGCGT  
TTGATGAAATACTTAAGGGTTTACCTAATGCTATGCAAGATGCACTCAAAGAAGATATTG  
GTCTTGATGAGGCAGTAGGGATTATGACGGGTCGAGTGGTCTATAAATATGAGGAGGTAC  
AGGTAAATGATTAACACATAAACAATTGATCAGTTACAAGAGTTATTACAAATACAAAAG  
GACTTTGACGATAGAATACCAACACCAAATTTACGAGATAGCAAGATTGCGTATGCGGTT  
GAGTTCTTTGAATGGTTTAAACACATTGGAAACGTTCAAGAATTGGAAGAAGAAACCAGGT  
AAACCGTTAGACGTACAGCTAGACGAGTGAGCAGACGTGTTAGCGTTTGGATTGAGTATT  
GCTAATCAACAAGCAGATAACATGGAAGAAATTTTAGGTTATTTAGGTGAGGGAGATTTT  
AACGACTATATAGAACGAGTTGAAATCGATTATAACGATAGTGATGTAGTAGATGAATTT  
ATGTGAACTATAGATGAAATGTATGAAAGTCCATATAGTAGCAACTTATTTTTACCGTTT  
GCATTAGCGAACAACACTACTACACTATCGATCAACTCATTGACGCATACAAAAAGAAAATG  
AAAAGGAACCACGAAAGACAAGATGGAACAGCAGACGCAGGGTAAGGATACGTATAAAGA  
CATATTAGATCGGGTCAAGGAGGATTTGGGGAAGTGACACAATACTTAGTCACAACATTC  
AAAGATTCAACAGGACAACCACATGAACATTTTACTACTGCTAGAGATAATCAGACGTTT  
ACAGTTGTTGAGGCAGAGAGTAAAGAAGAAGCGAAAGAAAAGTACGAGGCACAAGTTAAA  
AGAGATGCAATTATTAATTAGGTCAGTTGTTTGAAGATATAAGGGAGTGTCGGAAATGA  
CGGATGTTAAAAGTAAAACATTTTCAGGTGGAGTTTATTTTGTAAAACAGCTGAACCTT  
TTGAAAAATATGTTGAAAGAATGACGTGTTTTAATGGTTATATTTACGCAAGTACTATAA  
TCAAGCAACCAACGTATTTTAAAACAGATACGATTGAATCAATCACACTTATTGAGGAAC  
GTGGGAAATGAATCAGCTGAGAATTTTATTACATGACGGTAGTAGTTTGGTACTACATGA  
AGATGAATTATTTAACGAAATAGTATTTGTTTTGGATGATTATAGAAATGATGATCACTA  
TTTAACGATAGAAAAAGATTAGGGCAGAGAACTTGGATTGAACAAAGGTTATATAGTTGG  
GAGTAATGTTGAGGAGGCAGACGATGACTAACCAATATTAAGACTATTATTCTTACTAG  
CGAGGTATGAGCTAGGTAAGTATGTAACGGAGCAAGTATATATTATGATGACGACTAATG  
ATGATGTAGAGATGCCGAGTGACTTCGCAAAGTTGAGCGATCAGTCTGATTTGATGAGGG  
CGGAGGTGTCAGAGTAGATGATGTGGTTAGCCGTAGCAATTATATTACTAGTCCTCTTAT  
TATTTGGTGTGATGTTGCAAGCTGAACAGTTAAAAGGCGATGTGAAAGTTAAAGAGCGGG  
AGATAAAGATATTAAGAAGTAGATTGAGACATTTTGACGATTAACATATTTGTACGGAG  
GGTATTCATGACTAAAAAGAAAGACGGATTAATAATTATCAACAGTTCGGAAATTAGAAGA  
CGAGTTGTGCGATTATCCTAATTATCATAAACAACCTGAAGATTTAAGAAGTGAAATACT  
GACACCGTGGATTCCAACAGATACAAATATAGGCGGGGAGTTTGTACCATCTAATACATC  
AAAAACAGAAATGGCAGTAACTAATTATCTTTGTAGTATAAGAAGTGGTAAAATACATGA  
GTTTAAGAGTGCGATTGAACTTACAATCAACACCTCAAATAGGAAAGAACGCGAATTCAT  
TCAAGAGTATTATTTAATAAAAAGACTTTGATTGCGGTTTGTATGACCTACACATCTC  
TGAAAGTACAGCGCATAGTATCAAGAAGAAAATCGTGTCTAACTAGCCGATGAATTAGG  
AGAATACTAAATTTAACAGTAAAATGACAGTTTTTGACACCTATAACGAGATATTATCAT  
AGTGTAGGATATTGACTATCTTACTGCGTTTCCCTTATCGCAATTAGGAATAAGGGATCT  
ATGTGGGTTGGATGATTATAGCCATTCCCTTTTTTAATTTTAAAAGCGTATAGCGCGAG  
AGTTGGTGGTAAATGAAATGAACAAATAAACTAAAAGCGACGTTTGTCTGCAGAAGTAT  
ATACAATACCTAGTACTGAATGTTATGGCAACGCTACTAAGTCAGCTGTGCATGCCTGAT  
CTAGCGAAAAGACGGCGTACTCACAAGGAGAGCGTATGTTGAAGCATGGTGAAATTCAGA  
ATTATATCAAGGAGGTTGAAACACAACCTTTGACGAGAATATTATGTCAGGTAAAGAAG  
TGTTGTATAGGCTAACTAGAACAGCTAGAGGAGAACACACGAAAGTTCAAGCTGTCTGTA  
CGAAAACCTGGAGACTTTAAATAGAATCCGGGTAAGTGGCAAAAATGCAATTAGTATACGACG  
AACACATACAAATTGTTACTAAGTCACCGAAAATAAGTGACCAAACAAGCCCTTAGAGA  
TGTTAGGTAGACATCACAATTTTACATACAAACAAGAAGTCGACCACAAAATACCGA  
TGTTTGTGATAATATTCCGGAAGATGATTAGTCATGTATGAAATACTTGATCTAAAAAA  
TAAAATCGGAGGTGGCTACAATAAGTTTTGGCACAACAAAACCTTTTACCGTGTGTTAA  
AGGTTCAAGGGGTAGCAAGAAAAGTAAAACCTACCGCTATCAATCTCATTTATCGAAGAAT  
GAAATATGATTGGGCAAATATACTTGTAGTCAGAAGATTTAGCAACACTAACAAACAATC  
AACGCATACAGATTTAAAGTGGGCAACTAACTAATTAGGCGTTGCTCACTGATTTAAATT  
CAACGAAAGTTTGCCGGAATAACGTATAAACCTACTGGACAAAAAATACTGTTTAAAGG

TTTAGACGACCCATTGAAAATAACATCGATTACTGTTGATACAGGCATTTTGTGTGGGGC  
TTGGTTTGAAGAGGGTTATCAAATAGAAACATTCGCTAAGTTTGGCACTGTTGTTGAGTC  
AATATGTGGTAGCTACGATAGTCCGGAATTTTTCAATCAAATCACAGTCACTTTTAACCC  
GTGGTCGAAAAGCCATTCGTTGAAGCCTACATTTTTTGTGATGAAGAAAACAAAATTAACAA  
TACTTTTTTCAGATACAACAACCTTATAGTGTTAATGAATGGTTAGATAAAGTCGATATTGA  
ACGATATGAAGATTTGTATCTAAAGAATCCTAGACGTGCAAGAATCGTTTGTGATGGAGA  
TTGGGGTGTTCAGAGGGGCTTGTATTGATAATTATAAAGTGGAAGACTTTGAGTGTTT  
TGAGGAGTTTAAAAGAACGCAAGAAATATCTCCCGAATGGATTTTGGGTTTAGTCAAGA  
CCCTACAACAGTAGTTAGTACGGTTGTAGATTTAAAAAACAAAAAGTTATTCATCTATGA  
TGAACACTATAAAAAAGCGATGTTAACTGATGATATAAAACAAATGCTTATTAAAAAAGG  
ATTAGGTGATGTAGATATTGCAGCTGATTATGGGGCTGGTGGAGATTGAGTGATCAGTGA  
ATTGAAATCTAAAGGAATTAAGGTATAAAAAATGCGTTGAAAGGCGCTAATACTATTTT  
ACCAGGCATTCAATTCATTCAAGGCTCTGAAGTTATTATACACCCTTCATGTGAACACGC  
TATCGAAGAGTTCAACACTTATACATTTGAACAAGATAATGATGGTAAGTGGTTGAACTA  
GCCTATATATGCTAATAACCATATTATCGATGGATTGCGTTATAGTCTTGAGAAATATCA  
TATCGTACGTAAAAACGTAAAAAGAACATAGAAAGCAAAACAAAAGTAAGTAAATCTCT  
AGGATTATAGGAGGGAACAAATGTTAAAGGCAAACGAATTTGAAACGGATACTGATTTAC  
GAGAAAACAGAAATTACTTGTTTAAACGATGAAGCTAATGTTGTTTAAACATATCACGGGA  
CAGAGTCTGATTTATTACAAAACATTAATGAAGTAAGTAAATACATTGAACATCACATGA  
ATTACCAACGACCTAGATTAAGGTGTTAAGTGATTATTACGAAGGTAACACTAAGAATT  
TGGTTGAGTTAACACGACGCAAAGAAGAGTACATGGCAGATAACCGTGTAGCGCATGATT  
ACGCATCTTAGATTAGCGATTTTATTAACGGTTATTTCTTAGGTAATCCGATTCAATGTC  
AAGATGATGATAAAGATGTATTAGAAGCTATTGAGGCGTTCAATGGTTTAAATGATGTTG  
AGTCACACAATAGATCTTTAGGATTAGATTTGTCAATATATGGCAAAGCTTATGAGTTAA  
TGATTAGAAACCAAGATGATGAAACGCGTTTATACAAGAGTGATGCAACGAGTACTTTTG  
TCATATACGACAATACAATTGGAGATAATAGTATCGCAGGCGTTAGATATTTAAGAACTA  
AACCAATAGACAAGACTGACGAAGATGAAGTGTTTACAGTTGATATATTTACGTCTCACG  
GTGTTTATAGATAGCCTACCACTAGAACAAATGGATTGAAGCTCACACCACGTGAAAACG  
GTTTTGAATCACACTCTTTCGAACGTATGCCTATTGCAGAATTTAGCAACAACGAAAGAA  
GAAAAGGAGATTATGAGAAAGTAATCACTTTGATTGATTTGTATGATAATGCATAATCAG  
ATACTGCTAACTTCATGAGTGATTTAAACGACGATATGTTATTGATTAAGGTAACCTTAT  
CATTAGATCCGGATGAAGTAAAAAAACAAAAAGAAGCTAACGTGTTATTTTTAGGGCCAA  
CCATTTATGAGAATAGGGATACAGGTATCGAAACAGAGGGTTCAGTTGACGGCGGTTATA  
TTTATAAGCAATACGATGTACAAGGTACCGAAGCTTATAAAGACCGGTTGAACAGTGATA  
TACACCTGTGTACCAACACGCCTAACATGAAAGATGATAACTTTAGTGGTACGCAATCGG  
GCGAGGCAATGAAACATAAATTGTTTCGGATTAGAACAACGTAATAAACTAAAGAAGGAT  
TGTTTACTTAAGGGTTAAGACGTCGTGCTAAGTTGTTAGAGACAATACTTCAAATACAC  
GGTCGATTGGCGCTAACAAAGATTTCAATACTGTTAGATACGTATACAACAGAACTTAC  
CTAAATCATTAAATCGAAGAATTAAGCTTATATTGATTCTGGCGGGAAGATTAGTCAA  
CACTTTAATGTCTCTATTCTCGTTCCTTCCAAGACCCTGAATTGGAAGTCAAGAAAATAG  
AAGAAGATGAGAAAGAATCTATAAAAAAAGCTCAAAAAGGTATGTATAAAGACCCTAGAG  
ACATCAATCATGACCCACAAGCTGATGATACAAAAGATACTGTTGATAAAGAGGAATGAT  
TGAAATTGCCTAACAAAAACACTCAAGAATATTGGGAAGAACGCGTACGCAAAGCAATCG  
AGAATGAGGTGAAGCGTTATAAACTAAAGCTGAAGTAATAGAACGTATATTGAATATGT  
TGATTAGGCGCATTGAAAAAGAAATCAATGCGTTTATTGTTAAGTACGGAGATTTTGCAG  
GCGTTACATTACAAGATGCACAAAAAATTATTGATGAGTTCGATGTAAACGCGTTTCAAG  
AAGAAGCAAAAAGATTGGTCGAAAACAAGGACTTTAGCGATAGAGCCAATGAAGAATTA  
AGAAGTATAACACTAAGATGTATGTATCTAGTGCACAGATGTTAAAGATTCAAATAGAAT  
TCTTAATTGCTTATGCAATAGCTCAAACAGAATTATCGATGAGGGAATATTTCGAATCAA  
CAGCTTATCGTGTGTTAAGTGATCAAGCGGGTATTTTAGGTGAAGGTGTACAAGTAGCTA  
AAGAAGTTATAGATACAGTCGTTGTTAAACAATTTTCATGGTGTGCGTTTGGTCAGAGCGAT  
TATGGACTAATACTGAAGCGATGAAACAAGAAGTAGAAGGAATAATTGCTAATGTGGTTA  
CTAGAGGTCGACATCCTAAGGAATATGTTAAAGATATGCGCAAGCACCTAAACAAATTCG  
AAGGCACAGCAAGACAAAAGACTGCAGCAATTAATCATTGCTTTATACGGAATCGGCAC  
GTGTTTCGCGCACCATCAAGTCTTGACAGCATGAAAGAAATTTACCGGAAGGATATTA  
TGTATATTGCAAAAATTGATAGTAGAACAATAAAGGATGCGAGGGGCTTAATGGTGAAA  
TATTCAAAGTTAAAGACGCTAAAATTGGTGTAAATTTCTACCCTATGCATATCCATTGTC

G TTCAGATTGTGCATTACTACCTAAATCTATGTGCGCCGAAAAACCCAACCAAGAAATGAA  
AAACATAATACTTCGGAGGAAAAGTGAAAAGCGATGATTGATTTAAAAGTAAAAGTTTTT  
AAATGCAAGTTAGCATTGTATGATAGTAAATTCGGTGTGGAGGATATTGGTATGAGCA  
ATACTGAAAGATACTTTAGAGACATAGCAAGAGAGTTAAAAGGTATACGTAAAGAGTTAC  
AAAAGCGAAACGAAACAGTTATTATTGATTCAAACCTTAGACAGCGTAAGGTCGGCATTAT  
TAGCCAATAACGAAAAACAGAAATATAACGAACCACTCTTTTAATAGCTAGCACTTAATT  
GTGTTGGCTATTTTTTATGTCCAAAACGTGCTGATGACATAAAAAGCACGCATGTAAAAA  
CAGTCGACAGACTATAGATGGAGGTAAATCTCATGGAAGAAAATAAACTTAAGTTGAATT  
TGCAATTTTTTGCAGACCAATCAGATAATCCGGACGAACCAGGCGGAGATGGTAAAAAAG  
GAAATCCTGATAAGAAAGAATATGACGAAGGCACTGAAATAACTTTCACGCCAGAGCAAC  
AAAAGGAAATTGATGAAATACTTGAACGTCGTGTAGCCACGAAAAGAAAAAAGCTGATG  
AGTATGCAAAAAGAAAAAGCAGAAGAAGCCGCTAAAGAAGCTGCTAAATTAGCGAAAATCA  
ACAAGGATCAAAAAGATGAGTATGAACGCAACAATTGGAAAAAGAGCTGGAGCATTAC  
GCTCAGAAAAACAATTAAGTGAAATGCGTTCAGAAGCAAGGAAAATGTTAAGTGAACCAG  
AAGTTGATTCATCAGATGAGGCTGTTAATTTAGTTGTAACAGATACTGCTGAACAACTA  
AATTGAATGTTGAAGCTTTTTCTAATGCAGTAAAAAAAGCGGTTAATGGAGCGGTTAACA  
TAAACGCTAGACAATCGCCATTGACTGGTGGAGATTCATTTAATCAATCGACTGAAAATA  
AACCGCAAACTTAGATGAAATAGCTAGACAAAAAAGAATTATTA AAAAATTAACGGAGGC  
ATTTCAATGGAACAAGCACAAAAATTA AAAATTA AATTTGCAACATTTTGCAGTAACAAT  
GTTAAACCGCAAGTATTTAACCCTGATAATGTAATGATGCACGAAAAGAAAGATGGCAGC  
TTGATGAATGATTTCACAACTCTCATCTTACAAGAGGTTATGGAAAACTCTAAAATTATG  
CAATTAGGTAAGTACGAACCAATGGAAGGTAAGTACTGAGAAGAAGTTACTTTTTGGGCTGAT  
AAACCAGGTGCTTACTGGGTAGGTGAATCTCAAAAAATCGAAACATCTAAAGCTACATGG  
GTTAATGCTACTATGATAGCGTTTAAATTAGGGGTTATCTTACCTGTAACAAACGAGTTT  
TTGAATTACAATTATTCACAATTCTTTGAAGAAATGAAGCCTATGATTGCTGAAGCATT  
TATAAAAAGTTTGTGATGAAGCGTGTATTTTGAATCAAGGTAACAATCCATTTCGGTAATTCA  
ATTGCACAATCAATTGAAAAAACTAATAAGGTTCTTAAAGGAGACTTCAGACAAGATTAC  
CTTATTGATTTAGAGGCATGACTTGAAGATGACGAATTAGAAGCAAATGCGTTTATCTCA  
AAAACGCAAAACAGGAGCTTGTTACGTAAAATTGTAGATCCTGAAACAAAAGAACGCATT  
TATGGCCGTAACAGTGATACATTCGACGGTTTACCTGTGGTTAATCTTAAATCAAGTAAC  
TTAAAACGTGGTGAACATACTACTGGAGATTTTCGATAAGTTGATTTACGGTATCCCTCAA  
TTAATTGAATACAAAATCGATGAAACAGCACAAATTATCTAAAGTTAAAACGAAGATGGC  
ACACCTGTAAACTTATTCGAACAAGATATGGTGGCCATTACGTGCAATTATGCATGTTGC  
ATTGCATATCGCTGATGACAAAGCATTGCTTAGGTAGTTCGTGCTGATGCAAAACCATC  
TTCAAATCCAGGAGAAGTTTAATAAATAAATAGGAGTGATAACATGCCCGAAATCATTGG  
AATTGTTAAGTAGATTTTACAGATTTAGAAGATATCAGACATGTCTATATGAAAGGGCA  
TGTCTACCTCGCAAAGGTTATGATCCTAAGAATGAACGTATAAAATCTTTAGCCAGCGT  
TGTAATAAACGCAATGAGCAAATGTTTTACATTGTAATGACAAATTAACCAAAAAAGA  
ACTTGTGCAAAATAGCAAGTTTTGTGGGCTTACAAGTTGATGAAAAACAACAAAAGCTGA  
AATTATCAACACTTTTGAGTCGCTAGACTAGGTGGTTATATGACTCCGCTAGCTGATGTA  
AAAAAACGTATTGGTCTTAAAGATGAAAAGCAAGATGAACAATTAGAGGAAATTATAAAA  
AGTTGTGAAAGCCCGTTGTTATAAATGTTACCTATGGAAGTTGAACAATACCGGAAAGG  
TTTAGTTACATGATTAAAGAAGTTGCAGTTAAACGCTACAACAGGATTGGTGTGCTGAAGGT  
ATGACATCAGAAGCGGTTGACGGACATAGCAATGCGTATGAATTGAACGATTTCAAGGAG  
TATGAAGCTATTATTGATAATTACTTTAATGCTAGAACGAGAACTAAAAAAGGAAGGGCT  
GTGTTCTTTTGAGATATGAAGATAGAGTAATTTTTCAATTAGGACAAGTAGCAACTTACA  
ATCCTAAACTAGCGAAAAAGAAAACGCACTAATCACTTATGATGCGATACCATGCAATA  
TTAACCCCATTTCTAGAGCAAGAAAGCAATTTGAATTTGGCGATGTAAAAAACGAAGTAA  
CTGTCCTGAGGGTCAAAGAATCCATATCTTACCCTGTTAGCCACGTGTTGGTTAATGGCA  
TTCGCTACAAGATAGTTGATAAAAAGGATATACAGACACGAAACGTCATATTATATCGAAG  
AGGTCAATTGATGAATATAGATGGATTTGACGCACTGTTAAACCAATTTACGATATGAA  
AAACAACATCGATGATGATGTAGATGATACTTGACAAGAAAACGCCAAAGAATATGTAGT  
ACGAGCTAAATTGAAAGCTAGAGAAGTAATGAATAAGGGTTATTGGACTGCTAATTTATC  
ACGCAATATCAGATATAAAAAATCTGGCGATTTGCAATACACTATCACATCGCATGCACC  
TTATAGTAGTTTCTTAGAGTTTCGTCCCTCGATACATGGAGGCAGTACCTTTTTATGTGGCC  
AGTCTATGAGGTAATAAGAAAATCGACTGTAGAAGAGTTGAAAGCGTTGTTTGAATAGGA  
GATAAAAGCATGACACCAAACTTACAACCTTTATAATAATGCGTTTGAAACGCTACACGGA

TATCGATTCCCTGTTATTTCTCGTAAAGAGATGCAACAAGAGGTTCCGTATCCTTTTTTT  
GTAATAAAAATGCCGGAGTCAAACAGAAGTAAATACACGTTTGATAGTTATTCTGGTAGC  
ACGAATTTAGTTCTTGATATTTGGTGTGTAAGTGATGATTTAGGCCATCATGACGGACTT  
GTTAAGAGATGTATTGATGATTTAACACCTAGCGTTAAAACAAACGATTATGACTTTGAA  
GTAGATGATACTAACATCACACAGTTAGTTGATGATACTACCAATCAAGATTTGCTACAC  
ACATCAGTAACGATATCGTACAAAACATTTTAAAAAACGGAGGAATATTGAATGGCAAAT  
ATGAAAAATAATAATGATCGTATTATATAATTTAGAAAAGCTAGCGAAAAAGTAGATGCT  
ACTAAAATGCTTTTTTTAACTGAATACGGCTTATCACATGAAGCTGATACAGATACAGAG  
GATACAATGGACTGTTCTTATAACACAGGTGGTTCTGTTGAGTCAACAATCTCTGGTACT  
GCTAAAATGTGTTACGGTGACGGTTTTGCAGATGAAATTGAAGATGAAGTTGTAGATCGC  
GTATTGTATGAGGCTTGGGAAGTTGAAAGTAGAATACCAGGCAAAAATGGAGATGCCACT  
AAATTTAAATCGAAATATTTCCAAGGTTTCCACAATAAATTTGAATTTAAAGCAGAAGCT  
AACGGTATTGATGAATATGAATGTGAATATGGAGTGAATGGTCGTTTCCACCGTGGATTT  
GCAACACTACCTGAGGCTGTAACAAAGAACTTAAGCCGACTGGATACAGATTCCATGAC  
ACTACAAAAGCAGATGCGTTAACTGGCGAAGATTTAACAGCAATTCCACACCCTAAGGTA  
GATTCATCAACGGTTACACTAGGAGAGGTATAAAAAATAGGGCGTTAAGCCCTATTTATTT  
TGTATCAATTAATCATGAATGGAGATTTTAAAGTTATGAATGTAGAGAGTAACGGAAAGTC  
ATTAGAATTAAGTGTTGGTTTTAAATTTTTAAGAGAAATCGATAACCGATCAGGTTCAA  
AGTTGAGCAAGCTTCTATCGGTCAAGGTGTATCAATGTTGCCTGTAAATTTAGAGAGTGG  
AAATCCTGTTGTGATTGGCGAACTTTAAATTGCAGCTACATCTCACTTAAAAAACAAGC  
AATTACTTTTAATAACCTTGCTGAAGCGCTAGATGAAATCGCAGAAAATATCGGACTAGA  
AGAATTCGGTTCAGATATTTTAAACGGAGTTGGGAAAGCGACCTATGACCCGAAACCTAGT  
CGGAGTAATAGAAGGGGAAGAGAAACCAGCGGAAGCGTAATATCTTACGACAGAATCGTT  
ATAACTTGTATGTCAACACTTGGTATCACAGATTTGAACGTTATTGAGCAAATGACATTA  
ACATAATATAACTATCGAATCTATGCGAAAGAGTATGTAATGCTAACCCAAGAGTTCGAA  
CGTTACAACTTGCCTTTGCTAGTCGTGATGCTGCAGCTACAAAAAATGTTGGGACAGAA  
AATAAACCTAAAGAGGAATATGTTTTTAACCACGCAAACGACGTATTGCCTTATGAAGAA  
AATATCCAACCTGCTTAACGAACGTACAGATATAAGATTTAGTAGCGAACGTGATGAATAC  
GAACCACAAAACAATGAATTTCTTTAAAGTTATAGCAGAATTTAAACAAGCAATAGAAAGAG  
AGGTGTTAATGTGACGGAATATACAATTAAGCGACTATTGAAGCTAGTGTAGCCAAATT  
CATAAGGGAAATCGATAGTGCGGTTAAGTCTGTGCAAAGATTTAAACGAGTAGCAGATCA  
AACTAAAGATGTCGAATTAATGCTGATGATAAAAAATTACAAAAAACTATCAAAGTTGC  
TAAGAAGCCTTTAGATGCCTTTAGTAACAAAAAAGTAAAAGCTAAATTAGATGCTAGTAT  
ACAAGACTTACAACAAAAGGTACTAGAATTGAATTTGAACTAGACAACTAACTCTAA  
AGAAGTTACTCCAGAGATTAATTACAAAAACAAAAAATTGTCTAAAGATATCGCTGAAGC  
AGAAGCTAAGTTATCCGAACCTAGAAAAGAAGCGTGTCAATGTTGACATCAATGCTGATAA  
CATTAAATTCAATCGAGTGTTAAAAGTATCTAAAGCTATTCTTGAAGCTTTAAATAGGTC  
TAAAGCCAAAGCTATTTTAGATGTAGACAACAGTGTGCTAATTCTAAAATCAACCGTAC  
TAAAGAAGAGCTTAAAAGCATTCCAAATAAAACTAGATCTCGCCTTGATGTAGATACAAG  
GCTTTCTATACCAACTATTTATGCGTTTTAAAAAATCATTAGACGCATTGCCAAACAAAA  
AACAAACAAGGTAGATGTCGATACTAATGGTTTTAAAGAAAGCTTATGCCTACATAATAAA  
AGCAAACGACAATTTCCAAAGACAGATGGGGAATTTAGCTAATATGTTCCGTGTGTCCGG  
GACTGTAGTTTCTAATATGGTTGGTGGATTACTAACTTCATCTTTTAGCATTTTAATACC  
TGTAATAGCGAGCGTAGTCCCTGTAGTGTGTTGCACTATTAACGCTATCAAAGTGTTAAC  
TGGTGGTGTACTTGCTTTAGGTGGTGTGCTGTAGCAATAGCTGGTGTGCTGGCTTTGTAGCATT  
TGGCGCAATGGCTTTCAGCGCTATAAAGATGCTTACTGACGGCACTTTACAAGCTAGCTC  
AGCAACAAACGATTACAAAAAAGCTTTAGATGGCGTAAAGTCAGCATGGACTGATATTAT  
AAAGCAAAATCAATCCGCTATCTTTACAACGCTTGAAAATGTTTTAAATACTGTTAAAAC  
AGCAATGCAGAGCTTACAACCGGTTTTTAAAGTGGTATTTCAAGAGGAATGGAAGAGGCGTC  
TCAGAGTGTACTTAAATGGGCTCAAAATAGCGGTGTAGCATCAAGGTTCTTCAACATGAT  
GAATACAACCTGGTGTTCCTGATTTTAAACAAGCTATTAAGTGTGCTGCAGGCGGTTTTCGGTGA  
CGTTTTAGTCAATGTATTACACAATTAGCACCCTGTTTCAATGGTCCGCTGATTGGTT  
GGATAGATAAGGTCAATCTTTCTCTAACTGGGCTAATAGTGCAGCTGGAGAAAATTCGAT  
TACTCGTTTTATTGAATACAAAAACAAATTTGCCTATCATTGGTAATATTTTTCAAAA  
TGTTTTCGCTGGAATTAACAATTTGACGAATGCATTTAGTGGATCGTCAACTGGTATAAT  
CCAGTCTCTAGAACAGATGCCAGCTAATTTTAAAGGAAATGGTCTGAACAAGTAGGACAATC  
TCAAGGGTTCAAAGACTTTGTCAGTTATATACAAACAATGGACCACTAATAATGCAATT

AATTGGGAACATTGCAAGAGGATTAGTTGGATTTCGCAACAGCGATGGCTCCTATAGCTAG  
TGCAGTATTACGCGTTGCAGTAGCAATAACTGGTTGGATTGCTAACTTGTGGAGGCGCA  
TCCAGCTACAGCACAATTAGTTGGCGTCATTATATCTTAAGTTGGTGCATTTAGATTTTT  
AATTGCTCCAATATTTGCGGTAATGGATTTTCGGGGGCCATTAGCAGCAAGATTAGGCGC  
ATTAGTAACTAAGTTTGGTTGGGCTAAAACAGGAACCTTAGTATTAAGTAAGGCAATGAC  
ATCGTTAAAAGGTCCAATAAAGTTAGTTACAGCTATATTCCAATTGTTATTCGGTAAGAT  
TGGATTAATCAGAAATGCTATCTCAGGACTAGTAACTGTGTTTGGTACTTTAGGCGGTCC  
AATAACAATAGTAATTGGTGTAAATTGCTGCATTAATAGCTATATTCTGTTTTATTGTGGAA  
TAAAATTGAAGGATTCAGAACTTTATTATAAATGCCTGGAATGAGATAAAAACGTTTTAT  
GGTTAATGTTTGGAAATGTATTACAAGCTGTAGCTTCGGTTGTATGGAATGCTATTTAAC  
AGCTATCACTACAGCAGTATCGAATGTTTACAATTTTATAATGATTGTTTGGAAATCAAAT  
AGTCGCTTATTTACAAGGGCTATGGAATGGAATAATCGCTATTGCACCAACAGTATGGAA  
CCTTTTAGTTACAATCATTACAACCTGTTTTACGACGATAATGACAATAGTTATTACGAT  
ATGGACAGCTATTTGGACGTTCTTAAGTACAATCTGGAATACGATAATTACAATCGCTAC  
AACGATTTGGAATTTGTTGGTCACTGTAATAACTACTGTGTTTAGAACAATCATGACAAT  
CGCAATGACAATTTGGAACGCTATTTGGACGTTCTTACAGACGTTGTGTAACTATAGT  
TACTGTGGCAACTAAGGTTTTGAACGCTATCACGACAGCTATCTCTACTGCGTTACAAGC  
GGCATGGAGTTTCATTTCTAATATCTGGAATACGATTTGGAGTTTCTTTCTGGTATATT  
AACGACGATTTGGAATAAAGTAGTAAGTATATTCACACAAGTTGTATCACCTATATCAGA  
CAAATGTCTCAAGATTGGGACTTCATTGTCACTAAAGGTATGCAATGGGTATCTACTAT  
ACAAGTACGCTAATTAACCTTTGTTAATAGAGTTATTCAAGGAGTGGTTAATGTTGTA  
CAAAGTTAGTCAAGGTATGACAAATGCAGTAAATAAAAATAAAAAGTTTTATAGGAGATTT  
TGTGTCTGCAGGTGCTGATATGATCTGTGGTTAATTAGAGGTATTGAACAAGTGGCTGG  
CCAATTAGTAGATGCAGCTAAGAAAGTTGCTAAGAAAGCTTTAGATGCAGCTAAAAGTGC  
TTTGGGTATTCACCTCACCTTCACGTGAATTCATGGATGTTGATAGGTATTCAATGCTAGG  
TTTCGTTAAAGGTATAGCTAATCATTCAAGTAAAGTTATCCGTAATGTTTCTAATGTTGC  
AGATAAAGTAGTTGATGCATTTCAACCTACATTAACGCACCTGACATCTCTAGTATTAC  
AGGAACTTAAGTAATTTAGGTGGAATAAATGCGCAAGTACAACACACACATTCTAT  
TGGAACATCACCGAACATGAAAAGTTAAAGTTGAATTTAATGTTAATAACGATGCGCT  
TACTAGAATTGTTAACGGCAGAAATGCTAACCGCAATTCTGAGTATTACTTATAAAGGAC  
GTTACAAATGGACATAGAATTAACAAAAAAGATGGTACTGTGATCAAATTAAGTGAATA  
CGGGTTTATCGTTAACAATATAGTAATTGATAGCATGCAAATCAACACAAAGTATCAAGA  
CAAAGAAAATATGAACGGTCTCGTATTAATGGAGAGCAATTATATCAGTAGAGATATTGT  
TGTTCCCTGTTTTTGTAAAGTAAAAAATCGTTCAGACCTTGCTGATATGCGAGATATGTT  
GTATTCGTTAACTACTGATATAGAACCAATGTATTTACGTGAAATCAGAAGACAAGAAGA  
GTTGAATTAAGGTTTACTCAACCAACTTCTCATGATTACGTGAAATTAGATAAAAACAA  
CTTCCCGGATTATGAATATTAAGACACGATCAACAAATTTATGTAAACGGTAAACAGTA  
TGAAGTTATTTCTAGCGGAGTTATAAATCCTAAACAAAAGATAACAACGTTGCTTTGGA  
ATTGAAGTTTGACACTACAGAAGTACCATACGGCGAAAGGATTGGAACAAGCCTAGAGTT  
AGAAGAAAACAAAAGGTTGGATTGTGGTTCGTTTGAAGTTAATATTGATTGGCATGTAGG  
TGGGGATTTGCGCCAGTATACATTTGAAAATGTTAGTAAAGATAACAGTTTTCTATCATGG  
TAGTGCTCCTAACGACCAATTCAACATGTATAAAAAGATAACAATTATTTTGGGCGAAGA  
TACAGAATCGTTTGTATGGAATTTAACGCATGCTGAAATAATGAAAATCGAAGGTATCAA  
ACTAAAAGCTGGAGACAAAATTGTTTATGATGGCTTCCGAGTCTATAAAAACGGTGTGGA  
AAGAAGGACCGAAACGAATATAGCCCAACCAAAAATTAATAACGGAGCTAATAAATTTGA  
GTTAATCAAACGGTACAAAAGTTCAGTTTGAATTTTATTATAAGTAGGTGTC  
TGAATGACAATAATTGTAAGACCACCTAAAGGTAATGGCTCACCTGTACCAGTAGAAACA  
ACTTTAGTGAAAAAGTTAATGCTGATGGTGTATTAACCTTGTGAGATTCTAGAAAATAAA  
TATACTTATGAAGTTATTAACGCTATAGGGAAAAGATGGATTGTTAGTCATGTGCAAGGT  
GAAAACGACAAGAAAGAAATATGTAATAACTGTCATGGATAGGAGATCAGAAGGCGACGGA  
CAACTGGTTGAAGGTACTGCTAGAGAGATTCCCTTAGACAAGTTAATGATTGATTGAATT  
TATGCTAATGTAACAGGATCTTTTACAGTAGAAAGATATTTAACATTGTCTTACAAGGT  
ACTGGAATGCTTTTTGTAGTCGAGGGCAAAGTTAAATCTTCAAAGTTTGACAACGGCAGG  
CAAGGCGACACAAGGTTAGAAATGATAAAAAAAGGTTTGGAAATTTTGGATTAGAATAC  
CAGATCACATATGACAAAAGAATGACAGATATAAGTTTGTATTGACGCCTTTTGCAAAG  
CAAAAAGCGTCTTATTTTATTCTGACGAAGTGAACGCCAACGCTATAAAAACGAGGAA  
GATGCAAGTGATTTCCGCCACCATCATTAGAGGATATGGTAATTATTCAGGAGAAGAAACA



TGCGAAAACGCTGGGCTCGTAATGGAAGCTAGAAGTGCATTAGCTGAAATATACGGCGAC  
ATCCACGCAGAACCATTAAAGATGGCAAAGTACTGACCAAGAACTATGGATAAAGAA  
TTACAATCGAGATTGAAAAAGTCGTTAAAACAATCTTTGTCTTTGGACTTTTTGGTGTTA  
AGTGAATCATAGCCAGAAGCAGACCCACGACCCGGAGACATAGTACAAATAAAATCTACC  
AACTAGCTTTGAATAATTTACCCCGTATAGTACAAGTTAACACGATTAGGGGTATAAAC  
ATTGTAATAGTTAGGCAAGATGTAACGCTTGGTGAGTTAATCGAGAACAACGATATATG  
AAAAAAGTTAATACTGCAGCTAACTATGTTTCTGGATTAATGATGTTAACCTTTCTAAT  
CCTAGTAAAGCGCCAGAAAACCTGAAGTCTAAAGTAGCGTTAATAACTAAATCAACACTC  
GATTTGATGAGTAGAACTGATCTAATTTAAGACAAACAACAGAAAGTGAGTTCTAAGACT  
GTAAGTGCATCAGATTGCACTATCGTTCATGATTTTATAGATAAATCAAACATTAAAGAT  
GAAAAAACACTTGGAACGATTGGCGATTCTGTACCTCGAGGATCACATTCGAAAACATAAT  
TTCACAGAAATGTTAGGCAAGAAGTTAAAAGCTAAAACGACCAACCTTGCAGGAGGTGGC  
GCAACAATGGCAACAGTTCCAATAGGTAAAGAAGCGGTAGAAAACAGCATACATAGACAA  
GCAGAGCAAATAAGAGGAGACCTAATCGTATTACCAGGTACAGATGATGACTGGTTACAT  
GGTTATTGGGCAGGCGTACCGATAGGCACTGATAAAACCGACACTAAAACGTTTTACGGC  
GCCTTTTGTCTGCAATTGAAGTTATCAGGCCAAAATAATCCAGCTTCAAAAATACTGGTA  
ATGACAGCTACTAGGTAATGCCGTATGAGTGGTACAACGATACGTCGTAAAGATACGCAC  
AAAAACAACACTAGCGTTAACTTTAGAGGATTATGTCAATGCTCAGATATTGGCTTGTAGT  
GTATTGGATGTACCAGTATAAGATGCCTATCATAACAGATTATTTAAGCCATATAATCCA  
GCGTTCAGAAAATCGAGTATGCCAGACGAATTGCATCCGAACGAGAGGGGTCATGAAGTT  
ATTAAGTACGAACTTATTAATAATTATTACCAGTTTTACGGATAGAAAAGGAGGAAGACA  
TGGATAACAAATTAATTACAGACTTAAGTAGAGTCTTTGACTACAGATATGTAGATGAAA  
ATGAGTATAACTTTAAACTTATTTTCAGACATGCTGACGGATTTTAATTTCTCTCTTGAAT  
ACCATAGAAATAAAGAGGTATTTGCACATAATGGAGAGCAAATAAAGTATGAGTATTTAA  
CTGTCAAGTAGCGTCTCTGATTTTTTAACGTATCTAAACGGCCGTTTCAGCAATATGG  
TACTAGGTCATAACGGCGACGGTATCAACGAAGTAAAAGACGCGCGCGTTGATAATACAG  
GTTATGGTCATAAAGCATTCCAAGTTCGTTTGTATCATGATTATTCAACACTAGATGCTT  
TCACTAAAAAAGTTGAGAAAGCTGTAGATGAACACTATAAAGAATTTTCGAGCGACAGAAT  
ACCGATTCGAACCAAAGAGCAAGAACCGGAATTCATCACAGATTTATCGCCATATACTA  
ACGCAGTAATGCAACCATTTTGGGTAGACCCTAGAACGAAAATTATTTATATGACGGAAG  
CTCGTCCAGGTAATCATTACATGTTATCTAGATTGAAGCCCATCGGACAATTTATTGATA  
GATTGCTTATTAATAACAGCGGTCACGGTACACACAATGCGTATAGATACATTGATGGAG  
AATTATGGATTTATTCAGCTGTATTGGACAGTGACAAAAACAAGTAGTTTGTACGTTTCC  
AATCTAGAACTGGAGAAATAACTTATGGTAATGAAATGCAAGATGTCATGCCGAATATAA  
TTAACGACAGATATACGTCAGCGATTTATAATCCGGTAGAAAATTTAAGGATTTCTAGAC  
GTGAATTTAAACCCACTGAAGGACAACCTAAGAATTCGTTGAACTTTGTTGAGGTTAGAA  
GTGCTGACGATATTGATAAAGGTATAGACAAAGTATTGTATCAAATGGATATACCTATGG  
AATACACTTCAGATACACAACCTATGCAAGGTATTACTTATGATGCAGGTATCTTATATT  
GGTATACAGGTGATTCGAATACAGCCAACCCTAACTACTAACAAGGTTTCGATATAAAAA  
CAAAGAATTGTTATTTAAACGACGTATCGATATTGGCGGTGTGAATAATAACTTTAAAG  
GAGACTTCCAAGAAGCTGAGGGTCTAGATATGTATTACGATCTCGAAACAGGACGCAAAG  
CGTTTTAATAGGGGTAACTTTTGTACCTGGTAACAACAGACATCACTCTATTTATTCCA  
TCGGCCAAAGAGGTGTTAACCAATTTTTAAAAAAAATTGCACCTCAAGTATCGATGACTG  
ATTCAGGCGGACGTGTTAAACCGTTACCAATACAGAACCCAGCATATCTAAGTGATATTA  
CGGAATTTGGTCATTACTATATCTATACGCAAGACACAAAAATGCATTAGATTTCCCGT  
TACCGAAAGCGTTTAGAGATGCAGGTTGGTTCCTTTGATGTACTGCCTGGACACTATAATG  
GTGCTCTAAGACAAGTCTTTACCAGAAATGGCACAGGTAGAAATATGCTTAAATTCGAAC  
GTGTCATTGACATTTTCAATAAGAAAAACAACGGAGCATGGAATTTCTGTCCGAAAACG  
CCGGTTATTGGGAACATATCCCTAAGAGTATTACAAAATTATCAGATTTAAAAATCGTTG  
GTTTAGATTTCTATGTCACTACGGAAGAATCACAACGATTTACTGATTTTCGTAAAGACT  
TTAAAGGTATTGCAGGTTGGATATTAGAAGTAAAATCGAATACACCAGGTAACACAACAC  
AAGTATTAAGACGTAAAAACGTCCCGTCTGCACATCAATTTTTAGTTAGAACTTTGGTA  
CTGGTGGCGTTGGTAAATGGAGTTTATTTCGAAGGAAAGGTGGTTGAATAATGGTAGTAGA  
TAATTTTTTCGAAAGATGATAACTTAATCGACTTACAAACAACATCACAATGTAATCCGGT  
TATTGACACAAACATCAGTTACTATGAATCAGATAGAGGAACTGGTCTTTTTAAATTTGC  
AGTAACTAAGAATAACAGACCGTTATCTATAGGTTCTAAACATGTTAATACATCTATCGT  
GTTAAAAACCGATGATTATAACGTAGATAGAGGCGCTTATATTTTCAGACGAATTAACGAT

AGTAGATGCAATCAAGGGGCGTTTGCAGAATGTGATACCGAATGAATTTTTTAAAACATTC  
AGGCAAGGTGCATGCTCAGGCATTCTTTACACAAAACGGGAGTAATAAGGTTGTTGTTGA  
ACGTCAATTTAGCTTCAATATTGAACATGATTTAGTTAGTGGGTTTGATGGTTTAAACAAA  
GCTTGTATATCAAATCTATTCAAGATACTATCGAAGCTGTCGGTAAACACTTTAACCA  
ATTAAAGCAAAATATGGCTGATACACAGACGTTAATAGCAAAAATGAATGATAGTGCGAC  
AAAAGGCATTTCATCAAATCGAAATCAAGGAAAACGAAGCTATACAAGCTATTACTGCGAC  
GCAAACACTAGTGCAACACAAGCTGTCACAGCTGAATTCGATAAAAATAGGTGATAAAGAGCA  
AGCGATTTTTGAACGTGTTAACGAAGTTGAACAACAAATCAATGGCGCTGACCTTGTTAA  
GGGTAATTCATCAACAAATTGGCAAAAAGTCTAAACTGACTGATGATCACGGTAAAGCAAT  
TGAATCGTCTGAGCAGTCCATAGATAGCGTTTTTAAGCGAAATTAACACATCTAGGATTAT  
TCATATCACTAGCGCAACAGATGCGCCAACATTTAAAGATATAGGCACTTTAGCGACGCC  
TAAAGAAGATGGCGTTGATGATGGTTCTGAAGTTTCAGCAACTACGAATACTTTAGGGAA  
ATCAGGCTTGTGGTTGTTTATGTTGTTGATGACAGTACAGCTCGTGCTACATGTTATCC  
AGACGATTCAAATGATGAGTACACAAAATATAACATCGGTGGCACATGGTATCAGTTCTA  
TAAAAAAGTTGACGAAGAATTAACGAAGAAATTTGTTTAATAAACGGTTAACAAACGCTTT  
GAATCAAGCTAAGCAGTATGTAGATGATAAATTCGGAACAACGAGCTGGCATCAACATAA  
GATGACAGAGCCGAATGGTCCATCAATTCAGTTAACTATAATAATGCGCAAGGCGATT  
GGGATATTTAACTGCTGGTAATTACTATGCAACAAGAATGCCGGATTTACCAGGTAGCGT  
TGTAAGCTATGAGGGTTACTTATCGGTATTCGTTAAAGATGATACAAACAAGCTATTTAA  
CTTCACTCCTTATAACTCTAAAACGATTCACACACGATCAATCACAAACGGCAGACTTGA  
GCAACAGTGGACAGTTCCTAATGAACATAAAGCAAAGGTATGGTTCGACGGTTGCGCAAA  
TGGTGTAGGTACAACAGTCAATCTAACTGAACCGTTCACAAACTATTCTATTTTGTGGT  
AAGTGGAACTTATCCAGGTGGCGTTATTGAGGGATTCGGACTAACCGCATTACCTAACGC  
GATTCAATTGAGTAAAGCGAATGTAGTTGACTCAGACGGCAACGGTGGGGGTATTTATGA  
GTGCTTACTATCCAAACCAAGTAGCACTACTTTAAGAATAGATAACGATGTGTACTGTGA  
TTTAGGTAAAACATCAGGTTCTGGAGCGAATGTCAACATAGTTACTATAACTAAAATTAT  
GGGGTGGAAATAATGAAAGTCACATTAACGATAAAAACGAAGTTATGGGATTCGTCAAT  
ACTGGCGGTTTACGCAAAAGTTAAGATCTAGATGACAACAATGTGCCTATTAATTTTAAA  
GAAGAGTTCGAACCTAGAAAGTTTGTGGTCACTAACGGCGAAATTAATAACAATAGCAAT  
TTCGAAAAAGAACACGTACCGACTGCATGAAGCCAACAAGTGCGTCAGATTTAAGTGAT  
GAGGAAC TTCGCGGAATGCTTGCAGTATGCAATTGCAGGTGGCACAAGTAAACGTATTA  
ACAATGGAATTAGCTCAACAAAGCGCTATATTAACACAACCGTTGACTGACCTGAAAAC  
AACAAATCAAGTACTGAGGGGGACGTTTAAACCAATGAAGATGATTTATCCAACCTTCCAG  
GACATTAACCTTTTTATGTGTGGGGTTGCTATAAAAATGACCAAATTAATGGTACATA  
GACATGGGTGTAATCGACAAAGAAGAATATGCATTGATCACTGGAGAAAAATTTCCAGAA  
ACAAAAGATGAAAAGTCACAGGTGTAATCCTTGTGGCTTTTTAATTTAACACAAAGTAGG  
TGGCGTAATGTTTGGATTTACCCAACGGCCCGATCATGAATGGCGTACTAGAAGATTAGA  
ACAGAATGATAAAAACAATGCTTAGCACTCTCAATGAGATTAAATTAGGCCCAAAAACCTCA  
AGAGCAAGTTAACATTAATTAGATGAACTTTAAATGCTATCGAGAGGGAAAGACAGAT  
AGACGAAAAAATAAGAAAGAAAACGACAAAAATATACGCGATATGAAAATGTGGATTCT  
CGGTTTGATAGGGACTATCTTCAGTACGATTGTCATAGCTTGACTAAGAACTATTTTTGA  
TATTTAAAGGAGGTGATTACCATCCTTAAAGGGATTTTAGGATATAGCTTCTGGGCGTGC  
TTCTGGTTTGGTAAATGTAATAACAGTTAAGAGTCAGTGATTCGGCACTGGCTTTTTAT  
TTTGATTGAAATGGGGTTCATACATGTGATAACCCAATCCAAGACTCGAACACCTACAG  
CAAGTGAAGTAGTAGAGTGGGCGTTGTATATTGCTAAAAAGAAAATAGCTATGGATGTAC  
CTGGTTCTGGAATGGGGGCGCACTGTGGGGACTTGCCTAATTAATTGCTTGATAAATATT  
GGGGGTTTAGAACATGGGGAAATGCTGATGCTATGGCTCAGAAATCTAATTATAGAGGTA  
GAGATTTCAAGATAATTAGAAATACAAAAGATTTTATAACACAACCAGGCGACTGGGGTG  
TTTGGACTGGTGGTTCGGCAGGACATGTAAACATTGTAGTGGGACCGTGCAGAAAAGACT  
ATTGGTATGGTGTGGATCAAACCTGGTATACAAATATTGCAACAGGAAGTCCGCCGTATA  
AAATCAAACACTCTTATCATGATGGACCAGGTGGAGGAGTTAATATTTTGTAGACCAC  
CATATCATCCGGAGAAATCTACGCCGGCTCCTAAACCCGAAGACGACAGAGATAATAACG  
AAAAAATAATAAAAAAGTTCCGATTTGGAAAGATGTAACAACCTATAAAGTACACTATTT  
CTAGCCAAGAGGTTAATTATCCAGAATAAATTTACTGTATAGTAGAAGGTAATCGAC  
GACTCGAAAAACCTAAAGGAATAAGGATTAGAAACACACAACGATGAGCTCGGTAGAAA  
GTTTATAACAACAGTAGGAAGAAATACAAACAGGATGTAGAATATCCCCACTTTTATGTTG  
ATAGACATAATCTTTGGGCACCTAGCAGAGCTGTATTTGAAGTTCCTAATGAACCTGATT

ATATACTTATAGACGTATGTGAAGATTATAGTGCAGTAAAAATGAATTTATTTTTAATG  
AGATTCACGCAATGGCTGTAGCTGTAGATCTGATGGCCAAATATGAGATACCTCTAAGTA  
TTGACAATTTAAAAGTAGACGACAGCATTGGCCTTCGATGCCGGAACATGTTAATTGGA  
ATATGCTTGACAACGGTGTCCCCCTAAAGGTAAATACGAAGCATTAGAAAAGGCATTAC  
TTAATATATTTAAAACAGAGAAAAATTATTAATTTTATAACTAAACCAACAGTAACAA  
AATCTAGAATAAAAGTTATGGTAGATAATAAAAACGCTGATATAGCGAATGTAAGAGACT  
CATCACCAACAGCTAATAATGGCTCGGCATCTAAACAACCGCAGATCATAACAGAAACGA  
GTCCTTATACATTCAAACAAGCACTGGATAAGCAAATGGCAAGAGGTAACCCGAAAAAAT  
CTAATGCTTGGGGTGGGCTAACGCTACACGAGCACAACCGAGTTCAGCTATGAATGTTA  
AACGAATATGGGAAAGTAACACGCGGTGCTACCAAATGCTTAATTTAGGCAAGTATCAAG  
GCGTATCAATTAGTTCGCTTAATAAGATACTTAAAGGTAAGGGGACTTTGAAGAATCAAG  
GTAAAGCGTTCGCAGAAGCGTATAAAAAGCACAACATTAATGAAATTTATTTAATCGCGC  
ATGCTTACTTAGAACGTGGATATGGAACAAGCAACTTCGCTAACGCAAAAGATGGGGTAT  
ACAACCTCCTTCGGCATCGGCGCTTACGAAAACAATCCTAACTACGCAATGAAGTTTGCTA  
GGAATAAAGGTTGGACATCTCCAGCAAAAGCAATCCTGGGCGGTGCTAGCTCGGTAAGAA  
AGGATTACATCAATAAAGGTCAAACACGTTGTACCGAATTAGATGGAATCCTAAGAATC  
CAGCTACCCACCAATACGCTACTGCTATAGAGTGGTGCCAACATCAAGCAAGTACACTCG  
CTAAGTTATATAAACAAATCGGCTTAAAAGGTATCTATTTACAAGGGATAAATATAAAT  
AAAAAGGTGTATAAATGTACAAAATAAAAGATGTTGAAACGAGAATAAAAAATGATGGTG  
TTGACTTAGGTGTCATTGGCTGTCGATTTTACACTGAAGATGAAAATACAGCATCTATAA  
GAATAGGTATCAATTACAAACAAGGTCGTATCGCTCTAAAAGCACATGGCTTAACACCTA  
GATTACATTTGTTTATGGAAGATGGCTCTATATTCAAAAATGATCCCCTTATTATCGACG  
ATGTTGTAAAACGGTTCCTTACCTACAAAAGACCTAAAAGGTTATCAAACACGCTGGTT  
ATGTTTCGCTGTAAGCTGTTTTTAGAGAAAGAAGAAGAAAAAATACATGTCGCAAACCTTT  
CTTTCAATATCGTTGATAGTGGTATTGAATCTGCTGTAGCATAAGAAATCGATGTTAAAT  
TGGTAGATGATGCTATTACGAGAATTTTAAAAGATAACGCGACAGATTTATTGAGCAAAG  
ACTGTAAAGAGAAAATAGATAATGATGTCATTTCTTACATCGAAAAGAATGAAAGTAGAT  
TTAATGGTGCGAAAGGTGATAAAGGCGAACC GGACAACTGGTGCGAAAGGTGATACAG  
GTAAAAAAGGAGAACAAAGGCGCACCCGGTAAAACGGTACTGTAGTATCAATCAATCCTG  
GCACTAAAATGTGGCAAATTGACGGTAAAGATACAGATATCAAAGCAGAACCTGAGTTAT  
TGGATAAAAAAATATCGCAAATGTTGAAGGGTTAGAAGATAAATTGCAAGAAGTTAAAA  
AAATCAAAGATACAACCTCTCAACGACTCTAAAACGTATACGGATTCAAAGATTGCTGAAC  
TAGTTGATAGCGCGCCTGAATCTATGAATACATCAAGCGAATTAGCAGAAGCAATACAAA  
ACAACCTATTTTCAAGAAAGTGTATTGCAACAGATTGGCTCAAAGTTAGTACAGAAGATT  
TTGAGGAATTCATACAAACACTAACTGATATATATGCTTCAAAAAATCATAATCATGACG  
AGCGGTATGTTTTGTATCTCAAGCTTTTACTAAACAACAAGCGGATAATTTATATCAAC  
TAAAAAGCGCATCTCAACAGACGGTAAAATTTGGACAGGAAGATAAAAATGAATATAACT  
ATATATATCAAAAAGACCCTAATACACTTTACTTAATTAAGGGGGGATTTTTATGGAAGG  
TAATTTTAAAATGTAAAGAAGTTTATTTACGAAGGTGAAGAATATACAAAAGTATATGC  
TGGAATATCCAAGTATGGAAAGAGCCTTCATCGTTTGCAATAAAACCCTTACCTAAAAA  
TAAATACCCGGACAGCATAGAAGATTCAACAGCAAAATGGACAATAAATGGAGTTGAACC  
TAATAAAAGTTATCAGGTGACAATAGAAAATGTACGTAGCGGTATAATGAGGATTCGCA  
AACTAATTTAGTGTCAAGTGATTTAGGAATATCAGTAGTCAATAGCGGAGTGGCTAGTAA  
AAATATCAACTTTAGTAATCCTTCAGGGATGTTGTATGTCACTATAAGTGATGTTTATTC  
AGGATCTCCGAAATTGACCATTGAATAATTTTAAATGACTAATTTTTTAGTCGTTTTTTA  
TTTTGGATAAAAGGAGCAAACAATGGATATTAAGTAAATGAGATTTAAAATAATG  
CAGTATTAACAGGTTTAGTTGGTCCATTGTTGTTATTGATCAAACAATCACAGATTTTT  
TCGGATTCGATTTATCAACTCAACTAAATCAAGCCAGCGCACCATAGGTGCTATCCTCA  
CGCTACTTACAGGGATTGGCGTTATTACTGACCCAACGTCAAAGGGCGTCTCAGCTTCAT  
CTATAGCATAGACATATCAAGCGCCTAGAGATTGCAATAAAGAAGAACAACAAGTTAAGT  
GGAAATCATCACAAGACAGTAGTTTAAACGCTGGAATTAAGCGCGAAAGCACCAAAAGAAT  
ATGATATATCACAACCTTTCACAGACGCCTCTAACGATGTTGGCTTTGATGAGAATGAGT  
ATCATCATGGAGGTGGAGACAATGCAAGCAAAATTAATAAAAAAGAGTTTATAGACTGG  
TTGAAAACATCTGAAGGAAGACAATCAATGTGGACTTATGGTATGTATTTCAATGTTTT  
GATTATGTCAATGCTGCTTGGAAAGTTTTGTTGGGATTACTTCTGAAAGGTTTAGGTGCA  
AAAGATATACCCTTTGCAAACAATGTCGATGGACTAGCCACTGTATACCAAAATACGCCG  
GACTTTTTGACAAAACCCGGCGATATGGTTGTGTTTCGGTAGTAATTACGGTGCAGGATAC

GGACACGTAGCATGAGTAATTGAAGCAACTTTAGATTATATCCTTGTATATAAGCAGAAT  
TGGCTAGGCGGTCGCTGGACTGACGGAATCGAACACCCGGCTGGGGTTGGGAAAAAGCT  
ACAAGACGACAACATGCTTATGATTTCCCTATGTGGTTGCTCCGTCCGAATTTTAAAAGT  
GAGACAGCGCCACGATCCGTTCAATCTCCTACACAAGCACCTAAAAAAGAAACAGCTAAG  
CCACAACCTAAAGCAGTAGAACTTAAATCATCAAAGATGTGGTTAAAGGTTATGACCTA  
CCTAAGCGTGATAGTAACCCTAAAGGTATAGTTATACACAACAACGCAGGGAGCAAAGGG  
GCGACTGCTGAAGCATATCGTAACGGATTAGTAAATACACCTTTATAAAGATTAGAAGCG  
GGCATTGCGCATAGTTACGTATCAGGCAACACTGTTTGGCAAGCGTTAGATGAATCACAA  
GAAGGTTGGCATAACCCCGAATCAAATAGGTAATAAATTTTATTACGGTATTGAAGTATGT  
CAATCAATGGACGCAGATAACGCGACATTCTTAAGAAATGAACAGACAACCTTTCCAAGAA  
TGCGCTAGATTGTTGAAAAAATGGGGATTACCATCAAACAGAAATACAATCAGATTGCAA  
AATGAAATTACTTCAACATCATGCGCTCATAGAAGTTCGGTTTTACACACTGGTTTTGAC  
CCAGGAACCTCGCGGTCTATTGCCGGAAGATAAACAATTACAGCGTAAAGACTACTTTATC  
AAGCAAATCAGAGTGTATATGGACGGTAAGATACCAGGTGCCACTGTCTCTAAGGAGTCA  
AGCGGTTCAAGAAATACAGTTAAACCAGTTGCGAGGGCATGGAAACGTAATAAATATGGT  
ACTTACTACATGGAAGAAAGTGCTAGATTCACAAACGGTAATCAACCAATAACTGTAAGA  
AAAATAGGACCATTCTTATCATGCCCGGTAGCTTTCCAATTCCAACCTGGTGGATATTGT  
AATTATACAGAAGTGATGGGACAAGATGGTTCATGTTTGGGTAGGATATACATGGGTGGGG  
CAACGTTATTACTTGCCTATTAGAACATGGAATGGTTCGCCCCACCTAATCAGATTTTA  
GGTGACTTATGGGGCGAAATCAGTTAGAATGACATAGTCATGTCTATTTAAGCAGGTGCG  
TTACATACCTGCATTCTATTTACATTTAAAGATAAAATGTGCTATTATTTTACTAGAACT  
TTTTAACATTTCTCTCAAGATTTAAATGTCGATAACAGGCAGGTACTACGGTACTTGCCT  
ATTTTTTATGTTATAATGTAATTACATTACCAGTAACCTATCTGGCTTAAAACCACATTT  
CCGGTAGCCAATCCGGCTATGCAGAGGACTTACTTGCGTAAAGTAGTAAGAAGCTGACTG  
CATATTTAAACCACCCACACTAGTTACTGGGTGGTTGTTTTTGTTCGCCATTATGTTCTG  
TCTACATCTTTTTGCGCAAGTTTTGTATTATGTATATATAGTATAAATAAGGGATATTTT  
AAATGGAAGATAATAAAAATTCAGCAAAAATGTACTCATTCAAAGCTTTATATTTTTTTA  
CTGCAGCTTTTTGTAAATATAGTACTATTATAACATCTATAAATTTTGAGGTGCGTATGT  
TAGGTGTAACACTTTATTTATGCCTATTGTTCTAGAAAATTACATGAAGAATGTTTACA  
ATAAAGCAACTAAGATTTTGAGAAGAATAGGATATATATTTCCCTAGTTTATTCATATTTA  
TAAACATTTTAATATTTATTTTATGTTATTATATGCCTACATATAAGTTTACCATTAGTA  
CAAATTGGTATGTTGGTGCTATTATAATAACAACAATACCATTAGTTTTTATTAGTATAT  
TAGATATTTTCCTTTATGGATTTAACAACGAGGAAATCAAAGCTAGTAATGATACTAAAG  
AGTATTTGAGAAAGAACAGAGAACAAAGTAAAGAATAAAGCAAGAGAAAGTAC  
TGAAAGAGGAAGAACGTCAATTTAAAATAGAACGTTCTAAAAGAAAGGGATGATAGTAAT  
GGTTATAACAATGATAAGCGTTTTTGTATAATTGCTATCTTATTATTTTATTTGTCAGC  
GGTAACTCTTACCGCAGTTAGATCTTATGCTTATAATGTTAAATTTAGTGTACCAACGCT  
ATTTGCAATACCATTAATTTTGGTTCAGTACACATATAAAAATTTACAATACTTACAAATT  
GTCTGACAGAAAAAAGCCTTCAGAATGCTTTTATTTATATTTAAAAAATATCCGGTAGC  
AATAGCTATGTTTTTAACTATTATTGCTACAAATATCGCTGAACAAAATGTTAAATTATC  
AAATGGTGCAACTTATAAGAAAATGAAAATTTAAAGCAGAAGAAACGTAAAAAAATGAT  
TAACAAGGTTTCGTAACGTAATACTAATGGAGAAATGCTTGTGGGAAGATAAATAAGTTT  
CTTAGTATTTCTTATGATTTTAAATATAATAGGTTTATTATCTTTTCTTGTGAAATTATA  
ACCGTACGGTTTTAAGATGCGGTTATTTTTATTCTATACAATCAACAAAACCACAAGACC  
TATTAATTTAGCAGTGTGGTTTTTTATATGTGAAGCTAAAATAACTACAAATGATACCAT  
TTTTGATACCATTTTGTAGTAAACAGAGAAAATAAGGAAAATAAAAAAGGCAAAAAACG  
CATTAAATCAACGTTTATTGTCTCATGAAATTTAAATGTATATAAATTTCACTTCGCATG  
GG

>NewGenomeName\_175

ACGTAGGGGCGGGGCTTAGTATTACCCCGCACCAGGATCAGCGGAGTCATTTAGACTCG  
CTATAAGCCGTTAGATGTGTATACACGTGGACGATCAGGATCTGTGATTGGTGAAGCGAA  
TCTGACGGGAGCTCGTCCGAAGCCTCGTGGTAGGGCCCCCATGTTGCTTTATCTTTACTT  
TAATAAAGTAAAGTAACATGCTGTCCCTTGCTTTATTCGTTTTCGAGTTGTTTACAGCTG  
TCTTTGCTTCGCCTCGAAGCAAAGGACATTCTCATCGTCTATAAAAGCTGTGTTCTCCGT  
GTGTAATTCGTCGGAATTATCGAGCGTAAGTCTCGTTCTTGTCTATGGAAGATTTCAAG  
CAACCAAAGCTCTCTTATGGAGAGATAGTTCAAATGAAGGAAGAACAAGATGCTTTCTGG  
AGTTGTTATCATGTGTTTCTCCGTCGCAATGAAGATGTTCTTGGAGAGATGTGAAGACGC

CATGGAAGGAAATTGCTGCATATCCAAAGCTCCCTACATATGCTCCGATACGGTGGGTT  
CTTAAGACTAAGGCAATTTTTGATGTCAGAGTAGATGAATGTAAGTCATGTTTCGCATGAG  
GAAATTAGTAGAAGGGATTAATAATCCCAATAAGAAAGAAGGTTTAAAAGACCTGTATGAT  
TCAGGTAATTATAGATATCAAGTGTATTATTCTTCATCGTGTAAATAGAGATAAAGCAGAT  
TAATAGATAAATAATTACAATTGTATTGTTTCTGCTATTGTTTATGTTTCATTAATAATT  
TATGGTTTGCAAACCCAGAGCTATTTCAGAGGTAGAAGACAACACTACAATAGATAACATATA  
CATTACAATGATATTTGAGAAATATATTATTGTTAATAACTCTGCGAAGCTATATGTCTT  
GGCCCTATAGGCCCAAATGCTCTTAAGCCCAATGAAATTAACACTGAAGTGAGTCAGCTG  
ACGTCAGCTGACTCCTTGATG

>NewGenomeName\_176

TGGTATTACCCCGTGCCGGGATCAGAGACATTTGACCAATAGTTGACTAGTATAATAGC  
CCTTGGATTAATGACACGTGGCCGCTCAGGGTCCGTGAGGCTAGTGAAGCGCTTAAGCT  
GAACGAATCTGACGGAAGAGCGTTCACACTTAGATCTAGTTAGCGTGCTTAGTACGCGTT  
GTCTTGGGTTGATAAATAGAGTGCTTCTGAACAGATTGTTTCAGAATTCATAGCGAGATG  
GATTCTGGTGATGGTTTCAATACATACTCATATGAAGAAGGTGCTGGAGATTCGAAGAAG  
GAATTTTTATATAAAATAGGTATTATTATGTCATGTATTGTAGGGATTGTAGTTTTATGG  
GTTTTAATTATATTATGATGTGCTGTTCCCTCGCTATGCTAGATCAACGATGGACGCTTGG  
TTATCTTCGTCTTCTATTATGAAGAGGAAGATGGCTTCAAGGATTACTGGTACTCCGTTT  
GAAGAACTGGTCCTCATCGTGACAGAAGATGGGCTCAAAGAAGAAGCTGAAGCGGCGAAC  
CAGAATAATAATGATAATGTAATAGATTTAGTTGATATGTTGTAATTGTATATGGAGTA  
ATGAGAATTATTATTCTGTTCTTCGTCTGTGTTTTTAAGCTTTTTCTGTGTTTTAA  
TGGCGTCTGTAGAGAGAAAAGAATAATTGTAAGGTAGACGACGATGTAGTGGATTATAGT  
TGTCTTTACTTCGCCTGGAAGAAAGTCACATTTCAAGTTGTGAGTGTTATTGCTTTTTGAT  
GAAGCTTGCTCGAAGCAGCGTATAACTTTAATTTGAATTTGGTTTTGGCGCGTTAGTGAA  
ATTGCGGCTGTAAATGTGTCAAGTTGTGAGTGGCTGAAATAAGATAATAGAGATATTATG  
ATTGTTTGAATTTAATTCCGCGAAGCGATATGTTAAGTGATATATGGAACGAAGCGTTTT  
GATGACGTCATATGTCTCCGTGCTTACGTCAGCACGGGGCT

>NewGenomeName\_177

ATGACTGAGCCTGGAGCAACGGGGTTCAGTTCGGGACCGGGAATGCATCCGCATCCTGAC  
TTGGACTCCGACGCGGGGAAGTCTCTCGCGCCCAACAATGTGGAGACCCTGCACGATCAG  
ATTCGCGATCTGCAGGCGAGCAAGCGGACCAACGCCGCACGCGCTGGAGAGACGATGCGG  
GACATGTACTTTTCACTCGGGAATCCGGATCGCTACGGGCCCAATCCCGCGCTTGAGCAA  
GGCGATGGCAAGCCGGAGCCTAGCCCCACGCCCAGGAGTAACCGCAGACATTGGAACGC  
AAGCCGTAATCGTTTTGTGCAATAACAGATGTGCAAGTCCGGTCCGATTCGTGGCTAGGGCGG  
CCACTGCCGGCCGACAGTATTATTGAGGGACGAATCCGCGCCTGGCAGAAGCGAATTGCA  
ATGCCACGAGGTGATACCACCAAGGAGCTGACCGACCGCACCGTGGGGAAGCTCGACGGG  
CCAGAGGAGTTCCGCCCCGAGTTTGGAAATCAAGGTCCGGAACGTTTACAATGCGTTCGCAAG  
GATTTGGACCATCCCACCTATCGCAGCATGCCGTGTCTGATGTTCCATGTGCCGTTGCAG  
TTCCGCGGACACTATCGTGTGGAACGTCTCGCGAACTTCTCGGGCGACCCGGACGACTAT  
CGAATCGACAACCACGGCTACCGGCTGTGTGAGGCTGACACGCCGCGACGGTCCACGGGT  
CGCCTCAAGCGTGCTAGCAACCGACAGCCGTAAGTGCAGCAGCATGGCGCGCGCCTACAC  
CCGCTGGACAAGGTGCGAGTTGATCCCAAGGATCCCAGCGCCATGACGCGCATGGAGCTG  
TTGACGCACGGGTACATTGATGTGGAAGACCTCACCCACGACGAACTCAAAAATGGGCTC  
GTGGCTCCTGGGCGTGGTGGTAATGCAATCATCCACTTGCCCAAGGACGTGTACACAAA  
ATCGTCAACAGGCACCTTTCACCTTGCCAAGGAGCTGCTGCTGCAGGGAATGATGCCGGCC  
ATCACGGTGCTCAGAAACATTGCAGAGAACAAAGCACGACATCTACGAAGCCAAAGACCGC  
GTCAAGGCCGCCATCTACATTGTGGACAGAGTCTTTGGTAAGCAACCAGATACGGCACTG  
GTGCTGGATGGTGTGATGGTGCAGGACAGGAGCCCTGGCAGCAGATTGTGGCCGGGATC  
ATGGACAACACGCCTGCGGAATCCCGTGCAGGCGCGCGCTCCCTCTGGCGGAGAAGGC  
GCTACGCTCAACCACAACGGTGAGGCCGAGGAGCTTCTCGATGTTGAGGTCGTGGAAGAG  
TCTGCGGCAGATCATGATTCAGCGACGCCGGAACGCCAGACGACACGGGACCTGATGCG  
AGCGCTCTCATCGCAGCCGTAGCTCACACTGCAAAGCCCAAGCGCGCGAAGGCCAAGGCG  
TCTGCTGGCACGAGTGGCACGAGTGGCACGAGTGGCAAAGCCTGCCAAGGTG  
CGGGTCAAGCGGCCGAAGCGCGACGCCAGGTAAGCTTCGCGGGGGCGGGGTGGACGCGAGG  
CTGCCAAGCAACCGGAGTGGACCCGGGATGCGCGCAGATTCCCTTCTGTCCCAGGGTTCAC  
TCCCAAGAAGTGCAGGACTGGCAAGGAGCTGAGCATGGCGAAGCAGGGTGTGCGTCCGGGA  
CATCAACGGTCCCACCAACAGGCACCGTCTGTCACCAAGGCTTTGCAGCCCGCGCCGAA

GACCAAGCTGCACCGGCCCAAGACAGCCTAGGAGGGCACCATGGCCAAGGGCGTGAAGAA  
GCTTCCAAAGCGCAAGGGCACCAACCCCATCCCGCCTGACAAGTGGAACTCTGATGACAT  
CGCTCGGCGTCAGCCCTAGCAGGACCAGAAGCTCCAACCTACCACCAAGGGTCCGCACAC  
CGGAACCAACGACAGCTTCAAGTAGCACCTCGCCATGGACACGCTGCCCGTGACGGTTAC  
CCGGAGTGGCACTGTCCAGGTGGCTGGCCGCGGTCCCGCTGGCGAGGCTGTGGTGCTAGA  
GACCACGCTCCAGGTCTGGCGGGCAGCCAACAACCAAGTCGAGCGCGTGGCCCATGCCCA  
CGGGTACC GGCGTGAACCGACCCGACAGAGTAGGATCACGTGCATGCCCAAGGAGAAGG  
TCACCGGAGCCAAGCTCAAATGGGGTAGCGCTGCCCAGAAGCGCGCTCAGCGAAAGGCTG  
CAGAAGCCAGTCCCCGGAAACGGCGCAAACGAGGCCTGCAGGACATTCTGAAGCGCAAAA  
GGCACGCAGCCGGTAGCTTCTCCGAGGTTCCGACGATCTCGGTTCGAGGTGGCCAGGGAGC  
ACGACCTGTCCGGTATCGGGCACGGGGCCAACAAGGAGGCCTACCGTGCCAGTGCAGCCG  
AGAGCCGCAAGATCAAGGCCGCTGGCGGGACGAGCTCGGCCGCCCGCGTCTACAGCACCG  
CCCGCAAACCTTAGTACACCGCGCCACGCGGTAAGGCAGGCAACCAAGGCAAGGTGAGCC  
TGAGCCC GCGTAGCAAGGGTTCGGCTCGTTCGTCGGACAAGTTC AAGCAAGGCGATACTG  
TCTATGCGGACGGCAAGTCTTGACAATCAGGAGTTTCCGCGAGGCCAATGGCAATACCT  
ATGTCGATGCCAAGGCCGACAACGGAACCGATCTCTCCGTCGTCATCAAGGGCACCGGTC  
TGGACAAGAAGACCATCCGGACGGCTCTGGGCGATCGCTTTCGTTCCGAGTCCAAGACTG  
TAAAGCCTGGCGTCAGTGCTGCTGCACATCGCACCAAGAGCTTCTCTCAGAATGCGCGTG  
GCGTGTTCGATGGGTGGCCGAGGATCGAGCTCCAAAGCGCCCAAGGACATGAGCAGCATGT  
CCGACCGCGACTTGCAGAACGCCATTCTGAACGCTCGGACCGCAGCCGACAAGAAGGCGT  
ACTCCAACGAGTTGGCCAAGCGCAATCTCGACACGCACTTTCCCAAGGGCATCAAGAACG  
CCTCGACAGAAGAGCTGCAGAACAAAGGTGAAGGACGGCACCACTCCGTCTCGGTAAGA  
CCGCCATCGACGCCGAGCTGGACCGCCGAGCAGAGGCGAAGGCACCCGCGAAGGCCCGTG  
GTGGGCGGCGACCTGAGAAGCCGATCGCCCAGGTGATGAAGCCGCCCAAGGACACGGTGT  
CGCGGGTTGACACGAATGGCAATCCGACCCCTTAGGGCGATCCACCGATACGGGAACGGCA  
AGAAGGAGTCTGCCTATCCCGACGCCAATCATCGTGCGGCCTGGAACAAGCTCGTAGGTC  
GCGATACATAACCGCGACTTGAGAGACGACATGACACCGCGCCAGCGCGCCA ACTACCGCA  
AGGAGCTGCAGCGTAAGCTGGACTATCCGCGCATCAGCGACAGTGTCAAGAAGCAGGCC  
GCGATGAGAAGGCTCTGCTGGATGCGCTCGACAAGGGGGCTGGCAGCGGATCCGCGAATT  
CGGGGGATGCGAGGGCACAGCGCATACTAGATCTGCACGACCACGAGCTGCATGACCTGG  
CCAGCGAGATGGGTCCTCTGGACTTGTACAAGCGGGATCTCAAGGGCGAAGGACACTTCG  
ACCGGAAGCCTTCCGAAGTCTCCAAGGAAGAGCGCGTTCGCAATGCCACTTAGGGTCTGA  
TGC GTTACGTGAAGAAGATCTTGGGTACGAGGTCGATTGGGACGAGGAGCGGCTCGACA  
ACGACCTCAACAACGACCCGCGCATGAAGAAGCTGCGAGCCATCCTGGCCAAGCTGCGAA  
AAATGACAGGGCCGTCCGAATCCCGGTCGGCCAATCGAACAGAAATCAAGGGTAAGTCTT  
CGGACGATGTGGATACGGCCATTGATGACCTCAAGGCTGCACAAGACAGCAACAAGTCCG  
ACGCCAAGGCTAAGGTGCTCTGGAACGTATTCGGCACTACGACAGCCCCGCGACTTCA  
AGCCTCCTCGATCTGCACAAGACCACAAACGCCAGAGTCAAGCCTCGTTCCGGGATGTGT  
CCTCGGCGATCAACGGCTCACTGCGCTCTGGCCAGAGTATCTACAGGAACGCCTGGTAGC  
GTGGCGTTGTTGAGGATCTGGACAGCATGATCAGCGAGTCTACCCTCAAGCGGCCGATCA  
CCGTGCGCCGCTTCATCGGTCAGAGCGCTGGCGGAAGTGGTATTTCGTGGCGACTATGCAG  
GGCTCAAGAAGCAGCTCGAGACTGGCACCTTCAGGGACAAAGGCTTTATGTCCACAGAGG  
CCGTTACGCCGGGATAGTCCGTCGGCCAGATGGGACGGCTGTGGTCCAACCGAGGGAAGC  
CCGGTGAGAACGATTTTCGTGCTGGAAAAGGATCATCCCAAAGGTTTCAATGCGCTTGATC  
TCAGGATGGAAGACCTCGACGACAACCATCTCAGCGAGATCCTCCTGCCTCGGAACACCG  
AGTGGGAGGTGACCGGTACGCGCACCGAGGACGGCATCACCGTCTGCAAGCTCCGGCCCA  
GCACCAAGCCGACGTATGACGAGGTTCCGTCCAAGCGACGCAAGAAGTCATGACCAGCAC  
AGCCAATCCTGCTGCTGCACA ACTTGATCGCTTG CAGATTTACGACACCGATATCGAGGT  
CACCACCGAGCGCGGCCGAGAGCGCCGCCAGGTCTGGGACCTACACGCTGGTCAGCTCGC  
CATTGAGGAGAGCCCTGCGCGTAACAAGGTGGCCACCTGTGGGCGACGCTTCGGCAAATC  
GGACCTGGGTGGCAAGCGGCTGGTTCGGCCCGCATTCCCGGCGTACTACCGACTGGACCT  
GCTCCTAACCACCAACAAGGCGATGATCTACAGTATTGTGGGGCGGGAGTACTCTGACGC  
CGAGAAGGAGTTCCGCGTACTGTGCAACACCTTGGTAACTTGGGTGTACCCTTCGACAA  
GCCTGGCAGCTACTACGATGCCGTTGGCGGAAACATGCACCTGAGCGTGTGGCAGGGCGC  
ATACCAGGTGCATGCCAAGAGCGCCAAGTATCCCGACACGCTCGTGGGTGAGGGCTTGAG  
TGGCGTGATCATCGCCGAGGCCGCGAAGCAAAAGCCGTCGGTGTGGACTAAGCATGTGCG  
TCCGACGCTGGGTGACTTA ACTGGCTGGTCGCTTCATACGTCAACTCCTGAGGGCAAGAA

CCACTTCCACGAAAAGTTCCAGATGGGCCAGGATCCTAACAAATCCGGAGTGGGAGAGCTG  
GCGCATGCCAGCTGGGGCAATCCGTACGTGTACACGCGCACGGGCCGTCTGGTCGCGCT  
GGGCAAGCTTCTCCCGAGACGCCATCCCCGACCACGAGTACACGCTCGACCGACACGT  
CACCATCATGCAGCAGCTGATGTGCGAGAACCCGACGGTGTCCGCAATTCAAATCGTTGC  
GGACCATAAGCTTCGGGTTGACCAGGAGGTGATTGAGCTCGCAGCCGACATGTGCATCGA  
GAGCTTCAACCAGGAGATCGGGCGGGACTTCACCGAGTCCGTGGGCAAGGTGTTCAAGGA  
CTGGGACGAGGAATACCATGTTGCAGACCTGGTTGACTACAACGTCAAGCAGTTCGGAAC  
CTACTTCATCCCCAATTACGAGACCTATGCAGCTGCGGACTACGGTTAGACAACCCCAA  
TGTGTGGCTAGTCATACAGATTGGCAAATGGGGCGAGGTCAACGTCTCCGCGAGATCAA  
CATGTCCGGGGCTGACGGCCGATGCGTTCGCTGATGAGATTCGGCGTCAGATGTGCAACCC  
GCCAAACCTTCGAATCTTCTATCCGGACCTCGCTGACCCTGTGTCTGTCTGAGACGTTGAG  
TCAAAGCTCGGCATCCGCGCCGCTGCCGGAACAGGTGGTGAGAAGCGCATACGCCTCAA  
CCTGATGCGACAGTTCCTGAAGCGTGGGGCGTCACGACCCACCGACCTCACGGGCATGGG  
ATGGCGTCCGCAGCTGATGTTTGATCGGAGCTGTGCGAATGCGCGCCGTGAGATGGAGGC  
GTACCCCTACCCTGACAGCACGGACAAGCCGATCCCAAGCTCGCTGTTCAATGAGGAGCC  
GCTCAAGCAGGATGACCGTGTGCCCGAGGGCGCTGGGTGCGATTCTTCGTGGGGCACTACGG  
CGAGAAGGCGCTGGTGAACGAGCGTGCCGGTACACGCATTTCCAAGGCCAACATCGAACA  
CCAGTGGACTAACCGCGAGCGCCGTAGCACCAACGCGCCCAAGGACATCAAGTACCAGCC  
CCTAACGGATGGTGAACCTGATGCATACCAGTACAAGAATCCCGACGTGGGTGGGGTAA  
AGAGCTGCATGACTGATTCGGAGTAGGATAAACAACCATGGGCCAGGACAAACGCCAATA  
CGGCAGTACGCAACAGCTGCGTGCAGGAGAAGCCAATTTCCCAACGCCGTAACGGATTT  
CGACAAGGCGCGGCTGGCCAGTTACCGGCTGTACGAGGACATGTACCTCACCAACACGTC  
CGACTACCAGGTGATCTTGCCTGGTGGCGACGAAGGTGACCAGCGGCCATCTACGTGCC  
CAACGGCGAGACGCTCATCGACGCGAAGATGCGCTTCTCCGACAGGGGCTGAAGTGGGA  
GTTCTCCAAGAAGGATGCCAAAGTCGACAACGCCATCAGAGTCTGTTTCGACCGGGAGAA  
CTGGGAGCAGAAGTTCGAAAGTCTCAAGCGCTGGAGCGAAATCCGCGGTGACTATGTGCT  
GCTGCTGTTTCAGCTTCGACTAGAAGGACGAGGGATCCAGGCTCTCCTTGCACGAGGTGGA  
CGCCAGCACGTATTTCCCGCACGAGGATCCGCGTTACCCTGGCCAGGTGCTGGGCGTGTA  
CTTGGTGGATGATTATCCGCACCCGGATTCCGAGAAGAAGAACGAGAAGTGTGCGCGCGT  
CCAGACGTACATGAAGACGCTCGACGACGACGGGAAGCCAGTCCCGGGTGGCGCGATCAA  
ATGCACCGAGGAGCTGTACGAGCCAGGCAAGTATGACGACCGTCCCGAGTCACCTCTCGA  
GCCCCGACGACATCAAGAAGCTGAGCACCTCACTGAGGAAGAGCCTCTGCCCGAACAGAT  
CACGACACTGCCGGTGTTCATTTGCGCGGACACCCGATTATGAACGCGATGTTCCGGACG  
CTCTGGCCTGGCGCGGCTCGAGTCGTTGATTCCATCTGTCGACCAGACCATGACGGACGA  
GGATCTGATCATGGTGTGGTGGTGGACTGGGCTTCTACGCAACATACTCAGCTCCGCCGCG  
TGATTTCGCTCGGCAATATGGTGCCGTGGACAATCAGCCACTGGGCATGGTTCGAGCATGG  
CCAGAACAACAAGATCTACCGAGTCAATGGTGTGCAAGCCTTGAGCCTAGCCAGACTCA  
CATGAACAAGGCCGAAGAGGCCATGCAACAACAAGGGCATCCCCTACATAGCTGTAGG  
CGTGGAGGACGCTGCGGTCGCCGAGAGCGGCATTGCCCTGGATCTCAAGCTCAGCGCAAT  
CCTCAGCAGTTGCGCAGAGCAGGATCTAGAGCTGAAGTCGGTGTCAAGCAATTTCTTCTA  
TAATCTGGTGCAGCAGTGGATTCCGGCGTATGAGGGTGTGGGGATTGACGACGCTGACAA  
GAAGCTCACCGTCACCATCACCTCCGAGATCCCAAGCCGGTCAACAACGAGAAGCGATT  
CGCACAACCTGTTGGAGTTGTGGGAGGCTGGGCTGATCCCTGCGAAGAAGCTCACCGGGGA  
GCACAGCAAGATCATGGGCTTTGAGCTGACCGAGGAAGACTTCAGGCAGGCCCCCGAGGA  
CAAGAAGACCCAGGGCATTGCCCAAGCGGAAGCCGCCGACCCGTTCCGGGGCGCAAATGGC  
AGCAGAACAGGGTATCTCCGACGACGAGGACGACCAAGCCCTGAACGGAAAACCGTTGTG  
AGGAGCTAGCCATGGCCAAGGGTAGGGCGCAGCAGCAAGAAGCGCAAGACATATGCCGGCT  
TCAAGTCAAAGAGGTTCGTGGCACTGGGCTTTTTCGACCAAGCAGCCCTGGGCACGCGAGA  
AGGCCACAAGACCAAGGGCGGACCCAAGGTCCGTTACCGTCGACTTCCAGAGAGCAAAC  
ACTCTGGTGCAGGCAAGAAGGTCTACAGAAGGAAGAAGCTTTGACGATCGAGCTGGAACG  
TCCTGACGACGAGCAGGTTTGGACACGAGTTCGCGATGAGCTTCCCCAGGACGCGGTGGC  
TTGCCTGGTGCATATGTGTCAGCAGAGCCCCAGGCCGAGGGCTGCGGCTTTATCACCGC  
GAGCCATGCCATCACCCGATTCCAAATGTATCATCTATGCCGGAACACGAATTCGTCAT  
GGCCAGGGTCAGATGATGCAGGTGCTGTTTCGAGAGAAGGTGTTCCGGCCCTACCATTC  
CCACCCGACGGGTGACCCCTGTCCAAGCGCTTACGATACTGATCACATTGGTTACCTGTA  
CCAGCAGGGCTGCCCGTGGGATTACTACATCGTGACGAATGCAGGAGTGTTCGGATATGA  
GCACAGGGAGAGGGCGCGTGGCGGACGACGTTGAATCCAGAGATGATGATAGTTCATGTCA

TGCCGGTGGACGACCTGATTGAGCATGTAGAATTGCCGGACTGCCCGTGCGATCCGGACC  
TCGAGCTGATCGAGCGTACCGACGACCATTTTGGACAGATGTACAGCCACAATGCTGCCG  
ATGGTCGGAATGATGAGGCTGAGGAAGAGGATCTGGTTTGACCTCTCCACTCGAAGAGCC  
GTCAGTATTACCTCAGCGGCCTCGCAAAAACCTGGCTCCTGAGATACCTTGGAGGACAGGA  
GAAATACGATGCAATCATCGCAACAGCCCTGCTTGACGCTGCGGATGATGCGGAACGAGG  
CATA CGCCAAAGCCTTGGCGACGACCGACTAGGATCGTCGACTCGAAGATATCAACTGCA  
GCTTGCAGTCTGCTGCACGTGACTCCCTCAAGCTGCTTTTCCGAAACGTGCATT CAGC  
GATCACAGCGGGTGTATCGGAGGCAGCGGCCGCGGCGGTTCGAAGCAGGATTCCTCGACGA  
TCGCCG CATTCTGAATCGCCTGTACCCGAACCGCGCTCGGCGCGGCAAGTACTAAGACTC  
CATGCGGCAGAGCGCATCCCCTGACGTTTCAGGCCATGATGACGCGTGTGCAACAGAGCAA  
CCGACCCCTTAGCCAGCGAGTTTACCACACGCAAGCCCTGGCCAACGGCACGGTCGACCG  
AGTGATCACCTCAGCACTGGTGAAGGGTGATGGTGCGGCCGACATCGCCAAGGCCGTGCC  
CCAGAGTATCACCCCGAACGTGCCTGGCGGAGGCAGCTACGCTGCAATGCGCTTGAGGCT  
GACCGAGATTAACAATGCATTCCATGCTCAGGCCATTAACGACATCAACACCAAGCCATG  
GGTGGAGCATTTTCGAGTGGCACCTGAGCAGAACACACAAGGAGCAGGGCCGTCGGTGCGA  
AGTGTATGCTCGCATCAAACGCTTTCCAAAGGAAGTGATTCCAGACAAGCCCCATCCGGA  
ATGCCCTGCTATATCACGGCTTCGCTGACACCCTGGGAGGAATTCGAAAACAACCTTTCT  
GATAGGAATGTACGACAGCTACATCGACAACAATTTGCGGTAATAGGGTAGGGTAATCCG  
CAGGAAGGAACTCTCATGACTGACACATTCTCGCATCGCTCGGCGCTACCGGCTCGACG  
CTGTCTGTCTCGACGTCGATGGCGATGGTGACTTCGATGGGTACGACGACGATTCGGAT  
GATTCGGACGACGGTGCATCGGACCGAGGATAGTCTCGAAAGTCCGACTACGGGGATGAT  
CGCGACAGTGGCGATGACGCCAATGATGCTGACGACGACGATCTTCGAGCAGATCTCAAG  
GCGAAGGACAAGAAGATCGCCAAGCTCGAGCGGGACCTCGAAGACGCCCTCGAGATGATC  
GAGGAGGCAGAAACCAAGCGCCGCAGGCGAGGTGACGATGACTACGATGACGACAACACC  
GAGTACCACGAGCTGCGCGACGAGAACGACAAGCTCCGCGCTCTGCTCAATGGTCCGTAC  
ATCCGTACGCAGATCTCGAGCTTCCGCGACAAGGACGGGAATCTCAAATGGGAATGGGAT  
GACCCGGAACCGTGTTTCGCGCTTCTGAAGACGGCAGACCACGAGGTTCGACGTCGAGACG  
GGCGAGATCGACGGTCTGGAGGAGCAGCTGCGAGATCTTGACGGAACAAGCCGTTCTCTG  
TTGCGGCAGCGCAGCTCTCGTCGTGGCGCTTCGGGTAAAGTTCTCGGTGGCTCCAGCGAC  
AAGAAGAAACCCAGTCGGGAAGACCTCGCGTCCGACTTCTCCGCATTCAAACAATGATC  
TGATTGAGAGGTTGACCCATGGAGAGGTATGACAAGTACAACCCCTACGGCCGAGGTTTT  
CGAGCCCCGCTGGCAGCCGACTGGACTGACGCCGACGCTGGCAGGCAGTATGCCGTAGGC  
ATCAACAACGACGGGGCTGTCGTGGTGGGCGCAGGCCAGTCCGGCGTGGCTGGCGTGCTA  
GTGCTACCAAGGAGGCCAAGGCCGGATCCATCGTGGAAGTCATGAAGTTTGGCGAGGTC  
GTCGAATTCGGTCCCACCTCGGGCACTCCCGGCACTGACTTCGGCTCTGCTGGTACGGCG  
TACTACGCCGACACCAGCACCGGCGCAATCAACTCCACGTCCGGCGAGGCCAAGGTCAAG  
GTCGGACACACCCTCGGGGCTCAGCGACTGATCGTCGCCGTGGCCGCTGGCGTTGTCGAT  
CCTTCGCCGAACGAGAAGTGAGCCAGCCCGATGAAAACCTGCAACAGAAGGAAGAGTAATT  
AGGGAGAGTTTCTCGCGATCCTCGCTGCGGTGGGCCTCTCTGGTCATGACAACCAGGGT  
GGCTACAACACTGCCGGTGACATCAAGTACAAGACCGCCGATGGCGTGTCTGACGACAGC  
CTGTGGAACCTGTT CAGCAACGTCACGGACGAGTGGAACAAGCACAAGTCCAAGATGGTT  
CAGCTGATGACGTTCCCGGTCACCAACCCGACCGAGAAGGTGCCGCGCATCGGCCAGTTC  
GGCTTCCAGAAGGCCTGGGAGTTTCGGCGTCCCCAAGAGCAAGCGGACCGAGCTGAGCTTC  
TACCAGCTCGCGTACGACTTCGAGGACTACGACCTGGCATTCCGATACACCTGGAAGTTC  
CAGCGTGACGCTCCGTGCTGCTGATCAAGGCGTACCACAACCAGGCTCTCCAGGCCGAC  
GCCAAGCTCATCCACCGCAAGGTGATGGAGGCGATCTTCGACAACCGCGAGCGCGAAGCG  
GACATCGAAGGCCTGCCCTACAAGGTCTATCCACTCTACAACGGCGACAACATGATCCCG  
CCGGAGTACAACGGCACGACCTTCACTACCGGCCACAACCACTACCTGGTCTCCGGTGGT  
ACGAAGATCGACTCCGCCGATGTGGAGATGGCTCCTACCACATCCGTGAGCACGGCTAC  
ACGGAGGAAAACGGCACCCAGCTCATCGCCTTCGCACACAAGGCCGAGATCCAGGAAGTC  
CGTCCGTTCCGCTTCGGGCAGAAGAACAACAACCTCGGCCGCGGCGAACTACGACTTCGTG  
CAGTCGCAGGGCGAATCGCCCCTGTACCTGCCGAACGCGGACGGCCTGCTCGGCTAGCAG  
CCGTAGTCGATGTGGAAGGGCTTGC GCGTCAAGGGATCCTACGACGACGTGCTCTGGATT  
GAAGAGCCGACCATGCCGGCAGGCTACGTTCTGTTCTGGCCACTGGCCGGTACGGTCGCC  
CAGCAGAACCTCGGGCGCCTTGC GCGAGCACGAGGACGCGGCGTGGCGCGGTCTTCGT CAG  
ATCCCCGGCAACCCGACCCGTTACCCGCTGATCGACGGCTTCCACCAGCGGTCTTCGGC  
ACCGGTATCCGTCAGCGTGGTGGTGCAGTTGACCTGCAGGTCAAGGCCTCTGGCACTTAC



GACATCCCGACCAAGTGGACGAACGCTGGTGGATTTCGTATGAGCCGTGTAATCCCAGAGG  
ACCGTCCGCTGTCCGATGAGGACCGCGCATGGCTCAATGAGCGCAGAATGGCGTGGAAGG  
TCGAGCCGATCGACCGCGCCTACCCTCCGGGGTCGGACAGGGTCGAGGATGACACCTCGA  
CCAAACCGTCCGAGCCGCAGGGCGATGACGACGAGGAGGTGTAGGTTCGACGAGGCCATCT  
CGAAGTACGTCTGAAGACCTCCCCAACAAGGACGCCGTCAAGGAGCGCCTGATCCTGGAGG  
AGGTGGAGCTCGAAGACGATGCGAAGCGTGAGGCACTCAATGGCCTCCTCGTGATCCACC  
TGCAGGAACAGGGGCACGCCGGCAAGGACATCGAGCTCGGAGACTGATTGTGGCCTCCGA  
AGCAGTTGTGCAGCTGTTCAAGACGCATCTGTTCGGGCGTCGATGGTATGTGGGAACATTC  
CGAGATCTCAGATAACATCGACGCCACGGGTCTGTCAGCAAGGCAGTGCGTGCTTACTG  
GTCCAAGGTGGTCAACACCACATACTGCGGACCGATGTGAGCGAGAGTGGCAGCTCGCG  
TAACGCAACCATCATCTACCGCAATGCCATGGAGCAGTTGCAACGGTGGGATGAGATCAT  
CAAGGAAGAGGACGCCAAACAGGAAGCCGAGACCGTCCGGTACTGTGAGGTTCAACCGACT  
TCCGAGGAATTTCTCGTCATGACCGTGTGACCCAGTGCGCAAAGGGGATTGGAATTCCTC  
CTTGCTGGCACACGCGCATTTCATCGACGATGATCCGACCACGATCGTCCTCAATCGTGGC  
CAAGCAACACGCGTCGAGAAGCCTGGAGGCGGATACGATTTACCCCAGGGGGCTCCCCGA  
ACTGCAGAGATCTTCAAGGTCATCAGCCACACTGGCGACGGGTCCGGACTAACCGAGGCC  
CTAGACGGCATCCAGACGCCGGTACGCGAGGACATCCTGCTGGGGGCTCATGATTCTGTG  
GCCTAGGTTGGCGGCTGGTGGGTCGACGGGAACAATCGGTACACAGTGACCGAATTCCTC  
GTGGCAAATGGCTGCGAGCGCAGATGGCGTGTCCGCAGCGTGCGGCTGGAGCCGAATTAT  
GGCTAAGATCGAGTTCAAGTTCAAGGACATCGCGCTACGCCATGGGGTGGCAGACATGGA  
AGCCAAGGTCGACCGCGCCATGAAAGCCACCAGCAATTACCATGCGGTCGAGGGCACGGC  
CCACGTGAAGGAGCATGCTACCTGTACTGACCGGACGGGTGCTGCGCGTGCTGGTTTGA  
CGCTGTGGCTAGTACTCCACAGCCCAGCCGCTACGAAATCGTGTTTGGCCACACGGTTCA  
CTATGGCATCCGGCTCGAGATCGCAAACAGCGGTCGGTACGAGATCATCATGCCACAGT  
CCGTGACGAGGGCAAGCTCATGGCTCAGCGTCTTCGCGGCCCTCCTGGGGAGACTCCGATG  
AGCAGAGCCGCAGTGCTAGAAGCGCTCCGGGCCGATGTTGCGCTCGGGCAAATGCTCGGT  
CCGGGCAAACATTCTGACGAACTACTCCAAAGAGAGTCCGCCTAACTATTTTGTCCAGGG  
CCATTTGCAGTGATTTCGTTGGGGTGGCAAACGATTGACCTGCGGTGAATCGCGGACCC  
AGAGGCGTGAACATCTGGGGTCACATCCCAGCAACATCAAAGCACTGACTACACGCGGATC  
GATCGAATCCTCAAGCGCACAAAAGAGATCATGCTGTCTCTGGAAGACGTTGCTGGCGCT  
GATGGGGCCCCTTGGTCAGCACGCGCTTCTGCGGAGAGCGATGATCTCGTTGACCCG  
GGAATCGAAACGATCACGCGCTACGCGACATTCAGCGTGCCAGCAGAAGCACCTGAAGT  
CAAGTACGATAACCTACAGGAAAGGATGCTCTCATGGCGAATCGGATCACCCCACCGCCC  
TCGGATGTCAACCCCGCAGAGGCCTCTGCACCCGAGGCCAGGAATCGTCCTCGGGCAAG  
CGGAAATATCTCAAGTTAGTTGGCACGCGAGAAGATCTCACCTTCGCATCGCGCCGGCAGT  
CACTACCACATCACCGAGGCACAGCTGGTGGAAAGCCGGTGTGCCGCGCGGAAGGTGCTTC  
AAGTCCAAGGGCTCTGGCAACGATGCGCTCGCGGCGACCGAGGTCACCTTCGGCCCCGAG  
ACTCAGCACAAGGTGCCGCGCGACGCCTTCTAAAAGGAGGCCGCGACACCGGCTGTTGCAG  
GAGCCGTACATCATCCTCGTTGAGTAGTAGGGAACGCGTGAGTGCAATACCGATGCAAGG  
GCAAGGTTACGGTGAGCTGTCGGTAGACGGTCTCCTCGTGTTTCATGTGCTCCCACATCG  
CTTGACAGGACGGAAGAAGCGATCGTTCGTCCTTCACTACATGGACGCGAACACCGGCA  
CCCTCAAATACACCTCGCGACAATAACCGGAACCCATTGAAAGGTAGGGAAAATAACTATT  
GGCACCGCATTGCCCTATGGTCTGAGGGACGTGAAGATCACACCCTATGCAGACGAGGGT  
GGCACCGTTCTCGGCGATAACGAGCTACGACATGCCGAACGCACAGACGTTACGCTTCAAC  
GAAACTGAGGAGTTCACCGAGCTCCGTGGGGATGACCGGCTGGTAGCGACGCACGGCAAT  
GGCGAACAGGTCGACTGGTTCGCTGTAGGTTCGGTGGCATCAGTCTGGTGATCTGGTTCGATC  
CTGACGGGTGGCCAGTTGATCCAGTCCGGGCTGACCCCGAATCGCAAGGAGATCATGCGG  
AAGCGCGGCACCGACGTGTGTCCGTAATTCGCGTGGACGGCCAGGTCATGTCCGAGTCC  
GGCGGCGACATTGTGGCGCGCGTGTACCGCTGCCGCTGCAATGACAACATCTACGGTGAC  
TTCGGCAACGGTACTTTCCACATCACAGCTGCTCGGGTGTGCGTCTGCCCTGCAGGAT  
GAGGCGAACGACCTGCTGTACGACATCATCCGTAACGAGACCAAGGCGTGGCTGACGCTC  
ACCCCTGAGCCCAACCCGCTGCAGTCGCCTCAGAACCTGTCGGGCGGCACGACCACCGCC  
ACCATCATCGTCCTGTGTCGAGGGGAAGTCGTTGGCGCGGACGAGTATCGGGTGCAGAAG  
TCTTCGGCCCGCTGTGTCACCTGGAGCCTCGTCGACGACGTGGAGGACCCACCATCACT  
GTGAGCCATCGCACCGCCAGCACGGCTTACCATTTCCGTGTGGCGACCAAGGTCGCCAGT  
GCGCTGTGAGTGTCTCGGCTCCTTTGCCGGTCTCCACGCCTGCCCAAACCTAACCCAAG  
GCTCTCTGGGGCGCAGGGTGTGGCATCTCGACTGCGCCCCATAGAATTCAATCTAGAGCC

CAAGGAGGCCATGATATGCCCGAAATCAGCGAGCAAGAGTTCGAAGAGCTCATTCCGGATT  
AGAGAACAGACTCTGGCGCAGGAGAATGCCCGCAAGTCTTCAGAAATCGAAGAACGGGCC  
AAAAAGGCCGCTCTTGCTGCCCTGGCAGAGGCCGAGGAAGACAAGTTCGCCGTCAAGGGC  
TGGGGCAAGGATGTCGTCCGTAAGACACTCGACATCCAATGTCCCAGCGGACAGTGGTGC  
CACGCCAAGACTTTAACCATCGAGGACGCGATGTCGCTCGGTTTGTGGACAGCCTTGAT  
CTGTTACACATTACGCTCATGGCTCCGATCATGGCCGACGACGAGGACAAGGAGCGCGCT  
GAAGAAGAGCAGAATGCTGGTCTCCTCAACAGCCTCAAGGATTCTGGCAAGCGTGCCAGC  
TTCTTCGGCACGGTGAACCGCGTGACGGCGCATTGTATGCTGAAGCCGCGCGTGACCTC  
GAGGACGACGGCTACCTCCCCGAAGGCACTGTCTTCGCCGACGACATCCCGTTCGCTGAC  
AAGATGCACATCTTCCGGAATGTGTTCCGGGGGAATGGGGGAATTCCACGATGAAAACGTTT  
CGCGAAGGACCGGAAGGCAGCGTGTACGCTGAACCAGATGGCGCTCCTGTACAGGACGCG  
TCCGAGTGACCTAGTCGGTTTGGAGGATCCGTTGCTGCGATACTACGTTGATCGAGGGCT  
GCGGATCTTCGGCGTAACGGTGCAGAACAGGGTCGATGATGCTGGCCATGCTGCGGGCCG  
TGGCGCCAAGAACAACCGGTATAGGGAAGCGCACCAAAACGGTGCGCGCAAGCGCACCTT  
GGCCAAGCTGCTGGGCGAGGACATGGTGAGTAGCTGAGCTGGCTTCCGAGGTCCGGCGAA  
GGCGGTGTGACGTGCCAGATTACGTCCTTGGGCGTGCCCATGGCTAGATCGTCTTCGACG  
TTGACAAGAGTGGTGTTCGACGCGCCGAAGGCGCGAGGGACCGCATGGAGGAGTGGGCCC  
ACAGGTTAGCCGAGGGACTCGACGTGGCTAAGAAGTCAACCTCTGCTTGGGAGAAGACCC  
ATCGCAAGGCTGTGGGCACCACTGAGGCTCAGGCGCGTGCGCTCGATCGGTACAGCCGCA  
TTCAGGAGGCAGACGAGCGCGCTGCAATTGAGCGTCGCAAGGCCGACAAGGAGCTCAAGG  
AAATCCTCGATGCCGGTAAGGCTACCGAGGAGGAGATCCAGAAGGCCATCGAGAAGACCA  
ACAAGGCCAAGGGCAAAGCGCTACAGCTCGCCAAGGAGCGCAAGAAGGCTGAGCGCGATG  
TCGAGCGAGCTGCAGCTGGCCTGCGCACCGAGCACGAGACCAAGCTCAAGGTCAACACCA  
AGGACGCCGATCGGGGCGTCGATCGTTTCTACGACAATGTTGATCGTCGTGCTGAACGTA  
GTTTCGCGCGTCATCGCCAAGCTGGGCACAGGAACCATCAAGGCTGGTGCCGCGACGGCTG  
GTGTAGGTGCGCTGGGCGGGTTGCTGGCTGTAGCGAGGTCCGGTGCTACAGGCGTCCGAA  
GCATCGGCATCTTTCAGCTTGGCGCAGCGATCGCTGATCTGTCTAGTGCACCTGGGTGTTT  
TGCCCGGCGTCGTGGGTGCAGGTGCCATCGCGATGGGCACGATCCAGCACGCCCCCGACC  
GATTCGGCGAAGCTCTTAATGACCTCGGAACCGACGACTTCGCCGACGCGATCAAGGAGT  
TAGCTCCGGCTGCATTGTATGTGGCCGTTGAGCTCAACACGCTTCTGCCCGGGTTTAAGA  
ACTTCCATAAGAACGCCGAAAAGGCGCTTTTCGAGCCGCTCAAGGGTGTGACCACAGAGC  
TGACGACGACCTTCCTGCCGACGATCCAGGGTGCAACTAACCAGATCGCCAAATTCTTCG  
GTCGCACCGGCGCTGGCCTGGCGGAATGGCTCATGAAGCCAGAACAGCAGCGCGACATCC  
AGAACTTCCTGTGGAACACCGTTCGAGGGCTTCGAGCGTCTGTTCGGATGCTGCTCAGCAAC  
AGCTGCAGGCATTCACCGACATCATGACGGTGAGCGTCGTGTTCTGCTCCAGATCGGTG  
GTGAGATCGCTGAGGCTGCAAAGGAATTCGCTGGCTGGATCCGCACCATGCGGGATAACG  
GCGAACTCGCCGCGTGATCCGCGATGGCCTCGAGGAGCTGAAGACCTTCCTTGGTGCGC  
TCAAGAACTTTGGGCTGGGCGTGTTGTACATCGACCGCATCGCCAACGAGTTCGGCAGCG  
GTTTCATCGCTCTGTTTCGAGAACTTAGCCAGTCTTTCCTTTCCTGGACGCACAGTGTTG  
AGGGACAGGAAGCCCTACCAAGTTCTTCATGGCCACGAGTGAGGCCGCGCGTCTGCTCA  
TGCCGCTGCTTGAGAAGCTGGGCACGCTGTTGTTTCGGCACCATCGGAGCAGGATTGGGCG  
GCTTGGGAATTGAGCTCGCTCCGGCATTCAACTTCCTGTTTCGAGACGCTGAATGTCGGCT  
TCCATCATCTGATCCAGGTGCTGATCAACAGCGCACCCCAGATCACCCAGTTCCTCACGA  
CTCTGGGAATTCTTTTCGTCCACATCATCAGACAAGTCGGACCGCACTTGCCGGCATTGC  
TCGGGACTCTTGACGATTTGTTCTACAAGCTCGGGCTGGCCATGGGTCCGCTAGCGAGCG  
CGCTGGTTCAGGGTGTACCCCTGATCATCAACGCTTTCATGACAAGTGGGACACAATCG  
CCAATAGTCTCAATGGCTTGGCGGCTTCTGTTGCGAAGGCGATTGAGTCTGGTGATTGGT  
CTGGTGTGCTTGATCGCATCACGAACCTGTTCCAGCCCTTGGGCGATGCTGCGATGCAGG  
CTCTGCTCGACGCTATCAATCGTTGGACCAAGGATATTGGGGAAGCCAGACTCAAAGTCA  
TGATCGCCTTGGCCGACGAGATCACCCCTGGATCGACATCAATGCCCCGATATGGGGCG  
AGAAGATCGTCAAGGGGCTGCACGAAGGCATGGGCGGAGCTATCCCGGTCATCCGACCGG  
TGGCCAAGAAGGTCCTTGGGGCGCTGAGCGATTGGTTCCCGAGTTCTCGGGCCAAGAAGG  
GGCCGATTTCGGGTACCGGCTGTACGCCGTACCGTGGCAAGGCGTTGATTGAGGGCTTCG  
CCGAAGGCATCCTGGCTGGCGGAGCAAGCACCCAGAAGGCCGTGGGATCCGCCGTGGGAG  
GCGCGAGCTCCGGGATGAACTCCGGGATCAGCGGCCTCGTCAAGGACCTCACCGAGCTCA  
CGAGCTTTGGTTCGGAGTCTGCTCAGCTTTGTCCAGGGCATCAGCGACGTCGTGTTCCAGA  
CGATTAAGTGCGCCACCACAGACTTCACGACGGGCGAGAGCCCCCTGCCAAAGCGCTTCG

TGCGCAATGTGAGCGATGAAGAGCTCGCCAAGCGTCGTGAGGACAAGGCGTATCGCGACA  
GCCTCAAGGAGCAGAAGTAGAGCGGCACCGGTCCCACGGGCGCTCTGTGCGCCGGAACCTC  
AGCGCCTGCTTGACCAGACGAATCCTGGTGGAAACAGGTGAAGCCGCAGTTCCGTTGATCC  
AGAAGGAAGAGGGCACCTGGACATCTCCGAACAAGGACTGGGCCAACCTCATTAGCGTG  
AGTCGGGTGGCAACGCAACAATCACCCAAGGTATTCAGGACGCCAACTCCGGCGGGAATG  
AGGCCGAGGGGCTGTTCCAGGTCACGCCGAGCACTTGGAAGGCGTACGCCGGCACAGACT  
TTGCTCCGAACGCGAAGGCCGCCACTTCGCAGCAGCAGGTGATCATCTCGGCGCGGATCA  
TCCAAAAGAATCCAAGCGGGGCTGACTGGGGTGCGAACCTTCCGGGGCGTGAGGACCCCG  
AAGAGCTGCTGAGAGGCTTGACGACTGCCAGCGCAACTAGCACGACGAGCAATCCATCGG  
CCAAGTCGAAGGCCAAGGCTGCAGGCACCGAGGAAACGCTCAAGCCTGCGACTGGCCTCC  
AGATGGAGGCGATCGGCGACGGTTTTTTCAAGGACACGAACACCGAGGCCGTCTGTGAG  
AGATCGATGGATCTTATTACAACGTCACCGATTTGGCCGTCGGCAAGGACGGCAAGCCGC  
TCCTCAACGAGGACGGCAAGCCCATCTCCCGCACGAGCGCCAACAAGAGCGCGTCTCGGC  
CATCTGCGCCAAAGGCACGGGAGCCGTATGGCCTCAAGCCTGGCACCGATACGCATGGCT  
ACGGGAATGGCAATGTGATGTTTTCCCGGAGTCGGTCATGGCTCTGGCCGCTCAGTTCCG  
GCATCAAGGCCAGCACCTACAACGGTCATCAGGAGTCTGACCGCAACGAGCCTGGCTATG  
CACCAAATCCGCAGCGCTTCAACCGAGGGATTGTCAGGCTCGGTCCGACTAAGAACCTGC  
AGGCGTTCGCCGAATATCTCGAGACGATAACCGGACGCCCTGGAGCAGGTGCTCTGGCAGA  
ACCCCGACACCGGCCTCAAGATCAGTATCGCTGGCGGAAAGATCAACCCTGGATACTATC  
CGCAGGACACCTATGATGTCCACGCCGGAATGATCCTAGCAACATCCACGGTCACACCC  
GGCAGTCGATGTGATCCCCTGCGGGGCGAGGATTATGTGCCTGGTGAGACGCCGACCA  
GCACGGGTGATTCGATCCTGGACGAACTCCAGAAGATCACGGCGAACACCGAGGAAAGCA  
GCAGCACCGAGGACAAGATGGTGCGCCAATTCCTCGATCAGAATCCGATCCTGAACGAAC  
TCGTCACGGCCGCACAGGATCCCAGCGGCTCGGATGAACAGCTAAAGGCTGCCCTGGGCG  
GGCTGCAGACAGCCCTCGACGCCCAAACCAAATGGACACGCCTGCCAGTCGTTATCTTG  
CCGATCAGCTGAGTGGCATGCAGAACCAGATCATGACAGATCGTGGCTTCGGCGTGGCCG  
ACATTCCTGTTGATGCGGCACAGGGCATTGCCAATGGGGCGATGGGCCTGGTTGGCGACG  
TCTTCAAGATCATCGACGACACGCTCAAGTCCATTGAGTCGGCAAGCGAGATCAGCTCA  
CTCTTGTCTCGGTATTGAGAATACCGAGGACATCATGAAGATCATCGACAACGTTTCA  
GCTTCATCCAGATGGCGGGAACCATCGCCGAGACGGTGACAGACGGCCTGAACTTCCCGA  
GCTCGATCGCGAGCATTGCCGGCGGCGCACCCGTTGGCCAGGGTGCCGTAGGCGGGCTTC  
AGGCGGCAGCGGCGATCTCGGGAATCATCACGTCGGTGATCCAATCAGTCAATGCCGCAA  
TTGATCTGGGCCAGGAAGCGTACCGAATCACGAGCAAATAACAACGGCAAGTTTCTCAGCT  
ACCTGGTGGGTGCTGGCGAAGGTTCTCTGATGGGCGACATGAGACTCCTTATGAACAAGA  
ACGATTGGACGCTCAAGGCGTGGTCCGAGGACAATCCCGAGGACAAGCGCAGCCATCAGG  
TTCCGGCCTGGCTGCGGGATGAGCGGAGCGTCGCGGAGCAGGGCGGCAAGATCCGAGACC  
TCAACATGTACATCGGGCCTGGCCCAGACCCGAATGAGGCAATGAACGAGGGCATGTGGC  
GCGTGATGACTGACCAGAGAGGCGTGTTACCAGTAAGTATTAATCTCGAACCTGGCCAG  
TACCAGATCGGAGATCTGGTGTTCGGCCGTGGCACCATTTATCCTGTGACAAGCATTGAG  
ATCCAGAGCTACCAAGTGCAAGCACAGGATTTCCAGGTGATTCGCAGCGACGAGGTGCAA  
TTCGGGCAGGACAGCCTGCTGCCCGGCCAAATCGTGTTCGAGCTCGGGAAGTATGATTTT  
AAGCGACTCGCCAATGTGGAGCCGTACACACGCCGTCTCTTCAACGAGGAGCCCTTCAAG  
AAGCTCCTCAACAAGCTCGCAGCCGAGTGGCGGGGTGACGACGTCTGCCAGAACTGGGGT  
GCGATGAAGGCGCTGAAATGCTGCGAACGTGATGGTAAGGTACTTGTGTGGTACGGACGT  
CCCGGCAAGTTTACAGACCACCAAGCGATCTCGGAAATCGTCTTTCTTACGGTGACTGCG  
GAGTTTCGTGCTGCAGACACGCTCATGTAATCCGACAAGGAGTCTGGCGACGAGGTGCTC  
AAGGGTGATGGCCCGACAATCATCAATCGGGCTGACGGCTAGGCCAAGAGCTGGTTGCGC  
GTGGTGGGCTATGGCCCCCTGACGCACCCGGTCATCACCATCGGAGACCAGCAGGTGAG  
CTTGACGTTGAGTTGGCAGATGGAGAAGCCTTCGAGGGCAGCTTGTATCCGTGGCAGCGT  
CGTGCTATCAACAAATCTGGACAGAACATCAGTTCGAAGTTGATCGGCTACACCCAGTGC  
CTCGACCGGCTGCAACTCCCTCCAGCCGAGTTCCTACGCCGGTACGGTGGACCTCCGAC  
GAGATCAACACATGGGTGCGCGAGCTGGGCAATCAGTCCTGGATCGAGAAGATCGACGGG  
GTGAACAACCTTCAATCTTCCAACCCCTCCAAGACGACCCATGGCCGGGTGGTTCGTGCGA  
TTTGATCTGTTCAATCCGGAGTTCGCCGAGAAGTTCATCGGCTCGGGCATGCTTGGCGGA  
ATCAGCGACTGCCTGTATACTAAGAAGACCTTCGCCACGCGGAGCCAGTACTGCGAAGCC  
AAAATCGTTGAGCCGTGGGGAGGTGCGGAGCGGCATCGTCATCATGAGTTATGCCACGATG  
ACCAACTTCGCGCTGCTCCAGGTGACTTCAGGACCCAACAACGACTACCTCAAGATCCGT

ACTGGCAGCGCCTACAACACATACTCGACCGTCCGGGACAGCTGGAAGAATCCGAATAGC  
TGGAAAGAGACGGACGTGGTGGGAATCGGCTCCTCATAACGATGAGGACACCGAGAACACC  
ACCTACACAGCGTATTTCAATGGCGATCCGGTCGCTGAGTGGACCGACGAGGTCAATGTC  
GTCGGCACAGCTGCGACCAATCGGTCACAGGGATTTCATCTTCGACATGGACAGTCAGCTT  
CTGACCATCGGCACAGGGTTCAAGGACATTCTGGCCTACGACACTGGGACGGTGCAGGCT  
CCTACAGGCAGAGTGTTCTGTGCTCTGGCGAGATGCATACACGGTGGCCTCATGAAAGCCC  
AGGACCGCAACCGATTTCATGATCGAGGAAGCGCGCACGGGCGCAATCCTCACCCGCGATC  
TTCACGTACAGAATCCGAAGATCCTCAACAAGCTCAGTGGCCCTTGC GTTATTGAGTTTG  
ATGTCGATCACCGACACCACTCGGTCCAACACCCCGACGGCACTGGCCCCCTCTGTTC  
AGCCCTGGGGCCACTGGTGCCATGTTGAGCGCGAGATTCTGGGGCAAGCGCGTCATCATCG  
CCTCAGCCCTATTCCAGCCTAGTGAGGTGACCGAGGAGACAGGCCTGCTGAAGGCTCAGT  
GGCAGGGCTTCTCGGGATATCCCAAAAACCTTGCCTGGCTACAGA ACTGAAATCCGATCC  
CGGTCGGTCCATTCGAGAGCGTGCACCGCATCCGGAGGCAACTCCAGAGCTATAGCAAGG  
GCAATCTCGGCGTACAGGTGTACTCTCCTGGGCCTGGCGGAACACGCGTCACTCCGCCAA  
ACAGCAACACCGAGCTGCTTCCTGGATTCTCCTTCGATAGCCAGCAGTTAATCCAAGACT  
TCTTCGCCATCTTCATTTCGGCGCGTTGACTTCACCGACTGCGGGCGATCACATCAACAAGC  
TGGCTCGCGACATTCCGTTGACTACTTCGGGGAGTCGGAATGGAACGAGGATCACACAG  
CCATCAACAAATCCATTCGGCTAGAGTATGCGCACGGGGGTGTATTCCAGGATAATCTGA  
CCTTCCGGGTCAACGAGAATGTGATCCGGGCAAAGAGCAAGATCGAGTCAGAGATTGAGT  
GGACCAGCGACATTGGCATTTCGCGGCTGGTTCGCCGCAAGGTCTACAGCTCTCAGATCA  
GCAATGCCGACCCAAACCGCTACAGACGCTTCATCCTTGAAGAAGATGCTCGCATCAACA  
GCACCGAGCGGTCTGAAGCCTGGGCGCATCGGCAGCTGACCAGACGTC AATTCCCCTCGT  
ACTGGGAAACAATCACCATCAATATGCATCATAACGAATGCTCCGTTCCGGTACGTGGGATG  
TCGACGACCAGATCAGAGTACAGGGGCTGATGCCGTGGGTTCGGATATGTTGACCAGGTGC  
ACAAGATCCTTGC GTGCTCCCTGGATGAGACGTCGGCTACATGCGAATTGACACCTCGAG  
CTGAAGGCGCATTCAACTTCGATCCGATCCTCTTCGAAGGCAAGCTTCCGAACCTTCTGG  
CAGATCTGAGTTTACC GCCAGCATGTTCAACTGGACTGCCGCTCTGGGCAGCTGGTTCGC  
GTGACAGCCTGCGAGGCAAGGATTCTCTCGGAGCGGCTCGTGTACGTGTAACGGCCAAG  
AGAAGCTGCTCTTGAGCGATGCCGTACCAGTTGTGGCAGGCGTTGATGTAACGTTGAGCA  
CGTGGGTGTGTTGGCAGAATCTCGTGGCCACTGACGAGCCGCTCGAGCTGATCCTCAACA  
CCTACA ACTCGGATGGCGA ACTGCTCAACACCGTTGTCTTCGCTAGCACATCGGGCTCTG  
GAGAGACGCCGAGCTGGGTACAGCTCAGCAACGCATATACGATTCCCTCATGAGTCGCGT  
CGATGCGGGCTGGTGGACGAGTAATCGAGGACGCCAAGACCGGGTCCGGTATGGTATGACG  
AGTTGAACTTCACGAAGGACGTCTGATGGCCTACGAGTACGAGAGCAAGGAATCTCGGGC  
TCTCCGGTCTATCCAGAGCAAGA ACTACCCTGACACCAACAAGGATTTTCGTA AAGACTCT  
GAGTCGGCTCAACAGTTCTGCTGACTACATCTCGTCTACATGATCATCATGCAAAAAGG  
CATTGATGACGCCAATAAGAACTTCATCGAGCAGATCCAAAGTTTCATCAATGATCTGAT  
CGTTCTGTTTGC GGGCGGACAGCCCACGGGCATCGAGCTCGGCGACCTCAAGTACATCAT  
CCAGGCTCTGCGCGCGCTGTTCCGGCTTCAACGGGCCATTCCCAATGAGCTTGATCAACGC  
GGTGCAGCACTTCTGCCTCGGGTATATTGTTCCGCTGCCACAGTTTACAGACGTCATCAC  
CGACACCATCATCGCCTGCGCCGAAGAGCTGGGGCTGGACCCAGAGTTTCGTTGATGCGCT  
GCGCGAGCTCACCGACGCCATCAATGTTCTTGGCATGCGCATTGGCGATTTGTTCCGCCAG  
TATCATGAGTATCTTCAGCATCTTTCAGTTTCCAGAGCTCGGTACAGGACCGCTCGCCAA  
ACTATGGGATCTTCTGGCAGGAATTTTCGATGGCATCCACGGGAATGCGCTGCGGCCGGT  
ACTCCTCGCCATCAGCAACTCGACCTTTCGGTTCATCGAAGGTCTCTCGTCACTGGTCAA  
CTATATGGACGACCTGGTTCGACGGCCTTGCCAACGGAAAGTTCCTCAAGATAAACTCACC  
GCTGAATGCGGCAAATCTGTTCCGGGGCTATCGGATCTAATCTTATCAAGGTCGTTCTCTGC  
TGGTGC ACTGACCAATCGTTCGCGTTGAGCTACTCGACAATGCGTACTTCACCGAGGATGC  
CATCGCTCCGGGCAGCGAGTGGGCCCCGGGACATGCTGGCGTCCCGCACCGACAATGATGG  
CACAGGTAGCGCGATGGTGTATCGCCAACGGTCAGCCGCACGCCCTCAACACCGGGGCAAA  
CAAGCACGACAAGATTCTGTCCGGCCCCGGACAGCGTATTCCCTTGGGCATCTAAATAAG  
TCATGACGGCGCTGTGCTACAGGACCGGCGATCATTCCGCAGGTTCCGGCGTTTCAATGG  
CAACATCCCTATCGTTCGGCCTGTACGAAATTGGATCGTACACTCCTCCTGTGGAAGACCT  
GCCGTGGCCTGGCCACAAGCTCGAGGGTGTCTACACAGTTGAGGAGGATGTCACCCACAT  
CCAGGTGCGCGTGTACGTCACCGAAGCCGCCCTGGCGGGTCCGGTATCGCATTGCCGATGT  
GGATTTCCGCAAGGTCACCGACCTGGCCTTGATCTCTGGTCTGACAGAAGCCTTGGAGGC  
GCTCGAGCCTGACCAGCGTGTCTGCTGCACGCAATCGCCAACGCGGTCAGCAACATCCC

GATCATCGGGGATGGGAGCGAGGTTCTGATCAATGCGCTACAGAACTTCAATCCGGCCAA  
TATCGCTGGAGCTCTGGGCAGTTCACTGCTGAAGGGGCGACCTGTTTCGGGAGCATCCGACA  
CATGATCGCTGCGGCACGTGGTGTTCGGGTGTCGGCGGTAGCCGAGGATGCCACGCTCGC  
AGACCTGTACAACGCGATGAATGCGGGCGCTCAAAAATGTGCGCCGGATACGACGAGACAAC  
CTTCGTCGATAACCACGACATTCGTTCCGGTGAATGCGCCTTGGACCAACTACATTGATGT  
CATCGGCGTGGGCAAGGGCCAGGACGGCATGGACGGCCCGACGGTGCCGCCGATCCCCGG  
TGTGTTTCGGACAAGATGGGCACCTGGGAAGGGTGTCTGCCACCACATGGGTCAAGGGTGT  
CCACTACGACAATGATCTCACCCGCGTCCAGGTCACCTTCAAAAGCAATGGCTCTGGGAC  
CTTCTCGATTCCCGGTTACAGCCTCACCTGTCTGCTGCAAGCCGACCTCCGCGCCAATT  
TCAAATCGGAACAGGCTGGCACGCCAAGGGTCCGGGCACATATGTCTACAACGACCGCCC  
ATACGCTGCTGGCGGAACACAGAACCAGCCTGGACGCAACGGAATTGGACTGGGTGGCTC  
TGGCGCTGGTGGTGGCGTGCTTCAGAGTGGTGGCCGAGGCGGATCTGCCGGCGGATGGGT  
GCGTCTGCGTGCAGCTGAAGCAGAGTATCCGTCTACTGGATCAGACACGACGCCTCCGAC  
CCCTCCGAAAGTTAGCGTTGTCAATGCGACGAGTGACACTCTGTATCTGCTCCCGAGCGG  
AAGCGTGGACCAGTAATGGCTAGTGATGTCAGCGGCTTGCCCGGATATCTGTTCTACCTT  
GATGACTCAACGCCACCCCTCAACGCAGAGCCGTTTCTGCCGAGCTCTGGTCTGCCGTAT  
CCCATAACGAGGCCTTGACGCAAACACTGACTATAGCAATCGCATCTACGTCACGGCGATC  
GACCATGCTGGCAACGAGTCCGACCCCATCCCCTGGAGGAGGCTCTCGACGAGATGAGC  
CCATTCCCCGCCAGCACGCTCAGCCCCACGCCAGAACAATCGCCCATGAACTCAACTGGC  
ACCACTGCCATCGACAACATCATCAAGCGATGCATCGCGGCTGGTGGCCGGTCTGGTGTG  
ACGGTGGGGATTACGAGCCCTTGGGGATACTACCTTGGAAAGCTTCGGTGAGGGCACCGGC  
GTCGACCGACACTTCCTCATGGGCAGCCAAACCAAGAGCTTCCTCAGCTGGGCCGTGATG  
ATGGCAATTGACGAAGGCCGTTTCTCCCTCGACACCACAATCAACGACATTCTCGACTCG  
CCGTGGAGTACGAAACCGACCATTCAGCAGCTGATGATCATGCGGTTCGGGCATGTACAAC  
TACCAATCGGACTCGGCATTCGGCCTGCAGGTGGCGATGAACACTGTAATGTCGTACAGC  
CTGCAGCAAATGATCGCCAGGAGTCGCAACGGCGCCAAGCATTGAGCCTGGCGAAAAG  
TATGATTACAACAACGGAACCTCGTTCGCTCTAGCATTGATGCTCGAGGAAACGGACCCC  
GAAGGCCGCAAGATCCACGAAATAATCAAGCAGGGCATCCTTGATCCGCTGGATCTCGTC  
TACACGAATTTCCCTACTGTCACCAGCGGACCTCCGGCACCTTCTGCCATCCTGTACTCG  
TGGAACCTCTTGTGTCGCTCATCGGCATCAAGCTCTGCCAGAACGTGACCATGCAGCAC  
CCCAACATCACATGGGCGGCTGGCTGTATGACCAGTGTGCTTGGCGACATGCTGAAGTGG  
GGCAAGGAGCTTCGCCAGTGCACGCTGCTGTCACCAGAATCAGCCGATCTGATCCACCCA  
ACTCACATCATGTATCCGAGTGCACCCTATGGCCTCAACAAGGACGGTGCAACAGAATTC  
GGATACGGGTTGCACGGCCATATCAAAGTTGGCTCCTGGCGGGGATCCGACGGCAGTTGG  
ATCGGCTGCGACTCTGCGACAATGTACGAGCCCACCACCGGCACCATCATCACGGTGTAG  
GAGAATTTTCAGACGCCGTGATCGCTTTACTTGGCCACAGTTTGGCACGAATCCGCGGAG  
TATATGATGCCGGGGTTCGGCGACGTATCCGGGCTAACAGACCGGCGAGAATGCGGCAGGT  
ACGGTCCGCACATCGCTGAAGAAGCTTGGCACGTTCTCCGAGGGTGCGGTGTGGCTCCT  
GGCACCGAAGGCGTTGAATTCGACAATGCGAATGCGGTTCAGCACGACTCCGGACGAAACC  
GCAGCATTCAACATCGCGTCCGCTGCAAAAAGCATTGGTGGCCTGCGTCTCTGCACAAGGT  
AGCACGGACTGGGGAGGCGCAGCCGTCAAGGCCAAGATTGATGGCATTGAAATGGAGAAG  
GTTGTGTCGACAACCGATGGCACTACCTCCGGGAATGGCCTGGTGTGCTTCCGCCTCCTC  
AATCCGCCGCCCGGGGCGAACAAGAAGGTCACATTTGAAGGGATGGGATCTCTTGCACAC  
TATTATGCGAATGGCACAGCCTCGTACAAGAATGTGCGGGTCTTAGGAGCGCCTGTGAAG  
AACAGGGGTTCCGGGTCGTCTGCCATCATTACTGTCGGTGGCACAACATCTTTGGATATG  
GTTTTGGGCGGATACTACTTCCAGGGTGCGCACAACCTCATTCAACAAGAATGTTTCGTGGT  
GGCAGCGGTCAGGCAGCATTTCGTCAACCAGGGCCTGTTGATCGGAGACTCTGCCGCTGGC  
GGAGACGTCACCTTGACCGAGACATTCACGAGCTCGATTCAATGGTCTGGGACGGCGTTC  
GTTCTTCGGGCTGAGGAGCGCTGATGGCTGTGCGATGGTGGGCGGAGAGCTTCTCGATAA  
TACAGACCGAGCTTAGCCAGCTGGTCAATGAATCTGTAGGTGACCAGAGCCAGTATGGCC  
TTGCTACCGTTGAACTCCAGAAGCTTCGAACTCAAATGGAGGCAATCGCTTACGACTATC  
TAGTGTGTCGTCGGCCACTGAGCTCATGAAACTCTCCACGAGCGCCTCTGCTGGACAAGTGT  
ATTTCTCCAACAACCAGACAGCCGTGAAGAAGCTCGTGACCCAAGCGCTTGCCGGAGTCA  
CAGCTCCCGTAACATGGCAGGGCACAGGCCCGCTCCCGACAGGCGTCGGCATCCCTGTCC  
AGAACAACCTGGACAGCACCGGCTGGAACCGATGTGTACATCGCAGCCGTCATGGACCGCT  
CGGGCAGATTCACCGGCGCGACATTCGGTGGCGAAGCGGGCACTCTGATGGAAGCATTGT  
TGCACAACAACAACGCTAGCACAGGACGTACGACGTTGTGGCGTTTCGCAGGCAAGGGCG

ACGGCACCAACAAGACCTTCTCCATGACAGGTAGCGGCTATGGTTGGTTCGGTGTGTGCA  
GCGTTGCCTTCTCTGGCGTTGTGTTCGGTTCGGAACACCCGCGACCACGTACGGATCGGGCA  
CTTCGCCTTCCCAGGTGGTCACGGAACCAGGGCTGCAGATACTCGGACGAGGAGTTGGCG  
GAGCTGGTGTTCGGCACACTGAGTGCCTTCTCTGGTCTGACCAACAGAGTCAACCAGAACA  
TGAACGGTTCGAGCCTTGCAGTCAATCAAGCTGAGGTGCCAGGAACAACAGGGGGCAACCA  
CGCAGAATTACCCTGATGGGTACATCTTCCCTGCCCTCCGGAATACATAGGAGATCGAGT  
TGAATACAGAGTTGCAGGCGATCAAGGACCCAATGAATGCCCTTGACTTCGATACTGCGC  
GTGATCTGCCAAGTTGTATGTTCGAGCACCATCCGGAGGAGTTCGTCGACTATTACCAGA  
TTGTGGAGGAGTCGGCCAACGACGAAGAAGCGATCGCCAAGGTTCGTGACGTCCATTGAGG  
TGTTGCCAGCTGCAGGCCTCACCCAGCAGCAGTATCGTGGTGTGACACCTTCCATCTGTTC  
GCTGGGACCCGGAGAACATTGGCGCCACAACGGAACCTGTGGTGTGCAATCCAATCCCGC  
CGACTGTGAGGAATGACTGAACATGGCGAAGGCATATTCTGTACGCTGGATGTGGCCCA  
GGGAATGCTCGGTGGTAGCACCAGCTACGCCGTAGCTCTTGGGTCCCGCCAAGATCAA  
GATTTAGTCAGGCACTCCACCGGCCAATGCTGGGGCTGCGCTTACGGCAACACGCTACT  
GGCCACTCTCACATGCGCAAGCACGTCTATCGCCAGCCAGAGCGATACTGGCACTGCCGC  
GCGTGCGAAGTGGGCCACGAGCGCGTCTGCGGTGGCCGACCCACAGGTACGGCCACCTT  
CTTCCGCACCACCACGTCGTCCGACACAGTGATCGACCAGGGTACCATCGATACTACTGG  
TGCAGACCTCGACATGTTCGACGACGTCGTTGACGGCTGGGTCCACCATCGCAGTGAGCTC  
GCGGACAACAGACTTTCGCTACGGCCATAGGAGACAGCATGGCATTGATCCAAAAGCAG  
GGCTACTGGAAATCCGACAGTGGCTGGCGCATGTGTGACACAGCCGAATTGGACTACACG  
GCTGTGCCGGGGACCAGCTTCAAGCTCGGCGTTCGCAGTGGATCACCCAACATCATTCTC  
AAGGCACTGATCTGGCGTCTTGACAAGATCGAACCCATGATGACGTCGCAAATCGGTTGC  
TACACAGCCGAAAACCTCGATGGCGAACAGCAACCACAACCTCTGCGACGGCGATCGACTAC  
AACTGGAACAAGCCCCCTACCAGAAATGGGGGACATGGCCGCATCGTTCGGCCGTCGAT  
AAGATCGTCGACGATTTCCGCGGAATCATCGAGTTCGGCGGTGGCTGGACCTCGCCGCGT  
GACGAGATGCACTTTGAGCTGCACTTCGCGGAGGGGCATGCTGGCACCGAGGCTCTAGCC  
AAGGTTTTGGCCAATGGCCTATGGGGTATCTGGAAGGCCGGAGCAGCCCAGCCCTCACC  
CCCGCGCCTGGCGGAGGGAACGACGGCATTCTGCGGATCGGCTCCGAGGGGGCCGGAGGTG  
CTCAAGATGCAGCGCGGTATGAACTCTGTGTTCAAGAATTACCGCGCCATGCCGCTGTTG  
GAAGACGGCATCTACGGGGCCAAGACCAAGGAAGCTGTCGTCGAGTTCAGCAGCGTTCA  
CTCATTGATGTGGACGGTGTGTTGGCCCGCAGACCAAGGCGATGCTCGCCGAGTACGCC  
ATCGTGCTGACCGGAGCGACTGCTCCGACCGCTCCGCCAGCCATCGTGCCGCAGAAGGTC  
TGGCCTCAGACCGCCGGTGACCGTGAGCTTCGGGAGTACATTGAGGGCGCAGCTCGGGCCT  
GGGGACCCGTCGTGGCCGATCAAGCTCGGCAACAACGAGAAGGGCGATGCGCTCACGGTT  
CGCGAACGTCTTGCCTTGACGGCTAAGGACATTGAAGAGATCAAGGGAAGGCTGTGCGAG  
TGAAGAATCTGTGCAACTACTGGAAGGCTGGCATTGTGCTTGTAGGTACGGCTGGCACAG  
CCGTGGCTACCCTCGCAGCTGACGAGAATGTTTCGACCCCGTGGGGGAATCGGGTGTCA  
CCTGGCTGGCTGTTGCCCGTGTGCCCCCTACGACCCGCGCTAACCTGGCTCAAGCGCAACG  
AGCCACGGTCACTGAACCAGAAGAGATCCTCCGCCGTGCAAAGGTACGCGCATCCTCGT  
CCTCCTATGCCTAGGAGGCTGGGCGCAGTGGCTATGGTGTGTTACTCGTATTGACCTGT  
GTGTCGTGTCCGCAGGCTGAGAGCTCAGCCGACGGCAATGACAAGCACCATAGCCAGCTG  
TGCAGGGATGAGGAATACGCCAAAAGCATGCGGTTCGAGTGTGGACGGGTGCAGAGTGGC  
CCCATATCAATCACGCCTGCGACTGGCGGACACGGTGGGGGAGCTCGGTGCCGAGGTTTG  
ATCGGGAGGATCCTGGACTAAGTAGGGCTGGGAGGGCTCCTCTGATGTTCCGTCCAACAG  
ACTCTCGATGCTTGCAGCATATTACGCAACCCTCGTCTGATTGAACACGGCACTATTT  
ACGTGTGCTGTATGATGGGGCTCTGGGTGTGGTCTCTGTGATTGCTGGTGATCGGACCTG  
TTCCGAACCTCAACCATCGACGAGCTCACAGACTATGTCCAAAACATCCTTGCTTCATGTA  
TCTTCATCGGCTCGTTCGTGTGTCTGTGCGCCATCTCCCTCGGCACTAAGTACGTCTCTCC  
CCAAAGCGGATATCCGCTTGTGCTACCGCTTCCCCTTGTGGGGGAATTCCCGCCTTGGCAG  
GGAGCGTCGGAACGTACGCAGGGGCCATCGCCACAATACTGGCTCATTTTTGGGTATTGG  
CGTATGCAGCTTCCATCGGAACATTCATCTGCTTCCGGTATCGTCTGGAATGGGCTAGATT  
TGCTCTTCGAGATTGCTCGACTGAATGAGGAGATCAATTACCTCAAATACGGTGCAGGCT  
CTGAAGAGCGGCTAGAGGACAGGGACGATGAACGGAATTGTTGATGTTGGCTGGATCCTC  
ACATTTGTGGCCATCGTGTCTGCTAGCGTGCCAGTGCTTTCCGTTGTCCTTGACTATCGC  
AGCCGAAAGCGTCAGGCGGAGGCAGAGGCGAACAAACAAAGATGCCGATACCGGGATAAAG  
AAGGTTTTCTGAGCAGGAACCTTTCGCAATGCGTTCGTGACAATGAATGAAGACCGCTGGATC  
ACGCGTGAGAAGCGCTGGCAGGAGCGCGAAGACGCTCTCGAGCGCGTAATTCAAGAGCTG

CGAAAAGAGATGGATAATTTGCGCTCTGACATGAATGTCTATATTGAATTCATCGCCAAT  
GATGAGAAGTGGCATTCTATGACCGTATGCACCGCATCCAGAACGATCTCCCTGCGCCA  
CAGGATCGGATCACATTCCAGCAGTTCATGGAGTCGCGCCGAGAGGCAGCGGGGAGGCTG  
TAACATGGAACTCAAGGTTGGCTCAAGCGACGCGAACACTGATGGTGAGGTA ACTCCCTG  
GCAGAACTGGGTAAAGGGGTATGCCGCAAGCTATTCGACATCACGGGCCCCATCGACGG  
GTACTATGGCTACTCGGATGCCGACTTCACCCGTGAGCTACAGCGCCTTCTGGGGCTGCC  
GATCACCGGCGTGTTCGATGATATGACAGCCCTGCACCCAAAGGTCAATTACCGCTGGAA  
GGGGCAAGGCGCTGGGGAACCAGCCGCACGCCGGAAGATCTGGTTCTACTCCAGTCCCGG  
TTCGGGCTCAAACGAATTCGTCGGCCATCGTTCGAGGTCGGCGAGTTCTGCAAGAACGT  
CCTGAAGATCAACCACCAGCCAGTGCATTTCGGTTCATCGGCGGATATCTCGGGCTGATGGG  
TGGCGACCCCAAGTTCAGCTACAACGACGTCATCTGTGACCAGTACAAGTCGTTGGAGTC  
GTTGCTGGACAACAATCCTGACACCAAGGACCCAGACGTCGTGTACTGGTTCTCGGGCTA  
CTCGCAGAAGGCCGACGGCCTCGAAGACGCACTCGAGATCTTGTTCGGCGATGGGGGATT  
CACCATCCCCAAGACTGGCGAAACCGTGGGTCCGGGTAAGTATCGGACCTGCGGCCAAG  
AATTAACGGCACCATACAGTTTGGCAATCCCAGCAAGCAACCCGGCCACACCCGCGTCGG  
GAATCGCCACCCGGAAGCGGCATCTCCCGCAATAAGCGGCCGAGTGGCTCAGCATCCT  
CACCTGGGACATCGTACCCTTCCCCAGGGGCACCGGACTTTTACGCTGCCTGCGACGA  
TGACATCCGACCGTTGTGCTACGAGTGGTTCATCAAGGCCGACACCCGAACTGCTCTTCTT  
CGTGTACACGGCGCAGATCATCATCCCGGCGCTCCTGAATCTTCTGGCTCCATTCTTGGG  
AGGCTTCGGAGGGATGACGACCCCGCTGGCTGGCGGGATTCTGGCGATCGCTACCGGCTT  
GCCGATGAACCTGCTCCACGGCCTGCTCAGCGGGGTGGCAGCACCCGACAATGCTCCGAA  
CCCCAAGCTCATCGAACTCCTCAGCGTGCGTGGTGT TTTGACGAACATGACGCAGCTCAT  
CAAGCTTCTGACCAACATCTCCGGCGTCCAGACGCACGGCGAATACCACCTTCCGAAGAA  
AGAGTTCAACGGCCGAGCGGAATCCATGGCGGCTGCGACATCGTTGCGGGCTTCCGGCG  
ATAAGGAACACTCATGGAACGCGTGACAGTTTACCAAGACAGCAACAACGAATGGCGCAG  
GCGGTTCAAAGCCAGCAAAGGCCGGGTGATGGCTCACAGCGGCGAGGGTTACCAGAACAA  
GCAGGTCGCCCTCACAGCGATCGATGCTGTGTTTGGCGGGCTTGTGCCAGAGGTGGTGGA  
TGAGGCTGGCGAGCAGCTCGAGGTAGTGCCGAACGACCCAGCGCTCGAGGCCGCGCAAAC  
GCTCCTGACGCTAATGACAGGGCACGACTGGGACCGCCCGAAGCTCGTGAAGTGCTCAGC  
GAGCTTGCGCCAGCACGCTTGCGCAACGCTCGTGAAGCAAGGTGTTGGCGTTCGAGAAAGC  
AGAGGCTATCGTGGGCGAGCGGTGGGCCGAATACGGGAGTCCCAGAACAGCTGATCATA  
GCCTGTAGCTGCAACGGCCGATCGCTCGGCAGAAGCCAACGTAGCACCCAAAATGGATCT  
GTCTCCGGGAAGGCCTCCCACCGGCGAGGAGCTTCGGCGCAAGGCGCGCAGCCGTATCGA  
CAGATGGCGCAAAGAAAGAGCCGGAGCCCCTGAGAACTCCGGCTCCGATACTTAGCCAGA  
CTAGATTTCCATCGCGGGCTGCTCGTCCCTCCTTCTTGGAGTCCCTGAGCTCCTTTTCGAGC  
TGCCTTGACGGTAAACTTGAAGGCTTCGCCGAACCTCGCGATTTCCGCAGACCGGGCCGAA  
GCCCAGGTAGACGCTCAGCTCGTGGGTTCATCGTACGGGTGCAGACGCAGCAGCTTCCGTA  
GATGGCGCCGAACGCCTTCCCCTCCTCGTAGCTCATCCGCTGCTCGGCGGTTAGGCCCTCG  
GAGCGGACGCTTGCCCTCGTACTCGAAGTGAGCGGTGAAGACGGTGCCAGCAGTCTCGTC  
GTGGCGGTTTTCTCGACGACGACCGAGCGCTTGGCGACCTGGTAGCCGCGCTGGGTTTT  
GTAGACCTTGTAGATGGTACCGTCGGCGACGCGATAACATGCCATCCTCCAGTTCGTCGGT  
GCCAGGCTTCGCCCTTCTCGGCGACCGGGGTGATGTGGGGTCCCTGGATTTTCGACCGTCCG  
ACCAGCCATCTCGGTGGTCCCGATGACCGGATCTGCGCCCTTGATGGTCATGCTCTTCAG  
CCAATCGATCAGGTTGCTGGCATCCTTCGAGCTGAAGGGCTTGTAGCAGAACACGTAGCC  
GTCCGATGCACCGTGGTTGTCGACGACGTACGCCAGCGCAGCGTTGACGCGTTCGCCGAG  
CAGGTCGCTACTCATGGCCTTCTGATCTCATCCATGACATACGGGGTGCCGTCCACACC  
CTTGTGTCGTCGCGCATGATGGCCAGTCGATCATCAGGCCGATGGTTCGAAGCGCGAGACAC  
GGCCTTGTGGCGGTAGTCGCTGGCCACGCGCGCTGCTCGAGCACGTCCTTGATCCAGTT  
GATCTGCTCGTTGGTTCGCGGGCTTACGGTTCGCGGTCGCGTTCATTTTTGATTCCCTTCT  
CCGGTGTCCGAGGCGCTTTGGGTAGCCTCGTTGAAAAGACGAACGTTACGGCAGAAATTG  
CATTGTGCTACTCCTACCAAAGTACGCGCTCACGGCGCGTGGGTTCGGGCTCGCCTACC  
AGGACAATCCTACTGCAGTTGCACAAGACGCACCTCGGCGTCCCCAGCAAGCCGCATGG  
CCGCCAGCGCGCGGCTGGTAGTGCGTGGACCACGGGTGTCCGCAGGTCCACTGGTCTACG  
GCGTACCGGGTGTGCGGAGAAGCTGCATTCACCGCATCACCCACAGCCAACGCTGCATC  
AGGCGATGGCCCGGATCAGCGCCAGCACCGCGCGGCGCATGTCGTTCTCCGGCATGCCGG  
TGATGACCGCGACAGTCTTGCCGTCGGGATTGACGACCCACTTGGCGCTGTGCTCTTCGC  
CGACTGCGAGGGCGTCTGCCACCTGGCGGTCTGTCACGGTATGCCGTCACGCTAGCACGTA

GCGTACGGACGGTGAGATCGTCTCATCGGTGTCATTGCCGGCCAACGCGGGAACGCTCA  
GCGCCTTCACGATGCTGTCCACCTTGGACCTGAAGTTCGGGCTGTGGTCCGCGTTGCGGA  
CTGCCCCGTCAACCACCTTCTCCAGGTAGTTGTAGCGGACCAGAACTTGCTCGGCCTGCC  
CGCGCTCGAGGGTGATCGCACTAGCCACCGTTTTGTGCGGCGATCACCTGCTCGCGGGACG  
TCCATCCGAACGTAGCGGCAACTTCGGGCGATCTGCATATGCTGGTTGACGTTGGTGTATGG  
GCATGAGGCCCTCCTGGGCTCGTGGGGATGATTGCGCCCCGAACGTTACGCCACCGCGCCG  
ATTCCGGGCTACTGCCGTCTACATGCGTTCGTAGGGGTGGCAACAATATTCCGGCCC  
GTAGCGCGAATCGGGTTCGACTAGAGTACCTTTACTCCTGTCCGCCTCCCACATCCCCAG  
GAGCCCCAATGAGCATCACATTCCAGCCTGGTCAGCAGGTCGAGGTCTACTCCGTCGACA  
ACGTGCTGCACCCCGAGCCGCTGAAGCCCCTCTGGTATCGCATGGTCGTCACAGCCGGAC  
CCTTCGAGCTGAATACCGGCCACGAGGGGTACCGCGTCTCCGGTCCGGGGAAGCCGGAGC  
CGTCATTCGACCAGTATTGCAAGGCTGCCAATGGGATGCGTTCGGTCCGCGCCGTCGATG  
CCGAGCTCGCTGCCCGGTACGACGCGTTCGGGAGGTGGGTCCGGCAAGTGATCCGGCTGGC  
ACGCCGCACAGGCTACTGGGTCTGCAAGCGGTGGTGGCAGGGCAACCTTGGC  
GTGCCGGTCTGCGGGAGGGCCAAGTGAGCGAGCTGTGCGCCCTCTGCGGGC  
GAAGAGCACTACTCGCCGGGCGACTCGAGCGGAAGGCTGGTGAAGGTTGTGAGGCCGAT  
ATCAGCACTCCCTGCCAGCCTAGAACCATCGAGACCCGGAGCGTTGCGAGTGC  
GTTCCCTGCGTTTGC  
CGGGATTGGAGAGCGAACCCGGCACCCGACATCACCGAA  
ATCGACATGTACGACCCGGAAGGACGCTGATGAAGTCTTCGACGTGCTAATCACCACGC  
ATAGCACAGACAAAAGCGAGGATCTGGCCCAGATCATCATGCCGACTCATATCGCGAAAG  
ATCTTGAGGCTGCTGGCTGGACTGTCCGGAGCACAATCGTTCTGGAACACAAGACGGGGC  
TGACGGGCAACTATCGCAACGAGAATGTTTCAGCACCCGCTCGAGAAGGAAGCAGGACACT  
GAAATGGCCAAGGAAAGCATCATCAACCGAGTGCAGAACCTGCTGAACCTCGCGATGGAC  
CAGAGCGCCACCGAGGACGAGCGCAAGGTCGCCAGGAACGCGCGAACGCGCTGATGGCG  
CAGCACATGATTGACCAGATGGACCTCAAGCCCGAGGACCCCGGTTCGTTTCGCGCGTACC  
AGCACAAAGTGGGAGTTCTTCTTCGAGTTCGAGTTCGCAGTGCAGCTAAAGGACTTGCTC  
GCAGCCGTCGTCCGGCACGCTACCTGCCGTGCCACGAGCACGCGCAGGATCGCCAAGGGC  
GGCGAGCCCAACATGGGGGTGACCATTGTTGGTACACCTGAGAACATCGCCTACGCCGAG  
CGCCTGTGGATGGTCGTTTTACCCGAGCTCACCAGGAACATATTCCCAGAGGTGGACCCC  
AACGAGAGCTTCGACAGAAATGTGTACAAATTCGTGAAGGCTGGCTTTAAGTGGCAGGAG  
ATCCATGAGCTGCTCTGGCGGCACAAGGACGATCCGCATTGGATGGGATTCCC  
GTTGAAC  
GACCCGTATCCGCCAGAGAAGCAGAGCGAATATAGCTGGCATGCCAAGGTGTATGGTGGC  
GACCGCGGACGTCTGAAGCGTGCATACTCGTGTGGTCAAGCGTTTCGGCGAAAGCAGC  
GCGCACACACCACGCGACATGGCGTGCACCCCGGAGCTATGTGCAGAGCTACTCGAGC  
ACAATCTCATTGCGGCTGCACGACATGCGGAGCAAGAGCGAGGACGCTGTGAGTGATCGC  
GACAAGTTCGCCCTGGCGGTGCGCAGCTCGCAGGACGAAGCTGACGCCGAGTTCTGTCCG  
CTGTTCCCGCAGTTCGACCCGGAGCACATCCGCAAGCAGCGTGAGGAGATGCTCCGCCAG  
GAGCAGATCCGTTTGCAGAACATGACTCTCGAGGAGCGGGCTCGCGCTGAGTAGGAGCGC  
CTCAAGCGTGAAGAGCGCGCTGGCAAGCACTGGGCGAAGACGCGGGACAAGAGCTACCAC  
CAGGCTGGCTGGGCGCGCGGCAGTGCTGTGGCCTAGAAGGTCAATCTCAACGACGACACG  
CAGATCCACCACAGCAAGAAAGAGATTGGGTGATGTGGATTGATGACTGGCTCGAGGCAG  
CCTACGACGAGCGCACCGAAGCTCCCGACGATCTGGACAACGACGAGTGGTGGCCGGAGG  
ACGATGGTGTGAGTGACCAACGCTCAAGCTCGCAAGCGAATTCAACGAGGAAGTGATC  
GCCTTCCGGGACGGCTACGTCTACGGCAAGAGCCTCACCCGAGCTCTCGACAAGGCCATC  
CTCATGGCCGATGCGGGCCGACCGGCGGAACGGCCATCTCCTCGAAGTCATCAACGATCAG  
CAGTAGCAACAACTGACCATCAGCAGCTAGGCTAAGCCTTACCTCGTCTCAGAAGGGA  
ATCTGACACATGAGCAAGACCACCTCAGCCATCGCCACAGGCAAGACCGCCGAGTCTCC  
GCTCTGGCGGAGAAGCACGGCTGGACGGCGGAAACCAAGGAAGACGTCAAGAACGACATC  
ACCACCCTCAAGCTTACACGCAGCGATGAGTGGGTTGAGATCCGCTGGGAGGGGAACTCC  
TGCAAGGAGATGCCGACGGTCTGACACGAAGGGCAGCTCAGGTACGTCCGGAACGTTGCA  
GCTGCGAAGCGCGTCCGCGAGGCTACTGCCGAGCAGAATGCGGAGCCTTTCCAGAAGCGG  
ACTGTGGCCAAGCAA  
ACTGCGCGCATGACCACGCATGCCAAGCGGCCTCGCCGGAAGGAC  
AAGCTCGTGGAGGCGATTCCC  
GACAGCGACCGGCAGATCAATGAAGCCCTCCTCGTC  
CGGAAAATCCTCTGGCGAAACAGCACGAGCGGCAGTTT  
GAGGAGGATGTGGTGTGGCC  
GGGAAGAATACGAATGGCCACTACTATGTGTCCACGAGGGT  
GCGAAACGCCC  
GATCAAC  
TTCATCGGCGCATATGGTTGTGAGCGGTGAAGATTTCTGCGATTT  
CGCAGGT  
CAGATAG  
GCAGAACGAGTAGCCCGAAGCGGGTCGAATAGGGTACGATTGTCTTATCCAATCGGGAGC



AAGAGGGGAATCACAAAATGGACGTTTCGTACCCTCACCTCCAGGGATCGCAAGGTTGCCG  
CCCAGCTGGCCAGCGGGCCTCTGACGACCAGCTCACCTACCGGACAGCCGAAGGTGCTC  
GTCGGGCCAAAATCGGCCGTACCGTGTGGTATGAGATGGCTGCAACTCGTGTGTCTGACG  
GTAGGCAGTACCCCTATTGGCTTGCCAAAGACTCGAGTAGCTTCCGTGGCTCATTCTGG  
ACAGCTTCGACCTGTAGTAGCGGAATCGGGCCGATGGGGTAACGTTCCGGTCTGTCAACG  
ACGAAGGGAATCCAATCAGCGAGCTCAATGTAGGCGATCGAGCGCGAATCATCAAGGTCA  
TCGATCTGGACAACGACCGCAAGGTCATCACAGACCCCGCCGGGGCAGCTGCGCTGTTTCG  
GAGGGTACGGACCTGGAATTGGCGATGTCGTGGTCATCACCGCGAAGACCCCTCGGCGAAC  
TGTACGACTACGAAGCCGAATGGGAGATGGAGAAGGGCCACAAGACCTTGAGCTTTCTGG  
CGGAAGAGCTGGAGCCAGTCAAGTGAGTAAGCGCGAGTGGAAGATCTGGTTGGCGGACGG  
CAAGATCGTCCTGCTGACCGACGGGTACGATCCGGCGGTTGTCCAGAACATCAAGCTGTC  
CTTGCCGACGCCGCGCTCGTTCCGGCGTACCACCAAGACGTGGCACGTCCCCAGATGTG  
GGAGACTTGTGTGCGCCCTCCGCCAGCTCGCCAATTGGCATCGAGCTGACCTGAAGATAAG  
CGAAGAGCTCCGGCTGTGGGCTATGGCCGAGAAGCTCCGGCTGGCGAGCATCCCCGACGT  
CAACGAACACAACGTGCTGCAGCCATCCCGAACATTGAGCGCGAGCTGCCAGCCATGGC  
GGAAGCGCTGAAGGCACACCCCTTCCAGACAGTGGGCGTTCGGTTCGCCGCCACAGCGCG  
GAACGTTCTGATCGCCGACCCCCCGGTCTGCGCAAGACGCTGCAAACGATCGGCGCTGT  
GGCCGAGAGCGGCCTGAAAGGGCCCGTCTGGTAGTTCCCGCGCCGAAGTCGGCTGCCGT  
CATTACCTGGCCCAACGAGCTGCGGCAGTGGGTGCCGGGCGACGTCGTGATCCCGATCTC  
GGGAGCATGAAGCCTGCAGAACGCGCGGAAGCTGTGAGCGCGCCAAGGCTTACGCCGA  
GCACGGGGACAAGCGCGGCTGAGTCGTACGACCCCAACTACGTTTCGCATGCGGGGCTGA  
GCTCGACACCTACGGCAACTATGTGTACGGGGGTGGCCAGAAGATTGTGCAGCCGGTACG  
CGAGGCTCTGCAAGGGCTGTTTCGACTTCGAGTGGTCAGCGATCGTCGTGGACGAGTCGCA  
CAAGACGCTCGCCTGTTGTACGGGTAAACCGCAAGAAGTGGTCTGCACAGCGCCTGGGCCT  
AGAAGTCTCCGGGTGAATAAGGATGGGCTGCGGATAGCTCTGAGCGGCACACCCTTCCG  
GGCAAGGAAGACAACGCCTACGGCACCTTGCAGTGGCTGCGACCCGACCTGTTACCCGG  
ATTCTGGAAGTGGGCTTAGAAGCACTTCCAGATCTACGGCGATGGTTTCGGACAGATCGT  
GGGTGAGGTCAAGGACTCAGAGGAGTTCAACAACAGCCTCAAGCCAGTCATGGTGCGGCG  
CACCAAGGCCGAGGACGTCAAGGACCTGCCTCCCCAGATCTATGCCGGTGAGCATCTGGA  
CCCCGAGGACCCCAATTCCGCAGTGGCAATTTGGCTTCCGATGGAGGGGAAGCAGCTCAA  
GGCGTAACAGGCCTTGGTCAAGGATGCAGCCGTCAGGCTGGAGAGCGGTGGCCTTTCCGC  
CAACGGCGTCTTGCGGATATGACGCGTCTGAAGCAGATGGCCTGCTCCTATGGCGATCT  
GGCTATTGCTCCGACAGGAGAGCAGACGTTCCGTCGTCGTTGCCGAGCAACATGTTTGA  
TTACCTTGTAGACCTTCTGAGCGATCGTGGCATCGGTAGTGGCGAGTTCGCCTCTAGCGG  
GAAGGTGATTGTCGCCAGCCAGTTCACCAAGCAGCTGAATCTGTTCTACGCCGAGCTGAA  
CAAGCTGGGCATCAAGTGCCACCTGCTCATCGGCGCGACTTCGGAGGAGGAGAGGGTCCG  
TATGGCAGACGCCTTCCAGAACACCAAGATTAGCGACGACACGCCGCACGTGTTCTGCA  
GAATACCATCGCTGGTGGCGCGTCTACTCTGGACGCTGCGGATGATGTTGTGACGCT  
TGACGAAACGTGGAACAAGGACGACCAGGAGCAGGTCGAAGATCGCGCTCACCGAATCAG  
CCGTAACGACCACACGGTGACCATCCACAACCTTCGCAGTCGGAGCAGCATCGAGGAGCG  
CATCGCCACGAGTGCGTTTGCTCAGTAGCGAAACATCAAGTCCATCATCGACGCAGCGCG  
CGGTGTCGAGTTCGCACTCGAGCTCCTGGAAGGAGTCAAGGCATGAGCACCCCTCAGCGCA  
TGCTTCATCACGGCCATGCTCAGCGGGTCATCAATGTACTTGCAGGCCTGGCGGATTAC  
CGCAAGCCTCTACCCAGAGAGGAGATGCGGGACTACATGGAGCGGTATCTACACCGGGAG  
GAGGCAGAGCTGGCAGAGCGCCGTCTACAGGCCAGCTCTACAACGCTCGGCGTCGCGCT  
GCGCCGCATCCGGACGCGGGTGCACCCGTGCGGATCACCCAGGGTGCACGTGGCTAGAAAG  
GGGAGAGGCGAGCGAGAGGAGTAAAGTCAAATAAAAGTTCGGATAAATTACCGATTCCGAC  
CAAGAACCAGTAAGCTTTCATTCCACGCCCAAAAACCTTCATAGTCCCAACGAACAGAAGGA  
AAAACAATGTCCCGGAAGCCCGAGTCCAAAGAGACAAGCACCCCGCGAAGGCAAGGTG  
CGTTTGATCCTTTCGCCAATCCGGGCACCCCTCGCCGAGCAGGAGGCCGCGTGGCTGAAC  
GAGCAGTTCCCCGGCCTGAACGTCAAGGTACGCCACGTCCGTGCGGTCATCAGTAACCAC  
ACGCCCGCCAGAAGTCCGACCTTCGCCGCCAAGCGCGGGACGCCGAGCGAGCCAAGCTC  
GCCGAGGATCGCGAGGCGCGGAAGGCTGCCGCCGAGCAGCGCAAGGCCGAAGCCGAACAG  
CGCAAGGCTGAGCGTGAGCAGCGCAAGGCAGAGCGTGCGGCCAAGGCAGCAGCCAAGGCT  
GACGAGAAGCCGAAGCCAAGCCTGCTGCCATGAAGGCCACTCCGGCCAAAGCCGTGCC  
AAGCCTGCTCCCAAGAAGCGCGTCTCGCGTCCCCGGAAGCGTACCGGTGACGTGCCCGCT  
GAGGACGCATTCTGATCCACCCACCCCTCGGGGTGGCCGAGCCTCTGGGACATGGGGA

TGGCCAGAGTCTCGGTGGAGGTTGAGCAAGTGCACCTCTCAGCACCGGATCTCCATCAC  
AGGACTCCCGTCAAGTCCAGGAAGTACTCAGCCTCCTCCAAGAAAAAGCTCACTGACAG  
AAGGGAATCTGCAAAGTGAAACGCATCAAGAAAATCGCGATCGCCGCTGTGGTGGAGACG  
CAAGTCGGCCTCGGAATCCTCAGCGCCGCACCGGCGAACGCCGACTATATGATGGGGTGT  
GAGCGAGTCCGCTGGGGCTTCCTGTTCAGTGGCTATCGCACCATCTGCGACGGCCCAAG  
CGGCCGACGGCAGCTGGGACCGGACGCGTTCGTGAATCGACCCAGCGCACATGGCTGGC  
GGATACTGCTCGGGCAGCAGGTATTACGTCAGCTGCACCCCGAGCTACTGGCTCAACGAG  
AGCAAACAAAGCCTCGAGACCTATCCGGTCAATTGATGCAACTGTGTTGCCTGGCGAACCC  
TGCAGGCTCCCTCCGGGCACGAACAGGATCCTCTGATCCATGGCACCCAAAAGCTCACGA  
ACATAAGGGAATCCATGAAACTCAAGGTGTTGACATTCATTGCCTGCGAGCAGTGCGGCA  
CCCGTTTCGGTGGGCCAGAAGCTGGCGAATACGACTACCGAAATCTTCCGGGCAAGATGA  
CGATTGCCAATATCTCGTCGAAGAAGCTCTGGCAAGTATGTGCATTTCGTCTCATCTGGG  
GAGACGACGACGTAATTCTGTGTGGCCCTGATTGCGTCAAGAGCTGGCTTGATGAGGTGG  
TGTCGCGTGGCAACTAGAATCCCGCTGCCCTGCTACGCAAGAGCGAACGCACCGTGTAC  
AAGAGGTGCCCGTGGAAAGTGGTACCAGAGCGTTGTGCGCGGCCCTCGTGCCGAACAATCCC  
CGCCAGGACGCGCGGTGGTTCGGTACTGGCATTACCTGGGCAAGTCCGCGTGGAACGTC  
CCCGGACGCCAGCGTGGCCGCGACATGCACGATACCTGGGACGAGTTCTCACAGGGTACA  
TTCACCACAGTCAGCTCGCAAGGGCTGGTGAACGACGAATGGGAGAGCGAGTGGGTTGAC  
GCAAACAATCTGGCGCACGCCATGATTGACACCCACCTACAGGCGTATGGGAACGACGAC  
AACTGGGAGGTGATCACTGCTGAGCAGCCATTTTCGGTCTGATCCCGCACCCCGACAAG  
ACATTC AACCATGCGGTGTGCCGGTACGTCGGCACCATCGACCTGATCATCCGCGAGCTG  
GACACCGGCGAGATTTGGCTGGACGACACCAAGACCCGCGCGCATGTATACCCACCAC  
CTGACACTGTTGGAGCAGCCTGCTGCGTACGTAGCTGTGGGCACGCACGCCGTCCGGGAG  
CAGGAGATGATTGGCCCCAAGGAGCGGGTCAAGGGCATCATCTTCGACTTCATGCGGAAG  
GGCTTTCGGACGATCGTCTCGCAACGATCGCGGCGAGTATTGCAACAAGCGGGTCAAG  
TAGCACTTTGTCGAAGCCATCCTGAATTGTCCGGGGTATGAAGGTCCTCTGAACACCGAG  
CGAGATCTGCTTCGGCTTAAGCTCGACGAACTGCAACACATCGCCGATGAGCTCAACCTG  
ACTGTTCTGGGCGATGTCTCCGCCACCAGGGTGCGCCCTGCTGTTGCGAGAGATACTC  
CTGAAGAGCCCGAAGGAGTGCTCACGGCAGATCCGCAGGACCGGCGAGAAGGTGCTACAC  
ATGAACGCAGTGCGCGCCGGTAAGCTCGCGATCCTCAAGACGCCGCAGGACGACTGCAAC  
TTCTGCGATTACTTCGATCTCTGCGAGCTCGACGAGTCTGGCGGAGATACGGAGTATTT  
GCGTCGCAGGCATTTGTGGCTTGTGATGCCTACGCGGATCATCGCGAAGGCGCTGAGAAT  
TCGAAGATCAGCGTCAAGAACA AAAACAAGACAGGAGTGCAGTATGAGGTGGCCGGTAGCCT  
GAAAGATATGAGCCTCAAGGAGGTTGCAGCCCTCAAGAAACGCGTGAACAGACAGTACGC  
CCTCAAACGCATCAACGGTGGTGACCGAGACAACCTAATCGAGCTCATCGACAAGGTTGA  
GGCGTGCGTCATCAAATGCCTGAAGGCAACCGAAGCATCCCCGATTTCTACTGAGAAAG  
GAAGGCTGATGGTCCAATCCAAGATCAACAAAGTCGCCGACGACGAGGACTACGTGAATC  
TCCTCGTGTATGGTAACTCCGGGGTGGGCAAGACGGTGTACTGCGGCAGTGACGACGAGG  
TGATGTTCTTTGCGCCGAAGACA ACTCTGACGGCCTGCTCTCCGCCAAGCTGGCGGGTA  
CCACGGCGGACAAGTGGCCCATCCCGGATTGGGGTATCTCGTTGAGGCGTACA ACTATC  
TCGACGAGCTCGCCGAAATTCCATACTGGATCGTGGTCGACTCGCGGACCGAGATGC  
AGATCATGGCCATGCAGGACATCCTCGATCGTGCCGTCGAGGAGAATCCGAGCAGTGATC  
CGGACATCCCGCAGATCCAGGCCTGGCAGAAGTATTACGAAATGGTGAAGCGGATGATCA  
AGTGCTTGAACGCTTTGCCGGTCAACGTTATGTACACGGCGCTGTCGCGGCAGACCGAGG  
ACGAGGAACGTACCGAGTACCTTCTCCCGATCTGCAGGGCAAGAAGAACA ACTACGCCA  
AGCAGGTGGTCACTGGATGACCAGCTTCGGTTGCATGCAGATCAAGCGCGTCCGTGTCA  
AGACGGACGACGACATCGCCAAGAAGGTGAAGGAGGTGCGCCGAATCACCTGGAAGGACA  
CAGGTTTGGTGACTGGCAAGGACCGCACCAAAGCTCTCACCCCGTACACCGACATCCGCG  
ATGTCACCAATCCTGAGGATGATGGCCTCACCTCAAGGACATCAGGCTCCGCGTCGAGC  
GGAAGAAGACCGGCTCTGCCAAGTCGGCAACCACCAAACGTCCGGCCAGAAAACTGCGT  
CGGCTCGTACTCATAAGGAGAGTGCATAAATGCCAAGCTCAAGCCATTTCGGCATCGGCG  
ATGTCGAGGACATGATCATCGCCGAGAACTCCTTCAACACGGAGGTCGTGCCAAGGGCG  
TGTAACAGGCGAAGGTCAAGCGCATGAAGCACGGCACCATCCAGAAGGAAGGTCCGAACA  
AGGGAAAGAGCCGCTTCTGGATCTTGATGGAGGTCGTCCGGCCGAAGTCGACGCCGAAGA  
CGTACATCGGTGCCTCAATCTCGCACAATATCAACGTGATCGAGTCCGGCGTTGGCTTCT  
GCAAAGACTTCTCAACGCGCTTGCGGGACCGGAGCCCGCCAAGCAGGCCGTGCTGAAGC  
GTGCCTTCTGGGCAGCCGACATCGTTCGTCGATTTCGGACGGGCACGTCATGAAGATCGGCA

AGAAGCGTGTCAATGGCGACGGCAATGGCGAGCTCGTTGTACCGTCAAGACCAAGCTCG  
GCAAGGACCCTCGTTCGGGCGATCCGCAGGCACGGGTTGACAAGTTCCTGGTCCCAGG  
CTAACGACGACGACGATGACGACGACCTCGATGAGGACCTAGAGGACGACGATGATCTCG  
CCGATGTCGACGACGAGGATTCGAACGACGATGATTCGGACGACGAGGATGCGGGCGACG  
AAAACGACGAAGACGACGAAGACGACGAAGACGACGAAGACGACGAAGACGACGAAGACGACCAGGACA  
ACGAGGACGACGACGACGAGGACGTGGAGGAAGACGACGAGGACGACGAAGACGAGGACG  
AGGACGAGGATGGTGAATCCGACTCCC GCCGTGCGGAACTCGAAGCCCTGACCATCGCCA  
AGCTCCGCGTCGAGGCCAAGAGGGTCTGGTGTGCCGCCAGCAACGATCAAGGGCCAGTCCA  
AGGACGAGCTCATCGATAACCATTATCGACGCCGAGGCTGACTCGGACGGCGAGGACGACC  
CCTTCTGCTCGGGTAGCACATCGGGTACCTGACAGACGAAACCGTCAGGCTAAGTCGTTG  
TAGGGACGTCCACAGCCCAGCCCAACAACCTTTCAGCAAAGGAGCCATCATGGCCGATGA  
GCGTCGGTGCCTGCGGATGTATCATGGTCTGGTTCGAATGAAAACACACATGGCTATG  
CATCCACTGCGACCTCAACATCGAACATCAGGAGTACGCCTCGTGAAATCTGTTGCCATC  
CTTGGTTGTGGGCCTTCTGGGCTCCTCGTGGCTCATGCAGCCGCCATGCTCGGCTGGGAC  
TTCCGAATCTACAGCAAGAAGCGCAAGA ACTTCTTGTGGCAGCCAATACCTACACGAG  
GCCACCCCGGCATGACAGACCCAGTTCGGCGAGCGTGGCATAACAACCTTGTGGGTACG  
CCAGAAGGCTATCGGCAGAAGGTGTATGGCGCTGGCTACGATGGCAGCGTGTGCCAGAA  
GACCTCGAGCAGCATCACTACGCCTGTAACATCCGCCCCACCTACGACAAGCTGTGGAAT  
GCCTATCTCGACGAGATTGTCGCCGTGGTGTATCGACAAGCGCTGGGAGTCGGCCGAATTC  
TTCCGGAATGGCAGCACTGACTTCCGCCCCGCCCTGACCATCAGCACGGTGGCCGCAAG  
ATCTGGGCCAATCCTGGCGATGTCTTCGCAAGCCATAAAGTGTGGGCGATCGGGGATGCG  
CCCGAGCTAGGACAGACCGTTCGGTTCGAGCCCAAACAGGACAACACGATCATCTGCGAC  
GGCACAGCCGACGTCGGCTGGTACCGGCTGAGCAAGGTGTTCCGGCTACACCACCATCGAG  
TGGCCACACGGCCGCAAACCTCTTATCCCGAACATGGGGGAGGTCGAGAAGCCGCTCTGG  
CAAAACAGTTCTGGAGCCAGCGACTTCATTCACAACGGTTCGGTACGGCGCATGGGAGAAG  
GGCGTGTGACGACAGACGCCTTCCACCAGGCCATGAAGTACCTCGGACAGGACAAGTTG  
GGCTGACCGATGATGGGCAAACCTGTTGTTGGACTTCACATTGATGGGACACTATTCGAC  
TACCATGGGCACTTCTTGCCTTTGTAGAGGATTGGTATGGCCGACCAATGCCAGACCCG  
CAGGAAATCAACCCAGGCCTGCCCTTCACAAGTTTATGCGTACGTCGAAAGCTACGTAC  
CGGCAGTGTAAGCTGGCATATCGCCAGGGAGGCCCTTGAGCGCAGCATGCCGGTGTATGAT  
GGGGCGTCGGAGGTGACCCGAGCAATCCGCCGCGCTGGCGGAGAAGTGTGGATCTGTACG  
ACCCGTCCATATCTCAAGCTCGACACCCAAGCGCCAAACACCATACACTTGTTCGGGAGC  
AACAGAATCCAATTCGATCACATACTCAGCGGGCCACACAAGTATCGCGACCTCGTGAAA  
CAGGTGGGTGCGGACCGAATTGTTCGGAGTGCTTGACGACCTGTCAGAGATGTACGAGCAA  
GCATAAATGTTGGGGCTCAACCCCATCCTTTGGGACCAGCCGTACAATCGACACATCACC  
GCAAACCGCATCAAACATCTGTACCTCGCACAGATCTCATTCCTCGCGAGGATCGAAGTG  
TACAAAGAGAAACAGAAGGGAAACTGATGGGCTCGACATATTCATCAGACAATCCGTTGA  
GTTTCGCGCTGTTCCGGGCTGTCCCGCCACGCAGAGTGGCCTGTCTGGCGGAGGCTGGACT  
GGGGATAACCCATGCTGCACCTTGGTCCTGGCGATTAGATTGTCCGGGGCGCTGAGGAAAC  
TGGACTACCCGGCATTTCGATTTTCGATGACCCAGAGATCAGCTTGCCGTACGATGACGGGT  
CAGTCGGCGGTGTCATCGCCACGCATGTGCTGGAGCATCTGGCTGACCCACGCCACTCA  
TCCGGGAGGTGGCGCGTGTGTTGAACTTCGGGTGCCCATTCACATCCTGGTGCCTCACG  
GTCAGCCCCGATTTATTTGCAAGACCTCGTCCATAAGACACCGTTCGTGCTTGCCACGT  
GGAAGAACTTCTGCACAACGGATTCTATGACAACAATTACGGCGAGGGCGGATTGCCGC  
TCAGTATCGGGCCAACTTCAAGTTTGCCCTCAAGGAGGGCAACGAAGCCATCATCACC  
AGCTCATCAAGGAGTGACAGTGTCCAACGAAAACAAGCGTGTGCGAGTCATTCTGGAAGA  
GATCACCTCCAAGTACGCCAGTCCGGTGGATGACTTGATCGCCAAACATCTTCCGCGCGT  
GCTAGAGCTGTCCCGGAGCAAGGGGCGCGACTACAGCGACCGCTCCGGCATCTTCGCGGC  
CGAGGTGCTCGGTGCGCCGGGGCAGTTCGCCGAGATCTGGCGCAAGATTCCCAAGCTCAA  
AAAGGGCCTGTGGGACCAGGACGCGCTCGAGGACGAGACCGGCGACGAGATCATGTTCGA  
TCTGATCGGGCATTGCGTGTTCGCGTTTGACATGATCCAGACAGTATGCGGATCGGCCA  
GGCTCCCAGCGGACACTCATGGATACGAGGGTACGAGATCGGCCGAAGTCAGGGCGCGTTCC  
TTCTGGCACCGAACGCTTCACTGAATCAGACAAGAGTCCGATCACGGGCAAGCGCGATGC  
TAACGGTGGCGACTTCCGTGTCTAGGGCATGGGTGATCGGTGGCGCGTCCGGCATCGGGA  
AGGCCTGCGCCGAGCGGCTCGGCCGAATACATGGTGACCACGAGCACCGGTCTACGAGAAG  
GGTATTGGGACGTCCGCAGCGATTTGCGATCCATCTTCATACACGATGAGGTGATACTC  
CGACCCACATCGTGTATGCTGCAGGCATCAACCATCTCGACTGGATCGGGAATGGTGC

GGAGCCATGTCGAAGTTATCGACACCAACCTTACTGGATTTCATTCGTCTGATGGACGGCC  
TGGTGCCTTTGGCTACTACAGCACTGGCAAGCTGGGTGGGTATCCGTACCACATAAAGC  
CCAGCATCGTCGTGATCAGCAGTGATGCGGCTGAGCTACCGCTCCGAACCTCTATCCGGT  
ACTGCGCAAGCAAGGCAGGGTTCAACATGGCCGTCAAGGTGGCTGCCCGAGAAGCTCGGT  
CGTACGGCTGGCTGATCAATGCCGTCTCGCCGGAGATGACTGCGCCCACGGGCATGAGTG  
ATTACATCGACAAACGTGTTCCGGAAGTGCGAGGTTTACTCCGATCGAAGCTGCGCAGT  
ACGAGTCACAGCAGGAGGTCGTCCCTGGACGCATCGCTACTCGAGAGGTGGCAGAGGTGG  
TGTTTCGATGTGCTCGCCGGACCTGAGCACCTCAACGGGTCCATCATTACCATCAATGGCG  
GGCGCTGACCGGTAGGAATTCGGCCTCCCCGAGAGGGGAGGCTGAATTTTCTCCGAAAC  
ACCCCTATTTCGCGACGGTGTAGTAGGCTTCGGCCCAGTGTCTAGAAGGGAATATTGAGTT  
GAAGGACCTTGAGCTCAGCCAGCCAGACCCGATCCGCGAGAAGCGAATTGGAGAGGAGCT  
CTCTTTTTCCAAAACCAGCAATGGCTTGTGCGGTGAGACCGATGAAGTTCGCATCGCTTCA  
CACCCACTAAACCTTCTCCTACGGCGATGGCTACGGACCACTCAAGGAGCACGTCCAGTG  
AGTTGCGGAGCTGGGCATGGGCGCTCTGGCGCTCACCGAGCACGGCAACCTGCGCAGGCA  
CGCACAACCTCGAGAAGGCCTGCAACGAAATTGAAATCAGGCCGATCTTCGGGTGCGAGCT  
GTACGTTGCTCCGCCAGGCGAGAACCAGCAAGTGCCATCAGACGGTCTTGGCGATGAACGA  
GGTCCGGGCTCCAGAATCTGAACCGCATCGTCACCAAGAGCTGGAAGAACTTCTACCGCTG  
GCCACAACCAGCTGGAAGTAGTTGGAGGAACACAATGAGGGGCTCATCGTACTTTCAGG  
ATGCGCCGATAGCGTACTATCATGCACGCTGCTGGGTGGTACGTCTTGCGGTGACAAGCG  
ACTCACCGCAAGCAAGCGCCACATCGCTCGTGGCGCTGGGCTTATTGGACGGTACCAAGA  
GGTATTTGGAGATCGGTACTACCTTGAAGCCCAGAGATTTCCAAGACTTGATCGCACTTG  
CGTCTCAATCCGCTCCTCGCACGGCTATCGGAACTCACCGGAGATCGTCTTGTTGGCAC  
GGCTGATGTTTCATGATCCACGTGGATCCGACAATGATATGCAGAAGATTCTTCACGCGGC  
TCATCGCGGGTCTACTGTGGAGGCTACTGAGGCGTCTGGGAGTATGACATTCTCCTCAC  
TTACCCGGAATCAGGCCGAGAAATCTATATGGACCTGGTGGGTACGGGGCTGACGAAAGC  
CCAATCGCGCGAAGCGGTTCTGGAGTCTGGCCGAAACGCTGAGCACTGTAACGTGATTCT  
GCCGAAGAACCAGCCGATCCGTTTCCCAAGCCTACCAAGGAAGTTGACGGCACGCAGGT  
GCCGATGAGCGCCAACGAGCCGATCCGTAAGTGGCTCAACGAGGGCTGGCACTTCCGTAT  
GGCGACCAACCCTAACATGCGGAAGAACCGCCAGGCATACAAGGCACGAGTCGAGCATGA  
GCTTGGCATGATGGAGGAGAAGCACTTACGTGATCACTTCCTGATACTCAGCGATGCGGT  
CCGTTGGGCCAAAGACCACAAGATTCCGGTTGGGCCCGCTCGTGGTAGTGCTGCGACGTC  
GCTTGTGTGCTACTTGCTTCGGAACACTGAAGTCGATCCGATGCTCTTCCCGCGCATGCT  
GTTTGAACGTTTTCATTGATCCGACACGTACAGAGCTGCCCGACGTCGACCTTGACTCCTC  
AGACGACCGACGAATCGAAGTCAAGCGCTCCCTAGACGAGAAGTACGGTGCGGACCGTGT  
TGGTAACATCGGAAACTTCACGCGTTGTCGTGGCAAGAATTCGATCGACGACGTGGCTCG  
CGTGTACAAAATCCCCGTCTGGGAAACGGAAATCGTCAGGAACCTCATCATCGAGCGCTC  
TGGCGGTGACAGTCGTCTCAGTGATTCTTTCGAGGATACATTCAACATGTTCCCAAGAC  
CGCAGCAGTTCTGGAGCGTCACCCAGAGCTCGCCAACGCGATTTCGCCTGGAGGGAAATTA  
CCGGGGGATGGGAGTTCATGCCGCGGCATCGTCATTAGTAACACTCCCATCACCGATAC  
CTGCGCAGTGTACGAGCGCGAATCGGCCGGCAAGACGACGCGAGGTCATCGCATAACGAAA  
GAAGGACGGCGAGTATGTCGGCATGCTCACGGCAGACTTCTCGGTCTGTCGACGATGGG  
CATGATCGGTATCGCCCTTGACACGATTGGGATGGAACCTTGAAGACCTATATCGAATCCC  
TCTTGATGACCAGAAGGTGCTGGAGGCATTCCGGCGTGGAGACGTCCCCGGCATCTTTCA  
GTTTGAAGGACGAGCTACGCGGATCGTGTGCAGTGACGTTGTGCCAGACCACTTCCAACA  
CCTGGCGGATATCAACGCACTCAGCCGCCCGGGTCCGCTCTTCTCAGGAAAGACTGCGGC  
TACTGCGAGGTCAAGCACGGGCGCAAGACTCCAGAGCGGTACCACCGCATCTGGACAA  
TCTGACTGACTGGACATATGGTTCAGCTGGTGTACCAGGAGCAGGTTCTAAGCACCATCAG  
GGAGCTCGGAGGCTTCCCGATGAGTGAGGTCCACAGTATCCCTAAGATCATCTCCCAAAA  
GCTCGGCGAAGCCCAGTTCTAGGCCAAATACAGGATGTTTCGAGGACGATGCTTGACAGAA  
CCACGCCTGCACCCCGGAGCAGGTGCAGAAGATCTGGCGCTTCTGGCGACATCAGCCAC  
CTACTCATTCAACATCGCGCACTGCATCAGCTACAGCATGCTCGCCTACTGGCAGATGTG  
GATCAAGCAACACCTCCCCACCGGCTTCTATGCGGCCAGCTGCGCAAGGTCAACGACGA  
GAAGCTCTACAAGTTGATGCGGGATGAGGTGCGGCACAACATGTCTATCCTCCCGCCAAG  
CATCAACGAGTCGATGGCGAGCTGGTCCGCTCCCATGGAGGGTGTGTTGTGCGCGCAGGATT  
CCTTCAGATACCGGGAGTGGGTCCCAAGACATCGGAGGAGATAGTCCAATGGCGCAATCA  
GAAGCTCAGGAAGGGACAGAAGGCAATCGCAGCCAGTGCCCCGACCGCATGTGGTCCGA  
CCTGCTTGAGGTAAAGGGGATTGGCCCCAAGTCCATCGAGAAGATCGTGGCATTCTGCGA

GTCAGAGGACCCATTCGGGCTCAACAGGGTTCAAGACCTGTTCAAGTCTCTGCGGGCGGAT  
CATCAAGCCCCTCAATGGGTATGGGGTGCCAGCGCCTACGCATAACAGCGAGAGCATCCC  
GCGTACCGGCGACCACGACGGCATTGTCTGGATGGGCATCCCCCAGGCCAAGAACTATCA  
GGACTATATCGAGAATCAGCGGTCTCGGTACGGCAAGGAAGAGGCCGAGATTCTCGCTGA  
GATGAAGGATCCGCATCTGGTCAAGTGCTGTCTGGTGCAGTGCTTTGACGACTATGAGGA  
CGACGTGTACTGCCGTTGGAATCGCTGGCAGTTCCCGAAGTTTGAGAAGATGCTGGAATC  
GCTGGCCGTTGATGGCAGCAACGTCCTCATTGTGCGCGGTCGCAAGCGTGAGGACTTCGG  
AGTGTCACTCCACGTGACGGATGCGTGGGTGCTTGAGTTGGACGAGGACGAAAGGCTATA  
GTATGGGCAAGAAGAAGAAGCGTGTGGGCAAGCCCGGACCCAAGCACAACCCGCTGAAGC  
TGGTGGGTGGTGGCGAGTACTCGGCCGCACGCGTCATCAAGGTGATCCAGAACATGCTCA  
AGCCGCCAGAGACGGTGCTCGCGCACATCCAACGCGTAGGGGCGCCGTTCTGGGTAGCAC  
CATTTGGAGTTTCGCAGGAGGGCGAGCAGTACGCGCCTACGTGCCTGGTGGCGCCGTACG  
ACGACCTGATTTCCGGCCGAGCTGGCCATCTGGCTGCTGGCGAGGAGCTTGCCGAGACGT  
ACACCGAGGAAGCCCACAAGGCGAGTCTCGCGGCTGCGCGTAGTGTGCGAGGCCGCACAGC  
CCAAGAGCGACCTGGACCCACAGCCATTCTGGCCCCGGTAAAGGAGATGCAGCAACAGG  
TTCACGGCGCACAGTCGCGGGTTGCTGACACAGCATCAAAGATCGAACCCACCGAGCTTT  
CGGACGAGGAGCGCGACGAGCTCCTCCGCAAGCTGCGGGGTTAATTCCAACAACAAGAAG  
GGAATCACATCATGACCAGGAAAGAGATCGCCAACACTACGCCGACGTGGCGTTGCTCAAGG  
CTGAGGAGATCGACCGCACCAAGGGACCGCTGGTGTTCCTGCTGAGCTGCAACAACGATC  
CGCTTGGGAGCATCGCGGCTGCTGCCAAGGCGTACAAGGGCGAGTTCCCTGAGTCACTGG  
CCCAGATCACCGACGACGAGCGCCGGTACTACCTCAAGGAGGTGCAGAAGTCGGTGCTTG  
AAATGCCTCTGGAGGCTGTCCAGTTCCTACTCCGCATCACCGGTATGACTCGCGGGTTCA  
CCCACCAGATGGTCCGGCAGCGCACCCGACGCCTACTCCCAGGAGAGCACGCGCTTCGCCG  
TCAAGGAAGACGACCCAGTCGGATTGCCACCCAGCCTGCAAGACACGATGCGATGGAACG  
AATGGGTTCGAGGAATTTGCGATGGAGATCTATCCAGTTCGCAGCCAACGGCGTGCATC  
TTCAGGACAGGCGTGACCAGGCTGAAGAGTTCGCCGAGACGATGGCCGACAAGGTTGAGC  
ACTGGCGTCGTCGGTGGGGTAGGGCTATAGGCGTCATCGAGGAGGCGTACAACGCTCAGG  
TCAACGAGGGCATGCCAGGCGAGGACGCGCATGGATTGCTGCCGACGAACCTTCTGACCC  
AGATCAACTACATCACCGATCTGCGTGTCTCAAAGGCCATGCAGGAGTGCGGCTCTGCA  
CGCGAGCGCAGTTCGAGTGGCGTCAGGTCTCGGCCCAGATCGTCCGGGCGATCCGTGAGT  
ACGGGAATACCAAGACGTACATGACGAACGACAATGTCCAAGACATTCCGGAGAACCAGA  
AGTCGTCGGAGTGGCAGTTCGATGCCTTAGCGGACATCTTCCGGCCGATCTGCAACTACC  
GGGGGAGCTGCCAGTTCAGGTAGACTTCGACCCGGCACTGCATAATCCGTGATCGCGTCG  
AGGAGAATGCCGGTATCAATCGCCCGAGCACCGACTGGGAAAAGGAATGGGTCCGACCGA  
AGCCTCTAAGCCCCACTGGCGCTGAGGGTTACATCGGACCGATCTTCCCGGCTGAGTGGC  
TCCTGGATCCCTCAGCGGGAAGGACGAAGTGACCATGGAGACCGGCGCATGCCGACTGTG  
TCGGAGCGTGGTTCGATCGGGCCGCCCTCACCCAACTGGCTACACAGCTTCATCTGCGC  
GCGATGCAGTGAAGGATTGAAACGATTGAGCGCGAAGCTCTTGCCCACGACAGGAGGGGA  
TTCAGTTGGGAATCATCGTCAATGATTTGGCCGAAGGGAGGTTCGCACCGTGCCGCTATGC  
GTAAGAAGAAGTGCAACAGAGACAGCGAAGCCGGAATCAACTATTCCACAGCACCGGTCA  
TCGCTGTTGATCCGGGCGGAACGACCGGCTGGTCTTTCATGTGTGTGGAGCCATTGGCTC  
TGCACGACCCCGCAGGAAATGGTACTCGAGAACATCATACTCATCAGCACGACGAGCTCA  
GCCGCACTGTCCGATGCAATATCGCGGAAGGCGTAGACCTCTGCGTCGCAGATCTGTATG  
AATTCATCTCGGCTTGGCCCCAGGCCGCTGTGCTGGTGGAGGACTTCGTTATCCGAAGCA  
ACAATCGGAGTCGCGAATTCCTTTCGCCCGTGCAGGATTACCGCCAGACTCAAGCACCTGC  
TATGGGCCGACAACCCATACATCATCCGACAGACACCAGCAGACGCCAAGGTCACCGCGA  
GCGATGACCGGCTGAAGAGCTGGGGCTTGTACGACAAGCATGGCAGTCTTGGGCACGCAC  
GCGATGCCGATCGGCACGCAATTACATTCCTGCGCAAGGCCAAAAGCAACCCGAAGCTCC  
GGGCGATGGCTTGGCCGCACCTATTCGTAGAGGAGCGTATTTATGCAGTCGAAGACGACG  
AACAAAGCTGGGGCTGATGTGCCGCCAGCGTGGCTGGTTCGGGTGCTGGGCGATCACCAG  
CAGCAGATGAATGGGCTGTGGTGCACATGCTCTTGGAAAGAGCACGGACGCCTTCGGCGCT  
CCGAAGCACTACACAACCTTCTCTGCAGAACATCAAGCGGCCGAAGTACATCGCGCTCTG  
AGTGATGGCGTCGCAGCTTTTTCGAGGAGGTTCCGTGAGCAAATCGGACGAGTTCTATG  
CCAAGGCGTTGGTTCGCGCTAGGTGATGCAGAAGCTGCGCAAGCTCACCTCAAGGAGAGCT  
TCGACGACAATCACAAACACCTTCTGGTCTCAGCGCGTACTTGCGCACTGTGCCTTGGCGA  
ATGCCTAGCTCAAGGTTCGCAGGGTGGGAGCTCGGCTTCGAGGCCTGGAACGGGAAGGAAG  
AGGACCAGTTCTCGGTGCTCACCTTCGGCACAGACGGGGTGGTTCGCGACGTTCCCCGACG

ACATCGAGGAGCGCCGATGAGGCGCGCAAGCATGAACGGCCTCAATCCGACAGTCGTCAA  
GAGACAGAACGACGCCCTCTACAAGAATCCAAATCCCAAGGACGCCTTCACATTCGGGGC  
CACGTGCCCGGACTGCGCTGGCGGGCTACAGTACAAGTGGGACCGGATGAAGTTCCGGCC  
CAAGCGCAAGGGATGGATCTGTCTGCTGCCACGAGATTGAACTGGAAAGGCTGCCACC  
AATCAACATGGTCGGCCCCGCATCGGAGGAGGAAGGATGCCCCGTGGAGTAGCGATTACT  
AAGGAGCAAATCGCAAGGGCGGAGGAGCTTTTGAACAAAGGCTGCTCTTACCTCGAAGTC  
TCCCGAACCATCGGCATCGGCGAGTTCAGCATTGCTCTCAAGTTCCCGGTTCGGGGCTTG  
ACACAAGAGCAGAAAGCCGAGCACAAACGTCTCAGTGATCTGTTCAAGCGTCTCGACACC  
ATCTGGTGCTTGGAGAGGGCACAGAGAGGGCGAGAGGGCGGCATCATAAGTTCAGTAGCCC  
GCATCGGCCCCGAACCAGTACGATAAAAACCGTAACTAGGAGGAACCATGAAGCTCACCGG  
AACTGCCCCGCGAACGTCGCGGGTGAGCGGGTGGGTTCGAGCCAGAAACCGACCAAGCGTT  
CAAGGAGTATGCCCGCGAGCTCGGGACCAAGACCTCACTAGCCTTGCGCCGCGTCACCAT  
CCTTGGCTTGCCCCAAGAGGGCTTCCAGATCGACAGCGAAGTGGTTCCGATGCCCGACAG  
ACCATCACACAGGAAGGAGTGACCGATGAGCCGAGTGGAGGTGGCCCTCGCGTGCGTAGC  
CCTGTCTGCGGCGATGCTGCTGAGCCAGGCCGCTACTGTGGGCGCAGAGCCCCGAGCAGCT  
GCCCGGAAGGACCAGTTGTACCTCACATGCCTACTCATTGGCGAGGTGCCATACGGAAC  
GGCTGCAAATGCCACTCCATTGCACGTCGTGTATGCCAGGCTACCACTGGCGGAGACTG  
GAACGCCACCTCTCTCGGGAAGCTCGGCCAAGAGATCATCCGCAACAACCCGAGGTTTGA  
CGCCGACTCGGCAGCGAACATCATGGTGTGAGCATGACACTGTACTGCCCGAGAACAT  
CCCCGTCTGGTTCCACGCCGAGACGGCCAAGTCTCTCGCCGAGGACGCCGGTGTGGCTGT  
CCCTGTGGCGACGAATCCTGGTCCCTACAAACCCCTCCACGCTAGGAGCTTCTGCCATG  
CACTCAGCGCCTTTTTGCGTATCTACCGCTGACTTCATCGTCTGGGGGTTCACCTTCGCG  
CTCACGGCTCTCACAGCTTGCCCGTGAAGCATGGTTGGCGCGTGAAGACTCCGCTAGAG  
CTCGTGCATCGCACCTTCAACAAGCACGGCATGCCACCAGCGGTATCTGCCACATGGC  
TTCGATCGTACGGCGCACCACTACGCGCTCCGAGGCTATGAGCAGGTGGAAACCCAGGGT  
AGCGGCGAATGCGTGAAGGAAATGACCCGAACTCAATTTACCCACAGCACTAGCTGCCCC  
AGCTGCTGGTTCGTTCGGGGCGATACCGTACGGCCCGATAGAAGAATACTTCAATCTCCA  
CCCGAGCAGACGATCTGGGTCGAGAATGACGATGGCAGCGTCCATCTCCGCAAAGCCTTG  
GAAGAAAACCTGGGCCGAGACCAAATACAAGGTCTGGGGAGAATGGCAGCGAGAATGCAAG  
ACCAAGGACCTGAATCTGATCCGGCAATTTGCGGTGAAGCCTGTGGTGTACCGCACATGC  
CCGAGTTGCGCGTACACATGGTTTGGAGCACTAACAGCAGGGAATACATCATGATAATGAA  
AAACAGTCCGGAGGACGCACTGCGGAAGGCTACAGCTGCATTTGCTCTGCGTCAAATTCG  
TGAGGTCAAGGAGCGCGCTGACTACATGCTCGTCCACGGCCTGACCGAGGCCGACGTGTA  
CGGAAAGCATGCTCGTGAGGGCTGTGAGCAGCGCGAGAATCTTGGTTCGCTGGATCATCAC  
GCCCAAAGGACTCAAGAGGGTAGTCCCAGACCCGGACGACGTCGTCGGCTGCGTGCCGGT  
TCTCGTTCGAAACCCGGACTACATTGGCGAGCACCCGAGAGCGTAACGAAACGTTGCGCCG  
GTACTIONGATCCTCGCTTCGGCAAGGATTGGTTCGGGCTACGTCGGCAAAGTTCCCTACCA  
GCAGAGGTTTCAGGAACACAAGGAGCCACAGCAATTACGGCACAAGCCCTATGGGTATCC  
GAACCCGGCCTGGGAGCTGAACTACTTCCGCGTCAACACCTTCGGCTGGACGCACTATGT  
CTGCCGAACCAAGCATGACGAAAGCTGCCGGTTCACGAAGAGACAAGAGGAGGTGATTGG  
CTGATGGACTGGAATCTCCTGATCGGCGCTGCTAAAGGCGCTGCGATGGGCGCGACGATC  
TATTTGGTTCGGATGCATCGTCCGATAACAACGTCGGATACAGAGCAGCCACAAGGAGGCC  
CACCAATGAGAGGCGTGAAGGGCTCTGGCCAAGGCACATGGGCAGCGCGCTACGACAGCG  
TGTGCTCGGTGTGCCCGCACCCAATCTTCAAGGGTGATCCAGTCCACAAGGTGCACAACA  
AGGTAGCCCCGAGGAGTGCCATGCGCTTGATGAGCGTGGCGGGTTCGGCCTTGATGTCA  
GCGGCATTGAGCAAGAGCGCCTCAACGGCCGATACGGGAAGGGCTACGAGGACCCGGCCGA  
GCTACACAGACCGGGGCCGACGCAAGCACAAACGCAAAAGTGGCGAGTGTTTCCAGATAC  
ATGCAGGAGAATGCCCGTGAACCTCGAAGACACACACGGCGAATACGCCGGTAAGAGCTT  
GGCCTAGAAGATGCAGGACAAGCTCGACTCTGCTTACAAGGCGTGGCGCGTTCGCCGGTGG  
TAGTGATCCTCGACAGAACTCGCAACAGGGACGGCACAACAGTAACTTCGGCCGGGTTGA  
GGGCTATGCGGCGCACCTCGGAATCCTCAGGGGCACAAGTACAAAACATGAGATCGAGGA  
AGCGCAAAGGCGATACAGATGAGGAATCCCTTCAAGTACGGTAGCCCGCAGCGGGTGTG  
TTGGCGTACTGGCTGATGCGGTGGGCGTACCGGATCGTTGAGAGCATTGATCGGGGTCCC  
GTCCCGAAGATCAGCATGTGGACCTTACCTTTGAGCGTGGGAAGGGTGCGGTCGTTCCG  
AAGGACGATCGGGCAGAGCACAAGGGTTGCATACTCGTGTATCTTAAGATCGTGAGTAT  
GACCGTGCCTGGTTCGTAGAGTGCCTCGTTCGGCAAAGACGAGGACGAGGACCAAGACGCC  
TTCGGCACCCCTGGATCTGCCCAAGGAGCGGTAAAGCCAAGTACGACAAGAAGTTCGGCAT

CAATGCCGACTGGCGGGAGACCACGACGCGCGGGCCACGAGGAGCGTACGGCAGTCGCC  
AGACAGCCCAGGAGACCCAGAAGCACCCAGTCGTAAGGGATTCGGGTACGCTGGCGGCC  
AGACGGCACTTGCCCCGGCTGCGGCAGGCACTGGACCAGCGTGTACCAGACGCGCGACGC  
AAAACGAATTCCCTTCGGCACCACCGGAAAACCTACCATACTTCTACAAGACCACACC  
ATTGGAGGGACAATGAACGTTCCAGTCGCGGAAGCCGCACAACGGGGCGATGAGGAAGGTG  
CAAGACTACCCAAGGCCAACCATGCCCTGATCGTCGCCGCCCGTGAGGGCGTTGAAGCCG  
ATCCGCGAACTGCACTACCCAGAACCTGATAACCGAGCCCCCTTCGCCCGGAATGCCTT  
GTCGAGTGGCCCTGCGACACCGCCAAGCTGGTCTACACCACCGAGGAGCTGGAGTGATGA  
TCTTATGGCATGCTCGGCGTGAACCTCGAGCGCTCTCGGAACCATCGTTTCCACAATCGGC  
GGGTGGACAAGAGTGTCCAAGCTATATACACCTGGTGGGAGTACATGGACGAGATCGACT  
TGGTGAATGGCGAGAACGACACCATGCGCATCACGGTCATGGAAGAAGAGATTCACCCTC  
CTCAAGGAGTTCTGCTCCATGAAAAGCCCAAGGTCATTTCGCGCATTTTCATCAGAGGTTGA  
CATCGAAAATTAGCCTCGAGTACCAGATCAACACAGCGTACGTAGCCCAAAGCACTATCA  
GCCCCGCTCGAGGAGATCACGGCCGACGGCTGGATGGCGCTCGGCCACTACAAGATCTATC  
GGTACTGCATCCGAGGCCGCATCAGGCCTGGCGGAGACGGTTACGAGCCATATCGCATTG  
TCATCCTGCCGGGTGAGGTCAGCCCTCCGGGCATATGGTATCCGTGGTCAGGACAGCCCG  
AGGACTTGCCGAATGAGGTAAGTTCGACGCAACATAACCACGGGATGTTTATGGCAGATAAAT  
AGCCCATCCCCAAAACCAAATACCATCCCTTCACAGAAAGACAGCACATATGTTCTGTGCG  
TAGGAATCGCGCGGCCGCAAGAGAGAACGCGCGCATGTACAATCTCAGCAAGGTCTATGG  
CTACCTCGACGCTCTCAAGGAGCTACCCACAGCCATCCAAGTGGAACCTCAACTGCGCGA  
ATAGAAGGCGCATCTGGTGTCTCCGAGCGAGCCGCCGTGGACCCTCCACAGCTTTACCTG  
CTGGTTAGAGGGTGAGGTGCTTCGAATGAGCAAGAAAAAACAGATTCCGCCAGACGAGTG  
GGTCAAGAAGGTCGATCGCGTAAAGTCACGCCTAGACCGTCTCACGCGTCGTCGGAGGTG  
AACGACATGGATGTCGATTTCTTGATGGCAGTACGTAAACAGCGGGCCACATGGCCTCGA  
CGAGGTGGGTGGAAGCCGCACCCACCGACAAGCCCAAGGCTGAGCCTGATAAACGGTAA  
GCTATCTAGCTGCGGAAATAGGTTCGACCATGCGGGTCTAGGCCAGAGAAGAAGGGACACA  
TCGTAACGTGTCAACAGCGCGAAAAATCAACAGCGCCAAGCCATTCCGACGTGCGGTAGA  
AGCCTCCCGTGAACGGGGATGGGCGGGAACGCTACCGCTGCCGCCTCGGAGCAACAAGAA  
GCCTCCAACAGGTTACACCGGGCACACAGCGCCGAACCCGAGCGACGATGACATCGCGAG  
CTGGCTGCGAATGCCAAGTACGCCCAGGGCAATATTTGTCTGCACCTGGGTCCGGTAGA  
GACGCGTGGGCCGGACGGAGACCGCCTGGAGCTCATCGGAATTGGCGTCGATGACTATGA  
GGAGGGTGGCAAGGTCAAGGAGGGCGGCAAGCAGCTCGCCGCGCTCCTGGCCGAACCTCGG  
GCCACTCCCCAAGACGTATAACCAGCAGCTCGCGCACACGCGTGAGCGGTATCCGCTTCTT  
CCTGGTCCCCGCCAGCACGCATGGATGGGGAAGGCCGCGCCGTACATCGACATTGTCTG  
CAAGACATACCGTTACGCCATCGTATGCCAAGTTGACACCCAGGCGTGGTCGATGAGGA  
GACGGGGAAGGTCAACACCGAAGGTGGCCAGTACAAGTGGCGCGATCCGCAGGGGCAGTT  
GCTGGATGGGCAAGAGGACACCCCTGACGTTAATGATCTACCCCTCCTGCCCGATGCGTG  
GGTAGAGCGGCTGAGCCGTGGCGGCATGAAGCTCTCGGACGAGGACGCCGAGATCGACAT  
GGATCTGAACGTAGACGAGATGTTCCGGTGGTCCGGGGGCACGTTGCCGGGCAGTGACGA  
GGACGCCAGCGCTGCTCCAAAGTGAAAGCGGTAGTTAAGTACTGGCAGTGGCAGATTGA  
GGAGGACGCCTCTAGCCACGACAAGATCACCGGCTCGCACCAGAATCTGGACTGCTTCGC  
GACCGAGGGGCACACCGGCTGGCGGCAGGCCATGGCAGCTGTGGATGCGAGCGTCGCCGA  
AGACACCATCAAGAACCGTGGGAAGCGCGAAATCAGCGAGCTGCGCTCAGAAATCATGCG  
TAGCAAGGTGAATGCGCTCCGAAAGCTCAAAGCCCAGATAGACAAGGGCAGGCGCAACGT  
GCTCACGGTGTGCACGTGCTACGAGCCCAGCGCAGACGAGTTTCGACGCGTTCACCGCCAG  
CCTCAACAGCGCCAAGGCAGCTGCCAGCGAGCCTACCGAGGAGCGCGAGGTCGCCAGCGG  
TGAGGGGCGAGACGGATATTGGCGCGATGGCATGCCAATGGCACCCCGCAGGACCCCGG  
CGACTACGAGCAAAGCGACCAGGGCAACGGCGATCACTGGATCGACCTGCACAAGGACAA  
TGCGTTCTACGTTCCGGCGCTAGGCCAATGGATCATGTGGACAGGGAAGAGCTGGAACGT  
GGGGGATGGCTGTGCCGAGCGGAGGTACGGACGCGTGAAGGCTCCCCAGAAGCGGTATGC  
CGAACAGCTTATGCGGCGCGCGGCTGAGCTCAAGGCTGCGCAGGATCCTACGGCCAACGC  
GGCTGTGGCGATGGCGAAGAGCTGGCGTAGCTGGGCCACCCGACGCGGCGATGTGGGGCC  
GATTGCGCGTGCCCTCAAGGCCGCCAGCATGGAGATAGGCATAGAAGAAGGCGAGCTCAA  
CGCTAATCCGGCGCTGATCTGCTGCGAGAATGGCGTGCTCGAACTCGATCTGTGCCCGCT  
CGACTCCCTGTCGGACGACTCCCAGAGCGCTGGGCGCAACGGGGATAGAGGTAGGCCGCAA  
CGGACGCAACGGCACCGCAAATGTGGCTAGCTTGGCCGAGGACGACGAAGAGTTTGATCT  
TGACTACGAGGCTTTGGCTCCCAATAGCCATGTGCGCCTGCGAGAGATCCGGCGCGAAGA

CTTGCTGACGCTGAGTACTGTGACTAACTACCTGCCCTGGCAGGAGCTGGTGGCCGGGGA  
GTTCCGGCAAACAGGAAGGGCTGTATGCGAGCACGTGGGCACGAGCAGTAGAGATGTATCT  
GCCTGATGTGGAGGTCCGGCGGTTCTCTGCAGAACTGCTAAGGTACAGACTGCTCGGCCA  
CAACCGAGAGTGCATCGTCGTGTTTCTGCACGGGCCAACGGGCAGTGGTAAATCCACCTT  
CCTCATCGCCACGCTCAACGAGCTCGGCCAATATGCGGATGTGGTTGATCTGGGCATCTT  
CAAGGGCGACCGGCAGACCAACCCAGCTGTGGCTTACGCCCTCCCAGGCGCATTGTGAC  
GTGCTCCGAGGCTAGCCAGCGGACCATGCTGCACGCCGACATGTTCAAGCGAATTACGGG  
CGGTGACCCGTTGACTGCAGAACTGAAGTATAGCAACGAATCTGTCAAGCGGAAGCCCGC  
ATTTGTACCGTGGATCGCCACCAACATCCCACCCAGCATGCCTGGTGCCGATGCTGCGGT  
GGTTGACCGGACGGTGGTGGTGTGATTCAATGAGCAGATACGTAACAAGACGTCCGGCAT  
GAATGCGATGCTGTCTAGTCCGAGGGCCAAAACGGCTGTGCTCGCGTGGGCGGTTCGAGGG  
TTGGGGAATGTATCGGCGCGAGGGGCTGAGGCGCGCAGATTTCCCGGCTGCAGTGAAGGG  
TGAGAGCATTGAATTTACCAACCAGTTCTCCGATGTGAGCGAGTTCCTGAGTGAGTGCGT  
GGAGGAGGCTCCGATGAGCCTCCGGCGGAAGGCTGAGAGGCGCGCGTGGCGCGTGTGCGA  
CTGGCTCGAGGAATGGCACATAACGGTCAGCGGGGTGTACGACGTGTACGTCAGCTGGTG  
CCAGGAGAACCGCGTTGCGGATCGTAACATCATGAAGAAAAATGGGTTCTCGCGCCAACT  
GAAGGACTATGGATAGCGGGCCGAAGTTGTGAAGGAAGATGGCTTCACTTCGAGAGCTGA  
CGCTGGCTTCAAGCTCAACTCTCCAAATGCACGCGCTTTGAAATTGCAAAAAGACAGCTG  
ATTATTGGACAAGAATGGCTCTGAGACGGGGCTGTTACGCAATGCGTAACCCAATCAGTA  
ACTACATTTGACCTGCGGAAACACATCATTTTGGTTACTGGTTGGGGTTCGTTTCCACTT  
AGGACTATACCTACTCTCGTTCTTATACTTCTACCCTGTTTCCCTACTACCTATTATCT  
AAAAAAGCGAAACGGGTAAGTACTGAGGAGGGTATAAAAATGCTGGTAGAGCAATGGATTTCG  
ATTTTTGAGAGGCCCGGAATGCGCTACCGAATAGGTAACCCGAACACAGGCTATATGCGG  
AAACATGTTTCGTTTCGCGTAGTTTCGTTGTGACGGATACCCTGAGAGGGTATCTAGGAGC  
TTAAATTTGTGGGATCAGAGATGGTTTGGACAGCAGCAATCAAGACTGATGGAATTGGAG  
GAATGGC

>NewGenomeName\_178

TCCCGACGCTGATCAGCCCACCCAACCCCGGTAGGCCCTCCGCCTGGTGGGCCATCCTCG  
CCTTGCCTGGGTGTTGCCCTGGGTCATCCCTGGGAGCTTCCGGCTTCGCCGGTGGTGCGGT  
GGGCTTCCCTGGCCTGTCGCCAGCCATTCTACACGGCTCAGCGGGAGTGTC AACCCCTTGG  
GCTTGCCTGTCGCTCTACCGGGCTTGTCCGTAGTACCTGGAGCGCTCCAGCGCGTTCGCG  
GTGCATGGCCCTGGCTATCTCGTACTCCTGGGATGCCTGCTGCTTCCGCCAGGGTGTGC  
ACAGTGCCGGTGGCCCTGCGCGGCCACTGTGCTAGCTGCCTCTGCCATGCCGCGTCTCTG  
CTGGTACCAGGCACGCTCACCTCTGTTCTGTCTGCTCAGCATCCTCTGTGCCTCCTGTGG  
TCCTGTCGGGTGGTAGGGCGGGAGTGGCTGGCCTTGCCTCACAGCGTAGCCTTGCCTCTT  
GTCGTGCCATGGCTCTACCTGGCTGCTCCCTGGGTATTCCCTGGGGTTGCCTGGGTGGTC  
CTGGCCACTGCCTCTAGGCCACGTA CTACTCGCCTCTACCTGTCCTGTCTAGTCTCTGC  
TCCCAGTCGCTCCCTGGGTGCTGGTCTGTCTCCCTGGCGCCGCACTGGTCCCTGCTGTCTT  
ACCTCGCCGCTCCCACGCTGCTCGGTCGCACCTGCGGCGCTGATGGACTCCTATTTGTC  
CATTGCGTGTGACATAACCGCAGCCTTAGTGCCAGGCGGGTACCAGGGCGATGGCCTAGC  
TGGCTGGATGGACCCTGGCTGTTACCTGGGAACGATAATCCTGGCTAGCTAGACTAAGCC  
TCGCATGCGTGGGTCTCTATACGTGCGTAGAGGCTCCAGGCAGGGCCTAGGCGGGGTGTT  
GACACAACAGGTAGGCGTCTGTACTATGCGCCCTTTCTCCACGCAACACCGCCTCTACAG  
GGAGCCTGGAGACAGGGTTGACACACTACCGGGGCATCGGTAGAGTGCGCAGCCAGAGGG  
ACGGAACAACGCACCCTTCCAAGCGCGGCACATGCCATAGGCGCAAGGGATACGGTTGGG  
TTCCAGGGCAAGACCCACTACGTGTAAGGCCGGCAGGCATCGCTGAGCGGATTGACAGTA  
ACACGCTCAGTCGGTACGATGTGCACTACTCGGCAAGACACGCAACATCAGTTACCGGGT  
TGACACGACAAGGCCGAGTCGCTAACATGGCCACCAGCAACAAAGTGACCCGGCGGATAA  
CATGGTCCGGTAAGCTCCAGCAAACGGGCTGGGCTGGACGGGTAAGACGAGTGAAGCTGA  
CAGCGTAGGCCCTTCGTTAGAAGGCAGCCAAGGTGGATCACGCACCAGAAGGTGACCTGTA  
GGAATCGGGCAGCGCCGTAGGACTGCCAGGGGGTCAAGGCTAACCCCGCAAAAGAAACAG  
CCGAGCGTTAGGATCACGTCCCGAAGCAGTGTCCGGGGGAGCATCTGGTCCAACCGACAG  
TAGTCGGATGCCTGCAAGCCGAATCAACGGCTGGCCTACGGGCTGGGCATCCCCTCGCAA  
ATCGGTTGTATCTGGCAAGAGCCATCGGGTTGGCGGATGGGCTGCGAATGGGCAACGATG  
GCTCTTGAGCAGATAACAACGAACAGGAGTAACCATGAGCAAGAACGCCGCTGGTGCATCC  
AAGGCCGCAAGCTACGGGCCGATATGAAACGCTATCTCGCTGGCCACCGCGCCACGAAG  
GTAGCCGAACCTGATCGCCATCGGCGACAGCTCCGCACGGTCTGAACTGCGCAAGACGCGC



GATGTTTCGGTACAGCTCGGACAAGGCAACCACTCCCAGGACTGCTTCAATCCCAAGGGC  
AAGCACTTTGCCCGTGGTTCCGAAGGCAAGGCACGCAACATCCTCCAGGGCTTCATCGCG  
AGCTCATCCCAAGCAAATGGACTCTGACCATGGCCAACCAACTGACCAGCACCGTCATCG  
CTTTCATCGGTACCGCTGCCATACCAACGCAATCGAAGCCATCCGCGTTTCGTGGCAAGG  
AACTCGACGAGGCCTTCCAAGTACCGGACTGTCCATCCTGAACCACGTCGATCTCCACG  
GCGACGTGACCGAAGTCAAGGCGCTGTACGAAGCCATGCCGAAGGGTAGGCGCCGCAATG  
CGCTGGTCGAGTGGCTGACCAAGTTCGGCAAGGTACAGGTGAACACCGAGAAGAAAACCA  
ACAACGAGCATCCGTTCTGTACAACAAGTTTGGCAAGACCGATCTCGTCGACGCCACCA  
ACGAACCGTGGTACGGGTTCAAGCCGGCGAAATCGCTCGATCAGGAATTCAACCTCGGCG  
CCGCACTCGCCGCTGTCCGCAAGCAAGTGCTCCAGGGCGCAGACCAAAGGGAAGGTGATCG  
TCGGCGCTGAACTGCTGGGCGACCGGGAAGTCTGGCCGCCAAGGCCGCACCCATGGTTCG  
AGAAAGCCAAGCGCGCTACTGCCACTAACTAGCTCAAGTCGAGCGCAAGCGAGACGGGC  
GCTCCGCTGGACCTAGTACAAGTGGAGATACCACGATGACTTTCAAGCGACGTCTGCGCC  
GTCAAATCGCCGTGGCTCAGTACAGCCGGCCCCGCCACTATCCCTACGGCGAGCAGGCCG  
TACAGGAGGAAAAGTAATGGATATCTGGATCGCTCTTCCCTTCTCCGAATTCGGCCTGAA  
CGTTAGCGAGTGCGCCGTGCAATTCACCCTGGGCATGATCGCAACCGCCCTGTTTCATCCA  
TCTGCTGCTGAAGCGGTGACTCAAGTCATGGCCCTGGAGGGCGACCCCTCGCCTACTCCGG  
GGCAATCGCTGGACTCATACAAGCGAGAATTAACCGTGCAAGCTTTGAATAATCTGTT  
GATCGCAATCCCAAGGACCCGGCATGCCGATTCAACGCAGCCGACAAGGCGCTGTGCGC  
CCATGGCTTTCCTTATGGGTGACCTGAGCCGCGGCCACGTCTGACCCCTGGCGGGTTCAT  
CGTGGTAGGCGCCGGCGTGACCGTCAAACGCTACGACGAAGCGTATCGCTTGAGCCCCGA  
TCTCTACTCCGCAGGCTTCGACGTGCTGCTGGTCCACGGCAGCCCCGCTGTCCGGGCACGT  
CACCTGCCAGGCGTACGGCTGGATCAACGCTGAGGACCACAAGGGCTGCGCGAACGGGCG  
CCCGATCTTCGACATTGCAGGAACCTCGTACCATGTCCTCGCGTGATCCGTACCGTATCG  
GCCACCGCGTGGGGCTGGTGAAGTACAGCGACCCCTACCTGGGTGCCGACGCGGCAGGCA  
CCCGGGGCATCATTGAAGCCATAACCCGTCCGTCCCGCTGTATGACGATCTACCACGTAC  
GCTGCGAGCGGACCCCTGCGCCTTATCGAGGCCGAGGCCCGTAACGTGCGCTTCATCAGAC  
AGCTACCGACCCGCAAATGACGAGGCTCATCATCGCTGTCAGCCCGTTGGGCGGTTGCGC  
CTTGGTGTGGAGTCGCAAGCGACCGGTGCGTCCCTTGCGATTCTACTGACGCAAGGCCG  
TAAACGCTGGCTTCGCAAGAATCGCCGCACGGCCTTGCTTGGTAGCCGATTCCCTCATAGT  
GAATTGGAGCAATCGCATATGAATCCTACTTACGTGCTCCGTCTCAAGGACGGAAGCACA  
CGCGAGGTGGCCGCCGACAGCATCATACCGGCCACACCTTTGCCGAAGTCTGGTTCCCTC  
GGTGGCGCGGTGCTATCTACCCGGCCTGTGAAGTACGAGAGGTGTATCGCACTGACCTC  
GTGAAGGAGGGCGAGTAATGACCGTCAAGACCGTGTATGTCAAGCCTGAAGACCCGACGC  
CACCAGTCTTGTCCGTAGGACGCCTGTCACCAGGTGAACTGTACAAGGTGGTGACGCCTA  
GCTCGGCAGAGGGCGCCGTTGTGCTGGCGACCAAGCTGACGCCTGCCCTCGCTCAGGCAG  
TCCTCGTACTGCACAGCATGAACCCCGCGCAGTAAGCGGTGGGCACGGCCATACTAAACA  
CAGACTTGCGGTGCCGCCGCTAGGTACCGGCGAGTACATCAAGCTCGTTCAAGGGGAGG  
CCGACCAATGATCGCTGCCCTGTTTCGTAATCCTGACTCGGCCTGTACTGCTGCCTCGGCCTGCTAGC  
AGGCTCCTGCTACTGCATCGCAGTGGCGCCGCCGTTTGAGAACCCTACGGAAGTGCAGTT  
ACAGGACGCCTGCCTGATCGGGTGCCTCTGGCCCTTCGTGCTCGTAATCATGGGCTACCT  
AGGGGTGCGATCCTTCTTCTGTGGCGCTCTGGGTGGCGTGGCGCCCATCGGTAACGTTT  
TCACAGCAAGCGATAAGGAACTGCGATGATCCGTTCCCATGTACACGGCACCAACCGTGA  
GCTACCCCGACTTCACAAGCACACTGAATTGGAGGCGGGCGAGCTGTACCAAGTCGTGCA  
GCCCGAGTCCCGTCGGGGCCCGCTGGTGTCTGGCGTGGGGAGCACGACCGACCGTGCCGT  
CCGCACGGTGGTGGCTGTAGTCATCCACGAAGAAGTTGAGGGGAACCTGTCTACACCGAG  
TCCTACCGTGCTGCGTAACGACACCTGGCGCATGGTGTCTCGTGAACAAGGGCACCCAACC  
GACTCACC GCCGAGTGACCAAGGCGAAAGCTGGCGCGCCAGCCTTCCACCGTGGTCAT  
TCCTTGCCGGGAACCAACTCAACTGAGGAGCTACAGCATGACCAACGTCAACACCACCAC  
CGAGATCAGCACCGCTGCCGTCTGGGCGCCAAGCTCATCAAGAAGCCGGCTACCGTGGA  
AGACTTCCGCAACAACGTGGTCTTCCACCACACCGCCCTGGCCAACCTGACCGAGACCTA  
CAACGAGGCGGTGCTGCCCTGCAAACCGCCGAGCGCCTGTCCGGCCTCGTCGCCGGTGA  
CGTTATCACCTAGGACCACGACAAGTCCGAGAAGGCAGAAGTGCTGTGCGGCGGAGTAAT  
CAGCGTGGTCCCGGCGTCTATCAGGTGCTGGTGCCTGTCAGCGTCAGCGCCCCGGCAA  
GCTGCTGGACGTGAAGGCTGGCGCCATCCGCGCCGTCTAAGCTCCGGCTGCTCCGGCTGA  
ATGCCTGGATGAAGCCATCGCCAGGGCGAGTAAGGCCCGCACGTAATAGGTCTGGCCCT  
GCCGGGCCTATTGAGAGCTAGCCATAACCATAGGAGGAGTCAACGTGAGCAAGCACAACC

CGAACACATCAGCGGCCCGGTACGCAGCGTCAGCGTAGCAAAGTCTCCCGTCGTCTAGGA  
CCTGGGAGACCGCCTGGAATACGCCCTGGCCGTGTGCCAGGAACGCGCCCAGGATATCGA  
CCCCCTGAGCCGCCGGCTCCAGGCTGCCGAGGGGGCACGCCGCTGGGAGATCGACGCGAT  
TCGCAGCCATCAGGCGACGATCCGTCTACTCCAGAACGACTTGAACGCAGCGCATGATGC  
CCACGAGGCACAAGCGCGCCGCGCTCGCAAGGCAACCATCATGGCCTGGGTATGCCTGCT  
GACCGCAGGTTTGGCCGTCACCCGGAAGCTGGCAGGAGTCTGGCCATGCAGTGCCAAGAC  
CTTTACACGAACCTCGCAACGGACATGTTACGCGTACCCGGGCTCCAGGTGACCCCGGAG  
ATGCGCCGCGTGGCCAAGAGCCGGGCATTGCCCCACGCCTATACGCCCAAGAAACAGGCT  
TCGGGCGGGACTTACACCGCCCCTGTGAGCGGCGTCACCTGTGACGGTGGTAACGTGGAG  
GTGCGCCTGGATAACGTGGAGCGCGTCAGCACCTGTGACTATGCCGATCTAGAGGCGCTG  
GTAGCGGCCAGCTTGTGCTAGGCCGACGCGAAGCGCGACGACGAGTACGAAAAGCTGCTG  
CTCAAGGCATTCCCGCTGGTATCGAAGAAGGCCGCCCCGCTGTCCGCCAAGGACTTCGAG  
GGACGTCTGCAGGATCTGCTCGAAACCAAGCTGGCCGTAACCGTGGCCTGCGCGATGCC  
GGAATAGAGATGGACGGACCGCTGCACAGCCGGGTACGGAAGTTTGGCGACCTGAATAAC  
GAGATGGGCGCTAAACTGTTACGCCTCCAGCAGGGCTTGACCCGGCTGGTGGAGGTAGGT  
CAACGGGCCGGCCTGTATTGGGACGACGCGGAGACTCAGCGATTGCTGACGGTGGCCCCG  
ACCAAGGCCGTCTGTCGGCTCAGCAGCAAGCTGACCCGGCGTGGGGTATGCCTCCCGCGCT  
TCCGTGGCGAAGGCTGAGGCCGAGGCTCGTGAGCGGGCGAAGGCGGCGGCTAAAGACACC  
TGGCAGGCAGCAACCTTCGCAGCCACCATCGCCGGCGGCGTCTGGGCAGCGTGCTGACG  
TACTTGCTCGTCTAAGCGACCCGGGGCCTACTCCGGTGTCAAATCCGAGGGCGTTCCTAGA  
GCGCCCTCTCGTGTAAGTCTGGAGGATCGCGAACATGCAATACCACTGCACGCATTACAA  
CGGATACCGCTTCGGCGTCGAGCTGGAGGACGAAGCCGTGTTCCCGTGCATCAACGGCAA  
GCGGGCGACCTGGGACAAGGTGGCGGCATGTGCCGGTAGCCTTGTGCATTACATGGCGCA  
GGACCTGATTGACGTCGGCCAGCGCAAGTTGAGGGAGATCGAAGATGAGCAAGACGAGTC  
TGTACCCGCTGAACCTGCATCCCGGCCTGATACAGATCAAGACGATCCACGTATTCAGAA  
TCCAGGCGGCGAAGGACGAGCCGAACCTGGTGGCAGTGGTTGCTGTGGCAGCGGAAGTACC  
ACACACTCCGCGACAGCCTGGACACCCGCGGGGGAACCTGAGTGCAGATATCGCCGAGTATG  
TCCACCGCCTCCGCCGGAATGGCTGTGAGATATGGACATCTGGCGTAACAAGGGCGGCG  
TGCTGGCCCTCGGTGCCTTCAGCCTCGCCGGCGAGATGATTGGCTCCTGCCTCTTGGTGG  
ACAACGAACCTGCGCGCCCTGTGCGTGGACGACCCGGAACAAGGGGCGGGTATCGGCGCTG  
AGCTGGTGCAGCGCTGCCGAGCTGGCAGGTGCCGAGCGCCTAAGTTGCTTCGAATTCCTGG  
AACCGTTCTACGCCGGCTTGGGCTGGCGCTCCGAGCGCCGCGAGGCAAACCTGGACTGAAG  
GTGAGCCGGTCTGTGCTGCACATGAGGGCGCCCGGTTATGACGCATGAGGTGATGACATGG  
CTTATCGGAACAACCGCTGGTCATCGGATCCGCCTTCAGTCTGGAGGCCCTGGGCGTG  
CTGATAACGCAGGACAACGGCGGCCCGCCTACGGCACCCGCATTACCTGGCGCCTCCAGG  
ACATGTTTCGAGGCCCGAGGCGTGCTGCGTCCCCTGTGCGAGGAGTGGTATCAATGGCAGT  
GTGCCGCGACTCCTGGCGGAAGCAGACGCGGGCGCTCGCCGTAGGCCAGACTGGCAGGGT  
CCGGCACGTCCTGGGATGCAAGAGCATGAGACGGGGCGGGAGCAACATGACCGTCAAGAC  
TCTGCCTGACCGTTGGGTGGCGTATTGCTACTCCTGCCAGGAAGGTGGCGTGGTTGAGAA  
AACGCATGTGCGGAGGGTGCATGCGCGGACCAAGAACGCTTTATGGCATGGCCCCGAGGA  
TGCCTCGGACTGGACGCGGGCCGACTGCTTTCAGTCGCTCTATGGTTTGCTGCTGTCCAA  
GGGCATCGACTAAAACGTGATGACCCAGGGTTGCCGCTGCTGCACAGCGGAAGGCAGCA  
TCGGCTTATCTTCCCTACCTACGCGGGCTGGATTGGGCGCGCTACTGCCGACCAAAATCC  
CAAGTGGGTGGGCTACGGGTATCCTGCCCCGATTACCATGGATGGCCCCAGGAATTATC  
AATGGGCAGGCCATGGGGGCTGACGGAAGAATACTTGTGCGGCGCTGAGGGTGCGGTGGGC  
CTGTCCCGAAGTCTTTGCTGTGCGTCTGAACGGTACAAGGCTGCGCGACAGGCTGGCAGG  
GATCATGTTGCAGCAGACCTATAAGCGCGCCGTCATCTTCTTGGATGCCGACCCGGCAGG  
TGTCCGTGGTACTGCAGGCGTGATGCGCCGGCTCCGGTCCCTGCTTATCGAAGGCCAAGT  
AATACCTACGCCGGGCGGGCTCGACCCCAAGGACCTGACCAGCGAGCAGATAAGGAGCCT  
AGTAATTGCACGTATTGACGCTACACGCACTGAGTGACAGGGACCGCTTCCGCACGTTGC  
GGAGTGTGGTGCCTGAAGGGATGATGGGGCCGGAGACGTGCTTTGCCATCGACAGGATCG  
AGCAATACTGGAAGGTCTACCCAGCGCATCAGCAGGTGGAACCGCAGGCGCTGCGCGAAC  
TGATCAAGCTGCGAGGTGGCTACCAACCGGAAAACTGGCGGTAGTCCCTGAACGTGCTCA  
ACCAACTGGACAAGCCGGTAGACCCGGACTCGCTACAGGGCGTCTGTGCCAGCTCAACG  
AGCTGAATTTATCAGGGCGGGTGGATGCCCTCCTGGCGCAGTACAACCAGGGCGAGGACA  
TCGACCTAGCGTATGAGCTGCGCCGGCTGAGGGACGATGCCCTGCGCCGCGAAGGGGTCA  
GCACGCCGACTGACTACGTGACGGACGACGTGTTTCGATATCCTGGCCGAGGAGCAGGGTG

ACCACGGCATCAAGCTGCTGGGGCTGGTGCTACCAGCGTATATGAAGGCCCTCCACGCCG  
GGCCTCGGTGCTGGTGGCTGCGCCACCGGATGCGGGCAAGACCTCGTTCATGGCCTGGA  
TCGCCGTACACATTGCACCGCAGCTCCAGCGGTACTTCGACCCAGGCCGGCCATCCTAT  
GGCTGAATTCGAGGGCAAGGGGCGGCGGATCAAGCCGCGCTTGTACTCGGCGGCCTTGG  
GCATGGCCGTGGGCGAGATTCTTACCGTGGACCCGGAAGAGGTACGCAAGCAGTACGCCG  
ACAAGATCGGCGGCGACTCCGAGCTGATTTCGCATCAAGGACTTCCATGGTGGGTCCCTGG  
CTCAGGCCGAGCAGGTCAATTGACGCGATGAAGCCGGCGGTGGTGTGTTTGGGACATGATGG  
CTCACGTCAAGGGTGGCCAGCGCAAGGACCAGAACCAGCACCGACGAGAAGGAGTATAAGG  
TGGCCGAGCTCCGCGAGATGGCTGTGCGCCTCGACTTCATCAGCTTTATGACGTGGCAGA  
TCAGTAACGATGGCCACGACCAGTTGTTCCCGCCGACGTCCTGCCTCAAGGATTTCGAAGA  
CAGCGGTACAGGGCGCCGTGGATGTGCAAATCCACCTGGGCCGTCTCAACGGTGCAGGATC  
AACAGGTCAATGCGTGGCCTGTCCCTGCCGAAGGACAAGTTCCAGATGGACGGGAAGCCTT  
CGAACGTGAAGGCGATGATTAACCTTCGACGCCGCTCGGTGTCGTTTCTTTGAGAGTGTAG  
ACCATGCAAGCTAAGCATAGCCGGGTGCTCGAAGGCACCAAAGAAATTTCACTGGGTTC  
ATTGCACTTCCGACCGGGGTCAAGGCCCTGTTGCTTCGCCTGTACTCTGATGCACGGGCC  
AACGAGGGCGTCCCTGGCCGGTGGGTTCCTCGCGACCTCATGCATGGCGCCACTCCA  
AAGGAGTTGGACATCGCCCTGTACGGCATGACGCGAGTATCACGCTGAAGTGCTCATCAAC  
AGCGTGCTTCCCTACCCTGGACCCGCGCTTCGTCCGGGAGGGTTGCTGCAGTTCGAGTAC  
GCCGACGCAGGTGAGGGCGGTATCTTCAAGGGCGTGCTGTCCCTCGTAGGCTGCCGTGGC  
CTGGAGGGCATGGACGTGGATTTAACTACTACGACGCCGACAGCCTTGGCCGGGTGATG  
GAGTCGTTTCGACTTCACCATCAACCAGGTAGGCATTGCGTACAACCTGGCCCGACCCCGAA  
GGCGACCCGCGCCTGGGTGTGTACCTGCATAAAGGACGTTACCTGGGGCGTGAACAAGGAA  
GTCGGTGCAGGCTCACGTCTGCCGGAACGATGCGAGAAAATGCGAGCCAAGGCCGCGTAC  
TACGGATGGGGTAACGTGTGATGAGCAAGCGCGACGTGGTAATGGATAACGAGAAAGGCA  
TCTGGCGTGGTGTGACCAGAACGACAAGGCCGTCGAGGCCATCATCAAGAAGAACGGGT  
ACGTGATCGTCGAGCCTAAAATCGACGGGTGCCGTGCCATCGTCGGTTCGCATGGCGCGG  
TGTCCCGCAGCGGGCGCCGCTTCCCTGCCCTGGACGGCCTGGAGGATCGCATCATCGCGA  
AACTGTACAGTCCGGCCTGGACTCCGGTCTGGTGTGACTGTGAGATGTACCTGGAAT  
GCATGCCCTTCAGTGAGGCGACCGGGCGTATGGCCCGCAAGACCCAGTTGACCGAGGCCG  
AGCGGAAGTGCCTGCACTTCCCGGTATTTCGACGCCACCCATATCGGCGTGTCCGCAAGT  
CGCGCAAGTCCCACCCCGTGTACAATGAGCGCCGCGCCATGGTCCGCAGCCTCATGGAAG  
ATTGCCGGCGGGGCGACACCCCGTACTTCTTCCAGGTAGCCGCAACAATCCTGCCGTTCTA  
TGGAGGCGGTACTCCGCTGGTACGGCGACCACCGCTCCATGGGCATCGAGGGGTCGATGG  
GGAAAGACCCGAGCCTGACCTACCGCAACGGCAAGGTTGCTGGCTGCTACAAGCGCAAGC  
CGGAGATCACCGTGGACGGGCGTATCGTCGGGTACGTGAAGGGCAAGACTGGCAAGAACG  
TGGGCCGCGTCGTGGGCTACCGTGTGGAGCTGGAAGATGGTTCCGGCACCGTGGCCGCCA  
CCGGCCTAAACGAGGAGCACATCCAGCTCCTCACCTGCGCCCACCTCAACGCCACATCG  
ACGAGGCCATGACGAACTACGGTTCGTATCGTCGAGGTCTCCACGAAGGAGCGCTCGACCA  
ACACCCTCCGCCATCCAGCTTCAGTCGCTTCCGCGACCTGGCCAGTAACGCTGGAGCGA  
AGGTATGAAGATTCGAAAGTCCCATAACCGCAACTACCCGGAAGATATGGTATAACACGC  
CACCAACCGGGTTTCGCTGCTGTATCGGAAGTACGTCATGGGTTCGCTGTTTCATCAGCCA  
GGACGGAACATTCGCATCTGCGTCATAGCAGGGACTTGGGACCACGTTGGGTCCGACGT  
TTGGCATCATGCGCGGGACAGCCAATCCCTCGGCGCCGTCGCCGTAAGTTGCACCGGGT  
CATGCGACGGCTGCGTCGCAATCTGCGACAGGTAGGTGTCAAAGTATGAGAATGCCACC  
GAGGAAGAACGTATGATCCGCTGCTTGTGCGGATATCCACGTACCCTTGTGCCTGCTG  
TTCCCGGCCTCCGCACCAAGACCCACATGGACCTTCAAGAGGAAGAGCTGTTCGATTCTGA  
ATTGACTACGACCATGCGAAGCTGGGCCGTATGGGACTCTGCCACGCGGTCTCCCTGTAC  
CAACTGACCATATGGGGACCTGAAGGAATGGTCCGCTACCTGATGCAGGAGATTCCCCGC  
CGTGTGCTGGAAGGTCTGCTGGTCAAGGCGCAGCAGTACAGTCAAAGCAACTGGTACAGC  
AAATGACGACTATCCGAATCCTCGACCTCGAAACCGAGAGCTACGAGCACAAGGGGCGCA  
AGGCGTCGCCCTTTGACCCCGCAACTACATCGTCATGGCCGGCTGGCGGGACGATCTGG  
ACGGCAAGGTTCGGCCAGAAGGTGGAACATCGCTTCCGCAGCCGGGCCGAAGCCGAAGACC  
CGAACAACCGCTGGTTAAACGTTCGACGGCGTGGACGTGATCGAAGCTCACAATGCCATGT  
TCGAATCGAACTGGTTCTTACCCGCTACCGGGACGAGTACCTGGCCTTCTGCGACGCG  
GGGGCCGGGTCTGGTGTACCCAGCAGGCCGAGTATCTGCTGAGTCATCAGACGTGGTTGT  
ACCCGGCACTCGACGAGCTGGCTTCGAAGTACGGCGGCACCCACAAGGTGGACGGCATCA  
AGATGCTGTGGGACCAGGGCGTGCTCACCTCAGAGACGGACCAGGACCTGCTGAGCGAGT

ACTTGTCCGGCCCTGCGCTGATATCGAGAACACCGCCCTCGTATTCTACGGCCAGTTGA  
TGAAGCTTCACGCCCCGTGGTATGTGGGCAGGTTAGCTGGAGCGCTGCGAGGCCCTGATCG  
GTTTCTCGGTAATGGAGTGCGCCGGCCTGAAGGTGGACCTCGAAGTCGCCAACGTGAACC  
ACGCCAAGCAACTGGAAGAGGTTGCCGGGATCGAGGCTGAGCTGAAGAAGCTGATGCCCG  
ACTTCCCAGAACTTCGAGTTCAAGTATACCAGCCTGTATCATGAGCGCACGGCTCT  
ACGGCGGCGAAGTGCGGTACAAGGGCCGGGTGCCACCGAAGATGGCCGGTTGGAGAAAG  
TCGACTTCGTGCGCTTCGGTACGGCCAAGCGGGGGACACCAATCGAGAGTACCTCGGTGC  
GGGTCCCCTCAGCCAGGTGATCCTCGACGACGACCACTGGAAGTACCGGGCCATCACCG  
AGCTGGAGACCAAGTACGGCCCGGTCATCACGTTCTCCTCCGGCAAGAACAAGGGCAGCA  
CCAAGGTGTTCCGCAAGGACACGGACATTCCGGGGACCAATTGGGATGACGACCAGCGAT  
TCCGGTTCCCCGGCCTGATCAACGTGACCAACCTGCCGCAAGTAGTGCGTGAGAAATTCC  
TGGGCAAACGCCCCGGAGTTCCAGTGCGCCCTCACCTGGCGGATGGATCGCCCGTATTCA  
GCACCAGCGGTGACGCCCTCAAGGCTCTGGAGAAACAGGGCTTCGAGGCGGCCAAGCTGT  
TGATGCGGCTGGCCGAGCTGCACAAGGACAACCTCCTCGTTCTACATCACCCATACCTACA  
ACAAGGATGGGACGATTATGGACACGAAGGGGATGCTCAAGTACGTGGACGACGACGGTA  
TCATCCACCATTTCGCTGAATACGACGGCGACGGCGACAACGCGCCTGTAGTCCAGCGGCC  
CGAACCTCCAGCAGCTCCCCTCGAAGGACGAGGACGACCCGGAAGCCGGCAGCCGCGTGA  
AGGAGATGTTTCGTGTCTCGCTTCGGCGCGGATGGGATGATCGGGCGAGACCGACTATACCG  
CCCTGGAGGTGGTGTGTTGGGGGCGCTGTGCAAGGATCGGAACCTCCTGGCGAAACTGA  
TGGTCGGCACTGACATGCACTTGTACCGCCTTGCAGGGAAGCACACCAACTGGAACGGGT  
TCGACAACGACCAGCTCGTGGCCATCAAGAAGGACCCCAACTACGCGTGGCACGGTTCGA  
TGATGCAGGCTCGGAAGAACATCAAGCACAAGGCATTTTCGGCGCAGTACGGCGCGAGTG  
CTGCTTGTATCGCATTCAACACCGGCTGTACCGTGGAAAGAGGCCAGGAATTCCTGGACA  
ACGAGGCGGCCCTGTTCCCAGAGTCCATCGCATTCCGGCAGATCGTCCGCGACAGTGCAG  
AGGCCACCAGGCTCGTCATGTACAAGGCCGAGGACCAGATGCCGGCAGGCGCCTTCAGCG  
AGATGGCGCCGGATGGCAACTGGCGCCAGTACCGCCGTGGATTCTGGCAAGCGCCGGGTG  
GCACCTGCTACAGCTTCCGCCAACAGGAGCGCTGGGACAAGTAACAGCGCAAGACGGTCA  
TGGACTTCAAGGACACGCAGATCGCCAACTACTGGAACCAGGGCGAGGCTGGGTTTCATGA  
TGAATGTGAGCGTAGGGCGCATCTTCCGTTGGATGCTGCATCGCCAGGATTCATGGTTA  
CCGAGTTCCTGATCAACAACGTACACGATGCCGTCTACACCGACTGCCACCATGACACCG  
CCGCCGAGGTCAACAATGGCCTGCGCCACATCATGGCCGACGCTGCCCGCTACATGAGCG  
AGCGCCTGAGCTACGACATCGCCGACGTTCCGTTCCCGGCAGTGGGTGAGACGGGGCGGG  
ACATGTTCAATATGGAGGTGATCCAGTGAAAGAACTACACCCGCTGCACACGCCTGAGTT  
CGTCAAGACATTCCCTGGACCGGGCCGGGTTGCTGCCGGGATTACGCCGTACGGGCCGCAC  
CACCGGCATTGCTCTACAGGCCATTGGCATGGCGCTGTCCCATCCGAGGGAAACTTTGAC  
GTTTCGTGGACCACCCGGACGGCAGCGCGGCAGCACTGGTGGCCAGCATTGAAACCATACT  
GGCGACCTTGGGCTACAAGAACGTCTCGTTTCGAACCACAACCCGTGCCGATGGGCGCAG  
CGTGAGCATCGTCTTCAAGACGCTGCCGAGCGACTGATGACCCTTCCCTACTCCGGCCTT  
AAATCTTCATCCGACACGAGGGAGAACACGCATGACTCAACAACCTAACGCTCTGCAAGG  
CGGCCTCGCCCTGGCCAACAAGGCTGCCGAGACCGCAACCATCGACATGTCCGAATGCTC  
CACCGGCGGTGGCGGGCGGTTCGCATCTTCCCGGCGGGCACCGCCATGGGCCTCTTCTGCAT  
GTACATCGAGCTGGGGGACCTCGTCAAGGAATTCCCGGGCAAGCTAAAGAATCCGGCGCC  
TCAAATCCGCATGGGCTTCGCATTGTGGGGCGACGTGAACCCGCAGGCCGTAACCCGCA  
GAGCCGCTCGGACGACCCGTTCCACACCTACGCGGCCGACGGCTCGGTCAAGCCCAGCCT  
GTTCCGTGCCTTCGAGATGACCCTCGGCAACAACGAAAAGTCCAAGACCAAGCTGGCCTT  
CGACAGGATGAACTGGAGCGGGCAGCATACCCACTTCGCTCAGACGCTCGGCCAGGCGTT  
CATCATCCCATTAAAGCGCACCAAGATCACCAAGGGCAACAACGCCGTAAGGAACCCAA  
CGACATGGATTGGGGCGACATCATTAAGCCCTATAACCCGGTTCGATGGCAGCCCGTATAA  
CGTGCCGGAACCTGCCTATGGTCTTGTGAGTATTCTTCTTCGACGGGGCCGACCAAGGA  
GACCTGGGACGCCCTGTATATCGAGGGTACCTCGGACAACGGCAAGTCCAAGAAGTTCCT  
GCAAGATAACCATGCGCTCGGCCACCAACCTCCCCGGCTCGGCCCTGCACATCATGTTGGG  
CGGCGGCGACGATCTGATCATCCAGCCAACGAGCCAGGCCGACGGCAGCAACCTGCCGGC  
AGTGCCCAACGTGGCCGCCGATGCAGGCGTAGCAGCAGCCCTGCCGTCTGGCAGTCCC  
GCAGGCAGTGGCTCAGGCGACCCCAAGCGTGCCCCAGGTGGCGAATGTGGCTGCCCTGT  
GGGAGGTACTGCCGAGGCGCAGAACGTGCTGCCTGACGTCCCGCAGGTGGCCAGGTGGC  
GCATCCGGCACCAAGTCGAGGTGCCGTCCGTTCCCGGTAGTACGCAAGTACCGCAGGTTTA  
ATGCGGCTCCCATCGGGAGAGTTCCTGTGAGGACTATCCGAGCAGTTCGACCGTACCATG

GCAGGCGGGACGTTGGTGTGTGACGCCGACGGTCCCCTTACGTGGCTTCGGCTACTGCA  
AAGACCCTGGACACTGCGCTCCGGCGATTCTGGAAGATCATACTGGAGCAGCAGTTCCTG  
GCGCACTGTACAGGGATACGGGTCCAGCTCACGGCAGCAGGTGAGGCTAAGGCGTACCGC  
GACGTGTATCCGACCATGAAACCCTGCCAGGTCCAGCGCAAGGGGAAGGCAAAGCCCCGCG  
CTGCTGGAGCCGCTGCGGCCGGCTGTGGCCGACGTGCATGAACGAAGCGGGGGCGCTGAA  
GGGATCGACGTTATCCTGCACACGTTCTTCGAGGGCGGATGACGGCAGGATGATGGAAGCC  
TACGCCATGCAGGACAAGGCCATCATCCAATCCGACGACAAGGACTTGC GGATGACGATC  
TACCCGTATTGGGAGATCGATACAGCGTGTGTGAGCAGGATCGACGGGGGCTTCAGCTAC  
CTCAAGGAGGCGTATACGCCGTCCGGTCAGTTCAAGCTCAGAGGGCACGGACGCAAGTTC  
ATCCTGGCGCAGTGGCTCGGCCGGGATACTGCTGACAACATCCGAGGAATCGATCGATTC  
AACGGTAAGCTCTGCGGGATGAAGACGGCCTTCGATATCCTCCACCCGTTACGGACGAG  
GACGAGGCCATCGACATGATCCTGGAGGCGTACGCCAACATTAAGCAAACCCGCTGGCA  
GAGGCCGAGGTGCTGTGGATGCGCCGAACGCCTACCGACAATGCAGCGCAGTACCTGTTA  
AGCCGAGACCTACGTGCGGCCTTCCGACAGTGGATTATCGAGCTGGGAGCCTACCACGAG  
GCGCTGCTCCAGAAGCGGAGGGAGAGTGACTATTAAGAGTGAGCCGAAGGTCTACCAGAT  
ACCCCGCAGCCAACGGCGCACCTTACCCTGAAGCTCTGGGCTGAGCAGGGCAAGCTATG  
CCCGCTCTGCGGTAACCCATCGATATCAGCGTGAAGGACGAGGCGGTGATGGACCACGA  
CCACGAGACGGGGCTGGTGCGGGGCGTCTGATCGATCCTGTAACACCCGACAGAAAGCAA  
GATTATGAACGCGGCGGGTTCCTGGGGATGCAAGTCGATGAAATACACCGACATCATCCC  
CTACCTTCGTGCCCTCCTGACGTACCTGGAGGAGCCGAAGCATCCGCTGATCTACCCCT  
GCACAAGACCGACGAGGAGAAACACGAAGCGAAGCTGGCCAAGCCCCGGCAGGCAGCCGC  
CAAACGCAAGGCGGCGATGGCCGTCGCAAGGCACAACGCGAGGAACGTATGAGCAAACCTC  
CGAATCAATTCACCAATGAGTACCTGCGCAACGTCTATGTGCGAGCTGGGTCCCAAGAAA  
GGCGCCGAGCATCTGACCAGGCATTGCGCTTCGGCGAAGTGAGCCGCCAGTGCTTCCGC  
AACTGGTGCATCAAGCTGGGCTTCCACGACAGCAGGACACGCGGCACGTACGCCACGAAG  
GGCGCTCTGCACTGGCTGGCCTGAAAGGCCCGCCGAGGTAGTGCGCAAGTTCCTGGCGCC  
GTGGGCAACGTGGTTGGCCAGGGTCCGAAGGTAAGTACTGAGCCTGGACATCGAGACCTCGCT  
ATCGAGGGTTGGGTCTGATCGCTCTGGAAGCAGACCGTTGGCCTCAACCAGATCAAGCGG  
GACTGGACCATTAGTCTGTTCTGCGCGAAGTGGATTACAGCGACGAGGTGATCTACATG  
GACTGCCAAGGTGATCCCTTGGACGACATTCACATGCTGGTTCGCTCTGCATAATCTGCTG  
GACGAGGCCGAGACCATCATCGTCCAGAACGGCAAGCGCTTCGACGTACCCAAGATCAAC  
GCCGGTTCCTTCTGAACAAAATGCCGCCGCGGCGACCGTTCAAGGTGACCGACACCTTG  
ATCATGCCAAGCAGCAGATCGTGTTCCTCCAGCCGCAAGCTGGAGTACATGACCCACAAG  
GCGTGCACCATCAAGAACTCCTCCACGGCAAGTTCCTCCGGAGTCGACCTGTGGGCAGCC  
TGCCTCCAGGACAGCCCGAAGCCTGGGAGGATATGCGCCTGTACAACATTGACGACGTA  
CGGTGATGGAGGAGCTGTACATCCTGATGCTCCCCTGGTTCGTCGGCCATCCCAACGTG  
GCCGTGACTTCAACGACGCCGAGCCGACCAATCCGATGCCCGAAGTGTGGCGACACGGAT  
GTCAAGCGAGAAGGCTGGGTGCATACGCAGACCCGGCAAGTACGAGCACTATGACTGGGGC  
GGCTGCGGTGGCTGGAGCCGAGGGCGGTACACCCGCAACACCTCGGAACACCGCAATGCC  
CTGCTGAGCAACTAAGGAGACACCATGATCGTGCACAAGTCGTATGAGGTCGCGCTAGCT  
GAGCGCTACAAGACGGGCGCCGCCCTTGACGAACGCAAGGTGCGGCAAACCTCCCGATGCAC  
CTGGTGGTCGATGGCTTCCCGCTGCTCAGGCGGGAGCTTGCCCGCGTGATGCAGTGGGCC  
GCCGAGGTCAAGGGCTACAAGCCGCACGACTGGAAGAAGATGTGCGTGGCGAGTTCAAG  
GCCGCACAGCATCGGCACGAGTCCAATCGCCTGCTGGACGGGCGCTGGATGACGAGTCG  
GGCCTGATGCTCCTCGTGCATGAGGCATGCAACGCAATGGCTGCCGCCGAGGTGGCCCTG  
ATGGATCGGGAGAAAGGCAATGAGTAAAATCTGTTGGTGTACCCGACTGCACGAGACCGA  
TGAAGGTGTTCCGGTCAACTGGGCCTTCAACGAGCGGGGCATCGGGGTCAACTACGTAC  
AGCGTACATCACGCCGGCGATGGTCAGCCATCGGGACTGGAGCGATGTCATACTCCCGGA  
CATTCTCCGGGAGATGGCGGAGCGCCTGGAGCTGGAAGTGAAGCTGGTGGAACTGCGCTG  
GTTCCGCGCTGAGATTCTGAGCTGCGGGGAATGGCATGACTACCGAGCGGTGACGCTGGA  
TGGGGCGGTTAGCCTGGCCGAGGCGAGTGGGGTCCCAGGATATCGGGCGCGTAATCGA  
AAGACGATAGGAGACGGAATGGACGTGATACAGCAGCAGATCGCCACGAAGAGGCCTTG  
GTCGGGGCGGCGCAGAATGACGCCCGCATTGCATTGGAAAAGGCGATTGCCCAAGGGTCC  
ATCGACCGCATCCGGAGGGCGCGTATCATGTTGATGCGGATGGTCCACATCGTGACCGAA  
GCGATCTTCGCCACACAGGAAGCGAAGGCGGGCGGGGCCGAGCGAAGCTACGGCACCTG  
CTGCGGATCATCGGCGCCAGGACCTCGCCGTATGGCGCTGCGGGCTGGGCTGTGATG  
CTCATCAACGACCCAACGATCAGAGCGACGAAGTATTACACCCAATGGGCAAGATGCTC

TGTCGCGAGATCGAAGTGCGGTTGGCCTTCAAGGTCAACCATCCCTATTACGACCGGACG  
CTGGACTACCTCAAGACCAGTAGGACTCGCATCGTCCGGCACATCCCGAAGACGATGGAC  
GCTCTTCTGGACGCGGTGCTGCCCGAAGAGGGCGCGCATCCACCTGCCCGATGGAGACTAT  
CTCCGCCTGGGCAAGTTCATCGGGGATCCGCTCATCCAGTTCGGCCTATTCGAGCCGAAC  
CGGTTTGTAGGGCGAGGGCGGCACGAGTGTCCACCTGGAGCCGTCGCCGGAGGCCAAGGAG  
TTCCTACAGGACCCATCGGGCGGCAATGACCTGGGGCGGCCAGGGCGTATCGTGATGCTG  
GCCCCGGCGAGACCCTGGCAGGACTGGTGCATGGAGGCTACTACAGCGCCAAGGCGCAG  
AAGCACCACGTACTGGTGCAGCACCAAGCACCAGACCAACCGGGCACGGCAGATGCAG  
CTCCGCCACCTGGGCCGGGACAAGATGCCCGAGTCTACGAGGGCGTTCGACGTGCTGCAA  
TCGGTAGCCTACGAGATGAACCACGACGTGTACGAGATCATCGAGCGCGTCTTCACCTCC  
GGTGGCGGCGTGCTGGGCCTCCCCAGCGCACGTACCCGGACGAGCCGGACTTCCCGCTC  
GGCGACGAGGGGGCCAAGGAGAATGCCAGTGAGGAAGAAGTGGAGGCCTTCAACCGTTGG  
AAACGATCCGTCCACCGGTGGTACTCCGGGGAGCGAGAGCATAACAGCCAAGCTTCGCGAA  
TTTGCTGCACTCTACTGAGTTGTTTCGAGAGCATCATGGCAAGGCAGTGTATTTCCCGATG  
CACGTTGACTCCCGTGGCCGCATGTACTATTGGGGCACACCCGGATCCCCAAGGGTCCGAC  
ATCGCCAAGGCCTGTCTGCGCTTCCACGAGAAGCGAGTGTCTCGTCAAGCGCGGACTGTAC  
TGGACCAAGGTCCACGTCGCCAACTCCCTCGGATGCGATAAGGTGTACTTCGACGACCGG  
GCAGCCTGGGTCGATGAGCGATGGGATGACTTCCCTGCGAGCGCACGACGAGGGGCCGGAG  
AACTATTCGAGTCTCTTTCACGAAGCCGAGTCGCCCTGTGCGCCATCGCAGGTCTGCTG  
GAGCTGCGGGCGGCTTACGCCTCCGGCAACCCCGAAGGGTATGCCAGCGGCTTCATCGTC  
CACATGGACGCCACCTGCTCCGGTCTCCAGCACTACTCGGCTATTCTCCGAGATGAGATC  
GGCGGAGCCTACGTCAACCTCCTACCTCCTGGACTTGCCAAAGCTGACATCTACTCCCGA  
GTGCTCGGACTCGTTAATGAGGCTCTGGAGAGAGACTGAGCGGAAGGCGCGGATGGCGAG  
GCGCGGGGTTATGCCCTTCTATGGGAAAAAGCTGGTCTAACGCGAAACCTGACCAAGAAG  
CCCTGCATGACGCTGGTGTACGGCACACGGTCAAGGGCGTTCGTGGACCACTGCCTGGAG  
TACCTCGACGAGTCCGGCGTGGAGATTCCCGAGGGTGTCCCGTCATACCACCTGGGAAGC  
TACATGGCGACGCTCATACTGGTCACAATCCGCGAGACAGTACCATCGGCAGTCTTCGCC  
ATGGAGAGGCTCCAGCGGCATGCTAAGGCCCTTCTGACGCCTCCAAGGATTTGCACTGG  
ACCACGCCGCTCGGCATGCAGGTCTTCCAGTCTACCCGAAGACCGAGGAGGTGCGGGTA  
CGGCTGCGAGCCGAGGCTGTTCGAGTACGTGACCCTGTACGAGGCCAAGGACGAGCTAGAC  
CCGCTGCGCAACGCCAACGGCATCGTCCGAACCTCGTGCATGGCCTGGACAGAATCCAC  
CTGGGACTGACGGCCCTGGCCTGTGCGGCAGAGGGAATCCCGACCCACGCCATCCACGAC  
AGCGTGGGGACCTAGGCTGGCGACGTGGACC GGATGCTCGTCCACATCAGGAAGCAGTTC  
GTCACCATGTACAGCGGCCCTGCGTGCTCGTAGAGCTGGCTCGACAGCTTGGGGTAGAG  
GCTACCCCGCCCCGTCGGGGATCGTTGAATCGGGAGGCTGAGCGGGACTCCTGGGCGTTC  
TTCTGCTGAGTAGATTATGTCACCCACATAGGAGCAAGTGCATCCGTCCAGAGGCCTCGT  
AGAGGAAGAGGGGTCAGGGAAGACCCAAGAGGAGGAGAAGTGAGAGAAGACGACTACCAA  
GGATTCTAGATAGAGTAGAAAAACCATCATAGGAGATATGATAGATGGCTACTATGAAGA  
GTAAAGGGCCAATGATTATGTCACGCACAGTGAAGGATCGAGAACAGGCAAGGGTAAGC  
CCCACCCTGTGACGTTACCTCTCAGCAGATCGAGTGGCTAGAACAGACCTTCCCCGAAC  
ATCAGATCAGTCTGGAACCACGATGGAAGAAATCCAGTTTCAGGCTGGCCGCCGCGATG  
TGGTGCGGGCTATCCGCCTGCGTCGCCGCGATGCAATCGCAGTGGAGCGTAAAGGATGAA  
CAAGTCACTCTGGCGAGTCCACGAAAAAGCCGGCGCCCCTTCCGAACCTGATGGGGCTGTG  
GTGGCTGGCAGTACAGGAGCTGGAAGAGTTACCCCTCTTCCGCTCGAAGGAAGAAGCCCT  
GGAAGCTATGCTCGACAGTATCGAGGGCAATGATCGGAACGAGCTGCTGGTATTCCGTGA  
TGGCCAACTGGCCGGCGGAGACTGCATTGTGTTTCGAGGACGATCCTAACGTCCGGCCATG  
CGTCACCGCGCAGTGGCAGTACGTTTTGCCACGCTACCCGAATACAGGCGTGGCGCGAGA  
GTTCAATTCGCGAACTGCACCGGCAGGCCGGCTGGGGTCAAATCCCCCTCGTGTGCAGGGG  
CCGTCGCGAGCGCGAAAGCCGGTATACGATCCACTACCGGAGAGCCAAGCCTTATGGGCA  
AGAAAGTGAAAAAGGTGCTGGGCAAGACGATCATCGGTAAACTCGCTGACGGCCTGCTCG  
GCACTGACCTGAGCGGCGCACAAACCCGATGCCCGAAAGATGGAAGAGCATAAACGCCTCA  
TGCAACAGCAGGCGGACCAGCTCGCAAGAAACCAGCAGGTTGACCTCACCACCGAGAACG  
TGTCGCAGGTTGACCTAGGAGCGATGGCCGGTGACACTGGCACC GGCAATCGGAGACGCC  
GGAATCAGGCAGGCACAGGCGTATCGCAAACCCCTCGGTATCAACTACTGACGAGGTACGC  
CATGAAGTCTACCGCAGCAATGCTGTGGGAGAATCTCCGGGATGGGAGCGTGGAGCAGCG  
AGCTATCGAGTTCGCCAAGACCACGCTACCCTACCTGATGGTTCGATCCCATGTCCGGCAG  
CCGAGGAGACGTAGAGAACGACTTCCAATCTGCCGGTGCCTACTCGTCAACAACCTCGC

CGCATAGCTGGCGCGGTTCGCTGTTCCCGACGGGGATTCCGTTCTTCCGTTCCGAAATTAC  
CGATGCGATCCGGCGGGAAGCCGACAGCCGGGACACTGACATCACCGAAGTGACTGCTGC  
CCTATCCCGCGTGGATCGCAAAGCAACTCAGCGCCTATTCCAGAACGCCTCCCTGGCGGT  
CCTGACGCAGGTGATCAAGCTACTGATCGTGACTGGCAACGCCAGCTATAACCGCAACAG  
CGACGAGGCCACGGTAGTCGCATGGTTCGCTCCGCTCCGACGCGGTGCGCCGAGATGCGAC  
CGGCCGATGGATGGACATCGTGCTCAAGCAGCGCTACAAGTCCAAGGACCTGGACGGGGC  
GTACAAGCAGGACCTGATGCGTGCGGGTCGCAACCTGTCCGGTTCGGGCAGGGTGTACA  
CTACCCGCATGTTTCAGCGCAAGAAGGGCACGGCGGTGGAATACGCCGAGCTGTACCACGA  
GATCGACGGCGTGCGTGTGGGCGAGGAAGGGCGCTGGCCTATTCACCTCTGCCCGTACAT  
CGTACCGACCTGGAACCTCGCCCCCGCGAGCACTACGGTCGAGGCCACGTCGAGGACTA  
CATCGGCGACTTCGCCAAGCTGTCCATGGTGAGCGAGAAGCTCGGCCTGTACGAGGTGGA  
GTCGCTGGAGGTCTGAACCTCGTGAGCGAGGCCAAGGGCGCGGTGGTTCGATGACTACCA  
GGACGCTGAGATGGGCGACTACGTGCCGGGTGGCGCGGAGGCCGTCCGGGCCTATGAGCG  
TGGCGACTACACCAAGATGGCTGCTATCCAGCAGAGTCTCCAGGCTGTAGTCGTCGGGT  
GAACCAAGCGTTCATGTACGGCGCCAACCAGCGCGACGCCGACCGCGTCACCGCCGAAGA  
GGTCCGCATCACTACGTAGGAGGGCGGAGAACACGCTGGGTGGCACCTACTCGCTGCACGC  
CGAGAATCTCCAGTCGCCCTGGCGTACGGCTGCCTCTCGGAGGTGGATGCTGCGCTGCT  
CCAGGGCTTGATCACCAAGCAGCACAAGCCGGCTATCGAGGCGGGCCTCCAGCCCTTTC  
CCGGTCCGCCGCTTGCAGAGCATGCACAACGCATCCCAGGTCATTGCAGGCTTGGCCCC  
GATTGCTCAGCTTGACCCACGCATCTCGCTACCGAAGATGATGGACACGATTTGGGCCGC  
TTTCAGCGCCGACACCTCGCAGTTCTACAAGAGCGAGGAAGAGCTACAAGGCGAGGGCAGA  
ACAGCGGCGCGAGCAGGCCGCGCAGGCCAGGCCGCACAGGAGACCTTGTTGAAGGCGC  
TACCGACCTGACCAACGCACTCGCAGGAGTCTGATAGATGCAACAGAACGAATAGCAACT  
GCCACCGGGCCTCGCTAACCTGGTTGCCAACGTCCCGCCCGCCGCCGACCGACCCCAAG  
TCATGTGCAGGTGATGCGGAATCCCGTCATCCAGCCGCAGCCCCAGTAGGCGGCGCAGCC  
GGGACAGGCAGGGTTCGCCGCGAAACTGGCTATCCCGACCCAGCAGCCGCAACCCGTTCC  
GACCAGCGCCATGACGCCGCACTACCAGCCGGTAGCGGTGCCCGCCGCTGGCCAACCCGT  
TGTCGCGAAAGCGCCCGCACAGCCGGCTCCGTTAGTTCCCTCCGGCTCCGGTCGCAGTTC  
TCCCGAGAACCTTGAGGTTCCGCCGCGCCCGCATTCCTCCCAACGGAGAGATCGTAGG  
CACCTGGCGGGGAATCCGGAAGGCGACCCGCAACTGGCGCCGTCCATCGGATATCTGGA  
AGCGTTCACCGACAAGATCGACACCGTTCGGGCCTTCGGTAAGGCCGCCGAGCACCGCGA  
TCCCCGCGTCATCGACGAGCACTATCTGAAAGAAGCGCTGGGCGTGGCCAAGCGCAGCA  
CGTCATAAACATGGCGAAGGGCGTTCTGACCTATGTCGATGCTCAGGCCAGGCAGTCAT  
GATCCAGACCTATGCCGCCGTCGGCGGTGAGGCTCTGCTCAAGCAGGCCGCTAGCGTCTT  
CAAACAACACGCTGACCCGGCTGCCAAGGCCGCCATCGGTCGCCTGATGGACTCGGGCGT  
TGCTCAGTGCATGCAATACGCCCGAAGCAGATCGGTGACTTCGCTCAAGGCTCCGGTGC  
CGTGGTTAAGGCGACCGGCCAACCTTTGGCGCAGCGGCGCCTGCCCTGGCGGCCCTGTC  
CGCTGAGCAGTACCGTGCCGAGGTCTCGAAGCTCCCGTTGAACGCAGCGGAAGCCGCCAT  
GGCCGCTCTGCGTGAGCGCCGCAAGGCAGGTATGGCGCAGGGTCTCTAACGACCCTGCC  
TACTCCGGCCTTAAACCAACATCCAAAAGAGAGTGAAACGCATGAGCTTTCTGAACGACC  
TGACCCGTCCGAACTACGCGGGCAAGAACGCGGACGTTGACATCCACCTCGAAAAGCACC  
TCGGCATCGTCGACAAGCACTTCGCCTACACCTCCAAGTTCGCGCCGCTGATGAACATCC  
GCGACCTGCGCGGCTCCAACGTCGTCCGCCTGGATCGCCTGGGTAACGTGCAAGTCAAGG  
GCCGTCGTGCCGGCGAATAGCTGGAGCGCAGCCGAGTCGTGAACGACAAGGGGAACCTGA  
CCTTCGACACCCTGCTGTACCTCCGCCACCAGTTCGATCACCAGGACGAGTGGACCCATT  
CCTTCGACATGCGCAAGGAAGTCGCCGAGCTGGACGGCCAGGAAGTGGCCCGTAAGTTCCG  
ACCAAGCCTGCATGATCCAGGTGATCAAGGCCGCTGCGATCGATGCACCGGTGGACCTGG  
TAGATTCCTTCTAGGCGGGCGTGCTGGAGAAGCTGGACCTCACCGGCGTCACCTCCTCCA  
AGGAAGCCGCCAACAAGATCGTCCGCATGCACCGCAAGGTGGTTCGAGTCTTCATCAACC  
GCGACCTCGGCGATGCCGTCTACTCCGAGGGCCTGACTCCGATGTCGCCTCGTGTGTTCA  
GCCTCCTGCTGGAGCACGACAAGCTGATGAACGTGAGTACCAAGCCACCGGCGCTACCA  
ACGACTACGTGAAGTCGCGTGTGGCCATCCTCAATGGCGTGAAGGTGCTGGAGACTCCGC  
GCTTCGCCACCGAAGCCATCGCAGCACATCGGCTGGGCTCCACGTCAACGGGAGCGCCG  
AGGAAGCCGAGCGCCTGATCGCCCTGCTGCTCCCGAGCAAGACCCTGATCACCGCCAGG  
TGGCGGCGGTTTCAGCCCAAGCTGTGGGAAGACCACGATCAGTTCTCGTGGGTCTTGATA  
CCTTCAGAGGTACAACATCGGTGCCGTCGCCCGGATACCGCTGCCGCCATCGAACTGA  
ACGGCATCAACGCCTTCGACATCACCAGTGATGCCGCGAAACCCCGCACTTCGGTGTGG

GGTTTCTTCAAAGCATAACGACCCGCGCAGATTCCCTGCGTGGGTTTTTTCGCGCTTTAGGA  
CAAACCTATGCTACTACTCGACGCAGTGAATGTCAGCCTGGGCAAGATCGGCGAGTTGC  
CGATCCCGAGCATGGATGAAACGTACCCAACCATGGCCATCGCCCCCCCCGAGTTGGAGG  
ACCAGCGCATCGAGTTGCTGACGCAAGGCTGGTGGTTCAACACCTGGTTCGAAGCACGAGC  
GAACACCCGACTCGCAGGGCCGTATCAACCTGTCCAAGGACACATTGGCGTTCTACCCGG  
ATTCCCCGATCTCCAGTGGGACGGCCAGGGAGTGCAGCGACGCCAACACCCGGCGACGACC  
GTATCGGCAAGGTTCGTAGAGGGCCGGCTCGTGTGTCCCCTGAGTGGGACCGTATCCCCG  
AGATTGCCAGCGCGTCATAGCGCACCAAGCCGCCCTGGCCGTGTACACCCACGAGCTCG  
GGCCGGGCGAGACGGCGCAGGTCATCGCCCAGGAGTTGCAGGCGTATCAGAACGAACTGA  
TCCGCATGCACACCCGATCCCGCCCCGCTCAACACCCAGGCCAAGCGCAGCTTTAGCCGGT  
GGCGGCGCGGCCTGAGGACCTGACCATGAGCTACAAGCAATCCCCGTACCCCAACCTACT  
GATGGGCGTGAGCCACCAGGTGCCGTTTCGAGCGACGGCCAGGGCAGCTCAGCGAGCAGAT  
CAACATGGTGTGGGACCCCGTGTCCGGCCCTTCGCCGCCGTAGCGGTATCGAGCTGATGGC  
ACACCTGCTGCACACTGACCAGCCCTGGCCGAGGCCGTTCCCTGTACCACACCAACCTGGG  
CGGGCGCAGGATTGCGATACTGGTGGCGCAGCACCGGGGCGTGCTATACCTGTTTCGACGA  
GCGGGATGGCCGCTGCTGATGGGGCAGCCGCTGGTCCACGACTACCTCAAAGCCGCCGA  
CTGCCGGCAGCTTCGCGCCGCCACGGTGGCTAATGACCTGTTCAACGGCAACCTGAGCGT  
GAAGCCGGAAGCCGACCGCACTGACGTGATGAGCGTGGACCCCAATAAGGCGGGGCTGGCT  
TTACATCAAGGCGGGTTCAGTATTCGAAGTCGTTTCGCCATGACCATGCAGGTGAAGGACAA  
TGCCACCGGTACGACTTACAGCCACACGGCCAACTACGTGACGCCGGACATCGCCAGCAT  
CAACCCCAACCTCGCCGAGGCCCGTTCAGACGAGCGTGGGCTACATCGCGTGGCAGCT  
CTACGGCAAGTTCTTCGGCGCCCCGGAGTCCACCCTGCCCAACTCCACGAAGAAGTACCC  
CAAGGTTGACCCCGACACGGCTACGGCTACGGTAGCCGGCTATATCAACCAGCGGGGCGT  
GCAGGACGGCTACATCGCCTTCGGGGGCGACGGGGACATCGTGGTTCGAGGGGTCTACCGA  
TATGGGCAACAACACTACGGCATTGCCTCGGGTGGCATGAGCCTCAACGCCACCGCAGACCT  
ACCGGCCCTACTGCCGGGTGCGGGTACGCCGGGCACTGGCGTGCAGTTCATGGACTGGGC  
CGTCATGGCCACTGGCTCGACCAAGGCGCCAGTCTACTTCGAGTGGGATTCGGCGCACCG  
CCGCTGGGGGGAGCGCGCAGCCTACGGGACCGATTGGCTCTTGAAGAAGATGCCCTTGGC  
CCTACGCTGGGACGAGGCGACCAACACCTACTGCTTGAACGAGCTCGACTACGACCGGCG  
CGGCTCCGGCGACGAGGACACGAACCCACGTTCAACTTCGTACCCGGGGCATCACGGG  
CATGACGACCTTCCAGGGCAGGCTGGTCCCTGCTGTCTCAGGAGTACGTCTGTATGTCCGC  
GAGCAACAACCCGCACCGCTGGTTCAGAAGTTCGGCGGGCGGCGCTAACGACGAATAACC  
CATCGAGATCGCGTCCAGGGCAGCCTGACCGAGCCGTACGAGCACGCAGTCACCTTCAA  
CAAGGACTTGATCGTCTTCGCCAAGAAGTATCAGGCCGTGGTCCCTGGCGGGCGGTATCGT  
GACCCCGCGAACGGCGGTCATCAACATTACGACGCAGTACAACCTCGATAACCCGAGCGGC  
ACCCGCCGTACAGGCCGTAGCGTGTACTTCGCCGCTGAGCGTGCCCTGCGCTTCATGGG  
CCTGCACGAGATGGCCCCGTGCCATCCACGGACAGCAACTACGTCCCGAGGACGTTAT  
CAGCCACATCCCGAGCTACATGCCAGGGCCTGCAGAGTACATCCAAGCGGGCGGCCTCAAG  
CGGCTACCTCGTGTTCGTACACAGTACGGCGGACGAGATGATTTGCCACCAGTACCTGTG  
GCAGGGCAACGAGAAAGTGCGGAACGCATTCCCTCCGCTGGACGCTACGGCACCAGATCAT  
CGGGACCTACTTACCCGGGGACAACCTGATGGTCTTCATCCAGAAGGGTCAGGAGATAGC  
CCTGGGCGGATGCACCTGAACAGCCTGCCTGCACGGGAGGGCCTGCAATATCCGAAGTA  
CGACTACTGGCGGCGTATCGAAGCGACTGTTCGAGGGCGAGCTGGAGCTGACCAAGCAGCA  
TTGGGACCAGATCAAGGACGCCCCTGCCGTGTACCAGCTACATCCCGTGGCGGGCGCATT  
CATGGAGCACTACCAGCTCGGCGTGAAGCGCGGGACCATCAACAAGGTGTTCCCTCGACGT  
TCCCGAGGCCGTTGCCGGTTCGGTCTACGTGGTGGCTGCGAGTTCTGGTCCAAGGTGGA  
GTTACCCCCGCCAGTGCTGCGGGACCACAACGGCCTGCCGATGACCTTGGCCCCGTGCAGT  
ACTGCACCGCTACAACGTCAACTTCGGATGGACCGGAGAGTTCTTGTGGCGCATCAGCGA  
CACGGCCCGGCCAACCAGCCGTGGTACGACACGACGCCTCTACGGCTGTTTCAGCCGGCA  
ACTCAACGCCGGCGAGCCGCTGGTGGACAGCGCTGTGGTGGCCGCTGCAGGCCCGGGTCCG  
TATGGCGACCTCCAAGTTCGAGTTGAGCTGCCATAGCCCCTACGATATGAACGTGCGGGC  
CGTGGAGTACAACCTCAAGTCCAACCAAACCTACAGGAAGGTGTGATGGCATTCTGGCTA  
CCACTACTGGCCGCTGGCGGCATGTCCGGCTCTCCAGCAGGGCCTATCCAACAAGGAAGAA  
CGCCGCAAGATCAAGGCCGAGAACAAGGCCCGACTCAAGACGGACCACGACAACCTGGTC  
GCCGCTGCCCGCGACATCGCCAACCTGGGCGTTCATGGCTGCAAGCTACCGCAAGCAGGCC  
GTGGCATCCCAAGTCGAGGCCAAGCGGCAGGGCATGCACGCCGGCGGGAGCGCCTCGGCA  
CAGGCAGGGGCCTTCGGGGTCAAGGGTGCATCCGTAGATGCGGTGGCCCTGGGCATCGAG



CGCGAGGTGGGCGGGGCCCTGATCCAGATTGACGATAACCTGGACAACCATATGTGGAAC  
CTCGCAGAGCAGGCACACTCCATCCAGGCCAGGCTAAGGCCGGCCTGCTGGGGCAGAAG  
AGCACAACAGCGGGGCAACGCTCCCCGCTGGTCGCCGGCTTGATGTCTGCTGGTTCCCTA  
TACGCAAGCCAATACTTCAAGTTCGGCGCCACGCCTAAAGGAGGCAACTAATGGCGGAAT  
CGAACGTGCTTCCCAGGAGCTTGGGATCAACGTCGGACGGACTCAACTCCAGCCGGGCC  
AGAGCGCCCGGGCGCATGGTGCGAGACTCCGAGGTCAACTATAGCGGCCCCAGGGTGGGT  
CGCCATTCTCGACGGCATACTTGGTGCCGGTCAGCATATCGCTGGCAAGTGGTTCGAGC  
ACAACGTGCAGCAGGAAGTGCTTCGGGGCGAGCGTGCCCGCATGGCCGGGGAGGCCGACG  
ACGCCGTAAACAGCAACATCCTGGCCAAGCCCTTGGTGAAGGGCGGCTGGCGCAAGCAGG  
GCTACCGCATCGCCAGGCTGACTTCAGCATGAAGAAGCAGCAGTTTATGGCCACCAAGG  
GCAGGGAGATGACTCCCGAGGGGTTCGAAAGCACCTGTTCGAGGAAGCGGCACACGTGC  
TGGACTCGACCGAGGGCATGAACCCCAACGACGCCCTACAGGCGCTGGCCAGCAGCAGA  
CGGCCGAGGAACAACCTTTCGGCATGCAGGCCAAGGCCTACATGGACTGGTCCATCGACC  
AAGCCGCCCGAGGCTTCCGCACCCAGGGTAACAGCATCCTGGCCAAGGCCGTGCAGGCC  
AGGCCACGGGCGACGAGCTGTCCCGGCAGTTGACCCTGGAAGAGGCCGGCCGGTTCCTACA  
CCAACATCATGACCTCCGAGGACATCCCGCTGAAGGTGCGCGACAAGGTGGGCATGCAGT  
TCCTGGCGGCCAGCCTGGATATGAACCAGCGGGGCATCTACGAGAGTCTGCGCGACGCCG  
GCTTCCTCGACGGCATGGCCTTCGACGACCGACGTGCGCTCAATGGCCTATACGAGAAGT  
CGAAGGCGCAGACCCTGGCCAAGGACTCGATGGCCACGCTACGGGCCGACGCGGACTTCC  
AGCAGCGGGTGGCCAACGGCGCCATCACCGACCTTGCCGAGGTTCGAGGCGTATTCTCGGG  
GCATGGTGGCGGAAGGCCGCTGGAGCGACGCACAGGCCGTCTCCTTCATGACCAAGGCTA  
TGACCGGCCTGGGCAACGCACAGCGCATGCAGGGCATCATGGCCGGCCCTGGAGGCCGGCG  
ACATCAACGCACTGCACAACCTCGGGACCCACGTTACCGAGCCCCTGGAGCAGTGGGATA  
AGATGCAGGCGGCCAACGGCTCGAGTCTCACCGATCGGTTGGTACAGGGCACGCGACTCG  
GCCTACGCCTCGGGACCTTCCCAAGGACCTACGGCGAGTCCGTTGGCAGCGCGGTCCGCA  
TGATCCAGGCCGCCAAGGAAGGCGAGGCCAACCCGGAGTTGGTCAACACGCTGAACAGCA  
TCTTCGAGCAGGTGGCCTCCGCGCAGCAGATCAACCCATCTGCCGGCAACGTGATGCTCT  
CGGGTATCCCGGAGGCCGAGCAGGGCGCCGTATCCTGGGCACTCAAGCAGATGAAGATGG  
GCATCGCCCCGGCGCAGGCCCTGCGGGAGTTCAGCGCCAACGCGGAAGTCGTCAAGCAGA  
TGGACGAGTTTGAGAAGGTCCAGAACACCAAGGCCTTCAAGGACAAACTCGGTAAGCAGG  
TCAATGTCAAGTTCGTGAACAACATCTTCGGTCGGGCCCTGGAACATGCTGACCGGAGAGA  
GCGACCTCAGCAACAACGAGGCCGTCTAAGCATGTACCGCCTTGCAACCATCGACGAGG  
CCAACCTGGCTGGCAAGCGACCGCAAGCACGACGAGGACTCCTCACAGCGTCACAGGCCGGG  
AGGCTCTGCTGGAGATCGCCGCCGCCAACGTCAGCAACCCGACTATCCAGGTCCGGTGAGT  
CCCGCGACCTCAAGGAGGGGGAGCTGTTCAAGTCGCCGCGACAGCGCGCCGCTGATCCTGC  
CGATACGCACTACCGCCGAGCAGCTATTCGGCACCAACGACACCGAGACCGTCCGGCGCAG  
TCCTGGCCGAGCAGCACAAGCCGACAGGTTGAGGGCCTCCTGGGCTACAAGTCCGTGGTGG  
CGTTTGAGTAAGACCGCACCAATGGCAGCCTACTCGTCGTCGAGTACGACGAGAACGGGG  
TGGCCCTGGACCGTACGCGGGGCGAGCCACAGGCCGTGGGTAACGAAGTGCTCAATCGCA  
ACTCCGACAAGCTGAACGCTCACCGGGGCGCCGAGTATGGGGCCAACGTCAAGGTCAGCG  
GCACGGACATTCGCATGAACGGCGGCAACAGCGCCGGCATGTTGAAGCAGGATGTGTTCA  
ACTGGCGTAAGGAGCTGGCACAGTTCGAGGCCTATCGAGGGGAGGCGTACAAGGATGCCG  
ACTGTTATAGCGTGGGCCTGGGTCACCTGGGCAGTGGCAATGCTGGGGCAGGAACTA  
CGGTCACGTCTGAGCAGGCCGCACAGTGGTTCGCCGAGGGCACCGACCGAGCGCTCGACC  
AGGGCGTGAGGCTGGCCGACAAGCTGGGCGTTACGAACAATGCTTCGATCCTGGGCTTGG  
CCGGAATGGCCTTCCAGATGGGCGAAGGACGTGCCCGGCCGTTCCGCAACACCTTCCAGG  
TGATCCGGGCTCGCAACGAGGAGGCCTACGAGGCCGGTGTACGGAACAGCAAGTTGTACA  
CGCAGACGCCCAACCGGGCTGAGGCATTCATCAAGCGCATGGCGCCCCACTTCGATACCC  
CGAGTCAAGTCGGGGTTCGACTGGTACAGCGCCGTAACAGCGGAGTAAGACATGGCAAAGC  
AATTCAAGGGCCGTATGACGCCCAAGTACCCCTCGACCAAGCACCGCTCGACGAGGCC  
AAGTACACGGTCAGCTCGATGCAGTGTCCACCGTGGGGTTTGACGCCCTGACGGGCGGGCG  
AGATCGGAGAACGGAACGTGGCGGCAGGCCAACGTGCCAACGCTCGGGAACCTGGAGCGCA  
TCATCGCAGACCAGAACATGCCGGCCCTTGACCGTGTCTTCTGCACTCTGGAACCAGTCCA  
CTCTCGTCGGATGCTGGTGCCTTTCGCTCCAACCCGACGCAAACCTTGCGGGCAACAGCA  
CCGGCGAGGTGGACCCCAACTTCGACGCCGGGACTTACGGGGTCCAGGCCGCTCCAGGCCG  
CTGGCATCCAGCCGAGTGACAACCTCCAGATCATGGCCCGCGCCGGCAACGCCGAGG  
ACACGGCCTACGTACTGTCGAGGATTCACCGGTATGAGCAAGACGAACAATCGTGCGGG

ACAACCCGTA CTAGAACTTCGCAGCGGGCATGCTGGACCCGGCTGCGCTGGCAGTTCGATG  
CGTTACTTTTCGGTGCTGGCCGTGTTCTACAGCTCGGTGCTGCTGGAATGGCTGCTGTTG  
GCGGCGCTGGCCAAGTCGGGTATGTTCTGGGCTGGATGACGCAGGTGCCGACGTGGATG  
CCGGAACCTACATCGTCTGGCGCTCTCGGTGCTGGCGTGGGTGCTCAGCTGGGGTCTG  
GTGCTGGACGCATTGCCGCCGAAGCCCCAACGCAACCCGCATGTGCCGGAAGTATCGGCGC  
CTACTGTCGGGCTGCCAGAAGTAGCGATGACCGCCGAGGAAGCCGCCGCTCGTGGCTTCA  
AGGCAGGCGATGTGGAGGACCTGCTGGAAAAGGGCACTGTCCTGTCCCGGGTAAACTCTC  
GAGTGGAGCAGGCCGAGATAACCGCCATCCCGCGCCGGGACACTGCCTTCGGTGACGAGC  
TGCACGGCCTGTGGGGCCGCAAGCTGTGGAGGTGGTGGACCACCTCAAGACCCACGCT  
AGGTGCCCAAGCCGTTGCAAGGCGTGGCCGCCAAGGTCGCCGAGACGTTGAAGACCCTGG  
AGGGCCTGGGGCAGCGCAACATGTTCCGCGTGGTGCAGGGCGGGCATAACCGTTAGCTCCG  
CCTTCTCAAGCCAAGCACGGCGGGTCTGCTTTCGACGCAGGGATTGGACACTCTGGTCC  
AGGTGCGTGGCAGCACGGCGCCGGGCGGTGGGCACCAACCCGGTCACGGTCCCTCCACG  
AGGCGGTTACGCCGCCACGGTAGGCGTGATGAATACCGCCCTGCAGAATCCTGGCGCGA  
TCACTCCCAAGGTGGCCAGTCCATGCAGACCCTGGAGAACGTCCGCGGTAAGGTGCTCA  
ACGCCTTGAAGCAGGACCGGGGCGCCGGTCCGCAACTGTCCGAGTTCGAGGAAACCCTGC  
TGGCGGGCAACTCCAACACCCTGGCGAACGTCAAGGATCTGGTGGCCTGGGGCCTGACGG  
ACACCCGCTTCCAGAAGACCCTGAACCGGCTGCGCTACGGGGACGGCGGGGAAGGGCCTCT  
GGTCCCGGTTTCGTCGAGGGCAACAGCAGCCTGCTGGGCCTGCGACCTGATGCGGACCCGG  
CGCTGAGCCGCGTCTGGCGGCCTCAGAGACGATCATGGACGCCATGCCGGGGTACACCT  
AGGCCAGGCCAAGTGGGCCAACAAGGGAGCACCAGCGACCGAGGAGGCCAGCCTGGAGA  
CCATCGTGCATCCACCCGGGAACGTGCCCGAGAAGGTGCCGGCTTCGTGAACCGATTCT  
TTAGCAAGGCCGACCTCCTGGCACAGCCGGGTGAGGGTGCAGCGGCGACTCCTGAGCCGTC  
TCATCGACGGCCCGGTTTCGTCGGGATAGGTTTCAGCACGAACGACAACGCAGCGAGCTATT  
TGCGCCGCTGCCGCAACTAGTTCGAGGGCTACGTCAAGTCTACGACGAGATGATGGCGA  
TGGCGATGGCTGAGTAGGGCGCGGGCCTGACCGCTCGGGCACGCAACTCTCGCCGCGCTA  
TGGCCGTCCTGGATCAGCTCAACGAGCAGGTCACCCGGGAGCTGCTGCGCAGGGACCGGG  
AGTGGACCGCCTATGGCAGCGTCCGCGTAGACCCGAACCTACCGGCCACCATCAAGGCC  
TGGCGGACCACTCCGACGAGAGTACGGACTGATGGGCCAGCGTGCCCGGGAGGCCGGCG  
TGCGTGGGTTTCGAGA ACTTCGCACCACGCCCCGGGTACTTCCACCGCTCGTGGA ACTTGT  
CGAAGATGGCGCAGATGGACGAGGCGGCCCCAGGCTTGGCTCGCCGCACTATCAGCGAAG  
CCGTATTCCGGGGCATCCCTGGATTGGAACGGGCGGATGCTGACACCATCGCACAGGCCA  
TCGTACAGCGGGCACGAGACCGGGCGACCGGTATCCGCTCTGAGTACATGGACGCGATGG  
GCGTGGCTGAAACGGCCTTCATCCGGCAGGCGCTGGAAGAGGCCACCGTGTCCAGGCCA  
AGTTCGTCAGCATCATGGCGAAGATCGATCAGACGCAGTCCGACCGGGGCACCGTCAAGT  
ACGGCAAGGGCCGGGTGTCGCTGGACATGACCGCCGAGATCAACCACAACGGCACCGTGT  
ACCGCGTACAGGACCTGATCGACCGGGACCTCAACCGACTGATGTAGA ACTATTTCAGGCA  
GTATGTCCGGCCGCTCGGCGTTGGCTCGGGCTGGTATGCCGGGCGACTCCGAGGTTCGAGG  
AGTTCATCCGTGAGTACCAGCGGGAGGCTGCGCACCTGGGCACCGACAAGGTGCAGGAGC  
TGACGGGGCAACTGCGGGGCGTCTTCGGGGACTTCACCTGCGACGTGCCGCGCGAGCACC  
AGCTCGGCCCCGTTGGCTGAGCGGGCCAGCGGGTTTACCAGCGCCACCATGCTGGGGTTCT  
CCGGCGTGTACCAGCTTGCAGAGCTGGCCACGATGGCCCAACGCCAGGGCGTCTTCAACG  
TCATGAAGGCCATGATGAACTCCCGCGTCCGGGACTTCATAGGCGCCATGCGCCGTAACC  
CGGACCTCGCCGACGAGATGCAGACCGTCTCGGCCTGAACCTCGCCAACGACATCCGCA  
TGAGGCCCTGGAAGCGGCAGTTCGACACCTTCTCGCCAGCCAGGATACTTCATGGATC  
GCTTCTGCGCTCAGGTAAGCCGGCTGTCCCGGTCTCAACGGCCTGAAGTTTATCCACA  
ACTGGCAATCCCGCATGAACGCCAACCTCACCTTGAACAAGGTGGCGCGGGCCGCGCAGG  
GGGATGAAGCAGCGCTTCGCGTGCTCCAGCAGTACGGGAAGGACGTGGACCGGACGCCAG  
TGCTGGCGCGGGTTCGCGGTTATGTACATAACAGAGGAAGCAACGCCCAATCCATGAATT  
GGGGCGCCTGGAGCCAAGCAGACGTGAACACCGTCATGAACACCGCACTGCGGATCATGG  
ACGACTCGCTGCTGTATGGTAGGGTCTGTCAGAACTCGGTCTTTGCCCGGTCACCTGTCCG  
GTCAAATCCAGGGCCAGTTCGCGAGCTTCGTGGCCTTCGCGCACAACAAGCTCCTCCGGG  
GAACCTACGTGAACTCCGGCGTGCTTGGCGTGGCCTCGCTCCTCGCATTCCAGTATCCGC  
TCACAGCGCTGATGATGGGTGCCAAGGCAGCGAACAACGGCAAGTCCGACCACTCTGATG  
AAGGCAGCGGCAAGATGGCCATCCGCGGCATCGGCTCCACTGCCGGTCTCGGTTTCACCG  
CCGACATGTGGGGCGTAGTACCGGGCACTCCCTGAAGTCCGCCAGGTCTTCGGGCTGG  
GGGAGCACTCCAACGAGGTGTTCCGTGGCGTCAAGGACCCAGTAACCGGCGACGACCCCG

CAGCCGCCACCGGCGAGATCGTCAGCGGGCGCCGACGGGGCACTGCCTTTCGTCAACGTAT  
TCCCGGCGACCAAGTTGGTGCTGGAATCCATCAAAGGGGAATAACGTGGCTCGGTTCAAG  
AATCCCGAGACCATCCACGTTGCAGATGGGGTCGAGACTGTCTTCAGTCTCGACTTCCCG  
TTCCTGCGGGCGTGAGGATGTATTCGTCCAGGTCGATAAGATACTCGTCACCGACTATACG  
TGGGTAGCCGACACCAACATCCAATTGGCCGTGGTGCCGAAGAAGGACCAAGAGGTCCGC  
ATCTTCCGCGACACGCCCGCCAGGTCCCGGACACACAGTTCAGCCAGGGCATCCCGGTC  
CTGCCTCGATACATCGACGCGAACAACAAGCAGCTCCTGTACGCTGTGCAGGAAGGCATC  
AACACCGCGTACCTCGCTCTCGATGGCGTACTCGACGCGATCCGTATCGCCGAGGAGGCT  
TGTCGCCTGGCGCAGGAAGCACTCGACGCCGCAATGAGGGCGCCTCGCCGTGCCCTGGGC  
TTCGCTGAGATACGCACCGTGACCGAGGACTCGGATATTGATCCGAGCTGGCGGGGGTAC  
TGGAACCGCTGCAGCACTGCCGACAAGCCTCTGACATTGACCATCCACATGGAAGACCCG  
GATGCACCGTGAGTCGAGTTCAGCGAGGTTCACTTCGAGCAGGCCGGTGTGCGTGACCTA  
AACATCGTAGCCGGTCTGGCGTTACCATCAACCGTTTGCAGAACACCACCATGCAGCTC  
TACGGGGAGAATGGCGTGTGTACTCTCAAGCGGCTGGGGCGCTAACCCTGGTTCGTGTTC  
GGGGCCATGGAGGACGAATAATGCGCGGCATTATCGCGGGCATCATGGCCTCCCAAATTC  
GACGGCCCAAGCCCATCCTAGCGACCTACCCGTATCCCATCATGGAGGGCGGATAATCGCT  
GGGCTGCTCGGCCCAATATCGTGGCAGCTCTGACTAGGGACACTCTGAAGCAGGTCCGGC  
CAGAAGACACGCTGGAGCACTACAGTGCAGCCACCCTATACTGGCCGCCAGCATGCGCA  
GCCTGACACAAACGGGCTACGGCGGGGCATGGCCGTACCAGCTCGTAACAGGTGTGGCAA  
ATACCACGCTCCGGTTCGCTGGTGAAGTCTACTACGGTCGAGGCTCAGCCCTAACTAGCCA  
CGCCGGCGATCCACTCGGCCGACCTGCGGGTAGTGCTCATTATCTCGGATTACGAGGTAG  
AGTCGTTCCATTACACCCTGACCAACAGCCTTGTACAGGCGTAGCTGAAAAATGTTTAAAG  
ACCGAAGTAAAGGGACGTTACACCCTGATTCGCCGCAAGGCGGACGGCACTCCGGTGGAG  
ACTCTGGAGTTCGACAACATCATTACGAATGCGGGCCTGGATTGGATCGCCGCTATGGAT  
ACCGACCTCATGGGCGAACGCGTAGCGGTCAGCACTTCTACAGCCGATCCCACCCCGAGC  
GCACCCGCCATCCCGGAGGTTGTGCAACGACGTCGCGATCTGCCCTGATGGAGGTACT  
CCGTAGGGCCTGGATGGCGACTGGCTGTTTTGGCGGAAGCGTTGGAGATTCCCGCAGGAC  
ACCCTAGCTGGTCAAGTCTGCCACCATGGGCCTCATCTGCAACTCGGATCGTCGCTTC  
GAGAATAACACGGGTGAGCTGATCCCGAAGGATTCCCCGCTGTCGTACACTCGCATCAAG  
GACGCCGCGGGCACCCCTACTACTCTGGTGGTGGCCGCTGACGAGATTCCGGGATGTCCAG  
TACGAGTTCGCGAGCCGGCCCGCAGGAACGGCTGAGGCCAAGTTCGTGATCTCCGGCGTG  
GAACGCACCTTCCGGCTGATCCCACAGCCTTTTGCGAACCGTGCTAATCTCTCCGGGGAA  
CGCTACAGCTTCTACAACACCAAGCCCTTACCAACGGCAAGCACGCCTCCGGCGGCAAT  
GTCCGAGACGCTCAGTGGGAGAAGAAATATCCCAAGTACGTGCGCGGCTCCTACAAGGCG  
CAGATCACGCTGCTTGCCAGGTCCAGAACGGCAATATGGCTGGCGGCATCACCGGCACC  
GAGGAACCTCAGATTTACAATGGACGTAACATATGTGCTCGATATCAACCCGCCTGTTGTG  
AAGAACAATACCCAGGGGTTACCGTGACCCTGGAGTTTACGGTGGCGAGGGCATAACCT  
ATGGCACTGATCTAAGACTTCAACCCGGACCTTGATCCGAAGGCTAAGTCCAAGTTCGTA  
GGTGCAGGAGGCCGTATGGACATCAGGGACGTGCTGGACTTCTGCGACGGTGGTGTGGCT  
AGCCAGGACCCGTCGAGGGCATGTTGGTCCGCGTGTGGGGAACAGAGCTTCCCAGGAC  
GGGACCTACCTGGGTCACGAGGACGGCTCGAACGAGATTGCGATCAGCGGAGGTTTCGAA  
GAAGGTATCTCCACGACGTACCTCGACTTCGAGAGCAACATGAACTACGTGTGTGCTTTC  
GTACGAGCCGACCGGACTGGTGAATCTCCTACTTCAACGTGCAGCAGGGCCCGCGGCTC  
CTCGTGGAGCTTGGCCAGGTTGACGATGCCAAGGTGGCTCTGTACGACAAACGTCCGGGG  
GCTACCGCCTGGGCGCAGGCTATCGTGCCCTACACACGCTACGGGAACCTCTACGTCCGC  
ACGCAAAATGATAACTACACCGAAGAGCACCTGGAGCTGGATAACCGGCAAGGTATTCCGG  
TCTCTGGTGAATGCGATATGGGCACCAACCTCCGCCTCCAAGTCCAATTACAGAGGGCAC  
ATGTAATGAGTAAAAACCGGACCGCCAGTGCTGAGCGGCTGGGCCTGCTTCACGAGCTGG  
TCTGCACCGCTATCGAGCGCAACTTCAAGTGGTACATGGACAACGACATCCCGATCCCCG  
CATCGCATATCGCTGCCGCCACCAAGTTCCTCAAGGACAACGAGATCACCTGTGATCCGT  
CCGACACCATCTACATCGACCGTCTCCGCGAGGGGATGCGGCAGGCGCAGGCGGAAATC  
GCCGAATTGACTAGGAGGGCTTCATCGCTGGCGAGACCGACGACGAGATGGAACGCCTGT  
ACACCCACTAAGGAGGCAGCATGCCGCCGAAGAACAATTCCAGATAGCCACGAAGTGC  
GGGATATGTCCCCGCGCTTCCGGGACTGCTGCCTGGACGCCATGCTGTTCTCCTCGGGTTCA  
CGATGACCTCGATGCAGCTCGACATCGCGAACTTCATGCAGGACTCGCCCAACAAGGCGA  
CGGTTGCTGCCAGCGTGGCGAAGCTAAGTCCATCATCGCCTGTATCTACGTGGTCTGGT  
GCATCGCGCAGAACCCGGCCACCCGTGCGATGCTGGTCTCCGGCTCCGGCGCCAAGGCCG

AAGAGAACGGCCAGTTGATCACGAAGCTGATCATGCATTGGGACCTGTTGGCGTACCTGC  
GCCCCGAGGCCCGCATGGGCGACCGGACCTCGGCTACCAGCTTCGATGTGAACTGGGCGT  
TGAAGGGCGTCGAGAAGTCGGCCTCCATCAACTGCATCGGGATCACCGCCGCCCTCCAGG  
GCTACCAGGCTGACATCCTGATCCCTGACGACATCGAGACCACGAAGAACGGCCTGACCG  
CAACCGAGCGGGCCAAGCTGACGCGGCAGTCGCAGGAATTAACCTCCATCTGTACCCACG  
GTAAGATTCTGTACCTGGGCACTCCGCAGTCGCGGGAATCCATTTAGAACGGCCTGCCTT  
CGCGGGGCTTCCTCATGCGCATCTGGCCGGGCCGTTTCCCGACCCTGGACGAGCAGAAGC  
GCTACGGCGAGTGGCTGGCCCCCTCTATCGTGGACCGTATCTCCCGCCGGGAAGTGAAGG  
GCCACAACCCCGCACAGGCAAGGGCCTGGACGGAACCCGTTGCTGGGCCGCGTACCCGC  
ATCGCTACAACGAAGAGGACCGTATCGACAAGGAACTGGACCAGGGTGGCGAGGGCTTCC  
AGCTCCAGTACATGCTGGACACCAGCCTCGCCGACGAGCGGCATGCAGCTCAAGCATC  
GTGACCTGCTGTTTCATCGACGCGACGCACGAGAGCGTACCCGAGCAGGTGGCCTGGGCTG  
CCGACGAGCGCTTCAAGCTCAAGTTCGACGCCACCGATTCCCGGTCATCAAGCCTGAGC  
TGTACCTGAGGGCCCTGATGGCTGGCGGCTGGGCACCGCTCCAGCAAATGACGATGTTCCG  
TGGACCCTGCCGGCGACGGTGGCGACGAGCTGTCGTATGCCGTGGGCGGGACTCTTGGCC  
CGTACATCCAAGTCGTGAGCATCGGCGGCTGGAAGGGCGGCTTTGCCGAGGAGAACC  
AGAAATGTATCGCCCTGGCTGCGCGCTATGGCGTCAGGGTGTATCTATGTCGAGAAAAACC  
TCGGCGCTGGTGCAGTTGGACAGCTCTTTCGCAACCAAATGCGATCCATCGACCCGGACA  
CCAAGTACCCCGCTATGAGGGGATCGGCGTAGAAGACCGCCCGAAGTCCGGTCAGAAAG  
AGCGTCGCATCATCGACGTCTGCGGCCATCATGCAGCGGCACCGGCTGATCTTCCACG  
TATCGGCGATGGATTCCGACCACGTGGCCTGTCAGCAGTACCCAGCGGACAAGCGCAATG  
AGCGCTCCGTGTTCCAGCAGATTCACAACATCACACCACCGACCGAGGCTCACTGCCGAAGG  
ACGACCGGATCGATGCCCTGAGGGCCTTGTCCGCGAGCTGACACCATCGCTCGTACAGG  
AGGACGAAGCCGCAACCCGCGCTAGTGACGAGGCTGCCAAGAAGGAATGGCTGAACAACC  
CGATGGGTTACTAAGTCTGTCCTTCGGTCTCTCGGCATGGGCCGAGAGCGTGC  
GCCGCCAAAAGGACGAAGACTATGATGATTGATCCCGCCACCGAGGCGGGCAAAGGCAC  
CCTCGCCGTCACCGGCGTGGGGATCGCCGTTTACTCGCCCTTTGAGATCGCCAGCCTCTT  
TGCTGCGGTACTCACCGCGCTCTACGTGGGCGCCAGCTCATCAGCCTGCTCCGGAAGAT  
GCTCGATAGCATCGCGGAGCTTCGCCGGAGGTTCAAGAAGTGAACAAGCCCTGCGCGGC  
GCAGCCCTTGCGGCTGCCCTCGCCGGCCTTGTGCCCCTGGAAGGCAGTGAGACCACCGCG  
TACAGGGCCATCGCCGGCGTCCCCACCATCTGCTCTGGAACTACTGCCGGACTCAAGATG  
GGCGACAAAGCCACACCAGAGCAGTGCTACCAAGTTGACGATCAAGGACTACCAGCGCTTC  
GAGCGCATCGTCTGGACGCCATCAAGGTGCCGCTGAACGTGAACGAGCAGACCGCCCTG  
ACGTTCTGCTGCTACAACGTGGGTCCAGTCTGTACAACCAGCACAGCGTACAAGCGCTTC  
AACCAAGGCCTCGCCACTGAGGGCTGCCAAGCCCTGGCCATGTGGAACAAGGTCACGATC  
GACGGCCAGAAGGTCGTATCGAAGGGCCTCGTGAATCGCCGCAACGTGGAGATCAAACAA  
TGCCTCGAACCATCGTGGCAATACTCGTCTTGTGTTGAGCCCTGGGAGCCTCGTACG  
GCTTCGTCCAGAGCTACCGGGCCTTGGGTATCGCCAGGAGGATCAAGGGGCAGACGT  
CCCGCGCGGAGGCCCTGGAGGTGCGCTACGCCACCTTGCAGCGCCACGTCCAGGAGGTCT  
CTGCCAGAACCAACACCCCGCGCCAGGAGGTTGACCATGCCCTGGACCAGAACCGCCCGT  
GGGCCGACCGGCCTGTGCCTGCTGCTGCTGCTGTTGGCAGCCTGTGTAACCGCCCCGGCGCC  
GCTGTGCTGTGCGAACACCCACTGATTGACCCTACCACCCAGGCTGGCCTGATCCGCGCT  
GTAGCGGCCTATCAGGACGCCCTGGACCTATGCAACGCCCTGAATCAAGGAGATTGACAT  
GGCTAACCCCGCGAGCAGTACCTTGCTGGCCGTAACACCGGCCTGACCTTCTACCAGGT  
GTGCCAGCCCGGCACCGACAACCGCATCGCCCTACACGAGAAGGACGAGGCCGATGTCAG  
GGCAAAGGGCACCGCTGTGAACGCAGCAGCCACTGCCCTGGGCGGCGAGGGCCCGCGCTAC  
CCCACCGGACCCGCTACCCGCCTACAAGGTGGAGAACCGTGACACCCGGCCCGTGGACGG  
CGGTGGTTCGTTGAAGGTGACTATAGCCAACGGCGCCATACCAATGTCGTGTACACCGC  
ACCGGCGGGCTGAGCTTCAGCCCGTCCAACCTGACTCCATCCGTAACACAAGGAACTGAT  
CCATTGCAACCTTCGCCGCTGCCACTCAGAAAGACCTCCGCGCCTTCGCCGGCAGCATCG  
AGAACCTGATCCGTCCGCTGGAAGAAGTGGCCCTGGGTTCTGGCTACAACGAGACCAAGC  
TGCAGCTGAGCTGGTCGCACACCTCGACGAGCTGATGGCTGCTGTCGAGACTGCCAAGG  
TCAAGGTCTACGTGTAGTAGTTCAAGCCGAGCACCTGCATAGGCGGGTGTCCACTGGAA  
CTACTGGAATTTTTATTGAGCGTGTGTGTGGGCTGGGTGGGCTGGTGTGGGCTGGAGTAG  
TACTCCGGCTCTAATTTTGGTATCGTTCGTGTGAGAACCCTCCCGACTCTGATCAGCCCA  
CCCTTCCCCCGTAGGCCCTACGCCTGGTGGGCCATCCTCGCCTTGCTGGGTGTTGCCTG  
GGTCATCCCTGGGAGCTTCCGGCTTCGCCGGTGGTGGGCTTCCCTGCCCTGTGCGC

CAGCCATTCTACACGGCTAAGCGGGAGTGTCAACCCTTGGGGCTAGCGCTGTGCTCTACC  
GGGCTTGGCCGTAGTACCTGGAGCGCTCCAGCGCATCGCGGTGCATGGCCCCGGCTACCT  
CGTACACCTGGGATGCCTGCCGCTTCCGCCAGGGTGTGCGTAGTGCTGGTGGTCTGCG  
CTGCCCCTGTGCTAGCTGCCTCTGCCATGCCGCGTCTGCTGGTACCAGGCACGCTCAC  
CTCTGTTCTGTCTGCTCAGCATCTCCGTGCCCTCTGTGGTCTGTCGGGTGGTGGTGCG  
GGAGTGGGTGGC

>NewGenomeName\_179

TTAAAATTTAACATTCTTAACCAGTTTCATAAAGTCTTGTGCGCGTTTGTGCGTTTGCAG  
AATACGATACCAGTTATCTACAATATCATAACAGTAACGGGCTATTCTCTTTAAACTTCGC  
ACAACTGCTTTAAATCGTTCGTTTGGTGCCGTGAATTTTTCAGCACAGATCTTTTTAGT  
TTCTTCGTCCATAATCCAACGAGTATGAAGGAGTAACTTGGAAACCTCTTTATTATAATG  
ACGACCCTACAGTCTGTCAATAAATTCTGGAATACAGCGTTATAGTTCATCGTCATGAAA  
CAACATAGTGATCACACCCAGATATTCGCCATACCCAGATGATTGGACTTAACCTTCTT  
CGCCAGACCAGCCAGCTTAACGCGAACAAATTCTAGCGCACATTCCAATTGTTTCGTCAAC  
GAGATATTTTTGTGTCTCGTTTCGAGTAATAATACTTTGTTACCCCGAAGTAGTCAAG  
CGCCGGATGTAATGTATTTTCACTATAGATCGATTTTCGACTACGGCTTTCGAATGCATC  
ACCTACGCGAACATGTGCAAGCCTGATAACTCGCGAATCTTGCCTTTCATGTGATG  
GCTGGTTTTATGCCAACTGTCACCTATCTTTTCCATGATATACACGTTAGGCAGCTTGGG  
AGTCGCTTGACGTTGTGTACGCTCGGTCTTCTCCGGCTTAACTGCTTTAGCACGCAGATC  
ATCGGCCCCAGAACTTTAATCACGGTCATTTTCAAGATCATAAATACTGTTTGATGTA  
CTCGAAAGTCTCCATATGTTTTTCGTTGCGCTGACGGAACAAAAGTACCTTTTTATTGAT  
GCCGTATTCGTGGACCATGCCGTTAAGAGTCAAGTGCACGCAGTTTCGGTTGATCGGTTTC  
ATCAATAAGACACAAAATATCTTCTTTATGCATCCATACAAAATGCGTAATGTTGTATTG  
ACTGCTAACGAAAGCAGGGCGCAATTTACTGATGGTGTGACGAGTACGATACAGAATATA  
CACCTGACCTTCTACGTCATTAGGCGAATCTTTACCCGCATTCACAACTTATTATAGAT  
TGCTACCGGATCGTCCATTGTCCGATCTTACCCATCTTGCTAATAATATTGCGTTGCGT  
CGATGAATACTCGCTCATAAATTGAGCAAGTTTACGCTCTGTTTTAATGTTGGCGATCTT  
ATCTTTAACCTTTTACAACATCATTTTATTGATTTCTGCAATGCGTTTTTCGATGTTTCGC  
TTTAGTCTCAATTGACAAGTGAACCTTCTTACGCGATGGCATCAGGTCCAGATCACCCAA  
CTCAAAATTAATGTAAATGGTCTGGTGCTGGCGGTTTACAACCTTCTAACCATGTTCCGCG  
AACATATTCATACGGGATCGGATACTGGATCTTACCCATGATTGCATATACTACATAGGA  
ATCGTTATCACGCCATTACAAACATAATAATTATCAAAGCTAGGGAAATAATTAATTTT  
GATTGCATCGATATTCGGTTTGTGTTCCCCAAAATGACGCAGTACAAATTGCGCTTCTCG  
ATGCCATGTCTGAATGTCTTTTTCTTTCACCGGAATAGTGATTTTTCAGACCATTGTCTTC  
ACAGGTCGGTTCGTCGAAAATCTGCACCATTTTCGGCATAGAGTTTTGCACAAATGCCGT  
AAAGCTATAAGCGCGACCATTGTAATAGTTTACGATTGTAAAGGTGTCGGTATAGCTATA  
AGCAGACTTCGCACCTAAACCAAAGATCCGATATAATCATTAGTCTGGTCTTTTGTGTA  
TTCAGAGTAAACCGTAAACAGTTGTTCTAATTTCTTCTTAGACGGAATACCAGTACCATA  
ATCACGCACAGAAAATACGGTTCGATTGCAGTCGGTAAATGTATATCAAACGGACGATC  
TAATGTTCCGGCTTCTTTGTGAGTGTGCGGTAGCATTACATGAATACTCACGGACGCAAGC  
ACGCTCACAAATATTGATAAGTGTCTTAGAAAGCACCATAAAAGCCTTGCTACTTGCTTT  
CAGTGAAAAATCAACCGCACCGCTCAAGTCACTGCCAAATACTTCTTATTATCAATATG  
CATTTTCATAATATAATCCTCACTTAATTAATAATCTTCTTTGTCCATCTCTGCGTAGATT  
AGATCCCACGCCATAAATCAATAAACGCATTATATGTCACGGTGCAATCGTTGTGATC  
ACTTCTTTAGCATATTTCTTGATGTTTTTCGTAGGAACTTGCAGGATCAATTTTGTGCTTA  
CGAAGGTGTGCATATTCATACCTCAAACATTTTCATAAACAGGTCCATCGATTTCTTTCT  
CGATGGCACTTGGCGATCAGAAAATCAAACCTTCGACTCATTTTCTACTCCTTATACATT  
TTCAATACCCATTGCAGATGGGCTTCTGCGTCAACCAGTTCAGCGCGGGCTTCTCTAA  
GCACTTGCTGTATTCTTTACGTTCCCACTCGGCAATTTTCGTTTTTCAGGACTTCTTCATA  
GTAAGCAATTACGCCTTTAAGGTCTGAACTTTACGGCTTGCCAATTCGATGTAATGGTT  
ACGCATGTTGATTCTCCTAAGTGGTTTCTCGTTTCGATGGGGACATTATGATATATCCCG  
GATCCAGTGTCAAAGATTTTTAATCTTTTTTCAATGCATCCATTACTCGCTCTGAGATC  
AGTTCTCGTAAGCACTGATAACCATGATATTTGATGGCAATGTCACGCAGATCATTAAAC  
AGGTCCCGTACTTCATGGTCTTTCAGATCGTCTCTGTATTTTCGATTTAACCGTGTCTTTA  
GGTGGATTGTGGATAACCTGAAAACCTTGTTCTGCAATCACTGCGGCTTCGCGCTGGCGT  
TCATGCTGTACTGTATTTTTGATCAGGTCTGCTTCCATGAACTTTGCCATATTCATCATC  
ATGTTATTCTTTTTGCTCATTATTAATCCTCATAAAAGAAAAGGGAGACTTCCATTATA

GAGAATCTCCCTTGTATGTCAACTAAAATTTAAAGATGCAAACCTCCCCGTGATGAATTTT  
TGCATATTCATCATATGCTCGAGCGGCTTCCCTCTGAGTAGCAAACGATCCTATGTATTT  
TCTGTATCCGTTTATCCTTATTTGTGCTTGCCACGGTCTTTTGCTCGATCCTTTGCGATG  
AGTAACACCATTATATATGCTCGTGACCCGTCCATTTTCTTTGTATTGTACATGTTTTG  
TAGTTGTGTTGCCTCCCGTAAATTTGGTGGATTGTTGTTTTCTGGTATCCCGTCTATGTG  
GTCTATTACCTTAACCTGTGTTCCATATTCAAGAAACCAGACAATTCTATGTACAAGATA  
TGTAGATTTTCTCTTTTGAACCTTTTGGAAACATCTATTGCCAAATGACCGTAATTTAA  
CTTTTTTGTTTTTACTTTATCACCGACTTGGTAGAAATATCCCTCTGGTAGCCCATAAA  
AGACGGACTATTTGTTTTGTGATATAGAACACCTTCCGTGTGTCCAAATCTTCGTTTTAA  
TTCCTCTGAATTTCAAGTATTCCAAAATTTTCGCACTTTTCATGTTATGACTCCATCCATG  
CCTTCCTCATGTCTGAATCTTCACTATAGAGCAAATCGAATAGCTCTTTATAGTTTTCCG  
GTAACGTGATGATCTCCATGACAGGATAGTTGATCACGCGATGATAGTCTGATTCTGTGA  
GCGATGCTAAACCTTTGATATATCGAATGTTGTAACCTTTGATATTATCTCGGTCGTTCT  
CGAAATCTTCTAGGTCATTATACCATCGAACATCATCACCTTTCTTTGGTTCAGCAATGA  
TAATAGGCGTTTTGATAAACCGGATTCGTCCATCTTCGAACAATTCAGGCCAACGTGCAA  
AGAAAGAGACCAGACTCGGTTAATAGACCCGATCCCGTCAGTATCAGCGTCGGTCATAA  
TCGCAATATTTTTGTATTGCATAACTTCCAATGCATCAACACCAAATGCAACCCAGTGA  
TCGCCATGATGTTGAAAATTTCCGGCGTTCTTAACGATCTTTGCCTCCGGTTGTTCCCTCG  
TTGTAAGAGTTTTGCCTCGCAACGGGAAACCTCCATGTAAATCTTGATCACGTACAGAGA  
TCAGACAGTTGATCGCGGAATCACCTTCCGTCAAAAACAGGGTAGTTTCTGCGTCAGTTC  
CAATAAGGTTAGCTTTAACGTGTTTTGCTACCTTAGCGCGTTTTGCTGCCTTTGCTGCCT  
TAGTCGCTGCCGCTTTATCTGCTGCCTCTTTGCGTGCCAGGACTACAGCAATAATAGGCA  
TGATAATGTTTTCTTTCGTCGCAATGACTTTAGCCAGCTTTTTAAAATCAAGATCAGTAT  
GACGCTTGATATCACAGTTGGGTTAGTCAAGCGTCTTTTTGTCTGTGAATCAAAACGAA  
GGTTATGCAATTCACGAAAAATCAAAATACAGGTCAATCCAGACTTAACCGCAGCTTTAG  
TAACATCAACCTTATATTCTTTCTTGATTGTTTTACAATCTCTTCACAAAGATCATCTG  
TCACGTAGTCTACGTGTGTTCCCCGTTTTTGGTAAACAAACCGTTAGCAAAGGATACTG  
ATTTAAAACCTTCTCCCTCGACCGCCGAACTAGGGCAAGTGAAAAGTTTTTCATCTTCAA  
TGACAAACGGATCATCATTGTATAGTTTAGCATAATCCTTGAACTTACTAACAATACGTT  
TACCATTAAACTTAAACGTGATCTTAGGAAATATTTCCGCTCAATGATTGCAGACGATCAT  
GAACAATATCTAAAACAGAGTTGTCCAGCATATAACCTTGGAAAGTGGTTCGAAGTCTGGGC  
AAAATGTAACCTTTGTTCCCTTGAATTCTGATGGTTTTCGATGACCATGTGATATTTTCAG  
CACGGTTTTGTACATTGAACGGTCATTTCTGTTTTCGCCGTCACTGGTGACACCAGTAAACC  
AATCGCTAAAGAAATTTGATAACGACGACTCAACACCGTTCATCCCTTGCGTTAATCGAT  
TGGTATCATCAAAGTTAGACCCTGCTTTTGTCCGTGTCCATGCGGCTACAGGTTGCGGAA  
TCTGCGTACCCTCTGGGGTAGTAACCATATGTTGAGGAATACCGCGACCGTTGTCTGTTA  
CCGTAACAATATTGTTTTGGATATCGACGCTAATCACATTGGCAAATTCAAAATTATTGC  
GAATCGCCTCGTCTACAGAGTTGTCGATGATCTCATCAATGATTTTCACCAGTCCAGGAA  
CATATGAAATTTTTGTCCATTTACCGAACCGGAAACGTTGATGTTCTTCGTAAGTTGTTG  
ATCCTATCTACATTCCTGCACGCTTAAGGACATGCTCACGATCAGATAAAATGCGAAACT  
CACTCATTATTAACCTCTTCATAACATAACCATAACTTACTGCAACCGCCACAAAGACG  
GCTGCAACAATCATATTATAAATTGAGTGATTGTCAAGTATATGACTCATGACACGCGCA  
CATTTTTATCATAGTACCCGCCATTAATACCGCGCGGGCAGTTAATCCCTGATTGCATT  
CTTTACCACATTCAGGGCATTCTGCCTTTTACGTTCCGAAATTGTGCGGATTTTCTGAA  
AATGACCGTGTTCTTCACAAGAATAATCATATAATGGCATATTATCCCTTTGTTTTCTTA  
ACTAAATTTGGATCTGGATTTTCTGGCAAGTCTTCCAGACCCATAGCATAACGTTGTGCA  
TAGATTAGCAGAAGAATATCGCGAGCGCAATCATGAATTGCGTCATGCGCGATAAATCCG  
TCTAGCGTACCCATTGGTAACGGGCATTCACACATAACCACGATGCATCAATGTACGCTCA  
ATGGCGGTCCGAACATCTCGGATAATCCAGAATCGCACAGGTTCAAGGCTGAACGGCTCT  
CGTGTATTGTGTGCACGGCGGATCATATCAACTGGTAACGGAATATCAAACGCATTACCG  
CGTGACCACATTACGGATTTAACCGGATCTACTCCTACGGCTTCACAGAATGCGTTAAAA  
CGCGCTAAACCTTCTTTAGTTGATACTTCCGTACCATTTGTGATTAATTGCTTTCTCATG  
CCTTCTGAGGCGGTATTCTTCCACCATTCACCCACGATGATCAAACACCCTAACTCCT  
TTCTGGGAAGGAATAACAAATTTTACCAGAAAGGAATTGTCAACCAGTTCTTCAAATGTA  
GGTGGATTGTGCGGATCTTCTTTAAATCCGATTGCCGCCATATTGATAACCGCCCCATCA  
GGCGGATAACCTAAACTTTCAAAGTCAATCATTAAATCCACTGGAAGCATTTTAAATATC  
CTCCGCGATATGCCGGAACAACCTCCAGATCGTTTTTATCCAGAATGAAACCGCTACAATC

AATAATCCCGTTACCGTAATTATCGGTTAACAGTCGTTCCGTTGCCATGTATGCGCGTAC  
TTTGTGTTAAAATTCATTACATGTTGTGCATAGTACAATGAATCTTTTGACGGTTCCA  
CGCGACAATTGATTGTAGATGTATTACATTAGCCACATTATTAATAACAACCATATCAAA  
AACCTCGCTTAGTGAAATGCTCGATCATTTTATTGATACATGCAGCTTCACTATCGCCGG  
ACACGTTCCAGCCGTATAGACCCCATCTAAAGCACATGGTAACAGTTCATTGTGACGGC  
TTACCGTCACATCATTAAATTCTGGGATACTTCGCATAATCATAATAAGTTCCTCAAATA  
TAGTCTACTCGATACCGCGCACGGGTAACACCAACATATAATAACTGCATTGCCAATTCA  
AAGTCAACATTGTCTGTACACATGCAAGGAGTATATAGGAACACGCGGTCTACGCTGATC  
CCTTGTGACTTATGAATGGTGAAGCTCGTAATGCTTTTACATTCAAGAACATACGCTTC  
ATCGTCCAGAATGAATCCCAATCTGGTTTAAATTTTGGATTCTCTTTCTTCATTTGCGGA  
TATTGTCCGGCGACCGTATTAGATAGATAGAGAAAATGTTCTTCTGACGTTGTTCTGTC  
AGAATGTTGATTTCTACTAAATCCGGTTTATCTGTAGTGATTCCGACTGCATCTAAACCG  
ACTTTCTGATTTAGGATCTCTTTGTCTTCGTCATCATCGACGCTTTCCACTTTCAGAGTA  
TATCCTAAAACCTGGGTGCGGATGTACCCCGTACAACGTAATGTAAATTCGCGCGGGTATA  
ACCTCTTAAACTCGGATCATCTCACCATTGTTAAAAATAACATTAGGAATCTTCTTCCCG  
CGTTCATCTCGCAGATATTCGATCAATGGTTCCTGAGTAACCAGAATTTTCATCTACAATC  
ACTGGTTCATCGGTGTTATAAACGCGCTTACGGACAATTTTCATTGTGTTTTTCGACGCTC  
TTGTTAGTGTAGGCCAGAATACGGTTTTCTAGAAGGTCTTCCGGCGTTTTTACGGTATCG  
AAATAATGCTTCATAAACTCCGGCAGAGTTGAGCTATGGAATACACCCTCGTTACCGCAC  
TGCTTATCGAATACCCATTTACCATTACGGACAGCGGTCCACATCAATTATTGGCGCA  
TTAGATCGTTTAAATCTCTGTAAAGTTCTACATTCTGAAACCTTTCATCCGTCAAGAAAGGA  
GAGATCGACGTTGCACCGCTCGGATCAACTGGTCGTAACCTGGTGCGGATCGCCAACCTGCA  
ATAATAACAATTCGACCGTTGATACTCTTCATGAGAATATCAAATAGTTTCTTATCGACC  
ATACTCGCTTCATCAACAATGATGATCTGAACATCATCTAGCTTAGGAGTATCTTTTTGC  
TCAAATACTTGAGTATCTTCATAGTTGGTCGGGTTTAGTCGCAGTAGTGCAGGTAAAGTA  
AATGCTTGCCGACCTACCGCTTACTCAAACCTTTTTTAGCCTGGTGGGTAGGCGTTGCC  
AAAACCACACCAGTTACACTACGGCGGACCATTTCTGAACAATGAATTTTCATCATTGCG  
GTTTTACCAGTACCCGCCGACCCACGGACAGTTGTATGCTTCTTTTGTTCATGCGTTTC  
ATTAGAACATCAAAGCATGTCTTTGCCCGTCTGTTAACATATCGAAAGTTAATACTCTG  
CTCATTATCCTAAAATCCTCACCTTGCGAACACAGATAGTATTGAGTTCTCGCCGTACCC  
GTTCTTTTTCATATTCAGGAATTTTATATTCGATACCATCCCGAACAATTCAGAAGACC  
GGATTATGCCAAATTTTCGTTTAGGTACAACCTTGTATTTTCGGTTCACCCGCCAATAGAC  
TCTCACAATAATCTATCTGATCACACATTGACGCTAACGCAGCATCATGTGTTTCGCAAG  
TTAGGACGCGACCCTTCGCGTCCACTGAGTATTGAAAGAATCCGTCTTTATCACGATAAC  
ATACAGCAAATACATGCATTATAAACCTACCTTCGCTTTCATCAATTCAATCCACGACGC  
ATCAAACGGAAGCCCGTATTTACGCGTTCTTTTGTGCTGGCGTAAAGTTCTCATACTT  
AGAAAGAGATTCAATCAAACGCTGGTATATTTAGCACGACTTCGGTATTGTTTGAAT  
AGCCTTAAGTTTTTCTTCTTTCTTGTGATTTTCGCTAAGGGCTTGCTTCAGATCTGCAAT  
TTTCTGATAACGTTCTTCCATACGGAAGAGAGTATTTTTAATAGCTCGCTCGACTGCCTC  
TGCTTTCTCCGGTTCGTTGTGCTTTTTGTGGCGCTCGATTGCCAATTTCTTTTCTTCGAT  
TGCTATTTCTGATTTTTGATGCGATTCTCGTTAAGTTCGATCCACTCTATGTACTTCGC  
ACGTAGGGCAATTTTCATCATCAGAAGGTTTACCGTTAGTTCCTAGTTCCTGGATCTCTTT  
AAGAGATTCGATAGTGTGATTGCCACGGAAAGAATTGTATTTTCAGTTTAAACCGGAATTAC  
ATTGCCATCAACATATCCAGATTGCAATCAATGCGCTCTAAGGAGAGTCCATCATCACC  
TTCACCGAAAGCCTCACCGGAATGGGCGCAATGAGTCTGTCCGTAATGTTACGCACAGT  
GACTAAGCTCATAGAGAAGTCTTTGTTGCGACGTGAAGCACCAGCCATGATAGAGTTCAG  
ACGGAAAACAACCAGCGCCAATTTCTCGTTAGATTTCAAAGCAAACAGTTTCATAATTGA  
TTCTCCTTAGTTGGTATGTGTGTATAATTGTCTATCTGGTTTTGCGCTGTCAACACTTAAA  
TTAAAGAAAATTTGTAAATCTCTATCAGATCGCCATTACACGCGTAAACTTCCTCGATCT  
CATCAAGGATCATGGTTCGTCCTGTCTTGTATATGCATTCGCGCTCATCTGCCAACATAG  
CATACAAAGACAGTCGAGTAGTCGGATTGTCATACTCTTTAGACACCACTCGGTAAATAG  
CATGTTTCGTAATAATTCATGCAAGGCTTGGTAGGTTTTATTGCCATAATCTTTCTGTTG  
CATAAACATCTGTTGCAAAGTCTCTGCTGTTGATAGCAGTGGCGTAAAGCTCATAGGAC  
GCTCTACAACGAAAGAATCACCTACAATTAAGGTATCCAGCTTACGGCCTTCTCTTTTGC  
TCACACCGCGATACAAGGCTTCATGATGCACTAACCGCTCAGTCTTTTCAATCAATCCAT  
TAAGGATCGATATATCGATATTTTCTTTAGAGTTCATCACTTCATCAATGATGTTAAGTT  
CTTCTGGTGTAAATTGCATAATAAAAAAGCCTCCAATCTTTCGACGGGAGGCATAATAAA

ACCATTGATTGAGTTTGTCAATTACAAAGTGTATGTGATCTATAAATAAGTTTGTAGAA  
CTAAAGGAGATCACAAAATGAACTATAAACGTATTTATGATAACCTGATTGAACGTGCTA  
AGACTAAAAATATCGTTCGGATACACAGAAAAGCATCACATCATAACGACGTTGTATGGATG  
GAAGCGATGACCCTACCAACCTAGTAAGACTTACACCAGAAGAACATTATATGGCACATC  
TTTTGTTAGTTAAGATATATCCAGATAATAATAAACTGATATATGCCGCTAACATGATGT  
GCGTTTCTTGTTCATGGACAAAGACAAACAAATAAGCGTCACGGATGGTTGCGTAGAAAAA  
CGGCGGAAGCGCATAGTAAAAGAATACGCGATAGAATGGAGAACGATCCAGAATATAGAG  
CTAAGGTTTTCGGAATGGGCTAGAAAAATGGGTAAAGCCATGAAAGGCGTTAAGCGAGGAC  
CGGAATTTAGCAGAAAGTTGGCAGAAAGAAACAGAAATACCGTGATGAGAGAAGAACTA  
AACGTAAGATCGGGGAAGCCAACAAAGGGAAGAAACGTACAGAAGAATATAAAAGAAAAC  
ATAGTGAAAGGTATAAAGGTGAAGGTAATCCGATGGATGGTAAACGAGGAAAGGACCATC  
CGGCATATGGTACTAAACCGTGGAACAACCAAACATCATTTGTTGAGCAGAAAGCATGGT  
GGCCGTTTCGCTGGCATGTTTTATGACTGGTATCGGAGAGATAATTGACCGTGGAACACATA  
AACGCCACGGTCATAAGAGAATGTTGGATGAGTTAGGTTTCGTTGGTTGGCGAGAAAAAG  
AGCCAGCCGCAGCAAGACGATCAATTGACATGTTTCGCTAAAGGCTGGAATCCTTATGAAG  
ACCAAGAATGGTTAGATTATGTTAATACCCGCTTTCCAAACGACGATAGTTTTCCGCGTT  
CTTTAACATATAACAAGACAAACAGATCCTTCGCAGTAAGCCCCAACGCCAAAGGTTTACA  
CATAATGAAACGGATTTGGTCGACGGCTTCTAGGTATGTTTCCAAACGATCCGCCTCAGA  
TAAACACTAAAGAGGCGGTTTCGTGCTTCCATATGATTGGCTTTCAGTGTTTCCACAC  
CGCGCTAGCGTCTTTCCCGTTAGACATAACCACCAACTCAGTATACAGTTCTCGCGTTTC  
GTCGTAAGCGCATTATCATTAGCGCGCAAAAAATCTAAAAACTCTCCACATGTTTTCAA  
TTCATCAATTTTTGCTACCCACGGACGGTCATTAGATACCTGGTCTTGTAGTGCTTTCTG  
CAGGTCCACCATGTGTTGAAATGGGTTATCACCGTTGGTGATAATTTCTTTATATTTTTC  
TTCTGCAAAATTCAGAGTTTCCGCGTTTACTAAGTGTGCACAAGAATTAATTTCTGACAT  
ATTCACCTCATTAATTAATAAATTACAATATTTTATAAACCGCATTTTAGCCATCAGACCT  
TGTACGGTGTCTCTTTGATATATCCATGATCTGGTCGCGTGTAGCGCCCTCGTCCTGA  
ATCATGGCATTAAACGTCTTTAGAATGCCACGGACAACGATCCCACAATACAATCTTTTCC  
CCTGCATTGATAAACTTTTCCAGTCGGTGCATTGTATCGGCAGATCGTGGATCCGCATCA  
AGTACAAACACTCGCTGGTCTGGGAAAGGTATTTTATCTAATCCCAAAGTACCGCCAGTA  
ATTGCACACCCGTTATCAATAACAATGAATCGATCGGACCTTCTAAGAAATACACTGGT  
TACTCGGATCGGCGCGTTCAAGACCATAGACCTTACTCGCTAACTCATGAGTTTTAATC  
GTCAGATATTTGGTCTTTCCGTTATCCTTTCTCAATGCTCGCCCCTGAATGGATTCTATC  
TTGTTCTCGCGGTTAAAGATAGGAATCACTAAACGCGCCTCAGGTTGTGGATTCTCGAAA  
GTATCAGCCTTAATGTGATTTGCTGCCTTTTGCCATTCTCTCGTTAAATACAGAAGATCC  
CATTTATCGTGGGGAATGCAACGATCACTGACATACTTTATTATAGGATGATTAGTCGGT  
AGAGTATCTAATCTCTCGCAGAAAGGCAATGTTTGCACCTTCTTAATCTCCGGCTTTTCT  
ACTTTTTTTAGTGGCTTGAACGTGGTGTCTTGTGGTGCCTTGTTCCTTCCGTCGTTCC  
ATAAGACATTCCCTGAATAAGTCCGGCTTATACTGTTTGAGAAATTCACCTAACGGCTGA  
TTGTAGTTACAGTTGAAACAACCATAACGCAAACCTATCCTTATAGGTATAGATATGGAAT  
CGCGCTTGAGTATGATTTTTCTTTGAGTCCCCGCAGATCGGACAACCTACGGACCAGCGTA  
AATGAGCTAGTATGCAACCGTTTAAAATTTTCGTTTCGCCGTATATGGCTTTTTCCGCTATT  
TCATAATCTGCGTAGTAACCTATAATAACCTCTTATAGCTCAAATTCATGAAAGTTCCC  
ACACTTTCATTTTCATTCTCTCCGTTTTTCATCTAAGCCAAATTTGTAGACACTACCATCT  
GGCGATATGAAAGAGAATACACGAAAACGGCCTACCGGGTCAAGTTCTGTAAATTCATAT  
TCTTTCCCGGCTTCAAAAAGTGCATATGTGTTTTTAAGACATTTTCATCGTAATCATTAA  
GCGCCACCGATGAGAACATGATAATAATACCAGAATACATAACAGTCTCAGAAATTTTTT  
CTGTTTTTGTCTTATATCCAGACAACCTGAAAAGACAACACCCGAAATAGCCATCACAA  
GCCCGATAATGAATACAATAAAATTAACCAATGTCTTTCTCCTTTTTTTCGTTTTTTCTTTA  
CCCGCTACACTAGGTCCACGATTGGTAATAGATCCGCTCGTTTCCCTGCTGCGATCTTC  
TCAGGATTGCCGCCAGCATCGCCAGCGGTATATCTTCTTTGAGTTTATTTTTCTTCAACA  
AACTGTTTAAAACCAATCATAGAATAATCTCTTTCAGTAAGTCAACAATCTGGTCTTTTCG  
TCAGTTTATCCTGATTCTCTACAATCTTGATAACACAAGCGTTAACATCTTTGCGAGTCA  
CGCGGGAGATCGTTTTAATACGATGGAACGGTTCGTAGAAATATACTGCTTCATTATAGG  
TCGCAGCAATTTTTTGACGCATTTGATCTTTATCGGCCATAAAAACAATTGCAATTTTTCG  
GATCTACACCAGCCACATCATAAAGTTCGGCGACTCCCCAGCGTCCTCCCGGTTCAATCA  
TCCCAGCGTGTTTACCGTTAATAAAGATAAGAATATCTCCGTTATTTGCGGTTTTAAATG  
CTACATCTTCCGGCGTAATCATAGTCTTCATAAATATCGTCTCCTTAAAGTTTCATTATAG



ATCAAGCGAACGTAGAAAGCAAATGTTTTGTTTCTTTCAGTTGTCGTTCAAGGTCTTTGC  
GTTTCTCTTTCAACTGTAGTTTAGCATTGTTTTGTTGTTTTTCAACATCTTTATTAATGT  
GCTTAGTCCAATTATCAATATCAGAATAAGTTGGCATAACCAATTCTAGACCTAATGCGG  
TTGGATGCAGGGTAACAGTCCATAAACCCTAATCTTCTTAACTAGGTCTGGGTGTAGTG  
TACTATCTACATCTTCCGGTGTCAACTCTATTTTTTCTTTCAGTGGTGGGATCTCGTCAT  
ATGGTTCCAATGCATTTACTTTAATATCAGATACCTCATCAAAGAATCCGCGTACATCCG  
CAAGAAATACACAAGCAATTTCCCAACCGTGATCACGCAGAGAAGTAATATTTTTCACTC  
GCCACCATGTGTGATGATTGATGTGACATTGCCATCGAGGTCCACCGAATTTACGAGAA  
ATGTCTTATCGTCTGTGAGATGATTATAAAACTGTGCTTCGGCTGTAGTCATCTCCAGAA  
ACAGATCTCGGATCGGACGACCATCAGGTGCGTTACCTTCCTTGAGAGTATAAAAGCGAC  
TTACGATCCATTTTGGCGGTAAAGCATTAGCGATCATGTTATATCTCCTATCAAATCATT  
CACCAGCGCCCCGAGGGCGCATTTTATTAGAAAGTCATGTTTTTTGCTAGCTCGTCGAG  
TTTTTCTCGTTTCTCGGCTTGCTGTGCGCTTTGTGGTTAACTTGTGCATTCTCCTGATC  
TGCGATCTGGTTTGGTACTTCATACCAACGCTGATTGCGTTTTCTTCACACCAACGTTAAA  
CCGTGAATAATAGTTCTTGTACCGTAACGAGACTTGATCTGCTTCATGAGTTGGACGCC  
CATTTTAGCCAGGTCTTCGGTTTCGATAACACCCAACATAAAGTCGGCAGTAGCCGGAAG  
ACCTGCTGATTCAGCGGTATCACTCATGTTAAGGTGCGAAGCATCCCAACCCGCGCGGGT  
AGTCTGTGCCGAGTCCAACCAACAACATCCCCTTAACAAAAAATCCTCGCAGTTCTTC  
CGCAACCGCGTTAACTAGTGTGTAACATTTTTAGAGTATACACGCAAGCGAGACGATGC  
GCAAATCCCCAGATAGTCAACAATCACAACATCAGGTTTAACTGTTTCTTGAGTCGCAA  
TTCATTCATTAACGCCTCAAAGGGATTGGAGTTCGCGCCACCAGTAGGATACTGCTTGAT  
CATCAATTTCCAACCGGACGATCTCTGATCTGCTTATTCTTAACACGCTTCATGCGTGC  
GGAATATTCGCAAAAAGAAACATTACCATTATCCAATTCATCTAATGTAATGTCAAGCAA  
GTTTGCCTCGATACGTTTGGCTACGACATGCTCTGCCCTCTCCATTGAGATATAACAATAC  
ATCATAACCACATTCCATATAACCCGAGCAAGAGAACACAAGCCAAGCGATTTACCAAC  
GTTTACACCAGCAAGCAACACATTTAGCGTTTTTCTTCCGCCCTCCTTTTGTGCTTTT  
ATTCAACATGGGCAGCTTAAACGGGACCTTATTCGCCTTAGTCTGATATAGCAAGAATCG  
TTTTTCAAAGTCATTAACCAGTCATGACCTACATCAGAATCAAACGTAATGGATAGTGC  
TTCCTGCATGATCTCAGGAATAGCACCTCACTAGGCAATTTCTTATTCTGTTTCTCTTA  
TGGTAGTTGTGCGTCCGCTGAATCTCTAGCGCCCGTGACATTGCATTATACATGGCACG  
GACACGAATAAATTTTTCGGTTTCCTTCATTAACCAATCAAGGTCTTCCGGTGTATTCTC  
AAGCGAATCAAGAAGAGTTTTGGCCCCTTCATATGTTGTCTGATTGCCTCTCTCCCTGTC  
TAAAGCAATCTGTAATGCAGTTGGTGTAGGAATATTGGAATATTCGTCTACGTGCTTTTT  
AATCAGCTTATAAATCAGTTTTTCTTCGCTTCGGTGAAGTAGTCCGCTTTAAGGTGAGG  
CCATACATTCGTAAGAATGCGCCATTGTACATCAACTGTGAAAAGATAGTTTTAATCAT  
ACATATCCCCAACTACACGCATAACAAAGGTCTTGAGTTTATACGAGAAAGTTTCTTTT  
TTCAACTTTTCTTCTGCTTCTTTGATCTGCGCGGTTAACGCCTAAATGACGTGTGGATAT  
ACCACATCACGATCTGACGGCGTGGAGTAGTCGACCACAATACCTTTAGTGTATGGATCG  
TACTCAACATTATGAATATAGACAATATGATGTTCTCCCTCTTCATCAACAATTATCAAT  
TCCTGAATAACTGTCTTCATTGCTTCTTGAATCAAGCCGTGTGCTTCTTCTAAACTTGGT  
GGTTTCTTATCCATAATATAATCCTCTCTAGATATGAAAAAGGGGCACGTAGCCCCTTTA  
CTACCATTGTTATGCTAACATATCTTCGATTTCTTTGTCAACTGCTTCGTCGCTGATCAC  
TTGCCCCAGCTTATAATGATCGTTGATTGCTTCGTTAAACTTATCGTTTGTGAGAAGTGG  
TTCCAGAACTCAATGCTATTGGTTTCTTAGCACGGAACCTGCGTTCTTCGGTTTCCCT  
CTCTCCGGTCTCAGTATTCAGGATTGAACGAGAATACCAGCCGTTTGACGGTTTCACTAC  
CCAGCCTAACTCTACAGCCAACTCCAGCAAACCGGAATAAGGATCGATACCACCGCTAAA  
TGTTACGCTAATCGGGAACCTTAGATTTTTCTTTAACGTTTCGTGATTTTTCCGCATTAG  
GATAAAATCATAACCAGTAATTTCCGTTTCTTCTTTCTGCTGACGACGACCAATAATGAA  
AACTTCATTGGCTGAATCCATCGCGCCCGTACCGCCGGACATAACGGTCTTACTAATCCT  
TTCTTGCGTTTCGTAAGTGTGTTAATAGCGATGCACGGGATATCATTATAGTCAGATA  
CGGCGTAACCATTCGGAACAAGCCTTTAAGTGCTTTCGCTCGCGTCATATCCTGTGCGGA  
TTTCTCATTAAATCGCGTCTTCAACTTCTTTTTTACATGGTAAGTTACCGATTGAGTCAAT  
AAAGATGATCACTTTATCTTCACGGGTAATTTGCTCAAGCTGGTTTCATGGTTTCATATTT  
AAGTTCTTCGATGTTCTTGATTGGAACATGCACCACGCGATCAGGATCTACACCCATAGA  
TTCAAGATAAGCGGGTGTAAATACCGAACTCAGAATCAAAGAACAACACGCCGCATCAGG  
ATTCTGTTTCATGTATGACTAACACAAGTTAATCCCAAGTTTGTTTTAAAGTGCTTAGA  
CGGACCAGCAAAGAAAATCAGACCAGATTGAAAGCCTTTTTTAAAGATCACCTGAAAACGC

AATATTCAGCATCGGGATCTTAGTGCGAGTATTTGTTTTTTCGTTGAAGAAGTTGGATTT  
AGACAGTACCGCAGTAGTTTTTCAGGGTAGAGTTCTTTTTTCAGTTTTTCCAGTACAGACAT  
TATTCATACCTCTATTCAGTTAATCCGTAATACTTTAATTGCTTCATTGTTATTCGATCT  
TTGTAGTGCTCTTGAATTAACTTTTTCATCGCATCAACATTGATCGTCACCAATACTTCG  
TTGCTGTGATTTCCGTGAACCTTTCTTGAAATGCTCTATGCCTTTCTCACGTTACGTTA  
ATCTTTTCAATGTCTCTCATAGTATATTTCTCACGTTGGCGGGTATCGTCACCCAACACC  
CGCATTATACACACTTTATCTTAAATGTCAAACAGGTCCGTCAGTGAAGCAACTTTTTTC  
ATATTGCAGCTTCGCAGCCGTGGTAATGTTCTCCAGTGGTTTGACGAAAGTCTTACTAAA  
CAAAAAAGGCCAGTCCAACAACCTTCAACACCTCTGAATCAATTTCTGGCGGAATACGAGT  
ACCAGACAACCAACCAAAAACAGATTTCTCCAAACGGATTTCCGGTCTTAAACGGTACAAT  
CATAACCTTCTCGCCTTCACGAATCGGATCTAGTCCGAATTTTCGAGCATTACGATTATA  
ACACAATACACTCTTAAACCGAATACGGACAACCCTTAATCGGATACCCGTTTGAATCGCT  
GTATTTCTGTAGGTTGTTTGCAGACGATACCGCAGCAACATCAAGATAGTCAAGTTTTCT  
AAATTCCTTGCTCAAAAATACCGTAGTATTCCTGCAATGACTCTTCACCTTCCTGCAACAT  
ACGGCGAATACCTTCTTTCAGTGATTTCTGGCATGCTTTAGGGGTGGAGCTACGTTGCGT  
TTCCATGCCCTGATTTTTAGCTTAGGTTACGCAAAGCGCGTTCCCTCCATATCCCAAAC  
ATTAAGAGCATAACGCTTTTTACAAGTCCAGAATCCGCCGATACCCGCAGATTTCAACGG  
AGGACCAGCAATTGCCTCACAGTCCATAAACATCAAGTGCTCATAGTTGTTTACTGACTC  
GCATAACTCGCGATATCCCTTGTCGATAATAGGTTCCATTCGATGTTTACCGAAATTATC  
AAGGAAGTCAACAAGTTTTTCGCTATCGTCGAAACGGTCTTCCCCGCCAACCTTATCAGT  
AACATTGTTAACCAGCACATAAACGGAGTCAAGTATCACAATAACGAACATATGCAAAATC  
AGTCGTTCCGCAAAGCTCGTTAAGTATTCGTTAATCTTACGCTCAATCCACTGAATTGC  
AAGCTGACCGAACAGTGTGATCGCACTAGCGTTACGGAGATCATAAAAACGGAATTTAGG  
ATCCCCCAACGCACCATAAAGGGAGTTGATCAAACTTTACGAGAACGCTGGTTTGTATT  
GCACAAGATCGACTCGTCTTTACTTTCTTCCAGTAATTTCTCTAATGCATCTTTACTCAA  
TTCAGAAAGCATCGATTAAAACGCTTCATCGAAGTCGTGACGCACTTCAACGCTATAGCT  
AATGGTTCCCCCATAAACATGATTTTCATCGTGTAGAATCGCTTACAGAGTTCAGCATT  
GCGGTCACATGCCAATATCATGTTTTTTTACTGCTTACGCTGATCGAATACCTTTTTAAT  
CTCAATCGGTACGATACCGTGAATATCTTTTCTATACATCCATCCGTTAGGCGAGCAAGA  
ATACTCATCACTCGGACGTGGTGCAGTTTTATTGATATACTCGTGCATCGGTGCAGCATC  
AAAAGATCCGGCGATTGTTTCCGGCGGAATATTAACCTGACGGATCATTGATGGCTACCA  
TTATGTTACGCGTGGTTCGCTACTCCCAGCGCCCGTTCTCTTGCGAACTGCTACATGTCAC  
CATGTAGATTAGACTATATCACATTCTCATAGAGAATCCTGCCATTTCGAATCGCTTGAT  
TCTACTCTACTCGGTTTCGTTACCCTTTTCGATAGTCGTTGAACAACCTGCATCTTTAAGCTC  
ATTTTGATCAAACGGTGTCTCTTACAGTATCCGCTATAAGTCTTACCCTGATACGGAT  
TCGACACCAGTTTAAATGTAGTCGTTAATGCTTCCGCGTTATGTATTTTCGTACTTTCTTA  
AAATGTCTTTTATCTCGCGCTCCAATGTATATCAATATCTATATACATTATAAGACACG  
TTACCTCAAATGCAACTGCTGCTGATTGTCTCCTTAGAGATTTCCAGCAATTAAGCAG  
GTTATTCGATCACTGTCACCAGTGAAAGCCCCATAGCAGTTTAGGGAAGTAAGGTCAAAG  
CTCATCATCCAACGGTAAGCATTCCGGCACAGGTTCTTTTACGAATGCGCCCGGATAAGTC  
TGCTTAGGCTGTATCTTGTCTCTGGTACTACTTTACCCTCAGCTTTCAGAGATCCGAAC  
ATAATAGCATCCCATACTTTCATTGGGTTATAAACATGGTTAAATTTAATCTTTGCTTAG  
AAACATAGGCTATACACCAGATCGATAAATCCGCGCTTTTTATCAATCGCCAACACACGG  
TCAACGTCGCCGAAGTTATAATCGATGTAAAGTGGATGGTTGTCATCACGCAATTTCTTT  
AACGGCCATCATGATCAACCTTACCGATTCTGTCTCATATTCAGCAACATAATCTAAC  
GCATATGTTGGTTGAGTCGTAAAGCTAAGTTGCTTGTACAGGTCAATATAATCAAGGCTT  
TCGATCCCATGATCGTAAATGCTTACGCTCGTTGCCAAAATCATCCTGTGAGATTCGG  
GATTTAATCTTACCGCACGGGCTTAGACGGTTAGCGGTTCTACTTTCGAACTTATTACTG  
ATACGTTTAAATGATATATGGAATATCGAATGTTTCTGTGTTCCAGCCAGTGAAACCAACG  
GGTCGGTTTTCTCAAAGAATCGGATGTATTCTAACAGAAATTCATCTTCTGTGTCATAG  
ACGTTATAACAACGCGCTCTACAATATCAGGTCCAAGAATAGACTTGCTAGATTCCCAG  
ATTTACCGTTTTTTTCTTTCAAATCAAATACAAAGAAACGATCATGTACGGAATCATAA  
TGCATAATTGCATCGATAGGATATTTTCGCTTCTTCTGGTTTAGGAAATTTCTGGGGCTGTA  
ACCTCGATATCAACCCATGCTACACGGCTTTTATTTTCGGTCATATCGAATCTCGCCTTTA  
TACGTATCAGACAGATAGGAGATGATAAAGTCATACATCCCTAGCGCCTCCTGCCCCATT  
TCTCCCGTCTTTTACGCGCATTTGTTGGCCCTGTTTCATAGATGGGAATTTTTTAGCAATG  
CAAGGCTTGCCATAGATATCTTTATAATTCGTAACCATAACCAGGCGCGGCATGATGAAAT

AAAGTTGGCGTATATTCAACGTAACGCTCTTGTCTTGTCCAGCATCATCAATATAACGC  
TCGTAGATCTTATCACCCACTCGCTCACATGACAGTAAATACATAATAAACTCCTTCA  
CTTACGAAAGACACTCATTATAGGGGAATCGACTTAGTTTGTCAATACCCCTATCCCATC  
AGTATCTTAGCGTCCGATCTGATATTTCTCTATCAGCGTCCACTCTTCTTTCTGTTTGAA  
AGACAGTACACGGAAATTATTAECTTCGGTAGTTTCAAATCACTATCAATCAGAGTACA  
CAGATTCCACTGCGCAAGAAGTTTTGCAATGTTATTACGGCGTAATTCATCTTCCCACGT  
CATTTTAACTACTACGACCATCTAATTTCAACAACCTCCTTGAAATGAACGATGTAATAGCG  
CCCTTTCTTCTGGAGAATATGACAAGACTGATACAGTGTCTTGTCTCGATTGTTGGCAAT  
GCCGCAGCGGGTTAAAGTTTCCTTAATTTTAAAGGAAGTTTTTCAGGACTAATCAAATTAAT  
TTCAATCATTTTACCACCTTTCTATAATCTTTTTTAAAGTCGTTTCCCTTCTGTCTGATTCT  
TAGTAACACCCGCCAAAAGTTCATCGGTGCTTACGGTTTAAATGTGCTTCAATAACTTGT  
CCATATATCCCTTTTCATTAGCCAAATCGAGATATAACCGGGCGTCATCCATATTTGCAC  
AATATGCTTTTCGCCACTGCCATTAACCACTTTTTTGGTCCAATTCTTCTGTTAGTTTAG  
CCCATTACCGTATCGTTTCCCCTTAGAAATACTCTGTAAAACATAATCAAATGCATTT  
GATCTGGGAGACCATGACCGATTAATTTATCACCTACGCGCTATATAGGCAATCTGCGT  
GCTGGGAAAGAGCGGTGTTAATCCATCTCTGATTATATGCAGAATTGTTTCCCACATTAA  
CACGCTGTTTATCTAAGGTGATATGATCCATCAGAGCAAATAACATTGTGCGTTTTCT  
CGGTGAATGTGTCAGCTAATTCAGACACCTTTTACAATAACGAGAGCGCCATGCAATTT  
CATGCTCGTTTAAATTGTGTATCATCTTACCGAAAAATTGACCTAACATTATACGAACTC  
CAATTCAACCATCAATTGCATGAACAAAAAGTCAATGTGAATCTCTTTATCAGCCGCGTG  
CGCAAACATCTGATTATTATCACCGACAATCTCCGTGAGACGAATAATAGAAGCTGGCTT  
AACTTGAGTATACTCAACTCAGGATAAAGTTTCTTGACAAATTGAGCGTATGTATTGGTATA  
GCGTGGTGGGAGTTTACGCACATTAGCAAACCTGTTTAGTTTTTAAAGTGCTTCCACCACATC  
GGTTACTTCGGTATTGCTACTTTTCGATAACCATGCTCAATACCCACGATCAATTTTACC  
ATGTTTAGCGTAGCGGTCCAAAAGTTTCATTACGCGCCGGAAGTCTGGGAAGTTCTGCTT  
AACCAGTTCGGCTAATACGCGCATTTCTTCTACTGACACACCTTCTTTATCAAGAATTGC  
TTTACACCGGACGATCATTCTTTTCATCATGCGAAGCTGATCATCTTTAGTCGGAGATCC  
AAACGTGATGGGGTCAAACGACATCGTAAACGCTGGGATAATACCTTCTAGATCGTTTGC  
TGTGATAATGAATGTCACATTGTTTGAAGTATGCCTCAGAGAACTACGCAATTGTCTTTG  
AGCGTCACCCAACCCCGCTCGGTCATACTCATCGAGAATAACAACCTTTGCCCTTTTCTCG  
TTTTTCTTCATCGAGTGATACACTCTGCCCAAAGCTTGTAATCTCATCGCGGATAAAAAC  
AATCTTACAATCTGCGCCGTTAACAACAGATAATCAACACCCACATCTTCGCAAAGCGC  
CTTAGCAACGATTGTTTTACCAGTACCCGTCGATCGGCTATGCAGGATCATAGAAGGGAT  
TCGGCCTTGCTTAAACAATCTGCGCGAAGATTTTTTTTATCTGCTTCCGGCAGAATACATTC  
AGAAATTGATTTTCGGACGGTATTTCTGTTCCCACTGAAACTCATTTTCATTAACACTCAG  
CATATAATCACCTCTCACAAATTAATCATTAAAATGGGGAGTATTTACTCCCCACAA  
ACATTATATTAGTCGGTGTAGCTGGAGTCTAGGTCACACGCGATCATATAAGATACGGTT  
GCACTTGCCAGCCATACAGCCTTACGGCGAGTGAAGCTCAGTTTGTAATCGCCGAAGTCC  
GTAGCAACCAGTTTCATGTCATCTTTACGAATAAAGAAATGGAAGTCTGCGGTTCCGGTA  
TATTCGCCCATATCAAGACAAAACATCTCATTAGGATTATTTTTGTCAATCTCTTCCCAA  
CCTTTGATCATCAGACGACCATCAATCGGTAGAAATTCAGGGCGATTCACTTTAAGCTGA  
TTGCTCATTTTTCATAAGCTGTTTTCAGATAGTCGTTGCTCAGTTCGTAATCTACATCGCTT  
GCAGGTGGAGTAACTCGGCCTTTTCGGTGATAGGATAGCAGCAGCACTATCACAGGATAA  
TTAATTTTTCAGACGATCATTAGACACACGAATGTTTCCGGTGCGGTTATCAACCGTAATA  
TCCGCTTCATCGCCCACCAGATTCAGAATGCCCGGGAAAGAGTTAAGATCATAGATCCCG  
ATTCCGTGTTTCGAGTTCTTGATTCAGAGTCGCTTACCATATAACAACGTTTGTCATGTTT  
TTGGTGATTAGGACGTATCCTTTTTTCAAGATGATACCTGGGTAAATAGCGGAAAAGTTT  
TTCAGGGTAGCAATGGTTTCTTTAGTCAGTTTCATCAAATCACTTTGATCATGTTAATCA  
ATTGATTACGGGTTTACTTCGTGCTCATTTTGAATCTTTAGCATTCTTTTCGATAAATCTT  
TTCTCGGCTTCCCTTATCGGATGAGTGAGTATACTTCAATCCAATGTAAGCTGTCAAGTAT  
TGTTGCAGAGCATAGACAGTAACAGGATTCTTTGCGGTCTTTTTTCCGTGCGAGATATACC  
AGATCACCCCGAACATCAAACACAAGTTTACGACGAATCACATCATCAACAAATTTATCT  
AGGACAAAATACCGCTCAATACACTCTATCCCGTGACGGTAGTTCATTACATCGTTATCT  
TTGATATAGTCAAACGGAATATGCCATAATTTACTATTTTGTAGGATGAATAGCATTGT  
TCTTTTAAAGCTCATAACGTTTCAATTCTATCACTTCCCATCAGCAATTGCGATCAGACGAGT  
TACTACTACGCTAGCGGCTTCAATCAGCAGTTCATCAGTGTCAATCTGATAACCCTTTTC  
GAGAATATCTTTACCTCGAATAGTTTTAGCGCCTTTAGCAATTGAATCATCGTAATACTT

GCGCATTGCCGCGATCCATTCTTTTTTAACCATATCATCAATATGCGCGTACAGTTCAAA  
GCGTGCTTGCTGCGGGATAACCTTCATTGTAGCTTTCTCGCTTTCTGGCGTTTGTAGTAC  
CCATGCTTTACGGATCATGTTCAATTGCTCGGTCAAATTCGAGACTGGTTTTCTTGTTCTG  
AATGTCTGCTACAGTAATTTTAGCCAGGTTTTCGGAAGTAGTCATAATATTAATCTCCAA  
AATAAAATCAGTATATCACGTTCTAAAGTTTGTGCAACCCAGCATCAGGGTAATCAAG  
TTGATCAAAGTTGGGGACCAGCATAAACTCATGATGACGACAAGACAACATTTTTGTAT  
GTCCGCATCGCTGTATATGCTATTTTTTCATATCCCCATACTAACTACATATTCTTCACC  
GGAATATAGATTGATTAATGTATAACAATTCTAACTCCGGCTGCGTTACTCTGTCAAATGT  
TAACATTCATTTAGTGAATCGCCACGTTTAAACCATCTTGAGATGACGGCTAAAATCAT  
CAGGGTTATGGTCACGATGGCTGATAATATACACGTTATCATCTAACATGTCAATGATGG  
AATCAAGTGCTTTTACGCCCTGAACGTCCGTAGCCCCATCATAAATTCGTGAGTACCA  
ACAAAGAAATATTAGTACCAGATACTTTACCAGCAACATCACGCCATGTAAAGAGCATCG  
CAAGGTCAATACGTGCCTTTTCGCCCTTGACTGAATGATGTATACGAAAACGATTCACGCC  
CCCGTGATTTGATTGTTTCGTTAAACTCTTCATCTAACGTAAAGATATAATCCGCTTCCA  
TGATATCAAGATAATACGCAATCCGATCCTTGAAATATGGAATATATTTCTTGACGATAG  
TCGCCTTAACACCGGAATCGTTCAACATTTCTGTTACAAATCCACGGTGATATTTTTCAA  
GAACTAGCTTTGATTTTTTCATTAGTAATCTCTACCAGTTCGTGTTCCAGTTTAGCAAGTT  
CTTCGGAATTGTCAACCCTTTCTTTTTGCAAGTTCCTGCATTGCTTTCTGGATCTGTTTAG  
CCCGACCTACAGATGCCGTTAAATTCGCTCTCTGTGACTCTATAGCGCGTGTAATTTCCA  
AGACCTTAGTTTGTGCTGCGTGGAAGAATTGGCCTTCTCTGCGTATTCTACGCGTTTCT  
CGTCAATCAGAGACAGTTTATGTTCTGCTTGCTTTTTGTTTCGCGTACAGCTTGATCAT  
TACCTTGAATGATCGGTTGAGTGCAAGTAGGACAGATCCCGCCTTTCTCATGCATATGGA  
TAACACGGTCAAAGTTCTGGAGCTGCGCACCAGTCTGTGCGATAGCCGTATTAATTTTAG  
CAAATGCCGCGCTAGGATCTTCCGGCATAACAACAGCCAATAGCTCATCGGTCAAGCGCC  
TTTCTTCGGCTTTAAATGCTTTAGCCGATTCTACCTCTCTATAATACATATTCTGCAAAC  
GCTGTAGATTCTCGGCACTAGACTTGCTCGCGTCTCTATTTACTTTTTATGGGTGTTGA  
TTTGTGCTGAACGTGATTAGCTTTCAATTCCTGCATTTGGATATTCTGGGTAATCTCCC  
GCACATACGCTTTATTCAGTTTATCCATTTTCGCCTAGCGTAGCAATATCAAGCAAATCCT  
CGACCAGTTCACGGCGACCCGCTGCCGGAAGACTCATAAACGGAACATAACCAGCAGTGC  
CTAAACAACGATCTGTTTAAAGCTGGCTAGGTTTCATTCCTATGATGACTTCAAATATT  
CCTGAAAGTCTTTGGTGCCTGCGCTCTCGTCGATCTTTTGACCGTCTCGATGCACTTCGA  
ATACTTCCGGTTTTTTGACCACGTTTGATATAAAACTCTTTCCCGTCCAGTTCAAACCAGA  
CTTCGACTAACAGTTTCTTTTTGTTGACGCTGTTAATCAATTGGCCTTTCTTGATACTAC  
GAAACGGTTTACCGAACAACAACAAGCAAAGCGCCTCGATCATGGTTCGATTTACCAGCAC  
CGTTAACACCAGTGATTAGTGTCTTTTTGAATTCGTCTAGCTGAATCTCAACAGGTTTCAG  
CACCCACGCTCATTATATTTTGATAGCGCAAGGTTTTAAAATTTAACTTTGCCATTAAGC  
CACTCCGCAATCACACATTCATAATATTAATGCTAACACATCTTCATCAATGTTGTAA  
ACACTTGGTGCCTTCACTTTAACTAATGTGTCTCTGCGATCTGGCAGCATGATCACATCA  
TCCAGTGTGCGCAGGATCATATGTCATAAAGGGATCAACATAAATACCTTTATTCAATGCC  
AGATATTCGCGAAGACCTTCTATAACCCTGTGTCTAAGGTAGGTCATCGATAGAATCATT  
TTAGTTTATGTTCTCTAAAAATTCTTCAATTTACCTTGCAGGTCTTCCGCTTGCTGTT  
CCAGAATATCGCGAAATTCACCTACAGTCAAGCGGTAATCACATTTACCAGTCGATGCG  
GGAGAATATACCCTTTATACATTGTCTATGACGCTTCTAGGAATACCCACTATGCATGA  
CAGAGATCCAACCTCTAACGTCAATGGAGTATTCGGATAATAATACTTGCTGGATTGTT  
TCCACTGGACGAAAGCACCATATAACAATCGGATTATATTCACCAACCACACTCTTAATAA  
TGGATTCAACTTTGTCTTTTACAAAGTCGCCAATGCCCATAGTCACCATCAATCTTGTG  
GGTGGATCACTTTAAGGTAACGACGGTAGCCGTCATCATACCAAAGCTTAACCACTGGCT  
GACCCACATTTTAGCAATACGCGCTTTCAGATAACCATAGATCGGATTCTTCTAATATG  
ATTGTTTTAGTGTGTACGCGTGCCTAATTCAATAAAATATTCCATTGCTCTCGAATCAG  
GATCAGCCGCGACCTTAGTCGATTTCATAATATGTTCCCTCGTCCAATTTTCATATTGTTTC  
AGGTCTTCTAAAAGTTCATCCACTGCTTGTTTCAGCACATGACGCAGCGTAAACTAATAG  
CTTTCATCAAATCTATTTCCGCGCGAGGAATAGAGCGAATCTTACACTTAACAGTAGTA  
TCGGTGAGTCGCTTTTCGACCATCATCCGAACCTTTCATGCTCTTTGTAATACGACACA  
TCAACAGAGATTCCCTTGCCTAGCAAACATAGGCAATGCCGCAATTAATTCATTACC  
TTTTGTGCAAGTGTTCATCATAACAGACTCCATAGACCCACGAGCAATAACATTCTGGG  
TAATATCAGCAACCTTACGGGATACGATGTTTGTAGCCCCTCTTTGGTGGTATTTTCAC  
GATCAAATGGGATTTTCGTCATGAGTCCACAAACCATAGTTAGACCGAAATGCTAGCATAT

ACTGACCATCTCGCACAACTCAAATACATGGATCTTAGTGAATTTTCGACAAACCTTCGT  
TGATTTCTTTTCAGTGCATTAGCAATCATAACAACCTCCAATCAATTTTTAGAGAGTATAA  
CGGGGATTTCTCCCCGCGTCAACTAACTTTTTGCGTTATTTACTTCGGCTAAAAGTTCAT  
CAGAAATACACTTGACCGCCGCAAGTCTTCCGGTCTAGGTTTTGTTCTTCCAGATATT  
CATAGACCATCTGAATAGTGCTTTTAACTTCAATAACACCTGTTTCCTGTGATGCGCTAC  
TCTCCAGTTTATGGACCACCTTTAGCTTGTGTACAACGGCCTCTAACGCGCTTTCTAACT  
TAGCTAACCCATTATCAGCGACCGTTGCGATAAGACGCACACTAAGCCCTTTAAAGCGTT  
CTACATCGATTTTATCGTCTGACGGGTAAGTGATACGCACATGATAAGTTTTGTCATTCT  
TAATAAACTCTTTTTTGTGTGTATCGGTATCGAATGCCCAAAAACCACGCGGATCGTTTT  
CGTCACCCGCGGTTAGTGTGTATGGTGTACCAATATACGTTACGTTACCGCCATCACTGA  
TAGTATGCAAGTGTCCCGAAAACACTTCACGGTATTTCTTGAGGAAGTCCGCGCTATAAC  
CTTCGGATTTTAGCCCTTTATAGAAATAGTAGCCAGACAATTTCCAATGGCCTACACAAT  
ATTCGCTGAATGAGTTTTGAATAAACTCTAAAATGTCTGATTTATTGTCATCACAAAACC  
ACGGGAACATGTCAAATGATACACCATCAAAGGTAAGTGTTCGGTTTATCGATAACCT  
TAATGCAATCATACTGGCTTAACACTTCACGCGGTGCGTTAGGCTGAATCTTATGACGTT  
TGAATAGATCATGGTTCCCTATGGTACATAACAGGTGATTCCAGATTCTTCCAGTAACG  
GGATGACCTTAGTACGGTAAAACACTCATCGTCGCATGAGTAATAGCTTTTTCGGCAATCAA  
ACCAATCCCCTGTTTGAATCCATGTCTTAATATTATGCTCTTTGGAGTATTCAACCGCTT  
TCTTGATGTTATCAAGAATATACTCATGCACCCACGGATCATCGCCACCGATACCAGTAT  
GCAGATCACCTAAAAGCAAAAATTTTCATTGTCTCTTCTCTCTCGTTTTTCGATGCTCTC  
ACTATATCACAGAAAAGAAAAGGGAAACCCCTTGCAGAGTCTCCCTTATAACAGACAT  
TACAGCATACTTAATACCGTTTGCCGTGTACTGACCCACATAACAGAAAGCAGTTCTGGC  
GTGTGTGGCTGTTTGTAGATATCACGTAATTTTCCGATAGCGTAGATATACGCATCACGA  
TTATCATCGATGATAGCTTGTTCAGCCCACCGCTTAAGTCGTGCAATCTCTCGCGAGTTC  
TTACGCAAGATCTTTTCCGCTTGCTTAGCGGCTTAGCCTCTAGTTCTGCTTGTACTTTG  
TCTACTGCATTCACTGCAATCTTGTCTATGCTGTTTCATCGTAAGTCATGTTATTTTACCTC  
TGGGATATAATCAATTATTAAGAAAATTCATCTTCTGATACATTATAGCTATGTGAGAT  
TGTACCCGTCAAGGCCTCAAGATCCGGTGATTTGATATTGCACGGATCGATAATCACCGG  
AACGCCGCACTCTCTCAAAAATAATTTGGCGAAATACGGCACGAGGGCAGTTTCAAATC  
TGCTTCTTCCAGCAAACGGGAAATGTTAATTTTCAATCTCATAAAAATTGGTCCAGGCTAG  
GCAATTCCTCAGTCAATACATCTTCAACCTTTGCCGCTTTCCGGTTTATTGACCGATTCT  
CGTAGTTGTTGATTTTATCGTAAATGTCTGTATGAATGCCTCATCAGCAATCTGGCACA  
TATCAGCGTCGCGTTGGTCATATACATGATGCACAAAATATTTGTATTTTGGCGGCTGTCG  
CTGTTCTCTCTTTTTTAAAGCGCTGTACAAATGCATTAAAGCACGCTTGCGTGATGTAAG  
CATGAGGATTTTTATACTTTGACTCGGCAAAATTAATCAAACCTTGACCGCCGCTCCGA  
TTCCGTCGTCGATCATTCTTAGCGCCATGTTTACTATAACCAGAAAAGTTCAAACGAC  
GTGATAGATTTTAGAGATTTGCATAATTGCTAGACCGATTTGATCGCTCATTGGAACCT  
GCCGACCTTCTGCTGCAATTTGTTGTTTCCAACGGCAAATTTCTTCGTAAAGCTCTTTAT  
TGTTTACATAATCAGACACTTCGCACCCTCGCTATTATTTAGGAAATAACCCTTTCGGGC  
TATTTCCCATTTGCCATTATACTTTCTTTGCTTAGTTATCCACACTCTAACCATCTCTACT  
GATTCACCGTCAGACGGATCAAGAGTTTTTCTTTTTTCTGCATGCGATACTCAAATCCG  
TTAAATCTTGCATTTCTTGTCTCGTTAAAGTCGAACATCTTTTTAAATGATTTTTCGCCCT  
TTACGCTCACCACATTCTAGCGGAATCATTCCGGTCTCTTATTACATTGGCATTAGGTAGA  
AACGTTTTTGGATAATCTACCAACGCCCATCAGGAACATATAGATTAACATTCTCCTTG  
CTCTCGTTGTCTCTCAGGTTACAACGCAAACATAATTGAAATGCTGGTTCCAGATAATCA  
GACACATGACGCGCTTTCAAAAACCTGTTTGTCTGGGAGATCGCAACTATTAGCAAGACCT  
TTTTAAATATCAATCTCACATCGTTGAGGGTTAAAGCCGAACATCACAGCAACATTTTTTA  
TGATGAATGTAAGAGTTAAGACCATAAGATCCGTCAGGTATCCGCTCACCAATACCATTT  
GTGCACGCTTCTCGGTCCCGATTCACGGTATAAGTGAATTCATCGCCACAGTCATTTTTA  
ACCATATCAACAAGACGTTCAAAGGTATTGTTTGTCTGACTGGTGACGCGACCAGCGT  
TCGGAGTCAGTCATAAGGATGATGTTAACTCTATCTGTATTTTGTACTCTTTGAAATAT  
GGTCTGGATTCTACCGCACTCGGAATAAAAATCGCAATTTGCGTAGTATCGTAGATACTTC  
CCGCTATATGTATCAAAGAGATTTGCACATGCTATCGTAACTTTTTTAAAGTCTCCCCAC  
GTACCGTGTTTGTATCGTTCAAGTAAACAATTTTCGACCCATTCTTCCGGTGTCTTCG  
TTATGTTTTACCATAACGTTGATTTTCTTCTAATAACGCCCTCATAAAGCCCTCGAAGA  
GAAGAATCGATCATATCAGTACCATCCTTTGCACTTTCTATCTTTTCTTTGATAGCGGCC  
TTCTCAGAGTCTTTTAGAACTAAGTTCTGTAGGCATTCCGATTCGTCGGCGATTGGTTCC

CAATGCTTCGGGATAAGTTCAAGATTAGACTTAAACGGATACTCATTAAATTCAACCAGT  
TGAGGAACCTTCATCAATGTAAAGAGCATAATCACCAAACATTTTTGAACGTTCCATATTA  
GATAACGCTGTATGTGTAATGAATATCACATCAGCACCGTCTTTAACTGATTGCATTATC  
GACGCTTGCCTTAAAGGCTTCTTAGTCTTGTGCTATCGATCAAGACAGCACGACCG  
CCATTCTTTTAACTTATTGTAAGATTGTTCACTTAAAACACGAGATGGCAAAGCAATA  
ACCGCTTTTCCTTTTGTCTCTAGGACGTGGGAAAGTATAGCATCAGTTTTCCCGCCGCT  
GGCAATGCGATTAATGTTTCAATCTTCATTAGAAACCCTTACGTCGTGCTTTCTGGCATT  
TCTTGATCAATTGATCAGAAATTCGCGCTTAGGTGCAATCTCTTTCACACCGAAAGCAC  
TAATGCCAAATTCAGAGAGAATATATTCAACTAAAAATACACGCACACGCGCTTACCGA  
TATTCACGCCGTTATTTTTAGATATGTCTGGCCTTCGACTTGCATCAGATCTAAATCTG  
CGTCGGTAATATTGATTTCTTCCATGCGCCCAAATCGAGAATAAACCATGTGTGGGATGG  
CATTGTGTTCTAACATAATATATTCCCTCACTCAAGAATTACTTAATGATACATACTTTAC  
CAGATCCGTGACAATGAGCACAACCCATCACACGCAATCCTGTTCGGTTACAGTGTT  
TACACTTCTTCAACGGTAAAGCCATTATAGCAAATAAAGCAATAATGAACACCGAAACTA  
AATTCTCAATAATCATAAATCTCCCAAAGTCTTTATAGCCTCCAATGTGCTCATTGTCA  
ATGAATATCTGGGGGTATACAAATCGGAGGCTCTTTGAGTTCAGCCTCCCGCCAGTTCT  
TCAATCATATCACGGTCGGGAATAGTGTCAACCCCAACCTGCTTGAATACTGGTTAAGT  
GTATACGAAATACCCAGATCATCCAGTAGCTTCATTGCACTAATAACAACCATAACAATGA  
TAAGCCTCTTTCGGTATGCCGTATATCTCGATCATTCTCAGCCTTTAATCGTTCTAGTT  
CTTCGTCCAGTTCCTTGATCCGTTGGTCACATTCCAAGTCACGCTGCAACTTAGTGGCGA  
ATACTCGTTTAACTGATTGTAATCATCGATTTTAAACACTTCTTCTTCGCCATAGCGAC  
GTACAGAACTTCGTAGTTATTGAAGAATTGTTGCATCATTGCTTCGGATGATAGTTCTG  
CCGATACTACTTTAAAATATTGATCTACTGTAGGCGAAAACCAATTGCAAGCATAAAGAT  
AAACCTTTTTCATTGTCTGGACACTGGTAAGCCTTACCATCGATTTCAATCACAGAAACAT  
ATTCAGGTATAGTAGATGAATCAATAGCTAAGACTTTAAACGAACGGTCCCGTTAAACT  
CGGAGATCTCACGATTTCGCATCACTGGTAGCAAATGCTTTACGCGCTTGTTGTTTTTCC  
ACTGATAGGTCATACCAACAACAACTTATTACCAACCTCGCTCTTACCAATCAAAAAT  
TCAACTTCACGACGTTAATGTCTTCTTGAAGGTCTTTAATCTTCTGGCGATCTTGCATT  
ATTTCCGGCCATCTTGTCAAGTGCTTCGATGAAATCATCGAAACGTTCAAAGGGTTTACCT  
TCGTTTGCTTCGCCAAATTTAACCATTGTCAGGCCGTAACGACTACTAAACAGACGTTTC  
AACTGTCCAACGATTTTAGAATCATTGGTTATAACTTCCAATTCTTCTACTTCACGAAAG  
AATTTTCTATCAGAATCTATAAACCAGCTAGGTCCCTTGTGGTTCGCTATCTTCTGTTGCG  
CTCATTAGAGTATGGTCTTTACCATCAATTTCAATTACATCAATTTGCCACATGGACTA  
ACATTTTTAACAGTAAAAGGTCTATAATTTATTGCTCGTGCAATAACATAATTAAGGTTA  
GATACGCTTTCAGCATAATGGCAGAAGTCTGTATAGCATTTCGCATCTTCCAAGTCTAA  
GTTTTACCAACTTCCATTTCTGGGGAACCTTCTTCAACTTCACGAAAGAATTTCTATCA  
AATGGACTAAAGAAATATGTTGCACTCCAAATGTCTTTTCCGTAGCAGTTTTCCGGCGTA  
TGATAAACACCGTCTAGCTCTATTGCATCAATCCAACCGTTACCCTCGATCTCGATGATG  
GTAAATGGCTTGTACCAATAGCTTCACTAATATCGCTGTTAAGTGGAGAATGAACACGT  
TCTCCGTTAGTAATAAACTCAGTTTTAGCGTTCTCGTCTTTCCAGGTGTAAGTTTTACCA  
ATTTCCATTTTATAATATATCCCTTAAACCGATTTTATCAAGTTCGTTTAAATGCTTTC  
TCTGCTTCCGTGCATATCTTGCACCCTTTCGGGCATTTTGTCAAGAAAATGTTTTAACTCT  
TCAAAACTGGAGATATGACGCATGGCGTTAGCACCGATAGCCGCATGTGATTTGCATTCA  
AAGCGGATTTTATAATTATCCATCGCCAATTTGAGAAGATCAATTAATTTAGATTCTTCT  
GGAATAATAATTTCTTCAAATCTGCTACGGTCAATGATCCAGCAACCAACAAGATATACCT  
ACATCGGTTGAACTCATATAAGTTCCATCATGAAGATAATCAGCCCGCTCGTATCCTTTT  
TTCGCATCAACCGACGCAACTTTAAACGGTAATCTCAGATATTTCAAATAATCAACATCA  
TACCATTTAAAAAATTGGTTTGCAGCTTTTACATCTTTCACGCATAGGTCTTACCAACT  
TCCATTTTATAATATCATCACTCATTTTTGATACGGGATTCTAATTGGATCATAACGGTC  
GCGCGTTTGTGTTTTCGCGGATAGCACCGATGCGGCTAGGCACACCATCAAGCACGGT  
CTAATACCTTCTAGAGTAGTAATTTTGGCAATGCTATTATGTAACCCCATCTTATCGAT  
CAACTGAATGTCGTAGGCTTCCATAAGCAGACCCAGGCGTTCTAAAGTTAGGTCTTCTTA  
TTTTTCTTCCGATTCTGGAATCTTAGGTTCAATAGTAACTTCGGTAAAGAAACGACGCTC  
ACCCGACCAAACACACACCGGAGCAGCCAATAGGGGATTCTTTTAAACGTCATAGAATC  
GAAATTAACCAATAATAGTAATTTCTCTAACATCACCATCATCGTCAAGGTCTCTAC  
CTTAAACGGGCGACCAGCCTACAAGTCCACAATACATCTGTTAATAGACGACGAAAATTT  
AGTCAGTTCGGCTTTCGACGCTTCGCATTCATCTTGTAAAGTTTAAACCAACTTCCCATTC

CATAATAATCACCTCAAATAATTTTCACTGGAATACTATTAACAATCTTGTATTGTACTT  
GATTGTCAGACCCCCGCCACGGCTTCTTTCGTTGGCATACTTTAATAATAACGCCCATCGA  
TGAACATGTGACTGATTCTACAATTTTTCTTTGCTCATCATTCAATTGGTCAAGGGTAT  
AACCGGACCATAGCCAAATATCTTTGTTTGGCATCCATGATTTTACTTCATCGATGATCC  
GCTGTACACCCTTTAAATTGCGTTTATAACAACGGATCACCACCTAAGAATGTTAGCCCCCT  
GAATAAAATCAGGTCTAAGCAGATCCAGAATCAATCCCATTGTATCATCGGTGAATGGTT  
CCCCGTTCTTAGGATTGAGTAGGCTAGCATTAAAGCAACCATCACATGCGTATGAACATC  
CGGTAACGTAAAGGGAGACTCTCACTCCCGCACCTTAACCATATCACAATCTTTAATAT  
CGGCATAGCGTAATTTGCCGTATGTATCAGAACTCATATTCAATTACCCCGAACTTGTTT  
ACAATCTGCGCTTTATAGTAACCACCGCGAGATGGTAATAGATAAGCTGGGCTTAGGTCT  
TCGTATTCACGGATTTCTACTTGTGCGTTTTTCAGTTTCCCAAATCAGTAAAGTCCATTTA  
TTTGATTCTCCTGTAAAGTTGTATCGCGTCTTGATGAATATAGTATAGGGGATCTCGCGA  
TCCCCGTCAAGCATTATTTAAATTTTACGAGAGATTTCAACCACAAGCGGCCTGGTAGG  
GACTCTCCGGCAAACATGAAATTGTCATCTGGTTAAGAACGCAGCATATTCAAATAAAC  
TTGAGGCACTCTTCGTAATCTTTACGTTTAAAGATAAATCACATTCTCGCCAGTACCGATC  
ACACCTTTTCTATATCCATGCTCTTTACGCACAGACCATTGTACAGTATCTTTTTTAACC  
CGAATCACAACAGGTTCCCAATACCCAGCGCATCCGGCTACACCACACGATCAGGTCAGG  
AAGTATTGACCTTTTGTCTTTGTTTTCTCCACCCGATATTAACCGGATGCCATTCGTGA  
AACAAGGCTACAGCATCGTGTGTCTCTTCGATCTGTTTATTGTCAATTCTTACCGTAACC  
ATCCATACAGGGATCTTATTTGTTGGTTCATCATATAACATGAATCATCATCAATATGT  
TCTACTGTCATGTCCACATTAATTGATTTTTCGCGTGTCCATGTGTGCTTTGCTTTACGC  
TTACGATTCAATAATTTAGACATATTCACCTCACATTATGAACGAAATTATACGCCATCA  
AAATGAGAACTTGCATTACAGCTATTATAGATAATAAATCCTGTATCTGGCGCTTGTACT  
ACTAATTGACTTGCATTAACAGCGGCAACAGTAAAAATACGATCCGTGAGACTATGTTTA  
ATTTCTGTCCCAACTTCCAATGGGATGTACTCTTCTCTTCGACCCCAACACCAAACAG  
CCTTCTTCATGGTACGCCTGAATCTTTTTATCACAATTACACAGTTTAGCAAATCAAGC  
GTAGACAATTCATGAGAGTTGTGCGGTATAAACCAACACAAATTGATTATGATAGCGAATC  
ACATACAGGTTATTATCTTCGTCAACGACACAAAACACTACGGATTTGTGTGCCTTCGCCG  
TTACTCCAGCAGATATTAACAACCGTTCCCATATAAAGAACTTTCTTTTGTACCAAAG  
CTAGCCAGTGTGCTAGCGTGCATTTAACAACACTACCCATCACCAATTTCTAACTTGCGA  
ATTTAATTTCTTTATTCAATATACAAAACATAATGTTGTCTCTCTTGTTTTTCGATGTG  
AGCATTATACACGAGCTTATCCGGTTGTCAACACCCCAAAACGAAAAAGCCGACCCTTTC  
GGATCGACTAAATATTACATGTGCTTAAACGCGGTTTACCATCTCGGAGTGTTTCCCGTGG  
TTAAATGGACGCAGATCAACAGATCCAAGATATCCACTAACGCGACGGATAACATTCATC  
TTTTCCAGATTGTCATTTCCGCAATCAGGGCAAACAAAACAGACTCGGTGCTCTCATT  
TCCTTATTAGATCCGCATACATGACATACATCGGAAGGAGTATTAACACCGAAGTAGTGC  
AATTTATCCATTGCATAGTCTACTACAGTTTCAAGACCTTTCAGGTTGTTTTTCATGTCT  
GGGAACTCAACATAAGAGATCATGCCACCGGACGCCAACCAGTGATAATCTTTCTCAAAG  
TCGATTTTCTCAAATGGTGTGACTTTCGGGTCTACGTCAAGGCGGAATGAGTTGGTGTAC  
CAGTCTTTATCGGTAGCACCTTAAACAATACCAAATTGCTCTCTGTCCAGTCGATTAAT  
CGATAGCAAAGGCTCTCGGCTGGCGTACCGTAAAGACTAAACCCAAGTCCGGTTTCGTCC  
TTCCATTTTTTCAGTATAATGACGCAAGATCTTAAGAATATGTTTACCGTATCGCTGCGCA  
TCTTCCGAATCAAACGGATGAACACCAAACAGGACGCTCAATACCTCATGTAAACCAATA  
TATCCAAGAGAGATACTAGCGCGACCATCATTACAGCACTTCCAAAATTTTATCGTTTTGA  
TGAATACGGAAAAATGCACCTTCTGTATACAGTACAGGAGCTACATTGGCTTTAGCCCCCT  
TGTAAGCGTCTACGCGACTCATAATCGCATCAAAGCAAATAGGCATACGATTAGCTAGC  
TCTTGTTCGAATAGCTCAATTCTGCGCATTACAGACGCTTTACCAGCACGACGCGCGGCA  
ATAAGAGCCATACGCGGAAGATTACAGAGTCACAACACCCAAGTTATTACGTCCGTCTAAT  
ACTTCGTGCTCTTTCTCGTTATGCCACACACCCAGGAACTTCTACACATTATTTGTTCC  
GGGTAGGTCGCTCATCTACCCCCGCTTTTCGGCTGCTACATGTGCGCCATGCAGAACAGAC  
TATATCTTCTATCTTTTCGATAGTCTACCATTTTCGGATCGCTTGATCCTACGCCGCTACAT  
TCATCACGGCTAGTCGTTAGGCATTTTCATAGCGGAACTCATATTCATAAGTATTGGTTTT  
TCTACCATCAAGAATTGCAGATACATTTTTACGATGCAAGCCCAATGTTTCAGAAAGACT  
TCTCACGCTTTTAAATGTCTGCTCTTGTCGGTTTTCTTTATGGATCGCAGTAACCTTATA  
TGAACGACGTGTGAACCTTATAGCACCCGTTTTTCGTAACATTCTTTCGTGTTTTTCGCTGTT  
AGTCCCCCACTCAAGGTTAGATGCATCGTTTTATAGTTTTATCGTCGTTTTTATGTTTCAC  
ATATCGATAGCCGTTAGGATTCGGAATCCAACATTCAGCCACAATAACATGAACACGCAA

ACATAAAGGTTTCTTGTCTCTCATTACCTTTACTAATGTATATCCGGTATTGTTTTCTAT  
CCAGGTACTIONACTGTTTACCTTTAGGAGAAAACACCCGTCATCTTTTCGATACCATATA  
TTCGGTATCACGAATTTTTCTAAGTTCCATAATATATCCTCTTATACACATTGGCGTAAA  
GAGAACATGACCGCTATGTTTAGCACGGGATTGTCTTCTAGAGAGTTCCCCCGTTTAGGC  
AGATTTTAGATGAGCTGTTTCAAGTTTACCCATCGGGCTAACCGGAACACTAGATCCAGT  
GATGCTACGGTTATTCTTTCGCAGAGATATAATCAGGGTAAAGACGCTTACTAGAACATTC  
CAATGCAAGTTGCTTAATGTCTAGTTCCGGATCTTCCGGTTTAAAGTTTAAATCCTTCTTC  
TAAGAACATCACCGCTTAGGAAACACCGGAGTTATACCGTCTTTACCTAAACCTTTAGT  
TCGAACCTTTCAGGATCGCTTCTGCATCAGTTTTTCTTCCAGCTAGTACCCTTACCAA  
GGTTAAAGTCACAAAGGGTGTGTTGACCGTTGGTAGAGAACAAAGTGTTTCATCTCATATTC  
CAACGCCTGATATCCGTCTAACGTTTCTTTTTCTGTTTTCTTGTGCATAGAGAGAATC  
AGCTTTGATTCCGTAGGTTTCGGCATCAGCAAAGTGTTTATGATATGTTTTCTTAAACATA  
CGGCGCTAACACCTGGTCGATGTTTGCAATTGTGGTCCCGCCATATTGATGACTTGCCAC  
CTGTGCGATAATTTGAGCGGTTACAGCACATGCAACACCGATCGATTTAGGACTTTCGAT  
TTGTGCGCTACCCAATTTAAAACCATTTCTCTAACATGTGTTTGAGATTAACAAGACAGCA  
GTTAGTAAACGGCATAGCTGGTGCATAATCCATATCATGATAATGAATATCACCGTCTAC  
ATGCGCTTTATAGATGTGCTCAGGTAACACGGTTTTAGCAATATGTTTAGACACAGCGCC  
AGCAATCAGATCTCGACGTGTCGGGAATGTTTCGCGCGTCTTTGTTTCGCGTCTCTTTGCT  
TACTTCGTTTTCTTACCCGTTGCGATCTCTGTAATGTCTTTGATTAGTTTTTCCATTGT  
ATCACCTATGAAAAGCGGGATTTCTCCCGCTCGTTGATAGTTATTTTACCAGTTCTGCT  
AATCTTTTTCTTTAGCTTCTAGTTCAGCTTTAAGCTGTTTAAATCTCTTGTGCTTCGGA  
TTAGCGGCTTCCCTGCTTACTATTTCCGGATAACCTGATCTAGATACAACCTCCCAATCCTGA  
ATATTTTTGATAATGTTTCCGTCCACATTAATTGGTCCGGAGATTCAGTACAGCTTCCAGT  
TTAGTTGCAAAAACCTTTAATTGCTGGTGTGAAGTATTTATATTCGTTATCTTCAAACCAA  
TAACCTAGACTTGCATTCACAATACGAAGATGAAGTTTAAAGATCGAGGTCTTTATCATCG  
GTATATAGGCCTTTTATACACCCCATAGAATTAACAACAACCTTTAAAACCAATTTTATCT  
ACACCACCAAAAACATCTTCAAGAATATCAGCAATTGAGCTATTAGCGCAAGATTGGTCCG  
CTGAAAGCGTCAAGGTTTTCTTTAGTTACAGTATACCAAACATCTTGTACCCACATAATA  
TAATCCTCTCGTTGTTAAGTGGGAGTATTATAGCATACTCCCTTCGCATGTCAAGTACTA  
ACTTTTTTCTTACTGCTTTCACCTTCTGGCGAATTACTCGAATCTCTTCGATCTCTTTT  
TCAGTCTCTTTAACAATTTCTTTGCGATTCTGAATATCTGTATTGAGATTATCATCAAGT  
TTAGGCAGCATGTCAATCAAGAACCTTTTTAAAGTCTTTCAGGTTTCGGATAACAGCACCT  
TCACCCATTACCGCCACACCAACACCATCCGGCAGATCACCAAACAGTTTATCCAGTTCA  
GACAGATGATCATGGTCTTCTAATGCTTCCCTCCGGTTCAGATGGCAGTTCAACAAAGTTA  
TACCGTTCATCATTGCTGATAAAGTGATACCAGCAAAGCCCGAAAGATTTCCGGTGTATAT  
TCTAAACCATCAATTTCAACCGCGTCAACACTTCCATAATCATCTACTTTAGTTCCCTTA  
AATCCTTGTTCCAGCTTTTGAACAATTTCAACAACATGACTTGATACAGTTTCAGCGGTA  
AACCAATATGGCACATTATGCTGATTTGGCTTGTAGCGTTCACCTACTTTAAATCTCTGA  
CCATCCGCTTGCATAGCATGAAATTGTTGTTTCGTGATTTCCGCGAAGTATTCAAATTCG  
CCACCATCAAACACACAAGCCCATTTGATCACAAAACGATCTGCCTTAAACAGTTTCACCT  
TTCGCGGTGATCATGGTAGCTGATCCGTGCAATTCTTCTTCAACTAAAAGCCATATTCG  
ACAAAATCAACAAGTTACATAGCTTCTTTGTGATCTGGATCATGCTCTCCCCAGAATCGC  
TTAAATTCTTGCAAACCTTCTGGTGTAAACGAATAACATTTACCTTTTTCAAAGTAAGTC  
GGCATTGCATCCTCTTTCTTGTTCATCGCTTCGTATGCCTGTTTTGAGATGCGTTTTAAAG  
TATTTACGCTCATCGTGCATAATCATAGTAGCCCAATAATAAACGATATCCTCAGCGGAA  
TAAACTACATCCCCAGCTTCAATAGTAATAACATGACCGTTGTCATCTTTTTCTAATACT  
TTAAAGCCCTTTTCGAGGATTTACGCAACCCGAATATGACCACGGCGCGAAGCATCGGTC  
AGAATAAATTGAATTGCGAGAAAAGTCTAGAAACTCATCTTTACCACCTTCACGGAATGCA  
TAGTAATGACCTTCAAGGAATTTAGCCATAATATAATCCTCTCGTTGTTTAAATGGGAGT  
ATCTTACTACTCCCGTTTCATCATGTCAAGCGTTAAATGACTTTTTTGGATCTCTTTCAGT  
TCAGCTACTTTATCGGCGCTGAATTTAGCGTAGGTATCATGTGCAATAATTTCACTTTCA  
AGAAAGGTTTCCAGCCGAGATCTATTTTCAATAAGGAACTCTTTCAGGTCTTCCGCGTTC  
TTGATAAAGATTTTATTGTCAGTAATGTCATCTTCAATCGCAAAGGAGATAGAGCGAACT  
TTACCAAAAAGTTAATCAGATCTTCCAGCTATTCTTCTTTCTTAACTGGTTTCATTCT  
TCAAACCTGCTTTTTTCGTGATGCGTTTTAAAGTATCTGCGCTCGCTTGCATCAATCATGATT  
GACGCACCCTCATAATCATGAGTTTCTACCAAATACACTTTACCATAACATTAACCGTA  
AGAACTTTAAAGCCCTGTGAAGCACACCATAACAGGAACTTGTTATGTTGTGGATAGCGT



TTAACAAGTTCCTCTGCGGACTCAGCATTACGGAAAGTGTAACAACGACCTCGTTCAAAA  
ATAGCATCATTTGAAAACCTTAGCTGGATACAATTTATACGTTTTCTGTACCATAATATAA  
TTCTCTATGATTTCACTAATTGAACAGTACGAAACAGAATGCGGTCACACGGAAGAAGCA  
TAAATTCCCAACGCGGATCAAAGTCTTTAGCGGTATATGTTTTCCCATCAACCGAGATTT  
CACTTACATAACCAATAAGTGACACTTTAAGAACAGTAAACCCATTCTTGATGACTTCGT  
ATGTATCTTTCAATCCTTCGTAGTCATCCTGTAGGAAGTCTTTACGTGCTTGCTCAGATT  
TAAAAACATAGGCCACACCGGATTTAAACATGTTACGCATTGTTGATTCTCCTTCTTGAT  
TAAATGGGAGTATTTTACTACTCCCATTTCTTACTGTCAACTACTATCTTAATCTTTGTA  
TAAATTGTTTTCTTATGCTTCTTCGTGATCTCTTCTTTTGTATCAGCGTCACAGTAATCGA  
AACCTTCTGCGTCCATAATAGCAACCATCTCCGCGCGTGTCAAGCGTGAAAATCGTTTTA  
CTTTATCAACAGCATATTGAGGATGTAAATGATTGTTGGTGTAGTATCCTTTGATGTAAT  
TAACATAGTTTGTAGCCCAAACAACGAAATCAGCACCTAAAGCACCAACACCAAACCGTT  
TAAAGTCTCCGGTCAATGATCCTTCTAGGCGGTTGCAACACGAATGAAGAAATCCCCTTA  
CACGGCCTTGCCCTTTCCCTTCTAGATCGTGGTTCGTGGTCAAGATAGTTTTTGCTCATAT  
CCTCAAAAAGTGGCAATTGACAAAGGGGGCAAATACCCCCCTGTTTTTCGAATAGTTCTT  
GTTTGTACTCTTTAGCACTCTTAGCCGTGAGTAACATAAATTCACCCTCAAAGAAGGTA  
TTAAACCATGAATCTTGTTTTGCCTACAAAGGATCGGAACTCATCAAAGCCACCAATAT  
AATCACCATCATAAAAAATCTGCGGCATGGTGGCAATAACTTCTACCCTGCGCGATCCT  
GAATGTGCGCAATGATAGAATCAATCTTTAAAGGGCGACCGTTTTTCGTCCACACCATCAC  
TGACAGGAATATAGATGTAAGGGATCTTACGCGATTCACAAAGGCGCTTTGCATTCTGAC  
AATACTTACAGTTGTAACCTTCAAACCAAAAAGTTCTACCATGTTGTACCTCAATCTAC  
GTTAGTTACATAAACTTCTTGTGTATCAGAAGACTTACCACCTGAACGATCTAGGCAATA  
GGTCTTATTCAACAGGACGCGAGTTTAAATCATTCCGCTTGATAAAGTCAAGGAGATGATC  
ATTTACCTTTCCCTTATGATGTGTGACATTACTGATACCAAACCGAAAACAACGCTCCAT  
AATAGATTCTACCCACTGATTGAATTTAATCTCTTCCCTCGTCACTCCAGAACTTATTGTA  
TTCCGCAGAAGTGATAAGGTACGGCGGGTCCAAATAAACGAAATCACCTGGCAAGATCTC  
GATCTTGTATAGCGACCAGACGTAGAACTGATTCGACCGTCTTTGTTTCCTTCCTTAAA  
ATTCAGGACACGCTCTACCGCGTTTTTCGTTAAAAGTCCGGCGACCAAATTAGCATTAAA  
TTCTCCCTTCCTGTTATGGCGGTTAATGTTGCTAAAACCTGTGCTGAATCAGAACAACAG  
AGATAGCGGATCTGGATTCTCATTATACTTCTTGGCGAATGCCATGTAAGCGTCTTTATC  
TTCGCGAGACAAACCATTCTCGGCAATAATCCGCTTGATCGTAGAAACCGGTTTCAGGACA  
CTCGTCAATCGCTTTGTACGCGTCAATTAAGCGGTGATCAGAGTCATTAGCCAGCACATC  
CCCTTCGACGTACAGAGACACGCTCAAGCCGCCACAAAAGGCATCAACAAAGCGGTTATA  
GTGCTTAGGGAAATACTTACTACCACCAGGCAATAACTTTTTCTTATTGCCAGTGTAGGG  
AATTAACCTAATGCTTTCTTATTATCCCTTCCTCAAATAAGTTCTCTCGATCTCTACC  
AGTTGAAAAATTCTTGCCAATCACACGGAAAATTGCAGTTTCCGAAATGATCCTCTTTG  
TAAAGTTCTTTACCGGATGGCAGCTTAATATCTGTTACGCTGTAGTATCCGCAACAATCG  
CAATCACCATCTGTATATTCTGTTTTAGTCGGAATATCCATCGTTGCCAGATACAAAGGT  
ACATCGTCTTGCTCAAAGTTCAGGTAACCTTCATGGTTCGAATGAAACAAAGTTATCATCA  
CCACCGAAAGGGATATAATGGTCATAATCTGATACAGGGTGACCGTGTAATTCCCATTCT  
ACAATTTTAACATTACCACTAAACTTTATACCCATAATTTCAACAAGAAAATGAGTATCG  
TCAATGTAAATCTTACTAGGGGTTGGATAAACCATTATATAATCCTCATATCTCAGAGAA  
TAGAATCTCTGTTAGCTTCACTGACTGCTTTCTGAATGTTAGCGTATACTCGAAAGGAAA  
TTCAATACCCAACCTCAAAGAGAAATAGCCTACCGCCTCTTTATGCTTATCGATTAGGGC  
GATCCTAACCAATCCCCTTGAATCTCTTGAAGGCGGTGAATGGCTAGTAACACGGGTATC  
ATGCAATGTCCAGTCACCATTACGAATCAAGATTAACGGTTTATCGTCATTGAAGATCAC  
CGACCCCTTTCCGGTTCGGTGTGTTTATACTAATCATCAAATTCTAAGAAATATTCTG  
GAACGATATAACCGTTAAAGTCATTACACTTATAAAAAATGTGGTGCATTTAATGCTGGT  
GATCATTAGTAAAGATTTTACCCTCTAGAACCAGAATGTAATTAATAGGTCTAATACCTA  
CAGAATCAGGGTCTAGACCTTTTTCTTTCAGTTCAGCCAGCGTTAAAACCTCGTCCAGATC  
CTAACGTAGCCATGATTTACCCCAATTTCATCAAGTTTATGTTCGACGATTTTCAGAGTAT  
TTTTCTACTTCTTAAATCTTAGTGTGGATCTCCACGATCTCGTCTTCACTATCAGAAAGT  
TTAATGGCAATAGCTGTACTTCCCTTGACCCGTCTTGATCGCTTCTTTCAGTTCAACCAAC  
ATGTCCGCGTGTTCATAGCAATTCCTTCACGTTCGAACATAAGCGACGGTCAAAGCCTCA  
TCAGCGATTTCTAAAGCATTTCAGCAACACCAACAGCCATTTTACGAGTAGACAGCATA  
AATTCACCTCACATTATTCACGTTAACGCCGTTCATCAATCCAGCCTACGCTATTTGGTT  
TAACAGTTTTACCATAGGATGCATACTTACTCAAGCATGGTTAACATCATTATCAAATC

TTCCTAAACGTA CTCCCAAAGCAGGAATATCCATGTATGCGGGCTTTATATCCCCATGTAA  
CGTATTCAGCATCAATCTCAACCGGACGGCCTTAAAAAGCATACTACTACACCGTGACGGT  
CGACGATAACATAGCGATAGCCAGCCGGAAGATACACAGTTTCGCCGTAAACTTTAACTC  
GAGTAGCAGAAGAGATAAACATAATATAATCCTCACACCGTTTCAATTTGATGCGGGTCATTA  
TATGATAACCGCATTTCATGTCAACAGTTTTTTAAAAATCTTCTTCCGGTTTATATCGA  
CCGTCATCGACTGGTTTTGGACTGAATCCTTTATGCGTGCGCGGGCTTCGCTTCCGGTTTA  
CCAGCAATCATCAAACAAAAACATTTTCAGCCCCTTATAACACATAACATTATCAACCACG  
GTCCACGTTATAGGCCATACGATTGCAGCAATACAAAATGCTCCTGTATCGACCTCTTTG  
GTGCCCTTGTCGAATCTGGCGTACAAGCAGAATACTAGATACGAGATCATTGCACCAGTA  
GTCCAGATATAAAGCACATTAACAATATCTTGTGTGTCACATTATCCTCCTTACATGTC  
TTGCAGTGCATAAAAGCATTTCCTTCATAGTCATAGAAAATGTCAAAGTATGCTTTTTTC  
CACATACTCGCCATTAATCCAAGCGGCAGTAACAATCAGAGTGGTCCAGTTAGATCCGCT  
CTCAACGGTAAAGGTTTTAATACCCAGCTTCGCTGCCAAGTCGAACGCAAACCGGACGCA  
ACCACGGCAGGAAGTGATATTGGAAGTTTTGATTTTAAAGCCACCGCGAGTTTTAGAAAT  
TTCTACTTTAGCGAAAGACAGGTTGCTCATTGATTCTCCTTAATAAAGTGTGTTTTCGT  
TTTGATGTGTGTAGTATAGGGGATACGTGATCCCGTGTCAACAAATTTTTTATGACTTTA  
GTGAATTAACCACTACATCAAATGATGAACAGAGCACACCTTATTAACACATACTCAT  
CGTGTTTAGGAATAGCGCCTAACCGCTTTATTTTCGCTCGCGGACACGATAAACCGTTTAT  
CCGGTGCATTTACCTTACATGCTTCAACAACGCACGGGAAACGCGTTTCAGAGAGTTCTG  
GATAGTTTTCTGAATCCATCTGGACAATGAATACCCTGTTACATTGATTGTAGAATCCTG  
TTTTTGATTTTCATCAAGTTTTCTTCTCTGTACAATTCGTGCAATCTTCCCTTTCATGATTT  
CGTTGGTTCTTGTCTTCACAGTTTACCCATTCAACAAGATCTTTACCCAACCTCGAAAGCC  
CATTCTCGGTCTTGTCTTACGTTTTGTAGGTATGGACTTTCTGACACTCTACGAAGTGAT  
GTTGTGCGTAACAAGAATGATCCCAGGAATGGTTCGGATGTTCCCTTCAATATAACAATAGGA  
CGCGAGTCACTATCAATACCTTGTAATAAGGTGTATCCTGAATCACTTAGAATCGTATAC  
TTTTTCATTTACACATCACAGTTTCCCTCAACCAGTTATTAAGCGAGCAAACCATGACG  
CTTTTCGTGCTTCTTTTACTTTATGTGCACGAAAACCACCGAAACACCATTTCATAATCAT  
CACCGAAACATGATTCAACAGGAACACCCGCATTTTCGTAGTTCTCTGGTCTTTATCATAA  
ACCCTTGACATAAGGGTCGACCTTCAACAATGCTAGGAAGTTTAACTTTTTCCATGAAAG  
TATACCCAGCACGGTCAATAATTTCAATTTTCATTTTACATTATCTCCAGAGATCTTCC  
AGCAATATCAATTTACCAGCGCGAACATCTAGGATAAGATGCGGTAGGTGTATGCAGTT  
TTCCACCCCACTCGCTTCATTTCTGAAACCGTGACGTAAGCCCATCCGTTTCGCTGTAAT  
AAAGTCTACTTCAACCTTGAGAGGAAAGCAAGACTTTTCTATGTCTTCAAATCCGATAAT  
GTGTTTTGTGCTTGAATATCGAATATATCCGGTGATCATTGTTGTGATCTCCTTATACTCA  
ACACACCATCAGCAGGTAGCCCATGATAAACGCTCATAACGCTGGCAGAAATCGGACCAT  
AGATATTGTTACCGTTTCGGCATAGTTGAAATATGCGTTTTCTCTCCAACCTTTCACGAAA  
GAAGTATTCGATCTTGTGATCTCGACCGGAGTATATCCGAAAGCGGGTTCCAACCTCAACA  
TTTGAACATAATGCCAATTTAACAGAATTTGTTTTTCTGACCGCTGTACGGTTTCCCTTCT  
GGGTACAGCACAGCAGGTTTAGCGGCTAAGCGGATAAACTCAGTATTTTTAATGAACAGA  
ATATCATGATAACCGTCATATTCCGACACTTGCATAGTAACAGGAAAATCGACATGTGCT  
AAACCTGGTAGATCTCGCATATCATGAAAGGTGCCATCAACTTTTTTCAATCTATATTCC  
TCACTCTTCTGTTTCATTTCTTTTATATGGTACTATAACAGGATTAATACAGCAAGCACC  
AATTACGTTATGAGCACCACAAGTTAAACATTTATAGTCATGGAACCTTATTAAGGAATCG  
ACCAAACCTCATAACCGACTAGCGCCGCGTGTACTTGTAGTCTCGATCTCATCCATATCAGC  
CAATGTTTTAACCTTCATAGTATAATCCGCAAATGGTAGTTTTACGAAGATGGTCATTAC  
ATGCTTTTTAATGCATCAGTCGCGGTGTCATAGCGAGTATTATCATAGCACCAGTAACCAT  
CTGTTAACTGATAAATCAATCCGTCCTTTTTAGCTTCGATGAAAGACAATCTTTGAAAG  
TTTCTACTTTCTTTGCTGATACTCCACGGTACGGCGTTTATAGAGTTTAGCTAAAATGC  
GTTTCAGCTTGTTCCTCTTTATTGCCAGACAGATCCCAGATGATGTTCCCTTATATGCTTGA  
TTAATCGTTCAGTGGTCATCTTTGATTCTCCTTAATTGGTATGCGTGCATTATAGCATTG  
TGATTATCTTTGTCAACACCCAAAAACA AAAAAGGCTATCCCGAAGGATAGCCCATAAAA  
TTACACGCGAGCACCAGTAGATCGTGCCTACTTTATCCAGCGTGGAGCATTACCAGTAAC  
GGCTTTACCAGCAGCACCACCGTTATATTCTGTACCGTTCCCTGAGTATTACATCTTCC  
TCCAGCAGCACCACGTTACCGCACGCACCGCCTGTATATGCACTAAGAGACCCCTCACC  
AACAGATCCTTTACCAGGAGCGGAAATAGTACCAGCAGTTGCACCGGAAGTCATATGAGA  
GGAAGACCCACCAGCACCGAATGGGCGACCACCGCCACCACCAATACTAGTCGACCCCT  
GTTACCGCCGCCACCAGCCGCCACCAGCGATAGCACCAGTTATTTGTAATTCGTAG

AAGTGTACCGATAGCGTTATTGATTGCGTTTTCCACCAGCAGCGCCAGCAGCGTTACTACC  
ACCATTACCCCCACGTCCGTAGACATTCACACCGGAGTTAATGATCAATGTTACATATTC  
GTTTGTAAACGAGCTAGGGAAGTCAAGACAAGGAACGCCAGTAGATTGGGCAACAATATC  
ACCAGTGATAGTAATTACTACAGGAGAAGATCCTTGTGCTTTCATCCAGCTAATAAGAGT  
GTCTTTATTGTAAGAGTACTAGCACCAATGCTATAATGAATCTCTTTAGAGCGTCCGAC  
CATTGCCGACATATACGCCGGACGACCTAAGCGTACAGCTTCCATTGCGGCACTCATCCA  
CCGTTGACCAGTCTCGGACACGGCAGATGATCCTACCCATCCAGAAGATATTGCCATAAA  
ATTTCTCACAAAGAAAAGCCCATTTAAGGGGCATTGATTGATAAATACTTAGATGAT  
CTCTGCTTACCATCCAAGAAGAAAGACCATGTTTTGTTAGGATAGCGAAGCGCCCATGA  
TTCGGCAGTTTTAACACCAGTTTCGAACAATTGACGGCTGGTCACTTTAGCCATACCATC  
TTCGATGGCAACGTTTTCAATAATCATCGGTTACTTAGCGCCACGCATGAAACCGAAGCC  
AGCGGAAGATTTGATAATTTAACAGTGGCCATTTTTGATTCTCCTAGAAAGTGTCTGT  
TTCGATGGGTGTATTATGCAATAACACCGGATCGCTGTCAACACTTTCTAAGAAAAATTT  
TTAAACTAATCGAATATAGCCCAGAATTTACAGCACCTTTAGCCAGTCCATAAACTTCCCA  
TTCAAGGTCGCAGTAGTCATAATTTGCAACCATCAACTGACCATTTTTTCATGCAGCAATC  
ATGAGAGAAAATTTGCCCGCATCAACTACGATAGTAATAAACTTTCTGATTCTGGCGG  
TGTGGAAGACAAAGCGACCATATGACCCTTCAGCTTAGTAAGTGTGATGGAACAATAGA  
ATTCGGGCTTACCTTAATACCGTTAAATTCGTTTTGTGTCTTTCATGCCAGACCTCGCAA  
ACACTAATAGCATAATCATGCTGGTTATTCATAATATCAATTGCATTGTGATAACGAGCT  
AAACCATCAAGGATAAATTCTTGTATCCTGTTTCAGTTTGGTATCACGCGCAGCCCTA  
AGAGCATCAAGAACAGGTCCAAAGTGATTATCTAATTCATCTTCGGTTGCAATGTTTCCT  
ATTGCCTCGTCTATCCGTGATTCTAATGCTTGCTTTTCGTTGATCACTTGCTTGGTATAT  
TCCAACACATCAAGAATATCGCGGGTAACGTCGCCATGATAAGGTATTCCCGCATGAAGA  
TGATCAATTAGTCGTTGAATGTCAATGTTCAATTTGTAACCCTCCTCTGAAAGCACATCCC  
AGATCGTTGAGTCAAGGTGCATTAATTTCCACATAATAGAGTCATAACTACCGAAGCCAG  
AAGTAAAATTACATCTCACTGGCGATATGTCTTATGAAAATCGGTGGCTGTCACTGCAT  
CAATAGGCATATCGTCACCTGAAAGCACCAGACATTTAAGAATCATAACTCTGTTAGCCG  
TTGGCGCGTGCTTAGTCTTTTCAGCCTATTTTTCGATGATCCGTTTTGCCTTTGCTTCTT  
TGAAACGTCCAGACCAAATCCGGTTTTCGGTATTGATTGATAATAATTTCAATCACATCAG  
TTTGCAATCTTCACGGTCTCCATAATGGTTTTGTAAGCCAGTTAAGATGATCACCGAAA  
CACTTTGCGGTGTTACCCTTCGGATCGCGGAGCATGGTTTTCTACGATCTCATCGGCAGTA  
ACAATTTCTCCTTTCTTTGCTGCATGTTCTACCATATACTTCAAAGTTTCTTCGGAAGCA  
AGTGCTGCGGCTACTGGATTAATCATTTTTGATTCTCCTTTGTTGTCGATGTGTGCATTA  
TGCTATACCCTATTCCGGTTGTCAACACCTAAAAACTAAAAAGCCACCCTTTCGGATGGC  
TTTTTGATTATATTTTATTCACGTCCATTTGTATGGTAGTGTGTTGAATCGACCTTTGCTA  
AACTAGTTAAACATAGTAACCAATTCACCATCCCTTTCCAATGATAACCCTTCCCTCGTCT  
TAGACGGGTCTTCCGATTCCGGTAGTAATTGAACACGCGAAAGTATGAGGAAGCCTAATAG  
TTGTGTTAATGCTAGTATTCTTTACTTCTGGTATGCATCCCACGGTGACTAACATTAAG  
CCAGTCGAGTGAGTTTATAAATTGTTTTAAAGCATAGAGCTTTGATATCGTCTAAAACGC  
TCTGTAACGAGCTATCCACATCATTATAAATCTCACTAGCCATTTGCGTTAACTCTTGCA  
AATAGGCAATTTGCTAATCTCCTTGCGGACGACCAACTTTGGCTGAAAACGACCAGTGA  
TCCCAATATTGGTTTTAGTGAATTATCAACCAATTTCTTGCAATTTCAAGATAGAACTCTT  
CTAGAGCCTTATGTTTTGCATAAGATCCAGGACCAGTTACCCCAAATGCGCAGAATGCA  
TATAAGCAACACTCATCAGACATTCACCGATAAAGCGCTCAACTTTATTAGCCTTTCCCT  
CTTCGGACGTCTTTAGAAAATCACTGAATTTTCATGTTCTAGATTCTCCATATTATGCAAC  
AGAACAAATTGTTGTGCGGCATATCCCCCATAATAAAACACTGCCTAGAATCCATACTT  
TACTACGAGCATAACATCTTCATAATATGGGCATGAAATTTCTGGCTGGTTTTCAATGGAA  
GGAGATATTTTGTGTTAGATATACTATCATTGCGCCGTCGAAATAATCAGTAAAGTCACCA  
GTTGGATCATATTGATCAGCACCGACACTTCCGACCGCAGTCAAGCATATTGCCGCTGTT  
AGAGTTTTACGAATAAATGACATAAGTCATTTCCCCAGATTGAAAATATTCAGTTATATT  
TATAATCTGGGGCTTTATTTATGATTAACTCTTATTTGGTAGTACCGTCAATAAAATGTT  
TACGACACACAGAAACATATTTATCCTCTGCACTAACTTCTATTTGAGCACCATCGCGAA  
TAACATTACCCTCTTTATCTACACGAAGGACCATTGTTGCTTTCTTGCCACAATGACAAA  
TACACTTCATTTGACAGTGTATCAGCAAATGCCATTAATGCCGAGATCCTTCAAATA  
GATTGCCCTGAAAGTCAGTGCGAAGGCCATAGCACAGTACAGGGATATTAGCATCATCAA  
CAAGCGCACACAAGCCTAAAACATGCTCTTTAGTCATAAATTGTGCTTCATCTACAAATA  
CAGCATCAGGACGCCAGCGATCCGGTCTACGTTACCTAACGATTCACGATAAACCAAAT

CGAAAAGATCATCCGATTTAGTGAAGGTGATCGCTGGGGCACTTAGGCCAATTCGGGAAA  
CGACTTCACTTTCTGAATCTCGATTATCAATCGCTGGCTTAAGAATTAATACTCGCATAT  
CACGTTCTGTATAGTTATAAGCACTTTGTAACAGAGAAGTTGATTTGCCAGCGTTCATAG  
ATGCATAGTAGAAATATAATTGCGCCATTAATTAATCTCCAAAAATCCAACAAGACCTAA  
ACCGATATAAGTCCAGATACCAATAAAAAAGATGATAATGCTCATTGCAAGGATAAACCC  
TTTCAGCGTTTTGGGATACCCGACCCAATATCCCGACCATCTTCTAACCGGATCAGTTT  
ATTGCCTTCAGAGTCCATATCAACTACAACATGTTTATTTTCGAGATTGCAATAGATATTG  
TTTTACAATCTCTTCACCCGCCATAATAACAATAACGAAAATAAAAAGTCCACACAACAAG  
ATTAATGATAGTCTCAAGCATTCTATCACCTCCACCCAATCAGGTGTTTCTGAAAGA  
CTCCTTCTCCTTCATGATGGTTCGCAACCTTTATTGCTACAATACATCCACCAATCCCACA  
TTCCCCACGGTAAACGCTGCGTATCGTCGTTACAGCAAGTGAAGATAATAGGCCAACCCAC  
ATCTAACACATCGGCAGTTATCTTTTCATGTGAGCGGTATTTCGGCTTCTTCATAGATGACT  
CCAATAAAATCGACATTTACATTTAGGGCAATGCGGTTCTTTTCATTTAATACCCGTCTGT  
CTTTGGAACACTAACAGGAGCGGTTTTTATATTGTATTCAGTGAAACAACGAAAACAAGT  
TACGTTTTCTACAGACTGACGTTTCACCCAATCACCGGAATATAGATCATTTTTTATTTGT  
CATATTCAACCACCACAATCTTAATGTCTGGAGTAGCAATATTAATGATCTCTTCTACAC  
ATTCCCCTCAAGGCCACCGATACCGCAACCGATTTTAGAAATATAGAAAGGCTGTATAG  
CACCATCAAAAACATCATTGATAGTCTCAAGTCCTTTCAGGATAGCACCATATTCAGCAT  
TTGGACCCGGTCGGAATTGAGTATATAGATTCACCCCGCACCCAGTTATAACCATTAACCT  
GATGCGTCCAGACACTAAACCCACCCAGCTTTTCTACCTTACCGCGAGAAGTTTGCTTGT  
CAATCTCTAACGCTTGCAGAACTCTTTCGCGATCTTTGCAGCAATACCAGCACCCATAG  
TATGAAAACAATTACAACCATGAATTAATGACCGTTTCTTGTTTAAACAGGGCGATGA  
GATCGCCCTTTACAGTATCAATAATCATAATATAAACCTCTCATTAGTCACGGGAAGAGT  
ACCCAGCCATAAAACGGCTTAACAGTGTGTCGCGATTAGCAAAGCATAAATTGCTTATCAG  
GGGCAGTATCACAAAGGTTGCGTTTTGTTTTAGCAAAGCTGGCAATACTCAGATCCCACG  
CTCGATTTTTTTGGTTTTTCGTCTCGACCTTGTTTGTATGCTTCGTTCGAGTTCAAGTGCGA  
TAAAATCACTACACATGTTGTCATCATCATAGAAAGTTTTAATGATCTTTTTTGTGATCT  
CAAATCCTTTGTATTTCGAACCTTTGGATAAGGGCGCTCATTACTAGCAAGCGCACCCAGCCG  
AGAACATCATAGCAATCATAGTAATTATTGTCAACTTTTTTCATATATTCCTCAATAGCGT  
TTAGTCTTAAGAAAGCCTTTACTCTTTAGATGGTTAGCCTTTTTTTAGTACATCATCAGCA  
TAACCTAACCCGGCTTTATAGTTCCATCCAGCATTGTAAGAAGCTAGCGCGAGTCGGATA  
TTACCGTTTCGAACATCCAGCCAGTATGCTAACTCATCCATCGCGTAGAATGCAGAAACC  
TCGCGATTTCATGATGAAGTTGATAGTCTGGCGATCACTCATTTTAACACCCGCGCTTTGCA  
TTTTTCGCTTTCACCGTTTTAGGGTAATTTTGAAATAATCCATAAGCATGATGATTTTTC  
TTTGGTGCTAAGTTTGCACCCGCGCTTGATTCTTGCCATGCGATACCCGCCAGGATGTGA  
CCTAAACCCTTTCCGTTATAGCGAATATTCGGATGGTCTTTTTTCAACTTACCGCTATTC  
TCGAATTGCTCGCCGTATTGATAGGCGAAATGTAAATTATCTAGATGGTGTGCTGTAAAG  
TTGTCTATCGGCGCTTTTTTTGATCGGTGCGCTAGTCGATGCGTGTGTAGCACCAACGGCT  
AGTGACAGACTCAATACTATCGCTTTTAGAACTTTTAACATTAATTTCTCCTGTTTGGCT  
TAACTTTCTGATTCATACTATAGCCCTATCACCCAGAAAGTCAAGCATTATTTTGTATCCA  
ATTTCCATTATTGGTCTACATTCAAACAACCCGCCGACATTTTACCCGCCAGTCGTTTTG  
GATTCTCTATAACAATTCGGCAGCATAGGCCGTGATATGGCTTACCCTCTTCGATTAGAT  
CTACTGTCATCCCGATCCACATGTTACCGTCAGTAATTTCTAATCGATTTCGGTTCGGTCTT  
CCATTTTCAGGAAGTCGAAGATCTCCGGCAAACGAGTTTCTATCTTATTGAATAGTTCCA  
TTGTCTTATGTTTCATCGATATGACGATCGGTTAGACGGTCGATCATATGCGGACTAAAGC  
GAATGAAAATATAACCCAGCGTAACCATCATTCAAGCACTTTTCTTTGATCTGCGCATTGG  
TTTTGCGCAGTTAGGTTTTCGAAGAATCTACGCAGCTTACTACGGCGAACATGTACGTTAA  
TTGTTTTCCATTTTATTATCCTTTCTTAAACAAATTGCGAATCCAGTATACAAACGGGATT  
TCTTTAAACTTGAATTTCTCTATAGTTAATTTCTTTAGGAGCAAGATGAATACCATAAGCA  
TCATGTGTAACTATATGCCATTTTCTATAGCCGAAATGTGAACAACCGTCTGGACCTAGG  
TTAATAAGAGTTTCTCGCTCACTAGGATTATTTTTCCACAATTTTGTAAATAGGATCGCAC  
ATAATTCGACCTAGCGTACCATCAATAATCTCACAACGGTAAAGTTTTCCAGCAGTGAGA  
TAGGCGCACCCGTCATAGTCGGTATAAACAACACTTCTTTAACACTCATTTTAATACTC  
CTTTGTTGTTTTCGATGGGGGTATGTTACTACCCCGATCATGTGTGTCAACTACTTTTTC  
AAGATTTTTTTTTGATTGCATTCCAAGACCTTTATTTCCAGGTTGTTTTGGTTCTTCGAT  
CAGTGTCCATGTTTCGACCGTCTAAGTGTGCACAATTTTTAAGGCAAATAAAAATCTGGTG  
TCGCTTATTAGCACGGATATACCCACTATTTCGCAAATCTTTTCATGTGGTGTATATTCATA

CAGTGTATTAGGTGTAATATACTTGCGGTACTATAAAGGTGTCATCACATACATCATGGT  
ACTAACTCCCAACGATCACCGGAAGATGAGACCATCCACCATCAAGAAGTATCGTAATA  
CGATAACCTATATCATCTTTGATGTAACCGATTGTCGGTGGATTTTCGTTCGTCTCGTGCC  
GGGGTAAAATCATACTTTCCGGGCGTAATATCTTGTCCCTTATTGCTATTGGTATAA  
ACTTGCATTTTCTTAATCTCCTATATTAATAACCACGGGTATAGTGTTCAGAACACG  
GTCAGATGAATATATTCTAATAGATCTTTCCAAAAGTCAACATTTGGTTCTTCCGGCATA  
CCGTTTTTCTTTGCCTCTTCACGCGGAGTTTAAACACGCTCGTAGAGATCTTCAATTCT  
TCCCGCGCATTATCAAAGGGTCTTTCTCCTAACTTACACGCTAAAATAGAAGAACGTCGC  
GCGAGCGCGAATTGTAGATCACCTGTCTTATAGATTTCAAGTAGCTGATAACCAACACGC  
AGAGCATGAGAAAGTTCTTTCCAGTTACTGAAATACTTTTCAGATTTGGCTACCTGCTTT  
TTGAGATAGCCAGACGAACCCACATACCAACATGATAGAATTTATCTCGATGTGTTTCGG  
ATGTATTCCCATTTCTCTGGAGGATTCAACCAACATGTTACTAGGCGCGTGCACCATATCA  
ATAGCGCCGATATCGCCTTTACATGCCAGATTGATAAACCGTTTTAGACTGAACATATTA  
ACGTCAATATCGTCTTTGGTGTCTTGATCCCTTGACCACTAGTGCTTTGATCATAGTGT  
TCTTTCATCGATCCTAAGATAATTTCTTTCGCGAGTCGGAACAAAGATACCACGAAAATCT  
TTATCGGAATTTTCAGTATCAAGGCCGTATAAGTGAGATCCGAAGACCATTTTAAACCATT  
GTATGCATAATTAACCCCTCTTTAGTATTTTACGTTACGTCGAACGCCTTTTCGAATCTG  
ACAAATAGCAGACGGTGAAACATTATATTTTCTTGCAAGTTCTACACCCTTCATATGGGG  
AGAAGATAAAAATCTCTTCCACTTGGTCGTCGGTAAGTTTTGCGTTTCCGTGGTTCTCTCC  
CCAATTTTGTTTAATCCTTCTTCCCTTCGCATGAACAAGATTTTCGGGTATCTGTGTCGA  
TTCAAGATTATAAAGGTCATAGTTTTATTTGTTTTCCATCCTTATTATTAACACTACCGGTA  
GTTATTTGGATTCCGAATAAACGCAACCGCCATAGCTTTATGCATATTCACGGTTTTTCT  
AAATCCATCCGGCTTATAAAAATACTGTAAATTTAGAATAACCAGTTTTACCATAAAGACT  
AATATAATTTCCGGTCTCCGTATTTCTAACCCCTACCATGAGAGCTAATCTCAAATTGAGT  
GTAGGGCAACAGCGCATCAATCACTTTCCATTCTTCGACAGGATGGTCATCACAATATCT  
TTAATCATCATATCACCTCATAAAAATAAAGCCAACCCCTTTCGGATTGGCTTAAAAATT  
TACATTGCTTCCGTAAAGGTGCGCGAAATAACGTCACGTTGTTGGTCTGGAGTCAGACTA  
TTGAATCTTACGGCATATCCGCTAACGCGAATGGTTAGTTGCGGATACTTATCAGGATTA  
GCAACCGCATCGAGAAGAAGATCGCCACTCATAACATTGATATGAGCGTGCTGACCACCT  
TCGACAACCGGAGCACCATTATCTACAATCACCGGACGGAAGCTAGTTGTGTGCAGTGCC  
AGAGACTCGACGTCTTCTGCGGTGATCACATGGTCTTCTGCGAAAGTTTTACTAACAAC  
ACTTTAGCGCCGATCAGTGCTTTTCGGTTCGGATAACCAGAACCATAGGCGCGAAGTGTCCA  
CCAATAATAGTACCTTTATGCTCACCTTTCATGATTGGAATTGCTTTAAATTCCATAATT  
CACCTCTTATAGATCAGGACGTTTCGTCATTAATTTTACCAAGCAAAAACAACATAGAGTTT  
ATCAGGTTGGACTTTACGATTCTTTTTAATTGTAGCACGGAATCGACGAGCTACGCTTTC  
TTTATTTTTCATTAGTTGAGACCTAAGCCAATGAAAATAGGTTGGTCTCTACATTACCC  
ATCCCAACACTAAGTCCATTCAATTCTAAAACACTGCAATACGCTGTCAGTAAATCCGCGC  
ATGGTAGTATCTAGGATAAAAATTGTTTTGTCAAGAATACGACCTCGCCATGTGATCGGA  
TTCAGGAAAGTTCCGGATAGATGTACAATCTACATCTGAAATATTTACATATTCACCGCGA  
CCGCGATCTCGGATCGTTTTGGCATGTTCCCGCGTCGTTGAAACGATAAAGACACTAAAG  
CCTTTTCGCGTATAATGCTCATTAACTTGATTCTAGCGTCTGTATGCCCTGTCTGACGG  
CCTAAATTGATTGAGACGATGGAATCTAGGTCATCAGCAATGTTGCGTCGCTTACGGCGT  
TCTATGATGCCATTTACGGCAGATACACACGACGATAAATCAAATCTTTACTTTCTAAT  
TTTACATCAATATTCATGGTAAAGTCTCCAGTGAACGGGGAGAGATCCTTAGATTGTCTC  
CCCGTTGATGGTTAATATTTTATTTTGGATCTGGGAAATTCAATAGAGCATATACTCCAT  
AAAATTTCCCTAGCTGGATTATCATAAGCGATTGCAGCTTCGATTTCTGTGTCATATTGTC  
CAAGAACATGTCTTTGTAGGTTGACCATTATACTAGCTCTCCATATCTTACGCTAATCCT  
TCCTGTTACACTTACTAACACCCTTATACACACTAGAAAACTTTTTAGACTTCTTCTTTC  
TATGATGTTGATTTTTCGCGTCGTTTGCCTCCCTACGATTTGGAGGATTGTTATTAGCAG  
GATTACCGTCAATATGATCAATTAATCTAACTAGCGTCCTATGTTCTAGAAACCAAACAA  
CCCTATGCACGAATAGATGAACGCTAGGAAGACCGTCATCTCTACTATGCCAAAATCTAA  
GATGACCATCTTTATTTGTTCTGACTTTAACTAAATCGCCGTGTTTATATCTACTCCCTA  
ATGGTCGTCCTTTGATAGCTTTACTATCGACTCTATAATATAAGATACCCTCTATATGAG  
CATATCTAAGTTTTATCTCGTTTTGTAGGGATTCCCAATATTTAAAAGCCATTTTAT  
AATCCTCACAAAGCCAGCGATTAAGCTGGCTTTATTTTAGTTATACCGGGTCTGGATATA  
CCTTTTTATCGAGTTCCATATGCGGTCCGTCTTTAAAAGTCAACCCCGCAGA  
TAACAGGAACACCCAATTCTCGACCAGCTTGCTTAAATGCATCAGCGATCATACGGTAGT

ATTTTCATGTTCCATGTTTCCTTATCTTTTCGGATACGCTACAACGTCAACCGCGAAACCGT  
GAAGATGACGAGATTTTCATAGTCTTAGATTTACCTTCCGCAACATATTTCTCTTGCGTTT  
CTAGACTACGTACACTTTCCGTAATACCAAAATCGACCGGAGTCAGTTCTAAAGCACGAT  
GAACGACTTTTACCAGGTCTGGATGTACACCAACAAGCCGATCTTTGCTTCTTTGAGATA  
ATTTATAATTATTCACCCCTTTGTGAGTGATAATATTTAGTTCCCGGCGATCCTGCAT  
AGAGTTCTTGTATTAGCACCAATAAGGATAGCATTAAACGACAACCATTCCCAATCAACC  
CACTGATTATTATAAATGCTAAGTCCGTTTGCTAGGCCAAATACATGCATTCCGGTCCAC  
ATACTCAGAGCCATAATCAACATCACGGTAAAACCAATGCAAATCTCATATTTTCC  
TTTTCTCTGTTTACGTTTATAAAAGTAATACATTACCTCATCGCGTCCGGTGATCCAACA  
TGCTAGGGCGGTAAACAGCTTTACAATTCCCAACACACCTACTGACGCGGCGCTGTCAAC  
GGACATAGGAACAGTAAAGGCCATAGCTAACATAGCAACGCCACAAATGACATTAAGCAC  
CATTATAATAAGACCGAAGAAAACCATTGTCAATCCTCCGACACAAGAAAACCAACAATC  
ACGCCAGTGATAAGACATGATGCGCCGCTAATCAGACAACCCTCACCAAGTGATTCCAC  
CAGATCAGACAAGCGACAATAACACAGAATCCCCATACTACCGCAATCGCAACATAGGCA  
AGGGTCGCCAAAACATATATTCGTTTATTATACATCCATTACCAAACAAATAAGAAA  
AAAGCCATATCAACAGAAACGAGGCAATTGATCCGGCAAGCAAATGACATTAGAGAATC  
CGCCGTCTATCCAGGCGACAAAACAGAATACGCCAGTATAGAAGCATAAACCAATTACAA  
AGCATAACAATAAGCAACCATAGATAAAAACGCCATAGAAAGCCCTCCATCGAGATAAATTA  
GTGCGGGTAGTACATTACCCTACCCGCATTGTTAATCATCGCAGAGCGTGTTCTAGAACG  
ATTCCACACCAACCGCTAACCACACCCAAACCCACAGCAACAAGCAGATTCACTCGGTCT  
TTTGGAATCATCGCAAACAGAACACCCACACAGAAAGCCATTACCATTGAAGTTAAC  
ATTTGTTCAACCATTATCACACCTTTAAAGTCATAGACGCATAAAGATTAATGTCAGGCC  
AGTTAGGTTTCGCAATTATACTCAACATCCCACAAATAAAGCGGTTTAGATGTATCAGCCA  
AGTTTTAAAAATCTTCTACCCACATTTCAAGGCTATATGATGGATAAACTAGGCTATCAT  
ATCCGCCGTAACGTTGGCCTACTGGTCGGTCAGTAAAAACTACCTCAAGATCCGGTAATT  
CTTTTTCAAGGATAACCGCCAGCGCATAAATCAGACGTTCTTCTTGTACGCTGCCGCA  
GGACCGTTGTCTGTGGGTTTTTTGGTTCACTAGCAAGCACCTCCACATTTTCACAGAAT  
GAAATTTTCACAGACACAATTTTACCATAAGTGAAGAATGAATATACATTATCGAGATAT  
TCATCGTCACCTACAATCACATCAAACCTGCGGATCAGCAACCGCCGCAACATATTCTACC  
AGTTCATCAATAGAATTCAACTTATTTTCATCAATTCGGCTGTATTTGGATGCATCTGTG  
ATTTTAAAACCACGTTCTCTCAGCTTATCAATTAGAATTTACGGGGAGTTTCAAACAGT  
TTGCTCATAATATAATCCTCACATAGTTAATCAATGGTCAACAATCTTGCACATTATAAC  
AGAAAGAACAAGACCGCAACCCACATATAGATCCCAGCAATCAATGCAATTTCAATATC  
ACAATATCCAAGATATAACAACAGGAATTAACAACAACATACAGACCAGCGCAAAGAACT  
AGCAAAGACGCTAGAAAATCCGATAGCAGTATTAGTAATATTCATATTAACAACCCTCGC  
GGCTTAAGTCAACAGCAATTGCATACAGCATAATGAATATGCTAGCCGATCCGAGAATCA  
ATGCACCCTCACATTTTGAAACTCGCTCATCAAATGTAACATTATCCATCCGAGGATGT  
TAAAGGCGCAGACCGCGCCTATGTTTCGCTAACCAATTAATCTTTTTTCATAATATACCTTA  
GAAAGAAACAGTTTTCAAGAAATCCAGATTTTTAGTACCGAATACAGAAAAGTAGTGTTT  
TCCTTTTTTCGGTTTTAGAGAAAGCGATTGTCTTCTCTACATGGTGACGGAAGCCAGACAG  
ACGATCACCCAGGCCAAGGCGGCAAGCGTAAGTAGTGCCGTTTTTCGAAAGTAACCTCGAT  
TTGAGTTTTGTTCATATTCGCGTTCATAGGCTTTTGCTGCCGCTTCCGTGTGCTTTACGCTC  
GAAGTCTTCGAAGTGGAATACTTCGTTTGCGTTAGCGAATACAGAAGATTCAGAGAAGAT  
AACTTTAACCGATACTGGTTTTCAATTTGATACTCCTTAGTAGTTCGTGTTTCGTTTCGAT  
GGGTGATTATGTTATACACCTCTCTCGTGTCAACAACCTTCTTAGTCTTTTTTCATAAT  
TTCTAGAGCATTTTCTACAGCACCTTCCAACCTTCCACATAATGGACATAGTAAGGAA  
GTTAAAGCACCCGCGAGGAATCAACCTTTTTAGAGATAAACCATTCTACAAACGCTTCGCT  
CATACCATGCTCTTTAGCGGATTCGCGTAATTGTTCAATTTGGTCTTCCATAGTATCACC  
TCAACACCTAACGTTATTCAAACCTCAATCGGTCTATTTCATCCTATTGTAAGTACATAT  
AACAAACCATAGTTATGTGTTGGTTGTACCGTATCAGATAGACACGCTTGTACAGCATCGC  
GCTCCGATGGGTCTACAACCTCAGCTTTAAGTAATGCTAAAATCTGGTTATAGCGTACTC  
TTAGTTGTAATAATGGTTTATCCCCATATTACCCCTTATAGTTGATCAGCGATGTAAG  
CGTGACAAGCGCGGAGTTTCATTAATGCACTACCTTTCACTTCGCCTACGATGTTTCATAA  
CTTCTAAGCGGTCCGATGGATTTCATCTTAGAGCACCAGATCCGGTTAGCCAATTCCAGTT  
TACTCATATTTGGTTCCATCTCAAACAGTTCACGCTCAAAGTCGATAATTTCTTCTGCTG  
CGTCTTTAAAGTTAATCATTTTGATTCTCCCGTTTCGTTGATGGTTGTATTGTAGGGGAG  
TGATCCTCCCTGTCAACACTTTTATCAGAAATATGCAATATAGTTTGCCAGTCCGACAG

AGTCATCATTTCGGCATTGCTTTTACTGCCAGTTACAACCCTGCTCCA ACTTTCTGTTT TAG  
CGGATTCTTCGTTATAACCCCGAGATTACCAGAATAGCTACTCCGTTTTCTTTGCTTACTG  
CTTTCAGTGCTTTAGTGATGCGACGTGCCATAATTTGATTCTCCGTTTAAGAAAGTGTGT  
TTCGTTTCGATGGGTGTATTATGCTATAGGCCGGATCTGGTGTCAACA ACTTTTTTTAAA  
AAAAATTTTTAGGCAATAAAAAAGCCACTCCGAAGAGTGGCTTATAGGGAAGGTAGCGAA  
TCTTCCTTGTCTCCCACCTGCTAGCGGCCTAGCAAGTGAATGCTTTAGCGTACCGGATCG  
CCCATACGCTGCAATAAATGCGGCTAGGTGACTGCCAAATCATTCTAACCGCGCTGTCTT  
TAGTTCACTATTATTTATATCGCTTTCTCTCGCGACGTTTTTGTATCTTCTTCTTGATAG  
AGTTAAATGCATTA AAAAAGACACATGACACTAATAATAAACATAACCGTATTTTTCTACGA  
TATCCCACGGCTTCGCATCAGTACAGATCCCCCAAACGGTAAAAAATGCAAATAGTGCAG  
AAGAGATCACAAGCATGATACTTGCTAAGATATAAAAAGTCATTTTCATGGTTTTACCTC  
AATTCCTTCGCTATTCATTACACATCCACGCAGTAAGCAAGAATCCTAACACATAAGCAAC  
AAAATACGTTAATGCTTCTTCTGGTTCTGTGCTGTGTATCATCATTAAACCAGTTAGAAC  
GGTCTTAACAATGACATTTAAAATAATTAGCCACGCAAATAATTTTCATCGTTTGCCCCAT  
TTCGGTTCGAGTCTTTACAAA CTTATACATTCCGTAACAATCTCGAATCATCCACGTAACA  
AGAGCACCAGTCAACACAAACAATACACAGAAGAAGTAAAACGGTCCAGTTGCATTATCA  
ACATGAGCAAGCCATGTAAAGAAAACACATGCTAAGAATGTAAAGAACATCATAAAAACAC  
AAGAAAGCAAATATTTTCATGCTACTCATAGCGCCACCATAACAACAGATCATAAGAAAAC  
CCAACGCAATAAGAATTGCATCAAATTTAGTGA ACTCAGGTCCACCTATCAACATCATT  
GTTCTGTTCATTATAGATCACAGAGCCATCTTACAGCACCACATAAAGCGATCAAAG  
ACTAGGTCTAAACGAGATTACAACAAGTTTACAAAAATCATCTAAGGTAACACCGCAATA  
GCTACCTACTGTAACAACACCGATCATCAGACACAGAAAGAAAACAAATGCAACCAGAAA  
CAATGTATTGCTAAACAGTTTAGTGATCATTAGACACCCCCACGACGATCAATTTCAAAA  
ACTTTTTTACCATCAACGAAGCATGTTACA ACTGCCTAGTTGACTTCCGCAAATTTGTTGT  
GTCACCCACTTAAGGTCAGAGCGAAACAATGTTCTATTAATAACA AATGTTTTACCGCTC  
TTATCCTTACCATAAATTTTTGCTTTAACCATATCCAATTCCATATTATCACCTTCTTTG  
CTAATCGCTAAACCCAATCCGAAGAGAGGACCCGATGCTACAGTATACTCGAAAGTTTCA  
AATGCAGTAAAGAAATCTAAGCCACCAGGTAACAGAGTTGCAGTAAACAGAGTACCAGCT  
ACGAACATAAAAGTTTTACCGATAAATTTCA TTTTGATTCTCCTTTCGTTTGTTTGTGGG  
GGTATCTTACTACCCCGTTTTCATGTTGTCAACTGTTTTTAAGAAAATTTTACTTCGTCT  
ACAATGTCTTTCATGACATTGATTTCCATTCCGGTCAGAACACGTTGGAACATTTGCTGC  
ACATACGCTTTCAGGTATTCATTTGATGGCTTGCTATCGAAAGTCTTTTTTAGTGTAGTAG  
TCATCACCGAAAGCTACTGTAATTACATTTTCGTCGTCGTTCCAAGCGATATAAGCAAAT  
TTGCCGTTATCCCAGAAGCGAGCACTAATTGCTACTTTTGTTGAATCGAATCCTACTTCG  
CTGTGAGATTCAAGAACTACTTGCGTACCAGTTTCTTTATGAATGTAGTAGCGGGATACT  
AAGTCAAAGCTACGGGTGTAGTGACATTCGAATTTATCTTTAAACATCATCATTTTGATT  
TTCCTAAATGTGTTTCGTTTCGATATGTGCATTATGCTATAGTCGTTTATGGTTGTCAAC  
ACCTAAAAACAAAAACCCCGAAA ACTTTTCGGGGTATAAAAATTACAGTTTGGTTCGTCCA  
CTCCAGGTCTAGATCTTCGACATACTCATGAGATCGGACAATCTTTAAATCGAACTCTAG  
GTCAGTGCCAAATTTACGCGCACCAACATCATAAGAAAGCGTGATATGCGGTACATATTC  
AGGATAATCCCGCGTCGCGCCTAAAGCAGTGCCGATATCGTGTCTGAATTGCATGTAGTC  
GCTTTCAAATGCCAACACAAGCGCATTAGTACCGGATTGAGTTTCAAACACTTTCAGATG  
GCATAGAGAGCCTAAAAACTTTTCACCCTCTTCTGGGATAAACGGAACATAGACACGAGA  
ATATAAGATAGTGCTATGCAGTTTATCACGAGGAACGGCATTAGGCAGATCGTAGAACTC  
CTGCAATTTTTCAATGCGGTCTAGTGTATCCTCAGTGAATTTAACAGCCGCATATGTACC  
TTAACGGATTCTCGAAACGGGGTCATAATCAAGCCTCCGTGATCAGTTCTACTTCTCT  
TCTGCGTCTACCGCTGCTTCGTCTTTAGGGAGAAGTGCTTTCACTTCTTCGACAATAGCA  
TCAAGGGAAACAGTCCCGTTTTTCGTCTGGCTGAATACCCACAATGCGTACCAGTTCCATC  
AATACACGCTCACGATCTTTCAGTTGGCCTTCTAAGAATGCGGCCTTTTCTTGAGTGTCA  
AACAGACGTA CTTTCAGGACATTAATCATTTGTTTCATGCTGATTGGACATATTCACATCT  
CCTACTTGTGATAACTTTTTTATTAATGTTTCGCGAGAATCGCGCTTTCAAATTCTTCTA  
ATGAACCATTATTTATGATAATGGTTTCACCGTCAATAGGCAAAAATTCCTTTTTCGGTGG  
AGTGAGTCCATAACAATACCAGTATCACGCTGAATATGCAACACCTTAGCACCCATAGCAC  
GCACGAGAGCAATTTCAATAGGCTGACGCATATCAACCACTACAAAATAACCTTCTTCAT  
TTTTGCGCTTCATAAACTCATTACGAATAGATTACACCAATAAAGCGGATTGATCAAGT  
TAACCATTATATCAGTACCGAGAGTGGTTAACATGAGACGAATAGACCAGACGTTATTAT  
GTTTTTCGCCAATCTCATTAACGACCTCGTAAATCTCAGCCAGACGATCACAAGTAAAGG

AACTACCGCCATACTTCGAATCGAGCATAAGCCGACACTGAATAAACCCTTATGCGCGG  
TATAGGTATCAATACCTAGATCGGCTTCTCTGTCACGCCCTAACCCGTCAAAGTCAAGAT  
AAGTCAGACCTAAGTCTGGTTGACATTCGCACAATATTTCTTTGATCGGTGCTGCCAGTT  
GATAACTATGTCCATCAATGATTAACGCGGCAGTATCTTTTCTACTCGCTTTTTACCAC  
AGAGTGCAATCAATTTTATTATATAAGCCTCTAATTACTTTCTAAAAGCAGGGTGCATAG  
CTTTAATACCTTCCACCCTCAGACGATCCGCCGCCTGAATTGCTGGGCGAGGAACGATCA  
GTAGACCATCACGTTCAATCCTCATTGTTTTAAAGGGAAGAATTGCAGTACACACCAGAG  
ATTCATGCATATCATCGGTGTATGTTAACTCAAGTTCCCCCAATTGTGAACACCAACAAC  
CATAAAAGTTAAAGGTGCACACAATGTTAAGTCGTTGTTGTCATCATGTGAACCTTGAA  
CGGCTTCTGGCATTGAATCCTTCCACGCAGTGGAGTCACCGTTATTGTAGTCTACTATAG  
AAAGCATCCATGTGTAAAGGTTTAGATAGCCATCCAAATGCTCATCGACAATAAACCGGA  
CTACCAACGGGTCAAACCTCCACATGACTAGACGGATAATAAGCGACCGCCAAACCATATT  
GACCAGAACTTGCTTAGTCGGTGAAATGGTTATAGCTGGAAGTGTAACACCTTGAGCAT  
TTAAAGTAAAGCCTTTTGTAGTTGTCCATCTGGAATATTGATCTGCCAGTTGCTGGGGT  
TAGCATAGTTAAAGAGATTAGACATTACTGATTCCTCAAATGAAAATATTTATTAACAAT  
TGTCGCTTTGCGACGTGCCGGAGGCACTGACTACTTTTTAACCGAAACAAATTTTCTATT  
ATTCTAAAGATCTTTCTTCGTTTTGGTTATGTTTTAACCAATAACTATATTTTTATACCG  
TAATAAATAAAACGGGTACTATACGAGGACTTCTTATGACAGAAGACATTTTGATAAAAC  
TCTATGATCGTCTGGATAACGAAGTAGCAACATTGCGGGGTGAAGTTCTCTATTTGTCTA  
AATGCAATACAGATCTGCTTAAGCAGATTGCAGAAAGGGATGATCAAATAAAATCCCTTT  
CAGGTGCATTACGTGATCGCGACAAGGCATTAGAGATTGTACAGCGTGTACCAACAAGG  
AAGAGTTAAAAGACTTCTTACATGGTTATGCTCATGCCATCGATCTATAATAAAAAAGCC  
CGTCATTGACGGGCTTAATGTTAACTATTGATCATATCAATGACGTTTTGTAGCTCTGAT  
ATGGATAGCGTTTCTGTATATCCATCTGGCATACTTCTTAACTAACATAGAAACCTTTA  
TACCTTTTCTTTATTGCACATACCATAGAAAGAGCATCATCACCGTTATCGTATTTTTTA  
TAAAATGTCAACCCATGACGAAATATAGATTTTGAAGATTGGTTTTGTATTCTTTTTATT  
AATCTGTTGTTGGTTATACCAAATTTTATAGCAACCGCAACATCTTCTTTGTATAAAGTT  
TGTACATAAATGTATGCAGGTTTATTCCTCTTAAATCCATGATTGCTACACATAGGGCCA  
CCGCTATTTTTTGATACGTGGTCTCCTAAGTTTGACGTAATTCATGTCCGCTACTACCA  
CGCATTACCAATTTTGTTTTTAGCATTCTCTATACACACCGCCAACAAAATTAACAAAT  
GTATCACCTTTATCAATCGCCTTATCTGTTATTTCTTTACTACTTGCTCAGTTGACTTC  
TTGTTTTTACCTGAACATCGTTTACATCTAGATCCATTAATACTAAACACGAGTGACCAGAT  
GCAGTATATTCATGTCCATTAGGGCATTAACTAAGATATTTCTTTCATAAAAATCTTTA  
TAATCAGACACATAGCCAATGACTTCGTGGTCTTTTTGGTTATTCCTCATCTCTGTTAGC  
AACTCTTCGCTATTCAGCGTTTACCCTTAAACGCAGAGACAACCATGACCTTGACAAAGA  
TATATAAATTTCTTAGTAAAGTTTTTGTGCAATCAGGACAATGCATTAGTAATTCTGTC  
ATTTGACCTGTATATCGTTTAGGAATATCGATCAATGTGTATTGTCCGCATATTGACTTT  
AATGAATCATCTATTCTTTCTTTGGTCCAGCGTAAGCGACCAGTGCAATTCATGACATTTT  
ACACCCAGTCTAAGAGTATCTAAACTAAATATAGTTGACGTATGTCCTTTATCACATTTT  
AACTTAAATCTAGTATCCTTTGCGTTGGTGTATTCTCCGACTAGACCATAACCATTCATAA  
CAACATGGGATATGTTCTTTTACCTTCTCTAGATATACACCGAACGGTCTAGGAACTGAA  
TTGGGTTTTCTTTCTTTAGTCATATTTTTATATCCTGTAAATTAAGCGCCGTCACCAGC  
GGCGCTATTTTTATAATCATTAAAACAATTTCCACACCTTACGAGCATCATATTTCTTGT  
CTTTGCTCATAAACTGGTAGGTCGAAAGATACACAACCGTGCTCCAATCTTTTGGTGCGA  
TCTCAATCAGTTTTGTTTGGATGGGTCCAGGCAAATATGCTTTGATCAGGTGGTCTGCGC  
CTCACATACCTTAAACATCACTCCATTTAATTTTTAAACGAGTTTTATTAAGAGTAG  
GTGTACTCGCGTATTGTCGCAACAATGCTTCTAAGAAGTCTGGCGAGCTTGAGGTGGCC  
CATAGTGCAAGTTCAAACCTAGCATAATCTCGTTTTCCCGCTTAAGATGTACCAAATCCTA  
GACAGATAATCAAGGGGTATCGGTCAAAGAATGGCAAAGAATCCCGATATTTTGGGTTAT  
ACGCAGAAGTATAGATCCGTCCCCTTGTGGTTTTACTACCTGGTGACCTTTTACACCAT  
CCTTGATGGTCTTCATAAACCCTCCTGCGATTTTTCTTTAGGACGACTCTTAGATACAG  
CACGCATAGACGCACGAAAATCATTAAATCATCATCATTGCGCGTTGCTGCTTATTGAGAC  
CCTTTGCACCTTTCCCTTTTAGTTTTCAACTTCTATTGCTGTTTTAATTTGCTGGCAT  
AACGAGACATACTTTTAGTGAAAGTCGCATAGGCTATTCCCTTGGAAATCTGCATATGCTT  
TAGCTGTCATGCCTTTGGCTTTTGGCTTTCGCAAATTTCTACACCCAATTCGACCCACTGTT  
TAGACTTTCGTTTTTGGGGTAGACGGCTTTTCGTCTTCTGTGATTATTTCAAATACGCTC  
ATAATATTATCCTCTATTTGTTAAGCCCTTTAAGCCAAACACTTTATTTAATGCATGTT



CGGTGATGATCTTAAACTCCATGTTATGCTTTTTTGCATAATTTACGGCAGCTAACCATT  
TTTCAGTATTTTTTGTGTATGTCCATACTTCATGCATATATCGTTGCTTTGCTTTCGCGG  
TCATTCTTTTTGGCTTCTCCGGTGGCCTTGTCTCTTTAGCTGGTTAACTTCCCATAAAT  
GCTCCTTGCCATCATCAAACCTAACGTA AAAATCCATAAAGTATCTGTGTCTTTTTCCGT  
TTGTTGATGACTCATAAGGAATTACTACGGTCTCAGATCCCCATTGTGCAACTCAGGGAT  
TGCGGTCTAGCCACTGCATGATCCATCTTTCCCAGCTTGAACGGTATGTGATCTTACGTA  
TATCCCCTTTATACTTTTCCCTGTTTCTCAGGAACATACTTGCCCTTATAAGTGTAGATC  
CTCCCATTTTAGCACCTTTATTATTAATAACATAATACTATTTATCAATTGAGGGTGATA  
AAATGCTCTTTTCTATCTTCCCTGCCATTGAACACAACGGCAAGATGATTACTGACATTG  
TGCGCAATTACCGCGCATATTTCAACGCAATAATTTCTGATTATAACATACAAACATATT  
ACATTCAAGTTAGTCCACGACCGGAACAAGTGGCATATGAAGTATACGGAAACCAACAAC  
TTTACTGGATATTGCTGATGCTTAATGACGTATACGATCCGTTCCATGACTGGATCACCG  
ATCAAGAGACAGCATATGAATCAGCCGATCAACGATATGCAAATGTCCGGAGGAAATCAAG  
TATTATACCACGTTGATCTTGACGGAAACAAGTATTGGAATCTTACCGAATATCCGAAA  
GATCAAGCAATTGGTATGATAAAGGGGATATTCATCACCGTCATTTGCAGTTTCATGGTG  
CATTGTGACAGTGGACACACTGGAAGATGCGATCCTCCGTAATGAGGAACGACGCAAGA  
TCAAGATCATAGATCCTACACAAATTAGACAATTTATTAACGCATTCATTGAGAAATGG  
AAAAGGCTGATGTGTAAGGTGATTAATTACGCTAATGTTTGATAACTCCGTTAAATGGTT  
TACCGGAATTGAAGAAAACAGGGAAGACCCATTAATGCTGGGGCGTGTTTCAGGTTAGGAT  
TCATGGTATCCATCCCTCGCTATCCACGCACGGTACATTCAAGGTCTTCCAACAGAAGA  
TCTATTATGGATTACGCCAGTACAAGATATTACAAGCGCGGCGATCTCCGGTATAGGTCA  
AAGCCCTACTGGTATTGTTGAAGGTTCAATGGTATTTGGTTTGGCTTTAGATGAACGTTA  
TTTAAACTGCGTTATTCTGGGTACTATTGCCGGACAATATACAGAGAAACCACTCACTAC  
AGAAGGTTTTTGGCACCCTTCTGCTGCATATCCTCTTTATATTGGTAATGAGGTTAATAT  
TCTTGCTCGTGGCCGTATTAACCCAGAAACCGGACAAACAACAAAACCTGATAGTGTCTA  
TATTCGAGATGAAAACACTGGAGTTGCAGTAAATCCAGACGACGAGCCATTAGACCAAT  
TCCGGTTGATGATAATCCTGATTTTACAATAGAAAAAATGCTGAGGGGCGATGAGGCATA  
TCGCGAGAAATGGTATCTTGATTCAGAAGGATTTCCGACAATAGGCATCGGGCATTGAT  
CATTTATAAGAAAACCAAGTATCTGGGTATTATCAATAATGAACTTTCTAAGCTGGTAGG  
GCGTGAAGTTACAAACGGAAGACTTACCGCCGAAGAAGTTTGTAAGTATTTGCTGACGA  
TATAGAAAAGACTCGTCGTGATATGCGCAAACATCCACGAATTGCACCTGTCTATAATAA  
ATGTAATGCCCTCGTCGTATGGCATTAGAAAATATGGCGTTTCAAGTGGGTGTTGGTGG  
ATTGGGTAAATTTAAGAATAGTCTTGCTGCGATGTTAGCGGAAGAATGGAAGCAAGCCTA  
TGATAGATTACGTCAATCTGTATGGGCTAATCAAACCTCAGGACGGTCAAGCCGTGTTTC  
TAAAATTATTCTTACTGGTAACTTAGAATCATATGGCGTAATTGCTCCAAAGAAAGAGGA  
ATCTGTTTCTGATGATCCGCGAGCACGTTTGAGAAATGCCCGTATTGCTGCCTATAAGAC  
GCAGAGAGCAGAAGAAGACCCAGAGGCACCGTTTACCCGACAAGACACATGAATCATGTT  
TAAAGAGCCTAAGAGTTCGTATTATGCGAGGTATCCTTATAACCATGTGTACGAGTCAGA  
GAGCGGTCAATATTATCGAGATTGATGATACTCCTTCTCATGAGCGTTATCACCGCAAACA  
TCCTTCTGGTACATTTGAAGAAACAGACCGGACGAAACGAGGGTAGAAAAGATTGAAGG  
TGATGATTATCTAATCGTTAAACAAGGCCGGAAGTAAACGTTAAGGGTAATTTGCAAGT  
TGTTGTTGAAGGTGACGCGCAAGTTTATTATATGGGTAAATGTGATGCAAACCGTTCATGG  
TAACGTCACTGAATTTATTCGTGGCAATGTTAATCAGACCGTTGAAGGTACGGCTAACAT  
GCATGTTGTAGGTGATGTTACCGCTCAACTTGACGCTAATTTAACGGCTAACGTCAAGGG  
TAATGCTGACTTAATGATCGAGGGTAACACTACCGAAACAATTAAGGTAACCTATGATTT  
AACCGTTTAGGGTAATTTAATATGACCGTCAATGGCACTAAATCAGATCAGGTTAATGG  
TAACTGGTCCCGTAATTGTGGTGCAAGCGTTAAAGATATTGCATCTGGTACAGTTCAACT  
TGATGGTAGCCGATTGATTTTGGGTGAGGTAACATAATGGTTGAAATTCTTCCGATGAAT  
TCAAAATTGGAGGATATCAGCGAGCGAGAAATCTTTGAGGTGGTGTCTCTTATAAAGCA  
ACGACACCGGATGCAAATACCACATACACAATTAAGAGTTTAAAGATCAGCGAGTATCGC  
CCTAATAAGGGCGTTACCGTTGAAGAACTAAAATATCTGGTGAGGATCGGGATAGTTTT  
ACGCTTGGCGCGGATTCTCTTAAATATATAACGAAAGATAGAATTA AAAAATCTGCCGGA  
AGTTTTGATGATTTACCAGATCCAACCTACCGCAGATCTATATTATTTAACGCTCCTACA  
CGTCTACAGGAGGTTTATACTTATAAAGTAACCCTAACCTATATCCAATCTGTTTCAGAG  
TCTTCTGGTGGTTCTGGTGAAGGAAATAGTGGTGGTTCCAATAGCCGAGAGGGTGCTGGT  
GAAACTAATCCTCCTCCGGTAGTAACCGAACATACAATAGAGAAAGTATATACTCAAACC  
GTTTCTGGAAATTGGGATGTGTGGGCGCAGCACCTAAGAGATTATGTAGATAGGGGTGTT

TAATGGCCGGATTATCCTACGATAAAGGCTAAAACCTACAGGGCACGGAAACTACCCACCTA  
CCGTAATTAATGCAACTCAATCTAAGGTATTTGTTGAGGGTATCCCTGTATTAGTCGAAG  
GAGACCCAATTACACCACACACAAAAACAACAAGCCTTATGATACACACGGGGGAACTA  
CGGTCGCCAGTACCCCGAAAGTATTTGTTACCGGAAAGAAAGCAATTCAAATGGCAGATT  
GTATTAGCTGTGGCGATACCGTCGCTATGGCATCACCGAAGGTATTCATAAAATGACAAA  
GGAAAAGATTACACAAATTCCTGATATTTTTAATGCTGCTACATTCGATGAAATTAAG  
CGCATTAACAGACTGGATGAGAAACCAGGAAGAATTTAAAGATTGTGATTTTTAATGGTGC  
TGGTATTAACGTATTGATGGACTTGCTCGCATATAACACTCTGTATATTCAGCAATTCGC  
TAACGCCGCCCTATATAAATCTTTTATCAGAACGGCAATTAAGCGTAGTTCAGCTGTTCA  
AGCCGCGCAAGATTTAGGACATTTGCCAGCAAGTAAAACCTAGTGCATCGACTACAATTAT  
GTTGCACGTAACACATCCTCGAAATCCGGCAAGTATTCGAATCCCACGAGGAACTAAATT  
TATTGCAGGCGTGGATCGCCAGACGTCTTATCCGTTTGTGACTACTGAAGACGTTGTGAG  
CGTTTGAGGTTCAAATGGATTATATACGCCTATGCTTAAAGTCGCACAAGGTCGTATTGT  
TCGTACAGAAATGTTATTTGATCCGAAGTAACAAATTCTGATCCGCGATCCTGATATTGA  
CCGCGCTCAGGTTAAATTGTGGGTAGACGGTGTGAATGGAAAGACTGGACACGAGAAAG  
CATTGTTAACGCAACTGGTGCAAGCAATATTTTCTATATGCGTGAAACCGTGGACGGTCA  
TACAGAAATCTTCTTTGGTGAAGGTGAATCAACTTTATCTGCTGGTGGCGGTGCACTGGG  
AGCAAATTATATTGGTGGACTTAAGCCGTCAACTGGTGCTAACATTGTTATCGAATATAT  
CAGCACTAAAGGCGGGGAAGCTAACGGATCTGTCAATTTACATACGCGGATACATTGGC  
ATCTAACTCTATTGTA AAAATTATTGAGAAATCCGACAAATGATCGTGATTATGTCCGGTGC  
AGATGGTGGTGGTGTATCCTGAATCAATCGAACGTATCCGTGAACTTGTCCGGTAATGCG  
TGAATCTCAGCGTCGTTGTGTTACTGCTTCTGACTATGAGGCTTTTGTACCTAGCCGTTT  
TGGTAGTATTGTCCAGGCGGTACAATGTTTCACCGACGGAGAAAAACCTCGTTATGCTTT  
TGTTGCTGTTAAGCCTAAATCTGGCTTGCCTTTGACA ACTGTTCAAAAAGAAGATATGCA  
GGATTATCTGGCAAAATATAATCTTGCCCTATAACGCCGAGCATCATTGACTCAA ACTA  
TCTGTATATTAACAGAATATTAAGTTTCCCTATTCAATCAATGACTTGACACAATCAGA  
GCAGTGGTTGCGCGGTGCGGTTATTGATCAGATTGATGCATATTATACCAACGAAGTGGA  
AATTTTTAACAGACCTTTAGTAAGTCTAAAATGCTTGTCTCGTATTGACAAAGCTGATGT  
ATCTGTGATAGGTTCTAGTGCAGAAATCGAGATGGTGCAGAGATCGACAACATCTATAA  
AGCACCTATGGCTGGAATCAAGTTTTTACACCAGTATAAGAGCGGAATCAAGTCTAGTTC  
ATTCAACTTCGAAAAGGACGACAAGCAATATCCGATCCAGTATGTAAGTACAGAAATGAA  
CAAAGAATCCGGTTTAGCTAAATTGCTGGTTGGACCTTTCCCTGTTGGGTCTGCAATCGC  
TTTACCGCAATATCCGGCACTGATTTTGATAAAGAGCTTATCGACGGTGCAGGACCTATA  
CTTTGAGGTTGGAGATGTTGAGCATTATGACGACCTTATTTTCATGGGATCTGGGTAACT  
GAATATCAATAGCGATCGCTTTACTGGTTCATATATGGAGTTGACAGCTAAACCGATTGC  
TGATAACATCTTTACTAATGACGGTCTTTGATCGTGTGTTGAAAACGATCTCCGTCCTCA  
GTACACA ACTATTAGTCTGGAGGCAATTGCTCAATGATTAAAGCGCCTAGTGTA ACTAGC  
TTGACAATAGAAAAATTGTCTGCTAATCAGGCGTATATCACATGGGATGACGTAGGCGAA  
AACTTCTTTTATTTTGTGGAGTTAGCCGAAACCAGATCACGAGACGGGGAGATCATCCCC  
GTCGATGAGTGAAGCTGGGTAAACCTGGGATATACTGCCGAACAAA ACTGGTTTGGAGAT  
AAAAACCTTTTGCCAGAATATTATTACAAATTTTCGTGTAGCAGTAGCCGCAGAAAGGATTT  
GAACAAAGTAAATGGATTGAAACCGAAGAGTTTCAGACATTTAAAACAAACGCATATAAT  
TTTTCTATGATGCGAGAGTTCAACCTTGCAAACGAGTTTGTTAAGCAAAAAGTTTACATAT  
GATAATCGTGATTATATTA AATTCAATACTGATTTAATTCAAGCATCATTGATGAAGGAA  
GATTTTGTCTTTAGTCCTGAATATGCAAACATGACAAATATCTCAA ACTACATTGTAGTT  
GATGAGAACTTTCATGAAATACAGGATCACATAGAAAAAGTTTGTACTGATATAAACCGC  
ACTATGTTAGCGGAAATGAACGGTGTGTTGTGTACCTTTTTCGAACGGTTCAGCCGATTGTG  
AAAGTGTCAAATGATAAAGGTCAATCATGGAAAGCATAACAAGGCTTTTAAATGACCGTGTA  
GGCAATCCGGTTTCCCGTACATGCGTTTATCAGTCTAAAACCACTACTTACGTTT TAGGA  
TATGACCGAATCTTTTACGGATGACAAGCTAGAGATACTCGATGGAGCGCGGACGATGTT  
CGTTT TAGTGATGATACGATCACTTTTGC AAAGGTTGGTGACGAGAACGATTTAGGCTTT  
GACGTTGAGATCTTTGGTGTATTTTCCAGATTGACAGGTGACACCACAAAATACGCCGAA  
GCTCTGGCGTGCAGTGACGATTATTTGTGGGTTGGTGCTAAAGATGTTATTCGCCGATT  
CGTCTTAAAGAATACTCCTGTTGATACCGTACAGGGTTCGCTACGTTTGAAGAAAAATA  
TTCGATCCTGATGTTATCCGAGTAACAGGAAATGATAAAGCTGTCATTCAGAAAATGGAT  
GTGATCGACGGTAAATTGCTTGTATTTGTTACGGGTAAAGTTAAACAGCGTTATCAAGAT  
CCA ACTAAACCAGAAAACGTTGCTCCGACAGATGATGCGGGTGTATACTTAATAGGGAGT

GATGGTCTGTCTTTTCAGAGAGTATTTGGCAACACTCCGCAGGAAAGGGAATATATTCAG  
CATGGGTTTCAGTTATATGTCAACCAATGGTGTATGAGGTGTTTCATAAGCCATTATAATCAT  
CACTTTGAAAGCATTTCACCTGATCCAGAACTGCCGCGAAATATGAATTAGGCGAAGCT  
GTGAAATATTCTCAGGAGCCAACCTTATCTAACTGATAAGAAAATACATCAAACACTTTTC  
AGAGCAAGTTATGATGATTTGCGTATTTGGTAGTTGGGACCGCAAGCGTATTATAATGAG  
GCTGATTATACATGGATGCGTTCGAAACGGTGTCCGTGTGTGGATCACAAATGATAATCGC  
CCGTTGGTTGTTTATCCAGAGGTTATCTATACTCAAGAAGATGATACATCTGGCATTCTT  
GACCAAAATAGGGTCAACCGAGAAGTTTTTGATAAAGGGACCGTGACCTGTTATCTTAAC  
AATGATAAATTTGAAGGATTCAAACAATATGCATCCGATGTAATGTTCCAAAAAAAACG  
GGAGAGATCATAGGATTCTATCAATTTAATTATCGTGTTCGTGACCAAGTTGGTGTATAT  
TGGAAACCTACAGATGTCGCATTTGTTGCTGAATTGCAAAATCAGGTTCCGGGAGGTTCCC  
TGGGTTCCCTGTTTATTATGACAGAGAGCAAGATCCAGATTTGCGGCCTATACTGAATAAG  
ATGACGCCTGATAGCTTTTTACTTGAGAACGAAAATTCAGAAAATCTCTGAATATTAT  
CTGCAATTCCTAAGTGATGGTTCAGGAACATATTATAATAAACTAAAAAATCTGATTAAA  
AACAAATATCCACGCGAGCAAGATGCATATGATTATCTTTGGTCAGAGATGTACAAACGA  
AACATCTATGCAGATAAAAAACAAGCGAGATGCGGTCGTAAGATTCTTTGAATCCTCCAAA  
TCAGATTTTTAGTCCACTAAGGGCGTGGAGGCTTCTTACAAGTTCTTGTTAAGTTACTT  
TATAATGAAGATGTGGAAATTGAGGTTGAATCACAAGCCGTAAGAGTATGATATTGTT  
GTTAGTTCAACGAACATTGACGAGGATATCGTAGGACGCACGATCTATACTCCAACCAGA  
CGGGCTAACGTGACTTATCTTGAAAGGGAATATGAAGGTGGACGTCTACGCTGGCGAGTA  
ACCATTATAACCAGATCGGGCGGTTTGAAGAAGGTCAAGTGATCAAATCAGAGAAAACA  
GCGTTTGAGGGGATGATCCTTGTTGGTGTTCGTGGTAAAGAGTTGTTGAGTAGTTCAATC  
GACTATATCAACCGCTCACGAAGCCAATAAACCATGAAGATTAAGAGTGCCTTGCCAGTT  
TTGCGCTATGCAAATGATGTAATGCGATTCTGTTTATCCTGTCGGCTTTGGTTTCATAGGT  
GTTACTCTTCTTACAATGTTTATTAATAGCGGGTTCAGTATGAGACACGTAGAAACTATA  
ATTCAATCTCTGAAAAATTACAAGTTTGACAGCGGATTGCCTTGCGTGTATCCTGATCGT  
GTTGGTGTATCTTGATGTTGATGGAAATATTAAGATTGACCCACTAACAGGGAAACCATTA  
TACTTAACGTACCGACAATTGGCGAAGAGTTCCCGGTTCCCTCCTTAATATGATCAGGAG  
AACAGCGAATTGTTCCACGGACTTAAAGCAAGCGAAGGATTTGCAATGAGTCCACTG  
TTTGACCAGTCGGCGGTAACATTCTCTATGTTCCGTGAACCTTGTAGATAAACGGTTGAAG  
GATAATATAGGGAATCCACGCGATCCGAAGAATCCGACACAGAGGAAAATTAATGGCTAC  
TGAAAATAGTGTGATCTATCGCTCAATCATTACTAGCAAATTCAGAACAGAAAACTTCT  
GAACTTCTATAATTCTGTAGGCGATGGAGCAAATCAAATTACAATTTATGGAACGTTAGG  
ACGTTTCAGAGCCGTGGTCAGAAAACGAAAAAGAGGTGGGCTTTGCCCCACCTTATCCGAC  
CGATTCAACGGCTGGTGTGTTGACATGTGGACCCATTTGATGGGGGCGGTTAACATTAA  
CAAATCACTTCTTGATGCGGTTATCCCTCGTAAAGATTGGGGTGATACCGGACAGGATAA  
CCCGCGCACGTTCTTTATCAATGACATTGTTGTTGTCTACTCAGCACCATATAACCGAAC  
TGATGTTGGTAGCGGCTGGATGGTCTATCGCGTAACCGATGTTCCCTGAACGCGGTTACTG  
CTCGATTTCAAGCATTGACGCTAAAGTAGAGTGTTTGAAGTTGGGCGGAAAGTGACCC  
CGCTCATGAATCAATTGCGCCACCTGTAGGAAAGGGCGATTCTATTGATATGGGTGATGG  
GTATCGTTGGGAATATCTGTACACAATTCCACCTGATGCGGCGATCAACCGTTGCACCAA  
TGAACATATTGTTGTACCGTTCGCCGATGAACTGCGACAAGATCCGGCGCGTTGGGGCTA  
TGACAATGTGATCACATGGTATAAGGACTATAATCTTCTTTATCGGCTGAAAGTAGTAAC  
TTTGCGTTTTTCAGGCTTATATGGACTCTGCGCAATTCCCAACGACCGCGTTAGTGGGTAA  
TACTGGTTTTCCGTCAGTTAAGCATTATCCTTAACCCATTGGAAAAGAAAGCACGCCCTAG  
CGATCAAGACGTTAAAGCGGTCAAAGATAAGTACCGACCGCAAGACTTAGAGCCACACTC  
AGGCGAAATGATCTACATGGAAAACCGACAACCTATCGTTCGGTCATTAGATCAAACAGA  
ACTTGTCTCTGTATTGTTGAGTTCTAAGTGTATGATTTTAAAAGCCAATTCGAGAGAGT  
TGGCTTTTTCCATTGTTGGTGTGACAATCTTATTTGGTAAGGTATAATACACACATCTA  
AACAAACGGAGGATTAATTATGGCACGTCGTAATTTACAGATAATTGTGAAGCAATTCAG  
GTATCCCCTTGCCGTTGGGATGTGATCGCGAACGGTGAAGGATCGGCGAGATCATCGAT  
CATACTCATTCACTAGCCGATTACACCGATGAACTCTGCGAGGATATCAACTTCATG  
AATGCCAATAAACGATTCAAGACTATCGACGAAGCTATCTATTTTGTGTATAATCCAAC  
TTCGGTATGTGGGGAAC TAGAAAATGGCACGCGAAAATATTAATTTGCATTACACAATGA  
ATAAAGCTAAGTTCCCAATGCAAAAGCATTACTATGGTCTACGTGCACAAGATCCTAAAC  
TCTATGGTACTCATTGGTTTTGTAAACATGATAACCAATGGCACACATACGAAGAAATGG  
ATGAGATGATGAAACAGGGTATTGAATTTAGTTATTCTAATTATGACCATCGTATAACTT

GCATTCGAAAATTGAAACGATGGATTTCGTAAGAATCCGCAATTTAAAAACTTTGTGTTCT  
TTATGTCTCATGTTTATTTGGGAAATAGCGTTACCGTCACAGCAAAGGTTAAATAATGGC  
ACGACTTTCTAAACAAGAACAATAATTACACGATCGGGTGATGGAGTTGATTAATTCAGA  
TCGCCATTGACATATGAAGAAAAAGAATTTTGCTATAATAACTCTCATGGCGATGGTCT  
AGGCGGTTACAGGTGCATTCTTACCCCAAGAGGGCTTGCATGGGATTTTACCATCGATGC  
ACATTGCACAGGAAAAGTATTAGATCTTTGTGCTGGGATCGGTCGCTTATCTTTTTGTAT  
GTTACATCGTTGTAAGCCAGAAAAGATCGTATGCGTCGAACTCAATCCAGAATTTGCGCG  
GATTGGCAAGAGACTATTACCGGAGGCAGAATGGATCACCAGCGATGTATTGCAATTTGA  
GTCAAACGAAAAATTCGATGTGGTGATCAGCAATCCACCTTTTGGGAAAATCAATACAAC  
CGACACAAAGGATGTATTTGAGTACACTGGCGGCGAATTTGAATTTAAGGTTATGACATT  
AGGCCAGAAGTTTGCCGATGTAGGTTCTTTTATTGTTCTACTGGTTCCGCTGGTTTTGC  
TTATTCCGGCAGACCTTATTATGACGGGAGCATGAAGTCTAATAAATATCTAAAATGGAG  
CAAACAACTGGTTTGGTGACTTACGCCGGATGTGGGATCGATACATGAATCTATCGCGA  
TGAATGGCATAAGTACCAACGTTTTAACAAGAAGTGGTCGAGGTTCCGGTATTACGAGAAAGA  
AGCTGTAGAAGCGCATAAATCACGTCCTAACGAACAAATAGAAGAAAGTAAGGAGATTAC  
CTTACCGAAACAGGAAAGCGAGTCTGGGACGCTCTCAGATTTGTTTGACATTTAATTATA  
AGCTGTCTTGTGGGCGGCTTTTTTATATGTATTTTATAAATAATACATCATAACATGAG  
GAATTAACAATGGCACAAGTTCTAAAGAAAAGAATAGACACAGGTAAGTGTGACCAATCC  
CAGCACCGGGGACATCCTCTATGACGGCGGTAATAAACTTAACGATAACTTTGATTCAAT  
CTATGACGCATTTGCTGATCAACGGTTTAAAGACGTAGACCACGGCGTAGGAAGAATGGT  
TATTCATGCAACCGGATACTATCAGAAACATCCACGTCAAAGCTACTCTGGTTCCGCTGT  
TGAGATTGGGAGTCTACACGATATCGATACAACCTCAAGGCGCACTTATTGCTATTCTACC  
TAAAGCAAAGGTCGGTGAGGGTGTGTTTATCATAAATAGTAACGGTAGCCTATCAACGAC  
TACACCGCTCAATATTCAAACCTCAAGCAGGTGATTCTATTAGCTGGAATTCCGGAGATGC  
TACAATAACACAAGCATTTCAAAAGTCACTGTTTGGTGTACTGCCGTTGAAGGTAGTCG  
CGTAACATGGCGATTGGGTATCGAAAGTATGTTTACCGATAGAACAACGCCATTAGATAA  
AACAGTTAACGTAACCTGGAGTAGCAACAACGTTGCTATTGCCGCAAAAACAGAATACCT  
TTCCATCAAATTATTAACCTACCGTAGCAATACATCCGGTTCAAAAATGCGTTCAAGTGA  
AACGCTACTGATGATTGATTCTAAAGCCGGAGAAGTTTATGCGACGGAATATGCAGTTTT  
GCAGAAGACAGAAGACGAATTATACACGGTTCGTTATTTTCATCGGTTCCGGCGATAAAGT  
ATATGCAGAGTATAAGGCTACTGGCGAAAATATTCGTTTAGCAGTTAAAGCCGTAGACAC  
TATTAATAATCGGGGTTGCTACATGAAACAATTAATTAATATCGGTAACCTTGTGATGAC  
GGTACAGGTGATTATCAAAGAAAAGGCGGTCAGAAGATTAATGACAACCTTTTCTGAACTT  
TATACTAAGCTGGGGGATGGTGATATCCCTCATGCATCCGGCGCGTGGAAAACCTCACACA  
CAACCAGTATGAAAACCAAATTTTGGTGATGCATGGGCGATTAATACAACGAACAACGCT  
GTTTCTGTTGAATTGCCTAAAGGTGGAGTTGGTGATTGTAACAAGACAATTAACCTTCGT  
GATGTTTGGCGCTCGTGGGCGTCTCATAACGTAACACTTAAGCCAGCACAAAGGTGATACC  
ATTAAGGGATCTCCAATCGACCGTGAGTTGTATAAGGATTTTATGGATGTTGAACTGGTT  
TATTGTGCGCCTGGACGCTGGGAATATATCGGAAACAAGCGAGTTGACACGATCACCACG  
TCTGACCTAAGCACAGTAGCTAAGGAAGTTTATATTGCCACAGAAGGGCAAACATATTTCC  
CCTAATGTATTTGGTTCTAACACATATAACACTCGAAATGTTGAAGTATATTATCGAGGA  
AACCTTTTATATTATGGCAAGTCTTTTAGTAATGACTCTAGCAACGGTTCAATTGGTGAG  
GATGGATCACTTGTGAACTTGATGGCAAAGCATAAACTTCGTTTTCGTTGTTCCGGCT  
GGGATACCGTTCAAATTATTACATAGATGGACGGAATTGCATCATTCCGATCTAGTTAT  
ATCACACACAAATTAGAGTGTATGCTACCGGAATGACAGCACTAGAACTATTCCCTGGT  
GAAGTGTGGGTAGGTGATTTATCGACGAAAAAGAATTTACCAATGCTGATTTGGGAGTT  
AGTAAACGTGATATAATTAACCCAAATTCATTTGAGTTATTAATAAATGGTACTCAAATG  
ATTAAGCTGGTGATGCTGATCTTCTTCGTTTGTGTTGTAAGGTGCTGACGGAGAAACC  
GAAGAGAGTTGCGCACTTGTGGCGGTCAGTGGGTACAGTCAGGCGAAGATTATTCAGT  
GTATTTGATGAGAATAGCATTGTAACAGGGATTAATTAAGCTAAAGCGTTGGACAATAGA  
GATACCATAACAATTCGTTGGTTTAAATAACGATATCGGAACTCTATTAGAATGGGATGGT  
GTCGGCGGGCTTAAAGAAAAAGCAGACAAGATTTATCTCAATAACGAAGACGAAGTTAAT  
TTAACAACAAATTTGAATATACAGACTTCCAGAATCCTAGCCAGAAAAACACTCGTCCG  
GCGGAAGAGTATTCAGGTCGAATTATGGATATATATGCACCGTTTGATATTTTCCATCCG  
ATCGGCACGATATACGAATTCGCACATAACCCAGCTAACCCAGCGACATATATGGGTATG  
GGTATCTGGGTTCCGGTATGCGGAAGGAGACTTTCTTGCTGGTTGGTCTTCCGATGCCAGC  
GCCAGAAATTTTCATTAACAATAACGATCTTGATATTCATGGACAACCTACACACACC

GCTGGTGGTACTGGTTGTGAAGTTGCCTATCAAATCAAGAAAAATATGATTCCTGAATTA  
CAATCCAGCGATCGTGTTTTGGTGAAGACGATACAGGGTCAATTATCATTGGTGGTTGT  
CAAGTTAACCCCTGATGCGGCAGGTCCAGCGTTTACGAAATATAGAGAGGATATCGTAAAA  
GTTAATTCTGGAATGCTGATCCATCAATGATGGGTATTTTTCTCCATATCGCACCGTT  
CATCGCTGGTTAATGGTAGGTTAATATGATTTCTAAAACACGTTCTAAAGCAAGCGTATT  
TTCTAGCGACGCAGCATTTCGTTTCATACGATCCGGGGTCTAAAGACCCCATTTATTGGAGA  
CATTCGCCAATTGGTGGATTAAACGTAGACCAATCTCGCAAAGGTTCTTTTATTAACAA  
CGTACAATCAGCCATTGATGATTTGTATAGCATTCTATGCTTAATGTCGGGGATGTATT  
GGTACTACAAATGCAACTCCACCGGAAGCGGGCAGATAGAACTCTTTCTTTTCAC  
TGAACGGTAACAAATACACACGATCCAGCCGCGAAAAAAGTTGTGATGGAAGTTTGGG  
TTATCCATTTGTTGTTAATGTTGGAACATCGAATGTTGCATTATGCGAAATGGCCACAAC  
AAAATTTACTGAATTGAAAGACCAAAGCATCCTGTTCTCTTAAGTTCGGAGGAAAGGCAA  
TGGCAACGATCAAATAGAGATTCAGTATATTGATTAACGCACACGAAGCAACGGTCGT  
AGAAAAATATGGTATTTGCATTCGTGGGGAAATAAATCCCCCTGCTCGTTATGGTTATGG  
TGCATGGTCCAGATTGGGAACGGAAGAAAGATTTGATTCAACACTATTTTATTTAAGCG  
TATTGCGTAAGGTGTAATAATTATGAATAACACTATTAATCACGTAAGACGATGCACAG  
TATGTTAAGTTTGACCCTACCGGAAATTGGCCTAGCAATATAAAAAACGTACAAGCGGCA  
TTAGCCGCTATTCAGGGATTGGCTATTGCAGGTCTTCCAACGGCAACCGAAGAAAGAGCG  
GGTATTGCTGAAATTGCTACTCAACACGAAGTAGATGATGGGTTGGATGGAACATAAATT  
GTTACCCCAAAAACATTGGCTGTTAAGCTGTCAAGACCGGACGCAACAAAACCTTGTCAAA  
GGGATCACTCGCTATGCTAATAACGATGAAGCTATGGGCGATACTCCAAATATTGCAATT  
GGTCTGATACATTAACCCATGTATTCGAGAATAAGAAAGCAACGGATACCGTACAGGGT  
ACAATTAATAATTTGTTCTATGGATGCGGCAAAAATCGGTAGTGATGACACTATGGCGGTC  
ACGCCTAAAAAGATGCACGCTGCTATTGCTCAGATTGTTCTGGGTTGATTCCAGAACAA  
AACACGGCGACCGAGTCCCGTGAGGGTTTAGTTCGACTGGCGACAAGCCAACAAACGCTT  
GCTGGAACATCAGAGAAGGATTTGCCGTTAGCCCATATGCATTTTCCAACGCAAGAGCC  
AATGAAAATCAGGCGGGTACTGTTAAAATTGCGTCATCCCAACAAATGATTGACGGTAAT  
GACAACACAGTAGTAATATCAGCACAAAAATTTGCGAACACTAAAGCAACCACTGGACAA  
TTCGGTGTGTTAAGCTAACAGATAACCCAGGATCAGGCGAGGCAACCACAGCACTGTGC  
GCAAACGCTCGTGTATTGCCTCTAAGTGGTGGCGTCTGTTACTGGTGTATGTATCGTCAT  
AGTGGAGGCGACGGAACAGTTCATCATTAAAAATGAACTGGATGGTCTTTGTATGCCT  
ATTGCTGCCATCATTCTTACAGCATTAAACAGTTTCGACCACGCACAATTCAAATCTGC  
AACGGTCAATGGTTAATAAACACCAATATCCAGTATTATTTTACGAATCGGTTTCACT  
TACGGCGGAGATGGCGGAGACAACCTTGCTATACCCGATATGCGAGGGCTTGTTGCTAGA  
GGATGCGACCACGGTCGAGGACTAGACCCAGGTCGTGGATTTGGTACTTATCAAGACGAC  
AGCGTGCAACATATGACAGGTAACCTCCCTGTAGCCAACCGTTGGCGAGGTTTCGACTGGT  
GGTGTATTTGCCATCACAGGCGGTCAATGGAGCACGAACTATAACAACGGTGGTGGTGAT  
GATTGGGGTAGTATTGTTAACTTTGACAGCGCATGACAGGTTAGAACGTCTGGCGAAACT  
CGCGTTAAAAGCCTTGCATTAAACTACATGATAAGGGTACAATAATGATCGAACAGTTAA  
ACTTCCGAAAGATCCCTAACGTCGATGGTGTCCCTGGAGAGGGACAGCATTCTATTAGCT  
GGATTAATAAATGGTGAATGTGTAAGCGCAGCAACCACAGAAACAGGACACGAGGGGACGC  
TTAACCGCGCCCCCTTATGCGATTCAAGAAAATATTGTTTCGCTCTGGATGAAAATTCTAAGG  
CAACGGTAACAAAAGTTAACGAAGTTGTTACAGCAGTTAATGATATTAAACTACTTTAG  
GCACGGTTGCTGATGGTAGTATTATTGATATTGTCAATCAAACACTATTGTAAAGGTTGATT  
CTGCAGAAGAAAATTTAGGAGAACTTCAAGGATATTACAAACCACAGTAGATGAACTGG  
CAGAGACTGGCAAGAAAATTTGGTGTTCGTCCGGCAGCAGATCCGAGTACACGAACAATAT  
ATAATGATATTTCTTTCATCAAACAAGAATTGGGCGCTTCCCTAACTTCAATATCAACG  
GTTCTCCAGATCCGGGTAGTTCCGGTTCGGTATCAAATATCGAGTTATCCAGAATACGG  
CAGCATTAAACAACCACGGTCAGCGAATCCGCCATCTAGAAAACGACTCGCAAGATTCTG  
ACGTTGGAGAGGTAACAAAACAAGCTAACAAAATGCATAGCGAGCTAGGCGATACATCAC  
TAGCAACACAGGACAATGTTTATCTTCGTCTTCGCACAAATACTCGCAATATCGCTAGTA  
TATCAAACGAAGTTCAGGAAGTAAAGAAAGCGATTCTATTTGAATCAATTCCTGATATCG  
GGACTAAAGTAACTAAGCTACAATCTGATTATACACAGCTTAATGATGAAGTCAACGGCG  
TTGACGCTGGTATCCGTCCTCGTTAACTCTTCTGGAAAATAATATTGGCAATCCTCAGG  
CCGCTGGAAGTATTGATTATCGATTGACTAATCATGAACGGGAATTTGTAGATCTTAAAT  
CTGTTGTGGGTGTAAGTGGTGTGATGGTCTACGTGGTGGAGGTTGCGCGAATCTCTAAAA  
CAGTTGGTACTGATAGTGAGCGTCATACTATCGCAGGTCGTCTAAAAATTGTCGAAAACA

CACAGGGACGACTAGAAGCTAGCGTACAGGATGTCGAGCAAAGGATCGGGCGATCGAGATT  
CCGGTCTAACC GGCGGGGTTATTAAGCTGTCAAGCGACATGTACGGCAATCCAGAAGGAA  
GCACGCAGCTTGAACAAGATGGGATCGTGAAAACCTGTTAAGGAATTGAGCACATCAAATG  
CAAGCAAGGTAACAGACGTTCTGATGATGGTTTCCATTATCTACGTAAGCACGGGGAAA  
GGGTTTCAGGTCGCATGGGCGGCTGGTGCATTTAAAAACACCGCTCAGATTGATATTACTC  
TCGACGGACAAGATCAATACAAAGGAATCCCGCTAAACGATATGACCGAAGAAGTTCCTG  
CGCGTGGAATGGTTAAGAGCGAATCTCTTGTACGGTTAACGACAAAGGCTTATTCCGTT  
GTGATTTCCGTTGTTCTGTAAATGCGGCACATAAGGCTACTTTCGTAGTCGGTATTGCTA  
AAAATGGTCTGATTGTACATGAGGCACGAAATGGTCATTATGGACCTGATGATTTAATTA  
GCTATTCTACCAGTGCTTTCCTAAATATTGATAAAGGGCGACCGGATCGATATTTCGCATTA  
AGGGCGTATCCGAAGAAGCATTAGCGCAACAGCTACAAATTAAGAGTTCCTCTTTGGAA  
TTTCTCCGGTATAAGAAATTAAGGGGGCGTTAAGCCCCTTATTCGTTTATAGGTGATATT  
ATGTCAGGATATGTACCCAATAACCCAAGAGAATTAAGAGACGCTATTCTGCGTCGTTTA  
GGCGCACAGTAATTAACGTAGAAGTAACAGAAGACCAGATTTACGATTGTATTTCAGAGA  
GCATTAGA ACTCTATGGGGAATATCATTTCGATGCTGTGAATAAAGGATATAAAGTATTT  
CGTGTTAGTGCAGAGCAAGCGCAACACGGGGTATTTGATTTAAGCGAGTCTGGAGTATTC  
GCAGTAACTAAAATAATTCGAACAAACGTAGGTAGCGCGGCTACGATGGATGGTACTGCC  
GTTTATCCGTTGGTTTACTGACTTCTGTTGGGTTTAGCGGGTGTAAATGGCGGTTTAGGA  
TCTGGCTGTAGTAAATTTTATGGACCAAATGCAATGGGCGGTGATCTAGGATATTTCGAA  
CAGCTTATGAGCTATCGAGCCACTATGCAAAATATGCTTAATCCGCTGCCAGATTATTGG  
TATAATAGCGCAAACGGACA ACTTAAGATAACAGGAACTTCCGAGAAGGTGATCTCATT  
GTTGTTGAATTATATGTTAAAAGTTATGTTGATCTACCTGATATGATCGGGCGCGGTTGCT  
GGTTATGCTCATGCGGGAGGATGTTCTACCGCTGGCGGGATTAGCGCCGTTTATGATAAC  
CCA ACTGCTGGTTAAGCGGGATTGTTGCTGGCATGGGACCGACCCATGATAACAAGCAG  
GGCGCATATAATAACCGTTGGGTTAAGACTGCGCGACTGCGTTTACTCGTGAGCTATGG  
GGCAGATCTTAGCTCAACATCAAGGGTTGCAATTACCAGGTGGTGTCACTGTTTATGGT  
GTCAGAATCATCGAAGAAGCACGCGCGGATATTGAGAAATTGCGACGAGA ACTACTTGAC  
TTAGATCCTCCGTTCCGGCATCCTCATGATTTGATTAATTGGGGGAGTATTCCTCCATTG  
GAGTAACATATGTTAACAACACTCTTTTTGCTCGCCTTGAATCGCATAAGGATTATGAG  
ATTACACGACAAACCGAGATTCTCAATCCTTACGTAAATTTCAACCGTCATACAAACACC  
CAGACGTTAGCCGACGTTATCGTCGCCGAAGCTATTCAGATGCGAGGTGTAGAATTATAT  
TACATCCCTCGTGAATTTGTCAAACCAGATATGATCTTTGGTGAGGATGTTCAAAGCAA  
TTTACTAAAGCATGGAAATTTGCTGCGTATATAAACTCTTTCGACGGGTATGAAGGTGCA  
GGAAACTTTTTTCAATCTATGGGTTATACGGCAAACGACGAATTAACGTTAACGGTGAAT  
CCTAACCTATTCAAGCATCAAGTAGATGATCAAGAGCCAAAATCAGCTGACTTGATTTAT  
TTTCCAATGAGTAATGATCTCTTTGAAATTAATTAGGTGCGAGCCATATCAGCCGTTTTTT  
CAGGCTGGCAACAATGCCATGCGTAAAATTATTGCAGAGAAATTTGTGTATAGCAGTGAG  
GAATTGCGACCCGAATTACCACGCAATGAGGGAATTAATGTTGATGAGTTTGCGGATCTG  
GATCTTGCACCGATCACTAATCTGGACGGGTTAACAGATATCAACTTAGATCAGTACAAA  
GAAGATAAGCAATTCAGAAGCGAAGGACAAGACTTTATTGATCCGATTGATCCTATTAAT  
GGCAAGCGTTCACCTTTATCCGATTATTGATAAATACTTGTATTGATATAATATAAGGAT  
CTAATGACTTATGAAAACTATTATCTATACGAAATAAAGAACAATATAAATGGTAAGAT  
ATATGTAGTCATTCGTGGGCATGATGGTGACATAAGTCAAGATCCTTATATGGGTAGTGG  
ATTGACTCTTAAGAGGTCTATTA AAAAAGAACGGGATAGAAA ACTTCACAAAAACGATTCT  
CAAAACGTTTGCTCATGGAAAGAGGCAAGGAAAGCAGAAAGAGAAATAGTTACAGAGGA  
ATTTGTA AAAAAGAGAAGATACCTATAATGTTTCCGTTGGTGGACAAGGTGGAAATACTCA  
CGCTGGGATGAGCGAAGAACGAAGAAA ACTTGCAAGCGAAAGACACGCAAAAAGCAAACCG  
AAATAGAGTATGGAAGCAAGAATCTAGAGATAAGGTTAGCGCAAGATTCAAAGGTCATAA  
GCTATCACAGAAGCAGATAGACGCGCTCAAGAAGGCAAACACAGGAAAAAAGTACACAGA  
AGAACACAAGTTCAA AATAGGTAAAACGTGGCGAGGAAAGAAACGACCAGATATAGGAGA  
GAAGGTTGCGGCAA AATTAACAGGGAGAAA ACTACCCCAAGAACATGCGGCAGCAATAAC  
GCAAAATACACTCAGAGGAAAACAACACTTTAGGGCAAAAAGATTCTTCATCGACGAGAT  
GGAATTTTATATTTTGAGTGATGCAGCTAAAATGTTTGGTATAAGTTATAAAAACGGTTAA  
AGCTAGACTTCTCTCAGATAAGTTTCCTACATGGAGATATGAATAAATGTTTTACATTT  
TTACAATTCGTCAATTAGAAGGTATATTGTATTGCTGGGTAATTTATTCTCCGGCGTACA  
AATTA AAAAGGGTGCGTAGTGACGGTGAGCGTTTTATTAAAGTTCATATCACCTACGCAA  
GAAAGAAAAATTCATGATGAGTCTGGATAAATATAACAATATCTTAAGCGAGGAAGACGT

CGCAAAGGTAGAACTATTTTACCTCGTATGTGTCTTTCTTTGATTGATATGACATACGC  
CCAGAACTTTAAAACCAATATTGCAAATAAGACAGTACCAAATATAACGGCTGATGGAAT  
CAGGAGCGTAACACAATATAATCCTGTACCATATAAGTTTACTTTTCGAGTTAGGGATTTA  
TACGCGTAACGAAGATGATATGTTTCAGATAATTGAACAGATTCTTCTTACTTCCAGCC  
TCATTTTAACTGTAAGATTAAGAACAACACGGTAATGATGTATGGATTGATCGAGATAT  
TCAGGTCACAATTAGTTCTATTACTCCAGATGAACAGGTAGGGCAAGATAAGTTTTCTCG  
TCGTCGTCTTGAGTGGACCATTATGTTTGAGTTCATCGGGTTTATCTATCCTCCAGCCAC  
CGACGTTAAGGGGGAAATCAGAACGATTTATCTTGATTTTCATGCTAATTCTCGTGAATT  
AACTCCAAGCGGTAATTTTGAATCAGTGGATCATGAAGTTGTTAAACGTGATGTTGAGCA  
AGAAGAATGGGACGGAACATCAAAGAATCATATTCTAGTGATATTCCAATACCAGTTGC  
ACCGACTCCACCGGGTCCACGTATTGTAAGAGAATTTTAAAGAGGTAATTTATTATGTCAG  
ATCTAGGCTTAGATATGAAGCAATTAATGAATTTTCGAAAGTCTAGGTCGTCCGGGGTCAT  
TCGACGCGGAAGAAGATCGAGTGAGCTATAATCCGCTCGTCTTGACTCCGGTCGAAAGCC  
ATCCAGAAGATCGTAATATTGGCTAACACGAGATTATAATGAGGCACGTCAGAATATTC  
ATTTTCAGAATCAGATGATGATGGACGCCGCAAAGATTTTATCTTGAACCTTGCTAAAAATA  
GTGAGTCTCCGAGGTTCTACAATCACTTAACGGCCTCATGCAGCAAATGAGCAACAACA  
ATAAAGAAATGCTGAACATCCATAAGGATATGAAGAAAATCACCGAGCAAGCTGGAGAGA  
AAAAGAAAGATAATACCCCAACCGCACCGTAAATATCCCGAATGCGACCGTCTTTATGG  
GTTCTCCTAGTGATTTAATGGATGAAATCGAAGACGAGGAAGCGCGAGTTATTGAAGGCG  
AGACAGTATGAGCGTGATTGAAGGGATTAACGCAATGGCGACGGATGAACACCCGCTACA  
TTTAGCTCATCCGCTACACTAGAACTAAAATTTGATTTCAAATGGTATTGAATGGAGTTT  
ATCAAAGCATGATGATAAATGGTATCCTAACAGTTTTTCTGACCATCTGAAATTAACAG  
ACCGCAGAAAATAAGGATGCAAAGCACTGATCCAACAAATTATAAGTTCTTTAAAGATAG  
TGACAATATTCGCACGCGGTATATGCGGTTAAAGAAATTGCGAAGGGCGAATATTA AAC  
TCAGTATACCCCTGAAATGATCGCGGAGTGGAACGATGCCGTAAAGATATTGTATATTT  
CGCAGAAACCTATTGCGCAATTACACACATCGACTACGGTACAATCAAAGTACAATTGCG  
TCATTATCAGAAAAATATGCTTAAGATTATGCATGAAAACCGCATGAGCGCACATAAACT  
CAGTCGTGAGCTCGGGAAATCTACCGCTGTAGCAATATTCCTTGCTCCCTACGTTTGCTT  
TAATAACGACAAAGCGGTAGGTATACTGGCACACAAAGGATCAATGGCAGTTGAGGTTCT  
AGAACGTACTAAACAAGCAATTGAACTATTGCCGGACTTCTTACAGCCTGGTATTGTAGA  
ATGGAACAAGAAATCTATTGTGTTAGAAAACGGGTCTAGTATCGGCGCTTATGCATCGTC  
ACCACATGCGGTGCGCGGAAACTCCTTTAGTCTCATATACATAGACGAGGCAGCCTTTAT  
TAGTGCGTGGCAGGACGCATGGTTAGCTATTCAGCCAGTTATCTCATCCGGTCGTGAATC  
TAATCTGATCATGACAACA ACTCCGAACGGGCTTAATTACTTTTATGACATTTGCCACTC  
AGCCATTGATGGTAAAAGCGGTTAGGTACCTTATGAGGCGGTTTAGCATTCTGTAAAGA  
ACGTCTTTACAATAACGCTGATATATTCGATGATGGTTATGAGTGGTCATCTCAGGCGAT  
CGCCGGATCTAGTCTTGAGCAATTTCTTACAGGAACATAACGCTGAATTTTTTCGGTAGTTC  
CGGTACTCTGATCAGGGCAACCACACTATCAAGATTATCATTTATTGACGTCGTTAATGA  
TAACGGGTTTTATCAGTTTGAGAAACCGAAAGAAGGTAGAAAATATGTTGCTACACTAGA  
TTGCTCCGAAGGTCGAGGACAGGACTACCATGCATTGCAAATCATTGATAGTACTGAATT  
TCCTTATAAGCAGGTTGCAGTATATCACAGCAATACTACGTCCCTTTTTATATTACCGGA  
TATGGTCTTTAAATATCTCATGATGTATAACGAATGTCCAGTTTATATCGAGCTAAATAG  
TACGGGTGTATCTATTGCTAAGTCTCTTGCGATGGATCTTGAATATGATAATATTATTG  
CGACTCATTCATAGATCTAGGGATGAAACAATCCAAAAGATCTAAAGCAATGGGATGTTT  
GGCACTAATAGACTTAATAGAAAAAGATAAGCTGATCATTAAATCATAAAGGA ACTATTCA  
GGAGTTGCGGATATTCTCCGAGAAGGGAGTAACCTGGGCGGCAGAAGAAGGTTTTACGA  
TGATTTGGTCACGAGTCTGGTAGTATTTGGTTGGTTAACA ACTCAAGAAAAATTCGCCGA  
ACATGCAGGAAAAGACGAAATGCGGATCGCCACCGAAATATTCCGAAAGGAATTAGATGA  
ATTGGGGGAAGAATACGCGCCCGTGGTAATATATGACGGTGTAAACGGCATCGAAGAATA  
TAGGCCGCGTGAAGGTCTAACAATGATGTAAATACGATAATGCATAAAAGGATGAGGAAA  
TTCTAATGACTCTATTATCACCGGGTTTCGAAACGACAGAACTACTCTCTCCACTACCA  
TTGTGCAATCTGCGACTGGTCGCGGGGCGCTGGTAGGTAAATTTT CAGTGGGGTCCAGCTT  
TCCAGGCTGTACAAGTAACTAAGGAAGTTGAATTAGTTAATAAACTTGGTCTGCCGGATA  
ATAACACCGCAGACTATTTTATGAGCGGGGCTAACTTCTCCAGTATGGCAATGACCTGC  
GTGTTGTTTCGTGGACTCAATAAAGAAAAAGCAAAAAACGCAACTGCCCTAGCTGGTAACG  
TAGAGTTTGAAATCACAACGAAGGTTCAA ACTATGAAGTAGGCGATACCATCAAGATTA  
AACATAACCGTCAGGATATTGAAACGGCAGGTAAAGTAACTAAAGTTGATGGTGTGGTA

AAGTTAAGGGCGTATTTATCCCAACTGGTAAAATTATCGCTCACGCTAAAGCAATCGGTG  
TATATCCAGAACATGATGGCGGTTGGACGGCAGAGTTCACTTCTTCGTCAGGTAACGATA  
GTGCGGCGCTGTCAGTAACTAAAATTGTTACCGATTCCGGTCTTCTCTAACGGATCTGG  
AACTTCCCGAGCCAATATCACCAATCAAGATTTTTTGACTAAGCTCAAAAAGTATGATA  
TGCCAGCGGTAAGTGCAATCTATGCTGGTGAGATCGGCAACTCTCTGGAAGTTGAAATC  
TGGCACGTAGCTCGTTCAGTGGCGCGGTAGCACCTGAATTA ACTATGTATCCGTTCCGGCG  
GAACTCGTGCCGCAGCACGCAACCTATTTCCAGATGCACCGCAGAATGATAATCAATATG  
CGTTTATTGTTTCGGCGAGATGGTGTGGGGGAGAATCCTATGTACTGTCTACTCTGAAAG  
GGGATAAAGACTTGTACGGCAATTCTATCTACATGGACGACTTCTTTGCTCGTGGTTCTA  
GCCAGTACATCTATGCAACCGCTCAAGGGTGGGTAGATGGTTTCAGTGGTATTATCTCTC  
TTGCTGGTGGTGTGTCTGCTCACGAAGCCAGTACGGGCGACCGTGGAGATGATCCGTTCA  
TTGGTGCGATGATGCAAGGTTGGGATCTGTTTGCTGAACGAGAATCTATTCACGTAAACC  
TGTTGATTGCTGGTGATGTGCTGGCGAAGGCGATGCGTTCTCTACCGTACAGAAACATG  
CTGTTTCCATCGGTGATGAGCTTCAGGATTGCTTAGTAATGGTTTCTCCGCCGCGTACCA  
CTGTTGTTAATATTCCGGTCACTACCCCAATCGATAATCTGATCGCATCGCGAGAAGGAA  
ATAGCAATTATTACAGACAACAACATGAACATTAATAACACGTACGCGGTTATTGATGGTA  
ACTACAAATATCAGTATGACAAATACAACGACGTAAACCGTTGGGTTCCGTTGGCTGCTG  
ATATTGCTGGTTTGTGCGCTCGTACTGATGCTGTATCCAGCCGTGGATGAGTCCGGCAG  
GTTATAACCGTGGTCAGATCATGAACGTGGTTAAACTGGCTATTGAGCCTCGCAAGGCAC  
ACCGTGATCGTCTGTATCAGGCTGCAATTAACCCAGTGATCGGTGCTGGTGGTGAAGGGT  
TTATCCTGACGGGTGATAAAACCGCTACGACTGTTCCCTAGCCCGTTTGACCGCATTAACG  
TTCGTCGCTGGTTAACATGCTGAAAAAGCATATCGGCGATTTCGAGCAAATACAAACCGT  
TTGAAACCAACGATAACTTTACTCGCGCTTCTTCCGTATGGAGGTTTCGCAATATCTCA  
GCACGATTTCGCTCTCTTGGTGGCATTATGACTTCCGAGTACAATGCGACACCACGAACA  
ACACGCCGGATGTAATTGATCGTAACGAATTTGTTGCTAGTATGTTTCATCAAACCAGCAA  
AATCGATCTACTATATCATGCTCAATTCACTGCTGTTGCAACTGGTGCTGATTTTCACG  
AAATTATCGGTCCAGCTAACCAGGCATAATCAGTAAATTAGCATAGATTA AAAAGTTAAAT  
CAAGCGGGGATTTTCTCCCGCTCTATTAAGGAATATCAATTATGGCACTCGATTTGAAT  
GATATTACACGCGGTTTCGAGTCTGGCGATTTTGCTCGTCCTAACCTGTTTGAAGTTGAG  
ATCCCGCATCTGGGGCAAACCTTTAAGCTGATGTGTAAGGCTGCGACTGTCCCGGCTGCT  
ACCGTAGAAAAAATTGCTGTAGGCTATCAAACCCGTAAAATTAACATCGCTGGCGACCGT  
GTATACGACGACTGGAACATCACTGTATTCAACGATGACGCACACAAGATCCGTGATGCT  
ATCGTTGCATGGAGCGATCAGACACATGGCACAGGTTCCGGCGATCACTGGTGCAACTCCT  
GCACAATATAAGAAACAAGCTATTGTTGCTGACTTAACCGTAACACCGAATCAACTAGC  
GAAAAAACATTGTACGGTATTTTCCCGACCAACGTTGGTGAAGTAACCCTCGATTGGGAA  
CAAAACAACGAAGTTGAAACGTTTGAAGTTACTTTTGCTATCGATTGGGTAGAATAAATA  
TATTATCATGCGGGGAGAAGTTCCCGCTTAATTTCTCCCAATTCGAGGGTACTAATGTT  
TAGTAGATTA AAAAATGCTTGC GCGTGGGGCTGATTTTGACAACGACAAATACGAAGAAGA  
AATTAAGATAAAGCAGAGTCTATCGCCGCACCTAAAACAATGATGGTGCTACGGAAGT  
AGAAAGCAATGATAATTCACATGCTCGCGCGTGGA ACTCTATTACCCAGCAATTTTACAG  
CACCGACCAGATAATCAGCACAACTAAGCAATTAGTTAACACATATCGCGGTTTGATGAA  
TTACCATGAAGTCGAAAACGCTGTACAAAATATCGTTCACGATGCGATTGTATTTGAAGA  
AGGTCATGAAGTTTTTTCATTAATCTTGAGGGGACTGGCTTTAGTGAATCTGTAAAAGA  
GCGCATTAAATGAAGAATTTAAAGATCTTTTAAACACAATCCAGTTTGATAAGCGTGGTCA  
GGATATGTTCCGTCGCTGGTATGTGATTCGCGTATTTTCTTCCATAAAAATCATCGGCAA  
AAATCCAAAAGATGGTATCGTAGAATTACGCCAGCTTGACCCACGAAATCTTGAATACGT  
TCGAGAGATCATTACAGAAGACACACCGGAATGTAAAATTTATAAAGCAACGAAAGTATA  
TTTCATTTACTGTAGGCAATAGCTCTTATTGCGCAGGTGGTCAAGTATCCTCTCCTAA  
TAGTCGCGTTAAAATCCCGCGTAGTGCTATTACATACGCTCACAGCGGCTCGATGGATTG  
CGATGATAAATATATCATTGGTTATTTGCATCGGGCAGTTAAGCCAGTAAACTAGCTTAA  
ATTGTTGGAAGACGCAATGGTCGTTTATCGTATCACGCGTGCACCGGAACGCCGAGTGTT  
CTTTATTGATACCGGAAACATGAACAACCGCAAGGCTACACAGCACTTGA ACTCAGTGGC  
ACAGTCTTTTAAAACCGCGTGTGTTATGATGCATCGACTGGTAAACTTAAAACCGCA  
AGCAAATCTATCAATGACAGAGGAATACTGGTTACAGCGTCGAGATGGTAAAGCAATCAC  
CGCCGTTGCTACTTTACCGGGTGCATCCGGTATGAGTGATATCGATGATATTCGCTACTT  
TAACCGTAAATTGTATGAAGCGTTGCGTGTGCCATTGTACGTAGCAATCTCTCCGATGC  
TAATATGGTGATCGGTGGTGGTTCAGAAATTA CTGCGGATGAGTTGGAATTTTCGAA



ATTCATTAGAGCTCTGCAATCACAGTTTTTCGGAAGTATTGCGCGATCCTCTGAAATATAA  
TCTGATTCTCAAAAATGTAATTACGGAAGACGATTGGGATCGTGAAATAAATAATATCAA  
GGTGGTTTTGCATCGCGACTCTTACTATACAGAAGATAAAGACGCGGAAATTTTAGAACG  
TCGAATCGGTCTAATCGAACGTATTACACCTTACATTGGTAAATATTTCTCTAACCAGAC  
AGTGATGCGTGACATTCTGAAATATACCGATGACCTGATGGACACCGAGAAGAAACAGAT  
CGAAGAAGAAGCGAACGATCCGCGCTTTAAACAAACTCCCGATGAAATAGAGGATTTTTTA  
AATGAAACAATTTATCGAAGCAATTAAACTCGCGATGTAACGCTGATCGAAAAAGAATT  
TGATAAGATCATGGAGGCTAAAAAAGCCCAGATCATCGAATCCAGCGTGTTCGAAATCGC  
ATCCAGTATCATGATCGAAGGTGAAGAAGAAAAAGACCGCGATGATGAAGAAGATATGGA  
AGATGAAGATGAGGACGACGAAGATCGCGAAGCCGATAAAAAAGACAAAGAAGACGACGA  
ATAATCGGAAGCCAACATGATTAAGATTTTACTCCTAAAGCTGACTTAGAACTTTTCT  
GCCGGAAGCACAGGAAAACCTTGGACATGTTGGCTATGTTTGAGTCAGACGAACTTTTGAA  
AATCGTTGAAGGTATCTCCGAGGATGAGCCGGAACCTGGCGGTAGCAATGCTGTCTATCAT  
CGACGGAATTACTGTAATGAAACAATGGTTAAACATGTAAACGCACGCGGGGAAGTTGA  
ACGTAAGAAAGATCGCAAAACCCGTGAGCGTGATGCTTACATGACTACTGGCCTAAGCAA  
AGCTAAACGCCGTCAAATTGCCCGTCTGTGCTGCAAAAACCAAACGTGCAAATCCATCTAT  
CGAACGTCATGCGGATCGTAAGCGCAAAAAAGCAATGCGTAAACGTAAGGCGTTAGGATT  
ATAACAGGAAACAACATGGAAAAGAGCGAATTACTGATCGAACAATGGGGCGTTCCTTGT  
GATCGCGGTAGTTCGTCATTGCTTGAATCATTGATGTTAAGGCTACAGGAAATCTCTAT  
ATTCAAGGGATTTTCTGCAAGCCGAAACGGTAAACCGTAATAAACGCTAGTATCCTCGC  
AGTGTCTAGAAAATGCGGTTACTAAATACATACATGAACAAGTTGAGACACATCAAGCT  
CTAGGCGAACTTAATCACCCAGCAAGAGCAATGCCAGATCCATCTAATAGTTGCACCATA  
ATTGAAAAATTGTGGTGGGAAGGTTATAACGTGACGGGTAAAGCCCGTGTATTGAAGGG  
GATAAAGGCGCAGGTGATAAACTTACTGCACTGCTTCGCGCTGGCTGGATTCTGGCGTT  
TCCTCCCGTGGATTGGGTTCGGTAGAAAGACTTTGGTCGCGGATACAATATTGTACAGGAA  
GGTTTTGTGTTGACGGTTGGTGTGATGTTGTTTGGGGCCCCGAGCGCACCCGGATGCGTGG  
GTAACCTCCTGTGGTTGAGTCAACGGATAGCGATTCTAGCGCGTCAGACGCACCAGAAAGC  
GATAAAACCGAAAAAGTGACTAACCTACAGACTCACAAACAAACATCGTAGAATCGAAT  
AATAGCGCGTTTATGGCGCTCGCAGAAGCGTTATCTAAACGCTATAAATAATAACGTCGT  
TATCAACAAGAAGGTTATATCCATGCTTAAAGAAATGCTGCTCGAAGAAGCAAAACAGAT  
CACCGTAGACGTTGCTCTCGATGACCTGTTTGAATCCGTCGAACTGTCGCCGTAAGTAAA  
AGAAAATTTTGATACTATCGACGCTCAGGTGGTAAAAGCTAATGCTGTTGCTCTGGCAGA  
AAGCCACATTGAAAAAATCGCCGCTAAAGCCGATGAACTGGTAGAATCAAAGGTCGAAGA  
CGCACGCACCCGAGATTGAAACCAAACCTGTACGAAGATGCAGATAAATTCCTGAATCACTT  
AGGCGCTAAATGGCTGGCAGAAAATAAAGAAGCCGTTACCCGTAATATTAAGCGGATCT  
GTGCGAATCCCTGATTGGTTCTCTCCAAGATGTTTTCGTTACTCACAAATGTTGTAGTGCC  
GGAAGAATCTGTAGACGTTGTTGCTGAACTTGACGAAGCACTCAAAGAAGAAAAAGAAAA  
AACCTCCGTACTCTTTGATGCCAACTGCAACTAGAAAGCGAAATTCGTGGTATGAAGCG  
CGAACAAGCGATCAATGAAAGCACTCTTGATCTTTCCGATACTCAGAAAGAAAAAGTAAC  
CGCGCTGATTGAAGGTCTGGAATATAGCGAACTTTTCGATAAGAAATTAACCTGCAATTGT  
CGAAATGGTGGCTAAGAAATAAGACAAACCAGCCAAGATTGAAGAATCACTAAATACTGA  
TGCCGACAAGCTGAATGTTATTGCAGAAGCTGTGCAAGAATCAGGGAAAAAAGCAACTGT  
AGATTCGCGCTATCTCGCTACCTGAATTTTCATCTAATGCAATTCACATCTACTAATAAA  
TACTTTAGGTTAACAACAACAAGGTTTAAAGAACATGAAAACGACCAAAGAAGACTGATGG  
AAAAATGGTCCCCGCTGCTGGAGAACGAAAAACTGCCGGAATCGCAACTGCGTCTAAGC  
AGAACTGGTTGCTAAAATTCTGGAATCTCAGGAAGCGGACTTTGCTGTAGATCCGATCT  
ATAAGGATGAAAAAGTTGTTGAAGCATTCCGGTGGCTTTATCGCAGAAGCCGAAGTTGCAG  
GCGACCACGGTTATAACGCATCTAATATCGCGTCTGGTCAGACTTCTGGTGCAATCACCA  
ACGTAGGTCCGGCTGTTATCGGTATGGTTCGCCGTGCTATTCCTAACCTGATCGCATTG  
ATATTTGTGGTGTTTCAGCCGATGAGCACTCCGACAAGCCAGATCTTTGCAATCCGTTCTG  
TATACGGTGGCGACCCGCTGGCTGAACACGCTAAAGAAGCATTCCATCCGATGTACTCTC  
CGAATGCGTTCCATAGCTCTCTGGCTGCTAAAGATGCAACGACTGTTTCTCCTACTGGCA  
CTGCGTTCCAGAACTAACTCTCAGGACTCCGATTGCCGCAGGTGATAATGTACACCACA  
CCTTCGCAGAACTGGCATCGCATATCTGCAAAACGTTACCCGAGAACAAGTAACCCCGA  
CCAAAGCTGACAGCCAGTCAGATGATGAAGTTGTCATGAAGCTGATGGAAGAAGGTAAC  
TGGCTGAAATCGCTTTCCGGTATGGCTACTTCCATCGCTGAATTGCAGCAAGGGTTAATG  
GTTCTCAGTATAACCCGTGGAACGAAATGTCAATGCGTCTTGACAAACAGGTTGTTGAAG

CGAAATCTCGCCAACTGAAAGCCCGTTATTCTACCGAAGTTGGGCAGGATCTGCGTGCTG  
TTCACGGTATGGATGCTGACGCTGAACTGAATGCTATCCTGGCTAACGAATTTCTGCTGG  
AAATCAACCGTGAAATCGTTGACGTGATCAACTTTACCGCTCAGGTTGGTAAAACCTGGTA  
TGA CTCAGACCGTTGGTTCTAAAGCTGGTGTATTTGACCTGCAAAACCCGATTGATACTC  
GCGGTGCTCGTTGGGCTGGTGAATCCTTCAAGTCTCTGATATAACCAGATCGACAAAGAAG  
CTGCTAAAACCACTCGTCAGACTGGTCGCGGTGCTGGTAACTTTGTTATCGGTTCCCGTA  
ACGTTGTAAACATTCTGGCTTCTGCTGATCAGGGTATCAGTCTTGCTATGAAGGGTGCTG  
CACAGGGTCTGAATACCGACACCACTAAAGCTGTTTTGCTGGTGTCTGGCTGGTAAAGT  
ACAAAGTATTCATCGACCAGTATGCTCGTCAGGACTACTTCACCGTAGGTTACAAAGGCG  
ATAAAGAAATGGATGCTGGTATCTACTAGGCTCCGTATGTTGCTCTGAGTCCGCTGCGTG  
CAACTGATCCGCAGTCTTTCCACCCGGTCTGGGCTTCAAGACTCGCTACGGCATCGGCA  
TCAACCCGATTGCTGACAGCAAATCCCAGGCGCCGTCCGCTCGCATCACCTCCGGTATGT  
TGAGCAAAGACAGCGTAGGTA AAAACGCATACTTCCGTCGTGTATGGGTTAAAGGTTGCT  
AATAAAGCCATTCTGAATACTCCGGTCCGGTGAATAACCCGACTTATCATAAACCTTA  
TGACAGTGTAAAGTGTTAATTCCAAAGGGAAGACTCGAAAGGTTCTTCCCTTTTTGCGTA  
TTATAACCCGTCAAAATAAGGTTGCAAGCCTATACTCTATTGGGAGCTAAAATAGATAT  
ACACAACAAACAATTCACCAATTTTCGTAGTAACTGCATGGCAAAGGGACCAATGAATG  
AAATGAGCATTTCATGTTGATATTGGGTCGGATAGATTTGGTAGATATACAGATCTGGTGT  
ATGCCGACCTTGTATGACATTCCAGCGTGACGCTGGCGGTAATTTTGGTTTTGGTACGC  
TGCTCCCTGAATTAACCCCAAATTCCTCATAAGGAGGAAATGCATGAGTAAGAAAGAAAA  
CAGCTATGTTATGACTCGTAAGGAATACAACGAATTGATGTTAGCATTAGCTTACGCAAT  
TATTAGTTCTGATCATGCAATTAATCTGGTAAACAAAGTTAACCGTAGCGTTGATAATGT  
TTCTAAGAAGAAGTAAGTTTATTTTGGAAATCCTTCGGATTCTTTTTCTTTTTGTATAAA  
TATGATATATCCATTAAGGCAAATACAGGATTCATAAACATGGCTCATATTTTTACTGAA  
CTGTTGCGGGAATCTACTTCCTCAGTAGCTAACAGACAGCGCGACCGCAACTATTATCA  
TTAACTCGCGCGGTAACAACCTGATTTTCTCTGATCTGGTAGCAATCCAGCCAACGGAT  
CAACCAGTATCTGCATTGTACGGCCTACGTTATCTTAATCGTGATGGTCAGATGACTTTC  
CGAACTGCTACAACCTACGGAGGCGCGGCTGGTGATCACACAGAGATTGAAGAGTTTTCA  
AAAGAAAAATCTTATGACGAAGGCGCACTGTTCAAATCAGACAATGTTGTATACGAAGTT  
GTGACCGCTGGTACAGTCGGTGCAGATGCCGAAACTCCGGAAGCTGCAATCTTTAAAGGC  
ATAATGCCAAACAAAATCGTTTCTATAGCGATTGTGCATCGGTAGAATACTTTGAAGAT  
AAAAACACCGAAATTTTCGTCTACCTCTATGCAGTTTGATAAATGGCAGGTTAATGTAGGT  
TCTCGTAAACTGAAAACCTCATTACGACCGAATTGATGCAGGCTCTTGAGGCAAGCCAA  
ATCAACTCTGAAAACCTCTGTAATTGATCTTCCGGCTACGATCGCTTCAGAAGAGATCAAC  
AAACATATTATTCAGAAGTTGATCACTGTATCATCTCGCTATAAAATTAAGTGATCACC  
CCTGACGGCGTACTTTCTCTCGTTAGCGTACAGGACTCACCAGCACAAGCGCGTGAACCT  
TACCGCTATGCTTGCGAAATGAGCAATCAAATGTTGCGGACTTCTCCTTTTTCTGGTACA  
TACGTTATGGCGTCTTCTCGCGTGGTTTGCCCTCCTACAATCTACCGGATGGATGGAAGAA  
ACCGACAATGTTCTAAGCGAAGGTCGTCTACATTGCGGTCTGGAAGTGTACGCAGACACG  
ACAGCACCTTTCGATTATATGCTCGTTGGTTGTAAGCACATGATCCGTGATATGGAGAGT  
GTAGGTTCTCTGTTCTACTCCCATATAACAGAAGCCGACGGCGCTGGCGCGTATAAGAGT  
GTAATTGACCCTAATAGCTTCCAGCATCATGTAGCTATTATCTATCGTTATTCCTCTCT  
GTCAACCATATACATCAAAGTTGATCAGGAAGAACACCAGGTCATAAAGGGTGACGAT  
TGGGGTGAAATGGCTGGACGTTTCAGAAATGTCCTACATTTTAGGAATCGAACTGCCACCG  
CTTGAGATTGACAACGCTTAACTAAATATCTAACCAAGACAAGTCAGATCCGCCCAAGAT  
TTTTTCGACGGCGGATCTATTTTCTTGATGATATAAGTTAAATCATGGTAGCCCGTGTCT  
ACGGGCAACATAAACAGCAATTCTAGTTCCTCCGAAACGATTCCATTAACCTTCTTTCGC  
CCAGAATATCACACAATCTACAGGATCATCAAGTGTCTCACCTAAGACTTGAGCAACATT  
TCTAGAAAACAGATTTTGCATGTATAACGGTATAGAACGAGGATTATCATAAATGTGTTC  
TAATTCATCCATCGCCAGATTTTTTTGTTCTAAGGTTTGCCATGCAATAACATCATGACC  
GTTATGCTTGTGGTCATAAAACTTCCAATTTGGAATGAAAATTTTTCTATAATCTGGATC  
GTAATACTTCATGAAAGCATTGTCCATACCGTAAGCCCCTCCAGAATGCGCTACAACGCG  
ATTTTCTGACAATACCTCCCAATGGTACTAGCCATCATCAAATGTCGCTAGGCGCTTT  
TCTAGAGCCTATTAAAGCACATCTACGAAGTGGTTTTACTCCAAATAGATCTTGTAACCTG  
GTCAAACATAATATTTCTCCATAGAAAGCAATATCATACTACAAGTTAATAACAAATAC  
AAGTATCCGCGTAGCGGAAGCGAGCACAGCGAGCAATCAAACACTTCCAGTAATTGATCA  
ATAAATGTTTCGAAACAAATTTTTATTATTCTATAAGATAAGTCTTCGTTTTGATCATAAT

TTAATCACACCTGTAAAACTACACAAAAGGATATCGCTTCGCGAACTCCTACGGAGTAT  
AACATTTGTGATACAATATGTAGTGATTAATAATTAACCAAAGATACATTTTCTATGTTT  
TAAAGATCTTTCTTCGTTTTGATCATAATTTAATCAAACAGTATTAATATTGTGCACATT  
TAAACTAAAATTATGTTAGTAACAGATAACAAAAACGCCGACCCGAAGGACGGCTAATG  
TTAATTATTTGTTGATAACGATCTGATTTTCGGCGAATGGTAACATTACTCTTAGAGATGA  
TCAGATCATCCGGCACTACGTTAGTTTTGTATGGCTGGAAGCGAACAAGCATCTGATTGC  
GTTTAGACCCTTCCTTAATCTTGATTTCCATCTGGATATTGTTTCCTACGTGAGCAACCG  
CAATTTACCTTTATTCTCATAGACCCACTTGCTGGTAACGTCTCCTGCAAAAAGCCTTAA  
TAACTTGCAATGCTTCGTCGTATGCGGTAGAGCTGTGAACCTTTCAGAAGGCCAGCCGTAG  
CAAGACGGGAACAGGTGATCGCCGGAGATTGCCAAACATCAACATTAATTTGCTCAATCA  
GAGTAACACCGCCCTGATCAACTGCTTTGAATGCTTCGAACATTGCCTTTTTTCATTGCTA  
CGTGGTTTTTATGGAAATTCATAATTAGTCACCTCTATTGATTAGTTATTTCAGAATATTA  
ATTACAAATCAGGACATTGCCCGTTTTGAATGCGTCCATTATAACAGTGTTATTTGGCTTG  
TCAACACGTTTTTGAACCTTTATTTTTAAATTTTTTGTTCGATGTGGTGTTTACGATAAACA  
ACTTTTTCACGGCTGGCGTAAGCCTCGCGTGCATCTTTTACCATCAACCATGCCTTAGCC  
GCATCTTGTCGCTGATCCCGCCAATCTTCTTAGCAATATCAACAAAATTAAGACCGAGG  
TCTTCGCGTAGCATGTAAACCATTAACGCTGTTTTCTTGTCATCACTTCGCCCCATTGA  
CGATTAACAGGATAGTGATCAGTACCGGAACTGGATCATGACAGTACCAATAAACCGGA  
TAAACGCATTTTCTGACTTCCACACATGACATGCGACTAGCTGATAGACCATTTTTGCAA  
CCAAAGCCAGAAAATACATCTCGATTGGTGCTTCTTTGATCAATCGTACAATCTCATTCA  
TACTTCACCTCATACTCATAAACACAACAACGAATAATACAGTAACAGTTATCAACGC  
CATTTTCAACCCCATATTCATAATATTTTCTTCGCTCACTATGGACAGTAGCATGTCTGA  
TGCCTGCCATTATAGGCATCTAAATCGCTCTGTGAAGCACAAAAACAAAATGCCACCCC  
GAAGTATGGCTGATAGATTTTCAATTAAGCAGGATGCGTTTCACGAATGCGTAGAACTCGCT  
CTAACGTATCTCGGTCCAGTTTATGTAAATCTTTGGAATGATACATGAAACCATTGCGAG  
ATTCCATGCAAGTGCAATCACTATATTGTTCTTCCGCTGCCGCGATTGTCTCCAGATCTT  
TGGCGTACTTGCTGGTTGAATAAACTTCTCGATCACGCCACTCTAACCCAGCCTCATTGA  
ATTTAACAATCTCGTGAAATACCCACCATCCAATGTAGATAAATGAAGTTTTGCCCCACG  
GGATCGGGTGTACGTAACGAAACATTTTAACAACCTTCCATTGAACATTTTTCGGCTTGAC  
TTGCTGCAACTTCTACTGTTTCATCTTCGATCTGTTGATATAGTTTAGCAACACACCAGA  
ATTTGGCTGTGTCATCGTAAGTAGCACTCTCTTTGAACAGATGACCGTCTGGCATGATAG  
AAAATCGTTCCAGTGCTTCGCCGTCCTCACTACCGATTAGAGTCCGGTGACAGTTGCCCTT  
CGCGCTGCAAATACCAGTTATGTTTGATCGTCAATTCAGGCATACCGCTAGAATCGCCTA  
CAATGTCCTCTGACACAACATAATTAAGTAAGATCTCATTACCTTGTGCCACGGTCTTTG  
ATTCCAGCACATCCTGTTCTACGTTCAATTGTTGCCAGCATGATTTTAGTCGATGCGCTAT  
CGGCTGAATTTTCCGACTCAACCCACACTTTTACAGTATACACGCCGTTTTTATCTGCTT  
TAAACTTTTTGACTGTAGTATTCTGTTTTGTGTCTATAACTTCTTCGCCCTTACTCCAAC  
TATAATGTAGTTGATAGTTGTCTGCTGGAGTCTTACCACCCGAAAAATTTACTGTTGCAT  
GTAATTCTACGTCTTTTTTGTGATGATACGTATAAATGCGGGCGTTTCGGTGATATTTACGA  
TTAATTCCGCTTCTTCCATGAGGAAAACCTTCCAGATTCTACTGATTCCATCGTATAAGCAT  
CTTGTAACCTTGACTTTATAGCTACCCGCATTTTCACTTGTTGCGCCTTCTACAGTTAGCG  
TAGCTGTGTTATTTTCATGCTGTTGGTTCGCTTTTTGTCCATGTATATGTCAAATTGCTTG  
GTAATGGTTCGTCACCCGCTAAAGTCGCCGTTAAGGTGAAACCATCTCCAGCAAGAAAAC  
ATCTTTTGTAGATTGTATTGATACTGTGAAAGCCATATGAAGCCACTCCCATAGAAAAT  
CCGAATTTAATTAATTGAAATATTTGAATGCCATCAACCAGATAACCATTGCGATATTCC  
AATACATGAGTATTAGAATAGTGATCCAACGAGGCCGATATAGTCTCGATCTCGTCTGGG  
TATTTGTTCTGTTTGGTGTAAATACATTGATTTTGGTAGGCATGTAGTATCCTCTTTTTAA  
TTGCATAACGGAACACTACAATTAATAAATATAACAAATATTTTACAACCTTATATCACCCAAA  
AATTACTTGAGTGTGTGGAATTGGCTATGTTTAGTCTCTCGCACCTTGACAGACCCATCG  
CGTTTGATATAATAGATCAGTGACTTGAGGGTGTGCGTGTACATACGCGTGCGGGAAACGT  
TCTGGATACTTCTTCCAATCTGGAGTATTAACGATCCAGTTCGAAAATATAACCACGGGCAG  
GAGTAGTAACCACGACCGCCACCGATCAAGCAAATGGTCGGACGGAAGCCAGTAAGATCG  
CAAATGAATCAGTGTATGTGCTAGGGAACGATGCTCTGTTTCGTCAGAGGAAATGTTT  
GGTAACGGAGATTTCACTTTAACTTCCGGTGCTTCTTCAACATCTGACTTAACTTCTTCG  
ACCACTGGTTCAACTGCTGGAGATTCTTCTTTTTGTTTCTTCAATGACGATCTCAGGTTCT  
TTCATTGCTTCAACCAGAGACGGATCAACTTCGTCGAATACTATTTTATCATCTGCGGTG  
TCTGCTGCCAGAATAAGATCGTTAATACTGGTTCCTTCTGCCGGAGTTTCTTCTTCCATT

TCGGAAGCCAGTGTAGTTAATTCGGTTTCTACGAACTCGATCATGTTCTCTAGTGATAAA  
GTCTTTTTGACCTTAATATCAAATTGTTTTGCGTAGTCAGCTAATTCTGTTTTAGCTGTT  
TTCTGTGCTTCTTTCTCGTCGGACGCCGCAACAGCGCGGAGTTCTTCGAAATATTCTTTA  
TCAAACATGTTATTATCCTGATTGGGGGTGTTTGTATAAATATTTGTATACTGTATTTAT  
TGAGTGAGGCTATTCGCTATGCAAGATATTAATAATCACTTTCTGAACTATTCGCATGTT  
CAAATTGAATGTAGCGATTCAATTTTATTAGAAATGCGAGATTATTTTAGTTTTGAAGTC  
GAGGGAGCGCGGTTTCAAAAACGTGTAAAATACGGAGGCTGGGATGGGCGTATTCGTCTT  
TTAGATTACAACGGAAAGCTGCCAATCGGCCTAACTAAAACCGTGGGAATCTTCGCTAAA  
AATATGGGCTATAGTGTATGGGTAGATCCTCGCTTATTCGAAAAAGAACAAGTTACAGAA  
GAAGAAATTACAAAATGGTGTAATGCCTTAGAATTATATTCCGGTGCTAACAGGATCACC  
CCGCATTGGTATCAATCAAAGGCTGTCTTGGAAGGTATCCATCATAAACGCCGTATGTTA  
GTTTTGCATACGTCCGCTGGTAAATCTTCGATTGCTTGTATGTTGTCTCGCTGGTACTTA  
GAGA ACTACGAAGGGAAAGTGCTGATCATCGTTCCTACCACGTCGCTAGTGCTGCAAATG  
CGTGATGACTTTGTTGATTATCGCCAGTTACCTTATGAAGCAATTCATACTATCATGAGC  
GGTACTAGTAAACACGTAGGTGATCGCCTGATCGTTGTTAGTACGTGGCAATCTGCATAT  
AAACAACCTCGTGAGTGGTTCAGCAATTTGGGATGGTTATTGTTGACGAATGTCACAAA  
GCCACTGCTAAAAACCTGCTAAACATCGTACTGATATGGTTCATTGCCAGTATAAGATC  
GGCATGACTGGTTCCTCGTGACGGGAAAGCTAACATGATGCAGTATGTCGGGCTTTTC  
GGTGATATTTCTAAGATCGTGAGTATTGACCGCCTGATGGATGAAGGGCAGGTGACAAAA  
CTGAAAATTA ACTGTCTTTTCCTTCGTTATACCGATGAGGAATGTAGCGCGGTTAAGGGG  
CGAGAATATGCGTAAGAGATCACGTATATTACATCTCACCCACGACGAAATAAGTTTGCT  
TGTAATTTGGCGCTAAA ACTCGGTAAGAAGGGCGAAAACGTATTCCTGATGTTCCGCAAC  
ACTAAGCACGGAAA ACTTATGTATGACGCGTTACAGAAGGTACACGACAAGGTATATTAT  
ATTGACGGTGGAGTTAAGACAGAAGAACGAGACGAGTTCAAAAAATTAGCGGAAGGGGAA  
ACAGGGATCATTGTCTTGCGTCTTATGGTGTATTCTCTACTGGTGTTTCAATTAAGAAT  
TTGCATCATGTTATTTTCGGTCATCCAGTGAAGGAATCAACTATCGTTGGCCAGAGTATC  
GGTCGTGCATTGCGTAAACATGGTCTAAGGATATTGCAACGGTCTGGGATCTTATCGAT  
GATTTGGCGGTTAAGACAAAAGCGCAAGAATTCTCAGAAACAGTTTAGCCACCTTAATTAT  
GCTCTTAAACATGCGCTTGTAAGTATAAAAATTTACAACACCGATCGATTTCGAATATGTC  
ACGAAAACAATCGAGATCTAATAAATAGGGGCTTTAATGCCCTTTATTCTACGGAGATT  
AAAAATGATTAGCTTTAAACGTTTTTTGGTTGAGGCCGCTTTTGACGGTTTCATGAGTAA  
GATTTATTCTTGTAATACTATCGAGGGATTAATGAACTTGAGGCATATTATGAGAAGCG  
CAAGAAAGAAACAGAATTGAAACCTGCTGATGACATTTTCGATCCGTGATGCTATCGCTGG  
ACGCCGTAAGCAACTGGAAGCGGACAACGAGCCAGAAGAGGAGCCGGAAGAGGATTTTAA  
AGATATAAAAAAGCCCCATCAATGATGGGGCAAATAAACCAATTAATAATCGGTTATCAA  
CAAATTACATTAACAGCATTGTTTGCTCTACGAGTTGTTCTTGTTCTTCGCCGTTCCGGAT  
CTTCACTAATCGAACGTTCTGTTACTAGCTGTAAGCAGTAGCCAGTGTGAGCAACGCCGT  
TTTCTGTCTGCACTGATAACGCATCCTCGACAGGTTGTTTACAACAAATACAGATATTCA  
TAAAAATTCCTCCTGCATGTATTTAGCGACCAGATTCCAGCATAACGAATTGTATAGCAT  
TCTTGATCGCAAATCCACGAGATTTAACGATATCAAGTGCGCGACCAGCAAATCCATTA  
CCATCTGGAAATATGCAATTTTCGATCAAGCGGTAGGATCTCGTCGTCTGCTGCCATGA  
CAACTTTCAGTTCTGATTTCTCATATTCAGCACGACACCAGTCATCACTACGGTTAGTGT  
AAAAGTCAAGACGATTTTTCATAGCCTTTTTCTTTTTAGCCTCAAGAGCAATAGTCTCTC  
TTTTCGCCTCGCTGTAATCCTTAACCACTTTGAGTATACTACCGGATTATTCAGCGCGT  
CCCATTGCAACTTAGTCGCATCGATCTTCATGTCAGCTTCTAATTGTTCTTTCAAATCGT  
TTAGGTCCATAATATCCACTTATTCACACTAAGACCTATATCATATCACACACAAAATCA  
CTTTGCAAGTCTTATGCGTAGTTGTTCAAGATAATCTGGGTTATCTATTACTGAAAAGTA  
GATTGATACTATGATTGAGTTATCGTCGTA CTGCGGAGTTACTTCTACTGTCAGGTTTTCG  
GACCCGTGGTTCGTAGTTTCGGATCGCCTCATTGATGTTTTTTGATAAGGTATCCACTGT  
CAGTGGGTTTCATGTTCTCAAACAGTGATTTATTGAGATCGCATCCAAACAGTGGATCAA  
TGGACGAGATCCCTTGCGAGTAGTCACGATCAGTAGAATAGAATCTTTAACCGCTTTAAT  
CACTATGTTCTTTTTATCGTCGTTATTCCACGATCTGGATATATTGAGATCCAAATCAGT  
ATACATCTGATTAATAGTTGCCCTGTTATACCTCAAAGAAATTTAAGGAACTGGATAGA  
CCTGATAATGAATATAACACGATTCCCCGCTTTTCGCACTTGATCGGTA CTGCCAGCGTG  
ATTTGATTTCTTGTTAGCTCGTCGTTCACTTCTTCCACTTTATCCGTGGTAAGCATATCC  
AGCACGCGGTCAAAGTCCTGTGCGTTCAGGTCGTCTATATTGAATTGCTGATCGCCGATC  
ACGATATATTCGATACATGCAATTACCATCTGCATAATATCAACAGCTTCTGCAA ACTTA

GGTTGACCACACTTGATTTTTACTTGTCTTAAGTCCAGAATATACGGTTCAACTTCTGGT  
ATCTGTGTGCGTGAAACATCAAGAGAGTATACTTTCTCTTTATTGCATACACCACACACC  
CAAGTAGCATCAATTTTCATCTTATTGAGGCTGTCACACCATAAGAGAAGAAAAATATAT  
TCTGCTTCGCATTTCTCTAGCTCTAATGCATTGATCCCCGTACATTCAGGTATGATCTCT  
ATAACAACCTCTGACAGCTTGCCAGTCTCTTTTGCTGCTACCAGTTTTAGAAATTGGCCG  
AAGGTGAAAGCACGGGCGTGTATCAACTTTTCGCCTAATTGGATCTTGAAAAAGTATTGC  
ATAATAAAACACCCTTTATAAACACATAGAATTATTTAGTATTTTATAAATACCCGAAAG  
GGGATTATACCATGAATATTATCCGAATAGAAGTCCGGAAGGTGTGCAGAGATTTAAA  
CCATTCACGGTAAAAGATTATATAGATTTCTGTTCTGGTGTCAACTGAAATTAAGATGAAT  
CCAGAAGAAGAACAACGATTCTGGATGAGCTATTAGAAGAAATATATCCAGAAGTAGAT  
CCGACATTTTCGTGAATATATTTTCTGAATGTCTTTACTAGCTCAATTGGTAAAACAAAG  
ATACCGCTTTGTTTTACTTGCCCGACTTGCAACAAAGAAAGAAAAATGTTGCTTAACTTA  
CAGGTTGAAGCACTAAAACCTATCGTTCTAGTGGCCGCAGGGCTTAAAATAACTTTCCGG  
TATGTTAAACCATCAACCGACTATGCAAAAACGTTTCTGGATGCGATAGAGCGTGTATCT  
GATGGTATAAATGGTTATCTAGGGACTGCATTACCGGAAGAAGTTAGAGAACAGGTTATC  
GATTCAATCTCATTGCTGTATTTGAAGAAGTTGTTAAGCAGATGCACACAATCAATATC  
GAACAAAAGATATCTTGTGTGAAAGTCATGACCTGAAATACATAGGTCTTCTTCCATTA  
TTCAAATTGTTGTTGAATCCAGAAGAGTTATTCATCTTTTATCGAATAAACCATCTATTG  
GCAAAATCAAATTATTCTATCAGTGATCTTATGGATATGTTACCGATTGAGAGAAACATT  
GCACTGACACTGGTCGATAAAGACGTAAAAGAGGCAAATAATGCAAAGAACGGGGTTTCC  
TAATGTCTCAATAAAAACCTTTATCAGGATTATGAGGCATTTCTAAATCATCGCTTTATAGA  
GTTGCGTCCTAACTTTGTTACAATGACTCTGCGTGATTTCGATTTCGTGGGGTGAATGAAGG  
ATTGTTGCAATTCTATGATAATAAGGCGATGCATACAAAATTAACGGGAGAGAGATCTT  
TCAGATTTTCGCTATCAACTGCTAATACAGATGAAGTGTAAACCGAATCTATGGGATCTC  
TCATAGTAATGTATCAATTGACCAAAAATCCGACAACATTTTAAACATTCCAGTTAAAGAG  
CTATCACGAAACACTAAACCTTAAATGTTCTCGCTCATTGACAAATAAGGCGGTTAATAA  
CGTAACTAGCATGATTGATGCCATCTATAAGGAAGTTCCTTTATGGAAACCTACTATAAA  
GGGTGATAACTTTGTTATTCCTCGTTGTCCGTGGGTTAGTACCATAAATGACTATATGGA  
TTTTGTTAGGGCATAACGGGCAAAGCGTAGAAACCGAGTTTTTCGTGTATTGCTGGGAAGA  
TTTTGATGGTATAACGATTGCTGGATACGATAACAATATAAAAAATGAGCCAATACCAGC  
TATAATCTGTGAGCCTAGACTCATGGGGCAATTTATTGATATGTCGCCTAATCTGATGGT  
TTTTAATTTGAGTGGCAGACTAAGAGCAATGCTAAAGTTAAAAAATTCATTTAGCAATG  
TGAAATACACCACTATTGATTTTGTACTAAGCAGTATAATAAAAATTATTGTTGGTAATA  
GGGATATTATTGCACACTTTGCTCATGGTGGCGCTTATGGGGATTTAACTTATAAAAAATG  
CGTTTTTGAAGGATCTAAACTTGCCACAATAGAACAAATATGATTCATATGCTACCGCCG  
TGTGTCACGGTAATTTTCGTTGCCCGGATGGTTATTCGATTCTTTGATGAGAAGC  
ACAAGCACGCAATGATTTTATAGTTGACGAAGTGGTGCATGAAAGAAGCCGAGAGCAAT  
CATTAACTCACCTGTATATGATCGGTAACAGCGAAGAATTACAGGAAGTCAAATTTGAAG  
GTAAGATATAATGACAGAACTAAACCTATGTTAAAATTTGTTGTTCTGTAAAAAAATT  
AGAGATAAACGGGAAACATATTAAGATCCCAAAAATGGGGATTAAGCAACATCGATTATT  
AAAAGATGTTTCGTAGCTGTGATGAAACATCAAAGATTCTTCTTGATTCAATCTGTCCTGG  
GTTAGACGCAGCCGAGTCTGAGTTGGTTATGCTTAACCTTTGTGCGTTAATGGTAATTG  
TCTGGAAGAAAAAGATGGTCTTAAAGTTGTCTGATGTATATATTTGTACAGAGACTGAAT  
TACTGTAAATGGTAAAGTCTTTAAATTTAAAAATCCAATGTATACTTCTGACCCCATAT  
CGATGACGCTGATTTCTTGAGTCATCATTATCACGATCCTAGCGTAGACTTCCATGATTT  
CCCAGCTTTTATTATGGATTGGGCTACAGGATTAAGAAAACTATTGCACTGGATACACC  
GGAAGTACTATCTATGGTGGAAATTAACATATTGGATCGCCTATCATGAATGACGCATTA  
ACATCATTTTCGCGGGATGCGCAAGGAAGCGGAAGAAAACCCGATTGATAAATTTAACAAA  
TTAGATAAACTAAATTTCTCTTGATAATTTGCAAGCCGCTACCGAATTGGTGGCAGAGACA  
GTAGAGCAAAAATCTAATGAAGTTGTTGGTGCAGGATAACACCGCAGCCAATGAA  
TTGACGGCAGAAAATACACAATCTACCGCTGGAATAACCAAAAAACTTATGAAGAATTG  
CAAAAATCAATAATTTCTCTTCTCAGATGAATGAGAAATTACGTGGCTTTGGTGTACG  
ATGGAACGTAGATTTGGTGTGTCAGTAAAATGGCTAGCGGTATTGGTGCATGAAAGAA  
GCATTGAAAAAACCGGAACAACCGCAAACAATGCCATCACCTCAGTCAGTTTTGCCTACT  
GTACCGGAACAGCCTAACAATGACAACCTATCAAGGTCTTCCAAGAAAAAACTAGATGCT  
GATGACCGAAAGAAAAAGAACGCCACAGATAAGCGTAATGCTGATTCTATGGAAGATCTT  
CTTAAAGTTGTTTCGTGGAGGATTTAAAGAAACCATAGGTATCTCTAATAAGGTCTTAGGG

ATGTTATTTAAGATCACTTTGACCGCTATGGCAGAAGCCGCACACTGGGGTGCTATTTTG  
ATGGGTATTTTTTTTGTTCATTGATACTCTGATGGTTCATTTTCAGATATTGGAGTGGTTTA  
TTCGAAACAAAATTCAATGAATTTATGGATAAAGCCGGAGGATGGGCTGGTCCTATTAGC  
GATATTTTAACTACTGTTTCGTCAGGTTTCGAGATTATTGGTCTAAAGGCCGATATGGAGAG  
TTAATTAATCTCTTGTATGGGTATTGCTGATGCATGCTATAAAACCTTTAGCCAACTT  
GATCGAATTATCACTACGGGTATTGCTAAAATTGTTTCGTATGATCCCTGGCATGGGTGAT  
TATGCCGATAAGTTAGAATGTGGTGCTTTAAAGTCTGCGGTTCGCTCAAGGCTATACGCCA  
AATGAAGGAGAACTCGAATTAATGGATAAAGGTCGACTCTGAACCCGAAGAAGACAAATAT  
GGAGAGCGCACAGGGTGGACCGGAAAAGCCCGTGATATTGGCTAGGCCATAGGCGAATCT  
TTAAGGATTAAGTTAACGAAGGTCTTGTAGTCTGGGCTGGAGAGATCAAAGGATGTT  
GACGCAGAGAAACGACAAGAAGATTAAAACGCGGAGAATATAAGTCTGTTTCTGCTGAA  
CAACGATCTTCTAGTCGTAACTTAGAATTAAGCGAGGGCGCGATAAATAATATTAAT  
GAAGTTATGGAGAATTTGAGCGGTGACTATGACAAAGAAATAATGGGAGAGTTGAAAAAG  
GATATTGATGTTTACCGTGAGCAAGTTC AAGATCCTACATTAGTTGAAAGTGATCGTTCT  
CAGTTAGAGCGTCTTATTGAAAAATTTGATGAGATGTATGCTGATAAAACTAAGGGTGTG  
GTTCCAATAAATCTGTTCCGGCAACTGAAACGGAAACAGCAAATAAGCGGAACGTACT  
GAACAAATGCAGAAACAAGCTGCAAACCAGCAACAAACGACAAATCAGACCTCAAACGTA  
AATAATACACAAATTGTAACAAACAATAGA ACTATTAACAGGGTGCACCAACA ACTAGA  
ATTGATGCCCCAGGTACAATTAATATGGGGA ACTTTTAATGAAAATTAGTGTTATCAATG  
ATGCCGTTGATAGCTTTAAAGCGGGGGTTAAAACCTCCGCTGGTTTTACCTCAAAAAATG  
AAGGGCAAACATTAACCGCTCAATTC CCGCTGAACGTGCTAGCGGTAATGATGCTAGCG  
GTTATTATATCAACGACTTATATAATAATGGTCAGTTATTC ACTGCATACGATTACACAT  
CCCGTACTACTGGATCGTTGCGTGATTT CAGGAAAAGAAAATGTTGCTAGCGGTTTTG  
GCGGTAGCGTTAATATCGCTGGTTTTGATTTAAATTTGGGTGGGAGAAATGCTGCATTTG  
ACCGAGAGGCAATTGCTAATATTCTTCTTCCTCGTAGCCAATCTGACGTTGACGCTGCCA  
GCCATAAGTTAATGATGTTGGTGAATCTGTTATTTCTCGCGGCGGTGGTACTTTAGGCG  
GTGCTCTTTCTAATATGGCATCTACTGCCGTTTTTGGTGGTATCGAAAGTATTACTGGTG  
GATACCTTGCCGATCACGGTGAACAGATTTATAACTGCGCGAAGCATGTATGCGGGTG  
CTGACGCACGAACGAAA ACTACGTATGGCATCTAACCCCGTAGTATTGAAGACCTTC  
GCAATATTCTGATCATATACGAAACGTTTTTAGAGTTGTCTTATGTTTCTAGTGGTATTT  
CCAGCACCGCAAAGAATTA AAAAGCGGAAGTTGATGCGTGGTATAAAAATACACTATTGA  
GCAAATCCACTCCAGCCGAGGCAAAGAGAAATGATACGCTGTTTGAAGGGATCACCGATT  
TTCTATCCAACGTAATTA CTGTATCTAACCCGACAATACGGATGATCTCTAACTTCGGCA  
AGCGTACATAGTTTGAAGGGCGTAGCGATGCATTTGGTCCCGCTCAGATCTCAAGTGTAC  
GTCTGGACAAGTCGCCTGATGGTAAGTTTAATGGCCTTGCTATTTCTCCTAACTTGCCGA  
GTACCTTTGTTCTGGAAGTATCATTTAGAGAGATCTTGACACTTTCCCGTGGTACTATAT  
TTGGGAGTGCGGCATAATGTTTAAATTTAAATGACTTTAACGAACAAGCCGCTAACCTTGA  
CTTTCAGCGATCTAACTTATTCAGCGTGGCATTGTCACC ACTCCAAGTAATAAGACACA  
AGCGATCCTGGAAAGTATGGGTGGTGC GG TATATGATATTATACCAAATGCATTAAATGA  
CTATTTCCGGGATTACTCGTGGTGATTATACTGACGCATTAACAAATCTTGCTGTACAGGG  
TGTTAGGCGTGCTGTTGATTCATTTGGTGTCAAAAAGTATCTTTTAGGTGCAATGTCATC  
CCGCGTAGTTCAATCTCTTCTGCGGCAATTTGATGTTGGTACATATGCGCTTGACTGGTT  
CAATATGGCATATAAGTCAAGCGGTGTTCTGGTGTATGCTGTTAAGGTTCCAGAAAACAG  
ATTGAATTATGAAATGGACCGTAACCACAATGCGCCAAACATTCGAATTGCCGGACGTGA  
TTTTGATCCGCTTGATTGAGCTTAAGAATGGACTCGAGCGCATCAA ACTATAGAGCAAT  
GCAGGATTGGGTAACTCAGTAGAAGACCCCGTTACAGGGCTTCGTGCGCTTCCTGTTGA  
CGTTGAAGCAGATATTCAGGTCAACTTACATAACCGAATGGGAGTTCCTCACACGATCAT  
GATGTTTAAATGGTTGTGTTCCCTGTTGGTGTGAGTGCACCGGAATTA AACTATGAAAACAA  
CAACGAAATCACAACATTCGATGTTACTTTTCGCATATCGTTCTATGCAA ACTGGTGCTCT  
AGGAGAGCAAACCGCGCGAGAATGGATTGAGGATAAGGCAATAAACGCAATAACAAACAC  
TTTCGGTAATAATTTACTTGATAGTGGGTTATCTGCTGCTGGTAATGCTTTATCGCGTCT  
AAATGGCGTTGGTGGGCGCGTGGTGAATACTGTCACTAACTAGTTCTGATAATCTAAAGG  
CGGGGATAATCCCCGCCTTTTTATTTTGCTAAATCATTGCAATATTTTAGTGCTTAGCT  
TGAAAATCTGCGCTGTTAAGTTCTTCATAACGGTCATAATCACCGTTTAAATGCTGCCTTT  
CTTGCTTCTTGCTCTATCTGCATGTCAGACATGATAATAACAGCGATCCCGTGCTTTCATC  
TTCTCAAGTTGTATAGACTCTTCTTTCTGTTTGCGCAATTCCTTCTTGACGCTTCTTTTCT  
TCTCGTGCTTCTCTTCCCGCGCTTCTTTGATTGCATCCTTGAACATCTGCGTTTTGTGGT

GCTAAACAAACTTTAACGGGATCCACGTCTCGCCGTTCCATTTTAGAAATAAAGCATGAT  
TCGATCTGATCATCACTTGCATATGCTGCTTTACATTCACGAAGCAAGAAAACCGGATCT  
GATTTAGCATTATCATAGCTTCCATGTTAGCACAAACCAGTAAGAATGAATGCAGCCGCA  
AGACCAATCAGTTTAATCATTTCGTTTAGTCACGTCACCGAAAATTGTAAATTGACTAC  
GATTCTCATCGCCGAAAGATTCTACTACGTCGTTTACCTTGACGCAAGTCCCGCGCGGTA  
AAATTACTTCACATTCGCAAGGGTTCATGCAATGGACCCAACAACAAAACCTTTATGAT  
CTTTTACATCAATCACCCATGATACATTACAAGAATGTTGCATCTTTCCGGTCATTGATT  
CATATCGATTCTCACAATAAAGGCTAGTGCTGTTTGATAGCAATCCTCCAAACATGATCG  
GTGTCATGCTGGTCGATACAAAGTTTGTAAAGGTAACCTCCTTATCTTCAATGATGCGCC  
CTATTGTCTGAATGTCAAGATCTTGACCGCGATAAAGAGTACCGTTTAACTTTTCGGTTT  
TATCCATGACGCAATCCATCAAATCAACAATCTCTGATATCTCATCGCTCATGTCTTCTT  
CGCTTAAGAGAGCACCATTTACCAATTCGTATTGTTTCAGACACATAATCACAGATTGCAG  
TATATTCTTCTGGGGTTATGTTGTTATGTTTGTAAATGTTTGAATACATTATCTCCAAAGT  
CTTCAGAGTGTACTTCATACTTCACATTAATGCTTTTCTTGACAAATCCATAATCTTGTG  
TCTCACGCTCAAGGAAGCGGATAGCCTTCGCATAATCATCAAAGTTAATCTGATCGCTGA  
TCATCTCAGTGATCATGTAACCATTAATCCCCTCAATGTCATATGTTTCGATGTAATTAT  
CCATACGTTCCATCATTGATTTCGCGTGATTCTTCCGAAAGACGAAAATCCTGTAATTGTT  
TGAACATTTTAAACCTCCCATATAACAGAAAACGGGGCTAGTATCAAACCTAGTCCCCGAT  
TGAGTCAACCATTATTTCTTAAAAATTACATTTTAAATTCATCTGGCATTGCGTCTACAG  
ATACCAGATCAGCGATAAGCTGACGTAGAGTTGCCTTATCTGCTTTATTACGTTCCGGTTT  
TAGCTTCGCTAATGAAGCTGGAGAAAGACAGGTCAGAAGCAGGTTTAAACAACACCTTCAC  
GGATGAATGCATCACCGTCTGCGATCATCTCGCCAGATTCTTGTAAATGCTGCCAGTTCAT  
TTTTGTTTATAATATGTGCCTCAATGTAATAAGTTTCTTGTGAATCCGTCGATGCCGTAG  
CACGAGTTACCGTATCAAAGGATAACACAACACCGCGAGGAAGTCAAATCTCGCCTTCTT  
TGTAAGCAAATGCTTTGTTACCTACTGGCAATACAGGGATGTTTTCCGCGCCAGCAATGG  
AGAAAGCAACATTAGCGCCACCTTCACCGCGAGAGCCAGCCATAGAATCAACACCAGCAA  
CGGCACTAGCCACGTTTGCATTCCAGCCGCCAAAATGTTAGGTGCAAGGGAAGTGCTCA  
CATAGTTTTTAAAGTAAAACGCTTTTTGCTTACGTGCAGTTTCCCACATTTGCGACCGGA  
AGTCCATACCACGATACAGAATAGTACCCGGATCAAGTCTAACGCCATAGTTGGAGAAGG  
CATCATCCAGTGCATCGCACATCTTGACCAATTCCTTCTGGATCTGAGATTCCTTCAAAC  
CTTCCAGCTTACGGTTCGTTAGGAAGTTGTTTCATATTGATGTATGCTGCATCGGCATATT  
CGCTCAACACAAAACCTTCCGCGCCTGGCAGATCAAGATCAATATTTGCCATCATTACAG  
CCATGTTGCTAGCAATTGCTTCAAACATACCGGAAGCAACATTACGTAGGGCATCGGTTT  
TAATCTGGGTGATATTACGACGCAGCATTTCAGCTTTTACATATGCTGGCATAGACTGGT  
CTACTCGATCCATTGCCAGTGCGGTGATCTTGTTTTGAATACTTCCTCGCTCATGATTT  
CTTTTAAAGCGTTTGATTGATGCTGCGATAACTTCCGCAGTCAACGGATCATACTGATCCT  
GAACTTTTACCAGTTCGCTTACTGCGTATTTTGCATCGGCTTCGCTTTCAAAAATAGTAC  
GCATGAAACCATAGCGAGTGATAATCACTTGTCCAGTCATTCAGAGAACGGGGCGGTTG  
AACGTTCTAAGGCTTGACGATCAATCAGAGTATTAACCTGTTTCGTAGGTTCTGCTTCGG  
TGATATCTTCTTCCGGTTTAAAGATTAATTTTTTCTGGATGATTCACATAGTCGCTGTTAT  
AGGTCGCTTGAGTTTTTCAGCCTTCTTCTTTAGTCAAACGAGATTTAGCCGCTACGCGTT  
GTTCCGCTTCCGCGTTTCGTTCTTATTCTGACACAAGACTAGCCGCATACGCTTCATCTT  
TAGTCAGAGATTCACCAGTAGCCTTAGATACCCAGCGATCACCTAAATCACTTTCTACTT  
TAGTGAAGAAGGAATCATCAAGTTTAAATCCCTTTAATCTTATCAATCGCCATACCGCGAC  
GCTTGACAACAACATAAGCGATCTTTTTGCTGGTCATTACTTCCTGCTGGAATACTTCAA  
ACGTCGGTGTACGACGCAACAACGCTCGATAACGCGCTTAACCAGTTCGGTTCGTACCTT  
TCATGCGGGATACGTTAAAACGGAACATAACAGCGTCTAGTTGCGCTTTACGGGCTGTTT  
CCATAACCACATCAAAGCACTTGACATAACTGCAATCGGGTTATCGCCTAGACCATTTT  
CAAGCTGTACAATACGACCGCTTTTGTTCATTTTCGCACAGTACAACATGTGCGGTCTTGT  
CACCCATACGAATGATTTTAGGTGTTTTGTTGGTGAAGTTACAAAGACGGACAATCACAT  
CTTTATCGCGTGTCTGTACTGCAAAAAGCTGTTTAGGATTCTGCTTAGGCTTTAAGCACT  
GTATCGGGGCAATACTACCAAAGTTTTCTTCTTCCGTCAACAGCCATTTCTCGAAAG  
ATTCAATCATTAGATCGTCGATTTCTAAGTTAAACATTTTATATCCTCTAGTTGATAACC  
TATAAACCTATATTTATGAAAACGGGGCTAAACGCCCTTTTTATTATAATGCACCATCG  
AGCAATTTCTCTGAGGTGTATCCTGAATAGTCTTTTTCAATCAGGATATATTTTCTACT  
CGTTTAAATACAACCGCGCGTATCAACCTATTCTGCGTAGTTGATGGTACGAGTTGTTCCA  
GCTTCCAGTAATGCAGTACCGATTTTCGTTAATGCGGTTCATAAGTTACGTCGGTAATGATG

ATTTTCGATGTTAGCCATTTGATACTCCTTAGTAGTTCGTTTCTGTATGGGTGTATTATGA  
TATAGGCCCTCTGTTATGTCAACAACCTTTTGAACAATTTTGAATTAATTCTGCTTTGA  
TTTCGCAGAGAACATCTAAAGATTTCTCGTCACCCGCTTTTGCTGCTTCTGCTTGCATTT  
TTGAAATGGCTTCAATCTCAGTGCAATTATAAGCCGCTTGAACCTTTAGCGATTGCGATGA  
TTGCCGATTTCGATGGTTAAGTGTTTCATGTTTGATTCTCCTTTTCGTTTCGGTATGTGTGT  
ATTATAGGGGATCGATGATCCCCTGTCAACAACCTTTTTTATGTTATTTTTTAATTGCCTAT  
CTGGCAATAGGGCAATCACATGCTGGCGATGTTCTTCCGATTGAGGGACACCGAAAAAGT  
TAGTTTTGTAGAAATACTCTAATCGGTCTTCTCGTGTGCTCTCTTCCATCTTGATCGCGG  
GTAATCCGAGATTTTCGGAGACGTCGCTTTTCTGCTGGCGTTAAATCACTGTAATACAACA  
TAGAATCATCATTACCAGCAATGCTGAACTCATCCTTCATAAAGGAGAATATTGCCTTTA  
ACCGCTGTTTACCCTCCACGATTTTCGATCTCATAGCGAGAGCCATCATCAACCTTAGCCA  
TTGCGATCGCACCAACCGGAACTCATTAAATCAGGTTTTTCGATAAACATACGTTTGT  
CTGTGTCCCATACTAAAGGACGCTGATAATCTGGGTTTCATGTTGATATAGCCATCTTCTA  
ACCATGCATCATAAACAGAGATGAAAAAGTTTTTATGATTGGTATAGTAACGGCGTTTTAG  
GCGTTAAACGGTTCATGTTATAGTCTCCTGAATGGATCATCACGTAATCAATATCTTTT  
AAGAACTCATCCCATGAATGCCGGATATTGTTCTTAATTCTCCAGATAAGCGCAGGGATT  
GAACGCTCTCCCATCTCGAAGTAAGGATCATATGGTCCGATGCCCAATATGCTACTACA  
ATTCCACAATCAGCGCAATAGTATTCTATTTCACTTGCTGGCGACCAAAGTCCATCAATA  
TGAGCGGTGATCTTGCTTTTCGATGTTATGGCTGTGACAATCAGGGCAACGGATGCAATGA  
CCTTGTTTATCGTAATTTGACGTTAGCGAATACTTAAACAATCTCATTATAGATCCTTAT  
TTGCTTCAAATACTGCCTTTGCGAATCCTCGCGGGGTAAGTCACCTTATAGTCTTTGTTT  
TCGTTCCCTTTCGCGCCTAGCTTAGAATCCTGTTTTCTGTACCCTTTATTGATCTGCAACG  
GTTTCTTTTCTGGCATTATAAAGCCTTGTGAGGACCATAAGCAAGTCTTTTTTCGGTTACA  
TATCACGGGCGGCAATATACTCAGGAAACGTAGGATGCTTATCATCTTCCGGCAAATAAC  
CGCCATATTCCCACGGATGGAACACATAATCAGGCTTACGCCACATGCTAGAGATAACGC  
TTACAGGATCCTCTATCATGTAGGGAACCTCCTAGCCATTCACCCAAATAAGCGGTTATTT  
TAGCTGCCCTTACATCATGAACTTGAATCAATGGTCCTTGCTCACGTTTCTTTCGTTCAA  
AGTGTGCAGCGCTACTAACAGCTAAATTGGTGCACGGTGGGAATGCAAAGATAATATCCG  
GTTTCCCCCATTC AAGGTCCATTGCTCTTTCAGCCGGTTCAAATCAATCCAGGTGTTTA  
GATAGGTAATGTTTGGATGTTCAAATCTGGTATTATACTTTTTTGTATGTACCGTGGTCCG  
CGTCATCCGCATTA AAGCAGACTACCTTATGACCTACTTTAGCCTATTCTAGCCCCATTA  
TCCCCGATCCGTCAAAGTTGCAGAATATTAATTTTTTGTTCACGCTGCCCCCATTTGGTTT  
GTTACTAACAGAATCTAAAAGACCTTTGGTAGCCAGTTCGCGGCAAGTTTTTCAGAGCCGC  
AACTTCCCAGCCAGCCGCAATCAGGTTATCAATGAGGCTGTTAGCAACTTCTTCGCTCAT  
GAAAGAGCACTGTTTGCCGATGGTGTAGCGTACACGCTGTAATTTTCAGTTTACGGAAGCC  
TCTAACGTT CAGGTCTTTAGCGATTTTCTTTGCGGTTTCGATGTTAGCCATTGTTTGATT  
CTCCTAAGTGGTATCTCGTCTTGATGGTTGTATTGTAGGGGAGTTATCCTCCCCTGTCAA  
CACTTTTTATAAAATTATTTGTTAATTTCTGGTGC GTTTGCTAGGATAGTAACCTTCTTTA  
ACTCCGAGATACTTCGCAACCATCCCTACAATCTTCTGTGCTACTACAATGTCAAATTTT  
AGATAATCTTCGCCGTGGGTTTCAATGATATATGCTTACATGCTGCTTTAGTCTCGAAC  
ATTTTGATTCTCCTATTTTCGTTTCGGTATGTGTGTATTATAGGGGATCGGTGATCCCCTG  
TCAACAACCTTTTAGCGACGGCGACGATGTTTTTTGAGAGTTGCCTTTTTTGTATGCTTCAT  
ATGCCTTTTTACC GTTTTTATGTGCTTTTTTTGGTATATGATTGATTTTTCTTATTGTTTT  
TGTATGTTTCCCGGTCAGTATTAATTTTCGTTACATTCCACGAAACGGTGTGCGATGTTCTT  
GTGGTATGATCAAACATTTATCATAATTAACCATTTTCGTTTTTCGTTGTTTGTGGTTTCT  
TTGGTGTGTTGTTTGC ACTAAAAGACCCAGCAAAGAGAATGAGTATAGCGGTCATTAACG  
CAAACATTGTTTTCTTAATCATAATATTCTCCTTTAGTTTCTGCGGGAGTGTGAATATAA  
CACTCCCTTAATAATCTGTATTATTCGTGATTAGTTTCGATTTTTGTGCATTTTGCACCAG  
TTCAGCCGATCGCCCAGATCTTGATAGTTAATGCTTTTATCTGCTACCATCGTTTTTGT  
TTGATACCCATATGTGCGTTATGAGTAAGCATTTTTTACAGTGAACCTCGATTTTATCGCCT  
TTAGCTTTAACATCAACCAGTTTGGTCCACTGGCTACTAGAACC GGAATGTTCATAACCA  
ACGATGTTTCCGATGTATGCTTCTTTGTTTTTTCAGGATTTTCGGTTGCTTTGATGAATTT  
ATTTTTGATTCTCCAGTTCGTTTCGGTATGGGTGTATTATGCTATGTTCTTACTTTGGTG  
TCAACAACCTTTTTTAGATATTTTCAGAAATAAATTTTAAAACCTTGACGTAAATGTTTCT  
CATCTTTGATGGTAGCCGGAAGTTCCTTCTTTACTTCTGTGCAAGATAGATATTTCCGT  
TCCAAGTGAAAGATCCGTCTTCGTTTACTCGATAGCTGAACATCCACTCGCAATCATTTT  
CGATTTCATATACACAGAAGGGTGTAAATCGATAAAGCTATTGATTTCAAGGTGCAAAC



CGTGACGTTTTGCAAAGTTGGTAGTGGTTTTAGACAGCACCATTGTTTGATTCTCCTAAG  
TGGTATCTCGTCTTGATGGGTTTTATTATCCGATACACAGGATCTGGTGTCAATGCCTTTT  
TTAAAATTTTATGCAATAAAAAAGCCGACGCTATGGTCGGCTAATAAAATCATTTAGACA  
AATAATCATTCAAGTGAATCCGGTCGGCGTATCCTGGTGTACGTCAATCGTAATCACTT  
TAACGCGTGCTTTCTTGCGACCTGGGTTTTCTCGTAACCAGTGCTCATGACCGTGAACAT  
TTTATACTGCGATGCTTCTTCGAAAGTACGGATCGGACAAGGGTAATCTGCGTAAAGGAG  
CTCTAGGTCTTCGGTGTATGTAATAATATACATCATAATTACTGTTCTCTAGTTAAGCAG  
AGACATTCGGAACATTGGGAGATTTTCGCGGGTAAATTCAAAGATATTATCTTTCATAGT  
AGTATCCTCAATAGTTGGATGAAAAGGGGGGCTTAATGCCCGTATATTAAAACAGTCCT  
TCCTGTACACCGTAGAAGAGTTCATCGCTGATAATTTCATTAATGCGACGGTGTGCATTT  
TCCTGATTTGCGAAGTTGTCAGCAAGTTCTACTTTAGTTTCGCCATCATGAGTCCATTTA  
GTGATAACTTTACCATCGGCAAATTTGAAGTTGAACTCTTTAGCTACCGCATCGCGTACC  
AGACGTGCAAACCTATTGTTGCGGATTGCATTGTAGGTTTCGTGTGCAGCGTGAACGAAT  
TTGTTAACTTTCAGAGTGATAGTAACGTATGCCATAATTTGATTCTCCTAGTTAGAAAGT  
GTATCTCGTTTTGACGGGTGTATTATGCTATACACCCGATCCATTGTCAACGCCTTTTTTA  
TAAAATAATTTTCGATATCTTTATGATGTTTTTCATCGTGCTTGGTCTGCCGCGGCTGGCG  
CTACGTTGGAAGCGATAGTCTTCACTACTGTTGCACCTTTTTTCGGTGTCCGAAACCCAAT  
GATTATGGAACTGCTATTATTTAACACATGATAAGAAAATGATTTAATGTTAGGGAAAT  
TATAAGTGTAATAACGTACCCTTAATTCTGAATCTACGTATAGATAGATCACCGCACCTA  
GATAGACCGTCTCACTCGTTCGTCACCTAACAGTAGAGTATTTTCGCAATTCTTCTAAAT  
TGTCTTTTGTAAGAACAATCATAGTATCAGCCTCAATTAACCAAATTAACATTGGTGT  
GTGGTGGTTTTCTCGTGCGTCCGCTTCTTCCGGTGTACGTTACGAGCGACGACAAT  
AACACTTGCTGCCTCTCCGTGATGATAGATCTCTACCCAATGGTTATGATTTGCGAATCC  
GTGTTTTATTGCGTAAGCGAACGGCTTATACGTCCAGTAGTAACTATAATATCGTACATT  
TAGATCGCTATCAATGTACAAATATGTGCTGTCGTTTACATTGCCACTAACAAACAAAAC  
AAGACAATTGCGAAGATCTGACAATATTTTGTCTGTCAATTTTATAATGTGACTGTTTAT  
AATTAACACCACTCAAGAGTTTTTGAACACACATCTATCCATTGTTGATTATATGCGGTT  
TCTTTCCATGACACAATACCAGTCGAATATTGGTTTTTGTTCAGAAAAGGACGGGCAT  
TTTGATGCATCTTCCATCATCTTTTCGGCGAACTCTGGTTCGTATACCCGCAGAATCTGT  
TGATATGCTTTGTATTCTTTAAATTTGCTCATAATCATTCACTACCTTATCAGCTTCTTT  
AGTTGTTTTTACATCAACTGCGATAACCCGTAAAGGTTTCGTATGGTTCACCAATGATC  
GTGAATATCGGCTTGTGATTTATCACCAAAGGAATCACGAATATCACTTTTACATTTATA  
GCTAATGTGACCGTCATGGTCAACATAAAGGTAATTATCGAAAATCGGCGTTTTTAAGAT  
CATACCGAAAATCTTTCTTTGTGTGCTTATCCAGTGTTGCAGTAATTCGCATCATAAT  
ATATTCCTCATAGAAAGGGATGGTCATTTCTTGAGCATGTACATTCTCGTTAGGATTAAA  
CTTCATCCAACCGATATTGTCTACCAGCATATGCACATTTTTATCATATCCTACGTGGGT  
AGTCAATACTGTACGTGCTTTACCTTCAACGATGATTTCCATGTACTTCTGAACTTCGAT  
AGCTTTCATTTGATTCTCCGTTTGTGTTGCTTGTGATGGGAGTATCTTACAACCTCCCTTAA  
TCATTGTCAACTATTATTTGTTAATTTCCGCTGCGTTGCTTGGATAGTAGCCTTCTTTAA  
CACCCAGATATTTTCGAACCAATCCGGTGATCTTCTGTGCTACTACGATATCGAATTTCA  
GGTAGTCTTACCGTGGTTTTGCTACAATGTATGCTTCGCATTCTGCTTTAGTCTGGAACA  
TTTTTGATTCTCCTATATCTCGTTGGTATGTGTGCATTATAGGGGATCACCGATCCCCTG  
TCAACAACCTTTTAATGCTTTATATGCGTATTTCATAAATTTGTCTGCCACTTCATAGGT  
ATGTTTCAGATTCTACGCCTGATTCGAGAACAATAGCTAGGTTCGGTTTCGTCAATCCC GCC  
GTACCAATGATTTGATGTTTCGATTTTTTTCAATTGGAAATTGGTCACTTTTATCTGTGCG  
ACAAAATACATCTAAATGCTCATCGATGTAAGAGATCCAATCTTCATAAAGAATAACGGG  
TATTAGCAAGATTTTTATTGCCTTCAACGAAAGGTTTCGGCTACAAGCAAATTAGTATGTT  
CCATAGTAATTTCTCCAATTATACAGCTTCGTAAACTTCCCAATGACCAACACCAGCA  
CGCTTAACGAAAAGGTTTTCTTTGATGTTATTCATAACCGTCTGGATGGATTTAATGCGG  
TGTGAAGGATTCCATTCTTCGTTGGAATTGCGGCGATACATAAATAACATTACCAGTTCGC  
TTATATTCAGCAACCAATTTAAGACAACACATAATCTTATCCTCAATTTGTGGGAGAGTA  
TTACCCCTCCCGATGTTGTTATATTACATTACACAAAATGGCGTGTCAATGCTTCTTTTG  
CGGTTCCGCTAAGACTTTTCGATCTCGTCTGGCATAACATCAACCGCCAGA ACTTCTACAA  
CATCCTCGGACCCTAACAGTGAGTATGGCGTTTGTAGAACTTGGTAACCAGACTACCTT  
CCTCGTCCCATTAAACGCTATCGCTAGCCCACCACACATCACCGTTGATAAAGTTGATGT  
AAAGCACACTACGCCACATTGAATTAATTACTTTCAATACTGCGCCTTTCATCTCTTCCA  
CGGTATGGTCTTCCATTTTGAAGACCTCACCTACCTGAACTTTTGCCATGTTACATGCTC

CGAATATGTTTAGCTGCATCTTCCAGTTCGTCGATAGTGACACTGTGTGCCAGTAAGTGT  
ACTGGTTGTGGTTCTTCACCTTCCATAGTATTGATCAGATGACCGTTTCCAGGGTGGAAAT  
GTATCGTTGCCGTTCCAAATAGCATAACACATCATCTACTGTTACGTAGATAATAAGTCCA  
ATCGGTGATTCTGGTAATTGAAAAATTTTACCCACTGCATCTTTGCGATTGTTTACGATA  
ACTTTTACTGACTTCATTTAGTTACCTCTCGTTAAATTACATCACAATCACGCCAGCCGT  
TGAAAGTTGATGTTTCAACTGAGCATTTTCTGCTACTGTCAAATCAATGATTTCTTGTGA  
CGCTGCAATCATATAGCCATTGGTGATATTGTTTTGCATCAGTTCAATGGTTTCTTCGTT  
GTAGCGAATTTTAGCGATGATTTGTTGAAGTTCATGTTTGATTCTCCTAGTTGTTTCG  
GTATGTGTGATTATAGGGGAGTTTAACTCCCTGTCAACAACTTTTTTAAAGTTTTTC  
CATGATAACGGTCATAATTACATCTTCTGCGCGAGCGGTCAGATTATCAGCGTCAGCATG  
TGGGCGGTTGGTTGTTACAGAGATATCACCGTTGCGCACTGGTTTGATATTGATATCAAG  
ATGTTCCGCGAAACGTTCCGCCAGTTACAGAATGAATTTTGGTGTTAAATTCTTTTTCCAG  
TGCCTTGCGAACTTACGAATCAGGATAGCGTTTTTTCAGTTGGTTCTCCGCGCTCATGGT  
CTTCTGGGTGTTTATGGTTCGTCGAAGTCAATCATTGGCAGCGTTACGATGTATTTTAT  
TTTTGATTCTCCGTTTAAAGAAAGTGTGTTTTCGTTTTGATGTGTGTAGTATAGGGGATACG  
TGATCCCCTGTCAACAACTTTTTTTAAATTATTTTTTTCATGAGCTTAATGGCTTCTTCCAT  
AGCCCTCACATTTTCGATAGTTAGGGTATCGTGTAGATCGTCATACATTTCGCTTAAGGGT  
GGAAACTTCTCAAACCTCTAGGTTTTCTAGATACAGTTGAACAAATTGTTTCTCTACCAT  
CTCGGCTTTTAGCTTGTCTGCTTGTTCCTGTACATATGATTTTCGTAGGACCCAAGACCAA  
CAAATGATTAAGGTGATCAACGGGCTAATGATCAATGATAGGATAACATAACCGATAAC  
GCTACGGTTTAAATGGCTTGCGTACATGCCTACCAGGAAAACAAAAGGTTATAGATAAA  
CAGAAAGAACATATAATAGTTACTCCTTATCTTCGCGCTCGTACTTTTCGAAATACAATT  
CTACTGGCTGGTCATGAATTGACAGCAAGCCAAAGCGTTTAGCCGCTCGCATTTCGCATAT  
TGCCTGAATATACTTCTGGAAGTTCTCGCGTATACACTTACGCCAGTATTCTAAGCCCA  
TACAGCTTTTATAAAGATTGCATTGTACACACGCCGAATTCATGTTATCAAGTATATCAT  
TTCCGGTTTATGCATTCCTACGACCTTATACTTCCACGATCCATCATCAATACGGGCAA  
TTCGTCCATTTTCATCATAGACTACCTTTGAGCGTCGCAATACTGGTTTGATGTGGTCTG  
CGTGCCAGCGATCCCTTAGTTCCCTCGCCACAATAGGCACAACGTCCACCATATTTTCAATT  
TCAGGATCTGGCGTTGCTCTTTCTTTGACAATTTTTTAGGTTTAGGGGCTTTTCGCCCTT  
CATTATCACACATCGAATACCTCTTTTACTGTATTTGCAGTGGTCTTGTCTGATGCGAATA  
CGTTTGATGATTGGGAGAAATAAAGAGAACTCCGGTTCATCTTCTTTACGTGATTTGCTG  
CGGATATAACCGTTGCATGTCATCTAAATGACTTTTCCAATCAGGTTATGACGGTCAGCC  
CATAACATTTCTCGGTCGAGTTTCAATTCGACGATCGAACGGAATTACACGTTTCAGTACCA  
TCATAACCTTTTTCGGTTGTAGTGTGCGTTAATCCCGATCCGGTGTAGTCATCATTCGT  
CCGCACGCACTACGGACAGTAAAACCGCCTACCTTATTCGGGTCTTTACTATGCGGATAT  
ACATCAACAATTTCCGCGTCGAAGTCAATCACTTCTTTAAATTTAACCGGATCTTTACTA  
CGGCGATCTTCAAATACACCATGTAATTTTTAAAGGATAATACCTTCTAAGCCCATGTTT  
ACATAGCGATGATATTCTTCGCGAGCTTCATCTATATTGTTAACTACAGTGTTTTCGATT  
ATCTGAACACGAGGATCGTTAAGTTCTTCAACAATCTGTTTTAGTTCTTCGAATCGATCT  
TGATATTGCTTCGTTGCTTTTACGTTTCCGTAATACACATCACCGTCGATAACATCCCAG  
ACAGTGTAACAATAACATTGGGCTTCTTCTTTTGAATAGTTTCTTTTTCAGTGATTTGTTG  
AGGATACCATTTACGGTCTGACGATCTGCAACAACGGATTCTTTTACTGCTTCCGCTACT  
AGCGTTAATGGCATTTCCTCTCCTTCAAATATCCATGACAGAGTACCATCATAAACGCTT  
TCAACGAACTCCTGCGCTGGTGTGTTGCGAAAGGGTAGGCATATATAACCAATCCCCATCT  
AGAACAATTACACGGCCTCGTAGACGCTCTAAAACAGCAAACAATCATCCAGCCCCTGA  
TAGGTATTACCTGAACGGGTATAGATTGCTAATGTTTCCCGTCAATATCAGCCATCCCA  
TGAGCGCCATCGCTTTTAAAGTTGTGCATACGCCGGATACTTGATATTAGCAATGGTCTTA  
TCACAACATGACGATGCAAGGTGACACGGTTGCTGGGGGATCAGTTTCTTCCATACCTTG  
TTTGCAATGGTAGCTGAACAGCCGCAATTCCAGATCACAATTCAGGACCATCATTGCAACT  
TTAGCATCATCCTCTGACAAGCAAGTCAGAGTATCGGTAACCTAGCTGTAATGCTGCATTA  
CCAGTTACTTGGCGCGTGGCAAGTTTATTTTTAAAGACCTGTAATGCACCGGATAAAGAC  
AATACAGACGAATAACGCGATGGTTTATCGTATTTCTTTACGCCAAACGTAACCTGTTTG  
CAATATGCCAGATAAAAACATTTCTTTTTCAGTGTTCATTGCTTGCAGATTCTTTTTCAGGATC  
TTTTCTTTTTCAGCGATGTTTTGCTGTTGCTGCAAGCTGGTTAATGATATTAAGAATTGAC  
ATTTTACCCCCGTTTTGTTAAACGTTTACGAATATCATTGAGGATACTACAAAATTCCGA  
TTCAGTCAATATAGTCTTTAACGGATCAGTTCCACCTATGCTATGACGTAATTTCTTATT  
TCCTGTAGCGAGTAATGCTGTACAAAATTCTGGGTTATTCCGTGCCATCGTAACAAATGC

CAGATGTACCAGTCTGTAATAATGCTCACTCATTTCGATTAATCGGGCGACCCTGAAAATA  
TAACATGTGATTCTCAATCTTTTCAGTTCTTCCGGTCTTTTTGCTTTGCCACCGTGCAT  
CAAAAAGATTTCTCTTTGTCTCTGAGGGTTCTTAAATCTTAGCCCCTGTAAAAATCCTTC  
TGAGCTGTAAATATCGCAACCAATAGACGGAATGGTCTTTTATTGACATTACTCAATTC  
ACCAATGGATAAAGTCCACCCGGATAGATATCAATTTCAGAAGTCATTGAAACTAATCT  
CGCTAATCAGAGAGAACGGATCATAATCGTCATTAGGAATATCGATAGTAATCGAATGAG  
GATTTACCCATACACCAAACCTGGTCTTCTTCCGGTGAATACTTCGGTATGGATTTTCGTGGA  
TGTTTACATTCATAGTTTTTCATAATAAAAATTCCTTAATAATCAATAACTTACAAAATCAT  
ATAGCCAAAATATAGGCGGGATTATTTCCCGCCGTTTAAAATCATAAACCGTAAACTACC  
ACAATATTCTGTTTGTGTGTTACAGTCCTTTTCAGGTCGATCTCTTCTTCTTCTTACCG  
CCGTTAATAACGTCTGGGTGAGGAACTTTATTCATCTTGCCATGTGGCAGTAGAACAGTT  
TTACCCAGCAATTTCTTTATCTACAGTCTCGCCAATATCAATAATCTTACCTACCAGCGGA  
ATCTCGCCCATAGTGCCTTTTGCTCAATAATGATCCCCATAGTGCTTTTTACTTCGGTC  
CCTGCGCTTTCTGCTTTAGCTTCGATAATTACATAATCACCAAGTGCTTTAGGAGTTTTA  
TCGGTCATAATTTTATTACCTCTTCAAATCAATACAGTTTAATGATGAATTATTTATAAA  
TTTCGACGTTCTGCGCGGGCGTCAGCCCATCTACATTAATCAGACTATCAAGCCAAAAC  
TACGGAAACCTTCAACTGCAATTTCTTATACTGGCAAAGATGTTTCTGATTCTTTACGCG  
GTTTTTCAACATTCGGAACCTAACCACTTTTCGTATGTTTTCGAACGGCATCAGTGCCGGAT  
CTCGCGTGGCGATCATCTCACGGACAGTACCATCTTTCTTAGTAAACTGCAAAGAGTGGG  
TACCGACCGAAAACATTTTCTTTAGTGCTTCACGAAGTGCGATATTATCAACTTGTTTACG  
TCATTATCAATACCCTTCAAATCAGTCAATAATGCTTTTGGAAATACGCGTGATCGTAATA  
TCTGCATTATTCAGAATATCAGCCCAATCACGCCACCATTTCGATCATATGTGTGCGCAA  
TAGTATAGATGTTTAATTCCACTGTTTGCAATTTCTTTAGCGCAATCTGCACACGGTGAA  
GCAGTACACCACATACTAGCGCCTTCAATCGATACACCGCTACGGGCAGCAAACAAAATA  
GCATTTAATTCAGCGTGGATCTCGTTTTTCTGTGACCATGCACTATGCTCTGGTTCGTTTT  
TCTGGGATCATTTTGCCGTCATCATCCAGCCAACCGTTTTTATGTGCATGACAGCTACAA  
TTTACTTGCCCTGCTGGAGTGCCGTTAAATCCAGTAGAAATGATTCGCCCCTTTTTTCG  
ATCAGTGCGCCTACCTTCCACGAAACACATTTAGAGTTCTTTGCGATTAGATAGGCGATC  
TGCATGTAAGTTTGTGACAACATAATAATCCTCACATATTAATTAACCGTATACGCGA  
AAGTATTCTACCGATCCGTCGCTATACTGTTTTACATTGAATGTATTCACACCATGATCA  
TTGCTCATAATGACATATACTGCGACGCTCATCACCAAACGGGTAAATGGTGCGGGT  
TCAATTTCAACATTAACAAACACGTTTAGGAATTGCTTCGCCTAATTGCTTGAGTCTATCG  
GTAAACATTAAGTCTCCGTAGTTAACCTGAAAACATTCTACACCAATTGTGCGGTACA  
TGTC AACCACTTGATCACGGTCATCTACTGCCAAAACAACATGATAACGCGGTGCAATTT  
CCGAGAAGAAGATCTCTTTCTTCACTTCATGGTCTGGACGTCGATCATTAGTTTCACGCT  
GGAAGTGATCGCTAGGTTCAATACCCTGTTTACGCAGCCATTGCAGAGTATCCTCTTCGC  
AAACATCCTCACGCCCTGAGCATGTAATGATACGATAACCATTATCACGATACAGTTTAA  
GCATTTTCGATCACTTGCGGACGCGGTTTATCTTCTTTGACCTTTGTCCAGTCAAACGGAT  
GACGACCGCCCTTATCCGCTAATGTCCCATCAATATCAAAGATCACCGCTTTCGGTAGCA  
TGGTATTCCTTTTGTATACTTCTTGACCCATATATTCCTGCATAAGATAAGATTGGTTGC  
GCAGATTAGAAAGTGGAATTGCTTTCTCGCCGCGATAGAAATTACGTTTCTTTAGTGTCT  
CAAATGATTCCTTGAACACTTGTTTCAAGTATACACCGCGTTAAAGTCTTTTGCAAGTTCTT  
TGTAGAATACACGATGTTTTTCTTTCAGGTTGGTATCAGAGATAATGATACTCAATCCGC  
GTGATAGAGTCTCGCGAGAAATCATTCTCTGAATAGACTCTACCAGCTTTTCTTTTCTT  
TACTATACTTGTATTTCAAAGTGAGTCAACACCAAACAACATAAGACGAAGATCATCAC  
GATTCACATTACGATAATTGCTGAACCGTTTACATGTTTCCATAGCCCATGTAGTTTTAC  
CGGACCCAGAACAACCACCGGTTAAAATCACCTCACATTTTCGGAATTATTTCTCCTTCGG  
TTTGCACCGTTTCTCATTAAAGTTCTTTGCGATAATAACACATGATCAACTTACTTTCAAG  
TGTATATCTCTTAATATCAGCCAACCAGACTCTAAATATTTGGGAGTCCTCCCACGACAT  
AGAAACTCTAGGTTTACCGTCTATTGTATCCACTTTCAGGTCAATGTCAACTTATTCTAT  
TGGTGCTGGTAGTGGAGGATGTAATTTCCGGTACTGTGAATAATGGTCCATTGTATACGA  
GGAAAGAGCAAATACAATAGGTACAGCGAAGACATCGATTATGGCGGTCTGAAAATTCTT  
ATGTGCTTTCTTAAACAACCAGTGTATCACGAAAATTGAAAACACCATAAGGATAATAAT  
GCTTGCACCGATCCCAGATAATCAACCAGATTAATAATTGCTTATCTGCTCTTTCGCTAGG  
GAATATTTCTATGCTCATTTAGTAGCCTCCTTTAATTCTTCGGTAAACTCCTTAAATGTA  
TCATTAAGCTGTTTCTCTACCAACTTGGGTTTTTGTGCTACTACATAGCCTCGTGTAGCG  
TCTTTCATTGCTTTGTTTTGTTCTTCTGGAAACTTAGTTCTTATTCCGTACATCTCCTTT

TGTAGTGAGTCTACGACCTTCATCTTTTCATCTGTCTTTTTCTTATACTCTGTAAATTCC  
TGATTTAATCGGTCCACCTCCTTTTTATTTCCACCAGATATTGCCACCTACCCCCAGC  
AACACAGATATGATAACAATGTATATCAGCTTTGACATTTTACCCCCAACGACAAAAGGC  
GGGGAAGTACCCCGATTATTATTACCAATCAATCTTATCAGCCGGAATCTGTTTCTTAT  
AATCCGTAGATAGTAAGTTTTCATTGAAGCCAGAATACGGTCATAATCAAGACCATCAA  
ATGCAATCATGAGACACATGAAAATATATGATTGTGCATCACCATGTTTACGTGATTCTGA  
TAGTCGCATTGGATGCATATGTCTTTCTGTCTTCTCCCGCGTGTGCGTTATACCATTCTG  
TTGCTGTCTGTAAGGCATTGCGAAGAATGGACCTGAATGCTTCTCCTCGAATAGCTCAATTC  
GTTCCAGTGCTTCCGGTTCGCCTTCATATGCAGCACGCAAATCATCGGTTCCGCTTTCTA  
CGACATAGTAGATCAGGTTATTAGGAAACATCGATGTGTTTTTAATGTTCTGCACAGCCA  
TATACCATTCACTCTTCACCTTGAACATTTGACCGTCTTTAGTGCGTGCAACAATTCCTT  
CGATACCTTCTGCGGTCCGAACTTCATCAAGAATATTGCTATAACGCGCTGAATCAACGT  
GTAACGCATACACCAGATGAGCACGTAGGATTGCGTCAGCAAATAGCACTTGATGCGGTA  
CGTACTCTCCTGTGACGTTATGGCGTACATTCAGAAGTGTTAGCGACGGTTCAGAATATT  
CTAAAACAATTCGGTTGCTGGCTGTGTATATTCAAAGTTGAAAGTATAATCAGACCCAA  
TATCGGCGATCTTAGCGCGTAGATCCGCATACTTCTCTGAATACAGAAGACCGTTTGCTC  
TCTCTGCCTGGCTTGAGTACAAGGCCGCTTTAGACTTCAACTGAACATAGCCGTTATCAA  
TGTATGTGCTTACTAGACTACCGTCCATTTTCGTCCATGACCATTTCCACATCTTCCGGCT  
TAAAGCGAGCGCGATCATTCTCACCCAAATTAAAAACTTCTCCATAGGACGAGATGCAA  
TGCGGACAGGTCGGTCTTTATCATCGAATTCAAACATGATCCCGCGACACTATAACGCAT  
CTGGTTTATCCAGATTTCCGGTTTGCTAAAGTATAGATAACTAAAAATGCGCATAACGGG  
TTTGCATCGCCGTAATTTTCATCTTTGTAATAGAACGTATCAGATCCGTCACATAGTGCCA  
TCAGATTTTTGAACAATGCTAAAACTTTTTTTTGTTGTTTTCTTTTGTGACATAATTTGT  
GTTCCATTCTGGTTTAAATTTGGTGAGCAAAACAGGTTCTTCGATATCGGCAGTGCTTAT  
AATATCTTTACCCGTTGGATTCTCGATGTACAACCTCAAAGCATTGGCGGTAAGAGAATGT  
TACTGTCTTACCTTCTGTAGCGCCTTATGAATATTCTTACTCTTGCGAGTATCCGCTGT  
TGGTGTGTTGTCTGTTAATGCTCGTCCGGTAATAATTGATCCGCTTTCTGAGATTAACAGT  
CTGACCAATGTATAACCAGTTCATCATCAACCACAATAGCGTAAAGAACATTTAAACGGTT  
TTTCTGAGGCGGTAGAATCACATCACCATCTTTACACTCTAAACATGAATATTTAACGAA  
TCCATAGTTTTCTATTAGCTCATTAAATCATTATCCTTTCCCTCACGTACAACAAAGGCGG  
GATTTCTCCCGCCAACCTTATTAACCTTTCCAGAATATCGCGAGCATCGTTACGCTCCTTG  
ATGATCTTCAGGACAAATTCCAGTTTTTTCTTTGTTTCAGTGTTCGGTTTTCCATTGCTTCT  
TTGACGGTAAACACTCCGCCACCTTGCCCGTATACAGTGACAGTGATTTACCCCAACATC  
GTGGTGTGAAAACCGCCAATTTTCGGTGATTTCGAAAGAAACAATCACCTCACGGATAGTA  
TTGCGATCGTTGATTTCTTCCAGCGTATTATCGGTTTTGTAAGCGGTTGCTTTAACCAT  
CGGATCAGCATTGTCTGATCTGGGGAGATGGTCATTTTGTCCATCGCATGTTGCAATGCA  
GCGTAACCGAAAACCTTGAACGAAGTCCAGAACGTCTTTGCGAGTTTGAAATTTAATCATC  
TTGATACTCCTTAGTAAGTTAGTTTCGTTTCGATGGGGTATCTTACTACCCCGTTTCAG  
GCTGTCAACTACTTTTTAATGACAAGTTCGAATTTTGTACCTTACGTCCTCGTTTATTG  
AAAGCAACCCACGGACGGTTTTCAATGTAGAACAATTCTTCGCCAATAATGAATACTGGC  
TGATTGTCAAGGCGACCCATCAGGTCACGCTGGCGAATGGTAGTAGATTCTGTATACTTCG  
CCTACTACAAAGTGTTTCGCTGATAGAGTCGGTACAAGTAAATTTCAATTTGATTCTCCTG  
TGTTTCGTTTCGATGGGGGTATCTTACTACCCCGCTATTCAAGTGTCAACTACTCTTTA  
GTTGTTGTATTCAATCCACCATTTGAGTGAGCTTATCAATATTTTTGTGTTTCTTTCCAA  
CTTATCCCACCGTTTTTCGAGGGTTTATCAACCGGAATAGGTAAGGTGACTTGTTAAGTG  
AACTCGGTCACTGTAATGATTGATGTAAGTCTTTTCAATTTCAAGTTTCATCTTTTTACG  
ATGAAAAGATGCAATGACTTGTCTTCTGTTTCCATATGTTCCCTGCGTTTCGATGTGGGT  
ATTATGCTATGGTAAGATCCGATTGTCAACACCCAATAACAAAAAAGTCGCCACTATGG  
GCGACTTTGAACAAACATTAATCATGACCGTGATTTGCAATATCCGCTCGTGTCTGTCT  
CTGTGATTACCTACGTCAAAGACACGATAACCATTTTCACGAAGAACTTTAATCACTTCT  
GGGTTATCCTCAAAGACTCCGACAACCTTCATCTTTATCAAAGGATTTAATTACCTCTAAT  
TTGATGTGATAGTCTTTACGGGAATCATTGCGACCTCTCATAAAGATTTTATCGAAAGAC  
ACATCATTAGCGATCAACCATTCACCGTTTCCATGTAAGCATGTGAACCTTCGTCCGGTG  
AGGATGTAATCAAATGCCCGTTGTTCGGAAAGAGCATTGATAACACGGATTACATCGTAA  
ATGGGGGAATCTCCCCACATGCGTGTGTTATGTTTCGGTCCATGACTCGACTTTATCAAGA  
TTTTTCGGTTGGCATCTTTGCTAGTCGATGTGTTGGATCTGTGATCGTAAAATCTAAATCG  
ACAAAATATATCATAGATATTTCCCGGATCGGTTGTAGTCATCGTCTTTTAAATCGGTAT

TAACCTGAGACAACAGATACATAATCTCTACTTCCCTGCGCTGCATTCTGCACTTCGTCAG  
AGTTTAACCACTTACGCATCCACGGTAAAGGATGACGACGAACACTAAACGGGCTTTTCA  
GTCCGGCAGCTCGCATAACGGGAATCTGCCAGGTATTCTACATAGGTTTTTCAGAATTTCCG  
GTGACAGGTTAGGAATTGCCCCATTGCGAATAGGTGGTCTACCCATGCTTTTTCTTGCT  
CGACAACATCCAGAAAGATTTTCGTTGCTTCGCCTTCAAGTTCTTCCGCAATCTGTTTTCC  
ACTCATCACCATCAACCCCGTTTTGCCATTGACGAATAATGTATTGTGTGCCTTTTAAAT  
GAAGTTGTTTCATCACGCGCAATAAATTTTCATGATCTTTCGCGTTACCTTCCAGTCAACCAC  
GTTTCGGCAAAGCTGAAAGTACATGCAAAGGACACATAAAAACGAATTGCTTCCAGTGCGT  
TGACGCAGTGTCCACACAGATAAATCGAAGCCATCAGATCTCGTTTTGTATCTTCAAGAA  
ATCTTCTTGCATCATCTAATGCTGTCTGGTCTGCTCGTTCTTCCCAATAGCGGAGATCTT  
CTTTTGCATTCTCATACTTACGCATCCAATAAAGAACATCATCATAATATTTCCCGATAG  
ATTCCGCTCGCTTCATGATAGCAGGTTTATCGATGATCTGGTTCGAACTCACTAGCCGGAT  
CAATGAAACAGTTACGGATAATGTGTGTATAGCTTCGGCTATGAATCGTTTCGCTGAATG  
TCCTTGTTTTGCAACCATGTATCGAGAGTTGGATCAGATACAATTGGACCAAATGCTGCGG  
ACGGTGCAGGACCATGAATAGAATCAAGTAATGTCTTATACTTCAAGTTTTTCAGTAAAGA  
AACACTTTTCAACGTCACCCATATTAAGATATTGAATGCGGTTCGGTTGCAAGTGAATTT  
CTTCTGGACGCCAGAAAAATGACAGAGATTTTTCAATTAATTCTTCAAATACTTGATGAC  
GCTGAATGTCATAACGAGCGATACCTAAACCGCTACCCAGAAACATCGGTTTCATTCTATA  
TATCAACGTGTTACGATTAAATACCGTATTTCCCATTCACATATTCCTCATTTTACAGT  
TATCAAAGTGCCATCGTAGAGCATTGCCTTTATTGTTAATTTTACCGCAATGCGGACAAG  
GATCTGCCATTGTTGCTTCCCTTTGTCGGTTGTGAAATCAGCTTTCTCATTTCCTCGCTAT  
GTGGTATTCCTTTAGTTGGCGATGGTTTCCCAAACATAGGATTTTTACTTCCCATCTAG  
CTTTTGAAATGTTTAAACGCGTGCTCCTTTGTTTTTGGCTTACGCATTTTAGCTTTTGTCT  
CTTCTGATTTCAATACACCTTTCGAAGATTCGCTAGTCTTTCTTCGCGTTTTCTTCTCTCA  
TCGGCTTGCCCTTTCTTTGTTTCAGAGCTAAGTACCCTAGCTTGTTTCATATACCCTAGACG  
AAATAATATAATCTCTTTTATTGGTCTTCGCATTTTTTGGCTAACACATCATACCAAATG  
CTTGTGCCATAGGTCCACCATGAATTTTGGCCAGCAGATGATGAATCACGAAATGTTCTT  
TTGCTGTCAACTCAATCAGGTTATCAACTTCATCACCGCCACCCATAGATCGCGGTA  
TATGATGTGTTTCCTTATATCCTTCAATGGTTCCTCTGATCTTTGCTTTTTCTATGATTG  
CGTCATATAGGTTTTGTAAGTTCATGAATTATTCCTCTTTTCTGTATACCATTATTTATC  
CGGTATCCAGAAGAAGGATTAATTCACCTCACTATTATCCGACAACCTCAAACATTTAT  
CATCAGGAAGAATAGCCATTCGACGCGGTATTCATCCTCAACGTAGGAGCAAGTCCCAT  
CATGTCGAGCATCATATTCATCACCGACAACAAGCTATGAGCTAGCTCAAATCTACAG  
CAACACATTTTAATTTGGTCATAATAAATTCCTCACTTGTTTTTGTGTTGATTATAG  
CGGGGATTTCTCCCCGCGTCAACACTTATTTTACAGCTTGCAAGATGAGCACTCCCTAGC  
GTCTTCCGTACCATCTGCACCCTCGCGAACGTTTCGCATAATACAGGGTTTTTCAGACCGTA  
ATATTGAGCAAACAACATATCATATAACACATCAGCAATATCGACTATAACCAGTCTTATA  
AGTGCTTGGATCGTATGATGTATTGGAACATAATCGCCTGATCCACAAACTTCTGCATGAT  
CGCTGCCAGTGTGAGATAAGGCTTGTTACCTTTCTTGATCAGTGTCCAAAGCAGGTCAAT  
AACATCAGCATTATTCTCTACGTTTCGGAATAACCTGATTAATTTGCCCTTCTCTCGATCC  
TTTAAACCGATACGATCCCGCGAGGCGGTTCAATACCGTTTGTGCTGTTAGATACCTGAGA  
AGACGACTCACAAGGCATCAGCGCCGACAGTGTACTGTTACGAATGCCATATTTTTGCAG  
GTCTTCGCACAGTTCTTCCCAATCCATCTCATAACACCTGATCAACCAGTTCATCTACTGT  
CTTTTTGTACCAGTCGATAGGAAGTTCACCGCGACCATAGCGTGTTTCGTGCATCAGTTC  
GCAAGCACCTTCTCTTTAGCCAGTCGCACACTAGCCTTAATCAGAGCATATTGCAAGCC  
TTCAAACGTTTTATGCGTAGACTCGTTAGCGTCTCCATATGTGAAGAAATTATCTGCTAG  
ATATGATGCAAAGTTAGTCACACCAACACCCAGAGAGCGACGTTTTTTTTGGCTGTCAGAGG  
TTGTTCTACAGGATAATCCTGATAATCTAACAGGTTGTCAAGTGCACGCACCATAACCAT  
AGCAATGCGTTCCTACTTCTTCCATATTTTCGATATCGAAATTACCTAAAACATATGCTGC  
CAAAGTACATAGGCTAATTTCTGAATCATCACGACCCATCGGTTTTGTAGGCAGAGCAAT  
TTCAAACACAGGTTAGATTGTGTAATCGGTGCTACATTACGAATAAACGCCCCCGTGATT  
GTTTCATGTTGTCTGTGAACGTTGGGTAGATTTCGACCAGTGTAAAACGTTCAATTGCCAC  
CGCTAAAACGGGTCTTCGGCTTTAACACGAGTTTTACGAACACTCGGATCTTTTTCCAG  
TGTTTCGTAAAGCTGGCGGAAACCTTCCTCGTCTCGGAAGGACAGATCCCAACAAGCC  
ACCTGCAACAACCTGGACTAAACAGAGTAATGTAATCCCGTTTAAAGGAATCGCTCTACCAT  
CAGGTTATTAATCTGTACGCCGTAATCAAGATGACGAATGCGGTTATCTTCCACCCCTT  
ATTGTTCTTTAACACAATCAGACTTTCAAACTCTAAATGCCATATTGGGTAATAGAGAGT

TGCCGCCCCGCCACGAATGCCGCCTTGTGAGCATGACTTAACGGCCGTCTGAAAATGTTT  
CCAGACTGGAATAACGCCAGTATGACGAACTTCACCATGCCCGATCTTAGATCCTTCCGC  
GCGAATCATGCCAGCGTTGGTACCGATACCAGCACGCTTGCTAATACTTGATGATTGC  
ATTTGCTGTTTCGTTGATGCCCTGCAATGAGTCATCACTTTCGATCACCACACACGAACT  
AAATTGGCGTGTGGGGCTACGCACACCTGCCATAATCGGAGTACGTAGAGAGATTTGCTT  
ATTCGCAACAGCATTATAAAAATCAACCACGTGTTCAAGACGATTTTCTGTCTCTTCTGG  
ATGCAAGCACATAACCGATCAGCATATACGCAAATTATGGTGTTCGATGGTTTTCTTAGT  
GCTGCGATCCTGAACAAGATATTTCTCTTTAACTGCATCGCACCAGCATAGGTCATTTT  
AAAATCAAGTTTATGGGCGATGAATTTCTCCAGATATTCCTACTTCTTCACGGGAATACTT  
TTGCAGAATTCGCGATCATATTTTCCGGTTGCAATATTACGCTCAATATGGCTGTAAAA  
ATCAATCGGTTGGAATTGACCGTATACTGCTTTGCGAAGCGCGAACATTGCAAGGTTACT  
TGCTACATATTGATAATCGGGTGTCTTACAGTAATGTTATCTGCTGCGACCTTAATCAA  
TACTTTCTGGATATCGTTGGTAGACATACTTTTTTCAGAAGTGGTTCAACCATATCAAA  
CAATTCATATGGATCAACGTTATGACCTTCGGCTGCCGCTTCCAGAATTTTCATTACTTT  
TTCTTTTTCAAACGGAACAGTCAGACCGGAAGACTTAACAACTTTTTAAATCATATTACC  
TCACTTCATATTTTAGCAGGAACAAGTTTATCCTCCATATTGGGGGCTTTCGCCCCCTTT  
GTTATACTGCCATTTGAGCGGTGATCGCTGGATGGCTTTGATAGTTGTGAATTTTAAAT  
CTTTCGGAGTCTTTGTCAATACCTCATCTAAAGATTTAAATTCCTGCAACTCAATTATTG  
TTTTATCAAACGGAACACGGCTTAACTGTTCCATAACTTGATCAAAATAGTTTTTGTAAA  
TGTGGCAATCCCCACACTGATAAACCAGTTCGCCAACTTCTAATCCGCATATCTTCGCGA  
TGATATGCGTTAACAGTGCATAGCTCGCTACGTTGAACGGATTCCCTAAAAAGAGATCAT  
TCGAACGCATGAAAAATAAACAACCTCAATTTGTTGTCGTTGGAAACACAAAACGTACCA  
TCGGATGACATACACCTAGCACAGCATTATGCGTTTCCTGTACGTTCCATGAATCAATGA  
TAATACGACGACTATATGGATCATTCTTGATCATGTCAATAACTTTTTGTAAGTGGTCTT  
CCCAAATCTTCGGGCGATAGACATAATTCTCCATCGTCTTTAGTGCTTGATGTGTCTACGT  
CCATACTAACAAACATCGTGGTATCCGGTGCTATCATTTCACCACCCAGATAATCACTAT  
CAAGCAGATAACCGAAATAACCATCATCTACCCATTCTGAAATCCCCACAAGCAATATG  
CATCATTAAACAAAATTAGATTGAGTCTTCCAGTGGTCTGCTACCAGAATATAATCAAACCT  
CTTCATAACGCATACCACGCCAGATAGCACATAAACGGTCTTCTGTTTCATTGGTTGGTG  
TAAAGTCTTCTACCCACGGGTGCTTAAATGTATGTGTATATTTGCTCTTAACGCGCTTAA  
TTTTGATTTACCGTGTGGATGAATCGGTTTTTCGTCGCCATGCCATACCATACTATTAC  
CGACATTATAACCATTGAATCGCAAGGGATTCTTTTTCTTTCATATCAAGACAGTTGCCGC  
GCCAAATATCAAAGGCTTCTCGTCAAACCTTGCCGCCTGTAATTTCTGTAAGCGACGGC  
GGTCAAGTGATCCCTCCATAAACCATAGCAATTCGCCAATTACAGAGGCTGTAGCCATCT  
TTTTAGTGGCCAGTAAGGGGAAACCCTTGCTTAAATCAATTCGCATTTGTGCACCGAATT  
TAGAGAGCGTACCTACTCCAGTTCGGTCTTACGAGGCCAGCCATTATCAAGAACATCAC  
GCAATAGTTTCAAATATTCTTTCATCCACACCACCTTTTTCTTATTGATTGCTTTCTTA  
CGCAGTTTTGCTACTGTCTCGTCAATGTCTATAAAGATAACACCACGGTTCGAATACAGTT  
GCAGGTCTTGAGATATCGCTATTTTCTTGCACAGGAAGCCATGATGCGCTCGTTCATCA  
TAGAGATATTGTAAACCGTAATAATCTACGGTACTGCGTAGTTTTAACTGGTAGCCGTC  
CATAATTGAATAAATACCGACTTTCATTATTGTTCCCGTCGACAACGTAAACACCGACTAC  
CAGCAAACATCAAAGATTCACCACAATGTTTGCCTCATAATCTGTCAGAATTTTCATGT  
TACGCCTTCTTACGTTCTAAAATTTGTTTCGCTGATCAGGTGATCATCAAGGAAGTAATTA  
TGTTCTTCTTTTGTGCAAATCAAATATAATTCCTAAATCATTTCCTTAGAGATACCA  
ACATCATATTCGAACGGATCATTAAATTCCTGCTCGTTGAACATATGTTAAGACAATACGG  
TCCGCAAAGTCAACCGCTTTTTCAATCAGGGAAGGTCCCTCCAATAACGCTTACCAAACCT  
TGCAATTTCTCTATGACTTCTAATAATTCCTTCAATCCACCATCATTAGTAATCGCGGTA  
TACACAACCTGGTTGGTTCGCCGTTTTTTGCTTTCGGTGCTGGCTTAATGGTATCGGTGCTA  
ACAACCACATTCACACGACCTTCCAGTGCTTTAGGAAGACTTTCAAAGGTATTACGTCCC  
ATTACCACCGCCGCAAGATCAACATCTCCCATAGTGCGCATTTTAAAGTTTTCCATGTCC  
TTTTTGATTGGACGACCCACGGTAAACCGCCTTTAAACCAAAGCCCAATTTTCATCC  
GACATTTTAGTGTCACCAATCGCAAATACACATTGAATCATAATATAAATCTCCTAGCAA  
ACCAGCTTGAGATAGTTTTCGTTAACGTTTTCTTCTGTGATCTCGGTTTTAACTCATTA  
ACAACATCAGGAGAAACATAATAGCGTTCGGAATAATCACGCCACATTTTCAGTAGACTG  
AAACCAACATTAACACCATTTTCCCAGAAACGGAAGATAATTTTATTTGCGGTGTAACGG  
TAATCGCTTTGAATCAAGCTGCCATCACCGCGACGTGATTCATAAACCGTAATACATTCA  
CGTTAGCGGCTTTAAGACATTCTTCAATAGTGCCGCATTAGATAATTTTCGGTTGAGTCG

TTTACGATTTGTTCAACAGTCCACATAATAATCCTCTCTTTGTTTCGATGTGTGTATT  
ATACATTAACACATAAAGCATGTCAACACCTTTTTTCATAGAGTTTTAGGCAATAAAAAAGC  
CTCCCCGAAGGAAGGCCTTAAAATTCATTACATCCCTAACAGAGCGTCAAGATCATCCAG  
ATCAGAAGCGGAGGAAGTACCGCCACCCAGATCCAGCGATGCCATCAGGTCATCAGCGGA  
AGAATCTTACGCCGTGCTAGCTGCGTTAATAACCAACTACAGTGCTAGCTGCGTTAATACC  
AGCATCGAATGCATTCATCTGTGCGTCAAATCGTCAAGCTGGCTGTTAAGCGCGGCCGC  
AGCACTGGAAGCCCCAGCACCAGCTACCATAGAAACACCCATAGTTTTCTTAAATTTGGT  
TTCCAGTTCATCGAACGGTTTTAACTGGCTAGGCGCTACAATCTCACTCAGGTCAACCAT  
GTTTTCCATCAGATATTTCTGATATGCTTCGTCTTCAATTTTCGGAAGCTGTGATTGCTG  
CATGAAACGAGAATCATCATAGTTCTGGTGTATTATCAACCTTCTTAGCTTTCAGGAGGAA  
GTTAGCACCGGAGAACACACAAGTTACATCGACCGGAACTTCGCCCATATCGGTATTCAC  
GTTACCATTGCAACGATCTTATCATAAATTTCTGACCGAAGCGGAATTTGAATACCTT  
ACCTTCATTTTCTGGTGCTTGAGGATCTTTCAGTACCAGAATATTTGCGTAGTAAGAGGC  
TTTACGCTTAATCAGTTGCCATTCGGTCTTATCCGTATTGTACAGATCTTTTTTCGTTAAT  
ATATTTGCACACAGGGCAAGAATCAAATCACCGTGGGTGCTGGAGCAGATTTCCCACTA  
CCATTTGCCATTAACCTTTGAAGGAATGGTTTACCAGTTTACAATCGGCAGACCGTCTTC  
TGTCTTAGACGGCAGGAAGCGAATCAGGGCTTACCCTGCTGCATCAGTCTTAAT  
CTTCCCCCTTTTCGGATCTTCTTTGGAGAAACCGTTGCCACCTTTCAGTGTGGCCAGTTG  
AGCTTGCAGTTTGAATAATCTTGGAGTTTAAACATCTTCACTATTCCTTCTTTTGATTA  
ATTTACTAGACTATTATACAGAATTAATTTACTTGTCAACTATTTGTTTCTGTTTTAA  
TTGAGATATTTCTTACACTCTTAACTTCTTAAACAAATAATGCTCTTGCTTTTGCGGC  
GTCATAACAAGTAGTTTCTTGTACGCCTTCATTTAACACTATAAGTTTGCAAAATCAA  
GACTTTGGCTACCTTGTGCGTTCGTCGATTATATTTAGAAAGCTATCTAACACATAAAA  
CGACTCAAACGATATAATCCGATTCTGCAGTAGTTTAAAGATACCGCTAGTTTCGGTTGC  
GGGATTGTATGTAATTAGCTCTTTAAGAGTAACCCCGCGTTTCTCGGAGAAGTATACCAG  
ACTTTTAAATGTCATCGTCAAATCGTGTGCTGCATCGGTTATCTTTCCTATGTATCCAT  
ATAAAAGCCGTATGCGTCAACATCAGTGATTTACCTACCCATGCATCGGTATTAGCTAC  
CAGATTGCTTAGGAATAGGAAGTGTAATTCTCTTAGATTGTACTTTTCCGCTAATTTTGC  
GAAATGATACTTATCTCTGCGTTTATTGAATGCGGCATCAGACAACCGCATCCTCCAATT  
GTATTTTCCGCAATCATAACGCCCGTTCATGTGAGCTTTCATCATGCAATATAACATATA  
CACAGATTTAGCATTAAATTCGCATATCTGGATCTGGAGGAAGACGGTTTCTGATCATA  
TACCCCTTAAATATCGAGAGTGTTGTTTCGGTTCGTCGATCACTCCCTTCTGAGCGTTCT  
ATTTACTATACATTCTTGTGTGATCTTGTCAATAATGGACACCGGAATATACTTCTGATA  
GTGACCATATTCGATAGAGTTTTCTCTACAACTGCGTTGTCGCTTCAAGATAAGTCAA  
TCCCTCTTCAACAACCAGTTATTCGATTGCAAGACCGTTTGTGTTTTGTTTCGCGGCTTT  
TACCTCATGTTCAATTAAGCATTGAACACCCGAGCATAGAGTTCTACCGCTTCGTCGCGTT  
CTGCTTCGAAGGTTTTCGCGCTGTTGCTGGTGATACAGTTTATACAGAATGCCCCACATTT  
TACCATCGACGCCTAATCTTCTTAGCACGCTGTTTGATCTCTTTGATCTTCTCGCCGT  
ATGCTTCGTGAATGGTTTTCTGATCGCTGGCTTCTTAAATCAGTTGTGCCAGGGTATTT  
CGTGCCTGCTTCGTCAAATACTACTTTTTCTTTTTTCTGTTTTCAGTCATAATATTAACCC  
TCTTTCGTCATTAATTGAGAACCACGTTTTCAGCTTTTGAATTCGCTAGGACTTAAATCG  
TCACCAACATATTCTAGCATCATTCTGGGATAATGTCAAGTGCTTTTTTCATCACCTGAT  
TTTAACTCGACCTCAAGTTCATTGTGAGCCTCTCCATTCTTTCGCCGACTTTGCAATAA  
TAGAAAGTGTCTTTGCACATTTCCACTATAGCACCTTCAAGGTCAAGTTTCAATGACTTG  
CGGTATGTCATTACTTGAATAAAGGAACGATAAGGTTCGGAGTTTACGCCTAGACTATCA  
ACATAATGATAGAAATCATCCATTGTTGAAAAAGTGATTTCTTCTCGGTTGAATAGTCCA  
GATTCATCACTTATTTTGACCATAATCAATGATCTATTAACGTCAAGTCGATCATAA  
ATTCTTTTTCGACGCATTGCATGATCTTCGGTATCATAATAAAATTCGTGTTTTAGAGTG  
TTAGCACGCTCTACTAGATTGTACCCGTCATACATTGCTACCCACAAATCACAGATTGTT  
TCGACGCCAATTTGTGAGTGTGCATAGTATTTAATTCAAGTTCTTTCATATGTCAACCC  
TTAGAACTACCAATTTTCTGCAACATTTTAACTAACGCATTGGTTACAAAATAGTTATA  
AATTTTACCGCGTGGTGCTGGTTTAGATTTCTCCCATGCTAACAAAATTTTCATATTCGAT  
GTTATCAGGAATAAATTCAAAATCAATAAGTTTCGCGGTTTTTCGTCAAAGCGTAGTGCTTC  
TTCTCTGTTCATCAAAGACTTTGGATCTTCGGCATCGAAAATTTGCTATAACCATTTGGT  
TGCAATTGTTTTAGCTCGTTCCCTTCCAGTCGTGAGATAATGAAATCACTACGGCACTT  
GATAGAAGCTACACCGTCTTTTTCGTCACCTTAAACACATTTTACCATAAGGTATTTGTA  
AGGGCTACCATATTTGCATTTCTTCCATGCTTTCTGTACTGGCGCCCACTGTTTCACGTT

TTTGTATTTGTGCAACTGTGTGTAGTCACCATCGCCGGAGTTGATTAGCACCTGGCGACC  
TTCTACAGAAAACCTTTTTAGTTATCACAGCGATTATATCATCTGCTTCAACTTTGTCAAC  
CTGAATAACGTGATAAAGGCATGTTCTCTTTAAACTCTTCGGTGATCTTATTGATCGCAGC  
AAAGATCATCTCCCAATCACGCGGATCTGCGTCTGGTTTTTCCTTACGGTTGCGTTTTATA  
GTAAGGGGCGATATCACGTCGCCAGTAACGTTTACTTGAATCAAAGGCAAGTACCGTAAT  
TGGGTATTGCTCTTTGAATTTTGTGCATATTATAACGCATGGTGTCAAGGATAAGATGACG  
AATCATGCCTTCATTAATAGGATCTTCCGGTTTAAAGGTATGCGAGATAGTAGCAATCAG  
AAGCTGCGACATATCAATCAAATGCACACCTTCCGGCAGTTTATCTTCTGGATCATCCAA  
GAAATCATTACGTGTAGCGGTAGTTTTTGTAAACGGGTTATACGTCATAATTAAGTTCTC  
TCCACTCTCACAAACATATTCGCCAACCGAGTTAGATACTTCACGATCATACCCGTAT  
TTCTCCATAACTCGCAGAATTGCATTGTTTAAATTCGGAACGGAAATAATTATAATCCTTA  
TCAGGGATTCTGTCAACTACCCATTTTGCACCTTCTGACAATTCAACTTTAACCATAATA  
TATCACCTCTTTTGTCTATGAAGGCTCATTTTATAAATATGAACATACTATAAAAGG  
AGACCCAAAATGGCAGATTTTTCTCAACATATCAAGGCCACATTTGGCTTTGACGCTGG  
TAATGAAAAGGTCGTCATGTTGCATACGCAGATAAAAACACATCAACGGATGCGGTCAA  
CGTTGAATTTTTCAATTACCATAATGGTATTACTCAGTATGACACAACCTCGCGGTTATGA  
TCAATACGGAACACTACAATCTATCAAACCGTCCGTATTATGCAAAAAGAAGATATCACAAA  
GCCAGCAGGTGATATTGACCCGACTAAATGGCAAGCACTGCGCACGGACCCACGTTGGGA  
TTATATTGCAGCAACTTCCAGTGATACTCATTTAAAGTCTGGTGATTATATCGCTGCAGA  
TGGTCAATTTGCAAACCTTGACTTTCTCTATGCCAACTAAACCAGCAGAGGGAGACTAT  
ATCAGTAAAAGATATCGGTGGCAAGTGTGGTGTTAACGAATTATCGTTCTTGAGTTCAGG  
ACATGAGTTTTACCATAACGGTAATGTGTATAACCGAAAATGGTATTGCACTACCCCGTA  
TGCAATGAAGTATTTTCATCTTTGTTCCGGAATCGTTGGCATGTTTATCAGACGGGAACAGA  
GCCGCGCGGTGTATACGCACAGCCAACGATTGATGCTATTCAAATGCAGAATGGTGATCA  
GGTATTTGTCGTAGTTTCGTTGGGTAATATTACCTTAGTGCTTCCTAAGTTTGCCAACAA  
TGCGGACATGATCCAGACTACAGACCTTGACGGATTAACCGCAACCAACCACGTTACGGT  
TAAAGTTCATGAGCACGCAGAAGAACAATCAATTGGCACGTCCGGTCTAAAAGAGATTAT  
CGGTAAGCGTAGCGGTTCATGGTGTATTCATCTTTGACAAGACGGAAAACCTTATGGCGTTT  
GTGGGATGGTGATCAGTCTGTTTCGTTAAACCGATCATCGATGACACTCGCTTGCAACC  
TAATAGCTATGTTGCTGTATTTGTTGGTCGTGATGTTACGCTGACGCTGCCGACCAATGT  
CGAGCCGGGTGATCGTATTCAAGTTTCTATGCAGTATATGCAAGGAAACCAGAATTCCTCG  
TATTATCACCGCCACTGTGGATACAAAATCCTTATGCAGAAAAACATGGTTCAGTTTCC  
TAAGCGTAGCGAGTACCCACTCAATGGGACTGATACATGGACTGGAGTGTCTGAATTGTC  
TTTCAACGATGCAAATGATTATGTACCTTATCTGGAGTCTCTTATTTCAGAAGGTGATGA  
TGTTAAGAAATACTGGTTGGTGACACATGCTCACCCGATTGTAGAACGAGTAGATCCGAC  
TCGTAAAGATCGTGTGGTGTAAATTGCACTGGCTACCCAACTGAAACGAATAAAAACCA  
TGAAGAGAATCCTAGCGACGAAGTTGCAGTAACACCAAAAATGCTGGCTAATAAAACCGC  
CAACGAACTCGACGCGGTATTGCTCGCATTGCGACTCAAGCGGAAACGCATCAAGATAC  
TGTTCCAACTTCCTGGATGATGTTATCGTTACGCCTAAAAGTTAAATGACTGTGTTGC  
TACCGAAGCCCGTTCGTTGGTGTGATGGAAAATGCAACCCAGCACGAAACCAATGAAGGTTT  
AGACGATAACCCGCGCTATTACTCCTAAGAAATTAGAAGAACGTCGCGCTTCCGAAGATCC  
CGCTGGTATTGCTGAAATTGCTCAGGCTGGCGGCAGTGCTGCCGCTCGACGTGGCGGAGC  
TGGTACAGGGATCTTTAACATCAATGACCATGCTAAAATTGTTACGCCAAAAACATCAA  
CGAAGTCAAGGCGACCGAACTTCCCGTGGTGTGGCTATCTGGCAACTGACGCGGAAGT  
GCAAGGGGCTACAGAATCAAACCCGCAAGATGCTTTACTCATCACGACTCGCACGCTAAC  
GAAACGTACTGCTACCGAATCGCGCACTGGTATCGCTGAAATTGCAACTCAGGAAGAAAC  
AACTTAGGTCAAAGTGATAACCATATCATCACGCCAAAAAGTTGCATACTCGCCGCGC  
AGCGGAAACTTTACAAGGTTTAGCAGAAATTGCAACTCAGCCGGAATTTGTGCGAGGTCT  
TGACGATACTCGCATTTCTACCCATTGAAGGTTAAAACCTTCTTTGAGAATGCACAGCG  
TTTGAAAGTTCGATCCGACTCAGGGGCTTAAACGTTACTGGTGATTTGTGGCAAGGTATCAC  
GATTCGCGGTTTGGATGCAACCGAAGATACAAAAGGTGTGCTAAAAGTTGCTACTACTCA  
GCTTACGGATGCTGGTCAAGATGATACTACAATCATCACGCCTAAAAGCTGCAAGGCAA  
AAAGGCCACCGAAGGTAAGAAGGTATTATCCGAATTGGTACTCAAGCCGAAACCGTGGC  
TGGTGCCTGGCTAATGTAGCAATTTCTCGGAAGAACATCAAATATGTTGTTTCAGACAGA  
GGATACATGGAAAGCAACCGAAGCGCGTCGTGGTTTCTTGAAAGTTGCTACTCAGGAAAA  
CTGTTTTGTTGGTGATAATCTGCAAGGTTCTACTCAAGAAGTACTAGGAACTACCAGCATGA  
CGGAATTGCTGTTACCCCTAAAGGATTAACACTACGCCTGCTAATTTCTTACCTAAGAT



GGCAACCGCTCAGAATAGTTTCAAATTGGGTAACGTGGAGGCCGCTAAATGCGCGCGTAG  
AGACATTGACCAGACCATAGAGAGCAATTACACGTTTAATAAAAACCGTTAACGTGAAGGG  
CGATTTAGAGTGCTTAAAATCAGTTTCCTTTGAAACTCTGTCTGTGACTAAGA ACTCAAC  
CGACGAGCCGAGTAATGGTCATCTGGTGTGGGTGAGCGTGGAGTTGACGGTCACTCCGG  
AATTACTCTGCATGGCACAACCGCATCGGAAGGCATGAAAACTCGTGGTCTATTATGGT  
TGGTGGTACTGGAACAGCGCAAGTTGTTGATAGTGATGCTATCGCTTTCGGTAAAATCAA  
TGATAGAGGAGTCGTCGAGCATTACGCCTTTGCTATGGAACACAATGGCGACGCGACAGC  
ATATAGAGACTTTATTGCAAGGTCCTAACCTGTATGCGAAACAAGGCGGTTTATACATTGT  
TGACCAGTCTAATCCGGCAATGACTCGTTCGCCAGATGGTATGCTGAATATCGGTCACGG  
TGGAAGTGTTAACATCAAGGCAGGTCATCAAACGTTAACTACAGAGATCGCCGGACAGAA  
ATATCAGATCGTACAGGCAGGAAACGCTGATGAAGTTCTTAACCGTCAGTGTGTTAAGAA  
TGCTGGCGATAACAATGGTCGGTAAGCTGACTATGGATAATGCGCCTCTTGTTTCTGTTAA  
GCATGAAGCTAGCGCGGCAACCGCTCCGGCAATCAGCAACATCGGTTTCTGGAATATGCG  
CGTTACTACCCAGAACATCAAAGAAAGTTATCCAGAGAACAAAACTGTACTCTGATGCA  
ATGGGGTACTGACGCGGACGGGCTTACCCAGCTTTGGTCCCGATGGTACTCATAGACA  
TTATATCCGTTCCGGTACTGGTGGTCAATGGACCGCATGGGGTGAAATTTACACCAAACA  
GAATAAGCCTACCGCTCAGGAAATCGGGGCAGTAGTTGCAGAACGTGGTTTAATGAATTC  
TATGACGGTGCCTGACTGGATCAAAGTTGGTAATGTTAAAATCATCGCCAATAATCTGAC  
TCGTACCGTAGACTTGATCTGGGACGACTAATTATAGGGGGCGAAAGCCCCCTTTGGGGT  
TATTATGACACAAGATATAGAATTACGCAACACTGGAATTAGGTTTGCGCATGTGACGA  
AGACTCTGCGACATTTACCAGCATTTACAGAAAATAACTCTGTGCTGTATAAGCTGGAAGT  
GCGCGGATCTAATGCGGATTCGACCAAACCAGCAAGGATTAGATTTAATGGAGTGGAGAT  
CGTTGGCACTGGCTATGAAAATGGCCTAAATTTTAAAGTTCTTACTCCA ACTGGACA ACT  
ACACGAAGAAAAGGTATTCTATGGTCGCGGTGCTGTTTTGGCAATGCGTGATTATCTTTA  
TTTGCTGAAAGGTGACTATATCATTGCGATGGCAACACATGGAGAATTGTTTGCAGATCC  
GATAAGTGATGATATATTTTCTAAGCTGGGATCTGTATCATTCCCGAATCACATTTAGTT  
ACAGCAAATGCCTCGTGTATCCTATGCAGCAATTTACTCTACTAAAATTGGTAAAATTGT  
GTGCGAAGGGATGCAAGCAACGCACGGAGAAGGTCAAGATTCGTCTATACAAATTGAGAA  
AGTTTATGATACTATAGACGATCTTGCAATAACAGGAACACCACAACGATTTTTAGATTA  
TCCGGTTGAATATGTTAGCGAAGATGCCGAACATTTGAGCTAATACAATGGCCTCATGA  
TGAGATCAGCGCACC ACTTGAATATTTTAAACATAAAGGCAGGTGACACACTATCAATATC  
CTTTGAATTGTTCCGTGATAGTGCCGACGCCGACCCAACGTAACAGCGCGTTTCTATCA  
CAACTACTTCACTGATGGACTATATCAA ACTGGCGTTCGTTATAATACCAGCCAGAAGGA  
TCAATGGGAAAAGTTTGAAGCCATCTATACCGTACCGGAAGGAGTTGATAGTGTTACCAC  
TGTTTGGATCAGATATCCAACCAACTCAAATGAAGGTATTGTTAAAATTAGAAACATACT  
AATAACGCCGATCAGCGGAGTCGTCAA ACTACTGGTCCGACTTCATTTGGTGTAAAGGG  
TGTTAGAACA ACTCATATTCAGGATAAGTGTGATTTTACTAACCCTGTAATGAGTCTTCT  
TATACTGCCTAGAGATAATAAAAACATCACATACAACA ACTTTAAAGAGTTTCGATTTTGA  
TTAACATTTTTTAAACAAGCCGATCCTCGTGGTCCGCTTTATTTTTATACAGTTGGTTAAA  
CATAACCGAAACGAAGAAAGATCTTTAGAATAATAGAAAATTTGTTTCGGTTAAAAATA  
GTCCGTGCCTACGGCACGTCGCGAAGCGATATGTTGTTAACATTCTATAAATACTCGGAA  
CTATAACTAATTTTTGAGGTTACTTTATGGCAGATTTGAAACATGGATCTACTGTAGGCG  
GATCTCCATTTGTACGCAAGGAAACTTGACGATCCAGCCAACGGGAGATCAGCTTTTCT  
ACCAAGGTCATAAAATCTATACCGCTTTTGATAAACCCCTCGGCTGCCGATTTTGACGCTG  
TTAGTGCTAAAGACGGTGGCACATTTCAA AAGCAGGTCCATTTTGAGGAAGGTTAAGCG  
TAGGTAGCGCATCGGCTGGAGAAACCAAACGAACGGGATCTTTAAAGGAAATAGTGATG  
CGGCTAACTTTGATGTTGTAAGTTGGGGTTTGCATTTCGTGGAAATCTATTGGTTTTGTTA  
ATGCCCGTAATGGCGTTATCATGGCTTATATTGACACTACCACAGGTGATTTTTAAACTA  
AAGGGACTATCGAAGGGACAACCATTAAGACACAGGTCAACGCTTCTATAGCCCTGTTA  
ATAAACCAACGAATAATGATTGAGATTTGGTGTTCGCCGCGGTGATACCTCACAGGAA  
CATATAATTTAAACACTGTCACTGTTAAACTATCGGTTGATTAGAAATTAATTGCAAGGG  
AACGTGATTTAATTAATTTTGTGACTAAGATCTATTATGGTAACGTTCTTGATACGT  
TGGTCTTCCGAAGTAAAGATGAGCCTACCATTTTTGTTAATGGCAGAGAAGGTCGTTTTT  
ATCACACCAACAATAAACCAACTAAAGCCGATGTTGGGCTAGGCAATGTCACCAATGATG  
CACGGGTTAAACGTGCTGGTGTATATTATGGAAGGTA ACTTGAAGCGCCTAGAATGTTGG  
CGACAAACGATCCGGCTGGTCCTAATGAATTGGTTCGTTTGGAGCTACTTTGGGAGAATAT  
CAATGGTAGCAAATCCAACCATCATTGGAACGTTGATTGGAACACTCTTATTAATCGCG

GTATCTATCGTGTGGAAAATGCTGGGTCAGGTAATAAACCCGTCTGATAGCTATTATA  
ACGGCGTTTTGATGGTATATCGCCCAGAAGATGCGGGTCGGTACTCGTTCGAATTGTTTCAGG  
TGTATTATCCTGAATCTATTGACCATCCGATGTGCTGGCGTTCGTGTTCTAATGAATCAT  
GGACTGCCTGGAAGTATGTAGATCACCGTAAATTAGCCGCTATTCGCTATGTTAACGTAA  
CTGGCGATAACCATGACAGGACCGTTAACTGTTCCGGCTGCAAACGGTGTTAGAACAGCTA  
GAGGTGCATATAATGGTGATAACTACTATGCTGGGTTAAATAGTGCCGATGGCACGGCTA  
TGATTCACCGTATCAGCTATATTAAGCCACTGAAGAATTGGGTATTACACATGATTCGA  
AAGCTGTTTTTCGTTAAATCGCGTGGCAATACTCAAGCCACAGACCGCTATGAACTTGACC  
ACGAAAGGCATAAACCTACCCCTGCCGAAGTTGGCGCGGTTCCACTTAATGCGGGTATTG  
ATTTTGGTACTTTCTAATAGTAGCGGGGAGTATATCCCCGCTTTTCTAAATAATATTATT  
CTGATAACCGTTTAAGGATTTTATAAAATGGCAGATTTAAACAGAATCCAATTTTAACGT  
TCTAGCACGAACGGTCGTAAACCTGATGCTACTACAATGACGCAAGGTGAACTTGCTATC  
AACCTGCATGATTATTATTGTCTACAAAAAATGACTCTGGTTCTATTATTGACTTAAGC  
TGTCCTCCGATCTATGACCGCGATGTTATCATGGCTGGTAAAGTAAAGGGAGATTATTAC  
ATTTTAGGTAAAACCGCTAATTATCTTGAAGATCAGACAGCGAGAGACCTTAACCGTTTT  
GGAGCATTCCGTACCAATGGTCTAGATGGATTTTTAGATTTGACCTTGCATGTTCCCTCAT  
TCTGCTGGCGTTCAACATGGTTCGAGGATTTACTTTCCGTTATGCGACTGGCGGATCTCGT  
GTTGAAACATATGGGTATAATGCACAGGGACAAAAAGCATTTCAGCTATAAAATGTATCAT  
GAAGGTGATAAACCAACTCCAGGAGAACTGAACGTTTATAGCAAACAAGAAGTAGATAGA  
ATGTTTGTAAAACGTTAACTTTCTACAGGTTCTGGTGATATCGTTGACGGTTATTTT  
AAATTAGCGACTGCGATGATTCACAAGACGGTCATAGTGTATTTTTCCGTATTCATGGT  
GGTAACGGATATAACATTACTGCAAACGATCAAGTTGATATTGTAGAAATTGTTATTTCG  
AGTGGAATAATCGTCCTAAAGGTGTAAACGTTATTGCATACCGCCGAAATACAAACAAA  
GCATTTGATGTTTTGGCTGTTAATACTTCTGGTGATAACTATGATATCTACGTGAAATAT  
CAGCGTTACACTGATAAGGTTATTGTTGAATTTGGTAAAAGTGTTGATGTTAATCTGGTA  
GTCCATGACGTTCCAGACTTTGTTGTTGATCGTCCTGTTGGCGATAACGTTATTGGCGGT  
CGCGCGGTAACATTTTTCAACACCGAAAAACAAACGAGGTGTGTTGAGTTTTGACGACAAT  
ACACAAAACAGCTATGATATTGTTTCACATGAGTAATGATAAAGGTACTGGACGAAAATAT  
ATTCGTAAATTCCGTAGTAACTATAATGAAATGATCTGGCATGAGACGGTTCAAGGTAAC  
GTATGCCGTTTAGCTACTGGAACCTACCGACGCAAACGAAGTTCTCAAATTACCGACCGC  
ACGTTGCAAACCTGGCAATGCTGTTTTTGGACGGTGGTAATAATAATGTTTCGTTTACATCGT  
AAAACCGGAAAAAGTAACTATCTGGAATATTATGATGCCCGTGACGGAGCAAATAAACGT  
CAGGGATCTATTGGGTATGGCGATGCCACAATAACCAGTTGTCAATTATTAACGAACTC  
TCCGAAGGTAATAACTCGATTTTCTTTAACGAGACAGGTCAAATTTCACTTAACGTAGGA  
AAGACAAAAATTGTTTCATAGCAACGGACAATATATTTCTACCAACGCCGATAACTATCGT  
ATAATTTATGGTGATTATGGAACATTCTGGCGAAATGATAGCGTTAACTTTATCTCATG  
TCCACTGCCGAAAATGATAAATGGTGTACTTGGAAATAGCTATCGACCATTCAATTAACA  
CTAACAGCGGCGATGTTCAATTGGGTGGTGTATGGTAACGAATCGGCATTAACGTTAGAA  
TGTGCTTCCCGTGCCGCTCGCTTTAGTAATGACGTTTACATTAAGAAAGGGCTTTTGACT  
TTCGACGCTGGGCGATTAGGATCTCGCGATTATATTAGATTTAATCATTGGGGCGATAGC  
AATAACGGTTCGCGATAACATCCTACAGATTGAAGACAGTTCAGGGCGCACATCTTACCACT  
GAACGTGCTATGGGTACTGGTAACATAACAGCACGTTTTAAAGGCTTTGTTTCGTGTTGAG  
TCTGGTGGGATTGCATTTGATGCTAATCGGGGGGCGCAGTCTCAATTTACCTTACACACA  
TGGGGTAACGAGCAACGCAAACAGGTTTTTGAATGTAAGGATGCTACAAGTTATCACTGG  
TATACTGAACGTAACAGGGTGGCACTGGACCTATTCTGTTTCGTTATGGCGGGTAGTCTA  
AACGTTGGTAGCAATATCACAACTGGTCCGGATATTACGTTTAAACGCGCTGGCAAT  
AAGCACATCTGGTTTAGAGATCAAACGGCTTAGAGTTAGGCTTGATGTACTGCGATGAT  
GCTGGTGTATTTCGTTCCGTGGTTCAGAAACAAGCCCAGGAGTGGAAATTTGCAGATAAA  
ATGATCCAGTGGGAATCTGGCACTGCATCCGGTGGCGGTAATGGCCTGATTTCGTGGTGAA  
GTTGCTGGCGGTAGTTGGGCTAGCTGGCGTGACCGTGCTGCTGGCCTTATGGTTGGGTGT  
CCTCAATCAACCAATTCCGCTCCTAACATCTGGAAGCTACTCATTGGGGTCAATATCAC  
ATTGCAGCAATGGGTGTACATGTTCCCTAACGGTAGTATCGGGGATGCTATAGCTCGCCTA  
AACGTTTCATGACGCCAACTTTGACTTTAGCGCCTCCGGTGACATGTCGGCAGGGCGTAAC  
GGTTCGTTTAAACGATGTTTATAATTCGTTCTGATGCTCGCCTTAAAATCAATAAGGAAGAG  
TATAAGGAGAATGCCACTGATAAAGTTAATCGCTTGACTGTGTACACCTACGATAAGGTT  
AAATCTTTAACTGACCGTAGTGTTATCGCCCATGAAGTTGGTATTATTGCTCAGGATCTT  
GAGAAAGAATTGCCGGAAGCAGTAACAACCTTGTAAGGTTCGGCGACCCAGATAAACCCAGAA

GAGATCTTAACAATTTCTAACTCTGCTGTCAACGCTCTTTTAATTAAGGCGTTTCAGGTA  
ATGAGCGAAGAATTGAAAGCCGTTAAAGCTGAACTAGCGGAACCTTAAAAAGAATTAAGGA  
AACTCCCAGGGAAGGGAACCTACTAAGGAGAAACGGCTATGGTCTATAATATCGTCATTGG  
TGCTTTGTATAAATTCGGAATGAAATAATTGTCAAAGTTAATTAGTGAGAAGATGCTCAC  
TAAAATTTTCTTCTATTGCGCTCGTCGTCATGCGGCTTATACCAATACGCCAATTGATGA  
TCGTTTTGTGCGAAGAACTTTATAAGGAGTTTAATAAAGATCAGTCAGAAGATAGTAACGA  
GCGAGATAAACCTAGTGATAGTCAACTACCTAAATAAGAGTACACTGTCATAGTTATCTT  
AGAGCATTGTATGCAAGTTTCTGAAAAAGGGAAAGACTTTGCTATCTCAAATGTCCTGCG  
CGCTATTTTCACTAAAGACGAGGAGTTGCTCGTACTTCGTGTTTTTGTGCGCGTCGT  
GTTGTCCATATTGGCATTGTGCTGTTGATAGTAAAAACGAGTTATTTGCGCTTTATAAAGA  
GACTCGTTATGAGACTTATGCTCACATTCTCCAGGTAGAGAAAGACCGCAATTTTGATAA  
TGCAGCACAGGAGCAGTTACAGATAGTTCATGTATCGGGTGATGCCGATTTTTCTGCTGT  
TTTTAGTTTTCTGTCGAAAAACCTAAACTAGTTTGTGATTTGGTGGCATATGAAGGAAA  
GCTACCGCATACAATCGATGAAAAGAATTTAGGCGGATTCCCTATCAATAAAACGAGTGC  
AGAATATCGTAGGCATCTTTTAGGTAAATCATACTTTACCGATAAAGATTTCCAGTATAT  
TCCATCAAGAGAAAAGAAATTAGAGAGTATCGATATAGGGGTTATGTATTCTTGTCTAT  
ATTCAATCTCGACAATGTCTATTCTGGTAGTATCTCCATTGCATGGAAGAATAAACCGGA  
TATTGACATTGAGAATTTAGATACTCTTTGCAATCAATCTGCCAGAATCCTCGGAAGGAT  
TAGATAACTTAAAGGGGAAGCCTTTAGGCCTCCCATCTTTTTATTGGCGCATAGAAGAC  
CCTGAATCACGTTTTGACGCTGTATGATGAAAACAGGTAGCGTACCAGTCATCGGCTTGT  
TTGTCTTCGTCAGAAAACGCGTAATCGCGTGTATACCGTTTTCTACTTTGACCAGTGCA  
ATAGCTGTTTCTGGAAGATCAATCAATCGGACAAAATCACCATCTTCCACTCTACACGA  
GCAATATCATAGCCCATCTCAAATATACAATCGCTTGTCTAATTTTATTCTGCAAACCT  
TCCCGTAAACATTCTCTGCCAACTTACGTGCATCTTTTACAATATCTTTCATGGTATGTC  
TATAATTTTTAGCTAGATCAATGATGCAATCAACAAAGAAGTAATAGCGTCGCAGTGCTA  
CCAGCTCAACATCTTCAAGATGACCATTTTCTCCAATCGCTGAAATGTGTTTAAATTCCT  
TTCGGATCGCGTCCATCGCTACATTAACCTCTTTTATAATATCTTTCGTATTATATGCAC  
CTCGACTAATCAAATTTTGGTTAGGTCTTCTGCTCTTTCTTCAAAGTTGTCAATTTCAA  
ACTCGATCATAATCACCTCTCATAATTCACGCTGTTGTTTCAACATTTTTTCGTGGTTT  
GCTAATTCTATACCTTGTAAAGAGCATCACCAGTGCCATTTTCAATGATTCATCACCTTTC  
ATAATCAAATTTACCGAAAATATTCTCTGTCATAATTCTTGCTTCGTCGATTATTTTCG  
TCATGTTTATGGTGTAGTTATGATCCTTTAGTGCTTTAATAACAACGAGCAAGGAATCTA  
AAAACACTCGATACCGGGTATATTCTACGCTATTTGTGAATACCGATGTTTTCTCGACTT  
TATCGATCAGATAGCCTAAAACCGATAGCGCCTCGTTTACTTCCCTTGTTACTTTATCGG  
CGCTAAACAACACCGGACAAAGACGCGGTGTGATTAACCGCGCTGCGTCTTCAATTCGG  
TCGCTTTCATGATTCATATTTGTCATAGTTAAACAGTATATAATCCCCTTACAGATGAA  
AACCTGTAACGATCAACGCATCGATCATAACCGTAGGAATAAACGGTTCGCCCTCATCTA  
TTTCAACTTTGAATTGGTGCCATTTGCTAATACTTCTTCCGGTACACCCAGCGATTTCGG  
CGTCTGCTTTAGTTTCATCCATAATCCAACCTAGGCTGCATAAGCGCATAGTTTACATAGT  
CCATTTCTGGGGTGATGTCATCAATGTTAATATAATTTGCAGTTGACGCGTTTACAGAATTT  
CAAATTTCTTATTATCAACCTGTACCATGTATAATTCAGTAGTTCCTGGGATCAGTTCCC  
ACACAATCAGTACATTTTTCATAGTTCACCTCACTTAACATAGATTTTCTTTAATGCTTT  
CAGGATCGTTGCTTCCGGCGCTTCTTCCGGAGGAGGAAGCAATTCTACCACTTCTCTTC  
CAACTCGATATAGTCTACCAGATATTCTACATAGAATGCAAGTGCTTCCATGAAATTAGA  
TGCTACATCCGATTCACCACAAGAGCCTACATGCATTGTATAAACATCACTGCGATCAAG  
TTTGTGGATGCTTCCAGATAGTTTCGGTTATACCAGACTTCCCACACTTTCAGCTTCC  
GGTTTTGGTTGCTGTTTTATAATCGGTTTTCGTAATGATGCAATTGACGTTGCAAATCATT  
GATAATAACACATTTTTTCGTAATTGTTTTGAATTTCCATGATGGAATCTTCACTTATCGT  
TAAGAAGTTCTAAAACCTTCTGTCGTAATTTGTCAATATTAGTTGATTCAAAAACCTGTAC  
GGTATCCCAGCTTTGACCGTATGATCGCGAGCAATCCCCATATCCCCATTGTTGAACCT  
GATAGTATTCAAGGTACGGGTGCTGCCGAACCTATGATACCATCGCGATTAAAAATTACCC  
TAATATAATCCTCACGTCAACAACCTATTTTTCGGTTGTACTTCTGCCACTTTCGGTAATA  
CTGTTTGTAAAATTTGTTTTACGTTTTTACCAGCTTACTATAACATGTTATCTAACATCAA  
GTCAATAAGACCTCCCAGGTGCTGGTAGTTCCCCGCTCGGATAAGTTCTTTAATTAAGT  
GTCCTGAAGATCTTTGTATACTACGTTAATGATGGTCTTTTCTGCTTCTTTCGTCTCGAC  
CATCCGGTGATTAGCTTTCATCGCATCCACCAATCTTTTGTGATCTTCATGTTATTA  
TTTCATCACTTAACCTCTTCGCAAGTATATCTCGACTCAATACGTTTTTTCGTTTTCCACCG

CGCTCAGCATCATAGATATGACGGAATGTCAATTTGCTTTCATCATCAACAAGTTTATTT  
CGTTGGAATTTAGCGCCATGTTTTGCAGAGAATATCATTCCGATTTTATAATCTTCGCTG  
TTGATCATAGTTCCGTTATCTGTGATTTCAAAATCCATAACTACAGGTTCTTGCATTGTG  
CTGGAGATCATGATTTTAGCAATGTACCTCTCTTAGAACTTGAATTTTTGCATTTTCG  
TTCATAATATCATCATCTTCTACACTCATTCCATTGATTGTAGTAATTTAACAACCTTC  
GGCAAATGTAGGAAAACGTGGTTTTCTTCGGATTAATTACTTCCGGCTGTTTCTCTTCA  
ACCTTCGGTTCTTCCACCCTTTTTCTTCTGTTTCGGTTGTTCTTCTTCAACCTTCGCA  
GAAGTCTCTGAATCGCTTTCTGGTGCTGTTTCTTCTTTAGGTAATACATTCAATTAAGTTT  
TGAATTTGAGCGTTATATACAGCCTCCAGTGGCTGAATCTGCCCCGATATTGATCATTGTA  
TCACGAACAGTTTTATTCCAGTTGCGTTGCTCTTGTTCAGAGACGGATCAATCTTAACA  
GCCTTAACATACACCTCATGAAGTTTAGAGTCCAGTGCAGGAGATTGACTCATTAGCACAA  
ATAAACTTCTCTGATTTGGTAGTAGCTTTAGCGCAATCAAAGGACGCAGCGTTAGCACCG  
AAAGCAGTAGCAGAAAGAACGATAGCAGCGATAATGTTTTGATAATATAATCCTCAGTG  
TTTTGTCTTGATGGGAGTATCTTACTACTCCCTTAATCCGGTGTCAACTACTTTTTTAAA  
TTTCTTCTAAAGTAAAATCTTCAATGTTGTTGTGCTCGGCGAACGATACAAGACCAGCAT  
TCCATGCATCATCCTCAGAGAAGAATACACCGTAACGTTTCAATCCTTTAGCGCCTTCAA  
ATTTAACCATTAATTTGTGAGTATGTTTCATTTTGATTCTCCTTCGTTGTCTTGATGGGT  
TTAGTATAGGGGATCGCCGATCCCCTGTCAACAACCTATTTTTTAATTTTTACCCGCTCGT  
GCATTAATACGCATTTTCTGCATAGCCATGATCTGGCTTACTGCTTCTGCTTTACGTTCT  
TGCCTGGTAACTTGACCAGATTCCGCAAACCTCTCCCGCAAACCTTCTTCTACGATCTCGCGA  
ACTTGAGAACGTCCAAAGATGCGGTTTCTTCGTAGCTCATAAATCTGTTACTACTTGC  
TCGATAGATTTTCACTGATTCTCCTTTCGTTTGGTATGGGAGTATAATACTGCTCCCATG  
TCTTTAAGTCAACAACCTATTTTAAATTATTTTCGACCTTACCCATTCCGCGTATTCTTG  
CGCGGCTACTTTCGGATTTAGGCCGTCTTCGTACATTGCTTCAAGTAATTCTTCGTCGTT  
GGGCTTATACCCTAGATAAAGCCTCCACCTGATTTTTCCAAATTTTATACCAGTACATATT  
ATCACCAGTCAAGAGCGCGTGTCTCTGCGTCTTCCCATGCTTGATCCATAACAGCCTTGA  
AAACATATTCTAGAGTATCATCTTTAGAGAATCCGAAGACTTTAGACGGACTATCTTCAA  
TTGCTACTCCAGCAACTTCTGCATTACGCGCTTGGCAATAATGCAACTCTAAGTTATCGA  
GATAGCGACCGCCTAATTTCTCCATATCATCCAGCATTTCAGTAACCTACTTTATTTG  
CAATTAACACTTTGCTGTTTTCGTTGCTCATCTTTGATTCTCCTTTTGTTTGGTATG  
TGTGTATTATGCGAGTCTGGATTCGTGAAGTCAACAACCTTTTAAAATAAAAAAGCCTAC  
CACAAGGATCGGCTTAATAATCAGTTACTTACTAAATTTCTTTTTTGGCTCCGTCTACCGC  
ATGAGATGCCAGTACCGCAGCCGCATGTGCACTTTTATCTGTGTTGCAGAGAACGCCAG  
ATAAACATCACGCCAAAGTTAATCATCTCGTAGATCATATCAATATCATTTCCTTGTTT  
GTTGGCGATGCTATTTCGTCGTTATCTGGTAAGGTAACGGCTTGATCTGTACTGGTTCCGC  
CATCGCGCTAATCGGTTTCGGATCAGTCATAATAGGTGCTGTTGTGGGTGGTGTTCCTCA  
TACACCATTATTCCACGGTTAATCGTTGTGTCGTAAGTTTATAAGGATTTTTGTCTGG  
GTC AACCATCCATGCATGATGAGTACCCAAACCATTGAAGTGATGCGTAGTTCAGTCAT  
AATTTATTTCTCTCTGAAAATTTCTTTCATCAAGCTGTCGATCTTTGCTCTGTGTCCTGG  
TGTGTTTGTCAATTTCTGCTAATTTGCTCAGAGATTCAGTGGTATCCGGTTGGATTCTTC  
CAGTGTTC AACGACCATTGGCACAATCTTTTTATTTTTGTACACAAATGCAATTTAACC  
GCCTTCTGGATATTCTTTCATAATCAACCCTTCTTAAGTTCTTTAAGATCCTTCTTATAT  
TCCTTCATTGCGGTCGCTTTTGTCCAATACTCATATTCATATGATGTTTATCGGCATCT  
TTGACCAGTCGATCATACTCTTCTTGAGTAACGCTATAACAATGGCATAGAACTAGCTTA  
TCGGCGTATGGACGCAGTTTTTCATGCCATTGATGGATTGCATTACCTCGGCCTTTTTTC  
TTGCCCTGTAGCTCGATTTCCGCCCTTAATTACGCGATCGATAAATTCGGCTTTAGCCATT  
GCATAATTGTATGCTTCCAGGGTTTCCGCTTGCATCAATTCAATGCGTTTATCGACATAC  
CCTAATCGGATTTTCGACGAATCGACGGATCAGATCGCTCGCTTTATCGAATACTTCTACT  
AAACCACGTTCAATTAACCACTACTATATTCTGGGCTACTAAATGTGTTAGTTTAGAAACC  
TTCATGATTTGCTCATGTGCGAGCGGATTCATATTCGCTTTTGAAGTAATCGCGTTTCAGT  
GTTACTTTAAATCTCAATCCATCCTTAGAGCAACGGTCATTATACGATAGAATCAGATCT  
TTTTCTTCCAGTGCATCCAGTACCGCTACATATTCTTACGGTCGAAGTTATAAGGAACT  
TCTGATATTGTCAGCTTAGTCTTGGGTTTTGTTTCAATGTACCCTCAAGAATCACACCA  
TCGCGGTCATCACGAGGGATAACTTTACCCGTGAATTTCCGGGAATTGAACACTAGGTTCT  
TTATCCAGTTTTTCCGGCAAGTGCTAGCTCTGTGCATTCAATAAGGCTTTCCAGTGAATGC  
GGTAAAATGTCAGTTTCATACCCTGTAGCAATACCACTAATACCATGAGCCAATACCATT  
GGCACAAGTGGCAAGTAGAACGCTGGCGGGATGTGTTCCAGATCGTCTGCTTAGGTGCG

CAATTCATATCTTTATAGATTTTAAAGAAGTTTTTCATGCACACGAACAAAGAAATAACGT  
GCCGCACCTGCATTCTGGACTAAACGCGATCCAAAGTTACCTTGACCGTCAAGCAGTGGA  
GTATTATTGCTCCATGTATTTCGCCATGAGTGATCCGGCTTCTACGGCATTAGTTTCCCCG  
TGGTGATAACCCAACTCAGCAACACCAGATCCAATATCTGCCATCTTACGGAATTTCTTA  
CGGTCGCCTTTACTCTTTTGAAGTGAGCACTCCATAACAAAGCGTTGCACTGGTTTAAAGT  
CCATCGACCAATTGAGGAATCCCAGGTTCCCTCGGCAGAATAGATCGCATATTCCTTAGCT  
TCATTATGTACAATGCTTTCAAGGCTGCGGTAAGTAAATGTGTTTGAATTTGACTAATT  
TTATCCTTCTTACCTCATAACGCTTACAAATCACATTCTTTACTTTATCAGATTTATC  
AGCCCAATCCAATAGCCATTTTAAACGGAAGGATTGACACAATAAACGGGGCAGCAATCAA  
AGCAAACATGATACACCTGATAATCAGGAAAACGCAAGTGACAAAACCTAGCGATAGTGAT  
CCCGACAAAACAAAATACCATAGAAAACAGAGTAATGATATAGAAAGGCCAGAATACCCA  
CTCCCGCATCTTAAACGCCTTTGTATTCTCTGAATTGCTTAAAATCTACAAAGAACTCTCG  
GATAGACGCGTACAGGACCGAAAAATCATCTTTCATTGCTCTGAATGAGCAATCTTCTAT  
TTTAGAATGACCTAGCATTATTAACCGCCTTTCATCATTGATACAGGAATTGTTTTCTGA  
TTTGTGTATAATTGGCCTACTTCAATTTTTTCTTGAATCACCACGACGTTACAATATCCA  
CTGTCTTTAAGTTTTCTGATAATGACTCGCTTTTGTTCGTCGGTGATAGGATTGACTGTT  
CTACCAATTCACCGCAAATAATAGCACCATCTTTACAATTGCCAGTAACTTTCATGCTA  
CGACCGTGAACAACAACCACGTCACCGTAAATCACATTTTAGTCGTCGATTTTGGTAAA  
ACCGTGACCGTCATAATGTATTCCCTCTAAGAAAGGCCGCGCAAAGCGGCCTATGTTGAT  
TATTGTTCTACAGTATAACCGTTGTTTTCAAGCCATGCAATAACAATTTTTCGCCAATT  
TCATCGAGCATTTCATCAGCGCAGTATTCTTTAATGAAAGTAGATGGATCATTATTGCTT  
ACTACGTGCTGGATCACAACATGTTTCAGTAATTGCGTCTAGCAGTTCACTATGATCATA  
TCATTAAGGATATCTTCAACACTAACATTATTAACCAAATCAACATCATCCATCGTCACA  
GTAACGCGACCGGACGGACGCAATGAATATTGGCTACTTTCAACTTCAACATGTGCACTT  
TCGCAAGTAACTTTCATATCAATCATAATTAATTCCTCTGTTAGTAATGGCTAAACCCTT  
CGGTCACATCTTCAACCACATAGTAACGATGACAGCGCATTGTTGGCATTTCGCCTAATCTT  
TCGGGATACTTACAACGTGACGCGGATCAACTTTACATTTAATGATTTCGGCCTCGTCCAC  
CGCCATAGTGCGGAATATAGTGTTCGCTGCAACGTGGAGGCCATTAGAGCAAGTGCGAT  
CATCATCTGGGTCCACGTCTTTACGATTCATTTAACCAGTTCGCGCCCTGGGCTATTATCAA  
ACGTATGAGTAAAGAAATCTTTATAATCAACAACAACACGTTTCCATGCATAGAAACAAC  
CATCTTCCCCGATCTCAATGTCGTTGTGCTCTAAGAAGTCAAATAGACGATCTACCGCCC  
TACGGCTAGGGTTTTTCTTGCCTTCTCAAAGAAATTCAGATAGTGCGTATATGGCTTAT  
TCTCTTTAATCGACTCAACAACCTCGACGAGTCAGATTATTATCAAGAACAATATTATGAT  
AATACACAATACCATTTTCGCTACGGAAAGCACCATGATAATATACTTCAACCTCTTTCT  
TAATGTCAATCAGCGTAATAGCTTTGATGAAATCATTATGTTTAAATCGCTTCCAGTGCTT  
CATTAAAGTTAACATGCGACGGATCAGCAGCATAACAATGTCACCACATGTAATAGTAA  
TAACTTAGTTGAGGCTATTGCTACGATTTTTGAGGAAGTAGTCTCGGGCTTTTTTGGCG  
GTTACCGCCTTTTCTTACTGGTTTTTTCGGCGTGCTTTACGTTTTTCTAGTGCCCTTG  
GACCTTCCGCTACAGCGTCTTTCTGAATCAGTAATACACGGGAGGCAGTACGGCGAGATA  
CCCCAAATGCTGCCGCAAGTGCTTCGCGGGTAGTAACTTACCTCCGCCCCACTGTGTAG  
CCAGTTTGATTTGTTTCGCAGAATCCAGGCATTGAACGTTACGGTCAGAGACGGTAATTT  
TTGCTTTAGACATAGTATTCATTCCTCTATTAGTTGGGCGACTATCGCCGCCCGATTAC  
ATCATTATAACCAGAATTATTTTGCTGCTACAACCTTGCGGATTGTGCGGTCTGATACATT  
ATAGATTCGTGCCAGGTCGCCTTTAGTCAAGCCGCGAACGTATTGTTTACGGATGGTTTC  
TTTCTGGATAGCGGTACGTTTAGTCATAATATCACCTC

>NewGenomeName\_180

ACCCCCGCTCCAGGTTTAGCGGCGTCAACGAGTGTCCGTCCCAGCCGTTTATTGAATAGT  
CACGTGTACGATCATGATCTGTGATTCGTGCAGCGAAGCTCACGGAAGATTTTACACCCC  
ACCGTTGGTCCGACAATGCTTATCTCTACTTTTTAGAAAGTAAAGATGGATTCTTTTTA  
TTATGATATTACTTGAAATTTAGATTATCATTGCATCGTCATGAAGCAAAGAAGTTTCTG  
TCTCTATAAGTTCCAGTCCTGTTTTTCGTTGTGCACACAACGCAAAATGGTGAGCAATTGG  
ACTCGATCAGGCAAAAAGGGTAGCAAAAACACCTCGTCGTGGTTACACCTGGCCTTCCAAG  
CCGGCTGTTCCACAACCATAGGCGTCGTTTCATCAGGCAGCCGATTGAAGAAAGTTGGC  
GTGTCCGGTAGAGAAATTAAGCCTGAAGGTGCTGTTGCGCGATACAAAATTCATAAGGTG  
ATGTAGAGTTGCACCATGAGGATACGACCGGGAGAGTTGGTGAATTATCTGATCGCCAAG  
TGGAGTTGACCTGTTGTTACTTGGTCCGACGCTTTCACGGCGCCTGCTCAAATTTGGAAA  
GAGAGTTTTCAAGATACGGCTACTATCATAGTCAAAGTTAAAGCGGAATCTGATTCTCTA

GCTGGATCAGATTGTATTAATCATTCTATAAGTTCATCGGATTTGGAGCTGGCATTAGT  
CATACAAACATTTATACGTTATAACGTATACCAATGAAGCCGTCAAGACTGTATTAGAA  
CATAGAGTGTATCTTGAAGTTTAATGCGACTGTGTAAGACGAACATATGAATAATGAGT  
GAATATTGCGTTTGATCTATTTACTCCGGCAAGCGGCATGTTTTGTAGTTTGATTATCCA  
TAAATACCGTTCATTAATGAAGGGATAATGTCTCTTTTCCCCTTATGTGACGTCATTGGA  
TACCGTGCTGTGCTGGGGCGGGGCTTCGTATT

>NewGenomeName\_181

TACCCGCGAAGCCGCCTGTGCGGTACGGTGGGGGGAGAAACCGGATAAAGCAACCGCATT  
ATGCAGATATCGATTGAATTTGGTTCTGCTGTGTAATAATCTGCACAAGCACACCGGTCAT  
TGTGCATCAATTTTTGACACGGGACGTCAGCACCCGACATGGCAGAGCTGGAATGTTGAA  
AGCTGGATCGGGCATTCCGATGCCAACATGCCAACACGAGTAAACTTGACTACACTGGT  
GGCGGAAGAAAAAGATTAATTACAACACCAGCAGAACCCGTAGACAAATGGGCAAAATCT  
ATCATGAAAGTGATCATAAAAACGCTCACGAAATAGATCATGAAATCTCAGATGAAGTAC  
CCAGCAATGACGCGGGTTCGGGCGATACAAAATGTGCAAAAACCTCTGAAAAAACAGCG  
CATATTCGGCAGAAACGAAACGGATTGGTGGTTCCCGACTTTTGCCACCTTCAAACGCTT  
TATTTTCAGAGAAACAGCGACGCCGTACGCCACCGTGGGTATGCGAAGTATCTTGAGGCCG  
AAAACCTCATGGATGATGCGTCCGACCTGCTGATATTCGTTGAACTGGTGTTCACCGGGG  
CCTGCGCACTTTTCAGTAACTAAGGCGCTTAAAGGGATGTGGGCCGACTTGAAGAGGCAA  
ATGACGTGGAAACCCGTGTCGCTCTTTACGACATAATACACATAGCTGAAAAGGCCCTTG  
ACCGGAATATTGACCGTATCGAGTCAACCGTACGCTCATTGCTGACGCGGGACGTCTTAG  
GTGAGACGCCACCATAACTATGTGCGTACCGGGAAGGAAGCGACGCTGCCAGCGATAAAC  
TCACAGCTGAAACAAATATTCTGACCAACCAGCGTCCGGGCGTTGTTAAGCCTCTCAGGG  
ACATCGTGTATCGCTGGTTGAAATGAGTAATTCGAGGAGACTGGATGACATTCGGGACG  
AACGAACCGCGATGTGATGAGCCGTCAGAAATTACCGAGACTGAACAACGACTGTTTCATC  
ATGACTAAACTGAACAATCCAGGTGGCCGCTCAATCATCTCTACAAGATACAGAAAGAA  
AAAGGTGAACTCGTCACCTTCAGAATGGAGCCCACGCAGCGCCAGTTCGTTCCGGAGCATG  
CACAATAAAGATATGATCCTGAAAGCGCGCCGGCTGGGATTTACCACGGCCATTGATATG  
TATCTTCTTACCAGCCGCTATTCATCCCGCATCTCAAATGCGGGTTCGTCGCGCAGGAT  
AAAAAAGCTGCCATCGAATTTCTCCGCACAAAGATTGCTGTACCGATTGATCATCTCCGT  
GATTGGCTAACATCGTCATTCACCATCGTTGAACGTCACAGCGGTGCCAGCGCTGGCTCT  
AGCCTGTTTGGTCACGGCTCGAGTATCAAGTGGGCCTCCTCATTCCATTTACGTACGGTC  
CCGCGCCTGCATATCGAAAATCAAGGTAAAATTTGCGGGTAATATCCGGCTAAGGCGAAA  
GAACTGGGCATCGGTACTATTAATGCCTGCTCTGCTTAAGGCAACACTGTTGATCGTTCA  
ATAGGTGAAGGCGTGGGTGGTGAATTTTACGAGATGTGTAACCGCGCACAGGAGATCACT  
GCATCAGGCTTATTGTTACCGCCACAGGATTATATATTCCATGTTTACACCTGGTGGCAG  
GATCCTCAATACAGCCCCAGAGTGCCGGATATCGGGCTGAAGCTGTCAGGCGACCAAAGG  
AAGTATTTTCTACGGTAGGGAACGCAATGAACATCACGCCTAGTGACGAACCGAAGCCG  
TGTAATAATCAATAAGGAAACTGAATAACGTGAGGAAAGGCAGCAGGCGTTTCCATCAACG  
GCACGGGACGCGTGTCTGGGCTCCGAACTACGTGTTGTCTGTGCCGAAAGTATATTGCAG  
GTCGAATCAATCTGATCGCCAGCCATGATTGTTTAGGACAATGAAAATGTTACAGGCACG  
AGGACTAAAGCACAGTCTCCACGTGAAGGAAATAAAAACGAGTTGCCGCGGACGCTGATG  
AATGACCTGCTGGTATGGGATCTTCCGGATCCGGAGGAAGCTTATGTTTGTGGCGCTGAT  
ACTGCAGAAGGGCTGGCGCACGGAGACTGCTCATCGCTGTACGTTGTGACACGCAGTAAT  
GACGAGCAGGTTGCTCAGTGGTTCGGGAATGTTCGATGCTGGACTTTTTCTCAACTAATT  
TCTCAGGTCTGTTCGATGTTTATCAAAGCGTCTTTGGGGTCCGAGCGCAATAATCATTGA  
CATGCACTTAGGCTGAAACTCGCCGAGCTCTATCCAACACGTCATATATAACAACGAATAG  
CAACTTGACCAGCCATATGACGACGATACGCCCCGCCCTGGTTGGCTGACAACCCGTCAG  
AGCAAACCTGTTCTGACCGAAGCAATAAACACTCTCCTGAATAATGAAATGTCAGGGATC  
CGCCGGTCAGGCACATTATCGGAAATGAACACCTACGTTTATGACGCGAAAGTCTGCAAG  
ATTGCAGAAGAGGGATTCTTCGATGATCAGCTCATGAGGTTTCATGATCGCCCCGGTGAGG  
CGCGCCAGAGTGCCGGCGGGGGTATAACCCACAACGGATACACGCAGAACCACACACTGG  
ATAGCTCACTGATGTAAAATAAACTAACCCCTGGCGACGAAAACGACAATGGAGCCA  
CGCCGCGATTTTCTCAGCGCCACTTTCAGGCGCTTTGTTCTGCCATTGACAGCCAGCCTA  
AATGGCGTGATGCCGCAACAAGGTCTGTGCGTATTTTCGATGGCAATCAGCAGCCACCGG  
AAGTCCTTCAGGTGTTGAAAGATCGCGGTCCGGCCGATGACTATACATAACCTCATCCCGC  
TTACCGTCGATGGCGTTCTGGGAATGGAGGCCATTACACGACTGATCTGTACCTTATGA  
AAAACGAGCCAGACGATGACAATGAGAAATTGGCTGAGCCTATGAATGCTGAATTTGCCG

AGGCACGCCGCTTGGCCATATGCATAAAGTCCGCTCGCATGCCTATGCGGGACTGATCA  
TGGCGGACCTCAGTTGTATGGAGGTCCGACGAAACAGAGACCCGATAGAGCCTGAATTTA  
AGGTGCTTACTCTCAGCCGGAATGAGCTTTTCTGCGACGGGCTGAGCATGGAGGCTGATT  
TAAGTCACTGCCGATGGCTGATGCGTCGCGTCTGGGTGAATACCGTTGAGGCAGAAGCCA  
CATTCTTGGAAAGGGCTCAGGTTAGCGATTAAGCCATTGATGAACGCCGTGGTATTGTCG  
ATACCACGGTTACTGAAGGCCAGCCCAGGCCGTTTATGAGTGCATGACACGAGTATCAGT  
CATGGGGTCCAAAGCCGAACAATTGTCCTCAGAGTGAACGCCGACGTGTGCAGCTTGATG  
TGCTTTATTACCGTACATTCGAGCGTCTTCCGGTGATTGAACTCAGTAAGGGACGAGTGG  
TGGCCTTTGCTAAAGCAAATCTGACGCAGGCGGGAGCAGTGGAGTCCGGGTAGGTTGAGG  
TGAAAGCAGGGCGGGAAAGGCCGTAGCCGTGTAGCGTGGGTTATCGGCCACACTTTATTG  
TGGATCGCCTCTCTCGTGCTCCGCATGCGATGTTTCCGCTGTTTCTTTTCGGGGGATAACC  
GAAAGGCTAACACCGGGGCGTCAGACGGGCTAATTTCTGGCGCCAGTGCGGCACAGGACG  
AGGTGAAATTTCTGTCGTATCCAGTTGACCCGGTTGCTGCAGGCCAAACGCGAGATTATGG  
AACAGGATGCCACCAAGTTGTCAAGTCAAACACCCAATTCAGCAGATCGAACGTCCGGATG  
GCACTATCAAACCTGAAGCCGGTCCGAATAAATCACAAAAGTGTGCGCAGATGTTTTTCGGC  
TTGAGCAGGATTATCAGGTCGACGACCAGCAGTTTCAGGTCATGGATGAATCGTAAAAAC  
TTATTCAGGATAACCGTGGGAGTTTATCCCGCCTTTCTTGGGCCGGATTCATGTGCGACGT  
CAGGCATTGCTATCAGTAAACTGGTTTCGCATGGGGCAACAACCCTTGCGCAAATCAACG  
ACAACCTACCAGTTTCCCAGGCAGCAGGTGGGACGACAGTTGCTACCTTATCTTCTCCATG  
ACCTCCAAAATCTCCGTAATTATGGAGTGGTGATTACTCGCGATGATGGCCTGCGTGGCC  
AGACCATCCTCCCTAATGCTGTAGGTAATAATGGTGAACCTGACCAGTGATATTTCAAGGT  
TATATAAACATATTGCCCTGGCGTGTGTTTCATCTGACACCAGCTTTTAAGGCACAGCGTG  
CACCGCGGATGTCTTAGGTTATTCAGGGGTAGAAGCCGTAGGTGCAGGCTGCTGTGCTGG  
ACCTGTGGGTTAATCTTGTGGATGTGCCACAGAAACAGGAGGTTTTTTCGCGTATTTCGTT  
CCGCGCTGGGGACACCAAAAATCACCAGAGGAAATGACGCCGGAAGAACAGGCAGTAGCGG  
AGCCACAACAGAACTTCAGCAACAACAGTCCGAACTGCAGATACGCGAGATGGTTGGCA  
TAGTGGCTAACACAGGTAGCCGACGCCGCCAGGCCCCCGTCCGCTGCACACCGCGCCAATG  
CCAGTGTCCAGCGGGAAGGCGCACTGAAACAAGGGCACCGTTATGTGGGTGCGCTTCAGT  
AGGCACATACGGCAGAAATTGTTAATGGCGTACAGCATATGGAACAGGAGCAGTACGACC  
TTCAGTAACAGATGCTGTATACGTTACAACAGCGGGCGATCGAAATGTGCTCCGTAAT  
TCTGGCCTCAATTGAACCCCGTCATAGTACGGGGTTTTTTGATTTCAGGAGGTAAGCGTTC  
CGGGAGCGGTGCGCTGCTTCGCGGGGGCGCCGATAAGCCTTATGTACTCAATCATCCCGA  
TCTGTCCGATACTCGGACCATGGGGAGTTAGTTATGGATTTTTTGACCTACGGGGCAAGAA  
AGCCCGGAACAACCTAGAAAAACTGCTGGCAGGATTTGGGGATGTCGATATAGGCACTCCC  
GCTCAGTAAGTCGTCACGGAAGCTACCACTGAAAAACATGCGGATGAAGTACCAGAGACT  
CAGTCGGGCGATAACAATGTGGCACCCGACGCCCGATGCCACTGTGGAGCACACGCAGGGC  
GTGAAGGTTCCGGAAGCCAAGGGGGGGGTGACCCGCCACGGGAAACACGGCATTACCTAT  
GACGTCCTAGAGGGCGGAACCTTCCGGTATTCTACGGGCCGTACACAAAGCCGCACTTCTC  
GGTGGGGAGACAGCTGGAGATAAACGCAGGGCGGAACTGCTTACGTCTCAGATCCCCCAT  
GCCGGTATGAGTCCCACACCGGTACCGCAGAACGAAAAAATTTCTGATTAGCAGATTGCC  
CGTCTCAGGGTGACGTATCGGGAAATTTGTGACGCGATAGCTTCTCTCATCCATAATAAT  
AGCTATATCCAGTCCCGTGTTACCAATCAGCACCGTATGCAAAGGTATTGGTGGTGAG  
GATTTGTCAGCCGTTATTAATGCGGTGAATGCCGTGCGCGTGCTGAAAACGTGCGCAGGAG  
GCCGATCCATATAGCTTCTCGGTTGCTGTATCCATCGACGGGAAGCTCCAGAATGACCAC  
GCATGGAAAGACAATACTACTGAACGTGTGCTGAAGCGACCCCTCGTACCCATTTT  
GCTGTCAGAGAAGTCAGTGAGTCGTCGGCTGACAACAAGGAAAACAACACGGATATCCGG  
TAAACGGCGGAAGAGAATGTGAAGACCGCTGAAGAGCTGTAGCCAGTACTAGCTTCCCCC  
TCAGATTGAGGCGCCACGGCTTCCCAGGAAACCGGTATTAATTTTGACTGGTTACTTGGC  
GGATGGCATTTCAGAGGCAAAGGCGATTATGCGCGGTGACACGAATGCTGAGATAGACGCG  
CTTCAGAAGAAGCTTGGGTAACCTTGTGAAGAAGAAGTGAATAATGACGACTGTAACAT  
CAGCCCAGTCAATAAGCAGCCTCAGGTAGAGCATCTTACCGCTGGCAACCGCAACCACT  
CGATCGTAAATATTGTCACTTAACAGCAGGAAGCGCCAGACTCGGTCTAGTCGGACAAGA  
AAAGGACTAAGCAGTCCGGCGCGAGCGCTCCGGTGGTCCGTGTCACAACTTTAACAAGC  
AGACCGGTGATGAAGTGACCATCAGCATCAAGCACAATCTCTCTAAACGTTTCGACGATGG  
GAGATGAGCGTGTGGAAGGTGGTGGTGGTGGATCACAGGGATGCTGACTAGTCCCTGAAAA  
TCATTCACGGACGTCACCTGGTGTATGCAAACGGTCAATGAGTCAAGCAGCGCACGAAGG  
TTACCTGGCATCCTCAGCCAGAACGTTTCTGGGGATGTACTAAAATGACCTGCAAGACC

ATATTGCCATAGTGGCTCTTGCTGTAGCTCGTGCTGATTATGAAGCAGGGTCAGTAGTCT  
GCCTACAGCGGAGCACGCGGAATTCAATAAAAGCCTGACCAACGATGTACTGCCACCGAC  
ACATCACCTCACTCTTTTGGCGGTGATGCAACAAGCTTTTAGCATATGGAAGCGGCAGA  
TATTTTTTCTTTTGGCCAGGTTGACAATGTCATGCTGATCCTTGACGAAATGCAGCATGC  
GTGATTGCCGGTTCGTTTGTCCGGTGATGAACTTTACGGAGAAGACCCATATTACGTCCT  
GTCCGACACTCCGTGTCAGGGGAACGTGTGGTACACCTCGAGGTCGGGTAAGGACTGGGA  
CCGGGTGACGGTTCGTGCCGTGAAGCGTGCAAAAGGTGTTAACCATCCGCTGTTCTAAGG  
TGAATGTGCTATGAGGTGCAATATCCTGTATCGTAAGCGAGCAGGAATGCGGAACCGTTT  
CTTTCAGGGGTCAAAGGTTCTGGTATCAAAGAATAACCTGACGGCAACCGCGGAAGAGGT  
CGCTGTTGCAACCAATCTTGACGGCCCCATGCTACCGGGGGCTCACGCGCTGACCACTGC  
TTACGATCGGAAGGCAGGCGGTCACTTCCGCATGGTTGAGAAGAAAACGGATACGGATAT  
CCGTAATAAGATAGCAATCATCTTGATCAAGGGTCTTACACAAATCCGTTTGCACGATCA  
GAGCGTTAAGATGCCGGGTCCCGGCGTGATTTCCGTTGATGCAGCCGTGAAGCTCTGATT  
ATTTCCTTTACCTATGCCGGGCTTTCGAGCGGCTTTTTCTGGAGCCAGTTATTGTGGCAA  
AGACTATCCTTGCCCCGTCAGTGTACGGGCGTATACGTCTACGCACGGTAATGATT  
AGGTGTCAGCAGGCGTATTTACGGTGAATGCTGCGGAAGCGCAAAGTGTATTTCATCCTG  
TCTCACTGCCAGTGGGCATCCGTATGAACTCGCTCCAACCTGATCTCGACGGGTGGTCTGT  
CTCCTGCAACCCTCAGCATTCCGGTCCGGTGAGTATGCTCTCATCGACAACAGCGATGCTC  
TATCTGCAAAATTTGCCAGATATGTGCCGGTGGAGCCGGACACCACACTGCGTGATGGGG  
AGCTGGTTATTCTCACGCTTAAGACTGCCGCTTCAACTGGCATCCTGAATGTCGTGCTGC  
GTGAAACCGTGGTGGGAGACTAATTAACCGTCCGGTCCGAGTCATGCGAGATTTTTGT  
CCGGGGAGTCATGTGAGTAAAAAATCACCCGATGTCTATATCGGCCCAGAACCCGTGACA  
GAGCACACCATTACCCGTTGTCGCACGCTGTTTCGCACGTTTTTGAGCGGCTGCATCATGAC  
AGCGCGACAGCTTCGCAACAGCTGGGGTTTCTGATGTCTGGTTGCCTCGAGAAGAGTTT  
GGTGATACTCTGAATAAGCCAGAAGAGAATGATCATTTTTCGGCAGGCTCAGCAGGCGCAG  
GAAAGAGTGATGGCTGCGCTGGCAGACTCGCATAACAGTTTTTGTGTTTCTGTTAACGGC  
CAGGAGGTGAATTCAATTGAGCTCACCTCAGCACTGCTGGCGACGCAGTGTGACGCATAA  
CAGCTGGATATTCACAAAGGCCCGGAAGGGACCGCTGAGGCATTTTCGTATCCGGGTGCGT  
TAGGCATTACGCCGTCGTGATGCGGAGACTGATCAGCAAGGCGGAACAAAGTGACTTTTT  
ACCGTATGGCCGTCGCAATATGATCGGTCCATTGTCCATTATGGAGACGGATCCTCTGTA  
TCTGATGGGCTTGCCATTACGCCGCCAGTCGTTAGTGTGCCGTCGGGTGATTACTCTTGT  
ACCAGTAGCGGAAAAAGAACTCGTGCTTACGTCACACAAACACGCTGACGAGTGC GTTCA  
TATCGTCCGTATCTCGGGAGATGATCATGAGCTTTTTGTTGGTTCGGGATGTCTCTGTCAG  
CACCGGACGCTCCCCGCGATTTCCCTGTTCTCCCGAGGAGGTGATCGTGCTTCATGGTGT  
GGCTCCTAAAGCCGGACGCAGCCAGATACCGGATGAACTCCTCACATGGCCACAAGAAGT  
GGCTGCGGGGGCGCTTGCGCGTGTGTTTCATGCACTCTGTTGTTACATGGTACATCCTTT  
ATGCGCAGAGCGTTTTTCTGTGCAGTTTTTCAGAGGGGTTCCGTCGGGCATAGCGACATAC  
AAGGGCGCCAAGCCCGTAGTCATCATAACCACAACCCTGTACTTAGGGAGAGGTTTTTCTG  
ATGACGGTGGTGACAGAAAGCATCGGACGTGTGCATACACAACCTGGTTGACCCATTGTTA  
GTTTACTGGCCCCTGCACGAAATGTGCGATTAATAACAATGATGCTGTGAAGGCAGGGATT  
CTGGCGAGACTGGATGCTCGCGGAAGACTGGAAAGAATAAGTTGTATTCCCGGCGACCGT  
CTGGTTTTGCCAATGGTGTATTACACCGTCTCGCCGGGATATGCCTAAGTAACGGTAGT  
TCAGTTAGTCCATTATCCCGGGATGTGCTGGATGCCTAGTATCCTGAGTGGCCACAATG  
GATGGTATTCCCTGAATGTGTAATCAGCAACCACTTGTCCCCGCGCATATTCTGGCTGTTT  
CCTGCGCCTGACAAAAAATAAGTACTGATGAAGTGGGGAGCCGGACACAGGAGGCCCTG  
TATGTTCTGACGCAGGATGATGTCACGCCAGTACCCTGGAAGAGGCTTATGTTGACCCA  
CTGGTGGAGCGGAAGTTGTTTGTGCTTACGTTATGATGGGGCCGGTGGCGCAGATTAG  
GTGGGGGCTGCGCAGCATTATGAGAGTTTTTTTTGAGCAATTTGGGATCCAGCTTGTGGCA  
GACAGTGCTTTGTATGCCCGTAAAAAAGTGTTTAACGGAGATTGAGAGTGAGTGTGATG  
TTTCGGAGACGCTGAAATGTCTGCTGGTGCGGCCATATCAGGAGCAAATATTACCCCGA  
CGGTGCTGACAGTTTTACAGGAAGCGCTCAGCGGCACCAGTGCGTCCGGCAGCGCCTCCTG  
AAGGGCGATACTACGGAATGTCGATCGATCCGGATGAGTATGCGGGTTCGGGGACGGGGC  
AAGGGCAGACTGCTGTCTACGGGCGTGTGCGTATTGATGAATCCGAAAGATCCGGTGACGC  
TCAATATGCCGGTGTGACGAAGTCTTGTAGCGGTAAGCATAACCCGGAGAAGTGGTGACAG  
ATTTCCGGCAGATACAGAATAATGTGGCTGATGACCTTGCGACTATTTGTGCGCTGAGTG  
AAGACACGGGGACGAAATACATAGAGGACACACAGGCACAACGAAGTGAAGCAGCCAGCG  
CGAAGTGTGCATGTGACAGTGCAAGAGGGCACCAAGCAGGGCGGCAGAAGCAGGACTAA



AAACTACTGATGCCACTGAGGCCCGATCCGGTGAATCACACCACCGGGGAATGCAGAGG  
AAAGCTCGACCCGTGCCAGATACTCTGAAAAAGCTGCCGCAGCTGATGCAGAGGAACCCA  
GACAGCTTGCTGAAAAGGCCAGCCTGGCGCAGGAGTGCGCCGGAGAGATCCCTAAGCGGG  
CAGAGCTTGGCACTGTCAGTGCTGAAGAGGCCAGACGTAAGCTGAGAATGCCCGCGGGC  
CACGGGGGCTCAGGGAGAACTGGTCCGAAGAGGGATTTCCGGTCCTAAAGGCGTAAACG  
GTCCAGTGGTCCCTCAAGGGCCCGCAGCGCCGAAAGGAGAGCGTGGTGACGTTGGTGCTC  
AGGGGGCTGTAGGGCCTGGTGGTCCGAGGGGTGAGAACGGCGAACATGGGGGGTGAGGAC  
CGCAGGGAATCTCTGGCCTGAACGGGCATCCCAGGAGAGCGGGGGCCTAAAGGAGACTAGG  
GGGATATGGGGCCAAATGGCGAGAGCGGGGATCGGGGAGCTCCTGTAGGCCCGCAAGCTC  
CTAAAGGGGAACGAGGAGACGCCGGACCACAGGGACCGATCGAAGCACGAGGTCTGCTTG  
GGGAGAGTGACCTCCGAGGTGAACCTGGTCTTACTGGTCCGAGAGGGGAACGCGGAGAGA  
CCGGACCTCAGGGAACCTCGTGGAGAGCCATGTCCGGCAGGCAGCGCTGCATATGTGGGAG  
ATGCAACGACCCGCACAGAACGGAGTTGTGGAGTTAAGCAGCGCAACGGTCAGTGAGGATG  
AAACGAAGGCTGCCACCCCGAAATCGGTGCTAGCGGCAATGTATGGCTCAAATTAAGCGA  
AAAAAAAGGCAGAAAGTTGCTGCAGCAGAAGGTGGTGTTCCTCGGTCCGAAAGGAAATAAAG  
GGGCCACGGGGCCAGGAGGTCTGGCTGGGTAGGAGGGTGATAAGGGAGAGCGCGGTGCCA  
CCGGTCTGTCTGGGGCCCGCCGGCAAACCTGGGACCGGCAGATGTTACTGGTCCGGCAAGCC  
CGCAGGGGCTGCTTCGTGACAGGGGAGAGCGGGGAGAGACCGGTCTGACGGGAAATGCCG  
GTCCACAGGATCAAAAAGGGGATACCGGTGCGGCAGCCCCGGCAGGCCACATGTACCAA  
AAAGAGAAACAGGTGTGGCAGCCCCGTTCCGGGCGACCTGACCTCAGGGGCCGAAGGGTG  
ACCCGGAGAATACCCAAAGACGGTTCGGTCTGGGGCCGGGAAACACTATTGAGAAAAACA  
GCCATGGCTGGTTCCTCGACTACTGATAGCGCACTCATCACGGGAGTGGCCTATATTTACC  
CCGAAGAAGCCACCCGGGTTCCAGGCTTTTTTCTAGCATTGCAAGCCAGGTTTCGTGACG  
GGCCGCGGCAGGATGTCAAGGGGCTAGATGAAGAGGGCAGAGATACAGGCAGAACAGGAG  
AATGACATGAACTTTTAGAGAAAGCTTATGCAGAGTCTGTCCGGTTGCGGATAGGAGGAT  
CACTGTGAGAACAAGAAGTCGCTGACAGCATAACTGCGATTGAGACCTGGAGAGACTATG  
GCGTCAGATGAGAAGGGCATAATTCCGGAGCAGGACAGAATAATCACACAGGTAGCGAAA  
CCAAGTTCTGATATAAATCCGATACAGTGTGTGGGGAGACCGTTGCGAATCTTGCGTGCT  
CACGGGACGTGGGAAAATATTGGCGAGATGAAAAAGCCGACAGCTTCAGAAAAAAGGTGG  
CCCTGCTCGGTTTTTTGTTGTCATGTATAGGGGGGGGTTACTAGAGAGTGAAGTAATAAA  
TATGTTAATAGGTTGGTGTGTAGGATGCCGTCTCATTCTGGTTCAGGAGTTTTTTATGCC  
GGGAAATCGCAGGACGATTGTGTATAGTATAGAATCCTGGTTAATATTCTGTGATAGTCA  
CTTGGGCCATTAATGCGCAGTATGTATCATGGACGCCGTTTTTATTAGCTGAGTCTGGA  
AACATTGAAAGTGGAACCTTGTGTGGCCTTGCAGCTGAATTGGGAATTCAAACGAAGACA  
GCGAATAGCTTTCTATATACGGGAAAGGCTAAAAATGGACGGTATGGTGTGAGTGTGTAA  
CTGCTCGTGTGTGCGGAGTGATGCTTCACGTGCGGACAGCGGCAGAGATTCTGCTATGCA  
AAGTTGGGAGGAATATGCGGCCCCAAACCTAAAGAAAATATCAATGATCAATGTAGTTGT  
TTAGGCAGCATCAGAGTTGCATGCAAAGCATTTTGTACAGTGATGCCGATCGCGATTTT  
AGCGAAGTCCATCATATATCCTCAGATTTATTAGCCTGAAGCAGTCGAAGGACTTTCTAT  
GCCCTAGATCGATATACCAAGATGCGTGTGATGATGCCGCGGGTTGTGACCTCCATGCT  
GTCCGAGCATTACGCTGTACTGGCGGAAGACAGCCATTTCCGGTATGGTGGTATTACACT  
AGAATGTCGGATATTAGGGGTAGAGAAAACATAACAAATTAAGCCCATAACCATTTTTCA  
GTAGCATGTCACCTTCTGGTGTGCATGGCCGGAGGAGGTGGATAAGATCCGCAGAACGAT  
CGCTCAGGACACGCACGAGGGATTTTACTACATTGCCGGGCGTATTCCTAAAGTGACTGA  
TGCGACTATTGCCACAAAAGGAGAGGTGAATTACCCGACATCATAGTATCGTATGGGGAT  
CCCGGCTCCTACAACACCTCCTGTATGTACTGGGCAGCCGGGCGTCGATGTTCCGACGA  
TAGCCCGGAAGATCATGAAGCCCGGTGTTATACGGAAGCCCTTGACCCAATTTATGGAGA  
CGAAGGTGCGCCAGGTCTGGCGTCTGTAGAGGGCGACACTCCGTACTCGTGGTACTGCGGT  
ACACATGACCCTGGCTCCGGTGCCAGCGCAGAATTCAAGTATCAAACGCCGCTGGATTTA  
TCGCTCTGCATCAGGTGGGGGCGAGGCGGGATTTTTACTTGTGGCTGAGTTGTATGCATC  
CGTGTTCAGTTACACTGACAAGGTACCGGCGATAAACCTCGCACCTTCACTGGCGACACG  
GGATCACCTGCTGCCACCACAGAATATGACAGGCCTTTGCTTGATCGCATAACGGTATAGC  
CGCCGGGTGTGCCGGTAATGAAGCGATGTTTTCCGGAAGCGTATTTGCCGGTTCATCGTC  
GGAAGTGAATCGAGACACAACCACAGAAGATATTGTAGCTATCTGTCAGCTTGGAACGTC  
ACTGGTGTATGGTTACAAGTGGGGAGGCCTATTAGTTCAGTGAGGTATCACTGTCCACAAT  
TTCTGGTTCCAAAAGCCCTTCATTGCAGGCGTGTGTGAGCAGGCGGAGTATGGTCCGAT  
GGCCGGGTTTTCTGCTTTACGAAGGAAGATCTGGCCTGGTGTCTGTTGGTACAGACGGGAA

AGTCACGCTGGCGAAGGAACAGATTGTTTTACCGGAATACTGGCAGAGACAGTTTAATCC  
TGCCTCCATTGTGGGTTATCGCCGGCGTGGTGATTACGTTGCCCGTTACAAGAAACCGGA  
TGTTAAGCAGGATGTGGTTGTAATCCGTCCGGTGAACATGGCTATCCGTTACCACAGTAC  
ACCGTTTGGGTGCGCAGGACTTGATCTCTCGAAAGATATGATGCGCGTGGTGACAGGAGA  
CAAAAAGTCAGTGCTTGCCGGGGAGGCTCTGCCCTCCAGGATGAGGTGGGATCTACAAAT  
TTATTTATACCCTGAAAGAGTCTCTTCTTCTATATCAGGGTGACATCTCGAGCTCCTGA  
GCGGCTCTTGATCACCATTATGGCTGATGAGGTTCCCTGTGATTCATTTTGCGCCGGGTGC  
GTTTAAGGGAAGTGTGGTGAGACGTCCGGCAGTAATCGGGCAAACTGGCAGGTGATAGC  
AGCCGGATTCCGGCAGGTGCAAGAAATAACCCTGACTACATAAATCTCGAAGATGCCGCT  
ATGTCCAGATAACCGTGGCCTGCCGGGAAGGATTTATCCACTGTTGTGGAGAATATGGAA  
TTTGGCACCCGGGCAGCGCGGTGAAGGACGTCATGCATTTGTGACCCGTGAGGAACTGATT  
GGTCTTAAACGCGCCCTGCGACGAACATCGGGCGGTGGCTCATATGCACTGAATCCGCGT  
GTTAAGACTGACAGTGCTTTAATGACTGTTGATTTTAGAACATAACCGCTGAATTATCAC  
CCGACCGGTAGACTTGCCTCGGCTCTTCTTGAATAGGACATGCCTAATTAGCCCGGACAT  
TCACTGACTGAAAATTAGCGGTGTACGGAGCATGTCCTTCCTGATGCAGTGCTAGTTGCC  
ACGCCGCCGGGGCACGTCTACGGCGATCCGGTTGTCCCTGGCTGGTCGGGATTTTACTAG  
ATACGTTCTGGTAACGCGGCAGGACTGAAAGGTCCATGGAATGCAGAAAAAGGCATTCCC  
GCACAACCACAGATCGGCGTGAAGGCGATTAGTAGCCAGATCCGAGATGAGGCTGCAGAG  
TCACCGGTTGGGTCCGAGCTGCGTAAAGAAATAAAAAATGCGCAGGTGCAGGAGGTAAG  
GATGCTGCAATTAAGACAACCGAACTTGGAGGGACTCTAAGGCAAGAAACGACAATAACG  
ATTGGTGGTATTGAAACGCGCATTAGCACACCCGGATTCCACAACGAGTGGATCACGTAAT  
GAGGTCCACAAGCGCACCACTAAATTGGATAAAGAACGCGATAAAGCTTTTCTCGCAATG  
TGGTCAGAAAAAGCTCGAGTTGATGGTATCACGACGGGAATCGGGATTGTGCGCCGAAAA  
GACAGCGAAGCCCGACCCGTAAGTAACGTTACCCTTTGTGCGTCGCCGTTGTATGTCCTT  
GATGCGAATAATCCGGTTAACAGAGCCTATCTGTGTGCGGTATCAAGTGGCAAGGTTGTG  
ACCCGAAAGCGATGATCTATGAGGCGCTGATTGAAACGCTGGTGTGCGGGAAGGTTGTG  
GCCTATCAGGTTAAAGCCGTTTTAAGTATCACTCAACCCGTTACCCGGAGTGCCGTTATA  
CAGGAGGGGAACTTTCATGTTGATTCTCACGGTAACCTGAAGGTTATAGGCCTTTTATGT  
ATTACGTCACAAGGGCACCTAACCATTGTTACTCTAATCTGAATGTAGGACTGGTGATC  
CGAATGATAAAATTGAGCTGTATGACCAGTAGGGACGACTTGCTGTACGAATAGTCAGA  
CTAAGCTGATCAGGAGGTGAGTATTGGAATACCGTTTAGCCATTTATAACAGAAATAATG  
TTAATGTCACGGGCGTGCTGACTCCAGTAATTTTCTCGACAGATTTAAAGCGGAGGCTG  
TCTCAAAGCCGTACTCTAATAAACCTGACGGGAACTGAGTGCTGGCTGTATGTTGTGCAT  
TTCCCTGGTTTGATTTATTTGCGGGTTCGGAAAGTCCGAGGATGACCATTAATCACAATA  
CGGTGACGTCGTCGAATCTTGAGCAAGGTTTAGGATCTTACATTTATACATTTTGGGGAT  
AAGTGTTCTTTACGTTTTGAGGATTATGAAGGCGGGTGGCAGCGTATGGTTTAGTCCAGG  
TTTTGCGCCGACGTGTCTGATCAAAAAAGGCACCGTGCGGCCGACTGAAAAGTGTTTCTT  
GAAAACATAAATCACGTCAACCAAAAGACGGTCTACTTTATCAAAAACAGAGAAGAAGGC  
GGAAGTCATGTACAAATATGGACAGAAGGAAGGGCATCATGCACTGAGGTTTCAGGTAAT  
TGCCAGGGCGTCGACCCCTCGTTTTACGACCGCTTATGTTTTCGCGTATATGTTTACTCC  
ACTTCTGAGTATGGGATCGCCATGTAGAACCAGGTCCGTAAGATGATTTATCATGGCGA  
TAGGATGCTGCTTGACGCGAAGTTAATACCCGTTGGGATCAGTTTTGAAAAGGACATTGG  
ATATCACTACGCACTCATGCCTGCACAAATCGGGTATTCTAACTGGAGAAGAACCCTTA  
TGATCGACAGAATAATATGTCATCATCTGGTGCTACAAGAAATAAATGATATTCCTATGA  
GCAATCTTCCGGTGGTGCAACAAGGGATATTCGACAGCCGTATATAGATAAAGTCCTGGT  
TATTA AACGTCAGTATATGATTAGTTGAAGCGAGTGTTGCATATTCATTGAAAACGTCT  
ATACAGATGTATTAATAAAAAGTTTAGCGTGTTATCTGAATACACGATATCGAGTATGAA  
GAGTATAGCAATACTGGTTGTGTCGGCAATCTCCGGGATTGCCTGTGTAAATTTACCTGC  
AAATCCAGCAGAAGGAGAGCATAACAATTTCTCTGGGCTAAGCGCACTTTCAGTGTCCGGG  
ACTGGGGGATTTGGTTCGAGGATTCGACCGGTCATAAGAGGGAGACTTTGTGTCATCTCGG  
CTACAGAACTAGTGTTTCATCATTCCGGCGAATATACAGATCGTCATGTCAGTAGATATCA  
AGGCCAGGGTATAAATCCTCAGGGCATTGATCTCAGGTCTAGCTACGAGATAACGGATGA  
TTTTGGCGTTATCTGCTCTTTTACATAGACGCGTTCTGTACGAACTCACAGACATTTAT  
TGATGTGCAGTCAGTCGATCAATCCAGGCACATTAAGAAAACGGCAGCTTCTGACAGCAC  
GGATATCAGGGCGAAGTACTGGTGTCTGTTAGCGGGGACTACATGCCGTGTTAAGCAGTT  
CATGAGTTTAAATGCGATGGCAAGGATGGGCGTTGCTAAAGTTTGGGCTTACCTGAAAAT  
TAAGTACAAAATTAACCGTAGTGGCGTATTTTCTGAAAGCAACAGGACGAAAAAAGCTC

CCTTGC GTGTGCTGCATATGCGCAGTTTAACTTGAATGAGAGTGT CACACTGGATGTGGC  
TACTAAGGCTCCGGCTCTAGAGACTGGCGCACGCATGGGGTTACCGAGGGCATTTCGGCT  
GAGCTTCTGACCAGTATGCGGTAACCGGCTACTCCCCGCTCTGAGGGCGGGGTTTTTATT  
GCCCCCGCAGGGAAACAACCGTAAATTATGTGTGGGGCCCTTTCGGCTGTTGGCTGGAGG  
GTGAACCTGATGGCCTGATGTGAAAGGGCCCCGATACGAGTTAACGTTGACCCGAGGCC  
CAAGCCATAATAACTTAACCAAGTAGATTGTTAGCGCCTCTCTGTAAGAGGAGTCAAGCG  
CTATGTTGCAAAAAGCGATTATGACCGTCACAATTTGCATGACGGTTATCTTCACCATCT  
GGATGTTGCACGGTGCACAGTGTGAGTTCGGCTGAATCCGACGGGAGCGGGGATTGCGG  
GGTTCTTACAGAGTAAGCAGTAGGAACAGTGTGGCGGAGAACAGAGTCCCCGTCAACTGG  
TTGCTGAGGGACAGCCGATATGCCACCCGTTTCCATTGAGAGCACGAACGATAAAAATTCT  
CTGGTATAGCAATCGTGTTGTAAGGAATTCCCGCAACTATGAATATATGAAAGAAGTTCA  
TGACGCCGACCTTAAAAAGCAGGCGGTGTGTTTTGAGTTACCTGATGGCTCTTCGGTGCT  
TCGTTCTGTACGCAGTGTGGTCGTATGCCTTCTGTTCCGGGGTTGTTCCGGCGTGTGTT  
GGGGAGAAATAGCGTTAGTCGTTACCTGCGGGAGGTGAAGACATTATCCCATCTGGCTGA  
CGTACACTGGGATGAGTTCATACGGCAAGGGGAGGTTTTATCCGGCTGGGAAAACGAGT  
GGGCTTTGAGCGAATGCCAGATGAAGAAGATGGTTCTATGGTATTCGGGATAGCGGTCTG  
ACTGCTAAAGCTTTCTTCATTGTGCTAAATCCAACATTGTAATTCACATTCTGACCCTGC  
TCGGGCAGGGTTTTTTGATATCCAGCGGGCCATGATGGGTGGAAGTCAAGGCGGTGGTGA  
TACTTATGTA AAAATCAACAGCAGCGCAAATAACACAGGAAGAAATAGACTCGATAGGGTG  
GCAGGATTACAAGAATATCTCCGCCCGCCTGCGGATAACTTTATGGGAAAAGTGGATGA  
CCTGAAATGAGTGCAGCAGTACGAGAATATCGCTGCCACCCCAAACTGGGGTATTAGAA  
CCAGTTTTTACAGGCACGGCAGGTTCTTGCAGTAACCTTCCTCAGTCGGGGCGTTGACCC  
ATCGAGTGGACGTTTTTAAGGCGGTAATCCATGCGCACAGAGTGACCGGGCAACCGGGCA  
GATTGACACACCCACACGGGGGCGAGATATCTCAGGCAGATAAGTATGTTGCCCGGCTACG  
GGATGTGGCTGCTCTCCGTGCTGGTCAGAAGGCGGGTGCGTTACAGAGTTCTACCTCTCT  
GACAGACAGCAGTCTGGCAAAGCTTAATGGGACGCACTGTGACGTTTACGGAACACCA  
GGCGCGCGCCTCTCTCGTTGGCGCGGAATGGGTGCGGCAGGTCCCTATGCGATGCAAGA  
GGCTGGCGGACGGGGAGGAACCGGCGGTCTCAAACACCCGGCACAGGGCAAATGCCAT  
TCATCATCAGGCTCAGACTTGGAGAGTGTGATTATGGCGTATGGCAAATACGCAACTCTC  
TCATGGGCAGGATATTCAGGAGCATCCCGCCCCAGGGTGACTTGCAGACGTCAGCAATG  
CTGCCACCCCAACAATACGACGACTGGGGAATCAGATATTTGCCTCGTTGGCAAGGCTG  
GCTGATCTTGTGGAGA ACTACATCCTGATGAATGGACAGCTTGCACGGGTGCGAGGACTT  
GCCACTTCCGGTCTCCGTAAAGCTCAGCTGGCGCAGTCTAACCAGATGATGAGAAATGGG  
GTAAACCGCCCCGGATGATACCGACTGTAGTACGCTGGGGTTACGTGATGCACTGGCAATT  
GCTGGCGCGAAGCATGCTCTACGATAAGCTGAACAGGATCGACCGATGACTATTCTGACC  
GGGGCCTCTGCCAGGGAAGTCAGAAAGTGAGTGTGCGGGCCGACTGGTGGAAGCATAA  
GACGGAGATATGGGATACGCTTAAGTGGATATTGCAAATGTGTCCCGGCGCGAGGCATTA  
CAGGGAATAAGTGACGAACGCATACGACGTGATGAAATTGAGGCTGCGTGCAAAAAGATG  
GCGACGCAAAAACAACGCGCAGAACAAGGAGAATATCGGTACTGGCTTTAGTACGGGAGCG  
GCTATTGGCGCATCCATCGGTAGGCTGTTGGTGCTGCTCTTGGAACAGTGATTGGCGGC  
GTTGCTGGTTCTTGTTTTTAAGGAGTGGTGAACGAGCGAATTAGAACAGGGGTTACTTGC  
CGGATTCAGCAGCGTCGACCCGGCAAGGACCCTTCGTAAGGAGCTTGGTTTGCCTGCAGC  
ACAGTTCGCACGACTTCAGAAAAATAACGAGCGCGATTTTGCCTTTACGTAGTCTCGGTT  
TGAAGATAATAAAGACGGTCATCAGCGGA ACTTTAATTCCAGAGCCAAAGATGACGACCG  
TAATCATGCACTGCAGGAGATGGAGTTTAAACGCTATCCAGAATTACCGGAACGCGTCACT  
CCGTATGGATCATCAGCTACTCCAGTTGCCGAAACACAACCAGCGACGGCTTGAGTATAA  
CGATATAATTGCCATCGCCAGGCACTAATGTAAGGGGTAAGAAATGAAATTGAGGGTGT  
CGATCAAGAGGCTGTAACGCTTCAGTTGTGGCAGCTGCCTAAGGGACATCCAATAATTCT  
TATGTGCAACGGAGGCTATACATCGCAAGGGGGTGAGGCCGTATGCAACCTGCAAAAAAT  
CTTTGGTGATACTGTAGAAACGGCGATCGATTTCGAGTAAGAGCCCGGAAAATCTCGATGT  
GATGTCTGGCGTGTGTTGTTCCCGCAACTACAACAGAGTATCGGCATTTCTGATTTCGACCGG  
TGACAAAACGTTAAAAGAGGCCACGATTGGCCGTATCGTACCGGCACAGCGGTAAGGGAA  
CGTACCTATCGGCCTTGATTTACACACAGCTATGCCTCCACCGCGCATAAGGCTGTAAA  
AGAGTACGGCAGTGC GCGGCCTGATGATCAAACCGTCTTAGCGCTGCCCGTTGAAAAGGC  
TATCGCTCAGGTCTGAGATCCCCGCAAATTTGCAGAGATAACGAAGAATTATGGGTATCA  
TATGCCGACCCGGCACGGACTTTCTCTGAAAGCGCTTCAGAAGGGGGCCAGCAACGTAGC  
GTCGGACGCGCTTAAAGACAGGCGGA ACTGCCAGGCTGCGGGGGATGAATATAATGCTGC

GCCGGGGTCACCACCGCATCTACAGAAAATTGAACAACAACCACTGTAGCAGTGGATTAT  
CAACTGGGCGGGCAACGATCCTGATAAGCTGTTATTGGCCAGTAATGTAGCGGGACGTCA  
GCCTGAAAAGCTCGATCCGCAGAATAAGAGATTGCTGGGGAACGGGTATTCTGAATTTTCT  
AGGTATTAACGGCCACGGGGGAACAGGCGAGAGATGAAAGCGCTTCATCTGCATCTCA  
ATTTATACGTGGACTGAGACAGAATTACGCCAGTAATTCACGATATTCCATTAATACCA  
TTTCCTGTAGCCCGGTCAATGTGCCGGGTTTTTTTTTTGGATTCTGTCTTGCCCATTCAGC  
GGAACAGCGTCCTGAGGCGCAACTCGGTAACCATAAACGTA AAAAGCCTGAGCATTCTGCC  
ACCCGCCGAAACTGACAGCAATGAAGCATTTTTCTCTGAGCCGAATCGCTGGAAGGATAA  
CAATACGTCGTCCAGCCTGGGTGATACATTGCCAACAAATGGGTAAAGGTTTTCGCCAGTC  
CGTCCGGGGAATAGGGGAAATAACCCGTGGACTCGGTCATGCGATGATTAGAGTTCCGT  
AAAAACAGGGGCGCGTTTTCTTAAATGAGTTCAGCCGTATGGGTCTGCCAGGTGTCCCAAC  
GGTGCAGGATATCTTTGCCGGTGGCAGCAGGGGGGCTGATGAGATACTCGATACCCTCCC  
TAATGGCAAAAACGCGGTTACTGATAGTTTCGGTAAAGGTATGAGGGCAACCGGTAAGCC  
TGTCAGTGCTAGTACCAATGCCCCAGATGAATGGCTGACTGGTAAGATGTCGCCGGGTGC  
AGTTCGTGCGCTGAATGCGACGATGACCGAAGGCTCTAATGAATCTGCGGTCTGGGTGGC  
GAAGGGTTTAAACCGAATTGGTGCGGTTTTACCTGATATGGTTGCTGGCCGTGTGGCTAG  
AAAGGTGGGTGACTGACCACTGCGAAAAGTGCTAACCGCCGGGCTGGAGTAAAAATGCCT  
CGCGGCAGGGATGCAGCTGGAGAGAGCCACGGCACTGGCAGCAGAAGCTGTCGATAATAA  
GCAGCCGGATTCAATTGTAGGCGGGACTGATCACCCATTCCACTATGAGTGCATAGGGCCA  
GCGTGCAATAGCGGCATCAGATGCTGTTCTTAAATGCTGATTGCTCTGAGCCGGCGCAGTC  
ACGGAATATTAAGCAGACGTTTATGTCCATTGAATCCGACCCGCAGCGCTCACAGCTTAC  
CAAAGCCAGAACATCGATCTAGCAAGAGTGCGTGTTGCAGATAAGGGGGCGCAAGCCGCT  
GGGAACCGATCCTGAATTGAGTGCTGTGAGTGCCATGGCGGCATGACTGGGTGACTCACA  
ATTGTTTAAATCTGGTGACACGAGGGACAGCGAAGACCGGTAGAAGCCCCAGTGTAAGAAC  
TGCCACGGGACAGGGGGCGATTAATGCGGCGAAGGTGCGCTATTAACGCTATAAGCAAAA  
CACGGCATTGCGTGGGACCGCCTTAAATGGGTGTATCACGGTCGTAAGGCGAGGCTGATGC  
AACGAGCGATGGTACTGCCTTCGGTGCTGCGATGAGGGCTCCGTTCCGGTGAGCTTGCAGG  
ATATCGTGGCTTACGTCAGGCCGCTGAAGAAACCCGCATGCGTGTTAGTCAAACCAGGCC  
GGAGGACGTCGCAGCCTCCCGACCCGAATCTGTTGCTCCGGTGGCGCAGCAGCATGAAGG  
CATGAAGGGAGTGAATCCCCGGCAGCTTCTTGAGCAGTATGCTGCTCCGGATGTGGGTTT  
AGAGGCTGACGTATCCGCGGCTCATCGCCGGGACGCTACCAGCCAGTGGTGGAAACGAACT  
GGACGAACAGCCGTAGCGACAGGCTGCGATGAATGAGCTGAAGGCTAGGCCGCGTTCTGA  
ACTGCGTGACGCATACGGCAGCTTCAGCCAGAAAGAAGGGCGCACCCAGACTGAAGAAAA  
ACAGTTTCAGGGAATAAGCGGACTCATTCGCCCAACAATTAAGCCACGGCGGAAGCACA  
GTCACAGCCTGGAATGCGGAGGATCGTAACGGGAGCATTACCTGACGGTGCGGTTCCG  
GGATCCGAAGAAAGTCCCCATTGAAATTAACGGGAATGGAGCGTCCAGAGCAGCCGAACC  
CATTGAGAAGGAGCGCCCGGAGAGACGGTATTTACGCATAAGAGAAGGGCCATGGGGAG  
TGATGTTTTCCGTAATGCCCCCGCGACCCGGCCTGATACCGTCCGTAGTGAAGAAAGGCGA  
GAATCAGTATGCCGTTGAAATCGACAAGCCTGCGTTCACTGAAGTTGTGGCAACGGAAAC  
CTTTAAACAACCTGGCTCACGACAAGCATAATTGCTGAAGCTTACCCCATGCAGCAGCCTGC  
GTTTCATGCGCAACCAGCGATTCCGAAGTTTCACCGGCGATGACACTGGGGTATAGGCATG  
TCTTGTCGGTGGCAACGCGCCGACGGCATAGGATCTTGTA AATTCCCAGATGACGGAAGA  
TGATGCCGGACCGAAAGCACAGGAGTTACCAGAGAGTCCGCGCCTTCCCGTTTCGCAGCGA  
TATTCCTCCCTGACAGGGATAGCCGTTCCCGGGAGAAGTTGCGCATAACGTCGGATTAAGA  
TCACGCCGGACCTGGTGATCGTTTTATCAGAACCGGTGCGGTTAAGGGCCAAAGGTTCCA  
GAAAGGACAAGCTCGGTGCGCGGAAAACGTCGATAGTCGACATGGGGAAACACTCGAGGG  
TGACCTGGTTTTGTGCGGTTCTGCCGTACCCGGATGGGCAGAAAGCGACGGCGCCGGTACG  
TGAACGGCTACCGGCTCCGGACATTGCGCGTAATGTACGTATGCCACATCCTGAATCGCT  
TCCCGCGCTGTACGGGACTTACTTCGTGAGCTTGCCCAGCAGGCGGAAGGTCGCCGACA  
GGCCTGAGTAAATCGTGAAATCCCGCACCCCTGAGCCGATCGCACCTGCTTCTAAAACAAC  
TGTCCCTACTAATAGGGAAGCTACAGTGCGCGGCAGTGAAGAAAGGGACAAGAAAATTGA  
AGACTTTGCAGAAGAAATTAAGGGCTCGGCAAAACACCGTTGTGCTCAGCTTGCTTAGAC  
ACTGGGTAAAAAGCTGGAAGACAGGGATAGGGTACGCTGCCGCACAGCCAACGGTTCCC  
GAAACCGGACTACGTAAACTGGCGAACAAATGGTGCTGATGCTGATACTCTGGGTATGAT  
AGCGCTGGATCGTAGCGATATTGCGGCGAAGAGGAAACACAATACGGCAGGATTGGGGGA  
GAGCATAAAAACGGTACGACACACTATGTGCTGAATTATGCACGGAACGCTCAACGCGAA  
ACGGGTGCGAGAATGGATGGAAGGCAATATGCCCTCCCGTTGAGCGGATACCTGTCAACT

GTTACGCACTCTGCCGACCTAACAGATAGAGCGGGCTTGTGCTTATCTGGTGTGATCGGG  
TCTCTATCAGGCGGGACGAGGGCAGCGTCACCAATCGGCACAGTAACTTTATTCACTGCG  
CAATAAGGACAGTAAGCGGAGTAACATCTTCTTCCCGGAATGCGGGGATGAGTTACTAGC  
AAAGGCGAGATTCTCGTTTTATGAGCAGGAGGAAAAATCACAGGCGAAAGGTGGTGAAAA  
AACAGCACAGTCATCGTGTGACAAAATCAGCTTTAAGGTGTTCCCGAATATCCTCAGTGG  
CGATATTGTTATCGTTTTAAGGTAAAAAGAAAATGAAGGCCAGAGGTGTCTTTAAGTCAGC  
CAGTGAGCCGCGTAAGTACATTGATTCCCATCGTGATGAGCTTGTTAGTGATCTTAAGGA  
GATGCGGGGGATTTCGCGTGATGAGCAGCGAGACCCACGAACCGCTAACGTAGTGGACC  
AGAACGCCTTAAGGGGAATGTTTTACC GGAGCAGTTCAGTGCTGCGTTCAGTTTCCGCGG  
TGTGCAGTTTGGTAACAACGTGGTAGGTCCGCGTCTTTAGGCTGATTTTAACCGGCATTA  
TGACTCGCTGCATGACCTCGCGGAAGTAATGAATGTACCGACAATAGCGTTTTGCCTGAT  
CGGTCGTCTGGACCTTGCATTTGCTGCCAGTGGTAAGGGTAAGGCCGCCCCCCTAGGA  
ACCAGGTGACGTGGCCCTCAACCTGACAAAAGGTAACGGACCGAGTGCGCTGGGGTACGA  
ATGGCTCCATTCTCCTCATAAATATTTTGGCCGTTATGACGTTTCCAATTACGGGAAAAT  
AACGTACAGGCTGCCACTTGTTGACGGCAGCACAGCGTCTCCGGCGCCTATTCAAAGACGG  
CATGGATGTTGGTGCTGAATAGCCGGTACTTCAGAAGGTGTACGACGCCTTTAAAGGTGT  
GATTCGGGCCATTA AAAACAGTGACATGCCGCGTCTCGGCGCTTCACGATGAGGTGCG  
CTCAACACATTACTGGTCAACGGATGTTGAAATCGCGGCACGTGCCTTTGAGCATTATGT  
TCAGCATCAGGCGCGTATGGCTGCCGTGGAAAATGATTATCCGGCCTATATCCGAAACGG  
ACCTGAGCACAAACACAGAGAACACCTACGATTATCCGACGAATCCCGAACTCGATGGCGG  
TACTCATGAGGCAGTCGATCACCTGTTCCGCACCCTGAAAATCCATGAGCCGGAAAAGGG  
AGATGCGTATTATTCACGAAAGGGCGTTACCCGCACACCTGAGGGTAATCTCATTCGGGA  
TGTTGACCGTAGAGTAGAGTCCGAAGACAGCCCGCTACCGCAGTTTGAAGCGGTTGCCCG  
TCACGTGATGGGCGGCATTATGGACAGTCACCTGAAGGTCCGTGTGGTGACGTCACAGAA  
AGAAGCTGAAGCTCTGGCGGGTGAATTGTTCCAAGGTTACGGCAGGGGGCGTTCATTCTA  
TCGTCCGGATAAACGAAAAATTGTCCTGGTGGCGGATAACATCACGGACGGGCGGCCCGC  
TCGCGAGAAGCGGGGTAAACGAGGTCATTCGTCAAGCCGTGGAGCATGTTTTACACCAGC  
GGAACATCAGACCATTATCAATACCGCGCTGATCACTCGAGGAAGTGATAACGTCCGCAT  
GCGTGAACCTGGCCTAGGGTTAATGCTTCCTAAGGTCAGGAATCTCCTGGACTACATGT  
GGATGAATTTCTAGCACATATGGCGGAGATTCTGCCTAATAAATCTGTTGCGGCATGGCA  
GCTTTTTGTTGCCCGGGTTATTGGGGTACTGCGTCTGACGGGGTCACTGAAGCCGACTAA  
ACTGAACGATATCGGACTTGTTACGCGAATTTCCGTACGTTAGGCCAGCGTGTGAGGCA  
AGGTTTACGCACCGTGATGATGGCGCGAGTGCATTGTTTCAGTACTCAGGTCGTTGTAA  
ACGCGATCCGTTCAAAGTGCCGGCATGTGAGGGTGAGCGTTATCGTAATTACCTTGCAAG  
ATTGATGAAATGTCTGCGTACCACAGATTTAACGGTAAACATCGGGCGTACGCCGCCGGT  
ATTGCGAGACCTTAGTGACCCGGACTTGACGCTGGTAATTTCTGTTACTGAGCGGAG  
GGTCACCAATGGTGTGAAACAAGGGCTGGCGATGCAATTTAGCGAGAGACTACCGTAACT  
GATGCACGAAGCGGATGCAACTTACAGCTCAGCGCCAAAAGAAAATGCGGTTGTTATCCT  
GCTTGATGACATGGAGAAAATGGTGATCCGGTGGAGTCAGTGGCACACATGAAGGCTGT  
CCGGTAGCGTGTGGAAATCAACAAGGTAGCTTTTTGTTTTCGGTACAGAAAATGGTAAAAA  
ACTTAAGAGTGTGGAAATAAGAGGGTTAACGTTGGACCGGAGCGAAGAATTAAGCCGCGA  
TAATCTTCGGGACAGAGGTCACCAATTGCCCAAACGGGCGCATTCTAATAGCGGCTCTTC  
GAATAAGAACTCTATCCAGAAGATATTAGCAAAGGGCCGCATTACTCCCGAACCCGCAG  
TCTGACACCGGTAGTGAAAAGTGCCTCGCGTTTAGTGCGCCAGATGCAGGATAAACTCCA  
GGCGCTGAAAGTCGTTCCGGGACAAGATCCGTAAAACCTGCGGCAAAGTGAGCGACAGTAA  
CAACGCTTAGAAGGGGGAAGAAATATCCACGGGAAGGCGGAAAAAGACCTGAACGTGAT  
GAAGGAGCGCTACGTTACGGCACTGGCTAAAATTTCTGGCGGAGTACAAAATTTGCGCAGGC  
TGATATTGATGGGTACCTCTACCCCCGTACACGATGGAACGCAACGCGCATAACGCGAA  
AATCCACACGAGAATGCAGGACGGCACTTCCGAGATACTCAACGCCACGAGGCAGAAAT  
CATGCAACGTGGATGTTACAGAGGCAAACATGCACAGTATGTCCTACAGGCAGGGATTAT  
TGATGATACGCTGCCCCATCGCCGTGAGCTTATCCATTACGAGGGACTTGATAAGACCGT  
TACGGTCGATGACTGGCAGAACGCCTACCGTTACCACGATCCCCTGTAAGGTCAATATGT  
TGACGGTACGGTGTCACTGCCACCCACAGGTAAGAGCTTCACTATCTGCATACGTGAAAG  
CATGCAGTCTATGGGCCGTGCATCCCTGGGACGGTCTCCGTCCACTCATGCGATACATGA  
CCTGAGCGAATAGGTGCTCCGTGCATCGCAAAAACGATGAGGGTGACGCCTTCTGAAACC  
GGTGCAGGATAATCCCGACAAGGATTACTGGCAGGGATTCCCGATGACAGCCCGGATAA  
CATCCGAACGGTTCTAGAGCACCACGAGCAGGAAAGTGGTCAAACCAGTCCGGTCCGGTCTGT

CGGACGCCCTGTACCGATGGCAGTGATGGCAGACCTGTACTTCACCACCAAAAAGAACGA  
CAACTTGTACTACATCAAACCTCCACGATCCGCTCTTGATCCGTTTCGATGCAGAGCAAAGG  
ACCGGAGACCATCAATGCCTTTTGTTCGTACGCTGGGGCAAGTTAACCGGTGCCTGGCAAC  
GGTAAACACGTCGTATAACCCGGATTGGCTGGTCAATAACCTCATCCTTGACGTGCTTAA  
TTCCGTGTTGAAGCTGAAGGCGGAGCAGGGGATGAGCGACGGTAAACTGAAATGGCTGGA  
TAACATATCCCCGCTGGCTGTGGTGAAAGACAGCCGTTCTTCTAGTCAGCCATAGACGC  
CATTCTGCTTAGTAAAACCCTCACTGAAAAGGGGCACAGTGGGAAAAAGTGTGGAAAGA  
GTTTGTAAAGGATTGCGGGAAAACCGGCTGGTTTAAACACGGGTCATCTTGAAGGCCAGAA  
GAAGGAAAGGGATCGCTTTGCCTCACTGGCGATGGGGGGAATGAAAGGCCAGATAATCGG  
GGCGTGGAATTCGTTCCCTTAACTGTGAGGAGGCTGCCAACGGTGCGGTTGAAAACGCTCT  
GTCACCTTTCTGCCTATAAGCACGGCCGTGATGCTTGATTGTAACGCCACCAGGCGGCGAC  
TCTTGACACAAACATGACGGTGGACTTTAAGCATACTGGTGAGCAGGGAGCGCTGATGAA  
TCCGCTGCAGATGTTCCGACAGTGCCAACATTCAGGGAACGGCAAATCTGGTGAGAACGTT  
CGGACACCCTAATGGTGAGGGTCCCTTTATTGGATCCCATTCCCTTGAAGGATCTGAATGT  
TGTAGAGACAATCGCGCTTGCAGCTGTGGGAGCAGGGAATCTGTATGGCTCGCTTCACCG  
CAGCGTGGCGGGTCAGGATGACTATGGGGTAACTGGTATGAAAAGGTGCGGGCACATGT  
CAAAGAGCCTTACCTCGTCATTATGAAATCCGTGTTCCGGGGGAAATGCCGGAGAGAAGTA  
GAGTATGCCTCTGTCTTGCGGGTACAACGTTTTCTTCCCTGCTCGGGCATACTGCTGAAAG  
TGTGGCGGCGGGTGACCTGACGGCGTCCCGTGTTCCTGTAATGTTGTTTCGTGGTGTCT  
CGGTGCACTCAGCCCGATTGCCAGTTAGACGACGAAAATACTGTCCTGGGCACTGCTGAA  
AAAAAAGCGCCGATCATTCTGCGTATGTTTGCTAACCTTGCCATGACTGGAATTGTCAA  
GAGGGCGCATTGTACCAGGAGAACATGCCTTTTGGTATATCAAACCTGGCAGCCAGCT  
GGGGAGACGTTCAACGCCAGAAGCATCAAAGGCCTTTGCATCGTGGCTTAATGCGTTCTC  
AGGTGGCAGCCAGTACCGTCCCGGGGCGGTGGATATCACACCGGAATCGCTGAAATTCTG  
CTGTGATTATCCCTCCGGCCGACAGGGCGCTTAATTTCCAAAACACTACGATTGCGGCGGT  
TCCATCGCTGAATGGTATTGATCTACCGGAACAGCAAGTGCCCTTCCCTGTGGAAACCCTC  
GCTAGAGGTGATGCCGTATGCAGACCAGATGAATATGTACGACCGGAGGTCGGAGGTTGC  
GCAGTCTCCCGCAGAGCTGAGCAGGCTGACCGTTGCAGAAAGGACAACGCGCACTGGATA  
GTACAACGGAATAATTGTCAGTGAACAGGCTTATGTATTATACCCGCCAGAGACTGAAGGA  
TGTGCGTAATTAGCGTGATGCGATTTACCCCGACAGTACTCTAAGTCTGTTCGCACCAGAC  
GGCGTAGGTGATATCCGTAGTGTGGGAGATGCAAATCGCCGTGGATCGGTTTAAACCGCGA  
GTACAACGAAAAAGTGGGAGTGGATTAACAGAAAGGGCCCCGGAGGGAATAGCGGGGGTG  
ATTAAGAAATCAATACTCATTGACCTGTAATAACCGGAGGTTTTAACACATAGTTAGATG  
AGCAGTTCATTTAATGCAGAGAGCCGATTTATGTTAATGTAGAAAAATGTGCAGAAATG  
GTAGCCTATTTGCTGAAAGAGCACGGTGGATTTATGCGTCTAATTAAGCTGAAGGAGGAG  
CGGTAATGGCGAATGGCATTGATGAGCCAAATAATCTTGATAGGTTAGTAAGCGATCTGA  
CTTAGCCGAGGGGATGTTACCCCTTATCGCCAAGAAACAATAACCGCAAGCAGAATTGC  
GGATGGAACCTTACAGGCCACGATGAGATCGAAAAGGAGTTTTTTTACCCAGTATTGGA  
TCGGTTTCTTATATCCAAAGATAGGCCATTTAACATCCTCCACGCCCTGAAGGACGGAGA  
TTTACAGCGCAGCGGATAAGACTCGGTGTTTTGTTGAAAACACCTGTGCTAACTCACAGA  
AAACCCGTCAGTAAGACGGGCTTAATGAGCTGGGACGGTTACCTTAATAATTTTCAGTGCC  
TGTACATCCACTTTGACACTGCTCAAGCCTTTATCGATGTCGCCCTCAATTCCTTACGTGG  
TTTTTCGGAGAAACATTCTGCCCGTCCCAATTGCTGTCATCGAAATATGTGACAATTGTC  
CCGCTATGGATGCGAAACTCATAACGTTACCCACCCACTTTTTCAACGATGCTCACTCCA  
AGGATACCCCAAGGCTCATCCTTGAGTTCTTTTGCCTGCGCTACTCTTGAACGCTCTGCT  
TCAGGCCCTTGAAACCGCCCGGCTGTGCAAAGCGCCTAAAGACACAGCAGAGATAGGT  
GCTGCTCCCAAACCCTTTTGCAGTCATATTTTTTTTGTGCTGAGATGAACATTCACACAGAA  
TTCTCAGTATTGTAATGCTCGGGTGCCTTGACGATGACTGACACATCAGCGGTAGTGAGA  
GATTACTCCTCTGCTAGGTCACCTACTTGTGAGATCCCTAGTCTACGAAGACAGCGCCTT  
CCGTCGGACGGGTTTCGTATTCGAACCTCGCAGACGTCATTCCTCGTTACCAATGGCGTCA  
ATATGACGGTTAAACAGATGACAAGCAGGGCCACTTACATCGCCTTATGCTGCTTCATTT  
CCTGCTTCTCCTTGCCTTTCGGCACGTAAGAGACTAATCTACATGTGTTAAGCAGGGATT  
GAGCATCAGATTAAGCGTCTTGCCGGATCCGTAATGTAAATTTGTGCTTCTCTA  
TATCAGCCATAGGTGTTTCATGCCCGAGGGAGATAGCCTCATGACCCGCAGCAATTCCTC  
TTAACTTTCTTTTTCCGGCAAGACGTTTTTATCTCCAGGGAAAAATTGAATAAACAACAT  
GCAGCACTGCCATTACTGTTCCAACCTTCTGCGAATCCTTCAGGCCGGGTCATTGATTCAC  
ATTTTTCTCAATATTTTTAATGTCAATGTCCGCATCCAGTATTGCAGTTCATGCTGCCCG

CAACCGTGCTTTGGTGTCTTTTTCTTAACGCTCGAGACTGGCAACAGATTCTCGGAGCTG  
ATCGTGTCTGTTATGAAACTGTCTAATATCTCTCACCCTCACCATCGTTGGAACA  
CCGCAGGACATACCGAAATGGGTCCACAACACATCCACACTGGAAGCACACGAAAACATG  
ATCCTGTTTCATGATACTCAATGGCGCGATTTTTAAAGCTCTGTTGTCAGTAGTTTTTCT  
GCCAGTTATTGCTATGTTTCAGCCGCTTCTCTCCTCGCGCCTCGGCTGCACCAGTGAGAT  
CATAGTATCGTCTTCATTTTTCGATTAGTTCACCTCCGGCGGGGTTTAGATAGCGGCATC  
CAGTCTTACGGTTTCCACGTCGCAACCGGAATTCACCACCCGTCAGTAGCTTCAGGATGC  
CCCAGCATGAAAGGCGCCCACTTCACTCGCCAGTCACCTTTCCTGTCAAACCTCCACGGCA  
ACAAGAACGGCTGTCCTGGCATTTCGGCACACGCTCACTTCGACTTATCCAACCATGCGCA  
GTCGCCGGACAGTTGCCAGACACCCCATTTCTGCAACCATTCCAGGTCGACATATTCCTCA  
ACCCAGTTTCCGTCGCACCCCGGAAGCCATTGCTCAGCCTTGAGCGCATCAGTGTGAAAG  
ACCCAAGTTCGACCGACGTCAAATTGCATTTTCGAGGGGTCAGCAATCTGTTCAAGCTGC  
GCGTGTGGTAAGTTGTAAGTTGGGCTTACGAGTTCGGCTTCCAGTTCTGATATACGCCTC  
TCTGATGCGCCAATAACACACGCCTATCACGTAGCGGTTCTTCCAGTACGGCAACATGG  
CATTCACTATCAATTAGGTCGTTCTATGCTGTCGCGAGCTGAACTGTCAGGTTCCCATAC  
CTAAGCGCAATCTCCTCGATCTCCTGGTTGCGGCGTTCTATGTATTGCTCCTTTCTTTCC  
CTTTCATCCAGCAGTTCCAGCACGGTAGCCGGGTTAACCTCAGCTATGAATTCAGTGTTT  
CATAAACCTGCGCATCTTATTCAACCATGCAATTAACATGACATTCTACTATCACACCAC  
CGTGTTTTAGTTTCCGTCTTTGGGAAACAAACGCTACTGTTACATAGCCGTGCTCGTTAA  
CAGATGTACGCCCTATGATATAGCTTCTTTAGTCGCTTCTCTGCCCTTACCGCATTA  
CCTGATAGTCAATCTTGTTCATTTTACTCTTCACTCCGGTATACAGGGATTACTACGCC  
CCTCTTCTAATTACGCAAGATGGATCCCCTGGTTCATGCCTTCAAACCTAAGGCTTCG  
AAAAATGCATCCATTTGCGTATGCCGTTGCTCCTGCTCTCCGCGTTTATCCCTTTTTTC  
AGGGAAAAAAGTGTACGCCAGCCTCCTCTGCAGAACATGATCTAGAAATAATCCAGGAGA  
GCTAGGCCGGTGTTCAGGGCTGTAGTGATGGTTGTCGTGGTGTATTATGTTACGTCACCC  
CTCTGTCTTTGTTGAAAAGTTCAAGATCCTGCTTGCAACTGGCGCAAGCTCTGCATCCAC  
GAACAGCCAGGCGTCGCGGCTCATCTATCGGAGCGGCACACTCGCAAACACGAATAGCAG  
ATGGGGTATTACTACTGGATTTGTATTTTCGCAGGGAGAGATTGCGGCCATGTTCTTCGA  
TTTCACCAGCGTGGTTCGACGAAATCTGCCGATTTCTTTCCTTCAGGCATGAAACAACGA  
GCTGAAGCTCCTTTGCTGTTAGTCTTTCGAATTGCCTTGCGCGCAGGCTTTTCAACATTGG  
TCTGGCCCGCTGAACTACGAAACTCGACTAGTCAAGCTGTGCAACGTCACTCAGTATTAC  
ATATCTGTTCTTCGTCGCAATGTAGGGGGTCCCATGCCCAATGTCATAACAATTGTTCTGT  
GAAGGAGGAGTTGAGCTCTTTCACCATCGGGTACAAGTGATTGCTGAGGTCCTGGACTTT  
TTCCACCCAGAGTTGCATGTAGCAGAGGAGGATCATTTCTCCTCGTCTGTGAATTGTTGCCG  
TAATTATGCTTGTGCTGACTCCATGTTGCGCAGTTTTTGTTCGCACTCGATGAAGTATCT  
GCGTATCTGTGCGCCTTTGTGCTTACGATCTAACACCGCCATTTCTCTGGTTGTATCGAG  
GGTAAGGCGTTGATCATTTTTCCCTCGCCATAACCTACTTACAGCTTCTGGGAAAGAGC  
TATATAGTCCCTGGTTTTCTACTAATCACTACTATTCAATACGGTCTGTAATCCACGTTAC  
AAAGCGTTAACCTACTCCAAGTAAAGGATGTATATCACGGGCATTAGCGATAAGGGTGT  
TTAGCTGTCGATAGTACCATTGAAAACGGGGAGGGGTTGCCTGGACATTATGACCTCCGT  
ATATGTTTAGTTTATAACCTCGGGTTAGCAGCTGGCGGTCGGGTGTCAATTGAGCTAAAT  
AAGAAGCTCAGGGCATATTCCACTTGCAGGGGTTATATTACGCCTCTCCACCCGGCCTTA  
TTACGGATGTAACCTATGCCATATCCCAGGCGTAAAAGAGCTCCAAGGCTACGGGGTGC GG  
AGCCCGCTTACTTGTTCAGTGCGGTAAGTATGCGCTAGCTTTGGAGGGTTTGTCAATCGA  
CGGAATATTGATGAACGCCGAACGGTAAATGCCTAATCCAATACTGACGCAAATTCGC  
ATCACAAACTTGCCTGAATTATCGGAAATATAAAGTTAAATCCCCTTAAATGTATGTGTC  
ACTATTGGGGCAAATGTGGTTCTTTGGGGCATATGTGAGGGGAAAAACAACGGATAAAG  
AACGGTGTAAACTTAAATTTCTTCATGGTCAAATGAGGTGTAACAGATTGAATAAGGTAT  
GCTCTTGGACGAGGTTAGGTAATTCTATGTTTTTAATGCTTCTTGGTTTCAACACGTCTA  
AGGATATGGTTTATCATTTTTGTAAAATATAATTTGATTTTCATCCTCCTGGTCACTTTGGG  
TAACGTTTGGGGCACGGGCATTACTGGCATTATTCAGCATGGGATCTTGAGTCACGCTCC  
GCTCAGGCATTATGCAACATAGACATTGTAGAGCATGCTAGCCCTGGAGTGCCCCATCC  
GTGATTCAATAACCGTCGGGCTTGCTCGGCAAGATAAAGGCCCTTACCATAACTATGGA  
GTGGCACATACGCTTACGGGATAAGATCCCCGCTTTTTTATTGATGAATCCCATGTGG  
CACCGATGGGGCTTTGCGCGTAGGTAATACCCGCCGGGTGACTCATGCGAACGAATTGTG  
GACAGAAAACACAAGTCACTCGTGCAAAACGGTTCATACTTACTCGCGTAAATGTACAT  
TGTTCTGCTGCTGCCTGCCAGGAGGAGTAAGCATCGCCTGCTTTTTATGCGCTTCACTTG

CTGGTGCAAGAAGATGTATGGCCCCGGTTGGTGCCTAAGTCGGTCTTTGGTAGGTTAAAAT  
CGCCGATTTTTGTAAAATTTTCGTCGCACTGTTATAGTGACAGCCTTCAGGTCCATAGCAT  
CCCACGTAAGTGCGGCAATTTACCGTGTCCGATCCGTGTAACAACAGCCACTGTTTCAGC  
GGTGTGGTCTCTTGGTTATGGCAGGCATGCATGAGACGGCTAAACTAATCTCTGGTCA  
GTGGATATGGCACTGGTTTTAGTTTCCTCAGCGGTGTTCTTGGAGTAAACGGGTTTTGCC  
CCGGATGACCGTTTTTCGGCAGCACAGCTGAACATTCTGCTGTTGTTGTCACGTAGCAGT  
TCACTGTGGGTACGGTTCATACTTTTCGGGACGTGCTGGTGTGCCTGCCTCCCTCTTCCC  
CGGTCAGTAAATGTTTCCTGATACGCAACCGATCTTCTTATGTGATCGATGACGTCAGCC  
TGCTAGGACCAAGCCGCGGTAACATATTTTTCTTACTGATTGATAATGCTTTAAGGCGT  
TACTACCGATTTCCATTGCTTTCAGAGTAAGCCATTTCTGTGCCAGTTCACCGACGGTGA  
TATCTTATTTTACCAGGTCAAATAGCTTCAGGTCAGGTAAGACGTAGAATCGATCGGCAT  
AATAAGACGTGCTTGTTCGGTCTCCAGAGCAGTCCGTAGCCCTTAATTATCCGGCGATCT  
TTCTGTTTTGCGGTGTATGGCGCACGCGAATAGTTTCGCGCGCTCGTTTACCCCTGTACT  
CAAACGTTATTGGGTGTTTTCTCCGAAATTGTAAACGCCTGTTGGATAGGCTGAATTCG  
CCATTGTTCCCTCCCGCGTCCAAGAGCACGCTCAGTTTATACTCTTATGGATAAAAGTTAT  
ACACCCTGAGATGGTAAGGGTGAGTTTTTCGATCCAAGTGGTGGTAGTACGAAGATGTCAG  
AGAGAGTCGCTCTTTTTCTTGGCGTTCGGTTCGGGGGCTATTTGTTTATCTTCTGCCG  
GTCATCCACTCACTGTCCCTGACGCGTAATATTGTACTTTTACACACCCCTGATACCGCC  
ACTGAGACCTCCAGTGTTACCAAACCATCCGTATTCATCTCAACGACAGGTGTCATGACT  
GGCTGAACGCCATGCTTCTGTTGGATTCACTCACCCATTAGTTGCTTCTGCATGTGC  
AAGAAAAACCACCATCGAGGGGCTTGGTGTGCTTTTAGGTTTTCAAGTCGAATCTTGGT  
TACGCTTCTCCGGGACGAACACCGGGTTTTTCGTCCTTTGATATTGCGAAGTTATCAAT  
TTGCGCGGCACTCTACACTTCTAGCATCCATGAATCTAAGGCGCGAACAGCCTCCCTACG  
CTTTTTAACTTCCCGCGCATCTTAGGTATCGACGAGGACATCAACGCAATTTAAGGAAAT  
GTGGAGTTTGACTTTACATTCGATCATGACTGCTTATCGTTCATTTCCGCCACAGAGGGA  
AGATATATCTTCAGGGTCTGGCTGGTATTTCTATAACGTTTCGAGGGTTGAATGTTGAACA  
CGCCATCATCATCTCCATAAAACCAAACCTCGCCGTAGCGAGTTGAGATAAAAGAAATCCT  
AGCTAGTGCGAAGATTGTCAAACAGTTGCGATATGCATCTCTATAGCCAAACCCTTTGCC  
GGTTTATCGCCGAAGTGCATGTGTGATTGTCATGATTTTCATATTCCTCCTACGGACCA  
TCAATTCTTCGGCGGGAATCGTTCGCGCTTCGGGTATCCCTTTATGGTAATCATGCGGTAA  
TACTCGCGAACATAAAATCGCTTATTCCAGTAGTTATTAACAGGCCATCCTCTTCCGTT  
TTCTATCCGGGCGAAATGGCCTCGAAGCATTACCTTTAACTGCCAGTGGCAGGTTAGCC  
ACGGTTAGCCTTCTGCGGCGGTTCTGGTAGCGGCATCCAGTGAATTGCTTTCTCAATACC  
ATCACAGGCTTAACCGTCGCATCTCCGCGCCGAAAGGTGCTTCCGGAGTACCGTGCCGA  
CCATGTTAGCGGTTTAACCAGACTGCTATCGAAATTCACCGAAATAAGCACGTTCTGTCC  
TTTTTCAGGCGGTCGAGCACTACAGCTTATCGAACAAATAAGAGTTACCGGAGAGTTTCC  
TGCCTCATAAGCGGATTTCCGGCCAGTGCATAAGTGTGCGTTGCTTACACATGCGCAAGC  
AACGTTTGTGTTTTTTTTTTTTTCTGACAACCATTCTTGGAGTCAACGCTTGGCAGTGCG  
GCTTGCCGCATCAATTCGTGGTAGGCAGATATATAGTGGTACATTTCCCGGCGTCATCGT  
ATTGTCACGACAAATAAACTTGATACAACCATTTTTAACGTGCTCAATTACCGCTGTGTC  
GTTAGGGGCGAATTGTTTCAGTGGTCAATACAGTAACCGTCAATTTCTGAAGTACGGCGCTC  
AATATCATATCGCAAGTCCATGTTGCCGAATCGCTCTTGGGTTTTCTTAAGTCATTTCTTT  
CTCAGTGAACGTTGTCATGTGTTAGTGCTTCTGTACTTTAACGCAATTTTTTCAGCGTCAA  
GCCGTTTCGATTTCTGACAAACTGGTTAACCCAGGGGCATGACTGCTAGGCATATAGAC  
GCTTGCAGTGGGGAAGTCCTTATCCTCATCAATGCTGGCAACGTGCTCGCCGTTGTATGC  
GCTCAGCGTGTCTAGGACACAATAAAAACCTTCCCTCCGGCGGCCCTGAAATACTTTACTGC  
CTTACAAGACGATCCTGCGCTTTTTCCGGTTCAGGCGTCAGGACGATTAATTCCTGCAA  
GGTTGCTATTTTCAGTTTTTCGTAATGACTTAATTTTATTGTGCAAGTGTGTTGAACGACG  
CCCATAACCACCTCATTATACGACTACTAACTAGCCCAATTAATTTCCGGCTGGCCCAGA  
CGAAAATTTGCGCGGATATCGGTGTCATCAGCACGATAAACAGAATGAGAAAGAAAAATT  
CTGTCGCTATACTTTTTTCGCGGATATTCTTTTGGAGAATATTGTAGGCCCATCATTCTCCT  
TTGTTGCTCCTCAAAATTTTATGGGCTGGCGCAGAAGCACGCGTTTTGTCTTTGCTTATT  
CGACAGCGATCCTTGCAGCGCTTTTTGTACTTCTAGCCCATGACCCACCGATATAGTCA  
CCGAAGCCAAGCCAATTATCTCTGCCATCTGTATAGTAGAGGCAATCACTATAGCGATGC  
ATTGTCTAATTTGCAGCAGCAGCCATATCACTCCATTTTAGTGCGCAAATGGTTTTACCT  
GCGGTTTTGCCCCGCGCTGGGCTTTTTGCAAAAACCACAATCCATCATCCCGAACTATCT  
CATCTAGGCCTTCCGTCGGTTCGTGAGTACACCCACTGCCAGACGCTAGAAGCGTTTTCT



ACCAACTAACAGAATTTTGGCTTTACGGTTTTTCATCGGTTGCCTCTCCGGCATCTGTTT  
GGTGCTCGGTGAGCCGATGTAATACCGGTAGGGCGGCGCTTTGGCGTCGGGATGATGTTT  
TTTGCAATTAGCCCAGAAGCCCGGAAACAAGTCGGATACGTAAACAAGCAGATACATGCC  
ACACGCACTATTCACCCCTTTTGATGCGACTGCCAGCGGCGAGCTGGGCTACACTTTCTT  
CCCAGAACCCTTGTGAAGCGCCATTAGCTTGTAGTCAATCGGTGCATATTTGCGATTAA  
AGTAGGCCGGAGCATCATTCTCAGTTTCGTTCAGGTAATTCGCCAGGGCCAAAAAGATTGT  
TCTAAATGCATATGAGTCCGTTCTTAGCGTCGCCAGTTCCTGCCATTTCGATAATGGCAG  
CCTGCATGACCAGAATGCTATTCCCGGTTAATAAGTCCAGTTTTTTGTACCGGGTGTGGA  
TGTTTGCATTCTCCCTTGGGACTCTTACGTTTCACTTTTCTGAGCCTTCAAGTAACACCT  
GCTTATCGCGTAGAGCTTCTGCTAGTTCAGTAACATGGCATTCACTCTCAATAAGGTTGT  
ACTCTGCTGCTTCAAGCTCAACACCCAGCTTCCCCGACTTAAGCGCAATCTACTCGTTCT  
CCTTGTGCGGGCGTTCCATGTATGGCAGGTTTCTTTTCTGTTTCATCTCGCAGTACCAGCT  
TGGAAGCCGGGTCAGTCTATGCCATGAATGCAGCTTTAGCATAAGCGTGATCATCTGGTT  
CAATCAGGCGGTCAACATGACGTTTCGGCAATCACGCCACCGGGTCTCTTTTCCATTTTT  
GGCAAACAAAACTACTGTTAAATTACCATGCTGGTTAACGGATGCATGCCCTAAGAGGT  
AGCTTCTTTGGATGGTTTCTCTGCCTTTTACCCAGTCCCTGATAATTAATTTTCGCTCC  
CTTCGAACCCTCTCTATACTGATAAGCTACAGCTCCTCCTCACAACCTGCACAAGTCCC  
ACAACCTTACACGGCCAGGCGTTTTTCGCTGATCTAGGGAATCGCCACACTCACAACACAG  
GGTGGCAAAAACCTCCTGGTGGTTCAGGGGGCGCATTTTTATAGCCGTGTTTCGCTGTGA  
TTCTTCAGTTTCTGATGTTGAATTAATGAGGTCTGCAATCTTTCATTAATCCCTGAAGTG  
ATCATAAATACGCTTGAGGGTGAATGCGAATAATACTGAAGGAGCCTGTAGCTCCATGGT  
GATTTTGCTTTTCATCTTCTCCGTTCCCTTAAAGACGCCGTTTTACAGGCCGATCGCAAGA  
CTTAAATGAGTTGGTGGGAGTCCATTAGCGTTACCGTCTCGCGGGCGCTACTTCAGAGCG  
CTTCGGGAAATGTCATGGCCGTTTTTATCCGGAAACTGCTTTCGGGCTTTTTTGTATGCCA  
GTATTTGCCAGACGACCAATGCTGCGAAGGGCGTTTTCTGCTCAGGTGTCATTGAACAA  
GGCCCGTGTGCGCAAGCCTCAGCAAAGAGAATAAAAAGCCTGCTGCCAGAAAAATGCATT  
CTGTTGTTGTTAAGGCGGGTCTCTCTAGTTTGCTTCAGCTTCCCCGCCAGCCTTTCTAG  
CTTTTGTGAAAGGGATGTGACTGACGTATGAAATTCTTCTCCAGTTTCTACTGGTATTCG  
CACAAACCTGACTCCAATTTTAGCGAGGCTATGTGCCCTCTAGAAACTCGTTCTTAACTC  
AACGGCACATGCTTTGTCTAGAGAGCAGCCTGTCTATTATTTATCTCCTCAGCCAGCCGC  
TGTGCTTCCAGGTAATTTCTGATAACAGAAAGGACGGAAAGTACACAGCGTCGCTTTGTA  
ATGGAGTGGACGAAAGCGCCCTAACCTACCCGGATATTATCGTGAGGATGTTTCATCGCC  
ATTACTACCAAATACAAAACCAATTTTAGCCAGTGCCTCGTCCAATTTGTCAATGAACT  
ACCGCACCATCTCGTCAAAACTTGCCATGTACATTTTCATCTCGCTTAAATCACGACATAAT  
GCAGGACTTCACGCTTCTACCTGGGTAATAGTTGGCAAAAATACCAGGCATCTTTTCGTT  
TCACCCACATGCTGGACTGCACCTGGACCCTATAAGCCGGCTTTATGGCCTCGAAACCAC  
GGAGCCGGAACCTTCTTGAAATCCCGGTAGGTAATCAGGCATTTTCAGTTCCATGCCATTTG  
AGGCACTGCATAAACCATCGGGAGAGCAGGCGCCACACATACTTTCGTGCGGATAGATGA  
TCGGGGATTCCATAACAGTCACTCTGGAAGTGAACCTCAAACAGTGTTCTGGCGTCGTTCT  
CGTACTTTTTTCCCAGGCCAGCGCGTTAGCGTTAACTTCCGTAGCCACACCCGGTGCAAA  
CTTCGGCAAGCAGGTTGTGGCAGTAGGAAATTTTCATGTCAGGCCACTGCTTTCCAGAGC  
GGGGCTGTGCTATCAGGTTGTGAACCTTCTGAAGCGGTGATGACGCCGAGCCGTAATTTGT  
GGCATGCATCTCGCCCCTTTTCGACAGGTCTGACCTCGGTTCCGGTATGCTGCATGAAAA  
AGTCTGTGTCATGCAGCCACCTTCTGTTTCAGAGGCTTTCTATTTTCAGTAATCCAAGAAC  
TTCCCCTGGTTTCGTCTGTGTCAGTTCTGACGATGCGCGAAAGTCGAGGGCGACATATCTG  
GGTACAGAGCGACAAGAAGTCGTTATCACATGTTAAATCCAGGGCGAACAGCAGAGCGTT  
AATCTCCTCCACGGGTTTCATCGTTAACCGGAACGATGTTGCGTTCGGGGCTGGGGTGTCTGC  
AGTGTAGGCAGTCATTGCGACAATGCGCCCGGCCTCATCGTTGTCATAGATACGAGCCAA  
TCCGAAGGCCAGACGGGCACACTGAATCATGACTTTATGCCGTAACATCCGTTTGGGATC  
CGACTGCCACGGGGCCGGTGATTTCTCTACCTTCGCGGGTTAGGAATGGTTTCGCGGAGGCA  
CTCATCCATCCACTCGGTAACCTCAGATCGGATAATTACAGTTCGATGCTGTAAATCCGGGA  
TGTACAGGATTCATGGTCTGCTCAAAGCCTTAGCCATCTAACTGCCGGTTTTAATTGGT  
GGCGCGGGGCCAACCATCAACGCCACCACCGGAACGATGCCGTTTCAGTTATCAGGGAA  
GGCATAAAATTGGGTAGTCCACGCATTATGTCCGTAAGTGGTTAGCGACTATCAACAATGC  
TATGAACTGCGCCTCGCTGGCATCACCTATAAATGCCGTCTGGCGAGCAGTGGCGAAAAG  
TCCCTCTCGGTGCGCCGAATCCATGCTGGCACGTTTCGTGCAGCTTCCCTGCCAGCATTGC  
GAGTGATGCACACTTCGGGTTTTATCCTCTGAATCTATATCAACCTGGTGGGGACCACTT

GTTTCAACCATGTCCTGGATGGGTTCTGCCTTGCCTTAAACTCAACAATGTCATCA  
AACGCACGGGTAATACCTTTTTTGTCTGGCCCCGAGGCGTTGCTAATGATCCCTGTAGGGT  
GATTCCAACAGGTGCTGGGGCAGACCTATTCCCAAGTCGTCTGCCAGGTCTGCGTCTTTC  
TCTTACGGGCGATCTTCTGGTAGTGTGCGGTCCAGCGCTGAGCCTAACACGACCGTGA  
ATGGTATAAGCGTTCAAGGTTGAACCTCTGACATAGCGCTGAAAATATCGCCCCGAAAT  
GCCGGGCTGATTGGGAAAACAGGAAAGGGGGTTAGTGAATGGTTTAGCTTGATCTCAATT  
CCAGTATTACTATCCATTTTTTATTAGCGTGCACCGCGTCAAGAAACATCTTTTCATCGC  
TAATAAAAGTGGCGGTAGTGACTTTACTCTCGATCGCCATAAGTGTTTGATCCATTTTTG  
GGGACTACTGGCTGATTTAGTATGTCGATAAGGCGTTTCCATCCTTACGTAATTTACGG  
GTGATTTCGTTCAAGGAACCATTCGGAAGGGCAGCCAGCAACAGGCCACCTCGCATAGGCA  
CAGTACATGGTGAGCTCCTTATATATACATGAGAAAAACCGCCTCGAGTGAAGCGTTATG  
GGTATGCGGTAGCGCTGCGCTCAGGCGGCATGGCTTATCACATCATCTGAAGCAAAGCTA  
ACTGCTGTATCGATATCGGTAATCTTATTCCCTTCGCTCCCATCCATTGGAGGCCATGCT  
TCCGGACCATGTCCATCTTTCCAGTCGAACTCACACAAAACACCCTATGCACTCATGTGCG  
CTTGAAATAGCTATAAGCAGAGCACCTTGCGCAAGGCTGATTAATACAGCATTCAATAAA  
GAGCCTTGTTTATTGAGTTGGTAATCAGAGTCTGACCAGCAATTATTAATCTGGTGAAGG  
TTTTCTCTGCCACTACGTCATGGTCGTTTGAAAATTCTATAACATTCTTTACTCTGTAA  
TCAATGATTTATTGTTTGATGTTTGACATCTGTTTATAACCTCCCGGATAAAAATTCGCC  
CTCACATCGGAGGGCGAAGAAGATTACCAATAATCAGAACAAGTGGGCTACTGTTTAATT  
ACGAGCGAGATTGCTCCGTGTATTCACTCGTTGGAATTAATACACAGTGTGTGTTTATT  
CTGTTGTTTATGCTAAAAATAAAGGCGACCTTCAGCAAGTCGTGTTGTAGATGTTACAGG  
TACCAAGGAAGTGATTGGATGGAGCGCCATAAATGATGAATTCATCGTATGACGGGTCTT  
TCTCAACCTCTTGTCTATTGACATTCTTGCCTTAGTGTGGTCAGCGGAGAAGCATAAAA  
CAGCCCAGGCCACCATTGTTTTAAAAAGAAGTGCATTGGACTGTGGTTTTACTGCATTTG  
CGTTAACGCGATAATCACAAATCGCGGTTGCATGAACTTCCATATATCACCTAAAATTAG  
CGATTTGCTGCCCAATTTAGCTTTCTGGCGACCAACACAAGTCATCTCGCTGTCATTTGT  
TTGGATTGCCGCTAGCCTGCCGCGTAAAGAGGTACATTTGGAAGACAAGTTGAGTCTTCA  
TATTTTCTGATCAAAGTTGTGGGTATTATTTCTTCTGCTCTCATCGTTGGTTTGCCTCG  
CATTGTAAGTCCACTCGTGATGGGGTGGGCCTGTGTAGTTTGAGGGAGATAATTGCCTCC  
TGACTTTGCATGTTTGCGGGACGAGCTCTACGGCGAGAAGCTGCGGGCGGATTACATTCT  
GTTTTTCGGGAGTTTGATTCTCTCGAATAAACGCTGTCGCTGCCATCTCGAACTTCTTC  
CTGCGTCCGGGCGCTTCTGCATCGCACTCCACAGCTTATGTGGTTCGGTGATATGGCTTTT  
CAGCCACGTAGTAGATATTAGACGTTGTTTAAAGAGCCTCCAAGTCTGTTTAACTTGGCA  
TGCAGCGTCTGCTGACGGTTAACGGGTACGATATGCAATTCACTTAGTCAACACTATGC  
GTTCTAACACGGGGCGTTTGTGTTGCAACGCTTCGTATTTAATAGTATTGTTTTTTAGCGT  
GGGTGATTGCCTCGGCGATGTAAGGAAAGATCCGAATTTTCGTTGTTTAGTGTGTGGTAT  
CTATTTACTTTTCGAGTAAATTCAATTGATTATGTGTTTTTTTGGACGAGACGAAAAGAAA  
ACCATGCATGGAGGCCGGGTTGCTGATTACCCGTGTGGCCTTGAGCGATAATGCTCAGAG  
AGATGTTCAACATCTCAATTGCCTAATCGAGCATAGGCATTCAACTGAACTGCTCGAACG  
AATTGGTCATTCATTTTTGTAAGTAGACATCTGTTTTTTCTCATATTGGAAGCACCCCAAC  
AAGCGCTTGAAAAAAGGTGCCAGAGTCGATAAGGTCACATCGCAAATATTATGTACCTTT  
ACAATGACTCCTTCTGGAGGCTCTGGTTAACTGCATGAATGTCGGACTTCGGGGTTGGA  
CATTGTGCAGAATGCTTTTTTATAAATTGAGGCCGTACGTAAACTTTCCGCATTGAAGAGT  
TGCCGTAGGCTTCTTCGTTTCGTGTTATCGTTAGGAATGCCCTTAATCGTAACCGTAACCG  
CTGATTCGGGGTGAAGAAGTACTGGAAGATCCTATCTATGAAATGGATTAGCCTTGACTT  
ACACTTTTGTGGTTCGCCAGTCAAATATTTTTCTCACTGTATTCTTTGTTAATCGTGG  
CGACTGGGAATGCTTACCAGAGTGAACAGCTTCAAACCTTTTTGACTCCCTTTTGCATGC  
GGCTTTTATATGAAGTCATTCTGCTGTGCTAGTCTTTGGCTCAGTTGCGTGGATGTATC  
GCTCGGCAAGCTCATTGACATCAAGTTGAGTAAGATCACCCATTTCTCTTCTTAGACTA  
CCGTTAAGAGGGGCGGAATGAGTTTTATTAATTTTCGAGCGCTTTCATATTTCACTATGT  
TCAGCGACAGAAGATCTTCAAGAAAGTCCTTGAATGCCTGCGCGCTAACGGTTGAATTAG  
CCATTTGCTCTCTCTAAGTTATTGCCTCAGAACGTGTTGATCCACGAATTGAATTGAA  
TGCAACACTCAAGTCTGGTGAGTTTCCCTGCCAGATCCACTCTCAGTAAAACAGGCCGCA  
GCTATGCGACTTTTCATCTCGTAAATCTTTTTATACTACCTCCAGAAACCGCAGGCTCG  
GTGAGCCCTAACAACTTGAAGCGCATCGGCCAGAGAAAGCTCCGTGCAATACGGGGTGT  
TTTTATATCTTTCTGCGGCCAAGAAATTTACCATCTGTACAGAGAGCGTATCCACTTGAT  
TATGTTTGATGGCAGGACGTTTTTCCACCTGCCTACCCTGCAATACAGGACGCTGCACA

CCGATATTTATCCGCCGGTCATTCACGTTATAGACAATATCAAGCTCATTACGGATGTAC  
TCACATGGCCTTATGCTTTCAATCAATAGGTGAACTTCTCTTTGACCGCTTGATACTCAT  
GGCGATTAAACTTCAGCTATCCTCTTTACCAAACGTCTCTTCAGGGCATTGGCTGACGA  
TAACTTTCGCCCCAACGGAACCACTCTCAGTCCATGGGAACGTTGGATATTGCGGGTTA  
GTGGTGGTAGAAAGAGCTGACCGTTATCCCTGATCAGTTACTTGGCTGTAAATCCGTCCG  
CACCAAGTCTCGCGATGCAGATATCGCCGCGCTTAACATCCTCCTCAGGGTCAACCAGAA  
TTAACATCCCGTCATGAGATCTAGGTTTGGCACCAGTTGTTGCGGTCATTGACTTACCTT  
CAACCACACGCGAGACGGCAGATTCCTGACTTTTGGTTGCGCTTACTAATCTCTCCG  
CATCACCTTTGGTTAAGATGCCGAGTTCTGGCGAGAACATCCAGGCTAAACATGAGAAC  
AGACAGGGTACTCATATTGTGTCTTAACTGGGGGCCACGAGGATGCTCCAACAGGTGAAA  
ATGTCCCGTCGTGGTTAAATGATATGTTATCAAGACCTAAGTATTTCAACACCACCCCAA  
ATTCGCTAAGAGATAGATGACGAGACCCTCCCAACCGCTGTCCTATTCCACCGTGCGGCA  
TACCTAGCTTCTCGGCTCACTTCTTTGATTGATGCCGAGCACTTTAATTCTGAATCTAG  
CCAGTTCATACCATTTCATTTTCATGCCCTTACTATTTTCGCTCGGTACAGGAAACATCCA  
TGCACAACGTGTATATTTACTTGTCTTTGAGAAGAACATGTTGTATTTTTTTTATTCTGTTG  
ATACTATAGAGGGCATATGAGCTACTTACGAAGATATCGAAGGTCACTGAATATCTCTCC  
TACAACACTTGCTAATGTAGTTAGATGCACACAGTGAGCGATCGGACACTGGGAAGCTGG  
TCGTCGCTTCCCATACTTAAACCTGCCGTGCTCTTCTTGTGTTGTCTAAATAACTTAGG  
CGCAAAACAAAGTCGTGATGACGTGTTCCCGCTGGAGCAAAAAGCGGCTTCATAAGCAGA  
GCAGCTCTTTGTAACAACGCACATTCGTTCTATTTTCGCTGAAAGGCGAGTCCCAAGATAT  
CTGACCAACTAAGGCCACATGCGTTGCCACTTATAACTCTCAACTAGCTATTCCTATCT  
TAAATCTTTAGAAATGGAACCAGCAAATTACAGCAAATATCACAGCGAGCAATTGATCG  
CGCTGAAACTGATTTACTCATCTAGCTGGCAACGCTTGCCCGGCGCCTTCTGGCAAAGAT  
GATTGGTTGACAGGAAGCGAAGATAAGGAGAACGGACTGGAGATTTATTGCTTCAGTCTT  
GTGTTCTTTTGAATGTCATCAGGCATAAGTCCGATCAGCAGGGCTTTCAAGTACGCGCT  
TGATGAAATCACAAGGAAAAAATCCCCGGCCGCCACCGAGGATTTTAAGCAAATTACTTT  
GCAATTCTGAGGGAATTACTGGATCAAGCCACAGGAGCAACTATCACAAAACAACCTCAGT  
GCTGGCCAGGCCAAAAGTCACGAACACATCCTACGTGTTTCGCTTACTGTCTGCTTCAAT  
CAGCCTGGTCTATTCGGGGCTGAGTTGGAAAAAGTGAGGCTGATGCTGAAGGATAATGGT  
GATGGGTGACACATCTAATCTTGCAGGAAAGCCAGAGAGGCAAGAAGTCCACAACAACCGCA  
TCAAAGCAGCGGTAAGGGCTATGCCTTGCTTACCCTGTAATAAATATGGCTGTGCCGCTTAA  
CAAGTACGAAGAAACAGCGCAACTGTGGGTCCGCTTAATCCTCAAAGCAAAACATGCGCC  
TGAGTATGTAATGACTCGCGCAGGAGAAGTTCTGGAAGGCAAAGGCAAGCTACGTGGCGG  
TAGAACTCTCTGGCGCTTGGAAACAGAACTCAAACCAGACCATTTTCAGTAACTGCGTAG  
AAAGTTCAAAAAACTCGACGTGATTGCTTGGGTTTACATTTGAAATACTCAGTTTTCTA  
GGGAGAGGAATATGCCGATTATCCCTGATATTTTGTAAACAGCAGATTACCAGCAAATTAG  
CACCTCAAAGCCAGCAATACCAATGCCTGCAAGCAATACAGTACCTGCAGGTTACCACCA  
AATTACCACCGATGAAGAATATGAGCATAAATATCTCTAAGACTGACGTATTAGAGAGTGC  
CACAGAAGTCACAAAGTCTGACATGGAAAAACCCGCCGTTTCGCTGTCAGGCTATTGTCGA  
TGCATAACCAGAAATACTTCCGCAAGGGCAAAATAGCTGCGCACTGAATGACAAGCGGAA  
TATCGAGATGCGTACGTTCTGGCGCAAACCCGGAGATAGAACACGCCAGCTTGACGTGCA  
TCGGTCTACGATGCAGGACTGGATAAATTATTCGAGCTACGCAGGCGAAAATGGCCGATC  
GATGTTTCGAAGAGCGCCAAAACAATCACCGCTGTACCGGCTCTCACAAAAGGGGTTTTA  
GTTCTGTTCAACGACAATACGGACTTGAAAGTTTCGTGAGGGTGAACACGATGACCGATA  
ATTTTTCTGCGCCGCCCATAGCATCTAGGCAGAGCAGCCAGTGATTGGTGGATTGCTTC  
TGGATGATGACAGTGGTGAGCGTGTCACAAAGTTCGGGCAATGCTGCTGCCTGATTCAT  
GTTACAGCCGAACGAACAAAATCATTTTTGGAGAAATAACCAGAATGCACCTGGAGCAAA  
GGACAGTAAATCGCCTGACGATTTTCGATGAACTGGAGCCTAAATCGTTCACGGCGACTT  
TGGGCTGTTTAGCTTATAACCCTAAGATCGCTAAGAACACGCCAAGCGCATCAAACATCG  
TTGCCTATGCAATGGAGGTTTGTGAAACCGTAATGGATCGCTGCCCCATCAACCGGAAGA  
CTGAAGCGTCGGAATTGCAATATTCCCGAAACGGAATGAGTGCCCCGCAGATGTACGTAG  
TTATCCAGGCGAATATCACGCAACTGTCAGACCATGCAACAACAGGATCGCGTTTCGGCC  
TTCGCTCATTTGGAGAGATCATGGAAGACTGTGTCAGGGACCTTAAGAACCGATTTAACC  
CGTCAGGCGAACAACGAGGTATGACCACAGTGATCCCATCGTTGGACAGAATGATGTCAC  
CGAAAGGTCTGGTGAAGGCTCTCTTTTTTCATGGGCGCTCGCCCTAAGATAGGGAAAA  
TGACGCTAAACAGCCAGATGGCAATCAATTTCCCTGAGCATCGGACAAACCCCGCTCTGA  
CATAACGCCCTTAAATGCTAGGTGATTAGAATCTGGACCAACTGGTAGGACACAAGTCGG

GTGTTAACCTAATATTCTTTACCTTCCGGCGACAAATGAAGCCGATAACGGCTACCACG  
GTGCTAACGATGGCTACTGCAACGGGGCGATCGAAACAGCTAATCGCTTGAGTGAAATCG  
ACATGCATTACATCGACGATACATCGGAATTCTCTCTGGCCCAAATTGTCAGCGAAAGCC  
GTCGAATCAAACGAGAAAAAGGATGCGTTTGCATGATTCAGGTCGATTATGTAACACTAG  
TGACCGCTGAGAAAGCCGCTCGCTCCAACTTGGTTACGGCATAATCACCACAGGACTGA  
AGAACCTGGCCACTGAGCTTGATCGCGTTGGTGTGCTTCTGACGCCTCTTAACCACGCAC  
TGCAGAGCCGAACCAATATTACCACACTATCAAGTGACTTACGAGATACAGGCGAGATAA  
AACAGGTTTGCATGATTAGGTCAGGATCCATCGAGAAGGTGCTTTTTATGACAGTGTTT  
CACCTGGTGAAACCGAAGTAATCCTACGTCTCAATCGTCATGGCAATTCGGGCACTGTGT  
ATTGCATCCAGTCACGTGGCGCTATTTGTGACCCAGTCCAGCAGTCTCCTGAAATGCGCC  
GAGGTCAACGCGAGGACCCGCGTCCGAGAAGAAAGGACGATTCTGATGAATAAACAAAA  
ATTAGCCAGTCCCGAAAAGGCATAGGGTGGACAAATATACTTCGCTTTCAAAGAACAGGC  
ACTACAATAATCCAGACGGAATCGAAAATCGCCAGGCAGTTACGCGATGGCGGATTCTT  
GAAAGAAATTTAAATTACGCGCCAGAGGATAGCGTTTAAAGGGAATGATATAAATCATCA  
TCGAATAGCTGCGTATTGCTCCCATCTTCCCGATGACGTTGACGTTGATGAAATGGTTAG  
GGTGACCAAGCCTTGACCACCCACATCACTGAGCTAATGACAGGCCTGCCGGTAATCGCA  
GGCCTTATTACTTGGGCGAGAGGGAAGTCAACGATAGCTACCGTTGGTTTGAAAAATGGG  
GGTCAAAAGAGGAAAGCCAGTTCACGGGAGATGATGTATTATAAGAGTCTGCCTGGGTGA  
TATGTAAGGCATCGCGCGCTGCTACTGAACTGGATATCGACTGGCCCGAATCGAATGACG  
ACTTTTGGTAGGAAGGTGAGGAAGGTGCTTCTGCGATGGGTTATGAGTATGGGCGTGACC  
AAACGGTAATTGCAGTAATAAAAGACAGCAGCGCCGAGGCTTCAAAGAAAAGAATTCCG  
ATTAAGCAAATAACAGTGCAATAAATCACTTTTTAGGCATCACAAATCGCTCTGTAGCGAG  
GTAGAAGGGGGCAAGGCAAGCCAATAAGCAGTGAGACTGCATGTGGCGTCAGTATGGGTG  
TGATGAGGTGTTAAGAAATGAGTACGTTAGCTGAGCTTGTGAGGGCTGAGTTTCGCTAAG  
AGTAGTCGCGTAGGTATCGGTACCGTTCATCGTCCAGTTCGCGTCTGATGAGGATTATG  
AGCAATAACCTGTAGCACGACTCTATCCGCGTGAGCGTGTTCTTTAACGGTTGTTCAAAC  
TCAACATTGGGTTTAACCGCAACAGAATTATCCGGAGTCTGGATTAAAAGTGAAGAAGTG  
ATCATGAGCGACCGATGCTTAACCCACCAACGCGAAAAGAATGTCCGTTTTGCGGCGGT  
AATGCTGGTCTGTGGTTTGGGACCGGCATATATGTTGAGGTGTGGAGCTTTCAGTATGT  
GACTTCTGTGAAGGCAGGGGGGCATGGGCACCAACAGTTGCTTCCGCGGCTGAACTATGT  
AGCCGTTGAGCCGTAGTTGAAGCACACCTTTCTGCTTAGCAACGAATCAATCAGAAATAC  
CGGCATAGACGCCATCCTCTCACTAAATATCGACGACAAGTCACCCCGCGAAGTCCACGT  
CAAAGAACCAAGCGCATCAAAGCCCAAAATGACCGTAAGTGGCCGATGCTGAACGATAT  
TTCTCGACAGGTGCAATGGCATGCTCAACGGCAGGCGCCCGGAGACTGGAAAGATCTGTA  
CACTGCCCTGTGCTTAAACACGTAAAACTGGAGCAACGAAGTGTACCCGGTATCGACAG  
TGGCGTTGTCATGCTTGGCGTGCGTACCAGCAAAATGCGCAATGCCAGCATGACTGCGCC  
AATCGCAGTCATGTTCTGGTTTCGGCTCATTGCACAACGTGCTGTGGAGTGATGACTGCC  
GCGAAAGTATGAATGGTCAACGAAAAGTAGGGCTGCATGTCTATCAAATTAATAACG  
CCAGCACACGACACGGAGTTGTGGGAAACGCCGCTTTGGCTTTTTGATGCAATGGATATT  
GAGATTGGTTTCTCCCTGTATTCAGCTGCGAGCGACAAAAACGCTCTGTGTGCTCCCTGG  
CTAACTGAGGATGACGACGCGTTAATTTCTACGGGGATAAGTCTCGGTGCTGTCCGGAAT  
AACCCATCGTCCAGCAATATCAGGCCGTCGGTGGAAAAAGCCGCAGAGCAGTGCAATCAA  
CACCCACAGACGGTAGTGGTGAATCTGCCAGAGGATATGTCAGTCGCATGTTTCAGCATG  
GCTCTGAGGAGTCTGGACGTCGTTTCGCATCATCGCTGATGGACGCATTAATTTTATGGAG  
CCGTCGACAGGTCTGCAGTTGAAGGGAAACAGCTAAGGCTGAATGTTGCTGATTTGGCGA  
CCGTTTCAGCAGTCCCTCGACGGATGTTTACTATCGTATCCAAAGCGGCATTGACGGCGAGC  
GGGCTGGGCGTAAGGAAGGCTGTATAAAGGCCTCAGCTCCGAAGTCTCACAGACATCATCG  
CCGAAAACCTGCAAATGCCTCCCAACGAAACGATTGGGAAATAAACGCAAGCCAATCCCAA  
AAAAATCTGACGAAACAACCTTCAATTACCCACTCAGCGCTCGGATATCCGGTGTATAA  
GACATCGTGCGAGATAATGACAATGCTTTCAATTCAACCTGGATTTGGAGTTAAAATCAA  
AAAAGGCCACTTGTGTTGGCGAGAAAGTGTCAACAACGAAAATGGCGTCTATCCGGTTCC  
CTCGGTACGTACGTATAGGAAAACTGGGAGGCAACGAAGTATTGGTATACATGCGGCAG  
AGCCGCATTTAATGACCCAGACTGGTTAGTGTAACCACCGCGCAGTCCGTTAGGCAAA  
TAGATTGGCCAATATCACATACATGATGGCGTATCAAAAAGCATGGAAAGAGCACAGCGA  
TCGGTAGCAACAACACATGGGAAAACCTTAAATCAGTAAACATGGAACCTAAGATGAAAGAT  
CGGTGAAGCAATACCAGACATTGATGCCTACATTCGATGTGTAATGGTGACCGGGATGC  
TTAGCCCAACCAATCACTTCAATACCAGAGAGCAAGCGTCGAGCGGGCTTTAAGGTGCG

GTAACAGCGGTCAGACGCTGCATTTGCTTGAAGCTCACAAGTCTGGGTAATGCTGTGCAG  
ATCTGATGAGAGATCAGGATACCTCAGTGTCCGAGAAAGAACACGATGGCCAAACCTGTT  
CGAGGGAACCTTCAATATATGCAAGGAGTGCTTTTACCCGGCATTCTCCAATCAGCGCTGG  
TACTGCCCGGAACACGGAACCTCAGTTAGCGCTCAAAGTAAAGGTAACAGCTAAAAAAA  
GGGAAAAAGCAGCAGCGGAGAAACGACGACGCGAGGAGCAGAAACAGAAAGATAAAATG  
GATATACGAAACCTCACCTTAAAGGCCCGCAGCTACAAAATTAACAAGCCCAACAAGCC  
AGAAACGCCTGCATAAGAGAATGGGACCGCTACTTACGATGTAGCGCGCCCGGAACGCTA  
ATGTCTGCTCAGTCGGATGCTGGACATTACGGGACAATTTCTGCGGCACCTCAACTCCTA  
TGTAATGAAGGCAAAATTCGCAAGCAGTGCGTGGAGTGCAACCAGCACAAAAGCGGAATT  
CTCATTCCCTATCGCGTTCGAACTGAGTAACCCAATCGGACAGGAAGCTGTAGACGAAACC  
GAATCCAACCACACCCTCCACAGCTGGACTATCGAAGAGTGCAGGGAGATCACGGCCAAG  
TAACAGCAGAACCTTAAAGACCTGCGGATCAGCAGAATTGAGGCCGCATGGCGTTCTCAG  
GAACCAGCATGCCTGAGATTCTCGTTGAGCCATATGAAAATTAGACCAAGATACGCAGAA  
TACTGAACTTTAGTCGCAACACTGCCAGTAAATACAGGGGCGATAAAGAAGGAAAAAGAT  
TCGCTATTACCATCCGTGTTCTTATAGTTCATCGCTGATGGGGTAAATTTACGGAGGCGT  
GATGTCCGGCAGGGTTCATGAGTGCTGGGGGGAACGGGCGGCAAATAACCATGAGGCTGTG  
ACCGGGTCACCCATTTTCGCCGGCTTTAAGGGACTGACCCAGAAAAAGTAAATCTCGC  
CCGCAAGGCAGTGACGATGATGGGATGGAGATATGCGGCTGTATAGCCCGCCTTTACCGG  
AACAAATTGCGATCTGCATGTCTTGCTGGTTGATTATTACGTGCTGGGGAGGACGTTTCATG  
GCGCTGGCACCGACGCATGGGTGCTCTGACCCCAAGATAGGTAGTCGTCGTCACAGAGCG  
GAGCGAATCGTTGAAGACCAGCTGAAGATACTGGGATTGAGGCTTTACGTGGATCTGTTT  
GTTGAGTGTTTATAGTCGGGAGGGTTAACATCTGTATTATGTGACGCGACGCAATAGTTGA  
CGATCTTAAAATTCAGCATATCAAGATAAGAGTGGTTACATTGCCACGCTCCATCACCCC  
CCGATATGCGGCGTTTTTGGTTTCCAGAATCCTGTGAGCTAGACGAAAAGTATGCAGAAA  
GGAAGGTGCGACCACAATTAATAACATAACCTTAAAAGTTGCACATGGCACTATCAATTT  
TCTATATATTGTGTATATTTTATATTGCAGCATGATCGTGTAACGAATTTTCCGTAACAG  
CAGTTCGCTCTACGAGTTTGCCAGCCTCCCCAATTGATGGCTTTTTTATGGCCGTAACA  
TACTGGGTATCAGTAAAAATTGTTGTCTACGTGCGTCAAGCCGCCGATTAGATCTCACC  
AGATATGTTAAGGTTGCAGCGCTCTCTGAATAGCATAATCAGTCTCATTACGTTACTGTT  
ACGTTTATCCGGTGCAGCAGTAAAACGCCGTCTTCAGCGGAAGAAGGATGTGAGAAATAT  
AGGTATCGGACGGGTCTCAAGGGGTAATGTGTATCATGAAATTAATTATTTTLAGAGTGC  
TCGATTTTTCTTTGTTATCTTTTCAGTTAATCGGGTTGCGAAGGAATTTACCTTAGACT  
TCTCGACCGAAAAGACGTATGTAAATTCGCTGTATGTCATACGCTCTACAATAGGTACTC  
CATTAGAGACTAGTACTTCAGAAGGTACGTCTTTACTGATGATTGATAGTGGTTCCAGGG  
ATAGTTAGTTTGAAGTTGGTGTGTCAGAAGGATAAATCCAGAGGAAGGGCGGTTAATCATC  
AATAGCTTAATGGTGATCGAAATCATTAAAGGTGTGGCCGGGCTTGCTAACAGGACTAATA  
ATGTTTTTTCTCGGTTTACTGATTTGTTACATGTGACCTTTCCAGGTACAACAGCACTTA  
CAGTGTCTGGTGACAGCAGCTATAACCACGTTACAGCGTGTTCAGGTATCAGGCGTGCGG  
GGATACAGATAGATCGCCTTTCTTTGACAACACTACATATCTCGGTTTTATGTCACATAGTG  
GAACCTCAGTGACGCAGACTGTGGCAAGAGCGATGTTACGGTTTGTACTGTGACAGCTG  
AAGCTATTGGTTTTTCGCCAAATACAGGGGGGATTTTCGTACAACACTGGATGATCTCAGTG  
CGCGTTCTTATTTACTGACTGCTAAAGATGTTGATCTTACATGTAACCTCGGGAAGGTTGA  
GTATTGTCCTGCCAGAGCATGATAGACAAGACTCTGTTTCGTGTAGGAAGAATTCCTTTTG  
GAACCATTAATGCAAACCTGGGAAGTCTGGCCTTCATCCTGAATCGTCAGCATCAGGCAT  
CACGAGTTGCCAGAATGGAATCTGATGAGTTTCTTCTATGTGGCCGGCAGATGGAAGAG  
TCCGTATGATTACGCACAAAAAATATTGTGTGATGCATACGCTCTGGGGGCGAGTTCCGA  
TGCGCTGTACCATTAGCAGTTGAGGGGGTTAAATGAAAAAACATAATTAATAGCAGCAT  
CGTTTTTATTATTTTCAGCAAGTGCGCTGGCGGCGCCTCATTGTGACGGCGGAAAAGTGG  
AGTATAAAGATATAATGATGACGGTACCGTTACAGTTACCGTGGGAGATAAAAAATTAT  
ATACCAAACGATGGAATCGTCAGTCTCTTCTTCGCAGTACGCAAATTACAGGGCTGACTG  
TAGCCATTATAGCTGATGCCTGTCATAGTGGCGGGGGATTTAGCGAAGTTATTTTTCTT  
GATTTACAATAGCTCAGTGATAATAGCAGGCTGGAATTCATAAATGTGAAATACATCTCA  
AGTCAGTCAGATGTTGCCGGACTGATGATGGATGTCTTAGAAAATTTCTGCATGCGGAAG  
CCCCCTGTGCGGAGCGGCGACAGGTTACCGGTCAGATCTCCTAGATGATCGTAAGCGAGT  
AAACGCGGGTTTAGTAGCACCAGGCTGAACTCACCGGGAGGCTCCCGGCACTATGGAATG  
GCACATAGCGCCACTCTCCAGCCCCTCTCCAGAGGCGCTGTCTTTTTGACAGCAAAAGCC  
CGCGCAGGGAGACGCTGGCGGCACCGAATAAACAACACAACGTGAAGTAGTTTTTTCAGCT

TACCTATAATATCCGACAGTAGTCACTCTCCGCAATATCGCGGCCGTTTTGATATTGCGG  
GTTGTTGTCTATCTTCTCCCCTTTTCTATAGCTTCCGCATTGCAGCACGATCATCAGTT  
TACACACAATATTATCCCGGCCGGGACGATTCATGACATTGCCACACTAGGATGCGGTCA  
GGGTGGCGTTCGGCGTCAGACCTTGCTGATGCCCTTGCGCAAACCTTTCTTGAAGGATGGC  
AACCATTCCGGTGTGCCGTTTTCTTCGTATACGGATGATTGCGCACGACAGATTGAGTCGA  
TTGTCTCAGCAGGTCATGTGCGCACACCTGTTGTGCTGTAGCAGAGAGGTGGGGAAGCTG  
CAGTAATCAGCTCCACCAGTTACCCCGGGTATTAATTTGTTGTGGTTCTGGCAGGGCAGT  
CAAACGCCATGTTCGTATGGTGGATGTCGTCTACTTCCGGAGACATAACGACCGTCCGCACC  
CGCCATAAAGTAGTTGTCGCGTCGCAGTACGGTGACACCGGGCGGTGTCGCCTGTAAAT  
ATAACGACATCGTTCGTCACACCATTTTCTGCATGCTGTGGAGGACATGGGTGCGCTTA  
GCCTTCGGAAAGCGGACCTGTCCAAGGGGCAGTAATGAACCGTGGGGCCGGGGCTACATA  
ACGCCAAAAAATCGCAGGCGTTTACACCGGGCAATCCGGGCATTCTGTTGGTTCCGTA  
GACGGGGTGGTTAAGCCTTCGCCACCGGAGGCGAGGGCGTATTGAGTGACGCGAGTGATA  
CCTCCGAGAATTCAACCCGCTGAGGTGTGGACAAGCCGCCGTATCAGGACCTTATCGGAC  
TAACAAAAGCAGCAATGAGGGAGTATCCGAAATAGGTTCTGATTGCAGTGGTGAGGATGC  
AGGGGGAATTTGATTTTGGCTGTACGCCGGCTCTCCACGCAGCATAGTTTGGTGCCTCG  
TTGATAAATTTTCGTGAAGACCTGGGGGAAATGACAGGTCAGTGCCTGTTGGCTATCCTG  
AGTTGTTCCCTGGACATGCGGGTACAACACGTATTTCTGGAAGCAGAACAACGCGTCCT  
AGTACCAGACCGTGTACGGCAGCAGCAAAAACAAAACGAAATAGAATATCCATTTTCGTAC  
CGTTTCATGACGTTGAGAATTGGGTGCATGTGCCGTGGAACCCACCGGATGAAAACCTGG  
ACATTGCGGCTATAGGATATTGCGGTTTCGAAATGGCGTGACAGCTCTGCCACCTGGTCCT  
CACAGGACAGGGCGAGGCATCTCAGCGCCTGGGCACGCCGTCCGATTATTTCCGAACGTC  
TGGCAACGGCTATTTTGCGCCATTCCGAAGGAGTGGTGCTAAACGCGGGGGCATCACCGA  
CAGTACCGGAGGTGCCCGGACATGGCCTTTCGCTGCAGAAGCCACAGCCGTCACAACAC  
TGCTCTCTTACCTTGGCGGCGAGCCAGAGGGTAGCCTGGAAGTACAGGGGTGGTCAGCAC  
GTGGCGGGAGGGGTCCAGTCGACGCCTATGCGGAGGGAACCGCAGGTTAGGCAGTGAAGG  
TGACCACGGAAGACGGTAAAAGGAGCGGGGTGCTGGTGTACGCTGCGGGCAATGGTGCGG  
TTCTGTTACAGAAAGGGCGACAGATTCGCTTCCACTTTTAGGTTTCGGAAGTGCTAGCTG  
CGGAGCAGTATGTTTTGGCGTTTTATTGGCCGGTATCTTCACAGCCGCAGGGCGTTGCGC  
TTACCAGAGACGGGTCGAAAACCAACCGGCAGCGTTCTACATCCTGCCAGATCCAATCG  
AACTGAATGTGACGTACCACAATGCGAAACTGGCGACAAACAACCTGATCCAGGAAATCT  
TTGGTGCAGTGGTTAACGCATTGCGTACGATGGCGTTCCGCCTTGCCGGGAATAACAGCC  
TTCACGCGACGCCCGTTATCGACGGTCGGGCTGGCGTACCTATCATGCTGACGCAGTCAC  
CGATCAGAGCAAATGCGGCGGATAGACCGCATGTGACAAACATTTCCAAAGATGCTACTT  
ACCTGGTGCTGATGGACAGCAATGCTGTGGAATTGACCAACAGAGCCACCCCGGCATGAT  
AAAAAAAACCGTCAGCGACAGGAATCCACGCTGGCGGTGGTAATACCTATGGCGAATAAA  
TAAAGGAGCGAAACATTCGTGGCATGGTCTCTTAAATCAAAAAGAGTTCTTATTGTCAACC  
ATCACGGAAAGAAATTATTACATTTCTGAACCAGTTAAAGCTGTACTTATGTACGGTGGT  
CTGTGAGCTGTATCTCCTATCGGGTGGGGACTCGGCCAAGCGGGACTTGTGCGCAGACG  
GATCGCCAAAATGTCCGCTGAGAAAGTCAGTGCCAGTCAATCAGCCGGAAGCAAGCCCGA  
AGTGCCGCTCATTTAGGGGCAACTTCTTTAGTACATCTTTTCGAGGAGAAAGTCCCCTGG  
TAGGAATTACATCCCTGGTTACTGCTAAAGCACTGAAGGAAGACCTGGGGCCCTGGTGAAG  
TCCGGAGCGGCTTGAAACAGATACTTCGGCAAAAAGTGGAAGGGCGTCTTGATGCAGAGG  
TTGATAACCATTCTGCATGAGCTCCGGGCCGCACCGGCAGATCCGGAGCCGGAGGCCATCT  
CGGGTGAGGGGAGTGCTTTAGATCGCGGTGAACCCACACCGGACAGCGACATGATGATGT  
AAGCAGGCGTCAGGGACCACCGTTGTGTGCCGGTGGTCTTTTTTCTTGGTGAGTCCTTCC  
GGATTGCGCGAGAGGGGTCATGTACTAGATGGAAAAAATCACAACAGGTGTGTGCGCACAC  
CACGTAAGCGGAGGGAATGGGCTCCGGGTTCTGCAAGTTGCTGGGCAGGGTTTCCCCGTC  
TCAGTGGGCGGCCACAGACGTGCTGGGGATTCCGGCTGTTTGGGCTGCTGACAAATCTGAC  
GAACCTACATTTAAAAATTA AAAAAGGACCGGCGTATGGAGGCTCCGGGAGAGTTATGTGA  
TGAGCAGAATACTCCGCTATGTTTTATCGGCTGCCGTTCTGGCGCTGATTGGCGCAGGTC  
CTTCTGAGCCTGAAATTCTTGACCAGTATCTGGATGAGAAGCGAGGTAACCATAACCACGG  
CATCCCGTGATGGCGGGGGTAAC TAGACCATCTGGCGTGGACCGACCCGGGTGGTGGGTA  
AGCGTGTTATTCCTGGCATGCAGCAATCCAAGGAAAAATGCGACAGGGTTAACGCCATTG  
ACCGTGATAAAGGCGCTTGCCTGGGTGGAGAAAAACGTCAAAGTGCCGCTGACCGATCCCC  
GGAAAGCGGGGAGCGCGTCATTCTGGCCGTAAAACATTGGACCCTGTAAGTGTTTCCCTT  
CGACGTTTTACAGACGAATAAATTCAGGTGAGCGAAAAGGTTTCATGCGAACCCATTCGCT

GGTGGATTAAGGACGGTAGCAGATACTGCCGACTTCGTTTAAACAACAGTTAGCGTCAGG  
TATCCCGTCGTGACCAGCAGTGCTCTCTGGCTTGCTCGGGATTCAACAGAGAAGATGAAA  
ATTCTGCTGGGAAATGATGATTGTTTGTCTGGTACGGTTAACACGGAATCCGCAAATTGG  
CAAATGTAAAGTGCATAAAGTTAAACAGTAGTTTAACTCAGGGACCGTAATGATGCC  
TTTGCCTTTTCTGCGTATCTCATGCGCATCTCCCAACTCAGAACCCTTTCAGGATGACGCT  
TCAGGATACCGTTTTAGCTGTTCGGAGCATTCTGTGGTCTGGATACCTGTAAGAGAAGGT  
TCGTCATAAAAGCAAGTAACCCATGAATACGATGGCCATGCCGTTTCACGGCAACTCTC  
TTTATGTACTTAACCAGAACGGCCATCCCTTTGTTCCCATGAGACTTCTCGTTGCGGGGA  
TCGGGGTAGCATCGAAATCCAGGTGTGTAAGTTAAGATAACCGTTTTGCGTCAACTACAC  
CGAAATCGTAATGGTTGCGGAGGCTGAGAAACAAGGCAATGCGCTGTCCCTGCCACTCC  
GAAAACCTGCCGCCTGCCACAAAACATTCATCCCAACAGAGTAAAACCTCGAAATTCGCG  
ATAGGGTCATCCGGTATCAGGAAGAGTGCAGACGATGTTTATAACGAGTACTGGATGAAGG  
GTTTTGTCGTTTTCTCACCGTAAAATGAGCTTGATGGTAGAACTCAACCAGGCTTGTGCGG  
ACAGGAAACGGGATAAAAACATGGCCAGTGTGCTTGGTACCGGGCCGGACGAGTTGAATC  
AGGTCCATGCCACGCATGTATCAAACTCCATACACTGGTAGAAGGAGCCAATATGCTGA  
TTGATATTCTCCTGGGTGATACTGGCAAAGGGAAAATAAATAAGGCGGATTGTTTGGGTG  
GACAATGATATCAGATAAACTCAGAACGCTGGTGAAGAGCCTCTGTGTACTTAACTGCAT  
TTCATTTTTAGTCCTGCAGGTTGCCATTTTTCTTCTCGACCGCCTGGCGCTTCTGACGTA  
AAAGGGACTGGTGGGGTCAAACCGTGATGAACCTTGATCGGTGGGTGGCGATTATTGTCC  
TGGCGGTTGGGTATGTTGCGCTGTGGCTGGCAACAACCAATTACGGTGACAACGTGCTGA  
CCTATAAGGCGCAGCGGATAAAAAAGCCAGGTAGATGGAACAGGCGTATGCCAGCGTTA  
CTGACATGAAACTCCGCCAACGTCCTGTGGCTGCGCTCGATGAAAGACAATCGAGGGAGT  
TAGTCGATGCTAGTGCTGAAAATGAAACACTGCCCGCTGAAGTTGCCGCTGGTCTTAAGG  
GGCTGCGGATAAACACCACCTGCTCCGGTACCGTGTGTGTAGCCACCGGCACCTCCCGCG  
TGGATAATGCATCCGGCCCAGCGACGGGCAGCCAAGGCTAAACGGGATTAATTCGTCCTCA  
GAGAAGTCTGGTCACTATGCAGAAACAACCTGGAAGCAACTCAGAAGTATATTTATGAGC  
ATGGCAGATAGAGTTGACGATGTTCGATGGGCAACTCACGTCATTATAGTCAGCAATACAC  
CCGCGCTTCCGCGGACTAAAATTACTATAGTAATAAAACCGTGCAATCCATTTGAGAT  
TATTCGCTGGGTTTTAGATTTAAACAATCTTCTTAGTGCTGCCACAATTTTTGGCTACACC  
TACAGTTTTCTGCTGCCATTTCCAGAAACGAAGAACTGATAGGTGATGGTTTTCTTTGG  
TGCAACAGCTGTCTGTTCTTTTGAACAGTAAACGTCTGTTGAGCCCTTCTGTAAAGAAG  
AGGGGCCAGCGCAGTAGCGAGTCGCATTTTTCTTCATCGCGTTATTCCCGATGCTTTTTGA  
AGTACGCAGAATCCTACGTGGAGAAAATTCAACAACCCCTAAACAATGAGCCGAAATTTT  
ATATTGTTAATATTTCTAAATGTATGTCAGGTTTCGATGAAAAGACCTTGTATCCCCGGGT  
TAACCATGTCCGCAGACCTAACGGGGAAATTTTCGGAGGGATTGTGCGGGGATCAACAAA  
ACCGCTGCACACCGGTTTACTCTTTTACATGGGATGGGAGCGAT

>NewGenomeName\_182

CAGTCGGTGAAGCTGCAGAGATCATGAGCTGTGTTTGTGACATGCTGTATTTGCAATACA  
AGGCAGAGTATCCTGAACTCAGTGAAACTCAGATTGCGGATTTGATTAACCGAATTGA  
ATTTCCAACCTCAACTTGAAAGCTGAAAAATGGGTGATGAAAGCATGTACCAAGTAATTTT  
TATCGCAATTGTCATAGTCGTGGTTATTGAGTGTTACATGTCCATGTGGGATGACTATTG  
GAACGGTAAATGCAAAAACGAAATCACTGAATCTAACGCATGGCGCAAAAAGTATGACAT  
GACACTGTGGCGAAAAGACCGGAAAGCTGGTCCATTTTCAAGGTGGGTAATTTGTTAGAT  
GACACTTTGAAAGACATCAAATAAAGCCAATGCCAGGGTATCAGTTTCCGAAAATTGTAT  
AAAGCTCAAGCTGAAATTCGCAAAGACAATATTGCTAATCCTGATTTTCGATCAAACCTGGA  
AATTTGATGTCTTTGCTTTACAGATCGCAAATGAAAGATGTTAAAAAAAATCCATTTGGG  
AGGACTAAATGTCAACTGTAGCTGTCATTACGAGTATTGTGCTCATGTTTCGCAAAGACAC  
AAAGTAGTGATATAATGGCAACTACTCTATCAATTCATTATGAGCAATATTAATGTCTGA  
TGAATTCAAAGTTCTAACTCCTCGCGAACACGTAATTCTTCGCCCAAATAGGTATGTAGG  
TTCTGTGCGCATATGAACCACATGAGCGTTTTCTTGTGGTAAGTATCAATCCGTTTCTTA  
TGTTCCGGGCCTGGTAAAATCATCGATGAAATCATCGATAACCCGGTTGACGAAGGTAT  
TCGTACCGATTTTAAATTTGCAAATAAGATTGATATTCGCTTTGTTTTGCTTGAAGGTTT  
TGTGACGGTAGCGGATAACGGCCGAGGTATTCCTCAATCACTGGTAAACACTCCAGACGG  
AGAAATGCCTAAGCCTGTTGCTGACTGGACACAACTATGGCAGGCTCAAACCTTGATGA  
TCCCAACCGCGTATCAAGGGGGATGAATGGTGTAGGTTCTTCTGAAAACTTCTTCTC  
CAAGACTTTTATCGGTGAAACGTGCGATGGCGAAAACGTTCTCACTGTCACCTGCTCTGA  
TAGTGAATCTCAAGTCAATTGGGAAACCAAGCGGGGTAAAATCAAAGGAACGTCGGTATA

TTTCATCCCTGATGGAAAGCACTTTGAAGGAAAAACGATCGATCAGCAGATAGTAGATAT  
CATTTCAGATCGAAACAGGGCACTGTCTGTGGTGTACCCGAAGATTCAATTCACCACCAA  
CGGTGAAGTGGCTTCAATGAAGTTTGCAGAATACGCTAAAATGTTTCGGGGATGATTCTCT  
CATTCTCGAAAATGATAATTTTAGCATCGCAATCTGCAATTCTCCTGAAGGATTCCGTCA  
AGTCAGTTATGTCAATGGTTTGAATATCAAGAATGGTGGTCCCACATCGATTACTTGAT  
AGAAGGCATTCCCGACGAACTTATTCCATCAATCAAACGAAAGTATAAAATTGAAATAAG  
CAAAGCTCGAATTAAGAATGCTTGACAATGATTGTGGTTGTTTCGTGGAATGAGTAATCT  
TCGGTTTGATTCTCAGACAAAGGAACGTTTGACCAATCCGCTTGGCGAAGTGAAATCACA  
CATTGAGCTGGATTTCAAAAAGTTAGGAAAGCAAATCATGAACAATGATGCTATCCTGAT  
GCCAATCATCGAGGCTGCTCTTGCTCGTCATCTGGCTGCAGAAAAAGCAGCATTGACGAA  
AGCCCAAAAAGCAGCAGCAAAAACCAAAGTCGCTAAGCATATAAAGGCCGGTTCCTGGGG  
TGACATTTCCAAAGAAACAACCTCTGTTCCCTGACAGAAGGTGATTTCGGCCCTTGGTTATTT  
GTTGAGTGTTCGTGACAGCGAGTTGCATGGTGGATATGCTCTTCGAGGAAAGGTTATGAA  
CACTTGGGGAATGAAAGGTTCTGACGTGCGAAAGAAGTGAAGATTGGCCGATATCTGTGC  
AATCATGGGACTCGATTTAGCTAATCCGGATGATGTGCGAAAATCGCAAATACAAAAATGT  
TGCAATCATGACCGACGCCGATCCAGATGGCCAAGGCTCAATTTACCCATGTCTACCCGC  
GTTCTTTAGCCGTTGGCCAAAGTTGTATGATCTCGGTTGCGTACGATTTGTAAAAACTCC  
GGTAGTCATTCTTTCTAAAGGAAAGCAGATCAAGTGGTTTTATACCATAACTGAGTTTGA  
AGCGCAAAAGGAACAGTACAAAGGTTGGGAACTTCGATATATCAAAGGATTGGGTTCACT  
TCGCGAACATGAATATCCGAAGCTGTTAACAACCCTCAGTATGATATCGTCGATCTTGG  
GCCCGATTGCGAAGAATTGTTTCGAAATGCTGCTTGGCGATGAAGCAGAAGTTCGAAAACA  
ATGGATGTCACAATGAAAAGGGCTCTTCGGAGCCCTTGTGTGTTTTGAAAAACAGTGTA  
CAACGCTTAAAGTGAATGGTATTATGGCTCCATCAAATCAATCAAGGAGTACATCATGAA  
AATCGTTCGAGTTAAATTCAAATCCCCGGAACATCGTAAAGCTTTTGCTAAATCTGCCTC  
GTACAACGCCGAATTTGAGAAATTCATGCCAGACGAATTTTGGCTAGGTTTGACCCACA  
CAGAAATGTTCAATACCGTTTGGTCGATTCTGATGGTGTGATGAGCGAGCTGCCGGAATC  
AACTGGTGGTGGCGTAATCATTTTCGACGACGAAGAAGTTCATTATTTTCATGGAAATTAT  
TGAATAATATCACAAACAAAGCAGTTTACAATCGTGAGGCTATGGGATACTATAGCCTCAG  
GTTAAACGAACTAGCAAAAACATGTAGTAATTTAAAATGATCAACTTCACCGAAGCATT  
GGCAACGTTAAATCCCATGGGATGTTCTTCTCCCCGTATCTTGATACCTTTATCAGTCTT  
TACGGTGTGAAACTGATTCTCCGTCAGTCTTCATGACCATCAAAGGCACAAAGAAAGCA  
AAGCGTCTCGGCGGCAAGAAAGCTGCTTCATACATCGAATACGTTCAAATTGAATTGTGCG  
AAAGGAGAATAAAATGAAAGCACGTTTCAAAGCTGAAGAAGCACATCAGCAGTTCATCGA  
CTACGGCGAAAAGCGTTGGACAATTGGCCCTCTGGGCGACACAAATAACAACCGTCGCAT  
CGCTCGTCATTTGGGAATGAAAGAGTTCGATGTTGTCAAATCGATTTTCCATTTGCTGG  
CTGGTTCGACATCGTCATTGATGACATGGTGTTCGAGTCTATCGCTAGTGACGAAGTTTG  
CTTCTTCGAGTTCATTGATTGATTAAGTGGCCGGGCAGCCGCCCGGCTTTTTTGTATCAA  
AACAGTTTGAGGCTTTGCCTCTTCGAGCGAAGCTCGAATTTACCCTTTTAGTTATAATAT  
CTATTAAGACATAAAGGATAAAAATATCTAGTTCGACGGGGTTCGAACCAGGTAAACCTGG  
CTGAACCCAATAGTTTAGTCAATGATACATTCACATAAGAATAAGGTATTATCCAGGTT  
AACCCAGTTAATCCAAAAATTATTTAACTTTAACTGTGTCAATTGTAATGTTTACCGTGT  
TAGGATAACACCAGTAGAAAAACAAGGAGGTCATTATGACCCTGCATGAAGAAATATCT  
GAAGCTCTGGTTCGAATTTGTGCGCATCAACGTACGATTTCATGGGTGATGATGAAACTGCC  
GATGAACTGAGCGACGAAGTTAACCCGATTATTGCTAATATCAAAGCTGGTATTGCAACC  
CGCAAAGAAGTGGCCCGCTGTGTCAATTTGGGTCTTGTGCACGAAGCTAATCTTTATGGT  
TCCGATTGGGGCAAAATTGTTTCCAAAATGGAACACCGCATGAAAAAGGAACATAGTTAT  
GCAAATCACCTTTAAATCCGAAGAACACCGCAAAGCATTTCACAGTATTGCCAAATGCAA  
TGAATGGATTGCTCACGCTCTCGGTATGGACACATGGGAATGCCGAGAAGAACCGGCAGA  
TGAGTATGACAAAACCCAGTATTGGCTGTTCTTGACGGTTTCGGCAAACAGGTTCGCTGG  
AGTGTGTTGTGATGACGGGCGTCAGTGTGAAGATCATGCATGGATTTTCTGGGGTGC  
CAAATATTTTCGATATTACTGAATAAAGGAAACACATAATGATTATCGGTTCTAACGAACA  
AGATGTGATGTTTGGTAATGCACGTTCTAAACGGACCGGGTTTAAAATCCAGGCTGGGCG  
GAAGGCCTTCCAAGTACTTTCTGAAAAGCTTTATAAAGACAAAGCTGAAGCAGTTTACG  
TGAGCTTTCGTGCAACGCGGTTGAAATCCATTGCGAACTTGGAAAAGGACATATCCGTT  
CAACGTCCTCTCCAACTTCAATTTACCCATGGTTCGTAATCCGCGATTTTGTAACTGG  
GCTGACGCAAGAGCAAGTTGATGAAATTTTCACTGTCTATTTTGTCTCCACCAAAGATGG  
TTCCGATGATTC AATAGGTGGTTTCGGCCTTGGTTGCAAGTCTCCATTTGCATACAGCGA



GTCGGGTGGCGGTTTCACTGTAAAAAGCTATCAAAAAGGCCTGTGTACTGTCTACAACAT  
GTATATGGATAATGGAGAACCATTTGCTACACCGATGTGCGACTACTCCGACGCCCGAAGA  
AGATGGTCTCGAGATTCTGGTTCCAATCCCTGAGCACGAACATGCTCGCTGGAAAGTACT  
AGCTCGCAAAGTGTACCGGGCATATGATCGCTGCAAACCTTACATCAAAAGATGGATGC  
AAGCAGCATTGAAGAATTTCCGAATCAAGATTCGTTCTTCAATACTGACGAATTCGCCCG  
TCCAGGAGAAGTGTATGCTGTAATCGGTGGAGTAGTGTACCCGATCCCTCAACGTCTCCT  
GGACTCCGATATGGTATTCCGATATGCTGGTAAAGCTGCATATATCAAGTGCCCTATTGG  
CTCAGTAGACATTGCTCCTTCTCGGGAAGCACTCTCGTTGACCACAGAAGGCCGAAGATTA  
CATTATTGGTCGACTTCGTGATTTTTCTGATAACTATGCCGAATCGGTAAAGAAGGAATT  
TGACGGAATAACCGATAAACGAAAAGCCGTAATTAATGCCAGTGGATAACAACACTATGT  
TCGTCAAGCTATTTAGATTGACCATTGATGGCGAGCGAATTAACGATCTTATTGATCG  
ATATACGGATATGTCAAAGCTTAGTGACATTACGGTGTACGCATATCGTGACGGTAGTTT  
GCGCCAGCATATTACGCGTTCGGGATATTCGTGGAGAAGTTCCAATATAGATGCAAAAAGA  
TGCCTTTGGCATCAGTCGGCGTAAAGTGCATGTTCTCATCAATGATACAGGTGAAGGTAT  
TCCGAATATGGTTCGGGCGTATCATCATCATATTGGTGATACCATTCCAGTCGTTGTGTT  
GAACTAAACTCGCAAATAAAGCAGAGTGAGTACGCCGATATGGACGAACCATGAAAGC  
TATTTGCGAAAAGTTTAGCGTTGACGAACGCTCAATTCTCAAATTTAGCGAAATGAATGA  
TATTCGAAAAGCATTACCATAACATAAGCGCAAACATCTACTCCTCGCGATGCTAAGCC  
AAACGTTCAACGTCATTACATCAATGATTCCGACCTTGGTGACGTTGAATTAATATACAT  
GACATCCGCTGAAATAAAAGCTCTTGAAGGAATTGCGGTTATTTTCGTATAGCGATACATT  
TGACAGAATTGCGCTTAAAGCTTCGCAGTATACAATGCGTAGTGCCCTAGCAGATTGAT  
AGAGATTGGAGCAACCGAAGTTTACGTCATCGATAATGGAAAGCGTTCTGCCCGCAGTTA  
AGGCTCCTCGTTTGAATGCGGTTTTAAGTGGGCATATGACCAGTACAAAGTGTGCGAAAG  
ATGCTTTTGTATTTCTTAGTGCCGAGTGCCCTAATATCGGAGACTTTAAACAAGCATTTC  
GTCTTAAGCAAATGGGCATTCTTGAATTGGTATAACCGAAAAGTTTGACGAAAACAATG  
ATGATTTCTGAATGATGCATCCCAATGGGTTGAAATCGGAAATCCCGATTATGCCGATT  
TTGCTGAAATCAAAGAATATGTTGATGAACAGAATAAAAAGTATTCCGAAATGTTCTATG  
ATCATATGGAGTCATTGAAAATTAACACCTGCTATTGTTTGCAGTTGCCGTTAGTGGTA  
TAGCATTAACTCCTGAAATCATGAAAGATATCGAAATTCTCCGGGCTCAGTAAGAACCCT  
TAAAACAAAGAGGTATGATATGGCTAAGCTTAAATTTGTTGAGTGTTTTGATAATGAAAC  
CAAGCAACAGATTTTTGACAAATATTCTCTTGGCAATGTGTCTCAAGCTTATTTGGCAAG  
TGAATACTGCGTATCGATAGATAACAATTGCTCGGGTTCTGAAAGAAGTCCGAAATTGGGA  
AATATCTGCTGCAACGTCAGAGGATTCACCTGCCGAGGAAGAAATTGCTGATAAGCTGGA  
ATGTACCTGGATGGCCAATTCCAAGTTCCTTTCTGTGACCATCGGCGCCGAAACTTATAA  
CGCTTCTGGCGATCACCCACAGTTCATGGAAATCATCAGTCTTCTGGGCGAGGAAAAATA  
CGATGAAGCAATGGAAATGTTGAATATCAAGCGTGCTCTTGAGCGATATGTCTCAGGCCA  
TCTGGTTAGCGAAGGCCGACACTGAAATACAAAGATCTGATCATTGATTCTGGTCTTAC  
TCGTCGCATCGTCGGAAAGATGCAAAACGGCGAACCTTTCGAGCCGCTCGTTTCATTCTT  
TGAAATCTGATGGCGAACCCGAGTCGTCAAGCCGTATATCAGCTGTACGACTTCCTGGA  
ACACAACGACATTGAAATCACCGATGATGGTCAATTTATTGCTTGGAAAGCGTGTAACAG  
CAATTTCAAACACATGCACACTGGCAAATTCGATAGCTCTCCCGGAACAGTGGTAAAGGT  
TAATCGCTTCCAGGTTGACGAAAACCCTAACGTTACCTGCTCTCACGGTCTTACGTTGC  
TGCCAAGTCTTATATCCCTCATTATGGTGGTGGTCTGGAAGAAGTATTGCATGCAAGGT  
CAACCCAGCAGATGGAGTCGCTATTCCAACCGTCTACAACAATGCCACAATGCGTTGTGC  
CGGGTATGAAGTTCTTTACGAAGTAACTTCTGACTTCAAAGAAATGAAGCACTACTAATT  
TTCATAAGCCACTTCGGAGGGCTTGTTTGAAGGCGTTGTATGAGCTCACCATTGGCA  
TTATATTTTACCAAGACGATGACATTGTTGGTTCGGGTGATGGAAATCATAGTTGGATT  
CGCCGGATGGCTTACAGAAAGCGAAGAACAATAACTGCAGTTGTTGAAGGAACATCTTGGC  
AGTTACGACCATTCGAAAAAGAATGGACTCATTTATTGCTGCTGGCCGAGTGTTTTATG  
CTCAAGATTACGAGAAAATGAAACAATCATTTCTTATAGAAAGCTTTGATTTATCCG  
ATTTTTTATTGTCATATTCTGAAATTGTGAGGAAATTGTATTGACGGTACCGATGAACGT  
ATCCCATGACGAATTTATCGCCCTTCGTATATCCAGCCGTTTGACGCGGATATTATTCG  
TCTTCAGATCTGCGACCAACTCAAAAAGCAGCCTGACACGAGGGATGAGCTTTTTGAAAA  
ACGGAAAAGGAGATATGATGATACCATCCAATACGGTCTCGATGAAGCGGCTGGGAATGA  
TATTCCTCGGCAAGAGCTCATTGATAGAACGGTTCATTCCTGAATGCCGAAATGGGTGT  
CACATATATCCTGGGTGGGGTCTGGGGAGAATTTGACTGGTTAGACAATGACAATATCAC  
CTTTGATGTGCCAACACCTGGGTTCAATCTGGAATCAAGACTTCTTTTTCGAAAATGGCC

AACGATGCATACCGCCGGTGCTAAACCGTATGGCAATTCAGAAGGGCTGTGCTTGTAAACC  
TGGTTTTCGCGGAGATGCTGATGTTTACTTGGTATTGATCATCAATGAATATGGTGGCGG  
TATCACATATAGGCCGAATTACTTCTTCACAAAGCGAGCTATGGAAAATTATCCGTATGT  
GATCTGCGTTCCCAAGCGCGGGTGGAGCATAATCATTAGACAGCACAAACAAATTTGT  
TTATTTTTATAACAAGTGGTGTACACTCTGATTGTGCGTGATAAAATGCACCTATCAACA  
ACACTGGAGCATTTTGCATCGAGGAAATGAAAATGAGAACTCACGATTTTCTGGAAAGAC  
GCGCCAGGCCGCGCTGTGCCGAGCAAAAGAAAGAGCTGATAGCTGAGCACAGAATGTTTT  
GCTCATTGATCGGTCATCACATCATCATGTGCTATGATCGCGAAGACTCACCTGAGCTCA  
TTCAAGCCAAGAAAGACCGCGATGCAATCGAAAACTCCTAACGGAGATTACTAAATGAA  
AACTAGTACACATCACGTCACAGCTATTGATGCCCGGTGTGTTGGCACTTTTGAACCTGA  
ACCGGCAAACTTGCAGGATTCAAAGTACACTTTCGAAGAAGTGATGCATAGAATCGGTTA  
TACGATGGTTGATTCGTTAGCCACGCTTGCAAGCTCCCTCGCAGGTATTGAAGCACTTGT  
TTATGAAAACATGATCACCTTCCCCTGCTGGGTAAAACGGGTTGGGAATCACTTCGATTA  
GATGTATGACGTGAACTGGGTTTTCTTTGATTTTGTTCCTTTCTGAATAAAACAAGTT  
TACAACTCGTGGCTATAGGATACTATAGCCTCAAGTTAAACAAATAGATAAACACGGAG  
TATTTTTATGATCAACTACAATTTCAAATGCGAACTTCTACCGAAGCCTTCAATTATGA  
TGTCGGCACCACGCGTGGTAAAGCCTGGGCAAATAAACTCTTCGCGAGTATCTGGATGA  
AACTGGCGAGAAAGATGCCACCATCACCTCATCAGAGAAGAAAACTGTAAATGGAGTA  
AGTTATGAAAGGCCCTAAAACATTCGACAGCCAATTCAGGCTACGCGGCGGTTTTGCGCA  
AGACGTCAGCAATGGCGAAATCAAGAACGAGCCAATGTTTGTCAACTCAGACTTGGCATT  
CGAGTACCAGAACGGCGGCCCTACTCGCAGTTTTATCGAGAATCTCCCGCTCGATTG  
GAAAAGCAATGTGATTTTCGATTCGCGTGTTCACATGCTTATGCCTGGGTGGTACCCCGC  
GATTCCCGGATATCACCATGATGACGTGCCGCGCCCGCATTCCGGTAGGCCAGCACTT  
TGCAACTGCAGGACAGCCAGACTTTGACAATCCTCGTTATCTGTCTCGCCATATCCTTGC  
TTTGGTTATCGGCGATATCTGTCTACTCATTTTGCAGTAGGACTATCGGAATTCAGCCA  
AATGCCTGATGGTGAACCTTATCTATCGGCAATGGCAACAGGAAGTCATGGCTAACTCGA  
AACTGGTGAGTTAAGTAAGCATATTGCTGCTGATCTAACTCTTGTAGAGTTTACTGGCA  
AACCTGACACACTGGGTCAAAGCGGTTAGAAACGGCTGGCGTTGGTTTGGTTCGAGTTTC  
TCGCGACACTGATCGAGTTCTGACACCGTCGAATGAAATTCGACGTCAAGTTCAAGTTA  
CATGGAATTCCTGATGGAGGGTTGGTGTGTTAAGTATCGCTTTGTTAGTGAAGAGCAA  
TTCAACGCATGGGCCAAGCAAAATTATGCACAGGAATTCGCATTCGCTTTTAATTCATGG  
GATACAATCTTCGAAATGGAAGAAATCGGGCGTAAAGTGTGCTCTGACACTATGGAAATC  
GACGGCGAAATTTACATGAGTACTCAATGGTACCCATTCAATATAACAGACCTTGGCAAT  
CGCATCATCGAGGTGAATGAATGAACTCTACTTCTTGCAGCACATTGAAATCAAATAGC  
TGGCGTGACTTCTGCGAATTTGAAATCGGAAGTTATGGTGAAAAGATCATCAAGATGTT  
TGCTTAACAGCTGTGTTAGTTTAAAATACAAGTCAACCAATTGAATAGAGAAAAATATCA  
TGAAAATAATGTTACTGCTCAACGTATTGTAGTTACTGGTGCCCAACGTGTTGGTGCTT  
TTGAATTTGACGCAGGAAAATCCCTGGATGTGAAATTCATTTTGTGCCTGGCAAGAATC  
GTGAAAGCATTAGCCAGCCCGGCAGTTATGTTATCGTTAAAGATGTTGTTGCTGTAGCTC  
GTACTTTTGTGGCCAAACAAGAAAAGAGTGTGGTTTTAACGAGACTATTTTCGAGAGTAA  
TTAGCTGCTGTTGGAAATATACTGACGGTCTTCCGCGGAAGATTTATCGCTCAGTCACAG  
GTCAAAACAAGACACATACGGTTTACCATATCCCGATGTCCTTGGTGCCAAGACTGTTGA  
ATATGCAACAACCTTGAGCTGTTTGAAGATAACACCACCAATATCAGTCGCTCACTGCTG  
TTTTGCGTCAACTGTTAAGGTATATAATTTCAATATCAAAAACGATAAAGGAATACCCA  
TGGCATTAGTTTAGATGATTTTTTTCATCAAGAGCCGATTGTGCCGGTTGCAAAACCGG  
CATCTAATCCCGAACTCCGCCTTGGAAATGAAAGCAAAGATGATGAATTTTTTCCCCCGG  
CAGGAATTACCATCAACCAGGTCACCGATGAAACGGTAATCGAACTGAAGTACTCGATT  
CTTCGGTTGTTAAAGAAGTCGATGAACTGAAGTACTTGACGAGCAAATTCGGCAATGCC  
AATCTGAAATTGATTGAGATATTCCGGCATGGAAGAAAGCCGATTGCAAAGTCATTTAA  
CTAATCTGCATAATCGACATGTGCAATCGATCATCAACAATGAAGCTCTTGAAGTTGCGA  
TGTATACAGTTGAAGAACGTGCAATCCCATCTATCATCGATGGCTTTAAACCGGTTTCGAC  
GCTTTTTCATGTATCGCGCATTGGTATATGCGAACCAAAATAAGACCAAGTTTAAACAAG  
TAGCAGCGCTTGCAGGCGGTGTTTCTGAGGCAGGTTATCACCTGGGGAAAGGTTCTGCCG  
TAAGTGCTGGACAACCTATTGCAAATACGTGGAACAACAACATTACAGTATTGGAAGGAG  
AGGGAACTTTGGTACTCGTCTGTTCAACAAGAAGCTGCACCACGATATGTGTTTTGTC  
GTGTCCATCAGAATTTCTGGGACATCTATAAAGACATTTCTCTTTCTCCGGTGCATCCCG  
ACCCTGAGCATTGCGCGCCGCTTTTTATCTGCCTGTTATTCCTATGGTTTTTCGCGAATG

CGGTAAAAGGTATTGCCACTGGCTATGCTACTACAATTTTCCCGCACTCTTACGAGAGTC  
TAGTGAAGTGCACACTGGCTGCAGTAAAAGCCGAAGAAATCCCCGAGCCGGAAGTGCAGT  
TCCCATGCTTTAATGGTATAGTTCGTCGAATCAATTCAAAATCTATCGAAATCGATGGTC  
TCTATGAGCTAGTTGGACAAACCAAATCATTATTACCGAAGTTCCAGTTCGATATGATC  
GTCTTGAGTACGTCAGTATTCTCGACAAGCTCGAAGAACAGGGAAAAATCGTAGGTTACA  
AGGAACAAACAAGTGATGGATTCCGGTTTGAAGTAACTCTCAAACGTCAGGATAAATTTG  
TCGAATTGATGGAAAAAAATCCGGAAGTTGCACATGAGCGTATCATCAAATGTTCAACC  
TTTGCCAAAATCTTTCGCAAAACATCACCGTTCTCGACGAGAATGGAGAATTGGCAGAGT  
ATGAATGTGCCGCCGATCTGATTCGAGACTTTGTGGAGTATCGCAAAAAATACACCACC  
AGCGTGTTACCTTCGAAAAAGAAAAGGCAGAATATTTCGAGTGATTTGGCTTGGGCCGGAT  
TTGCCTTTGTTAATGAATTGATTGAAGAAAAAATTGTTCTTCGTGGAAAATCGAAAGCGC  
AACTTATTGCCGAAGTAAAGTCCAAGCCGAATGTGGCAGGATTTGAAAACGAACTAGTTG  
GCATGAGCATTACCGTCTTACTGAAGACGAAACTCATAAACTTCAGGAAGAAGCTCTGA  
AACAGACCAAAGAATACAACACTACAGGTTCGAGCACTACTCCAGAAAACGAATATGTTAAAG  
ACCTCCAAACTTTAACAATAAAAAACAAAGGCCTCTTCGGAGGCCTTTGATGTTTCTAG  
ACAAAAGTGTGTACAACACTGCTTTAGAATGTATAGAATAGCCTCAAGTTAAACAAACTGTC  
ATGGAGCATATTATGATTTCAAGCGCTGAAAAACAAAATCAGCCGGTATTATGAGGAA  
CGCGTACAGTGGATGCGCGAAAATCATATCGTTGACGTTACAACACTCCAACCTTATACTCTC  
AAGTTTACCAATCACAAGGGTTATGTTGGTCAATGTCCTTACTCTAACCGTGAAATCAGA  
ATTTAGAAAAACAAAATCAATTTGCAACATGGGAGTCCATTAAGACATAATCAACCAT  
GAGCTGGCTCACTGGGCAACCGTAGGTCATGGCCACGATTAAGTATGGCAGCAAATGGCC  
GTTTCGTCTTGGAGCAACTCCTGCGAAAACCTGCACCCATGGCCAACCTGCAAAAACCGTAT  
GTCATAATGTGCAAAGGCAAAGTTGTAGGATATTCTGAGGTATTGCGAGTCGGTTCAGAC  
GCTGCCACACGAAACATCAAAGGAAAAAAGAAACAAACTCTTGGATTTTTTGGAGTATAAG  
GTAAATCCAGAATTCATCGATAACTCCAACCTGGAGCGAACCAAGTGTCGAAATCCCAACA  
CGAATCAAAAAGACAAACAGCATTATCGCCGATTTTCTCAGCGATCTTTGAGGAAAAGCA  
TGGAATTTTCAAATAATGCAAAAACACTAGTGTACTCCGTTTGGTATGGTGATACTATAGC  
ATCATACTAACAAACTGATTAATAACAACGGAGTATATCAAATGTTCAACATCACAAA  
ATCCAAGTAATGCAGATCAACCTCATGAAGAAAGCTGTTGAAAATTTCCAAGGTTTTGAA  
ATCAACGCAGTAATCATAAATCCGCTCAACAAAATGATGAACAACGAAGTTCGATAAG  
CGTGAAATGAATCGCTGCGAACAGTTCTTCAACGACATTATTCAAGACGATCTGATGTGG  
CAAAATGCTGATTGCGCTAAACTCTCAAATCCATGAAGCGTAAACTTGCTGCAGAGATG  
AAAAAATCTTAAGTTATTTCAACAAAGAGGTTTACAACGCTAAACCGCTTGATTAATA  
GCTACAAGTTCAACAAACTACCACAAAGCAAACGGAGTATTTAAAATGACCATGACCAA  
ATCGAAGCTATCGCAAAAGTTCTGAACAACCTCCAGGATCTCTGAAAACGCTACTTCTGTC  
TTCATTCAAGTTGCAAAGAAAGATTTGTTACTGCTGTTGAACTTGCGGAACCCACTGAA  
ATGAACAAAACGCAGTTTACTCCAATATCGGCGTGATGATGAAAAAGGGTTTGATCGAA  
AAATCTGGCGACGGCTACGTAACCACCGAAAGTGGTGATGCCATTCTCATCGAAGCTGCC  
GAAATGTCGAAAGCTGCCAACCTGAAGTTGAAGCACCTAAAGTTGAAAAGAAAAAAGGA  
ACTCGTGAAGCTCGCGAAATCAGAGTCGAAATGACTAAAAATATCGAGCTCGTGGAGCGG  
CTGCTGTCCAACCTCGGCATCGAGCACAAGAAAGCAGTCATCAATCGCCAAAACACTACGAA  
ATCAGTCTGAACAAACGCCACGCTGATGGATAACCGCAAATTCGAAATTCTCAACCGCGGC  
ATCTCCGTATCGTTGGTTACAAAGTATCTGAAGAAATCATCAACAACCTCAAACCTTTG  
GGTTGTGAAATCAAGCAAGGTCCGGCAAACCTGCTACATCGACATCACCGCGAATGAAAAG  
AACATCGTTCGTCTGATGGAAGAAATTCAGCCGCTAACTAATGCGACTAAATACTAGCA  
ACTAAGAAAACACTATCAGCCATCGCATGTTATAATGTGATGGTTGATTTCAATTTGAGGAAA  
AATATGAAAATTTAATTGTTGGTGCTGGTTTGAAGTGGAGCAACTATTGCGCGTAGTCTC  
GCTGAACAAGGGCATGACATCACAGTCATTGACAAACGGAAACACATCGGCGGAAACTGC  
TATGACGAAGTTCGAAATGGTACACTAGTACATAAGTACGGACCACACCTTTTGCATCAT  
AGCGACTTGGGTGTGCACAATTTCTTTACGCTGGACTTCTTGGATTCCCTATGAGCAC  
AAGGCAAAAGTCGAATATAGAGATACATTAATCTCTTTCCCGTGAATCTGAAAACACTC  
CAAGAGCTCTATGGTAGTGAAACGGAGCAAGAGGCCATCAAGTATTTGAAAAGGTTGGA  
GACACGAAATCTCCACCAACTGTTATGAACTTTTCAATCATTCCGTAGGAAAAGACCTT  
GCCGATATTTCTTTAGACCATACACGAAGAAAATGTGGGGCACTGATCCTAAAAACATT  
GAGTGTGCTGTTGGCGCAAGGATTCCTGTCGCACCTATGATGATGACCGATATTTTAGT  
GATAAGTACCAATATTTGCCCGAAGGCGGTTACACTAAGAAGTCGGAAAGAATGCTTGAC  
CATGAACGAATTGAGGTCAAATTCGCACGCCATTGAAAAGGAAATGGAAGCTCACTAT

GACTTCATTTTCAACTCGATGCCTATCGATGCGTACTATGACTTCAAATTTGGCAAATTG  
CCGTACCGTTCTTTGCCCATGGAAGTAAAACAAGAGAAGCATAATCATGGAATTACTACC  
GAGAATAACTCTGCTTCTGAAGAAGGTCATACCCGTTACACCGTTTGGTAGAATATTCCA  
GGCCATGGCGATGGTGACATGGTGACTTACGAGTACCCGTGCGACTACGATGGCACAAAC  
GTGCCGTATTATCCAGTGACTCACGGAAAAGAACTCTATGCTAAGTATGCTGAGCATGCA  
AAGACTGATAAAATGATGTTTATCGGCCGTATGGGTGCATATCGGTATATCGATCTGTGG  
AAAGCAGTTCGCAATGGTCTCGTTATCGTTTCAGATTTGGAAGCATAACTCATAGCCGGC  
CGTTGGCCGGCTTTTCAAAGGATATAAAATGAAAATTCTTGTAACCTTGCATAATAACT  
ATCATGCTCGCCCCAACTGGCATCTGGAAAACGTTCTCGCTATCGTCTCGTGACTGCGA  
CTACCGGCCCTCGTCGAAGCTCTCAAAGATATGGGCCATGATGTTGATCAACGCTTCGTTA  
CCCCAGGTGAAGACCTGAGTGGCTACGACAAAGTCTTCACTGCTAATTTGATGCTACTG  
GCGGTATGCAACCAGGTGGTTATGGCGTTTACTGGCTTCTGGCAAATCGTCCC GGCGCGA  
TCATTGTCATTGATGATTGGCAGACTCCCGAACGTTTGAAGAAAGGCTTCAAAAAGTCTG  
CCACTCGCACCCGTGAACAATTTGAAGAAGTTCTGTTCCGCGAATTAATGCTGTACGACC  
AGCACAACGAAGCTCCTGATGCAATCACTGCTGATCCTTCGCTGAAAGAAGATATCGTCC  
GCGGTTATGCTAAGAACGTCTTCGATTCTCACCGAATTCTGTATTGCGCATTTCGACAACT  
TCGAAGTTTCCAAGAATTTGATTATCCACAAGAATCTTATTCGTTCTGTCCCGAATCCT  
ATGTTCCTAGCCCAGATGATCGGCTGCGCGAATTGGGTCTGGCACGTCAAGATATTTTCC  
GCGAACGTAAATGGATTATCGCCGGTATCGGTGGTCTTCTTACAAAGAAAGCATGTAAGT  
TCAAAGACAACCTTCACTTGGGATGTAGAAGTATTTGGTTCGTGCAACTATCGACGTTGATG  
CCAAACTTGCAAAAGAGCCCGAAGTAATTCAAGCCTACTCGGGTGCCCCCGCTTTTTTCT  
ACCCAGACCAAAACAACCTTCGGCTCCAACCTGGTGGCGCAATCGACCACGCCAATGCGCTG  
ATATGGGTGCTGTTCTCTTTATGATGTCTGATGAAGAAGCTTCATTGTTGGGCCCGTCTT  
ATATGGGGCTTTTCGATCGAGAAGTTAGAAGCCAAGACTGACGAAGAGCTCGATGATCTTG  
CTGCTCGTCAGAAGGCCGATTATTATACGTCAAATCCTCTGGACAAAGCAAAGTTAAAT  
CTTGCTTGATTGATTATGACGTGATGAGTTTAAACAAGCTGCTTCGGCCGCTTTTTTG  
GGGAATTTTATGAAGCAAATTATCGTAAGGCTGTTTACGCCGATTTACGCAACAACAAA  
TCACCCAAAATGGCCTGGGCACGAGTGTGGCAAGCTGTTAACGAACACCACACTGGGTTT  
CCCTGTGAGTTGATGCATGAGGCTAAACCATGGACAGAATATGATCGGGTCTATGTCAAT  
TTCAATCTGGAGCCGTATGACAGATTGAGTTTGTGTTGGCGGTCCCTCAGCCACAATCCGCT  
GAGTTTATTAATGTGCTGAAGGATTCACCGGTGAAGTTGTTGCATTAGACAAACCTTTG  
GCCCGTTTTGGTGAATTCTGCAAAGCACGTTGTTTCAACAACATGGTGCACCCAACATG  
AAAGTTCCCAGCTATGGAGAGGAATTGATTGGGATTCATTCAAGCGCAATTTGACAAA  
GCCACCTGTTTAAACGATGGCTTCTTTGCCGCTTGAAGATGTTACACTCGGTGATTCTCAC  
AGTATTTCAAGTGTGGCAGCCAGTCTATAAGGCTTATCGCTGCGACGCGCAAACATTACGT  
AGAGCTTTGAAAAGGGGATTGACAAGTTTCTTCTGATAAAGTTTCGGAATTTGACAATT  
TATTTTGAAAACATCGACGTTCCGGTATCATTTCGGTTTCCAAAATAACCCGATTTCTGAT  
GTAATTGAAAAGCTCGACGAGTATGAGAAACAACCTAGTCCGACTAAAGGAGTCTGGACAA  
GTTACCGGAGAAATCCAACCTTGTGCACCTGCTTCTTATTGAAGATGAGTCAAGAAAATC  
CCAAGAAACAATATGCTTAAACGGAAAATGGTTTAAACGGCAGTTGGGCTGAAAGAAATTC  
TGATGAACATTTTCAATAATGGATTATCGGAAATAGCATTCAAACACGGTTTCAAGGTT  
CATACTTGCCAAACAGCTGGTATGTTGAAACGTATAAAGACCCAAAATCATTCTTTACT  
CGCTTGAAGCCATGAAAGCTTTGCATCTTGCCTTACCATTCTATCGGTATGAAGGGTTT  
AAAGATAGCAACACTCTAGTGTGTTTACATCTAAAGGCCTTCGGGCCTTTTTAGGGGT  
AAAGGTGTGATACATGTGTTTTATGCTTGATATTATGGCATTGCTTGATAAAGGAGAATT  
GAAAATGTCAAACGACCAACATGTTAAAGCGACAAATAAACGGCTCGAGTACAAAAGTGC  
GCTGTATCGCTGTCGTGCCATGGGGCTAAAGTTTCCGGGAACAGAAATTTGTGAATTTAT  
CCTTCTTTAAGCATAACAACGACTGGCTGAATCGTGAAGATGACGATCGCCTAATGAAATA  
TGACGGCAAACATCGATCCGACCCACCCGCTCGTCGTAACGGTCAAGCAGGCTGGTTCTCG  
GAAAATCTATGTTGACATCATCGGCCGAAGATGGTCAACCTTTGGTAGATTGCGAGTACTA  
TGCCTTTGTTCTGAAGATTTACGCCTCATTGAAAAGTATAGGGACACAGTATGCTTGA  
GAAAATGCGATAAAAAGTGAAAATAAATGTGTACTTAAAATGAGGCTATTGATACTAGAG  
CCTCATCAAATAAACGAATACACAAACACGGAGTATATCAAATGCAAGTAACCATCAAAA  
ACGGTCTTTACTTTGGTAATGTTGTTAACGGTACTTTTGAAACTAACGGAAACACCTGGT  
GGGATGCCAGCGAGAACGATCCCCGCGAAGGTAAAGTTAACGCCGTTCTGAAAGGCAAAT  
CTCGGATGGTTTGGGTAAATCGCAATGACATCGTGATTACCGAAAGTTTTGCTGGTGTTG  
CTCAAACCTGATGTCCCTGAAGAAACTGTTGACGAAATGCGTCCCTCGAATCGCAAACCGCT

TCGATGTAATGGACAAAATGACCTTAGGACTTGTTATAGGCACCATTTCGTTCTCTGATTA  
TCTCCGGTGCTCCTGGAATCGGCAAGACCTTCAGCTTGGAGATACAGCTGAAACATGCTG  
ATGAAATTGGCGACATCTCTTTCTCTTCAATCAAAGGAAAGTGCTCTCCCATCCGGCTCT  
ACAACCTCCTCTGGGAAAACCGTGATGAAGACTGTGTTGTGCTGCTGGATGACGTCGATG  
TGTTCTCCAACGAAGACACTCTCAACGTAAGTAAAGCTGCTCTTGACACTGGCGAAGAAC  
GCATCATCACATGGGGTACTGCCAGCAACTACTTGGCAGAACGCAATATCCCCAACAACT  
TCGAGATCAAAGGTTCCATCGTCTTCACTAAAGCAGATATCGACGCTTAAATCGATC  
GTGGCACTAAACTTGTCCGCACCTCGATGCTCTGCAGTCTCGCTCCATCTACCTTGACC  
TTGGCGTTCGCACTAGCCGCGAAATCATGGTTCGAGTGGAAGACGTAATCACTAAAACCTG  
ATATGCTGCAAAAACGCGGACTGTCTGAAGCACAAGTTGTCAATGCCTTGGAATGGATGA  
AAGATAACGTGGACCGCCTCCGCTCTGTATCTCTGCGGACTGCCCTGTACCTCGGCGATG  
TCATCAAGACTGATAGTGATTGGGCCGATGTTGCTGAAGTTACACTCCTGAAGTAATACG  
CATGAGCTGGAGGAATTCCTCCAGCTCCTTAATATGGTTATTCATCTTAGTAAAAAGAAT  
CAAGCTAGTTCACACTGGTTAACCCAAATGGAGAAATGAAATGAATCCGAAAAAATGGTC  
TTATCATGAAATATTTTGGCAGTGCAGAAGCAAAGCCCCAAATTCACACGGTTGAAGGTA  
TTCGAGCAAATGCTCTTGAAATTTTCAAGCAACTCGAAGATCGAATCGCTGCTGATTTCG  
ATACTCTTGACCAAATTGCTACTCGCCGGCAAAAACGAACTGCAAGCGCATGAACTTGCCA  
TCAAGAATTTGATGGAACGTCATGCGGCCATAATGAATAATTTGTCTGCTGCGCAAACCTC  
AAGTGAGTGACTCCATCAAAACTGCTCAAATTATGAAGGCTAATATTGCTCAAATTTGCT  
AATAACCAGAGGGCTCTTGAGGAGCCCTCGTTTTTAGGAAGCAATATGCAATACAGTTAT  
GGCGAAATTACGATTTTGGTATTTGCTCTAATATTCATTATGTGGCTTTTGTATAAAGCT  
CGACATTTTCATATTGGATATTTTGGATGCTGTTTGTGGCATGTTTATTAGGAGAGATTA  
TAAATCCGGTTGCTAAACATGACTTCAACAAAGGTGCAGCTCATGTAGACAAGAAACGAC  
GCTTAAAAGAAAAGCGCAAACAAAACATAAGAAGGGGTACAATGATGGAACATAATTATT  
GATGTTTCGAAAATTGTAAGCGTCGCAATCGGCGCATTTATCATCATGCGATTGATCGTA  
ATTGCTTTAGCTAGCAAAGGCTTTATTTCTGCAAGCGACCAAATCACCGAAAATTTACAC  
AAATGGCAAAGTTTGAATCTTCGGGTCGAGAGTTGTTTGGTAATTACAGCATTGTTGTC  
ACCCCTTTGGTCATTGCTCTCCTTCTTGTTTTGTACTCTGTTTTGGCCAATTGTGTTG  
CTGTATATTATCGCAAAATAAAAAGGTATGTACTTTTTGAAAAGATTTTTGTAAAATGTA  
ACATATCAAATTTTGGCGTATTGATAAGAGAAACAACATGTCATACAATGAAACAATAAA  
AGAAATCATTTCAAATTGCGTCAGTTCTGATCAAATTTGGCTGTGAAGACATTCTGAACAA  
TCAAGAACTTTTCGTATCGTTCTTGAACGAATTGGGTTTAAAATCACCAAGTGGGGAAGA  
GTTCACTCGAGCTGGTTCTAGGACCAATGATGAAGCGTCTACCTGCTGATCAGCGTGAAG  
AATTAGTAGAAATGTTCAACCAAGGTCATCGCGACATCAACCACCAATGATCACGTATA  
CAAACAGCAACTAAGGAAATATTATGGAAATCGAAATCGATAAAAAGTACCGTGTAATCG  
ACGCCTCTCGTTTTGAAAACGAGCACGGCATCAAAAATGGCCATGAATTCCTTCGTGGATT  
CGCTAGGCGATGATGGAGATATTTGGTCTCGCGGAATCGCTTGGAAATGGAGTAGGCGGCG  
ACAGCAACGATGCTCCATACGCCGGTTGGGCATTGCTGATGAAAGGCTATCAAGATCATT  
GTCCAGAAACACCAGCGGATTACTCAGGCGCTATTGAACAAGTATGAAAAAAGGGAACCG  
TAAGGTTCCCTTTGTTTTATCTAGCTCTACTCAAAAAGTCTTTTCGGCTTGATTGCAAATA  
ACGAAAAGTTTGTTTTCATTAATTACTGGCTTTTTACGCCAAAACATCGATACTGCCCA  
GCATAAACGTTGTCTAAGTTCACAATCGGGCAACTGTACATGTATTCAAACACTACTGTCC  
CCCGCAGGAAGAAACGCAAAATCCTTGTAAATTGCTAAAATGTCTTCTTACAAATGGACC  
ATATATTCATTAGATGTTTTGTTTATTGGATACCCGCCCTGTCCATATCTACAAGTTCC  
AACGGCGTTTTCCCTCCGTGGCGACCATGTCAACGAAATAGTTCAAGTTTCTAGGTCTA  
AAAGAAAATATAACTGAAAATCAGCTCGATTTGAAACATGTGCTATTTGAAGCTGTTCT  
TGTGTCGCTACCTCAAATTTTCTATCGCGTTCGGCTTGAAGAAATTCCTGGTAATTTTGA  
AAACGAGTATCTCGGTAAACATTGAAGATTTTCGTCCTTGTGTACCAACTGAAACCAAGT  
ATGAATACAAGGATCAGCAAAATTGCCCGATAAAAATACAACGTCGACGGTGACAGCGTCT  
TTGAACAATCCGTCCAGAATTTCCATCAGAATCCCCGCACGACCAGGGGTTTGAGTTCCC  
TGCCTTTGGTTTTCTGTACTCATAAAGTTGTTACTCCTATATAACAGCTCTATTTAATGC  
TTTCGGCACCTAACGGTGCCGAAATGTCATTTATAAGAATCCATTGTGCCAGTCAGTACA  
ACTTTTGCAACTCGCATTGCCCTGTTGGGGGTTTGCTTTGCCCAAGATGAATTAAGCAAT  
TCAGAGTATGCTTTAGACCAGTCCTTATTGGCTCTGAATGCGAGTGATTTTTTGAATCCA  
GATAGACGAGGACCTCCATTTTGAACATTAAGTTACAAATAGCATTTTTTCTAATAGGG  
TCACAAGCATCATATGCTAATTTGATATTAGGATATTTCTTGATTTCACTTTTACTGTT  
TGAACATCAGAGCTAAACAGTGCACCTGCATTCACTCTCAGAGATAACCCCGTTCACCTGG

CGACCAACCTGTTTACTCAATGTATGGTTTAGTAAGGCCATATCGGTTGTCTTCTGGGGT  
ATAATCAGGTGACCTATCCCAACAGTAGGGTACCCTAGATGGTCCCAATACACTTTCATA  
ACTCTTCCCTCATCGTAGATGCGCATGTCTTCTAACGTCATATGCTTTCTCCTCAATTAT  
TTTCCGAATATTGACGTGTTTGGTGGCCAGAAAATGATTTAAACAGCTCGCCGTCATACG  
CCGCAAGATGCACGGCACCCGGCAAAGCCATATTCAAATATGGCGACCATGACGAATTTT  
GACCTCTATCACCCACATCATGTTGATCAAAATCTCCATAGTTTCCAACGACTTCAAATT  
GTATTCGGTCTCGGCCCGTTGGATGCGTGAAGTTGAAAGTACGTGAGCCATAACCAATCGG  
AAACATATTGATCTGGTGGCGTGTATACTAGAGTTTCTTGCCACGGCTGGTTATCCCCTC  
TCCATCGTAGATTAACGTATCCGAGATCTCCGCCGCGATGAGACGCCCGGCCAGTTCCGA  
TGTATCCGATTTTTATGGTTGCACGTTGTAAGTGAATTCCGTAGAGTAACTGAAAT  
TCTGATTTCTGTTATACGGATATCTAGAGCCAGACCACATGTAGCACCCCGATGGCGATC  
TGCTTTTATTGAAGTAACTCGATACCCACCAATTTATAGGTGACGCACCTTGTCTTAAT  
AAAACGCCGAAAGTTGTGGGTCTGCCGCGTTGCCTGCGCCAGATAGTCCGGCAAATCGCC  
GGACGTTAGTAAAGCAATTTGGCTTTTTGATATCACCGGTATAACCAATCGCGTTATACC  
CAACGCTCCAAAATCGCCCATGTCGTTGAGACATTTTGCCTCCCAATGTTATATAAAGTT  
CAAGGCAGCGTTCACAGTATAAACTATTGTTCCGCCTTCAGTGGCAGCGAACTCGTAAGT  
TTGAGATCGAACAGTTCCCTTGTTTGGATTTAATACCCCGCGTTGCACACCATCTACGTG  
ATACCATCGAGCCTCTGTGCAGTTTTTATATGTGATTCCACCATTTCGTATACGCACCCA  
TGCCCTGCCGTCGAAAATATGGTAAGATTTAACGGTTGTGCCATCTATATAAGCGTAGAT  
TGTCTGACGGGTTGATGCATTATAGCTAAACGTCGCATATGGCGGTGATTGTTTCCAGT  
GAGAACGGATTGTATAGAAGCAATCTGCTTAAGACTGGCCATAACAGCCAACTGCCCGAG  
GAAACCGGTTGTGCCAAGACCGGCTTACTCAGAATGTTGGAGCCCCATCGATTGGCCTG  
GAAGTCGGTGTGCTGAGACAACCAGCAGGGAACGCTTGGTACGGCCATAATCCAACCT  
CCTTACCTTCTCGGAGAGTTCCCTTGACTGCCTCCACCAGTAGCGCAATCAATGAGGAGT  
TTGATAGCGTCAGGATTTCCGGTCCCGTCTTTGTTACTTGAATCCACTACACGAGTAAACAG  
CTTCCGGGTAGCCCCCTGCTCGACGTTTGTGCAATCAATCCGACCTCTTTTTTGTGCTACT  
CAGTGGCTTCAAGCGTCTGCTTCTTGTGCTAGGAGTAGGCGGTCAGTGTTGACACTTTCC  
GTAGCGCGTCACGTAATCCCAAAGTTCTTCTTAAGTCGCCGGTCTGACCGGATGAAGA  
CGTCATTCGCGTTCACATTCCTGTGATAATCCCTGCATACGAGGCGAGTCCTTGTGTGT  
GTAAGCGGAAGTCCCCTCCCTCCACAAGTGTAACGTAAGTGGCAAAGCGGCCTGCCATGT  
GGAACGCGACGCCCGGGCGACTGTCGTTAGCGGGGTTACCGTTCACCTCGATAGCGCACT  
GGTAGTAGTCGTTTCCACGGCATTATTTGCCACAAACCTGTCGCCTTGTTCACCAGCT  
CGAAAGGCCCTTCTGGGCACCGGCCTCCTGTCCGCCAATCCACGCTTTAGTTCCAGCAA  
AGTTGATAGCAAAGTCTCCGAAGAATCCTGCTGCGTTTCCGTGAGCTTGGTTGAAGAGAT  
ATGTCCATTAGTATTCGGAATGCCCCGAATGTTGGGTCCTTGAAGAATCCAGATTGAG  
GACGGAGATTACAATCGCCCAAACCTGTGGAAATGCCAGTTCCGTACGTCCCAAGACCAA  
ATCCTGCCGGAGCCGCACCAACATCCGAGGCAGTCGGCTTGTTCCTTCATGGTAAATCT  
TGATAGATAGCCCCACGTGCGCCACTACGCCATGTGAGAGAGTTATCAGCCCCATCGTGC  
CCCCAATCCACAAGCGTCTTATCTCAGTGCCATCAGGTGCGCTCCACACGATGTCTGCCA  
TGTCACTAGCAGAGTGCCCTACAAGGTCAAGTATCCCTGTGACTCCTAGCATCCCGGATA  
CAGTCCCACCAGCAACAGGCAGAGCCCCGATTCAGACAGCGACCAAGACACGTCACCCG  
CACCGTTAACGAACTTAGCAGCGTTGCCGATAGTCAGGGTGCGGGCTGTACCCAGTTCCG  
CCGTGGTGTGTTGCCGGAACCGTCAAAGTTGGTGCCGTTAATCTGGCGAGCCGTAGCCA  
GCTTGGTTGCCGTGGCCGCATTGCCAGCAAGAGCGACCGTGAATGTGGGTGCGGTCACCC  
GAGCAGCCACGACCAGCCCTGTAGGCTTTAGTGACATCCAATCGGTAGTGTTCCGCTCCGT  
TTACTCTGCCACTTGAAGTATTCGTTACCGGTATCCCCGGTTTTGAACCACATGTAGG  
TGTCCGTGTGCTGTCAGAGGCATTCTTGAAACCAATCTTCGTGTAATCAGAATTGAAGA  
CGCAGCCCAGCTCGCAGGCAGCATCGACGAACGTAAGCCCACAGGTCATTGCATCGCCAG  
CTTTAGCAACCGCACTAACGTTAGTTGCAGAAATCGAAATATTCTATGTGCCATCAAATG  
AAACACCTGCAATAAGTCTAGCTGTCTGTAATCTAGAAGCCGTAACGGCATTTCATTGA  
CTGGAAGAGCTCCTACTGCATCTGGAGTTGGGTTATATCCGTTATAGTAAACACGATTGC  
TTCCGTTATAAGTACCAGAGCCTTTATCAAAATTCGCAAGAACAATGGTTTTTGTATTTT  
CACTTACATGGCCATTAACCGCAAAGATAGATGTTCCATATGTAACATCAGTTGCACAGG  
CGGTGACGGCTGTTTCGATATCGACTCTAACTCTTATCGGGAAAGCACCTGTTTCAACGT  
AAACAACAAACCCATCTACGGCCTCAGATGGTCCGTGGATTGAGTGAATTGCTCTTTCTG  
ATGTAGAATAAATCGTAAACTGGCCTACGGCATAACTTCCACCGTCACCCCATCCACTGG  
CGCGAACATTACCGGTAAATGAACAATTGTTTCATTGGAAGTGTGATGGCCAGATAAAG

TATCGATAAAGACAAATGAGTTGGCTGCACCATTTGTTTCAAAAAGAACTGGAATATATC  
CTGAACCAGGTGCTCCAGCAGGAAGTGTGATCGACAAATCTTTCACATCTTTACCTGAAG  
CAGTACCAGTCGATTCAACAAAATCACGACGTCCCACAGAATTAGCTTCGGTGCCTTGCG  
CGTCAGACAAAAGAACTTTTGGAACTCAAATTGCCACACATAGTATCGCCGATTTTTT  
TAACGTAATCGGAGTGTGTATGGCTGTCGTTTGTACTCTCACTGCTAGAGAAGCATTG  
CACTACCGTTCGAACGATACTGAGCCAGTTGCGCCTCCGGTCAAACCTGATAGTTCTTGCGG  
TTTGCTACTTTGATGCAGACACAGCATTGACCCGGCAGCTAATACACCAATTTCTGCAG  
GAGTAGGTTTATCAGCTTCGGTATAAATCTTTTGGTTTGCTAATTTAGAGCCTGCCGAGT  
CGTATGCGTATGTGTACATAACCATAACCGATACTTCCGTAATCGAAAGTAACACCACGGG  
CATTCGCACCGTTACTGGCCGATGGATGAGTAACGCTAATAGTCAATCCACTGAATCCGC  
CCAGACTGTTATGCCTGAAGAATCCGGAATAGCCCATTGACAAGTTATGAGGTGTTCCCA  
TAGCAGACGATTTGCTCAGCAAGTATCCATTGTTTCGCAGTATTGGTGTTCAGTGTGATA  
AATCGTGCATCAGCCTCGCTCTGGTTATAGTATGGATTATCCATCGCCGAGCGTTGGATA  
AGGCCGGTGTGCTAATCAAAGTCCGCCCGTGTATTGTATACGGCGGAATCAAAGCGA  
ATTTTACTGGTAGTGATTCCATCTTGGGCATAACCGAGTACTAAATCAGTTCACCAGGT  
GCGCCAATATACAGGTTTTTAGACGAGATTGCTCGAATGAACTGGACACTTCCATACTGT  
ATATCAAAGTTTCCAGTATTAGCGGATACCAACGCTCCTTTCAGAGAAACATCACCATT  
AGATTTAGCGATTTTAAAGTCCTTCAAATGCCCTTGCGCCGTTGGTGTGAGTAATTGCGAC  
TTTAAAGTTACCAGCCGCATCAGTTCCAAGATATGACTGAGGCGTATTTCCCTTTGAAAA  
ACGAATATAAGCAGGACCACTAAAGCTTGACTTAAACGCTAATGGGTAATCGGTGGAAGT  
TTCGATGTACAGAACACCCGACATAGTATCGCCAGCACGAGATACTACTTGGCGTTCATT  
TGCCTTGGTTTGTGCTTTTCCGAATAAATTCTTGCACCCTTGTACAGGATAGCATTACC  
GCTTGGTACCAGCGCAAGATTGCCTTGGTGCCAAACAGGTGAACCACCGATCGTGGTTCC  
AACTTTTAAATCTGCCATATGGGCTCCCTTGTTTAACCAATGATTGGGGATCTCTTATTA  
TATTTAAAGCACTCAAATTA AAAACAATCCTGGCTCCAGGTTCAAGCTTGCTTGAACCTA  
TCTTTTTATCCTTTTAGTTATAATATCTATTAAGCCATAAAGGATAAGTTGTGGCAGGGC  
CAAACCTGGAAGCCAGGATTTTATATTCTAACTAAAGCAAACAAGGGCCAAGAGGCC  
TTATTTCTCGTTAATATCGTTTGAAGTAATGATATTCTTTTGTTCAGATTCAAAAGCTG  
TAATACAGGATTTATGTAATTACCGATATTGCTTATGCTATTAGCTCTAATACCAATCTC  
ACCAATTGCTGCATCCGCAACTTTATCATCATCGTCCCTTGTAAACCCGCGCTATAGTGAC  
ATTCGCACACCTGCTGTTCCAGCACTGACACTTGACGGATATCGGTATGCTGCAGAAGC  
AAAATCTTCGCCCTGAGCTTTGCGTTGGCAGTTTGAATAACCTTCAAATTTTGGCCA  
CACACCTGGGGTTCGGTGTGTGCGTTGCTAGCCATATACTGCTTTTCCATATGCCTGAAGA  
GTCTTGAGTCCATACATACAAAAAACATCTTCCACC GGCGGTA ACTAGTGTCTGGTTCGCT  
GTGCGGCTCGCATTGGATATGATATATTGATTCCCATTGCGTTGTTATATTTAAGACAA  
ATAACGCTTAAATTCGTATTGATTCCCCACTGAGAAATATTCATTTATGCCATCGACATT  
TCTTGACGGTAATCCACACGCTCCAATATCGACAACGTCGTCAAAAACA ACTTGCAAATA  
GGCATTAGTGTCTTCTGCGAACTGTTAGGATTATCCCAACAAAATTCTCGTAACAAA  
ACGCTTTAATCTTGTATTGAAAATTGCAACGTACGAACTTCTATATGCTCTCGGAGTAAA  
AAGAGCATCGGATTGTGATTTAGATAACTAGAACAGGCCACGACATAGCTCCATATTG  
TTTCATGAATGTATCAAAATCCTCTGACGATCTGATAGCATCATGCAAACTACTACTAC  
TATATTGTCAGATGGTGCAGACATTAGATATGTTCTTAAAGTGTCAAGATGCTCGGGTCT  
AGCATATATGTCAAACGTCGCAAAATTAGATGCTACTCCGGTTGGAGAAATAGTGATAGC  
GTTCAAACCCCTTCCGTACGAAGGCAAAACCCAAACACCATTGAGTTTTACGTACGGTAC  
TCTGACACTGGAGTCATCATTGACTCCAAGTGCCTGTATCATATACTTTATTGCGTTATT  
TTCACCTAAGTGATTTGATTCAACGTAAGATGGCCCAAGATGGGCCATAAATTGTTTCAGC  
CATAACGATTCCTTATTCTTCCCAGATAAACTCATCTGTCTTGGTCAAGTTGTTGGCAAC  
GATTTTACATTACCAATTTTGTATCCAATGTCTAATCGTTATATTATTGGAAGATGAACC  
TGTAATATCAACTGCACCTACGTCTTGAGCAGTAGGTTTGTACCCTTGTGATAAATCTC  
GTA CTCAAAGTTTCCGATCTTTACGATTGGATTCTGATTCCGGATCAAGACACACACGGCC  
ACTCGCTATATCGGTATTTCCGAAAACGAAGTCATTTCCACCAGAGGTAATGTAACGATT  
TGAGTTTTTGAATTGCAAATACTTAAACATTGTCACCGGTGTTTGACAGAAGCATTGCTCC  
AGTCATAGTCGATGTACCAGCACGACGAAGATATGTTGGGTTGAGCTTTGTCTGAGCGTT  
GGCAGTATTAATTACCGGTGAGCCATAAATTGTGAAGGCATCAGTAGAGCTTGCCAATAC  
AGCCATTGTTGAAGTAGCATTAAACA ACTATGAATCCGCCTGCAACAGATTGTGCAAATTG  
ATTCGCCGCTAATTCGGTTCCACCCAGATAAATTCTCACACCTGTGTTTTCCATAACAAG  
GAAACCAGCAGTTGATTTTATATGTTGTGCAATTAGTACATCACC GGCTCTATTA ACTTT

CAGCTTACTAGAGAAAGTTGAACCGTCTTTAGTTGCAATAGCAATTTCACTGCCAGAAAC  
TTCAGAACCACCAACGCCACCTGCAATAAATACCCAATCGTTTATTGCAGCATCACTTCC  
AGCCATTATGGTGATAACCATTGGCTCCATCAGGAGCTCTAGTTTTACCTATTTGAACAGA  
GTTTGTGCGACGTATTATCGATAATCACTCTTGCCTAGTTGTGCGTAGCATTGGTAATATT  
TGCAGCTACCATTGCGGCAGTAAAAGTCATCCCGCCTGTTACCGTCTGAGCAACAGTTCG  
ACGGACCCAATCGTTAGCAACAACACCACCAAGTTTCAGTCGGTCTGGGCGGTTGCCAT  
TTTCGGCAAATAGTTTTGCAACGCATAGTTCAGACTCAGCGGACTAACGGCCAGCCCATC  
ATTTGAATATGATGTGTATGCTTGGGTTGAACCGACAGTATCGTTTCCAACGGAAGTTAA  
CTCTACTGTTGCTGCTTTGACAAACCCACGGCGTGTTCATTTCTGACCATGTCGGTTC  
AATTTGCGCTATAGATATGAAGTCTTCTGGACTAACAGCCAAATTAGTTGCTGTTCCAGT  
TCTAACTTCAGCGGTTGTGCGCAACCCGGATAATACCGTCCAGAGTTCTTGTGCTTTTTCT  
TCCATCGAGTTTTTTTTGAAGTTACGATGGTATTGTCTGAACTAGATCCATTCGCCTCAAG  
TTGGGTTGAAACACGCAATGTCCCACGTTGAGCTTCTGTAGCAAGACTTATTTCCAACAGA  
AACAGTGCTCCAAATGGTTCAGATTGGGTCAAACCATCAGTCGTGTTTACCGAAATTCT  
TGCCGTATTGTTGAAACGATTCTTCAATTTCAATGGAGTGACGATAGTTAAATCGTTTTGT  
CGCTGTATCTATTTAGATGTCGTCGCAATACGGGCAATACCTGTGATAGTTTCTGTTGA  
AGTGCGATCATTCAACTTTTTGGGAGTAATAGCACGGGTATCATCAGTTCGGGCGTTTGT  
TTCAGTCTGGGTTGCAATCTCAATCAGATCATGCTTTGATTCTGTGCTCGACGAGCTCC  
CAATCTTTCGGCTGTTACAAGCAAAGGCCAAGTGGATCAGATGATCCCCCTTCGACTTC  
CGCCTGTGTGGCAATATAACCTCTACCCTTACTGTTTCGTTGGCCTTGAATTCATCCAG  
GGTTAACGGTGTGACAGCTTTCGACTGATCGGCTTTGTTATAAACACCAGTCCCAGCAGC  
TGAGCGAGTTGTAGCAGCTGTTCCATTTTTAGAAACCACGGCTAAGATACCGGTCAGAGT  
TTCTGACGCAATACGATTATGCAACTTTTTGGAAGTCACAATTGTTATGTCGTCAGTTGA  
GCCGTTTGTCTTCTGCTTGTAGTGGCAATCTCCGCTAAACCACACCGAGTTTCGGTAGCAGT  
TCTTTCATTTAACTTTTTCGGATTGACGATAATGTCATCCAAATAAGTTGAAGTGCTTAA  
CTGATTGACTTCAGCGGTTGTTACCAAAGGGCAATGCCACGACGAGTTTCAGGAGCAGT  
CTTCTTAGCCAATGTTTTTGAAGTGACAATAGTTTCGTCATTTCGGGTTATCTTCGTGATT  
TTTGTACTTCTGCTTGTATCCGCGAGAGCAGCCACGCCAGACGAGCAAGACGAGTTGT  
ATCAACACGTTCAACTTTTGGTTGAACATTTCCGGTTATCCATCCGTATTGCGAAGAAGT  
AACACCACCAGGGACGGGTCTAACTGTGGGTACATTAGCTCGACATATGGAATGTAATC  
TGTGTCAACACTTATAGAAATAGATGAAACTAATTCCCACCCATTTGTCATCGGGTATTC  
CGAACGACGCTGGAAGTGCATTTGAGCTTTCGACCCAACAATCAGCTCATTGAACTTG  
ATTTACTCTGATTGTACAAGTTTGACCTTTTCTCAGATAATCCATAGTGATTTGAACACG  
GTCACCTATGGCTACCTCCTCTGGAAGAGTCAGCACGGTGTCTGACTTGGCAAATTACT  
GTTGCCAGTCACCAGAATGTGTTCAAACGGCAGCAGTGTGTGTCAGTTTTGGTAACACG  
AATGCGTATCCTTTGGTCTCCATCCCATACTTTCCAAGTCAAAGAAGGAAAATCGAATAC  
GAATGATCGGTAACCAGATGTGCCTGATTTCGATTTTGGTAACACCGGTTTCATTAATATT  
GTGACCTGAACCTGGGAAAATCTCAAGAGTCGAGTGGTGAATCGGGTTCATCCCATCAAT  
ATCATTGGTTGTAATTGCATCCCATGCCTAGCATGTTTTGGCAGAACAAGACGAATTGT  
TCCTGCAGCAGTACGTCTCCAGGTAACCATCCCTGACTGCAACTGGAATCCTTTAATCGA  
TGGCTCAACAAAATAACTGTTTCAGTACTGGAGCTGCTACATCTACTTTCCATCTCTTTCC  
AGCTGCTTTATAGACGAACATATATTGGCAGAATGGGACAATTGCACGGAAGCGAGCGCC  
GACACTGGCTGCCTTATATTCGATGACTGCTGTTTCTATAGATACAAATTCCAGATCGTT  
ACCACCTGGCTGATCGCCTACGTCTTTTACTAAAGTATCGCCATCGACTGGTGATGT  
TGGCAAGTTGAAAACCAGATTGTTGAATCTATTGTCAGTAGTGATATATTGACCAGAACT  
CAACTGAAGTGCGGGCCAGTGGAGTTAATGAACTGCCATGTTGGGTCTACACGGAGACC  
AGTCCATTTTGTGACGTCGAAAGCTCCAGCCGGGGAAGCATTATCTGCTTTTTGCGTAATA  
AATTCGACGCTCGAAAATTACAGCATGTTTTGCATCATACCCACGGGTGCTGTCATATTC  
TTAAATTGTGTTACATTTGTGGAATAATCCAACGCTAACGCCATCGGACAAAATTGTCTT  
ATCGGCCATTGCAACGTTGATCAGTTTTTTCGCCGCTGCATCAAGGCCGCTTGTGGCGCG  
AAACGCTTGTCTAACATTTTTTGACCTCTCCTGTTACTAACTTAGTTATTTATGTTAGT  
ATGTCTAGGTGTTCAATAAGAGAAATTGATATGAACTGAAATGATTTTCATGGGTGCAACC  
ACAAAGGATGATGTCAATATTATTGACGCATCTCAATTAATTATCGCGACAATAATGGCT  
AACTTTACTCCTGAAGATGTAAATGAGCGAATGCTCAGACATTTAATTCTGGATACGGTT  
CGAAACAACGTCAAAAGTTCAAAAACGAATATCCCGATACTATTATCGCATTTGACGAT  
TCTGCCAATGGTTATTGGAGACGTGACATTGCTTGGTATTACAAATTAACCGAAAGACT  
AATCAAGAAGAATCTCCATAGGATTGGGAACCTTCTCTTTAGAATTATCAATAAAGTGGTC



AACGAAATGCTTAATATCTACCCAGGTGTTAAGATGATCAAACCTTGATAAAAAGCTGAGGCT  
GACGATATTATTGCGGGTTTGGTCAAAAAGTTCACCGAGGAAGGTCGATGTGTTATGATT  
TCTTCTTCTGACTCTGACTTTACTCAATTGCACAAATACAAGGGTGTCAAGCAATATTCA  
CCTGCTCAGAAGAAAGCAGTAAAGCCAAAATATGGTAGTCCAAAGCATGACGTGTTTGT  
AAACTGATTTAGGGTGATGCAAAAGATGGTGTTCGGGAATAAAAAGCTCGTGATACATTT  
GTCCTTGATCGTGACGAAGGTGAACGTGCTCCACCTTGTTCTACCAAGTGGATTAATTCA  
ATCGTTGAATCTGAAGACCCTCGAGCTGCATTGGAAGGAAGAATGGCAAAAAGCGTTGG  
GATATGAATGTTTCGGTTGCTTGATTTGGATAAAAATCCAGCACATGTTTCGGATCGAATC  
ATTCAAGCTTATAATTCTTCAGTAGTCAATCCTCGTGGTAAATTGTACAGCTATTTTGT  
AAACATGGCTTGGTTAAACTTCTCGATAAAGTAAATCAATTCTAAGGATATAACATGAAA  
GAACAGAAGAAAAAGAAAGAAAAAGTACGAATTCAACCCGGCTGTTTCATGGCGAACGTCT  
ACAAGAAATTATTACCGAAGCATCAAATCTGCGCACCATGCAAGAATCTTATGCTGAAAA  
GGTAAAAGAGCAGCGCAATATTGCCATTACTGAATGCGGTGTTGACGGCAAACTGTTCAA  
TCAACTGTTCCGGATTTACCACAAGCCGGAACGTGAGCAGTTTGAAGATACTGCCGATGA  
AGTTACTTCAGTGTATGACCAAACCTTTAAAGGCAAATGATGTCAAATCCGAGCAATCTG  
AATGATAAAAAGCGCAAACGGGATAGAGATAGAAAATCTGGTTAAACTGGATTGACATAT  
CTGGAAGCATGTGTTTCAGTGGTTGGAAGAAAATCTTTAGAAAATTAAGTACTGCCCACAAA  
TATATCCCGCGAGCGGTAATTGGCAAACCTTTCAAAGAATGTGTTCGATTCCGACATGCTT  
CGACCTTCCATTGCAAAAATCGATGACACGAAATAGTTTGGACTTTTTGATGTGAGATTTA  
TATGATCGCTCTCCGATATCCGCCTAGACCTGATAGATTTATTAGTGCAAAGGGCGCGTT  
TATGCTTTATTTGATGATGAAACAACATATGGCTGGAAAATATGACATAATCAAATATGG  
TTGGAATATGAAAGTTACTGATGCTGCGTTTAAATAAACGCAGAGATAAGTACTTCTTTGA  
TAAGATGAGCGATAAATTTACCTTAAAGACTTGACAGAGATATCTCTGGCAACGTTTTT  
GGAAAATTCGAATGGCTGGGCCGGAGATCTTGTCTTCTGAAGATGCAATGGCAGCCCATCG  
AGAATTGTTGGGAAGATACATCAGATTCCCCGAAATATACAGGGAAGACCTGAAACACCT  
GGTGTATTTTTTCCAATAAAGTCAATGTTCCGATAGGTAAACTATTGGAGTATAATGAAA  
AACAAACAACGAGCCCAATTTTTCAAATTAATCTCCAATCTGGCCTGATCAAAAACAGAAACAT  
ATTTGGTTATTGATTCATTCCTTGGTCTAATCGACAAAATCGATGAGAAAATGTCAGCTG  
ATATAATCTGCCGAAACTGGCATAACCACTTGGTCAATTACCGGAAATTGGTAGTAAAA  
ATAATGACATAGCTAAAGCCAAGTTTATTCAACACGTAAAAGAGTATATAGCTGAAGTTT  
AGCTATATCAAAATTGATGTAAAATGTAAAACGCAAAAACAACCTGTCAAAAATAAGATA  
GGAAAATAAATATGTTCAAGCGCAGCAATCCTTCTCGTCTTCCAGCACAACTGGCCGCTC  
TGAAAGGTAATGCAGGTGGTTCCGGTGGAGATAAGAATGAATGGAAACTGAAAAATGATG  
CAGCTGGTAATGGTCAAGCAGTAATTCGTTTCCCTTCCAGGTAAAGGTGATGAAGGTCTTC  
CGTTTGTTAAGCTGATTAACCACGGCTTCAAGAAAAATAACAAATGGTATATCGAAAATT  
CTTCTTCTACCCACGGTGATTTTGACAACCTGCCCGTTTGCCAACATCTCAGCCGCACTG  
ATTCTTACATCACCAACGCTGAAGAATATAAGCTGCTGAAGCGTAAGACTTCCTATTGGG  
CAAACATTCTGGTAATCAAAGACGCTGCCACTCCTGAAAATGAAGGCAAGGTGATGAAGA  
TTCGCATTGGCGCAAAGGTAATGGAAAAAATTAATGCCATGATCAACGTCGACCCGGAAA  
TGGGCGAAACCCAGTAGACGTAACCTTGCCTTTTTCGAAGGTGCAAACCTTCGTTTACAGAA  
CCAAGAAAGTTGGCGGTTTTACCAGCTATGATGACTGCAAATCTTGGCTCAATCCTAAA  
TTGCAAAGATCAACGATCCCGAATTCCGAAAGTTCCTCATTGATGGCATGGAACATTTGA  
GCAAAAATCGTTGCTCCTTCCGAATTCAAGCCTCTTGAAGAAGTGGAGAAGAAATTCAG  
CAAGTAATGGGTAATGTCATCGCTGCTGGCTCTGCCGTTTCTGCCGCATCTTCTGTCT  
AGCGAACTGAATGACTTCGACGAACAGATTACCTCGTTTCGACACTGATGTAGTTTCAGCCA  
TCCGTGCCTAATGCTTCTTCTGGTTCGCGATGACGATCTGGATGCTTCTCGGCTAATAT  
AGAAAAGGAACCTTCGGGTCCTTTTTTTGCATCAAATCTCTCAAAAAGTAGGGTACAAC  
TATGCCATACAGTGTAGAATGTCTCCATCAAATCAACCAAGGCCTAATAAAAATGAAAGA  
CATTCTCGATTATCCAGTTGACACCAAGGGTTCGGATTTGCCTCAAGAAATCTCGCTTT  
GCACGTAAGTCGTTGTGAAAGGACGGTTGCCGCGTTTGGAGGTCAAGATGAATTTTTTCGA  
ATTCATCAACACTAAACCATGTGGCGGTTGGGTTTTGGACTATAAGGCCAAGTTTGAAGA  
AGTAAATGGCGTCAAATTTCCCAGCAATATCAGATTCGAATTATAAGGAAAATTGACATG  
TCATCGAACAAAGTTCTCATCAAATTCAAATCTCCTAAAGCTCGTGCTAAATTTGCAGCT  
TTCTCTTCAGCTAATAGCGCAATTGCTGTATATATGCAGCATTACTAGCTGACTGCTGTC  
AATAAAGAGAATGGCGATATTGTAATTCTCGAAGATGGCAAAGAATTTGAGCTCGATGGA  
TACTGGACTCCCGCGATTTTTATGTCAGAGCGTCGATATCTTGACATCGAAGTGATTATA  
CTCAAAACATTGTTCAAAGGAAATATTATGCACATTAACACTAAATCTTGGCACTATCG

TTTTCTGAATTCTCTCAACACAAATATCCCGAATTCTTTATGCCCGTATTTCTGGAAAGT  
CGTGTTTACGATCGCATGGATCACCGGTTTCGATTTTACTGCTCATTGATTTTTTTCACATC  
TATTGGTGCCAGAATCTTCGAAGGAATTGGCTTTGCCCTCGCTAATATGGTATTGTACTG  
GAGCCTTGCCGCTGTAGTAGGTAAGTACTGTCACCGTTACATCTGCTATTGTGCTGGTTGTCGC  
AGTAATATTCGGCTTTGTTGGGCCAAAAGAAAATTTCAAGCCACCATACAAAGAAGAACC  
GTTGATTATCACCTTTGTCAAGAACAAAAGTCTAAAATTTGCCCGCGTCTTGAATTTGA  
AGACATGAGCAAAAAGACTGAAGAATAAGTTCGCAACCAGTGAGGTCATGATAAAATGAC  
CTCACAAAATAAAAACAATCTCCGGCTTATAATGTTTCACTGAGTAAGGAATGATTAATA  
TGATTATTAATAATGTACGTCAACTGGCTTCTATTCGCAAAAATTGCAGATCTTCAGCCGA  
TCCCGGGTGCTGATGCTATCGAATGCGCAACCATCGACGGCTGGGAAATAGTCGTGAAGA  
AAGGCGAATTCCCAATTGATGATGATTGCGTATATTTTCGAAATTGATTCCATGCGACCGA  
CAGATAATCCTGCTTTCAAATTCCTTGGAAATCCCGTGCCAGGATGTACGAAGGCAAAATGC  
GAGCTCGAGTGAAGACCATTAACTTCGCGGCCAACTTTCTCAAGGTATTGCTTTGCCGG  
TTAACGCATTTACCATCGGAGAAGTACTGCTCGGTGTTTATGGAATGGACCAAAGTCTTGACC  
AAATTCCTCGGTATTATCAAATATGAGCCGGCTCAAGACGGTCTGGCTGTAACCCGGCCG  
GTAATTTCCCTGTTTTTCAATTCGAAAAGTACTGATGAAGAACGCTGCCAAGACATTTTAAGCA  
AATACAGCGCTCGTTACAAAGATGTTGTGTTCCAAAAGTCTCTGAAGCTGGATGGTAGTT  
CTATCACCATGGCCTGGGTAACAGATCCTAACCTGTTTCTCGAGCTTGGAAACCGAAGATG  
AACCATATGCTCACGATTACGACGACGCTCAATTTATCCTAGCTTCTCGTAATCAGGCTC  
TCCGCTATAACCCCGAAAGCAAGTGGTGGATGGGTGTTGAAAAGTACTACCAAATCATCGAAC  
AACTGAAGAAGATGGGCAAAATCTGTCGCAATTCAGCGTGGACTGATGGGTCTGCTATCC  
AGAAAACCGCGAAAAGTACTCGACAAGTACCGGATTTTCGCATTCCGTGCCTGGTTTATCG  
AAGAGCAACGTTTTGCTACCGACGAAGAGTTCACGACCTGTGCCGTGCTCTCAGCATGG  
AAATGGTGCCGCAGCTTGGTCTGTTGCAAGCCGTTTGAACAATTTGAAACTGCCAAAGAAA  
TGTTGGCTGATGCGGATATTCGCTCCACCAACCACACGATTGCTGAAGGTGTCGTTTATA  
AGTCTGTTGACCTTGTAATGGCGAGATGATTCACTTCCAAGCAATCAACAAGAAATTCT  
TGCTGAAATGTGAGGACTAACATGAAAATAAAGAAATTGCAACCTTTACAAGTCTTGTGT  
CCGAAATGCTGGATAAATGAAGATTATTGCTACTGCTATTGAGAATTCGATGTCTAATAC  
ATTGGGGCTGAAATGCCGCTTTTCACTTGAAGAGATGAAACAGATATCAAGTCAATTAAC  
CGAATCCAACCCGGAGGTGAGTGTGATTAAAGCCGTATGTGCTTTAGGTGTACCGTCCG  
ATTTTCATAAGCATGGAGTTTTTGTATTTGGTAAAGATGGCGATTTACCATGGCCATCGA  
TCCCTGAAGACTTTAAACCTTACAGGGAAAAAACCAGTGGGACTATCTGTCTTATGGGTG  
CAAAAACATTCCAGTCGCTCCCAAAGAATCTTCCGGGAAGGGTACTGGTTGTTGTTGGCG  
ATCCTAAGCGTGAGTGCCGGAACAAATCAGGTGAACTTCCCTGATGATTTTCGTCAATCTTG  
ATATTGACTGGATTTCTGTGGTAAAAGAGCTATATCCAGAAAATGATATATCGACTATCG  
GTGGCCTCGGTCTGATACTGTCAGTCGCCAACAAAGTGTGATAAACTCCATATCAATTTTC  
TTATGCTTACTTCTGACTATGATACAATTGACCCAACAGTTTATATCACTGAAACCGCAC  
TAGGAGTTGTCATGGGTAAACGGAAAATGAATACTATCGTGTGTCGAGTTGATCGTGAAC  
ATTGCACCAACATTAGAGCAGGAATTTGGAAATGATTCAATACACCGATTTAGTATGCGA  
TATTATACCAATGGGCGAAAGAAGACTAATCGCACTGGAATAGGCACCCGTTCCGGTATT  
CGGTTGAATGCTTCGCTTTGACCTCAGCGAAGGCTTCCCGGCCACCACATGCAAACGTAT  
AGCAGTTGTTCCAGTTGTGGGGGAATTGCTGTGGTTTATGGAAGGTTCAACGAATTTCGA  
ACATCTGCGCAAATTGACCTATGGCGGAGAAGTCTGATCGTAAAACCATCTGGGATGAAAA  
CTATAACAAGCAAGCCGTTGATCTTGGATATTCTGATGGATACCTTGGTCCCGTTTATGG  
CAAGCAATGGCGTATGTTCCGGGAATAAAAACACGGTTCGATCAGCTGCAAAAATGTGATCGA  
TCAAATCAAAGCAAACCCCGACAGTCGTCGCTTTTGGTTGTTGCATGGAATCCTGAAGA  
TATCGATAAATGGCTTTGCCTCCATGTCACTATGCGTTCAGTTTGAAGTATATGAAGGC  
AAACTCAGTTTGTGAGGAGCCCACGATCCGTCGATGTTGGTCTTGGTCTGCCATTCAAT  
ATTGCGTCTATGCGCTTCTTGTCCATATTGTAGCACGAATTTGCAATTTGGAAGTTGGT  
GAATTTGGTATTCTCTGGTGCAGATGTCCACATTTACGAAAATCAGCTGAGTCATCTCGGC  
GGTATGCTTTCTCGTGAAGAACGCCCTTTGCCTACGTTGAGTTTCCCGGATATTGGCAGT  
TTGAGTGATCTGCGTTTACTGGAAGCAGCCGAGTTCCCTCTGGACGGGTATGAACCACAT  
CCAACAATTAAGTACCGATGGCTGTGTAATGAGTTTATGCACCGTTGTAAACGTCAAG  
CATGAAAGATGTGACGTTTCGTATACAGCGAGGCACTATATGGGGTAATCCATACGGAGAA  
CCCATTGGAAACGGCAGGATTATCTTGCATAATTACAAAAGCATTTAAGACACCAAATA  
AAAAGTGGGGTTATTACTCTTGGACGATTTAGAATCACTACGAGGCAAGAGATTGGGGTGT  
GGTTGCAAACCATGCCATGCCACGGAGATATTCTTGTCTGATCTAGTTAATCGCATGTTT

AAGGAGGTGCCAAGCGTAGATGATTTTCATATGACATCAAAAAGAACACGGATTCATTCGGG  
TAGCAGAATTGACCATAGGTA AAAACGGACGTATATCCAGAGATTTTTGCTAAAGACCCA  
TCACTAAAACACATCATTTATTTGTTTACAATTGATGATGAAGTTGTGTATATTGGTCAT  
ACTAAGAATTTGCACAAACGAATGGACTCATATGCTAATGGCAAGTATTGGAAAAATACG  
ATCAAGTCACATTTCCAAAAATCCAAGTTTCTGGAAGAAGCAGTAAACTCGGGTAAGAGA  
GTTTGTGTTCCGATAAAGCATTGCTTCAAAATCGTTATAACCACTCCTGCTGGGCCAAAC  
GTTATAGCTGACCTAGACGCGGAAGAGAAAAATTAATCGGGATATTTAATCTTGTCTAA  
ATTCAAGACTGAAGGTTAAATTATGAGCAGAACAACCTGAACTTTTTAATAACTTGATGTC  
TGTTGTGGAAAAATCCGAAAAGGGCAATTTCTACCTCAAGGACGTCATTACGAGTATGGG  
GACAAAAGCTCGAATTTTCAGCTATTTTATCGCTTCATATACCGATTGGCTGCAAGATGA  
TGCTTTGGAATGTCGAGGCATTATGTTTGAGCTAAATGATAAAAACGAGCCAGCTCGAAT  
CATGGCTCGCCCAATGCAGAAGTTCTTCAATCTGAAAGAAAACCCCATGACCATTGGGCT  
CGACTTAACTAAGACGATCGGTTTGATGGAAAAAGCGGATGGGTTCGCTGATTAGCAGTTA  
TCATGATCGAGGGTACGTTTATCTGAAATCTAAAGCTGCGGTATTTTCCGATCAAGCCAA  
TAAAGCAATGGTGATGGTGAATTCGCCTGCTTATGAAAAATTGCGCGATGCACTTGTACG  
AGGCGTTCCCGATTTTACTTTCAATATGGAAAATGTTGGACCAAGCAATCGGGTTGTCCT  
TCCGAACGAGGAAGAAGAATTGATTGTTCTCAACGTACGTCACAATGAAACAGGTCAATA  
TGTAGAATTTTCTACTCTGCTGGATGACCCATTGATTCGTCATCGTATGATCGGGGTTTA  
TCCTTGCCCGGATTGGAGTAAAGTTACTCCCGAAGAATGGGAAGCTGCGACTCGTGCCGA  
GACCGCTATTGAAGGAGTTATCGGTATTATGCCAGATGGCCAGCTGATCAAACCTGAAGAC  
CGACTGGTACTCCTCTTTGCATCGTACCAAAGACTCGATCAATAACAATAAGGCATTGTT  
CCAAGCCATCAAAGAACGTTCTTCCGACGATCTTCGTGGCCTGTTTTCCGATGATAATGT  
CGTTTTGTCAAAAATCGAGGCCTTTGAATCCGCTTATGTTGATACTGTTGCTAAATAGCA  
CAAAATTTGCGCAGAAGTGTGTTGACGATTTGCGAGGATTTGACCGTCGAAGTTTTGCTAT  
CGAAGCACAAGCGAGAATGAAAGACTGTGCGTAGCTTTTTGGCGTAGTTATGCAACAGTA  
CGGCCGCGATTGGGACGGCGAACTCGCTGTCGAGAAAATCGAATAGCACATCATCAAAGA  
ATACGCAACATACGTTCCAATGGCGTACGGTTAAATAAAGTTGCAAAAACCTGTGAACATT  
TGACGGTGAATGATTAGACTAAATCCGTAATCAACATGGAGTTAATCGAATCAATCATT  
ACAATTACACCGTCGAAATTCTCATCAACACGTACGCTCTCGGCCGCGAGTTCGGATGGAA  
TTCGAATTTTCGACAAAAACGGTAAAGTTGTAGGATATATTACTGATTTGCGCAAAGCTG  
CTCATTCTGCAGCCGAAAAGAAAAGAAAATCCAATCGTACTCTCGGGAATACTATCAAC  
AAGCTTAAACTAACATTGGCCCAATGGTCAATGAAGTTGTGAACGAGTTGAAAAATGTTT  
TTGCAGGTACACCCGCAAAGGTGTTTATTAACGAAACGATGCCGAATGTCAAGTTCATGG  
GAGCCAAGTTCTATTTTATCTTGTCTCCACTGACTGACAAAATTCGTGTAAACATCACTC  
ATAAAGATGCATGCCGCATGAAGTATGTTTTCCCGCAACATGCCAAACTTGATATTCGTC  
AAGGCGGAAGAAGCATTTTGTATTGATGGTTTGACACAGAGCGAAGGCATCGCTCTTGGA  
AAGGATTCTGCGAAAATGTTGTTAACTTTGAGTTCGCTGCTCAGTTGGCTAAAAAGTAAT  
GCGTTATATCTCATCATAATGGTCTTAATGGCCATTATGATGAAAAATCAACACGACGAA  
ATCTCTACGCTAAAAAATAGTTTAGAATCGATGAAATCATTCCAAACTAAGTCGTATGAG  
AATGCAAAAACCCGTCAATGAGGCGCTGCTGAAGTCTCCAAAAGCTACAAAGCAAATGGAA  
AAAATTGCGGAACAGAAACCGCAACTATTAGAAAAACGAATGAATATGGGCTTCCAGAAG  
TTAGCTGATCAACTTCAGGAGAGTACAAAACGAGGTATATCATCATTCTACTCGGATGTC  
TCCTGATCACATCCTGTGCATCTAAGCCCATGTTGCCAAAACCATCGCCGATACATAAAC  
TCGATATAACATCGAAAGCAACCGAAAATGGAGCTTTACTAAGTTTTGAGGATTACAATA  
AGTTGGGTGTATGGTTAACGGATGTCAACAGATATGTCAAAGATCAAAAACAAATAATTC  
AAATATGTGAGGATACAATTAATGACTGAACGTTTTCGCATCTCAACAACCTCATTTTGACA  
GTTGGTCTACTAGTTCCGGAAAAGCACCTGGGCAAATGAGCAAGTTTGGGCAAATCCT  
GCGAAATACGTTAGTTTGAATCGTGATGATTTTCGTTTTAGCCTTTTTGGCTGTGCGGACT  
TGGTCTGCATACAAGTTCAATAAGCATAATGAGCAACTGGTAACGAATGCTATCCAAAAA  
GCAGCGATTGAAGCTATTGCCATGAGCAAGACTGTCATTATTTCCGACACCAATCTGAAT  
ATGACGACTCAAGGAACTTGGAAAATTTTCGCAGATACTCATAACGTTGAGTTTGTGCTGA  
AATATTTTGCGCCGGCCTTCTGTCTACTCTCATGGAGAGTAATCGCTATAGGCGAGCGG  
GCTTTGCCTGAAGTCGTTGTGAAGCGTCAATATGACCAATATATGGTTGATTTTGGAGGC  
CAGAGGGTTTATACTCCTGACTTTGCAAAAACCTCGGGCAAGCATTTTTGACCTGGATGCC  
TCCCTGTTTGATAACAGCCAACGGCATGCCTTCGATTGGTTCGAAAGTTCTGGATGACTCT  
CCCCGTGACTCTGTGCTAGACCTTGTCAAAATGTACGTTGATCGCGGTTATGCTTGCATT  
ACCGTTTCGGGCCGTGATGGTGTCTTCTCAAGCAGATTCTATCAAGGCTCTGAATAACGCC

GGTCTTTTCCCTGCGGCCATTACCACCGCGCTGCAGGCGATTCTCGTTCTGATGATATC  
GAAAAAGAAGAAATTTTCTGGCAACAGATCGAGCCCAATTGGTGTGCTGTTTCGGGCAATT  
GATGATCGTCAAAAGGTTGTTGATATGTGGCGTCGTATCGGGCTGGAATGCTGGCAAGTT  
CAACCTGGTGATTTCTGATTCAAATGCCCTCTTCGGAGGGCATTTTTGTAAAGAAATCAAT  
AAAAAGTACTGTACATGTCGGTTTAGTGTGATAATATAGTCACATTAACAAAATGGAGTA  
AAAATATGTTTTTTGACACCTACGACACTGCGCTGGCAGAGTTGGAAAAGCGCTGCGGCG  
AATTCCAGAACAAGTTAAAGCTCGCGACAAAATGCGATGGTTTCAATAACTCAAATTA  
GCATCAAGGAATTTGAGTTGGTCGTCGCCAATGGTGCAGGCGGGCGTGACAATAATTTGG  
TTGCAATTTTCGTTGGCCCAACCTCCTGTGCCGAAGTTTATCATCAGCTGCTCTCGGGTAA  
TCGCATGAAAGATAACAAGTGTATTACAACATGCCTATCTCGTTGCACAAGAATCTCATTG  
TGTTTCGTGGAAAGTAGGTGCTATCATTTCGAAAGATGGTCGAATTATTTTCGACCGGTTA  
TAACGGAACCTCCAGCTGGTTGCAACCATGCCAATAGTAATGACCATGCCGAAGAAAAGTGG  
TTGGCTTGATTCTCACGGTAAGTTGCCAGGAATGTATCGGCAAGCACAAAGTGAATGGTC  
AAAGGCAAATGAAATTCACGCAGAATTGAACGCCATTCTGTATGTTCGCGAAAACCGGGCA  
AAGTATCGATGGTGTGATATGCACGTTACTGTTTCTCCGTGTCCAGATTGTGCAAAAAGC  
CATAGCTCAGTCGGGGATTAAGCGAGTCGTCTATAATGAGTTATATGATCGTAATCCGTC  
TGGCTGGGACGACATAATCATTAAAGTCTGGAGTGGAAAGTAGTGAAAACGAACAGCCTCT  
CAACATTATCAAGAAAATTTACACCACCAGCAACCAAAAATTGAGGAAGTTTTTATGATCG  
TTGAAGTATCTCCTAACGCCAAAGTACTTGAAGTCAAATTTCTTTGAAGTTAATAGCGTCG  
CAGAAGCTGCCGTTCTGGGAATAGATCCAGAATGGTTTGACGATGTCAAAGCCGTCGTCA  
AAGTTGACAAAAACGAACCGCTGTTTGGTTATTATCCGTGCCTTATCGGTGTTGTCACTG  
GTCATCCGGATTTTGGCGATGGTAAAGTGATTTCGCACTTCTACTGTAGATATGGTAATTC  
ATACTCGTGGTGAGTTCGAAGAACGTACTATCGTTTTCACTCGCAATTCTCGTTATGAGG  
TAATTCATGAAAATTCAGCTCGATACTAAAGCACTCGAATCACTTTTCCCGGAAGGTTT  
GGAGGCTCGTGTAGAACTCCAAAATGCAGTTATTGCTAACTTCGCAAAGAAAATGCAAGA  
AAAGCATCTTGAAGACGTAACACGGGACCAGATTCGTACAGCTGTTCAAGAGGCTGGTGT  
TTCGATGGATTCATATTCATCGTTCGTGACATGCTGAACAAAACGATCACCAACAACGG  
TTGGGATGCATCAAGTGCGCAATTGAAGACCAATTCCAGTTTGGCTCGTGCTATCCATAA  
CTATGCCATTCAGCAAGACCTGAAATTGATGAAGGGTATGGAAGCATGGGCCAATGAAAT  
GGTTAGTAAAGAAGTGGAAAGCGCGAAGAAGCTGGCAAAGTTTCGTTGAGCATTACAT  
CCAAGAAGCTGAAATGAATATCGCAAAGCAAAGAAGCAAGCTTTTGGCGACATCGAATC  
TCGGATTGTTGCTGCCTGTAAGCAAATATGCCGGAAATCATTTCGTGCTGAAATGGCGAA  
TTATCTGAACAAACCAATACTACTGTAAGGAAATAAAAGGTCTAAGCAATATGTACTTCA  
ACAAATGCTGTTCTCTATTTTGGCTGACGGCGAACATGAACTGATTTTTTCGAACAGCAGA  
CGATTTCGCATCGGGTAATGCTTGCTACTCGTGACACTGTCCTGATTGAGGTTGCTGAAAA  
AGGTGACACAGCTTTTACGGCAACAGAACCTGAAGAAAAGATAGAACGCAAAGAAAGTAA  
TATTTTGAACGTCGTGCTTTACGATTTGGAAGTAAAAGCTTGGCGATCGTTCCGAGTAGA  
TCGACGCGTATCTATCAACGGTACTGGTGTGGCCACGCTGGCATCTATTATTGGTGCTCA  
ACATCGCAATCAACTGAAAATGGGCCACATCGAAGAGCGTTACGTTTCTACCGAAAGCAA  
GGGTTACGTGAATTTTAAATACGTTGACCCCGATGAGGTGAGCTATATGGTTCGAAAACCT  
TTCGCGATTTGAGCTTTTGTCCGACGAACACGGTACCAATACATGGTTCCTTTTAGAAGA  
CGAATCCAATTTTAAATCTGTGCTGCTGTTGCCCATACGATGGGATAACTTATAATTATC  
CCATCAACAAAACAGTTAAAGAGTAAATCATGACTAACGTAACACCTATTGCTCAATTTG  
AAAGCATGATTCCTGAATCAAAAAATTTGGCATCCGCAGGTGATGAAATCATTTCAGATT  
CTGGATTTGTTCTTGGAAATACGCGATCTTCTGAAGTTCCTCTCACTGCTGAGATTATCT  
CAGTCGGCAAAGACGTACCGCACCATTTGAAAGTAGGTATGCAAGTTTTGATTCCAAATG  
GCCGTATGCACAATGTACCCGATCCTCGTTATCTGTCCGGCGAAATCAGTGCGAAGAATA  
GTCGAAAGCTGCCAGCAAGCCACTGGAAAGATATTCAAGTCGTGTATGCTTAAGTGATTG  
TCAATATAAGATTAGACAAATTAACAAAAGGAAATGAAAATGGCTGAGCAAAGAAAGC  
AGTTGAGAAAAAAGTAGAAGCTCCGAAAACCTGGCCGTCAAGGTTACAAGCGTAAATCCAA  
CAGCCGTGTTGATCAAGTTGGTGTGCTCTGGTAGCTCGTGTTATGCGCCAAGTCAAACA  
TATTGATCAGTTTGGTCAACCAAACCACGAAGGTCGCAAGCGCCAGAAGTGATTAATGGG  
ACCTTCGGGTCCCATTTTATTTTGAAGAGCGGTTTGAAGGAAATATAATGCAATACGA  
AAATCCGATTATTTGACTGATGTGACGGGGTTTTGGTTCAATGGACAACCTGGCCTCCC  
ATATTTTCGTTTCAGAAAATGGCATTTCGGACCGACGAAATTTTGAAGAACTCTGGTTCGACGA  
ACGATTCCGCACTGGGGGAGAATTGTTTCGGTGTCAACGCGCGAATTGCAAATAATTTGAT  
GCGAGAGTATAACAACTCAAATTTTCATCAAAAATCTTTCTGGAGATGTGATCCAATCGA

TGTTGTAAATCGAATGAAAGATCAATATGACTTTATTGCCATTACTGCGCTAGGTGATTC  
TAACCGAGCTCTGCTCAACCGGTGTTGCAACCTGAACACACTTTTCCCGGGCGCGTTCAA  
AGATATTCTGTGTGTTGACATCGGCGAAAGCAAAATGCCGCATTGCATTTCCGTAAAGCA  
AAAATATAAAAATCGTTTGGTTTGTTCGATGATTTGGTAAGTAATCTCCAAGATTG  
TCATGATGCGATGTCGCAATTGCCTAAAATCCATATGCTTCGAACTGAAGGCGCGCGTGA  
AGTAAAACATGATATCAACAAATACCACACTGCTAAAAATTGGTACGATGTTGAAAAGCT  
ATTAGTTCAACTTGATCCAAAATCAAATACAATCGATTTGACACATCATTGACTTGGCA  
AGATAAACCTACCGTCTCTGGGGTAAAATGAAATGCATATTTTAGACATTCTGAACGAAA  
TTTCCTCAACTGATTCGTCAAAAAGAAAAAGAAAAAGTCCTGAATCGCAACAAAGATAAT  
AACCTTCTCAAACTGTTTTACCCCTTGCGTATAACCGTCAGTTAACGTACGGCATTACG  
CCAAAAGGTTTGAATTTCCGGCGGTTTGGTTGGACTTATGAGTTTGGAAAATTTAGCCAC  
GAGCTTGTAATAAAAATATTCCACCCGAAATTTGACAGGTAACGCAGGTATTCCTACATG  
CAACAGATGCTTGATAGTAGGTCAAGTTCTAGTTGTGAAGTTGCCAGTCGTATTCTTTCA  
AGGGACCTCAACTGTGGAGCATCTGTTGCTCTTGAAACAAAACATGGCCCCGGCATTATT  
CCTGAACAACCTCAGTTTCTTGACAGCACCATACAGTGAAAAGAATTTGAAGAAAATACGT  
TGGCCTGCTATTGCTCAATTGAAAGCCGATGGAGCCCGTTGCATGGCTCTCGTATCTGCG  
GATGGCTCACAGGTATCACTGGTGTACGGAACGGTAATGAATATCTGAAGTTGTATGAC  
ATTACATCACAGTTGAAGGAACTCGCTCAGGTTGTGAGAGAGACTCTGCAACATTATGAT  
GATTTTGTATAGACGGCGAATTGATTCATCGAGCTCCAATCTCTGCATCCATTAACG  
GCTAAACAACATACAGTGGATGATCTGTTTGAATTCCTGAGACAAATGATGAAGAAGAA  
ATCGAATCAGATCGAAACAAATCCAATGGTTTAAAGTAATAAAGCTCTAGATGGAACAATT  
AGCGACGTTGATCAATCAGAAATGATTTTTAACATATGGGATATTATTCCGCAGGAAGTT  
TATTACGAGCGCGAAAAGAGCAAATTGTACTACGAGAATCGATTTGCTACTCTTGCTTGC  
CTGACTGAAGCTTTTCGATGGTACCCAAAAATATCAAAACATTCAACTCATTGAATCCGAA  
GAAGTAGAGACATACGAGCAAGCTACAAAAATTTATCAGAGATATGTTGATCAAGACCGA  
GAAGGTATCATTCTTAAAAATTAAGATGGCCTGTGGGCAACGCTAGAACAAGTGACCAA  
ATCAAGTTCAAGGTAGAAGTAGAAATTGATTTGAAGATTGTCGAAGTTTATCCTCATCGA  
AAAGATGCGTCGAAGGTAGGTGGCTTTGTTCTGGAAGATTCTTCAGGTCAAATCAGGGTT  
CGTTGGGGTTCTGGCTTAAAAGACACAACCCATAAAAAGGTAATGGCGCTAAAGTCGAA  
ATTCCTATCAGCGAAGAGCATGAATATGACCGCCAAGCGCTTATGCTGATAAAAAATGAG  
TTGATCGGCCAGATTGTTCAATGCAAATGCAATGGATTGCAAGAGAGGAAGGGGCGTAAG  
CCGAATGAAGCAAATTCAGCTGTTTCTCCCTATTTTCCCACTCATCCACGTGACAAA  
TCAAAACCACATCATATCCATGATGTTCTCCAGATGCTATTCTAGACTGAAAAAGGCCT  
TCGGGCCTTTTTTCGTTTCTGTCGTGTACATGTTGATTTCGGCTTTGATAGCATGAATACG  
TACACAACACTATTGGAGAAATTCACATGATTGTTAAAGTTTCGATACAATTTTGAAGACCAC  
ACTGGCGAAGCCGACGACGCTCAAACCGCTTTTGAGAAAGCAACTGAAGTTATGCTGTCA  
CAGCTTCCCCAAAACAGAAAACACGTTTTACGCCACTGTTCCAAATGAAAGCCGTTTT  
GGCAGCGGTGATATTCGTGCAATGAATGTTATCCGCATGACCCGTGTTGACCTCATGGCT  
GTTCCGGGCGGACGACTTCGAATTTCCGTTCTTTGTAAAAGTATGTGAATAAGCTCCTTCG  
GGAGCTTATTGAAGAAAATTATGCTAAACCTTCAACTGTTGTACCTGTAGCTATTGAAA  
AGCCCATATTTTCAAATCACATCCGTCATCCGGCGGATATACCGTGGACACAATAAATT  
CCCCAATAACTTTTGAAGAATTAGAGTGGGCATGTAAAACGTTAGAATACGCTCATTATG  
TTAGCAGCCATAGAAACATGCCATGGATGAATTTGGAATTGGGGTCATATGGGCAAGTGC  
GGCTAATTTTTCGACTTTCATGGTAAAAACTCCCAGATATAATCAGAATGTGCAATCGTA  
TAGCCGAGCAACGATGCACCGACAGTTGCATGTGATTTTGAAAAAATATGACGACTACG  
TGTCTAGCTATTGCGATGAAGAATTTCAAACGTTTCTGCTGCTTTGCGGTCTGGAATAT  
TCGACGATGCAAATAAAAAATTCGTAACCGAGTGCATACGACGGATGGACTCACATATGG  
CAGGAGGTGAGAATTTTAATAAATCTGTATGGAGAGGAATGTATCTCAATAAGGCAGATT  
ATATGAAATTTAAAGATAGTGGGTCTATTCTCTTTAAAAATTTTCGTATCGACATCATT  
GCCCGTTTTTTTCAATTACGGCATTGCGCAATGCAGACATCGCGATTTTAAACGAAATCA  
CACGCGAAATTGTTATCGATGGCGACCCACATCGACCTGTCACTATAAACATGCACATTG  
ACTGTCATAATGTGAAACACCTGATTCCGGGAAACCTTAGTCCCTACCCGGAGGAGTGCG  
AAGTAATCTTGACAAAACACTGTACTCGTAATAGATGAGATTTTCGAATATGTGTCTC  
ACGTCGACAGTTTTTGTGTTTAAACGCGAAAGCGGTTCCGTTAAGTCAATTCCTGGAA  
CAACATTAGTAGTGTAATAACATTTTAGACCTATAAGGAAAACAAAATGCTGCTATTTG  
AGATGACAGATGAGCAATTGGATGAGGTATTCGACGGTGGAGTTGGAAAATACCCGCGTGG  
TCAATCTTTTGCCAAAGACAAAAGTTCCGTATGTATTAACATCCAAGTTCCCTGGTTAG

AAAATCTGGCCTTTGCGATTCTTTAATTTTACTTCCAAAGGTGATTCCGCGAAGCAGGGCA  
AACCTGGCGACAAATTCATGCAAACACAGGTCATCCAGATTTTCAGAAAAAGGAACACCAC  
AGATTCTGAGAGATGGTCTCGGTAGTGACCCCATTTGGCGCAATGAATATGATAACTGACG  
AAATCGTTAATATGCTTGTGAGGTATCGAATTGATGCAACGCTTCTGATGTTTCTGACAA  
AGGCACTGAAAGGCCAAGCTAAAAATATTGCGCGAATTACATCCCGGCTTTTGCAAAAAC  
GATCAGGTGGAAAGTTAATTGTTTTGCCAGAATTGTTGGAAAGAGGCCAAAAAATATACAT  
ACATTATGATTTAGCGAAAATCAACAGGAATTACTAGTGTCAAAGGATTGTAAATTGATC  
CTGAGCTTTATACGGTTTCATCTACCAGTGTAGGCGATGTCGTGATTGCTGAGAAAACCTG  
GTGAAAAAGTCAAAAGGCAGAAGCTATTGCTGGGTCAATTGAAGAGAGAGAAGAAAAAC  
GCTCTACTAAGTCAATGACAACTTCAAATTTCCACGTGGAGATTTGATCAAGGCATTCA  
CAACCAGTATTGCCTCTTCGGACAAGGAAAACAATTACTACGACCAATTTGGTGTGGCC  
CAGTCGAGAAAAAACCGCCAACTAGCGAGGTTGAGGAAGCAGTTATCAATGCTTATAACA  
CGATAACCAAAGAACAATAACGGAAATCGCATAATTACAAATTCTCTAATTTAGCCGCTG  
CTAATTCTCTTGACAAAATTGACTTTGACAAATATGATGCGTCAAGCCATGAATTGCTTG  
CTCTCTATGCGGAGACGGTTCGTCAAACGTCAGAGAAAGCCGCACAGAAATGGGTAGATG  
AAAATATTCCGGATGAACATCGGGGTGTGAAGAAAGGAAAAGTCGATTTTCATGCTTTATA  
AGGAGGTGAGACGCGCTATTATGGAATGGGCGAATTATCTTGGTAACAAATTTGATGATA  
CTGTCGGCAGTGTTAAAATGAGAAAAAGATTGCCACCTGAATGTGTTGATGCTATACAAA  
CTCACACTTTGAATGACTATCGGAAGATTAACAATGTTTTTCATCGGCAACCGAAAACCAT  
CAGCTAAAACCGTAAATGATATACAGAATCTCGACAGAGCTTTTGACATTGCAGGAATTA  
AACTTCTGAGAATCTCACCTTTGGCGGGGTATGGCATGCCCAAATTATCCAGCTAAAG  
TAGCTTTGGAAAATAAAATGTTTTATTTTTCTAACTACGTGTCGTATTCTGCTGTTCTTA  
TGGTATTTTTAGGTGGGTGTATTGCCGAGCATGACATTGACATTCTTACTGCTAAAGAGA  
ATGTTGAGGCGCAGGTTGAAACAGGCAAAAAAGCACGGGGCTCATTTCGCATTTGCTATC  
AAAATGTCCAGGTCCCAGCTCTTATAGTTAACGGGATATCGAATTATACGAAAGAACGC  
GAAATTGTTCTTCCACGAGGAACAATTTTTGAATTAAAAAAAGTCAGTAATGTTGGTGAA  
TTTACTTCAGGAAAAAGGAAATATCTGATAGATTGTTCTGCCGTTTTCAAAGTCAAAGC  
GACGAATCAACAGAGATTTACGACGGTGATTTGCTAATGCAAACAGGCGAAGTCAAACCTG  
TTTGAAGGTTTTTCTGGATTCATTAATCTCGCGATGATGAAGAAAAAGAAAGACTCAA  
GCTGAAAGGATACAAAGAGACAATTATTTGTCAACTCTCATCGACTTAGGTGCAGAAAGC  
AAATTTGTCCAGGTAATAGAATAAAAAAGGGAGCCGTATGGCTCCCTTTTTGTTATTCAA  
ATGAACCAAATTTTGACAACCTATCCACCAGCTTGTGTTGCCGAGTTCGGGTAATAAATCAC  
CCTTAAGCCAGTCTTCAAGCATTGCTTGATTAACCGCACCAAGTGTTCATGACTCGATACG  
CGAATGTAACGTCAAACGTTGTAATAGCATTGTTATCCTCGTAGCTAAGTTCAGGTGCTG  
ATACGCTAACAGGTACGCGTCCATTAACATGGGCACAGTGTGGGGTATACCGTCTCTGG  
AGTGCAAATTCACTTGTATATCTGCTTCAACATCAGCAGGCAGTGAACGCAGTCCGGTGA  
CAGGGTCTTCGACCGCATTTACCCAATCCTGCATAGCCCGGTAATTGGCAGCCTGATGGT  
CCATTCTGAAACTAATTATGAGAGGATCATACTCGCGCCCCATCAATATGATGTTTGGAG  
CGTTGTGAAATTTGTCCATTTCATAATTTAGCGGGATTTCTGGCATTTTTTACAGAATAAA  
CCGTAAACCAGTATGTGTATTGACAGCATTGAAAAAGTCAAGCACATACGTACCGACTT  
CAAATGACCAAGTAGGGACTGTATAGTTCGAGACGTCATTGCGCCGATCAAATATCTCG  
AAAGACCTGATTTGCGTATGATACTTTTGTGTGCCTTGAACCTATGACTTTATTCAAGGTG  
CTCGAAAGCATAACCTTGTGTCAACCCTGCAAAATCTTTCCCAAATGGAAGATTGTTATAG  
AGATATGCACCGACTCCATCAAGCAAATGGCTTTGTTTTAGATGATGGGGTTGTTGCGAA  
AATAACAGAGAACATATTTGTTCTCTGAAAGTCTTTATTCAATTCTTGTGAAATTCATC  
TGATTTATACATGATTATCTCTCATATAGATCAGATCGATTAAGGGCAAGAATCTCT  
CTGAAAGTGACTTCAAGTACAAAACCTTGAAGGCAAATTAGGTGCTATTGCTAAACCGCCG  
AAGTGACCGTCAGGGCTCTTATCGAACCGTATACTTTGAATTTGCGCTGGCCCAAATACA  
TCAGACCGCATATCAAATGAACTTGTTCACCGAAATTTCTAATAGTACAAATAATTGGA  
TTAGAAACAACGTTAACATTACTCAAAAATGATGTTATTCTTTCAAACATCGTAGTTTGA  
CCCTGAGTTGCTTCTGGTGTGAGTGGGTAAATGAATGTTTCTTTGTATGCTTTATTAAGA  
GTGCTTTTTATTTGACTCGCCGTTTTTACTTATCTACTCCTCCGTACGAGTAATACGAG  
AGCATTTCGTAAATTAACAAAATTTGCATTAGGTGCTATACATTACGAGGCGTTAATTGC  
CAGGTATATGTTTTTGTACGATTCTCTGCGCCAGCGTACATTGCCCTGGATGCGATGTAT  
ACTTGCTCACCACGGTCAGCAAATGCTCCCTGGGTAATAGACTCCAATACGCCATACAAT  
GCATGAGAAGCCATCGAGCTCAGTGCCCCGGTCACAGAAGTGTGCGCTCGTTCAACCAGT  
GATTGCTGGACATCATTGAATTTCTGGCTAATAGTATCTACATCTGTCTGTCCCCGAGGC

ATCAGGATGTTAGCTATGGTTTCCTTGACAACACCCTTACGATAATCGCCAATGTTATTT  
AGACCTGATCTGAACGATCGCAAATCCCCAGTCTGTCTGCCGGCATAGTTAAATGCTGAC  
AATATCAAACCGTTTTGATACTGATCATTAAACATTGAAATCTTGCGCTGAGTCATTGCT  
GGATTTCTCTCGGCAGGGAATTGGGCTATGGCAATTTTGCTAATAGGCCTGCGAGGTGAA  
GAACCCGTTGCCGGGTTCTCTCCTTTCAATATTCCGCCTACCACATCCTGAACCACGCCG  
ACTAAAAGTTCGGTACTCTCATAAGATGTTATTCCCCATACCAGGTCCAGGCGAAGATG  
TTCTCGGAGCCTGGACAATTGTTTGATTTTGATTTTGACAATGTTAGCCTTTGTGTGAT  
AGTTGTTTTGAATGGCTGCCTCTTGCTTCTTGCTTTCAACTCTCTTCTCTTTGTCGA  
TGGATTTAACAGTCGAAACCTCTGGTTCAGGAGCAGGTTTTATTGCAGCTGTCGGCACA  
CCAATGTTTTCTCATGCTCGCCCAAGAATTTAGTCTGTTTGTCTATTTCCACTCTAAGTT  
GGACATAAGATTCCTTAGTCAACTTACCTTCTTGATAAGACTGTTCAACTTCATTGCAAC  
GATCATCGAGCAACTAGCGGTGTTTGTTCATAAATTCAGGAGAAGTTTTATTCTTTTTGG  
CAGTAACGCAAACATGGTTTATTTTCCCGCTCAGAACGTCATATCTGCAAAATTGCTCTG  
CTGTAGTATTTTTGGCAATTTCCATGCGTTTTTCACGCTTTTCTTTCTCGTCAGGGGTCT  
CTTCATCTTCCCCATTCACTTTACGCCATTGCTTATCAAACCAATTAGCTTCGGTGTAT  
TTGCGTCTTCAGTTTCGCGTTTTCTAACACGGCCGATTACTTCTTCTCTTTTGAAG  
GAGTATATCCGACGCTGATGCAGCAACTGATATTGCAGAAGCTTCGAGCGAATCGGCTT  
TTTCATCTGCACCGAGAGCTCTTAATATAGTTGCGCCAAGTTTGGCCAAACCGACCAACA  
TCATATTGACCATATATTTCAATTTGGTCAAGGGCACCTTCGGCAAACGAACAAACATTT  
TTGTATATTCATCACTCTTGAAATAATTCATCAGGTCTGTTATAACTCCATGAACATTTT  
CAAATGGTGTGCTAAAGAGCCCAATTGATTTTTAAATTCGGCTTAATTCTCTTCAAATA  
GTGTAGTCCAATGAGTAAAATGACGAGATAAAAACGTGAAATGTCATAATCAAGGAAAACA  
CGAGTGCAGCCATTTTGGCAAATGAGAACGGCAGTCAAAGTGTATTTGAACAACATTG  
AACTTATTGAATTGGCAACGCTAATAGTTTTCTTAAAACCATTATCGACTGACGACACAA  
TACGATCTCCGATTCGGTCAATCGCACGTTCAACATTGTCTTCTTTGTCTGGTCTAACTT  
TATCCTCTTTTTCTTCTTCTTGGCTTATCGTTTTTTAGGAATTTGATATCTTCAGAAA  
TAGTTTTCAAATACCCTAAAACCTGGGTTATTTTTGGATGTTTGTCTTCTTCTCTACTA  
TCTTTTTAGCTGTTTGGTCACTAGTGTGTTGCGTAATTGGATTTTTTTCAACATCCG  
CTAAGAAATATTTTTTAGCTTTTCAGCAAATTCAGTTAGTTTGCTAAATGTTTTCTTGG  
AAGTATCTGAAATCTCTTCAAGTGATGATTAGAAATTTCAAGTGGCTTCCGCGGAAAGTT  
CTGTTGCAGCAGCAATATTTTAGGTTTCAGAAGTGTGTTGACTATTTTACGAAGTTCTG  
AATTACCATGTTCAACTGTTTACCTATAAGCTCAGATGAAGCTAAAAGATCGCCAGTGT  
TGTCTGGCGGATTTTCCAAAGCAGTTTTGATTTTAGATTGCTCAGAATCTCTTTGCCTAT  
CTCTTCTCAAGTCTCTTAGTGTCTTTTGGAGTAGCCATTAATTTATTGCAATAATGTTTGA  
GCCACCATTTATTTTGCCAAATGGTGCAGCAACTGAAAAAGTAGAAACTATAAAATCTGC  
CCAATCCAATACAAACGCAGGTGCATCTTCGAAATTAAGTCAAACCCGCTTTTTTCTTT  
GTAGTATTGCTTGGTCAAGCATGTCCAATGTCGATACAAACGTATCAGTTATCATGGGAGG  
TTTGAATAACAGAATATTGCCGTTTAGCTCGAATTCATATTTTGGCGCTAATATAGGCTTT  
GTCAATATCAACGTCAAACCGTTAATGGTTTGAACGGTCGGCAACTTTTTGTTGAATGC  
CAGCAGATGCAAATTACCATATCTGCTTCAGCGGCATTCAAACCCGGGCGAATAGAATC  
AAGCCATTCGATTATACATGAGTATACACCCTGCATATCTTTCAGCAATTTGATATGCCT  
GAAACCAAATTTTGGAAATCGTGATCTTTTTCCAGAGACTTTTATGTTCTTAAACAGCAGG  
GATAATGTTCAATTTTGGTTTCATGTTATTTGCCTTTCGTTAAAATCTGTATGAGCTTTC  
GAGTTGTTGAAAAGATACATATTAGTTATAGATTGCTCTCTGCTTATTTTCATGTATAACT  
TCATCAACGAAATACTCGCCTCTAAATTGATTCTTTTGATCGTAGAATTCCAAACGCATG  
CCGGGTACGAGACCAAATTTCCGATGTTTTTGGCTGTGCAAGACGCATCGTCTTCTGAA  
AATATAAGAGACCTATTGTACTCTTCGGCACCAGGGCGGCTTATTTGGTCATAATATGCA  
CCAGAACGGCTAATACAAACTGAATTTAGCCCTTCGCCAGTAACAACCCGAGTTTGCATT  
TTGTCTATGAATGAGTGGGCATAAAAACGAGGTATTCTCGTATGGGTTACGGGTATACGCG  
TTTGCTTTTTGTCAACCATTCAATATGAAAGCATATTTTTTTATCTACCATCGCAATAGTT  
TCACCAAACAACCGCGGCTCCGTCACGACGTATTGTATTGGATCATTTTTTGCTAATAGAT  
TCAAAATCTGACATATGAATGCCTAACATATCTTCCCAGACCAATGGAACACTTTCGTAT  
CCAGTCGTTTGGCCATGTCGTCTAATAAACTTGTAGTATGCATTTATGTCCAACACCCAA  
TTTGTCAAGTGGCACTCTAGTGCCAATCGAATTGATTCTCGGCGCGAGTTTGGGAGTTCCA  
GAATACAAATAATCAATCATCTCGTTCACGGATGCTACAGCATCATTGTAAACATTCTG  
CTAAACTTGAGATTACGTACCGAATGTATTGAACCAACTGGAATGTTATGATGTTGTCA  
CCTTTCATATCTACGTTTGCAGATAGATGTTTGTATGCCATACAACCGGTTATAAGTTATT

TCAGTGTTTCGCTCTTTTGGAGAGATGTTTGGATTATTTTCATCACCAGTCAAACGTGTCTGT  
AAACCGTTTGGAGTCATAAATTTGCAGCAGCCCTTCATTTATAACCATTTGTTAGACCATCT  
CTCGTGGTCATGGTAATAAAAAGTTCCTGCTAATTCAATAAACCTATTCTCCATCGAGGCA  
TCATAAATTTCTGGTAAAGTTTTATGGAGACATTGGGATAACCAGCGCGTTGTAACAATAAA  
TTTTCTCCTTTAATTTCTTTTCCCACCAGGCTGAGAACAATGGACCTTTTCGACTGGTAGCA  
TAATCATTATGTTCGGCCAGAAAATAGGCATGTCTTACTAGCGCTCTGTGTATCTTGTAAA  
AATTGAAAATTTTCATCAGGATTAACCAAAAACCTCAAACAAATCGAGCATATTAGTAAAAT  
TGATGTCATAATCTTTACAACATTTGATTTTTTTGATTTACTAAAATCGGGTTGAATGATT  
TTGATAGTTCAACAAATTTCTTCGTATGAAATCATATCAACCACTTGACTGCGCTCATCTT  
CACCCAGTTCATCCCAGGTGTATTTCGTTGTGCCCGTTATATATCCTATCAACAGTCTCAT  
AGAAGAGTACGTCGGGTGAACCTGATTTACGAGGCATACGAAATTTGAACGTTATGTTGT  
TTACCTGCAACTCTGGAGTTTTTLAGTGGCTCTTGTGTCAACTTCAATCTAAGATTGTGCA  
TCGACTTGCAGTGCGGGCATGTGAAAGCTGCGCCCACAAGTGATTTGCCCAAACCTCCAG  
TAAAAACTATCAGAAAAATATGTTACGTTCAAACGGCGTATAATCCGGAAACATTTCTT  
CGAGCAAATCGGAAAATATCTCAGATTTCACTAAAGGTTTACTTCTCATCTCATTCTGA  
TCAATAATAAATCACGAGATTCTGAAACTGTTATCGGTTTAAATCTGTGTGTGCCGCTCG  
GAAGCTTTATGAGGATTATATTCATTATAGATACACCCCTTTTAGGTTATTTAAATACAT  
TCAGGAGGACTGTATGGACATTAATAATCACAGTTGGAAATAAGCAAGTAGAAACTCCCAT  
GTTGTTCGGTGCAGCAATATCTGTCTATCGTAAATGATGCAGATGAAATGATTCCGAAAAT  
CAGTTTCAATAAAATAGGTACGCCGTTACCGAAACATCTAACTGAGCAAGCTCTCATCAA  
ATTGATAGCGATCTCAAAGAAAAAAGTCATCAAATGAAATCAGAGTGCACGCTACGTCA  
AAAAGAAAATAAGTTTGAAGTGCATCCCGATAATGTCTGTGTTTCTGACGGATTGGGGCT  
ATCGCATGTTCGCTGGCGGAGTGGTTATCAATATGAGATACCCGATGCTGTTTCGAAGATCG  
GGATATGTTTGGAGATGATAGACAGATATATAGTGTCAATTTGAATATGCAGATCAGCTATT  
CAAGTGGGAAGATTCAACACAATACGAAAAAGACATTTTATTTAAGCATTTGACGTTTTTC  
ACATATTGAAGCTATCGTAGAAAACTTCAATCTCCACAGGTATATGCTGCAGTTCCAAT  
CGAGTGTGAATGTGGAAATCAATACCCAGCGGTTATAAATGGTGCTAGTAAATTGGTAGA  
TTCCTGGGGGTAAAATGAAAATAAATCTGCTTTATACAGATCTTGACCCAGATTTCAAC  
AAATCGTGGGACAATGATGTGTTAATGACACGAGGAGCTCGTGCCGTAAAAAATTCTATC  
ATAGGGATAGTTTCTACTCCAATTGGTGCGAGACCATTTAACCATACTTTGGCTGCGAC  
TTACCAGACCAGCTATTTGATAACATTACGCCGTTGGTGATAGACACGGTTAGACGAAAT  
ATTCAAACGGCTATACGAAACTTTGAGCCACGTGTAAACAATCTTCAAGTCGACTCAACT  
GGAAATTACGGTAATAACGAACTCATTGTCACAATTCGATTTTCAATTATCGATAATCCA  
GCAGTAATAGACGAAATAAAAATGAAACTTTCAAATTAATTTAGCCCTCTTCGGAGGGCT  
TTTTTGTACGAAAATGAAAGAAAAAAGTCACCTGGGAAACAGCATAAATAAAAAGTCAGT  
TGAATTGCTGAAAAGAATGAGATACTCCAGGAAACAGGATGTAAAAATCAATACTGGAGC  
CCATGGCTCCAACGAGCTTGCTCGTTAATTTTTATCCTTTTAGTTATAATATCTATTAAG  
CCATAAAGGATAAGTATTGGCTAGGCCAAAACCTGGAGGCCAGATTTTACTCTTCAACTA  
TCGATTTATAGTGTATACTGGCCACAACACTAAAGGAGAGTAAAACATGATCATCAATA  
AAATTGAAGAAGTTCGTATGTCTTTTCGCAAGCTTGGCTCTGATGGCGCTAAAGCTGCAA  
ATCTTCTCGGTCTAGTAATTGGCCAGCTCCAGCAAACCTCGAGCTAATTCCGACGCTGCAG  
TTATCAAAGTAATCAATTCCCTTTTGAAGGGAATTCGCGAGCGTATTGCTCAAAAATACA  
ATCAGCACGACCTCGCCAATGCATATCGAGAAGAAGCACTTCTTCTCAGTTAATTCCTC  
AAGCCATTACTGACGAACAATATAACTCGGTTCGTCATGGTAAAGCTGTGCTAGACCTTA  
ATCGGGTGAATGGCCCAAATACCAATCTTATTACCGGAAAACCTTATGGCAAAGCTGTCAG  
CCGGTGTGAAAGATGGAAAATGGTCTATCCCTGACGCTGCTTCGTTGAAATAAAAAGAACC  
AAGTATACATACCTTTTCGCTTTGGACGTAATTTGTGAATAAAATGAACGATGAAATTTGC  
GTAGTATGTAAACAGTTAGTTCCTAAAGCACTTGTGTTTACACATCATTTGGACCAGCG  
CATCGTGGTCCATGTGCCATTATGTTGAAACTTTACCTCTTTCAGAATCTACCGGAATT  
CTTGAAGAGACCGAACTTCTGGTGTAAAGATAAAGAGGCCTGCATACGCAGACCGTTGTTT  
TATCAGAAGTCTTCAGGCGGTTTCGCTTTCTTCTCTGGCATTTCGAATTCACCTTCTACGG  
CCAGCGATAGCCTCTCGCACCTAAATATCATCGGTGGGTTTCAATACAACCTTTTTTAACT  
CGCTTGTGTAATTTTTTCTAGCTCATCTAGTCCTTCTGCTGTTTGACACGCGGCAATT  
TTAGACATAAATGAATCCACTGTTCCCTTCTGCTATAAATTTCTGAAACATTTCCATTGCA  
TCCCTCCTATAAAGAAATTTTATGCAAAGTGTAATTGAATTTTTCTGACACATATCTTTC  
AATACGTTGAATTGCGTGTGTCAGGGCGTAATTTTTCTTTGTGATTTCCCATGAACATT  
GATTATCCCAATATCGTCAATAATGTCCATACTGTAGCAATACTCTTGGCTGAGTGCTT



TCTTAAACTCGCCCAATAGTTGGGAGAACAATTGCCTTTGATTTTACAGGGTGTGCAAA  
AATGATATGATGCAAATTTTTGATTGACACACCAGTAGAGAAAACACCATATGAAGGTAC  
GAAAACATGACCAGTTCACCTTCGGCGATGATTTTCATCTGATCACGGATTTTCGGTGTG  
TGTATATCCAGATATAAAATGAACTTTACCTGGGTCATGAATCTTTCTAAGCGTATTGTA  
CAAAGCCATACCATGCGCTTGCAGGCGTAACATCAGAAATGCATTTTCACTTTTGTCTGC  
GATTTTTTTAGCCATCGACCATACAACTTTATTTCTTCTCGTATGATTCGTGATAAATTT  
TATTTCTTCATCATAAGAAAATTTTCTGGCAGAAGTTCGATCTTCTCTCGAATAACCAAG  
CTGAATAGCTTTAACTTGCAAATCACATAATTGGCCCTCTTCCATTAGCTGTTTTGTTGT  
TACTGGTCTAAAAATATCCCCAACATGCCAACATATTACACAATGTTTGTCTTTCCATC  
TCGCAGAGAACCAGACAAACCGTATTTAAACGGTATATGATCGACGGATTCGATGATTTT  
CTTTATTTATGTCCCAGTGGATAGATGACACTCGTCGTTTATTACACAACCGAATGGGTC  
AAACCATTCTTTTTTCTGCTTAATGGCAGCTTGCCAAGTAGAAAACATATATCAAAGCAAT  
CGAATCTTTTACGGTCCCCTACTTTATCCCAAGCGTAGCTTCTCGAGGGAAAAGACGGTA  
ATCGACAAAGTCATCAATCATTGGTTGACAAGAGATGTCGTTGGAACAATGACAAGAAC  
TTTGTCTTTGTAATTTTCTAAATATCACAGAGACAGCAATGCTTGAATCAGGGATTTACC  
AGCAGATGTAGGCAAATTTAGCAATTTTATTTTTGCGCATATCCCCTCATAACAGCATC  
AGCCTGATACCAGTGAGGAGTGATTTTGTGTTACCAGAATAAATATCTTTGCTGTTTAC  
CCATGCATCAAATTCGGAACGTGGAATATTTTGTCTTTCCGTGATCAACGGGTCAACAAC  
TATTTTATAATCGTTCTGCTCGGCAAACCTTTATTGCTTGAGTGACTAGTCCATAAGGAAG  
CAAATGATCATATCCTAGCAGGAATATGACACCAGACCAACCTCCACACTTGAGACGCGG  
AGAAAATTGATAGCCATCTGCCTTAAATGAAGAATACTCCCGCATTTCATAGAAGATCGA  
GTCTTCGCAAACAACCCTGCCAAAACCTGTAGTTTTCAAATACAATATTTATCATTAAACG  
TCTCTTAAATAAGTCATATAGTTTTATTTATACAAAGGAATCACCATGAAAGAGAACTT  
TTTAGTCGCTCTGATATCGAATCTCAGTTTGGTTCTATTTCTGTGCGAGAAGGCAAGAAA  
AAACTAGCAGATTATGCTCTCAAGAATTACGACATTAAACTCGTCAGAAACAAGTCGTTT  
GAAAATATGATGAACGATTTTGAATCTGCTGTCAATGCCAAATTCGAGGCCGCTCGTGCG  
GAAGCTGGAGATGCTGAAGAACTATCGATATGGGAGAACGTGTTGACCTATCAAAGGGG  
AGTGAGCTTGACCCTGCTAAAATGGATATTGAAGATGAAACATCTGAAACAACAGAGCAG  
CCTGTTGTTGCTGAACCATCGGTTGAAATTGTCGATCAAGACCAAGTAGAAGAAAAGCCG  
GCCATCGCGTTTTCTGACTTGAAAATTGAAGCGACTACAGCAACTGAGACAACCTACCCAA  
GTAGAAGAAAAACCGGATTCTGATTTTGTTTTGTTCATTCCCTGACGACTATGCGCCAAA  
TATCGGCTGGACGGACCAGAAGGTCGAGCATTATTAATGTTCCGTATTGGATACACAAT  
TGGATGCAGGGAAGAAATTGGAAAATTGAAATTGCAGAATGTCCATATGACAAAGAGCTG  
CTGAAGTCATTGGCATGTTACATCGAGCGAGATGGTTCCGTGGCCATTCGCGAATCACGA  
AATGGCAAATTCATCGTTATTTTATAAACCAGGGGTCTATGACCCCTTCTTTTGTTTAAGG  
AAAAACAATATGGCAATTAAGTCTTCTCTCCACTTGATCCATCCGTTTCGGAAGG  
TAGTATTGTTGACTTTACCGTTACTTTTAGCGGGGATGAGATGGTACAGGAAGTTGATGG  
TTACGAATGGCTTGTGTCGGCGTTGCTCAAAGCGGAGAAACATCAACTACTTTAAGCAA  
AACCTTTGATTCGGCCGTTTCGTTTACTGTAAAATGCAATGTGACATATGCTCTTGTAGC  
TGACGACGGTGCTGAGCCAGTTGTTCTTGCAGCCGAGAGTGCTGCGACCGTCAAGAAGT  
ACCCGCACTTGATGGAAGCATTGGTTTCGTTTACCCCTTGGCTTTCAAAAACCTCGAGTTT  
CTCGTGGGTTCCGTACTGGGTGCATGAATGGATGGTAGCGAATCCAAGATGGCGTCAAAC  
ACCGGCAGAAAGTCTTGGCCAATCATTGCTTTCTCGATTGACCAAGCTGTGGAGGAATA  
CGGCGAATGCTTGATGCAAAAATCCCGTAATGGGTACATTTACAAACCATCTGCTTATAC  
CAAGTAAAAGGAGCCTTCGGGCTCCTTTTTTGTTTACATTTCTAGAAAAACGTATTATGA  
TGGCTTTGCCAACTTTGGGCAATTCACAAGGTTCCGAATAATTAAGGAATCTTCCATAATC  
GAAAGTGAGGAAATTATGCTGAAATCGGCATTAGAAAATGTGATTTTGGAAAATAGTCAA  
GCCATCGAAGGCAAAGTGCTTGTACCGATGCCAAGAAAATGTACACTGACCCGAATTCG  
CCAATTCATCACAGAGCCAAGCACCGTGATGAGCGGTTTCAAATCCAATTTTCGTGATTTG  
ATGTACACTGCAACGACTTATCCAGTTGCAATTGACGGCCCGATATGGGAATCGTCGTAT  
TCCCTGATGTATCCGATGATTTTGCCTAACCGTTTTTGGTGCTTTTAAACGTCAATGGCCAT  
AATTTACGTGACGTTATTGTTACTCTGCTTGAACCTCAGGCGTGAATTCAAAAGAAAATG  
GCTCTTGCATCTTGCAAACTGCGTGACTGTCCAGATAACGGTATCGATTACAACAGA  
GCACAGTGGTACACTAAAGCTATTTTATGTTTGTATGATGCTCGATTTGCTGATGATCGA  
GAATTCGACATCGAAAATTTGTAATAATTGCAAAAAGCGAATACGGTTCGAACCGCAATT  
TCCATAATCTCATCCGGTGGGATTTTGTCTCAATGCCTCAGTCGATTCATTTGTTTCTGCT  
TCAGCATTACCGATTACTTTTTCTGAGACACAACATAACGACAAAATATTCAAAGATAGTG

ATTTTCGAACACGGATGCGTCGCTGACCCGGGCAAAATGCATCGAGTTCGTCTGATTACA  
GAAAAAATCAAAGATCGGCTGATCAAAAACCAGCGTCAACAGTTCAAGAAATAGTTGTAC  
AATGATGGGCTATGTGTTATGATAGTCCCATCAAATCTACCAAGGAGCATATCATGAGAA  
CAATCCACTGCAAAGACGAGTATATCGAGTTTTATCATGGCTCTTGTACACTCGGCCTTA  
AAGGTGATATGCTTCTCCGCGTGAAGGAGCAGACACGATTTCCGACAAGGGCCGGAAAA  
GGAATTTGGACCGTGTGTTTTTCACCAAAGACCGCGGTCTAGCCAAGGTTTATGCTAGAC  
GTGCTGCTCGTTCTATTGGCGGGCAGCCAACCTCTATTTTCGAGTTATTGCACCGGTTGACA  
CGGTCTTTATCTCTGAAACGCCGGGCGCGACGGTTTACCATGCTGCCTGGGCTTTTGTG  
AACAGATTCCATTTGGTAAATTGAGCGACTAGAAAGATGAAATTCACGACAACCTTACTTC  
AATTTCAAACAACACCGTCCGGACGATATCATTAGCGGTGCGATAGTGTCAAAGACAAAA  
GAAGACATTATCGGACGCATCAAAGCTTACGCTGATTCTATTTGTCCGATAGAAGATCGA  
ACCGATGAAAACGGAAATGACACTCTCAAATCGAAGAGGGTGCTCGACTCCCAGAGTCG  
ATGCGTTCGCGGCCAATTCAAGTCACTATGAGGTATTCGTAATGAGATATACTCAAAGG  
ATCTCGCAGATTCCATTAGCTTTGCTGTGGGCGTTCACATTGATCAATTTGACAAAGGCG  
GAAATCCGTATATTTTGCACCCATTGAAATTGCTGCATTGGGCCAGACATGCCAATGAAG  
ACGTTGATGTTCAAATTCTGTGCATGCTTCATGATTGTGCAGAGGATAGTTCGCTGGGTG  
TTGCAGAGACACTGGATTTGATCGAGATCACTTTTGGCACCGAAATGCGTAAACTCGTGG  
ATATTCTGACGAAGCGTGATGGTGAAAAATATGATGAATATCTTGATCGTATCAAATTGG  
ACGTCAGATCCGCGAAAGTTAAGTGCTTTGATCTTAGACACAATTCTGATCTGCGCCGAC  
TGAAAGGTATTACAGTCAAAGATCAAAGACGTACCTTGAAATACCAAGTCGCTTATGCCA  
AACCGAATATTTGGATTCAAGAGCAAAGGATGAACAAAAATGCGTAATATTTCTGAGCTT  
TCGTCAGCCGAAAAGGTACAAGTGCATTTTCATGTTTCGTGAAATGAAGCATGGATTTCGTA  
CAAATCGCCAAAATGTATGACATTCGCGCGACAAATGTCATCGATGTCGTCAAAGACGTT  
GATGAAATGCGCGACAATCATCTGGAAGCTCTTACCCGACAGCCGGTAGTGTATCGGAAG  
CACTTTGTGAATCCCAAACGGCATCAAATGATGGTCGCTTCAAAGCTCGGAAGCGCGCA  
AAAGGCCAAAACCTTTGAGACTTTGCCATCTACATTGACTCCCGAGGAATCGCTTGAGATT  
TCTCAAGCCTCGGCCAACATGCCCGTCAGGCCAACAAAGAGAAGAGCTTGAAGCTTTGTTG  
AACAAATTCAGACAAACTGATGTACATTCTCCTCGATTTTGGTTAAAATTCTCCCATAA  
TGAAAACCGAAATCACGGAGTATTAATAATGTCATCTAGACTGGATATGCTTAACCGCTA  
CAATGCTATTGCTTCGGCCTCAGTCAAAGCTTCTGAACCTGTCAAAGCACCATTTTGA  
AATTCTTCGAGAGAAACGCAGCACCGAAATTGAAGAAAAAATTCAAGCTGAGCGAGATGA  
AGTTGATCGTCAAATTGAATACATGGCTTTCTTCAGCGCAAATCAGCGTACTTGAACC  
GTATCAGGTTAAAGTAAAAGCTGCGAAGAGCGCGGCTTAGAGTGGCGTATAACTTTTCA  
ACAATTTGTTGAATTGATGAAAGTCGAAAAATGTGCATACACAGGTACTGTTTTCCCTAA  
AGACCATGGCCGTTCTACTGAGCGCATAAACCCCAAAGTCGGCTACACGATGGAAAACGT  
GGTAATCGTCACTGCTCGTGCAAACAGCAAAAAGGCTCATCTTGACCAATTTGTTACGA  
AGAGCATATCCCCGCTGATATGAAAGTCAAACCTTTTTGCGCAAAGCAATTTATCAATTGG  
AGAAAAATACAAAATGAATTGCATTAACGTTTTGAAAATGCTATAGGACGTGACGAGTA  
TATGGTATTTCCCGAGAAGTGGACAAATCAAAGTGGTTTTGCTGCCAAAATCATCGAGTT  
GTTCAATGAAAATACTAAACCTGGTGGATCCGCTCCAACAGTTTAGCCAATGGGAAATTG  
GCCATCTACGAGCTATCTTAGCGACATGCCTCGTTTGTATGTTGAAACGCTATGGATG  
GGAAGTGGCGCACGATTATCGTCAATGGTGCAAAGATAATCCTGGCAAATTTTACTGT  
CGAAGTATTCGGCAGCCCTGAAGCGAGATATCCTACATCATTATGATGAAATACGAAA  
AGGAATTAACCTCAAATTGTTTTGATCAAAGAAAAGCCCCGACGAGTCGGGGCTTTGTTG  
TATTTGCAATTTGTAAATTGATCAGGTTACACCGGAATGATTCTGGGTAATTTACACCT  
AACATATATGACATATCAGATTGACCTACCAAGTTATCCAATCATCACCTGTTACATTA  
CGTTCACCGGATTGACCTATACGTGTAGTGTACGGGTTAATGGATAAACCATACCGAAGC  
ATAATGCCAACAGATGGTTGCAGTGACGTGGAGTCATTGATAACTTTATAAGCACCCAAA  
TCATCTGGTTCAATATATGGTGAATAGAACAACGAACCTACGGGTTCAATATCATTGACG  
TAATGCTTACAGCAAGTGATCAGATAGTCAAATGACGATACCGTATCAACATACACTTTC  
AGCCCGTTGAGCAGAGTTCCTGCTGAAAGAGGATCTTCGTTTCGCATACTTCCATCCGGAT  
GCTTCAAGCATAGCAGAAACGCGAGTTGTACAGAGAACATAGGTCGCTTCATACGATGTG  
TTTCTCAGCATCTGATTTTTTCAATTCGCATGCTTGTGATACAGAGTTCTTCCAATAACC  
GGGGCGTCAGTGCTAGCGGTCATATCCAGAATCCCATTTGGCGAAATATCTTCTACCTTA  
TAGCGGCGCGAAACGGTTATAAGAGTCTGAATAATGTCTTTGTTAATATCTTCAGATATC  
ATAGTTGACAGGACATCATCGACTACGCCAACACCATCCACTTTATTTGCTTCAAATCC  
TGCATCAACTCAACACTTATATTTGTCTTAAGTTTGGCGTGTGCGAACTGGAAGTGTCCAC

CGATCAAACCTTGA AATCAGTTTTCGACAAATGATGATGCACCTTCAAATTTCTTTTGCTAAT  
GCTGCTTCAGACTTGATTCTCAGGTTGCCGAGCATTACAGGATCACCGATTCCATAGGCA  
ATGTTTCCAGTTGACGATGGCAAAGTCAGTGGGTTTGTGGCAGTGTA AACACATCATT  
GAATCTTTCAAACATAACCCCTTAGCCATGGGAGTCTCTAGTTGCGCAAGAGGAATCGAA  
TCCCGATATCCGACTGACCCCATGTAAGTTGCAGCGCTGGAGAATGATTAATTACGGCA  
GGTTCAAATATTTACACCGTACAGTGTGGAGTTGGCATGTTAGTTTCTAGAATTGCT  
ACCATTTCCGGTAAAAATCAAGTTGTTTGGCGCCCGGGTCAAGCCGACAAGAGCGCGACGG  
CTCTGACGATTTGCCCGGTAGTTGTTGATTCAGAAATCAGATCGTTAATTCTGCTCATA  
TTTTTCTTTATTGTTTCGGCGATTATACGAACTCGTGTAATCGTGAAGTTTGACGTTGAT  
GAAACCAATTCCAAAGCACCACCATTCGTGGCAAATTTCCGTTTTTATGAGCACTTATG  
AATGAGTTGCAGTTTATTGTCTGCGAAGCCTGCCAGATAGTCTGACGACAGTCAATGAA  
TCAATATTTACGCCTGCATTAACGGTGAGTTCCAACGAGTTTGCAGGTTCTGCATACCA  
AATGAGCCAGTGATTGCTATTTTATATTGAAGTGACCTGACGCGCCATTTGCAGCTATTT  
GGCATGTCACTGATTTCAATTTTGAAGATTCATGCATAGAGGACATAACTGGAATATTTG  
ATTTTATTAGCAGCATATATTTTTCCTTATGCAAAAAAGGGAGCCCGAAGGCTCCCTTAA  
CCATTCCTTGGTTGTGGAACCAAGTCCTTTTGAATTACAGACCTTTAACCCATACACGGC  
GGAAGTAGGCATTCTTACCAACGCTGTGAGCACCAGGCATAACCATTGCTGATTCGACTGG  
TAGGCGCTTGGGTGCGGGATTACAGCGAACAGGTTAACACCGATGGCGTAACGAGTCTTGA  
AGCCCATGACCGGTTGGAAGTTCTTCGGATCAGAACCACGCAGCGGGGTGAGTCAACGT  
ATGGGCCGTAGCAGATACCGGCATCCAGGTTGTTGGCACC GCGGTAACCCATGGTGAAGT  
AATCTTGACGGGCGTATTGGTCTGTGTAGACCTTGTAACGACCACCCAGAACACCAGCGA  
ACACACCCTTGGTAGTATCAGCGTTCAGGCCAGAAAGCCATACCTTGAGCAGCTGGGGTGA  
TACCAGTATCAACCAGAGCCAGGGCAGAACTACGTTACGCGAAGCGATGATGAAGTAAC  
CAGCACCACGACCAGTTTGACGAGCAATTTGTTAGCTTCCCTTGTGACTTGGTTCAGCA  
GAGCTTTGTAGCTTTACCCAGCCCAACGAGCACCACGAACATCGATCCGGTCTTGGAAGT  
CAAACACACCGGCAGCAGAACCTACAGTTTGAGTCCAGCCAGATTTACCAATTTGAGCGG  
TGTAGTTAATCCAATCGATAACTTCACGGTTGATTTCCAGCATAACTTCGTTAGCCAGAA  
TTCCGTTTAGCTCCCTGTCTGCATCCATACCATGAACAGCGCGCAGGTCTTGGGCCAGTT  
CGATAAAGCATTGAGCTTTAGTTGACGAGATTCGCTTCGACGGTTTGCTTGTGATAC  
GGAAGCTCATTTGTTCCAAGGGTTATCGGTGGTTCCGTTAAATCCTTGACGAAGTTCGG  
CGATAGAGGTAGCCATACCTTCAGCAATTTAGCCAGTTCGCCGGCAGCAATCTTGGCAG  
TAACCAGGGCATCCAGAGCAGCACCAGTTTCGTTGGTACCGACAGTCACGCTTCCGCCAG  
TCACGTTCTGCAGAGAAGCTGAACCAGACTCGTAGAAGAAGTGATACACGATATCACCGG  
TAGCAACAGCTTGACCAGCAGTCAGCGTAGCAAACGGACTGCCATCGTCTGCAGTGCTAG  
CACCTTGGCAGCCAGACCTGAATGCCAAGCATCAGGAGCATAACATCGGGTGGAAAGCTT  
CCTTAGCACCAGAAGCCAGAGGGTCTATGCCGTAAACAGAACGCAGGGCAAAGCCTTGGC  
CAGTAGGACCAGTCATCGGCTGCACACCAGCGATATCGAAGGCGATCAGGGATGTAATTG  
CGCGTCGTACCATGCCGATAACAGCAGGGCCGATGTTTGTAAATTGCTCACGAACGTTGGC  
CAGCAGCAATATTGGTAGGATCGTAACCGTGATCACCAGCAACTTTGGCTTCCATCAGAG  
AGAGACCGAATGGTTCAATAAGTTTGTATCGGGATACACCGGATCGGTTTTTGAATCTT  
TTTCTGAGCTACGAGAATTTGGGTTACAAGAGCTTGCTTCTTTTTACCAGCAATTTAG  
GCAGACCTTACCTTCCCGCAGCGGAGTCCATATGTTTCAAGAAATTTCTTTGGTTTTAGAG  
ACATTGTTATAACCTTTATTGAATTAAGAAGACATACGGGAAGCAGCGGCCAGATAGGCG  
GCCATGGAATTTTGCCTGCTTGTATCATTTTGTCAACAATAACTTCGGGTTTCAAG  
TTTACCACAGCTGCAGATTCATCAATATTTAATGCTTGTTCCTGGATCGGTTTTTGTTC  
TTTTGACCAGAATTAGCAACCATTGCGACAATCGCAGACAGTTTTGGTGAATAACTATCA  
CCATATTCCAGGCCTTCAACAAGACTCAGAACTTTTTCTTTCTGTGACTCGGTCAAACCT  
GCAGTAGCTTCTGAAATAGCTTTTTTCTTTCTTCAGTGAAGAAATTTGCTCTTCCAGAGCC  
AAATTTTATCAACAGCGATTTAATTTAGCTGTAGATTCAACCAGCTCAGCATTAGTTC  
GTCAATAACATCTACTTGTCTTCTGGTACAGAGACGTTATTTTCAATGAACAGTTCTTT  
GAGACCGGTTGCAAATGATTCGAACAGCTCAGACTTGATGTTTGTGTTCACTTGCAGCGC  
ATTTTCTTTAGCGATTCTTTGCCAGATGAGTTAAAAATTTATCAATATCTTCGTAAAG  
TTTTGTTTTCAACTTGTACACGGGCTGCTTCAATTCCTTCGGCCAGTTGAGATTCGGCTGA  
AGAAGCAATATCGGCAATGTGAGATTCAGCAAGCGTGATTGAAGCCGATCGTACAGCCTG  
CTCAAACGCAGTACTGACATTTTCTTTTACGGCTTCGTCCAGCTGAACAGACTCGAAAAT  
ACTGTCCAGTTCAACGGCTACCGCGCCAGTTTCTCGCTTGATTCAGCCAGCAGTTTATC  
TTTAAGGGACATTTGGTTTTTCTTTAGTTCAACATTGAAGCCTATGTTTTTAGCCAATT

GGCCGAACGCTTCATTAAGTGTGCTTACATTGTTATTTATAGCCTCTGTAGGAGCTTCAG  
ATTCTTGTTCTTTGCTCTCTCTTAGTGGTTTAAACGTACGCGTGTGGAGCAGATGGCCCC  
AAACAACATCAACCGCTAGAGTGAGGCGATAACGCTCCTGAACAAAGCCACCTGTAACCT  
GCCCCGAGACCACGTGATGATACTCCCAGAATCCAACCAGCTCGTATATTGGCGGCAAGTA  
TATCACCTGAACCAAATCACCTTCAATTACCCTGGCACGACCCATTACATTATCGCCTT  
CCCACCATAGTTTTTCTACTCTGATTGAAGCCAAATTAGGGCCAGGCATCGGCCTTGCAG  
GATGATTACTTGCGCCGAGTGATTGTTTAGAATTTATTTGGGTAGCAATATAATCGTCTGA  
CAGCTTTGGCAAGAACAGCTTTAGGATAAATTTCTCCCGTTTCTATTCTTAACGTTAGCTT  
ACCTAAAGATGCCTTCAATATACAAAGCACCTTTACCATCATCCACTGATTGACTACAA  
GTTTCAAGAACAGGTGCCGCCGGGAATGCGCCATACTTCAATTAGCAGCTCGTCTTCCATCT  
TATGACCCCAATGCTTTACGGCGTTTCAAGGCACGTTTGTGTTTTCGCTGCGCCTTTCTCC  
CAATGGTTGGTTGAGAGCGCTTAGTTTTTCGCCGCTTACGAGCCATTTGTCTACGAGTA  
GCAGCAGTTAGCCAGTAGTTTTAAATGCATTGCGCTTCCGTGTTTTTCGATCTTTGGTA  
CGAGTTACTTCACCTTTCGAATTAACATGTTTGACAATTGCGTCTCAAATGGAAATATTT  
TCAACTGCAGCAATCACTGCCAATGACATATCTGTTTCGTCAAGGGAATTTTTGGAAATA  
ACACCGATAAATTTGATCGGTGCTAAATCCGGCTTCTACCAAGGATTTTACACGAATCACT  
GCTTGCGCAAATGAGATTCAATGACTTGTTGATTGCTGAATAGCCCGATGGAATAAGC  
ATTTATTCCTCCTCTTCATCTTCATCATCTTCATCGTCATTCTCATCATCTTCGTCGTC  
TCGGGTTTTTCACCTTCGGTAACAACCTGCGCGAGCAATGGCCTGTTTTTCTTCGGCGTAT  
ACTGACTCTTTTACAAGAGCCATTTTCGCCTTAAATTGACGTTTTGCTTCAATTAATCA  
CCTGATTAGACAGCATCGATCAATTTTTCCATTTAGAAATCGTCCTCGTTTTTCAGGGTTT  
TGGAATCGTTGACATTCGCCTCTTTTTCTATTTGCTTTTCTCTTGAGCAATTTGCTCA  
TCAGTCATCTGCAAAATGTTTTTCATGACATAATCATGCGAGACATATTTATCTACATAC  
GGCTCGTTTTTGAGAAAGAGCGTCAACTCGTTGTCGAAGCGTTTCAATATCTTTCAATTCG  
ATATAATAGGAATCTAGATGGAAACTAACCTTGATGTTATTTATTTGCTCTTCCCATTTCG  
CTTTCTAATATGATTTTTCTTGTAATGAAATTGGTTTTGAGCGGGTCAAGGAAAATTTCT  
TCAAAATTGTGTTGAAGCTGAACAATAAATTTTTCTGCAATCTAATTCATCGCGGGTGATA  
GACATATCTTGGCCACCAATTACCATTCCGCCATCGTCGCGAGGCATCCGGGACAAAGGA  
ATTCTCAGAGCTTCATAGAGCTTTTTATAGAACCAGCGAATATCATCCATTTCCCCCATT  
GTTTGGGCGCCTGGAAGAGAAGTAACTTCGGTAACAGATTTACCATTTCTACGCATCAAC  
CAATAATCTCTAGTCATTGAAAGATTGCGTTTTTGATTTTTTACAGTACCTGTATTCGAA  
TCGTATACAACACGCTTTTTTCAGGCTCTGCATGATCCATTACGTATTCATTTGCCTTG  
CGATTTGGCATATTTTCTACGTGAATGCAGAAAACACGTCTTTCCGGAGCACGCGTAATA  
CGATATATTACCAAAGCATCTTCTAAGAGTTTTAATTGGTTTGCAGGCTTAACAGCATT  
TGCAGATAACCGACAATCCCACGATCAGAACAATCCTGAAGGCCTGAATGCGCATATACA  
ATGGCACTTCTCGGAATTGTAATGCGTGTGTTTCGGTTCAAACAGTCTGCCGTTATAAGCA  
TAACCTTCGCTGCCGGTGGTATAAACAATAAATTCGCGATAGCCTTTTACTATCGAAGTA  
CCACCGTCGTCAGCCGTAACGATTTACGATAATATTCGACATGACGTGGGTCTAACCGG  
CGTAATTCAACAATGCCTTCTTTAGGATTAGGCATTATTTTATGGAAGAATATGCGGGAG  
TCCACATAACCATCTGCGGAACAACGTGTGCGAGTCTGCGAGATACATTTAGCAATCTGCAA  
ATTTTCACTAACTCTTCTAAAATTTTGTCTTTGATAGATGAACTAAATTCAGTATCGTCC  
AAATCAAGCGATACTACTTTGTGACCCTTTTCATAAACAACAGCTTCATTTACGATAGTT  
GCTACAGCTCGCTCAACTTCATGATTATTCATGAGTTGGAGATATGTGTTTATGAGGTCC  
TTGGTACCGGAAAGGTTGTTATCGATACCAACAATAATTGTTGCATTAGAGCGTGATATGAT  
GATTCTCCCTCGCGAGCTTCAATCTCGGTGGCACAATCATCTTTTTTAGAAGTCGCAATC  
GATTCGTGGCCTTGTTTGGAGCCGCTCGTCATATTCATTTTATGATCGAAACGATCCCAAAT  
TTAAACAATCTAAAACCTTCATACAAACTCCTAATCAGGCACCATTATTGCTGCCTGTA  
TTTATTATTCCCACCAGTCGAGTGCAAACGTAGTTTCAAATGTAGAACTGTGTTGTTAT  
CATCCCAGTCGAGAGTAACTTCACCAACGTTAGTTGGGAAAAGACCGACAATGGTATATT  
CTTTAGTTGTAATTCCATTACGATCTTTTTGACGAACAATGCCAGGCTTTTTTATATGCTT  
CTGGAATATCGCCAGTGATTTCAATTACCATTCCATGAGTCATGGCATTCTAATCGACAA  
TTGCCTGTGAGTGTTATGGGCCGAATCGTTATAAATCGTAATCGTCCAGTCGTCAAAAA  
TACGGTCACCTGCAACATTAAGTTTTCGGTTCATGTATCCAACCGGGATTTTTTCAACAG  
TGGCTGCCGGCATTGTACCTGCTTTACCTTTAAATTTGAAATTTTGGCCAGGTATGGGA  
TTTCAATTTCAAACAAGTTAGGGCGGGCGAAATCACCGGACTCAAACCCCTGAGGACAT  
CAGTTACGTCCATTATCAACCTCTATGTTTATTTATGGGCCCATATTTGGGCCCAACGCT  
GAATTATGCTAATTGGGCAGGGCCAATTAACCTCGTCAAAGTTAGCACCAGTAGATGTGCG

TACAAAGTTCAGAGTGATGTAGTTAATTGAACGAGGAGCTTTGATATAAATCGTAGCTAC  
AAATTCATTACTGTCGATAACTTGCCGAGTGTTGTTTGTGTATCACAGACCACGCGGAA  
GTAATAAACACCACCCAGTGACCTGATGTTGTCGAGATATTGCGAAACTTCCATACGGAC  
CTCTGACGAGTAAATGCATCGTTATTTCAAACAATTCGTAATTAGAAGTATCACCAATAT  
TTTTCTTCAACATGTTGAACAGGCGACGAACGTTAATTCGGTCAATTGGAGATGGAACGT  
GAGTTGCCATTTTGTCTCCAAAGAGAAACAAATCCGTCACCGCCGGCAAACCTGTAACCG  
GGTTAATTGACACTTGATACATGGTATCACGCAGCGATTGCTTAGGTTCAATTGCCAGTT  
TGATGGTGTGCGAAGTTGGCCGCGACGATATCCAGCAGGGGTCATCGATGGATGTCCTA  
CTTGATCGGTGTAGGCACACAATCCGGCAATATCGGCAGAAAGAGGAACCCACCGGTTAA  
TATCATTGTATTTGTCATACTGATATTTATAGTTGCCTGCAATAAAAGCATATGTTGAGC  
TAATATTCATGTTATTGTCGACAACCTCACCACCAGATGTACACCCATGTCGCCATTCGA  
CAATATTCTTAACCGCTTGAGTGGTAGGAACCCCAACAAGTAATTCTGACGGAGGATTGA  
CGAATGCTACACAGTCTTGGCGGTCATCTGCGAGAGCAACGACATGTTTCTGGACAGTAG  
ATGCAACAGCAGCACCGTCAGATGCACATGCTCCAGCAATCATCAGGTTGACATGCAGAG  
CTTCTCTGTCGGTAAACAGATCCCAACCAGCAATCAATTCATCTTAACCAACAGCATCAT  
TTGCCGAAGCGCCTCCACCGAGCCGGATGATACCGGTAAAGCCAGCAGGCCAATTTCCAC  
TAGAAGCATAAATGAAATTAAGTGGAAACCATTACGGAAATAGTCGTCCATGAAATGTATTT  
CCATAAACATCTCGATCTCCGCGACGAGTGGACAACACAGTAGATTGACTACGATGCCG  
TCTCGACGAACAATAATAGCAAATTGGTCATCAGTAATCGGGCCGTATTGAATGACGCTT  
GCGCATTGCTAGTGCAGTACCACCAAACGGGCTAATTGGCTGGGCTGCACCACTTTGGA  
ATGCGGCCTTAGAAATTATTTCAACTTCGACAGTTGTACCGATTTCCCCGGGATAGACGG  
CTGAAATCAGAGGCATTCCATATTTGGCAAATTAGGCAGCACTTTGGTAGAAGTCATAA  
CATCTGGAGCTTCTTCCGAATTAGCAAAAGTAACTCCAGAATCAACTACGATATTAACCA  
AGGTTAAAGCAGCAGCAGAACCGCCAGATGCGCCCGATACTTCTGCGCGTCAGTTATTTCT  
CTAAGACAGGATATGTTCCAGCTGTTTGGCTTTTGAATTACTGCAGCTGAAGGAACATA  
ACAAAGCCTTAAATTTACCGTCAGCATCAACTTTAGTTACTTTTCCGCTTCTGTAAACAG  
TTGTGGTGTATACTTAATAGAAACGGTATCACCTACGGTATAACCTTGTCTTCCGGTAG  
TAATTGTTACTTCGATTTGGTTAAACAATGGAGATGCGTTTTTAGCTTGCTCCATGTCAA  
TTACGCGCACGAGACGAAGATCATTACCATACTGCAAGAAGTTCATAGCACTCATGAAAT  
ACGGAGCAGTGACATTGTATGGGCTACCAAACATATCAACCAATTCGACTTCATTTGTAA  
CTTGACGCATTTTCATAGGCAGGACCCCATGCGAATTTGCCGACTAATGCGGCACGGCCAG  
TAGCTGACCGAACGACAGTTGAATTGATGGAAGTGTCTTCAATTTCAATGCCAGGGCTCA  
GAAGTGCCATATTTTGGTTCCTTGGAAAGTTAGTTAAACACATGTTTATTTATTGCTTTAT  
ATTTACACGAACGACATAACCATTACTGCCAACTCCGAAAGTTTCTTCTCCGCTGTCAACT  
ATAACGACAGGCGTATAGTCGTTATATAAATTTTCCATTTCTGACGAAATATCTCATT  
GCCAATCGCATGTCATCTCTCGGTAATAATCAGAAAATCTCGGTTGGGTAGTAAGCCAT  
GCAAATATTACCAATGACATCACCAAGTCATCATGGAAACCGTCTTCGGCTGCCCATGAC  
ACACCTTTTTCGGAAAATGTCTCAGTTCCATTATCGTGGCTTTATGGTAAAGCACTAAT  
TTCTCTTTTTCGATTAAATCCTTGAGAGTAGAACAACCTATGGCATTAGACCCTTTAGTT  
TGCTTCATCACGAGGTCGTTGTACGAGTCACATATAATGTTTTCGTATTCCAGTTCCGAA  
TACAACGACTTAGCTTTGGCTACACACGTTGCATTCAGCTCAATATATATGTATGGCTGA  
TAATACATATTTAAGTACTTGAGCAACACATCAGGGAGTATCAGGTGTGACGTGGTGTG  
CTGTGATATACTGCGACCTATTCGTACGGGAATTCTGTTATGTCTATATGTGCACAGCA  
TGATAATCTTGCCACGACCTTCAGCAGAGTCAAGTGTGCGATATTTTTATGACCTTCA  
ATTGGTTCCTTAAACATCGTGAAATTGTCTGATGCTGAAACTTCTTTCCACGTCATTTTT  
GACAGTTTGAACCCGTTGATCAACGTTCCAGATGTTCCCTGGAAAGCAGTATTATGCTCC  
TGTTGAAATGCCTCAAGGCTAGAACC GGCGATTGTCTTGGCTGACCAAGAATATTCGTCG  
TCAAAATATGAATCGCTGCCACCTGTTTTAGAACCATCTGAATACATGCGCTCTTCTACG  
GACGACCATGTTGCGGTATACGGAACAAAACCAGATTTGCTTCCACTTCCATCCGAATTA  
GGGGTAATTGCAGCAGTCCAGATATGGTACCAATGATTAAGCCCATGCGGCGTTGTTGTC  
ATCAAAATCTTCGAATGACGACCTGATGATATAACTGGCTGGATTGCTAACCACGCGTCG  
TTGAAGTTGGGAATAAAAGCAACTTCGTCGATGTAATCAGCGCACACGAGTTACCCCGC  
ACAGCATCAGGGGAACTGGAAAATGCACCAATCGCACAAACATTTCCAAGAGTGATAGAC  
CCTTTATTCCATTCAACGCTACCAGGCTGCAGAAAATCTGGCAATGGCTCCAATGCCTGC  
TTTGTCTATGAAGA ACTTCCGCTGACATGGATGCTTTATGCGCAAGGATACGAACGTTT  
TTAGCCGGATTGAAGCAAACAATAATGTGCAATGAAAATAGCTACTACTGTCGTTTTTTTCG  
AGCTGCCGAGACAAATTTGCTGCCATCAGACGATTGCCAGCCATTATTCTAAGCATATCT

TTTTGGTAGTCTCGCAATTGGACCCGGATTATGCCATCGTCAATATGCTCAATGCAGCAA  
TAGTTTTCCGCGAATTAACGATATCTTCTTTGCATCTCTTTTCGCTCGGCTAACATCTCC  
TTTGTCCATTTTATTTAATGTTAGCACGCTTTAGATTTCGGCAAACCATTATATCTAGAA  
CGCCTGTTTGTTTTATCTTTAAACGTTCTAAACATTGACGGGTCGTCAGCTTAGATTTTT  
ACCCTCTTACTCCCTGTGATTTACAGATATCTATCAAATGTTCGAGGGATACCACTTATCA  
TCGTGATTTGACAAAATCCATTCCCCATCTTCGCGCATTCTCTCTTTAACGTGGATGGA  
TGGGGCATTGCAATGGGTGATCACTTTCGAAAATATTCATACTTCATCACCAATTCCA  
GTTCAAGCAATTCATCAGGAGAACCTTCGAATTCTATAATGTCTCCGCTTTCATCATT  
GAACTTTGCCGAGTATGGATGGTTCTGACGATGTTAGTTCTTTTCAATTCCTTGTGCATTT  
TAATGGTTTCTTTAATGGTTGAAGTCATTTGACCCTTTAGCTGAGAAAATACTTCAACCA  
TACGTGGACTATCGTCATTTTTGGCATTTCCTCAATGCAATCTTTGCCATGTCCATCATCA  
TTTGAGTTTGAAAATGCATGTTGCGTCTAACAAAGCGTATGGTCATCATCTGGTCAATTT  
TTCTATTGTTTGGATTTGATGTCGGTTCTTGTAAGACCAACGGGGCGTATACCTGCACGT  
CTTCCCCGTTGCGTCCCTTCGATACCAGACAAAGCCTTGAGACTAGTGAAGTCTAAAAGAT  
CATTCATAGAGTATTTCCCTATCGTGGTTCGAGGCGGTGATTCTGATCGATATTGTTTGT  
CATACTTCCATCGAACTCCCGTCCCAATCTTGAGCGTGCCTGTTTTTTGGAACAACCTGG  
TGATCAACTGATTCAAAATGAGTATCTTTGTTTATTTCTCTTTCATTGCCAAAGAAATCA  
AGATAAATCGTTCTAATTTACCTGCAATATTTTTGGTGTGGATATAACCAACCAGTG  
AACTAAACATGATTGACCATTCAATACGGCCTCGTTGTTAGCCAGGGCCATCTAGCTGC  
TCATCAGGTGTTATGGATATGATAGTTATATGGATATCCCGCCCTTTAATAATTATTTTCG  
CTGTGATACAACCTCAGTTATTGTGCATGAAAAATGTGGTTGAAAGTATGGTAAAATTTGT  
TCAACTATTTGAAATGCATCATCTTCATGTTCGGGTCTCTATTCCCTAGTTCAAACATGAAT  
GTGTATGGCACAGGGTTAAATTGCGCCAACGCTTCCCATTGGGTTTATTTATCCATCTA  
TCTTGAGTATTTCCAGTTTTTTCCATTGAGTTATATTGCATATCGATCAAATGCAAATTC  
ATGCTAGGAAGAATTGCTTCGACTTTTGCAATGTTGAATTCGGAAGTTGGCATCGTAATA  
TCATCAATAGACATTAATAAATTTTTCTTTACTTGCCTAGGTGATAGGAACACCTTGAAAA  
TAATGCTGGCCATCTCGAAAACGAGAACTTGAATATGACCAAAAAGTTCCATTAGCATC  
AATACATATCGGCGTATTGAGCTGTTATAAAAATGATTGCCAAACATGACTGTCCCTCAT  
GCCGCCAAAGGGACTATTAAGCCGTTCACTGGGTTTGTACCAATTGGATCAAATGGCT  
CTACAAATGGTCTAGCTTCATTTTGCCTGAACATTCTCACCAATCTGATCGATTTTTT  
GATCAATTAACCATCTAAATTCGATATTGGCTCCAGGTCTAAACCATTATACGGATCT  
TCAATTTAGGTTTTTCTGGAACCTGAGGAGCCAATTTTTTACCAGAGTATATGAATTT  
CTGGGCAACAATTACCCTGATTGGATTTTTTCCCATCTGATAAAAACGGCGTGTAAAGTTC  
TACCCATGTTATTTCAAAAAGGCTGTTATCCATTGGCAAATAAATCAGATCACCTAGTTT  
AGGTTCTTTTCCATTTACTTGATGCTTGAAAAGGCCTGGATTGATAGAAATTCTGACTTC  
GTCATTTTGTGATGGCGAAATTTAGAAAAGAACTATGTTGTCCCTCATATGACTCGAA  
GCTATTGAGCCATGCCGCAAATTTCCATGCTTTTTCAAATCTGCTATTTGGGTCTTCTCC  
AAACACAAGGTCCAAATTTGTATATTCTCTTTCGAGAGAATAAAAATTCCAAGCCTCTCAT  
GTGAATAGATTCTGCAACTAGAGTGTCTGGAGGGCCTGAGAGCCCTCATACCGATTGAA  
TTTGACATACGGGTTAAGAATATTTTGTCTCATGTGTTTGTGATATCCGCCTCTATTTTC  
TAAAGTAGCGAATAGTGACTTATCCATCATAATTTACCCCATGATAATAGGAGGAGGCC  
ATCCAGCAATTCGAGTTCTTGCCTAAGCTTATCGATATCTATTCTAGCTTCTTCAATTAG  
CCGATTTCCATCGATTGTTACACCACCTGCAAGCTGCATACCTTGATGTACCGCTAAAAC  
TTGGCCGTTTAGTTCTTTTCAAGTTTTTGTTTTTGCCATGTCTTTTACCGAGCGATTATTGT  
ATGAATTATCTTTTGTACATACCATTGGGTGGCCTGCATAAATTTGGCCATGTGACATAG  
TAGGATTTGCGTATTTTTGCGCCACTGACGGCACGCTCTCGTCATCTGACATGGCAAACC  
CATATCCAGCCGAAGTTCCTGAAAGCATTGAGTCAACATTCGCATACGATTTGCAGTAAA  
CCTCAAATACCAGCAAATCTCCTTTTTGCAATTTGCCAGCAACTCTCATATTTCCGGTAG  
TACTGTTGAAAAGAAATCAGGCAAAGGAGAAAGCATGTCTCCCATCATGTCTCGATATG  
ACATCAATTGAGTGAAATATCCGAGATCTGCGCCAAAAGCATTAGGCCCATACCATCGGC  
ATTGGCCGCCAATTGAAGCTCCAGTCATACCCATAACAAAATCAGTAAACCACGGATAAA  
CAGCCGGGCCGTCCATGGTTATAATTGACCCCATATTGGTTTGAATTACCTGAGTAACTG  
CAAAAACATTGCCACCTGCAAACTAATTACACCAGTTTTAGCTTGTCTTCCGGTTAATA  
CTACTGTTGCATATGTTTTGTGCAATCCATCGTAGTGATATTCACCGTACAATTCGAGAG  
CTCTAGATATTCAATCAAATACTTGTGCTCTGTTACTTCGACGTGCACGATAGGTGCAC  
CTAAACGTATAAGTATAGCGTCTTTAATTCTAACGGGTTATTAGTGGTATATGACATAA  
GTGTCTCCTTTATGATATTTAAGCAAATTATGGCGGAGCCCTTCGAGCTAGCTCGAAAAT

TTTATCCTGTTAGTTATAATATCTATTAAGCCATAAAGGATAAAGTTTTATTTACAATAAA  
GGCTCCCGAAGGAGCTTTGAGATTATGCTGGGACAATAACAGCAGACATTTTGCCGATAG  
TTATCGAGTTAGCTGAACTTGAGTCAAGTGCTTTGACATAAATTGCGATGGTATCATCCA  
AAATTACATTGTACAGCCATTTGTGTGCGTAGAGTCTACCGTTTGATCTCAGGGTAAATT  
CTTGCAAATTGGTGTATGGTGAATCCGCCGCTTGTATGAGCTATTGAGATTTCCAGAT  
TATCTGTTTCTAACAACCAGATGTTTCAATTTTCGATGCTTGCATTAACATAACCAGCCAT  
CAGTGAATTTGATTTGTCCGGATTCAAATATGCAACCGTTTGCTACGGTCTGATCAACAT  
CAACAAATGGAATAATCTTCGACGTTTCAGTTGTAGTTATTTGAAAATCTTTTTTTTCAA  
CAGCAACCATGATGTTAGTTGCTTTAACCCGAAAACCGTTTTTCGTAATACCAGCGACCTT  
CTGCAAGTGGCTTATCTAACTTAAGTTGAAGAGTTTCTCTGCTTTCTTTGACAGTTTCT  
TAATACCATCTCTTTCAAGTTGTGTAATTCAGCCTCATTACATAACAATTCGGTTGCCA  
TCAGAAATGTTTGCAGAAACAAGACCTGAATTTTCATCACCCACACGTGAAATAACCTCAT  
TCAACGATAAAGACATTTGGTTGTGATTTGTCTGTAAAATGTACAGTCGGCCGTTTATAG  
ATGATGGTTCTTCGATAGAGCCAATAGCGGCATTGAGATCTGAAATATCCCTGAACTC  
CACTGAACTGTCTGCCCTAAAATCTGCGTAATTGTTGCAATATTAGAGGTATTTTCGAT  
TGATGTCGTGCAAAATTGATTTTTCGCTATTAACATCACCGATTTTCTGCTCTACCGCTC  
CAAGACGAGATAACACACCTGTCACAGGGGTATTCATCGTGTTCGCGAGAGAACTCAACG  
CACTTTCATTCAACTCCACCCTTGACGCTATCGACACAGGGTTGGAAAAATCGCTTTTTTA  
TCTTGATTTGATCAACGTCATCATTACCACCACCTAAAGTATTTTCGATAGCGGTCAATC  
TGGTATAAATCGGAATTCCTGTACCAAGATTAGTATTGCCGACTTCCATCCTCAAATCAT  
ATAAATCAGTCGTCAATTGACCTGCATCTGACTGCGCCAATTAATTTTCAAGCGCGGTTA  
TGCGCTGGGTGTTTACAGAGACACGGTTTGGTTTACTTGACTAAACCGACACTTTAATCCCG  
AACCTATCGAAGAAGGAGCAGAATTACCGTTTATGTGCAAGCCTGGATATGCACCTATTT  
CGTTTTTTACCCAATACAAATCACCATATACAGATCGAGTTGTCTCGTCTTCGAAATATC  
GATGGCAAAGCTTTTCCGAAGTTGATTCTGAAAGAGAAAGAACACCTGCTAAATTAGTTT  
CAACCTCGCTAATATCTTGCTTGATAGCTAAAATATCATTAGAATTAGCATTGATTTGGT  
CAATTACCGTATTATCACCGATTACACGCAAGTTATGTTGGATAATAGTTACCGCATCGA  
CAATCTCATTGATTTTTAGGAATGACTGGGCTTGGTCTTCGTCTAGCTGAATAACGTTCT  
GTTGAATATTAAGTGGAGCCCTGTTGTAAACACCGTCGCTGGATGTTTCGGTGGAAGCGG  
CCGAAAGCCGCTCTCCGTTTTTAATCCAACCACTTCGAAGTTGACCATCACCTGGAGTAG  
TATCAACATAAGGAATAACTCCTTTCGTGATTTTGTCTATCATATTTTTTCTCGAGTTT  
TTCTAATCTTGATTTAAGCTCTTTATTAGCCTCAATCAGTAATGCAATGAGAGCCATTGG  
AGAAACACTAAGAGTTCCGTCGTCAAGTGTTTTGACGCCTTATGGTAAAACTTTTTGCAA  
TTGCTGAGCAAAAATACCGGCCTCTTTGCCTATCACGGTATTGTCAGTCAAAGATTTATG  
TTTTGTGTAATCCCAGCGTCAAGGCTATCTATTTTTACGAGCGCACCTTTGAGAGGCTG  
AATATCAGTTTTGAACCTGATATCGCAACGAACATACATATCGTTAATGGCGATGTTTCC  
GGCTAGCCATAAATGACCACCTGGCCTAAGCGTAGCAATTGTGGTATCTACGTCATTGGT  
GCGAGTTGTCCATCTAAAATACTCGTTGTTATTGTCTCCAACAGCAAAAAGCAAATACGA  
ATTCTGTCAACGTCACTATCGTTTTTGAATGTTATAGGAGCCAAATCGGTATTTCTATT  
CCACAAAATTCCTTGATTGTTTTCTGTGAAATTGCTATTACCAGTCATTGGGCCACCTGA  
GCGATAACAACCTGGGCATTAGCAGAAAGAGCCGATTTCGCCTGTGAGCTTTCAGTATT  
AGGAAGGCGAACTAATCCTTTATGAGTGCTATTAGCATTCAATATGGAAAGTTTAGCTGG  
AGTAATAACGACAGTGTTATCAGCTAATGCTAATGTTTTCGAATTTGTTGCTACTTTAAG  
CAATCCAGCTTAGCTTTCCGTCCTTGCCATTCTTGATAAAGTATATGGACTAACAGCATA  
GCCATCTCTAAGAACTACTGCTAAAGCTTGAGCCAATGTGGCCAAACGGACAACCTCCGTC  
TGAGCTTTCTGTTGCAGTTCCCATGATTCTGAGAAATGCGCAATAGCCTGCTTGGTCTT  
AAGAGGAGTCATAGCAGTGGTATAGTCGGTGCCAGATATTGCCTGGGCAGCAGTCGATAT  
ACGGATTGTTCTCTTGTGCTTCCGGTAGAACCTTTATTTGCAATGACAGACCCAGTTT  
CGAAGGTGTTATTGCAGCGGTGTTAATAGATAAGGCCAAAGGTTTCATCATTTGTTGCGTA  
ACGAGTATTACCAATAATGGCGTCGGTAGCCTGCGGCGTCTACATCGCTATCCCAGAAG  
ATTAAGAGTAATAACAGTATTGTCACTCATGCCAGCTGCGGCTTCAGCTTCAGTAGAGAT  
TCTAATGATGCCAGGTACAACCTCAGTTGCTATCGGCAGGCCATTAACAGTTAATGCCCA  
TGGAGCTATTTCAATTCAATGCGTCTGATACGGTTTCACTGAACTGCGCCAATCTGGGCT  
AGAGAAAAATACCGAATCCGCTGAATCCGAAATATGATATTTGATATTGTTATTCATTAA  
CCAATCCTCTTGAAGTAGTAAAGATCAAATGAACTGGTCACTGACCCACTAGTAAGAGTT  
TTTGACTCTTTACCCATATATTCCCAATTACCATATCCAGGCTTTCCAGGAACAGTAATT  
TCACGTTGAACACCAATTCCCAACTGCTAAAACCTTTCGATATTCCCATGCTCAGCCGAA

TCAATGAATTGCACTTCTATGATGGGATTTGTTGTGCCAGATTGTCTTTGAACAGAATAC  
AATAAAATGCCGGCATCTCGCATTTTTTCAAATTTTGCCAAAACCTATGTGCGATACTGCA  
TCAGCGTTAGTTCGAGCGGCAATAACGAGAGGTATACCGTAAACTGTAATGACTGATTTG  
TTTAATTCAGACGGAAGAACAACCTCCGCTAAATGTAAGCATCTCAGCTTGACGAACACCT  
TCTGGGGAAACTTGAACGTGTGAAGTATATATCGCGTTAATAGGCAACATTGTCAGTGTT  
TGGAGTTCGTCGATAGCTGATTGCACGTTTGGACAGTTCACACCGTCAATAAATGAGTCT  
ATCGTCGGCCACCTATATTTTCGGGCACTCATTACTTGGGTGACCGGTTTGGTCAGATAC  
TCGATATGAGTTGCTTTCCTAAAGATGTTGTGTGCACTCTCTAATGTTTTTGAATCATT  
ATCCACCCCTTACCCATTTGTATGCTGTAATTATCGGAGGAAGAATATTAATGTTTCCTA  
GCGTTGTATTTCTTTATTTACAGCAAGAACTGATTCTACGTATTTTGTATAGCCAGGAC  
CAGATGCATCAGGGTCAACTTGACAGCCGCCAATGATGATATTTCCATCGTTATTTGCGA  
CTAAAACTTTATTGCTTGAAACAAGCTCAGGCACATTTTGAGGAATTAGTTCAACAGATT  
TTGAACCGTATGTTCCACCTGCGGTATGGCTTGGATTACCCTGATTGTCGAGGTCGTTAT  
TGTTTAAACCAAATTCGACATCAGCCTGATTTCGATGTCCATCCTGCAACCAAACGCCCTT  
CAGCATATCTTGTCCATACACCAAACCCCATGTAATCACGTGGGTTGGCAGGGTTGCTGG  
CATTCTCATATATTGTCCCAATCGGATAGAAAGCATCGAACAACAGTGGGATATTTTCAA  
TTCTTCCGCTGAAAGTGCCTGGAATAATTTGTGACGTACGCTGGACAGGATTGTCAAAT  
CGGTGTATTTCGATTTGATTTTGGTTTATTAATTCCTTGCTCGGTGATGAGGTAAACAGAAT  
CAGCTTTATCTTTTATACCATTTGTACCTTCCCAACCCAACCGAGTACCAATATCGTTAT  
TGAACCATCTGATGGTGATCATGTCACCGGATTCAAATGTTCTTCCAACTTAATATCGG  
TAATATTGCCGTTGTCATCCAATACGATAGAATAATCAATAGATGACGGAACCCAGTTTC  
CACCATTATCCCAACACATTTGTTGAGTATCGCCAATTGCATTCTCGCAGATGAACATCG  
GCAAATCGCCGGCCCTGCTCGATTAGGCATCGTCCCCTTTAGAAGAACTTCAAGCGAAT  
TTGGATTTATTCCATTGTTTGGCTGAATATCGAATTCGTCAATAGTGAAATCAGTTTTTG  
TCGAAATATCTCCAACCCAAATTTACCAGGCGATGACGTTTTTTGTGTTGTTGATGCAT  
CAAAAATCAGAATATGCCTAAGGTTATATGAACTCCGGTAAGAAGCGATTCCATCCATGT  
AGGTGACAATTGTTACAGTATCTCCTTTTTTGTATGTCAATAACACGAATTCGAATACTTC  
TTCCATCTAATGGCAGCACTGATGTCAAATTTGGCTGGGTCGATAGATCCATAGTTCGAGT  
TTTCGTTTAAAGTGTGCGCGTAATACAGCAAGTTACCGCGGAGATAGACTTCGAGGTTG  
CAATATTGTAATTTGTTGTCCCGAACACATTAGGAAAATCGGTTTGACCATCAACAGTCA  
CAACTATTTCTTTTTTGGCAAAGTACTCAAATCGGATGTTGTAATCTTATCGACACGCT  
TGTTCTCTACGTATTCCCATCTGCCTGGCGAACAATATACAAGCTCAACGTCCATCAAAT  
TTTTGTGAAGATTACGAGGATTTGGTGAACCCTTTAACGTATCTCCCGAAGCAGCAACCA  
AGATTACGTTTTGACTTGCCCATGTGCCCCACACATCTCGCAATTTTATTGCTTTATTGT  
AGTCCGAAACAGATCCTTTAGGCAAATTGACAGTAATAGAAACAGCGGTGGTGTATTG  
CCCATGAATCGCCGAATAATGGAAAATGAGCTCCTACCGAATGATTTTTCCACGCACCTG  
CAGCGAATGGGCGATCTCCGTCGCCAGTTGTGAATAGAGTTCGGTAAAGTTGTTATTGA  
CTTTTTGCCGACCACGGCGGAGATAATCGCCGTGGCCATCATCAACAACGTTTCCGATTT  
TGATTATTTCCATTATGATGTTCCCCCAATATTAATTGTGTGTCGATGGCTTTTATTGAAA  
ACGTATTTGCACACTGCGAGATTTTACTTCAGCGTCGACGTTATCGCCCGCGCCAATAAA  
GAAACGAATTGTGTATAATTCGTTAGAGGTATTCTTAAGAACAGCATACTCAGTATTTAT  
AACCGCATTGTGAAGCGTATCGACTGATATCATGTATTCCGAATTTTTAAAACTGTGCC  
AGCAGTGTTCGGGCGGCAACCATCAACTTTATCGCAGAATATTCGTTTTTACAAGCAAT  
ACGACTAGTAGTTGCAGTAGTTGTGGCCAAAATAGTTTTTTCAACTGGCATAATAGAATT  
TCCAAACATTGGGGTTAGTCCGTATTCCCAATATTTTTCTGACCCTTCGATCTTTGTGCA  
CCAGACAAAACCTCTGGCGTATTGAGACGTTATAAAAAGAGAGCCAGATGTTCCAAAGAT  
ATTTTCGCCCTCTTGAGGGCGAATTATGAGAGGATTTGACGGAGAAATTGATCCAGAACT  
ATTTATAAAGATGCAACCTTCCCCAAACTTTGCATTTGGTAGAGTCATGGTCAAGGCTCC  
GCCTGACGTGTCTGCGTCATGCATAGAACCAATATCTAGCGCATTCCCGGCATAATATTG  
TCGCGATAATTTCTGGTAATATCCAGTGGCGTAAAGAAATTGAGAGTCAGCTCCTTCAGA  
AGCTGACGAATAAAGTCTATAATCACCAAGTGTGTTATAAAGCGCATCAATAATTTGGTT  
GAGTTTGACACCAGCGTCATAGAGTATATCACCAGTTGAAGGATTACGTATAACGCCTAC  
ATCAATTCTCTTTTTTGGTAGATTGTAACATTTGTATTCTTAAAATGAGAAAATGATAT  
TGATTTCTTCTGTCTGATCGAGTGCTCGAGTGATAGGCTGTCTATTTTCCATCTATATCA  
TTTTTCTGAATCTTTTTCCAATTCCTCAGGTTTACATGCTATCAGGGTCGCTTTAACAT  
CTGGATCGGACGGCAATGATTTTTTAACTAACGGGTTGATGATTACGCTCATCTGGCGAA  
AACCGGTGTTACCTGGGAGTGATGCCTCAGGGAAGTATATTGAGTCCATATACGCTCTGA



ACCGGCGTGTGTCTACTTTAACCCGGTAAATGAGGTCTAACTTATCCGGATACCATAGAA  
TAGCGTCTTCATACCCCATCTCGCAGGATCGTCAGAAAGTTCATCCGGGAAAGGCACAA  
CAATATGTTCAATTTGTGCATCTGTTTATTGATACATCGGGCGGAATAGTGTACAGCTATT  
CCCACACATAGCCATCACTCATGTCGATTGCCATAGCAGTCCCGCGAGGTGGTTCAATTG  
ATTCATGAGTGGCAGTCCATTTCCACCTATAGTGATACTCTATTTTGTGCATCTATTC  
CCGAGATAGAACACGAACCAATAGAAGGAACATCAACACAGCGGTAAATCATCCAATAA  
CCGAAGTGTGGTACGATTGTAGGTAGCCGAGTTGACTACGACGATATCCTCGATAAAAA  
ATGTCTTTGGATTGTCATATCTGATATCTCGCCAATCTTTACGCGGAATTATTGCGTCCA  
GTAGAGATTTATCAATTTTTACTGCACCTAGCATGTTTGTCCACATGTCAACAACGCCAT  
CAACCGAATCATTGGATATGGAGGTGCAAAGCCGACATCGGTTTCATTGTTGACCAAG  
GAGTATCACGTCCAAATGTGGCATATATTGTGTTTTTGGTGGGCTCGTCGCCACCATGT  
CGTAAAAGTTTAGCAAATTTTTGTTCTAAATTTACTAGTCACAATAGCACGATAGAAAT  
TACTCATCCATTTTCACCTGTGTTGGGTTTTGTGGATCACGAGGATTTCCAACGTCATCT  
TTCAGTCGTTTTTCATCTAGTCGTCTAAATTGCGAAAACGTCACAGCTGACTGATCAGAC  
AAAGGACTCATTGCAAATCTTCGTTCTGATGGAAGTTTTCTTAACCATGATTCTTCTTCA  
GTGTCATATCCAGGAGGAGGAACAAATGGTTCGCCAGCATTGGCCCAACCAAGTATAAA  
GCTTCTCCGGTGGCAGAGTCATGCTCAATATTTCCGTCAACGTCTAATTTGGCTACACGG  
TCGTATTGCTCAGTTGGGTAACCAGCATCCCATCGATACGTTTTCTAAATTATCGATGAT  
AGTTTCTACATGTTTCATCGATAAACCAGAATTGATGAACATCGTGAGCAGTTTTATTCC  
ATCAAATCCAAAACCAACTGGATGTACAAAACGGAGAACATCTTGCGCATATCTAGACGC  
CGAAGAGTTGACTCTATAGTCATGGTGAATATGATCTACCTCGATTGATATTGTCAAT  
CGAATCGCTCATAAGCTCCTTTCCTTAACCCCTACCAATATTTACCTACGAACGAACT  
AGTTTCGGATTTTATTTGCTGGCCTTCAAAGAATTTACCAATCATATTGTGAATGGTTAT  
TCTCCATTTCAATTGGCCTTCAACATACTCACGATCGACGTATGTAACGTTTGCACGTCC  
TGTAGGAGTATATATGGTTCTTCCAACAATGTCTTGGCTTATGTTGGTTGAATAAACTAC  
GATGTCATATTCTATTCCATGCTTTGACTCGATGTCGATTTCAACATCTTCGTTATAAAG  
CAATCTGAAAAGGCAGTTATATGATTGTTCAACCCCTTTCGTGGAATAAAAATCGTAGGC  
CCGAGATTCAACAAATCTTGCGACAGAATCTCGCTTAGCTTCATCCAAATAGTTGTTTCT  
TTTTAAAATTTCTGACCAAAGATATTCATACGTATATTGCTCGCGAGGGTATTTGTTTTT  
TATCAAATTTGAGCGATTTGTTGTAATACGTCCCGTTTCCGTCCGACAAGAATTGCAGATA  
ATATTTGCAAATGCACCAAATTTGGTATCTTCGTACAAATAACTTTCAGGCATCATTTT  
AGTAACAAGTGGCTGAAGGTCAGGATCCTTTAATCAAACAAATGGAGCACGTGTCCACGG  
AACTTCACGCTCTTGATTGCGAAGCTCAGCTACCATCATGACGTTGGCCGGCGTCCAGAA  
AACGGATGTAGTATTTGTTACCCGATATGTGAATTCATAATACCCAATTTTTTCGCCAGT  
ATTTTTATTGAAAAGTACCCCATTTGGCATATTGTTTGAACCGGTAAAGTATACGTTATT  
TGCATACAGTGTTACAACGCCTTTGTTGTAAGTTTCTCTGTTTACCCTTTTATCACTTTC  
TGTTCCCTCGTCGTCGATAGAGAACGAATATTCGATTTTTGGGTAAACAACAAGAGCTAT  
GTCGTTGTGTGTTATCCAACACCTTGTGCTACAACGAGCCATCCATGTGAACGCTGCTTC  
GTTATAGTATTGCCGAGAGCCAAGTTTCCACTCTGAATCATCGGCATTGATTCTGAATGT  
TCCCATATGAATTTGGGATATCGGAATTATAACCTGGAGTCAATTCGTATCTTACTGCTTC  
AAATACGTTGTCCTATTTGTTTGGTAAATCTAGATCTGGCAAAGTACCTGGATATTTGAA  
GTTTATCTGAGAAACAAATATCTCTTCTCCATTTGTTGACATATTGCTATATTCATGCGA  
TATCCAAGTATGGTCTTCGCCAATACCAAAAATTTTCGCCAAGAAGTACCATCGAACTC  
ATAAACTCCAGCAATTGGGTCATGGACAACATTTTTGGGGTTTCTTGGGTCTAGACCTGC  
CTGAGTAACTAGGCCAGTAATGAAAGCATAAAGCTTGCCGTTGAATGTATCAAGCTTTTT  
CGTAACAGCCCGTGCGTTTGTGTTATATTGAAAGAGGTTGGGTCAAAAAGTTTCTCACC  
AAATGTGCGACTAACTGGATCAGTATCAATCGGGGCATTAGATGTATTGATTCTGCGCAA  
CTTATTTCTCGCTGCTACATATACCCAATCGTCATCGGCAGCATTATTTATCTCCCTTCC  
TAAAAATATCACCAGAAAGCCGAGCGTATGAGTTGAATATTTCAACATCAAAGCCAAGAT  
TCAGTTCATCGCCAGTTTTTAAAGAATGTCGCACTATCTGAGCTAAATCTGACGTCATCAG  
CTGACCATCTGACATCATTGCCCCTACGACCGTAATAGATGTTATCATATCCAAGAAGAT  
ATGTAGTAGTGCTTGTGTTGATATGTTACTGTTCAACTAACGGGGTTGCCGACACGCCCGT  
TGAAAGCTTTGTAATATTTCCAGTTTTGCCCTTTGTCATTCGACACTTTGGCCATTGGCT  
GAAAACGCTCAAACAGATAAAACACGTCGTCATTTTCAGCTAGCATTGTTCTATTTTTGT  
CAACACACACTTGCTCAATAAAGCCTTGTATTTTCGTGATAGTTTTTCATTGAAACTATTT  
TGTCATAAAGATTCGTCGCATCAGTCAGTTAATTGCTGAAAACGAAATCTTCGGTCATTA  
GCGAAGCCATAATTACATCAGTATTGAAATTGACGTAATTTCCGTTGTTTTTAGAGAACT

TTTCCCTCAAAAAGGAAGCGGCAGGTGTGAATTCTTTTCATGGCAGATATGTAGTAGGCAT  
TTTCCGAAAAGGTTTGAAACTCCTCAGTTTCTACCCAATCAGACATCTCAACTCCTTTTC  
CAGAAACGCGAACTCGCATTTTGTAAATATGTGTCTGCTTGTATAGATGTGTCTTCAAACC  
ATTCTTCGACCGATGTTACACCTAATTGACCCCAACTGGTTCAGACCCTGCTCTAGTCT  
GAAGAAGTTCGACAATATAGTAAAAATTTGAACCTACATCGTCCCAAGTCAAATATACTT  
GATTCGCCGATAAAAATTTTGATTTTAAGGCTCGTTACGGCCGGTGCTTTTATGATCATA  
AATCTCAAAGGGCCGTTAGCCCCTTATTGTGAAATTGCTTCAAGAGTAATAGCAGTGTA  
CTGTTGACATAAATCATTCTCAAATACTATAAGAGTTCCATCTTTCGCAAAGATAGTGTC  
ATCAACTGGTAATGCTTCTATTTCTATATATGCTCCAGCAAATGATTCTGCCGGTACAGG  
TAAGATACCAAGGTCAAAGTTTATAACACTGAGAGCATAGTCAACTGTTCCAACCTTCATA  
GTTCTTGTTTCTTCCACCCACTGTTGTTTTTGTGAAATCATTAAAAGAGTACTCTGATGC  
AGGAATATCGCCATCAGCAAATGGCGCAATCAAATTTTACCAGTTTGTGACGTAGAAAAC  
GTAATTAACATCATGCGTTACGTTATTATTGGTGAAGTTGATTGTAGAACTATTGACTGA  
CCCCTTTTTTATTAGCATTATCGAAAGATATTCCATCCATCGGAGTTTTGAAGAATTTAT  
CTGCGTCCCTGACATGATATATTTTCAGCAGAAGAGCCGATAATAGAATCATCCGAGGAAT  
CTTCACGTGTCAACATCTTTGATTTGGAGAAGTTTTTGTGAAAATATCTACTTCGTCAG  
TGTAATAGCGGTCAATCGAATCAATTATTTGCCCGCGAAGTCATTCTTCAGAGTTATA  
ATTCTGAACGGTTATATGTCACCTTTGATTTTGGACTTGATGTACATGTAATTTGGGTCTA  
TTACTGCAGGGGTAATAGGGCGCGAGGTTATATTGTGACAAATAATTTTCAATGTCTTCT  
TTTTGAACAGTTGTTAGTCTAAGCCCTTGTTTTGGCTTAATAGAGATGAACGCGTATCCC  
CTTTTCTCACGGTCAGTGAAGCACTGAACGGCTTGAACAACCTGAACCAAACCTTGTGAGAG  
ACGAATTACTCGTAGCCGGTTGCAGTAACCCATCTGCGCTGAGATTCTCTCATAACTGGG  
GAAAAGTTCACGGATTCTTTCGATGTCTTCGGGATCACCACCACCCTGAGTACCCACATA  
ATCGGCGTCATCAGTCGGATTCTCAATCAGATCAGTTATGACGATATTTTGAAGAGTATC  
GGAGTTTGCGAAATCTCTTGACCCATTTGCTGGCTCACCACGAGTGCTCAAATATTGAT  
CACGATTGTTGACCCGATATTCCGGTTTGGAGCCCCCAATGTAACCTTGCTACAAGAGCCCC  
GCCACCGATTTCCGGTGCTAGCTTCACCTTCGCCAAAGAATATCTCAGTCGTCTGGTCAAC  
GGTCTCACGCATATAAAATACGTTAGAAGCACCCGAAATATCAACCATCGCATTATTGGT  
ACAATCGACCCAAGGTGAACCATCTACCCATACACGAACTTTAGATCTGTCGATATTGGG  
GTCACGAATCAAATTTGACTAATTTCCAACAAATTTCAACTCAGTTCGAACTATTTCGTCC  
TTGATACACGTTTACGAGGGATTCTGTAAGTATTATTCTGACCACGAATTATTGTAACATA  
GTCGAGAGTAACGAATGGGTAGTTATCAGTACGTTCCACCGTACCAACGAATTTAGTTCC  
TCTCGGAATACGAATGCTGGTAGGATTCAACGGGTTTGTGCGCTTTGAGCAGTAAAGTCGT  
ACGAGAAGCAGTACGAGAATCTAGCATATATCCTATGTCCTGAGCATGTTGAACAACCTGA  
ACTTCTTAATACAGCGGTTCCGGATAAAACTCTCGAATAATGCTGAATATGAAAATTCCTG  
AATATAGAGTGTGCAATATGCCAGCAAATCGGTTAAAACGTTTAACTTGAACCAGTAAA  
GCCATAATCTTTAAATTCATCCTGGTTACCTAACCAGTCAATTAAGTCGCTTTTGATTT  
GTCAAAGGTAGCGCCTTTAAAAAATATCTGGGATATTTGTTTTCAATTTTCATCCTATAAA  
CACCTTACTAGATGATTGCGCAATTGTGTCTCCGCAAGATATTGGATCACAAATTGATAC  
TGCGGGTTTTCCACCAACAAAACCTTCGCCGTAGTGGGAATAACGTAGCCGTCATGAAC  
ATCATAAGGCTCAACAGTGTTCGATGAGGTATTATTCTGTGCGCTTCAACGAGGACCTT  
TATACCGTCAACAAAACCTTTTCCCTGCGTGGCTTGTATTTGTGTAGGAGGATATGAATT  
ATGGCCAGTTGTCCAAGCCATATCGTATGTCAATCCAGGCATAAAAGGCCCTCCTATGTG  
ATTCTATTTAAGAGCTCCCGGGAGGCATTAATAAAATAAACAGGAGTGTAACCTATATGA  
TTTTTTTCATTTTTTGTACCCAATAGATTATCAGGGTAAATCTACTACTGATATTTTAAAG  
AATTACAGAGCGTATTTTAAATCGTGTTATCGTAAAAACAAGCCTGAAGTGTATTGGATA  
AATGGTTCAACAAGACCTGAAATGTTGGCACATGAGCTTTATGGCAATCAACAGCTCTAT  
TGGGTTTTGCTAATGCTAAACGATGTATATGACCCATTTTACGGGTGGATAACAACACAA  
GATGCTGCATATGATTACGCGCAGCTACAATATCCAGAAAATAAGGTCGTATATCATGTT  
GATGCCAATGGTGAAAAGTATTGGAATTTGGTAGAAGACCCAGATTTACCGAGACATTGG  
TATGATGCTGGAGATACATCTAGATCACATATTCAATATGTTGGAGCACTTCGGGGCCGTT  
GCTTCCCTTGAAGCTCAATCTGCTGTCAATGAGCAGAAACGAAAAATTCTGATAATTAGC  
GAAGCTGATATCAACTCGTTCCTAAACGACATGATACGTGAAATGGAAAAGGTTTAAAGGT  
GCATTATGTTAAAAGGTATTGATAGATTTTTTACTGGCGTCGTAGAAGATCGTCAGGATC  
CGTACATGTTAGGAAGGGTGAGAGTGCGTGTCCACGGTATTCACCCAGAACAAAAGGTTA  
GAGCAGACAACTATGGTTTAGCAACCGAGGATTTGCTGTGGATGTGAGTAGGCATGCCTG  
TAACATCAGCGTCAGTTTCGGGTGTAGGCCAGGCTCCAGTAGGCATCGTGACCGGTACTC

ACGTATACGGCATTCTTCTTGGATGAATTTTAGCAAAATGGCCTAGTTCTCGGGACATATC  
CAGGCATATATCCAATGATGCCTGATTTCAATAAAGGGTTTTCTGACCCATCAAGGGAAT  
ATCCTCGGTACGTTCGGTTCAGATGTGAATATTTTGGCTAGAGGTGGAAGAGAAATAAAAA  
TTTCACCAGGCCAAATTGGAAAACAAAACCAAATTGTTCCAGTTGTCGTAGAAGATCAAA  
ATCTCAACCGAGATGTTGCACAAGGTGCAGATAGAACACCAAATGACGAAATATACCCAA  
ATCCAGATCCAGACGTAACAATAGAGGATATGTTACGTTATGACGAAGGTATTCGTGTAT  
CGTTTTATTGGGACAGTAAAGGAGATCCTACTGTTGGAATAGGTCATTTGATAGTTCACG  
AAAAAACTAGAAATATGACAAGAGTAAACCAATTGCTCAGTCAACAAGTAGGCAGGCAGG  
TTAATGGGAGAATAAACGAAGAAGAATGCTCTATGCTGTTGGAACGCGATCTTTCCAGCG  
TCTATTCTAGCATATCTAGCAATTACAAGGTTCGGCCCGGTATATTGATGCTGGACGATG  
CTCGTAAAATGGCTATTGTCAATATGACGTTCCAAATGGGTGTTGGTGGCGTGGCAAATT  
TCAATATGATGCTTGTATACTTGGCACTAGGCCAATACGATAATGCGGCTGATGCTGCTC  
TCTATTCTTTATGGGCTAGACAACTTCATCACGAGCTCGTCGTGTGTCAGAAGTCATAA  
GAAATGGAACTTGGTGCCATACGGTGGGTCACAAGGATCTGTGCCGTCATTGCGGACGA  
TGAGAATGTTCAAACGGAAAGTGTATCATCAACCGCCCAAGCTCCCTCGTTCACCGAGC  
CTGAATCACCTTACTCGGCTGTATATCCATATAACAAAGTGTATGAAAGTGAGTCTGGTC  
ACATCCAGGAAATTGATGATACACCCGGGCATGAAAGCTTAAGAACATATCATCGGACGG  
GTACGTTTGAAGAAATACATCCTGATGGAACAACGTCACGAAAATTATTGCGGATGATT  
TCTACATTGTCAAGAACGATGGGTATGTTTCATATCGGCGGAAAACCTCAAGATCGTTGTCG  
ACGGGGATGCTGATATTTTTGTTCAAGGCGATTCTAATAGCACAATATCTGGAAATGGTA  
CCCAATTCGTTTCGTGGTAATGTTGACGAGCGAGTAGAAGGTAATGTCAATCAGGATGTCA  
CTGGAAATTCATCGGGGTTAGTAAAAGGAAATCTAAATGCAGATGTTGATGGAAACGCCG  
ATATTAAGTTATGGGTGACTGTTTTAACACGATTGATGGAAATTACACTCTAAAAATTG  
GAGGCAATTTTTCTACCGAAGCTGGAGGAAGTAGGACAGATGATGTTTCTGGTAATTGGA  
ATAGACATTCGGCCCAAGTATCCTATGTTGCACAAGGAACATTCTCAATTGATGGTTCTA  
GAATAAACTTGGGGTAATTCATGTCAATATATTACCAGCATCTGCCGTTTTGCCTGTTA  
AAAGGGAAAATGAAATAGTATCGCAGACATTTAGCGCAAACCTAACTGATCCAGGGGCAA  
CCCTGGATTCTTTGGAAATTAGTGCTATAGATCAAAATGAAGGAATAGTCATTGTCAACA  
ATGGATTTTCAGGACAATATACTGGAGTTTTTACCCTTAACGTTGGTTTTATCATATCGTT  
TAAAAACCGGAGAACGTGAAACAGCAAATAGATGGGAAGATTTGCCTGATCCACAAACAA  
CGGATTTGTATTCTTTTCTTGCGCCAAGAGTAATGGAAAAAGAATATTCATACCTTGATG  
TTTTAACATACGACGTTGTTACGCCAACTAGAGCCAGGTAAGCCTCCAAGACGAACCACT  
TAGATATGTGATAAGCAAGACGAATACACAAAAAGTAGTTGGTGAGTGGAAACACATGGGC  
TAACAATTTGCGAGATTATGTAATAGGGGTAGGTAAGGCATATTCTGGAAATTTACGC  
CAAAAACATCGAAAATAACAAGGGCAATGCAGATAAAATCACGTATAGATCCAGTTGGAA  
AGCCTGGGTCATGAAATTTTGCATCAGTCGCCTTCAGTTTTAGCATGGAATTCTGAAGA  
AGTAATAATCCCGTACTTCTCGAATGCTGACGGAAAAAGACGAAGATATATCATGGATTT  
TTGGGTCAAAGTGTCAAACGGCCAAGTATTCCTGTTGGAAGTAAAACCCGAAAAGGAGTG  
CAGACCTCCCAGATGAAGTCTACGAATACTGCGAAAGCCAAAAAGCAATTTATGGCAGA  
AATGTACACATGGCAAGTGAATACAGATAAGTGGAAAGCTGCTAATTCCTTGTGTATGGA  
AAAAGGTTGGAATTTCAAGATAATAACTGAAAATTCTCTTAGAACTCATTTTGGATGGAG  
AGGATAATGATTTTTGACTATATCAATGAAGCTCCACAGAAAAAGTCAAGAAACCAATGG  
GTAACATTGGGAATAGAATGGAGAGAAGCAAAATCCAAGGTGTATCAGGAAAGGATTTT  
GCAAAATCAAAGGGTCTAAATTATGACACGTTTAGACGGACTATGCTTAAATTCGCAAAG  
CAAATGATATTGCCATAGAAGTAGAAAGTCTAAAAAATAAAGCAAAATTAATGCACAC  
GAAAAAGCATTACTCATGATAAATGACTTTAGAAGTCAATTACTTTCAAGAGCAGCTGAC  
ACTGGATCAGCAAACAATAATAAATCTCAAAAATGGTTCAATGATACTGTCAAAAATCA  
ATTGCGGGTCACATGATATCAAACCCGAAACCAGGGAGAATTTACACTTTTGCATATGAT  
GCAAAGCACAAAGATACTCTCGAATATTTGGATAGATTCCCGCTAATTTTTATTTCTGTGA  
ATAGGCACATCTTCATCAGGCCCTTAATGTATGGCTTAAACTTGCATTATATTCCTCTAA  
AAGCTAGACAAAGCTTTTTTGAAGAATCGCTAAAAAATGATGCAAGCACCGAACGACTCT  
CCAATAAAACGACTCTGAAAATAAATTGGTCAAATGTTAAAGGAATGAATGGTTCCGACG  
TCATGATAAAAGCATACCTACCAGCTCATTTAAAAGGTTCAATGCTAGAAGCGAAACCTA  
GCGACTGGGTGAACGTCATTTACATGGCGCTGCAGCAGTTTATGTCGAAAGGCAAACGAT  
ACTCTGCCAAAAGGTAAGGGCACGTGCTTAATGGTAATGGCCTGGACTTCGTCTGGGCC  
ATCTTATTTTATAGATTAAGAAACCATATATCTCGACGTAATGAGTTTAAACAGGGTGATT  
CCGGTAAACCCTATATGCATTCAGTTATATAAAGGTTACTGGCTTGCCAGATTCAAGCT

TGCTTGAATCATTCAATTTTTATCCTTTATGGCTTAATAGATATTATAACTAAAAGGATAA  
AAAGATAAGTTTGAGCAAGCTCAAACCTGTAAACAGGTTTTAATTTTTATGGAGTTTTAC  
AAGGGCTTTAAACAATCAATCGAATATTACTAACTTTACGCTTGATATACCGTCATCTGC  
TGGTATTAAGACCATGCTCATGAACGTGCAATCAGCATCAAACCAGGTTTTTCGTATACC  
TCCGACAGAAATGCCATTATATTCTCAGTGAACCTGCTAGACAAAACGTGCCCAGTACAAC  
AACCGAATTTGATCCGTTGATTGTTTCGAGTGTTGCTTGATGAGGATTTTGAAGCATATAC  
CGAAATGTACAGATGGATGCTTTTCATTGAATGACTATGCTCGGCAAACCTCCACTATGTG  
GGCAACGGGTAATCAACCGCCAGCAATAACGCTTCATGTTCTTAATAACTCTAAGCGTGA  
TATAACTGCCTCATTCAATTATCATGGTGCTTGGCCATCTGAAATCGGTGAAATAGAGTA  
TTCTTACACTGAAGATGGTGATGTTTCTGTGACATTTACAATTACCTTTTTCTTCAAATA  
TTTTGAAATTGAAAAAGATGGTGAATTAATACGACGTTTGAGAGTATAATAATGTTAATT  
GCGTTATCGGGCAAAAAGAGATGTGGAAAAGACACAGTAGGCGATCTATTTGAAAAAGAA  
GGTTTTCATAAGTACGCTTGAGCAGAACCTATCAAGATTTTCCTGTACCGGGCAATCCGA  
GATGACAATCGGTTGCCAATGTTTGTCCAAGATTTTGATATGAATGATTTTAACGGTTTT  
GGTTATGACCGTGAAGAATATTTGCCATTCCCTAAATCGGATGTTTTTAGAATTATGCGA  
TCTGCATGGATGCTTGTGTGTGATGACCAACAAATCGATTACACGTATGCGCATACTGGA  
ATTATTTCAGAAGCAGTTCTTGGCAATAAGAAAGCATGATCAATTCGTCGACTGATGCAA  
ACATTTGGAGCTGATATTGGTTGCGCAATAAATAAACGTATATGGCTGCAATATCTAGAA  
AATTTCCCTATTGAATCACGAAAATGTCGTTGTTCCCTGACTGTCGGCAAGACTATGAAATG  
TCAGAAATGCGAGAATTTGGAGCAGTAGTTGCTCATATTATTCGTCGTAATGATTGAGTG  
GATACTCATTCCACCGAAGCAGGTTCCCTATCCGGTCTGGTGATCATATAATTGATAAT  
ACTGGAACGCTTGAAGATTTGCATGAATCCGTTAACAATTTTCGTAAAAACACTAAACCT  
AAGGATATAAAATGAACGCAGAACAAACCAATCGCTTCCCTGAAAATTAGAGTTCTTG  
ATCTGAGCGAGCAACTTGTGCTACTCAACAACAAGCAAAAATAATTTTCAGATGCCCTCA  
CCAACATCGTCCAACCTTTTGGGTGTGACCCCGGCCGATGGTGAAGATAGCATTGCCCTTT  
CTTCTATTGTAGAAGGAGTAGAAGCTCTGGTTCCTTCTCAAGAAGTTGGTGTGGTAGAAG  
AATAATGTTTACAGACAGCTTCGTAGGAACATACGTTGCTTGTAATTTAGTGATGAAAC  
GCTGGATTTTATCCAGCGTATTCAATAAGAACTTAGATTGCCAAATCCAGTTCCTCGATA  
CGAACTTCATTCGACTATCGTTTATAGCAGAGTATATGTTCCATTTATCCCAGACGTTTC  
GCCCCAACATTTGGCCGATAGGTGCTATCTGAGAATTTTGAACCTCCAGAAAAGAATTC  
TCTTGTCTGGCGTATGATTCTCCGTACATGCAAAAACGACATGCGTTCGGCCAGATCCT  
TGGCTCGTCTGCTCATGATTTTGACGAATACATTCCTCACATCACGATTGCAAAAAGACAT  
TGGTCTCTTAAGTATGAAGGATCATAACGACTTCCCTATCGTAACAACACACGAATATGT  
GGAAGAATTACGTGAAGATTAAGCAAAAAGCAATTAATGTTCAAAGCTGCGAAAATTGA  
CGTACTATGAAATTCATGAACAAAACATTGTTTCAGAAATGAGAATAATCAAACCTTAAGC  
AAAATAAAATGCAAAAAGCAAGTAATTCTGTCCACTGGTTCTACCCTGACTGTATCCGGCC  
GTGCTGTTTCTGTTGAAGTAGGCCCTGTTTTACTGCCCGTGTCAAAGGTGAAGGTGAAA  
AACCGCTAGTAGTTGCTGAAGTTCGCAGTGAACCTGGTTGAAGTTATTGTTTCATGAGCCTC  
GCCTCCTGGGTGAAGCTGTGCAAGCTGCTGAATCATTTTCAAATGCTCTCTTCGGAGGGC  
ATTTTTGTAACATAGGAGAAGTTATGGAAATCTTTATGTTTTATTTTGTGCTCACATAT  
TTGGCAGCATGTACAGTTTTGGCTATTAACGTGATAAAGTATAACAACATCAACATTCAGA  
TGGAAATTTGTCTGGACAACCTGGCCAAAATTGCGGATTTATATTGACAACCGCACTATGC  
AGCTACATTATTCCGTTTTCGCGTTTATGCGGATACAATTGGAAAAATAAATGACAGATCA  
GCAAGAAGAATTTTACATACGAAAACATCCGAATTAGTTAAAGTCTGGTGTGAATATGA  
CATAAATGGCAGTTATGGAGGAAACAACAATGAAGAAGTTTGTGCTATCATGTTTCCATC  
AGATATGCCGCCAGATGTTTATTCTGCTCATATTAGCATCATGGTTATGAAACATATGAA  
AGAGCAAACCTGGCATAGATGAAGACGATCTTGATGGTCTTATTGGATGGGACTACTTTAC  
GCCTTTGGAATTGTGATGGAAAACGTTGGCATTGCAAGAGTTGTCAGAACAATTGAGTTC  
GATTAACATAAAGCATAGACTTGACGTATAGAAAATGAAATTTGCACCCGGAACCTGTAAT  
TCCAGAAGGATACGTCATTAATAACTTCCCTGGGAAAATGATGGTGTGATTACGATGA  
TGTCAATTCATACCGGCAGGCCAATGAAAGAGATCGAATTCCTTTGAGAAAATCAAACCGAT  
TTTCAGTTCATACCACGGCGAAACAAATAAAGGCTATGGCAACAAAGATTATAATCCTGG  
GATGGCCGCCGATTTGTTTGAGATTTTTGTAAAAAATATGCATTCGATTTGCAATTCAA  
ACGCTATCTAGGGTTGACACCAGATATGTGTGGTCCACTTGATGGCGATTTATACAAATT  
CATTCTGCCATGACAAATTCTACATAATGGTGAAGAAAACATCACCGGTTATGCCAAAC  
AGTATGTCTTCGATTTTTATTTGTGTGGTCGAGTCTATTGAAATCGAGTATAACCAGTCTG  
AATACGTTGTTCCAAAATTACACCTCGTTAAAATTAAGGTTATCTAATGCAATTTTTAT

TTGAATTATTTGCAGCTAGCGTTCGATACACTGCTGTTGCACTGATAGTCTATGATTTGC  
TACATGGTTATGCATTCTTTGACGAATGGCGGAAAGGAAAGCCCGACTGAAAGTTTCCAG  
CAAAAAGCCTATCAACCATGCAGATTTATGGAGCCATTGCAGCAGCATGGCTACCTGTAG  
CTCTTTTCTTGCTATGGAAGCTAATTGCATTCATTTACTTCAAAGTAGTAGTCGATAAAA  
TTTACAAAAGTAGTTTACATTGATGGAACATGTTTTATGATAGTCCCATCAAATCAAC  
ACGGAGTAATTTAAATGAAAATCTATCACCCGCAACATATCGCGAAAGTTAACGGTATTA  
CAAAGGTTGACATGATTCGCGGCCATAAACTCAAGGATTTTCATTGCTATATCATGTTTA  
AAGATGGCAAGGTCATTGATTGCACCTTCAAAAATCTCACGGCACAATTCCGCAATATGG  
AAAAGATTGCTCGTGAAGTAGCAGCAGAACATCAATACACTCTGTGAGAAACAACACAGT  
TCTGACAATGGGTTGACTATAATACCCATCGAAATTGGCCGTGGAGGTAATCAATAATGC  
GTGCTGAAATACTAATAACCGAAGGAGGTAAAATGAAAAAAATTGTTTGGTTTTAGCTCTT  
GCTTTTGCATCTTCTTATGCGATCGCAGATTC AACCAATTTGATAATTGGTTGTTTTTC  
AAAACATTACGAAAATGATGAAATGATTGTA AACATCCGGCGATAGGGGTCGAAATTGA  
CAACTTTTCAATAGTATATACGTGCAAAAACCTCGATTAATAAACCTTCGGTTCAGTTGGC  
TTATTCTGACACATTTTACTTATGGAATGTTTGATATTGGTTATCGCGTTGGTTTTAT  
GACCGGTTATCGATATGGAACAAAATATGCCAATAACCGATGGTATAATGGTGTGATT  
GGGTGCCGGGATAGCCCCGCTCGCCGCCATTGCTATTTTCGGTAGCTACCCCTATTCCGAG  
CGTCAAATTTGTTACAAGCGTAACACCAGTTATTACGATGTTTCGGATTAAGAGTGAAC  
TTGGTAAATTTGAGAACGCAAAAATGAACTATTTACCCGACTGGTAAAGAAAAACGTTT  
AAATCGTGGAACGCCTGAAAGAGTGGCTGTACGCTAATTTTGATTCGTGGGATGCTGAT  
ATATTAGATATTCCATTTAACTCGACTGTACATTGGGGTCTGTGCCCATTTGATCAAGAT  
ATCTACAGTGGAAAAGAAACGTTTGTGTTGGAATTTCTGCAAAAACCTTTTAGAAAAGGAA  
CTCGAGAGCCGAGCTGAGGAGATTTGAATTGAAACCGGCGTTGTAAAACCTGCCCGCTCA  
TCTAAAAGAATGGTTCATTTCTTATATGTGCAATTCGGGTGAACAGCATCTCATGGAAGC  
ATGGCATGATGAAGGCATCGAAGGCGATGGCGTCGATTTTCAGATATCCATATTATTCTCG  
AAGGCGTGGCGAAGAAGTTGACGAGACCGCTGATCTCGTAGTTAGTGAGGATAAGTGACT  
TATTGCGAAACGTTTTTAAGTTGTGCTGAAATCGAGCAAAAATTCACATACCAGGCACC  
CAAAAATAGATATACCAAATAACAAAAGGTGAGCGCGATGCGGTAAGGAAGCGAAGCGG  
TTACATCCTTAATACTGGACCGAGTAAGTTAGGGCGGATGGACTGGGCTATCGGAAAACG  
GGGAAGCATAGACCCGAGCACCTGGCGTTCTTATGCAAGTATGGTGGGATTGGTATACAC  
TGGAGGCTTAAAACCTCCCGCCTTCGGGATTGTGGGTTTCGAGTCCACTACTTGCACCAA  
ATTCAAATTTCTAAAGCATATTGTTTACACGCTTCGGAAATAAGATATTATTA ACTTATC  
GAATCAAAAACACGCATTCAGTCTTGAATGGGATAAATGGTGA AAAAGCAATGGTTTTCTG  
GAGCAAGCCTTAAGTGGACAGAACCCTCATCCTAGTGACGCAGGAAGTGTGTTTTGATTTGA  
AAAGAATTCTGAAAGATTGGCCCGAGTTGGTTTAAGGCACCGGTCTTGAAAACCGGCGAT  
CATAGGAATACGGTCCATCCGTTTCAATCGGATATCTTGCTCCAATTGAGGTGCTGTGA  
GCCGAGCGGCTTAAGGCGGTCCTAATGCAGGACATACGAAAGCGTATCGTAGGTTTCAAT  
CCTACCGGCATCCATTAATTATGAGGCATATTGTTTCAGAGTTTCTGGATATGAGAGATTA  
TAGTCTCATCGATTA AAACAAGTTGATTTTGGGGTGATGTAGCATAACGGTTCATGCGGCC  
GGCTGTTAACCGGTGTGGA AACTCTACGTTGGTTTCGACTCCAACCATCACCGCCAAAATC  
AATTTTCATGGAACGTTTCGGGTAATGGTATCCCCAGCGGCTGTAACCCGCTCGCCTCTGGC  
ATTCTTGGTTCGAGACCACGGCGTTCCACCAATTTAACATGAGAAATATATTTTATGAAG  
CAAGATCTATTTGATAGATACGGATCCTTCTTATTGAAAGAAGGAATACACGGTGATTTT  
GAAATAACTGATGATTTAGTTCATTTCGATATTTTTCAATCATATCTATCAGACGACTAAA  
TTGCCATTTATACGAAAACGGCAGCTGGGTTAAGAGCATTGCGCCCATGAGTTACG  
TTAGAGTATCTTCTCAATTTGTAATATTATCGATCTGGAAAAGCGTCGGGAATAAATG  
AAGGTTTTGTTTATCTGATAACAAATCCAGCTTGGCCACATCATTTTAAAATTGGAAGTA  
CAATATCAATACAATTTTCGATTATCATCGTACCATAGTTATTCACCGGATCGCGATTTTG  
ATATGGTCAACTATTTCTTATCCAAATCTAGTTTTGCGGATGAAAAGCCTTACACAATT  
TGTATGAAGCTGATGACGAGTGGAGTTATGACAAAACGGGAGATAAAAATGAAAGAAGCTC  
TGCAATTCTTCAATCATAAGCGCAAAAATAGATAAACAAGTTTTACGAGCATCTCTAACTC  
AATTGGTAGAGAAGCGGACCTTTAATCCGTCAAGTCTGAGTTCGAGTCTCAGGGGATGCA  
CAAATAACGGTGACGTATTGCGGTAAGAGCCGTCGCCGATGTAAAGCGGGTACTTTA  
CGAGTCTTGTGGAATCGAAACCAACTCTCTCCACCAGTTTTGCAGTAAAGAAGTTGTAA  
TGCCTTATCAATTTGAGCGGCGAGTGTGTGGCCGAGCACACCACCTTTTAGGCGCCGGAAGA  
CGGGTTCGAGTTCCGTACCGCTCACTGTAATTAGTTTTCAAGTAATCATTGGTGTGACCTT

AGTAGAAATGGTAGCGATCCTCGAAGTGACCCAGGGTGTACGGGTTTCGAACCCCGTAGGT  
CACCCCAATGATTATTTTCGCGGGTAAGGTGTTTATGGATACATGCTAGTCTTCCAAGCT  
TGAGTAGACCGGTTTCGATACCGGCTACCCGCTCCAAACACAAGTCACAGGGCTCTAGATT  
CCTAGTAAGTTTTGCACCCCTGGTTGATGCACTGTCCATTATTGCGCCGTGGCTGGAGCC  
CGCGAGTTGGACAACCGTATTGTCTCCGGCACTTAGATGACCGGCTTTAACAAGAGAAAT  
CGGGAGACGTCCCCTTAAATCCTCGTTAAAACTTCTGTAGTCACTCCCGTCATTTTGGC  
CGGTGAAACGAGGAAGTATAGACGGGTAACGAATTCCTCTCAGCGTAGGCAAGTGGTAT  
GTCGTTCCGTTTGGGACGGAATTTTCGGGTGTTTCGATTACCCCGCTGAGACCAGATTAC  
GTAAGCGGATACTTGGTTGCAAACAAGTTCGTAAAGCCGTCGAATTTGGTAACATCCTCT  
CCTGGCACTATCCAGTGATGCGGTTATCCAGAACGGCGCAACCTGAAGAATTGAGTCAC  
ATCCGTAAGGCCCTGACTCCAATTCTTCAAACACTCTTGTATTATGTGGCGGTTCGAGACAT  
CCCCGCGTAAAAACTGAAATCTCGATGTCCCGAGCTGCAGCCCTAGGGAAGAGTGTTTG  
AAGAATTGAACTAACTCTGAGGAACATTTTATGAATGTTGTCAAATTAACAACCACGCGC  
GATGTCTGTTGTGATCAAACCAATTCATTGGTTCACATGAATTCTGCTATGGCCCATGT  
GATGCTGGTGATGGTTGGATTGCTAAATGTGCGGTTTGTCAAAAAGAATGGGATATCGAT  
AGCAGCTGTATTACCTCCGTCGTTAAGACTTGGCGTGAAATTGAAGTTGACACAAAACAAA  
ATTTGCGGTGACCTGACCGTTGGTGAATTGGTTCACATTTTAAGCTGATTTGTTTTCCAT  
ACTCCAATTGATAGCATTTCGATTGAAAAGTTCATCTAATCTTGTATTTGCTTCATCTAAC  
GGAGATGGCGAAAATATACATGATTAATTGCCGGTTTAGCTCATCTGGTAGAGCTCAGCC  
TTTGTAAACGCTGGGGCGGTCCGTTTCGAGTCGGACAATCGGCACCAAATTTTACATGAGG  
AAAATATTATGTTATTTGCTTATCAAGTTATTGCTGTTATCTTCTTTTTTTACTCTTGCT  
TGGGCGATTATAAGCGATATTAGGATCCCTTCCGAAATTGCGGGTAATTTGATTGGCT  
CTGCTTTTGCAGGTGGTTTGTGGCCATTGACGGTACTTATCCATATTTTTTGCATCGCAA  
ACCGCAACCGCCAAATAAATACAAAGGAACGGACTTCTTCGGACCCGTTTCGTTAAGTAAA  
AGGGAAGACCATCTGGATATGACGAGGCCGTTGGACTGTATCATATCTTGCTGGCCCTTG  
GCCTCCGACGAGGTTTTGTCTGGAAATGGTGCGCCAGATCGTTTCAATATGACATTGGT  
GTTAGCGGTAGCATGCCGGTCTCCCAAACCGTGCGGCCAGGGTTCGAATCCTTGATGTCA  
TGCCAATAGTGGATTAGCTCAGTAGGTAGAGCACTCGACCGATAATCGAGAGCGCATTGG  
TTCGATCCCAATATCCACTACCAAATTTTAGGAGAAGTGGATGAGCGGCTGAAATCGCT  
TCCCTGCTAAGAAAGTAAACCGAAAGGTTTCGAGAGTTCAAATCTCTCCTTCTCCGCCAA  
ATGTATCCTGAAGCATATTGTTGCAAATTTCTCAATGAGTGATCTTATTAACCTACATCCA  
AAACAGAGTTTAGAGCGGAGCCATAGGTTATTTGGTTAAAATAGTCCCCTGGCACGGGAC  
AGCACCGAGTTCGATCCTCGGTGGCTCCGCTCTAAATTTTGTGATGCGATGTAGAGGAGAGT  
TCGTCTCGTCGGGCTCATATCCCGAAAATCAGCGGTTTCGAATCCGCTCATCGCTTCCAA  
CTTCAATCGCTTATTGAACGTGGGAAAATAGCAAATCTGGGAAAGGGTTCGCGAACCGGA  
ACCTTAAAGTAGCTTTCTAAGTACTTGTGTCTGGCAGTTCACACATACGTATATTTGTG  
ATGGGTTTCGAGACCCTAACAAAGCGCCGAATAACAACGCCGGCTACCGATCGAATGATCG  
TTATCGGCTTTTTCATCTGACGGCCCTGTAGCTAGACGGTTCAGCAGGGCGGCTCATAAC  
CGCTCGTAGTAGGTTTCGATTCTACCAGGGTCACCAATTTGGGTTCTTCATTTAATGGGA  
AGACCGTAGGTTGCTTTGCATCCTGATAATGCTATTTTCGATACTAGCAGAACCCACCAAT  
TTGAGGAAAATACTATAGATATCGGATCCGGCGCGCCTTGGCCGACGTGTGCATTGAGTA  
ATTTGCTCCGCATGAATTCGTTATCGATGGGATTAAATGTTCCCTCAATGGAAGGATTCC  
TTAGTCTCTCAAATTCAAATCGCCTGAAATGCAATAACACGTTTGCCTCTGGTTGGTA  
AAGCCGCCAAATTTAAAGGCAAAAAGAAAACTGGTGGACAGATCAAACCTCTGTACTGGA  
AAGGTACACCGATGCGGCGGCAAAGCGATGCTTATTCTGATTTAATCTGCCGTGCGTACG  
ACGAAATTGCGAAGAATCCGGATTTCAACGAGCAATCCTAGCCACCCGGAATTCCTCGT  
TAACCCATTCAATGGGTAAAAGTAAAAGAATGAAACAGTGTTAACTGAACAAGAATTTT  
GTTCAAATCTGTATCGTATTCGAGATAAACTCCAAGCCGCTTGATTGCGGCTTTTTAGTC  
ATATGGTCTCTTAGCTCGGTTGGATAGAGCTTCGGCCTTCTAAGCCGCGGGTTCATTGGTT  
CAAATCCAATAGGGACTGCCAAATTAAGGTGATGTCATGGCGATGATGCACGAAAATC  
TCATGCCCGAGAGGGAAGGGGCAGTGGAAATGCACGAAGCGAGAATTGGTATAATTCTCC  
ATTGTGAAAAACACCGGCCCAAATAGAAAACCCGGAGTTGTAAAAGAACAAATTCAGA  
AGATCAATTAACCTGATGAACAGAAGCTTCGCAGGCGTCAACATGAATTGCTCAGATCAAC  
TTATTAAGGTAATTAATATGTCTCATTACAAACGTATGAAAGATGAGCTGAGTGAATTGG  
TTGTTGACTGAATAAGCTCAACGACTTCATTAACATGACTGATATTTACAAGACTCTTG  
ATCCTGATGAGAAGTTTCTCATGGAACAACAGTATATCGCGATGGACAGGTATTACGATA  
TGCTAAAACGGCGAATTAAGCGTCAATAATAATTAGGGCTCCTTCGGGAGCCCTTGTCTG

ATTCTCTCGACGAGGTTTCAACATGAACAAATATTTTCGATTATAACTCTTTCTTCGTAAA  
TGCAATGCGTGTGTTTGGTCAATTACCCACCGGGGTGCGAGATGGAGGTATTGAAAGA  
TCGATCAGATTTTTTAAAATCGAATAGAACAATATCCATAAATGTGGGTCGGGAAACCGG  
TAAAACAACCTTCATTTATCAGGCTTGGTCACGAATGAAGCAATCATGCCAAAGTCGCAAT  
GGTAGTCATGAACACCCAAAATAAGAAAATGACCAAAGTATGGGAGCTAAATTCGATCT  
TCTGACTTTTTAATGATATGAAGAGACAATTGCAGATTCTGGATTTAGAAAAATCTCAAT  
TCATCATGGTTGACGAGAGCGAGTTTATTCTCTTTGATGAGAACAGGGTGCACGATTTTT  
ACAAATGGGCAAAATTAGTAAATGCCGAATTTGTAATAAAAACCTTGATGCAGTCTGTAA  
ATTATTCAAGCCTAGTGTTATTATTGCCATATCAAATAAACACACATTACAAGCATTAAA  
AATGTCTAAAGCTACTCACACTATCGATTTTCGGTTTTGGTAAAATCGTTGCTCAGAATTC  
TGGTCATTATTTCAATGTTATTGAGAGTCATGACCCAATTATTCCCGCAAATACCAAATT  
TCCAGTCAATGACACTTTGGTTCTTGAAGCAAACTAATCGAATTGGAGTAAGCGGCCTT  
AACGCTTATCTTTCACTATGCTAAAAGACATAATGACTGAGCACTACAATCGCGATAGTG  
CAGATGACCCAATCAAAGTTGTTAAAACATCGGGCGTAATTTATACGGCCAGTTTGATGC  
ATAAATTATCTTACGATCAACTACCGGGAGGAGCGCTGATCGTAGCAGACAGAGATATTG  
CACAGGACATATGGCATGCATGTGATAAACCGAAAATGTTAGATACTTAGTCATTTTGCA  
AAGATAAAATGCATTTTGAGCTTTTGCATAGGCCTCCAGTAATCATATTTGTAACCTTCTG  
CCAATGTAGAGAGCATAACGCACTGCTTTATTGTCAAAGACTGGGTTTTCAAATCTACTG  
AATTTACGGCGTATTACCTCGAACAATGCGACGGTTATGTCCATAAATTGAGAAGTCTTA  
TAGGATTTAAAATGTACGAACTTTACAAAACCCTTCCGATGTATCAAAGCCAAGAAGGTT  
GGATTATCAAATACCCTGAGTTTGCCAAATTGGCAGATGAGCAAATGCATGCTTTTTGGC  
CATGGGAAGAACCAGTTGTTGATAATGATGCTCAAGATCTGCGCACCAAATTGACACCTG  
GCGAGTTGAACGGTCTTACGACCGTTCTTAACTGTTTGCAATTTACGAGCGCAAAGTCG  
GTGAAGATTATTGGTCTGCACGAATCGCTCGAACATTCGGTTCGCCCTGAAATCAATCGCA  
TGGCAACTCTATTTGCCGCCGTAGAAGGTAACCTCGCATGCACCTTTTTACAATAAAGTTA  
ATGAAGTTCTTTATCTGGATGACGAAGCTTTCTACACTTCTTGGAAGAAAGCGAAGAGA  
TATCTCGTCGCATTCAGTCTGTAGGTAAATCGGTAGCAGAACCCGATGATGCCAAATCTT  
TTGCAGCTTTCACTTTCATTGAAGGTGCTGTACTTTGTTCCAGCTTTGCATTCTCAAAC  
ACTTCCAAGCCCAGGAATGTGGCAAAGACTTGATGCGAAATATTTGCCGTGGTGTGACC  
TTTCAGTTGCGGATGAACATCACCCTCAATTGGTGGAGCAATGTTGTTTCAAACACTTT  
GCCGTGAAATGAAAGAAGAATATGGTGAAGATGTCCGGGCAAACTGAAAAATGGCATT  
TCAACATGGCATATCAAGTGTTTGATCTCGAGTCTGGCATCATTGATCTCGTTTTCGCTG  
AACCAATTGATGGTATAACTGCTGACGAGCTACGAGTTATTGTCAAATCTCGAATTAATC  
TTTGCCTGGAAAATCTTCGTTATGAGCCATTTTCGAAATCGAAAATAACCCTATCGCTG  
ATTGGTTCTATCGCACCATTAATGCCAAGAAATTCCATGATTTCTTCACTGGCTCAGGT  
CGGAATACAACATCAATTGGAACCAAGAAGGTTTCTCTGATGGCTGGTAAATTAATTCTG  
CCCTGGTAAGCCAGGGCAATCTTTTTAAAATCAAGGTGCTTTAATGTCTAAAATTTCAA  
ATTCGAATCTTTGTCAGCCGAACGCAAACATATGCAGTCAATTGGCGAAATGCCACAGTG  
GTTTACAACGCAGGGCGATTTGATGTTCTTGAAAAATTATCAGTACAAAGGAGAAACCTT  
TCGTGGTGCCTCCGGCGAGTCGCTTCAACACTTGCAAAGCATGATATCCGGCCAGAAGC  
TGAAGAGCGCTATTTGACCTTCTCTGGTCCGGTAAGCTGGCGATGGCTACCCAGTTTG  
CTGTAACACCGGCACAGATCGTGGAGTGCCTGTTTCTGCGCAGTAAATTATGTGGGGGA  
CAGTGTCTTGTAGTTCTACGAAGGCCAAACGGAAGTCGCAATGCTCGCTAAAAACGGTTT  
CGGAACCTGCGTCATATCTTGGACACATCCGACCTCGTGGATCCGATATCTCGACCAGCCA  
CAACAAATCAGACGGAGTCGTTCTGTATTTGACAACCTTCGTTAACACCAAAAACAAAGGT  
TGCAACTGCTTGCCGACGTGGTGAATCGGCCGGTTACGTTGACTTCTAGCATGGTGATTT  
CTGGGAACCTCAGGGGTATGTGCTGAAAAACACGGCTTCTGCACACGTTGGTTGGGTATT  
TGAGAAAGAAGATTACGAAAAGCTTCTGGCTCGCGATCCTGAATATATGGCGCGCTGGAA  
TGAACCTGCTTTATATGCGCGCCCGTACTGGTAGCGGTTATATGTGGAAGAACTGGATCGC  
TAACGATCTGGCTCCACAAGCACTCAAAAATTCAGGTATCCGTATTCGATCAAGCCAGCT  
GTGCACCGAAATCGCATTGCCATCTGACGATATGCATACTTTTACCTGTATCCTGAGCTC  
ATTGAATTTGGCTCGTTGGGATGAAATTAGTGCTGAAGATATCAAATGGGCTGTTCTGTTT  
CCTTGATTCGGTACGCTCAGAATTCTTGGAAAAAGCGAAAAAACTCCCGTATGACACTCT  
TCATAAAACTATCAGATTTACCGAAAAAGCACGTGCGCTCGGTCTTGGTAGTTTGGGTTT  
CCATACCTATCTCCAGATGAATGATACCGCGTTCTAATCTGGCGCCGCCACATTCTGAA  
CAATAGCATTATTCGCAAATCAAGGTTTATGCAGAAGCTGCTTCTCGGGAATTAGCAGA  
AGAGCATGGTGAACCAGAACGGTGTGTTGGAACAGGTATGCGTAATGCTACTTTGATCAC

TATTGCTCCAAATATGAGTTCTGCTCTATTGGCTGGTGGTGTATCTCAGGGTGTGAGCC  
ACTCGTATGTAACAGCGTCATCCAGCAGTCAAATGCTGGTGACTIONTTGTTTCGCTCGAACCC  
GGTATTGGCTAAAGTATTGTCCGACCGTCTTTCTGATAAAGAAATCAAAGACCTCATGGA  
CAATATTGCCACCTATCATAATGGTTCTGTTCAACATCTGGATATTTTGACAGACCATGA  
GAAAATGGTGTTCAAACAGTTTATGAGATTGACCAGCGTGAATCATAACGTCTTGCTTC  
AGCTTGTCAACGGCACATTGACCAAGCGCAATCAATCAATTTGTTCTTCGCTGCTGATGA  
AAAAGAATCAGTCGTTGCGTCCGTTTCATAGAGCGGTTATGGATGACCCTCGTCTGAAATC  
TCTTTATTATTTTCGTTCCGAGCATGGAGTAAAAGCTTCAACTGGTGAGGCGGGGTGTTT  
AGCATGCCAGGGCTACTTGCAAGGGGCGAAAGCCCCTTTTATAGAACCCTATGTGACAAAA  
TTTGAAACATCATCCGGTGAGAAAATTTATTGTGGTATGCATAAAAGTAGGCATGCTAAT  
CCTTTATCTGACCCCTATTGTGGGTCTGGACTAATTTTAAGAAATGCCATATCAAATAC  
GGTGTGCTAGTATAAGATCGGTTGAATGGTTTGAACATTCAACCGAAGAAGAGATGATT  
GAAGCGGAAATTTTGTTAATTTCAAGTATGGTTGATAACCCTAATTGTAATAATATCGCA  
TACGGTGGTTTTGATGGGAATGCTTTACGGTATGCTTCCGATGAGAGAAGAGAAGCATT  
CGCGAAACATCACGCCAGAAAATGATCAAGCGATATAAAGACAGTGATGAAATTA AAAAG  
CACAGCAACCGCATGCGAGTTGCATGTAATCGACCGGAAGAACGGCAAAAACGAGCCGAG  
CGACATGCTGAACTTTATAGCCGCCCTGGTTATTCCGAGCGTATGTGCGCAATGCAAAAA  
GAAACGCAAAGCCGCCCTGACGTCAAGGCCAAAATGCTGAAGGTGTAATAGCGGCGAGA  
AAGGCAATAAAATTCTTAAAACAAATTAATATATCGGGCGTAATAACTATTATAGATGGG  
CGATTTGTTGAAAAATTC AAAGTTGCGCATGAGTTGTCAACAAAATATGATATCAAATAA  
ACCAAATATTTTGAGAATTATCGACCTGATATTAATTCATTGCTGGGATAAATGTGTCT  
CTACTAATTTTATGCGCAATTTTGTCTATGCCAATCCGCTTTTTGGATTTGGGTATATA  
ATTGACGTGTTACTTTCAACTGTGATTTCTTTCTTTGTTTTGGAAGGAATTACTGCAATA  
GCTTATTATACAGGGAAAATAAATTATTTATCTTTTCGGCGCTGTCTGGTGTGCAAACCTG  
CAAACCTCGTAAAACCTATGCTTGCCAATGTTGACTATAAATATATTGATGTGCGATTCTGA  
TGAAGGCATAGCTCTAACAGCAAATAACGCAATTCGAGGTTTGCCTACAATGATTAATGT  
AGAAACAACCGATCGTTTTACGGGAATTCGATAAACGTTGCGCAATTGAAGCAAAAAAT  
GGGAATTTAACAATGGGCTCTTCGGAGCCATTTTCATTTTCATTTTATGGTGTACATCG  
CGAAAAATCCATGTTAGAATAAGTTTGAATCAATAACATATGGAGTATTATCATGAATCG  
CTACAAACTTCGGAGAATCCTCGAAGCAGAGTTTAAAGAAATCAACAGAAAAATCGGAGA  
AGCTCGGTTGGCTTCTGGTCATGGCCACCGTTTTTCATCTGGAATACACTTATCATTTTCAT  
AGATCACCTTTTGCTTTGCAATATCCATATCGATGATACGCTGAGCTTGATCAAAGGTTT  
GAAGGAAAAAATACACGAAGTTGACGCATACATGTCTCTTCCGTATCCTCCGCATCTTGA  
CGAAAACGAGTCGAAGGTGTAGAATATCGACCAATTCGCTTAGAAATCACTAATGGATC  
ACTTTCGATTGGAATTACTCCTACCAAATTCGGCCATCATCAGAATACAGTTCTTCTTT  
GACATGTCGAATGGCAATAATCAATTCACGACGTTTAACTTCAAACGTAACACTACAAAAGT  
AATTA AAATGGAGGGGTTATGAGGCTATTGATGATTCTCATGATCGTATTTGCCACACAT  
GTTTATGCCGGTCCGTCGGTAACAGACTTTTCCGGACACTCAAAGTACAATGTGTGCGTAT  
GCTTACA ACTATGGAAAGGCTTATGACTTGACGGGAGAATTGCGAGATGTCAATTATCCG  
AATTTCCGGGAACGATCGTCATCTTGGCACATTATTCGCTGCTATCGCATGGGAAGAATCC  
TCAGCTGGAATAAAACTGGTAGAAATATAAAGGGTGATCACGCGTATGGGATGTTTCAA  
AATCTTTACACAACGGTTACATCTAAACTCGACAATAGAGGAATTCCGTACAGACATTGG  
TATCTGAAAAGGAATTTGGAGCGTAAAAGTTCTTCTGCCGAATGGGCTATGGATGAACTC  
TCATACTGCCTCAAGGTTTCGAAAAGGTAAAATTCGAATTGCTCTGGCTTCATAACAACGCA  
GGTTGAAATTACCATGCTGGTTTGAGATATGGCGATCGTGTTTTGGCATAAAAATCCACAG  
CTCAAACAACGGACGTTATTTACAAATAAATGTTTACATTTTTGAGGTTCTGGGATACT  
ATAACCTCAGTTAAACAAACCAATCAAATGTGGAGTAAGTTATGGAATTCATCATCAATA  
AGTTCCGGTATCGCGTTTATTGCGGCCGTTGAAGTTGATCGTGCTAATTTAGAAGGTTGCC  
GATTTTTGAAGTCACTTTACGATATGAACGTAGCTATGCCAGAAGAATCTTTCGGATGCG  
AGTTTTTGATTACTCGCGATTCCCACGATTCCCAAATTTTGATTACCCCGATTCCCGAA  
TTATGATTCACACCGATTTTAACTCGTCTGAAGTCCGCATAGAACTGAAAGATTCATTC  
GGGAATACTGTTTGTGAGGTAAAGCGCAATATCATCTTTTGTATTGCTGGGCGTCCATA  
CGTGGACGCCGTAGATATCGAACTCAATCGTGTCCATTACAGCAATGGAAATGACCGTTA  
GGGCTTAGCTCATTCCGGTGGAGTCGGCTTACAGAGTTATGATTTCAATGATGTTCTCGC  
ACACGAGGGTGAAATATGAAAAAGCCAATAGCAGCTGTTTTAGCACTGTCAATTTATGGT  
TGCGGCGCGGCCGCTGCTGCAGTAGCAAACATGAACGAAATGTTCTGGTTTCCTGAGAAA  
TCCGGAGTAATCAAAGAATTTACCGATGAAAATGGCACGTATGAATCTGCTCAGTCCGTT



TCATGTGATATGCAATACGCACAGAAACGTGACGATTGCCTTGGGATTATTTTCAATAGT  
GATTATTGGATAAATTGACTCTGCACGATCTGACGACAGTATTTTATATTGGTCTGAGCGA  
GTTATGATTAGCTTCGACGGAGTTGTTCAAATCGTTGACTATGTTCCGACTAGCTCCGCT  
ATCGTTAATTGGCGTAAAGATAATCCCGATTTC AACCCGATAGGCAAAGTTATGTCAATT  
ACTACACCTTACGGCTAAGGAGAGTTACATTATGATCGTTAACACAGTCAAAGGTAATG  
CAATCAGTCTGTTTCTGAACGGCGAATATGACATGTTTCCGCATGGTTGTAACATTTTAA  
ACCGAATGGGTTCTGGCATTGCTAAAGAAGTTCGTGTACGCCTCCCTGAGCTTTGGGAAC  
TGGATCAAAAGACAGTTGAAGGTGATCGTTCCAAGCTTGGAACGATCTCGGCCACAAGTT  
ACCCCTATGCTGGCCTTGCCTTCAACTTCTATACTCAGGCGACTTACTGGGACCCTAGCG  
ATATGTTGTCCTATGATGCGGCCCGTTCATGCATTGAAACCTTGAACACTATGTGTCAAG  
AAACTGTCGATTTTGGCCTCGGTAAGCCGACGATGTGTATTCTAAAATAGGTGCTGGTC  
TTGCCCCGAGGTGATTGGGGCAAATTGAAGCAATCATCAACGAAGTAACTCCAAATATTG  
ATATTACAGTGGTGGAAATTCGATGGCAGTCGGTAAATGGCAACAGTGTGGTCCGGTGATG  
AACCGTATCTTCGAATGTGCAATAGTCGAATTACTTGGCGAAGAATGTAAAGGTATTATA  
ATCCACTCATATCGTGACGCCGGCGATGTAGTTCTCGTGAATTACGAGTTGCTGTACCAC  
CGCCGAGTGTATTATTGGTCAAACCTCAATGGTGCCGTAATGAAATTTCAAAAAGAATTTT  
TGATTGAACTCATTGTGCAATCGCTGGAAAACATCCCAGGAGAAGGTCTTCCATCAGAAC  
TGTGTGGCAAATATGAAACTTTAGTAAACGAAGTTGTGCGACCCGCGGGCGCTGGACTGTTT  
ACTACGACTTTGTTTTCTCCTTTGAAAAGGATGGAGTAAAGCGCTATTTACGCGAACCAT  
ATGAAGTCGGTGCAACACAAGAGCAGGAAAGCCCGATTTGGGAAACTGAACCTGATCTGA  
TGGATGTCAGTGAAGTCGAACCGTATGAAGTGACTACAATTGCATACAAGTGGAGAACA  
ATGGCTAAAGAAATAGAACGTAAATGCCTTGTTAAATTCGTTCCATACAAGAATTTGGAG  
CAGTTTCCTCATAAGCAAATTGCACAATTCTACTTTGATGGTAAACGCTCTCGAAGTGTG  
ATGGATACTGGCGTTCGTGAAAAATTCATAGAAACAGTGAAAACCTGGCGCCGGTTTGGTT  
CGCGAAGAGGTGCAAAACGAAATCGACAAGAATACTGCATGGGAAGCCCATGATGCTGCC  
GGTTTACCAACTTGTGTTGTTAAAAACTCTGTACGAAATCCCGCATGATCATGGATTAAC  
GATCGAACTCGATATGTTTGCTTGTGGTGAACAGTATTCCGAGATCGAATTTGATAACGT  
CGAAGATGTCAATGCATTCATTCCACCGTGTGTTCCGGCGAAGAAGTTACCAATGGTGA  
ATATCACACCAACTATGCGCTTTTCAAGCGGCTCAACGAGGTCTAAATGGCAAGTCTTCA  
TTTTCACTGTGCTGCCATGACTTCTGGCAAAGGCACACATTTGCTTCAAGTAGCACACAA  
TTACGAAGAACGTGACATGCGTACTACTATCATAAAGCCTGCGATTGATACGCGTTATGG  
TTCAACCGTATCCTTAAGAATTGGTATATCGCGGCCTGCTATTATGGTGAGGCAAAGCGA  
TAGTTTGACCGCCTTAATCAGCAAAGAGCATAATGGGCAGCACATTAGTTGTGTTTAGGT  
AGATGAAGCGCAATTTCTGCTTCCAGAACAAGTCAGCCAGCTTGC GGCTGTTGTAGACGT  
ACTGGACATTCCAGTAATGTGCTATGGATTGTTGTCTGATTCAAATGGTAACATATTACC  
GGCAGCAGAACGACTGATGGTTTTGGCAGAAGAAAAGGTTGAGCACAAAACCATATGTTG  
GTGTGGCACCAAAGCTACAATGAACATGAGAATCGATGAGAATGGCAAGAAAGTGTGGGG  
GCCAAGTGTTCGATAGGTGGCAATGATCGCTATATTTAGTATGTCGTTAACACTGGAC  
ATTGGGAAAATCTTCAAATAAATTTCAAAAAGATGTTTACAACAAGGTTGTTTTGTATAG  
AATATCCTCAAATTAACGAAATGAGAAATACATTATGAAAAGTTCTGATGTTTTTTGCC  
AAGTTCAACTTGCTCAAGCTTTTGAACCTGAAGAGTTGAAACGCAGATTAGCCCCGGTTG  
GAAAATTCATTGCCGACGAAATGATTTCAAACGACTTTTTACAATCACCTTCGCGCGCG  
ATAAATTCCCTGGAATTTACACCAGAGATGTGTCGACTATCTAAGA ACTCTTGGATATG  
AGACTCGCACCGAATCTCAACGTAATGAAAGCTATATCATCGTAACTGCAAAAACCCTAAT  
GCAATCAAAAAGGAAATATAATGCGTACTATGTCCAAAAGTCCCAAAAATTACCAAGAAAAT  
GGGCCTTTCTATCGCAGCCGGTCTGCTGACCACAATTACTGCCCTGAATATCTTTACTGT  
GGTCGATGATGGTTCCGTTGCAACCACCACTTTCCTGGGTAACGTTAGCCTGAATATCAT  
GCACCCCGGTCTGAATATCATCAACCCGCTGGCATCAGTTGATACCTATTCAACTCGTGA  
TCTGAAGATGGATTTCTCAAACGTACAAGTTCTTCTCAAGATAAACTGAAAAATTTCTGT  
CGATTTCACTCTGATGCCGCGATTTCGACGGTGATAAAGCCCAGATGGTTCGCATCAACGG  
CGGTACCGAACGTCAGGCCATTGACAAGTACGTAGAGAAGAAATTCGAGAGTACTGTTTCG  
TGAATCCGGCAAAAACATCAAGAAAGCGCAAGATCTGTTTGGCGATGCTACCACTCAGTC  
CATGCGGCAAGACACGATCAAACTGAAGTCAACGACTATTCCAAGCCGTTTGGTTATGA  
GGTATCCGAAGTGTTCCTGCAAGAGATTACTCTGCCGAAGCTCATTCAAGACCAGGTTGA  
GCAAACCAAAAATTCGTGAAGAAGCCGTAAACCAAGCCCAAGTGGATCTGGATCAAGCCGA  
AAAAGTGGCACAACAACAGGTTAAGACAGCCGAAGCTGCGCGTGAAGCCCGTGAACAAAA  
CGCGGTTGCTAACGAGCTTGATGCTGATGCTAAACTGTACTCCGCTGGTAAAGAAGCTGA

AGCTAACGCTCTGCTGCTGAAGAACATTACTCCTGAAATGATCAAATGGCGCCAGCTGGA  
AGTCGAAATGATTTCGTGCCAACAAATATCAAGGTGGTGTATCGCAGACTGTGGTCGGCGC  
TGGTTATGATAGACAAATGCTGATGGACATGCGTTCCAAGTAATTTAACTCGAGCTCCTT  
CGGGAGCCCATTTTGATAATAAATTGTTAAATTGGAATATATTATGTTTAGCCGTGGT  
TTACTGTAATCGAATTGATGGTATTAGTGGCGATTGTTATCATTCTGTTAGCCATAGCA  
ATACCGGCTTTTTTCGGATAACGAAATTTATAAGCCGATCGATTTCAGCATGCCCTCATGGG  
TTAACAACCGCAATTACGGCAAATGGCGAAGAAATTTCTTGTGGCCGAAAAAATCAAGTG  
ATCAATAAACAAACACTAACAAATCGGAGAATAAATGCAAAAAGCAACTCAAAATGGGCATC  
ATGGCGGCATTCGTAGCAGCAGCACTTTCTGGTTGTGGCGAGCGACAGTCTGATACATTT  
TCTTATAATGGTCTCGGTGGAGAACCTACGCCTACCGTTCACAGCGACTTCGGCAGAGCAA  
TGTCAAGAACTGGGTGGTGGTTCGACGGAGCAATGCCAACTAGCGTTTAAGCAAGCAAAG  
GATGAACACACCTCAGCTGCACCGAAATTCAATGACCAAACATCAAGTGAATCTGGCACA  
TGTGCTGTATGCACCCAAACACAAATTCAGAATTCGGATGGTAGTTTCAGCGACGTGTTT  
GTTCCAGCTATGGTTGGTATGATTGTTGGCCAATTGATGTCAAGCAATGCTCGCCCGATG  
CCAGTATATGCGCCAAGTCAACCCGAAGATCGTTCGAAATGGCTTCGTCACTGCGAATGGT  
TCCTAGGTTCCCTCCTGGAAAAGGTTCTATCGGTGCAAACAGTTTCAAAACTTCCTTTGGC  
CAGGGAAGTATTGCAAACCGGTAGCATCTTCTAAACCTGTTGTGAGAATGTCATCAGGC  
GGTTTCGGAAAATCCGGTGGCTTCGGCTCTTCAGGTGGTTAATTACAAAAGCGCTTTAC  
GCTGATGGGACTATGATTTACTATAGTCCCATCAAATCAATAACGAGTACATCATGATTT  
ATGCTGGCCAAAATATCGAATCACCAGACCTGTAAGCGAACAGCACATTGTTGGTGT  
GTGATATTATAACAATCTCCCAATTCAGTAAAAAGGCATTCGTTCTATGGATATTTCT  
GTTGACGATGATGGAATTCATATGAAGGAATTCTAATGTTTGAAGGCCCGTACAATATC  
CAGGAGTACTGGGAAAAGTTCGATTTGTGCTTGGAGCCTGTTTAAATGATTGACGGAATT  
TATCGGATTATTGGCGAAATCTCTCTGAATCATCGTTACATTAGCCAAGGTGACGAAATT  
TATTTGCAAGAAGACGAATACGGAAATATCCGCGGTCCTTCAGTTGACTGGGACGGGCAT  
GAAACTGAAATTGGTTACATTTTGTGCCACACGCATTGGAAGAAATTCCCGGCAAAACT  
TACCACGAAGCTTACCGAATTTGGATAGACACTGTTTTGGAGAAAGTAGAATGAAACGCG  
TATCGATTGAAGCTCGTAAAGAGTGGTTGCCACAGTTGACTTCTGAAGGTGTTTTGTGGA  
CCACTACTGAAGAAGGTCCTTATTGGGCCGAAGCAATGGTTCAGCCCAAGTATTACTCCT  
TCACTCGCAAAGAGCAAGAGCAACTCGTGAAAGCCGCAAACAAAATCCATGAAATGTGTT  
TTGAGAAGATCGAATGCCTGTTCACTAGCGACGCCAAAAGCAAACGAAATTTTCAACA  
TGTTCAATATCCCATACGATTCTCGTGATCAAATCATAACGAGGTGGGAAGATGACGAAT  
GGGGCCTTTAGGGACGGTTTGATTTCAACATGACCGAAAACGGACCCAAGCTTTTCGAAT  
ATAATGCCGATACCCCCACCATTCTCATTGAATCTGCAATTTCTCAATGGAATTGGTTCA  
ACGATCAACGCGAAAAATTCATCAAGAAGCTTTTCACTTTAACGAAATTAATGAAGCAT  
TGGTTAATCACTGGCGTGACATGAGCACTTATAACGCAATTGGCGATAAAATCAGCTTTG  
TAGCTACTACGCAAGTTGATGATTTTGTACAATCGCGTACATGGCTGAAACTGCTTCAG  
AAGCTGGACTGAATGTCAAACCTGTTTCGATATCGCCGAAATTCAGCTAGGTGATGACGGCA  
ATTTTTATGACATTGAAGGCCAGCATATAGACACTTGCCTCACACTATATCCATGGGAAT  
GGCTGTATGAAGACGATTTTGACAAAGACATCGATGGATGCAACACTCGGTTTATTGAAC  
CAACCTGGAAAATGATGCTTTCCAACAAAGCACTTTTGGTTCTTCTTTATGAGCGTTATC  
ATGATTGCGAGTCGTTGGTCCCAGCGTATACAGTAGATGATTTTGACCGATTGAATCTGT  
TCACATATGAAAATCCGAAATGGGTGTCAAAGCCTATTGTTTCTCGGGAAGGATGTAATG  
TTCATATTTTTGAATATGGCGGAGAAAGTGAATTCACCGATGGTAATCACGTAGAAGAAC  
CGCGTTTCGTCCAGCAATATATCGAATGGAAAGATTTTCGATGGCTGCTACCCAATGCTTG  
GTGATGGATGGTAGGTAGCGATGCCGTGGGCTAGGGTATCAGAGAAGATGATAGCCGAA  
TTACCGGTAATAACAGCCGATTTATTCCGCACGTCGTAGAAAATTGACAAACTCCAGATG  
AGTTAAACCCTCTGTAATGCGTTAAATATGATAGGAGTATAAACCCATGGATTGGCCAGC  
TGCCTTGTCATATTGGTTAAACCAGTATGCGGTAAAGACAAAGGCTTCAAATAGGCTTTG  
CCTTTGTTTCATACCATCCAGGAGGGGCCAATGGCCCATTTGTTCGTATGTTAAAAACATT  
TTCAATAATCACATTGGTTTTAGCTCCAATGCACTTCGTAGAGGGCGGACCCTGAAAATGG  
GTCTTATGATTAGTACATGCGTGGCGCTTTAATAGGGTATAGCAACGAAATGGTGGCATC  
TCCAGATAATTCGGTTGAATTTCTTGAGCATTTGAACGATAAATGGAAATCTGCTAAAAG  
CTGTTTCGAGTTGTTATCAAACCTGGATATTTTGAAGCAAAGACATTCATAGCAAAGAGAGA  
AGGTCATGGAAGTAAGATTCCGGTGTGTTGTAACCGAGAAAACAAGCATTTTTGATGAGT  
TTATTGGTGCCTGTTTAGTGTCAAGCACATATGGGCATTCAGGACTTTTATGACAAAG  
TCGTATGAAAAGCATATGGCATAACGAATATTTCTATGACAACCTGCCAGGGCAGATTGAT

ATTTTCGCTGAATCGTATATGGGTTTCAGCCTTTACATATCGTCCGCGACTGTCCATTTAT  
AATGGAAC TTTGGAGTCATTTGTCAACCAATATGCCAGATGGCGGAAAAGGTATCTCCC  
ATTGCACCTAATACGGTTCTCAAAAACACCTCAGATGATATCCAAGAGCTTTGTCCGATG  
ACAATGTATAAACTATCATTGCACTAATTCAAATGCCCTGGTGTGAACCAGGGCCTTTTT  
GTATCCGCTCTGAAATAAAATTCAAAATGGTTGTACTCTTACGTTAAACTATTTTAGAATG  
TTATCAGAATCAACCAACGGGGACAACCGATGAAACGTGTTAATGAAATGCCCAAAGTG  
GTCAGATTGTAGTTGTCTGGGTATATGACGGCAAACCTCTGGTCTGAAACCTGGCGCTTGA  
ACAACGGGGTGGTTCGAAATCCTCATGGATGATGACACTGCTGATAAATGGCGTACAAACG  
ACCGTTATTACGATGATGGCTATGAAGATCTCGAACTCAACTATATTGGGATTTAAAAAT  
GTCTATACTTCAGGAAATCCACAAGCTGTGCAAAACAAATGGGTGTGGAAGCATCAGAATT  
CAAGATTTTCGCCTATTTGGAAAATTGTGCGCAAACCTGAGTGGTCCTATGGGCTTTTCATT  
TGAGCGCGAATTTACTGTTTACGAACATAAAGAAACGGGCTATACTATCGCAGTACAGTC  
TGAGCGGCATAGAGCTCAATTTGTCAACGAAAACAACGAAGAGGTTAAGGGTTTCGCTGA  
AATGATCGTTTCGGCGAGCGAAGTAGAACCTCACAAAAGCAAACATGGCACACGTTGGCA  
GTTTGTGTAACGCTTTAGTCATTTTAGTGTATATTACCAGTACAATGGTTTTCGAATAAAA  
AGACTGGAAATAAAAACCTCGAGCGCAGCTCGATCGCGAAGGGATAACTAATTGGAGATAA  
TATGCAAATTATCTTTAAGCCTGCAGGCGAAGGTAACCAGCCGAAGCAATCAAATCTGC  
CTATATGGCAGCAATGAATTACCCTCTTCTTATCGTTTGTCTGAAGAGCATCCAGCTGT  
ACTGAAGCATCGAATTAACATGTTTCAAGTATTCAGAATCCTGCTATCAAAAACCGCTATGA  
CATCGTTACTTGTGGAACTGCAACTCCCGAAATGTTCAAAGATCTTGGCTTTTTTCGA  
CCGTTGTGGCGCCATTATTCTGGTTGTCAAGTTCGCAATGAGTCGCGGCCCTTGGATTAA  
AGTATGTGCCGAACCTCGAAGCATATGGTTAAGAAGTAATTGCTACTCAAGAAGTTGTTAA  
ACCTGCGCAAAAATCGCACAAAGTGTATCACTGAAATGATCGTGGCCCCTTAAAAGGGAC  
CATATGGAGGAATTATGAAAACATATCGTTTTAAATCTGATGAAGCTCGACATGAATTTG  
CTGCCATAAGCGACATAAATGCTGCTATTGCTAATAGCGTATGCGATCATGTGTTCTACG  
TAGCTATGCCACGAAATACTATCGATGAGATTTTTTTTCGAAATCAACGGTATTACTTTGT  
TTCCCGAGTATTTTCTGTTTTCTTAGCTAACGAAGTAAAAGAATATTTGGAAGAAGAAA  
GCGCTGGGGATGTTGCTCACGAGATATCCATAAGATATTGGAAACTAACGATGTTGAGC  
AATTGCTTGCAAAATCGCGGCCCTGCGGGAACGCATGTCTAAACTTGAAAATCGTCTTG  
AACGTCTTGAAACGGTTGGTATAAATGAAATCTACAGCTTTAGCGTATGTTCTTTGGTTTT  
TTCTGGGTGTTTTTGGTATTCACCGTTTCTACACCAGAAATTATGTCACCGGAGTTATTT  
GGTTTTTTACTTGCAGTCTGTTTGGTCTTGGCTGGTTTGTGCGACTTTTTTCTCGCAGCAG  
GATTTTTTTCGACGCGCCACATTGAATGGAGTGAAAATCAGATAGAAATTAATACAATGA  
TTCGTCGAGGTTATTGACATGGTTTATAATTATGATCGTGCTGTTTTTATTGGCCGCTTT  
TTCCAGCTTTTTCCACCGTGGACATGAAATGCTGATTTACAAAGCGCTTCAAACCTGCTAA  
AACTGTTGCTGTTGTCTTCGGGTCATCCCATTTGTTATCCAAACACAGTCAACCCGCTTCC  
AACACTGGTTCGAATCAGAATGTTCAAAGCATGGATGAGTAACAATCTCACTCCTAGCGA  
ACAGGCCAGAATTGTTTTCGGTAATGTTCCCTGACTACCGCTATAACGAGGATCGCTGGCA  
AACAGAAGTTCGTGAGGCCGGGCAGGAGCAACCGGGCGAGCGTATTACGATGATTGCATA  
CGATCAGGATGAAGATTCTTATTGGATCAAACCTTTGGATGGGACCATATTCAATGCAT  
GGGCGTTCAGAATCACGGAAAAGACAACCTCACATACCCCAATGCGCGATGCATTTCTTCG  
AACCGGTTCTATCCACGACGATTTCCCTATCAATCCGTCAGTGCGGTCATTTCTTTTGAA  
ATTTTGAATACCGAAGGTTCCGAACCTACGACCCGGTTGATGGAAGAACGTTTGTGATGTG  
GGACCATGAACTGGCAAAGTTTAAAGATTATCCATACGCTGATGCTCTCAACTGCAATAC  
TGCTGATGCCGTAGTAATGTGCAACAACCATCTTCTGGTTATTAGCCGCAAACATGCACC  
AGGCAAAGGTA CTCTTGCTCTTCCAGGTGGTCACAAGAATTCCAATGAGACCTTCCGCGA  
TTGTGCAATTCGCGAATTGTATGAAGAAGTTCGGATTGATGTCGATCATCAAAAATCAT  
TGGGTCTATAAAAAGCACACGAAGTATTTGATCACCCAAAGAGAACGGCAGAGTTCTGCAA  
ACCGACGGTTGCTTATTATAACGTA CTTCAACCCAAATGACGACGGTAGTTTGCCTGAAGT  
TCGTGCTGATGATGATGAAAAAGCAGCATTTTGGATGCCAATGCATGAATACAAGAGAAA  
TCTGGCACGTATGTTTGACGATCATGCTGAAATCATTTCGCGCTTACCGGTATCTAGGA  
TACAATTACGGAAAATGTTGTAACATCACTAAAGGAGAATAAAAATGAAAGCAATCTGCT  
TTCGCAAGAAAATCAAAAAGCAAATATTTGAGCGCCTTACACCAGGTGATGACGTGCGTG  
ACCAAATGCTCGTTGGGAAGTTGCAACAGTTTGTTCATCACTGAAAATCCAATGATTA  
TTTTACGCAAAAAGATGAGTCGAATTCATGTTATTATCGAACTTGCCACTGACTGCAGCG  
AAATGTTTTTCCAGTTTAAAGAAATTTCTCCCGAAGGTATTACCAGCTGGGGTGAAACGT  
CTGAAACTTCCGAAATCAAATTCGTCAAGTGGTCATTTCCGGCGTGATGAAAGAAAACGAAG

AAACTGTTTACACCCAGATTCAAGTCGGCGATGAATTCATCCATCGTAATCTTGATAAAC  
GATACGTGGTTAAATTCATCGCAGAAGACGGTTCTCTAATTGCTTGGGATTCTGATCATC  
ATAGGTCAGTTCTCGTTAACCGCAACGATTGTGATCAACTTAAAGCATATGACATGAAAT  
TATCTTAAGGTGGAAATTATGCAAAAAGTAGTTTTTGGAGGGCCTTCACGGCTCTCATCTT  
TACGGTCTCAATACTCCTGAATCTGACCTGGATATGAAAGGCATTTTCATCCCCGATCCC  
AAAGATATTCTGCTTGGCCGAGCCAAAAGAAGCTATTCCATCACAACCTGGCAACGACAAG  
TCCAAGCACAGTAAGGATGATGTTGATATCGAAATGTTTTTCGCTCCAGCAATGCATCCTG  
GATGCGGCCAAGGGTGAACCTATGCGCTGGATATGCTGCATTCTCCAAAAGACAAAATC  
ATCACCGACTCGTCTGTTTGGCAATATATCCATCAAACCGGTCTGCTTTCTCCACGACC  
AGTATGACTTCCTATATGGGTTAGGTTATGAAGCAAGCGGCAAAATATGGTGTAAAAGGT  
TCTCGTTTAGCCGCATTACGAGAAGTATAAGAGTTCATGGATGCTCTTCAGATTCACGAA  
AACCGAAGACTGCGAGACCTAAAAGTTCCTCTGCCACAAACCGAGTTCTGCTTCTGGACT  
CACGTTGAAGAAAATCCCGACAACATGTCGTATTACACCATGATGGGCCGTAAGTACATG  
GCTGGTGTAAAGAACGCTGAATTCTGCGGGGCAGTTGACAAGCTCTGGGCCGAATATGGC  
GATCGAGCTCGCAAAGCCGAAGCAAATGAAGGTATCGACTGGAAAGCTCTAAGCCATGCG  
TTGCGAGGCAGTCTTCAATTGCGTGAAATTTACAAAACCTGGCGATTTGAGGTATCCATTG  
GCCGATACTGAAGAAATCAAACCTGGTTAAAGCTGGCAAACTGTCTTTTCGCTGTTGTTCAA  
GAACGACTGGAAGAAATGGTGTGAAGCTGTTGATACGGCCGCAAAAGAATCATCTAAGAAC  
GGAATGCCCGATAAAGTGGACATTGCACCATGGGAAGCGTTTGTGCAACAAGTTTACGCC  
GAAGCAATGAAAGAATATCTGGAGAGCGAATAATGAAATTGATTCGCTTTAAATTCAAAA  
GTAAGGAAATGCTGACCGAGTATACTACTGGGTTAAGACGCCATATTTGGGCAGTAGGTT  
TCAGCGCAAACACAGTTTTTATTGCCAGAATCAACAAACGTGGCCAAGTCAAAGTATTT  
TTGATGGTAAAACCTCTTAAAGAAATTGTTTCTTCGAAAGAAGGTTGGCTTCTTTTGCCT  
CCTTTGAGTTTGAAAAGTTTTGTGAAAAAGTAAGCTAAACGGTTTACATTGTTGGGGCTA  
TGATTTACTATAGTCCCATCAAATCAACAAGGAGTATGTCATGAAAATCACTAAATCAAC  
TAACCTGCAATCAATGGATTTTCGTTGGCCGTGTCGTTAAGGCAGCGCCAGAAACCAAAGA  
GGTGA AAAATTTACCCCGATTTCGAAACCATTTCTACCGGTATTACCGTAGGAATCGTTGG  
CGCATGGGCTGCAATGTGCTTTATTGGCGATATCGATATGGCTCGTAAAATCTTCATTGC  
TGGTATTATCGCTGGCGCGACTTTCTCGTTATGAAAAGGGACTGATGAAATGATTA  
ACTGCTGAAATGGCAAATATGGTTGCACAGAACTCCCGCAGAAATCGTCAATTCCGTATCT  
GTGCATTTTGTATGATTTCTTCAATGATAATACGAAAGACCCAATGATTGTCAAAGGCGGC  
TATATGTCTGGTGACGCGGGCCAATTCTTGCCTTACCTACGTGAAAAGCAGCCTTTTCT  
CATTGGCATAATGATGACATTATCTAACGTTTTATTGCAGAACTGCGGGGATTGGTCTAT  
AAAGCAGAACTGGATTGTCCACCTATGAGCCCTGATTACCTTTCAGTAGCGTTGGTAACA  
AAATGATCGTTTTGGGGCATTAAATGGAGCTGAACATCGTTAAAGTATACTTGGAAAGCA  
AACTCCAAGTTGCATCGCGCATCGGTAATAAAGTCGGTGAACCTTGAGATTTTCGCTAAAG  
AATATTGGCTGGTGAATGACGGATTTCTATTTCTGCATGACGGGCCAGGTATTTCCGAAA  
ATGATTGTTTCGCTCTGGTATGAAATTTCTCTGGAAATGTCACGTTTCTGATCAAATCACGG  
CGTTTATGGTAGACGACTATGTTTCCGAAAGCGCCAAGGCTATTGTAGTTATTACTGATA  
AGGAAGACAAATCATGAATGGAAAAATCTACCCTTCGTTCTCAACGTAAACACCAGCGCC  
GACGTCACAACGACATTGCTCATGTTTCGCAATTTTTTGAACACCTTACAATCCGAGCAGC  
ATGATCGCGATTGGCTCAAACCTGGTTTGCAAAATGTTCAATGTTAAAACAATGGTCATAT  
GGGATAATACGTATCAAAAACAGCCAGGATTCGGCGTGGTTTGGGCACAAAATTGACC  
GAATTATGAGAGAAAACCATATTCCATGGTGTAAAGCCAACACTGGTATAGCCATATATA  
TGCATGAGAGAGGCGTCTCGCGAGTTTGCCTGTTTCGCGTTTTCTACCGACAAAGGCGTAT  
TGATGCTCGCACGGCTTCTTGAATTTGAAGTTCATTCTCTGGTATGAATGTAGTTTTGC  
CGGTGTTGACTCGCTATCGGAACCGTCGGAATACCGAACTTCGCACGAAAATGGTTCATC  
CTAAGCCTGAAAACATTCATTATGCGACTACCGAAGAGATTGATAGCATGAGAGATACTA  
TTAGCATTGATAAAATGTTAACACAAATCCCATCACTCGAGTCACGAATCAGCGCTCTTT  
CTCGGAACTTGCCCAATTGCAAGATAAACTCCAAAATACACGACAAGATGTCCGCGATT  
ATCTTTTCGAAAAGTATGGTATTTGATTGAAAAGTTAGTGTACAGTGATGGGAACATTGG  
TAATAATGTTCCCATCAATAAACGAACGGAGTAATTTAAATTTCCATCAAAAACCTGCTGCA  
ATCAACATTGGGTACATAGCGTCATTCGCATTGTTTTATTTCGATGTATATCGGAAATGCT  
TATGCGGTTCTGGGATGTGCGATGGCAGTTATCGGTTCAACCATTATTGCGAGAATTTGC  
GAATGAATTATTATGCGACAGTTAAGAACTTTTTGGAAAATCGTCGGGATACTTCCAATA  
ATCACTTCAAAACCTATAAGCCTGTAGCTGAACGGTTGGCAAATTATCACCCTTCATGA  
AGATGGTAAATGATATTTTACCGAATCTGATGCCCGCATCGCCTCTCGGTAAACACAATG

GCATCTCCAAAATCAAGCCAAACTACTTTAATATTGATGCCGAAAACAACGTCACGGTTA  
AACGAATTATTTGGCTCAACACAGTGTGGTGAAGCAGATTGTTTTGCAGAGAGACGGGAAC  
TGCTTAGGCATTATGGGGCTGCCGTA AAAAATTGATATTTCTGAAAATGGCAGAAATCAA  
TAGTTAGATTTAGCATCATCTTGAGCGAAATTAACGTGTCAAGCCTGTTGCTGAAGATG  
CAAACATTGTCGAAGAGGCACGATCCGCAGAACCTGTTAATCTCGAAACTGAAAAGAAA  
TTTGCGAAAGAATCTTCTTTTCTGAAGCGATCGGAAAAGCTATCAACACTTTTTCGAGGTG  
CACTCCACTTTGGCTCTAAACGGTTGAACGAAATTGGCAGTGAAATCGCCAAGTTACAAG  
CACTACGTAAAGAAATCGAAGACAACATGAAAAGCATCAAAAACCTCAATTAGGGGCTTAAT  
TATGAATATGATCCGTCCACACATCGGCGTGAAAGGTATCCCTCTGATCGCAATGACTGA  
TTCTTACAAAATCACCCATTGGAACCAGATGCCTGAAGGTACCGAAGAAGCAGTTTTCTA  
CGTCGAAGCTCGTGGTGGCAAATTCGATGAAATCGTTATCGGTGGCGTGGAATATCTGCT  
GACCAAGTTTGCAGAAATCATCACCAAAGATGATATTGACGAAATGGATGCCATGAGCAA  
GGCTCACTTTGGCCAAGACGTATTCAACCGTGAAGGTGGGAAGCAGTCCGCCAATATCA  
AGAACAGCATGGCTGTCTGCCATCCAAATCGATGCTGTTCCGGAAGGTACTGTTGTCCC  
AGTCAATAATGTTGTGCTGACTGTTTCGTGTCAAAGCAACATTCGTTTGGCTGGCGGGCTG  
GTTTGAGCCAATCATTTTGGAGAGCTGTCTGGTACAATTCTACTGTTGCCATGCCGAGCCG  
CGAATGTATCAAATCTATTCGCCGCCACCTGATTGAAACTTCTGACCTGGAAGTAGGCAG  
TCCTGAGTTCAACTTTGTGCTGATGACCCGACTACATGATTTTGGTTCTCGCGGCGTTAG  
TTCTGGTGAATCTACTGCAAACGGCGGTTGTGCTCATCTGTACAACCTCCATGGGTACTGA  
CACTGTGCGAGTCGCTGTATTTTCGAAAACAGGTGTTTGGCGCTGAAATGGCAGGCATCTC  
TGTAACAGCTCGTGAGCACTCCACCGTAACTCTTGGGGTGCCGATCGCGAAAAGACGC  
CTACTTCAACTCGGTTGAACTCTTCGGTGCGGGTGCATATTCATTGTGTATGACTCTAC  
CGATTTAAAGAAGGCAATCCGTGAAATCGAGAGCTATAAGGACAAAGTTATCGCCAAGAG  
TGGTACTCTGATCGCTCGACCTGACAGTGTGATATGATCGACAATATCAGTTTTGCCCT  
GGAAACTCTGGGCGAAATCTTCGGTTATGAAACCCACAGCAAGAGCTACCAGGTTCTGAA  
TAAGCATTGTCGTATTATTCAAGGTGATGGCATCGACGGTCCCGAAGTTATCGACCGCGT  
TCTGACTGTTATGAAAGCTCGCGGTGGGGCTGCAGAGATTATTGCGTTCGGTATGGGTGG  
CGGTCTTCTGCAAATGGTTAATCGTGACACCTGCAAGTGGGCCATAAAAATGTCTGCCAT  
CAAAATCAACGGTGTATGGAATGACGTATTCAAATGCCCAAAGGCGCTGAATGGAAAGC  
TTCCAAGAAAGGTGAGCTTAAGCTGCGAATCATGGATGACGGCCGCTATTACACCGAAGG  
AACTATCGAAGGTGGTCAAATGCTGTACGACGTAAGCGCCAAAGACGGTTTTTGTGAACT  
TATGTGCAAAGATGCATTCGTCCGGTATTATGATGCTGAAAAGGGTCAAAAATTCAAGAG  
CAATCTGGCTGAAATCCGCCAGCGTACTGCAACTAAATAATCATTCAAATGCCCTCCGAA  
GAGGGCATTGTGTCATTGGAGAAATAATGATCAACAAAATTATCAAGTGGTATGAGCAAGA  
ATGGCTGTACAAAAGAACTAATCTATGAATGGGAAAATTCATACCTGGTAAAATATTT  
TTCGATTGACGGAGAATTCGGACATATTCATCATTTTGGGGCCAAATGTATGACCGATA  
TAAGTTAAATCGTTTACGACTCTTTATTGTTTCTATTGAATGGGGTCATATCGTTATGTC  
AAAAGCGGAGTGGGAAAGTAATGCAAATCAAATGACAAGAAATGAATTCAAAAAAGCTC  
TAGAAAATAATGACCAATACGAATATCCTCTGCACAATGAAACAATCAACCAATTGCGTT  
CAGTTTTTTCTGTCCCGCAAGTTGAATATGTTTATTTGTCAATTTCAAGAATATCAATCCA  
TTTTACCCATAATCCCTCATGACGCGAGTATGTATGCACATACATAATCATGCCAAAGAA  
TTCACCAGGGTGATCGGTGGCAATATCAGAGTTAATCTTTTGTGCGACAGATCATGAACAA  
ATCAAAAACACGATATTTTGGGAATTCCTGATATAGAGGAAGTTGAAATTGGAAATTTCG  
AAAAATTTTGCCCAAGACGGTAAAATATATAACGCAACAATAGACTACAACAACAAACAG  
GTTATAATGGTGGCAAATGACCCTCAAGTTTAGAAAATTCAAAGCAAAGACGAACGTA  
ATATGTTTAAAGTTACCATCAACTTCAGCGACAAGTTTGATGATAAAACGATTCATTGGG  
AACTGCCAGCTGTTAATTTAAACGAAGCTTCTATTGAAATTGAGCGTCTTGCCATTTTCC  
TGGAAAATGCAATAATCGATACCCAAAAGGTAAAGGGTGGTCTGGACGATTTACCGATA  
TTCCCGACTACTATCGCTATTTCTGCGAAGAGGAAGAAAGCATAGAAATCTGGGAAAAT  
ACGGTGTGAAACTCTATGGTGGCCACGCCATGATGGTGAATATCCAAAAACCTTGCCA  
GCTATGAAATCGTATATACTCAGAACGATAACGTGAAGTACAGTGAACCGTGTAAATTA  
ATAAGAGCATATGGAGGAATCTTTATGCTCTAAAATTCCAAGTCTGCTGATGAATTA  
CAGAAATTGTCTGAAGAACAAAATAACTGCTGTAAATTGTGTGGAAACGAGTTTGACGGT  
CCATACAATAAACAGCATTGATCACGATCACGATTGCAAGGCCCGAATACCGGAAAG  
ACTCGTGGTCTACTTTGCAGTAGATGCAATCTAATTGAAGGCATAAAGAAACACAAATTT  
ATACGGTCAGGATTAAGGCAAAGGATGTTGATTACATCCAATGGATGAGATCGCTATTA  
GAATATGTAGATTCGGATCATTCAAAAAATCCAATACACCCGAATTACGTTTCCGACATG

ACCAAAAATTTCTGGCGGAAAAACTTGAGTGAAATGAAGGCCGAACACTACGCGAACGAGGA  
TTTGAATTTGATGAAAAAGATCAAAAAGCTGTTTTAGTCAAAAAATTCAGAAAGCAATTT  
AAGAAGGCCATTCAATGACTACCCGATCACTTGTAAATGCAGTTAGTAGAAGGCCAATCTG  
GCCTGCACCACGAAAATGCGACTAAAAACGCTGACGTTATCCCGACCATGCGAGATATGA  
TGGCATCTCTCCTCAAAGGATTACGCTAAAAGCATTTTGGCCATCTCATTTAATCGAAG  
CACATGATAGTGGAGTTATTCATATTCACTATCTAGAATATGCTTTTACTCTTCCAATGA  
CAAATTGTTGCTTGGTTAATCTCAAAGAAATGTTCAAAAATGGCTTCAAATGGGTGATG  
CCCAAATTGAAGAGCCTAAATCCTTTGGTGTAGCTTCAGCCATTATGGCGCAAATTACCG  
CACAAGTTTCTTCCCACCAATATGGAGGGACTACTCTTGCCAACATTGACCAAGCCCTTG  
CGCCATACGCCATAATGTCATGGAATAAGCATTTTTCTGTGCGGCTGCAGTATCATCAGCG  
ACAATGAGAAAATTGAAAAATATGCATACGAGATGACTGCTAAAGAAATCTATGACGGTA  
TGCAAGCTTTTGAATACGAAGTCAACACGATGTTTACCACAAATGGCCAAACACCGTTTCG  
TGACAATTACATTTGGGATGGGAACTAACTGGTTCGAAAAAGAAATTCAAAAAACTATTT  
TGAAAGTACGAATCAAGGGTCTTGGAAGAATGGCATCACATCAGTATTTCCAAAAACTC  
GTTATGTTTCATGGAAGCTGGTATAAACTTAAATCCTGGAGATCCAACTATGAAATTTAA  
CACCTTGCTCTGGAATGTTTACGCCAAGCGAATGTACCTTGACATTATCAGCGCGTAACAC  
AACAGATCCATCACTGGTAGTAAGACTCCTGTTAGTCCAATGGGTTGCCGGTCTTTTCTG  
GCTGGTATAAAGTCTGGCGAACTAGATGGCAGAAACAATTTAGGTGTTGTCTCTGTCAAT  
ATTCCCCGGATTGCTATCGAAGCAAACGGATCACAGAATCGTTCTTTAAACTACATAAA  
GATCGTTTTGAATTGTCAGTTGAAGCATCTCTTGAACGAATTAACACCCAGAAGGTGCT  
AAGGCAAAGACCGCCGCAATTTCTTACTGAAGGGGCCCTTGGTCTATATCTTAATCC  
GGAAGAAGAGTTTTTTGCCGCATTTGAAAGAACGAGCTTCGATTTCAATTGGTTATATTG  
GCCTTCATGAAGCTGCTCTGATTATGACTGGCAAATCGACAGCCAATGATCTAGAAGCAC  
GCAATTTTGCCTTTTCGATTGCAACATATCTCGATTTTTAATGCGCAAAGCAAACACTCA  
ACACCGGATGGAAATTTAGTCTTTATTCTACTCCGTCTGAATCGCTGTGCGATAGATTCT  
GCCAGCTGGATCGCAAGAAATATGGTGTATCGAAGGAATTACGGACAAAGATTGGTATA  
CGAATAGCTTCCATATTCCTGTTGATGCCGAGTTGAACCCGTATGACAAAATAGATGCC  
AAAAGAATTTCAATTGGATTGCATCGGGTGGACATATCAGCTTTGTCGAACTACCCAATA  
TGCGAAACAATCTCGAGGCCCTAGAGCAAATTTGGGATTACGCGATGGAAAATCTTTCCC  
TATTTTTGGAACAAACACACCTGTTGATAAATGCCACGAATGCGGTTTTGACGGTGAATT  
CAAATGCACCTCGAAAGGATTTAGTTGCCCGAGCTGCGGTAACCACGACTCGGCAAAGAT  
GTCAGTTATCCGAAGAGTTTGCAGATATCTGGGTGCTCCGTTGGCGAGAGGCTTCAATAA  
AGGCAAACAAGCCGAGGTTTTCAGCACGTGTCAAGCATGTGAAATAATTTTTAAAAACTTG  
TTTACATTTGTGCAGATGTGTGTTAATATACATCTGCACAACTAAACAGCCCAAATGAG  
GTTATTATGTCTGATATTAAGCAAAGTATTGAAACCTTTGAAAAGAAATTCAGGATATT  
GAGTCCATCCTGGAAACCCCAATGGATAAAGATGAAGCTCAACAAGCAATCCACAACCTG  
AATTCTATGTCTGAGGAATTCGAATCAATCGCTCAAGCTGTTGCTGATCGATTCTGCATT  
TCCTTCTCGACGGTTGATTATGGATATGACCGTACATATTATCCTAAAGGTCACCGTTTT  
TGGTCGGAAAGCAACGCCGAAGAGTAGGGACAGGGAACCGAGAATGGCTACTGGCTCAGT  
TCCTCTGATATGTGTTAAGGAGAAAAGCAATGGCTCGTTCTAATGAATTGGTAGAAAAGG  
CAGTTCAACTTCAAAAACATCTTGTGTAAGTTGAAGCACTGGCAACAGAACATGAATACG  
GCATGGAAATCAATGGCAATGAAGTAGATTTTCGACGACTGGCTGTCAGGCAGTTGTTATG  
GCGACGCTTGTGAATCATTGTCATTAATGCAGATGGCTCCGTGTGGATGGAAAGTAGTT  
GCTAATTAAGGGGCTCTTCGGAGCCCCAATTTGAGGGTTTTGTTATGATTATTGTTGGCG  
CTCGTGCTTTTCAAGCTAGGCTAATTCGTTTGTGCTCCTACAGTAAATATGGACCATG  
ACTTCATTGCATACGAAGAAGAATGGAAGGAATATCAAGTCAGAATGCAAGGTCGGACTA  
TTGAAGTAAAAGCCCGAATGTTTCGAGCTTTCGTCGTCGGTGTATGGTAAATCTCGTTGCT  
GTTATCACGAAGCATATATCGTTCAACCTGGCTCGTCCGATGAAATGATTTACAACTCA  
TGGAGACTGTTCCCGGTAAAGTCGTATATGCCACTCCTGACATTCTTCTCGCCATGAAAA  
TGGCTCATCGGTTCAAAAAGAACACTCGCAATTTTCATCAAACGATGATGTACATTCATG  
AATTGCGTGAATTTGGTATAGTCATGTGGCCTGAACACGTGGAAATTTTCAAAAAGCGTG  
AACAGAATCTCTGAATTATGGCCACCCGAAGCTTAACGTCAGTAAAGGCGCATTTTTTCA  
AAGACGACATCTATACCTATGATCATGACACAATTCAGGAAGCAGTGGCGGTTGACCGTA  
TTCCAGCAGATCGATCATAACATGGTTGATGGCGCTGAAGTAACGACGTCAAAGAAAAAT  
TCGTTAATAGCTCGCGTCGTATTAGTTGATGGGTGTTTATGAAGAATCTTGTGTTTTGG  
CTCTGGGACGTTGTCTTATTCTATCCCAGGAAAAGTTCAACCCTATAAAGCTTTTCAA  
TGGCCCTTGAGAAAGTATGCACTTCTATTACATCTGGCTGGTTCAGTGAATTTGCGTGGG

AAAATTATTGCGACGTTATGAAAATTTACGCCGATCGAGTCAGGGCTGGCGACTCATAACG  
ACGAATTGTTCAAACGAAACCAGCATCTCCTGAAAATTCACAGTAAATAAATATGGATTT  
TCACATAGTAGGTATACTGTGCAAGAATACATAGTCCAAAAAAGTTCGTCAGAACTGAC  
ATCCCGGCACGTGAACCGGAAAAAGCGGATGAATCCGAAAATCCTAAAACAGACCAATAG  
AAGCTGTTAATAGGTTATGCCAGGTGTTATAATGACCCTGGGCATATTCGTAATTGGAG  
AATGTAGTGGATATTGAAATGCATATTGAAGCACAAAAACAGATTTCGAGAAGCTGAATGG  
TCTGTTTCGCACAGCAAAACACGCTCGAATGCGCGAACTGTGAAACGCATATGTAGAGGAA  
AAAGAAGCTGGCCGAGTCGAATCTGAACTTATTTTCAGAAGATCATGTTGCTAAAGCTATT  
TCGAGTTATTTGAAGTCGAATGAATATGACGTAATGCTTGACCGTAGAAAAGAAGTCGCA  
AAACAAAAATTTAGTTGTCCATGTTGCGGATTCCGATCAAATGCAACTTGTTTCATGGGTT  
AATAAAGTAGCTGATCTTCGATGCCGCAAATGCAACCGGAAATTTTTTTTGGAAAGTCTCCG  
ATATGATGTTTGAAGAAGCAAAAGAGTCAATAAACCGCCCTCCTAAACTTTTCTTTGGTA  
AAGAAAATGATGGGACTCATGTAGGCAGTATTTTGGAAAAAATACAGAAATACATTGGTC  
CAGGAGATGCTTATCGAGTGGAGTATCGGTTACTACTAGACGGCGGTGATGTCGTAACCTG  
GAGTAGGAATAGCCAATTATAACTGGATAACAAAAGTTGGGTACAGGCTTGATGTTGTAA  
TAACAAGAATCAAACCCACAGAGGCGACGTTAGACCGATGGAGCTGTATCTTTTCGGAGA  
AATGGCATGATTGAAATATACGGAATTGTTTCAGAATAGCACAAATGCCCAGCATGCGAC  
TTTGTGTCAAACGTCTTGAAGAAGATGGCATAGAATATTCATAGAAAACCTGTTTTGCG  
GGATGCTAAAACCTGATCTCGCGTTTGTAGTACCAGCGAGACGTCATCGATGAACTCAGGGG  
TCGTATAGGGCAACCCAAAGGTTCCCTGGAGCTTCCCAAGGTTTTTGTAAATGGGATATA  
CATCGGCGGTGACAAAGCTCTCCGGGATTATCTGGATTCATAGGCCTCTTCGGAGGCCTT  
TTTCGTAAAAGTAGTGTACAAGGTGTTTTTTCGCGATGATAAGATAAGTAACAAGTCAAGTG  
AATGATATTTACATTATGATCGATATACCGAATATTATTGAAAATATGAACGAAATGTTT  
GCGATTCTTGGGTATAAGCCTAATAACGGCAAAGCGTGGACAGGATATGTTGACGCAGAA  
GGCAAAGGCCGCAACCAATCAATTGGCAAACCGCTAACATGGTAGGCTTGAACATCTGG  
TCGCCGCGGTGCCAGCACGAGAACTGTTTGGAAATTAAGTCAAGTCTCAGCAACTTGAC  
GAAGTTCGCATGTTTGCAAAAAGACAACCAACGAACAATTGGTTGGTCAAATATGCTGGTG  
TATGACAAAAAGAACAACAATTAGAGCAATGTGTTTATTGCTAATCCTATGTCAACT  
ATGTGAGAAAATACTATGTCTATGAAAATATTGCCGAAGTTATTCGTACAAAAATCAAC  
TCGTTTGTCAAGAAAAATACTTCTGTGCAAGACCAATATGCGAAAGCAGCAGAACAAAGTG  
ATTAGCCAAATCACCAGGCTGGAAACGGCACATGTGAAATCCGTTTCAGAAGAAAAACGG  
TTGCGTCAATATGCAAAAAGATAAGCAAGTTGAGGCGCGGCAAAAAGATAATGAAATTCGT  
CTGCTCATGAATCAAATGTTCCCGTAGAAGCTCATGTTAAACTTGCTATTCCGTACCGT  
CGTACGGCAGAAGCGCTGAATGCCAAAGTTGATGAGTTGGAAAAAATGCGGGACGAGATT  
AAGCTGGAGGTTGTTGAACTCGACAAATCTCGTTTACTGCTGCTGCTGCTGCTGCTGCTGCT  
ATCCGCGAAACTCGCAATGCAGAAGCGCTGGGTATTTCTTGTCCCGAAGATGTAATCGAA  
TAGGCTGGTCTCACCAAAGTCGATGTCAACGATGTTATGATGCGTATCGAAACCTTCAAC  
GGCGATAAACAAACAGCTGTAACAATTAGCGAAATGAAAATTATATCAATGGTCTGAAG  
TAATTATAAAGGGCCTCCTTGGAGGCCCTTTGAAAATGGAGTATGTTAATGATTTGCTCA  
ACATTAGTTACTCTAGTCGATCCAAATGGAATTCCAACTAACTATTGGTATAATCCGGTG  
ACAATGGTATATACCAACGCGAAAGGCGAATCTATTGACGCATACACCGCTGATTCTATG  
GGATATACTATCAGCAGAACCGAAGAAGCCAAAGAAACGATCGAGTCTTTTCTCAAACCTG  
TCTAATGCCGAAATGAAAAGAATTATCGCGAAATGATAGGTAAAGATCGTCAGATTGAA  
CGTGTAGAGCATTATGGGAGTGCTAAAATGGATTACGAAACTTTGGCTAGAGCCACTGAA  
ACTGCTGATAGTCTTAGACTCAATAAGATTAACGAGTGATCTTTTGAATTTGAACGCG  
CAGTATCTTCCAACCTGTTTCTGGTATGTCGGCTGCTGCGGCTGCCCTTAAACAAATCTTC  
GGTGGTATTCAAATCGGAGTAGAACGACGATGGAAGCGGACGTCGGAAGCCAGCCACGGT  
GAAAAGTATATCGCCATTATAGCATTTCCTGCTGTAGCAGATTTTCAGAGCCGTTGGTGAC  
GCAATCAAATTCGTCAAACCTCCTGCGGTCTGCACGTCCTCAGTTGTCACATATCGGTAAT  
ACAAAATTGGCTTACACTAACTGGCTTTAAACAACAGCGAAAGTGAAGTAAAATTTGTC  
AAAGAATGGAATAGCCATTTACCGAGGACGTGCTTATCAGTATCATGCTGGAAAAAGGC  
TATAACATGTCGATCAGCTGCCTAAATCAAATATTGCTGTTGGGTGAGTTGTGCAATTAT  
TCCATTCTTAAATTTTCGCGAATTGAAATGTTTGTAGACTATTGCCGCCGAACTGCTCCG  
AAGAGAGACTGAAACAGTTTACAAAGACCGTCAATCGTGATAAGATAATTTAGTTGAAAC  
AAGCATTCAAATTTTCGAGAGGAATTCAAATATGTCTAATGCATTCATTGCTGTTTCGTAA  
CTTTGCTGTACGCACTGCTTACGCCGATTACCGCTGATAATATTCTTGGTTCGTGAAAT  
CACCGAACAAATGATCTACAAAGTTGAAAACACAGTATGGGATGCTATGATGGAAGTGGG

TGTTACCGGCATTGGACGCCGAGCGATTTCGCAGTTTTATTGTGCAATATATCGCGGATGA  
ATTCGGTACCCGTCCGCTTGGCCCACTCCTACACACGCAGGTTACAAGCAAGTCGCCGA  
AGACGCGTACAAGAAATATCAAGGAAAAGCTCGCAAATCCGCCAAGAAATGTACGTACAG  
CAAGCGATAATTTTCTTAGCTCCAAATAAAGTATCTGAAGGCTTTTCGCTGTCTCCGAA  
ATAGGAATATCACAATGCAATTCATAATTATTGTTTCAAGCCGTCATGCTGGTCCGATTG  
ATCGCTATATTATGGATTTGAAAAATATCGACCCGCTTTCTCCGGGTGGTTGCGAAATGC  
ATATTTTACGTACTACTTCTGGTGCTGAGATCATTTTCCATGTTGACGGTTATGACCCCG  
AATTGTACAACGAAGTTCACCGGCACGTTTATTACATTCTGAATGCCATTCGTTTGCCGG  
CTGGTGCACACCTTGTTCGGAGTTATAGAACGAGAAATTAGAGCCGCCAGGCCGAAAAAGC  
TGTTAGCGAATTTATCTACATGGAATAATTCATATGAATTTCAAGGGCTTTTATACTGGT  
GTAGGGAGTCGCGCGACTCCCGAACATATTTGTCGTTTGATGAAAGATATCGCGGGGGTT  
GCTGCGAACAGAGGATATACCGGACGTTCTGGTGGTGCCGTTAAAGCAGATGACGCATTT  
GAAACTGGATTTTTGGCAGTTGCTGATAGTTTAGCCATCGGCATTATGGCTGAATTTGAT  
GTTTATCTGCCATGGAAACGATTCAATGGCCGTTTTGCACCAAACATGCTCGTCACAAG  
CTCATTTTACCAAGCGCCAATGAGTGGGACGCCGAGCAAAGCATGAAAACGGTCCACCCA  
ATTTACTCCAAAGGAGGTAAATTGACTGGTGGTGCTCTTGCACCTTCATACTCGAAATGTT  
TATCAAGTTCTCGGTTAGAATCTGAAAACACCTTCAGAATTCCTTGGTGTGTTATTCGGTT  
CCAACGGATAACGGAGTTTCTGGAGGAACAATACTGTGTGGCAGCTTGCAATGTGTCAT  
GGTGTAGAGTGTTATAATCTTTACAACCAGTTTGACATTGAGCGGCTTAAGGAATTTTTG  
GATCTTTGAACTTTACACTCTCTCCGCTATACCAGCTGCAGGAAAAAATGCAGCTATTC  
TAAATCATATTGTTGAAAATAACGAAAAGGCAATTATAGCCAGCATATCTAGACAATTGT  
CGAAACAATCTTTCGAATACTTTGTTCGGTCTGGGCGGAGAAGGCGAGTTAGTTGACACCG  
ATAACCGCCAAGGCGAAAAGTCGGTACACGAAGCAGTTCTCAAAGCATCCGAAGCATTGT  
ATGTGATTTTTACAACGCACGCGGCTTTAATGGGTCTTCGAGATATTGATGCTTTAAAAG  
ATTTAATCTGTATATCGCTAAGGTTCCAGAATTCACAAGCTTCGAGCGATTTACTTGCA  
CAAATCAGTCGAAATTCATATACTCGAATTGTGCAAAATACATGAAACTGGACTATTAG  
AGCTGCGTGATGAGCATCGAAAATCAGTCCAAAAAATGGCAATACATGGCTTTAGAGGAA  
ATGATGACATTTATTCAACTCTTTTTCCGTTGTATAAAGCACTCCTGACAGGTGTCCCTG  
TCAGGCTGTACAGTAGAGGGAGGTGTGACGCAATGTTATTACGTGAATGACGCGGCAAATG  
ATGATTGGGCAAATTCAGTCAATAACTGTCTGTTCTGCAAATTTTGAGCAGACTTTTA  
CTAGCATGATTATGAAGCATTTTAACGGATGGGAATTTGAAGAGTCTCCGCTAGTTGAGC  
GGTTAGCTTTCCGAGTTTATCCTAAAACCTGCTCGCGTAAAAATTCATGTAATGTTTGTTG  
ATGATTTGTCTCGTTACAAAGCCGACAAGGAAGTAGATGGGATTTTCGAATTACACTCGCA  
TCGAAAATACTCTCGACACAACCATAAATGGCGATTTTCATTTACACTCGAAATTCCTTATC  
GGCCTAGAATGCCAAAGGGGACGGAAGTTCCTTATAACGCGCACGGTCTAAACAATATT  
CGGATTATACCAATCTGGTTGTGATGTTTTCGTATAATCCGGCGCCTTGGCAAGTTCCAA  
TTTTGAAAGAACTCGCAAAGTCGGTAGGCTTAGATGAAAGTGCAATGGTTGACGCGTACA  
TAGTTTCAAAGTATCTTGAACCCGCATTTCAACTTTGCACAAGATGTGATATCCGAAATG  
AACATTCGCTAAAACCCATCAACCGGTATGTTCCCTGATATGAAATTAGCTCGATATATGT  
TGAGTTATTTGCCGCACGCTGAGATATGTGACGGTAATTCAATCGAAAATCACAACAGG  
TAAAGAGAAATCGAGAATCGTATCAAGCGCTATACCAAATGACAGAGAAAGAAAGGTTGA  
AATACAAGTATCTGCTAAGAAAACCTGGGCGAAAACCTCGATATCAATTCTGCGGAAGACC  
AGGAATTTGTCCAGGACTGGATAATCAAACGCGAGAAAAAGCCAAAAAGAAGGCCTCTA  
CATGAGGCCTTTGTTGTAAGCACATGATAACACAGGGATCACTCTGGGGTTATCAGGAAT  
TTTTGATGATAGGTTATTAGTCTAATGACCTTGTTTAAACCTGGTTGATTATAGAAATCC  
TGGCTCCAGGTTTAAAGCTTGCTTGAACCTTATCTTTTTTATCCTTTTAGTTATAATATCTA  
TTAAGCCATAAAGGATAAGTTTTGGCAGGGCCAAAACCTGCAGGCAGTAAAGTTAAATAA  
GTTTAGCAAGCTTATTAGTATGATATAATCAGTCATAGGAGGAATTGCCCTATGAAATAT  
GTTGACAATGAAGTTCTATAACCAGAATATTTGCAAATGGAAACAAGATATGCGTGATGCA  
GGGCATCACATCAAGATGACAGATGCAATTGATATAGACATTATGAAGATTGCAAAAGGT  
TTTACCGGATATTACAAATTTGCTGGATATACGCAAATTTGAAAGACGGAATGATATCT  
GATGCAGTCGAAGCTGTTGTAAGGGATTAGTAAATTTTCGATGAAGAAAACCTACAAAAC  
CCCCATGCTTATATCACACAGGCTTGTACCCTGCTTTATTGGACGCATCAAGTACGAA  
AAACACGAAATGGCAATCAAATACCGGTATTTTTTGACCAACGTGTATGACGAGCATGAT  
GAGGATATGTCACGATTGTTGATGAAAATTTTCATCCAAGACATCCATGGCAAACCTAGTA  
GCCTTTGAATCATCCCTTAAATCTAAAAAGAAAGATAAAGAGGATGTTCTTAATTTGGAT  
TCATTCTATGAAAACGACCGTGAAGATTAATCTTTTACCCATCATTGATTCAACATGCGG



AGAAATAGAATTATTAAGCGTATTTTCGTAAAACCTCCAATTATTGGATTATAATATTCTTG  
TAGTTTTAAGATCCTGCCAATATTTTCATGGCAGCCGTTCTGAAGTAGAACTAGGCCAACT  
CGATTGGGATATTGATGTAGACACAATGACAATGGAGATTTTCATATGTCGCCTGATTACG  
ATGTTGACCTTAGCACTGGTGCAGAAGCTCTGACTGAGGTTTATCGCCAAAATCTCATGG  
ATTTACAAGAACATCTACGAAAAACAAGCTGAAGAAAAAAGCCGCAAAGCATCTTAAAAAC  
TCATGGGAGAGAAATTAAGCGGCTGAAGAAACATGCTGAACGAGCTCTATTTCGCAAACAA  
TAAAGAACAGTATGCGTATGCTATCAGTAAACTTCGTACCCTTTACAAGCAAAGCAACA  
TCCGCATTCTGCAATGATCACTATGTTTGAAGCTAGTCGTCAACAAATTGTTTACATGGC  
TAAAGCATATGCTACTGCCATCCAACCGGCAGAAAAATAGTCAAGCAAATTCGCAAACCTG  
TTCCAGTTTGTCTATTGATCTATTATAGGCTCCACGGAGCCTATTTTTGTATTAGGAT  
TTAAACATGAACTTTTGCATCTCGGTGATATGCACAATGGCGTAAAAGATGATGACCCT  
TGGCATGAAAACATCGCTGAACACATAATTGACCAGGCTGTTGAATATTCTAAAGCAAAT  
GGGATAACTCAATGGCTTCAGAGTGGTGACTTTTTTTCGAGTTAGAAAGGCTGTAACACAA  
CGTATAATGGAATTCGTCAGGACTCGAATTACGCCCAAATTGAAGGAAGCTGGTATTATA  
TGCTATGTGATCGTGGGAAATCACGACATGAATAAGAAGGATAAAAATACATCCAAATAGC  
GTAACGGAAATTCTGGGTAAAGATGAAACGTATGTCGGGATTGATAAACCGACGACGGTC  
AATTCGAAGGTCTTGATTACGACCTTATTCGGTGGTTGTGTAAAGAAAATGCATCAGAC  
ATTTTCGAGTTTGTCAAAAAGTCAGAATCCCCATGGTGTCTTGGTCAATTGGGAACATAAGC  
GGATTCTATTTCTACAAAAATATTCCGAGTTTGGGATACAGTGGAGATTTTTTGA AAAAG  
TATGAAAAGTTGTCTCTGGACATTTTGATACTCAATCAGGCGGTGAAAATATTCACTAC  
ATCGGCACACCTTATACGATTACAACCGGTGATGAAGATGCCCTCGCGGATTCTGGGTT  
CTTGACACAGAAACCCGTGATCTTGAATTTATTCCGAATTCCAAAACATGGCACCAACGA  
CTGACTTATCCTGGTGTACAGTAGACGAAATTCGAGAGTGCTCCGGTTGTTCTGTCCGT  
TTGAGTGCTAATGAAGTTGATGAAGGCTTGACAAAAGTTGAATTTCTTCTGTCTAAAATT  
GTTTCATGATTTGAGAACCATCAACAAATCTGCCAAAATTGAAGTTGATTCTTCATCTGAT  
ATAACCGATGACGGCGAAACTCTTACTGTTTCATCTATGGATACTTCTGGTAGTTCGATG  
ACCATAATGGGTTTATTCGCTGAAAGTGTCCCAAATTCCAGCATCGGTGCGGAACATAAAA  
GAAGCAATCGTAATTATGGCAAATGAACTTTATGCTGAGGCTATTGCATCATGATTGAAA  
TTAAAAGAAGCAGCTTGGATTTATTCGAGTTCGCTACAAAACATCAAGTCCGTAGGCG  
GTGATCCTATCGATATGTCGCTTAAACAAATATGCTAAAACATTGTGCACTGGCAAAAATA  
GTGCCGAAAATCGACAATGTTGGACGCAATTTATTTTTGCGCTATTCGGTAAACTTTTTTC  
GAGATATTACAACAAACCGACTGCTGAATGAAAACACTGGCAAAAATTTGTTAGTGGAAC  
TTTGGTTGGAATACGAAGCAAAGGTTTATCACATTAACCGTGGAAATTAAGCCTAATAAGT  
TTTCGATAACTTGTGACGGCGTGGCTATAGATGCTGCAGCATCAGTTAAAGATTTTCAGT  
CATATTCGAAGAAATGATTGGAACGAATTCTACCAGTTTTAAACAGATAGTTGTTTTGG  
GCACTGCTGGATATACGCCGTTTATGCAACTAAAAGCGCCGGAAGGGCGCAAACCTGGTG  
GAAGATTTGCTGGAAGTATCCGTCTTAGCTCAAATAGATAAAACCAATAAAAGCCACGGA  
TTAAGGAGTTAAACCAGGATATCACTTCAGTTGATATGGAAATAAACCATATAAACTCAC  
AGCTGAAAACATAACCAGGATCACCAGAATAACTCTAATGCATCCAATGCTGCTGCTATAT  
CCGACCATCAGGCAGTATATGACGCTGCTCGCGAAAAAGCAAAGAAATCAAGTCGGCTA  
TTGATTTGCTCACAACGCAAATTACAGAATTCGTGATGCCTGCTTCCCCTGGATCCGATC  
TTGGCAAGTTTACAATGGCTAGAGCAAAGCCGCGAGCGCAACATGAACAATTTCCGGTA  
TTGCTCATATGCATGAAGATGGTGTAAACGTGCCAACATGCATGCAGCAATTTGACGATC  
CTGAACTGCTAGTGAAATTGCGTGATAAAATGTCGCAGATCCAAGGTCAACTTGATAAAG  
CCGATGTTTCGCATAAATGAACTCAACCAAATATGATAGAGTTCAATGAAGCAGCTGTTA  
ATTTCCGCGATCTTCAGAATAAGTTAAACAACGAAAAACAGTCTATTGATCTTTATGTTA  
ACCAAGCAAAGCTGCAAAGCTGCAATCGAGCGTCTGCAAGTTGAAAGAACAGATTACA  
CATCGGAAATCGACCAACTCGGGAATAACCTACGTCTAAAAATTAGTGCTAAGCCTGATT  
TAGAAAAAGAGAAGCACCGTACGTCTTTGATAGCTGATCCTTTGCAGGATTTCGGGAATTA  
AAGCCGTCATCATGGCCCGCTATATTCCGTATTTCAATAATCGCATCTCTCATTATCTTG  
ATATAATGGATGCAGATTTTGGATTTACTCTTGATTCCGAATTTAAAGAAGTAATAAAAT  
CTTCAGGAAGAAGCACATTCAGTTATAACAGTTTTTTCTCAAGGCGAAAAAGCTCGTATTG  
ACATGGCTGTCATGTTTGTCTGGCGTGATTTAGCATCTGAAGTTTCTGGTGTAGATGCTA  
ATGCCCTGTTTATGGATGCAGTATTGGACGGTCCTTCTAATGATGATGCACAACGCTCAG  
TGTTTTCAATCATAGAAAACATGAAAGCCAACGTGTTTATCATTTCGCATGGAGAACACG  
ATCCTCAGAAATTTGACAGACACATTGTAATGTCAAAGCTAGGGAGAAGTACGCTAATGA  
ATGAGGTACTTTTTGATGTTTTATAATCTTCCAACAACCTGCTCCTGAAATAAGAAGTTAT

AATTTAACTGATGAAAATGGTCATGTAAATTTGATTGTCACTGATGATGACCTGAAACAG  
GTCTTCAGCGAAGAAGATATCCGCAAGTTGAAATCAAATCGCCATGCTTATTACAATTTA  
GTTGAAATTTTCGACTAATGATTTGCCTGAATAGAAATTATATTAGAATGTTTCGTTATAA  
ACACACTGAAGAATATGTATGCGTAATCAACCCGTTGTTTTTTACCAGCCGATATCCGC  
CCGATGAGCGATAACGTGTTGAAAATTCAGTTAAAATCCGAAAAGCTTGGGTATCATT  
ATCAGTGATATTCGTGCAAACCAATTGCAAGCTCTTGAGCAGAAAATTCGGTTCGAACTA  
TATGCCGAAATTGATAAAAATGGTTCGAGACATGTATATCGATATGCTCGTACGCCGCCGA  
GAAAGCATTTTAGCCAATGGCGGATATCATGTAAAGGATTGAACGACAAAAAAGTACTG  
GCCAAACAATTCCAATACGACACTGACGAACTGATTATTCAAGCTGCTCAGACTGTCATG  
GCAGATTACTAATAAGCTATATCGTAGTTGTGTTATAAATTTCAAATACTGAAAGGAAT  
ATGAAATGAACTTACAAAAGCAACACTGTCCGTAATGAAGAATTTTGCAGCTATCAATC  
CATCTCTGCGACTTACCCCTGGCAATTCATCATGACCAAGTCGGTAAATGGTGTTCAT  
ACGGTGAAGTTACAATCGCTGATGAAATTGATTCTGAGCTGAACATTTATGACCTTCTA  
ACTTCTGTCAATTCTTGGTCAACTGGGTGAAGGTTCTGAAATCAATCTCTCAAACGGGG  
AAATTGTGATCCAGAATGGTCGTGCAAAAAGTAAATCTGCCTGATGCTGAATCTTCAGTCA  
TCGTGGTTCCGAAGCAACGGCTGCGTATGCCACCGGCTGATGTAGAGTTTGACCTGAAAG  
CCGAAGATTTAGCAGAAATTCTCAAATCTCTCGAGCAGTTGGTGCAGACCCGCATCGCGA  
TTACTAATCGCAATGATCATATCGTTATTGATGCGTTTGCCGTCAAAGACGGCGATAATG  
CACGAACCCGATATTCTTTGACTGTCTGTCCATACGAAGCCACCCACAACCTTCAGTTTCG  
TTATCAACCTTGAAAACGTCAGTGTGTCGTTGCCGATTACAAAATCAATATTTCTTCCA  
AGGGCGCTGCTCAATTCCAGGGAATTAATACCGCATATGTATTTGTCCTTGAAACATCTT  
CAAAGCAGACTTCTAATAAATCCTGGTGTGATATAATGCGGGTGTAAAAGCCCGCTTTC  
TTTTGAGAGGAATTTTAATATGTTGACAGTTAATGCCGGCGAATTCATGTTTAAAACAA  
ATATCGCCAGGAACAATCGATGAATGCATTTTGCCAGAATATGACAAAAAGATTTTCAA  
ATCTATCGTTAAATCTGGTCGTATCCCCAACATTATTCTTCATTCTCCTTCCCCAGGCAC  
AGGTAAAACACTACCGTCGCCAAAGCTCTGGTATCAGAAGTTGAAGCCGAGTTTCTGTTTCG  
TAACGGCTCCGACGCAAAAATTGACTTTGTTTCGCGATGTTATGACTCCATTTGCAAGCTC  
TAAAACATATGGCAGCTGGTGGAAAAGTAGTTATCATCGATGAATTTGATCGAGCAGGTCT  
TGCAGATTCTCAGCGTCATCTTCGCTCATTTCATGGAAGCTCATTCCAAAAATTGCATATT  
TATCATTACTGCGAATGATTTGGGTGGAATTAATCCAGCACTTCAATCACGGTGTTCGTGT  
TATTCAATTTGGTAATGCCGATCAATCTGATAAAGTCAATATCATGAAACAGATGATTGT  
TCGTGCCGAAGCAATTTGTGATGCTGAAAATATCGAAGTTGAAGATCGCAAAGTTATTGC  
CGTTTGGTTAAAAGAAGTTCCTGATTTCCGTAAAACACTGTCAACGAGATAGATTTCTA  
TGCATCCGAAGGTAAAATTGACAGCGGTATTCTGAGTCTGGTTCTCAATACCCGCAACGA  
TATCGAACAAGTCATTGATGCAATTAAGCTAAAGATTTGAAATCGCTTCGTGCAATGGC  
TGGTCAATACCACTGATTACGCTGGTTTTGTTGAACGTCTATGTAATGCACTGTACCC  
GCTCGTTAATGGTCCGGAAAAAATTCGCATGTACGAAATTATCGGTGAAAACAACCAACT  
GTTTGGCCAATCCGCAAAATATCGAGATTCATGTTCAATATATGTTCCGGTCAGCTTGCCGT  
AGAATTACATGGTAACTGGCTGTAAGGAGTTCGATATGAATTTGAATTTCTTATGGGTG  
ATGATGAGCAACTCAATGAGCACGAAATTGCCTGACAATCGAAAGATTGGGATGCCGTAT  
CTGCATTAGCTGATTCGTTCAAAGAACCTGCCGAAAACAATGCATTCGCATAGTTGGATG  
ATATCACCTACACCAAACCGGAATGATGTGTTTCAGATAGTGATTATCCGGCATGGTTTA  
TCAATAATGCTCTTTCGATGCATGCCGAAACACTGTATTCCGGCATAACGTCATGAATCTTC  
TGTCAGCATTGCCGGCCCTAGCGCAATACAATTACCTCGTGTCTATCTGTAAGAAAAGGCA  
AGATTTACGGGAAATGGCCTAAACTAGATGGATCAATCAACGAAAAGCTTTATATTGCCG  
TTATAAAGCAGCGAATAACGTTGATTTGCATACAACAAAGACGTATATGCAAATCATGC  
AAAGGCGAAACACTTTGCATGATTTTCTGAAAAGTCAGAAATATATTGTAACCTCCAGCAT  
TTGTTAAAACACTGTTGCGAAAACAGCAAAAAGATCAAACGCAGATGCTTAAGTTGGCTAACA  
AATTCTAAGGTTTTCTTATGATCCAAATCGATATCAATCATCCTGATGATTTTCTGAAAA  
TTGCTGTATCACTTACACGAATTGGCATTGCTTCTAATAAAGAAAAGAACTTTATCAA  
GCTGCCATATACTTCAAAGCAAGGCCGAACATTCATCGTTTCATTTCAAGGAAATGCTGA  
TACTAGATGGTCTACCAGTACCAATTTCCGAAGAAGCTATTTCTAGACGAAATAACATTG  
CTTCATTGCGTCAGTCATGGAATTTGTGTAATAATGCTAACTCCTATTGACTTGTTCATCTC  
ACAATAATTTAGAGTTATTAGCCACAAGCAAAAAGGGCGAATGGCAACTTATCGCGAAGT  
ATAAATTTGGTTAATGAAATGGCCTCAACAGAGGCCATTTAGAAGGACATATTATGCAGC  
ATTACACGAACATCGAAGTTATTGAAATACTATATTTGAGCGTTACGTTAAAGACGGTG  
TAATCCTATCGCCAAAAACAAATTATCAGCCCACACTTTTCATCATGCCGCCCCAGGTG

TAGAGACGAAGGACAAAGACATCTATTGGCTTTTTTCCGTACCAAAGAAGCATGAAAATA  
TTTGGGAAGCAAAGTAATGGCAAAAACGAATGGCCGAAATTGGCCAAGATGCCAGGGGTA  
TGGACGACTATTGTATTTCTACATCTCCGATAATTATCGCGGAGTTATTGATTTTGATC  
GTGACAATGTCATTATCGATGTAGTCGATATCGAAGTAACAGCTCCAGAACTCCCTGATC  
CCAAATTTGCAAAATATGAAATTGATATGATTTCCCATGTGCGTGTGACGAGGGCAAAA  
AGACATATTACATTTTTGACCTTGTTGATGATGTAGGCCATTGGGACCCATCTAAGTCTG  
TTCTAGACAAATATATTCTTGACAATGTCGTTTACATGCCATTTCGACACTGAAATTGATC  
TTCTTCTCAACTATATTCAACTATGGAAATCATCTACGCCTGATTTGGTGTGGTTGGA  
ACAGCGAAGGTCTCGATATTCGTACATTATCACTCGAATTATCAACATCTGGGTGAAA  
GTGCGGCTAACCATGTAAGTCCGTACGGCAAGATCAGCTCAAAAACAATTACAAACATGT  
ACGGTGAAAAACGATCTATCCTTTCCATGTTGTTGCACTGATGGATTATATGGATGTTT  
TTAAAACGTTACGTTTCACTGTTATGCCTGACTACAAGCTAGTTAACGTTGGATATCGCG  
AAGTTAAAGCAGCCAAATTGGAATATGACGGCCCAATTAATAAGTTCCGAGCAGCAGATC  
ACCAACGATATGTGCGAGTACTGTGTGCGAGATACGGATATGATCCTGTGGATCGATGGCC  
GTCGGTGCTTTATTGATCTTATTGTGTCTCTTTGTTCTTACGCGAAAATTCGTTTCGAGG  
ACGTATTAGGAACTATTAAGTTTGGGATTCTATCATTTTTAATTCGCTTGTCGAGAAAA  
ATGTAGTTATTCGATGATGAAAGCTAGTCCACAGCAAAGTTTCCCTGGGGCATAACGTAA  
AAGAACCTGTTCCCTGGTGCATGATGATATGGCATGAGCTTTGATTTAACATCTCTGTATC  
CGAGTATTCTGCGTCTTCTCACTATCAGCCCAGAGATGATTGCCGGTATGTTTGCACCTG  
CACATCTTGACGACTATATCAATAAGACTGCTCCTAAACCATCTGAAGTTTATAGTTGTG  
CCCCAAATGGCATGATGTACAAACGGGGTGAAGTAGGTGACTGCCAGCCGAAACTGAGA  
AAGTATTCTTGCAACGTAAGCCGAAAAGAAAATGATGCTTGCTGCTATACGCAATCAGG  
AAGCAATTAAGAAAAATTCTGGCTTCCAGGGGCGAAAAGGTAGACCACTAATGTTCCGCT  
TTCGTATGGGTGTTATATTATGCACCCATCTTGCAAGGAATTACATTATGTGGTACATTTA  
CAAAATAACGAATGAGCTAAACGGCAAAATTTACGTCGGGGTTCACAAATCCGAAGACAT  
GAAAACGACCCTTACATCGGTACAGGGCGTACGTGTTAAACGAGCAATCGCCAAATATGG  
TGTTGAAAATTTCACTCGGACGACGTTGTCCGAATTTGCGACAGCCGAAAGACTTACAA  
TATGGAAGCCGCCATAGTGAAGAGTTTATCAGCCGTCCAGACGTCTACAACGCAAT  
GGTCGGCGGTAAAGGTGGTTGGGCCACATCAAAAAGCCCGGGCAGCATATGAAAGACC  
TGTCATGGCTGCTAACATTGGGTCTTGCGTTCGCCGTGCATATGAGCAAGACCCGATTAA  
AAAGCTTATTAGCCTCGCCAATTTCAAAAAGCGTTCGGAAATGAACCGTGGCAAGGAACA  
TTCAGTGGAAGACTCGCCAAAAGCGGTCCGACTCGCCAAACGATTTCTACGCGTATAACAC  
ATCTGTTTTAACCGGTATCCCAAAGTCAGCTGAGCATCGCAAGAAAATGAAAGCCGCATG  
GCCTGAAGAACGCCGCGCAAGCCAAGCAGAGCGTTCGAAAGGCCCTAGTAGCCTCAGGTAA  
TGAGGCATTGCTAAAAACAGGCTGGGCAAAACTAATAGCGAAGAAACGAAGGCTAAGAT  
GTCTGAAGCGAAGAAAAATACGGGGCTGAAAAGCCAAAAGTTATTGTAAAATTTCCACA  
CTGCGGAAAAGAAGGCATCAAGCATGCCATGCTCAGATGGCATTTCGACAATTGCAAACC  
CAAAGAGGCATAATTATGGAAGTTCGAATAGTCCGCGACTTCAATGAAGATGAGCTCGCA  
TATTTGAATACTCTTCAACCGATGAACTTCTACCATGATCGGTGCTGTTGTGAAACAGAA  
GAACAAAAACGCAACACCAACCAATTGTACCACAAAATTTTATGATCAACTCGCTTTACGTA  
GCTTTTTAACACTTCTTAACTTGAAGCTCCTTAAACCCGGTGAAGTCAAGGAGCTCTC  
AATGAGTCGATCCTGAGCCGAGTCTCGAAAGAGAAAGGTGCAACGACTATCGAAAGGCGG  
GTAATACCGAACCGAGTAGAGTACACCCAAGTGGGTGGAAGCGCCGTGTGTGCAGCAATG  
CATTTGATATAGTCTGCTCTGCATAGCGATATGCAGCTGTGAGTAAATGTCGCGACGACA  
TATCCACGGTCTTGGATTAGCGACCCAAGGCGAACACCTGGTAGGTAACAACCTTCTTCT  
GATTCTACGATTTGCGAAATGCTGAAGCTATTACAACCTACGGTAAATTGGCTATTGGT  
GGATTGAGCGTAAACTGAACGCATATATCAACAATGTTGTCAAAAACAATAATATTGATT  
ATGTGTGTTATATTGATACTGACTCGGTATATCTCAACATGGAAGCAGTGGTTAATAAAG  
TAGGGATTGACAAATTCCGGGACACCAACCATCTGATCGATTTCCCTTGATAATCTCGGAG  
ATAAAAAGCTCGATCCATTTATCGACGAGTCATAAAGAAGTTCGACGATTATATGAACA  
ATGAGCACCATCTCTTGCTCATGGACCGCGAAGCTATTTTTGGAGCTCCATTGGGTCTG  
ACGGAATTGGTGGTTTCTGGACAAGTAAAAAGCGATACGCTTTGAACGTTTACGATATGG  
AAGGCACTCGAGACGCTGAACCGCATCTGAAAATCATGGGTCGAGAACTCAACGATCAT  
CCACACCTTTGGCTTGTCAAAATCGTTAAAAGAGTCAATTCGTCCGTTGTTGCAAGAAG  
GTGAATCTTCTTTGCAAAATATTTCATTCAATTCAAGACTGAAATCAAAACGATCGATT  
ATCAAGAGATTGCCGAGTGTCTTCTGCGAATAATATCGCCAAAACGCGGATTCCGGCAG  
GATATCCAATTAAGGAGCTCCGTATCATCTGAAAGGAGCCCTTGCATATAACCGGATTG

CAAAAACCTGACCAATCAATTCCAGAGATTGTTGAAGGCGAAAAGGTAATGGTTATTCCTC  
TTCGTGATCGCAATCCATTCAATGAAGCGTGTTTTGCTTGGCCGTCAGGAACACTAATTC  
GACCTGTCGTAGAAGCCGATCTTTTGAAGTTTAGGGATATAAATAAGCATTTTGATAAAA  
CATTCGTTAAACCACTTGCTTCAATTTGCGAAGCTACGAAATCAGATTATGATTTTAGGT  
ATAATTTGTTTGACATGTTTGATATTTGAGGAAATAGTATGTGTTAAATGACTGTTCAAG  
ATATTCGTGACATCATGGTGTCAAATAACAAATCAAATGAATTTGTTACTGACAAATCCG  
GGTTAAAACCTGTCGAAATTGCCCCAGTTATGTTTAATCACGATGAAGATCTACTTTTCG  
GTAAACTTAATGACGATAATATTGAGCGAGAGTTGTCTTGGTATTTGAGTCAATCTCGTT  
ATGGTGCTGATATTCAGGTA AAAACCCAGCAATTTGGGAAGCAGTTTCAGATTGTAACG  
GTATGATCAACTCCAATTATGGCTGGGCTATTTTCAGCGAAGAAAATGGAAATCAGTTTG  
CAAATGTTGTCAAACACCTAATTGAAAATCAATACACTCGTCGTGCAAACATGATTTATA  
ATCGACCGTCTATGCATACTGATTACAATGCAAATGGTATGTCCGATTTTCATGTGCACCA  
ATAACGTCCAGTACCAGATTCGGGATGGAAAACCTGAATGCAGTCGTTTCATATGAGGTCAA  
ATGACGCTATTTTCGGTTATCGGAATGATTGGGCGTGGCAGGATTATGTTTTGTCTAGAC  
TGGTTGATACTCTTTAATCCCATGAAATCATGGTATAAAAAGGGTGATATCTACTGGTGTG  
CCGATTCACCTCCTTGTGTATGAAAGACATTTTGGCCTGATTGAACAATATATTGCTCAAT  
AATTCTCTATTTCCGCATAGCGAGCATAATATTGCTCGCTATGTTTAGAATCTTTATAGG  
GTTGATATAATGTCACCCCAAAAGGGAACATTTATGGCATCTACCACTGATGATGAAAC  
TACCAAAAATTTAAATGAGGCTCATTCTCTTATACAGCATCCTATGGAAAACGTTAAACA  
AGAGCTGCTGATAATCGATAAATCAAGCAAATCACACCTTGTATATTTTTGATGCTCAT  
ATACATGATGGAAAACCTGCATGTAGATTACAAAGCAGTTAATGAAAATGATGAAATTCAT  
CAACTTGTTTCATGAAGCTATGAATGCACAAGTCAAACAAATTATGAAGGATAAAGAGGCA  
CAAATTGGTTGAAGCAATCCTTGAAAACCTTACTCTCAACAATACGTACTTTATTTTCG  
GCGTACCCGTACATAAAAAGAAGATTATTTTCGACCGTGGGCCTTACCGCGAGATTTTTAAA  
CTCATCCAAAACACGTGAATGAGTACAATACAATCCCAAACAAAACCTGCACTTGCAATC  
GCACTTGACAAAAGTCTATCGATCAAGTAACTCATGACGGTGTGAAGGAAGTTATGGCT  
CGTCTGTCTTCTAAACCAGAAGATCATGCCTGGTTAATTAAGAAACTGAATCCTGCTGC  
AAAGACCAAGCGATGTATAACGCGTTGACTAAGGCATTCGAGATACAGGAAAATGCGGCC  
AATCCATTTGAAGAACGAAATAAGAAATTGCCGGATGTTTGCGCAATCGAAGATTTGATG  
ATAGAAGCATTGGCTATTTTCGTTTGATGGCTCAGTCGGACATGATTGGTTTGAAGGTTAT  
GAACGACGTTATCTGCTTTATCAATCCAAAGCTAATAAAGTCCCGTTCATCTCATAACGTT  
CTGAATAAAAATGACCAAGGGTGGTGCAGAACTTGGCACGCTAAATGTTATCATGGCGGGT  
GTCAACGTTGGTAAATCTCTTGGTCTTTGCTCTTTGGCCGCTGATTATCTCCAAACTGGC  
AAAACGTCGTTTATTTCTCGATGGAGATGGCTGAACATGTTGTTGCGAAACGTATAGAT  
GCCAACTTGCTTGATGTCACGCTTGACGAAATAGATGATGGCAACATGAGCTTTGCTGAG  
TATAAAGCTCGGATGGAGCGTCTGAAATCCAGAAATATGGGTTCGTTTGATTATCAAGCAA  
TACCCAACCTTCTGGTTCGAATGCTAATCATTCTACGCGTTTTTTGAACGACCAGAAGCTT  
AAGAAAACCTTCAAAGCAGACGTTGTTATTGTGGACTATCTGGGTATCTGTGCATCCACA  
CGAATTCGTGGAGGTTCTGAGA ACTCGTATACTTTGGTAAAAGCTATTGCCGAAGAATTA  
CGTGGCCCGGCTGTCCAACATCAAGTTGTTTTATGGACTGGTGTCAAACCACTCGATCT  
GCATGGGATTCGACCCACATCGGCATGTCAGATGTAGCCGAATCTGCTGGCTTACCAGCA  
ACTGCTGATTTTATGCTTGCAGTGCTGGAACTGAAGAGTTAGCTCAAATGGGTCTCCAA  
CCGATGATGCAAATAAAATCCCGGTATGGAGATAAACATTGGATTAACAAATTCAAATA  
GGGCGGTAAAAGGGCAACCAGAGATGGTACGATGTAGAGGAAGAACAATCAAGGCCAGG  
AACGCCAAACACACCTTCTCCAAGACAAGCTGACAATACGAAGGGCAATAACTCAAGAAA  
GCATCTTGACGAACTTGCCGCGGCAATGCATTTCTGATAGCCTAACGGCCATCTACATAG  
GAAACTGATGATGAAAACATTTCTAGAGTGTCTGGTAAACAGAAAGATTATGTCAATAT  
GGATATACAGGTTGACGAAGACGTTGTGGCTGGTATTCTGGAGGAGACCCCGTCAACAT  
CGCAGCTGGTAAAACGTCTGGCCAGTCATTTCCCCGGGGCCTAAAGTCCTTCTAAGAA  
GGAAAAGAAGAAGAAATGATTACGTTTCGAAGCCCCTCAAGAAGCGTGCGAGGCTTTAGGT  
CATGTAGCATTAAAGAATCTTAGAAATCAACCTTATCTTGATATTCTGAAAACCATCTAC  
ACGAATTGCTTACCAAGCACGATGAAGGATGTCGTGTATGAGATGGCTGTTAGTGCTGCA  
GAAATTGATTCGTA CTGGTTACGCAAGGAAAGCCATTCTCTCGTTTAGAATATGCTCAA  
CACCGTGACATTCTGTTGGAAGCATGTCGGCAATTGGATGCTAATGGATTTTTGTGCTAG  
TATAATGGGGCGAAGAGCCCCATTTGGAGTTATTATGTTTCGCTGATTTTTTTGTTTGCCGA  
ACGAGCAATGATGCATTTGCCAAAATAAAAACGAAAGAAGGGAAAGTTCAATTCAAGATG  
TCCAATATGCGGTGATTCCATGACGGACATGAACAAAGCCCGCTTTTGGATGTATGAGAA

GAAGGGCGAGTGGCAAGTTCATTGCTTTAACTGTGGTTATCATAGCAATTTGGGCGGGTA  
TTTAAAGGAGCGAGAAGAAAACTTAATCGTGAATGGCTATTAGAAAGAAGGAAAGAAAG  
CACTGTCTTCACGCCAGAAGCAAAACCAGTAGAAAATCTCTTCACCAAAAAGATGCCGGT  
GATTGAAAAGTTAACTTTTTGTGATCGTCTAGATTTGCTACCAGCGAACCACCCTATAGT  
AAAATATGTCGCAAAAAGAAAAATACCAGATTCGCGATATAAGCGGTTATGGTTTACTCG  
CGAATGGCAGAAATTGGTAAATTCTATTTTCAGCAGATACTTATACGCGCGAATCACCGGA  
ATATAGGTTGGTTATACCGATTTTTTGACAAAAACGGTGAAATCCAGTCTTTTCAGGGAAG  
AGCTCTATCAGCTAGTCCAAACAAATACATCACCATAAAGGCTCATGAAGATGCATCAAA  
AATTCGGAATGGACACAATTGATGGGAACCGAACTGTATGGTTTATGGAAGGACCGATT  
GACTCCCTTTTCATTCCGAATTCCGGAGCTATCACTGGCGGTAGTCTTGCATTAAGTAAA  
GTTCCATTCAAAGCACTCGAGTATGGGTTCTTGATCATGAACCATTTTCATCCTGATACG  
TGCAAGCGACTGTCTAGACTAATTGATGCAGGTGAACGAGTTGTGATGTGGGACAGGTGT  
GCTTGGGCGCCCAAGATGTAAACGATATGATAATGAAGGAAAATGCAACTGCCGAAGAT  
ATTCTCCAGTATTGCAAGGACAACGTCGTGTGCGGGTTTGCAAGCAAACTGCGATTTGGT  
AAATGGAAGCGTTGCTAAGGCCTCTTCGGAGGCCTTAGTTGTTTTTATTGAACGATGACG  
AACAAAACAGTGTACTATCTCTAAAGGTGATACTGTATCATCATAACCAAACAACTGA  
TTAAAACAACGGAGTATATCATGACACGTAAAAAACTCGAACATCCTTCTCTATTGTGCA  
ATGCTCACCTCATAGGCGAATGGTATGAGAATCCTCGGGTTGCGAGCATTTTGATCAAGA  
AAAACGGAAAGACTGGTAAAATTCCATCAAATTTACCGTTCGGACAAATAAAAACCCTC  
TCGGCGGTGCGAGGGCATGTAACCTTTCTTTTACACCAAATTGGCTTGGCTACTCGATCGAT  
ATCTGATGCTAATGGACGAAATGACAAAACGCGGCTATTCCGCGACTGACAATTGGAAAG  
TTGAAATTTTCGTCCCTGAAGACGCCCATTTGTTTGGTGAATGGGTACCGTCAGACGACG  
ACATCTCGCTGAGTCGCACAAGAATTTCTGAGATGATTCCCGAAAAGCACAAGTTAACTG  
AAATGCAAATTCACAACCTTAAGCAGATTGACGAATGTAAGGAAAAAATGAATGAAATCT  
GAGCTTTATAAACGTGGATACAAATGGGCTTTTGACTTTAATGAATTTGATCGCGGCGCA  
TTGGAGGCTGTCCGCGATATGCAAAATACGGAGAACAACAAATGAAAGCTCTGACTATTA  
CTCTATTATTCGCTGCTTCTACAGCTTCTGCTGCTAGCTTCGATTGTCAAGTAAAAAATC  
TGAATGCCACCGAGAAAGCTATTTGCGCTGTTCCAGAAATTTCTTTGCTGGATGATCAAG  
TGGCTGAAGCATTCAAGGCAGTATCGCATATTCCTGAAGTTAAGGCTGACCAAAGAGCTT  
AGATCAAAGAGCGCAACGCATCAACGTCTTTGTCTTCGCTTAAAGACAATATGACTGACC  
GCATCATTGGGTTGCAGATTATTGCCGAATTGGAAGGTGTTTCAGAAAAAACCGCATTATG  
AAATTTGTCCGAACCGATTCTGCTAAAGCTACAAGTAATCGACCCGTCGATAAAGACACGG  
TGGCAGATCTCATTGGAAGCAAAGCAAGGGGTTGAACTTAGCTTTTCGTGGAAAAAACG  
AGCTACACACATTACCGTGACAAAAATGCTCCAATTTAGATGCGCGACTGTGCGTACAGG  
ATAGTTGCAACGATGTGATGGGCAGATTGGTAGCTCAAGCTCGTTCGCTGGTCTAATT  
AATGAATTCAAATCTGTAGAGTATAAAATCGAAACCGGTTTTATCAATATGACTATTGCT  
AATTTGAAAATGAATATTCAGCAGGGTCGTCAAGTGTGCGAACTATGGCAATAGGATCA  
ATGAGGTAATACAAAATGTGGATTCTTATTCTCACCATAGTTGGAACAGGGATGTCTTCT  
GTTCAATCTATCCCGTTTAAACACGTGTGATTCTGTGGGAAAAAGCTCGAATTGTGTGAATG  
AAAATACTCCTGATTCTAGGAAATACACTGCTGTCCGTTTTGAAAAAGTGATATAATTACT  
ACAAATAAGATAGGAGAACAATAATGACAGCCCAATTTAATGAATGCGCACAAGTAACTGA  
TAATATGGATAAGGAAGTAAATGCAGTGTATGATTGCCTTATTGCCAACGATAATCCTCT  
CAATCGAATGCTTGACATGCAACGTCAACTTCAAATTGAGCTCGCACAACGGCATCCAAA  
ATACAATCGCGACCCACGAGTGCTTAAACTTGTGGCGAAATCTTGACTGGTGTCAAGC  
TCAGGACGATTATATTGCCGACGAAATTCGCGAGCGATATACTGCTCTAGGTGGAATGAG  
TAACCCCAAACCGAATGCCATCTGAAAACCATGGCGCGCTGAACATGCCGAATATCGCAA  
TCGACTATTTTTTTGAATTGTGCTCTGGAGACCAACTCGAAGCAAAATTAGAGTTGATTGA  
CCAAATTCACTTTGTTCTTAAACAAGATCATTTTCGATGGGCATGGATGGCGATGAAATCTT  
CAAATCTATTATTTGAAAAATGCCGAAAACCTTTGCACGGCAGGAGAATGGATACTAATG  
CTTGAACAAGATGAAATTGATGAAATCAATCGCTTGGCGCAGACTAGATGTTGAAGAAGGA  
AGGGCGGATATTTACGCCCCATATATTCATTTCAAACAATCAAATATGAGGATTTTTTAT  
TATGTATGAAGTCAAATGGATTGAAATTAACAGGGACAATCATGGCGTAACATCTGCTAT  
GAATACACCCAACGGCGTTCTAATCCGTGTTAATTACCCTTTTAAAGCGGAAAAGTTTGA  
TATGACATTCATTCATGATATAAAAGTTGTCAATAATCCCAATGGAAATGGATATATTAT  
CTGCCACGTGTGATTTCATGAAAAAATATGTAATCCAATGGATAGACGTGCAAGGATTCTG  
TCATTTTCTGGATGGCAATTTGTATGGCTCATCTAGTGGTGTGCTATTCCATAATTCATG  
GGAAGATGCCAAAGCTAATATATAGAAAGCGAAAGAAGCCAAAACAGAGTATTTGAAAGG

AACAAAAGTCGTCAAAAACGACTATTTGGGCCCTCCAACGATAGTCACAATCAACAAGCC  
GTCGGAATATTTGGCCAATGCGCATAAACGAATGTGTGATACAATGCATATCGTTGATTT  
TAATGTGATGCCAAAACAAATGAGGTAAAAATGGTAACATATGATGATTTGACTGTTGGC  
CAAAAAGATGCTATTGAAAAAGCACTCCAAGCAATGAGAATAAACGTCATATTACCATT  
CGAGGGCCTGCGGACTCTGGTAAACTACTATGACCCGTTTTCTGCTTGAGCGTCTTTTC  
CAGACCGGCCAACAAAGGTGTTGTTCTCACAGCACCTACGCACCAAGCAAAGAAAGAATTG  
TCCAAACATGCCTTGCGCAAATCATATACAATTCAGTCTGTCTTGAAGATTAACCAAAGC  
ACTCTCGAAGAAAATCAAATTTTTGAGCAGAAAGGTACTCCTGACTTCTCCAAAACACGT  
GTGCTTATCTGCGACGAAGTATCGTTTTATACCCGCAAATTGTTTGACATTCTGATGCGA  
AATGTTCCATCTCATTGTGTTGTTATCGGCATTGGAGATAAGGGCGCAAATTCGGCGAGTA  
TCAGAAGATGATACGCATGAACTCCGTCCATTCTTCACAGACAATCGATTTCAACAAGTT  
GAATTGACCGAATTAACCGTCACCAAGGTCCAATCATTGAAGTTGCAACAGATATCCGA  
AATGGCAAATTGATTTATGAAAAGCTTGACGATTCTCGTAATGGAGTAAAGCAATTTTCAT  
ACGGTCAAAGATTTTCTTTCAAATATTTTCGAAAGAACAAAAACGCCCAATGACCTACTT  
GAAAATCGCATAATGGCTTACACAACCAATTCTGTTGATAAGCTAAATTCGGTTATCCGT  
AAACAGCTGTATGGAGCAAACGCTGCGCCATTCTGCCGGATGAAATATTGGTCATGCAA  
GAACCGCTCATGTTTGACATTGACGTTGGTGGCCAAACTCTAAAAGCAGTCATTTTCAAC  
ACTTGGCAAACCGTACGAGTTAGAAACGTTAAACCTTCTCGCAAACCGCTTAAAGCAAAA  
GGTGTGCGGCGAAATTGAAGTCGAATGCACAATGCTCGAGTGTGAATCTTATGAAGAAGAT  
GAAGATGACTTTAGACGATCGTGGTTTACGGTTGTTTCATGGCCAAAATACTCAATATGCA  
TTAAACGAATTTTTGTCTATTATTGCTGACAAATATAGAAGTCGTGAAGTTTTCCCAAC  
TGGAAGACTTCTGGGCAATACGCAATACTTTCACCAAAGTTCGACCCTTGCGTGCAATG  
ACATTTCATAAATCACAGGGTTCAACATTCGATAATGCATATCTTTTTACTCCGTGTTTG  
CATCAATCTTGCAGAGCCCCGGATGTTGCACAGGAATTGATTTATGTGCGAAATACTCGT  
GCCCGCAAAAATGTCTGTTTCGTATAAGTAACTGAAAAAGCGACTTATAGACCAGGGCA  
ACTGGTCTATTTTATCAAAAACGGGTATCGCTAGAGAGGAACCGTATTACAATACAAAT  
TCGGAGGTTATCGCATAGTGAGTGATGCTTTTGATATGGTATTGCACATTAACCAAACC  
AAGTGGAGAGTAGATTAGTATGAGCAAAGTGACAGATTTTATTATTGACTGGGAAACAAT  
GGGCAATGCTCCTGATGGTGCAGTAGTTCACCTTGCTTTTTTGGTGGTTGAGCATGACCC  
GTACAAACTGCCTACGTTTGAAGATCTGTGTAAACGCGGGCGTCGATTCAAATTCATCT  
CCAAGAACA AAAAAGCATGAGATTCTTTGACCAAGGAACAATCGATTGGTGGAAAAACA  
AGATGTGCAATCTCAAAGCATCTTAAACCATCGAGCGAAGATGTCAGCGTCTTGGAATT  
TTATGAAAGCTTCTTGATTTTCTTGCAGCACAAGGGTTTGACAAGTAAACAGGTCAGGG  
CTGGTGTGCGGGTCAAAGCTTCGATTTTCTTATCATGATCGATGTTATCCGCAAAATTTA  
CAACACTCGTGAAACATTCAAGTACGAACCATGTTTCTTCTGGCAGCAACGTGATGTTTCG  
TACTGCTGTAGAAGCTACTCTGCTGATGCGAGATATGACCATGTGTCCCATGCCGAAGGG  
TGTTTTGGATGGATTTGTTGCTCATAACGCAATTCACGATTGTGCCAAGGCTGCCCTAGA  
ATGGCTTTATTTCAAAGCGATATGCTCTCGGTCTCGACGATATTGCCACCGGTGATGATGT  
TGACCCGCGGAGTGTCCGCAAATGATAGTTGCTTTTGGAGAGGGGTTGAAAAACCCCTT  
CATTTATCGCACATCACCTGGAGAGATGACAAAATTCAAAGTGCTTATGTTATTAACGGG  
GCATGGGAATTTAACAGGGTGAATGGAGTTTTGTGTGTCGAAGGGGATGTTAATTCTCCA  
ATGGAAGAATTTCAAATTGCAATACATGTTCTCAGGCGTTTGTAGTGGTGATTACAAT  
GTAATCATTGAATGGGCTGAAAATGAGGTATCATAATGATTTACGAGCATTACGACGCAG  
ATAGCTTCTGGAGTACAACGATCCAAACAGCAATGGAACCTCCGAAATCGGTTGAATTCAA  
CGATGTGCTGCGGTTTTGTCAAACGCAAAGATTATAATGCGCGATATGAAGCGTTGATTA  
AATCTATCGGAGAAATGCTTGGGCATATGCATCCGACGGCCAAAACCTGGGTAACAAAAC  
CAAATCCTTTACAGGGATGGTGTACTAGTTGAGATTCGAGAATGAAACAAAATTACGCTTG  
GCTAGCATATCACTTCGGCTTGGTTCCAGCAAATGGTTGCAAATATGGCACTCGCGGATT  
TACGTTTGCTAACAATAACCCGCACTTTGCAAAAATTCATTTGAACTGAAGATTTTTGTGC  
TATTTTGCAGTTCGCACGACCCTGCTTCTTAAAGGGCCGCGAAGTTGCCGTTTCATGATCA  
TGACAGATTGATGTACGGCTGCTTGTCTGGGGCGGATGAGCTTTTTATCAGAAGTCGAGA  
CACTCGAAAGCTGAAATTTAGTTTTGGCTATCAAATCCGCGACTCATCTTGTTTTGAA  
CCGTGTATCAACACTGATTGCCGATGGATTCAACGAACCAAATGAGGCCCCGAAATGGAT  
CAGCAAGTAAATGTAGAAGTAGTTGTTTATCTGGATATTGACGGTGTCTCAATACGCAG  
GATGATCACATGGAATGGAGAACTGACAAGAACAGTCACCTGTATCGTGTTCGCCATAC  
AATCGTGGCGATTTTGACAGCAACCATAGACTCAGTTTGCTGGGGGAATGGCTAAAGAAA  
CATGATGCTAATGTGGTTGTAATTAGCTCGTGGGTCGTTTTGCGTGATACTGGAAAAATG

ATATGAGATTTTCTCGAACTTCCGTATCATTCCGAATCATACTGACTGGCGGTGGAAAA  
TCTCGTGGCACTGGTGTACTTCGTCATGTAGCCGATCATAATATCCATAGATGGGTGGTC  
TTGGATGACGCCAAGTGCATGTATGATCTCGATGAGGTCCTACTTAGGCACCTCGCTCAT  
ATCAAAGGTGGTCTCAATGAATCATACTTAGAAGAGGCCGACTTCATTCTTTGACACCTG  
GTGGTCGCGCATCGAGAGTCGCTGGGAAACAGCATAAATAAAAAGTCAGTTGAATTGAT  
AAAACAACGAAGTGACTAACTGGAATAAAAAGAACCGGGCTTCGCCCCTCGTGTGCTTGCAC  
GAATCCAGTTTGTCTGTTTCATCTGATTTATATAGGGGCTCGTCGGAGCCCCTTTTTTGT  
TTCAAAACTAGTGTACAAGATAGTGCTTCATGATAAAATGACTTCAGATTAAACAACAAG  
GAGTACTTTTATGATTTACGCAATTAACAAATTCAGTGTAGCATTGCGATTGAAGCCAA  
CATTTGTGCTTATTCGATTGCTTCTAGAGGCTGCCAAGTTTCTCGTGTGCTGACGATAT  
GTATGCTGCCATGTATCCTCAGGCTGTCTGGTTACGAGTATCCCGTCAAGCAAGATGGCGA  
TGCTATCATTTGCGAACTCGAACAGACCAACGTTTCGCGTAGAAAAAGATTTTGTGTAATT  
TATCTGTGAGTACGAAAATTAAGTGTACAACCTGATGTGGCTGTTTTAGAATGGCCACATC  
AAACAACATGGAGTAAGGAAAATGCGTATTTCCAAAGATTTATTCCTCGACGTAATGTT  
TTCCAACAAGGTTTCTGTTGTTGAGAACTCCACGAAGAGCATCTCTGCTATACCTCTGT  
TCTACATGTTTTCGAAGGCAATACTCGAATTGCTGTTCTCGAACGTGTTATCACCGCAGA  
AGGTACCCTTGGGTTCTGACAGAAGGTATCTACGTAGAGCTGAAGGGCAAATCTGATG  
GGAGCGCCGAATCATAGATTGCTCCTACGCGAAGAAAAAGTCATGGAGTTGAAAAGGAA  
TTGTATGACCTTTAATCGAAATGAACTCTATTGGTGCAAACAATCAAGACACTTGGGGC  
AAACTCTTTAAGACTAAGGCATACAATGAGTCTCAAGCTCAAATGGCCGAGTATACAGAG  
AAAATTCGCAAAATCATTGCGACTAATTTCCGCAATCTGACACGTACGCGTACGAGCCG  
ATTGGTTTGAAGGGAATTGTGGATGTTTCAATGAAACGTGGACAACGAATTTAGTGAAA  
CTTCAATACGAGTAATAAAAATAAGAATTCGTCTTGTGATAAGAAAGGTCTCATAGATG  
CAAACCGCCAAGACAGTCAATCCTACAGATTGGCAAGGACCATTGTTGAATTTGCAGAAT  
GGAGGCAACTCTGTGTTATAGGCAATGATGGTCCCAGATGGCTTCTCAATGTCTACGGTC  
CATGCTGGCGCGGTAGAATTTCTGCAAACTGCAAGCAATATTTGAGGGTCAAATGAAA  
CTTAAATTGAAAATCCCTCTCTCGGAATATCAACAACGTTTTTGCAAAACCTGAAGCGCAG  
AGGTTGTGGGCAAGTACGCTTGAACCTGAAATCCAAATCTGGAGAACTTGAAGTTCTCGAA  
ACAGACCCAGACGGGACATTGAGAACAATGCTACTTTCCCTCGGATACCACATTGGAATT  
CCACTCGAAGCACAACGATATTTTGAATTTGAGGAGCAAAAATGATTGATGACGTTAAAA  
TCGATATGACCAGCAGCTTTAACGCTAGGATGGCTGTCCCTCCAAGATCAATGGGTTTTG  
TGCTGGCCAAGCTGATGGAAGAAGTAGGGGAATTTGCAAAGTCGCTGAACCAGCCAGAAC  
GTTGCGATGAACGCT

>NewGenomeName\_183

CTCTCTCTACTTAATATATTATTCCAATCAAATGCCTGCCAAATCGGGTCTACATATC  
AATAACATAGGTAATTCCTATCAATGGAGGACACTGTGGATGAAGTAGTACGAATATGGT  
TAGTTCTTTTACCTAGTGGTTTGATCATCTGGATTTTGAGACGAGATAACAATGGCAAAC  
AATAAATACGATGTACTACTCCAAGACAAATACTTGGAAAGGGGATACGGTCACAAACGAC  
GTGTACAGCATTCTGGAAGCGTTTAGTGTTTCGTAATAGTGCATTACAACATTTGATTAAG  
AAAGCTCTCATGGTAGGCAATAGAGGGGCACAAAGACGTGCTTAAGGACTGCCAAGACATT  
ATTGATTCTGGTGTACGAGCAAAAAGAAGTAAACCCAGCGGCAATTCATTGAATGGGCA  
AATCCACGAGATAAGGAACTAAACATGGAGGCTATCCCCAATGGATAATAACCTAGCAGC  
TATGTGGATTATAATCCTGTTTCTGTTTATCATATAAAAAGAAAGGGCCAATTAAGGCCCT  
CATCTTATTCTCGTTTACACCACTGTGGAACCTGGCATTAGCCAACCAATTATGGCTACTG  
CTGTCATCAAAAAGAAGCCTAAGACTCCCACAATGAACCACGATGTTGGAACATTGGTCT  
GGTTGATTACTTGGGCTTCATAGTTAACGTTATCCCTACCGACTACATTCTGAACGTTCT  
CAGCTTTCACCTCAAGATTAGAACTCATAGAGTATTCTTTAGCTCCAATCTGATTCTCTA  
CTTGTAACCAGCATTCTGGTCAGGAAGTAAAACATCCTTAGCAATCTCTTCTGGAGACA  
GAGAACTACACCCATTAATGGAGACGCCCATCACTAAACCTGTCGAGACGAGTAGAGATT  
TCATCCTGCTTTTTACGTAGGTCATCTATATCCCTCCGGTATTATTTTCATCTCAGTCTGG  
ATAATTACTAAGTTCTCATTCTGTCGAAGTTGGTTAACTAACTCCCTGTTCTCTAAT  
TGTTGGCTTTGCAACTGACGGACCTCCGTTTCAAACCTGACCAACCTTATAAGACCAAGAT  
AGTGTAGTACCACCAATAGCCACTACAACAGAGAGGAACGTACTAATTGGAGCAGATTTCT  
CAGTCGTTTAGCATAACGTACCTCCCATAGCGTCCAAATAAGCTGCAACAATATTAAGGCG  
TATAGAGTAAGTATTGGAATTATCGACAAAGGCTGAGCTAACGTAGATGTGGAGAATACG  
CTCTAGCGGTATCCCCTTGTATTGAAGAGAAGAAATAGAAGTGTAGACCTTGTGCTCACA  
ACAGCGGATAAGAGAGAGGGCCAAGGTAGGGCCATCACTAATGTGGAACGGTGGCAGTAA

GAACAGAATCATCACCAAGAGTAATATAGCACCTTTCATACGTAACCTGTATAGTATTGT  
TCATACTCACCTAGCAGATTCCATGGGTCCATTAACCTGTGGTGCACCTTCATCAACCTTA  
CCAGATTATGGGTCTTTGTATCTAAGTCCTGCCTAGATAGTTTTCAAAGCCTCTGGAGTA  
ATAACTTGTGGCTAAATTCCTCGAAGGCTTTCTCTTCTTCCCTTAGTCAAGATCATGGTA  
CGTTTTGGAGCAACACCTAGTTATGGAGCATTCTCTAGAGCGTCTGGCTTCTGGCGTTA  
ACCTCAGGAGGTTGTTCCAGTCGATAGGACGTTTGATTACCAGGTCTAAGTACTCTTCT  
GGAGAAGCAGCAAAGTTCTGTCAAATATCAGGAGTTTCTTCCAATACGTTGTACGTATCA  
ATCAATCGAGACTTAACATAAGTATCCTCCACACCATTAATATCCACATTCTCTTAACCA  
GCAGGGCCAGTGTACATAACCACCACGCGCTTGCTCTGGACGGTATTTTGAACCATAGTAG  
AACTTATCTGGCTGAGCATTGACTACAATCTTAATGTCATCTAGGTTGTCATTTGTTGCT  
AACATACGTCAACGTAACGCACTGGTACCTACATCTAGCTCGTGGTCGCTAGTGGTTTTT  
ATCAACTCTCGATCTCGTGCAAAGTAACCTTTGTACTGAGGAGTTAACAAATGGAGTAATG  
TTCTCTGGTGCAGACCGCAAAGCTCTGTGACAACAGGTTGTGCAGTAGAACTATTATTA  
CGAATCATATCTAGGTTATATAACGCCCCACCTTGCTTGTTGTTTAGAGCTGATGTATTG  
TAAATAACTTTCTCAGTCTCTCCACCTTTTCAATCTCTTTCTCTTGGTCACGGTTGGCA  
GTAACACCCACCAGTTCGTTAGTAACCGCACCAAGCTCGCCGTAAGCTGAATCCCAAG  
TTCTGAGATTTAGTCATTAGGTCTGACAGGAATGGGTTCTTCTTAATCAGTGCCTTAGCA  
CGTTCATCACCATCCATAGACCGGAAGATGGACTCTTTCATTGAGTCTGGAATAGCGTTG  
TTCTTGGTTAAGTAACTTAGGCCACCATAGTACTGGGTGCCCCACGCTGTAGTCATTTCA  
GCCGCCAAATCATTTGGAGCTTTAACCATTTCATAGATGTCTGGTCACTAATCAACGTC  
TTCATGTTTTGTTTGAAGTATACTGGTAGGTGAATAGTTTCAAACGAGTCCCTGGTA  
ATCGCACACGGTTAGTTGCAGACTTCATTCAGGTTTTCTGTAACCTGGACAGCACTACGT  
TCTATTCCAATCGCTAGAGCACGTTGTTGTTCCAATCCCAATGTACCATTTGGAGAGTTG  
AACATGGTTCGGCAAATCTCATCTTGAGCACGGATAGTCGAGTCATTAATTCCCACATAA  
ATATCATCTGTGAAGTTCTCAGCATTGAGTGTACGAATCTCACTCTGATGCTGTGATTGA  
ATCAAGTTCATTGCAGTTTGTGAGATACACCGAACTCTAACTGAGTCTGTGTTACCTTC  
TCACGATAATCATTACGGGCTTTCTCTTCTGGAGATAGCTCCGTATCTACCTTACCCAAA  
CTCGAACTGGATTAACCGATGCCAAACAAAGTAGCAACACGTTACGAATTTCTTAGCA  
AAGAATAGATACTGGTTGATTGCTTCTGCCATGATGGCACGGGCTTTAACCTGTGCCTCA  
CGGCGTTGCTAACCAGCTTTAACCTTAGCTGCTAATCCACCCATACGGTCTAGGTACGGT  
TGAATCTCAGTAGGGATTTCTATATGTTGTGGGTTATCTAGAATGTTTCGAGCATCGTTA  
ACAACACTCACAGAACTACATCACCAACCAATCTTGTGACCAAGGCTCCCGACAGCCTTA  
AAGACTCGTGCGGGAGTATCATCTTGAATACCAGCTTGAATGGGAGTTTGATTAGAAGCT  
ACTGCTTGGATAGAGTTGCTTGTGTCAAAGATATTAGTTGCCATATTACTGTATTCTCT  
TGTAGGGCATCAATTACATCTACATTGTAACGGTCTGATGAACTGTGTAAAGTATCACCT  
GAGCTAAGCTGTTTAGTCATCATGCTGCGAATGAACTCTACTTTTGGTTCGCTACTACTA  
AGCAGCTCATCAACTACAGCTTGACGTAATTGGTATAATCAATCGGGGTCATCTGCCAGT  
GAGCTATCAATCCAGTTCATAACAAAACCAGTTGCACTCACTCCAGCCTCGTCTGTTCTTA  
TCCCACGCCATAGCAATTTTGTAAATAAGGTTCACTGACAAATTCACGTAGTTACGTTTT  
AGGTCGCTACGTGGTTTCACTGAATCTTGTGCATCATGGTATACTCACAGACTGTGGA  
CTAAAGCCCAATGCTTTTGTAAAGGCTTGAGCTACACTAACTTCTTGCTGCCAGAATTGA  
TGGCCGTTAGCTTTCATGATTGGTTATCCGTTATACATCAAATACGCACCGATTAAGTTA  
CCAGTTGATGTTGGAATGTGAGCAATGATTCGCCATAAACTGAACCATCTTAACAGCA  
TATGTCAGTGTTAAGTCATCCCCAGCTAACGCCACTTTGCCATAAACTCCATGTTCTCC  
AAGAACCAATCTGGTTAGTACCGAAGCCAAAACACGTCCGTACACACCGCCTGCCGCA  
CATGCCGCTAGTTCTGGCAGTGGGTAATCCCCACTAAAGATTCTCGTAAGCGTCTCTCT  
AAAGCATTATGTAACCGAAGCGAGAAGCAACGTCTGCATTACACCAAAGCCTCTTAGA  
GCTAATCCAGTTATGTCTTGTTCAAAGCTTCTATCACCATCGGGTTTAGGTCTTGTGGC  
TCTATACCTGCCACGATAAAGCAAAATCAACTATCAAGTTACCGTAAGTAATAACCACG  
GCTCCGAACAGCATTAGCTTGGCAGTCACTAGGATAATCTTATCTTGGGTGGATAGGGTG  
GTGCCTAACCTAGCCTCGATAAATTTAGTGGCAACCTTTTGGAACTGGAACGGAATTGAT  
TGCCAACCTTTCTGGAACCAAGCACGGTTAGATTGTGACATATTTAACGGAATGCTTCT  
GTACGAGCAAGCACTTGTTCGCTGCCATATCGTCAAACCTTAGCTGCCTTGGTAGGTGCC  
TTCCACTCTTCGTAAGCGATAACCAAACGAGATAGGAGAAGTAAACAAATCACCTTGATAA  
AAGAACAATCGACCTTTCTTAAGAATCGGCTCATCATGGATCTGGTTACTGGAATGCCA  
CTAGCCGGAATACGGTAGTCACCTTGAGCAGTAACAACAGAATCATATAAGCCTGACTGC  
TTGCATCCTTCGTAGAACTTACGAATATACGGTAAAGTTTTCTCAATACATTGTAAGTGA



CTCTAAAGAATACGTGGGTCTTTTCCTTAGTCTAAGAAGTGTAACCTTAGTCATTCACTGA  
AACCTTTTCAGTGAGTGTTGCTTACTGACTGAAGCTGCTACAGTAGAACCCATAGCCTGT  
ACCAAGAAGTGAAGCAGGAGAGAACAAACCTAGCAGAACGTAAAACGCAGCGCCTTGGATA  
TTCTGAATTGGGCCAGATTGGTTTATACGAGATAAACTTTCTGCCAGTCCACGCTTGTCC  
TTACGGTCTAGATACTCTGCTAGAGAATTGGCCATGTTGGACATATCACGTTCTTCCATC  
CTCAAATAACGCATCATTAGAGAGACTTTCGTCATGAACCATCAATAGTTTTTTCACGA  
AGCGCATCATCTAGTTTCTCAGCCACAATAGCGCGAGCAGCTTGGAAATTCTCTGTACGA  
ATATCATGACCTAGCTACATACTAGCTTGTTCACCAACGGTCTTGTAGGGCCAGTTTC  
AATTCGCTAATCGGGTAACGAGTTGAGATGATACCAAAGTATTGGCCTAACGCTTCGATT  
TGAGATATGAACTCAGCCTCTAAGACTTCCGGACCAAACCTTGATACGTTCCCTCAGCACA  
GCACTACGGATCTTACCGACGTACACGTTGATAATATATGCATCACGTTACGACAGCATT  
ATCTCACGGTCACGGAGAACTTTGTAATTCTTGTACGCGTTACGTGCTTTAAGAGTCTCG  
GCATCTCGTTCCGCATACACCACGTTATCAAAGTAACGGATTGTCTTGTGTTGTCACAA  
GTCTTACCATCTACATTGATTGGAACCTCCTCTTTAACAAAGTGGTAAGCATGCTTGTAG  
ATAAGAGGCATATAGCCCTTACGACTATTTGGAACCGTCCGCTTAGGTCACGGATAGCT  
TCACTTTCAACGATAGCGAATTTCAAACCTCTCTACCTTTTCATCCAGAACTCGTTTGA  
GTATCTAGATAAGTCAGTTGATAACCTTTCTGATACAAACCATCCAACATTTACCTGTC  
ATGTCGGTGATGATACCGTCATTAACGGGGACATACACATAGATCTCGTTACGTGCTTGG  
AAACATTGTTTGGCACTGGTAGCGTCTTCGTAATCTTTAGCATAACGCAGACTGTTACCA  
CTCTGTACCGGTGTGTTTCCACGGTATTTAAGCTCTCTATATAAGTCCTCATTATCATC  
TGCCAACCTTGGTCAGCAATCTGGCGCATTGTGGCGTATGCTTTGAACTCAGCATCATT  
AGTTGAGGTAATCAGGTCTGTCACCTTTCACGAATTCACGGTATGAATATACCTCATCA  
TTCAGTGTGCCTTTCTTTAGAATCACATCTACCTTTTGAATCCCTCAGTATTAACACCT  
TTCAAACCTTTCATTATAGCTTTTTTGAATCCACTACGTATCTTAGCACGTTGACCCAAT  
ACACGAGGGAATGTATCCACATAGAATGCACGGTCACGGTCTTGTGAAGAGTTTGGACTC  
ACTACCTTACCCATTTCTTAGCCATCATGCTAATCTTGTCTGTGTAGAAGCCACCACGT  
ACTGCATCTTGGTTCTACTCCATAATCTCTTGGGTAACGCTAGGTAGTTGTGTTGCACCA  
GTCATAGGGTTAACAAATGTCATACTTGAACCTCACATCCTTGTCCGTAATTTCAAATGTC  
TGGTTAGATACTTCGTGTGCTCCGCAATACGAGCAGCAATCTTCTCGGCAAATGCTTGT  
TGCTCTCGTGGAGTCAGTGGAACACCTGCACGGGCTATGTTTCGTAGTCTCAGCAAAGATA  
GCATCATCAGTTGACCAACGTTTCTTAACTTCGTGTGCAATCTCTGGAGGAGCACCTTCT  
AGGATAACCCCATATCTTGAATAGGAGCAGCAGTAGTACCTGCATCTTAAACGAGACATT  
GATACCGCACTAGCGGTATCCTCCGAACGAGAGGCAACGTCTACAACGGTAGCGGGAACA  
TCTCGCACGTGTGCTACATTTGAGCAGTAGACGATAGACGTTTTTAAAGCCGACACTATT  
TTGATAGCAGTTACGCCTAGCGTAGCTGTATCTACCTTATCTAGAATAGAAGCTAATTGA  
GTGTTGGATTGAGTTTCTACGCCAGTAGGAGACATTAGGAGTACCATCTGTTGGAACCTCG  
TTATCTGTTGCTTCTTGTGCAGCTTTACGCAACTCTTTAAATGCACGACTACGTTCTTGA  
GGAGGGAATCCATAAAACGCTTTCCTAGGTCGGCTAGGCCACCACCTGAAGTCATAAAC  
TCAGTGAACCAGTTACCGGCTTCTGGACGTACTGCCTGTAGCAAATCAGCAGATTGAGCA  
CTGTGACAACCCGGTAAGAACATAGCAGTTAGGGCAGCCATAGAAGTCATAGTTCCCCAC  
AAACGTTCTTCCCATACCTACCGATTTGACGACGAACCCATAATTGAGTTGCAGCATCT  
TCCCGTTCTTCTGGAGTTAGCTTAGTGTTCCAATGAGTCTACGTAGGCCAGTTCAGCACCT  
AGTTCACGGTCATAATCTCCCGACGAACCGTTAGCAATCTTAGTCAGTGGTGCAGCAGAG  
TTAGCTCATACTTGTGGATTATCTCCAGCAAGCTCATCAATAGCCATAGCTATAACAGTT  
ACAGGAGCTTCTTAGCTTCTTGTGACAGTTAGCTAGACGAACAATTGGGTCAGTATTG  
TACGCTTCCATATAAGTTTTTATAAGGTCGTTACCACCAGTACGGAACTTACTAGTGGAT  
CCACGAATAGCCACCTCTTTCTTAGATGAAATAGGGTCAAATTGTTGCTCTTGTCCCATT  
TCTAGTGGATTTGAATATACAAATTCTACACCAATGGCCATCTCTTATGTCCTTAAATTA  
TTCTTTAACGAACTGACCAAAGTCAGCATATTGCATTCCAATGTTAGCAATAGCTCCAAC  
ACTACTAGCTCGCCTAGAAGCTTTAGCAGCATTCCGAGAATAACCACTAGCTTCTTTAGA  
TAGCTGACGGGTTTGGTCTAAGAATCTCAGGTTAGCAGTGGTCTGTGAGCTAATGGACGC  
CACAGCACCTGCTTCGCCGGGGCTACCGGACGTACCGGTTTGTGACGAGCAGTATTCTCAAT  
TCTTGTCTCGTTGGATTCGGGCTAGTTGTAAAGCAAGGTCAAGTCTAGGGGCTTGTGTAAC  
ATCTGCAATCCGAGATTGGACATCTTGTCTGTTTCGTTGTTCTTTTGTGCTTGTGCTAGA  
TTCGGCAATGGAGACGGCTGTACCAGCGACAGACGCACCAGCAGCAAAAACCTGAGCAGC  
AGCTACAGCAGCGGCAGTTGCCATATCACACCTCCAATAGTTTACTGTAAACGATGTTAT  
CTACGTGGTACCCAATTCGTTCTAGAGTGGAGGTAGTAGGAGTTAAGCCAATGGGGAGAA

CTGTTGCACCGTACCCGTCTACGGAACCTTTCAGTAGAATCGAAAATTCTCTTGAACACCG  
TAGCACCTCAATACTCTGGCTTTAGGTACAAACAAATAGTAGATGCTACACATTCCTCGG  
TGAATAGGACTTTAAGAACTGCATTGTAAATCAGGTATCCGATTGCAGTTTCCTCATCTC  
TTACCACAAAGATTTTCAGCATACCCGCCCAAGGAGATTGAAGCAGCTTTCTAGATTCA  
ACTCGAAGACTGATTTAGTTGAACGAGGGTCTGCCTCAAGAAAATTATCCTCAAACAGAC  
CACTAACATACAATTCCTCAAGAACTTCCGGTTTACTTTCCATGTAAATTTTTATCATA  
CTTAGTACCTCCACTAACGGTACTGCCAACCTAACAACTTATAATCCTGGTTTGGCTC  
TGTTCTGAACACAACTGGAATGCCGTTTCTGAACCTCTAATTTCGCTTTCTGGCAGTGAT  
TACTTCATAAGGGTACACATTGATACCCTGTTTGGAGATCCATCGGCCTACGGTAACGGTA  
GTACGGACTGTGACGGGTAATCTCATTCCACTTCTTGCCCGTAGGAGAGTCGTTTAAAGTC  
CCAACGAATAGGTAGCAACCTGCTAGATTCATTTGGTCTGGTAACTCCTCCATCTACATC  
TTTGAACCATGTATCAGTTCTCAGCATGGGAGTTGCTAGGCTTGTAATTTGTTTACGGCG  
TTGAGTATCGTCTAATTTTCAGCGGAGCACTAACAGGTTAGCCTCTGGATCAACTAGCCC  
GAAGACTTTAAAGTTATCTTTGTTAAACGAATAGAATCCAAACGAATCATCATCACTTTG  
GATTGTTAGATACATAGTATCTCTGAACTCTTCATCACCGATTCTACGTCCCAATGGGAC  
TGTAACATCAGCAGACTCTACTTTAACTCTATCTATAACCAGCAACGATAAAGTAATCACC  
AACTTCCTTATTACTAATTACGTTACGCTATGGAACATGTCCGGTAAGTCTTTCTGCTAC  
AGTAATGTCACTCTTGAACCGGTTAATCAAGACTGCACCATAACGTAAGATAAAGATAAT  
CTCTAGGTCAAAGTTGTTTGGGTTGGCATTCTCTATCTCGCCAGCGGACATATTTATA  
TGGACGTTCTACAGTACCTACCAACTTAACTTACTAGAAGTAGTTAACTCATTATATAA  
GGATTGAATCTTTTGTCTGTTAGATTCTGACCAGAGTGTTTTCCAGTTGTTTGGTATGG  
AGATAGGACATTGATTCTTACTCTGCCCAATAGAAAACGGTATAACCATATGCCACAAC  
AGAACGTGGAGTCACACAACCGTAGGCAGTAATCTTGTCTACGTGATAACCAGTAGCAGA  
GAACATAACATGTGACGTGCCACTCAACAACCACTCCATTTTCAGCAAAGAAAAACAG  
ACCACTGGAAACTTCTTCCATTGCATCAATCTTACAAGCTGCGTTGATTTTTATGAAACC  
ACCGTCTGTATCAACAAGAGCACTGTCTACTTCACTTGTGGGGTCAGCAGACTGATAACA  
CTTGTTAATCTCTGCGTTAGATTTAACTAACAGTGAGAAGAATACGTGATTACGGAAATC  
AGGACGTACATCAATTTTTCTTGGGGTTGAGTGGAATCCTGCAACGAATACTCGACC  
CGCGACTGTTTGAATGCAAGAAGGTTTACCACTAGCTAACACTTGTACTGACGCCACCGT  
AGAACCATGAGGTGCAGGAGTGTTTTGCCGTTTCTCCCCGATACCGGTAGTTGTACTGTC  
TTTCTTCCGACTTGGAGTAAGCTTTCCGATTGCGTTAGCGTCTGTACCAGCAGATGTTTT  
ATATAACCACCAGATATCGTAGCCACTAGGATAAGCACCGAATGTGGCATAAAGTTGAGGT  
AATCTTTTTAGTATCCCAACCTTGGATAAGTAGCTCGTACAGATAATCTGACCATAGGGT  
TTTTGGCCGTTCTTTACTTGGAGCCGAACGTCCCCACACATCAGACTTCCAAGGAACAG  
AACCTTTCTATCTACTACAATATTAGTACGGGCAGTGATTGAGTCTGATTGAATATCCAT  
GATCTGGTTTGATATACGGTCTGCATCCTGAGCTGCAAATAAAAAGATACCCTCTACCGA  
AGCACCAATAATAACCTCTGTTGTACCTTCCGTGGTTTAAAATTCGTGGTTGTTAAT  
AAACAATTTCCCGTTAGATAACGGCTCAGCAGATGTATCAAGGAAAATTAAGTTATCACC  
GAACTGTACTGCTCCCATTTCTGGAAAGGCACTATAGTGAGTTTCCCATAACGTAAACACT  
AGATACTAAAGTTTGGTCTGAGAAGTCTACGTAGGAAGGATACAAAGTAACTGAATCTTC  
CAAACCCAAACCTTTGCGTCTTTCCCAAGCGTCAGCTTTTGAGAGGATGAAGTTCTCACC  
CTCTCAGAAAGAATCAATAGGCAGATTTAGAATGTTCCCTTCTGTGATTAGACCAGACTG  
AACTGATTGTATTCTAGATTAGTCTGGTGTCTTGCTATTGCCTTTTGCTCCTCTTTTTT  
CAGTAGCTAGGTATTGTTTGTATGCGTTGCCAAGCGATCGCTATTGAGGTGTATTGGCCTT  
TAAGAACTCTGGTACTTGATCACCGCCTTCAACCTAATCTCGTATAGAGTACCTTCGT  
TATCTGTAACCTCTACTTTAAATTCCTTTGTTACTGCCATTAATATCTCCCTAATAAGAT  
TTATCGAAATATGGACTACGACAATTTGGGCTAGTTGAAGCTGTTGGGCTGCCGTAGTTA  
GGTAATCGAATACCACCTTTGTCCTGCCAACTCTTGCGACTGATACGACGACGATGGATT  
GTAGCCGATTCTTCGTGTTTAGCGGAGTCCATTGGTCTAATCTTGGCACTGAATGCTCCT  
TTCGCTTATCTGAATAGGTATGGGAACATGCCAGCAGGTAATCAAGAATCCAATCATCT  
TCCATCAGAACTTAGGACTAATACAAGCGATGCCTTGAGTTTTATCCTTGTGGATTGTA  
GATTCTGCGTCTTTGTTGTAGCTATCGAATACAAGATACTCATCATCGAATGAAGTCCAG  
AATTGTGGAGCATTATCGTTTAGGATGAAGTACACAATGCCGTTGTTATCACGGACTTTT  
TGACTCTGGCCCCGACCTGAATTGAGAGTAGCTTGTCGAACTAAGAACTCATCTGGATAC  
AGGTACTTTAACTCAGTGTAAGATACTGGAGGCTCTTTCATTGAGGTATAGTATGCCACG  
TCAGTCATCTCTTGTATGTTGTCAGGTAGCTTTAAGTAGTTTGGTTTCTCCACATCACTG  
ACACCATCTAACTGGACTCCTCGATGATAGTAATCAATCGTTGAGTTGGTGATTAGGTTG

TCATATGAAGAACGTAGGATGTACGCCGATTGTAACGAGTCAGTGGTATCATCAATAGAG  
TTGACGTTATCACCATCCGAATCACTCGGCATGTCTTGATGAATATCAATAACGGTATAT  
TTCATTATCGGTTACGCTGTCTACCACCACCAGCCTTACCAGATCTGTCACCAGATTTAC  
CACCATCGGAACGGTTGGCACTTCGAGTACGTACTCGTAAGTTACCATCACCATTACCGC  
CACCGTTTTTCAAAGTTCTTTTGTGTCTATGTCTTTCCCGTCACCCTTATGAACTTTTC  
CCTCACGTTTCATCTTCCGACGAGCCGCATTCCGTTTCGCCCGATTCTTCTTTTGTCTG  
GAGTACCTTGGCACTTGGCGTACTCCTGTCCGTAACATACGCTTCTTTGCCATTACTGAAG  
ATCCGAGATCTTAAGAATTATCGTATCATCTTGACTAGCAACGCTGAATTGACCTGCTAC  
ATATTTTACTTTACCATCAAAGGACAACATGTAGTCAGTACCGACCGGAATAATTGAGTC  
ACGGCACTCCATAATTTCAATTCTGGTATTCAGACGGCCACCTACTGAGGATTTGACCAG  
AGTGAAGGTGTAGTGACGACGTACGATTGGCGTATATACAGCAGTTTTGCCAAAAGGGTC  
AATGTAATAACCTGTCCGAGTTGGAAATGATTCATTGTTGAGTGGGACAACTCAGTAGT  
GCCATCACCTTTGGCAAGTAAAAATGAGTTGATTGGGGCATTAAACAGCTCCTTTTACTTC  
ATGTAAGTATTCATCTGGAAGATTCTGATGTTGTAAATCAGCCATGGGAATGACTCCTTG  
TACTAGTTAGTAATTTAGTTAAGTATAATTTCTTACTGTATCATGTTATACATTACTTA  
ATTAATATACTCGTCTTCTCCAATACCTGTGAAGTCACGCTACACCAATTAGTTTTGAAT  
CAAAGTGTACACGGAAATATACAGGTAAGGAAGCCCTCCGAAGAGGCCCTTGAGATTA  
GTGTTGTACTCGGTATACGCCTAAAGTGACACGAGCATCTGTTGGGAGTCCAGCAATAGT  
TTGAGGACTAATGATGATTCCAATCTGTTTGGAGCTGTCAGATGTGTAAGTGTGACTGTTTGCATCG  
TACTTTCTCACCAGGTACGACACTTATTGGAACAGTGAGATCAATGAGTTAACATCACC  
GGAATCACCACCAGTCAGTTACAGCAATCTTGTAGTTCCAGGCACCGGACTACATGAGAC  
GCCATCCATTGAGGGTTCTACATACATTCCCACTACGCATCTCCAGCACCTCCCGTTTC  
TCGAATTACCTGTACTGACATAGTTAACAATCCTTGCGCCTATCGACGAAAGTTAGTAC  
TCCAGAGGTTAGGTCTGTTTGTACAAAATCACTGGCAATCTAAGTAACGTTGAAGGTAAT  
TACAGAACCAACGTTTGTACTCAACAGTTGTATAGCCGGTAAGGAATTAGGAGTAGT  
GGAGCTGATTCTTATAATGTCCTCTTGGAACTCCGGAAAGGCGTGGTTTTCCACCGATT  
TTCTGCGAGGTTAGGCATCAACACTTCAACATCCGTTTGGATAGGAGAAACGATTAGCAC  
ATTATCTAATGACTCTAGAGTGTGTGGGATAAACTCTAGAGCATTATCAGATTCGTTAAC  
CGACACTAGATTCTTACCCTGCCCTACGTAAGTGTGTTGGGCAATCTAACAATCTACGAA  
AGTCTTTTTACCTTGAGGCTTCCATCAACATACTCAAGAGTTGCTAGTTCCTTATCGAC  
CCAAGGACGCATCGATAGAGAGTAGGCTGGGACACCATCACTACCGCCTTTAACGTACAA  
GTCTTGTCCGAATCCGTAAGCTTTTGCACCTAGAACTGCGCCTTGTTCGTAATCAAAGG  
AGTCGGTAGAGTGAAAGTAGCCATTCCCTACAGGTTGGCTGCTTCCCATATCTCCATCAA  
CGCGATGGAGTTGTTATACGTTAGTCTGAAATGTACGTTAGGAAGCTCGTTAGTGCAATA  
TAATCCGGTTTTAACACAGTCTCACTGTATGGAACAGTTACGATAAATTCAAAGTTGAT  
TAGATCCTCAGATACGTTTGTAGTTATAACCGCGTATTCGAGAGGGCCATACACTCGCGT  
AACAGCGGAAAAGCATCACTGTACGAAATCCACACCCTGCCTAGATGGGAAATAAGA  
TTTTCTGTGGCCTTGTTAAAGAACCCTACGTTCTCTCCATACTACCGATTTTGTGTAC  
ACCACTGACACTGAGTTAGATGAAACATCGAGTTCACCCTCAGAATTGGAGAATACACT  
AGTTCCACGAATTTTCGAGGTATCCACATCCCGCTTAAACAATCTCATTGTCCGAAACGCG  
ACGATCAATTAGAGGTTCTATATTATTGTCTATGCTATCGGCAATAACACGCTTCGCCTT  
ACTAACACCGGCATTGAGAATGTCATTTGAGTTCATATCTAGGTCACCTTCCATTTGGTT  
TGGTTCACCTTCTGGGTTATCCCTGAATAGAACCTCATCATTGGGTGCGCCCTCAATCTT  
CTGGAAATTACGATTAATTGTCTCAGAAGGACCGGAGGTAACATTACTCAGGACAATCTT  
AGCCATACTATCTCCTTGGTTGTATAATTTTTTACCTATCAAAGAAAAGGGAGAGCCT  
AAGTCCCTCCTTGCATTTCGTTCAACCTAGCTTAGATTGAACCTTGACCTTTTGCACCAGC  
AGCGGCATTAGGATTCATACCTAGTTTCACATAACCAACAGTTACACGAACTTTACCTGC  
CTCGGTACAGTTGGCGAAGTACCAGCTAGCTTGAAGGTAACCTTCGGTATCAGCAGTTAA  
GGCAATTGCCAGGTACCTTCTAGAGTAAGTTTAAACAACCCACTGCTTCCGCTTGTGC  
TTCTATCTGTTCAACAGCGTTGGTATCTACTGGACCTTTAGCACCTACTGCATTAACAGG  
GTCAGTACCACCTAGACCAACACCTCGGATACGTGAGCAGAAGCATCACCAGCTAAAGC  
ACCTTTAGGCAGAACTACTTTTTTGTATGCAGCATAGTCTTCCGCGAAAGCAGAAACCCA  
CATGTCAAAGGTCATTTCCATAATGGAACCTTCGGTCTTAATGCGACCTTTTGGTGCGCG  
TGTACCACGAGGACGATAGAAGTTGTGAGTACCAAGACCAGCAGAGTTTTCAAACGCAT  
AATACTCTCCTTAGATTAATCTAGTAAAGAACCGAAGGGGGGACAATCCCTCACTCCGG  
TCATATTAATTAATTGTAAGCAGTCTCAGAAGCGAGCAGTGCAAACAGAATGTCTTTACG  
TGGGATGCCAAGACCATAACGACGACGAGCAACGAACTCATCACGAGCAATGTCTTTGTT

ACGTACAGACTCAACACGAGGAGCTTGACGTTCTGCGTACATTACAAGTATCCAGTTATC  
ATCAGCAACAAACATATGAATACACGGAACACCGTTGGTGATTGTCACACCACCTACCTG  
TTCAATCACGAGATGTGGCAGACGGTTAGAAGTGATAATGGTCCAGCCGTACAAGTTGGT  
AATGAACATGTGGCCACGAGCAAAACCGCCTTTAAACTCATCCATAAAGAATGGGTTAGA  
GTCGATAGCACTTGCAGTGAGTTGGAACCTTCGTATTCAGAGTTGCATCGACGATGGGGTC  
AACACTCAGAATACGACCACCTAGTGGAAAGTTCGCCTTCTCAGCAGAAAGTTTCAGGTA  
AATCAAGTCTTCCAGTTCGATAGTCTTGTTAGTATCTTTAGCGATACCCTGGTGAGCAA  
GCCGTTATTCTCGTTAGCATCAGCAGCAGTTAGACCTTCGTAAGCTACATGTAGATAGCG  
AGTTTCAAAGTCTTTCGATCGCACGAGTAGACTCTTGATCACGCATTGCCATCATAGT  
TTCGATTTGAGTACCGTCTTGACGTAATTTGTCAGTAACAGACCAAGCACCGCCTTTGTA  
GTCAGTAATACGCATCTGTTTCGATACCAGTCTCGATTGGGTTGTACACTAGTGGAGTTGC  
TTCTTCAACATCCTGAATAGTTACCGTACCAACAGTTTTAATGTTTAGCACTTCACCAGC  
AGGAAAATCTGAGACATTATGATACATCATTGCTGGCAAGAAATCTTCGTGTAGGTTTTC  
CGGAATGAATTTTGACTATCGCTCAGCCTCAAAAAAATGGCTTGAATTGCCAGTAATTTG  
TGAACCAGTTGCACCAGACATATGTAAATCTCCTTAAAAATTAGTAAGCATGAGAACTT  
CTTGACCACCAGTATCAGCTAAACCACATGCACGGGAGGCACCGACTAAGTCAGAAGTAG  
AACCTGTTGAACCCATTTTGAAGTTGAGTTGTGGGTCTGGCGGGGTCTGTAATTGCGCCG  
TGGTTTGGGTAGCTGTTGGAATAACAGTTCGAAGTAGTTGGATTTGATTCGACATTAATA  
AACTTAGAACTGGTTTAGGTGATTTAGCAGCGAGGTCTTTCATAAAATCGAAACCTACTC  
CTAATTCAGCAGCTTTAGCCTTTAGAGCCTCGGTTCGCTCTATTGCTATCGCCAAAATTAC  
CAATCAGGGCATTAGTTTCCGCTACTTACTTAGCTTGTGCTTGAGCTTGGGCATCACGTT  
TGTTAAGTAATTCTAACACCGCCTGTTTCATCTACACCTGCCTGGACCTGTGAGGCAGTTG  
GTTGTTGACGTACAGTAAGAGACGCTACTACGTCCTCCAGGGTCTCAGCTTTCGCTAGCT  
TAGCCTTCAAAGGCTCATTCTCTTGCTTTAAACGTTGGCTTTCAGCTTCGAGATTAGCAA  
TATGCGATTGAGCGTGTGGAATACTATCTAAAGCTGCTTGAACGTCAGTGTATTCACGAC  
CTTCACCCACATAAGCCGCAACTTCTGGATCCAGTTGTGGAGCCGCAGGAGCAGGTTGGT  
GTACGGGTTGTTGTGGTTCTTGAGCTTGTGGCTCTTGAGCCTGTGCGAATAAAGTCACTA  
GGTCAGTCATTTAATTCTCCTTATTTAAATTCTTTAACGTGATTACGAAAGAATTCTAAT  
AACTTAGAGTAATAAGTCAATTACTTGTAGTAAAGTTTTTTCTTTACTATTGTATGCAGC  
CTGTTTGAAGCCCCGATTAGGGCAATCGAAACAATCCATTTTGATTTGTTGTTCTCAATT  
CTCAGCCATACGTTGTCTTAGAATTTCCACCTGTATATCCCTGACTACCTTACTTCCAGC  
GGAATCGTTGGCGAACTGTTGCTTTTGTTCGCCTTAGATTACTTGAGTCCAAACAGTTTT  
CATACTTATCTCCTTATACTAACGGTACTTGTGCTACGTGTTTCGATATGTGTTTGAGAAT  
GGTTAACAAGTGCAGAGGTTGTCGTTGCTTCCATAACTGCAACGTTAGGTTTGCAAGTAT  
CCCACCACCTAAGCTTAGGTTGTGTTCCAACATCTTAGCCAAGTTCTCAGTAGACACAT  
GAGGGCTACTATCTTGCCAAACTGGAGTATTAGCAATACCCATTAGGCTTTGTACTACTT  
GGGCTTGTCTCCAAAGTGTGCGAGCACCTACAGGACGTAGAAGACCTTTTGCTGTAATAT  
CGTATTTTTTAACGTTTCATGAAGTTTCCACTTTGTTCATCAGAGTCAAACACACGAATGG  
TATCAGCTCCGTCTAAGTTACGACGAGAAATATCTAACATCGAGTTCAGAACCTCCTCCA  
TCAGTTTTACTTCAAAGTTCATAAACTTCTCTTTGAAGATACGGCCAGCGGCGTTTTGAA  
GTTGTTGAACCTCGCATGCTGGTTTCTCACGGCGAGTACGAATACCCATAGCTTAATGAG  
GAGCACCTGCAAACTCTTCCATCTTAGCTTCAAGAATCTGAATCTGCATATCTGCTTGTA  
GAGATTGAGTGTTAGGAGCCATCATCGCTACATCACCATCACCATTGATGTAATCTTTT  
CCAGTGGTCCCCAAACAAAGTCTCAACATCAGCTTTAACCTTCATTGGAGGTAACCCGA  
TTTGTTCAAACACGACAGCTTTTAAGTTTCCAAGCTGGTCGATACGATATTGCATACCTA  
CTAGGTGATATAGTAGTCCCATAGCGTACAGGTTATCTTGACGAATACGCCCTCCACAAT  
GGAAGATTGGAGCTTGTGCAAACCATGATGGATTCTCTTTTTCTCGATTACAAACAGGC  
GGTCAAAGATTGTGACTTTTCATATTACGCTTAAATGTCCCTGACTGAGTATGATGGTAGT  
CACCATATAATCTCAGAACCTCAACGTAAGTACTTTGGAAGTAATCGTAAAGGTTGCCAA  
ATCCGTCCATAGAGAAGCCTACAGCCCTTTCACAGTCTTCCCTAGTGTAATGCCTAGCG  
CACGACGAAATTCTCGTCCACGAGCGATTGCGGAAGCGAGAGAGGCATTCTCTGGCTGGT  
CCTGTTCCATTTGTAGTAACTCACCTCATTCAACACAGTACGAATGATTTCTGGAGAAT  
GGGCAATGTCTACAGCTACGGGATTAACACAATATCTTTTGGGTCGGTGCAGGCTGCAC  
GACGACCAAATAACGTATCACGAGTAGCGCCAGATACTCATCCTTGGTGGTTTCTTCA  
CATACGCGACGGTGGCAAACAGTTGTCGTAGTCTATGAAGTCAATTAGGATTTGACTCA  
TGATTGTGCGGAATTCCGATTCCCTAACCTTGTTATCCATGTATTGCTGAATAGCGTCCC  
CTTTGGCCTCATCCTGCAGGCTCTTACCTTCCCCTTCAACCACCGTTCATTTGGAAACA

ATGCACTAATGTAGTTGTAGTGTAAGTTATCTCGAATCTGACACAACCTTAGGTTAAAGTAG  
TTTTGTGCTTCCACGGTAACGTGCTGTTCTGTCGTAGTAGTGGTATCAGAAGCCAAGATGT  
AGTTACGTAGTTCACTCTTTTGAGATAACGACTTCTCACGCTGACTGTTCCAGTTCTGCC  
AAGGATTAGCATTCTGTTTCAGCCAGACCATCACGAGTGTCTGCTTAGGATCTGTTGTAGTT  
CAAGAACCTTGCCCGTCATTAATTAATTCCTCCAAATCTAGGGTTAAATTGAATGACGTC  
GCTTTCACGTTTAGCTCTTGCAGAACGTTGCAGAGGTTTTACCGCAATCGCTACAGCAGA  
AGCTACAGCGTCTTTTAAGTCATCATGAGGTGCACGCGTCAACAAAAGTTCATCCTCAAG  
CATTGGAATGTAACCACCTCTTCTACGCCTCTTAATACCTTGCTCATAACCGTGGATCCAA  
TACAGCAGCCATACGTTCTTCCCTTAGAACCAGCGCCTTAGTTGGTTCGAAACTCGTCGAT  
ACTAATAGTCGTGAATTCCTTGCGTAAGTTCTCTTTAATATCAGTTACAATGATTTGCTG  
TGCCGCAGTAACCTCGGCACGGAGCTTCTTAAATTACCACTTACTACGCAAAGCAGAGAT  
ATGTTTCATAGTAATCATTAAATCTTATCTATCTTGGGTCTGGTCAATATCCAAAACGTAAT  
GTAACCTTCTGAATCAATCACAATAACAAGGATTGCTGTAAAGTTCGGCCTTCTTAGATAA  
ACTAAATGCAAAGTCCACAGCAGCAATGATATTCAAAGGTCTGTCCTTAAACCAGTATCA  
ACCTTCCCGATAGGTAACGAATTTCTCATCGTAGTATTGGAAACTGCTATAGTTCAAACG  
TGCTGATTCTGGGTCTGTTGGGACATTGTCGTAAGTACTGAGCAAAGAAGTGAACACGGTCAAC  
GAATTTAGCTTCTTCTTAGGGCAGAACACGGTTATCAAACCACACTTCTTACCATCACA  
ACCACGAGAAGTACGAGGCCACAAGAATACACCATCTTCTTCTAGAACACGCTCAAAAAT  
ATCCCAAACACGTCTTCCACTCCAGTGTCTTCTCCATGTTTCGTCGAATACGGGTGATG  
CTGATTCTTCTTGTGTGCTTAATATCATCAGGATGATACCGAGTACCACAAGCCTTAAAC  
AATACCATCAGCGTTTAGGATAGATTCCATCTGAGACATAGCAGCAGCTACCTTGCGTCT  
ACCATCCTCAGTATATGCGTTATCTGGAACACTACAACGTTATCAGAAATAATAACATCAGC  
GTGCCAACCAAGTGGGGTTAGTGGTGAAGGCCAGCAGTCTTAATAGTAAAGGCTCGGACGCC  
TTCCATCTTACCTATTGGGTGGTCAACTGCGTTTGCAGTGTATTTCGATTTCTCATGTTT  
ACCCTCCTACTCGTTAATCATATCCGGCCAGTACCGGCGGTAGATGTTGGAAGTCATGAT  
GTTCTTAATATAATAACTGCATTTACAGCTAATTCAGTATACCAGAGATATACAGAAT  
TGTTGTCTCTGGACGCGTAGTCACTACCAAGCTACCCCAAGAGTCATCATGTGAGATTT  
TAAGGGAGCACGAGGTAAGTGTAGAAGTTGGTCTGCTCATGACTCTCCATCCACTATGC  
CACATCCTTGTGGACCTCACCATCAACGTAATTGTGGAGTATCCAATCGGCAGAACGTCCA  
GAAGTTAGACTCAGCACCTTCTCTAATTTCTGTCATCTTACTCAATCATACTCCTTAGTA  
GTCGTGCATAGTCTTCTCAAGTTCATCCATAACCCGTGATGCCATCCGTGTCTCACGAA  
TAATTTCTTCTTCTTGGGCGTCTGCCCCACGTTTGTGCTATCCTGCTTCGGCAAGCC  
ATTTGGCAGCATCAAAAGACTTTCCATCTCGTGCCATTTCCATTGCACTGCGTACACCAA  
TAGAGCGAAGTTGAATCCCGGCTTCTTCTTCCATTTCTCGTACATAGCGTACAATTCTT  
GGTTAGCCTTAAACTTCTTCCAGTGTGTCACCCACCTAAGCATTCCCTCGCAAATTTCA  
TCTGAGTTGGGTCTTCGATGCACTTATCGATAAACAGCCGTTAAATGCTTAGTTACTTCT  
CACCTTTGTACATACAGTATTCATCCTGAATCGTGTAAATTGAGCTAGGCTTGAATCCCT  
TCTCTACGAATAACTCCTGAGTAATCCAGCTACACATAGAGTCCTTAAATGCCTTCTCA  
TCGGACCTCCTTAATATGGCTTATTACAGGGGTAATATAAAATTAATAATTTACTAATGC  
CAAGGGTATCTTAATTTAATGGTCTTAACAGCAGCCCTCCCCGCCATCTCGGCTTGGCGA  
GTCTTGTCAAACCTGCCACCCCATAAATAATGGGTCACTAACTACTCGATATGCCGCTTGG  
CTACGTTTTAGATTCTTCTTCAATTTATCTCACATGGAACAATATCTAATGGGTTTCCAAGT  
AGTTCTTCTTTATTCACAAACGTAGAAGAAGCTTCATCCCATAACCATGACCGGAGGAA  
AGTTCTCCGGAACATAATCTTAGTTTAGTGATAGAATCTCCTTAGTTGATTAGAGGACCT  
AACTGATTACCAGCATTGACATTGTTAACTTTAGACGTACCATCAGCGGCAGCCCCAGCA  
GCTCCGCCAACCTGACCACCGAGTCCAGCAGTCTGGTTTCTGATTCACCGGTGGCTCCA  
GGTGTCCCTGCCTCGCCAAGAGTACCACCATACCTCCGTTACGACCTCGTCTTGCCTTA  
GGCCACCGTTAGCACCGGCCAGACCGTTTGTGCTGCTAGTGAGAATCCTTGACCGTTT  
CCCCATCACCACCGGGACCACCGGTAGTGTATGTAGTATCGGTCACTGTCTAGTTCCG  
TACATTGCGTTAGACTTCAAACGCCACACCGGCACCCTACAAGTTGGGGGCATAGTAC  
GTCCACCCTCCCACGGCTCTAGTGATACCGTAGGTAACAACATTTCCCAACGTCTGGACCA  
TACCAACGATATATCTCGGAGTTACCCATACGTAGGCTACAGTTACGAGCCCGAAATTCG  
ATATGGTTCCCTGCAGCGTATGTACAAGTTCCAGATAATGGGTACGTTCTGTAGATTGC  
TTAGTAAAGAAACCGTTACCACCTGTACCACCTTTACCAGCACCACCGAATCCACCGGCG  
ATTGTGCCGTGGTTGGTTATGTTAATCTTTTGGGAAATCTGTACTCGTAAGCCAGGGTCA  
CCAGCTTGGCCTACTCCAGTTCCACCAACACCACCTTAAACCATAGATCTTACCATTGTTG  
ATGATGTTAATTGTCTTCTTCCAATGCTGTCTGGAATCACAATTTCTGGAGTGCTGACG

TTTGTTGAGTACACAATCACGACAGAGTTAATCACGAGATTAATGATAGGCTCTTCTCTA  
CTACCTACTGCCGTAGCTAGGTTTAAATTTGCTGTATTCTGACTGATTGTGTAAGTAAAT  
TCGGGGTTTTGGCATTCTGCCATTCCCCGTTTTAACGAGCCCAACCAATCGTGTATTTTC  
CAAACCTCCACCGACATTAAGTTTCATTGTAGCCTGTCTGTAGTTCCAGAATCATTTACT  
CCAACCTGGCATGGTTCCTCCTTATACGTAAGTCTGTAAGCCAAATACCTTCATCTGCACCCCA  
GAAGGTGCGCTAGAAGATACAGTAATCTTTCGCTTTCTAACGGCTGCTAAATCAGGAGCA  
GAACGGGCATCAGTTGCAGCATCATATGCGGCTTTCACACGGTCAGTTGTTGCATAAGTA  
GTAGTACTTTTTGAGTTAGTAGCACGAGAGGCTCCCAATTGTTTATGGTGCTTTAACCA  
ACCTCAGCTTTAGTAGGCCAACGAGTTGCGAAGTCTGGAATGCCTGTAATCACCGACCAT  
GGTGGAACATAACCAACAGGTTTGTGTCTAGCATCAATCTCACCTTTCGAATAGGCAGTA  
CCTGCTAACTCCAATCCAGTTCTAGCATCTGCAATAAGTTGCGCCTTAGTACTTCCTTCC  
AACTTCTCTGCATTTACAGCCGTAGCGTTAGCACCTAGAGCACCTATTTCCGTTGGGGTC  
GGTTTTAACCCCGTGAGGTAGATTTTACGCCATGGGCGAGATTTCCAAGTTGTCTATTA  
ACAGATTTGAAAAATAAAACCTTACTATTATTCCCAGACCCAGTTAATAGTTGGAATGCC  
GTATCTGCTGGAGGTGATAAAAATGATACTAAGTTACCGTAATTTGTTCCCTCTTGATA  
TTTGGATTGTTGTTACCTAGGCGAACAAACACCAGTTTGTGTGGATACTGATTCAAACA  
AGAGTGTTAGAAGACTCAGCATAACATCACAGTGAGGCCACATCACAGACGGAACAGCT  
CGATCATCTGAGGCAGAGGGTTTATTACTTGGAGAGTATACCCTAACACTACCCTCATAT  
AGTTGGCTAGATGACACCACTTTATCTGGAAGTATTGTTACTGATGAGGTTGCGGCATAA  
TGTATACCTGCACTTCCAATACCAACCTGATCATCTACACCTGACCAGCATTGGTAATA  
TACACACTTCCTCTATTACCAATCACTCCGTAACCATCGATCTTTGCCACGCCTCGGTTT  
GGAGTAGTATTTACAGAATCGGAGTCGATGAGCAAGGCCGAGTCATTGTATCTCCAGCT  
TTATTTACGGCTCCTCACACTGCTGGAGTTGGTTTGTCCGTATCCGAGTAGAACTTAGTA  
TCCGCTTCTGATTTTTAGTGCACACTGTTGGCGTCGGCTAGGCTGGTAACATTACCTAGA  
CGACCATTAACGGACTGTACGCGAGTACCAATCTCTAGAATACCCCAAGTGGAACCAGTC  
CAAACAATCAGGTCAGTGTGCGAGCAGTGTGCGTGTTCACCTGTGATTTGTGTAGATACG  
CGATTTGGGTTGTTGGTACCTACAACATAGGCTGCACCGTTTGGTGATGGGTCATTTGGA  
GCCATACCTTGGTTGATTGTTTGGTCGTCTGGGTCTCCCGTCACAACGATGCTTGTGGA  
GTGGTAGAGGCGTTGTCCATCTGCGCCTTAGCCGTAATATGGATAGAACCGGCACTACCG  
GCAAGCAAGTCGCTTACCTCAACTTTCTCCAACCTTTAGTAGAGTAATTTTGAATCATT  
ACGTAATCAGAGTTACTGATAGGCCCTTTACAGGGGCCGAATCAGGGTCGATTATTTTCG  
GTTTGAATCTTATCAACCATCGAAATCTGCTTATGCTTTCAAAGATACTACACTAAATTG  
AGAACCAGTAGTGGTACTCTGCTTTGTTTGAAGTTAGTTCCCGGAGAAGTTTCGTATCC  
ATCAAGGATAACTGATATAGTGTTCCTCTCTAGGAGAAGGAATAATAAACGCCCAAGT  
GCCTCCAGAAAAACCATAATAAGTTTTGTAATTTGCGCTAGCATAAGCACGTCTGGAAGA  
CCCATAACAATACGGAACCGTTTACGCGAATACTCCAAGTCATTTAAACATCAGCAAAGAA  
TGATGGACTAAACGAGGCCAACAAAGACTTGTAATCCTCCAAACTCACCATTCGAGAAGT  
CGCAAACGGGGTACTAATCACTCCGATACGAACACTAAATGACCGTGCTTGGTTAAGTGG  
AGTATCTGTTCCACCAGACTTTGTACTTGACAGTGCAGTAGATGACCCAATGTTTAACTT  
GGTAGCACTTACACCAGTCATCACTTTGATTGTGAAACCTTGAACCAATTCCACCTTTAC  
CCACACTCCAGAACCATGATACACGCGAGATTCTGAATAGCCTTGAGATTTCTTGTACTG  
GATATCAACATCGTACACAACAGGGTGTGGGTTAATAGCGTTAATCAATGCTTAGCTCCA  
ACTAGTGCCTGTGGTTTCAATATACCACTCACGAGAACCACGTTGACCTTGGTCCCCTTG  
TGGACCTTTGTCACCTGTTGGACCCTGTGGTACCATTGCACCTCGTGGGCCTTCCGGCCC  
TTGTGGTCCGATTGGGCCTTGAGCACCTGTTGGCCGTAAGTGGACCGTGCGGACCAATAAT  
ACGTTGAGGACCTGCGGCCCTTGTGGGCCTGTTAAAACCCTATCCCCTCGAGGGCCTTT  
CTCACCTGTGGGCCACGTTCCCCTTGGGGACCCTGGATACCTTGAGGCCCTTGGTTCGCC  
TTGCACACCCTCTCGCCTTGGCGACCCCGAGCACCTTGTGGACCTGTAGGGCCGATGGT  
TCCTTGCTCACCTTGGAGTCCGAGTGGACCTTGACCAACCGGAAAACCTGGAGACCAATC  
ACCAGACGCTGCGCTTGACTTACTAAAGATCGCCCCCTTAGTCACAAATGGGAGACTGGAG  
ACGTACTGTGATGCGGACTCCAGTTTTAGGAGTTTCATCAAATGTTAGACCGTTACCAGC  
TACCTCAAAGAATCTAGGGCCTGGTATGAGTTGCCTTGCCAAACATATAGGTTACTCTT  
CAAGTTTGGAGTGAACAACAAGTGAACCTTTGTAGAGCGATCTGCAGCAAAGGCCTG  
TGCTTCGAATGTAGAGTCACATGAATAGTCTGTTGCAAAGTAGATAAATGGTGGAACTTC  
ATCATCGTATGCACTCAGACCAATAAACAAACCTTGAGCATTGATGATTAGAGAGTCGCC  
CTTATCACCTATCGAGCCAACCTGGACCAGTAGCACCGGTAGGGCCTTCCGGACCCGTAAG  
GTCTTCGTACTTACCCACGTACCATCTGGATTGCGGAAACGTAGGTTTGGACAATCCCT

TTCATCCTCTGGAGATGGACCTTGTGTGCCTGCAGGACCAACTACGCCCTGCGGACCTTA  
AATGTTTACCCTAGGACCCCACTCAATATCTACACCAGTGTCTGGGTCAATCTTGTGGC  
GAATCTAATTGATGTGGTAGCTTGAGTAATGTCGTCACCAAATTGGTGGATTGGAGTAGG  
ACCTACTACGCCGTATGGTCCCTGAGGCCCTGAATGCCTTGTGTCTTGAATATTCTG  
TGGACCTTGTCTCCAGTAGGGCCTTGGCGACCCCTCTGGGCCTGCCGTGCCTGCAGGACC  
AACTACTTTAAGTGGAGCATATGAGTAAATGTCCACCCTGTTTGTAGACGTTTGGACGTA  
GTTAAAGAATCCTACCTTAGTGCACACTGTAGGGTAATCCACTTCTGGAAATAGACGGAT  
ACCGTTTAGATACACTTTGGTAGAGAAAGGACCTGCAACTACCTTAGTACCGCTGTCGAA  
GTCAATAGTAACTCCATCACGAGTATGTGCAATCCGTGTTGGAACAATACCAGATACATC  
ACCTTCTAAGGTATTAAGGTCTTCCAGTCGTTGAGGTTCCGGTAGGGTTAGTTGGAGCGGG  
TAGATTAATTATACGGTTGGAGTTGATATCCAACCTCTTGTTCATTTGATTGGAACCACT  
CTTAACTGAGAGTACATTCGAGTTTAGAGCCTCGACAATCTTCTCAAAGTTGGAGTTACT  
TGTGGAGGTGTTAAAGCCTCCTCTTACTTCACTAAGAGTAATAGTCATAGTTATTTAATC  
TCCATAAGATTTATAGAAATAGTTATTGTGTAAAGTAACTATACTATAAAAATGATTAAG  
TATTAATGCATTCCAATATAGAAACATGTCAATACTTAAAAATCCCCCGTAGGTTACGC  
AACTACGTTAAGCGGGTAGGTCGTATTCCTTTTACTAAGTCTCTGTTGGCATCAGCC  
GTGCAAGTATTCAACGTACGCTACTCTTTAGTAACTACTCATACATGAAAGATACAATAC  
CAAGAATCTTTCGGGGCTGTGGTGTGGCCCCGACTTGTTTACTATAGAGTATCGCCCCGTA  
GAATGAAGCCATATAGACGTCTAGACCACAAATATTTTCATATTTGCTAGCTGTCATAGA  
TGACAAATAAGAAATGTGGAACGCCAGAATTTCTGTGGGAAATTTTTATGTTGCTATGCA  
AACCAAGATAGAACGCCCGTGACCCCTCTACCCCTCACCGGGGATGTGCATGTACACC  
TTTTATCTTTATGTGCGCATTTAGCTGTACTCACACATTTTTGATAGATTGGATGGTTG  
AGCATTAAACATTCACAAATCGTCTCGACAATTACCAATCTCCCACACTTGCCTATTAC  
GGGTCCGCACAGCGATTCTGCTGCGCTAACATATTGCTTTATATATTATTAGGATGGGCTG  
AGTGTTATGTATATAGCTGTACAAGTTACTGATAGCTAGCTATATTCCAAGTGGTATA  
ATAGGTTGTTTATTTGTATCTTATACACGTATATAAAGAGAGTATTACCGATTCATATCT  
ATGTTTAGAAATGTGATGTATGTCACTTGTATACCAGTTTGGATTGGTGTAAATATTCAC  
ACCGTCCGTAAGGCAACAGCCTAACGATATGGAGAGAGATGGTTACACTGTTTATCTCTG  
CTCTTCAAAAAGTGGTTGACAATGATTGCTGATTTAAGATAATCTTTACACCGTCAAAT  
GTTTGCGGTGATACGTAATCCAGTGTGCTCTGGGTTAATTGAGGTAAGCGGCGTTAGCA  
ACTACTAGCATATACCGCTCTAGATGTACCGAACAGGAAGCTAGACAACAACGCTTGCCA  
AGGTGAGGATGATTGAGTTGACATTGTCACCACGCTCTGAGGAGCAATATAGTTAACCGC  
AAGGTGCTCAAAACGTTCTTCAATAATTCCGATCCTGCCACTGATTTAACATCCGTAAGT  
AGGTTGATGAGGCGACGTCTCGCGTAGCTGTGAGGGGGTAGACTCTCAAAGGTATGGAGC  
TACGTTGCGCTCGGTTGAGATTCCGTGACGCTTTATCTATAAATCGTCCAAGTACTAA  
CCGTTATGTTTATAACTACAGTGCAGGATGACGTTGATATGGTTGAATTTTGAACGCTGGG  
TGTTGATAAGCCGTTATGAAATGCGCGTCCACCGTGTAAACAAAATTTATGCGACAGCTA  
CAATCAGCACGCCAACAGTCCGGCGTGATGAATGGTAATAGGACTGTATATTTAAGGGC  
GTTAGATTACTAATTAATTAATCTATATGTTAATTAGTAATATCTTGTGAGCTAAAG  
TTTGTTTAGTGTCTTAAATATTTATGGTGAGCGGTTAACTAATCTATTGTGTATAGTCG  
TTTAATAATGATACCCAATGTGATTCAGTTCTGTGTGCTCCGTGTTCAATGTTTACTCTC  
CAGAGGGCTAGTTAAATGTTGACTAGCCTTTATTGTATTCACTAACAAGCGAGGTATAAC  
AATGCCAGCTCGAATAACAACACTAACGTTTTAAAAGACAAGGTTAACCGCATCAATAGTCT  
GTTAGGTATTGGAATCGATGCGGTAGGTCGGTATGACCTGGAAGCTAACAAAGAAGGTTA  
TAGATTGGTTCAAGTTATGTGTGATTCGTTCTTATTATGCCAGTCTCTGACTACCTAAC  
CCGTAAACAATTAACCTGTTCTTACTGGTCTAGTCACTGGTCTAACTCTACCAAATAA  
CTAATCTCATAGGTGATTATCATGGCACTACAACACTGAATCTAACTTCAAAGCTAAA  
CTTTACAATTGGGTAAGGTTAGCAAGTTTAAAGCGTGATGAACTGCAAGAATTTATTGTG  
GTCGGTGAACACTACATGCCCAACAAAACGACACTGATTTTACCAAAGTGTGACGTAATG  
GTCGCTTGTGAAGATGTGAAGGCATTCCCTATCCAAGATGTATGTGACCACATCAAGAAA  
GTAATCAACGGTGCAGCATGGAAAGTTAAGGGTAAAGTGTTCAGAAGGCTAACAAAGAGA  
GCGACTATTGAATACAACATTGGCGACCTAGAATCTGAGGCATGGTACGAGTTTAGCAAG  
GTCACCAAACCAGTAAAAGAAATGGATATTAGCAATTCGGCTGCACGTTGGTCTAAACAA  
CTGCGTGAGAGCATTGATAAAGGTTTGCTTAAAGACGGTCAACAAGATAATGCCGAAAAC  
CTACTAAATATACTGGTTCAATTAGTAGGGTAGTAAGCCAGCAGCCATTCCAAATGAGTG  
GCTGTTATGGTTAGTGTACATACACATGATGATGAAGACTATTATGTCTATTTAAATGCG  
TCCATTCGCTTTGTCTCAATTGACCTTACTGATACTCCGTTTGTAGATACGTCGGTGC

TCATAAGTACATTAGGACTGAAGATAAATTGATTGTGATTGGGATGGTACTGTGACTCGT  
AGGGGCGGTACTGTTGGTAAAGTGTACACTGCGAAAGATTCTGAGCGTGATAACTGGCCA  
TTTGTGTCTTAAACTATAACGGTAAAACATACGCAAGCGGTGGTCTAGATTGGATTGTT  
GGTGAGTTCGAGCAGTCCGATTTTGA AAACTTGGTTGACCAGACACCAACCATTGAAGCT  
ACACCGGCCAACTAGCTGAAAGCCACCAGCATTGCTATAATACTGAGTGATTACAAA  
AGGCTATTTGATTGGGTAGCCTTTGTTATTTTCATTAACGCAACCATAGGAGAATATCAT  
ACGTATTATCCATTTTGTACGCAACGGCGTAGTAAC TAACGCAAACGTAGTAGCACAGGA  
CGATAGCCTGCACATCAAGGGTACTACCTATGTTCCATGTTAGATTTCGGGGTCAATGGGT  
TAATGTTTCGTGGCGATAAGGTGGTGGATGCGGAGACAGCACACCTACCAACAACCTTCCG  
AATGTTAGCTCTGACTGTGTAATACTAGGTGCGAAAAGTACTATCATCATCATTCCCTCA  
GCGATAAGGTGACGGCAACATTACACAACGCAATTCAAGCCGTGCCCATAGTCCAGAACG  
TTTTATGCTACGCAAGCAAACAGCAGACGTTGGACTAAACAAAAGTGGTCAATCTAATCTC  
TCGTGCCACTGGTGGTGCCGGGTTTCGTGGTTCGCTTGGTTTTTTCTGTGCGGCTATTAA  
AAAGGACGGTGCAAACATCCGTAGGCTGTCAACGTGGGAAGCGTACGGTCAAGTGTCTGA  
CTCAATAACCACAATGGCTATTGTCCACTAACTGAATAGGTATTCAATCATGTTCCATAC  
AATCACTCTGAGTGTAGCCGTA CTGTTATGGGATTGGCTATTCTGTTAAATGGTCTAAT  
GCTAATCGGCTCTATCTTAAATCCGAAGTCACTAGCCCAATCTGTAAAGGTTATTACACT  
TTTGATTAACATTTCCACGCTTGTGGCGTTGTTGTTTAAGATGCCAATCGGAGCATGATT  
GATGCTTTCCGATAAAGTTGTGCCCTTAATCCTGCTTATTTACGTATTTTTACGGAGAAC  
ATAAACTATGTGTAATAACGTTCCCAGTCGTCTCGATGCGCAAGAACGTTTACAAAAGGC  
TTACGCTAGTGTTACATCTCGAAGCGCTGTTATCTTCCCAACGAACGTAAGCGGATCGG  
TCCAAC TCCCGTGTTAAGTCTAGAAGTACTAAGACTTATCGACCAGCCATACCTCCTCG  
TGGCTTTAATCACTTAAACTGAATAAATATTAAGAGTCCATTATGGATCGTAGAATTACA  
CTAGCCGCTTGTGTTTTCGTTGCTACACCTCGTGAAAATAATTTAGCCGTATCAATTATC  
TTTGATGGTTCGTGAACTAAACGCGACTGAGTTCAATCCAAAGCGTGACGTGCCTTTAGCT  
GAAATGTTGGCAAGGCAAAATCGTGAAGAAGATTTATTTTTGGCAGCACAAACACTGCGC  
GACACAGCCTTTATGGTCGGTATCGGTGCAGTACTAGTGGATGACGCAGTACGTGACGCC  
TTCTTTGAAGCTGCAGAGAAAGCAGTCGAGCAATTGATTGTGCAATCTGAATCATTCCAC  
GCAACTAAACATTAATCCCCTAACCAGAGAGAACTACCATCACGTGCCCAATATAAGGA  
ATCATGATTGTGTTTATTATCTCTAAA ACTTTCTCAGTATTTGGTTAAACTGTTGTTTAC  
CAAATCAACACTAAAACGCTCGTTGGCTCTACCTTTGTAGCCGGTGAAGTAACGGTCGAA  
GGTACTTTGAAAGACCCAACCTTGGAAGGTGCAATGGCTGCATTTCGAGGAGTTCAGCGAA  
AACCACGCAAAAGGTGCGGCCGTA CTGATCAAAGTAGCTAAGTCTTCCAACAGAAAATG  
ACCACCAAGAAATCATTTGACTGCTTGGGAGGTATGATGAACGTTGCAATGGTTGCTCCA  
TCCGAATCAAGCCGTGAGGTAGGTTGCGATGTCTCCAAGCGGCGAGACGAAGATGGTGAT  
TGGGAAGATGTTCCACCAGGAAATACTCAACCTAGCAGGCGATTGCAGTGTTGCGGATATG  
ATGCACAGCTACAACCAAGGTGCAGCGGAACACTTAGCAGTGGCTCTAATGCTGACTGGT  
TCACTAGGCTTTACTAGCTCTAAATAATCTAATCGGACTCCTACTTTGGTGGTGGAAAAC  
CTTCCACTAACTCAAGTTGAAAGAGAGAAATACTATGAAAAGCATTTCGTTTAAATCAACA  
AATCCGTCCTGAAATCGTTAGCAACGTGCTGAAAGCTTGAGCTATTGAGAACCCAAAGCC  
TGAGTGTGAGGGTAGACCAAGTAAAAACACTTTGTTAGATGCCGCATACGCCCAATGGTA  
GAAAGACTTCCA ACTGGATATTCTATTTAGTTGTGGTTTGAAAGACGAGATTTTCAACAA  
AGAGAGCTTCGTATCTCCACGTGTTGTTGATGAACAAGGCACTGAAATAATCTACGAAGG  
GATGTACTCCAAAAATGCAGGTGGTAAGATCGAGCGCCGACCCTTCTACCAACTGGTGC  
TCTTCAACTAACCACCTTTCACCGGTGTACATCGAATGGAAGAAGCAACATGATGAGTT  
CCTTCTTCAATATGAGCAAGTGAAGAAGTGGGAACAACTCGTGCTGACAAAGCCACTGA  
AATCCGTGCTGGGCCAGACAGTGTGAACACCACCAAGCAATTGCTTCAATCATGGCCAGA  
GATTGAAGGCTTTATGCCAAGTGGTTATGTAGACCCTAGCTAAGTACA ACTACCAGCAAT  
CCTCCCAACCTTACCAACTGGAGAGTAAATTATGAAATCCTTTCTACTGAGTGTATTCTT  
GATTCTAACATTGTGCTTATCGCTTCCCTCAGAAGCTGAACCAAGTCTAATGTTACAAG  
AGCTGCCTTTGTAGAATACATTGGCAGTTGTATCACTGATAGATACATTGCAGCGGCTAC  
GCCTAACGGTAAATTTTATGTAGACTTTATCTTAGCAACTAAGAAGTCACAGATTTATTA  
CTACAGACTAGACCGCGAACAGAAACCATTGTTTGCAGATTATCTGTGGGAATTGGAATC  
TAAATACACTGGTGCCAAAGGTTGCAA ACTAGCTCTAGAAGCCATGCAAGAAGGCTCAGA  
TGAAATGGCTGCCACCTTGGTTCATGGAGAAGGTTTGTAGTGAATAAGTCAAGGGTATCT  
AATTGGATGCCCTTTATCGTTTTCTTAATCAATTGGAAACTGTTATGAAATAATATATT  
GAATCCCGATAAACCTACTATCTAGTATCTTCTACTGTGGCTGCCGTAGTAGAACAT



TTGTTTGCCGTTCTTGGTAATGGTGAGGATATGAACAATACAGGATAAATCCGAGGCAAT  
TACCAATGTGGGAATCGTTTAACTTTGGTGAGTCTGTCTCCTTGGCTCATATCTTTTCA  
TGGTCAACTACAGAAGAATTTCAACCCTTTCATAAATTTGATGGATGCCGTGATGTTGGT  
CATAAAGACGCTGCCAATACTTCATAGATTGTGTTATGTTAACGCCAGACCAGATTGCA  
GGTGTCAAACCTTGGAAGATAACATTGATGTTGTCAAATGTGTTTCGACTTAATACGCCA  
AGACTTACTGACGAGGATGTATCTCCCGATGATCCCGATATATTCTTAAGCAAGTTAGAT  
GGAGCCAAGATTACTAATGAGCATGGCGGATGTGACTTAACAAAAAAGCAACCAAATTCA  
GTTAGAAAAGTGTGGTTCTTACGGCTTTTATGGTCTGACTGCCCAGAGTTCGTAGAGAAA  
GAAGTTCGTGAAAGTTGGTCTGACGTTAGCCTAGGTAATGACCACTACTCCTGGAAAACA  
GAGGCAGATGAAGAACTATTGACCGCTACTCAAATATTAACCTTCTGGTTGAACCACAAA  
GGCGTCCCGGTGGGTGTACAGGTCCTAGTTCATTGGTGGTGGTAATTTTAGTGGATAAAT  
AGAGAGTACTTTCTAGTGCTCTCAATCATGTTCACTAAATAGGAGAAAATAAGATG  
AAACGTTTCGCTATTGCTTACACTGCACAAGAAGGCCGTAACACTAAAGTTAAAGTTTTC  
TCGACTAATGCGGAAGACAAAGAGATTGCTATGTTTGAGTTCAAATACTACCGCGAAGAG  
CAAACCGACCAACTCACCATCAATGGGTACGAGATGCACCAAATCACTAACTAACAAAGG  
TACTATCATCATGAGCACACTGCATAGAACGCTAACACTGGAAAACAAAACCGATGCTCC  
CAACGGACAAAGAGTCACTGTAGTGATCCACAACAATAAGGATTATGATGTTGAGGTGTT  
AGCTCACGAATCAGATAAATTCGGCTCTTATGCAATCTGTAGACACATTGAAGACCAATC  
ACAATTGTGATTAGTATTCAACCACTGTAGTTCTAGTAAGTGAGCTTATGTGGGGTTCAG  
TGAACGGGAGTTATTCAGTTTGCTGGAAAATATCTAACTAATACAGGTAATAACATGA  
ACCGTGAAGTAGAAGCAGGGCGCTTACTTGCCCGTGTAATTGCTGGAGATTGTGGTATCA  
ACCTAGTAATCCGAGAGTACTGTACGGTTCCAATGACTGACCGTAAGACAATCACAATGC  
CAGTGCTACGTCCCTAATGGGATGTTACAGTGCCACGGCGCAGCGTTGGTGGGCAGGAC  
TTATCCACGAGTGTTATCACCACACGGGCACTAACTCCCTTGATTTTAAGTTACTGCGTG  
AATTGAAAATCGACACCAACAAATTCCTTGGTATGGTACTCAACATGGTTGTGACCATA  
ACATTGAATACAAAGAGTTTAGGAACTCGCGGGTGCTGATGAATGGATGGATGCTCACT  
ATTTTGAGAGTTACATGAAAATCAGCCGTAAGTTTGGTAGTTATCCAGAAGAATCTAAGG  
GAGCGTGCGCATTAAAAGCCATTGTTGCCTTTGACCACACAATGCGCTCTCAAAGGAGTG  
GCATTGTTAATCTTCACTTAGGGGAGGGACTAACTGCTGAACTTGCCCGCACTATGTTCC  
AACTTTGTTGGACAAAGCCCAAGGCCTTACCTAACCAAACGAGATGGTGGTTTGCCTA  
ACCTGCACGTCTGCAATGATTTGATGGACTTTTTAGACCTAAAAGAAGAAAAAGATGGAG  
CCAACCTCAAAGCAGAGGCTTCATCCGACTCTAAATCAGGCCTAGGTGTAGGTAAGCCCA  
GCGATGGTGGAGGCGAAGGTGACGAGGGAGAAGGTGCAGGAAGTGGCTCAGGAACGCCTA  
GAGAGGGCGAAAGTGAAGCAGGTGAAGGGGAAGTACCTCAAGAGCTTATTGAGATGTTCT  
ACGGGGATTCTGGACGTACTTCCGACGATGGTAAGCGTGCTTCTGGTATTAACGTTAAGC  
TAAATTGCGATTGGGACGCACGAGATACGTCTGGCTCCCGTATGCTAACTGCTGAAGAGT  
TACAACCTAAACACTTTCCAGGCCGCGCCGTAATACTGGCGCAGATGATGTGCGGTCTC  
ACCTCAATTTCACTCTGAGTGATAAGGTCCGAAACATCCTGAAAGTTATGTCCCAAGTCA  
ACTGGCAGGGTGGTCACAAGCGAGGCAAGTTACATCGCAAAGCTGTGGCGAAAGTAACGA  
CTGGCAGTAATGTTATCTGCCGTCAAAGGAACAGGAGGTTTTATTAGATACGGGTGTAA  
CTGTTCTGTTAGATAGCTCAGGCTCTATGTCTGGACGTAGCAAGTACCTCCACGGTATGT  
TGGCGTGTGTATGGTGACTGATGCTTTGAACAAAGTCGGCATTCCGATTGAAGTTCTAG  
ACTTTACTCAAACCTTACAAAGGCTCCAACCTCGTACAACCAACATCTGATTCACAACCCGT  
TCGGTCGTGATACGGCTTGTGACATGGTAGATTCAATGGATGGAGTTGACTTAGATA  
ACAATGACGTTGGTACTGCTATTATGTGGGCATACTCTCGTCTAATTCGCCACAGAGCTA  
AGCGTAAAATCTTGATTGTGTTATGTGATGGTAGCCCTGCATGTTTGCAAGCTAACTCTA  
ACGCATTCACTAAGCAAGTGGTTCGAGTAGATTGTAAGAATCTCCAGTAGAAATCGACG  
GCATCGGCATTATGGACGGTAACGTTAAACGCATCTACTCAAAGCGATGTTATCAGAA  
CACCAGAGCAACTAGAATCAGCTCTACTTAATGTCGTTAAATCTATAATTCTCGGTTACT  
AAGGAACACATATCATGGCAACTATGACAACAGCAAATAAGAAGCTCTACGTTCTCTTG  
TAGCGGAGGCAGTGGCAGCACCTATGGCAGGTGAGGCTCGTAAAGATGAGTACGTTACTA  
CGGCTAAACAACCAGAAGCTCCAAAGAAACCTCCTCGTTTAGAAGATGAGATTCCACAAC  
CATCAGGTGATGGTGTAAATAGTATGCTGTAATTATTGGGCATTCTCTTCCATATGGTG  
AGTTCTATTTCCACACCTACAAGAAGGAAGATTGGCTGGAAGAACTACAATCTCTGATTC  
CAGAAATTGATAGCAACATGGAGTTTGTGATGATGACCTTGCTCTTGCTATTCTTATGGGCA  
TTTAATACTACATACGTGTATTCGCTTATGGCGCACCGGGAGCTGGTAAGTCAGTTACTC  
CAGAACAATCTGTGCTCGTCTCGGGTATCCTGGCATGTTCTGTGCTGGTATGGGCGGTA

CAGAGCCTAGCGACTACGTGGGTTCTCCTTGGGTGAGTGAGGGCAGTATGGAATGGAAAG  
ACGGCCCAATGTCTTACGCTGTACGCAAATGTGTATTCTTCAGTTCGATGAGCCATTCA  
AAGAGGCTGCACAACTAACATGTGTATCCAATTACTGCTAGATACTCGTCATACTCTGA  
AACTGTACGGTCATGCTGACCCTGTAAAGGGTAACTTACGTGCTCATGATAGCTTTTCGTA  
TCATGCTTGCTGATAACGTCCGTGGTTCGGCGACCAAATGGATAAGTTTTCGGCAGAGT  
TACAAGACCAATCTACTCTGAACAGAATGGTGTACAAAGTTCATGTGCCATACCCAACCTG  
AGAAGGCTGAGTAAGAAATCCTACCCCGTAAGTTCACCAACTAACTGAGCGTTAGGCTA  
CTAAGATTGTTTCCTTAGCTAACCTGATTCGTAAGGATGGGAGCAAGGAACATACCA  
TGCCTTACTCTGTACGTGATGCCAATTACTGGCTGAACAATCACTGCGTTTACGTAACC  
CTGCGTATGCATTCAAAAAGACCTAGTTCGATGGTGTCAATGGCGACGTTGAGAAGAAAG  
AGCTTGAGAAAAAGTTGAACATGGTTAAGTTCGACGAGTAAAACTCTAAGAAGATATCA  
CGGCTTATAATGGTCGCCCGGTCTGTGTGTTTAGCGCAGACCGCATTAACTAGCATAAG  
CTCGTGATTGGTTTGAGGAAGAGTATGACCTGAAACACGTCGAAGGAGAGACTGGTTCAA  
CTA ACTTCGTCATAGGCGGTAGATAAGTTTGGAGAGAGAGCGTATCCTACGGCCACGAGA  
GGGAATCAGGTGATGCTGTAGCGTGGATGTTTAAATCAGATTTGTTAAAGGGCAGTGGGT  
ATGTATATCCACTATTCATTA ACTTAGATGAGGAGGTCAGCGATAAGTACTACTCTGTGT  
AGTGGTCGTGGACTAGGACAATATTCTACTCTAGTCGTTGTTGTGTGCTACGTTTCTGAA  
CAAGTTAAAGAAGAGGCTATTAAGGCTATTCTTGGAGAGATTGGAGTCAATAAACCTCAT  
ACATACAGATTCACTAAAGAGAGCTGTGTGTATTGGTTCTTACGAGAGATTGATGCATCT  
CACTACCAGTTAACCCAACTGCAATTGCAGAGGTGGCAGAGTGGAGGAACCATAGAATA  
TGTTGAATCCACCCACGAACCAAGTGACTAAATAATTGTTAAGTTAGAGGAGTTATTAGT  
ATGATTGATACTCCTTGGTTCGGCTGTAAAGCGTGAGATAACGAAATCCAACCACATAAG  
TTTCGTGCTCTCTGGGAGAATGATGAAATTCTAGAGGTTTGGGAAAACCTGTGACCTAAG  
TGTCGTGTTAAAGTACCACATTGGATCTCTCGCACTGAACAATGACACAATGATTCATCA  
GGGATTTCGATTCACTCACTCCAGTATGGGAGATTCACTGGGTGAATTTATGCACTCATGA  
CATAACAGAGGTTCTTCTGGTGGCAGTTTTAATTCCGAATACCTAGATTAAAGCCACGT  
AGACGTCAATCCAGAGTGGGCTATCGGAGAAACGAACCATTTCTTTCAATGCAAGGAAGG  
GCACAACAACAACCGATTCCATGTTACCCCGTAGAGAACGGTGTGTACATTGGCTACTG  
CCATCAATGCGGTGGTAACGGTGTCTATCGTGAGAAGTTTGGCCGTGTTAAAAAAA ACT  
AGCTGGTAGCAGTCCTAAGAAGAACCACCGTGACTATAAACTTCCAAGGACTATTACGAC  
TAACATGTCAGAGTGGTCGTCAAAGACTAAAGCGCGGTTGTGGAAAGCCATGCTCACCGA  
TGATGAATTTAAAGATAGAGGTTTCTGGTACGATACCGAAGCAAGTCGAGTGGTACTTCC  
TATCTATTAATATGTTGAGTATCAAGGATACCGCTCTCGAAGAGTGGAGGATAACGGCGA  
AGCGAAAAACTTGGCAATGTCTAAAGACCGAGAAAATTTTCATGCTGTATTCAAACCTAGG  
CACTAGCGGCTGTAATGTGGTGGAAAGATGCTCTATCTTTTATCCGCATCAGTAGACTCAC  
CAGTTGCGTCTGTCTTTTTGTACATCTATATCAGACATTGTTCTAAATCTGAGTCGCGC  
TAATCACAATAAGTACAACATCTGGTTAGATAATGATAACCGACAGGTCAAAATCAAGCA  
GCTGCAGCTTAAAGGTAAGTAGGAGTTGTTTGGTTCCGACCGAATGATGAAGCCAGACAA  
AGACCCTAAAGAACATTCTGTCCCTGAACTCAAGGAGGTACTATACTTTAAAATTTAAA  
GTCGGTGATACGGTTAAAGTTGTAATAAAAGGTGCTATCTACACACCACATTCTATGTAA  
GGTGAAAGATACCCTGCGTGGGTGAATTGCGCTACTCTGAGACGCCTCACTAAATACGAA  
ATCACTGGAGTGCATCAAGATGCAACTACTGGAAGGGGTGTTGATAATAACTACGCGGTT  
CAAAATGCTAGTGGTCAAGTGTACATTTACGGTGAACGAGGTCTGTA ACTAGATACACCG  
ACTGTCAGTGCTCCAGTATCTGCAATCGGACCAGCACCGGTTCCGTTTGTTCAGAGTCA  
TGGATGCGTTTTGATGGGTAGGAACACGATACAATGCGTGGTTCGTTTAGTTGAAGCCCGT  
AAGATTGGCAACAGCAATAACGATGCTTGTGGCTTGTGGTGTGATGACCACCGTGAGGGT  
GTGAAGTGGACGCGTAATCACGCATTACGCAAGTTAGACGCGTTAGATGCGGCAGCAATG  
TACTCAAATTATCAGACATTAATCTGGAGTGTAAATCATGGGTGAAGAGATTAAGGTTG  
GAGATTGGGTTTCGCTATACTACTTCTCGTGGGCCTGACTTAACTCACAACAAAGAGTACC  
TAAGTATTCAGGTCTACAGTTCTGATGCCACTTACGGAATAATTCCGGTTTTGGATTATG  
TGGGTGATGTTCACTACTTGTGATGGATTTTGTGATGAGTGGTTAGGTA CTGTAATCCTG  
AATGGATTCTTGTGTTCCAGAAAGGTGATCCGTCTCCAAACGGAGGAGAGTGAGCAAGCC  
TAACAGTGTTCCGCAATGAAACCAATGGTACCGTTTCCGAAATATTGAAGGTGAGCTAA  
GGTTTGTGAGTGATTCACCTGCTACAAAAGAGCCGTTAGACGCAGTTCGTGCTGCGGCAA  
TGTTATTAGTCTTTGCTGATGAGGAGGCTAAATTGTGGGTTTAGACGTA CTGAAAATTAT  
GGATAGCCGTGATAAGTACGAACGTTACTCTCCATTTGTTTCGTGAACATAACGGAAGACCC  
TTCCGTCTGGAAGGTAAACCAAGAGATTA AAAACCTGGTTTAAAGAGGATGAAGAACGTGA

AGAAATTGATTGGGGTTCTTTCTCGACTTGGTTCTGTACTATTAGGTATGGTCACTTATC  
TAGCGACAAGCTTGATATATATCGTTCTATCTTTGTGAAATTACCTGCTCGAGTTGTTGA  
TGCGACCTTGGAACGCAGTATGGTTGCCACCTTTATCACTCGCGGTTACTGTACTGCATT  
GGCAGATTAAGCTCTCCGAGGTGCGGAAGGCGAGCCGGTCACGGTTTAAGACCTCCAAAA  
AATCGTAGATGATTTGGCCAACGAGTTAGGTTGAGTTGATGAACCTTGATTTCGTTTGTGT  
AGAAGACTCTCTCCAGGATATTGTGAAGCGTATCACCACCGGTGGCTACGATTAGCGTAT  
TCAATTCGCCAACAGGTCAGTTGGTCGTATGCCAGAGAATGGTAAGCTGGATGTGTTAGT  
AGGTCGTCGTAAAGCTGGTAAAACAACGTACATGGCGTATAACGCTTCTGGTTTTGCTTC  
TCAAATGGCAGTAGATAAAGTTGTGTTGTGGTTCAATAACGAGGAAGATGGCGGTACAGG  
CAAGGTACGTATTGTCCAAGCAGCTATCAACTGGCCTAGTGCTGACATTGAGATTGCTCC  
TTCTGGTGCATTGTCTGCTTATATGGATTATGTTGGTAACAAAGATAAAGTTAGGATTAT  
CGACAAGGCGGACATTAGTGTGCGACGATATAGAACAATACATTAAGAAGTACAATGTAGG  
CTTAATTGTTATTGACCAGTTGTGGAAAGGCCACGGGTTTAAACGTGAGACAGCGGATGA  
AGTAGTTAGCCAAACTAAACTCTTAAACTGGGCGCGTGAGATCGCTAAGTAGTATCCCAG  
TGTTATGGTTACTCACCAAGCTGATGCGCAAGCGGAAGGTCAGAAATGGTTGGATATGTC  
CATGATGTACGGCAGTAAAACCGCTGCACAATGTGAGGCAGACTCAATCATCATGATGGG  
ACGTACTCCTGAGGAGTCTGAGAAAGCTGTTTCGATTCCCTACCAGTGCTAAAAACAAGAG  
TGCGGTAGGTCCTGATGTAGACCCTGCACTACGTGAAGGCCGTGCCGAGTTACTTATCAT  
TGAAGATACTGCTGAATTAAGGAGTTCTAAATGTGTTTAGACCATTTTCGATGACCCTAA  
TGAGGTTTTTGTACAGCGTTGTCATTTGACTGTAAAACAACCATTCGTAATCATGATAT  
TGGGAAGTTATTGGCTTCTCCTTTCCATCGTGCAAATAAAATGGTGTGCTTTGGTTGCAA  
AACATTAGAAGCTGAACCTGTAGTACTTCGTCCAAACCATGCTGACCTCACAATAATCAT  
TCGTGAGAATGGTGTGTTGTTGTTGGGAGGCCAGAACCTTTAGTTCGACTTGTTGTGGAT  
GATGCGAACGTATCCTGATTTCCGTGATATGTTCCCTATCCTATGTATTTGGGATACCCA  
TCTTGCTGAGTACTTGTTAACTGGACAACACCACAAGATGGCGTCTCTTAACGAGTTGGC  
TATGAAGCATGGAGGTACATTAAGAGATGACCGTATCGCCGAATTTTGGAAAGCTGGAGT  
TGATACCTCAGACATTCCTTTCCCGATGCTCGAAGAGTATCAGAAATAAGACGTTATCAA  
CACTGAGATCGTTTTCTAGATCCAGTTGACCAAATCATTAAAGGAAGGTCTTCTTGATCC  
TACTATGACTCAGGTGGACGCTCAAATGGCTACCACTGAGATGGAATGGAATGGTATGAA  
GTTCAACAAAGACCTTGCTTTGGACTTAGCTAAACCTCTCCAAGCTGTGATAGAAGACAT  
TAATCGTGCTGTATCTTCTGTGCTGGAAGCTGTAGTTTTTCCTAAAGACTCAATCATCGT  
GGGCAGTAACTCACAGAATAGTGCTCTCATCTTGGGTGGTGAGGTCAAGTACAAAGAAAA  
AGATTACATCTACAACGACGATGGTACAATTGCTACATTCAAAGGGGGTGCTCGTGGTGG  
TCAACCTAAGACCAAAAACCTTTGGACGCTCCAATCGTATTGAAGGTTTGTGTAAACCGCT  
CTCTCCGAAGGGTAAGAACGGTTCGTATCCAATAGGTGACGACGCTCTATCTAAAGTCAA  
AGCCAAATAGTTAGGGGACGCTGTAGTAGAACAGTTGGTCGGTGACATTCTTGAATTCCG  
CCAATTGGATAAGGATGTTAACTTACTATATTGGCTACGCTTCTCAAGTGTTCCCTGA  
TGGGTGTCTACATGGTAACTATCACCACACTAAAACCTGGTACTGGTCGGTTGTTTTCTAG  
TTCGCCAAATCTGCAAAATATCAGTAACTAATGTTTTGTAAGTTATATGGTTTGTGGTCT  
ATTCGGTGTAAGACTATAGTAGGTAAGTCGTGGGTAATTGTGTGCGACAATAGATTCAA  
CGAATATACTCGGCGATGAAGGGCCGTTGCGAGTATACTAAGAACGTCCGCTACTCTCGA  
TATGGTGGGAAAGGGATTCCAGTAGAGTTCCTATCTTACCGAGAGTTCAGAGAGTGGGCA  
TACCAAATGGGTACTCGCCAACCTTAACAATAGATAGAATCGACAATGACAAGAACTAC  
AGACCAGAAAATTGTATATGGATAACTCACTCTGAGAACACGCAATTTGGTTCCTTGAAG  
TAAAGGTATCAGAATGATAGGGTAGATGGCTCTATAGGGTATGTAAATAACAATCTTACA  
GAATTTTGTAGGGAGCATTCTTAACTCAGAGTGCTGTAAGTAAAGTGGGAAAGAACTAC  
AGAGGACAAACATCAAACAGCACAAAGGTTTCACATGGCAGATGTTAAGCGATGTATAA  
TCTCCAGATTTCCCAATGGAAAAATCATGGAATGTGACTTCTCTCATCCTGAGGTAATTG  
GTGGTGCGGTGTTAACTGGCGACCCAATGATGAAGAAAGATATTATTGAGGCTGTTGATA  
CTCACTGTATGTCTGCTTCTTGGGTAAATCCAAAATACTCCTTTGAGGAAATCTTAGCAG  
GGTACAGGGCAGAAGACCCTTTCTTACCAAACCTCCAGAAGAATGCCAAGCCTGTTAACT  
TTGCTTTGCTATACGGTGCTTGTGTTGAGACTGCTGCGGAGACCGCAGGTATCGAAGTAG  
ACAAGCTCAAGCAATCATTGATACCAACCACAAACGTCATTGTGTGTTGAACCATTTCC  
AAGATGATGTAATCGAGCAAGGTAACAAGAGTCGTCAACCCTCTAGTCGTCGTAAGTAAA  
TGGGTATGCCGGCTGGTCGTGGTGAGTACCGTGATCCAACAGGACGTAACCTGTACTTTCT  
ATGAGTCCGATGCTCCTGAGTTTCTTCGTCTTCGTGGACCGATGACTTCATTCTCCCAA  
CACAAATGTATGAACTACCCGACTTAACTTTTGCAACTGTTGATATTGTACCAATGATCT

GGGGACATACCTACAAACTACTGATGACTGACAAAACATTACGTGATAAAGTGCCTGATAC  
TTGGTACAGTGCACGATTCTGTAGTGTGGTATGTTTCATCCCGACTTTCTGGATTATGCAG  
CTAATCCCCTTCGTGGGTTGACGTTACGTACTCCTGAATACGTGGAACGTTACCTTAAAT  
TTCCACATCATATGCTTTTGGCTTGTGACGTTGACATCGGCGAGGGCGCATGGTTTAATA  
TGCATGGATACAAGTATTAGGAGGTTCCATGCAAACCGAAGCACAGAAAAGATGGTACGA  
AGAAAACAAAGAGCACCACCGTGAGATGGGAAGAAAGTGGATAAGGAAAATCCAGAGTCC  
GCTTCTCTAATTAAGCTACGCCACAGATTAAGAAGAACAACGGCATGACACTAGAGTAA  
TACAACCGTATGGTCAAATCCTGTATTAACCAATGCCAAATTTGTGGGCGTACTCCTGAT  
GGAAGTAAGTTAGACACTCGTCTGTGTGTAGACCACAACCAGGACACTGGAGAAGGACGA  
GGATTGATGTGTAGATGATGTAACCTAATGTTAGGCTATGCTATAGATAATCCAGAGATA  
CTAACCAATGCAATGAAATACTTGCTGAAATAACTTAGCAAACCTACCATAAATCTTAATA  
ACAATGGGAGATATTTCTATGACTACTAAGAGTGGTACAATCACTTCTATAGCTCGCAAT  
GGTAAATCAATCCAACCTAGGTGACGGTAACTGGTACTCAGCATTTCGCTGCTTCTCAGATT  
CCGGCTGAACTTAAAGCAGGTGACTCTGTAACCTTGGAAATATAAAGAGAATGGCCGTTAT  
CGGAACATTCAAGGCAACGTTAAGAAAGCAGGTGGTTCCTTCTCCTGCTGCCAGTGGTGGT  
AAAAGTACTCCAGCTTCCGGTGGTCGGGGTAATCGTGCTAACGGTGAAGAAGGTGGTTTC  
CCAATCCATCCACTAGCGTATGAACGTGCTCTTGACCGCCGCAACGCAGTTGCTGCGGCA  
AGTACTATCATCGCTTCTAAGATTGCACCTGGCAGTGAGTTTGAAGATATTGCCGATGAT  
ACACTCCAACCTAGCAATGACCTTCGAGGCATACTCAACTAGTGATATGGAACGTGTGGCT  
ATTGCTGGTAGGACTTCTGGCGACTCTGAATAAGTATGGTTGTATAACCTTTGGCTCCT  
TCGGGAGCCTTTCTTTTCTTTGGTGGAAATATGTTAGAGAACTTGCTCGTTTACTTCGT  
ATGCTTACTGGTTGTGCTACTGTAACCTGATGTTGACCCTTCTTTGACAAGACCCGTCAA  
CAATACGTTAAGGTTCAACGGAAAACCTGTGAAGGATTACATCCACGAGGATGAGTTGATT  
CGCCAAGCTCAAGAACGTCAGAAACGTCAGAAACGTCAGAAACGTTAACGCTCTGGCAGAGTAACGT  
ATTGCTAAAATCAACGACCTGATAGAGGAATAATAATGAGTTTAGAAGATCAATTATCTA  
AGTTGGTAGACGAGTTTGGTGAGAAAACAATCCAATTGGCTGGACCTAAAGGCACCGATG  
TAGGTAAGTTATAAGCCTACCGCAATGTTTTAGGATCCATCGAACAAGGATGCAGTCTAG  
AAGAATAACTCAGAACTTCACAAGGTTATCGACAGGGTGGAAACGCGATTAGGGCTAC  
ACAATGACGATTCAGCGAACTCTCTAACCTCCTAAAGAGGCTCCTTGGTTCAAATGCAGT  
AACGAACACTGCACCAACTTATGGCAAGCCATCACGGTAAGGCAGGCTGCATACGTTAT  
GAGCGAGACGATAAAACCCGTGACTATGTAACACAGAAATCTTTGGAGATAAGAATCATG  
GCTACAATCAAACCTCTCTAAAGGACTAACCCTGAAATCTTTTCTACTAACAGTTTTAAA  
GTTAAAACCTACCAACGTGTTTCGCGATGGTGGTTCTCGTAACCTCATCTATTGTGCATTA  
ACTGCTTCTAAGTTGGGTTACAAAACCTTCTGATTTGGATTAGCCCACACGCGTTTCGA  
GATGTTGCAGAAGATATTCGTAAGCTATTCGTAATGCCAATCTAAAGGTTAATCACCTA  
ACTCTAGAGGTACGTGAGGCTTAATATGACTACATGAGCATTACTTGATTTCGGACACTCC  
AGCGGTTGCTTCGGCAATTAGCTGAGAAGCTTATCACTATTCAACACTGGATGGTGTGTTG  
TTATCAACGTTAGGAGTGATGCTCCCAAGTCGGGACAAGACTCTCTAATTCAAGTATGGGA  
GGCCACAGCGCCTCCTCAATTTGCTGTATCTCTTTCTGAGAAGTTTATTCAAGGTGTTCT  
AGATGATGCTCAGTGTGACGATTATGTGTTGTTTATTGGTGGCGGTAATAAGCACCGATA  
TGATTTACCTCATCCTAATGGATAACCCTTACAAGGGCAATCGCACCGACATGAACTAACT  
TTTCTATCTTGATGAGTGCAAAAACCTATCTCATGGAGTACCACCAACGATTGTTTTTTGA  
CGGTTACGAAGCCGACGAAGGTTGCGGCATCATGATGAGTGGGGGTATGGAAGGTTACGA  
TGAACCTTCTGTTATGTCACATTGATTAAGATATGGATATGATTGAAGGTAATCACATACG  
TTAGAGTCGTAACAACAATGGGAAAACCTACCCTGCTGAGTTCTACACGGTGAACAAAGA  
AGAAGCTCTACGAACTTCTATCTCCGACTCCTTTCTGGCGACACGACTGAGAATATTC  
CGGCTATTATAAGTTAACTGGTAAGAAATTAGTTGCTGGTATCCAATCTGCATTGGAATC  
ACTGACTACTGAATTAGATATGTGGACTTACGTTTCGCCAAGTCTATGTTAAAGCAAGTAT  
GCGTGACGAGAACATCCTTATCCAAAGTGGTCGATTGCTCTGGAGTCAACGTAAGAAGG  
TGAAATGTGGAACCTCCTACGAACGTTGTACGGTAATAGCTATAACTGCCGACTACCAA  
AAGTAGACTGTGACTTACAAATTTGTAGCTGGTATTATCGACTGACTAACCCACAATGAT  
ATGTAGGCTGTAACCTCATGTAACCTAGAACTCTTTTTTAGTCTCTGGAATATGAAGAGTTA  
GCAGCATATTTTCGCTGATCAAATGTTTACAGACCTTAAAGAAGATTACGGAGTATTTAAT  
GGTGCGTAATACTTAAACACGAAAATCGTCAAAAAGCACAAAGCAACTTTCCTAGAAAAAAC  
TCGTCATCGTCAACGTGCTGAGTACCATCGTCGCAAAGAGGAGTAGAACTTCGTGAAGA  
TTAAGCCGCGTGAGTGTGCTGTGCTAAACGTTACGAGGTCCGCAAGTCGGGATTCCGTA  
GCGGATGCGAGCATGACTTTGCTAAAAAATGTTTCAGTACCTTAAGAGTATGAGACAGAGA

AACTACCATATCCAGTTACGTTAACGAAGCATTATATGCCTGATTTTGTCTGATTAAGA  
AAGACGGAAGTAAGATGTATCTGGAATCAAGGGTCGGTTACTGTTTCTGACCGTGTTA  
ATATGAAGCGTATCAAGAAATGTTACCCCACTTTAGATATTCGTATGGTGTCCAGATGG  
GCACTAACCGGATTACTAAAGTTTCCAAAACAACGTGTATGCAATGGTGCCTAAAGAAG  
ATCTCCTTGCATGGGATTGTAAGTGTAACCAGCACACATTCCAACCTGAGTGGTTAGAGG  
AGTAGAGATGAGCAAGTATAATTGTCCACATCCAGTACCTTGGACTGGTAAAGACCTAAA  
AGGTGCTTGGCACTTCACAATCAAATTGATGGCGTTCGTATTCTCCGCGATGAAGCGGG  
AAACGCAATTTCAAGGTAACGGTAAGCCGTTATATAACTTAGAAAATGTACCGGAGGAAAT  
CTCCGATGGAGAAATTTATTATGGGAGTTGGGAAGAGTCTATATCTCACTGCTGTTCTG  
TGCTACTGCTGTTGGCTCCGTTGATGGTGAGCATGTTACTTTCTATTTCTGTTGTTGA  
TAATCGTTTAGATTTAGGTATCCATATCAATCCAGCTGCGGAGGCTTTTAATACTGCTTT  
GAGTCTTGTTTTAGCTGAGGGACACGACGGTTACTTCTCCGTA AAAATTGATGGTAAAGA  
TAACTTTACAAAGTGAAACCTAACGAACTTACGATGTTGAAGTCCTAGGTATGGTAGA  
GGTACTGGTAAACATAAAGGGCGTATGGGAGCACTAGTTACTCCAACGGGTAATGTTGG  
TCCTGGATTCACATAATAAGAACATGAGTGGTGGAAAGTCAGAATATCCAAGTTTTGAAAG  
TCCACCACGTAAAATTATTGAAGTAAATGTTGGGAATTGACTAAATCTGATCAGTTCCG  
TCACCCTCGTTATATTCGTTTACGGGAGGATAAATAATGGCCTTTGGACCTAAAGGAGTG  
GCTTCTGCTTATATAGCAATGGATGAGATAAAAGAGGACACACTTGGTGATGTTATGGCT  
GCTCCTGAACCGATTAATTCCACCATGTACGGTGCTCCTCTAGACGATATATTAGCATT  
CATTCCCTATCACAAGCTACTGGTATGGAACCAAGAGATTTAACTGGAGTACTAGAAGAA  
GCAATTCTTCCAATGATGGACTTGAGAACACAAGGATGATTAATACATCACGTAAAAATG  
ATTACATACCTGCAACTGTTCAAACATTACTTTAAGGCATTATGAAAAAGATATTATTC  
ACAACGGTGATGAGAACGTCCTCGTTATGAAGTTGAATGCGGAGTTGGGTGAGGTTATCG  
AAGCGTTCTATGAGGGTCACAGTCACGAACACTGTAAAGAAGAAATCGGTGATATGCTTG  
TGGTCTTAATCAATCTGTGTGAACCTCCGTGGTTACTTCTCGCTGAATGTGCTAACACTA  
CATTCCAGAAGAGTAGCAAGCGCAAAGGTGAAACCATTATTGGTGGTTTTGTTAAGGAAG  
GGGATATGAAGTAATGGGTAGTCCGTA CTACTAGAACCGGAAATTA ACTTGGATGGTAC  
AAACATCTTCTAACTACTGGAGTTATGGGAGCCGGTAAAACGGCTGCCCTAATTGACGC  
AGTAGAACAAATTGGAAAAGAAAGGTCCGAATAACTATTTGTTTATTAAACGAGAGGTGTA  
TAATCGTGATGAAGGTGTACGTGCGCGGGATGGACGCACTCGACCGTGTACCCCAATTTG  
AACCAAGAAGA ACTTGTTCGGGTAATTTCTTTGTCTGGTGATATTGATTGTTTGCTCGC  
TGATGAGGCACAATTTCTTAGTCACGACTTCATTAAGCTAATCTGCCTTGAGGCAACTCT  
CCACAACATCCCTAACGTAGCATTCTACAGTTTAAAGACTGATTATTTGACAATACGTT  
TGAGGCATGGAAAGAGATTGCCAGTTACGCACACCGGATGTATGAGTTACGACACACTTC  
TGAAATGTGTGGA ACTCAGAATGCTGTACACAACAAGCGGATATCTGGTGGTGATTCTTT  
TAATAAAGTTGGTACTTATAATTATCGAGCTTCTTGTCTGTATGTTGAAGTAAGGAGAA  
ACGTGTATGATGTTCAAAGGTGAAA ACTGTGGTGCGGATCGTGAAGGTTTTAAAATCGTA  
GCCAGTCCA ACTAAGTTT GAGTTAGGTGTTGAGGATTCATGCAATTCAAACGTTGTTCT  
GAATGCGTTCTG TAGCTCTAACGCTATCTAAGTAAATGAGGGTAATTACGATTATGTGCGG  
GAAGAAGCTGACTGTT CAGGCGGCGCTCGCAAAATCTGAGCTTAGTACCTGTTGTCAAAC  
CATGTGCGATTAGTGCAGGGTAGCTGATTA AATCACACACCTTGAGAATGTGACAATCA  
ACAACGAGAAGAAATTGAGCTGCTTAGGGAGTTGATTAATGAATACATTACTGAGTAACT  
GTT CAGCAATTATTGGTAGTAAAGCTGACTTTAACTTAACACGTAACAACGCTAATAAGG  
ATGCCA ACTGTATCCACGTTATGCAGAAGTTCCACACTTTTCACGTAAGCAAGAGGAATT  
ACTTGACACTTACATTGATGATTGGGGACTCAGGCCAAACGATATGTATTTCTTATTG  
TGGTACGGACTGTGTAATTGGTTATTGTCATGCCTGTA ACTCTCATATAGATGCAGTAGC  
AACTGACCAAGGCTTTACTTGTCTAACTGTGGCTGTCACGATAGCCGGTAGGTGGTGAC  
TAAGCGAGTCTGTGGTTATCTAGGTAATCCATCAGAACGCGGATTCAATCATGGGAAGCA  
TGATAAGGTGATTCGGTGAGTTAAACATAGTTCATTGAATTTATGGCGGAGCTGGTCTTA  
TGCCCTCACCGCTTTCTTTTTGAGGTGATAACACAGAACAAGTAGACCATGATGCTTTCTG  
TAGAACTATGAAGGAATTATATAATGAGTGATGTAATTGGTATCGGAAACGCTGCGGTC  
AATCCAGATAACGTGTTGGAGATGGCCAAAGGTAAGTATGAATCTGTAATTCTTCTTGGT  
TACGACAAAGACGGTACTTAGATGGTCGGACCTGACTAACCTAACACGAGAGAATATC  
TTATGGTTACTGGAGCAATTC AAACACAAATACGTACTTAATATGTCTAACGAGGTGGTG  
TGATGGGCGAGAAATTGAGGGGAGTAGCTTCCGATTTGGGCCAGACTTCTCAGTAGAAC  
TTGCTCTAGAGATTCTGGTTAATGCAACAGGTGTGGCTACGGCCAGTACTAGAGTAACT  
CTGTGCGATTAACCGGACAGACTTTTATGGAGAGGTGGGGTTTCAGTGAGGAATACTATC

TTATATACAACTCTAAAGAAGTTGGTTGGTATATTAAGCAGTGAGTAGCAGTTGACAGAA  
TGGGTTTAGAAGTGATTGATCTGGGAGCTATTGCAAACACCACAAAAGACGAACCGATTT  
GGAGTTATCCATGATTTATTTTCTTGGAAATGAAGTACACGTTGGAGATGAGGTAGATGC  
GGTGGTTCGTGGTGGTGGAGCGTTCCAAAGAACTAATCAGAGGATTGGTAATTAAGATTAC  
TCCTAAGAGAGTTGAGTTATATCAACTAGGTATTGGAGAAAGGGTAATTGTTATTAGTAA  
CATCAATAGTTTGAAGTAAAGCGAGTAGCACATTAAGAGTAGTTGAAGTGAATACATG  
TAATATTGAATTAGTATGATTAACCTCTCTCTCTGCTTATTATACTATTCCTAT

>NewGenomeName\_184

ATATATCTTTGACTTTAACAACACATCACAAAACCACGCTACGATTACTACAAATATAAC  
GGAAAGGTAGGTGCGAACAAAAGTCATGTGAGCACAGGCAAGACCGTTATTTGTGTAAA  
AAGTTAGCGACAAAACATACAGGAGATAAACTCTGAGCTTATTTTGTGCTAATTTTGT  
TACAATCCTAAAGGATATCTCAGATCATTTAGTGAAGATACCTATAATAAATGGAGAATA  
CATCAAGAGTCATTCCGTCATAAATTTAAACAGGAGGTAATTCTTTGACTCGATTATTAT  
GAGTTTCCATAGCAGGAAGCAGTTGCAAGAATGTTTCATAGTCACTTCTGGTCAGCATCCA  
AAACACATGAGAGAATATCCATCTGGCGAGGTCTCATTAGTAACATTGGTTGTATGTGAA  
ACATGCTTAGGGTACATTGAAAATTTTGATAAACTTTGTCAGTTCCTATCTGGTAAAAT  
GCCCCAATGAAGGTCATGGCGTATAGACCATTTCTAAAATTACGTTACCAAGAACATAAG  
CCGGTTATCTTAGATTCTGTTAAAACAAAGTTATGAGTAAATTTTTCGAGTATCGACATG  
TCGAATAGGATCTAATAGAACTCTTTAATTTTTGTAAAGAAATTCACCAGCGACAGTAC  
GTATAGAAATAATGGATAAAGAAGAGACACTAGAACACATTGTAGAATGTAAAGCACTTA  
TTGATAAACAAGACTTTCTTTACAAGGTTGCGTCTAGCATCTAAAGAAGCCAAAGAAG  
CAGCAGACATGAAGAACCGAGTCAATTCCTTAACTAGTGCGGTTGGTTATGAGGACCTTA  
TCGTGTGTATGGGTGTAATGGCTGCTACACTAGAGACGGCAGCCTAGAGGGATGATCTAT  
GCAAATTATTATCATATCTGAGGCACTAAAGACAGAATTAAGAAGATCTTATCAATGAGGT  
TTTAGATGAGAGAGAACTTCAGAAAACACTTGAAGGTCATTATGACGTTCCAGAAGATAC  
TGATTGGCATCCAGATGATGATGGTCTTGATTATGAAGTAAATTAAGGGATAAGAAGT  
TAAAAGCTTGTATAGAGAAATGGAAGAAGCGTTTAAAGTCGCCCCAAAATGCCACCACCAC  
CAAGTTGCCCCCTTGACCACACGTATATACTATGTTACGACTACACAGTAGTATACAAA  
CAACTTACACAAGAAAACCTAGAATCCGATCATGTCTTTGCATCTCTTAAGAAAGCATC  
AAGCACTGGGCATACTTTTCCTAGATTGGCTAAGGAGATCGAGAACTAAAGCAAGCAGC  
TCATGGTAACAATGGCGCATACAAGCGTGTGTTGGAACCAGTATTGGACAATACAGGTAA  
CGGTTATGCTGATATCTGATTCTTGACCGCACCTGATGGAGGGTAACTTCCTTTCGCTAA  
GATCTGGTCTGATGCCTTCAAACGTCGGGGGGGTAAAGGGAATATTGAAAACCTTTGCC  
ACCTCTTGGTAAATAAGACCCTGTTTCAGAATACAGTGCTGAAGTCTCCAACGCTGCAGG  
GGAGGGTTCTTATGAACGTGCATGAACACGGGCACAGAACAGAAAACCTTCTTACTAATC  
TAACATTTAAGTTGTGAGTGATCCTGCACACCCTGAGAAGGAGGTTAAGGTATTCCTATA  
CAAAGACGGAAAAAAGATTTTTGATAAACTCGTTGACGCAATGCGACTTCCATTTGAAGA  
CGAGACTCAAATCGATCCTTGCAATTTCTGCAAGGGTGCTGACTTCAAATTTGTAGATCCG  
CAAGGTCGCTGGTTACTGGAAACATGATAAGTCTGACTCTGCCCTACCTAATACACTAGG  
TGATTATAATGACAAACGTCTATAACAAATTTGCAAAGAGGCATAATCTCTTGCTGACTT  
TGAATACCCTAAGATCTTTAAGTCTTATGAGCGACTTAAGGAACGTCTTAGTGATGCTT  
GGGTAACACTGATACAGTAGCACGGCCTGATGAATCTTTTGAAGATGCTAAACCGCATA  
TCCAGATTGGGGATAAGATGATGAAAATTTTAGTGAGAATGCCGTTGCCTCTGCTCCTGC  
CGAGGATGACGTATAACTTTCTACTTTGGAAAACCTTGCTGAAGAGGACGGATTATAAAC  
TGTCCTAACGAGGGTTGTAATGACACTGCTTTTCTAGTATAATTAACATACATAAGGA  
ATACAATGTAAACTGCCACCGCTGCAATCATTTTCATTGCGTCAGTCCCTGTAAAAGCTG  
AAAGCATTGACACAGGAGTTATCGTCAAGCGTATGAATCCTCTAGAGGATATGCATACG  
AACAAAAGTACTATCGTTATGAGTATCGGAAAGAGCACGTTTCTGGCTCTACTAGATCGC  
CTGGTTACGTCGTACCTTACCGACCAGAGATTGCAAACCATCTATCTCTGGTGATCATA  
GCAGATCTCCAACCTGCCCTTCAAGAGTTTACAGAACTCCTTCAGCTGATGGTACTGAGT  
ATAGCGAGGGAGCAAGTCTTGGAGGAATCTTAGGAATAGGTGCAGGTGCAGCATTATCAC  
AAGGTGATGGTCGTTGGTGGACAATATCTTTGAGAATTGTCGGTGGATCTATGATCAGTT  
GTGAGATTGATGGAGGTTAGTGATGTCGTAACCTAAAACCTATAAAGCAAAGAAGATGT  
CGTAGCTATGATTCAGTTTGATATAAACAGACACAATCGTAATGCAGGACTCATCAATTT  
GGTTTTAGGACTTCTAATCATCGAACTCTTTAAAGATGGATTCTGTAGAGTTGTCGGAGA  
GATACCACCACTTATGGGTAACGATGTTGATTTGCTCAAAGAGATAGTGGAAGCACAAA  
AGAGGACGTATTAAGAAGCACTTTCAAGATCATGAACAACATCGGATTAGAAATTGTCGGC

TGGAGTATATTGTCAGTTGATTTACTAGCAAAAGTCGGACTCTTTAAAAGGAAATGAAAG  
ATGTAGCACTAGTAACATACTTGATTTTTATTTTTTATGTCATTCGCAGCCACCTGTGCAT  
ACATGTTTAGGTTGAAGGGCTCTACGTCGGATTCCCTTACCAAGGCATCAACTGTACATC  
CCGAGTAGTTAGGTGTTAGAGAAGGTGAACAGTTGTTACGAGTTACTTTCAAGGGATATG  
AAGAACTATCACTAGATGAAGTAAGAAAATATCCAGTAAGTGCACACGGAGACCATGAGT  
CCATGGAACCTCTGCCGCGATCTCCAAGATCGTATGGATGAATTTGATGAGGAAGACGGTG  
ATGGTGATGACGATGGTGACATCCCTGCTAAACCGTACGTCGGTTCTGGATTCTGAAATT  
GACTTTTAGTTCCCATGAAACGGGAAATAAATTTCCGGGAAAAATTTGACCCCTTTAGAT  
TTTTATGTTTGACACACGTCTTAGTAAAGACCGAGTGTCTTGAAACGCACATGGTGTTAT  
TTTTAGGACATATAAGTCGACGAATCTAACGCTTCTGACTTAGTTGTTTCATGAAGGTCC  
TTATCAATATCGTCCACCTGATTGTGTCGCAGGGAAACAATTCGATATACATTCCTTGCA  
AGATGATTAATCAGAGTTGTATCAGGCAAAAGAATGTTGGAATTAGTTAATTATGATTG  
AAGATTCCCATATCATATAGTGCTCCTTGATGTGCATAGTGGTACATCAATTATTCCTCG  
TGGAAGATTTTCATAGATCTCAATCAGCAGGCCGTGCATCTATTGTAATCAATCAAGCAA  
GAGATACAATGGATTTGATGCTAGTGCACACTTCTATCCGGTATCTTGTGCACAGAACGT  
CCAACATATAATGTATTAAAGAGTGAGAAACCAGTAACTGATCGCTTAGAAGAATGACT  
CTAAGATATCACCTTTATCTTCAAGAAAACTCCTCTTTAAAATTTGACAAGAGAGGAA  
TTACTTTAAAATGGGCCAACTCTATACTTCCTATTGGAAAGATGACATAACGTACTCT  
TAATGTTATGATGAAGCATGTGATGTAGAAACCTCTTTTTAATTATGATTTAATTTTTAC  
TTACTACTGCAGCATTCTTAACCTTTGCATATTATCTATGCAATTGGAATTGTAGTGG  
CCGTCGCCTTAGACCATCATCTCAAGATTAGACCCAGTCTGCTGACTCATCGATGAATC  
AGAGAACTGATTATATAGTGGAGACTAATAGCAAATAATGTTGGCGACAAGCATGGGTTG  
TAAAGTTTATTTGGTTGGTATGTAATATAGCATCGTTTGTATATCAAGGAACATGCAAC  
CACGCCAACATACTTTCTAGAAGGGAATATGAAGAAGGAATCAATAGAAAGGGAGTATGT  
TAAGGATAGAATGGAATACTTCAGAGAGTTCCATCGAGTCAGTGCACCAGCAGTTGTAAT  
GAAAGTGGAGGGTAAAGATGAGTAAAGTTTATGCAACTTGTATTATTGGTTCAGTCGCAT  
GGCGCACTGAAGCGCAAGCTTGTAGTCGTTGTTGGATGGGAGAGAACTTCTTTCCCTC  
CAATTGATGAAATATTCTTCCCAACTCAAGAGATGAAGTGTGAACTTGATGATTACGATA  
CTGAACACTGGACTCCTGTACAAGGTAAGTTGATCACAACCAAAGACGAGTACAGATAG  
AAGACAATGCGACTCATCCGACGGACGAAATATATAAGGTATGACTTGGTTTTTGGAAATG  
AGGACGGAGTGGGAAAGACCAGCGGAAGATGCCTGTTGGCAGCATAAACAAGGTGTATC  
GCAATGTTACACCCTCGATTCACATAACAGTAGCTAAAAATTTGGTGAAGGCGATGGAAAA  
TATTACTGGAAGCATTGTTCGAAAGGAAGCGGAGTACGACCTCTTCGTAGATGCTGATGGG  
TTGCAACTAGGATTTATACGTGACATTGTGCTATCTAAAGGATTTATTTTTAAAGCAATA  
TTTTACTAATATCCGCCACGATATCCAGTTCAGAAAGAGCCGCTAGAACTTAACTAGAA  
CTGCTCAAGCTAGAGGAGGAACTAGAACAAAGAACTACTACTGGAACCTCGAACTGGTTGAA  
CGGGTCGAACTGGTTGATGAGTATGCTTGTGGTTACTGACATCGGCTACGTTGCTAGTG  
GTGGTTGTGGTAATTCTTGCTGATGCTCTCGAATTTATTACACCTGGGGTTGCACTGGTT  
GCAGAAAGACCGTTATCGGATGATCTCACTGCAGTATTAAGTGAAGGTAAAGAAGCACTA  
CGCCTAAGATAACCAACACAATCAAAGGATGTAGAAGCGATACTGAGAGGTGACTTCTTA  
ATTTTTACATCATCTAATTCTGAATTAGGAGCGTGCGCAATGAGAGATTCAAACCTTTGA  
CGCATTCTATCTACAATTCCTTTGTTGGGAACTCTAATTCTTCTTTTTAATGCATTTAAG  
TTATCCTCATGCTCATAATTAGATACGGGATAAATTGAATCACTCTCACCTTTTGCAGTT  
CCGTCTGGTAAAACCTGTTCTTGAAGTTGAATTTACTTAAATTCCTTCTTTGACTAAGACT  
ATTCCATTATAGAAAGCATCTTTTGTTCATAGTGATGCAGAACTTCTAGATCGCCATAC  
TTTTAACAACCATATCTTGTAGACCTCCTTGACTTCTTGGCCCCCTGCTCGTAAAAATAA  
GTAATATTCTTTACCATTAATAACAACCAATCTAAAAATGGATCTCCTTATTCTACTTCG  
GCAATCATTGAGGGAGTTTCGCCTTCTACTAACGAATATGATGCAAAGAAGGTTGTATAC  
TCCCCTAGGTCTACTATAACTATAATTCTACGTCATGATTTTTTTGCTAAACGTTAATTG  
AAGGGTTCGTCATTCTTGACACTGTCGCCAACATCTACCTTTCGTCGAAAATTTAAAATAG  
ACCATTAGTACCCGTTTATGATGTCTCATTGACTGGGGAGACGATCCTCAGTAAATAGTA  
CTTCTAGTTCAACAGCAGGTAGTTGCATCATGCTCCCGACATTTCTTTTTATTGAAGTAT  
ACTGATTAGCTGGTGTGTAATTAACAGATAACCTAGAACATACACATGTATCCAGTATAA  
CATGTAACATATGTTAGTCTCATGTGCAGCAGTGCTTGAAGTGCCTAATGGAACACTAA  
ATTCATTGACGTTGGAGTCATTATGATAAATGCCAGTTCATATTGATCAGGAATACTAA  
AAAATCTATACCATGACATTACTCCAGCAATATCTCTGACAAAATTTTTTAAAATTTATTCG  
TCGTTTGATACTTGTACCTGTAGTATTTTCAAGTTTTTTAGAATCTTTTATATCTGGTA

AATTTAATAAATCACTTTTTTTGAATTACATTGGAACCTACCTTCGGGTGATCACCAACCT  
TTACATATTGACTTATTAATCTGACTTCTTGCGGTTCTTTATGGTTTCCTGCAAAGCTTT  
GAAAAGGAAATGAATGTTTTATTAATTAATTTGACTAAATATCTGCTCAACAGAAGGAT  
TGAATACTTTTCTTCTGTTCAACCTGCTAGAGACTTCATGTTTAAATTCGCTAGGACGC  
CTAGGAAACCAGATAACACATTAGGACGTTATGCAATAGGAAAAGCAAAAAACTCTGGAA  
GCACAGAGCTTCCAGAGTCTTGAAGTGCACCTGCCACGTTTTTAAAGAGATGTGCCACTTT  
GAATTGCATTGTTTCGCAGCCGCACTCCCAATACGTA AAAATTGTTTCATTATATACTGGTA  
AATGCTGTGCATTAACACCACCATGAATCGCAACATATGCTGTTAAAGGATGAAAGTTTG  
TTCTACCGACGTTTCTAGGAAAATTATTTTACCCGTAATAATCTTATCCTCCATCATGAT  
ATATAGTTTCTTTCTAGGTATTCTTAGGGAAGCTGTCTTCCCCGTAAGACCATCAACTG  
AATCACCATTAAAGTCTGAGGCCATTACCGGCGGACGTAATGCATAACATAAGATTGATT  
TACCATAACCGCCGACGTGAAAAAAGTCATTAGCCAAGATCTCTGTCTGCCTACTAACAT  
GGTCTCTATGGATTTATGAGGTATCAAGGAAAGAATCTGCCAAACTTTGCAAGAAAGTAT  
AAAGGTA ACTCCAATAACCTTATTTATAGATCGTCTTGGGAGTATGAGTTCATGAAATGG  
TGTGATATAACCTCCACGGTTCAAGAAAGGGGTATTGATGAGATTATAAATCCCTATATC  
TCCTCTGTTGCTGGTAAAAGACACAGATACCTCCCAGAGTTCTATGTAATGTTACAAGTT  
AGAAGATATTTGGTTGAAGTTAAACAATTGAGAGATACAAAAGCACCTAAA ACTCAGAAA  
CGAGTGTCAAACGTTATATCAACGAAGTCGTGACTTGGAGTGTGAACCAATCAAATGG  
AAAGCAGCATCGGAGTTTTGTAAAGATCAA AACTGGGAATTTATGTTGTTAACCGAAAAG  
GAGCTTAAAGTATAATGGCCATCCTGAACACAGA ACTTTCACAGTATCCTTGATATTTAG  
AGTTCCTAGCGTTCACGAACAAAGAAGATAATCATT CATGTTTTACTGACCTGTGCGCGG  
TATATGTTGCTGCACCTAGATTGTTAAA AAGTGATTCGGGACGTT CAGTATGAGGAAGTA  
AAACAAAAGATTCTATCCAGAGACTCCTCAACTCCGCAATCTCTTAAGTTAGTATGCTA  
ATCCTATAAGCCTTCCAATAAACAGATGACTTCTGGTTCTTTCTAAGTGTAGGAACAG  
CATTTAAGTATCCGACTGGCCCAGCGGACAGTCAGATGTCTATATCTTGCATTATGCCAC  
GTTCTCGGTATTCTAGAGCAGTTTTTCAAGAGAGGATTACATAATCTTCCGCTGAGTCAA  
ATCAATATGTAGAATATGATGATGATGATGGTTGTCCATGACTGAGAGTGTATAAATGGG  
AGACAGGAGGAGGTAAAGATGTAGTGCAAGATGAGAAAATGATCAAAGCATTGAAGCATT  
CAGGTGATCCTTATCTAATTGCAAGACAATATTGAGTCACTGTGGTATGCGAGATGAGAA  
ATGTATTTCCGTTTAAACATTGGATGAATTC AATAAAAACAATTACACCTCTAGAGCAATGA  
CTCTGT CAGTTGGACTCCTATATGCGCGCTATCGTCTTCCAGTTGCGGATGACTTCAGTG  
ATCCAGGCACATAACCAGTTCCCTAGTGAAGGTAATCACTTGACTTCAACTATTCCTGACC  
TTGATAAATATAAATATTGCAGTCTTCTAAA ACCAAAATCGACTTTTTATTTCCAGATAAC  
CGCAAAGAAATCCAGCCTAAAATTTGACCCCTAGGGTTCTTGACTAAATAACTATCCTG  
AATTGGACTACTCCGGAATTACCTAAGTTGACTGTACCAACGTACACTCTGAAACTACCG  
TCAGATGATAGCACGGTGAATTATAGACCATT CCTCGTCAAAGAAGAGAACTTTTACTT  
CTCTCAGCTCATTCTCAAACGAAGAAGAGCTAATTGTTGCTATTAAGTTATCACTGCT  
GCTTGCACAGATGTCAGAGATATTGATAAATTGGCAACTTTTGACATAGTAAACCTCTTC  
GTACAGAGCAGAACTAAATCTGGTGTCCACACTGTCAAGCTCACTTTGACCTGCCCTGAT  
GATAGTGAAACGTCTGTTGAAGTAGATATTCCTCTTGAAGAAATCAAGGTCAAAAAGACT  
AGAAGTCCCAA AACTAATCTTAGAATTGCTGATGAAGTCCCGGTTACTATGGGGTAGCCA  
AGTTTAGATACTTTTGTTGGTATGAACTTTGTTGGTGTGGTACTGAAGTGCCTGTTGAT  
CTAGTTTTTGAAATGGGAGGAATTTGCATCAAGACAATTTCTGATTCAGCACAAATTTTAT  
GACTGTCAGGACGTAGCTAAAACGTACTTCAAGCCTTCTTTGAAGGTAAGAACACTAAA  
CAGTATCAAATGGTTCAAGAATATTTTGAAACTACGCTGAAACTAACTCACACAGTTAAG  
GTTACGAATTC AAACACAGGTATCGACAGTGATGGAATTTTGGAGGGATTAGCAAGTTTT  
TTCGAATAGCCCTAATGCAGATGGACTTGATGACATAATATGGGAGCAATGTTGCTTTAT  
TTTACGATCACAAGTGGTATATAGAATATATTGACAATCTCATGCCATGGGAAAAGGGCG  
TCTATATGAATCTTCTTAGTAACTACCTAAAAGAGGACGAAACACGTATGACGTAGCAA  
AGGCACAAGGTGGCTAAGATACAAGTCTACGAGTTTATTAATCCTGGAGTGGCGACTATC  
CAA ACTCCATCGGTTGTTGCTTCGAGACAGACTATACTTGCTCAAAAAGTCTTGGTAAG  
ACATTAGAGGGCGTATGACATACAGTCCTTGAATTAGAAAAAATAACCAGCTTGCATCTA  
GGAATACAAAATAAGACGTATGAAGTGGAAAGAGGACAGGACCAGAGAAAAACAGATGCT  
GAAGCTGAAGAGTTAACAGACAAAGGTTTATCAA AATATTTCAATAAAAAGGGAAAAGAG  
GGTAAAAAATTTAAACAAGATAACAATCCGAAGGGTCCCTTTAGTAAAATGTTTGGGTGG  
GTAGCTCATCTGCTATCTCCATTGGTAGATCGAGCAAGAAAAATATTTTTTTTGTCTA  
ATTGAAGATTTACTACAGTAGACTGCAGATGAAGAAA ACTTAACTAAAATAGAGACCTTC



CTACTGAAAACAGATTTTGTCTTCAGCGAGATATATGGCTTTGGTAGATGGTTAATTAGG  
GATAATAATGTAGTTGGTATTGTCCAAGTATTTGGTAATGATAACAATTTTATTAGGTAGA  
CTTGTTAATATCGGTAAGTTTATGACAGGTAGCAGTGGGTTGAAATACCTGATGAACCCA  
TTCAATAGCATTGCTGATATTATCTTTCTAGCAAATCTTATTAGGGCCACTAGATTCATT  
CCAGGTAAAGATAGATGTTTACCGATTATTAATATTACAGACCTAATTAATAGCTAGT  
AAGCTAAACTTGAGGAGGGCAATAAGCGCAGGTAAACGGATGAATCATGGTCTTCTCAGT  
GGAGTAAGAGAGAGGGCTGAGAAAATTGGGAACGAGTGCAGGTAGTTAAATTACTCAAAAC  
ACTACCACAGGTAAAAACCGTCTTCACAGACTTACAGCTAGGGTAAAGCAAGCTGATAGA  
CTAAGCAAAGGTATTCAATCAGGAACCTGGTAACACTTTTACTAGAGCACTTAATGGTATA  
AAGATTAAATTTACAAAACCTAAGGTTTCTGGAAATGTAAAACCCAACCTCAATTTAAAG  
GTAAAACACACATTATTATAAAGCCCAAACTATTAAGGTAAAAGCTCAAGCTGGTGGC  
GGACCACAGGGCACCCCGTTGGCGATTGATCTTGATATAGGAAGTCAAGCGGCATTAGGT  
TTTATAGACCAGAAAACATCTCACAATTATCTCATAAAGTTCGTGGCAATAAGCAGGGAG  
GTGCATTCAACTGAATTTGAAAGGAGAACAAAAACAAGAGATTATGCTAAATCATATACT  
TCTGGTCTTACGGTGTTTTTCAAGAAAATTCTACTGGACGGGGTTGGTTGGCAACGAAT  
TAGGATAAACAAACGTTGGAGATGGAGACTAATTATCTGAAGACAATGCATTAGATACTG  
GGAAGTGTGATAGATCTGCTATGAATATTAATAAGTATAAGCACCGCTATAAACACATA  
AAACCTGAGAACAAGAGCACTACAAAATTTGGTGATCTGAAACCGAAAGATGATAACAAA  
TGGTGGAAACCAATAACATGGTTTGAAGCAGATGGTGGTAAATCACCAGGGTTCTTTATC  
GGTGGTTTATTTAGAGCGGTTAAATATGTAGTTAGTGGTGTAGTTCACACTGTTACTAGC  
GTTAGAAAGACTGTATGGAATGGTGTAGTCAGGTTGCTTCCAACCCAATTGCATCTACT  
GTAGCGTCATTTATTTCTGGTGCTAACGTTATCGTACCTGCTTTC AACGCAGTAAATGCA  
CTTAGTGCTGGTGTATCATGGGTACTTCAATATATGCACTTGGTGGTATCAGTAATTTT  
GCTAATATCTATAAAGTTAATGCTACTAATCTACCTACATGGATCCAAAACCTGAGAATG  
AGTATGGTTGGACAAGGTGTCACAGACATGTATCATTGTGCACTCAAGGCAGTGTCCAAC  
ATTAGTAGTAGATTTAATGTGTTCTTTGACAGGGTCAGAAATTGCGCGATTGGAAAGATT  
GGTATGCAATTTTTTAATGGTAATATTCGTGCTGCTATTGGTACTATAGGAGGGCGGAGG  
CCTGGGGTATTAGGAGGTATTGAGAATTTGGTAATAGGTTGTAGAAAAATAAATTAGAG  
CAAATCTTAGGAGCAGTTGCTGGTCTTGGAGGTTTAGTAAGTAAAGTTCCTAATATATTG  
TTAATCCCAGGCATGAAATCTATCCTAGATAAATCAGGCGAGGGGTTTAGTGCCTTAGCT  
GCTATTGGTAATATTGCTGACAAAGTAGGTATGAAAGGTGTATATCCAGATATCATGAGT  
GGTGTTC AATCTGGAAACTTTCTTGAAGGATTACCAGAACTTGCCGCAGAAATAAGCTTC  
GATCCGAGAGTTTTAGGTGCACTCGACCGAGGACGGGATTTATTACAAAATAATCAGTTC  
AATACAGAGTTTGCAATACGGACGACTAGTGAATTATTACCGGTTCCGATGATCGTAGAA  
AAAATCGTTGCAGTACCTACTCCTGTGCCAATAGATAGCGGTGGTACCCACATAGTAGCA  
CCATCCTCTACAAC TAACAGATATTGGCAACAGAAAAAAAAGGTCCGATACTAGATTTTG  
ATAAGTTTGTGACCCTAATGCGGGAGCTAGCACTACTTCTAGAGCTAATCCCAAAGGTG  
GGAATAGAGACTTAACTACTGTAGTGCAACAACATACAAGTGCAATTAATACTATGGGTA  
GAGTTGTGAATTCAATTAGCAGCACTATAGTTTCTACATAAGATGTGCAGATGAGGTTGT  
TGAAGACTGATTCAGAAAGATTTAAGACAGCATGGTTCATCCCAAGTATACGAAAGTAC  
ATCCTCCTCGTAAAAATGGAAGCATTGTTAATTTATTCAAGGGGAAAATAACCAGATTGCT  
TACAATCACTTTCAA AATTAGCAAGTGC GCTGATAAACTTTTTCTTAGATCTTCCTTCTC  
TTAAGTGGTTATCTAATCCTCAGAATCCAGCTTAGGTTGTTACATGACTTGAAGTTTTTG  
CTACAGTTTTTACAGTTGTAGCATCTGTGCTACAGTTGCCTTTGTTAGTTCTATAGAAG  
GACTGTACGATCTTTAATAGAAAGATGCTACATCGATGGAAAGATTAGGTGGTTGTA  
TAGCAAATGCAGGATTGGGAACCGCATTTCGTGGCATTAGCGTGTCTTACAAATCCAAAAG  
GGTTATCGAAACCGTATCAACCGTGCTATTATTTCGCTCACAAGGGTATCCTTCCTGCCT  
TTGCCAAACTTGCTACCCATCCTATTATTGAAGGTGCAGGATGGTTTCGTCTGCCAAAAT  
ATTCTGGTCAAATTA CTGGTTTAGTCAATAACAATGAGGAAACAATTGCAGAGGGTTTAG  
AAACAACAAGAATTGAATCTGGAGATACTATCATTGCCGAGTCTGAGTAAAAAGCACTAA  
GAATCGCAGACCTTAAAAAACA AAAAGAGGATCTTTTCCTTCTTTATTGGTAGGTTGGTC  
AAGCTAAAGAAATTGAAATGTTAATTTATCACTTAGAAACTGGGAAATCTAAAAGTTATG  
GATTTTTTGA AAATGGGGGTTATCTAGATGGGTATGCAATGAGTGGTTGGATTACTGGTC  
ATCAGTCTGGCAAGCATGTATCACTAGATGGTAATAAACGTGATTTTATTGGACATGGAA  
GTGAATATGTTGCACAGAAATCGTATGGGGGTGCATTTATTGTTTCGTTTCATACTCTTG  
CAACTAAAGAGGATCCCATCCAACATCTCGAAGAATTACTGAAGCAAGACTACTAGGAT  
TTTTTGAAGAAGGTGGTGGGTACGATTAGTTTGCTCCGAGAATGATTAAGATTCATGACG

GTTTCAGGCCAGCAGCAATACCTGAACCTAATGGTGGAAATTTCAACTGGCTATGGTTCGTT  
ATATTA AACCGTCTCATAATGTCCCTCCTACTATTTGTAGAGCGTTTGCAAACACCTGT  
TCGAACAAGATTATAAAGATCATGAAATCGCTGCTATGAATAAACCTGGTTGCGCCAAAT  
CTAGACCTCTACAAAAGCAGCATCCTTGGATCTCACCTATAATCAAGGTGCAGGTTGGC  
ATACTGGAATCACCTAGATCATGGCACCGTTCAACAAAGGTGAATATGATATCGAAGGTT  
ATGAACTAAAAGTTAATCTTCGGTTTAATAAAGTTGTACGTAGAGGACCTACTTTTTTCA  
ATTCGATGAAGAATAAAGGTTTGGGAGACGTTTTGGGACAATACCTTTTAGGTAGAGGTT  
TAGTAGTCCCTATGGACGAGTCGAAGTCAAGTAAAGGATTTGATTGGACATTTGGATTAG  
CACAAATGTTTGGGGGAATACCTGCTGCAGCTGCAACATTAGATTATAATATCAATGAGA  
ATAGACGCAATGGTTTGGAGACTATTACTAAAGATAATTCTTCTAGAGTCGTGCCTACTT  
TACATGCAGATACAAGTCCTGGATGGGGTATTGACGGAATTACCTATAAATTTGCTCGTC  
ATTTGGTATTCTACCCACATGCTGCTGAAATGTTTGTCTAAGATGGGGCAAGCATCAATTG  
GAATGGGAAAAGGATCTGATGTTGCAAGCAGCGGTAGATCACCATCAAAAATTAAGAAC  
GTGACGGTCACAACAACCTCAGTGCATTGATAGGGCGTAGGTATAAACATCGCTGGTTCTT  
CAAATGCATGGATGAAAACAATGCTTCTAGATCTGGTTGGGATTATAGATACAGTCACG  
GGCCTGGTACTGGTTACTATGATTAAGAGGGTGAGGGTGCAGATAAACTCCTATCTTAG  
GAACAGCTGGATAACCTTCATATTCGTTTCATGGGTTTACAGAAAGAAAACGCAAGGAGAA  
AATTACTAGATTCAAGTAGACTATCTGGATTAAGTTTATATGGTAGCACTACTGATCAAG  
GAGGTTCTGGAAGACCGTTTAATGACATCTTCTCGGAAGGAACATTTTGTAATATGGGAG  
ATTTCTTACAACCAAGGCTATCAACCAAACATAATGGATTCTCAGAATAGGGCGAGGA  
TTGCTCAAAATAACTGAACAAATCAGAGCTAAGAAAGTAACTGAACAAAGAAACCAAG  
CAAGAGGAGAAATCCATGCAAAGGCTTCGGAGATTATGCATATGGCGTTGGCTGTTGGAG  
ACGCGCAAAATCGGTCCAATAGGCAATTCAGTTCGACGGCTGAGTCGGCGATTGGGAGTT  
TATTAGGTGTTCAAGAAGGTGGAGGTACGGTCTCGAATCTTGGTTCAACAAATGGAACAG  
TATTACGGACTGCTGTTCTTCTTACTTCTTATAACAATCCTTTAACATGTATTTTCC  
AATTCGTAAAATTTCTTTAAAAGAAGGGATATTAGTCAGAGA ACTGTCAGGTCAGATAAA  
GATAACTCAATCCATTTACAGAAAAGGTAAAAGGGTGGAACTTCAGATGGAGCATATGA  
CTTAGTTACATCGTTAAGATGTTTTGAAATTTATGAAAGTATTGCAAATCCCTCCATGGA  
GTGCCATTTTATTTTCGACAGATGCAGGAGAACTTATAAGATCTTTAACAGGAAATGAGGC  
ATTTACTATTCAAGTTAGTACCTCTATGAAATATAGAATTTTCAATTTTCAGATCCTAGCA  
AATTC AATCAAGAATTATCACCAGACACACTAATGTAAC TTTTGAATAACTGTGTTTC  
TGATGAGTATCTAATCAACGAACTACAAATGTATTTGGTAATTCTGAAGATAGCTTCAA  
GAATGAAACAGAAGCTGGTGCTATCGTAAAATAATTATTAGGCAAAATATTTATAAAATC  
TGAGAAAAAATTGTATATTGAAAATACTATTAACGCACAATCTCTTATCTCTGCAA ACTG  
GCGAGTGTGTTGATTTAATTTATCGGATATCACAACAATGATTCGGAAATCCAGTAAAAA  
GGGTGTTATATAAAATGGGGTTCCTTTTTTCAAAAATGCACTGGGTTTTGATTTTATAAC  
AATTGACTCTATGACTCACGGTATTGTTAATCAAGAAGAAACATCTGAGGCATATATTGC  
ATCAGGTAAAACAAGACTATACACATATCATTACACA ACTAAAAGAAGGGGTGAAGCAGC  
TGATGATCAATTCAATATAAATCGTAGTGCATTTCTGAGGAGAAAACTTTTTGATGGG  
TTTAAGACTTGGTTCTTGGTCAGGATATAGTGTAGGTTTTTACCCTGTATTCATCACCAG  
ATCTAAAATGGGAACTAGCACAGATTTATATGCAGACGCTTATCCCTATTCGTAAGCTGA  
ATTATGGACAAGAATGGCAAATTAGAACGGAGGGAATGCTGTTATTTCTCAGCAGAAAAT  
GGATAATTCCTCTAAAATGCTGCTAATTTACCTAAACGAGTTAGATTATCAATGCTTCC  
TAATCAAATTTTGGATGCTAAGTTTCACAACAACCTCAAAGAAATTATCAAGAGTTAGT  
TGAATTACAAGCATGTCAATAGATGGGCATTGAATCATTACAACCAAATCATCTGACTAT  
CAACATTCCTGGCAATTTTGATTTCTATGTGGGTTTCGCAGGTTAACTTAAATATCCCTTC  
CACTAATCAAGAGGGTGACACACCTGAAAGAGATCCTAAGTATAGTGGTAGATGGTTGAT  
TGTTGCAGTAGCACATAAGGCGGTAGGTGTAACGTTCAAACAGTACTTGCTCTAATGAA  
GGCCTCGGATATGTCGAATCTCCACAATACCAAGAGGAAGGCATAGCACAACTTGACAT  
CCACACTAGCATTTTTTATAATATAAGTATAAATAATTATGGATCAACGAGGTACACAAA  
TGGACACTATAGACCAATACATACATAACCATAACGGTCAAATCGAAAATTCTCTCATAT  
CACCTTCCGCTCGTAGACACTTTAAACAAGAACTACACGGACTAGAAGAGTATGTAGAGC  
ATCACA AA ACTGAAATTGAACCGGGAGATCATCACGATCCAAAAGCATTTGTACTATATT  
CTGATGAAAGCCCAGAAGAATCACAATCCCTAGTTAATGACGATTAATTATGACAGCTAA  
TATACAGGAGTTTGTGACATTTCTTCTGGTGAGAGGAACTCAATAGATTTCTTGGTAT  
ATGGGAGAAGAAAGTCCCAGATGAATTATGTGATAGAACCCTAGATTATATTGCGTCCCA  
ATCACTCGATGAAACTGTTGGTAATGATAACGCATTGAGACACGATCGAAGGAGGTTTCT

TATCGAAATTATACCAAACATAAAGAACGGTTTAAAGAAGCTAGACGATTACCTAAGCAC  
TAAAGCAACAACCTATGCAAATCCATGGGGGGCTTTAAGCGTGCCTTTTTTACGAACAG  
TGAGATTAACCTATAAAAAGACATTGTCTTATGAGGGTTATCATGTTTCGCAATGTGAAAG  
AAATGGAATGCAATCTGTAATGAGAGAATTGGGATGGACTATCTGCTTAAATGAAATGCC  
TGAGGGAGAAGCAGAAACAGCAGTACTATTTGAAAAAATAGAAATCAACCACAGCAGGG  
GGAGATCGTGATCTTCCCTGCATCTTTTTTCTCATATTCATAGAGGTTCCCCCCCATCTAC  
ACGTAACAAGTACATTGCAACTAGTTGGTCTCTTTTTTATACCAACTGGCGGTATTAATAT  
GCAAGTAACTGCCGAGAAAGCGGGTAGACCACTTACTACAGCTACTGATCGATATTGCTA  
TACTACACCTGGTGTATGGTATACACGAAAAAGTCGAATAAATACTTTAAAAGTCTAGAAT  
ATTCTCATGTCAACTATTAATGTCGGATACGTCCAACGCAGTTCATCGCCAACAGGTGAA  
TTACCTGCCAGTGGAACAATTAATCGGCTGGCGGCCGACACCCATCTCCTGACACAGAT  
GCAATTTCTGCTGCTGCGGACGGAACGCTGACTGTAGCAGGTGTTGTGGAGACACCTGCA  
ATTCTAGATAAATCAGGTAATCCGCTTGGTGGTTGTCAAGATCTACAAGTTGTTCAAAGG  
GTTTCGTAACCTCATATGGTGAGTTTGGTAGCTCAAGTTATCAGAACAACACTAATAACTTA  
AATGCTATTGGTGATTAGTATATTGACATTTTCGACTACAAAAGCCAACGCTGCGATTTTG  
TGTCAGAGGGAAACTAAGATGTATGGTCTTAATACTGAGCACCAATAGGTTTACTTAAGA  
AGAAGAATCGGTAGTGGTGGTTTTAGTTCGTTATTTTCATGCCTATTGATCACATAGCACT  
ATTGATACATTTGCAGGAATTAACTGGCAAACCTTGCAACGGTACCTTCGAAGGAGAGTAA  
TTGTCGGCATTCAATTGATACACCAAACCACTCTACAGGGACGGCACTTCGTTCCAGCAA  
TACTTTGGAGCTTGGGCAGGAAGAAGTATCGTCTTCAGTAATCGGGATGCTAACAAAC  
CAGAACGCTCGTGGTAGGGATGTTACGATCTGCTATGAACTTGCACCTTATTCTTTAATT  
ACAACGACACTGCCAGTTCAAATCTTTAAAACCTCCATCTTAGGGTCTGCGATTTCAAAG  
ATAAGACCTGATCGTGTATGGATCATCTATGAAGGTGATCTGTGAATTCTTGGGTGGTTT  
TCTGAAAATACATAGCGTAGACCTAATGATGCTGAGATACTTGCCGAACCTTACAGGCAA  
TTGACTGCTTTCAATGCTAGGCAATATCAACGTAATAGACCATCTGCGTATCCAGATTTG  
AAATCACAGGTAGACATGTTGTATCATGACATCAAGGACAGAACGTTAGGTAGTTGAACA  
CGGATTGCAGCAGTTGAAGCGGTAAAAGCATAACCTCATGAACCTTTATGATTGAAGATT  
TTATTATAGGCCAGTGGACAAATAGCTATCAAGCACAAACAACACCTCACCATTTTTCTA  
CTGTTGAACTTTATGGGAAAAGGAAGAAGGTGGGTATCATTCAACGAATTTTTATAGCA  
GAGACAGTGCTAATAAACCATATAGTGAAAGATATCACAGGGTTATAGTAATATCCTTTG  
ATACATTTATTGTAGAAAATTATAACTTAGACTGGAAACCATCATAGAATTGTGATATGA  
TATAAACATCCGATGGTGAAGCATGGCATGCACACCTAGTAGGGGATAAATGCACTGGTT  
CAAAAGACTATACGATTGTATACGAGATCACTGTTTACGGGAATCGACTGTATAGTATGA  
TTCAAGGATAACGTGATAAAGGTAACATGGTATGGGGTATTGAGGGCATTTATAAAGTCA  
CTCGCCGTATGGACCCCAAATAAACTTGTAGCGATCTCAAAAAAATGTAGACCATTGTTG  
GGATGCTAAATAAACCCACGGTCAATCTTGTTCGGAAAAGATGCATTTTTCTGGTGGGTTG  
GCGTAGTAGAACATAACGAAGATCCTATGGAATTAGGTAGGGTCAAAGTTCGTGTGCCTC  
GATACTATACTAACGTACGAGGCGGACCAACTACAGTTCACCTACAGAAAATCTACCGT  
GGGCGTCATGTTTACAACATGCTGCCAAGCAGGTAACCTCACGGGCATGATGAAAGTTCTG  
GACAACTCTAACCTGGTGAATAGTCATCGGATTTCTTTGTGGACGCCGATCAGGCACTGA  
TGCCTATTGTCATGGAAGTTCTTCGTATTCAGAAATCAGACGAGACAAAAATTTAACACC  
AAATAGCTTTTACTGGTGAAGCAATGTAGCCAGGTCTTAGTGTTAATGCATCTGCATTAC  
ACCCCGCAAAAACAAACTCCACAATGGCAGGAAATATAGAAGAGGGTTTCCTGAGACAAG  
GTGTAAATTATACAGTTTGCCTCCTGGCTCGAAAATACAAGAGGAAGGAGGTAGTGTTT  
CTCCTAGGAATCTTGGAACTGCTGTAGGTATGAATGGTAGTGAAAGTAGTACTGTGTAAC  
TGATATATCCAGTAAAACCAATACCCACTGCTAATGGTGTTCGTGGTGGCTTGGGGATCAC  
TCGAATATAAACTATGATCTTTTTCTTTAAGATATTGTGGACCATTACAGGAGCCCTCGTAA  
AAAATGAAGACGGGGACTTCTCGATTTTCATGACGTGAAAAATTGTAATTGCAAACGCGT  
TAACTGGTAAAGCTGCAAAAATTCATTAGTGCTATATTTACTAAACTCGTTAGTTGTATCA  
GGCAATCTTAGGCAAACCTTGCAGAACAATTAATGTTATAACCTTACTTGCAGGTGCAA  
CTGGCATGCCATTTGTCAATTTTACTGGTGTATGGCTGCAGTTCAAAAGATTTTGTAGTG  
CGCTTTGCCTTGTTGATATAGATCTTTTACGTCTCAATCAATCTACTATTGATAGTCTTC  
TTAGCATTGTTGCAAATATCCTTGGAGGTATCATCTTTCAAGTACGAATGGTCATGAACA  
GTGTTTCAGAAAGTCATTGATGTTATTGTTAGCTCTGTTCAAATTGTTCTTAATAAAGCAC  
TCGGCATTGAAAATGATCTAAAATCTATTATCTCTGGAAAGGTAAAGGCACAAGAAGTCA  
TTGAAACATAGCAAGAAGGAACTCAAATATCCAACGATCTTCAACGTTACTTTTAAAAG  
CCATAACTAACTTAACTGGATTGATGGCATTATTTCTTAAGTTTGCAGGAAGTAAATGTA

AACGGACCCTTTATGGTGTGCTGAAAATGATAAAGGTGGGTATCCTCTATTTGATACATCTA  
AGTGCACACATGAGGAAGCTCGCTAATATCAACAGCATTTCGAGGAAGACATAGAGGTGCTT  
GTGGCTAAAATGTAAAGGGTGGCGAATTACTTGATAATATAATTTCTCGAGCCGATCCTA  
ATTTGTGACGGCTAAAACCTTTGTAAATGGTGTCTCTGAATTATATCTTGGCACACCTG  
GTCGTCTAGCAACAATAATCCGTAAAGAAAGTGGAAACAACATTTTCATCAGTTATAGGAA  
ATCAAAAAGCGTAGGCTGAATATACTGTCAAGAAAGCATTGCGTAAGGAAAAAACAATG  
TATCTGCTGCTAAAATAGACAAAAAATAAGTTGATGACAGAAAGGGACCAACAGAAAAGA  
AAGATGATGTTGAGGTTGCAGATCAGGCAACGTACGTTGGTAACATCCCTGAAGAAGTCC  
ATGGCGATCAATGTCGAGCAATTGATGGGTCACGGGGTACTAATATTGAAGGTGACTATC  
GTTTAGACATTACAGGTGATTGTCATATTTCTGTTGGTGGATCCTTTATGCTGTATGCTG  
AAGGTGCACCTAACAGGTAAAACCATGTGGAAGTCCATCTGGTGAAAAAGACATTAATA  
CACATTCATTGACATTTGGTTCTGATGTTAAAATGGATATCGCACAGTGTGCTGATTTTCTT  
ATGAAGGTTTCAAGATCTAATATGGGTGCGGCTACTACACAAATTAAGTGGATCTAACAGCG  
AAGTTACATCTACAACAACATAACATTGCTAGTGGTGGAAATTTATTGACTGCAGAAAAC  
CTGTTGACATTACTATACCATCGTTAGTAGAATCAATTAATAATCCCTCCTTACCCCATAC  
CTAGGGTTAAAACCTGGAATTTCTTAGAAAAGTTGGTGGTTCTATTGAAACATATACGACAC  
CTGGTTTAGATGCAGCAGATGCTATTTCTAGACATACCGTTGCAAAGCCTGCTGGATATG  
CCTTTCATCAAAAATGGTTTGGCATACAAAGACGTAGTTATAACAGGACCATGGCTCGCAA  
CGGCTACAGCAGGTCTTGCTAGTTTAAACAGCGGGTGCCGTAGTTAATATCACTGCAGGTG  
ATTCGATGAACACCACTGCAACAGGAGCAGTATACATAAAGGGTTTACGATATTCCTAA  
AGTAGTGCTATACTATGTGTGTGTTTCGCGAATGCCCTACTTGGATTGGTCCACAACACCT  
CCGCAGAACGACAGGAGACCCCATGCAAGACAGTCAGGTTGCGAAAATGTTTCTTAATTT  
CTCTAGGAGAGCTGTAAAAGCCGAGATGTTGAAGCGTACGACAAAACAATAGGATGTGA  
CTGGAATGAAGAGGGAGCGGAATGTTTCTCAGAAATTATTTCTCACCTTTGTGATGTCCT  
TGAAACTGATCTTACTACCTATTGTTTTGCAGAATCCGACTGATTGTTCCCATTAAGAT  
TTTGATCCCAACATAACATTTCCGATTTATATCGCAGTAATCACTGTATTGTTAGCTTC  
TATGGTATGTACAGGGGCTGCTTTGCAAATGAAGGATTGATACACCCATGTGACGACCAG  
GACGACTAAAACCTATGATTGGACCTATTGGCATTACATTAGATCAAGCAGATGATAACGT  
TCATTTTATGATTAATACTAACTGAACACCAAATAGTTTGTGGAAACATATCAACACCTAA  
GGGATCTGTTATGTTGGTTCTTGTAATGAAATTGCTCCTGTATCTGATGAAATCCAAGG  
GCAAGTTCGAGGAGTTTCGTAAACGTATTACGGAGTGAGATGCCGCTGAAACTAGACCTG  
GCGTGGAATGCTTTTTTCAATCAGAACGCAACGTGCCAAAAGCAGAAAAAGATGCTAATC  
TAACTAATTAGGAAATGTGGATTAATTTCAATGAATACTGTAATTTCCATGCAACTGCGG  
AACTGGCGACACCACTCAAAAAAGGAAAAAAGAGGGATTTTAAACCTCAAGCACTTCCT  
GCTGCTAAACAAGAGTACAAGCATTACAGAAAAGACTGGGAGTGGGGCGGAATCGGTAG  
ACGCACCAGACTTAAAATCTGTTGGGCTTGTTCCCGTGAGAGTTCAAGTCTCTCTACTCC  
TACTGTGCGGGGACTACGAAAGATCTCTATCTAGAACGAGTGCTCCCGTCATAACATAC  
GAAAATAACATGACAGTATTAATCATCATAGTTGTGCTCACTGTATTAGCGGGAGCACTT  
ATAAGGTACTAAGATCCGCATTAATGAAAGTTCCTACTAATACGGAACCTTTCCGTTT  
TGTTAATTGAGGATTTGTATACACAGGCAGAATTGCTTCTAATATGCTGAGAGTTAGAT  
TACTATCAATCTACTAGGTATATACTTGATGCAAATACTAATCCTGCTGTGACAGATGAT  
GGAAAACAAAAGCTCGAAAACAAGAAAACCTTGTTGATAATGTTTTCCAAGTACGAGAG  
TATCCTGGTATTTGAAATCTATGTAGAAATGTATTAGGACCTAGTTTGATATGTCATAGT  
GATGATCTTTTACAGTGGAAATATTTCCAACCTGATGTAGATCACTCTTAACTATCATAT  
TATGATGATGGTTCATATTATCTACCACACCACGATAACACCGTAGTCAGAGTGATATTA  
TTGTTTTAGAAAGCTGTTAAATGTTTTGAAGGCGTGGATTTTGTATTTGAAGATTATAGA  
ATGACTCTTAAATGTTGAAACACCTGCGCAGTAGCATTTCCTGGCACTACCAGACATGGT  
GTCACTCCTATCAAAAATCGAAGATCAACATGAAGAAGTGGTTTGGTGGTACTGTTTA  
TCACATTTCTTTGAATTTTAGATAAAGGCGTACTTAGTTTATCCCTTACCACCCAGAAAAG  
TTTGGGCAACAAAAGACTATATTTATGATTTTGAAAAAGGTCATGGGGAACCTTACACCTG  
GCATTTGGATCTCAGTAATGAGTATTCTAGCAAACGCATTATATGTTGAAACATGGCAAA  
CTGATTAAGATGCATTCTACGATATGTTACCTCGCAGTGGAGTTGTATGGAAACCAGATA  
TTGATTGGTATGATCAGTTGCCATTAGATGTATTAATACATTCGGAATGTTTTGATTAGA  
ATATTACAGTTGCAGATACACCTATACTAGGTAGATGTCCGGTTCTTTAGTAAGAATAAGA  
AGATGCTCGCAGGAGAGTATCAGTTTCCTATTGATCCTGCACCCCTGAGTTCTCCGCCT  
TAGATGTAAACTTTTTCAGAGCATGATCCAGAACATAAGACATTTAGCAGCATTACTCTAG  
ACAATGTACACCTTGCAGGACAACATAAACAAGATGTCAGTTCTTCGATAATAGATCGG

TAGATAATGATAATCTCAATAAAACTGACTTCAATATCTGCAGTCAATACTATGCAGTAG  
AAACCCTACTGAAGCGGTGGTCAGTAGGTCACACAGATGAGCGGGCATATATGGCAGGAG  
CAGAAGAGGAAGAAGAATTAGTCCCAACAGAGGGTTGACTTTCTTTATAAATAGACCTGT  
ATCAAATAGTGTGATTATCTGCGGGAGCCCGTGAAATATCTCAGCTGGATCCAATATCAG  
TTGCTGACCTATTGGTTGAAGCACTTTTACCCGTGGTAGTGTGCGGACCCATCGATTACTA  
ACAAAAAGCACAAAGTAAAGCAACACTTTTCGTGGAGTTGTACAAGGAAATGAGGGATCTG  
CTGGTCTTTATTTTATTAGACAGCGATCGGGGGCTATATTAATGACCGTACGATTAAA  
TCGGAGTTGCGTATGGAGATGGTGGTTTATAGTTTAGTAGAGGCTGCAAGACGGCAACTA  
GATCTCCGCTATTTGTAAGTGTGTTGGTGATACTGATTCTAATACGGACATTGTTTTTCG  
CACCGAAAGGAACGGTAACTGTCAAAGTTACGGGTCTAATTACTATCGATGACGGGTCTT  
TTACCTTAGACGATGTACAAGGACCTAAGGCAAGATTTTCGGGTAAGTAATGTTTAAACGG  
GAACTAATACTCGTGTTTTTACTCCATGCCATTACATCTGGTGATGGAACACTCTTGA  
TAGGTGCGGATCTACTGAAAACACTAAGAAATAAGACCATTCTTAATGACGAGGACAATC  
TCGGTATTACTAATGGCACTGATGAAGCAATATTTCAAATTATCTGGGGTCATACATTAA  
ACGTTAGAAGATCATTTTTTTATCCTGATGCGGGAACAGTAACAACACTACAGTAAAAACAA  
CTGCAACTGAATTTACATGGTTAGATACAAACGCAGAACAACAGCATTAGTAAGACTC  
TTTTAATTCTAACTAGCACAAAGAGGCTGAGGTGGAATCCTACTGGGCACAGTACAAGA  
CTACTGCTCTATCTGCTAATTGAAGTCTTACTGTTTCTGATTTATCGGGTCTCTTGCTT  
TCCGTGGTGCCACTCCTGTACGCCAGAACAATACTGTTGATAATTTAATACTTCAAGATT  
CAACGATTGCTTCAATGCAGACTACGTATTCAGTTGCTAACTCAAATTGGTTTACCAACG  
TAACTGTTGAAATACCTCCGACTGCATACCTATATAGCACAGGAGTTCCCTATACACTTG  
CTACATAGGCTGCTAAACAGGAGATTTAAAATAAAACATCGATTAACCCGGTGCTGAGGG  
GTGCAAAATCACAACTGGAGGTAGTGTACTCTTTCTATAGATGATATGACAGCAAACA  
GAACTTTCAGATTCCCTTATTTTATGATGCAACTCTGTTATCTACTGCAAACGTGACAATTC  
ATGACGTTACATTTATGCAGGTATTAGGGCAGCAAACCTTCCTGGTTCGCACAAGACATC  
AACAAATTGATCTACGCAGGATTTCAACTAAAATGGCTAATCAAGATTTACCTGCTTGAA  
ACGAACCGGCAGCGAACCCGAATACGTTGTTCTATTCTGCTAATGTTAGTAAATCTGCAA  
GCACGATCATCAACGTGGCTAATGATGGAACAGCATCAGACTACTCTGTTGCTCATAATA  
ATTTTATGATCAGAAGTTAGTAGTAAAGGGTTCTGGAACGGCAAAGAATTTACATGAGTATG  
ACGTCTTCATTGCATATAAGATGCCATTTGACTCTGCCTTTGTCCCTGCAGCACAGGGTT  
TTATGGGCGGTCTTCAGATTAGGAGTGCTGATAATGAATCAAAGTTTAGATATGAATCTG  
CATTTATTCCTGATTATGTAGAACTGTTTGTAAAACTTTTGCTATCAGAGAGATTACGA  
TTGAAAGTGTTACTGGTACGTTCTCTACTGGTAATACTATTACCAAAGGTTCTGGTAGTG  
ATACATCTACAGAAGTGATCTATGCTATAAATGGAAATATTCTTCATGTGCGATCTTCTA  
CTCTTCACGGATCTTGTGCCGGGTGACTGCAGATGACAGTATTGCAAACGGTGCGGGTG  
CATCAGCTAGAGTTGCCAGTCGTGGTGTAGGGTCTGCATCTAATAAATTTGTATTCTCTC  
GCAGATCAGGCGGAACCTTACGACCTTCGTTAGATATCTGCAGGAAACGGTTTTGAATCAT  
TTAACAATAGATAATACAGATTTTATCTTGTGACTCTACTAACTCAGGTCACGTTTTGG  
CATTATCAACTACTATTAAGGGTGAGTCGGGTCCAGACCGAACAACGGGTAACACTGATG  
CTGGAACCTGAATATACTACTGGTAAAATACTAATGGCACCATTTGGTGCTTGCCGTGTAT  
ACATTC AATATGCTTTCCGTATCACTTCACCTACTTTGGTATACTGGAAGAACTCTCTAA  
CTGTAATTGCTGCTAAAAGTAGTTTTGGTGTATCAGAGGCATATCTTACCACAACCTTATA  
CCCCTTCATTCAATGCATTTTATATCTATGAGGTAGAGGAATCTTGGACTAACTCTACGT  
CTATCTTTCTTCAGAACAGTATCACATATACTGTTACTGCTCAATCTTCTAGAGCGTAAG  
GTTATGATCGTAGGTATAGAGGTAATAACTTATATGTTATTGAAGGACTCAACTCTGCTA  
ACTTTGCAGGTACAGACACAATCTTAGATAACCCGAAGTTATCTACTGCAACAAGATCTA  
CTGTGACTGTAAGTAGTGTGCTTATTCAACTGCTGCTGTGGAAAATAATTACATTATTC  
AACGGTCAACTAACGCTGAGCATGCAGTCGCAAAGAATACTTCTAGTGTTGTTGGACCTG  
GTGGTAGATTGATTATCATCAGCACTACACAAAACAACACCTTTTCCCTTCTTGCGTTTT  
AACTTCCCTCAACTGCGTTCAATCCCCGTATTTTCGGCAGTTAATTAAGAACGAACAAG  
CGGATAGGTAATGTCGCTAACTAGACTTAAGAATATTATTACGTACAGAACTGGTTGCAT  
CATATATGTCAAACCCGTCGATTTTCGATGCATCAGATGCTATTGATAACAGGGTAACCTC  
TGCTTTGCGTCCTTTTAAAAGGTTGCAAAGAGCATTCTAAGAAGTAGCAAGATTTTGATA  
TAGGTTTGGTTTGGAGTAAGGAAGAGTTTGTATGCTTTTATAGTATCCTGCTCCAGCCTGGAGA  
ATATATTGTAGACAGTAGACCAGGTGACGTTTTATAAACGAACGTTGCATGGATTGTTGC  
CAACTCATACTTAGACTTAACTTCTCATAAGAACGTTCTATACAAATATAATTGAGTAGA  
ACGTGGAATATCGTTCCTAGAGGTTGTTCTTTAGGTGGAACCTGACCTTCGTCGTACAAT

TATTATTCGAGAATATGGTCCATATCCTACAACGCAAGCTGTAAAAGGCATTAAGATAGA  
AGATCAAGTTCCTCCATAAACAGCAATCTTCAAAGTTACTGGTGGTACTTATCTCTGGCA  
ATTCTCTTTGTTTCGAAGGTGCTGAAGTGGCTGGATACTTCCAACCAGCTTCCACTGGAAC  
ATTAGCACCTTAATTTTCACATCATAGACTGACTTGTTTTGAGTTTGCTGACGATCTTAA  
TCCATAATCAACTCTCAGTTCACAAGGAACAGTTCCCTCATCTGCTTACTTAGCTGTATC  
TAATATCCTGCGGAGAATTGATTTAGAGATTTATTATCAGAGAGAGACGAAATCTTTTCGC  
CACGATCCCTGATACAACGGGAGATCCTGCAGCTGATCAGTTTCAAGTAAGGGTAGAAGA  
AACCCGTAATGTAGGTCTTTTTCCGATGAATACCGAGTCTTCCGAATACAAGAAATGG  
ACAGACAGCAACGAATGTCACTGCTATCGAGTTTGATAACGCCAGAGACCACTGATTTTC  
AGGTGGTGACAACATCAACGTTAGTGGTCTTACAGGTTCAACTGGATCGCAATCCGATCT  
TGATGCAGGAGTTTATAATGAGTCTTTCACTGTCACTTGGGCATCATCAAACGTCTTCAC  
TTACCAGATGTAACATTCCCCTCAGGAAACGAAGTCGGATCAAACATAACTGTAAAGAC  
TAAGCTTCATACTGCTGACTCAGCATCACCGAATGCATTTAACATATCACTTAGAACAGG  
TCGGGGTATGAATGTTGTGCACGCAAGCGGTCCAAATGCAATTGCTTTCAGTCAATGGT  
TGTGGCACAGTTTACTTGACTGTCAATACAGAAAGACCAAAGACCCTTAGTAAGATATAA  
GGCATTAACTGGAAACTATGACGTAGCAACGGCAGTGGATGGTGCACAATTAGATGATTT  
AGCTGAATATAGAAGAGGTTGGGGTCATGAACACATCAAGTGCAGTAACGACTCCGTCAT  
GCAGGCAGTTTACGTGTTGACTGCGGGATACCAAGGTCATTTCACTGCACTAAGCGGTGG  
TGACATGTCAATCACCAACTCGAACTCTAACTTTGGTAAGACTGCTCGCAGATCAGCAGG  
GTTCAAAGCAAAAGCATTTTTGCAAGTTAAAGCGCGTATGATTACACATATCATTCTCTC  
AACAGCTCTCAAGACAATTTATCAAATGGAACAGGAACTAATGGTTCTTAAAATAATAC  
TCTTGCTAATGATGGATCTGTGAATGGTCTGATTCCAGGTATGACCGTATCTGTAACAAA  
TAGCGCTACGGGTGCAATCTACAGTTCAATTATCACTATTACTAGAGTAATCACACTTTG  
TGCTACAAATACATGAACTGTTAACGGCAAGGTAAGCTTTGATGACGAGACATATGTGAA  
CTAGGTAAACATCGATAATTCAAAAAGCTAAAGTACTTAATACTGCACTTTCAGGACAATG  
GGAAACACCCGGCACAAGACTATTCATATATTGTTATACTGATGAAGCGTCTCCTCCAAT  
CACTAGAGTTCAAGGTTTTACAGTCGGTGCAAAACCAGACGGAAGTGGTAATAGTGCGAT  
AGTAGATAAAATTAACAGCTGGTTAGTTACACAAGGTGCATCTTCTTCAACTGTACATAC  
AGCAAACATGTAACCGTATGCGCCTAGGGTATGAGGTCTTGCGGCTAGTGTGACTGGATC  
TCCATTACTAGATGTTAGTAATACACATACTATCAATGGTGTGTCAGGTTTCAGTCGGTGG  
TTGGTATCGACGTGTATCTCCTACTAATAACAGTATTTACGAAGTGTTTGTAATAATTC  
ACCATACAATACGGTCAGTTTTTCATCCTACTACATTCATCAAGAGAATCCCAGATCCAAG  
AGACTTACAAGGTAGAAAATATCGTGTACGTTGTGTAATAGAGAAGGATAAGACTTATCC  
GCTACCGACAGATCCTATCTCTGGTTTTCGTTTTACCACCTCTTAACAGTGATACTACAAC  
AGATAACTTAGTACGTGCATATTATATTTATGGTATCGTGACTTTTCAGAAGTTCGACAG  
AAGTGTTTCGGGAAGGAATATATTATCTAACATTACTATTCGGTTATATTGCACCTACTAC  
ATCTAACTTTGATGATAGGAAGTTCTCACAGAACGTTATCGAAGTATAACCTTCATTCTGA  
CAGACATAATCCAGTTGCTGATCGTCCTGCTGCAGTCTGTGATGCTACCAATGTTTCTAT  
AGGTATTGTTAATTCTACTGATGGTGCAACTCCAAGTCTGCTGCACTTGACCCCGACAGATC  
TATTACCAAAGATGCAATTATAGTCTTAATGATTGATACTGGTTGGCAGAACCCAAGGTC  
AACTCCAGAGTACGACTGAGTTAACGTACGTCGTCAGGTTATTGAACAGACTGCACGGGG  
AGGAGACGCAGAAACCAGCATGATTATTATTAGACAAGTTAACTGTGGAGTGGTTTCACC  
AATCTACGTAGAGTTTAGACGATACTCAATCTTGCGTTCTGGTAACCATACTGGGCATA  
TCTTGGTTTTGGTCCAGGTAACACTCAACTGCGTTCCCTAAAATAAGGTCGAATCATT  
ATCACCTGAGAAGAAGAGCTACTCCCAGTCTATTAAGAAGAAGGAGGAGGTGCATTCTA  
CTCTGGGTAAACTGGAATGGTGTGCTCATGCGTAACGAGGTTGATTAAACCTGTGAC  
GGGACAGATCACGAACGAAGATATTGCACAGTTTAATGTTGTTGGTGTGAGAACTCAAC  
CATTGAAACGCTATCAGAGCTAGTATAGACTGATAAACTGACTGTTATAGGTGGGGCATA  
TAACTCAATTAATTCATTCTTTGCAGGTCGTGTACATTCCAAGGTGCATCTAAATCTAC  
AACTACTTAACCGCTAAGAAATTTACTTGTAATAACCATGATTGTACAGTTATTAACCA  
AACCTTACCAGCACCTGAAAGTGGAAGTGTACTGCCCGATTTTAGTAATACCTCAGGATA  
CGATACGCCTGGTTATGATGATATTTTTTACAACATCAATTGGTCACCTGGTAGGTCTCA  
TGGTTGGATTTATTGCGGAGCTGCGTGGTATGGGGTTGGTGTACAGATACTGGTCAGAT  
CAATGTTATTAATGACTCTCGTGTACAGGATTGGTCTTGGTGTGCTCCTACGTATCC  
TTCCAGGGCAAACACCAACGATTGAGTAAGTATTGATGGAGACTAAGTTTTTACTGGAGC  
TGCTGGTGTAAAAGCCGCCAAATATAAAAAGAAACAATACACAGGAGACGGCAACCAATT  
GCCTTTCGCTGTTAGCACCTACACTGGTGTGCTTCAACACACTGACAAATCTTTAATAGT

ATAAATAAATCGTTTTGCACAAATTCCAGGCACTACCTACACTGTTGATTCAAATGGTGC  
AAATGTGGTGTTCAGTGGTGGAGTCGCACCGCTTCAAGAAATATTGGGCATAATCTCGA  
ATTACGTAGCTAGATAACAGCGAGGGTTGCAACAGAGCATGGCTGTTTAAAGAATTAGTG  
GAAATCAAATTTACGACAGGCCAGGTGCAATCATCACTACATTCAGTTTCTTAAGCACTA  
ACTCAGTGTGTAGATTACCTGGAGGTTCAACTGCAAACAGACCTAGAGGTGTATCTGTAG  
GAACTTAACGTTTTAATACTTCATTAGATTCTGCCGAAATTTGTAAGACTGATGATGGAC  
CTAGATCCGAATGGTGGTCACCTGTTTCAAGTGGTGTCTCCAGCTCTCGGAACGGACAGTA  
CTATCAAACTAACCCTATAACTATCTCAGAAAATAGTACTGTCGGACCTTCAGCAGGAA  
ATTAGTTTGCAAACGGAACGAGGGCAGGACCACTAACAAAAGGTAATGGCTATACTTA  
CAGTAGAGTCAGGTGGGTCATGGAGTGTAGTATAAAAGCAGCTCAACGTTGGGGAAATAA  
GATGTTTATTGGCAAACAGTTATAATATCAGTGTTCCTGCGGAGACTTCAATTAGTTTTG  
ATACGGGAGCTCAATAAACGCGTACTACTTTAGGAACCAAGTGACATGGTAGTTCCTTGTG  
GCACTGCTACAGAGTGGGATAATCAAGTACGAGTCCATCAAGAAGATTTTTGGAGTGAAC  
AAATGCGATGGAATAGAATATACCAACACCTTCAATTTTCTTACATATGTATGATGAATA  
TGGTGTCTGGTATTGCTGTAGAAGATATCAGAAGTTAAACAAGGCCTGCAGTAGAAGGAA  
ATGCAATACATAGAGCAGGTAATCAAGTGGTATAGATTGGATTCAACCAGAGGGGCACT  
CAGCTTCCTGAATGTAGTTTAGTAATGATGATAATGGAGGTGGTTGGGAATTATGTGTTT  
ATGGAAGGACACCAACCTCTCAGGAACATTAGCCTACAGCATCAGTCAGATTTAGTGAA  
CTACAGGTCTAGAGCAAGTAATACATCTACAACCTAAGATGGCGGACAGTTACACTCAAG  
CCGGAGGCACTAGTTCGACCTATACTGGCAATACTGCATATCGGATGCACGCATTAGATT  
TCGGCCCTAAGAACGTTTTTATATCGAGCCCAGCACCTGTAAACTCGAATAATAGTGCTT  
CTGAAGATAATCGTAGAACTAGAATCTGTACTACATATCAAGGGGGTCTCTCTGACAGAG  
GTCCAATACAGGAACTAGAGGTTTCAGAGAGCACCATACTTCTGGTGGAACATATTTTG  
TATATGGCAGCCAGCCTGAGTCAGGTAACAAGTTTGGATGCAGTGAAGTTACTAACGGTG  
CTTCAGACCGATACTGATGGGTAAAGTAAAATGAGTAAAGTAACTCTGGGATCATTGGGT  
GGTTTATCTAACACTATTGGACAGGCAACTTTACCTGCAGGAAATACTTGGACAGTTGAA  
GGAGACATATAGCATCATCACAATACTGGTGCAATGAAAGTGCCGACAGTAACGACTCCA  
CAGAGTCCGAATAGTCCAGCTGCAGGTGTAGTGAGATTTAATACTGAGCAAAGTTGCTTA  
GAGGTTTATACTGGTAGTGATGGAATGATCTCAGTAGTCTGGTGCTGCTGCAACTTCT  
AATTTAGGAACTCAATTCACCCTGCTATTAGTGGTATGGCACACAGGACAGCGGGATTA  
CCTTCTGGTCTTTATTGGATTA AAACTAATGGAAGTGTAATAATTATAAAAATGTATGTT  
GATAATGATCGGAATGGTGGTGGTTGGGTGTTACTTCTACTTATTAGGCGATAGGCCTGT  
CAAGATCACATGACTAATAGTTCTTTCGTATTAGTATTAGTTTAGTTTCGTAGATTTGGT  
AACACAAGCACACGATAGTTGAAAACCTCATGGATGAACGCTATGTGAACTGCATCAACC  
GACTCGGGTAGCACTCGATGGTGGTTGGAGCCACATGATTTTGTTAACCTGCTGAGAAT  
ATGTTTGTGACAGTGCTGCTACTCCAACCTATCATCAAGTGCTAGTAATCAGCACGCA  
ACAACACGAGTCTTCTACATATGAAGGTAGTATCTCTGACAGAGGACCTAACACAGGA  
TCTAGAGCGTTAGGTGATCATCACTTCTGGTGGTACCTATGTTGCTAATGATAGACAC  
CCAGAACAAGCTCAAACTGCGGATTTAGGTCTGACAATTTGTGTGCATCCAACGGATAC  
TTATGGTTTTAATAAAAATGATCCTTTTATACGTGGGCGAATTAATGGATCTAAGGGGAA  
CAACCGAAAGATTAGAATGGAGACGAGTAACAATGTTGTTATCACTGGAACCTTACTCA  
TAATCGTTGAGGTAGATTTACATTTCCATTGGAACGACTGCAGAAAGACCTAGTAGTCC  
AGCTGCAGGTATGTAAGCTGTAACACAACCTTTTCGGTATGCTGAGGTTTATAATGGTAG  
TGCATGGTATTCTGCAAGGTCGGGTATTCTTGGAACGGTAAGAACCGGGGGAGGTCCGGA  
AAAAAATTCTCAACAACCTCGCGGACTACGTTCTGGTTTATAGAGTTTCCACCAAGTGG  
TCGCTCAAAATATCAAATGTATATGGATGACAGTAGCTTTGGTGGAGGTTGGGTTCGCGAT  
GGCAAGTGTTAGAACATCTACATGTCAAAAACATATGGCCCAAGCTGCTGTTCTGATTAG  
TGGTACGAATGGTCTTAGCCTAGATAATACATCAACAACCTAAGATAGCAGACGCATGGAT  
CTATGCTTTTGTATCTGGTGCTAAGTATACTGGGTATACTAGATATTGGATGGTAGCCAC  
TGGATTCAATAAAAATGTGTTTCATTGATTCTACTGTTACTGTAGATTTACTCAATTCTGC  
TACTAATCAGAACGCAAGAACAACGTTATCTAACTCCTATCAAGGAACTTTAGATGATAG  
AGGTCCTAACACAGGAAGTAGAGGTGTTGGAGAACACCATACGTCTGCGGGAACGTA  
CGATTATGGTGGACACCCTGCATCAGTGGGCAACTGCGCATTTTCGAGAAGACACTGGAGT  
TGCATCTAATGGTTACCTCTTGCTAAAATGATAAATAGAAACATACCGAAGTTTTACGAC  
ATGTCTATATTTAAAGTCGTTAAATCTAAAGACTGACAGGCACCCGCAAGTGGTCCCGAA  
GTCACCTTAGATTCGTCTGGAAACATCTCTTTGCCAGGTTATATTTTCATCTACTGGTGAT  
GTCGCTGCTGATGAGGTTACAGTCAACTCCTTACTTCTTATTCCCGGATATGCAACGACT

GCATTCCTGGTAGGGCAACTACAAGAAGTCTTGCATGGGATACAGATGATGAAGTAATT  
AAAGTTTGGGACGCCACGGAATGCAGAAATCTTGGAAAAGGAGCAGGAATATCAGGTAGT  
GGTGGATCAGTTTCAAATGCAGGTGGATATACTTTCCATACATGTACAAGAGGTGGAGCG  
TTAACGATTGATGGAGAAGGACCTGTTCGATGTCTTTTAGTTCGTTGTGGTGCAGATGTT  
GGAACGAGTGATGCTTGTGCTAACTCAGGAGTAACTGACGGAGGTTACAGGTGGAGGAGCA  
GGTGGTTAGGTTTCATGTAGGAGGTATGCCTATCACATCTGGAAGTAATCCAGATAGTTTT  
TGTGGTGCCGGGAATGGTGATCAGTATGGAGGAAACCCTGGTCAAATTTGTCCGCCCGCC  
ACATTC AATGGACTTGTTCATACGGTCCAGCATTCCGGGGCCGCAGGTCCTGGTAATAGA  
CCATGTGGTCTTGGTGGAACTGGCGGTGGAGCAGGAGGAGGTGGAGGTTACCTTGTCAA  
TGCGGTTCTGCACAACAATCTGGTGCACCTGGTCCGCCTGGTTCTAATGAACATGGATAT  
CCTGGTGGTCTAATACTAACCAGCATGTTACTCTGGTCTGGTGGAGGAGGGGCAGGA  
GGATCTGGTTCGACTGCTGGAAATGATCGTCAGGCACCTGGTGGAAATGGAAGGTCTAAC  
GTAATAGTGTAAGTAATACACCCTTCGTAGGCGGCGGAGGAGGTGGCGGTGGTCATCCA  
GATGCAGGTCGTGGCGTTAACGGAGGTTCTGGTGCCCCAGGTCACGGTGGTGTGCTTCT  
AACCGTCAGAATCATAATTATGGTGGTGCAGGTTACCTGGTCAAGGTGGCGGTGGCGGA  
GGAGGTGCCGGAAATCCTTGTCCAAATGGGTGAGGTGTTAATGGCGGTAGTGGTGTCTG  
ATTGTTAGATATCAGACACTCTAATTCTGCATAGTGGATCGCAGCCATCTTAGCTCTCTT  
CCAAGTTTGGATAGCATCAATAGGAGGTTAAACAATGCACTCACCCGCAAAGTTACAGCA  
TATATGGAACACAAGAGGAATTACTGTTTCTTCATGGGAACATTTAATTAGTTGATAGAA  
ATGATAATTTGATTAGCAGTCAACGTCTGAACTCTACAAGTGTTCGTAACCTGAGTGAC  
ACCAGGTATATCATGTGATTTTACCTTCGCAGCATAATCATATAAGGACTCTCATCTTA  
TCTTCCATATCACGGTAATCATTAGCATATTCTTTCATAACTGCTGCAGAGAAATGTCT  
AAACTCCCCTAGTCACTTAACCCGATTGCCTATTTCTTTTGCTGCACCGTTACGAGGATC  
AAACAAGATGGATCTATTTCTAATGCTCTAGGGGCTGCTTCGGATCTACCTTGATAGAT  
TGAAATTATTCTTCCGTCAGCGATCATATCTGCTACTTCAAATGATTTTGTAGGTCAAGT  
CCTTCCATATACAACCTGAGTTATGCTATCTTGGAGAGGTCCGAGTTATAAACGATACAC  
TGGTGGTTTTGTATTGTCACGAGGATCTTCATGGTGCAGAAGTTTTGCTGCTCCAATCGA  
CGTACCTGCATCACTTGGTACAGGTTCTATGAATAAGTTTACATCACGCGGTGACACAGT  
CATAACAGTAATAGTTTGGAAACGCAATTCAAAAAAACCCCCAGATAACCAAACGTTCTT  
ACACCCTGTTACTTCAACTCGATTGAGACTATATTGTGCAACGTGTTCTTGTGTTTGT  
ATGTAAGGTGAAAGCAAAATCTGCGTTTGCATCACAATCACCAAGCAAAAAATGTAATCC  
TACTTCATGTAAGTCTTTACCGCTGTAAGTAATTGATTGTATATTAATCCAGTATCATA  
TATTGATATGGGTAGTTGCTCGCCATAAGGTCTAAACCCATAACTTTACCTTCATCTAG  
TTCATGAGACCCAAATTCCATGGATGTATTTGAAATGCCCTACCCTACCAAGATTATT  
AGAGATATGAGTCACACCAAGTTTGTGATAAATTTCAAAGGGAACAGCAACGTGTCTATC  
TACAACGGTAAAAGTAGCAGAATTTGGTGCTCAAAGGTTCGTAGATAATACTCTACCATA  
AGTGGCAGATTGAAACATATCTACTACAAGAGGTACGCCGGATCCCATTCGACTTTTAC  
AATACAGATTGCATCATCAAATCCAGAGTTGTA AAAAGCGTGTGCTGCTTGGAGTTTATG  
ATGTTATAGTGAAAGGTAATGATCCTCAGTGACATACTTATTATCTTTCGTCTCCACATA  
TAGACTATATGGCTCATCAGCAATGGAACCGCCAGCCGGTGTCAATATGCCTACACCTGC  
AATACAAATATTATAGGGGTTTAAAGGTGTCAACGTGAGTCAAACATTGACATGTAAAGGC  
ATCATACTTTCTATTAGATAATCTCCATTCTCAAGGTGGTAGACAATTCGCCATTTTG  
ACGTAAAGTAGTAGAGGAATTATGCAGAATACTAATAACCTAAATTTCTCATAGGATTTCT  
TGATTCCTTATACATATATTATAACATGATTTTATAATTATGACATTTAATAAAGTGTGG  
TATGAGACCGATATTCCAGAGGAATTTGTAAGTCTCATAGAGAGAGAGTGC AAACCGTAT  
GATGATATAGTTAAGGTAGCGAGTGTAAGAGAAGGAGAGATTTTGCTACAAGGGATAGT  
CAAACATCTTGGCTTCTGCAGCTAGTTGGGTGCGCAGGATTCTGTATGTCTTATGGATTG  
AAGTCAAAGAGATATAACTTTATGTATGATATAGAGGGTATTGTTAGCAATGGAATCCAA  
TATACAGCATATGATCAAGGCCGATTTTATAATTGGCGTCAAGATGCAGAGCACACTGCT  
GCAGACGAAAATGGTATGTTGAGAAAACGTCACTTACTTTACAACCCTCGTCTTCTGAT  
GACTATCAAGGTGGAAATATTGAAACGAAAACACTGATGAAGAGGTCTATCTAGTGCCA  
TGACGTAGATGTACATATCTTGTGTTTGAAGTAGAACTGCTCGTAGAGCCACAGAGGTT  
AGTGGTGGTATTTCGTAAGTCTCTGGTAAGGTGGGGAATTGGACCGAGGTGGCGATGATAC  
ATTAGAAAGTTTTGAGTCATATCAACTGAAGTATTTGGCCATTGATCACCTGTTAGTTG  
AAGAACCCCTCTTGAACGAAGAAAATTTGGATATGATAAAAATGGCAGAATTGAAAATG  
TGTCTTAACAAGCACAAGTTCCAAATAGTCTGGCACGATACAATCACCCGATGTATAAAA  
AATTATACAAAGGTGTTCAATCAAAAAATGGACCTATCTTACGGGAGAAGTTATAACCAA



CATTTTACTTCGATAGATTTTATTTCAAGGGTCAAGAATTAAGAAACATCATTAGAGAC  
CTGCATCTGTAATCAGTGTCTCCAGGAATATCAGCACTAGCTCAACTACACCATGGCCAA  
TATAATTTGAACTTCCTCACGGAGATGTTAAGGAGCTTTAAACAAATCATGGTGATGCTG  
TATTATCTTAGGATGTTGAGTTAGAACATTGGAGAGAACTATTAAGGTACGCCAAAAG  
TTTGCTATACCAAATTTTCATGCACCTTGTAGGGGCAGAGAGATTTACGCCGAATATG  
CTTATGAACTAAGTGCTAAATAACTAAAGTACAACCTAACTGACCAAGGAAAAGGTCAC  
ATTACGTTTCGGATAAATGATGATAATGTTGTGCGAGAGAGTAGAAACACCTGACGACGTTT  
ATGAATGTCTTGACACAGATGAACTCGATGAACAACATGCGATGACAACTCTGAGATAGT  
TTTTTGGAGCCACAATAATTGGGTGAACACCTCATAACAATTCCAACAGTCGTGGTAGGC  
TTGCAGGTGTGGGGGATATATATCGTCCAGACTTAGATAAGTTTGTATCTGCAATACCAG  
CAGGTTTAGACTCATAAGCTATAAATGAGGAAACCCTGCAGAGAGAACCCCTATACCGA  
TGCCCTCTGCTAACGAAGATCGTACTTGGAAAGTGGGATGAAACAACAAAACATGGGACG  
AACAAAAGAATGAAAAAACTGTATGAATTTGTCTCTTTTGTATGTAGCAATTAATTTATT  
GAGAGCTCCTGCTAAATGGACTCTAGACCATGAAACGTTTAATTGGAAAGAGAGCAGACC  
TAGCCCAACTACGGAAGAAGTTGAAGTTTCTCTAAACAAAATAAATGAATATGAAGCGAG  
TCTTCTTATATTTCTGTTAGTAGAACATCAAGAAGAGTAAGCCGATACATGTCAAGATCC  
CGAATTTATCGCGTGGTATTATAAGCACGATCCTGAAGATAGAGGTGTAAGGTTCGGAGG  
AGGGAATAAGCTAGGACAAGGGATAGGTGGTAAAGGTGGTGTAGTTCCTGAGTAATTTGG  
GGGTGTATATTTTTGTCACTATAGATTGAATGACATACAAAAATTCCAACCTGCGGTTGA  
CAATGCGGGTATTGGTTGTTGTTTATATTGCCTCAAACCACACATATTTGATATATGTAC  
CAGTTTACCAGGTAGGCAGTATCATTTGATGGAAACGAGAACACTTCCATAGCTTAATGG  
CATGATAGATCAAGTTAAAGAAATGATTGTAGATGCAGTAGATGCTAAAAACCTCAAGTT  
AGCATCTGAATGTACAGTCTACGGGGAAGAAGCAACATATCATACAATGCATGAACACAA  
CATTAAACATAAATATTTGTAGTGAGATATACTTTGATGTAGAAGAAGAAGTTTCCGGGC  
AAAAAATGGATCTTTTTATTATTTCTTGGACTGAGTCAAACACTTCCGCCAAGTGCAGG  
AGGCGTTTTGAGATTTCTTCAACTCTTTGTCATCGTGCTTACACTCAGAAAAGTAAAT  
GAGACTTGGATTGAATCTTGTTCACACATGTAACAAATTTTTGGTAATGAATTCTACC  
ATCAATATAGAATGCCTGACTTCGATACTCTTAACGAAAGGTTAGATGCAGCTGAACAAT  
TTGATGATTCAGATTACACACGGGGAGACCTATGTATGAATGAACGCGAATCATACAATG  
TAAAAGATTCCTTTGCTATTCTAGTCGTACCTAATACTTTTAGGTCTGGTGTCTTAATG  
TTAAATTCATGCTGACTTTTTCAGGCCTTGGTTGAACGGATATAATCGTGGTGTATTTT  
AAAAGATACATTATCATGTTGATTGTGACATTGCAGGAGTGATATCTTTAAGTGATGGTG  
AAGATTTCTCAAATTTTGTCTGGGGCTTTCCCCATACATCATTTACTAAACCTTGG  
TTAAGATACGCACTAAGATGGAGTTATCTAATGTATATTATCCAGAGGTGAAAGCGCGTG  
AGGTTTTGTTATTTCCCTCACACAGGTTACATGGTGTTCCTCGTCATAATTCTGTGTCAA  
TTAGAAAGACACTTTCTTTAATGTGGGAGTGACAAATGTTGAATGAAGTGATTTAACT  
GATAATTTTTTGAATGATGACATTTGTAATTGGTTCATGTCATTGCATCAAACCTTTTT  
CCTTCAGATGGATCAGAGTTTGAAGAATAGAAGGATTATAAATTTAACAGAACAACTCAT  
GTTCTCTATAATCATAATCTACCTTATGATGTAACAGTCTATCTAAAGATAGTCCAAGCA  
AACTTGACTACAGAGGGTAGGATGTACGACCCTAAAGCATTTCCTCAATTATATTTCATTGC  
ACAGAGTGGACAGCACCAAGCTAGCACCCAAAACACTCAGATTATGATGAACTCGTTTGG  
ACATCTATTCTATACTTGAATGATAAGTTCACAGGAGGTAATCCTATTATTGAAGGTGAA  
AAAATCCCACCAAAAAATGGAAGTGTTGACCCCTGAAAGGAGAGTTAGCATATGGAGCT  
GAAGAAGTCACAGAGGGTGATCGCTATACTATCTCGGTATCGTCTAAAAATCAAATAGGA  
GTAAACAAATACAGATGATACTAGATTAATTCCTACATCAATGTGCATGGGTGCTTTGG  
AATTATCCCCGAAGATCGTGCAATTTTATCTCCAGTACAACCTTAGTAGAGACAGAGATC  
AATGTGCATGGGTCACTCCACATAAACATATACTTGATTGATCACAAGTATTCAAGTTG  
AAGTAAGAAAGTATGTTAAATAGTACGTTTATATAGACATTGGTTTGAAGTAGAGTATATA  
ATATGCAACGTCATGGTGCTTGGGTGATCAGAAATGATAAAGGTGATTACACAGAGATAT  
ATCCTCAGCCTAATTCATTATAAGTGGTGGATATTATTTATCAGTCAGTGCCCATGAAG  
GACGTATTGAATTCTATGATGATGAAGATGGATTGTTTGGCAGGTCTTTCACGGTATTAA  
CTAACACTGAACCTAGTAATAGAAATTCTCAAAGAGCAAACGTTAGAATGTAAGAATCGAA  
CGATGGTCTTATTTAATCACGTCTAAAGCATAGCGTTGCACCCATTCTCTTGGAAACAAC  
CTAGATTCTTACTAACATTTGACTACACATTAAGGGTGTATTTGATGCAAAAAGAGAACA  
AGGGGAACAATGTGCCAGTTAAATGAACTGTACACAGGCTCGCCATTTCAAAAAAATTGT  
GTTATACTAATAGGCTATCGTAAACAGAACAATGCCACATTTTACTCTCATCTGCAGAGT  
CGAAGATGAGACCCTGACAAAAAAAGCATTTGATGCCACATTCATGATGATGTTGTCTGA

TAGCACTGCGGACTACCTACATGGAGTAGGTTATTGTTTCGAGGATCTTTCAACGCAATT  
GTAACCAACTCAGGGAACCTGACACATACTACAAGTAGTTACTATTTTACATACTCATA  
ATGGGTAAGCCATTTTCGGCGAGGTGGTATCGAACAAGGTTACTAGTCCCATGGTAAATCA  
ATCTGAGACAAGCGACAAACAAAAATAGTCGTTATAAAAAATCGAACATGATAACAGAAGG  
GAATTAAAAAATGAAAGATCAAAACGTAATTCGTCCGAATGAAAGTCCTGATGTAAAATG  
TTAGTGAGCATTAGACCTCTTTACCGAGTCACTTAAGAAACCAGACCCAGATTGGCGTAG  
GTGTGCGTATAATCAGGATTGTCTCAATGAACTGATGCAAATAAGATAACACGTTGTAA  
ATATTTTTCAACGTTGAAATAAACACAGAACTTTGAGACCCCGGATGAATCCGATACAAT  
AGAACAAGAGAAGTTGGAACCCACTTCCCCTTTATCTTATTGGAAATAAATGTATCTTAA  
ATCTGCTATATTAACCTTAAATGCAATCAGAACTATTGAAATAAGCTCTCTTGTATACGA  
TTCAAATTTACAGAAACGATACTATGGGGATACAATTATTTAGGAATCTCGTTATCTAAG  
TAAGATGATAGAAATTCAGAATAGGGTTGCTCAACTACGTGTTGAGGAGTTATACACCTA  
ATGTTTCGTAAAGAAATTAACCTCTTGAAGCACGCAATCAAGAACGGGCAGGATTACCCA  
TTTCTATACTGCGAAAGGGAGTTTCATAAACTGAGGACGAAACTTAGGCAACTCAGGGAG  
GGGAAGAGATCGACTATTCTAGCACAGATGCGTGGAGTTGCATACGACGTGTGACAGTTA  
AGTTAGTGACAAACCCTTACTCACATTACTTCTAAAATCGTTGATATTACGAATGTGCGAA  
ACAAGCCCACGTAAAAGTTTCCAGGTAACGGACATCCACCGCAATTCGTTTTTCTGTCCA  
ACTTAAGTAGTTGAGTTTTGTTTCGACCCTCCTATTAATTTTTGACATGGAAGTCCAAGC  
ACAAGGTAACAAATTTAAGGACATTGTAAGTCGTGAGAGCACTGGTCTATCAAATAAAGA  
ACGTGCTGCTGTAAAGAAGAATGGTTATACCCCATCATTTGAGTTATCATATGGGCTTAA  
GGTAGTGGACGATGCTAGTATTAACGACTGGCAACAATACTATTTGCTGTTCTGATAT  
TCTCAGAATTATGAGACATGATGATTATAAACTATTTGTTGGGTGCTACGATCAAGTAGG  
AGATCAAAAAATATATCACAGCCAATCTGAGTTTTTTATTGAACCTAAACACTATCTAAC  
TTTAGGCGGATACATGGAATATGAAAACCTGGAATTGTTTGTAAACTATGTAAAGAGTAT  
TCCACAGGGAGCAAAAGGAGGAGACGCTTCTAACTATTTAGAGACAATTTGCAAGAAAG  
TGTATCATCCTATAAAGCATTAGATAGTATCAATCCAGAGGTAGATAGTTAGAAACCAAG  
AAGAGTTCAATGTTCAATTAATAAAGTACGAAGTAATTGCCAGTGGTGTAGAATATGGACA  
GAAAGATATATCTTTAATCCCCTAATATTAATAATCATACTTTTCAAGAAATGAGAGCATT  
TGCCGTCCATAAAATTCACCTCAGAAAGATATTGCGATGACCCAGATTATCTTGCTAAC  
GAAAGAATTAATCATATAAATCCTACCGGTAGAATTCTTGAACATACTAGAGGAGAAGGT  
TGGCTTTAAGATAATTATGATAAGGACAATCAAGAATTGTGTGAACTGGGAGAGGGAAGT  
GACTTGTACAATATCAAAGAATGTTGATTGGATTATTATTAATCCGCGTTGGTCTATG  
ATGCAACCATTTCTAGTGCATGCCATGGAAGTGGCGGACAATACGGTATATTGAACCAG  
AGCAATTATTATACTACTAAACGTAGAAGAAAAGATATGAGAGCATATTACTTTGCAATT  
AACGAGATATATACTGTCCCCACACCTACAAAACCTGGCCTCAACCAGGGTTCCAATA  
GCTGCTGTTAATACAAAGAGAGATTATAAAGGAAATATTAAGCTTTCTTGTACGCCGGAT  
CTTTCCTGATATTAATCACCACATACTTGAAGTCCATCGTACAAATGATGTTTAGCGCCT  
AATTAGGGCATTACAGATAAACTATTATGCCTACAAAGCAGAGACGGAAGAAACGTCTAG  
ATAATGCTGTTTTATATTATCTTGAGAATATTATTTCAATAGATGAGTGGCATGATGAGT  
GGGAAGTTTGCCCTATACAAAGAGACCACCAAGGGAGAGCAAGTACACGAAAGCACAGAG  
ATAAGTCCCCTACACTAGAATCTTCACACTTAGAAGTAGATGGCGCAGTATTAACGAAAG  
CTTGGTACGAGCCAGAAACGAAGAAGACATACAAAGCAGGAAATAGATTGAAAACCTAACG  
GACATACTAGAGACGGACACTGGTGGTCCGATGATCCTCACGATTGGCAACCCTGACACG  
TACGTCTCAACTATAAGCAACACGAAACAATTATCTCCTGATACAAAGATTACTGAATTC  
ACGACAAAGCAGATGACGCGGAAATTGAATATGATAGGGTAGGTGGTTCGTATCGTGCTG  
TATATGGAGAGATGAATATTGTAACGAAAGATTGTAATTCGCGTAAATTTGAACCATTAC  
AACACGAAGCTTTACTATGTTTTTCTAACAATTATAACCTCGCGATGAAGACATATACGG  
TTTACCTCAAGATGTGGGTTAGTGAGATTGAAGACCCTGTTTTATAGGTCCGTAAAGTAT  
AGCTTGATTCTGAATTTAATAGTTGGAAGCTAACAACGCTGCCACACTATAACCCATTAA  
CTTGGGCATATCTTGTCTTATATCAAGTGTAAGCAAGTTCCAGAAGAAGTAAAGAAAC  
TAAAGGAATTCATATTCAGAGGGTCTAACTATGAAGTGGTAGTAGACCCCTCAAATGGCC  
GTGAGGATCGATTTAGTCCCTCGAAATGTAGCATGGAGAGCGTGGGAACAACCTCAAAGTGG  
GCACGTGAGGCTTTGTTTCAGACCTCAGCAATGAACGGAAGTTATCCCTTTATCAAGATGG  
AATCATTTCCACTATTGTGTATTGATAAATGTATTGAAGGTAAGTATATCAAGAAGGATG  
GTAGCATGAGAGGTGTTATCTGGAACCTACTTAGAAGTGTGCAACTTGCTCGGGAAG  
TAGCACATCGTAGGACACCACACGTTGAGTATGCGACATTACCAATAGGGGTGTTCC  
CCGAAGACGGGAGACTAGACGAGTAAGGGTAGTGTACACCCCCCTGGACAGAGGGGTTTTT

TTATGCTATACTGATTGTATGGAAAAGATGTTAGGCAACTACGTCCACACAAAGCAAGCG  
CATTCAACCCTACGCGGGAGGGTTACAAGGTTTCGAAACATTGTTCCCTGCGGGTGGTGGTA  
AAACGTACATCACGATAGCTGATGCTCTTAAGCGATTCAAGTTACCAGTTGCACACACTA  
CAGTTGTAGTTGCACCGCGTATCTTACTTACTAATCTATATCGCCAAGATTTCCCAGAGC  
ATAATCTAGATGGATAACTTAAACAAGGTTTTGATGTTGCTTATGTTCTCCCAGGCGAGT  
CTCACCACATCAGCACAAACAAGTCTATGTGGATTCAATACTTGGGTTAACAACAGCAAAA  
AGCACATTTTCGATATTTACCACATATGATTCACTTAGAAACGTCGTCATGCAGTTGATG  
TAGAAGTTGATAGTATTTTCTTTGATGAGGCACATAATGAATGTGGGAAGCAGTTCCATA  
TTGCTCTATCCGAAATAGTCCAGTATGATAAAAAGGAGTTACTTCTATACAGCTGCACCTC  
GCATAGGTCATGGTGTATCACTTGACAGAGGTATGAACAACACCTAAGTATATGGTGGTC  
GATTGGAGAATGTTCCCGCACAGGAACTTGCCAAGTCAGGTGCTATTGTTCCCCCTAAGA  
TTGGTCCCTTTGAGACTCTTAAATCAACCCATCTTGACAAGTGTAAATGCTCATGAGATTG  
ATGCTGATAACCTCAGAGATCTTAGCGGTACATTTGATAATAGTCAGAACAACGAGATAC  
TAGTTGCACCACCTAGTCCAAGAGTCTTGTGTAATATGCCCTGAAATAGTAATATTCTTG  
AGTAGCTCAAGGACAATGGATATGACGTTATGCACAACACATCAAAGTTTCGTGATATCA  
TCAGTGGCTCACGAGTTGGTAGCGAAGAGTTTTTTGACACACACACTCAGGGGGGTCCGG  
ACGAAAGTAAAAGATTTCTTATTGTCTCTATAACAATACTTTCTGAAGATATCAATGCTT  
CAGGTTTGACTCGTACAGTTGTGTTGAGAAACCTACCTATCATTGAAATGGCTCAAACCTA  
TTGGTCGTATCATCCGAGTTCATTCTGATGATCGTAAATCAGTTGGTGTGGTCTCATTTC  
CTGTAGGTCCATTGCACTTATACAAAAACAACCTTGTACAAGTAAGTGTTCCTACTGGAC  
AAAACCGTGGAGATGCAATTGGTAAAAGATTGCAGAATGTAGTCTACCAAATTTTTGTG  
ATGGTGTTCCTCCTATCGCTTATGGCTAATGAAATTAAGAGCACAAAAGATACAATTTT  
ATATGGGGGTTGTAGGAATTCATCCTCCACTATACATAAGAGAGCCCAGCTCTGTGCAAC  
TTCCCCCCTTAGTATGGACTAATGGATTATGGTGGAGAGTTATCACAAATAGGACACGA  
ACAAACACCCGAAGAATATATTGAAGAAGTGTAAAAGTATTGAGAGAAGTTAAGAGTGT  
TTTGGGAGATGATGGCACTCTATACTTAAACATAGGGGATAGTTCTTACAGCTTTAGCCC  
TAGTAAGGGTCTATCATATCCTTAACAAATAGTATTTAAAACCTATACAAGATTTAACTGA  
TCAATCTAACAAACGGGGTAACACATTA AAAAGATTA AAAACAGTAAGACCTTATAGGTAT  
TCTGGGTTGTCAGCATTTCATTACTCAAAGATGGGTAGTATCTTAGGCAAGTTATTAT  
ATGGTATTAACCTAATCCAATGCCAGAAAGTGTAAAGGATAGATGCACCAAAGTACATGA  
ATATATTTTCTTATTCTCTAAGAACAAGAAATATTAGTATGACAATGTAGCACTGAAATA  
ACCTGCAAAAAGATTGGGGGACAAGTGATAGAACTAGTGGAAGTATCCTAAGAAAGTAAC  
TGGAGTAAGTCCATATACTGGACTCAATAAGAGTTATCCTTCAAAGAATAAAAAGATAAGT  
ATGGTCAGTCACTAGTAAACCATCTTAGGCAACTCACATTGCAGTGCTTCCCCCTGACTT  
AATTAAACCTTGGATCCTACCAGGGAGAAAGAAAGGAGATTTCAATCTTGCCCCATTTAT  
GGGTAGTGGCACAACAGCAAATGTATCTAAACAATTAGAGAGGCATAATATCGGTTCTGA  
ACTGCATTTAGAATATAAATCGCTGATAGATTCAAGATTACCAAACACAGCTCTTACGGG  
CTTTTTGGAGTGTGGTAGTTGACGTACTCCACACTATCGGATACATATGACCCTATAGTC  
AATTATAGTATATTCATAGGACTGATTTTAATTATGTCAACAAATGCTAGAATCGCACTC  
ACATTGTCCGATATAGCTTTTGTTCAGTTTATCATCATATGGACGGTTATCCTGTTTTTC  
TATGGTGTAGTCTAACTGACCGGTATAGCAACCTCGAGCCGGTTATTTATCTGCTCCCA  
GGTGGATCCATGAGTTCATGTTGGTTCAGATAATGAGTATGATTTTCGAGAATAAGGAATTT  
GTAAAACGGGACCATAAACCTACTTACTACTCAGAGAGAGGAGAGTACAGCACCCCCTAGA  
GTCTGACACTCAAATGAAGAGTTCCTGGATCATTGTGCCCACTGTAGTGGAGAATTCGGT  
CATGTCTAGGACAAGGGAGAGTGGTTCGCTTATGAGACTACAGACCGCACTTTAGTTGAG  
ATTCCAGGGGAGATAGCAGAATGAAATTTCTAGTAAAAGACATTGAACTCTATTTAAGTG  
ATGCTGGGGACGGAGACCCCGATTTACAATTCACAGAACAAGAAGAGTACGTAATGCACC  
ATAGATGCCTAGGTAGATTGACAGCAAGCAATGGAAAACAGCTGTAATAAATGATTTTTCG  
ATTTTCATAGGTTATCCTGTAGAGATAATTGACTCCGAGGTAAAAGCCTGACAACCTACCC  
ACTTCCGAAGGTGCTACAAAGACGAGGTATTGAAATTATGCTAATGAATGAACAGCCAAG  
AACATTCTGGATAGAGGACGTGAAAAGATACACCCAGATTTTCAGTTCGACAGCATAGT  
ATACGACACCCACACTCGAGGCACTTAGGTCCCCCGTCCCCTCTATCATACCCTATACT  
AAGAATAGTTGAAGAAACAAAAGCAATACATTCCATTCTACGAGTTCCCCAAATCCCCTC  
TCTCATTTTATGGTATTTTGTAAATTGTAATCGCACTCGTCACACTTTACGGTGTTAATG  
TAAAGTATTTCAATAGCCCATACAACGAGGATTACAACCTTATGCTAGATTTTTTATCAGA  
AGTCTTAGGGGATTTTTGCTTAGAGAATGATCTACCAATCGTGAGCGCAGATGACCTATT  
ATATGTACCTGCATGTTTCAGACATCAATATTTCTCAACCCCAAAAAAATGGGTAAACCCA

TTCAATTGAAGTCTGGCATATTATCCAAGAGAATTCTTAATGAGATGTTTATAATGACAA  
CTCAAGAACCTGACATTGCAATTACTCAGATGTCTCAGCACTTGTTTACTGTGATGCGGA  
CCAGAGTCAAAGAGGACCGGCATCTAGATGCCCTATCAATTTACGAGGAGAGGGTAGCAA  
ATGGCAAAGACCCTCAGGACGTGGATTTCAGAGTTCACTTTTATCCCTAACACAACCTTTG  
GCGATTTGAGATATGACGTGTGACAGTACGTTTAGTGTACATAGGTTCCCGATTCCATAT  
CCATTACTCATTATAAAAAAGACAGGAACAAAACAACACCAAGAGAAGAAATCAGTATCA  
TATTTATGGAACCTGGTTAGTGACGCACTTAAGTATTGTGATGATCGTGATGACCCTGCAT  
TTGCGATGTATGATGACATGAGAGACGCATTTGAAAAAGATGTTTCGCTATCCTATGGAGC  
TTTAAACAATTAATTAACGACAAGAGCAAACCTTGAAAAATTTGGTAAGACTCATAATG  
AGTTGAATGAACTCAGATACCATTATGTTGCCAGATATGTTCGAAAATATGTCAACTAAGG  
ACTGACTCCAGAATGTCTTTCATGATTTGCGCGATTATGTTTCATAATCAACCAGATGTAG  
AATTTGGTGATGAAGCCCAAACTATTGTGAAGATCCCTATGATGATCTTCTTACTGACA  
TCAAAGAGCATTCAATCAGAGATTTTAAAAAACCTTTAGAAGAAAGAAGAAACAATTACT  
AGATTAGGACAAAAAAACAACTTACTAAGTTTGGCTTAGATAATAACCTAGATGCTTCA  
TTTGTGCAACAAAAGCGGGATTAACCTTATGTTCCCTTGACAGTAGCAGGTGATTTTAAA  
GAATGAGAAAAACAGAACTAACAAAAGGACAATTTTCGAGAAATCCTTGATGCAGTGAGGG  
TCTTACGTGATGATTACAGAGAAGCCTTTAACTTCATGAGGAAGTACCTGGTACAGCAC  
AGTTAGATTCGTTTAGTGGAGTTGATGAACTGGCAAGTATTGATACGACACTCATCGAAC  
AATTTAAGCAGGTAAAACCTCAATTCGCCAGATTGGGAGTGTCTGTTAATTATCTGTCACA  
CACTCCTACCCATGAGTTAGAAAATACCCTATAATAAGAATAAGCAACCAAAGAACAAT  
AGTGACTCCAGAACCATTGCCAGTTCACATGAGTGGAGTTCATCTCAACAATATGGTAAA  
AGTCTATGATCTAGTCAGAGACATCAGTTTCAACTCACACCCGAACAGACCCGAAGTGTT  
GCAGAATATTCAATACACAGAAGTCAACAGAGGATTTTCCAATAAAAATCAGTTACATCA  
AAAGTTACCATCGTTTTTTGATATTAATAAACGCGACGCGTACACTAAAGAAGAGCATATC  
CAAAAGTGAAAAGATTAGTATGAAGAAGGTTATGGCATATCCCTAAACGATCATGAGAGC  
TCCATGATCGAAGAGGAAGAACCATTTATTCTTTATCAGGGCGCATAATGGAACTTGAT  
TAAAGCTCTTTGAGCATAACCCTAGAGGACGAACATTCACATATTAATAACAACATATGGG  
TAGCACGTGATGGGGCAGGGATTGAACTACGTCAAGATGCAGAATTATCAATCCGCATAT  
ATAATTATAACTATGATGGGGCATATGATGGGGAAGATAATGACAGTTAAACACGTGTCA  
CGTACGGTTACCGTCCACTCTATTATCCTTTACAGTAATGGTAATTAACATTTTTATT  
ATGATACAGTATTTAATTGAAATCCAAGATACACCGATCAGAGAACCAGTAAGCGGTTGT  
AGTTATGACATCGTATAAGCTATCACACAACATAACGGTTCATGCGGTATTACTATGCGAT  
ACTATGAATGGTACTAGATTGATACCGGGCATTATAGTGATAAGGATTGCTCAATTCAT  
TCAAAGGAGATTTTTTAAAATGGGTGCTAAATCTGACGTGTGTGCTAATTTAGATGAGACT  
TATATGCGAGAAATGGAAATCCCGAAAGATTCCGATCATTACATTCACGACTAACGACCC  
GAGCTTCAATACTATTGGGATAGTCCAACAGAATAGGATTATGATTGGAGAGACGATTTT  
CCTCATGCTGATTGTATGTGCGAAAGCTGTTTTGATATAGCAATCTCAGAATAGAAAATC  
ACATGGAAGTGTGCCAGTTGTGGAAGTGTACATAGTCTCCCTATTCCCTATACATTTACC  
TCTATACGTTTAGTATCTTCAATAAACGTCATGCACAACCTTTAAAGCATTTCGAGAATAT  
CGTGAATCATGCCACATCGGATCACACCCAGATGTTTTATATCCTATTGATGGATTAAC  
GGTGAAGAGTTAGCACTTGATACTCACATAGCTAGAATAATGGGCATCATCTGCCGGT  
GAAGTACTCTGGGGAGAAGGGTATAGTTTCGATCATTAGAGAGTCAGAGATTTTGTTTAC  
GCAAGTAGGTCAGTAGCATGAGGAGATTTAAAATTCTAGAGAGGTTTGTAAAGTTCTAATG  
ATATAACGATCGAAGGGAATACCGTAGAGGAAGCGATCGATCTATATCATCGTGGACCAT  
TTCCCGATAGTGCGGTACAGCAATATGATATGTTTTGCGATTTTGAATTTAGAGATATAC  
GTCCAGAGTGATGGATGATTTAACAGGAAAAGAAAAGTCGCACATTCAGTTGACTGAAGT  
TAAAAACCTATGAAACAATTGCCATCATTTGATGACGAACTAATTGGAATATAACCAGAA  
TTTGGACGCTATCACATACGAGGACATTTTTGAACCATTCGTGGACAGTTCAAATATTAC  
CACATAGTTTGAACATTCACATTATTATGGCCTATAATAGTAGTTTAAACAAAGCGGCTT  
TATGAACAAGACTTATACATTGACTGATGCCACATGAGAGTCATCAATGTAATGCGCAC  
ATATTTTGACGAGTTGGGAAGCAATCCAAAATACAAAACCGATTTTGAATGTTTTTTATGA  
CTATACTAAAAGAGGCGGAGAACTATTCTTAGGCGAGTAAAATGTCAGTATCACATCACG  
AGGGCATTCTCGGAACTTGCGACGATGAGGCATGGATAGACTACGCAAAAGAGCATGGTA  
TTACATAAGAACAACCTTACAACACTTGAGCAGAATTCAGACTACTGTATTCTACCAGAGA  
TGGAAGCAGAAGCTAGCAAAAGGTGCAAGGACTTGTGCCCGTAGGAATAGGGTTACATAG  
TTCCCCCATTCAACGCACCTATCCTTTATAATAAGAGTTTCAACAAACAATCTAAGAGA  
AGGGCGAAAAGCAAGCAGGTGAGCAATTTATTTAGGATTGGTCAGACTTCATAAAATCT

AACCCTAGTTGTAGGGGAGACAAAATTGCAAAGAGGGTGTGCCTTTAATGATTTTTGTTAAC  
CCTCTCCATAAATATGGTCTAGTCTCAGATTATCAAGCATATAACACGTCAAACCCTTTC  
TAAGGAGATTTTTAAAAATTACAACGTGCGAACTTTTAGAGGAGTCACTAATGCAGGTGA  
AGATTATCAACTTGAGTATTTGAAGCGGGATCCGAACCACCCCTGAAACAAATTTGACT  
ATACCGTTGTAGTTCCAGATACTAATCTAGGTTATCATGCACCCTATACAATGGATTGAG  
AAGTTGCAAATACAAGTGCAATGGAGTGGGCAAGCGACTACGGTCGGGCATCTGTAGAAG  
ATCGTTGCCTAAAAACAGTATTCGCAGTGCGGTACTGTGACAGTTAGATTAGTCGCACAT  
GGTAACCCTATTGTCAGTATTTACCGATATCATAATAGTATATCAAATACACTTGTATA  
AAACATGACAATCTTAGAATACAAAAAACTTCAATAAAACGCCGCTCTTATGATCGGTCT  
TGATGTATCTCAAGAGAGAACATACAGAGTAATCCACAGAATCCTTGAAGTTGACAATTT  
TCAAATGTTGCCTGCTCATGTGCAGACTTCTCAGAATTTGTAAAAGAGTAGGCGGAGTG  
GGTTTTGATGGGTGTGCTAAGGTTGTTTTGTATGACTCTGATCTAGACTTTGCTAAACT  
AGACAGAATTATCAAACCTGAAAACGGATAAATCAGGGGAGTGTAATGGGACGAACCCCT  
AAACAACCTTGAGTATATCTTCGCATGTCTCAATTTCCATGATGGTGAGAATGAGCATATT  
AAAATGGGCATGATCGAAGTTAATGCTAGTATATTCAGACTAGCAACAAACCAACTACAG  
GAGATTTACAAAAACGACTAGAGCAGAATACGCGTTAGTCTTTCAAGCACTTAAAAACCA  
TCGTCTTTCTATCACAGATGAGCATGAAGCTATTAGCAAATAAATTTCTAGACGGTCTTTT  
TGAGCCCTAACTCGATAAACTAAAAGTAATCGAAGAGACCGCATTAGCTTCATCACTTTT  
AGAAATTCCCGAAGATCTCGAAGAGGACACATCTGAAATTAACCACTTACTTTTCGATA  
AGTCAACGTACCTTGAGACTCTTTGATTAGGGGCACCGGGTTTGCCCATGTGTGGGTGCG  
CCGACCTATAACTATAGTATAACAAACAAAGAAACCTTTTTATTATGAACAAAGTCGAAG  
CTACAAGTAATTCAATGATTCGCAACGCTAGAACTTAGTCATAGGGTAATACTTGCAC  
CTTACGATACTGATGGAGATTGCATAGTTTATCTACATGGCAATCTTATCGCAACTGTAG  
GCGACTCATTGATGGCAATCTTTGAAGGTAGTTTTCAATCGAATACAATAAGTCTAGTC  
TCCTCGCATTGCTACACGAATTCAGACCACACACAAAAGTGGTCGTTAATAACTTTCAAT  
CGTTTTTCAAAGTACATAAATACATTAGTTCCAATTGACACAAAGAGTCTAGTATAATGAC  
AGTATTGAATGGATATGAAAAAATGTTCACTACCGTCCACCCTCTACACTTCGCGAGAAC  
ATTCTGGATAGAGGACGGAAACAACCTACGTTTCATGACCAACTTATAAATATGGTGCTAC  
ACATTGGGAACAATGGGATTGAGTTAGCGAGTGGAGAGACTTAGAAGGGGTTAACCTCGA  
TAAATTACTTGATGTTTATAAACTTGTCTAGAGTATAAACAATTTGGTACGGAGGATAT  
TAGCTAGTGCATTCTGTTCTTTACGAGTGGTCGGAATTAGTTGAAATTCATAAGCAGAT  
GCTCAATTAGAAAAGGGAATCGAAGCCACCAATCAAGCGATTAAATCCAGAAACCTAACA  
GATAACAAAGCTTATACAGAAACACTATATAGAGCTAGATCGGAAATCAATAAACAAC  
ACTCACATTCTAGTACAATTCCATAAATTCAGAACAATGCAAAAAGGGGATATAGGCA  
CATTTCGAGGAGTGATGGGTTTAAATCACTTTTAAATGTAAGGATTATATTACTTATTGCA  
TTCACAAGTATAAAAAAACTCATGAAGACAGAAAAAACTGCCGAAGAGCACACTCACAGG  
TCAATGTGCACATCTACCGACATGAGTGGGGTATCATTGAAACAACAGTGGGAAGAATGTA  
AGTATAACGACAAGAGAGTTAACGTCAATGTTATGGGATAGTTATCGGAATTATTTGTTT  
AACCAGCGATGAGCTAGAGCTGCGGACAATAATTA AAACTTGAATAAATCTTAGTGTGT  
GTTTTATCTGTGCGGTGAACCTCTCAGAGTAATGCGCCCTTTGCACGCATCTGAACAATTG  
TCAATTCATTGAGGATGTGCACAGATTTCCGCTAAGGGCTTGACATTATTGGGAGTTAT  
GCCTTATAATAACACAATAAAGGTATAGGAAATCAACTGTTTGCCTTCAACTATGACTAA  
AATGATCCACTCACTCTACAACGAAGTGGATGTATTACTACGACAGTTCTCTAGTATATA  
CGCAACGCAGATATATGTTTATGCTCTCAGAGTTGAGAGAGACGAATTGAGAGTACGGAC  
GAACCAGGATATAAGCGTATTTCTTTATCTCAAATCAATCGGTTATACTTGGGATTGTGT  
CCCTAGTTCTCAGTTAGGAGAGAGTTGACCATGGAATTACCATATGCTATAATATCAGTA  
AATCGGAGCTTATCCAAAGGTAACACTGAGAACAGCTACTGATTATTCAGAAGGCAGTCT  
TATAAGCCCCCTTAAAGTTAAAATCGTCAACTACCCGAACCACCAAAGGTTCTCCCGAGT  
ACCTGAGTCATAATTCTAATTTTCAATTTACATCGGTATTA AAAAACTTTGGAGAATAAA  
AATGCCCTCGAGTACGATCTAAAACAAACGAAGAATTTAGTGGTAGGCAAGAGCGAAT  
AGTATGGGCGATTGAACAACATACTAGACTGGAAGGGTGTTTAGATAACAGAATGTGTAA  
ATGCGCAGGTCTGCTGCTTCTATCTACACTGTAATGTATAAGGATTCAGTATATTCAT  
ATGAAGGGATTGGAAAAGGAATCATCCACTACATAACCACCTAAATACAGACTATAGAT  
CAAGGGTTATGGCCACAAATTTACACCAATACTAGCGGAAGACGATTATGGAGACTGAC  
TACTCACGATCCCCTACGAATTGTGTCAAGAGATGGGGTGGAAACGGGGAACTTTACTAG  
GGTATGAACTGAATGATTATGGAAGAGGTTTTATGTTAAAGAAAGTGAACGACTGAAAAA  
GATCAAGAAGAAATTTTTATAGCATTGAAAGCTATTAATGGATGTTGACTTGCTCTCAAT

ACACGGTGAGAGGCATTAGAGAAGCATGTTTCCGAACTACCAAACCAGACAAAACATAT  
GCCAAAGCAGAAGGTAAGAAGACTACTTAAATATCAAAGGTAAGTATGACCTGATAGAC  
AAACGTCTTAAGAACTACAACATGGTATGTAAAATGACTGCTAGAGGACACACCCATAC  
GCGTAACTCTAATTCCTTAAGGATAATCACAGTTAGGCTAACGATCCTGTGGCAGCACG  
GCAGGTCTTGATCACTTACAGTTGATATCCTACTGCAACGCTTCGAGATAGTACCCAATA  
TTACGTAGCTGCAAGAGAAGCCAACCTTCTTCATGTATAATGTTTCCGGAGGATGTCGAAA  
CACTAATCAATAATATTTTCCAACAGCAGAGGCATGTGGTAGGGCATTAAAGGATCATA  
GTGTGTCAATAATAAATCTTGTAGATTAGCCCTTGATGATACCCCGCCGAACTCTCTTT  
TGACATTGCATACTCTGACGTATTTTTCTCTTACTTATATGATATGTCTGGTAAAGCGGG  
TCATGTATAAACTGGTGCATATTATGTTGAAGATGAGATTAAACTACGAGTGGAGGATG  
TGGTACTCGGTATGGTGGTGATAATGAAACCACTTCAACTAATTGTTTCCCTTGATGTG  
TCAGTTTACCTGTACCGCAGCGACGACAGACCTTAAGTATAACCCCTCCACAGATGAAAC  
GGGCGAGCCCGACTGCCCTCTCCCTCTCTATTTCGGGGTTGGAACCACATCTAACAAGAT  
CGTTTCAAGAATGATGCGCTATCCACCCAGATACCAAACGGGGCGATGGACTTTGAGGT  
GGCAGACATGTGTTTCTATCTGTACTGATATATGGCATGAGAACCAACCCCAAGGAAC  
ACCATTCCTTCCACAGCAAACAACAACCTGGGTAGTGAATGCTGTAGCAGGTTTCGAGGA  
TGTTTCAAGATATGACCAAATGGCCACAGATGTCATCTCGTTCTTCTAACTATAACAA  
TAATGCAACTACAGGAATTAGGTTAAAGCTTCGTATTGAACCGAATCGTCTTGATAATCG  
CATCATTAAACGGAATAATTGGGAAGTACGCGAGGTTCTAAGCAATTGATCAGGATAGCC  
AGTATTTGATACATTTCGAGCAATCCAATGCACAGAGGCATACTAAGGGAAGGACAACACTAC  
ATTTCAATTACAAGTTAGGGTAAAAAATGTAGGACAAATCAATTCAATATGTAGTTCATC  
AGGTTTTGAACTACTGAGAGCGAATGATACTGTGATTGGACATATCATTACCCGCGTTTT  
CCACACAGATCAAGAAAACCTTCGAGTATCATGACGCATTCTTAGACCGAAACGATGATAA  
TTTTGCAAAAGATACTCAATATCCATCAAATAGGGCGCACGAAATCACCACAATAGCAGA  
GGTAGGCATTCCCGACCGCGAAATCTTGATTGGAAAGTATAAATTTCTCTATAAATCTAT  
GCAATTTGTCACCGCAGCCGTAGATTTTGACGCACCTGACATTTATAACTCCATAAAACC  
ACCAAGTTGTTACACTTACAATCACAATGGGCGCATATCAGGCTCGACAATTGTCAATGG  
AGGGACTGGTCGGAATCAATTGAATGAAGAACCTGACCTTGTTGTTACTGCACAAGTCAT  
TGAGAGTGGAGAAAACGCGGAACCGAAGGATACGATCTTTAATGGCGTGCTCACCGCGTT  
ACAACCTACAATTGCAGGTAGCGGATATGACGCAGATAATGCTCCATAGGCATGGATTCCG  
CAATATTTCCAGGGAAGTTCCCAAACTCAAGAGGATCGTGCCAAAGATTACTATACTCC  
CAACACTTCTAACCAACAAGATATGCAAATTTAGAATAATTTTCTTAAGCGGGGGGAGT  
TCCAGTCGGTGTGGACTAATTCGCGACTGATCAACCCGAACTTAACAAAGTTAGACTCA  
ATTAGGTCTTACAGATAGTGACATAAGAGCAGTTCTTCATGATAATGACGTAAAACGTTT  
ACCAATTGACCCTTCTACGTCTCCAGAAGTGTCAAAACCGAATTTGCGTCTCTATATGC  
GATTTTTGACTTCCAGGAATGGAAAACCTTCACTGAAAAACGACTCGTATGAATATTA  
CACAGCTCCTGTCCGCAGACGAGTTCAAAACCTAGGACAAAGAGGCTATTCCGCTAGATC  
TTTGGATACTCGTCGTGACCCTACACAAAATGATCAGTATGGTTTGAGCATTTTGAACGA  
TTCTGAACTTCACGACACCGCAAAAACCTTTTTGAAAGTTCATAAATAGCAAAGGCGTGC  
AAATAGAGATGCGGTTCTTGATGCAATGACACAAAAGTGGGTCCTGAGAATACAAAGTT  
TCAAGAAAACCTTAGTTGAGACTGTTCAAGGTCCTTTAGTCAATCTTACGGACGTAGACAC  
GGGACTAAATATATGATGACACAGTTTCGTGCGGACCCTACGTCAAAGTATGATCTTAA  
TGTTACACTTTATATGCCACCAGTAAGGTCGGGTAATTCACATTTTACTTGTGACCCTCC  
TACAACCTCAACAGGTGGAACAGTTCCAGGCGGAAATGGCGAAACTATTGTAACCTTCATA  
TCTAATGTCAAGTTTACTCGGCCCTGGGTGTCAGGCGTGAAGTTGTATCGGAACTTTATC  
TGTTTAAACAGTAACTTGTTGAGCAGGTGATAATCCTGCCCCTGCAGGAGCAGACTGCGG  
AAATCCTTTCACAATAACCTAATGGAATTCATTCCAACAGCCTCAGGAGCGCTTGATGT  
GCCTTATATACGGGAACATGTACTGGACACGGAGCGGGAGCAGGATCTTTACAACATCCT  
AGTCTTGGTGGAAAGAGTATTAAGGTTTACCTTGTTCACACGCACATCTTGATGCAATC  
ATTTCTCCAGACCAGTAGATGCGATGGATACTATAGCAACATGGCCTCCGAATCCGCAC  
TTACCTTTTGCTGCATTAGAGCTCAATGTGATTGTTAATGGTATACTGCCTATAAAGGGT  
TTCGCTCTTCTTATTCTCACCCTACTCCAACCTCTCTTACTCACACAGTTGTTAAACCG  
CTTGCAAATGGTGTATGTGTTTACTACTACGTCTTACCTGCGTGGCACTGTACAGTAGGA  
ACCGCGGGTGGTAGAGAAGCAGCACGATGTCATGCTGGAAAATTACTCGCTCCTAGTAAG  
ACCGTATTCATCAATGGTGGTCTAGCAGGAAGATTTGGTGTATCCTCTAGGTGATTCTACC  
CTAGCAATTCCGTGCAACTCGCGAGTTGCGGGTTGCAAGTCCAAATCTTTTCATAGGACCT  
TAAGTATGGCAATTAGACTTTACTTGGGTAACACCATTGTGACAACCCCAAAGAAAATAA

GTCAAGGTAGAAGACAGCCTAGTAAGTATAGAGCTACCTCTCGTAACAAAGCAACAATA  
GGTATCGTGGCCAAGGGAAATAGAATTGTACACGGTAACCGTACTGGAATCATATCTGTA  
GACTTGTGAGATCATTATTTATGATCATTAAAATGAATATTGTCGCTATTTAATTAATGAT  
CCACGTTCTGATAGATCCATTTCGGAAAAAATCTGATGAAGGCGCCAAATAATATTGGCAC  
TTTTCGTATTAGATGGCGTTAAAGAAAAGATTAGATAAAGATCAAGAGAGATCTTGTTC  
TTAACGGAACGCTCACTTGGTATGGTGTACAAAGCGAATACACAGGATGTTGCTGTCGTG  
AAAAATGACACTGCAATTGAACATGTGATCAAAAATCCAAGTATGACCACGCGTCGTGAA  
AAACCATTTCAACCTTTGGTAGGATCTAATATATCAAAAATAATTGTTTGAACGTGTAGAC  
GGTTTACAAGTGATGCTATCAAACAAGAAATCATATATACGATTAACGGTTTGAACCT  
CGCGTACTTTCGACAGGAGTTGGACTACAACCTCGTGAAGTTACAAATACATTCAATGTC  
ACGATTGTGTTTAAAAATAGTTGGAATCCCAATAGCCGAAACTATCGAGTTCCTATTACTG  
AGACATGAATAGTTCAATCAAATAACCTCACACCATTAGTCTTTGCAGATATCAAATCAC  
CAATCAAATCCTATCTGACAAGGCAGCACGAATTTACGGGTATGACTTTGAACGTTCTT  
CTTAATCGTACCTTATCGACTCATTAGCGAGTATTTTCATATTACACTGCATTTATTGATC  
ATTTGGCGATGAACGAGGCTTTTTTGCCTTCTGATACTATTAGAGATAATGTTGTTAACG  
ATGCAAAAATTTTAAATCACGTTCCACGTTCAATTACTTCTCTAGAGCGAGCTTTAATC  
TAGATGTAGAAACAACACAGTCTGCAGGTGGACATCCTAGCAGTATAACATTAAAAAAAG  
GTGCTTTTGAATCAGGTCGAAATTATCTTATTAACATTTTTCGAAGAGATTTGAATTACTG  
TCAGACCAAGCACAGGTATTGGCACATTTGACAATGTAGGAATAATGGAGGGTAGTATAT  
TTACCTTTCAATACATTGTAAATAACTTTGCAACTCTGGTGCATAAAGTCCCTTACGAAG  
ACACAGACATTTCTACTCTTAGTGTAAGAGAAAAACCTAACGAATTATCTAAAACATCAG  
ACTTAAACAGTTAGACTGATACAATGACTGATTTGACCCGCAACTACTCGAGCATACTTCC  
TCAATGAACGTGGCGATACGAGTTAGGAGGTAAAATTTGTTGATGATACTGCAGGTAAAG  
CAATAAACGATGCAGAAGTCGACTTTTAGAAAATTTGGTGACTTCTGGAACAGACGCAA  
ATGAAACTACAACATTTTCGTTTCGTTTGACAGATTACAGACAATATTGGAGGTCCCTCTA  
GTGGAAAATCAGTCACTTGGAGCATGCAAGAGATGTCACAACCTTGGTGCTGCAGCAGCTA  
CTTTAGAATCTAGTAAATATAATGCACCCAGATACTACACTGGACAATTCAGAGCAGTAA  
CAGCACAGGATTAAGCCTTAATTGCTGAAAAAGTGTATTCTAACGCCGATTCTGTTCTTG  
CATATGGTGGGGACTATTTAAATCTCCCAATTTCCGGATAAGTCTCTATTGCAATTCAAA  
CCAAAACCTGGTTATTTTATTAACAACGCAACCAAAAAGTCATTTTCTACAGATTTAAGAA  
AATATCATATGGAATCGATTGATCCGAAAGTTATTGACCCAGAACAGATGTATTGGTGT  
TGAAAGTCTTTGCGCAATACGATCGTGGCCCTGCATCTAATACAGCCGATTTTAAAACAA  
ATATTCAGAACGAAATTAACCATTGGGCAACACAAACTCAGATTGATAACTTTAATTCTG  
CTTTCAGAACACAAGCATTGAAAAAGCGGTGACTTAATCCGATAATCGTTTGAGTGATG  
TGACTTTACAACCTTTCGATCTTAAAATACACCTACCCAAACACAAATCAGACTAATACTT  
ACTGTATGGGTACTGGTGATGATCTATATGATAGTGCTCCAAGCAATTCCGATGGAAC  
CTTCTAAAAGGAACCTATATTTTCGTTGAGGACCTTTTAGACCAGCAGATAGACCAGGTA  
TTGATCAACAGTTTGAACATGATGGTTTTGGCAACTTAAGAACATTATGTAGCACTGGTC  
ATAAGAAGGTATATACAATTAATGTTGCAGGAACCTTAAATTGTGCTGCAGGTCAAACCT  
GTTTTGGTCTTTTAAATATTATTGGTTCAGGTGTCAAACACCTCCAACCTGGATTTAGAA  
CAATTAATGATTCAACAACCGGTGCAGGTGCGTAACAAATGCAGATTTAATTCGTACAG  
GTCTTCAGATTCCTCTTCTGTTTATTCCCTCCAACGTTCCATCTACTCCTCCTGCAATAC  
CAGGAACCTTATCGCTGTAATAAACCCAGAGTTTACTGTCGTCCCATTATGTACGACTC  
CACCTCCAACAATACGTCTAAATAGTTTGACGCAATCAGTGTTTAAATAGGGTTGCCACAA  
CTAGTACAATTGCTGATATCTCAGACGCAGGTGATCTTACATCCTCTTCTTGATTCTAGG  
TGTGAATGAAAATTAATAAGGTCTCTCAGTCAGATGTTTCACAGACTCCAGATTTTATTG  
GAAACGATTATCCATCATTCAATTAATTTTTTGAATATTAACGTTCTCAAGAAAAAA  
CTGGTATAGGGGAGAACATAGTCAATGAGTTTTTCCAATAAGTTGATATGGATAAACTTA  
ACATCGATATTCTTTATTGTGCTACAAAGTTGGGTGAATCGACAACACTACAACCTGCTGATT  
AGATAGTAGTTGAAAACAGTGACATTTTTTTAACTAAAGATGGTTCTGTTTTAATTGGGC  
AGGAAGGAGCATACTATGCATCGACTACAGCTTCACCAAAAATTGCTCGGAGCCCTGGTG  
TTTCTTACGAGCAAGTCAAATTAAGTGGACGCATCATGCAATTCTTCTAGATTCCACGG  
ATGGCACTACAGTTAGGATTTTAAACATCTCAGGATGGTCCAGTAGCAGCACCTTCTG  
CACTGCATTAATGTTGCTCACACGTTAAATATTATCATCTGGTGTGCTTACACCT  
TTTATGGCACTGCTCTTGTGTTTACTATTGCTACTAGTACCAGAATTCCTGCAGATGACT  
TACCTTCAACGTATATTACATATCAAAGTTGTTTGGTTGAGAATAAAAATTGTTGCAATAT  
ATAATTGATGTGGTACTTTCGGTGAAGGTAAGAGACAGTTTACCATGATACGAAATGGTT

CTCCTTAAGCACCTGTTGTAGGTCAATATATCTTAGCAATTTACGATCAGCTTCTATTAC  
TTCCTAAAGTAGACGTCTTTACAGAAAAAGACCAGTTTTTTTTTTCCTTACAGCACCTCTCA  
ATGGAAGATTTTTCTCACAAGACGAAATTGAAGCACCGGTTCCATCATTTGGATCTGTTG  
CTCTCGGGTACTATCGTGTGACGATAATGGAACCTTTAACTTGTGTTTCTGTAAAAGCAA  
ATGTTAGTAATTATCGTTTTCGTATACCCTCCTCAATTCACTATCAACTCCCATGCAGGTA  
GCGTTGGCACTGTAAGTGCCTCGTAAATGGTATTAAGAGTGTATCACTTTTGGAAAGGAG  
GCAAAGTAAGCAGCGATACTAACCCCTCCTGTAGATCAAGTGAATCACCAACAAAACCTG  
GTTCTGTAGCAGGAACCTTTAAAGCACCAGTTACTAAAGGTAGTGTCTGAGAAAGAAT  
TTATTAGTTCTGGTAGTGGATATACATTTACACCTACAATCACTTTCAAGCATCCTGGCG  
GTGCAATTCTAGGTACCTGTCCTATTGTAGGGGGTCAGGTATCAGGAACTATTTTCGATCA  
CTGATGGTGGTTACGGATACACTACAGTCCCCAAAGTTTATATTAGAGAACCAACGGGAG  
CTAATCCTATTACAGCAACTCGACCACCTGTCTTGACTGTTGGCGTAAAAACTTCTATTT  
CAACTACTAATGCAGGACGAGGATACATAACAACCTCCTAGAACATTTCTAGTTGTTCCAG  
TTGGTGAACAGGTCTTTTATACAACCTGTTGATTCAAAGGGGCATCTAGTAGGAATTTAAT  
TATTAGATGGTGGTAGCGAATATGAGGACGTACCTTCTGTTTATGTGCGCAGATAATATAG  
TAGATGCGACAGGAGCGTATGCGCGCGGAAGTACTGCTACTGCAGCTGCTGCTATAATAA  
ACGGCAGAGTTACTAATAATAATATTACTGCTTTTGGTTCTGGTTATAGTGCACCACATC  
CTCCTGAGATTGGACATCCAGCACCTCCTAAGGCCAAAAGCATCTGCAAAAATTGGCCTTC  
ACGCAGTTAGAAGATTTAAAGTAAATCAGTCAGGTGAAGGATATACAAAATCAAACCCAG  
TTGGTTGTGCGAGAGCAGCAAGTGGTATTACTTCTTACTGAAGATGGTAACGCTGTGT  
TTGCAAACCACTACAGCATCAGCACATGGGATTAATTGGGATGTAAAATGTCTAGATG  
CTTTATTTGTAGGACGTTTAGTAGACAAAGACTCTGAACAGTTTTTACATGATGTTCCAG  
GACTAGGTTATAGGAAAATTGATGTTAGAAGTGAAGTGAAGACAAATAAAGATTTCTATA  
CTGCAAAAAGGAACATCTTTTCAAGTATTAATTACCTCTTTAAGCTGCTAAATGGTGAACAGC  
CAATTATTACTTATCCTAAAGATCAAATGATCAATCCCTCTGCAGCAACATGGTGTCTTG  
CCACTATTTTGCCTGCAACTTTGGTAAGAGGAGATCCTACCGATATTAGAGACGGTTGGC  
TAAATCAAGATGCTGATATTGCTTATGTTAACGTGGCATCTGCGAGTTCTTTGATTGAAA  
ACTATATGTCTATCATAACTTCTGCCGTAGAAATTTTGGAACTTGTGTACCTGAAGACA  
ATATTGGGGTCCTTTTACAGTTCCTTATAAATCACAACCTTGTGAACCTTTAGGCACTG  
AACACAGTATTATCCCTGTTCCCTCTACAAGTGGTTGGCCAGAGAGAAACGGTGAGTTTT  
TAATAGGGAATAGTCACGTTGTATGATATCAGGGCAATTCACTCAACCAGTTTTATTGAGT  
GTACACGTGTTGTTAATAAATATTGTTGAAGATTGGGATTCTGCTACCGAGGTTGCTGCTA  
ACTTCTCAGTTTTTCGTTAACAAGGCACTCCTCAGGGAGTTGTCATGAAAATTGTTGGTA  
TCGTTGATTCTAAACAACAACCTTACTCATACTGGATCCTATCACTTACCTGGTGATT  
AATTAACAGTCTCTAAGTTGGGAGGAATAGGAACCAATGCTGAACGTACTACTTTGTTGT  
ATAACGTAAAAAATTCGTTAATATCAGTAGTAATACGTTTGGTGGTGTAAATAATCAGA  
CCGCAACTGTCACATGTGCTAATAAATGGTCTCTTAGTTGGAGATCAGGTAACAGTCT  
ATGGTGCTAACCCAATCATCTGTAATGGAACCTTCGTAGTTACATCTAGAGATAGTAATA  
GAGTATTCCCATATGAATCACTACAACCTGCTACAATCGTACCTCCAGGTAATATTCTTG  
TATCTGTTGACCTCAATAAAGGAAAGCCTGATGATACAGCTGTTTTAAATTCTAACGGAC  
CTTACACAAGTTATATTCAAACCTCTTTCTTATAAATACTACGTTGACGTCGCTTCTA  
CAAGTATACCAACTAAAAGGTTCGGTACGTTCCCTGGCTCTGCTATTTTGGCACGTAACC  
ATCGTAAATTTAACCGTTTCCCATCAGCGGTAACACTACAATTTCAACAAAGAATAATATAT  
CACCAGGTCCTATTGGATCATGCGTTAATGGCGTTTCTATATGGTCTTTTACGTCTACAA  
TGAAGAAACCTTCCCGGGCTTACTAAGATCTCTATTTCTAACGCATGTTCTGGATATA  
ATGCTGCTTCTCATCAAATATCACATTTTTTGGATGGTTCGATGAAGTGGTCCCACATCGA  
GTATAACTATTAATGGGTTCGGTTAACGACATTACTCTTACTGCAGGTGGGTCTGGATATA  
CTTCTTATCCTTTAGTTTCTGTAGCAGGTGGTGGAGTATCAGGTGCTTCCGCAACTGCAA  
TCACCCTAAAGGTGTTGTATCTAGAGTTTTGATTAACGTTGGTGGAAACAGGATATACAT  
CTAACCTACTATTACTATGGTTGGTGGCGGAGGAACTGTTGCTACGGGAACTGCATCAG  
TTACAGGTCCTTTTGAAGCTGTTTCTGTATCCAATGGTGGGGCGTCTTATACTTCAAATC  
CTACTGTCACACTAAGTTCTGGTAGTGGTGTCTGTTGCTCAAGCAAACGTTCAGAAGGGTC  
GTAGTATCTCTATCGCTATTATGTCTGCAGGTTTACAGAAATACTACAGTCACTTCAATTG  
ATATTAAGGAGAAGGTTTTGGGTGCTGTTGCTCGTGCAACGATTGATGTTGCTGGTGA  
ATGCAGGTAGAGTTACGAGTATCGAAATTATCAATAGAGGTTTACAGATATGTTCAAGGTA  
CGACTTTATTTAATTTAAACTCTGGTGGTCTCGTGCTACATTTACAGCAAACGTGTTCC  
CATGGACTTAAAACCTTCCGAGAAAGATCTACTCTTGATGCTGCAAAGGGAGGAGTATCAG



GTGGAGTTAATAATGACCATGCTGGTGAATATGCTCACTTATCCGAGCCACAATGATTAA  
GATATCGTCTTGATGATAATTTAATTACAAATAACTCCGGATTAGTCAAAGAGCAAGGAG  
CTCAATTTCCACACTCACCTATGATTGGTTGGGCATTTGATGGTAACCCAATTGCTGCTC  
CATATGGGGTCTCAAAACCTGCTGATCAGAACTCTTCTAGTGTTAATCTAAACATCTCTT  
ACCAACTAAACGCAGAACTTGTATAAATTGCTATTACAAACCAAAAATCCTGTTTCGAACAG  
CAGGTCCTCTTCTTTCTGAAGAATCTCGAGGTAGGTATGTTGAAGATTATCAATGTGTAT  
TTGGTCAGGGTGATTGAGATCAATATAATGGGCGTTTCTATAAGACACCTGAACATCCTC  
ATGGTTGATATTGCTATTTTGTCACTATTGGTTCTACTGCAGATGGTAATTCTCTATTCC  
CTGATGTTGTTGGTCTTAGTTTCAACCCTGTTGTAGATACTTGGAATCTAAGTGCTGATG  
CTGTTCCACAAAAAATTCCTAATGCAGTTGTTAGATATCGTTATCCATATTAGAACGTTA  
ATATGGACGTTGAGAGGACCTCAAATGCCTCTACATACGCTATACCCCAAGAAAAGGGTG  
AATTACTAAAATGTGATGTGGAAGAGGAAGATGGAAGTGGTATTATTGATCAGAAGGAAA  
CTGATGATCCAGATCCGGTTGATGAAGAACCTCTATTCCGATAATTTGATTATTTGCCTA  
GAGTAAAACCTTGATGCTAAAGTTGACATTGAAGTTGAGACAATTAATAAATTTGAAGATG  
CATCTGTAACAGGATTGACTAGTGAAAATGTAAGGGTTTGTATCAGGAAAATGACAGAT  
TAGTATTTGATAATACTGATGCTTATGGTTCTGGAGTTTCTGGTCGTGTTTCTAGAATCC  
AATGTGCATCAGTATTAACATAAGGTTTGGAGATTGTAGTAGTATTAATTATGGTCTAC  
TTAAAACCTACAAATCCTCGTAATTTAGTTGCAGGTGATACAGTATTTGTTGATTATTCTC  
CTGTAATGGACAGTACTAATGAGTCTTATATCGTACGTCAATATAAAGGTATTGACGAGA  
CTCAACTTACTCAAACCTTGCTCTGGTTTACACTCAGATATTCATTCAACAATTATTAATT  
ATGGTAATGGGTCTGACGGTAGTCTTAAAGCGGTTGTTACTAGTGTAGGTTCTGTGCGACA  
CTGTTAATTTTCGCTATTCTCGTTCTGGAGATACTTCCAACGCTAGAGTTATCTCCTCTC  
ACACACAGGTATTCAAGAAACCAGATAACTCTGTTTCATTGATTAATAAATGAAAATTATG  
CATCTACTAATGATGTATCTATGAATGATAATAAGGAAGACTTCATTTGGGGCAAAACAC  
ACGTCATCTCTGATTATCTTGTGCTTTTGTATGCACAACCTTTCTACAACAGGTGCTAAAG  
ATTGGAAAGCAACTATAACAAGGAAGTGGTGGTTGGATGATGCAGTATTCCAAAAGTTAA  
ACGATGATGGTAAGGGTATTTTCGTTGCAGGTAGGAAGTATCCTAACTCTTCTCTTTTAA  
TTGCATCCAACCCAGATACTACCTTGGTTAACTATGTTGGTGCAGAAAATCGTCTCAGTG  
CAACACTGAAGTACCAAAGAGCCTATGCAGGTAGTTTGGATCTACTCGTACAGATGAAA  
TTACCCCACTTAAAAAATTCCTCGGATACAAGAGTTTGTATAGGTGGAGAGACAAATCCTA  
ACTCTGCAGATTCTTACGATGCTTTTATTGCTCGACTTGATAATACTGGGAATTTTGCTA  
TTAACAGAAAGCATAATTTTGCATATAGTACTGAAAAGATTACTGATCTTATACTTAGTG  
GAAGTTATGTCTATTTCTCTCTGGAGATTGCATCTAGTGTCTGCGACTGCAGTTCAAG  
TTGGATTTAGTAAAGCAACTTTTGGAAACAAGTGCAATTACATTCCTCATATCAAACAGA  
GTAGTAATCCAGTGAATTCTATCTTAAATTCTAGTATCGCAATGGAGTAATTTGATGAGG  
CATATGTTACTGCTGCAACTCGGCACATATCTGATAATACCTCTACCACTGGTTTCTGGG  
TAGGCATATTTCAATACATCAGGAGATGTAAATTACCATAAGAGATGGACTGTTGCAGTAG  
GATCTATTACTGCAGCCAGTAAGTATGTTATTGATATGCTTGGTGGTCTTCAGGTAGCAG  
TTATTAATAATTGCTACAACCTGACTCTGTGCAAACTGCAGAGTCTATTAATAATCAGATATA  
CTGGTATAATTAAGGGTTATAGAACTCAACAGTTTAAATATTGATAATATTGAAGGTTTTA  
CTGTAAATTTCTTGTGTTGATAACTCTGCAGATGTTTCACTATTTCGGTTAAACTTCTT  
GGGATAGTCTGGATTTATTTTCCCATTACATCTGGATCTACCGCTTATACAACTGGTC  
ATTATATTTTAAACATATAACATCAACCAGTATGTGTATCAGTTATGCTGATAGTGTTGCCA  
ATATTTAGGGTTACAGCCCTGCAGGATCTAAATCTCCTTGAGGAAATTTTCTCTTAAAA  
TACTTCTGCTTAGTTATGAACAAATTTAAATTAGAATTGGACCACTGAATTTGACTTT  
TTAAGAAGCAAGTTCAGCTCAAACATTATCAGTAACACAACACACATTAGTTTTTATTG  
GTGATGCTTTAGACGCTACAGGTGGTATTGGGTTCTACTATGATGCTTCTTGTGGAAAAC  
TAGAATTGGTAGTTACAAATGATACTAGTAAAATAAATTCCACAGGATCTGCACTTCAGT  
CTAAATTAACACTACAATGTTTGTGATAATACACGGCAATACATTGGACTTACCAAAGAAG  
TTAATCAGTTTACTGCATATGTAACCTCGAATTCAGCTTTTACAGGAAGTGTTTCTAATA  
CATCATTATTCGGTAACGATCTTCTCGTTGGCGAAATTACTGGTTGAGATGGAACCTGCAG  
GAAATAGTCGTAAGACTGAACAAGGTCAATACTTTCTTGATCATCCCAGACTTAGAAATA  
GGGCAGTCACACCTGGCGTACCTACTGATGTCAATGCCTTCACGACTACAGGTACCTTTG  
CCTTTGAATCTCCTTGGGTTGATAGTGGATTGTTTACTACTAACCTTTCGAAGTATGATT  
AAATTTTTTACATTGGTTGGGGTCTTAAAGCTTGATAAAAATGCTGACGCTGTAACAATCG  
GAACTCAAACCTGTGCACACCAATCCTCAAATGGGATTTGTACGAACGAGTGTAAGTGCTG  
TGACAGGTGTAGATCTTACTGTAAATAATAATGGGTTTGTCTTAGGCGAGGCAGCATTCC

AAAATCTAGACTTTGATGATACAGCAACAACGATGAATGCGGGCACTGTGTCACTTACAT  
CGAAGCAGGATATCTGGAGTTGTAGAAGTCAACTGTTCCCTTTAACAGGGTCTAGAAGAC  
TTTAGGTTTCTTCTATTTTTAGAGGCAGATAGTACTTTAAAGTAACTCCAACATCTAAGA  
TTGATAATATCCCAGAACTTACAATTAATCAATCATTTAACTTTACTGTAGGAACAAAAT  
TAAAATTAATAAATGCAACCTCTGCGGCATTTATTAATAGTGGTCACATTATTACTACTG  
ACATTATTCATATTTAAAATATTCCTTTTTGTTAATTATAACGGTTGGTCTGATGATCTGA  
ATCAGGGTCAAGTAGTTATAGAGCAATTTAGTGAGCAGTCTACTTATGGCATTGTAGGTC  
CTATTCCTGCAGTGGTTAATGAAATTGAAGGATATAATTTTGCACAAGTAACTAACACAA  
CACCCGGCACAGTTGATATTGATCTGGACAAGTATAATTTAGAAGGAACATATAATGCTG  
CAGGGGGACAGATCTTAGATAGTTTTGCCAAAGTCAAACCACATAGTGGTATTGATCAAG  
CGATTAGTATTGATGAAGTTTCTTCATCAGGATCTCCGTCTATTGTTGGATCTCAAGTCA  
CAATCACTTCCTCTGATATTAGTGTTAATTCTGCAGACCCTACTGCACAAATTACCAACC  
TGACCTGTGTTTTAAAGATCACTGTAATTGCAAAGTTAACTTACCTTTTACAACCTACTG  
CACTTACAAATAGTGATCAAGTCTAAGTAATTACAGGAACTGATCATTCACTAGTTACTG  
GATCAGTGATTCTTCGTGATGATAATCGTAATCAAACCTTTTGGTTATACCACATAGGATG  
AATATGATGGCTCTTTTCCATTTTCTCCAATTGTGACTGCCAGAGAGTTTGTATATCATC  
TTCCTAGTGATGCACTAACTTCATCTGCTACCACAATAGCAAATGTTAGTATCTACGTTA  
AGTCTCCCGTTCTTAAAATTTATTATGGGCATCAATACTTGTGTTGATGTCAGTCAGTCCT  
AAATGAGCTGGGGTAAATAATCTTTCTCTTAAGATCCTTTAAACACATTAGAATATTCCT  
TCAAGTCTATAGAACGTGTGGGAACACCTGGGCTTACAGGAGCAGGAAATCCTACTCCTA  
CTCTAAATCTTAAAGTTGATGAGGGTAGTGTTCAAATATTTCTTATTACATTAATCTCT  
CTAGGACTGGTACTGATTCTCCTGTTTCTGATGGAATTTATCTTGATGTTACTGACTCTC  
CTGACAAGGGTACGTTCTTAGTTCAGTCTGCTCACGGTGCTGCTATTACACGTGGTGCTG  
ATATTATGTGATTTATTCTTATCTCCACACCAGGAGGAGCTGCGGATGTAAACCTAGCAT  
CTGATACTACATGTTGTGTTAAGGCAGTTGGTTCTATTGGTGCTATACGTATTGTTTCATC  
AAGGTGGTTTCTACACAAGATCACCCGTTGTTGGTGGAATTCATCTACTATACAAATTG  
AAAGAATAGCTACTAACGCCCCAGGCACAGAATATGCTGTAGTAACTTATCTTGTTGTTT  
CTATTGGTGGTGATGGTGAAGGTTGATTTCTAGATATTACTGTTACTGAGGGAACCTGATG  
CGCCCGGAGTAACTATTCCTGGTCAAATTCATCAGTTGTTGTTCTATCACCTGGTAAAA  
CTTGATTCCAGCAACTATTGAAGTTGAGGCGATTACTGGTATTAATGCATCTGGTTTAA  
CAGGGTCTGGTGTAGAAGTGAAGTTGTTATTCTTGCTTCTGGAAGTATGCATCTCTTT  
TCACTCCAGGTGATAAATGTGGTAAGATTATGAACTTATGAACTAGAAGTCTTGGTAATG  
ATTATCCTCATGACTATACTACTACGTCCAGAGATTACATTCCGACAAAGTGTTCAATTAA  
CATCAACCAGTATCCTAGAAAGTATTACAGTTACCTATCCAGGTTCTGGATGGTGACAGG  
CACATGCAGTGGTATTTACTGGTGGTGGCGGACTAGGTGCTGTTGCTGAAGGAACAACCTG  
AGAATTGTTGTTTAGATTAAATTATTTATAAAGATCCAGGCGGAGGTTATTCTTCTACAA  
CTGCAGTTGCTCTTAGATCTTCGTTCAACTATGTTGTAAGTTTACGTTAGGTCCTTTTT  
AGTATGCATTACCGCTTGGTATTGCTAACTGTTCTACGCTCACACTAAATTTTCGTTGATA  
GGGGTGAAGGTGCAGAGTTCCCGCTTGCTGCAGCTGCGATCGGTCGTTTGAATCGAAATA  
TAACTTATTACGCAATTGCTGGTACTGCAAACCTCTCTTGAACCAGATCAATAAAAACCTTG  
CCATGACTGCATGAAACACAACTTAAAGTGATGCTATTTTCATATGTCAATGGAGGATCAG  
GTCGTCACAATTACTCACTGAATCTTTTGGTATTGCTGCTACACCAAACGTTGTTACAT  
CTACCTTCTTAGAAGGAGAAGTGTGTTAGCATGGTGATTCTTTAGCTAACTCAAGTGCTC  
AAGGTTATGCGTCTACAAATAATGGGTGGCAGATAGGTCCTAGAGTTCTTGAGAATGTAG  
ATTATGCTGGTGATCTTATCGCAGGACAATGAGCAACTGGTGTATATCAAAGCATCGG  
GAACGATCAGTGACTTGAATATTGGTAAAGGTGTTGTTGAGATTGGTTCTCTCGCTAAGA  
CTACAGGACGTTGTATTGATGGGGTTGGTAAACCTTCTGAAATCATCGAAAAAATCAAA  
AGTCTTACTATAAGCAAGATTTCTCTTATGATAGTAAGCCTCCTGTTTTTATCGGTGACT  
GGCAAGACATTCTAATCAAAAACGTGCAACCTCCATTGTTCCAGTTATTTGGTGAATTAG  
ATGTTTCTGATTACGGACTTGTTCCTGCCAAAGGGACGGATTTCCATCTTACTAAATCCG  
TTGAAATCGCTCGACAAGCCATTGTTACTGACATTCAAAGTTTTGCTTTAGTAGGATCAT  
TGTATTCAGAATTCATAACAGAAATAATGTTCCGTCACAAGAGAACTACTTCTTCAG  
AAAATATGCTGACTTGTGTTGTTCAACGTGTTGATTATTTCTACTTTAGTTGATGGTG  
AAAGGCTTGCATTCCCACTAACAGTATGTGGGACTAATATTGATGCTAATACTAATCAAA  
CGATGATCGTTTTAAATGGTGTGTTTCAGAATCCTGGCACATCTTCAATGTTCAAGGTG  
ATTGACTGTATCCAACGACCCACCAGAACCTCCTGCAATTATCAAATACGTTAACGTTA  
CTATTCAAATATTCCTACTAAGAAAAGTTCAATTTGGAATTTTCGGTGGTATTTTCCCAA

ATCCTGGTAATGAAATGGTTGGAGCATCAACTGGAAATCGTCTTACCGTTACCGGTGTTG  
TAGAAAATGATGTATTTGGTTTCTTCAGTCAGGGAACACTACATGTACTCCTAATCAACTG  
TTACAGTTGGTACCACAGAGTTTGCTTCTTATCTTGCTGCAAGTAATGGTGTAACCGATG  
GTCAAAATATCGGTTTATTTAATTTTGGTGAGACAATTACTGACTTCCAGGGTGATACTG  
CTTGAGTCGAATCAATCAACGGACAGAAAGGGCAACAAACACCTTGAGCACATTTAAGAT  
ATTGTATGGCTCCGTCTACTACGTCATTTGAAGTAGTTGTATATAAGACGGAGTAAAGTG  
TCACTGATTCACCTGTTGCTGACGGAACATTTACTACAGGCCAAAACACTATCAGTTTGGAT  
CTGTAATTTCTTACTTAATAGTTTTACACAGGGATCTCACTCTACAACTTTTGGAGTTA  
CAAGTGCACAGTCTGGAACCACTGCTGTATCACCAACGAAGATAATCCTGTTTCATGGAA  
CTCAAATTTCTGTCAATAATCAACTAACTTTAATTAACAACACTGGAACATAGCAATCCA  
CCCCTGGTCTTTACAATAATCAATTAATGAAGCTATTATTGGTGCTCTATTTGGTGTA  
TTGCTCGTATTATTACAACCTTCTAGGTATCAAGATGCTGTAACCTCACGAATTTATTAGTC  
AGGTTAATATTTCAGAAGGCTCTTCTTTCTTTCGCTCTATTATTCAACAGGATTACACCTC  
AGACTTATCCAAACGTTGATCTTGATGATATTTCTAAATCTCAGGTAAGATTTGTTGATT  
TTACAGATAGTCTAACAGATCACCATACTCATTTCCCTTCTAAATAAGAAATTGACAATT  
ATGTTATTCCTTACGAGGTTGCTTCGGGTACTCTACAAATTGACACTATGAGTAACTACA  
AATTAGAGGAGGGTAATCAGGATGGGGAATTTCTACTCGTGAAGATGCTGTAGTTCGTA  
AATTAACCTTATAGGGATATAGTTGGAATAAGTTTATTCGTTCTGTCGAATTATCAGAA  
CACGTGATCCGAAGGAAGAAGTTATTGGTGCTAACCAAGCAAGAAAACTGCATACATTG  
TTAAGGTTGGTAGAGTTCTTAGAAACGATGGATATTATCATACTCAGAATTAATAATG  
CATTCTAACTGCAACAAATCACAAGTGAGTTGATGCATGTTTAGGTGTAACACCTGGAA  
CCGAAGGACTTACTTTTGTAAAGTGGTGTGCTGATTCAGGCCTGCAGGTGGCGCTGAAA  
CAGGTACGTGTACTGCTGCAACAGGAACTACCTATAATGAGTTGACCGGTGATCTAGTGA  
TTGAAATTCGAAATCATTCAATTAACGACAAGTAACACAGTTCTTATCGCTGATAACCGTC  
TTGGTTTTACTTGTGTACAAGGTGGTAATTCCTCTACTAAAACATATCCTCGTAGCACTG  
ACCCTGCATCAGCATCTGCTCGTAATGTAACCTGCAGTTATACCAAGTACGATAACAGTTA  
ACGTAGGTGCAATTACAATTGATGAATGTTATGCAGTCGCAGATTCGGATGAATTCGGTT  
TTGGCACTGCAGCGCTTACAATGGAGCGTTGGATCAAACCAATTACTGTTGGTGCAAGAA  
CAAGATCTATCATTGATTTCACTGCTGCAATGAAGTGGCTTCTTACCTATATCTTT  
AAGGTGCAATTTAGAGTATTATGGTAATGGTTAAATGGTCATTCAACGAACAGCAAACA  
TAGTTCCAAATCAATGGTCACACGTAGCTATTAGTAAATCAAGTTCTGCAACTAGAATGC  
TTGTTAATGGGGTTCAAGATGGTAGTAATTACAGCGAGACCAATTACTACGGAACGAACA  
AACCAGTTAGAATTGGTTATGATACTGCAGGTAATAATCACTTGATTGGATAAATCGATG  
AGCTTAGAGTTTCTATACCTGGACGTTATACAGGGTCATTTACGGCACCTACAGGTTTCT  
TCCAAGGCGATTCAAACGCTGTAATACTCATTCAATTTGATGGTGTTAACGACAACAGC  
ATCCAGAGGATTGGTCTGGATCTGCATCATTTACTAAGGATGAATAGTTCGATAATGACG  
CACTCCTAGAAAATTCTAGAACGGATGGTACACCTGCGGGGTTTCGGCGGTAATCCAAAA  
GATACTATAACTCTGCAGAGAATTGCGAAGGTAATATCGACTTTATCAAGAAAAAAGTTG  
TATATCAAATGAGACAGACATATCCAGAACTTGTTATTCTAGGAGTTCGTTTCTTCCAA  
CTAAACCCACATATGCCGCTGTAACCTGGTCGATTGTCAATGACAGTGACTGGAAACACAT  
TTACAAATGGTGGACATTTTCCACCTCCGTGTGCATCATACAATCCTTCGACTGATATAT  
TAACGATCACTCAGATCGATCACGGTGTAACAAATGGTAAGAACATCAAGATTAAAGTTC  
GTAGTATGACATTTACATGTGCAGAAGATAGTATCGCTCCTTATCATCCATATCCTCGTG  
GTAGAGATCCTGATGAAGGTAAGTGGTTGCCAGTTTCTAATGCGACTGCAGATTCATTCA  
CAGTTGATGTTGGCACATCATCTCAATCTACAACACTAGTACTTTTCGTATGTGCCTTATCTA  
ATGCGGTTGCTGTTGAGAAAGATACACTTAAGATTTTAGATCATTCTTTGACATTCACTT  
GTGCCATGGATGGTCATACAGCTAATAAACTTATACTCGTTCAACAGATCCTGCATCTA  
GAGTTGTTGCTCTTCCAATCAAATCATCCAGTTCTACCAATTTAACAGTTAGTGGAAACAC  
CCTCACCTTTAGTTAATTTCCAACCAACTAACGCAGCGTTTCGATGCTGATAACAGGTGCAT  
TCGTCGTGACGAAATCTAATCATAACCATCAATATTGGAACACGAGGTAGATTAACCTGCAA  
ATTCACTCAGATTTCTTGCACACAATATGTTAACAGTGCACAGAAAATTTATCCACGTG  
CACCTGCCGGCTATGGTCAACCTGCTCCTGCTTATAATACTGCTCTAGATGTAACCTGCAG  
TCGGAACGACTACACCAGAAATTAGTAGTCCAGCGCAAATTCCTACAACAGGTATTTTAA  
CATTCAATACAATTAGTAACCATTGATGATGTAACCTCGCAATAGAATTCAAATTGCTGAGA  
AGTCATTAACATTCACATGTGCTTATGATTGTAATGCTACAAACCACACGCATCCGAGAC  
ACACTGAGCCTGGCAGAGGTGAGTGCCTGAGGTAACCGTTGTTTCTGATGATACTTTA  
CGATTTATATTGGAACATCTAGAGATACTTCTCACATTCATTTGTTGGGTGACTGCAG

GTGCACTAATAAAAACAAACCGGAACCTGTTATTATTATAGTTGGTGTTCCTTCTGAGGCGG  
CTCAATATGCTCATATTTTTGTATCTGCTGCATCAAACGCAGTTGTTAAAGGTGGCAATT  
ACTTACATACATGTGTTTCGGATTCAAATCATGCATTCATTATTGACGAAGGTATTAATG  
ATGAAGATAAAAATTCGTGATACATTGAATTCGATGATTCTAGATCTTCGTAATGGTTCTA  
ACAATCATGTTTGGGATGCTGCATCTTAATATGTTAATAGTAGTGTTCCTCCAGTTCAGA  
TCGCACAAATTGAACCTGCTGTTAAACAAACATTATTCGCTTATGAAAAAGTTGATGATA  
TGCTTCAGTATGTCATTATAAATGCTCTTTGGCCAGTACAAGGTGCTAATGGTATAACCC  
AATTTACTGACGTTTCAATTACGGATTCCCTCATACCCTACATTGAATCAGTTTACACCTA  
CTAAGGGAACCTTATATTCCTGGTACTGGTGATATGGTATTGACTATTGGATCTCATTGAA  
AGACCACATCATCAATTGTTAATTTTGCAGTCGGTGGTGTACATTTTTTCTCACAAAG  
ATGGCAATGATCATCCTACTGCATATCCAAGAAGGACTGCTCCTGCTGCTAAGGCAGTTC  
AAGCTGGCATCGCTGTTGGTGGTGGTGTCACTAGCACAGTTAACGTAAGTAATTCAT  
CAGCAAGAGATCAATATACGCATACATGTTTAAATGCAGTAGCTAATTCTGTAAGTGAAT  
TAACTTATACCACTGGTGACTGTGCAGATGTCTGTTCAACTGTTGGTAACTTAATTACCA  
TCATTAGACATAACAATTACAATTGCTTCTGCATCATCACGAGTTGATCATTGGCAAGTG  
TTACTAATGTTGAACCTGCATATGAGTGCCTGGGGGATCAGTTGCTGGATATCTAGAAG  
CAACTTGAGCAGTTGATTATCATACTGCAGTAACTGTTCTCTGATATACAAATCAGATTG  
GTCCTGAGACGCAATAGCGTTTCAGAGATCCTGCAACCTTAATCAGACTTAATAGCACAG  
CAATCGTTGACAAAGCACCGTACGAATTGTTACAACATTTTCTACGTTGGCACAACAA  
TGCCTAGAAACCAAGGTGGTGCATGAACCGACGGAACCATTTCGTATTAAGACTGACTTAG  
GTAAGTACTTAGATGCTATCGCAAATGATTCACAAGAAGGTGCTAATCTTGAATCTATAA  
CAGGACCTGGATTCTATCTCTTGCAAAATGGAGGACTACGTTATACTCGTCTTCAAGTAT  
TCCAATCACTAGCTGATGATGGAAGACTTGATGAGTATATAAAACAAGCAGTTTTAGGAA  
CCTTAACACACGCTAACACTAACAGTAGTGTGTTGGAGACTGGGGAGTTACTGGAGCAG  
GTGTTTCCGGTTTCTTTAATGCTGTCACAGCTAGAATTGATGACCTCATTACAACCTAGTA  
ATAATAGGATTGCTCCAACAGGTTTCAGGCTTTGAACTGCTGACCATCGATTATTCTTTA  
ACATGCACTTTACCAAGGAAGAAATTAACGGTCTTGTCTACAGTATCTTTCATATGTCT  
TAAACGCTGTATCCTGTAATGCAAGTGCTTGGACTGATGAATTAGATCTTGAAGATTTAC  
TTGTTGCTCTTATATCTGGTTTACAGGCTGGTGGAAATAGATAGCACAATTCAGAAAGCAA  
GCACTTCTCTAACTGCTGCTCTTAATATTCAAACCTATTGACAATGTTCTCGCTGCAGCGT  
TATATGTTATTGGACAAGTTGAAATCCTTGATGAGTATGCGATTGAAAATGGAGTATGTC  
CTCAAGCAGAAGCTGGAAGTGCAAACAGTTCTAATCAATATGCCCCGCAATACGCTGATG  
TATCAGCACATAGCGATTCTATGTCAACTTCAGCAGTCAATGATGTTGTATATGCCTGGC  
GAGACTTAATTGAGATCGTTAAGGTTATATTCTCACCTGCCGGAAAATTAGCAACATGTG  
CAGCTAAACAATTAGAGTATAATGCAAATTATTACACTAATGACTTAAATGACGAAGTTA  
CCAGGCAATTTGGATCTGGTGCATGGTCTACTGATCAATAACACTTTAGAGAGGGTAAAG  
TTGGAGACATTGTGCATGATCTTATTACAACCTGATACTTACGATAAATCCACTGAATATC  
CATTTACATTCAGTGCAAGTTCGGGTACGTTTGTGATGGATAACTTGTGCTTCCAGTA  
AGGGTGGTGAAGCAACGGTATTGATAAGGACGGTGTAAATAAAATCCTTTCTGTCAGTG  
CATTTGGATGGCGTGCTAGGCTGGCAGCTAATACATTATCTGCTCCTAGCGATGCTACAG  
GAAGCATTGCTTCTGGCTGCGTAAGTTCTGCATGCAATAGGTGCAATAATCCAACCTAACG  
TTAACCTTCTTGATAGAGCAAGAACTTAAAGTCTAATATTGAAGCTCTTGTCTACTA  
CAAATATTTTCCCTGATACCGATAATGTTAATGCTAACGGTTGGATTGCATCCTAAACAA  
CAAATTCAGTAGATCATACTGCTGCTCCTGACGAAACACAACTGCTGATAAGTTAACTG  
CGTCAAGAAATAATACTGAGCACTACAAGGGTAAGTATTTCACTTTAAATTACTTAAAGA  
CCTTTGAAAGTGATACTACTAAATTTGAGACCACCACCGGAACATTCGTTACTGGTTCTG  
CAGGTGATACAGCTACTCAAACAATTACATATCCAATCTTTATTAAGGCCGCTGTGTATA  
CTAAGACGTATATATAGCTATCTCTAGATGGCTTTCTTGCTACACGTCAAAGGGCATTCT  
TTGATTTTGTTCATCAAAGGAACGTAGGGTTATATCTTTACAGCTTATCTTGCTGTAA  
CTGTAGGTGCCTTTGGAGTAAGTCCCTCATGGTAACGGATGGTATCGTGCTTATTTTGCAG  
CAACACTCGGATTTGGATTCTCTCAACTTCGTACACAAGTTTATACTCGAGGTTTAAAG  
GAGCACTCGTGCATACAGGTAATGAATCTGATGTATTATTTGTTTGGGCTCATAAACTCA  
ATAGTGGAGCCCTTGATCCTTATACTGCAGTATCTGGTACATTATTCTATTCAAACGCTG  
ATTATAATATCAAACATTTGTTTTGGATAACCTTGCAGACTCTAAGGGTAAGGCACTTG  
ACAATATTTTACATCTCCTTCGTCTCTTGCATCTTTCTATAAGTTCAATGATGCTTCTC  
TTGCATCAGATTACAATAAATCTACTATTCAAAGATTTATTCGTTATCATATAAATGATA  
TTAGACATGAGTTAGACCCGTCAACTTATTATACAGCTATTACTAACACGATGCGATCA

CAGTTCCTACAATCGAATATGGTGATCCTGAGGTTCCGATGGTACCTAGTGGCGGTGTTA  
ACCGTGCTGATGACTTCCATGGGTTACATAGTGACGCATACGCCGAACCTTGAGACTGTTT  
CAGAGAATACTCGTGAAGAAGTCCAAGTTTCTAAGAGATTTAGAATTGATGGTGACATTA  
CTGATGGTCTTTTACAATGGGTGAAACTATTGCTAAACAGGGTGCAGGTGGTATTATAG  
GTGTTGTATCCGGTTTTAACGCGCAAGCAAACCTATAAGAATGTTTCATGTTCCGGGTAACCG  
CAGGGGTTTTTGGCAGTTACAGACAATATTGTAGGTGCATCAAACCTTTGCCACCGCTCAA  
TTTGTGCTCTTGAAGATCGCGTTCACATAATCGGTATCCAAGGATTGTTTGAGGATGATA  
TCCCACCTCATAGGATATACATCTGGATCGACACGACAACCAACAGGTTTCTATCAAATA  
ATGCAGCGGGTACAGATAACACTGGAGGTACGCTAACAGTTGATACTGCAAGTCTAACTG  
GTACATTTGACACCCTCAGTGGTATATCCTCAGAGCTCTAGGAAGCTTATTTCTGTGCG  
CGGAGATTGATGGTTTAGATGTTAAGGTTGGTGATTGGGGCGCTTCCATAGGCAATATTC  
GTCTTGGCATTATATTCTTACATAAGTTGAATGTATTTATCAAAGGTAATAGACTGTGGT  
CAATTGTTGCAGGTCAGCAGCAAACCAATTATGTAGTTAGATCTTGGATGGAGCTTGCTA  
ATAATTACCTATACGACACACCTGTTGGTGGAGTTACACGTCAAGTGGGAGATGTTCTTG  
GCGACTACTGAACAGGCACAGCAGTAGCTGTGTGGCAAATTCATTTACAACCTGTGGTTA  
CAAATACAGGTCGGGGTGCTGCAAGAGTTCAAGATATTGAAAATATGGGTTTGAATAAGA  
GATTAGGTATCTATTCTGTTGTGAGTTCATCTAATGACAATGATGGTATTAATGTGCGG  
ATAATTATGCTACAGCGATCCTTAATGTTGATGATCTTAAAGCTCGTGTCAAACGTACGT  
TCAGAGGATTTGAAGGAACACAAACATCATTCAAACCTCACAAAATTAATGTAACCTCAAT  
ATCTGCCTGACCCCGAAGGACACATGCTCACCTTTATTAATGGTATCCTACAACCTCCTG  
GTGCAACTAATCCATACACAGCGTTCTCTGTTACTAGTCAGTTCACTAAGGCGCCTGCTT  
TGGGAGCATCCTTTACTGGATTCTACGTTGGTAAACTAAGGCAACTTGATGATAGTAGTT  
GCGAGTTTGATCCATTAAGTCAATCATTCAAACCTGAAACGTAATGATGTGTTCTATTCAT  
TTACACTAACTGATGGCGTTTAGTCAAGCACAATGACACCCGAAAACAATTTTATCGTTT  
CACTGAATGGTGTGATTGAAGAGGCGGGTATCGATGTTGAGATTATTGGTTGTTGAATCA  
TCTTTACTGAAGTTCCTCGATTTGGTTCACCATTGGTTGCATTCTCTTATGTTGGTTCTG  
AGGCAGCCGTTGATGCTTCGGAGGTTGTGCCTCCAATTGTACCACGTGGCTTTATTGACA  
TTCAAGGTGAGAATGCAGATAGATATGTGGCTGTTATTGATACATCACTCTCTAATTA  
CATTTGATTATATTGGATCTGTATTCGGACTGGAAGCTAGCCGAACCGAAGCTATAACAA  
ATGGACTTATTATGAATGTTGACTTAACTGGTGGTTGTTCCGGGATACACTTTCAGACGTA  
CTGTACGTGTTGATGCTATCTCAGGTTTTTAGCGGAATATCCGTGTACTAGTTGGTGTG  
CGGGTGTGGAACGCAGTGAAACTGATCCTGGATAGCAAAATTCTTCAGTTGCCGTTGAGA  
CCACTGTCGCTGATGGTTATGACGGACCTAATCTTGCAGATTATGGTGAACAACCTAATTG  
ATCCAGAGATCCCCTAAATATCTAATAATCGTAGCGAGGATTGGCTAAACAAGCACTATG  
TCTAAGTTCAGCATCAAATGATAACTCAGGCGACACCCTGAGAGCTGGTAGTGACTCGAT  
CAATGACAATTTTACTGCAATATACGGTGCCGTTGGTAATGGAACCTCACTGACTGTTAG  
TGTTACAAACCCTGCTTTTGGTCAGGTAAGTATACGGGAGTACGTTTTTGCCTTC  
TGACTGTACACGATTTACTTCAGCATTAGATGTAATGGTAATTATATTGAATTCTATTC  
TAGCGTTGGTATCGTTATTGATCCTAACGGAACCTGGCAACGTTACTATGTCTAATGGAAG  
TGGCTCAAACACTTTTAAATGGCACTACTGGAATAGTAGACGGTCCCTCAAAAATTCCTTA  
TAAGAATGAGATTACAACCTGTTGGTGCTGCTCCTGCTGCAGCAACACAACTTGTTATTT  
CTTTTCTGTAGGTGGGGATGATAATCCATATGTGAACATTAATAAACAGCAGGTGCAGC  
GGGCGATGTAAGAGCAGAGGCGGTAACCTAATATCTGTGTAGTGGATTACTTTATGACAT  
TGAGATTACTTCTGCAGCTCCAACAAATAGCCAAGTCTTACAATGGAATGGAACCTAAGTT  
CGTTCCAGCGGATGATTTTCAGGGAACCTCAGGAGGTGCCACTCAAGAGCTCTTCGCTAG  
CATATTTGTTGGCATTGGTGGCACTGCAGCGAATACTACAACAGACTATTTAACAAATTGC  
AGGTGGAACCTCACTACTGCAGATGTTCTTGGCACTTTAACAGTTAACTTCTCTAG  
AACGTTGACCAGCACCACATCAGCGATAACTGACCCTGATATGTCAGGAATGACTGAAGG  
TGATTGATTAATTTATAATGGAATTCCTGGGGTTCCTACTCGATCACCTATCACAGGGTG  
GGAACCTAGTGGTACTGGTTATGCACACAACCTTACGTTCACTGGTCCCTGGTTTCTCTAC  
AGCAACAAATGAACCCAGATCTAGTTGCAAATAGGGGCCAGAGATGCTTTTTGTTAACTC  
TAATAATGGTGGCGCACAACCACTTAGGATTCAGAGTTAAGCAGGTTCAAGTGGCAAACC  
ATACACCAGTGGTCAAACCTGGTAGTGGTACTGCAGTTCTTTATTGGACTGTTCCCTACGGA  
TGCGCCTGGCATACTTCATTAACAATGCACAATCCATTCACAAATGAGTGGGACTATCAC  
CGTAGTAAATTAGTGAATGATAAGAAGTGTTCGTGGAACCTGGTGTGTAATCGAACCAAT  
ATTCGATGAAATATATGCTGTTCTTGCAGTCAAAGTATCAAATGGAGGATCTTCGTACGC  
TCCTAGTGATCCGCCACGTCTCTGTGCCTGGTTGCTGAACTCCTGATGAAGTCGCGTT

ATCATAGCCAACCATTTGCTGCTGATTCTGGAAGAATCACTCAGGTCAGAGTTTTGAATAG  
AGGAAAGGGATATGAACGTCTCAGATTGCAAATTTTTCTGAGCAGGAAGCACCAAACGT  
TGTTACTTCATTTGATGTCTTTAGAGTATGGCAAAGTCATACTAAGTCTCCTACAACAGG  
TACGTTTACCTCTGATAGCCTTAGATTAGTTAGTGATAATCACCCCAAACCAACTCAGCA  
TTGCTTAACTGAAAGACAACCAGCCGGTTCTACAGTTCTCTTTGATAGAAGTTTTTATCA  
TACGACAATCTATCGTGGTGGAAAGGATGTTCCCTTAAGTTGGTCAAAGAGATTTTCAGAA  
AAATAAAGCTCTTGACATCATGGCAAATGGGGTCTTACTTCATACTCAAGAATGGGGATC  
ATCAGCAGGAACACATACAAACCTTCTCAGCTGGTAGTGTTAAATAGGAGTGTGTAAAAAA  
TACTAATACCTATGCTGCGGTAAATGATAGTGGTGTATTATTATCAAGGAAGTACAAT  
TTAAATCAGTTTGCTCTAGCTCATGATGATTTGATTGGGGTGAGATAACAATTCTACAC  
TTGGAATAATAAACTAGTAAGGGGAACCCTAGTTGTTGGTGTATCTAACTTAGATGAAAC  
AGTGGGTTCTATTGAAGTAGGTAGAATTGTAGATGAAGTCCCGGTCACTGGTAGAGGTGA  
AATTGGTAAGATTGTAAGAGATAATCAGAATAATGTTAGAAGAGTTTATATTAGAGCATT  
AACAGGTGATGCTTTCCAAGACAATAATCTTTTGTAGGTTCTAATGGACTTGAATTTAG  
AAGCCGTAGTGATCCAATATTAAGCACTCCATATTATATTGATTTTGGATCTGACGCGGC  
AAAGTTCGGTCTTTTCGCAACCGGTCAATTTTGTATCGCTTCCGTAAATATTCAAGTAAC  
AGCAAATTATTTAATGAAATTTAATTAGTCTGACGTACCTAATCATGCAGGTACAGGAAA  
TCCTATCAGAATTACCGCATTTCCTGATGGAACGTTGAATAACGGAACAATATATTACAA  
TACCACTGGTGTATCAAAAGCACCTGTTCCAGTTTATGAATCAATTAATGCTCCAGTATT  
CTTGCTGAAGAGTGTGAAAAACAAGGATTTATTTCTTTGTGGTTATCACAGATATAT  
AGGAGGATATGCAGGTGATGAAAATTACATGACCCTCAATTGATCGGCAGAAACATATAC  
TCCTACTAAGGATTATTATACCAGGGACTTATATCAAAGTAATAGCTCTCATCCCAACAC  
TATAGAGAAGTCGAGATATATTGATGGACACTCAAAAATTCTTGGTGTATCTATTGGTGG  
TTATTGAGTTTACGGACGTCGGGGATATAATTCTAGTGGTGCCGTAGCCAAAGAGACCTC  
TCCTTATATGGTTAGAATCACTGCAGAATTAGCGGGTGGACGTCCTCAGGTAGCTAGAGT  
ACCAACGGTAACCTATGCTGTTACCGTTTCTCCTGGACAGTTCCTTTTTGGAGGATCTCG  
TCCAAACTTTTTAGGATTAGATCGCGGTAAAACATACATTTTCGATCAAAACGACGCAAC  
TAATGACAGTCAACACTTACCAACCTCAACTACGCACCATAGTTGGCATGGGCAAATCG  
TGTTATCATTGGGAATACTCCAATTTTGGAGTCTGGCAATGGAATATAATATTATATTGA  
CGGGAGCGTAGGAACCTTTCAATCATATTTGTCAGGTTTTAACTTGGCAACATCTCGCAA  
GGTACGTTTTACAGTTGCTGTGAATTCACCTAATGCGTTATATTTGTTTGGATATACAAC  
TGCAGGTCATGGAATTAGAACTGTTCAAGAAGGATAGGTTCTAGGAGATGTGGTAGAAGA  
TTAGAAGTACGATTCCTCTATAGGGACACTTGATGAATTTAACGGTAAATTTGCTGTAAC  
ACCAGAGTATCCTAACGGTATCTATGCATACTTCATGAGTGAAGATAATGGTGGTAGTCC  
TGCATATCCATATGGTGTGGGTCCTACGTTTTACAGAACACTACGATTTGAAGGAGATAT  
TACACCTGCATAACCAACTGCCTGCCAACAGATGCAGAAGGTGATGAAGTTCATGCGGA  
TGATGGTAGTGTTCCTATAGCAAGATGACGATGAACGGTGTTAATTTCTTCGGACATGC  
GAAAGCAGAAATTCCTCGAGGGGAAGGATCTGGTGCTGTTGGCTCTCCTACTGGTCAACT  
TGTTACTGGTTTAGCAATACTTGATGGTGGTTGAAGTTATGCTACTCCTCCAACACTTAT  
CTTTGAAGGTGGTTGTGGACAAGGTCCACAAGGTGCTTCTGAAATTAATTCTCTAGGAAA  
AGCTACATCTAGTACAATCTCAAATCAAGGTGAATTCTACCAAGAACCTCAATTTATTTG  
AACCCTGGTGGTGGTGGTATTGGTGTCAAGGCAGAAGCAACTGTGCATCAAGGTGTTTT  
AACAGCAATTATTATTACAGAACCTGATAATCGATATACTTCAATTCCAACCTTGTCTT  
TGCAAAATTAGTGACAGTTAAGAGAAAATCTAGAGCACGTCAAGCATTAAACCAATCAAG  
CATTTATTTGTCAGGTGTTGATAAAACTGTTACCTCGTTTGATACTGAAATATATGTTGA  
TTCGACAGATGGATTCCTGGTTCTGGTCAGATGATTCTTAATTATGAAACACTCACTGA  
TCCCTCTAAATCAGCAGGAAATTTTGGTGGTCTGACAAGGGTTCTAAACTTTCATTATGA  
TCAACGGGTTATTCTTGACGCCGGTCAAATGATTCAAATGGTGGTTCAACTAATAAGTT  
TAAGGTTGGTGTAGACTGATGCGTAAAGCTAAAATTGCTACTAACTACGTTGCAAAAGT  
ATAGGACTGGAATCCGGATACCACTGAACTACTAGTTACTGTTGACGTTGATTAATTAGC  
ATTTACTGACGGTGGTATTACTTCTACTGAAAATGCAATCGTACAGTTTAATACAGGAGT  
TGCTTCTAGTGAACCTTCTGGAATCCTACCTCATATTGTGCTTACAACACTGGATCTAA  
TATTTTCTTATTGACAGACCCTCCTGCTCTTTTGGGAGACAGATTTTCCAAGATATTCG  
ACCAACAGCAGCAGGTGGTGGAAATTACGGACCTAGATAATACTGGCACTGATCATGCTAA  
TCAAATCAATCTTGGTGGTGGTATCTATAATTCTTTATATGGTATCGAAGAGCACCTAGG  
TAGACCAACTACATCACTATCCCACGTAGGTGATTATGAAAAAGCTAGAAGTGTCCATT  
CATGTATGCAACAATTCTGACTGCTTGTGCTTTGAGTGATGGTGTGACCGCACTGCACT

TCTAACTATAAACTTGAAGCAGCATATCGTAATCGTATAAATTATAGCGATAATGAAGT  
TGTTACAAGAGCAACTTCTGGCGTGAGAGGAACTCTTGTCTTATGAACCAACAACGAC  
TAAAGTAGTAGTGGGGAGGATTGTCCCATTTAATCCTCGTAATATCAAGGTTGGTAGTGG  
GGCATACTGTATGAGGTTTCTACAGTAGAACTCTAGTTGATGTTCTTATACAAAATGC  
GGCACAACTATACGGCTGCTGCAACAGTAACGTTTGAANAATCCTGGAAACATTCTAAC  
GACTGGAAGTATTTTCTCACCGCTGCAGGAGACCAAGTTGCTTCTACTACTATCAATAA  
TGCTGGATATGGTATTCAACAATCTGTTGATAACACATATAACCTACATTCAACAGTAAC  
ACTACTAATGCGACTGTGGATAACCACTGGTGTGGGTGCAGTTGCACAAGCAATTCTAGG  
AGGTGAGGACCTCGTAGTGAACGGTGGTGGACTATAAAGAATCCAGAGTATTGAATATAA  
AGCAACTGTTAGCTCGTAACCCTCAAATATAACCAGGAGGACGATAGTATCCCAAATGG  
CAGACTTCTTAACCGAACAAAATAGAATATTTTCTCCAGGGAAATTTATAACAGTGCTGG  
AAGGTCTGACGCTACTCAGAGTGACGTGGCAGCGGAACTGCCCCGTGATCGTTTGTATT  
TTTTCATGGGTAGCCCCAGCCTTGGGATAATGAAAATCGCCCCACAGGCAGTAGACT  
CATTCTCAGAGTTTTTTGGATCGTAAGATGTCATGATATCGATGAAGAGAGTCCCTCGGT  
CTAACACGATTCAGGTCGTTCTGATGAATTGACTGGGTTTCCCCAGAACAACACTACATGAG  
GACTAGGTTTTACCTATGAGATGTATAAACCTGACTATTCTCCTACCAAACACTGGTGCTT  
TAGGTGCTACCAAGGTATACGGCTCAGACTTTTATGCTATGAATTCACAATACCAATGTT  
GTAAAGTCATCTAAAATGGAACCTATCCTTCTGAGCTAAAAGGACGACATTTCGACAGTTG  
AACCTGCAGGTACGTCTAGTTCAATTAACGCTACTTGGGATGGTTATCGTTGGAAATACG  
TGTATCTAATTCCCGTGGCATCGGTTCTTAAAGTTTTATCAAATGCCGTATGTCTGTCT  
TTATCAATACATTGAGAAAGACAAATGCCGTTGCAGGTGAAATTGATACAGTTATTATCA  
CATACGCAGGTTCCGGTTACAACAACGTAACCTTATGATTATGTTGCAGTTTCGGGTGATG  
GAATTGGTTGCTGTGTTTCTATTGTTGTAGCCGGTGGTAAGACTAGCTCTGCTGCGGTTA  
CTTCTGGTGAATCAGAATATATATTTGGTAGAATAAGTTTTGACAACATCACTGGTATTG  
GAACAGGAACTGGCGGCATAGTTGATGTTTTCTTCATCCCCCAGTCGGAGATGAATCTG  
ACGCATTTGTTGAACTGGATGCTTCCGTGTAAAAATCGACGACACGCTAGCATATGATG  
AAGGTGCAGGTGACGGCCAATCGATAACGCTTATCGACGTATTGGTCTTGTTACTAATC  
CTTTACAGTTTGGAACCTTCTGAATTGATTCTGATTTAACGGTTTCTGCTTCAAAGGCCG  
CAATCATCTCCCCGACATGCCAAGGAACTATGTGCCTGATGGAATTATTACTCATACAC  
GAGTCATTGGTGGAAACCCACGTTACTGCTCGTGGTCTGTTATTTCTTGGAAATGCCCAA  
CTAAAGTCTTGAATATTATCAGAACGCTATTGATGGTATCTTCCCGGAAGTTACAGGGA  
AACAAAATGAGTTTGACGGCTCTACCGGCATCAATGGTGTACTTCTGGTGCAGCTGGTG  
AAGGTCAACCAGATGTTAATTTCCCTGATGTTCCCTAACTCTTCTTGTAGAACATTAAACA  
GCTCAGAATATGATTGGGGTACGTTGTTTAGCAATGGTTATTCCAAACCACACTTTGGGT  
CAAATAGCGTTCAGGTAATTTACATAGATAATAGATGAGCAATCACTGCTGCTAACTACC  
AAGTACAAGACATCAAATCGTAATCGAATTCTCATGGCACAAAACACCAACCTAAACGT  
TACACCATATTACGACAATTTTATAGACGATTCAAACCTTCTATAGCGGTTTGTTCGTC  
TGGTTCCCGATTCAAACGAGGGAACCTACTACGATGCAAAGCATCATTCAAACCCAGT  
GGAGAATGTTGGTGCCCACTTGTGTAAAGATGGTGTCAAGGTTATTCCAGGTCAAGTTGG  
TTATGACCTGACTGTCGATAGCATCCTGCTCCAAGAATCTTTCTTAGGCGCTGATTTTGA  
AAGTTATAGAACCAATTGAATGATAAGATCATCGCTGGTCTTGCTACAGGTCTAACGGC  
AACAGTTCTTTAGAGTATTTCTTCTCCAGAACCAGCTAAAGATTATATCACTCTACATGT  
AATGTATATTGAGTCTGTTGGAGCTAACAGCACTCCAGCAACTTTCTCTAATAATGAACA  
ATCAAATACAGAGACTGATATCACTTTCGGAACCACTTTGATTCAAGTTGGTTCTCCTTT  
CGCACAACTTCTACTGGTGTCTTCAAAAAGATTCTGTTGCTTATGTACATTCTGG  
TGATCTTTCATCAGCGGGTCTTTGCTGTGGTTCGCATATCAATATAGCCTTTTAGATCA  
ATATGGATGCAACCCCTCCCTTCGTATCGGACTTGATCTTCAAGAATCAATCATTGCCCC  
AGAAGAAGACCTTAGGCTCAACGATAATGCTGTAGGTACATCTAACTATGCTGCTCCTGG  
TTCTTATAGATTTAGAATAGCCACAGACTTAACTAAGAATCTTTTTACTGATGATGCCGA  
TAAAATCTTTATCGAACTTCTTCTATCAAGGCATGAAAGGTAGAATAACTTCTTGCCAG  
AACTGCGTATGATGAATTAGACAAGAGTATTGCACTTGGAACTTTTGGAGCGACTGGAGA  
TTACGTTGTTAAAGACTTTGAGGTCACTGTTAGAGAAAACCGTGATGATGGTTTTAACAC  
TGGCGTATATGCTGCGAGTACTACAACCTCACATGGTGCAGTTGCTGCAGAATCACAGTA  
CTCTGTTGCATTTGGTGTGGTGAAGCGTACGTTAGAGGATGTAGAATTAAGAGATTAGC  
GTCAAACTTCGTTGACTTAGACAAACCTCGTGAGGTGAAGGCAGAATAGAACACGTTTGT  
TCCATTTGAAATGGGCAACTTTACACCTGTAATAAATGTTTATGGATTCGCTAACGTTGT  
AGGTTCTACAATCACTAATGCATATCAAACCTCTAGAATTAAGTGATGGATTTACAACACTAC

ACCAGGTGATGCGAATGGTGTGTTATTTCGTTCTACTCGGGTTTCCTGTATGGAGCATGT  
TGTTAATCCTGATAATCTTTTTGGAAATGCTCATGATCAATATAAGTTGAGTATCTTACA  
TGCTCCTATGTTCCAGTTTTAGAACTAGCAACTGCTCCAACATATCGCAGCAAGTTCCT  
AGTTATGGGGGAAAACCTCAAGTTATAGAGCATTCTAGTCCATGCTATTTCTAGTGGTGA  
CTCCCTCATTTTAAATCAAGTAGAAGGAAATGTTTTAGAAAGTTGAGATGGTCACCGTAGG  
TTGACACGCAGTTGATACTATCTCTGCAGTACATGGTTATTCATCTTCTGTTACTGGTAA  
TTATGACTCCAGAGATGAAAGCACAAATGCTGTTTAAAGTTGCTCCAGAGGCAATCTAAGA  
AGATGTTTTACCTGTTGAGGGTGAAACCTTTACATACAGCACTACCGCAGGTAATGTTCT  
AACAAACCGATGCCGTCAGTGCTGCTTGTGGGGCTAGAAGTGCAGGAGCTTATACTATGGG  
TGCATCTGACTACACTACTGATGCAAATGGAACAGGAACAACATGCACTACCGTAATTGA  
CGGTTCCGGGTGATGATACGATTTCTATTCTTAAGGGTCGTTTGGGGCACGAGGTAGATGA  
CACATTTACTCTAGCAGATGCTAAACTTGGCGGATGCGGTGGTGCCTGCACTCACAGTTGA  
TGTTGCTACAGTTGGTCCTTCTATTGAGGCTTTACAATCAAATCTGCTTTAGATCTAGG  
ACCTGGTCATCAAGTATCTTTTAGTTCCGCAGAATTTGTTACTGTTACACTGTAACCTCG  
AACTGCATTCCCTACTACTAATACATCAAACATCTTGAATTATGGAAGACAACCTTGTA  
TGTAACAGCTGGTTCTGCTGCTCCTTCTGCAGACACCTATACTTCTGCAGTTGGATTACG  
AACTAAATTTAATGGAATCAAGAATGCTGATATTCTTAGCGATATGCCTGAGCAGTAGGT  
TAAGAGTATTTCTGATCTATCTATGATTGTTAGAAGAAAATTTGATGCTGAGACTGATGC  
TACTGACTCTATCTCTGTTACTTTACCTGAGAACGAACAGCTCCAAGCAATTAGTGATGA  
GAACTATCCCTTTACAGTTCTTGCAGGCTCTAACCCCACTCACCCAGTTGGTGATCAGAT  
CACTATCAATGCTACTAACTCTAGTGCTGCTGGATATACCACATTCTCATCTTCTGAAAC  
AACAACTTTACAGATTGCTTACTTAACAAATCTTACTTCTATTAAGTAACAGCGAATGT  
TTCTAAGAACGTTACTTCTAGAAAAACAAAATCTGGTGATCAGATGTTTGTCTTACATT  
TAATAAAGCCACTCAAACACTTGATAAGCAGAATAATATTTAACATATTTAAATCTATA  
GGTCACAAGAATTCAAGATAGAGACATCTCTCTTGATTTAGTTGACTGCTATCTTCTTCG  
CGCTTTATATGGATCTCTAGATGATATTGGTCCTGTTATTCATCTGTAACCTTTAGTCGA  
ACCTACTATCTTTGCTACAGGAACTAACGTAAGCGGTAGAAGTTCAACAGCAAGGGCAA  
AGTTGTTGCTTGCTTTTAAAGGTACCCTGAGACTTAACGTTGTTTATATATCTGGTATATT  
CCAACCTGGTGAAATTCTTGATGGTTATGACAGTCATAACTGAAATGAATACAATTAT  
TAATGTTGCTGCAGGAGCTGTTTTTTTTGATTCGAAAGTTGTAACCTGATAGTTACTGCAT  
GGAATCAAATCAAACCTGTTTTTCATGGAGGAAATTCGATAATTGTTCCGGAGGATAGGTGT  
CGTTGCTCCTGTTAGAAAACATAAAAATTATAATCGTCTACTACAGTCATTCTCTAACTGG  
AGATTATTTGGGTGGTCAATCTTAGCTCGATACATCATAACCGCGATATTCCTTTGTGTAA  
GGTTAAATTCCTTGCTGATTACATACACGTTAGACCAGGTGCAAAGCACCTGTTTAAATGG  
CATAGGTACGGTAGCATCTCCTGCATTTGTAACCTGTTCTACACGTGACTTTAAGTCAAG  
TGTGATTAAGATATCTCGAACATGTAATGCTACAGTCTTTGATATTCCAAAATTAATAG  
TAATTTCCGTTGTGATCTTGGTTGGTATCTTCCCTAGACTGGACAAATGTGTTGTCACGCC  
TAATGGTTAGTTACAAAGTAATAAAGGTAATCTTTTGATAGACCAAAGAACCTGATTC  
CCTAAAAGATGGTCTCCTTAGAGCAACAGTAACACTTAAACCATATGGTTTCGATCCACT  
TGCAGAGGTAGTAATTAACGTTCTGATAATAAACGGTATAACCATGCGTGATATCGGCGG  
TTTGAAACGGCGATTAGATCAGGTTGAATATTTTACATCACTCAACATGGTTGAAACTGA  
TACAGTCAATACTCAAATCTTGAGGCTAGTGGTACGTATCGTTTGAAGAATGGATTTAT  
TGTTGACGATTTTGGTGATCATAGTTTCGTCTGATGTTGGAGATCAAGATTTTCTGCATC  
GCTTGATTTTAGACTAGGGTATGCACTTCACTCTGATTACACAACGAACGTACCTTTAGT  
TATTAATATAACCTTGTCAACTAATATGCAACAACTGGTCCTCTAATTACGTTTCCATA  
TACTGAAGAGGCGAATGTTAATCAACCATATGATTCTCGTGTTGAGAATATTACTCCATT  
TAACGTCTTTGCCAATATCGGTCGTATTTTCGTTAACACCTGGTTCTGATGATTGTTTGA  
TTCTAATAGACTTGCTGTATCAGTTCAACAGATTGAACGTGATTTCTTAGAAGTTTCTTC  
TGAATTAATGTTGATCAGAATGGATTTGCTACAATTCAATCGGGAGCATGGGAAACTAC  
ATGGCCAGATGAAGAAGTCATATCATCTGAGGTAAC TAGAAACATTCATTGGTTTGTAAA  
AGGTATCGGTAGATGACCTAGACCTGACGCTTAGGATGGTTGTTGATGCGTGGTGTAA  
TCAGACTGATACAATCGAAGTTACTGCAGATCAAGTAATATCTGGTGTGTTGAACGCAAGT  
TATCCCTAGAATTGATCGTCAGTCTATGGGTGATGCGATTCTTTCTAGCACATCTATTCC  
TTGGTTTCGTTCTATTATAGTCGTAGATGATGGTGCAAGTCTAAATCCAAGAACACGTCT  
ATATTCATTCTTAGATGGAAAGGCAACTATTGATTGTGTGATTACATAAGATTGTTGAACT  
TTTTAAAGACCGTACAGTTCATAGTAGAACAACACTCTACTCCCTTTGGCATTGGTAAAGC  
CTAACAGGTTAAATTAGTGGTTGTAAGTCTACGGTTGCTGCTCGTGATGATTTTTCAA



GTTGAATCGTTATGATGACACAACACTTCCTACTTCCTATGCATCTCCAACCTGCATTTTT  
GAACATTGATACTACTGAACTTTCTAAGCAAGCAATCGGTGACACCTATGGGAATATGCA  
GAGTAAAGAAGTATTAGTTGCAACTTGTGGTGCTCGTGCTGTTGTTAAAGATCGTCGTCT  
GATTTCCGATCGTTTTGGTGCAGTAGAGGCATCATCCTTTATTCTTAATCCTGGTGTAGA  
TACAAACCCAAGATGGGCAACCGGAAGTAACTTTTCGACTTTCTACATCTGATTTTTT  
TTCACGTCTTTATGGTGCAGTGGCATCTTCGGCTCAAACCTTCATAGGAAGCAACAAGTCC  
GTTACCCGATTTCAAGAAATTATCTTGGCAATTCATAACGCAGAAATAGTGGATGAAAC  
TGTAACACTTGAACAAACAATTTCAGACAAGTAACTGTGAGTAGACAGATTTGTTGGTA  
TGACCGTCTCGCACAAATCCTTCATTGTTGATCAAGTCGGTTGGCGTGTCTTACTTCAGT  
CCATGTTTACTTCGTTAAAAAGGATGCAAACATTGCAGTTTCTATGCAAATCAGAACAAT  
CTAAAATGCTTATCCTACAACAACCATTTCTAGCTTTCTCTGATGTTAGTCTTGAACGTGA  
TCGGGTTTCAAGTTATCAGGATTTTCTTCAGTTGCAACTAGATTCCCATTGATGCCTCTGT  
ATATATTCCTCAATCACAAGAACATCGTTTTGTTCTCCTTTCTGACTCGAACTCATATCA  
GATTTGGATTTCCAGAATGGGTGAGATTGATGTCGCTGGTTACAGAACAATCACCGAACA  
ACCTTATGCAGGTGTTCTACTCAAATCTCAGAACGCTACTACATGGACTGCAGATCACTA  
GGAAAACCTTAAGTTTATTATCAACGCTGCATCCATCTGTAATTCTGGACAACTAACT  
TTAATTGAACAATGCAGTACTCGGTAGAGGAAACGGTGGTAAGTTAAATCTTGGTTGTGA  
TGCTATTCTAACATGCCAACAGAATTATTTCTTCCACTTAATTCCACAACATTACCTTA  
CCCAGTTGGTTGTCGTAGCTATCAAAAGACTACTTTGCCAGAGGGTACGAATACTGCAAG  
AACTATAAAACCCGGTGGTGTTCATGAACTATTAATGATATGGGTGGTGACAGGGCAGC  
AGGATCTAATACTGGTGGAGTAATTTCTAACCGTGTAGTTTCTTCCAAGACATTAGCAAC  
TATGCTTGTGACTGGTGCTTATTCTGGCTTTAGAGTAGGTGAAACAATTACAGGTCACTC  
CTCTACTGCTCCTTCTGCAGAGGTTGTAAGTTGGACTCAGGGAACAAATACTCAGACACT  
TGAATATGTGTCTTCTGCGTTTACTCCATCAACAGAAAGTATTATTGGTGGAACTTCAGC  
TAGAACTGAGACCTTCGGCAGTATGACTTGCTCTGGATACGCTGTTGAGTTTACTGCAAT  
CCCACGTTGCTACCCATCAAGAACACCAAGCAATTCTTCAACAACCAAGAACGATTCGTGT  
TTATCCTAGTTATCACTGTATGCACAGTGCATCTAGAAATGTGATTATTGAAGGCTCTGA  
ATCTGACGTTTCTGATACTGCTTTGACTGCATAAATATCTGCTACAGATACTAGTATTGC  
TGTAGGAGACGCTACTGCATACCACAAGAAGAGTAGCGGTGCTGCTATTGGAACAAGTAA  
CGTTTGTACATTAAGTTAATGATGAAATTATCTCTTATTGTGCAATCTCTAGATATAA  
CAATACTGGTACGGCTCATGAACGTGGTGTGAGGAAACAACCGCAGCATCCCATGCGCA  
TGAGTCTGTCGTTGAGTGTGTATCTTAGATGGTATTCTTCTAATCGAAATTGATAAAAC  
TCATGCATGAATTGAAGTTGTTACATTGGATTACGATGAAATTTCCACATCATCTATTGC  
TAGATTAGGACTTCTTGTGGTGGAAACAGGTATCATAGCATCACAGAATATTCAATACAG  
CACTCTTGTTCCTCAGATTCAGACGATGTTTCTTCTAAGACTGACATTACTGCTGCATT  
TAGCACAATTAGTGGTACCTCTATCAATGAACGCTCTATTTTGTTCAAACATATTTCTC  
ACATGCTGGAGTATTCTCTGATATTATGTTAAGTCAGGAGAATGATTTGATTCCACCACT  
ATTAGTTTGTTCAGCAATCAATGAATTTTCTGCACTTAGCGGTGCTAAGTCATTGAGAA  
GGATCTTACAATGACTACTGTTAAGACTACGATATCTCCTGTTATTGATACATATAGTAT  
GTCTATCACTTTGTTATCTAACCGTATCAATAGTCCTTCAGATCTTAATACTGCAAAGCT  
ATCATTGTTGATGTACACGATGCACTTTATATTACTAAGAGTGCAACTCTAACTAATAG  
TTCTGGTGTATCAAAGTTTTTGTGTTGCGATATCGCCCACCAACAGTGAGATTAAGGT  
GCTAGATAGGGTGCATGTTGGATCTTCTGTTACTATAGTACAACCTGTATTTGCCTT  
TATCCCAGCTGCAGGTTCTAAGGTTCTGCAACCACAGAAAGAGAAATATATTCATCTTA  
TGAATATGAAGTATCTGGTTTGTGTTGATCAATATCAAATCAACGTAGTGTAGTTGG  
TCATAATCAGGCATTAGTCCCCTTATCAAAGGTCTGAGAGCAATCCCCTCTTGTGTATA  
ATGAAACTTCGTGTAAGAGACGATGCAAATTGGTTTAGGGACTCCTATGCGTGTTCGGTC  
CAGTGGACTGCTAAATCTCTGTATGAGAAATATGTGGCAGCACATAACGCAGAACAAAGTC  
AAGAAAAAGGAATTTCTAATTTACAAAATGACGTTTCTGAGTTGAAAACAGATATGAGT  
GAAATTAATCACGCTTACTTACGTCAGTCCAAAACAAAACATCATAATCAATGTTGAAA  
AACTATCACAAGGAGAGATGAATTCTCAATTCAAGGAGAGATATGCAAAGTTGATTGAAAC  
AAAATTTACACTTGTCTGCGAAAATTAAGAAAAAGAGGTTACTGCACTTAAATTCTTGG  
GTGCTATTGAAACACTAGAATATTTTACACAGGCAGAGGAAAAGGCAGCTTCTACTACTC  
CTGATCCAGTTCCATCAGAATAATTCGAAAGGGGGACAGTCCCCCTCTTTTTTTAGCATA  
AATAATAAATAAAGCATAATATAATCGACTTGTGCTAACAAATGGCAAATAGAATGCAAT  
TAGGAAGAGGTGGCGCACTCGCCTGGGCGGATTCTAACCCGAACCTTGTCAAGGTGAAT  
TAGGTATGGAAGTTGACACGCGTCGTTTTAAGATCGGTGATGGTGTATCTGCATGGAACA

CCTTAAGGGACGAACGTCCGGTAGAGTCTACATCTAATCCTGCAGATACTTTAGTCCAAC  
GATATCCTCGTGGTAAGTTCTCTGCAGGTACCATTAGTTCTACTGTTATTCGTAACCCGT  
CTATTGTATGCACCCCTTGCTTCATCTAGACAAATCCCCTCTCTAATGAGATAACTGCTT  
TTGGTATATATGCTGGTTCTCAACTCGTAAATCTATCTGCTGAATTAGCACCTGTTTCTA  
CATTTCCACATTACGATGGTACGTCATCTCCCTCAGCTACCTACAATAAGGTGACTATCG  
ATGCAAAGGTTAGAGTAACTAACGGACAAGGTTTTACTGATTGTAACAACACTGTACTCTTG  
CTGATTATGGTCTTGACGGAACCGATGGAGGAACATCTTCACAACCATATGATTTAGACT  
TAGTTGCTGTTGCAGGTTTGACCACTTCTGTTATGATCTCTAGAAGTCTTGGAATACTG  
TAGCAACTCGTGCAATTACTGGAAGTGCAGACAATTATCTCTGTAAGTGTGGTTGTAGGTA  
TTTCGAGTAACCCAACACTATTCATATGATTGCCACTGCTGTTACAGCAGGTAACATAATA  
CGGCATCCCTGACATCTGTATCTCGTGCAGGAGGAAATGCTGAACCCTTTGCTACCGCTA  
CAGTTAAGGCTACTAAGTTTACTATTGAAGCCCATGGTTGATTGAGAATTGCAGCAGATG  
TGCCTTTCGCTACTGCTGGAGAAAGTAGTAAGTATGCTAGCGATAATGCACCTTTTACTT  
ACGTTAAATATGACTTCATTGCTTACGAATCAAAGTTTATCAAGCCTTCACTGGCATTG  
CTGCAGGAGTAGGTCCACCATCTGAGAGTAGCGGTGACCCTTGCGAATGGAGGTATCTAG  
CTGCCGAAGCACCACAGCAGATGGGATGGCCTAGTTTTGCACAAGATGATTTAGACGTTG  
ACGCGAACGGGCACGTCACGGTACCACCGCAGGAGTAGATAATTCACAATAACAAGACA  
ATAAACGTATTTTCACAATGTTAAGCCTGTTGAAAATCTTGAAGTAGATAACAACTTA  
CAACTTCTACCGACAACACGGCTTCTAATGTATTAACCTTTATTAATAATCAATAATAGTT  
CTGGCGGTTTATTATTTGGTGCTAATAACTGGTGATAGTGGTGCAGGAAAGATCGATG  
TAAATGTACGTTATTAATTTAGCGATCCTGATATTGCTATAGATGGGTCAGTTGCACATA  
CTCTAAACAAAACCGGTGTTGGTAATCTTACTTTTACAACACTGAAAACCTCGTCGTGTG  
CAAGATCTTTAACAGTTTCAGAAACAACCTATGGTTCGGAACTATCACAATCACAAGTA  
CTGCAGAAGATGTAGTTGATAATGATGCCTCAGATTCAAACGGAAAAGTTCATGTGCAAG  
ATTATAGATTACAAGATAACAACATTGCTACGTCTAATGCCAATATGCTCGTTATTCCTG  
GTGATGATCGTCTGCCAGTCGGCTAGTTCATGTTAACGGAAATTTGCGTGTAGATGGTT  
TGACTACGACGATTAATCCAACAGTTAAAACAATGATGATCCATAATTACTTTTGGTG  
GCGATACTGCCCCAGTTAGTGATGACAATAAAGATCGCGGACTTGAATTCTGATACTACG  
ACAATCAAGCAAGTATTGGATTCTTTGGTTACCATGATTCTTACACCGATCTCGGAGGAC  
ACGTCTGAGGGTTTACATTTTACACAACGCCACAAATATTTACAGCGGTCTGTAGTGGAA  
TTGGGTCCGATCTAACTGCAGGAAATTTAAAACCTCACAACAATACTAACTTAACAGCTA  
ATACTACAGGAGACTTACGAGTTACTGGTGGTGATCGTATTGGAGATAATGTTAATATTC  
GTGAATTGCTAGCTGTGATGGCGCAATCCGCGCTAATAGCACTTCTTGATTTGATCAGA  
ACATAATATTCGAAGGTGCTTCTAAGACATTGTCATTGAATAATGGTAGTGGCGCAACTA  
AAATACAACCTCACACTACTATAGGTAATGTAGAAATTGGTGGTATCTTAACAAATACTG  
GTTCTGTTGATCCAAACAGCACTTTAAATGTGGCATCCACAGTACCTTTTGTAGACACAG  
ATGAAACCACTGTTGCACAGAATGGTGGAAAGTGGTATTTATGAGATTCAATCAAATCATT  
ATTGTCCTTTTAGATTTGCCTGCGGTGAATATGTTGAAGGTGATACAGCAATCAATAGTG  
ATGTTTTAATTACCGGCGTACAAAACCAAGAGGCAGTGCTACAGAATCATTCCGTAATA  
GAACTTGCAGAACACCAGATATAAATTACGTTCTGCCTCAAGTGCGGCGTATTCTCCTT  
CATATGCATCTGATCATACTTCTAACTTAAGAATCTATCGTGGTGGAGGTACTCTAACTG  
GCCTCCCTATTGGTGATGATCTTTATATTGGTAAATTAACCTTTGGTGACAGTACTCAT  
TCCAAGTATTAGGAGAGTCAGATAAAACTACAAGTCAAGGAACATTAACAGTAGAAGGTC  
AAACAAATATTAATGACACTCTATTCTAAATGCTTCGAACGAAAAATTTAAGATTCAA  
ATTGATCTGCTGCAGATAAATTTTTCAGTCGATACTTATAATGGTAATACATTAATCGACG  
GAACACTTAATGTAAACGGTGTAACTGGTTTCGACGCAGAATTCGCATTTACAAACGGAA  
CGAGAGATAAGTTCTTTCTCGCATCAGCCTCAGGTAATACTCCAATCAAACGCCATTTCA  
CTGCTTATGGTCATATCGAATTAATTTCAACACTTGATGTTGATAGTAATACGGCACTTG  
GTGCACAACCTTACAGAACTGGTAACTCAGAGTTCAGCGGAACTGTAGCTGTTGATGCAA  
ATTTTGCAGTCAGATCAGAACTACTGATAAGATGATTGTTGTATCTTCGACAGGTCCCA  
TAGTAACTGATGGAACCTAGTTGTTGCAGGTCTCACAACCTATCAATGATGCTCTAATTG  
GTCAAAGTGATAACGAAGTAGTTGATATACACAATTGTCCTGGCACAACCTAAGCTTAGCA  
ATGATACTGAAAGCAGTAATAGAAATATTATCGGTTGCTTACAGTTGCTGATGCTACTC  
ATGTTAATAATACTCCTGGTGGTTCTAACGTTGTACCCTTAAGAAGAATCACTCAGCAA  
CTCTGACTGGTTCTTATTCCGCTGATGGTGCATTCAAACCATCTCGTGGTGCAGGTATCG  
GGAAAACCTTGCTGTTGGTGAAGGTGCAAGAGTATATGGAGGCGCTGAACTTACTGGGG  
CTCTTGGTCTTATTAATCGTGGTGATATATCTGGTGCTTTAACAACCTAATGATAGTGTTA

CAATCACTGCAGAAAATATGATGTTCAAGGTGCTGATTACATCTGCAGCGACCAAGTAGA  
CAATCCATACCGATAACGGTAGCACGGATATGAAATGAACATTGGATGTTGCAGGTGGGG  
TAACTGCACCATCTGACTTTATAGTCACCGGAAACCATACAGTCACTAGAAGATCAACTT  
CCGTCCATTCTACGGTCACAACAATCGATGACCCTGTTGTTAATGTTGGGGGTTATGCCG  
CACCCGCGTCTAGAGATGAAAAGGATCGTGCTACCGAATTCGTTATTATGATCGTTCTG  
CTAAAATCTGTTTCTTCGGGTTTGATAGATCATCCTCCCAATTCCAATTCCTACCAAGTA  
CAACAAATACTTCTGAAGTTCTCTCAGGAACAGATGGTGTCTAAGAGCAGGTAGTTTAA  
ATCTTACTGGTGTGTGCACAGCTCTTGATGTTGATGCTAATGCAAACATTGATGGCCAC  
TGACTGTAGATGGTGAGATTATTCACAAGCATCTTCAGGTCCTGCTCTTGTTATCCCAA  
AAACATATAAGATTAAAAATCTTAACTCAGACTTACTAGATGGTGTCTACAACCGCAACTG  
CTGCAACTCCTTCCACCTTAGTTCTTCGTGATTCTCTGGTGATTTTGCTGCTCATCAA  
TCACTGCAGCTCGTGTCCCAAGATCTGGTGTCTGGTTCCTTAGGAAGCGCATCCACTCCCA  
ACGCATGGAAGATTGCAAGATCACTCAACCCTAGCGCTGTTGTATCTGGTTTTGTAGTCA  
TCAATGGAAGTGAAATTGAAACACTGACAACGACTTATATTGATCCAGACATGACTCCTC  
TAGCAGCGATGAGTGGAAGTGGTTATGGCGTACGAACTGCTGCTAACACTTATGCCAAA  
GAACTCTCCAAGTCACCGCATCGTCTGCAATCACTCTTACTAACGCTCAGGGCGTTTATG  
GCAATAGTACTTTTCACTTTGCTAGTGCATCTTCTAATTCTGCAAACAACCTCGTCCTAA  
GAGACGGACCTGGCAACCTTGGTGCAGGTACTATTACTGGTGTCTTATCTGGGATTGTCA  
CAGGTAATGTAAGTGGTAATTTAACTGGTCAGGTATCTGATATCTCAAACAATGATAGTG  
GTGATCTTACTGGAGGACCTAACCTCTACTACACTAATGATAGAGTTGACTATAGAGTCA  
ATGCTCTTATTACTGCAGGAAGTGAATTAATGATACGATGACGCTGCAAATATAT  
ATACACTGACTGTAAGTCAAGTATCAATATCGATATTGTAACAGACGGTTAAACAA  
ATCTATTTACAAGTGTCTAGACCTAGAAGTCTGTTTACATATGGAAGTGGTATCACAC  
AAAGTTATGGAAGTTTCTCAGTTACTCCGTCTGATATCAATATTGACAACGTATCTGTAG  
GATCAACTTACCTATTTACAAGTGTCTAGAACAAAGAACTCATTACATACGGAAGTGT  
ATATTACACACAGTTTTGGAACCTTGCCCGTTACACAATCAGATATCAACACTGGTAATA  
GTACTGATGGTCTACAAAAGTACTCATTACTAATGAGCTTGTGATGATAGAGGCACCG  
CTTTAACTCTTGCTGGAAGTGGTGTAAATAAGTCACTGATAACGCTGGAGGAACTCTAC  
CTTTAGCATTGACTTTGGTGATTTTAACTGTCAATTTTACAGGAGGTTACTAACCTTT  
ACTTTACAAACACTCGTGTGATGCAGGGGCAGACTTGACAGTTGCTGCTGCGACAGGTT  
CAAAAGTTGATGTTTCTTCTAAGACTACTTCCGATCTTTCTGGAGGAACTTATCAATACT  
ATACATAATCAAGAGTTCCCGCAAACCTGACTATGCTTATGAACGACCAAGAGCAATGT  
TAACTAACCTCGCAACTAGCACCAACAAATCTTCACTTAGCTGGTGTATTCTAGAAGTCT  
GCACAGTTGTTACCAGTGGTGTAAATGTTGGTGGCGGTGGTGGATAAACTCCGTAACTA  
CGGTTGCTACAGATGGTTCAGTAACTGGGTTTGGATTGATTGTTGATACTACGGTTGATA  
GTGATGGAAACATCACTACTGCTGCGGTCAATGCAGGTGGTCTGGATATCTAATTACCG  
ATAGTGGCACAGTCAAAACCCCAACGCAGGTAAGAGTCTCAAATTGAGCTTGGGGACAC  
TCTCAGGAGGATCAGGTTATTCATGGTCTACTGGAGTAGGAGGCACTGGGGCTGACGGTT  
CTGCTGCGACTGGTGTATTAATCTCAAGTGCAGGTGCAGTCACTCACGTTACAGTTTATA  
ACGGTGGAAACATGATTCAGTGCAGGTTACTTATAAGTATTGCTAATGCTTATGCTACTG  
GAGTTAAGAAGCTTTGACCTACTAGTGTCTGCACGGTCTGGATACGCAACAGGAACTGCCA  
TTGCCACATCAGCGTCCGCAAATGGATCTGGAGCAACATTAATATTACTTCTGTCACTG  
CTTGTGGTGGTATCACTACTGTCGCAACCAACGATGATGGATTTGGTTTCGCTGAACCTG  
GAGTCTAGTCTTACTAATGCTACCGCAACTGATATCGTAACAGTAGGAAGCAGTGGTA  
CTGCTTACTCATCAAGAACTGCAGGGACCAATAACTTAGTCACATCTGATTATGGAAGTAA  
ATGCATCTTGTGCCAGCCCAACATTCAGTGTGTTGTTGGTTCAAATGGTCTGCTTCTA  
TCACCGTGACAGATGATGGTAGCGAATTTATCGCCAATGAAACTATCGGAGTTGATGATG  
CTCCAAAGGGTGGTGGCGGTGGTGTCTCTTACATTCGATGTAAGAGCAATCCATGGGA  
GCACTGTTACAGTTCTAGTATCCGTGATTCATGGTAACGGTGCACAGTTAATGTCGCTA  
ACATTGCAACAAAAGCAACTATAACTCGAACTGACATCACAACGATGGAAGTTGGAGCAA  
CAATTACAGGTGCTACTTCTGGCACTACAGGTATTATGACTGATCTCGGAACCAACCA  
TCACTGTCAATCCCGTTGACGGATTCTTCAAGAAAGGTGAAGTCGTCAGAGCTTATGGTG  
TACTACACGTTCTTCTCCTCATTCAAGTAAATAAGTTATGTCTGCCACTAGATCCGATA  
ATAAAACAGAAGTACAAGAGTATGCTGTACGTTGTTCAAGGACATCCTGCTATAGACATCA  
ACGTTGCTCCTGAGCAATTAGATGATTAGATAGGAGAAGCGTATGATTTCTATGAAGCCT  
TTCAGTCTGCAGGTAGTCACACATCCTTCATCTTTATTGAAGTTACAGATGCTAGTAAAA  
CAGCAGCAAAAAGTTCAACCCAGCAAGGATCTACCAAGTGGTATGAGAACAATAACTATG

TTTCAGTACTACCTAGCACCTTAGGAATTAATCGGGTATAGACACTGATCAGTGATTCTA  
GTATTGTGCCAGGTAACACGTCCAATATAAAGTACCCAATCTTTCTAAATGATGTGTCCG  
CCATGACCCATGGTGATATTCTTCATTACTTTATGACATATCAGTATCTTGAGACACTTG  
ATTTTGTAAACAAAGTCTACTAGGAGAAGAAGACTAAGATAAAAACGAGAAAACAAGGTAGAT  
TGTATCTCGATATGGATTGGGATTCAATGGGAACAGGAGACAAAATTTAAGTCGAAGTTC  
TCGTACGTCAAGATGCACAAAGTTATACCGCACTATATAATGATAACTGGTTAAAAGATT  
ATGTTTAAAGCGTTATTTCAACAACAATCGGGTAAAAACCTAGGTAAGTAAGATGGCATT  
AAATGTTAGGTGGCGTCACAATTAATGGCCTTCATATTCATTAGGACGCAGGTCAATTCA  
AGCATGGCCTTGAAGATAAAAATCGTGGTACATACTAACTACCTCCTTTAGACTTCGTGG  
GGTAATCTCTACTGGTCTATCTCAACTCTCCTACTCAAGATTTTGTTC AATCAGATTATT  
CTAGCGGAGGACGCTTCAAAGCAAATAGTTCTGCACTGGAACAAAAATTTATTGCACTTC  
TAGTGGTTGAAAGCATTGAAATCTATGGGCCAGATATTTACTATGTTTCAGAGAACGAATG  
TCAAGTAAGATACGGACTTTGGAGAGCACTCGGATTCGTAATTCGATACTGCGAAACCGA  
TTAGAGCATATGTTAATAATGCAGAAGGATGGGAAGGACTAGGTGATATACTTAGCAAAT  
TTGGAGTCCGTATCGAACAGAAGAGCACTTTTATATTCTCCCGTAAGAATTTTTATGAGC  
ATGTGGACGCCAGTGTACGCTTATCGTAGAAGGGAGACCAAACGAAGGGGACTTAATCT  
GGTTTCCAACAACAAGGCACTTATTTGAAAAACAAGTCGTAGAAGCAGAAAAACCATTTT  
ATCAATTAGGAAACGGATGTGTATGGGAATGTCAGCGTGACCTCTTAGAATGCAGTGACG  
GAAATCTTGCCACAGGAACCGCAGAGATCAATGCAATCGAAGCTACCTTTGCTAACGCTA  
TTACAGTTAACTTCGCTACTGGAGGGTCTAGCGATTTACAGTTGGTGAAATTTTTGCAG  
GAGGTATATCTAAAGTGAATGCTGAAGTTAAATCATGGGATTGTGCAACTAGACCGATAC  
ATGACTTTATTAATTCAGGTGTCATTACGATACCTGAAACGGTTACAGGGCAGACCTCAG  
GTGCTGCTTGGACAACCTGCATCATAACCACATACTAAATAACGTTAATACCGCGAACTCTA  
TTCAACAAAAGAACGGTCTTGAAACTTTGGATAACGATATTATTGACTTTACCGAAACTA  
ATCCATTCGGTTCAATTGGTTCCGTTACTAACACTACAATCTAATGTTAGGCACTTCTCC  
AGATCACGGAATTTTTAGGAACACTGTCGTTGCTTTTGGAACGTTATTTAATAATAGTGA  
ATTACCTCGTAATGCCGAAGTTATCAAAGTACCTTTAGGGTCCGGTCCTAAACAAAAACT  
CTTAGCATGGTTCGATCAAGTTCCTGATCCAACGAACAAAAGAGTTCAACTTACTCATCC  
CAGAATTTCTTGTGAAATTAACGGGGTAGCATATGACAGTGCAAAAAATCTTACACCCAC  
ACAAAAGATCAAGATGGCACGCAGTTCTACTACAAATAAGAACGTGTCTATGCCTGTTCC  
TTATATTATGGGTTTGGAGCTAGGAATCATCTCTAAAAATCAAGAAGATTGTTATCAAAT  
TTTAGACCGGATTCGCCCAATATTCCAACCTCCTCTCAATATGGCAGTAAGACTATTGCC  
GGAGATGACTGATATAAGAGACGCTCCCTCAGTCCTCAAGGGCGCCAAATATGAAGATGA  
CTATGAGGGTAAACTTACGACAAGAAGAGCGATCATTTCATACCTTACAATATACTGCTGG  
AACTCATCTATACGGTCCTGCATCAGCCCCAAAAGTTTACAAAAAGTCAAATACAGATTA  
CTATATAGAGACCACTACTACATGTACACGAAGAGAAGTAAGGTATACTGTTGTTCTTAA  
TCTCTCACAGGAGATGCTGATGATGATTTTCGGATTCGGAGAGACTACTGCAGTCTTTAC  
AGATAACAAAAACGTAATCCTACGAGTGATGCTGACGAGGCAATTTAATACTGTGCGACC  
CCTTTCGATGGTCTCAACCATGCTTCTGGTACTGAACCTACAAAACCTTCGAAAGCATGTG  
GAAAAAATAGAACCAATTCTGAAAAAAACAGAGACTGCAGATGTGAAGCAAGACTACGAG  
ATCTCTCGTGCTGCTTCTCGTAGTTTGTGAAAGAAAGGACAAGAAGCAGTATATGGTATA  
TTGGAAGTATCACAAGCATCAGATGAGCCTCGTACGACAGAAGTTGCAACAACAACGATT  
AAGAACGGAGCAGATGCTGCTGATAAAATAATTGATCTTCAGAAGAAGAGGAAAGAGTAG  
GAAGCTGATAATAAAAAGAATGCACCTTTTACAGTAAACGATGCTCTGTTTGGTGGTAGC  
TCGGCAGAGTTACAGAAATTGTTAAAGCAGAAAAAAGAAACAACCTAAAATGGACAAGAAA  
TAACAACACATGACATGTCAGTATTAATGTTATTTGCACGAGTACACTTGAAGGAGGTG  
CAGCTGAATATCAACTAATTCAAACAGGATATTATAGAGGTCGATCTATTCCAGGTGCAG  
CAGCTGTAACACTTCATGGTGATCCTGAAATCACACTTGCTCAGAATATGTTTCATTCTAC  
TCAAAGGTGGTAACACTGTTCAAGCAACAATTGTAGAAGCAGTATCTGTTCCCTACTGGTG  
ATTCTATCCTAGGTCAGCATAGTCATTCTACAGGTGATGCACTGCCATTCTCATCTGGTG  
ATTTTATAGCAATTGAAGATGATAGCACATCTCCTGCTATTCGTAGTACCTTCCCTCTCTG  
CGGGAACAGCTGGTAAAAAGATTACTGCTGAAATCTGAAACAGAATCGCTACTTATATTG  
GTTTCATCAGGTGCATCAGCAGATAATACTTTTGCCTTCTGAGCTCCTCAAGCAGTTGGTA  
AAGGAAGCATTAAAGCTGGTTGCCGCAACAAATGCAGTAATTATAGAAGATATTCGAGTGG  
TTGGTGGTTAAGATGCCCGCTGTAAATCAAGAGGAAGAGAGAATACTTAAAGGGATGAAG  
AAGAGTCATGATCAATGTAGGAACTCCATGGCGGTGAGATAAAGCAGTTATGTACGCT  
ACTGCTGATAAGTTAGCACAAAAAGAACAATTGAATGTTATGTACAATCAAGATTTTCATT

AAACTAGTCCACGGTAATCCTACGACAAGGATGCAACCGTAAGCAAAGTCAAAGACTATG  
GGAAAGATTTATGCTGATCGTGGAAGTCCCGAAAAGAAGAATAGAGCAAGTAGAAAGTCT  
CTTGAGAAAGATCTTAAGAAGAAAAGTTTAGGTTATGAAAAAGGTGTAGGGCAGTATAAA  
TATTCCTCAGGTGAGGGAGCAGGACGTGAGGTTTCATACCAAATAAGTCCTGGCAAAGGA  
ATCTCTACGAGATGTTTTGGTAAGATCATGCGTCGCTAGGAAGATAGCATTGTCAAGAA  
TCAGTTATCAGTAAGAAAGCAGATAAACCTGTTAGGCTACATGATACTTAGTCTAGAAAA  
CCATCTGCGTGAATGAACTTAGGTAAACCAGAAGCAGGCAAAAATCCTGGGGGTTTGGCA  
AAAACCTTCTGGTACTACAGACAGAAAAGGTAAACTCGGTCCAAGTACTAACCAGCGATG  
CACCATGGCGACGAATAAAATTATCGACAAGAACAATGTGGTGATACTTACTTGCACGA  
CTGGTGTCTAAAAATAACTCTTCTGATTGGTAGCCTGTTTGGGTTTCAGCGGGGTGGTAA  
ATACGCACGTAAAGCCTGCGCCAAACAACCTGGACAAAGGACCAAACCCAAGAGCGGTTC  
CAGTAAGATGAATAGAACCCTAAATAAAAAAGAGGAAGATGCTGCCTTTTCGTGCGACAAA  
CTGCCATGATCCTAATCCAATTAGGAAAGGAAGGGCAATCAACGTGAAAACATCATCTAA  
ACAAAAACACAAAGACGAAAAAGTTTCAAGTTAGCATAACGGTAAAATCTCGCTATTCAGT  
TTGGCCATGTGGTTATGCAAGGGGTGCACTTGTCAAATGCCGAAAAGTTCGTGTAAAAAA  
TTGGGGGAACAAAGGTAAGAAAGAAGAATTTGATATGAAGGTAAAAGTATTCGAAAATTT  
TCAAGCAGAATGTTGGAAGACTCATAAAAAAGTTGGTATCAAACGAACGGTGATAAGTT  
AGTAAACGATTTTCGTCCAATGAACGAAGCAAAGGAATACATAGGACCGGACAAAGCGGA  
CAGAAAACCTTATCAAGAATATGGATAACCCTAGATATGATAAAAAGTTAGCAGACTAAGA  
AAAGAAGAGGGAGCTTAAGAATCGTCAAGCAATTAAGGATAAAGCGACTAAGGGTATGAA  
GTTTACTCAAGCAGAAATAACCAACGGGGCAAAGAAGTGTTAGCCAGATTATGAGAAAAA  
AGGAACGCAAAAAGCATTAGGGCGAAACGTACAAACGCTGTATTA AAAAGGAAGACACAAA  
CTATGTGAGAGAAAAAGCAGCAGCATGGACTAGGAAAGCAGGAAAAAACCGATCAGACGG  
AGTAAACGACAAAGGCAGAAAAAGTTACGAACGAGAAAATCCAGGATCCGACCTTAAAGC  
AGCGAGCGACAAATTTGGAAACCCCCGCAGGGCTTCATTCGGCACTAGAATTAAGGAAT  
GTAAAAGATATCAACTTCAAAGAAAACAGCCAGCGAGCCTGACTTAAGGATTAACAAAAG  
CTTGCGTGCTTGGAATTGTTGATCTATCATAGGGTGTAGACTGTACCATTA AAAATTAGAA  
TCTATCGGATGTGTAGTGCTACATGGAAGGGCGAACAATTATATTGGTCAACTCGAAAAG  
AGGGTTGCTCTCATGATCTTGCTGGACTAGTACGTAATAATCATGGAGATGAGACTTGTC  
TAAATCCATGTAAAGGATCCTCTAGTTGTCCATCCTGGGGATAGCGTCATGGAATGATTG  
ATGTCGTGAGGGGTGGGTATGGTAAAGATAGTTGGTTTTGTAAAGTTCTCAATTTGTATTA  
GGCTTTAAATATGAAACAGCAACAAGAAGAGAAGCGTTGCATTGGAAGTTCCCTATGGTA  
GCAGCGTTCGATAAGATGCTTGCAAAAATTAGAAATTGTAGAGGGTGGTAAGATCAAAGAT  
GCTTTTCTAGAAGGTCTTGCATCTTCTATTTTGTGCAAGTGTGGGAAGCACGTAATAGA  
GGACTATTCATACCTGAGATATTTTATGCGGGTTTGGCAAGAAAAGATATGCATAGAAAA  
GATAACGTACATGTAGATGACGCTAACCGAAATGATACTATTA AAAATATGGTCTTCTTG  
AATAGTGACTGGGATCCCAACACGATGGGTGGTGGATTTATGCATGGTGGTGTAAACGT  
AAATTGAACCCTACAGACTTTTGTGTTTTCGATCTAAGA ACTCCTCATGCACCAGAGGAT  
ATAAGCTCTGAGCACAAAAGACTAGCGGTGGATTTCTCTGTTGAGAAAACGAAACAGGCA  
TGCAACTTCAACAGCAATCAACTACACGATAGTGAAGACTGTAAAAGGAGAACGATGTTT  
TTTGATCACACCCGTTTGTATATACTTTCCCGGGGACATGGGAACCCCAACCACATATA  
CTGTACAACCCGACACTTCTTATTTCTCTTATATCAACAGCATTCTTCTATGGGTGCGACT  
GTATACATTATAGGCGTCAGGAGAAAGAGAAAACGCATCTGATAAATGACAGACCTAAAC  
GCAATTATATTAATCGCAACCGGTGGCATTATTGATTTTTGGTATACAGATAGAGACTTC  
CAAAGAGTTTGGGTGCTTGAGAAGATAGCTCGAGCGCCCTATTTTTCTTTTTTGAGTGTT  
TTACATTTAAGAGACTCAATGGGGGCACGAGGACCAGAACACATTTATCTAATGGAGGAG  
CATTGTGGTAAAACACTTAACGAAACACTACATCTTGAATAACTGGAAAGTTCGGTGTGTG  
ATCTCTTATTGGATTGATCTTCCTTTTCGCCAAACACCTCGTCCTTATCTACTATTGAATC  
ATGGTGGTTTATTATAGGTTATACGCTGTACCTGCTTACGACCTAAAGCAAAAAGTAGTG  
TGGCGTGCTGCACATACATATGAAGAATACCTAACACGTTTTCCAGATGACGAGGTCATC  
ACTCGAATCACGGTTGATGAAATTAACATGTAAATGAATTATCCAGAGCAATGAAGTTA  
ATAAAATAAGAACCCTAACAGAAACGAGTATAAATTAGTATTAGATGCTCTTTGGAAAC  
GTCAGCGATGCTTTATCGCAGGTAATAGAATGCTCGAAGAATACGAGAAACCTATTGAGG  
ACTTTGAAAATGCCAGTCTATCGTGACTACGAGATTGGACTAAATGACCATGAATAAATT  
GAACACAGGATTTCAACCTGTGACTTGCTGCATCCTGTCCACTGCTTATCTTAAGGACCA  
GTGGCACAGTTAGCTCATGATATTAATATGGATTTTGGCTTGCAGCCAATCTAAGGTCAG  
ATGGATGATCATATAATGAAAAATGTCAAGTCAGCAGGTATTGATCACTCAAATCACTGG

GTTGAGAAATAACTACATGATTTAGACTTATGAAAGGAATGAGAACTACAGAATCTTCTG  
AACAACTGACTCAACGTTTTACCAAACGTAAGATGCAGTTGACACGAAGGAAACAAGAAC  
TTCAATCTGCATATGATGAGTATGTCAAATTAGAATGAGATCTGACTTGACGTGAAGGTT  
CTAAGTAAGAAATTGAATATGTTGTTTTTCGGCAAATGACGAGGAGATGGTAACCGTACTG  
GTATTTAAGACCACTCTCCCAACTAAAAATGGCGGCGAGGCACGAAATCGTCTTAGGCG  
AAATATGAGTTCGGTGCAATCACCAAATTGCTGCACCCTCAATGGAGATGAAACTAGCAT  
GTCCATTATACTATAGGTTATCATGCTAAGCAAATCAACACTATGAAATATGTGAGTA  
GGCTGAAGATGCTTATCATAACCATCAAACAAGCAAGCGAAGATTTAGTAGGATTGAATAA  
TCCACACTCAGTAGAAGATTGTATCAAAGTAAATTAATGGTCGTCTGGGGTGGAAATATG  
GATGGAGTTTATACTCGTTGTATTTGTCACTTAGTATACCTACTTTATACTTAGAATGGC  
ATACAAGGAGATGGTCGATGGCACCGATTCAACCAGCGAGCGGGAAAAGCTGCTATAACT  
GTAGACTAACGGAGATTAATCGTGTGTTGACGCCATACTATTGATGTCACCATTGGTA  
TGGGGTTTCATATATAACAAGCAAGAGAGAGCTAGAATTGCAGGCATCGATACGCAAGAGA  
AAAGAACAAGAGATCTGGGCGAGAAGGCATTGGGAATAGAAGCTACAAACTGGATGAAAA  
AAAAATTAGAGCATGCTATTAATGGAGATGCTGATGTCCGTCTACAACTGAACTTAAAG  
GTGGGTTTGGTAAGTATGGTAGGTTGCTTGGTTGGTTATACGTTGGAGATGATGATGAAT  
CGCTCAGTGAAAAACTGATAGTGCAATGATATGCATGGTCGTACGACGGTGGATCAAAC  
AAAAAACTTCGATGACCTCCGTGAAATGAGACGTAGCTTCGGAACCTTGCTATAGTCTA  
GCATCTCTTATTAGAACTAAGATTTTCATGGTTACCACAATTAGACGAACTTGTTTGCAT  
GATGGTGTGTTTACATACAGGTGAAGGGTTCATCTATTATTGCATGTGGAATTCTAAGGGT  
TTAAGAAAGTTACAGATAGAAAAAGCAATAACAAATAGAGGGATTGAGATACTACTGT  
GTATCATATCCAGATCCAGAGTTAAGTATCCACTCTTTGGATGTGATATCGTAGAAGCA  
GGTGGTAAAGTTAATGCTGCTATAGATGATGTGTCACCAGTGCATAAGGTACATTATAGT  
TTAGGTAATATAACATATAATTTTTAAAAAGAGGAGGCATCTACCAGAGTAGGGTGAGATA  
TATTCACCATGGTGTAAAGTTTGTAAAGGTTAGAAAAGGATGAGTACAATAACTTTTTATTA  
TTGTGTGGTGTATACTCAGAGGCATTCTGACACATAGTAAGAACAGCATAAAGAGAATCA  
GGCTGGAGAAATACTATGAGGAGATATGACGAGCAGTGTGTTATTGGACATCGCAGATG  
AACAAACAAGAGCACTGAGGCGGTGGTATCCCAATGGTTCCATAACCCGTGTGCATCGAAA  
TATATACAGAACCTGCTATTTGACAATCCCAACCTGTGGGAACAGAAATGTTGCAAGCTC  
TCAAGGCACTTGCCATTGGCCCCATAGCGAAAGGAAACATGAACGTTGAGGTTTACCTTT  
TCAATCCTGTTGGAATTGGTGAACCTCCAGATGGTCATGTGCTATTCAAGAACAATTG  
ATTTGATTGCTAAATAAGAGGAACGTTTGGAAAGTAATCGAAAAGTATTTTGGAGTATGAA  
TGAATCTGTATGGTGAAGCTGAATGCCTCATGAGTATCTCGGCAACCCAAACCTAAAAAA  
AGTATACACATCAATTGACTTCTAACCAGAATATGTACCTGAGGTATTGAAATGTCAAGA  
TTATCTCATGTACTTTACCAAAAATTGTATCAAGATCGTTTCTCTATATGAGGGTCCAGT  
TCAATTTAACATGTATCATTTTACAGAGGATATGGTATCTAAGTTTTCATGATCATAGATT  
CAATATCGCTACAATTCCACGACGGTGTATTAAGTCTACAAATGTTACTGCATACTTAAT  
TTGCTATGTGTTATTCAATGCAAATGTCAACGTAGCAATCCTTGCAAACAAGCTGCAAG  
TGCTAGAGAGATGCTTAAAAGATTACAGTTAAGTTATGAAAACCTCCTAAACTGGATGCA  
ACACGGAATCCTCTAATGGGACACAGCTTCTCTGGAACCTTGAAAACGGCAGTAAAATATT  
GGCTGCTTATAACCACCGCTGCTGCTGTCAGGGGTAGGTCATCTAACGTTATATTTCTGGA  
TGATTTTCGCGTTCATTCCGAAACACTTCGCTGATCAGTTTGTGCGGTTTTGTTTATCCGAC  
TATCTCCTCAGCTAAGTCTACGAAGGTTATGAATTTATCTACTCGACAAGGGATGAATAT  
GTTCTACATACTCTGGCATGATGCAGAGCGTGGAACGAATGAGTAGGTGCATACGGAAGT  
TCACTGGTGAGAGGAGCCACGTAGAGATGATGTAACGAAAGAGTAACCTTTTAAAGACAC  
ACCAGCATCTCAGTTTCGTGTTAAGTTTGTGAGTGTGAGCACTTAGGATCTGCTGATAAATT  
GATTGCTCCTAGTTAGTAGATAATCATGCCATATCATCACCCAATTACATCTGCTCGTGG  
TCTTGCAGGATATGAGCAAGCATTTCAGAGCATAATTAGGTTTTTACTGTTGACGTATA  
AAGACTTGTGGTAATGATTACTCAGCATCTTGTGGAATAGATAACCAAACTATTCCTTA  
TAAAATGGTTGCCAGATATAAGTACAATGAAATTAACCCAACGTTCCACCAGATATTAT  
CGTGGACATTGCAACGTATTATAATAACGCATACATCTTATGTGAACTAGAAGATATTGG  
TGGACACCTAGGAGATATTATTCCTTTTGTATTTGGAGTATGAGAATTTGTTGATGGCTGC  
AATGGGAGGTTCGTGCAGGCCAATAACTAGGTCAAGGTTTTATTTCGTAAGAAAACCCA  
TGCTGTAAAGCTGTAAACAGCAACAAAACAAGTTTGTATGTTCTAACCTTAAAGTATTAAT  
TGAAGAAGATAAATCGCTTATAAATGAAGATGACACGATTGCGGAATTAACACGGTTCAT  
TGCGAAACGTCAAACATACCAAGCGGAAGAAGGTTGTAATGACGACTTTCCTATGTGTTT  
AGTGATTCTTAGTGCGATGGCAATGCAACCACACTTTACAGAGATGTACGATAACCACGC

ACGTCCACGCATCTATGAACAACGGAAAGAGATGCTTGAACATGACATGAGACCTTTTGG  
TTTTGTAACATCCCGCAGGGAAGATGATTATTTTGGCGCACGCACAGGGCTATATGTGGAA  
ATTCGCGGAATACGGGGATTAATCCTACACGTTGGAGTTTAGGTAAGGTTTCAGAAAAAT  
AAATAATCCTAGACATCTGATGTTGGAATCACCTAGGAGAAAATTAACCATGGCAGCGA  
ATCAATTATCTCCAGGGGTAGTGGTATAGGAGGGAGAACTTACTACGATTACCACCCTAT  
CGACCGCTAACGGTGGTGTGCACGCTGCACTTTTTAGGCTCGGTACTGTTGCAGACATGG  
TCGAAATCTCCAGTTTAAGGGATCTAGCAGAGCAATTTGGAAAACCGAATAGGTATAACT  
ACGAGATTTGGTATATTGCAGCAAAAATTTCTTCGGTATGGCGGACTACTAACAACAGTTC  
GCGTTGACTTGACATCGATCAAAAAGGCAATTAGTAAGGGAACTGCATTTACAGTCAAGA  
ATTTAAGTACTATGAAAACACTTAGGAAGGTGCTACTACCACATGGTAGTGGGCAACAC  
GAACTTCTGGAACGAAAGGAAACCCAAGCGGTGGATTTGGAAGTACGCAGGTCCAGTTC  
TAATCTCTGTTGTTCCCTGCACCTTGTTTCAGGAAACGGTCGGGAATTCGTTGCTGTGGAAG  
CACTCTCCGCAACATCAGGTGCTGCATGGAAAGTATCCAATACAGCATCGTATTAAGAG  
TCACATGTGTTGTTGGCGACCTCGTTCCTGGCACCAATATAATTCTTTCAATTTCTGGTT  
GTAACCAGACAGTTACAGTGCTTGCTAGGGATCCTACTAACATGACACTTGACATGGGTC  
TTCCTTCTGGTGGTATCACTGGTATCCTTGCTGATGGTCAGACTGTAAGTCAAGGAACTT  
ATACTTGTGTGATTGCATCATCTGGTATTCAAAGAAGAGTATATGGTGGATTAACAAG  
GAAGTATTGAATTCGATGCGGCTGATAGTATCGCTGATCCTAACTCTAATGCTGTTTCAA  
TCAGTTAGGTTTCGTTCTGAGTATGCAGAGCGTGAGAATCTACCTGGTGCAAAAATGGATTT  
ACGTTCCCTGCGGGTCCCTTCTACTTCAGTCTTTGCAAAGAATGCAGGTGGATTTGGAGATG  
AACTTCGCGATCTAGTTATTGATATCGATGGTGTCTACTGGAACAAGTAGTGCTTTTC  
TTGAGCGTTTGATTGGTCATTA AAAAGCATCTGACGCTAAACCAGGTGTTGGTGAAGCAA  
ACTACTACAAAGAAATAATCAACCAAAAAGTCGGAGTATATCTACTGGGGTTTAGATAAAA  
CGGGAGTATTGAATGCGACTGCTTCTTCTGCTGCAGGAAACTGGGGTTTAGCTGCTGCCT  
CTAGACTGGGTAACCTACTACGCTCTGCCGATGGTTCTACTGGTTATCCTGTGGGACGCA  
CCAGTGTAGGCTCTAAGAACAATGAAAAATACTAATACAGATTAAGTCTGGTTTTCACT  
ACGGTATTTCTGGTGGGCTTTACAGTGTAACAAGCACATCTCTTGCAACGGCATATGGTA  
TCGCTGAAGATCCTCAGTCACATACAATTGACTTCATTCATAGTTGTCCATCAGGTGCAG  
ATGATGCTTCTGCAATCGCGAAAGTAACTTCTCCAGTTAACATTGCTGAATAAAGAAGAG  
ATTCTTTAGTATTCGTTTCACCTCCTAGTCGAAACGTAATTGGAGTACTTACTCTACTA  
CTACAGCTGATAATATCGTTATCTTCTTCGATCTATCACCTAGTACGTCTTACATGGTTT  
TTGATTTTGGATATAAGTATATCTACCATAAGTATAACGATGTATACAGATACGTTCCAA  
CCAACGGTGACATAGCAGGTGTATGTTTACAGACA ACTGAGTCTGAAGCCCCATGATTCA  
CACCTGCAGGTTTTCAACGTGATGTTTTAAGAACTGCTATCAAACAAGCATAACACACCAA  
CTAAGACACTAAGAGATCGCTTGTATGCAAACAGAAGGAACCTGTCGTATCATTGCCTG  
GACAAGGCGTCGTCCTCTGTGGTGACAAGACTGCACTCGGATTTCCAGCCGCGTATGATA  
CAATCGAGGTACGTCGTCTAGTCCTCACCAACCAACGTGTTATCGCAGGGGCTGCTAAAG  
CACA ACTCTTTGAACAAAACGATGAAGCACGAAGATCAATCTCCTTGAATACCATCGAAC  
CTTATCTTAGGTGAGTTTAAACGTCGGCGTGGTGTAACTGACTTCGTAGTTATGTGGGATT  
TCTCGAACAACCCACCAGAGGCAGTCAATCGTGGAAAGCTCTACGCGCAGAGTTTTGTGA  
AACCAAATCGCTCAATCAACTACATTA ACTTGGACATTTGTTGCAACTAGTACTGGAGTTA  
CCTTCAGCGAAGTAACTACTTAAATTAATGCACCCTTTTTTCAGAGGCTTTCCTCATCT  
GTACCCTCTGATAATTTTTCTTGGTCTAAATAAAAACCGATGTTGCCTCCTAAAAAATGG  
CAAAAAGAGGATCGAATGACGATGTTAAGGCAAATGTCGCATCAGACTTTGCTCGTCCTA  
ACCTAGTCCAAGTTAATTTACCATTTCCCTCTGGAATCATTAAATTATGAAGACTTGGTAA  
AGCATCGAAAGTTCAATGTTTCATGGAGCGAGTCTTCCTTTGGCCAGATTGGTCTTATAG  
AACGTCCTTACAGAGGACGTACTCTAAAATCGCAGGAGACCGATCGTTTGAACCTTGG  
CAACCACTGTTATGTATGACAGTAAGTTTGTGCTAAGAACCGCATTGGAATTGTGGACAT  
TAAGCATTCAAGCATAACAGCGAAA ACTTCACTTCTGCGGGCGGGTCTTGGAAACGTAGCTG  
ATTCAAGTGGACACATTGCGGACATGAAGCTTCATAAATTAGGAAGAGAGATTAATCAA  
GAGAGAAATCAAAGTTCTCAAATCCTATACGTTCTATAACATCTTCCCTAGTGCAATCG  
CAGCGAATGACCTAAATTACGGATACAACGTTGCAATCGAAGAATTCACCGTTGAGATTC  
CGGTT CAGAATTGGACTCCTCTAGCAGACGCCAACAGCTAAACCGCTAAATAGCACAGGA  
CCAATTATTA AAAACATTTAATAGTTGCCACACAGCTGTCCGGTTTTTCACTAGAGTGACC  
GAAGAGGGTCCGGTAGGCACCTTCTTTTATTCAAAGGATAGTATGGAAGGATCGCAACC  
TATGGTAGGCGGCGGTTACTATGCATATCCGGTCGATTTT GATGGCACGTTAGCAATGA  
GTAAGA ACTCATCTCTCGTTAGAGAGAGATGATTCTTCAACGTC ACTGCGCTAGTAGATT

TGATGTCGTCGTGAAAGAAAATATTTGTGGCAACTTTGACTACGTTCCCGTCGAAGTCGA  
GTTGTCTAACTTGAAACAGTCCGACAAAATGAATAAATTAATCAGGGTAGATTTCCAGAC  
AATTCTTCGCATGCTTGACTTTGGTATTAGGTCGTACGGAATGTTCCGTCGTTGGTATGT  
CGATGGAAGATTATTTTACCATAAGGTTATGGATCTAGATAACCCTAGAAATGGTCTTAC  
TGAGTTACGATAATTTTGACCCTCGTAAGATTCGTAAGGTTACGGAGTATGATTTGAAACG  
TCCAAACGAACTTACTGGACTGGATCTGAATGCTCAACTTACACAAAAAATTCAGATGA  
TTATCTATAAAAATGGTAAGCGGTTGAAGAACTCTGGATCTCAGCAAGGAATTGACATTGG  
TGCTGATTCAATCACTTGTGTCATTCTGGTTTACAGGATTTCACTAAGAATATGACATT  
AACTCATCTCCATAATGCAATCAAAGCGGTTAACAAACTCCGTTGTGATTGAAGACACATT  
GGTAATCTATAGATTATCAAGAGCACCATTAAGAAGGATTGTCTACATCTATGTAGGTAA  
CCGTCCGAAGACCAAAGAGGAACAGTACCTCCGTGAAGTTGTAGTAAGGTATCATAATAC  
ATTGGTGTATGATGCAAACACTGCTGAGATTAAGATGACAGGAAGTTCATGACCATGTA  
GGAAGACGTCTGGTTACCTCGCCGTGAAGCCGGTAGAGGAACTGAGATATCCACCCTTCC  
TGGCGGACGAAATCTTGATGAACTAGAAGACGTTAAGTATATCCAAAAAACGTTATCCAA  
AGCGAAGAACGTACCGCCATCAAGACTTGAGACTGAGACTACCTTTAACCTAGATCGCGC  
TGCAGAATTTACTAGGGACGAAGTAAAGTTCCAAAATTTTATTGCACCTGTCAGACAGAG  
ATTCTCACAAATGTTTATGTATCCCCGTACAACCTCATCTCGTTCTGATGGTCACAATGAC  
GTTTCAAGATAGGGAAGATACCAAAGATCAGATTCAATTTGGCTTTTTTGTCTACAACAA  
CTTCAAGGCACTGAATGAAATCGAAATCCGCAATGTGCGTATAAATCAAGTAACCACAAT  
GGATCCTTACGTTGGAAAATACTTGCCTATTGATTATATGCGTAGTCAGGTTCTAAAATG  
AACTGAACAGGACATTAAGGAATCAGAAAAACAGATGGAATCTGAACAAGAAGCAGGTCT  
TATACTTGATACACAGCACGCAATGGATACCGATAGCGATGGTGTCACTGCCCGAATCG  
GGAAGTAGCTCGACAAGCCACTCCTCAAGTAGACGCGGGTGACGCGAAACGGGGAGAAAT  
CGAAACTATAAATAATAATTGTGAAAGTAAAATTATGCATACTGCAATTACAAAACATAT  
AGTTCAACAAGTCTTCGTAGACGACACAGCGAAAGCAGTTGAATGCGTCAATGATGCATT  
GGCTGCAACTGCATATGATGCCATTCAAGGAAGAAAGGTTGAGTTCGCACGTACTATGGG  
ATTTGAGCTAGATGATACCGCACAGGATGCCACAGATGAAATTGTAGATAACCTATCTGA  
AGAACTGACCAACCCGAACTGTTCTCGTTGATTGTGCGAAGTGGAGATCCAACAGA  
AGAACCAGAAGGACCCGTTGATCACGGAACACCTTCTTGTAGAAGAACTGCTCGAGGA  
ACAAACCGATGAGACTAAGAGCTGAAGACATTTCAAACCTTGGACTTTATCTGCGTAGATA  
TAGAAGGCAAGTAAAAATACTCCATTGAAGGTGTCTTTCGACGAGCGGAATTA AAAAAT  
GCATCTATAGAATGTATCCCTTGAAGATTTTTTCCAAAGAAGTTGCTAAATATTATGCGT  
TCTACATGCAAAAAGGGAGTGCCCTTGGAGTATTACGTGACCCTGGTGGTCCGTCAATTA  
ACTTTGACCGCGTTTCCCAGAAGATACTTTCTCAAAGGAAGAAGGAAACATCTTCATAG  
GTAGAGTAAAACCTGCTCGAAGCACCTATGGGTCCGATCGCAAAGAACCACTTAGATGAGG  
GTGTCAAACCAGGTGTTTCATATAGAGGCATGGGTTCAATTTGTAAAGAAGAGAACTGTA  
ATGTTGTTATGGACGACGTTATGCTCGCGACTGCAGCAGACATAGTCGCCGATCCTTCCG  
AGCCTGATGCTTTTGTGTCAGTGGAATATGGAAGGAAAGGAGTAGGTATGGGACAATGGAA  
TCCTAAAAGAATATGCTGTGGCAGTAATTAACAACAAATTGAACAAGCAACTCTAATTA  
ATCTGCAAGAACGTAGGGTTTCAGCGTTTGAGGCGTGTTCTTAGAGTCTGTGATTTAAAA  
ATAAATACAGACAACGCTTATCTCTACCGGAGTTTAAACCTATAGCGAAGACCCTCGATA  
AAGAGCTAGATAACATGGAGCAAGCGGACGAAGGCTCTGCTCCTATCACCAATAACGCAA  
TACCGGGTGAGAATATGGACATTTCAAAGCAGGAAGTACAAAAATAGTCGTGAACGTAG  
AAGGGCCTGAAGCGGCTAAAATGGAAGGCACAAAAGAATAAGAACGCAGGTAGTTTTG  
CTGCAATTCAGTGAAGGAATAGGGTTATAAGTCTCTGAGCACTACACCAAGGGCTGGAT  
GCGCAAAAACAAGAGGAGGTAGTGACGGACGAGGGCGAAAAAGAGGAAATCGCTGAAACGA  
AGTACGACTTTTCTCAGGATGTTGACGCTCTTGTGCGAGGGGAAGAATAACAGAAATACC  
TCCGAGTCAAAGTAGCTACTATTTTTGAAGCAGCTGTTACTGCCAAAGTTAACGACCAAG  
TCAAAGCGTTGCAAGAAGCGTTTGAAACTACGCTTCTGAAAGAAGTCGCACAAGTTCATA  
CAGAATTGGTTCGAGAAGGTGGACGATTACTTGTGTTATGCTGCCGAGCAATGGATGAAGA  
TAATCACATTGCAAATCGAGCATCCCCTCAAGACTGAGATGCCAACATCGTACTTCAAAG  
GACTAAAAGGTCTCTTCTTAGAGCACAACTTTACAGTGCCTGAGGGGTAGTTCAACTTGC  
TAGATGGAATCACAGGTGACCTTGATGATATGGAAGCTAACTATAACAAGCAAGTAGACA  
CTAATGTTGCTTTGAACAAGCGCGTTGGTGAGTTTGTAAAAATGGAAATTGGGGACGACG  
CAGCTACTGGACGGGTAGAAACAGTAAAGGAGAAGTTAGCGTCATTAGCAGAGGGTGTG  
AGCTTAACAAGTAAGAAGGTTTTTCGCAATAAGGTGCAAACTATCAAGGAATCCTACTTTA  
GTAAGAATGCTGAGGTCTTACAAATGCAACTGGGCCTACTGAAGAAAGTTCCGCTCCTT



TGGTAGAAGATACTAACACCAGCAAAATGACGAAGTACGGTGTGACTCGCTCACTGTT  
CCAAGTAATTAATACTACTACCCCCAGGTGGTAAATTTTAAATGTGATTAAATCAACTTCAG  
GAGAAGTGGGGACCCCTTCTAAATCAAGATTCTCTACCTTAGATTGATGATGCACATAAG  
CGTGGCGGAGGAGCCCAACTCCTATAGAACCGAGAACAAGCATTCCCTGAATAAGGACAA  
ATCCTTACAGAGACCCTACAAATCGCAGTTATAGGTGGTTTTCGGTGGCGCTGCGACTGCA  
ACATGTCCTGTAGCAGGTTTTGACCCCTTATTGAGCAGGCTTATCAGACGCTCAAGGACA  
CAATTCATTCCAAATGATATTGCAGGGGTCCCAGCAATGTTTGGTCCCTCCATGTCATATC  
TTTGCAATCAGAACCAGTTCGGTATTGAAAAAGATCCTTCAATTGGCGATTACAGAGAT  
GCCCTTCAATGAGTCTAGCGCAGGTTTCGCTGTTCCCTGATGGTAACCGTCTTGCTGAC  
TACGTTCCGACTGCCTCTGGTGGTTCGGCCATTAACGATGCTGAAGGTGCTAACCCATGT  
CGTATTACTCATACCCCTGCAGGAACATATGACCTGACAGGTGACGCTCCAAGAATGAAC  
ACCACTGCTGTTGTAGAAATTGCAGATGCAGCTGCAGCAACTACCTTCGGAGCAATGGGT  
TTCTCAATCGAGAATGTTACTGCTACGGCTAAAGCACGCGCTTTAACGGCAGGGTACAGT  
ATTGAGCTTGCTCAAACCTTGAAAGCAATCCATGGTCTTGATGCCGAGCAGGAGTTAGCG  
AAGATTCTTTCAACTAAAATCCTGGCGGAAATAATCAGGGAAGTTGTTAGAACAGGCTAT  
GTTAACGATGTGGTAGGTGCTAAAACTTGACTGCTAACGAAGGTATCTTCGACCTAAC  
GTTGACTCAAATGGTAGATCGTCTGTCGAGAAATTCAAAGGACTTAAGATCCAGATTGAA  
ATAGACGCAAACGCAATCGGTCATCAGACACGTCCGGCGAACGGGTAAATATGATCTTCGCA  
TCCGCTGACGATGTATCCGCTCTTGGTAAGGCTGGCGTCTTGATTAGGGTCCCTGGTCTT  
CAGGGAAACAATGATCTTGTGGTGTGACACAACCTCAACTCTTGTGGAAACCCTTAAG  
GTAAGAATCAAGGTTTACGTTGACCCATATTCAGCAAACGTAAGTGACATGTACTGCTAC  
CTGCCAGGCAACAAGGGACCCTAATCTTCTGACGCAGGATTATTCTAGCGATCATATGTG  
CCTTTTCAACAAGTCAGAGCAATCAACCCTCACACGTTCCAGCAAAAAAATTGCATTTAAG  
CCGAGAAACGGTATGGATTCTATTCCATTCACTCAAGGTCTTACCTAAGTGTCTGGAGCA  
CGTACTGCTAATACTAACGAGTATTGCATAAGAGTTCAGGTTGGTAACTTAATGTCATAA  
ATATTATTATTTAACTTGCTAGAGGGTGCTAGAGAACCTCTTTTTTTTATGCTATACTATA  
TTTGTGGACGCATCACTGGGAGTGACTGAATCAACTTACTGGCATATAACTCGTACAGG  
TGAGGCGACAGAGGTGGTGTCAATGTTAGGAAAGGCAGAACTACAAACCAAGTAGGCCG  
TAGGCAGAGTTGTAATTCTCAGCTGTAGAAATGCCCTCCGCTTGTCAGTATACAGGATTC  
TAACCTCCCGCATTTGTTTTTTGTAAAAGGATTAAGTACTTAGCGAGATTGTCAGGTTT  
GCCTTATAAGGAGTAAAAGAGTTAGGGTCAACAAGATGCACTAAACTTTCCTTATTATTC  
ACTTCACAGATGCAGAAAGATTTATGCACAACCTAGTGACATATAATCAATTAGCAGGTT  
CGTACGAGGAAGAACACGACACACGGCTAACAGAATACTACGAGTGTTTAATCGAAAGAG  
ACGACCAACAACAGATCTATCAAAAAATTTGCAGAGAGGTGCGTATGTAACAAATATTCC  
GGAAGACTTAGCAAGGGGGCGGAGCAGCTCACTCTTAAATATGCTACATAGCTCTCTCAC  
AATGGAAATATATTATTGCTCATACTCCTTATTCTCCTGAGTGGCATCGTAAAAGGCCTC  
TAAAGGAAGCACTGTTTAAATAGCTTGACGATTGCGTTTAGAACGATATCATGGTAAAAG  
ATCTCAAAGACATCCTTGACACTACATCTGATGAAGCGTACAAAGTGTATACTAAACTCA  
ATCCAGTATCAGCCAAACTCAGTACAGAATAACGATTGCTTTCAATCCAAAACCGACTAC  
GATTTGCGTCTAGCTGAAACCAATGGTAGGGGGTGAAAATGTCAATCTATAAGACATGA  
TTGGGGCTCAAAAACTACCGAAAAGAAATACCACTGATGCTCCTTGGAAGCCACAAGCAC  
GACAGAAAGCAGCAAATCCTGACATAAATAATAGAGCGACTGACGATTTGCGGAATAAGA  
TGTCGTTAGGAGAACACCACCCATCGGATTATAGAAGCGGGTTCAATGGTGCAGATGACA  
TTGGTGAATGGTCTAACAGAGAGAAACCTAACGTCTGGAGACAACGAGACTAATGTCAA  
CTGGTTCCAAGCCGATCTAACAATAACAACCTTTCCTTGCCCTATAGGATAGCTTTTGT  
ATTAGATAAGGCAACGAAGGTGATTTTTTATGTCAACAAGCAGAGATTTCAACAATACA  
GTTAAATGATAATCTTAATCCGACTGCAGGTTTAGTCCCTTTACCTAGAGAAGGCAAGAG  
ACGCTATGGTGAATTTGACCGTTGAGGTTACCGTAGATGAAGATGTAGGAAAGTACATGGA  
ACTCCACAAATGGCTGCGTGCTTTAGGAACTCCCAATCTTATCATGAGCGTGTGGATG  
GGAAGCCAAGTATCAACACGCCCCATCACAACACAGAAGATTCTCCGTTGCCACTCTTCA  
AGTATTAACAACAATAACTTAGCGGACTTTGATATAGTCTTCAACGATTTATTTCTAC  
AGAACTATCACCCTATCATTGATGTTTACAAGGTGGTAAACCATTTCATAACTGCACG  
GGCAACTTTTAAATATACTCTATACGAAATAAGAAACGTATATTCGAGAACTAGACGATG  
AAGAAGTTCAATCTCTGCAAGTGTGATCATAACATGGGGTGGTAAAGTTAACTCGTATACT  
AAATCTACAACGTGGGCGAAGAAGCAACCGTCCCCTTTAAACCAGCTAATTACAGGTATG  
ATCGAATCCTTACTTTCTCAATGGAATGATGGTAAAAGAATTCTGGCTATGGACGACGTT  
GATCGTCAGGTAGATAAAAATCCAATCCCAGTGGGAAACAATGAGCGACAGACAAGAAAC

ATAATCGGGGCGACAGGAGATTTTTGAGATGAAGGCTGGTCTATCGAAATTACAAATCCG  
ATTGTTAAAAGAGGGTCTCAACAAGTACAGAGGCATGGTTATTCCAAGCCATGGACAA  
CGACAGTAAGAACTGAAGGGCATCAAGGAACACCTTGTCTGTCAGTCAGGATATCAGAT  
TTCATAGAATGAGAGGTTTGAACGTGAAGGGGATCAGGGTGTGTGAATCTGGAACATTT  
CAAGAGGTGTGGAACAAGGATTGTGTATATGACGGAGATTTCTACTGCGAAGAATCTGCA  
AAAATTCCTCAACTCCATAACAATTCTTTGGTGTATCACAACACTTTCTCTCTTATGAAA  
AAAGAAAGATTGTTTGAATGAAACGTCTCATAAAAGAAAAATGGTTCTACTATAAAGGT  
AAACCACCCTCCTCAGTCTACAAAGAAACACCATTTAATTTGAAAATTACTACAAAAGAA  
GAGCTCGTTATGTCTATTGAAGCCGATGATGCAATCTGCACACTACAATTTAGGATAGAC  
TACATAGTTCAGTTTCTATTGTATCTTGATAGTATCTTACGAGTTATAACCAATCGTAAT  
TTTCAAATTAAGAGTGCAATTGAATGGGAAAAATTTAAGAGTGGTTTTTATTGAATGACG  
CATTGACCTACAAAGATGTTATCGTCAATACAAAGGCACAGGTTATAATCAGCAAGGTAA  
TTTCCTATAGACATAATTCGACTAGAGGATAAATTCGTAGCGGAGTCCCATCGAAAAGCA  
GTTAAGAGACAGCATGGTTAGGAGATAGAGAACTCCTGTCTTGGCTTCTTCGTATGATTA  
AGAAGATAAATCCATATGCTCGATGGAATCTAAAGATTACAGTAGTCGAACGAATACAGT  
ATGGTGGATATTGTGAAGGTGATTTTCATGATTGGCACATAGATCAACACCCTCAACCAG  
TAAAGGGATTAGTCCCAATGGTTAGTATGACACTCTTCTATATGAAAATTACGAAGGAG  
GCGAAGATGATTTGGTTTTATATCAAACAGAGCCAGATACCAGACTTAATACTTTTACGT  
AAAATGCATGATCAGCTATATTTTTCCGATGTGATCGAAGGCAGCGGGTACGTCCTATTA  
TATATGGAACCTCAATCTTTAGTGGCATGGTTTCGTGGACCTCCTTCTTGGTCAAAG  
AATGAAGTCTATCTTAACCTTGAAGCCCAATCCCACATTGAGTATGAGTTAGCAGATTTA  
TATCCCTTCGAGGTCGAGTCTGCAACATTTAAGCAGAAGACTAGAAGGTATAGAGGCTGG  
GACGGTAAGTTTAGTTTCTTTTCTCCCGCAACGGGAGAGATATATGGCGGCCGTGTGGAT  
GACTTAACAGACTTGGCGAAAGAAAAGGGATATGAATAGCAAATACAAGATGCTCAATAG  
TTTGGTCATCCTATCACAGAGAATGAACTAATCACTCCCAACTCGGTTGTAGGGTTTTGTC  
AAAGCACTGCGTCTTCTCCCGCCTCTACCAGCAAGGGAGTAGCAGTAAAAGGCAATTCGC  
GAACCACTAAAACACAACAGACGACTTTTCTTCCCCCACAGCGTCAGGACAATCTTTG  
ATGATTTATGCATTGGTTAGATATAAATTAACCGTTGGTTCGTAATGTTTTCAAGTGTAGTC  
CCCAATACCTACCTAACGATCAAATTTATAAGGTCTTTGAAACATATGGTTGGATGGCA  
AAGAAAGATTACCATAAGATATAGGCAGAGCAAGACAGATATACAGATCACAATGTGATA  
ATTACTACTTGGCAGTCAGTATATAAACTACGAAAGATATGCTTTGATAGATTTGACTGC  
CTGATTGGTGATGAAGCACATCAGTTCTAAGCAAATCTCTAAGGACATTGGTGGGTAAG  
TTCCATGATTGTCAATACCGGATTGGTTTTACAGGAACACTAGATGCTGAGAATGTTAAT  
CAAGTTGTATGAGAAGGTTTGTGGGTAGATGTTCTCAAGTTACTAGAACTAATCAATTG  
ATGAAGGCAGGGCACATTGAACATTTAAAAGTCAAGGTAGTTCTTTTAAAAAATGAAGAA  
AAATTTTTTGAAGGATATCGGGATGAAATTGATTAACGAGTTGAACACGAAGGAATGAAG  
AAATTTATCCGTAAGATTGCGCGTGTACTCAAAGGAAATAGCCTTATACGTATCAGTTAT  
GTGCAACGACATGGTGAAGCTCTTTACAAATTGATAAATATCTACACAGACAGACCTGCG  
TTCTTTGTTTCATGGGGGTGTAGATTTTCGATGATCGCGAAGAAATTCGCATGCTAACAGAG  
GCATCCGATAATGCAATCATTTTTGCATCGTATGGTACGTTCTATACTGGCATCAATATT  
AGCAGCTTACATAATGTTATTCTCGCTGGAGCTTCAATATGTCCGGAGTCGTAATTCACAG  
TCTCTTGAACGAGCAATGCGGAAAGGAGACAATAAATTAAGCCACTTTGGATGATATT  
GCGGATGATACCTCCACAGACAGGGGCAATAACTACACGTTGAATCTCCCGATCGTGAGA  
GACAAGATTTATAATTAAGAGAAATTTAGTATGAGATCATAGATGTAAAAGTTAAAGCT  
TATGATTCACTACGAAAACACCACGAAGAATTTACCGGTATATTATAACTGCTTAGGGG  
GGAGGATATCCTTGCTAAGGCAGTTATGAGAGAACACCGTGGAGGGAGTTAATTTTCAG  
GTCTGATCCTGTTAGCGCATTCCCAACGACTAAGGACAACCGCGAGCAAAAAACATCAAG  
AGGTATGGGTTTCAGTAAATGGATTCCAATGTCTGACGAAGAATGTTTTATTTTAAAGAGA  
GACGGATCTCATGACCATGGCAACAATGAGTAGAGCTCTCTAACTCATGTACGATGCATA  
CATCATCGGCGAAGATGGAAATCGAAAGCAACTGGAAGAACGTCAAGGTCCTCCCTCTAT  
CGCTCAAGGATATCTACGAAAGATAAAAGACATCCGTGCCTTCATGGTAAATTCGTATGA  
GAAGGAAGTTATATTTTCGTCTGAACCCTTACAGTGTGAGTATAGTTGTGGTTGACAGTTT  
TGTC AAGTGTGCTATAATTAACAAAGAAATATTTGTACGAAGAAATTTTCCCCCAAT  
AAGCGATAGCATTATGTAAACAATCAATAGATTCGAGCTGGTATTCTCAAGTAAAAGCT  
AGAGTAGACCATTCAAAGAAAAGGGCCTACCATAACCTCGTGTCAATCCCTACATTGGT  
GGTTGCTTTTTTAAAGATTGCTGCTCATCTATTATATACTCCAAACTTTATTAATTACATG  
TTAATGATGATATGGTGTGTGATGGTATCCGGAATTGTAGACAGTTTATTGATATCTTT

GATCCTGCAAAGAGCTGAAACCCCTTTGAAAATTTTACACAAATCGGTTACTATACTCTC  
ATAAGAAGAACTGCTATAGAGAAAAGACAAACGGATATTAAGAAAAAATTATAGTGAAA  
ACTGGATACGATCATATATTCACAGCTGACGGAGACACAAAATCACAGTATAATCAACTT  
AAATCCCGTGTGCGAAATGAATTCTAAACGATTAAGATTCTCTTAATAACAGATCAACACT  
TTGGAGTGCGGCATGACAACCAACATTTTATCATTTATTACAAAAAGTTTCACAATGATA  
TTGTACTTACTTTTTGAAAAGCATCTGTCATTA AACAGGTCAATGCTCTTGGTGCTAGCT  
TTGATCGTAGTAGATTCATTATCTTTATATCTCTAAATGAAACAAAAGAAATGGGGTTTG  
ATCCATTGAGAGATATGTGTATTCCACTGACCATGCTTGTGGCGACCAGGACATATTCT  
ACAAACATACTGCTCGAGCTAATGCCACAAATGAATTACTCAAAGGGTACGACAGCATCA  
CAGTCATTGCCGACCACGATACTGTCACCTTTCATGGTCTACGTTCTCTTCTCCTGTCTT  
GGATTTGTGATGCCAATCGGGAACGATTTATCAAAGTTATCCAAGAATCTGGTGCCCTTG  
TCAGAAATGGGTCATTTGGAGCTTAACGGTTTAGAGCCTCATCCAGGTCTCGTGATGGAAA  
GTGGAAGGGAACCAATGTTTTTAGTAAATCTAAAAGAGTATTCTCTGGACACTATCATC  
TGAAATCTAATAACGGTAATATCAGATACTTAGGTAATTCTTAGCAACTTAACTGGTATG  
ACTACGCAGCGAATAGAGGTTTTTACGTTTTTGTATACAGACACAATTA AAACTACTTTTT  
ATAGGAATCCCTTTTATGTTTTTTATAAGCTGTATTATAATTGTGATGTGTCTCTCCCTG  
ACGAATCAGAAATCAGAGGATCACGCGTCACAATATTTGTAGAAGATAAAGGAGACTAAC  
GGAAGTTCGACTACAATTTAAAACGCATACAGTATCCGGGTTGCGCAGATCTTAAGAGTT  
TTGAAGTTCCTAGCGTGGA ACTTGAGAATTGCAGTGACGCGCTATAAACCGAAGATACAA  
TGACCTTGTTAGACATATATGTAGTTGAGGTAGATTAAGGGTCAATAACCCCAATGTTA  
AGTCTGTCATGCGATCACTATATCTAGAGGCATCAGAACGAAAATGTTTGTCTCACTGA  
GAAAACA ACTGGGGCTGTATATGCTAGCTCTAAGTCATGCGACGAACAGGGTAAGAAGAA  
CGTGCTTGGTTATGCAGAGCAAGACGGTGCAGAATGAGATAGCGTGCTTCTAGAGGCAGA  
TGACGTTAATCAGGAATTTGCCATTCTGCAAGTAGATGCAGAAATCGTTGCGGTGGATTG  
TGGAATTATGAGTATTCTTCTGCTATAGTAGAACCTACTGAGTTACTCATGCCATAAAT  
CAAATTTGATAAATGATATTTTATGAAAATATTAAGTGGAAGGGTGTGACTTCCCTTTGT  
GATCAAAGGACAGAAATTAGCTCGAATGAATGTCCATCAACTCTGATTGTGGGTGCGAAC  
GGTGCTGGTAAATCCACTCTCTTAGATGCATTATGTTTTGTTTTATTCAATAGACCTTTT  
ACAAAATTAGTAGAGGACAGTTAGGAAATAGTATCAATGAAAAGGCCTGGAGGCTGAA  
CTATTATGCTCAATTAGTGTACCTGAGTATAGCGTCTTTTGTGGAGCGAAACCTAATGTA  
CTCGGTGTCTACAAAATCAATAACATGGTTGACCAAGATGCTGCTGCCAAAGACACGCAG  
AAGTATCTCGAACAATCCGTTCTCAA ACTCAACACTAAATCCTTTACAGAGGTGCTCATC  
TTGGGTTTATCCTCATTTCGTCACCTTCTGCAACTCAACGCATCTGTCAGGAGAGAAGTT  
GTTGAAGATTTACTTGACATCATCATATCCTCCCAAAGGAATACGATCCTAAAAGATCGT  
GATAGAAATGCAATGTAACAACAACGGGATTGTTATCATCTCCTTCAAATCGCAGAGGAA  
CGTGTTAACAATCAAGAAAGAATTATTAGCACTCTTGCTGATGTGAGTGAAACTCGTCAA  
AAAGAGAAGAAAAGTCAAATTA AAAACTATAATGAAAAAATTAATAAGAAGAAAAGATA  
CGTGATAAACTGAATGAAGAAGTAGAAACTCCTACTACAGGTTTCAAGAATGTTGATAAT  
CATAAATCAGTATGAAATGACCGTCGTCAAGAACAATCTGATATCAATTCAGAATTATAA  
TCTTCCGCCAAACA ACTTTAGTTTTTAAAATCACATGTTGGAGGTCTTACCTGTTCTCAG  
CAAATTGAATTGGAAATCAAGACAGCAGTGATTGGTTATTTAGAAATTACAGGTAAGCAT  
CTTACAAAAGATTTCAAAGGTTTAAACACATAAAATTGCTGATGCAGTTAGTGTTGGGGAG  
AGAATGGAAATCCATTCCAGAAATATCATGGAAACTCGTAGTAAAGTACCTTCTGCAGAA  
AGAGAGATCGTACGTTGAGAGTCAGAGAACCTTACATAAATGAACTTATATTAGAACTA  
CAAACAAACAGTCCTAACATTAGAGAAGTAATAGTATCTTTAGTTACGGTTCAAAAAGAA  
TTAGAAGAAACACAATAATATTGTGGGAAGATACATCAGACTGTTGATGAATTTAAGTC  
ATAGGAAATTTGTA AAAAGGACTCTGGTTTTATGATTCAGATTATTAAGACGTCTGTTACT  
ATTTTTCATAATATAATCAATAAATATATGCACATCATGGATTTCTTTCATAAGATCACA  
CTTGTTGAAGGATTC AAAGAAGTACCTAAAAGTAGCTTTAGATAGGAATTGTCACATTCA  
TCTTTTCTGAAAGGTGAAAAGCGGACATTGATTTAGCATGGCTATTTACTTGCAGAGAA  
GTTGCTCGTATGAAAACAATGCTCCTACTAATTA ACTCATTCTTGATGAAGTATTGGAC  
AGTTCTTTGGAGGCAGATGTTATAAATAAACTCTTGAAGAATCTACATGCATTGGGTATT  
TCAAGTAACTATGTGTTCTCTCCGTCAACGGTGATGTCTTATTAGGCAAATTCCTAAGG  
ACAGTAAATTTGAAAAGAATTATTA ACTCTCTCGTATGTGAGACGACTCGTGAATTTG  
GAGAGTATGTGCAAAGCACTTGGAGACAAGTCTGGAAAGTCAGATAAAGAACCGGATCG  
GATGGCTTTAATCTGAACATGTATTTTCATT CAGTTGGTAGTTACTGACTGTTTTATCGT  
AGCAGGTATGATAACACCCTGGATCGATCATCAGGTTCCGCCGTCACATCAGCGTCTGCG

AATTAACACCTGGCACAATAACTATCACATTCTTAATTGGTCTGCTATAATAGGTGTAT  
CCGAAACACAGACAGATGATCAATCAAGAAGTAAAAGGAACACCCACTAACTACTAGCA  
ATAGAAAACCTCACAGTTGAGCCCCGTCAGGTTACAACCTGCATACTTCGATGTAGAGAAT  
CGTGTCTTTGCCTCCTTGTGTGGAAGTCTGCCTCACACACTGTTTACGATCTACTTGAA  
GGTTAAGAGGTAGGAGATGCACTTTATACTCCTGCAGATGACTGGGACTAAAATATTCCT  
AAAGCCCCATCAGTGTGGTCTGAAGATGTTCTGATTTGAAAACCTAATGAGGGCGTACCTAT  
CCTGGTCTTCGTGAGTCTTTCTTTGACGGGTACAACGAACCTATGGAATCATGATTTCTTC  
GGTGTCAAACATTAGGATCATGAGTATCTCCCACTGATTGATCGCATCAATCTTTACTTC  
AAAGGCAATCTCAATATGCCTTTCTCAGCTGCAGAGAAAGCATGGGTAATCTGAACTGGA  
TAAACGCAAACGTTACAAGAAGTAGAAGACCTTTCAAGAGATCTATACGGCTGGGCTGAA  
GAAACGCAAGCAGAGAACGAGCAAGAAGATGTGGAAATGGATATTGAGATTGGTACTGGC  
CATGGTAATATCAGTGGTGGAGATTCTGATACAGAAAAGGAAGCCGTAGAGAAAAGATTAT  
TCTGAAGAAGAAACATCTGCACCTGATATCGATCCTATTCAACCCTGGGATAGTTCAGAG  
AATCCTCTTGAGGACCTATCAGAACATCTCAATACTTACTTAGAACCTATCGGAGGGCGAT  
GGATAAGATCTATTCAATGACTTTGATCAAGTGTGCTAATCTGAGAATACTACAGATACA  
GCATTACAATTAATATTAGACGCTTTAGTTGATTATGGTGCGAAGGAGTGGGTTTACGTT  
GGTCTTCATAAAGTAGAAATTGATGAACTTCTAGTTTCTTACTCTACAATTCAAAGTGAT  
CATGAAGCATTATTCTCTTTTTACAAAAATCGTGACCAAGATGCAGAAACCTATAAGAGC  
GAGTGTCTTCAGTATGCAGATGGTCATTACAACAAATTCCAGACAGACGCACAGCAATCT  
GTAACCTTTCTTGTCAAACAGTTTGAGATCCAGGAATCTGCTGATGATTACAACCGTGCA  
GCAGGATCACCGAAAGATGTTGTCAACACTGATACTCTTACAAATACAAAGTTACTGAT  
GACATCTTCAAGAAAGTTACAACCTGTTCTGAGGCTAAGAATCACGGGCTTATTCTACAT  
CCTGATTGGTCTGGTTCTAGGCTGTATCACCTCTTGGATAATGACAAGTAAGTTTTCAAG  
TTGGTATCGCTCTGTCGTAATCAGGTAATCCTTACCAAGTCTAGGCATTCCAGAGGCAA  
TACTATGGATATAATCATAATAATTGCAAACAATGGAATTCTGGTGTGCAACCTAATGAA  
GGTGTCTTGGTGTGCAAATGATTTACATTTCTTGCATTACTATCTACTAAGTAAAAT  
GCTAATTCACTTGAAAATTCACTCGGACAAATGTACAGACAAGTATTTACTATCGGTGGA  
TACCGTATGTCTGCGATGACCAATAACAGTCGTGGTGGAACTCCATTTGCGGAAGCTGTT  
TTCTGCACTCGTCAGTTGGTAAACGATCTCAAGAAGGTAGATAACGTTCCAGAAAGTAAAT  
CTTGTATGCTTAAGTGATGGCGAAGCAAATCCAATGTCAGACTGGACAAAAGTCCATAC  
AGCACTATCCTGCAGGAGATGGGTGAGGAACAATTCAGACTTGCTGAAATCTGTCACTCA  
AGAAATAGACTTTTTCATTCTTCGTGATTTTGGCACTGGGTCTCAACGCAAAGTTAATGGT  
AGTCCATAAGAACTACAAAAGGACCGTATGTTTCATGAGAGAAGTTAGTGATTACAAC  
TGGATTGGTATCTGACTCTGCAGTAAAGGCGAGGTATTAATATTGATTCGTATGCTTGGT  
ATGGGTACATAACGTCAAGACGAACTTGACAAGCAATGGAAGAAACAAAGATTTGCTTCT  
ATCTGAGATGAAGTTGGATACTCTCAAGCTTTGTATAAGCCGGACAGGGGCAATGGCGCA  
CGAACTCAAGACCTAACTGTAGAACAGAAAGGTGAAGTTGCTACCAAGCACGACTACAA  
TGTGCATTCGAAAACGGATGGGTTATAAGTCCACAAACAAAACCTCTCCTCAACGTCTAC  
ATTAACAGATCGCATGAAATGTAAGGTCACTCTATTTAAAGCGGGAACAATCTTTGAAG  
AACTGTTACCGCTGTGATTATGATGATGCAACAAAAGTTGCATTAGCAAGAGATCCCA  
ATTCTACCTTAATGTGTGTGACTGCATTGTTCCGATAAAGAAGTGTCCACTTGCTCTACC  
ACTAAGCAGATACACCTGCTATAATACATCTATAAACAAAATAGACTATGACTTATGAA  
CCAAACCCTGTGACAACCTGAACAACCTGTTTAAACACCTAACTCATAATGTTGGAACCTGAA  
GGCGGATGCAAAGACATTCGTGAGTCAGAAATGTTACTTAACTATTTTACACGACTGCA  
TGTAAGAGACTTAAGTCTTCTAAATCAGTGATAGGCAAGTGGAAATCTAAGCACTCAAGAA  
ATTGAACGTGCGTACGGAGCACCTGCTGCTAGTATAAAGGCAATCTATGTTCCATAATAA  
GTTAAGACTTATGTTGCTATTGGTAACTTCACTTCTGTAGAGAAAGTTATCTCATTGACG  
AAGTTCTATCCTCTATTACATTACAGGGCCTTCTTGAACGGTAAGACTCTATCAGTTGAA  
CAGGCATGGGCTGCAACTAACAGGGGGTTAATCCTTGTCAACATCAAATCGAAATTGAC  
GAGGACGATCTTATGGGTGGCTTTCGTCTTAATAAAGGCGACACTGTTTTTCACAGCGGA  
CCTAGGGTTCAGGTTTTTGTATATGCGCCCTGTATTACTGCTAGATGCGATCGACCTAGCA  
TATAACAAAACCTTTCTTTGCAAGCTGTCCTTGAAGGTAAAGGTGATTCTTAAAGAAT  
ATTGTTAGGTATGTATTAACCTGTTCAAGGATTTACTTTAATCGCTACTGCTAGCACTAAC  
GGTAACGGTTCGATCATGGCAGATTCGTAGGAACATATATTCTCAACGAAGCATTCCGT  
GAGAGATCCCAATCACCATTGTGTAAGAGTATCCTTCTGCTATTAGCTAGACTAACATT  
TTGATCAATAAGGGATGTGACAAAGACTATGCAGAGAACTTAATCAAGTGGGCAGGTGTA  
ATACGTAAGACATTCATGGATGTTGGTGTGATGAAGTTATCATAACTCGTAGTTTGGTT

AACATTGATTCAGCATACCAGGTCTTTCGAGATAAAGTTGACAGCAATCACAAACTGTGTG  
AGCCGTTTAGACGATGCTACAAAATCATCCTTCCAAGTTCTTCTACAAAAATTGACGCA  
GGAGAAGATTCAGAGTTTACTGATTATCACGAGGCTCAATCATTGAGTTGATGATCACGT  
ATCGTGAAGAGGAGTTCCCAGAGGTTACTCCGACCTTACCTCGATACCACTTACTATCCAC  
ACTATGCTAGTGATAAGATTCACACTCTTGTGTACACGATTCATGTGGCGATGCTACAG  
CATTTTGTAGAAGTAACGTTTCAAAGGACGCTTTCGCTTCGATCGGAAAGGTAGGGCTA  
GACAAGATATCTAACTAGTGCTACACAATGGAGTCTTACTCATGCCCTTTTATACAAGGG  
ATCAAGCAAACCACGCGGCAGCAACTTTTGCAGCACAAGGCGACTAATTCAGTATGACAG  
TAATTTCCAAACCCAATATTGAAGTCTTTAAAACTTTTGATCAATCAACAAGTCTATTG  
TTATTAACCTGGGAATAAGATTTCAACACACAGGCTTAATAAGGATATTCTCCCTATTG  
CCCGAGTCGCAAAACAATTTGATTGGAAAATTTCTATCTCTGATTTGGGAGTTTTCTTG  
GAGGGTTATCTCTGTTTCACTCACCGAACATGGATACTACTGAAACCAACTACGTCACAG  
TAAGTGATCTACAAGATAAATCCATGACACGTTATCTCGATGCTGATCCTGATATGAATA  
CTCAGGCACCAGGAAACGAAATCAACTTGCCATCAGAGAACGTTGAATTTAAACTTGAAT  
CTATAATTCGGATGCAATTACAACGTGCTGCTATGGTATATAAACTCCCTGTCCTTTGTT  
TGTATGGGGATGGAGAAAGTATGCAGCTGTGTATGACAGGTAAGAGAAATGATACTTCCA  
ATTATTAATCAGTAGAGGTTGGAAGTACTGATGAGTTTTGTTGATGTTTCAAAGTTG  
AAAACCTTAAACTTTTTATCCCGGGATTTTGATTTAGGATTGTGTAAGACAAAGGTTGCTT  
TGTTCAAAAATGACGGACTCAAGTACTACATGACTCTAGACCCTTACACATGAGATGTTG  
GCCCTGTGACAGAGATCTAAACTGGGGAGGTGACAACGATTGTCCTTATGCAGAGGATTA  
TAGTTTCGTAACCTATCTCCACTGCCCTAAGTGCGATTCTTACGTTGAAGTTTCTTATCC  
TAAGAAAGATGAAAGAATTTGATTTTAAACTCGATTATGGGAGACCTGACCTTACAGACC  
AGGAGACTCGTAAGCTGTATCGTATTTGAAGAGGGGAGCAAGGGGTTCTACTGGCTCGCC  
CTTATGCTAACGACATTTGATCTCGTTGGAGATTCAAAACTCACACTTAGGCAGTAAAT  
CTTCCACCCATATCTTTGCTATGTACCTTGATTATCGTCATGAAAAGGATTTTCATCGGTA  
TAGATAGGTGTCGTAAGTTTCTTGAAGGGGGTGTAACTGATCAAGGAGAATTGCCAATC  
ATAGCGATGGTAAAAAGTATGATAAAGATGGTAATGTAAAACCCCAATAACCAGATCATG  
ATACCTGTTATTTTCGCTGAGTCTGCTAAAATATTTAAGAGGGTTCGAGATATTGTTGCGA  
ACAATAAAACATATGTTACAATGAGGGAAGTATGGCGGGCATATGAATGAACATTTTTGT  
AACTGATCCTTCCCAACAAATTCTGCTCAGGTATCACCTGATATACACAGCGTGAAGCT  
GGCACTTGAGACCTGTCAGATGTTTTCTAATGCTGCATCTGATAAATGGGGTCACGGTTT  
TGGTTTCGCTACTTTAAATAGGTGGCACACCATACAAAACAGATAAAGGGGGCTTTTCGTA  
TCATCCCTGCACTGTATGGGCACAAGATAATGGGACATGGTTGATGGTGCATGGGCATGC  
CTTATGCTGTGAATATACTCTTAGATACGGTGAGATACATGGTTGTCGATCAGCTATCGA  
ACATTGTGAAAAAATATTTCTCCTGAGGGTACCGCTCCAACACATTTTGTTCGCATC  
TCCTGATCATTTTAAGCATGAGAACACTATTGACATTTTACTGCATACAAGTATTATAT  
AAATAGGCAATCATGGGTATCAGATAATTATCAAAGGTTACCTTATAGTAAACCTAATTG  
GGCAAATTAATTATTATGAAAGAGTTTTTGTGCTCGAGAATTATCGGCCTAAAAACGGA  
GAACAATGGATCTTGCCGAATCTGTGAAGACCACCTTCAAGAATTTTGTACAGCAGGGT  
GGGATTCCTAATCTCCTTCTATCCGGGACAGCAGGGGTAGGTAAAACAATTTGCGAAA  
GGTTTTGGTCACGAACTAGGAGCAGACTATTATGTTATCAACGGATCCGATGGATGATGA  
TTCCTTGACACCGTAAGAAACCAGGCAAAAAACGTAGTCGCAAATGTCTTACTTACAGCA  
GAAGCAAAGAACGAAGTTCTTGTGTCATCGTCGACGCAGACCACACTACACTAGATGTTCAA  
CTCTTACTTCGTGCATCGATAGAAGAATTTCAAAGAATTGTAGATTTATATTTACCCGT  
TATTTTGAATACATAATTTGTGAACCTTACACCTTAGAACAACCTGTCTTAGAGTTCAAC  
GTTTCGATGTAAACTTAACAAGAACTCGCTGCAAAATTTTGGTAGTTGTAAAGGTATT  
CTGATTGCTGTCAAAGTTACCTTCTCAGAAAAAGTTGTAGCAGAAGTTGTTCTGAATTAT  
TTTCCAGACTCCCGAAGGACTCTTAATGAGTTGCAACGACATGCAAGCACAGGATGTAAT  
GATACTGGAATCCTAGGAGCACTTGGAGCCGCAAATATCGATAGTCTAGTTGAATCATTG  
ATAACAAAAAGATTCATTGATGTAATGAAATGGCTTACCAAAAACCTAGATTCTGATCCT  
GTCTCTATCTTGACAAAACCTCTATGATAATGCTTCTAATGTCTTCACAGTTCCTAGTATT  
GCAGCAGCAGTTTCATACAGTGCTGAATATCAATACAAGTATGCATTCGTCGTAGATCAG  
GCAATCTATCTCCCTGCAGGGTAAACTCAATTGATGCTTAAATGCGAGTTCAAGTAACAC  
CCAGTGACCTTTACAAAAAGGTAAATGAACTTGCTAAGGTCCCTGACTTACCTTGGCATT  
GGTATGACAATGCATACCAGCACGACGAGGCTACTGAAGGTAGAATAACTTTGGTTTCT  
TCTCACATTTAGTCTTAGAGAGGCCTGGATATACTTAGTTAACTACTAAGAAAAATTCTG  
ATGACTTTCGTTAGTTTCATGATCTATTTGTTGAGTTTCAGTAGAGGAATTAACATTGACC

CTAAAGTAATTTAAAGGATCCATGTTAACCTGACTACTGTATCACAGGTCACCAAATATG  
CTTCTGGCCAAAGAGACCAGGACTTTCCCCATTAGAATATGATAATACTTAACAGGAA  
CTCATGGAGGTCTTACTAAAGTTGGAAACACCAACTACTCTTGTATGCTTAACGAAGCAA  
TAGTTTTTTGACGATGTTACGCACACATGGAACATACGACTGTATGACGAATAGTTCTTG  
GCTACAGTTTTTTATAATTATGACTTAGAAATTTATTAGAAATCCTGAGAAGATTACAGC  
ACAGGTAAGTCATGATTCTACTACTGGTTCTGGGGTGCTATGGCAGTTGCTGTTGTAGG  
GGGTCAACTATATGTTGGGTCTTCTTACAGACAAATGCCACATCAGTGGACAGATGGTT  
TGAACGGACCATTGAGATGATACTTCCACTAAAACCTCCAACGGGACGCTTGATGGC  
TGTTCCAATGCCTCATCCAGATTCCTATGTTGATCCTATGATTATCAGATGACAGCTTTA  
AAGACACCACTGAGATATCCTGGCGGTAAGTCTCGTGCTACTAAAAAGATGGCACAATAT  
TTTCCAGAGTAGACAACTCTGCTGAATTCCGTGAACCTTTTCTTGGAGGTGGATCTGTA  
GCGTTATACTTTACTCAGATGTATCCTCATTTGGAAATCGGGCTAAATGATCTATACGAA  
CCTCTGTATACATTTACGAATCAACTGCAAAAGCATCGTGATGATCTTTGGAACCAACTT  
GTTCAACTCAAGCAAAAATATCCAGATTCGTCTTCGGCAAAGAATTTTTTCGGGCAAGCC  
GAAGATTATCTTACTAGACACCCAAAAGATAGCGATTTTAAGGCTCGTGCTGTCGCTTTC  
TATGTTTTTAACCCGTTCTTTTTCTGGACTCACTGCGTCCTCCTCGTTCAGCAAACAA  
GCGTCTGATTCAAACCTTTCAATGCGAGGAATTGAAAGGGTACCATTCTACGGAAGACAT  
ATGAAAAGGTGGGCATTCTCTATTCTGCAATACGAAAAATTATTTACAGATGATACTAAT  
GCATTCCTATTCTTATATCCTCCCTGCGATATCAAGGCAAACCTTGGATGGAAAGAGAGGC  
ACAATGTAGATTGGACTCAGCCACGATTCTTTTGCAAAAAGGTCTGATAGAGTCGAGTGT  
GATCAAATGATATCTTATTATCCACCCAGTTTAATAAAGCAAAGATGCCAAGGTTGGAAA  
GCACTAGAATACGATCATTCTTTAATATGATATCTGTAGGTGACTACACGAAAGATCAA  
GGACAACGCAAAGAATTTCTCCTTTTAAATTATGGCCTATGTTGAAAGACTTCTTCTAAA  
GGATTATCTATGCTCAATCAACTTCAGCAAACATTATTTGATGAATGAGGATTCTGTATG  
GGTGAAGAACTATCCTTCATATGTAATCAATAAATCTCTGTCGCATCATTGGATACGAT  
CATGTATTCTAATGTCATGAATATCCATTCTGATGTAGATTAACGTTTGCGATATGATTT  
CTTTATAAATATCCTGAGACCCCGAAAGAAATTTTCTCCTAGGGGTAAGGAACAGAAAGT  
GAAAGATCTTGACCCTGTTAAAAAATACTATGGTTATAGCAATGATAAAGAATAGCAAGC  
CTTAGAGATCTTGACTGCATCCCAACTTAATCACATTAAGGATAAACTGAACAAAGGAGG  
TAAGACCAGATGAATGAAGCTAACCAAGCACAGTGGACTAAGAATGGTATGGTTGTAGTG  
CATTCAAAGTACCATACGCTTTTCTAAAGGTTTCGTGAAACACTTACACGTATCGGTGTA  
GCTTCTCCTATAGAGAAAAAGTTATACCAGTCCTTTCAGATTCGACATAAGAAACGTCAA  
TACTATATTGTGCAATTCTAAGAATTATTTGCTCTTGATGGTAAGAAAGCACACCTATCT  
GAGAATGATGTGCCGCGTTGAAACAGAATTATTAAATTACTATATGAGTGGGGACTAGGT  
GAGATTGTAAATTTACCAGCGATCTCAAACGCTGCGCCATTAAGTTAAATTAAGTATTC  
GCATACAAAGAGAAAGGACACTGCCCCGCTTGAGTCCAAATATATCATCGCGAAAAACGT  
CAAGTTACAGAAATGATATATAGTTTAGTGTTAATATACCAGCATAAAGGCAGACGCCAAG  
AAAATAATGGAATATCCAACCGGTGCCATAGGAAAAATCAAAGTGTTCAAGTGAAGATAAC  
AATGAACAACCTTGCTATCCTAAGTACAGACGTACGCCTTGATATTTTGATTTGGAGTGCT  
GTTATCTCACCTTTGAATTAGGTTACGATACCTGGGTGGCAACGAGAAATGATTGATCCA  
ACTTATGGAATTTGCGTCTTCACAGGAGTCACAGCTTATGTCTGCATTCAAACGGGAGGT  
AAGAAAAACAATAGTGCCAGTGGTGTGTTGCAAACTCTAAGAAAGACAAGGAGATG  
TTTATTTCAAAGCAACTCAGTCAGCACCAACGCGACCGATTCAAGTTAGTAGTTCCTACA  
GTTAAATTTACAAGGTATAATCATGCAAAAAATTATCAACGGGATCGCTATCTTCTCATG  
TGTCGTGGAACCTTGGTCTAGTAGGACGAGGTGGGTATGTATACATCGGTCCGGTTGCTAA  
CATCGAGGACATCAAAGAGAAAAACAATCAATGCCGCACTTGGTGGAGGAAGTGGCTCTCT  
ATCTGACATGGCAGATACACAACCTCCTGTAACCTGGTGCACCAGTTCATTACCTTG  
ATTACCCTGAACGGTCAATGTATATCAATCGGTGTAGTTGGTAGTATATACGTAGTATCC  
CACATGGGAATGATAGGTTATATTGCCCTTAGGAAAACCGAGTGTCAATTACCTAGGAGA  
GATGTTCTGTAGGTGACGATACTACATACGCCATATTAGCTGATAAGGATGGCTATAAA  
ATTAGTTACTCAGCAAACGATCCTAAGACAGCATTATATTAGTAAGGACAACAAAGAAAA  
GGTTGTTACTGAGCACTAGCAAATGCACCTACGAAGATCACTGAAGACTACTTGTGGAT  
GGTATGATTAATCAAGGCGGTGCTGGATCTAACAAGAGATCTTGAATTTATCAATCACCT  
CGTTTGACCCCAACAATGAGCATAAATAGTCGCTGCTCGAAAAAGGGAAGCCTGTATC  
AAAGCAATCGGATCAGCAGAGGCTACAGGCCGTCTCGTTGTCACATCTATTGGTGTCTGCT  
GCTGCACATTCTCTAAGTAGTTTCCCCTTTGTTAGATGGTTCGGTGTCTGGCTGGGTGGCA  
ATGTTTGGTGGCAATCAGGGAGCTGATATAGGTGGAAAGATGGGGCAGGACATCAGTAAG

GATTGTTAAGTATTTTCCTTCTTAGGACGTTTGAATGGAGCTAATCCTTTCTTCTCACCA  
TACTGATTACACTGTAAGTCATTACGACTTAAATTAGGTGGTTCTTTAGCGGGATTCTTT  
TGTACGATCGTAGTGAGTTTTTAAATGAGTGGTTTTATAACTCTCAACATGAATGGTGT  
GCAACTGTAGATGCTGGAGCTACCACTGCGATAGATGCTGTTACGCTGACTTGATTTGTG  
GGTGGTAGACATCTTTGAATTGCTGTCAGATCCTCACACTACACTACGCAATGACCACCT  
CTACCTTCATGAGCTATAACTCTTATTTACCATTGAGGTACATCACCTACCATAGGT  
CGTTTAGGAGCAGGATACGCAATCTCTTTATCAGTTTTTGGTATCGATGGCACCTATGGT  
GTATCTACTTCTTGTCTATGTGGTGGTTAACGACAGGAGGTGGCGGTGCCTCTATGACC  
ATCTGAAATTGATCAGGTGGATAATCCATCGCATAATATAATGGCACACCTGCATCACA  
AATACTAATACTTTATCTTCCCTCGTCTTCAATCCTTTTATTACTCTTGTCACCTCGGCTGC  
TGCGCTTCCACACAACCTGGCATCTGAATGATGCCTTACCTATGTTTACCGTAGGAGGA  
CATCCGAACGTTGTTGAGTGAAACGGTTGTTTCGTTAACCAATCAGGGATATCTCTAATA  
AATAGTCTCCTCGTTCGGATGTCTCGAACACTTGCGTTATAGACTTTTATCTTTGGTGTA  
TCCATACATCATGGGTTTCCCTACTGATATATCTTCTAAGTTATCTGCATTTGTGCTGGGG  
AGCTCATGAGCATGAGGAGCAATAACATTAACATTCTACACAACAACGTGTGCACGAATA  
CTATAATATGGTGTCTTGGGATGGAATGAAATCCCCCTTTCTTCAAATTTCCACAATAT  
TTAAGACGATCTGTTTCAACGTCAACGCTCATATTCGCTACGGTTTGATTTGCTACTGTG  
ATATTTTCTGCTGCTACCTCTGTACACTGCTCTTGTAGTTTCTTATCTAATGGTCTAGCT  
CGTGTTCAGATTCACCAAATGAGAAATTATAATTATCTTTTTTTTCTGTACTTGTAGGC  
ACATGGTATAAAAATATTACCTGGATTCTCAATTACACCGTCATCATTAAAGATCTGACATA  
TCTACACAGGCTCCATATAGTATAGTTCGTACGGTTTTCGTGCTGAAGCCGTTCCCTGTG  
ATCTACGCAGTAACCTTCAAGGTAGCACCTTGATGTTGAATGCCATTACCATATGTGTTT  
GTTGTCTGCGGACCTTGTAAAACCTTGTATTGCCTGGTTTGTCACTGAGACTGCTGTGTTG  
GCGATTGGTCTTGCAGTCGCACCGACACCACCAACTGTCACTGCATTGACAGTCGGAACA  
AAGGGCATGAATCCATTAATGGCAAATAATGCTATTTACTTAAGATACTTGGAGTATCTG  
TTACCGAAGTTACCGTTGTGTCCCTTTGTCTTACGGTGTGGTTTGAAAGTCCCTGGTCCCA  
TGTAGGTTTCGATCTAGTGGAACGCTGTACCTGGCGTCTGTATTGTGAAGTTGGATTTGT  
CGCTTACACCCGGCCATGTCGAATTTACTCCTTCAATAGTTATCACATGGGTAGCATTAG  
TAGGTGACAAATTATGATCTGTAGTTACACCGTGCCCACTGACAGGCGATTGATAGCCTG  
AGTTACCGTCCATCGAAGATATGGTCGTCACCACAGTGCAAGTAGTTTCCGTTTGGATGG  
TCATCGAGGCCTGGTGGCAATTTGGCACCAAAGGGACTGTTATGACTTGGTTAGTAGCAC  
CACCCATAGCTATTAATAGGAATAACTTATATGTATTCCCTCGTGATCATTAGTCAAAAAC  
ACTCATTTTCGCTAACAAATTGAGCTGTTAAAGAATTACCTTACCGACTGTACCTGGTCA  
ACTTGTGCCATGAGTATCATTAAATGTTATGTCTATTTGTGATCGCTGCTGTAGTTCCTGT  
TCCAGCTGTTCCCTGCACCTTGTGTGGAGATATGACCCCAACTAGCAGTTGCCTCAGAAGA  
ATTGTCACTCTGTGCGCCATGATTGGGCAAAGGAGAATGATTATACAGATGCTAGGTCATC  
ATCTGCAGATGATCCTGTACATCGATTTGGAACCTCAGTAGTTGTTTCGGATTGTTCCAAC  
ACCTATAGTAGGGCAATAATCATTAAATGCCGATACCACCATCTACAGCGCTACCATTGGC  
CGGTGTACGCGTTGTGATCAAGTTATTTCCAAGATCGAATAGTTAGTGACAATTCGTGT  
CTGACTCACGATTTGAGGTACCACAGTTAGTTGTAAGCTAGATTGGTGTCTAGTCGATAG  
TCCGCCCGCATTTGCTGCTGCGCCGAACGTCAAAGCATAATGAAAGGAATAAATTTCTT  
CATTATTTTACTCATTGGGAAACCTGTACTATATAGGTCTGCAAACCATAAACATATAT  
TCGGGATGTACCATTTCCCTGACATCTTACTATATGGTTACATAGTAGTGTGCGCTCCGGG  
GACAAACTCAAACACACGCTTATTTAAGGAGCAACATGACTAACTTATCACCGTGGTCAT  
CTAATGATGTCGATTCAATTTTTAACGCTGCAAATAGTTACAGGGTAGGATTCGATGAGT  
TCTTCGACAGAATACACGCGTACGGAACAGGTTACATACGGGACAAACCGCTCCATACA  
ATATTGTGAATGAATCCGCATAGAAGTGGGGACTAGAAGTGGCTCTCGAAGGTTGGTCAG  
TAGACGAAAAAGCAGTAGCAATAGAGCAGAGCGTACTACTAGGCAAATCTCACGTTCAAG  
AGCCAAATTCAAAGAAGGACAACAAGTTCATAGCGATGTACCATCCAGGACATTTGCTA  
GAGGATTTAATCAATCAGATGCCGTAGACCTTGGCAAAGTATCCTTTGTCAAAGCAATGC  
GAACAATTGAGATACAGAAGGTAGTTCCAGAACATCAGAAAAGACGAGTCTATGATCTCG  
GTTATTGAAAACCTATCGCAGTTCTTGACCTGTAATTAAGATACAAAACAATCACTTATG  
ATATATCAAGTGGGTGTATGTTCTTTTAAAAAATGAAAGCATTAGCATTGGATTGCTT  
CCTTACTATTCTCAACCGGTTGTGCAAATGCCAGAACAAGGTTGAGTGGTGCAGGTGCA  
TCATTCCCATCTAAAATCTATACTCGGTGGTTCTCAGACGTAGCAAAGCTGGTGGAGCA  
AGAGTAAACTATCCGGCAGTTGGTTCTGGTAGGGGAAGAAAAGCATTAAATTGTCGACAGC  
GTAAACTTCGGTGCCTCTGATGACCCTATTAACAAATGGATATAGACAGAGTAACAAGA

GGATTAGTTCAGATACCTATGACATGTGGAACCTATTGCATTTGGATATAACAATCCTGAC  
TGTGATTTATAACTTACACAAAAACAGGAAGTTGAAGTTGCAAGGGGTATCATCACTTAC  
TGGAACGAAATGGGATGTGATGATCAGAGTATGACTAGGGCACATCGTTCAGATGGTTCT  
GGTACAACCAACGCATCTACAAGTAGTATGCAATCATTCTCGCCTACATGGACACTAGGC  
ACAGTTTAATCTGCGGCGTGGTTAACAGGAGTGGGAGGTAACCGTAACGCAGGAGTCCGA  
TGAGTAATTACAAATACACCTGGATCAATTGGATTTATGAATGAATCTTAGAATGAGGAT  
CTTTTAAGACCCGCAGCACTATGAAACAAGTCGGGTAACCTTTGAAAAAAATCATTTGAC  
GCCGGATCAAAGGCCCTTAACTGGATCACTCTTGTGAGAACTTGCAAGAACACATCCA  
AATGCAGAAGCAGGAGCAGCGTATCCGATTGCAACTTTAACTTGGATACTTGCATATGAA  
CGAGGTAACGGTAAGATTACAGCTGCAATCAAGACAACCTTAGCAGCTCTATTGAGTGGT  
GAGCATCAAAATAAAGCAGGTAAGTTATGATTCGTTCTCTTAAAGGCGACATTCCTGAG  
AAGGCATGAGCAGCAGTTGACTAGGTACGATACATACTTTTATAATATATACGTATCCTAA  
TTATTATATGAGTGTAAGACTCGTGCGAACAAGAAACGGTGAAGATGTTATCTGTGAAGT  
TTAGGAGGTCTGAACTAAAGAAGATCCAAGCAAAGCAGTAGCCTCTCAACGTAACAATCC  
ATATATTTTATGCATGCAAGGAGATAAAAAATAAAGAACCTCCAATTCTTGTAGATGATGG  
TGCAGGTGAAAATGTAAGTATAATCAAAGATCCCGATATCTACTTCCAACCTCGGAATCC  
TCTGTCTTCTAACAACAAAATTTCTTTTGAAGTTAGAGGAAGTGGTAACCGCATATGAGAC  
ATATCCAGAGGACATCTCTAAATACAACACATTAATGGAGGCAGATGGAGGAAAACCAA  
GCTAAGTCCTGTTTCATGAATCAACGGAGTGAATACCTTATTGGACAGGTAACAGAGCTAG  
GTGAGGAACCAAATATCCTTATCGAAAAATGCTATGAAGTTACGAGTGTGGATACCATGA  
TCCCGTTTCCAAAATACAGTTCACAACGTGATGTCTTCTTGACATCTCGTAATATCTTGA  
GTATACTAGATCGGACACCAACACTGTTGGAAATCTACAATCAATTATGTGTTCTTTCTA  
CGCCAACATTCTACTAGCTGGTCACTCTATACTTTTTCAGAGAGTATGAGAATGGAGACGC  
GGATCAATATCGCACATCCTTTTCTCCTACCATTTATGATTTGTATAAGAAAAAAGAAAA  
GTTTACAACCTCTAGCTTGGAGATACGTGTCTCCTGTCAAGTTTCATAACGCAATAGAAGC  
AAGAGAGTTTATAAAAGAGTATGAAAATGTAGATAATTGTGTAGTCCATGGTTACGAAAG  
ATTTGTGATCACTACAGTCGTCACCAATATCTAGATGATCTTGACTACCTCATTGATCA  
GATGAAAATCTATTTATCGGACATCGAGGTTCTATGTGAAAGTGGATTCCTGGATGTAGA  
AGCAGCAGCAGAAGAAATGCTATCAATCACCATTAAAGATATCGTCTCTAGCAAACATTA  
CAGTTGGACAAATAGAGAGTTTGTATGCACCAGATAGTCTATACTTGAACGTCTCGTGGAC  
CGAACAAGAGATGCTTACAAACTTTATTACATGGTGGTCACAAAACACTCCAGACATTCT  
AACTGGTTGGAACGTTAACTTGTGTGTCGTCCTCCTGACTAGTTGAGTAAATCGTAC  
TCTCGGTGAGAACTGGATGAAGAATTAATCCCCCTGGAATCGTGCAATGAAAGGGAAGT  
ATACGTCCAAGGTAGGAGGAATTACGCTTATGATATCTCTGGTGTTAATATCCTCGATTA  
CCTCGAACTATAAGGTAAGTTAACATACTCAAATCAGGAGTCTTATAGACTCGATCACAT  
TGCCTGTGTCGAGATCGGGCAAAGAAAAGTAACTCCTGACGAGTCTGAAATATTCAAAGA  
CTTCTATACAGCTGATTGCCACAAGTTTATGAAAGACAACATACACGACGTTGAGTTTAT  
GGACCGTCTTGAAGACAAGATGAAGTTGCTTGGACTTGTATTACAATTTCTAATGATGA  
TAGGGCAAGCTTTGAAGATGGGTATAGTCGGGTACGTTTGTAGGATACGACGACATATGA  
CTATCTTACAGAAAGAAACCGTGTGTTCTCCTCGAAAAGCAGCGAAGAAAGATGTAAA  
ATACGCAGGAGCGTACGTCAAAGAACCGAAACCAGGAGGATATGACAGGGGTGTCAGCTT  
TGACCTCAATAGCCTGTATCCTCACCTTATTATGCCATCCGATATCTCGCCCGAAACACG  
CAGGGACACTAGACTTCCCTTTGCAAGCGTTGAGAGAATCCTTAATCAGGAGTTGGTGAT  
AGCGGAAGACTATTGTGTGTGTGCAGACGGTACCATGTATCGAAAAGATATTCATGGTTT  
ATTGCCAGAGATCAAGCAGGAGATCTACGATGGACGAACGATCTAGGAAAAGCAAATGCT  
GGGTACAAAACAGCAACATGAAACCTCAGCATCTAACAACTAGTCGCTGCCATTTCAA  
GTTCAACAAAATACAGATGGCAAGAAAGATTCAACTTAAATTTGCCTATGGTGCTATCGG  
AAATCAATACTTCCGATACTACAATCTTGCAATTGCTGCGACAATTACTTTGTGACGCGCA  
AGTTTGAATCCGTTGGCTCGAAACCACAATGCACGATTATCTCAACAAGACACTCTAAAC  
GACAGGAGAAGATCATGTTATTGCTAGTGAAACCTATAGTATCCACCTCAATCTGGGGCC  
TCTGATCGAGGCTGTATACGATGCGAGCGCGGCGAATTATTCGAGCATCGTCGCTCACAT  
TAATAAGGTGTGTGAGGTGGAACCTGAGATATATATGACTAGTTCTTATGAAGAGTTGGC  
CACATATGGAAACGCATCCGAACAGAAGATGGTCATGAAGCGTGAGTATATTACCAACAA  
AGGTATCTGTACTGCCAAGACAAGATATATTCTTAACGTTTGGGATAGTGAGGGTGTTCG  
CCATGAGATAACTAACTTAAAGCCCCTGGGTAACGAAGCGGTTAAGTCTTCTACACATTC  
AGCATGTCAAACATCTCTGCGTGATTGCCAACAGTTATCATGAATGAATATGAACAGTC  
TGCACAGTGGTTTATTGCTGACTTCAAAAATCATTTTTCTGCCGAATCTAATGTAGACAT



CTCATTTCTAGAGATTGTAATAATCTAAATAAGTGGTTCGAACCCGACAACGATCTATCA  
CAAAGCGACACATATCCATGTGAGAGTGGCACTGGTATATAACTTTTATGATATGTA  
CTTACTTACTCACATGTATCCATGAATTAAGATGGAGAGAAGATCATATTCGTCTATTT  
GAAGACTCCAAACAAAATCAACGAGAACAGTATCAGTTACCTTTATATGTTCCCGTAATA  
GTTTGGACTTTACAAAAAGGTGGATTATGATCTACAATTTTAGAAGAGTTTCCTAGAACC  
CATCAAAGTCCTTATGGCCGTCCTTGGTTGGCAACCCGAACAAATCGCATCATTGGAGTT  
TTTATTTTCATGAAATAGGTTGTTGAATACCAAAAAACAATTGGTATCCCAGATAAAAAGA  
GAACAAGTTTTGGACGATGAGTCAGAGGCAAAATGGTTTGAACGTGCTTTGAATCGTACG  
AAGGCTATAACGACAATCACGGAGGTTGACGAGAGAGTTTACTGAAGTCTGTTGTATCAA  
TAATTGGAAATGAATATGCAGGACAAGTATCAGACGGAGTTTGTGCAGGTGATACAAAAG  
ATTTTATTGATAATGGTTCTTATGTCTCTAATGCCTTAGTTTCTGGATCAATTTATGGCG  
GGTTGCCAAGCAATAATATCACAGCGATTGCAGGTGCTTCATCAACTGGTAAAACCTTCT  
TTTTCTTGGCATTGTGCAACACTTTCTAGATTATGATCCTGGAGCATGTGTAATTTAGT  
TTGAAACTGCGTGAGCTATTAGCAACCAACTGATTTTTGATAGAGGTTTAGATGCAGATA  
GAATGATGATCGTTCCTGTGCCTACGATCGAAGATTCTACAACCTCAAGCCTGCAGGATTC  
TTGACAAATAAACGGAACAGAATGAGTCTGATCGTAAACGTATGATATTTGTATTAGTTT  
CTGGTGGTAAGCTTGCTAGTAATAAAGATGTTGAAGACTTTGCTAATGACAAGAATGTCA  
GCGATATGACACTAAGTCAATCTATCAAAGGAGCTTTGCGTGTTTCATACGGTAAAATTAG  
GTTGAGCAAACGTTCCCTATGGTCGTATTGAATCATACTGATGTTATAGGAAGTTATA  
TTCCAACGCAATAAAGGGGCGGTGGAAGTGGACTCAAATACGCTTCATAAACAATTGTAT  
GTCTAGCAAAGAAGATGGAAAAAGATAGTACTGAGGTTGTTGGAAATATTATCAAATGTC  
AAGCCCAAACATCCCGTCTAAGACAAGAGAATTCTATTGAAGAGACACGGTTATATTATA  
ATCGTGGACTTTATAGGTATTATGGATTACTAGAAGTGTGTTAAAAGCATGGAGTATTAC  
CACGCAAAGGTAATCGTATTATTGTTGGTCAAACCTTCTGTATATCCTAAATCCATTCTTG  
CTTAGCCAGAAAAGTATATTTCTTATGTGTTAATGGAAGCATTAGACGAGGCAGCAAAGA  
AGGAGTTTCTATATAGTCACTAATCTTACTGACTACATTAATGCTATGATGATAGGTTT  
CTATGGGATTTCTACAAACATGTACTTCAAACATTCACTGAATCATAAAGACATGTGACT  
CGTATAGTTAGAAAACCAAGAGCAACCTTTAATGAGTTGAATATCTAACAAGCTTTATG  
GAAATAGATCTTGCATGGTTGAGAATTCAAAACATATACAGACAGTCTTTGGTGAGATT  
ATCAACGTTTATATGAGTGCTTTACAGTCAGAAACAGATTTTCCCTGCAAAGATTCTTTT  
GGAGAGTTCAGAATTAATCATCTAATAATGATCGACTAGATCAATTTAAAGATCATGTC  
GATGTAGGAAACTATAATGCTGCTCGTAGGTTTTTTGTGATGTTTTTATATTTGAATGAC  
GTTGATGATGGTGGGCAAACCTAATTTTCCCTAGATTGAGCTATGAAGTTTCACCTAAACGT  
GGTAGAATATTATTATTCCTTGCTACATTGCAGGATCGTCTCTGAGGATTGCCACCTGAG  
TCTGACAAACAGTATATTGTTGGTAGTTATTTACACTACCTATGAATCTGGAAGTCACGA  
TTCTATGTCATCGATTGTATAATAGGAAATGTGCAAGGAAGGTTCTTCCCTTTATTGAAGG  
TAGATTATTTTACAGTACGTTCTTACAAGAGTCTTTTTCTTGATCTACATGAATACATTA  
GTCAGTATGATGCATTCCCAACTCTGAACGCACTTAGTATTGAATGTCAATAAAGAAAAG  
TTCGTAGAGAGGAATAATTTCAAGAAACCGTTCAGGTTTTAGAAGTCCATCCGATGATG  
AGAACGACCACGATTGGATCGTAGATTCTACAGAAAAGTGGTGTGAGGAGCGTGCATCT  
ACCTATAGCTTAGAGAATCTGTTAAGATTGCTGACGCTCAAGATACCAAATGCGAAAGGG  
GTGCTATTCGCGAGATTCTTTCAAAGCATTAGGAGTATCATTGAGCAACATATCGGTC  
AAGAATATTTTGAAGACGCTACTGATCGTTTTGAATATTATCATACATAGGCAGACAAGA  
TTCCTTTTGTATATGGAGTCTTTTAATAAGATTCCCAAGGGTGGTTTAGTAAAAAATCAC  
TAAACATCGTTCTTGGAGGAGCAGGTGTTGGTAAATATTTGGTCATGTGTCACTTTGCTG  
CATCAACTTTATTGCAAGGTATGAATGTTTTATACATTACTTGTGAAATGGCAGAAGAAA  
AGGCTGCAGCACGTATTCATGCAATCCTTTTATATGTTTCGCATTCAAATCTCGCTCATC  
TAACACAACCAATCTTTGTAAAAAAGATTAGAACACTAGCAAAGAAAACCTCATGGGAAAC  
GTATGATCAAAGAATATTATCCAGCGGCAGCACTTGTAGGCCACTTTAAATCGCTGATCA  
GTGGTCTTGCATTGAGGAGGAGAATTAGACCTGATACTGTCTTAATAGATTCTCTAAACA  
TTTGTGCTTCCCAGAGATACAAAGGAAGTATTGTGAATTCTTATACCTATGTTAAAGCAA  
ATGCTGTAGAACTTAGAGGACTTGGGGTAGAATGTAACGTCCCGATTGTCTCCGTCACAC  
AAACGAGGCGTTATGGTTTTGAGTCTACTGATATTGATCTCACTGCTACGAGTGAATACG  
TTGGTTTCCCTGCTATTGCTGACATCATGTTTGGCTCTTATCTCGGCTGAGGTCCTTGAGG  
GGATGGATAAAATTATGTTCAAACAACCTTATAAATCGCTATAATGATCCTACTATGAATA  
AAATATTTTGTGTAGGTATTGACAGAGCGAAGTTGAGGTTTTATGACGTAGAAGAATCTG  
CTCCAGATGACCTTGTGTTTCTGGTCAAGCAGAAGCGAAGGTTTCAGCTTGTACACAGAT

TTACAACAAAGACAACCTTTAAGTGCATTATAGTACGGGTGATTTGAAGAAGTATAATGAA  
TTTGTAAGTCTGTTATATCTGAAGAGAGTAAGTATAGTGGTCATTTCCACAATCATTG  
AGAGAAATAGATTATAAAGACTTCTCTGCACATAGAGCATGAACTGCTTCAGACGGACTA  
TGTGCTGAGTCAAGTGAATATACTGAGATAGTAAAGAAGATATTATTTCAAGATAAACCA  
TTTACTGAAGTGAGTGTTCATCTGAAACGTCAACTAGGTGCTATCGTGTGGTACTTT  
ATACAGGCAGGTATAGTATTAGAAGTACCACCAGAAGAGGTTATAGAAATGAATGTAGAA  
AAGTTGAAGAGCAGATATCCCCGTTGAGAGTTTGTGGCCACAATTCTGAAATACGTA  
CAAGGAGATGTTTAAATGGTAGGATCTGGTGAAAGCCTGGCAGTTGTAAGTGATCTTGCTG  
ACGCATTCAATACTGGTGAAAGGAAAGATGACACGCCATTTTTGATTTGTATTATAGGAC  
TTTATTGGATTAAAGTTAAATCGATACAAGCTTAGGACTTCGTAACAGAAATCAAGAG  
TACTAAAAAAGTATTGTTGGTTCAATAGTTGAAGGTCATCAGAAAGCACACAGATCCT  
GATGTTAGGTAACTTTATCAAGACGAAAAGGTTCTATCTGGAAAAAGTTTGAACCTAT  
GCAATTGACAGCAGATTTTATTGCTGACAATAGTTGTGCTAGGCCACATACAAAAAAGT  
TGGCACATATAATTGGTTGCCTACTGATGAGTTTGAAGTTCTAATAACGGGTAGGTTAGC  
TGCCGATAGATTTATTCTTATCAAACACAAAACAACGGATCCAGTAGTCTCGGCAGAACC  
TCACCCTTAATTTGACTATGATAAAAAAGTCTTTACCAAAGATGGTAGAGAGGGGTATAT  
GCAAGAGTATAAAATAAATCAAGAGAAAGATAAATCAGAAGACGGCGACAAACACTAGAG  
AACTTCGAAACAAGATGATGGTTCTAGAGTTTGTTCGAATGTGTAATCGCAAGAAACA  
AAGAACTATCCTGGAAAGACATGGTATAAGTCTATGAAGGATCTGCTCCTGAATCGAGAT  
GAACACATCTTAAACCAATTGCTGCATTACAAAAGTTTTTAGGATCTAATGAAGTGAATC  
AATACTCCAGAGTTAAAGGACTCATGACTTACATTGAACACATTGCCAAGAAAGAGTGTG  
GGGTATGAGTAAAGGTTTCGTTTGAATCCTATGGATATTATATTGGTTAAGAAGAGTGCAA  
AGAAAGTTGTAGAAGCACCTATGAAAGAATTTACTAACATTGATGGAATGAGTCAATGTG  
CAAAACCCGCTCAACTCAATGTCTGTAAGCGTGTAGCATTAAACTGTTAAATTTTAATTG  
CTATAGCTCTTAAAGCAGTTGCAGCAAAGAAAAAGACTGCTAACGCAGATCTTGCCAATA  
CACGTAGAAGAACTGGTCAACATACCATGGTTACCATGGTTACTAACTCTCTGAAGTGTA  
CGGTAAATTTAGTAAAGAAAACGAATTACCTATCTGATACTGGCGAACTTGGTTGTGATA  
TAGTGGCAGCGAAAGGTGGTAAAATACATGGTCAATAAAGAAATTTTCAGTATTCTAAGG  
AAGGCAAGTTAGTTCAAATAGATCTCACTCCCAATGGTAAAGACGCAGGAGCAAAACATG  
GTAAAGTTTCAAGTCTTGCCTTGAATATATTTCTAGGAGTTTAAAGATAAACTCGTCCAA  
CTTCTGCAACAAAACCTTAATCATATTCCTAGAGTTGGTGGTTGCACAGATAGTCATAAAA  
AATACTGGAATTAGTTGTATAAAAAATTAGTTACATGTCGTATGATCGTTTTTGGTGAAG  
TAGCCGTGTATGAAATTATCCAAAATGTGCTGAATATATCGCAGTAGTTATCGTCCTTG  
CCATATCATAACGAAGCTCGTCAGGCAGATAGACGTTCTACAGCTAGATTCTCGTCTAAGC  
TGATTGCTATGGAATGGGCACATATGTGGATGGAGATTGCAAAGATGATGAAAATGCACC  
AGTAGGCCACAGCACTATAGGATGGTGCAAAAAAGAATTCGGCGATTGTAACGGTCCGT  
TCCTAAAGATATACTAGTCCAGTTTACAAAGTGTCAACTATTACTCGGACTTCATTCTCA  
GCGTGCTATAATATTATATAGACAGAGGACACCTAGCCTCACGAACACCTTCAACAC  
CTTGAGGATCTGATCTGTGCTGGTTCGTAAGGAAGGGTTGGATGCAGTATGGACTGCACTT  
AACAAAGACAGCATTGATTATTAAGTGGGATGGTGTCTCCTGCTATCGTCTTTGGCTGAAAC  
CCTGCCATTGGCAAATTCCTCGTTGCAACAAAATCCGTCTTTAACAAACCCAAGGTCAAG  
ATCTGTTCTGATCAAACAGATATTGAGGAACGTTACTCTGGCAACCTTGCAGGACATTCTG  
CGCTAATGTCTTTGGAAGCTTCTCGTATCCGTGGAATTGTCCACGAGGATTTCTGTCGGT  
GTCGGAGGGGGCAGTGTATCGCGCTAATAATTTGAGTACCGTCTTCTCTGTCCGATC  
CTTAGCGATGTTATCCTTTCTCCACATCCTTCTAATAACCGAAGTTCTTCCAAATAGTGTT  
GGGAGCATTCCGCATGATATACTTCTATATTATCTGATTTCTACTTTATAGTTAAGGAA  
GAGGCAGATGCATAGGTTGCAAATTCCTTTCTACAACCTGGGACAAGTCTCTCAGCAGG  
ATGCCTAGATGTAATGTTCTAGCGAGAAGGTACGTCCACATATTCAGAAACATATCAAC  
AGGTTTTTCCGTTGTGATTTACCAATTCATTCCGCACAATTTGTGTATACTAATTTCCCT  
GATAAAAATAAGTATGAAGTTAATGTTACTTCATTTCAGAGTGTGCCATAAGTTGTTTCCA  
TTGAAGCAGAGTTTAAATGCATAACATCGTTGTTGATGGAACCTGTGAAATGCTACATCTAT  
GGAAAACCTACAGAGCAGTAGGGTTTTCTAACTGTTTGTGTTTCTCCCGACGAAATTGTA  
GATAGATTGACTTTTAGTAAAGCTCCCTTCAACGTTAGTAAAAATTCGACGAATAAAAA  
ATTTAATGCTTTTCTAATAAAACACAGAGAACGTTTGGTGCTAAAGCAGCGGAAACATT  
AAATCTTTCACACGTAGGTTACGGTAAATACGCCTACCCATCTGTGAATTTGACGCACAT  
TTTTAAGGTTGGTAAGCTGGTAAAAAGTACAGCAAAAGATGCAGCGAATACACAACAGCA  
TGCGGAGAGAAGAAAGGGGAGGTGGCGAAGGTCAGGTCGGTCAAGGCGCAATATCTATTAC

ATTTGGAAAATTTAATTCACCTACTATTGGGCACGAGAACTTCTTAAGAAAGTAGCACA  
TGAAGCAAAGTCTGGTGGAGGAGAGTATAGAGTTTTTCCTTCAAGCACTGAAGATCCTAA  
GTAGACTTCTCTTGATTCTGGAECTAAGATCAGGTAGATGACACAAGCCTATCCAGACCA  
TGCGAATGCAATCGTTGATAATGACGACTTGACAACCTATCTTTGATGTGCTTACTGCTCT  
TAACAATGATGGGCATAGTTCAGTAAATATTGTCGTGGGTGGTGATTGAGTAAGTGAAC  
TAATTTATTGGCAACGAAGTCTAACGGTGACTTATATACATTTGATCCGATTAAGTAAC  
ATTAGCAGGAGGTACAGACCCTGACTTTGAAGGTGGAGAGGGTATGTTTGCATCTAAAAT  
GAGAACGGCATCGATGGAAGGTGATCAAGAGTCTTTCAATTAAGGTAAACCTAAAGCGAG  
GTCTAAGGAAGATAAACACACGATGTATCTAACACTCAGACAATCAATGAATGTCCAGGT  
ATCATTGCTGACTTCCCAGACGCATCATATCATCTTTATGAGATTGCTCCTAAGTGGGA  
TCCTCTAGGTTTGGAGGTAGCATAATAGGATACTAGAATGTTTGTAGTAGGTACGTTAGT  
TGAAAAGATCAAAACAGGTATTGCAGGTAAAGTTGTTAGACGTGGTAGTAACCTACCCAT  
TTACATTGATGAGCATGATAATCTCTCCGCTCAAGATTGAAAGACCTTGTGGAGACTAA  
GAATCTGGTTATGGATTGAGTTTACACCTGCAGGTGAGATAAGAACCAACGAATCAGC  
TGCATCTTATGGTATGATGACGCCTCGCGGGTGCCGAAACAAGATAAATAAAAAAGTAAA  
GGTTACTAAGGAAGATGGATTTAAGAAGTACCCTTCATGAGTGTGTCATACCAAGCGG  
TGCAGGACACAGAAAAGACTCTAGATCCCGTTTGAAAAGAAGACGGTGATGTAGATAATG  
ACGGTGATAACGATTCATCTAATAAGTATCTTATGTAGCGTGGTAAGGCAATTGCCAGTG  
CAATGAGGAACGAACATCATCAAAAAGATGAGAATGGAAAAGTCATCGAGCATGATGTTG  
ATGAGGAAGAAGTAAAAGCAGCATAACAGTAACGGATGCTGATAAGAAGGGTGACACCT  
AAGCGTATCAGAAGTTCAGGAAGGTATGAAAGGTAAAGATGGTAAACCTTTATACAAAG  
CAGTAGATCACATGAAAGACAAACAAGAGATCCATCCTGATGGCAGCTTTATATACCAG  
AAGAAGTAGAGAAAGTAGCACAACACACTAGACACTGGGATGCTGAGATGGAAGAAGGTT  
ATGGTGTGAGGAAAGGGTATTCTATAGGTGGAGAGGTAAAGGCGCCAAGAATGCGGAAAG  
GCGCTACGGCATTGATGGTCTAACAAGGCAGCAAGCGAAGCAAAGTATAGAATCCGTC  
CTAAACTAGGGCAAACGCGGAGCAATGTTAAAGTAATGTTATCTTTCAAACGCCTATC  
TGATAAGAAAACCTAAAATTAACCTAAATTCTAGGCAGGACGATATCATGGAGGGAGATAA  
AACTCTCAGCGATGGCGAAGATTGCGGGTGCTTGAACCACGACACAAAACGTCACATGGA  
TGAAGTTGGCCATGAAAAATCAGTATCTACCGAACAATAAAGTTATGACAGTAACGATGA  
AGTCTCAGAAGAAAGCACCGAAAGCAATTCTCAAAGCGATAACTCTGAAAAGAACCTGTT  
AACCGTGAATCAATTTTCATGACGGATCATTTTATGGATTTTATAAGGGATCAAGTAAACC  
ATCACGTCCAATGGCTGCCGTTGTCAAACCTATCTAAACCTAACCTAAAGTAAAAAACA  
AAGAGTGATGAATCTCGGGGTAGGTGAATAGACTAAGTATGAAGTTATGAGGAGAGAAAC  
GTATAAGGATGCTCATAAAGACTTCAATGGTGGCACTAAGAATGAACCTAGGGGAATCAGT  
TTACACTCCCGAGATGAAAGCAACAGTATCAAGATGTGTTATATTCTCTGAAACAAAGTA  
TGAGAGAGGTGCGTCAACCTATGATGCCATGTCTTTCAGAAATAAAAGAGCAGTAGGTTA  
CGGAGGTGACGCCATACCTCCCGACGCGAGGAGGAAGTAAAATGAGGAGAGAATGACGAG  
GCATAAAGCATCCTAAATGAAAGAAGAAAACCATAGAGCTGATGCACATGATGCTGTAAA  
GAAATCAATCATTGCCAAGTATGGAAAAGGTGCTACCATGAGAACGGGTAGCAAGCAACA  
GAACAAAGTCTGACGTGCTAAGTATATTGAAGGCACTGGAAAGTATAAGAATATGGCATA  
TCAGAAAAAGCATACTGCTAAAGTCGCTACGCAGCGTGGGTTTAAAGTCTGTTACAGCTA  
CACTGATACTATGGCACGTTATGGTGGTAAAGATAATTACGACAAGGGTAGAGGATCCG  
GTCATGAGCACACCCCTAAACCCATCTGATTGTCCCAATGCTCAGTGTTAGTGCTTTGAT  
GATAGGAAATGCATACCAGTAACCAAAGGTAGGTCAGTAGGAAAGAATGGTATGTTGGTC  
AAAGAAACGACAAAGCTAAAGAACGAAATATTTGCGACGGCACAGAAAAACATACGATG  
CTAAAGTCCAAGAACTCAAGGATGTCATGGCATAAGGAAAAGAAGCAGAAGATAAGTCA  
TATAAGACTACTAGAGCAAACGGCGGACGTTTCTATGACAAGAAAGGTTCTGGTTACGTT  
AAGGACGGTAAGAAACAATACGAGTGATAGCCTATATCCTGTGTAATTACATTTTGAGAT  
CATGATGGGTAACATTTTAATACCACTGGCATAACAAGCTAATCTATTCTGTGTTCAACAA  
TATCCCTCATGATGAAGGAATCGGAGAGGAACTAATCGATAGTTCTTTATTGATTATGGG  
CAAGGCAGTGAAACTCACCAAGAGGACCGCGGCCGAGGCTCTAGTTGAAAAGTAAAGGA  
AGCACTTGCTGCTCAATAAGTCGCGCTTTCGACCCCGTTAGAGAGGTCTCAGAGACCCCT  
TTTTTCATAAATAACTACGGGTAAAAACAGAATTTCTAGCAGCATAACCATGGCACTTTAC  
GGTGAAAGTGATGCAGACGGTTTTAAGCCAAAGTGGGCTCTGAGAGGCGCGCGTGTAGAG  
CCGCGACATACTTTAGCAACCGCTGATGGTTGGGTTCTTCGTTTTTACATGAATGCCGCG  
AAGACAAAGTTTTGGGATGAAATTTTTGTCTCAGATGATGGGCTTGTATGTGCAGGTTGT  
CGTGGAACCAATACCTTGGGTGGTGCAGATATTACTGCAGTAGTCTTTGAAGAGACTGGT

TATGCGGGTGGAGCAAAGTTAATCTTGTGTGGTCTATAAGGAACAGGTCCACATCACA  
AACGCTTCAACTTTTGTTCGTTAGAAATCCTACTGACAGTGCCAACATCACTGCAACTGCG  
GCAGCACAAACAGGTGTAACCGTGATCACTTTACATGCACGTCTGCTACATCTGCTACA  
GCATATGCTATCCAAGCACAAAGCAATCTCTGGAACAATCGTTGACACCCTGGTGGATTA  
GCATACGATATCGTAGATGCTTATGGTGTAGTAGTTGGTGCAGGTGGAAGTGGTTCTACC  
GCAACATTTAATGCCAGTTAACTAACATATGAAATTTGGCCAGCTAAATGAGGATAAATT  
TCTCATGTTTCGCCATTAAGCATTATGAGAATCCTCTCTGTGTGACTCGAGAGGATTTTGA  
TTAAGATTTAACACGATTCAAGAATCTTAAAAGACTCTTGAAGCGTTATGTGAGAAGAGG  
TCCGTTAAGGATTCATCTCGTCATCAATCATATAATAATCTTATATAATGTTTTATGTGA  
AGCAGCAACTCCTCTTGTCTTCTTTAATTTAGAAAGAGAATATTTTCAGGTTAATAAAGAC  
TCTACAGATCTACTTGAATAAATATCCCGTAGGGAGGCTTTCAGACTTGGAACAGGCC  
CGATTTAGAATAAGA ACTTAAACAGGTATAGGCTATGATGACAGCCGGTACAGGCGAATT  
AAGTGGTATCGCAGCTGCCAGAGGTCTGTTGCGGGGTTTGGACCTGTCATGACGATGAG  
AGGTAACCTTAAAAAATTAAGGTACCAAATCTTGTTCCTGCGAAGAAACAGATAGAGT  
AAGGGCTCAAGGTCTTCTAGATTATTCAAAACAAAATTAACGTACCTGAGGTTGGTGA  
AACAAATCGTGTGTTGCTCATAGGCCTTCTGAACTAAGGATGAAATTAAGGATGGAATCAT  
GCCTAAGTATAGGTCTGGTATTAAGATTTAACGAATCATTCTGTTGGTGGTCTGCTAAATT  
CTTCATGGACAAGAGACTGAAGCACATGAAGAATTTGAACGACGAGTCTGAACTAAAGAA  
AGCAAAAATAAACGGTAAGACTACTAAGAGCGGTGGTACGATAACTCATCGTGTCAATAA  
GAATAACGAGGCAGATGCACAAGCAGCGATGAAGAATGATCCGAGATGCGTTGTTGGTAT  
GACTGGAGTAAAACCTGTTAAAGCAGCTGCAGGTGATCAGCACGTGAAGAATCAAATGCA  
TCAGCAAAGATTTCAGAGCATGAAGAAGAAAGTCAGGTTAAAAAAGCTACAATTACAAA  
ACACTTACA ACTGATAACACAACA ACTTGAAGAAGCAAGCAAGGACTGGAGTAGAACAAGA  
CGCCACAAGGTAATGACTGACCTTAAACACCGTTATAATTGAGAACTCGCACATGTACTC  
GATACAGTGCAGGAGAATTCTGTGAAAATGCGTCTACCTCTTGCTGTGTGTAATGAGAAG  
ATAGATAAAAAAGACAAGATAGATCAAGTTTTGTTTGACAAGGTTGATAGATTGCATGCA  
GATATTAATAGAGAGACAGAACAGATAAAGATAGGTTGTGAAAGCCACATCGGTAAGATA  
GATCATCGTTCGAACGTTGATAGAAAAGAAAATGGGGACTATATTTGGAGCAGTTGAAATC  
GTAACGTCCCTTGTATCAGCACCAGGACAGGCAGCTCTGAAGCAGTTGACAAACAATCAA  
ACTCCTAGTATGATAACAACACCGATTATTAGGTCTCCTTGATCGACAATTCTTTGGCAA  
ACCTACTCTCTTATCGTCTTCACAGACTTAAGCAGGTGAAGAACGGGACGTTCAACTTTA  
GGTGTCTTATTTTCGGTGACTCCCCAAAACCTAAGAATAAAAACACCAGGTTATTTCTTCG  
CTAAGGATTGTGGTCTCGTTTTTAAAGTGCAATAACTGCCGTGTAGTCACATCGTTTGGTC  
ACTTTCTAAAGGATAAAGCGAGTGACCTTCATGATGAAGACATCAGGGAGAGATACAAAG  
AAGGTCTTACCGGTATAGGTACGAATGTGGCAGATTCGGAGTTTAGTTATCAAACCCAA  
TCTTCAAAAAGAAGGGAGAACAAAACGTATTTTCAGGGCTAAATACTTCGCACTCAGCGT  
TAGCATACTTCACCAAACGTGGTGTCCCGAGGAAACCTTTCGCGAGTTTATACTATGTAG  
ATGAGTTTTGCTCATCGATTAACCAACAAAACCTACCTTCTATATGTCACTATGGATC  
ACCAAAGGATTATTACTCCTTTTATTGAGGGAAATGGCGAATGGTTTGGATTTCAAGGGA  
GGTGTCTGAATCCTAACGATATACTAAGGTAGCTAACAAATCATGTTGGATGAAGATCGAA  
TGAATGTTTATTGTCATGTTTCGTATCAACTTCAAGAAGACCCAGTATATTACTTAAGGTC  
CTCTCGATAGTCTTTTTATCGACAATGCAATGGCTATGCCAGCTGCTGAGGTTGCTAGAT  
AATTAATAAATGGGAAAGAGGCAATCTATGTTTAGGATAATAACAAGCGAAGTAAGGAAA  
CTGATTACCGGATTGAAAAACCAATTGATAAATAATAACAAGGAGTAATCTGGCCTAGGT  
GTCTGCAAGAGAAAGATCTAAATGACATGTTCTCTCCTGGACACGACCTGCAATCTACGG  
AAGAATTTTATACATAACCAAGGATTGGAAGCAAATTTAAATTAACCGAATGGAAAGAGG  
TATGATTAGTCCAAGGACACCCAAACGAATCGACGTCACAAAATGATTAGGAGGGATGAC  
ACCCTTAGACCTTAAGCGGGGTCATAAGATGCTAGAACTTGCCTGTGAAGATATTGCCGG  
GGTCTCTGAATCTGCTGTAGAGATTAACAGCGGTCTTCAATTTTTTGACGGATTGAAGAC  
AGCGGACAATCAAGAAATTTCTTAATCGATCAGCGAATGATCTGATCCCTCTTGATGTTAC  
TAACTAGCAGTTTGTACTGCAAGATTGCTGTTGTTGGGTTTCAGAAAGGCAGTATATAG  
CGGTTACAGTAATGGTCATCGTCCTTTACTTGAGCATGTCAGGCAGTGTATAGACAAAGG  
TGTGTATGATGTGAGTACTGTTTCAAATATACTGAAGAAGCATGGGAAAAACAGAATTA  
TTATATTGCTCACGTCATAGATTATTTGTTTACATATGCCGGTCTTCGTCAGGTGGTTCGA  
TAAACATCTCGTACAAGATCCTTCATCAGGAGAAGTAAACGAAAGTCCACAGTTCATCTA  
TATTATGGTGACGATTATTCTCTCCAAGACGATCATAAATTTTATCGTTTGGTGTATAT  
CAGAAACTACTATGACGCATTCTCAAACACAGACTCAACATTCCAAGGCCGATTGTGGG

AGGAGTGCCTACGCCACTCAGACAATCTGCAAGCTGTGTTTTTGTGTTGATGATGTCAC  
ACTCGATAGCATTTTTAGCAGTGACATGGCTATTGGCAAGAATGTTGCACAACGGGTAGG  
TATTGGTATCAAGGCGGGTAGAATCAGTGGCGTCAACAACAAAATCCGTAGTGGAGAAGT  
ACAACATACTGGTGTATACCTTTTCTCAAAAAGCTTGAAAGTACTGTCAGATGCTGCAC  
TCAGAATAGCATTGTGGTGGAAACAGCTACAGTCCACTTCCCAATCTGTCACCAGGAAAT  
AGTAGATATTATTGTTCTAAAGAATAATAAAGGGAAAGAAGACAATAGAGTAAGGACACT  
AAACTAAAGTATTTCAGATTCGTGAGTTGTTAATCAACGACTCATTGATGATCGCAGCAT  
CACTTTGGTTAGTCCACATGATGTGCCTGGTTTATTCCAAACATTTGGAACCTCCTGAGTA  
TGATGATCTACGTGTATAGTATGAAAATGATCGTGCTATTCCCTAGAAAGACTATGATGGC  
AAAGAATCTCATCCTTGATCTATAGAAGGGGAGAGCAGGAACAAAACGCGTTTATATCAT  
GAACATTCATCACTGTAATAGTACAGTTCATTCAAAGATTAAGTAAACATGAGGAATTT  
ATGTCAGGAGATTGCTCTTCCATCAGATCCTATTTCGACATATACATCGTTCAGGTGAGCT  
TTCTTTGTGTATCCTATCTGCTATCTACGTGCGTAAGTTAAAGAACCTGGAAGAACTTGA  
TGAACATGTTGTTGTTCCCTGGTTCATGATGCATTGATTTATAATCAACAGTATCA  
TGTCATGCTGGAACGCAAAGTACATTGAATCGTAGATGACTGGGTATTCGTTACATTGG  
AATTGCAAATTATCTCGCTAAGAATGGCGCTAAGTATGATTCTCAGAAAGCATCTGACTT  
TGTTCAATAATTTACTGGAAGATTCCAGTATGCTATTCTATGAGCATCGAGTCGTATGGA  
AATAGAGAAAGGTCCTTGCGGTCATTTCCGGTCAGCCAATGTATACTGATGGAATTGTTCC  
TAACGATACATAAAAGAGTGAAGTAGATGAGATTGGTCCGATTGACCTATCATGTGATTG  
GGAGTATCTCAGGGGCAGCATCAAGGAGTATGGACCCAGGCACAGTACTTTGTGCGGCCA  
GAGGCCTTCGGAGAGCAGTGCCGTTGTGTCAAATGACCCAAAAGGAGTCAAACCTCCTAG  
AGACTCCCTATCCGTTAAGAACGCAAAGAACGGACCCGCGTAAGCAGATTGTACCGTCTCA  
TAACCCTCTAAAAGCAAACCTATACCCAGCTATGGGATATCCATAACATCCATCATTCCAG  
CAAAGTAAATGCAGTAATACAGATCTGCCTCGATCAGGCAATCAGTGGTACTCGCGTTA  
CAATCCAAAGAATTATCCTTACGATGAAGTGCATGTAGCTGTGATGGCAAAGATCTTTT  
GACCACGTACAAATATGGTTCGGAAGACTTCATATTATCAACACACATATTATTCTAGCAA  
AGATGGTGACGATGAACCAAACGTCGATAAAGTTTCTCAACGACATACTCACCTCGGAGGA  
AGTAGACTGTGACAGTTGCAAGGTCTGATGCAGAAGTACAAAGAAGGACAGTATGTAACA  
AGAACAAAGTAAAGTCAAACCTAAAACCAATGTTATTTGGCCAACCATTAGGAGTCTAAA  
CATATGATGCATATAAGTATCCAGCATTGATAGACTTACACTATGACATCTCGGATATT  
TCTGGAGACCCGAAGAGGTGTCTCTCCTGGAAGATAGATCAGACTATCAAACCTTACAC  
CAGTACAGAAGCACATCTTTAGTTCTAGCTTGAAGTATCAAATCATGCTTGAGACAGTTC  
ACGGTAGAGAACGAGGTATGGCTTCCATTCCCTCTTGCTCTCTTCCCTGAGTTGGAAGCAT  
GCATGACGCTATGGGAGTTTAGGGAAACGATCCATACTCTTTCCTATACAGACCTCATCT  
AGAATGTATATCCAGATCCTTCAGAGGTATTTGATATTATCTTAGATGATGACAATGGAA  
TGTCTCGTCCCTCATCAATGGCTAGATCGTACGAAGAAGTTATTAATTCAGCATACGAGT  
TTGATAATTGTCAACCATGGTATCTTGCAAGACAAGGACATTTAACTGGAACCTATGAAA  
GATACCAACTCAAAGAAAACCTCTATAAGGCTATTGCAAACGTTAACATTCTTGAAGGCA  
TTCGTTTCTATGTCTCCTTTGCGATTTCTCTTGCTTTTGGCGAAAATATACTTATGGATA  
GCTCAGGTAAGATTCTCTCTCTGATCGCTAGAGAGGAAAGTTCGACACTTGGTTATCAGAC  
AAAATATGCTCAAGAAGTGGGCAAAAGGTGACCACTCCGAAATGGCAGAAATCGCAAGAG  
AAGAAAGACCATTTCGTCTAAATATCTGCAAGAGAAGTGTGAAGCGGAGAAGACTTGGG  
CAAACCTATATGTCTAGGGAAAGTATTATCATTGGATCGAATGTTTCGCTTACTACATAATT  
ATATTGAGTGGATTGCTAATCGTAGAATGGGAGCAATCGCATTAGGTCCTGTGTTGGGAC  
AAACTAATAGAAACACTCCGTTGCCATGGACTCAACCCAGGTTAAATAGTAAGGGTCAAC  
AGAACGCTCCACAAGAAACGCAGATTAAGGTTATGTCGTGGGAGGAAGCAAACAAGACG  
TCCAAGGAGACTCCTTTGCATGATTCTCGCTCTTTAACAGAGTGGATAGATAAAACTTAT  
AATGATCTAGTCGGGTGAGGAAATCACTAGGTTCCAGAAGTTACTGACATGATTTGTACT  
CTTGCTCGGAACGAAGCAACTAAGAGTTTGCACGAAGACTTAAAGTAAAGATAAAGATAAG  
AATAAAAGGTGTTAAAGAGTACCATAGTGAACCTACCAATGTCAGGAATCTGGGATATAAA  
TAAAATGTTCAAGTAAGAGTTGTTACCCAACGTTTCATCTAATGCACGGGGTTCGCACTACT  
GGTAGTGATGTTTTCGGAACACGATGCTTACACTTTGCAGTATGATGTAACGAATGGAA  
TCAATAGGGGATTAAGATACTAAGCGATGTGAAAATTAGTTCAGAGACCCATGAGGATCT  
GATAGATAACTTCTATACGACAGCATCAAACGAAATTTGTGAAGACTGGCAACTTGCAGG  
CAAGTTATTTCGAGAACGGATCGTTCATCCCATGCTCCCTATTATAATTGCTACTGCAGT  
GACATCTGCGGATATTCTACCATTAATCGAGCCTGCTCGAATGTATTAGGGAATTGATGA  
ACAATCAAGGCAAGAAATCAATGCAATTTTTCAAGTAGATGTACCCAATGCTGTAGGTCT

TAAGAGTGATTGATACGAAAACGAAGAAAGGAACGTACCTTAAACAAGGCACTAAGTTTG  
GGAGTAAAAACATGACTACAATGGCTTACAGAAGCGTCAAGTGTGACGCTGAGGCATACA  
AAGCATAGGTTCTTTCAGAGCAAGCAAGTAGCACGCGACACGATCTAATGTATCGTGGAA  
TGAAGGCCCAGCATAAATTCGCAGCCCCCTCGTACTCATAACAGAACTACAAACCACCGG  
GATCATATCCTTAGGGTCTGTAGTTTTTCATGTTTATGATCTATCCGGAACGGCGTCTTT  
GCCTCGCAAGAGACCCACAGTTGCTAAACAGCAATTTTGAGAGGGTTTCTGGTCTTCCTG  
AAGATGATTCCACTAAACAAGATCCAGTCAAGACCTTGGCTTTTTTAACCTATCGTGGAG  
TGGACTATGCTAAGTGGGTTTACCTCAGGGTACAATACGGTGGAGCACAACCCTGAAACA  
TAACATCTTAATTATGTTAAAATACACACTTAAAACGTAGTCCTTTACGACTTGGGTTTT  
CTATGTTAGAATAAAGATTATGAATTATGCGAAGGAGCACCACGAACATCTTTCTGCAGT  
GTGCGGATGCCGTTACGATCTCTAATACTTTTGAGACAAGTTTAATTCACGGTGTAACTA  
CCAACCCATATCTTATGTTAAAACAGGCCAAGATCCTATGGAAGTCATAACGGAAATTT  
CAGATAGATTTTCGCTTCCATGCTTCAATCTCTGCCGAAGTGGTAGGAGACTCGGTCACTG  
AAATGTTAGATACGGCAGAGA ACTATATCCTCGTTGGACCAAACATCAGAAGTAAATTT  
CAAGCACTCCAGAAGGTTTTAGGGCATGCTGAGACCTCACTAACGAATAAGTTAGTGTAA  
ATGTCACAATAGTATTCTCAACAGCACAATAAATGCTAGCATCTAAAGCAGGTGCAACTT  
ACTTTTCTCCTTTTCTAGGCAGAGTATACGTTAACTCAGTCGATGGAATCCAAATGATTG  
AGGAGATTGCAGACGTATTTGCAACTCACGCATGAGACACTAAGGTTCTCGCTGTTTCAG  
CTTGGGAAGTTCAACAAGTATCATCTGCCTTTAGAGTAGGAGTAGATATACGCACTCTCC  
CTGTTACTGTTTTAAATTAGATGTATTAACACATTCCTACAGATAAAGGATTAGAGCCGT  
ATGATAAAGACTGGCAGGAATTGCAAGCATGTCTGAAGAAATAAATCGTAGATATCCTCC  
CTCTGGGAGAGGCCAAATGAGAAAGAATCATATCGATCCCAGAGTCTTTAGCCTCAAACA  
CGAACCCCTATAATGAACATGGCGGTGCAAGTAATGACTGGAAAGCAGGTGCAAACCTATTC  
ACTCGATAGAGATCTACAAATCCTACTCGAATATTACTCATGATGGAAACAAATTTAAAA  
ACATTGATCTACGGCCTTGACGTTGCAGTAGCTGAGCTCAAAGCTGCGGTCTATCCAGAC  
ATTCGATCAGATCGTATAAGTAGGATTACTGACGAGCACGCTAGTCATTCTGACATCAAC  
GATGAACACGGACTTGGCCATTGATTTTGAAAATCCCTGGCTATTCCAAGGTTCAACTTG  
CAATTCTATGGATAATGGCGATTTATTCCGTTTCGTCTACCGTATTACA ACTAAGGTTAA  
GGTGAGAATCTACAGCCGAATAAAGTATTCTTAGGCCATTAGTACACCGAAGGGAAAGGA  
AAGAAAACAAAACAAGAAACCGATTTCGAAAAAATATTATGGTGGTTGTCCAGAATTTAA  
AGAAGATATTA AATTGTATTTAAAGGAAGGGTTTAGCCGATACATTTTATGCCTACATAA  
CACGAAGGGCCAATGCAATCATGAGGAGACCCGACA ACTATTTTTCAATAATGTA CTTAG  
GGAGGCATCAAAAGATGGAACCCCTGCATTCTACA ACTCGAACATACTTGGCAGGTGCAT  
GCGTCAAGATCATTTCAATGCAAGACA ACTGCAGATAACTCTTCTATATTCTCAAGGTAG  
TCAAGGGACTTCTCTTATGGACGAAGAATTCTATATTTTCAGACGCTAGGATCCCCATCAT  
GATAGATCATTTGCATAAAAGTTCTTAGCTCGAAGAGGAGGAACTTGGAAAGCCACAGGGA  
CAGTAGCTCAGCGGAAAGCGCAACTACCTGCTAAGCAGTCGGTCGTAGGTTCAATTCCTA  
CCTGTCTCGGTGCCTGCGGGCAAATCAGTATGTACAGGTTAAAATAATTACTACAGCAGA  
ATGCTTCTCGCCTTGTCTCAATATCCTAACGGAAGCAGTAACCCGACAGATTATACTCAA  
CACCGAACATCCTATCATATGTAATGAACTAGTAATAACAATTAGGATAAAGGTATTTA  
ACTCTACGGTGTATGCAGATGAGGGTTTCGAAATCCTTTTATCCAAACTTGAAATCGATCA  
TTATTATGAAACTTGAAACCCTTTTAGAACGGTGTCCATGCCGTTATCTGTGAGTTGGAA  
CTCTGCCAAGCAGTCATACAGATTATTGTATCCAGAAGGTTACGAATAGCCACTACACT  
ACTGAGACATGTATCTTCTTGAGAATTCAGCTCAACTGGATTATGTTATTGAAGACATTG  
AATACACAAAATGGTTAGACCCTGATCCTGAGGTC ACTGCGTACGGCGGAAAACGGTATG  
TCGTTTCCGAATCTAATTAATGAACTCCGAATTGCTATTGAGGATCTACAGAGCAGTGAC  
TAATACACCTGTGCCCCACAACAATAACGGTATCATATCCTAACATACGGATAAATCCC  
ATATTTACCATTAGACGTTAAGCTAGATGGTTTTTAGGCGCGAAAGCAACTCATAGTCCTA  
GTA CTAAATCAGCACCCCTTGGGGGTGCTTTGAATTTTATTATATGTTGATTCTGATATCTT  
AATATTTCAAATGCTTGACACATCTTAAAACCTTATATATAATTGGAACAATTCTTAATG  
ATACTACACAAAATGACAACAACCACCGAATCAGGAGGAAGACATAAAATGTTTCCAGCT  
GAAACTCGTCCTCACATTGATGATGACTATCAAGGATACGGAAAGAACCCTGAACTTAC  
AATGCTCTCTTGGCGATGCGTGGTTTTAGTTGCGGGTTATGTCTCTTCCGTTACCACAGGT  
AACTTCTTCTCGGTGGTCACCTTGGTTTTTAATGATGGA ACTTACCGCATCAATTGTAC  
ACACACAATCAACACACAACAGGAACACTATCATGACTCTTGAAGCAGAAGGAGTTAATG  
GCTGGGCAGCAATGCTCGTTTTCGTAGCAGCAGTTGGGGCTTACGTCACATCTAGTGAAA  
TCATTCCAGGTTTTTTCTAATGTATGCATCAATGCAATAGAAGCAGAAGTGCAGAAAGT

AGTTGCTAAGTAGCTTAACGGTAGATAAGCAACGCTTGGTGTAAATGGCAGGAATACGGTC  
TACTTAAACAACAGGTCAACTCATTCCAGGTTTCGGATAATGAAACATGGGATTTTCGAA  
GAGGAAAAAACTGTAGACACGCGAAGATTCGTCAACTCGAAGCAGTAGTGTAGTATCAT  
TTCACAGGTTTGATCGCACCACGTAGTTTCTAGTAAACTATCACGACGTCATGGTAGCGT  
ATAAGAGAGCTATATCTGTACGTTACATTCCATTCTGATACTTTCTTATCACGGCAGGGT  
TCACAGAACTGTTGGATTACCGGTACACGCTCACGGATTTATGTAATGTATATTTATCA  
AGAAACGTGGATTTCATACAATGTTGTGTTTCGTTTATGCCTGTCATAACGCTCTTCATTGT  
TAGTTTTGTGTCATGCTCGGTGATCTTCCCTGGGACGCTGATGACGATGATTATGATGGTGG  
CGGAGGAGTAATGACGCCAGTTTATAACTATGAACCTCAACGAGCATAAATACACTATAT  
TATTAGCATCAGAAGTTCACGATGCCTAATCCTAAAGCACTCTATAAAGATATGGAGACC  
TCCACCATGCACTATGACGAGTTCCTATGTGATTCTGATGCAGAATTAGAGTTTAAAGCA  
GATTTTCAGTAACAACAGAATAGATAGACAACCTATAGAGGAAGCTCGACTTCCCTTTTT  
AATTAATAATCTTATGATAACGTGTAATTGATCATGGCAGCATATACAAATAACACTTC  
CGTATGGCTAGCAACCCGAAGGACTGACGATAAAGTAGTTGAATACTTGGATTCACTTAC  
TGCATGGAACCCGGACATAAGAATCGCAAAGATTTTTGACACTCAAGCAGGTGGCAGAAA  
GTTTCTTCAAGCAGGGGGTATGAAAGGTAGCCTACGAAAACATTCATCAGACTTCGTGCA  
TTAGACGAATTACCTTATCATGGATGGTCTGAAGACAACCCTGAATGAGAAATAAATTGC  
ACAGACAATCCTGTGTACGAATCATGTGATATTTTTATACACCAGCAGATGTATGACTTC  
TGCACGAGACATCTGAGTAGAATAGTTGCCTCAGAAAACAACCTATTAATACTGATCTTAA  
CCACTCGGCTTCTCCGTAAAGACATGTTACTATAAATTAATCAACTGAGTGAGAAAATTC  
ACACTTTTGCTATGTGTACCAGTTTAAACCGAGACCTATGGGTTAGTAAATTGCGTCTCTC  
AAATCCAGCAGTGTAGGGATAGATGGGGATATGGTATCGCTCTACCCTTTGAGCCCTACT  
GAACAACCTCCTAATGACAACCTCTTTCAGACAAGGTAGAGAAGGCCGAATCCTACAAGG  
ATGGCCAGAGTTCTGCGAATGGTTAAACAAGCACTAACAACATACTCTCCCTTGCTTCGTT  
CGGTGTCTTGATGATCCCATGTATATTACAAGCAGCAGCATGCTTCTTTGTTTCATTCAT  
CGCTGCACCACCTGTCTATACCGACGGAATCACGGAACCTGTAGCAGGTGCTCTAATATA  
TGAAACAACATCATCTCAGGTGCAGTCGCTACATCTTCAAAGCAATCGGTCTTCACTT  
CGACCCATATTGGAAAGCCGCCACAATCGATGAGTGGTTATGTAATGGCGGTCCATACCA  
GGTGGTAATTTTCCACTTCCCTAATCGAAATCACTGTCTCCATGGGTAGACAATGGGAGTT  
ATCATACAGCCTAGGTATGGGACGTTGGAGCTGTGTTGCTTTCTCAGCACCCGTATCTGC  
ACCATTTGCAGTATTCCTTGTATAGCCATTTGGTCAGGGTTCTTGTCTGAGGGTATTTCG  
TCTAGGAATTTCTGGAACATTTCGACTTCATGTTTCGTATTCCACGCAGACCACAACATTCT  
TATGCCTCCCTTTCATATGGCAGGGGTAAACCGGTATGTTTCGGGGGATCTCTAGTCTGCGG  
ACTGCATGCTTCACTTGTAACACCTTCGCTGATGAGAGCGACTACTGAGGAAGAATCTCA  
GAACTATGCTTACAAGTTCGGCCAAGAAGAAGAACCCATAACATTGTTGTAGTACATGA  
ATACGTCGGAAGATTAATCTTCCAGGGTGCAACTTTCAACAACCTGAAGAAGTCTTCACTT  
CATCCGAGCAGTGGGCCAAGTTGTATGTGTATGTTAATCTCTATGGGCATCTGTACAAG  
GGCGAGCGACTTGAACGGATTTAACTTTAAACCGATCAGTTGTAGATCCTAACGGTAAGGT  
CATTCTACCTGGGGTGTGCTGCTTAAACAGAGCTAACCTTGGAAATGGAAGCAGTGCTCGA  
TCGTAACGCTCCCCACTTCCCACTAAACGTAGCATCTGCTGAGAATACAGGGGGTTGCTTT  
AAATGCACCAACAATCGGTAAATTAGTATTGAGGGGCACAAGCACAGATGGCTCAATTT  
CTCGTAAATAACGGAGGTTACTTTGCGATACTAGGCTACATGTACTTTCTAGCAATAGCT  
ATCTCGTTAAGACCTGTCTTAAACCTAATCTAAATAGAGGGGTAAGACCACTCTTTTTTTA  
TGGCATTTTATTATCAGTAATGTAGTTTTAGTCCTCTATGAGAGCTACCTCACACTGATG  
CTGAGATAGCACAGAGGGCACGATTTGCTGTGTGTGATACTGAGCATTTAGGAAAAGACG  
CTGAACGTGTTGTTACTCTTGATTTGACAGGTTTATATGATAGTATGCAAGAAGTTAATG  
GAGAAGTGCCCTCCTTCTTTAAGCGTCAAAGATGTAACAAAGAACGTATCCTGCTGGCA  
CTATAGAAAATGATCATTTTGTATGGGAATATCAAGGTGACCGTGGAGAGAATTATGATA  
GTGGTTGGAATTCTGCAGACGCAATCAATGAAGTTAGTTTAGCTAATTCTGTTCCCTCAAC  
CGACAGTACCTCCAACAAGTAGTCCCGTATAACATCGGGATATTAGTAAAAGATCTCTAA  
CTTTCTTCAATGCTAACGGATCTTAAAGTTACAAAAGCTGCTTCTGAGGGATCTTCACCAG  
CCACATTTCCAGTTGATTATGAGTAGACAGGGTCTTCTGAAGCAAATGAATATGGTTTAT  
GGACTAGGACCAGAGAGTGTACGTTACCACTCGCACCTCAATCAGTAACATATAGAATTA  
ATGTCACAGAAGCAGGAACCTTATGGAATTAATGCTGCTGACGAACTGGATCTGCAA  
CGATTGGATCGTAGACTACGGCGTTCATCACAATAGTGGTGGTATGACAACCACGGGAA  
GTCCCACTACTGCTACACGATCATTGTCAGGGGGTGTTTTATGAGTGACAGTTGTACGCA  
CGAAGGAGGCCGATAGTCCCCCAACGATAACTGATGATGATTATCTTTGGAGAAATAATC

CAGGTGGATGGTATCTCAAGATATGTAAGGATGCAGTATGTGGAAGTGCACCTAGTATTT  
CTTGGGTAATCTCTGGTCCTCATCCTCTGTGGTTCGTCATTCATGATTACGTACGTAGTAT  
TCCGAAGTGATAATGCTCCTTTACGAGTTGCCGCTCAAACAGCATCTTATAATATAAATA  
TTCCTAGAGCAAGTAATTATGATTTTGAATTTTCAGGCAGATAGCACTGCTGCATTCTCAC  
TTCATGGAACACCGATTGCGACGTCGGATTCATATACAACAAGTAGCACTGCCACACTCT  
CTAACTTGAGTGCAGAAATGCATACTTTAATTGCCTCAGTTACTAACACTACTACATCTG  
GGAACGTAGCTAATACTTGGACAGATAATCCTGGTGGTGCAGCATGAACAATTTCTCAAT  
CTGGTGCTATAACAGGTTTCATCAGTAAATTTTTCTACTTCTGGTGACGGAAATCTCTTCT  
GGCACACTAGAAAGGCAACATGATACACACACTCAATCACATAATGGAACCTCCCAATAT  
CCAACCGATCAAGTACCTAAAGGGATAAAAAGAAAATGTAAGTGTGCTGACGCACACTT  
TGATTTAGCTGTAGATCCTACGGAAATCATTGACGCAGCCTTAGACACACATGAATACTT  
TGAAGGAAAATATCAAGTGCAAAGAATTTTAACTGAAATCCGTAAACGAACACCCGAATA  
ACACGAATCCAAAAGAAAACAATCAAAGCAGCAAAAAGGAATCATTAAAGGGACGCAAGCTTA  
ATAAAAAATTGTGGACTAGAGAAGATGTTCTCTTTGCCAAATTAATCAAAAACAAGAGCCA  
AGAAAAAATTGCGAGAAGAAAACACTTGATAGATTTCCAAGAAAATGTTAGTATAACTAC  
TCGACGCGAAGGACGCCCGCCAACAAAGATTTCCGAAGGGCTCAATTACTCCCGCTACG  
GCACTACAGTTAAAAACCTAACGGAAGTTCGTGGAGCATTCTTACATGTGCAGGTATAAC  
TCTGGAAGAAAATTAGAACAACAACACTATTAATTCAACAATCGCTGCAGTCGCTGGAGCC  
CCTCTTCTAGTAGCTGGGGCCGCTGTTGTTGGTACATATGTTAACTCAGAAACAACCTGGA  
TCATATCCTGATAGAACATACTCATCTGGTGGATTTGCAGCAGTTGTAGGATCCAAGGGG  
GAAATACCTCGTGGTATCGGTTGGTAAAAATCTGGTGCTCCTACTGTAACGCATACAGAA  
TCAACTGATGAGTTCGTAGGCGTTGAGTTATTACGATAAATTGGTGGAGCTTACCATAAG  
TGCTAGGGAGAAATCGCTGGCCTAACTAAATCTGAGGTGGACATCGACTTAATTGCTAAG  
GCAGGTGGTAAGTTCGTTTTCTAAACGGATCTATATAATAAGAATCCAAGGGACTCTATG  
AGTCCCCTGTTTTATTCTACTAAACCATTATGAATTTTACCCTTTACACACGAGACGGGTG  
TTCTTACTGCACTCAAATCATAACAAGTATTAGAACGAAAAAATATAATCATCGGGAAAA  
CTGATTAGGGGTTGACTTGCAACGAGAAGCATACTAGAATCAATTTGAGAGGGATCAAC  
TTCCGTCAGGGTGTATTAGGTGCCACCAATCTTGGGGGTTGAGCTGATACAGTTCGATA  
CCTTCGTGATTACAACCATACCTGATGGAAGAGTTTTACGGTCTTGTGAGTCTGCCAAT  
TATGCTGCGTTTGAAAAGAATATCTGTCTCGTCAATCCGTAGAATTATATGACTCACACC  
AAGATTAACGTATATAAATACAAGAGTTCTTTGATAGCACAACTGCTAAGGATTTAGCA  
TTGACTGTTTCTGATCTCTCTGGATAATTCAAGGGCGCATCTGACGCTTATCAGCAGTTA  
CTTTGGCACCCAGATGGGCATCTCAGTAAACCAAAAAGAAAAGGTAATCTCAAAGTACCTG  
TCACAGATTTTGATAGATGTACTGCAATACGAATGGTATAAGAGACCAGGTTCGTAGGAAA  
ACCTGGAAAAAAGCTAAGGAGAGTCCTATTGAAATTGCACTGGTAGGATTAACAA  
CAATCGGTGCTTTTTATTGTTGGTATAACTGTCTATTGGTTCGCGTAAAGGTACGTTGAAG  
ATTAATCGAAAACGTTGCCTACGCACAATCGGTCACACATCCTGAGTTGTTTGATGAAT  
ACGGTGACATGATTCATGATGAACTAATCTATATTCGACCAGAGTATAGGTTCTTATAAC  
ATGAAGATCACGATGACGATTATGATTACCAAATCACGCCTAAACGATCAATTGTTAACA  
GTA ACTCTAGGGTAATTATTAGTGAGTTCCTAAGAAAGGCCTCAAGTGCTAAAATTATCA  
AAGCTATAGTTGTATTGCTGAAGAAACACAACACTCCCGCAATCCGTCAACTAATGATCA  
TCAACTTTGATGAGAGTGTCTACCAGAGCTCCCCGAAGGTGAGGTTCCCTACACTCGTA  
ATGGTGCCCTTGTAGGGTCAGATCAGACTAGACTTGAACAAGAATCTAGAGGACTATCCA  
GATTCTTCAAAGAGGTGACAATCGTCTCAAGTATTTGAAGAGAGAGTCCATGTTGGGGC  
AACTTCTAGAAGGAATGTCTGTTGAGGAAGCAGAACTTTCGGTTCATGTCAGGACGGAT  
ACATGCGATATAAGTATAAGAGATCCACTAAGGCAATAGTTTCCGGGAGCATTTCATCTA  
TTGAATGGGGAGACAGAATTTGAAAGGAGTTTGGAGCTTCAAAGAAAAGAGCACTCCCGA  
TGATGCAAAGATAAGTCATTACTTTACACCCTCTATTTGGTTGAGTATAAGTTGAATGA  
TAAACCTGCCTTTGTAATTGCAATCGCAAGTAAAGCAGTAGATCTTTCGGATTAATACTA  
TGA ACTTTATAAAAAGATCTTTGTACAGTTTACACACTCCGAGGGTAGAATTAACCCTAT  
ATTATGGAGCGATCGAACACAGAAGAAAGGCAAGCTAAACCAAAGATTAGCGTCTGCTTT  
GAGCTTAGAAAAGCACCCCATGCAGAGGAAAAGAAAAGTAATAAGAAGCAGCATAAGCA  
GTTGCTAGAGTAGTTCAGTCTTTGTCCGACCTGCGATGGTGTGACTATGGAATTGG  
TTGAGGCGAAGTATGTTTGGTCTTAGCACTAGTCGGTATCTATCAGCGCTTGGTTTGTAT  
CTGATATCTGAAATTTACTTGGGAAGTGTGAGTAACTATGTTCAATATTTGTA ACTCC  
TGTTGCATAATAAACTATCGGGGGCGTCGCTAGGGTGAGTAATCCTAAAACCAAGAGAA  
CCCTGATGTCGGGGATCTACTTTAGTATTGTATCACGAATGGTCATTGGAGTGACTTAGA



ACAAGCGTTCATGCCTCGAGAGATTAACACGACTTGTGCTATTGCTGCTCAAGTTCTAAG  
GCATAGGTGGTTCACATATCAAGAATTTTCACAGAGGTACGCTGACTTTTCTCTACTTCA  
AGAGAGCATCCCTCTACCAGA ACTACGTCGTCAAGACGATAAGAGTAGACAGAATAGTAT  
TGATGATGTGGATCCATTCATCAAACACGACTACGAGTTGAGAATGGAAGGCAATGTGG  
AGATCCAATGAACTCTATAAAGCAATGCTTCCCTCAGGTATTGCAAAGAATGTGCGGG  
ATTGCTATTGCCTATGGCAACACCAACTAAAATGTACATGAGTGGATCACTTCGCACATG  
GGTTCATTTATTGATATGCCTTCCGCTAATGGAACACATAAAGAACATATGAATATTGC  
AGAAGCATCCGCACAACATCTTATATGTCAGATCCCAATCATCTCCAAGGCATTTGATTA  
GTGTCGTTAAGATGATTGCAATTGTTTTGATGAAGACA ACTACAATGACCTACAACCGTG  
TTCGAGGATAGATTTATGTCTCCTTACCCAGAAATAAACAAAAAAACTGAAGAGAAAAA  
GAACTCCACAAGACCAGGAAACACTTGAATCCGTGTAGAAAAGATAATCCCGATAGGGAT  
AGAGACTCGCAATCAGGTGGCGGAGGTATGACCTACGGTGTAGCTACCATGGAGGACGGA  
TTCAAAGATGTCATGTCTAAAGTCTATAAGCAAATCCTCAACCTAAGCTATCTCGTTTT  
ACATAATGGCAAACGCAAGAAAAGGAACTAACTCTCCGAAAACCTTTGCCCAATGGTATGT  
CGAGGAAAGAAATGAAACGTAAGAAACCTATCGACCCATCATACTTGACAGAGGTTAAAC  
CTCTGACAGATAATCAGAGAGGGTCAATTTGCTAAGTATGCGGTAGGTAGGAACTTGTTAC  
AGCATCGTGCTCAAGGAACCGGAAGGACTGTTATTACTTTATATCTGGCTTCGCGAGAAG  
TACCTGACGAAAACACGGCGTATGTTAAAATATACAATGTAAGGTCTTTAGTTCCTACTT  
GAGAGATTGCTTGCCTACCAGGTGAGCATGAAGATAAAGATGCACTATGTCACATTCCAT  
ACAAAAATATCGTCAGGTCTCTGCTTAGTATGCCTGATGACGACTTCGTTGAAATGGTAT  
ATTATGACTTACGTGCACAAGAACTATTTTCGCTTTGGTCTAATTCCTTTTATTCGTGGAG  
CCACTCGTGATTAAGCTATTGTTATTATCGATGAGTTCAGTAACTTAAGCTTTGATGGGT  
TGGATTCTATGATAGCTCGCATAGGTAAAGACAGCAAGATTAAGATCTGTGGTGACATTA  
ACCAGTCAGATCTGACATGATAGAATGATAAGTCTGGTATCTCAGACTCTATAAAAATTC  
TACAGCAGATGAATAAGTTTTTCATGCATTGAGTTTGATATCAATGGTACGGTTCGCTCAG  
GACTTGTGAGGTCTTATCTCTTGTCAAATAGAATCTTGGCTTCTAATGTTTACATTTCGT  
TGATGTAGGTAATATTTTCAGTTGAGGTAGACCCAGTCCGTAATATGGATTACTTATGTA  
TCCTATACCTGGGGGGAATAAATATTATCCTAGCGTAACCCAGTCACGGCGTTTACGAA  
CGCACAGTCTTTCAAAGATTGGAGAACCCGCATAGGTGAGGACGAGGCGAATCGCATCAC  
TGCAAGAGGAACTCAACGAGGAAGGGCATTTCATAACATTGCGGAAGATTACTAAGG  
TGCATTAAGCTTGACAGGTACTTGGCAAATACTCCATTCTCTGTTTGAATGTTACAATC  
AGCAGAGTCTACACGACAGCGAATCTATAATAGTCATTGACTCGAGAAATTTCTCACTTC  
ACACTATCTCGGTTTAGCAGGTTCGAGTAGAGTGCCTGGCTGAGTACGATGGCGAATCGGC  
AAAGATCAATTTGATAACGTCCAGTAAAGAAAAAAGGATGATCATATCGAGCATTATTT  
TGTTCAAGAAACGGCATATGCAGCGAGGTTTCTAGAAGGTTTCAAGGAATTGAGGTCATGAA  
AATTGTAAGTGTATCGGCACTGAAGAAGAATTTATACACGGATTTGTGAAGTACAATCT  
TGATGACTATTTTCAGTTACGTAAAACCTACATCGAAGAATTTGTTAGGGCAAGACATGC  
CTCAAGAAATACTTGAGGATAAATTTTTAACACCTACCAAATTCACAAAGATATTGAAA  
GGTTTTTTAGGAAAAGTGATGGTCTCATTAGATCAATTGAAGCAGTAGTTACATACTGCC  
AAGAGAATGAGATCGAGGTGTAGACAGTACCCAACTGATTTCTAAACCGTGTTATGACC  
GTTTGCCTCGCAAGCACAAGATTTGAATTATATGAAAGCATCTCTTAAAGGAATATTAC  
AACTGTGACAGGGTTCGCAGTGCATTAG

>NewGenomeName\_185

ATGATGAGCCAAAGTGCCAAGGAGAAGGTCTAAGTATCCGGTAGTGTACAGCGCTATCAG  
GCTGGGATCGAGATTAATGCTGAGTCCTTCAGTATTCTTATCGACTCTATTTAGAACGAC  
AAAGTTCTTGCGGCGGTGCGTGAACCGCTGTACAATGCTGTTCACTCACACACGGAAGCT  
GGTTGCCGAGATAAGCCGATTATCATTCACTCCCCGACCGACCTGGATCCTTGGTACACC  
GTCCGGGATGATGGTTCAGGTATGGACTTCGAGATGGTTCACACAGACCTTCATTATGTTG  
GGGACCTCCACTAAGCGAGACTCCAAGGAATTGATTGGGGCCAAAGGCATCGGCTCTCAG  
GCTCCGTTACCCGTAACCGACAAGTTTACGGTCCCCGCGTCAAAAACGATATGAAATCT  
GTTTACCCGGTGCATAGGAATGAGGGTATTCAGGAGGTTGTTCTCTGCACGAGTCGAAG  
GCTACAGAGGAAAATGGGGTTGACATTAACCTAAACGTAGATCCTTCTGAGAGCTCCAAA  
TATCGCAAGGCAATCGTCAAGTGCCTGCGATATGCAAGATTCCCGTATGCGATCAATGAT  
CCTTTTGTGTCGTCTGAGATCAATGACCGAACCTATCCGGATCAGTGTGCTTATGAGGAC  
ACAGAAACAGGTTGGAAGCTGGAATGTGCACGTCCGTATCCTGCAATGCAGACAGCGTG  
GTTTTGATGGGCCAGCAACCTTATCAGGCCAACTATCTGCCAGTAATAAGAACTGGCCT  
ATGATGCTGCTTCCGATTCTTATCGGGGATTGTGACTTGAACCCTGGTCGTGAATGGACC

ATTGTAGGTAAGAATGACATTGGTTTTTCGGGATCGCCTCGAAAAGATTGTTGAGGAGGCT  
ATTTAAAAACGAGGTCAGGAAGTCGAGAAAGAGATTACGCAGCTACCTACACTGACAGAA  
GTGCTGGAGTAAATGAAGCGTGTTCGGTGGCGGCTTCTCAACCCGTTACGGGTTCGGGGT  
ATCGCCGACAAGTTCCATGACCGCTTTGTTACTTTTCAGTCTAGACAAGTGAATAACTTAT  
GGTGAGCCTGTTACTCGGCGGAAACTGACAAGACTTTTCGGTTTTGCTGACCTTGTGAAC  
GGTTGGCCACTGGTTTACAACGACGACGGTAAGTGCATCCCCCAAGTGTAACTGTCTG  
TCTGTAAACTGCTTAAAACGTGTCTACGTTACGAAACGTATTGAGGCGCTGGAGATCCTG  
AAAAACCCGTTCTTCGTTGGAATGGTGCATAAACTTACCGACCTTGAGAAGGGTCTGTC  
GTACGGGGTGACAAGTAGTTCGGTGGGTATGGCTTGTACGAACCTGGTCACACAGTGTGG  
GTCATCGACCAAGCTTGTACTATCAAGAGCGTCCCAAATGCTCGCGCCGACTTTGAGGAT  
ATCGAATCCGCCTTGTGTTACACTGGTGGACAGGTCAAGGATATTTGGGCTCTTGGTGCT  
TTTCTGTATCTGCACCGTAAACAACAGCACGAGAGTTTCTAGAGAACTTGGGGGTCGAG  
GGCAAGATGTATATTGTGCCTCCTAATCGCAATGGCTGGCTACCTGATGAAACAAGGATC  
ACTACCAGAGATGTACTTTCTGATCTTGCAAAACAGAATCTCATGGAGTATGATCTGAAC  
CCTCGTACGAATTGCATGTCAACTTACCGCCAATTGGGGAAGGAGCTTGGTATTTTTTGG  
TTTAAAGTTGAAACCGCCCCTGACTATAAGCCTAAAGTAATCCTGTCTTATCAGCTTTCG  
CACAGCAAGGGAAATTACGCTCTGGAGAAAAAGGCTGAAAGGATTGTGAATGCACGTATG  
CGTATTGGTAAAAAGCTTTGGGTAGTTAAAAAATCTCGATACCCGCTGCTCTGGTATGTA  
GACCTGAAGCACTTAAACACACCAGAGATGAATGAGTATCGACAACCTTATCGATAGCAA  
CGAGAACCTAAATGAGTCAGTTATCCGTATCCCCTAGCGCAGCGCGTATGTTTGCAGTCG  
TCTACGGCTCGAAGGTCGCGGAGCGTGGTTTTGTCTCCGGCTGTAACCGGGCGCT  
GGAAGTATGTACCAAAAGACAGCCAAGGGGCATCTAACCCCCAGAGGTAGATATGAGTT  
TCGCCCCGGAAGCCAAGCCTGCTCCGGCTTCACAGATCTTCGCATTCCGTGGTATATCG  
GGGATTCTGCAAAAGGGAAAAAGAACGCGAAGATTATTGATCCGGCGAAAACATCCGATG  
GTCGTGATAATTACGAGGGTGTGGATAAAGACCTCGGTATGCAGGGGAAGTGTGGTCCG  
TCGTCTTTGAGGTTTCCGATCTATATATCGAGGCCACTGTAACCCTTTTGCCTGGACCAC  
ACAAGGTTCTGCGACTGTGGTTATTGAAGAGCCCGAGCCTAAGTCCTACTTCGAAGAAG  
AGACTGTTCCACGAATGAACCAGCGGTCATCATGACTCCAGGCTATGTTTGCCTCTCGA  
TGCCTTATGGTACTCCGCATACCATCAACCGTGACAATGCTATCTTCTTGTATGTGGGTC  
TACTGCTGATTGGGGGTTCTATCGAAGGGGCACTCGCGCTGAGCGAACCAGGTAAAGAAG  
CCAGGGCTGAAAAGTCGGTGGATCTCAGCCCTGACCTTAAATTAATCTCGATGCCGTTGTGT  
ACTGGCACGGTCAGAAACAGGAAAGCACCCCTGGCTGATCGCTTTCTGACCGACATTATTA  
ATGATACGTTAGATGACAGTTATGTTAAGTTCGTGCAGAAGCTGGTACACAACCCGGCTT  
ATGCGTCTGTGAAAATGCTGTATGACTTAATTCAGCACACCGGTCTTGAGATTCTTGAGA  
ACGGTGATATGAAGGCATATAAGAAGATCACCGTCTTAACCGAGGAACCTCGCGATAGCT  
ACACACGAAAGGTTCCGAACATAAAGAGCAAATCATTTCATGCTTCAAACATGGTGG  
ATGATTACCCTAACCAAACTTGTAGCCATAGTACGCATATTACCTCTCTAAAGTAGGATG  
GTGGGCTTGGTCTCAACGGACTGATTGAGGTTGCGGGTAAAGCTGATGATGTGATCAGTG  
TACCTTACGACTACAACCAACAGAAGTGTTCGTTGCTGCAGTTATGAAGTCCTCACAGGCG  
CTGAAAAACCAGTTGGGGCGCCGGATGTGCTGGTTATCGGGACGATGGGGGAAGTTCAGG  
AAGAGATTAACCGGGAAGAAGAACTAAGGAGGATTGATGTCAGATTTTGGTGTGGGCGG  
TGAAGCTGCACTTGGTGTGTCATGTCGGGGCATATCATCATCGTTACGTGACCCGGTGG  
TAGCTGCAAAAGTTAAACCATGGAGAGCATGCAATCGGTCTATGCAGGTTCCGGTCCCTAC  
AGTAGACCCTACGGGGGCTGCTACAATTAACGTCAGTGGAAAGACTGCACACGGTGCCTA  
GGGGCTTACAATGGGGGTTGCGACCAAAAAGGGTACTGAAGACATTAAGCCGAAAGTGAA  
TTGACAATTGAAGAGTAAAGCGCTAAAGATCATCATCATTGATGAGATCAGTCTGTTTCCAG  
GGCTGATAAGGTGTGGGAAATGGATATGAAATGCCGACGCGCAAGAAAGCTACCAAATAA  
GCCCTTTGGTGGTTTGCAGAGCTGCCTGTTTGGTACTACTTCCAGAACCCGCGCTCCT  
TATAGAGGCAGAAAAGGAGGCGTAGTTCCAGATCCATTACACAGGATTGTCATACGTCTC  
AGATACTTGAAGGACCTCAATCAGTATCCAATATTACTTGAGATAGTTTATTACCAGTG  
CAGTGTCCGTTTGTCAACGATGCTTTATCGTCTGCGTTCGAGGACAGCGAATTCAGAAGT  
TTTTAAATTCATGCACACGCATTGTTATGATCATGGCAAGCTTCTTGTATGCCATAACGAA  
CACATCTGCAAATGATGCTGCGGATAAAGTAAACAAGAAGCGTTTTGATGAGGTCTGTGG  
GTTGCCCTAAGTTATACAGTGAGAAGACATCCGGTGAGTTTAGTCAAAAACGTTTACCTGA  
CGAGCCTGACCTGAAGGAAGGAGCACAGGTAAGGTCCACAGTAACCTACCGTAAAGGCTT  
TGCTGAGCCAGAGTATGTCAATGGTTCCCGTGGAGAGATAAGCGAACTCGTTCTGGATAG  
TGTGGAGGTGCATTGGGAATTTGGTTGAATAGTTGATGTCGATGTCTTTGGGAGGGAGAA

TGTTGAATATATACCAATCAAGCTCAGGACTTCCGATGGTACAACAACCGAGGAGATTGA  
TAAGGTCACTTTTCGGTGAAGTCCGCGCTTTGCCTATCCGTTTGGGCTGGGCTCTCACTAT  
CCATACCGCGCAGGGCTTGACTTTACCTGAAAAGAATATAGACCTTCGATATGGCGCTTT  
TGCACCCGGTATGTCTTATGTTGCTATCAGCAGAGCTACATCCGCTAATGAATTAAGACT  
ATTGAACAAGGTCAAAGAAAAGGATATAAATGTTGACTAACGCATAGTAAGAATTTAGGA  
AGAGACGTTCCCAGGGAAACAGGAGATAAAATTATGGCATCATACTCTTGAAATGGGTTA  
TTCAAGAAGTTCCAAAAGGAACTTGAAGTTTGAACAACACCCCAGACGTAAGTGGGGTG  
AAGCCACCGAAGGATACTACACATATCCAAATGGCCTCTCTTGATAAGATGAGGTCAGCA  
TAAGGCTACGTGTCTCGTCGTGTTCCACAATATCCGAACTTTATAGCTGGTCGTTTTGAT  
TACCTGTCCCTTTCTGGGAATGGTTTTATCTACCTGGAAGATTGGGTGTCATAACCACAAT  
AATGCAATGGTCCGTGGTAACACTGTCAGAAGGATTCCAGATCATTTCGGCTTCTCTCTT  
CATAACCGTATTGTGGATCAGGTGACTGTACAGCATGATAAATCCCCTATGCAGCTGGT  
TCAGGCTTTAAATCGCAGAAATTATGCGTGAAATTTTCTGACATTTGAAGTTAAAAATTT  
TTCTGATCTGAAGAAAGTTTGAACAGAAAAAATGTTGAAACTTGGAGATGTGGCTAATGA  
TAATTATAAAGAGGCCCATCGTCACATGACTATAGTTTTGTTGCATTGGTCGTCAATTA  
AGACGAACTGGAGTTGCGCAAAAATGCGGAAAAAACTGTTTAAACAGGCTGTTTGCAAAGA  
CGGACGAACCTCATCGTGAAGTTAATGTGTTTCGATTACACAAAACGTGAAGCAGCGGTTG  
ATATTACTCTTCGCACGATTGATGTTGGGGAGTATGGAGAGGCCAAAGGATTTCCTCAT  
TTGATCAACTGGCACCGGGGGTTGACGACTTTATTGTTGTGAATCTTGTAATCCTCTA  
TGCAGGAAGAGGTTGATTACCACATGTCTTTTGTGGTTGAGTTCGTCACTTGAATTGGAG  
TGGGTATTCCGCAGCTAACCCCAACCTACTAGGAAGGTGCAGAAGATGAGTAAGTCCCTGG  
AATGTCGAGGCTGAACTTGGGTACATGAACCCAACCGAAGGTGTGGTTGCAGTAGAAGCA  
CTTTATACTGTTTACGACCCGGAGTTTGATAGCAAAGAGAACGATTTGGATTACAATGGT  
TTTCAAGACTTAGAACAATCTGCAGTTCTAAAAATCGGCTCCAGATCCTCTTTGACATA  
CCAGATGATCTCATGGACCATCGCCTACGTGAGCTTCTGCGTAGTGCAGAGATCGAAGGT  
TGTTTCCATCGTGAGGAGGCATTGTAATGGAAAAGATTGAAATGAAACTAGTTAACTTCA  
TTATGAGGCAGACCAAGAAAGAAGAGGCTGAAGAAATTCTGGCAAATCTCATTGTGTAG  
GTTTTGTCATCATGTGGCCGAGCGAAGCCGAAGGTTGGGTGAATTTTACAAGGGTACAAT  
CGCATAAGTCACTAATCGTTGTCCTTAATACTGATGGCGGCCTTACAGCGGCTCACAAGT  
TCCAGGTAGTCAATGGTGCACCAGAGAGAGTTCCTCATTGAGGTCCGGTATGAATAAAGTG  
GTGTTGAGCCTTTTCGATGGCTGCGGCACCATGGGGTGGGAGTATGCCAACAATGGTTCT  
AAGTCATACTGCTGCAAGGTTAATGCTGGGGAATATGGTGGTTATGAGGTGGTCAGGGTT  
AACCATCCTAATAGTAAGTATATCAATTCTTGGGTCGCTGAGGGTTTTGATCCAGAGAAA  
GAAGGGATCCCTAAGCCAGATGTTCTCTTGGAATTGCCACCAAGTACCGATAGGGCAGTT  
AGCGCCGCTGATCATTTCCTCAAAGGCAGGCAAAGACCGTCTTATTCCGGTCAGAGCC  
CCGAATACAGCTAAGGTTGCAGCAATGTTAGGAGATAAGTTCGGGTGTCCATACATGATA  
GAGAACCCTGTGAGTGTTCTGACCTCCAAATAGAGGAGTCCGAACAACATGTTCCATCCG  
TATGAGCGTGGGGGATATCTACCGCATGATGATGTTTCATCCTTTCTTCCTTGATTATAAT  
AATTCGCGAAGCTCATCCCCTAGAAAGACGTGTCTTTGGACGGGTAATGGTTTTGAACTT  
CCACCCGCAAAGCCCGTTCCGGTAGCGCAGGGTTACGCAGAACAGCATAATAAGCTCGGA  
GGAAAGTCTGCCAAAACGATACTGATACGTTCTTTAACACCCCGTGGTTTTGCTGCTGCG  
GTTTTTTATTCCAAGTAAAGTGAGGCCACGTGAAAGGGTTATTATTAGTTGGTTGTCG  
ATCAGGGCCATCGGATGGAGATAAACGTATGCTCCTATACGCTGACAAAGTGTGTGGCAT  
CTACCCACAGCTCAAACGAACCCGACGCGAGCATTAAAAAGTTACGGCACCCCTGCTGG  
ACACAGTACGGTGCAGGCTAAGTTCTGTCAATATTCGTCTGACTGCAGCAATGGTGGTTT  
TCAAATGTCTGGAACAGTAAAACCTGTTGTTGCCTTTGCAAATGGCGATCCTGTCCTAA  
TGACTTTTGGGCGTATAACACGGGAGTTGATAGTGCAACCTGTTGGATGTACTTTAACAC  
AGGAACTTCTTCTGTTTTAAAAACCTATCAGTCAACTATTTATCTGCAGGATAACTCTGC  
TTCTGTACAGAGTGGTCCAGTGTACGAATAACCGTTCGAACCAGTGGAACCACATCGCGAT  
TATTTACGATCGGACAACCTCTCCAGTTCTATGTGAACGGAAACCGCATTGTATCGCAAGC  
ACCTGCTGGCCGCTGGAGTACAGCTTCATCATTCCGAAGGGTGTGGATGGTGTGGATA  
AGCAAATTGTTTCATGGATCAGTTTCGAAATTCGGGTTTTGTGAGGTAGTCAGGTAATTC  
ATTCATAACGTTCCGCACCTTTTGATATGGATTAGGGGCTAAGTTGAAAAATGTGGTG  
ATCGCAAAGCTTCAACCGTACAAAAGTTTGAGGATAATATGAATTTCTTTTTTGATAAG  
GGATATCACATCCAGGGTGGTATTTGCTTCCAGGGTGTACTTTATATTGGTGTGTTGTT  
AGGTCGTGTTAAGGAGAGAAATGGGGGCATGGTCCGGATTGGGGCAACATTGTGGACTAC  
CGAGACGGATAGCGATACTGCAAAGTATACACCTTGTGAGGTTCGAAACCACAATTGTCCA

GCGCCAGTTATTGGCAAGGAAGCTGGATCAATATCTCGAAAGGGATATTGCTCTATACGC  
ATTCACGGGTACATGTGTCATATGCATGCAATCTGGTGGCTGGTTCACCACGGGCCAACCC  
CCATTAGGTTTGCAGGTTGAGCATATCCAATCGTTAAGGGAGACGGCCGGTGTTCGGAT  
GACCGAATAACGAATCTACTACTCCTTACAAGAGGTACAAATAGTCGTGAAGGTGGTGGC  
AACATGCCTAATTCTTCCAACAGGTCTTCTCGAAGAAGCGGAGTTGCTGGGGATAGAGGT  
TAACCATCAAAGACTTAGATGGCAAGGATACCCGTTGACGGAAAAGTTCTCCTTAAAGAT  
ATTGAGAGTTTCAATGAAGCCTCTCAGCAAAGAGGGTGTGGGAAAAAGAGCATTGCTTT  
GGAGGATTAAGAGTAATTTTGTATTTTTCGGCTTATCGACAAGGTGGTCAAGAGAACCCGA  
AAGCACAAAGGTTTGGCAATAACGGCAATCCTGGAGGAAGAGTGAGTGATCAGCAGGGAG  
AAGAAGACACCCTGGAATCCGTAGTCGATGGCACCCGTATTCTGGCAGTGCCTAAACTGC  
GCCTCTCGCTTGATGCAGCGAAGTATTTAAAAATCGGGACTGCTGTTTCATCAGGCGAGG  
GGGTAACCATTACAGCAACATACTTGCCATATTAGCATAAGTACGGTAAGCTTACTGGTT  
ACAAGACACCTGGCTGGAACTCCCAAAGCGGACGAAGGGACACTTCTCTGTGGTTCGGCA  
CTTTAAAGGCAGCATCTCAGTTCTTTAGTCAGAATGAAGCTGCTATGGGCGCTGGTAGTA  
AACAGATTTTTGTTCTTGATGGTGAAGGTGATGTGACTGATGGGAGGGATGGGGGTTTCG  
ATTCTGTCAAAGCTGTAGCTGCTATCCCCAATGCCCGAAAGGGGTGGAGGATTGCGCGG  
CAAGTGTTCTGACAGGTATCATTGCCATTCATGACGGTGGCGAAGATGCAGGTATTCCGA  
CACTGCATTTTGTCTGGATTACACTGTGGCCCAGCTAACGCAATTGACACCTTCGCTAACT  
ATGAGAAGTTTATTTGTGGTTACGAAAAAGTAGTTCTTGGTTGAGATAACGATGATGCAA  
CAACGCTCGAAAAGGAACGTAAAATCAAGAAAGGTAAGGTAGCGACAGATCATGTTGCAT  
CATTCTTGATGTCAGACAATAGCTTTGTAGTTGGTTACCCTAATGAACGTCACGATCAGG  
CTGGTGTTAAAGATATTCGAGATCTGTACGATGCTGGGAAGGCTCGTGGAACCTGGAACA  
TGTTTTCCAAGGCAGAAGACAGGTATGCACCTGTCTAACCGATCAGTCTGAGCAATATCA  
CCATTCAGACCCTTCGTAAGAAGAAGAAAGATGGTGTTCATCAGCAGGTATGCGTCGAC  
TTTATGAGTTGAGAAAAGGCCACATGCTGGAGAGCGGTGGACCCTAACTGGACCAGGTG  
GCGGGGGTTGACAAACTAGCCCCCTCAAGCACTGGTGTATGAAGAAAAGCTGGTGAATTC  
GGTGA AAAACCCTAACGTGAAGACGAGGGCAATACCGATCGAAGCCGTCGCGTCTCTCCTT  
GTATAAGGAAGGATTATGTGGAACAGTATACAAAATGTTGATTGATGCGTAGTTTCTGAC  
AAATTTGAAGCAGGAGGGAAGAGAGGCTAGATTACAAAACCTGATAACAGTGGCAGATAC  
TTGCGTGTTAGCCTGTGCTGAGAAGGGAGACTTTCTCGGTGGATGGTTCACCGTCTTGTA  
GCGTTTACTTTTTGGGACCCCATAGAGGGTTAACCTTATGTGAATCACACAAACTGTGAA  
AAAGCGGATACCTCAGTTGACAATCTTTAACGCGTAACCCAACGCGAGAATCAAGAACAA  
GCTGTTTTTAACAAGCTTGTTCCTCGTTGTGAGGAAATATAGACATCTGAAGTCACAGTG  
AGTGAAGTTCTTCAGATGACAAAAACTCTGCAACAAGA ACTCCCAGTATCAGAAGTGCCA  
AGGAGATTCTCCGTGCTTTTTTCGGATTGTGACCAGAATTAATAACAGAGAAACTTGGGAA  
TGGTTAACGTGTGAATACGAATCTTTTTCAGGAAGACCAAAA ACTAACACGGCTTTTCGGGA  
TAGCGTCAACAGATATACGAGCTGTTCAAGTATGGCTTCCCCAGCAGAGAGGTTGCTAAG  
CTGTTTGGTGTCTTAAAACGACTGTAGTAAACATCAGGAGAGACTTTTCGGAACCTGAA  
CCGAGTAACCGTGAAGAAGGTAACGATGTACATCCAAGTGGGTGGATGCGCTAGGCATCC  
CGAAAGGATGATGATAAAGTCCGTTCTGCTTGGAACATGCAGCAGACCCCGATATGAGA  
TAGGCGTCTGGCACGGAATAACGAACCTTGCTGTGCATAAGCAGAAGCCCAATTTCTCGC  
AAGATCGAGTATGCGATTGTGGATTATCTTCGAAATATGGATATGCATCGTCTTGACGGC  
GGGAAGGAGCGAGCGAAGGTTGCAATCATCCGTCTTGATGAGGATGAGGAGGAGTCAGTA  
GAGAGCCTGTAAGCTGAAGAGTTGAAGGTGGACCCTAAACCATCTGATGCACATCCTTAA  
CAGGTCCTCACTGAAGAAGAACACCTTTCCATTGACCAACGGTGGATTACTGAGGACAAG  
ATTCAGATCTTTGACCACTACCGTGTTACCCCGATTGATCAGTTGAGTCAGAAAATGAAA  
CATATGGTGGGCCTTTATGGTTGTAAGTGGATTATACTTGACCACCTGTCAATGTTGGCG  
TTCGGTTTTACGTCAGACAATGATCTCAGAGATTTGGACAATACCAAGACCGACCTTGCG  
GCATTCTGTAAGCAGTATGATGTGTTTATTCTCAGTATTTGCCACATAAAGCGAAAGGAG  
CTTCAGGTACCGAACTATAAAGACGGTAATATGTCGCCTATCAGGTATCCTGTACGTA  
GATGACATGCGTGGTTCTGCTGCACTGTAACAGCTTTCTGGATTTGCGTGGGTGTGGAG  
CCAGAAGAAGAACCAGACCTCTCTCGTGGTCTGTCCGTGTGGTTGTCATGAAGAGCCGC  
CCACACGAAAGAATCGGTGTAGCAGACACCATGAGCATGGCCGAAAACGGATAATTCACG  
GATGCGTCTGGTTGGGTATGGGCAGACGGAATGTTCAAGCTGGACGGGTAAGCCAAGCTT  
CGTCTGAAGGTTCCGGTTCAA ACTCTACA ACTCGATACTCCGGTGGGTGAGGCCAATGTA  
CCAGTACCTGTCGTGGAGAATCCGGTGCAACTCCGGGCGTCAGCAGACATGGATGAGACT  
ACACCGTTATGATGATATATTAACCAACTGCGAGGTGGGTGTCGATGAAGACCAACCCAT

CTCGCATAGGAGGAGCATGAAAGGGTGTCTCTAAAGGATATCGAAGCTCATTGCCTGTT  
AGAGGAAGTGACTIONAAGTACCAATGTACCCTTCTTAAGGAAGACGGGGGTAACAAGTGGAA  
TTTGTCTTAGATCCTGCGCACCCAGAGTATGAGAGCGCCGTAAGATATGCTCGCAGCAA  
GATAGACGCCAATCTCACGATCCGCTCATATGACGAGCTTAAGCCGTTCTTGAAAACCTCG  
CCGTGGTATTGCGTGACTIONACCCTTTTTGGTTATGATCTTCGCCACTGGAACAAACTATC  
AGACATTGAGTAGGACATGTTTCAGAGACCCTAAGTCTCTGGGCACGATTGGGTATACCCA  
AGTTAACCTGACCGATGCTTTGTCTATGAGCCGTGTACTTTATCCTGACGGCCACTACC  
CAATGGCTGTCCCGATCCATTTTTGAACCCGGTAACCGGGAAAGGTGACCGAGTTGATCC  
ACGTGGCCTTTTTGGCTTACGGCTTTCGTGTGGCGAACGAGAAAGTTCAGATAGATGACTG  
GCGCAAGTAGAAGCTCTAGGAGTACGTTAGCCGTGTGTGGGAAGGCGTTCTTATTCACGC  
ACTGACGTGGAGAGCAGTGATTGATAAATCCACCGTTCCTCGTTGGCCGGATGACAACCA  
GTTTCATGTACACGGCTAAACCCGAAGGTATTCGCCAGATTAACCTGGAATAACGCTCTTCG  
TCGCAGTATCCTGTAGGATTACCTGATGATTGCGCAAGAGATTCAGAGTGTTACGTTCAA  
CAAGCATGAGGCGTAAAAACTTCGAGAGCTAATTGAAGTTATGATGAAAGAGATCGACGA  
AGACGTTCGAACCGTTACTTCCTATGACGGAGCTGGTAAAATCTTAACAACCTAAGTTCCC  
GGCTATCGCGTTTGATGGTGCTGGGAATAACTACCACCACGGATAGAACTGCTGACAGTA  
CAAGCTTGGGTCTCTGGTTAACCGCCAGGCGCTGGACTTTAAGGGCCCTCCAAAAACCGC  
TTTTAAAAGTAATGGTGAGGTCCTCCGGGAGGAGAAAGATGCTGCATCCAGAACTGTGT  
TGAAGACCCTATGCACTTCGGGGATTTTTGTGCGGGTACAAAGGAATAAAGAGAATACCCG  
GGTGCCTCGGGCACCTGACCTGATGGAGAAGGCCAAGGAGGATTTGAGAAAGGGTAAGGT  
GCCTGACCACATGGTCCCGATGAGGCTCTCGAACCCAGGACTACATCCACAAGTACCTGAT  
CCGCGATGCTGACTGAACACCTACCAGGTGGCGTGTAAAGATGTTACCAAGGATCAGTG  
CAAGAAGGCGAGAACTGACCCAGAGATTGACGCATTATTCAGAAAGTACATTGAGGAGCT  
TGCGGAATCAGAATATAAGTCGTTGATTCTAGAGCAGTTAATTAACAAAGACAACCAAAA  
CAACACCTCAGAGCGCTAGTTTCATCAACGGCTAGCGTCTGACGAGACGTATGCTGACAT  
ATGCAAGAAGTTCGGGCGCAAAGCTCGTCAGTTTCCAACCTCACCACACTTGGAGTATAA  
CTTCGCCAAGCTACGTCCCAACCTCGAACGTATTCATGTTCACTTCGCAAAAATAGATCGT  
TAAGTCGTTGTCACTGCGTAACCGTCGCTCAGTCCGCGACCCGATTGATGAGGATAAGAA  
TGACTIONAATGTTTGCTCTCCCACTCTCGCCGTGAGATTGATGGGACGCTTCCTGACCATTT  
TTCTGTAATCACCACACCCGGGCCTTGCAAGCACACCATTTGTCCACAGATTACTAAGAC  
AGATCCGAAGGTGCTGCTCGAAAAAGAAATGCGAGGAATGTGGGTGTTACTGGAGGGTA  
TGATCAGGTTCGGGATCTAGGGCTCCAACCTAGAGGGCATGATTGCCGCACGGGGTGCATC  
CGAGTTCGAAGGCGCTTAATACTTCCGGATCATGGACATCGGAGATGCTCTCTCGCGAAA  
CGGAGAAGCGTACACCAAAGCTTCAGGAACCCACGTTACGCGTAACGTGGGTAAAGGTGT  
GACCTACAGTAGCATGTTTCGGTGCTAAGGCAGTGGAGATTGCAGCGATGTTCAACATCTC  
CTTTGACAAAGCTCACGCGTAATTTGTGCTTTGTGGGATAGAGACTTCGGTTTGAAAGG  
TCGTAAAGAATGGCTGGAGAACTTCTTGGAAAGCAACAGGGAAAGCGTTATATTCCTGGATT  
GGAGGGTTCGAGGCGTTGGACCAGTTCTAAGCACTCATTACGGAATGTTTACATGCAGAT  
CGGCGGTGCATTACTTTTTGACCTTGTTGGCCGTCTGCTACGCTTGGACCTGGTGTGGCG  
TGCCTGGCATGATGAGGATGAACGTCGCCTGAGCTCCTACCATACGTAACATTGTGGCTT  
TGTGAGGTAACATAACATCGAATATCTCTTTTATTTTTTCGGGAAGGATATGGCTGACAGTT  
TTGGTAGACTGTTATACTATGATCACCCGGAGCGAAGCTTGTTCAGGAATTTTAGAGACAA  
GAACGTTGAGAGACGAATTCCTTAAAAGAAACCAGCAATATGCGAGAAGAAACATGACA  
ACTACCCAACAGAATCGAGACATGCTGATTGCCATTACACTGGGCGATGGATGGATATGT  
AAGCATGGTCATCCCGAAGTGTGGCACTCTATCCACCAGAAATAGAACACATTGATGAAA  
TATGATAAGATTAAGAAATTTTTGTCCACTTGGAATTTTCATACCCGAAAAACGGCTTGGGC  
AATGAACAGGTTCGGTATTAGAACTAAAATATTACCTTTCATAATATTACTTCGTCGTATT  
TAGCTTCCTGAAGGTAACACTCTTCAGAGGGAGATTACTAATGAGACTTGGACCAGAG  
CACTTGGCATTATTTTGCATGGACGATGGAAATTTAACGACCTTACGAGTAGGAAGGTT  
GTTAAGTCATCCTCCCATATACGTTAAGTCTTTGGACTCGCAGAGTGCATTGTTTGCTA  
GTTGTAGCCTGGATAAAATCTCTTACTGGCGTATGCCCTTGGACAAGAAGTGTACGGGA  
GGTAAAGAGTTCGCTATATGTATTAGAACCGGGGAGGGGAGGATTTTTAGCCAAGTAATA  
CGAGCATTGATGAAAAAGCACGATGTATAAGGTGTGCTATGATTAATTCCTGGGTAAAC  
CGAACTAGCGGCGTTGAAAAAGACAGCATCCCTGTGGATGGATAGATAGTCCGATACTG  
CGGGAATCGTATGGCAACACGTAATCGTGTGGGCGAGATAAATGACCTCGCTAAACTTT  
TGGATGAATACCAGCCCGAGCTTCCTAAGAAAAACTTTAAGCAGTGGGAGTGTGATTCCC  
TGGACGATGCTAAAGCTTTCGTCAAATAATGGAACGCGCAAGGCCGCGTATTTGACGGGC

ATGAGTGGAGAAAGGCGGTA AAAAGACGACAATTGTGGTGTATGTCAAGGATGCCGTACGTA  
ATCCGGTTTAAAGAGGGCCTCTTTGGTGAAGATGGGAAGATGGACATCCATTATTACCCTG  
TTGGTGAGATGGTTGTGAAATGTGTTGAGAAAGCTGCTTGTATGATGGGTTCTCCAGTGC  
ATATCACAGGTACTTACTCCATGCGTAAAACGAGGACTGAGTGTCACTAAAGTTAAAGGG  
GCGGAAGCCCCTGGTCTTGGATACTATAAAAGTATGAGTTGATTCTTACTACAATGGGAA  
CAAAGAAATCTGTTTCATGTTGGTAAACTGGAATACACCAACATATCTTCCTCCTCACAAAT  
CATCGACTGTCCCTGCCAATGTGGAGGGGTTTCAAGTTACTTCGTGTAGGTCAAGGAGGTT  
CAGCCCAAATAATCCACCTTCAAGACGTGGAGGTGCGAGTGGAGACTTGGTGTGGAGCC  
ACATCATCCCAGTTTTTCTGGAGAGATTTTACAAGTGTTTTAAACAACTAATGCAGATA  
GGACGACGCTTGTAGGTTTGTTCGTGGTTCTGTACCACTAGTGGCTGCTTTTTTCCGGT  
CAGGACCTTACCCGTACACGGGGCTATACCCAGAAGCGGGTGTATGCAGTCATAAATGAAG  
GCGGCGCGGGTGGGAATAATACCCAGCCATTGAAATAAAACGTTGCAGTGGCTCAGGTG  
GTGCCGACAGGTATATGCGGAAAGGTGGTGTATGGCGGTCATGCATACCTAGCATCAACAA  
TGTAATTTCAAGGCCACGTTTGTGAGGGAGGCGGTGGCGTTGGCTCATGTGGCTATTACT  
TATCTGGTTCCACATCTTGGGGGAACTACGGTGCCGGTGGCGGTGTCGGAATCCAGGGCG  
TTGGGGTCAATAGTGACGGAGGTAGAGGTGGATAATCACAAACAATAGCAAGCTGCGGGT  
CTTGGGGGGCAGACCCTACAGGTGCGGAGGGTGGTAAATTTGGGGGTGGGGCTGGACACG  
GATCTTCAAGCTGTCTTGGTTGCTCAGCGGTGCGGATAATCTGGGGAAATGCAGAAAAGA  
GCGAATTCCCAATCAATGCCCGAAAGGTATTAATAAATAAGAGGAGGATCTACGATTA  
AAAGGTCAATTGGTTACATTGAAACCAGGTGGCCCTTACATGGTTGACGTGCGTGTGTTT  
AAAAGACCGCTGACCTCCACGGGGTAATCAGAGTCCTTAAATATGCTGCCTACTCATGG  
ATGAACGAAAGCACTGTGAAAGAGCTGGATGCCTTGGCTTTTCATTCTCTTTAAATTATC  
GGAGAGGGATATGAACGTA AAAAGGCGCCAAACAAGGTGCAAACCGTGGACGTGGA  
AAGCGAAGCTGCCCTCAAATCGGTTGTTTATGGGCCGACGATTGATTATCTTGCAGATGC  
TGTGGAGGTTAACTTTTGTACCGCTTCTCCACAACCTGCCACCGATGTTTTACGTTAA  
AAGCACGAGCAGGGAAAGTTACCGTTCTGGGACTACCGGTACACTAGCGCTGGTGAAGT  
GGATGCAGACTGGATTTACGCCACCATATTGGACGGGACAAGGAAGTTGGTTTATTGAC  
TGAAGAGGAATGGGAACTTTACAAGAGCTTTGTATTATCTCCCAGGTAAGTAAAGACTT  
TCAAAAATAACGAAAAAGTCCCTTGACTTGTGTTAAGGGGCTTTATTTTTAGGGGACA  
TAAATAACCTGGGGCGTGGTGGATGATCGAGGCAATGAATTATTTATGTATGGTGCCGGG  
GGCATTGACATATGTGTGGTGTGGCTTAGGCGCTTCTTTTCAAAAAATGAAACACAGCG  
CGCTGTGTACTTGGTTTATGAAGTAATCAATGCATCCTTACGGTGCATATCGACAGTAT  
CGTCGTATGCAAAGTCACATCCCTTGGGTTAAACCCTTGGTGTATTGGCGGATTTATGGTT  
GGTGCGGTGTTTATTGTTGCTGACATCGCAGATATCGTCAGCCATAATTGTAAGCTTAAC  
GGTGAACATCGCCTCGCAAACGTCCCTGATGGAGTTGTCGTTGAGAACAACCGAGCTGC  
GACGGGGATCGCGTGAATGCTCTGGTTACTACCCCTGAATAAATACTCACAATAGGAGA  
TTCAAATGATAAACTTAACGATTGCTCTGCTGGCTATGGCGTTTGTGCAACCGCCCATG  
CGGAAGAAGATGATGATTTCCAGATCGTACCTATGTAAAAGGTTGAGGAGAGCTACAAGA  
TCGAGCGTTTCTTTCTGATCATTGTTGCTCACAAGAAGTATCGTTTGGGAGAGACCTGTT  
TAGACATGGTGTATCCCTAAATAGGAGGCTCAGGTGGGGAGTGTACTGTGCGAAGGGGCTC  
GCTGGTATCAGGGGTCAGCTATCAACAGAACCAAAAAATCTGTGACCCGTGTGACATTAG  
TCTACAAATGTCAGAAGGGGATGTCATGAAAACGATTTTCTTGGCCACCCAGCTCGCACT  
TTCTTGCTCTGTCCATGCTACAGAGTGCTATAACCGATACCTTGGCAAAAATGATCGGAGA  
TGCAGGCAATGCTGATGTGCTGGATGCTTACAAGCAGGGTCTGGAACGAGCAAAGGCTAA  
GATACCAGTCGCAGAACATGAAATTAACATTTTCAAGTGGCAGCTTCAAACAT  
GGAAAACCAGATGATTATCCTCATAAACGCTGTTGAAGATATGGAGAATAGGAAATGACT  
ATGCCTCGTGGCCTTATCTTCGGA AAAATTTGCACCGCTGACCAACGGGCATATTGCATTT  
ATTCCGACGGCGGCTTCTCAGGTGAGTAACCTGTATCTGTTCTGTATATGACCAGAAA  
TGTGTTGACGCACAACAAGAGTGTATTCGTCCAAAGTTGGGTCTTGTGATCGCTATCGT  
GACTTGCTGGATGTTAATAACCGATGAGGGTCTGGATACCGTGAAGGTTGACTAGGTTGAT  
GAGTCGAATATACCCGGAAACCTGCAGGAGGAGCTGCTGACGCAAAACTGTTCCGTGAA  
AAGCAGCCTTTCGTTAAATACGACTTTGCCTTCTGTTCTGAGCCGGAGCACGATTCTTAC  
TTCAGTGGGGTCTTCCCTGAAGTGAAGCTTGTGTTATAGACTGAGAACGGAAAGCCGTT  
TCTATCTTTGCTACGATGATTCTTACCGACCGGTACAACACTTTCTATAACCTGGCATGG  
CCTGCACGGAAACGCTTCATGTAAAAGGTGCGCGTTATTGGTGTGACAGGACTGTTAAA  
ACGACCTTGACACAACACTTGCATACAGATTCGCTTACCTTGGACTCCAGATATTGGA  
TGACTGATTTGTGAGCGTGACTATCACTCGGGTGAGCTAGCAATGACTTGTGAGGATTAA

CTACGTGTCGCAATGGAGCATCTCCTGAAAGAGATGGCGGTGGCTGGTTGGGGTGACCGT  
GGGGTTATGTTCTCCAACACCACGAATCTGATCACACACTTCTGTGAAGTTTGTGCAGAT  
AAAATCTCGTACTCCAACCTGTATTTACGGACACTGAGCCGCGATGAGAGCTACAACCTG  
TACGATCTGTTCTCCTCACACCACAGGTCCTTGGGTTGCTGATCCTCCTCGTTT  
CAGCATGCACACGCAAGGCGTAAAGAAACGCATGCTTAGATTTAGACAATGATCAGGGCA  
TCTTATGAGACAAGCAAGGTGGTGCTCATCTCCGGCAATGATTACTAACAGCGTACTCAA  
AAAGACGAAGAAGCTGTACGTAAGTTGCTGAATATCCAAGGAGAATAAGAGGAACGTAAC  
TAATTCAGCATGAAGCAGGCTATTGGTATTCTGAAAGTTATTTTAGGAAAGCCCTCCGA  
GTTGGCTCAAGGTCTTCTGGCTAACGCTAACTGTCGTGAGCAAGGCTTATCTATAAA  
GTGAAATCACAAGTGTGATAATGACCTTTCGAGGCGTGTTCCTTCAGCGAGTGTCTGTA  
CAGTGTTTACAGACAATGTGTACTAGCGCAGACCAGGAACTTCGACTACCACGCGAATGT  
GGCTGACGACGACAGTATCTTTCTCCTCGAAGATACTTTGGTTATGAGGAGTATGTCGA  
AGCGGCAGACTGGATCATCGCGCATCTGAAAGGTGACTTAGATGGATCAAAATAAGCAGG  
TTTTGGTCTGGAAAACCCAAGAAGGTAATGTTTTACGGATCACCCATATGTCTGACGAGC  
ATTTACTGAATGCAATCATCTGGCTACTGACAGACACGGGTCTTGTGGCCAAAACCGAAA  
GTGTGCCAATAACTACGTGGGTAGAAGCAACGGCTGTGGAGTTAAACGGCCATATGGAGA  
GTAATGGCTAAGGTTCTTAACTTTTACCAGTTTGGTAAGGTTATCCCTGAAGGTGGGGTC  
TACATGGGCCGACCATGAAGAAAATTAACCTGGTGGGTCATAAGCTAGCCAACCCATGC  
CCGGTTGAGAAAGGTGGTGGGAATCGTGATGAGGTCATAAAAAAGTACCGTGGGTCGTTG  
TGGGAGAAGATCCAGACAGGTGAAATTACTTTGCAAGAGCTTGTGACTTGGACGGGAAA  
GACGTTGCATGCTTTTGTTCACCGAAGGGATGTCACTGTGATGTAATCATAGCGGCTATA  
GAATGGAAGAAGGGGAGGGTTACACAATGAGTTTGAAAAAGGATCACACTTATGTGGAGA  
TATATAATAACAACGCGGGAGGTAACCTCCTTGTGAGCTCTGATGATGCCGCAGGTTATC  
GTCTGGCAGGGTCAAAGATAACTGGTCAACCGATAGCCCGTGTGAAGTTTCTGTTGAAG  
AACAGATGATCGCAGTAAATAATCACCAGGGAGAATAACATCGTTTATGGTCGAGGTAGA  
AACGACTCAGATTCTCCCGGTCAGATTTTTAAGTGGGTAGATGGTAGACAGGCTTTATAA  
TGGAGATGCCCTTACTATGAACGTTGGATAGTGATCTTGTGCAGATGTTATTCAAAGAAG  
ATCCACAAAAGACAGCCTACCTATGCCGGATTCTAAGTGGCGGATGACTGGTTAGAGATT  
TCTGTCTTCATAGATTGGGTTACTCAACAACCTCCTGCGCGACAAGTGGCTGAATAAGGAA  
AGTTATCTTCAATTCGACAAAGACATTCTTTTGGAGGGGAAACAGAAGTCAACTCCTGAA  
GCATGTGCGTTCGTTCCAATATACATAATTACCACATTCGCCTATGTTAAGAACAGCGGC  
CTAACCATGGGGGTAACCAAAAAAGACAGCAGGAAGGTCTATGAGGCAGGGGGCAGGGTG  
GACGGGAAAGGAAAGTACTTGGCCTTGTAGCAACCCTCCTTGTGCTCATGCATTATGG  
CAAAGCAAACGCTGAAACTCTCCAATCTGTGATCGAGGTAACGCCTCATCTGAATTG  
TATAATGAGCTTACTGCGAAAGACCTGCAAAAAAGAGTTGACAGAAAATAAGCGACCTC  
CAAATGGAGAGGGAACTGACTTATGAAGATAAAAGATTACATGATGAATCTGTACT  
TGAGAACAACTGGACCGACTATTATGGTTGGTCGAAAATTGTACATCTATGGCTGTTCA  
TACGTTACGCCCATCGCTCTTGTGTGATCATCATGGGCTGTGGGGTTATTGCATTCA  
TCGCGTCTGTGACAGGTATTATCAGAACGTTCCGTGTTGCAAAAGGTAAACCTTCCAATT  
ATTATTGGGGGTTTGTGGCGAAAGTGTGGTACGCACACAGCTCCTTACAGTACAACTCT  
ACGCTGAAACGATTAGGTACCCTCTTCCATTCACTCTGTTGCAGGTGATAAGTGGGATAC  
GCTGGGCGAACAACCGGACTGTCTCGGGAGACGGTGAACGTTCCGGATGCTATCAAAGAGT  
ACCTCACCACAATGCAGCAGTGGTTGGTTGGTATTTTACGTTGGTTGTGATCGCCTTGT  
ATGCAGAAATTTTAAAGCCTTCTCAAAAAACCTATGCCTGGACTGGACTCCGTAACAGCGA  
TCCTCTCTGTTCTGGCAGCCTATCTGATTATGTTACGTTACGCAGAGCAGTCGTACGTGT  
GGATCATTCTGAATGTAGTCGCAGTCACTTTGAGGATTCAGACAGCACTCCACCTTAAA  
CTCAGGGGTGGGCTGTACTTGAATGTGGATCACTTTCTGTTAAACTCTATTTATGGTG  
CCTACCGATGATGGAAAAACGAACGAGCTATATAATGAGTGGATTTTGGGAATGGTTGAC  
GATTCGCAATAACTGGGTGCCGGTACTGCCCTTTATACTACGATGTTTGTGGGGCCAC  
TGTCTTATCTGTCAGGGAAAGATGGAAGTATAAAGTTATGGCATAATTAATGCTGGTTGT  
GGTATTTGGTACGCTATTGAAGCCCTCGTCATCTTAGACTGTTGGTTATCGCATGTATGC  
AAATGACAGGTCCACTTGTGCCCAACCCGACGCTGTGGCAACATTCTATGTGTTTCGATGC  
ACAGAAAGAACGGTGTCTTAAACCAGTACTGGGGTTTGCACCAGTAGATGAGATGCAGGT  
GCAGACCTTTACACCAAAACAACTTAGACAGGCGAATGGTTATCAAATCTGAGCGAACA  
GGTAAAAAATATGTAGAAATGTACGAAGCCATTCAGGCGAAAATCTAAATCTGGAAGAG  
CAGTTGGTCATGGTATACATCAAGAAGAATGTTCAATATCTTTATGTAGATTATGCTAAT  
GCATCCAGGTTCCATTAAGCCTTCCGTCAGGTCGATTTCTGAAATTAGGGTTATCCAGAT

CTGGTGAACCTCGGGCCTAATCTCTGGTGGTGAATTGAACACCATCGGCTCTTTACTGGAG  
GAGTTTTATGCGTAAACTCTTTAAGCGGCTACTGAGCCTGTTTAGTTCAAACCTCTAAACT  
GACCATTGGCGGTGGTGACACCATCACAGTGATCCAGAACTCAATTGTGCATGTTCTGAA  
GGGACGTGCCCCAGTGGGGGATTATAAGTACGAGCATAAACCCCTGACTGGAAATGACAT  
CCGGCATAATGCTAAAAAGGTACTGGCAGATGTAGGAGCTAAAAAGCTGCTAACAGAGGG  
CCCAGAAGACCGGCGGAAAGAGATAATGTAAGATTTGGCTCGGCATAGTAGGAAACGTCCG  
CCCACCAGCGCCTCCTGCACCCCCACGTCACTGTGTGGTTGTGGATGATGATTCTCTCAC  
ACGAAAGAGACGCAGTGAAACACGTTACCGTCGTGACGATGACGATATCATTGAAACCAG  
CGTTCTGTAGCGTCTGCTGTTTATCACTCGTCAAGTAGTGACGATTGTGGAAGTTATAG  
CGGAGGCAGGTGGGACTCCGCCAGTTCTTTCGGGAGGATGTGATTGAAAAAACAGAAACG  
TTTTTTTTGTTCAAACGGTCATTCCACTACCTCAGTCATAGAGCACGTAGTATCGACGAGT  
GATTGTGCCAAAACCTGCTGTAAAAGCCAAATATGTAATGGCACTGGAGGATGGTAATATG  
GTCACAGAAACAACGTCTTGTAGCTTCCCAACGTGGATGCATGATCCTTTTATTAAACT  
TTCAATGTAATAAGGAGTTTTTATAATGAAAATTTTTTCGGCACTGGCGCTTTTATTAA  
TCGCCTTGAAACTGTGCGGTGATGTTGCTTGGTCAAGGTGGTGGGTCTTGGCACCATTGT  
ACCTTCCGTTTCGCGATTTGTGTGGCGATCATACTTTTGTTTTTTCGACAGTATCTTTGGTG  
TTGCAGGGGCGGCTGCTCTTCTGGAGAAAATCTAATTAAGTAAGAAAAGATTACGCTAAA  
TGTTGTCATCCAGAGTAGAAAGGGGTAATATAACCACTTCACCCACAATCGTAGGATTGAT  
GACTGAGGCAGGAACCCCTATCGGAACCCAATCAGGAAAAGAAATACTCTTCTTCCGCGA  
ACTCGACGAAGCTCAGTGTGGAACGAATGTTCTTCTACCCAGTGCCGGAGCACAGATGAA  
TCGGTTCATCGGCTCAGAGCGAATTTGTTATGAGATGCTGAAGGTTATCGAAAGCGGCAA  
CATCACTACTGAGGAAGAAGTTCTTGCATCAGTGCGGAGGACTCCGCAAGAACCTCCTGCA  
ATTAACGGTTCATCGACTTTTGCCTGAATCTACTGCGTCAGGTTGAAGGTCTAGTGAT  
CGATAGACTTTTGGGTGTTTACAGTGATACCCAACAAGAAGATTCTACGTAATATGAGAG  
AGAATGAGCGTAATTAAGAATTCAAAGATCCGATGACGAGCAGTGTAACCCACTTCGCA  
GAGCGCAGTACCAAATTC AACAGCAGCAAACCTGTTAATAACAGATCCTGATAGAGTG  
AAACGTACCCAGATCGCAGCGCGAAATGCTCCGCCTGCAAAGGTTATCGAATCACCCGAT  
ACCCTAAGCTTCTTTAGGCCAGAGGTGGAGTAGGAATACAACGTTATTGGTCTCAAAGC  
GAGGGTAAGTGGAAGGCATGGGGGAGAAGTAGCTTCATGCAAGCCACCCTGACAAAATG  
CAAGTTAAGCTGGACTCTGGTTACAAAGACATTCTGCCTGGTATGTTTGCATCTTTCCCG  
CTGTAAGTGAGCACGAACGGCGATAAGCCCTATGTCAAAGGCTCTCTGAGTGGCCAGACT  
TTCAACCTTCTGGATGAAAGCAAAGCAGGTCAACATGCACCACGTCTGCAGCCGCAGCAT  
AGTGACCAGGATCAACAGTCTGGTGGTGGGGTAAAAGTTTACGGCGAGATCACCGCTATT  
GCAGGGGATCTGGCGATTGTAATGATGAGAAGAACTGCCCTAGTTATGTTGTAAGTGGCT  
GATCCGCAACTCGCGCAGATACACGTTTCTGGTCGCCTGACAGCCTTTGTAATCTTGCT  
GATGGCACAAGCCTGAACGGCTTTCAAGATTACGCCGCAGGAGTTCGAGGAAGTGGCTCA  
GGCGGTTTGGAGTCTGGTGGCAATTATGAACCTAGTAGTGTAGCTTGTGGTACGGTCTC  
AACGGCCTTAAGGAATTGATGGGTGCAGGATACAAAGTGTAGGATGAACTGGAAACAGTA  
AAAGCCATTACCGTGCAACTGTAGACATGAAGGTTTTCTTTCGGCGCGTAATGGTAAA  
GATGTTGAATCAAACGCTGTTGGAGCAAGTGCAGGTAGTGCAATCGTTGTTGCATGTTGC  
CGATTAATGCCAAATCGGAAGTAACTTAGGCAACGATCCTGGAAAGCGCCTAGAACGTG  
TATGTAACGCTCTCTGAGCCGGCTTATGAGTGCTTGACTACCGATGGCATGCCTGCGGAT  
AAAACCTCAACCACAGACTTCTCGGGAGCGTCTGAGCTGCACTGGAGAAGTACCACCTATG  
GAGGCTTATGATCCTCCGATGGACTTTGACGACGATATAACCCTTTGCCCAATCGGTCTG  
CAATATGGAAATAACTTCATCCATTGCATTTAATAAATAGAAAACGAGCCTTTCAGCGTC  
TTTTAGGTTTATTGCGGTTGAGCAGATAGAAATGGTTTCGCCGGGGTCAACAGGATCTGGT  
GGCCTGAGTAGTCTGTAACACTGACACGCGAATCATCAAACGCCTCAACCTCATCCTCC  
TTACAAATAAGACGAACACCACAACGGCCATCACTAACTGCAATACGGGAAAGGAACCT  
TCCTCATGAATCCGCAACATTTCCGGGATATGTAGTTGTTTCACTTCTCCGTCGATGAAGTTA  
GTATGAACAATGGCAGGAGAAATTTCCATTCCGACAACGTTTCGGACCTGGTGCATAGTAA  
GGAGTGTTTTTTTCTATGAACACGAACACATCACCAACCTCATTTTGTGGGATGGAATCG  
GTACTCACAGACAAGATGAAAACATAACCGCCATAGGTATCCGTGAACGATTCAGCATCC  
GCGCCAGACCCTGTTTTAGCAGTCATTGTAAAGTCAAACCACCCTCTTAAAGGAAGCTC  
ATGATACCGCTTGAGTCTACAGTTGCGATCGTAGGAGTACTCCATGTGAACGAAATTTCA  
TAAACTCAGCACCTGCTGGCTCAACAGTCCACGTAACCTGACTTCTCGAGCCTTTGATG  
GCGTATCGGATAGACCCTGTGGTGATTGCATCCGCAGTTGTCCCCCAAACGATGCTTCT  
GGGATGTTTGTGAACTACCAGTGCTATCGGTCGACCCGAAGGAACATAAAGGTTACCA



GCGGAATGACGGTTCTCCACATCCACCATCCAAAGGCTAATAGGGTTCCTCCGTTAAGG  
ACATCTTTCTTCATCTATAACAATGGAAGTCAGCTTCGTAAGATCTCAATCCCTTCCTCTA  
GGAAGTGGAAACATGGGTTGGTGTAAACACCATTGTTGATGGTGTGCCAAGGCCAAGTTGA  
GCACTTCGGTCAACAAGACAGTAAACCTTGTACCAAGAATAAGGAAATGCGACTGCCCA  
CCGTCGATAACCGTGATTGTCTCCAAACGACCCATAACCCTTTCTTAGAGTATTGAGCT  
GTCCCGATACCCCTCGTATATAAATAATGCTGTTTATCATCAACACCTGTAGAGGGCGCTA  
GCCATTGAGTTTCTTTTCGTTTCGCTAACCTCTCTTTAACACATACGGTTTCAGTCACAAAG  
GCAAAACTATCATCGATAAAGTTTTGTGTTTGTGTTGTTGAAGTACCATCTATCTGATGG  
ATGGCCCCAAAAACACGCCGAAGTCAAATATTGTCCAGGTATGTCTCGCAAGTATTCAAG  
CTGTAGGCTCTCAAAGTGGATGCACTAATACTTTTTGGGATCGATATTCCGGTAGTGTTA  
CCAGAACCATGGCATCCATTTGTGTTTGACCTGCTTCCATTAAATCTTCCATCTACCCCC  
GGCCAGATTCTGGTACCGAGAGCACAAGAAACACTGTGTAAATTTGAGAGGGGATAGTGTG  
CCTGTGATTGATGAAGGGAAGCTTGACCAAAAAGAATTGATATACACACTACAAGTGAAT  
TGACTGGAGTCCACACAATACTACCAGCCACCATTGTTGTCTTGGACAACAAAGGCTCTA  
CCACGACCAAAAATATCACCAACACCAATACCCGCCAAGTGCCAAGGAGCCTTGAACGGG  
CTTATGTTCCCGTTTTCGGGATTCACACCACGCATTATCCCCATGGGGATAGAGTCTCCCA  
TCAATCAGGAGGAGCGCCATTAATCTTTTGTAGAGCACCACCAACCGGGTCACGGGTAAAG  
ACCACCCTCTTAGCACTACTTGGTGGTAGGGGTTCTGTCCGTCCTCCAGAAAATGTCAAG  
AAGAGACAAGGATTAGGATACAGTAAAACCTCCTAAAACAAGGCTGCCCGAAGACAGCC  
TTGAATCATTACGGACTACCAACGATTGTAGTGTCAATAACACCGCATTCAACACCATCA  
GAGATAAATTGAAGTATAGTCACCGAATCAACCGTCTCGTTAATTGTTTTCTGTTTAAA  
ACCAAGTAGTTAGGTTCTAGAGTCACAGTGTGACGGCCAGTACCATCTTGAGTCAGGTAA  
ATCGAAGCTGAAAAGGATCTGTGCTTTCATGCCAAGCACCAATTGTTAAATCCGCATCC  
ACTGTTACGTTTTAGATGTTGGAATATCCACTTGTGGACCATGCCGCTGTATAGCTATCA  
ATCTCCTCAACGATAAGTGTGAGGAATTCTACACTTGCCTTGGATAGGATTCCCGAATCT  
TGTAACGTAAGGCTCTTGGCACTCACTGCACCGGTAAAGTTCAGAGATCCCACGTTGATG  
GGAACACCTGTCAATTCAACGGAAAGACCTGTAACCGTACCATGCATAACAAGGTTGTTA  
ACTGTGCTTGTTCCTGTGCGGTTGTTGAGGTTGTCATCACCGTTTACGGTCAGGTTTTCC  
TGGACTGTGACATCGGCCAGCACGCTAAGATCCTCAATAAACTCAGACGTACCTGCAATA  
GAGAGATTTTCTACAATTGTACCAACTGCTGTTCCGGGGGTAAATCGACCATATAGACTG  
GTTAACCTACCCACTGTGAATGGACCAGTGTGTTACGTTAGCCGCCGAGAAATCTTCG  
AGGGTTGTATTACCTTTTTCGGGTGAGATAACTTGTAAATATCAAGGCCACCGATTGTTGCG  
CATTTAAGGTTGCTAATAACCACTGACCTGTCAGTCACCATCAACAGTGAAACCGCCTGCG  
GTTGTAACAGAGTTTGGTGAAACATCAAGTCCGTCCTAAAGTGAAGGTGATACCTGTTACG  
TTACCTGCATCATTACAGGTTTCTACCTCAGTTGTACCAGAGACCTTAAATCTGGGTGCT  
GTAGGATCTTTACTTCCGTTACCATGGAAATGCACGTAATCGCAGAGGTTACTACTCACA  
CCTGTGAGAGACATGGTTGTATCATCTTCAGCCACTGTTCCGTTGACAGTAATGTCCATC  
TGGAGCTATTGCGCTACTATCGCATATGGCTCAAGGCGCGTCTTAAAGAATGTCCGATTA  
TCTGCGACTGTAATTCGAAGGTATGACTTGTACCTCCTGTGTCAGGATCAGTTTCTGG  
AATCGACCTGTTGAGTTATCTTCGTTTACAGGGCCAGTAAAGTCAATTGTCTACCAACC  
ACTAAAATAGTGAGCGTTGTAGCACCCGTTTTCAGACAACCTATGAAAAGGTAACCCTACCA  
CCTGAGATGCTTGACAAGGGGATAGCAAAGCCGTTGTAACAAAGGCTGTTGTGGCAATT  
GTTGGACCGTTGCTGTTAGCCGGAGGGGGTGGAGCCTCTGTGTTTCATGTCAGGATCTGG  
CTGTAGATAGGTGCAGAGATACTTGACATTGCCAATGCGTCGTTGGACAATCTTCAGTTA  
ACACTGGTAGCTGGGTTTTATGGTTAACCGTAAGCGGAGCGTGTGTTGCGGTTGGTACA  
TTCCACGATTGAACCCCATCTGTGCCATTAAGAATAAAGCTGGTTGAATACTGTGGTC  
TGAGTTCCCGCGATCCACGGCATACTGGTATTTCGAAAGAACAGGTTATCAAGAAGAGCT  
TTAGTAACCGTTGGAAAAGTGCAACGATCTTCAGTACCGACAGTTTCGGATGCCGATCCG  
TTGACAACCTTCAGGAGGCGTTTCAGAGTCTTCAACAACCTGATCGATAGCCTGTTCAAAT  
TGAGTCATGTCTGGCACACGAGTCTCCTTGTTCGTCTGACTATGGTTCTGTACGTTGGGC  
TTCTGTTACTCCCCAGCGTACAGGTATTTGCGTACTGATTAGTTGAGGTGCAGCAACAGT  
CAGTCCAAAAATCCACATGTACCACTCGGTCAACGTTCCATTGAATCCCCAGTAAAGGAA  
AATTGCGGTCATTGAAGCCAAGCCGATATTGATCCAAAACCTTTGTGTGAGAAACCCTCTA  
AGGGTCTACTGATGACCTCACAATATCTCTAATAGATTTTCATCAGTGATTTTAAACATATT  
TGCTCAGTCTTAACTATGAACTAACACGGGTGCGGACCTTGCAAGAACCACAAGGCTTAC  
AACAGTAGCGGTTTTTAGCCACTCTTTAACGGTATTGTCTTTAAATGATGCACAGAGGAT  
CGAAACTTCCATAACGGTCTCGTATGAAGATTTGATGGCAAAACTCAATGCGAGAGGCAA

AAGATATGGAAATTGCATGAGTATTACCTGGCAGAAGACTACAGGCACGGATACGGGAAG  
CATCAGCTTCTTCTTCCATCCCATCATAACACACTGTGGGAAACAGGAGGGTTATTTTC  
GAGCTAACATCATAATGCCATAGATAGAGACAGGTCAAAGAACTGGGTATGAACTGAAAA  
CTACCAGTACGGATGGTTCTCCAGCAGGATATGGATCATACAAAAAATAGACATGAACTT  
TATACGCTTGTCTGCAGTAAGCAGCAGCCCGGCAAAGGATAATAAATACAGTGCCGGAAT  
TATCATCTACGTTGATTCTCAATGAGTACCTTGAAGTACTGATTGTTGAGGTCAGCACGAAGA  
TCGCCCACGTCTTCTTTAGTGTCTTACGCAAGTCTGAAATTTTCATCTTTAACCGTTTTG  
AGTTTTCTTTCCAGAATCTCGTCCAGTTTTTCCATTCCGACCTGCTCCGCCTTAATCCTT  
ATGTTGTCTCTATGAAGTTCAGCCAGGCGCTCTTGCGTTTTTTTTTAATCTGAGTCTGTG  
ATTCTCAGGCCACCAATTAACAACATCGTGAGAACACCCCAATCAGCTTTGAGGATGGCA  
CATAAGTCAATAGACAATATAGAATCCTTTTGCTCTTGACTGGTCTTTCAGCCCACTTGA  
TATTGGGCTCATCCTCCGGGTCTGTTGCTAAAAGATCAATACGGTAGGTCTTTATCTACT  
CGAGATACGCTTTCTTGGAATCCAAAGTATATCCACTGGATATCAAAGCTTCAAGGGCTA  
AACTCTGGTTTTGTAGCCCAAGACACTTCACTGTCCAGAAGAAGTTCGGCCTGAGCAATAG  
CCTCTTTATTGAAATCTTTAAACTCCCCAGAGATGAATCGCACAGCCCCTAAAAGGGATT  
CAATATCGTCAGGAACTTCATCAACAACAGCAACCCTCATTGTTGTCGGGGAGGTATGTTG  
ATGGATCAGATGACACCACAACACGACATGACCGGACGACAGAAGAAGGATCTTGGTCC  
CCTCTCTCAATTTTGCCTATTCTTGCGCTATGTCGTACCAATCTGCTCCGTCTTTATCTT  
TCACGAAAAATACACCTGACTCTATGTGTGAGGGGTCCTTGTCCGTCTATGTTGGGGTGT  
ATAATCAAAATTCGCCACATACCGTAGTCATAAATCCTTCTTAGTAGAGGTTGGAAACAG  
TTACCCATTGTCAGTTAGTAAGAACTGTAGTGGTGCAGTGTAGTAAGTTGCGCCCCCTCA  
ATTCTTTCTTGTTACCGAATGCCTACCCGGTCATGACGTGACCTGCATGAAATCTGGATT  
CACTCAGACCTGTGACTACCCAATTACCTAATCCGATCTGCTGAACAAATCCACACAGGT  
TTAGTGTGACGTTAGCGTTACCATCTGCCGTTGAACCATTGATAGCTCTCACAACGTTTTC  
GTCCACCAGCTGCAGCGGTGTTGTTGCTGACAACAAGGGAGTTAACGTTACACTGTCCGT  
TTACTGTTGATGAGGGTGTAAAGAGTTTGTGCGACAACGTTGAACCCTTGAACGT  
TTCCTGTTGCTGTGAAGGTCCCTGTCCTGGATGTTGAGGACTGAATAGGTGGATCATTTA  
GCGGACCGCGTACTGTAGTGTGTTGTTGTAAGTGTGGAGAGGTTGCATTGACGATTACTCCGC  
TTCTACTTCCGCTTGCATGATGGTATCAGTTACCCTACACAGTGCAGCAGTGCCACTAA  
TAGCATTGAACTGCATCATTGTGAAAAATGAGCTACCAGAAGTGATGGAGCGGAAACGCA  
TCCAATCGATGCTCGACGAACCTGGATCATTACCGATATTATCACCAACTACAAAATCAA  
AGAATGTGGTGTGTCCTGCTGGGTCCGTTGGTTCGTGATGTAAGCGTATTCGGATTCCGATG  
GTTGGAGGTTCCGGCGTGGAACAGATAATTAAGCAAACATGGTGTGCCTGAAAAGTTCCG  
CATATCTGGTATCAGACTCTGTTTTACTCCAAACATCGAGGTTTCTTCTTGCTGCGGCCT  
TTTCTGCAAGGTCTGCATGGTTCCGATTACACGTAACAAAGGACTTTCGAGACCAGCGA  
TGTGCTACCAATGATATACTTGGACTACGCAGTCAGCATATTTAAAAGGTAGTTAACCT  
CTTTGACTGTTGGCTTTTCACCAAGTCCCCAACGTTTGTTC AACAGGTCATCGATAGGAC  
GTGCTTAGTTTTAAAATATAGGTGATAAGTAGAACAATATCTCCATAAGCCCAAGTCTCAA  
TAGGTACTGTTGGCGCTGCCACTGTAAGCTCCCTTAAATCAAGGTATTCTCTCCATCAGA  
AACATACGTCAGGTGAGCAAGACCACCCTGTCCTGTTTCGCCTTCTGAGTGGATCGATCC  
GAATCCGAGTGCAGTTTTATCGCCTGCGAATCCAAAAGCCCTACCCTTGTCTCCGTTAC  
TCTCAGGTGTGTTGGCATAGGCGACATGTCTTGAACCTCCTGGATAGCAGTCTCCACCAT  
GAAACATGTTTTCGAAATGTTGATATCGAAGCGGTAGTTATCCCCCTTGTATGTGGTAAA  
GTTATCTTCCCCGAACAAATGGTAAAGGCTATCGGTAATTTACAGGGCTTGTACGTTCTT  
CTCATCACTTGCCAAGAGGATGATAATCATAGCACGATAGTTCAAATCGCTCAAGCCATC  
ACGCTCAATCCCGACATGCCTCCCTATCTCACCAAGTATGACCCCTGTCGCATTTTTCCG  
TAATCTGTCCTCAGACAAGTTGACCCACATTTTCATCAAGCTATTTGAGGCGTTCCAGATA  
ACCCGTCATAACTGTGACAAGGTATTCTTTCTCTTTGAGATAATCAACAGGGATATATTC  
AAAACCTCCCGTAACGAAATGGGGCAGAGTATGGATGTGGTTCACATCCTTTAAATAGTC  
TGCCATACTAACCTCATTAGATGATTTGCTGGAATGTAAGCTCGTCTGTATCTAAAGCAA  
AGACTTCTGTGATCCTGCAACAACATCGGTGTTAGTATAAGAAATGTCAGGTTGGTTCAG  
TAGTCTGAACATCCACCAACAATTGGGTGAAGCGCCCTGCTCAAATAGAGGAACCAACTG  
CGGATACCAACTGGTTATTGTGAAGTGCATCTGCAATGATGAGTAGATCAACAGCGGCTT  
TCCGAGCAGATTTGCCAGTGTGTTGCTCTGTGACGGACAGGAGCTTTCCTTTATAACCAA  
CACGGAATGCAAGGTCACGAGCCTGTGCTTTGCTGTGATAGAACCCTTCCGTCTGATCAA  
CCTCTGTGATGGCATCATAAAAAACGTCACCATAGGTTGTTTTGGAAAATGGGATTATGG  
TATAACGTGCTTCACTGATTTTCGTCTGTGGAACCACCGCAAACACTACAGACTGAACTTAT

ATGCCGAAACACCAAACCTGGTCCGTTTCCCCTGTTTTGTTTTAGTATACACGAACCTTGC  
TGATGCGCTCGACGTTTCAAACGCCACAAACAACGGCAGGTCTAGTGGCATCAGCACCTG  
CTGCGGTGCTTTGTGAAGCATGAACCTTGTAAATCAATGTCTGTCTAAACATCGGAACCGT  
CCTTAAAGGCTGTCATGTTGGAGATGCTGATAACACCGCTTGGTCTCGGTGTGATATTCG  
TTACAGTATCGGTTTCAGGAGAAGTAGCCCTGCTTCAGTAGCAATTACTTCAACGGTAA  
TTGATCTCTGGGCCACTACGGGTGATGAACGTAAATCGACACGACTGTAAAGTGCCTGA  
TTTTCTTGTAGCATCATAACCAGATCTACATCGCTCCACCCGCAGAGTCAATGAAGCTCC  
TGTCTTCGTTTATCTGTGTGGAGTTGAAGACAATGAAATCCTTAAATCGATGATATCAACG  
CATTAACTGAGCGCTGTTGGACACCTTATTTTCGTTGCGACAAGGTCATTGATCTTGTGG  
AACCTTTGTTCTGATTAATCATCTAGAATGTATAGTTACCAAGAACCCAATCTTGGTTAA  
GTATTTGTAGCGCCAGGATCCTCCCTGCGACAGGATTGTCCTGCGTGGATACGAAGTTAC  
CACTGTCAATGCTATATGATGAAGAACTGTAAATCCTGCTGTAAGGGACGGTGTGGTTAA  
CAACCATGTTCGATAGTCCCTGATCCTCTTGTCTTACCACGACGATAAATACAACGACGAC  
CAATCAGTTAATCTAGATAAACAATTTCTGCCCCAGCAGGTTTCTGTACAGAATAGGGAG  
CCGCAGCCAGAAGGATCAATCGATCTTCTCTTTCATTAGAAATTGTGGTAAGTTCGTCAA  
CAACAGTGTTCACCTGAGTGTGAAAGTTTTCAACAAAAGTTCGGAACAGCGACTTCTTGG  
TATCTGCGATTTAATCATCCTGGGATGGGAGCGCAAAGCCGTAGTTATTTAATCCATATT  
GCTTAGGCACGAACGCCTCCCCTTGTAGATCTTTGCTCTAAGATGTGGCTAATTTATCA  
TATTGTCATTTAATTATAAAGGCGTATAATAAGAAAAGGGCCCGAAGCCCCTGGTTATTT  
AAGTCCTTACGCTGTCTACTACGGGATTTGTGCGAAACAAGGGCCGTGTTATCAGGTGAGG  
CTGTCTGGATTGGATTTGCAATGTCCAGATAGAACGGGGTGATCGAAGCACCTTTTTGAT  
ATGGCCCTCTCATAACCATTGTCTGGAGATCCCAGCACCGGGGCCGGCCTGGGTTAG  
TGAGTTGCAACCCAGCAGACTTACGTGTACGGGTAGCCCAGGGTAGTCGGATACTTGAAT  
ATGCTGCACACTGAAACGTTTTTGTAGTCAAGCACAGTTGCCTTGGTGAAGTCATTAGGTT  
CAATGTAAGAACCCCTGTGCAACAACAAGCATAACCAGCGGTCTTCTTCAGAATGATGT  
GCCATTCACCGAATTCCTTTCCTTGAGGAAAATCATCATTATCAGACATGCAGGTCTTAG  
CGGAATTAAGCAGTATGAAACTTCTGTTCCCGTTTGTCTTTGAGTGCTGAACCACAGCGA  
GGTAAACAACCGTCTGTTGTTAACTGGTCAATGCCTATCTGGCCGATGTTAGCGTTAGCGA  
AACCATTATCATCAAGGCTATTGATATTAATGATCTCAGCAGGACACCAAGGCCAACGGT  
TCATCCCCTCGCCGGCCTCGCCGTGTCCAGCCTCATACTCGCCAAGACCATCGAACTGTT  
TACTGCGGATGTCAGCAAGACGAAGTTTTGAGACAAGACCCCGATATTTAAAAGTGTGAC  
ACTCAATGTCCTAAACGTTACATCGTTGGTCCGGTCATCCATAGCACTAACTGGAATAT  
CTACCCGCCCGGATGAGTACGTACATTTTCGCATTGTAAAATCACTGCACGGGGCAGCAA  
AGGTTCCCTGGTTAACACCCCAAAAATAAATGAAACGGCTACCACCGTTGACCATTT  
CGCCACGAACACCATCAAGAACATAGTCTTTGCAATAATAACATTTCGATCCCACCGGAGG  
CCTGCAGTATTCGTTGCAAACGGATGCATAAAGGGTAAACCCCAAAGTTCTCGACTTTAA  
CGTCACGGCAAAGCTTGAAGAGCATAATTGACGAACTGGACGCATCATAACGCTACGCG  
TGATGATCCCCTCACAAAATGGTTATCAGAAGCCTTAGAACCCTCGGTCCCTGCCGCG  
CAACACCGATACAGAGACCACAGTTAGGAGCGTTATCTGAATTGTTGATGTTGTCGTTGT  
TAATATCTTCGATTGTCAAGCAACCCCGTTATAGCGGCTCTGCACAACGTTATGCTCAA  
TAGCATCGCCTGTCAAATCGGTAAATTTGAGACGGGCAATACATGCCCGAGTAACAAGAG  
TGCCTGTACCTTGCTGAAGGATACCATATTTACAACCGCTGGGATCACTATAACAGAACGT  
CAATTATACCTTCTATAGCGAGGGTATGTAGTACCATCGCCGTGGTGTGACATTGTTAT  
CCCATGAGGAGTCTGTAATGATACGACGCCACCAGAATGGCATGTACAAACACCTCTGA  
AGGTAACCCAGCGGAAAGTGATGTTTGCGAAATTCATGTACTTGTGCGCCAGTCTTGT  
TAAAGCTTCCACCATAACCATTCAACACCGTCGATATACACACTTCTGACAAGACCAGGGT  
TCCATCACCAGGCAGGAAGAGCTTCCCTGGGCTCTTTTGCCTATGCAGCTAAAGCTGTTA  
CCCCCTCTGTCCTTGTGGATATTTTCGACATAAATTTGTGCAGGGGTAACATAACCATAGA  
GTGAATGAGCCCCTGATCCCGATGGTCCACCGATAAAGGTTGAGCCATCAGCACCTAGAA  
GGTTTCCACGTACAGATGGCGCGTTGGCTCACCACGCTCCTTCATCCACACCACCTGTAG  
TCTCCGGTTTGGAGTCCGCCGGAAGGAGTGTCCGGTATGCCACTGTCTTTTGTGATCGATAA  
TGTTGGTAGATCTGTTCGATCACCTGTTCTTTTAGGGAGACGAGCGTTCCCCTTTCTTAGA  
AGGAAAACAGTCGCACCAACCCGACACGGGAGAACATATTTGACCATGTTTATTCACGAG  
TGGCATCCGACAGGTCAATAACCAGGTAGTCCCCCTCGAAAGAGTCTGTGCGACCCGGTA  
AGTCTTAGAATTTGACGCTAAGTATTAGATCTGCCAGAAGAGCCTCTTATCTTGTAAAGT  
CTCTGTACATAACCATAACAGACCAAATCCTCTTAAACCATTCCACGGCGTCAAAGTCAAAGG  
ACGCCCCATTTGTAGCATCCGCATGATGAGCCACAGACCAACACCCATTTCATCGGATAAT

TCGGAGTCAGAATGATGTAGTTCTCTTGGAAAAGATCGAAACAACGTTCTGCTACCAGGT  
CGATGTTAGGGATACGATCACGCATTCCTGCCTTCCCAAACATATAGCCACCATCCATGA  
ACAAGGCGGACATGTGACTGGTAAAGTCATATTCAGGTGCAAGCACCGTTCCATCAGGGT  
TAAAGATTGTAGGAGTTCTGCCTTCGTTGTTGACTTGGCACCAATTGAGATAAACGAACC  
AGTTCTGCCCATCAGCGAATAGCTTACTTGGAAATAGCCTCACCACGCTGAGACAATCCTT  
AAACGCAACGACATACATAGAAACATGCACGGGCTTCATATCCATCCCAAGCCTTTTCGT  
TCCAGTGCTACAGTGTGAAGGTTGTTAGCTCTCCGAAATTCTTCGCATCCCAACGATCTC  
ATACAAATGCGTGCGCCTTTAGTCCAGGCAGGACCCGATTTAAAGAGGCATAAAACCACA  
TCGGCGAATCATAAAGGACGTCAATGGTGTCTTCAATGTTGTCCAGGGCGATGTTTCAGAC  
CTTTGAAACAATACGGCGTTCGGGCACCTACACCCAGGGTACTGAAGACCACGCCAACCAT  
CGTACAGGGCCGTGTTTCGGGTCACTGATGTTGGAGACCGGGATGAGACCTGGGGTATAGT  
GGAGGCTGTTTGTCTTAAACTCAATGATCGTACTGTCGCCAAGCTTCGCACTGCCTGGGT  
TGTATGCGTACCCAGTGATGCGGAAATGCATAGTATAATCGTCCACCATCTGTGGAGGTGA  
ACTACTCAGGAACAGCATTAAACACAGTACCAATCGGTCCGTTTCGCTAACACCATCAACAG  
GGTCCGGTGTGAGGTGACAGGTTAATCTGCTTCAGATTATGGAGACCGATTAGGATTGGTC  
GTGGATCTGTTTCCGGATCATCTCGTTGATAACTACTTAGTACAAAACCTGGATGTCGTAA  
GCGGAAGTGTAGTCCGTCGACCGTTTGATGCACCAATCAAGGGCCACTATGGCCAGTTGT  
TTTCATCCGTAATCGTAATGTGCGAAGTTATAAGCGTTAGAGCGATAAGTAAACGCAGAAA  
GGTCTGCTGTTTCTCTATCTGTCAGCCAGAAAACAATCTTCGAACCTGCATCCGCATGTG  
TGATGTGAGTGCAAGGTTGTTCACTCCTTCCAAGAATCCCAGTCTGGTACTCATAGT  
CTACAACGTGTTGTCACCCCAATCCACAACCTATACGGGTGTCTGCAACAATGTCGTAAC  
CACTACGCGGAGGTGTTAAACGAACGAAGTTTGACAGGGGGATATCGATTCAAACAATCG  
AGTCAGTCCCGGGAGGCAGACCTCAACGGTATGTCACCTCGCCTGTTTCAGACTTCGTTT  
TATTGAGGTCTAGTTCAGGTCTGAACAATAGCCCATGCCAAGTTCGTTCTTATCCGCAG  
ACTGACAACGCTACTTGGATTTACCGTAAACACTGAACTAGATCGCCTGCTGTTCAAGGG  
TTGTCTGCGCAGATACTGCCTGATGAATACCAATATACCCTTCCGGGTCATGACTATACT  
CAGGGACCGCTGTGGAGGGGTAAGAGTAACCTCAGCTGATCCCGTCTCTGAACGGAATGA  
TGGCATAGGTGTATTTGCAGAAAACCTTATCGGAACGGTCATTGTCAGTATAATGGTCAC  
AAACCATCAAAGACGCTGCGATCAAACCAGCATTTTCTTGCTCCGGTGATCTGATACA  
TAACATAGTTTGCATCACACCACAAAGTTTCAGCATCAGAGGGCGTTGGCCAGTACTCCCA  
TCCCAATACGTAGGTTGAGAGGTCCGTCATGCCACATCGTGTTCGGTCCCTCTAGTTCC  
CACCATCCTCTACAGGGTAGCAAGTTGCATAGGAGTATTTGAACTTTCGTGTTACCGTGG  
TATATTTGAGTTGAACAGTGCCCCCTCCGCCTATGGCAAACCTCTACCAGAATAATAC  
CGTCGCCTTCAACTTATCTTCCGAGTCTGTCAATGATCCAATCGAAATCCCACTGAGACC  
CATTCTGATCGCAATTTGTCATACCATCGGCGTTAGCAGCATAGACGGTGCCGCAAAGC  
AATCCCATCCAAGATTAACATCAAAGCCGAACCGAGGCTTGTCATGGTATTACCCCAAT  
GAGGATCACCATGAGGAATTAACGTCTTACCATGTGACCATGACATAACGCTACCCTTAC  
ACCCATCGTGGGTTGGATATCCATCGTATGTCCGGTCCGTAATGTCCAAGCCTGGGCTCAT  
TCCTGTTTATGCTCCATTTCCGGGCGATAAACTACCGAAGGGTCTGGGATTGGCAGGACCAG  
CAGAGTCCGAGTCGATCAATGCTTGCATAAAATCTTCTGCTAGTTCCAGATATTTAAGGT  
CGTTGGTTGCAAGATATGCATTTGCGCAACCGAGGATCAAGACAGACTGACCCTCGGTAT  
TTGCATTACCGTTAGGCTTAGCTTCTTGAGGGCGTCCAGTTGATAAAGGGACTGTTGTAAG  
CCAAAACATTCTGTAACCTCAGGATGTAGTGTGACTGTCGGGTCAATGGACTCTCCCT  
TGTTTCTTTCAAGGAACTGTATGTGACCATCGATCAATTGAAAAGCATTATCAATGTTGT  
GGCGTAACTGTACCACGACTCAACTCAAGCCATAATAAGGGAGCCGAAACTACTATTCCC  
ACCATCATCAGTGACGAACTGAAAGATGTCTCGGAACCCGGTTTTATAAGAAAGAAGTGG  
AACACACCCATAATTACAATTAATCTTACTGGCCTATGAAACCAAATTCGTCACTGCACC  
CTGTGATAAAGGACGAGGTAAACGACGGTGATACATCCTGAGCCTTTGATGCATTGGTAAT  
TACGACCATGCACTGACCTCCTGTGAAGATGGCAACCAAAGAATCACCCCTGTTAAGGTT  
ACATGTTGGTGTCCCTTGAACATTGCCAGGCTTGAGAACTTACCTGGTCAACGGCTGCC  
ACCACTGGCACCGAACCTCATGCCAGGCGTTCTCAATGGTGCCGCATTTGGTTGACGGGGA  
AGATGAAATTGGACTTCTGTTTCGGAGAACCACCATTCGCTGTGTGATACTTACCATCCGT  
GTCAAAGAGTGCAAGGTCCTTCTTGATTCAAGGAACACACCCTCAGAAATGAAGACAAC  
CTTCATAAGACCATAACGAGTCATGATGGTGCCAAGAGAACCTCTCCTGGTTGTGTCTGC  
CTGATCCATAGCTACATAGTCAACACCAGATACGGTGACGGCGGAAGGAAGGTCAGAGAC  
CTTTACCGTTGGAAAGGAAAAATCTGCCATTCTTACACCTTTGAGGTTATGGTTGATGG  
ACCAGCCACCCTCTGTGGTGTGATATTCTTAAACATCTAGTAAACTACCAACCGGAA

TTGGATTATCCATATCATCACGAGACCTAGTATTCCACCATGTAGCATCGCCAGTGCGAG  
GAAGACAGAAGTTGATCAGGTAATAAAGTTTGTAGCCCAGGTGATCCAAGCATCGTCAT  
CAAAAAGAACGATTGCACCTTCATGAGGGGTTGGGTAATAATTCTCGTCTTGAGCTACCA  
AAGAGAGTCTTACCACTTCTGTTCTTTGTTTGTAACTTCATAAAAAGTCTTGATATCTAC  
GGGTTGTCCTATCCATAGTTGAATAGCTAGAGGTGATTTCAAGAATGGCAGTTTCAAGAG  
GCGTTACTTCTTGAGCTAATTGTCAATGACCGTTCGTCATTACTTTTTTGTCTAAATAAG  
CTGTCAATGGGAAACCAAATGTCTCATAGTATCACCAGTGACCAGCACAAATCTTGAATC  
ATGGCCACAGGCGCTGACGAAGGCGGACCTGGTTTAACTCCATAAGCTTCAGCCCCGAAC  
AGACATCAAGGTCTCCTGTAAGTGGGTCCATAAGGAGATCTGAGTAAAGAGTTGCCATTT  
AAACCTCTTCTTTGTTGGGTGGGTTGTTAATACGAGAATCACAAATCATCTGTCCATGCGT  
AGACGTGATCATGTTCGGACAAACCAATCATAGAAATCATTTCATATTCACACCGCGCGCTG  
TAATTAAGTTGCCATCAGCTGTGACTTTTGGCCCGTTGACACCAATGATCCCATCCACCT  
TTGAAGTCGGTGTGCTGCACCATTGGTGAAGGACATTTGACCAGTTTTATCAACAATGA  
ACGTTCCAACCAGACCGGTTAATTTAAAATCACCTTCACGCGTCTTTGAGAACTGAACTT  
GGTCGTTGCACAATTCAAGCTTGTGGGTCTATAGTGATGGCGTTGCCATCACTTTGAA  
CAACGATAATGGTTCGACACTCGAGAAAGTCCGTGGGTGTTCTTATAATTAGCGTCACCTT  
CATTGCGCTCAGAGAGGGAGATAACAACAACCTTCACTACGCTACACATGAAGCGTCAGGC  
GAGCTTTTCTCCGTTAGTTGAAGGCACGGCTAGCGGGAGATCGAAAACCGAAGGGTATG  
CGTCTACGGTGCCATCGTCGAAATTCGTTGAGGCTAAGAGTTGGACAGTGGCTGAAGGGA  
TTGCGTAATCCACATTAACCACTTTGCCCCAGTCCCTGTGTGCATGTTCGCGAGCTTGCC  
ATACGAACCAAGGGTTAAGCGCAGCTTTCGTACAATGATTTGATGCCATTATACCCCCAA  
TACTCCACCACGGGCTTCTGCAAGATCGAACTCAGCCATCCAATAACCACCCTCAAGGTG  
CCCCTTGTGGGTGAGGTACACAACCTTTATAAGTCCCTGAGTATCTTTGGCTTTTCAGGTA  
ATCCCTACTTTGAGGAATGATCGCACCCGTAAGCTCTGTCACCACAACGAGACGTGCGTC  
TTCTCTGGTCTCGGAACGACTTGGACCTTTGTTGGTCTTGGTTTTCTTTTTGGCTTTACT  
GTTCTTTTCCAGCAGACCCTTACTGGTTCAGGGTTTTGCGGGGTTGGTCACTCATGCAT  
ACCTGTCTCTGCACTGATCTCAAAAACAGCCGTCTAAAACCTCATGCCGTGTGTTGTCCA  
GAAAACCTGCACCATCTTGAACACTGAATCTTGAGCCGGTATTCTTCGCCAGCCTTTCAAG  
ATTGTGCGTATCGTTACCTGTGAAAGCGGTGGACTGCTGGCGAGTCTTACCACCGAACTT  
AATAACCTCCGCAATTGGTATCTTCAAGTCTGAGATAAGGTGCTTAACACCTGTGTCAAG  
AAGAGTCTCCTTCTTATATGACCTAGCGATCTTTGCAGTCATATTGCTGGCCGTTGCATC  
CCGCAGGACGTTTCGTTGTTTTCTAGTGTATCCATCCATTTATCGTGGACAAACCCAAC  
TGTCCTGTAAAAATCATTTGGTGTTCACCATCAAACCTCTGTCTCAAGAACATTGTCAAG  
AGACTCCCCCTTGTGAGATTCAAGATAAGTAACTGTTTCGTCACTCAGGTTATTAAGCGA  
GTCATAATTTGATTCCGGTCTATGGTGTATCCGTCTTCCCCTAAAACCTAGATATATGC  
AGTGCCTGTTTCGTTACTGAGCACATACGCGTTTTTTGTATTTTGGTTGCTATAATGAGC  
GATGTTCTTTGGTTACTGTCCAATATAAACAGGGTTGACAATGGTAAGTCTGCATGAACG  
TGATCAGTAAGTCCGCATCTGTTACTCCGCGTCTTCAGTAACCTCGTCGTCAGGAGCTGA  
ATAAAGGATTTGCATGTCAGACAATAACCCGAGATGGTATCTCCCAACACGTTTCGTTGC  
CGGGGTGTATGAGAAGACACTCAGTTGCCCTGAAGAAATGATTTCCAAATATTTAAAAGT  
GGCAAAGATGTCGAGAATTGTTGTTCAATTTGAAAGCGATCGTTGGACCAATGCCAACATC  
CCCAAATGAAACGTCGCCGAGATTGGTCTCTCTCGTTCCTACTGGCACCTCAACTCGTATGT  
TTGACTGTCCAGTAACTCACGCATAGTTTGGTGTGAGCAAAACCATCAATATCCCATGAGAA  
TGCGATCTTTGACATTACTTACCTACCGCCTTATCGTAATCAATAATGGAGCCTTCTGGA  
GTCCTAATCTTAGCATCTGGGGTCATAACACCAACAACCTTGGTCTTGCTTGTTAACTTT  
CCATTATCCATTGAAGCAGCAATCGCTTGCCACCGAAATCTGTGTGGGCCAGCAAATTTG  
GTTTCGACGAGCAGTGACTTCAACCGCATTGTTCGGTAGCTGAAGACTGCTCAGTCCCTGTC  
TGCTAGGTTTTACCACCAGACATTTTAAAGGTCCGAATAGATTGTTCGCCACCGCAGTTTTG  
CCAAGGATGAAGGTCCGGAACCTCCTGAACTCAAGCTGGAACACTAATACAGCGCCATCA  
GAGTTGATGCTACAAGCCTCCATCGAGGTTAATATGTAATTCTCGATGACCTTATCTTCA  
GGCACCAAGGTAACGATCTTACGATCAGTGGTAAGACTTCCGAGGACCTAAAGTGCCTTT  
TCTGGGCCGCGTGAGGCAACCGGGTTTTGACCGTCAGTATCTTTATCAATGTAATTGTTT  
AGGATATGATTTACACGAGATGAGTCCACCCTGAACTGAAAGAAAATTTCCCATCTTCG  
TTGACACCGTGGTCACTGAACTTTACCTTTTCTTACCTGCGTAGGCTGTCTATCAACG  
GTCCTTGTGTACAAGTGTAGTTCACCAACGTCTAAAATGATTGCTTGGTTGTTGGTGTGCG  
TTCATGTCCTTGATTTATACGTTTTCGCCACCGTAGATCAGACCACTGGCCAAGAGCGTA  
TATTGTACCTCTTCGCTGGCTTCTTGGGCTGTGTTGGACTTTTTTCGCGACGGTAGCCGTA

GCCATACCCTGGTTAGGTTAGGAATGGTTGTTGGATACAAATGCTATGCGTCCACCCATT  
ATACATGTTACCATTTTAGCATAAATCTTATGATAAAACAATTAATAATGGGGGCGAAGCC  
CCGTTAATTTATTGCTGCACACTAATCATTAACTTGATGTTCCCCAGGTTTGCAGCTTCG  
AGCTCCTTGTGATCATCTTCTTAAACCCACCTGCATCAATCTTGATTGTAATCGCTCCA  
TTGACAGGTTCCGGTTGGAATTACCATAGGAGCATTCTTCTGTCGGGCCAGCACCAGGCATC  
ATCGAGTTCTGGCTAAGGTAGTTAAGTCTAGGCTGATCAGTCATTGCCATCTGACGAGTA  
ATAAAGTCTCAAGTTTTACCCATCCACGAGTTTTTGTAAAGTTTACCACCTGCGGTTGTA  
TCTGTGCCGTATCTTGAGTCACTGGACACTAGAGCTCGGTTCGAAGACATAATTCCACGCA  
AGCATAATTACTCCAGAAATCAACCCATACAGACCAAGCCAAAGCGCAGATTTACCCATC  
TTAGCGAAGAGTGGACCATTCTTTTCTTCTTAGCGCTGCCCTCGCCACCATCATCATCC  
CGACCACAGAAGATCGTTGTTAGGAATTTTTAAGCTCCGGGGGGTTCAGCAATGTTTCGAA  
AGAACACCGAACCCCGGATCAGAGCGGAACCAAAGAACAGAGCACCGACACCCACCCCT  
ACCCATTTCCATGCAGAGGATAACTCCTCGGCAGTTTTACGGAAGATTGGAATCTAACGT  
TCCATGGTGCCTTGGATCAGCACAAGGTATTGTAAACAGTATCGACCATCTCCATGAAC  
GCGGCAGTGAACCCAGCAACGAATTGACCCGCATTTTGGGCCAACTCCCCGGTGGAAATGA  
AGCATTTTTGCAAGTTCGTTGAACGCCCTTCTTAAACACATCCCCAAACCCGCTCTGGAAA  
ACTTTGTTCCGAACTCAATCCAGGTTAAGGTCGGTCTCTCCATCGCAACACGGTTGCCT  
TACAATGCCTTACGTAAAGCACCACTTAATTTGCAGCCTCGGAGCAATACTTAGCTACA  
AAAGGTGGGACCTTCGCTGCTTCAACTCGCCATTCTTGATCATTTCGAGCAACTTGGTT  
ACGTCGATGGTGGAAACATTAAGCCTGTTGGGAAGCCTTGAGGAACACCTGTAAACAT  
ACCGGAATACCTTCGGCAAGTTCCTGCTACATTTCTTCCCTCCATGATCTTTCCTTGACCC  
ATCAGCTGCTGGATTACGGGAACCACTTTGGTATTTGACCGGATCAACCCGTAAGACA  
TTAGCGTATTCAGCGAACGCCTTGCAAAGTTCATCGTCTGGGATTTACGAAGAACACGA  
CCCGATGGGATGGCCATTTGGGTGTAACCCCGCGATGCAATCTTGAGGTCAAGAGCCAAT  
TGGTAAGACTGGTCACGACCAAACCTTGATGCGTCTCCAGCGCCTTTGGAGTTCTCAAAA  
ACCATTAGCATGCTGGATTCCATGCCATGAAAGAAGTACCACCTTTAGCAACCCCTTGCA  
GTGGCATTAAATGCACCGTAAGCTGCGCTAACGCTGATTCAAGTCCTACGAAGCTTTTTTC  
AACCCGGCTGTCAGGGTAAGAGTACTCTCACTTGCCTCCAAGATTCAAGTCTCCAGTGCT  
GGAAGTTCAGCACGCAAATTTGAAAACCTTCATAGTATTACTGTCACGGAAGCGCTCTTTC  
AGAGAATCCTACCCTTTCAGTTTTGATGAAGAATTGTCACGATAATTAGCACGGAGGCGA  
TCACCTGCGTTTGTAAACCGTAGGTACCTTGCCTGCAAGATCACCGGAATAAAACTGATCC  
TCAGCTTCAATTTTATTACAGGCCAGCTGTCGGACGGGTAGTTGCTCTTTGGTGACTTCC  
TTTGCTACGCTTGTTCACGTTTCATTTGACGAACCAGTGCAGCGTGTAGTGCTGGGTGCG  
AAAACCTTTGTTTGGGTAACCAACCCCTGCCTGTAGCATTTCGGGGCGTTCGCGCGTATTGAA  
CGTTTCTCTTGGAGGGCGGGTTGACGTGCAGCGGAATTTGCTGTATTTGTGCCGTAATCA  
CCACCTGTCTTCTCCATCCCACCTAGACGAGCCTGTAGGCCATTGTAACCCCTTGAGAT  
TCTGGAGATGTTTTTTCGTTTCAGTAGACCAACAGCCTGCTCTCTACGGGCCTTTTGAAGT  
ATGACGATTGCTTAACGGTCCCTACCTTCTTCTTAGCCTTTGCAATAGCATGGGGTGTA  
GTTTTCACTTGTCTGCACCCTCCCTATGGTGTAACTTTTTGTTGACAAGACGTGCCTGC  
ATTGCAGAACGTCTTAATGTTGCTGTTGTATCCGTCTTACTGGACGAGAACGCCCTGCCA  
GCTTTTTCCCATTCATTGTCAAAGACTTCACAGCTTTCATTGTACGACCGAAATACGTC  
CCGTCCACGTCCCATGTGGCTTTGTTGACTGTATGGCTTACGATAATATTCGCCATTGGG  
TCCCTTTCAATAAAAGAGCAAGGACCCCGAAAAGGAACCAGGCTAATGATTAACCTTGTTT  
TACCACGACGCCGCTGTTTTAGCTTGTAGCCCTTGTCTTACTTTCTTCTCTCTTT  
CGTGGGCATGAGAAACGAATCTTACACAGCGAGGTATTCATTACGCTTGAGCAAATAGG  
AGACATCAACATATTAAGGGAGCTACAGGATCCCCCTTGAAGTTTTTCAGACCACGGC  
TCCACAAGTAAGGGAACCAAGTCAGTGAGCTATTTTTCTTTGCATCATCCATAGCGCTCA  
GGACGAATTTTCGGAATTTTGGTCCGGTGTACTCCGTAGCCACTTCCATCGCCTGATCCAC  
CGAGTTCACCTGATGGTGTGTCGCAGGCGTCCCAGAAGTCCCTTAAGGTCTGCGAAACC  
GTTTTTCGTGAAAAACAGCCGTAGTTAGTCTGAAGAAGTCAAGCAACCAGCTTGATGAA  
GTCTAGCATTTTTGTCTTGGAACACAGCGTCCCTATCTACTCGATCCGCCACACCATCAAT  
GGATACATCTTCGAGAAACAATGCGGAGCGTTTTTCGAGGTCTCAAGCCCCATCCGTGC  
AAAGAGGTATAGAATAGCTGTAGGGAGGGCATCAGAACGGTCTGACCTCCAGTCATAAT  
GGAACCAGAAATACGTGACACTGGGACTGCAACATTACGACCGATCTTGGGAAGGTATTT  
CATGAGCTTCGTTGGAGACCAGTGCGGGATAATGAAGTTGTGACCTTCGACGTGGACTTC  
ATTTGTGGGTCTGATATTCTTGTACGCTCCTGCGTCTTTGTGGCCGAGTGATACATGCGT  
GTATAAAGGCCACATCCATGTGGCACACGAAACACTAAAACGATACCAGTCAGGCCAGGT

AGACCGAAGCCTGCGGAAGATAGAGTATCTGAGTTTAAGAAAGCATCAAGGAGACCGATT  
TCCCAGTCCATCTGGCTGCCTTATGTCCCGGAGGTCAGATCTTGTGTGTCTGAATCCAG  
CCGATGATGCTGAGTCCCATCCCCTCAGATCCTTCAAGAAGGACAGGAAAGAAAATCAGC  
GTCGTGATAGAGGCGTGTTCCTCCAGTTTGCAGAGTTTCCGTTACAAGAAGAAGTGTTT  
TGAAGTGACACCGCCATGACACCAGATTGGTTACGTGACAGTGCGGCGGATAGCCCACCA  
TCAACCCCATCTGGGGGATGATGTTATCATCGTTACGGGCAACGACAATCTTATTAGCT  
GCGGCGCAACCAGTCACACGCTGGGTCATCAGGTACAGTTTACTTTTTAGGGTCATGG  
GCTTACGGCCTAAGGATAGCAGTATCCGTTCAATTATCCTCCTGCTGTGACAATCTGACCG  
TTTCCGGAATTAGACCCTGTGTTATCTACCAGAACGGTGATCCGGATCTAAACGAAGGAT  
ACTGGCGTGTGTACACAAGCTCCACTGTCGCGTTGTTTACAGATTACGAGCAGCCAGATAG  
TTAGTCGGTATGATCGCACGTTGCGGGATTGAGATCACCGGATCGTAGAACACTTTGTTA  
TCGTATCGTATCCAGTGAGGATAGACCCGTTTGAATACCAACCTTGATCGGGTCGTTT  
ATCATTACCGATTCAGATCAGCAAGATCGTCATCTTTCATCTTCATGGAGAGACCCCTG  
TTAGAACGGCGAGACATGTATCAAAACACACTTTCTTCTGTACGGAATTCAGCCAGCGA  
CCGACATGGACAACGTCAACGTAGTTACCAGAAGCACACTTACCTTCGTAGAAGGAACCA  
ACACCGTTAATCATAACGGTAGAAGTCCAGATTCTGGTCCCAAATGGTCATGCGATCAGTC  
ACACTCCGACTTGGAACGAAAACACCTTCCATTGGCTTCGGGTGGATTGACTCACCACAA  
CAAGGGTTCGTTGGAAGCCATTGCACCGATACTTCCACCCTCTGGGAATACGCTATCAGCA  
AGAGGATCGTACATGCCGATGGTAGTAACGTACTGCAGTGCTTGCAGTTGGATATCAATG  
GAGTTGCTCCCATCGGTCTTAACAGTTCGTCAGCAGTTGAATCAACGTGCAGCTTGTAC  
TTTGCAAGATGGTAAGGAGCATTACCAAGGATTGAAGCGTTGCTGTGAGATACAGTGGCC  
ATGAAGTACCAGTTATCAGTAGCAGTCAGGACTTGTGGCAGAACAGACGACACAGTTACA  
ATTGAGGAGTTTGTGATTGTAATATTACCGCTGTCACTTCCAATACTGCATGTGCCATCA  
TTTCGGGGAGCGATTGTAACAGCGCCTGCGCTTGCCGCAGCAGTCAGAACAGTTGTCCGA  
GTTGCACCATCATTAAGTGCTGGTGCCATGGTAGTTGTCAGAGAGTTTGGGGTGGATTCA  
CGAGTCACTGAAAGAATATCGGTGGTCTGATAAGCTCCGGAAACTACGTTACAGAGCCACT  
GGGTTTCCGGTCTCAGTGTGTTTGTCTGTGAAGTCCACGATGGGATTGATAAACGCT  
GGAGGACCAATCATCAGGTAAGGAAAGGAAATGTAGAAGAAATCGCTTTAGTTGCAAAG  
GTGTAAGCTCGGGAACCTGGTGCGAATCCATCATCTTCAAGCTGATCGAGTTCGGTATAA  
GCCCCGAAAACGTTTCATGAAAGGCGTTGTGGATAGCCGGGAACAGCGGGGTTTCAAACCT  
TTCGTGTCGATTGGTTGAGTACCAAGCGTGACTGTAACGTCAACCAACTTGTATTATAA  
GCCATCGGTTTCTCTTTATTTCTGTACACACACTTATTCACCAGCACCTCTTTGTG  
CTGTATGCTGGCGGCTTGCGCCCCCTATACGGTCACTAATAAGCCAGAGCGTCGCTATAA  
GCAAGTGGTTTGTTCAGCCTTCGGCTGGGTAGTGATAAACGAGTTCTTCGTTGATCTTC  
TCTAGTTCTTCGAGAGCACCCGTAGCTGGTTCTACGAAGGACACGTTAAAAGTTCTCAAG  
ACTACAGCACGGGTCTCAAATATATGCATATTCAATGGAACCTTTAAACGAGAAATTGTC  
GAGGATGGCGAGTATGCAACAGGAGAGTTACTCCGGAAACATTTGTACATATGAACGGT  
AGGTTTCAATTGATTGCAATACCCGGCTTAATGCGTTGGCAGCTTACCACCGTAGGCTGTG  
AGGGCGTAATCAATCTCGTTATTATGAACAGTCATGGCATTGCTCTGTGTATCACCACT  
TCGTACGGCTGCCAGTCAATCTGGTCAACAGCCGTCAGCTCAACAAGAATGAATTCACCA  
TCCACCATGGGAATCTCATCTTCCCCTGCCAAGACAACGTTTCATCCTGTGGTTTTTTTA  
CAGAATGCTCCCCTGTATTCTGTAACGGGGTCAAAGATTTAATCGGAATTGGTGAATCCT  
GCCATTAATTCCTCTGTTCTGTCCTTCCGGGACGGATACTACGTAAGCTCTGAAACGGG  
CGACACCTGTAGTCTGATAATCATCAAATTTAATCACAGGGACCCACATCATATCCCCAC  
CGGAATTAATCAGTTTGTATTTGGTCTGCCAGTTTCGTTAGAGCCTTCAACACGACCTTTGA  
GCATCACAGAGGAATAAACGGTGAAGGAGTCATACTTGCTACCTCCTTCCCTGCAACAATT  
GTGATGTATAATCGCTTACCGCCTTACCTGTTAATGGTTGGCCAACACACTCACCAATAC  
CAAACCTTTCATACTCAGGTTCAACCCCCAGGTTTTTCGTACGGATTGCTTGTGTACCTT  
TTGAACATGCTCTGAGTCGCGCTGTAAGGGTTGGGCGACGTATTAATCTATTTCTTCCAA  
TAATTTCTGTAACCAGCTATTTTGCCTTACCCTCTGCTGTTAGATTCTTTGAATGTGCT  
GGGCGCTTTAAGGTCACCATAGTGGCACATCGCCTCACTGAATCCCTAGACATCGGCCCA  
CGAATCGGGTTCTCTTCTATTAGGATACTAACCAGAGTCCATAAAGAACCTTATCTTTCC  
TGCACCAGCTTTGACGGTCTTGGTCCGCATCGGTGTCGGATTACGACTGCCTCAAGCAAG  
GTATCCGAAAACCTTCTCTGGAGTTTTTCTGTTTCTTTTGTAGTACACCTGCTCCGCT  
AGTCATAAAGGTAAGGGCAGGAAGACCATTTCAGTGTTTCATGATGGGTTGTAGCGAGCGT  
TGCAGTATTAAGACCTGAGTAAAGAGGGGAGTCATAATAACCATATGAAACCTGACGCGA  
ATCATGTTGTTGGGTTACTCCGAAAAGTTTCTCAAACCTTGCTCAGATCTTGCTTACTTGT

GAATTTTGGTCTGATAGCCACATCCGTTTAGTTATTTTACCACATTATTTTAAACAAAATC  
AACGACCAAGCGAGGGCTAAGTAACGAGTACAGCGGTAAGGGTGTCTCCGAGGAACTCCT  
GGTACACCTGTCTCGGGTACAATGCCTTCAACATCGTACGGACCCCTTGAGTTCGGTCTC  
ACTTTCGCACGCCAGTGTTCATCATGACGGACACGCACAATGATGACTAACCTGGAAATC  
GCGCTGAGTCAAACGTCCACATTATCACACTTGGGCTGAAACCGGCTCAAGAACTCTTTC  
CAGTACGGGTATGGAGAACCACCTGTTACCTGGATGGTTTCGTACCCGTTCTTTTTCAAG  
CGTCTGTGATAGATGACTCTTCAGAATTTACTTCTTGAAGGATCAAGCAACGTACAACA  
TCAACGAGCGTATTATAAAGAACTCGCCACATGTCGCAGGTTGTTGATTGAGCGTTGGGC  
CAGTTTCCATTAACCTTCTCAATGCTAACAATGCCAGACTTGTTCGTCTGCTAAAAGC  
TCTGGGGTAATGGATACGAGGAGCAGTCGAATATACGGAATAATATCTTGGTCTGTCATT  
TTCGCTCCTGTTGGAATGCTCTTCTATGAATCAATATCTTATTACAAAATATGCTATTTG  
TCATTAACACCACTTGACAACACGTTAAGTTCTGTTATCTCTAAGTCATCAAACAAAAT  
GGAGAACATTTTATGAAACATATTAAGGCCGTTATGATTTGACTTATCGTTGGAGCACTT  
AGCGGGGCGGGAGCTTGTACGTACGTAATGATGAATCCGGATGTTATTAACAGCAAAGCA  
ACTGAATCAAGTTGTTTGTCTCCTGAAGAGATAGCGGCCAGCGTCCATCGACTTGTCTGT  
CCCGGATGCGACCAACGCTACAGATAATCATTCAAACCTGGCGTCACAGTTGTTTAGTCA  
GGTAAGATGGATGAGATAAAGAACAGGCTGGAGTATACCAGTATTGGAATGATGGGGCG  
ATCGTTTATGGAACCTGATGGATGAAAAGGGGCGTCCATCTGCACCCATTATAAAGACGGA  
AAAGACCTCTTGGCCAATCTGAATAGGGAAGCAGGTGTGCGTAAGCTTCTAAAATAAAG  
GCCCGAAGGGCCTTTTGTGACGCCATAATGCCAGCGGATTTAAGCTTCGCAAGCACTCC  
GTTAAAGTCTGTTAGCAGAGTTTCAACTTCGGTTGTTACAGAATCTACCTGTCCGGAAGC  
TTTCTAAACACCACCGAACGTGGTAGTTGTTGATGCGGGAAGTGTGTAACCTGCACCCGCC  
TTCTACGAGATCAGCAACAGAGATTAAGTTACCGGTATCAACATCGATAAATTTGGTTGA  
AAACACACGACGAGCTACAGTAGAAGTTGCCATATTTTATTTCTCCTGTTAGGAATGAGG  
AAGGTAATTGCGGAATATTTTCAACAGAGATTGCCTGATCCCACTGTCAATGTAATTCC  
AGTAAACTTCATCAACTCGTAATGAGATCTGGAGACGCTGTTGATTAAGCTGTCATTT  
CACTATTGGTGAAATCAGCGTTGTAACCATCCAGGAACTGTAATGGATAGACAATTGTGG  
TATCAGATCCATCTGCATCCCAAACATTCTTGATGCTTAACAAAGTTGCAAGATCAAAC  
TCTTTACGCGAACTTGGTACTCCCTGTTATCGTAAGGATACGGGATACCAATGTTAATGT  
CCCCGCTAAGAACAGTTTGTGCATCTGCCTTCTCTGATCTTATGCAGAGACAAGGCTGG  
CCGTACTTTCTTCTAAGTGAACACAGTACATCCCAAATTTGTACCCATTCTATGGTTT  
GGTCATTGAAATGTGGAGCGCCTTCAGTGACCACATCCCGTTCAGGCATTTGTTTCGGTA  
TAACCGGGGAGTAAGCTAACTCGACACGGTGGTCAGAATACATCCAAGAACCCGTGCTCA  
CTTTCGGATTATTCGTTCTGAAATCAGAAAGATCTACCTGATATTGCCCATTTGACGTTT  
TGATTAGAGGTATCTATGCGTTAGCTAGCATTTACTCTCCCGGAGAACGGGGCAGACGTC  
CCTTTATTAATGGACAGTCAAAGAGGTTGTACCTGTCAGGTTTGTACGGTCCCCGAGGAT  
AGTAAACAACCGTGCGGGTAGTTCCAAGTGTAACCGCTAATCCGTTTGAACATGCTAGGTT  
GCCAGGCCACGTCAGTGACGCACCTCAGCCAGAGAACACGATAACGATGATCAGTGCTCT  
GTTTGTACGTAGGTTATTGAAGCTCATGGTTTTGTTTTAGTACCAGCAACCTAGAAGTC  
TTGAGACACGCCAACATCCATAGCCCCAGTTGTAGAAGTAACCAGAAGATCGTAACGATA  
AAGTTTCTGCCACGAATTGTCTACACGGACACACTAGCCTGTACCTGCTGGTGCTTCAAG  
TACCGGAATATCAACCCACCCAGCATTTGTTTCGAGGTTGCGGAATGGTAGAGGCTCTATC  
ATAAACGTTTCTTCTACCCATGTTCACTAGAGAAGCCCAGGCGCTAGCAGATGCTCTCTG  
GAAGAATTCCAATGTGGGTTTATTGATGAAGTAATCACTGATTCGCCATCAGCTGGACC  
TGGGTACCCGACGAGTTTGACCAAAGTGCTCCTTGGTCTCCTTTAATAACCTGGATACC  
CTGAATGCCTTGTGACCCCTGTGGACCTTGTGGTCCGACATCGCCGGGGCAACCTTGGAT  
AGGTCCCAAGTTATCATAAGTGGTATCAGTCCATCCCAGAAATCTCCGTCCTCAATTA  
TCCCTGACCAAGCTCTCTAATAGAAGGAAGTTCAGTGATATTTCCGAGTTTGCCGAGGGT  
TTCTACCCCAGCACCCATCTGACCCCTCTGGTCAATTGTGGTCTTACCCGCTTGTGGACA  
TGTC AAGTCAACCCATCGTTTCCCATGCGGTCCAGCTGTAAACATAAGAATACTCTTTGTT  
CCCACCGGAAGTTACTGAATACATCCATCCTTGTGTTGGGTTTTGAACATCAAGCAGGTC  
CCCATAAGTCGCAATAACACCTTTAGCAACGATAGTTGCACCCATTGGTCTTGGTCACA  
TTGGAAACCAGGATCACCTTGCGGGCCACGCATGACTCCAAGATTTACCCAGTTAGTACC  
ATCGAACGCAAAGCTTCTCCAGTGTCCACTGTGTTGTGAAGATCTTCAGTTGCTGCGCT  
GGACGGCAAAGCTGCTTGAATTGGCTACCGTACCTCTGGCAGTGAGTAAACGCCCATTGG  
ACCCTCTGGTCTGTAGCCCCTGCGGGTCTTGCAGTCTACATCACCTGATGGCCTTA  
AGGCCCGTGTGGGACATCCGCCCCAGTATCTCATTTGGCAACGGCATCTCCTGTAGCCCC



GGTGTACACCTTGTAGCCTTTTGGGCGAACGTATGGACCTACGTGTATCCATTTAGCATC  
AGCCTGACTCCAGACCTAAAGGTTTGGAACTATAATCCAAGCTTCGCCTGGTGTTCCTGT  
TGCAAGAAGATCTGAAACCGCCCCTTTAGTCCCAAGAACACGAGCACCTTTACCAGCTTC  
ACCACGATCACCTTTCGGAGCTTCAGGTCTTGGTGGACCGAGAGGGCCAGTTAAACCAGT  
ATCGCCCCTATCTCCCTTTGGATCGATAGGTCCTTGGATAACCAGTAGTCCTTTTGTCTCC  
AGCAGGACCCTCTGACCCCTCAGGACCCTCTGGGCCTTGGTTCGCCCTTTCGTCCTTTAGG  
CCATTGTGGGCCGACATCACCTTGGTCACCTTTAGGTCCTTGGACGGGAACAATATCTTC  
CCAAATGTCGTCAGCTGACCAAACCCCAACGTTATTGGCCGTTTAAACAACCCAGGCATC  
AGACACAGCATGACCAAATTCAGGCAATTCGACAACCTGTTGCTACTGTTCCCTTCAGTTT  
TCCAATAGCGGCATCGTTACCGTTATCGCCCTTGTACCTTTAGGTCCTTGTATGCCCTGT  
TAAGCCCTGAATCCCTTGTATACCTTGGTCACCTTTCTATCAACAGTCCCCTCTGTCCG  
TTTAGACCCCCGGGGTCCGGTGGCAACAGTAGCCCCTTGTGGTCAGGCAGGCCCTACTTG  
CCCTACAGGTTGCCAACCGTCTGCCTCGCCAGCCCGAACCCACATCTGATCTTCGATATT  
GTAGGTATCGCTATTTCGAATTTCCGTGAGTAGGAAGGAGTGTGTGTTAGTAAATGTACG  
CCTGATCAACAATCCTATAACCATTGTGCCTTTGAGGTCCAGCGAAATCGCAGAGATGAGC  
ACAAGTGACTGTGCAACTGTCCAGTAATGAGTTCATATTTTCGTAAGTATCTCACTTTTCG  
CATGGTTGCCGAGGAGGAAGTTGGGATGGGTCTCAAATAATTCCTTGAATGTAACCTACC  
AAAACCCGGATCACCTTGGTGACCCTTGTGCCCCTTATCGCCTTTTTCACCGGGAGGGAG  
AATAAGACCTTCTTCACCAGGATGGGGCACTTAAGCACGAACGGTTCGGATCTTGGTAAG  
ATTAGGGACAACGATCTGAGGTGTAGCAACATACAGCTTTCGACCTGCCAATCCGAGCAG  
GTTATCACTGAGAGGGCTAACCCCGACAGAAAGTTCGACAGGGCCACCTACAAGGGCGTT  
ACCGGAAGCAGGATCTACAACAACAGCGGCCTTCTGCGGAGTAGTGGAGTTACCTCCACC  
GGGAAGTGTACTGTGGTCGTATCCTCTGTGTTGATTTGTCCATCGTCCACAAAGGTTCC  
TTAGACGGTACCTTCCGAAAGGATTACTTCCGTGTGGACGACCTTATCATTGTAATCTGC  
CATTTTTAGCCCTTATTTTACAGGCGCTAATTCCTTCAATCGCAGCCTTGAAGTCTGGAAT  
AATGTATTCGAAAGACTTGTTTTTTCGGAAGGGTAATGCCTTTGGTGCAGGCGAAGTCCGC  
AAGTTTTCTTTGCTCGCTTTCTTGTGACGCTTCGTGCTTCAGTGCTTCTGCCTCAGCCAG  
AATTGCTTCGTAACAGCTGACTCCACTTTCACCTCCTCAGTCTTGACTTCTTCACCAAT  
AGTGCCTACAATTGGATCCAGTGCCGTACCGCGACGATTCGGGTCTGGAAGAGGACTGTT  
GATGAGTACGCTGTATGTACGCATGCGGTGGGTAGAGTCTTCTGCATCCACATCAGTTCC  
AGTGATCTCAGCAAGAGGCTAGAATTACTCAACAGAGATGCGGAAAGCCCTTCGTTTCATT  
TACGAGGCAAAAGCCGTTCAAAGGAAGACGGGCAGAAATCCCATCATGCAGATCGGTTGC  
GTAAGTACCAAAGAATTTGAACAATTCCACCATGGTAGGGAAACTACGATAGTTTTGATT  
AGCCATAAAATCTCCATTTGGTTACCTTAGTAAAAACCACTTGACACCGTTGCTGAAGTG  
GCTGTTATTAAGGCAGAGAAACAAAAAGGGAGAGGTGAATAATCATCTCCCCCTCTTAGA  
GGTAGCTGTTACGCTGTCTTATGCGATAGTACCAGTGGAGCGAACGTCCAGATCGGGACG  
GGTGTAAACAGTGAGGAAGGAAGTTTTCGGACTCAACTTTCTTCTTAGCAGGTATGCAGA  
AGATGAGTACTACAGGACCAGTTCCTGCGAAGGAGTGTGTTGCTTCACGAACGTCATCTGC  
TGGTGCATAGTGAATCTGGAACATGTCGTAGATTACTTGCGGCAGAATCTAGGCTTCACC  
ATCAGTGAAGTAGGTTGAGATATCCTCGATGGAAGTTACGTTCTTCTGCACGTACATGCG  
GTTGTTGGCGTTCTCTGCTGCCGGACCCAGTCGCCGTGCAAGCGGCTCTTGAGTAGAAGC  
GTAGTATTGATAAGCGTTCATTACCAGCGCGTGAGCGCTCAGCGCTGAGAACCACTTACG  
AGAAGCCAGCACTACGATACCGTGGGTGTTGCCATTGACACCCGCACTGTGCAAGATGTT  
AGCACTATCTTCAGCTTCGAGAACGTCAGAAGTGTGATGGCAACATTTGTGAAGTCAAT  
GTTTGCCTGTGCTGAGTAACACCCCACTCGGTGAAGTAGTTGTACTGAGCACTCGGGTC  
TTGTCGTGCCAAGATTTACCCAAGATAGCCTGAAGCCCTGCTTGTCTTTTCAGTTGTTT  
ATGAGAGATGCGGAAACAACGAACCACACGATCAACAACATCTCCTCCAGTCTTCGGGGC  
GTGAGTAGTGAAATACTTACCGAAGTTTTGTACGTCTGCCGGAGTGATCTGACGATTA  
TGGGAAGAACGGGACGTTGAAGTTATTCAGTTGCGCCTTTTCAGTGCCAACGTAGTTACG  
TTAACCTGACGACGACGAGCCGGGAAGTACGCAGGAACCTCGTCAGCACGTTCAATCTG  
AGCGACAGTCGAAACACGGTGGTACGCTGAGAACAGGTCCATTTTGGTGATTTCGACGGAA  
CTGAGGTGGTACGATTTCCAGATTTGCGCCAAGTTCTTCGATCTGGAAGTCGTCAGAGCG  
TAACACTCCATTGTAATGATCCTTGGTGTATATTAGATAGACGTTACAGGGAGCTAATC  
AGAGCCGTCTAATATTTCTCGGTGATCTTCGGACCTTTGGCCTCAAGAGCCCCGATAGC  
AGCAGCGATAATTGCAGTAGTACCGTCAGCGAAAAACGGTTTGGCTTTGTTTCAGGGTAAG  
AGCACGAACTGCCCTAACTAAGTCGTAAGTACTGCCAACCACGAAGTCACGAGGATGATC  
GTAAGCAGGATCCAGCTCACGGTCCGGGATTACACTTAATCCCTCAGAAGCAGCGGAAGC

GGCAATTGGTTCGCACGCGGGCGTTGACAATCGTACGTGCTTACAGACCAGCTACGAATC  
CATCGGCATTTCCAGGAAGCTGTAGCCCTGGTCAGAATAGCCCACTCTACCCTGAAAGAT  
GTCAGAGTAGTACCCATAGATAGGATTATCCATTAATTTAAATTTCTCAATTATACGTT  
TAGTGCAGCAGCTTCACGAGCGCGATCTTTCGCTTCTCGCTGTTAGCGTGAAGGATTT  
TTAGACAACTTGTTGATGTCTTCAACAGTTCGTTACCGTCTTCTCCGAGTTCTGCAGT  
GCCGAACCTGTCTTACGTTTTCAACTTCTGTTTCCAGTTCCTCAAAGACGTACTTGGGC  
ATTTTCCAGAAGAGCTACTTCCGGACCGTTAGCATTGCGATGATGAAGCCTGCCGGAGA  
AGCGTGGTCAGATTCAGCATGAAACGTGAAATCTTGTGCTTGAGTCAGAGCGGCTTTCT  
TTCTACTTCAATAGCGGCTTTGATGATTTCAACAGCAGGAGCTTTAGCTTTGGCAGT  
TTCCAGTTGCTTGACCAGGACAAGGTATTCCTGAGACTTAGTTACTTCAGTTACATTATC  
CGATACAGAGGTCTCCTTATTTTCTTTGAATGTATCGATTACACGGCCAGTACCTGCTTC  
TTTGGCCACCCGAGTCACCTGGACATCTTCGGACTCACCTTCGGGGCTGGTCAGACCTCA  
TTAGATTACTCCCTTCAAAACAGTCGCTGAAGCTTCAGAAGTTCATACTGTTTAAACAAG  
GTCGATTTCTTACCCGCTGTGCGCTGCCTTGGCGTTCGTGATTGACTCCATACGCTCTTC  
CAGCCATTTCCCGGTGCTGTGCGTTCGAAGCTTGGGCGCGCTTATCATCAGGGTTTGCAGC  
GGCCTCATCTTCAAGTTCAGTTTCAAAGCCCAGCAGTTTGGCACGCAGTTCTGCACCGTC  
GCTCCACATATAGAAGATCTTACGCACGAACTCTTCGAAACTCATGGAACCGGTAACCTG  
TCGCTCCGCCCTGATAACGTCTTCGGTAATCTGTTCCGGTTTTAGGTCAGAATTGATCAG  
AAGTGATACTGGACGGAGGTTGGCAGAAAACCCTTGTCTCTCATGGCAGAGTGCGAAACC  
TTTTTCCATCACAGTATTGGCTTATGCAATTGTCATTCGCCAACTTCTAAACATACTCT  
ACACGGAAATCCGCGTTGGTGTTTTTTCCAGTTGCTTTATCGATTGATCCGGAACAGCGA  
ATGCTCAGGCCACCAACAACGTTTCGTCTTTTTAAGATCCGACAGTACAAGGTCGTAACCT  
TTACCTTTAGCTACCCAGGTGCCAGCCTTGAGTACTTGCTCGGTCCGGATAACCACTACA  
TAAAATTATTCCCGAATCCAAGTCCACTCGATTGTGAGAGAGTCAGTCTCAATCATGTGG  
AAGTGATACTCTACAACATTGCCAGCTTCGTTTGCCTTATCAAAAGTCTCCTTGGCCTTA  
GCGATTGCCTCAGCAGACATCGATTTCGGCGTCAGCTTCCTAGGCACCTGTTTCGTAGATA  
CCTTCGTAAGATATCATCTGCTCATCAGCGTCTTCTGATGTTTAAACACAGAGGCTGAC  
TTGTTGATTTAGTCTTAAACATTAGTTTGCATTGCTTTGGAAGCCTTCTCGATAGCG  
GCTTCAGGAGATTGGCCTGAAGGAATCAGGCCATTTGCAATACTCAGTACCTTGCTCTTC  
TGAACGAGAGACAGATCAGATACCGATTACAGGCAGGTCAGCCGTACTTGTGTATTTATC  
ATTTTCCCGTTGATAATTATCTTAAACACCATAACATATTCTTTTGAAGCTAGCTCAGTA  
AGTTGAAATTAATTATCTATATTGAATACGGAATAGTCTCTTTTGGAGGAGATTTTTCT  
GTTCCATTACAGTTAGAGCCTGCTGACATAACCATCACCGGAGCGACTGGTATCCTGATCA  
AGTAGTTTCAAAGTTCATCATTTGAGATGTCTTCGGAGATCTCTTCGACAAAGCCACCA  
ACTTCAAGACTCTTCTTGATAACTGTAGGAGTTTTAGGAAGATAACCAACAGCACTGAGA  
CGCTGATCTAACTTTGCGATGCCTTCCATCTTGAATTCTTGGAGCAGGGTTGGTGTGAGT  
ATGAGCATGTCTTCGTCTGCAAGACGGAGGTCATTAGTGACAGAAGCTGAGGGATCAGG  
TCCCTGTTGAAAGCCTCAATAATGATGTCCATGTCACGCTGAACGAGATGTCCGTGGCTG  
CACTGCTTCGATTCAGATAAATTTAAGACGCCTGGCCATCGTTACCAAGGTTGATGAAT  
CCAGCGCCATATGTGTGCGAGAATTGCCTTCTTGGCAGAGCTCACCTGTTCCAATGTACTG  
TACAGCTTGCCTGCACCGTCAATACCTTTATGTGACATCTTGTACTGTTACCACCCTGA  
GGGTTCAATTTGACGGCAGGATGAAGTAGGCTTGTACCTGCGTTGGTGTGTTGCTGCA  
TCGGCCATCAATCCTTGAACCATTTCTGATTCTGGTGATATCGGTTCAATCTCTGCGTTG  
TTCACGATCTGAGAACGGATCATCAGTTCGATGATACCACCAAATCTATGGAAGCGCAA  
AATAGTTTCGACGTCTTCAATCAGAATCTTTTCGCCGAAAGCACCTTAAACAACAACAAGA  
GGCGCAACACCGTCAGGGTATGACTCTGTACCCCCAAGACTCTTACCATCAGTTTATTG  
ATAGGAATGAAAACCTTACATACGCAGAGGAGGTCAGATTACTAATCAGGATAATAGAACTA  
GAGATTTGCGTCAGAGCGTTGTGGAATTTGGCAATAGCCATATTACTCTGGTGATTCTCT  
TTCAGGGAGCGCCATCCTCATCAAAAACCCAAGGTTTGGAACGAGAAAGACTTGAATGT  
GGCTTAAAGGAAATCTTACTGTTGGTATACCTAGCATATTTATATGAGGCAGATTCT  
AAACGGTACACCTTCGCAAAGATGGAGAATCCATGCTCCTTAAATGTTGCGGCACTACTA  
GCCATATCGCGCTGAGCTTGCTGGTTGGCAATTTCTTCAACGCGTATTCTATAAAGCCG  
GCTGCATCTCCGGATGCCTTACTGTCACGGTTATACAGGACTTTGATATCATAGAACGCT  
TTCGTTACGAAAACAGACTTCGTATCATGCGCCGTGGAGACAGTATCGTCTGCTTCATA  
GCAACGACGTTTGGCAGAAATCACTCCCAGCGTAACTATTCCACCTTCATCACTTGGGAT  
TCAGCACGAAGCAGAGAGAAAGCAGCAGAACCTGGTTCAGGTACGAAGACGACTACCA  
ACCAGATTTTCTTTCTGTTTTAACCACCCCGATGGTTGTGCAAATCCTGTAGACACG

AGTTATCCCCTCTGTTATATTCTCATGTACAAGGTCGGAGGAAGCATTTCGCGGATAACA  
ACAAGTCTGACGATCTCCTTCTTCTCCAAGAAATTCATACCGGAGGCAACGGAATCCGCT  
GAATCATTCTAATGGGTTCTTGTGCGTCGCTCACCATTAAACTTTTCAAGTTCAGTTATT  
AAGGCTTCAAATGTCTTAGCCTCGAAACTGCTTCTGACAATCCGCTCCAGTCTGACTGA  
GCAAGTTTTGCAAAGGAGTTAAGGATGTAAGTTTTGAGTTAGTCCGTGGCGTCGGGTCT  
CTCTCAACCAGAAACCTTTCAGCCAGAATCTCACGAGGGCTGGTTGTGGACTCACTAGTG  
CCTGCTTAACCGGGGTCAACGCTGAAGATGATAAGTACCTTATCCTCATCGTATTGGGCT  
TGCTTTTTAATGGTATCATCACTTTTACTAGCTTTCTTACAGATACGGCCTTGCGTTTGA  
GTGGAGTATTGACCGTCATCAACAAAGTCAGGGCAATAATCACCTGAAAGATAATAACAC  
CCATCAGAGTTGTTACTTACATTCACAGATGCAGAAAAGTCAGGGTCTCTGTTACCAGAT  
CTTCGTTCTATAGCTGCCTTGTGGAATCGTCTAACAGACGTAACGCCAGTGGTGGGCAA  
GGAACGTCCTTGAGAAAGGATCGCTGGAAATAGTTACACCTTCTGGGCGAACTTTCCAG  
TTCCCGTGAAGTAGCTGTGACTTTGGAATTTCCGCAAGACTCTCAAGGAAAGCAAGATTG  
TCTGGGTTGTTGTCAAGCAACGGTGGGTTAGCGAAGATAGTCCCACAGTTGAATGACAAG  
GAAAGTGGTTTTGGCTTGTACGAATGTCCAAACCGTCCCAATACTGCTCAATAAGCTCC  
TCAGCTGTATCTCCCCATAGGAATTAACCGTCACGACACATGATCTAACGGATAATCCCG  
TCTCGCTCCGCAATAGGTATACCATCATCGTCGAGATACCACTCAATCAACTCTTTAATC  
CTGTGGTCTGGGTCCGGGTTGCGTGTGATGATCATAACAGCTAGGGTATATGGATTCAGAA  
CGAAGACTAGACATGAGGTTTACGATCTCAAACCATTCACTGTGTACCTTCTTCAAAG  
ACAAAAAAGGTGTACTGACACCCTGGTGAGAGTACTTGTGTTTTCGTAATCCATGTGG  
GACCATTTTACTTTAACACCAGAAGGGAAAATTGATTCAGGTCTTTCTCCCTGAAGCGT  
GGTTTCCATTGCTGATCAAGCTGTGTGTAATGCCACGTGCTGTATCATGCAGATCACCA  
CCACCCTTCAACTAAGGGGTGATTCGACGGAACATGATGCAGTTCGTTCTTCGATCGTCG  
ATGATATTTACCGTTATTAATTGAAGCCGGTAGGATTTACCTGACCTCTCCGTACCCCA  
ATGATCAGTATTTCTGCGTTGTTTTCCAGTATCATTTGCTGTTAGTGCAGCCAGGTCCG  
AATGCTTAAATCAAAGACCTCCACATTAAGGGCGTAACTTGGCCTATAGGAGGTAGTTG  
ACCATGAACGTAGATACAAATAATGCCCTTATGACGAAGTAGGGGCCTTGTCAATCACTT  
TAGCGGATTAATAATGTGACGGAAGTATTGTTGCCGAGTCCATAACTTGTGCGGCCGTT  
GGTAGCATTACAGGATGTTGGTCTTCAATATCGCGCTGTTCTCAGAGGTTGAAGCAACATA  
CTTCAGGGGAGTTGGATCCGCAAGCTCAACCAGTGCAGCAGCAGGTGGTTGTGCAAGAAC  
CTTGGCAGGATCATACTTCTCAACTACCGGAACAACATGCGGCTTCACCTGACAACCAAC  
CAGTAGGGTGACTGCTATCATCAGTGCCCTTAATGCTTTATACATTTACCCCAAAGCTT  
TAGTTGTAAATGTCAACAAACTAGCTGTCAAGACCTTTCTTCTTGGGTGCATCAGACCTG  
CTGTAAACGTCTTGCTTTGCGTTAAGCTGTGCCTGCAATTCTGCATTTTTTGTCTGCTCT  
TCTGCCATTTTCTGTCAAGCATATGGGTTGCGATCTGTTGTTACCCTTGTAGACTGA  
CTTTCATCCGTGGTTTGTGTGGCAGATCCTTCCATATTTGATCTGTATCAGTCACCCCT  
AAAGTGTAGGACTGCGTGCTCTGCTCGGTATACCAGTTATTTGCAAATATCCCCCTCCA  
ACGATCACGGCAAGTAGTATGACCACTTCGATTACCTTTAGATTGCTTTTCATAAACTTC  
AAAGCCATTTCAATTTGTGTCATGAGATTTACCATTGGTTACAATTACCCGCTCGATTT  
TGAGCAGAGTTGTATGTTTCATCTTCGATCTCCAATGTGCGCATATTGTAGGCAATCCTGG  
TAGGGTGGCTCACACACACCTCAAGAAGGACAGCGCCAGCTAAAGAGGTTTTTCTCCCTCC  
ATCTCCAGTTCTACCCTTCCCACCCGAACACTTGTCTACGTGCAGGGCTTCTACCCGT  
CTAGATGAAGGTTTCAATGAACGTAATCTTGTCCCTGTTTCTCGGCCAGAAGGCCAA  
CTTTGTGCCTTTGCTCTACAGCTTGCATCAGAAAGAAGTTGTGAGAAGGACAAACTCCC  
GCAGTGTTATAGAATCTGGCCTTCCAGTATTCTTTCTGAGGCGTTCGTACAGGGTAAAGA  
TATTTACCTCTTGAAGACCTGTCCAATCACCTTTACCGACCTTCTGATAGTCCGTTGCAA  
GACCGCGGATGATTTTAACTAGCACCATCCAGTTTATCAAATAATCGCTCATATGAAA  
AAGGCCTTTCTTCATCGAAAAGCTTTCATCGTACGTACCATACTTCCACTCAGGTGGG  
CCTTGGCATCTGCCTAAATTTCAATACTGAAACTAGCAGCTGCAATGCCAAGCTTCATAT  
TCTCCCGGCGAGATATTGTATAACCGTGAGCGCGGTACTTATCAGGAAGATGCATACTAA  
TAATCGGGGAATACGTGTTGGGATTCAATACCAAACCTGCTGAGCGATGTGCTTCATGA  
AACTTCAGTGAAACTCCCACTGCTCTGATGCAAAGCTGAATGACCGCATATTAATCGTAA  
GCTCAAATTCGCAAATATCTTCAGTGCCTCAGGGAAAACATCGAAAGAGATAGATTACC  
GAACCGGCAGCTTTGTTATCGGTAACAAGACCCTTTTATCGGTCATACCGATATTATCG  
ATGATGCCAATCTTACTCTCTTTAACCGCTTAGGTGTATGCCGTAAAATCCTCAACAGAC  
ATGTCTTTCCAGATTTTTGCAAAGGAAAGAAGTACATGCGTGTGCATCGGCTTATCTTCA  
GATTTGATCACCGGGGAATTACATAATCTTTCAAGCTTCCAGATCGCCAAGTTCCTG

AAATATTTGAATGACCGTTTGGAACTGCCCCAGTTATCAGGGCGCCTCTGTGAGGGCTGAT  
TGACATTTAAAGAGGCTACGATCAGTCATGTACGCAAGGACTCCTCCCAGGTTATCCCAT  
GAAGGGAATTAAGGTCTAGGTCGTTTACTTCGCGGACTGAGAATAAGGATGTTAGTGTA  
CCAACCGCAACACGGATATCAAGGCGTTTAAAGGATCTCCATCAACCCGTTTGGAAATAAGG  
CGACGGAGGATCAGGTATCCCGTGGGTATTCTTCCCTTTGGAAACATATGCAGCCTGGTT  
TTCTGCTTTAGTAATTAACCATTGGAATGTCCCTGAAAAAAATAGCCCCGCAATAGCG  
GGGCGAGCCAAAAGAGACGAGATTGAATATTTATTATAATTAGAGTAAGAAAAGTGGGGA  
ATGAACCTTTGCTCGTCGAGGGTGTCTTATCCTCTCCACAGCCAAGGCCTTCTTTTGCCT  
CCACTTAGTTATTTGAATGCGTGATCGGGCCTCGAACCCGCGATCTTCGGCTAATGAGGC  
CTATATGATCTATGTATCCGTGTCACTACCACGCAATTGTTTGGTGGGGCCGGGTGGACT  
CGAACCAAAGACCATCTAGTTATCAGTGAGGAAGTCTACCAACTTAGTTACAACCCCATG  
TAATTGGGACTTCTTGATTGAATCGGACCACCGACGCTTGCAGTGTAAGACAGCGTTCT  
ACGATTGAACTAATGAAGCATTAAAGTGGTGGCCGTCAGGGGACTCGAACCCCAAAATC  
CGACTTTTAAGGACGGCATGTATACCAATTCCATCGATCGTCCAATACGTGGAAGAGCC  
ACTGCCTGCCTGATCCACCAGAATCCTTATGAAGCATTATCATCGGCCCTGTGGATGCTA  
TCATGAACCAGGGAGTCGATGCCTTTACTTGGTAGAGAATAAGAGATTTCGCACTCATCTG  
ATAGCCCCGGTGGAAACGAGGTGTGGACTTCACTCAGACCCATTCCGCAATTGGTACAAG  
TACCCGGATTTCGAACCCCGATTCTCAGCTTCATAGGCTGATGCTCAGTCCATGTGAACTA  
TACCTGCATTAATAATATGATGTTCTCTACTCTTAAATGAAGCCAAGCAGCCATGCACTC  
TTTGGCTCGCACTCAAAGTCTGAGTAAGGACAGTCGGCGATAGTCATGCTACCTGCTATC  
GCGGCATCAGAGCCACGACAATAGATTTGATCAAGTGTCATGATTTGTAGTCTTACAATA  
TCAGATATTTAAAATGGTCAGACCCGCAGGACTCGAGGCTGCGACCCGAAGCAACCAAGG  
CTCCACGCTCCCAACTTCACTACCGACTGTGTGTGTAAGCATTAAATTGTCCCAGAAGCT  
TACATCTGGTATCGCTGGCTAGATAACAAGTTCTCTAAGGAAAAGTTTTAATTTGCAAGGA  
GGTTGTACGGCGAGGCCGAAGAGGATGGAACCCTCATTTTCCGCATAGACACTGCGGGAG  
CATTCACTCGTCAGCCACGGCCCCATGAATTTGTGACGAGTAGAGGATTAGAACCTTCC  
TTGAGTTGGCACTCAGAGCTTAACAGGCCGGCGCCTAACCACTAGGCCAACTCGTCATTT  
AACTACATTATCAGCTAAAACAACCTTACGCAAGAATAATTTGCACTAATCTAAAAACGG  
TGTGTCTGGAGGGATTTCGTACAACCAAGCCTCCGATTCAAAGTCGGTTGCCCTTCGGCTTG  
CGTCACCACTTGGTTACAGCCCCGGTATTGTGAGGAGAGTCGAGGAATGGAACCCCTACC  
AATTCCAGCAGCACAGGCTTCGAAAATGCTTGTCCACCGGGGGACGGCACTCTCCTTAGA  
CCAAGATCTCAGAATTTAGATGATTCACTCCTATCGGGGCTCCTGTCTGTTTAGCAAAGA  
GATCCCTTGCTGATTACGGTTAATCTTCCAAATGTGGCGGAGCACCAGAGAATCTAACT  
CTCAAGCCGTTTTACCATTACGACCTGTCCAAGGGGGTTTTCTCAACTGTCTATTGGCA  
TCTCCAATTTGGAGGGAGCTGTGGGTATGGCGCCAGTTCCTCAACGTCACCTGTTGAAC  
ATCATCTCATAAATGCTTGGGCCACACGTGAGGACTGTCAAAGACAATGTTGCAATTAG  
GCAGGGCGAGGAGCATTCAAACCTTCCGTGGTCGAGTTCGAAGCCCGATGCATGAGGCCAG  
CTATGCCAACCCCTATTGGCGTGAAGGTAAGGAAGCGAACCCCATACGACTGCTTTTGG  
AGCCAGCTGGCAGCCACTGCTATTATGTTACCCGCACAAGGTTTCGCGGCCTGTGCGGG  
GATCGAACCAAGCAACCCCCAGCTTGAAGGGTGTGACTTTACATATATGTCTAACACGA  
CAAATCTAAGCGTCATGCCGGATTCGCACCGATGCCACCGACTTGGAAAGTACGGGGTGTCT  
GGGCCGCTAACACTAATGAGGCATAATTTTGGTGGGAGTACCAGGCTATACCCCTGCGAC  
CTCTCGATTATCGGTGAGCGCTCCAGTACCTTTACTATAATCCCTTTGATTTGGTGGCC  
CACCTGGATTTCGAACCAGGAACCCCGAAGGGCACAGATTTACAAGCCTCTGCAATCACC  
ATTCAGCCAGTGAGCCGAAATCTTTATAGCGGTGGAAGCCGGTCAGCAAAGAAACTGATG  
ATCTAAAACACAATCGCTTCGATAAATACAAATTTAGCAGCGCATGCTGCTGTTCCCTGCC  
AAAGCACAAAATTCCATAACTGCCGCGATTAATGCGATAACAAGAAACATCAATCCCCAA  
TTGAACATATTAGTATCCTCATATTAAGATGTTTTGGTTAACCATTTTCGTTTGAAGGAA  
AGATGTGCGGGAGTGAAAGGTTTTGATGGAGCCTTCTCCGGAACCTTATTACCGTCAACAA  
CGTTTTTAGTTTCTTCTTCACTTCCATTTTGTTCGTCGAATTAATCAAAGATCTTTTCTT  
CGCCTTTTCCGATGACGGGACGTGGAATGTTCTCTCTGAAGTTGACGTTGGTACTGAAAA  
TCATCATCAGGGCACGTAAAACCTGGTGTGCCTCAGGAATCATCGGGATGACCTTTGTCT  
TCATGTCAAGAAGATTCTTCTCAAGCTGAATTGCGTTTACTCCTTCTTAAAGGACGCC  
CTTTTCCACGACGACGCTTTGTAAGTTGTTGTTTCGCTGCCATAATTAACCCACCCAAT  
CATGTTATGAGACATGTATTTACAGTCAAGAGTTATTTTAAACATATTTTGTCTTGAATT  
TATAGCTGTTACGACTGTGGGGGAATCGAGCCCTAGTCATGCGTTTTATAGACGAAGCT  
ATTACCCTTCAGCAACAGTGCTTCGCCGAGGCAGTAGGATTCGAAGCCGCGTAAAGGAG

TTTAGCAGACTGCTGCGTACCCGCTGACTAGGCCCGTTAATTCTGGTACGCATGACGA  
GACTCGAACTCGTAATCATTTAAGCGGGAGATTTTAAGTCTCTTGTGTATCTTTAATTCC  
ACCACTCTGGCAATCCTCGTTCCTGAAATAAGATACATCAAATCTTTTCCAAGAGAAGG  
TCCACGGCTTTGTATATGCATACCATATTTCCCTGAGCAAGACCTCGAACAAAAGAGAAC  
AGATTTGTTATCAGATCTGTTCTTCTCTGTGATTTTGACAATGTAAAGGTACAACCACA  
ACAATGAAAGTTCCAATATATATCCTTTGCTCTTAGAACGCTCTTTTCTGCGTTAACCAA  
TCTTGTGAGACTTGCAGATTAGAGATGTTGTGGTTATTCACATTCCTGTCCATGTGGTC  
AACTGATTCTAAATTTGGGTCGAGCGTTCCTCCAAGACGCATCTCCATAAGATACTTTGG  
GTAGCTTCTCGCTATTTGCGTACCGTCATCAAGGTAGATGATCACATGTTGCATGCCATC  
AGCCCTAACATATGGGCTTAAAAGTTTCTAAGCTTACCGAAATACATATCCCTCTACCA  
GTGTGGACCACAGGCGCAAACATATTTTCAGCTGCATGGTGACTCCACCGACCTCCGTA  
TACCGCGAACGACGCTCTACGGCCCTAAAGATTCAGTTACAGCAACGTGGCCTTTGGCGC  
TGAAAGTCGCTTTCGTAAGGATCATTTTCCGACAGATGATTAGTCGCGGAATCAAAGA  
TATTAGCTAATGCACTTTAAAACACGGTAAACATCTTTTGTACGGGCTGAAGTCCTCAAC  
ATGGCCATATTCCCCATACAAGGACCACGTGTTTGGCAGACGCTGCGACTGTACCATTCT  
GTAATAATCGGGTCTCGCGATAACCAATTTTCGGAAGCACCCCTCCGTAGGTTGAGAAAG  
TTTTTAAGATTCTCAAACCCGTACATCAGATGTTGGGTTCCGGATGACAGAAGCGAACCG  
GATATGTATTCTCCTCCCCTCCACGCGGGAGGGTGTCTTCAGGTCTGGATGGAACCTCGA  
CCTTGCCAAAGGTCGTACCCGCCATTGGGCCCTCGTACAGGAATCGAACCGGTGCTTATC  
CCGAATCTTGGGACTACACTACCAACTTGAGCTAACGGGGAATTGTTAGATGCTGCCAAT  
AGGAATCGAACCCACGTCTTCGGCTTACAAGGCAGCTTCATCGCCACTTTTGCTTTCGGA  
CCGAGAATGCTGTTCCGATTAACTGGCCGGAGGTGTGGATAGCCATAGCCTGTGAGCCA  
ATTACCTTTGACCCAGGGTTTCTATAATCATCGAAATTTTATCTATGTCTTTTGAACGTA  
CCAAGTTTAAACGTTAACCTTTGAACTTTAATCTTTGAGTTTGAACCTTAACTATTCT  
ATCTCGCGATTTCGATGTTTGTTCCTTTCGGAGATCCTGTCCGAAGAACAGACGTCAGCGT  
TTCATCCTATCTGGGTACGTTTCGACGAGTTTAAAGTCCGTCCTCGCTAAAGGAAAGATT  
TTTTCAAGTTCGCTAACCAAAAGCAGCATTAAAGAGTCTACCTGTTGAAAACAGGAATT  
TCAAGATCTTTTTCATAACTCCCGCAATTAATTTAGACTGATCCCTCAATCTCTACTTC  
AGTCTTGGCATTGATATCAGACAGTGCAAAGTACCGTTGGAAGTGAAGTCTTGGATCTC  
TGCTTCCAGAGAGAGGATCGTGTCTGCTAGACCCAGAGCGTCACCGGTAGACGCCGTGCT  
GTTTATGCGGGTAGGACCTGCTACGACCTTCAGTTGTTTTCAGTATCCGGAGAATTGTCACG  
CCCAATGTACGGTGGGCGCGTCTGTTCCAGTTTCGCTTCGAACTCCATATTCTCCTTGT  
CGGACGAGCCTGAGCATGGTGTACTCTGCTTTCAGCTTGGCAAGCAGAAGCTGTTTGTA  
CGGAACGGTGCGTTTGGCGTGCAATCGCCTGCGCAACTGTCATCTCCTGGTTATTAAGTGC  
AGCCTTGGGGGTTGCCGTGGACTGCACAATGGCAGCTATCAGTTCGTCACGAACCTTTCAG  
GAGGTCTTGCAAGCCCTGATAGTCTGGTTTAGCAGCTTTCTCAAAGGCATCATCACTGAT  
CAGAGTACCAGGGATCTGACTCCAACCGTCAATAGCTTTAGCCATGTTAACAGCGTTAAG  
CTAGTGAACACGTTTCTCGATTTACCCCTCGATCTTGGTTCAGAGTAGCCAAGGCGCGGGT  
TACAGACATCTTAGCAGACATATTATTCTCCTCTCATTTAATTTTAAATTTTATAGTTAC  
TCCAAATTAATTTGCCGACTTACTTGTTCGAGACAGCATATTAGGTTGTGTTCAGTGTGTCT  
ACAACGCCTTGGCGACCAGGATGTGACTGAGCAATAGCTAGACGGTTTTTCAGTTCAGCT  
TTAAGGTCAGCACGAGCAGGTTCTACCTGATCAGTAAGCATTGCGAAACGCTCCTCTTTC  
GCTTCACTATTACCAGTCAGTTCTGACATTAGAAGTCTTGTGTTGAGATTCCAGGTTGGAC  
TTCGCTGGGTTGAGGTCGATTGGAGCAATGCGCTTAACTTCAGCAACAGCGGCATTGATC  
GCGTCTACGTTATTGTCTGTCCAACAGCCCGTTCATTACGCAGTTCTTCAACAATAGAC  
GGCTCCATTGCAACCAGACTGCGAGGTTTCAGCAGGTTTGACAGAACGCTTTCTGCATTT  
TCCAGAACCCTGATCTTCAGTTTGTACTGTTCTTCATCCAGCATTTCGTTAAACTTCACT  
TCAATCTGACCCAGTTCTTGTGTTTGTACTGCATCACCTGACTGATCTGCTCAGAGGCT  
TCCGCCAGGGCTTGAAGATCGGCAACTGCCTTGGAAAGGTTGGTTGCAGCAGAGGTTACC  
GCGTTGGTGGCACGTTGAGTTGCGGAAATGACAGATTTAGAAGCAGCCATTAAGTCTCA  
TTTGCTTTAAAGTAGGTTTTAAATGCAACAATTAAGTGGATGCGTTAGTCGAGCGAAGCTT  
TAATTAATTTCTTCGGTTCTCGGGTTGTTTTCGGACCACGACCAGTAATGCCAAAGAATGA  
TTATCGCTCAGAGGACAAGCATTGTGAGAATAATCATGCCGCCGCTCATCGTACAACGTC  
CATAATAGAATCAGAAAACCTCACAAACAACGTGCGCGTTCGGAGATACGATCATCGCATC  
GGCAGGGTGAACAACCTCTACTGAGACATCCACAAAAGGTTCTGCCACGGTTGTAGTAAT  
AGCAACAGCAGTACCAACAGCATCACCATAACATGCGTAACAGTGATTTCGAAAATTAATTT  
GCTCTTTGGTAAAGTTGGTTCGGGCACGAAGGATTCGAACCTTAGACCTTCGGCTTAAAGAG

AGCGCTACACTAACAGCTGTGTTAATACCCCGAATCTGGCCCCTGTTTTTCAAGACGTTG  
CCCGGGATCATCACGCTTGCCACGGCCCTTTATTTTAAGACGGATCGCCGCAGCCAGCTT  
CGTCTATCCCATGCCGGCTGAATTAATTCTTCTTACCTTTCGGCGCTACGGCGCCAACA  
ACTTATCGTCTATAGCTTTAGCAGCGCATTACACTTTGTCTGCCAGTGCATCACGA  
TGTGAGGCAGAAATGACCTGACTACCTTTACGGGGGAAACTGATTCCCGGATAGATA  
ACGTTGCCATATTCATCACGACGCTTCTTACGAATAGAAACCGTCTTTGTTACACCACC  
AGACGAACATCTTGAGGGGCAGACTGGGTCTGCGTCGACTTGGACTCAAAGTGCAGAC  
TGTTTGAATACGTCGATTGCAGAAACGTTCTTGTGTCGTTTCTTCTTAGCCATGTCTTAT  
TTCTCCTTTATTTGCTAATGTCTCGCTGACGTCAGTAATACTAAACTCTCTCACATCCTT  
TGTCATCGTTTTTTAAATCGTTTTGAACTACTTTATGAAAACCAAGTGAAAGGTGGTAT  
CGATCATAGGTGTCAACCGAGGTTGCCTTGATAGAATCAAATGTGCTTTTCCATGATTCT  
GACATACTAGGTGTTTTCAATGATACCATAAAACTCATATAGACGTTTTATTGCATCTCCG  
GCTTGGTAGTTGTGGCAGGAATTGAACCTGCCACCTCTTAAGTATAGGGGAAGTGCTCTA  
CCCAACTAAGCTCCATAACCATTCCGCTTTTGTGAGATGATTACTAATGGTTAATGAAAC  
CGTTGTCAACACCAAAAATGAAAAAAATCGCCAGATTTTTATTTGCAGTGTCTTGGCAT  
TACTTGCGATCTGAAGTCGCCTGGTTGTCAAGATGCTTGTGAGATCATGCAGCCCCACCG  
CGAACAATCAGAACATCCTGCTTCATCACATCAACGTCATATTGCAGGTGATCAACTTTC  
TGGTTGAGAGTTGCAGCACAGGCTGACAGTTTTTTCATGACGCTGATTTTTGTGGCTAGTA  
CACCCAGTACTGGCGGTGTCCCTTTTAGAACCGCGCCAATTATAGCCTATCTAAAAATT  
TGATTTGTCTGGGTTATCTGCAGCAGAACTATCTGCATGATCTATTTTACTGTAAAAGG  
TCCCAATTTAGTTGCGGAAATGTCCGTAACAGAACCTTCTGTTAATAACATTGGAGGT  
GGTTACCTTCTTTCGATCCATGAACGCAAGAGCGCGGACATGACATTCAGTGTAGTAATA  
AAAATTAAGGAATGTATCAGTGGGCCAGTCTCTGTGCTCATTTCAAAGATTGAGTCAA  
AGTCTGGCCTTTCAGCAGAAGAAATACCGTATCCATAAGCTACGAAAATGTCCACGTCTT  
CAGCCTGGCGAATGCCTTCACTGTAACCAATAAATCCTTCAAATTCCTCTTTCATCGTTT  
TACTCCTTTTCGCGTTGGGCGTGTAGTTGCCGCTTCAGCACGGCCCTGCTTATGGTTTTT  
ATACTGTCCGGAAGATTCGAAGAGAGTACTTGAATCTGAAATCACCGGCAACTGGGTATA  
AATAGGAGAAGCCACCTTCTTTCCGAACGATGCAACGTTTTTGCCATGCTTCAATGCAAA  
AGCCAGTCCTAGAAAAGCGATATCATTATCTTTTGCAGTCGCTTCGTCAAGGGTTGGTT  
AGAGTGATTCGCGCTCAATGTGCGCTCCATTATCTGAATTAATAACAAGCTTTAATGTAA  
ACATAATGACCTACAGTTAAGTTCTTAAGAATTCGAGTGGATTTCGTTAGTTTCGATCTT  
AGTAGTTGCCACTATATTTGTGATCACACATTCCCTGACGCCTCGACACCATGACGTTA  
TTCTCCTAGTGCTAAAGTCTAGAGGTCAAGCTCTTGGTCATCTGCCGTCGGATTATCAAT  
CTCAAGGAAATGTACCTCAAGACCTTCAAGGTTGTCCGGCTACCAAGCCTTCTTCTGGTC  
TGTGGGTGCGGAGGTACGATCGAGATCATGACGACTCACTGGATTCGCACTCAATATCT  
CCTTTTCTCTGTCTCTCCAAAATATTGCATCGTCAAGGTTCCCTAAATATTATTTTCGTT  
TATCAGTTCCCTTTTTTCTTGTCAACAATAATGCTCTCGTTTTACAACCCACGTTATGT  
TAACCTGTGACAGTGTGTTGAACATTCAGTGACATACCTCTTATTTCATTCGCGTGTGCTT  
TCTTCCGGTTTACCCCGCATTGTTGGTCGTTATCCTGTATCATGGTCAGCAAATTCAG  
GCATTTCTCCAGTCATATACAGATGTGCAGGTCTATGAGCAAAGTGTGCTCTTCCATCAA  
TACGTAGTACAAGATAACCGTGCTTTCCAACGCAAGCACACTCTTGTCCACCGACGCGGG  
GAGTGTCTTCCCTTTCATGAAAAACCCTCTTTTAAACATGTGAAAATGCCTGTCTGCGAAT  
CGTAATACAAACGCGTTTTGAGGAACTCTTGCCTTAACTAAGGGCTGGATTCCTCTTCG  
AGATCAATTTTTCCGGTATTAGTGGATAACCACACCGTTTTATCCTTGCTGGCGTTCATG  
TGATGACCGGAGCCAAAGGAAACGATGCAAACGCCTGGGCCGTGGGCGTCAAGATAAGCT  
TCAAATTCCTGTTTACAGGCTTTGCACTCCATCATGACTGGCCCTAACCTATTAGGCTCC  
TTAATATTAGACGGGTTTTTTGGTGTGTGATTACACATCAGGCAATCTCGTACTGGTACC  
TCATGCCAGTTGCGCGGTTCTTCCGTAGCCTATCTCTTAGAAAAGCCCCGAAGGGTGTG  
ATACTCTAAAGCTGAGAATACGCCGATCACGAATCTGTGTGAGGTCTCCGTCAATCTCC  
AACTGACCCTTTCGGGAGACACAACGGAGTTCGTTCTCACGAGACTGTACCTCAAGCACC  
TCCAGACTGTCAACCAGTTTTAAATGATTGTGCGCCACCCCGAATAACCTACAAGACCCCT  
TTTGCTGATATCTTACCGAGGTCAGTTTTTCGGCTTTTTGTCAACCATGATCTGCTTGCCG  
TCGATATCTGCACCCGTTGAGTTCACAGCCACACCCAGTGAACCACGAGGAGTGTACTGA  
GTTGTGTAAGAAACAAGACAGTACACGATCTTACTCGCTGCAAAGCCACGATCTTTCAGT  
CGTTTAAAGATAGCTTTTGCACGAGCAACAGCGGTAGAGTCACCGTACACCAGGCCGACA  
TGACAATCAAGAACCTAGTACCCTTTGTAGTTAACTTCGCCGCAAAGATTTCCAACAAC  
CTTTCTATGGCACCTTATACCTCATGATCCCCAAGACCTCACTCTTGGAATAAAAAGAAT

GCATTATCATCATCCTCTACCAGAATGTGACAATGTTTTCCATCAAACCTTCGCACCTTCA  
GAGTGGGCCACAGCCTGTAATGCTGTGTGAGTATCTGACCAGGCATCGACCTCAACCAAG  
CAGCGAGACCCGATAATATCTTGCTCAGGGATACCTGAGTCAGGTCGAATCACAACACGA  
CCTTCACGAGAAAGTATTTTCATGTTTCCAGATTTCTGCTGATTTTCGTGATAATCACCAG  
AATCCATAGCTATCTGCAAAGTAGGAACTAAACCTCTGGGAAAAGTGTCCGTGATGTAG  
CGTTACGAACTCGACTTCGGCAAGAGAACGTGTATAATCAAGGCTAAGGCATTTCATGA  
TTTACTGTGATTTCTTCAATCTCATTAAATGTTGACACAAGTATTGGTTGTGGGAACACGG  
TGTTTCAGATGCAGGGATAGACCCAGAAGGTATCCTACCTTTCATGTTGTAATAACGATTT  
GCATACACCAGCGCCGGAATGGGATCAGCACCCATAGAACTGATCAGTCGATCAATTTCA  
CTCTGTGCTGCGTTATGTGACCCACCTGCACCACGATATGCAAACAGTGGTTCTGGTAA  
GGAATATGCAGATTATACCCATTTGTTTCAGCAGCCGATTACTCAGACAGTTGACGATAT  
TGCCAGAATGTAGTTGCAGTTGTGATTGTTTTCCAGGTTGCTGCTGACATCACTCTTTCC  
AGGAAGTTCAGCAACCTGTAAAAATCCGGATGGGTATTCTGGATCGTCAACATTGAAACC  
TGCACCGGAGTCAGATTGCCTTCTGGGAAAGGACGGAATTCCTGAGGAGCATAACCAAGA  
TCGTGTAGCTTCTCATAACCACACATTCCCATCACACCCGCTCCAATACTCAGTGAGAAA  
ATTTCTTTATAATCAGAAATTGCTTCTCTCTTTGAGCGTATGAAAAAGTTTTTCATTAAC  
ATATCGATCATGAACCACATGAGGGATCCGTGTAATCTAGCAAACATCACAAGGAGCTCA  
GTGTCTGCGCAGTGGATTAAGTGCTTTGCGTTACGGGCGATCATACTCACCTGAACAAAT  
TCAGAACGTTTGTACATACATCGACATATGACGCGGTTTGTAAAAATCAGCGAACTAATC  
GGGCTTTCTTTATGCCGCGTTTTTGTGCTGCTGCAATTTTTGGACGCATTCTAGC  
GCCCGTTTTATTCTTTGCCAAGAAATTTAGACGTTTTCTGTCTAGTCGTGATATGCATA  
AATTCATCTACACCACCTCAAGAATGACCTGCTTGCCGAATGAGAAAATACCGTGTGT  
TACATAAAGGGTAACACGTTTTGAACCATTCTCCTTCAACGATGGTTCAAGGGCGATGAA  
TGTGCGCCCACTATCACAATGTCATCAACGATGACACATTTCGCGACCCGTATCGTCCCC  
GAACACAGCAGTACCTGTGATCTCGTTAGTTTTTATATCACGCACCTTACCTGCTTGAAC  
AAGACGAAGGCGGAGATGGTTCGGAACCTTCCGCGCTTGGCAGCGTGCTCCGGCATCTGG  
TGAAATAATCGCAACATCTCGAACAGCCAGTTTAAACTATAGGTTGCTGGTAGTTCAAG  
TTCGTGACGCATACCAACATTGGCCAGAAGTGGAGCAGAAACATCACTGTGCGGGTCATG  
TACGATAAACTTATCAAATCCAAGTGAGTTAACGATGGTTGCAAAAACCTTGATGGAGAA  
TGCCTCGCCAGGTTGCATCCCACGACCTTATCGCGCCTAGGGGAGGTACGGCAGGTGAAG  
GAAATCCTGTCCATAAATATCCATGTGATCAAGTCGAGAGCGAGCATCTGCCCGCAGAGG  
AAGTGCCATAACATCCGCAGAAGTCTTGAATTTGGCTGTGATATCAACGAAACCAAAGTA  
ACCTTCTAGTGCATAACTTAAATCGATCTTAACCTGTTTATCTCCACCCTTGAATGTAAG  
GTGATTAACATAGACTATCAGTTTGTTTAGACGAAGTTATAAACTCATTTTATTTCTCCT  
CAATAATCTGAATAGCCTTTAAGATCTCTTGATTGTGGATTCTCTCTGGGAAGCCGTCAG  
GTAACCACTCTTTTCCACAAACAAATTGTGGGATGGCACTCAACCCAATCTGCTCAATGT  
TGGTAGCTTCAGCATAAATTTGAACAGCTTGGAGTGCATTAGTTTCGTGCTGAAACAAAC  
CTTTCTTTGAATGTTGGCGCAATCTTTCGAAAACATTAATGCTATAACAACCTTTTCATA  
TTGTTAAGCCGGGGCCGGCAAGCTCTTGCACATAATCGCCGTACGTTCTTTCAAATTTTC  
GATTTGTAGCATACCAAACGAGTTACTGTACTGAATACACTCCGCTCGAATGTCAGAGA  
TGGCGGTTTTTATTCTCAATGCAAACCTTTTCATACAGAGAAGAGAGTGACCTACCAGCAG  
TGGCTCTACTCAACCCTGTGGAGTTTATGAAATCTTGGGAAGAATAAGTCCCGACACCCT  
TCAACCCATAATCATCAAAGAAGCTCTTCAGAAGCACTTTTCTCATTTCGATTTTATAA  
CTTCACGCATATCATCCGATATGTAGTAAGAATTATGTACTGCCTGTGTTTTGCATGTCC  
GTTAGATTCTTGAATAATCAGAACGTATGCTGCGATTGTATGCAAGATCCTCTATCTTTGT  
CAAGAACTCTGATACTTTCAGTTGAGAATTCTCACTCAACCCAAAAGATGTCACAAAGA  
TTTTTTATATGGAAAGAATACCACATCCGCACCATCAGGGTTTAAACTCTTGAAGAAATC  
ATACCTCCACCACAATTTTATCCTCCTTTGCACATGTTGTGGTGAGAGATGGTCATCTAA  
AAGCCACTGTGATGGGCTAGTGACGTAAGAGCCATCCCATATGTTAACAGTGTTATCACC  
AATCTTTATCTCCACCACCATCTCCAACCTTATTCCACAGCATATCTAATTAGATTGTACT  
CCAACGTAACGCAGATGTCAACCTAATTATTCCCAACCGGGAATGTCTAATTATTCCTAA  
ATAGGAACACAAAGCTAGTCTATCAATTAACCTAATGACCTTTTCGAAATCAAAGA  
ATAAACCATAAGATCTATAAGAAATATCTTTAAGTGGGATCTATATATTCTACGGTTATA  
GAGCGAGTGGCTCAGTTGGGTCAGTTGCGTCAGTATGGAAGAACAAAATCTGTTCTCAA  
GATTTAACCTCTCGTTTTTGTACGTGTACCATGCTCCTATGGTTTTAGAAAGAGAGTGTGAA  
TGTTGTCAAGTAAACCAGATAAAGTTTTTGGAGATATGGTGTGTGGTTAGAGGGCGTCGTA  
AGCCGATATCTACAGATGAAGAAAGTACACGATTGATGATGGTACGTGAAGTCTTTTCATG

AATGCAACAAGGATCAGAAAGTTTGTGTGGAGTTAACAGCTCGCAAATCCGCGCAGCCGG  
TGTTTGAAATTACTACGACTCTGTTTACGGTCGTCTACGCAGACCAAATGTGGTGGTGA  
CTCAGATGAAAGACTTGACAGTGGAGCACAGCCAAGGTAATTATTGTGTTGTGGATCCGA  
GTGAGATTCTCATAACGCACTGAGGGCCTCTCTGAGACGTTTTGTTGGTGTGGTGATACG  
CTTGGGTTTCATCACACCATTTTTATTCAATACAGGGCCACTCAGCCGCTATGAGGGCTAT  
TGTGGAGGATTAATTTGAAGCTTAGTACACATCTGGTGGACAATCTGTATGCAGAGAGG  
CTTTCATGGCTCTCAAGAACATCATGGCTGTCGCTGGAAAGCGTTCAATACACAACCTGT  
ATGTCGACATCCGTCTGGGTATTGGTAAGTCGTGGCTGGATTAATGTGTGTACATTCATG  
GGGATCGGAATGTCGTCAACTTGGTGTGCTTGAAGCTTATTACTTAGCAGCACAAACAGTA  
TGACCCGTGGAAACCAATACGTCGTGTACGCATACCCTACGTAGGACATGGATAAATGAA  
AAACGTCATCAGGAAGCCTGTAAGAGAAAATTTTCGATACAACGGATTTTTGTTTTATTAC  
AAAGGTTGAGATCATCAAATAAGCCATTCAACGCTTGCACGATCATGAGGCAGACCCTAA  
CGCAGAACCCTTACAAACGATGAAATCTAGCTGCTGTGTGGGTGGCAACTAAATATGCC  
TGAAGTGGAAAGGCGTGGACTCACCAAGTTTATGACGTTCCGGCCAAGAGAACGCCTCTTT  
AAGGCTGTATAAGAAAAGAACGACAAGGAAGAAAAAGAAATGACTAATATCGATCATGTA  
ACATCAGATACTCACTGGTTGCTTACCATTATTATTGGTTTCCCCTCCTGTGATAAGTGC  
CGTAAAGGCCTGTACGGACCCAAAGAAGATGCAGCGCGTGTGTCAAGATTAATGACGAC  
ATGGTTAAAACATCGAACAAACACGTGAAACCTGGCGATATTGTCGCACATTCACGTGAT  
TTTGTGATTACCTATGTTAAGCGTGTGAGCCGAAGGTTCTTGACATTTTTATCCAAATC  
TACGGAAAGACCATTTTCGGTTGTTAGCAACCACGACAACCATACGACAAAGTGGATATTT  
CGCTCGTTTGGTACCAAGTTGTTGACTATAAAAAAATTGCTGTCAGCGCAGACTAAGAA  
AAAGTTCGGGTGTGAATTTTCGCACTCCCCGTGTGCATCTTGAATAAAGGCACACCACGGA  
TCAGTCATGCTCCACGGACAGAGCCAGGTCTCATATAAAGCACCTGGTGGACGAATCCTT  
GTTGGGGGCTCGGTTGTCCACGGTCGTCCTTGACAATGCTTGAGGCCGTTTCTTAGTGC  
CTTAAGAAACCAAATTACGATATTCATCACTGAGGAGATAGTAAGCACAAACCAAGAACGC  
AATTTCTTTCCTAAGAAAACATCAAATCTTTTTACGCCCAATACATATTGCTCGCAGC  
TACACCCAAGCGGCACATCTTTGCCGACACTGGGAGAGGAGCGGAGCTTGAGTGCAGCAT  
TCCCCTTGACCTATGTTTATTCTGGGGGTGTGGAAGTCCGTATGACTGTGCGTATCATG  
CAGTATCCTCGCATCTAGCGACCAGAACATGAAAGTATTGACATGGCTGTTGAACTGGGG  
ACAAACTTGACTCAGAAATTATGCCAGGTGAGTTTCAGTGTGAGACACCGTATAATACA  
GCGTATTATCAGGTAGCTAGTTATGAAAAAAGATCTGAGCTCCCTTCTTGGTATCATTGA  
CTCTGATATAATTACACAGAGGGTGTGATGGAAAAAGTGCTTTACATCCTGTATGTCT  
TAAGTGGCGAAATTTGCTGCGAAGTTGTCATCCAAAGCACAAATCAACACCAATATTATGA  
AAGAGTATGAGTATGTGATAAATGAAATTACCTTTACAATTCATTACGTGGGTTGGTGA  
TACGGATGTTGCTGACGGCCACTTGGTTAAGGACATCCTCGGTGAGGGAAAAATATACTC  
ACCAGAGTTTTGTGCATTCGTAGCACGACAATTCAATGACTTCTTTAATCTGTAAAGAA  
GTATGGCAGCTATATGACAGGGGTTTCCCTAGAAACCCGCCTAGCGGACACATATTACTG  
CCACTACAAAGGAAGGTATATTTCGTAGTTTCAGAACAGAGACCGATGCTCTTAAAGCTTG  
GCAAATTGAAAATAGAAATCAGGCAAAAACCTCTTGAATCTCAGAACAGGATGTTATACT  
AAGAGAAAAGCTGCACGATAGTATTGAATTAATTGAATATGACTTCCTAATGGGAGAAGA  
AACATGCTCTTTAACGAAGACGGACTGGTCGCTAAAAATCTGGTCAACAAGAAGACTTTC  
ACTGAAGGACCGCTCGCTGGCCTATCAGTTCTGAAGTACATAAAAAAATGTCTTCTGGGAT  
AATCAGTGGAACACAGATCCACGTCTCCTGGAAGGCCGTGGCATGGGGGTTGATTAGGAG  
GACAATGTGGTTATGTGGCCTTTCACCAAAAATTTTCATTGACTTCTAAAAGGGCACAGAG  
CTTCCGGCAGACAAGGTGGTTGATGCATTTTCGTAAAGTTAATGGATTTATGGCATGCGCT  
GGTGTGTATCAGGGACACATTGTGGTGTCAACTACAGGAACCTCTGGGATCAGACTTTGCG  
GTTCTGCCCAAGAATCACATCATACTGGATGCAATGACATTGAGCACTTCATTAAGTGG  
ACACTAAGCTAAGAGGCGACGTACATCTTGGAAATCCGTGATCCAACCTGATCCGCGTATT  
GTTGATGAAGAGCCTGGGGCGTACCTGATTGCTGGTCAATCCAGAACCGTGACGGCCCA  
AGTTTGAGGCTGCCTGAAGGTGGTCTTGTGAGAATTGCGAATGATACTAAATTCATTCGT  
CATTAAAGTTCGCCAGATGGTCAAATTTTCCGATGCTGTTGAAATGTCAGAGCTTTGCAAC  
CACGAAGGTTTTTCATGTGCGTGATCCAAACTATCCGTTTCAGGTTCTGTGGAAAATCAA  
TCCCCTCATTATCTGTGCAAGAAGTTCTGGATGCGTGGTGGTGAACAAGTGGGAGATG  
ATCGGGGATCATCCATAACAACGCAAAGAAGCGTATTGATGAAGAGTATTACGAACCTGCTT  
GACCATATTCGTGAATACGACACTAATGATGCTTGGTTCAGCTATGGAATCACAGCAGCGC  
CGTATGTTAGTTGAAGAGTGTGTTTGCCTTAGAAGATCTGTTTGACCGCGGGACTCTGTGT  
TATGTTGGTGAAGGCGCGATGACTTAAAGGGAGCCCTTTAATAACGGCCGTCCATATGCCTT



GTGGATAAAAACTCGCAGGACTTTATTTCAGTTTCTCGACAATCGGACGAAACTATATCG  
GCGTGTACGAAGCGGCACTTCGATACTGATCCTAGAGAAGATTCTGATCTGGATGGGTA  
TTGATGTTTGCTGGCGCTTGAGGAAGAGATTGTCTTCGAAATGATGCTCTTTGGGCGGGT  
CCAGCTGTTTCGTTACACATCAAACCTTCAGCTGGGCCTAAGTTTATGCTTGCAAAAAGA  
TAATTTAGCCTGGTCTTGTGTAACCATTCGGAGAAAAAATACTGACGATAACGTAGGGA  
AAAGATATTAATCATCCTTCGTGGGGTGTGCTGGTGCGGGTAATCAACCGTGGGCGAACT  
CCTGAAGAATGACAGCAATGTTCTGCATTACGGAGCGGATATGGTCCACTATGTTGATGG  
AGAGTAACGGTGGAAAGCAGGAAAACCAGCACAAAGGCGCACTAGTGGTGCAGAAAAACGT  
ACGCCTGGCAGTGGATATCGGTTATCATCGCGTGATCGTCTCAAATACCTCAACCAGCGA  
GAAGGAGTTAATCCGTACCTTGAGTTGGCTAAAGGCTAATGATAACAAGTAGTTAGCTT  
GGTGGTTGAAGACCGGCATGGTCACGGGTCTATTCACAGGGTCCCCAGGAAAGACGAGA  
TGCTCAAGAGCGTCTGCTGCGTAACTCTTTGAAATTACAATAGGAGCGCTAAGTGAGACG  
TATGATGGTTATTTCTGGTGTGGTTTCTCTATTGAGAGTGGTGTTCGAACTTTCCGTAC  
TGATGAGTCAAGAGGTAAGGCGTTGTGGGATGAATACGGTCTGGAAGAGGTTTGCAAAAA  
CCACGCATTCCGTGTAACCTTCGGCGATAAAAACCCACATATGTTACAGTAAGCGTTGTGT  
TGAACCGCCTACTGTTACCCGAGCCTGGGTACATTTCGCGTTGCAGACTGGTACCAGCG  
CTATGCAGGGCAGGTTGTCAACTTGAGCACCAACGTGGATGATCTTTTGGAACGTGCTGG  
AGTGCCGAAAGAGCATAACGGTCAACATTTGTGGATACCGGAAGGAAATCATTGTCAACGA  
GAACCCGAAACGTAAAGCCGAGATTATTTATGTAGGCTCTAACGTGGTTGATCCTGATCA  
GTATAAATGGTGTAACGCGAAGTTGTGTTCTTGGGTGAATTTGCACCCGAATATATCAG  
GAACTATGACATCCTAGACACCCTTAGCTATGAACTATGTTGATGGTTGCCCGATGCC  
AAATACAGTCATTTACTTCAACTGGGCGTTGTTTCTTCTGTTCTGTTAGAGGACCAAAGGT  
GCTTTTGGTAAACCCACGTATCAACTATCATGAGCATGAACAGTATGATGCTCATGGTGT  
TATGCAATTCCGTTGTGGTGTGTAAGAGACTTTCAGCCACAACCATTTTATCGATACTGT  
GCGAGATCATATTGAATATAAGACAGCATTACAAGGTAAGGACAAATAATGTCCATTGCT  
TTAAATACCCAAGACGCTCCGCAATTAACGAGCACGCAATATATGAGGTTTGGAATGTT  
AGAACAGAGGGGGATGAGGTAATTGTTGATTTTCGTAATAAAATGGAAAGGTACAGCCT  
GAATGTAAAAAATGTAAGATGAAAAATGTTGGTCTTCTTATCAAACAACCTGCTGCATTA  
TAGCCTGTGCCTGAAGCGCGATCAAAATGGGAAAAGCAGATACTCCTTCTTTATCGTGAC  
ACAAAACAGGCGTTACGGACTGAGGAGAACGACTCTCCCATGCTCGAACACGATGCAAAC  
AACAGTTCATGAGCATTAGTTTACCCTGCTTATGTGCCGCTTAATCTTGATGGGGTACGC  
GGCCTTGTAACCTCTTGACAAAGTTGGTATCCCAGTATTTAATAGTCGCAGAAACAGGACG  
TACGCTGTTCAAGGTGCATCGTTGAAGCTGAAAAAAGAACTTGCAGAGCATACTGGGTTT  
GACAAATTGGAAGGTGAACTTTATATTCATGGTCTGAGCTTACAGAAGATTGTTGCACTG  
TCTAAGAAGTGCCGTACACCTGAGCAAATCGAGGTTGTGATTGAAAAGAATTACCAATCA  
GATCTAAAACGCTATCAGAAAGCTAGTGACAACTGTGAGCAAGTATGGAAAGATTTTGAT  
GGTGATGAATACGATGTAAGTATTGAACCGGTGAAAGCTGCTGGCCGATATGGCGTTTGC  
TCAAGATTTGACCTTGAATATCACATTTGCGGAGACTACTGTTAGCCCAGACAGCCCTTGG  
AATTCAGAGAGCCATGATAAAAACCGACTATCTGGTCCGGGTAGCCAGATGTATTCACGG  
GATTGTGAGGTCAATGCACCACTCAAAAATGTTGTTTCGGGGTGATTTTGTCTGACTGAA  
GATGCGGTAACGCGGTTTATTGGGCGATTCATGCAAGAGGATTTTGAAGGTGTTATTATC  
CCTAACTTCAAAGGAGTGTATGAATTCGGTCAGCGATCTTCCGATCTAACGACATGGACA  
CTGTTCCAGGATGGTGAAGCGGAGGTGTTGGACTCCGTGGAGGACATAAACAGTGAGGGC  
CTTCTTCTCTGCGAAGGAAAACACAGAACCAGATTTAACTGTCAGATGAAGGGGACGCGA  
GAAGAACGTTCTCAAGCGAGAATGTTACTTCTGGTTCGGTTAGTTACCCAGGTTACATTC  
CAGGCAAGGACTGACGACGGGGTTCCTCACTTCCCTGTAGGGCAGAGTATTCGCGAAGTT  
AATTCCTTGATATGGGACCCTGTATACTGTTGGGATTTTATAAGAGGAAACCTCAAGAGG  
TGGAAGCACATGTGTTCAATGGCTCTTGACATAAGTTGGTCAAGTGACAAAGTGGATGG  
ATACTGGTGTCTGGCAAGACTCAGAGTTTCACAAATGAGACATCCGTAACATGGATGTGA  
ATGGGACCCAAGGTTTCTGTTGCTTATATCGTTAAGGTTGGCGACCCATTCCCTACCA  
TCTGAACACAGTAGTTTACGACCTGTCTGAGCCTGTTATCGATGATGATGGTCTTCTCTG  
ATGATTAAGGCTAAGAACGTGGTGTGGGTGATAAGGTTGAGATGTGGGGCAAAGTAT  
ATCTCGTCAAAGGGGTCAAGGTAAGTGGTGTGACACCATTCTTGAAATCGACGATGGGT  
CTAATGTCCAGATCCGTGGTGAACCTGCTGTAAAAGTCACTGAGGTACGTGGTTAATGAC  
CCGGTATGGACTGGCGTTGCTTGGTGAACAGAACTCGCTGGTGGCGGGATATGTATCCC  
CTACCGCTTCCGTAAAGATAGGCTCGATGACTTTATCTACTGGACCCAGGGGAAGAATAT  
GCGTTTACTGATTGTCTGGGCGGCTGTATTGAGCCTTGTGACGCTGGCCCTTATCGAACC

GTTGGGAAACCCAATGACATGCCAGTTTGAGGGGCACGTCATACAAGATTAATACCTCCTA  
TTCGGGATTTAAGAATGGGAGTTACGGCGATAAGTGTCTGTTTCGTTGCAAAGAACGGAGT  
GCCGCTGACATTAAGGAGTATTCGCGATCGGCCTGATGGTGAACATGCTTCAGATGCTTA  
TAATCAAGGAGAATATATGATCTTCGGTGTAACTTATGAGACCCTACTGTCAATGACCAA  
CCCGAAAGATATGGATGAGCACGGTCGTCATGTAGCTCAATGGAACACCATAACCGCGTAT  
TGTTTCGTCGGGGCAAGGCGACTACGGTTGATCTGCAATTCTCTTTTGTGTGTTGAAGTGGT  
CAAAGAGCATATGAAGGCTCTCAGGGCAGGTGACCGAGTTGAGGCTGTTGATGCGGCCGG  
TGATCTGTTTCGAGGTCTCATCCATTGCTTTGTAGCGGCTTGAATCTTCTGGTGTCTCTG  
GGAGAACTGTCTGAAGACAGCACGGGGTGCTCAGTCCAACCTTCGGTGGGATGGTACAGCT  
TATCTTTGACACCCTCTTCTCTGTGGAATCAGTTGCTGCAATCTTCCAGCAGTGGGTGGC  
ATTATGTTTCCACTTAGATATCAACTTTGTTTACACCATGCGTCAGGTGTTATCCTCCAG  
CGACTCTAAGTATCCGATGATGACACAACCTAAGAGAGGGCTCACACTTCTCTGACCGTATA  
TAATGACGCTGAGTTGCTTACTGCCCAATGCAAAGGTATTGAGAAAACGATCCAACAGTCCG  
CTACTCTTCTGTAAACGCTGGACGTAGTGGTGAAAAGTTCCTGTTCCCTCGTTGGACAAGG  
TAAGATCATGAAGCCAAGCACTTCCGTAGAACCGAAAATGATTGCTTGACAATATAGAAG  
GGGTCTGTATAATGGACCCCATCAAGACAGAGAATAGTAAAGAATTGGAAAAAGATTTTG  
ATGAAATTTACAATGATCTGTAAAGTATTGTCAAACTCCTGAATGATCAAATAGTTATCG  
GGAACAGGCCGACATTCAGGCCGAAGCTATATATGTGCCGCTTCACAATGAAGCATCGCT  
GGGGGGGTGACAACAGGTACGCTTCTGAATGCACTCTCGAAAATCTGAAGACGTATGTCTG  
GTCAAGTCGACAAAGCTGGCGGTAAGATTATCGGCCTCGAATAAAAAGTGTGTTGACTAAAA  
GATTTAAATAGCTATACTCAATTGAATAGACAAAACAGAGGTGAAAACAAAACCTATAACCAG  
TATGCCTAAAACCAAAGTAGCACTGAAAACCACGCAGCCTTCTGACGCTGTAGACCGTGA  
GCACCTGAAAAAAATTGTTTCGGGACGGTCTTGTCTGCGAAGATCGCCCAAAAAGATCCGGC  
GTCATAGCTCAAAGACATCGTTGCATTTGAGAAAAGAAAGCCAGAAGTACTAGGACGCTAAGGT  
CATCAAGATCCTGATCAATGCAGTATTGGACCACCAGTATCAGACAGGTCAAAGCGTAA  
AAATCTCGAAGAGCAGGTTGAACAGATGTCCGAAGCTGATCCTCTGTTGGGTCGCGGGAG  
CAACTAATGAAATATTACCTGAATGGTGTGGACTTTTGGTGTCTTGTGCTTCATCTTT  
GGAGTCGCAGTACCTAGTCTGGTCTCAGAAAAGGCTACACTTTTAGTCATGGGCCGTTTC  
GCCCTTGTATTCTCCGCCCCAGTTGTTGTATGGTACTGGCTCCGAAAGGTGTTTATTAAC  
AGTGAAGGGGTTAATACTGCTAAATCTTAAAGCGTGTACGTGGGATAAGTTCAGGCTCT  
CGCCCGTTACACGAATAATTCTGCTGCTTCTTACGTAACAAAGATTGTTGATGAGTACGT  
TGACGAAAACGTAAAAACTGTGTACAAAAACGAAGAGGGCGAACCAAACTAATGCTCAAAG  
ACCTGAAACTTGTAATGTTTCTGTCTGATCGCTCTAGGGGCAAACGGCCTGACTGGTT  
GCGAACGTGCCAACGTGCCTGCGGTTGGTGTGTCATAAATGTTGACCCGTATGGTGACT  
AAAAGGGTGTCCAAGAACAAGAAGTTGGTATTGGTAAGTATAGGTTGACCTGGAACCTAAG  
ATATTTATCAGTTCCCGACATTCAACCACTTGAAAACTCCGAGAAGCCGTTTAACTTCG  
AGACCATGGATTTCGATGACGTTATCGGCTAAAATCGGTGTAGAATACTTGTGTTGATCGCT  
TCAAGGTCACGATGATTTTCCAGACGCACTGCAAAGGTGTTAAGGAAATCACAGATGTCA  
ACATTTGACAGAATATCTAGGATGCCTTGATGAAAGAGGCTGGCTCAATGGACATTGCCA  
CGCTGGCTGGTGATATTAAGAGTCAGTTGCTTGAACGTGTTACCAAGCAGTTTAGGTCCA  
AGCTTGATCCGATTGGTATTGTGATTTCACTGACAGATAACGTTGACCCGATTTACC  
CACCGCAGGTAACGGCGTTAATCAACGCCAAGATCGAAGAACTCAGACAGGTCTGCTGC  
GTGAGAACGAAATCCAGCATAACCAAGGCTGAAGCTCAGGAACAGATCGCGGCCGCCCGCG  
TCGAAGCTGAATCTTAGCGTCTGCAAGCTCATGGCGAGGCCAATGCTATAGTGGCACAGG  
AAAAGGAGACGCGGAATCGCTTCGGATGCCAGGTGATCCTCTGCGTAAAAACCCGTAGA  
TCGTGCAACTGCAAGCAATTAAGTGGAAATGGCGTTACCCTGGTATGTATGACCAGTG  
GAGCACAAGACTGTTTTCGTTTCTCTGCCACCAGGTAAGTGACAGGTGACTAAAGGCCCGG  
TTATGATTATCATCGGGTCTAAACATATCAAAGACGATCCTAGATGATTTCGTGTAAAAG  
TGTTTCATGGCAGTATTAGCGCTCTCTTCCCCGTATTTCGCCACAATCAACAACCTCACCT  
TGGTGGACGAGTACACCGATGCAAGCCCCATAGTCTGCATTTACAGTGGCGGTAATCGCA  
CAGAGTCCGTTGTTAAGGATGTGCTGCTGTTTCTGTTTCCAAAAAGTCATTCCACTTAG  
TTACTTTATAAACGTGTCCCTTGGTCTGCTTTTGTGTTAAGCTTTTACGATGTTGTTGG  
GGTAGTATACTGGCAGCCTCCTGTGCGCATTTCACATGGACGGCCACGGGGTTGGATA  
TCCCCGGATGAGTTTGTATGGTTGTATTCATAAGGGTTCTTGCTAGTACCGGGTTCATGA  
CAGCGAGGGGCAGACATGTGAGTTACTGATGAGCTTGTGCTTAGTACCCGATACGAT  
ATCTTTAGTAATCATTAGCGCTGTGCCCATCCTTTCGGGATTCCAAAGCACCAAGAGGTT  
GGTGCCACATTCTGGACGGGAGAACACTCCATGATGAATGAAAAGGCTATGCTGATAGGC

GATGAAAATATCGCGCTTCCTATTGCTAATGTATATCACCCCCAAGAAGCTAAGCAACTT  
GGTCGGCGGGCGAAGTACTTCGGCGGCAGCAAGTGGGAAGCGGTTCTGTGAAAATATCGTT  
GGGAATGGTCTTTATGCCAAGATATTGGCTAATCCCACCATTAAGGAAACGGCTATCAAG  
CTTCGTAATGAAGGCAGGGTTTTTCGTTGAGGCATCTCCCTAAGATCCAATCTGGGGAAATC  
AACATGACTGATAACGAGCCAGGATAAGAGGACCCAACCAACTTGAAAGGTCTTAACGTT  
CTCGGAAATTGCTGGCACGAAGCGATGGACCGAGTAATTGGCACTATGGAGGGGCCTTTA  
AATTAGAGATTGAAATGGTTCCCAATACAGCTTATTTTACTATCTTACGCTCTCACTTCT  
CTGAGTCCAATTGGGATGTCGAAAGGAAGAAATGTTATCCAAAAGCTAATTATTAATGTG  
ACATTTGAGGGGGAACAGGAACCGAACACGCCGTAGAATGTCACGAGATCTGGGACTTTG  
GCAATGGCAAGATCAGACTAAAAGGTCTGATCGCACTTTGCCCATCTTACCGCGAAGTCA  
AACATATTGGTTTGGCGGGTGTAGTGGTAGGGGGGAAATAGCTCTTCGTCACTTCATGA  
AGGTCGATGGTGTCTCCAGGTAATTGCAAAACAGTACGTGCAAGAGGCTTTCGTTTTAT  
GTCACGAACGTAAGTAAACGGGGAAAATGAGAATTGCATGTCGGCTATTTGGACGAGTATT  
TGAGTAACGGTGGTGGAGGATAGTGGTATATCTGTATGATAAAGATTGGACCAGAAGAGT  
CACGAATGACTGTGTGATCACTTTAGACCATGACCAGACTTCCTTTGTGTCTGCCGCTGG  
CGCTGGGGAGCATGCAATTAAGGCAACTCACATCGCTTCGGGTCCGGTCAAAGATCTATAA  
AAAAGACCAGAGCTCTGAGGTCCACAAAGATGGTGGTTGGCGGATGGTTGAAGGATCA  
GAACGCCGATATGTAAGTTAAGGCTAAAGATGAAGGCCGAGAGTTCACCCCTTGGGGAAAG  
CGATTACTTCGTAATAAAAAGATAGTCAAACCCCTGAACCAGTGGAACACTGCCTGTTTTAT  
CCTGAAGACATAGATTAATGCTATCTTTGAACATTTGGGAATCGACAGCAGAAATTGCCT  
TGGTGTGCTCGGCGGGGCCATCAACTTCCGTCTGATGTTACTAGCACCGGAACGTTACAA  
AGGAAGCGGTGAAGACACCCTTCGTCCTGTGCTGTTGACGGAATTCCGCGAGTATGACAA  
GAAGAAGTATAATGCCAAGGTCATTGATAGTGTGACGCAGATGTTTACCTGTCTGTTCT  
GATGTATACCGGAACTGAACACTTCCAGGCGACTGGTAAGATCAACTACATGGTTGCGTC  
GTTTCGACAAGGACCAGAAAGGAACACCGGGTTTACCTCTTGATATGATGCGTCATTACGA  
GGTGTAAACCGGGAAAACCCGATTCCGATGATGATCGAAGATTCTATCGGTGAGATCTG  
GATGGAAGGAAGCAACATCAAGGGATGGGGGCGTAAGTTCTTTGGCTACCAGATACTTTG  
CCGTCACAGTTCAGTCAATATCAAGCCTGATCAATGCTTCCATATCTCTGGGCGTGTGG  
AGACACTGCTGTATTCAACCTGATTAGGCATCTTCAGAACGACAAGGAAATTTGGACTGC  
AATCGTTAACCAGTACAAGACATGTTTACCGAACGGGGTTGGGTTAACCTGCTGGGATGG  
TTTACAGCGCAAGACGACCGCGGGGCAATGGGCTTCAATCATCTTCGAGATGGTTTACAT  
GCAGCGAACTGTCAAGGACCATACTCCCTCACAACCTGAACCTTCGTCGCGTGGGGGTTAT  
ATGATTGATAAGATGATCATGGATGCTGTAACGAGGGACACCGAGGCCATATCCGTGCC  
TCTCTGACGCTACAATTCATGGTTGCAACATGGCTGTGTGGAATGCCGAAAAAAGATAAT  
GGGACTATGTTGTCATCACGGATGACTGCCTTGACCCTGACAAGGTATGCAGAGTACTC  
CGTGTGCAAGATTGTGAGCTTGTGGAGGGGGAGAGATTACTGCTCCTGACAAGCGCCGCT  
TATGGAGACCTTTAGTGTCTGTGGTGTGTTTCCCTGGACGAAGCTGGAGGAGACTCCGAC  
GAAGTTGATGTCGGACGACCAAGGACTAAGTCACTGTGCTACCGTGATATGGGAACATGG  
AGATCCCCTTGGAAGGGAAATGATAAGGACAGGATGCACACACAGTTAAGGGAAAGAGGCA  
GAAGATTGTTGTTTATGTTGACAACGTTTCTGAGCAAAGCCGTTATATTCTGAACAAGAC  
AACAAAGCTTGGCAGAGGAAAACAGAATTGACCACAACCTCATCGAAGCCCTCAGTCTTGG  
TTCTCTGGGTAGTGCAACTAGTGATGTGGCTGGCCGTTTTTCCCTGTATTGTGTACGAATT  
GTACCAGTTTGGTATCTTAGGGTATGGTATAATCCACACTGTTGTCCCAACATCTGAGAA  
ATATTTTGTAAGAGGACTTTTACCGGAACAAGAGCGCACTTATGTGAAAGAAGTGGTTGA  
GGAAAAGACAAGTAAGAAGGTATACTCAACCGGCCAAGTGAAGATGGAAAAATCGCATAT  
TCTCAGGGCTGTTGAGTCCGACATGCCTGGCAGTTTAGACGGTCTTACGCTCGCGGCTGG  
GAAGGCGGACTATGCGCATGCGTATTTGATCGGGAACAAGTTCATGGATGGAGGATCCGT  
AGAATAAGGGTAAGGGCTCCTACATCAAAACCGAAGGCAAGGAAGAAACCGGTCGTAGTG  
CCATTGACGCCAGGACTTTGGGTAACAGATGCAAGTCAAATCGCTCCTTTCCGGGAGAAA  
TTAATACTTGGGCAGGGGGGTCTTGATCCTGTGCTTGGGGCGCCACTGCGCTAACCTTGC  
TTGGACCATGACCACTTCGATGTTAAATGTCGTGGAGTCTTGAGTCCGTGTGTGAACACC  
CTCGAAGGATTTGTGCTGAAGGCATGGATGAAGTACGTGTCTGCGTACACAGATACGTCA  
TTGTCCACACCGCTCCGAAATCTTGCTGACTACTTGGAGAATGATTTTGGCCGGTTCCT  
ATCCATGCTGTGTACAAAGAAGTTATGCTGTTGTTCTTGAGGTGATGTACCAATGACAAG  
ATCATTCAAAGGCAAGAGCCTGACCTCGGCATGATCATGACCCAAGGTAATCAGAAGCAT  
GATAGCATAACGTTTAACTGACAGAGCTTGTGACACAAACGGAGGGAAGATTTGCTGGA  
CAATTTGAGCCAGCCCTTAAAGTTCTATTGCAAGACCTGGCGGGGTGAATTCGGTTATCG

AACTCTGGTGGACCCGGTCTGCGGTAGGGTCCACTGAGTAACCCTAAGAGCCACAGTG  
GATGATCAAAGCATACTGTGTTGCGAGAGTTGCCATCCGTGACTTTGCTGTGAATGATAT  
TGTTGAATTTTTCCGAGCGGTGTAATGCTGAGTGGAGAAAAAGCCTTGCATTAAGCG  
AAAGGTATGACCAACCGTGAACCTTGCTCATCGTTATCTAGGGGAAAAGAGTAAGGAATCC  
GATATCAGTCTGATCCTGAATGCGCACCAAGTATGTTCCAGAGGCTGCTCAGGTGATCACC  
GGGACAGTTGTTGGCAATCTGGGCGCGAAGATCTTCCTTGGTGACGTAGAGGTATCACC  
AGGCTCGCTTGGGTCTTTAACCATTCAAGGCGTTTGTAACTTCACACGTAGTACAT  
GAGCCTTATATGTACACATGGGCGGGGAAGTGGTTGGATAACCCTGCGATTCTCAGTCTC  
AAGCTGCCGTTTATTAGACGCTCAAAACCGATATCCACGACGACCGAGAAGTGGTTAAA  
GAACTGCGGCATATCCATGACGAGGGTGATGTTTTTATTGCACACAACGCACATTTTCGAG  
AAAGAATGAGCTAACCAACGGTTTGTCTCTCGCCAGTAAAAGACCGCCGTCACCGTACATC  
GTGATCGATACGCTTGCAAGACTGAAGTCGGCTTTCTCCCTGCCGTCACCGTCTGGAG  
GCCGCGTGTAATTACTACGATCTTGCTGCCCCTCAGCGCCATCACGAAGGGATAACCTTG  
TGGATTTCGTTGCTTCCAGGGTGAGGTTGCAGCATTTCGAGGAAATGGAGTTTTACAACATC  
GGGTATATTGCGGCTCTTGAAGGTATCTATTTGAAAGTTAGACCGTTCATGAAGAGACAC  
CCGGATGTGACGGTCTATAATGACGATGACGACAACACTGTCCTTCGATGCGTTCCTTAT  
AACTCTGATAAGGTACTGCCTATCGAATGTAAGGTGGGGACAACCTGACTGTGAAAATTC  
CAGGCATATCGCTGTGAAAGGTTTGGTTTTGATATGCGTGACCGTCGCAACATCGGTACC  
AAGGAAGAGATGGCTCACACGCTTGTGAATATCATTTTAGGACTTCGGGCCCTTTGCAA  
GGAGAGAAGAATGAGTAGAGTTATCAGCATTAAAGTCCCTGACTCGTTTGATAATGACTG  
GTTAATCAAGCATCTTCGCGATCTTGACATGCGTCTGGAGGAGTTGGTAGAACCGGAATC  
TGAGGCAGAGCGCTTAAATAGGATCGGGGCCTGTCTGGACAGTGTTAACGCTATGCAAGA  
ATATGCGAGGAACTGATGGATATTTACGTTCTGAATGCACCGCCGTTGAGCGGTAAAGAT  
GTAATCTACACTCATCTGTGCGATTGTCACCCAAACCTGCCCCACGAGCAGGTGAAGGAA  
CTTCTGTTTGAAGTGGCTGTAAGGACCTCTGGCATCTCGCCCGACCGGTGGGACGCTATG  
TACACTCGTCTGTTTCTAGGAGGTCCCCGGTCCCTACCTGCTGATTGATGGTGTCAATCTA  
CCTCCTTGTGAGTCACTGATTGAGTCTCTGAGAAAGTGATCAAAACACTCTTCGGCAAT  
TCTGCGTACAGCAAGGCAGCGATTGCAAACCGAAGCAGAATAATGCGACTGATAAAATT  
ATTGTTCTTTCTGATGGAGGTTTACGGAAGAAAACCGAGAAGTTTCTGATCACGCGGAT  
GCTACTGGTGGCGAGTTTTTTCATTGCACGTATTCACCGGAAATGCAATGATTAGGGTAAC  
GACAGCAGGAACTGGTTATACCTTGACGGTATTCAGGTTCTGAGAACGACTTCGGTAAC  
AAAGAGGGTACGTTTACTCACTGCGCCGAATCTGTCTTTAGTGGGCGAGATCAAGCAGC  
TCTGTATGGTAGTATGCGTAAGCCACTTAAGACCGGTATGGTGGTAGACCTAGCGTTCGT  
AGGTTACAGGCACACCCGGCCTTGAATGGTTGGACCCGGTATAGGGTGTAAGGGCAGATTA  
TAACCTGCCGGATATAACGCCGCAGGGTATGGATTATAATAATCTGCCATAATCCTTCCC  
TCGTGGGAAGGTTAATCAGTTACCTCCGTATGAGTTCTGGGAAGATCAGTACCTGTACGA  
CTAACTGCGTCCCCGCGCCGGTCCGTTAATGCAGATGCAGCTTGGGCGGCTGCTGGACA  
CTTCAACCATTTTCGTGTCTCACTGAACGAAAGGCCATTTCTCGTCCAAGGTAAGATTCCT  
GAACCGAGAGACAGAGGAATTTTTTCAGCATCGAATCTGGAAGTGGTCACGACTTTTAGGC  
AACAAAAACAAGGCTGGTATTAAGATTCAAATCATCATTGATGAGCGTAATGAGTTCCT  
GAAGCAGTTTGGCCATACGTGATTAAGATCAAGTTCAAGACACCTTATGACCAACCTGA  
AGAGCTTCGCATCTCACTCGATCTTGAGAGCGAAGCCTGGAACGTCATCAAAGACTTCGG  
GCTGGATATTGCATAATGAAGAGATGCCCCGACAGGAGACTTCGCTGTCCACTATGGGCAT  
TGGGTGGAGGTAATCACCGAGGACAGAACCTTCCCTCATATCCTTCAAAGCAACAAGAGAC  
ATGTGGAAGGACATTCTGTACGATATCAGGTGTTTAAAGCCGGGACGGGCCCGGAAACA  
CCCTACCGTATCAAGAGGAGAGGCAAATGATTCTTATACCAGATTCTTTCGGTAGCATCA  
AAAACGAACTTCTGCGTCGTACCTAAAAAATCCACAAGTGCTCGGCGTTGATGCTGTAG  
GGATCAATGCAGCAGATCTTGCATCAACGAAGATTTTCGTTTCCCGTCTGCTCAGTGAGG  
CATACTTGGAAATATTCACCACCGACGTGGTTGAAGAAATGGTAGCCTTCCAGCAACGAT  
TCACAGATCACAATCTCATTCTTGGGAAAGTTATTGAGCAAGCGTTTGCCTGAGTTTTAG  
AAGAAAACATAGAGTCGATGTATAAGATACTGAAAGGAGCACAATAATGAAAAACCTGT  
ACTTGCCCCTGTTGGTGCAGATAGTATTTACCGCAAAGTCGACATATTACAACCTTTGA  
GCTTGAGTACCCTCGTATCCTTACATCGAACTGATGACACATTGTCTGTTTAGTCGGAA  
CGCTATGCGTAGCCGTGCAATGCCGGTCAAAAAGATGATCGAGCAGGTGCAGAGAGATCC  
TGCTATGCCTGTTAAGTTTGGAAAGAATCAACCAGGGATGCAGGATGCCGGTGAGTATGA  
AGCACAGCTTGGTTCATGGGTTTTTCGGCTGAAGATTGGTGGAACTCGCAGGATTAAGTGC  
GGCACGTTTTGCTGTTGAATTGAAAGATGCTGGTTACCACAAACAGATCACAACCGCCT

GCCTGAGCCTTTCCAGCAAATGAAAACGGTCTCGACTGCAACTGTCTTTGAGGATTTCCG  
TTGGTTGAGGATAGATAAGGATGCCGATCCAACCATTTACGCTTTAGCAGAGGCCATGAA  
CAAAGCATTGGACGAATCAGTACCTCTATAACTAGAGCCAGGGCAATGACACCCCCCTGA  
TGTTGATCACCTAGACAGTGTGGGAAAGCAGGCTAGTGTAGACACATTTGATTTTCAAGTGT  
TCTTGACGAGAACAACAGACCAGTCATCTTCACAGTGGATGTAGTTAAGGCTATTGGTGC  
AACTTTTTGTGCTCAGGTGTTTTATCGTGGGCTTAACAACACGAAAGAGAAAGATATAGA  
ACTGGATGGGAAAGTCTTAAGCGGTTATAAGGGTCACGCTTCTCCTTTTGATCATGTGGC  
AACCCCGATGAGATGAGAGTCCAGCGAGTACGCTTATGACCCAAGCATCAATTTGACGGA  
AAACCCTGTTCCCTGGGAAGCAGGCAATACCCATATTGATCGCAAATTTGCGCCTATGGAG  
TGGGAACTACCGAGGCTGGACTCAGTTGCGTCAATGACTGCCTAATAACTATGTTGAAGG  
TTGATGTTGCTGGATAGGAACGGATTTATCAGGTAGATTCTGATGGCACTGTTTGGTCTC  
TTTAAAGGTGGGTTGAGAAAAGTCGCCATGAAAAAGAAGTGCGCCACAGTTTGTCCCC  
CAAAGAAAAGAACATGTTCTGAGCGTGGCACAGGCTATCTGACTGTGAGATTGGCAAACA  
ACGGAGTTCTAAAAACCTTCAGGGTGCATAGGTTGATTGCTGAGGTGTGCCTACCTAACC  
CACCCAACAAGCCATTTGTGAATCCTAAAAATGGTGATAAGAGAAAACAACAAGGTCCAAA  
ATCTTGAATGGGTAAACGGGGAAGAGAACACTGTGCATGCGATAGTAACAAGGCTGAAGC  
GGGATAATCTGAGAGAACCCATGCCTTGCCGTTATGTAAGCGAACAACACTGGAAAGAATGT  
AGTCTGCGGTTGACCAAACCTCCAGTATTAAGTATCTTGGATGTATGAATTGCGGTGAGA  
AAGTACTCCACGATGATAGGCAGAATGGAGATTGCATGAGTAAGACAAAACGCAAACCAA  
CCCACCATATTTGCGTCAATTTCCACTTTATAAGATCCGTACCCGCATTCCCTGTAACCC  
AAGATAGGGCACTCCGTGCTGCCCTTTTTGCAGTAGGCTTCCAAGTAACCGATGGTTAAG  
GGAATCCTAAGCATGTAACAATACTTAACATGAAAAATGTACTATGTGCGAACTTGACCT  
ATCCGTACCGTAAAACAACAATCCTTGTTGGCGACTTGCGTCCGGATTATGCGTATGCAA  
AAATTTATAACGGTGTGATATTCTCCAGGTAGCGATTTACTCCGAGCGCTAGATGGAGT  
TCGCGCTTGATCTCCATAAGATATTCCAGTGAATGAGAAGGTTAATACGCGTAAGTACA  
CAAAGGTGTAGATCGTCCAGATTCGTTTGGTAGTACGTTTCGTTAGTGAAAATGTAGCAC  
CTCTCAGTGACGCATTTGGTCTGGGCGAATAATGAGTACAGAGAACACCAAGTCGAAAGA  
CCGTGGATTGGTTGACAAGTATCACTACGCCGTGTGGCTCTACTTCAAGGATTTAACCAC  
TGACAGCAAGATGTACGACGATTTGTAATATGATGAGTATTCTGGTAAAAGAGTTAATGT  
CGCACCTCCGGGTCAGACTGATAAACCAAACCAAGACGATGACGTAGGTAATAAGCCTCT  
TGCTCAATACGCAGAATAACAAGGGAAACGTTTGGTCAATAAAGTTGTAAGGTTGATGG  
AACGAAGGTACCGTTTGAACCAGGCCGCTGAACAAGTCAGAGATCTTTGGTGTGTAACG  
TAATGGTAACTGGTGACATATCTCCATGGGCACCTACAAGCTCCCGTATGATAGTTGCAC  
CACTGGTGAAGTAAAGCAAGCATTGCTCGATGCCTACGTGAGCCAAACAGACGACGCCCA  
TTCAAGGATGGCTGGGTGAGGTCTGATCGGTCAGATCAACAAAGAAGCGTACGACGGTTT  
CAGCAAGATCCCTGCTCTTTATAATGTCTAGCGCGAGCTTATCGACTAGGGTTATTGGGA  
AGCCATGGGTATGGTCCGATGATGATTGTGGAACCTTATGAGTATGATTCGTCATTCCAT  
GGACCTTGACTACGGCGACGGCGTCTGAAGTTATTGCGTGACAGGTACGGTATCAAAGA  
CGGCATCAACGATGTTGTTTTTGTAGTCACCGTAGATAATGTTTATGGGTGTTGCAATGGG  
GGTAATTAAGCGTATGCGTTCGTGAGCGTCCAATAAAGGATGTGATTAAGATGAATACGTA  
TCTATCGGAACTGACGATCGATGGTCCGACACCGTATCTGAACGGACTCCGTACCGGACG  
TACTGAATGTGGGTCTGCTGCATTATCAAGGCTGACGATACAGCGAAAAGAATTGGTGT  
TGATCGTGAAGTTACGTATTCGATCACCGTTGCACAGTCAGATCTTGACTACTACCTCCC  
CTCCCGCTCAATTGGTGACGCCGCTCGTAGTAATACGATCCAACCCATGGGTAAACTCAA  
ATATTACCGTGGCATTGATGCTCGGGTGAAAGAAAACCGACAGACCCGCCCTGGTGGTTC  
TGCCACGACCTCTTTTCTGGCCCTTGACCCGCGGATCGAAGAACTGTTGCGCCCTAAGAA  
CCCGCAGACACTTTCTACATAACGTATTAGTGCAATGGATTAAGCCACTGCTGTAACTA  
GTCTTTTATGAACCGTGTGGCGAAGTACTTTTTCTGGATGCTAGTATCTTACCAGGAAGC  
ACCTCCACTACACGAATGTATGTTCAAGATGACCATGCAGGAATTTGATGCAGAAGTTGC  
TCCTGTGGCAGCGGATACTAAGATCAATAAACCCCTGGGTGAAGGCTCGCGATCTAGAAGT  
AGAGATCGTTACCCAAAGAGCCGCAACAGTTCGCCTGTACGTATACTTGCCTGACGAGAT  
GAACCGGCACCCGCCTATCCTGGAGACTATTTCTTCTCCACCTATTGCCAAGAAATTTG  
TCTGCCTACCATCGGATTCAAAGATATGCGTAACATCTTTGATATCCTTGCAGACGATGA  
TGAGGTGCTCTTGGCTTCCGTGCATCTCGCGTTGCTGGGCGTGTGCTCCGTATGCGTA  
CGATGATGTTGCTTACTACGCCGTCCTTATGATCGACACCGTTACGGATATCATGGATTA  
TCCGTATGAGGATATGGAACACACTGCCAAGGCCGTCGTGGAATCGGTGTTGGTTTGAC  
AAACCATCCACATTACATCGCGAAACTCACGCTAGCTTACGGCTCTGCTGAGAGCAAGCA

TTTGATTTCATAACCTGGCAAAACTGCACACCTTCAGCTTACATAAATAAAGCCTGCGTCT  
TGCAAAAGAGCGTGGTGTAGCTCCGCGGATGAAAAAGAGCAAGTACCCACAAGGGTGGTT  
TCCAATCGACGCCTACAATAAAGGCGTTGATGGAATTGTGAAGAATCAAAGTCTCAAGCA  
GTATTGGGAACCTTTTACGACAAGATATTATCGAAGTTTGTGGTATCCGCAATAATGTGTG  
GGTAGCTTATATGGCGAACGAAAGTTCTTCTCTGGCGACGACCACTACAACTGACTTTA  
CCCGGTGCGAGATCACATTATCTTCGAGAAATCACCGCAGGGGTCTGTGCTGTTTGTCTG  
GTCGGAGTATGATGGACTGAAGGATTACTACACCTCTGCGTGGGGTATTAACACCAACGA  
CCTGATTGACCTTTTCGCTGTCATTCAGAGGATCGCAGGGTAGGCGATGGGTGCTGACCT  
CTACATTGACTATACGCAGTTGAAAGCCGGATAGATCTCAATGATGGACCAGACGGATTA  
CCTGATCCGTGCAAGGAAGATGGGCGTGAAGACTTGGTACTACTGGAACACGAAGGTTGG  
TGCTGGCGAATCACTCACCGCAGAATTTAAGTCGAGGCAGCAAGCAGAGGAAGAGACCCG  
CATGGATTGTCCACTGATAGCAGACACCTCGGTTGAAGACCTGAACAGTTAAGGTTGTGC  
GTTGTAATTCTTATGGGGCTCTGGCCCCTATTTATCCGGAGGTGAATCAATAGCAGTAGT  
CAACGCCGGGAAGAACTCTCATAAACCTGGTGATTATCTGCTGCCCTCGGACAGCAAAT  
GGGTCTGTATGACACCATCTACAAAAAATCCCCGGTCTGTTTGACCCGTACAAGCCTCA  
AAAGGAATAGGATTGGTCTGAATACGAAGTTGAGCTAAATGAGTTAATCACTGACTTTGC  
AACCTGTAGCAAGTCCGCTTCTGATGTCATGGTGCAGACCCTGATGTGGAAGTTCGAGGC  
AGATAGTGTTGCAGCACAGATAATCATCTGTCTGTTTGAACCTTTCATCGCAAACAGTGA  
ACTTTTCGCCATGATGATGAAGCAATCTTAGATGGAAGTTCGCCACGCGCTTTCATATTC  
TGATATCATCCGTCAGTGTGTTGCCAACTCTCGGCTAATTATTCAAGATATTCAAACAA  
TCGCGCAGTTCTCGTACCTTCTGCTTTGAGCCTCAAGTTCATGCGTGAACCTTGAAGTTCT  
TGGAGGACTTTATCGGCTCGATGCTGAATCAGTAGACAAAGACGTGGTTCGACGTTGTAT  
CCTACATGCATTGGTCACGATAATCTATCTGGGAGGGATTGAATTTATCTCCAGCTTCGC  
GTGTACCATTGCATTGGGAGAACACGGTGTGTTTGTCTGTTTCGGTTCAGCTAGTCCGGAT  
AATCATTCTGGATGGAATGCTGCGCACCAAGATGGATGTCGACGTTAGTGATACCCTTCT  
GACAGACCAGGTGTGGAAGACTAGTTTTAATGCCATTAAGTACCAGATCAAGGAAATCCT  
TGACGAAGTGCGAACAAAAGAGCTTGGTTGGGGTGATTACCTGTTAAGTGATGGTTCGTGT  
AATAATGGAATTGAATGCGCCGCTCCTGAAAGATTGGAGTAACTAGAAGTGCATTCCGAT  
TTATAGCTACTACGGTATTCCAAATGAGTTCAAAGCTACCAAGCAGGATCCACAGCCGTT  
AACGGATATCAGGATGAATCCAAGCCGAAAGCAGAACGCAAATCAGGCGCAAACAAACAC  
GGATACTCGTTTAATTGCGTCAGTCACCGATATATACGGTGAAGTCTCGGACTTTTCAGC  
AGTAACATTGGACAATTCGATTTTTGATATCAGGGTTGCTTAAGCTCACACCAAAATTC  
TGTCACTCTCGATGGTGGGCGTGATATGGGCTGGATTGCGAGGTCACGGTTTCATGCTC  
ACGCCGTCTGAATGGTGTGGACTGTGCTAAAGACTTTATTCAAGGCCAAAGCCTTTAGGT  
TGTCCCACGGAAAATGCTTCTGGGTGAGCAAGGGCTTTAGGAACTTGGGTACACCGGCAG  
TGGACCATTCTAGGACAGTTGTAACCTTTGTGGCTGATCTGGGTGTGAAAGGTTATGACGT  
TGATTATAGTGGCAAGATCGCAGCTTTTATTTTTACCTTCGAAACGGAGTAATAATGAGT  
ATCAAAGACAACATTTTCATTATGCAAGGCGAGGACAATTGCCAACACTGCGTCCGGGCA  
AGAGAGGTCGCTAAATCCAAAGGTCTGGTGTATTATGTATGTGACCTTGAAAATAAACTAC  
ACCCAAGAGGAACCGCTGGCAAAATCCTCTCCAGTACTCCGGACAACCGTACCCCGTGTC  
TCTATGGATGATGAAACGAGCACCCGGGATATCGGATCAGCCGAAGAGCTCATTGCATAC  
GCCAAAGCAAACATATGAGGGGGTAGATGAGTGAAAGTAGTAACACGCTCTGGGCGTGTT  
GAAGACTTCTCTCTGAAAAAAGTAAAACGACCGGTTGAGGCCGCCCTGTTAGCAATAGGC  
ATGGACCCACAAGCAGCACATCGAACGGCGGTCAATATCGTTCAGCGGATTTTCAATTTA  
TTCTTGACGACACCTGTGAGAAATGTCGAAGATTTCTATCGTGAAGTGGAAAATCTGTTG  
ATGGAAGAAGGTCCACTCCGTGACGCTGCTCGCGCTATACTGAGTATCGCCATGATCGT  
GACAACGCACGTGAAGGAAAGGGAAAACCTTTATGCATATATCACCGGATTCTCGGGCCAA  
TCCGCAAAATAGTGCCCTATGAGAATGCAAACAAACGAGGCACGGTCGTAAACACGCAC  
ATGAACCTACTAGCGGGGATTTTCGAGTAAACATGTGGCATTGACTCATTTACTTCCTAAG  
AACCTTGCGGAAGGGCATAACAGAGCGTTTTTGGACAGATTTCGCGAGCTTGTTTACCATGTA  
AGCCCGCTGACGGACTGTTGCGTGGTAAACTACCTGAACATGCTTGAAAATGGTTTCAAT  
ATCGGCAATGCTAAGATTGAGAAGCCGAGATCAATTGATGTTGCAACCACTGCATTCACA  
CAAATCATCCAGCCTGTAGCGTCAAGCGATTATGATTGACAGTCCTGTGCTCACATCGAC  
GAAGGTCTGAAGCAATTCTTTGAAATGAGCTTCATGAAGAATGTGAATCAGTTCAGAGC  
CACAGAAACGCCGTTGGTCCGACCAACAAAACGGTCTTGATGCAAACCAGACACTGCTG  
CATCTGGTCAATACCCTGATGAGCGTAAATGGTCAGGCACGTTTCATCACGATCAGCCTC  
GGTTTGGTTAGATCAATGATCGGTAGGATAATCAATTGTAATTATCTGACCGTGCACAAA

GAGGGCCTCAGCGCTGATAATGTGACCGCAGTGTTCCTCCGAAAGTGGTTATCTTCCTAAAG  
GAAGGCGTGTACATGAATCCAGGTGATTCGAATTGTGATCTGTAGTTGCGTGCTATGGAG  
TGTGGTGCTGAGAGAATCCACCCCGACTTCATCTCAGCTCCGTTGAACATGCAAGAGACC  
GGGTATTCGGACGGAAGGGTGACGAGCATGGGTTGTTCGTAGCTTTATATCTCACTATGCA  
ACCGAAAATGGAGAAAAGTACTATGTACGTTGCAATCTTGGCGTGGTAACCTTAAACTTA  
CCCATGATTACTGCCGAAGCAAAGCCGAAATGGTTTCTTCATACAACCTGCTTGATAAG  
CATATAAAAATGCCTTATGAGACACAGGTGCTTCGTCTTGGTCGTCTGATCGAGGTTACG  
GCATCCCAGAACCCGACATTGTTGATGGAAGGTACTGTGGCAAAGCTCGGGCCTGATGAG  
AAGATCAGTAAACTCTTCTATGGAGGGCACGCCTCCCTGAGTATCGGGTTTGTTCGGCCAT  
TATGAGGATGTGTAATCCTTTATGATGAGCCAGTACGCAAGGTGATGGCGATGAATATC  
ATGAAGTACATGAAGGATATCTGTGCAGAGTTCGAGGAGCGCAGTGGGTTAGGTTTCAGC  
CGGTATGGAACATCTGCGGAAAGCAAGAGTTACCGCTTTGCAAGCAAGTTACAGCAGAAA  
CGTCTGGTTTAAATTGAAAGAGATTACCTGACAAACTCTTACCACCACCCTGTGTGGCTC  
AACAGCGACCCGTGCAGTATGTAGGATTACGAATAAGGTTTCGCAGAGATCAGTAACGGC  
GGTGATTTTCGGATACGTGGATACCCCGAACCTGGAGCATATTATGCAGGCGCTTGAAGCT  
CTTATTTTCTATGGGTACGAGAACATTTATTATTTTCGGTATCAGTCAGCCAGTGGTTCAG  
TGCTTTAAATGCGGATTTAGCCGTGAGTAGAAGACGACTGCAAAAGGATTCCAATGTCCT  
ACTTCTGGGACCATGACGAAGGACCGTTTACTGCGATTTCGTCAAGTTTCCGGAGATCGG  
TCAGCATCAAACCTCACGACCCTACAACAATGGTAAAATGGAAGAGGTGCTGCAAGGGGTG  
AAACATGTATGCATTAGTTTGTATGAATCCACAGACCTCGTGAACGAAGAGGGGCTCA  
GGTGCCCCCTTTGTGTTAGCGGTTGCAGTCACGGATGTCGCGGCTGCTTTAACCAAAAAG  
CTTGGTTCGTATATCTAAGTTCATCTTTTCACCAATGCGGATGTTCTCTGGCTCATCAAAC  
TTATGGGAAGGCCTTTTATCAAGGGCTTGTTCGTTTCTTGGAGGTGAACCACTTGACCCAC  
AGAATGTTGATGAGGTCGTCAAAGTAATTCTGCGTGTCCGTGCAGTATTCCGAGATAGCA  
GGGGTATCATGGTGGGTACTGGATACACCTTCGAAGAAGTCCCAGAAAGGGTTAAAAAAC  
TTGTTGACATTAAGATGGACGGCAAGTATGATGAGTGGTATGCTAAAACCTAGAAGGTTCA  
CAGGTTCTGACAACCCGAGGATGTGGGTAAAGAATAAACGGTGTATGGATAGAGGACTAAT  
AGATGGGTAAAGAAAACACTGCCTAAGGCATAACAGATAGAACTGTCACTGGAACCTCTTG  
GCCTAGAGCATAAGAACTAGCGCCCCACTGAGATCGTACTGATGGAACCTGGTATCTGACG  
TTCCTGCCTGTGGCAACTACTGAGGTACTCCATGACTGAACTTATTAACGAAGAAGTAC  
CTTTGTGCCACACTCGCAGCTGCACACGCTTCAGCTCGCAGATTCCGAGGAACTGGCCCA  
TGAGTTGGTGGGCCTTGATTTCTAAGACTGATCAATCAGTTTACGGAACAAACTCAGTA  
TCAGATTGAGGCTCTCAAGCAAACGAATGCTGCCGCACGTAAAGGCCAGGATGCTGCGAT  
GGAAAAGGAGCTTAATGCTGCTTAGGTTAAGGTGAAGAAAGCTCTTTCTGAAGAGTTTAT  
GCCGGAGGTGATGGATCCGATGATTGACCTTCTGAAAGGAGAGCTGACACGGCACGAGCT  
TGCTTAAGCGATCTATTATGAACGTATCACCATCAAGATTTGGGGGATTCCGGCCCCGGCT  
TAAAACGGCTCTTCCAGAGGCGCTCTGAGAGGGCTAAGCCGAAAGGAGGTGTTCAATGAA  
TGCTGCGAGTCCCAGATTGAGCGTAAGCTGATCGAAGGTGGGTTTAGCGACGGCAAGTC  
TGGTGTGATGTAATATGCGGACACGCCACAAGATCCGAACTGCAAAAGAGCATTGCACA  
GGCTACCAGTGCAACAATTCCGGAGGTACTTAGAAACTCACGCAAGCACAGCTGGACAA  
AATCTTCCCCCTCGGTGCATGTTCTGGGAAGAATGCAAGATTCATGACGCCGCTCAATGA  
CCTGTCTGAAAAGACAGAGATCAATGCTGTGAATCAGATTGCAGGGTTCCGGTTTCAGCT  
TGATGTGGAGTCGGCGCAGGTCCGGTATGTACGTGGGCTCTGTAACGGTGGCTACTTTCA  
CAAGTACGACACTGGTCTATTCCAAAAGATTTGGAAACACACCCCAAGTAAAGATGGGGA  
TGGTCCCAACGCCAAGGGGAGGGGGCTGATCCAGGTGCCCGGACTCACAACCTAAGAGGC  
TTGCCGTAAGGCGATAGGTCTTGGCCTCGTTAACCACCCTGAGCTAGTTGAACAGCCTGA  
GTATGCTGTCCAGCCCTGGCTCGTATTGGGACAAGCGACACATCAGCCCCGCTTGCCT  
TGCTGGTGTGTCGTTAAAATTACCAAGCTTGTAAACAGTGGTACAAATTAACCTCGCCGA  
GCGCGCAGCCAACTACAAAAGGCTAAATCTGTTCTAACCTCGTAAGGAGATCCAATATC  
GGAAGACGCACAGAGGCTCGTGCTTTAAAACCTTTCGGGTTCGCCAGCAACAACGTGCAGAA  
AGACAATTAAAAACCACCCGCAATTGCACGAGGAGCGTAACAGCGCCCAGGCTCTGGTT  
TCACTGAATTTAAAGCCGAGGATTCCCTTACAAGTTACAGACTTGCAGAATTATAATT  
GCGAAAGATAGCTTCGGGAAAGGTAAAACCTACCAGGCATCCGCCGACGCTTCCGACTTG  
CTACGTAAAAACGATCTCGACAACATCCTAGTCGCTCGTCCCTGCGTGCAGACGGTTAAC  
ACCTCCGGCTTCAAACGTGAACTAGACTGGAAAAGCTGTTACCCTATGTTTCGTAACATG  
TTGGATACCATCCGAGGCGCATGGTTCGACGGGGCATATTACAATGCTCTAACAGACGGT  
TTAAATGGGAGTATCGGAGTTCACGAATTGGAAGCACCCCTGGTTCGATTATTCGACTAA

AACAGCTTCCTACTGATCGCCGAACCCCGGCAGAGTACCCCAAGAAGGAATGCTGAGTATC  
ATTACTCGTATTTCCGGTAATTGTACATTCGTTGTGATGGGTGCTGCCAGTCAGATAGAC  
ATTTAAGGTCAGTTTCGCCTGGCGGGGCTCATTGAGTTTAGCCAGCGACACAACCTCGAA  
GGTGTGGGTA CTGTGTCCTTTTCATGACCCAAATGAGGATATCCTTCGTCTGGTAAGGTT  
CGCGACATCGCTCTTGCCATGATGGCTGACCGTGACGCTAGACTGTATAAGCCGATGGCT  
GCTTAAAAGGAGAAAGATGGCATATTATGCAGGGGTAGGATCACGCGAAACACCCCCAGA  
GGTTATCAGCGTCATGTA AACACTGCTTTCCGTCTCGTCCGGCTCGGATTCACACTTCG  
GAGTGGGAACGCTGGAGGAGCGGATGCTGCATTTTCAGAGAGGGAGGTAAAAATATGACGA  
AGCTCTTAACAATGGAGAGAAGCCAGAGTATCGTACACGCTTGGCAAAGATCTACAGCC  
TTGTGGAGGCTTTTCCTTGAGACAATTAAGACCTTTGGCACTTCTGGGGTTATCCCTTGAG  
TTACCATGACCATCTCATACTGAACAAAAGCATAAAAAGGGATCTGTCCGGTTGAGGAAAG  
CCATACGAATTATGAGGCTCTTAAACGGAAAAGAAGTGCTTTTGCCTCCATTCCCGTAA  
TGTGCAACAAGA ACTGGGGGCAAACATCCTAGATCCAAAGCCCCTGCCCCCTGCCTTTA  
CTCTGAGTCGGAAGATAAGCATGGCAACCCAAAAGGCGGA ACTGCAACCGGTGGCAATCC  
CGCCAAATTGTATGCCATGAAGATGCCTAACCTAAACACTCCGGAGCGCTTGGCCTTGCT  
TGAGCAGTTTCTGACCAGTCTTGAGAGCGAACGAGGTGTGCAGGTTTAGAGTCAAGCGAA  
ATCAGTCCTACTGCCTTGTGAAGGTTGAAATAAAGGGTTGGGTTCTGGCAAAAAGACGG  
GATAACGGATTTAGGATATCGATGCAGGTGGGGAGATTTCGTCATGTTTGCACCACAGATG  
ACACGAAACCGTTCAATCATCTGACTGAACCTCTAGGGTACGAGTCCAAGAAA ACTAATG  
TGGTCGGAGATACAGTCCAGCTGGAAAATTTCCGGAATGTTTACATTTTGGATGATGGGT  
ACTCCGGAGCTAACGATGTAGTTAAGTAACTGATAGCTCGCTAGAAGCAGTATGACAGCT  
AGTATTCATGGGGTTGTTGCCCTTCGAAA ACTTATCGTTCTTAAGAATTGTGGTGTGTC  
GAGCCTGA ACTTTTCGAGGGGGAAAGTAACTAAGCTTTTACCTTGTGCCGTAACGTAATA  
GCACAGAGTTTGTATGAGCTGAATGATGGGGTTCTTACACGTATTATCTACAGCTAGGAG  
GGGGCTGAACGTGCAGCTCGCTGGATGTTTCCGGACAGACGTGATCTACTTAATCCTCAG  
ATTTATCTGGATCATCAGCGTCGTGTATAGAGATATGTGAATATCAGTCCTAAGGAACTG  
AAGGCGTTCCCAATGCTTCACACTTCAGCGTTAGCCTCCTAGATGGCAAGAAAAGTTCTC  
GGCACATTCAATTACAGCGATCAAGTGCTTGTGGATGACGAGACAGGGTACCACATTGAC  
TGGCGAATGAAGAATGCTTACATTCTGAAAGGCTACATTGCAAACGCTCGCGAGCAGGAT  
TAATAAGGAACAGAACAAA ACTTTTTCGGTATGCTGCCGGGGATTAGGGCGAACATTTA  
TACCTACCCGGACACTCTCATGATCAAGTTATCTAGATTGATGATCTGTATGGCTAAA  
AGACCATCAGGACCGTCTGCAAGTTATCCGCCCTCAAGCCGTGATGACACGATCCGGGT  
TGTGATTGACAGTCATGGTCGGGTAGTTTCTATCGCTTTGCGGTATGTCAGTGCCTCCG  
TGAGAATCAGCCCCGAGCGTAACCCCTACCGAAGGCAGCGTATGTTGTGCCGGGACAGT  
TTTGTGGTTGGCCATTAAGTACCGCACACTGTCACCACGGACAGAGGTCATGTTCCATAA  
TTATCAGGGCCGGACTTTTCGGCGATGAGGCAAACATGTACGCACAGATTGCATTTCGAGAT  
TCATGATTTTGAACGTATGATTGACACCTTCTACACCGGGCTTCTGACCGATTATGAGAG  
TGCAACCATCAAAGGTGGTGGTCAGGTGTGGATGGATGAGATAGAGGTCGTTAAGCGTGC  
CACTGCCGTGCTGTTGGATGAGACAAGAGTCAAACGTACGCAGCAAGGTGAGAACCCAAT  
CATTTTCGGCTAGATGAAGCCTAAACAGGAGAAAAGGTAGTTGAGAATGTTGACCTGAA  
CAACCTACCAGAAGGTGAGCCCGAGAGCGTGTGTCTGAAGAGTGTGTCGACGGGGAAAT  
GTTCAAGTTCCATGTTTCAACGCTGAGTGCAAAGATCTTGATGTCTTCAATGAGGATGA  
ACTGCAATCTATCCTGTCTCTGATCGATGCGCTGCCTGCAGGCACTGAAGAACCTCTGAA  
GGTTACCACTCAA AATAGCCAGGA ACTGATTGGTGAAATCCTCAA AACCTGCGAGTAAAT  
CGTTGGAAGTACTCTGAAGCAAAGGGGGAGCTAATGTCTGCCCTTTAAAAAAGAAGGAA  
GATTGCAGGGCATA CGATGTCCACGAAACCCCAACTTGGGCTGTTGAGGCCATGTTAAG  
GTTTCGCCGAATGATAACACCAA AACCTACTTGGATCGTTGAAGAGGCTCCGGTTGGTTC  
TACA ACTTCCCTGCCTTTGGGAAGCGCGTAGGGTAAAATCCGTCAGGGCGTAGGTGATCTT  
AACACCGGGTCTACCACGTAGATATGGTTGCGCCCAACCCACCATGCTCTTTGGCGCAA  
AAGTTCGTCACCCAGGCACCTGGTGAGGCGGATGTTGCGATCGTCTTGTGAGACTAAGT  
TCCTTTGAGGGCATGAAGCGTTTTGAGGGGTGGCAGGTGAACCCAATCAGTTCTCTATTG  
GTAATTTCTCAAAGGCCATCATTTTCAGACTATGCAAAAAGATATGGCAGCGGTTATGCC  
TGGTTTGTGTTGCGACAAGAAAACAAGCTCTGACTGAAGCCACTCATTTTCTGGTGCGA  
CACAGTCACGAATGTCGCAAACAGATGCTAGAGATCGCAAACAACGGAGAAAAGCAAAC  
CCCGGAGTCACTGAAGGAGCTGTACGATCAGATAGTGGACGGGCTAGCGCAGTGTGCGAG  
GAAGGGGACGTACGGGATAGGACTTTATCTCCTGTTCCCGGAGGAGATGAATGATTATCT  
GCCCCATCTTGTGGCGATCTTCGTGGTGACGGTTTACAGTCGATATCACCAGCTACCA



ACCAACAAAACAAGGCAGTTCAATAAGCTTGGTCGTAACATGGTAAATCAACCGGGTTCG  
GAGCGTTTTTTCTTTTTTGTACTTTACATGGAGAATACATGCACTTAAGCTGTTTTTCAA  
CAGAGTAGAACACATGCGATTTTACATTTATTACTGTCTTTTAGAGACCATCCTCTTCG  
GAAAATACATGGGAGACCTTATCCATAGCTGGCCAAAGGAGTAGGATTATTGCCCTGCCG  
GCAAGATTTGGAAAGTTAAACGTTGCTATCGCCCTGCGAGTGTGTATACTCGATTATGCA  
AGATGTTGAAACACGGAGCGATGGAGGACGATATGGTTTATCCACTCGTCAGAAACAGAT  
GACTAAAAGATCTGTTCAAAAACATTAACCAATGGGAGAACAACGCATGAAACAAGGTCT  
TACCAAAGAACAGGCCCTGATCCTGATCGCGTTCACAGGAATCCTTCGCTGACCGTTCAA  
CCTGATTCACGAAGATGTCGAAAATCGACTGGGCCAATCCGTATGAGCGCACGAGTTCGG  
CAGTAACGAGTTCTCCGCAGAACTGAAGGATGATTAACGTGAAAACCTTCATGGTGTGGAT  
TTACAAAGGGGAATGATGACGACCGAACTCAATTCCCGGGAAAAACTTTTTGCGATAGCA  
GATCGGCCGGGTGGCAAAAACGAAGACCATTAGTAGGCTTGAAATCCCCAGTGGACGAT  
GTGAAGCTGTACAACCACGGGCAGGAAGATGCAGACAGTCTCCCGGAATTTGCAGACGAC  
GAGCAAGACGATGAGGGACGCTGGGTGTGTATGATCCGTAAGGCAGTACTGGGCTATCAC  
CCGATGGGCGACGACGCTCCTATTGTGGCAACCCTTGTGGAAAAGAAGTACGACGCTGAA  
AATAAAGACACCGACATCATCTTTTACTACATGCGATAAACAATGAATAAAAATGTACATC  
ACCGATGCAGAATGGAAGTTACAAACGCAGTTCGGGCTTCTCTAAACTGAAACAAAACCA  
GAGAAAATAATTGATTAATAAAACATACACCGTTGTAAAAAACCTGTGCAATGAGAACAT  
GGGATAGCCTCCACAGGGGGTCAGGTGGTAACCACACTTGTAGAAGTTGCTGCTGATAC  
TGCTGTAGTTGTCTTAGACCAAGAAGGCCAGTTTTGTTAAGCTCTAAAGTCCGTAGCGA  
TGTATTTCTAACCAAGGTGGAAAATGCAGACCCGGAGAGGGGGTTTGTGGTGGAAATCCT  
AGACCGAAGTTTTCTGTTCCGTGTCAACGGTGTTCGGTATGAAGGCAACTATGAATACAC  
CGCAGAAGAACGGGGGATCACCGAATGAATCTCTATGCAAAAATTGACGGACACCCAGAAT  
GGTTGGAATGACTACATGGAAAAAGTCCGTGAATTTGTAAAGACTCACGATCAGGAAGAA  
ATTCTTCTTGTTACTTAAGAACTATTGACAGGTCGCGCACCGAAGTGGTATTGTCTAAT  
CAATGGCATGGTTGCAACAGTGTGCAATTTAACTTCTTCATTGAGGGTGAGACCGGTCTT  
GACGAGTATTTAATCTTCCCACCAAGAAATCATTAAAGAGACATTTATAAAGAATATATT  
CACGATGTATTCTAAGGAGAGCAGATGAAGGTATATTTGGTAGGTGGCGCAGTAGGTGAC  
GGTTTGCAGGGCCGTGAAGTCCACTACCGAGACTACTTGGTTGTGGGTGCAACACACGAC  
CAAGTGATTGAAGAAGGGATCATGCGGTGAGGCGCCTCCTTCCCGGTATCCTTCCATCCG  
GAGACTCAGGAAGAATACCCGCTCGCTCGCACTGAACGTAAGGTTGGAAACTGTCAAAAA  
AGTTTTGAGACCTTTTTTCAGCCCAGATGTAAACTGGCAGAAGACCTGTCTCGCGGGTAT  
ATGACTATTAATTCGATGGTTCAGGATCTGAATAGTGGCGAAATCATTGACCCGTTCCGGT  
GATCAATATGGTATCGAAAGGAAGGTCCAACGACACACGAACTTGGCATTCTTGATGAT  
CCTCTGCGTATCCTGAGAGCACATAGATCCAAAGGGCATTGTTGGTAAGGAATCGGATCTC  
CATCCGGAGACAAAATCTCTTTGTTAAGAGAACCGTCACGAACTTGAAAGTACCAGTGGC  
GAGCGGAAATGCGAAGAGATGAAATAGGCTGTTGGTGTGATGACTTTCGTTTCTATGCT  
GAAGCAATGGCAGAACTGGGCGAGTTACCAGAACTTGAATCGCTGCGCGGTGTAGAGCAA  
CCTCAGGAATACCATCCCCAAGATCACGCATTCATACACACATTGCTGTGCCTAGATATC  
GCAGACCATTACTAAGCAAACCTCTACACGAAGTTGGCAGTCCTGTGTACGACCTTGGC  
AAGGCCGTGGCTTTCTCCAAGTACGGTAACCTGCTCGGTACGACAAGCCAGGGGGGGCT  
CCGGTTGATGAACTGTGTGAACGTTTTCTGTGTGCCAAACGATTTCCGTGTCTGTTGTTGA  
TACGTGACTAAGCACCATACGGTTGTTTATGGCATCAGCCCTCGTAGAGTAAAAAAGGGT  
GCAAAACCGCGATCACTAGAGAAGCTTTTTCGAAGCTGCTGGTAACGTGAAGAGTACCAAG  
ACAGCTATGACGGCCAGCGCCCTGGCTGAAGCATCTTTCTGTGGTGAAGAGTACCAAG  
CGGGCAAAGGCAGCCGAACCTTACCCACAGGGCTTCGTTCTGATGGATGCTTTCGGGTGC  
ATTGTCGCTGTTGATGGCAAACCTAATCTCCGCTGAAGGTTTGGAGCAAGGGGAGAACAGGC  
ATTGAGATCGGGGAAATGATTAGGGTGGCACGTATCGAAGCAATCCGCAGCGTCACACAG  
GGTCAAATTGCCTGGTAAGTAGTGTGATGAAGAATTCGGATAAGGAAAAGTACACATA  
CGAGAAACATAACTTTTACGCTGACAAACACGCAGGGAAGCAGGTTTGTGCATAGAACAG  
CCTCGCAGCTATAAGGAACGAGGGTAGCGACTGGTGCGTGGATAATGGGTGCAATTATTC  
ATTACATCCATCGTACAGTAGCGCCATGTTGAAGTACACACAATTTTTCAAGTAGGGGAA  
CAATAATGCCTATTGAGCCTGTATTGTATTTATGCAATGGAAAACCTGGCTAGGTTGTCGA  
TTCTGTCTGTTGAATTAGTTTTGGATGGATAAGATAAGTTCTTCATCCGTCAACATCGGGC  
TACTGGTGACAGTCTTTTGGTCTCTCGGACCTTTCTATTTGGTGGGTGGCACAGTTGCCA  
CCATTTTTAAAGAGAATTTTGTATTGCAAGGAGAAAGAAATCAAGACACGTATATCGAG  
CGTGGCAATTCAATACATTGCGGGCATTAAACGCAGGTACCCAGTCAACGCACGCGATGTC

TGAGATGATATTGAATTACTCTCAACGCCGGAACAATTCCGGAGACCTGTTGAGGGCTTG  
GACTACCCGCGGTAAGACCATCATCGTCCCTCAACGGTGGATAACCAGTCGCCATTGGACGA  
ACTGTGGGAGAAGTTGAAACCTCTGAGCAGCACGTATCCGTGGGCCTCTATCTGAGAAGG  
GCAGGATGTACGGAACGCCGCTATGACATCAGTAGCTGTGGTGTGGCCACAGTAGATGTA  
AGGGCCGGAGGAATCCGATGTCGGCAATCTGTACCAACTCGGTTAGTAGATCGCCCCAGT  
GCTAGTCAATCAGTACGGCGATAAAATGGGCAATGTGGTGCATAACTACACAGAACCGTC  
TACAGACCTGATGACAATGACCAAATCTTTCCGACTGATAGTATTATAAGAGGACAGTAG  
GTGAAGTTGACCGCATTCTGATTATCGATATGATCTGTTTAGCTACGCTGATCGCTACTT  
CCGAGATCCGAATGATCAGGTCAGATAACAATAAAGATCCGAATTTCTTTGACCTCCCC  
TGCCTGATGTGGTAAACGGTTTTGAACAACAACCTGTTAAAGGGCGCCGAATACTGATATA  
CACAAATTTATACCCTATTCACCCTGCTTGGTGTGATATTACTGATCCGTCCTGGATGAT  
CGGTTAAGATTTCAAGTTGGCGGCACCAAGTTGCTCGATATCCGTCTGCCTTGCCGTTAT  
TGAGGGCTTGATGATGGTAACAACCTGATCCCACCTTCTGATGGGATGTTTGCAGGACC  
CCTGTTTGAGATTGGGATATGGAGACATATTTCTGCTCGCGCTGCAATCTTGCATGAGAA  
AGTAATCAAGACCGACAAGATTCTGGTAACGATCGGCCCTAATGGTTTTTTGTTTGTGCA  
TGTATCATTGAGCTGTTTGGAGCTAAGGTGGATCAATGAAAGACGTTTCGTGGATAGGATTT  
GAAGATTGGTGACGAGGGGTATATCAACTGGGGAGGCAATGAATTGCGCCCTGGTAAGGT  
CAAACAAATCATGGAAAATGAGGGCGAAAATCCTTGTTGATTCTTGGCCTAATACCCCCGA  
TCCAGCACACCGTTATTCCATGTCGAAAATGAAGTCGCGTGAGTGCCTGATCAAGGCAGA  
AGATCCAACAGGCTGGTATCCGGACGAAGACGTTTTATTGATTTACGAGATCATTCCGGCT  
TAGAGACGAGGTGAAATCCTTGATGGCGAACATTGAGTACCAAGAGCTCTTGAAATTCGG  
GGATAAAAACCGCAAATCCGATCTCGTTGTCTCTTAAGGAGAATTTTGAAACTGTTGAC  
TTGTTGGGTTGCTACTTTGGCAGCATCGCTTAAAGGACTAACCTCCAAACATCATATCCC  
GATATCCAAGGGGTTTTCTGTGCAGGTCTGAAGTTCTTCCGCACACCAGTCTGCAATATC  
AAGAAGTAAACCCCTGCTAAACAAGAAGATGGGAAGATTTATGACCTGACAAACGTCATG  
AAGCTTTTCGTGTAGATTCACTCGAACTTCATCGCGCTTGTGTTTCGTAGATGAGGAGGAT  
ATTCTCAAAGGTCTGATGTGTATGACTATCTACGTCCAATGGTACCAGAAGGGCTATCG  
ATCAAAGTCGCCTTTAGCCTCTCAGGCTACGCAGTGGCACAGGTTAATCGTATGCGTGGT  
CACTATAAGTGGATCAGCACGCCACAACCTGAAGCAAACCCCAACAAAGGAGTTTTTC  
CGTTGGTGCATAACGACAGCGAGCACCCGTTACTGAAACGAGCGAGTTTTAAGCAGGAA  
CTGGACGGACTGACCTGCTTCCGCATACTCGTACCTTACGGTAACAACGTTTACGGTGTG  
ATGGAGAACTTTAATAGATCTAGCCTATTCAATGCTTTCCGATAGGTTTCGTAATGTGAT  
TTACATGAACTGACCGCTGCGGATAAAAAGCGTAAGCCTTTGTGTATCGTAAAATATCTG  
GAAGAAGAGCAGAAGCGTGCAGAAAGAGAAGCACCGGAACTACTGGAAGCGGAAGGAAAAT  
CGAAATGAGGCTCGTCATGGAGTCGAAGTCCAGCTCGGATACGATACCAAACATGCGATG  
CACGACGTGCGCGTGATGCGTCTGGCGGAAGAGATTTTTACTGACAGTGAAGGCCTGGTT  
CAGAGGCCTGACGGTCACGAACTGCTTGTATCCGTGGTGGCAAGTGGACCCTTGAACAG  
CTTCTTGCTCGGGCCGACTAGAAAGACCGTTTTATCCGAGAAGAAGTGTACAAAAGACA  
GATATCCCAAACACAACCGACCTTGAAGTACCGCTCGTGTGCTTGTACCGCTCAACAT  
ATCTGCGGGGCCAAGATCGATGCTTGAGGCAGTAATCGGTTTACTTAGGGTTGCATATGC  
AGTTATTGCTGTGGTATACTCCATAGAGATGGAGAACGCTAAAGTTATCCGGCAGATTCC  
CCAGACCAGGACAGACCTTGATTGGTCTGAGCTTTGCTTCGCGTTCGCGTTCGCCTGGCG  
GCTTGGGCCACTGGCCCAATACTTGATGAGGAGATGAAATGAGACAGCTTGAATTTCTGG  
GAAGAACGATCGAGTTGGTTGCAGGATGGCAAATGAATACAAAATGAACCGAAACATCT  
CTGATGAACGAGGTAACCTCCCGATATTCGACACCAGGAGGACGGCCTTGGTGTGTTG  
TTGTCGGGTTTTCAATGTAAGGAGTACACATTAGGAGTTATGGTTTGTAGACGCCAGAGCA  
GGCGTAGATCTTACGTACGCGTATCCTCTTGCAACAACAACAGGCAACGACCTAAAAGA  
TTTTTTACAGAATGTTGGAGTTGATTCTATGCACGGTGTGCTTGCCCGAATTGTGGTGGTAC  
AGGTATTCGTAATGATGGCATGGGTATGTCTGTACACGGCATCTCCTTCCCCTGCCCGAA  
GTGTTGGTTCACATGTTGTTAGGCGGTAATTGCAAGCACTCAGGATTTTGAACCTTTGTG  
TTTTTGTCTTCCCCCTATTTAATGTTTGGCACGACAATGAAAAAATGGAGGTTATTAC  
TATGATAGGAAGTAGTATGTTACACGAATTGGTTCGTGAACACCCTACGCTACCAGAACA  
CTGGCAAACCTCTGCCGGAATAGAGTTTTAGTCAACAGAGAAGTTTAAAATAGCAGCTATT  
ACACCCTTCGTGTAGGGCGATTGGAGGTAATTCGTGGGCTTGAGACGCAAAACCTATGC  
CGTACACGTTCCATGTTGGTGTATGGGTAAGCTCCATCCTGATGGCTGGGAACAGTCTT  
TCGACCAGTGCAAGGGTTTTGAGGTGGCGATTCCGGGACATGTATAGAACAATCGACCTCA  
TCATCAACGTTACAAGCAGTCTCTGGGATGAGGATACAGCATCAAAGACCGGTTCCGGGA

ACCCCCAAACAAGGTTTTGGTTGCTGTTTTTCATAATCTACGCAATAATCAGCGTGGTTG  
TGTATGCTTATCCATTATTTTGAGGAGATTGAATGAGGTACAGAGGAGATTATAACAAC  
AGTATGCCGCACAGCGCCGTGAGACACGCCGTTAGCGTCGATCAACACCAGAAGGAAAAG  
CAAGACAATTGCAAATCAGCCTTGAAAGAATTGAGGCGGAGAAAACGTGCCACAGTCAATA  
GTGAGTGGGACATCTTCGTCCGTCTAGAGGTCAACCATCTTTACAAAGAGAGGATACGTG  
ACAGAGGCAATCCTTGTGAGACTGACCACATGCTGTCCCTCCGTGCAAAGATAGTATCTG  
GCCTAAACTGTTGTGATAATATCTAAGTTATCCCCGTA AAAATTGAACCGTAGTAAGAATA  
ACAACATGATCTACACGAACCGGCTGGAGTGGATTAACGATTTGGACACCCTATTCCGGG  
CGAATTAATAAAGCTTTTTGTAAACGGCTACGACTCACATCGTGATCAGTAAACTACAGGT  
AATTTCCAGGGTAGTGGCAAAGACAAATCCGTGTCAGATTGGTCAATCGTTTTCGTTGT  
GAAGGGTAAACACAATACGTATTCTGATGGAGTTTTTTATCCAAAGCTTACAATAACGGA  
TACCGCAGTACAAAACGATCAAATCTATTTGGTAACAACGAACAGGGTTGTGTA ACTCTT  
TATTTATACTGATCGTGTGTGCATCGGTGAGGGCGAGGTATACAACAGAGATATGTTTT  
AGACTCAACATCCCAAGCAGATGAAGCAGACTAATTGCCAAGAAAGAGCAAGGGTGC GGA  
TCTTGATATCCTTATGAAACAATACGGGAGAGTACCCGGAAGGATCTTGGA AAGGGGGAT  
GTCTGGAATGTTTCGTTGAGGAGTATGGCTCTGAAAGCGAAGAAAGAGTGTTCGTTTCATT  
ACGTTAAAGCGCCATTGGCGGGTTTTCTTTGATCATGCCTTAGTCAATCTTGCAATGACA  
AGACTGTCAGATGCATCAGCAACTGTCAGGTGCTCAATAAGAATGTCCA ACTATGTTGGC  
ATCCCCCGGACATGACCTTCGAACCGAATATGGTCCACCGGGCAAGGTTTTCGGATTGGA  
CGAATCTTGGCTCGTTCAAGAACATAACGCTACCTGCCGTTTAGATGGAATGTGAGCGGG  
CTCTTGGGGCTTAATTCGAATATAGGGCAGGTGGTATCCGGGGCGCACAGGTTGGTCTGGC  
CCATTTTCGTTCCCGGCGACCGTCACTATCTTCTGTCACCAGCATGGTGTCTCCG TATTAG  
GTTGTTTAAGACATCATCTTTGATAATTGTGCGTTAGTCAATGGTTGACGAAATATTTAT  
TTGTGACATAACGGGGAATAAATTCGGTTAGGAGATTGATTTCGTGTGAAAAGTAAGGTGA  
TGCAAGGGAAGA ACTTGCGACAATGATCAAACGGAAGGAGATCCTTGATGAAATCCTGAA  
TGATATCGACATGTGTATCCAAATGAGGAATGGTGCTGAGAAAGGCTCC CAGGAAAGGGC  
AAATTGCTCGCTTCTTATCGACGCTTTGATACACACTGCACAGAAGACCCGGAAGAAAGG  
TCTTCATTGACGTACAGTATCTACGGTACAATGTCTATGGACCCATGCTCCCGCGAGGGA  
GCGTGGTACTGCCAGTAGAGTAAAGTACCGTTTTACAAGACGGTAGAAGTAATGCAACAT  
TACAGAGAACTTGGCGATATGATCAGTGGAACTTGAATGTTTGGATGCGGGAAAAGGC  
GCAATCACTTACTGATCGGAACTTCCACTTAGTTCGTTCAACTGGACCGACTGGAGATG  
GAGCTCGTGGACAATGGTTGTTCTATGAGTCTGAGACTTCTCGCAGGTACTTCGAAAGTA  
CGGATGTACCGTGGTTACCGAGTAAAGAAAACCGACTTCCCGGGTACGCCGGCTGTAAGG  
CGTGTCCAGTGGTGGGCGAATTCGCGGTACTTTCACACCAGTGATGGTGGTAGAATTAT  
CTACCGAATCGTGAATATAGTGATCCATGGACGTGTGTTTGGCCTAGTGATGTCCGTCGT  
ATGTATTGGGCTGGACATTAAGCTTTATCCGGTCACGTAAGCATGTGCTGCGTATGCTTT  
TGTTGCAGGCTGGTTTCTAACTAAGCAAATCATGCTAGATGAAAATTTCTCAAAAATGCC  
TTTCCGTTTTTCAGACCTCATCTGGCTGGCATAATGGAAACCAGACGCTACGAGAAGCTT  
CGACGAGAGATCCACAAAGACTCACTTGATCAGTGGTTCCATTCTGATGAGCAATACTAA  
CATCTCCAGGAGAAAGAGATGGGCGGCGATACAACTCTTGATTTTCATCAAGCGGGAAGTG  
TGGTAGTATAGCGGTACAGGGAAGTGGCGCTTCAAGAACAAGGAGTTCAA ACTAGAGGGG  
CAAGCCTAAAAGGCCACAGTGCTATATTTCAAGATGAAAGACTCTTGATTTTATGGTATA  
ATAGAGTCTTACACAAGGAAAAGACAATATGTTTCGAAATGCTCTTGGCCGGTAAAGCCAA  
CATCTCCGCCGGAAGCATCAGAAGGGAAATGGCTGGGGGTGCGTATTTACTTGGCCCTATC  
TGAAAGCTATAAGTGGTACGGTAATTGTGGGACGTACCCAAGTGGCATTGGTGTGCCAC  
GACGACTTGGCCTTAGATTCTCGAAGATCTAGAGGATTTGTTGTCAAGATTCAGGCAATG  
CGTTGCAA AACTGGAAGATGGGTGTTGGTTGTTTTGGGGGCCAAACTCCGTGGGAGCGGT  
CCGTATTGTACGGGCTGGAATGCATCCGTAGTGTTTATCCGGAGACAGCACAAACAACGAA  
CATTCCCCGCACACAAATTGGTAATGTGGGCCGTATATGCTGTTGTTGCGATCATTCTGC  
TTCTCACTCTGACAACGACCTTTGCCTGAAGTGACACACCACACAAGTGGAGCCTGAAGG  
CGCTCCTGTATTCCCTGCCTGAGGACTCCCACCAATTTAGTCTAAAGAGGCAGAGCAATTT  
CCTCCTGACGTAAACTATCATCGCTGATGCGATTACCTAAAGAGTCA CAGGTGCCGAAGG  
TCTGCACGAAACAACACCTAGGGTGTCTTGCACCTGAGAATTGAATAATGCTCATTCAA  
CAGTCTATACGGACGTTGGATGTTCTGCGTGTTGAACTGTACCCCTGCTCCTGCGAGAAA  
GGTTGTAAATTTTCATCAGTAAACAATGCCCGTTGCACGGGTGAACTCGTTCATTGCTCTG  
CAACACAACATGTTTAGGGAATTGCATTTCTACGACACATGTAGCCTGAAGTGTGCGATGC  
TGAAACATATCGCAGGGCGAGTAGCCACAGGCTAACCCGTATACCGGGAAAGATATCAA

AACTACCCAGCCGCCCGCCGGGGGAAAGAAAAGAGGCCATTCTTGTATCGCTTGGGG  
ACGAACAATATCCGTTGGCTCGATGTTTGTATTGCTAGACGGACAATCACAGCCACCGGA  
GGTTGTCAAAGATCTTTACTCAATATCTGAGTGGTCCGATGTCGATACCCTTGCGAGTTA  
TTAGCACGATGATTGCAAGATGGTTTCTTGTGTGACTTATGATAGCTTAATCAAATATG  
ATGATTGGATTGATTAGCCAGCTTACTGCACGATTTGCCCTTGACTTGCTTCCTTTTGGC  
TGGGTGTATCTATTTTACATAGTACACGTTATACGCACCACAGATCGGACGGTTGCATGG  
GTGATAGTTGCACTATGTTCCGATTGCATCAATTAGCAATTACTATGACGAGGATCGGCC  
TGCTATATGTTATCACTGTGACAGTTTACACCCGTTATTAATCATTATGTGGGGTGT  
CTAGATAATAATGCTTGTGATAATCAATATAATTTTCGATTGTCATTTCAATCTCTAAATG  
AAAATCGTTCTGTACGGAAAAATCTTTTGGTAATTTTACACAACACACTTAACAGGGAGG  
GAAAATAGTGTTTAGCAACATTCTGCTTTTGTAGTATTATGCCACATAATAACAATTCTCA  
TTTTGCCAGTGATGGGCCAGATACCCGTCAATGCTAATGGATTGAAATGGATACTTATT  
ATAACTAGTTCCTGTTTGTACAGAAAGGGGTTAAGCGACTTTTCGTATCGAGAAAAAAC  
TTGACACATGAGGGATCTTTTATGCTCAGAAACACGCCTTTCAGCAGGCCAGCGGCCTAA  
ATTACAGATCGATTAATCATCGTTTGTGATCCATTAACGGCGATTTATTGCTAATAAAAA  
GATCTTGCCTATCATCACCTCGGGACACTATAACACAAAGCCCTTACGGGATGTTTTCGC  
CACGGTAAACAATGCTCAGATTGACCAAAGGGGTTTTTCGAATCTCCTTTATCTGGACAC  
TATAACATGAGAGCGAACAACGATAGTTGATCGATGTTATCGTGGCGAGTGTGATAATTT  
CATTGTGCAACTATCCCTTAGGAATGAATTATAATGTAAAGGATTAGCCATTGCTGAATC  
ACGTATGTGATTATATTGTAGCGTGTACGAGCCACCATAAAGCGAACGAAAATGATAAGT  
ATTACCATTGACTTACTCTCGTGTTATAGTGTGCTCGTTACGCTCGCGTCACTACCA  
CGATCAGCCGTCCGATTATTTTGTGGACAAGATCCTATTTTATGCTCAAACCTAGACCG  
TTCACACAATGGATTAGATGCGAAAAGTTATCAAATGAGAGTTATTATCACGAATTA  
TGAAACGTTTTAAAATGCGTGTTTTATTCAGTTGATAACATGCGGTATCAACTTTGAGGT  
GTTAGTGGGTCAAAGGCGATAAGCAATACCCTTTTAAACGCAATTTAACGTGTTTTAAC  
GTGTCATCTCGCTAGCCACGCCGTTATATTCCTTTCCTGGGATATCTCTAAAATCCCTT  
TTTGATAAATTGCCAACGGGGTACTGAGAATGCTTCTCAGTTGCGATATTGCAACGAAC  
ATAAAAGCGGGTAAAGATCTGGGGTATGTTTGGGGTGTTCGTGTGATATGCATAAGCCG  
TGACAATTCGGCCTTACTTACAACATGATGGCCAGTGGTCCGGCAATGATGAACGGTA  
GATCATAACGGTTCGATCGGTTTAAATCTGGGATATGGCTCCACCAATAAAAACACCAATG  
GCAAGGCGTCGATAATGGTGTACCTGTCTGTACGGTTGCGTCACTTCGTACAAGGCAGG  
CAAACCAGCCATAAAAAACACTTGACAAAACCGCCATAAACCAAGCCCTGGCTTTGTAA  
GATTTTGGCATTATTGGTAACGGTGTCTGGAGGACTGTAAACCGATCCGCCGCCGAAGC  
TTCCGCCTGCCTCATTTCGTCTACCATTTCGCACATTTTTTCGAAGCCCATATGCTCAAT  
GATCGTTGAAGTAAAGCGCTTTTCAAATCATCTCTTCTATAGTCGGCCAGAAGATAAAGA  
CCAGGTGATCAAGGGTGTGCTAGTGAATTGAACCACGTTTTTCGCTGCTCACATTCCAGGG  
GGCGATCCGTCTCGCTAAAACCTTGACGGGCCGAAACATTCCAAGTGGTTCCATTGTCCA  
TCAGTTCACTGTAGGCGGTGTGCTAGCCACTAGCCTAGAACTTTATAGGATCGAATTGAA  
AAACATGTTTCGTCGACTGAATAAAGCAGATAGAAACCAGTTGCAGATATTCACGGTTA  
TAAGGCTGTATCGTGCCTATCCAGGCCGCGCCCTTTCATATCTTCCCTGGGTTATTTTCA  
ACTGCATGTTCTATGTCCTGGTTGTATTGTTATGCGCCGTAAAGCCCATCACTATTA  
ATCATCGTTAAAATCGTCCAGGAATTCGAGAAATTCAAATTCATAGCTACGACATGGTT  
GACAAGCTCAATAGTTGTATTCTCTTAAGCAATCAGGCGCATCGGTGCGCCACTATAACAG  
ATCCGTTATTTTCGATATACTCTCCGACCTTTTGGGCGGTAAACGGTATTTATCTTTTGGC  
AAAATAACTTTTTACATGATCTGGGGCCGACAACAATGACCATTTGCGGGATCGAATCC  
GGGGTAACTATCAGGGCTTTTGTGGCGGATCTTAAAGCCTAATTTCCGTTTGC  
GTGGCGGCCATTTCCGCATTTCCGGATCGACGTTGTGTTTCTTACAAAACACACAGAT  
TTTGACCCCGCAGTTAGGTTGCGTAAATAATTCAGTCGGACCCGCTGCATTATTAATCATT  
TTAGTTTACCTCTCAGATTATGGCGGGGATGTCCACGTCCTTGTTTTTATTAGTATTCG  
TAGCATACTTTGTTACACGGACATCAAAGGCAATTTGAGCATCAGCACGATCCCAGAATA  
AGTCTTGATCTTGCTGCTCTTCAATGTCTAACTGGTTATACTGCGCTTGCCTTCATATT  
CCATAGCCAAAGATAAACAACCATCAACTTCATTAATAACGCTTTGAGATAAACAACCTT  
GCAGACTATCCTTTAACCTTTTCGAGCATGAACGACGCCGTGCGTTCGTCTGGTCCGGGC  
AATATGCAGACCATATAGCGGGCTTACATTTTACAATTTGTGCATAAAGATTTTCAACGA  
TAATCCGCGAACATCGTTAAGATTCCGATCAATGATTGGAGTTTATCACTATTGCTGA  
TAGTGATGAAATTTTCCATTTCTGTTTACCTTTCCGGCTTGTGGGGAACCATTTCCCGG  
CCTCGAAAAGATTTTAAACCGATCCGCGCCTGGCTTGCAAGCTATTTTTTTGTTCTCTC

GCCGTAATCATCGCCAACGTTGAAAATGTCCAGCATGGCACCAGCAGCGATCCATAGCAG  
GTACATTTCCCGGGTGTGGCGATGCATATTGTGCGATCCCGTCTGCCCTTCACGCTCGAT  
CCCTGTGTCGCCCAGGTAAGCGCGCAGCATTGGTTCGCTGTATTTCGCTTAACTGTAAGCC  
GTCCCTGAAATAAGGCGGGGCTCCGCTGTAGACGCTTCACGGTCCTCAGGGTGGGCGAT  
CGTTCTACCTGCTCACGCTCCCGAAAGATCAGACAGTGCCGACCGCATGAGGATGACTA  
ATAAACATTTATGTTTTTCATAATTCTTGGCCTTCTATTATGCCCGGGGGCGATCCCCG  
GCTTTTAGAACTTTAACCGATCTGGTTTTTCAGAGTGAACCGGAACAACCTCATGCAC  
CTTCCCAACAACCACGGCTAACACGTCCACAGATTGACGGAACGGCAGACTGTCAGCCTC  
CATTACGTAGCCTTTGGCCCTTCCAGCTGGTATGAGACGTAATTATCTTTTACTGCCCG  
CTGTGATGTGTGCTCAATTGTTGTATGCGTGCGGTTTCTAATGTCCAGGCGATCCCCGTC  
CACACCGTCATTAACATGGCAAAAATGAATTACGATTTTATCATCGAAACGAGGTAATC  
ACATTTTGCATAATCGGAACCGCCTGCCAGGAAAAAGAATTTATTTGCAAGTTCGGGCTC  
TAAAACCTCGTTCTAGATGCAGGATAATAACAGCGGGAAGATCACGAAAGACCAGACCAG  
GCGACACATAAAGCGCGACTCAATGTAAAGCGAGTATTCATTGGTGTATTCTACTTTGTA  
ACTTTTATGATTCCGCTCTACCAGGTGACCGGGAACCGCTGCCGGACGTGGCTGTTAAT  
TATTCATCAGCGGATCGCCATGTCAAATGTGTTTGGGGCATTGCTTCCAATTCTGGCGA  
AGGAATACGGGCCGGATCGATAGAATCAGGGTACGGCATAAACCCTAGCGGCGAACTC  
GCCAGACAGCGGATCATCGTATGATTCAACAACAAAATCGTCACATCGCATCATTATAGA  
TGCGCCATAAAAACAGATACCCGCGAAAACCTCAAAAATTTGATTAAGCTTATTTTTTGT  
GGAAAAGAATTTGGATTTAGTCGCTTTTTTTTTGCGCCATCTTCAACTCATCAAAAAGGC  
CGAATCGCTCGCTTTCTGAAGATTATAGGTGTTTTCGTACACGTTGCAAGCCTTTTCT  
CTGTAAAAGTTTCTTTTCAATCCAATCACACACCTATACCATGGTTCGTAAGGGAAATGT  
GAAAAGTCATTACAATAAATCCGAACATGATCAATTATGCAATAAAATGATATACCTAGC  
AAAAGCGGCAGGCATGGCTACCAAAAAGAGATCCGCGCCACCACACACTAAGAATCAGT  
ATAATCCAATATTTAGTTTACCCTCGTCTGGGGGGGCACCGTTGCCGCCTATGTAGAATC  
ATAGGATATGCGGCGCGGGTGGCGATCGTTAATTTTGGATCTGGTTTGTGTGGTTGTAAT  
GCTCATAACATACACGGGAAACCGTGACCGCTAGAGGCAAGAGGCATCGTACACCATCCG  
ACCGGGGGTCCATAGTGTGAGGTGCGCAGGGGTATTGTGGCGGGTAAACTTAAAACGCA  
AACGTAACCTCAGCGGACCACGGTCATCAAGGCCGCGAACCACACCGAACCCGATTTCC  
CGAAATTGGGGTAAACCCTTTAACCAGGAACTGAGATTCAAGCGGCGCGATCTGAGACT  
TCACGTTTTGCATTTTATCTACCTTTGGTTTTGTGTGGTTGTAAACATTGCCGCCCTACGC  
ATTAAGATAACACAACCACAACAGGACGCAATCACTAATTCAAATTATTTTTGTTGAGA  
CTTGTCTCATATGCAGTGATTTTCGCATGATTAGCGACAATTAGGCAGATAGTTTCACTG  
CGTACTAAATTTACGGGCCTTTGAGCGTGGCGGGATTATGTGATAAACTGCAAAAACGCT  
CTAAAACGCTTTCTAAGCCTTGCCAGGGCTGACCCTGGCAAGTGCAGCACCGCGCGGAGA  
TCTCGTTAAATTCATTTTCTGCATAGAAAAGCCTTTGAATTATCCCGGCCTTTCTGACTA  
ATCATTTTTACGGATTGCCACGGGAAAGCGCGCTTTCTTTCTGCTAACCCTTGTTAAG  
ATGTGGGTCGTTGCGGTCCGGCGTCCAGGTTTTGGCGATGCGCCCCGGCTTGTTGTGTTT  
GTCGTTTCGCTGGCGTCGCTCGTTTACCTGCCCATATAACCAGGAGATCATGCTGGCTCGT  
CATTTTTCAGTGTTGCGCATATATTAACCCCTCGTTTTTTTTATCGGACGTTGTTTGCAT  
GTTCAAAGATCCGGCCTTGTTTCTCGGCTATTTATTAGCTCGCCTTTTCGATCATCTCCG  
CGATCTGCTCCTTTGCGCCTTCTGTGTGATACGTGACCACTCCGCCCCGCTTGTTCACTT  
CACACAGTAAGCCGTTGCCATCGAGATTATTTAACGGCCAGCTCGCCGGGTGTGGTAGT  
TGTTCCGTGGAATCTGTGTTCTTAATAATGGTACACATTGCCGATCCTGTATTTATTAT  
AAGCCACAGCAGGCTCCGCCATAACCTGGCAGGCATATCCAGTAGAGAGCAGCAGCAG  
CCACCAAACCTCAGGATTTTAAACACTCTTAATAATCCTCAAACATCTCTCGGATTGTCTC  
CAGGTCTTCAGATGGAAACACTTTCCGGAGTTCCTCGCCAGTCTTCTGAAACGCAAGATA  
AATCTCTGAACCTTTGTGCGCATCCTCATCATAGCCCATATTAGCCCAAAAATCAGCATG  
AGATTCAGACCCAGATCTATATCTGACAGCAGGCAGGAAAGCCCTTTGCGGCGGGCGG  
TGTTGCAACTTAAACACGGGAACCGATAGCCAACGCTTTATTGTGCGTTGCGCTTGAAAC  
GTCGCGTGCCAGTGATTTTGTATCAACGATGAAATCCTTAGTATCAAATGTAGCTAATCC  
TCTTGCCTCGGTTGGGGTTTGTAGTCAAGTGTGACGGCCTACACGGTGACGCATTCCCGTTG  
AAAATCTGAGCGGTAAATCTTCCCGCCTTTATCGAAACTCTCGAACAACAATTCCGCTTG  
CCATTTGGATCGTTGTCAACGCCACCTTATCCGCTTTAATATCAATCCCTTGTTCTTT  
CACAAAGTTGAAGACGGCAACATCTTGATCGTTGAAAGTGATTTTGTCTTCAGGATATT  
TTACCGTTTCTTTGGTTTGGCACTTGTGCCGGGTTATTTCTCTTAATTGGTAGGGCTTAT  
CTTAAAGCCCCACCTATGTAGAGTCAATAATTATTTTCATGATTTCTTTCTCTAAATAATC

GAAGGCGGGC GATCACTTTCAAGCAATCAACTAATAGCTTAACGGGGAGCTTTAGATTGGC  
GATCCGTCGGCCTGCCTCTGGGTGTACGTCCTCAATTGTGCGTTTTGCACTGTAAACGAT  
CGTTAAACTTGCACGTTATCCATGCATACGACCATTTACACCGCCTTTAAATAAATTGT  
TAGTTAACCCGTA CT CATGGAGATAAGGGCACTTTTTAGTGTGGGGCGCTTCAGTCATTA  
TTTCATAAGCCAGATTATATCCCATTTTTTCAAGCCAGTAAAGCGTTGCGCTTTGCCCTT  
CGTTGTGTGATTATTCCC GGGC GACGGGGCGACTCCAGGGCCAGCACACCGTAACCAGTGT  
AACCATTTTTGGACGAATATCAGATCCGCACGTTGAAGCGTGGCGCGATGTTTCTCGATCG  
TGTTTCCGTTAACATCGCGACTAAAATAAAAAGGAAGCGAAAACAACAACAAAATCCCCGG  
TTGGGCTCGTGCATGATAATGAGGTCAGGCGGTTTACAACGTCATAAAGTTTGATAGTTG  
TTTCAA ACTGTGACATTCTGTTTACTTTTTTCAAGTATGGCGGGAACCTCTCCCGCCTTGAT  
TAATAAGGTAACCGATCGGCCGATGGTTTGCCAGCTATTCCTTGAAGTTTTTCAAATCTT  
TTTTACGCTTGTCTGTTTCTTGGGTGACGTTGATTTTTAAGCCGTTCTACTAGCGTAGC  
GATCCAGGTGGCCCCATCCGGATTTTATACAGGTCATGGTGTAAGATAATTCATTGCAA  
CTTGTAAGCGTAGAAACCGAAACCATAGCGCAGCTGGGGCGACTTATACAGCTTCGGCC  
AGGTGGCGATCGCACGGGTAGAGAAGAAAACCTCATAGACAAAATACGTATTACAGTACA  
TATCCGTAAGGTCAAGACAATGAAAATTCAGACTTGCGGTTTTGCTGTCTATTGATTTTT  
TGAAAATATCTATCATGTTTTCCATTTTCGTTTACCTGCTTTCTTTTCGGCTGGGTATTAG  
GGTCCAGTCCCCCGGTGCTTGTCAAATATTTTTTATCGGGCCATTTGCTCCGCTAAACG  
TGCGGCGATGTGGGATGGCTTTTTGGTTATCTGGATCGGCTTGCCGTTTGCCTCCTGTAC  
ATAGGAGACCCGCGACGCCTGTCCGTTACGGTAACCCGCTTTCATTTCTCAGTAACAAC  
CAGGGCCGGGGCGCTGTCCTTTGCAGCACGTTGATCGGCGGTGTCAGGATCGCCTCCTC  
CTAACGCCGGAGATAACCCGCCAGCGTTTACCAACAGGGGGCGGTGGTGCCGTTGTCGAT  
CACTTTTCCGCCGTTGGCTTGGGAAGCAGTACGGGCAAGGGCGCGAGAATCGCAATAATT  
TTTCATAGTGTAGCCTTCTTTGTGTGGTTGATTTGTTTGACTTGGCAATGTGTGGCGATT  
ATAACCCACACATTAGCCAGCGTCAACAATTACCTTACAGTTATGTTTTGACCTTTCAC  
AATTATATATGTGCGTCCGGCGTTTCTATATTGATCAAGGTATAGCCGACGATCACGCC  
CTGCAAATTA ACTTTCCATTGTGTAGGGAAGTTAGTCGAAACTCCTGATCGTTTTTTGGT  
TAGCCCCTTTTGTGGCCACCACTAAGGCGCGACAATCGCTTTAACTTCCGCCACACAGA  
GCCGGCATTTCGAATAAATCATGTTTCCATCATGTTTACCTCTTGTAGTAGCGGGTGGC  
TTGCCCGGCGGTTTAGTAGGATAACAGATCCGGAGTTGCTGAGCATGCTTTTACTAAGAT  
ATTACTCACGCCGTCAAAGTTTGCATGATCTCCGCGGCTGCCTTTTTTGTAGCGTCCAG  
TCCTTAACCGTTGATCCCCTTGCCGTTGTAAACTTCTTTTGTCTCGGTCTACGAATCGCT  
TTTGTGCTGGTTTGAATCGGTAAAAATGCAGCCAATAAACTCATTATCCAGGACGGTAAT  
CACGTTTCGCAGTGGCGGTCACACTGACACCATATCACTGTCAATAAAATCGCGCTCCAA  
AGCGTCTGTGGGGCCTCGTAAGCGTGGCGCGATGGGGTATCATCACACGGGTGATCGA  
GTCTGCGATCCGCTCTTTAAGGCTGTACTGTAACGGGATAGCATATTTTAACTATAGGG  
ATCCGCGTTAGGATTGTTTACAGTGACCCCGCCCTGGTGATCGACGGTCAATTTCCACTT  
ATCGCCAAATGTATCATTTGTATTACAGCATAACATCGTCAACGGTACACTGCATGCTGGT  
TTCGGAATAAATTGGAAGTTTCGATAGTGTCCATTCGTTTACCTTTTCTGTGTGGGGCGT  
CGGTGTGTCGCCGTGATGTGCTACATAGTAAACGGCATACTAACTGCTGTCAATCCCCCA  
GTACGAAAAGTTTTAAACAAGTCTTACCTTTATCCTTGTGTCATTCTGGGGGGGATCGTG  
TACTACATAACGACTGAGACATCAACGGCGGGTAAAGAAAGTGGAACCGTAAACGTAGT  
AACAAAGCGAAACATTTGTGACCGTTTGCACCTGGGAAACATCAGCAAATCAGTGTGAGTC  
TAAATCGGTGCCGTTGCCTCATGCCTCGCGTATCCTTAACGACGGATTCTACCTGGCGAA  
AGTAGTAGCGGCAAACGGAGAAGTTTTAGCGGATGCCCTGTAAAAAATATTTGGACCTGG  
GGCTTGCAATCGGCGCGGCTTGGGTTAGAGTTAGTTCATAGAAGAGGAAACACCACCC  
ATGGCGAAAAGTCGGGGCTTAGGTACCGGGCGTGGGTGCGATGTCGGAAGGTTTCATCGCC  
CTTAGTTCGACCCGATGACACTTGTATAGATTTGCAAAGACTCTTGATCCGTGGAGTGGT  
TATGCTATTAGTTCCACACGCCGAGGAGTAACGGAAATCGCGAAACACACGCCGAAGCTG  
CCCGCAATTCTGCAAATGAGAATGATTTTCATTCAACAAAAAATTTCTATTGTCATCTCG  
TGTGCGTGTGGGGGAAAATTACCGATCCCAAAAAAATTTTTCCGCTCTATAGAAAAAATA  
CGTTTTCAA AACTGAATACTCGATCGAGAACTGCGCGGAAATCTTTTTTCGATACACGGA  
AAAAATACGTTTTTCGACTTAGAAACACCGATCGAGTACCCAGTGTTATCCAGAAAACATT  
TTTTAACGATAAAGAAAAAAGACGATTTTGAAACCCAAA AACTTGCTCGGGTACACGGAGT  
TAAATCACAAAAGACGGAGTTAAGATTTCTGGAATTTTGCAACAATTCGTGTACCGGAG  
TATGGGATTTCCATGCGTAATCATTGTGATGCATGGGTGGGGTTTGAGATAAGTTGCTGT  
ACTATCCAAAATCTTAAATCACACTAAAATGGATATACACCCCGGCTATGAGGGAAAACC

ATGTCACCATCCATTGCGCATTTTCATGTTGATTTCCCGTTCAAAAATCTATGACAAATAG  
CAAGGGCAAACAATCTCACTTTGAAACACCGTATCGTTTCATAACAAGTTCTCTAAGAG  
AGAAATCATGTGATTGCATGTCGTCATTACAAATATTCTCAGAATACCATGCAGCAGGTG  
CCTATTCATCTATGTCAAAAAATCCTATATACCTTCCCCTTTGTTTCAATTTTTAAATCTCT  
GTGCCTTTAACTTACAAAGTTATTTGTCAAATGTTACACCTCTTGCATGTGTCCCATTTC  
GAGAAATATAACTGTTCAACCACACCGGGATGTAATACAGGTATCAGGGGCCGTAAGCCT  
TGTTCCCTTCTACCAGCGAATCTTCGTCAAGAGCATATACTTTTTGATAATTATCGCACC  
ACCATGTATGAAAGTTCATAAATTAATGCCACTTATGGACAACAACAACCCCTGATAAG  
ACGGCTAGTGACCGCTGTAGGACCTGTTTATCATATTGTGCCAATCCTTCCAGGGCCGTAT  
GTTGAGGGAGTTTACCATCTTCCGAATACTCGTGACAAACGGTGCATCGTTTTTTGCCAG  
CACCACATACGAAACTACCATGTTTTGAAGATGGTTACGATTCCATCTCTAAACCTAAAC  
TCATACCTTCCCTAAATGGCGCACGGTCGTCATTTTGGATTCTTCCCGAAAGTATCTC  
CCCACCCACAAATATCATACTCTGCGGGGTGCGACATTTTATACCTCCGGATTCAGCAT  
TAGTGGGAGTCATCTCCTCCATGAAAAGATCCTTCATCTCTGAGAGCCTGAAGCGATAGA  
CCATTGTATCCTTCGTCAAGATGATATCAAAGCTCCCATTGAGACCATCTATTTCGTAAGG  
TACAATCACCGTCACATAAACCCAGTGTCTTCTCGCAAAGAGTCATCCAGTCCTGAACAC  
CAACAACCATATTGTTTGCAGTGCTCCCAAGCAGCACAACCTCAACCACAGCAGAACCTG  
CGTAACCAGTTCTGTCTTCCCTGAATGATCCTGAGAACAACACCGCTTAAACTTATTCC  
AAACTCGAGACTCAAGCGCGCTGTAAGGGCTGGAGTCTGTTTGAAATCCCTTACCGCTT  
TTCCCGACATATACAAAAATAATCCGAGATTTCTGCAAGTACCAGCTCGTTGTCAACAG  
ACAAAATATCTTTACTCGGGGTAGCTCCCCGTTTGCCAACATAGATCAGGGAGTGCCTGA  
GAGTAACGACAAGGGCTTCCGGTTGGGCGACATAATGCTTATAGTCACAAAGGTCTGAAC  
ACTTCGGTATAGCCTTCAGTTAAGAAGGCTCATACTACTTTCCCGTGTCTGTTGTACA  
ACTCTGCCTCATCATCTACATCAGTTATAAATGCAAGGTAAGATTGCTCGTGCCTGTGC  
GCTCAAATATCTTGAGTAACTAGGATTCAAGATCCGGGTGCGGGTATTTCGTTCTGGGTAT  
GATCGAGAATCTCTGTGGTGTGGAAAACGGTTTTAATCTTAAAAGCTCCTGTAACGCTT  
GTGACGCGTATTAATAAAGAGCTGTACGTTTGCCTACTTAGTATGGGAAAACCCCGCAG  
AAGCGTTTCTACGTAACATACGGGGCTTTGTGGTGTGAGGTTTACCAGCCGATTTTG  
GCGCACCTTATACTAAATGTATGCCATATTCATTTTATGTTTTACAACATAGGGGATGGG  
TCAGTTTCAGAACATGAAGTAGCTCGGGCCATATATCTTCGCTCAGAACTTTAAGGTGTA  
CTAAGGGAACCTGCATCAACACACTTCCACGGGCTCACTGAAGTACTTCTGGCCCTGATTC  
GTCTGAAAGAAAGATCCTGTGTATCAAACACCACCCCAACTAGGGTGTCTTACGAATG  
ATGTCGAAGTTGGTCAACTTTTCTTACACAGTAGGGCTGCTGTTGTATCGACCAGTTTC  
ATTGGTTAGTCCCAACAAGCCATCGACATGATATACTTGCTGCCCGGTCTGTCAACAATG  
TCGATGTTTGGAGCAGACCGCCAGGACTGAATCCGGTATACTCGATTTCAAGGTGACGG  
ATCAGGTTCTGTTCTGATCTGTGACTTTACATTCCTACCAGTCATCGAGCTCATAACCT  
GTATTGTATACCCAGGTGCCTTTGTTATACAGCGCGGGGATTTCCCTCTTCCGAGCTTC  
GCGATTCAATCATTCCCACTTTTCTCTATCCCAAGGATCATAACCTGGACGTGTGGTTA  
CATGGGGATCAATCCAGGGAAATCATCGTTCCAGATATCTGGTATCCTCCCCAGCTTTGC  
TCAGACAGCGGCCTTTTACACTCCTTCGCAGAAAATGATGCCTATGCGAAGTCCCTCAGC  
CCTGTATTTGATATCATCGTTCCAGTCAGTTTTCGAATCGCAATGTCACGAACTTCACAAA  
CCAGTGTGAAGCTCTTGAACAGAAGAGGGGAACGAACTGCGACCACCTTCCGGATCAAG  
AGCGAATGTGTCATCCAAATCAAGCGATATACGCTTTCCTCAAATGATTTCACTCAGCC  
CCCATCCTCAATACGATATTGACCCACTTATTGAACCTTCTGTCAACATAATTTTCAAGA  
CGACGCGGGACTGTTTCTTCAACCTCGTGCCGATCAGAATCGCGAGGTTTTATACAGGCG  
TGGAGCAAGTGCATTTAAGCCGGGACGATTGCACAGTTGGTCACATCGGCAATCTCTGCG  
ATTGAAGATACATCACAACGATAAGGGCGATTGAGAGTTGGTGCCAGTTCTCCAACCTCC  
TCTACCAGAATCATCATGACCGAAAAAGTAGACCGGGCTTGCGCCGGGACGGAGGACTGG  
AGTGCGCGTTCAGCGATTCCGGTCAATTTAGTCTCGTTCTCGTTTGCCTTCTCAGCTTCAG  
CGGCTTTTGCGGCAGAATCCAGTTCATCGGCCTACTTCTTGATCCGCTCGTCTAGGTACT  
TGATGGTGCGGTTAGCCAATTGCTGAGTACGTGGTGTGATGCGCCACATTCTGATCGACAT  
ACGCCGCCAGCATTTTGTAAAGTTGTTTCTGTCTGAGGCCTGAAGATTGCATAAACAATCC  
CCAGGAAACATACCACATACCGAACACAGCAATCTTAAGACGACCTTTTGCAGGTCGT  
GCTTAAACACAGTTTGGCGCTCTGCTTCTCGCTGACGAGATGGTGTACCTCCCCAAA  
CTTCGAAACACAGCCAACCAGAAGTATCACCATTAGGATAACGTACCCTCATTGTACCAT  
CATTATGAATCCTGGTGACAACCTACCACATCTCGGGCTCTAGAAGTGTACCAGTCCTGAT  
TTACGACGAGGTTCTGCCCCAGAAATACTCCAACAGTTCCTTATTACCATCCGTCTCTT

CGTAAGCCTTCTGAACAGCATACATGATAACATATGCAACCGTTGAAATGAAGAGCAGGT  
AGCCCCAAGCGCCTTAAGTTCCATCAGTCGTGTATTTCATGAATCAGGTAAATCGGCAAAG  
GCCATGACATCAGTTATTCTCCTATTTATAAAAAATTTGGCACAATTGGCGAACGATCATC  
TATACAATCTACGCTTGAGGACAGCGCCTCAAAGCCATGAAGGAATCAATCTGGATCTT  
ACCACCACAGAACTCTATCGCCCAGTCATATCCTTTGGCGTTATACCTTTTTTCGGGCAT  
ATAACACCCTGTTAAAAGACTGGGTAAACAATGTGATGTGAAGACATTTTTTCATTTACA  
TTAAGACCCGCAACCAGTGCCCCAGCAGGTATGCTGTTGATACCATTGATATTAGCAGGA  
TGGCCTGCCTTGCCAAGTCGATTTTCGCAAAGTTTCTCCTTCATCGACTTCACCCATCACC  
CAGAAGTGCTCCTGACCAAGGAAAGAACCAGTATGCTTCTTCCCACGAGTCCACCGCT  
GTAGGGCCGCTATCCTCTGTGTAGGTCCGGTGTGTATCGCCGTAACCTGTCAGGCCATCG  
ATAGTCAAGTACAGTCTTGGCCTACAATCGCAACTGTCATCCACATGACAAGAGCAACTT  
GAGCTACTGGCTATCACACGGTACTTCGGAACCAGACGTTGACTAGAACGTTTTACATTA  
ACCAGTTTTTGGCCTTCGCGCCGCCACGGAGTAGATGGGATAAACAAGTTTGCCCTGTC  
CCCAATCGGATCCATCCACATTGAACTTCCACCCAAATCTGAATGCTTTCGCTATCGCTC  
CATCACTTCTCCTTGAAACCACCTATACACTCATAAAAACATGCATCACGTCTTTTTATTC  
AAGATTTTTTGTATATGGTTTTTAAAGACCTGATGTGTATTAATTCATATATGTATTCAT  
ATGCAAATTTAGCAGGACACGAGGTGCAAATTTTGGACCACAACACGTTGTATTCGTATG  
TGCTCATGCCTCTCCCTTCCAGAGATAAGTAGCCGTGTGTGACCAAGTTTTTTTATACAGG  
TTCTGATGGACCTTTCAGAAACACCGGTGGCCCCGCTTATCGTCTTGTAATTGCGAAAT  
ATTTCTTTTATTTTGTCTGTATGTATCCAGCGTTGTATTTTATATGTAGCATGGCACGAA  
GATCTGTACACGACAGTATCTTGTTCATGTAACCTCGTTTTTCATCACAAGGTACCCACCTCT  
AGCGCTTTCGGGACTACCGTAACCTCCCCACAATCGACAGGTTATAAAAATCCCTCGACA  
ATACTTACAGACTTTTCAAAGACTTGCTCTCAAAGATCTGTGTGCCACCAGGTATCCAA  
AAATCCATCATTGGAATCTGCCACTTTATCATCGTTTCTAAATGCCCTGCAACGCCCCCA  
TTCGTAAGTCTATATATATTCCAATTTGAAAACACTACCATATAGAGAAATTTGCTTT  
TCCCCTTCACTAGGGTTTTGCGTAATACCTACTTGACTAGCACCATCACAAAACCTCCCA  
ATCTACTTAGACTTATTTTTACCACCAGGGCTATATAAGTAAGCATGATCGGCCATAGTA  
ACTGTTTTATTTCTCTATCCAAAAGCAAGAATCCTATTCTCTCCAGGTTTCTCAGGTAT  
TGACTGAACAAATCCCATTCCATCCTTCTGCCTCAGAAAAGAAGTTGTACAGGGTACTTT  
TTACAATCCCTCCGAGAACCGAAGCATCTTTTTACCTTGCAAATCAAGGAACATTATCC  
CCAGTCAATTTTTTCAGCGTGTGTAAGAGATCAGGTAAACACATTTGCTGTGAATTTAAC  
ATTTTCATTCTCACCACCCAGATAATCTCTTACGAATTCAATAACATACTTGTTCGCAT  
ATTCTTCTTCATCATCATTATGCAACATTTCGGTTAATTACGCACACCATATTGTACAGAG  
AGCTCTCAAATGGTGAAAGTCCAGGTAAAATACCAAACATAAACTCCGCATCTGTGGTGA  
TCTCCTAAGGATTTACCGTGTAAGCTAGTGGGATAGTGGTCTCCCACTCCCCTATCTTGA  
ACTTCTTAAGACTCGAGGCTCTCCTGGTGTAAAGTTGTGAGGTGCTCACAATTTCTCACAAC  
CATCCTTTGTGAAGATTATTCGCACAAGTGCCCCGGTGTACATGATAACCCCGTCCACAC  
CGAAACCAACGGCGACGGTTTTAATTTGAGTGCTCATCTAAATCGCCCCGCCCTTCCCAAA  
GCTGGATCAAACCTTAGCACGGTTTCTACCGCAAAGGACACTCAGTGTTTTCCATTTACAA  
TCCCAGTCATTTTTGAGATGACTGAGCTCCACTATATACCCATCAGTGAAGAGTATCATA  
GCTGTTGCCTTCGGAATGTGGTCATCGATGTACTGGAATGCCACACCTGCCATAGTACCG  
CCTATGGTGGTTACATTGTAGTCCAGCATATCTTAGATGTTCTCCTGTGTGGACACTTTC  
ACATCACGAACCTTCGTTACCAGCAAATAATGTCACGCGGGAAGTTTTATAAAGCAGG  
CACAAACCAATAATCTCGTTGATGATAGTGGTGATTCTCGTCTAAGATATAGAACCCTGAC  
ACATCACAAACCCATCACGATGTGATTGTAACCTATTACTTACTTCCGGGCAAGATGATA  
CTTTGCTTGTGGTGTATGGCACCGTAGTTTCTTAACATTTGCGTAACAGACCCCGCTCTA  
CGAGCAGGTTTACGGAACGAAAGATACCCTCTCACACGAGAAATCATTTCGTTGTCTTAGC  
ATGTGCATATAATCAATGTAAGGTTTCCGCATTCTGGCTACCATTTCTCGTGCCTCTTTT  
GGTCTTCAACACCCGCGAGCCTTTAATGCAGCCCCAACAAAGAGCCGCTGACCATGCACAG  
GTCTCATCTTTAGATCCCAGGCTTGACACGGGTGTGGATCAGTGTACCCAGAAATGTCG  
CGATATGGGTAATAATCCCCGATACGAGTACCATTGAGTGTCTGAAACAGCCTTCCCT  
TTGTGAGTGGCGCCGTAATTTTTTCCGCGTCATCACGTGGATAGAGAATTCACAGTAA  
CCGTATGCCATAAATCAGACTTCATTATGTTTATCAAAGACTGTTTTCGCCCCACCAGGG  
TAAAATCGCATAACCTTAGAACGTGGTCCAAGATCGCTTCTCACAATATCTACGTTGATA  
TACTCATCCCCATCAATAATGTGCAGTCTTGAATCGAAGACCTTACCACGAGACCTATGT  
TCATTGGTTATATGGCTTGACTCATGGACGAGACTAACCGCCACTTCCCTTGGTGTTTTT  
CTACGATAGAATACATTGATATATCTGTTGTAGTGATACTTCTGCTCCTGAGTCATGTGG



GGGTGTTTATCAATTCGGGAAAACAGCTTCTTCTTCCGCTCTTCCTACACACCCAACAGT  
AACTTAGTGTTATAATATAGGTTGAGGTGGTCAGTGTCCGCAGTCGGTAACCAACGCCAA  
TCAGGGATGATCGCCAAAGA ACTTAGCAAAGTCCCGTAAAATGGGCGCTGTTGTAAGAAT  
GCAATACGAACAGATTGATTGTCCTTGAGAGCATCTTTCAGAATCTTTTCAATCATTTCG  
CTTTCGTCTTTAAACATATCCCTCTCGCAATAAAAGGGGCCATCCGTCAAATGGACTTA  
GTATATGTGATTTTTGAGTCCGGATCAACTCTTTTTTCTTCAACGAAATAATCTCTTCCTT  
CCACCCTGAATCCACATGCACTTTTCGGCCTTGGCTCATAACGGGGTTGATGGAACAGCAA  
ACAGTACAATTGCAACAACATTTCCATAATGGGCTTCGTGATAATCGTTACCCCTCAC  
CAACTACAATTGCAGGCTTGAAATCATGATCCAGCTTCTTTTGTGCAGGGGCCGTGCGAG  
GTCGGCCCAAGATGTGTTTCATACATTATACCACTTTGTTTCAGCATCGCGGTTATCTTCGG  
CAGACTGAGA ACTGCCTGCATCATCAATGGGGGCATTGCTGTTTCCTTTTTCTTGGATAC  
AACGATGAAATTAGCTTTCACAAAGCCAAGTTTAAAGGTGGAGGATGAGGAATCACTTAGG  
TTCACCTGTCAATTTCTCCCCTGTCATCGAGTTGGTGTACGGACCCATTTTTCTTGAA  
CTGTCCAAATGTCACACTTGCATTTATGCCTACATCAGAGGAGGTGTTGCAGTAGCTTGC  
ATACGCCAGAGCTACCGCTACGTCATCCTGCAGTAATGATGGCTCCGGTGCTTTTTCTGC  
GTCCTCCTCCACAGCCGCGCTTACTTCTCCGTA ACTTCGCCCTCAGTCTTATTCTTTTC  
TGCTTACTGGCCAGTGTCTTTCGATAGCAATCATCCGGTTCTCCTGTTGTGAGATATA  
TTTAGTCTTCAGCATTTCCCTTTGGTCTTTTGGCATGTTCCGCAACATTGTCTAAACGAT  
CTCGCAATCAAGCGGTTCACTTATTATGATTGCACTCTTGTGTTCAAGCAA ACTATCTAG  
CTATTTCGTTGGCACGACGGGTCACAACACGGATGTTTCGACGCATATAGCCTTTTTTATC  
GTCGATACGTTCAACTGGAGGTTCTTTCGGGTTATAACCTGCCACGGTTC CATATGGAA  
CAGCATGTTGGCGGAATGGCAAGTACCCATACCGAGTA ACTTCTTACCCATCATGCACCA  
ATCATCGAGGGTGAGTGAGAATTCGATACCACCTGTTCTTGTACGCACAA ACTTTGTGTG  
GTA ACTCTCTTCGAGATTTTTTGTCTCGTTTTTGTGTAAATTTTTATTTCAGTCGATCAT  
GTTCTACTCCCGGGATGTTCCCGGTCTTGTGGGGTGACCTAGCTGGCTTTCATTCCGAGC  
TGTC AACACTTGATTTCAAATTCTCTACAGTGTATGCTTTGTGTAGTTTTGTCTGAAGGC  
AGGATAAAAATGAATAAATCGACCGTTGATGTTAGAGAAGTAAACGCCCAAAGGTTACA  
GCAGATATCGACCGGAGCTTATTA AAAAATCACCAGACCATTCGCGCCCTGATCGAGCAC  
TGGCGAAAAGAGCACGAGTAGCGTCAAATGGGAATTATGGGTGTCTGAGATACCCCAACA  
ATGTATACCGATGATTTACTTTCAGGGTTGGACCCAAGGATGATGGAAGAAAAGCCCTT  
GCTGAACGACTCAAGGGCCTGCATCAAAGGGGGGATTGGAGACATGGGCCATTCTCGTGG  
TTCTGGGGTGATGACTGGCATGTTTATCGGCGGGAGAGCCTGGATAAGAGGTTTTTGGCC  
CGTCAAGCGCTCGATGTCAGAGACCGGGCCCTTAACTCAAGCCCGTTCGAGCGGGAAGAG  
CTCTCAAGAGGGTATGACTAAGCCAGCATCCGGGGGCCTGGGGATGGGGATGCCTTTACA  
AAGAGTTCTTCTTGGAGGTTGTCAAGTCGCACAAGGAAGTTACTCAGTTTGTTGAAGCCC  
CTGATCATACAAATGGGGCGTTGTGAACCAGACCTTATAATCAATGAAGAGTTACGCAGA  
TACGGCTTGTGATCAAAGTCACGAAGAGGTCATGAACTATCCTCATATTCTTGGGATA  
TCCTTGTCTCACGGACA ACTTCTTGTGATCTGCGACTTCAAGGATAGGGATAACTTCGAT  
GTGCAGTGCAACCGCATTGGTCACCGCGTCTTCCAATTGCGTGATCGCGGCGTTAAGGTC  
AAGAATGCCTGGGAGGCGTTGTAGATTTCCATTACGAGTGAGACATTATTCAGCTTCCGT  
TGGGGTGAAAGACTGTAATATATGGTGGGAGGAGAAACACCCAGCCCGGAAGAGATAATG  
ATGATGGCAATGGCTCGATATATAGATGAGTACTGGCTTGAGAACATACATGGTTCGTGAT  
GAGCAAAGAACAACCTTTTCATATGAGTGAGTAACAAAGATGGTACGAACTCTCAATA  
CCACGACTCCAGTTTTAACTCCGGCGCAAGAACTTGCTCTGGCTATCAAGATTGGAGTAG  
AGGACCACCTGAATCAGAAAGACAAGGGTGGTGATCCTCACATCCTTCATCCCCTGAAGG  
CCATGCAATAGCTGATGACTGATGATTTTCAACTGATGGCGGTTGCTGTCTTGCACGATG  
TGTTGGAAGATACCCATGAAACGGCGGCTGTTCTGGACATTCTGGGGTTGTCCAACCGTG  
GGGAACATGCTGAGGTTCTGCTGACAAAGACCCCAATCAAAGAGGGGAGTATAATATCC  
AGGGCATTGCAAGCAACTATGATTCGGTGCGAGTGAAACCTGCAGACCTACGCCATAACT  
TTGATGTTTCGTGCGCTGAACAGTCGTACCGCTAAGGATTTGTTGCGTGACCGTACATAACC  
ACGGCCTGGATCTACGTCCGACAAAGATAACAGAACATCATGACCCAATACCCTTTTTA  
CACAATGATGAATCTCTTGACACTTCATCGCACAAGCTAGTATACGCAAAAAAAGATGGG  
CTTCCTGCAGGGGATGCCCTCGTGGAAAGGGAGTAAGCATGTTCTCAAGTTGGAGGAACG  
TGGTTACATTCAGGTAAGTAGCAGATACCAATTGAGCGGGCCGGTGTCAAGATCCTTTTG  
TGTTCCCGATCAAATCTTTACAAAGTGACTCTATAAAGGAGCAAAGAATGTCGAGAAAG  
GATGCCTACACCCACAAAGGCACTCTCAAAAAACCCCGCCACGGCTGGGCGTGGACTGAG  
AACTTCGCGATACTTCTCGTTACTGGATGTCTTACCAGCATTACAGAGACAGGAGAAGCC

GTGAAGTATTGTACAACCTGAGGAGAAAGTGGCGGGTGGTGATGACTACCTCGACCTTGAA  
TCCACTTAGGAGCTCTGATATTAACAAACATTTACAAGAGGCTATCGAGTTATGGTGTAG  
TCAAGGGCAGAGCGGTGCGGCGCTTGTGCACCTCCTCTAGAAGCTCTCCGATCGCAAAGA  
GGAACACCTAACCTACTATAAAAATGAAGCCTCTGCACTGAATTCAGCATTGATTCGGGC  
ACAGTTTCAAAGTGGTTCGTCGAGTAAAAGTCACCGTTGACAACATCATCAGAACATGTTT  
GAAAAATTACTTTTATCATAACAACACGCGTTACGTTAATGTTGGTAAATTCAAGGCATG  
GGTAAAAAACATAACAAAAAAAGTTTTTTACTGCACTATATCGAACACCTGCCAGGCAA  
ATTTTCATGTGGAGGTTGTTTCGTCCTGACCAAGAATTGACTCGGATAAGGGAGGGGATTGC  
TGTTGGTAAGCTGTTTGGTAAACGCCTGTTTGCAGTAGACAAAGACGGTATGAGGATTAT  
CTGTGGTGTATGCATTCATTAGCACTAAGAAGGCGAAGAAGAATACGTAACCTGGAGAACCC  
GGTTTAGCTTGCCTGATCTGTGGGGTCAACGTAATGGTGAGTGCGGCCCTCAAGAGTGGA  
CAGTTCAGACGGTTCATGAGCTTATAAAGAGATCGCACGTCGGAGAAAACGGAAATTC  
CACAACAGACGATCGACAGACACGACTGGGATGCCCGTTTGTTCAGAGGTTTCAGGACATGT  
TACAATAAGTACCGACTCTTAAAGAGCAGCTTGACATACTAGCCCCTCTCAGTGCAAACG  
AAAATCTTTACTATCATGAGATCTGTGAAATATCCAAAGATACCCCGATGGCGCATTACA  
ACTAGGCGATGGACCTGTTGTATGATGGGTGTGAAAATTGTTCTGTGTGGGTGGATAAGT  
CAGAGGTATAGATTTTTTCAGATCCGGCAGTCATGCCGCCCTTCGTCCCCGCTGGACTCG  
TCGTGCGTTGTAAGCAGTCTTTGGTGCTTAGAAGCTGGAGCCAAATTAATAAATGTTCTC  
TGAGGATCTTGCAGCGAGGATTCATACGCGATACAATGATATTGCCCTGAAAAAATTGA  
GGGAGCAGTTGCAAATCTCCTTGAAGCAAGAAAACAACGCTTCTCGAGTCATAATATTT  
TTAAGGATAACCGGATCACTCCACGGGCCCTCGCGGATTAGATCCGCTTCTGTAAGCGCC  
GTGGGCGCGCGCTAATGATCTCCGGGGGTGCTGGCCTAGGGAAAAGTCAGGCCATGTGGC  
AGGTCGGAAACATGCAGTTTGGCGAACAAGAAAACAACCTGATCGATTTCCGGCTTGAGG  
TTAAAGATCCGTCAGATGTTCTGGGCGTACGTATCCCGGTCACAGACGACAAGGGTGTTC  
CGGGCACCGATTATGCGATCCGTAACCTTCTTGCTGAAGATCCTAGCCGGAAAGGTATCG  
TGTTCCCTGGATGAGCTTCTTCATGCGGAGCCTTACGTTGAGAAGGTTACATACCAGATCA  
TGCTGGCTCTCAGTATTTCCACCTACATGTTCCCGAAAGGGGTGGTGGTTGCATGTTTCAG  
GCGACCATCCCCGCGATGGTAGTGCGGTAAGTATGCTGGAAGCACCTCTGACTAAACGTG  
TGATCCTGGTTGCACTCGCTTACGACCGGACTGTTTGGCTGCACAATTCTGGTCTGCACA  
ACGATGTTCAACCACAACGCTGTTGCGTTTATCGGTGCAAGCCCAGGTACACTAGACAAC  
ATGGGGAGATGTTGGAAGTCAACTCCCCTTAATACGACACGCCTCGTACTTGGGTTACCG  
CAAGTGATATCTTGGACGATTTTGTATGGAGGTATCTTGTCCCCACGCGTGGCAGGACCG  
CTCTACAACGATCTGTGCGCAAAGCATTGACGGTGGAGTTTTGGTATTATCACACCAGTA  
GGGCAACCTTGGTTCATATCGAGGGGGTATGGACGGATCTTCAAGAAGCACACCGGGT  
CAGAGACCTCAGTTGTGTTAAGGACCCTCGGCTCCCAGGGTTCAAGCTGCTTGCCTAAGG  
CAATTCAGAGCAAAGAGTACACAGATGATCACGTTATTGACTTTTCTGCGAAGTTCTTGC  
TGTCCTTTATGACAATTTTGGACAGCATGCGACATCATGGAACCGTAATTTTCGTGAGGT  
CTGGGTCTCTGTGATCATCCATGAGAATCTTGTGATAAAGCAATCCTGATGTCGGGTG  
ATCGTTAGCGCTTATCTGCGAAATTGTTGGGTAAATGACCGGTAGTAATGCTGATCATCC  
CAGAATACCGCAAGAATTTTGTGTTAGGTGTTGATGCACGGGTAAAATAATCCTTGACAA  
CCCCAAGTGCGGCGGATATTCTTTGGTCACGCAAACAAGCGAGGACAAACTCAATGAC  
TAAGTTAACTGGAAAGGACCTCAACAGGCGATGCGTCAAGGTAAAAGGTCCGCAACCA  
ATACTGGAATCCAGAGGAGTTCCTCGAGATGAAGAACGGGCAAATCGTGTGCGAAATGGT  
ATACAACGTAGCTAGTTGGTATCTTGGCGAGGGATTGCAGGATGAGGGATGGAACGTGAT  
TGATGCGTAGACCTTGCTTCGGGTATTTTTATATGCTTGATAACCTGGTGTGTAACGTT  
TGGTTCGTTTAGGCTCTTTAACATAGAATATGTGGAGGATCACTACGGCCCAGACGCAA  
AGACCTGCCACATGCGTGAAGACAATGGTTTTTGTGCTGATCTTCCCTGGATGGCAGGAGTGA  
GTGCTGGGGCTCTCTTAGCCAAGATAGCGGAGCAAGACAAAGAATATGGTCACTTTCTCT  
GGGATTGCGAACAACGGAACAGACTTGTTCATGAAGGGGGAACTATGGTACAAGAGAC  
ACTTCGTCCAATTCCTAATTGTGACAATGTGATGGATGAACATTAATGGTATTGCTGAGT  
AAAATGCGGTGCCTTCATTCTGAAGATAGATATGGGTACCGGTGTCCTGATGAAAATTA  
TGAGTCCGACATAAGTTGCTGGAGTCCAGGTCCTGAATGGACGGCTCACGTAGCATGGTA  
CAATCGCTAAAGGCAAAGCTCAAATTTCCGCTGAAAGAGATCAACGAGGTTTGGCGGATT  
GATTGCTTTGACATGGTGTATGGCAGGTTATACATAACCGCATCAGTGTATTATTGTTGTC  
TGTGCTAATACGAAGGCTGAAGCTCGTCATAGCATGATCGCTTTTTAAGAGAGGAGTTAT  
GCATGAAAGTAAAAATAAACTGCAACTACAGCGACAGCTTAGACCATCCCCTTCCCTGGCG  
ACGTCCTCGGTGTTTTGGAAGGCGTTTTATAACGGAACCTACATTGAATACTATCGTTGTG

AAATGAAAAGTGGTGACCTTGACGTTTACCCATACGAGTATGATCAGGTGAAGAAGTAAC  
ATGAAACAGAGTGGATAGGCATTGCAGGCGCGTAAATCTTCCTTCTCATGTTACCCTGAG  
ACATGTTTGTATGTTTAAAAACCCCTCTCGCTCGTCGACATTTTGGCAGGATTGGTTGA  
ACAAAAAGAAAAGACAGTTATGTAAGGCTTGGTGTAAAGATTGAATGTAAAGGTTTTTAC  
TTGTTGGCACACAGGGTTGCTTGGGCTCTGTATCCCGGGGTATGGCGCACTTACTTTATT  
GACCACAGGGATCAACAAGAAGATAACAACCACATTACAAACCTAAGAGATATCCAGAAC  
TTTGAAATTTTTTATTATTATAGCAGGGGCAAAATGAAAGAAACTGGTTTACGTGCTGTA  
TTCATAGATAAAATAGTGTACAACACTCAGATACCATGCCGTCTATAGTAAAACCCACCTT  
GGAACATTCGACTCTGCCGAGGAAACCAGTGAATGTTATCAGGCATAGGGAAAACAGATT  
CATGACGCTGTTATGGAGAAGTATGATTTCAGCATAAAGTGGGTGACCGGATTGGGGCTG  
TGAAATCTGGGGAGGGCAATGTATTCGCGCATGGCTCCAATTGTTAATACACGATCGGAA  
GCGGAAACGCTCCTCTAATCAAAGCGGCGTTCACAAAAATGTAAGCTGCCGACCTCAAAA  
CGGAGAAGGGCGTCAAGACCAAGCTGGGTACCTGTACAGTGGCCCTTTTGGATGATGGTA  
CTCTCGCAGGATTTAATCTATACTCACATTAGGACTATAATCATCGTAAACAGGGTCTCA  
GGGAACTCGATTAGAATGCCCTATACGATTCGACGGTTGAAATTTAAAAGCTCTTACGGA  
GCCATACAGACGACCCTATGGACATCTATCGAATAGGGTTCCTAAACTAGGTGATGGGG  
TTGCAGGGCGTGAGTGGAAATGAGGTCGGAGCAATGAGGAAATGAATCTTCCACGATTGTG  
ATGTGCCGTTGTATATTGTACTGGAGCAAAAATGATGGTGGGCATTATCTATCTTCAGGT  
AGCTATCATTGGTTTGTACATCTTTATTAAGAGGACGCAGAGAGAATTCGGGAGGGTTCG  
TTGTGTAGAGCTCTTTCCTGCTATATGCATGGGATTGCTCTGGCCTGTATACTTCACTAA  
TCTTGTGATGCTGCGATTTATCACCGGGGACGGCAAATGATTGGACTATTCATGGGATG  
ATGGTCCATGCTAAAAGTGTGGATGTATCTGCAACAGATGGAACCTATATTTACATACAGT  
GCTCCTCGTGGCTAAAAAATATGCACTCATATCGATGACCGATGAAGATCCTAGTGATGA  
TGTTGACAATCTTGTAAGGCTAATGAGGGGATTGAATCCCTTGGGTGGAAACACGAGAG  
GGATGATTGATGGAAGAAATTGACGTTATCATTGATACCCACAATGCAACCTTCTGGAAG  
TCTGGTAACGACAAGACATCATGCCGTTCTGCGGGAACCGGTAAGTCTGCTATTAGTTCA  
AGTCGATACGAGCCGCTGCGTTGTCTGTACTCCCAGCAGCACCGATTTACGATCGAGAAG  
GTAACCATCGAAGGGGTGATTTTTTCGTAAGGACAGCGTGTACGTCATCCATGAGAAAGA  
GAATGGCTCCCTGTGGGACCATAACAGCAAAGATCGGTTGGATAAGTCCCAGGCGCTGCTGG  
AAACGCCTGGAACCTTGGCAAGCAAATAAAAATTTGACAACCAGAATCGCTATGTTGTAGT  
CTGTGTTCAAAAATGTTGGTTATGTCTTTATATGAGGAGAAGAGAAACGACAATGAGTA  
AATCTGTAGCAGGTATCTGCCAGACCGAACAGGAAGCGGTATAAATTGGGGGTAACCGTT  
TTTCTGGCCCACTTACCAATGCCCGTCTTTTTGCGGCTTTGTTGACACGAAGGATGTTC  
GCTGCATCTAAGGCTTTTGTATCGTGATCTGAAAAATTGCGGCTTCGACAATGGCGATA  
TCCGAACCTCTGTTGTAAAAGAAGTATCCTTCATGAGAGTAACATCTACGCCATCACGA  
TTACCAGTGCTTATTGACTCGCCAATGTGTGCCTGCTGGCAGGCGGTGTTTCTGTTGTGG  
CGTCATGACATCCTTAAGCTGCTTGCAGATGCAACGAAAGATGTTTATCTGGAAGACGGG  
GTTCTGTCCGTAGCGGCTAATCTGACCTATTGTGTGGCCCCAGAATATTTCCAGGATGCC  
ACGAAAAGTTTATCTCCCGCCAATGGGTTGTGACCCAAGCAGATTCTGTGAAGCGCACC  
CTGCAAGTCGGTTACGACGTCTATGAGGAGGAGCATTAAATTGACTCAAGCTGTCAAATAC  
CTAAGCATCAACAAGTCTCGTCCGGTGTATGCGTTCGGTCCACGACCGGCTTAACTTTGAC  
GGTAATGATCTAATCGTCTGCGAACAATGCAAGCTTGTTAACCCGACGGAGTTTATCCTG  
CCATACGTGGGGACTGTGATGATACACGGGACCAAGGTGAGCATTGTGTCTCAGTCCGAA  
GATGACGTTATGTTTCAGACCAAAGAACGTGTAATGTCACTTGAGCCGGATAACAGCGGC  
TTCATGGCGTTCCTGGCGCGTGAAGATACTGAAGCACTCCTGGAACAAGTAAAACACAAC  
TGCGAAATCAACGAAGTCCAGATCGAGTTCCTGGTGGAGATCGCTGTTGAATGGGCTGGT  
CGCGGTATTCAGAACGGTGTGCGCAGTCAAGCAGGTTGAGCAGTTCCTTGCCATCGGCCGT  
GTTGCAATCGGTCAGAAAGATACCTCACCGCAATGGTTACCACCAATCGCATTTTTTCGGC  
ATCGGCCTGCCAGAACAGAGGATCTTCAACGTGCTGGATTCCGGTACTGGTGCCTGCTT  
ATGCCGTTCCACGAACCGGAAATGGTACAGAGCCTTCTGACAACGCTGGCCTTGACAGGTG  
GAAGGTCAATGCCCGCTGGGAAGTTCTTCGGTGTGAGGGTGTGCGGTGAAGGGATCATC  
TGGTCTCTAAAGGGCCTTCAACTGGCACAAGATTTCCGGTGTGTGGTTCAAAGGCAAAGGT  
GAGATACTCTGTCTCGAAGGTCAAGACTCTCACAGCAGCTGATCCGGTACGCCACAT  
AATATTTGTGATGTTGTCGAGTATGCGGACAATGAGAACCGTGTGGAACAGGGCCTTGT  
GACGTGGGTTTCGACCAGACCCAGATCTGTGCATTTCATCGGTTGGGTTAGCCATGACACC  
GACAAGCAAGAAGGTGATGTGCTGAAAGCGTATGCCCTAACCATGAATGATGTTGCCAAA  
TTTATCAGCAACAATCGCCTGGTTGGGACATGCAAAAATTGAAGGAGGGGCTGTGATGG

CCCTTATCGTATCCACAACCCGAGCGGTGAAATACAAGCGTTTGAAGGCGCAGTGTGAAG  
CTTAAATCTTCTAGGATCAAGAACAGGGTAGACAATCTGTGGAAGAACATGCTACCTTTG  
TATTCACAGTTACAAAAGCGAGGATTGTGAAGAGTGGAAAAACCGAAACCGAAGTTTGAG  
GTGGGAAAGGAAGTAAGGGATCTTCTTAGCGGCAGGATCCTGAGCATAACTAGTCGCTGA  
TACTTTAGTGGTTGGGTATGCTCTTTCGATTATGTGAGGATGTATTTGTAGCCAGAGGAA  
GATTTGGAGGCTGGAGAGGGGACTGCGTGAGTCGTTAAATGTGAAGAGAAGACAAATGGA  
GGATAACGTGGTAAACTCTATAAGTATCACCTGCAATACCATCATCATCGGTAGCGTTGT  
TGGGGGTGATATGAACATTACTTCGCGTGGTGATAACATTTACATAAAGGGCGAGTTAGT  
TCACACCACGTAAGAGAAGAGCAACACTGGGGTTATTCATGGTGACATCAAGTGTATTT  
AATCGTTGCTGGTGATGTTAATGATTAAGGCGTAAATGCTGGCAATGTCAAGACCACTTC  
TGTTGATTTCCATGTTGAGAACGGCGCACTGGGGCACGTTACCACAATGGCCGGGGATGT  
TTATGCATAAATGATCAGAGGTAATGTGAAAACGTCTCAGGCGATATCTCCCGCGGTTA  
ATTGATAGACCCTTTCTTGGGGCGTTTTACTTTGGAGCAAGATTTGACACTAAAAGCAAC  
AGTTCTGGCAACCGCCTGTGCATTTTCTCTGACTACCACACCAGTCTTAGCCAAAGAAAA  
CGAAAATAAGCCCAAGGTGTGTCGCTTTTGTAATAAAGATGGTACATCGGTTAAGACCTT  
GGCAAGTAATATGTATCGTGAATCCCGTGGTGAAAGCCAGCATGGTCTTACGTGAATAAG  
TTCTGTGACGCTTAACCGAAAAGACAATGATAAGTTTCTTCGGACGGTGCTGAAGAGTGT  
CTACCAACCGGGGCGAGTTTCCCTGGACATCCGACAGTACAAGCTTCTAAGTGTAAGAGAA  
AGACCGTTGGGAAACGACCAAGGAGTTAACAGAGGTATTGACCAAGATACACAACAAAAA  
CAAATGGTTTATGAGGCCATTGTCATCACCAAGGGATCTACGGATTATCATTCAAAGAA  
GGTTAAGCCTTACTGGATCAAGCCGTTGATTTCGCACGGGCAGGATTGATAACGACAATA  
CTACCAAGAAAAGCCGGAACCTAGGGAGCCTGAACCTTTGAAAAATTTTATTGATGCTT  
TGTGTTAGCATTATCCCCATCTTGTGGTACTGTCTATTACTCACTGGATGTTCTGCGAA  
CAAGTGTGAGGAGCGTAACTTCATGGCTACCTGGTAGGCATCTACATAGTGTGCAAGGCT  
CGAAAAGAAACCCCTTAAATAACCGCAAGCAGCGGTGAGAAGG

>NewGenomeName\_186

AGGACTAGTCCATTCATCGGCTCGTACTCGCGATTGATGTCGTCGGCGGTCCCTTTGAC  
TCCCACGTTTCGTCACACGGTGATGAACACTTTGTGCGCCATCGAGGTGACTGGGGCGCGG  
TTCCAGGGCTTCGACGATTCGCCGGACGGTGACGAGCGGAGTGTCCGCCAGATCCTCCGG  
GAGCTTCAGTCGGGCAATGCAGTACGCGAGATCCATCGTCATGACATCGACCCGGTCCCTC  
CTAGTGCTGCTCGACGGCAGACTCGTCGTACACCGTGGACAGGCGGGCGGAGTTGTACTT  
GCGGCAGATCTCGCCACCGTCGGCGACGGCACGGATGTCATCCATGGTGACGGTGAGGTC  
CTTCTCGGACACGAGCATTGACTTTTCAGAGGGGGGTGGTGATGATGGCGAAGACGAACA  
TGAACAGGAACAGGCCGACCATCATGACCAGCCCCCTGCCGACGAGGCGGCGGAGGAGCA  
GCCGCGGTGACGGGATCCGCTCCCTGCGTGGAGTGTAGGCGTTGTGGCTTTCCATGGATG  
GGGTCTTCTCTCAGAACGGCGGTGCGGCGGGGATCGCGCAGACGACCGGCTGGGATTGCA  
GGTGCGGAGGCGGATCGGCTACATCGCAACGATGGTTCGCGGATGATGTACCACGGCTTGG  
GTACCGGCTCCCGCCGGTTCATGGAGATGGTGCGGTCCGCGACGCTGGGGTGGTGACGCG  
AGAAGGTGCGCAGGCCCTGCAGAAGGGCGTCTCCTTCGCCGACCGGACTGAACAGGTATG  
GGTAGAACATGGTGTGCGAGGCCCTGGACCGTGCCCGCCAGCACGACCGTCCCGCACCGAC  
CGCATCTGCCATTTTCGGCGGTAGTCGGTGGTTAGGTGGGAGTCGTGCTGACGCTGCATCT  
TCTAGGCCTTCTTTCGCGGGCGGCAAGGCTACTCCACTTCGAGCAGAGCGACGTTCTTCCC  
GTAGGTACCTCGCGGCGGTGGTTCGGCGTGAAACGAGGTGCGCGGTTCCAGTTCGGCGCT  
GAGCTGCCGGAGGTCGTAGAAGATGGTGCCGGTGACCACCTTGGTCCCGACGTCGCCCTG  
GTACAGGTACGTCGCCAGCTCGTCCGTCAGCAGCTCTGGCCGGACCTCGATGGTATACAG  
CACGCCGACGAAGCCGCCGTCATACTGCAGCGGCGGACGCTCACCCAGCTCGAACTCGGC  
CACGATCGCCAGCGGGTCCCCGGCCTACACGTGCAAGTCCTATCCATTCCTGGTGTTCAC  
CCTTTTCTGAGTCCACAATCTCTCTCAACGCCACTCGGCAACTGGCTTGTACTGCTC  
CTTGCTACTACTTCGCGGGGCTGTAGGTTACGATCGTCCACCCGATCCCGGAGATGTA  
GTAGCCGGAAGCGATGTGCGCCCCGGTGCAATCAAAGGCCCTTGATGGTCCACTTCTCTTG  
GCGCAGTACCAACGGTTCCCCGATTTGCTAGGGGCTAGTGCGAATACTCGCTTGTCCAT  
TCGGTCACACCTCCTCCCCTCCTTCGTCTCTCGATCAGCGGGCTGAGCTTTTTTACCCAGC  
CGTTGTGTGTGCCACGAAGCCTGGTGGCAGGCCATGGGTGACGCCCTCATCGTCTGCAC  
CGGCCGTAAAGACGACGTGGCTGTACAGCTCCCGTCCAAGGACGCTCTGGGTGACGGCGC  
GGACGATCGCTCCGCCGTACCCGTTAGGGCCGCGCTCGCAGACCTGGCCCTGGCCGTCGT  
CATCGACCGTGAAATGCTGTGACAGGTGGGCCTGATCGGCGACCCACACCGTCAAGTTCG  
GTGCGAGCTTGATCGCGTACACGGACGAGCAGCCGATCGCGTGCACAACGCCCGCAGTG

CAGCCTGGTTGTAGCCTCCGAGCTCGATTGCTCGGTGCTGCCATCGATCTTCAGCAGGA  
CGGCCAGTCGTGTCATGAATCTGTCCTCAGTGAGTGCATCGTAGTATTTTCGAGTGAGTGG  
ATCTACGGGGTCGGACTAGCTCCTGGCTTTGACGCTGACGGCCTCATCCGGGTCCGGCAG  
GGTTCAGAGGCCAGCTTCAACCAGGCGGACGGCAGAACGGCCGTAGTCCCCCTGTAAGTG  
CCACACCTGGCCGGTGTGATCAACTCCTGGAAGAGCGAGATGGTCTGCTCGTCCAG  
TTCGTCGCGTTCAAAGGCGATGATGCGGTAGATTACATCACTCATCGTTCCGTCTCTCC  
ACGTGCGGGTGTCTTCGATAGTTTGACCCCGGCCAGCGTCAGAAGCCTGGTGACGGGGA  
CCGGAGTGCTGACGGTGTGGTGAGCCCGAACAGGCCTTCGGCCTCTTCTGCGCCTTCT  
CGGGGTGACGATGTGCTGGCCTGCGTCCACCTCGGCCTTGCTCGGTGCGGTGGCGGGTGG  
CCTTGCGGTAGCGCCGACAGAGCGGGGTGCTGGGCCAGGTGCCGGCGCCGGAAGTCGTGCG  
TCGTCTCGAGCACCACCTTCGGGTACCGCTTCGCGTGCGGGGCCGGGATCTCGTACCCGA  
CCTCGTTGCCATTGGTGACGTGCACGACGAACGGGTGTGCGTCGCAATGACGCAGGACCC  
AGACGGTGCCGTACAGCGGGCCGGGGGACCATGCCTCGCCTTCTCCATGTGGCCGCTGA  
GCGCTACCTACTCCATCGCCCTTCTCCGTGTACCGGGCGATGGCGGCCTCTCTGGCAAC  
GATCTCGTCGAGCATCTGCCGGTGTCTTTGCGGCACGACGGGGATGTGCGCCGGGAGGAT  
CCAGCCGCCGAGGCACGTGCGCCAGGCGGTGGGGGTGCCGGACGAGCGGATGACGTAGAT  
GAGCGTGTGCGCTGTGCGGCAAGGAAGTCGGCGTGGTGACACTCCGTCAGGTGCGCCGAA  
TCTCGCCTCACCTATGGCGTACCCACCCTGCAGGCGGTGATCCGGATCTTATCGCGGCG  
CTCGATAGCCGCTGGCTCCTCCTCGGCGCGGATGCGGCTCTGGCGAACTCTCATTGCGTC  
ATCCACGCAGATCGCTGTAGGCGATGGTAAGGCCGAAGGCATCCGGCGGGACGGTAAGCG  
TCGTGCGCTAAGTGATGTATGCCGCCTCGCCTTAGCACGACGGGTGATCGGCCCAGCAGG  
TGAGGACCGAGAAGAATCCCTCGTCGGTGGCGTCCCGTGTACGAGCCGGGCGCGGTTGT  
CGGCGGGGACGCGCGGGGTGCCGGTGTGCGCGTGAACATCTAGGGCGGGGTGTGCGCGT  
CTCCGGTGTGCTGCAAGGTGCTGCACGGGTGCAAGGGCGGGCGTGTGACGGTGTCTTTTC  
CGCGGTCCGCGACCGACCGGGCCGCGCATCCGGCGAAGGCAAGCGTTCCGGCGGGCGGCGA  
CCGCGACGAGCGTGTAAAGGACAGAAGCGCCGGGGGACTTAGTGAATCTCCTTGGGGGCTG  
TTCATGAATTGGCGTAGAAGTTGCCCGCACGGAAGGAGTTGAAGCACTTCTGCTCGAGGT  
CAAATCGGTGCTCTCCCTAGATGTCTCCGAGGTTCCGGGCCGAGGGAGGATGAGGTGCTCG  
GATGGATCCCATCGAACTCCTCCTGCGTGTTTTGGTTCGAAGATGACGACGGCGCCGTCGA  
TCTGATGGATGAGCAGGGTGTGTTGGGCAGAAGCTGTGCCACTTGTCTCTTCTCAGG  
GGAACAACAAGCCGAGGGGGTCTCGGTAACCTCCGCGCGAGCTCTTGGCGATGGCGGCCT  
GGCGCTCGCAGGCGTAGTGCTGCTTGATGTGCGCCTTGATGGATCTCCGGTGTGCGGGCCAC  
GCTTGGCTCCGTAAGGACGTATCCGGCGGGCGAGGCTGTAGGGAATCCCATGATCAGAT  
CCCCCTCTCGGCGGTTTCTGCTTTGTCGACCAGCAGGTGATGTGGACGATGGTCTCGCC  
TCGGATGACGGGGAGGGGTAGGTCTTTCGGGGTGGCCAGGTGCTGGTTCGTGGTTCGAAGTA  
GGCGCGGGCGGTCTCGGACAAGCGGGCATGATCGCCGCCGATGTGCGATCGGAGGTGGTC  
GAAGGTGTGCGCCATCGGAATCACTTCCAGTTGGGTGTGCGATTGGCTGAGAGGATCAGG  
CGGCAGGTCTGCAGGAGACCTCCTTGAGAGACTAGCTGGCGAGGGCTTCTCGATGTGC  
AGGAGCGGCTTTCCTCAGACGCTACGTGGTCTCCTCGGGAGGCGTGGCGGACAGCGTGCGGG  
TCGGCGGGATTAGCGACGCGGATCGTCTGGCTCATGGGTTCGGCTCGGGCAGGGAGTGGT  
CGAGGGCGTGTGCTGGTTCGAGCCGTGCGTAGATGGTGGCCATCAGGGCGGGCGGGCCCT  
CGGGGTCTACGGTGAGTCGGGTGCGGGGCCCGCGTGCACCGCTGAGGCGCTCATCAGTT  
GAAGGGTGAACGGGCGGCTGAGCCTTTGGATCAGATCCTTTGCGGCACAACGTAGAGGGT  
GGTCAGGCAGTCGGTGCAGAAAGCCGACCCGGTGAGTGAGGGCTAGGTCTTCTGCAGGC  
CTTGCAAGTGGTGGTGGCGCTCGGCCAGCATGGCATTCTTCGGGAAGTCGACGAGGGTGGC  
GGAGCCAACGATCGGTGCGATCATGGCAATCACGTCCAAGATCGAGAAGGAGTAGTTCTC  
GGTGATACATGCTGCGAGCCTGCGCAGGTCCGCTGTCATCGGCGACCCAACCTCGCTATTG  
GCCTTGTAGTCGTTCTTGCATTCGCCGGTACCGGTATAGGCCAGGGTGTGACACCACCTCA  
CCGATCAGGGCCGCGAGGTGCCGGACGGGTACCTCGGCGATGGTCTCGACCAGCCGCTAG  
CCCCTGACCTCGGGACGGATCTGGCCATGGTGCCTTGGTAGACGACGGTGACGCGCTTG  
ATGTCGACGACCTCGTAGTGCTCGGGGTGCGGGAGCCCTGGCTGGACGCCGACGCTGGTT  
TCGGTGCGGGTAGACGTGACGGCGGCCTGCCGTATGTGGCGTACGTTTTTGGTGGTGCCC  
GGCACCTGTGCGGGAACCGGGGGCGCGCCATTCTGCAGAGCTGTGGGTTCATCAGGCCAG  
CACCGCCCGGAAGACGGTATGGACTTTGTTGGCGAGGGCTTTGAACTTGCCGGTGAGGGC  
TCCTTCTGCGTTGTGCAAGGCGCGGGTAACGCCCTTACGGTGGACTGGTGTGATGTGCCCA  
GGGGATGGCGGCCTGGATGACGCCGACGCGGTGCCGTTCCAGGTCTTGGCTCGGGCGTC  
GTGCCGGTACATTGTACCAGCTTGTGCGCTGGTAGGTGGCGATGTCCAGCGCCCGGCC

CTTCTCCCCCGGCACCGGCTGCGAGGGCTCCAGGAACTGGAAACACTGCCGGTTCGGTGAC  
TGTGGACTGGCCCAGCTCGTGGAGGGTGTTCGGTGAACCTCGGCCGCCGTCTCCTCGTTAAG  
CTTCAGCCCAGGAGCGGAACTCGTCGATGCAGAGGTCCGAGTACCGGCTGTGATGGATCTT  
GACCTGTACATCCTTGGCCTCCCCGAGAGCGATGTCCAACGTGTTGTTCGCAGACCGTACC  
GGTGATCGTCCGGCCGTAGGAGGTGGAGAGGCTGCCGTCGAGCGAGGTGGGGGCAAGCAG  
GTTGGGCCCCGTAGGCGAAGCCGGTGGTCTCGTTCGTGGAGCGTCTCAGGGAAGGACACCTC  
GACCCAGGCTTGGCCGCCCTGCCGGATGACACCTGCGCTGGTGTGATCTTCAGGCTGTCGGC  
GAGGATGATGCTGACCCCTCCGAGCAGCCTTTCGCGGTACTGGTGTGCTCGGACCCGTC  
GGTGAAGACCTTGAAGACGTGGTGGTTGTTCGGAGCGGGCGATGGCGGTGAGTCAGGGGAC  
CAGCCGGTTCGGCGACGGGGATGCCGTCAGCGTTGAGGCCGGTGACCTCTGTCAGGTCGGC  
AGGGAACCTCGGCAAGGACGGGGAGCTTACCGGCCTCCAGTCCAAGAGGCGCTCACCGAC  
GTCACCGATTTAGATGGCCCCCTCTTAGTGATTCAAGCGCTCGCCTTTGTCTCTGCGCG  
GTAGTGCCAGGCGTGGCCCCCGTTGTCAGTCATGCCGATCAGGTTGTTCGGTGTTCAGCCA  
AAGGGAGACTGCTGCGGACATTGCTCTCTACCTTTCGGGTTTCAGGCTTCGATGAGTCCGA  
GTACGTGGGAGAGCTTGTGTCGGTGGTGTTCACCCCGTTCGATGACCCCGTTCGGT  
TCGTTGCGGTGAAACCGGCGACGGTGGCGGTGCGGGTGAACCAGAACTGAGCTGCTCGA  
CGCTGCGATCGAAGCGGCTGAGGCTGCTGGTCTCGCTCGGGCGGTGGAGCTTGGACCAGC  
CGTGCTTGGTTCGCGGCGGTTCGCGACCTGCTGTCGTGCGGTTCATGGCGGGGACTCCCTAGT  
AGTCGCATCGCTGTGCGAGGCGGGCGGACTGGGCCTTGACCTCGAGGATGGAGCGGTTCGG  
TGTCGGTGGAGCGTTCGGAGTGGGGGAGGATCCAGGCGATCGCGCTGGTGTGACTCCT  
GTCGGTGGAAATGCCCCCAGGTGGCGAGGTCGGCCCCGCAGGACCAGATCTAGGGGTGGT  
TTACCTCGATCGAGCCGAGGTCGTTGACGTAGTCGTTGGCGGAGCCGCTGACCCCGTGGG  
TGAAGGTGAGTGTCTCCGCCTCCTGGACTTCCGTCTGGTACTCGTTCAGGACGGAGAAGG  
CGGCGCGGGTGGCGGAGGTCATGGCGGGTGCCTTTCAGATGTTCGGAGGTGGCGGTGAGGC  
GGATCCGGCGGCCCTTGACGTACCCGAGGATCAGGATGCTTTCGGAGCTGTTCTTGTGCT  
CGGTGAGCTTCCAGTAGCTGACGTCCATGGACTGGCGGACGATGTTCGACCTCGGTCCAAG  
TGGTCTTTATGTATCGCTTGCCGTCGTAGGAGATCAGCGGGTTGAGCATAAGTGAACGCTC  
CGTATCGGGATTAAGTATGCTCGCCCCGCGAAGCCCCAGGATCGGAGATGTTCGGTTCG  
GGCCTTGGCGATTGAGATCGGGGTGCGGTCTGGCTGGCGGTGCCGCGTCCACGACATCC  
GTAGTCGTGGCGGTTGTGCCAGTTGCGGCAGTCGCAACCTTCATTGCCTGTTCTTTGC  
GCTGCAGGGGAAGTCGGTGGCGGGCCGGCCAGCGGAAGCTGGTCTCGCCGGTTCGGCCCCGT  
CCCCTGTCCCCGCGCGAGCTTGCATCTCTGCCGCCCTGGTGGATGGGCGATGCGGGGAC  
CTAGTAATTGCTCACTCTGTGGAGTTGTCTGTCTTCTTATCCGGAGACGGGTTCGTGGCCG  
ACCATCCGTGCGGTGGTGTCCGAGTCTACCCGCTGTCGCTGGCGGGTCTCCTCGTCGCCG  
ACCGTTTCGGGGCAGGAGTGGCGCTCTGTCTATTCTCTCAGTGGGTTATGGGGGCTTTCG  
GTGTTGCTGTTGTGTTGACCAACTTCCCCCTGGACCCAGCAGTCGACAATGGGTCTGGG  
CATGCTCGTTATCAATCCGTTATCGGGTTGGTCGAGCCAGCCCTTGATCAACAGGCCTT  
GGCGCAGGTCAGGCCGTACTTCCGGCGTCCGGAGGCCTTGTGTCAATTCGCGCAGATTC  
TGGAGAAAGTGACCGTGAAGACCGGTACCAACTTCTGGCGCTCGTACGCTGGTTCGGCATG  
AGTAGCTGTTATGAGGGCCCGCGGGCGGTTCATCTACACCCGAGTGTTCGAAGGACCGCGCA  
GGCGGCCGGTTCGGTGGCCAAGCATGAGGCCGAGTGCAGGACCGTCTGCCAGCACGAGGGC  
AGGTCCGCGGCCAACGTGCTGTCCGACAACGACGTGGGAGCGTCCCGGTGGTTCGAAGGTG  
GACCGGAAGAATACTACGAGCGGCTGATCCGGATCCGGCAGCCGGGCCAAGCCCTGATCACC  
TGGGAGGCCTCCCGAGCGCAGCGCGACCTCGCGCGTACAACGGCCTGCGACAGCTCTGC  
ATTGAGCGGGACGTCATGTGGTGTAAATCCGCCCGCGTTTTTGTCTCACGCGGTCCGAC  
GACCGGTTTCATGCCGCTGCACGACATCGGCCTGGCCGAGAAGGAGGTCGTCCAGACCCTC  
GAGCGGATCATGCCGACCCTCCGGGCGAACC CGCAGCTCGGGAAGCCCTCGGGATCGTG  
CCGTACGGGTACCGCTCCATCCGTCACCCGACGCGGGCAAGCCGATCGGCCGGGAGCCG  
GACCCAGTCGTGGGGCCGGTTCGTGCGCGGCCTCGGGGATCGCTTCTGTGAGGTGTTCCG  
TTGAGGCGCATCGCAATTGACCTGAACGCGTCCGGCGTCAAGCTGCAGCAGGTCTAGGAA  
TGGACGCCTACCCTGCTCGGGAGAATGCTGCAGATGCCCGCGTACGCCGGTCTGCTGACG  
CACCACGGCGAGTTCGCCGGCCACGGCACCTGGCCAGCGATCATCACCGAGGACGAGCAC  
TACCGGATCATGGCAAGCCTGAAGGACCCGGGCCCGGAGACAGCCCGAACCTCGCCG  
AAGTCCCTCGTCACTAGCATCGCGGGCTGCGGGAAGTGGCGCTCGACGGTGCAGGAAG  
AAGCAGCCGGGGCGGACCGTGTACGTCTGGCGGGACATCGGCTGCGGGACGATGACGGCC  
TCCCACGTGGACGAGTACGTCGCGGTGTAGATGTTCAAGCTGCTGTCCGACCCGCGCGTA  
CGGAGGCGCGTAAGACAGCAGGGCGACCGCAAGGCCTCGGCGGAAGCCGTGGCCAAGATC

GGCTGGATGCGCGCCCGGATGGACGAGTCCGCCCTTGATGCCGCCAAGGAGGACATCAGC  
CCGCGAGCCTTCGCTCTCATGCAGAGGCAAGTGGCTGACCAAGCGCTCGAATCTTGAAGAG  
GTGGCGAACCAGGGCCCGATCCACCAGAGACTGGCCGACTTCACCGTCCCGTACTCCGAG  
GCGGTTTGGCCGAACATGGAGCTGGACCTGCAGCGCGACATCGTGCGGTCCACCCAGGAG  
GTCACCCTGTACCCGCAGAAGTTGCAACGCGAGCGAGATAAGTCGCCGATCGAAGTCCCT  
TGTCACACATCGCAAAAAGCCCCTGCTACGCGTGAATGCCGGGCGGGGGCTTTGATTTTCG  
AGCTAGACGAAGGCTGAGAGCGTGATCTCGTAGGCGAGCCTGTTCAACGCAGAGACGTGG  
TGCATCGGGTTCTTCGCGTCGTCGGTCTGCGCTGCGGTGGCGAGCAGGCCCGCGCTGAGG  
TTCACGAACTGACGCAAGCTGATCGCGGTGACGCTGACGTGCGATGCGGTGGCGAGGCG  
GGGGGGCGTCGGCTGCTGCTGTTGCTGGACCGGCTGCGGCGTGGGTGCGAGCGGTGCAAG  
GGCGGTGCGGTGCCGGCTTGGCAGCCTCATCGAGGACCGGGTGGGCTCCCGAGGTCGATGT  
GGCCGTGCAACTACCGAGGCACCACCAAGCGCGGCGTCGATCGACTCGGGGATGCGCTC  
CGTCGGCCGGTCAACCCCGCGCCAACCTTCGCACTGTGCAAGGTTTCCGAAGATATGCC  
GCCGAGCTGCGCGACTGCTTCCTGGGTTAGATCCAGCTCGGCGCGGGCGTTGCTGGATGGC  
CTCGCCGAGGAGGCTCTTGCCTCGGTTACCGTATCCGGGTGCGAGGTTCTTGTAAACGGTT  
CACATTGATCATCATTTTCAGCGTTGGCCAAACATTTTGGTTCGGGTTCTTCACTCCTTCAA  
CTTGCCGGGTGTAACGCCCTGGCTTGTCTGGGGATGGTGCTATGCTGCCCCGCCCAAACA  
TGGGTGTCGATAGTAGGGCCAAAGAATCATGCCCGTACTGTATACATCCGGTAACGGAC  
ACATCAATGTATGCACTGACCTTCGGGTATGCCACTGGGGCCAATTTGCGATGTGTATGC  
AATGGCCAAAGGCTTGCCAAACTTCTGGGGTTGGTTTTCCGTGGGTTCCAGCAAGCCAG  
CCGGTGACCATCACCACCGACGACCATCAGGAACCAACCGAACAGGTGAGCGAGATCTCT  
GGACGGAGGTCCCACACGCCCGACATGAAAGTGATCTTCGTCACACAAAAGACCACCAG  
TTCTTACTGCAGTCCCAGAAGTTGCACCTAGTCTTCATCCGGAGGCAGGCTCGCACCAC  
CAGCGATAAGCAGAGCGAATAGGAGACCTCTGTGATCAACACCGCCGGGCAAACCCATCG  
CCTCGCTTACCTCCCCTCCGAGGAGTGCGCGGGCGGAGAACGAGAAGGGCTTCGTCCACCT  
GTGCCGAGAGGAGAGGCGGATGGCCCGCGCATCGCACAGCCACGTACCTCGAACGAGGT  
GAAGCTGTTCCGCCGCACCGTCTTCGTCCAGCGCCAGCTCGTAGCCGACGGGGAGGCCGG  
GGCCAGCCTGGCGCATAACAGACGAGACCGTTCGAGCTGGCCGTCTACCGGGAACCTCAGGT  
CATCGAGACCGAGCACTGGTCCTAAAGCTCGACTCAAGAACCACCCGGCAGGCGAGCCAC  
CACCTATCCCTAGGGTCCACGAGTCCGATACAGCCACACCCGCAGCCGGGCTGCAATGTG  
TTTTTCGCCCTCCCTGCACCCGCTTTCGCCATTAAGTGGGAACCTTCGCCAGGTCCGCATA  
CAGCCAGGACTACCCGCTCGAGCCGGTTGACCGCGACGAGAGCGACGCCATCGTCAACTG  
GCAACTCGCCGGGGGAGGAGAGAAACGTGGCATCTACGGCAACCAAGCGCGGGCCGGAAGT  
CTGCAGCAAACCAAGCAACCCGCACGCACGCTGGCACGGCTGCCCGGAGGACATCCGCAG  
CCTGGTCAACGGGCACCTCGAAGACCAGTGCCCCGGATCCTGGCACTTCCGCCGAGACGG  
TACGCGTTGAAATACCTGACCCACCACAAGAAGTCGGCGACCGCCTGTTCCGAAACAACCT  
CAGCGGCCAACGCCGCTCATTCTCCCGAGGAGCTTGATTATGATGGCGCAAAACACCTT  
CACCAAACCCGACGACCCGAACCTAGGACCGCGACGCCCTCGGTTCAACCCTGATCGGGGC  
CATGGGCTTCAACCTCCAGTTAGCTGAGGCGACCGGCGAGCCGACCTCCGCCAACAGGT  
CGCGAAGGACGTCGCCTAGGCCGCTGAGCACGTCTGCTGTACCGCGATCCCGAGAAGGC  
CACTCGCACTTTCAACGGCAAGAACGGCACCTGCGGGCAAGACCAAGACGACCTCGACCA  
TCTGGTGAAGGGCACGCTGCTGGCGTACGACATCGGCGCGATCCAGACCGCCGTCATCT  
CACCAGGGTGTTTCGAGCGGGTCCGGCTCCGAGACCGGGTGGGTGATGGCATGAGCACCGAC  
GAGACCGGCCGCATCCTGCGCGTGGCCGCCGACCTGATCGAGACCAAGGGCTGGGCACGG  
TACTCTCCGCAAGCACCCAGAGCGAGCACTGCGTGCTCGGAGCGATCCGGGAGTCCGCC  
GACGGCAGCATCTTCGGGACCGCCAAGTCCAGGGCAGCAACGGCACGACTGGCCACACC  
CTGCGCGATCGGGGCGTCGAGGACGACCCGGAGCGCGACTACTACGGGCTGGGCGACAGC  
GCCTAACGCGAGAAGTCCGAGAACTTCGACCTGGTGACCGACTGTAACGACGCCGACGAC  
CGCACAGGGGGCCGAGGTCTCCAGGCCCCCTAGAGGCAGGCCACGGATGACCGGCATCA  
GGCTCTCCCGGATCAGCATCCGAACCACCCACGACCAGCCCTGGCGGGAGAAGGCGAAGT  
GTTTCGGCCACGACTGGAAGGGGTCCGAGGTCGAGGAGATGCCAAAGGGCCGCAACGCTC  
ACGAGACCAGAGCCATTCTCGCCAGGCGAACTGCCCCGCCGGCCCGGTCAAGCGTGAGG  
GCGCAGGGGGTTCCCTAGACAACCACGACATGGGCGTCATCCGGGCTGGTGTGGCCAGCC  
CCGGAACCAACGGATCCGAGGAGCACTGGCAGGCCGTCCGCAAGTTCGAGACGGCAACGG  
GCTGGGTGCCCCCCAGGACCAAGCGCAAGAAGGTATGGCCAGACAGTGCGAGAGCTGCG  
CCCGGTGATGCGTCCACGCCAAACCACCCTGGACGTATTCCTGGCACAATCACCCACT  
GGGCCGAAACCTATGCGGCACATGCCAGATGCGTCAGTGACGCGCAGATAAGTAGACCA

AGGAATCATGAGCGACGCCACCGAGTAGATCCGCCCGAAGATCACCTGGAGGGCACGCCG  
CCACTCGATCAACATCCTCCAGTTCGTCGACCAGGAGCGCGCGAAGCTCAACGCCCGGCT  
CGAGGAGCTGAAGGAGGTTCGAGGGCGAGTACCTCGCGATCATCCAGGCGGACCTGCACAA  
GTCCGGCAAGGTCGCCCTGCTCGACAACAAGCCGGTTCGTACCTGGCACAAGTCGTAACA  
GAAACGACTGAACCTGCAGGTGCTTAAACAACGGTACCCGAGGATTCACGAGGAGTGCAA  
GACCGAGGTGGAGGTCAGCACCAACAAGGTGATGGTGTGCCCGGCCGAGCCCTGCGCT  
GACTCGATCGAGATCGACGACCATCACATCGGCAGAATGAGAATCGAGTGCTACCGCCGC  
AGGGGAAACAAGAAGTCGCACAAGGCATTCTGTGGGGTCTGAGGTACCGATGCTGAATC  
CATGCGTCGACTGCAACGAACAGCTCCGATACGGCAAGCTTACCCGCTGCAAGCAGTGCA  
TGGAGGGACGCCGGGAGGGCGAAGAGCGAACCCTGCACCATATATGGGAGCCCTGGCTACT  
GCCGGGACCTCTGGATCACCTGCTAGAACCAGCGAGATGACCAGCGGTTCGGCACAAGCGCC  
TGCGGGACGAGCCGAAGGTCGCGTACTGCAACCGTGGCGAAGAATGCCGTAGCAAGTGGA  
AGCCGAGGCAGAAGCAGCGTACGTTCCGGTGCAACCTGTGCCGGAGCTGCTACACCCGCG  
ACGAGTACCTGCGCATGACGCCGGAAGAAGCGGGAAGCCAGACGCGAGGCCAATCGCAGGC  
TCCGCGCCAGAGCCACGTCAGCTGCCGAGCCGCACAAGACAATCGAGCTAGAGGAGGAGG  
TGGGGAATATGTTAAGCCAGGTGCAGCGGCCGGAGTTGCCGGCCGTCTGGGCAACTTG  
GGCCTTGGGACGAGGTTCGAGATCTGCGAGACGGTGGACCGAGCATCGCAGTTGCTGACG  
TAGTTCCTCACCAACGTGCCAGTGGGTGCGGCATGAAGCGCATCGTACCGCCCGTTCGAAG  
GCGTACCGCCGTCCAGGGGGATCCAGATTCGGAGTCGATGTTTCAAACCGCCGAACAGG  
TCGGCGAGTGGGGGCTGCTGTTTCGATGCCCGCTTCGCAACCGAGGAAGCCCGTCCGGC  
GCTTCGACATCTTCCCGGAGATTCACATCATGGATACTCGTTTTTCGCACACACGTTGTGA  
CGCACGGACTCTGGGTTCGACATCTATCCCGGCTACCCGCGAGTTCGGGATCCTCTCCACCG  
AGGAGCTGGAAGCCAGTACAAGGTGAAGAAGAAGTGACCAACACCCCGCACGGCAAGCT  
GATCGCCACCACCGGCGACGGCACCCACCCCAAGTTCAAGTCCGAGAACTTCGCGATCGA  
CGACCCGGTCTGGGTCTCGGTTACCCGAGGACGGTTCGGCCGTCTCGATGTTCAAGGA  
CTCGCGCTCGTACGAATGGGCGCTCTCCGCTCTCCGGCGGATCGGGGCAGTCTTATGCG  
GCAGGCCGAATGGTCCGACCGCCTGGACCTCGACACACCCACGACGAAGTCGGTGACTG  
ATGTTAACCCCGAAACACTACAGAAGCTCATTCCCAAGCGATTGCACGAGGTTCGTAGGC  
CTCATCTGCCTCGCGTGGGCGCGCTTCCGGTGAACGGAACACCACCTCATGCGCAACTCC  
ACCGCTCCTGACCACAAGCCGAAGTTCTGCCACTTCTCCAACACTACACGCCGGGCAAGGTC  
GCTGTAGGCTGTACGTTCCGCAAGGAGCTCGACGGCGTGCACCTTGTACGAGGTTCGCCTAA  
ACCGGCGAGGAGGGCGACACGCGGAGCTACGACGGGACGGACATCTGCAAGGGCGACTTC  
AAACACCCCGCCTGCAGGGGTTACCAGCATGATCAGATCCAGTCCGTGCAATACCACGCT  
CACGTAGACCGGGAAGGCGTCTCGGAAAGCGCAGCCGGCCGGAAGCCGCATCGCGGCG  
GACTACAGCCCTGACAGCCGGGAGCTAGCCGTTTTCTCGCCGTAGACACCACAGTACGTC  
GTCCGCAAGTTCGAGGAGCGGGGGATGTTACAGGACCCGCACCCTCTCGAAGACCGTTCG  
GACGGCTTCCGGCCGTGCTCTGGTAGCCGGAGAGCATGGTTCGTCCTTCAGACCCAGGAG  
GAGCGCGAGCCGCTGACGAACGAGCAGGCGGCCGAGGAGCTGGTCTCGAAGCTGCGGGCG  
GTGCCGGATCAGGTTCGGCGAGGACTAGGACATGCTCCCCGTGAATCGCGACGCCCTCCAC  
CACCCGAGCCACTACCGGACGCTCCCCGAGACGATCAAGCGCCCGAGCGGGATCGCGGCG  
ATGGACGTCAGCCGGTGGTACCCGTTTCGGAGAGGGCAACGTCCTGAAGTACCTGCTCCGC  
GCGGGCCATAAGGGCGACCGGCTGGAAGACCTGCGAAAGGCCAGGCAGTACCTGGTCTTC  
GCGATCGAATGGGAAGAAGAAGCACGAACCAAAAAGGGGGAAAACAATGTCTGACAACAA  
GGCCTTCTCAAGGAGATGCAGGGGGCCAAGGAAGCACCCACGCTGCCCCGACGTGATCAG  
CGACGAGTTAGCCGACATCCCGGACGAGCAGACCATGTTTCGAGTTCAACTCTAACTCACT  
CAGCGTTTTCGCTGGCGCTGGGTATGAGCGTGCAGTTCGACGCTGCATCAATCGCCAACGG  
CCTGCTAAATCTGGGGTTCAAGAGGTGAGCACGGGGGACGGCCTCGGCAAGGAGGTGAAC  
CACGCCCTGTGCGGACGGATGTGGCAAAGTACGGGTTCTCCGGCCTGTGCCCCGCGCTG  
CCGCTGATCGAGGGGTGGATGCCCGGCCAGGTTCGAGATCCGGGGCCGCTGGTCCGCATC  
ATATTCTCGTCCCTGCGCGGCGCGCTGAGCAACCCAAAGGTGGTTCGGGGGAGGGTTCGTT  
GTCCTTCGGAACCCGATCGGCAACACCGTGCCGCTCGTGCTGGCCGAAAACCGCTGGACC  
GACTACCCAGCAAAGAACCAGATCGAGGTACAACGGAGTGCTGGGTAAACAATATCGGAGC  
AGCTTTCGTGCAGCCCGCGCAGCAGATGGCCAAGGGCCTTCTAGGTATGGCGCGGAGCCT  
CGACGAGATAGGAAGGCAGTATTACACCGCCGATCAGCTCCAGTGGCTGGAGATGCGCAG  
CAGAGAGAAGGGCTTCGCGTACAGCGACGGCGAACTTCTCACCCAGGTTCGGCAGCAAGGT  
CGGTACCAAGAGGGACCAGCGAGGCTGACAGATTTCTCGACGTCGGCAGTGTGTTTCGCGG  
ACTAGCTCCGGCAAACCTGATCGACGCCGTAATCGCTTAGGAGCGAGCGAGCCCGCGCT



CTCAGCATAAAGGAGATCGGGCCGTCGCAGGCCGGTGTGGTGTGTCCCCGCCGGTTGGCGT  
GGTCGATGATCTCTAATCCTCCCTCTAACTCGAAGGGGGATCCGCATCCGTCGATCGTCG  
GCACGACGATGCCCGGCACGATGGAAGAGGTAATGGCGCCCGCCAACGAGGCCCTCGGCC  
GGGAGCGATGGCTCACGTAGACCAGTGTCTCGAGCCGATCGCCGGTACCTGCGACCTCT  
GCGACCAAGACACCCGGTCGGTGATCGACTGGAAGTTGCCCGGTCCAGTGCATTCAAGA  
AGTACTGCACCAAGGGACCAAGCCCAGGAATACCGCAGCCAGGTGAAAACCTACGGCCTCG  
GCTACCGTTACCTGGGCTACGTGATCGACAAGGACGCCATCATATTCTTCCCGCGCGCCG  
GTCACCTCTGCCAGTACCACATGTGGATCGAGGACTCCGACCCGCAGCGGTCACTCGACA  
CGGCCGATCGGCTGAACAACATCCGCATGGGTGTCGACAGCCTCGAAATCGACAGGTATC  
CCGAAAGCGCACAAACATGTCCCGGCTACACCTTGTTCTCGTGATGTTCAAGCTCGTGGT  
GGAATCCAAACTCACGAGGCAACCGTGAATGCCCGGAACAGCGGGTGATCCGAACGGGT  
TCCTGCCCCGACACCGGGGGTGCCTGATGCCGGTCAGCACCGACCACGCCTTCGTGGTGGT  
CACGGCCAACGGCACAACCGGCCCTGTCCCGGTACCAGAAGGGCGGACGCCCGGACCTGTC  
GCTGGAGTTCGTGCGCTCTGTGCCCGACCTCTTGACGTCTACCGAAAGTACCAGCAGTC  
GCCATGATGCTCACCTTCTCGTCCACGCCGCCCTCGCCTTCCCGGCCATCTACGTCCTG  
CTGGAGATGAGATTGCAATGGGCACAGCAGAAACGATCGACCTGATCCTTTCCAACACGC  
TCGTCGTACTIONGCTGCAATCGGAGACAACAGCTCTCGTAAGTTGCTCCCCCAAGCTCT  
TCACCCGACCCTGCGGGGTACCATCCGATCAGAAAAGCTCACCAACATGAGCAGCTCTA  
ACGCAAAGAACTTCTCATGGGTTCGACCAAGTCGGCGTCGTTTCCGACCCCCTGCACCA  
CGGTGATGGGCGTCAACAAGCAGGAGCCGGAGGTACGCAGCAGCGCGACTTCGACTCCG  
GCAAGCCGGCCTGCTGGGACAAGGACAAGCCCGGGCCGAAGATGCGGGTTCGTTATCACT  
TGCACACCTAGGAGCGCGACGTCATCGTCCGAACGACGATGGCGAGCGCAAGCTCTACG  
TGGCCAGCCCGAACATGCGGAAGGCAATCGCGGTGGCTGTCCGTGAGGCCGGTTGCAACG  
GCCTGGCCGTCGACGGTGCACCTCGCGGTGGCCTGCACCCAGTACGGCGTCAAGACCGGCA  
AGGACAACCCGCCGAAGGAGTACTCGGCGCAGTAGGTCCCGCCGACGGGTGAGGTGAACG  
TCGATACCGGTGCGGCCGACCCGGCAGCTGCACCGGCTACGGCACCTGCTCCTGCCCGG  
CACCTGCTCCCGCTCACGCTCCGACACCCGAGCTGGTCTTCCAGCAGGCACCCCCGGCGG  
CTGCTCCGGCAGCGGCCCGCGGTGGCCTCCACAGAGGCCCTGGCGGCACTAAACGCC  
TGACGGGCACCCAGGGCGGATCTAGCCACCTGAGGGGGCGGGTTCGGGATTCAGCGTAGTC  
CTGGCGCGCCCCTTAATTGTACCAAAGACAGGAAAGATCCATGGCAGGCAAGGTAATCC  
GTCGGATCGTCGTAGAGATCGACGAAGAGGCGAACGTCAAGATCGACGGCTACGGGTAGG  
CGACCGTGGACCCCGGCGAGATCCAGGGCGAGACGACGCTCTGGCCCGGCGGCGCCGTCC  
CGACGATCGTCATCCTCGCCCGCATGACCAGCTCGACGCGCCGCAGCTCGTCGCCGACG  
AGGTCTGGTTCGCTCGAGCGGCTTGAACAGATCCTGATGACCACCGCGCGCATCGCCCCAG  
GCGGCGCAATCGACTCGTCCGAGCTGGACGACGGTGGCGAGTACGCATCCGGGGACGAGA  
TCTAGTCATCACGCACAAGCTGAAGGTCAGCGACCACGAAGTCGTCCGCTGGTGCCGAGT  
TGAGTGCCAGCTCTGTGGAGCGAGACACTCTCCACAAATGGACATTGAAGCGGGACAT  
GGGGGAGGCCGCGTTCTCGAAGGACATCTGCTTGCCCCCGCCGTAGGGGTTCGACCCGAGGA  
GGAGGGGTCAACGTGCGTAGAAGACAGGCGGACTACCTGATCAGGAGGAATCGGCGCACCC  
GGGTCTGGACAGTGCATTGGCGCAACTACGAGCCGATCCCGAACTAATCGTTAGACGAC  
GCGCGGGTGACGCTAAACAACATGCTGCGCCTCGAAATCATCTGGAACACGAATTCACGG  
GGGAATAGGAGGGATTGAGATGCCGACACCCGGCACATGCACTCCGCAAGGCTATCGAGCT  
GCTCAAGGAGGACGGCTTGATACAGGAAGCGATGCACACGCCCGGGGGTACTGCTCGGT  
CGGAGCGATCCGGCAGGGCGGGTGCACGCTCTCGGCGAGGACGACGTGGAGCACAATCA  
CCAGGAGTTCAAGGACGAGCTGTCCCTGTGGCGCGACGAGACGGAGCGACTCGTCCGGGG  
CGTGATTCGCGACCCGCTACAACCACTCTAGAACCGTCCACTGGAACGACCACGGGCGGCG  
AATGGTGTCCAGGTGCTCGACGTCTTCGAGACCGCACCCGACGAGGCCGAAAGATGACC  
GGGTCCCCGCTGATGTGGGGCGCCGGTCCGACACTCTGCGCGCGTCGATGATCGCCGTC  
GGCTACCTCACCGCTCGCGACGAGAACGAAGGGGTACCGTACTTCTTCGCGATCCTGTTA  
GCCCTGATGATCGTCTGCTGGTAGGCGGAGGGGTGGTCTCTGAACGGCAGGCGCGATTTC  
CAGAACAGCCCCGGCCATGGCTGAGCGGCCGGAGCTGGAGGTCTGCGAGTGTGCCACTA  
CCGGTTCTTCCACTATGAGAACCGCTACTGCGACGCCCTGAAGATGGCCACAGGCTAGCT  
GCAAGGCTAGATCAGTCCCTACGGAATGCCGTGCGAGTGCACACCATTCGAGGAGAGAGA  
CGATGGGTGACTACCCCCACAGCACGGCACAGTCCGTGATTTTCGAGGAGATCCAGCCGC  
ACGGCGACGGCGCACCCGGCCGAGATCGATGACCACGTGCTGATCCCTGGCAGCAACACCG  
AAAGGGTTCGTGACCGACGTCGTCGCCGACTTCGCCCGGCTCGTGTTCAGCGACGGCAGCC  
GGAGGTTTCGCGTACGGGTGCACGCACCTGGCGACGGTCCCATCAGGCTGTCGCTCAACAT

CTTCGGCAAGGATTTTCGGGGTTCGTTGTCGGGGAGTACCCGGCACCCGGCCCCGAGGGTTCGA  
CCTCACTGAGATCAACCAGAAGGTTGAACACATGGCCCCGCGAGCTGAACGAGCGCGAGGG  
TTGGGAGAGCTGGCAGCTCCAACGCGGCGCCTCCGACGGGCAGTTCGGATTCGCGGACAA  
CTCCAGGCCGAGCCAGAAATCACACACACGATGGGAACCGAGATCACACAGCCGTTCCGA  
TAGGGGGTAACGAAGACGCTGGAGCACCGATGGATCGACATGAACCGCAAACCTGCACTTC  
AGGTACGGCTACGTTTCAGGCGCGGACGAGAAGGACGCCAGGAGCCACGAGGAGGACTAC  
GAAGGCAAAGAGCACCTGTTCGACGGTCTCCGACCCCCCTCGACGGCGAGAGCGTCAGCAGC  
GCAGTCAAACCCACCGGCCTGCCGGGGTTATTCCAGCAGCCCGGGTGTCTCCGGGACCAAG  
CACAAGCTGAATGTCGACATCGACTACCCGGTGTCTCGCGATCGAGTCATCCACGCCGGGC  
CACAGCCACCTGTGCACCGACAAAAGGAGCTGTCTGGGCCGACACGCTCCGGGGGCTCC  
GGGTGCTGGCCTCGGTTCGGCATCTTCGAGACGGGCTACTTGGACGCCAGCGAGCCGTGCG  
GGTGCACACACCTGCGGGTGGCGTGGCTGAAAAAGAAGCATCGCGCACCTCTCAGGCCGG  
ACGAGACGCACTGATGGCCGTGAAGCTGGCCGCCGGGGTTCGGCTGGTTCGACGAGGGCTA  
GGCAGGTGTACCGGCAGCCCGGCTGTGATCAAGAACCAGACCACCGTGAACGGCTGGGT  
CATGCAAGTGCACGTCGACCTGGGGCCGGACGAGGCCCGCGGCGCTCGGGTGGTTCGATGAT  
CAAGAAGTCCATGGAACCTGAAGGAGATTCGGGAGACGAGATGAACGCGCTGCCCTAGCG  
CCCTGGGGGAAATTCTGGGTGGAGTACGAGAGGTCGGAGTTCGCCATAAGATCATCTCC  
CTGGCCCCGGCGCAAGGGGCTACGGCTCCTCGAGATCGACGTCGCCGTCCGGCGAGCGGCTG  
GCGATCGTAACGGTACCGGCCGACGGCAAGGACATCGTTTTTCGAGAACGGCGAAATCACA  
AGAGCGACATACGAACTGCCGATCTGCGCGTATCGGAGGTGAGAGATTGAGGTCAACGGG  
AAGACGGTCAAGGTGACGACCCACGCGCGACGGCGAATGGCCGAGTTGGGTGTTCGACGAG  
CACGAGGTGCAGTTGGCGGTCAAGTACCCGGAGACCGTTCGACTCGTCCAGCTAATACCCC  
GGCTGCCAGAACTACCGGCGCGGCCGGATCAACATCGGTGCGAAGACCGAGGGCGACGAG  
CTGGTGGGCATCACCGTCGTCTGGCCGAGCCACGTACTTTGGCGAGAGCACATCGAGAAG  
ACCGGCGACGGTCACGGACGAAAGCTGAACCCGTGGCTGAACATCTGATCTGGACCCTGG  
TCCCCGGCCCCGGTGTTCGTCGTCGAGTGGTTCGACCCGAGGAGAGCGCGTGGGTGGGCCTGT  
GCCCGTCGCTCTTCCCCTCGCTGTCTGGCTCGCCGAGACACGGGCCGCCGCACTACGAG  
GCATACTAGACACGGTCTGGGTGCAACTGGGCCACAAATACGAAGGGGGCGCATCATGTCT  
GACAGTCGGATCACCCATGAGGACGTTACGCGGGCACCGTTCGGGCCGACAGTCGGATCA  
ATCTTGGACTTCGCGGAGAACCTGAACGACAGGCCCTCGCGACGACCCGCGTCGACCACGTG  
ACGATGGGCGCACTTGGCGCGTCATACCTGCGCCACCGCCGACCGGCCACCGAGCTGCCG  
CCGTCGTCCGTACCGCCGAGCGTCGACCCAAGGGACGTCCAGAAGCTGCACGTCAGCCTG  
GTCGCCCGCAAGCCGCTCCGGCTGGACCGCGAGAGTCATAACGTCCTCGACGTCTTCACG  
ACCGAGCAGGGCGAAACAAGACAGGGCAGCCTACGAGATCCGAGTACTGGGCGAGCATGGG  
GGCAACGACTTCTGCGTCAACCAGGGATGCTCGCGCTACTGGACCGTGGTGTTCACCGAT  
CCGGTGTCCCTGGAGGTAACGGGCATGGCCGCGCTCGTCGTCGCCGGAGCTACCCACGTG  
GGGACGTACGACAAGGTGCTACCGATCCCCGAATGCCAGCCTGCCGTGAACCCGTCCT  
GTTCCGCGATGAACGGGAACGGCAACGAGATCGTGCTCGACTCCGCCCCGGACCCCGAACG  
TCGACAGCTCCTCTTACCAGGGGGCGTTGCGTCTTCGTCACCCAGCCCGAGCGGTGGGC  
CGTGGTGGGACAACACAACCTGCCGGTGTACCGGCGACACAACACTCACTGCCGCGAGTT  
CTGTAACCTACAAGGACCACCCAGCTAGCTCGCGGAGCATAACCTCGAGGTGAATTGACA  
CGCCCGAGAGCAAGATCCAGGGGATCGTGGCGGCACTGAGTGAGACCGGCATCCCGGCCA  
ACGAGAACGACGTCGAAGAGTTCCTCGAGCACCTCGATGACGAGGGCCTCTCCGTGTCCC  
GGACGGGGGAGTACTCTTGAGCGACTTTATCGAAAGGCTGGACAGTCTCAGGCTGTACCA  
GTGGTACGTGCTGTTTCGTTCTAATGGGGCTAGCGTTAGGCCTCACAGACATGTTTCGTC  
GGCCACGGGGGGCCGAGTACCGCGCCCTGAAGGACGATGCGCCCCGGTGGGCACCCGAATG  
GTCCAACCTGGTTGTTCGCGCTGCTGACCATCGTCATCGTCGCCGTCCGCTGGCCGGTTCGT  
CACCGTCTTACGCTCTACAAGCTGACTGAGAGGGTAATCGTGTGCGGGCGTCAACAAGTA  
CCTGATCTGGTCAACGCCCGGTTCTTGCAGGAGGTCGGGATCACCGACCAGGATCTCGG  
CGGCCGCGTCTTCGGACCCGCCACGACGACAAAATCGATTACTGGCATGTTTCGACGCCGA  
AGGCAATGTGGTTCAGCCTGAAGGGAAGTGAACCGTGAGTAAGCGCCGCAAGCACAGGA  
ATGCGGCTCACGCGGTCTACTCGGTGCCCGAGACGACGTCGTACGTCTTCCATGGCGCCG  
AGCTACAGTTCTCCAGGCGGCATGAGTTCGTGCGAGCGACGCAGCGGTTCAAGCAGGACC  
TTCCGCCGTACAGCCACTCGGGCAGCGTGAGCTGGACCCTTATAACACACACAAGCAGC  
ACCTGCTCACCCGGCGCACATCGAACCAGCGCCGGCAGCTGCGGTACCTGAACCGCGCAT  
ACCGTCTGCGCAGCGACGAGCGGGGCTCGAAGGGCACGCTGCTCGAGGACCAGCCAGGA  
TCTCGATCAATGCGACGCAGGCCCGCAACCCGAAGATCACGCAGCAGCAGGAGGAGATCG

ACCAACTGCGCCGACAGCTCGCTGCCGCGACCGACGGCGACCGACGAAAGAGGGGATTCC  
GATGGGCCCGGAAAGTGAAGCGGGGCGCCAGCCGGACCTCGCGCCCGTACGAGAGCGGA  
CCTGCGCCGCGACCGGCTATGGACGGAGGATCAAGTCGACGAGTCCCTCGCGAAGGTCGA  
CATCCAACTCGCACCGTAGTAGCGGGATGCGATGCTGCGCATCGGGAATCTGCGAACGGT  
CGGGGTCTACAACGGCGAGCAGAACCTGCACCACACCGGCCGTTCCGCCGGGCATCACAC  
GGTGCATCGGGTAACTAAGGAACGGGGCGCTCGCCCTCGGACATGAGACGAAGCCCACCGG  
GAACGGGTTTCGAGGTCGCCTTGGCGTTCGGGGACGGTGTGAAGCTGTGAAGTTGGGCGGG  
TTCACCCCGGTCAAAGGTAACGAGGTCGTCGTCAACTCGGAGCACGTCATCGCCATCCAC  
CGCTACGGCCTGGACCACAGCGTGATCAACCTGATGAACGGGAACGACGTGCAGGGCAAG  
AACCTCAGCCCCATACAGGTCGGCCACCTCCTCGCCGACGGGAGGCTGCTGTGCAACCCC  
GTGTGACGCACGCGAAGCACGCCCGCAGGGGTAACCCAGGCGATGGCAGGTGCAGTACC  
TGGCCCGGGAGTACGTCTACTCGTCATGGAACCTTGGCCATGCGGGCGGGCAACACACTGG  
CCACCCTCGGAGGGCACATCCCGGTCCGAGGCCTGCTCTCGGTTCAACACATTCAATGAG  
TGAGGAAGTGACCATGTCTGATAGAATGAGATTGCGCGGATACGCCGACACGCTCGAGGAGAG  
CTGGAACAATGGCTGGAAATCAATCCAATGGCTGCCGAAGGGGAAGTGGGTCCCGGCGCC  
ATGCGGGTACACCGGCTACGACGCGGGCGATCCCCAGCTACCCGTACGTCATGGCGTGGGT  
CGAGGGCCCTCCCGACGCCGACGTCGGACTGCGGCTCCCGGCCGAGATCGTGGGCCGGGA  
CGTGGACGCGTACGGCCAGAAGACCGGGACGTCGACCAGCGCCGAGGCCAAGAAGCGGCA  
CCGGATGCGGCCCGCCCGGTGCGCTCCACCACGCGGACGGACTCGACATCGGGTATCCG  
TCTGTACCGCATGCCCGCCGACACCCACTGCACACGCAGATCAAGATCCCCGAACTGAC  
GATCGGCATCTTCGAGGTCGTCAGGACCACCACCGGTACAGCGTGTCTGTCGGCCGTCCAT  
TCGCCGCGAGGGGCGGATGTACGAGTGACGGCACGAGAAGGTCACCGTGGTGCCGGTCCG  
TCCGATCGACGAGTTGCCTGAGCTACCGCGCCCGTGGATCGAGGTACTGCTCAAGGAGGC  
CCACTCGGAGATCACCGTGTCCCGCGATCCGTTTCGAGGGCGCTCCGGCAGCTCCTGCAGGG  
GAACATGAGCGAGAAGGTCGGCGAGGCGCTGCGGGCGGAGAAGACCGATCTCTACTGCGA  
GCCGGGGTACGCCACGACGTCGCGAACGTCAACTTCCTGCGGCTACGGCGTATGGCGGA  
GAAAGGGGAGCGGAGCGTCACCTAGGGGCTCGAGTCCCTGCGGTCCCAGTTCGTGCGGAT  
GACGGGGCACCGGAACACCCAGTTCGAGGCCAACGCCGAGGTCAACCGGAAAGTGTACGG  
GCAGCGCGGGCACGACTTGCTCGCCAGCACGGCATCGAAGGAGAACTACTACGCGGTCTT  
CGGCGTGGACGACAACGTCCGGCAGTCCGAGACCCTGGCCAAGCAGAGGGGCGAGGGCCCC  
GCCGGACCCCGACGTCGAGTGGCAGCCGCGCCGTCGATCCGGCCTACGCGGTGCGGGC  
GTTCTGTTCGAGGAGGAGCCGATGACCCGGCAAACGAGTCAACCTGCAGCCGGGGTGT  
GGCCGCCGACGCGTTCCTGTTCCGATGGCAGCGGGGCCGGTTCGCCAGTTCGAGCAGCT  
GACCGGAGCGGCGACCGTCGCGGAGATCGAGTCCGGCGGGCAGGCCACGATGCGGACCAA  
GCTGCTCGCCGTCCCGGGCCTGGCCAACGTGCCGCGCTCGGAGCCGCTCATCGACGGGCT  
CCTCAACCGGGGCACCCTCTCACAGCTCTCCGGCCCGCGGGATCCGGCAAGACGTTTCGT  
CGCGCTCGACATGGCCTGCGCGCTGGCGTCAACCGAACCATTGGAACGGCCAGGACAT  
CCCGTGGAAAGCGCAACGGCAACAGCGGATTTGTCTATACGACCCGGCCGAGGGGGTCTC  
GGGTCTGTACGCCGGATCAAGCCGCGGTGGTCAATTGCAGGGGACGGGCATCGACCCCGG  
CACCTCCAGCACTACGTTTACCCGTAGGCGGTACAACCTCGGTGCGTTCACGCAGATGGA  
GGAGCTGACCGAACTCGCTCGCTCGCTCGACTGCGTGCTACGGAAAGCTGAGCTGCCGGC  
TCTAACAGCGCAGCGTGGACGTATTCCTCGGCCTGCCGTTCCATATCGCGAGCTACGCGC  
TGTTGACCCATTTATTCCCGGACCAGCTCGGACTGAAGGGCGGGCAATTCATCGGGACCG  
GCGGTGACGTCTCTGTGTTCCGACCAAGTCGAGCAGGCGACCGAACAACACTGTCGCGCA  
CGCACACTGGCTATCCGTGGCTGCCACTGAATCACTGCCACTCGATCTTCGAGTACACCG  
CCGACGACTTCATAGTCTCGGCTACCGCGCGCACCCGGTCATCAAGGCCCCCGTGGCCG  
TTTAAAGGAGGTGGGGCTGTGGCCGACAACAGGACAAAAGACCCTGCCGCCACGCCAGAC  
TTGCATTTTCGACTGGACCAACTGGCTCGAGCAGGGCGAGACGATTAGCCCTTGGACCTTC  
GACGTGACCGTCGGAATCGCGTTCGGCTCGACGGCGAAAACGACGACGAATAACGACGGTC  
TGGCTCTCAGGCGGACGCCCGGGCCAGAACTACCGCGTACGAAGCGAGTCATCACATCA  
GCTGGTTCGCACTGACAAACGGTCCATCACTACCCGCGTTCGAGACCGGCAATCTAAGGAG  
CTTCAATGGCTAACAACGACGCGCTCTGGTACCCAAGTATCTCCGTGAACAAGTACAACC  
GGGAGTAGGTACCGGTATCACCAGCAGCCTCGCCCGCGCGCAGACGATGGAGGACTACG  
CCAACATCACGCCGACCACTTCGTACCGTGGAGGGCAATGTCTCGTGTCCGCTGGTC  
TCCAGGGCCTGGCCGATATGATCATCGGCAACGGCAGCGTGACGGCGTTCACCGCAACCA  
AGGACCGCATCGGCGTCCGACACCAGCATCAATGCATTCAGCCCGGCCACAGCGACCTGC  
AGGTCGCGTCCAAGCTGTTACCCCGGAGGCCAGCGCGCCGTCGGCGTCCGCCGGTGTCA

TCTCGGCCTCGGCCCTGACCGGTTCCGCCGACGCCAAGTTCTCCTGGGAGGAGTGGTGCT  
TCGCGACCGGCTTCGGCCCCGACCGTGAAGAATGCCGTTCTGGCGACCGCTGGTGGTGGCT  
CGGCCGTGATGCTGACCCGCACGGTCCAGTCGCTCGGGACGTAGGCCTGCGGGCGCTGACT  
GCACGCTCTCCGGGACGGTCACCCTGTACTGATCCAGAAGCCAAGGGCACCTGACTTGAG  
ACGCCGCTACCAAGTTAGGTGCCTTGATAGTTTCGGCTTACTGACCCGCGCAGGCAGTAGC  
CACAAACAACCGTAAGTAGGGGGGGCCTGCCATGGACCGCAAGGGAAAGCATCGAGCGCAA  
ACCAACTCCAACGCGAAGCGTTTCGTAGCGACAGCAACCGGCGTCGGGGCACTCGTCCTC  
GTCTCCGCTGTCGACGGCACTCCGGCCGCGTCTGGGTACGACTCTTCCGGAGTCGCCAC  
CGCGGGTTGTCCGTCAACCGGAGCATGAACAACAGCAACGGGTTTCGACGGCGGCCTGCAG  
TTCACGCAGTCAACCTGGGACGAGTTCAAGCATGAAGGCGCAGCCTGGCGTGCTGATCTG  
GCCACGATAGCGGATCGGATCGAGGCAGCGGAAGCAACCCTGAAGGTGCAGGGCAGCAGC  
GCGTGGCGCGTGTGTGGGGCGTACCTCGGCCAGGGTGAAGGCACTCCCGGAGTTGGGACC  
GCGCCCGCCGCGCCTTCGTACGTAGAGCCTGCGCTCGTCCCCGCACCCTCCGCATCGTGG  
GTGGAGCCTGTCACTGGCACGAAGTCGCAGGGCTTCCAGGGTGGCCAGAACGGAGTCGAG  
ATCTCTGCCCCGATCGTACCCCCGATCTACGCAGCGGCGTCCGGCTCCATCGACCTCGCT  
GGGTTCAACAACGACCCCCGGCGGCTAGGGCAACTATATCCAGCAGGCCGCGGACTACGGC  
GCGAAGATCCAGTACGGCCACATCTGCTAGATCTACGTTCGGCGCAGGGCAGTACGTCACC  
GCCGGCTCGCTGCTCGCGGGCGGTTCGGCAACCCTGGCGCCTCGACCGGTGCTCACCTGCAT  
CTGCGGATTAGCGCCTAGGTTCCGGAGGCGTACCTGCTCAACCAGGGCTTCGCGCTGGAC  
TGGTCCGGGCCCAGCGGACTGCCCGTATTCCGGACCCGACACCTGTATCCGCCCTGGG  
GAAGAGGTGGCGGTTCGAGCACGTTCCGGTTCATCCTGTCCCCGGCTCCCGAGGGAGTCGAG  
ACGGTGACCGTCGTTCCGGGAGACACGCTTTCGCACAGCGCTGAGGTGTTCCGGGATCGAC  
TCCTGGGAGACCCTCTCGGAACTGAACAAGGATGTGGTTCGAGAACGCCCATGTGATCTAC  
CTCCTCCAGGTAATCCACCCGGCCTGTGATAACGGAAGTCAGCGGCATGGGTAGCCGAAT  
CAAGCTGAACTGCAGGACATCTAGGCCCTGGGCCACTGACTACTGTGAGAGGGGGGGCTG  
GGCACGGCGGTTGAGTAGGAAGCTCGAAGGCCGTCGTGCTCAGCGTTTATTGCGCGGCGG  
GCGATACGACCTGGCCGCCACCCGCCAGACCAAAAGTATTCAGGCATGGCTGACGTA  
GGTGGTCTACATGCCAACTGATGTCTACACCTCGAACAGTACCTGGACCTGCCCGGCTGG  
CGTCCACTCCATAAATGTTTGGATCTGGGGAGGCGGGCGGCTCCGGCGCGGGGTGCAACCTC  
GTTCTCCGACAACGCCGGCGGGCGGATCGGGCGGTGCCTTCGCCTTCAAGACGGTTCGCAGT  
CACCCCCGAAACGTCTACACCGTACACAGACGCCACTGGCGGCACCGGACAGGGCTCAA  
CGCTGGAGTCGGCGGGCGGCATCCTGGCTCGGTTGCACAGGCACCGTCTACGCCCCCGG  
CGGCAACGGCGGATCGAAGGCCAGTCCGGCACGGCCGGTGGGACGGTACCTCTGGCGC  
GATCCGCACCACGGTGTGCTACGGCGGCACAGGGTTCGGCCGCTAACCAGTCCGGCAACCG  
GTCCGGCGCCGGCGGGCGGGCGCAGGCTCGAACGGCTCAGGCGGCCCCGGCGGCCCGCT  
CTCTGGCGGCGCTGACCGTAACGGGTCCGGCGGCCAGTTTGGCGGCAACGGCGGCGCGG  
CGTACCACCGACGCGGACGGAGACCCCGACCGCATCCCCGTTCGGCGGCGGCCCTGGGGG  
TCGACGAGCCAGCAGGAGCTCAATCGGGCGGTAACGACGGTTCGGCGGAGGTCTGGATGAC  
CTACGTAACCGACATCACGATCAACCAGTCCGACGCCTCCGGCACGACGGCGGACGCGGA  
GACCGGCATCGGAAGGCCACCCCGACCGAGACCCTGTGGTTCGCCGAAATCGGCCCCAG  
GGTCTCGCCGTCGGCAACGGCAGATAACGGCGGGCGTTCGGCAACGAATCAGCCATGCCGAC  
AGCGACTGGCAACCAGGCGGACACCGGCTCCGGCACTGATCTGGTTCAGTCCGTTTCAGCGC  
GTTTCATCGAGCCTGCTGACACCGGCCAGGCCGACGATCTGGTCTCGGTTCAGCATCACGAT  
CGCCGGGGACTCCGAGCAGGGCTCGGAGTCGACCAGCTCTACACCAACGCCTCGACGGC  
GAGCGACATCGGCTCCGGCACTGATGCCAGCACGCTGATCGCGCAGGTCACTGCTGCGAC  
GGACACCGTACCCGCTACGCCAACGCACACGCCAGCAACAGCGTGGTTCGACGGCGACAC  
CGGATCTACGGCCGTCGGCACCCGCGACGCTGCGAACGGACTGTGGAGACGCAGCATGCGG  
GTCGGACGCGGGATCCACAACGGCGACCGTACCCAGGGCCATCCCGGATCGGGCGGCTA  
CACGGTACCCGGCATCCGGCAGCCTTCGACGGACACCGCGCACGGGGACGATGCCAGCAC  
AATGCGGTAGAGCCCGGTTCGGCGACACCGGCATCGGCACCGACCCCTGCGCAGATCCTCGT  
CACCGTCTACGGGAGAGACACCGGCAGCGGGGACAGCCTCGCCAGCGTCCGGCTGTTCTC  
GCCCCGACGACGCCGCGACCGGTTTCGAACGAGAACTCGTAAAAGGCCGTCCTCGGCATCCT  
CGACGCGCCCCGCCTGCTACCATCCCTCCGGACAAGCGGACGGTGAACATCGAGCGTGA  
GCGGCAAAGTTCGAGTCGTGGACAGGGAAGTCCGGCTCGTTCATCCTTGTCAAAGATCTGGC  
GCCGCGCACGACCATGCCGCGCAGCAACGGCTTTTCGCTCGGGCGTCCAGCCAGGGAGAAG  
CACGTCCATCGTGAAGCGAAAGTAGTAACCAGTGTCCGACGAGATGACCGTTCGAGCAGAG  
CGCCCTCGTCCGCGAGGTCCAGTCGGGGCGACATGCGTTCGGGCGCTGACCGGGATCCGTGA

CTACGTGGTCCAGGAGCCGGACGGCAACCGGAGCCCGAAGTGCGCCATTTCCCAGCTCAA  
GAACGGGGACACGGCCTCTCTCGTCTTGGCGCGGCAGAAGATCCTCGAAGAGATGGCACC  
CCTACCGCAAGGGAAGAAGCCCGGCGAGGACGACGCACCGAAGATTGGCATCGGCCAGAT  
CCGCGCCCTTCGCGCCGTTCGGCCACGACGAACCCATGGGCGGCAAGGAATCCGCCCGCAC  
TCAAGGGGGTACACGTTCGGAGAAGCTAAGGAGGTGACCAGTGGCAGTCCGTCTGGGCGAA  
TAGAATCCACGGATCCTTACGAGCCGACATCCGGGGGTTCGGTTCAGCTCGGGCGGGCCGC  
GAATCATTTCGAGCTCGCCGCGAGCCTGGCCTGACCCTCTATCCCTGGCAGCAGAACGTG  
CTGCACGGCGCTCTCGCCAAGCGCTATGACACCGTCTACAACCCATAACACGGATCAGCTC  
GATTACAAATGGGCCGCACTCGAAGTTCGGCCTGATGATCTCCCCCAGAACGGTAAAGGC  
TCTCTCCTGGAGCCCAGCGAGCTGGCGGGCCTGTTCTCTTCGGCATGCGCCAGATCATC  
CAGGCGACGCACCAAGTTCGATACCTCCAAGGAGGCCCTCGAGCGAATCCTCTTCTGATC  
GAGAACAACCAGGACTTCGAGCAAGAGGTTCATGAGGGTCAACTGGTTCACACGGTGAAGAG  
GGCATCATGATGAAGAAGCCGAAGGGGTCCAACCTTTCACCGCAACGACTCCGGTTCCTGT  
ACAGGGACCAAGGGCGGCGGCCGCGGCTTCTCGGGTTCGACACCCTGGTCTTCGACGAGGCC  
ATGATCCTTCGACGCCGACATGGTCAACGCGCTGATGCCTACGCTGACGGCCCGACCGAAT  
TTGCAGATCTGGTACACCGGCTTCGGCCGGTACCCGGAAGTCCACGCAAGTTCGGCCGCGTC  
CTACCCCGCGCCATCGCTGGCGGGCAGCCGCTGCTCGGGTACGGCGAATGGTCCGCGGAT  
CTTTCACCCCGCTCTACCCGTGCAACTGCGACGAGCAGCAGACAAGCCCAGGCGACCCACGT  
ACGTGGGCGAGGGCGAACGCCGCTTTCGGGATCCGCATCCAGGAGGAGGGCATCGCGGCG  
ACCTTCCGCTCAATGGACCTCGACTCGTTCGCGATGGAGCACCACGCCGTCCGCGACTGG  
CCCACCGAGGGGCAACGCCGATCGTGGTTCGCGGAGCAGTACGGCAAGAGCCGCTTCGAC  
GCCAATTCGCAGCTCGGCAACGACTTCGTCTTCGGGGTTCGACTTCGCGCCGGACCCGACG  
AAGGCGTCGATCCTGGCCGCGGGTCCGAACCAGCATGGCGTCATCCATCTGGGGATCGCC  
GGCAACGAGGACATCGGCTTCGACCACCGGTTTCGGCGTCTGTGCGTGCTCAGGCGGGTC  
ATGCACATCTGGCGTATCCAGCGCCCGAAGGCGGTAACGATCGACCCCGCCAGCCAGGCC  
GGTGGGCTGATCGAGCCGCTGCAGGACGCGCAGGTCAACGTCATCACCCCGACCTCGCGC  
GAGTACGGCGTCGCCTGCGGTGAGTTCGCTCCGGCATCGTGCCGCGCAAGGGTAAGAAG  
GGCTACGTCACGAACATAAGCCAGGACGCCCTTACCGCGTCAATCGAGGTCTCCGACACG  
CGGACCGCCGGTGACCTGTAGATGTGGAGCAAGTCGCTCTCGACGGCCACATCACCCCA  
ACCGTCGAGGCCACGCTCGCAGCCTGCGGGCTGGAAGAACATGGGCTATACGAAATCCGAA  
ACCGTCGCTACACCATGGGTAATCAGACGATGAGAGGCAGGACTGAATGAGGCGTGTCGA  
TCTACAGGTTCGTGATCCCGGTTCGCGATTGCGCTGGGCGTCACGGGCCCAGGTTCCGATCTT  
CGGAGTCTGGACCCTGACGTCTGAGCGGCAGCGATTCCCGTTCGCGGAGTTCTTCGTGGA  
GGGCACTGACTGATGGCAAACGGTGGTACCATCTACGCGGCCTAGGTCACCCGATCAAG  
CAGCCGTTGGGACTCGACGAACTCGCGCAGTGGTACCGGCAGGACAACCAGCCCCGTTG  
GCACAGCGTCAGGGGTACAGCAACACCGAGGCGATCGCCAAGTACTTCGCCGGCTACGTG  
CTTGGCGCGTACAAGGCCAACGGCGCTGTCTTCGCGGTAGCGCTGGCCCGGATGTTGGTC  
TTCACCGAAGTGCCTTCTCGTGCCAGCGGTCCACCGAGGACGGACGACACGGCGACCTG  
TACCGGTGGCCGAGCCTGAGGATCCTCGACAAGCCCTGGCCGAACCTTTCGACCGGGCGAC  
CTGCTGGCCCGAGCGATACAGGACACCGACCTGGCGGGCAATCACTACGTCGTCCGCGAG  
GGGAGTAGCCCGAACCCGCGCCTGCGCCGCCAGGGGCCCCGACTGGGTGAGCATCATCCCC  
ACCTCGCCCGCCGACAATGCAGTGCAGTCCGACGTCGTTCGGGTACATGTACAAGCCCCGA  
GGCAGCGAGAACAAGGAACTCTGGAAGCGGTAGCCGGTTCGATGGAACGAACGGTGGCCTC  
GCGCAATGGACCCCGATCCCCGACCCGGAGGCGGCCTACCGTGGAAATGAGCTGGCTGACA  
CCGGTTCTCCACGAGATCATGCACGACAACGCGGCGACGAAGGAGAAGCTGAAGTTCTTC  
GAGAACGCGGCCACGCCGAACCTCGCGGAGTCGTTCAAGTAGACGGTGACGGCTGAGCAG  
TTCAACGAGTTCATGACGCAGCTCAACGACAGCCACGGCGTTCGGTTACAACGCCTACAAG  
ACGCTGTACCTCGGCGGGCGGCTCGGACGTGCGCGTGATCGGCTCCAAGATGAAGGAGAGC  
AACTTCAAGTTGACGCAGGGTCTGTCCGAGTCGCACATCGCTGCGGCCGGACTTAACCAC  
CCCGTACGCGTAGGTCTTTCCGAAGGGCGGCAAGGTACCTCGCTGAACGTGGGCAACTAC  
AAGGCGGCGCGCAACAACCTTCGCCTACGCGACGATGCGGCCCTCTGGCGCTCGCTGTGT  
GCAGCGTTCTCGGTGCTGGTCGAGGAGTTCGACGACACGCCACTCTAGTACGAAGCGGGC  
GACGTCGAGTTCCTCTGACAGGACCTGAAAGATTTGGCCGAGATCTCCGCGCAGAACGCG  
TCCACGATCTAGAAGCTCGCCATCCAGGGCTACCCGCCGGTTCGATCTCCGAGGGCGATC  
GTCAAGGAAGACCTCCAGATGCTGAAGCACATCGGCCTCTACTCCGTCCAGCTCCAGCCC  
CCCGGAACCTGCGGCAAGGGCGCACTGACCCGACAGACGCTAGCTACGCAGACGTACGAC  
GTCGAGAAGGTCTGAATCATGTCAAAAACGACCCGGAAGCAAGTTGACGATGTCCCGAAC

CCGAAACAGCCAACAGTCAGTCAGGACAAGGCCAAGTGACCGCGCTCCCAAGGGAAGGAG  
TGATCGAGAGTCGTTCTGTGTACTCGCTCGGTGGAGTTCCGAGTCAACAAGGCCGCTGGA  
GACGGCGACGGCCGGACCCTCGAAGAGAACGCGGCAGTCTTCAACCAGGACACCAAGATA  
AACTCGTGGGAAGGCCGCTTACC GAACGAATCGCCAATGGCCCGTTCAAGAAGACCCTC  
CGTAGCGCAAGCCGAACATGCAGTACGACCATGGCCGGGACTACCGCGTCGGGGCGGTG  
CCGATCGGCGTGTACGAGGACATCCGGTAAGACGAGCACGGCCCGTTCGTGTCTGCCC  
GTGTTTCGACAACCCCGTCGTCTAACCGATCCGGCAAGCGATCGAGGGCGGTGCCGTACC  
GGCATGTCGATCAAGTTCCGCGTAACCTGAGACGAGTGGACGGACATGAACGGCAAGCGA  
GTTTCGCGGCACGGGATCAGCAAGCTGCTCTGGGAGCCGGGGCACCGGGGTCCGCTGGCG  
CGCACGTTCCGGGAGGTCTCGCTCTTCGAGGCTGGCCCCGGGTGACTCCAGCGTAAGCA  
GGAACCTCCTTCGGCGTCCGGATAACCAAGCAGGATCGCGAGGCTCTCGCCGCCGAGTAT  
CGGCGAACCATGGCCGGGACGGAGGCCGATCAAGACGTCGTTTCGATGGGTTCGAGGCTGAG  
GCGCATCACGAGAACGATTTTCGGACATCACTCCACGCGGAAACCGAGTACCATAGGGCT  
GTATCCGTCGGGCTCGCAGGGCAATTCGAATACAATAATTCGATCGGGAGCGACGGCGCC  
CGGACGGGCACCTCGCCTCCATCGAGACGCCCCGAAGCGGACGCCGCTCGCAGCCGGGGC  
ACCTCCAATCCGGAAGACACCAACACCCCCACCCTCAAAAGTTGCATTCTCATGACCCTC  
GAAGAACTGCGGGCACGTCCGGGCGAGATCGACATCCGCTCTGCGACATCGGTGCCGAA  
TACCGCGTCGCCGAACCTCGCCGAAGCCGACCAGGCCAGTGGGACGGCCTGGACGGCGAG  
CACGCCAAGGTCGCGAGCTCGTTCGAGCGCATCGAAGCCCGCATCAAGCGAATTGGTCCG  
CTGGCCACACCGGCAGCACCGAGCGCGCCACCCACCCCGGCACGCCGGGGTTCACGCC  
CGCCTCGACATTCTCGACACCGACGCCATCCGCTCCAGGCTCGCAGCGAAGGGGACTGC  
GTCGAGCGCTCCAGGACCACGCCACCGGGCCACGGAGATGATGCACTTCTCGCCGGAG  
CTCTCGCGCGACGCCGCCAGGTGCGCATCGAGCGCCTGCTCGTCAACCTCGACTCGAAG  
GGTGACCTCGCCAAGCGGATGCTGGTCACCGGCCCGCGACGTACTAGCGCGCGTTCGGC  
AAGGCTGCTCTTTGGCTGAGCCTGCAGGATCTGACGGCCGAGGAGGCCCGCGCCCTCGCA  
CTCGGTGCCGACGTCACGTCTGGCAGCATCGGTGTCTTCACGGTCCCCGCTCATCTCGAC  
GCGACGATGATCCACACCAGCGCGATCGACATCAACCCGCTGCGTGGCCTGGCGCGTGTG  
GTCCTGATACCGGCAAGGAGTGGCAGGGCGTCACCTACGCGAACGGCATCGTTGTATCG  
CGTGGCACTGAGGCCTCCGCGACCGACGTCTCCAGCCCGACCCTCCAGAGACCCAGGTC  
CGTGCCGACCGGGTCTCCGACTACGTTCCGGTTCGGATCGAGATCGAGCATGACTGGTCG  
GCGCTTCGTGAGCAGGTACCCCTGATGCGCGGAGAGGCCGAAGAACGCGGAGAAGGCGGGT  
TCGTTCTGCCCGGCGACGGCCTGGGCGTCAACCCCGCAGGGCCTGCTCACGGGCGTCTGT  
TCCGGTACGACGTCGCTGGCAGCATCTTGCCCTGCCCTACCTCCGGTGACATCTAAGCC  
TTGGAGTTGGCGCTGCCGAACCGCTACCTCGCGAGCGCTCGCTTCCAGGGCCCGAAGGCG  
AACTACAACCGCGTCCGGCAGATCGACACGGCCGGTGGAGCGGACCTGTGGGAGCGGCTC  
GGTGCCGGGGAGCCACGAAGCTCATATGTTACCCGCTGCATGAGTCGTGCAAGACGGAA  
GGTACCCGAAGACGGCCGCCGCAATCGCGTCTGGTTCGTTGGCGACTGCCGCATCTTC  
CTCATCGTCGATCGCATCGGCATGAGCATCGAGCTGGTCCCACACGTCTTCGCGAACTCG  
GGGGGCGCTATCGTGTGACCGGCAAGCGCGGCCTCTTCGCCGTGTGGCGCGCCAACCTCC  
CAGGTTCTAGTGCCGGACGCCTCCCGGGCCCTCAAGACGAAGGCATCCTGATCCACTGAC  
TCCCAAGAAGGGACGAAGCTCTGTCAAAGGTGTTGCGGCCATTAGCCGTGAGTAGGGCG  
GCAGCAATGGCACTCGGTGATCCATACATACCAAGGACGAGCTGAGCGACTACATGCAG  
ATCCAGTCGGGCGTGATCCAGTTCGACCAGATGCTGACTGACGCCTGCGCCGCCGACTCT  
CGTAGGTCGAGCAGCACTGCGGCGGTCTGTTCAACAAGTAGGACACGGCCACCCCCCCC  
ATCTTCAGATCGAGCGGCGGCGCAAGGTCACGGTTGACGACTTCCACACCTGCGCAGGC  
CTCGTAATCGAACAGGGTGACGGGCTGGGCAACTAGGAGCCGGTCGATAACCGCGTGCTGC  
TTTCTGGCCCCGTACGACGCGATCGTGGACGGCCTGCCGTGGGCTCGTACCGGCTCGAG  
TTCCCCGGCTGCGGCCGGGGTCCCTCGGATCGGTATCAGGCCCGGTTCCCTCCGCGTTTCC  
CCGCAGTGGGGCTGACCGACCGTTCGCCGCGACGGTCAAGCAGTCCACGTTGCAGATCGCC  
GAGCAGACGAACCGCCTCGCCGAGGTGCGCCTCGGGGTGACCGGCAACACGCAGTACTCC  
GGCGTCGTCCGTGTGGAGGATCTGCCGTTTCGTAGCGACGAAGCTCTGCCGTTGGTAATC  
ATTCCGATCCTGGTAGGGTGACATGACGACGCTCAGTGAGATCCGTGTGCGGCTCGTGAA  
GACGATCAAGGCGGGCGTCGACAAGCAGCAGCACGCGTACGAGACGGTCGAGGAGATCGT  
CAACGTACCGTGCATCATGATCGAGCCGTTAAACGCCGACTTCGAGGGTGGGTTGCACGC  
CGGGCGGCACACCTTGGAGCTCTACGTTTTTCGTGGTTCGCTTCTCGTGCAGCAGGTTCCGC  
GAAGCGCCAGAAGCGGGTCGGGCAGATGGTCTCCGGAACCGGCCCGAACAGCGTGGCTCC  
GATACTGAACGAGAACCACCCGCTCGGGCTGAACGGCGTTCGTGGCCAGTGCTACGGCAT

GAAGGGCTACGGCGGCTCGTACGACTGGGCCAAGGTCGCGCACGTCGGCGTAATCCTGCA  
GGTCCGTGTAACAGTCAATCCACACGCATTAGGAGCTGGCGGCAGCATGGCCGCTCTCAC  
AACCAAGGTTCTGTCCGAGGATGGGAACGCGCCTACCCTCGCTACTCCCATCGCCTCGGA  
TAGCTCACAGGTCAGCAACGGCCACACCACATTCTGTACGTCAGCGACACCGGGGGCTA  
GCCTGCTAGTGCAAGGATAACCTCGCCGGGCACGACGAGCTACGGCGTCGCCCTCCCGGA  
CAAGACGGTCTCCGTCCCCGGCGGGCGAGGCTAAGTACATAACCGCTCCGGCGCGAATACGC  
CGACGAGTCCGGCCAGGAGACGATCGCGGTTACCGGCACCCTCGCGTACCTGGAGGTCGC  
CGCCATCCGGGTGCGCTGATGGGCAGCGCGAACTTCCACAGTCTGCGCGGAGAGCAGGCC  
CAGGAGACAGCACCCACGCCAGCGAGACCGGCTTCTACCGGGTCTGGGGAAGAGCGCC  
CTCCTCGTCTGTAAGCCAGGCAAGGTCGTCCGGCTGTCGGTTCGAGCACGCAGCGCGGCTG  
CAGGCCTCCGGCAACTTAGAAGAGCTCAACCAGCGGAGCAATACCGCTGAAGAGCCGGGC  
CACGAGAGACCAGACAACATAAAGCAGTAAGGGTGATGGCAAATATCGTTCTCCGGGAAG  
TCTTCATTGAGGTCGATGGGGTGGACTTCTCGGATCACGTTTCGTCCGTGGCGTTTTTCGC  
TCAAGAATGCGGGCGTTCGACACCACGACCTTCAGCGGGCGGGGGCAAGGAGCAGGTCGACG  
GTCTGAAGGATGACGAGTTCACCGTGAACCTCCAGCAGGACTTCGACGCGGCCTCGGTTCG  
ACGCGAAGCTCTACCCGCTGTCCGGCCTGGAAGACGAGTTCGTCGGTAAGCATCGCACCC  
GCGCCGGAGCGGCCTCGGCTACCAACCCCGAGTACAGCGCGACCTGCGTCTGCTCGAGT  
ACCAGCCCCTCGCAGGCAAGGTCGGCGGCCTCTCCGAGACCACGGTGAAGTTCCCGACCC  
AGCGCAGCGGCATCTCGCTCTGGGTTCATCTGCCCGGCTAACGCCCATGGCGATCGAACG  
GTACCGGCTCACCTCTCGATCGATGTCATCGGCAGGACTCCCGTTCGCGAGGTTCCAGTA  
GGCGCTCACATCGGCGAACCGGCAGCTCCCGCGCGAGTTCAGATCAGCGTGAACGAGGT  
CGCACGCGGGCTGCGCGACGAGGCTCGGTATCAGGCTCTCCAGAAGTTCACGTCGAAGAA  
TTGCCACACCGGGCTTCGTGCAAGGTCGCCGCTGGCGTGCAGATCATCCAGCTCGAGAA  
CGGCGTCAAGGTGATCACCTCGATGCCTTAATCCGACGAGGCGATCAGCCCCCGCGGACT  
CGAGCGCTTGAAGGGTGGCGGCACCCCTGTTCCGCAACAAGGAACTGTAGGTGCGGCA  
GCGTCAAGGCTCCGACTCCTGGTTCCTCGAGACCATGCGGAAGGGCCAAGCGCCGCTGCG  
TAACAGCCTGGTACGCAACATCAACGATACGATCGAGAAGAACGACCACGAAAACCAAAT  
CGGCTGACGCCAAGACCAAAGCTGGGGCCAGGTGTTTTCTGTGCGGGTCTGCCTGGCCAC  
AGCTCCCCTTTCCCGCTGACTAGCTAAATCCACTGCACGACACACGAAATGGAACCGCGA  
CATCATGGCACTTCTCTCGAAGAAGGTCATCTCTTCGTTCGACGACCTCAAGACCGTCCG  
CGTCTCCGTCCCCGAGTGCGGTGGCGAGGTTCTGGTCCACACACTGTCTGGCCGTGAGCG  
GGCTGAGTTCGAGGCATCGACCCTCAAGACGAACAATGGCAAGCAGGAGCAGAAGTTCGCA  
GAATTTCCGCGCCCGCTTCGTGCGCCTGTGCGTTCGTGGGCGAGAAGGGTGAGCGCCTTTT  
CGCCGCTCGCGCTGAGGTTTCGATGCTCGGCAACAAGTACGTCGCCGCCCTGCTGCGCGT  
CTTCAACGAGGCGCAGAAGCTGAACGGCATGACCGACGCTGACGTCGAGGAGCTGACCGA  
ATCTTTTCGAGCAATATCCCGACGAGGTTTCTACTTCTGCCAGGCCGAGACGCTCGGGATG  
ACCATCGAGCAGATGCTGGCGGTAGTCTCCAGTACGGAGCTGGGGGGGTAGGAGGCGTAG  
GAACGCGCCTTCGGACCGATCGGGAAGAGCTGCGGAGAGCAGGCACTCGCCAGCTTCTCC  
GTCAAGCACGCGATCCTGCTCCGTCTGTACGGCGAGCAGATCGAGCACAACCCCTCCCA  
GTGCCTAGCAAGTACCCCCCCCCGTCGGAGTGCTACAGGCCTGAGGCCGCGGAGGACTCG  
GTAGATCAGGCCGAGTTCGACAGCAAGTTCGAGACTGACTGATCACCAAAGGCCCGTGC  
GTCGGTTGCCATTCCGGCAGCAGGACGGCGCGCTTCGTTTGTACCAGGCAGTAGGTTT  
CGCATGGCAACGATCACCTCGCTCAACTTCGCGATCAGGAGTAGTAGGGACGTGACTGCG  
CTGAACAAGGCACGTGACGACCTAATGGCTCTGCAGGCTCAGATGCGGACTATCTCGGGT  
GGCTCGCTGCACTTCACGGTCGACTCCGACACCGAAGAGGAGAAAGCCAAGATTCCGGAG  
CTGCTCGCACAGGCGCGGGACATCCAGATGGGCACCGACCTAAACGACGGCCAACCCGCT  
ACGGCGGAGGCCAAACTCGACATCCTGGCTCCCGATCGAGAAGTCGACGTGAGGGTGAAC  
GACTATGACATCGCGAACAAGATGGACCGGATCTCGGACTCCTTCGAGAACGCGTCAGTC  
AGTGCGGCGGATTTCCGGCAACTTGATGAACCGTGCGGGCTTCATGCCCAAGGTAGGCATC  
GCGGCGTTCGCCGCGGGCGTTCGTTCTTCCCGGACTGATCAACCTCGTCCGTGTCATCG  
CTGACCGGCGCGATGGGTGGCGGCATCATCGCTGTCGGCGCGCCGCTCTCAAGGAGCAC  
TAGGAGATAAAGGCGGGCTGGGAGGTCCTGTGGACCTCGACGAAGCCCACAGCCAGTCT  
GCAGCCCAGTCGAGGCTCCAGCCATTCCTGCACACCATGTCGATGGCCAAGACGAGGATC  
GCGGAACCTCAAGACGGAGCTGACAGACCTTTCGCGAGTGGAGCCCCCGGATCCTGCC  
CACACGTCCGGCCGGATGGATCTCCCCACAAACGCGATGCCCGCCGTCCGGCAGGCGCTC  
GAGCAGTCCAGCCCGATGGTCCAAGGGTTCGCCGATGGCCTCAGTTCGCTCGGCAGACAC  
GTCCTGAACAAGTTCGACGGGATGGGAGACGGCGCAGCGGGATTCCGGTCGACTTTGGAAG

ATCACGTTTGATCAGGTCGGCCTACTCATGGAGCAGTTCGGCGTCGCTGCCGGGATGATG  
TCCGCGACGGGCACCGTCGACTGGGATCGACTGCTGACCGGCTTCTACCAGTTCATCGGC  
GGCTTCTCGACGGCCTCGTCGACTTACCGACGCCGTCGACAAGGGGGTTCGGTGACCCG  
CTCTCGGTCTTCGGACTGCTCGGCCTCGTCTTGC GCGGCACGCTCGGACCGCTGGGCGAG  
CTGGTGGCCGCTATTTGGAACGCCCTCATGCGCGTCTCGACGGCACCGTGCAGGCGCTC  
AGCCCCGTATCGGGCGACTGCTGTCCGGCCTACTACGGAGATCGACTCGCTCTTCCCG  
CTACCAATGCGCTGCAGCCCTTGCTTGTTCATGGTTCGGCCAGTCTCTGCCACAGGCGATA  
AAACAGCTCGCACCGCTCCTGCCCCAGATCGTGGACGCGCTCGTCTCCGCACTCAGCCCC  
GCGTTCAGGGCCCTCATTCCCGCACCGGTTCCGGTTGTCTAGCAGATCACAGTATGCCTG  
AAGCCGCTGCTGGAAATGCTGCCCGGCGTGATCAACACGCTCAGCCCCGATCGTCTCGGT  
CTGGCAATCGCGTTCGGTAAGATCACGCAGTGGCTGTCCCCGCTGTTCCCGCACCTCAGG  
CAGATGTACGTCTCGTGGAAAGCTGATCTCGACGGCTATAGCTATAGGGCGCGGCATCAAG  
ATCGCGTACACGGCAGTCCGCAAGGCCCTCACGGTAGCGACCATCGCTCACACGGCGGCC  
GTCTGGGGGAACAACACCGCGATGAGCGCCAACCCGATCGGCTTGATTCTCATCGGCATC  
GGGCCTCTGGTGGCAGCGATCGTATGGCACGCGACAAAGACTCAGTTCCTCCAGACCGTC  
TGGGTGGCACTGAAGGTGTGCTGGCGGCTGTGTGCAAATGGATGAAGGATGCGTGGGAT  
GCCACGGTCCGATTCTGGCCCTGCGGTTGGAGCAGTTCCTCCGGCACGCTCGTCAACGCG  
TGGACCGCCACGTGGAAGGTGAGCAAGGTAGCGGCACAGGCTGTCTGGGGATTCTTACC  
AACCCCTGGAGCCAGTTCCTCACGGTCCCCAAGGTCACCTGGGAGGTCGTTTGCGGCGTC  
ATCAAGGCGGCCTGGGACGTCTGGTGGTTCTACATCCGAGCTAGTGTGCCATCATCTTG  
GCGTGGCTCGAAGTCGCCTGTGGTGCCCTGTGGTACACTGTCCGGCGAGTCTGGGATAGC  
TTCGTAACGATCTTCCAACCGCTGTGGGATGGTCGCTCGATGGGCGTCACGGTCTTCGTC  
GAGGGCGTCTGGGGTGAATCCAGATCGTCTGGGACCGATTGTGGAAGGCCGTGACGTCA  
GAATGGAACGACTTCATCGGCTGGCTGCGTCCGATATTGGAGTCTTTCATGGACACCGTG  
GAGCAGGTCGGTGAATCTATCTGCACCGCCGTCCAGATCGCCAGGGAGTTCCTGTGGCAT  
CAGGTCAAGCAGAAGTAGGACTGGTGGGTCAACCTGTTCGACGCCGTCCGGGACGCCCTTC  
TGTATCGGGATCACGGCTGCAGCCGAGACCGTCTGGACCGGAATCACTTCCGCGTGGAAC  
GTCTTCTGGAACGGCATCAAGGCGATGTGGGAGAACTTTTACAACGCCCTCCGCGCCGGC  
TGGGAAGCCTTCTGGAACCTGGCGGGGTGACGTGCGATGTGGCGTCTGAGATGCGATCACC  
AGGCAGTGGGGCGAGTTC AAGCAGAATTTGGAAGAAGTCTTCAGCACGAGGGTTCGACAAG  
GCCCCGAGATCTGGGATAAGATCCGAGAAGTCGTCGCGAAGCCGATCAACTTCGTCATC  
CGCATCTGGAACGTCCACGTCGCCGGTAAGTTCGGCCTCCCGGCACTGGTTCGAGATGGGC  
GGGTTTCGCTACCGGTTGTGCGGTCTACGGCCAGGGCACGGGAACGTCCGACGACATCCGC  
GCCCCGCTCTCGCCCCGGTGAGCACGTCTGCGCCGCAAAGGAAGTCGGTGCCACTGGCGAA  
CACGGCAACTTCCAGGCCATGCGTCGTAACACGCTCTACGGTGTGCGGCACTACGACTCC  
GGCGGTCCGGCCGAGTGGAGGATCGGCCAGCAGCAGAAGTGC GCGCCTGCCCTGCAGGTC  
ACTTCGGCTCAGCTGGACTCGAACGACTACCACGCACAGGGCAATACGGTGGACTTCTCG  
ACCGGCGGGCAGCCCGTCCATCGGAAATGATGGCCTTCGCGAACTGGAGCGTGGACACC  
TGGGGTGCTAACATACTCGAGCTGATCGACAGCCCCTTCGGACGGCACATCAAGGACGGT  
AACAGCGTCGGCGACGGCATGGGGTTATACGGGGCAGGCACGATGGCCCAGCACAGGAAT  
CATGTCAACTGGACAGTCGACCGCCCCCTTAACGAGGAAGAGGGCGACCGGAGCCCGCTG  
GGCAAGATCTGGGGCGGCGTTCGGCAAGGGGATTA ACTGGCCCTTAGATGAGCTGACCAAC  
CCGATCCTCGGAGGCAGGCCGGATCCGTTCTTCTGTTGTCGGCTCGCCGTTCCGCCGA  
TTCTCGAAGGCAGCGGCAACAAAAGTCCGAGACGAGTTCCTCGACAAGGCGCGCTGCGCT  
GAGGTTGCATCCGGCGGCACTGACAGTGGAGACATAGGAGGCTTCATCCCCGACGGGGAC  
CGGCTCGGTCTGTTAAACGAGGCCGTGCGGATCACGAACACCCAGCCAGCCTTATCGATC  
GAATCCTCGCAGGGCGGGCGCAACACGCAGATCACGCGGAGTTCGGGCTGGAACGCGGTC  
GCGTTCAACAACAGGTACGCGAACGCTGCGGGCGGGCGACGCCGCTCGCGGTCTGGCCCAG  
GTGATCCCGACGACGTTTCGAGGCTCACTCGGCGCTGGGCCACACCAACATCGACTCGCTG  
GTCGACAACGTCGCGCCCCAGATCAAGTACATCAAGTCGCGCTACGGCACCATCGTGAAC  
GTACAGCAGGCGAAAGGCAACATGGCCCCTCATGGCTACCGCACGGGTACCTTCTGGTCT  
GTGGCAGGTTGGCACCTCGTCGGCGAAGACGGATCCGAGATGGTGA ACTTCCGTGGCGGC  
GAGCAGGTTAAGACGTTTCGACGACATCATCCGCGCCCTGAAGGACTCCAAGTCTGGACAG  
AGCAAGGAGCTGGAGTCGACGCTGACGGCTGAGATTAGCACAGGGTTGGAGAAGACCGGG  
ACCGAGATCAACACCTCCGGAGCGCGGTCCGCGCAGTCTGTGCGAGCAGGATATGGAGCGA  
GTGCTCGCCACGGTGGGTATCCAGCTCAACCTTTCGATGCCGGTACCGCAGAACGGTGCA  
GACGCAGCTGCGTAAGCGCCGGAACCTGTGAATCTGCTTCTCCCGCAACTGGAGATAATG



ATCCGGCTGCATATCGGCACACGGTAACCACAAGGGGCGGGCTGGGGTTCACACTACGAATC  
TGGGTACGCCCCCTTCACGCGTAGGGAGACCCAACGGCTCTGTTCAACTTTCAGCGGAGC  
GGCGACGGGTTGAACGACTGATGGAAGAACATCGGCGGCGTCAGCGCCCTCCGGCAGGCG  
GTCACCAATCTCAGCGATGCGAAGTGCTTTCAGTGCCCTGCCGTCTAAGGCAGTCGCAGCC  
GTCTCCTTCCACGTCCACACCACGCGTTCGACTGCGCGGTCATACCCCTGTGACT  
GTGAAGATGGGGGTCGGCCACGACGCTGGCGCTGCACCGTCCGTCAGGGCCCCGTCGATC  
ACGGTCGCGGTCGTCGCCAGGATAACATCTCGCGCTCCCTGACGCGCACCATCTACCCG  
ACGAGCACCCCCACCATCCACGAGATCGCCACCTACCAGCGTGTGCGCTCGGCCTGGGG  
TGGGATGTACAGCGGCTCAACAACCTTCTGTGCCGGATCTTCTCGTACGTTGGCAACTTG  
GACCGTACCCGCTGCCACCGGCTCTGGTATCGGATCAAGTACCGGCTGCGGGCCGACCGTG  
GCGATCACCGCCCCGTCGGGCACCGTGACCACGCCGTCGCCGATCATCACGTGGACATAC  
ACGCCGACTCACGGCGATGCGCAGAAGACAGTGGAGTACAAGCTGTTACGTCCGAGCAG  
GAGGCCAAGGTGTAGTTCAACCCGGACACCGCGCCGCTGTCTTCCAGGACACGCTGCAG  
GGTACCTGACGAGCGTGCCGCTGCCGACGTCGAACAACCTCGAACAACACTACTGGGTCTAT  
ATGCGGGTACGTCGTCGTTCCGGCGCGGCTCGGTGTGGATCGGCCGTCAGTTCACGTTG  
TGCGGCCCGTCGACCGCGATCACCGGTGTCGACGACCCGACGTACGCACTCGGCTGTGCA  
GTGATCACGGTGGTGCCGGACAGCGAGTCGGGCAGCGCGTCGCTCCACATGCGGAACACC  
TCGAACAAGCTCAGCGCGCAGGAGGCGGACGCGGAGTTGCCGGCCGACGGCCACACGATC  
TCCGCCACCAACGCAACGATCACCCGCAAGTCCGGTGTCTCCTTCCCTGGGCGCACGCC  
TCGTGGAAGGTGACGGCGACAGCCGGGGAGCGGCACAGGTCACGACGGACTTCATCGCG  
ATCGAGGTGTCGCTGCCGTTGACCTCGCGCGCACAGTTCGGGGCGGCGGTCACCGGGCGC  
AACTGCCGGGTGGTGCAGCCGGTCTACGTGACGCTCTCCGCCGAGATCGCGGGATCCGCC  
CTGAACGGCAAATCGGTGACCGACTCATCGAGCACCTGGACCCAGGGCTCGGTGTACGGC  
AACGCTCCGGCGAACGGGGTCTAGACGCGGGTAACCTTCGAGATTCTGTTAGCTTCGGCC  
AGCGAGGTGCCCAACCGGGACCACCTGGGCGTCAGCTACGGCCTGAACACACCGTGGTCC  
GACGCCAGCAACGCCAGCCGCAACCTGCCCTCGGCGTACGTCTCGACTGCACAGGGGCAG  
TAGATCGGCGGCGAGTTCTGGACGCCGACTCGGCCTCGACGGCGGTCCCCGCGGCAGCC  
AACGGCACCGGGGCATCTGGTTCGAACTGCTTCAAGATGACGAACAACGGCCTGTCTCAG  
TCGTTCCGGGTTCCGAGGTGTCTGCACCGCGTTCGCGTGGCCACGTCCGGCGCGGAATTC  
CCGCTGAACAAGCCTTCCGGGCAAGGCGACGGGCGACCTCATGCTGGCCTTCGTCACGACG  
TCGCAGTTCTGCACGATCACGCCTTCGGGTGGCCGGGCCCTGGTCAACTCGGAGAAGGTC  
GACAACGGCACCCACGGACACCGCAATGTTTCGTCCTCAAGCGCACCGCCACGGCGTCCGAA  
CCAGCCTAATGGACCGATGCCTTTCTGTGACCAACTCGCTCCGGCGGTCGGCCGTCACG  
GTGGCGTACAGCGCCTCAACGGACGTTCTGACGGATAACACAGTCCGCCTCGAGTAACGAC  
ACCCCGCTCGGTCTGCAGACGCCTTCTCTGAACAACACGCACCCGAACGGCTGGCGCGTG  
TATGCCCTTCGCGGTGTCAGACAATGCCTCCGGCGGAACTCTGACGCCGAACTGGCAGTCC  
TCGTTACGATCCCGCACATCAGTTTCGTGGCCTCGGCTTCCCCGTGGTTCAGGGAGAAC  
ACCGCAGGCTGGTACACGATCAACAAGCCGTCGGGCACCCAGTCCGGAGACGCGATAGTC  
GCGACGATCGGCTACCTCGGCAACGGCATAACAGTGAACCCGCCTGCGGGGCTGGACCCTG  
TTGAACCACACGACGGCAAGCAAACGAGCGCCCGTCGCTACAGCCTCGCGGTGAACGAA  
CGAGTCGTTGGAGGGTTCGGAGCCGCTTTCCTGCTCCGGCAGTAGCAGGGGGGGCTCGCTG  
TACCGCACGACGACGATGCAGTGTCTCGCCTACCGCCACGTGACAAACCCATCCCCTTTC  
CTCTCCTCGCACAACACCGGCACCCTCAACTCGAGCGCGCTAGTAACCGGGCAGGCGGGC  
AACACGAACGCGCTGGCGTGCGGTGAGTCGACCTTCGGTGGTCTGTGCGATGCGGTCAAC  
GTCTTCGGCAGCAGGAACGCGGTCGTCGAGCGCATGGATAACTACGTGAAGTAGTAGATC  
CTGTTCCGGACGCCTCGCTGGCAAAGCGGTTCCGAGGGTCCACTCGAACGGCGCTGTGTCG  
ACGAGAACGTATGAGTGGTACGCGTATTCGAGCAACGCGCTCGACGCGGGCGACGGCTTC  
ATCCGCTTCTGCTCTGCTCGGTACGACTCCGACCCCGGTGGCCGACGAGACTGCACGC  
ATCGCAGGCGGGCCGGTGGGTTCCGGCGGACCCGTGGGTCTCCGCGAGGGTCTTGACTCG  
ACCGGTGTCACGCCGACAGGCAGCCAGTCGATCACCGGCATCTGCACTCCCGGATCCGGC  
ACCGATAATAACTCGATGGCTCGCTGGTTCGGCATCCTGAAGCCTACCCAGGCGCAGTCA  
GTCGGGTACACGACGGCCACGATGAACCGCACGGTGGACGTCTCTGTGGTCATGACCGAC  
CAGATAACCGGATCCCGACTTCGTGACGGCGTCAGCATCGTTCACCGGAGCGACGGCGGGC  
ACGCCCTACCTGACGGTAAACTTCTACAGCGTCAAAAAGTTGCTCGGCAGCCAGAGCGGC  
GAGGGCACGGCGTTCGCCCCCGGCGGGTGGACCAAGTCGTGGGGGACGTTCCGCATCCCG  
AGCTGCCCCACGCGCATGTGCGTCCGGCTCTCGGTCTCGGCTCGCAACGTGCGGTGACATC  
GTCTACTGGGATCGCGTCTCCCTGGCGTACGGCGTCGATCCGACCCACCGGCCGAACACC

TCGCGTGC GGAGCACCCGGTCTGGTTCGATGTCGCAGATCCAGTAGGCCGACGACGTCGGG  
ACCGGCCACTCGGATTGTGCGGACCTGCCCGCCTGAAGTCCAACCCGCCTGCGATCGAA  
CCGCGCTCCGGCTCGGCGCTCTATACCGCCCACGCTCGGATCACGCTGACCAACCGGAAG  
TACCCCGCTCGCACCATGCCTCTCGTCTCGCTGTCGACCTGTTTCATATCGGAGTGGGGG  
CCGGACAGCCGGGAGTTTACGTACGAGGGGAGGAACTACTGGCTCAAGGACATCCCGAAC  
CCGATCAACAACCTTCGGCTTAAGGTGGCCTCGGACAGGACGCAGGTGGCTAAGACGAAC  
AGCGCCACAGTGTTCAGCGTCTCGGCTCCGATCTTCCAGTCGTGCTCAGCGAGGGGTAC  
AAGCGCGAGACGTTACCATCAAGCTGACTCCGGTACCCACGAGGAGCGAGCCGATCTG  
CGGAAGATACTTACGTCCGGCCGGACCCTGTTCTGCGTAGGACATCGACTAGGCCTGG  
GGGGTTCGCCCGGTTCGGGGACCTGATCGAGGACGTCCTCCCGACCTAGAACCGGAAGTCC  
AAGCCGCTGCGCGAGATGTGATGCCAGTTGGTGCAGGTAGCGGCGGCAGCGTAACAAGGA  
GATCCAAATGCCCGCGCGACACACCGCTTCTGGACTAGATCCGAGGCAGTCACTGCGT  
CTACAGCTACGTGGACGTGTTTCGCTCCGGACCCGGGAAACCCGGCGGCTGGTTCGTGATCGA  
GGGCGAGATCAACGTCGACCCGGACAGCCCAGTCCCGTAGCGGGGGTTCGGATCAACTGCGT  
AGAGCTGGACGGCAGCTTCGTGCCCTTCGGCAACCAGGGCATCCTGACGCTGTTTCGGCAC  
CGGGATCTGGCCGTACCGGGGCATGAAGTACGCGGACGGCACCCGTGGAGGTTTAAACCGT  
GGGCGTGTTCGGGTTGGCGGGTATCGCCTTCTCGAGTCGTTCGAGGCGGGGCGGCAACGC  
GGGTATCCGCAACTCGCTCAGCATGTTTCGACCGATCCCGTGTGGTGGCGCGGACAGCTT  
CACGAACACGTCCACGATCAACGGCGGCACGATCATGATCACGGCGGTCAAGATGATCCT  
CGGCCGGACGTTCCCGACATAGAGTACGACGCGGTGTCGACCACGCTCACGACGACCAG  
CCCGTAGGTCTACACCCCGCTGGTTCGACCCGTGGGTGGTTCGCTCGGACCTCGCGAAGTC  
GACCGGCAGCGAGCTGTACTTCGACGTC AACGGCTGGGCGGTTCATCGCCCCGACAGCCGA  
TTTCGACGCGCGGCTGAACCCCGACTACACGTACTTCGCGGGGCGGGCTCTACGATGCT  
CGACCTGGCCTCCGAGTACAAGGACGAGCCGGGCTTCAACGACGTCGTTCGTTCGAGGGCCG  
GTCCACGGGCGCCGAGCTGCCCGGTGCGCGCGGAGGAGTGGGACTACGAACCCAGCTC  
TCCGACGTTCCGGTTCAGCCCGTACGGCGGGTAGCCTCATTTCGTGCAGGACACCAACGT  
GAAGTTACAGGCCGACGCGCTGAAGATGGCCGACGCGCTGCACCAAGGCTAAATCGGCTT  
CTCGGCCGGCGCTATCCATCAGCTCCTGGACGAACCCAGCGATGGAGGCCGGGGACGTCAT  
CCAGCTCGAGAGTGACTCCATGAACATCGCGCGCCACTACACTGTTCGACTCGTTCAACGG  
CCCGCTCAAGAAGGACGGCGTCCGGAGCCTCAAGCCCCGAACACGAAGGGTTGCTTCGTG  
ATTGAACTACGGGCAACCACCGGCACCGTTCCTGACCTGTGTAACGCTACTCGTACA  
AGCACTCTCGCAGGTGAACGATGAGAGGAGTACCGACACCTGCGGCGGACATCCCGCAGG  
GGGACATTACCTGGGCTCAGCAGACCCGACGCGTCCATCGCAGCACAGGCCCCAGGAGTGCC  
ACCAGATCAGCTCGCTGGCCAACGCGCTCACCCCGCCGACGCAGAGCTCGGGCGCTCGTAT  
CGCAGGCGACTATCGTCCGCGTCGAGGGCGGCTACCCGCCAACCGGGACGACCCAGGTCG  
GCGGCGACACCACGGCCTCGATCGTGGCGGTCCGCTACCTGGACAGCTACGTGCCGCTA  
CCGGGGACACGGTGATCGTTCGTAAGCAGGGGAGCGATCTGTTCGTCTTCGGCCAGATGG  
TGACAACCTCGCGGCCGGGGCGAACGGGTGGCAGGCTCCGACGCTGACGACGACGTGGA  
ACGCGAACCCACGTTTCATGCGGATCCTGTACCGGATGATCCACGACAAGGGCGCGCGGA  
AAATCCAGTTACATGCCCGCGTCTGGCGAAACGTCTCCCACACCGGCACGACACTGTTCA  
CTTAGCGGCGGACTACCGGTTGGACGTGCTGCGCGCCTTCCCTGTCACCCGAGAGCACC  
TGACCGGCGGCGCGAACGCGCTGCAGCTTCAGGCGGACACGGACGGAAAGGTGAATATCT  
CCGGCCACCAGCTCGAGACCGTGGGCATGAGCAGCTCGGGCGGCGTCACGACCCGGCTCGA  
CGGAAACCAACCACTAACCCATAACGTCGGACATCGACCAACCTGGTGACCCGGTGTTCG  
TCGGCTGGTGGACGGACTGGTTCGTGCAGACGGCTGTGGGAACTAAGGGCGTCAGGCACA  
ACCACAGCAATCCGAATGACACGCACACTATGACGAACGCGTCGTCCCTGGATTGATCT  
CGCTCGACGGCGCGGAGTCCGTCCTCTGAATAAGAGGTGCGGACGGTGGGGCGACACAGA  
GCATCTCGACGAGTTCTAGCGTCGCCGCTCCGGGTCCGACTTACCGCAGTCGTACTGCAG  
GCTCTGTTCAGGCAGAGACGGCCAGGGAGCGCAGGCTGCGGGTGTTCGTTCGTAATCACGGC  
GCGCCAGTACGACGCGATGCTCGAGATGCACGGCGCCGTATGCGCCATCTGCGCCCAGCC  
ACCGCCTCCGGGGGGAGTGATGGCCGTCGACGACAACCACAACCGCTGTCCACGAAGGAA  
GACGTGCGGCAAGCGTCTGCGCGGCCTTCTCTGCCACGAACCTCAACATGGCGCTCGGCAA  
GGTCTGGGAATCCAAACAGTTGCTGCACAAAGCGAGCGGGAACCTCGACGGTGGTCACT  
CGATCTGTACCTACTGCTCGGTGAGGTTGGGAAATGCAAGATATTGCCACAGCAATATC  
AGCAAGAACAGCAGCGGGCGATACGGCGGCCAGATCCGGCTGTTTCGTTCATCCGGACCCAG  
GAGGACAACGACACCGCGTGTCTCGCTGGCGGGGTACCTGCAGAACCCCGCTCCGGTGTG  
AGCTACCACCACTCGATCGACAATAACCGAGTGCATCGCGGTGGTTCGTTCACGGACCCGCTCC

GCGTGGGCAGTGC GCGATGCGAACGACTACACGGTCAACCTGTGATACGCCGGTAGCCGG  
GCCTCTATGTACGTGACGAATGGATCGCCAAGTACAGCAACGCGATCGACTTCACTGAC  
TGGCTGATCGCACGCGATGCGATGCAGTACGGCTTACGCCCTACGTCATCGGGCACCCG  
GAGATCCGCGCGGCCAAGCAGGTCACGACCGACCACTACAACAACACCAAAGGCCGGGG  
ATCGGCGTCTCACCGACGTCGGCGGCAGCTAACAGTGGGACGAGCAGCGCAAGGCCATC  
GACAAGTACATGGGTAACACGGCGCCGCTGCCGCCACCCCGCTTCCGATCGCCAACCCG  
ATCGACGAGTGC GGGAAAGGCGATCCTCTGGCTCGGGGACGCTCTCGATGGCCAGAAGCCC  
GGCCCGGACAAGAAGCGCCAGTCCCGTACTTCAAGAACGGCGTGGTCAACTGGACCCCG  
CATA CGGGCGCGCGTGAATCCTGGCGGAGCTGCTCAAGAAGTTCGACGACCTTAAGTGG  
GATACCGGCCCGGTGACTACCCGACCAACGAGCGCAACAGCCTCAACGGGCTGAACGGC  
CGTTCGAAGGGCGTCGTGGAGGGATTTACCTGCGGCAACCTGTCCCGCATGTACGGCAG  
GACGAGGCCTTCTGGACGCACGGCGAGATGGGCAACCGCTGGGGGCGTAGCGGATTCGAT  
AACGGTCCGCGCGGATGGCCCTGTTCGACGAGCTGCCATTTCGACGGCGGAGTGGTCCAG  
TACTTTGAGCACGGCAAGAGCCACTGGTCCGGCAAGCTCAATGCCATCGCGCTCCTGACC  
AAGGACGGCTCGGATACACCCCTGGCTGAACAGGGTAAC TAAGAGAAGGAGAGCGCAATG  
ACTCTGCGAGCAAAGACCGCTCACTACCGCCAGGCCGTCGGGGCTGGCATCTGATCCGTG  
CTGATGAGTCTGACCGCAATCCTCGGGCTGGGCGATTTTCTGCCCTCTTGACGGCTGTC  
GTCGTCACGACCACGATCGCCATCCTGACCACGGCTCGCATGTGGCTGGCGAAGAACGCC  
GACATGATCGACAACGCGGCAGACTCGTACGACGGACCGCACCGCGACTTCCGGCCCGAC  
GTGCCGACAAACGGGAAGCAGCTCGGCAGTGAGCGCCGCGTACCTGGCACTGATCGTCA  
CCATGGTCCGTCTGCTGCTCGTCTCGAACGGCATCACGATGTGGGGCACCGAGCGTCTCC  
TCAAGACCAGCCACTCGGAGCAGGGCAAGGCCATTGCAGTCCAGGCAACAGCGACGGCAC  
ACAGCGACAACATCCGCGCCGCGAGCTCCTCTTTCCAGACAGTGGTCTGCCTGCTGGCCC  
CACTGCAATCGCACATTAACGAATACGAGCTGCAGCTCCGTGAGGCCGTGACGTACATCG  
CCCACCTGCGCTCCGACATGACCCGATCCGTGAAGACGTCACGACCGCCCCCAAGTCCC  
TGCAGGCGATCGTGACTGATCGAGCCGCTGACGTTAGAAAGGCCAAAGGGCCCCCAGCC  
AAAGTTGCTCAGCGGCTCGGCTGGAGGCCCGTTTCTGCGTTG

>NewGenomeName\_187

CTCCGGGCCTGAACTCACTCATCGTATCAGTTACCAACCGCTAGATACTGGCCACTGGCG  
TCGTTCCGTAATAATGACCCTGACTGACGGTCAACTGACCGCCATCTCCTAAGTAACTG  
CTCCATAGCAGGGTAGTCATGCCTAAGTGCCACACGTAGGGCCCCTTGCGCGCGCAGCT  
GTGGCTGTCCTTAGTGTCTCCG CAGCAGGTTTAGGTTCTATCCAACACGTCGAACGAACC  
GGTCAGCGAGCATAACCCTAACTCGATTGGCAAGCCTAACGCCTGCACCGGGCACAATGGC  
CTCAAGGTACGATGAGGGATAGTCTACAGAGCCGAACATTGCGCACCGCTGCTTCGCACG  
GACGCCAACTCAAAGCCGCTGCGGTTAATCGCACGATCAAAGTCCCACTGTACCTGTCC  
GAGTTCGACGCGCGCTGCACGTTCTACTATAAGGTTCGGGAAGACGTA CTGCACCATAAGC  
ACTCTGCTCAAGCTGATCAACCAAAGTCGGTAGGACGAGGTAGGGCGGCAACTCCTTCGC  
TGGCGTTATGGTACGGGGAAGGAATGCTCCGTCCGGGCTAACAACTGGTACGGCGTTTAC  
ACTCGTCATGACAACGAGGACACACTACGGTAAGGAAAATACGGGTTTCGAGTACTCCTTT  
CGCTGGCCTTTCTCAGGCTCGCTCTGGGCCTCTACAAGCCGCACACGTCTGTATCGGAGT  
AATGGAAACTGCTAGAAAATAAAAGACTCACTATACGCCACAGACGGGCTTCTGAGGCTG  
GCATGCAGGTTTCGGTACGGCTGTGCGTGGGCTTGGCTCGCAGGGTAAAGCGAGCGTCA  
GCGATGCACTCGACGAGGTACCTCGTCGCCGCGCGACTCCTAAGAATGCAGGCGTTGCTT  
ACATTTTTGGTCAGCGACTCCCCTGCAAGGATTGACCCTAACGGACCGTGCCACATCCA  
TTCTCTGTACGGCGTCCACAGGCGGGTTGGTGAAGGGGCCGGTGTTC TAAGGAGACTCT  
CTAGATAGCTATAACGGTCCCCGGGGATTCCGGGCCAGAAGCTCTGACCCAAAATGATTC  
CCACGTGCGCCCGCCGCTCCCCGACATAATGAACGCGCGGTTTCGCCATCTGCCGTGGGCC  
GAATGTGGGCGTGCTGATTAGCGAAGTCTGGTCAGGGCCATTAATTGGTGCTGCTGTGG  
ATATCGACGGGGCCAGTATGGGATCGCTGTGCCAGGCTGTCAAGCAATTTGTTACGATGG  
CCGGGGCAAACGGTACGGGCACGGCAATATAGGTTGTGTGGCTTAGAGATCACGCACAGC  
GCGGCAATGCGACAAGCCCAGGCAGACACAAGTGCAGATTGTCTTCTTTGGGTGCGCGG  
GATTGTGAGACCTGGGAGCGCTTTGCTAATTGGGCCACTATAGCAATGGGAAACTCGATA  
CCCTGCGAATGTTTAGAAGACTCGACGCTAACGCCATATCTGTTTAAGCCCGGGCAACA  
GCACAGCCCGACCAACAGACCTCGATGTCAACACCACACTACACTCACGAATGACA  
GTCCGTACGGCCGACGCGCCACACGGTATACGCGGAGCCCGGACCGCAGATTAATGACC  
ACTCAACGCATGGTAGGAACATAGGGCCAACGATAACAAAAGACTAGACCCACAGGAATA  
ACAGTCTATGATGGGCACCACTGAGTCGCCACACAGCAACACAGGAGGAGAGTATGAAAT

AACCGGTTTACAGAGACGAGAAACACGGCACACGGCGCCACATGTTCAATTAACCGGACA  
AACTGCTACGGCGAGACTCTTGAAAGGCACTGGAACTAGCTAGCCTAAATAGCTAGCTT  
GTCAGCGCGACAGGAACAGAGAGGGAACAAGTCAGGTTGACAAGCTACACGCTTCACGGC  
GACATCCGCAACGCATCACAATGCTACACCAGCTTCAACGTCCCAAGCACGCACAGCACG  
TTGAATATGACGTCGACATGAACGTAGCCACGCACTAAGATTCGCGGGGGCAAGGTGAAA  
AGTTCAGTGAGAGCCGGGTAGTGCGGGAACCTGACTAACATTAGATGGTAGAAGACTGGAA  
TCTAATGAACGAGGGGATCAGCGGCACTTATCGACGTTCCCAAAGACTCGTTCGTCCAATC  
CTTAGCTTAACCGCGGGTATTGCGAGAGAGTCGAATGAGACCGAGATCCCATGGAAATTA  
CTGGGGCCGTCTTAGGCTCAGAGGTGGAACGAAATGATTACAGAAATACTGACCGTCGGG  
GTGATAGTCCACTAATTTAGGTGCATAAGCGAGCCAGACTGCCAATGCTCGTAGCCCGAG  
AGGAGGCAGCCGATACCCCGGTGGTTCCTAAAGCCCCTTGTGGTTATAGCCACCTGATG  
GTGTGTTACACACGTTCTAAACGGAGTCGGCATTGAAACTACCGTGGTGGAAATCATG  
GCTAAGTATTCATCCACCAGTAAGGTGGAACGACAGCATCAAATGGACGACAAGAACTTC  
CGAAGTAACCTCGCAACCATATCTGTGACTACAAGTCTCCGCGGTTTCAGGACAACCGAT  
CCTCTGTTGGCTGCGGCGCGAGGTGCAATCAAGATGGTGGCTGAGTTGTCCGATGCTAAA  
GGGGATGTCGCACTGACTGCATGGCGCAAGCCCGGCGAGATGCTGCATCTGCGATACTGC  
ACTGATGATGAACGAACGAGCAGGAACTCATGGGATACTAAGCAGACCACGGCTAAGCCG  
GGTCTGTCTAAGCCCGTCCGTGGTAGCACCACGAAACATCAACGAATTATGGCGGGGCGAG  
TCCCCCAGCGACTCACAAGCCATGCGAATCTCATCATCACTAATTAAGTCTGATCCTTG  
GCTCAGCTAATAACATCCAGGGTATTTTCAGCCATCGTCAGGCGCAGTGCTAAGATAGACT  
CTGACATCCACCTGGAAGATGTGGCCATCCTCTCGCACTTCAAGGACCACAACAACGTGC  
CACTGTTGAATGATCTGTATCGGTGCTTCCGAATGGTTCGCGCAACAATACCTTGGCCG  
TGTGGGCCTTCGCTAACGTAAGGGTGAGCTTCAATGAATGGTTCGGACCGTAAGGACATGC  
GTTTCTTGTTTCGCTAAGGCCATGGTAACGAACATCGAATTTGCCTGGGAGAAGCCTTCGT  
ACGAATACGCGCAGTCGTCTTGCTGAGCCAAGCGTTCGACGTGCAAGTGGCCATGGCTA  
AGATTCTGACCCAGAGGGCAAGGGCGCGCAAGGATGATACTTACGTGGAAGGCAAGGTGCG  
TAGCCAGCTAGTGCAACTGTCTGGCATGTCCAATGCGACATAACGCCCCACTCCCGTC  
CCCAAGCTGGGCATCGCTATCTCGCTGGGGCCCCAACCTCTGTTCGTGCCTATGAAACTCG  
AAGTCACCGCTACGGCCCTAGTCGCTGTTTTGGCGCGCACTAGCTGCTCTATGAATCTCG  
TAGTGGTATCCCACGCCGTCATCGCCGTAGACAGCGCCGTGAACAGCCCAGTGGACGCGAG  
CCGAAGTCATGAAAAAAGGGGGGCTCGGTGACAACCAACGAGCCGGGCGCCACGGCTGG  
GCATCTTGTCGGGTGAGCCTGCCATCAGCGCTCAGTGCGTATGCCCGTAGTCTTCCGTT  
CCGACCCGTCCTGGTACTGGAAGGTGAGCAGGTGCAAGACGGTGAGCTGTACGGACCACT  
GTTTCGCCTCAAGAGTCAAGAGACCATCGCAGCGTCCCGCTTGCTGTGCCTGGCTGGAA  
GCTCGCCAAACAAGAGATGTGCAAGGTAGAGGGCTACGTCAACCAGCTGGGTAAATGATT  
GACGACTCCTCGCTGCACGCAACAGCAACCAGTCTGGTGGACGCCTTCAATGCTATGAGT  
GCTGTGTACGTAAGCAGGCTTGAGGTGCAGCCTGGCAGCCGCAAGGCGGACGGCACGCTT  
GCGGTGGCGCGGGAAGCCTACACAACACCGTGCAGCTGCTGAGCTGTTGGTCTGCGGATC  
GTCAGCAACCATCACAACGACACGGTGTATCTATGGCGCGGCAGACAACATCGCCGTCCCT  
ACCATGCAGTTCGCGAGGCATGTGGTGCAGGGCCTGACTTTCTCGTAGGGACATGACCGC  
TCGCTGGTCATGGAGTAGTGGGCGCGGATCCGCAAGTACATTCAACAACACGGAGTTGCAT  
GAGGTGTGCCGCGATCTGTTTCATGGACCACACAGCGATGATGTCGCTATATAACGAGCGG  
AATGATGCCTTGCCGTGAGACCAGACCAAGTTTTTGATGGGGTGGCGCGGTGAGGGGTGC  
ACAAGAACTTCCCATCTAAAGATCTGCATTCTTGACTTCTACACCCGGAATGGCGGAA  
CTGATAGGAGATACGACATTGCAAGATCAGCGACTGGAATACCCGCTTGAAGGCCTCCGG  
CCTTACCGCGGGCTCCATGGTGCCCGAAGTGAGCAGGTTGACAGTGGTCAGCGCGATGCG  
ATGAGCATCACGACTAATAATGGTAGCTCGCTGATGATTGGCGTTGCCGACCCATCACAC  
TTGAAGTTCGGCTTTGCTTATCGGTGGCAGGCTCAGAGCTGGTGGTCTGAGAACGCACGG  
CGTCAAGCGCCGGCGAACAGCAAAGCTGTTGCGGTGTACGAACTGCCCGGCGCGTCTGCA  
ATTCAGGGTAACGAGCAGGTGCCATTAGATCTAGATGTCGCCAAGCTATTGGACCATATC  
CGCGCATCTGAGTAGGTGAGAGGGAACTCGATATGCCGTTGGCTGGGTATAACGAGCAA  
TGCGTACTGCAAACGGCGCGCCGGCCCCAGCCGGAACATAACTTTGCACACAAATCACAA  
CCTAAGCCCCGCGGACTGCTATTGCACTTCATACGTCAATGCGTGGTGCCTGGAGGAACT  
TGCTGCCGAGGAGACGTAAACCAGATACGCAAAGACCCGGCGCGGTTACGTGGATTCAAT  
TTCGCTGCTGTAGTGTTTCATGCGTGACACCTTCGATCTGGACGTTGAACTCGCCTCGGAA  
GCTTTCATCGAACTCAGGAGTACCTCCGGTGTCAAGACTTACTAGATCCGATTGGGAGGT  
TGAAACAATGGCCGAGGCTGGTCCCTTGGCCTGCGATGCACTGACGCACGCTGATCCTCT

CGGAGTAGTGCATCAGCCTACTCGGTAAGAGCTGCTGTACCGCGCAGGCTTGGCAGCCTA  
CACTGTTGTGGGTACATCTATGTCTGGTGCCACGACTCTGCCATGTCTGAGGGTAGCTT  
TGCACTGATCGATTACGAGAACGCATAAGCGGCTCGCTCACGATCCACAGAAGGACGCCG  
CAATTATGGCATCGCTCAATGTATTCCGTGTATGACTGGCGGAATAGGAGTGCCTCTC  
GACGTCGTAACGCGCTGTTTGTAGTCGTTGGCGTTCGAAGATAACTTCGTGAGCGTAATGT  
GGCACGACCAACCTTCCACACCCGTAACAACCTGTGTCTACCTGACTGTTCTTCCCGAGG  
CAGAGACTGTTAAAGCGGCTGAGATCACCGACCTGGACAACGTCCAAAAGTACATCCTGT  
CTAACCGCCTGCGCCAAGTGCGCGAGACTCGAGTAGGCCAGACCGTTTCCGGCCAGCGCA  
CCCACGCCGCCGCCGCGCCCTCGTCGTAGCCTGCAACGTGTCCAGCTTTGCAGCGTTTC  
CCCTGCGAGAACTGGCCTGTTTCGTTGCGCAGAAGAACAATAACGAAGTCGCTTTGGGGT  
TACTGCGCAGCATCGCGCACAGCAAGGCAGGCGAGCTGACCATTGCGCGCAGCAAATCTC  
AGAACAGGCTGTTTCGTCTGCCCCGAGTTCGTCCAAGTCTCCGCAGGTTGCTCAATCCTGTG  
AGCATAAAGCGCTGTCCGTTGCTGATAGCATGGCGCGCAACAATCCGTGCCAAGGGTTC  
ACGCTGTGCAGGTGCATGCGGTCTCCAGCACAAAGGCCGAGAAAGTTCGCACCGAAGAAGA  
TCGAAACTAATCACACCATGGTCTAGCTGTAGCATGGCGCGCAGCACGCAGATCCTGAGC  
TAGCCTTCCCGTCGTAGTGCTCTGCCGGCGATCCCGAACAGGTCAAACACATCGGCCCC  
GACTTTGTTGGTCCGCGGTTTGAAGCTGCTAAGCTCCTCATCAAGGACGGGTTTCGTTTCAT  
AGCACTGTGGACAAGGTACACTATAGCTACTCGGCCACGTAAGCCACCGTGCCAAATTC  
GAGGCATAAACCATGCTCGTCAAGATCGCGCCTTTCCTGATCGCTCTGGCCGAGTACATC  
GCCGAAGGCGCTGCTGAGCTTCAACTTCGGCCACAGATCATCTGCTGTCCCGGCGTGGC  
CGCGAGATCTTAAAGGCGCTCATCCAGTACAACGCCAAGTTCGCCAGGGTGCAGGTCAA  
CTCAAGGGACGGAGTGAGCGTGCCGTGGGTCTGTTAAGCTACCAGCAGGCCGCTGAGCAG  
CGGCGGATAAGGCAGTCAAGTTTCTGGGCGCTCTCAATTTCTGCGCCCCCGGGCCGGGA  
GCATGCCAAGTGAGCCTTAGGTGCCTCGTTTGCGGCGCGGCAGGATCGATTGGATCGTCA  
CTGACTACATGATAGCCGTGGAGTTCGCTGAGCTTGAGTCCCGCGTTCGCGTCTCTCCCT  
ACTTCCCCCATCTATGCGGACTCAAACCTATGAACCGACTGAACGTACTCGACCTGTACA  
AACGCTCCGCTGTCACCGGCGACATGATGTCCCTACTGCACCGTGCGCCGGGCGTTGACC  
CGCTCCACTACAACGGAGCTCTACATCAAGTCCAGGGCATCGTGCGACGGGGTAGCGAGG  
GTCAAGGGCTGGGCCGACTAGGAGGCGATGGATTCCAGTTCATCGGCGTGGTATCAACG  
CCGAGATGATCATGACCAGGCTGCGAGCTGTCCCTTACCCTGTGCATAGCTGTGTCGCT  
AAGTTATTCACGCGATGCCTGGTTGGCCACTGTGCGTTCATCCGCAACGACTACCATAAG  
CAGTTACGCTTTAAAGGCAAGCACGCCATATCTATGCGCAAGATGTTGGAGCACTGGCGT  
CGCAGTAACTGAGTACGTAATGAACATCTGCGGGGTGTGCATTGCGCGAAATTGTGCGCA  
TCCAAAATCCATGTTGGAGATACACCATGTAGAACGTACAAGCACTGATCACCGTAACAA  
ACGCCAACGCGGCAAAGAAGTCACGGTGATTGATATTGTGAACAACCTAATCTGGAAGA  
CCACCGAACCAACCGTGGCGCTGGCCAGTTCCTGCAAGAGCGGGCAAACGAAGCTGCAC  
GCTTGAACGTCTAATGCGGCACGGAGAGGTCGTTTCGTGTTTCGGTTCATTCTGCCACTGCTA  
AAGAGGCGACCGACAAGGTCATCGCCCTGGTCGAGCTGGCAGGCGGCACCAAGCTGCCGA  
AATTCACGGCCGTTGAAGACGCTGCGTTGATGATTTACTACGTTGCACCGAACAAGTTGG  
CTGCTGTCGTCGAGCAGGTCAAGGGCCCTCCAGACCCAATTCAAGGCTCCCAAAGTGCG  
ACATTCGGCTAGCGCAGTGGAAGGCTTGCCGCTCGATGTTAGCAGCGTTCTCGGCGGCA  
CGGACGCTGCCGCAGCAGTCGCTGGCCTGTAATGCTTGATCGTGGGCTGTTTGTCTCGAC  
TGATGACCTCTTGCATGAGGGCTTGATACGGCAGGTTAAGGCGTTGGGGATCCTGCCCGA  
CGATGCCGCAGGGCAAGGCGGAGTTGACTTCCAGGACTTACACGATATGGATCCCCGATT  
CGTAGCCGCAGGCGATCTTATCAGTCGAGCACCAGACTTCGTGATCTCGATGCCGTTCT  
GCCTCTCAGGACTTGCACAGCGTTGGTTCCGGGGTCGTCCCTGTTCGTTTCCGAGAAGCA  
CGCCATAGACGTACCAGACTGACAAAGAACAAGTAGCTCTCAAGCATGAATGCTTTGG  
TCTGCCCGCCTCGTTGCCAGTACTGGTTGAACAGGTTATGCTTCCGGATGCGGGGCGGCT  
GTATGGCATAGAGCTGGAGGTTTTGCGGTTTCATACAGCTTGCACAATATCGCCCAAGTGA  
ACAACGCTTTGGTCAATGGCATCTAGAGCTTGACTCAGGCTTTACAGTGGTTGTGGCACT  
TAGCAATGCGCAGGCTAGAGGCGGCACAGTGGTTCAGGGACACACCTTCTACCAGGCCTT  
CGATGATCTTCAGTTGGCTAGAGGATCGGCTCTGATCTTTCGGGTAAGATGTTCTTCA  
CCGAGGCATGCCGTTATTGAGAGCGTGCGCCACTTGCTTGTGTTCTGGACTAAAGTGGA  
ATCAGAAATGAGTGGTTCGTCTTAGCCCAGAAATTGCCGGTGCGTGCCACTCTATGCAT  
CCCGACTTATGTGGTCATGGCCCTCCGAGGTTGTGTGCCACGACGATACGAAATGGTCG  
GCGTTCTGCCAGCGGTGCGCGAACATTACATCAGTATTCAAACCAATCCCGCCTTTGCAC  
GAAGCCATCAGGGCGGCGGAACGGGAGCGGCTTGAAGAAAGAGCTGTAGCAACCGGAATC

CGGCCACCGATGCCAGCGTTGCATGACCTGGCCGAGTGGCCGCTGGGGGCACGGGTATGG  
TCATTGAGAACTGAGATATCTCACGCCGTGGTGTGTAGAGTGGCGGCTGCGATCATCCG  
CCGACGCGGCGTGTGGTATTCTCGGTTCTTGAAGATGCGCGCTTGGCTTTCTGGCAGTCC  
CTCAGCTTGTACGGAACGAGAGCAGCAAAGTATCTCAGCCAGCCGAACGAGCCCGAGTTA  
ACAGAAACGCTGTGCGGCGGTTAGATATGTCCTTCCGTTAGTCGAGGACTGACGGTCTGTG  
TACAACATCGGAGCGGCGGGTTGCAAATCTTTGTGCCTTATCGGTAAGAAGCTGCGACCG  
AAAGCACGGGCCTAGTTGTCAGCTAACGCTCAGTACACGGAATTGATCTGGCTTGACCCT  
GACGGGCCTAGTCGGAGTTGTGGCGTGGATGTCAAGGACTAACTATGGATGTGCGGGATT  
GCATCCCAATACTTCTGACTGAACGTGACCTAAAGTTACACAGCAAACGCGAGATTGCA  
AATGTCTTAGGACGTATCGCCTTAGCAATTGATGCTGGGCCGAAAGGATGGCGACGAGAT  
CCACTGGGTAGTGATCGCGCGTTCATTGTATCAACTGAGCGCCACTAACATCACTGACCT  
GGGCAGTGACTCCAAGGCGGATCCCGAGTGTGATCTGCTCTCTGTTAGCCGGGAGATCAC  
CAGGTGCTTCAACCCGATCTGTTATCTGCAGTAAAGACCCGGTGCTTGCGGAAGCGTACCG  
CCATGTGTTACAGCAGATCGAGAAGCCGATCGGCGATACTGATAGGTCATTGATCATGGG  
CCTGCTGTGGGACTACAACCTTGTGAATGACTCGCACGACATCGCCGAGCGCTTCTTCCG  
TAGTGAATAAATAAACGTACGCGAGGTGCGGGCGGACGGACTATCTACGTTTGAGCAGGA  
CATAGAGCGTAGGGTGAAGCTGCCTTTCGTGGCGCTTGACGAGTCGTTGTTCCCGAAGA  
CGTTAGCTAAGACGGGTTCAAGTGGGGGTGGGCTTGCGACGTGCGGACGATGAGGCCACT  
GCGCCGCGGCGACTTCGGCAACATGGGGGGGCGACCCGATAGGTGCAAGACCACTGCTCT  
CAAGGACCTCCGCACTTACGGAGCATCCCAGTGTGTTGTTCTACCCGGACAACCCGGA  
GACGCACCAGATTCCGTGTCTCAATAACCGAAGGGCCGCGCAAGCGCAACCTCAGGCGGAT  
GATCCAGTCGGAGTTCGGTTTCGGAACGGCTGAGCTAAATAGGAAGCAAACGGCTGTCAT  
CTTGCGGGATGAATACGACGTAGCGATTGCCGGTGGTCGGGCTATTATGAACGTCCTCCA  
CATGAACGCATTTACGGCGTGGCAGGTAGAAGAAAACCTTCGATCAGCCAACCTCCGGCTA  
GATGATCTTCAACATGGCGGACTACGAGAACTGCGTTGTTGGCCTTGCGAAGGGGGACAC  
GATAACAGAACAGGAGTGTGTGGCTATGTATCAAACGGAGTGCGACTGAACTATGAGATT  
CGACTGCAAGGTAICTGCTCCGTCGCAGGTACGGGCGGAAGGTGCCGGCGAACCGTATCC  
AACTCTACCGATGTCCAGTGACAGCAATACTGGCAAGCCAGATGCTGCCTTTTTTACTAT  
CACAGGCGGAACGTGCAACGATCGTTCGCTTCAAGAGTTGCGTTTCATTGGGACGACCAA  
GAACAAGCTACATCTTATCGGCCAGGCAGAAAGTCCGCGTGCGAGAGGGGTGAAGCACGC  
ATCAGCATAACGCGATGTCCGGCAATAATTATCAGCCGGCGCGCATCCGCGCGATTGATC  
TTGCCGTGTTTGAAGGGATTCTACACGCTAGGCGGGAGGCGCGTTAGCATGCAACCGCTG  
ACAGGACAAGGCCTGGAGGGATTGACATACGCGTGCCTGTCATCATCTTCCGGGGCAACA  
ACGAAGTGCCCACTGATATCGAGTTCGCGGTGGAACACTTCTCGCCACCAGCCCATGGGA  
TCGCTCGAACGATGCGGCACTCGTTAACTGAGGGCGTACACAAAGCGGTCAAGGAATACG  
CCGTTGAGTTCCTCACTACGTGATGTTTACAGCGTCGATCGCGACAACCTTCAAGTAGAAG  
GTGAATCCCTACCAAGAGAATTGGACGGTGGGGGTAGGTAAATGTCAGCACGTAAGAA  
CCTGCGGCAATCAAGCACGATGATAAGCATCGTAGCAAGAGATGCCTGGCGCGGTTTATT  
GAACCCAACCCGGCCTGCAAAGTATTCTAAGCAACTTGAAGTTTGGCGTGCTGTGT  
GGGATCGCCGAGTAGCCCGCTGGTCTGAATGCGTGGGGGGGCTTCATCAACCGGGGTGGC  
GAAGTGTGGGACTGTCAGCTCGTCCAGTAGCTGCTGCGCTGTCAAGGCCCGTCCGTTTAC  
ATGCTCTCTCGGGACGTGGTGTGAGTGGGTTTCGGCGGGCACACGAAACATGACGCGGTC  
AAGGACGTGTGGTTCGTAGCGGAACGAGACAATCTACATTCCCGATGGCGCGATGAGTTAG  
TACCTGTGCGGGCGACATCGGGAACACCTGCAATAGATTACTCGGCCTAGTGGTGGAGGCT  
CAGCAGCTAGGGCAATCCCAACGCATCATGCTGATCATGGGCGGGCTGGTCTTACGTTT  
GAGTCCGTACGTAAGGGCATGAATGCCGACTACGCCCTTGTGCTTGAAGCTACCGGCGGAG  
ATGGAAGAAGAAGTGGACTCGTTGAAGCTGCGTCTTGACGACTGCATGACTGGCAGCCTT  
GCGTCTAAATTCAATTGGGGCAGTTGCATCCGGTTCGGTTCGCTGTGGTCTAGTGCCTT  
GTTAACGAATAGGCCCGCGAAGCGATTCTAAATAAAGACGTCAAGCCGGCTTATGCACAG  
AAGACTGAGACTCACTCCCCACGTCTGACGGCAGCACTGTAGGACAGGACGAGTTGAAC  
GATTCTCAGCTCAGCGGTAAGCTGTGCCGACACTTGGGTCCTTTAGCGGGCGTCAAGAAC  
GCGCGTGAACCGTAGACGAAACAGCCTAAGGTTAACGACCTGTCGAGACCGAAGTGCGGT  
CTTGAAGACCACACCTGCGTGTTCCTGCTACACCAAGCCGAGCCACTTGTAGAAGACG  
GCCGCACCGGGATTGTACCACGCTGGCTCTGCCATCATCGAAGAGCGCTGCAACCGGGAC  
ATCGCATTCTCGACGAGTAGGAACGCCATGACAGACTCGGTTAGGACGTCGGGACGTTT  
ATGATGAAGACAAACGACGAAGTTGTGCAGAGAGGCCTGCTCACGCTGGTTCATCCCGAT  
TGTCTGATCAAGCACATGAGTAACATGATCAGCACGGTAACGGGCGGTTTCAAGTTCAAGT

AACCCGAAGCCGCAAAAATTTGCCGAATGGAGGTGAGGGCAAGTGCATCGCGACCGTTAAG  
TTCGTGCCCGGTTTTGAGCAGAAAGCTGTGAACATGCAATGCGGCATCTCGGCACTGCAC  
AACTACATCCAAGCGATCCTTCCGGATTGCAAGCAGATGATCACGGACTTGCTGGCCGGA  
GTTGACACGGACGTTCCACGGGTTGTGGAGACTGCCGTGATGGACGATTTGGAAGAGTAC  
CGACTGTGCCGCATTTAGCTGGCAGGCCGTGCGGTTGATATCGGTGAGTGGGTAGGCAAG  
CGGACGAAGGCTGAGCTCCTCTCGTTCCAGCGTGCTTACGGCACAGGCCGCAGCGCAGGTC  
AGCGAATCCACTAGCTTCCCAAGCGTTGAGGTGTACGGACTGATCGAACAGGAGAACCCG  
CGTACCCTGAAATCGCTACGTTGATGCTGACCTAATGGAGAAGATCACGAACAGCAAG  
ACCGCCTGCCGCAAGCTAGTTCCACACCTGGACTTCCCGGCTAATCAGGTTGGCTTCGCC  
ACCCGCTCGTATCGCACCCCAGACCCTTAGCTCTGCAGGCACCGGGAGGAGTGCTCTCCG  
ACGTTTCGTGGTTGAGAAGCCTGGTCCAAAGTCGTCGATCTTGCCAACGGAAATCAACAAC  
TACATCGTGAAGGGCACGGGCGCTGAGTCGGCGCCGTCAGCATCCTGGTTCTTGGTTTCG  
ATTTTCTACCGCCGCAAGTACAGGGACTGGCTGGACCTTCTGATAGAGCAGGTAATCGAC  
GCGGCAAATGTTGACGCGCATCCGAGAGTCTACAACGTCCTTGTCTGCTGTTATCTAAGCT  
TATGTCAAATGTGCATCACTATTCAGGGGGGCGTACTTAAAGTGGGCGAGCCAACTGGCA  
ATACCAAGCGACACAACCTTGGGACGAGAGCATGGCACACGAGAGCGCCGTCGAAGGCTTT  
GACGAACTGGCTGTTCCGCTTCGTGAAGAAATCATAACCGCAAGACCTCAAACAATATCTC  
TGAGAGGTGACGCAATTCCCGAACCAATCTATGACAAAGTCGCAATCGCAGCAGCCACCG  
CAGCATCCGTGGATCTACAACGTTTCATGAAGGAAGCGCAGAAAGCCGGCGGGCGGCTGTG  
CTCCACCAGCTGCGGCCGGCTGCATGGTAACCCTAGTCGGCTACATCCAAACCTGCATCC  
AGATCGTGCAGGAAAGAGCAAAATCAAACCCGTGAAGTTCCCCTGTGGTCTGGAAGATCAAG  
TCTATCTGATCTTCGGAAACATCGTCAAGGGACACGTATTGAAGGAGATGGAGAACGGAA  
CCTAGGTTTATGTGCGCCTTACCTTAACGCTCAAGCAGTCGGTGAAAGAGATGTCGGGGT  
CCTACAAACACTTCAACACGCGGATTTTTGACAAGACCGCGACGCTCTTCGCGCAACTGC  
TGGGCAAGCAATACATCGCCAAGATCAGCCTCTACCGAACAAAGAAAGACCTGAAGTCGC  
CGTATACTGGCTTCAAGTGCAAGTCTGCTTGTGTACCTTCATGACTCAGACCTAGAACC  
TGAACCTGATGGGCATGATCGCGATTGCCGTAGTCCCGAAACCGGCGGTGCTGACTCCGC  
TTAAGCTGTTCTCCTGGACTCGCCCGTGCAAACCGATGTGGGACTCGCAGTTCCTCGTAA  
CCAAGTGTGACGACCACAAGGACGAGAAGTCTGGCGGGGCTACTCCGGGCCGCAGCTAGA  
ACCAGTTGCTGAACAAGATTATCGGCTCACAGAACTGTCAAGGTTTGTCAATTCTGCGACA  
TCGTTGGCGGTCCGGACATCGCCGAAACCGGAGGGCCGGTGGTACAGGATACCCCCGCGA  
CGGAGTCGGTTGCTGTTCCGTCTCACGTCGCTGCCGCGGCTGCATTGGGGGCGCTGTAAT  
AGATTGGCTAGACACCGCAATAGCTACTGCTGTCGAGGAGCCAAGCCCAAGCGCGTCGAT  
CGCGGCCCTAGTGCCGGGAAGACTTGTGGAAGTTGATGAAGACTAGGCCGCCTACTTCAA  
GACGGGTAACGACGATGCCGATAGCGGTAAGGCGCTTCGTATTCTGATGCAGCGATTTAG  
CAGCATCAGGGAAAAGACCGGGGCGAGCATTGTGGTTGTTCTCCTGTCCGCCAGCGGTG  
TACCAAGGCCGACCGCCACCTTATTGCCACCGTGCCAGCGTATCACGAACAGCGGACTGG  
CTCTGCCCGTTCTAAGAACTCGCGGAACCTTGCCTGAGTTCATGGAGAGCTACAAAGGCC  
GTAGTTCACTCCGAAGATTTGGGGAGTCCGAGAATACGATTACGCGATGGCTGACATGCA  
TCAGATGTGGGTAGCCGAAAGCAAAGGCGAGTTGATCGAGACAGCTACACGTGACTTGGGA  
CATAAGATAGTATCCCGGAAGGCACATGAATTGGATAACTTACGAACTCAACCACGTTCC  
GCAAGGGTCTTGCAGGGCGATCGGCGCGAACGATTTGATCTATGGGCCCAAGTGGCTATG  
GCTGCGAACCCCTGCAAGGCCACGGCGCGGATCACTACCAGGGATTGCCGATCCACCGCAA  
GCCAACCGGCAAGTGAGAATAGGCCGGCGATGCATGAGCGCTGGTGCGTATTGCGGGTCT  
CGACAACGATGCCGATTCGTTTAGTGAAGTGGTGCAGTTCTACTATAAGTCAAACACACC  
CATGGCGCGGCTGTTGCGACTTCTTGAGACGTTGCTACCCGTATGGCTGCGGCGTGATCA  
TAAGGCCCCCATCAGGGACATGCTGATCCCTTTGCAAGTAGGGGATGCCAGAAAGGACTG  
CTTCAAATCGTCTCTGCCGCATAATCTGAAACGGGTGGGTGGTTCGGAAGCCGGAGGTTAC  
GCAAATTGAAGCTAACCAAAAAGTCAACTCAAATCACTACGGGACCAGATTCGTTTCAGTCC  
AGATAGTTGGTTGTGGGGATTGCAATTGGCGTGGCCGCATTGCTGATGCTGTCTTCGCTC  
ATTGCCACTAACACGGCCTTAATCACGGTACGCTGCATCGAAGTAGTAAAAGCCTTCTTC  
GAGTGCTGGAGAGCAAGCGCAAGCGCTTTGGCCGAGGCGACGTCGCAGCAATAGCAGGAT  
ACATGCAAGGCGTGCGGGACTCGATCCCAACGCACGCCACGCCACAAACCCGGATGATCC  
ATCAGACATTCAAGACCGAAGACGAGAAGCGCTTGGGGCGGAACGCCCTTGGCCCTAAGG  
CTCGCGCCAATGCGAGCAAAAAGAATAAATAAGGCGCAGTTCCTGATGCGAGTGTCCAG  
CAAGAACAGGCACACCGAAATTACTGGAGCCTTTGTGTGGGCCGTGGGCGCGGCTGGGCA  
GTACACTCGCGTGCTGGGGACGGAAAGGCCGTTCAAGGTGGCTCGTCAGACCGTCTATCA

CTGACGTGCGATGATCAGCGACAACGGCGGCAACAGGGCGAAGACGGTCCGCGAGCTGCG  
CGAGATGCGAGTGCTTCGCAAGCACGATCCCTTGTGGTGTGATCAAGACTTCGACAACCC  
GCGCGTGTGCAAGTCGACTCTGTTTGTACCGGAACTGCATGCGCCGTACCATCACCGATA  
TGCGGTGGCGTTCCTTCCAGATGTTGCTGGTAAGGAACAGCGGGAAGTACGCTCAACCT  
CGGCAAAGATCCGTACCACCATGCGATGTCGTTCCACGATAGTGCCGCAAATCTGCACAG  
CACACGCGTTAACTAGTGAAAGGCAGGAGGTGGTTGCATGAGCGGCCGAAGCTGCTCCC  
GGCCCCCTGGTTTGCGATTCCAGCCACTGTTAGGTCACGTTCCGGAGGACCCAGTACCA  
CGGCTTCCGGGTGGCGTTGATCCGAGGTTACCGGAAAGTTGAGCTCCTGAACGACTGCGG  
CGACCTCTGACATTGGGCCTAGAGAAGGCGAGACAAGATTCCGCGGACCCGACGTTAGGTT  
CAAACATCAGCCGAGCGGGCAAATTCGGGTAGACGTGGCGCATAACTCCTGCAACTTGGC  
TGTGGGCTTCCCCACGGCAACTTCTGGGTAGTATACACGGCAAGACGCAGGAGCCTCTA  
CTTCCGGATGCACAGCGGATGCCTCAGCGATTAGGACGCTTCTGCTTTCGCCCACGGCTA  
GCACCCGGTGCGCAAACCAGTTATTGAGTGTATCGTCATCCCTCATGGTCGTCCAACGCT  
GTTTCGGATGGTACTTAACAAGTAGGGCGCGCTGGAACGGTAGCGTGTAGTACGAGCATT  
CTGATATGGCCACTGACTACACTTGCCTAATCTGAATCGGCCCGTGTAAACGGACACACCG  
TCTGTGCCAAGCGAAAAACAGTCGCAGTAAGTCAGTGAGGTGCCGGGTGAAAATTGAGG  
GTGGGACAGGCCCTGGTCGGTGCTTATGATTCGCATGGCGACCGCTCTGGCCTTTGCCG  
TGGCCGTGCTTACCTTCTGGGCCATGACATACGCCGCGCCAGTTGGTAGCAGGTGGGGA  
CGAACAGGGAACGCTACCTAGAAGCTTTGTATGGCCACTGCTGCGCAATCGAATACGTTG  
AGGCACTTGACCCGAAGAGCAGCCTGCCGCACTGGCATCACGGGGGCTACAACGCTCTAT  
TGGTGTTCCTACGGGAGAACGTCCAATGAGCGATCCGCCCTCGTAACTGAATCGGTGGA  
CAAGTGCTAGAGCGAAAATCTGCAAGCAGCCATCGACACCCGGCAACCACTCGTAGGCACG  
GGTTATACTAGGTGACGCAATTGACTGCATGATCAGCATGATTGACCACGCAGAAGTACG  
TCAGGACTTTGAAACCGCATTAGGCGGGCTCGAGCACGAATAACGTGGGAATGCCTTACC  
GTAAAATTCTCCTACAAAACCGGAAAGAAACGTGCAACTTGAGCGGCAAGGCCCTGGCCC  
CGCTGCCGGAATTCGACTCCGGCAAAGTAGGTGTTCCGGTTCGAACTTCGACGCTTGCTAGC  
TGATCATCATGATCGGCCTAAACGTAGACCACGGCCTCTCCGGTTAGGCCACGGAACGCG  
TGAGTATGCCGCACACGCGCAACACTTCCATATCAGATCGGCGCGAAACAGGGTTTACT  
TTGGCGAGAAGTATGACCCGAATAATCTGTTTAAAGGATATTGTCGGCACGTTCCCAACGC  
AGTAACCCAGTACGAACTTGAAGCTTGGCGGTTTCGATGCAGTGAGGCGGCAACAGTACC  
GCACCCGGCGAGACCAAGCGCCCGTATGAAGTGCCTATGAAAGACTTGTGGCATGTGGCGA  
ACCGCGAGTACGGCGTTATTCCGACGATCACCCGTCGCCGCGTAGCTGAAGTGCTCGCAG  
ATATCTACAGCGACGTACAGTATGGATAACAAGCTGGTGCTCGACGGCTTTCTGGCCAAGC  
ATGCGGACTGACAGTGAAGTACCAGGTTAACCACGAAGGCCGCGAGAATCCACCTGAAAG  
ATCCCGTCAGCGTTGTCCTTCGATTCGTCGGCATCATTGAAAGCGTCGGTAACTTACAGG  
GCATCGTGGGCGCGATTGAAGTACTGGTGCGCGGCAAGCACGGAGTGGTCAGCGGTGGAG  
GACTGATGAACGCCGAGCGATTAGAGCTTAAACAACGAGCTGCGCAAGGTGATCGCCCAGA  
TAGCGGAAGTACATGCGTTCGGCATTACGCTTGACGGAAAAGTACGGTTCATGGCGCTACC  
AGCGCATCCAAGATGACACAACGGAATCCAGCAGGTAATGAAGGAGGCGGAAATAGCATG  
GGAGATGGTAGACGGTGGGCGTCCGGTCTGGGATGGCGAGGTTTCAAAGCGCCGATGCGGC  
GAATGAGACAGCGAATAATCAGCATCGTTCCGCGATATTACGACCCTTCATCCACCTTCT  
GTCAGAAGGTGAGGAGGTTAACTGCACCCGGCACTTCGTGGTGTGGCAGCACAGTCGAT  
AGTGCGGCCATATGGTCAGGATTCGCTGGCGTTGGCGGGCATCACGGTCCTTGTAGTGAT  
CAACCAAGCCTCTCCGAAGGGGAAGCCGATTTACTGGTGTGGTTATGTATATTGGCCA  
TTCGGTTTACAGCGAGGTTGCACTCAGGGAATACGAAGACCCGAAGCCTTAGCTGTATTT  
CACGTTTGTGCAGAACCTTTAGGGCCGCATGACGAGCAGAGAGCGAAGCAGGTTGAACGT  
GGTGCGATACAGTGCTGAGAAGTACGGGACGCGGCTACCGATTTGGGAGTCGGCGTTGAG  
AATGGACGTGGGCACCTTGTGCTGGGCGCGTCTCTGGACGTCGGAATGCCCGAGACTTT  
CGATTTAAGGTTGAAAAGGAAGGGGACCAAACACCTCCGGCTGCACCCTGACCTTCTGGC  
GCTGGTTCGACCAGATCAAGGGATTCTGTGCTGCGGGGTCGCCGTTGGACCTCTGTTGGGT  
GGGGCAGCAGAAACCATGAGTTACACCGTCCGATGGCCGCTGGCAAATAATGGCGATGGC  
TCGAACTGTGTCGTGTCTGATGGGAGGGTAAGCTACACCGACCCGCGAGGACGGTGGGCC  
GCGATTCCATAAAGCGCTGTGGAAGGTGCAGCACTTGGTGAGCTTAGTTAGTGAGCGGAG  
TCTGGAGATTATGAAGTTCGCTAGTAAGTATTTTCGACGTACAGGGTGTGTTGGTTAGCGA  
TCGGCGCGGCGACATGCCGACAAGCCTCTGTTAATACAGTCTGCTCCTGTCTCGTCCGCT  
CGTTGACATGAACGCGTTTGGAGCTTGCACAATGCACCCAGTGGCAACTGGAGGCACGGGA  
AAGTCACACGCAACTTCAGGTTAGCGTAGCGCATCCAAGCAGACCCAACGCAGTTGTCCG



CGTGGTGAACAAGTACAAAGGGATGGCACTCGGTTTTGTCTTTTCTGTGCTTTATCGGAG  
CCGCTTCTATGCCTCTCCCAATGGCTCTCCCACAAGGGAACCTACCTATGAATAGCGCT  
AAGCCATTTTGAGAGGTCTGCACCTCTCAGAACTTCTGCTTGCCTATTATAGTTCCGGGG  
CGCCAGGGCCATCAATTGGGCGGCTAACAATCCCGATAAGCAGCCGGTTCGAATACCGGGC  
GCAATAGGTGTTAGGCAAGGCTGATTTTATATGCCGCATGGCTAATCGCTCGACCAGCCA  
CCGAGAATGGACAGGCACTGATGTAACCTTCCAGTTCCGTGAGTGCAGCTGCGAGTACGC  
GTCTTGGTTACGGAATACTAGTTCGATTTCGCACTCGGATCCCACCTGGATAAGACGACTA  
TTGCAACGTTCTTAAACACTCCTCAGCGATGCTACGACATGGGGTAAGGAGGCGAGCATC  
GAACCTTATTCCCGACAGTTTGCAGCACGACAATTACGGACTCGTTGCCACTGCAAGCGC  
AGGAATCGTTCCGTCTGACATTGCCGAACGCGATATTGCCAGACGCTGGAAGTCAAACGT  
AGTTTCACGGTCGCCGGTCAAATGTAGCGTGACGACCCTGCCGAACGGCTCGACACGTCC  
CTACTGCCGGGACTTCCCTTATGAAGAAGTGCATGGACAAGGGCTCCAAGCCAGAGTTCGA  
CAACCGCGAGAATGTGCCCACTGCGCCGTGGCTGTTCGTACCGGGTGTGTGATGGCATCGG  
GAAGGTGGTTCGTAAGGGGACGGCAGGCGAAGGACTGGCCGCAGGTAGCATCGGCCATCCC  
GCGCGCCGCGAACGCCCACTCATCGAAGTCAGGACCCCTGCTGGGTTCCTTGCGCATCA  
GCGCTACCATCATCAGTATACTCACGGTGAGCGGTCGCAGCCTATCAGGCTAACGTAT  
CCCCATCAACGTCGAGACCTTCAAGGATGAGGGTGTCCGCGGCAACACAGGAACGGCTT  
CGTGCCTACCTTTCATGCAGAGCTGCGACGCGGCGCACCTCACCTTCTTACGAAGGGCTG  
GGAGCCCAAGGATGGGGGCGAGCACGCATTAATCCACTACGACTATAACGCCTTGCCAGA  
TCAGGTGCCAAACTGCACAGAATTGTACGTAGGTAGTTGGCGGACATACACCTGTACCA  
TGACGCTCTTAAAGCACTGGCGGGCGCAGGTGGCAGGGTTCGCCGGGCTTCCAGACGCCGG  
TGACTTGAACCTGGTTCGTTCGTAATCCGATCGGTTACTTCTTCTGCTATTTGCGCCACTA  
TAGCGACGATAAACTTTTATGCTCCAGAAAGCAGTGAATCGATTGACCCGATCCATTATG  
GGCAGCGAACTCGCGGTTCTCCAGAACAAGATTTGCCAGCCAGAACAATTAATAGAGTCC  
ACCACACAAGAACTGGCGGCTACGATATCTCGCCCTCCGAATGTCCAAAACCTGCGATCC  
AGTCAGGTATTTAATTAGCTTAACTCAAACAAGCTGGAACGACTATCCTTAGTTAGTCCC  
AGCAGCTCCGAATATTCTGCTTGTGTGGGTAGTCACAGACCATGCTCTGTTATGGAG  
AAGGATCTGGTGAATGGTTAAGACCACACATTGGCTTAAAGGGGGGAGTACGGTGATGT  
CAGTGAAGATCACCTGATCGTTACGACAGCATGTAAGCCCTGTAACTTACGCCGAGT  
TAGCTGTGTTGAAGCCCGGGAAGAGCCAATCAGCACAGCCGTGGCAAGTAGTAAATTGAT  
TGACTTCAAATGATCATGGAGCTCGCCGCGACGTTTCGTGGCGTACTTCGACGTTGCAGC  
GCCGTGGTTCGTACCTGACAATTAAGTACGCGTAGACCTGGATGGCCCGCCACCGGGCAG  
GACGGGTGACCACACAGACTTCATTGCGGCTGGCGAAGCTGTTCGGCCGAAAGAGAAGT  
CCGGTATTTTCGAGTTCGGAACGCGAGCCAATCGCCGGCAACAAGAAGTGGCCCGCCCTT  
TCGTCACATAGGTGTACGGCTATGGGCAATCACACTACAGAAGTGTAAATTGGTATTCGTT  
CTGCTAAAGCGCTACGCAAGACCGGCAAGATCATCAAGAGGGATGACCCGCTGCGCTGCG  
GTGACGCCATTCGGGAATCGGGGGGATTACCCGCGCTGACCCGCGAATGCGCCAAGAACA  
TTATGGAGATGTGCCAGACTGCCGCCAATCACGCCGCGAATCAACGAGGCGAGCAGGCAA  
GACAACAGGCCGACGCGCCGCTCTTAAGCCGAGCCACAAGCGGAAGCTGTTGGCCAGT  
CGACCGCTGCTGCTAAACATTCGGCCAGTCCGCAGATGCACCTCCAGGCCCAAAGGCTCC  
ACGATTAGCCACGCAGGGCCATCCTAACAACGCGCTGCCAGCGAGGCGCGCTGCAGGCG  
AGCCATCGGCAGAGGAGGGCGCAGCCAAGGAAAGCACGCCGAGTGTACCTACTGCCGCG  
GGTACCGCCAGCGCTTCGACCCGGCATAAGTACACCGCCAACGCCGCTTGCTCTTCCTAG  
ACCCCGAGCACCCGCAGGTTATTCTTTGTTGTCGCTCCTCCGAATCCGTATCGCAGCACC  
TACACACCAAGCGAAGAGGCTTACTGTACAGGGCTGAGCGCCTCGAAGGAAGTAGCAATC  
CGAGCGTTTGCCCGGAGGAGCGGAACGCCATGGGGCGCGACGCGCTCAGTACCCGCGGAA  
CATAACTGGGCGCGCAATTTGTACAGCTCTGCCAGCACACTTATGCTGGCAATAGTCC  
CGACACCCACCCATTCTTCCGGCTGGCGAGGTCTCTTCGGATGCGCCGACATTCGTGG  
CCGAGAACGACATGCCGATGGGATTGATGACGGGAGTGCTCTCGGAGGCCGAGCATGATG  
CTTTGCTGCAACTCGAAATGATCGGTGGCCGCGAAGCTATTTATGCGGCCACGACGCACT  
TTCAGATTGACGGTAACGTGGTTACGGACCGTTCGAGTAAGGACAAGCTGGAGTTCATCC  
AGCTCATGGGGCTCGCAGTACTCCGGGCGCGCAATCCTGACGGTGTGACCGTGATAAACC  
AGCAAGAGCTGGCGCACTCCGAGGTGAGCGAAACCGTACTCGATCACATCGACCCATGGC  
GCGAAGGAGATACCTACCACACTCCCCATCATAATACAGAGGCCGGCGCGCAAAGGGCG  
AGCACCCATCACAAATGCACGTTGACCAGATCGAACTGCCGTAGAACAGGTTCCGGTTCGA  
CCTACGCTCTGGATTTCTGCCCGCTGCACCTGCTGACATGACGTCCCTCGCTCTGAGACC  
ATTAAGCTGTGGGACGAGTTCGAGGTCTAGTTCCAGGGCTTCGGTACGCATGACGTGGTCA

GCGAGCCCCTCAGCGATGGCTCCATCATGGCTCCGCAATTCGGGAGGCTCTAAAACCCAA  
CCGGGATCACTCGGCTCGGAAAATTCCAGAACAGCAAAAACGGCGACGTAATGACCGGCG  
CAGCGAACGACCTTCCACTGATCTTTGCCAACGTGGGACAGCAACGGAACACCGTGGGGA  
CAATCAGCCACAGAACCCGGCTGCGACGCGGTCAGGGCTTCCAGCTCAACTTCGTCTGTA  
CGCGGCAGGCTGAGCGTGAGACCCCCCTAGAAACGAGGGTGAAAGCGACGTAAGTGGTAT  
CGACTCTGCGGGGGGTTTTCTCCCGAACTGTCCGCGACCTCCCTACACCTTTAGCTAATT  
GGCGGATGAAGAAAGCCAGCTGGAACATCATGGGCACGAAACTGCGCCTGGTGGCGATCA  
CGGGCCTTTACCGATGTGGCGGTAAAGCCGCTCTGGAACGCGTGGCGATCATCCTTGCGA  
ACGTGACTCAATCGGAGCAAACCCAGCCGACACTAGCATGAAGCTGGAAGAATCCACTA  
TTATCACCGACGTCGTGCGACGGCTTGACGTCACCATCGAACGATTCGTTGCCTCGGACG  
ATGAAATTCCGCAACGCATGCAACAACCTGCAAGCGCAACACGCACAAGGCGTGGATGGCA  
CCGCTGTCGTTACCACTGCACAGCCATCCGCATAATTACCTTCAGTCTGTTTGGCCGTAA  
ATACATGGAAGAGGCGTGCGTAGAAGGCGCACCCGGCTCGTTGCGCAGTAGCCGTCCCGGC  
GGCGGCCCCGGCGAGAACAATCACTCAAGACACATCACAAACTGCTGGCGCCGCGACCCG  
GCCATCCGTCGTTCAATTGCTTACGAGTCCACAGGCCACAGCAAAGCTTACAAGGCTTT  
GGGCCATATCGCCGCTGCGGGTAACCGGTCGGATCAGCCCCCGCCCTGGTAGCGCCGGA  
CCGCAGCTTCACCCTGCCGTAACGCGCCCTGGCGGCCAAGAGAATGCCGGACAGCGATCA  
TCCGGTGCCTATCCTGACCGCAGCGGTAAGCTAGGCCGCCGACGCACAGGAAGCCATCAA  
CCATCAAGTGACCGGCAACGTTTATGCGCTGACGGGTTTCACAGGGAGGTAGACCGCCGT  
GAAGGAGTGGGGCCCCGCAACTCTGACGATGCCGGGTAGGAAGCTATGAACGACCTCTT  
CGGACGTCGGAAGACCCGCAAGAGAGCGGCGACCCACCACGTGTGCATGCGCAACCGCTC  
AGGGGGTGTGCACGAACCCGCTTCTGGCGTGGTCAACCGGGATCACCTTTAGCCCGGGC  
CGGTGCCCGGGTGTAGATAACCAGCTGATCCGCTTACAGTTCTCCCACGAGGGCGAAAAC  
ACGGCGCGAGAACTGGGAAATGGCTACGTGAGCTCGGCTGAGTACCAAGAACTTGGCCG  
TCGCCTCGTGAGTTAATGCGAAGCGGCCCGATGCTATGTGGTCCACTAAAGCAACAGGGA  
AACCAAGTATCTATTGCATATGGATGACTCTATGTCTCTGGATAGCTTTATCGTAGTTTCG  
ACCCAACCCTAAAATGGGAGGCACAGAACTGCTTGACCCCAAACCTCGAAGAATTCGGTGC  
TATGTCCGCAGGCACTCCGCAGCGTCGTTACAGTCACCGACGGCATGATCGCTGTCTAGCG  
GACCAAGGGTAGTGCGACCGTCTCTAACAATGCCATCGGTGCAACCCTACTCCACGCAAT  
GCAACCGAGCAAGAGACCGAATGGTACAGCCGCGCAGCATTCTAAAACACCCGGGACGGT  
TGCCCGAACCCCTCAGGCCCGCGCCATCCTGCCTTTGCGGGATCTGTTCCAAACCTAGTA  
CGATAACCATGAGGAAATCGCGTTCGACCACGGCAAGCGCAATGCCAAGTCCAAAGCCCA  
GGGGTTCTGATCCAAGTTATCATGACGGCTCGTCTAACCGTGAACCCATACGGCAGGCT  
GCCGGGCAACGCTGCTGGCGCCTGCGTACCTGTGGGCGCAGCCGGTGTGGTGCCGACAC  
AGCGTACCTATCCCATGGCGTCCGACTGCTGTTGCGCGCAGATGACGGGGAAGCACGTTCA  
CCCAATCGTCAATGATGTATGGGTACGCGTTCCCCAACTGCGTTCTACGCTTGGCGTTG  
AGAGGGACCGGTCACCATCGATGTGTACGAGCCTTCCGATGGCTCCAACCTCAAGGCTCA  
CACCTGCACCGCGTGCGCCCTTCGAGCCGTACCTACTCGGAATCTGCGGAACTGGTTCGA  
AGGAGCAACCGAGTTGCCGCACCGCCTCGGTGCACTCCTGGGCGATGACTACGCTGGCGT  
CTTGACCTCCGTCGTTGCGCTAGTGTCTCGACTCTCGCCATCGTGGCCCGTTGTAGCAT  
CGAGCTCGAATCGAAGGTCTCTTCGACGACGTGTTACAGGTAAGTACTTGGATAGGTG  
GTAGGCATTGACTCGGCTCCAAACCTTGCCGAATACCCTGGCATCATCGTTTCCCCGGT  
ACGCCACTCTGGCCCGCAACGGGTTCCCTTTACCGGGAGCCTGTTGTTGGCGATTTTCGT  
AGGTACGCGCGAGTGACTTTTATTGCTGAGCTTGAAGGGGTAAATCGTTGCCTCGCCACG  
ATGGGTTAGCTGCCGATCAACTAGCTTGAGAGCAGCTGCAACCCAATTGTGACTAAGGCA  
CGGTCAGCGTTCAAAGACTTTACGTTTGAAGAACAGGCCGTAGGTTGGTGGCTCATCACC  
GAAGTCGTCAAATTGCAACCACAAGGGGTAAACGCCCGGAGATGACGGCTGCTACCGACCA  
CGTACCAACTGGCTCTAGATCTGGACGCTGGATGTTTACGAGCCATCCGGGCTTCGCATC  
CGTGACTGAAAACCTGTACGACAACGGGCGATCGAAAGTACGGAACGGTCACTATCTGATG  
GAAGTCGTTGTCGTCCCTCCCGGTCTGCGTGTGAACCTGCCGGACCACGCGAAATGGTTA  
ATCCGTGACAACCTGGGGTTCAAGTTCCAGATGGACTACAAGGGAGACGAGCTAAAGATA  
CAACATGCCTACAATTGCTCCACGGATGCCTATATCATCTGGATGCCTGACACCGTCCGG  
ACCATCAAGGCCAAACTGCTTCATAAAGGCACATCTGGTTTTCGCGTTTGTGCGCTCTCAC  
ATCCGTATCGCACTGACTGGCCGCTGGAGGTGATATGAGCAAAGGCACAGGCTCTTACGT  
TTCGTTGATCAAGGTGCAATCCGACCAGGTAGCCCACCATCTAAATCCCGGACAGATCTG  
GAAGCAAGTCAACAAGGTTTCTGACCAAGTGCAGCGGCTTGGCCGTCGCCGCGGTTCTGT  
GATGCTGTGGGAGCAACGACTATGGGAAATCGGGTGCAGACTCCTTCCCGCGAAGACGA

CAGGTCCTTCGGCCAGGAGCCCCTGTATCTCCGCCCTAACGAATTCAGCATCATCAACCG  
CAAGTGCGCAGTAGCAGGCTCTACCATGCCGAACCTGGTTGTGTTGACTAAGATAAGCGG  
CAACATACTGCCAGTTGCACCCGATGTCAGTCTGTCGGGTTACCCGCCAGACGCATTGAA  
CAGCATCATCCCAGTCATAAATCTGGTACTTCACGCGCGCAAGGGCGTAGCATAACGGTA  
CTCCGCAGTCGATGAATGCACCAGGCGCACAGCCGCTTACACGGTGGCCGCTAGGGTGAA  
GGGCGGTTTCGTTTGCCCCGAGCTACCTACTGTTTGTAAAGCGAGACAGCGCTCAGGACGT  
TAACACGGCGCAGTACACCACGTGACCACGTAGTATGCGGGCATGCTGGATACCGAGGA  
CATCCCCGAGTCATCGCCGACCCGGCGACGCTTAGCGAGACCGAGTCGTCCCCGAACTA  
CCAGAGGCTGATGAACGCCACTGTTTACGCTTACGAGAAAGACGTTAAGTAGTAAGTCGG  
TACCACGGCCGCGGGCGGTTTCAGCCAGCGGCAATCGCAGCTAAGTGGCAAGCTTTGATCAG  
TCCGAGCTAGCCCGGTAGTTCCGGCGTAATCGGTTCCACCGTGCTCATCGACGGTGGGGC  
GGGCTTAGCTGCGTTGGCGGCGGGACCAGCGACCAGATCGTCTGCGTGGCTCATAATT  
GGAAGCTGCGGCTGATTTGACCACGGTTCACCGGACAGGGCAGGGTTCGTTATCATCAACCC  
AACAAACGCGAGGTCGAACTACGTCAAGGCCATAGCCCAGGACGGCACCCACGACGCAAG  
GACGCAGGTGATCTGGGAGGAATAGCCCGACGTTGTGATCACGCCAAGAGCAGGCCCCAC  
AATCGGTGCGGTACACAACGGAACGTTCTTCGTTGCCCTGTTGCCAGCGGCACTCGCTGC  
GCCAGCCGGTATCACCGTAGCGCCATGTGAGCCGTTTGGCCGGCCGCCTTCGACAGTCA  
ATCGCTGCAACCGTTCCTACGCTGTGACATCAAACTCATCCGCATGGTCAAAGACCGTCT  
GATCATCGTGGCCGCGGCTATCGTGTTCTTGAGTAGCTCTGGTGAGTATTTCAACAGCTT  
CAGCTCGTCTGGACGGAACATTGCGGAGGACGACCCGATTGAAGTTTATTCAATGGGACG  
CGAAGTCGATGTGATCAGGCCAGGCACTTTGCTTGACCAACACCTGATCTTGTTCCAGAA  
GCAGTGGCAATCCGTAGTGCCGGGACGGGACGCCACCAGTCCACTTAACGCGGTTCGTTGC  
TGTACAGTCGGACTACCGCGACAGCAACACCTGCCCACTTGAGTCCAGCGACCAGCTGAT  
CTACTTCGTCCAGAAGCGCGAGGGTAAGGTGTGATTCAACAAAAGCTGGCCGGCGCTTA  
CGCTGTGAGTTTGGATACGTTTTAATACACACAGTCTTCAACTAAAACTGATAGACGA  
CCCCGGGCAGATTGTGGTGCTAACGTCACCACCTGCGCTGCTTGTTAGCACGGTACCCGA  
CGTCAGCCGCTTTGGGGTAAAAAGCTACCGCCAATCACAGAAAAACGCGGTACGGGTCTT  
CAATCGCTGAAGGAGGGGGATGTTACACAAGACTCTGGTTCGGTATGATGAGCATGACGCC  
GAAACAATCAGACCGGGACGTGAGAACGCATCGAAATCACGTCAAAGGGTTCGTGGTACGT  
AACGGATCGTATCACGATGTACTCGGATGTTCCCTCACTGTCAGCGCGACAGCCAGCCCCG  
TTACAGCGCTGCCGGTTCGCGGACCATCGGCAACGACGACTATCCAGAAGTACTGAGGGG  
CGCCTACCACATAACCGCATCGCGCTATTGTTGCGCGGCGATACTTCGTGAGCGATT  
GGCAGCGGTGCGTGAACAGATCGGGCCAACCTACGATCCAAACCTGTTGATCGGTGCGGG  
GTTTCGAGAGTTTCATGGTACTAACCAACCGATAACAGCCGCGCAATAAACGGTCAGGCAAC  
TCTTGACCCGCGACTGAAACTGGGCCAAATCGCCATGAACATCTTCGAATCGTCAGTGAT  
GAACGCGAGCTACTGCGACTTGGTTAACGCTGCCAGCAAAACCTATGCGGAACAGCTGCG  
CCGGGTTGCGCGTACTGCTATCGGTTGTGTACTGCAGGTAGACCAAGTGGTTCGACCTGC  
GTAGGGCGTGGTAGGCGTCTACAAAGTAGTGCGGAGACTGCAGGCTTATGCTGGCGGGACC  
GCTTTTGGTTCCCTGACACTCTCCGCGGTTCGAATTGCACGGGCAGCTCTATACATGTCG  
GAGACAGGAAATGTTCTGGATACCCATCATGATGGCCACTTTGGCGGTCTTACAGTAAGA  
TAAGCGGAACTGAAACATCAAGAACCATAACAGCAGCAACAAGGAGAACACCTTCGCAGC  
GACCGAGCAGCAAGAAGTCAAGAGGATTCTGCCCTCTGAGAAGTATGCGCTTAACCGCAT  
GAACCAACCCATCCAATCGCCAGACGCTCGGAACGCCTTCCGCCACCAATACGCCTCGGT  
CGAAGCATAGCGCGCTCCATTTGGCAAGCTGATGACCACGGACAGCTTTGCTAGCCTTGT  
GAGCGCCGCGGAGCTGCAGGGCATAACAGGTGGCGCGGTCGAGTCCGGCAGGGCGCTAGCGG  
TTCTACGACTTTGATGCTGGACGCAACAATGGTCTGCGGGCCGACATCCCCCAGCAGGA  
GATGCACCAGAAGTATTCCATTACCATTTGGGCAATCGGCGACGTAGAGAATAACAACCT  
GTACGACCAGTATGAGATTTTACAGCAACAGAACTGCTACTTCACGCCGTGGGACTGAA  
GGAAATTCAAGGCCCGCCGTAGCTTCCAACGAGCTCCGTTGGTGACGTGCGGATTGCCTG  
TGCGATGGCATTTCATGCATGCGGATAACAGCATGCGCACGTTTACGAAAGGGCGGCGGAT  
GGATGCGCATAGCGTGGGCAGTAAGCACAAATCTGGGTTAAGTCCACAAGGTGGCGGCTG  
TTTGCAGGGGACCGACGCTAGTTTCGTTCTTCCAACCTCGGAGGCAGGACGTAATGGTACCA  
CAATTGGGCCACGTCAGTAGCGGCGGGCAACAACGATATCAAGCCGGGTTGGCGCCCCCA  
CCGCAGACGGATACTACCAGCGAGCTTCTGTTTAGGATGGCCAAACCGATCTTGCAGAAA  
TAACTGGTAGGATTGTAGCAGTCGAAGATGGTGGAGGGCATGCAACGTGTCGCCACGCGC  
GAGGCTTCTCAGGGGATCAAGAAGGAAGACTCGGTCTGGCGAACATGTTTCGGAACCTCC  
CGTCTTAGCTGGCGCAGCCGCAATCACTAAGGTTCGAGGGTGTCTTGACCTCAACCT

CATATGTATGAGGACCGGCAGCGTACAGCGAGCCTGTTGACAGACGAGTTCCGGAAGCAC  
GCTGCGCAGGAAAGGCACCCCGACGTTACGGGCAATCCCGATGTGGATAACGTGGTGCAG  
GCCAAGATCGTAGGAGGCCCGGCCGTTAGATGAAGATACTAGACGAGGCAACCCACGCT  
TCGAAGCAGCAGCAAACCAAGAACAACAGCCACGGTATGCCTCAAACCTGCCGGTGACGAG  
CTCCATGGCACTGCGCTGCAGTTCGCATAGGGCTCTGTGAGCAAGGACGACTGCGATGTG  
GCCGAGGACAGAGTGGTGCCATCCAGCTGCCCTAACGCCGGGATGTTTCCCGCGAGGTCC  
AAGAAAGCGATGGTGGACAGTGCCGCGCTGACTATGACCAAGGACAAGGCGTGCGTTGAC  
CGTGTCTCCAGCGGAACGTGATATACACCGGGCTTGTTCGATGATACCCAGACCAAATG  
ATAAAGGTGCGCGATTTCAGCGGCCACTAAGATCTATAACGAGTACTGTGTCAACAAGTAC  
AGCGCAGCTATCCGCGTGCTGATGCGGGGTTTCGGCTGGGCGTAAACCGGCAAAGAACCAC  
GAAATGACTAACCAGATCAACCAGCGCTACTTCGACGAGACTGGAAGTGACACCGGCTTG  
CTCAATATGAAAAACGAGATAGGCATGGCTCGCAGCACGTGTTACCGCATGCTCAAGATT  
CAGGACAAGGTGGCTGACTTGGCAAGCAAAGCGTAGATGCCCGCACGGATCGGAGGTA  
CTGGCGCAGCGGGCGACAGAGTTTGTTTAGACCGGCAAGGCCGACTACGCTCAGGGCATG  
GGCATTACGCGCCACAAGACGGATGTAGAGTTCTACGAGGGCTTTTCATCCAAGTTAGCA  
ACTGGTAAACTGGAAGACGAGATGGATCTGGCAGTCGAGA ACTACAACCACGGTAAGACA  
TACGTTAAACCGCTATTGCCAGGCACGCTTATCGAGCCATTTAGCCAGATGATTAGCGGG  
GGCGTTCCGGGGCCCGGAGTTCTACCGCACCTTGGAGTTCCTTGAGGCATGGCTCCGGCGC  
GAGGAATAACAATGGTTCGAGAGATGGGTACCTCGGTAGCTGGAACGTGGGGTAGCTGCAA  
CGCTACCGGGATTCGCTGGTACGTTACTAGGCCACAAGCTACTAGCAGCCAAGGCAGCT  
TGGGTCACGACCGTATTGTGTTGGACTTAGCTCCGCTCGATGGACAACAAGCCGGTGATG  
CTGGAAGCCATACGCAAACAGATCGAAGGCACGGGCTTAATGAATAAGCTGGATCGCTGC  
TGGATGAAGGTGCCGGGCATGTCTTCTGCTACGAAAGGCGTTGTGTTTCAGCGTCATCTCT  
GGTGAGGCGCACGTCTATGTATAGAACCTCGGCATGGCTCCGCAGGGAGCATTCACTAGC  
GCACTGGATGGCTCTGGCAGTGCAATCGTTGACACTGTTGGCGCATGAGCGATCCCCAAC  
GAACCGAGCCAGCGGCACCTGGCTGCACTCAATATAGCCGACGCCAGACTATTGAGCGA  
GTGTTTCAGAAGTAAATGTACCCCGTAGCTCGTAAGCAGGGTGTGGCCGACA ACTTGGAC  
GTTTCCGACAGCAGCTTGACCATCAAGCAGGGTGAACAACACCATGGACTAAAGTGACG  
GACCCGACCAACTGGTACGGCTTTGCACACGCTGACGTGTCCCTGATGGGCGTCCAGGAC  
GTAACCGACAAGGATGGCAAGGTTTACGGAGACTACTAAGGCCTGCTGCTCCGGGACGTC  
AACACAGCAACAGTGAATATCATAACCAAATCCCTGAGTGAGTACAACGAGAAGACACTC  
AGGAACCGCAAAGTCATGACTCACAGCCTCCGCGAAGAAGGGCTTTAATTGGAGGCAGCA  
TGGCTAACAGTCTCGATTCAATCGAAACCAGAAAAGTAACAGTTGTCCCTGCGTCATCCT  
CTGGTTCAGGCTCGCTTGCTACGCCGACCGCACACATGACTTCGGGCAGGCGAGTACAC  
GCTCGCCGTCTGACGCCAAGGCAATCGCCACCGGCCAGAAGCCC GCCAACTCAATGCCT  
TTGAGATGATGTCTGCGTTCCAACAGGCAGCACACGGCGCGGTAGCCGCAATTGGTGCCG  
GAAATTCCCGGGAGCAAGGCGCGGCAGCCGGAGTCGAGGTCTATCAAGCGGTTAGCAACG  
ACCCCTTTAAGAATTCAAGCACCAACAAGTTCGTGCCAAGCACGGCGCTGACCGGTGTAG  
CAGACCCAGCAAGGGACGCTTACGTAGCAGGAGTGCTGGACGAAATCAGTTAGAAGCAAG  
ACTGCAAGGAATCCTTAGGCCCGGTTCGATCAAATAGGCGCGGCCATGCTGGAAGGACTG  
GCACCTGCGCGATCTTACGGATGCTGAGCGACA ACTACCACGGCGTTCGCTCCTTCTAGG  
ACGACCCGAAGTTCACGGCCGTGAGGGCCGAGAGATTTAGAGCAAAGCCTTGAGCCAAG  
AGGACCTCGGTTGGTGGGATAACGCCCGAGGTGAATGCAAACCGCAGAACAAAGCAGGCCA  
GTTTCCAGGTGACACGGTACCACTCCAAGATTAACGGGGCGCAGGCCGATGGCGTTTGCA  
CCGTAATCGGGCTAACTGGTGGCGTTCTTGATCCTGAGGGCTGTGCAGTAGGTCGGGCCG  
CCGGTAAGGTTCGAAAGTTGACCAAGATAGGCATGGGACTTGGCGCTGTCCAGCGCTGCC  
TGATCGGTGGCGCTGACGGTGCCGCAGGTCACGTTCTTGTGGCAGCCCGTCTGCAGTGCT  
CTGTGAGCTTGTGACGCTGGTACTACTCCTACTCCTCTGGTTTTCGGAGCCCTGTTTCG  
ATGGTGGCGTCAGCACCATGACCCGGTGAGTGTGCGCTGAGCCCTCTGCATCTTAGGCTG  
CTGCCTTCTCTGGCTACACCAAGGACCTCACAGAGTCTACATAGACGGTAGCCTGATAA  
TCCACGCAGGGCGTTTTTGAGCACGCTGCGTACCGGCTTCCCAGTCTAGAACGCTCGAGC  
AGACGGCCGGAGCAGCGCGGACGTGTTTCGACCAGCGCTCCAATGCCTACGGGCAGCAAG  
ACACACGGGGTATGCCAGACATCGAATGACTCCTGCCTGAGGCAGAAACGACCAAGCTGT  
GGGACAGCGGCCGAGACGAGTTGACATGCGTGCTTACGACGGATCTGGGAGGGCAGCTCA  
CAGATGTTGTCCGCCTGACGCCGGGGGGCGATCAGCGGGGCATCACCGCTGCGACTATCC  
CGGACAATGCCAAGCGCCTGATCTACACCGAGAAGATGCTGCCCAAACCTCCATAACCAGC  
TAACCGTTGATCAAGCCAAGCTTGATACCTTGATTGGCACCTGGGCTGCACCTATTGCTG

CGAGCGCGCAGGTAGCAAATTTTCAGCATGCCGCAATTAAGTCCTTTCCCACAGTGGGCATC  
CGATAATGAGGTGGATTGCAGCGAATTTGCTGGAGTCGCCCTCGCAAGCCGGTGACCGAC  
GCACTGCCGCAGCAATAGAGCATCCGATCCGCCGGCGTGAGTACAACAGCTTCAACGCC  
TGTAACACGCGGCGTATCGTGCTTGGCGCTATTGGACGGGCGGCTCGTTGGTCAAAGGCA  
TCCTTTTCAGGCATACGCACTTCGAGGAGTTCAACAACTGGTAAGCACTGAAGGGCCAA  
TCAGCACAGCCGGTAACATCCGTGATGCGCACCCGCGCGTTCGTACAGCCGCCGACACAA  
TGGAGGAGGGTTTCGACCATCGTTCAGCGGACCAGCGCCGCGCCAAGTCACTCGGTTCCG  
AGCTGCTTACAGCTTCCACCATCGGCTACCCTCCGCGCTTGCTGAAAAGCCAGTTAATCA  
AAGAACACCGTAAGCGCCGTGAGGCGATCCCTGAGGAAATCCGCAGCCAACGGCAGGACG  
CATAGGCGGGCATAACCGCGACGGGCGAAGTTCGCTCAAGAAGTAGCGGGCACCTACATCA  
ACCGCGCACGCGTGGACGCAGCAGTCGGTCCTGTAACCACGGGGGATATGTGTGACCCGC  
ACACACCAGGCAACCTGCGAGGCGCTTTAACTCAACACGCCATGAGCGAAGCAGACATCG  
ACCTGTACATGGTCTGGGTGGGTGTGGTGGGCGAAAGCACTCCAAGGTCGCTCCGCTC  
TCGAGTTGCCCAAGGAAATCAAGCTGCCTGGTTGCACCGTGTTCGCCAGGCGTGACGCAA  
TCATCAACGTAACCTCCGTGCTGTTCTGCTGCAACTCCCGCTACGTTAAGGGCGACGTT  
CGCTGAGCCGCTGTGGCATCATAACGCAAGGAAGGATTCGACCCGCTCTGGGAAGTGTGG  
TGTGGTCCGGTAAGGGCGTATCAGACAAGCGCGGGCCCAACGGGCAGAACGCCTTCCACC  
AAGCCGTGTCCGAATTTATGGGCAAGCCTTACGGAACCGCGCACCGACTGGCTGACATCT  
TATGCATGCGGACCGGCGCCAGCCGCCTGGGCTAGCAGTGATCCCTCAGCTCTTCGCGA  
GTGGGCGGATCGCTGCGCACTTGGGCTCATTGAAGGCACGGCACTTTGTCAAACACCTAG  
CACGCCGTGTGGAGGAGGTACGGAGCGGCAATAGAAGCAACCCCTTGTACTCGCTCGTGC  
AACCGGGCTTCCCCATCGGCGACGAGGACCTCGCTCTTATCCTTTGTACGTCGTTTCGATG  
ACGTCCAGTTGGCAGACATCGACGTTGCTGGTGTCTAGAACGCGCACTCCGTGGCGTAT  
CACAGGCACAGTACACCCCGACGGGGCACTGGTACGTTTCAGGCAGTTCAGACCCGAGGGC  
TACTGGAGCACATTTTCGACAAGGTCATGCGGTATGCGTACCACAGCACCTACCACTAGG  
CCCGGCATAGCTTGGGCATCTACGACAACATGATCCCCGCGAGCTAAAAGACCTTCGCA  
ACATCTCCGAGGTGACGGCACTGGCGCTCTCAAGGCATTCGACATCCGCCAGACTGCAC  
ACCCTGCCACGATGCAGGAGGTCCCAAGGTCACCGGGCGTGCTGCGAGCCCGATCATCC  
TGCCCGACTTCCCTCGGAGAGCGACAAGCGTTCGTGCATGACTCGTTCAAGCCCATCCTGA  
CTCAGTTCCGCTCGCACTCCCTGAACCCGAAGTCAAACCAATGAACTCGTACTCAGGTTG  
ACAAACGCACCGCGAAGGCTCTCGGTATGATGTTGGGCCCGAAGTCCGGTGCCAATGCCCG  
CGCACCTTGCCCGCGTGATAGGTGTATAGGCTCTTATGTCCGCTGACTGCTCTGCCGACT  
ACCGAGAGAAAACTTACGCGCTGATCTGCTGTCCCGCGCCACGCTGAACTATGCCTCTC  
GGGCCGCTCCGCTGGGCGTTACGGTGTATGCTTGCATGGGACCGCTGGGCACAAAGCTAT  
CCGGCGTCCGCTCCGGCTCTCAGGATGTACTCGGCAACGTCCCGGCGCTGGGCTACGTGT  
CCAAAACCGCATAAGCGCTGAAGGATACACATGTGTCCGGCATTATGCAGGCAATGTCCG  
GCGGGAACACGGTGTCTTGTGATGACAGGCGGACACCTGTGCGCACAGGATGGAGAAGGAGT  
GATGTTGGCTCTAAGTCGAACAGTTTTAATTGGGGCTCTATAGCAACACCAATACCAATT  
TTGGACGCATCACGATAGACTACGTGTCTAACAACGGGTTCCCCGGCAATGGTTCCATCA  
TGCAGATGGAAGTCAACTTAGCTGGCAACGACCCCGTTGTAGACTCTAGTGGTGATACAT  
ATTCCAAACCCGCCGAAGGGAAGGCTCAGTTCTTCACTCCCGAAACTGACACCACTCCAT  
GAATCGTGAAGAACTCGCCGCTGGGATTCGCCGGCTCAAACACCTTCATACCGTTGAGC  
CTGTACCAACCGGCAAGATTGTTAGGGTGTACCGCGAGGCCTAAGACCGTTACTCGCTGC  
GCAGCTACGTAGCGTTGCATAACGTGACCTCGCGTGATCTTGACGCAATCGCCCGGCGA  
ACGTCTTCATTGTTGAAGAAGCGAATGACGCAGCGCAGTTCGGAATCGACACGGACCGCG  
ACACAACACGATCTGCCACAGCTGCAACAGACGTGGCGCGTGCAGCTCTCGCAATGGGAG  
CCACCGCTCACCGCAACGTTCTGCGGCTGGGGCCACGGCTGACGCTGCTTCTAACGATG  
CCAAGCTGGCGCTGGTCAAACCAATAAGGCAGCACATGACGCAACAACGGCTGGACAGA  
GCTCCGCGCTCTTGTGGACGCTGGCACCTGCTGCTCATAACGAAAGCTGACTAGGCTATCG  
CTGCGTTCGAACACAGGCGACGCCAAGGCCAACCGGGCCGAAGGCAGGGCCAACGGAATTG  
ATGGCAAGGCAACCGCTGCTGTGGGCCCGCTCACGCGGGTACCGCCAGTGCTCAAAGGA  
CTGAGTCCACTTTAAAAGCGATTGACGGCAAAGCTACACCGCCTATCCACACCGCGTACT  
CAGCAACCACTATCGCGAACCACCCCAAGGCAACCGCCGATGACATTGAGGAGAATACGT  
CGCAAGCATGGGCTACGGCCAACGGGGCCGCTGCTCACGTCGCAAGCGCTAATAAAAAG  
GTGATCAGAGAATCCAGACCTCCAACCTTATCAAGCTCAAACGCGGCTGGCAAGGTAAGCC  
GCTCCGGTGATCAGAGCACCGGAGTTCAGTGGTTCGAGCCGCGTGTGCAGGCTATTGCCA  
AGGCCGCCCGCAAGGCGACGTTTTGATTGACACGTCGCTGGGCAGACGGTGCATGATGGCAT

GACTGGCGTCTGACGAGATTGTCCAATTCGCTCAGACTTCTGGTGACGGTTCAAAGTGA  
ATCTCGCCATGAACAGCGCATTTCAGGAGCGGGAGCGGTTCTGTGACAGTTCGAATGGCGGG  
CGGTTTCGATGGTATCCGTCGATACTTATCACACCTACGTCAACCCGCAGCCCGAAGGTT  
AAATCAGTCTTCGGGATAACGTGTCCGTGTGCGGTACCATAACAGTCACCACTGCTGTCA  
ACGTCAACACCTACACTCCTAGCCAAGTCTGTGTCAGTATCTACGGCGCAGTGCGGAAGTTG  
CAAACGCGCACATCTGCTTCCAGTACCAGCCCAGCGGAGATCTTAGTCTGATCTATAACCG  
ACTCGGGGTGTACCATGCCTGATCGGACAGACGGTGGTTCGCGACGCCTTGGCGCTGTACG  
GAAACAAGACCGCAGTCTTCAACGGTAACATCCCTGCTCCCTCTGCCGCTATCTCCAGAC  
GACTCGATGCCGGTCAAATGCCGGCGAGCGGGTCTTTGTTGTAAGCCAACGGCGCCTCAT  
GGCTTGCGAACGACAACAACGTGTACGGTGGGGTTTCGGTCCGCTAACTGTCCAACCTGGG  
TAAACACCGACCTCGTCACACGTGCCGAGTTTGGCGGTGCTGCCAGGCTAAAGTCGCAG  
GATTCACCGCCGGGCAAGACGGCTCCTACTCCATGCTGTAAACTCGCGGTTGGATCAACG  
GCAGCCCGGATGAACTCGTCGATGGGGATCAGCTCCGCTGGGCGACCTGTGCAGGAGACT  
TCTCGGATATCATCGGGTACGGCACTTTGCATTTAAAGCGCCGTGTGTCCACCGGTATCA  
AGGTTGTTTTTAGCCCTAATAGGATGAGGGTCAGCTAATGTAATTTCCGAAGACCTATCG  
GGACGGGTTCACTGTGTACGGCTTTTCGTCGTCCACGGCACGCCGAGGATTCCGGCAAGTT  
CATCCCGTCCGGAGTGCTCTGGGGACAACATAACGTTCCCTTACGCTATCAGCGCTCTCGA  
CAATGAACCTCGGGGCAAAGCCTTTTTGGACGATTGCTCGTCGCTTTGTGTGACCCCCAA  
CAAGCGTAAGTCCGACTCCGAGCACGAAGCAGAGGCCAAAGTCGCAGCCGAGCGACAATC  
TGTGAAAGCTGAGGTATCCGACCGGACGATCGTGGTACAAATTAACCGTGCCTCGCCAGA  
ACAACCTGCCCGGCCACCGCGATCGCACTCAACCTCAAGCAATAAGACATTGTCAGCAC  
TGACGCTGCAGACATGGAGATTTCGCATTACCTGGACTGCGGGCGTCCGGCAGAGCCCAATT  
CTCCGACTCTTTTGTCTAGTTCCGCAACACTCCGGTGGTGCAGGGAAAGGTGGGTATCTG  
GATTTTAATTCACGCAGGCTTCAACCTTTTCGACGCATATAATATGAATCTATAATGGCA  
GCTTCTAGTGCTTGCCTCGGCAATCTGCAACGTTTGTTCACCGCTTACTGGTGGCATCGG  
TTCGACGCTGTCGAACTGCGCGTCGTAGATGATGGCTGCGTCCCCTTACGTGCAACGAC  
CTTCCTGTCGACCGGGCGTTCTTTAGCGACAACAACATCACCGTTCGAACCCGGTTGCGGC  
AAAGACTTCGCCTGACTTGGCGCTCAGCTTGTGTCGCGCCTCAACGGTTCGGTGAGCCAT  
TTAGAGCTTGACGGTGTGCTCAAAGGCTAGGTAGGCTGCATGTGAGTTCGGTACACAGGG  
AATTCCAGACGCCCGGCCACGCACACTTGGCGCTACTTCAGCTAACATTCCGAAGCCTCG  
TGCCGTTTCTGAATATCTGCATGAAGTTCTTTTGGTTGCGGACAACCGCGATCCAGAAAG  
AGATCGGCTTGTACCTTGAAGCTTGGCCCCAAAGACCCGATGGTTGAAGCAAATCGCTCTC  
AAGCCTACTGCACCATTACCGCATTGTTTCGACGTTTAGACACTGGTTCAAGAACAACGTT  
CTCGAGTTAGGATAATCTCGGCATGTGGTAACCAGGCCAAACGAAATCTCGACGCTAACCG  
TCTGACTCATTATGACGATGGTATTTCTGGCGTGCCTCCGAACCTGACTCGCAACCAGATG  
ACCGACTCTCCATGGAGAAGGTTCGACGTTACACCATGGTGAGAGGCTTGGATAAGTTCG  
CCAAAGTGGCGTGCACCGTCAATTGATGGTTACACGGAGCGTAACCGAGTTGACTTGCTGA  
TTCCGGACGGCGAGCACTCCCTCCTGAACTCACCCACCGCCACCAACCCGGAAATTTTGC  
AGCAACAAAACCGTGCCGTCGAGTCCATCGCAGTCTCTCCCGTCGGCGCAAGCGTTCGTTA  
TAGAACATCGGGGCGGAGCGATCATCCCCGGGACACCGCAGACGGACGCTTCATCGTACA  
ACACACTCCCGGCAGCACGCTATGGCATGCGCAATTGGCCCCGGACGCTACCAAACGGTTCG  
AGACAGAAACGGCTTATGACGTGCATCTGGCGCAGTAGATCTGACATCGCATGACCCGTG  
ACCCTTCTCGGCGGGCAGGCGTGGAGATAACCTAACGCTCCTTCGAACCTGTGATCATG  
AGCTGCAGGGCGAGGACGCACTGCTCTCCAGGGGGAACAAGTAGGGTCTAGCCAACTTCC  
AGCTCCAGCACATGCTGTGTACGCGCCTGCACGACATCGAGTGCTCCACGCGATAACCG  
CTCACGTCGTCGTTATGAACCACGGCACGCTTATTCGAATGCCCTTTGAGCGTGGCGTCA  
ACGCTGAGCAGCTTCGACAGACTAAGGTCCGGTTGACTCGATTTACACTGCTCGATGCATT  
TTGTCATCGGCAAGGCGTTCGCTGCTCATGCATGCCGAGTGCGGGCAATCCACACCGCTG  
GGGGTGGCAAGAGCAGTGTGTAACCGGGGTAACCCTAGTTGACCAGCGCGGTGGTAACA  
TCGTCGTCCGCTCGGTAGAGGCTATCCCCGTCGAGTACGTCCGGGACACGCTTAAAGAAGC  
TGGTGTGCGACTGCAAGCTCTGGGAGCCTCGCCGACTCTTATAGAGATGAAAATAGGAC  
GTGGTCGCCATAACACAGGTGCTGCTTCCTCAGCTACATGTTGAGGGCATGCCCTGCGTTG  
TGCAAGTCGTGTACAACGCCGCCAGCAAGACGAGCGTATCGCCGACACTCTCGAGCCAA  
TCGCAGCCAGTGGGGAACATCATGTACGAAATCGTCGTCAATGTCCGCCGGGCTTCGT  
CGCTCCGCCACCCTGCTGACAACCGCGAGTTGTTTCGCCCTGCTGCACCAGGTCATCAGAT  
TCACACGTGACAAGGGCGCAATGGTAATAGACGACTGGCTGGACGTAAGTACTGAGCATCGCCG  
TAGCGTACTTCATCAAACCTTTGCCCGAGACTCCGCACTCGTTGCGCAATGAGTCAAGC

CTCAGGAGCTGCTCAAGTTCATGGAAAACCCGGTCAGCCACAACACTACTACATCAGGGCTG  
CTCAAATTGGCTACCGACAATGAGTTCATCCTAGAGCATGGTAGACAATGCGACGAGATT  
CTCGACTCTGCCATCCCGCGGTAAATTCCACGCCGGCCAGAAGTGCTGCCACTCCACTAT  
CCCTGCAATCTCCGCAGACGCAATCCATAAAGCCCAATCCGGGCTGAACAGCGGCGCGCC  
CCTTGCCTTCGTCACCGCGGCACGGAACGCCCTCCGCGGGCTCCCGGCCAGAACCCACT  
CGTCCGACGCGGTTACCTACGGCCATATAGTTTACACTGGCGGTGCGACCTCCGAACGAAC  
CGTGGCGCCTGTCCAATGGAACGCCTTACCGTAGTCGCTGCTCCTGAAGAAGTGATTTA  
TGACCAGGTTCCCCAAGTAGGGCGCCTTGGCGCTCTCTACTGTGGCTGTCCGTAGTAACT  
TCGAAACGGGCTTCAGCGTTCACCAGCACGAAGGAGCAACTGTGAACCGGGGATACCTTT  
ATTCAAGGGGAAAGCTCACCATCTGCACCGGCCGCACTGGCCCCGAGGTACTGTTAGGGT  
CACTCGACAGTGCCGCACAAGGCGCTGAGCTGCCTCCACGGCCGCGAAGTCGGCTGGCG  
CCGCGGCTAAGCGCCCGATCAAAAACCCGCTGAGCCAT

>NewGenomeName\_188

TTGTTGACTATCGACCTTTTCACGAAAAATGCCGCCTAATAATCGGAGGTTTTACTACAT  
GCTACAACACTCAACCGCTTCGGACTTGAACCACAAACCAATCATCGACGCTATCAAACC  
TCTTGTTAAACTGCTGGTACGCCAGTGCTATCTCAAACCTCGTAACCTCCGACTCTGGCA  
CCGGTCCAACAATCGCGTAGGACTGCTGGAAGAAATTCTAAATCCTTACAAAATCCGTAA  
TCGCCGTGGTGATAATGCTGACTTAGTACTGACCCCTTAATGCCAACTCGCCACTACAAT  
TGTTTATCTTGATCACGAAAAGGGTCATAACCCTCGCTTTAAACAGTACCCAGAGTCAGT  
CACTCTGGACGATATTATTACAGGCAAACCGAGTCCTCAGCCTGTCCCTTCTGAGCTTCA  
ACTACTCGTGAAGTCTGTGAGAATTACAGGATTAATGTATTCTCGATAAACGAAGAGCT  
CGTCGAATGCTATAACGTCTTCGGACAACGTGATATTAATGACACTATACACAAAACCC  
TATCGGTAACGCCAAACCGGACTTAATGTATGAAACATCTTTCTATAAACAATGGCCTGA  
ACTGGTAAGAAAACCACCCGTTTAATATAGCAGAAAGGACTACAACCTGTGCTAAGGCTAA  
GGGTACCACCAATGAGTGCTTGAAGGTCCTTGAGGCATCCACCACGGAATTCCTTCGTGG  
CTTCACCGTTAAGAGATTGATGAATTCTATGCGTCCTTGCCCAACTGAAGGCCGGTATGT  
AGTAGTCGACACTCTCACCTGAGCCGCTGAACGTTTCAAGGACTTCTATGCTAACCCCAA  
TGCTCTTCGTGACTATTCGGTTATATTGTCCGAATTGTTCTCACTGCCTATGGTAGTTC  
GGTCCATTATTCATAGACGGACTTCTATCAGAACTTTTATGTGCCTGAGTATGACACCGA  
GCATGTGCCTTTACTCTTTCACGCAGTGCATCTTATGCACAAACTTCCTTTGGGTTCTAT  
CGACCATAATGTTAGTGAGCTGGAGGGTACTAAAGGTCAAATAAATAGCTTGAAAAACAC  
ATAGCCTAATGGTTATTGTATAGCCGTCGCAGACCGGTATTCTTAGGATGCTTTCTCTTG  
CGTTGGATCGCTCTGGCCTGTGCTGACAAGGGATGAAACACTTAAATACACCTCGTACAT  
GGCTGTAGGCTTCTACGTGGCTAAATCCGTTAATGAAAAATTTTATGTTGACATCGCCGC  
AAAAGGCTGGGGGAATCGAAATTTGAAGCAACATGAAGAACGCAGATCGCTCTTTTACC  
ATAGAAGCTTTTTCGAATTCGGAGGAGCCACAACCTTGGGGATGAACTACTCCCAAAGAC  
GACGCTGAACGCCGAGTGTTAATCCAACCTTCGCAAGTAGGTTACTACGTGTCCCGTT  
CAACAACGTCTTGAAGCAGATCGCCAAGTAAGAGCTACTATTGAGGCTGGCAAGGCAATC  
TGTAGCCGACGTTTTGGAGGCGCAACCTGTGACGAGCAATCAGCAAAAATTCATGCGCAA  
TTTCACTCGATCAATCGGAGCGTCCATCCTAGAGCGTGTTATCTCTTAAAGGACGCAGGA  
GTTAGCAAATACAGATATTCCTGATGAGGTTAAATACTACGTTATTAATGCAGCTATTGC  
AGTTGGTGACTTGCGGCTTGCATCCAGCTGGACTGCTGGTGGAATGAAGAAATTCAGT  
CCCAATTTAATGAACTCGAGGGCGTCTTCTGTGCGACCTTTCGCCATAACCGCATCGTG  
GAAGCAAAGACTGATGCGCTTGATGATGACATGTGGATCAATATGATCCGCGCTATTCTT  
AAGGACTGGTTCCTACTATCAACAACAGTACGTGCATGGGAAAGAAGCGATCCTTGACATT  
CTAAATGGACGTGGCCTATTATCCACCTTGCCAAATGGCTTAGCTTACAAGGGAATCAA  
CATGACAGCAAATGATAAGCCAGTAGCCTTTCAAACGGCTATTCTCTCCGTCATACTTAT  
TCAGGCATCTTCTGTTCTTGACCTTACTGAGGACGATTTTCAGATTCTCACTACTGACCG  
TGATATGATTGCAACTGACCGCTCCCTAGCTCGCCGCACTATTGAGGCTTGGCTCTACGA  
AACTCTGGACATTGAGGGATACCCTCGCTTTCGTGCTCCTATTGAGTTTATTGGTGCTGT  
GAGTTCCATTAGGTTCAACCCATTTACATTCTAGCGCCGTGGCTTATTATGCAAGGCC  
TCAACTCACCTAAAACGTCATTAATGGGGTCGATGCCCCGGGTAAAGCCAGTTAACTCTT  
CGCGTTTACCTCGCGTGTACTCGCCGAAATACTAAGCTTATTAATGAAGAAGAAAAGAA  
AGCGCGTACAAAACGGCGCGCTCAAGGAGTGACGGATGCCTAACAAATGCTGTTCCGGCTCT  
CTCGGAGCTCATCTAAAGGTGGGTGCCTCTGGTATGTTGGCGGGACACAGTTCGGACCTA  
TAAGGGGATTCGTCCCCTCTATTTAAGGAGGCAATGCATCTATCTTACAAAATTCGCTA  
TACGTATTACGGACGACCTCTCACATCTGGGATTTCGACGGTGCTAGAATCGGAGAGCTTA

AAACGATCTCCTGGACTCCTGTTGTCGCTGGTGGTTCTTTCCAAACTGAAATGGTAGGCT  
CTATTAGTCTTTCTCCTCTCATTCTTGGTCTGGCTCGCGACTCTCGCGACGACGTCTTTA  
CTTTGGAGATCCCTCAGCGTCATGTCTATGGTCAACAATGGACTGACTTTATGAGGACTG  
GTGTTAACGCAACTCCTCTGGCTCCGGAGACTTATTCATATGTCTGTGATTCTGCTGGCG  
GGCTTGGCACTATCCCGTACACTGATGTGAAGATTCCTAAATACCTTCATCAAACCTTATC  
TCGATTATCACAACAACACTTGAAGCCGACGTGATATAATGATCTCCCCTATGCTAAGC  
TAACTAATATAAACGCTGACGATTTTAACTGGGGCGTTCTTCTCGCTAACTTAAAGTCTA  
TCTGCACCGCGCCCATGCCTCCTTATTCAATTTCAAGGCAGGAAGTGACTACAGGCGCTA  
CCACTATCGATATTATGGGCCTTCAAGCGGCCATAACAAACTCCACACTGATCAGGAAC  
GTGACAATTTCAAGTCTCGCTACCGCGAGTATCTGAGTGAAGTTTGCTGTACACGTCCT  
ATTACGATGATACCCGTCCTTTGCTCCTGAAGCGCTCTGAATGCTGGTCTTCTGGCTAGG  
ACCTCGCCGGTTCTGACCAACCTTTATTGGGTCAGTTCTATGGTCGCGACCAACAAACCT  
TTCTCCATAAAGTGCCTCGCTCATTTGTTCTGGAGCAACGCGGACTTACTACACTAACTG  
TTCATCGCTTACCTCCTGCTCATGAAATCGAAATACCCTATCTCGTCCGTAAGGAAACCC  
TGCATATACTGACATTGTCTGTGAGCCGCCTCTTATGTCTATCGGAGATCTGCGTGTA  
GTTAGGTAAAAGACCCCTTTCCCTCTGCTGGAAGTGGGAAATTCATGTTGCCGAAGGTC  
AATGGTATCGTACTCGGCCTGACCGCGGGGCCTTCGCTTATAAGTCACTTTACGGCTTCC  
CTTTCTATTCTGAACTGCCGTCAAAGGATATACTCGAACGTAGTCTCATTCGTACCGATA  
ACTATGGTTAAATCTTTCAGGCCATGCAACTTGCACACTGTAATATGCAAACCTAAATCTA  
ACCCTACTGTATAACGTCCAATGCCTACCACTCGTCATGGCATCAAGACGTGACAAAACCT  
AAACGTTGCAGGGGTACTATTGTTAATTTGCGCCTGTTCTGGGTTGAACAAGCGGATCGC  
GTTTGCTAACCTACATATGGAGATGCTGTGGTTTCAAATTTATCTCACTAAACATAATTC  
TCCGTTAACTTCTCAGTCTATTACTGCTAGAAAAACCCCTGGGGCTGCTGCTCCGAATAC  
GTCTACACCGGAGATTAGACGCTGTACTATTTCCGCTGGCTTAATTCTGACTTCGGCCGA  
GGCAACTTCTAGAGTCGCTCATCTCTTTCGTATTGTGCAAACCACTCCTACTGACAATCA  
GGTCTTATCGGTGGCCGCTTATTTATATGGCGTACCGTCTGATCCTATTCGTATTGCAAT  
TCGCTCTGAGGTCGATGACGGTAGCGTCCCTACTGATCTCGCTGCTCTGTCCTCTCCTTA  
TCCGGTGGCATTTCGTTACTTCTGGCAGTGGTCTGTCAATTGGCAGCTGCCGTCTCTTTTCC  
GCCGCATCCTGTTACTGCTGCTAATGCTGCATATGCTGGTGTAGTATCAGGAGCAAATC  
TTGGTGTCTGACATCGTGTCCGGACTCCTATCTGATCATCAGGTAACCCGTGAAATAAC  
CGTATTACAACCTCTAAAAGAAGGTCAAATCTATGTTCCGGGGCAATCGCTGGCGGTATTG  
CCCCCTCCCTTGCTGGTTCGACTTCTGAACAAAGCATTCGGGGGGCGGTTCTTGCAATCCCC  
AACTTGCCTTCAAGGTAATGTCCTCGCTACAGACAGTAATGTAATGGGTGCTAATGATG  
CTGGTATCGAATCCGATATTCAGAGTTCGGATCATTCCAATTGTTAACGAACTGCTACCA  
AACCTATCTCGAGCGTTCTAGCCGATACTGGCAAAGACGCCCTAACTTCAATCACTGACG  
CTGGAGTTTATTAACCTACGGAAAAAATCGGCATCTCTGATGCTGTTGCTGCTAAAGGTA  
AGCACACGAAAGATTATATTGCTTCTGCGTTCCCCGAACTTAACCGGTGGGAAAGTCGTG  
GCTCTCGTGCTCCATCTGATATACTGGTTCGATGCGGGATTCCAGACCCCGACAGGAATAA  
TTCGAATGGAGCGCGACAATAAAAAACAAATCTCTAAGTTGCAGAACTACACCGAAACGT  
ATATCACCGGTGTCCAGTCTGTTACTTCTGGGCAAATAACTAAGGACTCTGTGTATGCTC  
AAAAAAAATGCTCCGAAACAACGGGAAAGAATCTATGTCACGTGTTGGCGCTATCGACC  
ATAGCATAAGCCTACCAAACAACCAAACTTCAGACATTGTGCGGCAAATGTTTACTC  
AGGCTAATACCTCAGGTCACAACCTTACAAATGGCCAAATCGAACATCTTACTCGAAGAG  
TAGGCCCTGATTTGATGCTGTTTCGTGATAACACTTATGGTACGCTTGGAGAGACGGACC  
GCTCGAAGCAGGAGGTCCTAACTCTCGTTACGCTTCCCTCACAACCTCGGTTAAACCGCCA  
AGGATGTATAAAATGCCGTTAGTGACGCATCTGCTCGTATGGTCGATTATTGTAGTGGGG  
TAACTAAAGGTATCGCGGATACGTAGAACGACTATTTCAAAGATGACACGTGCGATGGGT  
ATAGCTAAAACCAACGTACCAAATAA

>NewGenomeName\_189

TTGTTGACATTCCCTAAACCCTTATGAGACTCTTGCTTCAACGCATGAAGTAGGAGTCTT  
TATTATGAAACCCGCTTACCCTGACTCATCCGATTCTCGGCTCTTGGTTGTTTAAAGTG  
CCCCGTTTATATCCGTTATGAGCAGCTTCATTACGGTCGTCTTATCATGGTTCGCGCTGT  
TCGTGATTTGTCCCCGCGTCAGCAGCTTATTGCTAACCCTAAAAACTGCTTTTACGTTGT  
TATTGCTGAGACTGACGTTACTTATTGTTCTGTCACTTATTTTGAATATGAGGGTGAGGA  
ATATACCGAGTGTGATTCAGCAACTATGGATAATATCCTTGCTTATATTAACCTCTCCTCA  
TTCCCTTCGCTCTGAGGAGGATTCATCCGTTGATGTTGACGATATGGCGTGGCTTTATGA  
AATTGCGGAGTAAGTTATGGAAACTGTCGTCGGAAAATTTATTACGTTGGCTGTTGTTGC



TCTTTTGCTGTATGGAATTGCCCGCTTAATTCGGAGGTACCCATGAAGTATTTTAGTCTT  
GTGGATGAACCTTATGCTTATTGCCCTGATACGAGGATTATGCACATTACTCGTAGCCGT  
GTTTCTGACCCTCGCTAAGAGCGTCGCTTTCTTACTGATCAGGAACAATTTGCACTTTTG  
GATTGGTTGAAAAACGCCCACTTATATTAAGTCTTGACAGGCCTTAAAAATACCATCT  
GTATTGCCCTCATAGGTTCACTCCGAGGGGTTTTTTGCATGGCTTCTGAAAGCTTCTCTG  
ATGTTGTTAAATCTGTTTGGTTCGCACGCTACGGCTATGCACGCTCATCTTCGAATGGCTG  
TTCAGGTTGATAATCGTAGTCGCCTTCTTTCTGCTTTGGTTTACCAGAGGGTAAAGCGCC  
TTTCCGAAGAGCCTCATTGGATGATGAGACTTATCCCTTTATGAATCTCAGACTGGCC  
TTTTGGAAGAGCATATGGCACTGTTTCGGACGTGTGCAGCCCACTTGATTATAGTAACA  
CTATAGAGCACCGTACCCCTTTGGATGCCGAATGAGTTCCCTGTTTGAAATGATCTGCC  
CAGGCGTTCGCTACGGTAAAACGTTGAATTCCCTTTGGATTAAGTATGTTGCTCAATGGC  
CTGAGAAGTTAATTCGTCAAGAGTTAGACATGGTTTAGCCGTTATCCTTTAAGGATGAGG  
GTGCTAAGTAGATGGAGAAGATGCACGAAAAAACACGCAAAAATCGCATGACTCAAAAAG  
TAATTAATTAGATTCGTAGTGCTCGCCAAAACGGCTGGTTTTTCGTATTTGATACGTTGA  
CACTTGCTGATGATCGTTTGCAGGCTTTTAATGAAAACCCCAATGGTCTTCGTGATTATT  
TCAGGACTGTTGATCGAGCTGTTCTGCGCGCTGAAGGTCGTTCCGGTTAAGGATTCCTACA  
ACGATTGCTATCGCTATTTTTGTGTGCCGGAGTTCGGAGGTCAGCACGGTCGTCTTCATT  
GGCATGTTGTGCATATGGTTCGGACGCTTCCTTTGGGAAGTTACGACCCTAATTTTCGTTT  
GCAAGGTACGTAATTATCGCCAGATTAACCTCGTTCCGTGGCATGTGGCCTTATGGCTTCA  
CGCAACCGATAGCTGTACGCTATAAACGTGATTCTTATTCTCGCAAATGTTGGTTGTGAC  
CTGTTGACAAATCAGATAAAGCAATGCAGAGTAAGCCCTATCAGGCGGTCGCATGGTATG  
TGACCAAATATGTAGCTAAGCAATCTGACCAGCGTCAGAAAGCTATTACTGAGAGACAAA  
AAAAATGTAAGAATCCACTTATGGCAATCTACCTGAAAAAGGAATTCAGAGATCGCAGCA  
GCCCCGAACTCGGAATGGAGTTACGGTCGATGGCGCATCTCAGCAACAAAGTGCTTCTGG  
AGCTGAGCCGAATCAGCTTCGATTCCAGCCCTCTGTATCAGATAGTGACAGAGTACGCCA  
AAAAGCAATTGACCTTGAACATCGGCCGCGCTGCCTTTGCACGTCAGTTTTGATGTGCGCT  
CGGAACTGAGAAGTATGTTGAAAAATATCCTTCGTTTGTATGAAAAAGACACCCGAGTTCA  
ATTGGCATAGATCTATCGCTTCAATGACGGTCACCTTAAAAAATGGGGATATTTCTGATG  
AAGCACGTCAATACATTATTGATGCAGGAATTACGCCTTTTGATTTGCGTGCTAAAGCGA  
CTCAAACCTTCGGTGTTAAGTGACCCGGATTTGTCTCAGGAGAAGGTTTCATGCTGAGCTC  
GACTCGTTACTACGCAAGTTATCGCGCTACTTTGACTAAGCAGCTGATGTTTTTACTAA  
AGCTGACTCTACCAATGATGATGACAAATGGCTTAATGCCTTTGGTAATTTGCTCCGTCA  
GTGGTTTCAGATTGAGGATTGGAAAGGCAAGCATAAAGAATTGCATGACGATTTAAAAAA  
ACGTGATGACATTTGAGCTGTTTCAAGGTTTCTTACCCATTAAATGTTAGGAGAATCTTA  
TGTCTAATCTTGTTGCTACTGATGTTAACTTTGCTACATCTGTTGCTTCTCTGAAGATGC  
TTCAGGCTTCCGCTGTTCTGGATATTACCGAGGAGGATTTTGATTTCTGACTGGTGATA  
AAATTTGGGTTGCTACTGACCGCAACCGTGCGCGTCGCTGTGTTGAGGCTGGTGTTTATG  
GAACACTGGACTTTGTAGGATAACCCTCGCTTTCCTGATCCTGTTGAGTCTATTGCTGCCG  
TCATTGCTTATTATGTTTCATCCCGTCAACATTCAGACGGCCTGCCTCATCATGGAAGGCG  
CTGAGTTTACGGAAAACATGTTTAATGGCGTCGAGCGTCAGGTTAAAGCCGCTGAGCTCT  
TGCGGTACACCTTGCGTGTTAAGGCGGGATCCAAAGAAACGGTTCTGAGCGCTGAAAAGA  
ATGCTCGTCAGAAACATCGTGAAGTGGAGTAATGTAATATGAAGCAAGCTCGTCGTTCC  
CCTTCTCGTAAGAAAGGCGCTCCTCTCTGGTGTGTAGGCGGTTCTCAATTTTAATTAACG  
GGGCTTCGGCCCCTATAAGGATTCTTAAATGTTAAACGTGCAAATTTCCGCTGAACGTAT  
TCCTCACGACCTTTCTCATCTGGTTTTTGTATGCAGGCAAAATTTGGTCGTTTAAAGGTTGC  
TTCTTGGACTCCGGTTGTTGCAGGTGATTCTTTTGACCTTGATATGATTGGCGCTATTCG  
CCTTTCCCGCTTCGTCGTGGCCTTGCTGTTGACTCTTGTGTTGACCTGTTACGTTTTA  
TGTCCCTCATGGTCATGTATATGGTGAGCAGTGGATTGATTTTATGAAGCAAGGTGTTGA  
TGCTGCTCCTTTGGCCCCCTGTTCAAGTGCACCTCGCGGTTGGAATAGTGCTCAGTATCTTGC  
TACTATTCCGTCTAGTAACTTAAAGGTTGCTAAGTTTCTTCATCAAGGTTACCTGAACAT  
TTACAATAATTACTTTAAAGCTCCGTGGATGGATGGCCTGACTTATGCCAACCCGTCTAA  
CATGGTGGGTGAAGATGTTTCGTTTTGGTGTTCGTGCATGTAAGTAACTAGAAAATTTGGAC  
TGCTCCGCTTCTCCTGATACTGAAACCCCTCATTCTATGGAGACTGAAACCAACTCCAT  
TGACATTATGGGTTTGCAGGCCGCTTATGCACAATTATATACTGAGCAGGAGCGTGATTA  
GTTTCATGACTCGTTATCGTGATATTGTTAACGAATTTGGAGGTAGTACTGCTTAGGATGC  
GGATCATCGTCCTTTGCTTGTATGCATTCTGAGTTCTGGCCTCAGGCTATGATGTTGA  
CGGCACCGACCAAAGCTCTCTCAGTCAGTTCTCCAGTCGTGTGCGAGCAGACGTTTAAAGCA

TTCAGTACCGCGATTCTTCTGCCCTGAGCATGGTTCTATGTTACACTCGCATTGGTCCG  
CTTCCAGCCGACTCTTCAAATGGAGATGCATTACTTAGTTGGTAAAAAAGATTTGATTTT  
GACTGATTTGGCTTGTGAACCTGTTTTGATGGCTAACTTGCCTCCTCGTGAGGTTAATAT  
ATCTCCGTTCTTCCATTCTGGCAGTGCTAGTGCTAAGTTGAAGATCGCTGAAGGTCAGTG  
GTATCGCATGCAGCCTGATCGCGTTGCGTTGCCGTATAACTATCTTGATGGTTTTCCGTT  
CTATAGCGCGATTCCGTCTGACGCTATTAAGCAGCGCGTCTGGTTATTACTGATAACTA  
CGCTGAGGCTTTGCAGTCTATGCAACTTGCGCACTGGAATATGGAGACTAAGTTTAATTG  
CACCATTTATCGTAATATGCCGACCACTCGCGACTCTATTATGACCTCTTGATTATGTGG  
GGCTTCGGCCCCCTTAAGGATATTGATTATGTTTCTCGTTTATGTATCTAAAAAATATTG  
CTCCGTTACCTCTGTGAATCGTGCCTTTTTCTATTGCCCTGCCGCAATCCCGAAGTTG  
TTAATTCTGGTGAGATTGTTGCAGGTCGTTCTACTATTCGCATTGCTTCTTCTATTGCTT  
CAGCTTCCAATGGAAGTTGTTTTGATTTTGTTCAGGTGATGGATCCGAATTCTCCTGATT  
CTCAGCAGGTTGTCTCTGTTGCTGCTTCGTTGTCTCTAGTGTTGATTTCGAATTATATTC  
CTTGTATTGTTTCGTTTTGAGAGCACTGTTGCTCAGCCTACCAGCTTGGATATTGCAACCG  
CTGATTTTATTCCGGTTGAGGCTTTTGGCCCTTCTCCTCGTGCGCTTAGCCTTCGCGATT  
GTGTTACCGTTGATGTTAAGCCTCGTACTGAAGGCAATAATGTTTTTGTGGTGTGGTTT  
TCTTCTCTGCTGCCGCTAATGCTGGTAATGTCGCTGGTGTGTTTCGATGGCTCAGGTTG  
ACTACGAAGTTCAGCTTTGCAGCCGCTGAAATAAAAGGCTCCCGCACTCCCGGTTAGAT  
GCGTGCCTAGTGTAGGGCAGACTGAGCCGTACGGAGATACCCGCTAAACTAGGAACGTGG  
AAGGCGCAAGCCGCGTTCCCTCCTGCTAAGCCCCAAAAGGAGTTACAGCGATGTTAGGTG  
CCGTTGTAGATGGTATTGCTTCAGCCTTAGCTGATGGAGCCGCTTCTAAGCTGTTTGGTG  
GTAAACCTGGCGCTCGAGCCGCTACCGAGTCCACTGGCCTTTGTAATGGTCAAGGCGTTA  
TTGGTATGGATCAAGATGCTGGTATTCAGTCAGCTGTTTCAGGGCTCTAATGGTCCAAATG  
GTCAGATTCCTGCCCCACGCAGACTGGTGGCGTTATGTCTGATGCTAAAAATATGATTA  
AGAAGCCTGGTAAAGATTTGCTTGGTGGCGTTATGACCGCAGGAAGTGATCGCATTAAGC  
AGGCACTGGTTAATAAGTTGGATGGTAACGATGCAAGGAAACAAGGACAGGCAACCCGTG  
ATTACTTGGCTGCGGCCTTCTCTGAGCTCAATGCATGGGAACGTGCTGGAGCTGGTGCTT  
CCGGTGCCGGGTTGCAGTCTTCCGGCCAGAATCAGCAAAAGGAGTTGATGCGTATGCAGC  
TGGATACTCAGAAGGATATTGCTTAGATGCAAATGCATAATAATTTGCAGATTGCTGGTC  
TTCAGTCCGCTACTTCTCGCGAGTATAAGAAGGATTCAGTTTATGCTCAGAATGAGATGC  
TTGAATTTAATCAACAGGAGTCACAGGCACGCGCCGAGTCTATCCTCGCCAACACTTACC  
TTACGGCTAAGCAGGCTGCCATGAAATTATGAGAATCGCCCTTACTCGTGCTCAGGAGA  
CTGGTCCGCATTTAACTAATAGTCAGATTATGGCATTGGAGAAAAAAGTTTATGCAGAAC  
TCGGAAAAATTCATCAAGATACTCAAACGCTCGTTATGGTAGCTCTCAAGTTACTGCTG  
CGGCGAAAGATGTTACGAAGATGATTACCGATGCCACTTCTGGTGCTGCCGATTTGGTCT  
CTCAACAGTGGAATTCTTTCTTTAAAGATGGCAAGTCTAATGGTATTCCCCCATTACCA  
GAAAATAA

>NewGenomeName\_190

GAATTCGAGTGGTTACTATTCCAGCACCATTTTAGCCTGTACACAGTAAGACGAGATGG  
ACGAATCGCTCGACTTCGCTCGCGATTTCGTCGAGGCCGGGGGGCGGACGCCCCCGGTT  
GCCCCCTACAACGAGTGGCGCACGCACAGGGGGGCACGTCATCCGTACAGGTGGGTAGG  
TCTTCCGTACAGGCGGGTACGTCTCAAAGGGGCGTCCCCGTACAGGGAGGTACGTCACGG  
GTAGAGGGGGGCACGTCACAGCCAATCAAAGCTGCCACGTTGCGAGATTGACATGTCGA  
AAATGGGCGGCGCAAGCCTCTCTATATATTGAGCGCACATAACCGGTCGGCAGTAGCTATA  
CGCATGGCGGTCCGGATGGCTGCACGGGAACGGCCGACAACCGGCCGCTGGGGGCAGTAA  
ATTGGCGCTTAGCGAAGAGGGGCAATCTGGGCCAGCGGAGCCGCGCAGGGGCGAGTAAT  
TTGAACCTGAACGCTCTCCAAGAAGGTACTCCATCCGGACCATCAACGGTCTTCAGGGCAC  
CAACAAGATCACGGCCGATGGAAACCCCTCAATGCAGAGAGATCCGGATTGGTATCGCTG  
GAATTACAATCACTATATCGCTGTGTGGCTAAGCGAGTGCCCCCGCTCCCACGCTAAGAT  
ATGCAACTGCGGACAATTCAGAAAGTACGGGTTTCAAGAATGTTCCGGTCTTGAGGATCC  
ATCAACCCAAGCCTCCCTCGTAGAAGCGATCCTGCGACCCCCCGAGTACAGGGTAAGCG  
AGCTAAAACACAGCTTGATTACAATACTCCCAGCCGACCCCGAACCGCAAAAAGGCGTA  
AAAGATTGTTAGATGGCAAGATGAGCTCGCAGGCCGAGAGGCCAAATTACCTCCTTCAGA  
AGGGGACGGTGGCACCACCTCAAGCAACTTCGACGAAGAGGAAAATTTGACATCAGAGG  
AGTCAGCGGTATCGTAGACGAGGTTTTAGGAAGGGCTTTCACAACCCCCCCCCCGGAGCG  
TGTAGTGTGAGGCTGCCGAACCCCGATCTACGATGACTATCCGCTTCCAAGGGCTCATC  
TTTCTCGCGTAAGGACGCATTCTGCATAAAAACAGGACAGCTGGGGGGTATGCACCCAC

ATGTACCGGGCGAGTGTGCGCCGAGATATTCTTGAACCTGAAAGCGTTCCTGCTAGCCACA  
ACGGCCCTGACATCCGTGAGCCAAATCGGAGGCCCCATCACCGGTGAGTTGATTGCGGAA  
GGGTCTAGATCTCAAGCCGCGGACAATTGGCCTAATTGCTGGCTGCCGCAAGATAATAAC  
GAGTCTCCGCTACACCATCGGCATTGTGGAGATGGGCCTTAATCATGATGCAGCCTACG  
GACTCTCGCCGGTTCTTTAGTCACCCAAAGTAGATGACCCTACAAGACATGGGTTCGCATG  
TTTGAGGGGTGGCGCCTGTTCCGACACATTGAAACCCGGTTTCAGCTCCTTACCCCTATA  
GATGTGGGGTCTTTCATCCCCGTGGCGAGTCTTCTCTCCCAGGGAGAGTACCTCACGCGT  
AGGGGCAATGTTATGTACAGCGGCGATCACCAGAACCGGTGGCAAGAAGGCGGACAAACG  
CTTACGGGGGGCATTGCTTATGCGACCGGGAAAGTGAAACCCGACGTGCAGCAGTACCCT  
GCTATGCCCCCAGACCCCTCGATCATATCCCCTACTACAGCGCAAGGCACGCAAGTCCGC  
TGCAGGTATAGCAAGCAAGATTGGTGGTCATGGGACACATATATGCGCTTTGCAAACTC  
ACAGTACACGGTGCACAATCGTCTGTTCCCTCCAGTGC AACGTTTCAGTGTATAGACGGTCC  
TTCAACCACCACAAGGCGAGAGGAGGCGGGGACCCCAAGGGCCTGAGATGGCACACGCTG  
TTGCCGATCGGCACGGAGACCATCGCCGACAGCTACATTTTCAGCACCCGCATCAGAGCTG  
GACCCTAATTTCTTTACGCTTTACGTAGCGCAAGGCACAAATAAGTAGCAACAGTACAAG  
TTCGGCACAGCTACCTACGCGCTAAAGTAGCTGGTAATGACGAGCGATGCATGGGCAGTG  
GTACGCGTCCAGTCGTTCTGGCAGCTGGGTAACATGCAGAGGCCATACCCATGGGACGTC  
AACTGGGCGACCAGCACCGGTA CTCCGGGACGCGAGCCCTGAAAAGGGGGGGGGGCTAAC  
GCCCCCCCCCTTAACCCCCCCCCCTGGGTGGGAATCCCCCCCAGAACCCCTTTTTTATA  
GCACACAATAAACGCAGAAAATAGACTTATCGCACTCTC

>NewGenomeName\_191

ATGGCACACCTAATTTCTAAAATGGCATGTGATACACCTTTTTATGTCAATAACCCACGC  
TACCCTATCTACAGCAACGACCGGCACGTTCCGGTTCCTTGTGGAAAGTGTCTAGCATGT  
TTGTCCAGACGCACTAGCGTCTGGACATTTTCGTTTAAAAACTCACGCAAAAAATGCTATA  
TCTTCTTATTTTACTTACTTACTTACGATACCAGATATGTACCTATATCAAGTAGGGGT  
TTCCTTACACTCGATAAACGAGACGTTTCGACTCTATTTTAAAAGGCTTAGGAACTTCAT  
TCAAAAGATCACGAACCCCTAAAATATTATTTAGCAGGAGAATATGGAAGCAAAACATTT  
AGACCCCATATCATATCATACTATTTAATGCCAACATCGAACTAATTCATAAAGCATGG  
GACAAAGGAGAAGTACACATAGGGGAATTAACAGAGGCTTCGGCCGCATACACTGCAAAA  
TATATAAACAAAGGAAAAGTTATCCCAGTGCACAAAAATGATGATAGACTGCCAGAATTT  
AGTTTAATGAGTAAGAACTAGGACATAACTATTTATCAGAAAAAATAATTTCGATATCAT  
AGAAGCGATATTGAAAGAAATTTTATAACATTGTAAGACGGAAAGAAAATAAGCTTACCT  
AGGTACTTTAGAGAAAAAATTTGGACAGAGCACGAAAGAAGAATACAAGCAGATAAACTA  
GCACAAAAATTCAAAGATTTAGAGCAACAAAAAGAAACAGAGTACTACACAAAAAATCAA  
AACTGGAAGGAAATGAACA ACTTAAAGAAAGTGGAAAAGCCCATAGAATTATTATACAC  
GAAAAACGAGCACGAGAAGGGCGCAATAAAATTTAGATCAAGCTTCAGTTATCAAGAAAA  
AACAGAGGAGCAGGAGGAGAAATCATCAATGGAACCAAGCCAAACAGTTCCAGACATGAC  
CTTGTCATTATCAGA ACTAGTACAACGATACACCAGAGGACAATCAGTGGCAACCTTTAC  
ACCCGTTTATTACGGAGAAGAGGAAGAATTCGCAGACGTTAGCAGAATGGATCCTATTGA  
GCGCATAGAGTATGCTCGATT CATTAGAGAAAAAATCTCAGATACCATACTCCCTAGC  
GGAGCATCAAGCTGGCGACGAAGGAGCAGCTGAGCCGCAAATGAGCGGTGGGCAAGATAA  
AATAGTACAAACAACCCCCCAAATGTATAATAACAAAATAGTAAAAAAGGGAAAGTTTA  
GCGGTACTACCGGTAAACTTCCCGATACGTGGCGCTATGGCAAAAAAACA AAAGCGCAAT  
GGCAAAAGGCCTTCGAAGAGGAGGCCAAACACTAATAATCCTTGATATATTAGTGCTAAT  
TGACACCAAGTAAAAACGAGAGCCTGCGAGAGTAAAAACGCAGGTGGAAAATTAACACA  
AAAAACAAAAAAGTTAATGGAACCAGTAACTACAGCCGCAGCAATCACAGCCGGCGTCAG  
TGCCTATCGGGCGGAGCCCAAGCATAACGACACAGGAAAACAAAACAAAAAATCTCGTGC  
ATTCTCCAGGGAGATGTACGAAAAAACA AAAGCAGTCAATTTGATGTTTTGGGATATGCA  
AAACCAGTATAATTCACCAAAGCAACAAATGGCAAGATTAAAATCTGCAGGATTAACCC  
AAATATGGTATACGACAAAGGCGGGGCTATTCAATCTGCTGGAAATATACCAACACCAGA  
TGTTCAAGGAGGACAATTTAGA ACTCCCGACTTTGGGCCAATATCAGGAGCTGTACAAGG  
ATATTTTGATACCAAAATAAAAACAGCCTCAATACGATAACTTAATGGCTGCAAATACATC  
AATTCACAAGAACCTATTTTAAAAGCTGCACAAACATTGGCAGCAACAGAAAGTACAAA  
AGGTCAATCTATAGCCAATGCATTGGCACAAACAACTTTCAATATTCAGTAGAAGGAGC  
GAGATTAGCAAACGAGCAAACCAGAGCAAACACACAATATACACTTTCTGGAAATGAAAG  
AAAGTCAGTCTTTTCAGGCACCTACTTTAGCAGCAGCAGTAGAAAATGTATTAAGAATCAA  
AGCAGAAACTGCTAATACAAATGCTGCAAGATGAAAAATAAACCAACAATTA AAAACTT

CCAACAAGATTATAGATTA AAAAGAATTTGAAGAAGATTTAGCAAAAACAAGGGATATACAA  
AAATGACCCTTTATGGTCAAGGGCATTAGCTCAATTTATTGAAGGTCTCACTGGAGGTAT  
TTCTATGAAAGATTTAGGAAAAAAGACAGGAGGATGGTTCAACCAATCAGGATTTAAAAA  
TGCAACGAAATCAACAATGTCATGGTGGATGCCCAAATAAAAATATTACAAAAAACGTCT  
GATGAAATAAAAAAAGATGTAAATGATTTGATAGATCAAATAACTAAAAATAGTTTTAGAA  
AGTGAATCAAATGATGCGGTAGCATTAAAGCAGATTAGATTCTGTATGTTCTTTACTACAA  
ATTACCCTTTTTTCATATTAATAACTTAAACAGCAAAAACCAATGCGCTACAGAAGAGGGC  
GAAGATCCCGCAGAAAAGGCTACGGCCGCAAAAAAACAACACTTACTTAGTTAAAAGAG  
GAGGCATAAGACTATAATGGCAAATGCAAACCTATTTAACCTCGGTTTCAGCTACCTAAAGT  
AGGTAGCAATGTATTTCGACCTTTCACATGATGTGAAAATGTCGTTTAAAATGGGTGGTCT  
TTATCCAACATGTGTAATGGAATGCGTACCAGGTGACAAAGTAAAAATAGGCACTGAAAC  
GATGCTTAGATTTGCACCACTTATCGCACCAAGTTATGCACAAAGTAAATGTTACAACCTCA  
TACTTCTTTGTGCCAAACAGAATATTATGGCCAACTGGGAACAATGGATTACAGGAAA  
CTTAGATGTACAAGGACCATGGTTTAGACTATTTCCCTTCACCAGCTTCAGGAGGATTTCA  
TGTTAAATCTTTAGCGGATTATTTAGGATATCCAACATTGTTAACGCCAAACGCTATACC  
ATATCCTGAGCCTGGAGCTCAAGTAGGAAGCCCTTTCCCTGTAGCAGCTTACAACAAAAT  
TTATAATGAATACTACAGAGACCAAAAATCTTCAATCTCCAGTTTTAGATTCATTAACAGA  
TGGAGAAAATGATCCATTTAGGAACCTAGCAGCAGGACCTGTTAAAAAAGAGCGTGGCA  
GCATGACTATTTTACATCATGTTTACCATGGGCACAAAAAGGTGAGGCTGTAACCTATTCC  
AATAGGAGATGTAACCTATAACTATAATGCAGCTGCTGGAGGAACTGTTATACGACAGGT  
AGATGGCACACCATATATAAACCAAAACAGATCTTATTTATTCAGATGCTGGAGGACAACC  
TAGAGCAGGAGGCGTAACAGGAACACGTTACAATATTGATAACTGCAGCCAGCTATCAGG  
AACTGCACAAGCAGCAGATATTAACTCAATTAGAAGAGCATTTAGACTTCAAGAATGGTT  
AGAAAGAAATGCTAGAGGAGTAACAAGATATATTGAAAGCATACTTGCTCACTTCGGTGT  
AAAGTCTTCAGATGCTAAACTTCAACGTCCAGAATACTTAGGTGGTTCAAAGGTAATAAT  
GGTAATTAGTGAGGTATTATCTACCGCAGAAACAACACTCCCAGTAGGTAACATGGCAGG  
ACATGGTATATCCGTAGCAGGAGGTAATGAATTAAGTACAATGATGAAGAACACGGGTG  
GATTATTGGAATAATTTCTGTAACACCAGAAAACAGCATATCAGCAAGGAATTCATAGATC  
ACTCAGCAAATTAGATTGACTAGATTATTTCTGGCCAACCTTTGCAAATATTGGAGAACA  
AGACGTATTAGGGAAAGAAATTTATGCAAATGGTATTAACATTGGAGAAACATTCGGTTA  
TGTTCCCGGTATGCAGAATATAAACTCTTAAATAGCAGAGTAGCAGGAGAAATGCGAAC  
TTCACTTGATTACTGGCACTTATGAAGAAAATTCAGTGCAGCACCAAACCTTAACTGGAGC  
ATTTATTGAATGCGACCCTAGTACGCGACTCTTCGCAGTTGAAGACGGAGAAGTTGACAA  
CATCTACGGACATATCTTTAACAACATTAAGGCGATTAGAAGAATGCCGAAAT

>NewGenomeName\_192

GTCTAAACATGTCTTTGGACAGACCCACCCTACGCCATAAGAAGAGTGGTCAGCGCATA  
GAGTGCCGTGTGGCTTATTCGATTGAATTGTTGAATCGTTTAACTCAGGAGCTACAAATG  
CACAGGGTGTCTCATATGCTGAACCTCTTGTATAACGATGTTTGGTTATCTCAACATGGT  
CCACGTTGTAAAGCTGACCTACAACGGTTTTTCAACCGGTTGCCTTAGCCCGGCTTTAAA  
TTTCGTTATGTTGCCTCAGGTGTGTATCGTGACCTTTCGTGAAGGCCTAATTATCAGTTT  
GGGTTATTTGGTTTGCCTGACTGGGCTCATGACCGTTGACTGTTTGGCAGTTCTAATGGTGAT  
TATAGCTTTACTGCTGCAACCATCTCGCAGTTATGCCTCAGGTGTAATCATCTTATTGGC  
TCCCTTAAATTTGAATCCGCTAGATAAACTGACCGATTTATCTTGTAAAAGATTAAGGGC  
TTGCAAAGCCTGAACCGCTTACGTTTCAGCATTCCACTGCTGAAGCTGTTTTGTCTCAG  
CCCGAATTTTTGGTTGTGTATGAAGGCATTGGCCGATCTTAGTTTAGGGATGGTTTTATG  
TCGGAAGAATTTCCGCCTGCTTCTGTTATTACCGCCCAGGACTCAAACCCCCAGTTCCA  
CGTTTTTGCAAACATTGTTTAAAGGGGTTTTGACCCGATCTTGCTCTGTATATGCAGTAT  
AGGTCTTCCCTTTCATGGCGAGTCAGATCTCGAGCGTAGAGCTTATCAGCACCTTCCGTTT  
TTAAGCGTTTCGCGTTGTCTTGTGGCACTACGAGAGCTTCACTTACAAAACGTATAATT  
AAAAGGGTTAGCCATGATTCTATTTGTTATTTGTGGTTAAGACCACGCCCCCGATGATTT  
TAACCGCCACATTTTCGTTCTTCATCGTGATGTTACTTTGTGTGAATTCAGTATGGTGT  
GAATCGCGCATCTGGTGATAACCAATTGAATAAGCATCCCGATGAGATTGAATTATATTT  
CTTGTGCGCATTTTATAATGCCGGCGGCGCAATTGTAATGATGAGCCTCAGGTACGTGT  
TCGTGCCAAAGACGTTTTGCAGCCGTATTGACCCCTGTGGGCCTTCGGGGCCATTTTATT  
GAATTTCAATTTGGAGATAGTATGTTTACTTTTAAATCGGTTGAGCCACAATATTTTAA  
ACGGTCCCTCGAGCTGACACCCACGTTCTCGATATTCTATGCAGAAAAGTCTGAAGACT  
ACGTTTGATGCTGGACTTCAAATTCCTAGTATGAGCGAAGATGCTTTACCCGGAGCCACA

ATTAATGTTGAAGCCACTATGTTCTGGGCATTTTTTTTACACCCATTTTTAGAGTTATGGAT  
ATTTGCCATTTGGACTCGTTTTTTTTTTTTTTTGTTCCTAATCGTATGGTTAGCACTAATTGG  
GTTTAGTTTTGTGGGGGAGCAGGAAAAGTGTGCAGATTCTATTTCTTACTCTATCCCTCCA  
CAAGTCTCCCCAGCTGGTGGATACGCTATCGGGTCTTACAGGATTACAGTGGCTTACCG  
AGTCTGGGTCAAGTTACGGCTGCTGCTAAGCTTTAACAATCGGCGTTACCTACCCGCGCC  
TATAATTTGATTTCTAACCAAGGGTTCGAGGGGTGATAATCAGCAGAATTCGCGTGTGTGT  
AACTAACGTGCCGGCCCTGAGTCTACACGTTCTACTGTTTATGCTTTGCTAAGACGCAGT  
AAGCGGCATGATTGTTTTACTTCTTATTTATCAGATTCACGGCAAGGTGGTACTGCTGTT  
TGTCTTCCTTTAGGCTCTCGTGAGCCTGTTTAGGGTACTGGCTAGACTCTGGGGCTTTTC  
GCTGGTGTACTCATTTTAGCTTTCATGCTGAAACTCCTTATACTATGCGTAATGCTTCT  
GCCTTTGACAAGACCAATAGTGGTCTACTCCTACTGGTTTAGGTGGCGTTATTAGTAAG  
ACTTTCGTTGTTGCTAATCTTCTTTTTTTCAGGTATACATGCTGATTTGTTGGCTTGTACG  
TCTGTGACTATTAATCACCTTTGTCAATGTCATCAGAGTCCGGACTTGCTGCCCCGTGAG  
GTGCGCGGTGGTACTCGTTACACTGAGATTTTCCGTTCTTATTTCCGGCGTAACTTCCGAG  
GAAGTTCGCTTGCGGCGACATGAGTATTTATATTGTGGCTCTACTCTTATTAGAATTTAT  
CCGATCGCCCAAACCACTGGTACTGGTGTCTTGTCCAGACTACCCCTTAGGAACCTTTA  
GCTGCTAAAAGTGTACTCAGGGACACGACCATGGGTTTAGCCAGTCGCTTGTGGTGTAT  
TGTTGTGTTATCAGTGTGTGTGCTCTTCGTGTTGCTTAGACTTATCCGCAAGATTTACGG  
CGTCATTGGAGCCGTTCCACTACTAATGAGAGTTACGTTTCGGCTTTTTCGATGCTTGT  
GAGCAAGCTATTGTAATAAGGAAATTGATGTTACTGGTGGTTCGTCTGATTCTAATGTT  
TTTGGTTATTGGGAGCATTGCGCGCAATATCGCTAAAAGCCTTCTGAAAGTACTGGGCTT  
TTTTGTTCAATTGCCGCATGTACTGACGACCCGTGGGCTTATGCGCAGGAATTTACTGGG  
GTGCCTACTTTGAATTCAACTTTTATTGAACATACACCGCGTCTCGCTCGCAACTTGACA  
GTTGGCTCAGCTGCCATTGGTATGTAGTCTTGTCTAGATGCGTTTTTTTAGTGGTTACGCT  
GTTTCGTCCTTCCAATTTACTCTTTACCATGGCTTATCGCTCATTTATATGCCTCTAGG  
ATTCTTATCGGGGCATGATGGAAGGTAATGGTTTTCTGTGTATGTTTGGAAATCTTAAGC  
GTGGTTTTTATTCTGTTGGTTCAGTGGTACTGCCATTCCTCCTCATATTGTCTCTGCTG  
GCGCATCTCCTCTTGGGTTAATGTGTTAGACTGATCCCAATGCTTCTAATGCTGCATTGG  
GTAATCGCCATATGGATTTTAAAGAGCGTATGTCTACAATGCTTACCAACGGAACGGTG  
AGGAATCGAAGGCTGCTAGCCTTAATCGGCTGCTTGCTTATTTGCAAGGTGGTTCGTGCTA  
CGTCGCCCTCTGGTGTACGCCATAGGTTGTTAACCCTTATGCTCCAGGTGCTGCAACCG  
GTTATCAGCCTGCCCAAACCCAGTTGCCAATCAGCAAGTTGGTAAGGCGGGTGTGAGA  
ATGAGAATGCGGAGGCTCATACTATTAAGAAGCGTGCTGACCCTCTAATATATCTCGCTG  
ATAGGCAATCCGCTTTGCCCTTGTCTGCTGACGAGCGTCTTCTTTCAATCTACTGTCTG  
TCCAAAGTCAGAATATTGCTGCCGAGACTAAGGATATTCGTATTGAGGGTGATCGGTAA  
TTGATGGTATTAACAGCATGAGTCTTCTGTAAAGCTTATTGTAGCGCAGACGTAAACCG  
ACGAGCAGAGTAAGCAGCAAATGTTTGTATCGCATTGAACACTTTGATTTAATCTGATT  
TGGTGGCTGCTGATTTAATAGCTATTTTGCAGGCTGAGAGTTGGGTCACCATTTAAGAC  
AGTACAAACCTTTGGTTGATGCTGTTACGAACATTTTACGTATGGGGCGACGTTAAGGTA  
TTTGGATGCTATTAGCTTCCGCTTATGCCAATTTTGTATGGACGTTCTTACGATTTTGTTA  
TGTAAGTGTTTAGAGGATGCTTTGACCCAGAAGCACTCACTCGAGGAGTCTGATATCAATA  
GTAATTTGATCGTTTTACGAAAAGTGGTCAATTTACCTAATCCAGTCTCTATGCCTCAGT  
ATGTTCAATATTTTGGCGTCTTTGCTTTTTCAGTCTGCTATGCATGTAGTTCGTCAGGAAG  
ATGAGACCTTGCTGCGGATGCTCGCAAGAATGCGTGCTATATCCCTAATTCCCGTCAGG  
TATTTTGGGAGTTTTTAGTAGATCCATCGAATTCAAAGAAGGTGTCGCGCATTGGTTTGG  
ATTTGCTAGTACCTAAGGCGATTCTCCGGTTCGACGCACCTCCTGTTGCTTAATCGTCTT  
TGGTTCGAGTTGGCGACTTGATGTAACGGTGCCTGTTGACAAATATTTGTGTTTGGCTTC  
TGTTGGAGTAACTATGAAGTCGATGTACCGTCCACCATGCCAATGAACGCACAAGCGCTTC  
ATCTTTTAAACACAACCTTATCAACGACTAAGCTAATTAATAGCACTGCTGGACCTCTGCG  
CGATGGTATACGCATCTAAGGTTAT

>NewGenomeName\_193

ACCGGCCACTTGGAGCCACGGAGCCCCTTGCAGCTATGCCTCCGCAAAAGAGGGAAGCAG  
CCGCTAAGAGGTGGTGTTCACGCTGAATAACCACACAGATGAACACGAGTCCGCCGTGA  
AGGCGTGGAACGCGAGTGAGTACCATTTTCGCTGTCGTTGGACGATAAAAGAGGGAGAATG  
GTACGCCGCAATTTGCAGGGCTACATTCATCTAAAGACGAAGGCTCGGCTAAGCACTCTGA  
AAAAATTACTTAGCCGTTCCCATTTGGGAGAAAGCTCGCGGTTCCGACAGCGACAACGAGG  
CGTACTGTACGAAAGATGGGGCGGTGATACTTACCATGGGCATGCCGGTGGAAAGGGAACC

GTAGCGATCTCTCAGGAGCTGTTGCCGCGTGAAAGCCGGAAGTCGAATGGTGGATATCG  
CGCGAGAGTTCAGTGAAGTCTACGACAAGTATGGGCGTGGCTTACGTGAACTGGCGCTTC  
TGATTGGACAGAAACAGCGAGATTTCAAACCGAATTTATCGTTGTCACCGGTCCGTCGG  
GCGTGGGCAAGAGCCGTTATGCTAATGAGTATCCTGGCACTAAGTTTTATAAGATGAAAC  
GGGACTGGTGGGACGGCTACTCTAACGAGGATTTTGTCTGTTATTGACGACTTTTCTGGAT  
GGATACCTTTTTGTGAGTTACTGCGTCTCACTGGTAGGTATCCACATAAGGTTCCCCTGA  
AAGGATCCTATGTGGAGTTAACGTCGAAGGTCATCACAGTGACCAGCAATACGCACCCCG  
ACTCGTGGTACAATGAAGAGAAGTGCTATCTACCCGCGTTGTATCGGCGGATAAATAAGT  
GGCTGACGTGGAATGCCATCCGGTTCGGGGATGCAACGGATTGTATGAAGAATACTACCCTA  
TAACTATTGACTACGGCCCCTCCCTCATAGTGCCTTTTGTAGGAAAGAGCAATCGCGGCC  
AGCCTAGGCGGCCGCGTTCACGGGTA CTTCGCGAGCGCACCGTCGCGAGCGAAGTTCCCT  
AGTGAAGTTCCCGAGGAAAACACTTGAGCTGAGGCGATTTATAATTTTAAACGCTTAATA  
AATAAAGACAGGAAACAGTATTGTGTGTCTGTACTTTATTTAGGGTTTGCGCGGTGGGT  
AGGTTCAATTTGTCTGAACTCAACATATATCGTCACTTTTGTCAAGGAATAGTAAAGCATCG  
TGGGGCTGGGGCCAACTGATGGCGAGGCCGTAGTGCTTTACTCTAGAGCCCGAGCTGGCT  
AAGTTTTGGTCTCCTTTCTTCATCAGAGGTATCCATGCGGATCTGGGGTTGGTTAGCCAT  
TGCCTGCAGTAACGTTCCCGCGTCCGGTGTCCGGAATTGAAATTTGGGGTCCGGGGTCCG  
AAAAGACGCTTGAATCCTTTGCGGAGGTCCCACTGTCTGGCGGCGTCCAGTTTGCTAGC  
GGGTCTGTCTCCAGGCCTGGCTTCTTGAAGAAGGCTTCAAGGTGGTTGTCTTGAAAGGGC  
ACATTGTGCCCTATACCATGCCATGCTCCCGAGTTGTCTGTTTGTAGTGACGCATTTTGAAT  
TTTGCCAGCCGGATCCTGTAGTCCCTCGAATGGTAGCCTCCAATTAATTGTCCCCCAGTCG  
AGGAAGTCGTCCAGCATTATGTTGAGGCCGTCCGCAGCCATTTAGGGTAGTGTCACCT  
GAGCCGGCGCATTCTTGTCTGTACATGCGGACAAACCTGAATCGGTATACTCTGTTAGTT  
CTGTGACCACGCCTATTGGTGAGTCTGCGTCTGGGCCAGTCACGTCGTCGCCATCGCCGT  
CTAATCGCCTGTGTCTGTGCGCGTCTCCTAGCAACCTGCATGAAAGAGCCAATCACGAGC  
TGTCACGTGACCGTGGCTCCAAGTGGCCGTTGAGTATT

>NewGenomeName\_194

ACCGGCGGGCCGGGCCCTTGGGGCAATCTGGCCCCTGGCCAAGCATGCGCAGTAGTGGCA  
CATGCTCGATGGCCGCGCAGCGGCCTTTATTTGCGGAGCATGCACAGCAGGCCGCGCAGC  
GGCCGCTATTTGCGAAGCATCATGGCAGCACGGCGACACAGCCGAGCCCGTCCGCTGGGGC  
GTTACTCTGAATAACTACACTCCCGAGGAAGAGGAGACCGCTCGCAATCTGATTCATGAT  
GCAGATAAGTACGCGTTTGCATAATCGGCAAAGAAGTTGGCGAAAGCGGTAGTCCCTCAT  
CTGCAAGGCTTCATGCATTTTAAAGCAAAGCAGCGGCTTACCGCTCTAAAGAACTTTTT  
CCTCGCGCGCATTTTGTAGAAAGCTCGCGGCAGTGATCAGTAGAATGCTGATTATTGTGGT  
AAAGACGGCGAAATACTTACCATGATCGGTA CTTCGAGTGATAATAATTCGAGTGATCTT  
GCGGGAGCTGTTGCCGCTGTGAAACGCGGAAGTCAAATGAGTGAAATCGCGCTAGAGTTC  
AGTGAAGTCTACGTCAAGTATGGGCGGGGCCTCCGTGATCTCCGGTTGCTGATTGGTTAC  
CCGCCCCGCGATTTCTAAACAGAAGTCATCGTGCTGATTGGCCCACCTCGCTGTGGCAAG  
TCAAATTTGGCCAATGAGATGGAAGGGTCTAAGTTCTACAAGATGAAAGGTGATTGGTGG  
GATGGTTATGACAATGAAAATATTGTGAGAATCGATGACTTCTACGGTTGGCTGCCGTAC  
TGTGAGTGCCTACGTCTGTTTGTGACCGGTACCCTCACCGTGTGCTGGTGAAAGGTGCCTAG  
GTGGAATTCACCAGCAAGAAGATTGTGTTTACCAGCAATCGCCATGTGGATGGGTGGTGG  
AAAGGTGAAATTGAGAAGAGTGCTTCTACCGACGGATACATGTGTACAAGTTTTATGAG  
ACTGGTGAATCAGGGACATGCCCGGACACATGCTCCCGCACCCAATCAATTATTCGGCG  
CGAGATGAAAACACCCCCCTCGGGAGGACAGTCGTTTTATCTCGCGCCCCCGAGTCGCG  
GAGTGCGCGAAGCGAACGGAGCGCGAGTGGCGCGGAGATTGTGCAAGACCGACGCGCGT  
AGCGCGGAGGGAGGAGACCACTTGCTTTGAATTTAATATGCTATCTTTATTAAGAGATC  
CAACAACATTCCTGTCTATGTCTTTTTTCAATTGCCAGTAATTGTTAAGCAGTCCCTGAACT  
TTGACAGGTCTTCTTCAGATTTCTTCAACATTATCTGAGCGAACTGCCTGAATGTTACAT  
ATATAGTTATTTCTGCATTATATCTCAGTGCCTGTCCAGGTGAAGGCCAAGAGAATGCCA  
GCCCGTAGTGCCTACTCTTGTACCGTCCCTCTGGGTCCCTGCTGGCATTCTTAAAGGTA  
ACCAGCCTGATCTACGGCTATTCAGCCACATTGATGCTGAAAAGTTAGAGGCTGTCATAT  
CTGATATGGTTAGTTGACGCTTTGGGCGTACTAGCCTCTTAAACCCTCTGACCAAGTTCC  
ACGCCCTCGCCCCGTTCCAGTTATCCAATAGGTCTTGCGTTTGTATCCTGTACTTTTATAT  
CTTTAACTCTGGGGTCCCTGTACTGGGACTGTGTACCCCATCCCGTTGCAACTTTTGTG  
TGACACCTTCAGGCCTCAGCACCACTTTTGTAACTTAATCCTGTAATCCTCGAACGGCC  
ATTCTGCCGGTATTCATCTTGACCTATAAAGTCAATTCAGGTTGAAGGTGAAGAAATCTG

AGGCCCACTTTTGTGGGTTAGTCTTGGATGGGAAATCCACTGTGAATTGCCGTCTAAGTA  
TAAACAAGTATATTCTGTACAGTCTGTGCCCTCTTCGGCTCCGGGGCAACCTGTGACGTC  
TGCGCACTCGTCTGTGAAACCGCCTTCTCCGGAAACCGCGTGTAACACGCCTCCTTCTGG  
TTGCTGAGCGACGTACCTAAAAATAGGATGGCCCCACGGCCCCGCGGTATAGTATT

>NewGenomeName\_195

TGCCACTACCGTGAAGGACCGCGAGCCCCTATCCCCCTGCCTGGGTGTGTCTCCGGGTGC  
CGGCGCGCGTAACAGCGCGCGTGTGCAAGCGTCTTGAATTTGCGGGTTCGTACCT  
GCGTCGGGAGGTTAGGGTGGTCGGCGCGTGAACAGGTTTCGAGGTCGGGTCTACCTTCTGG  
GGCCTAGTAAAGGGGTAAAGTGGCCCGATGGTTCTCTGGTGTGCGGCCCTTCTCCCTTCCCT  
GGTACGGGTGCGGTTCACTGGGGCGCCCGGGTTACTCTCCTCCTCCCTGGGGTCACTGA  
TCTCGTTAGCCCTGCCCTGCACTGCTGCTTTGCCTGCTCACTGCGATGGCTGACCTGCTA  
GCACCTTAATTGCTTCACTGGTTTCCGTCTCGCAAGCGGCCTCCTGTTACGCCGAGCC  
TCGAGCGCTCTTCTTGCCTCCCGCCTACGCTTCTCTCATGCTAGTGCGACAATGCTTT  
GGAACATTAGGATCACTAGGTTGTATAACGAATAGGTCTTGACAATCCTACTGCAAGTCT  
GACGAGTACGCAGCCTTAGTTAGGGCATGAGCAATACGCACTCGCTAACGTAAGGCAAGG  
TATTGTGTCTGGTCGAGCGTTGAGGTGTGGCGGGTAAGTGTACACCCCAACCAGTACTCG  
TCAAGCAAGGGACGGTGAAGGGTTGCCAAGCTTGACAACCCAAGCGTATGCTGTAAGACG  
TGCCTTGGTAGTCAAGGTAGCCGTACAGAAGTGCCTGAGATTGCGGGTTAACGTGCTAG  
ACTGTAACCCCTACGCTCTAGTCGTTCCGGCGGTGCTAGACTGTGGTTACGGATAGCACC  
TGGTTGAAGAGTATAGCTATTGCTACGCACTGGTCCCGAGGTTGACGCAACAAGCTGCAG  
TGTCGGGCGCGGAACGATGGTTCGACGCCTTACCGCTCTTTACCTCGTCGAGTCTGATG  
GGGATGCCCCCTAACGGGAGTTACTAATATGCGAGACGAACGCCTTGCTAACATCGCTC  
TTACCTAGAAAGTCGACAGCAAGTACGGTAATGACTAACGTATCATGCAAACCGGCAGC  
CATTTCCCGTTCGTATGACACAGTTCAACGCCAGCATCAGCAATTCGGGTATGGTATGGT  
AAACGCGCCTCCCTAGGGAGGCTACAACAGCAAATTAACGAGCGAAGCCCCAGTCTCAA  
CGATGGGCACCAAGATAGACGCAAACCGTTACGGGCAGTCAGGGGCGGGGCACACGCCAA  
CGTATGAGGTGCTCGCTGATGCAGGCCTTCGACTGATTCCAGTGCGCAAGTACACTTTGC  
GAGGAGTAATCTGACCCGACGAGGCATATCGGAGAGGCGTTCTACCGATGGTAGTACACC  
ATTCGCACCCGCCGGGCTTAGTTATCATTGCCATGTGGCCGGAAGCTCTAGAAAGGCGTG  
CGTACCCGTACCTTGTGGAGAACCTTGGACACGGCATGCTGTTCCCTGCACTGGCTCAAG  
GCAGGCCGGGAGTAATGCTCTGCCCTGATGATGGACAAGCATGCCCGAGGCCTAATAGG  
AGGAGATGCCGTCCAAGTGAATATTACCGCGCTAGATCGCAGGCTGCGCCGCAAAGCGAA  
GCGAAAGCAGCACCGAACCAGCCCTCCCGATTGACCTAGGCGCGATGCAGAAGCAAGC  
CGAGCACGACGTTGGCGTGCCTGCAAGCTTACCATGACGCGAGCCATGCCACACGTT  
GAATGAGCGGGCGGCTGCCACGAAGGATGCGCGCCAGCCCCACGACGTGTGTACTAATCT  
TAATAGCCGCAAGGTGACCGGCTTCTGGACTCCGCAATGTTGATATCGAAATGATTGTGC  
CAGCAGCCTTGAAGCGCCCAGGTTCCGCATGGGGCTTTGACCCAGTGCCGCGCCCACGAA  
CTCTATGAGGCGATGCGCCGCGGCTACCACGTGCGGATAACGCAATCGAGTAACCGGTTG  
ATGTGGCCTTTCCACTACAAAACCGTGAGGACTGTGGCGCAGTAGGAGGCCATCACGCG  
TCCTCGATAGTAAGTCTCTCCGCCATCCAACATGTTGATAATACTGTCAAGGGCCTTGA  
CCAAGCCGTGTAACCTATCGGCTTGGATATCCTCCAGCACGTTGCTGCTCACAGAGAAGT  
TAGTGTTCGTCGCACTCCTCATGGCGTTACCCAAGAGCGCCCGTGGCAGGGCATTGGC  
GGAACCGTACCAGAAGTACGGCAAGATGATGGTGACCACTGTAAAGGCCACCGCCTGGCA  
ATTCCCGCTGGAATTCATCAAGGACGCCAGAACCAGCCTAGACGGCGCAGCCGCCAAGCC  
CGGGTACTAGCGCAAGGCCGACCGCCACTGGCCGTCGAGTGCATATCGCCTTTCAATT  
ACCGTAACTCCTGAAGCATCCCGCCGAAGCTGCCGCAAAGGGGGTTGACGTAATGCGGGC  
CGAAGCCCTGGAGAAGTGCTAGGGATTAGTGGGCTATGACACCACTTCGGGCTAATAGCG  
ACGTAGCCAGAACTTCGGAGAATTAGCTATAGGCCAGTGTTAACCCGGAAGTATAGTATA  
AGACACGCAAGCAATGCAGCCGACCCCGGATAGTTATTTTGTGGTCCGTTGATTCTACA  
CAGGCCTAGGCTAGCCAATGCCTCTCTGCTCGGACTGGGCCTAATCAAGTCCCCCAGCA  
CAGCGCGCGGACGCTTCCCTCGCCGAAGTTAACTACCTACCAACGGGCCGAGGACACCCG  
CCATCCGACTGCACACGTGGCTCAAAAAGCGTGAAGATGAGAGGAGTATGGGCCGGGTAA  
TCGAGTACATCCGGACCGGCGCCCGCTGGTCTACCCTAACCGGTGACGTGTGGCGGATGG  
CCTGGAACGACATTGGTGACACCTACTTCCATAATGGCGCCGCTGCCCACGATTCAATC  
CCATCAGCAAACGTAATGCGTGCAAGTTCGCAAGGTGCCGTATTATGCATAACGTGCAA  
GAAGTCTTCTCGTCGTCATCGATCACAAGCACTACGCCGTTAGCACCGAGAGCTCAGAA  
ATCATGTGTTGTGCATTATGCTTCGCTCTGATGGCAGACTATATCAAACCTGACGATATC

TGAGCGGTGGGTCGTGCCGTTTACGATTATCTTGATGAGTTGGGTGCCCCGCAGGGTAGT  
CTGATGTACAACGCCTTGCATCGTATCGTCTTTCTCCTGAGGATATGACCCCTTACGAG  
TACCCGCCCCGAGGCCGGTAAACCGCTCTACTGCTTGTGGGACGAGCGCTCACGAAGTGGG  
ATGTAGAATGTCCGTCGACGTTTTAGAAAGTTCTCAACCATGGCATCGACGCCGGCATAAA  
CTGGGCGGGCCAGGACTGCGAGCAGTTCATGTGACACCCCTATGGCGTGCACCTCACTCT  
GCACATCATCAGATACGACGGGGGCACAGCTGCAGGGAAAGCTATTGGGGCGTACTTGCA  
TATCACACACCCATTGGCGAACTCATTTCGTTGTTGCAGAGGGTAGGAAGCTGCGGCAGGC  
CCTGATCACGCGCACGGTTCTTGAAGGCATCCTCATACTGTGTACCCGGGTTAGGTGAA  
CCGCGCGATGCCGTAACCTCGGACTTGCAGGGCCGAAACCCCTTCTAGATGAGGAGAGACC  
ATGCAACTAGCACCTCGCGGGCATTCTCGCACATGGCGACAACGCCATGATTAAGAGCTA  
CTTGGCTATGCCGAGCTGTAAGGGCGGCCTTATATTCACCGTAGATACGCGATCCCACCT  
AGCTCAGAGACTGCACGCCAGCGGGAGTACGTGATGTAGCACTTTCGGCTAGACCTGGA  
AATGGAGCACGGGGAGACCAGAATCTACGGGGCTGCCAAGGTTACCGCAAGGCTCCGCGC  
CTTCTACACCCTGGGGTATCTTGTATACTACCGAGCGATGACCTACGAGGAGGAAATGTC  
GCTGGCCATGACCCAGTGTGTCGACCTTGTGCGCATCATCCAACAGGTGGGCGCCTCCAT  
GCGACTGATCCAAGACCCGTAAGGACTGTTCTGTCCCCACTTTTGGTCCGAACCCGGA  
CTGCCCCTGACCGTGTGACCCCGAACGACCAGGTGGATTGTGCCGTAACCATGCCCGC  
CGTACTGGACTAGGAAGCAAACGGTGTGATTTGATGCGGAGCGTGCATTTGCTTGTGCA  
TAACGACCTGTTCTCGGAGTCGGTGTGATCTATCTGTTCTGTTCTCGATAAAGGTGGAGC  
CTCACCGCATGGACGGTCATCAGCTCACGTACTGATCAGCAGCTACTGCGGAACCTCATC  
GACAGCGCTGATTTGGCAGTGTACTACCAAGATGCTTACCGAATAGCAGTGGTGGCTA  
GGACTAGGGCGCAACATCATAGAGTATATCTATGCGTAAAGAAGTGTACTGCGTAGGCAA  
GCGCCTAGCGACCGTGAGCGGGTTCGGTGGCGCGCTCGATGCCGAACCCAGCTTCCCCCG  
GCACGTGCTACGAGCGCGACGGTGCAGTAGATCAAGAGCGACCAGCCGCTGTACTGACA  
GGAGTTTGAGGCACTGGGCGCGGATACTGTTGACGTAGTATGACTTAAGGGACCCAGCCC  
AGTAACGTGAGCTCTCCCGTTCCTGGCGTTATCGTTCCCAATGCTGGATTGAAGCATGA  
TGTTACGACACAACAATCCCTCCTGGACACTACTACACGCGGCAGATAAACCAGGAGTCC  
GTGTGAGCAACTGCGCGGCCATCGTCGCTTTCAAAGCCGGCATTATCAGCACGGCGCAGG  
AGGCCGAGCGCTTCAAGAAGTAGTGCCTCTCATTTAAACAAGCAGCGATGTAAGGAGTCC  
TTATGTACTTAGAACCTAAGAGAGTACACCCCGTGTAGGGTGAGGGGCTCCTCTACGTCT  
CGTTCCTCCTAACAGTGACGCAGACGCACCGTCTGTTCTTACTTATGCACTATGCCATCT  
CGGTGCGGGTCTGTTTCGAGACCGGGCTGCGTGCAGTTAATGAAATCCTCCTATCCGATT  
TGGGGCAGCCTGATAAATGTGTGGGTATCACCCCGTATTCAGCGCTGTGGAAAGCCGG  
TGCGCTGTATTGTCGCGCCAGTCCTTAGCACAGAGAGCGCCTCACGCTACTCGCTACTC  
AAGCATGACTGTATAGTGGTCCTGGCACTTAAACCCGGCCATCTCAGGGGCGTGGTGATC  
GCTGCCCAGGAACCTCCCGGCCTCGCGGGGGACTTCAGGGGCGACGTGCGCTTCAAGCGC  
CCCGGCAGTGAGGAGGGGGTGGCTGCTAATAAAAACCTGTACCACGAGACTCAGGCACTA  
GAGCCAGCGCTGGAGGATGCAGGTATCTACGGCCATTGCGTCCGGGATGTACGTGGCTGT  
GAGGGGGTATGAAACTGAGAACATAACAAGGGCAACCCGGTGTATCTTGGGCGGAGTATG  
TAGTGGACGGCCCGTTAAGTGATGAGCTGTGCTGGGCGAATCATCACCGCCCCGCGCGCT  
AGTGTCTCGCGGACAGCGACAACCGGGGGGACCACGAGGTTGGGCGCCGTGTGGGGCTGA  
ACCCGCGACCTCTCGAGTCAGTCTGGGTTGTGTGTGGCCAAGCGGGCCGGCTGCCGCACGA  
GTAACCGCTACAGGAGTGAGGCAGAAGCCGCGGAGCTCACCTTCAACTGACATGGATAT  
ACACGAGCGTGACGTTCTACGTGGCCCGCATCAAGCGGATGAGCACCCAACCTAAGCCTC  
CCCAGGCGGAACCTAAAGTGGAGAATCTGTAATGATCCCGTTCACCAACCTCACTGTAGT  
TATCGAAACGGATGACGCACTGGGCTGCCCAATCCAAGGCCGCACTCGCTACATCACCCG  
TACGTGTGGTCTCCGCGACCCAGCAACTCTCTAAGCCTCTTTGTGAGCAAATTAGAAGT  
CGATAGGAGTATCGCGATCTCTGACAGCGTCGACATGACCGCGGTCTTAGCCTGACCAA  
AGAAAACGCTCTGCCGCTGCGCGCGGCCCTTACATCTGAACTGGAGAACTGTAGTTGGT  
TAAGCATGGCGTTAGATCAGCGGCGAGAACAATTCATCCGCCCGTTGATGGCTTGGCT  
GGCAGAGCCTTCCGTATGAACACCGGTGTGAGTGCACCTCATGGCCTCGCTGCTGCGCCGC  
AATGGTGTGCTCCAGTGGCAGGACTACTCCCGGATGTCCAAGGAGGCCGTATTAGTGGCA  
AGAGCTACTCTGTAGATCTGGTGAACATCGCGAGTTGGAGGAAAGTAATAGCGACCTTG  
GGCACAGCTACCGCCATGGGCAGTTGAAGCGCATGCGAGAATCTGACAGCGGTCACAATG  
CCGTCCGAGTACTGGCCACTGCCTAAGAGATGGGGATGGTCTTGGCGATTACAGCAGTTAC  
CAGTGGAGAGCTAGCAGATAACGGGTTTTGCATAGACCACCTTTAAAGATCTGGCGTGT  
CGCCCGCTTGCCCTCGGCACTACCGTAATGGTGCGAAAACTATCCAACCTATCCAAAA



TCTGAACGACCAGCGCCATACCCTCGAAGCCCAGGCAGCCGAGGTGCTTGCTAAGGCCAA  
CACCTTCGGGAGCCGCGTGTATCGCTGGAGCGCATCCAGAGGACCGTCTAGCTAGATGA  
CATGGACTTCCAGATTGGCCGCCAGGACGAGATGCCGGTCGTCTCCGGCGTGGTACTGGG  
CGTTGGTAACACCGACGGCGGGAAGCAGATTGGCGTCTTCATCGGGGCATGCTACAACAG  
GTCTACGTACAGTTTCGAGGACTTTCATAGCGTGCACGGACTGCGTCCGCAGACTGCCGA  
GTTTACTCAGGACGCTGAGCAGCGAGCCGAGATACATCGGGGCTTAGTGCAAGGGGCTCC  
CCTCATAACCAGCCCCCGTTCGGTATATCAGTACCCTCCGCACACGAAGCTCAACTCCTG  
TAACATCGAGGTGAGACCATGAAAGTTGCTAAGAACCTTAACGAGGCAGCTCGCGAGTCC  
CTGCAAGGTAAGCTGGACGCGTAAGACATGAGGCTGCGCATGGCCTTTGACCAGGCGCGA  
CGCCATAACGAGGCGCTGGGGCGGGTGCCTAGACCGTGTCCGGTAACCCGGGGAAAAC  
GAACGCTTGCCTAAAGCGCTTGTCCAGGCAAACCACCATCTCGTGGCTAGGTTGGAGC  
TGGAGTAAGTAACCTCGACACCATCCAAGCCCAGAAGGCCAAGGAAGAGCGCCACGACGGG  
TTCGTGGAGAAGCTGGACCGGGAACCTCGAGAATGCCGAGGGGCGAGATACAGGACCACAAG  
GTGCGTATCACTACGATTAAGCGGATAGCCTACGCCCTGTGCCGTACGGTTCGTAGGATTG  
CGCTGGAAGCTACTCCAGCCAGCGGTTAATTCGAGGTTGTGCTGTCAGCCTCACCGCAG  
GCTGTAGGTCCAGTTGAGTGGGCAAGTGAGGCTAAACGCTAGCGTCCACGACGTGACTCA  
GATGCGTACCGACTGGGCAGAGAGTTCCACCACGACGGGACAGCTGCTTTGCCAGGGCT  
CATCGATGATTACAACGCGCTGCAAGCCCAGGCAGAGGCGCTACCGGCTCAGGATGCAAA  
ATGGAAAAGAAGCCATCAAGATATCCGCGAGACTGCAATACGTGAATTCATGCGTATTT  
CCAAGCACTGCGCACCCGAGCTGGAGGGGGCGCACGGATCGCTGCGCGATATGGACCACGC  
CGCGCGCATTAAACCCCTGCCGCCATCAGGGCATGGTCAATCCTTGACGTTATGGCTATTG  
GCTTGACTTGCCTATTGACGCTATCCACACCTGCCCCCAGGCGCCGGTAGCGCGGGAAACA  
GATGAAACGTTACCTAAGAATGGCCGAGTGGGGGGAGCGGCAGTAGGCAGTGGCGTGGGG  
GTTAGCTAATAGCGCATATGAGCTTATAGGCTTCACTCCGATTTATTAGTTCAAAGAAGT  
CGAGACCAGTTGTAACACGGCCGGATGATTTTTCCCTCGACAGCACCCCGCAGCCAGGG  
TCGTACGCTCGGGCGCTGGTGGAGGCGCTGTAATGAGTACTCGATTCTTGCCAGTGGGC  
GATCCTGACGGCGAGTCCCTCCAGCATCGTAAAAGCCAAGACAGCCGTTTCCGCCACCAGC  
CGGCAGCAATCGGTTTGGCCCTCCCCGAGAACGTTGTTCTGCACAGGACGCAGCTTCTTG  
CCATCGGGCAAACTCCCGCACGGAGCACA ACTTGGAGAACCGTGCACGCCCTTGTTC  
GCAACGCCACCGACAGGTAGTGGGAGTACTGTCACATCTGGCTCGAGGGCGGGCAGGCGC  
TGAAAACACCTGTGCTCGAGGGTGCAGAGGACCAAGTCCAGGAACGCTTTATCCCATGGC  
CCTACGATGCTAGAAGCGCAGTTGGCGACTAGATGTACCGCATCGTATACCGCAA ACTGT  
TAGAAAAAGGCATCGACTTGGTTAGTATGCTGCCAGGGGTGCCCGTTTAGATGAGTCGCC  
GTCCGGGTTGCCTGAAGCGCTCCAGTGGGCAGAGGTTGTAGGCTCGCGCCATAGGCGCAG  
TTCAGCAGAAGTGGTGCGCGACCTCAAACCAAGGTGAGCGCCCGGCTGTGTTCCACCCC  
GCCCCACGATCACATTAAGCGTCGGTGTCTGCTCACTTAAGACTATATATTCGCGATGT  
AGATAAGGTGGGATTAGAATGATTCAAAAGCTATTTCTAATGCAGCGATCGGGACTCGTG  
TGAACAAACGCCGGGCGGCTCCTCGACGCAAAGCAGAAGAGGGGCGGAACGCATTCGATG  
GGGACCGAGCCGGGGCTGACGGGTAGCCAACTCCCGCAGGCCTCTTCCAGGCATCGGCT  
AGTGAGTTCGCACCTTTGACGCCTCACTGGGGTTAGACCCCAAGGATATCCGGACGCCAT  
CGGTACAGCAGCTGATAAATGGGACGCCGCACGAATGAGGAGGAATTGGAGGCTACGGAT  
CGCGCCC GCGCTGCCGTGGCGTAGGCGCAGGGGA ACTATGGGCAGTACA ACTGTCCGCCG  
GTCAAATGGTACCGGAGCGGGACGGTGC GCGTATGCATTCTGGTACGGCTTCTTGCAA  
GACTTGC GGGATGTGCAGTGTGCTACCGTGACCAATCTATCCGCATGCTCCGGTAATAGA  
TCAATGAAAAGGGTGTGAGAGACTGTCGGAGTTTTACCCGAAGCCAAGCAAGAACGACG  
CCGCGATTAGTGC GGCCTTAGAGCAGGGTCCCCCTGGCGAGCGATCGATGTGTTCCAGGG  
ACGATGAATTCATGAGCGGAGCGGGCGACGCTGACGATTATGGCCAGCAATACTTTGATC  
CTGCAAGCCGTGCGCTCGAAGTAGAAGTTACGAAATCCGATTGACATAGTGCCCTCCCAG  
ATGCTTGGCACCCAGGCGCAGTTTATATTGGCCGCGTATCTGATCTACCACAAAGGGTAC  
CCTGCTAGCGAGTACCCGGACATCGGCGCGCTCGCTTCACTGGGGATGCTCCGGTCCGCA  
TACAACCGTGAGCAGTTGGCTAAGAAACGCCACACAACGGAGATCCTGCGCCAGAACGTT  
GACCAGGAACCCATCACGTGCGTCGTGAACAATGTGCGAGGGAGGGACTTCGCCATGCGC  
CCGGGTTCTCTGCTGTCCAGTACAACGCCGGGGGCGAGGTTGATCTAGCGTACGAGCTG  
AGTCGCATTGCGCCGGAGACGCAGCGGTCATGGCCACAGCTCCAGCTCCGAGTGGTTA  
AGGCACAGCATTGAGCAAATGCTGACACGGAACGAGAAGGACTTCGGCCTAATGTTGGCC  
CTGCATGTCTGGCAGTCGCACACCTAGGGCCTACTGGGAGGCGCCCCAGTGACGTTGACA  
GGGCGCTGCGACAAGAGCAAGACCAGCCTCATTGTATTCATCCTAGCCCGCTCCGCGGGG

AAGGTAGACCGTTACAATGACCTGGAGTTATCTAACCTCTGGCTCAACATCGAGGGCAAG  
GGTTAGGGCCTGATCTCACCTCTCTACCAGCAAGCCCACGGGGTGGAGATTGAGGAGATG  
GTGGAGATGAGCAATGCTGTCACGCTGAGCGGTGCGGACACCTCCTAGGCTGGCAGTGTG  
GATCGTATCAGTTTACACGATATGCCCGCTGCCTGCTTCGTGCTATTAAGAAGGTCATC  
GAAGCGATGGAGCCCTGTATTGTCGTGTGGGATAGAATGTGGAACCTCCCGTTGTGACAC  
AGTTCCGCGGGTAGGAACAAAGTTCGGTGTGGGGGAAAAGTAGCAAGCCGCCCGTGGC  
ATGTCGGTGTGACACGCGCTGAGCCGGGGTGTGCCAGATCAGAAACGAGAGTGTG  
AACATGCTGTACCCGGCGTACTCCGCGCCAAGGGCAGCAAGATCGGTAACCAGGGCGTG  
ATCGATCTCATGGTGACGATGGGGCCGCGGGAGGCCCTGAGATGCCGTAGCTACAGGGT  
ATGAGCACGCGGAAAATAAAGCGCCATATTCCCAATATCCCAAGCCAAATAACCTCTGAG  
GTATTTTTTCGCTGCAGCGAAAGCTCAGAGGGACCAGGGTTCTTAATCGGTGGGGAGTTGG  
CGCCGCAGACCATGCTTAAGAGGCGTGGCTCGCTCTTTTCGTAATCAAAGCGTTGCACGA  
GTACTACGACGTGTCAGTCAACATAACCATCGCAAGCCTAGCATATGTGCAAGCGCTGGA  
CGAGCGCCTGAAGACCCACATTAACAATTTACTGTACGTACTCGGGACGATACGGGGATG  
GCCCAAGCAATTACCCTACATCGCAGCCTGATAGAGACTGTCAAGGTGGACGCCGAACCTG  
GATGACCGATGACTCCGTCTCAAGCTGTCTCAGAGTGACACCTTGTCACAGGTTCTGCTC  
GCCCATGCCGGCCCCGTGCGCCTGGCTGAGCTAGTCACCATGCACGAACCACGGGAGCAA  
ACGAAAGAACAACACTGAACCCTTACGTTTGAAGTTCGCACGGCCTAAATTTGCCCGTCCGC  
GACAAACAACGAGCTCGACTGCATGTTGTAAGTGGCTGAGACCCAGGTAGGCACGTACCG  
CCAATAACAACACTCGGCGGCGGCTGTGTAGCGTGGTCTGCTGCGGAGCACCCGGACCGTGA  
CGAGTTCGGGTGGGTGGCAATCGTAAGAGGACAGCCAAACCTTATCCTCTCCTGGGACGC  
GACGCTATGCGTGTGCTGGTTGGCGCCGAATGCGTGGCTAAGGTATTGAACCTCACTCT  
AAAACCTGGAGCGGGTTGGCTAACTGCAGACTCTCCGCGGTGCATTACCCGAACAGGCGCG  
GACGAAGTTGGAGCGACCCCGTGTACAGGTGAAGCAAAGTACCAGGAGTTCTTGAATTA  
GCACTAAGAAGCCCCTGCTCTGCCATCCGACGGCGCACCTTGCGATGGACGGGACTAAAA  
AGGCACTCGAGAGGCGTCTGCACCAACGCACGATCCAGCCATTTGGGATGGTGTCTGGGT  
TCCGCGTAGTGATCCGCCTTAAATGCCAAGGGGACGTGGTGTGACCGCACGCGTAGGTA  
TTGTAGTCTTAAACTTGTCTAGACTTGTGGAGCGCCTTCGTAGGACCCTGTTACGCCAC  
GCCACCAATGTGGAGCGACTACGACCGGGAGCGCTGGATCAAGCGCCGCCCGTACGACC  
CCATTCGCGCCTACTGCGCCTTGATACCCGCTGCTCGGGCAGCACCTGAAGAAGGTGT  
ACATCCTGATGTTCTGTTCTGGGAGTATTCGGTACTTAGAAGGCCGGGTTGAGGATCGAG  
TTCCGAATGTGCCATCTGAGACGAACGTTGGAGACTCTTTGGTTTCTAAGGCCTGGCCC  
CTCTCCCGCCGCGGATCGAGTGCCCGAGGTCCCTGTTTATCTACTAGCAGTCTTGGACCT  
GCGAAACAGTGGGTGTCATCCAGGTTCCGGTGTGAGCCTGCCTGGGCAGCCGGGTACAAGG  
GCCTGGTCTTCAAGGACCCCACTCTTACCGCGCAACGGCAAGGTCTCCGGGGGCTGGA  
AGTTGAAACCTGGTTGCCGCTTCGAGTTGGCGCCTATATCTGAGCCGGATGGCACTGACA  
TCGACTTCGTGAGGGGAGTCCCCGAAGAGTCGAACGCGAATAAGATCGTTCGGATTCCCTGG  
AACGTATGGAACACGGGGCTTAAGTAAACGCAGCCGAGTTGGCGCATCACGAGATGGCCT  
GAGACGACCAGAGATAACACGTATGCGCCTAGGTCGATAGTTTAATCCAAACGCTCTACC  
TTGGGCGCGCCTGTCGCATGCCCGATATGGAGCGCACTCAGGATGCCAGTATTCGCCACC  
CACACTTCGACGGGTTCCGAGATATCCACAGGGCCGTACGTCTGAAAGCGTCAGAACGAG  
TTTTATCTTGCGGCTGGACCCTACGCATAAGCGCGGGGTGGTACTAGGGATTGGCTGGGA  
TTCGCTCCGTCCCTGGAAAGCGACGTACAACCAGCTGCGTGGTCCGGCTGTTGGTATCCGG  
GTCCCTCGGAATCGGTAAGGCGAGGGTACTCTACTGGCGGCGAAAATGAAACTACGAACA  
ATAGCTTTGGAGTAAACTACCGTACCCTGGTACGGGACGCTAGTGTCCCCGGACCACCCT  
ATGAACTACCTGATCATGCCCGGTGGCTGAGCCCACGGATACGGCGGCCCTCCCTGCGCGG  
GTACAGCACCTAGACTTCACTTCGTGCGGGAATCGGGCAAGTTTATACTGGTTCGACGTC  
TACGGGATAGACCTCCTCGGAGCACCCAACGCTGGGTACGATGTGTGCTTCTTCATGAAC  
CGCCACCGCAACGACCTCGAGTAGATCGGGAAGCGCAGGGGCAGCGGGCTTTGTACCTTG  
ATCCGGCACTAAATCCTGTCAATATTCCAGACACGTACCGAAGATTTCGTGAGAGTGTA  
ACGAAGTACTGTGGTATTCAGACGATCGATGCGGTGAAGGATCTGTTCAAGCAGCGGCAC  
CTCACCAGGACCATCGAGCCGAATCTCCTCGTTCGAGTACGTAGACGGTCCCAGGGTTCAG  
GTTAAGCACGCAAGCCTCAGCTTCTCCGGGCTGAGGGCTCTGCTCCAGGCGCGCGTGCAG  
CGTGGGCAGGTAGTGTAGCGCTGCGAAGACCTGCTGGGCTTCGCCTACTGCGATTTATTC  
TTCCGGGCCGTGAACACCTAGGCGACCGAGGCGATACAAACGAAGCAGTAACCTGAGCTG  
GCCGAGGTTTCGAGGATAGGTACACGAGCCCCTGCCAGATTTGCCGAATCACTTGGAGTTC  
AACTGGGGCAGTGACTACCATCTTAGCGCCGTATCGATCGGCGCACCCGGTGAAATACAGG

ACCCGCGCTCCCCGCACCGAAGCCGGTGGCCTCGTAATGGGCGCTAAGTATTAGTGTGCC  
ATTCTCAGTGACAAATTCACCCCTGTGAGCTACCTTAACGCCCCCGGTCCAGGAGGGGGTT  
GCAAACCAAATCCGAGAACACGGAACCCCGGATCGTCACAAGCCCGGCCAGAACAAGGGC  
GAGTTGACGATTATAAGGTTGACTCTGACCAGCCGCAAATGAAGTGGTAGGATACAGTT  
TTTGTGCCTCCCGGCGGCATCTTGATTAGCAAATGCCCTCGAAAATCCATGAGGAGCTC  
GCGTACCACGGCTCGGACTCGCGCAAAAACGGTGAATGGACCAGCACCCGCCTGCGGTGC  
GACGTGAAGGCCACGTTGTAGACCACCAGCTCGGACGTATTGGAGGTGCAGGCCTAACAC  
GGCTTCGATACCGCCGATAAGCTTTAACGCATGGAGTGCCTGGATAATAATAACAGCACA  
CACGACTGCTATGTGGGGTTCGCCAGGAGGGCAAGTTCCCGAGGGGCATCGGGATGCTC  
CTGTACCTCGAGCCGGACGGGATCACCCACTACCGCTTGAAGCTCTACGCAAGCGTCACA  
GGTCGCTTGTCTCCTGGTACCGGCACCTCGAGATCCTCCCGCGAGCCGGCAGACTCCGC  
CTAACGTGGGATTCGAGTCCCAGCGCCGGACTGCCGGGCGGATCGTCGAAGTGGATTAC  
TGGGCCCTGCAAATCGTGATGTTGGCTTCGCTCAGCGCCGACTCGAGCCTGGTGGGGCTG  
CCAGTTAACGGCTCAAACATAACAATGTGTGCATCTGGACGCGAAGCTCGGTGAACCCAC  
GGGGAGGTGCTGCACAAGGCAGTCAACAACGAGCCGCATCCGAAGGTCTCCGGATAACAAG  
CAGATGCGGACGTACATCATGCCACCAAACCTTCGCTGCTCGTTACGGGGCCAGTGCCGAG  
GGTATCGTATACGTCACTGTTGTATCTGTCGGGTACCCCATGGATTAGTTGGAAACAGAG  
GCCGGCCTGTTCCCGCAGAGCAGTCTGCTCCGTGGGCTTATGATTGCTGAGCTCGACCGT  
ACCGGCGACCTGACATAAGGGCGGCACCGCGAGCAGGGCGGCGACACTGGGGCGTAGCGG  
TGCCACAGCCGAGGTTACTGTCACGCGCCAGATGGTGCCCGTTACAGCTTCCGGGAATGG  
ACGCAGTGGAAAAGGAGTTGTGCCACCGGGTCATCGACTGAAAGGACAGCATGAGCGCC  
AACTACGGGTGCCAGGCCAGGTGTTCTACCTCCTGGCACTATCGGCAGGTCCGGTACTG  
AGTTGCCTCCGTTCCGAAAGATTCTATCGGACGAGGAGTTCCCGCAAGGTTCGCGTGTGG  
TTGATCAACAATGCACACGATTGGCTGTAATGCGACGTACTCAAATCGGTGGTACGGGAT  
GTATGCCTCCAGGTTAAGGCCGTTATGGAAGGCCCGTCGAAGTAGTAACGCGACCCCTC  
ACCTACATAATCGCGCACTTCTCGTTCCCGGCAGGTTCCAGGCAAGGCTCATCATGGCA  
GATAACGAGCACATAAACGGAGCAACTACACTATCCCAACCAGACACTGTGACTACCGGC  
TGACTGGCTGTACGCATTACCGCGGGACGCTCCCCATTCTCGGGCAAACCAGAATTCTAC  
TCGGGCAATAGCTGGAGAAGGGTTCATTCATGGCACAGGGCGCGGAGGTCTCTCCGTCA  
CGCAGCACAAACCATCCTTTGAAGTACACGACATGCACGTCCCCACTTACAACGTGACGAT  
GGTATGGCGCGAGGGCGCCAGCACCCCGCAATAGCCAGCCGCGCTGGCGACGAAAGACGG  
CTGCTGCTACCAAACGCTTCCCACGCAACGTGGCCACGCCATAGTCATAGAGCACGCCCA  
GTCCGGGCGACTTAACCTAATCAACCTGAACGCAGGTCAGTGCATTGATGGCACCCCACT  
GCCGGAGGAAGTATGAGCCAGAAATGACGAGCACTACTCGCCCTTGCAAACGACGGCGCT  
GAAAACGCTTATGGAGACCTCAGCCAAGGCTCCAAGGGCAGAGACAGTGGCAACCTCTAC  
CGCGCAGCCTATGTCTCCGCCCAGTGCCTGCGGTCCATCGTGTTCGTATGCACGCGTAG  
GAGTTCCAGGGTACGGGCAAGGTCCCTGCCCTGGAGTACCCCTGGGCTTCAAACCTTTT  
GGTGAAGGCTAGCAGAATGAAGACGGCAACCGCGCCGTCATCTAGACCTATAACATGAAC  
ATCGGCTACAACGAGCAGCCGGGCACGAAGATCACTTAAGACAAGCGCGGCTCGATGGGC  
CACACCAAGCCCTTCGCGCAAATGCTTGGCAACGACTTCTCGTTAAGATCGAGCACAAT  
GGGGTCAAGGAACAGCCCGCTAGGAAGCGCAGTCTCCTGAATCTGTCCGAGACCCTGCCG  
CCCCTCGCCGTGGTGAACGAGCAGCCGTACCAGATTACCCACGTAAACAACCTACCTGCTC  
GTCCTGTTGCTGTGATCACACCCGACCAAGGAAGCCTGGGACCCCATCCGCATCGAGGGC  
TCTAATGCGACCCCTCCACGTCCAAGAACTTCTTGCAAGAGACGAGCGTTCTGGCTATC  
GACTTGCTCGATCGGCCCGGGGCTGCGCCTGTGCGTCACGGGGGAGCTGGAGTCCCCA  
GAGTCGGTCGCCGGTATGCAACCTACCACGCCCGCAGTTGGGCATAGGCCGGCCGCGCGT  
AGCATCCCTACCGCCCGGGCTATCCCCGCTACCAGCGCGCCCTTGGCTGCTGCCGTGCCG  
CAGATCCCGGCAGTGCCTCAAGGGCCCGCGGTCCCCCGGTGCTGGTAGAGACAGTCGTC  
CCGGACTTGGCCATCGAGGGCGGTCTCCAGGCAGGGCCGTGGGGAGCCCAGCTAGGAGGA  
CTGTCCGAGAAGTGGAGGTTTCCGCGCTCGAGGACAAGCTCGAAGTGATGTTGCCAACC  
GCGTAATGCTGTTGGATAGCGTTGGGGCGGGCTACCCCTCCAGCTCCACTCTGAAGTCAG  
TTATTGCTGATGTACGGCGCCTCGTCATGGAGGCTCTAACCGACCAGTTCCTCACCGGAG  
CCTAGGCGGCGCGAGTTCACGCTGCCGGCCTTGGTGGTCCGAAGGCCCTACAGGGCCTGT  
ATCCGATGCGGAAGTTGTACGAGCTACCCCGCACCGGTAAGCCTAAACCGTGGTTCCTGG  
AGCCGCTGCGGGAGGTTCTGGCCACGGAGAGGCGTTCGAGTACGCATTTCCCGAGAAGA  
TCGTGGTCCACCTGCCTCCATAGTGGGAGACCGTCCGGCCCCCTGGTCCAGGACGGCGTGC  
TCTACGGCGCTGGCTCTGTCACCAAGTCTGAGGACAAGGACCACCGGGCGACACACGCC

CGTTCTATTAGTCGGAGAAGGGCAGGATGGATGTACTCCCCGAATCCGAACGCTTTTTCT  
GGATCAACGTTCGGGTTACGTCCGCTCTATCGCTCCGTGTCACGGGGCATCAGAGGAAGT  
TCTTCTGGGCACAGATGCACATGGGCGAGACGCCAATCACGGCCGTGGCCTGGAGCGCT  
GGGAGGGCAAGCGAATCGCACACGGTGGTACCATGGAAGTGCGAGGCCCTGTATAAAGCG  
AGAATGAGGCGGCCCTCAGTATCATCTGGGCCTACCACAAGATCGAGCAGCACACGCTCG  
CTGCGGCCAGGTGCTATGGCTGCGCCGCACCGAGGAGGACTCCGCGTACCGCTACCTCT  
GTGGACTGGACCTTGAACCGAGCCTGCGGCCGTGGGTGGATCACTTGAACGGCTACCACC  
CTAGAGTCTACAAGTAGGCTCTGCCGGAGCGTAATGAGGAACTGAGTAGGACGAAGCTC  
AGGGGCTGGGTGATACCCCCGTCACGAACGCGCTGGGAGGCCGCTGTCCGCTTTGCGGT  
AACCCGATCGATTCCAGCCTCGCACGGAAAGCGGTGGTTCGATAACCAGCACGATAACAATT  
GAAATACGTGGGTCTCTCTACCGATCCTGTACGGCGGCGGAAGGGAAGGTCAGCAACGCA  
GCCGGTAGATGGGGGACATGGAACACAAGCTTTGCCCCCAACATGCCGTTCTGTGGTGAAT  
GTGCTCCCGTACCAGAAAAGTTGGGGTCTGGGTAAATGTAGCTAGCTACAAGTCACCC  
GAATAAGCCGCAGAGGCCGAAGTGGGTAAATACGCAGTAAAGCAGCAGAATTTAGCCTCGCA  
TCCGCCCGGGCCGCACGATTCAGCGGAAGGGGACATCCCAGCTAATCACATAGTAAGAC  
GCATGAGTTTCCCGCACGAGGACATGGCCAATGCACTGTTGGTTGGCGGGCGGTAACAAGA  
CCCATGCGGAATAACACCTACTAATTTGGGACACGGGGTGGCAAGTCGGGAACTACTGC  
AACGATGGTACCAACAGGGTTACCGCATAAGTAGCATTAGCAGGAGAGAAACGACGGTCCG  
AGTCGGCCGGCTGTGCCACGAGTGCTGCTGGCGCGGTGAACCGCACTTTAGAAGACGGCA  
TATGTATTCTAAGCATCGACATCGAGTCGGGTGCCGAGATTGGCCGAGTGGGGTGACTCT  
TAGAGCAGAAGCTAGGGCTTAAACAGCTCACAAAGTTTGCAACATCCGCAGCTGCTGTG  
AGCAGTGGTTCGGGGGATACTAACATGATCTACTCCGACCTCGCCTAGGCAGACAACATTG  
CAGATAAAAGCAAGCAAGTAGCTGAGCTATAACAAGGTGGGGCATGAGTCAGATCCTGTAG  
TGGCACAGAACGGTACCCGATTTCGATCGAGCGGAGATTAAGCCCCATGGATGACCGGTG  
GTTACAAGCCAGCCCGCCAGTTCCGAGTAATCGACACCATGCCATGGCGAAGCAGCGGA  
TCGGCTTCATCAGAAACAAGCTGGGGTGGATGACCGACAAACTCTTCACCACAATGACGC  
GCGAGCATGAGAAGGGCCCCGGTATGGAGCTGTGAAACCTGTGCTTGGCAGGCAACCGCG  
GACCCTGGGAGGTGATGCTGCACTCCATAATTGGCGACGTAGTCTCGTTGGAGGGGTTGT  
ACTTGATCCAACGCCCTGGTATCAAGGCCATACGAACGTGGAGGTGTTCAACGATGGGC  
AGGAGATCGCTTGTCCGAAATGAGCCTCGTATCACCTCAAGCGCGATGGGGGGACTCACA  
CCCAGTTCGGTAAGTACGAGCTTTGTCATTGTAACGATTGAGGCGGTAAAACCGCAGAC  
GCAAAACCAAAAAATCGAAGCAGGTGGGTGTGCCCAGCCATTCAATTGCATTCACCTAT  
GAACCTGAGCGCTACTTCTACAGAGTCCCCAGCAAACACTACGCCGATGGAACGGGTGTGAT  
TACTGGAGAACGGAAGGGTTCGGCATAGGTGGGTGGGTACCGCCGGGCTGTAGAACCGCCC  
TTGGTGGGCGGGGAAAGGAACGACGCCGCCTACAAGACGGTCACCGGCAAGTCTGGTTGG  
ACCGTCCAACAAAACACTCAGCCAGGGGTTGGGGGCCAGCATCGCGGGACGTGGTTCTGTGTA  
CTGAACATCGCAGTGCCTCGTAACCGTGATGGAGTAAAGGAGAACATCCCGCATTCCTGG  
CGTAAGCACCGGACGCACGTACGCGCTATGAGGATGCCCTGCACCGCCACTCCGACCAC  
ATCCGCGACGGTAAGCCTCAGGATGGCGAGTGCAGCAGTGCACACTGGGCACACATTGCC  
ACGAACGCACTGTTACTCTGGGAACATAAATAATCCCAAGTATGAAACTGATGAGTGCGGG  
CTTATCGTGCTTGTGCGGCCCTGACAGCTGCAAACACTGATCCCAGGGGAATTCCTCAATCC  
AGAGGTCTCTATAGCACCGAGCTGCGCGAGGACAACGCCAGGAACCTATATTGAGCCTA  
TGCCTCGCGGCTGAGGAGTTCGGCGAAAACAACATTGGCCGCGTGTCCCCAGCACCTA  
AGGTCCGGTGATGATGGACCCTATCGACGCCATATGCAGCGTGGGAAGCCGCACAGCGC  
TGAGGCTATTCCCAGCACCTGCGCGAAGTTCAAGAGGCCCTGCGTGCCCGCAGGATCGA  
TGACATCCCAGCAGCACGTGCGCGTACCGCCGGTGTGTACGAGCAAGTGCGGGTTTGACT  
GGAGCTGGTTGTGGAATAAAAGGCACGCGGCCAGTAGCAGCTCAAGGCGGCTGGCTGCG  
CCTGGGCCATAACCGACTCCCGCGCCGGTCTGACCGTCCGCGTCGACCTGTGCAAGTCAT  
GCGGCACACAGCCAAGTCACCAGCCCCGCTAGACTGCTTCGGCCGCGCCCTCGGGCGGAC  
CATTGAGCACGTGCTAAGGTGCGGGAGGGACACCGTACGTCCGCGCCATTCTCAACCT  
GACTTGGGAGTACGTGCGCACAGCGGGCACGACCAGTGAACGTACACCCACTAGACGAT  
GGGTGCTTTGGTACAGAACGTGCCGGTAGGCCATTAGACGCGGACCTGACGACCACTGA  
GTACAACCACCTCGGCAAGCACGGCCGCCAGGCGAGCATGGATGCGGGTTCGGGTTGAGCT  
GCGGCGAGAAGGGCAGGGTCCAAGACGAGTGCGAATTACGTCTTCGCGGCTGAGGTGCG  
GGGGTCTTTGCTTTAGACCCGGCTGGCATTAGGGGTGCCGCGCATCTCATATTCGCTTA  
GCCGATCCTATGGGACGGGGTGGCTGGCTTCGGGTAGTGCACAGAGCGTATGAAGAACGA  
CTTGCCATTGAGTCGTGTAAACCGCCGTAACCTCGCACGCCGTTTCGCTTCGGCTTCTGGGA

AAACGTCTGGACATGCACCGATGTGCTCGCCTGTGCGAACTAGCTTCAGGACCAGGATTT  
CAGCATAACACCTCCCCCTCGCATCTGATGCAGGAGGCGTGGAACAGCGGCCACGGTGC  
CCTGGCCTTCGCGTAGCACGACGCGCCGCCGAGGGGGCGGACACATTCCCAGAGACCTG  
GAAGATGCACTCAGAGCCTAAGTTGTAGCTGGCGCGCTTTGCGAGTTGGAAGCGCTATCT  
TCACGCCTGGCCCATGGGCAAGATGGAACGCCGCAAAGCAGAGCAAGGTGTCGGCCAGGC  
CCCGCAGGTCTCCGCCGGCGCTGCGGCTCGAATGTGTGTCTCGACGTTTCATCGACAGCCG  
TGGACGGTATTAGTCCCGTGGGGCGTTGCACCCGCAAGGCGACGAGAATAGTAAGGTGCT  
GTTGCACCTCCCCGAGAAGCGCCCGCTGGGCAAGCGTCGCATCTAACGGATAGAGGTACA  
TGTGACAAATTGCCCGATGAGGAGAAGGCACGTTTCTATGCCCGGTAAGCCTTAGCTGT  
TGAGCGGAAGGTTGAGTTGTTTGCCCCCTGGAGGAATCGGACGACACGTGCTTGGCGGA  
GGCCGTCGCCCCCGCGGGCCATCCGCAGCCTTCTCGCCATGGCGCGAGGCCGAGCGCCC  
CGCCAACCCATTAACGTACTGCACTGGCCCGCCGATCGACAGGGACGACACCTGCTCTTG  
ACCCCATGTCTTCTCAGCGCTGCTCCGCTACCCGGTGGCAGGGGAGCAAGTGAACCTGTA  
CGACGGCGTTCGCGACTGCAAGGCCCATGTTTATCGCAAGGGGGCCAAGGTATAGCAGAC  
AGGGATCGACCGAGCCGCATCCGACCCGTCATCTAAGGACTAGCACCTGGCGAAGCTCTG  
GAACCAGGGAGAACTCCCCGCTCCCTAGCAAAGGGGGCCCGTATTCACCGACGTATTTGG  
AGCGGCACCTCGCGGTGTTGCGAAGGGCACTGCCGACTGGCTGGAAGGGTATCAGGCAAT  
CGTGGCCGATCGTTTCCATGTTATCGACCTTGCATACTACCTGTGCCGTGTGCTGTTCCC  
AGCAATAGAGGACGCTGTGCCTGCTACCGCCGCAGGGTGGTGTGGGGCCGGGATCAGGC  
ACGCAGGTCCACAGGCGACTCACCGATGTTGTGGTTCAGCCCGGTGGCCTACTGCGCGA  
GCGCGACTACCGCGACTCTGTGAAACACCGGGTTAAGAACAGGTCGTGCGGTAGCACAGA  
CACCGTGGTGCAGGAGGACCTGCTCCTGACGCGTCGCAACCGGCTGCAGAATGGCGTGGG  
AGCGAATTTTCGTATACGCTCTAGACGCATCGCACCTTTCCTTACGGCCCCGACTGCTGGC  
GGACGGTGGACTTGCAGTGGTGGCGATGACTGGCAGCGTTGTTCCACACCCCTCGAGCGT  
GGATGGAATGAACACTTCTATTCCGGAGGCGTTTCTGCGTCGGTATTCGGGAGAACGATTC  
TAGTACTCTGTTCCCTGCGTGGGATCGGGCAGGAGGCAGTAGGACCACCGCCGAAATGGTA  
CCTGGACTTGACCCTGGTCCCAAGCTCGGAATTTGGGAACTGTAACTGTCCCACTATAA  
TAACCAGGAGAAATTCGTACCCACAGAAAGCTAGGCACAGGTTCAAGTGAACATCAGACCA  
GATCGTCTAGTCTCTCAGGCCCTTCGGTTCACAGCCAGCGGCCCTGCTTAGGATGTGCC  
CACAGTTATGTACGAGGCAGGAATGGACAGCGTGATAGCTGCCTGTAATGCCAGTTGCTT  
AGCCCCGGAGACTTTGCATCTTGCCCTAGTAATCTATCACTTACGGCTGCAAGCGGAAC  
CCACTAACGGACGCTGGAACATGGATGAGGCGTATAGTGCGTGGTCCGAGCAGCCGTTTA  
CATACTTTTGGATGTGAAGCGGCGTTCTCAGGAGTGCCTGTGCTCCATCGAGCGCCTGA  
ATAGCTTGGCCATCATCGGTGGTAGGTGAGCCGGGATCGCTGTAATTGCAGTAGACCATG  
TTGTGCAGGAAGGCGAGTTTCTCCCGGTGCAGTGTCCGTACATCCTGCCTGAGTTCAAGA  
ATTTCGAGGGCGTCCGCTGCGTCCGTCCGCGCGGCACGGAATCTTGCCCGACAACTGAGCC  
TACCCACGATTGCGCTTCTCACCAGGATTGCTCCGGGGGCTCCAAGACAAGCTACAGGA  
GGTTATATGGCCAAAACGATCATAAAGGCAGTGGTTTGTGTGTCGTCACGGGGTCTAGCGGC  
GGGGGGCCGCGGAGCGGTGGCGGCGTGTGTTGGAGGGTAAACGGATTCCCTGGAAATCA  
GCACTGGCAGCGGCGGTGGAGCTGCAACGGTGTGGAGGCCAAAATCCCCAGGTGGACCGG  
AGCGAAGAGAACATTCGTACGATTGATGCTGGTGGCACTGGCGAGTCACAGCCAGAAGCC  
GGCACTAAGGCGCATCGTCGTCGTACCGGAGGTCTCGCATACTCCCTCAGCATAAACGTC  
GGGACCGATGCGACAGCAAGTCTTCTATGTTGGCGGTGTAGCGAGATACGACTGCAA  
TCCGAAAGGCCGAGGGCTTAAACCGGTGACTATCTCCCTCTGATAGCGCCCCCGCCAG  
AGAAGAGCTACCAGACGCAAGGAGTTGATTATGACTTTCCTTCTACCCCATCATCTCG  
TCAACAACCTCGACGGCCAAGGTGGCGCTGACCATGTTACCACCGAGCCGTGCCAGCTTCC  
AGATCGTGCGGGACGATACGCTACAAGAGCTGGCAACCGCTAACGACATCGACGAGTCCG  
GACTCCCCTGTCGCACTCCTGACCTTGAGCGCCTCGCTCTTCGGCTGCTATTTCGTAACG  
ATTGCCTCTCGCAGGTGCACCGCATCCTCGTGCTCTTGGTAGACAAAGGCAACGACCGGT  
GCTAAAGAGAGCCAGGCACAGGTAACGTGCTCATCTGGAGCATGCAGTTGTACACGGTGC  
ACCCTACCCCTCAAGGCATAACCCGCCGTGGTTATCCTCCGCCAGCAGATGCCGTTGCGAG  
AGCTTAGTCCCGAGATCCATGCAGACGCACACGCGAAGCAGATTGCCAAACGCGACTCAG  
TCAAGTGCGACTTGGACACCTTGATCGACTGGCACCCTAACCCGATCGGGAGACGCTTCG  
CTGTATGACACAAGCAAGAAGGTCTGCGCATCGGGCAGGAATCGAGCTACCCTGCGCTCG  
CATGCCCGTATGACCCCGTTGCGTGTACCGCACCTGACGGCGAGCGATAGGTAACCACT  
ACGTAGTGGCGTACAATGGCCAATTCTCCCGCGTCTCCGGTCTCAGCGAGCGCCGAGGCC  
TGGACGAGTTTGAGGCGTTGAGTCTGATGTACGTCATGTACGACGCCAGGGGTGGGCCGG

TGCCTGTATATCATGATGCACAGACCCGTGACTTCGTACCGGGCCTGATTTAAACGGTTG  
CGTCGTAATCGTACAGCGATTACAAGAAGATCGCCCAGGGCATTGCCAGTGTTCGAGAGCA  
TCGTAATGTGCGTCAATCGGGGGTTCATTTAGAGCGAGCAAGTACGCGACGTTGAACGTG  
TAACGATCGCGGTGATTTGTACAGTTGCTCAGCAGGCACCTAACCTCCTAGGCGGCCTGT  
ACAATCTGCTGGCTGAGACGTTGCAGGCGCCACTGGCATCCCTTATATTGCACGTGGCAT  
CTCGGCGTAACAGAGATATGCGACTCGCTATTGCCAGGGCGTGTACCGCTTGATCAGTT  
TCACCGGTAGCCCAGCGTGGACGACGTACATGGAGACCGCCAACATCCTTCGCACAACAC  
TGGAGGTCAGCACTAGCGTCCCAGGGGCTGAGCAACTACCAAGCGGTTGTACCTGAGC  
AGCTGGAAGAGCGTCTGTCACTCATCAACCCTGTTGTCCTCTCTATATTGTCGTAATAAC  
TTGCCGTTGTGGCTGCGGTATCCGAGCACGAAGCTGCCTTGCCACAACAACCACTAGATG  
TAGCTAGCCGACCGCTTGTGCCGCGACCTCAGCAGGAGTTCTAACACATGAGTTCCTG  
GGCACACGCAGTAGAGCCGACGGCGGCTCCAAACGCTGACCCGACGGCCACCCCTCTGCC  
TGCTCCTCTAGCTGGTCCGCCACCTGAGGCAGCTGTTGCTGCCGAGGTTGCTCATTAGGC  
TTTGAACCAACATTCTGGGTTTCGCGGGTGCCCCAACCGAGCGTGGTATCCTCCTCGCCCA  
CATAGCAGGGGACGTGGTGAGTCATCCGTCTGCAGCCGAAAGTACCGTGCCGGGAAACCT  
CATCACCGACGGTAAGCACCTGAACCTCGCCCCGCTTTTGGAAAGGCTATCGAGGAGGA  
TGATCTATTCGTCATCGACGAACGCTATCTAATCTAGGTGCCCGGCGAGCAGCCTGCGAA  
GTTGCTTAGGACGGAAGCTCGTCGGCTGCCTAAGTAAGCCCCCGGAATTGCGAACTCCT  
GGGTGATCAGCTGCTCGAGGACATCCATGGCGGTCAGGCGACCCTGACTGAAGCGATAGA  
GGTGTATCTCTGTTGCGGACGAATCAACGCGGGCCGTGATCGCCGAGCTTCTCGACAG  
TGGCAACCTCAAGAAAATGAAGGTCGCCCTCATGCAAATTAAGGACTTGGCAAGGGAATC  
CGGGCGAGTCGTTGTGCATGACCACCAACCTGTTGGCACCCAGGTGCGATGCAGTGGCT  
TTCCCGCGAGGATTAATTGCAGTCATCGATGAGCGCAATCTCTCCCCGAGAAGTTTTT  
GCTAGTGCCTGCCAGCGTCAGGCCGGCACCTAGTGGGGTCCGTGAGGAGATTGAGCCAT  
GACGTATCGCGTTGCTAATACCCCAATTCGTTCTGGTTTGGGCCGTCCGAAGGCTGAAGT  
TCACTTCCACATCGAGGAGCCCAGGGGCTGCTGGAAGCGAGCTATATGTATAGCTCGAT  
GTTTCGCATAGTGGAGGAACGGCCACCCCTGCCAGGCACCCGCCAACCGCCCGTCGTCCG  
AGTAGTTGCAAACGCCATCGCAGTCCGTAAGGACGGTAAGGACGAGGTGGTCGAGAAGAA  
GGCCAGCGTAAAGCTGAACCTGACCGTGGCAACTGTGCTCTTCGCCCGCCATTAATTGGT  
CAAGTCCGACTAGAGGACCTGTCACCTGGATGTCCGCAAACAAGCGCCAGCGCGGACGT  
CATCACCTGGCCCAGTACGGCCTGGCATGCTTCGTACAACCTCCGAATGGCGGCTA  
CTTACTGGCCCCGGCACATCTCAAGGCAGCCTTCCACGTTGGTATCCTGCTGCCGCTCTC  
CCTGTCTGGCCTTGCAGCCGATGCCGCCCGATGCCGACATCGACGTAGCCGCTCATGA  
CCAAGGCCTGGAGGTCACGATTTCCGCGTCATGGACGACCAGCTGATGTCCGAGGGTGT  
CACCTGCTGGACATGGTGATCTCCTCGTTCCCGGTGGAGCATGATCCCCTGATGAACGT  
CGACTTCGGCGCCAATGATGGTGTCAACTCCTAGGGCGGTGGTCGTATCGCCATGCTGAA  
CGGCGTGCATGTTGTCGAGACCCCGCGCTTCCCGCAGTCTCCGAACGCCTCGAACACCT  
GGGTGCCGACGACAACGTGGCCGACGCCGGGGTTCGACGCAAGAAGATCACCTTCTTCCC  
GACCATGGCTCTTCTCTCGGCCACGTACACCCGGTATCCGTCCATTTCTGGTAAGAAGA  
GAAATACTACCTCCACTACCAGGACACCTGCCAGGCGTATAACATCGGCCTGTGTGCC  
ATACGCTGTGTGCTTTGCCGACCGCTCCGTCACTAGGGAGTAAGGGCGGTGGTAATAGCA  
AGGACCTATCCCACGGCGAAAGTCCCTTTTTTGGTTCTACTCGCAGATAAGGCCCCACTA  
ACGGCGATCCCCATGAGACTTACTTATGTTGACGCGGTGAACCTCGCCTTGCGTGACCTC  
CACGAGACCCCTTGAACCTCGGTAGACGAGACCAACCACATGGTGGCACACATTCTACTC  
GCTATGGAGGACGTTTGGCGAAACACCCACGCCGAGGGATGGTCGTTCCCTCATCTGGAT  
GACTTTTCCGCAAGTCGCACGCCGTCTGGTTTGGTGCTCCAACACGAGGTGACTTGGCC  
TTGCACCCAGACGCTGTGGAGATGGTGCCTGGGCGGGCCGGTACTTCCTTTTTACTGGT  
ACAGGTTCCAAGGTAGATGGCGCTCGACGTAAGGGGCGTGTCCGACTCGATATCCCCTAC  
CACGAGTTTCCGGAGGGTACGCGCTATCTCGTAGTGTACCGGTCCGCCTACGCGGCTTAC  
GTAGCGGACTTCGGCGCGTATTGTAAGTGCACAGATCATTGTGAACAAGATGTACGCAGTA  
GGCGAGGAGGTGAGGGCGTTCCGCTTCCGGCAGACGTAGCTCACCTGCGGTAGCGTACC  
ACGGACACGACTGACTACAAGCGAGGTACGATTAATGAGTTGCTTTGGACGACCGTTCCG  
GCAGCTCCTGTTGAGCGTGAGTAAACAGTCTGTCAAGGATCGCCTTACGGGGCAGGTCTT  
GTGGCTCTTGAACATGCAGAGTCTTCTGGAGAGACGTAATCGCCGCGGTAGTACGGTACA  
CCTGAGCTCTGACGCCCTCGTCGTTACCGGTGACTACCGCCTCGCGTATGCCCTTGCCGC  
AATCTCGGGGCGCGCGATGCTGCTCCTAGTGGCCACACAGGACGGGACGCTGACTATCCG  
CTAAGATTCAAACGCCGAAGTACTGTTGACGGGGACAAGCTGCTACCGTACCATAAGTAC

CGGGAGAAGCTTCGGATTTGCAACACTATATGACAGCGTGTTCGTGGCATATACCTAAGT  
GATCACGCAAACACGGCTATAGTCTGGTCCTAGTGCGTACCCGGACCCAATCCGTGCGCG  
CTACATATACTTAGTTGCCCGGGCGTTCTCGAAACCGTACCCCTAGCCGTCACCAACCA  
AGTTACGGGGGTCACGAAGTCCCTGAAAGTGTCCACGTCTGCAACAGAGGCCAGTGAGTA  
TGCCGGTGATTGCGTGACCACGATGCTCCTCACGGCTACAGATGCGGGTGTAAATTATTGT  
TACTGCTGCCGATTTTGGCTACTTCCAGGACGGTGGCGGACCTGTACGTAACCGTCCTAGA  
GACAGAGGCGGTGAATACCGACTTAGGCAGTAGCTTTCTCCAGGCACGTAATGCAACTAG  
TATCGGGGAAGCTTCCCAGCTGACTGCAAAGCTAGGTGCCCATGAGGATGGGTTTCATAAT  
CGTACCCGAGCCGCTGAAAACAACATTTACATCCGCCTTGTTGATATTGAGTGGAAGTG  
GGACGAGGGTGGCTCTTCGCGTGTACAAGATGAGCTGATGGACATGCCGCTACGGATCAC  
GTA CTGCGCTCCGACCTTCAGCCTGACTGCATTGAACTACGATCGCCGTGCTTCTGCGGA  
CTTTAAATCGAAACCTGCCTTGGAGTGCACCGAGCAAGGTATCTCTGGGATAACGACCAT  
TCAGTGGCCGTAGGTCTGTTGGTTGGTGAGTACGTGTGGATGTCCGCATGCGGGATCCC  
ACTGCGTTGGTTAGGGGCCCTGAGTCATTACCCTAACTAAGAACGATCCTATCGATGTCCG  
GGCTACTGCTCCAGTGGCGTCCCCGTATGAGTACGCCGTGACCTTCAGCAGGGACCTGGT  
ATTTTTCGCCAAAACCCACAAGGGTCTAGTGGCGAGGCCGAACATTGCCACGCGTCGCGA  
TGCGACATCGAGGGTACAGCACAGAGGACAGCTTCAAGGACCCCAGTTCGCCTGTGGTCCG  
TGGTCCCACAGTGTTCTTGGCCAATCCCCGTAGCGGTTTAGGGACCGCGGGGTGAGAGAT  
GCTGGCATGCTAGTAGGGTGATGCCCAAGTGGACGCGAGCGACAGTGAGTCGCACCTGGC  
GAAGAACATTGTGAGGCCTAGACGCTTCTTGGCGACTTCCAGAACAACGAACATCGTGGT  
CGTGATTACCTCGTATCTCAGCGAGTTTGTGTGCACGAATACCTCAGGCATAGTGGGGA  
GTAGTTCCTCGCCGCGTAGCATAAGCGGAGCTACCCGACAGGGCAGCATGGGTATGTATTT  
CAGGGGTGACGGCATCTGTAAGCGGGTCCAGGTTTTCGGTTCGGGTATCCTCGGGGTGCT  
ATTCATGCAACGGCTTGGGGTGGCCCCGAGTATCCTAGGTGGACTGCTGGACCTGTACCA  
TCTCTGGGCAGCCAATGCGGACTAAGAAGCGGCAATCCGATCAATAGCTTCGGCCATGTC  
CCCCGAGGATAGCACCTTCGCGAACAAGCGCCCCGGGCGAGTTCAGTCCGTAGGCCAGCA  
CTGTGGGAATCGTCGGGAAGACGGGGCCTCGGTGTACATCAAAGCTCTCGGGAGCCAGGC  
GGGAGATCAGGACCGCATTGGATAACTGTCCCTCTCGGACGTGGGGCCTACCAGCCCCAT  
CCTCCGGCACCCCAACGGCGAATCGATCAATACAACGCGCACGCAGTTGCAGCATCTGAC  
GTGGTCTCTCGAGCATAACCGGGGAAGTCACCTTCCGTGTGGCCGATCATGCACGTGGGTA  
GTCCGCCTTAACGAACACGGCGATCCGCCTCGACAGTCGAAACGTGGGCTAGGGTTTGCC  
AAAATAGGCAACTGCAACCCACTACACCCTGCCATCGTACATACGTAGACGGCGCAGTT  
CTCCCTGGATAATGGCGACTCATAACGACATGGATATTACTTCCCTGGAGTAACGATACCG  
GTTCAACCAGCGCATTAGGAGGCAGTAATGGCATTACCAGCACTGCTCGCCATCGGCAGG  
GTGTCGGCAGCCCAAGGTATCTGCGGCGGCTTGCAACAACGGCAGGAGATTAACGCACAG  
TATACATTACCAAGGAAACCTTCCCTCCGGGACGTTCTACAGGCTTTCGAGGGCATGTCG  
GCGATAGGGGTGCGGCGCGGGCAAGTTCGAAGACTGTCCGCCAATAACCTTCAGTTCCTA  
GCACCTGGGGCGTACTAGGTGGGTGGCGTTCACCGAGCCGGCCAGGCCGCGGCGGAGGTG  
CAAGGCGGAAGCGTTGACGCAACCCTGGACGAGGTTGACGTTTCAGCACGCCGACGGATCA  
GTTAAGTTACAGCAGCAGCACATCGCGCAGGGGGTTCGACTTGAACCTACCGTATCCGGGAG  
GTGTTGTTCTGAGCCATGCGGGCTTGGGCCAGCTCCTAAATGTTCCGATCACCGGGAAA  
TTCTTTCTCAAGGACCTTGTCAGGGTGGCCTGTGAGAAAGCTCCGCATACGGCTCTCAG  
ACTTTGTTGTTTGGTAGTGTCAGTAGCACATCAACTATCAGCAGCGCCTACCGCCAAGC  
GGTTAACCTGTTGCCAGTGAGGCTGAATTCTGGCCGGGCGGAGCGCCTGGGCGCCAGGAG  
AAAATATGGATGAACTCGATACGCCGCGATTGGGTCAAGCTACGGGCAACCAGGGCCAG  
GCGGGTCCGGTACAACCCACAACGATTGCATGCTGAGCGTCCCCAGTCCGAGGAAAACGGA  
GCGCTCCTGGCGCTGAGCGGCCTGATCCATATTCGCGAAAGTATCGTTCAGAAGACGTTT  
CCTTCCGACTTGAAAAATGAGTACATGCAGGGTTCAGCTTGATCGTATGCTCTGGCAGGCC  
CTTTAGGATGTTGAGGGCTATGCGCACGCCCCCCAGTTGATCCGGGTTCGGTTTCCCAGAT  
TAAGACTACCGGAACCGCGAGAGGGACATTCGTGCGCGCATGAAGGAGTTGATACACACC  
TAGGAGCGCATGATGTCCCCTGACCAGCTCTTACAGGATTTGTTGCGAGTATCCCAGGGCT  
ATCCTTTAGGGCATGGGAGACGGCCCGTTTAATCAGGTCCATGCCAGTCCATGGCCTCC  
GAGACTCTTCTGGAGGAAGCACTCGACGGAGCGCAAGCTCAGGCATGCAAGGCGGGGGGT  
ATTGAGAAAGTAGGTAAGCAAACCGCTGCGCACGGGAACAGTCTCCCGACAAGTAACGGC  
AAGGCCAGCTCGGCGGTTACTTCGTGGCGCAGCAGCTGTACGACTTGCACATGGTCTGC  
TTCTACCGCGACGAGCTCGCCTCAGATGCCACTCCCGAGTACATGCGGCAGCAGGTGGCT  
GAGCTGTTCTGATGGGTGTA CTACGCAAGATCACCGCGACGTGGTTCACAGTTATGAAG

GACATGGGCCTCCTTTAAACTATTGCGTTCACATCCGCATGAACGAGAACGAGGGGGTT  
CGAGGCTTGAGGGCTGTATACGCGCCCTTTACCCCGCGGCGACCTGCCTCAGCTCTGGT  
GATTTTCGAGGCTCGTGTGACCAACGGGCCATTACGCCCTAGGCCAGGCTGCTGTATCCG  
GCGCAGGGGGCTGTTGCGGGGCCATGATGGCGAGTCAGCAGAAGGCCCTGCAGGACAAG  
TGATAGGCGGCGAGGTCGAGCAACGCGGCATTGGCGGGTGTATAACGCTTTGCAACGG  
GGTGTTAGGCAGACGCTGGACAATCTCTCCTGTTTCGGTCCCCGAGGCCCTTGTTGCGCGG  
GACGTACCGGCATACCTCCAGCAAGTGCCAGTGGCCACTAAGGCCGCAACCGCCCGGCGG  
ATGGGGGCACCCGTCGGCACCCCTCGCGAAACGCGCAGAGACTGAGGTGAGCGCCGCCCTA  
CGCATTTTGACCCTCACCCGGATGCTGCAGCCCCAACACCGGTTCGAGCTTTTTTCGGGAC  
TTCACGGACGATGTCATTCTTGTTTACCACGACCCCGGATGGGGAGACAACCTCTCCTT  
AGCGGTCTGGAACGAGAGATTCCATCCCTGTTTACGCCAGATGCTAGGGTACGTGCCATAA  
TGGACTGCCCCGGTACATAGCCTACGCAGTGCGGCGAGGTTTCAGGCAGCCTACGAACCT  
CAGCATCAGCCGTGCAGGGAAGTGTAGACCCGCAAGCATGAATCGGCCGCCCCCGGCTGAG  
ATGAAGTCTGGCAAGTTCTCCCAAGTCTGGGGGCTAGTACCGGAATGTAGCAGAACCCGG  
ACCGAGGGTCAAGCGTTCGACTCACTGCGGGTAGGGCCGACCCCGCAGGCTTCTGCCCTG  
GCACGACAGGCCAGGACTCCGGATCGGGCGCCAGTAGGATTGCGATACTGGCTGCCGCC  
AGAGTCAAGGAACGCACCATCGAAGTCAGCCCGGAGGTTGGCAAGACCACGCGTGGAGTG  
CTGCCAAGAAATGTCGCACTAGAACGCCAGTAGCTAACCCGAGAGCCACACAGGAACGG  
GTCTCGCCTGCATTCTTGACATTAGACCCCGCAACAGCGAAAGGATCCCGACGGGACTTG  
CACACGGACGCAGTCGGCGTGTGGACGATGGCAGTCTATGTTCGATGGCGTCCCCGCCTCG  
TCGGAGCTGGTGATTTGGTAGCAGGTCAGTCTGCAGATCTCCAAGCACATAGACGAGACA  
GTCGGCAAGGCAACTTGTGGTGACGTGGGTGATCTGCTTACGGACGACGAGTTCGAGAAG  
AGTATCTCAGGCCTCACTAGCAGACTAACCGATCGGACGCTTTGTTGCAGTGGCGCAGC  
GAGCTTGTTTCAAGAAAGATGATCCTCGCCTTACTGCGTACTCGGATCGTCACGCCGAAGCC  
CTAGGCGTCCGCGTGAACGTCGTTGGGCGCAGGAAGTTTGGCGACATGATCTCGCGCGAA  
TAAGCCGGGTTGCGGTACCTCGACAGTTCGGTAGGGCACGGGTGGAAGGCGAGCGCATT  
GCGCAGGAGCTGGGCATGACTACTGTATGGTTCGAAGCTGTCCGTTGGCCTCGCCTTTTAA  
GAGCTGGGCCACAGCGGGCCCTGGGTTTCGAGAAGAAGTTCACGGCCATCAGCAACGAG  
GACTTTGTCACTAAGTAGGAGCAGGAGCGGAAGACCAGGTCGTCCAAGCTAACCCAGTT  
CGTGGTGAATACTTCAATACCAAAATGAAGGGGCAGTGTGCGCCAACCTACGGCGGCTG  
TAGGACCAACCCAACAGCACCAAGCTTTTACTCTCCCCGAGGAGATCGTGCCAGTTAT  
CGCGGATGCTGCCAACCAGGTTACTCAGGTAAGGTCCCCAGTAGACCCGGCCCTGGCGGG  
ACAGATAGCAAAGCAGCACCATCTGGTTCTAACTCCGCCGCTGGAAGCCGCGCTTACAGA  
TGCTACTCGCAGCACTTGGGGTAACTGGCTAGATGGTCTGCAAAGGAGCGCAACCTAGTA  
CACTCGCCGAGCATACTGGACCATCGGGACGAGACGTTCCCCGACACTACGCCTACTT  
CGACTTCGAGCGGGCGTACGGCGACAACCTTCTTGCCACAATATTCACGATACCGACGA  
CAATCTTACCGCCCCGGGGGAAGTCACTTTATCTGAGGAAGCGAGCTGCACAGCCAAGGG  
TATTGCCGATAAAGAGGGCGGGTGAGGCTCTCCTGGACCGCAACGGAGTCACCGGGTTCAC  
GAGATGTAGGGTCGATCCTCTGATTATGCTGGAGGATAGCTCAACCTACTGTGTACCAT  
TGCCTAAAGATGGGGCTCCTTTTCGCATGCCTTCGCTGACGCGAGTTCTGCCCTGCCGGT  
GTCTGCCATGGACGACCACGTCGGTAAGGATTATGAGGCCATGGACTACGCTTTTAACTT  
CCGCGTACTGGCGGTGCCGTCCCGCTGGTGGGTGGTTCGAGTCCTGGATGGGCTGGGTTC  
CAGAGCCGGGATTGCCGGCGCACCTGAGGGCATGTTCTCTGGTCTGGCGAACTTCTGTC  
AGCGAACGCCAAACGCAACGACCCACCCCGATTTCGGCGGGAGTTCTGGCCAATCTGGT  
GGAGGATGTGGTGCGTGGTGCCGGTATCCTAACCAAGGACAATACGGCTAGTACCTTACG  
ATAAACTCAAAGTTCGTGGACGGCACCCCTTGCCATGGGGACGGAGTGTCCGGAGAAGAC  
TATCGCCAGGTTGAACGCCTTGTACGATAAAGGATCAAATTGGACGACTGCTATTGTTA  
CGGCGACCCAGGGACGCCCTTGTAGCGTAAGGCGGCAGGGGAGCCGGCCCGCCGAGACGC  
GGACTCGACCTGTTTCGGTGCCCTCACGAGCGAGGGCCTCGACACGGACATGAAGCGCCT  
GTCCGACGATGACTTGGCGATGATTTTCGGAGCGGGCGCAGCTGGCTAAGAGCCTGGGTCT  
AGCTGGGTTTGAGAACTTACACCGTGCCCCGCCTATTTCCACCGCGCCTTAATCCGGGC  
TAAGAGGCGTGCCTTTGAGGACGCCTACGGTCGCAAGACCATGGAGAACCGGCCTACCGA  
GATACCGTGCGGGGTCTAAACCTGACCAAGGAAGAGGCGCAGACTATCAGTACTGCGAT  
TCTGACACGTGCCAGGCACAAGGCCGCTGGCCACCGCCCCGAGTCCATGGGTGCCCCGGC  
CGAAACAGACACGGATGCAATCAACACTTAGCACTTGGAGGCCAGTCAAGACGACACCAC  
GATCAAGAGTGTGATGGGAAGTATTATGGAGAACTTGTATGTGCCCGGCATGTCTACTC  
CAGCAAGACGCGCTTACCGACAGATATGACCGTGAAGAATACCACACCCGACGGTTCGCAC



AATCACCGTGCTGCACTTTATTGACACCGATCTAAGTCGCCTGGCTCTGAACTGCAACCA  
GGAGATGGCAGCTCTGTCAGCCCTCTTGGAAAGCCGGTGTAGGCGGAGATGACGCAAGTAA  
TCAGGCCCTCCGGTGCCGCTACATCGGCACCTTCTGAAAGCAAAGCTCATGTATGCAAC  
CATTTACGAACTTATGCTCCAGTTCGCCATCTAACATCAGACTTCACCGGCATCTTCCC  
ACTTGCCTTTGTATTGGGTACACCTGCCCTACGGACTGAGAGCCTTTCGCAGATTACAAT  
GCTGGCAGCATCTGGGCTGTGTTAGGTCGCATAGTTCTGCACACGCGCGCGCCGTCACGT  
GGCTGCTGGTAAAAAGACGGAGCCCTTAACACAGTCCCCTGCGTTCGCCGGGTTGCTCCG  
AAAGCCTGGTTGCGTTCCTGACCTGTGCGGCGAGTGGTCTTCGGTGGTTTGTGTGTACCT  
CGCTCGCGAGGCGTGGGTCGCTCCCTTCTTAGTCAGTACGAGGCGAGACTCCCCTTCCG  
CGACACCTTGCGGGACCGCGTGCAGACCTTCGCAACCAAGGCGCTCCGATCCTTAACGC  
GATGGAGTATGTGCAAACGCATAAGGTGCGGGTGAACCCCGAATTGATCATGAAGACGAA  
CGGCAGCTTTGGCAACGGCGATCGTAACGCGTTCGCTGATGCTGCGCTAGTCCGGCCTGGA  
CGACACGGACCGGGTAAGATCAAGATAGCAGTGGATGACAACGCCGAGCACAACGGGAA  
AATCGTCAGGAGTTTGCCTGCGGGCGGTTGTCCGCAGGATGCACACGATGTTCGGACTGAA  
CGTCCGTGCCCCGCTCATGGACTACACGTTCCCTGTGCGGCAGGTAGGTTGAAGCCAGCAG  
TTTGGCTCGTATCCTCCTCGGCAGGTTTTTCGCCGAGTCCCAGGCTTCGGGATCTTCGG  
ACACAACAAGCTCCTTCACAGTGTATCCAGA ACTGGGTGTACACTGGACTGATCGTCCT  
TCTAGCCCACCAGTACCCACCCACCATGATGATGCTAGTTGGAAACGAGCTGCACAAAGG  
CCAGTCGGTGGACCTGGAGTCAGAGGCGCGCCTCATCACCTTGGCAAGAAAAGACATTGG  
CTAACCTGCCGTGATTGGCTATATCGGTGACGCAGCCGGTTCGTCGGCCTGTTGGGTAG  
ACGTGGCGGGCTTTTTGCCCGTGTGCCAGGTCTGGCCATCTCCCATGGGAGTATTGTACC  
GGGCACGGGGCACTTGTCTCAGGCGGAAGGCTCAGAGGCCCATGCCGATTACTTGCAGGC  
TGC GCGTACCGTACTACTCTTCGTGGGACTGTTGGCGGGAAGTGCCCCACTAAAGATCGC  
TGGAAGGAGTAACATCGATTTTCGCAAAACACCAAATACATGGGCTCACTACCTAGGTTAC  
GGCCTAGAGGATTCGGACCATGTACATTGCCGTACCGGAAACAGAAAAGGGAGTGTGCG  
ACTCTGGGCGGGGAGCCGGCAGCTGTACATTCACTCCAGCAGGTTGTATGCCACCGACA  
GCTGTCCTTGTAAGGGGGCCGCAATCCGTGTACGGCGTAGCTCTGCCCCATTCCAGCCT  
CGGCACGAGTTCGCCTACGGCGTGCCATTACTACCGCGTTCGATGGAGGCGAATTATCAT  
CAGTGCTTCTACTCTGTGGAGGAGGCAGTGAGTGAGACACATGCCAGTGCTTCCGAAGCG  
CTGATTGTCGGAGAGGAGGCCAGAGGCATTGAGTCCGCACCATAGGATTCAGCGGAAGAT  
GCGGCCATTGACCCCGGGCACCCGTTGCGTCTAGACCCGCCCGACCCGGCGAAGGGTCAT  
GGTCTGCTAGCCTACGAAGGAGGGGTGTGTTATCCGGTTCGATCCATCGATCAATGCAGA  
CGGCTTCTGGATATGGGTGCGTGTACAGACCAGCGCAAGTTCGCGCCGTTGGTGTGTGGCC  
AGTCACCCGCTTTCTGTGCACTTCGCAACTGTAGCGGAAGCTCAGATTGTGAACCCGCAT  
GCGCTCGCACTATCCGACCTACTAGACTGTGGGACAATGCACTCAGCTGTGGATTCATGG  
GCCCCGGTTCACATGCCATCTGGGGACTATCACATAAAGAGTGGGATAAGGAGTACATGC  
ACTCTCAGAGTTCAGGTTATGGCGCTACAGGTATGAGAAGCCCAACTGGTGCCTTACT  
GGCACATCTGTCTCTGTTGTGTGGGCCGCTTAGTTGCATAGCCGCATATAGCCCCCATG  
CCGTCTGGGTCACTAACAAATGGACCAGGCCCGCACCCCTAATCTTCTTGCGGTGGATTA  
TCTATCATCCGCACCCTGACTGATAGCAGCTTCTCGGTGTTTCGCACTAGCTACCGCGTT  
GGAGAGGTCTGTGAGGTCAGGGAGGTTCGAGGGAACGCCGCGAGAATCCGTGCAGCACCC  
ACTGCGGTGAACGACGGAGCTACGGTGGCGAACTAAAATGTAGTCTATGATGTCGTTGAT  
AAGGCTAGCATCCAAGTCGTGTCCGGGACAGTCCCTAATGAATGGACTGTTAGTAGAGTCG  
GGAGTTTCACCGCGTGTGATCGCGTAACGGTCACCATTGTAACCAACGCCTATGTCTAT  
TTTGCCATGTGCTATCACGCGAAGAGCGCAATCTGTAAAGTCTCGAACTTCGGCGACCGT  
TGCGACGACTTGGGACTCATCTTTGGAACATCTCACGGCCGTGGGGCAAACACCTATAAA  
GTCTACACTAGTCGTCATGTCGTCGCCACTGGTGGCGATGCAGAAGTAGCCTGCGTTCCA  
CTCCGTAACGAGCGTATGTGTA ACTGCACACTTAGGAGTGATAGTGCTTCTAGTCAGCAC  
GGCGAAGCCATCCACGGTAACGCAGAGGATTGCAGCACCGTAAACTGCACAGTCTACGGT  
CGGACAATTTGTAAAGGGTTCGTGTCTCAGCTAAACACAGTGTACACTGACTAACGCCTCG  
GGCGGTTGGATTCTTATATTCGCTGAGATTCTTGGTGGTACATGCCCATTAGACCAATTC  
ACTTTAATACTACCGGCGAGTCGCAGCCTGTTTTCTGTGGGGTTGTAGATGTACGTGGA  
AATTACCAAGTCTGACTCCACATAACAACGCAAACCTGTGGATTCTTATAGAAGGCGCC  
TGTCTGCGCGCGCGCAGTTTGAGTAAGTCTAGTCCCCTACTGCGCGCGCGTCTTGACAAT  
AGTTCAGTTCAGGAAACATAACAATCCAGGGGTCAGGATATTGATGTTTGCTGTCTGGGC  
AAGGAACTACACCACGAAATCACCTCGGTGAGTATCTCTACTGGGTATTGGATCGTGGAG  
AGTTTAGCGGCGTTAGCATGTTGCATCACGCCCGTGTTCATCTGGCGGCTTCGCAAT

GTCCAGATGCGGTTGCCTGAGCTGGGTGGAAGTGGTAAACTAACTACAGCAAACAATGCG  
TGTAACGTTACACCTCCAGTCACGTTACAGGTACATTTATTCTAAGGACCCAACCGGCCAG  
TTCACTTTAACGGAGAGCAGTTACGCCGGGAGTAGGATCAGAGTTCATATCGACATTTTCG  
ACCTAAGCGTCCTAAGCGACGTTGTGCCTGTGCACGGAGGTTCGGGACAAACTTGAGCTCA  
GGCGTTATTAACCAGCTGAACTGGCCGACCAGTATTTTTGAGGTAGCGTTGTGGAATCAA  
CGAGTGAGGTTCTCGGGGACTTGCACAGTGGACTGGCGCAGCTTATCCTGTACGAGCTAC  
GCCGGGCCCAATAGCAGGGGCCAACGATTCCCTATGCCACGGCTGATAAAGGCTGCTATCA  
CTAACTCCTTTAACGTTAGCACCATTACGTGCGAACCATCATGGTGAGATGCCCTAGAGT  
AGTTGCACGAGCAGCTCGAGGGTAAATGTGATGGTATCGTCACGCGTGTATGGACCTAAC  
TAAAGCTGGCCACGGGCGACGTAGCAGCACTGTACGGAGCATAACCCTATGGAGAACCACA  
AACGGTTTGAGCGGGCGCAACTTCTGCGCAAGATGTACCCGAAGATCGTGGCCTAATGCC  
AAGACGGAAGCGAGTAGCTCCACTACAGCGTGCCCCCGATGCAGGACGACATGGCACAGT  
CCATGCTCTACGGACCTTAACCCTCTATGGTCCCCGCCAACGGGGAGAGGCCAACAGTG  
CCACTGCGTCTGTGTTGGGCCTCTGGCGCCTGGCGCAGGGCCGCACGCATATTAAGGTCC  
CCGTCTGTA ACTCCCAGGATAAAGGATGAGGAGAACGGCAAAGTCATGCCCGGGCCGACCC  
ATAACGGGCCCGGTGTTCCAGCACCTTGCCCCGGCAA ACTACGCGGGGGACCGAACCTCTG  
TGCGGGAATTGGACGTGCAATGGCCGTTGGTGGGTGTGTATACGTCCGCATCCGTGAACT  
GTCTCGCTAGCACCCGGTCCCTATAAGGGTATCGTTGAAACCTGTTTATCCCAGGGCATA  
TCGAGACCACGGAGAACAGGTTTACCGCAACGGAGAGTGCTATGCTCAACACGCTCTCTA  
AGGAGTTCACCCCCATTGTGGCCGACAGGAACGGACGTATCTTGTACTCGGGTACACCCG  
AACCGCGAAAGGCTATTA ACTGCACCCGGGACTGTCCGTGCCTTCATAGTCCGCGTATGGA  
CAGGTCGCTACCAA AAGCGAGCGAGCTGGTGAAGTACGGGGATGTGTTGTCACCCAGGA  
TCCTCGAAATGATGGCGCGATTCCGGGTACAGCTGCTAGACTGGCCGTGGCACGGACAGTA  
CTCGTGGTTGTAGTACCGACCCTGAGCGGTAAAGTGAGGAGGATCTGTGTGATTATGAGA  
TGGAGCAGCGGCCCGACACCTTTGAACCCCGTCCATGTTGAACACCTCCCCCTGAGACG  
CTGCACATCAGCATTGCTACTCCGCGAGCTGATCGTGGCTGACATCTCACATGAGCAAG  
TACCGTGGAGCTGGTTCTGGGCCGACAGAGGCAAGATCCAAGATCGAATGGCCGCATGAGA  
TACCTGTT CAGTCTGTGGACAATTTCCCCCTAGCTAGTGTTCATGTACACTACGAGCAGA  
TCTTGTAGATGACCCTATTCCTCGACCCTGCCGGTAACGGCGTGAATGAGCTTGC GTTTG  
AGAAGGACGGTGGAATTGGTCTGTACATCCACGTCGTTGCCTCGCGCGGCTTCAAAGAGT  
GCGTCTCTGAAGACCACCTCGACATCCTGATT CAGTTATGTAATGACTTCGGGGTGAAGG  
TTGTCTGTAGAGAAAGACAAGGGCGGATGTA CTGTGACCCAGCTCTTCCGTAACCAAT  
CTCAGGGCGTTGGCCCTTAGGGTCAGCAGAGCCTCCTAGGCGTAGATGTAGACTAGCTGC  
ATAAGACCGAGCTGAAGGTCCTGCGGACCATCAACACGATCCGTGCAATGATGCCGAAGA  
ATCGCCTCGCGCAGCATCGCAGCGCCGTAGACATGGACTCGGAGTTGCTCTAGCAGTACT  
CGTTGTTGCCCGCGATGTGAGCTCAGGTCTGTACCAGATGCGCAGCATCAACTCTGACA  
GAGGCACCTGGACCAAGGAAGCCTGAATGGTTGCTCTTGAGGGTTCGGGTGGCCGA ACTCA  
TTGGTGTCTCTGCTCGACGAGGTTGAGAAACAACAGTACCTCGATGCTGCGGTTAGTGC  
TTGTGCTTCTGCGAAATTCAATTGGCAGGGGGCCGGATGTAGGCCGCTACCCCCGTAGC  
GGCACCGCTTATTCGAATGAGGTAGCGAAGATGATACAGATGACTGATTTACCAAAGGA  
CGCGGTGCTCCAGGCTGTCATGAATGTACCTCTCACC GGATTGGCCGCAGCGACCATCCT  
TGGGTACACCTTGAGTGACTGTCTAATTCTTCGTCATGTTTTCTTTACGGTTCTCTAACT  
GGGTACATCTGGCGGAAGTGGAACCTGTTGGAGCGTGGTCATTTGGAGTATTAGTCTCA  
AGGCCACCTTGACCTCTGCCGCACTTGCCCTCGTTCGGGGTCTTGGCATCGTGTACTACG  
CAGCCGAGTACCTAGGTGTAGAGGCCCCCTCCGCATCCTCCCGTACAAGGACACCGGGG  
TCCTCACTATTTGGTCCTATGATCCA ACTGTGGTCACCCATAATGTCCGGTACACGTCCC  
AGGAGTGC ACTGAGGACAGGCTGAAGGCTGTACAGGTGTACTGGGACGCCAACCGCCTGT  
ACTTGCCCCACGAGGACCCACTGAGCGTAAAAGCGGCCATTCTATACGTGGCGTACTATG  
TCGGTTCGTGCGTCTGCGCCTGGGACCTGGACGAGAGGGGTGCGAAGGTCCCCTCTTGCT  
TCCAGGTAGCCCTGGGTACACACTACTGTGTAGCGACCCGGCCAAGCCATCCAGGTCCCCT  
GGCAAGGAAGGCACGGGGTAGCCCAACGATATAAGGTATCGGTGCTGGAGAGATCTGTCC  
GGGTGCTTGATTACCGTCGCTGGGATTATGACCCAGTGCGCCTCAAGTACATGCGATGAG  
GCTCACGGTAGCCCTGATCCTAGACCTCGATGTGGTGGACGGAGCGGGCCTATAGGCAAT  
GAAGTAGGCGTGGCAATACCAACGCACTGCCGAGACCCTAGAGTCGCAGATATTGGCGGC  
CGAGGCCCGAACTGAGGGTGTTCAAGGACTGGTACTGCATGTCATGATCTGGGCCAGTTC  
AGTGGA ACTAGAGGCGCGGGTTGCGCTGAATCAACAACCTGCTTCGCGAGATTCTCCTGC  
CGCTGCTGCCGATAGTAGCGAGCTGTGCGAGCACCTGAAGTGCCGATCCTGTCCCCCGCC

AGCGTCCCGCTGCGCAATGGGACACCGAAGTTTAATTGGTCCCTCGGACTGCTAGCGTACC  
AACAAAGCCGTAGCACTGTCCAATGCGCGGAACGGGTGTGTTGACTGAAAGAGAAAAACAT  
GAGCATTATTTTCGGGAAGTGTAGACCATTACTGACACCCCGCGGCAATGCAGCCATCGG  
GCTGCCGTATCGCGATGGCTTCGCTCAGGGTGTATGGGGTTCGCGATAATCTTGCCTTGGG  
GGCCACCATGGTAGCCAGGGTGCATGCTGCCACGGATGTTGCCTTGCGGTCGTAGCGAAA  
TGCCGGCGTTGGACTGCCGGCTACTGAGAATGTCGTGAATTATGGGCGGTCCCGACCGG  
TGCCGCCCAACCGGCACTCACAGCACCACAGTGCCCTTCACAATAGCATCCAGCGCCTT  
CACCGCTATCGGTTTGAATTAAGGCGCCGGCGCGTTCAGGGCGATCTGGTCTCACCGGAC  
GCCTAAGCATCGGATCCTCTCAGGCTGGTGTAACTAATTGGAGGCTTGACCCCGCAGGG  
ATCATCCCCCAGACCTGCCTCTACCGTAGAGGCCCGCGCTGCCCAAGCTCCTGCGTGC  
AGTCGCTTCGGGTCCCTGCTGGTTGTACAGTTCACGTGTGATGTGCGGGCGTTGTTGCCT  
CTCGGGCAGCCACGTGCGTTCGAGAGGTTTCAGCCGCACGGCGCAGGGACAGGGTTTAGCGC  
GGATCTCCCTTCTGCTGCCTAGTACCCTGGTAGGCGGCACAGTGGTTCCTGGTGAGTTC  
CCTATTCCCTTCTTGGTACTGTTTCGGTTCACGGTACGCTCAGGCAACTATCCTGCAC  
CATGAGCCTGCCT

>NewGenomeName\_196

AGCAGTGTGGTTTACTATTAGCCCCGCTGCTGTGCCGGGAGATCCGAATAGTAATGGGCT  
TAATACATTAATGGGCCGCCAAGTAAGCGTTCAGTTCAGTATCTCCGTTATGGGCCTCGG  
ACCAACATTAAGAGAACGTGTGTGCTTGTGGGGTTGGACCGTAAGTCCAGTTCTAAAGC  
GGTATATTCATTGCTTCTATACGGAGGAGCAGCGAAATGAAAAAATCGCTGTTACACGT  
GTAAGAGGGCTATTAGTTCGCAGAGTTAAAAAATACCCTTCAAGTTGGAGGGTGTGGTGC  
TCTCTCTTATGTCAAACGGTGTGCCATGATGAAGCGCTACGGTCTGAAAGAATGGGGG  
AGGTGGAGGCGCCGCCCGCCCGTCCCTCGGATGAAGTATGCGAAGTCATAGGTATGTCA  
GGGTACTTATAGAAGGCTCGTATTCGCAACGCGCTTGTATCATCTTTGTATTTGCGTATA  
AAAAGATTTCAATACCAAACCTTAAGGAATAAAATATAGGATTACGAGACTAAGACATGA  
CAATAAAAAAAACTACGATACAATATTAACCTTATTATGCCGACGTTGTAGAATTA  
GGTCTGTTAATCTACATATATATATGTAGATTACAGTAGTGTAAAATAAATGACTTG  
GAAGGTAATTAATAATGATAAGAAATAAAATATCCCGAATACATAACAAGGGGAA  
AATGCAATTGAGACCTTTCACGCTTACATATTTTCGAATATATTAAGGGCCGAAGGCCCT  
CAATCTGCAGGTAATCGGAGATTCCTTCGTGACGAAGCAAGGCTATTATTGTAACAAG  
AAAGCATCGGACAACCTTGTATAGTGGTCCCCGAAACAGCTATCATATGATAGCTGGCAA  
GGACCCCTGGGCGGACTCCAAATATATATTAATAATAACATATAAAATGTATAAGTTATA  
CACATTAATATTAATTAAGACGCGTAAAGAGGAGGCGTGCCCCGCACGCCCTGTGG  
TGGTGGCACAGATGTCCCGAGTTAGTGCGCTTACGTC

>NewGenomeName\_197

ACGGGCCACATGGAGCCAGGGATCCACCATACTGGCAACTGTAAAGCTGCTGCTGCAGA  
GAGCTGGTGCTTTACGTTGAATGACTATATGGCCGAAGGAGCAGCTAACTTGTGGCACCT  
GCTCCCTGGTCCGTTCCAGTTTGCAATATATGGGAAGGAACGGGTGGAGCAGGGAACCCC  
TCATTTGCAATGCTTTCTACAGTTTAAAAATAAGCTGCGACTTACCCCATCAAGAACT  
ACTTGCCCGAGCTCACTGGGAAAAGGACCGTGGCTCAGATCATAAGAACGAGGAGTATTG  
TTATAAGGAAGACGCAGTGATACTACCATAGGGGAGGCAGTTCAGGCAACCGGAGTTT  
CCATGCCGGTGCTGTTACGGCCGTGAAGGCCGAAAGGAGAATGGTGGATATCGCGCGAGA  
GTTTGGCGAGATCGACGTCTAGTATGTGCATGGTCTGAGTGATTGGGCACTGATGATTGG  
ACAGAAATCCCGTGATTTCAAGACGGAAGTCTTTGTTATCAGGGGGCCATCCGGTGTGGG  
TAACTCGAGACTTGACTCTGAAATGGAAGGAACGAAGTGATATAGGTTGAAAGTTGACTG  
GTGGGATGGCTATCCCAATGCAGATATAGTTATGATGGATGACTTCTATGGGTGGCAGCT  
TATGTGGGAAATGTGGAGATTAATGGACAGGTATCCACATGAAGCTTCCGTGAAGGGGTC  
TTATGTGAAGTTCACGACTAAGAAGATTGTCATAACGAGTAATTTCGCACCCGGAAAGTTG  
GTACGGACCGGATAAGTGTCTCTGGCTGCTTTGTTTCAGGAGGATCATTAAGTGGATGTC  
CTGGGACGGACGGAGATTTGAGGATGTGCCAGATGCTAAGAAGAAGCCCCCGATCAACTA  
TTAACTCAGCCTCTAGGCCAAGAGCGTCTCGGAGGTGATTAATCAAATTGCGCTCGC  
GGCGCGCGGCGACGGACGAAGGCAAAAGCCGCCTGAGACCACGCGAAGAGCGGCCAGGGC  
CGAGCGACACCGAGCGGGCACATCCCGGGTCCGCTCAGGGTCACCCCGTTCGAGGGGCCG  
AAGGCCCGAAGAAAGCTATTTTGTACCCCCCTCAAATAAAAAGGCTCCAAACAATAA  
ATGTTTGGTGTCTTTATTTTGGAGTTGCCAAGTGAGTTCAGTTCATTTGCTGGAAGTCA  
ACTGGATGGTGACCTTGACCTGCTAGTCCATCTGGTGTGGGGTGGGTTCTGGCCAACTGA  
AGGCTAACAGTGATGTTTTACCCTGATTCCGGAGCTGGGAAGGTTCTGATCACTTTTCT

TCATAACCTATATCCAGGAGGAATCGGGAGTGCTGAGCCACAAGGCCGCCGTAACCTTTAG  
CAGCATCAGTGTTCGGTACGCTTAGTTGTGGTCTTGGTTTAAATAGCCTTCTGAAGCCTT  
TTCTGAGACCCCATTAACGAGCCGCGTCCCAGCTCGCTAGGGGGTCAGCATCAAGTCTTG  
TCTTTGTGAAGAAGTCCTATGGGTGATTATCTTGGATAGGTAGCTTGTGCATGAACCCTC  
TCCACGCCTCCCATGTTTCGTTGAGGGGTCTCATTCCCACTTTTGCTAACCTGACTCTAT  
AACTTCAAAAAGTAATCCCAATTGAAAGTACCCCAAGCCAGGGAGCCACACAGTATTA  
TGTTAATCCCATCAATTCCTAATGACTGCTGAGAACCCCTGTCTTTTTGTGTAGAACCT  
GACCGAAAACCCTACCAAATCTGAATCTATAGACCCTGTTGGTTCTGTGGCCCCCTCCTGC  
TGGCATGTATCCTTCTCCTCCTCCYCCAGTACCGACTCCTCCATCTCCTCCTCCTGGGAG  
CCATAAGTCGTCGTCTCCTAGCAGCCTGGTTAAAGGTTAACCACATCCGGGTTAATAATT  
AACCAGTGGCYCCCAGTCGACGTGRTAGTATA

>NewGenomeName\_198

TCGTTTTGAATACTTATTTTTAGGCTTGTTATTACGCATTTTTATAGACGCCTTAATTGTTA  
TTTCATACCAATTTGACACCGTTTAATCAACTATGCACATAGCTTGATGTTTTTTATCAG  
AATATAAAGGTGAGTACGTTCCAATTGTTTCTGTAATCTAAGAATGCCTCATTAAATCCA  
TTAATAAATACATATCTACACCATTATTAATTAATAGCTAGCGTACGAGTGTCTTAAAT  
GGTGTATTTTTAGATTTCGGGAATGCAGATTTAAAATGATACGAATAAGTAACGTATCTAA  
TAGGTTCTAAACCCCGAATATAGAACACTTTTCGTCAAAAAATTTATATCTTTTTAGAAG  
ATTCATTATTCATGTTTTTAAGCATCTCACTAATTAATTTGGTACAGGTCTTATCCCTT  
TAGAGCTTTCTTTTTTAGATTATATTCAATTTTTCTATTACTTAAATTGATATTCTTAG  
TTACGTTAATTTTCGCCTTTTATTTATCGTAATCTTTCCACTGCAAACCTAAAGCTTCTC  
CTATGCTAAGACCAGAATAAAATAACATTCTAGTCAGCTGACGAGAAGTATCAGTTGTGA  
TTTGTCTACTTTTTCATCAAATTCCTCACGAGTGATAAATTTAGCTTGTGGATTTGTTT  
TGGGAATAGGAGTTACCGATAATGTGGGGTCGTATAAGAGCTTGTAAATGCTTTTAGGCGT  
AATTGATAACTGCTTTAAAACCTGCCACACAGATCGGGCATAGTCAACAGAAAGACCTG  
CATCGTTTAAACAATAATTCCTGAAAGCAGTACATTACGTAGTAGTGATTTTGCCACTAG  
GTATATTTCCGAACCTTTCTTTATGTGAGTATTATATTCTGTAGTTTCGCTTTTCTATTG  
AGCGTGCAGAAAGATTTTCATTTTTTAAACGGTCAAAATATATATATTCAAAGGGTTGAT  
TGTCCGAGTATCCATATTAACATTTTGTATACATTTCGCTTTTCAGCTAGTTTGGCATCCT  
TCTTACGTTCAAACCCACGCTTCATTTTTCGTTTGTATTACCGTATACATCTTTATATC  
TAATGGAAAAATACCATTTACCTGTATTACCATCCTTATATACTGGCATTTCACTTCTCC  
CTCCTCAAAATTGGCAAAAAATGATAAGGGTACGCGGGACACCCGTCAAAATTGTATAAA  
AAAAGAGAGAGCGCAGATGCACCGTCTCATGTGCGCAAATATTTTCAGCGACTTGTGCAATT  
TGAAGCTTGCCGCAAATATTTTCAGCGGCTTGTTTTGTATATATGTAATATACCATCAAAG  
AGAGTGAAGTTCAAGCGATTTCACTAAGAAATCTAATTTTTATAAGATTTTCAATTTTAT  
GTACTGTTTCTTTTGAATACGAGATTTCTCCGGCAGGGTCATACCTATTAATTTTCGATA  
TTCTGTCTTGCTGATTGTGGTGATATTTAGAACGTTAGCATAGGTCTTTTTATACTAGA  
ATCGCTCATATCTTTTGCGAACCTTCGAAGATTTTTTGAAGTCGTCATTCAGCGATGTGT  
TTTCAGCAAGTAATTTTTGATCGTATGGGTTTTCTGCTTTTTCGACACCTTTTCAAGATTGA  
TAATGATTTTTTTAGCTAAATCCTTACCCGTTACGTCCATTTTTTCCAATACTAAAGTTA  
ACAAATTTTCTTCGATATGCACATTGAATTTACTTCTGGAAGATGTAAGTGGAACCTACCG  
TTAATATTGGATTTTTATTTGAATCGTGATTATTGAGTACCATACAAAAATGGTTTCCAG  
AAATCTCTCTGCCAACATTAACACCTAACTTTACATAAATTATAGTGCCTTTTTTATATC  
TGGTGTAATTTTTGTTTTCTTTTAACAATCTAACTTGATCCAATAAAAACTCTGAATATT  
CAAGACTCCATGAATTCATATATTTAAATTTGTAATCCCCTATTTTGAATCTTTTTAA  
AATCATTAAAGTGTGTTTCTAAAGGTGCGCTCTTCCATCCCTCATCTCCTCACGCCA  
CACAAGCGCTATTAATCAATATCCAGTAATTGTTGTTTTTTGTTATCGAACTCTTCCTGA  
GAAATTACTCCGACATATAATAATTCTTTATATTTTATTAATTCATCAGCAACAGAAAA  
CTCATTTTTTTCAGAATTGGATGGTTTCATAGAACTTTCTCGAATAGAGATTTGTTCTTGT  
ATTGTTTCCGCCATTCTAGATACAGTGTTTTTTGATATGCTTCCTATAGCTATACTTTAT  
GAACCGTGATGTATAATTATTTTCGCCAAAAAGAAGTCCTTTTTTATACGAAGCAGAATTG  
ATTTTCGCGAATGGAACTCATGAATATTCAAACCATATATCATACCTTTGTCTAAGAAT  
ACAATCTTAGACCAGTACATACTATTAAGTAGGTATTATTATTGTACAATCCCGAAGTT  
AGATACATTATGTTTTTCATTATCTTTTAAAATCATAGGTAGTTCTTTCACTTCTTTTTT  
GTACCAACAAATCCTCTACACCTATTTTCGCTAAATCTTTGGTAGATTTTAGGTAAGTTT  
TCGTCAGATTTATTGCTTTCACTTTCAAATTTCACTTCTTTTCTAGGTTTTCTTTGGTAT  
TCTTTTAAAATTTCTCTTTTGTCTTCCACAGATAGTTGCTTGTATTGCTTCTCTTCTCT

TTTATTTTAGTTCCTAAATATTGACTCTCAATCATACTTTCTTTGAACGTTAATCTGCTC  
TCAGGTAATTCTTTTCATGTTTCATTTCTCCTTGATTACACTTCTTTATATTTAAAACTC  
TCAACGGCTCAAATGTAATCGAATCCTCGCCATAGTGAGTTCACGACCATATGTCTTCT  
TATACTTCTATTGCTTCTAATATGTATTCTTCGCTTCATTGTAGATACTCAGACAAC  
CACACAAGTTGCGTACGCCATCATTATAAGCTTCTACAATTTTCGCGTAGCGGTACGGCTG  
ATATAAAGCCGTGTCGTCTTGCCTCATTTCGAACTTACGATTGTTGAATTTTCGATTGAT  
CTAAAAGGTTGCCATACGTCAACTTGTGGTGGGCAAGTTCTTCATATAATACTTTTAATT  
TGTTCTTTTCGGATAGGGAAGGTCTAATAAAAAATTTCTCCTTCTCGATACCAACCATCGA  
AGCCTCGAGGTACTCTTTGTGCTTCTTTCACTTCAACTTCACATTTCATAAGCAATTCTT  
CGTATTTTCCCATGCGCCAAACCCCTTTGGTGTCTTATTTCTTTCTATCTCTAACCCATT  
TCATAAAATTTTCGATTTCTTCCATTCTTCGGGAGTAAAGTCATCTTGATTTGCATGAC  
CGGCTATAGTTTCTTGATGAATACTTCTCTCTTCTGTAATTCTCGATTTAGGTACATTA  
AGTAATCTGCTAATTGATGGACATTTGATAATTCTAGGATATTTAAGTTCTTGAAGCCAGT  
TAGAGATTGTTGATTGACTTACCCCAATTGCTTCAGACAATTCTACTTGAGTAATGTTGT  
TCTCTTTCAGAAGTTGCTCTAAGTTCTCTGATAAAAATTTTCTAGCACTCTGATATTGCA  
TAATTTTCTCCTTTAGTATTACTTAATGTAAAATAATTTACCATACGTAATATCACTTT  
TCAATACAAAATATTACTTTTTTGAATAAATATCACTTTAGGTGTTGACATATTACTTT  
AAGTGATAGTATAGTTGTAATGTCAACGGGAGGTTATCCGAAATGCCAGAAAATTTTAA  
AGAGTTCTCTGTAAAGGTCTGGAGAACTAATTCGAATATGACACAACAAGATGTCGCTGA  
TAAGTTAGGCGTTAATAAAAAATTTGTAATAAGATGCGAAAAAGATGACGCAGAATTA  
AGCCTTACAATTGTATGCTTTAGCCAAATTATTCAACACAGAAGTTGATTATATAAAGGC  
TAAAAAATTTAACATTAATATCACTTTAAGTGATAAAGGAGGAACTCAGATGCAAGCAT  
TACAAACATTTAATTTTGAAGAATTACCAGTAAGAACATTAACAGTAAATGAGGAACCGT  
ATTTTGTAGGGAAAGAGGTAGCAGATATTCTAGGTTACAAAACCTGGCAATCGGGATATTT  
CCGCTCATGTTGATGCCGAAGATAAGCCGACGTGCCAAATCAGTCCCGCAGGTCAAAGAC  
GAAATCAAACAATCATCAACGAATCGGGTATTATACAGGCTAATCTTCTCATCAAACTAG  
AATCAGCTAAACGATTCAAACATTGGGTAACTTCAGACGTCCTACCCGCTATTCGAAAAC  
ACGGTATCTACGCAACAGACAACGTCATTGAACAAACATTAAGATCCAGACTACATCA  
TTCCAGTGTGACTGAGCATAAGAAAGAAAAAGAGCGAACTTACTTTTACAACAAGAAA  
TTGGAGAGCTAAAACCCAAAGCAGACTTTGTAGATGAAATCTTAAAGTCAACTGGTACAT  
TAGCAACAACCTCAAATCGCGGCAGACTACGGTAGATCAGCACAAAAGTTAAACAACTAC  
TACACGATGCTAGATTACAACGAAAAGTGAATTAACAGTGGGTGCTTTACTGAGACCACA  
TGGGCAAGGGTTACACAGAATCAGATACTATACCAATTGTACGCTCTGACGGTAGAGAAG  
ACACAGTATTACAGACTAGATGGACACAAAAGGAAGATTGAAAATACATGAAATCATGA  
CTGAATTAGGTAATAAAGCTGATTTAGGGGGAGCGTTGATGACACCAGAACA AAAAGAAA  
AGCTAAGCAATATAGTATTAACACTTTATGCCGCTAAAGAAAACA AAAAGTCAAACATCCA  
CACACAAGATACTTTACTGTGACATATGCAGGCGAGATTGAGCACACTTACGAGGTCCG  
ACAGAGAGAAACACCTTGAATCAATGATTGTGTGGGCAATTGACCAAATCGAACAGCACC  
TTGATTTAGACGAAGAAGAATAACACACAATTGAACAAAAAACTTAAAGAGGAGGAATTAC  
AAATGAACGCACTATACCAAACAACCCTCCTCATCACAAAGGGCAGTTGTGACGTCGAAGG  
TTGTAAAGATTGAGAAAAACACAAGATTTAACTTAGAAATTTTGATTATCCAAAAATTA  
ATAATGCTCAGAGCAAATCATTGTTGGATATTGCTAGTCACGATCTAAAAGATATTTAAC  
TGTATGCAAAATTTTCATATTTTGTGAGCTTTTAAAGCTTTCGTATAAAGCTATTGAATA  
AATAATTTTCGCAAGATACGTTATCAGGAGCATCTTCTTTCAACTTATTTATTCGATCTGT  
AAAAAAGTCACTGTCACCACCGAATTCTGGTTCGGCTTGATTACTAAGTTCACCAAAGAC  
ATTTTGAAAATCATTAATTCATACTTATCACCTCCTTTCACTAGGAGATAACTAAATT  
ATACACAACAAAAAATAAAAAGGAGGAATAGATATGATAAAAAATAGTTTGCAAGCTAA  
AGCACTTGTAGTAATTTTATCTGTTCTTAAATCCAAAGCAGGACAAATAATAAGAGCACT  
GAATAAAGTGCTTGAAGACGAACGTTACATTGCGATTTCGAGGCAGAACACCAGTCCAATA  
AGGTAGAGAAAAATTCCTTATCACGGCTTGTCACTCGAGAGAATAATGGAGGGCGCTGAC  
AAAAGAAAATGAGTAACATTTATAAAAAGCTACCTATTAGCAGGAATGTGTTTCACAGTCT  
TGGCGATTGTACCCATGCCGTTTCTATACTTCACTAAAGCAAGGTCAATTGCGGGATTTCG  
CAAGTATCGCAACATTCATATTTTATAAAGAATACTTTGATGACAACAAGGGAGAATGAA  
AAGATGTCAGATAAAGACTTGATGGAAAAAGTTGACAAGAGAAGGAAAGACAAAGATTTA  
ACGGTGAGAGAACTAGGACATTTGCTAGGTTTCTCTGATACTTATTTGATTAAGTTAAGA  
AATGGTTCAAGAAGAATTACGGATCGGAAGAGAGATAGAATTAATCGTTATTTAAACGGT  
GAATCCGACAATGTAAAAATTCCTAAATATTCACGAGATTCTGAACAAGTAGCATATGAC

AAGGCATATAAACAAGCTATAAAAGATTTAGAAGAATTTGTAAATAATAAAAAAACTGCT  
ACTTGAGACAACAAGTAACAGTGACAAACACTTAAGAAAAATTCATGTTCAATATAAAA  
CGACATAAAGGAAGTGTCAACAATGTACTACAAAATTGGCGATGTATGTCAAAAAGTAAT  
TAGTGTAGACGGATTTCGATTTTAAATTAGCAGTTAAGAAACAAGATTACAGTATTCTAGT  
GAATGTCTTAGATTTAGAAGATAGATTTATCGACGGTATAAATATAACCGATGAGAATGA  
TCTATACACAGCATTAGACATATTAATCAATTTATTTCTGAATGGATTGAAGAGAACAC  
AGACGAAAGATACAGGCTAATTAAGTACTGAGTCATAAGATGGTAGGAGGTCGCTATGAAGCA  
GACTGTAAATTACATCATCCGTCATAGGGATATGCCAATTTGTGTAACATAACAAACCATC  
TGATAATAATTCAGATGTTAGTTACTCCACAAATAGTAATAGAGCTAGGGGATTTAACGG  
TATGGAAGAAGCGTGTATCAATATGGATTATCACAAAGCAATCAAGAAAACAGTGACAGA  
AACTATTGAGTACGAGGGGGTAGAACATGACTGGACAACTTTATTTGAACAGTTGAACA  
GTAAAAACGTGAATGATCAAACAGAACAAAAAAATGGATTAACCTTATCTAGGATAGTCAT  
AGGCACACCAAGAGCTGAAAAAGATTGTCCCAAACACTACACAGTAAAAGTACACGAGTTTC  
CAGATCCAGATATTAACACAGAAAATACTTTTGTACCTTATTTGGCTACACCAGAAGCCT  
ATCTTGTACAGGTATCTGTGACTGTGAAAGATAGTACAGAGACTGAGTGGCTGCCAGTAT  
TGGACTTTAGAAATAAATAGCTTGCTAAAGGTAGTGCAACAACACTGTCGATATTAACAAAG  
CGAAAAACGATGTTTTGTTAAAGCTACGGCTGTACACGTTTAAGGCTTATATATCTACA  
ACGGCGAGGAACCTACCAAGTGCAAGTGACAACGATATTAAGAATTAGAAGAGCGTATCA  
ATCAGTTCGTGAACTTATCTCAAGAAAACCGGCGAGATGCAACTATCGATAAAACGATAA  
GATGGCTAAAAATATCTAACATTAATAAATTAAGTCAAAAACAAATCGCAGAAGCACACG  
AAAAATTGGATCCGGGATTAACAACAAATTGGATAGTGCGGAGAAACAATAATGTTAAACAG  
AGCAGTATTAGTAGGAAGCTTAACAAAAGACCCAGAATTAGGAAGCTCGCCAAATGGCGT  
AAAGGTAGGTACATTCACATTGGCAGTAAACAGAGCATTACGAATGCTCTGGCCGAGCG  
TGAAGCAGATTTTATAAACGTAGTAGTGTTCAGGAAACAAGCTGAAAATGTTAAAAACTA  
CCTTTCTAAAGGGTTCGCTGGCAGGTGTAGACGGTTCGACTACAAACACGTAGCTAAGAAAA  
TAAGGTTCGGGCAACGTGTATTTGTGACAGAAGTAGTAGCGGACAGTGTTCAATTCTTAGA  
ACCGAAGAATAACAACCAACAACCAACAACACTTATCATCAGCAAAGACAAGCTCAAAC  
TAGTAATAATCCTTTTGATAATACCACTGCGATTACTGATGATGACTTACCGTCCTGATT  
GGAATGATTAATGCCGAAAATTAAGTTATATCACTCAAGACGACGGCACAACCACAG  
TTGTCATCTCTGATGTTGTATTAGGTAATAAAGAAACATTACTACTTGATAACGGATTTG  
ATGTATAAGTCGATCTAAGCGTCATAGATCCATTTTGAATTACCGCAAGCAACGCAAAT  
TGATATTCGCATTGTGTAACGATATAGAAGCTCATAACAGGACAACCTCGAGATTATATGA  
GGCAAATGTTCCAAGATTATGTGAAGTTTCTGTATGGCTATGAAGAACGCATATCTTTAT  
CAAATTGTTCTCGAACTATAGCTAAGCAAATTATAGAAGCGATGTTTGAGTTGATTTTTA  
CAAATGCGATTCCATTAATTATAAATCAAGCAAATTAATGAAAGAAGATAACAATTATC  
TTTAGTGGGCAACGGTTCGCGTCATTGCATTATATGCGGAAAGCCTCACGCTGACTTAG  
CCCATTATCAAGCAGTCGGCAGAGGCATGAACAGAACCTAGATGCATCACGATGACAAAC  
ATGTATTAGCGTTATGTTCGCGAACATCACAAACGAGCAACATGCAATTGGTGCTAAGTCGT  
TTGATGATAAATATCACCTGCATGACTCGTGATAAAAGGTGATGAGAGGCTCAATAAAC  
TGTTGAAAGGAGAGAAAAAGGAATGAATAGTCTAAGAATAATAAAAAATAGCACTCCTAAT  
CGTCATCATGGCAGAAGAGATTAGAAATGCTATGCATGCTGTAAAAGTGGAGAAAATTTT  
AAAATCTCCGTTTAGTTAATACAGGTTCTTACAAAAGCTTTACCATAGGCGGACAACCTA  
ATTGAGCCTTTTTTGATGTCTATTACCCAGGGGCTGTAAAGTAACTTTAATACATCAAAT  
TCAATGCCAGGAAGTTACTTATTGTTTCTAGGATGTGTCCTGACTTTAACATTCTTTTA  
AAAAGTTCTAACCCCGAAACAAATCTTAGTTTTTCTATAAACTTATTAAGTGATTTAAA  
AACTGAGGAGCATAAAAGTTATTATAAATTCCTTGTGTTGTTAAGTATGACATGTCAAAA  
GTTTCATTTAAAACCCCTAACCTTACTAGGTTATTAATTGAAATTTTCGCTTGATTCTATA  
TCTAACGGAGAGTCTTTTATTAACGTGTCCGATATATTTATTCGTCATTCTTTGAGTTT  
AAAACCGCTCTATATTTAACGGCAGGATGTACTTGGTGATTCTTTAAATATTTTAAAATA  
ATAGCATCATTTGGGGATAATTGTTTAATTATTTCAACAAATGAATGGTGGGTTAATGAG  
TTTTTTCTGTCATCCATAGATGATGCTATTAGTTTTGCGAACATATTACTTAAAGTTTTT  
TCACTAAACTAAAGCTTTGAAGCTTCTAGAGCACGACCTAGAAGAGAAAATTCTGGTTCT  
TGTAAGTTATTTTCAGTTACAGAAGATATTTCTTTTTTCAATTGTTCTTTGAATTTTTCA  
AATTCTACTTCTTTGATAAATACTTTATCCACATAAAGGTGGAATTTCCCAAAGACA  
AGTTTCCGAGTCTTAGAGAATGTTTCTACAGGCCCTTTGGATGCGCCTTCAATAATTTTA  
TCAAGACCTTTACCTAAAATAGGATCCATAATTATTCACCCCAATCTAACCCGATAGCG  
ATAATAAAATTATAACCAGAAAGGAGATAACGAACTGGTAACATTTAGACCGATAAAAGAA

AGTCGCGATTTTGCACACTGTGCATAAATCTTGTGTGTTTCGATAGTAATTTAAGTGCTAAA  
GCTAAAGGGATATTATTGTATTTCCCTATGTTCGTTCTGACAATTGGCAAAAATACACGTCA  
GAAGTAGTTAAACATATGACTGTTGGACAAAAATCAATCAATAGTGGCGTTCAAGAAGTC  
ATGGATAATAAATATGTTCCACAGAATACAAAAAAGAGCTGAAAACGGTGTGTTTAAAGGT  
TTTGAATACTTAGTTTAAAGAAAACCAACCGAAATGCCATTTTCGGAAAACGGATTATCG  
GCACACGGGTTTTTCGGAAAACGGAAAACGGAAAACCGAAAAGGGCCTAGTACTAATAAT  
AATAGTACTATTGATGATTTAACTAATAATAACGATACTAATAATGATGGAAGTACATTG  
TCGGGCAACCCGACTGTGTATTCCATTCCCTATAAAGAAATTATTGAATACTTAAATAAA  
AAAGCAGGAAAGCATTTTAAACAAAATACAGCTAAAACAAGATTATATTAGAGCAAGA  
TGGAATCAAGATTTTAGGTTGGAGGATTTTGAAAAGGTGATTGATATCAAACAGCTAAA  
TGGTTAAACACGGATAGCGATAAATACCTTAGACCAGAAACACTATTTGGCAGTAAATTT  
GAGGGGTACCTCAATCAAAAAATACAACCAACTGGCACGAATCAATTGGAACGCATGATC  
TAGGACGAAAGTTATTGGGATTAGGGGGATATTATGAAACCACTATTCTGCGAAAAGATA  
AACGAATGCTTGAAAAAATATCAACCTACTCATGTTCGAAAAGGATTGAAATGTGAGAGA  
TGTCGAAGTGAATACGACTTATATAAGTTTGCTCCTACTAAAAAACACCCAAATGGTTAC  
GAGTATAAAGGCGGTTGCAAATGTGAAATCTATGAGGAATATAAGCGAAACAAGCAACGG  
AAGATAACAACATATTCAATCAATCAAACGTTAATCCGTCTTTAAGAGATGCAACAGTC  
AAAACTACCAGCCACACAATGAAAAACAAGTACACCCTAAACAACAGCAATAGAGTAC  
GATCAAGGCTTCTCAACAAGAGAGCCAAAATAATTAATATTGCAAGGTTACATACGGAACT  
GGTAAAAGCCACCTAGCATAACGCTATCGCAAAAGTAGTTAAAGCAAAAGGGCATAACGGTT  
GCTTTTATGCATATAGCAAGGTTGATGGATCGTATCAAAGCGACATACAACAAAAATGCA  
ATAGAGACTACAGACGAGCTAGTCAGATTGCTAAGTGATATTGCTTTACTTGTCTAGAT  
GATATGGGTGTAGAAAACACATAGCACACTTTAAATAAAATTTTCAGCATTATTGATAAC  
AGAGTAGGTAAAAAAAACATCTTTACAACCTAAGTTAGTGATAAAGAAGTAAATCAAAAT  
ATGAACTGGCTACGTATCAATTCAAGAATGAAACACAATGCAAGAAAAGTAAGAGTAATC  
GGAGACGATTTACAGGGAGCGGGACGCATGGTAACCAAGAAGTAAAGTAAACTTG  
AGTGTTACAGATATGTACGCTCAGAAACTCTTAGACGAGGCACAGGGCGATAAAAAGAAGT  
TATATGACCTATTTATCCAAAACTTGCAGACCGTCATACACGGCCCGCTATCGTCGGAT  
CTTAAGGAGTGTTAAAAATGCCGAAAAGAAAATATTACTTATACCGAGAAGATGGCACAG  
AAGATATTAAGGTCATCAAGTATAAAAAGAAGGAGAATGAAGTTTATTGGCTCACAGGAG  
CCCATTTACAGCGACGAAAAGAAAATTATGACTGATAGTGACCTAAAACGATTTAAAGGCG  
CTCATGGACTTCTATATGAGCAAGAGCTAGGTTTACAAGCAACAATATTTGATATTTAGA  
GGTGGAAGATGAGTACATAACGCTAAGAAAAGTTGAGTACAAAGGAATTGTATTTGATA  
GCAAAGTAGAGTGTGAATATTACCAAGATTTAGAAAAGTAATATGAATGGCACTCACTATG  
ATCGTATCGAACTACAACCTAAATTCGAACTACAACCTAAATTTGGGAAGCAAACACCGA  
TTACGTATATAGCCGATTTCTCTTTGTGCAAGGAAGGGAAACTGGTTGAAGTTACAGACG  
TTAAAGGTAAGGCGACTGAAGTTGCCAACATCAAAGCGAAGATATTCAGATATCAGAATA  
GAGATGTGAATTTAACGTTGATATGTACAGCGCCTAAATACACAGGACAAGAATGGATGG  
TATATGAGGACTTAGTGAAAGTCAGACGTAAAAGAAAACAGAAATGAAGTGATCTAATG  
CCACAACAAGCATATAGAAACGCAACGATTGATATAAGAATACCTACCGTAGTTGAATAT  
CAGCATTTTGATGTTGTGGATAAAGAAAAAGAAACGCTGGCAAAGCGCTTAGCTAACAAT  
CCGGACGAATTACTAAAATATGACAGCTTAGCAATAAGACATCCATATATAGAGGTGGAA  
TAAATGAGTATCGTAAAGATTAACGGTAAACCGTATAAATTTACCGAACATGAAAATGAA  
TTGATAAAAAAGAACGGTTTAACTCCAGGACTGGTTGCAAAAAGAGTACGAGGTGGCTGG  
GCGTTGTTAAAAGCCTTAAACGCACCTTACGGCATGCGCTTAGCTGAGTATAAAGAAATT  
GTGTTATCCAGAATTATGCAACGAGAGGCTAGAGAACGTGAAATAGCTAGACAACGACGT  
AAAGAGGCTGAATTACGTAAGAAGAAGGCAGATTTGTTTAAATGTACCTCAGAAACATTCA  
CGTGATCCGTACTGGTTTGAAGAATACTTATAACCAAATGTTCAAGAAATGGAGTGAAGCA  
TAATGAGCATAATCAGTAACCGAAAAGTAGATATGAACAAAACGCAAGACAATGTTAAGC  
AACCGGCGCATTAACATACGGCAACATTGAAATTATAGATTCTATTGAACATGTTACGT  
CGCAGTACCCACCAAATAGGATTTCGCAATAGGTAATGCAATCAAATACTTGTCTAGAG  
CACCGTTAAAGAATGGTCATGAGGGTTTAGCAAAAGCGAGGTTTTATATCCAGAGAGTAT  
TTGATTTGTGGGACGGGTAACGATGGCAACGCAAAAACCTAGTTGATTACGTAATGTCATT  
AGAGGAGCAATTGGATTTAGAAAACCTGCGAAAATATACAGACCAACAAGTTAAAGCAAT  
GAGTCATAAGGAAGTTGGCAATGTGATTGAAAACCTATAAGGCAAGCATAAATTATGAAGA  
GATATACGACGAATGCATGTCGTTTGGTCTGCCTAATTGTTAAAAGGAGTGATGACCATG  
ACAGATAGCGCGGTAAAGAATACCTAAATCAATTATTTGATCTAAGAGATAACTGTAT

CAGGATAACGAACGAGTGGCACATATCCATGTAGTAAACGGCACTTATTACTTTACGGT  
CATATCGTGCCAGGTTGGCAAGGCGTGCAAAAGACATTTGATAGAGCGGAAGAGCTTGAA  
ACATATAAAAAGCAACATGGTTTGGAAACGAGGAACAGAAGCAACTAATTTATATTAA  
AAGGGCGGAAACAATGATAATCAAATTGAAAAAGAAATGAATTTACCTGAACTTATCCA  
ATGGGCTTGGGTTAACCCCAAGTTATCAGGTAATAAAAGATTCTATTCAAATGTTGTTGA  
ACGCAACTGTTGTGTGACTTTTCGATGTTGATAGCATCTTATGTAATGTGACTGGATACGT  
ATCGATTAACCATAAATTTACTGTTCAAGAGGAGATATCACAATGAAAATCAAAGTTAAA  
AAAGAAATGAGATTAGGTGAATTAATTAGATGGGCGCGAGTAAATCCGGTTGTATCACAA  
GGAAAAATATTTTTTTCAACAGGATTTAGTGATGAATTCGCTCGTTTTTCATCCAAATACA  
AATAAGTGTTTCGACGTCAAGTTTTATTCTAATTGATATCCCCTTCATAGTTGATATTTAA  
AAAGAAGTAACGGAAGACACTAAGGTTGATAGGTTGATTGAATTATTCCAGATTCAAGAA  
GGAGACTATAACTCTATACTATATGAGAACACTAGTATACAAGAATGTTTATATGGCAGA  
TGCCTGCCTACCAAAGCATTCTACATCTTAAACGATGACCTAACTATGACGTTAATGTGG  
AAAGATGGGGAGTTGCTAGTATGATGTTGAAATTTAAAGCTTGGAAATAAAGATAAAAAAG  
TTATGAGTATTATTGACGAAATCGATTTTAATAGTGGGTGCATTTTGATTTCAACAGGTT  
ATACAAGTTTCAATGAAGTAAAATTTACAATACACAGGTTCTAAAGATGTGCACGGTG  
TGGAGATTTATGAAGGGGATGTTGTTCAAGATTGTTATTCGAGAGAAGTAAGTTTTATCG  
AGCTTAAAGAAGGAGCTTTTTATATAACTTTTAGCAATGTAATGAATTACTAAGTGAAA  
ATGACGATATTATTGAAATTGTTGGAAATATTTTTGAAAATGTGATGCTATTGGAGGGTA  
TGAGATGACGTTACCTTATCAGATGAACAATATAAAAATCTTTGTAATACTAATAACAA  
GTTATTAGATAAACTTCACAAAGCATTAAAAGATCGTGAAGAGTACAAGAGGCAACGAGG  
TGAGCTTATTGGGGATATAGCGAAGTTACGAGCTTGTAACAAAGAAGTGTAGAAGAAAGC  
AAGCGCATGGGATAGGTATTGCAAGAGCGTTGAAAAAGATTTAATAAACGAATTCGGTAA  
CGATGATGAAAGAGTTAAATTCGGAATGGAATTAACAATCAAATTTTTGCGGAGGATGA  
CACTAATGAATAACCGTGAACAAATAGAACAATCCGTTATAAGTGCTAGTGCGTATCACG  
GTAATGAAACAGAGGGATTTCTAAAAGAGATTGAGGACGTATATAAGAAAGCGCAAGCGT  
TTGATGAAATACTTAAGGGTTTACCTAATGCTATGCAAGATGCACTCAAAGAAGATATTG  
GTCTTGATGAGGCAGTAGGGATTATGACGGGTGCGAGTGCTCTATAAATATGAGGAGGTAC  
AGGAAAATAATTAACACATTAACAATTGATCAGTTAAAAGAGTTATTACAAATACAAAAG  
GACTTTGACGATAGAATACCAACACCAAACTTACGAGATAGCAAGATTGCGTATGCGGTT  
AAGTTCCTTGAATGGTTTAAACACATTGGAAACGTTCAAGAATTGGAAGAAGAAACCAGGT  
AAACCGTTAGACGTACAGCTAGACGAGTGAGCAGACATGTTAGCGTTTGGAGTGAGTATT  
GCTAATCAACAAGCAGATATCATGGAAGAAATTTTAGGTTATTTAGGTCAGGGAGATTTA  
AACGACTATATAGAACGAGTTGAAATCGATTATAACGACAGTGATGTAGTAGATGAATTT  
ATGTGAACTATAGATGAAATGAATGAAAGTCCATATAGTAGCAACTTATTTTTACCGTTT  
GCACTAGCGAACAACACTACTACACTATCGATCAACTCATTGACGCATACATAAAGAAAATG  
AAAAGGAACCACGAAAGACAAGATGGAACAGCAGACGCGAGGGAAAGGATACGTATAAAGA  
CATATTAGATCCGGTAAAGGAGGATTTGGGGTATTGACACAATACTTAGTCACAACATTC  
AAAGATTCAACAGGACAACCACATGAACATTTTACTACTGCTAGAGATAATCAGACGTTT  
ACAGTTGTTGAGGCAGAGAGTAAAGAAGAAGCGAAAGAAAAGTACGAGGCACAAGTTAAA  
AGAGATACAATTATTAATTTAGGGCAGTTGTTTGAAGATATAAGGGAGTGTCGGAAATGA  
CGGATGTTAAAATTAAACTATTTCAAGTGGAGTTATTTTTGTAAAAACAGCTCAACCTT  
TTGAAAAATATGTTGAAAGAATGACGTGTTTTAATGTTTATATTTACGCAAGTACTATAA  
TCAAGCAACCAACGTATATTAAAACAGATACGATTGAATCAATCACACTTATTAAGGAAC  
GTGGGAAATGAATGAGCTGAGAATTTTATTACATGACGGTAGTAGTTTGGTACTACATGA  
AGATGAATTATTTAACGAAATAGTATTTGTTTTGGATGATTTTAGAAATGATGATCACTA  
TTAACGATAGAAAAAGATTAGGGCAGAGAAGTGTATTGAACAAAGGCTCTATAGTTGG  
GATTAATGTTGAGGAGGCAGACGATGACTAACCAATATTAAGACTATTATTCTTACTAG  
CGAGGTATGAGCTAGTTAAGTATGTAACGGAGCAAGTATATATTATGATGACGGCTAATG  
ATGATGTAGAGATGCCGAGTGACTTCGCAAAGTTGAGCGATCAGTCTGATTTGATGAGGG  
CGGAGGTGTCAGAGTAGATGATGTGGTTAGTCGTAGCACTTATATTACTAGTCATCTTAT  
TCTTTGGTGTGATGTTGCAAGCTGAACAGTTAAAAGGCGATGTGAAAGTTAAAGAGCGGG  
AGATAGAGATATTAAGAAGTAGATTGAGACATTTTGAAGATTAAACATATTTGTACGGAG  
GGTATTCATGACTAAAAGAAAGACGGATAAAAATTATCAACAGTTCGGGAATTAGTAGA  
CGATTTGTGCGATTATCCTAATTATCGTAAACAACCTTGAAGATTTAAGAAGTGAAATACT  
GACACCGTGGATTCCAACAGATACAAATATAGGCGGGGAGTTTGTACCATCTAATACATC  
AAAAACAGAAATGGCAGTAACTAATTATCTTTGTAGTATAAGAAGAGGTAAAATACATGA



GTTTAAGAGTGCGATTGAACGTACAATCAACACCTCAAATAGGAAAGAACGCGAATTCAT  
TCAAGAGCATTATTTTAATAAAAAGACTTTGATTGTGGTTTGTGCATGACCTACACATCTC  
TGAAAGTACAGCGCATAGTATCAAAAAGAAAATCGTGTCTAAACTAGCCGATGAATTAGG  
AGAATACTAAATTTAACAGTAAAATGACAGTTTTTGACACCTATAACGAGATATTATGAT  
AGTGTAGGATATTGACTATCTTACTGCGTTTTCCCTTATCGCAATTCGGAATAAGGGATCC  
ATGTGGGTTGGCTGATTATAGCCATTCCTTATTTAATTTTAAAAAGCGTATAGCGCGAG  
AGTTGGTGGTAAATGAAATGAACAAATTAATAAAAAGCGACGTTTGCTTGCAGAAGTAT  
ATACAATACCTAGTACTGAATGTTATGGCAACGCTACTAAGTCAGCTGCGCGTGCCTGAT  
CTAGCGAAAAGACGGCGTACTCACAAGGACAGCGTATGTTGAAGCATTGTGAAATTCAGA  
ATTATATCAAGGAGGTTGAAACAAAACCTTTGACGAGAATATTATGTCAGGTAAGAAG  
TGTTGTATAGGCTAACTAGAACAGCTATAGGAGAACACACGGAAGTTGAAGCTGTCGTAA  
CAAAAACCTGGAGACTATAAATAGAATCCGGGTACTGGCAAAAATGCAATTAGTATACGACG  
AACACATACAAATTGTTACTAAGTCACCGAAAATAAGTGACCAAAAACAAAGCGTTAGAGA  
TGTTAGGTCGACATCACAAATTATTTACAGACAAAACAAGAAGTCGACCACAAAATACCGA  
TGTTTGTGATATTATCCCGGAAGATGATTAGTCATGTATGAAATCCTTGATCTAAAAAA  
TAAAATCGGAGTTGGCTAGAATAAGTTTTGGCACAACAAAACCTTTTACCGTGTGTTAA  
AGGTTCAAGGGGTAGCAAGAAAAGTAAAACCTACCGCTATTAATCTCATTTATCGAAGAAT  
GAAATATGATTGGGCAAATATACTTGTAGTCAGAAGATTTAGCAACACTAACAAACAATC  
AACGCATACAGATTTAAAGTGGGCAACTAACTAATTAGGCGTTGCTCACTGATTTAAATT  
CAACGAAAGTTTGCCGGAAATAACGTATAAACCTACTGGACAAAAAATACTGTATAAAGG  
TTTAGACGACCCATTGAAAATAACATCGATTACTGTTGATACAGGCATTTTGTGTGGGAC  
TTGGTTTGAAGAGGGTTATCAAATAGAAACATTCGCTAAGTTTGGCGCTGTTGTTGAGTC  
AATATGTGGTAGCTACGATAGTCCGGAATTTTTCAATCAAATCACAGTCACTTTTAACCC  
GTGGTCGGAAAGCCATTCGTTGAAGCCTACATTTTTTGTATGAAGAAACAAAATTAACAA  
TACTTTTTTTCAGATACAACACCTTATAGTGTTAATGAATGGTTAGATAAAGTCGATATTGA  
ACGATATGAAGATTTGTATCTAAAGAATCCTAGACGTGCAAGAATCGTTTGTGATGGAGA  
TTGGGGTGTGTCAGAGGGGCTTGTATTCGATAATTATAAAATGGAAGACTTTGAGTGTTT  
TGAGGAGTTTAAAAGAACGCAAGAAATATCTCCCGGAATGGATTTTGGGTTTAGTCAAGA  
CCCTACAACAGTAGTTAGTACGGTTGTAGATTTAAAAAACAAAAGTTATTCATCTATGA  
TGAACACTATAAAAAAGCGATGTTAACTGATGATATAAAACAAATGATTATTAAAAAAGG  
ATTAGGTGATGTAGATATTGCAGCTGATTATGGGGCTGGTGGAGATTGAGTGATCAGTGA  
ATTGAAATCCAAAGGGATTAAAGGTATAAAAAATGCGTTGAAAGGCGCTAATACTATTTT  
ACCAGGCATTCAATTCATTCAAGGCTCTGAAGTTATTATACACCCTTCATGTGAACACGC  
TATTGAAGAGTTCAACACTTATACATTTGACCAAGATATTGATGGTAAGTGGTTGAACAA  
GCCTATATATGCTAATAACCATATTATAGATGGATTGCGTTATAGTCTTGAGAAATATCA  
TATCGTACGTAAAAACGTAAAAAGAACATAGAAAGCAAATCAAAGTATTTAAATCTCT  
AGGATTATAGGAGGGAACAAATGTTAAAGGCAAACGAATTTGAAACGGATACTGATTTAC  
GAGAAAACAGATATTACTTGTTTAACGATGAAGCTAATGTTGTTTACACATATCACGGGA  
CACAGTCTGATTTATTACAAAACAATAATGAAGTAAGTAAATACATTGAACATCACATGA  
ATTACCAACGACCTAGATTTAAAGTTGTTAAGTGATTATTACGAAGGTAAAAACCTAAGAATC  
TGGTTGAGTTAACACGACGCAAAGAAGAGCACATGGCAGATAACCGTGTGCGCATGATT  
ACGCATCTTAGATTAGCGATTTTATTAACGGTTATTTTCGTAGGTAATCCGATTCATGTC  
GAGATGATGATAAAGATGTATTAGAAGCTATTGAGGCGTTCAATGGTTTAAATGATGTTG  
AGTCACACAATAGATCTTTAGGATTAGATTTGTCAATTTATGGCAAAGCTTATGAGTTAA  
TGATTAGAAACCAAGATGATGAAACGCGTTTATACAAGAGTGATGCAGCGAGTACTTTTG  
TCATATACGACAATAAATTGGAGGTAATAGTATCGCAGGCGTTAGATATTTAAGAATA  
AACCAATAGACAAGACTGACGAAGATGAAGTGTTTACAGCTGATATATTTACGTCTCAGG  
GTGTTTATAGATATCCTACCACTAGAACAAATGGATTGAAGCTCACACCACGTGAAAACG  
GTTTTGAATCACACTCTTTTGAACGTTTGCCTATTGCAGAATTTAGCAACAACGAAAGAA  
GAAAAGGAGATTATGAGAACGTAATCACTTTGATTCATTTGTATGATAATGCATAATCAG  
ATACTGCTAACTTCATGAGTGATTTATACGACGATATGTTATTGATTAAAGGTAACCTTAT  
CATTAGATCCGGCTGAAGTAAAAAAACAAAAGAAGCTAACGTGTTATTTTTCGGGCCAA  
CCATTTATGAGAATAGGGATACAGGTATCGAAACAGAGGGTTCAGTTGACGGCGGATATA  
TTTATAAGCAATACGATGTACAAGGTACCGAAGCTTATAAAGACCGTTTGAACAGTGATA  
TACACATGTGTACCAACACGCCTAACATGAAAGACGCTTAATTTAGTGGTACGCAATCGG  
GCGAGGCAATGAAACATAAATTGTTTCGGATTAGAACAACGTAATAAAAACCTAAAGAAGAAT  
TGATTACTTAAGGGTTAAGACGTCGTGCTAAGTTGTTAGAGACAATACTTCAAATAACAC

GGTCGATTGGCGCTAACAAAGATTTCAATACTGTTAGATACGTATACAACAGAACTTAC  
TTAAATCATTAAATCGAAGAATTAAGGCTTATATTGATTCTGGCGGGAAGATTAGTCAA  
CAACTTTAATGTCTCTATTCTCGTTCTTCCAAGACCCTGAATTGGAAGTCAAGAAAATAG  
AAGAAGATGAGAAAGAATCTATTAAGGCTCATAAAGGTATGTATAAAGACCCTAGAG  
ACCTCAATCATGACCACAAGATGATGATACAAAAGATACTGTTGATAAAGAGGAATGAA  
TGAAATTGCCTAACAAAACACTCAAGAATATTGGGAAGAACGCGTACGCAAAGCAATCG  
AGAATGAGGTGAAGCGTTATAAAACCAAAGCTGAAGTAATAGAACGTATATTGAATATGA  
TGATTAGGCGCATTGAAAAAGAAATCAATGCGTTTATTGTTAAGTACGGAGATTTTGCAG  
GCGTTACATTACAAGATACACAAAAGATTATTGATGCGTTTCGATGTAAAAGCGTTTCAAG  
AAGAAGCAAAAAGATAGGTCGAAAACAAGGACTTTAGCGATAGAGCAAATGAAGAATTA  
AGAAGTATAACACTAAGATGTATGTAAGTACTAGTGAACAGATGTTACAGATTCAAATAGAAT  
TCTTAATTGCTTATGCAATAGCTCAAACAGAATTATCGATGAGGGAATATTTTCGAATCAA  
CAGCTTATCGTGTGTTAAGTGTTCAAGCGGGTATTTTAGGTTGAAGGTGTACAAGTAGCTA  
AAGAAGTTATAGATACAGTCGTTGTTAAACAATTTTCATGGTGTTCGTTTGGTTCAGAGCGAT  
TATGGACTAATACTGATGCGATGAAACAAGAAGTAGAAGAAATAATTGCTAATGTGGTTA  
CTAGAGGTCGACATCCTAAGGAATATGTTAAAGATATGCGCAAGCACCTAAACAAATTTCG  
AAGGCACAGCAAGACAAAAGACTGCAGAAATTAATCATTGCTTTATACGGAATCGGCAC  
GTGTTTCGCGCACAATCAAGTATTGACAGCATGAAAGAAATTTACCGGAAGGATATTA  
TGTATACTGCAAAAATTGATAGTAGAACAACACTATAGGATGCGAGGGGCTTAATGGTGCAA  
TATTCAAAGTTAAAGACGCTAAAATTGGTGTAAATTTCTACCCTATGCATATCCATTGTC  
GTTTCAGATTGTACATTACTACCTAAATCTATGTGCGCCGAAAAACCCAACCCAGAAATGAA  
AACATAATACTTCCGGAGGGAGAGTGAAAATCGATGATTGATTTAAAAGTAAGAGTTTTT  
AAATGCAAGTTAGCATTGTATGATAGTAAATTCGGTGTTTGGAGGATATTGGTATGGGCA  
ATACTGAAAGATACTTTAGAGACATAGCAAGAGAGTTAAAAGGTATACGTAAAGAGTTAC  
AAAAGCGAAACGAAACAGTTATTATTGATTCAAACCTCAGACAGCTTAAGGTCGGCAGTAT  
TAGCCAATAACGAAAAACAGAAATATAACGAACCACTTTTTAATAGCTAGCACTAAATT  
GTGTTGGCTATTTTGTATGTCCAAAACGTGCTGATGACATAAAAAGCACGCATTGAAAA  
CAGTCGACAGACTATAGATGGAGGTGAATCTCATGGAAGAAAATAAACTTAAGTTGAATT  
TGCAATTTTTTGCAGACCAATCAGATGATCCGGACGAACCAGGCGGAGATGGTAAAAAAG  
GAAATCCTGATAAGAAAGAATATGACGAAGGCACTGAAATAACTTTACGCCAGAGCAAC  
AAAAGGAAATTGATGAAATACTTGAACGTCGTGTAGCCACGAAAAGAAAAAAGCTGATG  
AGTATGCAAAAAGAAAGAGCAGAAGAAGCCGCTAAAGAAGCTGCTAAATTAGCGAAAATGA  
ACAAGGATCAAAAAGATGAGTATGAACGCAACAATTGGAAAAAGAGCTGGAGCATTAC  
GCTCAGAAAAACAATTAAGTGAAATTCGTTTCAGAAGCAAGGCAAATGTTAAGTGAAGCAG  
AAGTTGATTCATCAGATGAGGCTGTTAATTTAGTTGTAACAGATACTGCTGAACAACTA  
AATTGAATGTTGAAGCTTTTTCTAATGCAGTAAAAAAGCTGTTAATGAAGCGGTTAAGA  
TTAACGCTAGACAATCGCCATTGACTGGTGGAGATTCATTTAATCAATCCACTGAAAATA  
AACCGCAAACTTAGATAAAAATAGCTAGACAAAACAGAATTATTAATAAATTAACGGAGGC  
ATTTAAATGGAACAAGCACAAAATTAATAATTAATTTGCAACATTTTTCGGGATAACAAT  
GTTAAACCGCAAGTATTTAACCTGATAATGTAATGATGCACGAAAAGAAAGATGGCAGC  
TTGATGAATGAATTCACAACCTCTCATCTTACAAGCGGTTTTTGGAAAACCTTAAAATTATG  
CAATTAGGTAAGTACGAACCAATGGAAGGTAAGTACTGAGAAGTAGTTTACTGTTTGGGCTGAC  
AAACCAGGTGCTTACTGGGTAGGTGAATGTCAAAAATCGAAACATCTAAAGCTACATGG  
GTTAATGCTACTATGATAGCGTTTTAATTAGGGGTTATCTTACCTGTAACAAACGAGTTT  
TTGAATTACAATTATTCATTTCTTTGAAGAAATGAAGCCTATGATTGCTGAAGCATT  
TATAAAAAGTTTATGATGAAGCGGGTATTTTGAATCAAGGTAACAATCCATTCGGTAATTC  
ATTGCACAATCAATTGAAAAAATAATAAGGTTATTAAGGTTGACTTCACACAAGATAAC  
CTTATTGATTTAGAGGCATGACTTGAAGATGACGAATTAGAAGCAAATCCGTTTATCTCA  
AAAACGCAAAACAGGAGCTTGTACGTAAAATTGTAGATCCTGAAACAAAAGAACGCATT  
TATGGCCGTAACAGTGATACATTCGACGGTTTACCTGTGGTTAATCTTAAATCAAGTAAC  
TTAAAACGTGGTGAACATACTGAGATTTTCGATAAGTTGATTTACGGTATCCCTCAA  
TTAATTGAATACAAAATTGATGAAACAGCACAAATTATCTACAGTTAAAACGAAGAGGAC  
ACACCTGTACACTTATTCGAACAAGATATGGTGGCCATTACGTGCAACTATGCATGTAGC  
ATTGCATATCGCTGATGATAAAGCATTGCTTAGGTAGTTTCGTGCTAATGCAAAAACCATC  
TTCAAATCCAGGAGAAGTTTAATAAATAAAGAGGAGTGATAACATGCCCGAAATCATTGG  
AATTGTTAAGTAGATTTTACAGATTTAGAAGATATCAGACATGTCTATATGAAAGGGCA  
TGCTACCCTCGCAAAGGTTATGATCCTACGAATGAACGTATAAAATCTTTAGACAGCGT

TGAAAATAAACGCAATCAGCGAATGATTTACATTGTAATGACAAATTAACCAAGAAAGA  
ACTTGTTCGAAATAGCAAGTTTTGTTGGCTTACAAGTTGATGAAAAACAACAAAAGCTGA  
AATTATCAACACTTTTGAGTCGCTAGAGTAGGTGGTTATATGACTCCGCTAGCTGATGTA  
AAAAACGTATTGGTCTTAAAGATGAAAAGCAAGATGAACAATTAGAGGAAATTATAAAA  
AGTTGTGAAAGCCCGTTGTTATAAATGTTACCTATGGAAGTTGAACAAATACCGGAAAGG  
TTAGTTACATCATTAAAGAAGTTGCAGTTAAACGCTACAACAGGATTGGTGCTGAAGGT  
ATGACATCAGAAGGCGTTGACGGACGTAGCAATGCGTATGAATTGAACGATTTCAAGGAG  
TATGAAGCTATTATTGATAATTACTTTAATGCTAGAACGAGAACTAAAAAAGGAAGGGCT  
GTGTTCTTTTGAGATATGAAGATAGAGTAATTTTTCAATTAGGACAAGTAGCAACTTACA  
ATCCTAAACTAGCGAAAAAGAAAACGCACTAATCACTTATGATGCGATTCCACGCAATA  
TTAACCCCATTTCTAGAGCAAGAAAGCAATTTGAATTTGGCGATGTAAAAACGAAGTAA  
CTGTCCTGAGGGTCAAAGAATCAATATCCTACCCTGTTAGCCACGGGTTAGTTAATGGCA  
TTCGCTACAAGATAGTTGATAAAAGGATTTACAGACACGAAACGTCATATTATATCGAAG  
AGGTCGATTGATGAATATAGATGGATTTACGCACTGTTAGGCCAATTTACAGATATGAA  
AAACAACATCGATGATGATGATGATGACTTTGACAAGAAAACGCCAAAGAATATGTAGT  
ACGAGCTAAATTGAAAGCTAGAGAAGTAAAGAATAACGGTTATTGAACTGCTAATTTATC  
ACGCAATATCAGATATATAAAATTTGGCGATTTGCGATACACTATCACATCGCATGCACC  
TTATAGTAGTTTCTTAGAGATTCGTACTCGATACATGGAGGCAGTACCTTTTATGTGGCC  
AGTCTATGAGGTAATAAGAAAATCGACTGTAGAAGAGTTGAAAGCGTTGTTTGAATAGGA  
GATAAAAGCATGACACCAAACCTTACAACCTTTATAATAATGCGTTTGAAACGCTACAAGGA  
TATGGATTCCTGTTATTTCTCGTAAAGAGATGCAATAAGAGGTTCCGTATCCTTTTTTT  
GTAATAAAAATGCCGGAGTCAAACAAAAGTAAATACACGTTTGATAGTTATTCTGGTGGC  
ACGAATTTAGTTCTTGATATTTGGTGTGTAAGTGATGATTTAGGACATCATGACGGACTT  
GTTAAGAGATGTATTGATGATTTAACACCTAGCGTTAAAACAAACGATTATGACTTTGAA  
GTAGATGATACTAACATCACACAGTTAGTTGATGATACTACCAATCAAGATTTGCTACAC  
ACATCAGTAACGATATCGTACAAAACATTTTAAAAACGGAGGAATATTGAATGGCAAAT  
ATGAAAGATAATAATGATCGTATTATATAATTTAGAAAAGCTAGCGAAAAAGTAGATGCT  
ACTAAAATGCTTTTTTTAACTGAATACGGCTTATCACATGAAGCTGATACAGATACAGAG  
GATACAATGGACTGTTCTTATAACACAGGTGGTTCTGTTGAGTCAACAATCTCTGATACT  
GCTAAAATGTGTTATGGTGACGGTTTTGCAGATGAAATTGAAGACGAAGTTGTAGATCGC  
GTATTGTATGAGGCTTGGGAAGTTGAAAGTAGAATACCAGGCAAAAATGGAGATGCCACT  
AAATTTGAAGCGAAATATTTCCAAGGTTTCCACAATAAATTTGAATTAAGCAGAAGCT  
AACGGTATTGAAGAATATGAATGTGAATATGGAGTGAATGGTCGTTTCCACCGTGGATTT  
GCAACACTACCTGAGGCTGTAACAAAGAACTTAAGCCGACTGGATACAGATTCCATGAC  
ACTACAAAAGCAGATGCGTTAACTGGCGAAGATTTAACAGCAATTCACACCCTAAGGTA  
GATTCATCAACGGTTACTAGGAGAGGTATAAAAATAGGGCGTTAAGCCCTATTTATTT  
TGTTTCAATTAATCATGAATGGAGATTTTAAAGTTATGAATGTATAAAGTAACGGAAAGTC  
ATTAGAATTAAGTGTTGGTTTTAAATTTTTAAGAGAAATCGATAACCGATTAGGTTCAA  
AGTTGAGCAAGCTTCTATCGGTCAAGGTGTATCAATGTTGACTGTAAATTTAGAGAGTGG  
AAATCCTGTTGTGATTGGCGAACTTTAAATTGCAGCTACATCTCACTTAAAAACCAAGC  
AATTACTTTTAATAACCTTGCTGAAGCGCTAGATGAAATCGCAGAAAATATCGGACTAGA  
AGAATTCGGTTCAGATATTTTAAACGGAGTTGGGAAAGCGACCTATGACCCGAAACCTAGT  
CGGAGTAATGGAAGCGGAAGAGAAACCAGCGGAAGCGTAAGATCTTACGACAGAATCGTT  
ATAACTTGCATGTCAACACTTGTTATCACAGATTTGAACGTTATTGAGCAAATGACATTA  
ACATAATATAACTATCGAATCTATGCGAAAGGGTATGAAATGCTAACCCAAGAGTTCGAA  
CGTTACAACTCGCGTTTGCTAGTCGTGCTGCTGCAGCTACAAAAAATGTTGGGACCGAA  
AATAAACCTAAAGAGGAATATGTTTATAACCACGCAAACGACGTATTGCCTTATGAAGAA  
AATGTCCGACTGCTTAAACGAACGTAAAGATATAAGATTTAGTAGCGAACGTGATTAATAC  
GAACCACAAAACAATGAATTTCTTAAAGTTATAGCAGAATTTAACAAGCAATAGAAAGAG  
AGGTGTTAATGTGACGGAATATACAATTAAGCGACTATTGAAGCTAGTGTAGCCAAATT  
CATATGGGAAATCGATAGTGCGGTTCACTGTGCAAAAGATTTAAACGAGTAGCAGATCA  
AACTAAAGATGTCGAATTAATGCTGATGATAAAAAATTACAAAAAACTATCAAAGTTGC  
TAAGAAGCCTTTAGATGCCTTTAGTAACAAAAAAGTAAAAGCTAAATTAGCTGCTAGTAT  
ACAAGACTTACAACAAAAGGTACTAGAATCGAATTTTGAACCTAGACAACTAACTCTAA  
AGAAGTTACTCCAGAGATTAATGACAAAAACAAAATTTGTCTAAAAATATCGCTGAAGC  
ACAAACTAAGTTATCCGAAGTAAAGAAAGCGTGTCAATATTGACATCAATGCTGATAA  
CATTAAATTCAATCGAGTGTTAAAAGTATCTAAAGCTATTCTTGAAGCTTTAAATAGGTC

CAAAGCCAAAGCTATTTTAGATGTAGCCAACAGTGTGCTAATTCTAAAATCAACCGTAC  
TAAAGAAGAGCTTAAAAGAATTCCAAATAAAACTAGATCTCGCCTTGATGTAGATAACAAG  
GCTCTCTATAACAACACTATTTATGCGTTTAAAAAATCATTAGACGCATTGCCAAACAAAA  
AACAAACAAGGTAGATGTCGATACTAATGGTTTAAAGAAAGCTTATGCCTACATAATAAA  
AGCAAACGACAATTTCCAAAGACAGAGGGGGAATTTAGCTAATATGTTTCGTGTGTCCAG  
GACTGTAGTTTCTAATATGGTTGGTGGATTACTAACTTCATCTTTTAGCATTTTAATACC  
TGTAATAGCGAGCGTAGTCCCTGTAGTGTGGTGCCTATTAAACGCTATCAAAGTGTTAAC  
TGGTGGTGTCTTGTCTTAGGTGGTGTGTAGCAATAGCTCATGCTGGCTTTGTAGCATT  
TGGCGCAATGGCTTTCAGCGCTATAAAGATGTTTACTGACGGCACTTTACAAGCTAGCTC  
AGCAACAAACGATTACAAAAAAGCTTTAGATGGAGTAAAGTCAGCATGGACTGCTATTAT  
AAAGCAAATCAATCCGCTATCTTTACAACGCTTGAAAATGTTTTAAATACTGTTAAAAC  
AGCAATGCAGAGCTTACAACCGGTTTTTAGCGGTATTTCAAGAGGAATGGAAGAGGCGTC  
TCAAAGTGTACTTAAATGGGCTCAAATAGCGGTGTAGCATCAAGGTTCTTCAACATGAT  
GAATACAACCTGGTGTTCCTGATTTAACAAGCTATTAAGTGCTGCAGGCGGTTTCGGTGA  
CGTTTTAGTCAATGTATTCACACAATTAGCACCCTGTTTCAATGGTTCGGCTGATTGGTT  
GGATAGATAAGGTCAATCTTTCTCTAACTGGGCTAATAGTGCAGCTGGAGAAAATTCGAT  
TACTCGTTTTATTGAATACAAAAACAAATTTGCCTATCATTGGTAATATTTTTCAAAA  
TGTTTTCGCTGGAATTAACAATTTGACGAATGCATTTAGTGCATCGTCAACCGGTATAAT  
CCAGTCTCTAGAACAGATGCCAGCTAATTTTAGGGAATGGTCTGAACAAGTAGGACAATC  
TCAAGGGTTCAAAGACTTTGTCAGTTATATACAAACAAATGGACCACTAATAATGCAATT  
AATTGGGAACATTGCAAGAGGATTAGTTGGATTCGCAACAGCGATGGCTCCTATAGCTAG  
TGCAGTATTACGCGTTGCAGTAGCAATAACTGGTTGGATAGCTAACTTGTTGAGGCGCA  
TCCAGCTACTGCACAATTAGTTGGCGTCATTATATCTTAAGTTGGTGCATTTAGATTTTT  
AATTGCTCCAATATTTGCGGTAATGGATTGTCGGGGGCCATTAGCAGCAAGATTAGGCGC  
ATTAGTAACTAAGTTTGGTTGGGCTAAACCAGGAACCTTAGTATTAAGTAAGGCAATGAC  
ATCGTTAAAAGGTCCAATAAAGTTAGTTACAGCTATATTCCAATTGTTATTCGGTAAGAT  
TGGATTAATCAGAAATGCTATCTCAGGACTAGTAACTGTGTTTGGTACTTTAGGCGGTCC  
AAGAACACTAGCAATTGGTGTAAATTGCTGCATTAATAGCTATATTCGTTTTATTGTGGAA  
TAAAATTGAAGGATTCAGAACTTTATTATAAATGCCTGGCATGAGATAAAAACGTTTTAT  
GGTTGATGTTAGGAATGTATTACAAGCTGTAGCTTCGGTTGTATGGAATGCTATATTAAC  
AGCTATCACTACAGCAGTATCCAATGTTCAACAATTTTATAATGATTGTTTGGAAATCAAT  
AGTCGCTTATTTACAAGGGCTATGGAATGGAATTATCGCTATTGCACCAACAGTATGGAA  
CCTTTTAGTTACAATCATTACAACCTGTTTTACGACGATAATGACAATAGTTATTACGAT  
ATGGACAGCTATTTGGACGTTCTTAAGTACAATCTGGAATACGATAATTACAATCGCTAC  
AACGATTTCAATTTGTTGGTCACTGTAATAACTACTGTGTTTACAACAATCATGACAAT  
CGCAAAGACAATTTGGAACGCTATTTGGACGTTCTTACAGACGTTGTGGAACACTATAGG  
TACTGTGGCAACTAAGGTTTGGAAACGCTTTCACGACAGCCATCTCTACTGCGTTACAAGC  
GGCATGGAGTTTCATTTCTAATATCTGGAATACGATTTGGAGTTTCTTTTCTGGTATATT  
AACGACGAATTGGAATAAAGTAGTAAGTATATTACACAAGTTGTATCACCTATATCAGA  
CAAATGTCTCAAGATTGGGACTTCATTGTCACTAAAGGTATGCAATGGGTATCTACTAT  
AACAAAGTACGCTAATTAACCTTTGTTAATAGAGTTATTCAAGGATTGGTTAATGTTGTAAA  
CAAAGTTAGTCAAGGTATGACAAATGCGGTAATAAAAATAAAAAGTTTTAGAGGAGATTT  
TGTGTCTGCACGTGCTGATATGATCTGTGGTTAATTAGAGGTATTGAACAAGTGGCTGG  
CCAATTAGTAGATGCAGCTAAAAAAGTCGCTAAGAAAGCTTTAGATGCAGCTAAAAGTGC  
TTTGGGTATTCCTCACGTTTACGTTGAAATTCATGGATGATGATATGATTCAATGCTAGG  
TTTCGTTAAAGGTATAGATAATCATTCAAGCAAAGTTATCCGTAATGTTTCTAATGTTGC  
AGATAAAGTAGTTGATGCATTTCAACCTACATTAACCGCACCTGACATCTCTCGTATTAC  
AGGAACTTAAGTAATTTAGGTGGAACATAAATGCGCAAGTACAACACACACATTCTAT  
TGGAACATCACCGAACATGAAAACCTGTTAAAGTTGAATTTAATGTTAATAACGATGCGCT  
TACTAGTATTGTTAACGGCAGAAATGCTAACCACAATTCTGAGTATTACTTACAAAGGAC  
GTTACAATGGACATACAATTAACAAAAAAGATTGTACTGTGATCAAATTAAGTGAATA  
CGGGTTTATCGTTAACAATATGGTAATTGATAGCATGCAAATCAACACAAAGTATCAAGA  
CCAAGAAAATATGAACGGTTCGCGTATTAATGGAGAGCAATTATATCAGTAGAGATATTGT  
TGTTACTTGTTTTTGTAAAGTAAAAAATCGTTCAGACCTTGCTGATATGCGAGATATGTT  
GTATTCGTTAACTACTGATATAGAACCAATGTATTTACTTGAAATCAGAAGAAAAGAAGA  
GTTGAATTACAGGTTTACTCAACCAACTTCTCATGATTACGTGAAATTAGATAAAAACAA  
CTTCCCGGATTATGAATATTCAAGACTCGATCAACAAATTTATGTAAACAGTAAACAGTA

TAAAGTTAAGTTTAGCGGAGTTATAAATCCTAAACAAAAAATAACAAGGTTGCTTTAGA  
ATTGAAGTTTGACACTACAGAGGTACCATACGGCGAAAGGATTGGCACAAGCCTAGAGTT  
AGAAGAAAACAAAAAGGTTGGATTGTGGTCGTTTGATTTAATATTGATTGGCATGTAGG  
TGGGGATAGGCGCCAGTATACATTTGATAATGTTAGTAAAGATACAGTTTTCTATCATGG  
TAGTGCTCCTAACGACCAATTCAACATGTATAAAAAGATAACAATTATTTGGGCGAAGA  
TACAGAATCGTTTGTATGGAACCTAACGCATGCTGAAATAATGAAAATCGAAGGTATCAA  
ACTAAAAGCTGGAGACAAAATTGTTTATGATGGCTTCCGAGTTTATAAAAACGGTGTGTA  
ATGAAGTACCGATACGAATATAGCCCAACCAAAAATTACATACGGAGCTAATAAATTTGA  
GTTTAATCAAACGGTACAAAAGTTCAGTTTGATTTGAAATTCTATCATAAGTAGGTGTC  
TGAATGACAATAATTGTAAGACCACCTAACGGTAATGGCGCACCTGTACCAATAGAAACA  
ACTTTAGTGAAAAGAGTTAATGCTGATGGTGTACTAACTTGTGAGATTCTAGAAAATAAA  
TATACTTATGAAATTATTAACGCTATAGGGAAAAGATGGATTGTTAGTCATGTCTGAAGGT  
GAAAACGACAAGAAAGAATATGTAATAACTGTCATTGATAGGAAATCAGAAGGCGACAGA  
CAACTGGTTGAAGGTACTGCTAGAGAGATTCCCTTAGACAAGTTAATGATTGATAGACTT  
TATGCTAATGTAACAGGATCTTTTACAGTAGACAGATATTTTAAACATTGTCTTTCAAGGT  
ACTGGAATGCTTTTTGAAGTCGAGGGCAAAGTTAAATCTTCAAAGTTTGACAACGGCAGT  
CAAGGCGCCACAAGGTTAGAAATGATAAAAAAAGGTTTGGAACATTTTGGATTAGAATAC  
CATATCACATATGACAAAAGAATGACAGATATAAGTTGGTATTGACGCCTTTTGC AAAG  
CAAAAAGCGTCTTATTTTATTTCTGACGAAGTGAACGCCAACGCTATAAAAACCTCGAGGAA  
GATGCAAGTGATTTTCGCCACCATCAATAGAGGATATGGTAATTATTCAGGAGAAGAAACA  
TTCGAACACGCTGGGCTCGTAATGGAAGCTAGAAGTGCATTAGCTGAAATATACGGCGAC  
ATCCACGCAGAACCATTTAAAGATGGTAATGTGACTGACCAAGAAACTATGGATAAAGAA  
TTACAATCGAGACTGACAAAGTCGTTAAAACAATCTTTGTCTTTGGACTTTTTGGTGTTA  
AGTGAATCATAGCCAGAAGCAGACCCACGACCCGGAGACATAGTACAAATGAAATCTACC  
AAACTAGCTTTGAATAATTTACCCCGTATAGTACAAGTTAACACGATTAGGGGTATTAC  
AATGTAATTGTTAGGCATGATGTAACGCTTGGTGTGTTAATCGAGAACAACGATATATG  
AAAAAAGTTAATACTGCAGCTAACTATGTTTCTGGATTAAATGATGTAAACCTTTCTAAT  
CCTAGTAAAGCGCCAGAAAACCTTGAAGTCTAAAGTAGCGTCAAGAGCTAAATCAACACTC  
GATTTGATGAGTAGAACTGATCTAAGTTAAGACAAACAACAGAAAGTGAGTTCTAAGACT  
GTAAGTGCATCAGATTGCACTATCGTTCATGATTTGATAGATAAATCAAACATTAAGAT  
GAAAAAACACTTGGAACGATTGGCGATTCTGTAGCTCGAGGATCACATTCGAAAACCTCAT  
TTAACAGAAATGTTAGGCAAGAAGTTAAAAGCTAAAACGACCAACCTTGCAAGAGGTGGC  
ACAACAATGGCAACAGTTCCAATAGGTAAAGAAGCGGTAGAAAACAGCATATATAGACAA  
GCAGAGCAAATAAGAGGAGACCTAATCGTATTACCAGGTACAGATGATGACTGGTTACAT  
TGTTATTGGGCAGGCGTATCGATAGGAACTGATAAAACCGACACTAAAACGTTTTACGGC  
GCTTTTGTTCTTCAATTGAAGTTATCAGGCAAAATAATCCAGCTTCAAAAATACTGGTA  
ATGACAGCAACTAGGTAATGCCGTATGAGTGGTACAACGATACGTCGTAAAGATACGCAC  
AAAAACAACACTAGCGTTAACTTTAGAGGCTTATGTCAATGCTCAGATATTGGCTTGTAGT  
GTATTGGATGTACCAGTATAAGATGCCTATCATAACAGATTATTTTAAAGCCATATAAACCA  
GCGTTCAGAAAATCGAGTATGCCAGACGAATTGCATCCGAACGAGAGGGGTCATGAAGTT  
ATTAAGTACGAACTTATTA AAAAATTATTACCAGTTTTACGGATAGAAAAGGAGGAAGACA  
TGGATAACAAATTAATTGCAGACTTAAGTAGAGTCTTTGACTACAGATATGTAGATGAAA  
ATGAGTATAACTTTAACTTATTTACAGACATGCTGACGGATTTAAATTTCTCTCTTGAAT  
ACCATTGAAATAAAGAGGTATTTACACATAATGGAGAGCAAATAAAGTATGAGTATTTAA  
CTGTCAACAGTAGCGTCTCTGATTTTTTAAAGTATCTAAACGGCCGTTTCAGCAATATGG  
TACTAGGTCATAACGGCGACGGTAACAACGAAGTAAAAGACGCGCGCGTTGATAATACAG  
GTTATGGTCATAAGGCATTCCAAGTTCGTTTGTATCATGATTATTCAACACTAGATGCTT  
TCACTAAATAAGTTGAGAAAGCTGTAGATGAACACTATAAAGAATATCGAGCGACAGAAT  
ACCGATTCGAACCAAAAGAGCAAGAACCGGAATTCATCACAGATTTATCGCCATATACTA  
ACGCAGTAATGCAACCATTTTGGGTAGACCCTAGAACGAAAATTATTTATATGATAGAAG  
CTCGTCCAGGTAATCATTACATGTTATCTAGATTGAAGCCAAACGGACAATTTATTGATA  
GATTGCTTATTA AAAACAGCGATCACGGTACACACAATGCATATAGATACATTGATGGAG  
AATTATGGATTTATTCAGCTGTATTGTACAGTGACAAAACAAGTAGTTTGTACGTTTCC  
AATGTAGA ACTGCAGAAATAACTTATGGTAATGAAATGCAAGATGTCATGCCGAATATAA  
TTAACGACACATATACGCCAGCGATTTATAATCCGGTAGAAAATTTAAGGATTTCTAGAC  
GTGAAGTTAAACCCACTGAAGGACA ACTTAAGAATTCGTTGAACGTTGTTGAGGTTAGAA  
GTGCTGACGATATTGATAAAGGTATAGACAAAGTATTGTATCAAATGGATATACCTATGG

AATACACTTCAGATACACAACCCATGCAAGGTATCACTTATGATGCAGGTATCTTATATT  
GGTATACAGGTGATTTCGAATACAGCCAACCCTAACTACTAACAAGGTTTCGATATAAAAA  
CAAAGAATTGTTATTTAAACGACGTATCGATATTGGCGGTGTGAATAATAACTTTAAAG  
GAGACTTCCAAGAAGCTGAGGGTCTTGATATGTATTACGATCTCGAAACAGGACGCAAAG  
CGTTTTAATAGGGGTAACTTTTGTACCTCGTAACAACATACATCACTGAATTTATTCCG  
TCGGCCAAAGAGGTGTTAACCAATTTTTAAAAAAAATTGCACCTCAAGTATCGATGACTG  
ATTCAGGCGGACGTGTTAAACCGTTACCAATACAGAACCAGCATATCTAAGTGATATTA  
CGGAAGTTGGTCATTACTATATCTATACGCAAGACACACAAAATGCATTAGATTTCCCGT  
TACCGAAAGCGTTTAGAGATGCAGGTTGGTCTTTGATGTACTGCCTGGACACTATAATG  
GTGCTCAAAGACAAGTCTTTACCAGAAATAGCACAGGTAGAAATATGCTTAAATTTCGAAC  
GTGTCATTGACATTTTCAATAAGAAAAACAACGGAGCATGGAATTTCTGTCCGCAAACG  
CCGGTATTGGGAACATATCCCTAAGAGTATTACAATATTATCGGATTTAAAAATCGTTG  
GTTTAGATTTCTATGTCACTACTGAAGAATCACAACGATTTACGGATTTTCGTAAAGACT  
TAAAAGGTATTGCAGGTTGGATATTAGAAGTAAAATCGAATACACCAAGCAACACAACAC  
AAGTATTAAGACGAAAAAATTCCCGTCTGCACATCAATTTTTAGTTAGAACTTTGGTA  
CTGGTGGCGTTGGTAAATGGAGTTTATTTCGAAGGAAAGATGGTTGAATAATGGTAGTAGA  
TAATTTTTTCGAAAGATGATAACTTAATCGACTTACAAACAACATCACAATGTAATCCGGT  
TATTGACACAAACATCAGTTACTATGAATCAGATAGAGGAACTGGTGTTTTTAAATTTTGC  
AGTAACTAAGAATAACAGCCCGTTATCTATAAGTTCTAAACATGTTAATACATCTATCGT  
GTTAAAAACCGATGGTTATAACGTAGATAGAGGCGTTATATTTTCAGACGAATTAACGAT  
AGTAGATGCAATTAATGGGCGTTTGGCCGAATGTGATACCGAATGAATTTTTAAAACATTC  
AGGCAAGGTGCATGCTCAGGCATTCTTTACACAAAACGGGAGTAATAAGGTGGTTGTTGA  
ACGTCAATTTAGCTTCAATATTGAACATGATTTAGTTAGTGGGTTTGATGGTTTAAACAA  
GCTTGTTTATATCAAATCTATTAAGATACTAACGATGCTGTCGGTAAACACTTTAACCA  
ATTAAGCAAATATGGCTGATACACAGACGTTAATAGCAAAGTGAATGATAGTGCGAC  
AAAAGGCATTCATCAAATCGAAATCAAGGAAAACGAAGCTATACAAGCTAATACTGCGAC  
GCAAAC TAGTGCAACACAAGCTGACACAGCTGAATTCGATAAAAATAGGTGATAAAGAGCA  
AGCGATTTTTGGACGGGTTAACGAAGTTGAACAACAAATCAATGGCTCTGACCTTGTTAA  
GGGTAATTCACAACAAATTTGGCAAAGTCTAAACTTACGGAGGATCACGGTAAAGCAAT  
TGAATCGTCTGAGCAGTCCATAGATAGCGTTTTAAGCGAAATTAACAGATCTAGGATTAT  
TCATATCACTAGCGCAACAGATGCGCCAACATTTAAAGATATAGGCACTTTAGCGACACC  
TAAAGAAGATGGCGTTGATGATGGTTCTGAAGTTTCAGCAACTACGAATACTTTAGGGAA  
ATCAGGCTTGTTAGTTGTTTATGTTGTTGATGACAGTACAGCTCGTGCTAAATGTTATCC  
AGACGATTCAAATGATGAGTACACAAAATATAACATCGGTGGCACATGGTATCAGTTCTA  
TAAAAAAGTTGACGAAGAATTAACGAAGAAATTTGTTGAATAAACGGTTAACAACGCTTT  
GAATCAAGCTAAGCAGTATGTAGATGATAAATTCGGAACAACGAGCTGGCATCAACATAA  
GATGACAGAGGCGAATGGTCCATCAATTCAGTTAACTAAAATAATGCGCAAGGCGATTT  
GGGAGATTTAACTGCTGGTAATTACTATGCAACAAGTTTGGCCGATTTACCAGGTAGCGT  
TGAAAGCTATGAGGGTTACTTATCGGTATTCGTTAAAGATGATACAAACAAGCTATTTAA  
CTTCACTCCTTATAAGTCTAAAACGATTTACACACGATCAATCACAACGGCAGACTTGA  
GCAACAGTGGACAGTTCCTAATGAACATAAATCAAAGGTATGGTTTCGACGGTTGCGCAA  
TGGTGTAGGTACAACAATCAATCTAACTGAACCGTTCACAACTATTCTATTTGGTTGGT  
AATTGGAAC TTATCCAGGTGGCGTTATTGAGGGATTTCGGACTAACCGCATTACCTAACGC  
AATTC AATTGAGTAAAGCGAATGTAGTTGACTCAGACGGCAACGGTGGGGGTATTTATGA  
GTGCTTACTACCCAAACCAAGTAGCACTACTTTAAGAATAGATAACGATGTGTACTTTGA  
TTTACGTAAAACATCAGGTTCTGGAGCGAATGTCAACATAGTTACTATAACTAAAAGTAT  
GGGGTGGAAATAATGAAAGTCACATTAACGATAAAAACGAAGTTATCGGATTCGTCAAT  
ACTGGCGGTTTACGCAAAGTTTAGATGTAGATGACAACAATGTGCGTATTAATTTTTAA  
GAAGAGTTCGTACCTAGAAAGTTTGTGTCCTAACGGCGAAATTAATACAATAGCAAT  
TTCGAAAAAGAAGACGTACCGAATGCATGAAGCCAACAAGTGCGTCAGATTTAAGTGAT  
GAGGAAC TTCGCGGAATGCTTGCAGTATGCAATTGCAGGTGGCACAAGTAAACGTCTTA  
ACAATGGAATTAGTTCAACAAAGCGCTATATTAACACAACCGTTGACTGACCTGAAAAC  
AACAAATCAAGTACTGAGGGGGACGTTTAAACCAATGAAGATGATTTATCCAATATCCAG  
GACATTAAGCTTTTTATGTGTGGGGTTGCTATAAAAATGACCAAATTAAGTGGTACATA  
GACATGGGTGTAATCGAAAAAGAAGAATATGCATTGAACACTGGAGAAAAATTTCCAGAA  
ACAAAAGATGAAAGGTCACAGGTGTAATCCTTGTGGCTTTTTAATTTAACACAAAGTAGG  
TGCGTAATGTTTGGATTTACCCAAAGGCACGATCATGAATGGCGTACTAGAAGATTAGA

ACCGAATGATAAAACAATGCTTAGCACTCTCAATGAGATTAATAATTAGGCCCAAAAACCTCA  
AGAGCAAGTTAACATTAAGTTAGATGAACTTTAGATGCTATCGAGAGGGAAAGACAGAT  
AGACGAAAAAATAAGAAAGAAAACGACAAAAATATACGCGATATGAAAATGTGGATTCT  
CGGTTTGATAGGGACTATCTTCAGTACGATTGTCATAGCTTGACTAAGAACTATTTTTGG  
TATTTAAAGGAGGTGATTACCATCCTTAAAGGGATTTTAGGATATAGCTTCTGGGCGTAC  
TTCTGGTTTGGTAAATGTAAATAACAGTTAAGAGTCAGTGATTCCGGCACTGGCTTTTTAT  
TTTGATTGCAATGGGGTTCATACATGGGATAACCCAATCCAAGACTCGAACACCTACAG  
CAAGTGAAGTAGTAGAGTGGGCGTTGTATATTGCTAAAAAGAAAATAGCTCTGGATGTAC  
CTGGTTCTGGAATGGGGGCGCACTGTTGGGACTTGCCTAATTACTTGCTTGATAAATATT  
GGGGGTTTAGAACATGGGGAAATGCTGATGCTATGGCTCAGAAATCTAATTATAGAGGTA  
GAGATTTCAAGATAATTAGAAAGACAAAAGATTTTATAACACAACCAGGCGACTGGGGTG  
TTTGGACTGGTGGTTCGGCAGGACATGTAAACATTGTAGTGGGACCGTGCAGAAAAGACT  
ATTGGTATGGTGGGGATCAAACTGGTATACAAATATTGCAACAGGAAGTCCGCCGTATA  
AAATCAAACACTCTTATCATGATGGACAAGGTGGAGGAGTTAAATATCTTGTTAGACCAC  
CATATCATCCGGAGAAATCTACGCCGGCTCCTAAACCCGAAGACGAAAGAGATAATAACG  
AAAAAATAAAGTTCCGATTTGGAAAGATGTAACAACCTATAAAGTACACTAGTT  
CTAGCCAAGAGGTTAATTATCCAGAATAAATTTACTGTATAGTAGAAGGTAATCGAC  
GACTCGAAAAACCTAAAGGAATAAGGATTAGAAACACACAAACGATGAGCTCGGTAGAAA  
GTTTATATAACAGTAGGAAGAAATACAAACAGGATGTAGAATATCCCCACTTTTATGTTG  
ATAGACAAAATATTTGGGCACCTAGCAGAGCTGTATTTGAAGTTCCTAATGAACCTGTTT  
ATGTACTTATAGACGTATGTGAAGATTATAGTGCGAATAAAAATGAATTTATTTTTAATG  
AGATTCACGCAATGGCTGTAGCTGTAGATCTGATGGCCAAATATGCGATACCTCTAAGTA  
TTGACAATTTAAAAATAGATGACAGCATTGACGTTTCGATGCCGGAACATGTTAATTGGA  
ATATGCTTGACAACGGTGTTCCTAAAGATGAATACGAAGCATTAGAAAAGGCATTAC  
TTAATATATTTAAAAACAGAGAAAGATTATTAAGTTTAAAACTAAACCAACAGTAACAA  
AATCTAGAATAAAAGTTAAGGTAGATAATAAAAACGCTGATATAGCGAATGTTAGAGACT  
CATCACCAACAGCTAATAATGGCTCGGCATCTAAACAACCGCAGATCATAACAGAAACCA  
GTCCTTATACATTCAAACAAGCACTGGATAAAACAATGGCAAGAGGTAACCCGAAAAAAT  
CTAATGCTTGGGGATGGGCTAACGCTACACGAGCACAACCGAGTTCAGCTATGAATGTTA  
AACGAATATGGGAAGGTAACACGCGGTGCTACCAAATGCTTAATTTAGGCAAGTATCAAG  
GCGTATCAATTAGTTCGCTTAATAAGAGACTTAAAGGTAAGGGGACTTTGAAGAATCAAG  
GTAAAGCGTTCGCAGAAGCGTATAAAAAGCACAACATTAATGAAATTTATTTAATCGCGC  
ATGCTTACTTAGAACGTGGATATGGATCAAGCAACTTCGCTAACGCAAAAGATGGGGTAT  
AGATCTCCTCCGGCATCGGCGCTTACACAAACAATCCTAACTACGCAATGACGTTTGCTA  
GGAATAAAGGTTGGACATCGCCAGCAAAAGCAATCCTGGGCCGTACTAGCTCCGTAAGAA  
CGGATTACATCAATAACGGTCAAACACGTTGTACCGAATTAGATGGAATCCTAAGAATC  
CAGCTACCCACCAATACGCTACTGCTATAGAGTGGTTCACATCAAGCAAGTACACTCG  
CTAAGTTATATAAACAATCGGCTTAAAAGGTATCTATTTCAAGGGATAAATATAAAT  
AAAGTGGTGTATAAATGTACAAAATAAAAGATGTTAAAACGAGAATAAAAAATGATGGTG  
TTGACTTAGGTGTCATTGGCTGTCGATTTTACACTGAAGATGAAAATACAGCCTCTATAA  
GAATAGGTATCAATTACAAACAAGGTCGTATCGCTCTAAAAGCACATGGCTTAACACCTA  
GATTACATTTGTTTATGGAAGATGGCTCTATATTCAAAAATGATCCCCTTATTATCGACG  
ATGTTGTAAAACGGTTCCTTACCTACAACAGACCTAAAAGGTTATCAAACACGCTGGTT  
ATGTTTCGCTGTAAGCTGTTTTTAGAGAAAGAAGAAGAAAAAATACATGTCGCAAACCTTT  
CTTTCAATATCGTTGATAGTGGTATTGAATCTGCTGTAGCAAAAGAAATCGATGTTAAAT  
TGGTAGATGATGCTATTACGAGAATTTTAAAAGATAACGCGACAGATTTATTGAGCAAAG  
ACTGTAAGAGAAAATAGATAAAGATGTCATTTCTTACATCGAAAAGAATGAAAGTAGAT  
TTAATGGTGCGAAAGGTGATAAAGGCGAACCGGGACAACCTGGTGCGAAAGGTGATACAG  
GTAAAAAAGGAGAACAAGGCGCACCCGGTAAAAACGGTACTGTAGTATCAATCAATCCTG  
ACAATAAATGTGGCAAATTGACCGTAAAGATACAGATATCAAAGCAGAATCTGAGTTAT  
TGGATAAAAACAATATCGCAAATGTTGAAGGGTTAGAAAATAAATTGCAAGAAGTTAAAA  
AAATCAAAGATACAACCTCTCAACGACTCTAAAACGTATACGGATTCCAAGATTGCTGAAC  
TAGTTGATAGCGCGCTGAATCTATGAATACATTAAGAGAATTAGCAGAAGCAATACAAA  
ACAACCTATTTTCAAGAAAGTGTATTGCAACAGATTGGCTCAAAGTTAGTACAGAAGATT  
TTGAGGAATTCATACAAACACTAACTGATATATATGCTTCAAAAAATCATAATCATGACG  
AGCGGTATGATAAAGTATCTCAAGCTTTTACTAAACAACAAGCGGATAATTTATATCAAC  
TAAAAAGCGCATCTCAACCGACGGTAAAATTTGGACAGGAAGACAAAATGAATATAACT

ATATATATCAAAAAGACCCTAATACACTTTACTTAAATTAAGGGGGGATTTTTATGGAAGG  
TAATTTTAAAAATGTAAAGAAGTTTATTTACGAAGGTGAAGAATATACAAAAGTATATGC  
TGGAAATATCCAAGTCTGTAAAAAGCCTTCATCTTTTGCAATAAAACCCTTACCTAAAAA  
TAAATACCCGGACAGCATAGAAGACTCAACAGCAAAATGGACAATAAATGGAGTTGAACC  
TAATAAAAGTTATCAGGTGACAATAGAAAATGTACGTAGCGGTATAATGAGGTTTTCGCA  
AACTAATTTAGTGTCAAGTGATTTAGGAATATCAGGAGTCAATAGCGGAGTGGCTAGTAA  
AAATATCAACTTTAGTAATCCTTCAGGGATGTTGTGTGTCACTATAAGTGATGTTTATTC  
AGGATCTCCGAAATTGACCATTGAATAATTTTAAATGACTAATTTTTTAGTCGTTTTTTA  
TTTTGGATAAAAAGGAGCAAACGAATGGATATTAAGTGGAAATTGAGATTTAAAAATAATG  
CAGTATTAACAGGTTTAGTGTGCTCATTATTGTTATTGATCAAACAAATCACAGATTTTT  
TCGGATTCGATTTATCAACGCAACTAAATCAAGCCAGCGCGATCATAGGTGCTATCCTCA  
CGCTACTTACAGGGATTGGCGATATTACTGACCCAACGTCAAAGGCGTCTCAGATTCAT  
CTATAGCATGGACATATCAAGCGCCTAGAGATTGCAATAAAGACGAACAACAAGTTACGT  
GGAAATCATCACAAGACAGTAGTTTAAACGCCGAATTAAGCGCCAAAGCACCAAAGAAT  
ATGATATATCACAACCTATCACAGACGCTTAAACGCTGTTGGCTTTGATGAGAATGAGT  
ATCATCATGGAGGTGGAGACAATGCAAGCAAAATTAATAAAAAAGAGTTTATAGACTGG  
TTGAAAACCTTCTGAAGGAAGACAATTCAATGTGGACTTATGGTATGTATTTCAATGTTTT  
GATTATGTCAATGCTGCTTGGAAAGTTTTGTTGGGATTACTTCTGAAAGGTTTAGGTGCA  
AAAGATATACCCTTTGTAAACAATGTTGATGGACTAGCAACTGTAAACCAAATACGCCG  
GACTCTTTGACAAAACCCGGCGATATGGTTGTGTTCCGGTAGTAATTACGGTGCAGGATAC  
GGACACGTAGCATGAGTAGTTGAAGCAACTTTAGATTATATCCTTGTATATAAGCAGAAT  
TGGCTAGGCGGTTGCTGGACTGACGGAATCGAACAACCCGGCTGGGGTTGGGAAAAAGCT  
ACAAGACGACAACATGCTTATGACTTCCCTATGTGGTTGCTCCGTCCGAATTTTAAAAGT  
GAGACAGCGCCACGATCAGTTCAATCTCCTACACAAGCACCTAAAAAAGAAACAGCTAAG  
CCACAACCTAAAGCAGTAGAACTTAAAATCATCAAAGATATGGTTGAAGGTTATGACCTA  
CCTAAGCGTGATAGTAACCCTAAAGGTATAGTTATACACAACAACGCAGGGAGCAAAGGG  
GCGACTGCTGAAGCATATCGTAACGGATTAGTAAATACACCTTTATAAAGATTAGAAGCG  
GGCATTGCGCATAGTTACGTATCAGGCAACACAGTTTGGCAAGCGTTAGATCAATCACA  
GAAGGTTGGCATAACCCGAATCAAATAGGTAATAAATATTATTACGGTATTGCAGTATTT  
CAATCAATGGACGCAGATAACGCGACATTCTTAAGAAATGAACAGACACCTTTCCAAGAA  
TGCCTAGATTGTTGAAAAAATGGGGATTACCAGCAAATAAAAAATACAATCAGATTGCAA  
AATGAAATTAATCAACATCATGCGCTCATAGAAGTTCCGGTTTTACACACTGGTTTTTAC  
CCAGGAACCTCGCGGTCTATTGCCGGAAGATAAACAATTACAGCTTAAAGACTACTTTATC  
AAGCAAATCAGAGTGTATATGGACGGTAAGATACCAGGTGCCACTGTCTCTAAGGAGTCA  
AGCGCTTCAAGAAATACAGTTAAACAGTTGCGAGGGCATGGAAACGTATTAATAGGGT  
ACTTACTACATGGAAGAAAGTGCTAGATACACAAACGGTAATCAACCAATCACTGTAAGA  
AAAATAGGACCATTCTTATCATGCCCGGTAGCTTTCCAATTCCAACCTGGTGGATATTGT  
GATTATACAGAAGTGATGTGACAAGATGGTCATGTTTGGGTAGGATATACATGGGTGGCG  
CAACGTTAGTACTTGCCTATTAGAACATGGAATGGTTCTGCCCCACCTAATCAGATATTA  
GGTGACTTATGGGGCGAAATCAGCTAGAATGACATAGTCATGTCTATTTAAGCAGGTGCG  
TTACATACCTGCATTCCATTTACATTTAAAGATAAAATGTGCTATTATTTTACTAGA  
TTTTAACATTTCTCTCAAGATTTAAATGTGATAACAGGCAGGTACTACGGTACTTGCCC  
ATTTTTTATGTTATAATGTAATTACATTACCAGTAACCTATCTGGCTTAAACACATTT  
CCGGTAGCCAATCCGGCTCTGCAGAGGACTTACTTGCCTGAAGTAGTAAGAAGCTGACTG  
CATATTTAAACCACTAGTACTGGGTGGTTGTTTTGTTTCGCCATTATGTTCTG  
TCTACATCTTTTTGCGCAAGTTTTGTATTGTGATATATAGTATAAATAAGGGATATTT  
AAATGGAAGATAATAAAAATTCAGCAAAAATGTACTAATTCAAAGCTTTATATTTTTTTA  
CTGCAGCTTTTTGTAAATATAGTGACTATTATAACATCTATAAATTTTTTAGGTGCTATGT  
TAGGTGTAACCTTTATTTTATGCCTATTGTTCTAGAAAATTACATGAAGAATGTTTACA  
ATAAAGCAACTAAGATTTTGAGAAGAATACGATATATATTTCCAGTTTATTCATATTTA  
TAAACATTTTAAATATTTATTTTATGTTATTATATGCCTACATATAAGGTTACCATTAGTA  
CAAGTTGGTATGTTGGTGCTATTATAATAACAACAATACCATTATTTTTTATAAGTATAT  
TAGATATTTTTCTTTATGGATTTAACAACGAGGAAATCAAAGCTAGTAATGATACTAAAG  
AGTATTTGAGAAAGAACAGAGAACAAAGTAAAGAATAAAGCAAGAGAAAGTAC  
TGAAAGAGGAAGAACGTCAATTTAAAATAGAACGTTCTAAAAGAAAGGGATTATAGTAAT  
GGTTATAACAATGATAAGCGTTTTTGTATAATTGCTATCTTATTATTTTATTTGTCAGC  
GGTAACTCTTACCGCAGTTAGATCTTATGCTTATAATGTTAAATTTAGTGTACCAACGCT



ATTTGCAATACCATTAATTTTGGTCTGTACACATATAAAAAATTTACAATACTTACAAATT  
GTCTGAGAGAAAAAAGCCTTCAGAATGCTTTTATTTATATTTAAAAAATATCCGGTAGC  
AATAGCTATGTTTTAACTATTATTGCTACAAGTATCGCTGAACAAAATGTTAAATTATC  
AAATGGTGCAACTTATAAGAAAAGTAAAATTTAAAGCAGAAGAAACGTAAAAAAATGAT  
TAACAAGGTTCTTCAACGTAATACTAATGGAGAAATGCTTTTGGGAATATAAATAAGTTT  
CTTAGTATTTCTTATGATTTTAATATAATAGGTTTATTATCTTTTCTTGTGAAATTATA  
ACCGTACCGTTTAAAGATGCGGTTATTTTTATTCTATAACAATCAACAAAACCATAAGACC  
TATTAATTTAGCAGTGTGGATTTTTATATGTGAAGCTAAAATAACTACAAATGATACCAA  
TTTTGATACCATTTTGTAGTAAAACAGAGAAAATAAGGAAAATAAAAAAGGCAAAAAACG  
CATTAAATCAACGTTTATTGTCTCATGAAATTTAAATGTATATAAATTTCACTTCGCATG  
GG

>NewGenomeName\_199

ACGTAGGGGGCGGGGCTTAGTATTACCCCGCCCCAGGATCCGCGGAGTCATTTAGACTCG  
CTATAACCCGTTAGATGTGTATACACGTGGACGATCAGGATCTGTGATTCGTGAAGCGAA  
TCTGACGGGAGATCGTCCGAAGCCTCGTGGTAGGGCCCCCATGTTGCTTGATCTTTACTT  
TAATAAAGTAAAGTAAACATGCTGTCCATTGCTTTATTCGTTTGCTAGTTGTTTACAGCTG  
TCTTTGCTTCGCCTCGAAGCAAAGGACATTCTCATCGTCTATAAAAGCTGTGTTCTCCGT  
GTGTAATTCGTCGGAATTATCGAGCGTAAGTCTCGTTCTTGTTCATGGAAGATTTCAAG  
CAACCAAAGCTCTCTTATGGAGAGATAGTTCAAATGAAGGAAGAACAAGATGCTTTCTGG  
AGTTGTTATCATGAGTTTCTCCGTCGCAATGAAGATGTTCTTGGAGAGATGTGAAGACGC  
CATGGAAGGAAATTGCCTGCATATCCAAAGCTCCCTACATATGCTCCGATACGGTGGGTT  
CTAAGATTAAGGCAATTTATCATGTGAGAGTAGATGAATGTAAGTCATGTTCCGCATGAG  
GAAATTAGTAGAAGGGATTATAATCCCAATAAGAAAGAAGGTTTAAACGACCTGTATGAT  
ACAGGTAATTATAGATATCAAGTGTATTATGCTTCATCGTGTAATAGAGATAAATCAGAT  
TAATAGATAAATAATTACAATTGTATTGTTTCTGCTATTGTTTCATGTTTCATTAATAATT  
TATGGTTTGCAAAACCAGAGCTATTCAGAGGTAGAAGACAACACTACAATAGATAACATATA  
CATTACAATGATATTTGAGAAATATATTATTGTTAATAACTCTGCGAAGCTATATGTCTT  
GGCCCTATAGGCCCAAATGCTCTTAAGCCCAATGAAATTAACACTGAAGTGAGTCAGCTG  
ACGTCAGCTGACTCCTTGATG

>NewGenomeName\_200

TGGTATTACCCCGTGCCGGGATCAGAGCCATTTGACCAATAGTTGACTAGTATAATAGC  
CCTTGGATTAATGACACGTGGCCGCTCAGGGTCCGTGAGGCTAGTGAAGCGCTTAAGCT  
GAACGAATCTGACGGAAGAGCGTTCACACTTAGATCTAGTTAGCGTACTTAGTACCCGTT  
GTCTTGGGTTGATAAATAGGGTGCTTCTGAACAGATTGTTTCAGAATTCATAGCGAGATG  
GATTCTGGTGATGGTTTCAATACATACTCATGTGAAGAAGGTGCTGGAGATTCGAAGAAG  
GAAGTTTTATATAAAATAGGTATTATTATGTTCATGTATTGTAGGGATTGTAGTTTTATGG  
GTTTTAATTATATTTGATGTGCTGTTCCCTCGCTACGCTAGATCAACGATGGACGCTTGG  
TTATCTTCGTCTTCTATTATGAAGAGGAAGATGGCTTCAAGGATTACTGGTACTCCGTTT  
AAAGAACTGGTCTCATCGTGAAAGAAGATGGGCTCAAAGAAGAAGTGAAGCGACGAAC  
CAGAATAATAATGATAATGTAATAGATTTAGTTGATATGTTGTAATTGTATATGGAGTA  
ATGAGAATTATGATTATTCTGTTCTTCGTCTGTGTTTTTTAAGCTTTTTCTGTGTTTTAA  
TGGCGTCTGTAGAGAGAAAAGAATAATTGTAAGTAGACGACGATGTAGTGGATTATAGT  
TGTCTCTACTTCGCCTGGAAGAAAGACACATTTCAAGTTGTGAATGTTATTGCTTTTATG  
GAAGCTTGCTCGAAGCAGCGTATAACTTTAATTTGAATTTGGTTTTGGCGCGTTAGTGAA  
ATTGCGGCTGTATATGTGTCAAGTTGTGAGTGGCTGAAATAAGATAATAGAGATATTATG  
ATTGTTTGAATTTAATTCCGCGAAGCGATATGTTAAGTGATATATGGAACGAAGCGTTTT  
GATGACGTCATATGTCTCCGTGCTTACGTCAGCACGGGGCT

>NewGenomeName\_201

ATGACTGAGCCTGGAGCATCGGGGTTTCAGGTGGGGACCGGGAATGCATCCGCATCCTGAC  
TTGGACTCCGACGCGGGGAAGTCTCTCGCGCCCAACAATGTGGAGACGCTGCACGATCAG  
ATTCGCGATCTGCAGGCGAGCAAGCGGACCAACGCCGCACGCGCTGGAGAGACGATGCGG  
GATATGTACTTTTCACTCGGGAATCCGGATCGCTACGGGCCCAATACCGCACTTGAGCAA  
GGCGATGGCAAGCCGGAGCCTAGCCCCACGCCCAGGAGTACCGCAGACATTGGAACGC  
AAGGCGTAATCGTTTGTGCAATAACAGATGTGCAGTCGGTCGGATTCGTGGCTAGGGCGG  
CCACTGCCGGCCGACAGTATTATTGAGGGACGAATCCGCGCCTGGCAGAAGCGAATTGCA  
ATGCCACGAGGTGATACCACCAAGGAGCTGACCGACCGCACCGTGGGGAAGCTCGACGGG  
CCAGAGGAGTTCCGCCCCGAGTTTGAATTAAGGTTCGGAACGTTTACAATGCGTTCGCAAG

GATTTGGACCATCCCACCTATCGCAGCATGCCGTGTCTGATGTTCCATGTGCCGTTGCAG  
TTCCGCGGACACTATCGTGTGGAACGTCTCGCGAACTTCTCGGGCGACCCGGACGACTAT  
CGAATCGACAACCACGGCTACCGGCTGCGTGAGGCTGACACGCCGCGACGGTCCACGGGT  
CGCCTCAAGCGTGCTATCAACCGACAGCCTTACTGCGAGCCGCATGGCGCGCGCCTACAC  
CCGCTGGACAAGGTGCGAGTTGATCCCAAGGATCCCAGCACCATGACGCGCATGGAGCTG  
TTGACGACACGGGTACATTGATGTGGAAGACCTCACCGACGACGAACTCAAAAATGGGCTC  
GTGGCTCCTGGGCGTGGTGGTAATGCAATGATCCACTTGCCCAAGGACGTGTACACAAA  
ATCGTCAACAGGCACCTTTCACCTTGCCAAGGAGCTGCTGCTGCAGGGGATGATGCCGGCC  
ATCACGGTGCTCAGAAACATTGCAGAGAACAAAGCACGACATCTACGAAGCCAAAGACCGC  
GTC AAGGCCGCATCTACATTGTGGACAGAGTCCTTGTAAGCAACCAGATACGGCACTG  
GTGCTGGGTGGTGTGCTGATGGTGGGGCCCAGGAGCCCTGGCAGCAGATTGTGGCCGGGATC  
ATGGACAACACGCCTGCGGAATCCCGTGCGGCGCGCGCTCCCTCTGGCGGAGAAGGC  
GCTACGCTCAACCACAACGGTGAGGCCGAGGAGCTTCTCGATGTTGAGGTCGTGGAAGAG  
TCTGCGGCAGATCATGATTCAGCGACGCCGCGAACGCCAGACGACACGGGACCTGATGCG  
AGCGCTCTCATCGCAGCCGTAGCTCCCACTGCAAAGCCCAAGCGCGCGAAGGCCAAGGCG  
TCTGCTGGCACGAGTGGCACGAGTGGCACGAGTGGCACGAGTGGAAAGCCTGCCAAGGTG  
CGGGTCAAGCGGCCGAAGCGCGACGCCAGGTAAGCTTCGCGGTGCGGGGTGGACGCGAGG  
CTGCCAAGCAACCGGAGTGGACCCGGGATGCGCGCAGATTCCCTTCTGTCCCGGGTTCAC  
TCCCAAGA ACTGCAGGACTGGCAAGGAGCTGAGCATGGCGAAGCAGGGTGTGCGTCGGGA  
CATCAACGGTCCCACCAAACAGGCACCGTCTGTACCAAGGCTTTGCAGCCCGCGCCGAA  
GACCAAGCTGCACCGGCCCAAGACAGCCTAGGAGGGCACCATGGCCAAGGGCGTGAAGAA  
GCTTCCAAAGCGCAAGGGCACCAACCCATCCCGCGTGACAAGTGGAACTCTGATGACAT  
CGCTCGGCGTCAGCCCTAGCAGGACCAGAAGCTCCA ACTCACCAAGGGTCCGCACAC  
CGGGACCAACGACAGCTTCAAGTAGCACCTCGCGATGGACACGCTGCCCGTGACGGTTAC  
CCGGAGTGGCACTGTCCAGGTGGCTGGCCGCGGTCCCGCTGGCGAGGCTGTGGTGTAG  
GACCACGCTCCAGGTCTGGCGCGCAGCCAACAACCATGTTCGAGCGCGTGGCCCATGCCCA  
CGGGATACCGGCGTGAACCGACCCGACAGAGTAGGATCGCGTGCATGCCCAAGGAGAAGG  
TCACCGGAGCCAAGCTCAAATGGGGTAGCGCGGCCAGAAAGCGCGCTCAGCGAAAGGCTG  
CAGAAGCCAGTCCCCGGAAACGGCGCAAACGAGGCCTGCAGGACATTCTGAAGCGCAAAA  
GGCACGCAGCCGGTAGCTTCTCCGAGGTGCGCACGATCTCGGTTCGAGGTGGCCAGGGAGC  
ACGACCTGTCCGGTACCGGGCACGGGGCCAACAAGGAGGCCTACCGTGCCAGTGCAGCCG  
AGAGCCGCAAGCTCAAGGCCGCTGGCGGGACGAGCTCGGCCGCCCGCGTCTACAGCACTG  
CCCGCAA ACTCTAGTACACCGCGCCACGCGGTAAGGCAGGCAACCAAGGCAAGGTGTGCC  
TGAGCCC GCGTAGCAAGGGTTCCGGCTCGTTCGTCGGACAAGTTCAAGCAAGGCGATACTG  
TCTATGCGGACGGCAAGTCTTGACAATCAGGAGTTTCCGCGAGGCCAATGGCAATACCT  
ATGTCGATGCCAAGGCCGACAACGGAACCGATCTCTCCCTCGTCATCAAGCGCACGGGTC  
TGGACAAGAAGACCATCCGGACGGCTCTGGGCGATCGCTTTCGTTCCGAGTCCAAGACTG  
TAAAGCCTGGCGTCAAGTGTGCTGCACATCGCGCCAAGAGCTTCTCTCAGAATGCGCGTG  
GCGTGTTCGATGGGTAGCCGAGGATCGAGCTCCA AAGCGCCAAGGACATGAGCAGCATGT  
CCGACCGCGACTTGCAGAACGCCATTCTGAACGCTCGGACCGCAGCCGACAAGAAGGCGT  
ACTCCAACGAGTTGGCCAAGCGCAATCTCGACACGCCCTTTCCCAAGGGCATCAAGAACG  
CCTCGACAGAAGAGCTGCAGAACAAAGGTGAAGGACGGCACCACTCCGTCTCGGTAAAGA  
CCGCCATCGACGCCGAGCTGTACCGCCGAGCAGAGGCGCAGGCACCCGCGAAGGCCCGTG  
GTGGGCGGCGACCTGAGAAGCCGATCGCCCAGGTGACGAAGCCGCCCAAGGACACGGTGC  
CGCGGGTTGACACGAATGGCAATCCGACCCCTTAGGGCATCCACCGATACGGGAGCGGCA  
AGAAGGAGTCTGCCTATCCCGACGCCAATCATCGTGCGGCCTGGAACAATCTCGTAGGTC  
GTGATACATACCGCGACTTGAGAGACGACATGACACCGCGCCAGCGCGCCA ACTACCGCA  
AGGAGCTGCAGCGTAAGCTGGACTATCCGCGCATCAGCGACAGTGTCAAGAAGCAGGCC  
GCGATGAGAAGGCTCTGCTGGATGCGCTCGACAAGGGGGCTGGCAGCGGATCCGCGAATG  
CGGGGGATGCGAGGGCACAGCGCATACTAGATCTGCACGACCACGAGCTGCAGGACCTGG  
CCAGCGAGATGGGTCCTCTGGACTTGTACACGCGGGATCTCAAGGGCGAAGGACACTTCG  
ACCGGAAGCCTTCCGAAATCTCCAAGGAAGAGCGCGTTCGCAATGCCACTTAGGGTCTGA  
TGC GTTACGTGAAGAAGATCTTGGGTACGAGGTCGATTGGGACGAGCAGCGGCTCGACA  
ACGCCCTCAACAACGACCCGCGCATGAAGAAGCTGCGAGCCATCCTGGCCAAGCTGCGAA  
AAATGACAGGGCCGTCCGAATCCCGGTCGGCCAATCGAACAGAAATCAAGGGTAAGTCTT  
CGGACGATGTGGATACGGCCATTGATGACCTCAAGGCTGCACAAGACAGCAACAAGTCCG  
ACGCCAAGGCTAAGGTGCTCTGGAACGTATTTGGCACTACGACATCCCCGCGGACTTCA

AGCCTCCTCGATCTGCACAAGACCACAAACGCCAGAGTCGAGCCTCGATCCGGGATGTGT  
CCTCGGCGATCAACGGCTCACTGCGCTGTGGCCAGAGTATCTCCAGGAACGCCTGGTAGC  
GTGGCGTTGTTGAGGATCTGGACAGCATGATCAGCGAGTCTACCCTCAAGCGGCCGATCA  
CCGTGCGCCGCTTCATCGGTCAGAGCGCTGGCGGAAGTGGTATTTCGTGGCGACTATGCAA  
GGGTCAAGAAGCAGCTCGAGTCTGGCACCTTAAGGGACAAAGGCTTTATGTCCACAGAGG  
CCGTTACGCCGGGATAGTCGGTTCGGCCAGATGGGACGGCTGTGGTCCAACCGAGGGAAGC  
CCGGTGAGAACGATTTTCGTGCTGGAAAAGGATCATCCCAAAGGTTTCAATGCGCTTGATC  
TCAGGATGGAAGACCTCGACCACAACCATCTCAGCGAGATCCTCCTGCCTCGGAACACCG  
AGTGGGAGGTGACCGGTACGCGCACCGAGGACGGCATCACCGTCTACAAGCTCCGGCCCA  
GCACCAAGTCGACGTATGACGAGGTTCCGTCCAAGCGACGCAAGAAGTCATGACCAGCAC  
AGCCAATCCTGCTGCTGCACAACCTGACCGCTTGC GGATTTACGACACCGAGATCGAGGT  
CACCACCGAGCGCGGCCGAGAGCGCCGCCAGGTCTGGGACCTACACGCTGGTCAGCTCGC  
CATTGAGGAGAGCCCTGCGCGTAACAAGGTGGCCACCTGTGGGGCGACGCTTCGGCAAATC  
GGACCTGGGTGGCAAGCGGCTGGTTCGCCCCGCATTCCC GGCGTACTACCGACTGGACCT  
GCTCCTAACCACCAACAAGGCGATGATCTACTGTATTGTGGGGCGGGAGTACTCGGACGC  
CGAGAAGGAGTTCGCGTACTGTGCGAACACCTTGGTATCATTGGGTGCACCCTTCGACAA  
GCCTGGCAGCTACTACCATGCCGTTGGCGGAAACATGCACCTGAGCGCGTGGCAGGGCGC  
ATACCAGGTGCATGCCAAGAGCGCCAAGTATCCC GACACGCTCGTGGGTGAGGGCTAGAG  
TGGCGTGATCATCGCCGAGGCCGCGAAGCAAAAGCCGTCGGTGTGGACTAAGCATGTGCG  
TCCGACGCTGGGTGACTTAACGGGCTGGTCGCTTCGTACGTCAACTCCTGAGGGCAAGAA  
CCACTTCCACGAAAAGTTCAGATGGGCCAGGATCCTAACAATCCGGAGTGGGAGAGCTG  
GCGCATGCCCTGCTGGGGCGAGTTCGTACGTGTACACGCGCACGGGCCGTCTGGTTCGCGCT  
GGGCAAGCTTCTCCCGAGACGCCCATCCCCGACCACGAGTACACGCTCGACCGACACGT  
CACCATCATGCAGCAGCTGATGTGCGAGAACCCGACGGTGTGCGCCATTCAAATCGTTGC  
GGACCATAAGCTTCTGGTTGACCAGGAGGTGATTGAGCTCGCAGCCGACATGTGCATCGA  
GAGCTTCAACCAGGAGATCGGGCGGGACTTCACCGAGTCCGTGGGCAAGGTGTTCAAGGA  
GTGGGACGAGGAATACCATGTTGCAGACCTGGTTGACTACAACGTCAAGCAGTTCGGAAC  
CTACTTCATCCCCAATTACGAGACCTATGCAGCTGCGGACTACGGCTAGACAACCCCAA  
TGTGTGGCTAGTCATACAGATTGGCAAATGGGGCGAGGTCAACGTCTCCGCGAGATCTA  
CATGTGCGGGGCTGACGGCCGATGCGTTCGCTGATGAGATTCGGCGTCAGATGTGCAACCC  
GCCAAACCTTCGAATCTTCTATCCGGACCTCGCTGACCCTATGTCGTCTGAGACGTTGAG  
CCAAAAGCTCGGCATCCGCGCCGCTGCCGGAACAGGTGGT GAGAAGCGCATAACGCTCAA  
CCTGATTCTACAGTTCCTGAAGCGTGGGGCGTCACGACCCACCGACCTCACGGGCATGGG  
ATGGCGTCCGCAGCTGATGTTTGATCGGAGCTGTGCGAATGCGCGCCGTGAGATGGAGGC  
GTACCCCTACCCTGACAGCACGGACAAGCCGATCCCAAGCTCGCTGTTCAATGAGGAGCC  
GCTCAAGCAGGACGACCGTGTGCCCGAGGCGCTGGGTGCGATTCTTCGTGGGGCACTACGG  
CGAGAAGGCGCTGGTGAACGAGCGTGCCGGTACACGCATTTCCAAGGCCAACATCGAACA  
CCAGCGGACTAACCGCGAGCGCCGTAGCACCAACGCGCCCAAGGACATCAAGTACCCGCG  
ACTAACGGATGGTGAACCTGATGCATACCAGTACAAGAATCCCGACGTGGGTTGGGGTAA  
AGAGCTGCATGACTGATTCGGAGTAGGATAAACAACCATGGGCCAGGACAAACGCCAATG  
CGGCAGTACGCAACAGCTGCGTGCAGTAGAAGCCAATTTCCCAACACCGTAACGGATTT  
CGACAAGGCGCGGCTGGCCAGTTACCGGCTGTACGAGGACATGTTCCCTACCAACACGTC  
CGACTACCAGGTGATCTTGCGTGGTGGCGACGAAGGTGACCAGCGGCCCATCTACGTGCC  
CAACGGCGAGACGCTCATCGACGCGAAGATGCGCTTCTCCTCGGACAGGGGCTGAAGTGGGA  
GTTCTCCAAGAAGGATGCCAAAGTCGACAACGCCATCAGAGACCTGTTTCGACCGGGAGAA  
CTGGGAGCAGAAGTTCGAAAGTCTCAAGCGCTGGACCGAAATCCGCGGTGACTATCTGCT  
GCTGCTGTTACGCTTCGACGAGAAGGACGAGGGATCCAGGCTCTCCTTGCACGAGGTGGA  
CCCCAGCACGTATTTCCCGCACGAGGATCCGCGTTACCCTGGCCAGGTGCTGGGGCGTGTA  
CTTGGTGGATGTTTATCCGCACCCGGATTCCGGGAAGAAGAACGAGAAGTGTGCGCGCGT  
CCAGACGTACATGAAGACGCTCGACGACGACGGGAAGCCAGTCCCCGGTGGCGCGATCAA  
ATGCACCGAGGAGCTGTACGAGCCAGGCAAGTATGACGACCGTCCC GAGTCACCTCTCGA  
GCCCCGACGACATCAAGAAGCTGAGCACCTCACTGAGGAAGAGCCTCTGCCCCAACAGAT  
CACGACACTGCCGGTGTTCATTTGCGCGGACACCCGATTATGAACGCGATGTTCCGGACG  
CTCTGGCCTGGCGCGGCTCGAGTCGTTGATTCCATCTGTGCGACACCATGACGGACGA  
GGATCTGATCATGGTGTGGTGGACTGGGCTTCTACGCATCATACTCAGCTCCGCCGCG  
TGATTGCGCGGCAATATGGTGCCGTGGACAATCAGCCC ACTGGGCATGGTTCGAGCATGG  
CCAGAACAACAAGATCTACCGAGTCAATGGTGTGGCAAGCCTTGAGCCTAGCCAGACTCA

CATGAACAAGGCCGAAGAGGCCATGCAACAAACCAAGGGCATCCCCTACATAGCTGTAGG  
CGTGGAGGACGTTGCGGTCGCCGAGAGCGGCGTTGCCCTGGATCTCAAGCTCAGCGCAAT  
CCTCAGCAGTTGCGCAGAGCAGGAGCTAGAGCTGAAGTCGGTGCTCAAGCAATTCTTCTA  
TAATCTGGTGACGCAGTGGATTCCGGCGTATGAGGGTGTGGGGATTGACGACGCTGACAA  
GAAGCTCACCGTCACCATCACCTCCGAGATCCCAAGCCGGTCAACAACGAGAAGCGATT  
CGCACAACCTGTTGGAGTTGTGGGAGGCTGGGCTGATCCCTGCGAAGAAGCTCACCGGGGA  
GCAAAGCAAGATCATGGGCTTTGAGCTGACCGAGGAAGACTTCAGGCAGGCCACCGAGGA  
CAAGAAGACCCAGGGCATTGCCCAAGCGGAAGCCGCCGACCCGTTCCGGGGCGCAAATGGC  
AGCAGAACAGGGTATCTCCGACGACGAGGACGACCAAGCCCTGAACGGACAACCGTTGTG  
AGGAGCTAGCCATGGCCAAGGGTAGGCGCAGAAGAAAGAAGCGCAAGACATATGCCGGCT  
TCAAGTCAAAGAGGTCGTGGCACTGGGCTTTTTCGACCAAGCAGCCCTGGGCACGCGAGA  
AGGCCACAAGACCAAGGGCGGACCCAAGGTCCGTTACCGTCGACTTCCAGAGAGCAAAC  
ACTCTGGTGCAGGCAAGAAGGTCTACAGAAGGAAGAAGCTTTGACGATCGAGCTGGAACG  
TCCTGAAGACGAGCAGTTTTGGACACGAGTTCGCGATGAGCTTCCCCAGGACGCGGTGGC  
TTGCCTGGTGCATATGTGTCAGCAGAGCCCCAGGCCGAGGTCTGCGGCTTTATCACCGC  
GAGCCATGCCATCACCCGATTCCAAATGTATCATCAATGCCGGAAGACGAATTCGTCAT  
GGCCAGGGTCAGATGATGCAGGTGCTGTTTCGAGAGAAGGTGATCGGCACCTACCTTTC  
CCACCCGACGGGTGACCCCTGGCCAAGCGCTTACGATACTGATCACATTGGTTACCTGTA  
CCAGCAGGGCTGCGCGTGGGATTACTACATCGTGACGAATGCAGGAGTGTTCCGATATGA  
GCACAGGGAGAGGCGCGAGGCGGACGACGTTGAATCCAGAGATGATGATAGTTCATGTCA  
TGCCGGTGGACGACCTGATTGAGCATGTAGAATTGCCGGACTGCCCGTGCATCCGGACC  
TCGAGCTGATCGAGCGTACCGACGACCATTTGGACAGATGTACAGCCACAATGCTGCCG  
ATGGCCGGAATGATGAGGCTGAGGAAGAGGATCTGGTTTGACCTCTCCACTCGAAGAGCC  
GTCAGTATTACCTCAGCGGCCTCGCAAAAAGTGGCTCCTGAGATACCTTGGAGGACAGGA  
GAAATACGATGCAATCATCGCAACAGCCCTGCTTGACGCTGCGGATGATGCGGAACAAGG  
CATAACGCAAAAGCCTTGGCGACGACCGACTAGGATCGTCGAGTCGAAGATATCAACTGCA  
GCTTGCGCAGTCTGCTGCACGTGACTCCCTCAAGCTGCTTTTCCGAAACGTGCATTCAGC  
GATCACAGCGGGTCAATCGGAGGCAGCGGTGCGCGCGGTGCAAGCAGGATTCCTCGACGA  
TCGCCGCATTCTGAATCGCCTGTACCCGAACCGCGCTCGGCGCGGCAAGTACTAAGACTC  
CATGCGGCAGAGCGCATCCCCTGGCGTTCAGGCCATGATGACGCGTGTGCAACAGAGCAA  
CCGACCCCTTAGCCAGCGAGTTTACCACACGCAAGCCCTGGCCAACGGCACGGTTCGACCG  
AGTGATCACCTCAGCACTGGTGAAGGGTATGGTGCGGCCGACATCGCCAAGGCCGTGCC  
CCAGAGTATCACCCCGCACGTGCCTGGCGGAGGCAGCTACGCTGCAATGCGCTTGAGGCT  
GACCGAGATTAACAATGCATTCCATGCTCAGGCGATTAACGACATCAACACCAAGCCATG  
GGTGGAGCATTTCGAGTGGCACCTGAGCAGAACACACAAGGAGCAGGGCTCTCGGTGCGA  
AGTGTATGCTCGCGTCAAACGCTTTCCAAAGGAAGTGATTCCAGACAAGCCCCATCCGCA  
ATGCCCTGCTATATCACGGCTTCGCTGACACCCTGGGAGGAATTCGAAAACAACCTTCT  
GATGGGAATGTACGACAGCTACATCGACAATAATTTGCGGTAATAGGGTAGGGTAATCCG  
CAGGAAGGAACTCTCATGACTGACACATTCCTCGCATCGCTCGGCGCTACCGGCGCGACG  
CTGTCTGGCCTCGACGTCGATGGCGATGGTGACTTCGATGGGTACGACGACGATTCGGAT  
GATTCGGACGACGGTGCATCGGACCGAGGATAGTCTCGAAAGTCCGACTACGGTGATGAT  
CGCGACAGTGGCGATGACGCCAATGATGCTGACGACGACGATCTTCGAGCAGATCTCAAG  
GCGAAGGACAAGAAGATCGCCAAGTTCGAACGGGACCTCGAAGACGCCCTCGAGATGATC  
GAGGAGGCAGAAACCAAGCGCCGAGGCGAGGTGACGATTACTACGATGACGACAACACC  
GAGTACCACGAGCTGCGCGACGAGAACGACAAGCTCCGCGCTCTGCTCAATGGTCCGTAC  
ATCCGTTTCGACAGATCTCGAGCATCCGCGACAAGGACGGGAATCTCAAATGGGACTGGGAG  
GACCCGAAACCGTGTTTCGCGCTTCTGAAGACGGCAGACCACGAGGTCGACGTCGATACG  
GGCGAGATCGACGGTCTGGAGGAGCAGCTGCGAGATCTTGCACGGAACAAGCCGTTCTCTG  
TTGCGGCAGCGCAGCTCTCGTCGTGGCGCTTCGGGTAAAGTTCTCGGTGGCTCCAGCGAC  
AAGAAGAAACCCAGTCGGGAAGACCTCGCGTCCGACTTCTCCGCATTCAACACAATGATC  
TGCTTGAGAGGTTGACCCATGGAGAGGTATGACAAGTACAACCCCTACGGCCGAGGTTTT  
CGAGCCCCGCTGGCAGCCGACTGGACTGACGCCGACGCTGGCAGGCAGTATGCCGTAGGC  
ATCAACAACGACGGGGCTGTCGTGGTGGGCGCAGGCCAGTCCGGCGTGGCTGGCGTGCTA  
GTGCTACCAAGGGGGCCAAGGCCGGATCCATCGTGGAAGTCATGAAGTTTGGCGAGGTC  
GTCGAATTCGGTCCCACCTCGGGCACTCCCGGCACTGACTTCGGCTCTGCTGGTACGGCG  
TACTACGCCGACACCAGCACCGGCGCAATCAACTCCACGTCCGGCGAGGCCAAGGTCAAG  
GTCGGACACACCCTCGGGGCTCAGCGACTGATCGTCGCCGTGGCCGATGGCGTTGTCGAT

CCTTCGCCGAACGCGGAGTGAGCCAGCCCGATGAAAACACTGCAACAGAAGGAAGAGTCATT  
AGGGAGAGTTCCTCGCGATCATCGCTGCGGTGGGCCTCTCTGGTCATGACAACCAGGGT  
GGCTACAACACTGCCGGTGACATCAAGTACAAGACCGCCGATGGCGTGTCGTACGACAGC  
CTGTGGAACCTGTTTCAGCAACGTCACGGACGAGTGGAACAAGCACAAGTCCAAGATGGTT  
CAGCGAATGACGTTCCCGGTCACCAACCCGACCGAGAAGGTGCCGCGCATCGGCCAGTTC  
GGCTTCGAGAAGGCCTGGGAGTTCGGCGTCCCCGAGAGCAAGCGGACCGAGCTGAGCTTC  
TATCAGCTCGCGTACGACTTCGAGGACTACGACCTGGCATTCCGATACACCTGAAAGTTC  
CAGCGTGACGCTCCGTCGTCGAGATCAAGGCGTACCACAACCAGGCTCTCCAGGCCGAC  
GCCAAGCTCATCCACCGCAAGGGGATGGAGGCGATCTTCGACAACCGCGAGCGCGAAGCG  
GACATCGAAGGCCTGCCAACAAGGTATATCCACTCTACAACGGCGACAACATGATCCCG  
CCGGAGTACAACGGCACGACCTTCACCACCGGCCACAACCACTACCTGGTCTCCGGTGGT  
ACGAAGATCGACTCCGCCGATGTGGAGATGGCTCCTCACCATATCCGTGAGCACGGCTAC  
ACGGAGGAAAACGGCACCCAGCTCATCGCCTTCGCACACAAGGCCGAGATTCAGGAAGTC  
CGTCCGTTCCGCTTCGGGCAGAAGAACAACAACACTCGGCCGCGGCCGAACACTACGACTTCGTG  
CAGTCGCAGGGCGAATCGCCCCTGTACCTGCCGAACGCGGACGGCCTGCTCGGCTAGCAG  
CCGTAGTCGATGTGGAAGGGCTTGCGCGTCAAGGGATCCTACGACGACGTGCTCTGGATT  
GAAGAGCCGACCATGCCGGCAGGCTACGTTCTGTTCTGGCCACTGGCGGTACGCTCGCC  
CAGCAGAACCTCGGGCCTTGCGCGAGCACGAGGACGCGGCGTGGCGCGGTCTTCGTGAG  
ATCCCCGGCAACCCGACGCGTTACCCGCTGATCGACGGCTTCTACCAGCGGTCTGTTCCGGC  
ACCGGTATCCGTGAGCGTGGTGGTGCAGTTGACCTGCAGGTCAAGGCCCTTGGCACTTAC  
GACATCCCGACTAACTGGACGAACGCTGGTGGATTTCGTATGAGCCGTGTAATCCCAGAGG  
ACCGTCCGCTGTCCGATGAGGACCGCGCATGGCTCAACGAGCGCAGAATGGGGTGGAAAGG  
TCGAGCTGATCGACCGCGCCTACCCTCCGGGGTCCGGACAGGGTTCGAGGATGACACCTCGA  
CCAAACCGTCCGAGCCGCAGGGCGATGACGACGAGGAGGTGTAGGTTCGACGAGGCCATCT  
CGAAGTACGTCGAAGACCTCCCCAACAAGGACGCCGTCAAGGAGCGCCTGATCCTGGAGG  
AGGTGGAGTTCGAAGACGATGCGAAGCGTGAGGAACTCAATGGCCTCCTCGTGATCCACC  
TGCAGGAACAGGGGCACGCCGGCAAGGACGGCGAGCTCGGAGACTGATTGTGGCCTCCGA  
AGCAGTTGGGCAGCTGTTCAAGACGCATCTGTCCGGCGTCGATGGTATGTGGGAAGATTC  
CGACATCTCAGATAACCATCGACGCCCTCCGGTCTGTGAGCAAGGCAGTGCCTGCTTACTG  
GTCCAAGGTGGTCAACAACACATACCTGCGGACCGATGTGAGCGAGAGTGGCAGCTCGCG  
TAACGCAACCATCATCTACCGCAATGCCATGGAGCAGTTGCAACGGTGGGATGAGATCAT  
CAAGGAAGAGGACGCCAAACAGGGAGCCGAGACCGTCCGTAAGTGTGAGGTTCAACCGACT  
TCCGAGGAATTTCTCGTCATGACCGTGTGAGCCAGTGCGCAAAGGGGATTGGAATTCCTC  
CTTGCTGGCACACGCGCATTTCATCGACGATGATCCGACCACGATCGTCCTCATTCGTGGC  
CAAGCAACACGCGTCGCGAAGCCTGGAGGCGGATACGATTTACCCCAGGGGCTCCCCGA  
ACTGCAGAGATCTTCAAGGTCATCAACCACACTGGCGACGGGTCGGCACTAACCGAGGCC  
CAAGACAGCATCCAGACGCCGGTACGCGAGGACATCCTGCTGGGGGCTCATGATTCTGTG  
GCCTAGGTTGGCGGCTGGTGGGTCGACGGGAACAATCCGGTACACAGTGACCGAATTCCTC  
GTGGCAAATGGCTACGAGCGCAGATGGCGTGTCCGCAGCGTGGGGCTGGAGCCGAATTAT  
GGCTAAGATCGAGTTCAGTTCAGGACATCGCGCTACGCCAGGGGGTGGAAAGACATGGA  
AGCCAAGGTTCGACCGCGCCATGAAAGCCACCAGCAATTACCATGCGGTTCGAGGGCACGGC  
CCACATGAAGGAGCATGCTACCTGTACTGACCGGACGGGTGCTGCGCGTGCTGGTTTGA  
CGCTGTGGCTAGCACTCCACAGCCCGACCGCTACGAAATCGTGTTTGGCCACACGGTGCA  
CTATGGCATCCGGCTCGAGATCGCAAACAGCGGTCCGGTACGAGATCATCATGCCACAGT  
CCGTCACGAGGGCAAGCTCATGGCTCAGCGTCTTCGCGGCCCTCCTGGGGAGACTCCGATG  
AGCAGAGCCGCAGTGCTAGATGCGCTCCGGGCCGATGTTGCGCTCGGGCAAATGATCGCT  
CCGGGCAACATTCTGACGAACTACTCCAAAGAGAGTCCGCCTAACTATTTTGCTCCAGGG  
CCATTTGCAGTGAGTCGTTGGGGTGGCAAACGATAGACCCTGCGGTGAATCGCGGACCC  
AGATGCGTGAACATCTGGGGTACATCCCAGCAACATCAAAGCACTGACTACACGCGGATC  
GATCGAATCCTCAAGCGCACCAAGAGATCATGCTGTCTTGGAAAGACGTTGCTGGCGCT  
GATGGGGCCCACTTGGTACGACGCGCTTCTGGCGGAGAGCGATGATCTCGTTGACCCG  
GGAATCGAAACGATCACGCGCTACGAGACTTTCAGCGTGCCAGCAGAAGCACCTGAAGT  
CAAGTACGATAACCTACAGGAAAGGATGCTCTTATGGCGAATCGGATCACCCACCGCCC  
TCGTATGTCAACCCCGCAGAGGCCTCTGCACCCGAGGCCAGGAATCGTCTCAGGCCAAG  
CGAAATATCTCAAGTTAGTTGGCACGTAGAAGATCTCACCTTCGCATCGCGCCGGCAGT  
CACTACCACATCACCGAGGCACCGCTGGTGGAAAGCCGGTGTGCCGCGCGGAAGGTGCTTC  
AAGTCCAAGGGCTCTGGCAACGATGCGCTCGCGGCGACCGAGGTCACCTTCGGCCCCGAG

ACTCAGCACAAGGTGCCGCGCAGCGCTTCTAAAAGGAGGCCGACACCGGCTGTTGCAG  
GAGCCGGACATCATCCTCGTTGAGGAGTAGGGAACGCGTGAGTGCAATACCGATGCAAGG  
GCAAGGTTACGGTGAGCTGTCGGAAGACGGTCTCCGCGTGTTTATGTGCTCCCACATCG  
CTTGACAGGACGGAAGAAGCGATCGTTCGTCCTTACCACATGGACCCGAACACCGGCA  
CCCTCAAATACTCCTCGCGACAATACCGGAACCCATTGAAAGGTAGGGAAAATAGCTATT  
GACACCGCATTGCCCTATGGTCTGAGGGACGTGAAGATCACACCCTATGCAGACGAGGGT  
GGCACCGTTCTCGGCGATACGAGCTACGACATGCCGAACGTACAGACGTTTCAAGCTTCAAC  
GAAACTGAGGAGTTCACCGAGCTCCGTGGGGATGACCGGCTGGGAGCGACGCACGGCAAT  
GGCGAACAGGTCGACTGGTTCGCTGTAGGTTCGGTGGCAGTGTGGTGTCTGGTTCGATC  
CTGACGGGTGGCCAGTTTATCCAGTCCGGGCTGACCCCGAATCGCAAGGAGATCTTGGCG  
AAGCGCGGCACCGACGTGTGTCCGTAATTCCGCGTGGACGGCCAGGTCATGTCGGAGTCC  
GGCGGCGACATTGTGGCGCGCGTGTACCGCTGCCGCTGCAATGACAACATCTACGGTGAC  
TTCGGCGACGGTACTTCCACATCACCAGCTGCTCGGGTGTTCGGTCTGCCCTGCTGGAT  
GAGGCGAACGACCTGCTGTACGACATCATCCGTAACGAGACCAAGACGTGGCTGACGCTC  
ACCCCTGAGTCCAACCCGCTGCAGTCGCTCAGAACCTGTCGGCCGGCACGACCACCGCC  
ACCATCATCGTCTGTGTCGTTGGAGGGAAGTCGTTGGCGCGGGCGAGTATCGGGTGCAGAAG  
TCTTCGGACGCCTGTGTACCTGGAGCCTCGTCGACGACGTGGAGAACCCACCATCACT  
GTGAGCCATCGCACCGCCAGCACGGCTTACCATTTCCGTGTGGCGACCAAGGTCGGCAGT  
GCGCTGTTCGGTGTCTCGGCTCCTTTGCCGGTCTCCACGCCTGCCAAACCTAACCCAAG  
GCTCTCTGGGGCGCAGGGTGTGGCAACTCGACTGCGCCCATAGAATTCAATCTAGAGCC  
CAAGGAGGCCATGCTATGCCCGAAATCAGCGAGCAAGAGTTCGAAGAGCTCATTCGGATT  
AGAAAACAGACTCTGGCGCAGGAGAATGCCCGCAAGTCTTCAGAAATCGAAGAACGGGCC  
AAAAGGCGCTCTTGTGCTGCCCTGGCAGAGGCCGAGGAAGACAAGTTCGCCGTCAAGGGC  
TGGGGCAAGGATGTCGTCCGTAAGACACTCGACATCCAATGTCCCAGCGGACAGCGGTGC  
CACGCCAAGACTTTAACCATCGAGGACGCGATGTCGCTCGGTTTGTGGACAGCCTTGAT  
CTGTACACCATTAAGCTCATGGCTCCGATCATGGCCGACGTTCGAGGACAAGGAGCGCGCT  
GAAGAAGAGCAGAATGCTGGTCTCCTCAACAGCCTCAAGGATTCTGGCAAGCGTGCCAGC  
TTCTTCGGCACGGTGAACCGCGTGACGGCGCATTGTATGATGAAGCCGCGCGTGGTCTC  
GAGGACGACGGCAACCTCCCCGAAGGCACTGTCTTCGCCGACGACATCCCGTTCGCTGAC  
AAGATCCACATCTTCCGGAATGTGTTCCGGGGGAATGGGGGAATTCACGATGAAAACGTTT  
CGCGAAGGACCGGAAGGCAGCGTGTGAGCTGAACCAGATGGCGCTCCTGTACAGGACGCG  
TCCGAGTGACCTAGTCGGTTTGGAGGATCCGTTGCTGCGATACTACGTTGATCGAGGGCT  
GCGGATCTTCGGCGTAGCGGTGCAGAACAGGGTTCGATGATGCTGGCCATGCTGCGGGCCG  
TGGCGCCAAGAACAACCGGTATAGGGAAGCGCACCAAAACGGTGCGCGCAAGCGCACCTT  
GGCCAAGCTGCTGGGCGAGGACATGGTGAGTAGCTCAGCTGGCTTCCGAGATCCGGCGAA  
GGCGGTGTGACGTGCCAGATTACGTCCTTGGGCGTGCCCATGGCTAGATCGTCTTCGACG  
TTGACAAGAGTGGTGTTCGACGCGCCGAAGGCGCGAGGGACCGCATGGAGGAGTGGGCCC  
ACAGGTTAGCCGAGGTAATCGACGTGGCTGAGAAGTCAACCTCTGCTTGGGAGAAGACCC  
ATCGCAAGGCTTTGGGCACCACTGAGGCTCAGGCGCGTGCGCTCGATCGGTACAGCTGCA  
TTCAGGAGGCAGACGAGCGCGCTGCAATTGAGCGTCGCAAGGCCGAGAAGGAGCTCAAGG  
AAATCCTCGATGCCGTAAGGCTACCGAGGAGGAGATCCAGAAGGCCATCGAGAAGACCA  
ACAAGGCCAAGGGCAAAGCGCTACAGCTCGCCAAGGAGCGCTAGAAGGCTGAGCGCGATG  
TCGAGCGAGCTGCAGCTGGCCTGCGCACCGAGCACGAGACCAAGCTCAAGATCAACACCA  
AGGACGCCGATCGGGGCGTTCGATCGTTTCTTCGACAATGTTGATCGTCGTGCTGAACGTA  
GTTTCGCGCGTCATCGCCAAGCTGGGCACAGGAACCATCAAGGCTGGTGGCGGACGGCTG  
GTGTAGGTGCGCTGGGCGGGTTGCTGGCTTTAGCGCGGTTCGGGTGCTACAGGCGTCGCAA  
GCATCGGCATCTTTCAGCTTGGCGCAGCGATCGCTGATCTGTCTAGTGCTCTGGGTGTTT  
TGCCCGGCGTTCGTGGGTGCAGGTGCCATCGCGATGGGCACGATCCAGCACGCCACCGACC  
GATTCGGCGAAGCTCTTAATGACCTCGGAACCGACGACTTCGCCGACGCGATCAAGGAGT  
TAGCTCCGGCTGCACTGTATGTGGCCGTTGAGCTCAACACGCTTCTGCCCGGGTTTAAAG  
ACTTCCATAAGAACGCCGAAAAGGCGCTTTTTCGAGCCGCTCAAGGGTGTGACCACTGAGC  
TGACGACGACCTTCTGCCGACGATCCAGGGTGCAACTAACAGATCGCCAAATTCTTCG  
GTCGCACCGGCGCTGGCCTGGCGGAATGGCTCATGAAGCCAGAACAGCAGCGCGACATCC  
AGAACTTCTGTGCAACACCGTTCGAGGGCTTCGAGCGTCTGTGCAATGCTGCTCAGCAAC  
AGCTGCAGGCATTCACCGACATCATGACGGTGAGCGTCGTGTTCTGCTCCAGATCGGTG  
GTGAGATCGCTGAGGCTGCAAAGGAATTCGCTGGCTGGATCCGCACCATGCGGGAGAACG  
GCGAACTCGCCGCGTGGATCCGCGATGGCCTCGAGGAGCTGAAGACCTTCTTGGTGC

TCAAGAACTTTGGGCTGGGCCTGGTGTACACCGACCGCATCGCCAACGAGTTCGGCAGCG  
GTTTCATCGCTCTGTTCGAGAACTTGGCCAGTCTTTCCTTTTCTGGACGCACAGTGTTG  
AGGGACAGGAAGCCCTACCAAGTTCTTCATGGCCACGAGTGAGGCCGCGCGTGTGCTCA  
CGCCGCTGCTTGAGAAGCTGGGCACGCTGTTGTTTCGGCACCATCGGAGCAGGATTGGCGC  
GCTTGGGAATTGAGCTCGCTCCGGCATTCAACTTCTGTTCGAGACGCTGAATGTCGGCT  
TCCATCATCTGATCCAGGTGCTGATCAATAGCGCACCCCAGATCACCCAGTTCCTCACGA  
CTCTGGGAATTCTTTTCGTCCACATCATCAGACAAGTCGGACCGCACTTGCCGGCATTGC  
TCGGGACTCTTGCAGATTTGTTCTACAAGCTCGGGCTGGCCATGGGTCCGCTAGCGAGCG  
CGCTGGTTCAGGGTGTACCCTGATCATCAACGCTTTCAATGACAAGTGGGACACAATCG  
CCAATAGCCTCAATGGCTTTGCGGCTTCTGTTGCGAAGGCGATTGAGTCTGGTGATTGGT  
CTGATGTCGTTGATCGCATCACGAACCTGTTCCAGCCCTTGGGTGATGCTGCGATGCAGG  
CTCTGCTCGACGCTATCAATCGTTGGACCAAGGATATTGGGGAAGCCAGACCCAAAGTCA  
TGATCGCCTTGGCCGACGAGATCACCCCTGGATCGACATCAATGCCCCGATATGGGGCG  
AGAAGATCGTCAAGGGGCTGCACGAAGGCATGGGCGGAGCTATCCCGGTCAACCGACCGG  
TGGCCAAGAAGGTCCTTGGGGCGCTGAGCGATTGGTTCCCGAGTTCTCCGGCCAAGAAGG  
GGCCGATTTCGGGTACCGGCTGTACGCCGTACCGTGGCAAGGCGTTGATTGAGGGCTTCG  
CCGAAGGCATCCTGGCTGGCGGAGCAAGCACCCAGAAGGCCGTGGGATCCGCCGTGGGAG  
GCGCGAGCTCCGGGATGAACTCCGGCATCAGCGGCCCTCGTCAAGGACCTCACCGAGCTCA  
CGAGCTTTGGTCGGAGTCTGCTCAGCTTTGTCCAGGGCATCAGCGACGTCGTGTTCCAGA  
CGATTAAGTGCGCCACCACAGACTTCACGACGGGCGAGAGCCCCCTGCCAAAGCGCTTCG  
TGCGCAATGTGAGCGATGAAGAGCTCGCCAAGCGTCGTGAGGACAAGGCGTATCGCGACA  
GCCTCAAGGAGCAGAAGTAGAGCGGCACCGGTCCCACGGGCGCTCTGTCCGCCGAACTTC  
AGCGCCTGCTTGACCAGACGAATCCTGGTGGAAACAGGTGAAGCCGCAGTTCGTTGATCC  
AGAAGGAAGAGGGCACCTGGACATCTCCGAACAAGGACTGGGCCAAGCTCATTACAGCGTG  
AGTCGGGTGGCAACGCAACAATCACCCAAGGTATTCAGGACTCCAACTCCGGCGGGAATT  
AGGCCGAGGGGCTGTTCCAGGTCACGCCGAGCACTTGGAAGGCGTACGCCGGCACAGACT  
TTGCTCCGAACGCGAAGGCCCGCCACTTCGCAGCAGCAGGTGATCATCTCGCCGCGGATCA  
TCCAAAAGAATCCGAGCGGGGCTGACTGGGGTGCGAACCTTCCGGGGCGTGAGGACCCCG  
AAGAGCTGCTGAGAGGCTTGACGACTGCCAGCGCAACTAGCACGACGAGCAATCCATCGG  
CCAAGTCCAAGGCCAAGGCTGCAGGCACCGAGGAAACGCTCAAGCCTACGACTGGCCTCC  
AGATGGAGGCGATCGGCGACGGTTTTTTCAACGACACGAACACCGAGGCCGTCTGTGAG  
AGATCGATGGATCTTATTACAACGTCACCGATTTGGCCGTCCGCACGGACGGCAAGCCGC  
TCCTCAACGAGGACGGCAAGCCCATCTCCCGCACGAGCGCCAACAAGAGCGCGTCTCGGC  
CATCTGCGCCAAAGGCACGGGAGCCGTATGGCCTCAAGCCTGGCACCGATACGCATGGCT  
ACGGGAATGGCAATGCCGATGTTTTCCCGGAGTCGGTCATGGCTCTGGCCGCTCAGTTCG  
GCATCAAGGCCAGCACCTACAACGGTCATCAGGAGTCTGACCGCAACGAGCCTGGCGATG  
CACCAAATCCCCAGCGCTTCAACCGAGGGATTGTCAGGGTCCGACTAAGAACCCTGC  
AGGCGTTCGCCGAATATCTCGAGACGATACCGGACGCCCTGGAGCAGTTGCTCTGGCAGA  
ACCCCGACACCGGCCTCAAGATCAGTATCGCTGGCGGAAAGATCAACCCTGGATACTATC  
CGCAGGACACCTATGATGTCCACGGCGGCAATGATCCTAGCAACATCCACGGTCACACCC  
GGCAGTCGATGTCGATCCCGTTGCCGGGCGAGGATTATGTGCCTGGTCAGACGCCGACCA  
GCACGGGTGAGTCGATCCTGGACGAACCCCAAGATCACGGCGAACACCGAGGAAAGCA  
GCAGCACCGAGGACAAGATGGTGCGCCAATTCCTCGATGAGAATCCGATCCTGAACGAAC  
TCGTCACGGCCGCACAGGATCCCAGCGGCTCGGATGAACAGCTAAAGGCTGCCCTGGGCG  
GGCTGCAGACAGCCATCGACGCCAAAACCAAATGCACACGCTGCCAGTCGTTATCTTG  
CCGATCAGCTGAGTGGCATGCAGAACCAGATCATGACAGATCGTGGCTTCGGCGTGGCCG  
ACATTCCTGTTGATGCGGCACAGGGCATTGCCAATGGGGCGATGGGCCTGGTTGGCGACG  
TCTTCAAGATCATCGACGACACGCTCAAGTCCATTGAGTCGGCAAGCGAGATCAGCTCCA  
CTCTTGTCTCGGTATTGAGAATAACCGAGGACATCATGAAGACCATCGACAACGTTTCA  
GCTTCATCCAGATGGCGGGAACCATCGCCCAGACGGTGACAGACGGCCTGAACTTCCCGA  
GCTCGATCGCGAGCATTGCCGGCGGCGCACCCGGTGGCCAGGGTGGCGTGGGCGGGCTTC  
AGGCGGCAGCGGCGACCTCGGGAATCATCACGTCGGTGATCCAATCAGTCAATGCCGCAA  
TTGATCTGGGCCAGGAAGCGTACCGAAGCACGAGCAAATACAACGGCAAGTTCCTCAGCT  
ACCTGGTGGGTGCTGGCGAAGGTTCTCTGATGGGGGACATGAGACTCCTTCTGAACAAGA  
ACGATTGGACGCTCAAGGCGTGGTCCGAGGACAATCCCGAGGACAAGCGCAGCCATCAGG  
TTCCGGCCTGGCTGCGGGATGAGCGGAGCGTCGCGGAGCAGGGCGGCAAGATCCGAGACC  
TCAACATGTACATCGGGCCTGGCCCAGACCCGAATGAGGCAATGAACGAGGGCATGTGGC

GCGAGATGACTGACCAGAGAGGCGTGTTCACCAGTAAGTATTAATCTCGAACCTGGCCAG  
TACCAGATCGGAGATCTGGTGTTCGGCCGTGGCACCATTTATCCTGTGACAAGCATTGAG  
ATCCAGAGCTACCAAGTGCAAGCACAGGATTTCCAGGTGATTCGCAGCGACGAGGTGCAA  
TTCGGGCAGGACAGCCTGCTGCCCGGCCAATCGTGTTCGAGCTCGGGATGTATGATTTT  
AAGCGACTCGCCAATGTGGAGCCGTACACACGCCGTATCTTTAACGAGGAGCCCTTCAAG  
AAGCTCCTCAACAAGCTCGCAGCCGAGTGGCGGGGTGACGACGTCTGCCAGAACTGGGGT  
GCGATGAAGGCGCTGAAATGCTGCGAACGTGATGGTAAGGTACTTGTGTGGTACGGACGT  
CCCGGCAAGTTTCAGACCACCAAGCGATCTCGGAAATCGTCTTTCTTCACGGTGACTGCG  
GAGTTTCGTTCGTGCAGACACGCTCATGTACTCCGACAAGGAGTCTGGCGTCGAGGTGCTC  
AAGGGTGATGGCCCGACAATCATCAATCGGGCTGACGGCGAGGCCAAGAGCTGGTTGCGC  
GTGGTGGGCTATGGCCCGCTGACGCACCCGGTCATCACCGTCGGAGACCAGCAGGTTCGAG  
CTTGACGTTGAGTTGGCAGATGGAGAAGCCTTCGAGGGCAGCTCGTATCCGTGGCAGCGT  
CGTGCTATCAACAAATCTGGACAGAACATCGGTTTCGAAGTTGATCGGGCAGACCCAGTGC  
CTCGACCGGCTGCAACTCCCTCCAGCCGGAGTTCCTACGCCGGTACGGTGGACCTCCGAC  
GAGATCAACACATGGGTGCGCCGAGCTGGGTAATCAGTCCTGGATCGAGAAGATCGACGGG  
GTGAACAACCTTCAATCTTCCCAACCCCTCCAAGACGTCCCATGGCCGGGTGGTTCGTGCGA  
TTTGATCTGTTCAATCCGGAGTTCGCCGAGACGTTTCATCGGCTCGCGCATGCTTGGCGGA  
ATCAGCGACTGCCTGTACACTAAGAAGACCTTCGCCACGCGGAGCCAGTACTGCGAAGCC  
AAAATCGTTGAGCCGTGGGGTGGTTCGGAGCGGCATCGTCATCATGAGTTATGCCACGATG  
ACCAACTTCGCGCTGCTCCAGGTGACTTCAGGACCCAACAACGACTACCTCAAGATCCGT  
ACTGGCAGCGCCTACAACACATACTCGACCGTCCGGGCCAGCTGGAAGAATCCGAATAGC  
TGGAAAGAGACGGACGTGGTGGGAATCGGCTCCTCATAACGATGAGGACACCGAGAACACC  
ACCTACACAGCGTATTTCAATGGCGATCCGGTTCGCTGAGTGGACCGACGAGGTGAATGTC  
GTCGGCACAGCTGCGACCAATCGGTCACAGGGATTCATCTTCGACATGGACAGTCAGCTT  
CTTACCATCGGCACAGGGTTCAAGGACATACTGGCCTACGACACTGGGACGGTGCAGGCT  
CCTACAGGCAGAGTGTTTCGTGCTCTGGCGAGATGCATACACGGTGGCCTCATGAAAGCCC  
AGGACCGCAACCGATTTCATGATCGAGGAAGCGCGCACGGGCCGAATCCTCACCCGCGATC  
TTCACGTACAGAATCCGAAGATCCTCAACAAGCTCAGTGGCCCTTTCGTTATCGAGTTTG  
ATGTCGATCACCGACACCCCTCGGTCCAACACCCCGACGGCACTGGCCCCCTCCTGTTGA  
AGCCCTGGGGCCACTGGTGCCATGTTGAGCGCGAGATTCGGGGCAAGCGCGTCATCATCG  
CCTCAGCCCTATTCCAGCCTAGTGAGGTGACAGGAGACAGGCCTGCTGAAGGCTCAGT  
GGCAGGGCTTTCGGGATATCCCAAAAACCTTGCCTGGCTACAGA ACTGAAATCCGATCC  
CGGTTCGATCCATTCGAGAACGTGCACCGCATCTGGAGGCACCTCCAGAGCTATAGCAAGG  
GCAATCTCGGCGTACAGGTGTA CTCTCCTGGGCCTGGCGGAACACGCGTCACTCCGCCAA  
ACAGCAACACCGAGCTGCTTCCTGGATTCTCCTTCGATAGCCAGCAGTTAATCCAAGACT  
TCTTCGCCATCTTCATTTCGGCGCGTTGACTTCACCGACTGCGGGCATCACATCAACAAGC  
TGGCTCGCGACATTCGTTTCGACTACTTCGGGGAGTCGGAATGGAACGAGGATCACACAG  
CCATCAACAAATCCATTCGGCTCGAGTATGCGCACGGGGGTGATTCCAGGATAATCTGA  
CCTTCCGGGTCAACGAGAATGTGATCCGGGCAAGAGCAAGATCGAGTCAGAGATTGAGT  
GGACCAGCGACATTGGCATTTCGCGGCTGGTTCCCGGCAAGGTCTACAGCTCTCAGATCA  
GCAATGCCGACCCAAACCGCTACAGACGCTTCATCCTTGAAGAAGATGCTCGCATCAACA  
GCACCGAGCGGTCTGAAGCCTGGGCGCATCGGCAGCTGACCAGACGTCAATTCCCCTCGT  
ACTGGGAAAAAATCACCATCAATATGCATCATCCGAATGCTCCGTTTCGGTACGTGGGATG  
TCGACGACCAGATCAGAGTACAGGGGCTGATGCCGTGGGTTCGGATATGTTGCCAGGTGC  
ACAAGATCCTTTCGTTCCCTGGATGAGACGTCGGCTACATGCGAATTGACACCTCGAG  
CTGAAGGCGCATTCAACTTCGATCCGATCCTCTTCGAAGGCAAGCTTCCGAACCTTCTGG  
CGGATCTGAGTTTCACCGCCAGCATGTTCAACTGGACTGCCGCTCTGGGCAGCTGGTTCGC  
GTGACAGCCTGCGAGGCAAGGATTCTCTCTGAGCGGCTCGTGTACGTGTAACGGCCAAG  
AGAAGCTGCTCTTGAGCGATGCCGTACCAGTTGTGGCAGGCGATGATGTAACGTTGAGCA  
CGTGGGTGTGTTGGCAGAATCTCGTGGCCACTGACGAGCCGCTCGAGCTGATCCTCAACA  
CCTACAACCTCGGATGGCGAACTGCTCAACACCCGTTGTCTTCGATAGCACATCGGGCTCTG  
GAGAGACGCCGGGCTGGGTACAGCTCAGCAACGCATATACGATTCCCTCAGGAGTCGCGT  
CGATGCCGGGCTGGTGGACGAGTGACCGAGGACGCCAAGACCGGGTCCGTATGGTATGACG  
AGTTCAACTTCACGAAGGACGTCTGATGGCCTACGAGTACGAGAGCAAGGAATCTCGGGC  
TCTCCGGTCTATCCAGAGCAAGAACTACCCTGACACCAACAAGGATTTTCGTAAGACTCT  
GAGTCGGCTCAACAGTTCTGCTGACTACATCTCGTCCTACATGATCATCATGAAAAGGT  
CATTGATGACGCCAATAAGAACTTCATCGAGCAGATCTAAAGTTTCATCAATGATCTGAT



CGTTCTGTTTGC GGGCGGACAGCCACGGGCATCGAGCTCGGCGACCTCAAGTACATCAT  
CCAGGCTCTGCGCGCGCTGTTTCGTCTTCAACGGGCCATTCCCAATGAGCTTGATCAACGC  
GGTGCAGCACTTCTGCCTCGGGTATATTGTTCCGCTGCCACAGTTTACAGACGTCATCAC  
CGACACCATCATCGCTGCGCCGAAGAGCTGGGGCTGGACCCAGAGTTCGTTGATGCGCT  
GCGCGAGCTCACCGACGCCATCAATGTTCTTGGCATGCGCATTGGCGATTTGTTTCGCCAA  
TATCATGAGTATCTTCAGCATCTTTCAGATTCCAGAGTTCGGTACAGGACCGCTCGCCAA  
ACTATGGGATCTTCTAGCGGGCATTTCGATGGCATCCACGGGAATGCGCTGCGGGCCGGT  
ACTCCTCGCCATCAGCAACTCGACCTTTCGGGTCATCGAAGGTCTCTCGTCACTGGTCAA  
CTATATGGACGACCTGGTCGACGGCCTTGCCAACGGAAAGTTCCTCAAGATAAACTCACC  
GCTGAATGCGGCAAATCTGTTTCGGGGCTATCGGATCTAATGTTATCAAGGTCTGTTCTCTGC  
TGGTGC ACTGACCAATCGTCGCGTTGAGCTACTCGACAATGCATACTTCACCGAGGATGG  
CATCGCTCCGGGCAGCGAGTGGGCCCTGGCCATGCTGTGCTCCCGCACCGACAATGATGG  
CACAGGTAGCGCGACGGTGATCGCCAACGGTCAGCCGCACGCCCTCAACACCGGGGCAA  
CAAGCACGACTAGATTCCCTGTCGGCCCCGGACAGCGTATTCCCTTGGGCATCTACATAAG  
TCATGACGGCGCTGTGCTACAGGACCGGCGATCATTCCGCAGGTTTCGGCGATTCAATGG  
CAACATCCCTATCGTCGGCCTGTACGAAATTGGATCGTACACTCCTCCTGTGGAAGACCT  
GCCGTGGCCTGGCCACAAGCTCGAGGGTGTCTACACAGTTGAGGAGGATGTCACCCACAT  
CCAGGTGCGCGTGTACGTCACCGACGCCGCCCTGGCGGGTTCGGTATCGCATTGCCGAGGT  
GGATTTTCGCCAAGGTCACCGACCTGGCCTTGATCTCTGGTCTGACAGAAGCCTTGGAGGC  
GCTCGAGTCTGACCAGCGTGTCTGTCAGCACGCAATCGCCAACGCGGTTCAGCAACATCCC  
GATCATCGGCGATGGGCGCGAGGATCTGATAAATGCGCTACAGA ACTTCAATCCGGCCAA  
TATCGCTGGAGCTCTGGGCAGTTCACTGCTGAAGGGCGACCTGTTTCGGGAGCATCCGACA  
CATGATCGCTGCGGCACGTGGTGTTCGGTGTTCGGCGGTAGCCGAGGATGCCACGCTCGC  
CGACCTGTACAACGCGATGAATGCGGGCGCTCAAAAATGTGCGCCGGATACGACGAGACAAC  
CTTCGTCGATACCACGACATTTCGTTCCGGTGAATGCGCCTTGGACCAACTACGTTGATGT  
CATCGGCGTGGGCAAGGGCCAGGACGGCATGGACGGCCCCGACGGTGCCGCCGATCCCCGG  
TGTGTTTCGGACAAGATGGGCACCTGGGAAAGGTGCTCGCCACCACATGGGTCAAGGGTGT  
CCGCTACGACAATGATCTCACCGGCGTTCAGGTCACCTTCAAAGCAATGGCTCTGGGAC  
CTTCTCGATTCTCGGTTACAGCCTCACCTGTCTCTGCAAGCCGACCTCCGCGCCAATT  
TCAAATCGGAACAGGCTGGCACGCCAAGGGTCCGGGCACATATGTCTACAACGACCGCCA  
ATACGCTGCTGGCGGAACATAGAACCAGCCTGGACGCAACGGAAATTGGACTGGGTGGCTC  
TGGCGCTGGTGGTGGCGTGCTTCAGAGTGGTGGCCGAGGCGGATCTGCCGGCGGATGGGT  
GCGTCTGCGTGCAGCTGAAGCAGAGTATCCGTCTACTGGATCAGACACGACGCCTCCGAC  
CCCTCCGAAAGTTAGCGTTGTCAATGCGACTAGTGACACTCTGTATCTGCTCCCGAGCGG  
AAGCTTGGACCAGTAATGGCTAGTGATGTCAGCGGCTTGGCCGGATATCTGTTCTACCTT  
GTTGACTCAACGGCACCCCTCAACGCAGAGCCGTTTCTGCCGAGCTCTTGTCTGCCGTAT  
CCCATAACGAGGCCTTGACGCAAACACTGACTATAGCAATCGCATCTACGTCACGACGATC  
GACAATGCTGGCAATGAGTCCGACCCCATCCCCTGGAGGAGGCTCTCGACGAGATGAGC  
CCATTCGCCCGCAGCACGCTCAGCCCCACGCCAGAACAATCGCCCATGAACTCAACTGGC  
ACCACTGCCATCGACAACATCATCAAGCGATGCATCGCGGCTGGTGCCGGTCCGGGTGTG  
ACGGTGGGGATTACGAGCCCTTGGGGATACTACCTTGGAAAGCTTCGGTGAGGGCACCGGC  
GTCGACCGACCCTTCCTCATGGGCAGCCAAACCAAGAGCTTCCTCAGCTGGGCCGTGATG  
ATGGCAATTGACGAAGGCCGTTTCTCCCTCGACACCACAATCAACGACATTCTCGACTCG  
CCGTGGAGTACGAAACCGACCTTTCAGCAGCTGATGATCATGCGGTTCGGGCATGTACAAC  
TACCAATCGGACTCGGCATTCGGCCTGCAGGTGGCGATGAACACTGTAATGTCGTACAGC  
CTGCAGCAAATGATCGCCAGGAGTCGCAACGGCGCCAAGCATTTCGAGCCTGGCGAGAAG  
TATGATTACAACAACGGAACCTCGTTCGCTCTAGCATTGATGCTCGAGGAAACGGACCCC  
GAAGGCCGCAAGATCCACGAAATAATCAAGCAGGACATCCTTGATCCGCTGGATCTCGTC  
TACACGAATTTCCCTACTGTCACCGAGCGGACCTCCGGCACCTTCTGCCATCCTGTACTCG  
TGGA ACTTCTTGTGTCGCTCATCGGCATCAAGCTCTGCCAGAACGTGACGGTGCAGCAC  
CCCAACATCACATGGGCGGCTGGCTGTATGACCAGTGTGCTTGGCGAGATGCTGAAGTGG  
GGCAAGGAGCTTCGCCAGTGCACGCTGCTGCCACCAGAATCAGCCGATCTGATCCACCCA  
ACTCACATCATGTATCCGAGTGCACCCATATGGCCTCAACAAGGACGGTGC AACAGAATTC  
GGATACGGGTTGCACGGCCATATCAAAGTTGGCTCCTGGCGGGGTTCCGACGGCAGTTGG  
ATCGGCTGCGACTCTGCGACAATGTACGAGCCCACCACCGGCACCATCATCACGGTGTAG  
GAGAATTTGCATACGCCGTGATTGCTTTACTTGGCCACAGTTTGGCACGAATGCGCGGAG  
TATATGATGACGGGGTTCGGCGACGTATCCGGGCTAACAGACCGGCGAGAATGCGGCAGGT

ACGGTCGGCACATCGCTGAAGAAGCTTGGCACGTTCTCCGAGGGTGGCGGTGTTGGCTCCT  
GGCACCGAAGGCGTTGAATTCGACAATGCGAATGCGGTGAGCAGACTCGGGACGAAACC  
GCAGCATTCAACATCGCGTCCGCTGCAAAAGCATTGGTGGCCTGGGTTTCTGCACAAGGT  
AGCACGGACTGTGGAGGCGCAGCCGTCAAGGCCAAGATTGATGGCATTGAAATGGAGAAG  
GTTGTGTCGACAACCGATGGCACTACCTCCGGGAATGGCCTGGTGTGCTTCCGCCTCCTC  
AATCCGCCGCCCGGGGCGAACAAGAAGGTCACATTCGAAGGGATGGGATCTCTTGCACAC  
TATTATGCGAATGGCACAGCCTCGTACAAGAATGTTCGGGTCTTAGGAGCGCCTGTGAAG  
AACAGGGGTTTCGGGGTTCGTCTGCCAGCCTTACTGTCGGTGGCACAACATCTTTGGATATG  
GTTTTGGGCGGATACTACTTCCAGGGTGGCGCAACTCATTTAACAAGAATGTTTCGTGGT  
GTCAGAGGTCAGGCAGCATTTCGTCAACCAGGGCCTGTTGATCGCAGACTCTGCCGCTGGC  
GGAGACGTCACCTTGACCGAGACATTCACGAGCTCGATTTCAGTGGCCTGGGACGGCGTTC  
GTTCTTCGGGCTGAGGAGCGCTGATGGCTGTTCGATGGTGGGCTGAGAGCTTCTCGATAA  
TACAGACCGAGCTTAGCCAGCTGGTTCAGTGAATCTGTAGGTGACCAGAGCCAGTATGGCC  
TTGCTACCGTTGAACTCCAGAAGCTTCGAACCTCAAATGGAGGCAATCGCTTACGACTATC  
TGGTGTGTCGTCGGCCACTGAGTTCATGAACTCTCCACGAGCGCCTCTGCTGGACAAGTGT  
ATTTCCGCAACATCCAGACAGCCGTAAAGAAGCTCGTGACCCAAGCGCTTGCCGGAGTCA  
CAGCTCCCGTAACATGGCAGGGCACAGGCCCGCTCCCGACAGGGCGTCGGCATCCCTGTCC  
AGAACAACCTGGACAGCACCGGCTGGAACCGATGTGTACATCGCAGCCGTCATGGACCGCT  
CGGGCAGATTCACCGGCGCGACATTCGGTGGCGAAGCGGGCACTCTGATGGAAGCATTGT  
TGCACAACAACAACGCTAGCACAGGACGTACGGCGTTGTGGCGTTCCGCAGGCAAGGGCG  
ACGGCACCAACAAGACCTTCTCCATGACAGGTAGCGGCTATGGTTGGTTCGGTGTGTGCA  
GCGTTGCCTTCTCTGGCGTTGTGTTCGGTTCGGAACACCCGCGACCACGTACGGATCGGGCA  
CTTCGCCTTCCCAGGTGGTCACGGAACCAGGGGTGCAGATACTCGGACGAGGAGTTGGCG  
GAGCTGGTGTGTCGTCACACTGAGTGCCTTCTCTGGTGTGACCAACAGAGTCAACCAGAACA  
TCAACGGTTCGAGCCTGGCAGTCAATCAAGGTGAGGTGCCAGGAACAATAGGGGCAACCA  
CGCACAAATTACCCTGATGGGTACATCTTCCCTGCCCTCCGGAATACATAGGAGATCGAGT  
TGAATACAGAGTTGCAGGCGATCAAGGACCCAATGAATGCCCTTACTTCGATACTGCGC  
GTGATCTGCCAAGTTGTATGTTCGAGCACCATCCGGAGGAGTTCGTCGACTATTACCAGA  
TTGTGGAGGAGTCGGCCAACGACGAAGAAGCGATCGCCAAGGTTCGTGACGTCCATTGAGG  
TGTTGCCAGCTGCAGGCCTCACCCAGCAGCAGTATCGTGGTGGAGACCTTCCATCTGTTC  
GCTGGGACCCGGAGAACATTGGCGCCACAACGGAACCTGTGGTGGCGCAATCCAATCCCGC  
CGACTGTGAGGAATGACTGAACATGGCGAAGGCATATTCTGTACGCTGGATGTGGCCCA  
GGGAATGCTCGGTGGTAGCACCAGCTACGCCGTAGCTCTTGGGTCTCGCCAAAGATCAA  
GATTTACTCAGGCCTCCACCGGCCAATGCTGGCGCTGCGCTGTACGGCAACACGCTGCT  
GGCCACTCTCACCTGCGCAAGCACGTCTATCGCCAGCCAGAGCGATACTGGCACTGCCGC  
GCGTGCGAAGTGGGCCACGAGCGCGTCTGCGGTGGCCGCAGCCACAGGTACGGCCACCTT  
CTTCCGCACCACCACGTCGTCCGACACAGTGATCGACCAGGGTACCATCGATACTACTGG  
TGCAGACCTCAACATGTCGACGACGTCGTGGACCGCTGGGTCCACCATCGCAGTGAGCTC  
GCGGACAACAGACTTTCGCTACGGCCCATAGGAGACAGCATGGCATTTCATCCAAAAGCAG  
GGCTACTGGAAATCCGAGAGTGGCTGGCGCATGTGTGACACAGCCGAATTGGACTACAG  
GCTGTGCCGGGGACCAGCTTCAAGCTCGGCGTTCGCAATGGATCAACCAACATCATTCTC  
AAGGCACTGATCTGGCGTCTTGACAAGATCGAACCATGATGACGTCGCAAATCAGTTGC  
TACACAGCCGAAAACCTCGATGGCGAACAGCAACCACAACCTCTGCGACGGCGATCGACTAC  
AACTGGAACAAGCACCCCTACCAGAAATGGGGGACATGGCCGCATCGTGCGGCCGTCGAT  
AAGATCGTCGACGATTTCCGCGGAATCATCGAGTTCGGCGGTGGCTGGACCGCGCCGCGT  
GACGAGATGCACTTTGAGTTGCACTTCGCGGAGGGGCATGCTGGCACCGAGGCTCTAGCC  
AAGGTTTTGGCCAATGGCCTATGGGGTATCTGGAAGGCCGGAGCAGCCCCAGCCCTCACC  
CCCGCGCCTGGCGGAGGGGACGACGGCATTCTGCGGATCGGCTCCGAGGGGGCCGGAGGTG  
CTCAAGATGCAGCGCGGTATGAACTCTGTGTTCAAGAATTACCGCGCCATGCCGCTGTTG  
GAAGACGGCATCTACGGGGCCAAGACCAAGGAAGCTGTCGTCGAGTTCCAGCAGCGTTCA  
CTCATTGATGTGGACGGTGAAGTTGGCCCGCAGACCAAGGCGAAGCTCGCCGAGTACGCC  
ATCGTGCTGACCGGGGCGACTGCTCCGACCGCTCCGCCAGCCATCGTGCCGCAGAAGGTC  
TGGCCTCAGACCGCCGGTGACCGTGAGCTTCGGGAGTACATTGAGGCGCAGCTCGGGCCT  
GGGGACCCGTCGTGGCCGATCAAGCTCGGCAACAACGAGAAGGGCGATGCGCTCACGGTT  
CGCGAACGTCTTGCCTTGACGGCTAAGGACATTGAAGAGATCAAGGGAAGGCTGTTCGAG  
TGAAGAATCTGTGCAACTACTGGAAGGCTGGCATTGCGCTTGTAGGTACGGGTGGCACAG  
CCGTGGCTACCCTCGCAGCTGACGAGAATGTTTCGACCCCGTGGGGGAATCGGGTGTCA

CCTGGCTGGCTGTTGCCGGTGTGCGCCCTCACGACCGCGCTGACCTGGCTCAAGCGCAACG  
AGCCACGGTCACTGAACCAGAAGAGATCCTCCGCCGTGCAAAGGTACGCGCATCCTCGT  
CCTCCTATGCATAGGAGGCTGGGCGCAGTGGCTATGGTGTGTTACTCGTATTGACCTGT  
CTGTCGTGTCCGCAGGCTGAGAGCTCAGCCGACGGCAATGACAAGCACCATAGCCAGCTG  
TGCAGGGATGAGGAATACGCCAAAAGCATGCGGTGAGTGTGGACGGGTGCATAGTGGC  
CCCATATCAATCACGCCTGCGACTGGCGGACACGGTGGGGGAGCTCGGTGCCGAGGTTTG  
ATCGGGAGGATCCTGGACAAAGTAGGGCTGGGAGGGCTCCTCTGATGCTCCGTCCAACAG  
ACTCTCGATGCTTGCAGCATATTACGCAAGCCTCGTCTGATTGAACACGGCAAAATTT  
ACGTGTGCTGTACGATGGGGCTCTGGGTGTGGTCTCTGTCAATTGCTGGTGATCGGACCTG  
TTCCGAACTCAACCATCGACGAGCTCACAGACTATGTCCAAAACATCCTTGCTTCATGTA  
TCTTCATCGGCTCGTTCGTGTGTCTGTGCGCCATCTCCCTCGGCACTAAGTACGTCTCC  
CCAAAGCGGATATCCGCTTGTGCTACCGCTTCCCCTTGTGGGGAATCCCCGCCTTGGCAG  
GGAGCGTCGGAACGTACGCAGGGGCCATCGCCCACAATACTGGCTCATTTTGGGTATTGG  
CGTATGCAGCTACCATCGGAACATTCATCTGCTTCGGTATCGTCTGGAATGGGCTAGATT  
TGCTCTTCGAGATTGCTCGACTGAATGAGGAGATCAATTACCTCATATACGGTGCGGGCT  
CTGAAGAGCGGCTAAAGGACAGGGACGATGAACGGAGATGTTGACGTTGGCTGGATCCTT  
ACATTCGTGGCCATCGTGTCTGCTAGCGTGCCAGTGCTTTCCGTTGTCCTTGACTATCGC  
AGCCGCAAGCGTCAGGCGGAGGCAGAGGGCAACAACAAGATGCCGATACCGGGATAAAG  
AAGGTTTCTGAGCAGGAACTTTCGCAATGCGTTCTGACAATGAATGAAGACCGCTGGATC  
ACGCGTGAGAAGCGCTGGCAGGAGCGCGAAGACCCTCTCGAGCGCGTAATTCAGAGCTG  
CGAAAAGAGATGGATAATTTGCGCTCTGACATGAATGTCTATATTGAATTCATCGCCAAT  
GATGAGCAGTGGCATTCTATGACCGGATGCACCGCATCCAGAACGATCTCCCTGCGCCA  
CAGGATCGGATCGCATTCCAGCAGTTCATGGAGTCGCGCCGAGAGGCAGCGGGGAGGCTG  
CAACATGTAACCTCAAGGTTGGCTCAAGCGACGCGAACAACACTGATGGTGAGGTAACCTCG  
GCAGAACTGGGTAAAGCGGTATGCCGCAAGCTATTCCGACATCACGGGCCCCATCGATGG  
GTAATGACTGACTCGGATGCCGACTTACCCGTGAGCTACAGCGCCTTCTGGGGCTGCC  
GATCACCGGCGTGTTCGATGATATGACAGACCTGCACCCAAAGGTCAATTACCGCTGGAA  
GGGGCAAGGCGCTGGGGAACCAGCCGCACGCCGAAGATCTGGTTCTACTCCAGTACCGG  
TTCGGGCTCAAACGAATTCGTCCGCCATCGTTCGAGGTCGGCGAGTTCTGCAAGAAGT  
CCTGAAGATCAACCACCAGCCAGTGCATTCCGGTCATCGGCGGATATCTCGGGCTGATGGG  
TGGCGACCCCAAGTTCAGCTACAACGACGTCATCTATGACCAGTACAAGTCGCTGGAGTG  
GTTGCTGGACAACAATCCTGACACCAAGGACCCAGACGTCGAGTTCTGGTTCTCGGGCTA  
CTCGCAGAAGGCCGACGGCCTCGAAGACGCACTCGAGATCTTGTTCGGCGATGGGGGATT  
CACCATCCCCAAGACTGGCGAAACCGTGGGTCCGGGTAAGTATCGGGACCTGCGGCCAAG  
AATTAACGGCACCATACAGTTTGGCAATCCCAGCAAGCAACCCGGCCCCACCCGCGTCGG  
GAATCGCCCACCCGGAAGCGGCATCTCCCAGCAATAAGCGGCCGAGTGGCTCAGCATCCT  
CACCTGGGACATCGTACCACCTTGCCAGGGGCACCGGACTTTTACGCTGCCTGCGACGA  
TGACATCCGACCGTTGTTCTACGAGTGGTTCATCAAGGCCGACACCGAAGTGCCTTCTT  
CGTGTACACGGCGCAGATCATCATCCCAGCGTCTCTGAATCTTCTGGCTCCATTCTTGCG  
AGGCTTCGGAGGGCTGACGACCCCGCTGGCTGGCCGGATTCTGGCGATCGTACCGGCTT  
GCCGATGAGCCTGCTCCACGGCCTGCTCAGCGGGGTGGCAGCACCCGACAATGCTCCGAA  
CCCCAAGCTCATCGAACTCCTCAGCGTGCGTGGTGTTTTGACGAACATGACGCAGCTCAT  
CAAGCTTCTGACCAACATCTCCGGCGTCCAGACGCACGGCGAATAACACCTTCCGAAGAA  
AGAGTTTAACGGCCGCAGCGGAATCCATGGCGGCTGCTACATCGTTGCGGGCTTCCGGCG  
ATAAGGAACACTCATGGAACGCGTGACAGTTTACCAAGACAGCAACAACGAATGGCGCAG  
GCGGTTCAAATCCAGCAAAGGCCGGGTGATGGCTCACAGCGGCGAGGGTTACCAGAACAA  
GCAGGTGCCCTCACAGCGATCGATGCTGTGCTTGGCGGGCTTGCGCCAGAGGTGGTGGA  
TGAGGCTTGCAGCAGCTCGGGGTAGTGCCGAACGACCCAGCGCTCGAGGCCGCGCAAAC  
TCTCCTGACGCTAATGACAGGGGACGACTGGGACCGCCCGAAGCTCGTGAAGTGCTCAGC  
GAGCTTGCGCCAGCACGCTTGCGCAACGCTCGTGAAGCAAGGTGTTGGCGTGCAGAAAGC  
AGAGGCTATCGTGGGCGAGCGGTGGGCCGAATACGGGAGCCCCGAAGCAGCTGATCATA  
GCCTGTAGCTGCAACGGCCGATCGCTCGGCAGAAAGCCAACGTAGCACCCAAAATGGATCT  
GTCTCCGGGAAGGCTCCCACCGGCGAGGAGCTTCGGCGCAAGGCGCACAGCCGTATCGA  
CAGATGGCGCAAAGAAAGAGCCGGAGCCCTGAGAACTCCGGCTCCGATACTTAGCCAGA  
CTAGATTTCCATCGCGGGCTGCTCGTCCCTCCTTCTTGGAGTCCCTGAGCTCCTTTCGAGC  
TGCCTTGACGGTAAACTTGAAGGCTTCGCCGAACCTCGCGATTTCCGCAGACCGGGCCGAA  
GCCAGGTAGACGCTCAGCTCGTGGGTATCGTACGGGTGCAAACGCAGCAGCTTCCGTA

GATTGCGCCGAACGCCTTCCCCTCCTCGTAGCTCATCCGCTGCTCGGGCGGTTAGGCCTCG  
GAGCGGACGCTTGCCCTCGTACTCGAAGTGAGCGGTGAAGACGGTGCCAGCAGTCTCGAC  
GTGGCGGTTTTCTCGACGACGTCCGAGCGCTTGGCGACCTGGTAGCCGCGCTGGGTTTT  
GTAGACCTTGTAGATGGTACCGTCGGCGACGCGGTACATGCCATCCTCCAGTTCGTCCGT  
GGCAGGCTTCGCTTCTCGGGCACCAGGGGTGATGTGGGGTCCCTGGATTCGACCGTCTC  
ACCAGCCATCTCGGTGGTCCCGATGACCGGATCTGCGCCCTTGATGGTCATGCTCTTCAG  
CCAATCGATCAGGTTGCTGGCATCCTTCGAGCTGAAGGGCTTGTAGCAGAACTCGTAGCC  
GTCCGATGCACCGTGGTTGTCGACGACGTACGCCAGCGCAGCGTTGACGCGTTCGCCGAG  
CAGGTCGCTACTCATGGCCTTCTGATCTCATCCATGACATAACGGGGTGCCGTCCACACC  
CTTGTCGTCGCGCATGATGGCCAGTCGATCATCAGGCGGATGGTTCGAAGCGCGAGACAC  
AGCCTTGTGGCGGTAGTCGCTGGCCACGCGCGCTGCTCGAGCAGGTCCTTGATCCAGTT  
GATCTGCTCGTTGGTTCGCGGGCTTGACGGTCCCGGTCGCGTTCATTTTTGATTCCCATCT  
CCGGTGTCCGAGGCGCTTTGGGTAGCCTCGTTGACAAGACGAACGTTACGGCAGAAATTG  
CATTGTGCTACTCCTACCAAAGTACAGCGCTCACGGCGCGTGGGTCCGGCTCGCCTACC  
AGGACAATCCTACTGCAGTTGCACAAGACGCACCTCGGCGTCCCCAGCAAGCCGCGTGG  
CCGCCAGCGCGCGGGCTGGTAGTGCGAGGACCACGGGTGTCCGCAGGTGCACTGGTCTACG  
GCGTACCGGGTGTGTCGGAGAAGCTGCATTCACCGCATCACCCACTGCCAACGCTCCATC  
AGGCGATGGCCCGGATCAGCGCCAGCACCGCGCGGGCGCATGTCGTTCTCCGGCATGCCGG  
TGATGACCGCGACAGTCTTGCCGTCGCGATTGACGACCCACTTGCGGCTGTCGTCTTCGC  
CGACTGCGAGGGCGTCTGCCACCAGGCGGTCTCACGGTATGCCGTCACGCTAGCACGTA  
GCGTACGGACGGTGAGATCGTCTCATCGGTGTCATTGCCGGCCAACGCGGGAAACGCTCA  
GCGCCTTCACGATGCTGTCCACCTTGGACCTGAAGTTCCTCGCTGTGGTCCGCGTTGCGGA  
CTGCCCCGTCACACCTTCTCCAGGTAGTTGTAGCGGACCAGAACTTGCTCGGCCTGCC  
CGCGCTCGAAGGTGATCGCACTGGCCACCGTTTTGTGCGGCGATCACCTGCTCGCGGGACG  
TCCATCCGAACGTAGCGGCAACTTCGGCGATCTGCATATACTGGTTGAGGTTGGTGTATGG  
GCATGAGGCCTCCTGGGTTCTGTTGGGGATGATTGCGCCCCGAACGTTACGCCACCGCGCCG  
ATTCGGGCTACTGCCGTCTACATGCGTCGTCATAGGGGTGGCAACAATATTCGGCCCCGA  
GTAGCGCGAATCGGGTTCGACTAGAGTACCTTTACTCCTGTCCGCCTCCCCACATCCCCAG  
GAGCCCCAATGAGCATCACATAACAGCCTGGTTCAGCAGGTCGAGGTTACTCCGGCGACA  
ACGAGCTGCACCCCGAGCCGCTGAAGCCCCTCTGGTATCGCATGGTCGTCACAGCCGGAC  
CCTTCGAGCTGAATAACCGGCCACGAGGGGTACCGCGTCTCCTCGGTCCGGGGAAGCCGGAGC  
CGTCATTCGACCAGTATTGCAAGGCTGCCAATGGGATGCGTTCCGTCGCCGACGTCGATC  
CCGAGCTCGCTGCCCGGTACGACGCGTTCCGGAGGTGGGTTCGGCAAGTGATCCGGCTGGC  
ACGCCGCACAGGCTACTGGGTCTGCAAGCGGTGCTGGCAGGGCAACCTTGGCGGAGAGAA  
GTGCCTGTTCTGCGGGAGGGCCAAGTGAGCGAGCTGTGCGCCCTCTGCGGGCACGAGTTC  
GAGGAGCACTACTCGCCGGGCGACTCGAGCGGAAGGCTGGTGCAAGGTTGTGAGGCCGAT  
ATCAGCACACCCTGCCAGCCTACAACCATCGAGACCCGGAGCGTTGCGAGTGCGACTAC  
GTTCCCTGCGTTTGCCCGGGATTCGAGAGCGAACCCGGCACCCGACCCCGACATCACCGAA  
ATCGACATGTACGACCCGGAAGGACGCTGATGAAGTTCTTCGACGTGCTAATCACACGC  
ATAGCACAGACAAAAGCGAGGATCTGGCCAGATCATCATGCCGACTCATATCGCCACAG  
ATCTTGAGGCTGCTGGCTGGACTGTCCGGATCACAATCGTTCTGGAACACAAGACGGGGC  
TGACGGGCAACTATCGCAACGAGAATGTTGAGCACCGCCTCGAGAAGGAAGCAGGACACT  
GAAATGGCCAAGGAAAGCATCATCAACCGAGTGCAGAACCTGCTGAACCTCGCGATGGAC  
CAGAGCGCCACCGAGGACGAGCGCAAGCTCGCCAGGAACGCGCGAACGCGCTGATGGCG  
CAGCACATGATTGACCAGATGGACCTCAAGCCCAGGACCCCGGTTCGGTTCGCGCGTACC  
AGCACAAAGTGGGAGTTCTTCTTCGAGTTCGAGTTCGCAGTGCAGCTAAAGGACTTGCTC  
GCAGCCGTATCCGGCACGCTACCTGCCGTGCCACGAGCACGCGCAGGATCGCCAAGGGC  
GGCGAGCCCAACATGGGGGTGACCATTGTTGGTACACCTGAGAACATCCCCTACGCCGAG  
CGCCTGTGGATGGTCGTTTTACCCGAGCTCACCAGGAACATATTCCCAGAGGTGGACCCC  
AACGAGAGCTTCGACAGAAATGTGTACAAATTCGTGAAGGCTGGCTTTAAGTGGCAGGAG  
ATCCATGAGCTGCTCTGGCGGCAACAAGGACGATCCGCATTGGATGGGATTCCCCTTGAAC  
GACCCGTATCCGCCAGAGAATCAGAGCGAATATAGCTGGCATGCCAAGGTGTATGGTGGC  
GACGGCGGACGCTGAAGCGTGCATACACTCGTGTGGTCAAGCGTTTCGGCGAAAGCAGC  
GCGCACACACCACGCGACATGGCGTGCACCGCCGGAGCTATGTGCAGAGCTACTCGAGC  
ACAATCTCATTGCGGCTGCACGACATGCGGAGCAAGAGCGAGGACGCTGTGAGTGATCGC  
GACAAGTTCGCCCTGGCGGTGCGCAGCTCGCAGGACGAAGCTGACGCCGAGTTCTATCGG  
CTGTTCCCGCAGTTCGACCCGGAGCACATCCGCAAGCAGCGTGAGGAGATGCTCCCCAG

GAGCAGATCCGTTTGCAGAACATGACTCTCGAGGAGCGGGCTCGCGCTGAGAAGGAGCGC  
CTCAAGCGTGAAGAGCGCGCTGGCAAGCACTGGGCGAAGACGCGGGACAAGAGCTACCAC  
TAGGCTGGCTGGGCGCGCGGCAGTGCTGTGGCCTAGAAGCTCAATCTCAACGACGACACG  
CAGATCCACCACAGCAAGAAAGAGATTGGGTGATGTGGATTGATGACTGGCTCGAGGCAG  
CCTACGACGAGCGCACCGAAGCTCCCGACGAGCTGGACAACGACGAGTGGTGGCCGGAGG  
ACGATGGTGTGAGTGACCAAACGCTCAAGCTCGCAAGCGAATCAACGAGGCAGTGATC  
GCCTTCCGGGACGGCTACGTCTACGGCAAGAGCCTCACCCGAGCTCTCGACAAGGCCATC  
CTCATGGCCGATGCGGGCCGACCGGGCGGAACGGCCATCTCCTCGAAGTCATCAACGATCAG  
CAGTAGCAACAAACCTGACCATCAGCAGCTAGGCTAAGCCTTACCTCGTCTCAGAAGGGA  
ATCTGACACATGAGCAAGACCACGTCAGCCATCGCCACAGGCAAGACCGCCGAGTCTCC  
GCTCTGGCGGAGAAGCACGGCTGGACGGCGGAAACCAAGGAAGACGTCAAGAACGACATC  
ACCACCCTCAAGCTTACACGCAGCGATGAGTGGGTTGAGATCCGCTGGGAGGGGAACTCC  
TGCAAGGAGATGCCGACGGTCTGACACGAAGGGCAGCTCAGGTACGTCCGGAACGTTGCA  
GCTGCGAAGCGCGTCTCGAGGGTACTGCCGAGCAGAATGCGGAGCCTTCCAGAAGCGG  
ACTGGGGCCAAGCAAACCTGCGCGCAAGACCACGCCTGCCAAGCGGCCTCGCCGGAAGGAC  
AAGCTCGTGGAGGGCATTCCCGACAGCGACGACCGGCAGATCAATGAAGCCCTCCTCGTC  
CGGAAAATCCTCTGGCGAAACAGCACGAGCGGCAGTGTGAGGAGGATGTGGTGTGGCC  
GGGAAGAATACGAATGGCCACTACTATGTGTCCACGAGGGTGAGAAACGCCAGATCAAC  
TTCATCGGCGCATATGGTTGTGAGCGGTGAAGATTTCTGCGATTTTCGACGGTCAGATAG  
GCAGAACGAGTAGCCCGAAGCTGGTCGAATAGGGTACGATTGTCTTATCCAATCGGGAGC  
AAGAGGGGAATCACAAAATGGACGTTTCGTACCCTCACCTCCAGGGATCGCAAGGTTGCCG  
CCCAGCTGGCCGAGCGGGCCTCTGACGACCAGCTGACCTACCGGACAGCCGAAGGTGCTC  
GTCGGGCCAAGATCGGCCGTACCGTGTGGTATGAGATGGCTGCAACTCGTGTGTCTGACG  
GTAGGCAGTACCCCTATTGGCTTGCCAAAGACTCGAGTAGCTTCCGTGGCTCATTCTGG  
ACAGCTTCGACCTGTAGTAGCGGAATCGGGCCGATGGGGTAACGTTCCGGTCTGTCAACG  
ACGAAGGGAATCCAATCAGCGAGCTCAATGTAGGCGATCGAGCGCGAATCATCAAGGTCA  
TCGATCTGGACAACGACCGCAAGGTCATCACCGACCCCGCCGGGCAGCTGCGCTGTTCCG  
GAGGGTACGGACCTGGAATTGGCGATGTCGTGGTCATCACCGCGAAGACCCTCGGCGAAC  
TGTACGACTACGAAGCCGAATGGGACATGGAGAAGGGCCACAAGACCTTGAGCTTTCTGG  
CGGAAGAGCTGGAGCCAGTCAAGTGAGTAAGCGCGAGTGGAAGATCTGGTTGGCGGACGG  
CAAGATCGTCCTGCTGACCGACGGGTACGATCCGGCGGTTGTGCGAGAACATCAAGCTGTC  
CTTGCCGACGCCGCGCTCGTTCCGGCGTACCACCAAGACGTGGCACGTCCCCCAGATGTG  
GGAGACTTGTGTGCGCCCTCCGCCAGCTCGCCAATCGGCATCGAGCTGACCTGAAGATAAG  
CGACGAGCTCCGGCTGTGGGCTATGGCCGAGAAGCTCCGGCTGGCGAGCATCCCCGACGT  
CAACGAACACAACGTGCTGCAGCCATCCCGAACATTGAGCGCGAGCTGCCAGCCATGGC  
GGAGGCGCTAAAGGCACACCCCTTCCAGACAGTGGGCGTTCGGTTCGCCGCAACAGCGCG  
GAACGTTCTGATTGCCGACACCCCGGTCTGCGCAAGACGCTGCAAACGATCGGCGCTGT  
GGCCGAGAGCGGCCTGAAAGGACCCCTCCTGGTAGTTCCCGCGGCGAAGTCGGCTGCCGT  
CATTACCTGGCCCAACGAGCTGCGGCAGTGGTTGCCGGACGACGTCGTGATCCCGATCTC  
GGGGAGCATGAAGCCTGCAGAACGCGCGGAAGCTGTGAGCGCGCCAAGGCTTACGCCGA  
GCACGGGGACAAGCGCGTCTGAGTCGTCACGACCCCAACTACCTTCGCATGCGGGCTGA  
GCTCGACACCTACGGCAACTATGTGTACGGGGGTGGCCAGAAGATTGTGCAGCCGGGACG  
CGAGGCTCTGGAAGGGCTGTTGACTTCGAGTGGTCAGCGATCGTCGTGGACGAGTCGCA  
CAAGACGCTCGCCTGTGGTACGGGTAACCGCAAGAAGTGGTCTGCACAGCGCCTGAGCCT  
AGAAGTCTCCGGGTGAATAAGGATGGGCTGCGGATAGCCCTGAGCGGCACACCCTCCG  
GGCAAGGAAGACAACGCCTACGGCACCTTGCAGTGGCTGCGACCCGACCTGTTACCCGG  
ATTCTGGAAGTGGGCTTAGAAGCACTTCCAGATCTACGGCGATGGTTTCGGACAGATCGT  
GGGCGAGGTCAAGGACTCAGAGGAGTTCAACAACAGCCTCAAGCCAGTCATGGTGCGGCG  
CACCAAGGCCGAGGACGTCAAGGACCTGCCTCCGCAGATCTATGCCGGTGAGCATCTCGA  
CCCCGAGGACCCCAATTCCGCAGTGGCAATTTGGCTTCCGATGGAGGGGAAGCAGCTCAA  
GGCGTATCAGGCCCTTGGTCAAGGATCCAGCCGTCAAGCTGGAGAGCGGTGTCCTTTCCGC  
CAACGGCGTCTGGCGGATATGACGCGTCTGAAGCAGATGGCCTGCTCCTATGGCGATCT  
GGCTATTGCTCCGACAGGAGAGCAGACGTTCCGTCCGTGTTGCCGAGCCACATGTTTGA  
TTACCTTGTAGACCTTCTGAGCGATCGTGGCATCGGTAGTGGCGAGTTCGACTCTACCGG  
GAAGGTGATTGTGCGCCAGCCAGTTCACCAAGCTGCTGAATCTGTTCTACGCCGAGCTGAA  
CAAGCTGGGCATCAAGTGCCACCTGCTCACCGGCGCGACTTCGGAGGAGGAGGGTCCG  
TATGGCAGACGCCTTCCAGAACACCAAGATTAGCGACGACACGCCGACGGTGTTCCTGCA

GAATACCATCGCTGGTGGCGCGTCTATCACTCTGGACGCTGCGGATGATGTTGTGACGCT  
TGACGAAACCTGGAACAAGGACGACCAGGAGCAGGTCGAAGATCGCGCTGACCGCATCAG  
CCGTAACGACCACACGGTGACCATCCACAACCTTCGCAGTCGGGGCAGCATCGAGGAGCG  
CATCGCCACGAGTGCGTTTGTCTAGTAGCGAAACATCAAGTCCATCATCGACGCAGCGCG  
CGGTGTGAGTTTCGCACTCGAGCTCCTGGAAGGAGTCAAGGCATGAGCACCTCAGCGCA  
TGCTTCATCACGGCCATGCTCAGCGGGTCATCAATGTACTTGCAGGCCAGGCGGATTAC  
CGAAGCCTCTCACCAGAGAGGAGATGCGGGACTACATGGAGCGGTATCTACACCGGGAG  
GAGGCAGAGCTGGCAGAGCGCCGTCTACAGGCCAGCTCTACAACGCTCGGCGTCGGGCT  
GCGCCGCATCCGGACGCGGGTGCACCCGTGCGGATCACCAGGGTGCACGTGGCTAGAAAG  
GGGAGAGGCGAGCGAGAGGAGTAAAGTCAAATAAAAGTTCGGATAAATTACCGATTCCGAC  
CAAGAACCAGTAAGCTTCATTCCACGCCAAAAACTTCATAATCCCAACGAACAGAAGGA  
AAAACAATGTCCCGGAAGCCCGAGTCCAAAGAGACAAGCACCACCCGCGAAGGCAAGGTG  
CGTTTTGATCCTTTCGCCAATCCGGGCACCTTCGCCGAGCAGGAGGCCGCGTGGCTGAAC  
GAGCAGTTCCCCGGCCTGAACGTCAAGGCCAGCCACGTCCGTGCGGTCATCAGTAACCAC  
ACGCCCTCCAGAAGTCCGACCTTCGCCGCCAAGCGCGGGACGCCGAGCGAGCCAAGCTC  
GCCGAGGATCGCGAGGCGCGGAAGGCTGCCGCCGAGCAGCGCAAGGCCGAAGCCGAACAG  
CGCAAGGCTGAGCCTGAGCAGCGCAAGGCAGAGCGTGCGGCCAAGGCAGCAGCCAAGGCT  
GACGAGAAGCCCGAAGCCAAGCCTGCTGCCATGAAGGCCACTCCGGCCAAGCCGTGCC  
AAGCCTGCTCCCAAGAAGCGCGTCTCGCGTCCCCGGAAGCGTACCGGTGACGTGCCCGCT  
GAGGACGCATTCTGATCCACCCACCCCTGGGGGTGGCTGAGCCTCTGGGACATGGGTA  
TGGCCAGAGTCTCGGTGGAGGTTGAGCAAGTGCACCTCTGAGCACCGGATCTCCATCAC  
AGGACTCCCGTCAAGTCCAGGAACACTCAGCCTCATCCAAGAAAAAGCTCACTGACAG  
AAGGGAATCTGCAAAGTGAAACGCATCAAGAAAGTCGCGATCGCCGCTGTGGTGGAGACG  
CAAGTCGGCCTCGGAATCCTCAGCGCCCCACCGGCGAACGCCGACTATATGATGGGGTGT  
GAGCGAGTCCGCTGGGGCTTCTGTTCAGTGGCTATCGCACCATCTGCGACGGCCCCAAG  
CGGCCGACGGCAGCTGGGACCGGACGCGTCTGAATCGACCCAGCGCACATGGCTGGC  
GGATACTGCTCGGGCAGCAGGTATTACCTCAGCTGCACCCCGAGCTACTGGCTCAACGAG  
AGCAAACAAAGCCTCGAGACCTATCCGGTCATTGATGCCACTGTGTTGCCTGGCGAACCC  
TGCAGGCTCCACCGGGCACGAACAGGATCCTCTGATCCATGGCACCCAAAAGCTCACGA  
ACATAAGGGAATCCATGAAACTCAAGGTGTTGACATTGATTGCCTGCGAGCAGTGCGGCA  
CCCATTCGGTGGGCCAGAAGCTGGCGAAGACGACTACCGAAATCTTCCGGGCAAGATGA  
CGATTGCCGAATATCTCGTCGAAGAAGCTCTGGCAAGTATGTGGATTCTGCTCATCTGGG  
GAGACGACGACGTAATTCTGTGTGGCCCTGATTGCGTCAAGAGCTGGCTTGATGAGGTGG  
TGTGGCGTGGCAACTAGAAATCCCGCTGCCCTGCTACGCAAGAGCGAACGCACCGTGTAC  
AAGAGGTGCCCGTGGAAAGTGGTACCAGAGCGTTGTGCGCGGCCTCGTGCCGAACAATCCC  
CGCCAGGACGCGAGGTGGTTCGGTACTGGCATTACCTGGGCAAGGCCGCGTGGAAACGTC  
CCCGGACGCAAGCGTGGCCGCGACATGCACGATACCTGGGACGAGTTCTCACAGGGTACA  
TTCACCACAGTCAGCTCGCAAGGGCTGGTGAACGACGAATGGGAGAGCGAGTGGGTTGAC  
GCAAACAATCTGGCTCACGCCATGATTGACACCCACCTACAGGCGTATGGGAACGACGAC  
AACTGGGAGGTGATCGCTGCTGAGCAGCCATTTTCGGTCTCTGATCCCGCACCCCGACAAG  
ACATTC AACCATTCGGTGTGCCGGTACGTGCGCACCATCAACCTGATCATCCGCGAGCTG  
GACACCGGCGAGATTTGGCTGGACGACACCAAGACCGCCGCGCGCATGTATATCCACCAC  
CTGACACTGTTGGAGCAGCCTGCTGCGTACGTAGCTGTGGGCACGCACGCCGTCCGGGAG  
CAGGAGATGATTGGCCCCAAGGAGCGGGTCAAGGGCATCATCTTCGACTTCATGCGGAAG  
GGCTTTCGGACGATCGTCTCGCAACGATCGCGGCGAGTATTGCAACAAGCGGGTCAAG  
TAGCACTTGTGCGAAGCCATCCTGAATTGTCCGGGGTATGAAGGTCCTCTGAACACCGAG  
CGAGATCTGCTTCGGCTTAAGCTCGACGAACCTGCAACACATCGCCGATGAGCTCAACCTG  
ACTGTTCTGGGCGATGTCTCCGCCAACAGGGTGCGCCCTGCTGTTGCGAGAGATACTC  
CTGAAGAGCCC GAAGGAGTGTTCACGGCAGATCCGCAGGACCGGCGAGAAGGTGCTACAC  
ATGAACGCAGTGCGCGCCGGTAAGCTCCCGATCCTCAAGACGCCGCGAGGACGACTGCAAC  
TTCTGCGATTACTTCGATCTCTGCGAGCTCGACGAGTCTGGCGGAGACACGGAGTATTT  
GCGTCGCAGGCATTTGTGGTTTGTGATGCCTACGCGGATCATCGCGAAGGCGCTGAGAAT  
TCGAAGATCAGCGTCAAGAACA AAAACAAGACAGGAGTGCAGTGGAGGTGGCCGGTAGCCT  
GAAAGATATGAGCCTCAAGGAGGTTGCAGCCCTCAAGAAACGCGTGAACAGACAGTACGC  
CCTCAAACGCATCAACGGTGGTGACCGAGACAACCTAATCGAGCTCATCGACAAGGTTGA  
GGCGTACATCATCAAAATGCCTGAAGGCAACCGAAGCATCCCCGATTTCTACTGAGAAAG  
GAAGGCTGATGGTCCAATCCAAGATCAACAAAGTCGCCGACGACGAGGACTACGTGAATC

TCCTCGTGTATGGTAACTCCGGGGTGGGCAAGACGGTGTACTGCGGCAGTGACGACGAGG  
TGATGTTCTTTGCGCCGGAAGACAACCTCAGACGGCCTGCTCTCCGCCAAGCTGGCGGGTA  
CCACGGCGGACAAGTGGCCCATCCGGGACTTGGGTGATCTCGTTGAGGCGTACAACCTATC  
TCGACGAGCTCGCCGAAATTCATACAACCTGGATCGTGGTCGACTCGCGGACCGCGATGC  
AGATCATGGCCATGCAGGACATCCCCGATCGTGCCGTCGAGGAGAATCCGAGCAGTGATC  
CGGACATCCCGCAGATCCAGGCCTGGCAGAAGTATTACGAAATGGTGAAGCGGATGATCA  
AGTGCTTGAACGCTTTGCCGGTCAACGTTATGTACACGGCGCTGGCGCGGCAGACCGAGG  
TCGAGGAAGGTACCGAGTACCTTCTCCCCGATCTGCAGGGCAAGAAGGACAACCTACGCCA  
AGCAGGTGGTCAGCTGGATGACCAGCTTCGGTTGCATGCAGATCAAGCGCGTCCGTGTCA  
AGACGGACGACGACATCGCCAAGAAGGTGAAGGAGGTGCGCCGAATCACCTGGAAGGACA  
CAGGTTTGGTGACTGGCAAGGACCGCACCAACGCTCTCACCCCGTACACCGACATCCGCG  
ATGTCACCAATCCTGAGGATGATGGCCTCACCTCAAGGACATCAGGCTCCGCGTCGAGC  
GGAAGAAGACCGGCTCTGCCAAGCCGGCAACCACCAACGTCCTCCGGCCAGAAAACTGCGT  
CGGCTCGTACTCAGAAGGAGAGTGCATCAATGCCCAAGCTCAAGCCATTCGGCATCGGCG  
ATGTCGAGGACATGATCATCGCCGAGAACTCCTTCAACACGGAGGTCGTGCCCAAGGGCG  
TGTACCAGGCGAAGGTCAAGCGCATGAAGCACGGCACCATCCAGAAGGAAGGTTCGGAACA  
AGGGAAAGAGCCGCTTCTGGATCTTGATGGAGGTGTCGGCCCGAAGTCGACGCCGAAGA  
CGTACATCGGTGCCTCAATCTCGCACAATATCAACGTGATCGAGTCCGGCGTTGGCTTCT  
GCAAAGACTTCCTCAACGCGCTGGCGGGACCGGAGCCCGCCAAGCAGGCCGTGCTGAATC  
GTGCGTTCTGGGCAGCCGACATCGTCGTCGATTCGGACGGGCACGTGATGAAGATCGGCA  
AGAAGCGTGTCAATGGCGACGGCAATGGCGAGCTCGTTGTCACCGTCAAGACCAAGCTCG  
GCAGGGACCCCTCGTTCGGGCGATCCGCAGGGCGCGGGTTGACAAGTTCCTGGTCCCAGG  
CTAACGACGACGACGATGACGACGACCTCGATGCGGACCTAGAGGACGACGATGATCTCG  
CCGATGTCGACGACGAGGATTCGGACGACGATGATTCGGACGACGAGGATGCGGGCGACG  
AAAACGACGAAGACGACGAAGACGACGAAGACGACGAAGACGACGAAGACGACCAAGACA  
ACGAGGACGACGACGACGAGGACGTGGAGGAAGACGACGAGGACGACGAAGACGAGGACG  
AGGACGAGGATGGTGAATCCGACTCGCGCCGTGCGGAACTCGAAGCCCTGACCATCGCCA  
AGCTCCGCGTCGAGGCCAAGAGGGTTCGGTGTGCCGCCAGCAACGCTCAAGGGCCAGTCCA  
AGGACGAGCTCATCGATACCATTATCGACGCCGAGGCTGACTCGGACGGCGAGGACGACC  
CGTTCTGCTCGGGTAGCACATCGGGTACCTGACAGACGAAACCGTCAGGCTAAGTCGTTG  
TAGGGACGTCCACAGCCCAGCCCAACAACCTTTCAGCAAAGGAGCCATCATGGCCGATGA  
GCGTCGGTGCCTGCGGATGTATCATGGTCTGGTTCGAATGAAAACCACACATGGCTATG  
CATCCACTGCGACCTCAACATCGAACATCAGGAGTACGCCTCGTGAAATCTGTTGCCATC  
CTTGGTTGTGGGCCTTCTGGGCTCCTCGTGGCTCATGACGTCGCCATGCTCGGCTGGGAC  
TTCCGAATCTACAGCAAGAAGCGCAAGAACCTTCTGTTTGGCAGCCGATACCTACACGAG  
GCCACCCCGGCATGACAGACCCAGTTTCGGCGAGCGTGGCATAACAACCTTGTGGGTACG  
CCAGAAGGCTATCGGCAGAAGGTGTATGGCGCTGGCTACGATGGCAGCGTGTTCGACAGAA  
GACCTCGAGCAGATCACTACGCCTGTAACATCCGCCCCACCTACGACAAGCTGTGGAAT  
GCCTATCTCGACGAGATTGTCGCCGTGGTGTATCGACAAGCGCTGGGAGTCGGCCGAATTC  
TTGCGGAATGGCAGCACTGACTTCCGCCCCGCCCTGATCATCAGCACGGTGCCTCGCAAG  
ATCTGGGCCAATCCTGGCGATGTGTTTCGCAAGCCATAAAGTGTGGGCGATCGGGGATGCG  
CCCGAGCTAGGACAGACCGTTCGGTTCGAGCCCAAACAGGACAACACGAACATCTGCGAC  
GGCACAGCCGACGTCGGCTGGTACCGGCTGTGCAAGGTGTTTCGGCTACACCACCATCGAG  
TGGCCACACGGCCGCAAACCTCTTATCCCGAACATGGGGGAGGTCGAGAAGCCGCTCTGG  
CACAAAGTTCTGGAGCCAGCGACTTCATTCACAACGGTCGGTACGGCGCATGGGAGAAG  
GGCGTGTGACGACAGACGCCTTCCACCAGGCCATGAAGTACCTCGGACAGGACAAGTTG  
GGCTGACCGATGATGGGCAAACCTGTTGTGGGACTTGACATTGATGGGACACTATTCGAC  
TACCATGGGCACTTCTTGCCTTTGTAGAGGATTGGTATGGCCGACCAATGCCGGACCCG  
CAGGACATCAACCCAGGCCTGCCCTTACAAGTTTATGCGTACGTCCAAAGCTACGTAC  
CGGCAGTGTAAGCTGGCATAATCGCCAGGGAGGCCTTGAGCGCAGCATGCCGGTGTATGAT  
GGGGCGTCCGGCGCTGACCCGAGCAATCCGCCCGCGCTGGCGGAGAAGTGTGGATCTGTACG  
ACCCGTCCATATCTCAAGCTCGACACCCAAGCGCCAAACACCATAACACTTGTTCGGGCGC  
AACAGAATCCAATTCGATCACATACTCAGCGGGCCACACAAGTATCGCGACCTCGTGA  
CAGGTGGGTGCGGACCGAATTGTCGGAGTGCTTGACGACCTGTCAGAGATGTACGAGCAA  
GCAGAAATGTTGGGGCTCAACCCATCCTTGGGGACCAGCCGTACAACCGACACATCACC  
GCAAACCGCATCAAACATCTGTACCTCGCACAGATCTCATTCCTCGCGAGGATCGAAGTG  
TACAAAGAGAAACAGAAGGGAAACTGATGGGCTCGACATATTCATCAGACAATCTGTTGA

GCTTCGCGCTGTTCCGGGCTGTCCCGCCACGCAGAGTGGCCTGTCTTGCGGAGGCTGGACT  
GGGATACCCCATGCTGCACCTTGGTCCTGGCGATAAGATTGACCGGGGCGCTGAGGAAC  
TGGACTACCCGGCATTTCGATTTTCGATGACCCAGAGATCAGCTTGCCGTACGATGACGGGT  
CAGTCGGCGGTGTCATCGCCACGCATGTGCTGGAGCATCTGGCTGACCCACGCCACTCA  
TCCGGGAGGTGGCGCGTGTGTTGAACTTCGGGTGCCATTCAACATCCTGGTGCCTCTCG  
GTCAGTCGCCGATGTATTTGCAAGACCTCGACCATAAGACACCGTTCGTGCTTGCCACGT  
GAAAGAACTTCCTGCACAACGGATTCTATGACAACAATTACGGCGAGGGCGGATTGCCGC  
TCAGTATCGGGCGCAACTTCAAGTTTGCCTCAAGGAGGGCAACGAAGCCATCATCACCC  
AGCTCATCAAGGAGTGACAGTGTCCAACGAAAACAAGCGTGTGCGAGTCATTCTGGAAGA  
GCTCACCTCCAAGTACGCCAGTCCGGTGGATGACTTGATCGCCAAACATCTTCCGCGCGT  
GCTAGAGCTGTTCCGGAGCAAGGCGCGCGACTACAGCGACCGCTCCGGCATCTTCGCGGC  
CGAGGTGCTCGGTGCGCCGGGGCAGTTCGCCGAGATCTGGCGCAAGATTCCCAAGCTCAA  
AAAGGGCCTGTGGGACCAGGACGCGCTCGAGGACGAGACCGGCGAAGAGATCATGTTTCA  
TCTGATCGGGCATTGCGTGTTCGCGTTGGACATGATCCAGACAGTATGCGGATCGGCCA  
GGCTCCCAGCGGACACTCATGGATACGAGGGTACGAGATCGGCGAAGTCAGGCGCGTTCC  
TTCTGGCACCGAACGCTTCACTGACTCAGACACGAGTCCGATCACGGTCAAGCGCGATGC  
TAACGGTGGCGACTTCCGTGTCTAGGGCATGGGTGATCGGTGGCGCGTCCGGCATCGGGA  
AGGCTGCGCCGAGCGGCTCGGCGAATACATGGTGACCACGAGCACCGGTCTACGAGAAG  
GGTATTGGGACGTCCGCAGCGATTTGCGATCCATCTTCATACACGATGAGGTGATACTC  
CGACCCACATCGTGTATGCTGCAGGCATCAACCATCTCGACTGGATCGGGAATGGTGCGC  
GGAGCCATGTCGAAGTTATCGACACCAACCTGACTGGATTCAATTCGTCTGATGGACGGAC  
TGGTGCCTTTGGCTACTACAGCACTGGCAAGCTGGGTGGGTATCCGTACCACATAAAGC  
CCAGCATCGTCGTGATCAGCAGTGATGCGGCTGAGCTACCACTCCGAACCTCTATCCGGT  
ACTGCGCATGCAAGGCAGGGTTCAACATGGCCGTCAAGGTGGCTGCTCGAGAACTCGGTC  
CGTACGGCTTGCCGATCAATGCCGTCTCGCCGGAGATGACTGGGCCACGGGCATGAGTG  
ATTACATCGACAAACGTGTTCCGGAATTGCGAGGTTTACTCCGATCGAAGCTGCGCAGT  
ACGAGTCACAGCAGGAGGTCGTCCCTGGACGCATCGCTACTCGAGAGGTGGCAGAGGTGG  
TGTTTCGATGTGCTCCCCGGACCTGAGCACCTCAACGGGTCCATCATTACCATCAATGGCG  
GGCGCTGACCGGTAGGAATTCGGCCTCCCCGAGAGGGGAGGCTGAATTTCTCCGAAAC  
ACCCCTATTTCGCGACGGTGTAGTAGGCTTCGGCCCAGTGTCTAGAAGGGAATATTGAGTT  
GAAGGACCTTGAGCTCAGCCAGCCAGACCCGACCCGCGGGAAGCGAATTGGTGAGGAGCT  
CTCTTTTCCAAAACCAGCAATGGCTTGTGCGGTGAGACCGATGAAGTTCGTATGGCTTCA  
CACCCACTAAACCTTCTCCTACGGCGATGGCTACGGACCACTCAAGGAGCACGTCCACCG  
AGTTGCGGAGCTGGGCATGGGCGCTCTGGCGCTCACCGAGCACGGCAACCTGCGCCGCCA  
CGCACAACCTCGAGAAGGCCTGCAACGAAATTGGAATCAGGCCGATCTTCGGGTGCGAGCT  
GTACGTTGCTCCGCCAGGCGAGAACCGCAAGTGCCATCAGACGGTCCCTGGCGATGAACGA  
GGTCCGGGCTCCAGAATCTGAACCGCATCGTCATCAAGAGCTGGAAGAATTCTAGCGGTG  
GCCAGAACCAGCTGGAAGTAGTTGGAGGAACACAATGAGGGGCTCATCGTACTTTCAGG  
ATGCGCCGATAGCGTACTATCATGCACGCTGCTGGGTGGTACGTCTTACGGTGACAAGCG  
ACTCACCGCAAGCAAGCGCGACATCGCTCGTGGCGCTGGGCTTATTGGACGGTACCAACA  
GGTATTTGGAGATCGGTACTACCTTGAAGCCCAGAGATTTCCAAGACTTGATCGCACTTG  
CGTCTCAATCCGCTCCTCGCACGGCTATCGGAACTCACCGGAGATCGTCTTGTTGGAAC  
GGCTGATGTTTATGATCCACGTGGATCCGACAATGATATGCAGAAGATTCTTCACGCGGC  
TCATCGCGGGTCTACTGTGGAGGCTACTGAGGCGTCCCTGGGAGTATGACATTCTCCTCAC  
TTACCCGGAATCAGGCCGAGAAATCTATATGGACCTGGTGGGTACGGGGCTGACCAAAGC  
CCAATCGCGCGAAGCGGTTCTGGAGTCTGGGCGAATCGCTGAGCGCTGTAACGTGATTCT  
GCCGAAGAACCAGCCGATCCGTTTCCCCAAGCCTACCAAGGAAGTTGACGGCACGCAGGT  
GCCGATGAGCGCCAACGAGCTGATCCGTAAGTGGCTCAACGAGGGCTGGCACTTCCGTAT  
GGCGACCAACCCGAACATGCGGAAGAACCCCCAGGGATAACAAGGCACGAGTCGAGCATGA  
GCTTGGCATGATGGAGTAGAAGCACTTACGTGATTACTTCTGATACTCAGCGATGCGGT  
CCGTTGGGCCAAAGACCACAAGATTCCGGTTGGGCCCGCTCGTGGTAGTGCTGCGACGTC  
GCTTGTGTGCTACTTGCTTCGGAACACTGAAGTCGATCCGATGCTCTTCCCGCGCATGCT  
GTTTGAACGTTTTCATTGATCCGACACGTACAGAGCTGCCCGACGTCGACCTTGACTCCTC  
AGACGACCGACGAATCGAGGTCAAGCGCTCCCTAGACGAGAAGTACGGTGCGGACCGTGT  
TGGTAACATCGGAAACTTCACGCGTTGTGCTGGCAAGAACTCGATCGACGACGTGGCTCG  
CGTGTACAAAATCCCCGTCTCGGAAACGGAAATCGTCAGGAACCTCATCATCGAGCGCTC  
CGGCGGTGACAGTCGTCTCAGTGATTCTTTCGAGGATACATCCAACATGTTCCCCAAGAC



CGCAGCAGTTCTGGAGCGTCACCCAGAGCTCGCCAACGCGATTTCGCCTGGAGGGAAATTA  
CCGGGGGATGGAAGTTCATGCTGCCGGCATCATCATTAGTAACACTCCCATCACCGATAC  
CTGCGCAGTCTACGAGCGGAATCGGCCGGCAAGACGACGACGGTCATCGCATAACGACAA  
GATGGACGGCGAGTATGTCGGCATGCTCACGGCAGACTTCCTCGGTCTGTGACGATGGG  
CATGATAGGTATCGCCCTTGACACGATTGGGATGGAACCTTGAAGACCTATATCGAATCCC  
TCTTGATGACCAGAAGGTGCTGGAGGCATTCCGGCGTGGAGACGTCCCCGGCATCTTTCA  
GTTTGAAGGACGAGCTACGCGGATCGTGTGCAGTGACGTTGTGCCTGACCACTTCCAACA  
CCTGGCGGATATCAACGCACTCAGCCGCCCGGGTCCGCTCTTCTCAGGAAAGACTGCGGC  
TACTGCGAGGTCAAGCACGGGCGCAAGACTCCAGAGCGGTACCACCGCATCTTGACAA  
TCTGACTGACTGGACATATGGTCAGCTGGTGTACCAGGAGCAGGTTCTAAGCACCATCAG  
GGAGCTCGGAGGCTTCCCGATGAGTGAGGTCCACAGTATCCCTAAGATCATCTCCAAAA  
GCTCGGCGAGGCCAGTTCTAGGCCAAATACAGGATGTTTCGAGGACAATGCTTGACAGAA  
CCACGGCTGCACCCCGGAGCAGGTACAGAAGATCTGGCGCTTCCCTGGCGACATCAGCCAC  
CGACTCATTCAACATCGCGCACTGCATCAGCTACAGCATGCTCGCCTACTGGCAGATGTG  
GATCAAGCAACACCTCCCCACCGCGTTCTATGCGGCCAGCTGCGCAAGGTCAACGACGA  
GAAGCTCTACATGTTGATGCGGGATCAGGTGCGGCACAACATGTCTATCCTCCCGCCAAG  
CATCAACGAGTCGATGGCGAGCTGGTCCGCTCCCATGGAAGGTGTTGTGCGCGCAGGATT  
CCTTCAGATACCGGGAGTGGGTCCCAAGACATCGGAGGAGATAGTCGAATGGCGCAATCA  
GAAGCTCAGGAAGGGACAGAAGGCAATCGCAGCCAGTGCCCCGGACCGCATGTGCTCGGA  
CCTGCTTGAGGTAAAGGGGATTGGCCCCAAGTCCATCGAGAAGATCGTGGCATTCTGCGA  
GTCAGAGGACCCATTCGGGCTCAACAGGGTTCAAGACCTGTTCAAGTCTCTGCGGCGGAT  
CATCAAGCCCGTCAATGGGTATGGGGTGCCAGCGCCTACGCATAACAGCGAGAGCATCCC  
GCGTACCGGCGACCACGACGGCATTGTCTGGATGGGCATCCCCGAGGCCAAGAACTATCA  
GGACTATATCGAGAATCAGCGGTCTCGGTACGGCAAGGAAGAGGCCGAGATTCTCGCTGA  
GATGAAGGATCCGCATCTGGTCAAGTGCTGTGTGGTGCAGTGCTTTGACGACTATGAGGA  
CGACGTGTACTGCCGTTGGAATCGCTGGCAGTTCCCGAAGTTTGAGAAGATGCTGGAATC  
GCTGGCCGTTGATGGCAGCAACGTCCTCATCGTGCGCGGTCGCAAGCGTGAGGACTTCGG  
AGTGTCACTCTACGTGACGGATGCGTGGGTGCTTGAGTTGGACGAGGACGAAAGGCTATA  
GTATGGGCAAGAAGAAGAAGCGTGTGGGCAAGCCCGGACCCAAGCACAACCCGCTGAAGC  
TGGTGGGTGGTGGCGAGGACTCGGCCGCACGGGTCATCAAGGTGATCCAGAACATGCTCA  
AGCCGCCAGAGACGGTGCTCGCGCACATCCAACGCGTAGGGGCTCCGTTCTGGGTAGCAC  
CATTTGGAGTTTCGCAGGAGGGCGAGCAGTACGCGCCTCCGTGCCTGGTGGCGCCGTACG  
ACGACCTGATTTCCGGCCGAGCTGGCCATCTGGCTGCTGGCGAGGAGCTTGCCGAGACGT  
ACACCGAGGAAGCCCCAAGGCGAGTCTCGCGGCTGCGCGTAGTGTGCGAGGCGCACAGC  
CCAAGAGCGACCTGGACCCACAGCCATTCTGGCCCAGGTAAAGGAGATGCAGCAGCAGG  
TTCACGGCGCACAGTCGCGGGTTGCTGATACAGCATCAAAGATCGAACCACCGAGCTTT  
CGGACGAGGAGCGCGACGAGCTCGTCCGCAAGCTGCGGGGTTAATTCCAACAACAAGAAG  
GGAATCACATCATGACCTGGAAAGAGATCGCCAACACTACGCCGACGTGGCGTTGCTCAAGG  
CTGAGGAGATCGACCGCACCAAGGGACCGCTGGTGTTCCTGCTGTGCTGCAACAACGATC  
CGCTTGGGAGCATCGCGGCTGCTGCCAAGGCGTACAAGGGCGAGTTCCCTGAGTCACTGG  
CCCAGATCACCGACGACGAGCGCCGGTACTACCTCAAGGAGGTGCAGAAGTCGGTGCTTG  
AAATGCCCTCTGGAGGCTGTCCAGTTCCACTTCCGCATCACCGGTATGACTCGCGGGTTCA  
CCCACCAGATGGTCCGGCAGCGCACCCGACGCTACTCCCAGGAGAGCACGCGCTTCGCCG  
TCAAGGAAGACGTCCCAGTCGGATCGCCACCCAGCCTGCAAGATACGATGCGATGGAACG  
AATGGGTTCGAGGATTTTTCGATGGAGATCTATCCAGTTCGCAGCCAACGGCGTGCGTATG  
TTCAGGACAGGCGTGACCAGGCTGAAGAGTTCGCCGAGACGATGGCCGACAAGGTTACGC  
ACTGGCGTCTCGGTGGGGTAGGGCTATAGGCGTCATCGAGGAGGAGTACAACGCTCAGG  
TCAACGAGGGCATGCCAGGCGAGGACGCGCGTGGATTGCTGCCGACGAACCTTCTGACCC  
AGATCAACTACATCACCGATCTGCGTGTCTCAAAGGCCATGCAGGCGTGCGGCTCTGCA  
CGCAAGCGCAGTTCGAGTGGCGTCAGGTCTGGGCCAGATCGTCCGGGCGATCCGTGCGT  
ACGGGAATACCAAGACGTACATGACGAACGACAATGTCCAAGACATGCCGGAGAACCAGA  
AGTCGTTCGAGTGGCAGTTCGATGCCTTAGCGGACATCTTCCGGCCGATCTGCAACTACC  
GGGGGAGCTGCCAGTTCAGGTAGACTTCGACCGGCACTGCATAATCCGTGATCGCGTCCG  
AGGAGAATGCCGGTATCAATCGCCGAGCACCGACTGGGAAAAGGAATGGGTTCGGACCGA  
AGCCTCTAAGCCCCACTGGCGCTGAGGGTTACATCGGACCGATCTTCCCGGCTGAGTGGC  
TCCTGGATCCCTCAGCGGGAAGGACGAAGTGACCATGGAGACCGGCGCATGCCGACTGTG  
TCGGAGGGTGGTCGATCGGGCCGCCCTCACCCAACACTGGCTACACAGCTTCATCTGCGC

GCGATGCAGTGAAGGATTGAAACGATTGAGCGCGAAGCTCTTGCCCACGACAGGAGGGGA  
TTCAGTTGGGAATCATCGTCAATGATTTGGCCGAAGGGAGGTTCGCACCGTGCCGCGATGC  
GTAAGAAGAAGTGCAACAGAGACAGCGAAGCCGGAATCAACTATTCCACAGCACCGGTCA  
TCGCTGTTGATCCGGGCGGAACGACCGGTGGTCTTCATGTGTGTGGAGCCATTGGCTC  
TGCACGACCCGACAGGAAATGGTACTCGAGAACATCATCACTCATCAGCACGACGAGCTCA  
GCCGCACTGTCGGATGCAATGTGCGGGAATGCGAAGACCTCTGCGTTCGACAGATCTGTATG  
AATTCATCTCGGCTTGGCCCCAGACCGCTGTGCTGGTGGAGGACTTCGTTATCCGAAGCA  
ACAATCGGAGTCGCGAATTCCTTTCGCCCGTGCAGATTACCGCCAGACTCAAGCACCTGC  
TATGGGCGGACAACCCATAACATCATCCGACAGACACCAGCAGACGCCAAGGTCAGTGCGA  
GCGATGACCGGCTGAAGAACTGGGGCTTGTACGACAAGCATGGCAGTCTTGGGCACGCAC  
GCGATGCCGATCGGCACGCAATTACATTCCTGCGCAAGGCCAAAAGCAACCCGAAGCTCC  
GGGCGATGGCTTGGCCGCACCTATTCGTAGAGGAGCGTATTTATGCAGTCGAAGACGACG  
AACAAAGCTGGGGCTGATGTGCCGCCAGCGTGGCTGGTTCGGGTGCTGGGCGATCACCAG  
CAGCAGATGAATGGGCTGTGGTGCACATGCTCTTGGAAAGAGCACGGACGCCTTCGGCGCT  
CCGAAGCACTACACAACCTTCTCTGCACAACATCAAGCGGCCGAAGTACATCGCGCTCTG  
AGTGATGGCGTCGCAGCTCTTTGCGAGGAGGTTCCGGTGAAGCAAATCGGACGAGTTCTATG  
CCAAGGCGTTGGTTCGCGCTAGCTGATGCAGAAGCTGCGCAAACCTCACCTCAAGGAGAGCT  
TCGACGACAATCACAACACCTTCTGGTCTCAGCGCGTACTTGCAGTCTGTGCCTTGGCGA  
ATGCCTAGCTCAAGGTCGCAGGGTGGGAGCTCGGCTTCGAGGCCTGGAACGGGAAGGAAG  
AGGACCAGTTCTCGGTGCTCACCTTCGGCACAGACGAGGTGGTCGCGACGTTCCCCGACG  
ACATCGAGGAGCGCCGATGAGGCGCGCAGGCATGAACGACCTCAATCCGACAGTCGTCAA  
GAGCCAGAACGACGCCACTACAAGAATCCAAATCCCAAGGACGCCTTCACATTCGGGGCG  
CACGTGCCCGGACTGCGCTGGCGGGCTACAGTACAAGTGGGACCGGATGAAGTTCGGGGCC  
CAAGCGCAAGGGATGGATCTGTCTGCTGCCACGAGATTGAACTGGAAGGGCTGCCACC  
AATCAACACGGTTCGGCCCCGCATCGGAGGAGGAAGAATGCCCCGTGGAGTAGCGATTACT  
AAGGAGCAAATCGCAAGGGCGGAGGAGCTTTTGAACAAAGGCTGCTCTTCCCTCGAAGTC  
TCCCGAACCATCGGCATCGGCGAGTTCAGCATTGCTCAAGTTCGCCGGTTCGGGGCTTG  
ACACAAGAGCAGAAAGCCAAGCACAAACGTCTCAATGATCTGTTCAAGCGTCTCGTCACC  
ATCTGGTGCTTGGAGAGGGCACAGAGAGGGCGAGAGGGCGCGCATCATAAGTTCAGTAGCCC  
GCATCGGCCCGAACACAGTACGATAAAAACCGTAACTAGGAGGAACCATGAAGCTCACCGG  
AACTGCCCCGCGAACGTCGCGGGTGAAGCGGGTGGGTTCGAGCCAGAAACCGACCAAGCGTT  
CATGGAGTATGCCCGCGAGCTCGGGACCAAGACCTCACAGCCTTGCGCCGCGTCACCAT  
CCTTGGCTTGCCCCAAGAGGGCTTCCAGATCGACAGCGAAGCGGTTCCGATGCCCGACAG  
ACCATCACACAGGAAGGATTGACCGATGAACCGAGTGGAGGTGGCCCTCGCGAGCGTAGC  
CCTGTCTGCGGCGATGCTGCTGAGCCAGGCCGCTACTGTGGGCGCAGAGCCCGAGCAGCT  
GCCCGGAAGGACCAGTTGTACCTCACATGCCTAGTCATTGGCGAGGTGCCATACGGAAC  
GGCTGCAAATGCCACTCCATTGCACGTGCTGTATGCCAGGGTATCACTGGCGGAGACTG  
GGACGCCACCTCTCTCGGAAAGCTCGGCCAAGAGATCATCCGCAACAACCCGAAGTTCGA  
CGCCGACTCGGCAGCGAACATCATGGTGTGAGCATGACACTGTACTGCCCCGAGAACAT  
CCCCGTCTGGTTCCACGCCGAGACGGCCAAGTCTCTCGCCGAGGACGCCGGTGTGGGTGT  
CCCTGTGGCGACGAATCCTGGTCCCTACAAACCCCTCCAACGCTAGGAGCTTCTGCCATG  
CACTCAGCGCCTTTTTGCGTATCTACCGCTGACTTCATCGTCTGGGGGATCACCTTCGCG  
CTCACGGCTCTCACAGCTTGGCCGCTGAAGCATGGTTGGCGCGTGAAGACTCCGCTAGAG  
CTCGTGATCGCACCTTCAACAAGCACGGCATGCCACCAGCGGTATCTGCCACATGGC  
TTCGATCTTACGGCGCACCACTACGCGCTCCGAGGCTATGAGCAGGTGGAAACCCAGGGT  
TGCGGCGAATGCGTGAAGGAACTGACCCGAACCTCAATTTACCCACAGCACTAGCTGCCCC  
AGCTGCTGGTTCGTCGGGGCGATAACCGTACGGCCCGATAGAAGAATACTTCAATCTCCA  
CCCGAGCAGACGATCTGAGTCGAGAATGACGATGGCAGCGTCCATCTCCGCAAAGCCTTG  
GAAGAGAACTGGGCCGAGACCAAATACAAGGTCTGGGGAGAATGGCAGCGAGAATGCAAG  
ACCAAGGACCTGAATCTGATCCGGGAATTTGCGGTGAAGCCTGTGGTGTACCGCACATGC  
CCGAGTTGCGCGTACACATGGTTTGAAGCACTAACAGCAGGGAATACATCATGATAATGAA  
AAACAGTCCGGAGGACGCACTGCGGAAGGCTACAGCTGCATTTGCTCTGCGTCAAATTCG  
TGAGGTTAAGGAGCGCGCTGACTACATGCTCGTCCACGGCCTGACCGAGGCCGACGTGTA  
CGGAAAGCATGCTCGTGAGGGCTGTGAGCAGCCCGAGAATCTTGGTTCGCTGGATCATCAC  
GCCAAAGGACTCAAGAGGGTAGTCCCAGACCCGGACGACGTCGTCGGCTGCGTGCCGGT  
TCTCGTTCGAAACCCGGACTACATTGGCGAGCACCCGAGAGCGTAACGAAACGTTGCGCCG  
GTAGTACGATCCTCGCTTCGGCAAGGATTGGTTCGGGCTACGTCGGCAAAGTTCCTACCA

GCAGAGGTTTCAGGCACACAAGGAGCCACAGCAATTACGGCACAAGCCCTATGGGTATCC  
GAACCCGGCCTGGGAGCTGAACTACTTCCGCGTCAACACCTTCGGCTGGACGCACTATGT  
CTGCCGACCCAAGCATGACGAAAGCTGCCGGTTCACGAAGAGACCATAGGAGGTGATGGG  
CTGATGGACTGGAATCTCTGATCGGGCGCTGCTAAAGGCGCTGCGATGGGCGCGACGATC  
TATTTGGTCGGATGCATCGTGGGATAACAACGTCGGATACAGAGCAGCCAAAAGGAGGCC  
CACCAATGAGAGGCGTGAAGGGCTCTGGCCAAGGCACATGGGCAGCGCGCTACGACACCG  
TGTGCTCGGTGTGCCCGCACCCAATCTTCAAGGGTGTATCCAGTCCACAAGGTGCACAACA  
AGGTAGCCCCCGAGGAGTGCCATGCGCTTGATGAGCGTGGCGGGTTCGGCCTTGATGTCA  
GCGGCATTGAGCAAGAGCGCCTCAACGGCCGATACGGGAAGGGCTACGAGGACCGGCCGA  
GCTACACAGTCCGGAGCCGACGCAAGCACGAACGAAAATGTGGCGAGTGTTCAGATAC  
ATGCAGGAGAATGCCCGTGAACTCGAAGACACACACGGCGGATACGCCGGTAAGAGCTT  
GGCCGAGAAGATGCAGGACAAGCTCGACTCTGCTTACAAGGCGTGGCGCGATGCCGGTGG  
TAGTGATCCTCGACAGAACTCGCAACAGGGACGGCACAACAGTAACTTCGGCCGGGTTGA  
GGGCTGTGCGGGCGCACCTCGGAATCCTCAGGGGCACAAGTACAAAACATGAGATCGAGGA  
AGCGCAAAGGCGATACAGATGAGGAATCCCTTCAAGTACGGTAGCCCGCAGCTGGTTGTG  
TTGGCGTACTGGCTGATGCGGTGGGCGTACCGGATCGTTGAGAGCATTGATCGGGGTCCC  
GTCCCGAAGATCAGCATGTGGACCTTCACCTTTGAGCGTGGGAAGGGTGGCGTCTTCGC  
AAGGACGATCGGGCAGAGCACAAGGGTTCATACTCGTGTATCTCTAAGATCGTGAGTAT  
GACCGTGCCTGGTCGTAGAGTGCCTCGTTCGGCAAAGACGAGGACGAGGACCAAGACGCC  
TTCGGCACCCCTGGATCTGCCCCGAGGAGCGGTAAGCCAAGTACGACAAGAAGTTCGGCAT  
CAATGCCGACTGGCGGGAGACCACGACGCGCGGGCCACGAGGAGCGTACGGCAGTCGCCC  
AGACAGCCCAGGAGACCCAGAAGCACCCAGTCGTAAGGGATTCGGGGTACGCTGGCGGCC  
AGACGGCACTTGCCCCGGCTGCGGCAGGCACTGGACCAGCGTGTACCAGACACGCGACGC  
AAAACGAAAATCCCTTCGGCACCAACCGGAAAACCTACCATACTTCTCACAAGACCACACC  
ATTGGAGGGACAATGAACGTTCCAGTCGCCGAAGCCGCACAACGGGCGATGAGGAAGGTG  
CAAGACTACCCAAGGCCAACCATGCCCTGATCGTCGCCCTCCCGTGAGGGCGTTGAAGCCG  
ATCCGCGAACTGCACTACCCAGAACCTGATGACCGAGCCCCCTTCGCCCGGAATGCCTT  
GTCGAGTGGCCCTGCGACACCGCCAACCTGGTCTACACCACCGAGGAGCTGGAGTGATGA  
TCTTATGGCATGCTCGGCGTGAACCTCGAGCACTCTCGGAACAATCGTTTCCACAATCGGC  
GGGTGGACAAGAGTGTCCAAGCTATATACACCTGGTGGAAAGTACATGGACGAGATCGACT  
TGGTGCATGGCGAGAACGACACCATGCGCATCACGGTCATGGAAGAAGAGATTCACCCTC  
CTCCAGGAGTTCTGCTCCATGAAAAGCCCAAGGTCATTCGCGCATTTTCATCAGAGGTTGA  
CAACGAAAATTAGCCTCGAGTACCAGATCAACACAGCGTACGTAGCCCAAAGCACTATCA  
GCCCCGCTCGAGGAGATCAGGGCCGACGGGTGGATGGCGCTCGGCCACTACAAGATCTATC  
GGTACTGCATCCGAGGCCGCATCAGGCCTGGCGGAGACGGTTACGAGCCATATCGCATTG  
TCATCCTGGCGGGTGAGGTACGCCCTCCGGGCATATGGTATCCGTGGTCAGGACAGCCCG  
AGGACTTGCCGAATGAGGTACTTGACGGAACCTACCACGGGATGTTTATGGCAGATAAAT  
AGCCATCCCCAAAACCAAATACCATCCCTTCACAGAAAGACAGCACATATGTTCTGTCTG  
TAGGAATCGCGCGACCGCAAGAGAGAACGCGCGCATGTACAATCTCCGCAAGATCTATGG  
CTACCTCGACGCTCTCAAGGAGCTACCACAGCCATCCAAGTGGAACCTCAACTGCGCGA  
ATAGAAGGCGCATCTGGTGTCTCCGAGCGAGCCGCCGTGGACCCTCCACAGCTTTACCTG  
CTGGTTAGAGGGTGAGGTGCTTTCGAATGAGCAAGAAAAACAGATTCCGCCAGACGAGTG  
GGTCAAGAAGGTCGATCGCGTAAATTCACGCCTAGACCGTCTCACGCGTCGTCGGAGGTG  
AACGACATGGATGTCGATTTTCATGATGGCAGTACGTAAACAGCGGGCCACATGGCCTCGA  
CGAGGTGGGTGGAAGCCGCACCCACCGACAAGCCCAAGGCTGAGCCCGATAAACGGTAA  
GCTATCTAGCTGCGGAAATAGGTCGACCATGCGGGTCTAGGCCAGAGAGGAAGGGACACA  
TCGTAACGTGTCAACAGCGCGAAAAATCAACAGCGCCAAGCCATTCCGACGCGCGGTAGA  
AGCCTACCGTGAACGGGGATGGGCGGGAACGCTACCGCTGCCGCCTCGGAGCAACAAGAA  
GCCTCCAACAGGTTACACCGGGCACACAGCGCCGTACCCGAGCGACGATGACATCGCGAG  
CTGGCTGCGAATGCCAAGTACTCCCAGGGCAATATCTGTCTGCACCTGGGTCCGGTAGA  
GACGCGTGGGCCGGACGGAGACCGCCTGGAGCTCATCGGAATTGACGTCGATGACTATGA  
GGAGGCTGGCAAGGTCAAGGAGGGCGGCAAGCAGCTCGCCGCGCTCCAGGCCGAACCTCGG  
GCCACTCCCCAAGACGTATAACCAGCAGCTCGCGCACAGGCGTGAGCGGTATCCGCTTCTT  
CCTGGTCCCCGCCAGCACGCATGGATGGGGAAGGCCGCGCCGTACATCGACATTGTCTG  
CAAGACATACCGTTACGCCATCGTATGCCAAGTTGACACCCAGGCGTGGTTCGATGAGGA  
GATGGGCAAGGTCATCACCGAAGGTGGCCAGTACAAGTGGCGCGATCCGCAGGGGCGAGTT  
GCTGGATGGGCAAGAGGACACCCCTGACGTTAATGATCTGCCCTCCTGCCCGATGCGTG

GGTAGAGCGGCTGAGCCGTGGCGGCATGAAGCTCTCGGACGAGGACGCCGAGATCGACAT  
GGATCTGAACGTAGACGAGATGTTCCGGTGGTCCGGGGGCACGTTGCCGGGCAGTGACGA  
GGACGCCAGCCCTGCTCCAAAGTGAAAGCGGTAGTTAAGTACTGGCAGGGGCAGATTGA  
GGAGGACGCCTCTAGCCACGACAAGATCACCGGCTCGCACTAGAATCTGGACTGCTTCGC  
GTCCGAGGGGCACACCGGCTGGCGGCAGGCCATGGCAGCTGTGGATGCGAGCGTCGCCGA  
AGACACCATCAAGAACCGTGGGAAGCGCGAAATCAGCGAGCTGCGCTCAGAAATCATGCG  
TAGCAAGGTGAATGCGCTCCGAAAGCTCAAAGCCCAGATAGACAAGGGCAGGCGCAACGT  
GCTCACGGTGTGCACGTGCTACGAGCCCAGCGCAGACGAGCTCGACGCGTTCACCGCCAG  
CCTCAACAGCGCCAAGGCAGCTGCCAGCGAGCCTACCGAGGAGCGCGAGGTCGCCAGCGG  
TGAGGGGCGAGACGGATAATTGGCGCGATGGCATGCCCAATGGCACCCCGCAGGACCCCGG  
CGACTACGAGCAAAGCGACCAGGGCAACGGCGATCACTGGATCGACCTGCACAAGGACAA  
TGCGTTCTACGTTCCGGCGCTAGGCCAATGGATCATGTGGACAGGGAAGAGCTGGAATGT  
GGGGGATGGCTGTGCCGAGCGGAGGTACGGACGCGTGAAGGCTCCCCAGAAGCGGTATGC  
CGAACAGCTTATGCGGCGCGCGGCTGAGCTCAAGGCTGCGCAGGATCCTACGGCCAACGC  
GGCTGTGGCGATGGCGAAGAGCTGGCGTAGCTGGGCCACCCGCAGCGGCGATGTGGGGCC  
GATTGCGCGTGCCCTCAAGGCCGCCAGCATGGAGATAGGCATAGAAGAAGGCGAGCTCAA  
CGCTAATCCGGCGCTGATCTGCTGCGAGAATGGCGTGCTCGAACTCGATCTGTGCCCGCT  
CGACTCCCTGTCGGACGACTCCCAGAGCGCTGGGCGCAACGGGGATAGAGGTAGGCCGCAA  
CGGACGCAACGGCACTGCAAATGTGGCTAGCTTGGCCGAGGACGACGAAGATTTTGATCT  
TGACTACGAGGCTTTGGCTCCCAATAGCCACGTGCGCCTGCGAGAGATCCGGCGCGAAGA  
CTTGCTGACGCTGAGTACTGTGACCAACTACCTGCCCTGGCAGGAGCTGGTGGCCGGGGA  
GTTCCGGCAAACAGGAAGGGCTGTATGCGAGCACGTGGGCACGAGCAGTAGAGATGTATCT  
GCCTGATGAGGAGGTCCGGCGGTTCCCTGCAGAACTGCTAAGGTACAGACTGCTCGGCCGA  
CAACCGAGAGTGCATCGTCGTGTTTCTGCACGGGCCAACGGGCAGTGGTAAATCCACCTT  
CCTCAACGCCACGCTCAACGAGCTCGGCGAATATGCGGATGTGGTTGATCTGGGCATCTT  
CAAGGGCGACCGGCAGACCAACCCAGCTCTGGCTTACGCCCTCCCCAGGCGCATTGTGAC  
GTGCTCCGAGGCTAGCCAGCGGACCATGCTGCACGCCGACATGTTCAAGCGAATTACGGG  
CGGTGACCCGTTGACTGCAGAACTGAAGTATAGCAACGAATCTGTCAAGCGGAAGCCCGC  
ATTTGTACCGTGGATCGCCACCAACATCCCACCCAGCATGCCTGGTGCCGATGCTGCGGT  
GGTTGATCGGACGGTGGTGGTGTGATTCAATGAGCAGATACGTAACAAGACGACGGCAT  
AAATGCGATGCTGTCTAGTCCGAGGGCCAAAACGGCTGTGCTCGCGTGGGCGGTCGAGGG  
TTGGGGAATGTATCGGGGCGAGGGGCTGAGGCGCGCAGATTTCCCGGCTGCAGTGAAGGG  
TGAGAGCATTGAATTTACCAACCAGTTCTCCGATGTGAGCGAGTTCCTGAGTGAGTGCGC  
GGAGGAGGCTCCGATGAGCCTCCGGCGGAAGGCTGAGAGGCGCGCGTGGCGCGTGTGCGA  
CTGGCTCGAGGAATGGCACATAACGGTCAGCGGGGTGTACGACGTGTACGTCACCTGGTG  
CCAGGAGAACCGCGTTGCGGATCGTAACATCATGAAGAAAAATGGGTTCTCGCGCCAACT  
GAAGGACTATGGATAGCGGGCCGAAGTTGTGAAGGAAGATGGCTTCACTTCGAGAACTTA  
CGCTGGCTTCAAGCTCAACTCTCCAAATGCACGCGCTTTGAAATTGCAAAAAGACAGCTG  
ATTATTGGACAAGAACGGCTCTGAGACGGGGCTGTTACGCAATGCGTAACCCAATCAGTA  
ACTACATTTGACCTGCGGAAACACATCATTTTGGTTACTGGTTGGGGTTCGTTTTCACTT  
AGCACTATACTACTCTCGTTCTTATACTTCTACCCTGTTTTCCCTACTACCTATTATCT  
AAAAAAGCGAAACGGGTAACCTGAGGAGGGTATAAAAATGCTGGTAGAGCAATGGATTTCG  
ATTTTTGAGAGGCCCGGAATGCGCTACCGAATAGGTAACCCGAACACAGGCTACATGCGG  
AAACATGTTTCGTTTCGCGTAGTTTCGTTGTGACGGATACCCTGGGAGGGTATCTAGGACC  
GTAATATGGGGGATCAGAGATGGTTTGGACAGCAGCAATCAAGACTGATGGAATTGGAG  
GAATGGC

>NewGenomeName\_202

TCCCGACGCTGATGCGCCCACCCAACCCCGGTAGGCCCTCCGCCTGGTGGGGCATTCTCG  
CCTTGCTTGGGTGTTGCCTGGGTCATCCCTGGGACCTTCCGGCTTCGCCGGTGGTGCGGT  
GGGCTTCCCTGGCCTGTCTCCAGCCATTCTACACGGCTCAGCGGGAGTGTCAACCCTTGG  
GCTAGCGCTGTCGCTCTACCCGGCTTGTCCGTAGTACCTGGAGCGCTCCAGCGCGTCCCG  
GTGCATGGCCCTGGCTATCTCGTACTCCTGGGATGCCTGCTGCTTCCGCCAGGGTGTGC  
ACAGTGCCGGTGGCCCTGCGCGGCCCACTGTGCTAGCTGCCTCTGCCATGCCGCGTCTG  
CTGGTACCAGGCACGCTCACCTCTGTTCTGTCTGCTCAGCATCCTCTGTGCCCTCCTGTGG  
TCCTGTCCGGTGGTAGGGCGGGAGTGGCTGGCCTTGCCTCACAGCGTAGCCTTGCCTCTT  
GTCGTGCCATGGCTCTACCCGGCTGCTCCCTGGGTATTCCCTGGGGTTGCCTGGGTGGTC  
CTGGCCACTGCCTCTAGGCCACGTACTCTAGTCGCCTCGACCTGTCCTGTCTAGTCCTGC

TCCCAGTCGCTCCCTGGGTGCTGGTCTGTTTCCCTGGCGCCGCACTGGTCCCTGCTGTCTT  
ACCTCGCCGCTCCCTCGCTGCTCGGTGCGACCTGCGGGCCTGATGGACTCCTATTTGTC  
CATTGCGTGTGACATAACCGCAGCCTTAGTGCCATGCGGGTACCAGGGCGATGGCCTAGC  
TGGCTGGATGGACCCTGGCTGTTACCTGGGAACGATAATCCTGGCTAGCTAGACTAAGCC  
TCGCATGCGTGGGTCTCTATACGTGCGTAGAGGCTCCAGGCAGGGCCTAGGGCGGGGTGT  
GACACAACAGGTAGGCGTCTGTACTATGCGCCCTGTCTCCACGCAACACCGCCTCTACAT  
GGAGCCTGGAGACAGGGTTGACACACTACCGGGGCATCGGTAGAGTGCGCAGCCAGAGGG  
ACGGAACAACGCTCCCTTCCAAGCGCGGCACATGCCATAGGCGCAAGGGACACGGTTGGG  
TTCCAGGGCAAGACCCACTACGTGTAAGGTCGGCAGGCATCGCTGAGCGGATTGACAGTA  
ACACGCTCAGTCGGTACGATGGGCACCACTCGGCAAGACACGCAACATCAGCTACCGGGT  
TGACACGACAAGGCCGAGTCGCTAACATGGCCACCAGCAACAAAGTGACCCGGCGGATAA  
CATGGTCCGGTAAGCTCCAGCAAACGGGCTGGGCTGGACGGGTAAGACGAGTGAAGCTGA  
CAGCGTAGGCCCTTCGTAGAAGGCAGCCAAGGTGGATCACGCACCAGAAGGTGACCTGTA  
GGAATCGGGCAGCGCCGTAGGACTTCCAGGGGGTCAAGGGCTAACCCCGCAAAGAAACAG  
CCGAGCGTTAGGATCACGTCCCAGCAGTGTCCGGGGGAGCATCTGGTCCAACCGACAG  
TAGTCGGATGCCTGCAAGCCGAATCAACGGCTGGCCTACGGGCTGGGCAGCCCCTCGCAA  
ATCGGTTGTATCTGGCAAGAGCCATCGGGTTGGCGGATGGGCTGCGAATGGGCAACGATG  
GCTCTTGAGCAGATAACAACCAACAGGAGTAACCATGAGCAAGAACGCCGCTGGTGCAGCC  
AAGGCCGCAAGCTACGGGCCGATATGAAACGCTATCTCGCTGGCCACCGTGCCACGAAG  
GTAGCCGAAGTATCGCCATCGGCGACAGCTCCGCACGGTCTGAACTGCGCAAGACGCGC  
GATGTTCCGGTACAGCTCGGACAAGGCAACCACTCCCGGGCACTGCTTCAATCCCAAGGGC  
AAGCACTTTGCCCGTGGTTCCGAAGGCAAGGCACGCAACATCCTCCAGGGGCTTCAACGCG  
AGTCATCCCAAGCAAAGGACTCTGACCATGGCCAACCAACTGACCAGCACCGTCACCG  
CTTTCATCGGTACCGCTGCCATACCAACGCAATCGAAGCCATCCGCGTTTCGTGGCAAGG  
AACTCGACGAGGCCTTCCAAGTACCGGACTGTCCATCCTGAACCACGTCGATCTCCACG  
GCGACGTGACCGAAGTCAAGGCGCTGTACGAAGCCATGCCGAAGGGTAGCCGCCGCAATG  
CGCTGGTCGAGTGGCTGACCAAGTTCGGAAAGGTACAGGTGAACACCTAGAAGAAAACCA  
ACAACGAGCATCCGTTCTGTACAACAAGTTTGGCACGACCTATCTCGACGACGCCACCA  
ACGGACCGTGGTACGGGTTCAAGCCGGCGAAATCGCTCGATCAGGAATTCAACCTCGCCG  
CCGCACTCACCGCTGTCCGCAAGCAAGTGCTCCAGGGCGCAGACCATAGGGAAGGTGATCG  
TCGGCGCTGAACTGCTGAGCGACCGGGAAGTCTGGCCGCCAAGGCCGCACCCATGGTTCG  
AGAAAGCCAAGCGCGCTACTGCCACTAAGTCAAGTCAAGTCGAGCGCAAGCGAGGCGGGC  
GCTCCGCTGGACCTAGTACAAGTGGAGATAACACGATGACTTTCAAGCGAGGTCTGGGAC  
GTCAAATCGCCGTGGCCAGTACAGCCGGCCCCGCCCCACTTTCCCTACGGCGAGCAGGCCG  
TACAGGAGGCAAAGTAATGGATATCTGGATCGCTATTCCCTTCTCCGAATTCGGCCTGAA  
CGTTAGCGAGTGCGCCGTGCAATTCACCCTGGGCATGATCGCAACCGCCCTGTTTATCCA  
TCTGCTGCTGAAGCGGTGACTCAAGTCATGGCCCTGGCGGGCGACCCCTCGCCTACTCCGG  
GGCAATCGCTGGACTCATACAAGCGAGAATTAACCGTGCAAGCTTTGAATAATCTGTT  
GATCGCAATCCCAAGGACCCGGCATGCCGATTCAACGCAGCCTACAAGGCGCTGTGCGC  
CCATGGCTTCTTATGGGTGACCTGAGTCGCGGCCACGTCTGACCCCTGGCGGGTTCAT  
CGTGGTAGGGCGCCGGCGTGACCGTCAAACGCTACGACGAAGCGTATCGCTTGAAGCCGGA  
TCTCTACTCCGCAGGCTTCGACGTGCTGCTGGTCCAGGGCAGCCCGCTGTCCGGGCACGT  
CACCTGCCAGGCGTACGGCTGGATCAAACGCTGAGTACCACAAGGGCTGCGCGAACGGGCG  
CCCGATCTTCGACATTGCAGGAACCTCGTACCATGTCTCGCGTGATCCGTACCGTATCG  
GCCACCGCGTGGGGCTGGTGAACGACAGCGACCCCTACCTGGGTGCCGACGCGGCAGGCA  
CCCGGGGCATCATTGAAGCCATAACCCGTCCGTCCCGCTGTATGACGATCTACCACGTAC  
GCTGCGAGCGGACCCTGCGCTTTATCGAGGCCGAGGCCCGTAACGTGCGCTTCATCAGAC  
AGTACCACCGCAAATGACGTGGCTCATCATCGCTGTGCGCCCGTTGGGCGGTTGCGC  
CTTGGTGTGGAGTCGCAAGCGACCGGTGCGTCCCTTGCATTCTACTGACGCAAGGCAGC  
TAAACGCTGGCTTCGCAAGAATCGCCGCACGGCCTTGCCTGGTAGCCGATTCTCATAAGT  
GAATTTGAGCAATCGCATATGAATCCTACTTACGTGCTCCGTCTCAAGGACGGAAGCACA  
CGCCAGGTGGTCGCCGACAGCATCATACCGGCCACACCTTTGACGAACTCTGGTTCCTC  
GGTGGCGCGGTGCTATCTACCCGGCCTGTGAAGTACGAGAGGTGCATCGCCCTGACCTC  
GTGAAGGAGGGCGAGAAATGACCGTCAAGACCGTGTATGTCAAGCCTGAAGACCCGGCGC  
CACCAGTCTTGTCCGTAGGACGCCTGTCACCAGGTGAACTCTACAAGATGGTGACGCCTA  
GCTCGGCAGAGTGCGCCGTTGTGCTGGCGACCAAGCTGACGCCTGCCCTCGCTCAGGCAG  
TACTCGTACTGCACAGCATGAACCCCTCGCAGTAAGCAGTGGGCACGGCCATACTAAACA

CAGACTTGCGCTGCCACCGCCTAGGTACCGGCGAGTACATCAAGCTCGTTCAAGGGGAGG  
CCGACCAATGATTGCTGCCCTGTTCTGTA CTGACTCGGCCTGTACTGCTGCCTCGGCCTGCTAGC  
AGGCTCCTGCTACTGCATCGCAGTGGAGCCGCCGTTTGAGAACCCTACGGAAGTGCAGTT  
ACAGGACGCCTGCCTGATCGGGTGCCTCTGGCCCTTCGTGCTCGTAATCATGGGCTACCT  
AGGGGTGCGATCCTTCTTCTGTGGCGCTCTGGGTGGCTTGCGCCGCCATCGGTAACGTTT  
TCACAGCAAGCGATAAGGAACTGCGATGATCCGTTCCCATGTACACGGCACCAACCGTGG  
GCAACCCCGACTTCACAAGCACACTGAATTGGAGGCGGGCGAGCTGTACCAAGTCGTGCA  
GCCCCGAGTCCCGTCGGGGCCCCGCTGGTGTCTCGGCGTGGGGAGCACGACCGACCGTGCCGT  
CCGCACGGTGGTGGCTGTAGACATCCACGAAGAAGTTGAGGGGAACCTGTCTACTCCGAG  
TCCTACCGTGCTGCATAACGATACCTGGCGCATGGTGTCTCGTTAACAAGAGCACCCA  
GACTCACC GCCGAGTGACCAAGGCTAAAGCTGGCGCGCCAGCCTTCCACCGTGGTCAT  
TCCTTGCCGGGAACCAACTCAACTGAGGAGCTACAGCATGACCAACGTCAACACCACCAC  
CGAGACCAGCACCGCTGCCGTCTGAGCGCCAAGCTCATCAAGAAGCCGGCTACCGTGGA  
AGACTGCCGCAACAACGTGGTCTTCCACCACACCGCCCTGGCCAACCTGACCGAGACCTA  
CAACGAGGCGGTTCGCTGCCCTGCAAACCGCCGAGCGACTGTCCAGCCTCGTCGCCGGTGA  
CGTTATCACCTACGACCACGACAAGTCCGAGAAGGCAGAAGTGCTGTGCGGCGGAGTAAT  
CAGCGTGGTTCGCCGGCGTCTATCAGGTGCTGGTGCCTTTCAGCGTCAGCGCCCCAGCCAA  
GCTGCTGGACGTGAAGGCTGGCGCCATCCGCGCCGTCTAAGCTCCGGCTGCTCCGGCTGA  
ATGCCTGGATGAAGCCATCGCCCAGGGCGAGTAAGGCCCGCACGTAATAGGTCTGGCCCT  
GCGGGGCCTATTGAGAGCTAGCCATACCATAGGAGGAGTCAACGTGAGCAAGCACAACCC  
CGAACACATCAGCGGCCCGTTACGCAGCGTGAGCGTAGCAAAGTCTCCCGTCGTCTAGGA  
CCTGGGAGACCGCCTGGAATACGCCCTGGCCGTGTGCCAGGAACGCGCCCAGGATATCGA  
CCCCCTGAGCCGCCGGCTCCAGGCTGCCGAGGGGGCACGCCGCTGGTAGATCGACGCGAT  
TCGCAGCCATCAGGCGACGATCAGTCTACTCCAGAACGACTTGAACGCAGCGCATGATGC  
CCACGAGGCACAAGAGCGCCGCGCTCGCAAGGCAACCATCATGGCATGGGTATACCTGCT  
GTCCGCAGGTTTGGCCGTCACCCTGAAGCTGGCAGGAGTCTGGCCATGCAGTGCCAAGTC  
CTTTACACGAACCTCGCAACGGACATGTTTACGCGTACCGGGCTCCCAGGTGACCCCGGAG  
ATGCGCCGCGTGGCCAAGAGCCGGGCATTCGCCACGCCTATACGCCCAAGAAACAGGCT  
TCGGGCGGGACTTACACCGCCCGTGTGAGCGGCGTCACCTGTGACGGTGGTAAGGTGGAG  
GTGCGCCTGGATAACGTGGAGCGCGTCAGCACCTGTGACTATGCCGATCTAGAGGCGCTG  
GTAGCGGCCAGCTTGTGCTAGGCCGACGCGAAGCGCGACGACGAGTACGAAAAGCTGCTG  
CTCAAGGCATTCCCGCTGGTATCGAAGAAGGCCGCCCCGCTGTCCGCCAAGGACTTCGAG  
GGACGTCTGCAGGATCTGCTCGAAACCAAGCTGGCGGTAAACCGTGGCCTGCGCGATGCC  
GGAATAGAGATGGACGTACCGCTGCACAGCCGGGTACGGAAGTTTGGCGACCTGAATAAC  
GAGATGGGCGCTAAACTGTTTACGCTCCAGCAGGGCTTGACCCGGCTGGTGGAGGTAGGT  
CAACGGGCCCGCCTGTATTGGGACGACGCGGAGACTCAGCGATTGCTGACGGTGGGCCCCG  
ACCAAGGCCGTCTGTGCGCTCAGCAGCAAGCTGACCGGCGTGGGGTATGCCTCCCGCGCT  
TCCGTGGCGAAGGCTGAGGCCGAGGCTCGTGAGCGGTGCAAGGCGGCGGCTAAAGACACC  
TGGCAGGCAGCAACCTTCGCAGCCACCATCGCCGGCGGCGTCTGTGGGCAGCGTGCTGACG  
TACCTGCTCGTCTAAGCGACCGGGGCCTTCTCCGGGGTCAAATCCGAGGGCGTTCTCTAGA  
GCGCCCTCTCGTGTGAGTCTGGAGGATCGCGAACATGCAATACTACTGCACGCATTACAA  
CGGATACCGCTTCGGCGTCGAGCTGGAGGACGAAGTCGTGTTCCCGTACATCAACGGCAA  
GCGGGCGACCTGGGACAAGGTGGCGGCATGTGCCAGTAGCCTTGTGCATTACAGGGCGCA  
GGACCTGATTGACGTCCGCCAGCGCAAGTTGAGGGAGATCGAAGATGAGCAAGACGAGTC  
TGTACCCGCTGAACCTGCATCCCGGCCTGATACAGATCAAGAAGATCCACGTATTCAGAA  
TCCAGGCGGCGAAGGACGAGCCGTA CTGGTGGCAGTGGTACCTGTGGCAGCGGAAGTACC  
ACACACTCCGCGACAGCCTGGACACGGCGGGGGA ACTGAGTGCAGATATCGCCGAGTATG  
TCCACCGCCTCCGCCGGAATGGCTGTGAGATAGGGACATCTGGCGTAACAAGGGCGGAG  
TGCTGGCCCTCTGTGCCTTACGCCTCGCCGTCGAGATGATTGGCTCCTGCCTCGGGGTGA  
ACAACGA ACTGCGCGCCCTGTGCGTGGACGACCAGAACAAGGGGCAGGGTATCGGGCGCTG  
AGCTGGTGC GCGCAGCCGAGCTGGCAGGTGCCGAGCGCCTGAGTTGCTTTCGAATTCCTGG  
AACCGTTCTACGCCGGCTTGGGCTGGCGCTCCGAGCGCCGCGAGGCAA ACTAGACTGAAG  
GTCAGCCGGTCTGTGCTGCACATGAGGGCGCCCCGTTATGACGCATGAGGTGATGACATGG  
CTTATCGCGAACAACCGCTGGTCATCGGATCCGACTTCACTCTGGTGGCCCTGGGGCTG  
CTGATAACGCAGGACAACGGCGGCGCCTACGGTACCCGCATGACCTGGCGCCTCCAGG  
ACATGTTTCGAGGCCCGAGGCGTGCGGCGTCCCCTATGGGAGGAGTGGTATCAATGGCAGT  
GTGCCGCGACTCCTGGCTGAAGCAAACGCGTGCGCTCGCCGTAGGCCAGACTGGCAGGGT

CCGGCAGGTCTTGGGATGCAAGAGCATGAGACGGGGCCGGAGCAACATGACCGTCAAGAC  
TCTGCCTGACCGTTGGGTGGCGTATTGCTACTCCTGCCAGGAAGGTGGCGTGGGTGAGAA  
AACGCATGTGCGGAGGGTGAATGCGCGGATCAAGAACGCTTTATGGCCAGGCCCGAGGA  
TGCCTCGGACTGGACGCGGGCCGACTGCTTTCAGTCGCTCTATGGTTTGTCTGTGCCAA  
GGCCATCGACTAAAACGTGATGACCCAGGGCTGCCGCTACTGTACAGCGGAAGGCAGCA  
TCGGCTTATCTTCCCTACCTACGCGGGCTGGATTGGGCGCGCTACTGCCGACCAAATCC  
CAAGTGGGTGGGCTACGGGTATCCCGCCCCGATTACCATGGATGGCCCCAGGAATTATC  
AATGGGCAGCCCATGGGTGCTGACGGAAGAATACTTGTGCGGCGCTGAGGGTGGCGTGGGC  
CTGTACCGAAGTCTTTGCTGTGCGGTCTGAACGGTTCAAGGCTGCGCGTCAGGCTGGCGGC  
GATCATGTTGCAGCAGACCTCTAAGCGCGCCTTCATCTTCTTGGATGGCGACCCGGCAGG  
TGTCCGTGGTACTGCAGGCGTGATGCGCCGGCTCCGGTCCCTGCTTACCGAAGGCCAAGT  
AATACCTACGCCGGGCGGGCTCGACCCCAAAGACCTGACCAGCGAGCAGATAAAGGAGCCT  
AGTAATTGGACGTATTAACGCTACACGCACTGAGTGACAGGGACCGCTTCCGCACGTTGC  
GGAGTTTGTTCCTGAAGGGATGATGGGGCAGGAGACGTGCTTTGCCATCGACAGGATCG  
AGCAATACTGGAAGGTCTACCCAGCGCATCAGCAGGTGGAACCGCAGGCGCTGCGCGAAC  
TGATCAAGCTGCGAGGTGGCTACCAACCGGAAAACTGGCGGTAGTTCTGAACGTCGTCA  
ACCAACTGGACAAGCCGGTAGACCCGGACTCGCTACAGGGCGTCGTGTCCAGCTCAACG  
AGCTGAATTTTTTCAGGGCGGGTGGATCCCCTCCTGGCGCAGTACAACCAGGGCGAGTACA  
TCGACCTAGCGTATGAGCTGCGCCGGCTGAGGGACGATGCCCTGCGCCGCGAAGGGGTCC  
GCACGCCGACTGACTACGTGACGGACAACGTGTTTCGATATCCTGGCCGAGGAGCAGGGTG  
ACCACGGCATCAAGCTGCTGGGGCTGGTGCTACCAGCGTATATGAAGGGCCTCCACGCCG  
GGTCCCTCGGTGCTGGTGGCTGCGCCACCGGACGCGGGCAAGACCTCGTTCATGGCCTGGA  
TCGCCGTAAACATTGCACCGCAGCTCAAGCGGTACTTCGACCCAGGCCGGCCATCCTAT  
GGCTGAATAACGAGGGCAAGGGGTGGCGGATCAAGCCGCGCCTGTACTCGGCGGCCTTGG  
GCATGGCCGTGCGCGAGATTCTTACCGTGGACCCGGAAGAGGTACGCAAGCAGTACGCCG  
ACAAGATCGGAGGGCGACTCCGAGCTGATTCGCATCAAGGACTTCCATGGTGGGTCCCTGG  
CCCAGGACGAGCAGGTCATTGACGCGATGAAGCCGGCGGTGGTGTTCCTGGACCTGATGG  
CTCACGTCAAGGGTGGCCAGCGCAAGGACCAGAACCAGCACCGAGAGAAGGAGTATAAGG  
TGGCCGAGCTCCGCGAGATGGCTGTGCGGCTCGACTTCATCAGCTTTATGACGTCGCAGA  
TCAGTAACGATGGCCACGACCAGTTGTTCCCGCCGAAGTTCGCTCAAGGATTCTGAAGA  
CAGCGGTACAGGGCGCCGTGGATGTGCAAATCCAACCTGGGCCGTCTCAACGGTGCGGATC  
AACAGGTTCATGCGTGGCCTGTCCCTGACGAAGGACAAGTTCAGGTGTACGGGAAGCCTT  
CAAACGTGAAGGCGATGATTAACCTTCGACGCTGCTCGGTGTGCTTTCTTTGAGAGTGTAG  
ACCATGCAAGCTAATCATAGCCGGGTGCTCGAAGGCACCAAAGAAATTTCACTGGGTTC  
ATTGCACTTCCGACCGGGGTCAAGGCCCTGTTGCTGCGCCTGACTCTGATGCACGGGCC  
AACGAGGGCGTCGCCCTGGCCGGTGGGTTCCTCGCGACCTCATGCATGGCGCCACTGCA  
AAGGAGTTGGACATCGCCCTGTACGGCATGACGCAAGTATCACGCTGAAGTGCTCATCAAC  
AGCGTGCTTCCCTACCCTGGACCCGCGCTTCGTCCGGGAGGGTTGCTGCAGTTCGAGTAC  
GCCGACGCAAGGTGAGGGCGGTATCTTCAAGGGCGTGCTGTCCCTCGTAGGCTGCCGTGGC  
CTGGAGGGCATGGACGTGGATTTTAACTACTACGACGCCGACGGCCTTGGCCGGGTGATG  
GAGTCGTTTCGACTTCACCATCAACCAGGTAGGCATTGCGTACAACCTGGCCCGACCCCGAA  
GGCGACCCGCGCCTGGGTGTGGACCTGCATAAGGACGTTACCTGGGGCGTGAAAAAGGAA  
GTCGGTGCAGGCTCAGGTCTGCCGGAACGATGCGAGAAAATGCGAGCCTAGGCCGCGTAC  
TACGGATGGGGTAAACGTGTGATGAGCAAGCGCGACGTGGTAATGGATAACGAGAAAGGCA  
TCTGGCGTGGTGTGACCAGAACGACAAGGCCGTCGAGGCCATCATCAAGAAGAACGGGT  
ACGCGATCGTCGAGCCTAAAATCGACGGGTGCCGTGCCATCGTCGGTGCGCATGGCGCGG  
TGTCCCGCAGCGGGCGCCTCTTCCCTGCCCTGGACGGCCTGGAGGATCGCATCATCGCGA  
AACTGTCACAGTCCGGCCTGGACTCCGGTCTGGTGTGACTGTGAGATGTACCTGGAAT  
GCATGCCCTTCAGTGAGGCGACCCGGCGTATGGCCCCGCAAGACCCAGCTGACCGAGGCCG  
AGCTGAAGTGCTGCACTTCGCGGTATTCGGCGCCACCCATATCGGCGTGCTCCGCAAGT  
CGCGCAAGTCCCACCCCGTGTACAATGAGCGCCGCGCCATGGTCCGCAGCCTCATGGAAG  
ATTGCCGGCGGGGCGACACCCCGTACTTCTTCCAGGTAGCCGCACAATCCTGCCGTTCTA  
TGGAGGCGGTACTCCGCTGGTACGGCTACCACCGCTCCATGGGCATCGAGGGGTTCGATGG  
GGAAAGACCCGAGCCTGACCTACCGCAACGGCAAGGTTGCTGGCTGCTACAAGCGCAAGC  
CGGAGATCACCGTGGACGGGCGTACCGTCCGGTACGTGATGGGCAAGACTGGCAAGAACG  
TGGGCCGCGTCGTGGGCTACCGTGTGGAGCTGGAAGATGGTTCCGGCACCGTGGCCGCCA  
CCGGCCTAAACGAGGAGCACATTCAGCTCCTCACCTGCGCCCACCTCAACGCCACATCG

ACGAGGCCATGACGAACTACGGTCGTATCGTCGAGGTCTCCACGATGGAGCGCTCGACCA  
ACACCCTCCGCCATCCCAGCTTCAGTCGCTACCGCGAGCTGGCCAGTAACCCTGGAGTGA  
AGGTATGAAGATTCGAAAGTCCCATAACCGCAACTACCCGGAAGATATGGCATAACCACGC  
CACCAACCGGGTTTGGCTGCTGTATCGGAAGTACGTCATGGGTTCCGTGTTTCATCAGCCA  
GGACGGAACATTCCGCATCTGCGTCATAGCAGGGACTTGGGACCACGTTGGGTCCGACGT  
TTGGCATCATGCGCGGGACATCCAATACCTCGGGCGCCGGTCCGGTAAGTTGCACCGGGT  
CATGCGACGGCTGCGTCGCAATCTGCGACAGGTAGGTGTCAAAGTATGAGAATGCCACC  
GAGGAAGAACGTATGATCCGCTGCTTGCTCGCGGATATCCACGTACCCTTGTGCCTGCTG  
TTCCCCGGCCTCCGAACCAAGACCCACATGGACCTTCAAGCGGAAGAGCTGTTCGATTGCA  
ATTGACTACGACCATGCGAAGCTGGGCCGTATGGGACTCTGCCACGCGGTCTCCCTGTAC  
CAACTGACCATATGGGGACCTGAAGGTATGGTCCGCTACCTGATGCAGGAGATTCCCCGC  
CGTGTGCTGGAAGGTCTGCTGGTCAAGGAGCAGCAGTACAGTCAAAGCAACTGGTACAGC  
AAATGACGACTATCCGAATCCTCGACCTCGAAACCGAGAGCTACGAGCACAAGGGGCGCA  
AGGCGTCGCCCTTTGACCCCCGCAACTACATCGTCATGGCCGGCTGGCGGGACGATCTCG  
ACGGCAAGGTTCGGCCAGAAGGTGGAACATCGCTTCCGCAGCCGGGCCGAAGCCGAAGACC  
CGAACAACCGCTGGTTAAACGTTCGACGGCGTGGACGTGATCGAAGCTCACAATGCCATGT  
TCGAATCGCACTGGTTCTTACCCGCTACCGGGACGAGTACCTGGCCTTCTGCGACGCG  
GGGGCCGGGTCTGGTGTACCCAGCAGGCCGAGTATCTGCTGAGTCATCAGACGTGGTTGT  
ACCCGGCACTCGACGAGCTGGCTTCGAAGTACGGCGGCACCCACAAGGTGGACGGCATCA  
AGCTGCTGTGGGACTAGCGCGTGCTCACCTCAGAGATGGACCAGGACCTGCTGAGCGAGT  
ACCTGTCCGGCCCCCTGCGCTGATATCGAGAACACCGCCCTCGTATTCGACGGCCAGTTGA  
TGAAGCTTACGCCCCGTGGTATGTGGGCAAGTTAGCTGGAGCGCTGCGAGGCCCTCATCG  
GTTTCTCGGCGATGGAGTGCGCCGGCCTGGAGGTGGACCTCGAAGTCGCCAACGTCAACC  
ACGCCAAGCAACTGGAATAGGTTGCCGGGATCGAGGCTGAGCTCAAGAATCTGATGCCCCG  
ACTTCCCGGAATACTTCGAGTTCAAGTATAACCACCCTGGATCACATGAGCGCATGGCTCT  
ACGGCGGCGAAGTGCAGTACAACGGCCGGGTGCCACCCGAAGATGGCCGGTTGGAGAAAG  
TCGACTTCGTGCGCTTCGGTACGGCCAAGCGGGGGACACCAATCGAGAGTACCTCGGTGC  
GGGTCCCGCTCAGCCAGGTGATCCTCGACGACGACCACTGGAAGTACCCGGCCATCACCG  
AGCTGGCGACCAGGTACGGCCCCGGTCATCACGTTCTCCTCCGGCAAGAACAAGGGCAGCA  
CCAAGGTGTTCCGGCAAGGACACGGACATTCCGGGGACCAATTGGGATGAGGACCAGCGAT  
TCCAGTTCCCCGGCCTGATCAACGTGACCAACCTGCCGGAAGTAGTGCGTGAGAAATTCC  
TGGGCAAACGCCCCGGAGTTCCAGTGCGCCCTCACCTGGCGGATGGATCGCCCCGTGTTCA  
GCACCAGCGGTGACGCCCTCAAGGCTCTGGAGAAACAGGGCTTCGAGGCGGCCAAGCTGT  
TGATGCGCCTGGCCGAGCTGCACAAGGACAACCTCCTCGTTCTACATCACCCATACCTACA  
ACAAGGATGGGACGATTATGGACACGCAGGGGATGCTCAAGTACGTGGACGACGACGGTA  
TCATCCACCATTTCGCTGAATACGACGGCGACGGCGACAACGCGCCTGTAGTCCAGCCGCC  
CGAACCTCCAGCAGCTCCCGTCGAAGGACGAGGACGACCCGGAAGCCGGCAGCCGCGTGA  
AGGAGATTTTCGTGTCTCGCTTCGGCGCGGATGGGATGATCGGCGAGACCGACTATACCG  
CCCTGGAGGTGGTGTATCTTGGCGGCGCTGTTCGAAGGATCGGAACCTCCTGGCGAAACTGA  
TGGTCCGCACTGACATGCACTTGTACAGCCTGGCAGGGAAGCACACCAACTGGAACGGGT  
TCGACAACGACCAGCTCGTGGCCATCAAGAAGGACCCCAACTACGCGTGGCACGGTTCGCA  
TGATGCAGGCTCGGATGAACATCAAGCACAAGGCATTTTCGGCGCAGTACGGCGCGAGCG  
CTGCTTGTATCGCATTCAACACCGGCTGTACGCTGGAAGAGGCCAGGAATTCCTGGACA  
ACGAGGCGGCCCTGTTCCAGAGTCCATCGCATTCCGGCAGATCGTCCGCGACAGTGCAG  
AGGCCACCAGGCTCGTCATGTACAAGGCCGAGGACCAGATGCCGGCAGGCGCCTTCAGCG  
AGATGGGGCCGGATGGCAACTGGCGCCAGTACCGCCGGGGATTCTGGCAAGCGCCGGGTG  
GCACCTGCTACAGCTTCCGCCAACAGGAGCGCTGGGACAAGTAACAGCGCAAGACGGTCA  
TGGACTTCAAGGACACGCAGATCGCCAACTACTGGAACCAGGGCGAGGCTGGGTTCATGA  
TGAAGTGTGAGCGTAGGGCGCATCTTCCGTTGGATGCTGCATCGCCAGGATTCATGGTTA  
CCGAGTTCCTGATCAACAACGTACACGATGCCGTCTACACCGATTGCCACCATGACACCG  
CCGCCATGGTCAACGGTGGCCTGCGCCACATCATGGCCGACGCTGCCCGCTACATGAGCG  
AGCGCCTGAGCTACGACATCGCCGACGTTCCGTTCCCGGCAGTGGGTGAGACGGGGCGGG  
TCATGTTCAATATGGAGGTGATCCAGTGAAAGAACTACACCCGCTGCAGACGCTTGAGTT  
CGTCAAGCCATTTCCTGGACCGGGCCGGGTTCTGCGGGATTACACCGTACGGGCCGCAC  
CACCGGCATTGCTCTACAGGCCATTGGCATGGCGCTGTCCCATCCGAGGGAAACTTTGAC  
GTTTCGTGGACCACCTGGACGGCAGCGCGGCTGCACTGGTGGCCAGCATTGAAACCATACT  
GGCGACCTTGGGCTACAAGAACGTCTCCTCGTTTCGACCCACAACCCGTGCGGATGGGCGCAG



CGTGAGCATCGTCTTCAAGACGCTCCCGAGCGACTGATGACCCTTCCCTACTCCGGCCTT  
AAATCTTCATCCGACACGAGAGAGAACACGCATGACTCAACAACCTAACGCTCTGCAAGG  
CGGCCTCGCCCTGGCCAACAAGGCTGCCGAGACCGCAACCATCGACATGTCCGAAAGCTC  
CACCGGCGGTGGCGGCGGTTCGCATCTTCCCGGAGGGCACCGCCATGGGCCTCTTCTGCAT  
GTACATGGAGCTGGGGGACCTCGTCAAGGAATTCCCGGGCAAGCTAAAGAATCCGGGCGCC  
TCAAATCCGCATGGGCTTCGCATTGTGGGCGGACGTGAACCCGACAGGCCGGTAACCCGCA  
GAGCCGCTCGGACGACCCGTTCCACACCTACGCGGCCGACGGCTCGGTCAAGCCCAGCCT  
GTTCCGTGCCTTCGAGATGACCCTCGGCAACAACGAAAAGTCCAAGACCAAGCTGGCCTT  
CGACAAGATGAACTGGAGCGGGCAGCATCCCCACTTCGCTCAGACGCTCGGCCAGGCGTT  
CATCATCCCGATTAAGCGCACCAAGATCACCAAGGGCAACTACGCCGGTAAGGAACCCAA  
CGACATGGATTGGGGCGACATCATTAAAGCCCTATAACCCGGTCGATGGCAGCCCGTATAA  
CGTGCCGGAACCTGCCTATGGTCCTGTTGACAGTATTCCTTCTTCGACGGGCCGACCAAGGA  
GACCTGGGACGCCCTGTATATCGAGGGCACCTCGGACAACGGCAAGTCAAAGAACTTCTT  
GCAAGAGACCATGCGCTCGGCCACCAACCTTCCCGGCTCAGCCCTGCACATCATGATGGG  
CGGCGGCGACGATCTGATCATCAAGCCAACGAGCCAGGCCGACAGGCAGCAACCTGCCGGC  
AGTGCCCAACGTGGCCGCCGATGCAGGCGTAGCAGCAGCCCCTGCCGTCTGGCAGTCCC  
TCAGGCAGTGGCTCAGGCGACCCCGAGCGTGCCCGAGGTGGCGAATGTGGCTGCCCTGT  
GGGAGGTAAGTCCGAGGCGCAGAACGTGCTGCCTGACGTCCCGCAGGTGGCCCAGGTGGC  
GCATCCGGCACCAAGTCGATGTGCCGTCCGTCCCGGTAGTCACGGAAGTACCGCGGGTTTA  
ATGCGGCTCCCATCGGAAGAGTTCCTGTGACGACTATCCGAGCAGTTCGACCGTACCATG  
GCAGGCGGGACGTTGGTGTGTGACGCCGACGTTCCCGCTTACGTGGCTTCGGCTACGGCA  
AAGACCCTGGACACTGCGCTCCGGCGATTCTGGAAGATCATACTGGAGCAGCAGTTCCTG  
GCGCACTGTACAGGGATACGGGTCCACCTCACGGCAGCAGGTGAGGCTAAGGCGTACCGC  
GACGTGTATCCGACCATGAAACCCTGCCAGGTCCAGCGCAAGGGGAAGGCAAAGCCCAGC  
CTGCTGGAGCCCCTGCGGCGGGCTGTGGCCGACGTGCATGAACGAGGCGGGCCGCTGAA  
GGGATCGACGCTATCCTGCACACGTTCTTCGAGGCGGATGACGGCAGAATGATGGATGCC  
TACGCCATGCAGGACAAGGCCATCATCCAATCCGCCGACAAGGACTTGCGGATGACGATC  
TACCCGTATAGGGAGATCGATACAGCGTGTGTGAGCAGGATCTACGGGGGCTTCAGCTAC  
CTCAAGGAGGCGTATACGCCGTCCGGTCAGTTCAAGCTCAGAGGGCACGGACGCAAGTTC  
ATCCTGGCGCAGTGGCTCGGCCGGGATACTGCTGACAACATCCGAGGAATCGATCGATTC  
AACGGTAAGCTCTGCGGGATGAAGACGGCCTTCGATATCCTCCACCCGTTACCGGACGAG  
GACGAGGCCATCGACATGATACTGGAGGCGTACGCCAACATTAAGCAAAAACCCGCTGGCA  
GAGGCCGAGGTGCTGTGGATGCGCCGAACGCCTACCGACAATGCAGCGCAGTACCTGTTA  
AGCCGAGACCTTCGTCCGGCCTTCCGACAGTGGATCATCGAGCTGGAAGCCTACCACGAG  
GCGCTGCTCCAGAAGCGGAGGGAGAGTGACTATGACGAGTGAGCCGAAGGTCTACCAGAT  
ACCCCGCAGCCAACGGCGCACCTTACCCTGGAGCTCTGGGCTGAGCAGGGCAAGCTATG  
CCCGCTCTGCGGTAACCCATCGATATCAGCGTGAAGGACGAGGCGGTGATGGACCACGA  
CCACGAGACGGGGCTGGTGCGGGGCGTCCTGCATCGATCCTGTAACACCTCAGAAGGCAA  
GATCACGAACGCGGGCGGTTTCTGGGGATGCAAGTCGATGAAATACACCGACATCATCCC  
CTACCTTCGTGCCCTCCTGACGTACCTGGAGGAGCCGAACCATCCGCTGATCTACCCCT  
GCACAAGACCGACGAGGAGAAACACGAATCGAAGCTGGCCAAGCCCTGGCAGGCAGCCGC  
CAAACGCAAGGCGGCGATGGCCGTCGCAAGGCACAACGCGAGGAACGTATGAGCAAACCTC  
CGAAGCAATTCACCAATGAGTACCTGCGCAACGTCTATGCCGAGCTGGGTCTCAAGAAA  
GGCGCCGAGCATCTGACCAGGCATTCGCGCTTCGGCGAAGTGAGCCGCCAGTGCTTCCGC  
AACTGGTGCATCAAGCTTGGCTTCCACGACAGCAGGACACGCGGCACGTACGCCGCGAAG  
GGCGCTCTGCACTGGCTGGCCCCGAAAGGCCCGCCGAGGTAGTGCGCAAGTTCCTGGCGCC  
GTAGGCAACGTGGTTGGCCAGGGTCCGAAGGTAAGTACTGAGCCTGGACATCGAGACCTCGCCT  
ATCGAGGGTTGGGTCTGGTTCGCTCTGGAAGCAGACCGTTGGCCTCAACCAGATCAAGCGG  
GACTGGACCAATTCTGTCTTCTGCGCGAAGTGGATTACAGCGACGAGGTGATCTACATG  
GACTGCCAAGGTGATCCCTCGGACGACATTCACATGCTGGTTCGCTCTGCATAATCTGCTG  
GACGAGGCCGAGACCATCATCGTCCAGAACGGCAAGCGCTTCGACGTACCCAAGATCAAC  
GCCCCGTTCTTCTGAACAAAATGCCGCCGCCGCGACCGTTCAAGGTGATCGACACCTTG  
ATCATGCCAAGCAGCAGATCGTGTTCCTAGCCGCAAGCTGGAGTACATGACCCACAAG  
GCGTGCACCATCAAGAACTCCTCCACGGCAAGTTCCCCGGAGTCGACCTGTGGGCAGCC  
TGCCTCCAGGACAACCCGGAAGCCTGGGAGGAGATGCGCCTGTACAACATTGACGACGTA  
CGGTCGATGGAGGAGCTGGACATCCTGATGCTCCCGTGGTTCGTTCGGCCATCCCAACGTG  
GCCGTGTAATCAACGACGCCGAGCCGACCATCCGATGCCCGAAGTGTGGCGACACGGAA

GTCAAGCGAGAAGGCTGGGTGCATACGCAGACCGGCAAGTACGAGCACTATCACTGGGGC  
GGATGCGGTGGCTGGAGCCGAGGGCGGTACACCCGCAACACCTCGGAACACCGCAATGCC  
CTGCTGAGCAACTAAGGAGACACCATGATCGTCGACAAGTCGTATGAGGTCGCTCTAGCT  
GAGCGTACAAGACGGGCGCCGCCCTTGACGAACGCAAGGTCGGCAAACCTCCCGATGCAC  
CTGGTGGTCGATGGCTGCCCGCTGCTCAGGCGGGAGCTTGCCCGCATGATGCAGTGGGCC  
GCCGAGGTCAAGGGGCACAAGCCGCACGACTGGAAGAAGATGTCGGTTGGCGAGTTCAAG  
GCCGCACAGCATCGGCACGAGTCCAATCGCCTCCTGGACGGGCGCTGGATGACGAGTCG  
GGCCTGATGCACCTCGTGCATGAGGCATGCAACGCAATGGCTGCCGCCTAGGTGGCCCTG  
ATGGATCGGGAGAGAGGCAATGAGTAAAATCTGTTGGTGTACCCGACTGCACGAGACCGA  
TGAAGGTGTTTCGGGTCAACTGGGCCTTCAACGAGCGGGGCATCGGGGTCAACTACGTCAC  
AGCGTACATCACGCCGGCGATGGTCAGCCATCGGGACTGGAGCGATGTCATACTCCCGGA  
CATTCTCCGGGAGATGGCGGAGCGCCTGTAGCTGGAAGTGAAGCTGGTGGAACTGCGCTG  
GTTCCGCGCTGAGATTCTGAGCTGCGGGGAATGGCATGACTACCGAGCGGTGACGCTGGA  
TGGGGCGGTTAGCCTGGCCGAGGCCGAGTGGGGTCCCGAGGATATCGGGCGCGTAATCGA  
AAGACGATAGGAGACGGAATGGACGTGATACAGCAGCAGATCGCCACGAAGAGGCCTTG  
GTCGGGGCTGCGCAGAATGACGCCCGCATTGCATTGGAAAAGGCGATTGCCCAAGGGTCC  
ATCGACCGCATCCGGAGGGCGCGTATCATGTTGATGCGGATGCTCCACATCGTGACCGAA  
GCGATCTTCAACCACCAGGAAGCGAAGGCGGGCGGGGCCGAGCGAAGCTACGTCACCTG  
CTGCGGATCATCGGCGCCTAGGACCTCGCCGTCCTGGCGCTGCGGGCTGGGCTGTCGATG  
CTCATCAACTGCCCAACGATCAGAGCGACGAAGTATTACACCCAAATGGGCAAGATGCTC  
TGTCGCGAGATCGAAGTGCGGTTGGCCTTCAAGGTCAGCCATCCCTATTACGACCGGACG  
CTGGACTACCTCAAGACCAGCAGGACTCGCATCGTCCGGCACATCCCGAAGACGATGGAC  
GCTCTTCTGGAAGCGGTGCTGCCCGAAGAGGCGCGCATCCACCTGCCCGATGGAGACTAT  
CTCCGCCTGCGCAAGTTCATCGGCGATCCGCTCATCCAGTTCGGCCTCTTCAAGCCGAAC  
CGGTTTGTAGGGCGAGGCCGTACGAGTGTCCACCTGGAGCCGTCGCCGGAGGCCAAGGAG  
TTCCTACAGGACCCATCGGCGGCAATGACCTGGGGCGGCCAGGGCGTATCGTGAGGCTG  
GCCCCGGCGAGACCCTGGCAGGACTGGTGCATGGAGGCTACTACAGCGCCAAGGCGCAG  
AAGCACCACGTAAGTGGTGCAGCGACCAAGCACCAGACCAAGCGGGCACGGCAGATGCAT  
CTCCGCCACCTGGGCCGGGACAAGATGCCCCGAGTCTACGAGGCGGTGACGCTGCTGCAA  
TCGGTAGCCTACGAGATGAACCACGACGTGTACGAGATCATCGAGCGCGTCTTACCTCC  
GGTGGCGGCGTGCTGGGCCTCCCCAGCGCACGTACCCGGACGAGCCTGAGTTCCCGCTC  
GGCGACGAGGGGGCCACGGAGAATGCCAGTAAGGAAGAAGTGGAGGCCTTCAATCGTTGG  
AAACGATCCGTCCACCGGTGGTACTCCGGGGAGCGAGAGCATAACAGCCAAGCTTCGCGAA  
TTTGCTGCACTCTACTGAGTTGTTTCGAGAGCATCATGGCAAGGCAGTGTATTTCCCGATG  
CACGTTGACTCCCGTGGCCGCATGTAATATTGGGGCACACCCGGATCCCCAAGGGTCCGAC  
ATCGCCAAGGCCTGTCTGCGCTTCCACGAGAAGCGAGTGCTCGACAAGCGCGGACTGTAC  
TGGATCAAGGTCCACGTCGCCAACTCCCTCGGATGCGATAAGGTGTACTTCGACGATCGG  
GCAGCCTGGGTCGATGAGCGATGGGATGACTTCCAGCGAGCGCTCGACGAGGGGCCGGAG  
TACTATTCGAGTCTCTTTCCCGAAGCCGAGTCGCCCTGTGCGCCATCGCAGGTCTGCTG  
GAGCTGCGGGCGGCTTACGCCTCCAGCAACCCTGAAGGGTATGCCAGCGGCTTCATCGTC  
CACATGGACGCCACCTGCTCCGGTCTCCAGCACTACTCGGCTATTCTCCGAGATGAGATC  
GGCGGAGCCTACGTCAACCTCCTACCTCCTGGACTTTCCAAAGCTGACATCTACTCCCGA  
GTGCTCGGACTCGTTAATGAGGCTCTGGAGAGAGACTGAGCGGAAGGCGCGGATGGCGAG  
GCGCGGGGTTATGCCCTTCTATGGGAAAAAGCTGGTCTAACGCGGAACCTGGCCAAGAAG  
CCCTGCTTGACGCTGGTGTACGGCACAACGTTCAAGGGCGTTCGTGGACCACTGCCTGGAG  
TACCTCGACGAGTCCGGCGTGGAGATTCCCGAGGGTGTCCCGTCATAACCACCTGGGAAGC  
TACATGGCGACGCTCATACTGGTCGCAATCCGCGAGACAGTACCATCGGCAGTCTTCGCC  
ATGGAGAGGCTCCAGCGGCTTGCTAAGGCCCTTCCTGACGCATCCAAGGATTTGCACTGG  
AACACGCCGCTCGGCATGCAGGTCTTCCAGTCTTACCCGAAGACCGAGGAGGTGCGGGTA  
CGGCTGCGAGCCGAGGCTGTGAGTACGTGACCCTGTACGAGGCCAAGGACGAGCTAGAC  
CCGCTGCGCAACGCCAACGGCATCGCTCCGAACCTTCGTGCATGGCCTGGACAGAAGCCCC  
CTGGGACTGACGGCCCTGGCCTCTGCGGCAGAGGGAATCCCGACCCAGCCATCCACGAC  
AGCGTGGGGACCTAGGCTGGCGACGTGGACCGGATGCACGTCCACATCAGGAAGCAGTTC  
GTCACCATGTACAGCGGCCCTGCGTGCTCGTAGAGCTTGCTCGACAGCTTGGGGTAGAG  
GCTACCCCGCACCGTCCGGGATCGTTGAATCGGGAGGCTGAGCGGGACTCCTGGGCGTTC  
TTCTGCTGAGTAGATTATGTCACCCACATAAGAGCAAGTGCATCCGTCCAGAGGCCTCGT  
AGAGGAAGAGGGGTCAGGGAAGACCCAAGAGGAGGAGAAATGAGAGAAGACGACTACCAA

GGATTCTAGATAGAGTAGAATAACCATCATAGGAGATATGATAGATGGCTACTATGAAGA  
GTAGAGGGCCAATGATTATGTCACGCACAGTGAAGGATCGAGAACAGGCAAGGGTAAGG  
CCCACCCTGTGACGTTACCTCTCAGCAGATCGAGTGGCTAAAACAGACCTTCTCCGAAC  
ATCAGATCAGTCTGGAACCACGATGGAAGACATCCAGTTTTAGGCTGGCCGCCGCGATG  
TGGTGCGGGCTATCCGCCTACGTCGCCGCGATGCAATCGCAGTGGAGCGTAAAGGATGAA  
CAAGTCACTCTGGCGAGTCCACGCAAAGCCGGCGCCCTTCCGAACCTGATGGGGCTCTG  
GCGGCTGGCAGTACAGGAGCTGGAAGAGTTCACCTCTTCCGCTCGAAGGAAGAAGCCCT  
GGAAGCTATGCTCGACAATATCGAGGGCAATGATCGGAACGAGCTGCTGGTATTCCGTGA  
TGGCCAACCTGGCCGGCGGAGACTGCATTGTGTTTCGAGGACGATCCTCACGTCGGCCCATG  
CCTCACCGCGCAGTGGCAGTACGTTTTGCCACACTACCGCAATACAGGCGTGGCGCGAGA  
GTTAATTCGCGAACTGCACCGGCAGGCCGGCTGGGATCAAATCCCCCTCGTGTGCTGGGG  
CCGTCGCGAGAGCGAAAGCCGGAATACGATCCACTACCGGAGAGCCAAGCCTTTCGGGCA  
AGAAAGTGAAAAGGTGCTGGGCAAGACGATCATCGGTAAACTCGCTGACGGCCTGCTCG  
GCACTGACCTGAGCGGCGCACAAACCCGATGCCCCGAAAGATGGAAGAGCATAAACGCCTCA  
TGCAACAGCCGGCGGACCAGCTCGCAAGAAACCAGCAGGTTGACCTCACCACCGAGAACG  
TGTCGCAGGTTGACCTAGGAGCGATGGCCGATGACAGTGGCACC GGCAATCGAAGACGCC  
GGAATCAGGCAGGCACAGGCGTATCGCAAACCTCGGTATCAACTACTGACGAGGTACGC  
CATAAAGTCTACCGCAGCAATGCTGTGGGAGAATCTCCGGGATGGGAGCGTGGAGCAGCG  
AGCTATCGAGTTCGCCGAGACCACGCTACCCTACCTGATGGTCGATCCCATGTCCGGCAG  
CCGAGGAGACGTAGAGCACGAATTCGAATCTGCCGGTGCCTACTCGTCAACAACCTCGC  
CGCATAGCTGGCGCGGTGCTGTTCCCGACGGGGATTCCGTTCTTCCGTTCCGAAATTAC  
CGATGCGATCCGGCGGGGAGCCGACAGCCGGCACACTGACATCACCGAGGTGACTGCTGC  
CCTATCCCGCGTGGATCGCAAAGCAACTCAGCGCCTATTCCAGAACGCCTCCCTGGCGGT  
CCTGACGCAGGTGATCAAGCTACTGATCGTACTGGCAACGCCAGCTATAACCGCAACAG  
CGACGAGGCCACGGTAGTCGCATGGTTCGCTCCGCTCCTACGCGGTGCGCCGAGATGCGAC  
CGGCCTATGGATGGAGATCGTGTCAAGCAGCGCTACAAGTCCAAGGACCTGGACGGGGC  
GTACAAGCAGGACCTGATGCGTGCGGGTCGCAACCTGTGCGGTTCCGGCAGGGTTGAACA  
CTACACGCATGTTACGCGCAAGAAGGGCACGGCGGTGGAATACGCCGAGCTGTACCACGA  
GATCGACGGCGTGCCTGTGGGCGAGGAATGCCGCTGGCCTATTCACCTCTGCCC GTACAT  
CGTACCGACCTGGAACCTCGCCCCGGCGAGCACTACGGTCGAGTCCACGTCGAGGACTA  
CATCGGCGACTTCGCCAAGCTGTCCATGGT GAGCGAGAAGCTCGGCCTGTACGAGGTGGA  
GTCGCTGGAGGTCCTGAACCTCGTGGACGAGGCCAAGGGCGCGGGCGGTCGATGACTACCA  
GGACGCTGAGAGGGGGCGACTACGTGCCGGGTGGCGCGGAGGCCGTACGGGCCTATGAGCG  
TGGCGACTACACCAAGATGGCTGCTATCCAGCAGAGTCTCCAGGCTGTAGTCGACCGGGT  
GAACCAAGCGTTCATGTACGGCGCCAACCAGCACGACGCCGACCGCGTCACCGCCGAAGA  
TGTCCGCATCACTACGTAGGAGGCGGGGAACACGCTGGGTGGCACCTACTCGCTGCACGC  
CGAGAATCTCCAGTCGCCCTAGCGTACGGCTGCCTCTCGGAGGTGGATGCTGCGCTGCT  
CCAGGGCTTGATCACCAAGCAGCACAAGCCGGCTATCGAGGCGGGCCTCCAGCCCTTTC  
CCGGTCCGCCGCTTGCAGAGCATGCTCAACGCATCCCAGGTCATCGCAGGCTTGGCCCC  
GATTGCTCAGCTTGACCCACGCATCTCGCTACCGAAGATGATGGACACGATTTGGGCCGC  
TTTCAGCGCCGACACCTCGCAGTTCTACAAGAGAGAGGAAGAGCTACAAGGCGAGGCAGA  
ACAGCGGCGCGAGCAGGCCGCGCAGGCACAGGCCGCACAGGAGAGCTTGGTTGGAGGGGC  
TTCCGACCTGACCAACGCACTCGCAGGAGTCTGATAGATGCAACAGAACGAATAGCAACT  
GCCACAGGGCGTCGCTAACCTGGTTGCCAACGTCCCGCCCCGCCGCCGACCCGACCCCAAG  
TCATGTGCAGGTGATGCCGAATCCCGTCATCCAGCCGCAGCCCCAGTAGGCGGGCGCAGCC  
GGGACAGGCAGGGTCGCCGCGAGCAACTGGCTATCCCGACCCAGCAGCCGCAACCCGTTCC  
GACAAGCGCCATGACGCCGCACTACCAGCCGGTAGCGGTGCTCGCCGCTGGCCAACCCGT  
TGTCCCGAAAGCGCCGGCACAGCCGGCTCCGTTAGCTCCTCCGGCTCCGGGCGCAGTTCC  
TCCCGACAACCTTGAGGTTCCGCCGCGCCCGCATTCACTCCCAACGGAGAGAACGTAGG  
CACCTGGCGGGGAATTCGGAAGGGCGACCCGCAACTGGCGCCGTCCATCAGCTATCTGGA  
AGCGTTCACCGACAAGATCGACACCGTTCGGGCCTTCGGTAAGGCCGGCGAGCACCGCGA  
TCCCGCTTCATCGACGTGCACTATCTGAAAGAAGCGCTGGGCGAGGCCCAAGCGCAGCA  
CGTCATAAACATGGCGAAGGGCGTTCGACCGATGTCGATGCTCAGGCCCAGGCAGTCAT  
GAACCAGACCTATGCCGCCGTCGGCGGTGAGGCTCTGCTCAAGCAGGCCGCTAGCGTCTT  
CAAACAACACGCTGACCCGGCTGCCAAGGGCGGCCATCGGTCGCCTGATGGACTCGGGCGT  
TGCTCAGTCCATGCAATACGCCGCGAAGCAGATCGGTGACTTCGCTTAAGGCTCCGGTGC  
CGTGGTTAAGGGCGACCGGCCAACCTCTTGGCGCAGCGGCCCTGCCCTGGCGGCCCTGTC

CGCTGAGCAGTACCGTGCCGAGGTCTCGAAGCTCCCGTTGAAGGCAGCGGAAGCCGCCAT  
GGCCGCTCTGCGTGAGCGCCGCAAGGCAGGTATGGCGCAGGGTCTCTAACGACCCTGCC  
TACTCCGGCCTTAAACCAACATCCAAAAGAGAAAGAAACGCATGAGCTTTCTGAACGACC  
AGACCTGTCCGAACTACGCGGGCAAGAACGCGGACGTTGACATCCCCCTCGAAAAGCACC  
TCGGCATCGTCGACAAGCACTTCGCCTACACCTCCAAGTTCGCGCCGCTGATGAACATCC  
GCGACCTGCGCGGCTCCTACGTTCGTCGCTGGATCGCCTGGGTAACGTGCAAGTCAAGG  
GCCGTCGTGCCGGCGAATAGCTGGAGCGCAGCCGAGTCGTGAACGACAAGGGGTACCTGA  
CCTTCGACACCCTGCTGTACCTCCGCCACCAGTTCGATCACCAGGACGAGTGGACCCAAT  
CCTTCGACATGCGCAAGGAAGTCGCCGAGCTGGAGGGCCAGGACCTGGCCCGTAAGTTTCG  
ACCAAGCCTACCTGATCCAGGTGATCAAGGCCGCTGCGGTTCGATGCACCGGTGGACCTGG  
AAGATTCTTCTAGCCGGGCGTGCTGGAGTAGCTGGACCTCACCTGCGTCACCTCCTCCA  
AGGAAGCCGCCAACAAAGATCGTCCGCATGCACCGCAAGGTGGTTCGAGTCCCTTCATCAACC  
GCGACCTCGGCGATGCCGTCTACTCTGAGGGCCTGACTCCGATGTCGCCTCGTGTGTTCA  
GCCTCCTGCTGGAGAACGACAAGCTGATGAACGTGAGTACCAAGCCACCGGCGCCACCA  
ACGACTACGTGAAGTCGCGTGTGGCCATCCTCAATGGCGTGAATGTGCTGGAGACTCCGC  
GCTTCGCCACCGAGGCCATCGCAGCACATCGGCTGGGCCCTCCACGTCAACGGAAGCGCCG  
AGGAAGCCGAGCGCCTGATCGCCCTGTTGCTCCCGAGCAAGACCCTGATCACCGCCAGG  
TGCGGGCGGTTTCAGCCCAAGATGTGGGAAGACCACGATCAGTTCTCGTGGGTCTGGATA  
CCTCCCAGAGGGACAACATCGGTGCCCGGCGCCCGGATACCGCTGCCGCCATCGAACGGA  
ATGGCATCAACGCCTTCGACATCACCAGTGATGCCGCGAAACCCCGCACTTCGGCGTGG  
GGTTTCTTCAAAGCGTAATGACCCGCGCAGATTCCTGCGTGGGTTTTTTCGCGCTTAGGA  
CAAACCCTATGCTACTACTCGACGCAGTGAATGTCAGCCTGGGCAAGATCGGCGAGTTGC  
CGATCCCGAGCATGGATGAAACGTACCCAACCATGGCCATCGCCCCCCCCGAGTTGGAGT  
ACCAGCGCATCCAGTTGCTGACGCAAGGCTGGTGGTTCAACACCTCGTCGAAGCACAAGC  
GAACACCCGATCCGCAGGGCCGTATCAACCTGTCCAAGGACACCTTGGCGTTCTACCCGG  
ATTCCCCGATCTCCAGTGGGACGGCCAGGGAGTGCGCGACGCCAACACCGGCGACGACC  
ATATCGGCAAGGTAGTAGAGGGCCGGCTCGTGATGTCCCGTGAGTGGGACCGTATCCCCG  
AGATTGCCAGCTCGTCATAGCGCACCAAGCTGCCCTGGCCGTGTACACCCACGAGCTCG  
GGCCGGGCGAGACGGCGCAGGTCAATCGCCAAGGAGTTGCAGGCGTACCAGAACGAACTGA  
GCCGCATGCACACCCGATCCCGCCGGCTCAACACCCAGGCCAAGCGCAGCTTTAGCCGGT  
GGCGGCGCAGCCTAAGGACCTGACCATGAGCTACAAGCAATCCGCGTACCCCAACCTACT  
GACGGGCGTGAGCCACCAGGTGCCGTTTCGAGCGACTGCCAGGGCAGCTCAGCGAGCAGAT  
CAACATGGTGTTCGGACCCCGTGTCCGGCCTTCGCCGCCGTAGCGGTATCGAGCTGATGGC  
ACACCTGCTGTACTACTGACCAGCCCTGGCCGAGGCCGTTCTGTACCACACCAACCTGGG  
CGGGCGCAACATTGCGATACTGGTGGCGCAGCACCGGGGCGCGCTATACCTGTTTCGACGA  
GCGGGATGGCCGCCTGCTGATGGGGCAGCCGCTGGTCCACGACTACCTCAAAGCCGCCGA  
CTGCCGGCAGCTTCGCGCCGCCACGGTGGCTAATGACCTGTTCAAACGGCAACCTGAGCGT  
GAAGCCGGAAGCCGACCGCACTGACGTGATGGGCGTGGACCCCAATAAGGCGGGGCTGGCT  
CTACATCAAGGCGGGTTCAGTATTCGAAGTTCGTTCTCCATGACCATCCAGGTGAAGGACAA  
TGCCACCGGTACGACTTACAGCCAAACGGCCAACCTACGTGACGCCGGACAACGCCAGCAC  
CAACCCCAACCTCGCCGAGGCCCGTTCAGACGAGCGTGGGCTACATCGCGTGGCAGCT  
CTACGGCAAGTTCTTCGGCGCCCCGGAGTACACCCTGCCCAACTCCACGAAGAAGTACCC  
CAAGGTTGACCCCAACAAGGCTACGGCTACGGTAGCCGGCTATATCAACCAGCGGGGCGT  
GCAGGACGGCTACATCGCCTTCGGGGCGACGGGGACATCGTGGCCGAGGGGTCTACCGA  
TATGGGCAACAACCTACGGCATCGCCTCGGGTGGCATGAGCTTCAAACGCCACCGCAGACCT  
ACCGGCCCTACTGCCGGGTGCGGGTACGCCGGGCACTGGCGTGCAGTTCATGGACTGGGC  
CGTCATGGCCACTGGCTCGACCAAGGCGCCAGTCTATTTTCGAGTGGGATTCGGCCCATCG  
CCGCTGGGGGGAGCGCGCAGCCTACGGGACCGATTGGGTCTTGAAGAAGATGCCCTTGGC  
CCTACGCTGGGACGAGGGCAGCAACACCTACTGCTTGGACGAGCTCGACTACGACCGGCG  
CGGCTCCGGCGACGAGGACACGAACCCACGTTCAACTTCGTCACCCGGGGCATCACCGG  
CATGACGACCTTCTGGGCAAGGCTGGTCTGCTGTCTCAGGAGTACGCCTGTATGTGCGC  
GAGCAACAACCCGCACCGCTGGTTCAAGAAGTCGGCGGGCGGCGCTCAACGACGAAGACCC  
CATCGAGATCGCGTCCAGGGCAGCCTGACCGAGCCGTACGAGCACGCAGTACCTCCAA  
CAAGGACTTGAGCGTCTTCGCCAAGAAGTATCAGGCCGTAGTCCCTGGCGGGCGGTATCGT  
GACCCCGCGAACGGCGGTTCATCAACATTACGACGCAGTACGACCTCGATACCCGAGCGGC  
ACCCGCCGTCACAGGCCGTAGCGTGTACTTCGCCGCTGAGCGTGCCCTGCGCTTCATGGG  
CCTGCACGAGATGGCCCCGTGCCATCCACGGACAGCCACTACGTGCCGAGGACGTTAT

CAGCCACATCCCGAGCTACATGCCAAGGCCTGCAGAGTACATCCAAGCGGGCGGCCTCAAG  
CGGCTACCTCGTGTTCGTCACCAGTACGGCGGACGAGTTGATTTGCCACCAGTACCTGTG  
GCAGGGCAACGAGAAAGTGCGGAACGCATTCCCTCCGCTGGACGCTACGGCACCAGATCAT  
CGGGACCTACTTCACCGGGGACAACCTGATGGTCTCATCCAGAAGGGTCAGGAGATAGC  
CCTGGGCCGGATGCACCTGAACAGCCTTCCCTGCACGGGAGGGCCTGCAATATCCGAAGTA  
CGACTACTGGCGGCGTATCGAAGCGACTGTGCGAGGGCGAGCTGGAGCTGACCAAGCAGCA  
TTGGGACCACATCAAGGACGCCCTGCCGTGTACCAGCCACATCCCGTGGCGGGCGCATT  
CATGGAGCACTACCAGCTCGGCGTGAAGCGCGGGACCATCACCAAGGTGATCCTCGACGT  
TCCCGAGGCCGTTGCCGGTTCGGTCTACGTGGTTGGCTGCGAGTTCTGGTCCAAGGTGGA  
GTTACCCCCGCCAGTGCTGCGGGACCACAACGGCCTGCCGATGACCTTGGCCCGTGCAGT  
ACTGCACCGCTACAACGTCAACTTCGGATGGACCGGAGTGTTCCAGTGGCGCATCAGCGA  
CACGGCCCCGGCCAACCAGCCGTGGTGCACACGACGCCTCTACGGCTGTTACAGCCGGCA  
ACTCAACGTGCGCGAGCCGCTGGTGGACAGCGCTGTGGTGGCCGCTGCAGGCCCGGGTCCG  
TATGGCGACCTCCAAGTTCGAGTTGAGCTGCCATAGCCCCTACGATATGAACGTGCGGGC  
CGTGGAGTACAACCTCAAGTCCAACCAAACCTACAGGAAGGTGTGATGGCATTCCGGGCTA  
CCACTACTGGCCGCTGGCGGCATGTGCGCTCTCCAGCAGGGCCTATCCAACAAGGAAGAA  
CGCCGCAAGATCAAGGCCGAGAACAAGGCCCGACTCAAGACGGACCACGACAACCTGGTC  
GCCGCTGCCCGCGACATCGCCAACCTGGGCGTTCATGGGTGCAAGGTACCGCAAGCAGGCC  
GTAGCATCCCAAGTCGCGGCCAAGCGGCAGGGCATGCACGCCGGCGGGAGCGCCTCGGCA  
CAGGCAGGGGCCTTCGGGGTCAAGGGTGCATCCGTAGATGCGGTGGCCCTGGGCATCGAG  
CGCGAGGTGGGCGAGGCCCTGATCCAGATTGACGATAACCTGGACAACCATATGTGGAAC  
CTCGCAGAGCAGGCACACTCCATCCAGGCCAGGCTAAGGCCGGCCTGCTGGGGCAGAAG  
AGCACAACAGCGGGGCAACGCTCCCCGCTGGTGCCCGGCTTGATGTCTGCTGGTTCCGTA  
TACGCAAGCCAATACTTCAAGTTCGGCGCCACGCCTAAAGGAGGCAACTGATGGCGGAAT  
CGCGACGTGCTTCCAGGAGCTTGGGAACAACGTCGGAAAGACTCAACTCCAGCCGGGCC  
AGAGCGCCCGGCGCATGGTCCGAGACTCCGAGGTCCACTATAGCGGCCCCAGGGTGGGTT  
CGCCATTCTCGACGGCATACTTGGTGGCCGTCAGCATATCGCTGGCCAGTGGTTCGAGC  
ACAACGTGCAGCAGGAAGTGCTTCGGGGCGAGCGTGCCCGCACGGCCGGGGAGGCCGACG  
ACGCCGTAAACAGCAACATCCTGGCCAAGCCCATGGTGAAGGGCGGCTGGCGCAAGCAGG  
GCTACCGCATCGCCAGGCTGACTTCAGCATGAAGAAGCAGCAGTTTATGGCCACCAAGG  
ACCGGGAGATGACTCGCGAGGGGTTCCGAAAGCACCTGTGCGAGGAAGCGGCACACGTGC  
TGGACTGGACCGAGGGCATGAACCCCAACGACGCCCTACAGGCGCTGGCCAGCAGCAGA  
CGGCCGAGGAACAACCTTTCGGCATGCAGGCCAAGGCCTACATGGACTGGTCCATTGACC  
AAGCCGCCCGAGGCTTCCGCACCCAGGGTAACAGCATCCTGGCCAAGGCCGTGCAGGCC  
AGGCCATAGGTGACGGGCTGTCCCGGCAGTTGACCCTGGAAGGGGCCGGCCTGTTCTACA  
CCAACATCATGACCTCCGAGGACATCCCGCTGGAGGTGCGCGACAAGGTGCGCATGCAGT  
TCCTGGCGGCCAGCCTGGATATGAACCAGCGGGGCATCTACGAGAGTCTGCGCGACGCCG  
GCTTCCCTCGACGGCATGGCCTTCGACGACCGACGTGCGCTCAATGGCCTCTACGAGAAGT  
CGAAGGCACAGACCCTGGCCAAGGACTCGATGGCCACGCTACGGGCCGACGCGGACTTCC  
AGCAGCGGGTGGCCAACGGCGCCATCACCGACCTTGCCGAGGTGCGAGGCGTATTCTCGGG  
TCATGGTGGCGGAAGGCCGCTGGAGCGACGACAGGCCGGCTCCTTCATGACCAAGGCTA  
TGACCGGGCTGGGCAACGCACAGCGCATGCAGGGCATCACGGCGGCCCTGGAGGCCGGCG  
ACATCAACGCAGTGCACAACCTCGGGACCCACGTTACCGAGCCCCTGGAGCAGTGGGATG  
AGATGCAGGCGGCCAACGGCTCCAGTCTCACCGATCGGTTGGTACAGGGCACGCGACTCG  
GCCTACGCCTCGGGACCTTCCCAAGGACCTACGGCGAGTCCGTTGGCAGCGCGGTCCGCT  
TGATCCAGGCCGCCAAGGAAGGCGAGGCCAACCCGGAGTTGGTCAACACGCTGAACAGCA  
TCTTCGAGCAGGTGGCCTCCGCGCAGGAGATCAACCCATCTGCCGGCAACGTGATGCTCT  
CGGGTATCCCGGAGGCCGAGCAGGGCGCCGTATCCTGGGCACTGAAGCAGATGAAGATGG  
GCATCGCCCCGGCGCAGGCCCTGCGGGAGTTCAGCGCCAACGCGGAAGTCGTCAAGCAGA  
TGAACGAGTTTGAGAAGGTCCAGAACATCAAGGCCTTCAAGGACAACCTCGGCAAGCAGG  
TCAATGTCAAGTTCGGGAACAACATCTTCGGTTCGGGCCTGGAACATGCTGACCGGAGAGA  
TCGACCTCAGCAACAACGAGGCCGTCCTAAGCATGTACCGCCTTGCAACCATCGACGAGG  
CCGACTGGGTGGAAAGCGACCGCAAGCACGCACTACTCCTACCAGCGTCACAGGCCCGG  
AGGCTCTGCTGGAGATCGCCGCCGCCAACGTCAGCAACCCGACTATCCAGGTCCGTTGAGT  
CGCGCGACCTCAAGGAGGGGGAGCTGTTACGCCGCCGCGACAGCGCGCCGCTGATCCTGC  
CGATACGCACGACCGCCAAGCAGCTATTCGGCACCAACGACACCGAGACCGTCCGGCGCAG  
TCCTGGCCGAGCAGCACAAGCCGCAGGTTGAGGGCCTCCTTGGCTACAAGTCCGTGGTGG

CGTTT GAGTACGACCGCACCAGTGGCAGCCTACTCGCCGTCGAGTACGACGAGAACGGGG  
TGGCCCTGGACCGTACGCGGGGCGATCCACAGGCCGTGGGTAACGAAGTGCTCAATCGCA  
ACTCCGACAAGCTGAACGCTAACCGCGGGCGCCGAGTATGGGGCCAACGTCAAGGTCAGCG  
GCAAGGACATTCGCATGAACGGCGGCAACAGCGCCGGCATGTTGAAGCAGGATGTGTTCA  
ACTGGCGTAAGGAGCTGGCACAGTTCGAGGCCTATCGAGGGGAGGCGTACAAGGATGCCG  
ACTGTTATAGCGTGGGCCTGGGTCACTACCTGGGCAGTGGCAATGCTGGGGCAGGAACTA  
CGGTCACGCCTGAGCAGGCCGCACAGTGGTTCGCCGAGGACACCGACCGAGCGCTCGACC  
AGGGCGTGAGGCTGGCCGACAAGCTGGGCGTTACGAACAATTCTTCGATCCTGGGCTTGG  
CCGGAATGGCCTTCCAGATGGGCGAAGGACGTGCCCGGCAGTTCGCAACACCTTCCAGG  
TGATCCGGGATCGCAACGAGGAGGCCTTCGAGGCGGTGTCAGGAACAGCAAGTTGTACA  
CGCCGACGCCCAACCGGGCTGAGGCGTTCATCAAGCGCAGGGCGCCCCACTTCGATACCC  
CGAGTCAAGTCGGGGTTCGACTGGTACAGCGCCGTAACAGCGGAGTAAGACATGGCAAAGC  
AATTC AAGGGCCGTATGACTCCCAAGTACCCCTCGACCAAGCACCGCTCGACGAGGCC  
AAGTACACGGTCAGCTCGATGCAGTGTCCACCGTGGGGTTCGACGCCCTGACGGGCGGGC  
AGATCGGAGAACGGAACGTGGCTGCAGGCCAACGTGCCAACGCTCGGGAACCTGGAGCGCA  
TCATCGCAGACCGGAACATGCCGGCCCTTGACCGTGTCTTCTGCACTCTGGAACCAGTCCA  
CTCTCGTCGGATGCTGGTGCCTTTTGCTCCAACCCGACGCAAACCTTGCGGGCAACAGCA  
CCGGCGAGGTGGACCCCAACTTCGACGCCGGGACTTACGGGGTCCAGGCGCTCTAGGCGG  
CTGGCATCCAGCCGAGTGACAACCTCCAGATCATGGCCCGCGCCGGCAACGCCGAGG  
ACACGGCCTACGTACTGTCGAGGATTC AACGTTATGAGCAAGACGAGCAAATCGTGCGGG  
ACAACCCGAACTGGAACCTTCGACGCGGGCATGCTGGACCCGGCTGGGCTGGCAGTCGATG  
CGTTACTTTCGGTGCTGGCCGTGTTCTACAGCTCGGTGCTGCTGGGATGGCTGCTGTTG  
GCGGGCGTGGCCAAGTCGGGTATGTTGCTGGGCTGGATGACGCAGGTGCCGACGTGGATG  
CCGGAACCAACATGGTTCGCTGGCGCTCTCGGTGTTGGCGTGGGTGCTCAGCTGGGGTCTG  
GTGCTGGACGCATTGCCGCCGAAGCCCCAACGCGACCCGCATGTGCCGGAAGTATCGGCGC  
CTACTGTCGGGCTGCCAGAAGTAGCGATGACCGCCGAGGAAGCCGCCGCTCGTGGCTTCA  
AGGCAGGCGATGTGGAGTACCTGCTGGAAAAGGGCACTGTCCTATCCCGGGTAAACTCCC  
GAGTGGAGCAGGCCGAGATAACCGCCATCCCGCGCCGGGACACTGGCTTCGGTGACGAGC  
TGCACGGCCTGTCCGGCCGCAAGCTGTCGGAGGTGGTGGACCACCTCAAGACCCACGCC  
AGGTGCCCAAGCCGTTGCGAGGCGTGGCCGCCAAGGTCGCCCGCGACGTTGAAGACCCTGG  
TGGGCCTGGGGCAGCGCAACATGTTCCGCGTGGTGCAGGGCGGGCATAACCGCTAGCTCCG  
CCTTCTCAAGCCAAGCACGGCGGGTCTGCTTTCGACGCAGGGATTGGACACTTAGGTCC  
AGCTGCGTGGCAGCACGGCGCCGGGCGCGTGGGCACCAACCTGGTACGGTCTCTCCACG  
AGGCGGTTACGCCCGCCACGGTAGGCGTGATGAATACCGCCCTGCGGAATCCTGGCGCGA  
TCACTCCAAGGTGGCCCAGTCCATCCAGACCCTGGAGAACGTCCGCGGTAAGGTGCTCA  
ACCCCTTGAAGCAGGACCGGGGCGCCGGTTCGGCAACTGTCCGAGTTCGAGGAAACCCTGC  
TGGCGGGCAACTCCAACACCCTGGCGAACGTCAAGGAGCTGGTGGCCTGGGGCCTGACAG  
ACACCCGCTTCCAGAAGACCCTGAACCGGCTGCGCTACGGGGACGGCGGGAAGGGCCTCT  
GGTCCCCTACGTCGAGGGCAACAGCAGCCTGCTGGGCCTGCGACCTGATGCGGTACCGT  
CGCTGAGCCGCGTCTTGGCGGCCTCAGAGACGATCATGTACGCCATGCCGGGGTACACCT  
AGGCACAGGCCAAGTGGGCCAACAAGGGCGCGCCAGCGACCGAGGAGGCCAGCCTGGAGA  
CCATCGTGCATCCACCTGGGAACGTGCCCGAGAAGGTGCCGGCTTCGTGAACCGATTCT  
TTAGCAAGGCCGACCTCCTGGCACAGCCGGGAGAGGGTGC GCGGGCGACTCCTGAGCCGTC  
TTATCGACGGCCCGGTTTCGTCGGGATAGGTTACCACGAACGACAACGCAGCGAGCTATT  
TGCGCCGCTGCCGCAACTAGTTCGAGGGCTACGTCAAGTCTTACGACGAGATGATGGCGA  
TGGCGATGGCTGAGTAGGGCGCGGGCCTGACCGCTCGGGCACTCAACTCTCGCCGCGCTA  
TGGCCGTCTTGGATCAGCCCAACGAGCAGGTACCCGGGAGCTGCTGCGCAGGGACCGGG  
AGTGGACCGCCTATGGCAGCGTCCGCGTAGGCCCGAACCTACCGGCCACCATCAAGGCC  
TGGCGGACCACTCCGACGAGAGTCACGGACTGATGGGCCAGCGTGCCCGGGAGGCCGGCG  
TGCGTGGGTTCGAGA ACTTCGCACCACGCCCGGGTACTTCCACCGCTCGTGGAACTTGT  
CGAAGATGGCGCAGATGGACGAGGCGGCCCCAGGCTTGGCTCGCCGGACTATCAGCGAAG  
CCGTATTCCGGGGCATCCCTGGATTGGCACGGGCGGATGCTGACACCATGGCACAGGCCA  
TCGTACAGCGGGCACGAGACCGGGCGACCGGTATCCGCTCTGAGTACATGGACGCGATGG  
GCGTGGCTGAAACGGCCTTCATCCGGCAGGCGCTGGAAGAGGCCAACGTGTCCAGGCCA  
AGTTCGTCAGCATCATGGCGAAGATCGATCAGACGCAGTCCGACCAGGGCACCGTCAAGT  
ACGGCTAGGGCCGGGTGTCGCTGGTTCATGACCGCCGAGATCAACCACAACGGCACCGTGT  
ACCGCGTACAGGACCTGATCGACCGGGACCTCAATCGACTGATGTAGA ACTATTACGGCA

GTATGTCGGGCGGTCGGCGTTGGCTCGGGCAGGTATGCCGGGCGACTCCGAGGTTCGAGG  
CGTTCATCCGTGAGTACCAGCGGGAGGCCGCGCACCTGGGCACCGACAAGGTGCAGGAGC  
TGACGGGGCAACTGCTGGGCGTCTTCGGGGACTTCACCTGCGACGTGCCGCGCGAGCACC  
AGCTCGGCCCGTGGCTGAGCGGGCCAGCGGGTTTACCAGCGCCGCCATGCTGGGGTTCT  
CCGGCGTGTACCAGCTTGCAGTGCTGGCCACGATGGCCCAACGCCAGGGCGTCTTCAACG  
TCATGGAGGCCATGATGAACTCCCAGCTCGGGGACTTCATAGGCGAAATGCGCCGTAACC  
CGACCTCGCCGACGAGATGCAGAGCGTCTCGGCCTGAACCTCGCCAACGACATCCGCA  
TGAGGCCCTGGAAGCGGCAGTTCGACACCTGCCTCGCCAGCCAGGATACTTCATGGATC  
GCTTCTGCACTCAGGTAAGCCGGCTGTCCCAGTCTCAACGGCCTGAAGTTTATCCACA  
ACTGGCAATCCCGCATGAACGCCAACCTCACCGTGAACAAAGTGGCGCGGGCCGCGCAGG  
GGGATAAAGCAGCCCTTCGCGTGCTTCAGCAGTACGGGAAGGACGTGGACCAGACGCCAG  
TGCTGGCGCGGGTTCACGGTTATGTACATAACAGAGCAAGGAACGCTCAATCCATGAATT  
GGGGCGCCTGGAGCCAAGCAGACGTGAACACCGTCATGAACACCGCACTGCGGATCATGG  
ACGACTCGCTGCTGTATGGTAGGGTCTGTCAGAACTCGGTCTTTGCCCGGTCACCTGTCCG  
GTCAAATCCAGGGCCGGTTCGCGAGCTTCGTGGCCTTCGCGCACAACAAGCTCCTCCGGG  
GAACCTACGTGAACTCCGGCGTGCTTGGCGTGGCCTCGCTCCTCGCATTCCAGTATCCGC  
TCACAGCGCTGGTGATCGGTGCCAAGGCAGCGATCAACGGCAAGTCCGACAACCTCTGATG  
AAGGCAGCGGCAAGATGGCCATCGGCGGCATCGGCTCCACTCCCAGGCTCGGCTTACCCG  
CCGACATGTGGGGCGTAGTCACCGGGCACTCCCTGAAGTCCGCCAGGTCTTCGGGCTGG  
GGGAGCACTCCAACGAGGTGTTCCGTGGCGTCAAGGACCCAGTAACCGGCGACGACCCCA  
CAGCCGCCACCGGCGAGATCGTCAGCGGCGCCGACGGGGCATTGCCTTTTCGTCAACGTAT  
TCCCAGGACCAAGTTGGTGCTGGAATCCATCACAGGGGAATAACGTGGCTCGGTTCAAG  
AATCCCGAGACCATCCACGTTGCAGATGGGGTTCGAGACTGTCTTCAGTCTCGACTTCCCG  
TTCCTGCGGCGTGAGGACGTATTCGTCCAGGTCGATAAAGATACTCGTCACCGACTATACG  
TGGGTAGACGATAACCAACATCCAATTGGACGTGGTGCGGAAGAAGGACCAAGAGGTCCGC  
ATCTTCCGCGACACGCCCGCCAGGTCCCAGGACACACAGTTCAGCCAGGGCATCCCAGTCC  
CTGCCTCGATACATCGACGCGAACAATAAGCAGCTCCTGTACGCTGTGCAGGAAGGCATC  
AACACCGCGTAACTCGCTCTCGATGGCGTACTCGACGCGATCCGTATCGCCGAGGAGGCT  
TATCGCCTGGCGCAGGAAGCACTCGACGCCGCAATGAGGCGCCTCGCCGTGCCCTGGGC  
TTCGCTGAGATACGCACCGTGACCGAGGACTCGGATATTGATCCGAGCTGGCGGGGGTAC  
TGGAACCGCTGCATCACTACCGACAAGACTCTGACCCTGACCATCCAGATGGAAGACCCG  
GATGCACCGTGAGTCGAGTTCAGCGAGGTTCACTTCGAGCAGGCCGGTGTGCGTGACCTA  
TACATCGTAGCCGGTTCGTGGCGTTACCATCAACCGTTTGCAGAACACCACCATGCAGCTC  
TACGGGGAGAATGGCGTGTGTACTCTCAAGCGGCTGCGCGCTAACCCTGGTTCGTGTTCC  
GGGGCCATGGAGGACGAATAATGCACGGCATTATCGCGGGCATCATGGCCTCCCAAATTC  
GACGGCCCAAGCCCATCCTAGCGACCTACCCGTATGCCATCATGGAGGCGGATAATCGCT  
GGGCTGCTCGGCCCAATATCGTGGCAGCTCTGACCAGGGACACTCTGAAGCAGGTCCGGC  
CAGAAGACACGCTGGAGCACTACAGTGCAGCCACCGCTATACTGGCCGCCAGCATGCGCA  
GCCTGACACAAACGGGCTACGGCGGGGCATGGCCGTACCAGCCCGTAACAGGTGTGGCAA  
ATACCACGCTCCGGCCGCTGGTGAAGTCTACTACGGTTCGAAGCTCAGCCCTATCTAGCCA  
CGCCGGCGATCCACTCGGCGGACCTGCGGGTAGTGCTCATTATCTCGGATTACGAGGTAG  
AGTCGTTCCATTACACCCTGACCAACCGCCTTGTACAGGCGTAGCTGAAAAATGTTTAAAG  
ACCGAAGTAAAGGGACGTTACACCCTGATTCGCCGCAAGGCGGACGGCTCTCCGGTGGAG  
ACTCTGGAGTTCGACAACATCATTACGAATGCGGGCCTGGATTGGATCGCCGCTATGGAT  
ACCGACCTCAGGGGCGAACGCGTAGCGGTCAGCACTTCTACAGCCGGTCCCACCCCGAGC  
GCACCGGCCATCCCGGAGGTTGTGCAACGCACGTCCGCATCTGCCCTGATGGAGGTACT  
CCGTAGGGCCTGGATGGCGACTGGCTGTTTTGGCGGAAGCGTTGGAGATTCCCGCAGGGC  
ACCCTAGCTGGTCAAGTCTGCCCACCGTGGGCCTCATCTGCAACTCGGATCGTCGCTTC  
GAGCATAACACGGGTGAGCTGATCCCAGAGGATTCCCCGCTGTCGTACACTCGCATCAAG  
GACGCCGCCGGGCACCCTACTACTCTGGTGGTGGGCGCTGACGAGATTGGGGATGTCCAG  
TACGAGTTCGCGAGCCGGCCCGCGGAACGGCTGAGGCCAAGTTCGTGATCTCCGGCGTG  
GAACGCACCTTCCGGCTGATCCCACAGCCTTTTGCGAACCCTGCTAATCTCTCCGGGGAA  
CGCTACAGCTTCTATAACACCAAGCCCTTACCAACGGCAAGCACGCTCCGGCGGCAAT  
GTCCGAGACGCTCAGTGGGAGAAGAAATATCCCAAGTACGTGCGCGGCTCCTACAAGGCG  
CAGATCACGCTGCTTGCCTGGTCCAGAACGGCAATATGCCTGGCGGCATCACCGGCACC  
GAGGAACTCCAGATTTACAATGGACGTAACCTATGTGCTCGAAATCAACCCGCCTGTTGTG  
AAGAACAATAACCCAGGGGTTACCGTGACACTGGAGTTTACGGTGGCGAGGGCATAACCT

ATGGCACTGATCTAAGACTTCAACCCGGACCTTGATCCGAAGGCTAAGTCCAAGTTCGTA  
GGTGCGCGAGGCCGTATGGACATCAGGGACGTGTTGGACTTCTGCGACGGTGGTGTGGCT  
AGCCAGGACCCGTCGCAGGGCATGTTGGGCCGCGTGTGGGGAACAGAGCTTCCCCAGGAC  
GGGACCTACCTGGGTCACGAGGACGGCTCGAACGAGATTTCGCATCAGCGGAGGTTTCGAA  
GAAGGTATCTCCACGATGTACCTCGACTTCGAGAGCAACATGAACTACGTGTGTGCTTTC  
GTACGAGCCGACCCGACTGGTGAATCTCCTACTTCAACGTGCAGCAAGGCCGCCGGCTC  
CTCGTGGAGCTTGACCAGGATGACGATGCCAAGGTGGCTCTGGACGACAAACCTCCGGGG  
GCTACCGCCTGGGCGCACGCTATCGTGCCTACACACGCTACGGGAACCTCTACGTCCGC  
ACGCAAAATGATAACTACACCGAAGAGCACCTGGAGCTGGATAACGGCAAGGTATTCCGG  
TCTCTGGTGAATGCGATATGGGCACCAACCTCCGCCTCCAAGTCCAATTACAGAGGGCAC  
ATGTAATGAGTAAAAACCGGACCCGACCGCCAGTGCTGAGCGGCTGGGCCTGCTTCACGAGCTGG  
TTTGCACCGATATCGAGCGCAACTTCAAGTGGTACATGGACAACGACATCCCGATCCCCG  
CATCGCATATCGCTGCCGCCACCAAGTTCCCTCCAGGACAACGAGATCACCTGTGATCCGT  
CCGACACCATCTACATCGACCGTCTCCGCGAGGGGATGCGGCAGGCGCAGGCGGAGAATC  
GCCGAATTGACTAGGAGGGCTTCATCGCTGGCGAGACCGACGACGAGATGGAACGCCAGT  
ACACCCCTAAGGAGGCAGCATGCCGCCGAAGAACAATTCCAGATAGCCACGAAGTGC  
GGGATATGTCCCCGCGCTTCCGGGACTGCTGCCTGGACGCCATGCTGTACCTCGGGTTCA  
CGATGACCTCGGTGCAGCTCGACATCGCGGACTTCATGCAGGACTCGCCAACAAGGCGA  
CGGTTGGTGCCAGCGTCGCTAAGCTAAGTCCATCATCGCCTGTATCTACGTGGTCTGGT  
GCATCGCGCAGAACCAGGCCACCCGTGCCATGCTGGTCTCCGGCTCCGGCGCCAAGGCCG  
AAGAGAACGGCCAGTTGATCACGAAGCTGATCATGCATTGGGACCTGTTGGCGTACCTGC  
GCCCGGAGGCCACATGGGCGACCCGACCTCCGGCTACCAGCTTCGATGTGAACTTGGCGT  
TGAAGGGCGTCGAGAAGTCGGCCTCCATCAACTGCATCGGGATCACCGCCGCCCTCCAGG  
GCTACCAGGCTGACATCCTGATCCCTGACGACATCGAGACCACGAAGAACGGCCTGACCG  
CAACCGAGCGGGCCAAGCTGACGCGGCAGTCGCAGGAGTTCACCTCCATCTGTACCCACG  
GTAAGATTCTGTACCTGGGCACTCCGCAGTCGCGGGAATCCATTTAGATCGGCCTGCCTT  
CGCGGGGCTTCCCTCATGCGCATCTGGCCGGGCCGTTCCCGACCCTGGACGAGCAGAAGC  
GCTACGGCGAGTGGCTGGCCCCCTCTATCGTGGACCGTATCTCCCGCCTGGAAGTGAAGG  
GCCACAACCCCGCACAGGCAAGGGCCTGGACGGAACCCGTTGCTGGGCCGCGGACCCGC  
ATCGCTACAACGAAGAGGACCCTATCGACAAGGAACTGGACCAGGGTGCCGAGGGCTTCC  
AGCTCCAGTACATGCTGGACACCAGCCTCGCCGACGAGCGGCATGCAGATCAAGCATC  
GTAACCTGCTGTTCTTCGACGCGACGCACGAGAGCGTACCCGAGCAAGTGGACGGGGCTG  
CCGACGAGCGCTTCAAGCTCAAGTTCGACGTCCACCGATTCCCGGTCATCAAGCCTGAGC  
TGTACCTGCGGGCCTTGATGGCTGGCGGCTGGGCACCGCTCCAGCAAATGACGATGTTAG  
TGGACCCTGCCGGCGACGGTGGCGACGAGGTGTCGTATGCCGTGGGCGGGACTCTTGGCC  
CGTACATCCAAGTCGTGAGCATAGGCGGCTGGAAGGGCGGCTTTGCCGAGGAGAACCGGG  
AGAAATGTATCGCCCTGGCTGCGCGCTATGGCGTCAGGGTGATCTATGTCGAGAAAAGCC  
TCGGCGCAGGTGCAGTTGGACAGCTCTTTCGCAACCAAATGCGATCCATCGACCCGGACA  
CCAAGTACCCCGCTATGAGGGGATCGGCGTAGAAGACCGCCAGAAGTCCGGTCAGAAAG  
AGCGTCGCATCATCGACGTCTGCGGCCCATCATGCAGCGGCACCCGGCTGATCTTCCACG  
TATCGGCGATGGATTCCGAACACGTGGCCTGTCAGCAGTACCAGCGGACAAGCGCAATG  
AGCGCTCCGTGTTCCAGCAGATTCACAACATCACACCAGGAGGCTCACTGCCGAAGG  
ACGACCGGATCGATGCCCTGAGGGCCTTGTCCGCGAGCTGACACCATCGCTCGTACAGG  
AGGACGAAGCCGCAACCCGCGCTAGTGAGGAGGCTGCCAAGAAGGAATGGCTGAACAACC  
CGATGGGTTACACTAAGTCTGTCTTCCGGTCTCTCGGGATGGGCCGAGAGCGTCGCAAGG  
GCCGCCAAAAGGACGAAGACTATGATGATTGATCCCGCCACCGAGGCGGGCAAAGGCAC  
CCTCGCCGTCACCGGCTTGGGGATCGCCGTTTACTCGCCCTTTGAGATCGCCAGCCTCTG  
TGCTGCGGTAATCACCGCGCTCTACGTGGGCGCCAGCCATCACCTGCTCCGGCAGAT  
GCTCGATAGCATCGCGGAGCTTCGCCCGAGGTTCAAGAAGTGAACAAGCCCTGCGCGGC  
GCAGCCCTTGCGGCTGCCCTCGCCGGCCTTGTGCGCCTGGAAGGCAGTGAGACCACCGCG  
TACAGGGCCATCGCCGACGTCCCCACCATCTGCTCTGGAACTACTGCCGGACTCAAGATG  
GGCGACAAAGCCACAGCAGAGCAGTGCTACCAGTTGACGATCAAGTACTCCAGCGCTTC  
GAGCGCATCGTCTGGACGCCATCAAGGTTCCGCTGAACGTGAACGAGCAGACCGCCCCG  
ACGTTCTTACGCTACAACGTGGGTCCAGTCTGTACAACCAGGACAGCGTACAAGCGCTTC  
AACCAAGGCCTCGACACTGAGGGCTGCCAAGCCCTGGCCATGTGGAACAAGGTCACGATC  
GACGGCGAGAAGGTCGTATCGAAGGGCCTCGTGAATCGCCGCAACGTGGAGATCAAACAA  
TGCCTCGAACCATCGTGGCAATACTCGTCTTGTGTGGTGGCCCTGGGAGCCTCGTACG



GCTTCGTCCAGAGTTACCGGGCCTTGGGTATCGCCAGGAGGAGATCAAGTGGCAGACGT  
CCCGCGGGAGGCCCTGGAGGTGCGCTACGCCACCTTGCAGCGCCACGTCCAGGAGGTCT  
CTGCCAGGACCAACACCCCGCCCCGGGAGGTTGACCATGCCCTGGACCAGAACCGCCCGT  
GGGCCGACCGGCTGTGCCTGCTGCTGTCGTTGGCAGCCTGTGTAACCGCCCCGGCGCCC  
GCTGTGCTGTGCGAACACCCACTGATTGACCCTACCACCCAGGCTGGCCTGATCCGCGCT  
GTAGCGGCCTATCAGGACGCCCTGGACCTATGCAACGCCCTGAATCAAGGAGATTGACAT  
GGCTAACCCCGCGAGCAGTACATTGCTGGCCGTAACACCGGCCTGACCTTCTACCAGGT  
GTGCCAGCCCGGCACCGACAACCGCATCGCCCTACACGAGAAGGACGAGGCCGATGTCAG  
GGCCAAGGGCACCGCTGTGATCGCAGCAGCCACTGCCCTGGGCGGGCAGGGCCGCGCTAC  
CCCACCGGACCCGTTTCATCGCCAACAAGGTGGAGAACCGTGACACCCTGCCCGTGGACGG  
CGGTGGTTCCGTGAAGGTGACTATAGCCAACGGCGCCATCACCAATGTCGTGTACACCGC  
ACCGGCGGGCTGAGCTTCAGCCCGTCCAACCTGACTCCATCCGTAACACAAGGAAGTAT  
CCATGGCAACCTTCGCCGCTGCAACTCAGTAAGACCTCCGCGCCTTCGCCGGCACCATCG  
AGAACCTGATCCGTCCGCTGGAAGAAGTGGCCCAGGGTCTGGCTACAACGAGACCAAGC  
TGCCAGCTGAGCCGGTTCGCACACTTCGATGAGCTGATGGCTGCTGTCGAGTCTGCCAAGG  
TCAAGGTCTACGTGTAGTAGTTCAAGCCGAGCACCTGCATAGGCGGGTGTCTCCACTGGAA  
CTACTGGAATTTTTATTGAGGGTGTGTGTGGGCTGGGTTGGCTGGTGTGGGCAGGAGTAG  
TACTCCGGGTCTAATTTTGGTATCGTTCGTGTGAGAACCCTCCCGACTCTGATCAGCCCA  
CCCTTCCCCCGTAGGCCCTCCGCCTGGTGGGCAATCCTCGCCTTGCTGGGTGTTGCCTG  
GGTCATCCCTGGGAGCTTCCGGCCTCGCCGGTGGTGCGGTGGGCTTCCCTGCCCTGTCGC  
CAGCCATACTACACGGCTAAGCGGGAGTGTCAACCCTTGGGCTAGCGCTGTGCTCTAGC  
GGGCTTGGCCGTAGTACCTGGAGCGCTCCAGCGCATCGCGGTGCATGGCCCCGGCTACCT  
CGTACACCTGGGATGCCTGCCGCTTCCGCCAGGGTGCAGCGTAGTGCTGGTGGTCTCTGCG  
CTGCCACTGTGCTAGCTGCCTCTGCCATGCCGCGTCTGCTGGTACCAGGCACGCTCAC  
CTCTGTTCTGTCTGCTCAGCATCTCCGTGCCTCCTGTGGTCTGTCGGGTGGTGGTGGC  
GGAGTGGGTGGC

>NewGenomeName\_203

TTAAAATTTTACATTCTTAACCAGTTTCATAAAGTCTTGTGCGCGTTTGTGCGTTTTGCAG  
AATACGATAACCAGTTATCTACAATATCATAACAGTAACGGGCTATTCTATTTAAACTTCGC  
ACAAATTGCTTTAAATTGTTTCGTTTGCTGCCGTGAATTTTTTCATCACAGATCTTTTTACT  
TTCTTCGTCCATAATCCAACGAGTATTAAGGAGTAACCTGGAAACCTCTTTATTATAATG  
ACGACCGTACAGTCTGTCAATAAATTCTGGAATACAGCGTTATAGTTCATCGTCATGAAA  
CAACATAGTGATCACACCCAGATATTCGACATAACCCAGATGATTGGACTTAACCTTCGT  
CGCCAGACCAGCCAGCTTAACGCGAACAAATTCTAGCGCACATTCCAATTGTTTCGTCAAC  
GAGATATTTTTGTGTCTCGTTTCGAGTAATAATACTTTGTTACCCCGAAGTGGTCAAG  
CGCCGGATGTAATGTATTTTCACTATAGATCGATTTTCGACTACGCATTTCAATGCATC  
ACCTACGCGGAACATGTGCAAGCCTGATAACTCGCGAATCTCTGCCGCTTTCATGTGATG  
GCTGGTTTTATGCCAACTGTCACCTATCTTTTCCAAGATATACACGTTAGGCAGCTTGGG  
AGTCGCTTACGTTGTGTACGCTCGTTCTTCTACGGCTTAACCTGCTTTAGCGCTCAGATC  
ATCGGCCCCAGAACCTTTAATCACCGTCATTTTCAAGATCATCATAATACTGTTTGATGTA  
CTCGAAAGTCTCCATATGTTTTTCGTTGCGCTGACGGAAGACGAGTACCTTTTTATTGAT  
GCCGTATTCCTGGACCATGCCGTTAAGAGTCAGTGCACGCAGTTTCGGTTTATCGGTATC  
ATCAATAAGACACAAAATATCTTCTTTATCCATCCATACAAAAATGCGTAATGTTGTATTG  
ACTGCTAACGAAAGCAGGGCGCAATTTACTGATTGTGTGACGAGTACGATACAGAGTATA  
CACCTGACCTTCTACGTCATTAGGCGAATCTTTACCCGCATTCACAACTTATTATAGAT  
TGCTACCGGATCGTCCATTGTCCGATCTTACCGATCTTGCTAATAATATTGCGTTGCCG  
CGATGAATACTGGCTCATAAATTGAGCAAGTTTACGCTCTGTTTTAATGTTTCGCGATCTT  
ATCTTTAACCTTTTCCAACATCATTTTATTGATTTCTGCAATGAGTTTTTTCGATGTTTCG  
TTTAGTCTCAATTGACAAGTGAACCTTCTTACGCGGTGGCATCAGGTCCAGATCACCCAA  
CTCAAAAATGAATGTAAATGGTCTGGTGTGGCGGTTTACAACCTTCTAACCATGTTCCGCG  
AACATATTCATACGGGATCGGATACTTGTATCTTACCCATGATTGCATATACTACATAGGA  
ATCGTTATCACGCCCATCACAAACATAAAAATTATCAAAGCTAGGGAAATAATTAATTTT  
GATTGGATTGATATTCGGTTTGTGTTCCCAAAAATGACGCAGTACAAATTGCGCTTCTCG  
ATGCCATGTCTGAATGTCTTTTTCTTTCACCGGAATAGTGATTTTTCAGAGCATTGTCTTC  
ACAGGTAGGTTTCGTCGAAAATCTGCACCATTTTCGGCATAGAGTTTTGCACAAATGCCGT  
AAAGCTATAAGCGCGACCATTGTAATAGTTTACGATTGTAAGGTGTCGGTATAGCTATA  
AGCAGACTTCGCACCTAAAACAAAAGATCCGATATAATCATTAGTCTGGTCTTTTGTGTA

TTCAGAGTAAACCGTAAACAGTTGTTCTAATTCTTTCTTAGACGGAATACCAGTACCATA  
ATCACGCACAGAAAAATACGGTTCGATTGCAGTCGGTAAATGTATATCAAACGGACGATC  
TAATGTTCCGGCTTCTTTGTGAGTGTCGGTAGCATTACATGAAGACTCACGGACGCAAGC  
ACGCTCACACTATTGATAAGAGTTCTTAGAAAGCACCATAAAAGCCTTGCTACTTGCTTT  
CAGTGAAAAATCAACCGCACCGCTCAAGTCACTGCCAAATACTTCTTCATTATCAATATG  
CATTTTCATAATATAATCCTCACTTAATTAATAATCTTCTTTGTCCATCTCTGCGTAGATT  
ACATCCCACGCCATAAATCAATAAACGCATTATATGTCACGATGCAATCGTTGTCAATC  
ACTGCTTTAGCATATTTCTTGATGTTTTTCGTAGGAACTTGCGGATCAATTTTGTGTTTG  
CGAAGGTGTGCATATTCATACCTCAAACATTCATAAACAGGTTTCATCGATTTCTTTTCT  
CGATGGCACTTGGCGATCAGAAAATCAAACCTTCGACTCATTTTCCACTCCTTATACATT  
TTCAATCACCCATTGCAGATGGGCTTCTGCGTCAACCAGTTCAGCGCGGGCGTTTCTCTAA  
GCACTTGCTGTATTCTTTACGTTCCCCTCGGCAATTTTCGTTTTTCAGGAGTTCCTCATA  
GTAAGCAATTTTCGCCTTTAAGGTCTGAAACTTTACGGCTTGCCAATTCGATGTAATGGTT  
ACGCATTTTGATTCTCCTAAGTGGTATCTCGTTTCGATGGGGACATTATGATATATCCCG  
GATCCAGTGTCAAAGATTTTTAATCTTTTTTCAATGCATCCATTACTCGCTCTGAGATC  
AGTTCTCGTAAGCACTGATAACCATGATATTCGATGGCAATGTCACGCAGATCATTAAACC  
AGGTCCCCTACTTCATGGTCTTTCAGATCGTCTCTGTATTTTCGATTTAAACCGTGTCTTTA  
GGTGGATTGCGGATAACCTGAAAACCTTGTTCTGCAATCACTGCGGCTTCGCGCTGGCGT  
TCATGCTGTACTGTATTTTTGATCAGGTCTGCCTCCATGAACTTTGCCCACTCATCATC  
ATGTTATTCTTGTTGCTCATTATTAATCCTCATAAAAGAAAAGGGAGACTCCCATTATA  
GAGATTCTCCCTTGATGTCAACTAAAATTTAAAGATGCAAACCTCCCCTGATGAATTTT  
TGCATATTCATCATATGCTCGAGCGGCTTCCTCCTGAGTAGCAAACGATCCTATGTATTT  
TCTGTATCCGTTTATCCTTATTTGTGCTTGCCACGGTCTTTTGCTCGATCCTTTGCGATG  
AGTAACACCATTATATATGCTCGTGCACCCGTCCATTTTCTTTGTATAGTACATGTTTTG  
TAGTTGTGTTGCCTCCCGTAAATTTGGTGGATTGTTGTTTTCTGGAATCCCGTCTATGTG  
GTCTATTACCTTAACCTGTGTTCCATATTCAAGAAACCAGACAATTCTATTTACAAGATA  
TGTAGATGTTCTCTTTTGAACCTTGTTGGAAACATCTATTGCCAAATGACCGTAATTTAA  
CTTTTTTGTTTTTACTTTATCACCGACTTGGTAGAAATATCCCTCTGGTAGACCATTAAA  
AGACGGACTATTTGTTTTGTGATATAGAACACCTTCCGTGTGTCCAAATCTTCGTTTTAA  
TTCCTCTTGAATTTCAGTATTCAAAATTTTCGCACTTTTCATATTATGACGCCATCCATG  
CCTTCCTCATGTCTGAATCTTCACTATAGAGCAAATCGAATAGCTCTTTATAGTTTTCCG  
GTAACGTGATGATCTCCATGACAGGATAGTTGATCACGCGATGATAGTCTGATTCTGTGA  
GCTATGCTAAACCTTAGATATATCGAATGTTGTAACCTTTGATATTATCTCGGTCGTTCT  
CGAAATCTTCAAGATCATTATACCATCGAACATCATGACCTTTCTTTGGTTCAGCAATGA  
TAATAGATGTTTTGATAAACCGGATTCGTCCATCTTCGTACAATTCAGGCCAACGTGCAA  
AGAAAGAGTCCAGACTAGGTTAATAGACCCGATCCCGTCAGTATCAGCGTCGGTCATAA  
TCGCAATATTTTTGTATTGCATAAATCCAATGCATCAACACCAAATTGCAACCCAGTGA  
TCGCCATGATGTTAAAAATTTTCGGCGTTCTTAACGATCTTTGCCTCCGGTTGTTCCACG  
TGGTAAGAGTTTTGCCTCGCAACGGGAAACCTCCATGTATATCTTGATCACGTACAGAGA  
TCAGATAGTTGATCGCTGAATCACCTTCCGTCAAAAACAGGGTAGTTTCAGCGTCAGTTC  
CAATAAGGTTAGCTTTAACGTGTTTTGCTACCTTAGCGCGTTTTGCTGCCTTTGCCGCT  
TAGTCGCTGCCGCTTTATCTGCTGCCTCTTTGCGTGCCAGGATTACAGCAATAATAGGCA  
TGATAATGTTTTCTTTCTTCGCAATGACTTTAGCCAGCTTTTTTAAAATCAAGATCAATAT  
GACGCTTGATAGCACCAGTTGGGTTAGTCAAGCGTTCAATTGTCTGTGAATCAAACGAA  
GGTTATGCAACTCACGAACAATCAAATCCAGGTCAATCCAGACTTAACCGCAGCTTTAG  
TAACATCAACCTTATAATTCTTTCTTGATTTCGTTTTACAATCTCTTCACAAAGATCATCTG  
TCACGTAGTCTACGTGTGTTCCCCCGTTTTTGGTAAACAAACCGTTAGCAAAGGATACTG  
ATTTAAAACCTTCTCCCTCGACCGCCGGAAGTAGGGCAAGTGAAAAGTTTTTATCTTCAA  
TGACAAACGGAACATCATTGTATAGTTTAGCATAATCCTTGAACCTACTAACAATACGTA  
TACCATTAAACTTAAACGTGATCTTAGGAAATATTACGCTCAATGATTGCAGACGATCAT  
GAACAATATCTAAAACAGAGTTGTCCAGCATATAACCTTGGAAGTGGTTCGAAGTCTGGGC  
AAAATGTAACCTTTGTTCCCTTCACTTTTGATGGTTTCGATGACCATGTGATATTTTTCAG  
CACGGTTTGTACATTGAACGGTCAATTTCTGTTTCGCCGTACAGGTACACCCAGTAAACC  
AATCGGAAAAGAAATTTGATAACGACGACTCAACACCGTTCATCCCTTGCGTTAATCGAT  
TGGTATCATCAAAGTTAGACCTGCTTTTGTCCGTGTCCATGCGGCTACAGGTTGCGGAA  
TCTGCGTACCCTCTGGGGTAGTAACCATATGTTGAGGAATACCGCGACCGTTGTCTGTTA  
CCGTAACAATATTGTTTTGGATATCGACGCTAATCACATTGGCAAATTCAAAATTAGTGC

GAATCGCCTCGTCTACAGAGTTGTCGATGATCTCATAAATGATTTTACCAGTCCAGGAA  
CATATGAAATTTTTATCCATTTACCGAACCGGAAACGTCGATGTTCTTCGTAAGTTGTTG  
ATACAATCTACATTCATGCACGCTTAAGGACATGCTCACGATCAGATACAATGCGAAACT  
CACTCATTATTAACCGCTTCAGAACATAACCATAACTTACTGCAACCGCCACAAAGACG  
GCTGCAACAATCATATTAATAAATTGAGTGATTGTCAAGTATATCACTCATGACACGCGCA  
CATTTTTATCACAGTACCCGCCATTAATACCGCGCGGGGCAGTTAATACCTGATTGCATT  
CTTACCACATTCAGGGCATTCTGCCTTGTACGTTTCGGAAATTTTTTCGGATTTTCTGAA  
ATTGACCGTGTCTTTCACAAGAATAATCATATAATGGCCTATTATCCCCTTTGTTTCTTA  
ACTGACTTTGGATCTGGATTTTCTGGCAAGTCTTCCAGACCCATAGCATAACGTTGTGCA  
TAGATTAGCAGAAGCATATCGCGAGCGCAATCATGAATTGCGTTATGCGCGATAAATCCG  
TCTAGCCTACCCATTGGGAACGTGCATTCACACATAACCACGATGCATCAATGTACGCTTA  
ATGGCGGTTTCGAACATCTCGGATAATCCAGAATCGCACAGGTTCAAGGCTGAACGGCTCT  
CGTGTATTGTGTGCACGGCGGATCATATCAACTAGTAACGGAATATCAAACGCATTACCG  
CGTGACCACATTACGGATTTAACCGGATCTACTCCTACGGCTTCACAGAATGCGTTAAAA  
CGCGCTGAACCTTCTTTAGTTGATACTTCCGTACCATTTGTGATTAATTGCTTTCTCATG  
CCTTCTGAGGCGGTATTCTTCCACCATTCAACCACACGATGATCAAACACCCTTACACCT  
TTCTGGGAAGGAATAACAATTTTTACCAGAAAGGAATTGTCAACCAGTTCTTTAAATGTA  
GGTGGATTGTGCGGATCTTCTTTAAATCCGATTGCCGCCATATTGATAACCGCCCCATCA  
GGCGGATAACCTAACTTTCAAAGTCAATCATTAAATCCACTGGAAGCATTTTAAATATC  
CTCCGCGATATGCCGGAACAACCTCCAGATCGTTTTTATCCAGAATGAAACCGCTACAATC  
ATAATCCCGTTACCGTAATTATCGGTTAACAGTCGTTCCGTTGCCATGTATGCGTGTAC  
TTTGTGTTAAAATTCATTACATGTTGTGCATAGTCACAATGAATCTTTTGACGGTTCCA  
CGCGACAATTGATTGTAGATGTATTACATGAGCCACATTATTAATAACAACCATATCAA  
AACCTCACTTAGTGAAATGCTCGATCATTTTATTGATACATGCAGCTTCACTATCGCCGG  
ACACGTTCCAGCCGTATAGACCCCATCTAAAGCACATGGTAACAGTTCCATTGTGACGGC  
TTACCGTCACATCATTAAATTCTGGGATACTTCGCATAATCATAATAAGTTCCTCAAATA  
TAGTCTACTCGATACCGCGCACGGGTAACACCAACATATAATAACTGCATTGCCAATTCA  
AAGTCCACATTGTCTGTACACATGCAAGGAGTATATAGGAACACGCGGTCTAAGCTGATC  
CCTTGTGACTTATGAATGGTGAAGCTGGTAATGCTTTTACATTCAAAAACATACGCTTC  
ATCGTCCAGAACGAATCCCAATCTGGTTTAAATTTTGGATTCTCTTTCTTCATTTCCGGA  
TATTGTCCGGCGACCGTATTCAGATAGATAGAGAAAATGTTCTTCTGACGTTGTTCTGTC  
AGAATGTTGATTTCTACTAAATCCGGTTTATCTGCAGTGATTTCAGACTGCATCTAAACCG  
ACTTTCTGATTTAGGATCTCTTTGTCTTCGTCATCATCGACGCTTTCCATTTTCAAAGTA  
TATCCTAAAATTGGTTGCGGATGTACCCCGTACAACGTAATGTAAATTCGCGCGGTATA  
ACCTCTTTAACTCGGATCATCTCACCATTGTTTAAAATAACATTAGGAATCTTCTTCCCG  
CGTTCATCTCGCAGATATTCGATCAATGGTTCCTGAGTAACCAGAATTTTCATCTACAATC  
ACTGGTTCATCGGTGTTATAAACGCGCTTACGGACAATTTCAATTGAGTTTTTTCGACGCTC  
TTGTTAGTCTAGGCCAGAATACGGTTTTCTAGTAGGTCTTCCGGCGTTTTTACGGTATCG  
AAAGAATGCTTCATAAGCTGCGGCAGAGTTAAGCTATGGAATACACCCTCGTTACCGCAC  
TGTTTTTCGAATACCCATTTACCATTACGGACAGCGGTTCGCCACATCAATTATTGGCGCA  
TTAGATAGTTTAAATCTCTGTAAAGTTCTACATTTCTGAAAGCTTTCATCCGTGAAGAAAGGA  
GAGATCGACGTTGCACCGCTCGGATCAACTGGTCGTAACCTGGTGCGGATCGCTAACTGCA  
ATAATAACAATTTCGACCGTTGATACTCTTCGTGAGAATATCAAATAGTTTCTTATCTACC  
ATACTCGCTTCATCGTCAAGGATGATCTGAACATCATCCAGCTTAGGAGTATCTTTTTGC  
TCAAATACTTGAGTATCTTCATAGTTGGTCGGGTTTGTGTCGAGTAGTGCATGTAAAGTA  
AATGCTTGCCGACCTACCGCTTACTCATAACTTTTTAGCCTGGTGGGTAGGCGTTGCC  
AAAACCACACCAGTTACACTACGGCGGACCATTACCTGAACAATGAATTTTCATCATTCCG  
GTTTTACCAGTACCCGCCGACCACGGACAGTTGTATGGTTCTTTTGTTCATGCGTTTC  
ATTAGAACATCATAAGCATGTTTTTGGCAGTCTGTAAACATATCGAAAGTTAATACTCTG  
CTCATTATCCTAAAAGCCTCACCTTGCGAACACAGATAGTATTGAGTTCTCGCCGTACCC  
GTTCTTTTTCATATTCAGGAATTTTATATTCGATACCATCCCGAACAATTACAGAAGACC  
GGATTATGCCAAATTTTCGTTTAGGTACAACCTTGTACTTCGGTTCACCCGCCGATAGAC  
TCTACAATAATCTATCTGATCACACATTGACGCTAACGCCGCATCATGTGTTTCGCAAG  
TTAGGACGCGACCCTTCGCGTTCACTGAGTATTGAAAGAATCCGTCTTTATCACGATAAC  
ATACAGCAAATACATGCATTATAAACCTACCTTCGCTTTCATCAATTCAATCCACGACGC  
ATCAATCGGAAGCCCGTATTTCTCGCGTCTTTTTGTGCTGGCGTTAAGTTCTCATAACAT  
AGAAAGAGATTCAATCAAACGCTGGTATATTTTAGGACGACTTCGGTATTGTCTGCAAT

AGCCTTAAGTTTTTCTTCTTTCTTGTGATTTTCGCTAAGGGTTTGCTTCAGATCTGCAAT  
TTTCTGATAACGTTCTTCCATGCGGAAGAGAGTATTTTTAATAGCTCGCTCGACTGCCTC  
TGCTTTCTCCGGTTCGTTGTGCTTTTTGTGGCGCTCGATTGCCAATTTCTTTTCTTCGAT  
TGCTATTTCTGATTTTTGATGCGATTCTCGTTAAGTTCGATCCAGTCTATGTAATTCGC  
ACGTAGGGCAATTTATCATCAGAAAGTTACCGTTAGTTCCTAGTTCCTGGATCTCTTT  
AAGAGATTCGATAGTGTGATTGCCACGGAAAGAATTGTATTTTCAGTTTAACCGGAATTAC  
ATTGCCATCAACATATCCCAGATTGCAATCAATGCGCTCTAAGGAGAGTCCATGATCACC  
TTCACCGAAAGCCTCACCGGAATAGGGCGCAATGAGTCTGTGGTAAATGTTACGCACAGT  
GACTAAGCTCATAGAGAAGTCTTTGTTGCGACGTGAAGCACCAGCCATGATAGAGTTCAG  
ACGGAAAACCACCAGCGCCAATTCTTCGTTAGATTTAAAAGCAAACAGTTTCATAATTGA  
TTCTCCTTAGTTGGTATGTGTGTATAATTGTCTATCTGGTTTTCGCTGTCAACACTTAAA  
TTAAAGAAAATTTGTAAATCTCTATCAGATCGTCATTACACGCGTAAACTTCCTCGATCT  
CATCAAGGATCATGGTTCGTCCTGTCTTGTATATGCATTTCGCGCTCATCTGCCAACAGAG  
CATACAAAGACAGTCGAGTAGTCGGATTGTCATACTCTTTAGGCACCCTCGGTTAATAG  
CATGTTTCGTAATAATTCATGCAAGGCTAGGTAGGTCTTATTGCCATAATCTTTCTGTTG  
CATCAACATCTGTTGCAAAGTCTCTGCTGTTGATTGCAGTGGCGTAAAGCTCATAGGAC  
GCTCTACAACGAAAGAATCACCTACAATTAAGGTATCCAGCTTACGGCCTTCTCTTTTGC  
TCACACCGCGATACAAGGCTTCATGATGCACTAACCGCTCAGTCTTTTCAATCAATCCAT  
TAAGGATCGACATATCGATATTTCTTTAGAGTTCATCACTTCATCAATGATGTTAAGTT  
CTTCTGGTGTAAATTGCATAATAAAAAAGCCTCCAATCTTTTCGACGGGAGGCATAATAAA  
ACCATTGATTGAGTTTGTGAGTTACAAAGTGTATGTGATCTATAAATAAGTTTGTAGAA  
CTAAAGGAGATCACAAAATGAACTATAAACGTATTTATGATAACCTGATTGAACGTGCTA  
AGACTAAAAATATCGTCGGATACACAGAAAAGCATCACATCATAACGACGTTGTATGGATG  
GAAGCGATGACCCTACCAACCTAGTAAGACTTACACCAGAAGAACATTATATGGCACATC  
TTTTGTTAGTTAAGATATATCCAGATAAGAATAAACTGATATATGCCGCTAACATGATGT  
GCGTTTCTTGTCATGGTCAAAGACAAACAAATAAGCGTCACGGATGGTTGCGTAGAAAAA  
CGGCGGAAGCGCATAGTACAAGAATACGCGATAGAATGGAGAACGATCCAGAATATAGAG  
CTAAGGTTTTCGGAATGGGCTAGAAAAATGGGTAAAGCCATGAAAGGCGTTAAGCGAGGAC  
CGGAATTTAGCAGAAAGTTGGCAGAAAGAAACAGAAATACCGTGATGAGAGAAGAACTA  
AACGTAAGATCGGGGAAGCCAACAAAGGGAAGAAGCGTACAGAAGAATATAAAAGAAAAC  
ATAGTGAAAGGTATAAAGGTGAAGGTAATCCGATGTATGGTAAACGAGGAAAGGACCATC  
CGGCATATGGTACTAAACCGTGGAACAACCAACATCATCTGTTGAGCAGAAAGGATGGT  
GGCGGTTTGTGCTGGCATGTTTTATGACTGGTATCGGAGAGGTATTGACCGTGGAATACATA  
AACGCCACGGTCATAAGAGAATGTTGGATGTGTTAGGTTTCGTTGGTTGGCGAGAAAAAG  
AGCCAGCCGCAGCAAGACGATCAATTGACATGTTTCGCTAAAGGCTGGAATCCTTATGAAG  
ACCAAGAATGGTTAGATTATGTTAATACCCGCTTTCCAAACGACCATAGTTTTCCGCGTT  
CTTTAACATATACAAGACAAACAGATCCTTCGCAGTAAGCCCCAACGCCAAGGGTTTACA  
CATAATGAAATGGAGTTGGTTCGACGGCTTCTAGGTATGCTTCCAAACGATCCGCCTCAGC  
TAAAACACCAAAGAGGGCGGTTTCGTGCTTCCATATGATTGGCTTTCCAGTGTTCACAC  
AGCGCTAGCGTCTTTCCCGTTAGACATAACCACCAACGCAGTATACAGTTCTGGCGTCTC  
GTCGTCAAGCGCATTATCATTAGCGCGCATAAAATCTAAAATCTCTCCACATGTTTTCAA  
TTCATCAATTTTTGCTACCCACGGACGGTCATTAGATACCTGGTCTTGTAGTGCTTTCTG  
CATGTCCACCATGTGTTGAAATGGGTTATCACCGTTGGTGATAATATCTTTATATTTTTC  
TACTGCAAAATTCAGAGTTTCCGCGTTTACTAAGTATGAACAAGAATTAATTCTGACAT  
ATTCACCTCATTAATTAATAAATCAATCTTTCATAAACCGCATTTTAGCCATGAGACCT  
TGACGGTGTTCTCTTTGATATATCCATTATCTGGTCGCGTGTAGCGCCCTCGTCCTGA  
ATGATGGCCTTAACGTCTTTAGAATGCCACGGGCAACGAACCCACAATACAATCTTTTCC  
CCTGCATTCATAAACTTATCCAGTCGGTGCATTGTATCGGCAGATCGTGGATCCGCATCA  
AGTACAAACACTCGCTAGTCTGGGAAAGGTATTTTCATCTAATCCCAAAGTACCGCCAGTA  
ATTGCACACCCGTTATCAATAACAATGAATCGATCGGACCTTCTAAGAAATACACTGGT  
TACTCGGATCGGCGCGTTCAAGACCATAGACCTTACTCGCTAACTCATGAGTTTTATTTC  
GTCAGATAGTTGGTCTTTCCGTTATCCTTTCTCAATGCTCGCCCCTGAATGGATTCTATC  
TTGTTCTCGCGGTTAAAGATAGGAATCACTAAACGCGGCTCAGGTTGTGGATTCTCGAAA  
GTATCAGCCTTAATGTGATTTGCTACCTTTTGCCATTCTCTCGTTAAATACAGAAGATCC  
CATTTATCGTGGGGAATGCAACGATCACTGACATACTTTATTATAGGATGATTAGTCGGA  
AGAGTATCTAATCTCTCGCAGAAAGGCAATATTTGCACTTTCTTAATCTCCGGCTTTTCT  
ACTTTTTTAGTGGCTTGAACGTGGTGTCTTGTGGTTCGCTTGTTCCTTCCGTCGTTCC

ATAAGACATTCCCTGAATAAGTCCGGCTTACACTGTTTGAGAAATTCACCTAACGGCTGA  
TTGTAGTTACAGTTGAAACAACCATAACGCAAACCTATCCTTATAGGTATAGATACGGAAT  
CGCGCTTGAGTATGATTTTTCTTTGAGTCACCGCAGATCGGACACCTACGGACCAGCGTA  
AATGAGCTAGTATGCAACCGTTTAAAATCTCGTTTCGCCGTATATGGCTTTTTCCGCTATT  
TCATAATCTGCGTAGTAACCTCATAATAACCTCTTTTAGCTCAAATTCATGAAAGTTCCC  
ACACTTTCATTTTCATTCTCTCCGTTTGCATCTAAGCCAAATTTGTAGACACTACCATCT  
GGCGATATGAAAGAGAATACACGAAAACGGCCTACCGGGTCAAGTTCTGTAAATTCATAT  
TCTTTTCCGGCTTCAAAAAGTGCATATGTGTTTTTAAGACATTTTCATCGTAATCAGTTAA  
GCGCCACCGATGAGAACATGATAATAATACCAGAATACATAACAGTCTCAGAAATTTTTT  
CTGCTTTTGTCTTATATCCAGACCACCTGAAAAAGACAACACCCGAAATAGCCATCACAA  
GCCCCGATAATGAATACAATAAAATTAACCATTTGTCTTTCTCCTTTTTGCGTTTTTCTTTA  
CCCGCTACACAAGGTCCACGATTGGTAATAGATCCGCTCGTTTCCCCTGCTGCGATCTTC  
TCAGGATTGCCGCCAGCATCGCCAGCGGTCAATCTTTGAGTTTATTTTTCTTCAACA  
AACTGTTTAAAACCGATCATAGAATAATCTCTTTCAGTAAGTCAACAATGTGGTCTTTTCG  
TCAGTTTATCCTGATTCTCTACAATCTTGATAACACAAGCGTTAACATCTTTGCGAGTCA  
CGCGGGAGATCGTTTTAATACGATGGAACGGTTCGTAGAAAGATACTGCTTCATTATAGG  
TCGCAGCAATTTTTGACGAATTTTCATCTTTATCGGCCATAAAAACAATTGCAATTTTCG  
GATCTACACCAGCCACATCATAAAGTTCGGCGACTCCCCAGCGTCCCTCCCGCTTCAATCA  
TCCCAGCGTGTTTACCGTTAATAAAGATAAGAATATCTCCGTTATTTGCGGTTTTAAATG  
CTACATCTTCCGGCGTAATCATAGTCTTCATAAATATCGTCTCCTTAGAGTTTCATTATAG  
ATCAACCGAACGTAGAAAGCAAATGTTTTGTTTTCTTTCAGTTGTCGTTCAAGGTCTTTTC  
GTTTCTCTTCAACTGTAGTTAGCATTGTTTCGTTGTTTTTCAACACCTTTATTAATGT  
GCTTAGTCCAATTATCAATATCCGAATAAGTTGGCATAACCAATTCTCGACCTAATGCGG  
TTGGATGCAGGGTAACAGTCCAAAACCGCTAATCTTCTTAACTAGGTCTGGGTGTAGTG  
TACTATCTACATCTTCCGGTGGCAACTCTATTTCTTCTTTAAGTGGTGGGATCTCGTCAT  
ATGGTTCCAATGCATTTACTTTAATATCAGATACCTCATCAAAGAATCCGCGTACATCCG  
CAGGAAATACACAAGCAATTTCCCAACCGTGATCACGCAGAGAAGTAATATTTTTCACTC  
GCCACCATGTGTGATGATTGATGTGACATTGCCATCGAGGTCCACCGAATTTACGAGAA  
ATTGCTTATCGTCTGTGATATGATTATAAACTGTGCTTCGGCTCTAGTCATCTCCAGAA  
ACAGATCTCGGATCGGACGACCATCAGGTGCGTTACCTTCCTTGAGAGTATAAAAGCGAC  
TTACGATCCATTTTGGCGGTAAGCATTAGCGATCATGTTATATCTCCTATCTAATCATT  
CACCAGCGCCCCGCGGGCGCATTTTATTAGAAAGTCATGTTTTTTGCTAGCTCGTCGAG  
TTTTTCTCGTTTCTCGGCTTGCTGTGCGCTTTGTGGTTAACTTGTGCATTCTCCTGATC  
TGCGATCTGGTTTGGTACTTCATACCAACGCTGATTGCGTTTTCTTCACACCCACGTTAAA  
CCGTGAATAATAGTTCTTGTACCGTAACGAGATTTGATCTGCTTCATGAGTTGGACGCC  
CATTTTAGCCAGGTCTTCGGTTTCGATAACACCCAACATAAAGTCGGCAGTAGCCGGAAG  
ACCTGCTGATTCAGCGGTATCACTCAAGTTAAGGTCCGAAGCATCCCAACCCGCGCGGGT  
AGTCTGTGCCGAGTCCAACCAACAACATCCCCTTAACAAAAAATCCTCGCAGTTCTTC  
CGAATCGCCTTAACTAGTGTGTAACCTATTTTCAGAGTATACACGCAAGCGAGACGATGC  
GCAAATCCCCAGATAGTCAACAAGCACACATCAGGTTTTAACCTGTTTGTGAGTCGCAA  
TTCATTCATTAACGCCTCAAAGTGATTGGAGTTCGCGCCACCAGTAGGATACTGCTTGAT  
CATCAATTTTCCAACCGGACGATCTCTGATCTTCTTATTTTTTACACGCTTCATGCGTGC  
GGAATATTCCGCAAAAGAAACATTACCATTATCCAATTCATCTAATGTAATGTCAAGCAA  
GTTTGCCTCGATACGTTTGGCTACGACATGCTCTGCCATCTCCAATGAGATATAACAATAC  
ATCATAACCACATTCATATAACCCGCGAGCAAGAGAACAAGCCAAGCGATTTACCAAC  
GTTTACCCAGCAAGCAACTCATTTAGCGTTTTTCTTTCCGCCCTCCTTTTCGTGCTTTT  
ATTCAACATCGGCAGCTTAAACGGGATCTTATTCGCCTTAGTCTGATATAGCGAGAATCT  
TTTTTCAAAGTCATTAACAGTCATGACCTACATCAGAATCAAACGTAATGGATAGTGC  
TTCCTGCATGATCTCAGGAATAGCACCTCACTAGGCAATTTCTTATTCTGTTTCTCTTA  
TGGTAGTTGTGCGTTCGCCTGAATCTCTAGCGCCCGTGACATTGCAATATAACATGGCACG  
GACACGAATAAATTTTTCGGTTTCTTTCATTAACCAATCAAGGTCTTCCGGTGTATTCTC  
AAGCGAATCAAGAAGATTTTTAGCCCCTTCATATGTCGTCTGATTGCCTCTCTCCCTGTC  
TAAAGCAATCTGTAATGCAGTTGGTGTAGGAATATTGGAATATTGCTCTACGTGCTTTTT  
AATCAGCTTATAAATCAGTTTTTCTTCGTCTTCGGTGAAGTAGTCCGCTTTAAGGTGAGG  
CCATACATTCGTAAAGAATGCGCCATTGTAATCAACTGTGAAAAGATAGTTTTAATCAT  
ACATATCCCCCAACTACACGCATAACAAAAGTCTTGAGTTTATACCAGAAAGTTTCTTTT  
TTCAACTTTTCTTCTGCTTCTTTGATCTGCGGTGTTAACGCCTTAATAACGTGTGGATAT

ACCACATCACGATCTGACGGCGTGGAGTAGTCGACCACAATACCTTTAGTGTATGGATCG  
TATTCAACATTATGAATAGAGACAATATGATGTTCTCCCTCTTCATCAACAATTATCAAT  
TCCTAAATAACTGTCTTCATTGCTTCTTGAATCAAGCCGTGTGCTTCTTCTAAACTTGGT  
GGTTTCTTATCCATAATATAATGCTCCCTAGATATGAAAAAGGGGCACGTAGCGCCTTTA  
CTACCATTGTTATGCTAACATATCTTCGATTTCTGTGTCAACTGCTTCGTCGCTGGTGAC  
TTGCCCCAGCTTATAATGATCGTTGATTGCTTCGTTAAACTTATCGTTTGTGAGAAGTGG  
TTTCCAGAACTCAATGCTATTGGTTTCTTTAGCACGGAACCTGGGTTCTTCGGTTTCCAC  
CTCTCCGGTCTCAGTATTCAGGATTAACGAGAATACCAGCCGTTTGACGGTTTCACTAC  
CCAGCCTAACTCTACAGCCAACTCCAGCAAACCGGAATAAGGATCGATACCACCGCTAAA  
TGTTACGCTAATCGGGAACCTTAGATTTTGTCTTAAACGTTTCGTGATTTTCCGCATTAG  
GATATAATCATAACCAGTAATTTCCGGTTCCTTCTTTCTGCTGACGACGACCAATAATGAA  
AACTTCATTGGCTGAATACATCGCGCCCGTACCGCCGGACATAACGGTCTTACTAATCAT  
TTCTTGCGTTTCGTAAGTGTGTTAATAGCGATGCACGGGATATCATTATAGTCAGTTA  
CGGCGTAACCATACGGAACAAGCCTTAAAGTGCTTTCGCTCGCGTCATATCCTGTGCGGA  
TTTCTCATTAAATCGCGTCTTCAACTTCTTTTTTACATGCTAAGTTACCGATTGAGTCAAT  
AGACATGATCACTTTATCTTCACGGGTAATTTGCTCAAGCTGGTTCATGGTTTCAAATTT  
AAGTTCTTCGATGTTCTTGATTGGAACATGCACCACGCGATCAGGATCTACACCCATAGA  
TTCAAGATAAGCGGGTGTAAATACCGAAATCAGAAGCAAAGAACAACACGCCGCATCAGG  
ATTCTGTTTCATGTATGCACTAACACAAGTTAATCCCATGTTTGATTTAAAGTGCGTAGA  
CGGACCAGCAAAGAAAATCAGACCAGATTGAAAGCCTTTTTTAAAGATCACCTGAAAACGC  
AATATTCAGCATCGGGATCTTAGTGCGAGTATTTGTTTTTTCGTTAAAGAAGCTGGATTT  
AGGCAGTACCGCAGTAGTTTTAGGGTAGAGTTCTTTTTCCGTTTTTCCAGTACAGACAT  
TATTCATACCTCTATTCAGTTAATCCATAATACTTTAATTGCTTCATTGTTATTCGATCT  
TTGTAGTGCTCTTGAATTAACTTTTTTCATCGCATCAACATTGATCGTCACAAATACTTCG  
TTGCTGTGATTTCCGGGAACTTTCTTGAAATGCTCTATGCCTTCCTCACGTTACGTTTA  
ATCTTTTCAATGTCTCTCATAGTATATTTCTCACGTTGGCGGGTATCGTCACCCAACACC  
CGCATTATACACACTTTATCTTAAATGTCAAACAGTTCCGTCAGTGAAGCAACTTTTTT  
ATATTGCAGCTTCGCAGCCGTGGTAATGTTCTCCAGTGGTTTGACGAAAGTCTTATTTAA  
CAACGAAGGCCAGTCCAACCACTTCAACACCTCTGATTCAATTTCTGGCCGAATACGAGT  
GCCAGACAACCAACCAAAAACAGATTTCTCTAAACGGATTTCCGGTCTTAAACGGTACAAT  
CATAACCTTCTCGCCTTCACGAATCGGATCTAGTCCGGATTTTTCGAGCATTACGATTATA  
ACACAATACACTCTTAAACCGCATAACGGACAACCCTTAAATCGGATACCCGTTTGAATCGCT  
GTATTTCTGTAGGTTGTTTGCAGATGATACCGCAGCAACATCAAGATAATCAAGTTTTCA  
AAATTTCTGCTCAAAAATACCGTAGTATTCCTGCAATGACTCTTCACCTTCCTGCAACAT  
ACGGCGAATACCTTCTTTCAGTGATTTCTGGCATGCTTTAGGGGTGGAGCTACGTTGCGT  
TTCCATGCCATGATTTTTAGCTTAGGTTACAGCAAAGCGCGTTCCTTCCATATCCCAAAC  
ATTAAGAGCATAACGCTTTTTACCAGTCCAGAATCCGCCGATACCCGCAGATTTCAACGG  
AGGACCAGCAATTGCCTCACGGTCCATAAACATCAAGTGCTCATAGTTGTTTCATGTACTC  
GCATAACTCGCGATATCCCTTGTGATAATAAGTTCCATTTCGATGGTTACCGAAATTATC  
AAGGAAGTCAACAAGTTTTTTCGCTATCGTCGAAACGGTCTTCCCCGCCAACCTTATCAAT  
AACATTGTTAACCAGCACATAAACGGAGTACAGTATCACAATAGCGAACATATGCAAAATC  
AGTCGTTCCGCAAAGCTCGTTTAAAGTAGTCGTTAATCTTACGCTCAATCCACTGAATTGC  
AAGCTGACCGAACAGTGTGATCGCACTAGCGTTACGGAGATCATAAAAACGGAATTTAGG  
ATTCCCCAACGCACCATAAAGGGAGTTGATCAAACTTTACGAGAACGCTGGTTTGTATT  
GCACAAGGTCGACTCGTATTTACATTTCTCCCGTAATTTCTCTAATGCATCTTTACGCAA  
TTCAGAAAGCATCGAATAAAAACGCTTCATCGAAGTCGTGACGCACTTCAACGCTATAGCT  
AATGGTTCCCCCATAAACATGATTTTCATCGTGTAGAATCTCTTAAACAGAGCTCAGCATT  
GCGGTCACATGCCAACATCATGTTTTTTTTACTGCTTACGCTGATCGAATACCATTTTAAAT  
CTCAATCGGTACGATACCTGAATATCTTTTTCTATACATCCATCCCTGAGGCGAGCAAGA  
ATACTCATCACTCGGACGTGGTGCAGTTTTATTGATATACTCGTGCATCGGTGCAGCATC  
AAAAGATCCGGCGATAGTTTTCCGGCGAAATATTAACCTGACGGATGATTGATGGATACCA  
TTATGTTACGCGTGGTTCGCTACTCCCGCGCCCGTTCTCTTGCGAACCTGCTACATGTCAC  
CATGTAGATTAGACTATATCATATTTCTCATAGAGAATCCTGCCATTTTCAATCGCTTGAT  
TCTACTTACTCGGTTTCGTTACCCTTTTCGATAGTCGTTGAACAACTGCATCTTTAAGCTC  
ATTTTGATCAAACGGTGTCTCTTACAGTATCCGCTATAATTCTTACCCTGATACGGAT  
TAGACACCAGTTTAAATGTAGTCGTTAATGCTTCCCTCCTTATGTATTTTCGACTTTCTTA  
AAATGTCTTTTATCTCGCGCCTCCAATGTATATCAATATCTATATACATTATAAGACACG

TTAGCTCAAAATGCAACTGCTGATGATTGTCTCCTTAGAGATTTCCCAGCAATTAAGCAG  
GTTATTTCGATCACTGTCACCAGTGAAAGCCCCATATCAGTTTAGGGCAGTAAGGTCAAAG  
CTCATCATCCAACGGTAAGCAGTCGGCACAGGTTCTTTTACGAATGCGCCCGGATAAGTC  
TGCTTAGGCTGTATCTTGTTCTCTGGTACTACTTTACCCTCAGCTTTCAGAGATCCGAAG  
ATAATAGCATCCCATACTTTCATCGGGTTATAAACATGGTTAAATTTAATCTTTGCTTAG  
AAACATAGGCTATACACCAGATCGATAAATCCGCGCTTTTTATCAATCGCCAACACACGG  
TCAACGTCGCCGATGTTATAATCGCTGTAAAGTTGGTGGTTGTCATCACGCAATTTCTTT  
AACGGCCCATCATAATCAACCTTACCGATTCTGTCTCATATTCAGCAACATAATCTAAC  
GTATATGTTGGTTGAGTCGTAAAGCTAAATTTCTTGACAGGTCAATATAATCAAGGCTT  
TCGATCCCCATGATCGTAAATGCTTCACGCTCGTTGCCAAAATCATCCTGTGAGATTCGG  
GATTTAATCTTACCGCACGGGCTTATACGGTTAGCGGTTCTACTTTCAAACCTTATTACTG  
ATACGTTTAAATGATATATGGAATATCGAATGTTTCTGTGTTCCAGCCAGTGAAACCAACG  
GGTCGGTTTTCTCAAAGAATCGGATGTATTCTAACAGAAATTCATCTTCTGTGTCATAG  
ACGTTATAAACAACGCGCTCTACAATATCAGGTCGAAGAATAGACTTGCTAGATTCCCAG  
ATTTACCGTTTTTTCTTTCAAATCAAATACAAAGAAACGATCATGTACGGAATCATAA  
TGCGTAAATTGCATCGATAGGATATTTCTGCTTCTTCTGGTTTAGGAAATCTGGGGCAGTG  
ACCTCGATATCAACCCATGCTACACGGATTTTATTTCTGGTTCATATCGAATCTCGCCTTA  
TACGAATCAGACAGATAGGAGATGAGAAAGTCATACATCCCTAGCGCCTCCTGCCCCCTT  
TCTCCCATCTTGTGACGCCATTTGTTGGCCTTGCTCATAGATGGGAATTTTTTAGCAATG  
CAAGGCTTGCCATAGATATCTTTATAATTCGTAACCATAACCAGGCGCGGCATGATGAAAT  
AAAGTTGGCGTATATTCAACGTAACGCTCTTGTCTTGTCCAGCATCATCAATATAACGC  
TCGTAGATCTTATCACCCACTCGCTCACATGACAGTAAATACATAATAAACTCCTTCA  
CGTACGAAAGACACACATTATAGGGGAATCGACTTAGTTTGTCAATACCCCTATCCCATC  
AGTATCTTACCGTCCGATCTGATATTTCTCTATCAGCGTCCACTCTTCTTTCTGTTTGAA  
AGACAGTACACGGAAATTATTAACCTTCGGTAGTGTCAAATCACTATCAATCAGAGTACA  
CAGATTCCACTGCGCAAGAAGTTTTGCAATGTTATTACGGCGTAATTCATCTTCCCACGT  
CATTTTAAACTACGACCATCTAATTTCAACAACCTCCTTGAAATGAACGATGTAATAGCG  
CCCTTTCTTCTGGAGAATATGACAAGACTGATACAGTGTCTTGTCTCGATTGTTGGCAAT  
GCCGCAGCGGGTTAAAGTTTCTTAAATTTTAAAGGAAGTTTTTCAGGACTAATCAAATTAAT  
TTCAATCATTTTACCACCTTTCTATAATCTTTTTAAGTCGTTACCTTTCTGTCTGATTCT  
TAGTAACACCCGCCAAAAGTTCATCGGTGCGATACGGTTTCATGTGCTTCAATAACTTGT  
CCATATATCCCTTTTTCATTAGCCAAATCGAGATAAAACCGGGCGTCATCCATATTTGCAC  
AATATGCTTTTCGCCACTGCCATTAACCAATTTTTGGTCCAATTTCTTCTGTTAGTTTAG  
CCCATTACCGTATCGTTCCCCCTTAGGAATACTCTGTAAAACATAATCAAAATGCATTT  
GATCTGGGAGACCATGACCGATTAAATTGATCACCTACGCGCTATATAGGCAATCTGCGA  
GCTGGGAAAGAGCGGTGTTAATCCATCTCTGATTATATGCAGAATTGTTTCCCACATTAA  
CACGCTGGTTATCTAAGGTGATATGATCCATCAGAGCAAATAATGCATTGTGCGTTTTCT  
CGGTGAATGTGTCAGCTAATTCAGACACCTTTTCACAGTCACGAGAGCGCCATGCAATTT  
CATGCTCGTTCAATTGTGTATCATCTTACCAGAAAATGACCTAACATTATACGAACTC  
CAATTC AACCATCAATTGCATTAACAAAAAGACAAAGTGAATCTCTTTATCAGCCGCGTG  
CGTAAACATCAGATTATTTTACCAGACAATCTCCGTGAGACGAACAATAGAAGCTGGCTT  
AACTTGAGTATAGAACTCAGGATAGAGTTTCTGGACAAATTGAGCGTATGTATTGGTATA  
GCGTGGTGCAGTTTTACGCACATTAGCAAACCTGTTTAGTTTTAAGTGCTTTCACCACATC  
GGTAACTTCGGTATTGCTACTTTTCGATAACCATGCTCAATACCCAGCATCAATTTTACC  
ATGTTTAGCGTAGCGGTCCAAAAGTTTCACTACGCGCCGGAAGTCTGGGAAGTTCTGCTT  
AACCAGTTCGGTAATACGCGCATTTCTTCTACTGGCACACCTTTTTTATCAAGAATTGC  
TTTACACCGGACGATCATTTCTTTCATCATGCGAAGCTGATCATCTTTAGTCGGAGATCC  
AAACGTGATGGGGTCAAACGAGATCGTAAACGCTGGGATAATACCTTCTAGATCGTTTCG  
TCTGATAATGAATGTCACGTTGTTTGGAGTATGCCTCAGAGAAATTACGCAAGTGTCTTTG  
AGCGTCAGCCAACCCCGCTCGGTCATACTCATCGATACTAACAACTTTGCCCTTTTCTCG  
TTTTTCTTTCATCGAGTGCTACACTCTGCCAAAACGTGTAATCTCATCGCGGATAAAAAC  
AATCTTACAATCTGCGCCGTTAACAGACAGATAATCAACACCCACATCTTCGCAAAGCGC  
CTTAGCAACGGTTGTTTTGCCAGTACCCGGCGATGGGCTATGCAGGATCATAGAAGGGAT  
TCGGCCTTGCTTAAACATCTGCGCGAAGATTTTTTTATTTGCTTCCGGCAGAATACATTC  
AGAAATTGATTTCCGGATGGTAGTTCTGTTCCCACTGAAACTCATTTTCATTAACACTCAG  
CATATAATAGCCTCTCACAAATTAATCATTAATAATGGGGAGTATTTACTCCCCACAA  
ACATCATATTAGTCGGTGTAGCTGGAGTCTAGGTCACACGCGATCATATAAGATACGGTT

TCAC TTGCCAGCCATACAGCCTTACGGCGAGTGAAGCTCAGTTTGTAAATCGCCGAAGTCC  
GTAGCAACCAGTTTCATGTTATCTTTACGAATAAAGAAATGGAAGTCTGCGGTTCCGGTA  
TATTCGCCCATATCAAGACAAAACATTTTCATTAGGATTATTTTTGTCAATCTCTTCCCAA  
CCTTTGATCATCAGACGACCATCAATCGGTAGAAATTC AAGGCGATTCACTTTAAGCTGA  
TTGCTCATT TTT CATAAGCTGTTTCAGATCGTCGTTGCTCAGTTTCGTAATCTACATCGCTT  
GCAGGTGGAGTAACTCGGCCTTTCCGTGATAGGATAGCAGCAGCACTAGCACCAGGATAA  
TTAATTTTCAGACGATCATTAGACACACGAAAGTTTCCGGTGCAGTTATCAACCGTAATA  
TCTGCTTCATCGCCCACCAGATT CAGAATGCCAGGAAAGAGTGAAGATCATAGATCCCG  
ATTCCGTGTTCCAGTTCTTGATT CAGAGTCGCTTACCATATAACAACGTTTGT CATGTTT  
TTGGTTATTAGGACGTATCCTTTTTTCAAGATGATCCCTGGGTTAATAGCGGAAAAGTTT  
TTCAGGGTAGCATTGGTTTCTTTAGTCAGTTTCATCAAATCACTTTTATCATGTTAATCA  
ATTAATTACGGGTTTACTTCGTGCTCATTTTGAATCTTTAGCATTCTTTTCGATAAATCTT  
TTCTCGGCTTCTTATCGGATGAGTGAGTATACTTCAATCCAGTGTAAGCTGTCAAGTAT  
TGTTGCTGAGCATAGACAGTAAACAGGATTCTTTGCGGTCTTTTTTCCGTGCGAGATATACC  
AGATCACCACGAACATCAAACGCAAGTTTACGACGAATCACATCATCAACAAATTTATCT  
AGGACAAAATACC ACTCAATACTCTATCCC GTGACGGTAGTTCATTACATCATTATCT  
TTGATATAGTCAAACGGAATATGACATAATTTACTATTTTGTAGGATGAATAGCATTGT  
TCTTTTAAGCTCATACTTTTCAATTCTATCACTTCCCATCAGCAATTGCGATCAGACCAGT  
TACTACTACGCTAGCGGCTTCAATCAGCAGTTCATCAGTGTCAATCTGATAACCCTTTTC  
GAGAATATCTTTACCTCGAATAGTTTTAGCGCCTTTAGCAATTGAATCATCGTAATACTT  
GCGCATTGCCGCGATCCATTCTTTTTGCACCATATCATCAATATACGCCTACAGTTCAA  
GCGTGCTTGCTGCGGGATAACCTTCATTTTAGCTTTCTCGCTTTCTGGCGTTTGTAGTAC  
CCATGCTTTACCGATCTTGTT CATGGCTCGGTCAAATTCGAGACTGGTTTTCTTGTTCTG  
AATGTCTGGTACAGTAATTTTAGCCAGGTTTGCGGAAGTAGTAATAATATTAATCTCCAA  
AATAAAATCAGTATATCACGTTCTAAAGTTTGTGCAACCCAGCATCAGGGTAATCAAG  
TTGATCAAAGTTGGGGACCTGCATAAACTCATGATGACGACAAGACAACATTTTGT TAT  
GTCCGCATCGCTGTATATGCTGTTTTTCATATCCCCATACTAACTACATATTCTTACC  
GGAATATAGATTGATTAATGTATACAATTCTAACTCCGGCTGCGTTACTCTGTCAA AAGT  
TAACATTCATTT CAGTGAATCGCCCACGTTTAAACCATCTTGAGATGACTGCTAAAATCAT  
CAGGGTTATGGTCACGATGGCTGATAATATACAGTTATCATCTAACTTGTCATTGACGG  
TATCAAGTGCTTTTACGCCCTGAACGTCCGTAGCCCATCATAAATTTCTGTCGAGTACCA  
ACAAAGAAATATTAGTACCAGATACTTTACCAGCAACATCACGCCATGTAAAGAGCATCG  
CAAGGTGAATACGTGCCTTTTTCGCTTGACTGAATGATGTATACGAAAACGATT CACGCC  
CCC GTGATTTGATTGTTTCGTTAAACTCTTCATCTAGCGTAAAGATATAATCCGCTTCCA  
TGATATCAAGATAATACGCAATCCGAATCTTGAAATATGGAATATATTTCTTGACGATAG  
ACGCCTTAACACCGGAATCGTTCAA AACTTCTGTTACAAATCCACGGTGATATTTTTCAA  
GAACTAGCTTTGATTTTTTATTAGTAATCTCTACCAGTTTCGTGTTCCAGTTTAGCAAGTT  
CTTCGGAATTGTCAACCCTTTCTTTTTGCAGTTCCTGCATTGCTTTCTGGATCTGTTTAG  
CCTGACCTACAGATGCCGTTAAATTC ACTCTCTGTGACTCTATAACGCGTTTAAATTTCCA  
AGACCTTAGTTTGTGCTGCGTGGAAGAATTGGCCCTCTCTGAGTATTCTACGCGCTTCT  
CGTCAATCAGAGGCAGTTTATGTTCTGCTTGTGCTTTTTTGTTCGCGTACAGCTTGATCAT  
TACCTTGAATGATCGGTTGTGTGCAAGTAGGACAGATCCCGCCTTTCTCGTGCATGTGGA  
TAACACGGTCAAAGTTCTGGATCTGCGCACCAGTCTGTGCGATAGCCGTATTAATTTTAG  
CAAATGCCGCGCTAGGATCTTCCGGCATAACAACAGACAATAGCTCATCGGTCAAGCGCC  
TTTCTTCGGCTTTAAATGCTTTAGCCGATTCTACCTCTTTATCATAATCTGCAAGC  
GCTGTAGATTCTCGGCACTAGACTTGCTCGCGTCTCTATTTACTTTTTATCAGTGTGGA  
TTTGATGCTGAACGTGATTAGCTTTTATTACCTGCATTTGGATATTCTGGGTAATCTCGC  
GCACATACGCTTTTATT CAGTTTATCCATTTTCGCTAGCGTAGCAATATCAAGCAAATCCT  
CGACCACTTCACGGCGACCCGCTGCCGGAAGACTCATAAACGGAACATAACCAGCAGTGC  
CTAAACAACGATCTGTTCAAAGCTGGCTAGGTTTCATTCTATGATGACTTCATAATATT  
CCTGAAAGTCTTTGGTGCCTGCGCTCTCGTCGATCTTTT GACCGTCTCGATGCACTTCGA  
ATACTTCCGGTTTTT GACCACGTTT GATATAAAACTCTTTCCCGTCCAGTTCAAACCAGA  
CTTCGACTAACAGTTTCTTTTTGTTGACGCTGTTAATCAATTGGCCTTTCTTGATACTAC  
GAAACGGTTTACCGAACAAACAAAGCAAAGCGCCTCGATCATGGTTCGATTTACCAGCAC  
CGTTAACACCAGGGATTAGTGTCTTTTTG AATCCGTCTAGCTGAATCTCAACAGATTCAG  
CACCCACGCTCATTACATTTTGATAGCGCAAGGTTTTAAAATTTAACTTTGCCATTAAGC  
CACTCCGCAATCACACATTCCATAATATTA AATGCTAACACATCTTCATCAATGTTGTAA



ACACTTGGTGCCTTCACTTTAACTGATGTGTCTCTGCGATCTGGCAGCATGAACAGATCA  
TCCAGTGTCCGAGGATCATATGTCATAAAGGGATCAACATAAATACCTTTATTCAATGCC  
AGATATTCGCGAAGACCTTCTATAACCCTGTGTCTAAGGTAGGTCATCGATAGAATCATT  
TTAGTTTATGTTCTCTAAAAATTCTTCAATTCCACCTTGCAGGTCTTCCGCTTGCTGTT  
CCAGAATATCGCGAAATTCACCTACAGTCAAGCGGTAATCACATTTACCAGTCGATGCG  
GGAGAATATAACCCTTTATACATTGTCTGTGACGCGTCTAGGCATACCCCACTATGCATGA  
CAGAGATCCAACCTCTTAACGTCAATTGAGTATTCGGAAAATAATACTTGCTGGATTGTT  
TCCACTGGACGAAAGCACCATATAACAATCGGATTATATTCACCAACCACACTCTTAATAA  
TGGATTCAACTTTGTCTTTTACAAAGTCGCCAATGCCCATAGTCACCATCAATTCTTGTG  
GGTGAATCACTTTAAGGTAACGACGGTAGCCGTCATCATACCACAGCTTAACCACTGACT  
GACCCACATTTTAGCAATACGCGCTTTCAGATAACCATAGATCGGATTCTTGTAATATG  
ATTGTTATAGTGTGTACGCGTGCACCAAGTCAATAAAATATTCCATTGCTATCGAATCAG  
GATCAGCCGCGACCTTACTCGTATTCATAAATATGTTCCCTCGTTCAATTGCATATTGTTTC  
AGGTCTTCTAAAAGTTCATCCACTGCTTGTTTCAGCACATGACGCAGCGTAAAGTAATAG  
CTTTCATCAAATTCTATTTCCGCGCGAGGAATAGAGCGAATCTTACACTTAACAGTAGTA  
TCGGTGAGGCGCTTTTCGACCATCATCCGAACCTTCTTCATGCTCTTTGTAATACCATA  
TCAACAGTGATTCCCTTGCCTGCGAGCAAACATAGGCAATGCCGCATTAAATTCCATTACC  
TTTTGTGTAAGTGTTTTCATCATAACAGACTCCATAGACCCACGAGCAATAACATTCTGGG  
TAATATCAGCAACCTTACGGGATACGATGTTTGTAGCCCTCTTTGGTGATATTTTCAC  
GATCAAATGGGATTTTCGTCATGAGTCCACAAACCATAGTTAGACCGAAATGATAGCATAT  
ACTGACCATCTCGCACAACCTCAAATACATGGATCTTAGTGAACCTTCGACAAACCTTTGT  
TGATTTCTTTCAGTGCATTAGCAATCATAACAACCTCCAATCAATTTTAGAGAGTATAA  
CGGGGATGTCTCCCCGCGTCAACTAACTTTTTGCGTTATTTGCTTCGGCTAATAGTTCAT  
CAGAAATACGCTTGACCGCCGCAAGTCTTCCGGATCTAGGTTTTGTTCTTCCAGATATT  
CATAGACCATCTGAATAGTGCTTTTAACTTCAATAACACCTCTTTCCTGTGATGCGCTAC  
TCTCCAGTTTATGGACCACCTTTAGCTTGTGTACAACGGCCTCTAACGCGCTTCTAACT  
TAGCTAACCATTATCAGCGACCGTTGCGATAAGACGCACACTAAGCTCTTTAAAGCGTT  
CTACATCGATTTTTTCGTCTGACGGGTAAGTGATACGCACATGATAAGTTTTGTCATTCT  
GAATAAACTCTTTTTTGTGTTTATGGGGATCGAATGCCCAAAAACCACGCGGATCGTTTT  
CGTCACCTGCCTTTAGTGTGTATGGTGTACCGATATACGTTACGTTACCGCCATCACTGA  
TAGTATGAAAGTGTCCCGAAAACACTTCACGGTATTTCTTGAGGAAGTCCGCGCTATAAC  
CTTCGGATTTTAGCCCTTTATAGAAATAGTAGCCAGACAATTCCAATGGCCTACACAAT  
ATTCGCTGAATGAGTTTTGAATAAACTCTAAAATGTCTGATTTATTGTCATCACAAAACC  
ACGGGAACATGTCAAATGATACACCATCAAAGGTAACCTGTTTCCGGTTTATCGATAACAT  
TAATGCAATCATATTGGCTTAACACTTCACGCGGTGCGTTAGGCTGAATCTTATGACGTT  
TGAATAGATCATGGTTCCTATGGTACATAACAGGTGATTCTAGATTCTTCCAGTGACG  
GGATGACCTTAGTACGGTAAAACCTCATCGTCGCATGAGTAATAGCTTTTCCGGCAATCAA  
ACCAATCCCCTGTTTGAATCCATCTCTTAATATTATGCTCTTTGGGGTATTCAACCGCTT  
TCTTGATGGTATCAAGAATATACTCATGCACCCACGGATCATCGCCACCGATACCAGTAT  
GCAGATTACCTAAAAGCAAAAATTTTCATTGTCTCTTCTCTCTTTCGTTTTTCGATGCTCTC  
ACTATATCACAGAAAAAGAAAAAGGGAAACCCCTTGCAGAGTCTCCCTTATAAAAGACAT  
TACAGCATACTTAATACCGTTTGCCGTGTACTGACCCACACAACAGAAAGCAGTTCTGGC  
GTGTGTGGCTGTTTGTGATATCACGTAATATTCGGATAGCGTAGATATACGCATCACGA  
TTATCATCGATGATAGCTTGTTACGCCACCCTTAAGTCGTGCAATCTCTCGCGGGTTC  
TTACGCAAGATCTTTTCCGCTTGCTTAGCGGCTTGAGCCTCTAGTTCTGCTTGTACTTTG  
TCCACTGCATTCACTGCAATCTTGTCATGCAGTTCATCGTAAGTCATGTTATTTTACCTC  
TGGGATATAATCAATTATTAAGAAAATTACCTTCTGATACATTATAGCTATGTGAGAT  
TGACCCCGTCAAGGCCTCAAGATCCGGTGATTTGATATTGCACGGATCGATAATCACCGG  
AACGCCGCACTCTCTCAAAAATAATTTGGCGAAATAAGGCACGAGGGCAGTTTCAAACCTC  
TGCTGCTTCCAGCAAACGGGAAATGGTAAGTTTCAATCTCATAAAATTGGTCCAGGCTAG  
GCAATTCCTCAGTCAATACATCTTCAACCTTTGGCGCTTTCGGTTTATTGACCGATTCTC  
CGTAGTTGTTGATTTTATCGTAAATGTCTGTATGAATGCCTCATCAGCAATCTGGCACA  
TATCAGCGTCGCGATGGTCATATACATGATGCACAAAATATTTGTATTTTGGCGCTGTCG  
CTGTTCTCTCTTTTTAATGCGCTGTACCAAAGCATTAAAGCACGCTTGCGTGATGTAAG  
CATCAGGATTTTTATACTTTGACTCGGCAAATAATCAAACCTTGACCGCCGCTTCGA  
TTCCGTCGTCGATCATTCTTGGCGCCATGTTTACTATAACCAGATAAGTTCAAACGAC  
GTGATAGATTTTTAGAGATTTGCATAATTGCAAGACCGATTTGTTTCGCTCATTGGAACCT

GCCGACCTTCTGCTGCAATTCGTTGTTTCCAACGGCAAATTTCTACGTAAAGCTCTTTAT  
TGTTTACATAATCAGACACTTCGGACCCCTCGCTATTATTTAGGAAATAACCCCTTTCGGGC  
TACTCCCCATTGCCATTATACTTTCTTTGCTTAATTATCCACACTCTAACCATCTCTACT  
GATTCACCGTCAGACGGATCAAGAGTTTTTCTTTTTTCTGCATGCGATACTTACATCCG  
TTAAATCTTGCACTCTCTTGCTCGTTAAAGTCGAACATCTTTTTAAATGATTTTCGCCCT  
TTACGCTCACCACATTCTAGCGGAATCATTCCGGTCTGTTATTACATTGGCATTAGGTAGA  
AACGTTTTTAGATAATCTACCAACGCCCATCAGGAACATATAGATTAACATTCTCCTTG  
CTCTCGTTGCCTCTCAGGTTACACAGCAAACATAATTGAAATGCTGGTTCAGATAATCA  
GTCACATGACGCGCTTTCAAAACTCGTTTGTGCGGGAGATCGCAACTATTAGCAAGACCT  
TCTAAAATATCAATCTCCCATCGTTGAGGGTTAAAGCCGAACATCACAGCAACATTTTTA  
TGATGAATGTAAGAGTTAAGACCATAAGAGCCGTAAGCCATCCGCTCACCAATACCATTT  
GTGCACGCTTCTCGGTCCCGATTACCGGTATAAATGAATTCATCGCCACATTCATTTTTA  
ACCATATCAACAAGACGTTCAAAGGTATTGTTTGTCTAACTTGTGACGCGACCAGCGT  
TCGGAGTCAGTCATAAGGATGATGTTAACTCTAGCTGTATTTTGATACTCTTTGAAATAT  
AGTCTGGATTCTACCGCACTCGGAACAAAATCGCAATTCGCATAGTATCGTAGATACTTC  
CCGCTCTATGGATCAAAGAGATTTGCACATGCTATCGTAACCTTTTTAAAGTCTCCCCAC  
GTACCGTGTGTTGTTATCGTTCAAGTAAACAATTCTCGACCCATTCTTCCGGTGTCTTCG  
TTATGTTTTACCATAACGTTGATTTTTCTTCTCTAATAACGCCTCATAAAGCCCTCGACGA  
GAAGAATCGATCATATCAGTACCATCCTTTGCACGTTCTATCTTTTATTTGATAGCGGCC  
TTCTCAGACTCTTTTAGAGCTAAGTTCTGTAGGCATTCCGATTCGACGGCGATTGGTTTCG  
CAATGCTTCGGGATAAGTTCAAAGATTAGACTTAAACGGGTACTCATTAAATTCACCAGT  
TGAGGAACCTCATCAATGTAAAGAGCATAATCACCAAACATTTTTGAACGTTCCATATTA  
GATAACGCTGTATGTGTAATGAATATCACATCAGCACCGTCTTTAACTGATTGCATTATC  
GACGCTTGCACTGTCTTAAGGCTTCTTAGTCTTGTGCTATCGATCAAGACAGCACGACCG  
CCCATTCTTTTAACTTATTGTAAAATTGTTCACTTAAAACACGAGATGGCGAAGCAATA  
ACAGCTTTTCTTTGGTCTCTAGGACGTGGGAAAGTATAGCATCAGTTTTCCCCGCCGCT  
GGCAATGCGATTAATGTTTCAATCTTCATTAGAAACCCTTAGGTCGTGCTTTCTGGCAGT  
TCTTGATCAATTTCTCAGAAATTCGCGCTTAGGTGCAATCTCTTTTACACCCGAAAGCAC  
TAATGCCAAATTCAGAGAGAATATATTCAACTAAAATTCACGCACACGCGCTTACCGA  
TATTCACGCCGTTATTTTTAGATATGTCTGGCCTTCGACTTGCATCAGATCTTAATCTG  
CGTCGGTAATATTGATTTCTTCCATGCGCCCAAATCGAGAATAAACCATGTGTGGGATGG  
CATTGTGTTCTAACATAATATATTCCTCACTCAAGAATTACTTAATGATACTTACTTTAC  
CAGATCCGCGACAATGAGCACAACACCCATCACACGCAAGCCTGTTCCGTTACAGTGTT  
TACACTTCTTCAACGGTAAAGCCATTATAGCAAATAAAGCAATAATGAACACCCGAAACTA  
AATTCTCAATAATCATAAATCTCCCTAAGTTCTTTATAGCCTCCAATGTGCTCATTGTCA  
ATGTATATCTGGGGGTATACAAATCGGAGGCTCTTTGAGTTCAGCCTCCCCGCCAGTTCT  
TCAATCATATCACGGTCGGGAATAATGTCAACCCCAACCTGCTTGAATACTGGTTTAAAGT  
GTATACGGAATACCCAGATCATCCAGTAGCTTCATTGCACTTATACAACCATAACAATGA  
TAAGCCTCTTTCGGTATGCCGTATATCTCGATCATTCTCAGCCTTTAATCGTTCTAGTT  
CTTCTTCCAGTTCCTTGATCCGTTGGTACGTTCCAAGTCACGCTGCAACTTAGTGGCGA  
ATACTCGTTTAACTGGTTGTAATCATCGATTTTAAACACTTCTTCTTCCGATAGCGAC  
GTACAGAACTTCGTAGTTATTGAAGAATTGTTGCATCATTGCTTCGGATGATAGTTCTG  
CCGATACTACCTTAAAATATTGATCTTATGTAGGCGAAAACCAATTGCAAGCATAAAGAT  
AAACCTTTTCAATTGTCTGGACACTGGTAAGCCTTACCATCGATTTCAATCACAGAAACAT  
ATTCAGGTATAGTAGATGAATCAATAGCTAAGACTTTAAACGAACGGTTCCCGATAAACT  
CGGAGATCACACGGTTCGCATCTCTGGTTGCAAATGCTTTACGCGCTTGTTTCGTTTGTCC  
ACTGATAGGTCATACCAACAACAACATATTACCAACCTCGCTCTTTACCAATCAAAAAT  
TCAACTTCACGACGTTAAATGTCTTCTTGAAGGTCTTTAATCTTCTGGCGATCTTGCATT  
ATTTCCGGCCATCTTGTCAAGTGCTTCGATGAAATCATCGAAACGTTCAAAGGTTTTACCT  
TCATTTGCTTCGCCAAATTTAACCATTGTCAGGCCGTCACGACTACTAAACAGACGTTTC  
AGCTATCCAACGATTTTAGAATCAGTGTTATAACTTCCAATTCTTATACTGCACGAAAG  
AATTTTCTATCAGAATCTATAAACCAGCTAGTTCCCTTGTGGTTCGCTATCTTCTGTTGCG  
CTCATTAGAGTATGGTCTTTACCATCAATTTCAAGTACATCAATTTGCCACATGGACTA  
ACATTTGTAACAGTAAAAGGTCTATAATTTATTGCTCGTGCAATAGCATAATTAAGGTTA  
GATACGTTTTTACGATAAATGGCAGAAGTCTGTCATAGCATGCGCATCTTTCCAAGTCTAA  
GTTTTACCAACTTCCATTTCTGGGGAACCTTCTTCAACTTCACGAAAGAATTTTCTATCA  
AATGGACTAAAGAAATATGTTGCAGTCCAAATTTCTTTTCTGTAGCAGTTTTTCGCCGTA

TGATAAACACCGTCTAGCTCTATTGCATCAATCCAACCGTTACCCTCGATCTCGATGATG  
GTAAATGGCTTGTACCAATAGCTTCACTAATATCGCTGTTAAGTGGAGAAAGAACACCT  
TCTCCGTTAGTAATAAACTCTGTTTTAGCGTTTTTCGTCTTCCAGGTGTAAGTTTTACCA  
ATTTCCATTTTATAATATATCCCCTTAACCGATTTTATCAAGTTCGTTTAATGCTTTC  
TCTGCTTCTGTATAGCTTGCACCCTTCCGGCATTGTTGTCAAGAAAATCTTTAAACCCT  
TCAAAGTGGAGAAATGACGCAAGGCGTTAGCACCGATAGCCGCATTTGATTTGCATTCA  
AAGCGGATTTTATAATTATCCATCGCCAATTTGAGAAGATCAATTAATTTAGATTCTTCT  
GGAATAATAAATTTCTTCAAATCTGCTACGGTCATGATCCAGCAACCAACAAGATAGACCT  
ACATCGGTTGAACTCATATAAGTTCATCATGAAGATAAACAGCCCGCACGTATCCTGTT  
TTCGCATCAACCGACGCAACTTTAAACGGTAATCTCAGATATTTCAAATAATCAACATCA  
TACCATTTAAAAAATTGTTTTGCAGCTTTTACATCTTCCACGCATAGGTCTTACCAACT  
TCCCATTTTATAATATCATCACTCATTTTTGATACGTGATTCTAATTGGATCATAACGGTC  
GCGCGTTTGTGTATACGCGGATCGCACCGATGCGGCTAGGCACACCATGAAGCACGCT  
CTTAATTCCTTCTAGGGTAGTAATTTTGACAATGATATTATGTAACCCCATCTTATCGAT  
CAACTGAATGTCGTAGGCTTCCATAAGCAGACCCAGGCGTTCTAAAGCTAGGTCTTCTTA  
TTTTTCTTCCGATTCTGGAATCTTAGGTTCAATAGTAACTTCGGTAAAGAAACGACGCTC  
ACCCGACCAAACCACACACCGGAGCAGCCATTAGGGGATTCTTTTAAACGTCATAGAATC  
GAAATTAATAAATAATAGTAATTTGTGTAACATCACCATCATCGTCAAGGTCTTCTAC  
CTTAAACGGGCGACCAGCCTACAAGTCCACAATACATCTGTTGATAGACGACGAAAATTT  
AGTCAGTTCGGCTTTCGACGCTTTCGATTCAATCTTGTAAGTTTTACCAACTTCCCATT  
CATAATAATCACCTCAAATAATTTTCACTGGAATACTATTAACAATCTTGTATTGTACTT  
GATTGTACAGATCCCCGCCACGGCTTCTTCGTTGGCATAACTTTAATAAACGCCCATCGA  
TGAACATGTCAACTGATTCTACAATTTTTCTTTGCTGATCACTCAATTGGTCAAGGGTAT  
AACCGGACCATAGCCAAATATCTTTGTTTGGCATCCATGATTTTACTTCATCGATGATCC  
ACTGTACAACCTTTAAATTGCGTTTATAACAACGGATTACCACCTAAGAATGTTAGCCGCT  
GAATAAAATCAGGTCTAAGCAGATCCAGAATCAATCCCATTGTATCATCGGTGAATGGTT  
CCCCGTTCTTAGGATTGAGTAGGCTAGCATTAAAGCAACCATCACATGCGTATGAACATC  
CGGTAACGTAAAGGGAGACTCTCACTCCCTCACCGTTAACCATATCACAATCTTTAATAT  
CGGCATAGCGTAGTTTGCCGTATGTATCAGAATCATATTCAATTACCCCGAATCGTTT  
CCAATCTGCGCTTTATAGTAACCACCGCGAGATGCTAATAGATAAGCTGGGCTTAGGTCT  
TCGTATTCACGGATTTCTACTTGTGCGTTTTTCAGTTTCCCAAATCAGTAAAGTCCATATA  
TTTGATTCTCCTTTAAAGTTGTATCGCGTCTTGATGAATATAGTATAGGGGATCTCGCGA  
TCCCCGTCAAGCATTGATTTAAGTTTTTCGAGAGATTTCAACCACAGGCGGCCTGGTAGG  
GACTCTCCGGGAAACATGAAATTGTCTTCTGGATAAGGACGAAGCATATTTCAAATAAAC  
TTGAGGCACTCTTCGTAATCTTTACGTTTAAAGATAAATCACATTCTCGCCAGTAGCGATC  
ACACCTTTTCTATATCCATGCTCTTTACGCACAGACCATTGTACAGTATCTTTTTTAAAC  
CGAATCACAACAGGTTCCCAATACCCAGCGCATCCGGCTACACCACACGAACAGGACAGG  
AAGTATTGACCTTTTGCTTTGTTTTCTCCACCCGATATTATCCGGATGCCATTCGTGA  
AACAAAGGCTACAGCATCGTGTGTCTTTCGATCTGTTTATTGTCAATTCTTACCGTAACC  
ATCCATACAGGGATCTTATTTGTTGGTTCATCATCATAACATGAATCATCATCAATATGT  
TCTCATGTATGTCACATTAATTGATTTTTCGCGTGTTCATGTGTGCTTTTACGC  
TTACGATTCAATAATTAAGACATATTCACCTCACATTATAAACGAAATTGTACGCCATCA  
AAATGAGAAGTTGCATTACAGCTATTATACGTAATAAATCCTGTATCTGGCGCTTGTACT  
ACAAATTGACTTGCATTAACAGCGGCAACAGTAAAAATACGATCCGTGAGACTATGTTTA  
ATTTCTGTCCCAACTTCCAATGGTATGTACTCTTCTCTTCGACCCCAACACCAAAGCAG  
CCTTCTTCATGGTACGCCTGAATCTTTTTATCACAATTACACAGTTTAGCAAATCAAGC  
GTATAAATTCATGAGAGTTGTGCGGTATAAACCAACACAGATTGATTATGATAGCGAATC  
ACACACAGGTTATTATCTTCGTAACGACACAAAAACTACGGATTTGTGTGCCTCCGCCT  
TACTCCAGCAGATATTAACAACCGTTCCCATATAAAGAACTTTCTTTTGTACCAAAG  
CTAGCCAGTGTGCTCGCGTGCATTTTAAACAACACTACACCATACCAATTTCTAACTTGCGA  
ATTTAATTTCTTTATTCAATATACAAAACATAATGTTGTCTCTCTTGTTTTTCGATGTG  
GGCATTATACACGAGCTAATCCGGTTGTCAACACCCCAAAACGAAAAAGTCGACCCTTTC  
GGATCGACTAAAATACATGTGCTTAAACGCGGTTTACCATCTCGGAGTGTTCCTCGTGG  
TTAAATGGACGCAGATCAACAGATCCAAGATATCCACTAACGCGACGGATAACGTTTCATC  
TTTTCCAGATTGTCATTTCCGCAATCAGGGCAAACAACCCAGACTCGGTGCTCTCATT  
TCCTTATTAGATCCGCATACATGACATACATCGGAAGGAGTATAAACACCGAAGTAGTGC  
AATTTATCCATTGCATAGTCTACTACAGTTTCAAGACCTTTCAGGTTGTTTTTCATGTCT

GGGA ACTCAACAGAAGAGATCATACCACCGGACGCCAACAGTGTAGTCTTTCTCAAAG  
TCGATTTTCTCAAATGGTGTGACTTTCGGGTCTACGTCAAGGTGGAATGAGTTGGTGTAC  
CAGTCTTTGT CAGTAGCACCCTTAACAATACCAAATTGCTCTCTGTCCAGTCGATTAAT  
CGATAGCAAAGGCTCTCGGCTGACGTACCGTAAAGACTAAACCCAAGTCCGGTTTCGTCC  
TTCCATTTTTCAGTATAATGACGCAAGATCTTAAGAATATGTTTACCGTATCGCTGCGCA  
TCTTCCGAATCAAACGGATGAACACCAAACAGGACGCTCAATACCTCATGTAAACCAATA  
TATCCAAGAGAGATACTAGCGCGACCATCCTTCAGCACTTCCAAAATTTTCATCGTTTTGA  
TGAATACGGAAAGATGCACCTTCTGTATACAGTACAGGAGCTACATTGGCTTTAGCCCCG  
TTTAAAGCGTCTACGCGACTCATAATCGCATCAAAGCAAATAGGCATACGATTAGCTAGC  
TCTTGTTCGAATAGCTCAATTCTGCGCATTACAGACGCTTTACCAGCACGACGCGCGGCA  
ATAAGAGCTATACGCGGAAGATTCAGAGTCACAACACCCAAGTTATTACGTCCGTCTAAT  
ACTGCCTCGCCTTTCTCGTTATGCCACACACCCAGGAACTTCTACACATTATTTGTTCA  
GGGTAGGTCGCTTATCTACCCCCGCCTTTCGGCTGCTACATGTGCGCCATGCAGAACAGAC  
TATATCTTCTATCTTTTCGATAGTCTACCATTTTCGGATCGCTTGATGCTACGCCGCTACAT  
TCATCACGGCTAGTCGTTAGGCATTTTCATAGCGGAACTCATATTCATAAGTATTGATTTT  
TCTACCATCAAGAATTGCAGATACATTTTTACGATGCAAGCCCAATGTTTCAGAAAGACT  
TCTCAGGCTTTTAAATGTCTGCTCTTGTCCGGTTTCTTTATGGATCGCAGGAACCTTATA  
TGAACGACGTGTGAACCTTATAGCACCCGTTTTCGTAACTTCTTTAGTGTTTTCACTGTT  
AGTCCCCCACTCAAGGTTAGATGCATCGTTTATAGTTTTATCGTCGTTTTTATGTTTCAC  
ATATCGATAGCCGTTAGGATTCGGAATCCAACATTCAGCCACAATAACATGAACACGCAA  
ACATAAAGGTTTCTTGTCTCTCATTACCCTTACTAATGTATATCCGGTATTGTTTTCTAT  
CCAGGTA CTCAACTGTTTACCTTTAGGAGAAAACACCCGTC CATCTTTCGATACCATATA  
TTCGGTATCACGAATTTTTCTAAGTTCCATAATATATCCTCTTATACACATTGGCGTAAA  
GAGATCATGACCGCTATGTTTAGCACGGGATTGTCTTCTAGAGAGTTCCCCCGTTTAGGC  
AGATTTTAGATGAGCTGTTTCAAGTTTACCATCGGGCTAATCGGAACACTACATCCACT  
GATGCTACGGTTATTCTTCGCAGAGATATAATCAGGGTAAAGACGCTTACTAGCACATTC  
CAATGCAAGTTGCTTAATGTCGTAGTTTCGGATCTTCCGGTTTAAAGGTTTAACTCTTCTTA  
TAAGAACATCACCAGCTTAGGAAACACCCGGAGTTATACCGTCTTTACCTAAACCTTTAGT  
TCGAACTTTCAGGATCGCTTTCTGCATCAGTTTTTCGTCCCAGCTAGTACCCTTACCAA  
GGTTAAAGTCACAAAACGTGTTTGACCGTTGGTAGAGAACAAGCGTTGATCTCATATTC  
CAACGCCTGATATCCGTCTAACGTTTCTTTTTCTGTTTTCTCTTGTGCATAGAGAGTATC  
AGCTTTGATTCCGTAGGTTTCGGCATCAGCAA ACTGTTTCATGATATGTTTTCTTAACATA  
CGGCGCTAATACCTGGTCGATGTGTGCAATTGTGTTCCCGCCATATTGATGACTTGCCAC  
CTTTGCGATAATTTGAGCGGTTACAGCACACGCAACACCGATCGCTTTAGGACTTTTCGAT  
TTGTGCGATACCCAATTTAAAACCATTCTCTAACATGTCTTTGAGATTAACAAAACAGCA  
GTTAGTAAACGGCATAGCTGGTGCATAATCCATATCTTGATAATGAATATCACCGTCTAC  
ATGCGCTTTATAGATGTGCTCAGGTAACACGGTTTAAAGCAATATGTTTAGACACAGCGTC  
AGCAATCAGATCTCGACGTGTCGGGAATGTTTCGCGCGTCTTTGTTTCGCGTCTCTTTGCT  
TACTTCGTTTTCTTTACCCGTTGCGATCTCTGTAATGTCTTTGATTAGTTTTTCCATTGT  
ATCACCTATGAAAAAGCGGGATTTCTCCCGCTCTTTGATAGTTATTTTACCAGCTCTGCT  
AATCTTTTTCTTTAGCTTCTAGTTTCAGCTTTAAGCTGTTTAACTCTTTGTGCTTCTTA  
TTAGCGGCTTCCCTGCTTACTATTTTCGGATAACCTGATCTAGATACA ACTCCCAATCCTGA  
ATATTTTTGATAATGTTTCCGTCAACATGAATTGGTTCGGAGATTCAGTACAGCTTCCAGT  
TTAGTTGCAAAA ACTTTAATTGCTGGGGTGAAGTATTCATATTCGTTATCTTCAA ACTAA  
TAACCTAGACTTGCATTCTCAAGACGAAGATGAAGTTTAAAGATCAAGGTCTTTATCATCG  
GTATATAGGTCTTTTATACACCCCATAGGATTAACAACA ACTTTAAAACCAATTTTATCT  
ACACCACCAAAAACATCTTCAAGAATATCAGCAATTGAGCTATTAGCGCAAGTTTGGTTCG  
CTGAATGCGTCAAGGTTTTCTTTAGTTACAGTATACCAAACATCTTGTACCCACATAATA  
TAATCCTCTCGTTGTTAAGTGGGAGTATTTTAGCATACTCCCTTCGCATGTCAAGTACTA  
ACTTTTTTCTTTACTGCTTTCACCTTCTGGCGAATTACTCGAATCTCTTCGATCTTTTT  
TCAGTCTCTTTAACGATTTCTTTACGATTCTGAATATCTGTATTGAGATTATCATCAAGT  
TTAGGCAGCATGTCAATCAAGAACTTTTTAAAGTCTTTCAGGTTTCGGATAACAGCACCT  
TCACCCATTACCGCCACACCAACACCATCCGGCAGATCACCAAACAGTTTAAACCAGTTCA  
GACAGATGATCATGGTCTTCTAATGCTTCCCTCCGGTTCAGATAGCAGTTCAACAAAGTTA  
TACCGTTCATCATTGCTGATATAGTGATACCAGCAAAGCCCGAAAGATTTTCGGTGTATAT  
TCTAAACCATCAATTTCAACCGCGTCAACACTTCCATAATCATCTACTTTAGTTCCTTA  
AATCCTTGTC CAGCTTTTGAACAATTTTAAACAATGACTTGATACAGTTTCAGCGGTA

AACCAATATGGCAAATTATGCTGATTTGGCTTGTAGCGTTCACCTACTTTAAATCTCTGA  
CCATCCGGTTGCATAGCATGAAATTGTTGTTTCGTGATTTCCGCGAAGTATTCAAATTCG  
CCACCATCATAACACAAGCCAATTGATCACAAAAACGATCGGCCTTAACAGTTTCACCG  
TTCGCGGTGATCATGGTAGCTGATCCGTGCAATTCTTCATCAACTAAAAAGCCATATTCG  
ACAAAATCAACAAGTTTCATAGCTTCTTTGTGATCTGGATCATGCTCTCCCCAGAATCGC  
TTAAATTCTTGCAAACCTTCTGGTGTAAACGAATAACATTTACCTTTTTCAAAGTAAGTC  
GGAATTGCATCCTCTTTCTTGTTCATCGCTTCGTATGCCTGTTTTGAGATGCGTTTTAAAG  
CATTTACGCTCATCGTGCATAATCATAGTATCCCAATAATAAACGATATCCTCACCGGAA  
TAACTACATCCCAAGCTTCAATAGTAATAACATGACCGTTGTCATCTTTTTCTAATACT  
TTAAAGCCCTTTTTCGACGATTTAGCAACCCGAATATGACCACGGCGCGTAGCATCGGTC  
AGAATAATTGAATTGCGAGAAAAGTCTAGAAACTCATCTTTACCACCTTCACGGAATGCA  
TAGTAATGACATTCAAAGAATTTAGCCATAATAATCCTCTCGTTGTTTTAAATGGGAGT  
ATCTTACTACTCCCGTTTCATCATGTCAAGCGTTAAATGACTTTTTGGATCTCTTTCAGT  
TCAGCTACTTTATCGGCGCTGAATTTAGCGTAGGTATCATGTGCAATAATTTCACTTTCA  
AGAAAGGTTTTCCAGCCGAGATCTATTTTCAATAAGGAACTCTTTCAGGTCTTCCGCGTTC  
TTTATAAAGATTTTTATTGTCAGTAATGTCATCTTCAATCGCAAAGGAGATAGAGCGAACT  
TTACCAAAAAAGTTAATCAGAACTTCCAGCGATTCTTCTTGCTTAACTGGTTTTCAATTTCT  
TCAAACCTGCTTTTTTCGTGATGCGGTTAAAGTATTTGCGCTCGCTTGCATCAATCATGATT  
GACGCACCCTCATAATCATGAGTTTCTACCAAATACACTTTACCATAACATTAACCGTA  
AGAACTTTAAAGCCCCTGTGAAGCACACCATAACAGGAACTTGTTATGTTGTGGATAGCGT  
TTAACAAGTTCCTCTGCGGACTCAGCATTACGGAAATTGTAATAACGACCTCGTTCAAAA  
ATAGCATCATTTGAAAACCTTAGCTGGATACAATTTATACGTTTTCTGTACCATAATATAA  
TCCTCTATCATTTCACTAATTGAACGGCACGAAACAGAATGCGGTCACACGGAAGAAGCA  
TAAATTCCCAACGCGGATCAAAGTCTTTAGCGGTATATGTTTTCCCATCAACCGAGATTT  
CACTTACATAACCAATAGGTGACACTTTAAGAACAGTAAACCCATTCTTGATGACTTCGT  
ATGTATCTTTCAATCCTTCGTAGTCATCCTCTAGGAAGTCTTTACGTGCTTGCTCAGATT  
TAAAAACATAGGCCACACCGGATTTAAACATGTTACGCATTGTTGATTCTCCTTCTTGAT  
TAGATGGGAGTACTTTACTACTCCCATTTCTTACTGTCAACTACTATCTTAATCTTTGTA  
TAAATTGTTTCTTATACTTCTTCGTGATCTCTTCTTGTATCAGCGTCACAGTAATCGA  
AACCTTCTGCGTCCATAATAGCAACCATCTCCGCGCGTGTCAAGCGTGAAAATCGTTTTA  
CTTTATCAACATCATATTGAGGATGTAAATGATTGTTGGTGTAGTCTCCTTTGATGTAAT  
TAACATAGTTTGTAGCCGAAACAACGAAATCAGCACCTAAAGCACCAACACCAAACCGTT  
TAAAGTCTCCGGTCAACGATCCTTCTAGGCGGTTGCAACACGAATGAAGCAATCCCCCTA  
CACGGCCTTGCCCTTTCCCATCTAGATCGTGGTTCGTGGTCAAGATAGTTTTTGCTCATAT  
CCTCAAAAAGTCGGAATTGACAAAGGGGGTAAATACCCCCCTGTTTTTCGAATAGTTCTT  
GCTTGTACTCTTTAGCACTCTTAGCCGTCAGTAACATAAATTCACCCTCAAAGAAGGTA  
TTTGACCATGAATCTTGTTTTGCTTACAAAGGATCGGAACTCATCAAAGCCACAAATAT  
AATCACCATCATAAGAAATCTGCGGCTTGGTGGCAATAACTTCTACCCCTGCGCGATCCT  
GAATGTCGGAATGATAGAATCAATCTTTAAAGGGCGACCGTTTTTCGTCCACACCATCAC  
TGACAGGAATATAGATGTAAGGGATCTTACGCGATTCACAAAGGCGCTTTGCATTCTGGC  
AATACTTACAGTTGTAACCTTCAAACCAAAAAATTTCTACCATTTTGTACCTCCATCTAC  
GTTAGTTACATAAACTTCTTGTGTATCAGAAGACTTACCACCTGAACGATCTAGGCAATA  
GGTCTTATTCAACAGGACGCAGTTTAAATCATTCCGCTTGATAAAGTCAAGGAGATGATC  
ATTTACCTTTCCCTTATGATGTGTGACATTACTGATACCAAACCGAAAACCACGCTCCAT  
AATAGATTCTACCCACTGATTGAATTTAATCTCTTCTCGTCACTCCAGAACTTATTGTA  
TTCCGCAGAAGTGATAAGGTACGCCGGGTCCAAATAAACGAAATCACCTGGCAAGATCTC  
GATCTTGTATAGCGACTAGACGTAACACTGATTCGACTGTCTTTGTTTTCTTGCTTAAA  
ATTCAGGACACGCTCTACCGCGTTTTTCGTTACAAGTCCGGCGACCAAATTAGCATTAAA  
TTCTCCCTTCTGTTATGGCGGTTAATGTTGCTAAAACCTGTGCTGAATCAGAACAAACAG  
AGATAGCGGATCTGGATTCTCATTATACTTCTTGCGGAATGCCATGTAAGCGTCTTTATC  
TTCGCGAGACAAACCATTCTCGGCAATAATCCGCTTGATCGTAGAAACCGGGTCAGGACA  
CTCGTCAATCGCTTTGTACGCGTCAATTAAGCGGTGATCATAGTCATTAGCCAGCACATC  
CCCTTCGACGTACAGAGACACGCTCAAGCCGCCACAAAAGGCATCAACAAAGCGGTTATA  
GTGCTTAGGGAAATACTTACTAACACCAGGCAATAACTTTTTCTTATTGCCAGTATAGGG  
AATTAAACCTAATGCTATCTTCATTATCCCTTCTCAAATAAGTTCTCTCGATCTCTACC  
AGTTCGAAAAATTCTTGCCAATCACACGGAAAATTGCAGTTTCCGAAATGATCCTCTTTG  
TAAAGTTCTTTACCGGATGGCAGCTTAATATCTGTTACGCTGTAGTATCCGCAACAATCG

CAATCACCATCTGTATATTCTGTTTTAGTCGGAATATCCATCCTTGCCAGATACAAAGGT  
ACATCGTCTTGCTCAAAGTTCCGATAACCTTCATGGTTCGAATGAAACAAAGTTATCATCA  
CCACCGAAAGGGATATAATGGTCATAATCGGATACAGGGTGACCGTGTAATTCCCATTCT  
ACAATTTTAACATTACCACTAACTTTATACCCATAATTTCAACAAGAAAATGAGTATCG  
TCAATGTAAATCTTACTAGGCGTTGGATAAACCATTATATAAACCTCATATCTCAGAGAA  
TAGAATCTCTGTTAGCTTCACTGACTGCTTTCTTAATGTTAGCGTATACTCGAAAGGAAA  
TTCAATACCCAACCTTCAAAGAGAATAGCCTACCGCCTCTTTATGCTTATCGGTTAGGGC  
GATCCTAACCAATTCCCGTTGAATCTCTTTAGGCGGTGAATGGATAGTAACACGGGTATC  
ATGCAATGTCCAGTCACCATTACGAATCAAGATTAACGGTTTATCGTCATTGAAGATCAC  
CGACCCCTTTCCGGTTCGGTGAGGGTTTTATACTAATCATCAAATTCTAAGAAATATTCTG  
GAACGATATGACCGTTAAAGTCATTACACTTATAAAAATGTGGTGCATTTAATGCTGGGT  
GAGCATTAGTAAAGATTTTACCCTCTAGAAACAGAATGTAATTAATAGGTCTAATACCTA  
CAGAATCAGGGTTCGAAACCTTTTTCTTTTCAGATCAGCCAGCGTTAAAACCTCGTCCAGATC  
GTAACGTAGCCATGATTTACCCCAATTTCATCAAGATTATGTTCGCAGCATTTCAGAGTAT  
TTTTCTACTTCTTAATCTTAGTGTGGATCTCAACGATCTCATCTTCACTATCAGAAAGT  
TTAATGGCAATAGCTGTACTTCCCTTGACCCGTCTTGATCGCTTCTTTCAGTTCAACCAAC  
ATGTCCGCGTGTTCATAGCAATTCTTCACGTTCGAACATAAGCGACGGTCAAAGCCTCA  
TCAGCGATTGCTAAAGCATTTCAGGAACACCAACAACCATTTCAGAGTAGACAGCATA  
AAATCACCTCACATTATTTACGTTAACGCCGTCATCAATCCAGCCTACGCTATTTGGTT  
TAACAGTTTTACCATAGGATGCAAACCTTAATCAAGCATGGTTAACATCATTATCAAATC  
TTCCTAAACGTAATCCCAAAGCAGGAATATCCATGTATGCGGGCTTTATATCCCCATGTAC  
CGTATTCAGAATCAATCTCAACCGGACGCTTTTAAAAGCATAACTACACCGGGACGGT  
CAACGATAACATAGCGATAGCCAGCCTTAAGATACACAGTTTCGCCGTAAACTTTAACTG  
GAGTAGCGGAAGAGATAAACATAAATAATCCTCACACCGTTTCAATTTATGCGGTCATTA  
TATGATAACCGCATTTCATGTCAACAGTTTTTTAAAATCTTCTGCCGGTTTATATCGA  
CCGTCATCGACTGGTTTTGGACTGAATCCTTTATGCGTGCCGGCTTCGCTTACGGTTTA  
CCAGCAATCATCAAACCAAACATTTACGCCCCTTATAACACATAACATTATCAACCACG  
GTCCACGTTATAGGCCATACGATTGCAGCAATACAAATGCTCCTGTATCGACCTCTTTG  
GTGCCCTTGTGACTCTGGCGTACAAGCAGAATACTAGATACGAGATCATTGAACCAGTA  
GTCCAGATATAAAGCACATTAACAATATCGTGTGCTGTCCCATTATCCTCCTTACATTTT  
TTGCAGTGCATAAAAGCATTTCCTTCATAGTCATAGAAAATGTCAAAGTATGCTTTTTT  
CACATACTCGCCATTAATCCAAGCGGCAGTAACAATCAGAGTGGTCCAGTTAGATCCGCT  
CTCAACGGTAAAGGTTTTAATACCCAGCTTCGCTGCCAAGTCGAACGCAAACCGGACGCA  
ACCACGGCAGGAAGTGATATTGGAAGTTTTGATTTTAAAGCCACCGCGAGTTTTAGAAAT  
TTCTACTTTAGCGAAAGACAGGTTGCTCATTGATTCTCCTTAATAAAGTGTGTCTCGT  
TTTGATGTGTGTAGTATAGGGGATACGTGATCCCCTGTCAAACAATTTTTTATGATTTTA  
GTGAATTAACCACTACATCAAATGATAGACAGAGCACACCTTATTAACACATACTCAT  
CGTGTTTAGGAATAGCGCCTAACCGCTTTATTCCGCTCGCGGACACGATAAACCGTTTAT  
CCGGTGCATTTACCTTACATGCTTCCACAACGCACGGGAAACGCGTTTCAGAGAGTTCTG  
GATAGTTTTCTGAATCCATCTGGACAATGAATACCCTGTTACATTGATTGTAGAATCCTG  
TTTTTGATTTTCATCAAGTTTTCTTCTCTGTACAATTCGTGCAATCTTCTTTTCATGATTT  
CGTTGGTTCTTGTCTTACAGTCTACCCATTTGACAAGATCTTTACCCAACCTCGAAAGCC  
CATTCTCGGTCTTGTCTTACGTTATGTAGGTATGGACTTTCTGACACTCTACGAAGTGAT  
GTTGTTCGTAACAAGAATGATCCCAGGAATGGTTCGGATGTTCCCTTTCAATATACGATAGGA  
CGCGAGACACTATCAATACCTTGTAATAAGGTGTATCCTGAATCACTTAGAATCATATAC  
TTTTTCATTTACACATCACAGTTTCTCGACCAGTTATTAAGCGAGCAAACCATGACG  
CTTTTCGTGCTTCTTTTACTTTATGTGCACGAAAACCACTGAAACACCATTTCATAATCAT  
CACCGAAACATGATTCAACAGGAACACCCGCATTTTCGTAGTTCTCTGGTCTTTATCATAA  
AACCTTGACATAAGGGTCGACCTTCAACAATGATAGGAAGTTTAACTTTTTCCCTGAAAG  
TATACCCAGCACGGTCAATAATTTCAATTTTCATTTTACATTATCTCCAGAGATCTTTCC  
AGCAATATCAATTTACACAGCGCGAACATCTAGGATAAGATGAGGTAGGTGTATGCAGTT  
TTCCCACCCACTCGCTTCAATTTCTGAAACCGTGACGTAAGCCATCCGTTTCGCTGTAAT  
AAAGTCTACTTCAACCTTGAGAGGAAAGCAAGACTTTTCTATGTCTTCAAATCCGATAAT  
GCTTTTTGTGCTTGAATATCGAATATATCCGGTGATCATTTTGTGATCTCCTTATACTCA  
ACACACCATCCGCAGGTAGCCCATGATAAACGCTCATAACGCTGGCAGAAATCGGACCAT  
AGATATTGTTTACCGTTCGGCATAGTTGGAATATGCGTTTTCTCTCAAACCTGTCACGAAA  
GAAGTATTCGATCTTGTGATCTCGACCGGAGTATATCCGAAAGCGGGTTCCAACCTCAACA

TCTGAACTAAATGCCAATTTAACAGAATTAGTTTTTCTGACCGCTGTCCGGTTTCCTTCT  
GGGTACAGCACAGCAGGTTTAGCGGCTAAGCGGATAAACTCAGTATTTTTAATGAACAGA  
ACATAATGATAACCGTCATATTCCGACACTTGCATAGTAACAGGAAAATCGACATGTGCT  
AAACCTGGTAGATCTCGCATATCATGAAAGGTGCCATCAACTTTTTTATTCTATATTCC  
TCACTCTTCTGTTTTATTCTTTTATATGGTACTATAACAAGATTAATACAGCAAGCACC  
AATTACGTTATGAGCACCACAAGTTAAACATTTATAGTCATGGAACCTTATTAAGGAATCG  
ACCAAACCTCATAACCGACTAGCGCCGCGTGTACTTGAGTCTCGATCTCATCCATATCAGC  
CAATGTTTTAACCTTCATAGTATAATCCTCAAATGGTAGTTTTACGAAGATAGTCATTAC  
ATGCTTTTTAATGCATCAGTCGCGGTGTCATAGCGAGTATTATCATAGCACCAGTAATCAT  
CTGTTAACTGATAAGTCAATCCGTCCTTTTTAGCTTCGATGAAAGACAATTCTTTGAAAG  
TTTGTACTTTCTTTGATGATACTCCACGGTCACGGCGTTTATAGAGTTTAGCTAAAACGC  
GTTACAGCTTGTTCTCTTTATTGCCAGACAGATCCCAGATGATGTTCCGTATATGCTTGA  
TTAATTGTTTCAAGTGGTCACTTTGATTCTCCTTAGTTGGTATGCGTGCATTATAGCATTG  
TGATTATCTTTGTCAACACCCAAAAACA AAAAAGCCTATCCC GAAGGATAGCCCATAAAA  
TTACACGCGAGCACC GTAGATCGTGCCTACTTTATCCCAGCGTGGAGCATTACCAGTAAC  
GGCTTTACCAGCAGCTCCACCGTTATATTCTGTACCGTTCCCTGAGTATTACATCTTCC  
TCCAGCAGCACCAACGTTACCGCACGCACCGCCTGTATATGCACTAAGAGACCCCTCACC  
AACAGATCCTTTACCAGGAGCGGAAATGGTACCAGCAGTTGCACCGGAACTCATATGAGA  
GGAAGACCCACCAGCACAGAATGGGCGACCACCGCCACCACCAATACTAGTCGACCCCT  
GTTACCGCCGCCACCGCCGCCACCGCCGCCGGCGATAGCACCGTTATTTGTAATTCGTAG  
ACGTGTACCGATAGCGTTATTGATTGCGTTTCCACCAGCAGCGCCAGCAGCGTTACTACC  
ACCATTACCCCCACGTCCGTAGACATTCACACCGGAGTTAATGATCAATGTTACATAGTC  
GTTAATTAACGAGCTAGGGAAGGCAAGACAAGGAACGCCAGTAGATTGGGCAACAATTC  
ACCAGTGATAGTAATTACTACAGGCGAAGATCCTTGTGCTCTCATCCAGTTAATAAGAGT  
GTCTTTATTGTAAGAGTACTAGCACCAATTCTATAATGAATCTCTTTAGAGCGTCCGAC  
CATTGCCGACATATACGCCGGACGACCTAAGCGTACAGCTTCCATTGCGGCACTCATCCA  
CCGTTGACCAGTCTCGGACACGGCAGATGATCCTACCCATCCAGAAGATATTGCCATAAA  
ATTTCTCACAAGAAAAGCCCATTTAAGGGGCATTGATTGATAATTAATTACTTAGATGAT  
CTCTGCTTACCATCCAAGAAGAAAGACCATGTTTTGTTAGGATAGCGAAGCGCCATGA  
TTCGGCAGTTTTAACACCAGTTTCGAACAATTGACGGCTGGTCACTTTAGCCATACCATC  
TTCGATGTCAACGTTTTCAATAATCATCGGGTACTTAGCGCCACGCATGAAACCGAAGCC  
AGCGGAAGATATGATAATTTAACAGTTGCCATTTTTGATTCTCCTAGAATGTGTGCTGT  
TTCGATGGGTGTATTATGCAATAACACCGGATCCCTGTCAACACTTTCTAAGAAAAATTT  
TTAAACTAATCGAATATAGCCGAGAATTCAGCACCTTTAGCCAGTCCATAAACGTTCCCA  
TTCAAGGTCGCCGTAGTCATAATTGGCAACCATCAACTGACCATTTTTTCATGCAGCAATC  
ATGAGATAAAATTTGCCCCGCATCAACTACGATAGTAATAAACTTTCTGATTCTGGCGG  
TGTGGAAGACAAAGCGACCATATGACCCTTCAGCTTAGTAAGTAGTGATCGAACAATAAA  
ATTCGGGCTTACCTTAATACCGTTAAATTCGTCTGTGTCTTTTCATGCCAGACCTCGCAA  
ACACTAATAGCATAACCATGCTGGTTATTCATAATATCAGTTGCATTGTGATAACGAGCT  
AAACCATCAAGGTTAAATTCTTGTTTATCCTGGTTCAGTTTGGTATCGCGCGCAGCCATA  
AGAGCATCAAGAACAGGTCCAAAGTGATTATCTAATTCATCCTCGGTTGCAATGTTTCT  
ATTGCCCTCGTCTATCCGTGATCCTAATGCTTGCTTTTCGTTGATCACTTGCTTGGTATAT  
TCCAACACATCAAGAACATCGCGGGTAACGTCGCCATGGTAAGCTATTCCC GCATGAAGA  
TGATCAATTAGTCGTTGAATGTCAATGTTCAATTTGTAACCCTCCTCTGAAAGCACATCCC  
AGATCGTTGAGTCAAGGTGCATTAAATTCCACATAATAGAGTCATAACTACCGAAGCCAG  
AAGTAAAATTACATCTCACTGGCGATATGTCTTATGAAAATCGGTGGCTGTCACTGCAT  
CAATAGGCATATCGTCACCTGAAAGCCCCAGACATTTAAGAATCATAACTCTGTTAGCCG  
TTGGCGCGTGCTTAGTCTTTTCAGCATATTTTTCGATGCTCCGTTTTGCCTTTGCTTCTT  
TGAAACGTCCAGACCAAATCCCGTTTTCGGTATCGATTATAATAATTTCAATCACATCAG  
TTTACATTCTTACGGTCTCCATAATGGTTTTGTAAGCCAGTTAAGATGATCACCGAAA  
AACTTTGCGGTGTTACCCTTCGGATCGCGGAGCATGGTTTCTACGATCTCATCGGCAGTA  
ACAATTTCTCCTTTCTTTGCTGTATGTTCTACCATATACTTCAAAGTTTCTTCGGAAGCA  
AGTGCTGCGGATACTGGATTAATCATTTTTGATTCTCCTTTGTTGTCGATGTGTGCATTA  
TGCTATAACCCTATTCCGGTGGTCAACACCTAAAACGAAAAGCCACCCTTTCGGATGGC  
TTGTTGATAATATGTTATTCACGTCCATTTGTATAGTAGTGTGTTGAATCGACCGTTGATA  
AACTAGTTAAACATAGTAACCAATTCACCATCCCTTTCCAATGATAACCCTTCTCGTCT  
TAGACGGGTCTTCCGATTCCGGTAGTTATTGAACACACGAAAGTATGAGGAAGCCTAATAG

TTGTGTTAATGCTAGTATTCTTTTACTTCTGGTATGCATCCCACGGTGACTAACATTAAG  
CCAGTCGAGTGAGTTTATAAATTGTTTTAAAGCATAGAGCTTTAATATCCTCTAAAACGC  
TCTGTAACGAGCTATCAACATCATTATAAATCTCACTAGCCATTTGCGTTAACTCTTGCA  
AATAGGCAATTTTCGCTAATCTCCTTGCGGACGACCAACTTTGGCTGATAACGACCAGTGA  
TCCCAATATTGGTTTCAGTGAAATTATCAACCAATCTTGCATTTCAAGATAGAACTCTT  
CTAGAGCCTTATGTTTTGCATAAGATCCAGGACCAGTTACCCCAAATGCGCAGAATGCA  
TATAAGCAACACTCATCATAACATTCACCGATAAAGCGCTCAACTTTATTAGCCTTTCCCT  
CTTCGGACGTCTTCAGAAAATCACTGAATTACATGTTCTAGATTCTCCATATTATGCAAC  
AGAACAAATTGTTGTGCGGCATATCCCCCATAATAACTGCTAGAAATCCATACTT  
TACTACGAGCATAACATCTTCATAAATATGGGCATGAAATTTCTGGCTGGTTTCAATGGAA  
GGAGATATTTTGTGTTAGATATACTATCATTGCGCCGTCGAAATAACCAGTAAAGTCACCA  
GTTGGATCATATTGATCAGCACCGACACTTCCGACCGCAGTCAAGCATATTGCCGCTGTT  
AGAGTTTTACGAATAAATGACATAAGTCATTTCCCCAGATTGAAAATATTCAGTTATATT  
TATAATCTGGGGCTTTATTTATGATTAACTCTTATTTGGTAGTACCGTCAATAAAAATGTT  
TACGACACACAGAAACATATTTATCCTCTGCACCAACTTCTATTTGAGCACCATCGCGTA  
TAACATTACCCTCTGTATCTACACGAAGGACCATTGTTGCTTTCTTGCCACAATGACAAA  
TACACTTCATTTTCGACCAGTGTATCAGCAAATGCCATTAATGCCGCAGATCCTTCAAATA  
GATTGCCCTGAAAGTCCGTGCGAAGGCCATAGCACAGTACATGGATATTAGCATCATCAA  
CAAGCGCACACAAGCCTAAAACATGCTCTTTAGTCATAAATTGGGCTTCATCTACAAATA  
CAGCATCAGGACGCCAGCGATCCGGTCTACGTTACCTAACGATTCACGATAAACCAAAT  
CGAAAAGATCATCCGATTTAGACAAGGTGATCGCTGGGGCACTGAGGCCAATTCGGGAAA  
CGACTACACTTTCTGAATCTCGATTATCAATCGCTGGCTTAAGAATTAATACTCGCATAT  
CACGTTCTGTATAGTTATAAGCACTTTGTAACAGAGAAGTTGATTTGCCAGCGTTCATAG  
ATGCATAGTAGAAATATAATTGCGCCATTAATTAATCTCCAAAAATCCAACCAGACCTAA  
ACCGATATAAGTCCAGATACCAATAAAAAAGATGATAATGCTCATGGCAAGGATAAACCC  
TTTCAGCGTTTTGGGATACCCGACCCAATATTTCCCGACCATCTTCTAACCGGATCAGTTT  
ATTGCTTTTCAGAGTCCATATCAACTACAACATGTTTATTTTCGAGATTGCAATAGATATTG  
TTTTACAATCTCTTCACCCGCCATAATAACAATAACGAAAATAAAAAGTCCACACAACAAG  
ATTAATGAGAGTCTCAAGCATTTTCTATCACCTCCACCCAATCAGGTGTTTCTGAAAGA  
CTCCTTCTCCTTCATGATGGTCGCAACCTTTATTGATACAATACATCCACCAATCCCACA  
TTCCCCACGGTAAACGCTGCGTATCGTCGTTACAGCAAGTGAAGATAATAGGCCAACCAC  
ATCTAACACATCGGCAGTTTTCTTTTCATGTGAGCGGTATTCGGCTTCTTCATAGATGACT  
CCAATATAATCGACATTTACATTTAGGGCAATGCGGTGCTTTTCAATTAATACCCGTCTGC  
CTTTGGAACACTAACAGGAGCGGTTTTTATATTGTATCCAGTGAAACAAAGAAAACAAGT  
TACGTTTTCTACAGACTGACGTTTCACCCAATCACCGGAATATAGATCATTTTTATTTGT  
CATATTCAACCACCACAATTTTAATGTCTGGAGTAGCAATATTAATGATCTCTTTTACAC  
ATTCCCCTCAAGGCCAGCGATACCGCAACCGATTTTAGGAATATAGAAAGGCTGTATAG  
CACCATCAAAAACATCATTGATAGTCTCAAATCCTTTCAGGATAGCACCATATTCAGCAT  
TTGGACCCGGTCGGAATTGAGTATATAGATTCACCCCGTACCAGTTATAACCATTAACTT  
GATGCGTCCAGGCACCAAACCCACCCAGCTTTTCTACCTTACCAGCGAGAAGTTTGCTTAT  
CAGTCTCTAACGCTTGCGGTAACCTTTTCGCGATCTTTGCAGCAGTACCAGCACCCATAG  
TATGAAAACAATTACAACCATGAATTAATGACCGTTTCTTGTGTTAAACAGGGCGATTA  
GATCGCCCTTTACAGTATCAATAATGATAATATAAACCTCTCATTAGTCACGGGAAGACT  
ACCCAGCCATAAAAACGGCTTAACAGTGTGTCGCGATAAGCAAAGCATAATTGCTTATCAG  
GGGACAGTATCACAAGGTTGCGTTTTGTTATAGCAAAGCTGGCAATACTCAGATCCCACG  
CTCGATTTTTTCGTTTTTCGTCTCGACCTTGTTTGTATGCTTCGTCGAGTTCAAGTGCGA  
TAAAATCACTACACATGTTGTCATCCTAGAAAGTTATAATGATCTTTTTTGTGATCT  
CAAATCCTTTGTATTTCGAACTTTGGATAAGGGCGCTCATTACTAGCAAGCGCACCAGCCG  
AGGACATCATAGCAATCATAGTAATTATTGTCAACTTTTTTCATATATTCCTCAATAGCGT  
TTAGTCTTAAGAATGCCTTTACTCTTTAGATGGTTATCCTCTTTTAGTACATCATCAGCA  
TAACCTAACCCGGCTTTATAGTTCCTTCCAGCATTGTAAGAAGCTAGCCCGAGTCGGATA  
ATACCGTTTCGAACATCCAGCCAGTATGCTAACTCATCCATCGCGTAGAATGCAGAAACC  
TCGCGATTCATGATGAAGTTGATAGTCTGGCGATCACTCATTTTAAACCCGCGCTTTGCA  
TTTTTCGCTTTTACCCTTCTAAGGTAATTTGAAATAATCCATAAGCATGATGATTTTTT  
TTTGGTGCTAAGTTTGCACCCGCGCTTGATTCTTGCCATGCGATACCCGCCAGTATGTGA  
CCTAAACCCTTTCCGTTATAGCGAATATTCGGATGGTCCTTTTTTCAACTTACCCTTTTC  
TCGAATTGCTCGCCGTATTGATAGGCGAAATGTAAATTATCTAGATGGTGTGCTGTAAAG



TTGTCTATCGGCGCTTTTTTGGATCGGTGCGCTAGTCGATGCGTGTGTAGCGCCAACGGCT  
AGTGACAGACTCAATACTATCGCTTTTAGAAGCTTTTAAACATTAATTTCTCCTGTTTGGCT  
TAACTTTCTGATTCCATACTATAGCCCTATCACCAGAGAGTCAAGCATTATTTTGAACCA  
ATTTCCATTATTGGTCTACCTTCAAAACAACCGCCGACATTTTACCCGCCAGTCGTTTTG  
GATTCTCTATAACCATTCGGCAGCATAGACCGTGATATGGCTTACCCTCTTCGATTAGAT  
CTACTGTCATCCCGATCCACATGTTACCGTCAGTAACTTCTAATCGATTTCGGTCGGTCTT  
CCATTTTCAGGAAGTTCGAACATCTCCGGCAAACGAGTTTCTATCTTATTGAATAGTTCCA  
TTGTCTTATGTTTCATCGATATGACGATCGGTTAGACGGTCGATCATATGCGGACTAAAGC  
GAATGAAAATATACTCAGCTTAAACCATCATTCAAGCACTTTTCTTTGATCTGCGCATTGG  
TTTGGCGCAGTTAGGTTTAGAAGAATTTACGCAGCTTACTACGGGGAACATTTACGTTAG  
TTGTTTCCATTTTATTATCCTTTCTTAAACAAATTGCGAATCCAGTATAACAACCGGGATT  
TCTTTAACTTTGAATTTCTCTATAGTTAATTTCTTTAGTAGCAAGATGAATACCATAAGCA  
TCATGTGTAACATATGCCATTTTCTATAGCCGAAATGTGAACAACCGTCTGGACCTAGG  
TTAATAAGAGTTTCTCGCTCACTAGGATTATTTTTCCACAATTTTGTAAATAGGATCGCAC  
ATAATTCGACCTAGCGTACCATGAATAATCTCACAACGGTAAAGTTTTCAAGCAGTGAGA  
TAGGCGCACCCGTCATAGTCGGTATAAACAACACTTCTTTAACACTCATTTTAATACTC  
CTTTGTCGTTTCGATGGGGGTATATTACTACCCCGATCATGTGTGTCAACTACTTTTGC  
AAGATTTTTTTGATTGCATTCCAAGACCTTTATTTCCAGGTTGTTTTGGTTCTTCGAT  
CAGTGTCTATGTTTCGACCGTCTAAGTGTGCACAATTTTTAAGGCAAATAAAAATCTGGTG  
TCGCTTATCAGCACGGATATAACCACTATTCGCAAATCTTTCAGGTGGTGTATGTTTATA  
CAGTGTATTAGGTGTAATATACTTGCAGTACTATAAGGTGTCATCGCATAACATCATGGT  
ACTAACTCCCAACGATCACCTCGAAGATGAGACCATCCACCATCAAGAAGTATCGTAAGA  
CGATAACCTATATCATCTTTGATGTAAGTGTGCGGTGGATTTTCGTCGTCCTCGTGCC  
GGGGTAAAATCATAACATCTTTCCGAGCGTAATATCTTGTCTTTATTGCTATTGGTATAA  
ACTTGCATTTTCTTAACTCCTATATTAATAACCAACGGCTATAGTGTTCAGAACAAACG  
GTCAGATGAATATATTGTAATAGATCTTTCCAAAAGTCAACATTTGGTTCTTCCGGCATA  
CCGTTTTTCTTTGCCTCTTCACGCGCGAGTTTAAACACGCTCGTAGAGATCTTTCAATTCT  
TCCCGCGCATTATCAAAGGTTTCTTCTCCTAACTTCCACGCTAAAATAGAAGAACGTCGC  
GCGAGCGGGAATTGTAGATCACATGTCTTATAGATTTCAAGTAGCTGATAACCAACACGC  
AGAGCATGAGAAAGATCTTTCCAGTACTGAAACACTTTTCAGATTTGGCTACCTGCTTT  
TTGAGATAGCCAGACGAACCCACATAACCAACATGATAGAATTTATCTCGATGTGTGCGG  
ATGTATTCCCATTCTCTGGAGGATTCAACCGACATGTTACTAGGCGCGTGCACCATATCA  
ATAGCGCCGATATCGCCTTTACATGCCAGATTGATAAACCGTTTTAGACTGAACATATTC  
CCGTCAATATCGTCTTTGGTGTTCTTGATCCCTTGACCGCTAGTGCTTTGATCAGAGTGT  
TCTTTCATCGATCCTAAGATAATTTCTTTCGAGTCGGAACAAAGATAACCACGATAATCT  
TTATCGGAAGTTTCAGTATCAAGGCCGTATAAGTGAGATCCGAAGACCATTTTAAACATT  
GTATGCATAATTAACCCCTCTTTAGTATTTTACGTTACGTCGAACGCCTTTTCGAATCTG  
ACAAATAGCAGACGGTGAAACATTATATTTCTTGCAAGTTCTACACCCTTCATATGGTG  
AGAAGATAAAAATCTTCCACTTGGTCGTCGGTAAGTTTTGCGTTTCCGTGGTTCTCTCC  
CCAATTTTTGTTTAACTCTTCTTCTTTCGATGAACAAGATTTTCGGGTATCTGTTGTCCA  
TTCAAGATTATAAAGGTCATAGTTTTATTTGTTTCCATCCTTATAATTAATACTACACGGTA  
GTTATTTGGATTCCGAATAAACGCAACCGCCATAGCTTTATGCATATTCACGGTTTTTCT  
AAATCCATCCGGCTTATAAAATACTGTAAATTTAGAATAACCAGTTTTACCATAGAGACT  
AATATAATTTCCGGTCTCCGTATTTCTAACCCTACCATGAGAGCTAATCTCAAATTGAGT  
GTAGGGCAACAGCGCATCAATCACTTTCCATTCTTCGACAAGATGGTTCATCCCAATATCT  
TTAATCATCATATCACCTCATAAAAATAAAGCCAACCCTTTGGGATTGGCTTAAAAATT  
TACATTGCTTCCGTAAAGGTGCGCGAAATAATGTCACGTTGTTGGTCTGGAGTCAGACTA  
TTGAATCTTACGGCATATCCGCTAACGCGAATGGTTAGTTGCGGATACGTATCAGGATTA  
GCAACCGCATCGAGAAGAAGATCGCGACTCATAACATTGATATTAGCGTGCTGACCACCT  
TCGACAACCGGAGCACCATTATCTACAATCACCGGACGGAAGCTAGTTGTGTGCAGTGCC  
AGAGAAGCGACGTCTTCTGCGGTGATCACATGGTCTTCTGCGAAAGTTTTACTAACAATT  
ACTTTAGCGCCGATCAGTGCTTTTCGGTTCGGATACCAGAATCATAGGCGCGAAGTGTCCA  
CCAATAATAGTACCTTTATGCTCACCTTTCATGATTTCGAATTGCTTTAAATTCCATATTT  
CACCTCATATAGATCAGGACGTTTCGTCATTAATTTTACCAACCAAAAACAACATAGAGTTT  
ATCAGGTAGGACATTACGATTCTTTTTAATTGTAGAACGGAATCGACGAGCTACGCTATC  
TTTATTTTTTATTAGTTGAGACCTAAGCCAATGAAAATGGGTTTGTCTCTACATTACCA  
ATCCCAACACTAAGTCGATTCAATTCTAAAACACTGCAATACGCTGTCAGTAAATCCGCGC

ATGGTAGTATCTAGGATAAAAAATTGTTTGGTCAAGACTACGACCTCGCCATGTGATCGGA  
TTCAGGAAAGTTCGGAAAGATGTACAATCTACATCTGAAATATTTACATTTTCACCGCGA  
CCGCGATCTCGGATCGTTTTGGCATGTTTCCGCGTCGTTGATACGATAAAGACACTATAG  
CCTTTTCGCGTATAAAGGTCATTTAACATGATTCTAGCGTCTGTATGCTCTGTCTGACGG  
CCTAAATTGATTGAGACGATGGAATCTAGGTCATCAGCAATATTGCGTCGCTTACGGCGT  
TCTATGATGCCATTTACGGCAGATACACACGCAGCATAAATCAAATCTTTACTTTCTAAT  
TTTACATCAATATTCATGGTAAAGTCTCCAGTGAACGGGGAGAGATCCTTAGATTGTCTC  
CCC GTT GAT GGT T A A T A T T T T A T T T T G G A T C T G G G A A A T T C A A T A G A G C A T A T A C T C C A T  
A A A A T T T C C T A G C T G C A T T A T C A T A A G C G A T A G C A G C T T C G A T T T C T G T G T C A T A T T G T C  
C A A G A A C A T G T C T T T G T A G C T T G A C C A T T A T A C T A G C T C T C C A T A T C T T A C G C A A A T C C T  
T C C T G T T A C A C T T A C T A A C A C C C T T A T A C A C A C T A G A A A A C T T T T T A G A C T T C T T C T T T C  
T A T T A T G T T G A T T T T G C G C G T C G T T T G C C T C C C T A A G A T T T G G A G G A T T G T T A T T A G C A G  
G A T T A C C G T C A A T A T G A T C A A T T A A T C T A A C T T G C G T C C C A T G T T C T A G A A A C C A A A C A A  
C C C T A T G C A C G A A T A G A T G A A C G C T A G G A A G A C C G T C A T C T C T A C T A T G C C A A A A C C T A A  
G A T G A C C A T C T T T A T T T G T T T G A C T T T A A C T A A A T C G C C G T G T T T A T A T C T A C T T C C T A  
A T G G T C G T C C T T T G A T A G C T T T A C T A T C G A C T C T A T A A T A T A A G A G A C C C T C T A T A A G A G  
C A T A T C T A A G T T T T A T C T C G T T T T G T A G G G A T T C A T C C C A G T A T T T A A A A G C C A T T T T A T  
A A T C C T C A C T A A G C C A G C G A T T A A G C T G G C T T T A T T T T A G T T A T A C C G G G T C T G G A T A T A  
C C T T T T T A T C G A G T T C C A G A T G C G G T C C G T C T T T A A A A G T A A C C C A A A C A A C C C C G C A G A  
T A A C A G G A A C A C C C A A T T C T C G A C C A G C T T G C T T A A A T G C A T C A G C G A T C A T A C G G T A G T  
A T T T C A T G T T C C A T G T T T C C T T A C C T T T C G G A T A C G A T A C A A C G T C A A C C G C G A A A C C G T  
G A A G A T G A C G A G A T T T C A T A G T C T T A G A T T T A G C T T C C G C A A C A T A T T T C T C T T G C G T T T  
C T A G A C T A C G T A C A C T T T C C G T A A T A C C A A A G T C G A C C G G A G T C A G T T C T A A A G C A C G A T  
G A A C G A C T T T T A C C A G G T C T G G A T G T A C A C C A A C A A G C C G A T C T T T G C T T C T T T G A G A T A  
A T T T A T A C A T T A T T C A C T C C C T T T G T G A G T G A T A A T A T T A G A T C C C G G C G A T C C T G C A T  
A G A G T T C T T G T A T T A G C A C C A A T A A G G A T A G C G T T A A C G A C A A C C A T T C C C C A A T C A A C C  
C A C T G A T T A A T A T A A A T G C T A A A T C C G T T T G C T A G G C C A A T A C A A G C A T T C C G G T C C A C  
A T A C T C A G A G C A A T A A T C A A C A T C A T G G T A A A A C C A A A T G C A A A T A T C A T A T T A T T T T C C  
T T T T C T C T G T T T A C G T T T A T A A A A G T A A T A C A T T A C C T C A T C G C G T C C G G T G A T C C A A C A  
T G C T A G G G C G G T A A A C A G C T T T A C A A T T C C C A A C A C A C C T A C T G A C G C G G C G C T G T C A A C  
A G A C A T A G G A A C A G T A A A G G C C A G A G C T A A C A T A G C A A C G C C A C G A A T G A C A T T A A G C A C  
C A T T A T A A T A A G A C C G A A G A A A A C C A T T G T C A A T C C T C C G A C A C A A G A A A A C C T A C A A T C  
A C G C C A G T G A T A T G A C A T G A T G C G C C G C T A A T C A G A C A A C C C T C A C C A A G T G A T T C C C A C  
C A G A T C A G A C A A G C G A C A A T A A C A C A G A A T C C C C A T A C T A C C G C A A T C G C A A C A T A G G C A  
A G G G T C G C C C C A A C A T A T A T T C G T T C A T A A T A C A T C C C A T T C A C C A A A C A A A T T A G A A A  
A A A G C C A T A T C A A C A G A A A C G A G G C A A T T G A T C C G G C A A G C A A A A T G A C A T T A G A G A A T C  
C G C C G T C T A T C C A G G C G A C A A A A C A G A A T A C G C C A G T A T A G A A G C A T A A A C C A A T T A C A A  
A G C A T A C A A T A A G C A A C C A C A G A T A A A A C G C C A T A G A A A G C C C T C C A T C G A G A T A A A T T A  
G T G C G G G T A G T A C A T T A C C C T A C C C G C A T T G T T A A T C A T C G C A G A G C G T G T T C T A G A A C A  
A T T C C A C A C C A A C C G T A A C C A C A C C C A A A C A C A C A G C A A C A A G C A G A T T C A T T C G G T C T  
T T T G G A G T C A T C G C A A A C A G A A C A A C A C C C A C A C A G A A A G C C A T T A C C A T T G A A G T T A A C  
A T T T G T T C A A C A A T T A T C A C A C C T T T A A A G T C A T A G A C G C A T A A A G A T T A A T G T C A G G C C  
A G T T A G G T T C G C A A T T A T A C T C A A C A T C C C A C A A A T A A A G C G G T T T A G A T G T A T C A G C C A  
A G T T T T A A A A A T C T T C T A C C C A C A T T T C A A G G C T A T A T G A T G G T T A A A C T A G G C T A T C A T  
A T C C G C C G T A A C G T T G G C T A C T G G T C G G T C A G T A A A A A C T A C C T C A A G A T C T G G T A A T T  
C T T T T T C A A G G A T A A C C G C C A G C G C A T A A A T C A G A C G T T C T T C C T T G T T A C G C T G C C G C A  
G G A C C G T T G T C T G T G G G T T T T T T T G G T T C A C T A G C A A G C A C C T C C A C A T T T T C A C A G A A T  
G A A A T T T T C A C A G A C A C A A T T T T A C C A T A A G T G A A G A A T G A A T A T A C A T T A T C G A G A T A T  
T C A T C G T C A C C T A C A A T C A C A A C A A A C T G C G G A T C A G C A A C C G C C G C A A C A T A T T C T A C C  
A G T T C A T C A A T A G A A T G C A A C T T A T T T T C A T C A A T T C G G C T G T A T T T G G T T G C A T C T G T G  
A T T T T A A A A C C A C G T T C T C T C A G C T T A T C A A T T A G A A T T T C A C G G G G A G T T C C A A A C A G T  
T T G C T C A T A A T A T C A T C C T C A C A T A G T T A A T C A A T G G T C A A T A A T C T T G C A C A T T A T A A C  
A G A A A G A A C A A A G A C C G C A A C C C A C A T A T A G A T C C C A G C A A T C A A T G C A A T T T C A A T A T C  
A C A A T A T C C A A G A T A T A C A A C A G G A A T A A A A C A A A C A T A C A G A C C A G C G C A A A G A A A C A  
A G C A A A G A C G C T A G A A A A T C C G A T A G C A G T C T T A G T A A T A T T C A T A T T A A C A A T C C A C G C  
G G C T T A A G T C A A A A G C A A T T G C A T A C A G C A T A A T G A A T A T G T T A G C C G A T C C G A G A A T C A  
A T G C A C C C T C A C A T T T T G A A A C T C G C T A A T C A A A A T G T A A C A T T A T C C A T C C G A G G A T G T

TAAAGGCGCAGACCGCGCCTATGTTTCGCTAACCAATTAATCTTTTTTCATAATATACCTTA  
GAAAGAAACACTTTTTCAAGAAATCCAGATTTTTAGTACCGACAACAGAAAAGTAGTGTTT  
TCCTTTTTTCGGTTTTAGAGAAAGCGATTTTCTTCTCTACATGGTGACGGAAGCCAGACAA  
ACGATCACCCAGGTCAAGGCGGCAAGCGTAAGTAGTGCCGTTTTTCGAAAGTAACCTCGAT  
TTGAGTTTTGTGCATATTCGCGTTCGTAGGCTTTTGTCTGCCGCTTCCTGTGCTTTACGCTC  
GATGCTTTCGAAGTGAATACTTCGTTTTGCGTTAGCGAATACAGAAGATTCAGAGAAGAT  
AACTTTAACCGATCCTGGTTTTCATTTTTGATACTCCTTAGTAGTTCGTGTTTTCGTTTTCGAT  
GGGTGTATTATGCTATACACCTCTCTCGTGTCAACAACCTTCTTAGTCTTTATTACATAAT  
TTCTAGAGCATTCTTCTGCAGCACCTTTCCAACCTTCCCACATAATGGACATAGTAAGGAA  
GTTAAAGCACCAGCAGGAATCAACCTTTTTAGAGATAAACCATTCTACAAACGCTTCGCT  
CATACCATGCTCTTGAGCGGATTCGCGTAATTGTTCAATTTGGTCTTCCATAGTATCACC  
TCAACACCTAACGTTATTCAAACCTCAAACGGTCTATTTCATCCTATTGTAAGTACATAT  
ACAAGCATAGTTATGTTTTGGTTGTACCGTATCAGATAGACACGCTTTTACAGCATCGC  
GGTCCGATGGGTCTACACCTCAGCTTTAAGTATTGCTAAAATCTGGTTATAGCGTACTC  
TTAGTTGTACTAATGGTTTTATCCCCCATATTACCCCCTTATAGTTGATCAGCGATGTAAG  
CGTGACAAGCGCGGAGTTTTATTAAATGCACTACCTTTCACTTCGCCTACGATGTTCTTAA  
CTTCTAAGCGGTTCGGATGGATTTCATCTTAGAGCACCAGATCTGGTTAGCCAATTCCAGTT  
TACTCATATTTGGTTCCATCTCAAACAGTTCACGCTCAAAGTCGATAATTTCTTTTTGCTG  
CGTCTTTAAAGTTAATCATTTTTGATTCTCCCGTTTTCGTTGATGGGTGTATTGTAGGGGAG  
TGATCCTCCCCTGTCAACACTTTTTATCAGAGATATGCTATATAGTTTGCCAGTCCGGCAG  
AGTAATCATTCGGCATTGCTTTTACTGCCAGTTAAAACCCCTGCTCCAACCTTACTGTTTAG  
CGGATTCTTCGTTATAACCCCAGATTACCAGACTAGCTACTACGTTTTTCATTGCTTACTG  
CTTTCAGTGCTTTAGTGGTGCAGCGTCCATAATTTGATTCTCCGTTTAAGAAAGTGTGT  
TTCGTTTTCGATGGGTGTATTATGCTATGGGCCGGATCTGGTGTCAACAACTTTTTTTTAAA  
AAAAATTTTTAGGCAATAAAAAAGCCACTCCGAAGAGTGGCTTATAGGGAAGGTAACGAA  
TCTTGCTTGTCTCCAACCGGCTTGCGGCCTAGCAAGTGAATGCTTTAGCGTACCGGAGCG  
CCCATACGCTGCAATAAATGCGGCTAGGTGACTTCCAAATCATTCTAACCGCGCTGTCTT  
TAGTTTCGCTATTATTTATATCGTTTTCTCGCGCGACGTTTTTGATCTTCTTCCTTGCTAG  
AGTTAAATGTATCAAAGAGACACATGCCACTAATAAATAACATAACCGTATTTTTTGACGA  
TATCCCACGGCTTCGCATCAGTACAGATCCCCCAAACGGTAAAAAATGCAAATAGTGCAG  
AAGAGATCACAAGCATGGTACTTTCTAAGATATCAAAGTAATTTTCATGGTTTTACCTC  
AATTCTTCGATATTCTTGACACATCCACGCAGTAAGCAAGAATCCTAACACATAAGCAAC  
AAAGTACGTTAATGCTACTTCTGGTTCTGTTCTGTGTATCATCATTAAACCAGCTAGAAC  
GGTCTTAACAATTACATTTAAAATAATTAGCCACGCAAATAATTTTCATCGTTTTGCCCCCT  
TTCGGTTCGAGTCTTTACAAACTTATACATTCCGTAACAATCTCGAAGCATCCACGTAACA  
AGAGCACCAGTCAACACAGACAATACACAGAAGAAGTAAAACGGTCCAGTTGCATTATCA  
ACATGAGCATGCCATGTAAAGAAAACACATGCTAAGAATGTAAAGAACATCATAAAACAC  
AAGAAAGCAAATATTTTCATGCTACTCATAGCGCCACCATAACAACAGATCATAAGAACAC  
CCAACGCAATAACAATTGCATCAAATTTAGTGAACCTCAGGTCCACCTATCAACATCATT  
GTTCTGTTTATTTCATAGATCACAGAGCCATCTTACAGCACCACATAAAGCGATCAAAG  
ACTAGGTCTAAACGAGATTACAACAAGTTTACAAAAATCATCTAAGGTAACACCGCAATA  
GCTACCTACTGTAACAACACCGATCATCAGACACAGAAAGAAAACAATGCAACCAGAAA  
CAAAGTATTGCTAAACAGTGTAGTGATCATTAGACACCCCCACGACGATCAATTTCAAAA  
ACTTTTTTACCATCAACGAAGCATGTTACAACCTGCCTAGTTGACTTCCGCAAATTTGTTGT  
GTCACCCACTTAAGGTCAGAGCGAAACAATGTTCTATTAATAACAATGTTTTACCGCTC  
TTATCCTTACCATAAATGTTGCTTTAACCATATCCAATTCATATTATCACCTTATTTG  
CTAATCGCTAAACCCAATCTGAAGAGAGCACCCGATGCTACGGTATACCCGAAAGTTTCA  
AATGCAGTAAAGATATCTAAGCCACCAGCTAACAGAGTTGCAGTAAACAGAGTACCAGCT  
ACGAACATAAAAGTTTTACCGATAAATTTCAATTTTGATTCTCCTTTCGTTTGTGTTGGG  
GGTATCTTACTAACCCCGTTTTCATGTTGTCAACTGTTTTTAAGAAAATTTTACTTCGTCT  
ACAATGTCTTTCATGACATTGATTTCCATTCCGGTTCAGAACACGTTGGAACATGGGCTGC  
ACATACGCTTTCAGGTATTCAATTTGATGGCTTGCTATCGATAGTCTTTTTAGTGTAGTAG  
TCATCAACGTAAGCTACTGTAATTACATTTTCGTCTGTCGTTCCAAGCGATATAAGCAAAT  
TTGCCGTTATCCCAGAAGCGAGCACTAATTGCTACTTTTGTGTAATCGAATCCTATTTTCG  
CTGTGAGATTCAAGAACTACTTGCCTACCAGTTTCTTTATGAATGTAGTAGCGGGATACT  
AAGTCAAAGCTACGGGTGTAGTGACATTTCGAATTTATCTTTAAACATCATCATTTTGATT  
CTCCTAAGTGTGTTTTCGTTTTCGATACGTGCATTATGCTATAGTCGTTGATGGTTGTCAAC

ACCTAAAAACAAAAACCCCGAAAAATTTTCGGGGTATAAAAAGTACAGTTTGGTCGTCCA  
CTCCAGGTCTAGATCTTCGACATACTCATGAGATCGGACACTCTCTAAATCGAACTCTAG  
GTCAGTGCCAAATTTACGCGCACCAACATCATAAGAAAGCGTGATATGCGGTACATATTC  
AGGATAATCCCGCGTCGCGCCTAAAGCAGTGCCGATATCTTGTCTGAATTGCATGTAGTC  
GCTTTCAAATGCCAACACAAGCGCATTAGTACCGGATTGAGTTTGAAACACTTTCAGATG  
GCATAGAGAGCCTAAAAACTCTTCACCCCTCTTCTGGGATAAACGGAACATAGACACGAGA  
ATATAAGATAGTGCTATGCAGTTTATCACGAGGAACGGCATTAGGCAGATCGTAGAACTC  
CTGCAATTTTTCAATGCGGTCTAGTGTATCCTCAGTGAATTTAACAGTCGCATATGTACC  
TTAACGGATTCTCGAAACGGGGTCATAATCAAGCCTCCGTGATCAGTTCTACTTCTCT  
TCTGCGTCTTCCGCTGCTTCGTCTTTAGGGAGAAGTGCTTTCAGTTCTTCCACAATAGCA  
TCAAGGGAAACAGTCCCGTTTTTCGTCTGGCTGAATACCCAGAATGCGTACCAGTTCCATC  
AATACACGCTCACGATCTTTCAGTTGGCCTTCTAAGAATGCGGCCTGTTCTTGAGTGTCA  
AACAGACGTACTTTCAGGACATTAATCATGTGTTTCATGCTGATTGGACATATTCACATCT  
CCTACTTGTTCATAACTTTTTGTTATATGTTTCGCGAGAATCGCGCTTTCAAATTCTTCTA  
ATGAACCATTATTTATGATAATGGTTTCACCGTCAATAGGCCAAAATTCCTTTTTTCGGTGG  
AGTGAGTCCATAACAATACCAGTATCACGCTGAATATGCAACACCTTAGCACCCATAGCAC  
GCACGAGAGCAATTTCAATAGGCTGTGCGCACATCAACCACTACAAAATAACCTTCTTCAT  
TTCTGCGCTCCATAAACTCATTACGGATAGATTACACCAATAAAGCGGATTGATCAAGT  
TAACCATTATATCAGTACCGAGAGTGGTTAACATGAGACGAATAGACCAGACGTTATTAT  
GTTTTTCGCCAATCTCATTAAACGACCTCGTAAATCTCAGCCAGACGATCACAAGTAAAGG  
AACTACCGCCATACTTCGAATCGAGCATAAGCCGACACTGAATAAACCCTTATGTGCGG  
TATAGGTATCAATACCTAGATCGGCTTGTCTGTCATGCCCTAACCCGTCAAAGTCAAGAT  
AAGTCAGACCTAAGTCTGGTTGACATTTGCACAATATTTCTATGATCGGTGCTGCCAGTT  
GATAACTATGTCCATCAATGATTAACGCGGCAGTATCTTTTCTACTCGCTTTTTACCAC  
AGAGTGCAATCAATTTTATTATATAAGCTTCTAATTACTTTCTAAAAGCAGGGTGCATAG  
CTTTAATACCTTCCACCCCTCTGACGATCCGCCGCCTGAATTGCTGGGCGAGGAACGATCA  
GTTGACCATCACGTCCAATGCTCATTGTGTTAAAGGGAAGAATTGCAGTACCCACCAGAG  
ATTCATGCATATCATCGGTGTATGTTAACTCAAGTTCCCCCAATTGTGAACACCAACAAC  
CATAAAAGTTAAAAGTGCACACACTGTTAAGTCGTTGTTGTCATCATGTGAACTTGAA  
CGGCTTCTGGCATTGAATCCTTCCACGCAGTGGAGTTACCGTTATTGTAGTCTACTATAG  
AAAGCATCCATGTGTAAGGTTTAGATAGCTTTCCAAATGCTCATCAACAATAAACCAGGA  
CTACCAACGGGTCAAACCTCCACATGACTAGACGGATAATAAGCGACCGCCATACCATATT  
GACCAGAACTTGCTTAGTCGGTAGAATGGTTAGAGCCGGAAGTGTAACCTTGAGCAT  
TTAAAGTAAAGCCTTTTGTAGTTGTCCATCTGGAATATTGATCTGCCAGTTGCTGGGGT  
TAGCATAGTTAAAGAGATTAGACATTACTGATTCCTCAAATGAAAATATTTATTAACAAT  
TGTCGCTTTGCGACGTGCCAGAGGCAATGACTACTTTTTAACCGAAACAAATTTTCTATT  
ATTCTAAAGATCTTCTTCGTTTTGGTTATGTTTTAACCAATAACTATATTTTTATACCG  
TAATAAATGAAACGGGTACTATACGAGGACTTCTTATGACAGAAGACATTTTAATAAAAC  
TCTATGATCGTCTGGATAACGAAGTAGCAACATTGCGGGGTGAAGTCCTCTATTTGTCTA  
AATGAAATACAGATCTGCTCAAGCAGATTGCAGAAAGGGATGATCAAATAAAATCCCTTT  
CAGGTGCATTACGTGATCGCGACAAGGCATTAGAGATTGTACAGCGTGTACCAATAAAGG  
AAGAGTTAAAAGACTTCTTACATGGTTATGCTCATGCCATCGATCTATAATAAAAAAGCC  
CGTCATTGACGGGCTTAATGTTAACTATTGATCATATCAATGACGTTTTGTAGCTCTGAT  
ATGGATAGCGTTTCTGTATATCCATCTGGCATATCTTCTTAACTAACATAGAAACCTTTA  
TACCTTTTCTTATTGCACATACCATAGAAAGAGCATCATCACCGTTATCGTATTTTTTA  
TAAAATGTCAACTCATGACGAAATATAGATTTTGAAGATTGGTTTTGTATTCTTTTTATT  
AATCTGTTGTTGGTTATACCAATTTTATAGCAACCGCAACATCTTCTTTGTATAAAGTT  
TGTACATAAATGTATACAGGTTTATTCCTCTTAAATCCATGATTGCTACACATAGGGCTA  
CCGCTATTTTTTGATACGTAGTCTCCTAAGTTTGACGTAATTCATGTCCGCTACTACAA  
CGCATTACCAATTTTGTCTTAGCATTCCTCTATACACACCGGCAACAAAATCAACAAAT  
GTATCACCTTTATCAATCGCCTTATCTGTTATTTCTTTACTACTTGCTCAGTTGACTTC  
TTGTTTTTACCTGAACATCGTACACATCTAGATCCATTAATACTAAAACGAGTGACCGGAT  
GCAGTATATTCATGTCCATTAGGGCATTAACTAAGATATTTCTTTCATAAAGATCTTTA  
TAATCAGACACATAGCCAATGACTTCGTGGTCTTTTTGGTTATTCCTCATCTCGGTTAGC  
AACTCTTCGCTATTCCCGCGTTTACCCTTAAACGCAGAGACAACCATGACCTTGATAAAGA  
TATATAAATTTCTTAGTAAAGTTTTTGTGCAATCAGGACAATGCATTAGTAATTCTGTCT  
ATTTGACCTGTATATCCTTTAGGAATATCGATCAATGTGTATTGTCCGCATATTGACTTT

AATGCATCATCTATTCTTTCTTTGGTCCAGCGTAAGCGACCAGTGCATTTCATGACATTCT  
ACACCCAGTCTAAGAGTATCTAAACTAAATATAGTTGACGTATGTCCTTTATCACATTTT  
AACTTAAATCTAGTATCCTTTGCGGTGGTGTATTCTCCGACTAGTCCAAACCATTTCATAA  
CAACATGGGATATGTTCTTTTACCTTCTCTAGATATACACCGAACGGTCTAGGAACTGAA  
TTGGGTTTTCTATCTTTAGTCATATTTTATATCCTGTAAATTAAGCGCCGTCACCAGC  
GGCGCTATTTTTATAATCATTAAAACAATTTCCACACTTTACGAGCATCATATTTCTTGT  
CTTTGCTCATAAACTGGTAGGTCGGAAGATACACAACCGCGCTCCAATCTTTTGGTGCGA  
TCTCAATCAGTTTTGTTTGGATGGGTCCAGGCAAATATGCTTTGATCATGTGGTCTGCGC  
CTCTCATACTTTAACATCACTCCATTTAATTTCTAAACGAGTTTTCTTACTAAGAGTAG  
GTGTACTCGCGTATTGTCGCAACAATGCTTCTAAGAACTGCTGGCGAGCTTTAGGTGGCC  
CATAGTGCAAGTTCAAACCTAGCATAATCTCGTTTCCTGCTTTAGATGTACCAAATCCTA  
GACAGATAATCAAGGGGTATCGGTCAAAGAATGGCAAAGAATCCCGATATTTTGGGTTAT  
ACGCAGAAGTATAGATCCGTCCCCTTGTGGTATTACTACCTGGTGACCTTTTACACCAT  
CCTTGATGGTCTTCATAAACCCTCCTGTGATTTTTCTTTAGGACAACCTCTTTGATACAG  
CACGCATAGACGCACGAAAATCATTAAATCATCATCATTGCGCGTTGCTGCTTATTGAGAC  
CCTTTGCACCTTTCCCTTTTAGTTTTGCAACTTCTATTGCTGTTTTAATTTTCGCTGGCAT  
AACGAGACATACTTTTAGTGAAAGTCGCATAGGCTATTCCCTTAGAATCTGCATATGCTT  
TACCTGTCATGCCTTTACCTTTTGGCTTTCGCAAATTCTACACCCAATTCTACCCACTGTT  
TAGACTTTTCGTTTTTGGGGTAGACGGCTTAGCGTCTTCTGTGATTATTTCAAATACGCTC  
ATAATATTATCCTCTAGTTGTTAAGCCCTTTAAAGCCAAACACTTTCTTTAATGCATGTT  
CGGTGATGATCTTAAACTCCAGGTATGCTTTTGGCATAATTTACGGCAGCTAACCATT  
TTTCAGTAGTTTTTGTGTATGTCCATACTTCATGCATATAGCTTTGCTTTGTCTTCGCGG  
TCATTCCTTTTGGCTTCTCCGGTGGCCTTGTCTCTTTAGCTGGTTTAACTTCCCATAAAT  
GCTCCTTGCCATCATCAAACCTTAAGGTAGAAATCCATAAAGTATCTGTGTCTTTTTCCGT  
TTGTTGATGACTCATAAGGAATTACTACGGTCTCAGATCCCCATTGTGCAACTCTGGGAT  
TGCGGTCTAGCCACTGCATGATCCATCTTTCCCTGCTTGAACGGTATGTGATCTTACGTA  
TATCCCCTTTATACTTTTCCTTATTCTCAGGAACATACTTGCCCTTATAAGTGTTAGATC  
CTCCCATTTTAGCACCTTTATTATTAATAACATAACTATTTATCAATTGAGGGTGATA  
AAATGCCCTTTTCTATCTTCCCTGCCATTGAATACAAAGGCAAGATGATTACTGACATTG  
TGCGCAATTACCGCGCATATTTGAACGCAATAATTTCTGATTATAACATACAAACATATT  
ACATTCAAGTTAGTCCACGACCGGAACAAGTTGCATACGAAGTATACGGAAACCAACAAC  
TTCCTGATATTGCTGATGCTTAATGACGTATACGATCCGTTCCATGACTGGATCACCG  
ATCAGGAGACAGCATATGAATCAGCCGAACAACGATATGCAAATGTGCGGAGGAAATCAAG  
TATTATACCACGTTGATCTTGACGGAAACAGGTATTGGAATCTTACCGAATATCCGAAAG  
GATCAAGCAGTTGGTATGATAAAGGGGATATTCATCATCGTCATTTGCAGTTTCATGGTG  
CATCGTCCGACAGTGGACACACTGGAAGAAGCGATCCTCCGTAATGAGGAACGACGCAAGA  
TCAAGATCATAGATCCTACACAAATTAACAATTTATTAACGCATTCATTGAGAAATGG  
AAAAGGCTGATGTGTAAGGTGATTAATTACGCTAATGCTTGATAACTCCGTGAAATGGTT  
TACCGGAATTGAAGACAACAGGGAGGTCCCATTAATGCTGGGGCGTGTTACGGTTAGGAT  
TCATGGTATACATGCCTCGCTATCCGCGCACGGTGACATTCAAGGTCTTCCAACAGAAGA  
TCTATTATGGATTACGCCAGTACAAGATATTACAAGCGCGGCGATCTCCGGTATAGGTCA  
ACGCCCTACTGGTATTGTTGAAGGTTCAATGGTATTTGGATTGGCTTTAGATGGACGTTA  
TTTAAACTGCGTTATTCTGGGTACTATTGCCGGACAATATACAGAGAAACCACTCACTAC  
AGAAGGTTTTTGCATCCTTCTGCTGCATATCCTCGTTATATTGGTAATGATGTTAATAT  
TCTTGCTCGTGGCCGTATTAACCCAGAAACCGGACAAACAACAAAACCTGATAATGTCTA  
TAATCGAGATGAAAACACTGGAGTTGCAGTAAATCCAGACGACGAGCCATTAGACCAAAT  
TCCGTTGATGATAATCCTGATTTTACAATAGAAAAAATGCTGAGGGGCGATGAGGGATA  
TCGCGAGAAATGGTATCTTGATTCAGAAGGATATCCGACAATAGGCATCGGGCATTGAT  
CATTTATTAGAAAACAGTGATCTGGGTATTATCAATAATGAACTTTCTAAGCTGGTAGG  
GCGTGAAGTTACAAACGGAAGACTTACCGCCGAAGAAGTTAGTAAAGTATTTGCTGACGA  
TATAGAAAAGACTCGTCGTGATATCCGCAAACATCAACGAATTGCACCTGTCTATAATAA  
ATGTAATGCCTCTCGTTGTATGGCATTAGAAAATATGGCGTTTCAAATGGGTGTTGGTGG  
ATTGGGTAAATTTAAGAATAGTCTTGCTGCGATGTTAGCGGAAGAATGGAAACAAGCCTA  
TGATAGATTACGTCAATCTGTATGCGCTAATCAAACCTCAGTACGGTCAAGCCGTGTTTC  
TAATATTATTCTTACTGGTAACTTAGAATCATATGGCGTAATTGCTCCAAGAAAGAGGA  
ATCTGTTTCTGATGATCCGCGAGCACGTTTGGAGAAATGCCCGTATTGCTGCCTATAAGAC  
GCAGAGAGCAGAAGAAGACCCAGAAGCACCGTTTACCCGACAAGACACAGAATCATGTT

TAAAGAGCCTAAGAGTTCGTATTATGCGAGGTATCCTTATAAACATGTGTACGAGTCAGA  
GAGCGGTCATATTATCGAGATTGATGATACTCCTTCTCATGAGCGTTATCACCGCAAACA  
TCCTTCTGGTACATTTGAAGAAACCAGACCGGACGGAACGAGGGTAGAAAAGATTGAAGG  
TGATGATTATCTAATCGTTAAACAAGGCCGAAAGTAAACGCTAAGGGTAATTTGCAAGT  
TCTTGTGAAGGTGACGCGCAAGTTTATTATATGGGTAATGTGATGCAAACCGTTCATGG  
TAACGTCACTGAATTTATTCGTGGCAATGTTAATCAGACCGTTGTAGGTACGCCTAACAT  
GCATGTTTTAGGTGATGTTACCGCTCAACTTGACGCTAATTTAACGGCTAATGTCAAGGG  
TAATGCTGAATTAATGATCGAGGGTAACACTACCGAAACAATTAAGGTAACACTATGATTT  
AACCGTTTAGGGTAATTTAATATGACCGTCAATGGCACTAAATCAGATCAGGTTAATGG  
TAAATGGTCCCCTAATTGTGGTGCAAGCGTTAAAGATATTGCATCTGGTACAGTTCAAAT  
TGATGGTAGCCGATTGATTTTGGGTGAGGTAACATAATGGTTGAAATTATTCCGATGAAT  
TCAAAATTGGAGGATATCAGCGAGCGAGAAATCTTTGAGGTGGTGCTCTCTTATAAAGCA  
ACGCCACCGGATGCAAATACCACATACACAATTAAGAGTTTAAAGATCAGCGAGTATCGC  
CCTAGTAAGGGCGTTACCGTTGAAGAACTAAAATATCTGGTGAGGATCGGGATAGTTTT  
ACGCTTGGCGCGGATTCTCTTAAATATATAACGAAAGATAGAATTAATAAATCTGCCGGA  
AGTTTTGATGATTTACCAGATCCAACACTACCGCAGATCTATATTATTTAACGCTCCTACA  
CGTCTACAGGAGGTTTATACTTATAAAGTAACCCTAACCTATATCCAATCTGTTTCAGAG  
TCTTCTGGTGGTCTGGTGAAGGAAATAGTGGTGGTTCCAATAGCCCAGAGGGTGCTGGT  
GAAACTAATCCTCCTCCGGTAGTAACCGCACATACAATAGAGAAAGTATATACTCAAACC  
GTTTTTGAAATTGGGATGTGTGGGCGCAGCAACTAAGAGATTATGTTGATAGGGGTGTT  
TAAAGGCCGATTATCCTACGATAAGGCTAAAACACTACAGGGCACGGAAACTACCCACCTA  
CCGTAATTAATGCAACTCAATCTAAGGTATTTGTTGAGGGTATCCCTGTACGAGTCGAAG  
GAGACCCAATTACACCACACACAAAAACAACAGAGCCTTATGATACACACGGGGGAACTA  
CGGTCCGAGTACCCCGAAAGTATTTGTTACCGGAAAGAAAGCAATTCAAATGGCAGATC  
GTATTAGCTGTGGCGATACCGTTCGCTATGGCATCACCGAAGGTATTCATAAAATGACAGA  
GCAAAGATTACAAAAATTCCTGATATTTTTAATGCTGCTACATTCGCTGAAATTAAG  
CGAATTAACAGACTCGATGAGAAACCAGGAAGAATTTAAAGATTTTGATTTAATGGTGC  
TGGTATTAACGTATTGATGGACTTGCTCGCATATAACACTCTGTATATTCAGCAATTCGC  
TAACGCCGCCCTATATGAATCTTTTATCAGAACGGCAATTAAGCGTACTTCAGCTTTTCA  
AGCCGCGCAAGATTTAGGACATTTGCCAGCAAGTAAAACACTAGTGCATCGACTACAATTAT  
GTTGCACGTAACACATCCTCGAAATCCGGCAAGTATTCGAATCCCACGAGGAACTAAATT  
TATTGCAAGCGTGGATCGCCAGACGTCTTATCCGTTTGTGACTACAGAAGACGTTGGGAG  
CGTTTGAAGTTCAAATGGATTATATACGCCTATGCTTAAAGTCGTACAAGGTCGTATTGT  
TCGTACAGAAATGTTATTTGATCCGAAGAAACAAATTCGATCCGCGATCCTGATATTGA  
CCGCGCTCAGGTTAAATTGTGGGTAGACGGTGCTGAATGGAAAGACTGGACACGAGAAAG  
CATTGTTAACGCAACTGGTGCAAGCAATATTTTCTATATGCGTGAAACCGTGGACGGTCA  
TACTGAAATCTTCTTTGGTGAAGGTGAATCAACTTTATCTGTTGCTGGCGGTGCACTGGA  
AGCAAATTATATTGGTGGACTTAAGCCGTCAACTGGTGCTAATATAGTTATCGAATATAT  
CAGCACTAAAGGTGCGGAAGCTAACGGATCTGTCAATTTACATACGCGGATACATTGGC  
ATCTATCTTTTTGTAAAAATTATTGAGAATCCGACAAATGGTTCGTGATTATGTCGGTGC  
AGATGGTGGTGGTATCCTGAATCAATCGAACGTATCCGTGAACTTGCTCCGGTAATGCG  
TGAATCTCAGCGTCGTTGTGTTACTGCTTCTGACTATGAGGCTTTTGTATCTAGCCGTTT  
TGGTAGTAGTGTCCAGGCGGTACAATGTTTCACCGACGGAGAAAAACCTGGTTATGCTTT  
TGTTGCTGTTAAGCCTAAATCTGGCTTGCGTTTGACAACTGTTCAAAAAGAAGATATGCG  
GGATTATCGGGCAAAATATAATCTTGCCCCTATCACGCCGAGCATCATTGACTCAAATA  
TCTGTATATTAACAGAATATTAAGTTTCTTATTCAATCAATGACTTGTCACAATCAGA  
GCAGTGGTTGCGCGGTGCGGTTATTGATCAGATTGATGCATATTATACCAACGAAGTGGA  
AATTTTTAACCTGACCTTTAGTAAGTCAAAAATGCTTTCTCGTATTGACAAAGCTGATGT  
ATCTGTGATAGGTTCTAGTGCAGAAATCGAGATGGTGCAAGAGATCGACAACTCCTATCA  
AGCACCTATGGCTGGAATCAAGTTTTTACACCAGTATAAGAGCGGAATCAAGTCTAGTTC  
ATTCAACTTCGAAAAGGACGACAAGCAATATCCGATCCAGTATGTAAGTACAGAAATGAA  
CAAAGAATCCGGTTTAGCTAAATTGCTGGTTGGACCTTTCCCTGTTGGTTCTGCAATCGC  
TTTACCGCAATATCCGGCACTGATTTTGATAAAGAGGTTATCGACGGTGCGGACCTATA  
CTTTGAGGTTGGAGATGTTTACGATTATGACGACCTTATTTTCATGGGATCTGGGTAACT  
GAATATCAATAGCGATCGCTTACTGGTTCATATATTGAGTTGACAGCTAAACCGATTGC  
TGATAACATCTTTACTAATGACGGTCTTTGATCGTGTGTTGAAAACGATCTCCGTCCTCA  
GTACACAACCTATTAGTCTGGAGGCAATTGCTCAATGATTAAAGCGCCTAGTGTAACCTAGC

TTGACAATAGGAAAATTGTCTGCTAATCAGGCGTATATCACATGGGATGACGTAGGCGAA  
AACTTCTTTTATTTTGTGGAGTTCGCCGAAACCAGATCACGAGCCGGGGAGATCATCCCC  
GTCGATGAGTGAAGCTGGGTAAACCTGGGATATACTGGCGAACAAAACCTGGTTTGAGGAT  
AAAACCTTTTGGCAGAATATTATTACAAATTTTCGTGTAGCAGTAGCCGCGGAAGGATTT  
GAACAAAGTAAATGGGTTGAAACCGAAGAGTTTCAGACATTTAAAACAAACGCATATAAT  
TTTTCTATCATGCGAGAGTTCAACCTTGCAAACGAGGTTGTTAAGCAAAAGTTTACATAT  
GATAATCGTGATTATATTAATTTAATACTGATTTAATTCAAGCATCATTGATGAAGGAA  
GATTTTGTCTTTAGTCGTGAATATGCAAACATGACAAATATCTCAAACACTACATTGTAGTT  
GATGAGAACTTTCATGAAATACAGGATCACATAGAAAAAGTTTGTACTGATATAAACCGC  
ACTATGTTAGCGGAAATGAACGGTGTTTTGTACTTTTTCGAACGGTTCAGCCGATTGTG  
AAAGTGTCAAATGATAAAGGTCAATCATGGAAAGCATAACAAGGCTTTTGATGACCGTGTA  
GGCAATCCGGTTTCCCGTAGATGCGTTTATCAGTTTAAACCCACTACTTACGTTTTAGGA  
TATGACCGAATCTTTTACGGACGACAAGCTAGAGATACTCGATGGAGCGCGGACGATGGT  
CGATTTAGTGATGATACGATCACTTTTGCAAAGGTTGGTGACGAGAACGATTTAGGCTTT  
GACGTTGAGATCTTTGGTGTATTTTCCAGATTGACAGGTGACACCACAAAATACGCCGAA  
GCTCTGGCGTGCAGTGACGATAATTTGTGGGTTGGTGCTAAAGATGTTATTCGCCGGATT  
CGTCTTAAGAATACTCCTGTTGATACCGTACAGGGTTCGCCTACGATTGGAGAAAAAATA  
TTCGATCCTGATGTTATCCCAGTAACAGGAAATGATAAAGCTGTCATTCAGAAAATGGAT  
GTGATCGACGGTAAATTGCTTGTATTTGTTACGGGTGAAGTTAAACGGCGTTATCAAGAT  
CCAATAAACCAGAAAACGTTCTTCCGACAGATGATGCGGGTGTATACTTAATAGGGAGT  
GATGGTCTGTCTTTTCAGAGAGTATTTGGCAACACTCCGCAGGAAAGGGAATATATTCAG  
CATGGGTTTCAGTAATATGCCAACCAATGGTGATGAGGTGTTTCATAAGCCATTGTAATCAT  
CACTTTGAAAGCATTTTACCTGATCCAGAACTGACGCGAAATATGAATTAGGCGAGGCT  
GTGAAATATTCTCAGGAGCCAACCTTATCTAACTGATAAAGAAAATACATCAAACACTCTC  
AGAGCAAGTTATGATGATTTGCGTATTTGGTAGTTGGGACCGCAAGCGTATTATGATGAG  
GCTGATTACACATGGATGCGTCGAAACGGTGTCCGTGTGTGGATCACAAATGATAATCGC  
CCGTTGGTTGTTTATCCAGAGGTTATCTATACTCAAGAAGATGATACATCTGGCATTCTT  
GACCAAAAACGGTCAACCGAGAAGTTTATGATAAAGGGACCGTGACCTGTTATCTTAAC  
AATGATAAATTTGAAGGATTCAAACAATATGCATCCGGTGTAAATGTTCCATAAAAACACG  
GGAGAGATCATAGGAGTCTATCAATTTAATTATCGTGTTTCGTGACCAAGTTAGTGTATAT  
TGGAAACCTACAAATGTCGCATTTGTTGCTGAATTGCAAAATCAGGTTCCGGGAGGTTCCC  
TGGGTTCCGGTTCATCATGACAGAGAGCAAGATCCAGATTTGCGGCCTATACTGAATAAG  
TTGACGCCTTATAGCTTTTTACTTGAGAACGAAAATTTTCAGAAAATTTCTCTGAATATTAT  
CTGCAATTCCTAAGTGATGGTTCAGGAACATATTATAATAAACTAAAAAATCTGATTAAA  
AACAAATATCCACGCGAGCAAGATGCATATGATTATCTTTGGTCAGAGATAAACAAACGA  
AACATCTATGCAGATAAAAACAAGCGAGATGCGGTGTAAGATTCTTTGAATCCTCCAAA  
TCAGATTCTTAGTCCACTAAGGGCGTGGAGGCTTCTTACAAGTTCTTGTTAAGTTACTT  
TATAATGAAGATGTGGAAATTGAGGTTGAATCACAAGCCGGACTAGAGTATGATATTGTT  
GTTAGTTCAACGAACACTGACGAGGATATCGTATGACGCACGATCTATACTCCAACCAGG  
CGGGCTAACGTGACTTATCTTGAAAGGGAATATGAAGGTGGACGTCTACGCTGTCGAGTA  
ACCATTACATAACCAGATCGGGCGGTTTGAAGAAGGTCAAGTGATCAAATCAGAGAAAACA  
GCGTTTGAGGGGATGATCCTAGTTGGTGTTCGTGGTAAAGAGTTGTTGAGTAGTTCAATC  
GACTATATCAACCGCTCACGAAGCCAATAAACCATGAAGATTTAAAAGTGCCTTGCCAGTA  
TTGCGCTATGCAAATGATGTAATGCGATTCTGTTTCATCCTGTCGGCTTTGGTTTCATAGGT  
GTTACTCTTCTTACAATGTTTATTAATAGCGGGTTCAGTATGAGACACGTAGAACTATA  
ATTCAATCTCTGAAAAATTGTAAGTTTACAGCGGATTGCCCTAGCGTGTATCCTGATCGT  
GTTGGTGGTCTTGATGTTGATGGAAATATTAAGATTGACCCAGTAACAGGGGAGACCATTA  
TACTTAACGTCACCGACAATTGGCGAAGAGTTCCCTGTTCCCTCTGAATATGATCAGGAG  
AACAGCGAATTGTTCCACGGACTTAAAGCAAGCGAACGAAGATTTGCAATGAGTCCACTG  
TTTGACCAGTCGGCGGTAACATTCTCTATGTTCCGTGAACCTTGTTAGATAAACGGTTGAAG  
GATAATATAGGGAATCCGCGCGATCCGAAGAATCCGACACAGAGGAAAATTAACGGCTAC  
TGAAAATAGTGTGATCTATCGCTCAATCATTGCTAGCAAATTCAGAACAGAAAACTTCT  
GAACTTCTATAATTCTGTAGGCGATGGAGCAAATCAAATTTCAATTTATGGAACGTTTGG  
ACGTTTCAGAGCCGTGGTTCAGAAAACGAAAAAGAGGTGGGCTTTGCCCCACCTTATCCGAC  
CGATTCAACGGCTTGTGTTGTTGACATGTGGACCCATTTGATGGGGGCGGTTAACATTAA  
CAAATCACTTCTTGATGCGGTTATCCCTCGTAAAGATTGGGGTGGTACCGGACAGGATAA  
CCCGCGCACATTCTTTATCAATGACATTGTTGTTGTCTACTCAGCACCATATATCCGAAC

TGATGTTGGTAGCGGCTGGATGGTCTATCGCGTAACCGATGTTCCCTGAACGCGGTTACTG  
CTCGATTTCAAGCATTGACGCTAAAGTTGAGTGTTTGAAGTTGGGCGGAAAGTGGACCCC  
CAGTCATGAATCAATTGCGCCACCTGTAGGAAAGGGCGATTCTATTGATATGTGTGATGG  
GTATCGTTGGGAATATCTGTACACAATTCCACCTGATGCGGCGATCAACCGTTGCACCAA  
TGGACATATTGTTGTACCGTTCCCCGATGAACTGCGACAAGATCCGGCGCGTTGGGGCTA  
TGACAATGCGATAACATGGTATAAGGACTATAATCTTCTTTATCGGCTGAAAGTAGTAAC  
TTTGCGTTTTTCAGGCTTATATGGACTCTGCGCAATTCCCAACGACCGCGTTAGTGGGTAA  
TACTGGTTTTCCGTCAGTTAAGCATTATCCTTAACCCATTGGAAAAGAAAGCACGCCCTAG  
CGATCAAGACGTTAAAGCGGTCAAAGATAAATACCGACCGCAAGACTTAGAGCCACACTC  
AGGCGAAATGATTTACATGGAAAACCGACAACCTATCGTTCGGTCATTAGATCAAACAGA  
ACTTGTTTCTGTATTGTTTGAAGTTCTAAGTGTATGATTTTAAAAGCCAATTCGAGAGAGT  
TGGCTTTTTCCATTGTTGGTGTGACAATCTTATTTGGTAAGGTATAATACACACATCTA  
AACAAACGGAGGATTAATTATGGCACGTCGTAAATTTACAGACAATTGTGAAGCAATTCAG  
GTATCCCCTTGCCGTTGGGGTGTGATCGCGAACGGCGAAAAGATCGGCGAGATCATCGAT  
CATAACGATTCATCACTAGCCGATTACACCGATGAACTATGGGAGGATATCAACTTCATG  
AATGCCACTAAACGATTCAAGACTATCGACGAAGCTATCTATTTTGTGTATAATCCAAC  
TTCGGTATTTGGGGAAGTAAAGTAAAGTAAAGTAAAGTAAAGTAAAGTAAAGTAAAGTAAAG  
ATAAAGCTAAGTTCCCAATGCAAAGCATTACTATGGTCTACGTGCACAAGATCCTAAAC  
TCTATGGTACTCATTGGTTTTGTAAACATGATAACCAATGGCACACATACGAAGAGATGG  
ATGAGATGATGAAACAGGGTATTGAATTTAGTTATTCTAATTATGACCATCGTATAACTT  
GCATTCGAAAATTGAAACGATGGATTCGTAAGAATCCGCAGTTTAAAACTTTGTATTCT  
TTATGTCTCATGTCTATTTGGGAAATAGCGTTACCGTACAGCAAAGATTAATAATGGC  
ACGACTTTCTAAACAAGCACAAAATTACACGATCGGGTGTGAGTTGATTAATTCAGA  
TCGCCATTGACATATGAAGAAAAGAATTTTGCTATAATAACTATCATGGCGATGGTCT  
AGGCGGTTGAGGTGCATTCTTACCCAGAAAGGGCTTGCATGGGATTTTACCATCGATGC  
ACATTGCACAGGAAAAGTGTAGATCTTTGTGCTGGGAACGGTCGCTTATCTTTTTGTAT  
GTTACATCGTTGTAAACCAGAAAAGATCGTATGCGTCGAACTCAATCCAGAATTTGCGCG  
GATTGGCAAGAGACTATTACCGGAGGCAGAATGGATCACCAGCGATGTATTCGAATTTGA  
GTCAAACGAAAATTTCGATGTGGTGTATCAGCAATCCACCTTTCGGGAAAATCAATACAAC  
CGACACAAAGGATGTATTTGAGTACACTGGCGGCGAATTTGAATTTAAGGTTATGACATT  
AGGCCAGAAGTTTGCCGATGTAGGTTCTTTTATTGTTCTACTGGTTCGCTGGTTTTGC  
TTATTCCGGCAGACCTTATTATGACGGGAGCAGGAAGTCTAATAAATATCTAAAATGGAG  
CAAACAAACTGGTTTTGGTACTTACGCCGGATGTGGGATCGATACATGAATCTATCGCGA  
TGAATGGCATAGTACCAATGTTTTAACAGAAGTGGTTCGAGGTTCCGGTATTACGAGAAAGA  
AGCTGTAGGAGCGCCTAAATCACGTCCTAACGAACAAATAGAAGAAAGTAAGGAGATTAC  
CTTACCGAAACAGGAAAGCGAGTCTGGGACGCTCTCAGATTTGTTTGACATTTAATTATA  
AGCCGCCCTTGTGGGCAGCTTGTGTTGTATGTTTTATAAATAATACATCATAACATGAG  
GAATTAACAATGGCACAAGTTCCAAAGAAAAGAATAGACACAGGTAAGTCCAGCAATCC  
CAGCACCGGGGACATCCTCTATGACGGCGGTAATAAACTTAACGATAACTTTGATTCAAT  
CTATGACGATTTGCTGATCAACGGTTTAAAGACGTAGACCACGGCGTAGGAAGAGTGGT  
TATTCATGCAACCGGATACTATCAGAAACATCCACGTCAAAGCTACTCTGGTTCCGCTGT  
TGAGATTGGGAGTCTACACGATATCGATACAACCTCAAGGGCGACTTATTGCTATTCTACC  
TAAAGCAAAGGTCGGTGAGGGTGTGTTGTTTATAAATAGTAACGGTAGCCTTTTAAACGAC  
TACACCGATCAATATTCAAACCTCAAGCAGGTGATTCTATTAGCGGGAATTCTGGTGATGC  
TACAATAACACAACCATTTTCAATAGTCACTGTTTGGTGTACTGCCGTTGAAGGTAGTCG  
CGTAACATGGCGATTGGGTATCGAAAGTATGTTTACCGATAACAACGCCATAAGATAA  
AACAGTTAACGTAACCTGGAGTAGCAACAACGTTGCTATTGCCGCGAGAAACAGAATACGT  
TTCCATCAAATTATTAACCTACCGCTAGCAATACATCCGGTTCAAAAATGCGTTCAAGTGA  
AACGCTACTGATGATTGATTCTAAAGCCGGAAAGGTTTATGCGACGGAATATGCAGTTTT  
GCAGAAGACAGAAGACGAATTATACACGGTTCGTTATTTTCATCGGTTCCGGCGATAAAGT  
ATATGCAGAGTATAAGGCTACTGGCGAAAATATTCGTTTAGCAGTTAAAGCCGTAGACAC  
TATTAATAATCGGGGTTGCTACATGAAACAATTAATTAATATCGGTAACCTTGTGATGAC  
GGTACAGGTGATTATCAAAGAAAAGGCGGTCAAAGATTAATGAGAACATTTCTGAACTT  
TATACTAAGCTGGGGGATGGTGATATCCCTCATGCATCCGGCGCGTGGAAAACCTCACACA  
CAACCAGTATTAACAACCAATTTTGGTGTATGCATGGGCGATTAATACAACGAACAACGCT  
GTTTCTGTTGAATTGCCTAAATGTGGAGTTGGTGTATTGTAACAAGACAATTAACCTTCGT  
GATGTTTGGCGCTCGTGGGCGTCTCATAACGTAACACTTAAGCCCGCACAAAGGTGATACC



ATTAAGGGATCTCCAATCGACCGTGGGTTGTATAAGGATTTTATCGATGTTGAACTGGTT  
TATTGTGCGCCTGGACGCTGGGAATATATCCGAAACAAGCGAGTTGACACGATCACCACG  
TCTGACCTAAGCACAGTAGCTAAGGAAGTTTATATTGCCACAGAAGGGCAAACATATTTCC  
CCTAATGTATTTGGTTCTAACACATATAACACTCGAAATGTTTAAAGTATATTATCGAGGA  
AACCTTTTATATTATGGCAAGTCTTTTAGTAATGACTCTAGCTACGGTTCAATTGGTGAG  
GATGGATCACTTGTGAACTTGACGGCAAAGCATAAACTTCGTTTTCCTTGTTCGGCT  
GGGATACCGTTCAAATTATTACATATATGGACGGAATTGCATCATTCCGATCTAGTTAT  
ATCACACACACAATTAGAGTGTATGATACCGGAATGACAGCACTAGAACTATTCTGGT  
GAAGTGTGGGTAGGTGATTTATCGACGAAAAAAGAATTTACCAATGCTGATTTGGGAGTT  
AGTAAACGTGATATAATTAACCCAAATTCATTTGAGTTATTAATAAATGGTACTCAAATG  
ATTAAGCTGGTGATGCTGATCTTCCTTCGTTTGTGTTGTGAAGGTGCTGACGCAGAAACC  
GAAGAGAGTTGCGCACTTGTGGCGGTGAGTGGGTACAGTCTGGAGAAGATTATTCCTG  
GTATTTGATGAGCATAGCATTGTAACAGGGATTAATAGCTAAAGCGTTGGACAATAGA  
GATACTATAACCATTTCGTTGGTTTAAATAACGATATCGGAACTCTATTAGAATGGGATGGT  
GTCGGCGGACTTAAAGAAAAAGCAGACAAGATTTATCTCAATAACGAAGACGAAGTTAAT  
TTAACAAAACAAATTGAATATACCGACTTCCAGAATCCTAGCCAGAAAAACACTCGTCCG  
GCGGAAGAGTATTCAGGTCGAATTATGGTTATATATGCACTGTTTGATATTTTCCATCCG  
ATCGGCACGATATACGAAAACGCACATAACCCAGCTAACCCAGCGACATATATGGGTATG  
GGTATCTGGGTTTCGGTATGCGGAAGGAGACTTTCTTGCTGGTTGGTCTTCTGATGCCAGC  
GCCAGAAATTTGCATTAACAATAACGATCTTGATATTCTTGGACAACCTACACACACC  
GCTGGTGGTACTGGTTGTGAAGTTGCCTATCAAATCAAGAAAGATATGATTCCTGAATTA  
CAATCCAACGAACGTGTTTTGGTGAAGACGATACAGGGTCAACTATCATTGGTGGTTGT  
CAAGTTAACCCGGATGCGGCAGGTCCAGCGTTTACGAAATATAGACAGGATATCGTAAAA  
GTTAATTCTGGAAATGCTGATCCATCAATGATGGGTATTCTTCTCCATATCGCACCGTT  
CATCGCTGGTTAATGGTAGGTTAATATGATTTCTAAAACACGTTCTAAAGCAAGCGTATT  
TTCTAGCGACGCAGCATTTCGTTTCATACGATCCGGGGTCTAAAGACCCCATTTGGAGA  
CATTGCCCCAATTGGTGGATTAACCGTAGACCAATCTCGCAAAGGTTCTTTTATTAACAA  
CGTACAATCAGCCATTGATGATTTGTATAGCATTCTATGCTTAATGTCGGGGATGTATT  
GGTAACTACAAATGCAACTCCACCGGTAGCGGCGGGACAAATAGAACTCTTTCTTTCAC  
TGGAACGGTAACAAATACACACGATCCAGCCGCGAAAAAAGTTGTGATGGAAGTTTTGGG  
TTATCCATTTGTTGTTAATGTTGGAACATCGAATGTTGCATTATGCGAAATGGCCACAAC  
AAAATTTACTGAATTGAAAGACAAAAGCATCCTGTTCTCTTAAGTTCAGAGGAAAGGCAC  
TGGCAACGATCAAATAGAGATTCAGTATATTGATTAACGCACACGAAGCAACGGTCGT  
AGAAAAATATGGTATTAGCATTTCGTGGGGAAATAAATCCCCCTGCTCGTTATGGTTATGG  
TGCATGGTCCAGATTGGGAACGGAAGAAAAAATTTGATTCAACACTATTTTATTTAAGCG  
TATTGCGTAAGGTGTAATAATGAATAACACTATTAATCACGTAAAAGACGATGCACAG  
TATGTTAAGTTTGACCCTACCGGAAATTGGCCTAGCAATATAAAAAACGTACAAGCGGCA  
TTAGCCGCTATTCAGGGATTTGCTATTGCAGGTCTTCCAACGGCAACCGAAGAAAGAGCG  
GGTATTGCTGAAATTGCTACTCAACAAGAAGTAGATGATGGGTTGGATGGAACATAAAT  
GTTACTCCAAAAAATTTGGCTGTTAAGCTGTCAAGACCGGACGCAACAAAACCTTGTCAA  
GGGATCACTCGCTATGTTAATAACGATTAAGCTACGGGCGATACTCCAATATTGCAATT  
GGTCTGATACATTAACCCATGTATTCAAGAATAAGAATGCAACGGATACCGTACAGGGT  
ACAATTAATAATCTGTTCTATGGATGCGGCAAAAATCGGTAGTGATGACACTATGGCGGTC  
ACGCCTAAAAAGATGCACGCTGCTATTGCTCAGATTGTTCTGGGTTGATTCCAGAACAA  
AACACGGCGACCGAGTCCCGTGAGGGTTTAGTTGACTGGCGACAAGCCAACAAACGCTT  
GCTGGAACATCAGAGAAGGATTTGCCGTTAGCCCATATGCATTTTCCAACGCAAGAGCC  
AATGAAAATCAGGCGGGTACTGTTAAAATAGCGTTATCCCAACAAATGATTGACGGTAAT  
GACAACACAGTCGTAGTATCAGCACAAAAATTTGCGAACACTAAAGCAACCACTGGACAA  
TTCGGTGTGTTAAGCTAACAGATAACCCAGGATCAGGCGAGGCAAACACAGCACTGTGC  
GCAAACGCTCCTGTATTGCCTCTAAGTGGTGGTGTGCTTACTGGTGATGTGTATCGTCAT  
AGTGGAGGCGACGGAACAGTTTATCATTAAAAATGAACTGGATGGTCTTTGTATGCCT  
ATTGGTGGCATCATTCTTACAGCATTAAACAGTTTCGTCCACGCACAATTCAAAATCTGC  
AACGGTCAATGGTTAATAAACACCAATATCCAGTATTATTTTACGAATCGGTTTCACT  
TACGGCGGAGATAGCGGAGACAACTTTGCTATACCCGATATGCGAGGGCTTGTGCTAGA  
GGATGCCACCACGGTCGAGGACTAGACCCAGGTTCGTGGATTTGGTACTTATCAAGACGAC  
AGCGTGCAACATATGACAGGTAACCTTACCTGTAGCCAACCGTTGGCGAGGTTGGACTGGT  
GGTGTATTTGCCATCACAGGCGGTCAATGGAGCACGAACTATAAAAACGGTGGTGGTGAT

GATTGGGGTAGTATTGTTAGCTTTGACAGCGCAAGAAAGGTTAGAACGTCTGGCGAAACT  
CGCGTTAAAAGCCTTGCATTCAACTACATGATAAGGGTACAGTAATGATCGAACAGTTAA  
ACATCCGAAAGATCCCTAACGTCGATGGTGACCCTGGAGAGGGACAGCATTCTATTAGCT  
GGATTA AAAATGGTGAATGTGTAAGCGCAGCAACCACAGAAACAGGACACGAGGGGACGC  
TTAACCGCGCCCCTTATGCGATTCAAGAAAATATTGTTTCGTCTGGATGAAAATTCTAAGG  
CAACGGTAACAAAAGTTAACAAAGTTGTTACAGCAGTTAATGATATTA AAACTACTTTAG  
GCACGGGTGCTGATGGTAGTATTATTGGTATTGTCAATCAA ACTATTGCAAAGGTTGATT  
CTGCAGAAGAAAATTTAAGAGAACTTCAAGGATATTACAAACCACAGTAGATGAACTGG  
CAGAGACAGGAAAGAAAATTGGTGTTCGTCCGGCAGCAGATCCTAGTACACGAACAATAT  
ATAATGATATTTCTTTCATCAAACAAGAATTGGGCGCTTCCCTAACTTCAATATCAACG  
GTTCTCCAGATCCGGGTAGTTCCGGTTCGGTATCGAATATCGAGTTATCCAGAATACGG  
CAGCATTAAACAACCACGGTCAGCGAATCCGCCAACTAGAAAACGACTGGCAAGATTCTG  
GCGTTGGAGAGGTAACAAAACAAGCTAACAAAATGCGTAGCGAGCTAGGCGATACATCAC  
TGGCAACACAGGACAATGTTTATCTTCGTCTTCGCACAAATACTCGCAATATCGCTAGTA  
TATCAAACGAAGTTCAGGAAGTAAAGAAAGCGATTCTATTTGAATCAAGTCCTGATATCG  
GGACTAAAGTAACTAAGCTACAATCTGATTATACACAGCTTAATGATGAAGTCAACGGCG  
TTGACGCTGGTATCCGTCCTCGTTTAACTCTTCTGGAAAGTAATATTGGCAATCCTCAGG  
CCGCTGCAAGTATTGATTATCGATTGACTAATCATGAACGGGAATTTGTAGATCTTAAAT  
CTGTTGTGGGTGTCAGTGGTGTGATGGTCTACGTGGTGAGGTTGCACGAATCTCTAAA  
CAGTTGGTACTGATAGTGAGCGTCATACTAACGCAGGTCGTCTAAAATTGTGCAAAA  
CACAGGGGCGACTAGAAGCTAGCGTACAGGATATCGAGCAAAGGATCGGCGATCGAGATT  
CCGGTCTAACCGCCGGGGTTATTAAGCTGTCAAGCGACATGTACGGCAATCCAGAAGGAA  
GCACGCAGCTTGAACAAGATGGGATCGTGAAA ACTGTTAAGGAATAGAGCACATCAAATG  
CAAGCAAGGTAACACACGTTCTGATGATGGTATCCATTATCTACGTAAGCACGGGGTAA  
GGGTTCAAGGTCGCATGGGCGGCTGGTGCATTTAAGAACACCGCTAAGATTGATATTACTC  
TCGACGGACAAGATCAATACAAAGGAATCCCGCTAAATGATATGACCGAAGAAGTTCCTG  
CGCGTGGAATGGTTAAGAGCGAATCTCTTGTACGGTTAACGACAAAGGCTTATTCCGTT  
TTGATTTCCGTTGTTCTGTAATGCGGGACATAACGCTACTTTCGTAGTCGGTATTGCTA  
AAAATGGTCTGATTGTACATGAGGTACGATATGGTCATTATGGACCTGATGATTTAATTA  
GCTATTCTACCAGTGCTTTCCTAAATATTGATAAGGGCGACCGGATCGATATTTCGCATTA  
AGGGCGTATCCGAAGAAGCATTAGCGCAACAGCTACAAATTAAGAGTTCCTCTTTGGAA  
TTTCTCCGGTATAAGAAATTAAGGGGGCGTTAAGCCCCTTATTCGTTTATAGGTGATATT  
ATGTCAGGATATGTACCCAATAACCCAAGAGAATTAAGACGCTATTCTGCGTCGTTTA  
GGCGCACAGTAATTAACGTAGAAGTAACAGAAGTCCAGATTTACGATTGTATTCAGAGA  
GCATTAGA ACTCTATGGGGAATATCATTTCGATGGTGTGAATAAAGGATATAAAGTATTT  
CGTGTTAGTGCAGAGCAAGCGCAACACGGGGTATTTGATTTAAGCGATTCTGGAGTATCC  
GCAGTAACTAAAATAAATCGAACAAACGTAGGTAGCGCGGCGACGATGGATGGTACTGCC  
GTTTATCCGTGGTTCACTGACTTTCTGTTGGGTTTAGCGGGTGGAAATGGCGGTTTAGGA  
TCTGGCTGTAGTAAATTTTATGGACCAAATGCAATGGGCGGTGATCTAGGATATTTCGAA  
CAGCTTATGAGCTATCGAGCCACTATGCAAAATATGCTTAATCCGCTGCCAGATTATTGG  
TATAATAGCGCAAACGGACA ACTTAAGATAACAGGAACTTCCGAGAAGCTGATCTCATA  
GTTGTTGAATTATATGTTAAAAGTTATGTTGATCTACCTGATATGATCGGCGCGGTTGCT  
GGTTATGCTCATGCGGGAGGATGTTCTACCGCTGGCGGGATTAGCGCCGTTTATGTTAAC  
GCAACTGCTGGTTTAAAGCGGGATTGTTGCTGGCATGGGACCGATCCGTGATAACGAGCAG  
GGCGCATATAATAACCGTTGGGTTAAAGACGGCGGCGACTGCTTTTACTCGTGAGCTATGG  
GGCAGATCTTAGCTCAACATCAAGGGTTGCAATTACCAGGTGGTGTCACTGTTGATGGT  
GTCAGAATCATCGAAGAAGCACGCGCGGATATTGAGAAATTGCGACAAGA ACTACTTGAC  
TTAGATCCTCCGTTCCGGCATCCTCATGATTTGATTTACTGGGGGAGTATTCCCCCATTTG  
GAGTAACATATGTTTAAACAACACTCTTTTTGCTCGCCTTGAATCGCATAAGGATTATGAG  
ATTACACGACAAACCGAGATTCTCAATCCTTACGTAAATTTCAACCGTCATACAAACACC  
CAGACGTTAGCCGACGTTATGGTCGCCGAAGCTATTCAGATGCGAGGTGTAGAATTATAT  
TACATCCCTAGTGAATTTGTCAAACCAGATATGATCTTTGGTGAGGATGTTCAAAGCAA  
TTTACTAAAGCATGGAAATTTGCTGCGTATATAAACTCTTTCGACGGGTATGAAGGTGCA  
GGAAACTTTTTTCAATCTATGGGTTATACGGCATAACGACGAATTATCGTTTACTGTGAAT  
CCTAACCTATTCAAGCATCAAGTAGATGATCAAGAGCCAAAATCAGCTGACTTGATTTAT  
TTTCCAATGAGTAATGATCTCTTTGAAATTAATTACGTGAGCCATATCAGCCGTTTTTT  
CAGGCTGGCAACAGTGCCATGCGTAAAATTATTGCAGAGAAATTTGTGTATAGCAGTGAG

GAATTGCGACCCGAATTACCACGCAATGAGGGAATTAATGTTGACGAGTTTGC GGATCTG  
GATCTTGCACCGATCACCAATCTGGACGGGTTAACAGATATCAACTTAGATCAGTACAAA  
CAAGATAAGCAATTCAGAAGCGAAGGACAAGACTTTATTGATCCGATTGCTCCTATTAAT  
GGCAAGCGTTCACCTTTATCCGATATTTGATAAATACTTGTATTGATATAATATAAGGAT  
CTAAAGACTTATGAAAACTATTATCTATACGAAATAAAGAACAATACAAATGGTAAGAT  
ATATGTTGGCATTCTGTGGGTATGATGGTGACATAAGTCAAGATCCTTATATGGGTAGTGG  
ATTGACTCTCAAGAGGTCTATTA AAAAAGAACGGGATAGAAA ACTTCACAAAAACGATTCT  
CAAAACGTTTGCCTCATGGCAAGAGGCAAGGAAAGCAGAAAGAGAAATAGTGACAGAGGA  
ATTTGTAAAAAGAGAAGAGACCTATATTGTTTCGGTTGGTGACAAAGGTGGAATACTCA  
CGCTGGGATGAGCGAAGAACGAAGAAA ACTTGCAAGCGAAAGACACGC AAAAGCAAACCG  
AAATAGAGTATGGAAGCAAGAATCTAGAGATAAGGTTATCGCAAGATTCAAAGGTCATAA  
GCTATCACAGAAGCAGATAGACGCGCTCAAGAAGGCAAACACAGGAAAAAAGTTCACAGA  
AGAACACAAGTTCAAAATAGGTAAAACGTGGCGAGTAAAGAAACGACCAGATATAGGAGA  
GAAGGTTGCGGCAA AATTAACAGGGAGAAA ACTACCCCCAGAACATGTGGCAGCAATAAC  
GCAAAATGCACTCAGAGGAAAACAACACTTTAGGGCAAAAAGATTCTTCATCGACGATAT  
GGAATTTTATATTTT GAGTGATGCAGCTAAAATGTTTGGTATAAGTTATAAAACGGTTAA  
AGCTAGACTTCTCTCAGATAAGTTTCCTACATGGAGATATGAATAAATGTTTTACATTT  
TTACAATTCGTCAATTAGAAGGTATATTGTATTGCTGGGTAA TTTATTCTCCGGCGTACA  
ATTTAAAAGGGTGCGTAGTGACGGTGAGCGTTTTATTAACGTT CATATCACCTACGCAA  
GAAAGAAAAATTCATGATGAGTCTGGACAAATATAACAATATCTTAAGCGAGGAAGACGT  
CGCAAAGGTAGAAAATATTTTACCTCGTATGTGTCTTTCTTTCATTGATATGACATACGC  
CCAGA ACTTTAAAACCAATATTGCAAATAAGAGAGTACCAAATATACGGCTGATGGAAT  
CAGGAGCGTAACACAATATAATCCGGTACCATATAAGTGTACTTTTCGAGTTAGGGATTTA  
TACGCGTAACGAAGATGATATGTTTCAGATAATTGAACAGATTCTTCCTTACTTCCAGCC  
TCATTTTAACTGTAGGATTAAGAACAACACGGTAATGATGTATGGATTGATCGAGATAA  
TCAGGTCACAATTTGTTCTATTACTCCAGATGAACAGGTAGGCGAAGATAAGTTTTCTCG  
TCGTCTCTTGAGTGGACCATTATGTTTGAGTTCATCGGGTTTATCTACCCTCCAGCCAC  
CGACGTTAAGGGGGAAATCAGAACGATTTATCTTGATTTTCATGCTAATTCTCGTGAATT  
AACTCCTAGCGGTAATTTTGAATCAGTGGATCATGAAGTTGTTAAACGTGATGTTGAGCA  
AGAAGAATGGGACGGA ACTATAAAAAGAATCATATTCTAGTGATATTCCAATACCAGTTGC  
ACCGACTCCACCGGGTCCACGTATTGTAAGAGAATTTTAAAGAGGTAATTTATTATGTGAG  
ATCTAGGCTTAGATATGAAGCAATTAATGAATTTTCGAAAGTCTAGGTCTTCCGGCGACAT  
TCGACGCGGAAGAAGATCGAGTGAGCTATAATTCGCTCGTCTTGACTCCGGTCTAAAGCC  
ATCCAGAAGATCGTAATATTGGCTAACACGAGATTATAATGAGGCACGTCAGAATATTC  
ATGTT CAGAATCAGATGATGATGGACGCCGCAAAGATTTATCTTGA ACTTGCTAAAAATA  
GTGAGTCTCCGAGATTCCTACAATCATTTAACGGCCTCATGCAGCAAATGAGCAACAACA  
ATAAAGAAATGCTGAACATCCATAAGGATATGAAGAAAATCACCGAGCAAGCTGGAGAGA  
AAAAGAAAGATAATACCCCAACCGCACGAGTTAATATCCAGAATGCGACCGTCTTTATGG  
GTTCTCCAAGTGATTTAATGGATGAAATCGAAGACGAGGAAGCGCGAGTTATTGAAGGCG  
AGACAGTATGAGCGTGATGGAAGGGTTT AACGCAATGGCGACGGATGAACACCCGCTACA  
TTTAGCTCATCCGTCTAAACTAGAACTAAAATTGATTCAACTGGTATTGAATGGATTTT  
ATCAAAGCATGATGATAAATGGTATCCTAAACGGTTTTCTGACTATCTGAAATTA AACAG  
ACCGCAGAAAACAAGGATGCAAAGCACTGATCCAACA AATTATAAGTTCTTTAAAGATAG  
TGACAATATTCGCACTCGGTATATGCGGTTAAAGAAATTGCGAAGGGCGAATATTA AAC  
TCAGTATACCCCTGAAATGAGCGCGGAGTGGAACGATGCCGTAAAGATATTGGATATTT  
CGCAGAAACCTATTGCGCAATTACACACATCGCCTACGGTACAATCAAAGTACAATTGCG  
TGATTATCAGAAAGATATGCTTAAGATCATGCATGAAAACCGCATGAGCGCACATAAACT  
CAGTCGTCAGCTAGGGAAA ACTACCGCTGTAGCAATATTCCTTGCTCACTACGTTTGCTT  
TAATAAAGACAAAGCGGTAGGTATACTGGCACACAAAGGATCAATGGCAGTTGAGGTTCT  
AGAACGTACTAAACAAGCAATTGAACTATTGCCGGACTTCTTACCGGCTGGTATTGTAGA  
ATGGAACAAGAAATCTATTGTGTTACAAAACGGGTCTAGTATCGGCGCTTATGCATCGTC  
ACCAGATGCGGTGCGCGGAAACTCCTTTAGTCTCATATGCATAGACGAGGCAGCCTTTAT  
TAGTGCGTGGCAGGACGCATGCTTAGCTATTCAACCAGTTATCTCATCCGGTCTGTAATC  
TGAGCTGATCATGACAACA ACTCCGAACGGGCTTAATTACTTTTATGACATTGGCCACTC  
AGCCATTGATGGTAAAAGCGGTAATGTACCTTATGAGGCGGTTTGGCATTCTGTAAAGA  
ACGTCTTTACAATAACGCTGATATATTCGATGATGGTTATGAGTGGTCATCTCAGGCGAT  
CGCCGGATCTAGTCTTGAGCAATTCCTTACAGGAACATAACGCTGAATTTTTCGGTAGTTC

CGGTACTCTGATCAGAGCAACCACACTATCAAGATTATCATTATTGACGTCGTTAATGA  
TAACGGGTTTTATCAGTTTGAGAAACCGAAAGAAGGTAGAAAATATGTTGCTACACTAGA  
TTGCTCAGAAGGTCGAGGACAGGACTATCATGCATTGCAAATCATTGATATTACTGAATT  
GCCTTATAAACAGGTTGCAGTATATCACAGCAATACTACGTCCCTTTCTATATTACCGGA  
TATTGTCTTTAAATATCTCATGATGTATAACGATTGTCCAGTTTATATCGAGCTAAATAG  
TACGGGTGTATCTATTGCTAAGTCTCTTGGGATGGATCTTGAATATGATAACATTATTTG  
CGACTCATCCATAGATCTAGGGATGAAACAATCCAAAGGATCTAATGCAATGGGATGTTC  
GGCACTAATAGACTTAATAGCAAAAAGATAAGCTGATCATTAAATCATAAAGGAACTATTCA  
GGAGTAGCGGACATTCTCCGAGAAGGGAGTAACCTGGGCGGCAGAAGAAGGTTATCACGA  
TGATTTGGTCATGAGTCTGGTAGTATTTGGTTGGTTAACAACCTCAAGAAAAATTCGCCGT  
ATATGCAGGAAAAGACGAAATGCGGATCGCCTCCGAAATATTCCGAAAGGAATTAGATGA  
ATTGGGGGAAGAATACGCGCCCGTGGTAATATATGACGGTGCAAACGGCATCGAAGAATA  
TAGGCCGCGTGAAGGTCTAACAATGATGTAAATACGATAATGCATAAAAGGATGAGGAAA  
TTCTAACGACTCTATTATCACCGGGTTTCGAAACGACAGAACTACTCTCTCCACTACCA  
TTGTGCAATCTGCGACTGGTCGCGTGGCGCTGGTAGGTAATTTCTATGGGGTCCAGCTT  
TCCAGGCTGTTCAAGTAACTAATGAAGTTGAATTAGTTAATAAATTTGGTCAGCCGGATA  
ATAACACCGCAGACTATTTTATGAGCGGGGCTAACTTCCCTCCAGTATGGCAATGACCTGC  
GTGTTGTTTCGTGGACTCAATAAAGAAAAAGCAAAAAACGCACCTGCCCTAGCTGGTAACG  
TAGAGTTTGAAATCACAAACGAAGGTTCAAACCTAGGAAGTAGGCGATACCATCAAGATTA  
AACATAAGCGTCAGGATATCGAAACGGCTGGTAGAGTAACTAGAGTTGATGGTGATGGCA  
AAGTTAAGGGCGTATTTATCCCAACTGGTAAAATTATCGCTCACGCTAAAGCAATCGGTG  
TATATCCAGAACTTGATGGCGGTTGGACGGCAGAGTTCACTTCTTCGTCAGGTAACGATA  
GTGCGGCGCTGTCAGTAACTAAAATTGTTACCGATTCCGGTCTTCTCTAACGGATCTGG  
AACTTCCAGAGCCAATATCACCAATCAAGATTTTTTTGACTAAGCTCAAAAAGTATGATA  
TGCCAGCGGTAAGTGCTATCTATGCTGGTGAGATAGGCAATTCTCTGGAAGTTGAAATTC  
TGGCACGTAGCTCGTTCAGTGGCGCGGTAGCACCTGAATTA ACTATGTATCCGTTCCGGCG  
GAACTCGTGACGCAGCACGCAACCTAATTCCATATGCACCGCAGAATGATAATCAATATG  
CGTTTATTGTTTCGTCGAGATGGTGTGGGGTAGTATCCTATGTACTGTCAACTCTGAAAG  
GGGATAAAGACTTATACGGCAATTCTATCTACATGGACGACTTCTTTGCTCGTGGTTCTA  
GCCAGTACATCTATGCAACCGCTCAAGGGTGGGTAGATGTTTTTCAGTGGTATTATCTCTC  
TTGCTGGTGGTGTGTCTGCTCACGAAGCCAGTACGGGCGACCGTGGAAGTGATCCGTTCA  
TTGGTGCGATGATGCAAGGTTGGGATCTGTTTGCTGAACGAGAATCTATTACGTA AAC  
TGTTGATTGCTGGTGATGTGCTGGCGAAGGCGATGCGCTCTCTACCGTACAGAAACATG  
CTGTTTCCATCGGTGATGAGCTTCAGGATTGCTTAGTAATGGTTTTCTCCGCCGCGTACCA  
CTGATGTTAATATTCCGGTCACTACCCCAATCGATAATCTGATCGCATGGCGAGAAGGAA  
ATAGCAATTATTACAGACAACAACATGAACATTAATACCTCGTACGCGGTTATTGATGGTA  
ACTACAAATATCAGTATGACAAA TACAACGACGTAAACCGTTGGGTTCCGTTGGCTGCTG  
ATATTGCTGGTTTGTGCGCTCGTACTGATGCTGTATCCCAGCCGTGGATGAGTCCGGCAG  
GTTATAACCGTGGTCAGATCATGAACGTGGTTAAACTGGCTATTGCGCCTCGCAAGGCAC  
ACCGTGATCGTCTGTATCAGGCTGCAATTAACCCGGTGATCGGTGCTGGTGGTGAAGGGT  
TTAGCCTGACGGGTGATAAAACCGCTACGACTGTTCCCTAGCCGTTTGACCGCATTAAACG  
TTCGTCGCTGGTTAACATGCTGAAAAGGAATATCGGCGATTTCGAGCAAATACAACTGT  
TTGAAAACAACGATAACTTTACTCGCGCTTCCCTCCGATGGAGGTTTCGCAATATCTGA  
GCACGATTCGCTCTTTGGTGGCATTATGACTTCCGAGTACAATGCGACACCACGAACA  
ACACGCCGGATGTAATTGATCGTAACGAATTTGTTGCTAGTATGTTTCATCAAACCAGCAA  
AATCGATCAACTATATCATGCTCAATTTCACTGCTGTTGCAACTGGTGCTGATTTTCACG  
AAATTATCGGTCCAGCTAACCAGGCATAATCAGTAAATTAGCATAGATTA AAAAGTTAAAT  
CAAGCGGGGATTTTCTCCCCGCTCTATTAAGGAATATCAATTATGGCACTCGATTTGAAT  
GATATTACACGCGGTTTCGAGTCTGGCGATTTTGCTCGTCCTAACCTGTTTTAAGTTGAG  
ATCCCGCATCTGGGGCAAACTTTAAGCTGATGTGTAAGGCTGCGAATGGCCCGGCTGCT  
ACCGTAGAAAAAATTGCTGTAAGCTATCAAACCCGTA AAAATTAACATCGCTGGCGACCGT  
GTATACGACGACTGGACCATCACTGTATTCAACGAGGACGCACACAGGATCCGTGATGCT  
ATCGTTGCATGGAGCGATCAGACACATGTACAGGTTCCGGCGATCACTGGTGCAACTCCT  
GCACAATATAAGAAACAAGCTATTGTTTCGTCGACTTAACCTTAACACCGAATCAACTAGC  
GAAAAAACATTGTACGGTATTTTCCCGACCAACGTTGGTGAAGTAACCCTCGATTGGGAA  
CAAAACAACGAAGTTGAAACGTTTGAAGTTACTTTTGCTATCGATTGGGTAGAATAAATA  
TATTATCATGCGGGGAGAAGTTCCCCGCTTAATTTCTCCCAATTCGAGGTGAATAATGTT

TAGTAGATTA AAAAATGCTTGC GCGT TGGGCTGATTTT GACAACGACAAATACGAAGAAGA  
AATTAAGATAAAGCAGAGTCTATCGCCGAACCTAAAAACAATGATGGTGTCTACGGAAGT  
AGAAAGCAATGATAATTCACATGCTCGCGCGTGGA ACTCTATTACCCAGCAATTTTACAG  
CACCGACCAGAAAATCAGCACA ACTAAGCAATTAGTTAACACATATCGCGGTTTGATGAA  
TAACCATGAAGTCGAAAACGCTGTACAAAAAATCGTTAACGATGCGATTGTATTTGAAGA  
AGGTCATGAAGTTGTTTCATTAAATCTTGAGGGGACTGGCTTTAGTGAATCTGTAAAAGA  
GCGCATTAAATGAAGAATTTAAAGATCTTTTAAACACTATCCAGTTTGATAAGCGTGGTAA  
GGATATGTTCCGTCGCTGGTATGTGATTTCGCGTATTTTCTTCCAAAAAATCATCGGCAA  
ATATCCAAAAGATGGTATCATAGAATTACGCCAGCTTGACCCACGAAATCTTGAATACGT  
TCGAGAGATCATTACAGAAGACACACCGGAAGGTAAAATTTATAAAGCAACGAAAGTATA  
TTTCATTTACACTGTAGGCAATAGATCTTATTGCGCAGGTGGTCAAGTATTCTCTCCTAA  
TAGTCGCGTTAAAATTCGCGTAGTGCTATTACATACGCTCACAGCGGCTCGATGGATTG  
CGATGATAAATATATCATTGGTTATTTGCATCCGGCAGTTAAGCCAGCAA ACTAGCTTAA  
ATTGGTGGAAAGACGCAATGGTCGTTTATCGTATCACGCGTGCACCGGAACGCCGAGTGTT  
CTTTATTGATACCGGAAACATGCACAACCGCAAGGCTACACAGCACTTGGACTCAGTCGC  
ACAGTCTTTTAAAAACCGCGTGTGTTTATGATGCACCGACTGGTAAACTTTAAAACCAGCA  
AGCAAATCTATCAATGACAGAGGAATACTGGTTACAGCGTCGAGATGGTAAAGCAATCAC  
CGCCGTTGCTACTTTACCGGGTGC GTCCGGTATGAGTGATATCGATGATATTCGCTACTT  
TAACCGTAAATTGAATGAAGCGTTGCGTGTGCCATTGTCACGTAGCAATCTCTCCGAAGC  
TAATATGGTGTATCGGTTGTGATGGTTCAGAAATTA CTGCGATGAGTTGGAATTTTCAA  
ATTCATTAGAGCTCTGCGATCACAGTTTTCGGAAGTATTGCGCGATCCTCTGAAATATA  
TCTGATTCTCAAAAATGTAATTACGGAAGACGATTGGGATCGTGAAATAAATAATATCAA  
GGTGGTTTTGCATCGCGACTCTTACTATACAGAAGTTAAAGACGCGGAAATTTTAGAAGG  
TCGAATCGGTCTAATCGCACGTATTACACCTTACATTGGTAAATATTTCTCTAACCAGAC  
AGTGATGCGTGACATTCTGAAATATACCGATGACCTGATGGACACCGAGAAGAAACAGAT  
CGAAGAAGAAGCGAACGATCCGCGCTTTAAACA AACTCCCGATGAAACAGAGGATTTTAA  
AATGAAACAATTTATCGAAGCAATTA AAAACTCGCGATGTAACGCTGATCGAAAAAGAATT  
TGATAAGATCATGGAGGCTAAAAAAGCCAGATCATCGAATCCAGCGTGTGCGAAATCGC  
ATCCAGTATCATGCTCGAAGGTGAAGAAGAAAAAGACCGCGATGATGAGGAAGATCTGGA  
AGATGAAGATGAGGAGGACGAAGATCGCAAAGACGATAAAAAAGACAAAGAAGACGACGA  
ATAATAGGAAGCCAACATGATTAAGATTTTACTCCTAAAGCTGACTTAGAAACTTTTCT  
GCCGGAAGCACAGGAAAAATTGGACATGTTGGCTATGTTTGAGTCAGACGAACTTTTGAA  
AATCGTTGAAGGTATCTCCGAGGATGAGCCGGA ACTGGCGGTAGCAATGCTGTCTATCAT  
CGACGGAATTACTATAAATGAAACAATGGTTAAACATGTAAACGCACGCGGGGAAGTTGA  
ACGTAAGAAAGATCGCAAAACCCGTGAGCGTGATGCTTACATGACTACTGGCCTAAGCAA  
AGCTAAACGCCGTCAAAATGCCCGTCGTGCTGCAAAAACCAAACGTGCAAATCCATCTAT  
CGAACGTCATGCGGAACGTAAGCGCAAAAAGCAATGCGTAAACGTAAGGCGTTAGCATT  
ATAACAGGAAACAACATGGAAAAAAGCAATTACTGATCGAACAATGGGGCGTTCCTTGT  
GCTCGCGGTAGTTTGTCAATTGCTTGAATCATTGATGATAAGGCTACAGGAAATCTCTAT  
ATTCAAGGGATTTTCTGCAAGTCGAAACGGTAAACCGTAATAAACGCTGGTATCCTCGC  
AGTGTTCTAGAAAATGCGGTTACTAAGTACATACATGAACAAGTTGAGACACATCAAGCT  
CTAGGCGAACTTAATCACCCAGCAAGAGCAATGCCAGATCCATCTAAAAGTTGCACCATA  
ATTGAAAAATTGTGGTTCGGAAGGTTATAACGTGATGGGTAAAGCCCGTGTATTGAAGGG  
GATAAAGGCGCAGGTGATAAACTTACTGCACTGATTCGCGCTGGCTGTATTCTGGTGTT  
TCTCCCGTGGATTGGGTTCGGTAGAAAGACTTTGGTCGCGGATACAATATTGTACAGGAG  
GGTTTTGTGTTACGGTTGGTGTGATGTTGTTTGGGGTCCGAGCGCACCGGATGCGTGG  
GTA ACTCCTGTGGTTGAGTCAACGGATAGAGATTCTAGCGCGTCAGACGCACCAGAAAGC  
GATAAAACCAAAAAAGTAACTAACCCTACAGACTCACAAACAAACATCGTAGAATCGAAT  
AATAGCGCGTTTATGGCGCTCGCAGAAGCGTTATCTAAACGCTATAAATAATAACGTCGT  
TATCAACAAGAAGGTTATAACCATGCTCTAAGAAATGCTGCTCGAAGAAGCAAAACAGAT  
CACCGTAGACGTTGCTCTCGATGACCTGTTTGAATCCGTCGAACTGTGCGCCGGAAGTAAA  
AGAAAATTTTGATACTATCGACGCTCAGGTGGTAAAAGCTAATGCTGTTGCTCTGGCAGA  
AAGCCACATTGAAAAAATCGCCGCTAAAGCCGATGAACTGGTGAATCAAAGGTCGAAGA  
AGCACGCACCGAGATTGAACTAAACTGTACGAAGATGCAGATAAATTCCTGAATCACTT  
AGGCGCTAAATGGCTGGCAGAAAATAAAGAAGCCGTTACCCGTAATATTAAGCGGATCT  
GTGCGAATCCCTGATTGGTTCTCTGCAAGATGTTTTCGTTACTACAATGTTGTAGTGCC  
GGAAGAATCTGTGGACGTTGTTGCTGAACTTGACGAAGCACTCAAAGAAGAAAAAGAAAA

AACCCCCGTA CTCTTTGATGCCAAACTGCAAGTTGAAAGCGTA AACTCGTG GTATGAAGCG  
CGAACAAGCGATCAATGAAAGCACTCGTGATCTTTCCGATACTCAGAAAGAAAAAGTAAC  
CGCACTGATTGAAGGTCTGGGATATAGCGAAACCTTCGATAAGAAATTA ACTGCAATTGT  
CGAAATGGTGGCTAAGAAAGAAGACAAACCACCAAGATTGAAGAATCACTAAATACTGA  
TGCCGACAAGCTGAATGTTATTGCAGAAGCTGTGCAAGAATCAGAGAAAAAAGCAACTGT  
AGATTCGCGGTATCTAGCTACCTGAATTTTCATCTAATGCAATTCACATCTACTAATAAA  
TAGTTTAGGTTAACAAACAACAAGGTTTAAAGAACATGACACCGACCAAAGA ACTGTTGG  
AAAAATGGTCCCCGCTGCTGGAGAACGAAAAACTGCCGAAATCGCAGCTGCGTCTCAGC  
AGAAACTGGTTGCTAAAATTCTGGAATCTCAGGAAGCGGACTTTGCTGTAGATCCGA ACT  
ATAAGGATGAAAAAGTTGGTGAAGCATTGCGGTGGCTTTATCGCAGAAGCCGAGGTTGCAG  
GCGACCACGGTTATAACGCATCTAATATCGCGTCTGGTCAGACTTCTGGTGCAATCACCC  
ACGTAGGTCCGGCTGTTATCGGTATGGTTCGCCGTGCTATTCTAACCTGATCGCATTTG  
ATATTTGTGTTGTTTCAGCCGATGAGCACTCCGACAAGCCAGATCTTTGCAATCCGTTCTG  
TATACGGTGGCGACCCGCTGGCTAAACACGCTAAAGAAGCATTCCATCCGATGTACTCTC  
CGAATGCGTTCCATAGCTCTCTGGCTGCTAAAGATGCAACGACTGTTTCTCCTACTGGCA  
CTGCGTTCCAGAACTAACTCTCAGTACTCCGATTGCCGCAGGTGATAATGTACACCACA  
CCTTCGCAGAACTGGCATCGCATATCTGGAAAACGATACCGCAGAACAAGTAACCCCGA  
CCAAAGCTGACAGCCAGTCAGATGATGAAGTTGTCATGAAGCTGATGGAAGAAGGTA AAC  
TGGCTGAAATCGCTTTCGGTATGGCTACTTCCATCGCTGAATTGCAGCAAGGGTTTAATG  
GTTCTCAGTATAACCCGTGGAAAGAAATGTCAATGCGTATTGACAAACAGGTTGTTGAAG  
CGAAATCTCGCCA ACTGAAAGCCCGTTATTGTATCGAAGTTGGGCAGGATCTGCGTGCTG  
TTCACGGTATGGATGCTGACGCTGAACTGAATGCTATCCTGCCTAACGAAGTTGTGCTGG  
AAATCAACCGTGAAATCGTTGACGTGATCAACTTTACCGCTCAGGTTGGTAAA ACTGGTA  
TGA CT CAGAGCGTTGGTTCTAAAGCTGGTGGATTTGACCTGCAAAACCCGATTGATACTC  
GCGGTGCTCGTTGGGCTGGTGAATCCTTCAAGTCTCTGATCTACCAGATCGACAAAGAAG  
CTGCTGAAATCACTCGTCAGACTAGTCGCGGTGCTGGTAACTTTGTTATCGGTTCCCGTA  
ACGTTGTAAACATTCTGGCTTCTGCTGATCAGGGTATCAGTCTTGCTATGAAGGGTGCTA  
CACTGGGTCTGAATACCGACACCACTAAAGCTGTTTTCGCTGGTGTCTGGCTGGTAAGT  
ACAAAGTATTCATCGGCCAGTATGCTCGTCAGGACTACTTCACCGTAGGTTACAAAGGCG  
ATAACGAAACGGATGCTGGTATCTACTAGGCTCCGTATGTTGCACTGACTCCGCTGCGTG  
CAACTGATCCGCAGTCTTTCCACCCGGTCTGGGCTTCAAGACTCGCTACGGCATCGGCA  
TCAACCCGTTTGCTCACAGCAAATCCCAGGCGCCCTCCGCTCGCATCACCTCCGGTATGT  
TGAGCAACGACAGCGTAGGTAAAAGGCATACTTCCGTCGTGTATGGGTAAAGGTTGCT  
AATATAAGCCATTCCTGAAA ACTCCGGTAGGGTGCAATACCCGACTTAGCATAAACCTTA  
TGACAGTGTAAGTGTTAATTCCAAAGGGAAGACTCGAAAGGGTCTTCCCTTTTTGCGTA  
TTATAACCCGTCATAAGTAAGGTTGCAAGCCTATACTCTATTGGGAGCTAAAATAGATAT  
ACACAACAACAATTCCACCAATTTTCGTA CTAACTGCAGGGCAAAGGGACCAATGAATG  
AAATGAGCATGCATGTTGATATTGGTTCGGATAGATTTGGTAGATATACAGATCTGGTGT  
ATGCCGACCTTGTATGACATTCCAGCGTGACGCTGGCGGTAATTTTGGTTTTGGTACGC  
TGTTCCCTGAATTAACCCCAATGCTCCATGAGGAGGAAATGCATGGGTAAGAAAGAAAA  
CAGCTATGTTATGACTCGTAAGGAATACAACGAATTGATGTTAGCATTAGCTTACGCAAT  
TATTCGTTCTGATCATGCAATTAATCTGGTAAACAAGTTAACCGTAGCGTTGATAATGT  
TTCTAAGAAGAAGTAAGTTTATTTTGGAAATCCTTCGGATTCTTTTTCGTTTTGTATAAA  
TATGACATATCCATTAAGGCAAATACAGGATT CATAACCATGACTCATATTTTTACTGAA  
CCGTTGCGGGAATCTACTTCCCTCAGTAGCTAAC CAGACAGCGCGACCACA ACTACTATCA  
TTAACTCGCGCGGTAAACAACCTGAGTTTCTCTGATCTGGTAGCAATCCAGCCAACGGAT  
CAACCAGTATCTGCACTGTACGGCCTACGTTATCTTAATCGTGATGGTCAGATGACTTTC  
CGAACTGCTACAACCTACGGTGGCGCGGCTGGTGATCACACAGAGATTGAAGAGTTTGCA  
AAAGAAAAATCTTATGACGAAGGCGCACTGTTCAAATCAGACAATGTTGTATACGAAGTT  
GCGACCGCTGGTACAGTCGGTGCAGATGCCGAAACTCCGGAAGGTGGAATCTTTAAAGGC  
ATAATGACAAACAACCTCGTTTTCTATAGCGATTGTGCATCGGTAGAATACTTTGAAGAT  
AAAAACACCGAAATTTCTGCTACCTCTATGCAGTTTGATAAATGGCAGGTTAATGTAGGT  
TCTCGTAAACTGAAAACCTCATTACGACCGAATTGATGCAGGCTCTTGAGGCAAGCCAA  
ATCAACTCTGAAA ACTCTGTAATTGATCTTCTGGCTACGATCGCTTCAGAAGAGATCAAC  
AAAGATATTATT CAGAAGTTGATCACTGTATCATCTCGCTATAAAATTAAGTGATCACC  
CCTGACGGCGCACTTTCTCTCGTTAGCGTACAGGATGCACCAGCACAAGCGCGTGA ACTT  
TACCGCTATGCTTGCGAAATGAGCAATCAAATGTTGCGGACTTCTTTCTTTTCTGGTACA

TACATTATGGCGTCTTCTCGCGTGGTTGGCCTCCTACAATCTACCGGATGGATGGAAGAA  
ACCGACAATGTTCTAAGCGAAGGTCGTCTACGTTGCGGTCTGGAAGTGTACGCAGACACG  
ACAGCACCTTTCGATTATATGCTCGTTGGGTGTAAGCACATGATCCGTGATATGGAGAGT  
GTAGGTTCTCTGTTCTACTCCCATATACAGAAGCCGACGGCGCTGGCGCGTATAAGAGT  
GTAATTGACCCTAATAGCTTCCAGCATCATGTAGCTATTATCTATCGTTATTTACTCTCT  
GTCAACCCATATACATCAAAAGTTGATCAGGAAGAACACCTGGTCATAAAGGGTGACGAT  
TGGGGTGAAATGGCTGGACGTTGAGAAATGTCCTACATTTTAGGAATCGAACTGCCACCG  
CTTGAGATTGATAACGCTTAACTAAATATCTAACCAAGACAAGTCAGATCCGCCCAAGAT  
TTTTTCGACGGCGGATCTATTTTCTTGATGATATAAGTTAAATCATGGTATCCCATGTCT  
ACGGGCAACATAAACAGCAATTCTAGTTCCTCCCGAAACGATTCCATTAACTTCTTTTCGC  
CCAGAATATCACACAATCTACAGGATCATCAAGTGTCTCACCTAAGACTTGAGCAACATT  
TCTAGAAAACAGATCTTGCATGTATAACGGTATAGAACGAGGATTATCATAAACGTGTTT  
TAATTCATCCATCGCCAGATTTTTTTTGTCTAAGGTTTGCCATGCAATAACATCATGACC  
GTTATGCTTGTGGTCATAAACTTCCAATTTGGAATGAAAATTTTTCTATAATCTGGATC  
GTCATACTTCATGAAAGCATTGTACATAACCGTAAGCCCCTCAGAATGCGCTACAACGCG  
TTTTTCTGACAATACCCTCCCAATGGTACTAGCCATCATCAAAATGTCGCTAGGCGCTTT  
TCTAGAGCCTATTAAGCACATCTACGAAGTGGTTTTACTCCAAATAGATCTTGGAAGT  
CTCAAACATAATATTTCTCCATAGAAAGCAATATCATACTACAAGTTAATAACAAATAC  
AAGTATCCGCGTAGCGGAAGCGAGCACAGCGAGCAATAAAACACTTCCAGTAATTGATTA  
ATAAATGTTTCGAAACAAATTTTTATTATTCTATAAGATAAGTCTTCGTTTTGATCATAAT  
TTAATCACACCTGTAAAAACTACAGAAAAGGATATCGCTTCGCGAACTCCTACGGAGTAT  
AACATTTGTGTTACAATATGTAGTCATTAATAATTAACCAAAGATACATTTTCTATGTTT  
TAAAGATCTTTCTTCGTTTTGATCATAATTTAATCAAACAGTATTAATATTGTGCACATG  
TAACTTAAATTATGTTAGTAACAGATAACAAAAAACGCCGACCCGAAGGACGGCTAATG  
TTAATTATTTGTTGATAACGATCTGATTTTCGGCTAATGGTAACTTACTCTTAGAGATGA  
TCAGATCATCCGGCACTACGTTAGTTTTGTATGGCTGGAAGCGAACAAGCATCTGATTGC  
GTTTAGACCCTTCCTTAATTTTGATTTCCCTCTGGATATTGTTGCCTACGTGAGCAACCG  
CAATTTACCTTTATTCTCATAGACCCTTGTCTGGTAATGTCTCCTGCAAAAGCCTTAA  
TAACTTGCAATGCTTCGACGTATGCGGTAGAGCTGTGAACCTTCCGAAGGACAGCCGTAG  
CAAGACGGGAGCAGGTGATCGCCGGGGATTGCCAAACATCAACATTAATTTGCTCAATCA  
GAGTAACACCGCCCTGATCAACTGCTTTGGATGCTTCGAACATTGCCTTTTTTCATTGCTA  
CGTGGTTTTTATGGAAATTCATAATTAGTCACCTCTATTGATTAGTTATTCAGAATATTA  
ATTACAAATCAGGACATTGCCCCTTGAATGCGTCCATTATAACAGTGTATTGTTGGCTTG  
TCAACACGTTTTTGAACCTTATTTTTAAATTTTTTGTGATGTGGTGTTTACGATAAACA  
ACCTTTTCACGGCTGGCGTAAGCCTCGCGTGCATCTTTTACCATCAACCATGCCTTAGCC  
GCATCCTGTCCGCTGATCCCGCCAATCTTCTTAGCAATATCAACAAAATTAAGACTGAGG  
TCTTCGCGTAGCATGTAAACCATTAAGGCTGTTTTCTTGTCCATCACTTGGCCCCATTGA  
CGATTAACAGGATAGTGATCAGTACCGGAAACTGGATCATGACAGTACCAATAAACCGGA  
TAAACGCATTTTCTGACTTCCACACATGACATGCGACTAGCTGATAGACCATTTTTGCAA  
CCAAAGCCAGAAAATACATCTCGATTGGTGCTTCTTTGATCAATCGTACAATCTCAGTCA  
TACTTCACCTCATAATTATAAACACAACAACGAATAATACAGTAATAGTTATCAACGC  
CATTTTCAACCCCATATTCATAATATTTTCTTCGCCCTACTATGGACAGTAGCATGTCGA  
TGCCTGCCATTATAGGCATCTAAATCGCTCTGTCAAGCACAAAAAGAAAAAGCCACCCC  
GAAGTATGGCTCATAGATTTCAATTAAGCAGGATGCGTTTCACGAATGCGTAGAACTCGAT  
CTAACGTATCTCGGTCCAGTTTGTGTAATCTTTGGAATGATACATGAAACCATTGCGAG  
ATTCCATGCAAGTGCAATCACTATATTGTTCTTCCGCCGCCGCGATTGTCTCCAGATCTT  
TGGCGTACTTGCTGTTGAATAAACTTCTCGATCACGCCACCCTAACCCAGCCTCATTGA  
ATTTAACAATCTCGTCAAATACCCACCATCCAATGTAGATAAATGAAGTTTTGCCCCACG  
GGATCGGGTGTACGTAACATAAATTTTAACTTCCGTTGAACATTTTTGGCTTGTAC  
TTGCTGCAACTTCTACTGTTTCATCTTCGATCTGTTGATATAGTTTAGCAACACACCAGA  
ATTTGGCTGTGTCATCGTAAGTAGCACTCTTTTGAACATATGACCGTCTGGCATGATAG  
AAAATCCTTCCAGTGCTTCGCCGTCTCACTACCGATTAGAGTCGGTGACAGTTGCCCTT  
CGCGCTGCAAATACCAGTTATGTTTGTGTCATTCAGGCATACGGCGAGAATCGCATA  
CAATGTCTCTGACACAACATGATTAAGTAATATCTCATTACCTAGTGCCACGGTCTTTG  
ATTCCACCACATCCTGTTCTACGTTTCAATGTTGCCAGCATGATTTTAGTCGATGCGCTAT  
CGGCTGAATTTTCCGACTCACCCACACTTTTACAGTATACACGCCCTTCTTATCTGCTT  
TAAATTTTTTGTATTGTAGTATTCTGTTTTGTGTCTATAACTTCTTCGCCCTTACTCCTAC

TATAATGTAGTTCATAGTTGTCTGCTGGAGTCTTCCCACCCGAAAAATTTACTGTTGCAT  
GTAATTCTACGTCTTTTTGTGATGATACGTATAAATTCGGCGGTTTCGGTGATATTTACGA  
TTAATTCCGCTTCTTCCATGAGGAAAATTTTCAGATTCTACTGATTCCATCGTATCAGCAT  
CTTGTACCTTGACTTTATAGCTACCCGCATTTTCCCTTGTTGCGCCTTCTACAGTTAGCG  
TAGCTGTGTTATTTTCATGCTGTTGGACGTCTTTTGTCCATGTATATGTCAAATTGCTTG  
GTAATGGTTCGTCACCCGCTAAAGTCGCCGTTAAGGTGAAACCATCTCCAGCAAGAAAAC  
ATCTTTTGTAGATTGTATTGATACTGTGAAAACCATATGAAGCCACTCCCATAGAAAAT  
CCGAATTTAATTAATTGAAATATTTGATTGCCATCAACCAGATAACCATTGCGATATTCC  
AATACATGAGTATTAGAATAGTGATGCAACGAGGCCGAAATAGTCTCGATCTCGTCTGGG  
TATTTGTTCTGTTTGGTGTAAATACATTGATTTTGGTAGGCATGTAGTATCCTCTTTTTAA  
TTGCATAACGGAECTACAATAAAAATTATAACAAATATTTCACAACTTTTATCACCCAAA  
AATTACTTGAGTGTGTGGAATTGGCTATGTTTAGTCTCTCGCACCTTGACAGACCCATCG  
CGTTTGATATAATAGATCAGTGACTTGAGGGTGTGCGTGTACATACGCGTGCGGGAAACGT  
TCTGGATACTTCTTCCAATCTGGAGTATTAACGATTCAGTCGAAAATACACCACGGGCAG  
GAGTAGTAACCACGACCGCCACCGATCAAGCAAATGGTTCGGACGGAAGCCAGTAAGATCG  
CTAAATGAATCAGTGTGCTAGGGAAACGATGCTCTGCTTCGTCAGAGGAAATGTTT  
GCTACCGGAGATTTCACTTTAACTTCCGGTGCTTCTTCAACCTCTGACTTAACTTCTTCG  
ACCACTGGTTCAACTGCTGGAGATTCTTCTTTTGTCTTTAAGGACAATCTCAGGTTCT  
TTCATTGCTTTAACCAGAGACGGATCAACTTCGTCGAATACTATTTTATCATCTGCGGTG  
TCTGCTGCCAGAATAAGATCGTTAATACTGGTTCCTTCTGCCGGAGTTTCTTCTTCCATT  
TCGGAAGCCAGTGTAGTTAATTTCGGTTTCTACGAACTCGATCATGTTCTCTAGTGATAAA  
GTCTTTTTGACCTTAATATCAAATTGTTTTGCGTAGTCAGCTAATTCTGTTTTAGCTGTT  
TTCTGTGCTTCTTCTCGTCGGACGCCGAATAGCGCCGAGTTCTTCGAAATATTCTTTA  
TCAAACATGTTATTATCCTGATTGGGGGTGTTTGTATAAATATTTGTATACTGTATTTAT  
TGAGTGAGGCTATTCGCTATGCAAGATATTAATAATCACTTTGTGAACTATTCGCATGTT  
CAAATTGAATGTAGCGATTCATTTTATTAGAAATGCGAGATTATTTTAGTTTTGAAGTC  
GAGGGAGCGCGTTTCAAAAACGAGTAAAATACGGAGGCTGGGATGGGCGTATTCGTCTT  
TTAGATTACAACGGAAAGCTGCCAATCGGCCTAACTAAAACCGTGGGAATCTTCGCTAAT  
AATATGGGCTATAGTGTATGGGTAGATCCTCGCTTATTCGAAAAGAACAAGTTACAGAA  
GAAAAAATTACAAAACGGTGTAATGCGTTAGAATTATATCCGGAGCTAACAGGATCACC  
CCGCATTGGTATCAATCAAAGGCTGTCTTTGAAGGTATCCATCATAAACGCCGTATGTTA  
GTTTTGCCTATGTCCGCTGGTAAATCTGCGATTGGTTGTATGTTGTCTCGCTGGTACTTA  
GAGA ACTACGAAGGGAAAGTGCTGATGATCGTTCCTACCACGTCGCTAGTGCTGCAATG  
CGTGATGACTTTGTTGATTATCGCGAGTTTCTTACGAAGCAATTCATACTATCATGAGC  
GGTACTAGTAAACCCGTAGGTGATCGCCTGATCGTTGTTAGTACATGGCAATCTGCATAT  
AAACAACCTCGTGAGTGGTTCAGCAATTTGGGATGGTTATTGTTGACGAATGTACAAA  
GCCAGTGCTAAAACCTGCTAAACATCGTTACTGATATGGATCATTCCCAGTATAAGATC  
GGCATGACTGGTTCGCTCGTGACGGGAAAGCCAACATGATTGAGTATGTCGGGGCTTTTC  
GGTGATATTCCTATGATCGTGAGTATTGACCGCCTGATGGATGAAGGGCAGGTGACAAA  
CTGAAAATTA ACTGTCTTTTCTTTCGTTATACCGATGAGGAATGTAGCGCGGTTAAGGGG  
CGAGAATATGCGTAAGAGATCAAGTATATTACAGCTAACCAACGACGAAATAAGTTTGCT  
TGTAATTTGGCGCTAAAACCTCGCTAAGAAGGGCGAAAACGTATTCCTGATGTTCCGCAAC  
ACTAAGCACGGAAAACCTTATGTATGACGCGTTACAGAAGGTACACGACAAGGTTTATTAC  
ATCGACGGTGGAGTTAAGACAGAAGAACGAGACGAGTTCAAAAAATTAGCGGAAGGGGAA  
ACAGGGATCATTGTTGCGTCTTATGGTGTATTCTCTACTGGTGTTCATTAAGAAT  
TTGCATCATGTTATTTTCGGTCATCCAGTGAAGGAATCAACTATCGTTCGCCAGAGTATC  
GGTTCGTGCATTGCGTTAACAAGGTTCTAAGGATATTGCAACGGTCTGGGATCTTATCGAT  
CATTTGGCGGTTAAGACAAAGAGCAAGAATTCTAAGAAACAGTTTAGCCACCTTAATTGT  
GCTCTTAAACATGCGCTTGTAAGTATAAAAATTTACAACACCGATCGATTTCGAATATGTC  
ACGAAAACAATCGAGATCTAATAAATAGGGGCTTTAATGCCCTTTATTCTACGGAGATT  
AAAAATGATTAGCTTTAAACGTTTTTTGGTTGAGGCAGCTATTGACGGTTTCATGAGTAA  
GATTTATTCATCTAATACTATCGAGGGATTAATGAACTTGAGGCATATTATGAGAAGCG  
CAAGTAAGAAACAGAGTTGAAACCTGCTGATGACATTTTCGATCCGTGAAGCTATCGCTGG  
ACGCCGTAAGCAACTGGAAGCGGACAACGAGCCAGAAGAGGAGCCGGAAGAGGATTTTAA  
AGATATAAAAAAGCCCCATCAAGGATGGGGCAAATAAACCAATTAATAATCGGTTATCAA  
CAAATTACATTAACAGCATTGTTTGCTCTAAGAGTTGTTCTTGTCTTCGCCGTTTCGCAT  
CTTCACTAATCGAACGTTCTGTTACTAGCTGTAAGCAGTAGCCAGTGTGAAGAACGCCGT



TTTCTGTCTGGACTGATAACGCATCCTCGACAGGTTGTTTACAACAAATACAGATATTCA  
TAAAAATTCCTCCTGCATGTATTTAGCGACCAGATTCCAGCATAACGCAATTTTATAGCAT  
TCTTGATCGCAAATCCACGAGATTTAACGATATCAAGTGCGCGACCAGCAAATCCATTA  
CCATCTGGAATATGCAATTTTCGTATCAAGCGGTAAGATCTCGTCATCTGCTGCCATGA  
CAGCTTTCAATTCTGATTTCTCATATTCAGCACGACACCAGTCAACACTACGGTTAGTGT  
AAAAGTCAAGACGATCTTTCATAGCCTTTTTCTTTTTAGCCTCAAGAGCAATAGTCTCTC  
TGTTCCGCTCGATGTAAATCCTTAACCACTTTGAGTATACTACCGGATTATTCAGCGCGT  
CCCATTGCAACTTAGTCGCATCGATCTTCATGTCAGCTTCTAATTGTTCTTTCAAATCGT  
TTAGGTCCATAATATCCCCTTATTCACACTAAGACCTATATCATATCACACACAAAATCA  
CTTTGCAAGTCTTATGCGTAGTTGTTCAAGATAATCTGGGTTATCTATTACTGAAAAGTA  
GATTGATACTATGATTGAGTTATCGTCGTA CTGCGGAGCTTCTTCTACTGTCAGGTTTCG  
GACCCGTGGTTCATAGTTTCGGATCGCCTCATTGATGTTTTTTGATAAGGTATCCACTAT  
CGGTGGGTTTCATGTTCTCAAACAGTGATTTATTGAGATCGCATCCACACAGTGGATCAA  
TGGACGAGATCCCTTGCGAGTAGTCACGATCAGTAGAATAGAATCTTTAACCGCTTTAAT  
CCCTATGTTCTTTTTATCGTCGTTATTCACGATCTGGATATATTGAGACCCAAATAAGT  
ATACATCTGATTAATAGTTGCCCTGTTATACCTCAAAGAAATTTAAGGAACTGGATAGA  
CCTGATAATGAATATACACCAGATTCCCCGCAATTCGCACTTGATCGGTACTGCCAGCGTG  
ATTTGATTTCTTGTTAGCTCGTCGTTCACTTCTTCCACTTTATCCGTGGTAAGCATATCC  
AGCACGCGGTCAAAGTCCTGTGCGTTCAGGTCGTCTATATTGAATTGCTGATCGCCGATC  
ACGATATATTCGATACATGCAATTACCATCTGCATAAGATCAACAGCTTCTGCAAATTTG  
GGTTGACGACACTTGATTTTTACTTGTCTTAAGTCCACAATATACGGTTCAACTTCTGGT  
ATCTGTGTGCGTGAAACATCAAGAGAGTATACTTACTCTTTCTTGCATACACCACACACC  
CAAGTAGCATCTATTTTCATCTTATTGAGGCTGTCACACCATTAGAGAAGAAAAATATAT  
TCTGCTTCGCATTTCTCTAGCTCTAATGCATTGATCCGCGTACATTCATGTATGATCTCT  
ATAACAACCTCTGACAGCTTGCCAGTCTCTTTTGCTGCTACCAGTTTTTGAAATTCGCCG  
AAGGTGAAAGCACGGGCGTGATCAACTTTTCGCCTAATTGGATCTTGAAAAAGTATTGC  
ATAATAAAACACCCTTTATAAACACATAGAATTATTTAGTATTTTATAAATACCCGAAAG  
GGGATTATACCATGAATATTATCCGAATAAAACTGCCGGAAGGTGTGCAGAGATTTAAA  
GCATTCACGGTAAAAGATTATATAGATTTTCGTTCTGGTGTCAACTGAAATTAAGATGAAT  
CCAGAAGAAGAACAACGATTCTGGATGAGCTATTAGAAGAAATATATCCAGAAGTAGAT  
CCGACATTTTCGTGAATATATTTTCCTGAATGTGTTTACTAGCTCAATAGGTAAAACAAAG  
ATACCGCATGTTTTTACTTGCCGACTTGCAACAAAGAAAGAAAAATGTTGCTTAACTTA  
CAGGTTGAAGCACTAAAACCAATCGTTCGAGTGGCCGCAGGGCTTAAAATAACTTTCCGG  
TATGTTAAACCATCAACCGACTATGCAAAAACGTTTCTGGATGCGATAGAGCGTGTATCT  
GATGGTATAAATGGTTATCTATGGACTGCATTACCGGAAGAAGTTAGAGAACAGGTTATC  
GATTCAATCTCATTGCTGTATTTGAAGAAGTTGTTAAGCAGATGCACACAATCAATATC  
GAACAAAAGATATCTTGTTGTGAAAGTCATGACCTGAAATACATAGGTCTTCTTCCATTA  
TTCAAATTTGTTGTTGAATCCAGATGAGTTATTCATCTTTTATCGAATAAACCATCTATTG  
GCAAAATCAAATTTATCTATCAGTGATCTTATGGATTTGTTACCGATTGAGAGAAACATT  
GCACTGACACTGGTCGATAAAGACGTAAAAGAGGCAAATAATGCAAAGAACGGGGTTTCC  
TAATGTCTCAATAAAACTTTATCAGGATTATGAGGCATTTCTAAATCATCGCTTTATAGA  
GTTGGGTCCTACCTTTGTTACAATGACTCTGCGTGATTCGATTCGTGGGGTGAATGAAGG  
ATTGTTGCAATTCTATGATAATAAGGCGATGCATACAAAATTAACGGGAGAGAGATCTT  
TCACATTTTCGCTATCCACTGCTAATACAGATGAAGGGTTTAAACCGAATCTAAGGGATCTC  
TCATAGTAATGTATCAATTGACCAAAAATCCGACAACATTTTAAACATTCCAGTTAAAGAG  
CTATCACGAAACACTAAACCTTAAATGTTCTCGCTCATTGACAAATAACGCGGTAAATAA  
CGTAACTAGCATGATTGATGCCATCTATAAGGAAGTTCCTTTATGGAAACCTACTATAAA  
GGGTGATAACTTTGTTATTCCTCGTTGTCCGTGGGTTAGTACCATAAATGACTATATGGA  
TTTTGTTAGGGCATAACGGGCAAAGCGTAGAAACCGAGTCTTTCGTGTATTGCTGGGAAGA  
TTTTGATGGTTTAAACGATTGCTGGATAACGATAACAATATTAATAAAATGAGCCAATACCAGC  
TATAATCTGTGAGCCTGGACTCATGGGGCAATTTATTGATATGTCGCGTAATCTGATGGT  
TTTTAATTTTGAAGTGGCAGACTAAGAGCAATGCTAAAGTTAAGAAATTCATTTAGCAATG  
TGAAATACACCACTATTGATTTTGTACTAAGCAGTATAATAAAATTTATTGTTGGTAATG  
GGGATAATATTGCACACTTTGCTCATGGTGGCGCCTATGGCGATTTAACTTATAAAAATG  
CGTTTTTGAAGGTTCTAAACTTGCCACAATAGAACAATATGATTCATATGCTACCGCCG  
TGTGTCACGGTAATTTTTCGTTGCGCCCCGGTATGGTTATTCGATTCTTTGATGAGAAGC  
AACAAAGCACGCAATGATTTTATAGTTGACGAAGTGGTGCATGAACGTAGCCGAGAGCAAT

CATTAACCTCACCTGTATATGATCGGTAACAGCGAAGAATTACAGGAAGTCAAATTTGAAG  
GTAAGATATAATGACAGAACTAAACCTATGTTAAAATTTGTTGTTCTCTAAAAAATT  
AGAGATAAACGGGAAACATATTAAGATCCCAAAAATGGGGATTAAGCAACATCGATTATT  
AAAAGATGTTTCGTAGCTGTGATGAAACATTAAGATTCTTCTTGATTCAATCTGTCCTGG  
GTTAGACGCAGCCGAGTCTGAGTTGGTTATGCTTAACCTTTGTGCGTTAATGGTAAGTG  
TCTGGAAGAAAAGATGGTCTTAAGTTGTCTGATGTATATATTTGTACAGAGACTAAATT  
TACTGTAAATGGTAAAGTCTTTAAATTTAAAAATCCAATGTATACTTCTGACCCCATAT  
CGATGACGCTGATTTCTTGAGTCATCATTATCACGATCCTAGCGTCGACTTCTTGATTT  
CCCAGCTTTTATTATGGATTGGGCTACAGGATTAAGAAAACTATTGCACTGGATACACC  
GGAAGTACTATCTATGGCGGAAATAACATATTAGATCGCCTATCATGAATGACGCATTA  
ACATCTTTTCACGGGATGCGCAAGGAAGCGGAAGAAAACCCGATTGATAAATTTAACAAA  
TTAGATAAACTTAATTTCTTCTTGATAATTTGCAAGCCGCTACCGAATTGGTGGCAGAGACA  
GTAGAGCAAAAATCTAATGAAGTCGTTGGTGCAGGATAACACCCGCAGCCAATGAA  
TTGACGGCAGAAAATACACAATCTACCGCTGGAAATACCCAAAAAACTTATGAAGAATTG  
CAAAAATCAATAATTTCTTCTCAGATGAATGAGAAATTCCGTGGTTTTGTTGTTACG  
ATGGAACGTAGATTTGGTGTGTCAGTAAAATGGCTAGCGCTATTGGTGCAGATTGAAGTA  
GCATTGAAAAAACCGGAACAACCGCAAACAATGCCATCACCTCAGTCAGTTTTGCCTACT  
GTACCGGAACAGCCTAACAATGACAACCTATCAAGGTCTTCCAACGAAAAAACTAGATGCT  
GATGACCGAAAGAAAAAGAACGCCACAGATAAGCGTAATGCTGATTCTATGGAAAATCTT  
CTTAAAGTTGTTTCGTGGAGGATTTAAAGAAACCATAGGTATCTTAATAAGGTCTTAGGG  
ATGTTATTCAAGATCGCTTTGACCGCTATGGCAGAAGCCGCACACTGGGGTGCTATTTTG  
ATGGGGATTTTTTTTGTTCATTGATACTCTGATGGTTCATTTTCAGATATTGGAGTGGTTA  
TTCGAAACAAAATTCATGAATTTATGGATAAAGCCGGAGGATGGGCTGGTCTATTAGC  
GATATTTTAACTACTGTTTCGTCAGGTTTCGAGAGGATTTGTCTAAAGGCAAATATGAAGAG  
TTAATTAATCTCTTGTATGGGTATTGGTGTGATGCATTCTATAAAACCTTTATCCAATT  
GATCGACTTATCACTACGGGTATTGCTAAAATTTGTTTCGTATGATCGCTGGCATGGGTGCT  
TATACCGATAAGTTAGAATATGGTGCTTTAAAATCTGCTGTCGCTCAAGGCTATACGCCA  
AATGAAGGAGAACTCGAATTAATGGATAAAGGTCGACTCTGAACACGAAGAAGACAAATCC  
GGTGAGCGCATAGGGTGGACCGGAAAAGCCCGTGATATTGGCTAGGCCATAGGCGAATCT  
TTAAGGATAAAGTTAACGAAGGTCTTGTAGTCTGGGCTGGAGAGATCAAAGGATGTT  
GACGCAGAGAAACGACAAGAAGAATTAACACGCGGAGAATATAAGTCTGTTTCTGCTGAA  
CAACGATCTGCTAGTCGTGAACCTTAGAATTAAGCGAGGGCGCGATAAATAATATTAAT  
GAAGTTATGGAGAATTTGAGCGGTGACTATGACAAAGAAAGAATGGGAGAGTTGAAAAAG  
GATATTGATGTTTACCTTGAGCACGTTCAAGATCCTACATTAGTTGAAAGTGATCGTACT  
CAGTTAGAGCGTCTTATTGAAAAATTTGATGAGATGTATGCTGATAAACTAAGGGTGTG  
GTTCCACCTAAATCTGTTCCGCAACTGAAACGGAAACAGCAAAAATAAGCGGAACGTA  
GCACAAATGCAGAAACAAGCTGCAATCCAGCAACAACGACAAATCAGACCTCAAACGTA  
AATAATACACAAATTGTAACAAACAATAGAACTATTATACAGGGTGCACCAACAACCTAGA  
ATTGATGCCCCAGGTACAATTAATATGGGGAACTTTTAATGAATATTAGTGTATCAGTG  
ATGCCGTTGATAGCTTTAAAGCGGGGGTTAAAACCTCCGCTGGTTTTACCTCAAAAAATA  
AAGGGAAAACATTAACCGCCCAATTCCTCCGCTGAACGTGCCAGCGGTAATGATGCTAGCG  
GTTATTATATCAACGACTTATATAATTATGGTCATTTATTCCTGCATACGATTACACAT  
CCCGTACTACTGGATCGTTGCGTGATTTACAGGAAAAGAAAAATGTTGCTAGCGGTTTTG  
GCGGCAGCGTTAATATCGCTGGTTTTGATTTAAATTTGGGTGGGAGAAATGCTGCATTTG  
ACCGAGAGGCAATTGCTAATATTCTTCTTCTCGTAGTCAATCTGACGTTGACGCTGCCA  
GCCATAAGTTAATGATGTTGGTGAATCTGTTATTTCTCGCGGCGGTGGTACTTTAGGCG  
GTGCTCTTTCTAATATGGCATCTACTGCCGTTTTTTGGTGGTATCGAAAGTATTACTGGTG  
GATACCTTGCCGATCAAGGTGAACAGATTTATAATACTGCGCGAAGCATGAATGCGGGTG  
CTGACGCACGAACGAAAACTACGTATGGCATCTAACCCACGTAAGTATTGCAGACCTTC  
GCAATATTCTGATCATATACGAAACCTTTTTAGAGTTGTCTTATGGTTCTAGTGGTATTT  
CCAGCACCGCAAAGGAATTAAGCGGAAGTTGATGCGTGGTATAAAAATACACTATTGA  
GCAAATCCATACCAGCCGAGGCAAAGAGAAATGATACGCTGTTTGAAGGGATCACCGATT  
TTCTATCCAACGTAATTAATGATCTAACCAGCAAGACGGATGATCTTAACCTTCGGCA  
AGCGTACATCGTTTGAACGGCGTAGCGATGCATTTGGTCCCCTCAGATCTCAAGTGTGC  
GTCTGGACAAGTAGCGTGATGGTAAGTTAATGGCCGTGCTATTTCTCCTAACTTGCCGA  
GTACCTTTGTTCTGGAAGTATCATTTAGAGAGATCTTGACACTTTCCCGTGCTACTATAT  
TTGGGAGTGCGGCATAATGTTTGAATTAATGACTATAACGAACAAGCAGCTAACCTTGA

CTTTCAGCGATCTAACATATTCAGCGTGGCATTGCGCCACTCCAAGTAATAAGACACA  
AGCGATCCTGGAAAGTATGGGTGGTGCGGTATATGATATTATACCAAATGCTTTAAATGA  
CTATTTCCGGGATTACTCGTGGTGATTATACTGACGCATTAACAAATCTTGCTGTACAGGG  
TGTTAGGCGTGTCTGTTGATTCATTTGGTGTCAAAAAGTATCTTTTAGGTGCAATGTCATC  
CCGCGTAGTTCAATCTCTTCTGCGGCAATTTGATGTTGGTACATATGCGCTTGACTGGTT  
CAATATGGCATAACAAGACAAGCGGTGTTCTGGTGTATGCTGTTAAGGTTCCAGAAAACAG  
ATTGAATTATGAAATGGACCGTAACCCCAATGCGCCAAACATTCGAATTGCCGGACGTGA  
TTTTGATCCGCTTGTATTGAGCTTAAGAATGGACTCGAGCGCAACAACTATAGAGCAAT  
GCAGGATTGGGTTAACTCAGTAGAAGACCCCGTTACAGGGCTTCGTGCGCTTCCTGTTGA  
CGTTGAAGCAGATATTCAGGTCAACTTACATAACCGAATGGGAGTTCCTCAGACGATCAT  
GATGTTTAATGGTTGTGTTCCCTGTTGGTGTGAGTGCACCGGAATTAACACTATGAAAATA  
CAACGAAATCACAACATTCGATGTTACTTTTCGCATATCGTTCTATGCAAACACTGGTGCTGT  
AGGAGAGCAAGCCGCGCGAGAATGGATTGAGGATAAGGCAATAAACGCAATAACAAACAC  
TTTCGGTAATAATTTACTTGTAGTGGGTTATCTGCTGCTGGTAATGCTATATCGCGTCT  
AAATGGCGTGGTGGGCGCGTGGTGAATACTGTCACTAACTAGTTCTGATAATAGAAAGG  
CGAGGATAATCCCCGCCTTTTTATTTTGCTAAATCATTGCAATATTTTAGTGCCTTAGCT  
TGAAATTCTGCGCTGTTAAGTTCTTCATAACGGTCATAATCCCCGTTTAAACGCTGCCTTT  
CTTGCTTCTGCTCTATCTGCATGTCAGACATGATAATACAGCGATCCCCTGCTTTCATC  
TTCTCAAGTTGTATAGACTCTTCTTTCTGTTTGCGCAATTCTTCTTGACGCTTCTTTTCT  
TCCCGTGCTTCTTCTTCCGCGCTTCTTTGATTGCATCCTTGAACATCTGCGTGTGTGGT  
GCTAAACCAACTTTAACGCGATCCACGTCTCGCCGTTCCATTTTAGAAATAAAGCATGAT  
TCGATCTGATCATCACTTGCATATGCTGCTTTACATTCACGAAGCAAGAAAACCGGATCT  
GATTTAGCATTATCATAGCTTCCATGTTAGCCCAACCAGTAAGAATGAATGCAGCCGCA  
AGACCAATCAGTTCAATCATTTTCAATTTAGTCACCTCACCGAAAATTGTAAATTGACTAC  
GATTCTCATCGCCGAAAGATTCTACTACGTCGTTTACCTTGACGCAAGTCCCGCGCGGTA  
AAATTACTTCACATTCGCAAGGGTTCATGCAATGGACCCAACAACGAAACCTTTATGAT  
CCTTTACATCAATCACCCATGATACATTACAAGAATGTTGCATCTTTCCGGTCAATTGATT  
CATATCGATTCTACAATACAGGCTAGTGCTGTTTGATAGCAATCCTCCAAACATGATCG  
GTGTCATGCTGGTCGATACAAAGTTTGTAAGGTAACCTCCTTATCTTCAATGATGCGCT  
CTATTGTCTGAATGTCAAGATGTTGACCGCGATAAAGAGTACCGTTTAACTTTTCGGT  
TATCCATGACGCAATCCATCAAATCAACAATCTCAGATATCTCATCGGTCATGTCTTCTT  
CCCTTAAGAGAGCACCATTTACCCATTCGTATTGTTTACAGACACATAATCACAGATTGCTG  
TATATTCTTCTGGGGTTATGTTGTTTGTGTTGTAATGTTTGAATACATTATCTCCAAAGT  
CTTCGGAGTGTACTTCTTACATCACATTAATGCTTTTCTTGACAAATCCATAATCTCGTG  
TCTCACGCTCAAGGAAACGGATAACCTTCGCATAATCATCAAAGTTAATCTGATCGCTGA  
TCATCTCAGTGATCCTGTAACCATTAATCCCCTCAATGTCATATGTTTCGATGTAATTAT  
CCATACGTTCCATCATTGATTGCGGTGATTCTTCCGAAAGACGAAAATCCTGTAATTGTT  
TGAACATTTTAAACCTCCCATATAACAGAAAACGGGGCTAGTATAAAGCTAGTCCCCGAT  
TGAGGCAACCATTATTTCTTAAAATTACATTTTAAATTTATCTGGCATTGCGTCTACAG  
ATACCAGATCAGCGATAAGCTGACGTAGAGTTGCCTTATTTCTTTCTTACGTTCCGGTTT  
TAGCTTCGCTAATGAAGCTGGAGAAAGACAGGTCAGAAGCCGGTTTAAACAACACCTTAC  
GGATGAATGCATCACCGTCTGAGATCATCGCGCCAGATTCTTGTAATGCTGCCAGTTCAT  
TGTTGTTTACATAATATGTGCCTCAATGTAATAAGTTTCTTGTGAATCCGTCGATGCCGTAG  
CACGAGTTACCGTATCAAAGGATAACACAACACCGCGAGGAAGTAAAATCTCGCTTTCTT  
TGTAAGCAAATGCTTTGTTACCTACTGGCAATACAGGGATGTTTTCCGCGCCAGCAATGG  
AGAAAGCAACATTAGCGCCACCTTACCGCGAGAGCCAGCCATAGAATCAACACCAGCAA  
CGGCACTAGCCACGTTTGCATTCCAGCCGCCAAAATGTTAGGTGCAAGGGAAGTGCTCA  
CATAGTTTTTAAAGTAAAACGCTTTTTGCTTACGTGGAGTTTCCACATTTGCGACCGGA  
AGTCCAGACCACGATACAGCATAGTACCCGGATCAAGTCTAACGCCATAGTTGGAGAAGG  
CATCATCCAGTGCATGGCACATCTTGACCAATCTTCTGGATCTGAGATTCCTTCAAAC  
CTTCCAGCTTACGGTTCGGCTAGGAAGTTGTTTCATATTGATGTATGCTGCATCGGCATATG  
CGCTCAACACAAAACCTTCCGCGCCTGGCAGATCAAGATCAATATTTGCCATCATTACAG  
CCATGTTCCAGCAATTGCTTCAAACATAACCGGAAGCAACATTACGTAGGGCATCGGTTT  
GAAGCTGGGTGATATTACGACGCAGCATTTACAGCTTTTACATCTGCTGGCATAGACTGGT  
CTACCCGATCCATTGCCAGTGCGGTGATCTTGTTTTCTAATACTTCCCTCGCTCATGATTT  
CTTTTAAAGCGTTTGATTGATGCTGCGATAACTTCCGCAGTCAACGGATCATACTGATCCT  
GAACTTTTGCCAGTTCGCTTACTGCGTATTTTGCATCGGCTTCGCTTTCAAAAATAGTAC

GCATGAAACCATAGCGAGTGATAATATCACTTATCCAGTCATTAAGAGAACGGGCGGTTG  
AACGTTCTAAGGCTTGACGATCAATCAGAGTATTAACACTGTTTCTTAGGTTCTGCTTCGG  
TGATATCTTCTTCCGGTTTAAGATTAATTTTTTCTGGATGATTCACATAGTCGCTGTTAT  
AGGTCGCTTGAGTTTTTCAGCCTTTCTTCTTTAGTCAAACGAGATTTAGCCGCTACGCGTC  
GTTCCGCCTCCGCGTTTCGTTCTTATTCGGACACAAGACTAGCCGCATACGCTTCATCTT  
TAGTCAGAGATTCACCACTAGCCTTAGATACCCAGCGATCACCTAAATCACTTTCTACTT  
TAGTGAACAAGGAATCATCAAGTTAATCCCTTTAATCTTATCAATCGCCATAACGCGAC  
GCTTGGCAACAATAAGCGATCTTTTTGCTGGTCATTACTTCCTGCTGGAATACTTCAA  
ACGTCGGTGTACGACACAACAACGCTCTATAACGCGCTTAACCAGTTCGGTCTTACCTT  
TCATGCGGGATACGTTAAAACGGAACATAGCAGCGTCTAGTTGCGCTTTACGGGCTGTTT  
CCATAACCACATCAAAAAGCACTTGACATAACTGCAATCGGGTTATCGCCTAGACCATTTT  
TAAGCTGTACAATACGAACGCTTTTGTTCATTTTCGCACAGTACAACATGTGCGGTATTGT  
CACCCATACGAATGATTTTAGGTGTTTTGTTGGTGAAGTTACAAAGACGGACAATCACAT  
CTTTATCGCGTGTCTGTACTGCAAAAAGCTGTTTAGGATTCTGCTTAGGCTTTAAGCACT  
GTACCGGGGCAATACTACCAAAGTTTTCTTCTCTTCCGTCAACAGCCATTTCTCGAAAG  
ATTCAATCATTAGATCGTCGATTTCTAAGTTAAACATTTTATATCCTCTAGTTGATAACC  
TATAAACCTATATTTATGAAAACGGGGCTAAACGCCCTTTTGATTATAATGCACCATCG  
AGCAATTGCTCTAAGGTGTATCCTTACTAGTCTTTTTCAATCAGGATATAATTTCTACT  
CGTTAATACAACCGCGCATATCAACGTATTCTGCGTAGTTGATGGTACGAGTTGTTCCA  
TCTTCCAGTAATGCAGTACCGATTTCTGTTAATGCGGTCATAAATTACGTCGGTAATGATG  
ATTTGATGTTAGCCATTTGATACTCCTTAGTAGTTTCGTTTCTGTATGGGTTTATTATGA  
TATACACCCTCTGTTATGTCAACAACCTTTTAGAACAATTTTGAATTAATTCTGATCTGA  
TTTCGCAGAGAACATCTAAAGATTTCTCATCACCCGCTCTTGCTGCTTCTGCTTGCATTT  
TTGAAATGGCTTCAATCTCAGTGCAATTATAAGCCGCTTGAACCTTAGCGATTGCGATGA  
TTGCCGCTTCGATGGTTAAGTGTTTCATGTTTGATTCTCCTTTTCGTTTCGGTATGTGTGT  
ATTATATGGGATCGATGATCCCCTGTCAACAACCTTTTGTAGTTATTTTTTAATTGCATAT  
CTTGCAATAGGGCAATCACATGCTGGCGATGTTCTTCCGATTGAGGCACACCGAAAAAGT  
TAGTTTTGTAGAAATATTCTAATCGGTCTTCTCGTGTCTCTCGTCCATCTTGATCGCGG  
GTAATCCGAGATTTCCGATAACGTCGCTTTTCTGCTGGCGTTAAATCACTGTAATAACA  
TAGAATCATCATTACCAGTAAGGCTAAGCTCATCCTACATAAAGGAGAATATTGCCTTTA  
ACCGCTGTTTACCCTCCACGATTTTCGATCTCATACCGAGAGCCATCATCAACCTTAGCCA  
TTGCGATCGGACCAACCAGAAAATCATTAAATCAGGTTTTTCGATAAACATACGTTTGT  
CTGTGTCCTATACTAAAGGACGCTGATAATCTGGGTTTCATGTTGATATAGCCATCTTCTA  
ACCATGCATCATAAACAGAGATGAAAAAGTTTTTAGTATTGGTATAGTAACGGCGTTT  
GCGTTACACGGTTCATGTTATAGACTCCTGAATTGATCATCACGTAATCAATATCTTTT  
AAGAACTCATCCCATGAATGCCGGATATTGTTCTTAATTCTCCAGATAAGCGCAGGGATT  
GAACGCTCTCCCATCTCGAAGTAAGGATCATATGATCCGATGCCCACTATGCTACTACA  
ATTCCACAATCAGCGTAATAGTATTCTATTTCACTTGCTGGCGACCAAAGTCCATCAATA  
TGTGCGGTGATCTTGCTTTTCGATGTTATGGCTATGACAATCAGGGCAAGGGATGCAATGA  
CCTTGTTTATCGTAATTTGACGTTAGCGAATACTTAAACAATCTCATTATAGATCCTTAT  
TTGCTTCAAATACTGCCTTTGCGAATCCTCGCGGGGTAAGTCACCTTATAGTCTGTGCTT  
TCGTTCCCTTTCCCGCCTAGCTTAGAATGCTGTTTTCTGTACCCTTTATTGATCTGCAACG  
GTTTCTTTTCTGGCATTATAAAGCCTTGTCCGGACCATAAGCAAGTCTTTTTTCGGGTACA  
TATCACGGGCGGCAATATACTCAGGAAACGTAGGATGCTTATCATCTTCCGGCAAATAAC  
CGCGATTTTTCCACGGATGGAACACATAATCAGGCTTACGCCACATGCTAGAGATAACGC  
TTACAGGATTCTCTATCATGTAGGGAACCTTAGCCATTCACCAAATAAGCGGTTATTT  
TAGCTGCCCTTACATCATGAACTTGATCAATGGTCCTTGCTCACGTTTCTTTTCGTTCAA  
AGTGTGCAGCGCTACTAACAGCTAGATTGGTGCACGGTGGGAATGCACAGATAATATCCG  
GTTTCCCCCATTC AAGGTCCATTGCCCTTTCCAGCCGGTTCAAATCAATCCAGGTGTTTA  
CATAGGTAATGTTTGGATGTTCAAATCTGGTATTATACTTTTTGTATGTACCGTGGTTCGG  
CGTCATCCGCATTAAGCAGACTACCTTATGACCTACTTTAGCCTATTCTAGCCCCATTA  
TCCCCGATCCGTCAAAGTTGCAGAATACTAATATTTGTTTACGCTGCCCCCATTTGGTTT  
GATACTAACAGAATCTAAAAGACCTTTGGTAGCCAGTTTCGCGGCAAGTTTTTCAGAGCCGC  
AACTTCCAGCCAGCCGCAATCAGGTTATCAATGAGGCTGTTAGCAACTTCTTCGCTCAT  
GAAAGAGCACTGTTTGGCGATGGTGTAGCGTACACGCTGTAATTTAGTTTACGGAAGCC  
TCTAACGTTACGGTCTTTAGCGATTTTCTTTGCGGTTTCGATGTCAGCCATTGTTTGATT  
CTCCTAAGTGGTATCTCGTCTTGATGGTTGCATTGTAGGGGAGTTATCCTCTCCTGTCAA

CACTTTTTATAAAATTATTTGTTAATTTCTGGTGC GTTGGCTAGGATAGTAACCTTCTTTA  
ACTCCGAGATATTTTCGCAACCATCCCTACAATCTTCTGTGCTACTACAATGTCAAGTTTC  
AGATCATCTTCGCCGTGGGTTTCAATGATATATGCTTCACATGCTGCTTTAGTCTCGAAC  
ATTTTGATTCTCCTATTTTCGTTTTCGGTATGTGTGATTATAGGGGATCGGTGATCCCCTG  
TCAACAACCTTTTAGCGACGGCGACGATGTTTTTTGAGAGTTGCCTTTTTTGTATGCTTTAA  
ATGCCTTTTTACCGTTTTTATGTGCTTTTTTTGGTATATGATTGATTTTTCTTATTGTTTT  
TGTATGTTTTCCCGGTGAGTATTAATTTTCGTTACATTCCACGAAACGGTGTGCGATGTTTTT  
GTGGTATGATCAAACATTTATCATAATTAACCATTTTCGTTTTTCGTTGTTTGTGGATTCT  
TTGGTGTGTTGTTTGCCTAAAAGACCCAGCGAAGAGAATGAGTATAGCGGTCATTAACG  
CAAATATTGTTTTCTTAATCATAATATTCACCTTTAGTTTCTGCGGGAGTGTGAATATAA  
CACTCCCTTAATATTCCGTATTATTCGTGATTAGTTTCGATTTTTGGGCATTTTACACCAG  
TTCAGCCAATCGCCCAGATCTTGATAGTTAATGCTTTTTATCTGCTACCATCGTTTTTGTG  
TTGATACCCATGTGTGCGTTATGAGTAAGCATTTTTACAGTGAACCTCGATTATATCGCCT  
TTAGCTTTAACATCCACCAGTTTGGTCCACTGGCTACCAGAACCGCGAATGTTTCATACCA  
ACGATGTTTTCCGATGTATGCTTCTTTGTTTTTTCAGGATTTTCGATTGCTTTGATGAATTT  
ATTTTTGATTCTCCAGTTTCGTTTCGGTATGGGTGATTATGCTATGTTTTTACTTTTCGTG  
TCAACAACCTTTTTTTAGAAATTTTTCCGAAATAAATTTTTAAACTTGACGTAAATGTTTCC  
CATCTTTGATGGTAGCCGGAAGTTCTTCTTTTACTTCTGTGCAAGATAGATATTTCCGT  
TCCAAGTGAAAGATCCGTCTTAGTTTACTCGATAGCTGAACATCCACTCGCACTCATTTT  
CGATTTTCATCTACACACAGAAGGGTGTAAATCGATAAAGCTATTGATTTCAAGGTCAAAGC  
CGGGACGTTTTTGCAAAGTTGGTAGTGGTTTTAGTCAGTACCATTGTTTGATTCTCCTAAG  
TGGTATCTCGTCTTGATGGGTTTTATTATCCGATACACAGGGTCTGGTGTGAGTGCCTTTT  
TTAAAATTTTTATGCAATAAAAAAGCCGACGCTAAGGTCGGCTATTAAAATCATTTAGACA  
AATAATCATTGAGTGAATCCGGTCCGGCGTATGCTGGTGTACGTCAATCGCAATCACTT  
TAACGCGTGCTTTCTTGCACCTGGGTTTTCTCGTAACCAGTGCTCATGACCGTGAACAT  
TTTATACTGCTATGCTTCTTCGAAAGTACGGATCGGACAAGGGTAATCTGCGTAAAGGAT  
CTCTAGGTCTTCGGTGTATGTA AAAACATACATCATAATTACTGTTCTCTAGTTTATGCAG  
AGACATTCGGAACATTGGGAGATTTTCGCGGGTAAATTCAAAGATATTATCTTTTCATATT  
AGTATCCTCAATAGTTGGATGAAAAGGGGGCTTAATGCCCGTATATTA AACAGTCCCT  
TCCTGTACACCGTAGAAGAGTTCATCGCTGATAATTTCAATTAATGCGACGGTGTGCATTT  
TCCTGAGTTGCGAAGTTGTCAGCAAGTTCTACTTTAGTTCCGCCATCATGAGTCCATTTA  
GTGGTAACTTTACCATCGGCAAATTTGAAGTTGAACTCTTTAGCTACCGCATCGCGTACC  
AGACGTGCAAACCTTATTGTTGCGGATTGCATTGTGCGTTTTCGTGTGGAGCGTGAACGAAT  
TTGTTAACTTTAGAGTGATAGTAACGTATGCCATAATTTGATTCTCCTAGTTAGAAAGT  
GTATCTCGTTTTCGACGGGTGTATTATGCTATACACCCGATCCATTGTCAACGCCTTTTTA  
TAAAATAATTTTCGATATCTTTATGATGTTTTTATCGTGCTTGGTCTGCCTCGGCTGGCG  
CTACGTTGCAAGCGATAGTCTTCACTACTGTTGCACCTTTTTTCGGTGTCCGACACCCAAT  
GATTATCGAAACTGCTATTATTA AACACTTGATAAGAAAATGATTTAATGTTAGGGAAAT  
GATAAGTGTAATAACGTACCCTTAATTCTGAATCTACGTATAAATAGATCACCGCACCTA  
GATAGACCGTCTCACTCGTTCGTCACCTAACAGTAGAGTATTTTCGCAATTCTTCTAAAT  
TGTCTTTTGTAAGAACAATCATAGTATAAGCCTCAATTA AACCAAATTA ACTTTGGTGT  
GTGGTGGTGTCTCGTGCCTCGTCCGCTTCTTCCGGTGACACGTTACGAGCGACGACAAT  
AACACATGCTGCCTCTCCGTGATGATAGTTCTTTACCCAATGGTTATGATTTGCGAATCC  
GTGTTGTATTGCGTAAGCGAACGGCTTATACGTCCAGTAGTA ACTATAATATCGTACATT  
TAGATCGCTATCAATGTACAAATATGTGCTGTCGTTTACATTGCCACTAACAAACAAAAC  
AAGACAATTGCGAAGATCTGACAATATTTTGTCTGTCAATTTTAGAATGTTACTGTTTAT  
AATTAACACCACTCAAGAGTTTTTTGCAAACACATCTATCCATTGTTGAGTATATGCGGCT  
TCTTTCCATGACACAACACCAGTCGAATAATGGTTTTTTGTTTCCAGAAAAGGACGGGAAT  
TTTGATGCATCTTCCATCATCTTTTCGGCGAACTCTGGTTCGTATACCCGCAGAATCTGT  
TGATATGCTTTGTATTCTTTAAATTTGCTCATAATCATTCACTACCTTACCAGCTTCTTT  
AGTTGTTTTTACAACA ACTGCGATAACCCGTAAAGGTTTCGTAATGGTTCCACCAATGATC  
GTGAATATCGGCTTGTGATTTATCACCAAAGGAATCACGAATATCACTTTTACATTTATA  
GCTAATGTGACCGTCATAGTCAACATAAAGGTAATTATCGAAAATCGGCGTGTTTAAGAT  
CATACCGAAAATCTTTCTTTGTGTGCTTATCCAGTGTGTCAGTAATTCGCATCATAGT  
ATATTCCTCATAGAAAGGGATGGTCATTTCTTGAGCTTGTACATTCTCGTTAAGATTA  
CTTCATCCAACCGATATTGTCTACTAGCATATGCACATTTCTATCATATCCTACGTGGGT  
AGTCAATACTGTATGTGCTTTACCTTCAACCATGATTCCCATGTACTTCTGAACTTCGAT

AGCTTTCCTTTTGGATTCTCCGTTTGTGTTGCTTGATGGGAGTATCTTACTACTCCCTTTAA  
TCATTGTCAACTATTATTTGTTACTTTCCGCTTCGTTGCTTGGATAGTAGCCTTCTTTAA  
CACCCAGATATTTTGAACCATTCGGGTGATCTTCTGTGCTACTACGATATCGCATTTC  
GGTAGTCTTACCGTGGTTTGTACAATGTATGCTTCGCATTCTGCTTTAGTCTGGAACA  
TTTTTGATTCTCCTATATCTCGTTGGTATGCGTGCATTATAGGGGATCACCGATCCCCTG  
TCAACAACCTTTTAAATGCTATATATGAGTATTTTCATAAATTTGTCTGCCACTTCATTGGC  
ATGTTTCAGATTCTACGCCTGATTCGAGAACAATAGCTAGGTTCGTTTCGTCATTCCC GCC  
GTACCAATGATTTGATGTTTCGATTTTTTTTCAATTGGAATTTGGTCACTTTTATCTGTGCG  
ACAAAATACATCTAAATGCTCATCGATGTAAAAGATCCAATCTTCATAAAGAATAACGGG  
TATTAGCAAGATTTTTATTGCCTTCAACGAAAGGTTCCGCTACAGGCCAAATTAGTATGTT  
CCATAGTAATTTCTCAAATTATACAGCTTCGTAACCTTCCAATGTCCAACACCTGCA  
CGCTTAACGAAAAGGTTTTCTTTGATGTTATTCATAAACGTCTGGATGGATTTAATGCGG  
AGTGAAGGTTCCATTCTTCGTTGGAATTGCGGCGATATAATAAACATTACCAGTTCGC  
TTATATTCAGCAACCATTTAAGACAACACATAATCTTATCCTCAATTTGTGGGAGTGTA  
TTACCCCTCCCGATGTTGTTATATTACATTACACAAAATGGCGTGTCAATGCTTCTTTTG  
CGTTCCGCTAAGACTTTCGATCTCGCTGGCATAACATCAACCGCCAGAACTTCTACAA  
CATCCTCGGACCCTAACAGTGAGTATGGCGTTTGTAGAACTTGGTAACCAGACTACCT  
CCTCGTCCCATTAAACGCTATCGCTAGCCCACCACACATCACCGTTGATAAAGTTGATGT  
AAAGCACACTACGCCAGATTGAATTAATTACTTTCAATACTGCGCCTTTCATCTCTTCCA  
CGATATGGTCTTCCATTTTGAAGACCTCACCTACCTGAACTTTTGCCATGTTACATGCTC  
AGAATATGTTTAGCTGCATCTTCCAGTTCGTCGATAGTGACACTGTGTGCCAGTAAGTGT  
ACTGGTTGTGGTTCTTCACCTTCCATAGTATTGATCAGATGACCGTTTCCCTGGGTGGAAT  
GTATCTTCGCCGTTCCAAATAGCATAACACATCATCTTCTGTTACGTAGATAATAAGTCCA  
ATCGGTGATTCTGGTTATTGAAAAATTTTACCCACTGCATCTTTGCGATTGTTTACGATA  
ACTTTTACTTACTTCATTTAGTTACCTCTCGTTAAATTACATCACAATCACGCCAGCCGT  
TGAAAGTTGATGTTTCAACTGAGCATTACTGCTACTGTCAAATCAATGACTTCTTGTA  
CGCTGCAATCATATAGCCATTGGTGATATTGTTTTGCATCAGTTCAATGGTTTCTTCGTT  
GTAGCGAATTTTAGCGATGACTTCGTTGAAGTTCATGTTTGATTCTCCTAGTTCGTTTCG  
GTATGCGTGTATTATAGGGGAGTTTAACTCCCCTGTCAACAACTTTTTTAAAGTTTTTC  
CATGATAGCGGTCATAATTACATCTTCTGCGCGAGCGGTCAGATTATCAGCGTCAGCTTG  
TGGGCGGTTGGATGTTACAGAGATATCACCGTTGCGCACTGGTTTGATATTGATATCAAG  
ATATTCGCGGAAACGTTCCGCCAGTTACAGAATGAATTTTGGTGTTAAATTCTTTTTCCAG  
TGCCTTGCGAACTTCACGAATCAGGATAGCGTTTTTTCAGTTGGTTCTCCGCGCTCATGGT  
CTTCTGGGTGTTTTCATGGTTCCGTCGAAGTCAATCATTGGCAGCGTTACGATGTATTTCAT  
TCTTGATTCTCCGTTTAAAGAAAGTGTGTTTCGTTTTGATGTGTGTAGTATAGGGGATACG  
TGATCCCCTGTCAACAACTTTTTTTAAATTATTTTTTCATGAGCTTAATGGCTGCTTCCAT  
AGCCAACACATTTTCGATAGTTAGGGTATCGTGTTAGATCGTCATACATTCTCTTAAGAGT  
GGAAACTTCTCAAACCTTAGGTTTTCTAGATACAGTTGAACAAATTGTTTCTGTACCAT  
CTCGGCTTTTAGCTTGTCTGCTTGTTCCTGTTTCATATGATTTTCGTAGGACCCAACACCAA  
CAAATGATAAAGGTGATCAACGGGCTAATGATCAATGATAGAATAACATAACCGATAAC  
GCTACGGTTTAAACGGCTTGCGTACATGCCTACCAGGAAAACATAAAGGATATAGATAAA  
CAGAAAGAACATATAATTGTTACTCCTTATTTTCGCGCTCGTACTTTTCGAAATAAAATT  
CTACTGGCTAGTCATGAATTGACAGCAAGCCAAAGCGTTTATCCGCTCGCAATCGCATAT  
TGCGCTGAATATACTTCTGGAAGTTCTCGCGTATACACTTACGCCAGTATTCTAAGCCCA  
TACAGCTTTTATACAGATTGCATTGTACACACGCCGAATTCATGTTATCAAGTATATCAT  
GTTCCGGTTTATGCATTCCTACGACCTTATACTTCCACGATCCATCATCATTACGGGCAA  
TTCGTCCATTTTCATCATAGACTACCTTTGAGCGTTCGCAAACCTGGTTTGATGTGGTCTG  
CGCGCCAGCGATCCCCTAGTTCCCTGGCCACAATAGGCACAACGTCCACCATATTTTCAAT  
TCAGGATCTGGCGTTGCTCTTTCTTTGACAATTTTTTCGGTTTAGGGGCTTTTCGCACCT  
CATTATCACACATCGAATACCTCTTTTACTGTATTTGCAGTGGTCTTGTCTGATGCGAATA  
CGTTTGATGATTGGGAGAAATAAAGAGAACTCCGGTTCATCTTCTTTACGTGATTTGCTG  
CGGATATAACCGTTGCATGTCATCTAAATGACTTTTCCAATCAGGTTATGACGGTCAGCC  
CATAACATTTACGGTCGAGTTTTCGACGATCGAACGGAATTACACGTTTCAGTACCA  
TCATCACCTTTTTTCAGTTGTAGTGTTCGGTTAATCCCGATCCGGTGTAGTCATCATTTCG  
CCGCACGCACTACGGACAGTAAAACCGCCTACCTTATTCGGGCCTTTACTATGCGGATAT  
ACATCAACAATTTCCGCGTTCGAAGTCAATCACTTCTTTAAATTTAACCCGATCTTTACTA  
CGGCGATCTTCAAATACACCATGTAAATTTTTAAGGATAATACCTTCTAAGCCCATGTTT

ACATAGCGATGATATACTTCGCGAGCTTCATCTATATTGTTAACTACAGTGGTTTCGATT  
ATCTGAACACGAGGATCGTTAAGTTCTTCAACAATCTGTTTTAGTTCTTCGAATCGATCT  
TGATATTGCTTCGTTGCTTTCACGTTTCCGTAATACACATCACGGTCGATAACATCCCAG  
ACAGTGTAACAACACATTGGGCTTCTTCTTTTGGAAATAGTTCCTTTTCAGTGATTTGTTG  
AGGATAACATTTACGGTCTGACGATCTGCAACAACGGATTCTTTTACTGCTTCCGCTACT  
GGCGTTAATGGCATTTCCTCTCCTTCAAATATCCATGACAGAGTACCATCATAAACCCCTT  
TCACCGAAGTCCTGCGCTGGTGTGTTGCGAAAGGGTAGGCATATATACCAATTCCCCATCT  
AGAACAATTCCACGGCCTCGTACACGCTCTAAAACAGCAAACAAATCACCCAGCCCCTGA  
TAGGTATTACCTGAACGGGTATAGATTGCTAATGTTTCCCGTCAATATCAGCCATCCCA  
CGAGCGCCATCGCTTTTAAGTTGTGCATACGCCGGATACTTGATATTAGCAATGGTCTTA  
TCAGAACATGACGATGCAAGGTGACACGGTTGCTGGGGGATCAGTTTCTTCCATACCTTG  
TTTACAATGGTAGCTGAACAGCCGCATTACAGATCACAATTCAGGACCATCATTGCAAAT  
TTAGCATCATCCTCTGACGAGCAAGTCAGAGTATCGGTAACCTAGCTGTAATGCTGCATTA  
CCAGTTACTTTGCGCGTGGCAAGTTTATTTTTTAAGACCTGTAATGCACCCGGATAAAGAC  
AATACAGACGAATAACGCGATGGTTTATCGTATTTCTTTACGCCAAACGTAACCTGTTTA  
CAATATGCCAGATAAAAACATTCTTTCAGTGTTCATTGCTTGCAGATTCTTTCAGGATC  
TTTTCTTTCAGCGATGTTTTGTCTGTTGCTGCAAGCTGGTTAATGATATTAAGAATTGAC  
ATTTTCACCCCGTTTTGTTAAACGTTTCACGAATATCATTGAGGATACTACAAAATTCCGA  
TTCAGTCAATATAGTCTTTAACGGATCAGTTCCACCTATGCTATGACGTAATTTCTTATT  
TCCTGTAGCGAGTAATGCTGTACAAAATTCTGGGTTATTCCGTGTCATCGTAACAAATGC  
CAGATGTACCAGTCTGTAATAATGCTCACTCATTGACCAATCGGGCGACCCTGAAAATA  
TAACATGTAATTTCTCAATCTTTTCAGTTCTTCCGGTTCTTTTTGCTTTGCCACCGTGCAT  
CAAAAAGATTTCTCTTTGTCTCTGAGGGTCTTAAATCTTAGCCCCTGTAAAAATCCTTC  
TGTGCTGTTAATATCGCAACCAATAGACGGAATGGTCTTTTATTGACATTACTCAAATC  
ACCAATGGATTAGGTCCACCCGCATAGATATCAATTTCAGAAGTCATTGAAACTAATCT  
CGTAATCAGAGAGAACGGATCATAATCGTCATTAGGAATATCGATAGTAATCGAATGAG  
GATTTACCCATACACCAAACCTGGTCTTCTTCGGTGAATACTTCGGTATGGATTTTCGTGGA  
TGTTTACATTCATAGTTTTTATAATAAAAATTCCTTAATAATCATTAACTTACAAAATCAT  
ATAGCCAAAATATAGGCGGGATTATTTCCCGCCGTTTAAAATCATTAAACCGTAAACTACC  
ACAATATTCTGTTTGTGAGTACTGTCCTTTTCAGGTTCGATCTCTTCTTCTTCTTACCG  
CCGTTAATAACGTCTGGGTGAGGAACTTTATTCATCTTGCCATGTGGCAGTAGAACAGTT  
TTACCCAGCAATTTCTTATCTACAGTCTCGCCAATATCAATAATCTTACCTACCAGCGGG  
ATCTAGCCCATAGTGCCTTTTGTCTAATAATGATCCCCATAGTGCTTTTTACTTCGGTC  
CCTGCGCTTTCTGCTTTAGCTTCGATAATTACATAATCACCAAGTGCTTTAGGAGTTTTA  
TCGATCATAATTTTATTACCTCTTCCAATCAATACAGTTTAATGATGAATTATTTATAAA  
TTTCGACGATCTGCGCGGGAGTCAGCCTATCTACATTAATCAGACTATCAAGCCAAAAC  
TACGGAAACCTTCAACTGCAATTTCAATTTACTGGCAAAGATGTTTCTGATTCTTTACGCG  
GTTTTTCAACATTCGGAACCTAACCACTTTTCGTATGTTTTCGAACGGCATCAGTGCCGGAT  
CTCGCGTGGCGATCATCTCACGGACAGTACCATCATTCTTAGTAAACTGCAAAGAGTGAG  
TACCGACCGAAAACATTTTCTTTAGTGCTTTCACGAAGTGCGATATTATCAACTTGTTTCAG  
TCATTATCAATACCCTTCAAATCAGTAAATAATGCTTTTTGGAATACGCGTGATCGTAATA  
TCTGCATTATTCAGAATATCAGCCCAATCACGCCACCATTTCGATCAAATGTGTGCGCAA  
TATTATAGATGTTTAATTCCACTGTTTGCAATTTCTTTAGCGCAATCTGCACACGGTGAA  
GCAGTACACCACATACTAGCGCCTTCAATCGATACACCGCTACGGGCAGCAAACAAAATA  
GCAGTTAATTCAGCGTGGATCTCGTTTTTCTGTGACCATGAACTATGCTCTGGTCGTTTT  
TCTGGGATCATTTTGCCGTCATCATCCAGCCAACCGTTTTTATGCGCATGACAGCTACAA  
TTTACTTGCCCTGCTGGAGTTCGTTAAATCCAGTAGAAATGATTCGCCCGTCTTTTTTCG  
ATCAGTGCGCCTACCTTCCACGAAACACATTTAGAGTTCTTTGCGATTAGATAGGCGATC  
TGCATGTAAGTTTGTGACAACATAAATAATCCTCACATATTAATTAACCGTATACGCGC  
CAGTATTCTACCGATCCGTCGCTATACTGTTTTACATTGAATGTATTCACACCATGATCA  
TTGCTCTTAATGACATATACTGCGACGCTCATCACCAAACGCGTTAAATGGTGCGGGT  
TGAATTTCAAATTAACAACGTTTAGGAAGTGCTTCGCCTAATTGCTTTAGTTTATCG  
GTAACATTAAGTCTCCGTAGTTAACCTGAAAACATTCTACACCAATTGTGCGGTACA  
TGTCACCACTTGACCACGGTCATCTACTGCCAAAACAACATGATAACGCGGTGCAATTT  
CCGAGAAGAAGATCTTTTCTTCACTTCATGGTCTGGACGTCGATCATTAGTTTCACGCT  
GGAAGTGATCGCTAGGTTCAATACCCTGTTACGCAGCCATTGCAGAGTATCTTCTTCGC  
AAACATCCTCACGCCCTGAGCATGTAATGATACGATAACCATTATCACGATACAGTTTAA

GCATTTTCGATCACTTGC GGACGCGGTTTATCTTCTTTGACCTTTGTCCAATCAAACGGAT  
GACGACCGCCCTTATCCGCTAATGTCCCATCAATATCAAAGATCACCGCTTTCGGTAGCA  
TGGTATTCCTTTTGTATACTTCTTGACCCATATATTCCTGCATAAGATAAAAAATGGTTGC  
GCAGATGAGAAAGTGGAAATTGCTTTCTCGCCGCGATAGAAATTTTCGTTTCTTTAGTGTCT  
CAAATGATTCATTGAACACTTGTTTCAGTAGACACCGCGTTAAAGTCTTTTGCAAGTTCTT  
TGTAGAATACACGATGTTTTTCATTCAGGTAGGTATCAGAGATAATGATACTCAATCCGC  
GTGATAGAGTCTCGCGAGAAATCATTCTCTGAATAGACTCTACCAGCTTTTCTTTTTCT  
TACTATACTTGTATTTCAAAGTGAGTCAACACCAAACAACATAAGACGAAGATCATCAC  
GATTCACATTACGATAATTGCTAAACCGTTTACATGTTTCCATTGCCCATGTAGTTTTAC  
CGGACCCAGAACAACCACCGGTTAAAATCACTTCACATTTCCGGAATTATTTCTCCTTCGG  
TTTGCACCGTTCCTCATTAAAGTTCTTTGCGAAAATAACTCATGATCAACTTACTTTCAAG  
TGTGTATCTCTTAATATCAGCCAACCAGACTCTAAATATTTGGGAGTCTCCCACTACAT  
AGAAACTCTAGGTTTACCGTCTATTGTATCCACTTTCAGGTCAATGTCAACTTATTCTAT  
TGGTGCTGGTAGTGGAGGATGTAATTTCCGGTACTGTGAATAATGGTCCATTGGACACGA  
GGAAAGAGCAAATACAATAGGTACAGCGAAGACATCGATTATGGTGGTCTGAAAATTCTT  
ATGTGCTTTCTTAAACAACCAGTGTATCACGAAAATTGATAACACCATAAGGATAATAAT  
GCTTGCACCGATCCCCAGATTATCAACCAGATTAAAATTGCTTCTCTGCTCTTGCGTAGG  
GAATATTTCTATGCTCATTAGTAGCCTCCTTAAATTCTTCGGTAAACTCCTTAAATGTA  
TCATTAAGCTGTTTCTCTACCAACTTGGGTTTTTGTGCTACTACATAGCCTCGTGTAGCG  
TCTTTCATTGTTTTGTTTTGTTCTTCTGGAACTTAGTTCCTTATTCCGTACATCTCCTTT  
TGTAGTGAGTCTACGACCTTCATCTTTTCATCTGTCTTTGTCTTATACTCTGTTAATTCC  
TGATTTAACCGGTCCACCTCCTTTTTATTTTCCCACCACATATTGCCACCTACCCCCAGC  
AACACAGATATGATAACAATGTATATCAGCTTTGACATATTACCCCCAACGACAAAAGGC  
GGGCAACTAGCCCCGCTTATTATTACCAATCAATCTTATCAGCCGGAATCTGTCTCTTAT  
AATTCCATAGATAGTAAGTTTTTCATTGAAGCCAGAATACGGTCATAATCAAGACCATCAA  
ATGCAATCATCAGACACATGAAAATATATGATTGTGCATCACCATGTTTACGTGATTCTGA  
TAGTCGCATTGGATGCATATGTCTTTCTGTTTTCTCCCGCGTGTGCGTTATAAAAATTCTG  
TTGCTGTCGTAAAGGCATTGCGAAGAATGGACCTGAATGCTTCCTCGAATAGCTCAATTC  
GTTCCAGTGCTTCCGGTTCGCCTTCATATGCAGCACGCAAATCATCGGTTTCGCTTTCTA  
CGACATAGTACATCAGGTTATTAGGAAACATCGATGTGTTTTTAATGTTCTGCGCAGCAG  
TATACCATTCACTCTTCACCGTGAACATTTGACCGTCTTTAGTGCGTGCAACAATTCCTT  
CGATACCTTCTGCGGTCCGAACCTTCATCAAGAATATTGCTATAACGCGTTAAATCAACGT  
GTAACGCATTCACCAGATGAGCACGTAGGATTGCGTCAGCAAATAGCACTTGATGCGGTA  
CGTACTCTCCTGTGACGTTATGGCGTACATTCAGAAGTCTTAGCGACGGTTCAAATATT  
CTAAAACAATTCGGTTGCTGGGTGCTGTATACTCAAAGTTGAAAGTATAATCAGACCCAT  
TATCGGCGATCTTAGCGCGTAGATCCGCATACTTCTCTGAATACGGAAGACCGTTTGCTC  
TCTCTGCCTGGCTTGAGTACAAGGCCGTTTTCGACTTCAACTGAACATAGCCGTTATCAA  
TGTATGTGCTTACTAGACTACCGTCCATTTTGTCCATGACCATTTCCACATTTTCCGGCT  
TAAAACGAGCGCGATCATTCTCACCCAAATTAAAAAACTTCTCCATAGGACGAGATGCAA  
TGCGGACAGGTCGGTCTTTATCATCGAATGCAAACATGATCCCGCGACACTATAACGCAT  
CTGGTTTATTCCAAGTTTCCGGTTTGCTAAAGTATAGATAACTAAAAATGCGCATAACGGG  
TTTGCATCGCCGTAATTTTCATCTTTGTAATAGAACGTATCAGATCCGTCACATAGTGCCA  
TCAGATTTTTGAACAATGCTAAAACCTTTTTTTGTTGTTTTTCATTTGTTGACATAATTTCT  
GTTCCATTCTGGTTTAAATTTGGTGATCAAACAGGTTCTTCGATTTCCGGCAGTGCTTAT  
AATATCTTTACCGTTGGATTCTCGATGTAACTCAAAGCATTGGCGGTAAGAGAATGT  
TACTGTCTTACCTTCTAGCGCCTTATGAATATTCTTATTCTTACGAGTATCCGCTGT  
TGGTGTGTTGCTGTTAATGCTCGTCCGGTAATAATTGATCCGCTTTCTGAGATTAACAGT  
CTGACCAATCTATAACCAGTTCATCATCAACCACAATAGCGTAAAGAACATTTAAACGGTT  
TTTCTGAGGCGGTAGAATCACATCACCATCTTTACTCTAAACATGAATATTTAACGAA  
TCCATAGTTTTCTATTAGCTCATTAAATCATTATCCTTTCTCACGTCACAACAAAGGCGG  
GATTTCTCCCGCCAACCTTATTAACCTTCCAGAATATCGCGAGCATCGTTACGCTCCTTG  
ATGATCTTCAGGACAAATTCAGTTTTTCTTTGTTTCAGTGTTCGGTTTTCCATTGCTTCT  
TTGACGGTAAACACTCCGCCACCTTGCCCGTATACAGTGACAGTGATTTACCTAATATC  
GTGGTATGAAAACCGCAAATTTCCGGTGATTGAAAGAAACAATCACCTCACGGATAGTA  
TTGCGATCGTTGATTTCTTCCAGCGTAATATCGCTTTTGTAAAGCGGTTGCTTTAACCAT  
CGGATCAGCATAGTCTGATCTGGGGAGATGGTCAATTTTGTCTATCGCAAGTTGCAATGCA  
GCGTAACCGAAAACCTTAAACGAAGTCCAGAACGTCTTTGCGAGTTTGAGATTTAATCATC



TTGATACTCCTTAGTAAGTTAGTTTCGTTTCGATGGGGTATCTTACTACCCCCGTTTCAG  
GCTGTCAACCACTTTTTAATGACAAGTTCGAATTTTGTACCTTACGTCCTCGTTTATTG  
AAAGCAACCCACGGACGGTTTTCAATGTAGAACAATTCTTCGCCAATAATGAATACTGGC  
TGATTGTCAAGGCGACCCATCAGGTCACACTGGAGAATGGTAGTAGATTCGTATACTTCG  
CCTACTACAAAGTGTTCGCTGATAGAGTCGGTACAAGTAAATTTTCATTTTGATTCTCCTG  
TGTTTCGTTTCGATGGGGTATCTTACTACCCCCGCTATTCAGTGTCAACTACTTTTTA  
GTTGTTGTATTTCATTCCACCATTGAGTGAGCTTATCAATTATTTTTGTGTTTCTTTCCAA  
CTTATCCCACCGTTTTTCGAGGGTTTATCAACCGGAATAGGTAAGGTGTACTTGTTAAGTG  
AACTCGGTCACTGTAGTGATTGATGTACTGCTTTTCAATTCTAAGTTTCATCTTTTTACG  
ATGAAAAGATGCAATGACTTGTTCTTCTGTTTCCATATGTTCCCTCCGTTTCGATGTGGGT  
ATTATGCTATGGTAAGATCCGATTGTCAACACCCAATAACAAAAAAGTCGCCACTATGG  
GCGACTTTGAACAAACATTAATCATGACCGTGATTTGCAATATCCGCTCGTGTGCTGTCT  
TTGTGATTACCTACGTCAAAGACACGATAACCATTTTCACGAAGAAGTTAATGACTTTT  
GGTTATCCTCAAAGACTCCGACAACCTTCATCTTTATCAAAGGATTTAATTACCTCTAAT  
TTGATGTGATAGTCTTTACGGGAATCATTGCGACCCCTCATAAAGATTTTATCGAAACAC  
ACATCATTAGCGATCAACCATTCCACCGTTTCCATGTAAGCACGTGAACTTCGTCCGGTG  
AGGATGTAATCAAATGCCCGTTGTGCGAAAGAGCATTGATAACACGGATTACATCGTAA  
ATGGGGGAATCTCCCCACATGCGTTGTTATGTTTCGGTCCATGACTCGACTTTATCAAGA  
TTTTTCGGTTGGCATCTTTGCTAGTCGATGAGTTGGATCTGTGATCGTAAAATCTAAATCG  
ACAAAATATATCATAGATATTTCCCGAATCGGTTGTAGTCATCGTCTGTTAAATCGGTAT  
TAACCTGAGACACCAGATACATAATCTCTACTTCTGCGCTGCATTCTGCACCTTTGTCAG  
AGTTTAACCACTTACGCATCCACGGTAAAGGATGACGACGAACACTAAACGGGCTTTTCA  
GTCCGGCAGCACGCATACGGGAATCTGCCAGGTATTCTACATAAGTTTTTCAGAATTTCCG  
GTGACAGAATAGGAATTGCCCCATTGCGAATAAGTGGTCAACCCATGCTTTTTTCTTGCT  
CGACAACATCCAGAAAGATTTTCGTTGCTTCGCCTTCAAGTTCTTCCGCAATCTGTTTCC  
ACTCATCACCATCAACCCCCGATGCCATTGACGAATAATGTATTGTGTGCCTTTTAAGT  
GAAGTTGTCCATCACGCGCAATAAATTTTCATGATCTTCGCGTTACCTTCCAGTAAACCAC  
GTTCCGGCAAAGCTGAAAGTACATGCATAGGACACATAAAAACGAATTGCTTCCAGTGCGT  
TGACGCAGTGTCCACACAGATAAATCGAAGCCATCAGATCTCGTTTTGTATCTTCAAAA  
ATCTTCTTGCATCATCTAATGCTGTCTGGTCTGCTCGTTCTTCCCAATAGCGGAGATCTT  
CTTTTGCATTCTCATACTTACGAATCCAATAAAGAACATCATCATAATATTTCCCGATAG  
GTTCCGCTCGCTTCATGATAGCAGGTTTATCGATGATCTGGTTCGAACTCACTAGCCGGAT  
CAATGAAACAGTTACGCATAATGTGTGTATAGCTTCGGCTATGAATCGTTTTCGCTGAATG  
TCCTTCTTTGCAACCATGTATCAAGAGTTGGATCAGATACAATTGGACCAATGCTGCGG  
ACGGTGC GCGACCATGAATAGAATCAAGTAATGTCTTATACTTCAAGTTTTTCAGTAAAGA  
AACACTTTTCAACGTCACCCATATTAAGATATTGAATGCGGTTCGGTTGCAAGTGAAATTT  
CTTCTGGACGCCAGAAAAATGACAGAGATTTTTCAATTAATTCTTCAAATACTTGATGAC  
GCTGAATGTCATAACGAGCGATACCTAAACCGCTACCCCGAAACATGGGTTTCATTCATAA  
TATCAACGTGTTACGATTAATAACCGTATTTCCCATTCACATATTCCTCATTTTACAGT  
TATCAAAGTGCCATCGTAGAGCATTGCCTTTATTGGTAATTTTACCGCAATGCGGACAAG  
GAGCTGCCATTGTTGCTTCCCTTTGTCCGTTGTGAAATCAGCTTTCTCATTTCCTCGCTAT  
GTGGTATTCCTTTAGTTGGCGATGGTTTCCCAAACATAGGATTTTTACTTCCCATTCTAG  
CATTTGAAATGTTTAACGCGTGCTCCTTTGTTTTTTGGCTTACGCATTTTAGCTTTTGTCT  
CTTCTGATTTCAATACACCTTTCGAAGATTCGCTAATCTTCTTCGCGTTTCTTCTTTCA  
TCGGCTTGCCCTTTCTTTGTTTCAGAGCTAAGTACCCTAGCTTGTTTCATATACCCTAGACG  
AAATAATATAATCTCTTTTATTGGTCTTCGCATTATTTGCTAAACACATCATGCCAAATG  
CTTGTGCCATAGGTCCACCATGAATTTTGGCCAGCAGATGATGAATCACGAAATGTTCTT  
TTGCTGTCAACTCAATCAGGTTATCAACTTGATCACCGCCAACCATAGATCGCGGTA AAA  
TATGATGTGTTTCTTATATCCTTCAATGGTTCCCTCTGATCTTTGCTTTTTCTATGATGG  
CGTCATATAGTTTTGTAAAGTTCATGAATTAATCCTCTTTCCTGTATAACCATTATTTATC  
CGGTATCCAGAAGAAGGATTAATTCACCTCACTATTATCCGACAACCTCAAACATTTAT  
CATCAGGAAGAATAGCCATTCTACGCCGATTCATCCTCAAGGTAGTAGCAGGTCCCAT  
CATGACGAGCATCATATTCATCACCGACAACAAAGCTATCAGCTAGCTCAAATCTACAG  
CAACACATTTAATTTGGTCATAATAAAATCCTCACTTGTTTTTGTGGTTGTATTATAG  
CGGGGATTTCTCCCCGCGTCAACACTTATTTTACAGCTTGCAAGATGAGCACCCGCTAGC  
GTCTTCCGTACCATCTGCACCGTCGCGAACGTTCCATAATACAGGGTTTTTCAGACCGTA  
ATATTGAGCAAACAACATATCATTTAACACATCAGCAATATCGACTATAACCAGTCTTATA

AGTGCTTGGATCGTATGATGTATTGGAACATAATCGCCTGATCGACAAACATCTGCATGAT  
CGCTGCCAGTGTGAGATAAGGCTTGTACCTTTCTTGATCATTGTCCAAAGCAGGTCAAT  
AACATCAGCATTATTCTCTACGTTTCGGAATAACCTGATTAATTGCCCTTCTTTTCGATCC  
TTAAACCGATACGATCCCGCGAGGCGGTTCAATACCGTTTGTGCTGTTAGATACCTGAGA  
AGACGACTCACAAGGCATCAGCGCCGACAGTGTACTGTTACGAATGCCATATTTTTGCAG  
GTCTTCGCGCAGTTCCTCCCAATCCATCTCATAACACCGGATCAACCAGTTCATCTACTGT  
CTTTTTGTACTAGTCGATAGGAAGTTCACCGCGACCATAGCGTGTTCGTGCATCAGTTC  
GCAAGCACCTTCTCTTTAGCCAGTCGCACACTAGCCTTAATCAGAGCATAATGCAAGCG  
TTCAAACGTTTTATGCGTAAACTCGTTAGCGTCTCCATATGTGAAGAAATTATCTGCTAG  
GTATGATGCAAAGTTAGTCACACCAACCCCCAGAGAGCGACGTTTTTTGGCTGTCAGAGG  
TTGTTCTACAGGATAATCCTGATAATCTAACAGGTTGTCAAGTGCACGCATCATAACCAT  
AGCAATGCGTTCTACTTCTCCATATTTTCGATATCGAAATTACCTAAAACATATGCTGC  
CAAAGTACATAGGCTAATTTCTGAATCATCACGACCCATCGGTTTTGTAGGCAGAGAAAT  
TTCAAACACAGGTTAGATTGTTAAACCGGTGCTATATTACGAATAAACGCCCCCGTGATT  
GTTTCATGTTGTCTGTGAACGTTGGGTAGATACGACCAGTGTAAAACGTTCAATTGCCAC  
CGTAAAAACAGGTCTTCGGCTTTAACACGAGTTTTACGAACACTCGGATCTTTTTCCAG  
TGTTTCGTAAAGCTGGCGGAAACCTTCCACGTCTCGGAAGTACAGATCCCAACAACAAGCC  
ACCCGCAACAACACTGGACTAAACAGAGTAATGTAATCCCGTTTAAGGAATCGCTCTACCAT  
CAGGTTATTAATCTGTACGCCGTAATCAAGATGACGCATGCGGTTATCTTCCACCCCTT  
ATTGTTCTTTAACACAATCAGACTTTCAAACCTCTAAATGCCATATTGGGTAATAGAGAGT  
TGCCGCCCCCGCCACGAATGCCGCCTTGTGAGCATGACTTAACGGCCGTCTGAAAATGTTT  
CCAGACTGGAATAACGCCAGTATGACGAACTTCACCATGCCCGATCTTAGATCCTTCCGC  
GCGAATCATGCCAGCGTTGATACCGATACCGACGCTTGCTAATACTTGTATGATCGC  
ATGTGCTGTTTCGTTGATGCCCTGCAATGAGTCATCACTTTCGATCACCACACACGAACT  
AAATTGGCGTGTGGGGTACGCACACCTGCCATAATCGGAGTAGGTAGAGAGATTTGCTT  
ATTCGCAAAAGCATTATAAAAATCAATTACGTGTTCAAGACGATTTTCTGTCTCTTCTGG  
ATGCAAGCACATCGCGATCAGCATATACGCAAATTGTGGTGTTCGATGATTTTCTTAGT  
GCTGCGATCCTGAACAAGATATTTCTCTTTAACTGCATCGCACCAGCATAGGTCCTTTT  
AAAATCAAGTTTATGGTCGATGAATTTCTCCAGATATTACACTTCTTCATGGGAATACTT  
TTGCAGAATTTTCGCGATCATATTTTCCGGTTGCAATATTACGCTCAATATGGCTGTAAAA  
ATCAATCGGTTGGAATTGACCGTATACTGCTTTGCGAAGCGCGAACATTGCAAGGTTACT  
TGCTACATATTGATAATCGCGTGTCTTCTACAGTAATGTTATCTGCTGCGACCTTAATCAA  
TACTTTCTGGATATCGTTGGTGGACATACCTTTTTTTCAGTAGTGGTTCAACCATATCAAA  
CAATTCATATGGATCAAAGTTATGACCTTCGGCTGCCGCTTCCAGAATTTTCACTACTTT  
TTCTTTTTCAAACGGAACAGTCAGACCGGAAGACTTAACAACGTTTTTAATCGTATTACC  
TCACTTCATATTTTAGCAGGAACAAGTTTATCCTCCATATTGGGGGCTTTCGCCCCCTTT  
GTTGTAATGCAATTTGAGCGGTGATCGCTGGATGGCTTTGATAGTTGTGAATTTTAAAT  
CTTTCGGAGTCTTTGTCAATACCTCGTCTAAAGATTTAAATTCCGGCAACTCAATTATTG  
GTTTATCAAAGGAACACGGCTTAACTGTTCCATAACTTGATCAAACCTGGTTTTTTGTAAA  
TGTGGCAATCCCCACACTGAAAAACCAGTTCGCCAACTTCTAATCCGCAAATCTTCGCGA  
TGATATGCGTTAACAGTCCATAGCTCGCTACGTTGAACGGATTCCCTAAAAAGAGATCAT  
TCGAAAGCATGAAAAATAAACAACCTCAATTTTTTGTGCTTGGAAACATAAAACTGTACCA  
TCGGATGACATACACCTAGCACAGCATTATGCGTTTCCTGTACGTTCCATCAATCAATGA  
TAATACGACGACTATATGGATCATTCTTGACCATGGCAATAACTTTTTGAAACTTGTCTT  
CCCAAATCTTCGGGCGATAGACATATTCTCCATCGTCTTCAGTGCTTGATGTGTCTACGT  
CCATACTAACAAACATCGTGGTATCCGGTGCTATCATATCCCCACCCAGATAATCACTAT  
CAAGCAGATAACCGAAATAACCATCATCTACCCATTCTGAAATCCCCACAAGCAATATG  
CATCATTAAACAAAATTAGATTGAGTCGTCCAGAGGTCTGCTACCAGAATATAATCAAAC  
CTTCATAACGCATACCACGCCAGATATCACATAAACGGTCTTCTGTTTCATTGGTTGGTG  
TAAAGTCTTCTACCCACGGGTGCTTAAATGTATGTGTATATTTGCTCTTAAGGCACTTAA  
TTTTGATTTACCGTGTGGATGAATCGGTTTTTCGTCGCCATGCCATACCATACCTATTAC  
CGACATTATAACCATTGAATCGCAAGGGATTCTTTTTCTTTCATATCAAGACAGTTGCCGC  
GCCAAATATCAAAGGCTTCTCGTCAAACCTTGCCGCCTGTAATTTCTGTAAGCGACGGC  
GGTCAAGTGATCCCTCCATAAACCACAGCAATTCGCCAATTACAGAGGCTTTAGCCATCT  
TTTTAGTGGCCAGTAAGGGGAAACCTTGCTTAAATCAATTTCGCATTTGTGCACCGAATT  
TAGAGAGCGTACCTACTCCACTTCGGTCTTCACGAGGCCAGCCATTATCAAGAACATCAC  
GCAATAGTTTCAAATATTCTTTCATCCCACACCACCTTTTTCTGATTGATTGCTTACTTA

CGGAGTTTTGCTACTGTCTCGTCAATGTCTATAAAGATAACACCACGGTTCGAATACAGTT  
GCAGGTCTTGAGATATCGCTATTTTCTTGACAGGAAGCCATGATGCGCTCGCTTCATCA  
TAGAGATATTGTAAACCGTAATAATCTACGGCTACTGCGTAGTTTTCACTGGTAGCCGTC  
CATAATTGAATAATACCGACTTTCATTATTGTTCCCGTCGACAATGTAAACACCGACTAC  
CAGCAAACATCAAAGATTCACCACAATGTTTGCACACATAATCTGTTCAGAAATTTTCTTGT  
TACGCCTTCTTACGTTCTAAAATTTGTTTCGCTGATCAGGTGATCATCAAGGAAGTAATTA  
TGTTCTTCTTTTGTGCAAAATCAAAATATAATTCCTAAATCATTTCCTTAGAGATACCA  
ACATCATATTCGAACGGATCATTAAATTCCTGCTCGTTGAACATATGTTAAGACAATACGG  
TCCGCAAGGTCAACCGCTTTTTCAATCAGGGAAGGTCCACCAATAACGCTTACCAAACCT  
TGCAATTTCTCTATGACTTCTAATAATTCCTTCAATCCACCATCATTAGTAATCGCGGTA  
TACACAACCTGGTTGGTCGCCGTTTTTTGCTTTCGGTGCTGGCTTAATGGTATCGGTGCTA  
ACAACCACATTCACACGACCTTCCAGTGCTTTAGGAAGACTTTCAAAGGTATTACGTCCC  
ATTACCACCGCCGCAAGATCAACATCTCCCATAGTGCGCATTTTAAAGTTTTCCATGTCC  
TTTTTGGTTGGACGACCCACGGTAAACCGCCTTTAAAACCAAAGCCCAATTTTCATCC  
GACATTTTAGTGTCACCAATCGGAAATACACATTGAATCATAATATAAATCTCCTATCAA  
ACCAGCTTGAGATAGTTTTCGTTAACGTTTTCTTCTGTGATCTCGGTTTTAAACTCATT  
ACCACATCAGGAGAAACATAATAGCGTTCGGAATAATCACGCCACATTTTCAGTAGGCTG  
AAACCAACATTAACACCATTTTCCCAGAAACGGAAGATAATTTTATTTGCGGTGTAGCGG  
TAATCGCTTTGAATCAAGCTGCCATCACCGCGACGTGATTCATAAACCGTAATACATTCA  
CGGTTAGCGGCTTTAAGACATTCTTCAATAGTGCCGCATGAGATAATTTTCGGTTGAGTCG  
TTTACGATTTGTTCTACAGTCCACATAATATAATCCTCTCTTTGTTTCGATCTGTCTATT  
ATACATTAACACACAAGCATGTCAACACCTAGTTGATAGAGTTTTAGGCAATAAAAAAGC  
CTCCCCGAGGGAAGGCCTTAAAATTCATTACATCCCTAACAGAGCGTCAAGATAATCCAG  
ATCAGAAGCGGAGGAAGTACCGCCACCCAGATCCAGCGATGCCATCAGGTCATCAGCGGA  
AGAATCTTACGCCGTGCTAGCTGCGTTAATACCAACTACAGTGCTAGCTGCGTTTTATACC  
AGCATCGAATGCATTCATCTGTGCGTCAAATCGTCAAGCTGGCTGTTAAGCGCTGCCGC  
AGCACTGGAAGCCGCAGCACCCAGCTACCATAGAAACACCCATCGTTTTCTTAAATTTGGT  
TTCCAGTTCATCGAACGGTTTTAAACTGGCTAGGCGCTACAATCTCACTCAGGTCAACCAT  
GTTTTCCATCAGATATTTCTGATATGCTTTGTCTTCACTTTTCGGAAGCTGTGATTGCTG  
CATGAAACGAGAATCATCATAGTTCTGGTGTTTATCAACCTTCTTAGCTTTCGGGAGGAA  
GTTAGCACCGGAGAACACACAAGTTACATCGACCGGAACCTCACCCATATCGGTATTCAC  
GTTACCCAGTCCAAAGATCTTATCATAAATTTTCTGACCGAAGCGGAATTTGAATACCTT  
ACCTTCATTTTCTGGTGCTTGAGGATCGTTCAGTACCAGAATATTTGCGTAGTAAGAGGC  
TTTACGCTTAATCAGTTGCCATCTTGTCTTATCGGTATTGTACAGATCTTTTTCGTTAAT  
ATATTTGCACACAGGGCAAGAATCCAAATCACCGTGGGTGCTGGAGCAGATTTCCCAATA  
CCATTTGCCATTAACTTTGAAGGAATGGTTTACCAGTTTACAATCGGCAGACCGTCTTC  
TGGCTTAGACGGCCGGAAGCGAATCAGGGCTTACCCTGCTGCATCAGTCTTAAT  
CTTCCACCTTTCGGATCTTCTTTGGAGAAACCATTGCCACCTTTCAGTGCGGCCAGTTG  
AGCTTGCAGTTTGGAGAATCTTGGCGTTTAAACATATTCATTTCTTCTTTTGATTA  
ATTTACTAGACTATTACACAGAATTAATTTACTTGTCAACTATTTGTTTCTGTTTTTAA  
TTGAGATATTTCTTTACACTCTTTAACTACTTAAACAAATAATGCTCTTGCTTTTGCGGC  
GTCATAACAAGTAGTTTCTTGTACGCCTTCATTTTAACTATAAAGTTTGCAAAATCAA  
GACTTTGGCTACCTTGTCTGTTTCGTCGATTATATTTAGAAAGCTGTCTAACAACATAAA  
CGACTCAAACGATATAATCCGATTTTGCAGTAGTTTAAAGATAACCGCTAGTTTTCGGTTGC  
GGGATTGTATGTAATTAGCTCTTTAAGAGTAACCCCGCTTCTCGGAGAAGTATAACCAG  
ACTTTTAAATGTCATCGTCAAATCGTGTGCTGCATCGGTTATCTTTCCTATGTATCCAT  
ATAAAAGCCGTATGCGTCAACATCAGTGATTTACCTACCCATGCATCGGTATTAGCTAC  
CAGATTGCTTAGGAATAGGAAGTATAATTCTCTTAGATTGTACTTTTCCGCTAATTTTGC  
GAAATGATACTTTTCTCTGCGTTTATTGAATGCGGCATCAGACAACCGCATCCTCCAATT  
GTATTTTCCGCAATCGTAACGCCCGTTCATGTGAGCTTTCATCATGCAATATAACATATA  
CACAGATTTAGCATTAAATTCGCTTATCTGGATCTGGAGGAAGACGGTTTCTGATCATA  
TACCCCTTAAATATCGAGAGTGTTGTTTCGGTTCGTCGATCACTCCCTCCCTGAGCGTTCT  
ATTTACTATAACATTTCTTGTGTGTTCTTGTCAATAATGGACACCGGAATATACTTCTGATA  
GTGACCATATTCGATAGAGTTTTCTCTACAACTGCGTTGTCGCTTCAAGATAAGTCAA  
TCCCTCTTCAACAACCAGTTTTTTCGATTGCAAGACCGTTTGTGTTTTGTTTCGCGGCTTT  
TACCTCATGTTTATTAAAGCATTGAACACCCGAGCATAGAGTTCTACCGCTTCGTCGCGTT  
CTGCTTCGAAGTTTTTCGGGCTGTTGCTGGTTATACAGTTTATACAGAATGCCCTACATTT

TACCATCGACGCCTAATTCTTCTTTAGCACGCTTTTTGACCTCTTTGATCTTATCGCCGT  
ATGCTTCGTGAATGGTTTTCTGATCGCTGGCTTCTTTAATCAGTTGTGCCAGGGTATTTTC  
CATGCACTGCTTCGTCAAATACTACTTTTTCTTTTTCTGTTTCAGGCATAATATTAACCC  
TCTTTTCGTCATTAATTGAGAACCACGTTTCAGCTTTTGAAATTCCGCTAGGACTTCAATCG  
TCACCAACATATTCTATCATCATTTCTCGGATAATGTCAAGTGCTTTTTTCATCAGCTAAT  
TTAACTCGACCTCAAGTTCATAGTGAGCCTTTCCCATTTCTTCGCCGACTTTGCAATAA  
TAGAAAGTGTCTTTGCACATTTCCACTATAGCACGTTCAAGGTCAAGTGACAATGTCTTG  
CGGTATGTCATTACTTGAATGAAGGAACGATAAGGTCGGAGTTTACGCCTAGACTATCA  
ACATAATGATAGAAATCGTCCATTGTTGAAAAAGTGATTTCTTCTCGGTTGAATATTCCA  
GATTCACTATCACTTATTTTGACCATAATCAATGATCTATTAACGTCAAGTCGAGCATAA  
ATTCCTTTTCGACGCATTGCATGATCTTCGGTATCATAATAAAATTCGTGTTTTAGAGTG  
TTAGCACGATCTACTAGATTGTACCCGTCATACATTGCTACCCACAAATCACAGATTGTT  
TCGACGCCAATATGTGAGTGTGCATAGTATTTAATTCAAGTTCTTTCATATGTCAACCC  
TTAGAACTCACCAATTTTCTGCAACATTTTACCTAACGCATTGGTTACAAAATAGTTATA  
AATTTTACCGCGTGGTGTCTGGTTTAGATTTCTCCCATGCTAACAAAATTCATATTCGAT  
GTTATCAGGAATAAAGTCAAATCAATAAGTTCGCGGTTTTTCGACAAAGCGTAGTGCTTC  
TTCATCTGTCATCAAAGACTTTGGATCTTCGGCATCGAAAATTTGCTCTATCCATTTGGT  
TGCTATTGGTTTAGCTCGTTCCTTCCAGTCGTGAGATAATGAAATCACTACGGCACTT  
GATAGAAGCTACACCGTCTTTTTCGTCACCTTAAACACATTTTACCATAAGGTCTTTGTA  
AGGGCTACCATATTTGCATTTCTCCAAGCTTTCTGTACTGGCGCCCACTGTTTCACGTT  
TTTGTATTTGTGCAACTGTGTGTAGTCACCATCGCCGGAGTTGATTAGCACCTGGCGACC  
TTCTACAGAAAACTTTTAGTTATCACAGCGATTATATCATCTGCTTCAACTTTGTCAAC  
CTGAATAACGTGATTAGGCATGCTCTCTTTAAACTCTTCGGTGATCTTATTGATCGCAGC  
AAAGATCATCTCCAATCACGCGGATCTGCGTCTGGTTTTTCTTACGGTTGCGTTCATA  
GTAAGGGGCGATATCACGTCGCCAGTAACGTTTTCTTGAATCAAAGGCAAGTACCGTAAT  
TGGGTATTGCTCTTTGAATTTTGTGCATATTATAACGCATGGTATCAACGATAAGATGACG  
AATCATGCCTTCATTAATAGGATCTTCCGGTTTAAAGGTATGCTAGATAGTAGCAATCAG  
AAGCTGCGACATATCAATCAAATGCACACCTTCCGGCAATTTATCTTCTGGATCATCGAA  
GAAATCATTACGTGTAGCGGTAGTTTTTGTAAACGGGTTATACGTCATAATTAAGTTCTC  
TCCACTCTCACAACAACATATTCGCCTAACGAGTTAGATACTTCACGATCATACCCGTAT  
TTCTCCATAACTCGCAGAATTGCATTGTTTAAATTGGGCACGGAAATATTTATAATCCTCA  
TCAGGGATTCTGTCAACAACCCATTTTGCACCTTCTGACAAATCAACTTTGACCATAATA  
TATCACCTCTTTTGTCTATGAAGGCTCATTTTATAAATATGAACATACTATAAAAGG  
AGACCCAAAATGGCAGATTTTTCTCAACATTTCAAGGCCACATTTGGGTTTGACGCTGG  
TAATGAAAAGGTCGTCAATGTAGCATAACGCAGATAAAAACACATCAACGGATGCGGTCAA  
CGTTGAATTTTTCAATTACCATAATGGTATTACTCAGTATGACACAACCTCGCGGTTATGA  
TCAATACGGAACACTACAATCTTTCAAACCGTCCGTATTAAGCAAAGAAGATATCACAAA  
GCCAGCAGGTGATATTGACCCGACTAAATGGCAAGCACTGCGCACGGACCCACGTTGGGA  
TTATTTTGCAGCAACTTCCAGTGATACTCCTTTAAAGTCTGGTGATTATATCGCAGCAGA  
TGGTCAATTTGCAAACCTTGACTTTCTCTATGCCAACTAACCCAGCAGAGGGAGACACTAT  
AACAGTAAAAGATATCGGTTGCAAGTGTGGTGTAAACGAATTCTCGTTCTTGAGTTCAGG  
ACATGAGTTTTACCATAACGCTAATGTGTATAACCGAAAATGGTATTGCACTACCCCGTA  
TGCAATGAACTATTTTCATCTTTGTTTCGGAATCGTTGGCATGTTTATCAGACGGGAACAGA  
GCCGCGAGATGTATACTCACAGCCAACGATTGATGCTATTCAAATGCAGAATGGTGATCA  
GGTATTTTCGTGGTAGTTCGTTGGGTAATATTACCTTAGTGCTTCCTAAGTTTGCCAACAA  
TGGCGACATGATCCAGACTACAGACCTTGACGGATTAACCGAAACCAACCACGTTACGGT  
TAAAGTTCATGAGCACGCAGAAGAACAATCAATTGGCCCATCCGGTCTAAAAGAGATTAT  
CGGTAAGCGTAGCGGTCATGGTGTATTTCATCTTTGACAAGACGGAAAACCTTATGGCGTTT  
GTGGGATGGTGATCAGTCTGTTTCGTTTAAACCGATCATCGATGACACTCGCTTGCAACC  
TAATAGCTATGGTGCTGTATTTGTTGGTTCGTGATGTTACTCTGACGCTGCCGACCAATGT  
CGAGCCGGGTGATCGTATTCAAGTTTCTATGCAGTATATGCAAGGAAACCAGAATTGCCG  
TATTATCACCGCCACTGTGGATACAAAATCCTTATGCAGAAAACATGGTTCCGTTTCC  
TAAGAGTAGCGAGTACCCATTCAATGGGACTGATACATGGACTGGAGTGTCTGAATTGTC  
TTTCAACGCTGCAAATGATTATGTACCTTATCTGGAGTTCTTATTTCAGAAGGTGATGA  
TGGTAAGAAATACTGGTTGGTGACACATGGTCACCCGATTGTAGAACGAGTAGATCCGAC  
TCGTAAAGATCGTGTTGGTATAATTGCACTGGCTACCCAAACTGAAACGAATAAAAACCA  
TGAAGAGAATCCTAGCGACGAAGTTGCAGTAACACCAAAAACCTGCTGGCTAATAAAAACCGC

CAACGAAACTCGACGCGGTATTGCTCGCAGTGCGACTCAAGCGGAAACGCATCAAGATAC  
TGGTTCCAACCTCCTGGATGATGTTATCGTTACGCCTAAAAAGTTAAATGACTGTGTTGC  
TACCGAAGCCCGTCGTGGTGTGATGGAAATTGCAACCCAGCACGAAACCAATGAAGGTTT  
AGACGATACCCGCGCTATTCTCCTAAGAAATTAGAAGAACGTCGCGCTTCCATAGATCC  
CGCTGGTATTGCTGAAATTGTTACGGCTGGCGGCAGTGCTGCCGCTCGACGTGGCGGAGC  
TGGTACAGGGATCTTTAACATCAATGACCATGCTAAAATTGTTACGCAAAAAACATCAA  
CGAAGTCAAGGCGACCGAAACTTCCCGTGGTGTGGCTATCTGGCAACTGACGCGGAAGT  
GCAAGGGGCTACAGAATCAAACCCGCAAGATGCTTTACTCATCACGACTCGCACGCTAAC  
GAAACGTACTGCTACCGAATCGCGCACTGGTATCGCAGAAATTGCAACTCAGGAAGAAAC  
AACTTAGGTCAAAGTGATAACCATATCATCACGCCAAAAAAGTTGCATACTCGCAGCGC  
AACGGAAACGTTACACGGTTTAGCAGAAATTGCAACTCAGCCGGAATTTGACGCAGGCCT  
TGACGATACTCGCATTTCTACCCCATTTGAAGATTAACCTTCTTTGAGAATGCACAGCG  
TTTGAAAGTCGATCCGACTCAGGGGCTTTACCTTACTGGTGATTTGTGGCAAGATATCAC  
GATTCGCGGTTTGGATGCAACCGAAGATACAAAAGGTGTGCTAAAGTTGCTACTACTCA  
GCTTACGGATGCTGGTCAAGATGATACTACAATCGTACGCCTAAAAAGCTGGAAGGCAA  
AAAGGCCACCGAAGGTAAAGAAGGTATTATCCGAATTGGTACACAAGCCGAAACCGTGGC  
TGGTGCCTGGTAATGTAGCAATTTCTCCGAAGAACATCAAATATGTTGTTTCAGACAGA  
GGATACATGGAAAGCAACCGAAGCGCGTCGTGGTTTCTTGAAAGTTGCTACTCAGGAAAA  
CTGTTTTGTTGGTGATAATCTGCAAGGTTCTACTCAAGAACTAGGAAACGACCAGCATGA  
CGAATTGCTGTTACCCCTAAAGGATTAACCTACCCACTTGCTAATTTCTTACCTAAGAT  
GGCAACCGCTCAGAATAGTTTGCAATCGGGTAACGTGGAGGCCGCTAGATGCGCGCGTAG  
AGACATTGACCAGACCATAGAGAGCAATTACACGTTTAATAATAACGTTAACGTGAACGG  
CGATTTAGATTGCTTAAAATCAGTTTCTTTGAAACTCTGTCTGTGACTAAGAACTCAAC  
CGCCGAGCCGAGTAATGGTCATCTGGTGTGGGTGAGCGTGGAGTTGACGGTCACACCGG  
AATTACTCTGCATGGCACAACCGCATCGGAATGCATGAAAACTCGGGGTCTATTATGGT  
TGGTGGTACTGGAACAGCGCAACTTGTGATAGTGATGCTATCGCTTTCAGTAAAATCAA  
TGATAGTGGTGTGCTGGAGCATTACGCCTTTGCTATGGAACACAATGGCGACGCGACAGC  
GTATAGAGACTTTATTGCAGGTCGTAACCTGTATGCGAAACAAGGCGGTCTATACATTGT  
TGACCAGTCTAAGCCGGCAATGACTCGTTCGCCAGATGGTATGCTGAATATCGGTCACGG  
TGGAAGTGTTAACATCAAGGCAGGTCATCAAACGTTAACTACAGAGATCGCCGGACAGAA  
ATATCAGATCGTACACGCAGGAAACGCTGATGAAGTTCTTAACCGTCAGTGTGTTAAGAA  
TGCTGGCGATAACAATGGTCGGTAAGCTGACTATGGATAAGGCGCCTCTTGTTTCTGTAA  
GCATGAAGCTAGCGCGGCAACCGCTCCGGCAATCAGCAACGTCGGTTTCTGGAATATGCG  
CGTACTACCCAGAACATCAAAGAAAGTTATCCAGAGAAAAAAAAGTGTACTCTGATGCA  
ATGGGGTACTGACGCGGACGGGCTTACCCAGCTTTGGTCCCAGATGGTACTCATAAACA  
TTATATCCGTTCCGGTACTGGTGGTCAATGGACCGCATGGGGTGAAATTTACACCAAACA  
GAATAAGCCTACCGCTCAGGAAATTGGGGCAGTAGTTGCAGAAGGTGGTTAATGAATTC  
TATGACGGTGCGTGACTGGATCAAAGTTGGTAATGTTAAAATCATCGCCAATAATCTGAC  
TCGTACCGTAGACTTGATCTGGGAAGACTAATTATAGGGGGCGAAAGCCCCCTATGGGGT  
TATTATGACACAAGATATAGAATTACGCAACACTGGAATAAGGTTTGCGCATGTGACGA  
AGACTCTGCGACATTTACCAGCATTTACAGAAAATAACTCTGTGCTGTATAAGCTGGAAGT  
GCGCGGATCTAATGCGGATTCGACCAACCCAGCAAGGATTAGATTTAATGGAGTGGAGAT  
CGTTGGCACTTGCTATGAAAATGGCCTAAATTTTAAAGTTCTTACTCCAAGTGGACAGCT  
ACACGAAGAAAAGGTATTCTATGGTTCGCGGTGCTGTTTTGGCAATGCGTGATTATCTTTA  
TTAGCTGAAAGGTGACTATATCATTGCGATGGTAACACATGGAGACTTGTGTTGCAGATCC  
GATAAGTGATGATATATTTCTAAGCTGGGTTCTGTATCATTCTCGAATCCCATTTGTT  
ACAGCAAATGCCTCGTGAATCCTATGCAGCAATTTATTCTACTAAAATTGGTAAAATTGT  
GTGCGAAGGGATGCTAGTAACGCACGGAGAAGGTCAAGATTCGTCTATAGAAATTGAGAA  
AGTTTATGATACTATAGATGATCTTGCAACAACAGGAACACCACAACGATTTTTAGATTA  
TCCGTTGAATATGTTAGCGAAGATGCCGAACATTTGAGCTAATACAATGGCCTCATGA  
TGAGATCAGCGCACCACTTGAATATTTTAAACATAAAGGCAGGTGACACACTTCAATATC  
CTTTGAATTGTTCCGTGATAGTGCCGACCCGACAGAGAACGTAACAGCGCGTTTCTATCA  
CAACTACTTCACTGATGGACTATATCAAACCTGGCGTTCGTTATAATACCAGCCAGAAGGA  
TCAATGGGAAAAGTTTGAAGCCGTCTATACCGTACCGGAAGGAGTTGATAGTGTTACCAC  
TGGTTGTATCAGATATCCAACCAACTCAAATGAGGGCTTTGTTCAAATTAGAAACATACT  
AATAACGCCGATCAGCGGAGACGTCAAACCTACTGGTCCGACTTCATTTGGTGTAAAGGG  
TGTTAGAACAACCTCATATTCAGGATAACTGTGATTTTACTAACCCCTGTAATGAGTCTTCT

TAAACTGCCTAGAGATAATAAACACAGCACATACAACAACCTTTAAAGAGTTCGATGTTGA  
TTAACATTTTTTAACAAGCCGATCCTCGTGGTTCGGCTTTATTTTTATACAGTTGGTTAAAA  
CACAAACCGAAACGAAGAAAGATCTTTAGAATAATAGAAAATTTGTTTCGGTTAAAAAAGA  
GTCCGTGCCTACGGCACGTGCGGAAGCGATATTTTGTTAACATTCTATAAAATACTCGGAA  
CTATAACTAATTTTTGAGGTTACTCTATGGCAGATTTGAAACATGGATCTACTGTAGGCG  
GATCTCCCATTTGGACGCAAGGAACTTGACGATCCAGCCAACGGGAGATCAGCTTTTCT  
ACCAAGGTCATAAAATCTATAACCGCTTTTGATAAACCTCGACTGCCGATTTTGACGCTG  
TTAGTGCTAAAGACGGTGGCACATTTCAAAGCAGGTCCATTTTGAGGAAGGTTTAAGCG  
TAGGTAGCGCATCGGCTGGAGAAACCAAACGAACGGGATCTTTAAAGGAAATAGTGATG  
CGGCTAACTTTGATGGTGTAAAGTTGGGGTTTGCATTCGTGGAAATCTATTGGTTTTGTTA  
ATGCCCGTGATGGCGTTATCATGGCTTATATTGACATTACCACAGGTGATTTTAAACTA  
AAGGGACTATCGAAGGGACAACCATTAAGACACAGGTCAACGCTTCTATAGCCCTGTTA  
ATAAACCAACGAATAATGATTGAGATTTGGTGTCTCGCCGCGGTGATACCTCACAGGAA  
CATATAATTTAAACACTGTCACTGTAAACTATCGGTTGATTAGAAATTAATTGCAAGGG  
AACGTGATTTAATTAATTTTGATGCGACTAAGATCTATTATGGTAACGTTCTTGATACGT  
TGGTCTTCCGAAGTAAAGATGAGCCTACCATTTTTGTTAATGGCAGAGAAGGTCGTTTTT  
ATCACACCAACAATAAACCAACTAAAGCCGATGTTGGGCTAGGCAATGTCACCAATGATG  
CACAGGTTAAACGTGCTGGTGATATTATGGAAGGTAACCTGCAAGCGCCTAGAATGTTGG  
CGACAACTATCCGGCTGGGCCTAATGAATTGGTTCGTTTGAGCTACGTTGAGAGAAAAT  
CAATGGTAGCAAATCCAACCATCATTGGAACGTTGATTGCAACACTCTTATTAATCGCG  
GTATCTATCGTGTGAAAATGCTGGGCCAGGTAATAACCCGTCTGATAGCTATTATA  
ACGGCGTTTTGATGGTATATCGCCCAGAAGATGCGGTCGGTACTCGTCAATGGTTCAGG  
TGTATTATCCTCAATCTATTGACCATCCGATGTGCTGACGTTTCGTGTTCTAATGAATCAT  
GGACTGCATGGAACATGTAGATCACCGTAAATTAGCCGCTATTCGCTATGTTAACGTAA  
CTGTGATACCATGACAGTACCGATAACTGTTCCGGCTGCAAACGGTGTTAGAACAGCTA  
GAGGTGCATATAATGGTGATAACTACTATGCTGGGTTAAATAGTGCCGATGGCACGGCTA  
TGATCCACCGTATCAGCTATATTAAGCCACTGAAAAATTGGGTATTACACATGAATCGA  
AAGCTGTTTTCGTTAAATCGCGTGGCAATACTCAAGCCACAGATCGCTATGAACTTGACC  
ACGAAGGGCATAAACCTACCCATGCCGAAGTTGGCGCGGTTCCACTTAATGCGGGTATTG  
ATTTTGGTACTTTCTAATTTTAGCGGGGATTATATCCCCGCTTTTCTAAATAATATTATT  
CTGATAACCGTTTAAGGATGTTATAAAATGGCAGATTTAAACAGAATCCAATTTAAACGT  
TCTAGCACGAAAGGACGTAAACCTGATGCTACTACAATGACGCAAGGTGAACTTGCTATC  
AACCTGCATGATTATTATTTGTTTACAAAAAATGACTCTGGTCTATTATTGACTTAAGC  
TGTCCTCCGATCTATGACCGCGATGTTATCATGGCTGGTAAAGTAAAGGGAGATTATTAC  
ATTTTAGGTAAAACCGCCAATTATCTTGAAGATCAGACAGCGAGACATCTTAACCGTTTT  
GGAGCATTCCGTACCAATGGTCTAGATGGATTTTTAGATTTGACCTTGCATGTTCCCTCAT  
TCTGCTGGCGTTCAACATGGTTCGAGGATTTACTTTCCGTTATGCGACTGGCGGATCTCGT  
GTTGAAACATATGGGTATAATGCACAGGGACAAAAGCATTACAGCTATAAAATGTATCAT  
GAAGGTGATAAACCAACTCCAGGAGAACTGAACGTTTATAGCTAACAAGAAGTAGATAGA  
ATGTTTTGTTAAAAACGTTAAACTTTCTACAGGTTCTGGTGATATCGTTGACGGTTATTTT  
AAATTAGCGACTGCGATGATTCACAAAGACGGTCGTAGTGTATTTTTCCGTATTCATGGT  
GGTAACCGATATTACACTGCAAACGATCAAGTTGATATTGTAGAAATTGTTATTCGC  
AGTGGAATAATCGTCCTAAAGGTGTAACGTTATTGCATACCGCCGAAATACAAAGAAA  
GCATTTGATGTTTTGGCTGTTAATAATTCTCGTGATAACTATGATATCTACGTGAAATAT  
CAGCGTTACACTGATAACGTTATTGATGAATTTGGTAAAAGTGTTGATATGAATCTGGTA  
GTCCATGACGTTCCAGACTTTATTGTTGATCGTCCTGTTGGCGATAATGTTATTGGCGGT  
CGCGCGGTAACATTTTTCAACACCGAAAACAAACGAGGTGTGTTGAGTTTTGACGACAAT  
ACACAAAACAGCTATGATATTGTTACATGAGTAATGATAAAGGTACTGGACGAAAATAT  
ATTCGTAAATTCCGTAGTAACTATAATGAAATGATCTGGCATGAGACGGTTCAAGGTAAC  
GTATATCGTTTTAGCTACTGGAACCTACCGACGCAAACGAAGTTCTCAAATTACCGACTGC  
ACGTTGCAAACCTGGCAATGCTGTTTTTACGGTGGTAATAATAATGTTTCGTTTACATCGT  
AAAACCGGAGAAAGTAACTATCTGGAATATTATGATGCCCGTGACGGAGCAAATAAACGT  
CAGGGATCTATTGGGTATGGCGATGCCACAACCTAACAGTTGTCAATTATTGACGAACTC  
TCCGAAGGTAATAACTCGATTTTCTTTAACGAGACAGGTCAAATTTCACTTAACGTAGGA  
AAGACAAAATTGTTTCATAGCAACGGACAATATATTTCTACCAACGCCGATAACTATCGT  
ATAATTTATGGTAATTATGGAACATTCTGGCGAAATGATAGCGTTAAACTTTATCTCATG  
TCCACTGCCGAAAATGATAAATGGTGTACTTGGAAATAGCTATCGACCATTCAATTACAAC

CTAACGAGCGGCGATGTTCAATTGGGTGGTGGTAAACGAATCGGCATTAACGTTAGAA  
TGTGCTTCCCGTGCCGCTCGCTTTAGTAATGACGTTTACATTAAGAAAGGGCGTTTGACT  
TTCGACGCTGGGCGATTAGGATCTCGCGATTATATTAGATTTAATCATTGGGGCGATAGC  
AATAACGGTTCGCGATAACATCCTACAGATTGAAGACAGTCAGGGCGCACATTTTACCCT  
GAACGTGCTATGGGTACTGGTAACATAACAGCACGTTTTAAAGGCTTTGTTTCGTGTTGAG  
TCTGGTGGAGATTGCATTTGATGCTAATCGGGGGCCGAGTCTCAATTTACCTTACACACA  
TGGGTTAACGAGCAACGCAAACAGGTTTTTGAATGTAAGGATGCTACAAGTTATCACTGG  
TATACTGAACGTACTCAGGGTGACACTGGACTTATTCTGTTTCGTTATGGCGGGTAGTCTA  
TACGTTGGTAGCAATATCACAACTGGTCCGGATATTACGTGTAAACGCGCTGGCAAT  
AAGCACATCTGGTTTTAGAGATCCAAACGGCTTAGAGTTAGGCTTGATGTACTGCGATGCT  
GCTGGTGGTATTTCGCTTCCGTGGTCAGAAACAAGCCCAGGCGTGGACATTTGCAGATAAA  
ATGATCCAGTGGGAATCTGGCACTGTATCCGGTGGCGGTAATGGCCCGATGCGTGGTGAA  
GTTGCTGGCGGTAGTTGGGCTAGCTGGCGTGACCGTGCTGCTTGCTTATGGTTGGGTGT  
CCTCAATCAACCAATTCCGCTCCTAACATCTGGAAAGCTACTCATTGGGGTCAATATCAC  
ATTGCGGCAATGGGTGGACATGTTCCCTAACGGTACTATCGGGGATGCTATAGCTCGCCTA  
ACCGTTCATGACGCCAACTTTGACTTTAGCGCCTCCGGTGACATGTCCGGCAGGGCGTAAC  
GGTTCGTTTTAACGATGTTTTATTCGTTCTGATGCTCGCCTTAAATTCAATAAGGAAGAG  
TATAAGGAGCATGCCACTGATCAAGTTAATCGCTTGACTGTGTACACCTACGATAAGGTT  
AAATCTTTAACTGACCGTAGTGTTATCGCCCATGAATTTGGTATTATTGCTCAGGATCTT  
GAGAAAGAATTGCCGGAAGCAGTAACAACCTTTAAGGTCGGCGACCCAGATAAAACCAGAA  
GAGATCTTAAACAATTTGTAACCTCTGCTGTCAACGCTCTTTTAATTAAGGCGTTTCAGGAA  
ATGAGCGAAGAATTGAAAGCCGTTAAAGCTGAACGAGCGGAACCTTAAAAAGAATTAAGGA  
AACTCCCAGGGAAGGGAACCTACTAAGGAGAAACGGCTATGGTCTATAATATCGTCATTGG  
TGCTTTGTATAAATTCGGAATGAAATTATTGTCAAAGTTAATTAGTGAGCAGATGCTCAC  
TAAAATTTTCTTCTATTGCGCTCGTCGTCATGCGGCTTACACCAAACGCCAATTGATGA  
TCGTTTTGTGGAAGAACTTTATAAGGAGTTTAATTAAGATCAGTCAGAAGATAGTAACGA  
GCAAGATAAACCTAGTGTTAGTCAACTACCTAAATAAGAGTACATTGTCATAGTTATCTT  
AGGGCATTGTATGCAAGTTTCTGAAAAAGGGAAAGACTTTGCTATCTCAAATGTCTGCG  
CGCTATTTTCACTAAAGCACGGAGTTGCTCGTACTTTCGTGTCTTTGCTGCCGTCGT  
GTTGTCCATATTGGCATTGTCTTTTATAGTAAAAACGAGTTATTTGCGCTTTATAAATA  
GACTCGTTATGAGACTTATGCTCACATTCTCCAGGTAGAGAAAGACCGCAATTTTGATAA  
TGCAGCACAGGAGCAGTTACAGATAGTTCATGTATCGGCTGATGCCGATTTTTCTGCTGT  
TTTTAGTTTTCTGTCGAAAAACCTAAACTATTTTGTTTATTTGGTGGCATATGAAGGAAA  
GCTATCGCATACAATCGATGAAAAGAATTTAGGGCGGATTCCTATCAATAAAACGAGTGA  
AGAATATCGTAGGCATCTTTTAGGTAATCATATTTTACCGATAAAGATTTCCAGTATAT  
TCCATCAAGAGAAAAGAAATTAGAGAGTATCGATATAGGGGTTATGTATTCTTGTCTTAT  
ATTCATTCTCGACAATGTCTATTCTGCTAGTATCTCCATTGCATGGAAGAAAAACCGGA  
TATTGACATTGAGAATTTAGATACTCTTTGCAATCAATCTGCCAGAATCCTCGGAAGGAT  
TAGATAACTTAAAGGGGAAGCCTTTAGGCCTCCCATCTTTTTATTGGCGCATAGAAGCC  
CCTAAATCACATTTTGACGCTGTATGATGAAAACAGGTAGCGTACCAGTCATCGGCTTGT  
TTGTCTTCGTCAGAAAACGCGTAATTGCGTTGTATACCGTTTTCTACTTTGACCAGTGCA  
ATAGCTGTTTCTGGAAGATCAATCAATCGGACAAAATCACCATCTTCCACTCTACACGA  
GCAACATCATAGCCATCTCAAAATATACAATCGCTTGTCTAATTTCAATTTCTGCAAAC  
TCCCGTAGACCTTCTCTGCCAACTTACGTGCATCTTTTACAATATCTTTTCATGTAATGTC  
TATAATTTTGTAGCTATATCAATGATGCAATCAACAAAGAAGTAATATCGTCGCAGTGCTA  
CCAGTTCAACATCTTAAAGATGACCATTTTCTCCACTCGCTGAAATGTGTTTAAATTCCT  
TTCGGATCGCGTCCATCGCTACATTAACCTTCTTTTATAATATCTTACGTATTATATGCAC  
CTCGACTAATCAAAATTTTGGCTAGGTCTTCTGCTTTTTCTTGAAAGTTGTCAATTTCAA  
ACTCGATCATAATCACCTCTCCTAATTTACGCTGTTGTTTCAACATTTTTTTCGTGGTTT  
GCTAATTCTATACCTTGTAAGAGCATCACAGTACAATTTTCAATGATTACATTACCTTTC  
ATAATCAAAATTTACCGAAAATATTCTCTGTACATAATTCTTGCTTCGTCGATTATTTTCG  
TCATGTTTCATGGTGTAGTTATGATCTTTTGTGCTTTAATAACAACGAGCAAGGAATCTA  
AAAACACTCGATAACGGGTATATTCTACGCTATTTGTGAATACCGATGTTTTCTCGACTT  
TATCGATCAGATAGCCTAAAACCGATAGCGCCTCGTTTACTTCCCTTGTTACTTTATCGG  
CGATAAACAACACCGGACAAAGAGGGCGGTGTCATTAACCGCGCTGCGTCTTTCAATTCGG  
TCGCTTTCATGATTTCGATTTTGTACATAGTTAAACAGTATATAATCCCCTTACAGATGAA  
AACCTGTTACGATCAACGCATCGATCATAACCGCTAGGAATATACGGTTCGCCCTCTTCTA

TTTCAACTTTGAATCGGTGCCATTTTCGCTAATACTTCTTCCGGTACACCCAGCGATTTCGG  
CGTCTGCTTTAGTTTCATCCATAATCCAAGTGGCTGCATGAGCGCATAGTTTACATAGT  
CCATTTCTGGGGTGATGTCATCAATTTTAATATATTTGCAGTTGACGCGTTTCAGAATTT  
CAAATTTCTTTATTATCAACCTGTACCATGTATGATTACAGTAGTTCCCTGGGATCAGTTCCC  
ACACAATGAGTACATTTTTCATAGTTACCTCACTTAACATAGATTTTCTTTAATGCTTT  
CAGGATCGTTGCTTCCGGCGCTTCTTCCGGAGGAGGAAGCAATTCTACCACTTCTCTTC  
CAACTCGATATAGTCTACCAGATATTCTACATAGAATGCAAGTGGTTCCATGAAATTAGA  
TGCTACATCCGATTACCACAAGCTCCTACATGCATTGTATAAACATCACTGCGATCAAG  
TTTGTGGATGCTTCCAGATAGTTTCGGTTATACCAGACTTCCCACACTTTCAGCTTTCC  
GGTTTTGGTTGCTGTTTTATAATCGGTTTCGTAATGAGGAAATTGACGTTGCAAATCATT  
GATAATAACACATTTTTCGTAATTGTTTTGAATTTCCATGATGTAATCCTCACTTATCGT  
TAAGAAGTTCTAAAACCTTCTGTCGTACTTTGTCAATATTAGTTGATTCAAAAACCTGTAC  
GGTATCCCAGCTTTGACCGTATGATCGCGAGCAATCCCCATATCCCCATTGTTCAACCT  
GATAGTATTCAAGGTACGGGTGCTGCCGA ACTATGATACCATCGCGATTAAAAATTACCA  
TAATATAATCCTCACGTCAACA ACTTATTTTCGGTTGTACTTCTGCCACTTTCGGTAATA  
CTGTTTGTAAAATTGTTTTACGTTTTACCAGCTTTACTATACATGTTATCTACCATCAA  
GTCAATAAGACCTCCCGGTGCTGGTAGTTCCCCGCTCGGATAAGTTCTTTAATTAAAGT  
GTCCTGATGATCTTTGTATACTACGTTAATGATGGTCTTTTCTGCTTTCTTCGTCCCGAC  
CATCCGGTGATTAGCTTTCATCGCATCCCACCAATCTTTTGTGATCTTCATGTTATTA  
TTTCATCACTTAACCTCTTCGCAAGTATTTCTCCACTCAATACGTTTTTTGTTTCCACCG  
CGCTCAGCATCATCGATATGACGGAATGTCAATTTGCTTTCATCATCAACAAGTTTATTT  
CGTTCGAATTTAGCGCCATGTTTCGCAGAGAATATCATTCCGATTTTATAATCTTCGCTG  
TTGATCATAGTCCCGTTATCTGTGATTTCAAATCCATAACTACAGGGTCTTGCATTGTG  
CTGGAGATCATGATTTTAGCAATGTCACCTCTCTTAGAACTTGAATTTTTGCATTTTCGT  
TTCATAATATCATCATCTTCTACACTCATTCCATTGATTGTAGTAATTTTAACA ACTTTC  
GGCAAATGTAGGAAAACGTGGTTTTCTTCGGATTAATTACTTCCGGCTGTTTCTCTTCA  
ACCTTCGGTTCTTCCACCACTTTTTCTTCTGTTTCGGTTGTTCTTCTTCAACCTTCGCA  
GAAGTCTCTGAATCGCTTCTGGTGCTGTTTCTTCTTTAGGTAATACATTCATTAAGTTT  
TGACTTTGAGCGTTATATACAGCCTCCAGTGGCTCAATCTGCCCGATATTGATCATTGTA  
TCACGAACAGTTTTATTCCAGTTGCGTTGCTCTTGTTCAGAGACGGATCAATCTTAACA  
GACTTAACATATACCTCATGAAGTTTAGAGACCAGTGCAGGAGATTGACTCATTAGCACAA  
ATAAACTTCTCTGATTTGGTAGTAGCTTTAGCGTAATCAAAGGACGCAGCGTTAGCACCG  
AAAGCAGTAGCAGAAAGAGCGATAGCAGCGATAATGTTTTTGATAATATATTCCACAGTG  
TTTTGTCTTGATGGGAGCATCTTACTACTCCCTTAATCCGGTGTCAACTACTTTTTTAAA  
TTTCTTCTACAGTAAAATCTTCAATGTTGTTGTGCTCGGCGAACGTTGCAAGACCAGCAT  
TCCATGCATCATCCTCAGAGAAGAATACACTGTAACGTTTCATATCCTTTAGCGCCTTCAA  
ATTTAACCATTAATTTGTGAGTATGTTTCATTTTGATTCTCCGTCGTTGTCTTGATGAGT  
TTAGTATAGGGTATCGCCGATCCCCTGTCAACA ACTATTTTTTAATTTTTACCCGCTCGT  
GCATTAATACGCATTTTCTGCATAGCCATGATCTGGCTTACTGCTTCTTCTTTACGTTCT  
TGCGTGGTAACGTGACCAGATTCCGCAA ACTCTCCCGCAACTTCTTCTACGATCTCGCGA  
ACTTGAGAACGTCCAAAGATGCGGTTTCTTTCGTAGCTCATAAGTTCTGTTACTACTTGC  
TCGATAGGCTTCATCTGATTGTCCTTTCGTTTGGTATGGGAGTATAATACTACTCCCATG  
TCTTTACGTCAACA ACTATTTTAAATTATTTTCGACCTTCACCCATTCCGCGTAGTCTTG  
CGCGGCTACTTTCGGATTTAGGCCGTCTTCGTACATTGCTTCAAGTAATTCTTCGTCGTT  
GGGCTTATACCCTAGATAAGCCTCCACCTGATTTGTCCAAATTTTATACCAGTTCATATT  
ATCACCAGTCAAGAGCGCGTGTCTGCGTCTTCCCATGCTTGATCCATAACAGCCTTGA  
AAACATATTCTAGAGGATCATCTTTAGAGAATCCGAAGACTTTAGACGGAATATCTTAAA  
TTGCTACTCCAGCAACTTCTGCATTACGCGCTTGGCAATAATGCAACTCTAAGTTATCGT  
GATAGCGACCCTAATTTCTCCAGATCATCCAGCATTTCCAGTAACCTACTTTATTTG  
CAATTAACACTTTGCTGTTTTCGTTGCTCATCTTTGATTCTCCTTTTGTGGTATG  
TGTGTATTATGCGAGTCTGGATTCTGTAAGGCAACAACCTTTTAAAATAAAAAAGCCTAC  
CACAAGGATGGGCTTAATAATCAGTTACTTACTAAATTTCTTTTTGGCTTCGTCTACCGC  
ATGAGATGCCAGTACCGCAGCCGCATGTGCACTTTTATCTGTGTTGCAGAGAACGCCAG  
ATAAACATCACGCCAAAGTTTAAATCATCTCGTAGATCATATCAATATCATTTTCATGTTT  
GTTGGCGATGCTATTCGTGCTTATCTGGTAAGGTAACGGCTTGATCTGTACTGGTTCCGC  
CATCGGGCTAATCGGTTTCGGATCAGTCATAATAGGTGCTGTTGTGGGTGGTGTTCCT  
TACACCATTATTCCACGGTTTAAATCGTTGTGTCGTAAGTTTATAAGGATTTTTGTCTGG



GTCAACCATCCATGCATGATGAGTACCCAAACCATTTGAAGTGATGCGTAGTTCAGTCAT  
AATTTATTTCCCCTCTGAAAATTCCTTCATCAAGCTGTCGATCTTTGCTCTGTGTCCTGG  
TGTGTTTGTCAATTTCTGCTAATTTGCTCAGAGATTCAGTGGTGTCCGGTTGGATTCTTC  
CAGTGTTC AACGACCATTGGCACAATCTTTTTATTTTTGTACACAAATGCAACTTAACC  
GCCTTCTGGATATTCTTTCATAATCAACCGTTGTTAAGTTCTTTAAGATCCTTCTTATAT  
TCCTTCATTGTGGTTCGCTTTTGTCCAATACTCATATTCAGTATGATGTTTATCGGCATCT  
TTGACCAGTCGATCATACTCTTCTTGAGTAACGCTATAACAATGGCATAGAACTAGCTTA  
TCGGCGTATGGACGCAGTTTTTCATGTACATTGTTGGATTGCATTACCTCGGCATTTTTTC  
TTGCCCTGTAGCTCGATTTTCGCCCTTAATTACGCGATCGATAAATTCGGCTTTAGCCATT  
GCATAATTGTATGCTTCCAGGGTTTCCGCTTGCATCAATTCAATGCGTTTATCGACATAC  
CCTGATCGGATTTTCGACGAATCGACGGATCAGATCGCTCGCTTCTCGAATACTTCTACT  
AAACCACGTTCAATAACCACCACTATATTCTGGGCTACTAAATGTGTTAGTTTAAAAACC  
TTCATGATTTGCTCATGTTCGAGCGGATTCATATTCGCTTTTGCAATAATCGCGTTTCAGT  
GTTACTTCAAATCTCCATTCATCCTTAGAGCAACGGTTCATTATACGATAGAATCAGATCT  
TTTTCTTCTAGTGCATCCAGTACCGCTACATATTCTTCACGGTTCGAAGTGATAAGGAACT  
TCTGATATTGTCAGCTTAGTCTTTCGCTTTAGTTTCATATGTACCCTCAAGAATCACACCA  
TCGCGGTTCATCACGAGGGATAACTTTACCCGTGAATTTTCGGGAATTAACACTATGTTCT  
TTATCCAGTTTTTCCGGCAAGCGCTAGCTCTGTGCATTCAATAAGGCTTTCAGTGAATGC  
GGTAAAATGTCAGTTTCATACCCTGTAGCAATAGCACTAATAACCATTAGCCAATACCATT  
GGCACAACCTGGCAAGTAGAACGCTGGCGGGATGTGTTCCAGATCTTCGTGCTTAGGTGCG  
CAATTCATATCTTTATAGATTTTAAAGAAGTTTTTCATGCACACGAACAAAGAAATAACGT  
GCCGCACCTGCTTCTGGACTAAACGCGATCCAAAGTTACCTTGACCGTCAAGCAGTGGA  
GTATTATAGCTCCATGTATTTCGCAATGAGTGATCCGGCTTCTACGGCATTAGTTTCCCCG  
TGGTGATAACCCAACCTCAGCAACACCAGATCCATTATCTGCCATCTTACGGAATTTCTTA  
CGGTGCGCTTTACTCTTTTGAAGTGAGCACTCCAAAACAAAGCGTTGCACTGGTTTAAAGA  
CCATCGACCAATTGAGGAATCCCGCGTTCCTCGGCAGAATAGATCGCATATTCCTTAGCT  
TCATTATGTACAATGCTTTCAGGCTGCGGTAAGTTAATGTGTTTGAATTTGACTAATT  
TTATCCATCTTCACCTCATAACGCTTACAAATCACATTCTTTACTTTATCAGATTTATC  
AGCCCAATCCAATAGCCATTTTAAACGGAAGGATTGACACAATAAACGGGGCAGCAATCAA  
AGCAAACATGATACACCTGATAATCAGGAAAACGCAACTGACGAACTAGCGATAGTGAT  
CCCGACAAAACAAAATACCATAGAAAACAGAGTAATGATATAGAAAGGCCAGAATACCCA  
CTCCCGCATCTTAAACGCCTTTGTATTCTTTGAATTGCTTAAAATCTACAAACAACCTCTCG  
GATAGACGCGTACAGGACCGAAAAATCATCTTTCATTGCTCTGAATGAGCAATCTTCTAT  
TTTGAATGACCTAGCATTATTAACCGCCTTTCATCATTGATACAGGAATTGTTTTCTGA  
TTTGTGTATAATTGGCCTACTTCAATTTTTTCTTGAATCACCACGACGTTACAATATCCA  
CTGTCTTTAAGTTTTCTGATAATAACGCGCTTTTGTTCGTCGGTAATAGGATTGACTGTT  
CTACCAATTCACCGCAAATAATAGCACCATCTTACAATTGCCAGTAACTTTTCATGCTA  
CGACCGTGAACAACAACCACGTCACCGTAAATGACATTTTCGTCGTCGATTTGGTAAA  
ACCGTGACCGTCATAATGTATTCCCTCTAAGAAAGGCCGCGCAAAGCGGCCTATGTTGAT  
TATTGTTCTACAGTATAACCGTTGTTTTCAAGCCATGCAATACCAATATTTTCGCCAATT  
TCATCGAGCATTTCATCAGCGCAGTATTCTTTAATGAAAGTAGATGGATCATTATTGCTT  
ACTACGTGCTGGATCACAACATGTTTCAGGAATTGCGTCTACCAGTTCAGTATGATCATA  
TCAGTAACGATATCTTCAACACTAACATTATTAACCAAATCAACATCATCCATCGTCACG  
GTAACGCGACCGGACGGACGCAAGGAATATTGGCTACTTTCAACTTCAACATGTGCACTT  
TCGCAAGTAACTTTTCATATCAATCATAATTAATTCCTCTGTTAGTAAATGGCTAAACCTTT  
CGGTCCCATCTTCAACCACATAGTAACGATGACAGCGCATTTTGGCATTTCGCATAATCTT  
TCGGGATACTTACAACGTGACGCGGATCAACTTTACATTTAATGATTTCGGCCTCGTCCAC  
CGCCTTAGTGCGGAATATAGTGTTCGCTGCAACGTGGAGGCCATTAGAGCAAGTGCGAT  
CATCATCTGGGTCCACGTCTTTACGATTCATTTTAAACCGTTCGCGCCCTGGGCTATTATCAA  
ACGTATGAGTAAAGAAATCTTTATAATCAACATCAACACGTTTCCATGCATAGAAACAAC  
CATCTTCCCCGATCTCAATGTGCTTGTGCTCTAAGAAGTCAAATAGACGATCTACCGCCT  
TACGGCTAGGGTTTTTCTTGCATTTCTCAAAGAAATTCAGATAGTGCATATATGGCTTAT  
TCTCTTTAATCGACTGAACAACCTCGACGAGTCAGATTATTATCAAGAACAATATTATGAT  
AATACACAATACCATTTTCGCTACGGAAAGCACCATGATAATATAATTCAACCTCTTTCT  
TAATGTCAATCATCGTAATAGCTTTGATGAAATCATTATGTTTAAATCGCTTCCAGTGGGT  
CATTAAAGTTAACATGCGACGGATCAGCAGCATAAACAATGTCACCACATGTAATAGTAA  
TAAACTTAGTTGAGGCTATTGCTACGATTTTTGAGGAAGTAGTCTCGGGCTTTTTTGCGC

GTTACACCGCCTTTTCTTTACTGGTTTTTCGGCGTGTTTTACGTTTTTCTAGTGCCTTGC  
GACCTTCCGCTACAGCGTCTTTCTGAACCAGTAATACACGGGAGGCAGTACGGCGAGATA  
CCCCAAATGCTGCCGCAAGTGCTTCGCGGGTAGTAAACTTACCTCCGCCCCACCGTGTAG  
CCAGTTTGATTTGTTTCGCAGAATCCAGGCATTGAACGTTACGGTCAGAGACGGTAATTT  
TTGATTTAGACATAGTATTCATTCTCTATTAGTTGGGCGTCTATCGCCGCCCGATTAC  
ATCATTATAACCAGAATTATTTTGCTGCTACAACCTTGCGGATTGTGCGGTCTGATACATT  
ATAGATTCGTGCGAGGTCGCCTTTAGTCAAGCCGCGAGCGTATTGTTTTCGGATGGTTTC  
TTTCTGGATAGCGGTTCAGTTCAGTCATAATATCACCTC

>NewGenomeName\_204

ACCCCCGCCCCAGATTCAGCGGAGTCAACGAGGCTCCATCTAATCCGTTTATTGAATAGT  
CACGTGAACAATCATGATCTGTGCTTCGTGAAGCGAAGCTCACGGAAGATTGTACACACT  
AACGTTGGTTCGCCGACAATGCTTTTTCTACTTTATAAAAAGTAAAGAAAAGATACTTTTA  
ATATTCTACTACGTGTAATATATTTTTTTCATCGCATTGTGATGAAGCAAAGAAATTTATC  
TCTCTATAAATACCAGTCTGTTTTTTGTTGGGCATACAACGAAAAATGGTGGGCAATTGG  
AATCGGTCAGGCAAAAAGGGTAGCACAACACTTCGTTCGTGGTTACACCAGGGCTTCCAAG  
TCGGCTGTTCTTCCACCATAGTCTCGTTCATCAGTCAGCTGTATTGAAGAAAGATGAC  
GTGTGGGGTAGAGAAATTAAGCCTTAAGGTGCTGTTGCGCGTTACGAAATTCGTAGGGTG  
ATGTAGAGTGGTACCATGAGGAAACGTCCGGGAGAGCTGGTGAATTATCTGATCGACAAG  
TGTAGTTCACCTGTTGATAAAAAGTCTGCAGCCTTCCCGGCAGCTGCTCTAATGTGGAAA  
GAGAGTTTTCAAGATACGATTACTGTCTATAGGCAAAGTTAAGGCAGGATCGAATTCTGTA  
GCTGGATCAGATTGTACTAAATCATTCAACAAGTTCATCAGATTTTGAGCTGGTATTAGT  
CAAACACAACATTTCTACGCTATAACGTATACCATTGAAGCTGTCAAGACTGTATTAGAA  
CATCGAGAGTATGTTGAAGTTTAATACCACTGTGTAATGAGGAACATATGAATAATGAGT  
TAATAATGCATTTGATATATTTACGCCGGGTAGCGGTATATTTTGTTCGTTGAGTTTCCA  
TATATACCCTTCTTTATTGAAGGGGTAATGTCTCTTTTGCCCTTATGTGACGTCATTTGA  
TACCGTGCTGAGCTGCAGCGGGGCTTCGTATT

>NewGenomeName\_205

TTGCGCGAAGCCGCGTGGCCGGTGCAGTGGTGGAAAGAACCCGGATAAAAACAACCGCATT  
GTGCAAATATCGATTAAATTTGGTGCTGCTGTGTGAAATCTGAACATTCACAGCGGTGAG  
TACGCATCAGTTTTTAACACGAGACGTCGGAACGTGAAATGCCCAAGCTGGCATGGAATA  
ACATGGAGCAGGCAATCCGATGCGAACATGCCGAAACGGGAATAACATTACTAGACTGGT  
GCCGGAAGAAAAAGATTAATTACAACACCTCCAGAACCCGTATAGAAATGGGCAAAATCG  
ATCATGAAAATGATCATAAATCCGCTCATGAAATAGATCATGACATCTCAAATGAAGAAC  
CCTGCAATGACGCGGGTTCGCGGATGAAAAAAGTGAAAAAAGCTCTGAAAAAACAGCG  
CAAATTCGGCAGAAACGAAACGGATTTCGTGGTTCCCGACTATTACCACCTTCAAACGCTT  
GTTCTTAGAGAAACACCCACGGCGTAAGACACCGTTCGATATGCGAAGTATCTTGAGGCAG  
ATAACCTTATGGATGATGCGTCTACATGCTACTATTTCGATGAACTGATGTTACCCGGGG  
CCCGCGCACTTTCAGTAACTAAGGCACTTAAAGGGATGTTTCGCCGACCTGGAATAGGCAA  
ATTACGTGAAACCCGTGTTGCTCTTCACGACAAAATAGTCAAAGCTGAACAGGCACTTG  
ACCGGAAGATTGACCGTATCGAGTCAACTGTACCCTCAATGCTGACGCAGGACGTCTTAG  
TTGACACAGCACGATAACTTCGTGCTGATCGGGAACGAATCTAAGCCGCTAGAGATAAAC  
TCACAGCTGAAACCGATATTCTGACCAACCAGCGTCGGGGCGTTGTTACGCCTGTCAGTG  
ACACCGTGTTCATCGCTTCTGAAATGAGTAATTCGGGGAGACTAGATGACATTCGGGAAG  
AATGAACCGCGATGTGATGAGCCGTCAGAAATGACCGAGGCTGAACAACGTCTGTTCATC  
ATGACTAAACTGAGCAATCCAGGTGGCGGCTCAATCATCTCAACAAAATACAGAACAAA  
GAAGGTGAACCTGACCTTCAGAGTGCATCGACGCAACGCCAGTCGTTCCGGAGCATG  
CACAATAAAAATATTATCCTGATAGCGCGCCACCTGGGATTTTCCACAGCCATTGATAGT  
TATCTTCTCAACCAGGCATTATTCATCACGCATCTCAAAGGCGGGCTCGTCGTTTACGGAT  
AAACAGGCTGCCATTGAAATTCTCCGCACAAAATTGCTGTACCGTTTGGTTCATCGTCCT  
GACTGGCTGAGAGCCTCATTACCATCGTTGAACGTCGCAGCGGTGCCAGCAGTGGCCAT  
AGCCTGATTGCTCACGGCTCGAGTATCCAGGTGGCAACCTCATTCCATTACAGTACGGTG  
CACCGCCTGCATATCTCAGATCAAGGTAAAATTTGCGCGAAATATCCGGCCAAGGCGAAA  
GAACTGCGAACCTGTACGGTTAATGCCGTCTCTGATGAAGGCATAATTTTTGATGAGTCA  
ATAGCGGAAGGCGTGGGTGGTGAATTTACGCGATTAGTTTCCGAGCACAGGAGTTCACT  
GCATCAGGCTTAATGGTGACGGGACAGGATTATATATTCCATTTTTACGCCCGGTGGCAG  
GCTCCTCAATACAGCGCCAGAGTGCCGGAAGCGGGCTGAAGCGGTACGGAAACAAAAG  
ACGTATTTTTCTGCGGTTGAGAACGCAATGAACATCACACTTACTGATGAACCGAAGCAG

TGGTACATCAATAAGGAACTGTATAACGAGAGGAAACGAAGCAGGAGTTTCCCTCAACG  
CCACAGGAGGCGTTTCTGACGTCCGGCCTACGTGTTTTTCAGTGCCGAAAGTATATTGCAT  
GCCGAATCATTCTGATCGCCACCTATCATAGTTTATGACATTGAAAATGTTACAGGAACG  
AAGACTAAAGCTCACTCTCCGCGTTAAGGAAATAAAAACGAGTTGCAGCGGATGCTGATG  
AATTATCTGCTGGTATGGGAACTGCCGGATCCGGATGAAGCGTATGTTTGTGGGGCAGAT  
ACGGCCGAAGGGCTGGTGCACGGAGACCGATCATCGCTGGATGGTGTCAAACGCAGTAAT  
GGCGAGCACGTTGGTCAGTGGTTCGGGCATCTCGAGTCTGAACTTTTTGCTCATCTCATT  
TCGCAGGTCTGTTCGTAGGTATATCAAAGCGTCTGCGGGGCCGGAGCGTACTAATCACGGA  
CATGCAGTTATCCTGAAACTCCGGGAGCTCTAACCGAAACGTTATATATAACAACGAATAG  
CATCTTAACCAGGCATATGACGACGATACGCCCCGCCTTGGCTGGCTGACAACCCGTCAG  
AGCAAACCTGTTCTGACCGAAGGAATGAAAACGTTTCTGAATAATGGCATATCACGGATC  
CGATGCTCAGGCACATTACCGGAAATAAACACTTACGTATATGACGCGGAAGGCTCCATG  
AATGGACAACAGGGATGCTTCGTTGATCAGCTCATGAGGTACATGATTGCCCAGGAGATG  
CGCGCCAGAATGCCGGTGAGGGTACAACAGACATCGGAACAACGCAGAACCACACACTGG  
ATGGCTCACTGATGTAATAATGAAACTAACCCCATGGCGACGAAAAACGACAATAGAGCCA  
CGCCGCGTTTTTCTCAGTGCCAGTTACAGGCTCTTTGTTCTTCTATTGACAGGCAGCCAA  
AATGGCGTGATGCCGCAAGCAAGGCCTGTGCGTATGACGATGGCTATCAGATGCCACCGG  
AAGTTCCTCAGGTATTGAAAGATCGCGGTCCGGCAGATGACTATCCATAACCTCATCGCAC  
CTACCGGCGATGGCGTTCTGGGAATAGAGGGTAAAACACGGACTGATCTGGTGCTCATGA  
TAAACAAGCCAGATGATGAAAATGAAAAACTGGCTGAAGCAATGAAAGCTCAATTTGCCG  
CGGCATGCCGCCCTGGCAATATGAATAAAGCCCGCTCTCATTCCCTATGCGGAACTAATCA  
AGGCGGGCCTCAGTTGGGTGGAGGTCAGACGGAACAGCAATCCCTTAGAGCCTGAACTTA  
AAGCGTGTACTGTCAGCCGGAATGAGGGTTTCTGGGACTCGCTGAGCCGGGAGGCTGATT  
TAAGTGAAGTCCCATGGCTGATGACTCGCCGCTGGATGGATACCGTTCAGGCAGAAGCCA  
CATTCTGGGAATGCCTCAGGTTATCGTTTAAGCCATTGATGAATGGCGTTCGTATTAGCG  
ATACCACGGTTGCTGAAGGCCAGCCCAGTCCGTTGATGAGTGCATGACACGAGTATCAGT  
CATGGGATCGAAAGTAGAACGAATGTTCTCAGCGTGAACGCCGACCTGTGCGGCTTGAGG  
TGGTCTATTACCGTACATTCGAGCGTCTCCGGTGATTGAACTCAGTAATGCACGGGTGG  
TGGCCTTTGATAAAACAAATCTGACGCAGGCGGTAGCTGTGGCATCCGGGTGGGTTCAGA  
TGAAAGCCGGGCGAGTAAGCCGTATTCGTCAATTCTGGTTTGTCCGGCCACACTATAATG  
TGGATCGCCCCTGTAGTGCTCCGCAGGGGATGTTTCCGCTGGTTCCTTTGGGGGGATACT  
GAAAGGATAAAACCGGGTAGCCATACGGGCTAATTTCCCGCGCCATTCTGGCTCAGGACG  
AGGTGAACTTTCGTTCGTGTCCAGCTGACGTGGTTGCTTCAGGCAAAACGCGCGGTTGTGG  
CCGAGGATCCCACCAAGTTGTCAGACAACCACCTGATGGAGCAAATCGAACGTCCGGATG  
GCACTATTAAGTGAACCGGGTCCGAGTAAATTACAAAAGTGTTCGCAGATGTTTTTCGGA  
TTGAGCAGGATTTTCGGGTGGCAACCAGCAGTTTCAGGTCATGCAGGAATCATAAAAAC  
TTATCCAGGATACCATGGGAGTTTATTCCGCATTTCTGTGGGCAGGATTCAGGTGCGACGT  
CAGGCGTTGCTATCAGTAACCTGGTATAGCAGGGGGCGACAACCCTTGCGCAAATCAACG  
CTAACTACCAGTATGGCTGCCAGCAGGTGGGACGACAATTGCTGCCTTATCATCTGGATG  
ACCTGAAAAAACGCCGTAATCATGCAGTGGTGATTACTCGCGATACTCGCCAGCGTCGCC  
AGACCATTGTCCGCAAAGATGAAGGAGATAATGGTGAAGTACCAAAGATAGTTTCGAGGT  
TACATACACATATTGCCCTGGCGCCTGTTAAGCACACACCAGCGTTTAAGGCACAGCGTG  
CCCCGAGAATGTCAGAGGTGATTCAGGGGCTAACGCCTCAGGTGCAGGCGGTTGTGCTCT  
ACCTGTGGGTAAATTTTCTGGATGTGCCGCAGAAACAGGAGTTTATTGAGCGTATTCGTA  
CTGCGCTGGGGACACCAAATGACCGGAAGAAATGACGCCGGAAGAACAGGAAGTAGCGG  
CTACCAAACAGGCACTTCATCAACAACAGGCGGAACTCCAGATGCGCGAGGAAGCTGGCC  
GAGCGGCAAAACAGGAAGCTGACGCCGGCAGGGCCCATGCCGCTTCACAACGGTATAATG  
CCAGTGCACAGCGGTAAGTTCGCTCTGACACAGGGCCATCGTTATATGGATGCGCTTAAGC  
AGGCAGATACGGCAGAAATATTGCTGGCGTAAAAAATATGGAAAAGGAGCAGTGCCTTC  
TTCAGTAACAGATGCTGTATACGTTACAACAGCGGATGACGGAAATGTCGCTCTGAAAAA  
TCTGTCTTCAATTGAACCCCGTCATAGTACGCGGTTTTTTTTGTTTCCGGAAGTAAGCGTTC  
CGGGAGCGGTGCGCTTATTTCGCGGGGGCGGCGATAAGCCTTGTTTACTTAATCATCCGGA  
TCTGTCCGATTCACCCACCATGCGCAGTTATTTATGGATTTTTAATTTTCGGGTGAAGAA  
AGCCCAGAACTAGTAAAACCTGCTGGAGGGACTTGGGGATGTCGATATAGACAGACTC  
GCACAGGACCTCGTCCCGGAGGATACCACGGAAAAACATGCGAATGAGGAAGCACAGACT  
CAGACGGGCGATAAGAATGTGGCACCGACCGGATACCACTGTGGAGCAGACGCAGGAC  
GTCAAGGAGCCGGAAGCTAAGGGGGGGCTCACCCGAGACGGTGAACACGGCATTCCCTAT

CAAGTCCTAGAAGCTGAACGTTCTGTAAAGCAACGGGCCGAACAGCAAGCCGCACTTCTC  
CGTGGGCAGACAGCTCAAGAAAATCGCAGGGCGGAAGTGTGACGTCTCAGATCCGCCAT  
GCCGGTATGAACCCACACCGTTACCGGAAAACGAAAAAATTTCCGATGTGCAGATTGCC  
CGTATCAGGGTGAGGTATCGGGAAAATTGTGACGCGTTAGCTTCTCTCATCATAATAAT  
ATCTATCTCCAGTCCCGTGTTCAGCGATCAGCACAGCAAGCAGAAGGTAATGGTGGTGAG  
GAATTATCACCGGTTCTTGATGCGATGAATGCCGTGCGGTTGCTGAAAACGTGGCAGGAG  
TCCGATCCAGATCGCTTTGCGGTTGCTGTAGCCATCGACGGGAAGCTCCAGCATGACCCC  
GCATGGAAAGACAATACGCGCACTGGACGTTTCGCTGAAGTGGCCCGTTCGTACGCAGGTT  
GCTTTCGGGGCAGTCAGTGCGTTCGCTGACAAAAAGGAAAACAAAACGGATATCCGG  
AAAACGGCGGAAGAGAACGTGAAGACCGCTGAAGAGGAGCAGGTAGTACCTGCTTCCCCG  
TCAGATTTAGGCACCACGGCTTCCGTCGGAACCGGTGATAATTTTGAACGGTTACATGGC  
GCTTCGCATTCTGATGAAGAGGCGATTATGCGCGGTGTGACGAATGCTGAGATAGACGCG  
ATTCGGGAGAAGCTCGGGGAACCTACTGAAGACGAACTGAAATAATTACGACTGTAACAT  
CAGCTCAGGCCGAATAAGCAGCATCGGGTGGCGCTTCTACCGCTGCCAACCGCAACCGCT  
CGATGTTTAATATCCTCACCGAACAGCAGGAAGCGCCAAAAGCGGATTCGCCGGACAAAA  
AAAGCATGAAGCAGTCCGGCTCGAGTGCGCCCGTTGTCCGTATCACAAACCTTAACAAAC  
AGGCTGGTGAAGTGACCATCAGTATCATGCACAAACGCAGTAAACGTTTCGACGATGG  
GAGATGCGCGTGTGGAAGGTCGTGGTGAAGTCTCAGCCATGCTGATTAATCCCTGAAAA  
TCAATCTGGGGCGTCAGCTGGTGTATGCACGCGGACATCTGAGTTGGCTGCGCACACAGC  
TTAACCTGGCATCCTCAGACAGAACGCTTCTGCGGACGTAATTAATGTCCTGCCGGAGC  
ATAGTGCGATAGTGCATCTTCTGTATTTTCGTGGTTATTTTGATGCTGGCACAGTATTCT  
GCCGACGGCGGAGCACCCCTGAATTCAAAAAAGCATGATAAACGATCTAATGCCTCCGAC  
ACATGACCGTCACTTTTGTGGCGGTGATGCGACAAGCTTTGGGCATACTGAAGCGGCATA  
TATTTGTTCTATTGGCCTGGTAGACAATCTCGCCCTGTACACTGACGTAATGCCGCATCC  
GTAACAGCCGGTTCGTCTGTCCGGTGGTGAACCTCACGGAAAAGCGACGTAATACGTCCT  
GTCCGTACGCAGCGCCAGGGGAATGACTGGTACACCTCGATGTCCAGTAAGGACTGGTA  
CCAGATGATGGTTCTTGCCGTGAACCGTGCAAAAGGTTTTATTCATCCGCTATTCAAAGG  
TGAGTGTGCGATGAGGTGCAATATCCTGGATCGCAAGCGTGCGGGAATGCCGCTCCGTTT  
CTATCAGGGGTCAAAGGTTCTGGTAACAAAGAAGCGCCTGACGGGAACACGTAAGATGT  
CGCTGCTGCAACCAATCTTGACCGTGTTCATGTTACTGGTTCGCTCAGGCGCTGGCCAATGA  
TTACGGTCAGATGGCGGGCGGTCACTTCAGCATCGTTGAGAAGAAAACGGATATGGATAA  
CCGTACTGAGATCGCAATCCTCTGGATCAACGGGCTGAAAAGAATCCGTTTGCCCCGAGAC  
GAGCGTCAAGATGCATGATCCCGGCGTGATTGCCGTTGATTACGCCGTGAAGCTCTGATT  
ATTTCCTTTCCCTATGCCGGGGTTTCGCCCCGGCCTTTTCAGGAGTCATTAATTATGCCAA  
AGAGTATATTTGCCCGTTCGCTGAGTGAACGGGTGTATACGGGTACGCACGGTAATGAGT  
CGGTGTCAGAAGTCGATTTACGGTGAATGCTGCGGAAGCGGACAGTGTTATTCTTCTTC  
TCTCAATGCAAGTGGGCATCCGTATCAACTCACTCCTACTGGATTCAACGGGTGGTCTGG  
GTCCTGCAACCGTCAGCATTAAAGTCCGTTGAGCATGCTCTCATCGATAACAGCGATTCTG  
TTTCTGCAAAATTTGCCACATATGTGCCAGCGGAGCCGTACACCACACTGCGTGACCGGG  
AGCTGGTTACTGTCACCATTAGGACTGCCGTTCAACCGGCGTCCTGAATATTGTGCTGC  
GTTATCGCGTGGTGGGATACTGATTAACCTTCCGGCCCCGCTCATGCGCGCTTTTTAT  
CCGGGGAATTATATGAGTGAGAAAATTGCCGTTGTCTATATCGGCCAAAACAGCGACA  
AAGGACACCATTACCGGAAGTCGCACGCTGTTCCACGCTTTCAGCCGATTTCATGTTGAC  
AGCGCGATAGCCTCACAATTGCTGGGGTTTCCGGTTGTCTGGTTTCGTCGTGAAGAGCTT  
GGTGATGCTCTGAAAAGCATCAAGAGAATGATCAGGTGCGCCAGGCACAGCAGGCGCAT  
GAAAGAGTCTTGCTGCGCTGGCAGACGCGGAGAACAGTATTGTTGTTTCTGTTAACGGG  
GAGGAGGTGGACTTAAGTAAGCTCACCTCAGTACGGCTGGCGCCGCTGTGTGAGGCAGAA  
GAGCTGGATGGTCACAAAGACCCGAAAGAAACGGCTGAGGCATTCCGTATCCGGGTGCGT  
AAGGCATTTCCGCCCGCTGTTGCGGAGACTGACCAGCATGGCGGAATACAGTGACTTTTT  
ACAGTACGTCCGTCGTATATCATCGGTCCACTGAACATTATGATTACGGATGCTCTGTC  
AATGGCTGCCGTGACTTTTAGCCGCCAGACGTTGGTGTGCCGTCGGGAGGTTACTGTTAT  
ACCAGTTGCAGGAAAAGAAATCGTGCTTCCGTATGACAAAGATGCTGAGGAGTGCGTTCA  
TGTGAGCCGTATCTCTGAAGTTAATCATGAGCTTTTTGTGGGTCCGGATGTGGATTTAG  
AACCGCACGCTGCCTGCGATTTGCCGTTCTCACGGTGAGGTGAGCGTGCTTTATGTCGT  
CGCTCCGAAAGCCGGACGCAGCCAGATACCGGATGAACTCCTCACATGGACACAAGAAGT  
GGCTGCGGTGGCAAATGAGCGTTTGTTCATGCAGACTGGTGTTCAGGGTCAGATCCGTT  
ACGCGCAAAGTATTTTTCTGTGCAGTTTTCTGAGGGGATCCGTCAGGCATATCGTCATAC

ACTGGCGCCAAGCCCGTACTCTTCATACCGCAACCCTCTACACAGGAAGAGGTTTTTCTG  
CTGACGACGATTACAGAAATCATCGGACGTGTGAATACACAACCTGGTCGAGCCGACGATG  
GTTTGTCTGGCCCCTGCAGGAATTGTGCGATTATTACGATGATGATGTGAGGGCAGTGATT  
CTGGCGAGACCGGATGCTAGCGGAAGCCTGGAAACAATAAGTTGTGTTTCATGGCGCCCGT  
CTGGTTTTGTTTCGATCGTGGAATACACCGTCTTGACGTGATATGCCTCAGTGACGGTAGT  
GCAGTTAGGCCATTCTCCCAGGAGGTGCTGGATGGGCAGGATCCTGCGTGGGCCACAACG  
AAGGGTATTCTGAATATTTTGTGCGCAACCCTTGTCCCCGCGCGTTTTTCTGGCTGTTA  
CCTGCGCCTGACAAAAAATAAGTAATGAGGCAGTGGTTAGCCGCATACAGGAGGCAGTG  
CATGTTCTGACGCAGTACGATGTTACGCCAGTTCCTACTGGAAGAGGCTTATGTTGACCCA  
CTGGTGGTGAGGATCTTGTGTAGCGCATTCAGTTAGGATGCGGCCGGGGGCGCAGAATCG  
GGGCTGGCTGCGCAGCATTATCAGAGTTTTGTTGAGCAGCTTGGGATCAAACAGGGGGCA  
GACAGTGCATTGTATGCCCCGTA AAAAAGTGT TTAACGGAGGTGGAGTGTGAGTGTGTCG  
TTTCGGGGAGGCTGAAATCTCTGCTGGTGAGGCGATATCAGGAGCAAGTATGATCCTGA  
CGGCGCTGTCAGTTTCACCCGATGTGCTCAGCGGCACCAGTGCCTCGGCAGTGACTCGTG  
AAGGTGGATATTACGGAATGTCGATGGATCCGGGGGAGTATGCGGTTTTCGGTGACGGTGA  
AAGCTAAGACTGCCGTCCACGGACGTGTGCGTATTGAGCAGCCCGAAAGTACGGTGACAC  
TCAATATGCTGTTACGCCGAGTCTTGTGAGGTTAGCATTTCGCGGAGGACTGCTGACAG  
ATTTCCGGCAGATACAGCATAATGTGGCTGATGACCTTGCCACTATTCGTCGCCTGAATG  
AAGCCACGGAGACCAAAAACACTCAAGCCATACAGGCCAAAAAAAGTGTAGCAGCCAGTG  
CGAGGAGTGCATGTGACAGTGCAAAGACGGCAACCAGCAGGACGGCTGAAGCCGGAAAAA  
AAGCCACTGATGCCACTAAGACTGCGACCCGTGCAGTCACAGCAACGGCGAATGCAGAGG  
AAAGCTCGACCCGTGCAGGAGAGTCTGAAAAAGCCGCCGGAGCTGATGCAGAAAAAGCCA  
GACGGGATGCTGAAATGGCCAGGCTGGCGCAGGAGAGCGCCGGAGAGATCCTGAAGCGGG  
CAGAGGCTGCCACGGTCAGTGCTGAAGAGGCTTGACGTATGGCTGAGAATGCACGGGGGC  
CTCGGGGGCCTCAGGGAGAACTGGGCCGAGGGGGGATTTTCGGTCTTAAAGGCGAAACAG  
GTCCAGTGGTCCCTCAACCGCGCGCAGGGCCGAAAGGAGAGCGTGGTGACGTTGGTGCTC  
AGGGGGATGTAGGGCCTGCAGGTGCGCGTGGTGAGAAGGCCGAACATGGGGGGTGAGGAC  
CGCAGGGAATACCAGGCCTGAAGGGGCATACCGGAGAGCGGGGGCCTAAAGGGGACCAGG  
GGGATATGGGGCCAAAAGGCGAGAGAGGTGATCCGGAAGGTCTGACAGGCCCGCAAGGTC  
CTAAAGGCGAACGAGGAGAAGCCGGACCACAGGGACCGATGGGAGCACGAGGTGAGCGTG  
GGGAGACTGGCCCCGAGGGGAACCTGGTCTACAGGTCCGGGAGGCGAACAAGGAGTGA  
CCGGGCCTTAGGGATCTCGTGGAGAGCCAGGCACGGCAGGCAGCGCTTCAAATGTGGGAG  
ATGCAACGACGGCACAGAAGGGCATTGTGCAGTTCAGCAGCGCAACGGTCCGTGATGATG  
AAACGAAGGCAGCCACCCTGAAAGCGGTGCAAGGGGCAATGGATGTGGCAAATGAAGCGA  
AAACAAAGGCAGAAGAGGCTGCAGCAGGAGGTGGTGTTCCTCGGTCCGAAAGGAGATAAAG  
GGGACACGGGGCCAGCAGGTCCGGCTGGGTGCGGAGGGTGATAAGGGAGACCGCGGTGCCA  
CCGGCCCTGTGCGGGGTAGCCGGCGAACGCAGACCGGCAGGTGATACTGGTCCGGCAGGCC  
CGCAGGGGCCGAAAGGGGACAGGCGAGAGCGGGAAGACACCGGTCTGACGGGAAATGCAG  
GTCCACAGGGTCCAAAGGGAAATACCGGTGCGGCCGCCCGGCAGGCCAGAGATAACAA  
AAGGAGAAACAGGTGCGGCAGGGCCGGTGGGGGCGACCGGACTTCAGGGGCGGAAGTGCG  
ACCCGGGGGATACGCAAAGACGGTTCCTGCTGGGACCGGGAGACATTATTGAGATAAAAC  
GCCATGGCCGGATCCCGGATACAGATGGCGTACTCATCACGGGCGTGACCTTCCTTGACC  
CCAAAGATGCCACACGGGTTTCAGGCTTTTTTCCAGCATTTCGCAAGTGAGGTTTTGGTGACG  
GGCCGTGGCAGGAGGTCAAGGGGCTGGATGAAGTGGGCAGAGATACAGGCAGTACAGCAG  
AATGACATGAATATTATGAGAAAGCTAATGCAGAGTTTTGTGCGGTTGCGGCTAGCATGAT  
GGCTGTGCAAACAGGCAGTCGCTTACAGCAGAACTGCGACTGGGACCGGCTGAGAATCTG  
GCGTCAGATGAGCAGGGCATAATTCCGGAGCAGGACAGGGTAATCACACAGGTGGTGATA  
CTGGATTCAGATAAAAAGCAGATACCGAGTGTGGTAAGACCGCTGCAAACCTTGCGTGCT  
GACGAGACGTGGGAAGATATTGGCGGGATGAAATAGCGGACAGCTTCACAAAAACCGTAG  
CCCGGCTCGGGTTTTTTGTTGTATAGGGGGGGGTTACTAGAGAGTGAAGTAATAAA  
TATATTAATAGGATGGAGTGAAGGATGCCGTGTAATTCTGGTTCAAGAGTTTTTTATGCA  
GGAAAATCGCATGACTATTCTGGATAGTATAGAATCCTTGTTAATAATATGTGATAGTCA  
GTTCCGGCCACTTAATGCGCAGTTTTATATCACGGACGCCGTTTCAAGCAGCTGAATCTGGA  
TACATTGAAAGGGGTAAATTGTGTGGCCTTGCCAGTGAATTGGGAAATCACACGAAGACA  
GTGAATAGCTTTCTGTATACGGGAATGGCGAAAAATGTACTGTAAGGTGAGAGTGTGTAA  
CATCTTGCGTGTGAGGAGTGTGCTTTTTCGTTGCTACAGCGGCGATGATAATGCAGTGAA  
AACAGGGGAGCAATATGCTCTGCCAAACCGAAAGAAAATTGCAATGATCAATGAAGTTAT

TTAGTCATCATCAGAATTTTCATGCAAGGCATTTTATCTCAGTGATGCCGATCGCGATTTT  
AGCGAAGTCCATCATATATCCCCTGATTTTTAAGCCTGAAGCAGTCAAAGGAGTTTCTAT  
GCCATATATCGATATCACCACGATGCGTGGGAAGATGCCGCGCGTTGTGACATCCATGAT  
GCCCCGAGCATTCCGCTCTACTGGCGGAGGACTGCCATTTCCGGTTTGGTGGTATTACACC  
AATATGTCAGATATGCGGGGTTGAGAGAACTTTCACAATTAAGCCAATTACAATTTTTCA  
TTAGCGTGTGATTTCTGGTTTGCATGGACGGATGTGGAGGATGCGATCCGCTCACCGAT  
CGCTCAGGACGCCACGAGCGTATTTACTACAATGACGGGCGTTTTCTAAAGTGCCTGA  
TGCGACTATTGCCACAAAAGGGGACGTGAATCACCCGACATCATCGTATCGACTGGGGAT  
CTCCGCGCCGACGACACCTCCTGTCTGTACTGTTACAGCAGGGCGGTGCTGTTTCAGACGA  
TAACCGGGATGATCATGAATCTCGGTTTTATACGGATACCTTTGTCCAGATTAGGGTGA  
GGAAGGTCCGCCAGCTCTGGCGTCTCTGGAGGTAACACTCCGTAICTCGGGGTAICTGAGGT  
ACAACCTGACGCTGGCTCCGGTGCCATTGCATAATGCAAGTATTAACGCCGCCGGATTTA  
TCGCTCTGCATCAGGTGGGGGGGAGGCGAGTTTGTTACTTGTGGCTGAATTGTATGCATC  
CGTGCTCAGTTTCACGGACAAGATATCGGCGAAAAACCTTGAACCTTCCGTGGTGAATG  
GGATTAGCTGCCGCTACCAGTGAATATGGCAGGCCTTTGGCTGATGTATAACGGTATTGC  
CGCCGGGTTTTCCGGTAATGAAGTGCTGTTTGCTGACGCCTATCAGCCGTATGCATCGCC  
GGAAGTGAATCGTGACACGACGGCAGAAGATATGGTAGTTATCTGTCAGTTGTGAACGTA  
ACTGGTGGTGGCGACAAAGGGGAAGCCTTATTTGTTACAGTGAGGTCTCACTGTCCACAAT  
TGCTGGTTCCAAAATCCCTTCAATGCAGGCGTGTCTGAGCAGGCGGAGTATGGTTGCGAT  
GGAGGGGTTTGTGCTGTATGAAGGAACAAATGGCCTGGTGTCTTCTGATGCCTACGGCAA  
TGTCGCGCTGGCGACGAAACAGATTGTTTCACGGGAACAGTGGCAGAGTCAGTTTAATCC  
CGCTCCATTGCGGCTTATCCATGGCGTGGTGAATATGTTGCCTGTTACACGTAACCGGA  
TGTTAAGCAGGATGTGTTTGTACTCCGTCCGGTGAACATGGATATCCGTCATAACCGTAC  
ACCGTTTGATTGCGCGTGGGTTGATCTCGCGAAAGATATGATGGGCGTGGTGACAGGAGA  
CAAAAAGTCAGTGCTTGCCGGGTGGGCTCTGCCCTCCAGGATAAGGTGGCATCCAAAAT  
TTTTTTATACCCTGAAAGAACTCTTTTTCTGTATCATGGTGCAATCTCACGCGCCTGA  
GCGGCTCGGGATCACCATTATGGCTGATGATGTTCCCTGTGATTCATTTTGCGCCGGGTAC  
GTTTAAGGGAAATGTGGTGAGACGTCCGACAGCACCCGGGCAAAACAGGCAGGTGATGGC  
ATCCGGATTCCGGCAGGTGCAAAGAATAACCCTGAGTACATCAATGTCGGAGATGCCTGT  
ATGACCAGAAAACGGTGGCATCCGGGGAAGGATTTAGCCACTGTTGTGGGGAATATGGAA  
ATTGGAACCGGGCAGCGTCGGGACGGACGTGCATGCATCTGTGACGCGTGAGGAAGTGATT  
GGTCTGAAACTCGCCCGACGAAGAACATCGGGTGTGTCTCATCTGAACTGAATCCGGGT  
ATTAAGATTGACAGAGCTTTAATGACTGTTGATTTTCTCGCAAACCGCTGAATTTTAAG  
GCGATAGGTAGATTTGGCTCGGTTCTTCTTGAATAGGATATGCTTAATTAGCGCGGACAT  
TCACTGCCTGAAATCTAGCGGGGTACGCAGCATGTCCTTCTGATGCAGTGCTCGTTGCC  
ACGACGACGGGGCAGGTTTACGGCGATCAGGTTGACCCTGGCTGGCCAGGATTTTACGGG  
ATATGTTTAGTTAACGCGGCAGGAGTGAAAGGTCCATGGAATGCTGAAAATGGCACTCAG  
GTACAAAACAGATCTGCGTGAAGGCCATCATTGACCAGATCCGAGATGAAGCTGCAAAG  
TCGCCGGTTTTGTACGAGCTGCTTAAAGAAATAAGAAACGCGCAGGAGCAGGCGGTAAG  
GATGCTGCAATTTAGACAACCGAAGTTGCAGGGACTCTAAGGGAAGAAACGACAAGAACG  
ATTGGTGGTATTGAAACCCGCATTAGCACACAGGATTCGTCAACCAGTGAATCGCTTTAT  
CACGTCGAAAAGCGCATCACTAAATTTGATAAATAACGCGGTGAAGCTTTTATCGCAATG  
TGGTCAAATAAACCGGGAGTTGATGGTATCACTCCGGGGATCGGGATTGTCGCCTGTTGA  
GACAGTGAAGGCAGAGCGGCAAGTCAGGGTACACTTTCTACGTCGCAGTTGTTTGTCTTT  
GACCCGAATTATCCGGATAACAGAGCCTATCTGTTTGCGGTATCAGGTGGCAAGGTAGTG  
ATCCCGAAAGCAATGATTTATGAGGCGGTGAGTGAAACGCTGGTGTGCGGGAAGGTAGTG  
GCGTATGAGGTAAGCCGGGTGAAGTGTCACTTCGCCCGTTATCAGGAGTGCCGTTATT  
CAGAACGGAACTTTCAGGTTGATTCACAGGGTAACCTGAATATTGGAGGCCTTTTTCAGT  
GCTACGTCACAAGGGGTAICTGACAATTTACTCTAATCAGAATGTAGGACTGGTGATC  
AGCAATGATAAAATAGAGCTTTATGACCAGAATGGACGACTTGCTGTACGAACAGTCAGA  
TTACGCGGATCAGGAGGTGAGTATTGGAATACGGTTTTGCCATTTATAACAGAAATAATG  
TTAATGTTACGGGCGTGCTCACTCCAGTAATTTTCTGGACAGATTTACAGCGGAGTCTG  
GCTCAAAGACGTAATCTAATAAACCCGACGGGAAATCTTTGCCGGCTGTATGTTGTGTAT  
TTCCGTGGAATAATGATTGGCGCATCGGAAAGTACCGAAGGTAACCATTAATGACAATA  
CGGTGTGCTGCTCGAATCTTGAGCAGGGTATAGGATCTTATTAATAACATGCGGGGGAT  
AAGTGTTTTGTTCGGTTTGTGACATTATGAAGGCGGGTGGCAGCGTATGGATAAGTCCAGG  
TTTTGCGCCCCAGTGTCTGATCAACAAAGGCACCATACCGGCGACTGAAAAGACTTTTTT

GGAAACATCTATCCCGTCAAGCAAAAAGTTGATCCTTCTTTATCAGAACAGAGAAGAAGGC  
CGATGTCATTTACAAGCATGAACAGAATGATGAATATCATGGACTAGGGCATCATGTAAT  
TGTCAGGGGAACTAACCCCTGGTTTCACGACGGCTTATGCTTTCGCGAATATGGTTACTCC  
ACCTTCTGAATATGGTATCGCCATGTATAACCCGGACGGTGAGATGATTTATCATAGCGA  
AATTATGCTGATTGACGCGAAGCTCATCCCCGTTGATATCAAAGTAGAAAAGGACGTTTG  
ATATCCAGGCGAAATAATGCCTGCACTAGTCGGGTACTATAACTGGAAAAGAACTCCTTA  
TGACCGACCGAATTATATGTCCTCCACTGGTGCTGGAGGAAATAAAAATATATTCCTGTGA  
GCAATCTTCCGGTGGTGCAACATGGGATATTTCGAAAGCCGTATATAGATAAGGTCCTGGT  
TATTAATACGTCAGTATATGATTAGTTGAAGCGAGTTTTCAATGCTCATTAAAATGTCT  
AACAAAATGTATTATTA AAAAGTTTAGCGTTTTATCTGAATACAGGATATCTTAAATGAA  
GAGTATAGCAACACCGGTTGTTTGTGAAATCTCCGGCATTGCCTGAGTAAATTTACCTGC  
ACATGCAGCAGAAGGACAGCATAACTTTCTGTGGGCTATGCGCACTTTCAGTTCCCGGG  
ACTGGAGGATTTTCGTAGAGGATGCGACTGCTCAGAACAGGTAGAGTTTCAGTCTTCTCGT  
CAACAGAACTACTTTTCTTCATTGGGCGAATATACAGATGGTCCGGTTCAGTGGATATGG  
AGGCAAGCATAAAAATCCAAAGGGCATTGATATCAGGTATAACTACGAGATAACGGATGA  
TTTTGGCGTTATCACCTCTTTGACATGGTTGCGTTCTGTCACTAACTCACAGACATTTAT  
TGATGTGCAGTCAGCCGATCATAACCAGGAGGATTAAGAATCCGGAAGCTTCTGCCAGAAC  
GGATATCAGTGCGAATTACTGGAGTCTGTGAGCTGGGCCTTATTGCCGTGTCAATCAGTA  
CATTCGTTTATATGCGATGGCATGGATGCGCGTTGCTTAAGTTAGCGCTTACCTGAAAAT  
TAAGGACAATATTAATAGTAGTGGCGGATTTTCTGCAAGCAACAGGACGAAAAAACCTC  
CCTCGCGTGTGCTGCCCGTGCACAGTTTAACTGTATGAGAGTGTTACTGCAAGTGGC  
TAACTAAGGTTCCAGCTCTAGCGACTGGCGCACGCGTGGCGTTACCGCTGGCATTCCGCT  
GAACTTCTGACCTTTTTCCGGTAACCGTGTACTCCCCGTAGTGATGGCGGGTCTTTTATT  
GCCCCAACAGAGATAACAACCGTAAAATCTGTGTGGGGGACTTTCGGCTGATGGCGGGACG  
GTTACCTGAAGGCCTGATGTGAATAGGCCCCGAGACGACTTAAAGTTGACCCGATGCAC  
CAACACTTATTACCTTAAGCAAGGAGAATGTTAGCGCCTCTCTATAAAAAGCGTCCAGCT  
CTATGTCGCAAAAAGCGCTTATGACCGTCACAATTTGCATGACGGTTATCTTCAGCATCT  
GGATGTTGCACGGTTCACGGTGTGAGTTCCGACTGACGTTGAGGGGAGCGGAGATTGCAG  
CGTTATTACAGAGTAAGCAGTAGGCAAAGCGCGACGGGGACGAGAGTCCCCGTCAACTGG  
TTGCTGAGGTTACCCGATATGGCACTAGTTTCAGTGAAGCGAATGAACGATAAAAATTCT  
CTGGTATATGCATCGTGTGTTGTGAGAAATTCCCGCAGCCATGATTTTATGAATGAAGTTAA  
ACACGCCGGCCTTAAAAGCAGGCGTTTAGTTTTGAGGCACCTGATGTCTCTTTGGTGCT  
GCGTTCTGTACTCAGTGCTGATGGTATCCCTTATGTTCTAGTGTTGTTGGGCGTGGCTAC  
GGGGAGAAACAGCGTTGAGCGTTACCTGCCGGAGGTGAAGACATTAACCCGCCCTGGCAGG  
CGGAGGCTCGGATGAGTTCCTTACGGCAAGGCCGGGATTGATCCGGCTGGGAAAACGACT  
GGGATTTGAGCGAATGCCGGATGAGGAGGATTGCTTCATGGTGTTCAGGATAGCGGTTTG  
ACTGCTAAAGTTTTCTTCATTGTGTTTCAACCAACATTGTAATTCACATTCTGACCCTGC  
TCCGGCAGGGTTTTTTGTTATCCAGGGGGCCGTTATGGGTGGAAGTGAAAGCGGTGCTGA  
TACCAAAGTAAAACCAACAGCAGCGCCAATAGCACAGGAAGGAGTGGCCTCGAAAGGGTG  
GCAGGATTACAAAATATCCTCCGCCCGGCTGCAGATAACTTCATGGAAAAGGTGGATGA  
CCTGAACAGTGAGCAGCAGTTCGACAATTTTGTGGCAATACAATTCTCGGGTATCAGAA  
ACAGTTTGTGAGGCACGGAAGGATCTTGCGAGTAATCTTACTCAGCCCGGCGTTGACCC  
ATCGAGTGCTCGTTTTAATGCGGTAATGAATGCGAACCAGAGTGACCAGGTAACCGGGCA  
GATTCACACACCCACACGGGGGACAGAGATCGCAGGCACATAAGTATGTTGCCCGGCTACG  
GGATGTTGCTGCTCTCGGTGCTGGTCAGAAGGCCGATGCGTTACAGAGTTTTTTCTCTCT  
GACAGACAGCAGTCTGGCGATAGCGAAATCGGATGCACTGCCGACGTTTACGAAACAGAA  
GGGGCGAGCCTCCCTAGTTGGCGCTTGTCTGGGTGCGGCGGGTTCATTTGCGATGCATAA  
GCCTGGCGGTAGCAGAGGAAGTGGCGGTGCTAAAACACCTGGCACCAGCGGTAATGCTAT  
TCATCATCAGGCTCAGAATCGGAGACTGTAATTATGGACCATGGCAAATACGAAGCTCTG  
GCATAGGCAAGTTATTCAGGAGCAGCCCGTCCACATCGTGAGTGGCAGACGTCAGCAGCG  
CTGACACCCCAACAATACGACGACTGGTGAACCAGATATTCGCCCCCGTCCGAAGGCTT  
GCTGACCTTGGGGAGCACAATAGTCTGATGTATGCACAGCTTGCACGCGTGGGAGGACTT  
GCAACTTCCAGTCTCAGTACAGCTCAGATGGCGCAGGAAAACAAGATAGAGAGAAATGGG  
GTAAACCGCCCGGATAATCCCGACGCTAGTACGCTGGGGTTACGTAATGCATTGGCAATT  
GCTGGCGCGATGCATGGTATACGTGTAGCCTAACAGGATCGACAGATGACTATTCTGAAC  
GGGGCTTCTGCACAGCCAGGACAGAAACGGAATGTTGGAGGGCAACTTGTGGCAGCGGAA  
GGTGGCAATATGTTATACGGTTTAGTGGATATTGCAAATCTGTGCGGGCGTGAGACATTA

CAGGGAATAAGTGACGGATGGAGACGTCGTGAAGAAATTGGGGCTCCGAACATAAAAGATG  
GCGACGCAACACAAAGCGCAGAACAAGCAGAATATGGGTACGGGCATTGGTACGGGGGCC  
GCTATTGGCTCCTCCGTTTCGTGGTCTGTTGGTGCTGTTGTTGGGGCTGAAGTTGGCGGC  
ATTGCTGGTTCTTCATTTAAGGAGTGGTGAATGAGCGGATTTGCACAGGGGTTACTTGC  
CGGATTCAGCACCGTTGACCATGCAATGAGCCGTCGTAGGGAGCTTGGTCTGCGAGAAGG  
ACAGCTTGCCCGGCTACAGAAAAATATCGAGCACGATTTTGCCCTTGCGCAGTCTCAGTT  
TGAATATAATAAAAACGGTGATCAGCGGAACCTTGTATTCAGACCCAAACTGGACGACCG  
TAATTATGCACGGAATGAGAGGGAGTTTGACGCTAACCAAAAATGACAGGAATTCGTCCT  
GGGTATGTAGCAGCAGCGACTCCAGCTGCAGGAATACAACCAGCGACGGCTTGAGTATAA  
CGATATTATTGCCATAGCCAGGCCCAATGGAAGCGCTAGGAAAGCCAACTGAGGATGG  
CGATAAGGACGCTGCAACGCTTCTGTTTCGGGGAGCTGCCAAAGGGACATCCATCAATTCT  
TATGTCAAACGAAGGCTATGCAGCGAAAGCGGGTGAGGCCGTGGTCAACCTGCAAAAAAT  
GTTTGGTGATAATCCAGACATGGCGATCGATTCGGGGAATACACCGGAAAATCTCGATGT  
CCTCTCCGGCGTGTGTTGCCCGGAACTACATCAGCGAATCGGCATGCCTGATTCAACCGG  
TGACAAAACATAACAGAGGCCAGGATTCGCGAGTATCGTACCAGCGCAGCAGTAGGGCAG  
GATACTTATTGGCAGTGATTTTCATATACCGCGATGGCTCCAACGCGCATAAACCTGTAGC  
AGAATACGGCAGTGCGCGCCCTGATGATCAAACCGTCTGCGCTACCCGTTGATAAGGG  
TATCGCTCTGGTCAGAGATCGCAGCAAATTTACAGAGAAATCGAAAAATTATGTTTATCT  
TATGCCGAAGCTGCAGGGACTTTCTCTGAAAGAGCTTCAGAAGGCCGCCAGCAACGTAGC  
GTCGGACGCGACCAAGAATGGCGGTAATGCCAGGCTGCGGTGGATGTATATTATCCGC  
GTCGGGTTCAACAACGGCATCATCAGCAAATTCAGCAACAAAAACTGCAGCAGCAGATTAT  
CAACTGGGCAGGAGATGCTCCTGATAAGCTGTCATCTGCCAGAAATGTACCGGCCCGTCA  
GCCTGAAATGCTGGACCCTCAGAATCAGAAATTGCTGGCGAACGGGTATGCGAATTTTCT  
CCGTATTCAAAAAGCCAGGGCGGAACAGGCCAGAGATGTAAGTGCTTCATATGCATCTCA  
GTTTATCCGTGGACTGAAACAGAATTACGCCAGTAATTCACGATATTCCATTATTACCA  
TTTCTGAGCCCGGCCATTGTGACGGGTTTTGTTATGGACTCTGTATGGCCGATTGAGA  
GGAACAGCGTACTTAGGCGCAACGCGGTAAGCAGAATCGTAGCAGCCTGAACATTCTGCA  
ACCCGCCGAAAAGAACAGCTATGAAGCATTTTTCTCTGATCCGAAACGCTGGAAGGATAA  
CAGTACGTCGTGCAGCCTGGGCGATGTATTGCCAAAAGTAGGTATAGATTTCCGCCAGTC  
CGTCCGGGGAACATGGGAAATGACACGTGGACTCGGTGATGAGATGATTCAGAGCCCAGT  
AGAAACAGCCGCGCGTCTTTAAATGAGTTCAGCCGTATGGGTCTGCCGTGTGTCGCAAC  
TGTGCAAGATTTTTTTGCCGGTGGCAACAGGGGGGCTAATGAGGTTATCGATCCCCTGCC  
TGATGGCAAAAACGCGGTTACTGATACTGTCGGTATAGATCTGAAGGTAACCGGTAAGGC  
TGTCAGTGCTGGTGCCAATGCCACTGACGAATGGCTGACCGGTAAGATATCGCTGGGTGC  
AGCTCGTGCGCTGAATGCGCCGATGACCTAAGCCTATAATGAATCTGCGGTCTGGGTGTC  
GAAGGGTGTAACCTGATTGGTGCGCTTTTACCTGATATGGTTGCTGGCGGTGTGGCTAG  
AAAGGTGGGTGACGGCCACTGCGAAAAATGCTAACCGTCCGGGCTGGACTAAAACCTACT  
CGCGGCACGGATGCAGCGGGAGCGAGCCACGGCACTGGCAGCAGAAGCTGTCGATAAAAA  
AATGCCGTATTTATTCTAGGCGGGTCTGATCAACCATTCTACTGAATGTGCACAGGGGCA  
GAGTGGAATAGCGGCAGCAGATGCTGTTCTTAATGCTGAGTACTCTGAGTTGGCGCAGTA  
ACGGAAAATTCAGCAGACGTTTTTTGTCCAATGAAGCCGACCCGACGACGCCCAGCTTCC  
CGATCGCCAGAACATGCATCTGGCAAAAGAGCGTGTTGCCGCTGAGGAGCGCACGCAGGA  
GGCAACCAATCCTGAATTGCTGGCGGTGAATGCCATGGCGGCAAAACTGTGTGACGCACA  
ACTGTTTAATCTGGTGACACGAGGTACAGCGAAGACCGGTAAAAGAGGCAGTGTCAGTAA  
TGCCGCGGAACAGGGGCCGATTAATGCGACGCAGGGCGGCTATTCACGCTATCAGGAAAC  
CACGGCATTGCGTGGTACCGCCTGAAAGGGGGTGTACGGTGGGAGGGCGTGGCTGACGC  
AACGATAGAAGGTGCAGCCTTTGGTGCTGCGATGGGGGCTCCGTTCCGGTGCCTTGCCGG  
ATATCGTGGCTGACGTCAGGCCGCGAGAAGAAACCGCCATGCGTGATGCTGAAACGGTCCC  
GCTGGACGACGCACCCTCGCAACCCAAACCTGTTGATCCGGTGGCGCAGCAGCGTGAAAC  
CATGAAGGGCATGAATCGCGAGCAGCTTCTGGAGCAGTATCCTGATGCGGATGTGGCAAC  
AGAGAGTGACGTATCCGCAGCTCATCGCCGGGATGCTGCCAGCCAGTGGTTGAATTAAC  
GGACGAACAGACGAAGCGACAGGCTGCGATGAATGAGCTGAAGGCTAGGCCGCGTTCTGA  
ACTGCGTGAGGCATACCGCAGACTCAGCCAGAAAGAGGGGCGCACCCAGCCTGAAGTAAA  
ACAGTTTCAGGGAATAAGCGGAGTGAGTCGTTCAACAACATGAAGTCACGGTGGAAGCACA  
GTCCAGCATGAAAATGCGGAGGATCGTCTGGGGAGCATTTACCCGACGGTGCCTGCGGTTCCG  
GGACCCGAATAAATTCGCACTGAAATTAACGGGAATGGAGCGTCAAGCCAGCCGAACG  
CATTGAGAAGGTGCGCCCGGACAACCGTTATTTACGGATGAGAAACGCGCCTTGGGGCG



TGATCTTTTCCGTAATGCCGCTGCCACCGGACTGAAACCGTCAGTAGTGAAGAAAGGCGA  
GTATCAGTATGCCGTTGAAATGGATAAGACGGCGTTCTCTGAAGATGTGGCAACGGAAAC  
CTTTAACACCCTGGCGGACGAAAAGCGTATTGTTGAAGCTCAGCTGCTGTAGCAGCCTGC  
GTTTCATGCGTAACCCCGATTCCGAGGTTTCAGGGGGCATGATACGGAGGAACAGGCCGG  
CATTGCCCGTGGCAACGCGCCGACGGCAGAGGAGCTTGCGCGTTCACAGAGGGGCTGAACA  
AGATGCCGATCCGACAGCACATGAGTTAAACGAGAGTCCACGCCTGCCCCTAACGGCGA  
TTTGCCCCCGGACAGGAATATCCGTTCCCTGGAGATGTGGCGCGTACGCCGGATGATAA  
TCTGGCCTGACGTGGTGGCCGTTTTGCCACAACCGGTGAGGTTAAGGGCAAGAGGTTCCA  
GAAAGCACAAGCTCGGGCACCGGAAAATGTCGCTCGTCGACAGGGGGAAACACTCGAGGA  
TCGCCTGGTTTTGTCGGGGTGTGCCGTACCGGATGCACAGAACGCGACAGCACCGGTACG  
TGAAGGGCTAGCGGCTCCTGAAACTGCGCGTAATGTACGTATGCCTCAGCATGAATCACT  
TCCCCGCACTGTACGGGACTCAGTTCCCTGAGCTTGCACAGCAGGCAGAAGTACGCCGACA  
GGCCGGAGGAAATCGTGACATCCCGCAGCCTGAGACCATAGCACCTAAATCTGAATCAAC  
TTTCTCTACTGATAGGGAAGCTAGCGTGCGCGGAGGTGAAGTTAGGGTCAAAAAAATTGA  
AGACTTTGGTGAAGAAATTTACGGGGCGCCAAAACACCGTTATGCACAGCTTGCTGAAAC  
ACAGCGAAAAACGCTGGAAGACAGGGATTCTGTACGCAGCGGCACAGCAAACCTGTTCCC  
GAAACCGGACTACACAAAACCTGGCGAACGCAGGTGCCGATGCTGGTACCCTGGCGATGAT  
AGCGCTGTCTCGTAGGGATATTGTGGCGAAGAGGAAACACAATACGGCAGGCTGGGGGGA  
GTGCATAAAAAAAGTACGTCACAATGTATCGGAAATGCTGAACGGATTGGTCAGCGCGAA  
ACGCCTCGCAGAATGGATGGAAGGCAGAATGCCCTCGCGTTGCGCGGGTACCTGGCAACT  
GTTACGCACTCTGCCGCCCTCACGGATAGACAGGGCTTCTGCTTATCGGGTCGTAACGGG  
TATGTATCAGGCGGCATGAGGGCAGGGTTACGATCGGACTCAGAACTTTATTCACTGTG  
CAATAAGGACTATAAGGGGAGTAACCTGTTTTTCTCGGAAAGCAGGGATGAATTACTAGC  
ATAGGCGAAAGTCTGGTTTGAAGAGGAGGAGGAAAAATCACAGGCGAAAGGTGGTGAAAA  
AACCGCACCGTCACCGGGTGACAAAATCAGCTTTAACGTTTACCTGAATACCCGCAGTGG  
CGTATTTTTATCGCTGAGGGTAAAAAGAAAATTAGGGTGAGAGGTGGCTTTAAGTCAGC  
TAGTGAGGCGCGTAAGTGCATTGATTCACATCGTGATGAGCTTGTTTCGTGACGTTAAGGA  
GTTGCCGGAGACTTCGCCTGAGGCGCAGCGAAACGGAACGAATCGCTACGGTACCGGACC  
AGAACGCCGAAGGGGAATGTTTCGCCGGGGCAGTTCAGTGTTGCGTTTGGTTTCCGTGG  
TGTGCAGTTTGGTAATTACGTGGTAGGTCCGCGTCGTCAGGCTGATTTGAACCCGGATTA  
TGAATCGCTGCATGTGCTTGCGGAAGTACTGAATGTACCGACAAGAGCGTTTTTCGCTGCT  
CGGTCGTCTTGGCCTGGCATTGTTGGTGGCAGGGGTAAAGGGTAAGGCCGCGCCACACTAGCA  
ATCAGTTGACGTGGCATTCAACCTGCCAAAAGGCACCGGACCAGGGTTCGCTGGCGCAAAA  
ATGGTTCCATTCTCTCGTTAATTATTTGGTTCGTTATGACGTTTCCAATTTCCGGGAAAAT  
TACGTAAAGTCGCCACTTGATGACGGCAGCACAGCGTGTCCGGGTCATATTTAAAGACGG  
CGGGGATGTTGATGCTGAATATCCGGGACGTCAGAAGGTTTACGACGCCTTAAAAGGTGT  
GATTCAGGCGATTAAGAGCAGCGACATGCCGCGTCGTTTCAGCGCTTATCCATGAGGTGCG  
CTCAAACCGTACTGGTCACCGGATGTTGAAATGGCGGCACGTGCCTTTGAGCGTTATGT  
TCAGGATCAGGCGCGTATGGCTGCCGTGGAGAATGATTATCTGGTCAGTATCCGTTACGC  
ACCTGAGCACAACACAGATAACATCTACGCTTATCCGACGAATGCGGAAGTGCACGGCGG  
TAATCGTGAGGCAATCGATCACCTGTTCCGCACCCTGAATTCCCGTGAGCCGGACAAGGG  
CGTTGCGTATTATTTCCGTAAGCGCGTTACCCGCACACCTGAAGGTAATCTCATTTCGGT  
TGTAACCGTAGTGCGGAAGCCAAAGGCAGCCCCGGCCCCGAGGTTGAAGCGGTTGCCCG  
TGACGTGATGTGCGGCATTATGGAGCGTGACATGAAGGTCCGCATGGTGAAGTCACAGAA  
AGAGGCTGAAGGGCTGGCGGATGCATTGTTTCATGGTTACGGCAGGGGGCATGCATTCTA  
TCGTCTGTATAAACGAGATAATTGTCCTGGAGGCGATTAACATCCCCGACGGGCGCACGCC  
TCGCGAGAAGCTGCGTCACGATGTCATTCTCCCTGCCGTGGAGCATGTTGTCACACCAGC  
GGAATATAAGACGATTATCAATACCGTGCTGTAAACTCGCGACAGTGATAACGTCACCAT  
GCGTGAAGCATGGCGTAAGGTTGATGCTTCCCTAAGCTCAGGAATCACCGGAAGTACAGGC  
GGGTCAATTTCTTGCACATATGGCGGTGATACAGGCGAATAAATTCGTGGCGGCAGGGAA  
GCGTGTGTTGCCCTGGTCAAAGGGGTACTGCGTCGTACCGAGTTACTGAAGCCGAATGA  
ACTAAACGATATCAGACTTGTTTCGAGCGACCATGCTTACGTTAGGCCAGCGTGTGAGGGA  
AGGTTACACGCCACGTGAGGATGGCGCGGGCGCATCGTTTCAGTACTCCTGTAGTGGTAA  
ACGTGATCCGTTGAAAGTGCCGGACGGTGAGGGTGAGCGGTATCGTGGTGAGCTTGCAAG  
AAGGATGACATCTCTGCGCACACAGATTTAACGGTAAACATCGGGGGGATCCCGCCGGT  
ATTGCGTGACCTTAGTGACCCGACTTGCCGCTGGTTATTTCCCGCGATACTGTGCGGAT  
GTTACCAATGGTGTGATCCAGGGGGGGCCGATGGATGTTATCGAGTGAAGTGGCGGCACT

GATGCACGATCCGGATGCAATTTACAGTTCCGGGACAAAAAGAAATGCGGTTATGATGCT  
GCTTGATGACGTGGAGAAAAATGGTGATCCGGTGGAGCCAGTGGCACACATGAAGGCTGT  
CCGGTCGCATCTGGAAATCAACAAGGTAGCTTCTGTTTACGGTACAGAAAATGGAAAAA  
ACTGAAGAATATGGAAATGATCGGGTTACCGCTGTACCGGAGAGAAAAATTAAGCCGCCA  
TAACCTCCTGCACAGAGGGCTCCAATTGCCAAAGGGGAACATTCTTATCGCGGCTCTGC  
GGATAAAATACTCTATCCTGAAGATATTCGCATGGGGCCGGATTACTCCCGTACCAGCAG  
TCTGACACCGGAAGAGAAAAATTGCCTCGCGTTTTGTGCGCCACATGCAGGATAAATTCCA  
TGCCTGAAAACCTGTTACAGGAGAATATCCGTA AAACTGGCGGCAAAGTGGGCAACAATAA  
CAACGCTTAGTTGGCTATAGA ACTCTTCCACGGGAAGGTGGAAAACGACGTGAACGTGAT  
GAAGGAGCGCTACGTTAAACCACTGGCTAAACTTCTGGCAGTGTACAAAATTGCGCAAGG  
CGATCTTGATGGGTACCTCTACCCCCGTACGCACCGGAACGTTAGGCGCATAACGCGAA  
AATCAACCCGAAAATACCCGACGGCGCTTCCGGGATGACCTACACCGAAGCGGGCGAAAT  
CATGCAGCGTGTAAGTAACAGTGGCAAACAGGCACAGTATGTCCGTCTGGCAGGCAACAT  
TGATGATATGGGGGCCCGTCCGCGAGAGCTTATCCGTTAGGACGGACATGAAGAGACCGG  
TGTGGTGGATGACTGGAAGAACGCTTACCGTTACTACGTTCCCTAAAAGGTCAGGATGT  
TTACGGTGTGGTGTACACAGCCACACACAGGTAAGGCCTTACCATCGGCAAACATGACAG  
CAGGCTGGCTAAGGGGCGTGCATCCCGGGCACAGTCTCCGTCCACTTAGGCGATACAGGA  
CCTGGGCGAATCGGTGATCCGCTTTCGCAAAAACGAAGTGGGTAACGCCTTCTGATACC  
TGTGTAGGATATTCCCGACAAAGATTAGTCGCAGCTATTGACTGATGACAGGCCGGATAG  
CATCCGGACGATTCTGGAGCTCAAGGACCATGAAACTGGTGA AACCATTCGCACGGTTGT  
TGAACGGCCTGTCCCGACGGCAATGATGGCAGACCGGTACTTCACCACCAAAAAGAACGG  
CAAAATCTACTTCATCAA ACTCCATCATCCGCGCGTGATGCGTGTGATGAAGAGTATGGG  
ACCGGAAACCAGAAATGCCTTTGTTTCGTACGCTGGGGAAAGTTAACCGCTTCTGGCAAC  
GGTGAACATGTAGTATAACCGGGAATTGCTCGTCAGTCAGTTCATCCGTGACCTGCAGAA  
GTCGCTGATGAACCTGATGGCGGAGCAGGGAAGGAGCGCCGGTAAACTGAAATGGCTGGA  
TAACTTATCCGCGCGGGCTGTGGTGAAAGACAGCCGTACTTCCATGTTAGCCGTATACGC  
CAGTCTGCGTGGTAAAACCTACACGTGAAAAAGTGCACAGTGGCAGAAGGTGTGGAAAGA  
GTTTGTTCGAGGACGGAGGGAAA ACTGGCTGGTTTAAACACGGGTGACCTCGAAGGCCAGCA  
GAAGGAAATGGATGGCCTTGTCTCACTGGCGAAGGGGGGATCGAAAAGCCAGAGTAGCGG  
GGCGTGGAATTCGTTCCCTAACCTTGACGAGGATGCCGTCCGGTCCGGTGGTGAACGCTAT  
GCCTCTTTCTGCCTATAAGCACGCCCGTGATGCCTGTTTGTGGCGCCACCAGGCCGAGTC  
TCTTGACAAGAACATGACGGTAAACTTTAACCGTCGTGGTGAGCAGGGGGCGCTGAGGAG  
TTCGCTGTACATGTTCCGCAACGCCAGCATTACAGGGAACGTCTAATTTGGTGAGAAGGCG  
AGGACACCTTAATGGTGAGGGACCTTACTGGAGCGCCTTCCCTGGTTGAAGCTGAATGT  
TCTGCAGAAAAAGGCGCTTGCCGCTGTGGGAGCGGGTTATCTGCTTGGCTCGCTTAACCG  
CAGCGTGGCGGGTGAGGATGATGATGGGGTAACTGGTATGACAAGGTACCGACTCATGT  
GAAAGAGCGTCACCTCGTCATTTTAAATCGGTGTTCCGGAGGCAAGGCCGGACAGAAATA  
GAGTATTCCTCTGCCTTACGGGAACAACGTTTTCTTCCCTGCTCGGGCATACTGCTGAAGG  
TGTGGCGGCGGGTGACCTGACGGCGTCCCCTGCTGCCTGTAATGTTGTTGGTGGTGTGCT  
TGGTGCATTTAGCCCAATTGGCAGTGAGGCGTCGGAAACACTGTCCGGGGCACTGCTGAA  
AAATGCAGCGCCGACCATTTCTGCGTCCGTTTGCTAACCATCCCACGAATGAAAACGTCAT  
GCGGGCGCAGATTTACCAGGAGAACATGCCTTTTGGTACACCAAAAACCAGGCAGCCAGCT  
GGGAATCGTTCAACGCCAGAAGCATAACAAGGCCTTTGCATCCTGGCTGAGTGCCTTCTC  
AGGTGGCAGCCAGTACCGTCCC GGCGCGGTGGATCTCACACCGGAATCGCTGAAATTTCTG  
GATTGCGTGTATCTCCGGCGGGACACGGCGCTGCATCTCCAAA ACTACGGTTGCAGTGGT  
TAAATCGCTGAATGGTATTGATATAACCGGACCAGCAGGTGCCCTTCCCTGGGGAAAATTT  
GCGAGAGGTGATGCAGTATGCAGACAAGCAGAATATGTACGACCGCATGTCAGAGGTAGT  
GCAGTACCACGTAGAGCTGAGGAGTCTGACCGTTGTAGAAAGGACAGCGTGCATTGACCA  
GTACAACGGAAAATTGTCAATGAACGGGCGTATGAATGATTCGGGAAGAGACTGAAGGC  
TTTCCGTAGACAGCGTGTTACCATTTACGCCACAGA ACTCTCAGTCTGTGCAACAGTC  
GGCGATGGTGATATCAGTAGTGCGGGATATGCAAATTGCGGTGCATCGGTCTAACCGCGA  
GTACAACAAAAAATGGGCGGGGATTAACAGAAATGGCACCGTAGGGAAGTGCGGGGCTG  
ATTAAGAAATAAACACTCATTGACCTGTAATAACCGGAGCTATCAACACATAGTCAGATG  
GGCATTTCATGTGATGCAGAGAGCCGATTTATGTTTAGAGAAGAAACTAGCGAAAATG  
GCAGCGTATTTGCTGAAAAGCATGGCGGATCTATGTGTTTCATTACGCTGAAGCAGCAT  
CGGTAATGGCGAATGGCATTATGAGCAAAATAATCTTTATATGTTATTAAGCGATCTGA  
TGTACCCGAGATCATGTTACC ACTGATCGACGGGAAACAATACCGGCAATCAGAATTGC

GGATGGATCTCTTCAGCCCCACGATGAGATCGATGAGGAGATTTTTCAGCCAGTATTGGA  
TGGCTTTCTTATCTCCAAAGATAGACCATTTGACATCATCCACGCCCTGAAGGACGGGGT  
CTTACAGAGCAGCGGATAAGACTCGGTGTTTTGATGAAACAACCTGTGATAACACACAGA  
AAACCCGTCAGAAAGACGGGCTTAGCACGCAGGGACGGTACTTTAATAATTTACAGTGCC  
TTTACATCCACTTTAACAACACTGCTCAAGTCTTTATCAATTTACAGCTCAATTCTTACCGTG  
TATTTTCGGAGAAACATTCACCCCGGCCGATGTGGTGTCTTCGAAATACGTGACAATTGGC  
CCGCTATTGTCACGAAACTCATAACGTTTCATCACCCACTTTTTTAACGATGCTCCCTTCA  
AGGATAACCCATGGATTATCCCTCAGTTCTTTTGCCTGCGCTACTGACGAACGCTCTGGC  
TCAGGCCCTGGAAACCGCCCTGCTGTTCAAAGCGCCAAAAGACACACCAGAAATAAGT  
GCTGCAACCAATACCAATGTCATTCATAGTCTCTTGGCTGAGATGAACTTTCCAACAGCA  
TTTTACAGTATGGTGTGTCGCGGGTGCCTTACGATGCCTCACACAGCAGACGTGGCGGGA  
GATTACTCCCCCGCTAGGTCTCTTACTTCTCAGATTTGTAGTCTACGAGGACAGCGACCT  
CCGTTTGACCGGTTTCGGATTTCGCACCGCGCAGAGGTTATTCCTCGTTACCAGCGCCGTGA  
CTGTGACGGTTAACCCAGATGACAATCAGGTGGATTATCATCGCCTTCTGCTGCTTCATAG  
CCTGCTTCTCCTTTTCTCTCGGCACGCAAGAGGCTAACCTACATGTGTTTCAAGTGGATT  
GTGCTCAGATTAATGTTAGGCGTCTTGCCGGACGCGTAACGTTAACTGGGGCTTTTCTA  
TATCTGCCATAGGTGTTTCATGCACGAGGAAGATAGCCTCAAGCACCCGCAGCAATTCTAC  
TTAACTCTTTTTTCCCGCAAACGTTTGTATCGCCAGCGAATAATCGAATACACAACCA  
GCACCACTGCCATTACTGTTCTACATTTGTGAATCCTCCAGGCCGGGTCATTGATTCAC  
CTTCTGCTCAATATTTTTAATGTCATTTTCCGCATACAGTATAGCAGTTCTTGCTGCCCG  
CAACCGTGCTTTGGTGTCTTTTCTTACCCTCGAGACTAGCAACAGATTCTCGGAGCTG  
ATCGTGTCTGTTATGAAGCTGTCTAATGCCTCTCACCACAGCCACACCATCGTTCGAACA  
CCGCAGGACATACGGAAATGGGTCCACAACACATCCGCACTTGAAGCACAGGAAAACGTG  
AACCTGTTTCATGAACCTCAATGGCGCTATTCTTAAAGCTCTGTTGTATGTAGTTTTTTCT  
GCCAGTTACTGCAATGTTTCAGCAGCTTCTCTTCATCGCGCGTTGGCTGCACCAGTGTGAT  
GATATTATCGCCATCATTTTCTTGGAGATCACCTCCTGCGGCGGTTCTGATAGCGGCATC  
CAGTCTTACGGGTACCACGTCGCACCCGCAATTAACCACCCGTCATTAGCGTCAGGATGC  
CCCGGCATGTAAATCGCCCACATCATTCCGGCGGTCACCTTTCCCGTCAAACCTCCACGGAA  
ATAAGAACGGCTGTTATGGTATCCGGCATTCCGCTCACTACAACCTTATCCAACCAGCCGGA  
GTTACCGGAGAGTTTCCCGACACCGCATTCTGCTAGCGTTCAGGTC AACGTATTCTGTA  
ACCCTCTGTCCGTGGCAGACTGAAGCCCTTGCTCAGCCTTTTGCAGCAGTGTGAACG  
GCACAAGTTCGACCGTCAGCAAATTGCATTTTCGTAGAGGTTAGCAATCTGTTCAAACCTGC  
GTGTGTGGCAACTTGTAAGTTTGGCGTACGAGTTCGGCTTCCAGTTCTGCTATCCACTTC  
TCTGATGCTTCAAGTAACACAAGCTTATCGCGTACCGCTTCTTCCAGTTCCGGCAACATGG  
CATTAAACCATCAATAAGGTTGTTCTCTGCTGCTCCCAGCTCAGCTCTCAGCTTCCCATAC  
GTAAGCGCAATCTCCTCGTTCCTGCTCGCGGCGTTTGTATGTATTGCTGCTTTCTTTCC  
CGTACATCGAGCAGTTCCATCACGGTAGCCGGGTTAGCCTCTGCTACGAATTCAGCGTTG  
ATAAGTCTGAGCATCTGTTTCAACCAGGCAGTTAACATGACATTCTGCAATCACGCCAC  
CGTGTTTTCTTTCCATTTTGGGAAACAAAACTCCAGTTAAATAGCCGTGCGGGTTAA  
CAGATGTACGCCATACGATGACGCTTCCTTGAAGTTTCTTTCTGCTTAAACGCAGTA  
CCTGGTAGTCAATCGTGCTGAATTTACTCTTCACTCCGGTATACATGGATTACTACGCC  
CCTCTTGTAATTCCGCGAACTGGATCCCCTGGTTCATTCCGTCAATACCTAAGGATTCCG  
AAAAATGCGTCTATTGCCTTATGGCGTTGTTCTGCTTACGGCGTTTATTCTTTTGTTC  
ATTAACAACAGTGACAGCCATCGTCTCTGCAGAACATGATGAAGAAATATTCAAGGAGC  
GCTAGGCCGGTGTTCAGTACTGTATTGATCGTTGTCGTGGTGTGATGTTACGTCACAC  
CCCCCTGTCTGTTGATAAGTTCAATATCCTGCTAGCAACTAGCGCAAGCTCTGCATCCAC  
GAACGGCCAGGCGTGGCCGCTCATCTATCGTAGCGCCACTCTCGCAACAATGAGTACCAG  
ATGGGGCATTACTGTGCGGATTTGTATTTTTGCAGGGAGAGATTGCGCTGCAATTCTTCGG  
TTTCAGCGGCGTTGTGACGAAATCTGCCGATTTTCGTTTCTTCCAGGCACGAACAAAGGA  
GCCGAAGCTCCTTTGGTTTAAAGAATTGAATTGACTTGCCCGCAGGCTTTTCAACACTGG  
TCTGGCCCGCTGAACTACGAAACTCGACTGGTCAAGCCCTGCCCCCTCTCTCCGTAGCAC  
ATCACTGTTTCGTCGCCACCATGTAGAGGGTCTCATAACGCAATGTCATACAACTTGTACGT  
GTAGGAGGAATTCAGCTCTTTCACGATCGGATAACAAGTATTGCTGAGGTCCTGGTCTTT  
TTCCAGACAGAGTTGCATGTAGCAGAGGAGGATCATTTCTCGTCCGTGAATTGTTGCTG  
TCATTATGCTTGTGCCGACTACAAGTTGCGCAGTTCCTTTTCGCACTCGATGAAGTATCT  
ACGTATCTGTGCGCCTTTTTTCGTTACGATCTACCATCGCCGCTACTTTGGCTGTATCGAC  
GGTAAGGTTTTAGTCTTTCTTCCCTCGCCATAACCTATTTACCGCTTCGGAGAAATAGC

TATATAGTCCTGATTTTCAACGAATCCGTAATAAATACGTTCTGTAATCCACGATTC  
AAAGCGTTTGCCTACTCCAAGAAAAGTATGTAATCACGGGTATTAACGACAAGATTGTT  
TTCGTTGGCGATAGCGCCGTTGAACACGGGGATCAGTTGCCTGGTCATTATGACCTCCTT  
ATTTGTTTAGTCTATAACCTCCAGTTAGTAGCTGGCGGTCCGGGTGTCAACTGAGCCAAAT  
AAGAAGCTCGGGGCATATTCCTCTTGCGGGTGTGTATTACGCCTCTCCACCCGACTTTT  
GTACGGATGTAACATGCCAAATCCAAGCATAAAAAAGCCGCAAAGCAATCGGGTGC GG  
AGCCCGCTTATTGGTTCCGACCGGTACAGTATGCGGTAGCGGTGGATGATGTGTCAATCAG  
CGGAATATTGATGAACGGGTAACCGTAAATGCCTCATGCTGACAATTAACGCAGAGTCGC  
ATCGCAATCTTGCGTGACTTATCGGAAATAACAAGTTAAATCCCCATAAATGTCTGGGGC  
ACTATTGGGGCAAATGTGGTTGTTAGGGGCATATTGGGGGCAAAAACTACCTATAAAG  
AACGGTGTAAAATTGATTTCTTCTTGGTCAAATGAGGTGTAACAGATTGAATAAGATCT  
GCTCTTGGAAGAGCTTCGGTAATCTGTGTTTTAAAGCTTCATGGTTTCAGCACGTCTA  
AGGATATGGTTTATCATACTGAAAAATATAATTTTATCTCATCCTCCTGGTCACTTTGGG  
GCAGGTCTGGGGCACGTGGATTAAGGACATTATTCAGCATGGTAACTTGAGACACGCTCC  
ACTCAGGCCTCCATGCAACATAGACATTGTAGACCATGCTTGCCTGGAGTGCCCCATCT  
GTGATTCATTAAGTGTGCGGTTTCTCGGCAAGATAAAGCCCAGCACGCATAGGGATGGC  
GTGACAGATACGTTTACGGGATTTGATACCCGCTTTTTTATTGCTGAATCCCATGCCG  
CTCCGATGGCGCTTACCGCGTAGGTAATACCCGCTTGTATTTTTTGCGAACGATTTGCG  
GAGAGAAAACAAAAGTGCCTCGTGCCCAAATGTTCTTCCGTGCTCGCTTAATTGAACAG  
TGATCTGATGCTGCCTGCTCAGACGAGTAAGCATCGTCTGGTTTTAAAGTCTTCACTTG  
CTGCTGCCAGAAGATGTATGACCCGGTTAGTGCCACGTCGGTCTGTGGTAGGGTAAAT  
CGCTATTTTTGTAAAATTACGTCGCACTGTTATCGTGCCAGCTGTCAGGTCCATAGCCT  
CCCACGCAAGTGAGGCAATTTACCGTGTGCGATCCATGTAAAACAGCCTCTGCCCAGA  
GGTTTTTGGTCTGTTGATGATGGCAGGCATCGATGAGACGGCTAAACTCATCACTGGTCA  
GTGGATCCGGCAATGGTTTTGATTTGGTCAGCGGTGTTCTTGAAGTAACCGGTTTTTTCT  
CCAGATACCCGTTTTCGGGCGCAAGGCTGAACATTCCGGCTGATGTTGTCATGTAACAGT  
TCACTGTGGGTACGGTCTTTCCTTTTCGGGACGTGCTGGTTTGCCTGCTTCCCTCTTCCC  
CGGTCAGTAACTCTTTCCTGATACACAGCAGTTCTTCTTGTAAATCGATGACGCCAGCC  
TGCCAGGACCAAGTCTCGGTAGCATATTTTTCATCGCTGCTTGATAATGACTTAAGGTGT  
TACTACCGATTTCCATTGCTTTCAGAGTAAGCCATTTCTGTGCCAGTTCACCGACGGTGA  
TATCTTTTTTTACCAGGCCAAATAGCTTCAGGTTAGGTGAGTCGGGGAGTCGATCGGCAT  
AATCAAACGTGCCTGTTCTGATTGCAAAGCAGACCGTAGCCCTTAACTCACGAGCGATCT  
TACTGTTTTTCGGCGTATCGGGCACGCGAAGATTTTCGCGCACTCGTTTACCCCTGTACT  
TAAACGTTATTTGGAGTTTTCTTCCGTGATTGTCAACGCCGGCTGGATAGGCTGAATTCG  
CCATTGTTCCCTCCTGCGTCCAAGAGCACGCTCAGGTTATGCTCTTATGGACAAGGTTTAA  
ACGTCCTGAGATGGTAAGGGTTGGTTTTTGATCCAAGTGTGGTGGTAGGAAGATCTTAG  
AGAGATCCGCTGTTTTCTTGGCGTGCCGTCGGGGGCTATTTGTTTATATTTTCGGCCG  
TTCATCCACTCACTGTCCCTGACGCGTAATATTGTACCTTTTCTCAGGCCTGTTACCGCC  
ATTAAGCTCCAGTCTTACCCAATCATCCGATTTATCTGTACAACAGGTTTGATGCCT  
GGCTGAATGCCATGGTTCTGTTGGTCTCCTCACTACCCATAAGTTCCCTCTGCATGTGT  
AAGACAAACCCGCCATCGGGGGGCTTGGTGTCTTTTAGTTTTTCAATTGGAATATTGGT  
TACGTCCTAATCGATGCGCACTCCTGGTTTTTTCGCCTTTTGATATTGCTAACTCATAACT  
TTGCGCGGCACAGTACCCAGTTCGCATCCATGAATCGAAGGCGCGAACAGCCTCGCTACG  
CTTTTTATCTTCTCTCGCATTTTTGATATCGACGAGGACATCAACGCAATTAAGGCAAAT  
GTGGATTTTGTCTTACATTGATCATGACGGCTTCGCCATGATTTCCGCCACACAGTGA  
GGATAAATCTTCAGCTTCTGGCTAGTGTTCGACAACGTTAGAGGGTTGAATGTTGAACT  
CGCCATAATCATCTCCAGAAAACGAAACTCGCCGTAGCGAGGTCAGAGAAAAGAAATCCC  
CGCGGGTGCAGGATTGTTATACATTGGCGATATTCACCTCTATCGCGAATCCCTTTACC  
GGTGTATCACCGTAGTGCGGATGTGTGATAGTCTTGATTTTCAATTCGAATATTGGT  
TCAATTCTTCGGCTGGAATCGTTCGCGCTTCGGGAATTCCTTTGTGGTAATCAGGAGGTCA  
TACTCGCGGTACATTATTCGCTTATTCAGTAGTTATTAACAGGCGATTCTCTTCCGTT  
TTCTATCCGGGGATCATGGCATCGAAGTATTCACCTTAACTGCAAGTTGCAGGTTAGCC  
ACGGTTAACCTCCTGCGGCGGTTCTGGTAGCGGCATCCAGTGAGTTGCTTGGTCAATACC  
ATCACCCGGCTTAATCGTTGCATCTCCGCGCCGAACGGTGCTTGCAGGAGTAGCGTGCGGA  
CAATATTAGCGGGTCAACCAGAGAGCTATCGAAATTCACCGAAATAAGCACGTTCTGGCC  
TTTTTCAGGCAATCGAACACTACAGCTTATCCAATATCCGGAGTTACCGGAGAGTTACC  
TGCCTCATAAGCGGATTTTATCCAGTGCGTAAGCTTTGCGTTGCTTTCACATCCGCAATC

AACGTCTATTTTTTCTTTTTTTTCCGACAACCATTCGTGCAATGAACGCTTGGCAGTATG  
GCTTGCTGGATCAATTCGTGGCCGGCAGATATAAAGTTGTACATTTCCCGGCTTCATCGT  
ATTTTCGGGACAAATAAACGTGATAAAACCATATTTAAGGTGCTAAATTCCCACTGAGTC  
GATAGTGGCGAATGGTTCAGTGGTCAATGCAGTCAACGCCATTTTCATTAGCGCTGCGCTC  
AATATTATCTCGCACGTCCAGGATGCCGATACGCTCTTTGATTTCTTTAGTCATTTCTTT  
CTCGGTGAACGTTCTCATGGGTATTCCCTAACCTCCTACAACGCCATCTTTCAGCGTGAT  
GCCGTGCCAATCATCAGCCCGACTGGTTAACCCTGGCGCATGAATCCTAGGCAAATAGAG  
GCTTGCAAGTGTGGTTGGCCTTATCATTAAACAATGTTGGCAACGTGCTCGCCGTTGTATGC  
GCTCAGCGTGTCTAGGAACTATAAAAATTTCCCTCCGGGTGCCCTGAAATACTTTACAGC  
CTTCAACAAGACGATTCCACGCTTTTTCTGTCTGCGTGCAGGACGCTTAAATCTTGCAA  
AGTTGCCATTTTCAGTTTCCCTTATATGGGTATTTTTTATTGTGCAGTGTGTTGAACGACG  
CCCATAACCACCTCATTGTACAACCTACTAACTAGTTCAATTATTTTCCAGTTTGCCGAGA  
CAAAAATTTGCGGGGATATCGGTGTCATTAGCCCGATAAACAGAAATGAGAAACAAAAT  
CTGTCGCTCTACTTTTTTCGCGGATATTATTTTCTGAATAATGTAGGCACACCACTCTCCT  
TTGTTGCACCGCACGATTTTATGCCCTGGCGCAAAGCACGCGTTTTGTCTTCGCTTATT  
CGACATCCATCCTTGCGCGCCTCTTTTGCACAGCCAGACCATGACGTACCGAGATAGTCA  
CCTAAGCGTAGCAACTTATCTTTGCTATCTGTACAGTGGAGGCAATCACTATAGAGATGC  
ATGGTGTAACTTGCAGCGATAGCCATATCACTCTCTTTTAGTGCGCAAGTGGTATTTCCCT  
GCGGTTTTGCGCCGCGCTGCGCTTTTTGCAAAAATCCACAATCCAACATCCCGTAATATT  
CATCAACCCACCCGTCGGTGGGTGAGTCTTAGCCACTGCCAGCTGCCAGGAGCGTTTTCC  
ACGAACGAACAGAATCTTTGCTTTACAGTTTTTCATGTGTTTACTCTCCTGCATCTCTTT  
GGTGCTCGACGTGCCGCTGTAATACCGGTATGGCTGCGCTTACGACTCGGGATGATGTTT  
TTTGCTATTAGCGCAGAAGCCCGAAAACGAGTCGGATACCGTAACAAGGAGATACATGCC  
ACCCGCACTACTCACCTCTTTTGATGCGACTGCCAGCGGCGCGCTCGGCTACAATTTGTT  
CCCAGAACCCTTGTGAAGCGCCAGAGGCTTTTCGTCAATCGGTTAGTATTTGCGATTAA  
AGTAGGCCTGAGCATCATTCTCAGATTCGTCGGGTAATTCGCAAGGGCCAAACAGTGTGT  
TATAGATACATGTTAGTCCGATCTTAGCGTCGCCAGCTGCGTGCCATTCGATAATGGCAG  
CCTGCATGACCAGAATGCTTTTCCAGATTAATAGGTCTGTTCTTTGTTCCCGTTGCGGC  
TGTATGCATTCTCACATTGTAGTTTTACGTTGCGTTTTTCTGAACCTTCAAGTAACGCCT  
GCTTATCGCGTCGAGCTTCTTCCAGTTCAGCAACATGGCATTCAATCTCAATAAGGTTGT  
TATCTGCTGCTTCAAGCTCAACACGCAGCTGCCAACCCTAAGCGCAATCTCCTCGTTCT  
CCTGTTTCGCGGCGTTTGATGTATTGCAGGTGTCTTTCTGTTTCATCCAGCAGTACCAGCA  
CGGAAGCCGGGTTAGTCTATGCTATGGATTCAGCGTTAGCATTAGCCTGATCATCTGATT  
CAATCAGGCGGTTAACATGACATAAGGCAATCACGCCACCGGGTTCTCCTTTCCATTTTT  
CGCAAACAAAACCTCCTGTTAAATTGCCGTGCTGGTTAACGGACGCATGCCCTACGATGT  
AGCTTCTTTGGTTGGTTTCTCTGCCTTTTACGCCGTCCTTGATATTTTATTTTCGCACA  
CTTCGAACGTCTCTGTTTACTGATCAGCTCCAGCTCTTCCAGGCAACTTGCACAAGTCCG  
ACAACCCTGAACGGCCAGGCGTCTTCGCTCATCTATGGGATCTCCACTCTCACAACACGG  
GGTCGCAGATATAGCCTGGTGGTTCAGGCGGCGCATTTTTTATCGCTGTGTTGCGCTTTAA  
TTCTTTAATTTCTGATGTTGAATCAAAGAGGTCTGCCATCTTCCATTAATCCCTGAATTG  
TTGGTGAGTACGCGTGAGGGTGAATTCGAATAATAGAAAAGGAGCCTGAAGCTCCTTGAT  
GATTTTGCTTTTCATCTTCTCGGTTCCCTTAAAGACGCCGTTTAAACATGCCGATCGCCAGA  
CTTCAATGAGTCGGTGTGAATCCCATTCGAGTTACCGTTTTGCGGAGCTTCTTCAGTACG  
CTACGGCAAATGTCTTGACGTTTTTATCCGGAAGCTGCTGTCTGGCTTTTTTTGATTTCA  
GTATTTGCCTGAGGGGCAACGATGCGAAGGGCCTTTCCCTGCTCAGGTGTCATTGAACAA  
GTCCCGTGTGCGCAAGCCTAAGCACACACACTATGAAGCCTGCTGCAAGAAATATGCATT  
CTGTTGTTATCAAGCCGGGTCTCTCGCGTTTGCTTCTGCTTTTCGCCGCCATCAATTCAG  
CTTTTGTGAATGGGATGTGACTGACGTATGAAATTCTTCGTCTGTTTCTACTGGAATGG  
CACAAACCGGACTCCAATTTAGCGAGGCTATGGGCCATCTCGATACTCGTTCCTAACTC  
AACGGCAGATGCTTTGTGCATACACCTGCCCGATTATCATTATCTCCTCCGCCAGCCGC  
TTTGCTTTCAGGGGATTTCCAATGACAGAAAGGCCGTGAAATACCCAGCCTCGCTTTGTA  
ACGGAGTTGACGAAAGTGTCTCACCTACCCGGATATTATCCTGGGGATGCTTCATCCCC  
ATTGCTCCCAATTACAAGACCAATTTTCAGCCAGTGCTGGTCCAGTTCGTCAATCCAAT  
CCGGCACCATTTTCGACAAAACCTGCCATGTACTTTGCACCCCGCTCAACTACGACATAAT  
GCAGGCCTTACGCTGCATACGTGGGTAATAGTTGGCAAAGTACCAGGCATCTTTTCGTG  
TCACCAACCTGCTGTACTGCACCTGGGCCCTGTAAGCCGGCTTTATGGCCTCGAAACGAC  
CGAGCCGGAACCTCATGAAATCCCGGTAGGTAACGGGCATTTTCAGCTCAAAGCCATTGG

AGGCACTGCTTAAACCATCGGGAGAGTAGGCGGTACTTATACTTTCGTCGCGATCGATGA  
TCTGGGATTCCATAACATTCACCCCGGAAGTGAACCTCAAACAGGGTTCTTGGCGTTTTCT  
CGTACTGTTTTCCCCAGGCCAGTGCTTTAGCGTTAACTGCCGGAGACACACCGGTGCAA  
CTTCGGCAAGCAGGTTGTGGAAGTAGGAAATTCTCATGTCAGGCCACGTCTTTCCTGAGC  
GAGGGTATGCTATCACGTTGTGAACCTTCTGAAGCGGTGATGACGCAGAGCCGTAATTTGT  
GCCATGCATCACCCCCCTTTTCGACAGCTCTCACGTCGATTCCGGTACGCTGCAGGATAA  
TGTCCGGTGTATGCAGCCACCTTCTGCTCGGAGGCTTTCTGTTTCAGGAATCCAAGAAC  
CTTCACTGCTTCGGCCTGTGTGTCAGTTCTGCCGATGCGCGAATGTCGCGGGCGAAATATCTG  
GGAAAAGAGCGGCAATAAGTCGTCATCCCATGATTTATCCAGGGCGATCAGCAGAGTGT  
AATCTCCTGCATGGTTTCATCGTTAAGCGGAGTGATGTTGCGTTCCGGCTGGCGTGCTGC  
AGTATATGGACTATTTTCGACAATGTGCTCGGCTTCATCCTTGTATAGATACCCGCCAA  
TCCGAAGGCCTGACGGGCACACTGAATCATGGCTTTATGCCGTAACATCCGTTTGGGTTG  
CGACTGCCACGGGCGGTGATGTATCTGCCTGCGAGGGTTTTGAATGGTTCGCGGGCGCA  
TTCATCCATCCACTCGGTAACGCAGGTAGGATGATTAGGGTTCGATGCGGTAATCCGGCA  
TATACAGGATTCACTGTCCTGGTCAAAGACCTTGCCATCAAACCTGCTGGTTTTAATTGAT  
GATGCGGGGCCAGCCATCAACGCCACCACCGGAACGATGCCGTTCTGCTTATCAGGGAA  
GGCGTAAATTTCTTTCGTCACGGTTTTAAGGGCGGACAGGTTGGCGACGATCAACAATGC  
GATGAACTGAGCATCACTGGCATCACCTTCAATGCCGTCTGGCGAGGACTGGTGATCAG  
TTCCTCTCGGTTCGAGAGAATCTATGCCGTCACGTTACGCCTGCTCCCCTGCGAGCGTTGT  
GAGTGCTGTACTCTTCCGGTTTATATCTCTGAATCAATAAGAACCTGGTGGTGACCACTT  
GTTTCAACCATGTACTGGAGGTGTTCTACCAAGCGCTCCTGAAACTCAACATCGGCGTAA  
AACGCACGGGCAAGAGCTTTTTTGCTGGCCCCGAGGCGTTTCTAATGATCGCTGCCGAGT  
GATTCAAACAGGGGCTGGGGCAGACTTATTCCCAAGCCGTCTGCCAGCTCTGCCTCTTTC  
TCTTCACGGGCGATCTGCTGGTAGTGTGCGGTCCAGCTCTGAGGCTCAAGACGATCCTGA  
ATAGTCTAAGCGTTCATTGTTGTACTCCTGAGATAGCGCTGAAAAAGTCGCCCCCGAAAT  
GCCGGGCTGATTAGGAAAACAGGAAAGGTGGTTTTGTGAATGCTTTAGCTTGATCGCAGTT  
TCAGTATTACTATCCATTTTTTATAGGCGTCGACGGCCTCACGAAACATCTTTTCATCGC  
TAATAAAAGTGGCGGTAGTGAATTTAGTCTGGATAGCCATAAGTGTTTGATCCATTTTTG  
GGTACTCCTCGCTGATTCAGTATGTCGATAAAGGCGTTTCCATCCTTCACCTCATTTACGG  
GTGATTCGTTCAAGTAAAGATTCCGGAAGGGCAGCCAGCAACAGGTCACCCCGCAATGGCA  
TATTGCATGGTGTGCTCCTTATTTGTACATAGGTA AAAACGCCTCGAGTGAAGCGTTATT  
GGTATGCGGTAGCGGCCCGCTCACGCGGCTTTGATTGTCTAATCAACTGAATCACATATT  
ACTGATGTAGCGATATGGGTAATTCTTATTCCTACGCTCCCATCCATTGGAGGCCATGCT  
TCCTGACCATTTCATCATTCCCGTCGAACTCACACAAAACACCATATGCATTTAAGTAG  
CTTGAAATGCTATAAGCAAAGCACCTTTCGCCAGCATGATTTATACAGCATTTAATAAA  
GAGCCGTGTTTATTGAGTCGGTATTCAGAGTCGGATCAGAAATTATTAATCTGGTGAAGT  
TTTTCTCTATCATTAAAGTCTTGGTCGATTGAAATTTCTATAGATGCTTTTCAGTCGTAA  
TCAATGATGTATTTTTTGATGTGTGACATCTGTTCATATCCTCCGAGATGAAATTTGCC  
CTCACATTGGAGGGCGAAGAAGATTTCCAATAATCAGAACAAGTCGGCTACTGTGTAGTT  
ACGAGCGAGATTGCTCCGTGTATTCACTCGTTGGAATGAATAAACAGTGCTGTATTTATT  
CTGTTCTTTATGCCAAAAATAAAGGCCAACAGCAGGCAGCCTTGTGTAAATGTTGCAGG  
TATCAAGTAAGTAGTTAGATGGAGCGCCATAAATTATGATTTTCATCGTGTGCAGGGTCCA  
TCGCAATCTCTTGCCTTATTCCCATTTCTTGCCTCAGTGTGTCGTCAGCGGGGAAGCATAACA  
CAGCCCACGCACCCATTGGTTTTAAAAGAAGTCAATTGGCTGTGGTTTTACTGAATTTG  
CGTTCACGCGAAAATCACAATCGCAGATTCATGAAATTCATATGTCACCTCAAATTAC  
CGATTTGCTGCCTAATTTCTTTTTCTGGCGACCAACACAAGTCTTCTTGCTGTCAGTTGT  
TTGGATTTCCGGTAGCCTGCCGCTTAAAGAGCTACATTTGGAAGACAAGTTGTGCTTTGA  
TATTTTCTGGTCAAAGTTGTGAGTGTATTACTACTGCTCTCATCGCTGGTTTGGCGTTG  
CATTGTTAGACGACTCGTGATGGGGTTGGCCTGTGTAGTTTGTGGGAGCTAATCGCCTCC  
TAACTTTGCTTGTGTGCGCGGCCAGCTCTACGGCGAGAAGCTACGGTGCCTTTACATTCT  
GTTTTTCGGGACCTAGATTCCTCCCGAATAAACTTTGGCGATGCCATCTCGAACCTCCTC  
CTGAGTCGGTTGCTTCGGCATCGCATCCCACTGCTTATGTGGTTGGGTGATCTGGCTTTT  
CAGCCACGTAGTCGAGAGTCGACGTTGTTTAAAGAGCCTGCCACTCTGGTCCAGTTGGCT  
TCCAGCGTCTGCTGATGGTTAAATAGTACGGTATGCACTTCACTTGGTCAATAACAAGTT  
GTTCTAAAACGGGGCGTGTTTTTGAACGCTTTGTAGTTAATCGTATTGTTTTTTAGCGT  
GGGTGATTGCCTCGGCGATGTAAGGGAAGATCAGTATTGCGTTGGTTAGTGACTTGTAT  
CTATTTATTTGTCAATAAATAACAATTGTTTATATGTTTTTGTGGCCGAGAGGGAGAGAAA

ACCCGGCATGGAGGCCGGATTGACGATTAGCGGTATGGCCTTGAGCGATAATGCTCAGAC  
ACATGTTTCAGGATTTCCATGCCTTATCCGTTTCGTAGGCATTCACATGAACTGCTCGATCG  
AATTGGTCATTCAAATCGTATGTAGACATCTGTTTTGTCTCATAGTGGCGGCAGCCCAAC  
AACCGCTGGAAAAAATGTTCCAGAGGCGCTAAGGTAACATCGCAAATATTGTGTACCTTT  
ACAATGGCTCCTTTTGGAGGCTCTGGTTAAACTGCATCAATGTCCGACTGGGGAGTTTGA  
CATTGTGTAGAATGCTTTTGCATTATTGAGGCTGAACGTAAACCTTCAGCATTGAACAGT  
TGCCTTCGGCTTATTCGCTTGTGATATCGTTAGGAATCCCGTTAATCGTTACTGTAACCC  
CTGATTCAGGTCGAAGAACTACCGATAGATCATAGCTATGAAGTGCATCAGCCTTGCCTT  
CGCCTTTAGTTGGTGCGCTAGTCAAATCTTTTTCTCACTGGATTCTTTGTCATTCCGGAG  
TACTGGGATTTCTTCACCAGACTGGAAAGCTTCAAACCTTTTGGATTTCCTTTTGCATGC  
GTCTTTTATATGCTGTAATGCTGCTGTCGGTAGTCTTCGGCTGACATGCGTTGATGTATC  
GCTGGGCACGCTCATTACATCAAGGTGAGTAACATCACCCATTTCTCTTCTTGGAGTA  
CCGTTAAGAGGCGATCGCATGAGTTTTTTAAATTCGAGCGGTGTCATCTTTCATTATGT  
TCAGCGACATAAGCTATTCAAGGAAGTCCTTGAATGCCTGCTCGCTAACGTTTGACTTTG  
CCATTTGCTCTCTCTCGAAGTTATTGACTCAGATCGTGTTTATCCAGTGATTGATTTGCA  
AGCAAGACTCAAGTCTTGAGACTTGCCGTTCCAGATCCACTCTCAATAAAAAAGGCCGCA  
GCTCTGCGTCCTTTACCTCCTAAATATCTTTTCTTACCTAAATAAACAGCGGGCGCG  
GTGAGCCCTGATAACTTAAAGTGCATCGGTCAGAGAAAGCTCCGTGCTATACAGGTGTTA  
TTTCATATCTTTTTGCAGTCAATACATTTTCCATCTGTCCAAAGAGCGGTTGCACTTGAT  
TCTGGTTGATGGCGGGACGTTTTTTACCTGCCTCACCCAGCCATAGAGGGCGCTGCTCA  
CCGATATTCATCGGCCGGTCATTGATGTTATAGACAATATCAAGCTCATTACGGATATAC  
TCTGATGGCCTAATGCTTGCAATGAATAGATGAACATTTTTTTGACCGCTTGGTACTCAT  
GGCCATTAACCTCCATCTATCCTCTTTACCCAAACGTCTCTTCAGGGCATTGGCTGGCGA  
TAACTTTCCCCACAACGGCACAACCTCTGAGTGCCTTGGATCATTGCATATTGCGGGTTTA  
GTGGTTGTAGAAAGAGCTGACCGCTATACCTGATCAGTTTCTTGACGGTAAATTCATCAC  
CACCAAGTCTGGCTATGCAGAAATCGCCGGGCTCAAGAAGTCTGCTCAGGGTCAACTAGAA  
TTAACTTCCCGTCAGGAGAACTAGGTTAGGAACCAGTTGGTGCGGTCATTGAGTTACCTT  
CAACCTTAAGCTAGAAGGCCGAGTCACTGGCTCTGTTGGTTGTGCTTACGAATCTCTCCG  
CATCACCTTTGGTAAAGGTTCTGAGTTCTGGAAAGAACATCCCTGACTGAACATGAGAAA  
AGACAGGGTACTCATATTGTTTCTTAACTGGGGCCGATCAGTATTCGCTAACAGGTGATA  
GTGTCTCGTTCGTGGATGAATGATTTGTTATCAATACCTAGGTATTCCAACACCACACCAA  
TATCACTAAGAGATGGATGACGAGATCCGCGCAACCAGTGTCTTATTCCACCCTGCGGCA  
TAGATAGCTTGTTCGGCTCACTTCTCTTGAGTGGTGCCGAGGTCTTTCATTCTGAATCTAG  
CCAGTTCATACCATTCTTTTTTTCATGTCCTTATTATTACGCACGGTACAGGAACCATCCC  
TGCACAATGTGTATTTTCACTTCTATTTGAGAAGCACAAATTGTATTGTTTTATTTCGTGG  
TTACTATGGGGGGCATATGGGCAACCTACGAAAATATCGAGAGTCACTGCATTTCTTTCC  
ATCAACAATTGCTAAGGCAGTTGGATGCACACAGGGAGCTATCGCACATTGGGAAGCTGG  
TTGTCGCTTCCCAGACCTTAAAACATGCTGTGCTCTTGCTGCGCCTCTAACTAACTTAGG  
CGAAAAGTAAGTCTTGATGACGTGTTCCCGCTGGAGCAAAAAGCCGCTTAATAAACGGA  
GCCGCTCTTTGTAACAACGCACATTCGTCTACGTCGCTGAAAAGCGAGACCCAAGATAT  
CTGACCAACCAAGGCCATATGCGTTTCCACGCATACCTCTCAACTAGCTATTCACTACCT  
GAAATCTTAAAGAACTGGAACAAACAAGTTACAGCAAATATCACAGCGAGAAATTGATCG  
CGCGAAACTGATTTACTCATCAACCTCTCAACGCCTGCCTGGCGCGGTCTGGCAAAGAT  
GATTAGCTGACAGGAATCTAAGATAAGAAGAACGTAAGTGGAGATTTATTGCTTCGGTCTT  
GCGTGCTTTCGGAATGGCAGCAGCCATCAGTCTGATAATCAGGGTTTTTATGTACGCGCT  
TGATGAAATCGCAAGAAAGAGATCCCCGACCGCCACCGAGGATTTAAGCAAATTAATAT  
GCAACTCTGAGGGAATTACTGGATCAATCCACAGGAGCCATTATGACAAAGCAACTCAGT  
GCTGACCAGGAAAAAAGTCACAAACACATACTCCGTGCTCGCTTCTGTCCAGCTTCAAG  
AAGCCTGGTTCGATTCTGGGCTGAGTTGGAAAAAGTGAAGCTAATGCAGAAGGAGAAAGGT  
CATAAGCAACATATCTAATCTAGCGGAACTCAGAGAGGCAAGAAGGGTACATGAACCGCA  
TCAAAGCAGCGTTAAGGGGTATGCCTTGCTTACCCTGTAATAATTATGGATGTGCCGTTTTA  
CAAGGACGCCGAAACATCGCATCTATGGGTACACTTAATCCTCAAAGCAAAACATACGCC  
TGAGTATGTAATGACTGACGCAGGAGCAATTCTGGTAGGCAGAGGGAAGCTACGTGGCGG  
TAGAATCTCTATGGCGCTTGGAAACAGGACTCAAACCAGATCGTGTTTACGTACCTGCTTAG  
AAAGTTCAAGAACTCGGCGTGAGTGTCTGGGTTTTACACGGAAAATTCTCAGTTTTTCTC  
GGTAGAGAAATATGTCGTTGATCAGTCAAATTTGGTAACAGCAGATTAGCAACAGATTAC  
GACTTCAAAGCCAGCAATACCAATGCGGGCGAGCAAGACGGTACCAGCAGATTTCTGCA

AATTACCACAGATAAAGAATATTGGCACATTATCTCTAAGACTGACGTATTAGAGAGTGC  
CACAGAAGACACAAAGTCTGACAATAAAAAACCTCCCGTTAGCTGTTAGGATGTTGTCGA  
TGCTGCCACGACTTATTTCTGAAGCGCCAAACAGCCGCGCACTGAATGGCAAGCGTAA  
AATCCAGATCCGATCGTTCTGGCGCAAAGCCGGAGTTATAACCCGCCAGCTTGACGTGCA  
TGGGTTACGCTGCACGACTGGATAAATTATTCGAGCTACGTATGCGAAAATTGCCGATG  
GATGTTGGAAGAGCGCCATCCAATCAGCGCGGAACCGTCTGGCACAAAAGGGGTTTTA  
TTTCTCTTAACGATAATACCTACTTGAAAGTTCGTGAAGTTGAACACGATGATCGATA  
ATTTTTATGCGCCGCCCATAGCGTCGAGGCAGAGCAGGCAGTGATTGGTGGATTGCTTC  
TGGATGATGACAGCGGTGAGCGCGTCCAGAAAGTTGTAGCGATGCTGATACCTGATTCTT  
TTACAGCCGACCACACAAATTCATTTTCGAAGAAATAACCATCTTGCAGTGGGAATAAA  
AGACAGTAGCTGGCCTGACGCTTTTCGATGAACTGGAGCGTGAATCGTTAACGCCGACTG  
TTGGCGGTTTAGCTTATATCGCTGAGATCGCTAAGAACACGCCAAGCGCAGCAAACATCG  
TTGCCTTAGCAATGGAGGTTTGTGAAATCGTAATGGAACGCCAAGCCATCAACCGGATGA  
CTGAAACGACGGAATTGCACTTTTCCACAACGGAATGAGTTCAACGCAGAAGTACGCAG  
CTAACCTGGCGATTTTCACGAAACTGCCAAACCATGCAAAAACAGGATCGCGTCGCGGCC  
TTCAGTCATTTGGCCACGTCATGGAAGACTGGGTTAGGGATCTTGAGAAGCGATTTGACC  
CGTCGCGCAACAACGAGGAATGATCACAGGGATCCCACCGCTGGACAGGATGCTGTCAC  
CGAAAGGTCTTGTGAAAGGCTCTCTGTTTGTTCATGGGCTCTCGCCCTACGATGGGGAAA  
TGACGGTATACAGGCCGGTGGCAATCAATTTTCGACGTGCATGGGAAAAGCCCGCTCTGA  
CGTTGAGCACTGAAATGCCAGGTGATCAGATACTGTAAATGCTGGTAGGACAGGAGTCAG  
GTGTTAACCCGATTATTGTTTACCTTGGCGCGACAAATGTGCGCGAAGAGGGCTATCAGG  
GTGACTACGAGGGTACTGTAACAGGGCCATCGAACCAGCTAATCGCTTGAGTGAATCG  
ACATGCTTTACATCGACGACAAGTCGGGATTATCTCTGGTTCAAATCGTCAGCGAAAGCC  
GTCGAATCAAACGGCAAAAAGGATGCGTTGACATGGTTCTGGTCGATTAATTTACACTAA  
TGACCGCTGCGAAGGCCGATCGCAACGACCTTGCTTACGTCATGATCACAAAGGACTGA  
AGAACCTTTCCAAAGAGCTCGAACCCGTTGTTGTGGTTCTAACGCATCTTAACCGCGCAC  
TGCAAAGCCGAACCAATAATCGCCCACTATCAAGTGACTCACGAGATACACGCCAGATTG  
AACAGGATTGCGATTATTGGGTGGGGATCCATCGTGAAGGTGCTTTTGATGACAGTGTT  
CACCTGGTGAAACCGAATAATCCTACGTCTCAATCGTCATGGCAATACCGGCACGGTGT  
ATTGCATCCAGGCACATGGCGCTATTTATGGCAGAGACCAACGGTCTGCTGAAATGCGCG  
GGGGTGAACGCGAGGAACAGCCGGCCGAGAAGAAAGGAGGATTCTGATGAATAAAAAACA  
ATTATCCGTTCTCGAAAAGGCATGGGATGCACAAATATCATTGCTTTGAAAGAAGAGGC  
AATACCAATTATCCAGACCGAATCGAAAAGAGCCACGCAGTTATGCGATGGCGGATTCCT  
GAACGAATTTAGATTACGAGCCAGATGATAACGTTTAAAAGGTATGATATAAATCATCG  
TGGTATAACGGCGTATTCCTCCCATCTTCCTGATGACGTTGAAGTTGATGAAATAGATAG  
GGAGACCAAGCAGTGACCATCTACATCACTGAGCTAATAACGGGCCTGCTGGTAATCGCA  
GGCCTTATTACTTGGGGGAGAGGGAAGCGAACGATTGCTACCGTCACTTTGAAAACCTGGT  
AGTCAAAGACAAAAGCCAGTTCACGGGAGATGATGAATTGAAAGAGTTTGCTTGGGTGA  
TATGGAAGGCATCGCGCTCAGCTATTGAACTGGATATCGACTGGCCCGACTCGAATGACG  
ACTTTTGGAAGGATGGTGAAGAAGGTGCTAATGCGATGGGTTATGAGGATGGGCGTGACA  
AAGCGGTATTTGCAGTAATGAAAGCCATCAGGGCCGCAGGAATCAAAAATAAGAATTTG  
ATTAAGCAGATAACACTTCTATAAATCACTTTTTAGACGTAACAACCGCTCTGTAGCGAG  
GTACACGAGGGCAAGGCATGCCAATAAGCAGCGAGAATGAATGGTGCCTCAGAATGTGTG  
TGAGGAGGTGCTAAGAAATGAGTACGTTAGCTGACCTTGTGAGGGCTAATTTTCGTTAAG  
AGTAGGTGCGTAGGTATTGGTATCGTTCATCGTCCAGTTTGCCGTTTGATGAGTTGTATT  
AGCATAACCTGCCCCACGACGCTATCCGCGTGACCGTGTCTTCGACGGTTGTTCAAAC  
TCAACCATGAGTTAAGCGCGACAGAATTAGCCGGAGTCTGGATTAAGAGTGAAGGAGTG  
AGCATGAGCGACTTATCATTAAACCCAGCCAACGCTAAAAGAATGTCCGTTATGCGGCGAA  
AATGCTCGTCTGAGGGTTGAGTCAGGAATAAATATTGAGGTGTGGGGCTATGCAGAATGT  
GACCTCTGTGAAGCCAGGGGGCCATGGGCCCATCAGTTGCTTCGGCGGCTGGAAAATGT  
AACTCGAGAGCTGGAGATGAAACAAAACCTTTCTGGTTCGCAACGAATCAATCAGAAATAC  
CGCCATAGACGCCATACTCTCACTACCCATCGACGACAAGTCACCCTGCGAAGGCCACGT  
TAGAGAACCAAGCGCAGCAAAGCCCAGAATGACCGTATGTGGCCAGTGCTGAACGATGT  
TTCTCGTCAGGTGCTATGGCATGGTCAACGGCTGGCGCCGGAAGACTGGAAAGACCAGTT  
CACTGCCCTGTGGTTAAGACCAAAAATTTGGAGCAACGAAGTGTGCCTGGTATCGACGG  
TGGGGTTGTTCATGCTTGGCGTGCGTACCAACAGAATGGGGAGGGGCAGCCTGACTGAGCT  
TATCGAAGTCATGTTCTGGTTCGCTCAGAGCCCAACGTGCGGTGGATTGATGACTACCG



GCGAAAGTATGAACGGTCACAACGAAAAAGAAGGGTGGCATGACTATCAAATCAAATACG  
CCAGCACACGACAAGGACTGCTAGCAAACCTCTGCTTTGGCTTTTTGATGCACTGGATATT  
GAGATTGGGTTCTGACTGAATCCAGCTGCGAGCGACAAAAACGTTCTGTGTGCTAACTGG  
CTAACTGAGGCTGACGACGCGCTAATTTCTACCGGGATCAATCACGGTGTCTGCTGGAAT  
AACTCACCGTCCAGCAATATCACGCCGTGGGTGAAAAAGCCGCGGAACAGTCCATATAA  
CAGCCACAGACGGTAGTGATTAATCTGCGAGAGGATATGTCAGTCGGATGGTTCAGCAAG  
GTTCTGGAGAGTGTGGACGACGTTTCGCATCATTGCTGATGGACGGATTAATTTTATGGAC  
CCGTCGACAGGGCTGGTAAAGAAGGGAATCAGCTAAGGCTGAATGTTGCTGATGTGGCGA  
TCGTTTCATCAGTCCTCGACGGATTTTTGCTATCGTATCCAAAGCGGCATTGATGGCGATC  
GGGCTGGGCGTAAGGAGGGCTGCATGAGGCGACAGCGACGAAGTAGCAGAGACATCATCT  
CCGAAAGCTGCAAATACCTTCCGACGATACGCTCCGGAAATAAACGCAAGCCAATCCCAA  
ACAATCTGACGTAAAAACCTTCAATTGCACAGCTCACCTGTCGGATATGCGGTGGCTAA  
GACATCGTGCAGGAAATGACAATGCTTTCAATTCAACCTGGATTTGAGCTTAAAACCAA  
AAAAGGCCTTATGTTTGGCGAGAAAGAGTCACAACCAAAAATGGTGTCTATCCGGTTACC  
ATTTATCAGTATTTATTTGCTAACCAGGGAGGCAACAAATTATTGGTATACATGCGTCAG  
AGCCGCATTTAACGAACCAGACTGGTTTGTGAAAAACCACCTCGCAGGTCGTTAGGAAAT  
GGGAATGGCAAATATGACATACATGAAGGCGTATCAAAAAGCATGGACAGAACACGGCGA  
TCGATACCAACAAGACATGGGAAAGCTTGAATCGGAAACATGGAATTAAGATGAAAGCT  
CGGTGAAGCAATACGAGACATTGATGCCTACAATCGATTTGTAATGGTGACAGCCATGC  
TTAGCCCCTCCCAATCCCTTCAATACCAGAAAGAAAACGTCGAGCGGGCTTTAACGTGCG  
CTAACAGCGGTCCGAAGCTGTATCTGCTTGAAGTTCACATGTCTGGGTACTGTTGTGCAG  
AACTGATGAGCGATCAGCATAGCTCAACGTACGAGGAAGAACACGATGGCCAAACCTCCG  
CGAAGGAAATGCACAATATGCAAGTAGTGGATTACCCGGAATACTCAAATCAGTGGTGG  
TACTGCCCTAACACCGAACTCAGTTAGCACTCAAACACTCAAAGTAAACAGCGAAAAAAA  
GTGGA AAAAGCAGCAGAGGAGAAACGACGACGAGAGGAGCAGAAACAGAAAGATAAAATG  
AAGATTCCAAAACCTCGCCTTAAAGCCCCGCGTACTGGATTAACAAGCCTAACAAAGCC  
CGAAACGCCTTCATCAGAGAATGAGGCCGCGACTTACGATGTATCTCCTGCGGAACGCTA  
ATGACTGCTCAGTGGGATGCCGGACATTACCGGACAACCTGCTGCGGCACCTCAACTCCGA  
TTTGTGAACTCAACATTCCTAGCAATGCGTGGGCTGCAACCGGCATGAAAGCGGAATT  
CTCATTCCCTATCTCGTCAACTGATTAACCGAATCGGGTAGGAAGCAGTAGACGACATC  
GAATCCAACCATAACCTCCACCGCTGGACTATCGAAGAGTGCAGGGCCATCACGGAGAAG  
AAACAGCAAAAACCTTAAAAACATGGGAATCCGCAGCATTGACGCGGCATGACGTTACAG  
GAAAAACCATTCTGACATGCTTGTGAGGCATATGAAAATCAGACCGAGGTACCCAGAT  
TACTGATCTGTAGTCGCAACAGGGTACAGTAAATACGCGGGCGATAAAGAGTGAAAGAGAC  
TCGCTATTGTCATCGCTGTTCTTATAGGACATCACAGATGTGGTATATACACCTAGGCGT  
GATATCCGGCAGGTTCTTGAGTGCTGTGGGGTACGGGCGGCAATTAACCATGAGGCTGTG  
ACCTTGTGACCCATTGCCGTCGGATTTAAGGGACTGATCCCCGAAAAAGTAAAAGCACGC  
CCCCAGTGCTGTGACGATGGTGCGATGGTGATATGCGGCTGTATAGCCCGCCTTTACCGT  
ACAATCGCGATCTGAATGACTTGCTGGTTGATAATAACGTGCTGGGGGGGACGTTTCATT  
GCGCGGGCACGGATACATGGGTGCTCTGACACCAGTATAGGTAAACGCCGTCACAAAGCG  
GAGGGGATAGTTGAAGACATGCTTATGATGCTGGGAGTGAGACTTGACGTGGCTAGGTTT  
GTTGAGCGTCAATATCCGGGAGGGAGAACCTCTGTATTTTATCAGCGAAAAAATAGTTTA  
CGATCGTAAAAGTCTGCCTATCATGATAACAGTGGTTATATTGCCACGCTGCTTCACCCG  
CCGATGCGCGGGTTTTTTTTGTTCCAGAAATCCTGTGCGCTAGACAGAAAGTATACTGAAG  
GGAAAGTGAGACCACAATTAATAACAAAATCTTAAAAATTTACATCGCATTATTAGTTT  
TCTAAATATTGTGATTTTTTTGATTGCAGGATGACCGTATAACGAAGTTTGCGTAACAG  
CATCTTGCTCTACGAGTTTGCCAGCCTCCCTCAGTGAACGGCTTTTACATGGCCGTAACA  
TCCTGGGTATCAATAAAAGTTCTTGTCTACGTACGCCAAGCCGTCGCATTAGATCTGGCC  
AGATATGTTAAGGTTGCAGCGCTCTCTGAATAGAATTATCATTTTCGTTACGTTATTGTT  
ACGTTTATCCGGTGCGCCGAAAAACTCCGTCCCTCATAGGATGGAGGATATCAAGAATAT  
AGTTATCGTATGGTGCTCTAGGAGTATGATGTAATATGAAAATAAATTCTTTTTAGAGTGC  
TAACTTTTTCTTTGTTATCCTTTCCGTTAATGTGGTTGGGAAGGAATTTACCTTAGACT  
TCTCGACCGCAAAGACATATCTCGATTGCTGTATGTCATTGCTCTACAATAGGTAGTC  
CATTCAAGACTAGATCATCAGGAGATACGTCATTACTGATGATTGATAGTGGCACAAGGG  
ATAATTTGTTTGCAGTTGGTGTTAGAGGGATAAATCCAGAGGCAGGGCGGTTTAAATAATC  
TACTGCTTATTGTAGAACGAAATAATTTATACGTGGCAGGATGTGTTAACAGGACTAATA  
ATGTTTTTTATCTGTTGGCTGATTTTTTAAATTTTACGTTTCAAGGTACAACAGCGGTTA

CATTCTCCGGTGACAGCAGTTATATCACGGTACAGCGTGTGACAGGGATCAGTCGTACGG  
GGATACAGATAAATCGCCATTCGTTGACAACCTTGTACCTGGATTGTATGTCGCATTGTG  
GAACCCCAAGTGACGCAGTCTGTGGCAAGAGCGATGTTACGGTTTGTACTGTGACTGCTG  
AAGCTTTAGGTTTTTCGGCAAATACAGTGGGGATTCGTACTACACTGGATGTTTTAGTG  
GGCGTTCTTATGTACTGACTGCGAAAGATGTTGATCTTACATTTAACTGGTGAAGGTTGA  
GTAGTGTCTGCTGATTATGATGGACAAGACACGGTTCGTCTAGGAAGAATTACTTTTG  
GAAGCATTGATGCAATTCTGGGAAGCGTGGCAGTAATACTCAATTGTCATCATCATGCGC  
CACGAGTTGCCAGAATGGCATCTGATGAGTTTCCTTCTATGTGGCCGGCAGATGGGAGAG  
TCCGTGGGATTACGCACAATAAAATATTGTGGGATTCATACACTCTGGGGGCAATTCTGA  
TGCGCAGCACCATAGCAGTTGAGTGGGTTAAATGAAAAAACATTATTAATAGCTGCAT  
CGTTTTATTATTTTCAGCAAGTGCCTGGCGACGCCTGATTGTGTCACTGGTAAGGTGG  
AGTATACAAAATATAATGATGACGATACCTTTACAATTATAGTGGGTGAAAAGGAATTGT  
TAACCAAAAGATGGAATCTTAAGTCTTCTTCTCAGTGGGCAAATTACGGGGATAACTG  
TAACCATTAATAACTAATGCCTGTAATAATGGAGGGGGATTTACCGAAGTTATTTTTCGTT  
GACTTACAATAGCTCAGTGAATAAGCAAGCTGAGATTCATAAATGTTTAATACATCTCA  
AGTCAGTCAGTTGTTGCCGGTCTGATCATGCATGTGTTAGAAATTTCTGCATGGTGAAT  
CCCACAGTGGGAGGGGGCGACTGGTGAACGGTGTGATCTATTTGATGATCGTCAGAGAGA  
ATACGCGGGTTTGGTGGCACCAGGTGCAACTACCGGGAGGCACCCGGCACTATGCAATG  
GCACATAGCGCCACTCTCCAGCCCCTCTCCGGAGGGGGCTCTCTTATTGACAAAACAAGCC  
CGCGCAGGGAGAAGCTGGAGGCAACGAACAACAACAACAAACCGTGGAGTAGTATTTAGCT  
GGCGAATAATATCCGACAGTAATCACTCTGCGCAATAGCACGGCCTTTTTTCGTATTGCGG  
GTTGTTGTCTCTCTTCTCCAGAGTCATGTAGCTTCCGCATTTAAGCACGCTCATAATTT  
TACTCACATTATTAGCCCGGCCGGGACGATTCATGGCATTTCACACTACGATGCGGTTA  
CGGCGGCATCACCGTCAGACCTTGCAGATGCCCTTGCGCAAAAAATTCGTGGTGGATGGC  
GACCATACGGTGGGCCGTATTCTTCGTATACGGCTGATGGCGCAGCACTTAATCAGGCGA  
TTGTCACAGAAGCTGATGTGAGCACACCTGTTGTGGTGAAGCTGACAGGTGGAGATGGTG  
CAGTAATTAGCGCCACCAGTAACCCCGGGTATTACTATGTTGTGGTTCTGGAAGCGAAGT  
CACACGCCATGTCGTATGGTGAAGGTCTTCTGTTTCCGGAGACATACGACCGTCCGGACC  
CGCCCATTAAGCAGCTGGCGTGTGCGCGTACGGTGACACCGGGGGGTGTCGCCTGTAAT  
ATAACGACATCATTCCGGCGGACCTTTGTCTGCATGATGTGCAGGACATGAGCCGCCTTA  
GCCATCCGAAAGGGGACCTTTCAAAGGGGGCAGTAGGGAACCGTGGGACAGGGGGCTACATA  
TCGCCAAAGAATCGCAGCCGTTTCTACCGGCGAATCCGGGCATTCTGTTGGTTCCGTGCT  
GTCTAGGTGGTTAAGCGTTCACCACCGGAGGCGAGGACACATACAGTGACGCCAGAGGTG  
CCTCGGAGAATTCAAACCGCTGTGGTGTGGACAAGCCGCTGTATAAGGACCTTATCGGTC  
GATCAAAAGCAGCACTGAAGAATTATCCGAACAATGCGCTGTTTGCCGTCGTGTGGATGC  
AGGGGGAATTTGATTTTGGCGGTACGCCGGCAAATCACTCAGCATAGTTTGGAGCGGTG  
TCGATAAATTACGTGCAGATCTGGCGGAAATGGCAGGTCAGTGCCTCGGTGGCTCTGCTG  
ACGGTGTTCCTTGGATTTGCGGGGACACGACGTATTTCTGGAAGCAGAACAACGAATCCT  
CGTACCAGACGGTGTACGGCAGCTGCAGAAACAACCGGAAAAGAACATCCATTTTCGTAC  
CGTTCATGACGTGTGAGAATTGGGTGAATGTGCCGTCCAACAACCGGAAGAAGACCCGG  
ACATTCGGGTATCGGATATTGCGGTTTCGAAATGGCGTGACAGTCCAGCCTCCTGGACGT  
CACAGGACAGGGCGAGCCATTCCAGCGCCTGAGCACGCGGTGGCATTATTTCCGACCGTC  
TAGCAACGGCGATTTTGCGCCATTCCGGAAGAGTGGCGCTAAACGCGGAGGCATCATCGA  
TAGTATCAGAGGTTCCGCCGACATCGCCTTCCGGTACAGAAGCCACAGGCGTCACAACAC  
TGCTCTTACCTTGGCAGCGAACCAGAGGGAAGCCTGAAAGTACAGGGATGGTCAGCCC  
GTGGCGGGAGGGGACGAGTCGTCAGCTAGGCAGAGGGAACCGGAGGTTAGGCAGTGAAGG  
TGACCAAGGAAGCCGGTAAATGCACCTGGGTGCTGGAGTACGCCCGGGGCATTGGTGGCG  
ATCTGTTACAGAAAGTGTGGCAGATTCGCTGCCACTTTAAGGTTTCGGGAGTGCTAGCTC  
CGAACCAGTATTTTATGGCGTAGTACTGGCCGCTATCTTCACTACCACAGGGCGTTGCC  
TGACCAGAGACCGGGGGAATAACCTGCTGGCAGCGTTCTACGTCCAGACAGATGCAACAG  
AACTGAATGTGATATAACCACAATGCGAAAGTGGCGACAAACAACCTGATACTGGGAATCT  
TTGGTGCATTTGATAACGTATGGCATAACGGTGGCCTTCCGCTTTGCGGTGAATAACGGCC  
TTCAGGTGTGCGCCGTTATTGATGGTCAGGATGTCATAACATTACGCTGACACAGTCAC  
CGCTCAGTGCATTTGCGGCTGATAAGCTGCATGTGACAAACATTACCTAAGGTGCTACTT  
ACCCGCTGCGGATGGACAGCATTGCGGTGGAAGTGAACAACACAGACACAAGGGCGTGAT  
AAAAAAAACCGTCAGCGACAGGAAGCCACGCTGGCCGTGGTTATACCTATGGTGGAAAAA  
TAAACGAGCGATACATTCGTGCTATGCTTTCCTAAATGAAAACAGTTCTTATTGTCAACA

ATAACGGAAAGAGATTACGACATTTCTGAACCAGTTAAAGCTGTACTTCTGTAGGGTGGT  
CTGTGAGCTGTCTCTGCTATCGGGTGGGTACAGGGCCATGCGTGACTIONTGTGGCGCAGACA  
GATTGACAAAGGGGACGCTGAGAAAATCAGCGCCAGTCAACCAGCCGGAAGCAACCCCGA  
AGTGCCGCTCATTTAGCGGGAATACTTAATCACATCTTTGACGAGAAAATCCCATGT  
CAGGAGTTACGTCCCTGGACTGCTGAAGCACTGAAGGAAGTCCTGCGCGCTGAAGAAG  
TCCGGTGTGCACTGGAACAGAAACATCGGCAAAACCTGGAACCGCTCTTGATGCAGAGG  
TTGATGCCAATCTGCATGAGCTCGTGGGCGCCCCGGCAGCTCCGGAGCCGGAGTTCATCT  
CGGGAGAGGGGAGTGCTTCAGATTGCGGTGACCCACACCCGGACAGCGACATGATGTTCT  
AAGCATGCGTCAGGGACCGCCGGTGTGTGCCAGGGGTAGTTTTTATTGCTTTGACCTTCC  
GGATTGCGGGAGAGGGGGTATGTACCAGATGGCAAAAATCACAACAGGGGTGTATTACAC  
CGCGTAAGCGGTGGGAATGGGCTACTGGTTCCTGCTGTTGATGGACAGGGTTTTCCCGTC  
TCAGTGGGCGGCAATAGGCGTCTGGGGTGTCTGCTGTTGGGCTACTGACATATCTGAC  
GCACCTGTATTTAAAGATTAAGAAGACCCGGCGTATGGCGGCACGGGGAGAGTTAGCTGA  
TGAGCACGAAACTCCGCTGTGATTCATCGGCTGCTGTTCTGGCGCTGATTGCCGAAAGTG  
CATCTGCGCCCGAAATCCTCGACGAGTTTCTGGATGAAAAGGAAGGTAACCACACCACAT  
CATCCCGTGATGGTGCGGGTATCTAGACCATCTGCCGTGGAGCGACCCGGGGGGATGGTC  
AGCTTGTATGCATGGCATGAAGCTGTCAAAGGAGAAATGCGACCGGGTTAACGCCATTG  
ACCGTCATAAAGCGCTGGCATGGGTGGAGAAAACACCAAAGTGACGCTGACCGAACACC  
AGAAAGCGGGGATCGCGTCATTCTGTCCGTACAACATCGGACCCGGTAAGTGTTACCCGT  
CGACGTTTTACAGACGAATTAATGCAGGTGATCGAAAAGGTAGCTGCGAACCTATTCGCT  
GGTGGATTGAGGGCGGTGGCAGGGACTGCCGTATTCGATCAAACAACCTGTTACGGTCAGG  
TATCCCGTCGTGACCAGCAGAGCGCGCCGGCGTGTGGGGAATCCACAAATAAGAAGAAT  
ATTTTGTGAAAATGAGGATTGCTTACAGGTACGGAAAACACGAAATCCTGCAAATTGG  
CAAATGTAAGTGCATAAAGTCAAACAGTAGTTTAACTGAGGGACCGTAATGATGCC  
TTTGTCAATTTCTGCGCATCTCACGCGCATCTCACAACACAGAACCTTTCAGGATGGCCCT  
TGAGGATCCGGTTTGGCTGTCCGGTGCCTTCTGTGGGCTGGTTTTCTGTGAGACAGGGT  
TCGTCCCTAAAAGGAAATAACCGATGAATATGATGGCCGTGCCGTTTCACGGCAACTCTC  
TTTATGTAGTTAACCAATGGCCAACCATAACGTTCCCATGAAACTTGTGCTTGAGGGGA  
TGGAGGTAGCCTCGAAATCACAATTGGCTAAGTTCATACAGCGTTTTTGCCTCAACTATAA  
CGGAAATAGTTATGGTTGCTGAGGATGGGAAACAACGCAATAGGGTATCCACGCCACTTC  
GAAAACCTTGCCGGCTGCCTATATAACGTTAATCCCAACAGAGTAAAACCCGACATCCGCG  
ATAAGGTCATCCGGTATCAGGAAGAGTCCGACGATGTTCTTTACGAGTACTTGCCGAGGG  
GTTTTGTGCTTAATCCCTTAAAATGAGCGTGATGGAAGAACTCAACCAGGCTTGTGCTG  
ACATGAAGCGGGATAAAGACATTGCCAGTGTGTTTGTACCGGGCTGAATGAGTGGAAC  
AGGTTAAAGCCTCGCATGTCTCAAACCTCCGTACGCTGGTAAATGAAGCCAATAGGCTTA  
TTGATTTTGTCTGCCTGATACAGGCAAAGGGAAGATTACAAAGGCGGATTGATGGGGTG  
TCTAATGATATCAGATAAACTCTTAAACGCTGGTGAAGAGCCTCTGTGTACTTGTGCGCAA  
TTCATTTTTAGTCATGCAGGTTGCCATTGTCTTTTTCCAGCGCCTGGCGAGTCCTGACGAT  
ATCGGGACTGGTGGCGTCAAAGCGAGATGAACCGTGTTCCGGTGGGTGGCGATTATTGTCC  
GGGTGGTTGGCTATGGTGCCTGTGACTGGCAACAACCAATTACGGTGACAACGCGCTCA  
CCTATAAAGCGCAGCGGATAAGAAAGCCAGAGAGCTGGAACACGCGAATGCCACCGTTA  
CTGACATGAAGGTGCGCCAGCGTGCCTGGCTGCGCTTGATGAAAATAATCGAGGGTGT  
TAGACTATGCCAGTGATGAACATGAAACTCTACGTGCCGAAGTTGCCGCTGGTCATTAGC  
GCCTGCGGATCACCGCCACCTTCTCCGGTACCGTGCGCGTAGCCACAGGCACCTCCCGCG  
TGGATAATGTATCCGGCCCAGACTGGCAGAAAACGCTGAACGGGATCATTTTCATCCTCG  
GAGAGAGGCTGGTCTCTATGCAAAATCAACTGTAAGGAACCCAGAAGTATATTAATTAGC  
AGTGCAGAAAAGTTGCCCATATCGATGGGCAACTCATCCAATTATTGTGTGCAATACAC  
CCGCGATTCCAGCGGAGTATAAATTCCTATAGTTATAAACCTAGCAGACCATTACGAA  
TATTTGCTGCGTTTTCTGTTTTAACAAACATTTTTCTGCGCCGCCACAAATTTTTGGCTGCCCC  
TACAGTTTTCTTCTGCCCATTTCCAGGAACGAAGAAGTGATGGGTGATGGTTCCTTTGG  
TGCAACTGCTGTCTGTTTTCTTTGAACAGTAAACGTCTGTTGAGCACTTCCTGTAATAAA  
CAGGGCCAGCGCAGTAGCGAGTCGCATTTTTCTTCATGTTGTTATTCCCGCTGCTTTTAGA  
AGTTCGCAGAATCGTATGCGTGGAATAAACAACCTAAACTATGAGTTGAAATTTT  
ATATTGTTAATATTTAATGATGTCCGGGTGCGATGAATCGACTTTGTATCCCCGGAT  
TAACTATGTCCACAGCCCTGACGGGGAACCTTCTCTGCGGTAGTGTGCGCGGATAATCAA  
ACCGATGCACACTGGCTTTTCTCATTTTTTCACGAGCTGGGAGCGAT

>NewGenomeName\_206

CAGTCGGTGAAGCTGCAGAGATCATGCGCTGTGTTTGTGACATGCTGTATTTGCAATACA  
AGGCAGAGTATCCTGAACTCAGTAAAACCTCAGATTGCGGATTTGATTAACCGAATTGA  
ATTTCCAACCTCAACTTGAAAGCTGAAAAATGGATGATGAAAGCATGTACCAAGTAATTTT  
TATCGCAATTGTCATATTCGCGCTTATTGAGTGTTACATGTCCATGTGGGATGACTATTG  
GAACGGTAAATGCAAAAACGAAATCACTGAATTTAACGCATGGCGCAAAAAGTATGACAT  
GACACTGTGGCGAAAAGACCGGAAAGCTGGTCCATTTTCAAGGTGGGTTATTTGTTAGAT  
GACACTTTGAAAGACATCAAATAAGCCAATGCCAAGGTATCAGTTTCCGAAAATTGTAT  
AAAGCTCGAGCTGAAATTCGCAAAGACAATATTGCTAATCCTGATTTTCGATCAAACCTGGA  
AATTTGATGTCTTTGCTTTACAGATCGCAAATGAAAGATGTTAAAAAAAATCCATTTGGG  
AGGACTAAATGTCAACTGTAGCTGTCATTGCGAGTATTGTGCTCATGTTTCGCAAAGACAC  
AACGTAGTGATATAATGGCAACTACTCTACCAATTCATTATGAGGAATATTAATGTCTGA  
TGAATTCAAAGTTCTAATTCCTCGCCAACACGTAATTCTTCGCCCAAATAGGTATGTAGG  
TTCTGTGCGCATATGAACCACATGAGCGATTCTTGTTTGGTAAGTATCAATCCCTTTCCTA  
TGTTCCGGGCCTGGTAAAAATCATCGATGAAATCATCGATAACCCGGTTGACGAAGGTAT  
TCGTACCGATTTAAAAATTTGCAAATAAGATTGATATTCGCTTTGATTAGCTTGAAGGTTT  
TGTGACGGTAGCGGATAACGGCCGAGGTATTCCTCAATCACTGGTAAACACTCCAGACGG  
AGAAATGCCTAAGCCTGTTGCTGACTGGACACAACTATGGTAGGCTCAAACCTTGATGA  
TCCCAACCGCGTATCAAGGGGGATGAATGGCGTAGGTTCTTCTCTGAAAACTTCTTCTC  
CAAGACTTCTATGGGTGAAACGTGCGATGGCGAAAACCTTCTCACTGTCACTTGCTCTGA  
TAGTGCATCTCAAGGCAATTGGGAAACCAAGCCGGTAAAATCAAAGGAACGTCCGGTATA  
TTTCATCCCTGATGGAAAGCACTTTGAAGGCAAAACGATCGATCAGCAGATAGTAGATAT  
CATTTCAAGATCGAACCAGGGCACTGTCTGTGGTGTACCCGAAGATTCAATTCACCATCAA  
CGGTGAAGTGGCTTCAATGAAGTTTGCAGAATACGCTAAAATGTTCCGGGGATGAATCTCT  
CCTTCTCGAAAATGATAATTTTAGCATCGCAATCAGCAATTCTCCTGAAGGATTCCCTCA  
AGTCAGTTATGTCAATGGTTTGAATATCAAGAATGGTGGTTCCACATCGATTACTTGAT  
AGATGGCATTCTCGACGCACTTATTCCATCAATCAAACGAAAGTATAAAATTGAAATAAG  
CAAAGCTCGAATTAAGAATGCTTGACAATGATCGTGGTGTTCGTGGAATGAGTAATCT  
TCGGTTTGATTCTCAGACAAAGGAACGTTTGACCAATCCGCTTGGCGAAGTGAATCACA  
CATTGAGCTGGATTTCAAAAAGTTAGGAAAGGAAATCATGAACAATGATGCTATCCTGAT  
GCCAATCATCGATGCTCCTTGTCTCGTCATCTGGCTGCAGAAAAGCAGCATTGACGAA  
AGCCCAAAAAGCAGCAGCAAAAACCAAAGTCGCTAAGCATATAAAGGCCGGTTCCCTGGGG  
TGACATTTCCAAAGAAACAACCTCTGTTCCCTGACAGAAGGTGATTCCGGCCCTTGGTTATTT  
GTTGAGTGTTCGTGACAGCGAGTTGCATGGTGGATATGCTCTTCGAGGAAAGGTTATGAA  
CACCTGGGGAATGAAAGGTTCTGACGTGCGGAAGAAGTGAAGAATTGGCCGATATCTGTGC  
AATGATGGGACTCGATTTAGCTAATCCGGATGATGTCGAAAATCGCAAATACAAAAATGT  
TTCAATCATGACCGACGCCGATCCAGATGGCCAAGGCTCAATTTACCCATGTCTACCCGC  
GTTCTTTAGCCTTTGGCCAAAGTTGTATGATCTCGGTTGCGTCCGATTTGTAAAAACTCC  
GGTAGTCATTCTTTCTAAAGGAAAGCAGATCAAGTGGTTTTATACCATAACTGAGTTTGA  
AGCGCAAAAGGAAAAGTACCGAGGTTGGGAACCTTCGATATATCAAGGGATTGGGTTCACT  
TCGCGAACATGAATATTCGAAGCTGTTAACTACCCTCAGTATGATATCGTCGATCTTGG  
GCCCGATTGCGAAGAATTGTTTCGAAATGCTGCTTTGCGACGAAGCAGAAGTTCGAAAACA  
ATGGATGTCACAATGAAAAGGGCTCTTCGGAGCCCTTTGTTGTTTTTGAAAAACAGTGTA  
CAACGCTTAAAGTGAATGGTATTATGGCTTCATCAAATCAAACAAGGAGTACATCATGAA  
AATCGTTTCGAGTTAAATTCAAATCCCCGGAACATCGTAAAGCTTTTGCTAAATCTGCCTC  
GTACAACGCCGAATTTGAGAAATTCATGCCAGACGAATTTTTCGTTAGGTTTGACCCACA  
CAGAAATGTTCAATACCGTTTGGTCGATTCTGATGGTGTGATGAGCCAGCTGCCGGAATC  
AACTGGTGGTGGCGTAATCATTTTCGACGACGAAGAAGTTCATTATTTTCATGGAGATTAT  
TGAATAATATCACAAACAAGCAGTTTACAATCGTGAGGCTATGGGATACTATAGCCTCCG  
GTTGAACGAACTAGCAAAAACATGTAGTAATTTAAAATGATCAACTTCACCGAAGCGTTC  
GGCAACGTTAAATCCCATGCGATGTTCTTCTCCCCGTATCTTGATACTTTATAAGTCTT  
TACTGTGTTGAAACTGATTCTCCGTCAGTCTTCATGAACATCAAAGGCACAAAGAAAGCA  
AAGCGTCTCGGCAGCAAGAAAGCTGCTTCATACATCGAATACCTTCAAATTGAATTGTCG  
AAAGGAGAATAAAATGAAAGCACGTTTAGAAGCTGAAGAAGCACATCAGCAGTTCATCGA  
CTACGGCGAAAAGCGTTGGGCAATTGGCCCTCTGGGCGACACAAATAACAACCGTCCGAT  
CGCTCTTCATTTGGGAATGAAAGAGTTCGATGTTGTCAAATCGATTTTCCATTTGCTGG  
CTGGTTCGACATCGGCATTGATGACATGGTGTTCGAGTCTATGGCTAGTGACGAAGTTT  
CTTCTTCGAGTTCATTGATTGATTAACCTGGCCGGGCAGCCGCCCGGCTTTTTTGTATCAA

AACAGTTTGAGGCTTTGCTCTTCGAGCGAAGCTCGAATTTACCCTTTTAGTTATAATAT  
CTATTAAGCCATAAAGGATAAAAATATCTAGTTGACGGGGACGAACCAGGTAAACCTGG  
CTGAACTCAATAGTTTAGTCAATGATACATTCACATAAGAATAAGGTAATCCAGGTTT  
AACCCAGTTAATCCAAAAATTTTAACTTTAACTGTGTCATTGTAATGTTTACCGTGT  
TAGGATAACACAAGTAGAAAAACAAGGAGGTCATAATGATCCTGCATGAAGGAATAGCT  
GAAGCTCTGGTTCGAATTTGTGCGCATCAACGTACGATTCATGGGTGATGAAGAACTGCC  
GATGAACTGAGCGACGAAGTTAACCCGATTATTGCTAATATCAAAGCTGGTATTGCAACC  
CGCAAAGTACTTGGCCGGCTGTGTCATTTGGGTCTTGTGCACGAAGATAATCTTTATGGT  
TCCGATTGGGGCAAATTTGTTTCCAAAAATGGAACAACGCATGAAAAAGGAACATAGTTAT  
GCAAATCACCTTTAAATCCGAAGAACACCCGCAAAGCATTTCACGTATTGCCAAATGCAA  
TGAATGGATTGCTCACGCTCTCGGTATGGACACATGGGAATGCCGAGAAGAACCAGGCAGA  
CGAATATGACAAAACCCAGTATTGGCTGTTCTTGACGGTTTCGGCAATCAGGTCGCTGG  
AGTGTGTTGTGTATGACGGGCGTCAGTGTGAAGATCATGCATGGATTTTCTGGGGTGC  
CAAATATTTCTATATTACTGAATAAAGGAAACACATAATGATTATCGGTTCTAACGAACA  
AGAAGTGATGTTTGGTAATGCACGATCTAAACGGACCGGGTTTAAAATCCAGGCTGGGCG  
GAAGGCCTTCCAAGTAATTTCTGAAAAGCTTTATAAAGACAAAGCTGAAGCAGTTTACG  
TGAGCTTTCGTGCAACGCGTTTGAAATCCATTGCGAACTTGGAAGGACATAATCCGTT  
CAACGTCCTCTCCCAACTTCAATTTACCCATGGTTCGTAATCCGCGATTTTGTAACTGG  
GCTGACGCAAGAGCAAGTTGATGAAATTTTCACTGTCAATTTTGTCTCCACCAAAGATGG  
TTCCGATGATTCCATAGGTGGTTTTCGGCCTTGGTTGCAAGTCTCCATTTGCATACAGCGA  
GTCGAGTGGCGGTTTCACTGTAAAAGCTATCAAAAAGGCCTGTGTACTGTCTACAACAT  
GTATATGGATAATGGAGAACCATTTGCTACACCGATGTGCGACTACTCCGACGCCCGAAGA  
AGATGGTCTCGAGATTCTGGTTCCAATCCCTGAGCACGAACATGCTCGCTGGAAAGTACT  
AGCTCGCAAAGTGTACCGGGCATATGATCGCTGCAAACCTTACATCACAAATATGGATGC  
AAGCAGCATTGAAGAATTTCCGAATCAAGATTCGTTCTTCAATACTGACGAATTCGCCCG  
TCCAGGAGAAGTGTATGCTGTAATCGGTGGAGTAGTGTACCCGGTCCCTCAACGTCTCCT  
GGAATCCGATATGGTATTCCGATATGCTGGTAAAGCTGCATATATCAAGTGCCCTATTGG  
CTCAGTAGACATTGCTCCTTCTCGGGAAGCACTCTCGTTGACCACAGAAGGCGAAGAATA  
CATTATTGGTCGACTTCGTGATTTTTCTGATAACTATGCCGAATCCGGTAAAGAAGGAATT  
TGACGGAATAACCGATAAACGAAAAGCCGTAATTAATGCCAGTGGATACAACAACACTATTT  
TCGTCAAGCTATTTTCAGATTTGACCATTGATGGCGAGCGAATTAACGATCTTATTGATCG  
ATATACGGATATGTCAAAGCTTAGTGACATTACGTTTTAAGCATATCGTGACGGTAGTTT  
GCGCCAGCATATTACGCGTTCGGTATATTCGTGGAGAAGTTCCAATATAGATGCAAAAAGA  
TGCCTTTGGCATCAGTCGGCGTAAAGTGCATGTTCTCATCAATGATACAGGTGAAGGTAT  
TCCGAGTATGGTTCGGGCGTATCATCATCATATTGGTGATACCATTCCAGTCGTTGTGTT  
GAACTAACTCGCAAATAAAGCAGAGTGAGTACGCCCGATATGGACGAACCATGAAAGC  
TATTTGCGAAAAGTTTAGCGTTGACGAACGCTCAATTTCTCAAATTTAGCGAAATGAATGA  
TATTCGAAAAGCATTACCCATACATAAGCGCAAACATCTACTCCTCGCGATGCTAAGCG  
AAACGTTCAACGTCATTATATCAATGATTCCGACCTTCGTGACGTTGAATTAATATACAT  
GAAATCCGCTGAAATAAAGCTCTTGAAGGAATTGCGGTTATTTCTGATAGCGATACATT  
TGACAAAATTGCGCTTAAAGCTTAGCAGTATACAATGCGTAGTGCCCTAGCAGATTGAT  
AGAGATTGGAGCAACCGAAGTTTACGTCATCGATAATGGAAAGCGTTCTGCCCGCTGTGA  
AGGGTCTCGTTTGAATGCGGTTTTAAGTGGGCATATGACCAGTACAAAGTGTGCAAG  
ATGCTTTTGTATTTCTTAGTGCCGAGTGCCCTAATATCGGAGACTTTAAACAAGCATTTC  
GTCTTAAGCAAATGGGCATTCTTGAATTGATATAATCGAAAAGTTTGACGAAAAAAGG  
ATGATTTCTGAATGATGCATCCCAATGGGTTGAAATCGGAAATCCCGATTATGCCGATT  
TTGCTGAAATCAAAGAATATGTTGATGAACAGAATAAAAAGTATTCTGAAATGTTCTATG  
ATCATATGGAGTCATTGAACATTACACACCTGCTATTGTTTGCAGTTGCCGTTAGTGGTA  
TAGCATTAACTCCTGAAATCATGAAAGATATCGAAATTTCTCCGGGCTCAGTAAGAACCCT  
TAAAACAAGAGGTATGATATGGCTAAGCTTAAATTTGTTGAGTGTGTTTGAATAATGAAAC  
CAAGCAACAGATTTTTGACAATTATTCTCTTGGCAATGTGTCTCAAGCTTATTGGGCAAG  
TGAATACTGCCTATCGATAGACACTATTGCTCGGGTTCTGAAGGAAGTCCGAAATTGGGA  
AATCTCTGCTGCAACGTCAGAGGATTCACCTGCCGAGGAAGATATTGCTGATAAGCTGGA  
ATGTACATGGATGGCCAATTCCAAGTTCCTTTCTGTGACCATCGGCGCCGAAACTTATAA  
CGTTCTGGCGATCGCCACAGTTCATGGAACCTCATCAGTCTTCTGGGCGAGGAAAAATA  
CGATGAAGCAATGGAATGTTGAATATCAAGCGTGGTCTTGAGCGATATGTCTCAGCCGA  
TCTGGTTATCGAAGGCGGCACACTGAAATACAAAGATCTGATCATTGATTCTGGTCTTAC

TCGTCGCATCGTCGGAAAGATGCAAAACGGAGAACCCTTTCGAGCCGCTCGTTGCATTCTT  
TGAAAATCTGATGGCGAACCCGAGTCGTCGAGCCGTATATCAGCTGTACGACTTCCTGGA  
ACACAACGACATTGAAATCACCGATGTTGGTCATTTCAATTGCTTGAAGCGTGTAACAG  
CAATTTCAAAGACATGCACACTGGCAAATTCGATAACTCTCCCGGAACAGTGGTTAAGGT  
TAATCGCTTCCAGGTTGACGAAAACCCTAACGTTACCTGCTCTCACGGTCTTCACGTTGC  
TGCCAAGTCTTATATCCCTCATTACGGTGGTGGGTCTGGAAAAGTGATTGCATGCAAGGT  
CAACCCAGCAGATGGAGTCGCTATTCCAACCGACTACAACAATGCCAAAATGCGTTGTGC  
CGGGTATGAAGTTCTTTACGAAGTAACTTCTGACTGCAAAGAAATGAAGCACTACTAATT  
TTCATAAGCCCTCTTCGGAGGGCTTGTTTGTAAAGGCGTTGTAAGAGCTCACCATTTGGCA  
TTATATTTTACCAAGACGATGACATTGTTGGTTCGGGTGATGGAAATCATAGTTGGATT  
CGCCGAATGACTTACAGAAAGCGAAGAACATAACTGCAGTTGTTGAAGGAACATCTTGGC  
AGTTACGACCATTCGAAAAAGAATGGACTCATTTCAATTGCTGCTGGCCGAGTGTTTTATG  
ATCAAGATTACAAGAAAATGAAACAAACCATTTCTCTTATAGAAAGCTTTGATTTATCAG  
ATTTTTCATTGTCATATTCTGAAATTGTGAGGAAATTGTAATGACGGTACCGATGAACGT  
ATCCCATGACGAATTTATCGCCCTTCGTCATATCCAACCGTTTGACGCGGTTATTATTTCG  
TCTTCAGATCTGCGACCAACTCATAAAGCAGCCTGAGACGAGGGATGAGCTTTTTGAAAA  
ACGGAAAAGGAGATATGATGATACCATCCAATACGCTCTCGATGAAGCGGCTGGGAATGA  
TATTCCTCGGCCAGAGCTCATTGATAGAACGGTTCATTCACTGAATGCCGAAATGGGTGT  
CACATATATGCTGGGTGGGGTCTGGGGAATATTTGACTGGTTAGACAATGACAATATCAC  
CTTTGATGTGCCAACAGCTGGGTCAATCTGGAAATCAAGACTTCTTTTGGCAAACGGCC  
AACGATGCATACCGCCGCTGCTAAACCGTATGGCAATGCACAAGGGCTGTGCTTGTACGC  
TGGTTTGC GCGGAGATGCTGATGTTACTTGGTATTGATCATCAATGAATATGCTGGCGG  
TATCACATATAGGCCGAATTACTTCTTCACAAAGCGAGCTATGGAAAATTATCCGTATGT  
GATCTGCGTTTCCAAGCGCGGCGGTGGAGCATAATCATTAGACAGCTCAACAAATTTGT  
TTATTTTTATAACAAGTGGTGTACACTCTTATTGTGCGTGATAAAATGCACCTATCAACA  
ACACTGGAGCATTTTGCATCGAGGAAATGAAAATGAGAACTCACCATTTTCTGAAAAGAC  
GCGCCAGGCCACGCTGTGCCGAGCAAAAGAAAGAGCTGATAGCTGAGCACAGAATGTTTT  
GCTCATTGATCGGTCATCACATCATGTGCTAGGATCGCGAAGACTCACCTGAGCTCA  
TTCAAGCCAAGAAAGACCGCGATGCAATCGAAAACTCCTAACGGAGATTACTAAATGAA  
AACTAGTACACATCACGTCACAGCTATTGATGCCCCGTGTGTTGGCACTTTTGAACCTGA  
ACCGGCAAACTTGC GGATTCAAAGTACACTTTCGAAGAAGTGATGCATAGAATCGGTTA  
TACGATGGTTGATTAGTTAGCCACGCTTGCAAGCTCCCTCGCAGGTATTGAAGCACTTGT  
TTATGAAAACATGATCACCTTCCCTGCTGGGTAAAACGGGTTGGGAATCACTTCGATGA  
GATGTATGACGTGAACTGGGTTTTCTTTGATTTTGTTCCTTCTGAATAAAACAAGTT  
TACAACTCGTGGCTATAGGATACTATAGCCTCAAGTTAAACAATAGAGAAACACGGAG  
TATTTTTATGATCAACTACAATTTCAAATGCGAACTTCTACCGAAGCCTTCAATTATGA  
TGTCGGCACCACGCGTGGTAAAGCCTGGGGAAATAAACTCTTCGCGAGTATCTGGATGA  
AACTGGCGAGAAAGATGCCACCATCACCTCATCAGAGAAGAAAACTGTAAATGGAGTA  
AGTTATGAAATGCCCTAAGACATTCGACAGCCAATTCAGGCTACGCGGCGGTTTTGCGCA  
AGACATCAGCAATGGCGAAATCAAGAACGAGCCAATGTTTGTCAACTCAGACTTGGCATT  
CGCGTACCAGAACGGCGGCCCTATCACTCGCAGTTTTATCGAGAATCTCCCGCTCGATTG  
GAAAAGCAATGTGATTTACGATTCGCGTGTTACATGCTTATGCCTGGGTGGTACCCCGC  
GATTCCCGGATATACCATGATGACGTGCCGCGCCCGCCGATTCCGGTAGGCCAGCACTT  
TGCAACTGCAGGACAGCCAGACTCTGACAATCCTCGTTATCTGTCTCGCCATATCCTTGG  
TTTGGTTATCGGCGATGTCTGTCTACTCATTTTGCAGTAGGACTATCGGAATTCAGCCG  
AATTCCTGATGGTGAACCTATCTATCGGCAATGGCATCAGGAAGTCATGACTAAACTCGA  
AACTGGTGAGTTAAGTAAGCATATTGCTCCTGATCTAACTCTTGTAGAGTGTGACCGGCA  
AACCTGACACACTGGGTCAAAGCGGTTAGAAACGGCTGGCGTTGGTTTGGTTCGAGTTTC  
TCGAGACACTGATCGAGTTCTGACACCGTCGATTGAAATTCGACGTCAAGTTCAAGTTTA  
CATGGAATTCCTGATGGAGGGTTGGTGTGTTAAGTATCGTTTTTGTAGTGAAGAGCAA  
TTCAACGCATGGGCCAAGCCAAATTATGCACAGGAATTCGCATTCGCTTTTGGTTCATGG  
GATACAATCTTCGAAATGGAAGAAATCGGGCGTCAAGTTTGTCTGAGACTATGGAAATC  
GACGGCGAAATTTACATGACTACTCAATGGTACCCATTCAATATAACAGACCTTGGCCAT  
CGCATCATCGAGGTGAAAGACTGAAACTCTACTTCTTGCAGCACATTGAAATCAAATAGC  
TGGCGTGACTTCTGCGAATTTGAAATCGGAAGTTATGGTGA AAAAGATCATCAAGATGTT  
TGCTTAACAGCTGTGTTACTTTAAAATACAAGTCAACCAATTGAATAGAGAAAAATATCA  
TGAAAACCTAATGTTACTGCTCAACGTATTGTTGTTACTGGTGCCCAACGTGTTGGTGCTT

TTGAATTTGACGCAGGAAAATTCCCTGGATGTGAAATTCACCTTTTGGCGCCTGGCAAGAATC  
GTGAAAGCATTAGCAAGCCCAGCATTATGTTATCGTTAAAGATGGTGTGCTGTAGCTC  
GTACTTTTGTGGCCAACAAGAAAAGAGTGTGGTTTTAACGAGACTATTCGCGAGTAA  
TTAGCTGCTGTTGGAATATACTGACGGTCTCCCGCGGAAGACTTATCGCTCAGTCACAG  
GTCAAAACAAGACACATACGGTTTACCATATCCCGATGTCCTTGGTGCCAAGACTGTTGA  
ATATGCAACAACCTTGAGCTGTTTGAAGATAACACCACCAAATATCAGTCGCTCACTGCTG  
TTTCGCGTCAACTGTTTAAAGGTATATAATTTTCAATATCAAAAACGATAAAGGAATACCCA  
TGGCATTAGCTTAGATGATTTTTTTTTCATCAAGAGCCGATTGTGCCGGTTGCAAAACCGG  
CATCTAATCCCGAAACTCCGCCTTGGAAATGAAAGCAAAGATGATGAATTGTTTCCCTCCGG  
CAGGAATTACCATCAACCAGGTCACCGATGAAACGGTAATCGAAACTGAAGTACTCGATT  
CTTCGGTTGTTAAAGAAGTCGATGAAACTGAAGTACTTGACGAGAAAATTCGGCAATGCC  
AATCTGAAATTGATTGAGATATTCGGCATGGAAGAAAGCCGTATTGCAAAGTCATTTAA  
CTAATCTGCATAATCGACATCTGCAATCGATCATCAACAATGAAGCTCTTGAATTTGCGA  
TGTATGCAGTTGAAGAACGTGCAATCCCATCTATCATCGATGGCTTTAAACAGGTTTCGAC  
GCTTTTTTCAGGTATCGCGCATTGGAATATGCGAACCAAAATAAGACCAAGTTTGACAAAG  
TAGCAGCGCTTGCAGGCGGTGTTTCTGAGGCAGGTTATCACCATGGCGAAGGTTCTGCCG  
TAAGTGCTGGACAACCTATTGCAAATACATGGAACAACAACATTACAGTATTGGAAGGAG  
ACGGAAACTTTGGTACTCGTCTGTTACCAAGAAGCTGCACCACGATATGTGTTTTGTC  
GTGTCCATCAGAATTTCTGGGACATCTATAAAGACATTTCTCTTTCTCCGGTGCATCCCG  
ACCCTGAGCATTGCGCCGCGTTTTTATCTGTCTGTTATTCCTATGGTTCTCGCGAATG  
GCGTAAAAGGTATTTCCACTGGCTATGCTACTACGATTTTCCCGCACTCTTTTCGAGAGTC  
TAGTGAAGTGCACACTGGCTGCAGTAAAAGACGAAGAAATCCCCGAGCCGGAAGTGCAGT  
TCCCATGCTTTAATGGTATAGTTCGTCGAATCAATTCAAATCTATCGAAATCGATGGTC  
TCTATGAGCTAGTTGGACAAACCAAACCTATTATTACCGAAGTTCAGTTCGATATGATC  
GTCTTGAGTACGTAAGTATTCTCGACAAGCTCGAAGAACAGGGGAAAATCGTAGGTTACA  
AGGAACAACAAGGGATGTGTTCCGGTTTGAAGTAACTCTCAAACGTCAGGATACATTTG  
TCGAATTGATGGAAAAAATCCGGAAGTTGCACATGAGCGTATCATCTAAATGTTCAACC  
CTTGCCAAAATCTTTTCGAAAACATCACCGTTCTCGACGAGAATGGAGAATTGGCAGAGT  
ATGAATGGGCCGCCGATGGGATTCGGGACTTTGTGGAGTATCGCAAAAATACACTACCC  
AGCGTGTTACCTTCGAAAAAGAAATGGCAGAATATTCGAGTGATTTGGCTTGGGCCGGAT  
TTGCCTTTGTTAATGAAGTGATTGAAGAAAAAATTGTTCTTCGTGGAAAATCGAAAGCGC  
AACTTATTGCCGAAGTAAAGTCCAAGCCGAATGTGGCAGGATTTGAAAACGAGCTAGTAG  
GGATGAGCATTACCGTCTTACTGAAGACGAAACTCACAACTTCAGGAAGAAGCTCTGA  
AACAGACCAAAGAATACAACACTACTGGTTCGAGCACTACTCCAGAAAACGAATATGTTAAAG  
ACCTCCAAACTTTAACAAAATAAAAACAAGGCCTTTCGGAGGCCTTTGATGTTTCTAG  
ACAAAAGTGTGTACAACCTGCTTCAGATTGTATACAATAGCCTCAAGTTAAACAAACTGTC  
ATGGAGCATACTATGATTTACAAAGCGCTGAACAACAAAATCAGCCGGTATTATGAGGAA  
CGAGTACAGTGGATGCGCGAAAATCATATCGTTGACGTTACAACCTCAACTTATACTCTC  
AAGTTTACCAATCACTAGGGTTATGTTGGTCAATGTCCTTACTCTAACCGTGAAATCAGA  
ATTTTCAGAAAAACAAAATCAATTTGCAACATGGGAGTCCATTAAGACACAATCAACCAT  
GAGCTGGCTCACTGGGCAACCGTAGGTCATGGCCACGATTAAGTATGGCAGCAAATGGCC  
GTTTCGTCTTGGAGCAACTCCTGCGAAAACCTGCACCCTTGGCCAACCTGCAAAAACCGTAT  
GTCATAATGTGCAAAGGCCAAAGTTGTAGGATATTCTGAGGTATTGCGAGTCGGTTCAGAC  
GCTGCCACACGAAACATCAAAGGAAAAAAGAAACAAAATCTTGGATTTTTGGAGTATAAG  
GTAAATCCAGAATTCATCGGTAACCTCAACTGGAGCGAACCAAGTGTCGAAATCCCAACA  
CGAATCAAAAAGACAAACAGCATTATCGCCGATTTTCTCAGCGATCTTTGAGGAAAAGCA  
TGGGATTTTCAAATAATGCAAAAACCTAGTGTACTCCGTTTGGTATGGTGATACTATAGC  
TTCATACCTAACAACTGATGAAAAACAACGGACTATATCAAATGTTCAACATCACAAA  
ATCCAAGTCATGCAGATCAACCTCATGAAGAAAGCTGTTGAAAATTTCCAAGGTTTTGAT  
ATCAAGGCAGTAATCATGAATCCGCTCAACAAAATGATGAACAACGAAGTTCTCGATAAG  
CGTGAAATGAATCGCTGCGAACAGTTCTTCAACGACATTAATCAAGACGATCTGATGTGG  
CAAAATGCTGATTGCGCTAAACTCTCAAAATCCATGAAGCGTAAACTTGCTGCAGCGATG  
AAAAAAGCTTAAGTTATTTCAACAAAGAGGTTTACAACGCTAAACCGCTTGATTAATA  
GCTACAAGTTAAACAAACTACCACAAAGCAAACGGAGTATTTAAAATGACCATGACCAAA  
ATCGAAGCTATCGCAAAAGTTCTGAACAACCTCCAGGATCTCTGAAAACGCTACTTCTGTC  
TTCATTCAAGTTGCAAAGAAAGCTTTTCGTTACTGCTGTTGAACTTGCGGAACCCACTGAA  
ATGAACAACAAACGCAGTTTACTCCAATATCGGCGTGATGATGAAAAAGGGTTTGATCGAA

AAATCTGGCGACGGCTACGTAACCACCGAAAGTAGTGATGCCATTCTCATCGAAGCTGCC  
GAAATGTTCGAAAGCTGCCAACCTGAAGTTGAAGCACCTAAAGTAGAAAAGAAAAAGGA  
ACTCGTGAAGCTCGCGAAATCAGAGTCGAAATGACTAAAAACATCGAGCTCGTGGAGCGG  
CTGCTGTCCAACCTCGGCATCGAGCACAAGAAAGCAGTCATCAATCGCCAAAACACTACGAA  
ATCAGTCTGAACAAACGCCACGCTGATTGATACCGCAAATTCGAAATTCTCAACCGCGGC  
ATCTTCCGTATCGTTGGTTACAAAGTATCTGAAGAAATCATCAACAACCTCAAACCTTTG  
GGTTGTGAAATCAAGCAAGGTCCGGCAAACCTGCTACATCGACATCACCGCGAATGAAAAG  
AACATCGTTCGTCTGATGGAAGAAATTCAGCCGCTAACTAATGCGACTAAATACTAGGA  
ACTAAGAAAACATCAGCCATCGCATGTTATAATGTGATGGTTGATTTCATTTGAGGAAA  
AATATGAAAATTTTAATTGTTGGTGCTGGTTTGACTGGAGCAACTATTGCGCGTAGTCTC  
GCTGAACTAGGGCATGACATCACAGTCATTGACAAACGGAAACACATCGGCGGAAACTAC  
TATGACGAAGTTCGAAATGGTACACTAGTACATAAGTACAGACCACACCTTTTGCATCAT  
AGCGACTTGGGTGTGCACAATTCCTTTACGCTGGACTTCCTGGATTCCCTATGAGCAC  
AAGGCAAAGTCGAATATAGAGATACATTATACTCTTCCCGTGAATCTGAAAACACTC  
CAAGAGCTCTATGGTAGTGAAACGGAGCAAGAGGCCATCAAGTATTTTGAAAAGGTTTCGA  
TACACGAAATCTCCACCAACTGTTCTGAACTTTTCGATCATTCCGTAGGAAAAGACCTT  
GCCGATATTTTCTTTAGACCATACACGAAGAAAATGTGGGGCACTGATCCTAAAAACATT  
GAGTGTGCTTTTGGCGCACGGATTCCCGTGCGCACCTATGATGATGACCGCTATTTTAGT  
GATAAGTACTAATATATGCCCGAAGGCGGTTACACTAAGATCTCGGAAAGAATGCTTGAC  
CATGAACGAATTGAGGTCAAATTCGCACGCCATTCGAAAAGGAAATGGAAGCTCACTAT  
GACTTCATTTTCAACTCGATGCCTATCGATGCGTACTATGACTTCAAATGTGGCAAATTG  
CCGTACCGTTCTTTGCGCATGGAAGTAAAACAAGAGAAGCATGATCATGGAATTACTACC  
GAGAATAACTCTGCTTCTGAAGAAGGTCATACCCGTTACATCGTTTGAAGAATATTCCA  
GGCCATGGCGATGGTGACATGGTGACTTACGAGTACCCGTGCGACTACGATGGCACAAC  
GTGCCGATTATCCAGTGACTCACGGAAAAGAACTCTATGCTAAGTTTGCTGAGCATGCA  
AAGACTGATAAAATGATGATTATCGGCCGTATGGGTGCATATCAGTTTATCGATATGTGA  
AAAGCAGTTCGCAATGGTCTCGATATCGTTTCAGATTTTCGAAGCATAACTCATAGCCGGC  
CGTTGGCCGGCTTTTCAAAGGATATAAAATGAAAATTCTTGTAAGTGGCACTAATAACT  
ATCATGCTCGCCCAACTGGCATCTCGAAAACGTTCTCGCTATCGTCTCGTGACTGCGA  
CTACCGGCCTCGTCGAAGCTCTCAAAGATATGGGCCACGATGTTGATCAACGCTTCGTTA  
CCCAGGTGAAGACCTGAGTGGCTACGACAAAGTCTTCACTGCTTATTTTCGATGCTACTG  
GCGGTATGCAACCAGGTGGTTATGGCGTTTACTGGCTTCTGGCGAATCCTCCCGGCGCGA  
TCATTGTCATTGATGATTGGCAGACTCCCGAACGTTTGAAGAAAGGCTTCAAATAGTCTG  
CCACTCGCACCCGTGAACAATTTGAAGAAGTCTGTTCCGCGAATTAATGCTGTACGACC  
AGCACAACGAAGCTCCTGATGCAATCACTGCTGATCCTTCGCTGAAAGAAGATATCGTCC  
GCGGTTATGCTAAGAACGTCTTCGATTCTCACCGAATTCTGTATTGCGCATTTCGACAAAC  
TCGAAGTTTCCAAGATTTTCGATTATCCACATGAATCTTATTCGTTCTGTCCCGAATCCT  
ATGTTCCCTAGCCCAGATGATCGGCTGCGCGAAATGGGTCTGGCACGTC AAGATATTTTCC  
GCGAACGTAAATGGATTATCGCCAGTATCGGTGGTCTTCTCTACAAAGAAAGCATGTAAGT  
TCAAAGGCAACTTCACTTGGGATGTAGAAGTATTTGGTTCGTGCAACTATCGACGTTGATG  
CCAAACTTGCAAAAAGAGCCCGAAGTAATTCAAGCCTACTCGGGTGCCCGCGCTTTTTTCT  
ACCCAGACCAAAACAACCTTCGGCTCCAACCTGGTGGCGCAATCGACCACGCCAATGCGCTA  
ATATGGGTGCTGTTCTCTTTATGATGTCTGATGAAGAAGCTTCATTGTTTGGCCCATCTT  
ATATGGGGCTTTTCGATCGAGAAGTTAGAAGCCAAGACTGACGAAGAGCTCGATGATCTTG  
CTGCTCGTCAGAAGGCCGATTATTACAAGTCAAATCCTCTGGACAAAGCAAAGTTAAAT  
CTTGCTTGATTGATTATGGCGTGATGAGTTTTAATAAAGCTGCTTCGGCCGCTTTTTG  
GGGAATTTTATGAAGCAAATTATCGTAAGGCTGTTTACGCCGATTTACACGCAACAAGAAA  
TCACCCAAAATGGCCTGGGCACGAGTGTGGCAAGCTGTCATCGAACACCACACTGGGTTT  
CCCTGTCAGTTGATCCATGAGGCTAAACCATGGACAGTATATGATCGGGTCTATGTCAAT  
TTCAATCTCGAGCCCTATGACAGATTGAGTTTGTGGCGGTCCTCAGCCACAATCCGCT  
GAGTTTATTAATGTGCTGAAGGCTTCATCGGTGAAGTTGTTGCATTAGACAAACCTTTG  
GCCCGTTTTGGTGAATTCTGCAAATCACGTTGTTTAAACAACATGGTGCACCCAACATG  
AAAGTTCCCGGCTATGGAGAGGAATTGACTGGGATTCCAGTCAAGCGCAATTTGACAAA  
GCCACCTGTTTAAACGATGGCTTCTTTGCCGCTTGAAGATGTTACACTCGGTGATTCTCAC  
AGTATGTCAGTGTGGCAGCCAGGCTATAAGGCTTATCGCTGCGACGCGCAAACATTACGT  
GGAGCTTTGAAAAGAGGATTGACAAGTTTCTTCTGATAAAGTTCGGAATTTGACAATT  
TATTTTGAAAACATCGACGTTCCGGTATCATTTCCGGTTTCCAAAATAACCCGATTTCTGAT



GTACTTGAAAAGCTCGACGAGTATGAAAAACAACCTAGTCGGACTAAAGGAGTCTGGACAA  
GTTACCGGAGAAATCCAACCTTGTGCACCTGCTTCTATTGAAGATGAGTCAAGAAAAATC  
CCAAGAAACAATATGCTTAACGGAAAAATGGTTTAAACGGAAGTTGGGCTGAAAGAAATTCA  
TGGATGACCATTTTCAATAATGGATTATCGGAAATAGCATTCAAACACGGTTTCAAGGT  
CATACTTGGCCAAACAGCTGGTATGTCGAAACGGATAAAGACCCAAAATCATTCTTTACT  
CGTTGGAAGCCATTAAGCTTTGCATCTTGCCTTACCAGTCTATCGGTATGAAGGCTTT  
AAAGATAGCAACACTCTAGTGTGTTGTTGACATCTAAAGGCCTTCGGGCCTTTTTTGGGAT  
AAAAGTGTGTACATGTGTTTTTATGCTTGATATTATGGCATTGCTTGATAAAGGAGAGTT  
GAAAATGTCAAACGACCAACATGTTAAAGCAACAATTAACGGCTCGAGTACAAAAGTGC  
ACTGTATCGCTGTCGTGCCATGGGGCTAAAGATTCCGGGAACAGAAATTTGTGAATTTAT  
CCTTCTTTAAGCATAACAACGACTGGCTGAATCGTGAAGATGACGATGGCATAATGAAATA  
TGACGGCAAATCGATCCGACCCGCCGCTCGTCGTAACGGTCAAGCAGGCTGGTTCTCG  
GAAAATCTATGTTGACATCATCGGCGAAGATGGTCAACCTTTGGTAGATTGCGAGTACTA  
TGCCTTTGTTCTGAAGATTCCAGCCTCATTGAAAAGTATAGGGACACAGTATGCTTCA  
GAAAATACGATAAAAAGTGAAAATAAATGTCTGCTCACAAATGAGGCTATTGATACTAGAG  
CCTCATCAAATAAACGAATACACAAACACGGAGTATATAAAATGCAAGTAACCATCAAAA  
ACGGTCTTTACTTTGGTAATGTTGTTAACGGTACTTTTGAAACTAACGGAAACACCTGGT  
GGGATGCCAGCGAGAACGATCCCCGCGATGGTAAAGTTAACGCCGTTCTGAAAGGCAAAT  
CTCGGATGGTTTGGGTAAATTGCAATGAAATCGTGATTACCGAAAGTTTTGCTGGTGTTG  
CTCAAATGATGTCCCTGAAGAACTGTTGACGATATGCGTCTCGAAGCGCAAACCGCT  
TCGATGTAATGGACAAAATGACCTAAGGACTTGTTAAAGGCTCCAATCGTTCTCTGATTA  
TCTCTGGTGCTCCTGGAATCGGCAAGACCTTCAGCTTGGAGATACAGCTGAAACATGCTG  
ATGAAATTGGCGACATCTCTTTCTTCAATCTAAGGAAAGTGCTCTCCCATCGGGCTCT  
ACAACCACCTCTGGGAAAACCGTGATGAAGACTGTGTTGTGGTGCTGGATGACGTCGATG  
TGTTCTCCAACGAAGACACTCTCAACGTAAGTAAAGCTGCTCTTGACACTGGCGAAGAAC  
GCATCATCACATGGGGTACTGCCAGCAACTACTTGGCAGAACGCAATATCCCCACCAACT  
TCGAGATCAAAGGTTCCATCGTCTTCACTAAAGCAGATATCGACGCTGAAATCGATC  
GTGGCACTAAACTTGCTCCGCACCTCGATGCTCTGCAGTCTCGCTCCATTGACCTTGACC  
TTGGCGTTCGCACTAGCCGCGAAATCATGGTTCGAGTGGAAGACGTAATCACTAAAATG  
ATATGCTGCAAAAACGCGGACTGTCTGAAGCACAAGTTGTCAATGCCTTGGAAATGGATGG  
AAGATAACGTGGACCGCCTCCGCTCTGTATCTCTGCGGACTGCCCTGTACCTCGGCGATT  
TCATCAAGACTGATAGTGATTGGGCCGATGTTCTGAAGTTACACTCCTGAAGTAATACG  
CATGAGCTGGAGGAATTCCTCCAGCTCCTTAATATGGTTTTTTCGCTTAGTAAAAAGAAT  
CAAGCTAGTTCACACTGGTTAACTCAAATGGAGAAATGAAATGAATCCGAAAAAATGGTC  
TTGTCATGAAATATTTTGGCAGTGCAGAAGCAAAGCCCCAAATCCAACGGTTGAAGGTA  
TTCGAGCAAATGCTCTTGAATTTTCAAGCAACTCGAAGATCGAATCGCTGCTGATTGGC  
AGACTCTTGACCGAATTGCTACTCGCCGGCAAACGAACTGCAAGCGCATGAGCTTGCCA  
TCAAGAATTTGATGGAACGTCATTCGGCCATAATGAATAATTTGTCTGCTGAGCAAATC  
AAGTGAGTGACTCCATCAAACGGCTCAAATTATGAAGGCTAATATTGCTCAAATTTGCT  
AATAACCAGAGGGCTCTTGAGGAGCCCTCCTTTTTAGGAATCAATATGCAATACAGTTAT  
GGCGAAATTACGAGTCTGGTATTTGCTCTAATATTCATTATGTGGCTTTTGTATAAAGCT  
CGACATTTCATATTGGATATTTGGATGCTGTTTGTGGCATGTTGATTAGGAGAGATTA  
TGAATCCAGTTGCTAAAAATGACTTCAACAAAGGTGCAGCGCATGTAGACAAGAAACGAC  
GCTTAAAAAATAGCGCAAACAAAACATAAGAAGGGGTACAATGATGGAACATAATTATT  
GATATTTGAAAATTGTAAGCGTCGCAATCGGCGCATTATCATCATGCGATTGATCGTA  
ATTGCTTTAGCTAGCAGAGGCTTTATTTCTGCAAGCGACCAAATCAACGAAAATTTACAC  
AATGGGAAAGTTTGAATCTTGGGGTCGAGAGTTGTTTGGTAATTACAGCATTGTTGTC  
ACCCCTTTGGTCATTGCTCTCCTTCTTGTTTTGTACTCTGTTTTGGCCAATTGTGTTG  
CTGTAGATTATCGCAAATAAAAAGGGATGTACTTTTTGAAAAGATTTTTGTAAAATGTA  
ACAAATCAAATTTTGGCCGATTGATAAGAGAAACAACATGTCATACAATGAAACAATAAA  
AGAAATCATTTCATTTGCGTCAGTTCTGATCAAATTTGGCTGTGAAGACATTCTGAACAA  
TCAAGAATTTTCGTATCGTTCTTGAACAAATTGGGTTTAAAATCACCAAGTGGGGAAGA  
GTTCACTCGAGCTGGTTTTAGGACAAATGATGAAGCGTCTACCTGCTGATCAGCGTGAAG  
AATTAGTAGCAATGTTCAACCAAGGTCATCGCGACATCAACCACCAAATGATCATGTATA  
CAAACAGCAACTAAGGAAATATTATGGAAATCGAAATCGATAAAAAGTACCGTGTAATCG  
ACGCCTCTCGTTTTGAAAACGAGCACGGCATCAAAAATGGCCATGAATTTCTTCGTGGATT  
CGCTAGTCGATGATGGAGATATTTGGTCTCGCGGAATCGCTTGGAAATGGAGTAGACGGCG

ACAGCAACGATGCTCCATACGTCGGTTGGGCATTGCTGATGAAAGGCTATCAAGATCATT  
GTCCAGAAACACCAGCGGATTACTCAGGCGCTATTGAACAAGAATGAAAGAAGGGAACCG  
TAAGGTTCCCTTTGTTTTATCTAGCTCTACTCAAAAAGTCTTTTCGGCTTGATTGCAAATA  
ACGAAAAGTTTGTTCATTAATTACTGGCTTTTTACGCCAAAACCTTCGATACTGCCCA  
TCATAAACGTTGTCTAAGTTCACAATCGGGCAACTGTACATGTATTCAAACACTACTGTCC  
CCCAGGAAGAAACGCAAAATCCTTGTAATTGCTAAAATGTCTTCCCTATAAATGGACA  
ATATATTCATTAGATGTTTTGTTTATTGGACACCCGCCCTTGCCATATCTACAAGTTCC  
AACGGCGTTTTCCCTCCGTGGCGACCATGTCAACGAAATAGTTCAAGTTTCTAGGTCTA  
AAAGAAAATTTAACTGAAAAATCTGCTCGATTTGAAACATGTACTATTTGAAGCTGTTCT  
TGTGTCGCTACCTCAAATTTTCTATCGCGTTCGGCTTGAAGTAAATCCGGGTAAATTTTGA  
AAACGAGTATCTCGGTAAACATTGAATATTTTCGTCCTTGTTGTACCAACTGAAACCAAGT  
ATGAATACAAGGATCAGCAAAATTGCCCGATAAAAATACAACCTTCGACGGTGACAGCGTCT  
TTGAACAATCCGTCAAGAATTTCCATCAGAATCCCCGCACGACCAGGGGTTTGAGTTCCC  
TGCCTTTGGTTTTCTGTACTCGTAAAGTTGTTACTCCTATATAACAGCTCTATTTAATGC  
TTTCGGCACCTAACGGTGCCGAAATGTCATTTATAAGAATCCATTGTGCCAGTCAGTACA  
ACTTTTGCAACACGCATTGGCCTGTTGGGGGTTTGTCTTTGCCCGAGATGAATTAAGCAAT  
TCAGAGTATGCTTTAGACCAGTCCTTATTGGCTTTGAATGCGAGTGATTTTTTGAATCCA  
GATAGACGAGGACCTCCCATTTTGAACATTAAGTTACAAATAGCATCTTTTCTAATAGGG  
TCACAAGCATCATATGCTAATTTGATATTAGGATATTTCTTGATTTCACTTTTACTGTT  
TGAACATCAGAGCTAAACAGTGCCTGCACTCCTCAGAGATAACCCCGTTCACCTGG  
CGACCAACCTGCTTACTCAATGTATGGTTTATTAAGGCCATATCGGTTGTCTTCTGGGGT  
ATAAACAGGTGACCTATCCCAACAGTAGGGTACCCTAGATGGTCCCAAGACACTTTCAAA  
ACTCTTCCCTCATCGTAGATGCGCATGTCTTCTAACGTCATATGCTTTCTCCTTAATTAT  
TTTCCGAATATTGACGTGTTTGGTGGCCAGAAAATGATTTAAACAGCTCGCCGTCATACG  
CCGCAAGATGCACGGCACCCGGCAAAGCCATATTCAAATATGGCGACCATGACGAATTTT  
GACCTCTATCACCCACATCATGTTGATCAAATCTCCATAGTTTCCAACGACTTCAAATT  
GTATTCGGTCTCGGCCCGTTGGATGCGTGCAGTTGAAAGTACGAGAGCCATACCAATCGG  
AAACATATTGATCTGGTGGCGTGTATACTAGATTTTCTTGCCACGGCTGGTTATCCCTC  
TCCATCGTAGATTAACGTATCCGAGATCTCCGCCGCAATGAGACGCCCGGCCAGTTCCGA  
TGTATCCGATTTTTATGATTGCACGTTGACTTGAGTGAATTCCGTAGAGTAACTGAAAT  
TCCGATTTCTGTTATCCGGATATATAGAGCCAGACCACATGTAGCACCGCGATGGCGATC  
TGCTTTTATTGAAGTAACTCGATCCCCACCAATTTATAGGTGACGCACCTTGTCCATACT  
AAAAGGCCGAAAGTTGTGGGTCTGCCGCGTTGCCTGCGCCAGATAGTCCGGCAAATCGCC  
GGACGTTAGTAAAGCAATTTGGCTTTTTGATATCACCCGGGATAAACAATCGCGTTATACC  
CAATGCTCCAAAATCGCCCATGTCGTTGAGACATTTTGCCTCCTAATGTTATATAAAGTT  
CAAGCCAGCGTTCACAGTATCAACTATTACTCCGCCTTCAGTGGCAGCGAACTCGTAAGT  
TTGAGATCGAACTGTTCCCTTGTTTGGATTTAATACCCCGCGTTGCACACCATCTACGTG  
ATACCATCGAGCCTCTGTGCAGTTTTTATATGTGATTCCACCATTTCGTATACGCACCCA  
TGCCCTGCCGTCGAAAATATGGTAAGATTTAACGGTTGTGCCATCTATATAAGTGTAGAT  
TGTCTGACGGGTTGATGCATTATAGCTAAACGTCGCATATGGCGGTGTATTGGTTCCAGT  
GACAACGGATTGTATAGAAGCAATCTGCTTAAGACTGGCCATAACCAGCCAACCTGCCCGAG  
GAAACCGGTTGTGCCAAGACCCGCTTTACTCAGAATGTTGGAGCCCCATCGATTGGCCGG  
GAACTCGGTGTTTGCCTGAGACAACCAGCAGGGAACGCTAGGTACGGCCATAATCCAACCT  
CCTTACCTTCGCCGAGAGTTCCCTTGACTGCCCCACCAGTAGCGCAATCAATGAGGAGT  
TTGATAGCGTCAGGATTTCCGGTCCCGTCTCTGTTACTTGAATCCACTACCCAAGTAACAG  
CTTCGGGTAGCCCCTGCTCGACGTTTGTGCAATCAATCCGACCTCTTTTTTGTGCTACT  
CAGTGGCTTCAAGCGTCTGCTTCTTGTGCTAGGAGTAGGCGGTCAGTGTTGACACTTTC  
GTAGCGCGTCACGTACTTCCCCAAAGTTCTTCTTAAGTCGCGGGTCTGACCGGATGTAGA  
CGTCATACGCGTTCACATTCCTGTGATAATCCCTGCATACGAGGCGAGCCTTTGTGTGT  
GGAAGCGGAAGTGCCCTCCCTACCACAAGTCTAACGTACTGGCAAAGCGGCCTGCCATGT  
GGAAACCGACGCCCGGGCGACTGTCGTTAGCGGGGTTACCGTTCACCTCGATAGCGCACT  
GGTAGTAGTCGTTTCCACGGCATTATTTGCCACAAACCTGTCGCCTTGTTTACCAGCT  
CGAAAGGCCCTCTCTGGGCACCGGCCTCCTGTCCGCAATCCACGCTTTAGTTCCAGCAA  
AGTTGATAGCAAAGTCTCCGAAGAATCCTGCTGCGTTTCCGTGAGCTTGGTTGAAGAGAT  
ATGTCCATTAGTATTCGGAATGCCCGCAATGTTGGGTCCTTGAAGAATCCAGATTGAG  
GACGGAGATTACAATCGCCAAAACCTGTGGAATGCCAGTTCGTACCTCCCAAGACCAA  
ATCCTGCCGGAGCCGCACCAACATCCGAGGCAGTCGGCTTGTTCCCTTCATGGTAAATCT

TGTAGATAGCCCCACGTGCGCCACTACGCCATGTGAGAGAGTTATCAGCCCCTATCGTGC  
CCCCATTCCACAGGCGTCCCTATCTCAGTGCCATCAGGTGCGCTCCACACGATGTCTGCCA  
TGTCCTAGCAGAGTGCCCTACAAGGTCAAGGATCCCTGTGACTCCTAGCATCCCGGATA  
CAGTCCCACCAGCAACATGCAGAGCCCCGATTTTCAGACAGCGACCAAGACACGTCACTCG  
CACCGTTAACGGACTTAGCAGCGTTGCCGATAGTCAGGTTGCGGGCTGTACCCCAGTTCCG  
CCGTGGTGTGTTGCCGGAACCGTCAAAGTTGGTGCCGTTAATCTGGCGAGCCGTAGCCA  
GCTTGGTTGCCGTGGCCGCATTGCCAGCAATAGCGACCGTGAATGTCGGTGCGGTCACCC  
CAGCAGCCACGACCAGCCCTGTAGGCTTTAGTGACATCCAATCGGTAGTGTTCCGCTCCGT  
TTACTCTGCCACTTGAAGTATTCGTTACCGGTATCCCCGGTTTTGAACCACATGTAGG  
TGCCGTGTGTCGTCAGAGGCATTCTTGAAACCAATCTTCGTGTAATCAGAATTGAAGA  
CGCAGCCCAGCTCGCAGGCAGCATCGACGAACGTAAGCCCACAGGTCATTGCATCGCCAG  
CTTTAGCAACCGCACCAACGTTAGTTGCAGAAATCGAAATATTCGATGTGCCATCAAATG  
AACACCTGCAATAAGTCTAGCTGTCTGTAATCTAGAAGCCGTAGCGGCATTTCCATTGA  
CTGGAAGAGCTCCTACTGCATCTGGAGTTGGGTTATATCCGTTATAGTAAACACGATTGC  
TTCCGTTATAAGTACCAGAGCCTTTATCAAAATACGCAAGAACAATGGTTTTTGTATTTT  
CACTTACTTGGCCATTAACCGCAAAGATAGATGTTCCATATGTAACATCAGTTGCACAGG  
CGGTGACGGCTGTTTCGATATCGACTCTAACTCTTATTGGGAAAGCACCTGTTTCAACGT  
AAACAACAAACCCATCTACGGCCTCAGATGGACCGTGGATTGAGTGAATTGCTCTTTCTG  
ATGTAGAATAAATCGTAAACTGGCCTACGGCATAACTTCAACCGTCACCCCATCCACTGG  
CGAGAACATTACCGGTAAATGAACCATTTGTTCAATTGGAAGTGTTGTATGGCCAGATAAAG  
TATCGATAAAGACAAATGAGTTGTCTGCACCATTTGTTTCAAAAAGAAGTGAATATATC  
CTGAACCAGGTGCTCCAGCTGGAAGTGTGATCGACAAATCTTTCACATCTTTACCTGAAG  
CAGTAACAGTCGATTCAACAAAATCACGACGTCCCACAGAATTAGCTTCGGTGCCTTGCG  
CGGCAGACAAAAGAAGTCTTGGAACTCAAATTGCCACACATAGTGTGCCGATTTTTTT  
TAACGTAATCGGAGTGTGCATGGCTGTCGTTTGTTAATCTCACTGCTAGAGAAGCATTG  
CACTACCGTCGAACGATAGTGAGCCAGTTGCGCCTCCGGTCAAAGTATAGTTCTTGCGG  
TTTGCTACTTTGATGCAGACACAGCGTTTGCACCGGCAGCTAATACACCAATTTCTGCAG  
GAGTAGGTTTATCAGCTTCGGTATAAATCTTTTGGTTTGCTAATTTAGAGCCTGCCGAGT  
CGTATGCGTATGTGTACATAACCGATACTTCCGTAATCGAAAGTAATACCACGGG  
CATTGCGACCGTTACTGGCCGATGGATGAGAAACGTTAATAGTCAATCCACTGAATCCGC  
CCAGACTGTTACGCCTGAAGAATCCGGAATAACCCAGTGACAAGTTATGAGGTGTTCCCA  
TAGCAGACGATTTGCTCAGCAAGTATCCATTTTTTCGCAGTATTGGCGTTCAGTCTGATA  
AATCGTGAATCAGCCTCGCTCTGGTTATAGTATGGATTATCCATAGCCGAGCGTTGGATA  
AGGCCGGTGTGCTAATCAAAAGTCCGCCCGTGTATTGTATACGGCGGAATCAAAGCGA  
ATTTTACTGGTAGTGATTCCATCTTGGGCATAACCGGGTACTAAATCAGTTCCACCAGGT  
GCGCCAATATACAGGTTTTTAGACGAGATTGCTCGAATGAACTGGACACTTCCATACTTT  
ATATCAAAGTTTTCCAGTATTAGCGGATACCAACGCTCCTTTCAGAGAAACATCACCATTT  
AGATTTAGCGATTTTAAGTCCTTCAAATGCCTTCGCGCCGTTGGTGTCAGTAATTGCGAC  
TTTAAAGTTACCAGACGCATCAGTTCCAACATATGACTGAGGCTTATTTCCCTTTGAAA  
ACGAATATAAGCAGGACCACTAACGCTTGACTTAAACGCTAATGGGTAATCGGTGGGAGT  
TTCGATGTACAGAACACCCGACATAGTATCGCCAGCACGAGATACTACTTGGAGTTCATT  
TGCCTTGGTTTGTGCTCTTCCGAATAAATTCTTGCACCCTTGTACAGGATAGCATTACC  
GCTTGGTACCAGCGCAAGATTGCCTTGGTGCCAAACAGGTGAACCACCGATCGTGGTTCC  
AACTTTGAGATCTGCCATATGGGCTCCCTTGTTTAAACCAATGATTGGGGATTTCTTATTA  
TATTTAAAGCACTCAAATTAATAAACAATCCTGGCTCCAGGTTCAAGCTTGCTTGAACCTT  
TCTTTTTATCCTTTAGTTATAATATCTATTAAGCCATAAAGGATAACTTGTGGCAGGGC  
CAAACCTGGAAGCCAGGATTATATATTCTAAGTAAAGCAAACAAGGGCCAAGAGGCC  
TTATTTTTTCGGTAATATCGTTTGAAGTAATGATATTCTTTTGTTCAGATTCAAAGCTG  
TAATACAAGATTTATGTAATTACCGATATTGCTTATGCTATTAGCTCTAATAACCAATCTC  
ACCAATTGCTGCATCCGCCACTTTATCATCATCGTCCCTTGTAACCCGCGCTATAGTGAC  
ATTTGCGACACCTGCTGTTCCAGCACTGACACTTGGAGATATCGGTATGCTGCAGAAGC  
AAAAATCTTCGCCCTGAGCTTTGCGTTGGCAGTTTGAATAACCTTCAAATTTGGCCA  
CACACCTGGGGTCCGGTGTGTGCGTTGCTAGCCATATGCTCCTTTTCCATATGCCTGAAGA  
GTCTTGATTCCATAGATACAAAAACATCTTCCACCGGCGGTAAGTACTGTCTGGTCCGCT  
GTGCAGCTCGCATTGGATATGATATATTGATTCCCATTGCGTTGTTATATTTAAGACAA  
ATAACACTTAAATTCGTATTGATTCCCCACTGAGAAATATTCGTTTATGCCATCGACATT  
TCTTGACGGTACTCCACACGCTCCAATATCGACAACGTCGTCAAAAACAAGTTGCAAATA

GGCATTAGTGTCTTCTGCGAAACTGTTAGGATTATTCCCAACAAAATTCTCGTAACAAAA  
ACGCTTTAATCTTGTATTGAAAATTGCAACGTACGAACTTCTATATGCTCTCGGAGTAAA  
AAGAGCATCGGATTGTGATATAGATAAGTAGAACCACGCCACGACCTAGCTCCATATTG  
TTTCATGAATGTGTCAAAAATCCTCTGACGATCTGATAGCATCATGCAAACTACTACTAC  
TATATTGTCAGATGGTGCAGACATTAGATAGGTTCTTAAAGTGTCAAGATGCTCGGGTCT  
AGCATATATGTCAAACGTCGCAAAATTAGATGCTACTCCGGTTGGAGAAATAGTGATAGC  
GTTCAAACCCCTTCCGTACGAAGGCAAAACCGAAACACCATTGATTTTTACGTACGGCAC  
TCTGACACTGGAGTCATCATTGACTCCACGTGCCTGTATCATATACTTTATTGCGTTATT  
TTCACCTAAGTTATTTGATTCAACGTAAGATGGCCCAAGATGGGCCATAAATTGTTCTGC  
CATAACGATTCCCTTATTCTTCCCAGATAAACTCATCTGTCTTGGTCAAGTTGTTGGCAAC  
GATTTTCACATTACCAATTTTGATCCAATCTCTAATCGTTTTATTATTGGAAGATGAACC  
TGTAATATCAACTGCACCTACGTCTTGAGCAGTAGGCTTGTACCCTTGTGATAAATCTC  
GTAATCAAGTTTCCGATCTTTACGATTGGATTCTGATTCCGGATCAAGACACAAACGGCC  
ACTCGTTGTATCGGTATTTCCGAAAACGAAGTCATTTCCATCAGGGGTAATGTAACGATT  
TGAGTTTTTGAATTGCAAATACTTAAACATTGTCACCGGTGTTTGACAGAAGCATTGCTCC  
AGTCATAGTCGATGTACCAGCACGACGAAGATATGTTGGGTTGAGCTTTGTCTGAGCGTT  
GGCAGTATTAATTACCGGTGAGCCATTAATTGTGAAGGCATCAGTAGAGCTTGCCAATAC  
AGCCATTGTTGAAGTAGCATTGACAACCTATGAATCCGCCTGCAACAGATTGTGCAAAATTG  
ATTCGCCGCTAATTCGGTTCCACCCGGATAAATTCTCACACCTGTGTTTTCTATAACAAG  
GAAACCAGCAGTTGATTTTATATGTTGGGCAATTAGTACATCACCGGCTCTATTAACCTT  
CAGCTTACTCGAGAAAGTTGAACCGTCTTTAGTTGCAATAGCAATTTCACTGCCAGAAAC  
TTCAGAACCACCAACGCCACCTGCAATAAATACCCAATCGTTTATTGCAGCATCACTTCC  
AGCCATTATGGTGATAACCATTGGCTCCATCAGGAGCTCTAGTTTTACCTATTTGACCAGA  
GTTTGTGCGACGTATTATCGATAATCACTCTTGCCTAGTTGTGTCGTAGAATTGGTAATATC  
TGCAGCTACCATTGCGACAGTGAAAGTCATCCCGCCTATTACCGTCTGAGCTACAGTTCG  
ACGGACCCAATCGTTAGCAACAACACCACCAAGTTTCAGTCGGTCTGGGCGGTTGCCAT  
TTTCGGCAAATATTTTTGCAACGCATAGTTCAGGCTCAGCGGACTAACGGCCAGCCCATC  
ATTTGAATATGATGTGTATGCTTGGGTTGAACCGACAGTCTCGTTTTCCAACGAAAGTTAA  
CTCTACTGTTGCTGCTTTGCCAAACCCACGGCGTGTTCATTTCTGACCATGGCGGTTCC  
AATTTGCGCTATAGATATGAAGTCTTCTGGACTAACAGCCAAATTAGTTGCTGTTCCAGT  
TCTAACTTCAGCGGTTGTGCGCAACCCGTATAATACCGTCCAGAGTTCTTGTGCGTTTTCT  
TCCATCGAGTTTTTTTTGAAGTTACAATGGTATTGTCTGCACTAGATCCATTGCGCTCAAG  
TTGGGTTGAAACACGCAATGCCCCACGTTGAGCTTCTGTAGCAAGACTTATTCCAACAGA  
AACAGTGCTGCAAATGGTTCAAGATTGGGTCAAACCATCAGTCGTGTTTACCGAAATTCT  
TGCCGTATTGTTGAAACGATTCTTCAATTTCAATGGAGTGACGATAGTTAAATCGTTTTGT  
CGCTGTATCTATTTAGATGTGTCGTCGCAATACGGGCAATACCTGTGATAGTTTCTGTTGA  
CGTGCATCATTCAACTTTTTGGGAGTAATAGCACGGGTATCATCAGTTCCGGCATTGT  
TTCAGTCTGGGTTGCGATCTCAATCAGATGATGCTTTGATTCTGTGCTCGACGAGCTCC  
CAATCTTTCCGGCTGTTACAAGCAAAGGCCAAAGTGGATCAGATGATCCCCCTTAGACTTC  
CGCCTGTGTGGCAATATAACCTCTACCTTTACTGTTCCGGTGGCCTTGAATTCATCCAG  
GGTTAACGGTGTGACAGCTTTCGACTGATCGGCTTTGTTATAAACACCAGTCCCAGCAGC  
TGAGCGAGTTGTAGCAGCTGTTCCATTTTTAGAAACCACGGCTAAGATACCGGTCAGAGT  
TTCTGACGCAATACGATTATGCAACTTTTTGGGAGTCACAATTGTTATGTCGTCTGTTGA  
GCCGTCTGCTTCTGCTTGTGAGTGGCAATCTCCGCTAAACCACACCGAGTTTCGGTAGCAGT  
TCTTTCAATTAACCTTTTTCGGATTGACGATAATGTCATCCAAATAAGTTGAAGTGCTTAA  
CTGATTGACTTCAGCGGTTGTTACCAAACGGGCAATGCCACGACGAGTTTCAGGAGCAGT  
CTTCTTAGCTAATGTTTTTGAAGTGACAATAGTTTCGTCAATTCGGGTTATCTTCGTGATT  
TTTGTTTACTTCTGCTTGTATCCGCGAGAGCAGCCACGCCAGACGAGCAAGACGAGTTGT  
ATCAACACGTTCAACTTTTTGGTTGAACATTTCCGATCATCCATCCGTATTGCGAAGAAGT  
AACACCACCAGGGACGGGTCTAACTGTGGGTACATTAGCTCGACATATGGAATGTAATC  
TGTGTCAACACTTATAGAATTAGATGAAACCAATTCCCACCCATTTGTCATCGGGTATTC  
CGAGCGACGCTGGAACCTGCATTTGAGCTTTCGACCCCAATCAGCTCATTGGAACCTGG  
ATTTACTCTGATTGTACAAGTTTGACCTTTTCTCAGATAATCCATAGTGATTTGAACACG  
GTCACCTATGGCTACCTCCTCTGGAAGAGTCAGCACGGTGGTCTGACTTGGCAAATTACT  
GTTGCCAGTCACCAGAATGTGTTCAAACGGCAGCAGTGCTGTGTCAGTTTTGTTAACACG  
AATGCGTATCCTTTGGTCTCCATCCATACTTTGCAAGTCAAAGAAGGAAAATCGAATAC  
GAATGACCGGTAACCAGATGTGCGTGATTTCGATTTTGGTAACACCGGTTTCATTAATATT

GTGACCTGAACCTGGGAAAATCTCAAGAGTCGAGTGGTGAATCGGGTTCATCCCATCAAT  
ATCATTGGTTGTAATTACATCCCCATGCCTAGCATGTTTTGGCAGAACAAGACGAATTGT  
TCCTGCAGCAGTACGTCTCCAGGTAACCATCCCTGACTGCAACTGGAATCCTTTAATCGA  
TGGCTCAACAAAATAACTGGTCAGTACTGGAGCTGCTACATCTACTTTCCATCTCTTTCC  
AGCTGCTTTATAGACGAACATATATTGGTAGAATGGGACAATTGCACGGAAGCGAGCGCC  
GAAACTGGCTGCCTTATATTCGATGACTGCTGTTTCTATAGATACAAAGTCCAGATCCTT  
AACACCTGGCTGATCGCCTACGTCCTTTATTACTAAAGTATCGCCATCGACTGGTGATGT  
TGGCAAGTTGAAAACCAGATTGTTGAATCTATTGTCAGTAGTGATATATTGACCAGAACT  
CAACTGAAGTGCGGGCCAGTCGAGTTAATGAACTGCCATGTTGGGTCAACACGGAGACC  
AGTCCATTTTGTGACGTCGAAAGCTCCAGCCGGGGAAGCAATATCTGCATTTGCGTAATA  
AATTCGATGCTCGAAAATTACAGCATGTTTTGCATCATAACCCACGGGTGCTGTCATATTC  
GTAAATTGTGTTATATTTGTAAAAAATCCAAAGCTAACGCCATCGGACAAAATTGTCTT  
ATCGGCCATTGCAACGCTGATCAGTTTTTCGCCACCTGCATCAAGGCCGCTTGTGGCGCG  
AAAGGCTTGCCTAACATTTTTGGACCTCTCCTGTTACTAACTTAGTTATTTATGTTAGT  
ATGTCTAGGTGTTCAATAAGAGAAATTGATATGAACTGAAAGGATTTTCATGGGTGCAACC  
ACAAAGGATGATGTCAACATTATTGACGCATCTCAATTAATTATCGCGACAATAATGGCT  
AACTTTACTCCTGAAGATATAATTGAGCGAATGCTCAGACATTTAATTCTGGATACGGTT  
CGAAACAACGTCAAAAAGTTCAAAAACGAATATCCCGATACTATTATCGCATTTGACGAT  
TCTGCCAATGGTTATTGGAGACGTGACATTGCTTGGTATAACAAATTAGACCGAAAGACT  
ATAAAGAAGAATCTCCATGGGATTGGGAACTTCTCTTTAGAAATATCAATAAAGTGGTC  
AGCGAAATGCTTAATATCTACCCAGGTGTTAAGATGATCAAACCTTGATAAAACTGAGGCT  
GACGATATTATTGCGGGTTTGGTCAAAAAGTTCACCGAGGAAGGTTCGATGTGTTATGATT  
TCTTCTTCTTACTCTGACTTTGCTCAATTGCACAAATACAAGGGTGTCAAGCAATATTCA  
CCTGCTCAGAAGAAAGCAGTAAAGCCAAAATATGGTAGTCCAAAGCATGACGTATTTGTT  
AAACTGATTTAGGGTGATGCAAAAAGATGGTGTTCGGGAATTAAGCTCGCGATACATTT  
GTCCTTGATCGTGTGCAAGGTGAACGTGCTCCACCTTGTCTACCAAGTGGATTAATTCA  
ATCGTTGAATCTGAAGACCCTGGAGCTGCATTGGAAAAGGAAGAATGGCAAAGCGTTGG  
GTTATGAATGTTTCGGTTGCTTGATTTGGATAAAATTCCAGCACATGTTTCGGATCGAAAC  
ATTCAAGCTTATAATTCTGCAGTAGTCAATCCTCGTGGTAAATAGAACAGCTATTTTGT  
AAACATGGCTTGGTTAACTTCTCGATAAAGTAAATCAATTCTAAGGAGATAACATGAAA  
GAACAGAAGAAAAAGAAAGAAAAAGTACGAATTC AACCCGGCTGTTTCATGGCGAACGTCT  
CCAAGAAATTATTACCGAAGCATCAAATCTGCGCACCATGCAAGAATCTTATGCTGAAAA  
GGTAAACAGCGGAGCAATATTGCCATTACTGAATGCGGTGTTTACGGCAAACCTGTTCAA  
TCAACTGTTCCGGATTTACCACAAGCAGGAACGTGAGCAGTTTGAAGATACTGCCGATGA  
AGTTACTTCAGTGTATGAGCAACCCTTTAAAGGCAAATGATGTCAAATCCGAGCAATCTG  
AATGGTAAAAGCGCAAACGGGATAGAGATAGAAAATCTGGTTAAAACCTGGATTGACATAT  
CTGGAAGCATGTGTTTCAGTGGATGGAAGAAAATCCTTTAGAAATTAAGTAGTGCCACAAA  
TATATCCGGCGAGCGGTAATTGGCACACTTTCAAAGGATGTGTTCGATTCCGACATGCTT  
AGACCTTCCATTGCAAATCGATGACACGAAATAGTTTGGACTTTTTGATGTGAGATTTA  
TATGATCGCTCTCCGATATCCCCCTAGACCTGATAGATTTATTAGTGCAAAGGGCGCGTT  
TATGCTTTATTTGATGATGAAACAACATATGGCTGGAAAATATGACATAATCAAATATAG  
TTGGAATATGAAAGTTACTGATGCTGCGTTTAAATAAACGCAGAGATAAGTACTTCTTTGA  
GAAGATGAGCGATAAATTTACCTGAAAGACTTGACAGAGATATCTCTGGCAACGTTTTTT  
GGAAAATTCGAATGGCTGGGCCGTAGATCTTGTCTTCTGAAGATGCAATGGCAGCCCATCG  
AGAATTGTTGGGAAGATACATCAGATTTCCCGAAATATACAGGGAAAGACCTGAAACACCT  
GGTGTATTTTTCCAATAAAGTCAATGTTCCGATAGGTAAACTATTGGAGTATAATGAAA  
AAAAACAACGAGCCCAATTTCAAATTACTCCAATCTGGCCTGATCAAACAGAATCAT  
ATTTGGTTATTGATTCATTCCTTGGTCTAATCGACAAAATCGATGAGAAAATGTCAGCTG  
ATATAATCTGCCAGAACTGGCATAACCAACTTGGTCAATTACCGGAAATTGGTAGTAAAAA  
ATAATGACATAGCTAAAGCCAAGTTTATTCAACACGTAAAAGAGTTTAAAGCTGAAGTTT  
AGCTATATCAAATTTGATGGAAAATGTAAAAACGCAAAAACAACCTGTCAAATAAAATA  
GGAAAATAAATATGTTCAAGCGCAGCGATCCTTGTCTGCTTCCAGCACAACTGGCCGCTC  
TGAAAGGTAATGCAGGTGGTTCCGGTGGAGATAAGAATGAATGGAACTGAAAAATGATG  
CAGCTGGTAATGGTCAAGCAGTAATTCGTTTCCAGGTAAAGGTGATGAAGGTCTTC  
CGTTTGTAAAGCTGATTAACCACGGCTTCAAGAAAATAACAAAGGGTATATCGAAAATT  
CTTCTTCTACCCACGGTGATTTTGTACAACCTGACCGGTTTGGCAACATCTCAGCCGCACTG  
ATTCTTACATCACCACGCTGAAGAATATAAGCTGCTGAAGCGTAAGACTTCTTATTGGG

CAAACATTCTGGTAATCAAAGACCCTGCCACTACTGAAAATCAAGGCAAGGTGATGAAGA  
TTCGCATTGGCGCAAAGGTAATGGAAAAAACTACTGCCATGATCAACGTCGACCCGGAAA  
TGGGCGGAACCCAGTAGACGTAACCTTGCCTTTTCGAAGGTGCAAACCTTCGTTTACAGAA  
CCAAGAAAGTTGGCGGTTTTACCAACTATGATGACTGCAAATCTTGGCTCAATCCTAAA  
TTGCAAAGATCAACGATCCCGAATTCCAAAAGTTCCTCATTGATGGCATAGAACATTTGA  
GCAAAAATCGTTGCTCCTTCCGAATTCAGCCTCTTGAAGAAGTGGAGAAGAAATCAAG  
CAAGTAATGGGTACTTCCATCGCTGCTGGCTCTGCCGTTTCTGCCGCATCTTCTCTGTCT  
AGCGAACTGAATGACTTCGACGAACAGATTACCTCGTTCGACACTGATGTAGTTCAGCCA  
TCCGTGCCTAATGCTTCTTCTGATCGCGATGACGATCTGGATGCTCTTCTCGGCTAATAT  
AGAAAAGGAACCTTCGGGTCCTTGTTTTGCATCAAATCTTCAAAGAGTAGGGTACAAC  
TATGCCATACAGTGTAGAATGTCTCCATCAAATCAACCAAGGCGTAATAAAAATGAAAGA  
CATTCTCGATTATCCAGTTGACACCAAGGGTTCGGATTTGCCACAAGAAATCTCGCTTT  
GCACGTAAGTCGTTGTGAAAAGACGGTTGCCTGGTTTTGAGGTCAAGATGAATTTTTCGA  
ATTCATCAACACTAAACCATGGGGCGGTTGGGTTTTGGACTATAAGGCCAATTTTGAAGA  
AGTAAATGGCGTCAAATTCCTCAACAATATCAGAGTCGAATTATAAGGAAAATTGACATG  
TCATCGAACAAAGTTCTCATCAAATTCAAATCTCCTAAAGCTCGTGCTAAATTTGCAGCA  
TTCTCTGCAGCTAATAGCGCAATTGCTGAATATATGCAGCATTACTAGCTGACTGCTGTC  
AATAAAGAGAATGGCGATATTGTAATTCTCGAAGATGGCAAAGAATTTGAGCTCGATGGA  
TACTGGACTCCCGCGATTTTTATGTCAGAGCGTCGATATTGTGACATCGAAGTGATTATA  
CTCAAACATTGTTCAAAGGAAATATTATGAAAATTAACACTAAATCTTGGCACTATCG  
TTTTCTGAATTCTCTCAACACAAATATCCCGAATCTTTATGGCCGTATTTCTGGGTAGT  
CGTGTTACGATCGCATGGATCACCGGCTCGATTTTATTGTTTCATTGATTTTTTCAAATC  
TATTGGTGCCAGAATCTTTCGAAGGAATTGGCTTTGCCCTCGCTAATATGGTATTGTACTG  
GAGCCTTGCCGCTGTAGTAGGTAAGTACTGTCACCGTCACATCTGCTATTGTGCTGGTTGTCGC  
AGTAATATTCGGCTTTGATTGGGCCACAGAAAATTTCAAGCCACCATACAAAGAAGAACC  
GTTGATTATCACCTTTGTCAAGAACA AAAAGTCTAAAATTTGCCCGCGTCTTGAATTTGA  
AGACATGAGCAACAAGACTGAAGAATAAGTTCGCAACCAGTGAGGTCATGATAAAATGAC  
CTCACA AAAATAAAAACAATCTCCGGCTTATAATGTTTCACTGAGTAAGGAATGATTAATA  
TGAGTATTAATAATGTACGACA ACTGGCTTCTATTCGCAAAAATTGCAGATCTTCAGCCGA  
TCCCGGGTGCTGATGCTATCGAATGCGCAACCATCGAAGGCTGGGAAATAGTCGTGAAGA  
AAGGCGAATTCCCAAGTGATGATGATTGCGTGTATATCGAAATTGATTCCATGCGACCGA  
CAGATAATCCTGCTTTCAAATCTTGGAAATCCCGTGCCAGGATGTACGAAGGCAAAATGC  
GAGCTCGAGTGAAGACCATTAAACCTCGCGGCCAACTTTCTCAAGGTATTGCTTTGCCGG  
TTAACGCATTTACCATCGGAGA ACTGCTCGGTGTTTATGGAATGGACCAAAGTATTGACC  
AAATCTCGGTATTATCAAATATGAGCCGGCTCAAGACGGTCTGGCTGTAACCCGGCCG  
GTACTTTCCCTGTTTTATTCCGAAA ACTGATGAAGAACGCTGCCAAAACATTTAAGCA  
AATACAGCACTCGTTACAAAGATGTTGTGTTCCAAAAGTCCCTGAAGCTGGATGGTAGTT  
CTATCACCATGGCCTGGGTAACAGATCCTAACCTGTTCCCTCGAGCTTGGAAACCGAAGATG  
AACCATATGCGCACGATTACGACGACGCTCAATTTATCCTAGCTTCTCGTAATCAGGTTT  
TCCGCTATAACCCCGAAAGCAAGTGGTGGATGGGTGTTGAAA ACTACCAAATCATCGAAC  
AATTGAAGAAGATGGGCAAATCTGTCGCAATTCAGCGTGA ACTGATGGGTCTGCTATCC  
AGTAAAACCGCGAAA ACTTCGACAAGTACCGGATGTTACATTCCGTGCCTGGTTTATCG  
AAGAGCAACGTTTTGCTACCGACGAAGAGTTCACGACCTGTGCCGTGCTCTCAGCATGG  
AAGTGGTGCCGCAGCTTGGTCGTTGCAAGCCGTTTGAACAATTTGAAACTGTCAAAGAAA  
TGTTGGTTGATGCGGATATCCGTCCACCAACCACACGATTGCTGAAGGTGTCGTTTATA  
AGTCTGTTGACCTTGTAATGGCGAGATGATTCACTTCCAAGCAATCAACAAGAAATCT  
TGCTGAAATGAGAGGACTATCATGGAAATTAAGAAATTGCAACCTTTACAAGTCTTGTGT  
CCGAAATGCTGGATACATGAAGATTATAGCTACTGCTATTGAGAATTTCGATGTCTAATAC  
ATTGGGACTGAAATGCCGCTTTTCACTTGAAGAGATGAAACAGGTACCAAGTCAATTAAC  
CGTATCCAACCCGGAGGTCGAGTGTGATTAAAGCCATATTTGCTTTAGGTGTACCGTCCG  
ATTTTCATAAGCCTGGACTTTTTGTATTTGGTAAAGATGGCGATTTACCATGGCCATCGA  
TCCCTGAAGACTTTAAACTTTACAGGGAAAAA ACCGATGGGACTATCTGTGTTATGGGTG  
CAAAAACATTCCAGTCGCTCCCAAAGAAATCTTCCGGGAAGGGTAATGGTAGTTATTGGCG  
ATCCTAAGCGTGAGTGCCGGAACAAATCAGGTGAACTTCCCTGATGATTTTCGTCAATCTTG  
ATATTGACTGGATTTCTGTGGTAAAAGAACTATATCCAGAAAATGATATATCGATTATCG  
GTGGCCTTGGTCTGATACTGTGAGTCGCAACAAGCGTGAAGAACTCCATATCAATTTTC  
TTATGCTTACTTCTGACTATGATACAATTGACCCAACAGTTTATATCACTGAAACCGCAC

TAGGAGTTGTCATGGGTAACGGAAAATTAATACTATCGTGTATCGAGTTGATCGTGAAC  
ATTGCACCAACATTAGAGCAGGAATTTGGAAATGATTAATAACACCGATTTAGTATGCGA  
TATTATCACCAATGGGCGAAAGAAGACTGATCGCACTGGAATAGGCACCCGTTCCGGTATT  
CGGTCGAATGCTTCGCTTTGACCTCAGCGAAGGCTTCCCGGCCACCACATGCAAACGTAT  
AGCAGTTGTTCCAGTTGTGGGGAAATTGCTGTGGTTTATGGAAGGTTCAACGAATGTCTGA  
ACATCGGCGCAAATTGACCTATGGCGGAGA ACTCTGATCGTAAAACCATCTGGGATGAAAA  
CAATAACAAGCAAGCCGTTGATCTTGGATATTCTGATGGATACCTTGGTCCCGTTTATGG  
CAAGCAATGGCGTATGTTTCGGAAATAAAAACCCCGTCGATCAGCTGCAAAAATGTGATCGA  
TCAAATCAAAGCAAACCCCGACAGTCGTCGCTTTTTGGTTCTTGCATGGAATCCTGAAGA  
TATCGATAAATGGCTTTGCCTCCATGTCACTATGCGTTCCTGTTTGAAGTATATGAAGGC  
AAACTCAGTTTGTGAGCCAACGATCCGTCGATGTTGGTCTTGGTCTGCCATTCAAT  
ATTGCGTCTATGCGCTTCTTGTCCATATTGTAGCACGAATTTGCAATTTGGAAGTTGGT  
GAATTGGTATTCTCTGGTGCAGATGTCCACATTTACGAAAATCACCTGAGTCATCTCGTC  
GGTATGCTTTCTCGGGAAGAACGCCCTTTGCCTACGTTGAGTTTCCCGGATATTGACAGT  
TTGAGTGATCTGCGTTTACTTGAAGCAGCCGAGTTCCCTCTGGACGGGTATGAACCACAT  
CCAACAATTAACCTACCGATGGCTGTGTAATGAGTATATGCACCGTTGTAAACGTCAAG  
CATGAAAGATGTGACGTTTCGTATAACAGCGAGGCACTATATGGGGTAATCCATACGGAGAA  
CCCATTGGAAACGGCAGGATTATCTTGACAATTACAAAAGCATTTAAAACACCAAATA  
AAAACCTGGGTTTATTACTCTTGACGATTTAGAATCACTACGAGGCAAGAGATTGGGGTGT  
GGTTGCAAACCATTGCCATGCCACGGAGATATTCTTGTCTGATCTAGTTAATCGCATGTTT  
AAGGATGTGCCAAGCTTAGATGATTTTCATATGACATTAAGAAGCAGGGATTCATTCAGA  
TAGCAGAATTGACCATAGGTA AAAACGGCCGTATATTCAGGGATTTTGTCTAAAGACCCA  
TCACTAAAACACATCATTTATTTGTTTACAATTGATGATGAAGTTGTGTATAATGGTCAA  
ACTAAGAATTTGCACAAACGAATGGACTCATATGCTAATGGCAAGTATTGGAAAAATACG  
ATCAAGTCACATTTCCAAAAATCCAAGTTTCTGGAAGAAGCAGTAAACTCGGGTAAGAGA  
GTTTTTGTTCGGATAAAGCATTGCTTCAAATCGTTATAACCACTCCTGCTGGGTCAAAC  
GTTATAGCTGACCTAGACGCGGAAGAGAAAAATTTATCGGGATATTTAATCTTGTCTAA  
ATTCAAGACTGAAGGTTAAATTATGAGCAGAACAACCTGAACTTTTTAATAACTTGATGTC  
TGTTGTGGAAAAATCCGAAAAGGGCAATTTCTACCTCAAGGACGTCATTACGAGTATGGG  
GACAAAAGCTCGAATTTTCAGCTATTTTATCGCTTCATATACCGATTGGCTGCAAGATGA  
TGCTTTGGAATGTCGAGGCATTATGTTTGTGCTAAATGATAAAAACGAGCCAGCTCGAAT  
CGTGGCTCGCCCAATGCAGAAGTTCTTCAATCTGAAAGAAAACCCACGACCATTGGGCT  
CGATTCAAATAAGACGATCGGTTTGTGAAAAAGCGGATGGGTCGCTGATTAGCAGTTA  
TCATGATCGAGGGTACGTTTATCTGAAATCTAAAGCTGCGGTTTTTTCCGATCAAGCCAA  
TAAAGCAATGGTGATGGTGAATTCGCCTGCTTATGAAAAATTGCGCGATGCACTTGTACG  
AGGCGTTCCCGATTTTACTTTCAATATGGAATATGTTGGACCAAGCAATCGGGTTGTCT  
TCCGAACGAGGAAGAAGAATTGATTGTTCTCAACGTACGTCACAATGAAACAGGTCAATA  
TGTAAGAATTTCTACTCTGCTGGATGAACCATTGATTCGTCATCGTATGATCGTGGTGTA  
TCCTTGCCCGGATTGGAGTAAAGTTACTCCCAGAAGAATGAGAAGCTGCGACTCATGCCGA  
GACCGTTATTGAAGGAGTTATCGGTATTATGCCAGATGGCCAGCTGAGCAAACCTGAAGAC  
CGACTGGTACTCCTCTTTGCATCGTACCAAAGACTCGATCAATAACAATAAGGCATTGTT  
CCAAGCCATCAAAGAACGTTCTTCCGACGATCTTCGTGGCCTGTTTTCCGATGATAATGT  
CGCTTTGTCAAAAATCGAGGCCTTTGAATCCGCTTATGTTGATACTGTTGCTAAATACCA  
CAAAATTTGCGCAGAAGTGTTTTACGATTTGCGAGGATTTGACCGTCGAAGTTTTGCTAT  
CGAAGCACAAGCGAGAATGAAAGACTGTCGGTATCTTTTTGGCGTGGTTATGCAACAGTA  
CGGCCGCGATTGGGACGCCGAACCTCGCTGTCGAGAAAATCGAATAGCACATCATCAAAGA  
ATACGCAACATACGTTCCAATGGCGTACCGTTAAATAAAGTTGCATATACTGTGTACATT  
TGACGGTGTAATGATTAGACTAAATCCATAATCAACATGGAGTTAATCGAATCAATCATT  
ACAATTACACCGTCGAAATACTCATGAACACGTACGCTCTCGGCGGCAGTTCCGGATGGAA  
TTCAAATTTTCGACAAAAACTGTAAAGTTGTAGGATATATTACTGATTTGCACAAAGCTG  
CGCAATCTGCAGCTGAAAAGAAAAGAAAAATCCAAATCGTACTCTCGGGAATACTATCAAC  
AAGCTTAAACTAACATTGGCCCAATGGTCAATGAAGTTGTGAACGAGTTGAAAAATGTTT  
TTGCAGGCACACCCGCAAAGGTGTTTATTAACGAAACGATGCCGAATGTCAAGTTCATGG  
GAGCCAAGTTCTATTTTATCTTGTCTCCACTGACTGACTAAATTCGTGTAAACATCACTC  
ATAAAGATGCATGCCGCATGAAGTATGTTTTCCCGCAACATGCCAAACTTGATATTCTGTC  
AAGGCGGACGAAGCATTTTGATTGATGGTTTGTACACAGAGCGAAGGCATCGCTCTTGTCA  
AAGGATTCTGCGAAAATGTTGTTAACTTTGAGTTTCGCTGCTCAGTTGGCTAAAAAGTAAT

GCCTTATATCTCATCATAATGGTCTTAATGGCCATTATGATGAAAAATCAACACGACGAA  
ATCTCTAGGCGAAAAAATAGTTTAGAAACGATGAAATCATTCCAAACTAAGTCGTATGAG  
AATGCAAAACCCGTCCTGAGGCGCTGCTGAAGTCTCCAAAAGCTACAAAGCAAATGGAA  
AAAATTGCGGAAAAGAAACCGCAAATATTAGAAAAACGAATGATTATGGGCTTCCAGAAG  
TTAGCTGATCAACTTCAGGAGAGTACAAAATGAGGTATATCATCATTCTACTCGGATGTC  
TCCTGATCACATCCTGTGCATCTAAGCCCATGTTGCCAAATCCATCGCCGAAACATAAAC  
TCGATATAACATCGAAAGCAACCGAAAATGGAGCTTTACTAAGTTTTGAGGATCACAATA  
AGTTGGGTGTATGGTTAACGGATGTCAACAGATATGTCAAAGATCAAAGCAAATAACTC  
AAATATGTGAGGATACAATTAATGACTGAACGTTTCGCATCTCAACAACCTCATTTTGACA  
GTTGGTCTACTAGTTCCGGAAAAAGCACCTGGGCAAATGAGCAAGTTTGGGCAAATCCT  
GCGAAATACGTTAGTTTGAATCGTGATGATTTTCGTTTTAGCCTTTTTGGCTGTCGGACT  
TGGTCTGCATACAAGTTCAATAAGCATAATGAGCAACTGGTAACGAATGCTATCCAAAA  
GCAGCGATTGAAGCTATTGCCATGAGCAAGACTGTCATTATTTCCGACACCAATCTGAAT  
AAGACGACTCAAGGAACTTGGAAAATTTCCGAGATACTCATAACGTTGAGTTTGTGCTGA  
AATATTTTGCGCCGGGCCTTCTGTCTACTCTCATGGAGAGTAATCGCTATAGGCGAGCGG  
GCATTGCCTGAATTCGTTGTGAAGCGTCAATATGACCAATATATGGTTGATTTTGGAGGC  
CAGCGGGTTTATACTCCTGGCTTTGCAAACCTCCGGCAAGCATTTTGTACCTGGCTGCC  
ACCCTGTTTGATAACAGCCAACGGCATGCCTTAGATTGGTCGAAAGTTCTGGATGACTCT  
CCCCGTGACTCTGTCGTAGACCTTTTCGAAATGTACGTTGATCGCGGTTATGCTTGCATT  
ACCGTTTCGGGCTGTGATGGTGTCTCAAGCAGATTCTATCAAGGCTCTGAATAACGCC  
GGTCTTTTCCCTTCGGCCATTACCAACGCGCTGCAGGCGATTCTCGTTCTGATGATATC  
GAAAAAGAAGAAATTTTCTGGCAACAGATCGAGCCCAATTGGTGTGCTGTTTCGTGCAATT  
GATGATCGTCAAAGGTTGTTGATATGTGGCGTCGTATCGGGCTGGAATGCTGGCAAGTT  
CAACCTGGTGATTTCTGATTCAAATGCCCTCTTCGGAGCGCATTTTGTAAAGAAATCAAT  
AAAAGTACTGTACATGTCGGTTTAGTGTGATAATATAGTCACATTAACAAAATGGAGCA  
AAAATATGTTTTTTGACACCTACGACACTGCGCTGGCAGAGTTGGAAAAGCGCTGCGGCG  
AATTCCAGAACAAGTTCAAGCTCGCGACAAAAATGCGATGGTTGCAATGACTCAAATTA  
GCATCAAGGAATTTGAGTTGGTCGTCGCAATGGTGCAGGCGGGCGTGACAATAATTTGG  
TTGCAAGTTGGTTGGCCAGCCTCCTGTGCCGAAGTTTATCATCAGCTGGTCTCGGGTAA  
TCGCATGAAAGATACAAGTGTATTACAACATGCCTATATCGTTGCACAAGAATCTCATTG  
TGTTTCGTGGAAAGTAGGTGCTATCATTTCGAAAGATGGTCGAATTATTTTCGACCGGTTA  
TACCGAACTCCAGCTGGTTGCAACCATGCCAATAGTAATGACCATGCGAAGAAAAGTGG  
TTGGCTTGATTCTCACGGTAAGTTGCCAGGAATGTATCGGCAAGCACACAGTGAGTGGTC  
AAAGGCAAATGAAATTCACGCAGAATTGAACGCCATTCTGTATGTCGCGAAAACCGGGCA  
AAGTATCGATGGTGCTGAGATGCACGTTACTGTTTCTCCGTGTCCAGATTGTGCAAAAGC  
CATAGCTCAGTCGGGGATTAAGCGAGTCGTCTATAATGAGTTATATGATCGTAATCCGTC  
TGGCTGGGATGACATAATCATTAAGTCTGGAGTGGAAATAGTGAAAAACGAACAGCTTCT  
CAACATTATCAAGAAAATTTACACCACCAGCAACCAAAATGAGGAAGTTTTTATGATCG  
TTGGAGTATCTCCTAACGCCAAAGTACTTGAAGTCAAATTCTATGAAGTTAATAGCGTCG  
CAGAAGCTGCCGATCTGGGAATCGATCCAGAATGGTTTGACGATGTCAAAGCCGTCGTCA  
AAGTTGAGAAAAACGAACCGCTGTTTGGTTATTATCCGTGCCTTTTCGGTTTTGTCCTG  
GTCATCCGGATTTTGC GGATGGTAAAGTGATTCGCACTTCTACTGTAGATAGGGTAATTC  
ATACTCGTGGTGAGTTTCGAAGAACGTAATCGTTTTCACTCGCAATTCTCGTTATGAGG  
TAATTCAATGAAAATTCAGCTCGATACTAAAGCACTCGAATCACTTTTCCCGGAAGGTTT  
GGAAGCTCGTGTAGAACTCCAAAATGCAGTTATTGCTAACTTCGCAAAGAAAATGCAAGA  
AAAGCATCTTGAAGACGTAACACGGGACCAGATTCGTACAGCTGCTCAAGAGGCTGGTGT  
TTCGATGGATTCATATTCATCGTTTCGTGACATGCTGAACAAAACGATACCAACAACGG  
CTGGGATGCATCAAGTGC GCAATTGAAGACCAATTCCAGTTTGGCTCGTGCTATCCGTAA  
CTATGCCATTCAGCAAGACCTGAAATTGATGAAGGGTATGGAAGCATGGGCCAATGAAAT  
GGTTAGTAAAGAACTGGTAAAGCGCGAAGAAGCTGGCAAACCTTTTCGCTGAGCATTACAT  
CCAAGAAGATGAAATGAATATCGCAAAGCGAAGAAGCAAGCTTTTTCGGACATCGAATC  
TCGGATTGTTGCTGCCTGTAAGCAAAATATGCCGGAAATCATTTCGTGCTGAAATGGCGAA  
TTATCTGAACAAACCAATACTACTGTAAGGAAATAAAAGGTCTAAGCAATATGTAATCA  
ACAAATGCTGTTCTCTATTTTGGCTGACGGCGAACGTGAACTGATTTTTCGAACAGCAGA  
CGATTTCGCATCGGGTAATGCTTGCTACTCGTGACACTGTCCTGATTGAGGTTGCTGAAAA  
AGGTGACACAGCTTTTACGGCAACAGAACCTGAAGAAAAGAAAGAACGCAAAGAAAGTAA  
TATTTTGAACGTCGTCGTTTACGATTTGGAAGCAAAAGCTTGGCGATCGTTCCGAGTCGA



TCGACGCGTATCTATCAACGGTACTGGTATGGCCACGCTGGCATCTATTATTGGTGCTCA  
ACATGGCAATCAACTCAAAATGGGCCACATCGAAGAGCGTTACGTTTCTACCCAAAGCAA  
GGGTTACGTGAAGTTTAAATCCGTTGACCCCGATGAGGTGATCTATATGGTCGAAAACCTC  
TTCGCGATTTGAGCTTTTGTCCGACGAACACGGTACCAATACATGGTTCCTTTTAGAAGA  
CGAATCCAATTTTAAATCTGTGCTGCTGTTGCCATAACGATGGGATAACTTATGATTATC  
CCATCAACAAAACAGTTAAAGAGAAAATCATGACTAACGTAACACCTATTGCTCAATTTG  
AAAGCATGATTCTTGAATCAAAAAATTTGGCATCCGCAGGTGATGAAATCATTTCAGATT  
CTGGATTTGTTCTTGGAAATACGCGATCTTCTGAAGTTCCTCTCACTGCTGAGATTATCT  
CAGTCGGCATAGACGTACCGCACCATTTGAAAGTAGGTATGCAAGTTTTGATTCCAAATG  
GCCGTATGCACAATGTACGCGATCCTCGTTATCTGTCCGGCGAAATCAGTGCGAAGAATA  
GTCGAAAGCTGCCAGCATGCCACTGGAAAGATATTCAAGTCGTGTATGCTTAATTGATTG  
TCAATATAAGATTAACAATAAACAAGGAAATGAAAATGGCTGAGCAAAAAGAAAGC  
AGTTGAGAAAAAAGTAGAAGCTCCGCAAACTGGCCGTCAAGGTTACAAGCGTAAATCCAA  
CAGCCGTGTAGATCAAGTTGGTGTATGCTCTGGTAGCTCGTGTTTTGCGCCAAGTCAAACA  
TATTGATCAGTTTGGTCAACCAAACCACGAAGGTCGCAAGCGCCAGAAGTGATTAAGGG  
ACCTTCGGGTCCCATTTTATTTTGAAGAGCGGTTTGAAGGAAATATAATGCAATACGA  
AAATCCGATTATTTGACTGATGTCGACGGGGTTTTGGTTCAATGGACAACCTGGCCTCCC  
ATATTTCTGTTAGAAATATGGCATTCCGACCGACGAAATTTTGAAGACTCTGGTTCGACGA  
ACGATTTTCGATTGGGGAAGAATTGTTTCGGTGTCAACGCGCGAATTGCAAATAATTTGAT  
GCGCGAGCATAACAACCTCAAATTTCAATCAATATCTTTCTGGAGATGTCGATCCAATCGA  
TGTTGAAAATCGAATGAAAGATCAATATGACTTTATTGCCATTACTGCGCTAGGTGATT  
TAACCGAGCTCTGCTCAACCGGTGTTGCAATCTGAACACACTTTTCCCAGGCGCGTTCAA  
AGATATTCTGTGTGTTGACATCGGCGAAAGCAAAATGCCGCATTGCATTTCCGTAAAGCA  
AAAATATAAAAATCGTTTGGTTTGTGTTTGTGCGATGATTTGGTCAGTAATCTCCAAGATTG  
TCATCATGCGATGTCGCAATTGCCTCAAATCCATATGCTTTCGAACTGAAGGCGCGCGTGA  
AGTAAAACATGATATCAACAAATACCACACTGCTAAAAATTGGTACGATGTTGAAAAGCT  
ATTAGTTCAACTTGATCCAAAATCAAATACAATCGATTTGACTCATCATTTCGACTTGGCA  
AGATAAACCTACCGTCTCTGGGGTAAAATGAAATGCATATTTTAGACATTCTGAACGAAA  
TTTCCTCAACTGATTCGTCAAGAGAAAAAGAAAGTCCGTAATCGCAACAAGAAAAT  
AACCTTCTCAATACTGTTTTACCCCTTGCCTATAACCGTCAGTTAACGTACGGCATTACG  
CCAAAAGGTTTGAATTTCCGGCGGTTTGGTTGGACTTATGAGTTTGGAAAATTTTCAGCCAC  
GAGCTTGTAAAAAAATATTCCACCCGAAATTTGACAGTTAACGCAGGTATTCCTACATG  
CAACAGATGCTTGCTAGTAGGTCAAGTTCTAGTTGTGAAGTTGCCAGTCGTATTCTTTCA  
AGGGACCTCAACTGTGGAGCATCTGTTGCTCTTGGAAACAAAACATGGCCCCGGCATTATT  
CCTGAACAACCTCAGTTTCTTGCAGCACCATAACAGTGAAAAGAATTTGAAGAAAATCCGT  
TGGCCTGCTATTGCTCAATTGAAAGCCGTTAGAGCCCGTTGCATGGCTCTCGTTTCTGCG  
GATGGCTCACAGGTATCACTGGTGTACGGAACGGTAATGAATATCTGAAGTTGTATGAC  
ATTACATCACAGTTGAAGGAACTCGCTCAGGTTGTGAGAGAGACTCTGCAACATTATGGT  
GATTTTGTATAGACGGCGAATTGATTCATCGAGCTCCAATCTCTGCATCTATTAACG  
GCTAAACAACATACAGTGGATGCTCTGTTTGGAAATTCCTGAGACAAATGATGAAGAAGAA  
ATCGAATCAGATCGAAACAAATCCAATGGTTTAAAGTAATAACGCTCTAGATGGAACAATT  
AGCGACGTTGATCAATCAGAAATGATTTTAAACGTATGGGATATTATTCCGCTGGAAGTT  
TATTACGAGCGGAAAAGAGCAAATTTGACTACGAGAATCGATTTGCTACTCTTGCTTGG  
CTGACTGAAGCTTTCGATGGTACCCAAATATATCAAAACATTTCGACTCATTGAATCCGAA  
GAAGTAGAGACATACGAGCAAGCTACAAAATTTATCAGAGATATGTTGATCAAGACCGA  
GAAGGTATCATTCTTAAAAATAAAGATGGCCTGTGGGCAAACGCTAGAACAAGTGACCAA  
ATCAAGTTCAAGGTAGAAGTAGAAATTGATTTGAAGATTGTCGAAGTTTATCCTCATCGA  
AAAGATGCGTTCGAAGGTAGGTGGCTTTGTTCTGGAAGATTCTTCAGGTCAAATCAGGGTT  
CGTTGCGGTTCTGGCTTAAAAGATAACAACCCATAAAAAGGTAAATGGCGCTAAAGTCGAA  
ATTCCTATCAGCGAAGAGCATGAATATGACCGCCAGGCGCTTATGCTGATAAAAAATGAG  
TTGATCGGCCAGATTGTTCAATGCAAATGCAATGGATTGCAAGAGAGGAAGGGGCGTAAG  
CCGAATGAAGCAACATTCAAGCTGTTGCTTCTATTTTCCCACTCATCCACGTGACAAA  
ACAAAACCATCATATCCATGATGTTCTCCAGATGCTATTCTGGACTGAAAAAGGCCT  
TCGGGCCTTTTTTCGTTTCTGTTGTGTGCATGTTGATTTCGGCTTTGATAGTATGAATACG  
TACACAACCTATTGGAGAAATTCACATGATTGTTAAAGTTTCGATACAATTTTGAAGAACAC  
ACTGGCGAAGCCGGCGACGCTCAAACCGCTTTTGAAGAAAGCAACTGAAGTTATGCTGTCA  
CAGCTTCCCCAAAACCGGAAAACACGTTTTACGCCACTTTTCCAAATGAAAGCCGTTTT

GGCAGCGGTGATATTCGTGCAATGAATGTTATCCGTATGACCCGTGTTGACCTCATGTCT  
GTTCCGGGCGGACGACTTCGAATTTCCGTTCTTTGTAAAAGTATGTGAATAAGCTCCTTCG  
GGAGCTTATTGAAGAAAATTATGCTAAACCCTCCACCTGTTGTACCTGTAGCTATTGAAA  
AGCCCATATTTTTCAAATCACTTCGGTCATTCGGCGGATTTACCGTGGACACAATAAATT  
CCCCAATAACTTTTTGAAGAATTAGAGTGGGCATGTAAAAACGTAGAAATAAGCTCATTATG  
TTAGCAGCCATAGAAACATGCCATGGATGAATTTGGAATTGGAGTCATATGGGCAAGTGC  
GGTTAATTTTTGACTTTCATGGTAAAAACTCCCCAGATATAATCAGAATGTGCAATCGTA  
TAGCCGAGCAACGATGCACCAACAGTTGCATGTGTAATTTGAAAAAATATGACGACTACG  
TGTCTAGCTATTGCGATGAAGCATTTCAAACGTTTCTGCTGCTTTGCGGTCTGGAATAT  
TCGACGATGCAAATAAAAAATTCGTAACCGAGTGCATACGACGGATGGATTCACATATGG  
CAAGAGGTGAGAATTTTAATAAATCTGTATGGAGAGGAATGTATCTCAATAAGGCAGATT  
ATATGAAATTTAAAGATAGTGGGTCTATTCTCTTTAAAAATTTTCATATCGACATCATT  
GCCCGCTTTTTTTCAATTACGGCATTGCGCAATGCAGACATCTCGATTTTAACGAAATCA  
CACGCGAAATTGTTATCGATGGCGACCCACATCGACCTGTCACTATAAACATGCACATTG  
ACTGTCATAATGTGAAACACCTGATTCCGGGAAACCTTAGTCCCTACCCGGAGGAGTGC  
AAGTAATCTTGACAAAAACACTGTACTCGTAATGGATGAGATTTTCGAATATGTGTCTC  
ACGTCGACAGTTTTTTGTTTGGTTAACGCGAAAGCGGTTCCGTTAAGTCAATTCACTGGAA  
CAACATAAGTAGTGTAATAACATTTTAGACCTATAAGGAAAACAAAATGCTGCTATTTG  
AGATGACAGATGAGCAATTGGATGAGGTATTCGACGGTGGAGTTGGAAAATACAGCGTGG  
TCAATCTTTTGCCTAAGACAAAAGTTCCGTATGTATTAACATCCAAGTTCCTGGTTTAG  
AAAATCTGGCTTTGCGATTCTTTAATTTACTTCCAAGGTGATTCCGCGAAGCAAGTCA  
AACCTGGCGACAAATTCATGCAAACACAGGTCATCCAGATTTTCAGAAAAAGTAACACCAC  
AGATTATGAGAGATGGTCTCGGTAGTGACCCATTGGCGCAATGAATATGATAACGGAAG  
AAATCGTTAATATGCTTGTGAGGTAGCGAATTGATGCAACGCTTCTGATGTTTCCGACAA  
AGGCACTGAAAGGCCAAGCTAAAAATATTGCGCGAATTACATCCCGGCTTATGCAAAAAAC  
GATCAGGTGGAAAGTTTATTGTTTTGCCAGAATTGTTGGAAAGAGGCAAAAAATATACAT  
ACATTATGATTTAGCGAAAATCAACAGGAATTAAGTGTCAAAGGATTGTAAATTGATC  
CTGAGCTTTATACGGTTTCATCTACCAGTGTAGGCGATGTGCTGATTGCTGAGAAAAC  
GTGAAAAAGTCAAAAGGCAGAAGCTATTGCTGGGTCAATTGAAAAGAGAGAAGAAAAAC  
GCTCTACTAAGTCAATGACAACTTCAAATACCACGTGTAGATTTGATCAAGGCATTCC  
CAACCAGTATTGCCTCTTCGGACAAGGAAAACAATTAAGTACGACCAATTTGGTGTGGCC  
CAGTCGAGAAAAAACCGCAACTAGCGAGGCTGAGGAAGCAGTTATCAATGCTTATAACA  
CGATAACCAAAGAACAATAACGGAAATCGCATTATTACAAATTTCTAATTTAGCCGCTC  
CTAATTTCTTTGACAAAATTGACTTTGACAAATATGATGCGTCAGGCCATGAATTGCCTG  
CTCCCTATGCGGAGACGGTTCGTCAAACGTCAGAGAAAGCCGCACAGAAATGGGTAGATG  
AAAATATTCGGATGAACATCGGGGTGTGAAGAAAGGAAAAGGCGATTTTCATGCTTTATA  
AGGAGGTGAGACGCGCTATTATGGAATGGGCGAATTATCTTGGTAACAAATTTGATGATA  
CTGTCGGCAGTGTTAAAATGAGAAAAAGATTGCCACCTGAATGTGTTGATGCTATACAAA  
CTTACACTTTGCATGACTATCGGAAGATTAACAATGTTTTTCATCGGCAACCTAAAACCAA  
CAGCTAAAACCGTAAATGATATACAGAATCTCGACAGAGCTTTACACATTGCAGGAATTA  
AACTTCTGAGAATCTCACCTTTGGCGGGGTATGGCATGCCCAAATTATCCAGCTAAAG  
TAGCTTTGGAAAATAAAATGTTTCATTTTTCTAACTACGTGTCGTGTTCTGCTGTTCTTA  
TGGTATTTTTAGGTGGGTGTATTGCCGAGCATGACATTGACATTCTTACTGCTAAAGAGA  
ATGATGAGGCGCAGGTTGAAACAGGCAAAAAACACGGGGCTCATTTCGCATTTGCTATC  
AAAAATGTCCAGGTCCAGCTCTTATAGTTAACGGGATATCGAATTATACGAAAGAACGC  
GAAATTGTTCTTCCACGAGGAACAATTTTTGAAATAAAAAAAGTCAGTAATGTTGGTGAA  
TTTACTTCAGGAAAAGGAAATATCTGATAGATTGTTCTGCCGTTTTTCAAAGTCAAAGC  
GACGAATCAACAGAGATTTACGACGGTGAATTTGCTAATGCAAAAAGGCGAAGTCAAACCTG  
TTCGAAGGTTTTTTCTGGATTCATGAAATCTCGCGAAGATGAAGAAAAAGAAAGACTCAA  
GCTGAAAGGATACAAAGAGACAATTATTTGTCAACTCTCATCGACTTAGGTGCAGAAAGC  
AAATTTGTCCAGGTGATAGAATAAAAAAGGGAGCCGTATGGCTCCCTTTTTGTTATTCAA  
ATGAACCAAATTTTGACAACATCCACCAGCTTGTGTTGCCGAGTTCAGGTAATAAATCAC  
CCTTAAGCCAGTCTTCAAGCTTTGCTTGATTAACCGCACCAAGTGTTCATGACTCGATACG  
CGAATGAAACGTCAAACGTTGTAATAGCATTGTTATCCTTGTAGCTAAGTTGAGGTGCTG  
ATACGCTAACAGGTATGCGTCCATTAAACATGGGCACAGTGTGGGGTATACCGTCTCTGG  
AGTGCAAATTCATTGTATATCTGCTTCAACATCAGCAGGCAGTGAACGCAGTCCGGTGA  
CAGGGTCTTCGACCGCATTTATCCAATCCTGCATAGCCCGGTAATTGGCAGCCTGATGGT

CAATTCTGAAACTAATTATGAGAGGATCATACTCGCGCCACATCAATATGATGTTTGGAG  
CGTTCTGAAATTTGTCCCTTTCATAATTTAGCCGGATTTCTGGCATTTTTACAGAATAAA  
CCGTAAACCAGTATGTGTATTGACAGCATTGAAAAAGTCAAGCAAATACGTACCGACTT  
CACATTGACCAAGTAGGGACTGTATAGTTTCGAGACGTCATTGCGCCGATCAAATATCTCG  
AAAGACCTGATTTGCGTATGATACTTTTGTGTGCCTTGAACATGAGTTTATTCAAAGTG  
CTCGAAAGCAGACCTTGTGTCAACCCGGCAAATCTTTCCCAAATGGAAGATTGTTATAG  
AGATATGCACCGAATCCATCAAGCAAATAGCTTTGTTTTAGATGATGGGGTTGTTGCGAA  
AATAACAGAGAACATATTTGTTCTCTGAAAGTCTTTATTCAATTCTTGTTGAAATTCATC  
TGATTTATACATGATTATTACTCATCATATAGATCAGATCGATTAAGGGCAAGAATCTCT  
CTGAAAGTGACTTCAAGTACAAAACCTTGAAGGCAAATTAGGTGCTATTGCTAAACCGCCG  
AAGTGACCGTCAGGGCTCTTATCGAACCGTATACTTTGAATTTGCGCTGGCCCAATTACA  
TCAGACCGCATATCAAATGAACTTGTTCACCGAAATTTCTAATAGTCCAAATAATTGGA  
TTAGAAACAACGTTAACATTACTCAAAAATGATGTTATTCTTTCAAACATCGTAGTTTGA  
CCCTGAGTTGCTTCTGGTGTGAGTGGGTTAATGAATGTTTCTTTGTATGCTTTATTAAGA  
GTGCTTTTTATTTGACTCGCCGTTTTGACTTATTTACTCCTCCGTACGAGTAATACGAG  
AGCATTTCGTAAATTAACAAAATTTGCATTAGGTTCGTATACATTACGAGGCGTTAATTGC  
CAGGTATATGTTTTGTACGATTCTCTGCACCAGCGTACATTGCCCTGGATGCGATGTAT  
ACTTGCTCACCACGGTCAGCAAATGCTCCCTGGGTAATAGACTCCAATCCGCCATACATT  
GCATGAGAAGCCATCGAGCTCAGTGCCCCGGTCACAGAACTGTCGCCTCGTTCAACCAGT  
GATTGCTGGACATCATTGAATTTCTGGCTAATAGTATCTACAACCTGTCTGTCCCCGAGGC  
ATCAGGATGTTAGCTTTGGCTTCCTTGACAACACCCTTACGATAATCGCCAATGTTATTT  
TGACCTGATCTGAACGATCGCAAATCCCCAGTCTGTCTGCCGGCATAAGTTAAATGCTGAC  
AATATCAAACCGTTTTGATACAGATCATTAAACATTGAAATCTTGCGCAGAGTCATTTCGCT  
GGATTTCTCTCGGCAGGGAATTGGGCTATGGCAATTTTGCTAATAGGCCTGCGAGGTGAA  
GAACCCGTTGCCGGGTTCTCCCCTTTCAATAATCCGCCTACCACACCCTGAACCACGCCG  
ACTAACGTTCCGTTACTCTCATCAGATGTTATTTCCCATACCAGGTCCAGGCGAAGATG  
TTCTCGGAGCCTGGACAATTGTTTGATTTTGATTTTGACAATGTTAGCCTTTGTGTGAT  
AGTTGTTTTGACTGGCTGCCGCTTGCTTCTTGCTTTCAACTCTCTTCTTTGTCGA  
TAGATTTACCAGTCGAAACCTCTGGTTCAGGAGCAGGTTTTATTGCAGCTGTCGGCACA  
ACAATGTTTTCTCATGCTCGGCCAAGATTTTAGTCTGTTTGTCTATTTCCACTCTAAGTT  
GGTCATAAGGTTCCCTTAGTCAACCTACCTTCTTGATAAGACTGTTCAACATAATTCTAAC  
GATCATCGAGCAACTCGCGGTGTTTGTTCATAAATTCAGGAGAAGTTTTATTCTTTTTGG  
CAGTAACGCCAAAATGGTTTATTTTCCCGCTCAGAACGTCATATCTTCAACATTGCTCTG  
CTGTAGTATTTTTGGCAATTTCCATGCGTTTTTCACGCTTTTCTTTCTCGTCAGGGGTCT  
CTTCATCTTCCCCATTCACCTTACGCCATTGCTTATCAAACCAATTAGCTTCGGTGTTAT  
TTGCGTCTTCAGTTTCGCGTCTTCTAACACGGCCAATTACTTCTTCTCTTTTGAAG  
GAGTATATCCGACGTCTGATGCAGCAACTGATATTGCAGAATCTTCGAGCGAATCGGCTT  
TTTCATCTGCACCGAGAGCTATTAATATAGTTGCGCTAAGTGTGGCCAAACCGACCTACA  
TCATATTGACCATATATTTCAATTTGGTCAAGGGAACCTTCGGCGAAACGAACAATCATCT  
TTGTATATTCATCACTCTTGAAATAATTCATCAGGTCTGTTCTAACTCCATGAACATTTT  
CAAATGGTGTGCTAAAGAGCCCAATTGATTTTTAAATTCGGCTTAATTCTCTTCAAATA  
TTGTAGTCCAATGAGGACAATGACGACATAAAACGTGAAATGTCATAATCAAGGAAAACA  
CGAGTGCAGCCATTTTGGCAAATGAGAACGGCAGTCAAAGTGTATTTGAACAACATTG  
AACTTATTGAATTGGCAACGCTAATATTTTCTTAAAACCATTATCGACTGACGACACAA  
TACGATCTCCGATTCGGTCAATCGCACGTTCAACATTGTCTTCTTTGTCTGGTCTAACTT  
TATCCTCTTTTTCTTCTTCTTTGGCTTATCGTTTTTTAGGAATTTGATATCTTCAGAAA  
TAGTTTTCAAATACCCTAAAACCTGGGTTATTTTTGGATGTTTGTCTTCTTCTCTACTA  
CCTTTTTAGCTGTTTGGTCACTAGTGTGTTGTTGCCGTAATTGGATTTTATTCAACATCCG  
CTACGAAATTAATTTTTAGCTTTTCAGCAAATTCACTTAGTTTGCTAAATGTTTTCTTGG  
AAGTATCTGAAATCTTTTCAAGTGATGATTAGAAATTTCAAGTGGCTTCCGCGGAAAGTT  
CTGTTGCAGCAGCAATATTTTCGGTTTCAGAAGTGCTGTTGACTATTTTACGAAGTTCTG  
AATTACCTTGTTCAACTGTTTCAGCTATAAGCTCAGATGAAGCTAAAAGATCGCCAGTGT  
TGTCTGGCGGATTTTCCAAGCAGTTTTGATTTTAGATTGCTCAGAATCTCTTTGCCTAT  
CTCTTCTCAAGTCTCTTAGTGTCTTTTGTAGTAGCCATTAATTAATTGCAATAATGTTTGA  
GCCACCATTTATTTTGGCAAATGGTGCAGCAACTGAAAAAGTAGAAACTATAAAATCTGC  
CCAATCCAATACAAACGCAGGTGCATCTTCGAAATTAAGTCAAACCCGCTTTTTTCTTT  
GTCGTATTGCTTGGTCAAGCATGTCCAATGTTCGATACAAACGTATCAGTTATCATGGGAGG

TTTGAAATACAGAATATTGCCGTTTLAGCTCGAATTCATATTTTGGCGCTAATATAGGCTTT  
GTCAATATCAACGTCAAACCGTTAATGGTTTGAACGGTCGGCAACTTTTTGTTGAATGC  
CACCAGATGCAAATTACCATATCTGCTTCAGCGGCATTCAAACCCGGGCGAATAGAATC  
AAGCCATTCGATCATAATGAGTCTACACCCTGCATATCTTTCAGCAATTTGATATGCCT  
GAAACCAAGTTTTGGAATCGTGATCTCTTTTCCAGTGACTTTTATGTTCTTAACAGCAGG  
GATAATGTTCAATTTTGGTTTCATGTTATTTGCCTTTCGTTAAAATCTGTATGAGCTTTC  
GAGTTGTTCAAAGATACATATTAGTTATAGATTGCTCTCTGCTTATTTTCATGTATAACT  
TCATCAACGAAATACTCGCCTCTAAATTGATTCTTTTGATCGTAGAATTCCAACGCATG  
CCTGGTACGAGACCAAATTCTCCGTATGTTTTTGGCTGTCCAAGACGCATCGTATTCTGAA  
AATATAAGAGACCTATTGTAATCTTCCGGCACCAGGGGCGGCTCATTGGTTCATAATATGCA  
CCAGAACGGCTAATACAACTGAATTTAGCCCTTCGCCAGTAACAACCCGAGCTTGCATT  
TTGTCTATGAATGAGTGGGCATAAAACGAGGTATTCTCGTATGGGTTACGGGTATACGCG  
TTTGCTTTTGTCAACCATTCAATATGAAAGCATATTTTTTTATCTACCATCGCAATAGTT  
TCACCAAACAACGCAGCACCGTACGACGTATTGTTTTGGATCATTTTTGCTAATAGAT  
TCAAAATCTGACATATGAATGCCTAACATATCTTCCCAGACCAATGAAACACTTTCCTAT  
CCAGTCGTTTCGCCATGTCGTCTAACAACTTGTAGTATGCATTTATGTCCAACACCCAA  
TTTGTACAGTGGCACTCTAGTGCCAATCGAATTGATTCTCGGGCGGAGTTTGGGAGTTCCA  
GAATACAAATAATCAATCATCTCGTTCACGGATGCTACAGCATCATTGTAAAGATTCTG  
CTAAACTTGAGATTACGTACCGAATGTATTGAGCCCAACTGGAATGTTATGATGTTGTCA  
CCTTTCATTTCTACGATTGCAGAAAGATGTTTGTACCATAACAACCGTTTATAAGTTATT  
TCAGTGTTTCGCTCTTTTGGAGAGATGTTTGGATTATTTTCATGACCAGTCAAACGTGTCTGT  
AAACCGTTTGAGTCATAAATTTGCAGCAGCCCTTCATTTATACCATTTGTTAGACCATCT  
CTCGTGGTCATGGTAATAAAAGTTTCTGCTAATTCAATAAACCTATTCTCCATCGAGGCA  
TCATAATTCTGGTAAAGTTTTATGGAGACATTGGGATAACCAGCGCGTTGTAACAATAAA  
TTTTCTCCTTAAATTCTTCTCCCACCAGGCTGAGAACAATGGACTTTTCGACTGGTAGCA  
TATTCATTATGTCGGCCAGAAAATAGTCATGTCTTCTAGCGCTCAGTTTATCTTTTAA  
AATTGAAAATTTTCATCAGGATTGACCAAACCTCAAACAATCGAGCATATTAGTAAAAT  
TGATGTCATAATCTTTACAACATTTGATTTTTTGGATTTACTAAAATCGGGTTGAAGGATT  
TTGATAGTTCAACAAATTCTTCGTATGAAATCATATCAACCAATTGGCTGCGCTCATCTT  
CACCCAGTTCATCCCAGGTGTATTTCGTTGTGCCCCTTATATATCCTATCAACAGTCTCAT  
AGAAGAGTACGTCGGGTGAACCTGATTTACGAGGCATACGAAATTTGAACGTTATGTTGT  
TTACCTGCAACTCTGGAGTTTTTLAGTGGCTCTTGTGTCAACTTCAATCTAAGATTGTGCA  
TCGACTTGCAGTGCGGGCATGTGATAGCTGCGCCCACAAGTGATTTGCCCAAACCTCCAG  
TAAAAACTATCAGAAAAATATGTTACGTTCAAAGGGCGTATAATCCGGAACCATTTCTT  
CGAGCAAACCGGAAAATATCTCAGATTTCACTAAAGGTTTACTTCTCATCTCATTCTGA  
TCAATAATAAATCACGATATTCTGAAACTGTTATCAGTTTAAATCTGTGTGTGCCGCTCG  
GAAGCTTTATGAGGATTATATTCAATTATAGATACACCCCTTTTAGGTTATTTAAATACAT  
TCAGGAGGACTGTATGGACATTAATAATCACAGTTTGAATAAGCAAGTAGAAACTCCCGT  
GTGGTCCGTGCGCGAATATCTGTCTATCGTAAATGATGCAGATGAAATGATGTCGAAAAT  
CAGTTTCAATAAAATAGGTACGCCGTTACCGAAACATCTAACTGAGCAAGCTCTCATCAA  
ATTGATAGCGATCTCAAAGAAAAAAGTCATCAAATGAAATCAGAGTGCACGCTATGTCA  
AAAAGAACATAAGTTTGAAGTGCATCCCGATATTCTCTGTGTTTCTGATCGATTGGGGCT  
ATCGCATGTCGCTGGCGGAGTGGTTATCAATATGAGATACCCGATGCTGTTTCAAGATCG  
GGATATGTTTGGAGATGATAGACAGATATATAGTGTCAATTTGAATATGCAGATCAGCTATT  
CAAGTGGGAAGATTCAACAGAAAACGAAAAAGACATTTTATTTAAGCATTTGACGTTTTT  
ACATATTGAAGCTATCGTAGAAAACTTCAATCTCCACAGGTATATGCTGCAGTTCCAAT  
CGAGTGTGAATGTGGAATCAATACCCAGCGGTTATAAATGGTGCTAGTAAATTGTTAGA  
TTCCTGTTGGGGTAAAATAAATAAATCTGCTTTATACAGATCTTGACCCAGATTTCAAC  
CAATCGTGGGACAATGATGTGTTAATGACACGAGGAGCTCGTGCCGTAAAAAATTCTATC  
ATAGGGATAGTTTCTACTCCAATTGGTGCGAGACCATTTAACCATACTTTGGCTGCGAC  
TTACCAGACCAGCTATTTGATAACATTACGCCGTTGGTGATAGACACGGTTAGACGAAAT  
ATTCAAACGGCTATACGAAACTTTGAGCCACGTGTAAACAATCTTCAAGTCGACTCAACT  
GGAAATTTCCGGTAAATAACGAACTCATTGTCACAATTCGATTTTGAATTATCGATAATCCA  
GCAGTAATAGACGAAATAAAAAATGAAACTTTCAAATTAATTTAGCCCTCTTCGGACGGCT  
TTTTTGTACGAAAATGAAAGAAAAAAGTCACCCGGGAAACAGCATAAATAAAAAGTCCGGT  
TGAATTGCTGAAAAGAATGAGATACTCCAGGAAACAGGATGTAAAAATCAATACTGGAGC  
CCATGGCTCCAACGAGCTTGCTCGTTAATTGTTATCCTTTTAGTTATAATATCTATTAAG

CCATAAAGGATAAGTTTTGGCTAGGCCAAAACCTGGAGGCCAGATTTTTCTGTTCAACTA  
TCGATTTATAGTGTTAAACTGGCCACAACACTAAAGGAGAGTAAAACATGATCATCAATA  
AAATTGAAGAAGTTCGTATGTCTTTTCGCAAGCTTGGCTCTGAGGACGCTAAAGCTGCAA  
ATCTTCTCGGTCTAGTAATTGGCCAGCTCCAGCAAACCTCGAGCTAATACCGACGCTGCAG  
TTATCCAAGTAATCAATTCCCTTTTGAAGGGAATTCGCGAGCGTATTGCTCAAAAATACA  
ATCGGCACGACCTCGCCAATGCATATCGAGAAGAAGCACTTCTTTCTCAGTTAATTCCCTC  
AAGCCATTACTGACGAACAATATAACTCGGTCGTCAATGGTAAAGCTGTGCTAGACCTGA  
ATCGGGTGAATGGCCCAAATACCAATCTTAAACACCGGAAAACCTTATGGCAAAGCTGTCAG  
CCGGTGTGAAAGATGGAAAATGGTCTATCCCTGACGCTGCTTCGTTGAAAAAACAGATCG  
AAGTATACATACCTTTTCGCTTTGGACGTAATTTGAGTATAAAATGAACGATGAAATTTGT  
GTAGTATGTAAACAGTTAGTTCCTAAAGCACTTGTGTTTACACATCTTTTGGACCAGCG  
CTTCGTGGTCCATGTGCCATTATGTTGAACTTTACCTCTTTCAGAATCTACCGGAATT  
CTTGAAGAGACCGGACTTCTGGTGTAAAGATAAAGAGGCCTGCATACGCAGACCGTTGTT  
TATCAGAAGTCTTCAGGCGGTTTCGCTTTCTTCTCTGGCATTTTGGACTTCACTTCTACGG  
CCAGCGATAGCCTCTCGCACCGAAATATCATCGGTGGGTTTCAATTCAACTTTTTTAACT  
CGTTGTTGTAATATTTTTCTAGCTCATCTAGTCCTTCTGCTGTTTGACACGCGGCAATT  
TTAGACATAAATGAATCCACTGTTGCTTCTGCGATAAATTTCTGAAACATTCCCATTGCA  
TCCCTCCTATAAAGAAATTTTATGCAAAGTGTAATTTGAATTTTTCTGACACATATCTTTC  
AATACGTTGAATTGCGTGTGTCAGGGCGTAATTTTTCTTGTGTATTTCCCATGAACATT  
GATTATCCCAATATCATCAATAATGGCCATACTGTAGCAATACTCTTGGATGAGTGCTT  
TCTTAGAACTCGCCCAATAGTTAGGAGAACAGTTGCCTTTGATTTTACAGGGTGTGCAAA  
AATGATATGATGCAAATTTTTGATTGACACACCAGTAGAGAAAACACCATATGAAGCTAC  
GAAAACATGACCGGTTCCACCTTCGTCGATGATTTTCATCTGATCACGGATTTCCGGTGTG  
TGTATATCCAGATATAAAATGAACTTTACCTGGGTGATGAATCTTTCTAAGCGTATTGTA  
CAAAGCCATACCATGCCCTTGCAGGCGTAACATCAGAAATGCATTTTCATTTTTGTCTGC  
GATTTTTTTAGCCATCGACCATACAACTTTATTTCTTTTCGTATGATTCGTGATAAATTT  
TATTTCTTCATTATAAGAAAATTTTCTGGCAGAAGTTCGATCTTCTCTCGAATAACCAAG  
TTGAATAGCTATAACTTGCAAATCAAATACTTGGCCCTCTCCATTAGCTGTATTGTTGT  
TACTGGTCTAAATATATCCCAAAGATGCCAACATATTACCCAATGTTTGCTTTTCCATC  
TCGCAGAGAACCAGACAAACCGTATTTAAACGGTATATGATCGACGGATTCGATGATTTT  
CTTTATTTATGTCCCAGTTGATAGATGACACTCGTCGTTTATAACACAGCCGAATGGGTC  
AAACCATTCTTTTTTCTGCTTAATGGCAGATTGCCAAGTAGAAACATATATCAAAGCATT  
CGAATCTTCTACGCTCCCCTACTTTATCCCAAGCATAGCTTCTCGAGGGAAAAGACGCTA  
ATCGACAAAGTCATCAATCATTGTTGACAAGAGATGTCGTTGGAACAATGACAAGAAC  
TTTGTCTTTGTAATTTTCTAAATATCACAGAGACAGCAATGCTTGAATCAGCGATTTACC  
AGCAGATGTAGGCAAATTTAGCAATTTTCTTTTACGCATATCCCCTCATAACAGCATC  
AGCCTGATACCAGGGAGGAGTGATTTTGTGTTACCAGAATAAATATCTTTGCTGTTTAC  
CCTTGCATCAAATTCGGAACGTGGAATATTTTGTCTTTCCGTGATCAACGGGTCAACAAC  
TATTTTATAATCGTTCTGCTCGGCAAACCTTTATTGCTTGAAGTACTGGTCCATAAAGGAAG  
CAAATGATCATATCCTAGCAGGAATATGACACCAGACCAACCTACACACTTGAGACGCGG  
AGAAAATTGATAGCCATCTGCTTTAAATGAAGAATACTCCCGCATTTTCATAGAAGATCGA  
GTCTTCGCAAACAACCCTGGCAAACCTGTAGTTTCCAAATAGAATATTTATCATTAAACG  
TCTCTTAAATAAGTCATATAGGTTTATTTATACAAGGGAATCACCATGAAAGAGAACTT  
TCTAGTCGCTCTGATATCGAATCTCAGTTTGGTTCTATTTCTGTGCGAGAAGGCAAGAAA  
AAACTAGCAGATTATGCTCTCAAGACTTACGACATTAACCTCGTCAGAAACAAGTCGTTT  
GAAAATATGATGAACGATTTTGAATCTGCTGTCAATGCCAAATTCGAGGCCGCTCGTGCG  
GGAGCTGGAGATGCTGAAGAACTATCGATATGGGAGAACGTGTTGACCTATCAAAGGGG  
ATTGAGCTTGACCCTGCTAAAATGGATATGGAAAATGAAACATCTGAAACAACCGAGCAG  
CCTGTTGTTGCTGAACCATCGGTTGAAATTGTCGATCAAGACCAAGTAGAAGAAAAGCCG  
GCCATCCCGTTTTTCTGCCTTGAATAATTGAAGCGACTACAGCAACTGAGACAACCTACCCAA  
GTAGAAGAAAACCGGATTATGATTTTGTGTTTGTGTCATTCCCTGACGACTATTCCGCAAAA  
GGTCGGCTGGACGGACCAGAAGGTCGAGCATTATTAATGTTCCGTATTGGATACACGAT  
TGGATGCAGGGAAGAAATTGGAACATTGAAATTGCAGAATGTCCATATGACAAAGAGCTG  
TTGAAGTCATTGGCATTTTACATCGAGCGAGATGGTTCCGTTGCCATTCGCGAATCACGA  
AATGGCAAATTCATCGTTATTTCTTAAACCGGGGTCTATGATCCCTTCTTTTGTTTAAGG  
AAAAAACCATATGGCAATTAAGCTTCTATCTCTCCACTTGATCCATCCGTTTCGGAAGG  
TAGTAGTGTTGACTTTACCGTTACTTTTAGCGGGGATGAGACGGTACAGGAGGTTGATGG

TTACGAATGGCTTGTTGACGGCGTTGCTCAAAGCGGAGAAACATCAACTACTTTAAGCAA  
CACCTATGATTCGGCCGGTTCGTTTACTGTAAAATGCAATGTGACATATGCTCTTGTTGC  
TGACGACGGGGCTGAGCCAGTTGTTCTTGCAGCGGAGAGTGCTGCGACCGTCGTAGAAGT  
ACGCGCACTTGATGAAAGCATTGGTTCGTTACCCCTTGGCTTTCAAAAACCTCGAGTTT  
CTCGTGGGTTCCGTAAGTGGTGCATGAATGGATGGTAGCGAATCCAACATGGCGTCAAAG  
ACCGGCAGAAAGTCCTTGGCCAATCATTACTTTCTCGATTGACCAAGCTGTCGAGGAATA  
CGGCGAATGCTTGATGCAAAAATCCCGTAATGGGTACATTTACAAAGCATCTGCTTATAC  
CATGTAAGGAGCCTTCGGGCTCCTTTTTTGTGTTACATTTCTAGAAAAACGTATTATGA  
TGGCTCTGCCAACTTTGGGCAATTCACAAGGTTCCGAATAATTAAGGAATCTTCCTAATC  
GAAAGTGAGGAAATTATGCTGAAATCGGCATTAGAAAATGTGATTTTGGAAAATAGTCAA  
GCCATCGAAGCCCAAGTGCTTGTACCGATGCCAAGAAAATGTTCACTGACCCGAATTTCG  
CTAATTCATCACAGAGCCAAGAACCGTGATGAGCGGTTTCAAATCCAATTTTCGTGATTTG  
ATGTACACTGCAACAACCTTATCCAGTTGCAATTGACGGCCCGATATGGGAATCGTCGTAT  
TCCCTGATGTATCCGATGATTTTGGCGTAACCATTTTGGTGCTTTTAACTCAATGGCCAT  
AATTTACGTGACGTTATTGTTACTCTACTTGAAGTCAAGCGTGAATTCAAAAGAAAATG  
GCTCTTGCGCATCTTGCAAACTGCGTGACTGTCCAGATGACGGTATCGATTACAACAGA  
GCACAGTGGTACACTAAAGCTATTTTATGTTTGATGTATGCTCGATTTGCTGATGATCGA  
GAATTTGACATCGAAAAATTTGTA AAAAATTGCAAAAAGCGAATACGATCGAGCCGCTATT  
TCCATAATCTCATCCGGTGGGATTTTGTCAATGCCTCAGTCGATTCATTTGTTTCTGCT  
TCAGCATTACCGATTACTTTTTCTGAGACACAACATAACGACAAAATATTCAAAGATAGTG  
ATTTTCGAACACGGATGCGTCGCTGACCCGGGCAAAAATGCATCGAGTTCGTCTGATTACA  
GAAAAAATCAAAGATCGGCTGATCAAACACCAGCGTCAACAGTTCATGAAATAGTTGTAC  
GATGATGGGCTATGTGTTATGATAGTCCCATCAAATCTACCAAGGAGTATATCATGACAA  
CAATCAACTGCAAAGACGCCTCTATCGAGTTTTATCATGGCTCTTGTACACTCGGCCTTA  
AAGGTGATATGCTTCTTCCGCTGAAGCAGCAGACACGATTGCCGACAAGGGCCGGAAAA  
GGAAGTCCGACCGTGTGTTTTTACCAAAGACCGCGGTCTAGCCAAGGTTTATGCTAGAC  
GTGCTGCTCGTTCTATTGGCGGCGAGCCAACCTCTATTTTCGAGTTATTGCACCGTTTGACA  
CGGTCTTTATCTCTGAAACGCCGGGCGCGACGGTTTACCATGCTGCCTGGGCTTCTGTTG  
AACAGATTCATTTGGTAAATTGAGCGACTAGAAAGATGAAATTCCCGACAACCTACTTC  
AATTACCAAACAACCGTCCGGACGATATCATCAGCGGTGCGATAGTGCCAAAGACAAAA  
GAAGACATTATCGAACGCATCAAAGCTTACGCTGATTCTATTTGTCCGATAGAAGATCGA  
ACCGATGAAAAGGGAAATGACACTCTCAAATCGAAGAGGTTGCCCGACTCCCAGAGTCG  
ATGCGTTCGCGGCCAATTCAAGTCACTATAAGGTATTCGTAATGAGATATACTCAAAGG  
ATCTCGCAGATTCCATTATCTTTGCTGTGGGCGTTCACATTGATCAATTTGACAAAGGCG  
GAAATCCGTATATTTTGCACCCATTGAAATTGCTGCATTGGGCCAGACATGCCAATTAAG  
ACGTTGATGTTCAAATTTCTGTTTCATGCTTCATGATTGTGCAGAGGATAGTTCGCTGGGTG  
TTGCAGAGACTGGATTTGATCGAGATCACTTTTGGCACCGAAATGCGTAAACTCGTGG  
ATATTCTGACGAAGCGTGATGGTGAAAAATTTGATGAATATCTTGATCGTATCAAATTGG  
ACGTCAGATCCGCGAAAGTGAAGTGCTTTGATCTTAGACACAATTCTGATCTGCGCCGAC  
TGAAAGGTATTACAGTCAAAGATCAAGAACGTACCTTGAATACCAAGTCGCTTATGCCA  
AACCGAATATTTGGATTCAAGAGCAAAAAGGATGAACAAAATGCGTAATATTTCTGAGCTT  
TCGTCAGCCGAAAAGGTACAAGTGCATTTTCATGTTTCGTGAAATGAAGCATGGATTCGTA  
CAAATCGCCAAAATGTATGACATTCGCGCGACAAAATGTCATCGATGTCGTCCAAGACGTT  
GATGAAATGCGCGACAATCATCTGGAAGCTTTACCCGACAGCCGGTAGTGTATCGGAAG  
CACTTTGTGAATCCCAAACCTGCATCAAATGATGGTCGCTTCAAAGCTCGGCAGCGCGCA  
AAAGGCAAACTTTTGAGACTTTGCCATCAACATTGACTCCCGAGAAGCTCGCTTGAGATT  
TCTCAAGCCTCGGCCAACATGCCCGTCAGGCCAACAAAGAGAAGAGCTTGAAGCTTTGTTG  
AACAAATTCAGACAAAACCTGAGGTACATTCTCCGCGATTTTGGTTAAAATTCTCCATAA  
TGAAAAACCGAAATCACGGAGTATTAATAATGTCATCTAGAATGGATATGTTTAAACCGTA  
CAATGCTATTGCTTCGGCCTCAGTCAAAGCTCCTGAACCTGTCAAAAAGCACCATTTTGA  
AATTCTTCGAGAGAAACGCAGCACCGAAATTGAAGAAAAAATTCAAGCTGAGCGAGATGA  
AGTCGATCGTCAAATTGAATACATGGCTTTCTTCAGCGCAAATCAGCGTACTTGCAACC  
GTATCAGGTTAAAGTAAAAAGCTGCGAAGAGCGCGGCTTAGAGTGGCATATACCTTTTCA  
ACATTTTGTGAAATTGATGAAAGTCGAATAATGTGCATACACAGGTAATCTTTTCCCTAA  
AGACCATGGCCGTTCTACTGAGCTCATAAACCCCAAAGTCGGATACACGATGGAAAACGT  
GGTAATCGTCACTGCTAGTGCAAAACAGCAAAAAGGCTCATCTTGTCCATTTTGTTCAGGA  
AGAGCATATCCCGCTGATATGAAAGTCAAACCTTTTTGCGCAAAGCAATTTATCAATTGG

AGAAAAATACAAAATGAATTGCATTAAACGTTTTGAAAAATGCTATAGTACGTGACGAGTA  
TATGGTATTTCCCGAGAAGCTGGACAAATCAAAGTGGTTTTGCTGCCAAAATCATCGAGTT  
GTTCAATGAAAATACTACACCTGGTGGATCCGCTCCAACAGTTTAGCCAATGGGAAATTG  
GCCATCTACGCGCTATCTTAGCGACATGCCTGGTTTTGTTTATGTTGAAACGCTATGGATG  
GAACTGGCGCACGATTATCGTCAATGGTACAAAGATAATCCTGGCAAATTTTGACCGT  
CGAAGTATTCGGCAGCCCTGAAGCGAAATATCCTACATCATTTATGATGAAATACGAAAA  
AGGAATTAATTCAAATTGTTTTGATCAAAGAAAAGCCCCGACGAGTCGGGGCTATGCTG  
TATTTGCAATTTGTAAATTGATCAGGTTACACCGGAATGATTCTGGGTAATTTACACCT  
AACATATATGACATATCAGATTGACCTACCAAGTTATCCCAATCATCACCTGTTACATTA  
CGTTCACCGGATTGACCTATACGTGTAGTGTACGCGTTAATGGATAAACCATAACCGAAGC  
ATAATGCCAACAGATGGTTGCAGTGAGGTGGAGTCATTGATAACTTTATAAGCACCCAAA  
TCATCTGCTTCAATATATGGTGAATAGAACAACGAACCTACGGGTTCAATATCATTGACG  
TAATGCTTACAGCCAGTGATCAGATAGTCAAATGACGATACCGTATCAACATACACTTTC  
AGCCCGTTGAGCAGAGTTCCTGCTGAAAGAGCATCTTCGTTTCGCATACTTCCATCCGGAT  
GCTTCAAGCATAGCAGAAACGCGAGTTGTCCAGAGAACATAGGTTCGCTTCATACGATGTG  
TTTCTCAGCATCTGATTTTTTCATTTTCGCATGCTTGTGATACAGAGTTCTTCCAATAACC  
GGGGCGTCAGTGCTAGCGGTTATATCCAGAATCCCATTTGGCGAAATATCTTCTTCTTA  
TAGCGGGCCAAACGGTTATAAGAGTCTGAATAATGTCTATGTTAATATCTTCAGATATC  
ATAGTTGACAGGACATCATCGACTACGCGAACACCATCCATTTTATTTGCTTCCAAATCC  
TGCATCAACTCAACACTTATATTTGTCTTAAGTTTGCCTGTGCGAACTGGAAGTGTCCAC  
CGATCAAACCTGAAATCAGTTTCGACAAATGATGATGCACCTTCAAATTTCTTTTGCTAAT  
GCTGCTTCAGACTTGATTCTCAGGTTGCCTAGCATTACAGCATCACCGATTGCATAAGCA  
ATGTTTCCAGTTGACGATGGCAAAGTCAGTGGGTTTGTGGAAGTGTAACCACATCATAT  
GAATCTTTCAAACATAACCCCTTAGCCATGGGAGTCTCTAGTTGCGCAAGAGGAATCGAA  
TCCCGATATCCGACTGACCCCATGTAAGTTGCAGCGCTGGAGAATGATTGATTACCGGCA  
GGGGTCAAATATTTACACCGTACAGTGTGGAGGTTGGAATGTCAGTTTCTAGAATTGCT  
ACCATTTCCGTAATAAATCAAGTTGTTTGCGGCCCGGGTCAAGCCGACAAGAGCGCGACGG  
CTCCGACGATTTGCCCCGGTAGTTGTTGATTCAGAAATCAGATCGTTAATTCTGCTCATG  
TTTTTCTTATTGTTTGGCGATTATACGAACTCGTGTAAATCGTGAAGTTTGACGTTGAT  
GAAACCAATTCCAAAGCACCACCATTTCGTGGCAAATTTCCGTTTTTATGAGCACTTATG  
AATGAGTTGCAGTTTATTGTATGCGAAGCCTGCCAGATATTCTGACGACAGTCAATGAA  
TCAATATTTACGCCTGCATTAACGGTGAGTTCCAACGAGTTTGCAGGTTCTGCATACCA  
AATGAGCCCGTGATTGCTATTTTATATTGAAGTGACCAGACGCGCCATTTGCAGCTATTT  
GGCATGTCAGTATTTCAATTTTGGAAAGATTCATGCATAGAGGACATAACTGGGATATTTG  
ATTATATTAGCAGCATATATTTTCTTATGCAAAAAAGGGAGCCCGAAGGCTCCCTTAA  
CCATTCCTTGGTTGTGGAACCAAGTCCTTTTGAATTACAGACCTTTAACCATAACACGGC  
GGAAGTAGGCATTCTTACCAACGCTGTGAGCACCAGGCATACCATTTGCTGATTCGACTGG  
TAGGAGCTTGGGTGCGTGATTCAGCGAACGGGTTAACACCGATGGAGTAACGAGTCTTGA  
AGCCATGACCGGTTGGAAGCTCTTCGGATCAGAACCACGCGGGCGGGTTCAGTGCAACGT  
ATGGGCAGTAGCAGATACCGGCATCCAGGTTGTTGGCACCGCGGTAACCCATGGTGAAGT  
AATCTTGACGGGCGTATTGGTCTGTGTAGACCTTGTAACGACCACCAGAACCAGCGA  
ACACACCCTTGGCAGTATCAGCGTTCAGGCCAGTAGCCATACCTTGAGCAGCTGGGGTGA  
TACCAGTATCAACCAGAGCCAGGGCAGAACTACGTTACGAGAAGCGATGATGAAGTAAC  
CAGCACCACGACCAGTTTGACGAGCAATTTGTTAGCTTCTTGTGACTTGGATCAGCA  
GAGCTTTGTAGCTTTCACCAGCCCAACGAGCACCACGAACATCGATCCCGTCTTGGAAGT  
CAAACACACCGGCAGCAGAACCTACAGTTTGAGTCCAGCCAGATTTACCAATTTGAGCGG  
TGTAGTTAATCCAATCGATAACTTCACGGTTGATTTCCAGCATAACTTCGTTAGCCAGGA  
TTCCGTTTAGCTCGCTGTCAGCATCCATACCATGAACAGCGCGCAGGTCTTGGGCCAGTT  
CGATAAAGCATTGAGGTTTTCAGTTGACGAGATTCCGCTTCGTCGGTTTGCTTGTGATAC  
GGAAGCTCATTTTCGTTCCAAGGGTTATCGGTGGTTCCGTTAAATCCTTGACGAAGTTCGG  
CGATAGGGGTAGCCATACCTTCAGCAATTTTCAGACAGTCCGCCCGGCAGCAATCTTGGCAG  
TAACCAGGGCATCCAGAGCAGCACCAGTTTCGTTGGTACCGACAGTCACGCTTCCGCCAG  
TCACGTTCTGCAGAGAAGCTGAACCAGACTCGTAGAAGAAGTGATACACGATATCACCGG  
TAGCAACAGCTTGACCAGCAGTCAGCGTAGCAAACGGACTGCGATCGTCTGCAGTGCTAG  
CACCTTGAAGCCAGACCTGAATGCCAAGCATCAGGAGCACACATCGGGTGGAAAGCTT  
CCTTAGCACCAGAAGCCAGAGGGTCTTTGCCGTAAACAGAACGCAGGGCAAATCCTCGGC  
CAGTAGGACCAGTCATCGGCTGCACACCAGCGATATCGAAGGCGATCAGGGATGGAATTG

CGCGTCGTACCATGCCGATAACAGCAGGGCCGATGTTTGTAAATTGCTCAGGAACGTTGGC  
CAGCAGCAATATTGGTAGGATCGTAACCGTGATCACCAGCAACTTTGGCTTCCATCAGAG  
AGTGACCGAATGCTTCAATAAGTTTGTTCATCGCGATACACCGGCTCGGTTTTGGAATCTT  
TTTCCTGAGCTACGAGAATTCGGGCTACAAGAGCTTGCTTCTTTTTACCAGCAATTTTCAG  
GCAGACCTTCACCTTCCCAGCAGCGGAGTCCATATGTTTCAGAATTTCTTTAGTTTTTCAGAG  
ACATTGTTATAACCTTTATTGAATTAAGAAGACATACGGGAAGAAGCGGCCAGATAGGCG  
GCCATGGAATTATTTGCCTGCTTGTATCATTTTGTCTCAACAATAACTTCGGGTTTCGAAG  
TTTACCACAGCTGCAGATTCATCAATATTTAATGCTTGTTCCTGGATCGGTTTTTGTTC  
TTTTGACCAGAATTAGCAACCATTTTCGACAATCGGAGACAGTTTTTGGTGAATAACTATCA  
CCATATTCCAGGCCTTCAACAAGACTCAGAACTTTTTCTTTCTGTGACTCGGTCAAACCT  
GCAGTAGCTTCTGAAATAGCTTTTTCTTACTTCAGAGAAGAAATTTGCTCTTCCAGAGCC  
AAATTTTATCAACAGCGATTTAATTTTCAGCTGTAGATTCAACCAGCTCAGAATTCAGTTC  
GTCCATAACATCTACTTGCTCTTCTGCTACAGAGACGTTATTTTCAATGAACAGTTCCTT  
GAGACCGGTTGCAAATGCTTCGAACAGCTCAGATTTGATGTTTGTGTTCACTTGCAGCGA  
ATTTTTTTTCAGCGATTCTTTGCCAGATGAGTTAAAAATTTATCAGTATCTTCGTAAAG  
TTTTGTTTCAACTTCTATACGGGCTGCTTCAATTCCTTCGGCCAGTTGAGATTCGGCTGA  
AGAAGCAATATCGGCAATGTGAGATTCAGCAAGCGTGATTGAAGCCGATCGTACAGCCTG  
CTCAAACGCAGTACTGACATTTTCTTTTACGGCTTCGTCCAGCTGAACGGACTCGAAAT  
ACTGTCCAGTTCAACGGCTACCGCGCCAGTTTCTCACTGGATTCAGCCAGCAGTTTATC  
TTTAAGGGACATTTGGTTTTTCTTTAGTTCAACATTGAAGCCTATGATTTTAGCCAATT  
GGCCGAACGCTTCATTAATTGTGCTTACATTGTTATTTATAGCATCTGTAGGAGCTTCAG  
ATTCTTGTCTTTGCTCTCTCTTAGTAGTTTAAACGTACGCGTGTGGAGCAGATGGCCCC  
AAACAACATCAACAGCTACAGTGAGGCGATAACGCTCCTGAACAAAGCCACCTGTAACTT  
GCCCCGAGACCACGTGATGATACTCCCGGAATCCAACCAGCTCGTATATTGGCGGCAAGTT  
TATCACCTGAACCAAATCACCTTCAATTACCCTGGCAGACTCATTACATTATCGCCTT  
CCCACCACAGTTTTTCTACTCTGATTGAAGCCAAATTAGGGCCAGGCATCGGCCTTGCAG  
GATGATTAGTTTCGCCGAGTGATTGTTTAGAATTTATTTAGATAGCAATATAATCGTCGA  
CAGCTTTGGCAAGAACAGCTTTAGGATAAATTCTCCCGTTTCTATTCTTAACGTTAGCTT  
ACCTGAAGATGCCTTCCATATACAAAGCACCTTTACCATCATCCACTGATTCGACTACAA  
CTTCAGAACAGGTGCCGCCGGGAATGCGCCATACTTCAATTAGCAGCTCGTCTTCCATCT  
TATGACCCCAATGCTTTACGGCGTTTCAAGGCACGTTTGTTTTGCCTGCGCCTTTCTCC  
CAATGGTTGGTTGAGAGCGCTTAGTTTTTCGCCGCTTACGAGCAATTTGCCTACGAGTA  
GCAGCAGTTAGCCAGTAGTTTTAAATGCATTGCGGTTCCGTGTTTTTCGATCTTTGGTA  
CGAGTACTTCACCTTTCGAATTAACATGTTTGACAATTGCGTCTCAAATGGAAATATTT  
TCAACTGCAGCAATCATTGCCAATGACATATCTGTTTCGTCAAGTGAATTTTTGGAAACA  
ACACCGATAATTTGATCGGTGCTAAATCCGGCTTCTACCAAGGATTTAACACGAATCACT  
GCTTGCGCAAATGAGATTCAATCACTGGTTGATTTGCTGAATAGCCGGATGGAATAAGC  
ATTTATTCCTCCTCTTCATCTTCATCATCTTCATCGTCATTCTCATCATCTTCGTCTGTC  
TCGGGTTTTTCACCTTCGGTAACAACACTGCGCGAGCAATGGCCTGTTTTTCTTCGGCGTAT  
ACTGAGTCTTTCACAAGAGCCATTTTCGCATTAAATTGACGTTTTGCTTCAATCAAATCA  
CCTGATTAGACAGCATCGATCAATTTCCCATTTAGAAATCGTCCTCGTTTTTCAGGGTTT  
TGGAATCGTTGACATTCGCCTCTTTTTCTATTTGCTTTTCTCTTGGAGCAATTTGCTCA  
TCAGTCATCTGCAAAATGTTTTTCATGACATAAGCATGCGAGACATATTTACCTACATAC  
GGCTCGTTTTGAGAAAGAGCGTCAACTCGTTGTCGAAGCGTTTCAATATCTTTCAATTCG  
ATATAATAGGAATCTAGATGGAAATTAACCTTGATGTTATTTATTTGCTCTTCCCATTTCG  
CTTTCTAATATGATTTTCTTGTAATCAAATTTGGTTTTGAGCGGGTCAAGGAAAATTTCT  
GCAAATTTGTGTTGAAGCTGAACAATAAATTTTCTGAAATCTAATTCATCGCGGGTGATA  
GACATATCTTGGCCACCAATTACCATTCCGCCATCGTCGCGAGGCATCCGGGACAAAGTA  
ATTCTCAGAGCTTCATAGAGCTTTTTATTGAACCAGCGAATATCATCCATTTCCCCATT  
GTTTGGGCGCCTGGAAGAGAAGTAACTTCGGTAACAGATTTACCATCTCGACGCATCAAC  
CAATAATCTCTAGTCCTTGAAGATTGCGTTTTTGTATTTTTCACAGTAACTGTATTCGAA  
TCGTATAACAACAGCTTTTTTCAGGCTCTGCATGATCCATTACGTATTCAGTTGCTTTG  
CGATTTGGCATATTTCTACGTGAATGTAAAAACACGTCTTTCCGGAGCACGCGTAATA  
CGATATATTACCAAAGCATCTTCTAAGAGTTTTAATTGGTCTGCAGGCTTAACAGCATT  
TGCAGATAACCGACAATCCCACGATCATAACAATCCTGAAGGCCTGAATGCGCATATACA  
ATGGCACTTGTTCGGAATTGTAATGCGTGTGTTTCGGTTCAAACAGTCTGCCGTTATAAGCA  
TTACCTTCGCTGCCGGTGGTATAAACAATAAATTCGCGATAGCCTTTTACTATCGAAGTA



CCACCGTCGTAAGCCGTAACGATTTACGATAATATTCGACATGACGTGGGTCTAGCCGG  
CGTAGTTCAACAATGCCTTCTTTAGGATTAGGCATTATTTTATGGATCAATATGCGGGAG  
TCCACATAACCATCTGCGGAACAATGTGTGCGAGTCTGCGAGATACATTTAGCAATCTGCAA  
ATTTTCATCAAACCTCTTCTAAAATTTTGTCTTTGATAGATGAACTAAATTCAGTATCATCC  
AAATCAAGCGATACTACTTTGTGACCCTTTTCATAAACAACAGCTTCATTTACGATATTT  
GCTACAGCTCGCTCAACTTCATGATTATTCATGAGTTGGAGATATGTGTTTATGAGGTCC  
TTGGTACCGGAAAGGTTATTATCGATACCAAAAAATTGTGCGATTAGAGCGTGATATGAT  
GATTCTCCCTCGCGAGCTTCAATCTCGGTGGCACCATCATCTTTTTTAGGAGTCGCAATC  
GATTCGTGGCCTTGTTGAGCCGCTCGTCATATTCATTTTGATCGAAACGATCACAAAAT  
TTAAACAAATCTAAAACCTTCATACAAACTCCTAATCAGGCACCATTATTGCTGCCTGTA  
TTTATTATTCCCACCAGTCGAGTGCAAACCTAGTTTCAAATGTACAAACTGTGTTGTTAT  
CATCCCAGTCGAGAGTAACTTCACCAACGTTAGTTGGGAAAAGACCGACAATGGTATATT  
CTTTAGTTGTAATTCCATTACGATCTTTTTGACGAACAATGCCAGGCTTTTTATATGCTT  
CTGGAATATCGCCAGTGATTTTCATAACCCATTCCATGAGTCATGGCATTCCAATCGACAA  
TTGCCTGTGCGAGTGTTATGGGCCGAATCGTTATAAATCGTAATCGTCCAGTCGTCAAAAA  
TACGGTCACCTGCAACATTAAGTTTTCGGTTCATGTATCCAACCGGGATTTTTTCAACAG  
TGGCTGCCGGCATTGTACCTGCTTTACCTTTAAATTTGAAATTTTGGCCAGGTATCGGA  
TTTCAATTTCAAACAAGTTAGGGCGGGCGAAATCACCGGACTCAAACCCCTGAGGACAT  
CAGTTACGTCCATTATCAACCTCTATGTTTATTTATGGGCCATATTTGGGCCAACGCT  
GAATTATGCTAATTGGGCAGGGCCAATTAACCTCGTCAAAGTTAGCACCAGTTGATGTGCG  
TACAAAGTTCAGAGTGATGTAGTTAATTGAACGAGGAGCTTTGATATAAATCGTAGCTAC  
AAATTCATTACTGTCGATAACTTGCCGAGTGTTGGTTGTTGTATCACAGACCACGCGGAA  
GTAATAAACACCACCAGTGACCTGATGTTGTGGACATATTGCGAAACTTCGGTACGGTC  
CTCTGACGAGTAAATGCATCGTTATTTACACAATTCGTAATTAGAAGTATACCAATAT  
TTTTCTTCAATATGTTGAAGAGGAGACGAACGTTAATTCGGTCAAATGGAGATGGATCGT  
GAGTTGCCATTTTGTCTCCAAAGAGAACAAATCCGTCACCGCCGGCAAACCTGTAACCG  
GGTTAATTGACACTTGAAACATGGTATCACGCAGCGATTGCTTAGGTTCAATTGCCAGTT  
TGATGGTGTGCGAAGTTGGCCGCGACGATATCCAGCAGGGGTCATCGATGGATGTCTTA  
CTTGATCGGTGTAGCCACACAATCCGGCAATATCGGCAGAAAGAGGAACCCACAGGTTAA  
TATCATTGTATTTGTCATACTGATATTTATAGTTGCCTGCAATAAAAGCATATGTTGAGC  
TAATATTCATGTTATTGTGCGACAACCTCACCACCAGATGTCACACCATTTCCGCTTCGA  
CAATATTCTTAACCGCTTGAGTGGTAGGAACCCCAACAAGTAATTCTGACGGAGGATTGA  
CGAATGCTACACAGTCTTGGCGGTACCTGCGAGAGCAACGACATTTTTCTGGCCAGTAG  
ATGCAACAGCAGCACCGTCAGATGCACATGCTCCAGCAATCATCAGGTTGACATGCAGAG  
CTTCTCTGTGCGCAAACAGATCCCAACCAGCAATCAATTCATCTGAACCAACAGCATCAT  
TTGCCGAAGCGCCTCCACCGAGCCGGATGATACCGGTAAAGCCAGCAGGCCAATTTCCAC  
TAGAAGCATAAATGAAAATACTGGAACCATTACGGAAATAGTCGTCCATGAAATGTATTT  
CCATAAACATCTCGATCTTCGCGACGAGTGGACAACACAGTAGATTCGACTACGATGCCG  
TCTCGACGAACAATAATAGCAAATTGGTCATCAGTAATCGGGCCGTATTGAATGACGGTT  
GCGCATTGCTAGTGCAGTACCACCTAACGGGCTAATTGGCTGGGCTGCACCACTTTGGG  
ATGCGGCCTTAGAAATTTTCAACTTCGACAGTTGTACCGATTTCCCCGGGATAGACGG  
CTGAAATCAGAGGCATTCCATCTTTGGCAAATTAGGCAGCACTTTGGTACAAGTTATAA  
CATCTGGAGCTTCTTCCGAATTAGCAAAAGTAACCTGCAGAATCAACTACGATATTAACCA  
AGGTTAAAGCAGCTGCAGAACCGCGAGATGCGCCCGATACTTCTGCGCGCCAGTTATTT  
CGAAGACAGGATATGTTCTCAGCTGTTTGGCTTTTGAATTAAGTACTGAGCTGAAGGAACA  
ACAAAGCCTTAAATTTACCGTCAGCATTAACTTTAGTTACTTTTCCGCTTCTGTAACAG  
TTGTGGTTTTATACTTAATAGAAACGGTATCACCTACGGTGTAAACCTTATCCTTCGGTAG  
TAATTGTTACTTCGATTTGGTTAAACAATGGAGATGCGTTTTTAGCTTGCTCCATGTCAA  
TTACGCGCACGAGACGAAGATCATTACCATACTGCAAGAAGTTCATAGCACTCATGAAAT  
ACGGAGCAGTGACATTGTATGGGCTACCAACATATCAACCAATTCGACTTCATTTGTAA  
CTTGACGCATTTTCATAGACAGGACCCCATGCGAATTTGCCGACTAATGCGGCACGGCCAG  
TAGCTGACCGAACGACAGTTGAATTGATGGAAGTGTCTTCAATTTCAATGCCAGGGCTCA  
GAAGTGCCATATTTTGGTTACTTGGAAAGTTAGTTTAAACATGTTTATTTATTGCTTTAT  
ATTTACACGAACGACATAACCATTACTGCCAACTCCGAAAGTTTCTTCTCCGCTGTCAACG  
ATAACGACAGGGCTATAGTCGTTATATAAATTTTCCATTTCTGACGAAATATCTCATT  
GCCAATCGCATGTCATCTCTGTTTAAATCAGAAAATCTCGGTTGGGCAGTAAGCCAT  
GCAAATATTACCAATGACATCACCAAGTCATCATGGAACCGTCTTCGGCTTCCCATGAC

ACACCTTTTTTCGGAAAATGCCCTCAGTTCATTATCGTGGCTTTATGGTAAAGCACTAAT  
TTTTCTTTTTTCGATTAATCCTTGAGATTAGAACAACCTATGGCATTGACCCTTTAGTT  
TGCTTGATCCCGAGGCCGTTGTACGAGTCACATATAATGTTTTTCGATTCCAGTTCGGAA  
TACAACGACTTAGCTATGGCTACACACGTTGCATTCAGCTCAATATATATGTATGGCTGA  
TAATACATATTTAAGTACTTGAGCAACACAGCAGGGAGTATCAGGTGTGACGTGGTGTG  
CTGTGATATACTGCGACCTGTTTCGTACGGGAATTCTGTTATGTCCTATATGTGCATAGCA  
TGATAATCTTGCCACGACCTTCAGCAGAGTCAAGTGTGCGATATTTTTATGACCTTCA  
ATTGGTTCCTTAAACATCGTGAAATTGTCTGATGCTGAAACTTCTTTCCACGTCATTTTT  
GACAGTTTGAACCCGTTGATCAACGTTGCAGATGTTCCCTGGAAAGCATTATTATGCTCC  
TGTTGAAATTCCTCAAGGCTAGAACCGGCGATTGTCTTGGCTGACCAAGAATATTCGTCG  
TCAAAATATGAATCGCTGCCACCTGTTTTAGAACCATCTGAATACATGCGCTCTTCTACG  
GACGACCATGTTGCGGTATACGGAAACAATACCAGATTTGCTTCCACTTCCATCCGAATTA  
GGGGTAATTGCAGCAGTCCAGATATCGTACCAGTGATTAAGCCCATTTCGGCGTTGTTGTC  
ATCAAAATCTTCGAATGACGACCTGATGAAATAACTGGCTGGATTGCTAACCACGCGTCG  
TTGAAGTTGGGAATATAAGCAACTTCGTTCGATGTAATCAGCGCACACGAGTTACCCCGC  
ACAGCATCAGGGGAACTGGAAAATGCACCAATCGCACAAACCATTTCCAAGAGAGATAGAC  
CCTTTATTCCATTCAACGATAACCAGGCTGCAGAAAATCTGGCAATAGGTCCAATGCCTGC  
TTTGTCTATGAAGAACTTCCGCTCACATGGATGCTTTATGAGCAAGGATACCAACGATT  
TTAGCCGGATTGAAGCAAACAATGTGCCATGAAAATAGCTACTACTGTCGGTTTTTCT  
AGCTGCCGAGACAAATTTGCTGCCATCAGACGATTGCCAGCCATTATTCTAAGCATATCT  
TTTTGGTAGTCTCGCAATTGGACCCGGATTATGCCATCGTCAATATGCTCAATGCAGCAA  
TAGTTTTCGGGCAATTAACGTTATCTTCTTTGCATCTCTTTCGCTCGGCTAACATCTCC  
TTTGTCCAGTTTATTTAATGTTAGCACGCTTTAGATTTCGGCAAACCATTATATCTAGAA  
CGCCTGTCTGTTTTATCTTTAAACGTTCTAACCATTGACGGGTCGTCAGCTTAGATTTTT  
ACCCTCTTACTCCCTGTGATTTCCGATATCTATCAAATGTTCGAGGGATAACCACTTATCA  
TCGTGATTTGACAAAATCCATTCCCCATCTTCGCGCATTCTCTCTTTAACGTGGATGGA  
CGGGGCATTTGCAATGGGTGATCACTTTCGAAAATATTCATACTTCATCACCAATTCGA  
GTAAAGCAATTCATCAGGAGAACCCTTCGAATTCTATAATGTCTCCGCTTTCATCATT  
GAACTTTGCCGAGTATGGATGGTTCTGACGATGTTAGATCTTTCATTTCCCTTGTGCATT  
TAATGATTTCTTTAATGGTTGAAGTCATTTGAGCCTTTAGCTGAGAAAATACTTCAACCA  
TACGTGGTCTATCGTCATTTTTGGCATTTCCTCAATGCAATCTTTGCCATGTCCATCATCA  
TTTGAGTTTGAAAATGCATGTTGCGTCTAACTAGCGTATGGTCATCATCCTGGTCAATTT  
TTCTATTGTTTGGATTTGTTGTCGGTTCTTGTAAAGACCAACGGGGCGTATACCTGAACGT  
CTTCGCCGTTGAGTCTTCGATACCAGACAATGCCTTGAGACTAGTGAAGTCTAAAAGAT  
CATTCATAGAGTATTTCCCTATCGTGGTTCGAGGCGGTGATTCTGATCGGTATTGTTGGTC  
CATACTCCACCGAACTCCCGTCCCAATCTTGAGCGGGCACTGTTTTTGGAAACAATTTGG  
TGAACAATGATTCAAATGAGTATCTTTGTTATTTCTCTTTCATTGCCAAAGAAATCA  
AGATAAATCGTTCTAATTCACCTGCAATATTTTTGGTGTGTTGGATATAACCAACCAGTG  
AGAATAAACATGATTGACCATTCAATACGGCCTCGTTGTTAGCCAGGGCCATCTAGCTGC  
TCATCAGTCGTTATGGATATGATAGTTATATGGATATCCCGCCCTTTAATAATTATTTTCG  
CTGTCATACAACTCAGTTGTTGTGCATGAAAAATGTGGTTGAAAGTATGGTAAAATTTGT  
TCAACTATTTGAAATGCATCATCTTCATGTCGGGTCTATATTCCTAGTTCAAACATGAAT  
GTGTATGGCACAGGGTGAAATTGCGCCAACGCTTCCCATTGGGTTTATTTATCCATTTA  
TCTTGAGTATTTCCAGTTTTTTCCATTGAGTTATATTGCATATCGATCAAATGCAAATTC  
ATTCTAGGAAGAATTGCTTCGGCTTTTGCAATGTTGAATTCGGAAAGTTGGCATCGTAATA  
TCATCAATAGACATTAATAATTTTTCTATACTTACGTAGGTGATAGGAACACCTTGAAAA  
TAATGCTGGCCATCTCGAAAACGAGAACTTGAATATGACCAAAAAGTTCCATTAGCATC  
AATACATATCGGGGTATTGAGCTGTTATAAAAATGATTGCCAAACATGACTGTCCCTCAT  
GCCGCCAATGGGACTATTAAGCCGTTCACTGGGTTTGTACCAATTGGATCAAATGGCT  
CTACAAATGGTCTAGCTTTGTTTTGCGCCTGAACATTCTCACCAATCTGATCGATTTTTT  
GATCAATTAACCATCTAAATTCGATATTGGCTCCAGTTCTAAACCATTATACGGATCT  
TCTATTTAGGTTTTTCTGGAACCTGAGGGGCCAATTTTTTACCAGAGTATATGAATTT  
CTGGGCAACAATTACCCTGATTGGATTTTTTCCCATCTGATAAATCGGCGTGTAAGGTT  
TACCCATGTTATTTCAAAAAGGCTGTTATCCATTGGCAAATAAATCAGATCACCTAGTTT  
AGGTTCTTTCCATTTACTTGATGCTTGAAAAGGCCTGGGTTGATAGAAATTCTGACTTC  
GTCATTTTGTGATGGCGAAATTTAGAAAAGTAACTATGTTGTCCCTCATATGACTCGAA  
TCTATTGAGCCATGCCGCAAATTTCCATGCTTTTTCAAATCTGCTATTTGGGTCTTCTCC

AAACACAAGGTCCAAATTTGTATATTCTCTTTTCGAGAGAATAAAAATTCCAAGCCTCTCAT  
TTGAATAGATTCTGCAACTAGAGTGTCTGTTGGAGGGCCTGAGAGCCCTCATACCGATTGAA  
TTTGACATACGGGTAAAGAATATTATGCTCATGTGTTTGTGATATCCGCTTCTGTTGTC  
TAAAGTAGCGAATAGTGACTTATCCATCATAATTTACCCCATGATAATAGGAGGAGGCC  
ATCCAGCAATTCGAGTTCTTACCCAAGCTTATCGATATCTATTCTAGCTTCTTCAATTAG  
GCGTATTCCAGCGATTGTTACACCACCTGGAAGCTACATACCTTGATGTTCCGCTAAAAC  
TTGGCCGTTTAGTTCTTTTCAGTTTTTTGTTTTTGCATGTCTTTTACCTAGCGATTATTGT  
ATGAATTATCTTTTGTACATACCATTGGGTTGGCCTGCATAAATTTGGCCATGTGACATAT  
TAGGACTTGCATTTTTTTGCGCCACTGACGGCACGCTCTCGTCATCTGACATGGCAAACC  
CATATCCAGCCGAAGTTCCTGAAAGCATTGAGTCAACATTTGCATACGATTTACAGTAAA  
CCTCAAATACCAGCAAATCTCCTTTTTGCAATTTGCCAGCAACTCTCATCATTTTCGGTAG  
TACTGTTGAAAAAGAAATCAGGCCAAAGGAGAAAGCATGTCTCCCATCATGTCTCGATAAG  
ACATCAATTGAGTGAAATATCCGAGATCTGCGCCAAAAGCATTAGGCCCATAGCATCGGC  
ATTGGCCGCCAATTGAAGCTCCAGTCATACCATAACTAAATCAGTAAACCACGGATAAA  
CAGCCGTGCCGTCCATGGTTATAATTGACCCCATATTGGTTCGAATTACCTGAGTAACTG  
CAAAAACATTGCCACCTGCAAACTAATTACACCAGTTTTAGCTTGTCTTCGGTTAATA  
CTACTGTTGCATATGTTTTGTGAAATCCATCGTATTGATATTCACCGTACAATTCTAGAG  
CTCTAGATATTCAATCAAATACTTGTGCTCTGTTACTTTCGACGTGCACGATAGGTGCAC  
CTAAACGTATAAGTATAGTGTCTTTAATTCTAACGGGTTATTAGTGGTATATGACATAA  
GTGTCTCCCTTATGATATTTAAGCAAATTATGGCGGAGCCCTTCGAGCTAGCTCGAAAAT  
TTTATCCTTTTAGTTATAATATCTATTAAGCCATAAAGGATAAAGTTTTATTACAATAAA  
GGCTCCCGAAGGAGCTTTGAGATTATGCTGGGACAATAACAGCAGGCATTTTGCCGATAG  
TTATCGAGTTAGCTGAACCTGAGTCAAGTGCTTTGACATAAATTGCGATGGTATCATCCA  
AAATTACATTGTACAGCCATTTGTGTGCGTAGAGTCTACCGTAAGATCTCAGAGTAAATT  
CTTGCAAATTGGTGTATGGTGAATTCGCGCCGCTTGTATGAGCTATTGAGATTTCCAGAT  
TATCTGTTTCTAACAAACCAGATGTTTCAATTCCGATGCTTGCATTAACTAAACCGCCAT  
CAGTGAATTTGATTTGTCCGGATTCAAACATGCAACCGTTTGCTACGGTCTGATCAAAT  
CAACAAATGGAATAATCTTCGACGTTTCAGTTGTAGTTATTTGACAATCTTTTTTTTCAA  
CAGAAACCATGATGTTAGTTGCTTTAACCCGAAAACCGTTTTTCGTAATACCAGCGACCTA  
CTGCAAGTGGCTTATCTAACTTAAGTTGAAGAGTTTCTCTGCTTTCTTTGACCGTTTTCT  
TAATACCATCTCTTTTCGAGTTGTGTAATTCAGCCTCATTTACATACAAGTCGGTTGCCA  
TCAGAATGTTTGCAGAAACAAGACCTGAATTTTCATCACCCACACGTGAAATAACCTCAT  
TCAACGATAAATACATTTGGTTGTGATTTGTCTGTAAAATGTACAGTCGGCCATTTATAG  
ATGATGGTTCTACGATAGAGCCAATAGCGGCATTGAGATCTGAAATATTCCCCTGAACTC  
CACTGAAACTGTCTGCCCTAAAATCTGCGTAATTGTTGCAATATTAGAGGTATTTTCGAT  
TGATGTCTGCAAAATTGTATTTTGCATTAACATCACCGATTTTCTGCTCTACCGCTC  
CAAGACGAGATAACACACCTGTCACAGGGGTATTCATCGTGTTCGCGAGAGAACTCAACG  
CACTTTCATTCAACTCCACCCTTGACGCTATCGACACAGGGTTGGAAAAATCGACTTTTA  
TCTTGATTTGATCAACGTCATCATTACCACCACCTAAAGTATTTTCGATAGGGGTCAATC  
TGGTATAAATCGGAATTCCTGTACCAAGATTAGTATTGCCGACTTCCATCCTCAAATCAT  
ATAAATCAGTCGTCAATTGACCTGCATCTGACTCTGCCATGAATTTTCAAGCGCGGTTA  
TGCGCTGGGTGTTTACAGAGACACGGTTTGGTTTGTGTTGACTAAACCGATACTTTAATCCCG  
AACCTATCGAAGAAGGAGCAGAATTACCGTTTAAAGTCGAAGCCCGGATATGCACCTATTT  
CGTTTTTCACCCAATACAAATCACCATATACAGATCGAGTTGTGTCGTCTTCGAAATATC  
GATGGCAAAGCTTTTCCGAAGTTGATTCTGAAAGAGAAAGAACACCTGCTAAATTAGTTT  
CAACCTCGCTAATATCTTGCTTGATAGCTAAAATATCATTAGAATTAGCATTGTTTTGGT  
CAATTACCGTATTATCACCGATTACACGCAAGTTATGTTGGATAATATTTACCGCATCGA  
CAATCTCATTGATTTTTAAGAATGACTGGGCTTGGTCTTCGTCTAGCTGAATAACGTTCT  
GTTGAATATTAAGTGGAGCCCTGTTGTAAACACCGTCGCTGGATGTTTCGGTGGAAAGCGG  
CCGAAAGCCGCTCTCCGTTTTTAATCCAACCCTTCGAAGTTGACCATCACCTGGAGTAG  
TATCAACATAAGGAATAACTCCTTTTCGTGATTTTGTCTATCATATTTTTTTCCTCGAGTTT  
TTCTAATCTTGATTTAAGCTCTTTATTAGCCTCAATCAGTAATGCATTGCGAGCCATTGG  
AGAAACACTAAGAGTTCCGTCGTCAAGTGTTTTGACGCCTTATGGTAAAACTTTTTGCAA  
TTGCTGAGCAAAAATACCTGCCTCTTTGCCTATCACGGTATTGTCAGTCAAAGATTTATG  
TTTTGTGTAAATCGCAGCGTCAAGGCTATCTATTTTTTACGAGCGCACCTTTGAGAGGCTG  
AATATCAGTTTTTGAACCTGATATCGCAACGAACATACATATCGTTAATGGCGATGTTTCC  
GGCTAGCCATAAATGACCACCTGGCCTAAGCGTAGCAATTGTGGTATCTACGTCATTGGT

GCGAGTTGTCCATCTAAAATACTCGTTGTTATTGTTTTCCAACAGCAAAAAGCAAATACGA  
ATTTCGTGTCAACGTCACTATCGTTTTTTGAATGTTATAGCAGCCAAATCGGTATTTCTATT  
CCACAAAATTCCTTGATTGTTTTCTGTGAAATTGATATTACCAGTCATTGGGCCACCTGA  
GCGATACAACACCTGGGCATTAGCAGAAAGAGCCGTATTGCCTGTGAGCTTTCAGTATT  
AAGAAGGCGAACTAATCCTTTATGAGTGCTAGTAGCATTCAATATGGAGAGTTTAGCTGG  
AGAAATAACGACAGTGTTATCAGCTAATGCTAATGTTTGCGAATTTCTTGCTACTTTAAG  
CAATCCAGCTGAGCTTTCGGTCCCTTGCCATTCTTGATAAAGTATATGGACTAACAGCATA  
GCCATCTCTAAGAACTACTGCTAAAGCTTGAGCCAATGTGGCCAAACGGACAAATCCGTC  
TGCGCTTCTGTGTCAGTTCCTCATGATTCTGAGAAATGCGCAATAGCCTGCTTGGTCTT  
AAGAGGAGTCATAGCAGTGGTATCGTCCGGTGCCAAATATTGCCTGGGCAGCAGTCGATAT  
ACGGATTGTTCCCTCTTGTGCGCTTGGTAGAACCTTTATTTGCAATGACAGACCCAGTTT  
CGAAGGTGTTATTGCAGCGGTGTTAATACATAAGGCCAAAGGTTTCATCATTGGTGCCTA  
ACGAGTATTACCAATAATGGCGTCGGTAGCCTGCGGGCGTCTACATCGCTATCCCCAGAAG  
ATTAAGAATAATAACAGTATTGTCACTCATGCCAGCTGCGGCTTCAGCTTCAGTGGAAT  
TCTAATGATGCCAGGTACAACCTCAGTTGCTATCGGCAGGCCATTAACAGTTAATGCCCA  
TGCGCTATTTTCATTCAATGCGTCTGATACGGTTTCAACTGAACTGCGCCAATCTGGCCT  
AGAGAAAAATACCGAATCCGCTGAATCCGGAATATGATATTTGATATTGTTATTCATTAA  
CCAATCATCTTGAAGTAGTAAAGATCAAATGAACTGGTTACTGACCCACTCGTAAGAGTT  
TTTGACTCTTTACCCATATATTCCCAATTACCATTTCCAGGCTTTCAGGAACAGTAATT  
TGACGTTGAACAACAATTCCTCAACTGCTAAAACCTTTCGATATTCCCATGCTTAGCCGAA  
TCAATGAATTGCACTTCTATGATGGGATTTGTTGTGCCAGATTGCTTTTGAACAGAATAA  
AATAAAATGCCGGCATCTCGCATTGTTCAAATTTTGCCAAAACCTATGTCGCATACGGCA  
TCAGCGTTAGTTCGAGCGGCAATAACGAAAGGTATACCGTAAACTGTAATGACTGATTTG  
TTTAATTCAGACGGAAGAACAACCTCCGCTAAATGTAAGCATCTCAGCTTGACGAACACCT  
GCTGGGGAAACTTGAACCTGTGAAGTACATATCGCGTTAATAGGCAACATTGTCAGTGTT  
TGGAGTTCGTCAATAGCTGATTGCACGTTTGGACAGTTCACACCGTCAATAAATGAGCCT  
ATCGTCCGCCACCTATATTTCCGGCACTCATTACTTGGGTGACCGGTTTGGTCACATAC  
TCGATATGAGTTGCTTTCCTAAAGATGTTGTGGGCACTCTCTAATGTTTTTGAATCATT  
ATCCCACTTACCCATTTGTATGCTATAATTATCGGAGGAAGAATATTAATGTTTCCTA  
GCGTTGTATTTCCCTTTATTTACAGCAAGAACTGATTCTAAGTATTTTGTATAGCCAGGAC  
CAGATGCATCAGGGTCAACTTGACAGCTGCCAATGATGATATTTCCATCGTTATTTGCGA  
CTAAAACCTTTATTGCTTGAAACAAGCTCAGGCACATTTTGAGGAATTAGTTCAACAGATT  
TTGAACCGCATGTTCCACCTGCGGTATAGCTTGGATTACCCTGATTGTCGAGGTCGTTAT  
TGTTTAAACCAAATTCGACATCAGCCTGATTTCGATGTCCATCCTGCAACCAAACGCCCTT  
CAGCATATCTTGTTACATACACCAAACCCCATGTAATCACGTGGGTTGGCACGGTTGCTGG  
CATTCTCATATATTGTCCCAATCGGATAGAAAGCATCGAACAACAGTTGGATATTTTCAA  
TTCTTCCGCTGAAAGTGCCTGGAATAATTTGTGACGTACGCTGGACAGGATTGTCAAAT  
CGGTGTATTTCGATTTGATTTTGGTTTATTAATTCTTGCTCGGTGATGAGGTAAACAGAAT  
CAGCTTTTTCTTTTATAACCATTTGGACCTTCCCAACCCAACCGAGTACCAATATCGTTAT  
TGAACCATCTGATGGTGATCATGTCACCGGATTCAAATGTTCTTACAACTTAATATCGG  
TAATATTGCCGTTGTCATCCAATACGATAGAATAGTCAATAGATGACGGAACCCAGTTTC  
CACCATTATCCCAACACATTTTTTTGAGTATCGCCAAGTGCATTCTCGCAGATAAACATCG  
GCAAATCGCCGGCCCCTGCTCGATCAAGCATCGTCCCCTTTAGAAGAACTTCAAGCGAAT  
TTGGATTTATTCCATTGTTTGGCTGAATATCGAATTCGTCAATAGTGAAATCAGTGTTTG  
TCGAAATATCTCCAACCAAATTTACCAGGCGATGACGTTTTTTGTGTTGTTGATGCAT  
CAAAAATCAGAATATGCTTAAGGTTATATGAACTCCGGTAAGAAGCGATTCCATCCATGT  
AGGTGACAATTGTTACAGTATCTCCTTTTTTTGATGTCAATAACACGAATTCGAATACTTC  
TTCCATCTAATGGCAGCACTGATGTCAAATTTGGCTGGGTCGATAGATCCATAGTTTCGAGT  
TTTAGTTTAAAGTCTCGCCGTAATACAGCAAGTTACCGCGGAGATAGACTTCGAGGTTTG  
CAATATTGTAATTTGTTGTCCCGAACACATTAGGAAAATCGGTTTGACCATCAACAGTCA  
CAACTATTTCTTTTTTTGGCAAAGTACTCAAATCGGATGTTGTAATCTTATCGACACTCT  
TGTTCTCTACGTATTCCCATCTGCCTGGCGAACAATAGACAAGCTCAACGTCCATCAAAT  
TTTTGTCAAGATTACGAGGATTTGGTGAACCCTTTAACGTATCTCCCGAAGCAGCAACCA  
AGACTACGTTTTGACTTGCCCTTGTGCCCCACACATCTCGCAATTTTATTGCTTTATTGT  
AGTCCGAAACAGATCCTTTAGGCAAATTGACAGTAATAGAAACAGCGGTGGTGTCTATTG  
CCCATGAATCTCCGAATAATGGAAAATGAGCTCCTACCGAATGATTTGTCCACGCACCTG  
CAGCGAATTGGCGATCTCCGTCGCCCAGTTGTGAATAGAGTTCGGTAAAGTTGTTATAGA

CTTTTTGCCACCACGGCGGAGAGAATCGCCGTGGCCATCATCAACAACGTTTCCGATTT  
TGATTATTGCCATTATGATGTTCCCCAATATTAATTGTGTCAATGGCTTTTGTGAAAA  
ACGTGTTTGCACACTGCGAGATTTTACGTCAGCGTAGACGTTATCGCCCGCGCCAATAAA  
GAAACGAATTGTGTATAATTCGTTAGAGGTATTCTTAAGAACAGCATACTCAGTATTTAT  
AACCGCATTGTATCCGTATCGACTGATATCATGTATTCCGAATTTTTAAAACTGCGCC  
AGCAGTGCTTCGGGCGGCAACCGTCAACTTTATCGCAGAATATTTCGTTTTTACAAGCAAT  
ACGAAAAGTAGTTGCAGTAGTTGTGGCCAAAATAGTTTTTTCAACTGGCAGAATAGAATT  
TCCAAACATTGGGGTTAGTCCGTATTCCCAATATTTTTCTGACCCTTCGATCTTTGTGCA  
CCAGACAAAACTCTGGCGTATTGAGACGTTATAATAAGAGAGCCAGATGTTCCAAAGAT  
ATTTTCGCCCTCTTGAGCGGAATTATGAGAGGATTTGACCGAGAAATTGATCCAGAACT  
ATTTATGAAGATGCAACCTTCCCCAACTTTGCATTTGGTATAGTCATGGTCAACGCTCC  
GCCTGACGTGTCTGCGTCATGCATAGAACCAATATCTAGCGCATTCCCGGCCTAATATTG  
TCGCGATAATTTCTGGTAATATCCAGTGGCGTAAAGAAATTGAGAGTCAGCTCCTCAGA  
AGCTGTGCAATGATGTCTATAATCACCAAATGTGTTATAAAGCGCATCAATAATTTGGTT  
GAGTTTGACACCACCGTCATAGAGTATATCACCAGTTGAAGGATTACGTATAACGCCTAC  
ATCAATTCTCTTTTTTGGTAGATTGTAACATTTGTATTCTTAAAATGAGAAAATGATAT  
TGATTTCTTCTGTCTGATCGAGAGCTCGAGTGATAGGCTGTCTATTTTCCATCTATATCA  
TTTTCTGAATCTTTTTCCAATTCTTCAGGTTTACATGCTATCAGGGTCGCTTTAACAT  
CTGGATCGGACGGCAATGATTTTCTAACTAACGGGTTGATGATTACCCTCATCTGGCGAA  
AACCAGTGTTCCTGGGAGTGATGCCTCAGGGAAGTATATTGAGTCCATATACGCTCTGA  
ACCGCGTGTGTCTACGTTAACCCGGTAAATGAGGTCTAACTTATCCGGATATCTTAGAA  
TAGCGTCTTCATACCCCCATCTCGAAGGATCGTCAGAAAGTTCATCCGGGAAAGGCACAA  
CAATATGTTCAATTTGTGCATTTGTTTATTGATACATCGGGCGAAATAGTGTACAGCTATT  
CCCACACATAGCCATCACTCATGTTCGATTGCCATAGCAGTCCCGCGAGGTGGTTCAATTG  
ATTCATGAGTGGCAGTCCATTTTCCACCTATAGTGATACACTCTATTTTGTTCATCTATTC  
CCGAGATAGAACACGAACTAATAGAAGGAACATCAACACAGCGGTAAATCATCCAACCTCA  
CCGAACTGTCGGTACGATTGTAGGTAGCCGAGTTGACTAGCACGATATCGTCGATAAAAA  
ATGTCTTTGGATTGTCATATCTGATATGTCGCCAACCTTTACGCGGAATTATTGCGTCCA  
GTAGAGATTTATCAATTTTTACTGCACCTAGCATGTTTGTCCACATGTCAACAACGCCAT  
CAACCGAATCATTGGATCTGGAGGTGCAAAGCCGCCATCGGTGTCATGCGTTGACCAAG  
GAGTATCACGTCCAAATGTGGCGTATACTGTGTTTTTGGTGGGCTCGTCGCCACCATGT  
CGTAAAAGTTTAGCAAATTTTTTGTCTAAATTTACTAGTCACAATAGCACGATAGAATT  
TACTCATCTATTTTACCTGTGTTGGGTTTTGTGGATCACGAGGATTTCCAACATCATCT  
TTCAGTCGTTTTTTCATCTAGTCGTCTAAATTGCGAAAACCTTCACAACCTGGCTGATCAGAC  
AAAGGACTCATTGCAAATCTTCGTTCTGATGGAAGTTTTCTAACCATGATTCTTCTTCA  
GTGTCATATCCAGGAGGAGGAACAAATGGTTTCGCCAGCATTGTTGGCCAAACCAAGTATAAA  
GCTTCTCCGGTGGCAGAGTCATGCTCAATTTCCGTCAACGTCTAATTTGGCTACACGG  
TCGTATTGCTCAGTTGGGTAACCAGCATCCCATCGATACGTTTTTCTAAATTATCGATGAT  
AGTTTCTACATGTTTCATTGATAAACCAGAATTGATGAACATCGTGAGAAGTGTTATTCC  
AACAAATCCAAAACCAACTGGATGTACAAAACGGAGAACATCTTGCGCATATCTTGACGC  
CGGAAGAGTTGACTCTATAGTCATGGTGTAAATATGATCTACCTCGATTGATATTGTCAAC  
CGAATCGCTCATAAGCTCCTTTCCTCTAACCCCTACCAATATTTACCTACGAACGGACT  
GGTTTCGGATTTTATTTGCTGGCCTTCAAAGAATTTACCAATCATATTGTGAATGGTTAT  
TCTCCATTTCCATTCGCCTTCAACATACTCACGATCGACGTATGTGACGTTTGCACGTCC  
TGTAGGCGTATATATGGTTCTTCCAACAATGTCTTGGCTTATGTTGGTTGAATAAACTAC  
GATGTCATATCCTATTCCATGCTTTGACTCGATGTCGATTCAACATCTTCGTTATAAAG  
CAATTTGAAAAGGCAGTTATATGATTGTTCAACCCCTTTCGTGGAATAAAAATCGTAGGC  
CCGAGATTCAACAATCTTGCAGACAGAATCTCGCTTAGCTTCATCCAAATAGTTGTTTCT  
TTTTAAAAGTTCTGACCAAAGATATTCATACGCATATTGCTCGCGAGGGTATTTGTTTTT  
TAGCAAATTGAGCGATTTGTTGTAATACGTCCCGTTTCCGTCCGACAAGAATTGCAGATA  
ATATTTCGCAAATGCACCAAATTTGGTATCTTCGTACAAACAACCTTTCAGGCATCATTTT  
AGTAACAAGTGGCTGAAGGTCAGGATCCTTTAATCAAACAATGGAGCACGTGTCCACGG  
AACTTCACGCTCTTGATTGCGAAGCTCAGCTACCATCATGACGTTGGCCGGCGTCCAGAA  
ACCGCATGTAGTATTTGTGACCCGATATGGGAATTCATAATAGCCAATTATTTCCGCCAGT  
ATTTTTATTGAACGGTACCCCATTTGGCATATTGTTTGAACCGGTAAAGTATACGTTATT  
TGCATACAGTGTTACAACGCCTTTGTTGTAAGTTTCTCTGTTTACCCTTTTATCACTTTC  
TGTTCCCTTCGTCGTCGATAGGGAACGAATATTCGATTTTAGGGTAAACAACAAGAGCTCT

GTCGTTGTGTGTTATCCAACACCTTGTGCTAGAAGGAGCCATCCATGTGAACGCTGCTTC  
GTTATAGAATTGCCGAGAGCCAAGTTTCCACTCTGAATCATCGGCATTGATTCTGAATGT  
TCCGATATGTATTGGGATATCGGAATTATAACCTGGAGTCAATTCGTATCTTACTGCTTC  
AAATACGTTGTCATAATTGTTTGGTAAATCTAGATCTGGCAAAGTACCTGGATATTTGAA  
GTTTATCTGAGAAACAAATATCTCTTCTCCATTTGTTGACATATTGCTATATTCATGCGA  
TATCCAAGTATGGTCTTCGCCAATACCAAAAACCTTTTCGCCAAGAAGTACCATCGAACTC  
ATAAACTCCAGCAATTGGGTCATGGACAACATTTTTGGGGTTTCTTGGGTCTAGCCCTGC  
CTGAGTAACTACGCCAGTAATCAAAGCATAAAGCTTGCCGTTGAATGTATCAAGCTTTTT  
CGTAACAGCCCGTGCCTTTGCTGTTATATTGAAAGAGGTTGGGTCAAAAAGTTTCTCACC  
AAATGTCGGACTAACTGGATCAGTATCAATAGGGGCATTAGATGTATTGATTCTGCGCAA  
CTTATTTACGCTGCTACATATACCCAATCGTCATCGGCAGCATTATTTATCTCCCTTCC  
TAAAAATATCACCAGGAAGCCGAGCGTATGAGTTGAATATTTTAAACATCAAAGCCAAGAT  
TCAGTTCATCGCCAGTTTTTGGAGAATGTCACACTATCTGAGCTAAATCTGACGTCATCAG  
CTGACCATCTGACATCATTTGCCCTACGACCGTAATAGATGTTATCATATCCAAGAAGAC  
ATGTAGTAGTGCTAGTTTGGATATGTTACAGTTCAACTAACGCGGTTGCCGACACGCCCGT  
TGAAAGCTTTGTAATATTTCCAGTTTTGCCCTTTGTCATTCGACACTTTGGCCATTGGCT  
GAAAACGCTCAAACAGATAAAAACACGTCGTCATTAACAGCTAGTATTGTTCTATTTTTGT  
CAACTCACACTTGTTCATAAAGCCTTGTATTTTCGTGATAGTTATCATTTGAAACTATTT  
TGTCATAAAGATTCGTCGCATCAGTAAGTTAATTGCTGAAAACATAATCTACGCTCATA  
GCGAAGCCATAATTACATCAGTATTGAAACTGACGTAATTTCCGTTGTTTTTAGAGAACT  
TTTCTCTCAAAAAGGAAGCGGCAGGTGTGAATCTTTCATGGCAGATATGTAGTAGGCAT  
TTCCGAAAAGGTTTGAAACTCCTCAGTGTCTACCCAATCAGACATCTCAAATCCTTTTC  
CAGAAACGCGAACTCGCATTTTGTACTATGTGTCTGCTTGTATAGATGTGTCTTCAAACC  
ATTCTTCGACCGCTGTTACACCTAATTGACCCCAACTGGTTCCAGACCCTGCTCTAGTCT  
GCAGAAGTTCGACAATATAGTCAAAAATTTGAACCTACATCGTCCCAAGTCAAATATACTT  
GATTCGCCGATAAAAATTTGATTTTAAGGCTCGTTACGGCCGGTGCTTTTATGATCATAA  
AATCTCCAAAGGGCCGTTAGGCCCTTATTGTGAAATTGCTTCAAGAGTAATAGCAGTGTA  
CTGTTGACATAAATCATTCTCAAATACGATAAGAGTTCCATCTTTCGCAAAGATAGTGTC  
ATCAACTGGTAATGCTTCTATTTCTATATATGCGCCAGCAAATGATTCTGCCCGTACAGG  
TAAGATACCAAGGTCAAAGTTTATAACACTGAGAGCATAGTCAACTGTTCCAACCTTCATA  
GTAATTGTTTCTTCCACCCACTGTTGTTTTTGTGAAATCATTAAAAGAGTACTCTGATGC  
AGGAATATCGCCATCAGCAAATGTCCCAATCAAAAATTTTACCAGTTTGTGACGTAGAAAC  
GTAAATGACTTCTTGCGTTACGTTATTATTGGTGAAGTTGATTGTAGAACTATTGACTGA  
CCCCATTTTTATTAGCATTATCGAAAGATATTCCATCCATCGGAGTTTTGAAGAAATTAT  
CTGCGTCCCTGACATGATATATTTTACGAGCAGAAAGAGCCGATAATAGAATCATCCGAGGAAT  
CTACACGTGTCAACATCTTTGATTTGGAGAAGTTTTTGTGAAATATATCTACTTCGTCAG  
TGTAATAGCGGTCAATAGAATCAATATTTGCCCGCGAAGTCAATCTTCAGAGTTATACA  
ATTCTGAACGGTTATATGTCACCTTTGATTTTGGATTTGATGTACATGTAATTTGGGTCTA  
TACTGCAGGGGTAATAGGGCGCGAGATTATATTGTGACAAATAATTTTCAATGTCTTCT  
TTCTGAACAGTTGTGAGTCTAAGCCCTTGTTTTGGCTTAATAGAGATGAATGCGTATCCC  
CTTTTCTCACTGTCAGTGGAGGACTGAACGGCTTGGACAACCTGAACCAAACCTTGTGAGAG  
ACAAATTACTCGTAGCCGGTTGCAGTAACCCATCTGCGCTGAGATTCTCTCATAACTGGG  
GAAAAGTTCACGGATTCTTTCGATGTCTTGGGGATCACCACCACCCTGAGTACCCACATA  
ATCGGCGTCATCAGTCGGATTCTCAATCAGATCAGTTATGACGATATTTTGAAGAGTATC  
GGAGTTTGCGAAATCTTTCGACCCATCTGCTGGCTCACCACGAGTGCTCAAATATTCGAT  
CACGATTGTTGACCCGATATTCGGTTTGGAGCCCCCAATGTAACCTGCTACAAGAGCCCC  
GCCACCGATTTCCGGTGCTAGCTTCACCTTCGCCAAGAATATCTCAGTCGTCTGGTCAAC  
GGTCTCACGCATATAAAAATACGTTAGAAAGCACCCGAAATATCAACCATCGCATTATTGGT  
CCAATCGACCCAAGGTGAACCATCTACCCATAACGAACCTTAGATCTGTGATATCGGG  
GTCACGAATCAAAAATTTGACTAATTTCCAACAAATTTCAACTCAGTTCGAACTATTCGTCC  
TTGATACACGTTTACAAGGGATTCTGTAAGTATTATTGTGACCACGAATTATTGTAACATA  
GTCGAGAGTAACGAATGGGTAGTAATCAGTACGTTCCACCGTACCAACGAATTTAGTTCC  
TCTCGGAATACGAATGCTGGTAGGATTCACGGGTTTGTGCGCTTGAGCAGTAAAGTCGT  
ACGAGAAGCAGTACGAGATTCTAGCATATATCCTATGTCTGAGCATGTTGAACAACTGA  
ACTTCTTAATAGAGCGGTTCCGGATAAAAACCTCTCGAATAATGCTGAATATGAAAATTGCTG  
AATATAGAGTGTGCAATATGCCAGCAAATCGGTTAAAACGTTTAACTTGAACCAGTAAA  
GCCATAATCTTTAAATTCATCCTGGTTACCTCACCAGTCAATTAAGTCGCTTTTGATTTTC

GTCAAAGGTAGCGCCTTTAAAAAATATCTGGGATATTTGTTTTCAATTTTCATCGTATAAA  
CACCTTGCTAGATGATTGCGCAATTGTGTCTCCGCAAGATATGGAATCACAAATTGATAA  
TGCGGGTTTTCCACCAACAAAAACCTTCGCCGTAGTGGGAATAACGTAGCCGTCATGAAC  
ATCATAAGGCTCAACTGTGTTTTCGATGAGGTATTATTCAGTCGCCTTCAACGAGGACCTT  
TATACCGTCAACAAAAACTTTTTCCCTGCGTGGTTTTGTATTTGTGTAGAAGGATATGTATC  
ATGGCCAGTTGTCCAAGCCATATCGTATGTCAATCCAGGCATAAAAGGCCCTCCTATGTG  
TTTCTATTTAAGAGCTCCCGGGAGGCATTAATAAAAATAAACAGGAGTGTCACTATATGA  
TTTTTTTCATTTTTTTGTACCCAATAGATTATCAGGGTAAATCTACTACTGATATTTTTAAG  
AATTACAGAGCGTATTTTAATCGTGTTATCGTAAAAATCAAGCCTGAAGTGTATTGGATA  
AATGGTTCAACAAGACCTGAAATGTTGGCACATGAGCTTTATGGCAATCAACAGCTATAA  
TGGGTTTTGCTAATGCTAAACGATGTATATGACCCATTTTACGGGTGGATAACAACACAA  
GATGCTGCATATGATTACGCGCAGCTACAATATCCAGAAAATAAGGTCGTATATCATGTT  
GATGCCAATGGTGAAAAGTATTGGAATTTGGTAGAAGACCCAGATTTCCCGAGACATTGG  
TATGATGCTGGAGATACATCTAGATCACATATTCAATATGTTGGAGCACTTCGGGGCGTT  
GCTTCCCTTGAAGCTCAATCTGCTGTCAATGAGCAGAAACGAAAAATTCTGATAATTAGC  
GAAGCTGATATCAACTCGTTCCTAAATGACATGATACGTGAAATGGAAAAGGTTTAAGGT  
GCGTTATGTTAAAAGGTACTGATAGATTTTTTACTGGCGTCGTAGAAGATCGTCAGGATC  
CGTACATGTTAGGAAGGGTGAGAGTGCCTGTCCACGGTATTCACCCAGAACAAAAGGTTA  
GAGCAGACAACACTACGGTTTAGCAACCGAGGATTTGCTGTGGATATCAGTAGGCATGCCTG  
TAACAACAGCGTCAGTTTCGGGTGTAGGCCAGGCTCCAGTAGGCATCGTGACCGGTACTC  
ACGTATACGGCATTTCCTTGGATGAATTTTAGCAAAAATGGCCTAGTTCTCGGGACATATC  
CAGGCATATATCCAATGGTGCCTGATTTCAATAAAGGGTTTTCTGACCCATAAAGGGAAT  
ATCCTCGGTACGTCGGTTCAGATGTGAATATCTTGGCTAGAGGTGGAAGAGAAATAAAAA  
TTTACCAGGCCAAATTGTAAAACAAAACCAAATTGTTCCAGTTGTCGTAGAAGATCAAA  
AACTCAACCGAGATGTTGCACAAGGTGCAGATAGAACACCAAATGACGAAATATACCCAA  
ATCCAGATCCAGACGTAACAATAGAGGATATGTTACGTTATGACGAAGGTATTCGTGTAT  
CGTTTTATTGGGACAGTAAAGGACATCCTACTGTTGGAATAGGTCATTTGATAGTTCACG  
AAAAAAGTAGAAATATGACAAGAATAAACCAATTGCTCAGTCAACAAGTAGGCAGGCAGG  
TTAATTGGAGAATAAACGAAGAAGAATGCTCTATGCTGTTCTACCGCGATCTTCCAGCG  
TCTATTCTAGCATATCTAGCAATTACAAGGTCCGGCCCGGTATATTCGATGCTAGACGATA  
CTCGTAAAATGGCTATTGTCAATATGACGTTCCAATGGGTGTTGGTGGCGTGGCAAATT  
TCAATATGATGCTTGGATACTTGGCACTAGGCCAATACCATAATGCGGCTGATGCTGCTC  
TCTATTCTTTATGGGCTAGACAAACTTCATCACGAGCTCGTCGTGTGTCAGAAGTCATAA  
GAAATGGAACTTGGTGCCATACGGTGGGTCACAAGGATCTGTGCCGTCATTGCGGACGA  
TGAGAATGTTCAAACCGGAAAGTGTATCATCAACCGCCCAAGCTCCCTCGTTCACCGAGC  
CTGAATCACCTTACTCGGCTGTATATCCATATAACAAAGTGTATGAAAGTGAGTCTGGTC  
TCATCCACGAAATTGATGATACACCCGGGCATGAAAGCTTAAGAACATATCATCGGACGG  
GTACGTTTGAAGAAATACATCCTGATGGACCAAGAGTCACGAAAATTATTCGCAATGATT  
TCTACATTGTCAAGAACGATGGGAACGTTTCATATCGGCGGAAAACCTCAAGATCGTTGTGC  
ACGGGGATGCTGATTTTTTTGTTTAAAGGCGATTCTAATAGCACAATATCTGGACATGCTA  
CCCAATTCGTTTCGTGGTAATGTTGACGAGCGAGTAGAAGGCAATGTCAATCAGTATGTCA  
CTGGAAATTCATCGGGGTTAGTAAAAGAAAATCTAAATGCAGATGTTGATGGAAACGCCG  
ATATTAAGTTATGGGTGACTGTTTTAACACGATTGATGGAAATTACACTCTAAAAATTG  
GAGGCATTTTTTCTACCGAAGCTGGTGGAAAGTAGGACAGATGATGTTTCTGGTAATTGGA  
ATAGACAATCGGCACAAGTATCCTATGTTGCACAAGGAACATTCTCAATTGATGGTTCTA  
GAATAAACTTGAGGTAATTCATGTCAAATATATTACCAGCATCAGCCGTTTTGCCTGTTG  
AAAGGGAAAATGAAATAGTATCGCAGACATTTAGCGCAAACCTAACTGACCCAGGGGCAA  
CCGTGGATTCTTTGGAAATTAGTGCTATAGATCAAAATGAAGGAATCGTCATTGTCAACA  
ATGGATTTTCAGGACAATATACTGGAGTTTTTACCCTTAACGGTGGTTTTATCATATCGTT  
TAAAAACCGGAGAACGTGAAACAGCAAATAGATGGGAAGATTTGCCTGATCCACACACAA  
CGGATTTGTATTCTTTTCTTGCGCCAAGAGTAATGGAAAAAGAATATTCATACCTTGATG  
ATTTAACATACGACGTTGTTACGCCAACTAGAGCCAGGTAAGCCTCCAAGACGAACCAGT  
TAGATATGTGATAAGCAAGACGAATACACAAAAAGTAGTTGGTGAGTGGATCACATGGGC  
TAACAATTTGCGAGATTATGTAAATAGGGGTAGATAAAGGCATATTCTGGAAATTTACGC  
CAAAAACATCGAAAAATACAAGGGCAATGCAGATAAAATCACGTATAGGTCCAGTTGGAA  
AGCCTGGGTCATGAAATTTTGCATCAGTCGCCTTCAGTTTTAGCATGGAATTCTGAAGA  
AGTAATAATCCCATACTTTTCGAATGCTGACGGAAAAAGACGAAGATATATCATGGATTT

TTGGGTATAAGTGTCAAACGGCCTAGTATTCCTGTTCGAAGTAAAACCCGAAAAGGAGTG  
CAGACCTCCCCAGATGAAGTCTACGAATACTGCGAAAGCCAAAAACCAATTTATGGCTGA  
AATGTACACGTGGCAAGTGAATACAGATAAGTGGAAAGCTGCTAATGCCTTGTGTATGGA  
AAACGGTTGGAATTTCAAGACAATAACTGAAAATTCTCTTAGAACTCATTTTGGATGGAG  
AGGATAATGATTCTTGACTATATCAATGAAGCTCCACAGAAAAAGTCAAGAAACCAATGG  
GTAACATTGGGAATAGAATGGAGAGAAGCAAATCCAAAGGTGTATCAGGAAAGGATTTT  
GCAAATCAAAGGGTCTAAATTATGACACGTTTAGACGGACTATGCTTAAATTCGCAAAG  
CAAATTGATATTGCCATAGAAGTAGAAAGTCTAAAAAATAAAGCAAATTAATGCACAC  
GAAAAAGCATTAGTCATGATAAATGACTTTAGAAGTCAATTACTTTCAAGAGCAGCTGAC  
ACTGGATCAGCAAACAAGAATAAATCTCAAAAATGGTTCAATGATACTGTCAAAAAATCA  
ATTCGCGGTACATGATATCAAACCCGAAACCAGGGAGAATTTACACTTCTGCATATGAT  
GCAAAGCACAAAGATACTCTCGAATATTGTGATAGATTCCCGCTAATTTTATTTCTGGCA  
ATAGGCACATCTTCATCAGGCCCTTAATGTATGGCTTAAACTTGCATTATATTCCTCTAA  
AAGCTAGACAAAGCTTTTTTAGAAGAATTGCTAAAAAATTATGCAAGCACCGAACGACTCT  
CCAATAAAACGACTCTGAAAATAAATTGGTCAAATGTTAAAGGAATGAATGGTTCCGACG  
TCATGATAAAAGCATACCTACCAGCTCATTTAAGAGGTTCAATGCTAGAAGCGAAACCTA  
GCGACTGGGTGAACGTCATTTACATGCCGCTGCAGCAGTTTATGTGAAAGGCAAACGAT  
ACTCTGCCAAAAAGGCAAGGGCACGTGCTTAATGGTAATGGCCTAGACTTCGTCTGGGCC  
ATCTTATTTTATAGATTAAGAAACCATATATCTCGACGTAACGAGTTTAGCAGGGTGATT  
CCGGTTAAATCCTTTATGCATTCAGTTATATACAGGTTACTGGCTTGCCAGATTCAAGCT  
TGCTTGAATCATTCAATTTTATCCTTTATGGCTTAAATAGATATTATAACTAAAAGGATAA  
AAAGATAAGTTTGGAGCAAGCTCAAACCTGTAAACAGGTTTTAATTTTATGGAGTTTTAC  
AAGGGCTTTAAACAATCAATCGAATATTACTAAGTACGCTTGATATACCGTCATCTGC  
TGGTATTAAGACCATGCTCATAAACGTGCAATCGGCATCAATACCAGGTTTTTCGTATACC  
TCCGACAGAAATGCCATTATATTCTCAGTGAAGTCTAGACAAAACGTGCCCAGTACAAC  
AACCGAATTTGATCCGTTGATTGTTTCGAGTGTGGTTGATGAGGATTTTGAAGCATATAC  
CGAAATGTACAGATGGATGCTTTCATTGAATGACTATGCTCGGCAAACCTCCCACTATGTG  
GGCAACGGTTAATCAACCGCCAGCAATAACGCTTCATGTTCTTAATAACTCTAAGCGTGA  
TATAATTGCCTCATTCAATTAACATGGTGCTCGGCCATCTGAAATCGGTGAAATAGAGTA  
TTCTTACACTGAAGATGGTGATGTTTCTGTGACATTTACAATTACCTTTTTCTTCAAATA  
TTTTGAAATTGAAAAAGATGGTGAATTAATACGACCTTTGAGAGTATAATAATGATAATT  
GCGTTATCGGCGAAAAAGAGATGTGAAAAGACACAGTAGGCGATCTATTTGAAAAAGAA  
GGTTTTCATAAGTACGCTTGGGCAGAACCTATCAAGATTTTCCTGTACCGTGCAATCCGA  
GATGACAATCGGTTGCCAATGTTTGTCCAAGATTTTGATATGAATGATTTTAACGGTTTT  
GGTTATGACCGTGAAGAATATTTGCCATTTCTAAATCGGATGTTTTTAGAATTATGCGA  
TCTGCATGGATGCTTGTGTGTGATGACCAACAAATCGATTACACGTATGCGCATACTGGA  
ATTATTTCAAAGCAGTTCTTGGCAATAAGAAAGCATGATCAATTCGTGCGACTGACGCAA  
ACATTTGGAAGTATATTGGTTGCTCAATAAATAAACGTATATGGTTGCAATATCTAGAA  
AATTTCTATTGAATCACGAAAATGTCGTTGTTACTGACTGTCGGCAAGACTATGAAATG  
TCAGAAATGCGAGAATTTGGAGCAGTAGTTGCTCATATTATTCGTGCGTACTGATTCAGTA  
GATACTCATTCCACCGAAGCCGGTCTTCTATCCGGTCTGGTGATCATATAATTGATAAT  
ACTGGAACGCTTGAAGATTTGCATGAATCCGTTAACAATTTTCGTAAAAACACTAAACCCT  
AAGGATATAAAATGAACGCAGAACAAACCAACATCGCTTCCCTGAAAATTCGAGTTCTTG  
ATCTGAGCGAGCAACTTGTGCTACTCAACAACAAGCAAATAATTTTCAGATGCCCTCA  
CCAACATCGTCCAACCTTTTAGGTGTGACCCCGCCGATGGTGAAGATAGCATTGCCCTTT  
CTTCTATTGTAGAAGGAGTAGAAGCTCTGGTTCCTTCTCAAGAAGTTGAAGTGGTAGAAG  
AATTATGTTTACACACAGCTTCGTAGGAACATACGTTGCTTGTAAATTTAGTGATGAAAC  
GCTGGATTTTATCCAGCGTATTCAATAAGAAGTATTGATGCCAAATCCTGTTTCTCGAGA  
CGAACTTCATTCGACTATCGTTTATAGCAGAGTATATGTTCCATTTATCCCAGACGTTTC  
GCCCCAACATTTGGCCTATAGTTGCTATCTGAGAATTTTTGAAACTCCAGAAAAGAATTC  
TCTTGTCTGGCGTGTGATTCTCCGTACATGCAAATCGACATGCGTTCGGCCAGATCCT  
TGGCTCGTCAGCTCATGATTTTGACGAATACATTCTCACATCACGATTGCAAAGACAT  
TGGTCTCTTAAGTATGAAGGAACATACGACTTCCCTATCGTAACAACACACGAATATGT  
GGAAGAATTACGTGAAGCGTAAAGCAAAGCAATTAATGTTCAAAGCTGCTAAAATTGA  
TGGACTATGAAATTCATGAACAAAACATTGTTTCAAGAAATGAGAAGTACTGCAAACTTAAGC  
AAAATAAAATGCAAAGCAAGTAATTCTGTCCACTGGTTCTACCCTTACTGTATCCGGCC  
GTGCTGTTTCTGTTGAAGTAGGCCCTGTTTTTACTGCCCGTGTCAAAGGTGAAGGTGAAA



AACGCGTAGTAGTTGCTGAAAGTTCGCAGTGAAGTGGTTGAAGTTATTGTTTCATGAGCCTC  
GCCTCCTGGATGAAGCTGTGCGAAGCTGCTTAATAATTTTCAAATGCCCTCTTCGGAGGGC  
ATTTTTGTAAGTATAGGAGAATTTATGCAAATCTTTTTGTTTTATTTTGTGCTCACATAT  
TTGGCAGCAAGTACAGTTTTGGCTATTAACGTGATAAAGTATACAACATCAACCTTCAGA  
TGGAATTTTGTCTGGACAACCTGGCCAAAATTGCGGGTTTGTATTGACAACCTGCACTATGC  
AGCTACATTATTCCGTTTTCGCGTTTATGCAGATACAATTGGAAAAATAAATGACAGATCA  
GCAAGAAGAATTTTTACATACGAAAACATCCGAATTAGTTAAAGTCTGGAGTGAATATGA  
CATAAATGGCAGTTATGGAGGAAACAACAATGAAGAAGTTTGTGCGTATCATGTTTCCATC  
AGATATGCCGACAGATGTTTATTATGCTCATATTAGCATCATGGTTATGAAACATATGAA  
AGAGCATACGGGCTTAGATGAAAACGATCTTGATGGTCTTATTGGATGGGACTACTTTAC  
GCCTTTGGAATTGTGATGGAAAACGTTGTCATTGCAAGAGTTGTCAGAACAATTGAGTGC  
GATTAACATAAAGCATAGACTTTGAGGTATAGAAAATGAAATTTGCACCCGGATCTGTAAT  
TCCAGAAGGATACGTCATTAATAATCACCTCCTGGGAAAATGATGGTGTGATTACGATGA  
TGTCATTCATACCGGCAGGCCAATGAAAGAGATCGAATTCCTTTGCGAAAATCAAACCGAT  
TTTCAGTTCATACCACTACGAAACAATAAAGGCTATGGCAACAAGATTATAATCCTGG  
GATGGCCGCCGATTTGTTTGAGATTTTTGTAAAAAATATGCATTCGTATTTGCAATTCAA  
ACGCTATCTAGGGTTGACACCAGATATGGGTGGTCAACTTGATGGCGATTTATACAAATT  
CATTCTGCCATGACAATTTCTACAAAATGGTGAAGAAAACCTCACCGGTTATGCCAAC  
AGTATGACTACGATTTTATTTGTGTGGTCGAGTCTATTGAAATCGAGTATAGCCAGTCTG  
AATACGTTGTTCCAAAATTACACCTCGTTAAAATTAAGGTTATCTAATACAATTTTTAT  
TTGAATTATTTGTAGCTAGCGTTCGATACACTGTTGTAGCACTGATAGTATATGTTTTGC  
TACATGGTTATGCATTCCTTTGACGAATGGCGGAAAGAAAAGCCCGACTGAAAGTTACCAG  
CAAAAAGCCTATCAACCATGCAGATTTATGGCGCCATTGCAGCAGCATGGCTACCTGTAG  
CTCTTTTCTTGCTATGGAAGCTAATTGCATTCATTTACTTCAAAGTAGTAGTCGATAAAA  
TTTACATAAAGTAGTTTACATTGATGGAACATGTTTTATTATAGTCCCATCAAATCAAC  
ACGGAGTAATTTAAATGAAAATCTATCACCCGCAACATATCGCGAAAGTTAACGGTATTA  
CAAAGGTTGACATGATTCGCGGCCATAAAAACCTCAAGGATTTCAATTGATATATCATGTTTA  
AAGATGGCAAGGTCATTGATTGCAGCTTCAAAGATGTCACGGCACAATTCGCAATATGG  
AAAAGATTGCTCGTGAAGTAGCATCAGAAAATCAATACACTCTGTGAGAAACAACACAGC  
TCTGACAATGGGTTGACTATAATACCCATCGAAATTGGCCGTGGAGGTAATCAATAACGC  
GTAAGTACTAATAACCGAAGGGGGTAAAATGAAAAAAATTGTTTGGTTTTAGCTCTT  
GCTTTTGCATCTTCTTATGCGATCGCAGATTCAACCAATTTGATAATTGGTTGTTTTTTC  
AAAACATTACGAAAATGATGAAATGATTGAAAACATCCGGCGATAGGGGTCGAAATTGA  
CAACTTTTCAATAGTATATACGTCGAAAAACTGGATTAATAAACCTTGGGTTTCAGTTGGC  
TTATTCTGACACATTTTACACTTATGGAATGTTTGATATTGGTTATCGCGTTGGTTTTAT  
GACCGTTATCGATATGGAACAAAATATGCCAATAACCGATGGTATAATGGTGTGATTT  
GGGTGCCGGGATAGCCCCGCTCGCCGCCATTGCTATTTTCGGTAGCTACCCCTATTCCGAG  
CGTCAAATTTGTTACAAGCGTAACACCAGTTATTACGATGTTTCGGATTAAAGAGTGAAC  
TTGGTAAATTTGAGACCGCAAAATGAAACTATTTACCCGACTTGTAAGAAAAAACGTTT  
AAATCGTGGAACGCCTGAAAGAGTGGCTGTACGCTAATTTTATTGTTTCGTGGGATGCCGAT  
ATATTAGATATTCCATTTAACTCGACTGTACATTGGGGTCTGTGCCCATTTGATCAAGAT  
ATCGACAGTGGAAAAGAAACGTTTGTGTTGGAATTTCTGCAAAACCCTTTTAGAAAAGGAA  
CTCGAGAGCCGAGCTGAGGAGATTTGAATTGGAACCCGCGTTGTAAAACCTGCCCGCTCA  
TCTAAAAGAATGGTTCATTTCTTATATGTGCAATTCGGGGGAACAGCATCTCATGGAAGC  
GTGGCATGATGAAGGCATCGAAGGCGACGGCGTGCATTTTCAGATATCCATATTATGCTAG  
AAGGCGTGGCGAAGGAGTTGACGAGACCGCTGATCTCGTAGTTAATGAGGATAAGTGACT  
TATTGCGAAACATTTTTAAGTTATCGCTGAAATCGAGCAAAAATTCACATACCAGGCACC  
CATTAAATTGATATACCAAATAACAAAAGGTCGAGCGCGATGCGGTAAGGAAGCGAAGCGG  
TTACATCCTTAATACTGGACCGAGTAAGTTAGGGCGGATGGACTGGGCTATCGGTAAACG  
GGGAAGCATAGACCCGAGCACCTGGCGTTCTTATGCAAGTATGGTGGGATTGGTATACAC  
TGGAGGCTTAAAACCTCCCGCCTTCGGGATTGTGGGTTTCGAGTCCCACTACTTGCACCAA  
ATTCAAATTTCTAAAGCATATTGTTTACACGCTTTGGAAATAAGATATTATTAACCTTATC  
GAATCAAACACGCATTCAGTCTTGAATGGGATAAATGGTGAAGCAATGGTTGTCCTG  
GAGCAAGCCTTAAGTGGACAGAACTCTCATCCTAGTGTGCGCAGGAAGTGTGTTTGAATTGA  
AAAGAATTCTGGAAGATTGTCCCGAGTTGATTTAAGGCACCGGTCTTGAAAACCGGCGAT  
CGTAGGAATACGGTCCATCCGTTTCAATCGGATATCTTGCTCCAATTGAGGTGCTGTGA  
GCCGAGCGGTTTAAAGGCGGTCCTAATGCAGGACATACGAAAGCGTATCGTAGGTTTCAAT

CCTACCGGCATCCATTAATTATGAGGCATATTGTTTCAGAGTTTCTGGAAATGAGAGATTA  
TAGTCTCATCGATTAACAAGTTGATTTTGGGGTGATGTAGAATAACGGTCATGCGGCC  
GGCTGTTAACCGGTGTGGAACTCTACGTTGGTTCGACTCCAACCATCACCGCCAAAATC  
AATTTACAGGGAACGTTCCGGTAATGGTATCCCAAGCGGCTGTAACCCGCTCGCCTCTGGC  
ATTCTTGGTTCGAGTCCAAGGCGTTACACCAATTTAACATGGGAAATATATTTTATGAAG  
CAAGATCTATTTGATAGATACGGATCCTTCTTATTGAAAGAAGGAATACACGGTGATTTT  
GAAATAACTGATGATTTAGTTCATTTCGATATTTTTCAATCATATCTATCAGACGACTAAA  
TTGCCATTTATACGAAAAACGGCAGCTGGGTAAAGAGCATTTCGCGCCAGATGAATTAAG  
TTAGAGTATCTTCTCAATTTGTAATATTATCGATCTGGAAAAGCGTCGGGAATAAATG  
AAGGTTTTGTTTATCTGATAACAAATCCAGCTTGTCCACATCATTTTAAAATTGGAAGTA  
CAATATCAATACAATCTCGATTATCATCGTACCATAGTTATTCACCGGATCGCGATTTTG  
ATATGGTCAATTATTTCTTATCTAAATCTAGTTTTGCGGATGAAAAAGCCTAGCACAAAT  
TGTATGCAGCTGATGACGAGTGGATTTATGACAAAACGGGAGATAAAATGAAAGAAGCTC  
TGCAATTCTTCAATCATAAGCGCAAAATAGATAAACAAGTTTTACGAGCATCTCTAACTC  
AATTGGTAGAGTAGCGGACCTTTAATCCGTCAAGTCTGAGTTCGAGTCTCAGGGGATGCA  
CCAAATAACTGTGAGGTATTGCGGTAAAGAGCCGCCCGGCATGTAAATCCGGTAGCTTA  
CGAGTCTTGTTAGAATCGAAACCAACTCTCTCCACCAGTTTTGCAGTAAAGAAGTTGTAA  
TGCGTTGTCATCAGGAACTTATGCGGAGTAACGTTTCGAACCATAACGGAATGATTCCAGG  
GTGCTATAATTTGAGCGGCGAGTGTGTGGCCGAGCACCCACCTTTTAGGCGCCGGAAGA  
CGGGTTCGAGTTCGTACCCTAAGTAAATAGTTTTCAAGTAATCATTGGTGTGACCTT  
AGTAGAAATGGTAGCTATCCTGGAAGTGACCCAGGGTTTACGGGTTTCGAACCCCGTAGGT  
CACCCCAATGATTATTTTCCCAGGTAAGGTGTTTATGGATACATGCTAGTCTTCCAAGCT  
TGAGTAGACCGGTTTCGATAGCGGCTACCCGCTCCAACACAAGTCACAGGGCTCTAGATT  
CCTAGTAAGTTTTCGCACCCCTGGTTGATGCACTGTCCATTATTGCGCCGTGGCTGGAGCC  
CGCGAGTTGGACAACCGGATCGACTCCGGCACTTAGATGACCGGCTTTAACAAAAGAAAT  
CGGGAGACGTCCCGTAAAATCCTCGTACAAACCTTCTGTAGTCACTCCCGTCAATTTGCG  
CGGCGAAACGAGGAAGTATAGACGGGTAACGAATTCAATCTCAGCGCAGGCAAGTGGTAT  
GTCGTTCCGTTTGGGACGGAATTTTCGGGTGTTTCGATTACCCCGCTGAGACCAAATTAC  
GTAAGCGGATACTTGGTTGCAAACAAGTTCGTAAAGCCGTGGAATGTGGTAACATCCTCT  
CCTGGCACTATCCCAGTGATGCGGTTATCCAGAACGGCGCAACCTGAAGAATTGAGTCAC  
ATCCATAAGGCCCTGACTCCAATTTCTCAAACACTCTTGTTTTATGTGGCGGTTCGAAACAT  
CCCCGCTTAAAAACTGAAATCTCGATGTCCCAGCTGCAGCGCTAGGGAAGAGTGTITG  
AAGAATTGAACTAACTCTGAGGAACATATTATGAATGTTGTCAAATTACAACCACGCGC  
GATGTCTGTTGTGATCAAACCAATTCATTGGTTCACATGAATTCTGCTATGGCCCATGT  
GATGCTGGTGTGATTGCTAAATTTGCGGTTTGTCAAAGAATGGGAAATCGAT  
AGCAGCTGTATTACCTCCGTCCTTAAGACTTGTGCTGAAATTGAAGTTGACACAAACAA  
ATTTTCGCGTGACCTGACCGTTGGTGAATTGGTTCACATTTTAAAGCAGATTTGTTTTCCAT  
ACTCCAATTGATAGCATTTCGATTGAAAAGTTCATCTAATCTTGTATTTGCTTCATCTAAC  
GGAGATGGCGAAAATATACATGATTAATTGCTGGTTTAGCTCATCTGGTAGAGCTCAGCC  
TTTGTAAAGGCTGGGGCGGTCCGTTTCGAGTCGGACAATCGGCGCCAAATTTTACATGAGG  
CAAATATTATGTTATTGGCTTATCAAGTTATTGCTTTTATCTTCTTTTTTTACTCTTGCT  
TGGGCGATTATAAGCGATATTAGGATCCCCTGCCGAAATTGCGGGTAATTTGATTGGCT  
CTGCTTTTGCAGGTGGTTTGTGGCCATTGACGGTACTTATCCATATTTTTTGCATCGCAA  
ACCGCAACCGCTAAATAAATACAAAGGAACGGACTTCTTCGGACCCGTTTCGTTAAGTAAA  
AGGGAAGACCATCTGGATATGACGAGGCCGTCCGACGGTATCATATCTTGCTGGCCCTTG  
GCCTCCGACGAGGTTTTGTCTGGAAATGGTGCGCCAGATCGTTTCAATATGACATTGGT  
GTTAGCGGTAGCATGCCGGTCTCCCAAACCGTGCGGCCAGGGTTCGAATCCTTGATGTCA  
TGCCAATAGTGGATTTCGCTCAGTAGGTAGAGCACTCGACCGATAATCGAGAGCGCATTGG  
TTCGATCCCAATATCCACTACCAAATTTTTAGGAGAAGTGGATGAGCAGCTGAAATCGCT  
TCCCTGCTAAGAAAGTAAACCGAAAGTTTTTCGAGAGTTCAAATCTCTCCTTCTCCGCCAA  
ATGTATCCTGACGCATATTGTTTCAAATTTCTCAATGAGTGATCTTATTAACCTACATCA  
AAACAGAGTTTAGAGCGGAGCCATAGGTTATTTGGTTAAAATAGTCCCCTGGCACGGGAC  
AGCACCGAGTTCGATCCTCGGTGGCTCCGCTCTAAATTTTGTGATGCGATGTAGAGGAGAGT  
TCGTCTCGTCCGGCTCATATCCCGAAAATCAGCGGTTTCGAATCCGCTCATCGCTTCCAA  
CTTCAATCGCTTATTGAACGTGGGAAAATAGCAAATCTGGGAAAGGGTTCGCGAACCGGA  
ACCTTGAAGTAGCTTTCTAACTACTTGTGTCTGGCAGTTCACACATACGTATATTTGTG  
ATGGGTTTCGAGACCCTAACAAAGCGCCCGAATAACAACGCCGCGACCGATCGAATGATCG

TTATCGGCTTTTTTCATCTGACGGCCCTGTAGCTAGACGGTTC AAGCAGGCGGCTCATAAC  
CGCTCGTAGTAGGTTTCGATTCCCTACCAGGGTCACCAATTTGGGTTCTTCATTTAATGGGA  
AGACCGTAGGTTGCTTTGCATCCTGATGATGCTATTTTCGATACTAGCAGAACCCACCAAT  
TTGAGGAAAATACTATGGATATCGGATCCGGCGCGCCTTGGCCAACGTGTGCATTGAGTA  
ATTTTGCTCCGCATGAATTCGTTATCGATGGGATTAATGTTCCCTCAATGGAAGGATTCC  
TTCAGTCTCTCAAATTC AACTCGCCTGAAATGCAAGAACACGTTTGC ACTCTGGTTGGTA  
AAGCCGCCAAATTTAAAGGCAAAAAGAAAACTGGTGGACAGATCAA ACTCTGTACTGGA  
AAGGTACACCGATGCGGCGGCAAAGCGATGCTTATTCTGATTTAATCTGCCGTGCGTACG  
ACGAAATTGCGACGAATTCGGGATTTCAACGAGCAATCCTAGCCACCCGGAATTCTTCGT  
AAACCCATTCAATGGGTAGAAGTAAAAAGAATGAAACAGTGGTAACTGAACAAGAATTTT  
GTTCAAATCTGTATTGTATTCGATATAAACTCCAAGCCGCTTGATTGCGGCTTTTTAGTC  
ATATGGTCTCTTAGCTCAGTTGGATAGAGCTGCGGCCTTCTAAGCCGCGGGTCATTGGTT  
CAAATCCAATAGGGACTGCCAAAGTAAAGGTGATGT CATGGCGATGATGCACGAAAAATC  
TCATGCCCGAGTGGGAAGGGGCAGTGGAAATGCACGAAGCGAGAATTGGTATAAATTCTCC  
ATTGTGAAAAAACACCGGCCCAAATAGAAAACCCGGAGTAGTAAAAGAACAAATTC CAGA  
AGATCAATTA ACTGATGAACAGTAGCCTCGCAGGCGTCAACAGGAATTGCTCAGATCAAT  
TGATTAAGGTAATTAATATGTCTCAATTGCAACGTATGAAAGATGAGCTGAGTGAATTGG  
TTGTTGACTGAATAAGCTCAACGACTTCATTAACATGTCTGATATTTACAAGACTCTTG  
ATCCTGATGAGTAGTTGCTCATGGAACAACAGTATATCGCGATGGACAGGTATTACGATA  
TGCTAAAACGGCGAATTAAGCGTCAATAATAATTAGGGCTCCTTCGGGAGCCCTTTTCGT  
ATTCTCTCGACGCGGTTTCAACATGAACAAATATTTTCGATTATAACTCTTTCTTCGTA  
TGAATGCGTGTGTTTTGGTCAATTACCCACCGGGGTGCGAGATGGAGGTATTGAAAGA  
TCGATCAGATTTTTTAAAATCGAATAGACCGATATCCATAAATGTTGGTTCGGCAAACCGG  
TAAAACA ACTTCATTTATCAGGCTTGGTCACGAATGAAGCAATCATGCCAAAGTCGCAAT  
GGTAGTCATGAACACCCAATATAAGCAAATGACCAAAGATATGGGAGCTAAATTCGATAT  
TCTGACTTTTTAATGATATGAAGAGACAATTGCAGATTCTGGATTTAGACAAAGCTCAAT  
TCATCATGGTTGACGAGAGCGAGTTTATTCTATTTGATGAGAACAGGGTGCACAATTTTT  
ACAAATGGGCAAAATTAGTAAATGCCGAATTTGTACTAAAACTTGATGCAGTCTGTAA  
ATTATTCAAGCCTAGTGTTATTATTGCCATATCAAATAAACACACATTACAAGCATTAGA  
AATGTCTAAAGCTACTCACACTATCGATTTTCGGTTCTGGTAAAATCGTTGCTCAGAATGC  
TGGTCATTATTTCAATGTTATTGAGAGTCATGACCCAATGATTCCCACAAATACCAAATT  
GCCAGTCAATGACACTTTGGTTCTTGAAGCAAACTAATCGAATTGGAGTAAGCGGCCTT  
AACGCTTATCTTTCACTATGCTAAAAGACATAATGACTGAGCACTACAATCGCGATAGTG  
CAGATGACCCAATCAAAGTTGTTAAAACATCGGGCGTAATTTATACGGCCAGTTTGATGC  
ATAAATTATCTTACGATCAACTAGCTGGAGGAGCGCTGATCGTAGCAGACAGAGATATTG  
CACAGGACATATGGCATGCATGTGATAAACCGAAAATGTTAGATACTTAGTCATTTTGCA  
AAGATAAAATGCATTTTGAGCTTTTCCATAGGCCTCCAGTAATCATATTTGTA ACTTCTG  
CCAATGTAGAGAGCATCCGCACTGCTGTATTTTCAAAGACTGGGTTTTCAAATTTCTACTG  
AATTTACGGCGTATTACCTCGCACAATGCGACGGTTATGTCCAAA AATTGAGAAGTCTTA  
TAGGATTTAAAATGTACGA ACTTTACAAAACCCTTCCGATGTATCAAAGCCAAGAAGGTT  
GGATTATCAATTAGCCTGAGTTTGCCAAATTGGCAGATGAGCAAATGCATGCTTTTTTGGC  
CATGGGAAGAACCAGTTGTTGATAATGATGCTCAAGATCTGCGCACCA AATTGCCACCTG  
GCGAATTGAACGGTCTTACGACCGTTCTTAAACTGTTTACAATTTACGAGCGCAAAGCCC  
GTGAAGATTTTTGGT CAGCACGAATCGCTCGAACATTCGGTCGCCCTGAAATCAATCGCA  
TGGCAACTCTATTTGCCGCGGTAGAAGGTA ACTCGCATGCACCTTTTTACAATAAAGTTA  
ATCAAGTTCTTTATCTGGATGACGAAGCTTGCTACACTTCTTGGAACGAAAGCGAAGAGT  
TATCTCGTCGCATT CAGTCTGTAGGTAATCGGTAGCAGACCCCGATGATGCCAAATCTT  
TTGCAGCTTTCACTTTCAATTGAAGGTGCTGTACTTTATTCCAGCTTTGCATTCTCTCAAAC  
ACTTCCAAGCCCAGGAATGTGGCAAAGACTTGATGCGAAATATTTGCCGTGGTGTGACC  
TTTTAGTTGCAGATGAACATCACC ACTCAATTGGTGGAGCAATATTGTTCCAAACACGTT  
GCCGTAAAATGAAAGAAAAATATGGTGAAGATCTCCGGGCCAAA ACTGAAAAATGGCATT  
TCAACATGGCATATCTAGTGT TTGATCTCGAGTCTGTGATCATTGATCTCGTTTTTCGCGG  
AACCAATTGATGGTATAACTGCTGACGATCTACGAGTTTTTGTCCAATCTCGAATTAATC  
ATTGCC TAGAAAATCTTGGTTATGAGCCATTTTCGAAGTCGAAAATAACCCTATGGCTG  
ATTGGTTCTATCGCACCATTAATGCCAAGAAATTCATGATTGCTTCACTGGCTCAGGTT  
CGGAATACAACATCATTTGGAACCAAGAAGGTTTCTCTGATGGCTGGTAAAATAAATTCTG  
CCCTGGTAAACCAGGGCAATCTTTTTAAAATCAAGGTGCTGTAACGTCTAAAATTTCAA

ATTCGAATCTTTGTCAGCCGAACGCAAACATATGCAGTCAATTGGCGAAATGCCACAGTG  
GTTTACAACGCAGGGCGATTTGATGTTCTGAAAAATTATAAGTACAAAGGAGAAACCTT  
TCGTGGTGCATTCCGGCGAGTCGCTTCAACACTTGCAAAGCATGATATCCGGCCAGAAGC  
TGAAGAGCGCTACTTCGACCTTCTCTGGTCCGGTAAGCTGACGATGGCTACCCCAGTTTG  
CTGTAACACCGGCACAGATCGTGGAGTGCCTGTTTCCTGCGCAGTACATTAGGTGGGGGA  
CAGTGTCTTGTAGTTCTACGAAGGCCAAACGGAAGTCGCAATGGTTCGCTAAAAACGGTTT  
CGAACTGCGTCATATCTTGGACACATCCGACCTCGTGGATCCGATATCTCGTCCAGCCA  
CAACAAAGCATAACGGACTCGTTCCTGTATTTGACAACCTTCTTTAACACCAAAAACAAAGT  
TGCAACTGCTTGCCGACGTGGTGAATCGGCCGGTTACGTTGACTTCTCGCATGGTGATTT  
CTGGGAACTTCAGGGGTATGTGCTGAAAAACACGGCTTCTGCGCACGTTGGTTGGGTATT  
TGAGAAAGAAGATTACGAAAAGCTTCTGGCTCGCGATCCTGATTATATGGCGCGCTGGAA  
TGAGCTGCTTTATATGCGCGCCCGTACTGGTAAGGGTTATATGTGGAAGAACTGGATCGC  
TAACGATCTGGCTCCACAAGCACTCAAAAATTCAGGTATCCGTATTCGATCAAGCCAGCT  
GTGCACCGAGATCGCATTGCCATCTGACGATATGCATACTTTTACCTGTATCCTGAGCTC  
ATTGAATTTGGCTCGTTGGGATGAAATTAGTGCTGAAGATATCAAATGGGCTGTTCGTTT  
CCTTGATTCCGGTACGCTCAGAATTCTTGGAAAAAGCGAAAAAACTCCCGTATGACACTCT  
TCATAAAACTATCAGATTTACCGAAAAAGCACGTGCGCTCGGTCTTGGTACTTTGGGTTT  
CCATACCTACCTCCAGATGAATGATACCGCGTTCGAATCTGGCGCCGCCACATTCTGAA  
CAATAGCATTATTCGCAAATCAAGGTTTATGCAGAAGCTGCTTCTCGGAATTAGCAGA  
AGAGCATGGTGAACCAGAAATGGTGTGTTGGAACAGGTATGCGTAATGCTACTTTGATCAC  
TATTGCTCCATATATGAGCTCTGCTCTATTGGCTGGTGGTGTATCACAGGGTGTGAGCC  
TCTCGTATGTAACAGCGTCATCCAACAGTCAAATGCTGGTGACTTTGTTTCGCTCGAACCC  
GGTAATGGCTAAAGTATTGTCCGACCGTCTTTCTGATAAAGAAATCAAAGACCTCATGGA  
CAATATTGTCACCTATCATAATGGTTCTGTTCAACATCTGGATATTTTGACAGACCATGA  
GAAAATGGTGTTCAAAACAGCTTATGAGATTGACCAACGTGCAATCATACTGCTTGTCTC  
AGCTTGTCAACGGCATATTGACCAAGCGCAATCAATCAATTTGTTCTTCGCTAATGATGA  
AAAAGAATCAGTCGTTGCGTCCGTTTCATAGAGCGGTTATGGATGACCCTCGTCTGAAATC  
TCTTTATTATTTGCGTTCCGAGCATGGAGTGAAAGCTTCAACTGGCGAGGGCGGGGTATT  
AGCATGCCAGGGCTACTTGCAAGGGGCGAAAGCCCTTTTATAGAACCCTATGTGACAAAA  
TTTGAAACATCATCAGGTGAGAAAATTTATTGTGGTATGCATAAAAGTAGGCATGCTAAT  
CCTTTATCTGACCCCTATTGTGGGTCTGGACTGATTTTAAGAAATGCCATATCAAATAC  
GGTGTCTTGTATAAGATCGGTTGAATGGTTTGAACATTCAACCGAAGTAGAGATGATT  
GAAGCGGAAATTTTGTAAATTTCAAGTATGGTTGATAACCCTAATTGTAATAATATCGCA  
TACGGTGGTTTTGATGGGAATGCTTTACGGTATGCTTCCGATGAGAGAAGAGAAGCATT  
CGCGAAACATCACGCCAAAAAATTATCAAGCGATATAAAGACAGTGATGAAATTA AAAAG  
CACAGCAACCACATGCGAGTTGCATGTAATCGACCGGAAGGACGGCAAAACCGAGCCGAG  
CGACATGCTGAACTTTATAGCCGCCCTGGTTATTCCGAGCGTATGGCGGCAATACAAAA  
GAAACGCAAAGCCGCCCTGACGTCAAGGCCAAAAATGCTGAAGGTGTATGAGCGGCGCGA  
AACGCAATAAAATTCTTAAAACAAATTAATATACCGGACGTAATAACTATTATAGATGGT  
CGATTTGTTGAAAAATTCAAAGTTGCGGATGAGTTGTCAACAAAATATGATATCAAATAA  
ACCAAATAAATTTGAGAATTATCGACCTGATATTAATTCATTGCTGGGATAAATGTGGCT  
CTACTAATTTAATGCGCAATTTTTGTCTATGCTAATCCGCGTTTTTGGATTTGGGTATATA  
ATTGACGTATTACTTTCAACTGTGATTTCTTTCTTTGTTTTGGAAGGAATTACTGCAATA  
GCTTATTATACAGGGAAAATAAATCATTATCTTTTCGGCGCTGACTGGTGTGCAAACCTG  
CAAACCTCGTAAAACCTATGCTTGCCAATGTTGACTATAAATATATTGATGTCGATTCTGA  
TGAAGGCATAGCTCTAACAGCAAATAACGCAATTCGAGGTTTGCCTACAATGATTAATGT  
AGAAACAACCGATCGTTTTACGGGAGTTCGGATAAACGTTGCGCAATTGAAGCAAAAAT  
GGGAATTTAACAATGGGCTCTTCGTAGCCATTTTCATTTTCATTTTATGGTGTACATCG  
CGAAAAATCCATGTCAGAATAAGTTTGAATCAATAACATATGGCGTATTATCATGAATCG  
CTACAAGCTTCGGAGAATCCTCGAAGCAGAGTTTAAAGAAATCAACAGAAAAATCGAAGA  
AGCTCGGTTGGCTTCTGGTTCATGGCCACCGTTTTTCATCTGGAATACACTTATCATTTCAT  
AGATCACCTTTTGCTTTGCAATATCCATATCGATGATACGCTGAGCTTGATCAAAGGTTT  
GAAGGAAAAAATACACGAAGTTGACGCATACATGTCTCTCCGTATCCTCCGCATCTTGA  
CGAAAAACGAGTCGAAGGTGTAGAATATCGACCAATTCGCTTAGAAATCACTAATGGATC  
ACTTTCGAATGGAATTACTCCTACCAAAATTCGCCATGATCTGAATACAGTTCTGCTTT  
CACATGTCGAATGGCAATATTCAATTCACGACGTTTAACTTCAAACGTAACACTACAAAAGT  
AATTA AAATGGAGGGGTTATGAGGCTATTGATGATTCTCATGATCGTATTTGCTACACAT

GTTTATGCCGGTCCGTCGGTAACAGACTTTTCGGGACTCAAAAAGTACAATGTGTCGTAT  
GCTTACAACACTATGGAAAGGCTTATGACTTGACGGGAGAATTGCGAGATGTCAATTATCCG  
AATTTCTGGAACGATCGTCATCTTGGCACATTATTCGCTGCTATCGCATGGGAAGAATCC  
TCAGCTGGAATAAACTGGTGGAGATATAAAGGGTCATCACGCGTATGGGATGTTTCAA  
AATCTTTACACAACGGTTACATCTAACTCGACAATAGAGGAATTCGGTACAGACATTGG  
TATCTGAAAAGGAATTTAGAGCGTAAAAGTTCTTCTGCCGAATGGGCTATGGATGAACTC  
TCATACTGTCTCAAGGTTGAAAAGGTAATAATTCGAATTGCTCTGGCTTCAAACAACGCA  
GGTTGGAATTACCATGCTGGTTTGAGATATGGCGATCGTGTGTTTGGCAAAAATCAAGAG  
CTCAAACAACGGACTTTATTTACAAATAAATGTTTACATTTTTGAGGTTTTGGGATACT  
ATAACCTCAGTTAAACAACCTAATCAAATGTGGAGTAAGTTATGGAATTCATCATCAATA  
AGTTCCGGTATGGCGTTTATTGTGTCCGTTGAAGTTGATCGTGCTAAATTGGAAGGTTGCC  
GATTTTTGAGTTCACTTTACGATATGAACGTAGCGATGCCAGAAGAATCTTTCGGATGCG  
AGTTTTTGATTACTCGCGATTCCCACGATTTCGCAAATTTTGATTACCCCGATTCCCGAA  
TTATGATTCACACCGATTTTAACTCGTCTGAAGTCCGCATTGAAACTGAAAGATTCATTC  
GGGAATACTGTTTGTGAGGTAAGCGCAATATCATCTTTTGTATTGCTGGGCGTCCATA  
CGTGGACGCCGTAGATATCGAATTCATCGTGTCCATTACAGCAATGGACATGACCGTTA  
GGGCTTAGCTCATTCCGGGTGGAGTCGGCTTACAGAGTTATGAGTTCAATGATGTTCTCGC  
ACACGAGGGTGAAATATGAAAAGCCAATAGCAGCTGTTTTAGCACTGTCATTTTTATGGT  
TGCGGCACGGCCGCTCCTGCAGTAGCAAACATTAAGGAAATGTTCTGGTTTCCTGAAAAA  
TCCGGAGTAATCAAAGAATTTACCGATGAAAATGGCACGTATGAATCTGCTCAGTCCGTT  
TCATGTGATATGCAATACGCACAGAAACGTGACGATTGCCTTGGGATAATATTCATAGT  
GATTATTGGATAAATTGACTCTGCACGATCTGACGACAGTATTTTATCTTGGTCTGAGCGA  
GTTATGATTAGCTTCGACGGAGTTGTTCAAATCGTTGACTATGTTCCGGACTGGCTCCGCT  
ATCGTTAATTGGCGTAAAGATAATCCCGATTTCAACCCGATAGGCCAAAGTTATGTCAATT  
ACTACTCCTTACGGCTATGGAGAGTTCACATTATGATCGTTAACACAGTCAAAGGTAATG  
CAAGCAGTCTGTTTCTGAACGGCGAATATGACATGTTTCCGCATGGTTGTAACATTTTTA  
ACCGAATGGGTTCTGGCATTGCTAAAGAAGGTCGTGAACGCCTCCCTGAGCTTTGGGAAC  
TCGATCAAAGACAGTTGAAGGTGATCGTTCCAAGCTTGGAACGATCTCGGCCACAAGTT  
ACCCCTATGCTGGCCTTGCTTCAACTTCTATACTCAGGCGACTTACTGGGACCCTAGCG  
ATATGTTGTCTATGATGCGGCCCGTTCATGCATTGAAACCTTGAACACTATGTGTCAAG  
AAACTGTCGATTTTGGCCTCGGTAAGCCGACGATGTGTATTCTTAAATAGGTGCTGGTC  
TTGCCCAGGTGATTGGGGCAAATTGAAGCAATCCTCAACCAAGTAACCTCAAATATTG  
ATATTACAGTGGTGGAAATTCGAGGGCAGTCGGTAAATGGCAACAATGTGGTCCGGTGATG  
AACCGTATCTTCGAATGTGCAATAGTCGAATTACTTGGCGAAGAATATAAAGGTATTATA  
ATCCACTCATATCGTGACGCCGGCGATGTAGTTCTCGAGAATTACGAGTTGATGTACCAC  
GGCCGAGTGTTTATTGGTCAAACCTTCAATGGTGCCTGAATGAAATTTCCAAAAGAATTTT  
TGATTGAACTCATTGTGCAATCGCTGGAAAACATCCCATGAGAAGGTCTTCCATCAGAAC  
TGTGTGGCAAATATGAAACTTTAGTAAACGAAGTTGTCGACCCGCGGGCGCTGGACTGTTT  
ATTACGACTTTGTTTTCTCCTTTGAAAAGGATGGAGTAAAGCGCTATTTACGCGAACCAT  
ATGAAGTCGGTGCAACAGAAGAGCAGGAAAGCCCGATTTGGGAAAGTGAACCTGATCTGA  
TGGATGTCAGTGTAGTCGAACCGTATGAAGTGACTACAATTGGATAACAAGTGGAAAGGACA  
ATGGCTAAAGAAATAGAACGTAAATGGCTTGTTAAATTCGTTCCAAACAAGAATTTGGAG  
CAGTTTCTCATAAGCAAATTGCACAATTCTACTTTGATGGTAAACGCTCTCGAAGTGTG  
ATGGAAACTGGCGTTCGTGAAAATTCATAGAAACAGTGAAAACCTGGCGCCGGTTAGGTT  
CGCGAAGAGGTGAAAACGAAATCGACAAGAATACTGCATGGGAAGCCCATGATGCTGCC  
GGTTTACCAACGTGTGTTGTTAAAACTCTGTACGAAATCCCGCATGATCATTGGTTAAC  
GATCGAACTCGATATGTTTGCTTGTGGTGAACAGTATACCGAGATCGAATTTGATAACGT  
CGAAGATGCCAATGCATTCATTCCACCGGGCTGGTTCGGCGAAGAAGTTACCAATGATGA  
ATATCACACCAACTATGCGCTTTTTCGAGCGGCTCAACGAGGTCTAAATGGCAAGTCTTTA  
TTTTCACTATGCTGCAATGACTTCTGGCAAAGCACACATTTGCTTCAAGTAGCACACAA  
TTACGTAGAACGTGACATGCGTACTACTATCATAAAGCCTGCGATTGATACGCGTTATGG  
TTCAACCGTATCCTTAAGAATTGGTATATAGCGGCCTGCTATTATGGTGAGGCAAAGCGA  
TAGTTTGACCACCTAATCAGCAAAGAGCATAATGGGCAGCACATTAGTTGTGTTAGGT  
AGATGAAGCGCAATTTCTGCTTCCAGAACAAGTCAGCCAGCTTGGCGCTGTTGTAGCCGA  
ACTGGACATTCCAGTAAAGTGCTATGGATTGTTGTCTGATTCAAATGGTAACATATTACC  
GGCAGCAGAACGACTGATGGTTTTGGCAGAAGAAAAGGTTGAGCACAAAACCATATGTTG  
GTGTGGCACCAAAGCTACAATGAACATGAGAATCGATGAGAATGGCAAGAAAGTGTGGGG

GCCAAGTTTTTCGATAGGTGGCAATGATCGCTATATTTTCAGTATGTCGTTAACACTGGAC  
ATTGGGAAAATCTTCAAAAACAATTACAAAAAGATGTTTACAACAAGGTTGTTTTGTATAG  
AATATCCTCAAATTAACGAAATGAGAAAGTCATTATGAAAAGTTCTGATGTTTTTTGCC  
AAGTTCAACTTGCTCAAGCTTTTGAACTGAAGAGTTGGAACGCAGATTAGCCCCGGTTG  
GAAAATTCATTGCCGACGATATGATTTCAAAAACGAGTTTTTACAATCACCTTCGCGGGCG  
ATAAATTCCTGGAATTTACACCAGAGATTTTCGTCGACTATCTAAGAACTCTTGGATATG  
AGACTCGCCCCGAATCTAAATGTAATGAAAGCTATATCATCGTAACTGCAAAAACCCTAAT  
GCAATCAAAAAGGAAATATAATGCGTACTATGTCCAAAGCTCCCAAAATTACCAAGAAAAT  
GGGACTTTCTATCGCAGCCGGTCTGCTGACCACAATTACTGCCCTGAATATCTTTACTGT  
GGTCGATGATGGTTCCGTTGCAACCACCACTTTCTGGGTAAACGTTAGCCTGAATATCAT  
GCAGCCCGGTCTGAATATCATCAACCCGCTGGCATCAGTTTATACCTATTCAACTCGTGA  
TCTGAAGATGGACTTCTCAAACGTACAAGTTCCTTCTCAAGATAAACTGAATAATTCTGT  
CGATTTCACTCTGATGCCGCGATTTCGACGGTGAGAAAGCCCAGATGGTTCGCATCAACGG  
CGGTACCGAACGTCAGGCGATTGACAAGTACGTAGAGAAGAAATTCGAGAGTACTGTACG  
TGAATCCGGCAAAAACATCAAATAAGCGCAAGATCTGTTTGCGGATGCTACCACTCAGTC  
CATGGGGCAAGACACGATCACAACCTGAAGTCAACGACTATTCCAAGCCGTTTGGTTATGA  
GGTAACCGAAGTGTTCCCTGCAAGAGATTACTCTGCCGAAGCTCATTCAAGACCAGGTTGA  
GCAAACCAAAAATTCGTGAAGAAGCCGTAAACCAAGCCCAAGCGGATCTGGATAAAGCCGA  
AAAAGTGGCACAACAACAGGTTAAGACCGTCAAGCTGCGCGTGAAGCCCGTGAACAAAA  
CGCGGTTGCTAACGAGCGTGATGCTGATGCAAACTGTACTCCGCTGGTAAAGACGCTGA  
AGCTAACGCTCTGCTGCAGAAGAACATTACTCCTGATATGATCAAATGGCGCCAGCTGGA  
AGTCGAAATGATTCGTGCCAACAAATATCAAGGTGGTGTATCGCAGACTGTGGTTCGGCGC  
TGGTTATGATGGACAAATGCTGATGGACATGCGTTCCAAGTAATTTAACTCGAGCTCCTT  
CGGGAGCCCATTTTGATAAAGATAACTTGTAAATTGGAATATATTATGTTTAGCCGTGGT  
TTTACTTTAATCGAATTGATGGTATTAGTGGCGATTGTTATCATTCTGTTAGCCATAGCA  
ATACCGGCTTTTTTCGCATAACGAAATTTATAATCCGATCGATTACGCATGCCCTCATGGG  
TTAACAACCGCAATTACGGCAAATGGCGAAGAAATTCCTGTTTGCCGAAAAAATCAAGTG  
ATCAATAAACAAACACTAACAAATCGGAGCATAAATGCAAAAAGCAACTCTAAATGGGCATC  
ATGGCGGCATTCGTAGCAGCAGCACTTTCTGGTTGTGGCGAGCAACAGTCTGATACATTT  
TCTTATAATGGTCTCGGTGGAGAACCTACGCCTACCGTCACAGCGACTTCGGCAGAGCAA  
TGTCAAGAACTGGGTGGTGGTTCGACGGAACAATGCCAACTAGCGTTTAAAGCAAGCAAAG  
GATGAACACACCTCAGCTGCACCGAAATTCATGACCAAACATCAAGTGAATCTGGCACA  
TGTGCTGTATGCACCCAAACACAAATTCAGAATTCCGATGGTAGTTTCAGCGACGTGTTT  
GTTCCAGCTATGGTTGGTATGATTGTTGGCCAATTGATGTCAAGCAATGCTCGCCCGATG  
CCAGTATATGCGCCAAGTCGACCCGAAAATCGTCGAAATGGCTTCGGCAGTGCGAATGGT  
TCCTAGGTTCTCCTGGAAAAGGTTCTATCGGTGCAAACAGTTTCAAACTTCCTTTGGC  
CAGGGAAGTATTGCAAAAACCGGTAGCATCTTCTAAACCTGTTGTGAGAATGTCATCAGGC  
GGTTTCGGAAAATCCGGTGGCTTCGGCTCTTCAGGTGGTTAATTACAAAAGCGCTTTAC  
GGTGATGGGCCTATGATTTACTATAGTCCCATCAAATCAATAACGAGTACATCATGATTT  
ATGCTGGCCAAAATATCGAATCACCAGACCTGTAAGCGAACAGCACATTGTTGGTGTGG  
GTGATATTATAACAATCTCCCAAATCACTAGAAAAAGGCATTCGTTCTATGGATATTTCT  
GTTGACGATGATGGAATTCATATGAAGGAATTCTAATGTTTGAAGGCCCGTACAATATC  
CCGAGTACTGGGAAAAGTCAATTGTGCTTGGAGCCTGTTTAAATGATTGACGGAATT  
TATCGGATATTGGCGAAATCTCTCTGAATCATCGTTACATTAGCCAAGGTGACGAAATT  
TATTTGCAAGAAGACGAATACGGAAATATCCGCGGTCCTTCAGATGACTGGGACGGGCAT  
GAACTGAAATTGGTTACATTTTGTGCCACACGCAGTGGAAGAAATCCCAGGCAAACT  
TACCACGAAGCTTACCGAATTTGGATTGACACTGTTTTGGAGAAAGTAGAATGAAACGCG  
TATAGATTAAGCTGGTAAAGAGTGGTTGCCACAGTTGACTTCTGAAGGTGTTTTATGGA  
CCACTACTGAAGAAGGTCCTTATTGGGCCGAAGCAATGGTTCTGCCCAAGTATTACTCCT  
TCACTCGCAAAGAGCAAGAGCAACTCGAGAAAGCCGCAAAACAAAATCCATGAAATGTGTC  
TTGAGAAGATCGAATGGCTGTTCACTAGCGACGCCAAAAGCAAAACGAAATTTTCAACA  
TGTTCAATATCCCATACGATTCTCGTGATCAAATCATACGCAGTTGGGAAGATGACAAAT  
GGGGCCTTTATGGACGGTTTGATTTCAACATGACCGAAAACGGACGCAAGCTTTTCGAAT  
ATAATGCCGATACCCCCACCATTCATTGAATCTGCAATTTCTCATTGGAATTGGTTCA  
ACGATCAACGCGAAAATTCATCAAGAAGCTTTACATTTTAAACGAAATTCATGAAGCAT  
TGGTTAATCACTTGCCTGACATGAGCACTTATAACGCAATTGGCGATAAAATCAGGTTTG  
TAGCTACTACGCTAGTTGATGATTTTGTACAATCGCATACATGGCTGAAACTGCTTCAG

AAGCTGGAGTGAATGTCAAACCTGTTTCGATATCGCCGAAATTCAGCTAGGTGATGACGGCA  
ATTTTTATGTCATGGAAGGCCAGCATATAGACACTTACTTCAAACCTATATCCATGGGAAT  
GGCTGTATGAAGACGATTTTGACAAAGACATCGATGGATGCAACACTCGGTTTATTGAAC  
CAACCTGGAAAATGATGCTTTCCAACAAAGCACTTTTGGTTCTTCTTTATGAGCGTTATC  
ATGATTGCGAGTTGTTGGTCCCAGCGTATACAGTAGATGATTTTGACCGATTGAATCTGT  
TCACATATGAAAATCCGAAATGGGTGTCAAAGCCTATTGTTTCTCGGGAAGGATGTAATG  
TTCATATTTTTGAATATGGCGGAGAAAGTGAATTCACCGATGGTAATCACGTAGAAGAAC  
CGCGATTTCGTCCAGCAATATATCGAATGGAAAGATTTTCGATGGCTGCTACCCAATGCTTG  
GTGTATGGATGGTAGGTAGCGATGCCGTGGGGTAGGGTATCAGAGAAGATGATAGCCGAA  
TTACCGGTAATAACAGCCGATTTATTCCGCACGTCGTAGAAAATTGACAACTCCAGATG  
ATTTAAACCCTCTGTAATGCGTTAAATATGATCGGAGTATAAACCCATGGATTGGCCAGC  
TGCCTTGTACATTGGTCAAACCAGTATGCGGTAAGACAAAGGCTTCAAATAGGCTTTG  
CCTTTGTTTAAATACCATCCAGGAGGGGCCAATGGCCCATTTTTTCGTATGTTAAAAACATT  
TTCAATAATCACATTGGTTTTAGCTTCAATGCACTTCGTAGAGGGCGGACCCTGAAAATGG  
GTCTTATGATGAGTACATGCGTGGCGCTTTAATAGGGTATAGCAATGAAATGGTGGC  
TCCAGATAATTCGGTTGAATTTCTTGAGCATTGAAACGATAAATGGAAATCTGCTAAAAG  
CTCTTCGAGTTGTTATCAAACCTGGATATTTTGAAGCAAAGACATTCATAGCAAAGAGAGA  
AGGTCATGGAAGTAAGATTTCGGTGTGTTGTAACCGAGAAAACAAGCATTTTTGATGACT  
TTATTTGTGCGTGTTAATGTCAAGCACATTTGGGCATTCCGAGCACTTTTATGACAAAG  
CCGTATGAAAAGCATATAGCATAAGAATTTCTATGACAACACGCCAGGGCAGATTGAT  
ATTTTCGCTGAATCGTATATGGGTTTCAGGATTTACATATCGGCCGCGACTCTCCATTTAT  
AATGGAACCTTGGAGTCATTTGTCAACCAACATGCCCAGATGGCGGAAAAGGTATCTCCC  
ATTGCACCTAATACGGTTCTCAAAAACACCTCAGATGATATCCAAGAGCCTTGTGCGTATG  
ACAATGTATAAACTATCATTGCACTAATTCAAATGCCCTGGTGTGAACCAGGGCCTTTTT  
GTATCCGTCTGAAATAAAATTCAAAATGGTTGTACTCTTACGTTAAACGATTTTAGAATG  
TTATCAGAATCAACCAACGGAGACAACCGATGAAACGTGTTAATGAAATGCCCGGAAATG  
GTCAGATTGTAGTTGTCTGGGTATATGACGGCAAACCTCTGGTCTGAAACCAGGCGCTTGA  
ACAACGGGGTGGTTCGAAATCCTCATGGATGATGACACTGCTGATGAATGGCGTACAAACG  
ACCGTTATTACGATGATGGTTATGAAGATCTCGAACTCAACTATAATTGTGATTTAAAAAT  
GTCATACTTCAGGAAATCCACAAGCTGTCGAAACAAATGGGTGTGGAAGCATCAGAATT  
CAAGATTTTCGCCTATTTGGAAAATTGTGCGCAAACCTGAGTGGTCCTATGGGCTTTCATT  
TGAGCGCGAATTCACTGTTTACGAACATAAAGAAACGGGTTATACTATCGCAGTTCAGTC  
TGAGCGGCATAGAGCTCAATTTGTCAACGAAAACAACGAAGAGGTTAAGGGTTGCGCTGA  
AATGATCGTTTCGGCGAGCGAAGTAGAACCTCACAAAAGCAAACATGGCACACGTTGGCA  
GTTTATGTAACGCTTTAGTCATTTTAGTGTATATTACCATTACAATGGTTTAGAATAATA  
AGACTGGAAATAAAAACCTCGAGCGCAGCTCGATCGCGAAGGGATTACTAATTGGAGATAA  
TATGCAAATTATCTTTAAGCCTGCAGGCGAAGGTA AACCGCCGAAGCAATCAAATCTGC  
CTATATGGCAGCAATGAATTACCCTGTTCTTATCGTTTGTCTGAAGAGCATCCAGCTGT  
ACTGAAGTATCGAGTTAACATGTTTCAGTATTCAGAATCCTGCTAACAAAACCGCTATGA  
CATAGTTACTTGTCTGGAACCTGCAACTCCCGAAATGTTCCAAGATCTTGGCTTTTTTCGA  
CCGTTGTGGCGCCATTATTCTGGATGTCAACTTCGCAATGAGTCGCGGCCATTGGATTAA  
AGTATGTGCCGAACTCGAAGCATATGGTTATGAAGTAATTGGTACTCAAGA ACTTGTTAA  
ACCTGCGCAAAAATCGCACAAAGTGTATCACTGAAATGATCGTGGCCCCCTTAAAGGGGC  
CATATGGAGGAATTATGAAAACATATCGTTTTAAATCTGATGAAGCTCGACATGAATTTG  
CTGCCATAAGCGACATAAATGCTGCTATTGCTAATAGCGTATGCGATCATGTGTTCTACT  
TAGCTATGCCACGAAATACTATCGATGAGATTTTTTTTCGAAATCGACGGTATTACTTTGT  
TTCCCGAGTCTTTTTCTGTTTTCTTAGCTAACGAAGTAAAAGAATATTTGGAAGAAGAAA  
GCGCTGGGGATGTTGCTCACGAGATATCCATAAGATATTGGAAAATAACGATCTCGAGC  
AATTGCTTGCAGAAAACGCGGCCCTGCGGGAACGCATGTCTAAACTTGAAAATCGTCTTG  
AATGTCTTGAACGGTTGGTATAAATGAAATCTACAGCTTTAGCGTATGTTCTTGGTTTT  
TTCTGGGCGTTTTTTGGTATTCACCGTTTCTACACCAGAAATTAAGTCACCGGAGTTATTT  
GGTTTTTTACTTGCGGTCTGTTTGGTCTTGGCTGGTTTGTGACTTTTTTCTCGCAGCAG  
GATTTTTTTCGACGCGCCACATTGAATGGAGCGAAAATCAGATAGAAATTAATACAATGA  
TTCGTCGAGGTTATTGACATGGTTTATAATTATGATCGTGCGGTTTTTATTGGCCGCTTT  
TTCCAGCTTTTTCCACCGTGGACATGAAATGCTGATTTACAAAGCGATTCAAACCTGCTAA  
AACTGTTGCTGTTGTCTTCGGGTCATCCCATCGTTATCCAAACACAGTCAACCCGCTTCC  
AACACTGGTTCGAATCAGAATGTTCAAAGCATGGATGAGTAACAATCTCACTCCTAGCGA

ACAGGCCAGAATTGTTTTTCGGTAATGTTTCTGACTACCGCTATAACGAGGATAGCCGGCA  
AACAGAAATTTCGTGAGGCCGGGCAGGAGCAACCGGGCGAGCGTATTGCGATGATTGCATA  
CGATCATGATGAAGATTCTTATTGGATCAAAACCTTTGGATGGGACCATATTCAATGCAT  
GGGCGTTCAGAATCACGGAAAAGACAACCTCAAATACCCCAATGCGCGATGCATTTCTTCG  
GACCGGTTCTATCCACGACGATTTCCCTATCAATCCGTCAGTGCGGTCATTTCTTTTGA  
ATTTTGAATACTGAAGGTTCCGAACACTACGCAGCCGGTTGATGGTAGAACGTTTCGATGTG  
GGACCATGAACTTGCACAGTTTAAAGATTATCCATACGCTGATGCTCTCAACGGCAATAC  
TGCTGCTGCCGTAGTATTGTGCAACAACCATATTCTGGTTATTAGCCGCAAACATGCACC  
CGGCAAAGGTACTCTTGCTCTTCCAGGTGGTCACAAGAATTCCTATGAGACCTTCCGCGA  
TTGTGCAATTCGCGAATTGTATGAAGAAGTTCGGATAGATGTCGATCATCAAAAAATCAT  
TGGGTCTATAAAAGCAGACGAAGTATTTGATCACCCAAAGAGAACGGCAGAGTTCTGCAA  
ACCGACGGTTGCTTATTATAACGTACTTCAACCCAATGACGACGGTAGTTTGCCTGAAGC  
TCGTGCTGATGATGATGAAAAAGCAGCTTTTTGGATGCGAATGCATGAATACAAGAGAAA  
TCGAGCACGTATGTTTGACGATCATGCTGAAATCATTTCGCGCTTCACCGTTATCTAGGA  
TACAATTACGGAAAATGTTGTACATCACTAAAGGAGAATAAAAACGAAAGCAAGCTGTA  
TTCGCAAGAAAATCAAAAAGCAAAAATTTGAGCGCCTTACACCAGGTGATGACGTGCGAG  
ACCAAAATGCTCGTTGGGAAGTTGCAACAGTTTGTTCGATCACTGAAAATTCAATGATTA  
TTTTACGCAAAAAGATGAGTCGAATTCATGTTATTATCGAACTTGCCACTGACTGCAGCG  
AAATGTTTTTCCAGTTTAAAGAAATTTCTCCCGAAGGTATTACCAGCTGGGGTGAAACGT  
CTTAACTTCCGAAATCAAATTCGTACGTGGTCAATTCGGCGTGATGAAAGAAAACGAAG  
AACTGTTTACACCCAGATTCAAGTCGGCGACGAATTCATCCATCGTAATCTTGATAAAC  
GATACGTGGTTAAATTCATCGCAGAAGGCCGGTTCTTTAATTGCTTGGGATTCTGATTATC  
ATAGGTCACTTTTTCGTTAACCGCAACGATTGTGACCAACTTAAAGCATATGACATGCAAT  
TATCTTAAGGTGGAAATTATGCAAAAAGTAGTTTTTTGAGGGCCTTCACGGCTCTCATCTT  
TACGGTCTCAATACTCCTGAATCTGACCTGGATATGAAAGGCATTTTCATCCCCGATCCC  
AAAGATATTCTGCTTGGCCGAGCCAAACGAAGCTATTCCATCACAACCTGGCAACGACAAG  
TCCAAGAACAGTAAGGATGATGTTGATATCGAAATGTTTTTCGCTCCAGCAATTCATCGTG  
GATGCGGCCAAGGGTGAAACCTATGCGCTGGATATGCTGCATTCTCCAAAAGACAAAATC  
ATCACCGACTCGTCTGTTTGGCAATATATCCATCAAACCGGTTCGGCTTTCTACACGACC  
AATATGACTTCCTATATGGGTTAGGTTATGAACCAAGCGGCAAAATATGGTGTAAAAGGT  
TCTCGTTTAGCCGCATTACGAGTAGTAAAAGAGTTCATGGATGCTCTTCAGATTCACGAA  
AACCGAAGACTGCGAGACCTAAAAGTTCCTCTGCCACAAACCGAGTTCTGCTTCTGGACT  
CACGTTGAAGAAAATCCCGACACCATGTCGTATTACACCATGATGGGCCGTAAGTACATG  
GCTGGTGTAAAGAACGCTGAATTTCTGCGGGGCAGTTGACAAGCTCTGGGCCGAATATGGC  
GTTTCGAGCTCGCAAAGCCGGAGCAAATGAAGGTATCGACTGGAAAGCTCTAAGCCATGCG  
TTGCGAGGCAGTCTTCAATTGCGTGAAATTTACAAAACCTGGCGATTTGAGGTATCCATTG  
GCCGATGCTGAAGAAAACAACTGGTTAAAGCTGGCAAACCTGTCTTTCGCTGTTGTTCAA  
GAACGACTGGAAGAAATGGTTGAAGCTGTTGATACGGCCGCAAAGAATCATCTAAGAAC  
GGAATGCCCATAAAGTGGACATTGCACCATGGGAAGCGTTTGTGCAACAGGTTTACGCC  
GAAGCAATGAAAGAATATCTGGCGAGCGAATAATGAAATTGATTCGCTTTAAATTCAAGA  
GTAAGGAAATGCTGACCGAGTATACTACTGGTTTAAAGACGCCATATTTGGGCAGTAGGTT  
TCAGCGCAAACACAGTTTTTTATTGCCAGAATCAACAAACGTGGCCAAGTCAAAGTATTT  
TTGATGGTAAAACCTCTTAAAGAAATTGTTTCTTCGAAAGAAGGTTGGCTTACTTTTGCCT  
CCTTTGAGTTTGGAAAGTTTGTGAAAAAGTAAGCTAAACGGTTTACATTGTTGGGGCTA  
TGATTTACTATAGTCCCATCAAATCAACAAGGAGTAAGTCATGAAAATCACTAAATCAAC  
TAACCTGCAATCCATGGATTTTCGTTGGCCGTGTCGTTAAGGCAGCGCCAGAAACCAAAGA  
GGTGA AAAATTTACCCCGATTTCGAAACCATTTCTGCCGGTATTACCGTAGGAATCGTTGG  
CGCATGGGCTGCAATGTGCTTTATTGGCGAAATCGATATGGCTCGTAAAATCTTCATTGC  
TGGTATTATTGCTGGCGCGACTTTCTCGTTATGAAAAAGGGACTGATGAAATGATTA  
CCTGCTGAAATGGCAAAAATGGTTGCACAGAACTCCGCAGAAATCGTCAATTCCTATCT  
GTGCATTTTGTGATGATTTCTTAAATGATAATACGAAAGACACAATGATTGGCAAAGGCGGC  
TATATGTCTGGTGACGCGGGCCAATTCTTTCGTTACCTACGCGAAAAGCAGCCTTTTAGT  
CATTTGCATAATGATGACATTATCTAACGTTTTATTGCAGAACTGCGGGGATTGGTCTAT  
AAAGCAGAACTTGATTGTCCACCTATGAGCCCTGATTACCTTTCAGTAGCGTTGGTAACA  
AAATGATCGTTTTTGGGGCATTAAATGGAGCTGAAAATAGTTAAAGTATACTTTGAAAGCA  
AACTCCAAGTTGCATCGCGCATCGGTAATAAAGTCGGTGAACCTTGAGATTTTCGCTAAAG  
AATATTGGCTGGTGAATGACGGATTTATATTTCTGGATGACGGGCCAGGTATTTCCGAAA



ATGATTGTTTCGCTCTGTTATGAAATTCTCTGGAAATGTCACGTTTCTGATCAAATCACGG  
CGTTTATGGTCGACGACTATGTTTCCGAAAGAGCCAAGGCTATTGTAGTTATTACTGATA  
AGGAAGACAAATCATGAATGGAAAAATCTACCCTTCGTTCTCAACGTAAACACCAGCGCC  
GACGTCACAACGACATTGCTCATGTTTCGCAATTTTTTTGAACACCTTACAATCCGAGCAGC  
ATGATCGCGATTGGCTCAATCTGGTTTGCAAAATGTTCAATGTTAAAACAATGGTCATAT  
GGGATAAGACGTATCAAAAAACAGCCAGGAATCCGGCGTGGTTTTGGCACAAAATTGACC  
GAATTATGAGAGAAAACCATATTGCATGGTGTAAAGCCAACACTGGTATAGCCATATATA  
TGCATGCGAGAGGCGTCTCGCGAGTTGGCGTGTGGGCGTTTTTCTACCGACAAAGGCGTAT  
TGATGCTCGCACGGCTTCTTGAATTTGAAGTTCATTCTCTGGTATGAATTTAGTTTTGC  
CGGTGTTGACTCGCTATCGGAACCGTCGGAATACCGAACTTCGCACGAAAATGGTTCATC  
CTAAGCCTGAAAACATTCCTTATGCGACTACCGAAGAAATTGATAGCATGAGAGATACTA  
TTAGCATTGATAAAATGTTAACAGAAATCCCAGCACTCGAGTCACGAATCAGCGCTCTTT  
CTCGGAACTTGCCCAATTGCAAGATAAACTCCAAAATACACGACAAGATGTCCGCGATT  
ATCTTTCGACAAAGTATGGTATTTGATTGAAAAGTTAGTCTACAGTGATGGGAACATTGG  
TAATAATGTTCCCATCAATAAACGAACGGAGTAATTTAAATTTCCATCAAAACTGCTGCA  
ATCAACATTGGGTACATAGCGTCATTTGCATTGTTTTATTTCGATGTATATCGGAAATGCT  
TATGCCGTTCTGGGATTTGCGATGGCAGTTATCGGTTCAACCATTATTGCGAGAATTTGC  
GAATGAATTATTATGCGACAGTTAAGAACTTTTTGGAAAATCGTCGGGATACTTCCAATA  
ATCACTTCAAAACCTATAAGCCTGTAGCTGAACGGTTGGCAATTTATCACCCTTCATGA  
AGTTGGTAAATGATATTTTACCGAATCTGAAGCCCGCATCGCCTCTCGGTAAACACAATG  
GCATCTCCAAAATCAAGCCGAACTACTTTAATATTGATGCCGAAAACAACGTCACGGTGA  
AACGAATTATTTGGCTCAACACAGTGTGTTGAAGCAGATTGTTTTGCAGCGAGACTGGAAC  
TGCTTAGGCATTATGGTGTGCTGCCGTA AAAAATTGATATTTCTGAAAATGGCAGAAATCAA  
TAGTTAGATTTAGCATCATCTTAAGCGAAATTAACGTTGCAAGCCTGTTGCTGAAGATG  
CAAACATTGGCGAAGAGGCACGATCGGCAGAACCTGTTAATCTCGAAACTGAAAAAGAAA  
TTTGCGAAAGCATCTTCTTTTCTGAAGCGATCGGAATAGCTATCAACACTTTACGATGTG  
CACCCCACTTTGGCTCTAAACGGTTGAACGAAATTGACAGTGAAATCGCCAAGTTGCAAG  
CACTACGTAAAGAAATCGAAGACAACATGAAAAGCATCAAAAACCTCAATTGGGGCTTAAT  
TATGAATATGATCCGTCCTCACATCGGCGTGAAAGGTATCCCTCTGATCGCAATGACTGA  
TTCTTACAAAATCACCCATTGGAACCAGATGCCTGAAGGTACCGAAGAAGCAGTTTTCTA  
CGTCGAAGCTCGTGGTGGCAAATTCGATGAAATCGTTATCGGTGGCGTGGAATATCTGGT  
GACCAAGTTTGCAGAAATCATCACCATGATGATATTGACGAAATGGATGCCATGAGCAA  
GGCTCACTTTGGCCAAGACGTATTCAACCGTGAAGGTTGGGAGGCAGTCCGCCAATATCA  
AGAACAGCATGGCTGTCTGCCATCCAAATCGATGCTGTTCCGGAAGGTGCTGTTGTCCC  
AGTCAATAATGTTGTGCTGACTGTTCTGTGCAAGCAACATTCGGTTGGCTGGCGGGCTG  
TTTTGAGCCAATCATTTTGAAGAGCTGTCTGGTACAATTCTACTGTTGCCATGCCGAGCCG  
CGAATGTATCAAATCTATTCGCCGCCACCTGATTGAACTTCTGACCTGGAAGTAGGCAG  
TCCTGAGTTCAACTTTGTGCTGATGACCCGACTACATGATTTTGGTTCTCGCGGCGTTAG  
TTCTGGTGAATCTGCTGCAAACGGCGGTTGTGCTCATCTGTACAACCTCCATCGGTACTGA  
CACTGTGCGAGTCGCTGTATTTTCGAAAACAGATGTTTGGCGCTGAAATGGCAGGCATCTC  
TGTCCCAGCTCGTGAGCACTCCACCGTAACCTCTTGGGGTGCCGATCGCGAAAAAGACGC  
CTACTTCAACTGGGTTGAACTCTTCGGTGCAGGTTGCATATTCCATTGTGTATGACTCTAC  
CGATTTTAAGAAGGCAATCCGTGAAATCGAGAGCTATAAGGACAAAGTTATCGCCAAGAG  
TGGTACTCTGATCGCTCGACCTGACAGTGGTGTATGATCGACAATATCAGTTTTGCCCT  
GGAAACTCTGGGCGTAATCTTCGGTTATGAAACCCACAGCAGGGGCTACAAGGTTCTGAA  
TAAGCATTGTCGTATTATTCAAGGTGATGGCATCAACGGTCCCGAAGTTATCGACCGCGT  
TCTGACTGTTATGAAAGCTCGCGGTTGGGCTGCAGAGATTATTACGTTCCGGTATGGGTGG  
CGGTCTTCTGCAAATGGTTAATCGTGACACCTGCAAGTGGGCCATGAAAATGTCTGCCAT  
CAAAATCAACGGTGTATGGAAAGACGTATTCAAATGCCAAAAGGCGCTGAATGGAAAGC  
TTCCAAGAAAGGTGAGCTTAAGCTGCGAATCATGGATGACGGCCGCCATTACACCGAAGG  
AACTATCGAAGGTGGTCAAATGCTGTACCACGTAAGCGCCAAAGACGGTTTTCGTTGAACT  
TATGTCGAAAGATGCATTCGTCCGGTATTATGATGCTGAAAAGGGTTAAAAATTCAAGAG  
CAATCTGGCTGAAATCCGCCAGCGTACTGCAACTAAATAATCATTCAAATGCGCTCCGAA  
GAGGGCATTGTTCATTGGAGAAATCATGATCAACAAAATTATCAAGTGGTATGAGCAAGA  
ATGGCTGTACAAAAGAACTAGTCTATGAATAGGAAAATTCATACCTGGTAAAATATTT  
TTCGATTGACGGAGAATTCGGACATATTCCATCATTTTGGGGCCAAATGTATGACCGATA  
TAAGTTAAATCGTTTACGACTCTTTATTGTTTCTATTGAATGGGGTCATATCGTTATGTC

AAAAGCGGAGTGGGAAAAGTAATGCAAATCAAATGACAAGAAATGAATTCAAAAAAGCTC  
TAGAAAATAATGACCAATACGAATATCCTCTGCACAATGAAACAATCAACCAATTGCGTT  
CAGTCTTTTCTGTCCCGCAAGTTGAATATGTTTATTTGTCATTTCAAGAATATCAATCCA  
TTTTACCCATAATCCCTCATGACGCGAGTATGTATGCGCATACATAATCATGCCAAAGAA  
TTCACCAGGGTGATCGGTGGCAATATCAGAGTTAATCTTTTGTGCGAGAGATCATGAACAA  
ATCAAAAACACGATATTTTGGGACTTTCCTGATATAGAGGAAGTTGAAATTGGAAATTCG  
AAAAATTTTGCCCAAGACGGTAAAATATATAACGCAACAATAGACTACAACACCAAACAG  
GTTATAATGGTGGCAAAATGACCCTCAAGTTTAGAAAATTCAAAGCAAAAGACGAACGTA  
ATATGTTTAAAGTTACCATCAACTTCAGCGACAAGTTTGATGATAAAACGATTCATTGGG  
AACTGCCAGCTGTTAATTTAAACGAAGCTTCTATTGGAATTGAGCGTCTTGCCATTTTCC  
TGAAAAATTCAATAATCGATACCCAAACGGTAAGGGTGGTCTGGACGATTCACCGATA  
TTCCCGACTACTATCGCTATTTGTGCGAAGAGGAAGAAAGCATAGAAATCTGGGAAAAAT  
ACGGTGTTGAAACGCTATGGTGGCCACGCCATGATGGTGGATATCCAAAAAACCTTGCCA  
GCTATGAAATCGTATATTCTGAGAACGATTACGTGAAGTACAGTGTAACCGTGTAATTA  
ATAAGAGCATATGGAGGAATCTTTATGCTCTTAAATTCCAAGTCTGCTGATGAATTA  
CAGAAATTGTCTGAAGAACAAAATAACTGCTGTAAATTGTGTGGAAACGAGTTTGACGGT  
CCATACAATAAACAGCATTGGATTACGATCACGTATTGCAAGGCCCGAATGCCGGAAAG  
ACTCGAGGTCTACTTTGCAGTAGATGCAATCTAATTGAAGGCATAATGAAACACAAATTT  
ATACGGTCAGGATTAAAGGCAAAGGATGCTGATTACATCCAATGGATGAGATCGCTATTA  
GAATATGTAGATTCAGATCATTCAAAAAATCCAATACACCCGAAGTACGTTTCCGACATG  
ACCAAAAATTTCTCGCGGAAAAACTTGAGTGAAATGAAGGCCGAACACTACGCGAACGAGGA  
TTTGAATTTGATGAAAAAGATCAAAAAGCTGTTTTAGTCAAAAAATTCAGAAAGCAATTT  
AAGAAGGCCATTCAATGACTACCCGATCACTTGTAATGCAGTTAGTAGAAGGCCAATCTG  
GCCTGCACCACGAAAATGCGACTAAAACGCCGACGTTATCCCGACCATGCGAGATATGA  
TGGCATCTCTCCTCAAAGGATTACGCTAAAAGCATTTTGCCATCTCATTTAATCGAAG  
CATATGATAGTGGAGATATTCATATTCATCTAGATTATGCTGTTACTCTTCCAATGA  
CAAATGTTGCTTGGTAAATCTCAAAGAAATGTTGAAAAATGGCTTCAAATGGGTGATG  
CCAAATTGAAGAGCCTAAATCCTTTGGTGTAGCTTCAGCCATTATGGCGCAAATTACCG  
CACAAGTTTCTTCCCACCAATATGGCGGGACTACTTTGCCAACATTGACCAAGCCCTTG  
CGCCATACGCCATAATATCATGGAATAAGCATTTTTCTGTGCGGCTGCAGTATCATCAGCG  
ACAATGAGAAAATTGAAAAATATGCATACGAGATGACTGCTAAAGAAATCTATGACGGTA  
TGCAAGCTTTTGAATACGAAGTCAACACGATATTTACCACAAATGGCCAACCACCGTTTCG  
TGACAATTACATTTGGGATGGGAACTAACTGGTTTCGAAAAAGAAATTCAAAAAAGTATTT  
TGAAAATACGAATCACGGGTCTTGGAAGAATGGCATCACACCAGTATTTCCAAAAACTC  
GTTATGTTTCATGGAAGCTGGTATAAACTTAAATCCTGGAGATCCAAACTATGAAATTA  
CACCTTGCTCTGGAATGTCCAGCCAAGCGAATGTACCTTGACATTATCAGCGCGTAACAC  
AAAAGATCCATCACTGGTAGTAAGACTCCTGTTAGTCCAATAGGTTGCCGGTCTTTTCTG  
GCTGGTATAAAGTCTGGAGAAGTAGATGGCAGAAACAATTTAGGTGTTGTCTCTGTCAAT  
ATTCCCCGATTGCTATCGAAGCAAACGGATCACAAGAATCGTTCTTTAAACTACATAAA  
GATCGTTTTGAATTGTCAGTGAAGCATCTCTTGAACGAATTAACACCCAGAAGGTGCT  
AAGGCAAAAGACCGCCGCAATTCTCTACACTGAAGGGGCCTTTGGTCTATATCTTAATCC  
GGAAGAAGAGTTTTTTGCCGCATTTGAAAGAACGAGCTTCGATTTCAATTGGTTATATTG  
GCCTTCATGAAGATGCTCTGATTATGACTGGCAAATCGACAGCCAATGATCTAGAAGCAC  
GCAATTTTGC GCGTTTCGATTGCAACATATCTCGATTTTTCATGCGCAAAAGCAAAACTCA  
ACACCGGATGGAAATGTAGTCTTTATTCTACTCCGTCTGAATCGCTGTGCGATAGATTCT  
GCCAGCTGGATCGCAAGAAATATGGTGTATCGAGGGAATTACGGAGAAAGATTGGTATA  
CGAATAGCTTCCATATTCCTCTTGATGCCGAGTTGAACCCGTATGAAAAAATAGATGCC  
AAAAAGAATTTCAATTGGATTGCATCGGGTGGACCTATCAGCTATGTCGAACTACCCAATA  
TGCGAAACAATCTCGAGGCCCTAGAGCAAATTTGGGATTACGCGATGGAAAAATCTTTCC  
TATTTTAGGAACACACACCTGTTGGTAAATGCTACGAATGCGGTTTTGACGGTGAAT  
CAAATGCACCTCGAAAGGATTTAGTTGCCCGAGCTGGGGTAACCACGACTCGGCAAGAT  
GTCAGTTATCCGAAGAGTTTGCAGATATCTGGGTGCTCCGTTGGCGAGAGGCTTCAATA  
AGGCAAACAAGCCGAGTTTCATCACGTGTCAAGCATATGAAATAATTTTAGAACTTG  
TTACATTTGTGCAGATGTGTGTTAATAACATCTGCACAACTAAACAGCCCAAATGAG  
GTTATTATGTCTGATTTTAAGCAAAGTATTGAAACCTTTGAAAAGAAATTCAGGATATT  
AAGTCCATCCTGGAAACCCCAATGGATAAAGATGAAGCTCAACAAGCAATCCACAACCTG  
AATTCTATGTCTGAGGAATTCGAATCAATCGCTCAAGCTGTTGCTGATCGATTCCGCATT

TCCTTCTCGACGGTTGATTATGGATATGGCCGTACATATTATCCTAAAGGTCACCGTTTT  
TGGTCGGAAAGCAACGCCGAAGAGTATGGACAGGGAACCGAGAATGGCTACTGGCTCCGT  
TCCTCTGATATGTGTTAAGGAGAGAAGCAATGGCTCGTTCTAAAGAATTGGTAGAAAAGG  
CAGTTCAACTTCAAAAACCTTCTTGTGAAGTTGAAGCACTGGCAGCAGAACATGAATACG  
GCATGGAAATCAACGGCAATGAAGTTGATTTTCGACGACTGGCTGTCAGGCAGTTGTTATG  
GCGACGGTTGTGAATCATTGGCATTAAATGCAGATGGCCCCGTGTGGATGGAAAGTAGTT  
GCTAGTTAAGGGGCTCTTCGGAAGCCCAATTTGAGGGTTTTGTTATGATTATTGTTGGCG  
CTCGTGCTTTTTCAAGCTAGGCTAATTCGGTTTGTGCTCCTACAGTAAATATGGACCATG  
ACTTCATTCCATACGAAGAAGAATGGAAGGAATATCAAGTCAGAATGCAAGGTCGGACTA  
TTGAAGTAAAAAGCCCGAATGTTTCGAGCTTTCGTCGTCGGTGATGGTAAATCTCGTTGCT  
GTTATCACGAAGCATATATCGTTCAACCTGGCTCGTCCGATGAAATGATTTACAACTCA  
TGGATACTGTTCCCGGTAAAGTCGTATATGCCACTCCTGACATTCTTCTCGCCATGAAAA  
TGGCTCATCGGTTCAAAAAGAACAACCTCGCAATTTTCATCAAAAACGATGATGTACATTCATG  
AATTGCGTGAATTTGGTATAGTCATGTGGCCTGAACACGTGGAAATTTTCAAAAAGCGTG  
AACAAAGAATCTCTGAATTATGGCCGCCCGAAGCTTAACGTCAGTAAAGGCGCATTTTTTCA  
AAAACGACATCTATACCTATGATCATGACACAATTCAGGAAGCAGTGGCGGTTGACCGTA  
TTCCAGCATATCGATCATAACATGGTTGATGGCGCTGAAGTAAACGACGTCAAAAAGAAAAAT  
TCTTTAATAGCTCTCGTCGTATTCAGTTGATGGGTGTTTATGAAGAATCTTGTGTTTTGG  
CTCTGGGACGTTGTCTTATTCCTTTCCAGGAAAAGTTCAACCCTATAAAGCTTTTTGAAA  
TGGCCCTTGAGAAAGTATGCACTTCTATTACATCTGGCTGGTTCCGTGAATTTGCGTGGG  
AAAATTATTGTGACGTTATGAAAATTTACGCCGATCGAGTCAGGGCTGGCGACTCATAACG  
ACGAATTGTTCAATCGAAACCAGCATTTCCTGAAAATTCACAGTAAATATATATGGATTT  
TCACATAGTAGGTATACTGTGCAAGCATAACATGGTCCAAAAAAAAGTTTCGTCAGAACTGAC  
ATCCCGGCACGTGAACCGGAAAAAGCGGATGAATCCGAAAATCCTAAAACAGACCAATAG  
AAGCTGTTAATAGTTTATGCCCAGGTGTTATAATGATCCTGGGCATTTTTTGTAAATTGGAG  
AATGTAGTGGGTATTGAAATGCATATTGAAGCACAAAAACAGATTTCGAGAAGCTGAATGG  
TCTGTTTCGCACAGCAAAAACACGCTCGAATGCGCGAACTGTGAAACGCAGATGTAGAGGAA  
AAAGAAACTGGCCGAGTCTAATCTGAACCTATTTTCAGAAGATCATGTTGCTAAAGCTATT  
TCGAGTTATTTGAAGTCGAATGAACATGACGTAATGCTTGACCGTAGAAAAGAAGTCGCA  
AAACAAAAATTTTCGTTGTCATGTTGCGATACCGATCAAATGCAACTTGTTTCATGGGTT  
AATAAAGTAGTTGATCTTCGATGCCGCAAATGCAACCGGAAATTTATTTGGGAGTCTCCG  
ATATGATGTTTGAAGAAGCAAAAAGAGTCAATAAACCGCCCTCCTAAACTTTTTCTTTGGTA  
AAGAATATGATGGGACTCATGTAGGCAGTATTTTGGAAAAAATACAGAAATACATTGGTC  
CAGGGGATGCTTATCGAGTGGAGTATCGGGTACTACTAGACGGCGGTGATGTCGTAACCTG  
TAGTAGGAATAGCCAATTATAACTGGATAACAAAAGTTGGCTACAGGCTTGATGTGGTAA  
TAACAAGAATCAAACCCACAGAGGCGACGTTAGACCGATGGAGCTGTATCTTTTCGGAGA  
AATGGCATGATTGAAATATACGGAATTGTTTCAGAATCGCACAAATGCCCAGCATGCGAC  
TTAGTGTCAAACGTCTTGACGAAGATGGCATAGAATATTCATAGAAAACCTGTTTTGCG  
GGAGGCTAAAACCTGATCTCGGGTTTGTAGTACCAGCGAGACGTCGTCGATGAACTCAGGCG  
TCGTATAGGGCAACCCAAAGGTTCCCTGGAGCTTCCCAAGGTTTTTGTAAATGGGATATA  
CATCGGCGGTGACAAAGCTCTCCTGGATTATCCGGATTCATACGCCTCTTCAGAGGCCTT  
TTTCGTAAAAGTAGTGTACAAGGTGTTTTTTCGATGATAAGATAAGTAACAAGTCAAGTG  
AATGATATTTACATTATGATCGATATACCGAATATTATTGAAAATATGAACGAAAGGTTT  
GCGATTCTTGGGTATAAGCCTAATAACGGCAAAGCGTGGACAGGCTATGTTGACGCAGAA  
GGCAAAGGCCCAACCAATCAATTGGCAAACCTGCTCAAATGGTAGGCTTGAACATCTGG  
TCGCCGCTGTGCCAGCACGAGAAACTGTTTGAATTAAGTCAAGTCAACTGAC  
GAAGTTCGCATGTTTGCAAAAAGACAACCAACGAACAATCGGTTGGTCAAATATGCTGGTG  
TATGACAAAAAGAACAACAATTAGAGCAATGTGTTTGAATTGCTAATCCTATGTCAACT  
ATGTGAGAAAATACTATGTCTATGAAAAATATTGCCGAATTTATTCGTACAAAATTC AAC  
TCGTTTGTCAAGAAAAATACTTCTGTGCAAGACCAATATGCGAAAGCAGCAGAACAAAGTG  
ATTAGCCAAATCACCAGGCTGGAAACGGCACATGTGAAATCCGTTTCAGAAGAAAAACGG  
TGGCGTCAATATGCAAAAAGATAAGCAAGTTGAGGCGCGGCAAAAAGATAATGAAATTCGT  
CTGCTCATGAATCAAATGTTCCCGTCGAAACTCATGTTAAACTTGCTATTCGGTACCGT  
CGTACGGCAGATGCGCTGAATGTCAAAGCCGATGAGTTGGAAAAAATGCGGGACGAGATT  
AAGCTGGAGGTTGTTGAACTCGACAATTCTCGTTCAGACTTGCTGCCTAACTTGAGTTT  
ATCCGCGATACTCGCAATGCAGAAGCGCTGGGTATTTCTTGTCCCGAAGATGTCATCGAA  
TAGGCTGGTCTCACCAAAGTCGATGTGAACGATGTTATGATGCGTATCGAAACCTTCAAC

GGCGATAAACGTACAGCTGTAACAATTAGCGAAATTGAATATTATATCAATGGTCTGAAG  
TAATTATAAAGGGCCTCCTTGGAGGCCCTTTGAAAATGGAGTATGTTAATGATTTGCTCA  
ACATTAGTAACTCTAGTCGATCCAAATGGAATTACAACCTAATTGGTATAATCCGGTG  
ACAATGGTATATACCAACGCGAAAGGCGAATCTATTGACGCATACACCGCCGATTCTATG  
GGATATACTATCAGCAGAACCGAAGAAGCCAAAGAGACGATCGATTCTTTTCTCAAACCTG  
TCTAATGCCGAAATGAAAAAGAATTATCGCGAAATGATAGGTAAAGATCGTCAGATTGAA  
CGTGAAGAGCATGATGGGAGTGCTAAAATGGATTACGAAACTTTGGCTAGAGCCACTGAA  
ACTGCTGATAGTCTTAGACTCAATAAGATTAACGAGTGATCTTTTGAATTTGAACGCG  
CAGTATCTTCCAACCTGTTTCTGGTATGTCGACTGCTGCGGCTGCCCTTAAAGAAATCTCC  
GGTGGTATTCAAATCGGAGTAGAACGGCGATGGAAGCGGACGTCGGAAGCCAGCCACGGT  
GAAAAGTATATCGCGCATTATAGCATTTCCTGTAGCAGATTCAGAGCCGTTGGTGAC  
GCAATCAAATTCGTCAAACCTCTGCGGTCTGCACGTCCTCAGTTGTCACATATCGGTAAT  
ACAAAATGGCTTACACTAAACGGGCTTAAACAACCGCGAAAGTGAAGTAAAATTTGTC  
AAAGAATGGAATAGCCATTTACCGAGGACGTGCTTATCAGTATCATGCTGGAAAAAGGC  
TATAACATGTCGATCAGCTGCCCAAATCAAATATTGCTGTTGGGTGAGTTGTCGATTTAT  
TCCATTCCTTAAATTTTCGCGAATTGAAATGTTTGTAGACTATTGCCGCCGAACTGCTCCG  
AAGAGAGACTGAAACAGTTTACAAAGACCGTCAATCGTGATAAGATAATTTAGTTGAAAC  
AAGCATTCAAATTTTCGAGAGGAATTCAAATATGTCTAATGCATTCATTGCTGTTTCGTAA  
CTTTGCTGTACGCACTGCTGCCGCCGAATTCACCGCTGATAATATTCTTGGTTCGTGAAAT  
CACCGAACAAATGATCTACAAAGTTGAAAACACAGTATGGGATGCTATGATGGAAGTGGG  
TGTTACCGGCATTGGACGCCGAGAGATTTCGCAGTGTTATTGTACAATATATCGCGGATGA  
ATTCGGTACCCAGCCGCTTGTTCCACACTCCTACACAGGCAGGTTACAAGCAAGTCGCCGA  
AGACGCGTACAAGAAATATCAAGGAAAAGCTCGCAAATCCACCAAGAAATGTACGGCAG  
AAAGCGATAATTTTCTTAACTCCAAATAAAGTATCTGAAGGCTTTTTCGGTGTCTTCCGAA  
ATAGGAATATAACACTGCAATTCATAATTATTGTTTCAAGCCGTCATGCTGGTCCGATTG  
ATCGCTATATTATGGATTTGAAAAATATCGACCGCGTTTCTCCGGGTGGTTGCGAAATGC  
ATATTTTACGTACTACTTCTGGTGCTGATATCATTTCATGTTGACGCTTATGACCCCG  
AATTGAACAACGAAGTTCACCGGCACGTTTATTACATTTCGGAATGCCATTTCGTGTGCCGG  
CTGGTGCACACCTTGTCCGAGTTATATAACGAGAAATTATAGCCGCCAGGCCGAGAAAGC  
TGTTAGCGACTTTATCTACATCGAATAATTAATATGAATTTCAAGGGCTTTTATACTGCT  
GTAGGGAGTCGCGAGACTCCCGAACATATTTGTCGTTTGTATGAAAGATATCGCGGGGGTT  
GCTGCGAACAGAGGATATAACGGACGTTCTGGTGGTGCCGTTAAAGCAGATGACGCATGT  
GAAACTGGATTTTTTGCAGTTGCTGACAGTTTAGCCATCGACAATATGGCTGAATTTGAT  
GTTTATCTGCCATGGAAACGATTCAATGGCCGTTTTGCACCAAACATGCTCGTCACAAC  
CTCATTTTACCAAGCGCCAATGAGTGGGACGTCGAGCAAAGCATGAAAACGGTCCACCCA  
ATTTACTCAAAGGAGGTAATTTGACTGGTGGTGCTCTTGCACCTTCATACTCGAAATGTT  
TATCAAGTTCTCGGATAGAATCTGAAAACACCTTCAGAATTCTTGGTGTGTTATTTCGGTT  
CCAACGGATAACGGAGTTTCTGGAGGAACAAATACTGTGTGGCAGCTTGCAATGTGTCAT  
GGTGTAGAATGTTATAATCCTTACAACCAGTTTACATTGAGCGGCTTAAGGAATTTTTG  
GATCTTTGAACTTTTACTCTCTCCGCTATACCAGCTGCAGGAAAAACTGCAGCTATTC  
TAAATCATATTGTTGAAAATAACGAAAAGGCAATTATAGCCAGCATATCTAGACAATTGT  
CGAAACAATCTTTCGAATACTTTGTCGGTCTGGGCGGAGAAGGCGAGTTAGTTGACACCG  
ATAACCGCCAAGGCGAAAAGTCGGTACACGTAGCAGTTCTCAAAGCATCCGAAGCATTG  
ATGTGATTTTTATAACGCACGCGGCTTTAATAGGTCTTCGAGATATTGACGCTTTAAAAG  
ATTTAATCTGTATATCGATGAGGTTCCAGAATTAACAAGCTTCGAGCGATTTACTTGCA  
CAACATCAGTCGAAATTCATATATTCGAATTGTGCAAAAATAGATGAAACTGGACTATTAG  
AGCTGCGTGATGAGCATCGAAAATCAGTCCAAAAAATGGCAATAGATGGCTTTAGAGGAA  
ATGATGACATTTATTCAACTCTTTTTCCGTTGTATAAAGCACTCCTGACAGGTGTCCCTG  
TCAGGCTGTGAGTAGAGGGAGGTGTGACGCAATGTTATTACGTGAATGACGCGGCAACTG  
ATGATTGGGCAAAAATTCAAGTCAATAACTGTCTGTTCTGCAAATTTTGAAGCAGACTTTTA  
CGAGCATGATTATGAAGCATTTTAACGGATGGGAATTTGAAGAGTCTCCGCTAGTTGAGC  
GGTTAGCTTTCCGAGTTTATCCTAAAACCTGCTCGCGTAATAATTCATGTAATGTTTGTG  
ATGATTTGTCTCGTTACAAAGCCGACAAGGAAGTAGATGGGATTTTCAATTACACCCGCA  
TCGAAACTACTCTCGACACAATCATAAATGGCGATTTTCAATTACACTCGAACTTCTTATC  
GGCCAAGAATGCCAAAGGGGACGGAAGTTCCTTATAACGCGCACGGTCTAAACAAATATT  
CGGATTATACCAATCTGGTTGTGATGTTTTCGTATAATCCGGCGCCTTGGCAAGTTCCAA  
TTTTGAAAGAACTCGCAAAGTCGGTGGGCTTAGATGAAAGTGCAATGGTTGACGCGTACA

TAGTTTCAAAGTATCTTGAACCCGCATTTCAACTTTGCACAATATGTGATATCCGAAATG  
AACATTTCGCTAAAACCCATCAACCGGTATGTTCTGATATGAAATTAGCTCGATATATGT  
TGAGTTATTTGCCGCACGCTGAGATATGTGACGGTAATTCAATCGAAAATCACAAACAGG  
TAAAAAGAAATCGAGAATCGTATCAAACGCTATACCAAATGACAGAGAAAAGAAAGGATGA  
AATACAAGAATCTGCTAAGAAAACCTTTGGCGAAAACCTCGATATCAATTCTGCGGGAGACC  
AGGGATTTGTCCAGGACTGGATAATCAAACGCGAGAAAAAGCCAAAAAGAAGGCCTCTA  
CATGAGGCCGTTGTTGTATGCACATGATAACACAGGGATCACTCTGGGGTTATCAGGAAT  
TTTTGATGATAGGGTATTAGTCTAATGACCTTGTTTAAACCTGGTTGATTATAGAAATCC  
TGGCTCCAGGTTCAAGCTTGCTTGAACCTTATCTTTTTTATCCTTTTAGTTATAATATCTA  
TAAAGCCATAAAGGATAAGTTTTTGGCAGGGCCAAAACCTGCAGGCAGTAAAGTTAAATAA  
GTTTAGCAAGCTTATTAGTATGATATAATCAGTCATAGGAGGAATTGCCCTATGTAATAT  
GTTGACAATGAAGTTCTATACCAGAATATTTGCAAATGGAAACAAGATATGCGTGATGCA  
GGGCATCACATCAAGATGACAGATGCAATTGGTATAGACATTATGAAGATTGCAAAAAGGT  
TTTACCGGATATTCCAAATTTGCTGGATATACGCAAAATTGGAAAGACGGAATGATATGT  
GATGCAGTCGAAGCTGTTGTATAGGGATTAGTAAATCTCGATGAAGAAAACCTACAAAAAC  
CCCCATGCTTATGTCACACAGGCTTGTTACCGTGCCTTTATTGGACGCATCAAGTACGAA  
AAACACGAAATGGCAATCAAATACCGGTATTTTTTTGACCAACGTGTATGACGAGTATGAT  
GAGGATATGTCACGATTGGTTGATGAAAATTTTCATCCAAGACATCCATGGCAAATTAGTA  
GCCTTTGAATCATCCCTTAAATCTAAAAAGAAAGATAAAGAGGATGTTCTTAATTTGGAT  
TCATTCTATGAAGACGACCGTGAAGATTAATCTTTTACCCATCATTGATTCAACATGCGG  
AGAAATAGAATTATTAAGCGTATTTTCGTAAAACCTCCAATTATTGGATTATAGTATTCTTG  
TAGTTTTAAGATCCTGCCAATATTTTCATGGCAGCCGTTTGAAGTAGAAAACCTAGGCCAACT  
CGATTGGGATATTGATGTAGACACAATGACAATGGAGATTTTCATATGTCGCCTGATTACG  
ATGTTGACCTTAGCACTGGTGCAGAAGCTCTGACTGAAGTTTATCGCCAAAGTCTCATGG  
ATTTACAAGAACATCTACGAAAAACAAGCTGAAGAAAAAAGCCGCAAAGCATCTTAAAAAC  
TCATGGGAGAGAAATTAAGCGGCTGAAGAAACATGCTGAACGAGCTCTATTCGCAAACAA  
TAAAGAACAGTATGCTTATGCTATCAGTAAACTTCGTACCCTTTACAAGCAAAGCAACA  
TCCGCATTCTGCAATGATCACTATGTTTGAACCTAGTCGTCCACAAATTGTTTACATGGC  
TAAAGCATATGCTACTGCCATCCAATCGGCAGAAAAATAGTCAAGCAAATCGCAAACCTG  
TTCCAGTTTGTCTATTTGATCTATTATAGGCTCCACGGAGCCTATTTTTGTATTAGGAT  
TTAAACATGAAACTTTTGCATCTCGGTGATATGCACAATGGCGTAAAAGATGATGACCCT  
TGGCATGAAAACATCGCTGAACACATAATTGACCAGGCTGTTGAATATTCTAAAGCAAAT  
GGGATAACTCAATGGCTTCAGAGTGGCGACTTTTTTTGACGTTAGAAAGGCTGTAACACAA  
CGTATAATGGAATTCGTCAGGACTCGAATTACGCCCAAATTGAAGGAAGCTGGTATTATA  
TGCTATGTGATCGTGGGAAATCACGAGATGAATAAGAAGGATAAAAATACATCCAATAGC  
ATAACGGAAATTCTGGGTAAAGATGAAACGTATGTCGGGATTGATAAACCGACGACGGTC  
AATTTGGAAGGGCTTGATTACGACCTTATTCGGTGGTTGTGTAAAGAAAATGCATCATA  
ATTTTGGAGTTTGTGCGAAAAGTCAGAATCCCCATGGTGTCTTGGTCATTGGGAACATAAGC  
GGATTCTATTTCTACAAAATATTCCGAGTTTGGGAAACAGTGGAGATTTTTTTGAAAAG  
TATGAAAAGGTGTCTCTGGACATTTTCACTCAATCAGGCGGTGAAAATATTTACTAC  
ATCGGCACACCTTATACGATTACAGCCGGTGTGAAAGATGCCCTCGCGGATTCTGGGTT  
CTTGACACAGAAACCTGTGATTTTGAATTTATTCGAATTCCAAAACATAGCACAAACGA  
CTGACTTATCTTGGTATTACAGTAGAAGAAATTCGAGAGTGCTCCGGTTGTTCTGTCCGT  
TTGATTGCTAATGAAGTTGATTAAGGCTTGACAAAAGTTGAATTTCTTTTGTCTAAAATT  
GTTTCATGATTTGAGAACCATCAACAAATCTGCCAAAATTGAAGTTGATTCTTCATCTGAT  
ATAACCGATGACGGCGAAACTCTTGTGTGAAATCTATGGATACTTCTGGTAGTTTCGATG  
ACCATAATGGGTTTATTCGCTGAAAGTGTGCAAATTCAGCATCGGAGCGGAACATAAA  
GAAGCTATCGTAATTATGGCAAATGAACTTTATGCTGAGGCTATTGCATCATAATTGAAA  
TTAAAAAGAAGCAGATTGGATTTATTCGAGTTCGCTACAAAACATCATGTCCTTAGGCG  
GTGATCCTATCGATATGTCGCTTAAACAAATATGCCAAAACATTGTGCACTGGCAAAAATA  
GTGCCGAAAATCGACAATGTTGGTTCGCAATTTATTTTTGCGCTATTCGGTAAACTTTTTTC  
GAGATATTACAACAAACCGACTGCTGAATGAAAACACTGGCAAAAATTTGTTAGTGGAAC  
TTTGGTTGGAATACGGAGCAAAGGTTTATACCATTACACGTTGAATTAAGCCTAATAAGT  
TTTCGATAACTTGTGACGGCGTGGCTATAGATGCTGCAGCATCAGATAAAGATTTTCAGT  
CATATTCGAAGAAATGATTGGAATGAATTCTACCAGTTTTTAAACAGATAGTTGTTTTGG  
GCACTGCTGGATATACGACGTTTATGCAACTAAAAGCCCCGGAAGGGCCCACTGGTG  
GAAGATTTGCTGGAAGTATCCGTCTTAGCTCAAATAGACAAAACCAATAAAAGCCACGGA

TTAAGGAGTTAAACCAGGATATCACTTCAGTTGATATGGATATAAACTATATAAACTCAC  
AGCTGAAAACATAACCAGGATCACCAGAATAACTCTAATGCACCCAATGCTGCTGCTATAT  
CCGACCATCAGGCAGTATATGACACTGCTCGCGAAAAAGCAAAAAGAAATCAAGTCGGCTA  
TTGATTTGCTCACAACGCAAATTACAGAATTCGTGATGCCTGCTTCCCCTGGATCCGATC  
TTGGCAAGTTTACAATGGCTAGAGCAAAAAGCCGCAGCGCAACATGAACAAATTTCCGGTA  
TTGCTCATATGCAGGAAGATGGTGGAAACGTGCCAACATGCATGCAGCAATTTGACGATC  
CTGAACTGCTAGTGAAATTGCGTGATAAAATGTCGCAGATCCATGGTCAACTTGATAAAG  
CCGATATTCGCATAAATGAACTCAACCAAAATATGATAGAGTTCAATGAAGCAGCTGTTA  
ATTTCCGCGATCTTCAGAATAAGTTAACCAACGAAAAACAGTCTATTGATCTTTATGTTA  
ACCAAACAAAAGCTGCAAAAAGCTGCAATCGAGCGTCTGCAAGATGAAAGAACAGATTACA  
CATCGGAAATCGACCAACTCGGGAATAACCTACGTTTAAAAATTAGTGCTAAGCCTGATT  
TAGAAAAAGAGAAGCACTGTACGTCTTTGTTAGCTGATCTTTTGCAGGATTCGGGAATTA  
AAGCCGTCATCATGGCCCGCTATATCCGTATTTCAATAATCGCATCTCTCATTATCTTG  
ATATAATGGATGCAGATTTTGGATTTACTCTTGATTCCGGAATTTAAAGAAGTAATAAAAT  
CTTCAGGAAGAAGCACATTCAGTTATAACAGTTTTTCTCAAGGCTAAAAAGCTCGTATTG  
ACATGGCTGTCATGTTTGTGGGCGTGATTTAGCATCTGAAGTTTCTGGTGTAGATGCTA  
ATGCCCTGTTTATGGATGCAGTATTTGACGGTCTTCTGATGATGATGCACAACGCTCAG  
TGTTTTCAATCATAGAAAACATGAAAGCCAACGTGTTTATCATTTCGCATGGAGAACACG  
ATCCTCAGAAATTTGACAGACACATTGTAATGTCAAAGCTAGGGAGAAGTACGCGTAATGA  
ATGAGGTAATTTTTGATGTTTTATAATCTTCCAACAAGTCTCCTGAAATAAGAAGTTAT  
AACTTAACTGATGAAAATGCTCATGTTAATTTGATTGTCAGTATGATGACCTGAAACAG  
GTTTTCAGCGAAGAAGATAACCGCAAGTTGAAATCAAATCGCCATGCTTATTACAAATTA  
GTTGAAATTTTCGACTAATGATTTGCGTGAATAGAAATCATATTAGAATGTTTCGTTATAA  
ACACACTGAGGAATATGTATGCGTAATCAAGCCGTTGTTTTGTACCAGCCGATATCCGC  
CCGATAAGCGATAACGTGTTTGAATAATCAGTTAAAATCCGAAAAGCTTGGGTATCATT  
ATCAGTGATATTCGTGCAAACCAATTGCAAGCTCTTGAGCAGAAAATTCGGTTCGAACTA  
TATGGCGAAATTTGATAAAATGGTTCAAGACATGTATATCGATATGCTCGTACGCCGCCGA  
CAAAGCATTTTAGCCAATGGCGGATATCATGTTAAAGGAATGAACGACAAAAAAGTACTA  
GCCAAACAATTTCCAATACGACACTGACGAACTGATTATTCAAGCTGCTCAGACTGTCATG  
GCATATTACTAATAAGCTATATCGTAGTTGTGTTATAATATTTCAAATACTGAAAGGAAT  
ATGAAATGAACTTACAAAAGCAACACTGTCCGTAATGAAGAATGTTGCAGCTATCAATC  
CATCTCTGCGACTTACCCTGGCAATTTTCATCATTACCAAGTCGGTAAATGGTGTTCAT  
ACGGTGAAGTTACAATCGCTGATGAAATTGATTCTGAGCTGAACATTTATGACCTTCTA  
ACTTCTGTCAATTTCTGGTGAAGTGGGTGAAGTTCTGAAATCAATCTCTCAAACGGGG  
AAATTGTGATCCAGAATGGTCGTGCAAAAAGTAAATCTGCCTGATGCTGAATCTTCAGTCA  
TCGTGGTTCCGAAGTAACGGCTGCGTATGCCACCGGCTGATGTAGAGTTTGACCTGAAAG  
CCGAAGATTTAGCGGAAATTTCTCAAAATCTCTCGAGCAGTTGGTGCAGACCGCATCGCGA  
TTACTAATCGCAATGATGATATCGTTATTGATGCGTGTGCCGTGAAAGACGGCGATAATG  
CACGAACCCGATATTCTTTGACGGTCTGTCCATACGAAGGCACCCACAACCTTCAGTTTCG  
TCATCAACCTTGAAAACGTCAGTGTGTCGTTGCCGATTACAAAATCAATATTTCTTCCA  
AGGGCGCTGCTCAATTTCCAGGGAATTAATACCGCATAAGTATTTGCCCTTGAAACATCTT  
CAAAGCAGACTTCTAATAAATCCTGGTGTGATATAATGCGGGTGTAAAAGCCCGCTTTC  
TTTTGAGAGGAATTTAATATCTTGACAGTTAATGCCGGCGAATTCATGTTTGAACCGA  
ATATCGCCCAGGAACAATCGATGAATGCATTTTGCCAGAATATGACAAAATGATTTTCAA  
ATCTATCGTTAAATCTGGTCGTATCCCCAACATTATTCTACATTCTCCTTCCCAGGCAC  
AGGTAAAACCTACCGGCGCCAAAGCTCTGGTATCAGAAGTTGAAGCCGAGTGTCTGTTTCG  
TAACGGCTCCGACGCAAAATATTGACTTTGTTTCGCGATGTTATGACTCCATTTGCAAGCTC  
TAAAACCTATGGCAGCTGGTGGAAAAGTAGTTATCATCGATGAATTTGATCGAGCAGGTCT  
TGCAGATTCTCAGCGTCATCTTCGCTCATTGGAAGCTCATTCCAAAAATTGCACATT  
TATCATTACTGCGAATGATTTGGGTGGAATTAATCCAGCACTTCAATGACGGTGTGCGTGT  
TATCCAATTTGGTAAAGCCGATCAATCTGATAAAGTCAATATGATGAAACAGATGATTGT  
TCGTGCCCAAGCAATATGTGATGCTGAAAATATCGAAGTTGAAGATCGCAAAGTTATTGA  
CGTTTTGGTTAAAAGAAGTTCCTGATTTCCGTAAAACCTGTCAACTAGATAGATTTCTA  
TGCATCCGAAGGTAAAATTGACAGCGGTATTCTGAGTCTGGTTCTCAATACCCGCAACGA  
TATCGAACAAGTCATTGGTGAATTAAGCTAAAGATTTCAAATCGCTTCGTGCAATGGC  
TGGTCAAGACACCACTGATTACGCTGGTTTTGTTGAACGTCTATGTAATGCACTGTACCC  
GCTCGTTAATGGTCCGGAAAAAATTCGCATCTACGAAATTATCGGTGAAAACAACCAACT

GTTTGGCCAAGCCGCAAATATCGAGATTCATGTTCAATATATGTTTCATTCAGCTTGCCGT  
AGAATTACATGGTAACTGGCTTTAAGGAGTTCGATATGAATTTGAATTTCCCTTATGGGTG  
ATGATGAGCAACTCAATGAGCAGGAAATTGCCTGGAAATCGAAAGATTGGGATGCCGTAT  
CAGCATTAGCTGATTCGTTCAAAGAACCTGCCGAAAACAATGCATTCGCATAGTTGGATT  
ATATCACCTACACCAAACCGGAATGATGTGTATCAGATAGTGATTATCCGGCATGGTTTA  
TCAATAATGCTCTTTTCGATGCATGCCGAAACACTGTATTCGGCATAACGTCATGAATCTTC  
TGTCAGCATTGCCGGCCCAAGCGCAATACAATTACCTGGTGTCTGTGTAAGAAATGGCA  
AGATGTACGGCAAATGGCCTAACTAGATGAATCAATCAACGAAAAGCTTTATATTGCCG  
TTATAACAAGCAGCGAATAACGTTGATTTGCATACAGCAAAGACGTATATACAAATCATGC  
AAAGGCGAAACACTTTGCATGATTTTCTGAAAAGTCAGAAATATATTGTAACCTCCAGCAT  
TTTTTAAAACCTGTTGCGAAAACAGCAAAAAGATCAAACGCAGATGCTTAAGTTCGCTAACA  
AATTCTAAGGTTTTCTTATGGTCCAAATCGATATCAATCATCTGATGATTTTCTGAAAA  
TTGCTGTATCACTTGCCCGAATTGGCATTGCTTCTAATAAAGAAAAGAACTTTACCAA  
GCCGCCATATACTTCAAAGCAAGGCCGAACATTTTCATCGTTCATTTCAAGGAAATGCTGA  
TACTAGATGGTCTACCAGTACCAATTTCCGAAGAACCTATTTCTAGACGAAATAACATTG  
CTTCATTGCGTCAGTCATGGAATTTGTGTAATACTAACTCCGATTGACTTGTCATCTC  
ACAATAATTTAGAGTTATTAGCCACAAGCAATAGGGCGAATAGCAACTTATCGCGAAGT  
ATAAATTTGGTTAATGAAATCGCCTCAACAGAGGCCATTTAGAAGGACATATTATGCAGC  
ATTACACGAACATCGAAGTTATTGGAAATACTATATTTGCGCGTTACGTTAAAGACGGTG  
TAATCCTATCGCGAAAAACAATTATCAGCCCACACTTTTTTCATCATGCCGCCCCAGGTG  
TAGAGACGAAGGACAAAGACATCTATTGGCTTTTTTTCGCGTACCAAAGAGGCATGAAAATA  
TTTGGGAAGCAAAGTAATGGCAAAAACCTAATGGCCGAAATTGGCCAAGATGCCAGGGGTA  
TGGACGACTATTGTATTTCTACATCTCCGAAAATTATCGCGGAGTTATTGATTTTGATC  
GTGACAAAGTTATTATGGATGTAGTCGATATCGAAGTAACAGCTCCAGAACTCCCTGATC  
CCATATTTGCAAAAATATGAAATTGATATGATTTCCCATGTGCGTTTGCACGAGGGCAAAA  
AGACATATTACATTTTTGGCCTTGTTAATGATGTAGGCCATTGGGACCCATCTAAGTCTG  
TTCTAGACAAATATATTCTTGACAATGTCGTTTACATGCCATTTCGACACTGAAATTGATC  
TTCTTCTCAACTATATTCAACTATGGAAATCATCTACGCCTGATTTGGTGTTTGGTTGGA  
ACAGCGAAGGTCTCGATATTCCGTCCATTATCACTCGAATTATCAACATCTTGGGTGAAA  
GTGCGGCTAACCATGTAAGTCCGTACGGCAAGATCAGCTCAAAAACAATTACAAACATAG  
ACGGTGAAAAAACCATCTATCCTATCCATGTTTTTGCCTGATGGATTATATGGATGTTT  
TTAAAACGTTTCAGTTTCGCTGTTATGCCTGACTACAAGCTAGTTAACGTTGGATATCGCG  
AAGTTAAAGCAGGCAAATTGGAATATGACGGCCCTATTAATAAGTTCCGAGCAGCAGATC  
ACCAACGATATGTCGATTACTGTGTGCGAGATACGGATATGATCCTGTGATCGATGGCC  
GTCGATGCTTTATTGATCTTATTCTGTCTCTATGTTCTTACGCGAAAATTCGTTTCGAGG  
ACGTATTAGGAACTATTAAGTTTGGGATTCTATCATTTTTAAATTCGCTTGTGAGAAAA  
ATGTAGTTATTCCGATGATGAAAGCTAGTCCACAGCAAAGTTTCCCTGGGGCATAACGTAA  
AAGAACCTGTTCTGGTGCATCGATATGGCATGAGCTTTGATTTAACATCTCTGCATC  
CGAGTATTCTGCGTCTTCTCAATATCAGCCCAGAGATGATTGCCGGTATGTTTGCACCTG  
CACAACCTTGACGACTATATCAATAAGACTGCTCCTAAACCATCTGAAGTTTATAGTTGTG  
CCCCAAATGGCATGATGTACAAACGGGGTGAAGTAGGTGTAAGTACTGCCAGCCGAAATTGAGA  
AAGTACTCTTGCAACGTAAGCCGAAAAGAAAATGATGCTTGTGCTATACGCAATCAGG  
AAGCAATTAAGAAAAATTCTGGCTTCCAGGGGCGAAATGGTAGACCACTAATGTTCCGCT  
TTCATATGGGTGTTATATTATGCACCCATCTTGCAGGAATTACATTATGTGGTACCTTTA  
CAAAAGAACGAATGAGCTAAACGGCAAATTTACGTCCGGGTTACAAAATCCGAAGACAT  
GAAAACGACCCTTACATCGGTTACGGCGTACGTGTTAAACGAGCAAGCGCCAAATATGG  
TGTTGAAAATTTCACTCGGACGACGTTGTTTCGAATTTGCGACAGCCGAAGTAGCTTACAA  
TATGGAAGCCGCCATAGTGAAGAGTTTATCAGCCGTCCAGACGTCTACAACGCAAT  
GGTCCGGCGGTAAAGGTGGTTGGGCCCACATCAAAAAGCCCGGGCAGCATATGAAAGACCC  
TGTCATGGCTGCTTACATTGGGTCTTGCCTTCGCCGTGCATATGAGCAAGACCCGATTAA  
AAAGCTTATTAGCCTCGCCAATTTCAAAAAGCGTCCGAAATGAACCGTGGCAAGGCACA  
TTCAGTGGATACTACCAAAGCGGTCCGACTCGCCAAACGATTTCTACTCGTATAACAC  
GTCTGTTTTAACCGGTATCGCAAAGTCAGCTGAGCATCGCAAGAAAATGAAAGCCGCTG  
GCCTGAAGAACGCCGCGCAAGCCAAGCAGAGCGTCCGAAAGGCCCTAGTAGCCTGAGGTAA  
TGAGGCATTGCTAAAAACAGGCTGGGCAAAAACCTAATAGCGAAGAACTAAGGCTAAGAT  
GTCTGAAGCGAAGAAAAAATACGGGGCTGAAAAGCCAAAAGTTATTGTAAAATTTCCACA  
CTGCGGCAAAGAAGGCATCAAGCATGCCATGCTCAGATGGCATTTCGACAATTGCCAACA

CAAAGAGGCGTAATTATGGAACCTCGAATTATTCCGCGACTTCAATGAAGATGAGCTCGCA  
TATTTGAATACTCTTTCAACCGATGAACTTCTACCATGATCGTTTCGTTGTGAAAAAGAA  
GAACAAAAACGCAACACCAACCAATTGTACCACAAAATTTTGATCAGCTCGCTTTACGTA  
GCTTTTTAACACTTCTTAACCTTGAAGCTCCTTAAACCCGGTGAAATCAGAGAACCTCTC  
AATGAGACGATCCTGAGCCAAGTCTCGAAAGAGAAAGGTGCAACGACTATCAAAGGCGG  
GTAATACCGAACCGAGTAGAGTACACCCAAGTGGGTGGAAGCGCCGTGTGTGCAGCAATG  
CATTTGATATAGTCAGCTCTGCATAGCGATATGCAGCTGTGAGTAAATGTGCGGACGACA  
TATTCACGGTCTTGGATTAGCGACCCAAGGCGAACACCTGGTAGGTAACAACCTTCTTCC  
GATTCTACGATTTGCGAAAAGCTGAAGCTATTACAACCTTACGGTAAATTGGCTATTCCGGT  
GTATTGAGCGTAAACTGAACGAAAATATCAACAATGTTGTCAAACAACCTAATGTTGATT  
ATGTGTGTTATATTGATACTGACTCGGTGTATCTCAACATGGAAGCAGTGGTTAATAAAG  
TCGGTATTGACAAATTCGGGGACACCAACCATCTGATCGATTTCCCTTGATAATCTCGGAG  
ATAAAAAGCTCGATCCATTTATCGACGAGTCATACAAAGAACTCGACGATTATATGAACA  
ATGTGAACCATCTCTTGCTCACGGACCGCGAAGGTATTTTTGGAGCTCCATTGGGTTCTG  
ACGGAATTGGTGGTTTCTGGACAGGTA AAAAGCGATACGCTTTGAACGTTTACGATATGG  
AAGGCACTCGATACGCTGAACCGCATCTGAAAATCATGGGTCTAGAACTGAACGATCAT  
CCACACCTTTGGCTTGTCAA AAAATCGTTAAAAGAGTCAATTCGTCGGTGGTTGCAAGAAG  
GTGAATCTTCTTTGCAA AATTATTGCATTCAATTCAAGACTGAAATCAAACGATCGATT  
ATCAAGAGATTGCCGCA GTGTCTTCTGCGAATCATATCGCCAAAAAAGCGGATTCCGGCAG  
GATATCCAATTAAGAAGCTCCGTATCATGTGAAAGGAGCCCTTGCATATAACCGGATTG  
CAAAAACCTGACCAATCAATACCAGAGATTGTGGAAGGCGAAAAGGTAATGGTTATTCCTC  
TTCGTGATCGCAATCCATTC AATGAAGCGTGT TTTGCTTGGCCGTCAGGAACACTAATTC  
GACCTGTCGTAGAAGCCGATCTTTTGAAGTTTATGGATATAAATAAGCATT TTTGATAAAA  
CATTCGTTAAACCACTTGCCTTCAATTTGCGAAGCTACGAAATCAGATTATGAATTTAGGT  
ATAATTTGTTTGACATGTTTGATATTTGAGGAAATAGTATGTGTTAAATGACTGTTCAAG  
ATATTCGGGACATCATGGTGTCAA AATACAAATCAAATGAATTTGTTACCGACAAATCCG  
GGTTAAAACCTGTCGAAATTGCCCCAGTTATGTTTAATCACGATGAAGATCTAATTTTCG  
GTAAACTTAATCACGATAATATTGAGCGAGAGTTGTCTTGGTATTTGAGTCAATCTCGTT  
ATGTTGCCGATATTCAGGTA AAACCCAGCAATTTGGGAAGCAGTTGCAGATTGTAACG  
GTATGATCAACTCCAATTATGGCTGGGCTATTTTCAGCGAAGAAAATGGAAATCAGTTTG  
CAAATGTTGTCAAACACCTAATTGAAAATCCATACACTCGTCGTGCAAACATGATTTATA  
CTCGACCGTCTATGCATACTGATTACAATGCAAATGGTATGTCCGAGTTCATGTGCACCA  
AAAACGTCCAGTACCAGATTCGGGATGGAAAACCTGATTGCAGTCGTTCCATATGAGGTCAA  
ATGACGCTATTTTCGGTTATCGGAATGATTGGGCGTGGCAGGATTATGTTTTTTCAATAC  
TGGTTGATACTCTTCAATCCCAAGAAATCATGGTATATAAGGGTGATATCTACTGGTGTG  
CCGATTCCTCCATGCGTATGAAAGACATTTTGGCCTGTTTGAACAATATATTTCTCAAT  
AATCTCAATTTAGCATAGCGAGCATAATATTGCTCGCTATGTTTAGAATCTTTATAGG  
GTTGATATAATGTCACCCACAAAGGGAACATTTATGGCATCTACCACTGATCATGAAAC  
TACCAAAAATTTAAATGAGGCTCATGCTCTTATACAGCATCCTATGGAAAACGTTAAACA  
AGAGCTGCTGATAATCGATAAATCAAGCAAATCACACCTGGTTATATTTTTGATGCTCAT  
ATACATGATGGAAAACCTGCATGTAGATTACAAAGCAGATAACGAAAATGATGAAATTCAT  
CAACTTGTTCAAGAAGCTATGAATGCACAAGTCAAACAAATTATGAAGGATAAAGAGGCA  
CAA AATTGGTTGACGCAATCCTTGAAAACCTTACTCTCAAACAATACGTACTTTATTTTCG  
GCATACCCGTACATAAAAGAAGATTATTTGACCGTGGGCCTTACCGCGAGATTTTTAAA  
CTCATCAAAAACACGTGAATGAGTACAATACTATCCCAAACAAAACCTGCACTTGCAATC  
GCACTTCACAAAAGTTCGATTAATCAAGTAACTCATGACGGTGTGAAGGAAGTTCTGGCT  
CGTCTCTCTTCTAAACCAGATGATCATGCCTGGTTAACTAAAGAACTTAATCCTGCTGC  
AAAGACCAAGCGATGTATAATGCGTTGTCTAAGGCATTCGAGATACAGGAAAATGCGGGCC  
AATCCATTTGAAGAACGAAATAAGAAATTGCCGGATGTTGGCGCAATCGAAGATTTCGATG  
ATAGAAGCATTGGCTATTTTCGTTTGATGGCTCAGTCGGACATGATTGGTTTGAAGGTTAT  
GAACGACGTTATATGCTTTATCAATCCAAGGTAATAAAGTCCCGTTCATCTCATACGTT  
CTGAATAAAAATAACCAAGGGTGGTGCAGAACTTGGCACGCTAAATGTTATCATGGCGGGT  
GTCAACGTTGGTAAATCTCTTGGTCTTTGCTCTTTGGCCGCTGATTATCTCAAACCTGGC  
AAAACGTCGTTTATTTCTCGATGGAGATGGCTGAACATGTTGTTGCGAAACGTATAGAT  
GCCAACTTGCTTGATGTCACGCTTGACGAAATAGATGATGGCAACATGAGCTTTGCTGAG  
TATAAAGCTCGGATGGAGCGTCTGAAATCCAGAAATATGGGTTCGTTGGATTATCAAGCAA  
TACCAACTTCTGGGTCGAATGCTAATCATTTC AACCGCTTTTTGAACGACCTGAAGCTG



AAGAAAACTTCAAAGCGGACGTTGTTATTGTGGACTATCTGGGTATCTGTGCATCCACA  
CGAATTCGTAGAGGTTCTGAGAAGCTCGTATACTTTGTTAAAAGCTATTGCCGAAGAATTA  
CGTGGCCCGGCTGTCCAACATCAAGTTGTTTTATGGACTGGTGCTCAAACCACTCGATCT  
GCATGGGATTCGACCGACATCGACATGTCAGATGTAGCCGAATCTGCTGGCTTACCAGCA  
ACTGCTGATTTTATGCGTGCAGTGTGGAACTGAAGAGTTAGCTCAAATGTGTCTCCAA  
CCGATGATGCAAATAAAATCGCGGTATGGAGATAAACATTGGATTAACAAATTCAAAATA  
GGGCGTTAAAGAGGGCAACCAGAGATGGTACGATGTAGAGGAAGAACAATCAAGGCCAGG  
AACGCCAAACACACCTTCTCCAAGACAAGCTGACAATACGAAGGGCAATAACTCAAGACA  
GCATCTTGACGAACTTGCCGCGGTAATGCATTTCTGATAGCCTAACGGCCATCTACATAG  
GAACTGATGATGAAAACATTTCTAGAGTGTCTGGTAAACAGAAAGATCATGTCAATAT  
GGATATACAGGATGACGAAGACGTTGTGGCTGGTGATTCTGGAGGAGACCCCGTCAACGT  
CGCAGCTGGGAAAACGTCTGGCGCAGTCATTTCCCGGGGCTAAAGTCCTTCTTAAGAA  
GGAAAAGAAGAAGAAATGATTACGTTTCGAAGCCGCTCAAGAAGCGTGCGAGGCTTTAGGT  
CATGCAGCATTAAAGAATCTTAGAAATCAACCTTATCTTGATATTCTGAAAACCATCTAC  
ACGAATTGCTTACCAAGCATGATGAAGGATGTCGTGTATGAAATGGCTGTTAGTGCTGCA  
GAAATTGATTCGTACTTGGTTACGCAAGGAAAGCCATTCTCTCGTTTAGAATATGCTCAA  
CACCGTGAAATTCTGTTGGAAGCATGTCGGCAATTGGATGCTAATGGGTTTTTTGTCGAAG  
TATAATAGGGCGAAGAGCCCCATTTGGAGTTATTATGTTTGCTGATTTTTTTGTTTGCCGA  
ACGAGCAATGATGCATTTGCCAAAATTCAAACGGAAGAAGGGAAAGTTCAATTCAAGATG  
TCCAATATGCGGTGATTCATGACGGACATGAACAAAGCCCGCTTTTGGATGTATGAGAA  
GAAGGGCGAGTGGCAAGTTCATTGCTTTAACTGTGGTTATCATAGCAATTTGGGCGGGTA  
TTAAAGGAGCGAGAAGAAAAACTTTATCGTGAATGGCTATTAGAAAGAAGGAAAGAAAG  
CACTGTCTTCAAGCCAGAAGCAAACCAGTAGAAAATCTCTTACCAAAAAGATGCCGGT  
GATTGAAAAGTTAAATTTTTGTGATCGTCTAGATTTGCTACGAGCGAACCACCCTATAGT  
AAAATATGTCGCAAAAAGAAAAATACCAGAATCAGCATATAAGCGGTTATGGTTTACTAG  
CGAATGGCAGAAATTGGTAAATTCTATTTACCAGATACGTATACGCGCGAATCACCGGA  
ATATAGGTTGGTTATACCGATATTTGACAAAAACGGTGAAATCCAGTCTTTTCAGGGAAG  
AGCTCTCTCAGATAGTCCAAACAAATACTTACCATAAAGGCTCATGAAGATGCATCAA  
AATTCGGAATGGACACAATTGATGGGAACCGAACTGTAGGGTATATGGAAGGACCGATT  
GACTCCCTTTTCATTCCGAATTCTGGAGCTATCACTGGCGGTAGTCTTGCATTAAGTAAA  
GTTCCCTTCAAAGCACTCGAGTATGGGTTCTTGATAATGAACCATTTATCCTGATACG  
TGCAAGCGACTGTCTAGAATAATTGATGCAGCTGAACGAGTTGTGATGTGGCATAGGTGT  
GCTTGGGCGTCCAAAGATGTAAACGATATGATAATGAAGGAAAATGCAACTGCCGAAGAT  
ATTCTCCAGTATTGCAAGGACACCGTCGTGTGCGGTTTTGCAAGCAAACACTGCGATTTGGC  
AAATGGAAGCGTTGCTAAGGCCTCTTCGGAGGCCTTAGTTGTTTTTATTGAACGATGACG  
AACAAAACAGTGTACTATCTCTAAAGATGATACTATATCATCATACCAAACAAACTGA  
TTAAACAACGGAGTATATCATGACACGTAACAAAACACTCGAACATCCTTCTCTATTGTGCA  
ATGCTCACCTCATAGGCGAATGGTATGAGAATCCTCGGGTTGCGAGCATTATGATCAATA  
GAAACGGAAAGACTGGTAAAATTCCATCAAATTTACCGTTTCGGACAAATAAAAACCCTC  
TCCGCGGTCGAGGGCATGTAACCTTTCTTTTACACCAAATTGGCTTGGCTACTCGATCGAT  
ATCTGATGCTAATGGAAGAAATGACAAAACGCGGCTATTCCGCGACTGACAATTGGAAAG  
TTGAAATTTTCGTCCATGAAGACGCCATTTGTTTGGTGAATGGCAACCGTCAGGCGATG  
ACATCTCGCTGAGTCGCACAAGAATTTCTGAGATGATTCCCGAAAAGCACAAAGTTAACTG  
AAATGCAAATTCAACAACCTTAAACAGATTGACGAATGTAAGGAAAAAATGAATGAAATCT  
GAGCTTTATAAACGTGGATACAAATGGGCTTTTACTTTAGTGAATTTGATCGCGGCGCA  
TTGGAGGCTGTCCGCGATATGCAAAAACGGAGAACAAAACATGAAAGCTCTGACTATTG  
CTCTATTATTCGCTGCTTCTACAGCTTCTGCTGCTAGCTTCGATTGTCAAGTAAAAAATC  
TGAATGCCACCGAGAAAGCTATTTGCGCTGTTCCAGAAATTTCTTTGCTGGATGATCAAG  
TGGCTGAAGCATTCAAGGCAGTATCGCATCTTCTGAAGTTAAGGCTGACCAAAGAGCTT  
AGATCAAAGAGCGCAACGCATCAACGTCTTTGTCTTCGCTTAAAGACAATATGACTGACC  
GCATCATTGGGTTGCAGATTATTGCCGAATTGGAAGGTGTTTCAGAAAAAACCGCATTCTG  
AAATTGTCCGAACCCATTCTGCTAAAGCTACAAGTAATCGACCCGTCGAAAAAGACACGG  
TGGCAGATCTCATTGGAAGCAAAGCAAGAGGTTGAACTTAGCTGTCGTGGAAAAAACG  
AGCTACACAGATTACCGTGACAAAAATGCTCCAATTTAGATGCGCGACTGTGCGTACAGG  
ATAGTTTCGAACGATGTGATGGGCAGATTGGTAGCTCAAGCTCGTTCGCTGGTCCAATT  
AATGAATTCAAATCTGTAGTGTATAAAATCGAAACCGGTTTTATCAATATGACTATTGAT  
AATTTGAAAATGAATATTCAGCAGGGTCGTCAAGTGTGCGAAACTATGGCAATAGGATCA

ATGAGGTAATACAAAATGTGGATTCTTATTCTCACCAAAGTTGGAACAGGGATGTCTTCT  
GTTCAATTCTATCCCCTTTAACTCGTATGATTCGTGTGAAAAAGCTCGAATTGTGTGAATG  
AAAATACTCCTGATTCTAGGAAATACACTGCTGTCCGTGTGAAAAGTGATATTACT  
ACAAATAAGATAGGAGAACAAAATGACACCCCAATTTAATGAATGCGCACAAGTAACTGA  
TAATATGGATAAGGAAGTAAATGCACTGTATGATTGCCTTATTGCCAACGATAATCCTCT  
CAATCGAATGCTTGACATGCAACGTCAACTTCAAATTGAGCTCGCACAACGGCATCCAAA  
ATACAATCGCGACCCACGAGTGCTTAAAACCTTGTGGCGAAATTCATGACTGGTGTCAAGC  
TCAGGACGATTATATTGCCGACGAAATTCGCGAGCGATATACTGCTCTAGGTGGAATGAG  
TAACCCCAAACCGAATGCCAGCTGGAACCATGGCGCGCTGAACATGCCGAATATCGCAA  
TCGACTATTTTTTAAATTGTGCGCTGAAGACCAACTCGAAGCAAATTCGAGTTGATTGA  
CCAAATTCACTTTGTTCTTAACAAGATCATTGCGATGGGCATGGATGGCGATGAAATCTT  
CAAATCTATTATTTGAAAAATGCCGAAAACCTTTGCGCGGCAGGAGAATGGATACTAACG  
CTTGAACAAGATGAAATTGATGAAATCAATCGCTTGCGCAAACCTAGATGTTGAAGAAGGA  
AGGGCGGATATTTACGCCCCATATATTCATTTCAAACAATCAAATATGAGGATTTTTAT  
TATGTATGAAGTCAAATGGATTGAAATTAACAGGGACAATCATGGCGTAACATTGGCTAT  
GAATACACCCAACGGCGTTCTAATCCGTGTTAATTACACTTTTAAAGCGGAAAAGTTTGA  
TATGACATTCATTCATGATATAAAAAGTTGTCAATAATCCCAATGGAAATGGATATATTTA  
CTGCCACGGGTGATTCATGATAAAATATGTAATCCAATGGATAGACGTGGAAGGAATCTG  
TCATTTTCTGGATGGCAATTTGTATGGCTAATGTAGTGGTGTGCTATTCCATCATTCTG  
GGAAGATGCCAAAGCTAATATAAAGAAAGCGAACGAAGCCAAAACAGAGTATTTGAAAGG  
AACAAAAGTCGTCAAAAACGACTAATGGGCCTCCAACGATAGTCACAATCAACAAGCC  
GTCGGAACATTGGGCCAATGCGCATAAACGAATGTGTGATACAATGCATATCGTTGATAT  
TAATGTGATGCCAAAACAAATGAGGTA AAAATGGTAACATATGATGATTTGACTGTTGGC  
CAAAAAGATGCTATTGAAAAAGCACTCCAAGCAGTGAGAACTAAACGTCATATTACCATT  
CGAGGGCCTGCGGGCTCTGGTTATACTACTATGACCCGTTTTCTGCTTGAGCGTCTTTTT  
CAGACCGGCCCAAGGTGTTGTTCTCACAGCACCTACGCACCAAGCGAAGAAACAATTG  
TCCAAACATGCCTTGCGCAAGTCATATAACAATTCAGTCTGTCTTGAAGATTAACCCAAGC  
ACTCTCGAAGAAAATCAAATTTTTGAGCAGAAACGTA CTCTGACTTCTCAAAAACACGT  
GTGCTTATCTGCGACGAAGTATCGTTTTATACCCGCAAATTGTTTGACATTCTGATGCGA  
AATGTACCATCTCATTGCGTTGTTATCGGCATTGGAGATAAGGGCGCAAATTCGGCGAGTA  
TCAGAAGATGATACGCATGAACTCCGTCCATTCTTCACAGACAATCGATTTCAACAAGTT  
GAATTGACCGATTTAAAACGTCACCAAGGTCCAATCATTAAAGTTGCAACAGATATCCGA  
AATGGCAAATTGATTTATGAAAAGCTTGACGATTCTCGTAATGGAGTAAAGCAATTTTCAT  
ACGGTCAAAGATTTTTCTTTCAAATATTTTCGAAAGAACAAAACGCCCAATGACCTACTT  
GAAAATCGCATCATGGCATAACAACCAATTCTGTTGATAAGCTAAATTCCGTTATCCGT  
AAACAGCTGTATGGAGCAAACGCTGCGCCATTCCGGCCGGATGAAATATTGGTCATGCAA  
GAACCGCTCATGTTGGGCATTGACGTTGGTGGCCAAACTCTAAAAGCAGTCATTTTCAAC  
AGTTGGCAAACGTAACGAGTTAGAAATGTGAAACCTTCTCGCAAACGCTTAAAGCAAAA  
GGTGTGCGCGAAATTGAAGTCGAATGCACAATGCTCGAGTGTGAATCTTATGAAGAAGAT  
GAAGATGACTTTAGACGATCGTGGTTTACGGTTGTGCATGGCCAAAATACTCAATATGCA  
TTAAACGAATTTTTGTCTATTATTGCTGAAAAATATAGAAGTCGTGAAGTTTTCCCAAC  
TGGAAAGACTTCTGGGCAATACGCAATACTTTCACCAAAGTTCGACCCCTGCGTGCAATG  
ACATTTCTTAAATCACAGGGTTCAACATTCGATAATGCATATCTTTTTACTCCGTGTTTG  
CATCAATCTTGCAGAGCCCCGGATGTTGCACAGGAATTGATTTATGTGCGAAATACTCGT  
GCCCGCTAAAATGTCTGTTTCGTATAAGTAACCTGAAAAAGCGATTTATAGACCAGGTCA  
ACTGGTCTATTTTATCAAAAACGGGTATCGCTAGAGCGGAACCGTATTACAATACAAAT  
TCGGAGGTTATCGCATAGTGAGTGATGCTTTTGATATGGTATTGCACATTAACCAAACC  
AAGTGGAGAGTAGATTAGTATGAGCAAAGTGACAGATTTTATTATTGACTGGGAAACAAT  
GGGCAATGCTCCTGATGGAGCAGTAGTTCACCTTGCTTTTTTTGGTGTGTTGAGCATGACCC  
GTACAAACTGCCTACGTTTGAAGATCTGTGTAAACGCGGGCGTCGATTCAAATTCATCT  
CCAAGAACA AAAAAACATGAGATTCTTTGACCAAGGAACAATCGATTGGTGGAAAAACA  
AGATGTGCAATCTCAAAGCATCTTAAACCATCGAGCGAAGATGTCAGCGTCTTGGAATT  
TTATGAAAGATTCCTTGATTTTCTTGCAGCACAAGTGTGTTGACAAGTAAACAGGTGAGG  
CTGGTGTGCGGGTCAAAGCTTCGATTTTCCTATCATGATCGATGTTATCCGCAAACCTTA  
CAACACTCGTGAAACATTCAAGTACGAACCATGTTTCTTCTGGCAGCAACGTGATGTTG  
TACTGCTGTAGAAGCTACTCTGCTGATGCGAGATATGACCATGTGTCCTATGCCGAAGG  
TGTTTTGGATGGATTTGTTGCTCATAACCAATTCACGATTGTGCCAAGGCTGCGCTAGA

ATGGCTTTATTCCAAGCGATATGCTCTCGGTCTCGACGATATTCCCACCGGTGATGATGT  
TGACCCACGGAGTGGCCGCAAATGATAGTTGCTTTTGGCGAGGGGTTGAAAAAACCCCTT  
CTTTTATCGCACATCACCTGGCGAGATGACAAAAATCAAAGTGCTTATGTTATTAACGGG  
GCATGGGAATTTAACAGGGTGAATGGAGTTTTGTGTGTGCGAAGGGGATGATAATTCTCCA  
ATGGAAGAATTTCAAATTGCAATACATGTTCTCAGGCCGTTTGTTAGTGGTGATTACAAT  
GGAATCATTGAATGGGCTGAAAATGAGGTATCATAATGATTTACGAGCATTACGACGCAG  
ATAGCTTCTTGAGTACAACGATCCAAACAGCAATGGAAATCCGAAATCGGTTGAATTCAA  
CGATGTCGCTGCGGTTTGTCAAACGCAAAGATTATAATGCGCGATATGAAGCGTTGATTT  
AATCTATCGGTGAAATGCTTGGGCATAAGCATCCGACGGCCAAAACCTGGGGTAGCAAAAC  
CAAATCCTTTCAGGGATGGTGTACTAGTGGAGATTGAGAATGAAACAAAATTACGCCTG  
GCTAGCATATCACTTCGGCTTGGTTCCAGCAAATGGTTGCAAATATGGCACTCGCGGATT  
TACGTTTGCTAACATAACCCGCACTTTACAAAATTCATTTGAACTGAAGATTTTTGTGC  
TATTTTGGCGAGTCGCACGACCCTGCTTCCCTTAAGGGCCGCGATGTTGCCGTTTCATGATCA  
TGACAGATTGATTTACGGCTGCTTGTCTGGGGCGGATGAGCTTTTTATCAGAATTCGAGA  
CACTCGAAAGCTGAAGTTTCAGTTTTGGCTATCAAATCAGCGACTCATCTTGTTTTGAA  
CCGTGTCATCAACACTGATTTCCGATGGATTCAACGAACCAAATGAGGCCCGAAATGGAT  
CAGCAAGTAAATGTAGAAGTAGTTGTTTATCTGGATATTGACGGTGTCTCAATACGCAG  
GATGATCACATGGAATGGAGAAGTACAGTACAGTACCTGTATCGTGTTTCGCCATAC  
AATCGTGGCGATTTTGACAGCAACCATAGACTCAGTTTTCTGGGGGAATGGCTAAAGAAA  
CATGATGCTAAAGTGGTTGTAATTAGCTCGTGGGTCGTTTTGCGTGATACTGGAAAGATG  
ATATGAGATTTTCTCGACCTTCCGTATCATTCCGAATCATACTGGCGGTGGAAAA  
TCTCGTGGCACTTGTGTACTTCGTTCATGTCGCCGAGCATAATATCCATAGATGGGTGGTC  
TTGGATGACGCCAAGTGCATGTATGATCTCGATGAGGTCCTACTTAGGCACCTCGCTCAT  
ATCAAAGGTGGTCTCAATGAATCATCCTTAGAAGAGGCCGACTTCATTCTTTGACACCTG  
GTGGTCCCGCATCGAGAGTCGCCTGGGAAACAGCATAAATAAAAAGTCAGATGAATTGAT  
AAAACAACGAAGTACTAACTGGAATAAAAAGAACCGGGCTTCGCCCGTCGTGCTTGCAC  
GAATCCAGTTTGTGCTTTCATCTGATTTATATAGGGGCTCTTCGGAGCCCCTTTTTTGT  
TTCAAACAAGTGTACAAGATAGTGCCTCATGATAAAATGACTTTTGATTAAACAACAAG  
GAGTACTTTTATGATTTACGCAATTAACAACCTCAGTGTAGCATTGCGATTGAAGCCAA  
CATTTGTGCTTATTCGATTGCTTCTAGAGGCTGCCAAATTTTCTCGTGTGCTGACGATAT  
GTATGCTGCCATGTATCCTCAGGCTGTCGGTTACGAGTATCCCGTCAAGGAAGATGGCGA  
TGCTATCATTTGCGAACTCGAACAGACCAACGTTTCGCGTAGAAAAAGATTTTGCTGAATT  
TATCTCTGAGTACGAAAATTAAGTGTACAAATGATGTGGCTGTTTTAGAATGGCCACATC  
AAACAACATGGAGTAATGAAAATGCGTATTTCCAAAGATTTATTCCTCGACGTAATGTT  
TTCCAACAAGGTTTCTGTTGTTGAGAACTCCCACGAAGAGCATCTCTGCTATAACCACTGT  
TCTATATGTTTTCGAAGGCAATACTCGAATTGCTGTTCTCGAACGTGTTATCACCCGAGA  
AGGTACCACTTGGGTTCTGACAGAAGGTATCTACGTAGAGCTGAAGGGTAAAATCTGATG  
GGAGCGCCGATTCCTAGATTGCTCCTATGCGAAGAAAAAAGTCATGGACTTGAAAAGGAA  
TTGTATGACCTTTAATCGAAATGAACTCTATTGGTGCAAACAATCAAGACACTTGGGGC  
AAACTCTTTAAGACTAAGGCATACAATGAGTCTCAAGCTCAAATAGCCGAGTATACAGAG  
AAAATTCGCAAAATCATTGCGACTAATTTCCGCAATCTGACACGTACGCGTACGAGCTG  
ATTGGTTTGAAGGGGAATTGTGGATGTTTCCATGAAACGTGGACAACGAATTTAGTGAAA  
CTTCAATACGAGTAATAAAAATAAGAAATCGTCTTGTGATACGAAAGGTTTCATAGATG  
CAAACCGCCAAGACAGTCAACCCTACACAATGGCAAGGACCATTGTTGAATTTGCAGAAT  
GGAGGCAACTCTGTGTTATAGGCAATGATGGTCCCAGATGGCTTCTCAATGTCTACGGTC  
CATGCTGGCGCGGTAGAATTTAGCAAACTGCAAGCAATATTTGAGGTTCAAATGAAA  
CTTAAATTGAAAATCCCTCTCTCCGAATATCAACAACGTTTTTGCAAAAGGAAGCGCAG  
AGGTTGTGGGCAAGTACGCTTGAAGTCAAATCTGGAGAACTTGAAGTTCTGGAA  
ACGGAGCCAGACGGGACATTTAGAACAATGCTACTTTCTCGGATACCACATTGGAATT  
CCACTCGAAGCACAACGATATTTGAAATTTGAGGAGCAAAAATGATTGATGACGTTAAAA  
TCGATATGACCAACAACCTTAAACGCTAGGGTGGCTGTCCCTCCAAGACCAATGGGTTTTG  
TGCTGGCCAAGCTGATGGAAGAAGTCGGGGAATTTGCAAAGTCGCTGAACCAGCCAGAAC  
GTTGCGATGAACGCT

>NewGenomeName\_207

CTCTCTCTCAACTTAATATATTAATCCGATCAAATACCTGTCAAATCGGTTCTACATGTC  
AATAAAAAAGGTAATTCCTATCAATGGAGGACACTGTTGATGAAGTAGTACGAATGAGGT  
TAGTTCTTTTACCCTGTGGTTTGAATTACCTGGATTTTGAAGCGTGAAAACAATGGCAAAC

AATAAATACGATGTACTACTCCAGGACAAATACTTGGACGGTGATACGGTGACAAACGCAC  
GTGTACAGCGCTCTGGAAGCGTTTAGCGTTCGTAATAGTGCATGACAACATTTGATAAAG  
AAAGCTCTCAGGGTAAGTAATAGAGGGCACAAAGAGGTGCTTAAGGAGTGCGAAGGCATT  
ATTGATTCTGTTGTCCGAGCAAAGATCTAGAACTCAACGGCAATTCATTGAATGGGCA  
AATGTTTGAGGTAACGAACATAACATGCGGGGTATCCCCGGTTGATAAGAACCTAGCAGC  
TATGTGGATTGTGATCATGCTCCTGTTTATCACATAAAAGAAAGAGACAATTAAGGCCCT  
TATCTTATTCTGGTTTACACCACTTCGGAACTGGCATTAAACCAACCAATTATGGCTACTG  
CTGTCATCAAGAACAAGCCTAAGACTCCCACAATGAATCACGATGTTGGAACATTGGTCT  
GGTAGATTTGTTGGGCTTCATTGTTAACGTTGTCCCTACCTACTACATTCTCAACCTTTT  
CTGCTTTTACCTCAAGTTTAGTTCCCATAGAGTCTTCTTTAGCTCCGATCTGAGTCTCTA  
CTTGTAACGAGCATTGTGGTCAGGAAGTAAAACATCCGTAGCACTCTCTTCTGGAGACA  
GAGAACTACACCCATTAATAGAGAGGACCAGCACTAAACCTGTGCGAGACGAGTAGAGATT  
TCATCCAGCTTTTTACGTAGGTCATCAATATCCCTCCGGTATTATTTTCATCTCAGACTGG  
ATAATTACTAAGTTCTCATTGATCTGTGCGAAGTTGGATAACAACTCCCAGTTTTCTGTT  
TGTTGGCATTGCAACTGACGGACCTCAGTTTCAAAGCGACCATCCGTATAAGACCAAGAT  
AGAGTAGTACCACCAATAGCCATTACAACAGAGAGGAACGTACTAATTGGAGCAGGCTCC  
CAGTCTTTAGCATAACGTATCTCGGATAGCGTCCAAATAACCTGCAACAATATTAAGGCG  
CATAGAGTAAGTATTGGAATTCTGGACAAAAGCTGAGCGATCGCAGATGTGGAGAATACG  
CTCTAGCGGTATCCCGTTATATTGAAGAGAAGAAATAGAAGTGTAGATCTTGAGCTCACA  
ACAGGGTATCAGAGGGAGTCCCAAGGTAGGGCCATCTCTGATGTGGAACGGTGGCAGTAA  
GAAACAGAAACATCACCAAGAGTAGTATAACCACTTTTCATACTGAACCGGTATAGTATTGT  
TGGTACTCACCTAGCAGATTCGATGGGTCCATTAACCGTGGAGCACCGTCATCAACCTTA  
CCAGATTATGGGTCTTTGTAGCTAAGCCCTGCCTAGATGGTTTTTCGAAGCCTCTGGAGTG  
ATACCTTGTTGTCTAAATTCCTCGAAGGCTTTCTCTTCTTCTTCTTAGACAAGATTATGGCA  
CGTTTTCCGAGCACCAACCCATTAGGGAGCATTCTCGAGATGGTCTGCCTGCTCTCGTTTA  
ACCTCAAGAAGTTGCTTCCAGTCGATACGACGTTTGATTACCAGGTCTAAGTACTCTTCT  
GGAGAAGCGGCAAAGTTCTGCCAAATCCCAGGGTTTTCTTTCAATACGTTGTACTIONTATCA  
ACCGATTGAGACTAAACAGAAGTATCCTCCACATCATTAAATAACCACATTCTCTTTACCA  
GCAGGGCCAGTGTACATAACGACGCGCTTGTCTGGACGGTATTTTGAACCATAGTAT  
AACTGATCTCGCTCAGTGTGGACTAGATTCTTAATGTCAGCTAGGTGGTCTTTTGTGCT  
CACATACGTTAACGTAACGCACTGGTACCTTCTTCTAGCTAGTGGTTCGATAGTGGTTTTT  
ATCAACGCTCGATCTCGTGGAAAATAACTTTGTACTGGGGAGGTAACCATGGAGTAATG  
TTCTCTGGTGCAGACCGCAAAGCTCTGTCTACAACAGGATGTGCAGTAGAGCAATTATTA  
CGAATCATATCCAGGTTATATAACGCCCCAGCTTGCTTGTTGTTTAGAGCTAATGTAGTA  
GAAACAACGTCTCCGTCTCTCCCACCTTTTCAATCTCTTTCTTCTTGTTCAGGGTTGGCA  
GTAATACCCACCAGTTCATGAGTAACCGCACCCAGGGGCTCGCTGGAAGCTGTATCCCAAG  
TTCTGAGATTTAGTCATCAGGTCTGACAGGAATGGGTTGTTCTTAATCAGTGCCTTAGCT  
CGTTCATCACCATCCATAGACCGGAAGATGAACTCATCCATTCAGGCTGGAATAGCCTTG  
TTCTAGGTTAAGTTACTTAGGGCATCATAGTTCTGGATGCCCCACGCTGTAATCATTGCC  
GCCGCCAAATCCTTTGGAGCTATAACCCATTTTCATCGCTCTCTGGTCACTAATCAACGTA  
TTAATGTTTTTCGTTCAACTGTTATACTTGTGGTCACTAGTTTCAAACGTGTCCTCGGTA  
ATCGCACCAAGGTACGTAGCAGACTGCATTCAGGTTTTCTCTAACTGGACAGCACTACGT  
TCTATTCCAATCTCTAGAGCGCGTTGTTGATCCAATACCAATGTACCATTTGGAGAGTTG  
AACATCGTTCGAAAATTTAACTTGAGCACGGATAGTCGAGTCACTACTTACGACGTAA  
ATATCATTGTGAAGTTCTCAGCATTGAGTGTACGAATCTCACTATGATGCTCTGATTGA  
ATCGAGTTCATTGCAGTATATTGCGATACATCGAACTTATACTCAGTCTGTGTTACCTTC  
TCACGATAATCATTACAGGGCTTTCTCTTCTGGCGATAGCTCCGTATCTACCTTACCCAAA  
CTCGAGCTGGATTAACCGATGCCAAAGAAAGTAGCACGACGTTACGAAGTTCCTTCGCA  
AAGAATAGCTACTGGTTGATTGCTTTTTGCCATGTTGGCACGGGCCTTCACCTGTGACTCA  
CGGCGTTGTAAACCAGCTTTAACCTTAGCTGCTTATGCACCCATACGGTTCGAAGTACGGT  
TGAATCTAAGTAGCGATTTATATATGCTGTGGGTTATTTAGAATGTCTCGAGCATCGTTA  
ACAACACTCTGAGAAAGTAGATCAACACCAATCCTGTGACTAAAGCTCCCGACGGCCTGA  
AAGACTCGTGCGGGAGTATCTTCTTGAGTACCAGCTTGAATGGGAGTTTGATTAGAAGCT  
ACTGCTTGGATAGAGTTGCGTGTGTCAAAGATATTAGTTGCCAAATAACTCTATTGTCCT  
GGTAGTGCATCAATTACATGTCCATTGTAACGGTCTGATAAACTATTTAAAGTATCACCT  
GAACTAGGCTGTTTAGTAATCATGCTTCGAATGAACTCTTCTCTTGGTTCGCTACCACTA  
AGCAGCTCATCAACTACCGCTTGCCGAATTTGGTATAATCAATCGGGGTCATCTGACAGT

GAGCTATAAATCCAGTTCATAACTAAACCAGTTGCACTCACTACAGCCTCGCCGTTATTA  
TCCCACGCCTTAGCAATTTTGTTAATAATGTTCTCTTACAAATTCACGTAGTTACTTTTT  
AGGTCGCTACGTGCTTTCAGTGAATCTAGTGCATCTTGGTATTCACCTCACATACGGTGG  
CCAAAGCCCAACGCTTTTGTTCAGGCTAGAGCCCCACTACCTTCTTGATGCCGGAATGGT  
TTGCCGTTAGCTTTCATGATTGCTTGTCCGTTATACATTAATAACGCAGCGAGTAAGTTA  
CGACTTGATGTTGTGATCTGGGGCAATGATTGCCCCATAAACTGAATCATATTAACAGCT  
TCTGGCAGTTTTAAGTCATCCGCAGGTAACGCCACTTTGCCATAAACTGCATGTTCTCC  
AAGAACCCAATTTGGTTAGCACCGAAGCCAAAAACACGTCCGTACACACCACCTGCCGCA  
CCTGCCGATAGTTGTGGCAGTGGGCAATCCCCACTAAAGATTTTAGTCAGAGTCTCCCCT  
AAAGCATTCAAGTTACCGAAGCGAGAAGCAACGTCCGCATCCAAACCAAACCTCTTAGA  
GCTAATCAAGTTATGTTTTCTTTCAAAGCTACTATCACCATAGGGTTTAGGTCTTGGGGC  
TCTATACCTGCCACGATCAAGCAGATTCAACTTTCAAGTTCCAGTAAGTAATGACACCG  
GATCCGATAAGTATTAGCTTGCCTGTCACTAGGTTAATCTTATCTTGGGTGGATAGGGTA  
GAGCCTATCCTAGGCGGATAGATGTAGTAGCAACCTGTTGGAACCTGGACCGGATTTGAT  
TGCCAGCCTTTCTGGAACCAAGCTGGGTTAGATTGTGACATATTCTAACGGAATGTTTCT  
GTACGAGCAAGCACTTGTTCCTACTGCCATATCTTCAATCTTAGCTGCCTTGGTAGCTGCC  
TTCCCCTTTACGTAAGCGCTACCAAACGAGATAGGAGAAGTAAACAAATCACCTTGAAAA  
AAGAAGATTGACCCCTTCTCTAAGAATCGGCTCACCATGGATTTAGTTACTGGAATGCGA  
CTAACCGGAATGCGGTAGTCACCGTGAGCAGTAACAACAGAATCGTATAAGCCTGACTTC  
TTCGAGCCTAAGTAGAACTCACGAATATCCGGTAAAGTTTTCTCCATACATTGTAAGTGA  
CTCTATAGAAAACGGGGGTCTTTTCTTAGTCTTAGAAGTGTATCTTAGACAATCGCTCA  
ATCCCTTTCAGGGCGTGTGGCTTACTAACTGAAGCTGCTACAGTAGAACCCATAGCCTGT  
ACCAAGAAGTGCAGGAGATAACAAACCTAGCAAAACGTAAAACGCGGCGCCTTGGATA  
TTCTGAGTTGGGACAGATTGCTTAATACGATATACACCTTCTGCCAGTCCACGCTTCTCC  
TTACGGTCTGGATACTCTGCTAGAGAATTAGCCATGTTGGACATAACACGTTCTTCCATA  
CTCATAATAGGCATCATCGGAGAACTTCGCCATGAAGAATTAATAGGTTTTCTATAAACT  
AGCGCATCATATATTTTCTCAGTCAGAATGGCGCGAGCAGCTTGGAAATTTCTCGGTACGA  
ATATCATGGCCTAGCTACTTGTAGGTTGGGTTATCAAACGGTCTTGTATTGCCAGCTTT  
AATGCGCTAATCGGGTAGCGAGTTGAGACGGTACCATAGTATTGGCCTAACGGTTCGATT  
TGAGAAATGAACTCTGCCTCTATGCCTTCCGGACCAAACCTTGATACGTTCCCTCAGCACA  
GCACTACGGAGGTTACCGACTTACACGTTGGTATTATCAGCCTCTCGTTAGGCACCATTG  
ATCTCACGGTCACGGAGAACTTTGTAATTCTTGTGTCAGCGTTGCGTGCTTTTAGAGGCTCG  
GCATATCGTTCAGCTTCCACTACGTTATCAAAGTAACGGATTGACTTGTGTCTGCACGA  
GTCTTACCGTCTACATTGATTGGAACCTTCTCTTTAACAAAGTGGTAAGCATCCTTGTAG  
ATAAGAGGCATATAGCCCTTACGACTATTTGGAACCAGTGGTCTAGATCACGGATAGAT  
TCCCGAACACGACACCTAATTTCAAACCTCCCTACCTTTCATCCAGAACTCGTTAGGA  
GTATCTCGATAAGTCAGTTGAAAACCTTTTTTATCCAAATCATCCAACATTTACCTGTC  
ATGTTGGTGATGATTTCGATCATTAAACGGGGACATACAAATAGATCTCGTTACGAGCTTCG  
AAACCTTGTTCCGGCACTGGAAGCGGTTTCGTAAACTTTAGCATAACACAGACTGTTACCA  
CTCTGTACAGTTTTGTTTCCACGGTGTATATGCTCTTTATATAAGTCCTCATTTCATC  
TGCCAACCTTGTTACGCAATCTGGCGCATTGTGGTGTATGCTTTGAACCCAGCATCATT  
AGTTGAGGTAATCAGGTCTGTCACCTTTCACCAAATCATGGTATGAATATACCTCATCA  
TTCAGTGTGCCTTACTTTAGAATCACATCTAGCATTGTGTAATGCGTCAGTATTTAAACCT  
CTCAAACCTTCATTACAGAGCTGTTTGGAAATCCACTACGAATATTAGCACGTTACACAA  
ACACGGGGGAATGTATCCACATAGACTCCACGGTCTCGGTCTAGTGAAGTGTGGACTC  
ACTACCTTAGCCCTTGCCTTAGCCATCATGCTAATCTTGTCTGTCTAGAAGCCACCACGT  
ACTGTAGCTTTGTTGTGCACCACAATCTCTGGAGTAACGTTACGTAGTTGAGTTGCACCA  
GTCATAGGGTTAACAAATTTACTACTTGGACTTCACACCCTTGTGCGGTAGTTTCAAATGTC  
AGGTTACATACTTCGTGTGCGACCTCAATATGAGCAGCAATCTTCTCAGCAAATGCTTGT  
TGCTCTAGTGGAGTCAGTGGAAACACCTACACCGGCTACCTTCATAGTCTACGCAAAGATA  
GCACCAACTGTTGACCAACGTTACGGACCTTCGTTTGTAAATTTCTGGAGCAGCACCTTCT  
AGGATAAATCCCATATCTTGCATAGGAGCAGCAGTAGTAGCTGCATATAAACGAGACATT  
GGTACCGCACTAGCGGTATCCTCCGAATGAAAGGCAACGTCTACAATGGTAGCCGCAACA  
TCTTGCAGGTGTGCTACGTTTTCGAGCAGTAGATGATAGACGTTTAAAAGCCTACGCTACT  
TTGATAACCAGATACGCCTAGCGTAGCTGTATCTACCTTATCTAGAAGAGAAGCTAGTTGA  
GTGTTGGATTCAGGATCTTGGCCAGTAGCAGTCATGAGGATTGGCATTGTTGGACCTCG  
TTATGTGTTCTTCTTGTGTCAGGTTTATGCTCCTCTTTAATTGCACGACTACGTTCTTGA

GGAGGTAATCCCATTAAACGGTTCCTGGGTCGGCTAGGCCACCACCGCAAGTAATAAAC  
TCAGTGAACCAGTTACCGGCTTCTGGACTTACTTCTCTGTAGCAAGTCAGCAGATTGAGCA  
CTGAGATAACCCGGTAAGAACAAGCAATTAGGGCAGCCATAGAAGGCATAGTTACCCAC  
AAACGTTTCATCCCACACCGCACCGATTTGACGACGAACCCATAATTGAGTAGCAGCATCT  
TCCCGGTCTTCTGGAGATAGCTTAGTGTCCAGTCTTCTACGTAGGCCAGCTCGGTACGT  
AGTGCATGGTCATAATCTCCGGACGCATCGTTCGCAATCTTAGTTCAGTGGTGCAGCAGAG  
TTAGCTAATACTTGTGGATTATCTCCAGGAAGCTCATCAATAGCCATTGCTGTACCAGGT  
AAAGGAGCTTCGTTAGCTTCTTGTAGAGAATTTGCTGGACGGCCAATTGGGTTCAGCGTTG  
GATGCTTTCATATAAGTTTTTCATAGTGTGTTATCACCAATGCAGAACTTACTGGGAGAT  
CCACGAATAGCTACCTCTCTCTTAGATGGAATATGTGCAAATTGTTGCACTTGTCCCATT  
TCTACTGGATTTGAATATACACCTTATTCACCAATGGCAATCTCTTTTCTCCTTTAATCT  
TTCTTTAACGAACTAACCCAGAGTCATCATAATGCATTCCAATGTTAGAAATAGCTCCAAC  
ACTAGTAGCTCCGCTAGAAGCTTTAGCAACATTCGAGAATAACCACTAGTTTCTTAAGA  
TAGGTGACGGGTTGGGTCTGAGAATCTCAGGTTAGCGTTGGTCTGTGAGCTATTGGACGC  
GAGTGCACCTGGTTCACCGGTTGTACCGTACGTACCGGTTTGAGCAGCAGTATTCTCACT  
TCTTGCTCGTTGGATTCGGGCTTGTGTAAAGCAAGGTCAAGTATAGCGGCTTGCTGAAC  
ATCTGCAATCCGAGATTGTACATCTTGCTTTTTTTCATTGTTCTTCTGTTGCTTTGCTAGA  
TCCGGCCATGGATACGGTTATACCAGCGACACTCGCACCGGCTGCGACAACCTGAGCAGC  
AGATACGGCAGCGGCAGTTGCTGTATCACACCTCCAATAGTTGACTGTAAACGTTGTTAC  
CTACGTGATACCCAATTCGTTCTAGAGAGGAGGTAGTAGGAGTTAAGCCAATGGGGAGAA  
CTGTTGTACCGTACCCGTCTACGGAACCTTTCAGCAGAATCCAAAATTCTCTTGAACCTCCG  
TAGCACCGCAATACTCTGAGTTTAGGTATAAACCAATTATTGATGCTACACATTCCTCGG  
TGAATAGGACTTTGAGAACTACATTGTAAATCATGTATCCGATTGGAGTTTGCTTACCTC  
TTACCACACAGATTTCCAGCATAACCCGCCGGAAGGGGATTGAACAAGCTCTCTAGATTCA  
ACTAGAAGACTGATTTACTTGAACGAGGGTCTGCCTCAAGAAAATTATCCTGAAACAGAC  
CACTAACTTACAATTCCTAAAGAACTTCCGGTTTACTTTCCATGTAAATCTTTATCATT  
CTTAGTACCTGCAGTCACGCTTACTGCCAACCTAACAACTTATAATCCTGGTTTGGCTC  
TGTTCTGACCTCAAACCTGGGATGCCGTACCTGAGCCTCTTATTCGCTTTCTGGCCGTGAT  
TTCTTCATAAGGAATCACATTGATACCCTGATTGAGATCCATCGGTCTACGGTAACGGTA  
GTACGGACTGTGACGAGTAATCTCATTCCAGTGCTTGCCCGTAGGAGCATCGGTTACAGTC  
CCAACGAATAGGTAGCAACATGCTCGATTCAATTTCTCTGGTATCTCCTCCATCTACATC  
TTTGAACCAAGTTTCAGTTCTTAGCATCTGAGTCGTTAGGCTTGTAAATTCGTTTACGGCG  
TTGAGTATTGACTAATTTGTGCCGAGCACTAAACAGGTAAGCCTCTGGATCAACTAGGCC  
GAAATCTTTAAAGTTATTATGGTTAAACGAATAGAATCCAAGCGAATCATCATGACTTTG  
GATTGTTAGGTGCATAGTATCTCTGAACTCTTCATCACCGATTCTACGTACCAATGGGAC  
TGAAACATCAGAAGAGCCTACTTTAACTTTATCTCTACCAGCTACGCTAAAGTTATCAAT  
AACATCCTTATTACTAATTACGTTATGCTATGGAACAAATACGGTAAGTATATCTGCTAC  
AGTAGTGTCTCTTGAACCGGTAAATCAAGAATGCACCATAACGTAAGATAACGATAAT  
CACTAGGTCAAAGTGATTTGGATTGGCATATTCCTAAGTAGCCACCGGACATATTTATA  
TTGAGGTTCTACAGTACCTACCAACTTAACCTTACTACAAGTAGATAACTCATTATATAA  
GGATTGAATCTTGTGTTCTGGTAGATTCTGGCCAGAGTTTTTTCCAGTTGATTGGGATGG  
AGATAGGACATTGATTCCCTACTCTGTCCAATAGAAAACGGTATAACCATATGCCACAAC  
AGAACGTGGAGACACCCAACCGTACGGAGTAATCTTGTCTACGTGATAACCAAGTAGGAGC  
GAACAGAACATGTGACGTCCCACTCAACAACCAAACTCCCTTTCCAGCAAAGAAAAACAG  
ACGTCTGGATACTTTTTCCATAGCATCAATCATAAAGCTGCGTTGATTTTTATGAAACC  
ACCGTCTGGATCGAAAAGAGTACTGGGTACTTCACTTGTGGCGTCAGGAGACTGATAACA  
CTTGTTAATCTCTGCGTTAGATTTAACTAACAGTGAGAAGAATACGTGAAAACGGAAATA  
AGGACTTACATCAGCGATTTTTCTTGGGGTTGATTGGAATCCTGCATCGAATACTCGACC  
TGCGAATGTTTGAATGGAAGAAGGTTTACCACTAGCTAACCTTGTAATGACGCTACCGT  
AGAACCACGAGGTGCAGGAGTGTTCGCCGTTCTTGACCCATACCGGTACTTATACTGTC  
TTTCATCCGACTTGGAGTAACTTTGCGATAGCCAGAGCGACTATCCCTGAACTTGT  
TTATAACCAAGAGATATCGTTGCCACTAAGATAAGCACCGAATGTGGCATAAGTGGTGCT  
AATCTTTTTAGTATCCCAAGCATTGTTAATAAGCTGGAACAGATAATATGACGAGAGGGT  
TTTTGGCAGTTCTTTACTTGGAGCCGAACGTCCCCACACATCACGACTTCCAAGGAACAG  
AACCTCTCTAGCTAATACGATATTAGTATGGGGAGTGATTGTGCCTGATTGAATATCCAT  
AATCTGGATTGATATACGGTCTGCATCCTGAGTTGCAAATTAAGAAACCCTCTACCGA  
ACCACCACTAATAATAACCTCTGACGTACCTTCTGTTGCTTAATATTCTTGGTTTTAAT

AAACAATTTCCCGTTAGATAACGGCTCAATAGATGTATCAATGAAATTTAACTTACCACC  
GAACTGTACTTCCACCATTTCTGAAATGGCACTATAGTGAGTTTCCCATAGGTAAACACT  
AGATACTAAATTTATGTCTGAGCAGTCTACGTAGGAATGATACAAAGTACCTGAATCTGC  
CAAACCCAATATTTTGGCGTCTTCCCAAGCGTCAGCTTTTAAGAGGATGAAGTTCTCACC  
CTCTCAGAAAGAATAAATAGGCAGATTTAGAATGTTCCCGTCTGAGATCATAACCACTG  
AACTGAGTGTATTCAATATTTGGCTGGTTTCTTGCGATTGGCTTTTGGCTCCTCGTTTTT  
CACTAGCTAGGTCTTGATTGATGCGTTGCCTAGTGAGCGCTCTTAAGGTGTATTGGCCTT  
TAAGAACTCTGATACTTGACCACCGCCTTCAACCTTAATCTCGCATAGAGTACCTTCGT  
TATTGGTAGCCGCTCCTTTAAATTCCCTTTGTTACGGCCATTAATATCTCCCTAATAAGAA  
TTATCGAAATATGGACGACAACAATTTGGGCTAGTTGAAGATGGTGCCCTGACGTGGTTA  
TGTAATCAGAAACCACCTTTGGCTTGCCAACTCTTGCGACTGATACGACGACGATGGATT  
GAAGCCCATTCTTCGAGTTTAGGGGAGTCCATTGGTCTCATCTTGGCACTCAATGCTGTT  
TTCGCTTCACTGAATAGGTATGGGAACATGTCTGCAGGTACATCAAGAATCCAATCGTCT  
TTCGTCGGAACTCAGGACTAATATAACCGATGCATAGAGGTTTATCATTGTGGATTGTA  
GATCCTGCGTCTTTGTTGTAGCTACCGAATACAAGATACTCATCTTCGCATGAAGACCAG  
TACTGTGGAGCTTTAACGTTTTGTTGAATTACGCAATGCCGTTGCCATCACGGACTGTT  
TGTACTCTGGCCCGACCTCGATTGAGACTAGGTTGTCGAACTACGGACTCATTGGATGC  
AGGTACTTTAACTCAGAGTAAGATACTGGACGCTGTTTCATTGAGGGTTAGTATGCCAAG  
TCAGTCATCTCATGTATGTTCTCAGGTAGCTTTAAGTAATTTGGTTTATCCACCTCACTG  
AAACGATGAACTGGACTCCTCGATGATAGTAATCAATCGTTGAGTTGGTGATTAGGTTG  
TCATATGAAGAAGGCATGATGTTCCGCGCTTGTTACGTGTCAGTGGTATCATCAATAGAG  
CTGACGCTGTCACCATCCGAATCACTCAGCATTCTTCATGAATCTGAATAACGGTATAT  
TTCGTTCTGGTTAAGCTGTTTACCACCTCCAGCCTTACCTGCTCTGTGACGAGATTGAA  
GACCATCGGACCGGGTGGCACTTCGAGAACGTACTCGTAAGTTACCATCACCATTACCGC  
CACCGTTTTTCAAAGTTCTTTAGTGGCCTACGTCTTCCAGTCACCCTTACGAATTTTTT  
CCTCACGTTTCATCTTCCATCGAGCCGCATCACGTTTCTCTCGATTCTTCTTTTGTCTA  
GGGTACCTTGGTACTTGGCGTACTCCTGTCTGTAAATACGCTTCTGTGCCATTACTGAAA  
ATCCGTGATTATAAGATTTCTCGAATCATCTTGACTAGCACCGCTGAATTGACCGGCTAC  
ATATTTCACTTTAGCATCACCCGTCAACGTGTAGTAAGTACCGACCGCAACAATTGAGTC  
ACGAGACTCCATAATATCATTCTGGTATTCAGACGGCCACCTTCTGAGGATTGGAACAG  
AGTGAAGGTGTATTGACGACGTACGATTGGCGTATATACGGCAGTTTTGCTAGAAGGGTC  
AATGGAAATACCTTTTGGAGTTGGAAATGATTCAATTGTTGCGTGGGACAAAGTCAGTAGT  
GCCATCACCTTTGGAACCTTAACAATGTGTTTATTGGAGCAATAACAGCTCCTTTTACTTC  
ATGTAAATATTCATCTGGAATATTCTGATGTTGTAAGACAGCCCTGGGGATTCTCTCCTTG  
TTAGTAGTTAGTAATTTACTTAAGTATTATTTCTTAATGTATCATGTTATACATTACATA  
ATTAATACTGGTCTTCTCCAATACCGGTGAAGTCACACTACACCAAGTAATTTTGAAT  
CAAAGTGACACGGAAATATACAGGTAAAACAAAGCCCTCAGAAGAGGCCCTTGATATTA  
GTGTTGTACTCGGAATACGGCTAAAGTGTCACCAGCTTCGGTTTCGGAGTCTGCAATCGT  
TTGAGGACTAATGATGACTCCAATCTGTTTGGAGCTGACAGATGTGTATTGTTTGCATCG  
TACTTTCTCACCAGGTACCACACTTATTGGATCAATGAAATCAACGAGTTTAAACATCACC  
GGATTAACCACCAGTCAGTGACAGCAATCTCGTAGTTCCAGACACCTGACTTCATGAGAC  
ACCATCCATTGATAGTTCTACATACTCGCCACTACGCGTCTCCAGCACCTCCGGATT  
TCGACTTACCTGTATTGACATAGTTACCAATGCTTTCGCACTCTCGGCGATAGGTAGTAC  
TCCAGAGGTTAGGTCTGTTTGTACAAAATCACTGGCAATATAAGTAAAGTTGACCTAAT  
TACAGTACCACGTTTGTATGATTGAGCAGTTGTATAGCCGTTAAGGAATTAGGGATAGT  
CGAGCTGATTCTTACAATGTCATGTTGGAACCTCCGGTAAGGCTTGGTTTTCCACCATT  
TTCTGTGAGGTTAGGCTTCAACACTTCACCATCAGTTTGGCTAGGAAAAACGATTAGCAC  
ATTATCTAATGACTCTAGAGTGTGGGGGATAAACTCCAAGCAGTATCAGAATCGTGACC  
CGCCAGTAGTTTCTCACCCTGCCCGACGTAAGAGTTGGGGCGGTACAACAACCTCTACGAA  
AGGATATTTACCTTGGCGCTTGGCTGACAGCATTCTCAAGAGTTGCTAATTCGTTATCGCC  
CCAATGACGCATCGATAGATAGTAGGCTCGGACAGCATCACTGCCGCCTTTAACTTACAA  
GTCTTGACCGATTCCGTAAGCGTTTGCAACTAGAACTGCGCCTTGTGCTAAATCAACAGG  
ACTCGGTAGAGTGAAAGTAGCCATTCTAAAGGTTGGCTCCTTCGCATATCTCCGTCAA  
CGCGATGGAGTTGTTATACGTTACTCTGAAATTTACGTTAGGAACCTCGTTAGTGTAATA  
TAATCGGGTCTTAAACACCGGCTCACTGTAGGGAACATTTACGACAAATCAAGGTTGAT  
TGGAACCTCAGAGACGATTGTGGTTCTAGCTACGATTCGAGAGGGCCATACACTCGCGT  
AACAGAGGAAACAGCATCACTGTCTGAAATTTCTCACACACTGCCAAGATGGGAAATAAGT

TTTTCTGTGTCCTTGTTAAAGAACCCTATGTTCTGTCCCATACTACCGATTTTGTGTAC  
ACCCACTGACACTGAGTTAGATGAAACATCGAGTTCACCCTCAAATTTGGAGAATACACC  
AGTTCCCACGAATTTTCGAGGAATCCAGATCCCGCTTACCAATCACATTTGCCGAAACACG  
ACCATCAATTAGAGGTTCTATAGTATTGTCACTGCTATCGGCAATAACAAGCTTCGCCTT  
AATAACACCAGCATTTAGAATGTCATTTGAGTCCATATCTAGGTCATTCTGCTTTTGGTT  
TGGTTCACCTTCTGGGTTATCGCTGAATAGAACCTCATCATTGCGTGCGCCCTCAGTCTA  
CTGGAAATTACGATTAATTATCTCACAAGAACATTAGGTAACATCACACAGAACAATCTT  
AGCCATGGACTGTCTCCTTAGTTGGATAATTTATTACCTATCAAAGAGAAGGGAGATCCT  
AAGACCTCCTTCGCATTCGATCAACCTATCTTAGATTGAAATTTGACCTTTTGCAGCAGC  
AGCCGCTTTTGGATTGATACCTAGTTTCACATAACGGACAGTTACACCAACTTTACCTGA  
ATCGGCCCCAGTTGGCGAAGCACCACTAGCTTGAGGGTAACTTCGGTATCAGCAGGTAA  
AGCACTTACCCAAGTACCTTCTAGAGTACGCTAAACAACACCGAATGCTTCGGCTTGTGC  
TTCTATCTGTTTCACACTGTTGGTATCTACTGAACCTTTAGAACCTACTGCATTAACATG  
GTCAGGACCACATAGAACAACACCTCGGAAACGTGAACATACGGATCACCGACTAAAGC  
ACCATTAGGTAAAACACTACTTTTTTGGATTCAGCATAGTCTTCCGTGAAAGCAGATCCCCA  
AATATCAAAGACCATTTCCATAGTGGAACGTTTCGGTCTTAATGCCACCTTTTGGTGCGG  
TGTACCAGGAGGTCCATAGAAGTTGTGAGTACCAAGAACAGCAAAGTTTTCAAACGGAT  
AATAATCTCCTTAGATTTAATCTAGTAAAGAACCGAACGGGGTACAATCCCTCACTCCGG  
TCATATTATTTACTTGCAAGCAGTCTCAGAAGCGAGCAGTGCAAACAGAATGTCTTTAAG  
TCGGATACCAAGACCATAACGACGACGAGCAACGAACTCATCACGGGCAAGGTCTTTGT  
ACGTTTCAGACTCAAACGAGGAGCTTGACGTTCTGCGTACATTACAGGTTTCCACTTATC  
ATTAGGAACACCCATACGGATACACGAAACAGCGTCGGTGATCGTCACACCTCCTGCCTG  
TTAAGCCACTACATGTGGCAGACGGTTAGAAGTGGTAATGGACCAGTCGTACAAGTTGGT  
AATGAACGTGTGGCGACGAGCGAAACCGCCTTTAACCTCATCCATAAAGTAGGGGTTAGA  
GTCGATAGCACTTGCAGTGATTTGGAACCTGGTATTCAGAGTTGCGTGAACGTTTGGGTA  
AACACTCAGAATACGACAACCTAGTGGAACGTTCTCCTTCTCAGCAGGAAGTTTCAGGTA  
AATCAAGTCTTCTAGTTCGATAGTCTTGTAGTATCTTTAGCGATACCCTGGCGAGCAA  
GCCGTTAAGCTCGTGAGCATTTCGCAGCAGTTAGACCGTCGTAAGCTACTTGTAGATAGCG  
AGTTTCTAAGTGTCTTGCATCGCTCGAGTAGACTCTTTAGGACGCATTGCCCTCAGAGT  
TTCGATTTGAGTACCCTCTTGACGTAATTTGTCAGTAACAGACCAAGCACCGCCTTTATA  
GTCACTAATACGCATCTGTACGTTACCACTCTCGATTGGGTTGTAGACTAGTGGAGTTTC  
TTCTTTCACATCGTGAATAGGTACCGTACCAACAGTTCGAATGTCTAGCACTACACTAGC  
AGTAAAAGCTGAGACGTTAAGATAAAGCAGTGCTGGCAAGAAATCATCTTGTGGTTTTG  
CAGAATGATTTTTGAATATTGGTGAGCCTCAATAAAATGACGGGAGTTGCGAGTATTTG  
TCAACCAGTTGCAGCAGACATATGTAAATCTCCTTAAAAATTAGTAAGGATGTCAAACCT  
CTTGCCGACCCTTATCAGGTAATCCACCTGCACGGAAGGCAGCGGCTAAGTCAGACGTAA  
AAGCTGTTGAACCCATTTTGAAGTCGAGTTGTGGCTCTGGCGGGGTCTGTAATTGCGACG  
TGGTTTGGGTAGCTGTTGCAATAACAGTTCGAAGTGGATGGCGTAGATTCGTCATTAAAT  
AACTTCGAACTGGTTTAGGTGATTTACCAGCGAGGTCTATCATAAAATCGTAACCTACTC  
CTAATTCAGCAGCTTTGGCCTTTAGAGCCGCGTTGGCTCTATTGATATCGCCATATTTAC  
CAATCAGGGTTTTAATTACCACTACTTGGTTAGTTTGTGCTTGAGCTTGGGCGTCACGTT  
TGTTAAGTAATTCTAACACGACCTGTTTCATCTAAACCTGCCTGGAGCTGTGAGGCAGTTG  
GTTGTTGACTTACAGTAAGAAACGCTACTACGTCCTCCAGATTCTTAGCTTTCGCTAGCT  
CAGCCTTCAAAGGCTCATTCTCTTGTCTTGGAGCGTTGGTTTTTTCAGCTTCTAGATTAGAAA  
TATGGGATTGAACGTGTGGAATACTAGCTAAAGCTGCGTGACCATCAGCGAATTTACGAC  
CTTACCCACATAAGCCGCAACTTCTGGTTTCAGTTGTGGAGCCGCAGGAACAGGTGGTT  
GTACGGGTTTTTCGTGGTTCTTGAGTTTTTGTCTCTTGACCCTGTGCGGATAAAGTCGCTT  
GGTCAGCCATTTTATTCTCAGTATTTAAATTTCTTTAGCTTGATCACGAAATGATTCTAAT  
AACTTAAAGTAATAAGTCATTAACCTTCTAGTAAGGTTTTTTCTTCACTATTGTATGCAGC  
CTGTCTGAAGCGCCAATTAGGGTAATAGAACCATCCATTCTGATTTGTTCTTCTCAATT  
CTCTGCGAAACGTTGTCCTACAATTCCCGCCTGTATATCCCTGACTACCTTACTTCCAGC  
GAACTCGTTGGCGAACTGTTCCTTTTGTTTCGCCTTACATTCCTTGAGTCCAAACAGTTTT  
CATACTTATATCATTATACTAACGTTACTTGTGATACTTGTCTATTTTTGTTTGGAGAAT  
TGGTAACAAGTGGAGAGGTTCGACGTTGCTTCCATAACTGCAACGTTAGGTTTGGAAAATAT  
CCCGACCACGTAAGCTTCGGTGGTGTACACCATGTTAGCCAAGTTCTCAGTAGACACAT  
GAGGTTTACTAGCTTTTCAAACGGGAGGATTAGCAATACCCATTAGACTTTGTACTACTC  
GCGCTAGTTCTGCAAAGTGTGCGAGCACCTACAGGACGTGGACGACCTTTTGTGAAATAC



CGTCTATTTTAACGTTTCATGAAGGCTGCCACATTGTCAACAGAGTCAAACACACGAATGG  
TATCAGCTACGTCTAACTTACGACGAGAAATTTCTCACATCGCTTTCAGACCCTCCTCCA  
TCAGCAGTACTTCACAGTTCATAATCTTCTTTTTGAAGATACGGCCAGCGGCGTTTTGAA  
GTTGTTGAACCTCGAATGCTGTTTTTTCACCGCGCGTACGAATACCGATGGCTTGATGAG  
GAGTACCTGCAAACCTCTCCATCTTAGCTTCAAGAATCTGAATCTGCATATCTGCTTGTA  
GAGCTTGAGTGGTAGGAGCAATCAACTCAACGTCACCATAACCATTGATGTCAATCTTCT  
CAAGTGGTCCCAATCAAACCTCCTCAGCATCAGCTTTAACCTTCATTGGTGGATACGCGA  
TTTTGTTCAAACACGACAGCTTTTAAGTTTCCAAGGTTGTCGATACGATATTGCATACCTA  
CTAGGTTATTTAGTGGTCCCAAAGCGTACAGGTTATCTTGATGAATACGCCCTCCACAGT  
GTAAGATACGAGTTTTTGC AAACCATGATGGATGCTCTTTTTCTAGATTAGAAACAGGC  
GGTCAAAGATTGTGACTTTCATATTACGCTTATATGTACCTGACAGCGTATGATGTTAGG  
CACCATAGAATCTCGGAAGCGAAACGTAAGGAGTTTGTAAAGTCATCGTAAAGGTTGCCAA  
ATCCGTCCATAGACCAGCCTACAGCCTTTTCACAGTCTTCCCGGGTGTAAGTGACTAGCC  
AACGACCAAATTCTCGTCCACGAGCGATAGCGGAAGCCAGAGAGGCATTCTCTGGCTGGA  
CCTGTTCCATTTGTAGTAAGGCACCCTCATTCAACACAGTACGAAAGATTTCTGGAGAGT  
GAGCAACGCTACAGGTACGGGATTA AACACGATATCTTTTGGCTCGGGGCGGGCTGCAC  
GAGGACCCAAAGACGTATTAGGAGTAGCGCCGGTTACCTCATCACTGGTGGTTCCTTCA  
CATACGTAACGGTGGCAAACAAGTGT CATAGTCAATGAAGTCACTTAGGAGTTCACTCA  
TGATTGTGCGGAATTCCGATTCCCTAACCTTGTTATCCAAGCATTGCTGACTAGCGTCCC  
CTTTGGCCTCATCCTGCAGGATCTTACCTTCCC ACTTCGCCACCCTTCATTTGGAAACA  
ATATATTAATGTAATCGGAGTGTTAGTTATCTCGAAACGGACACACCTTAGCTAAAGTGG  
TTTTGTGCTTCCACGATCACGTGCTGTTAGTCGTAGTAGTGGTATAAGAAGCCAAGGTGT  
AGTTACGTAGTTCACTCTACTGAGATAACGACTCCTGACGCTGACTGTTCCAGTTCCTGCC  
AAGTATTAGCAATCTGTT CAGCCAAACCATCACGAGTGTCTGCTTAGGATCCGTTGTAGTT  
CAAGAACCTTGCCTGTCATTAATCAATTCCTGAAAAGCTAGGGTTAAATTGAATGACGTC  
GCTTTCACGTTTAGCTCTTGCAGAACGTTGCGGAGGTTTTAACGTGATCTCTACAGCAGT  
GGCTAGACCCTTTTTCAAGACATCATGAGGAGGACGAGACAACAAGTTCATCCGCAAG  
CATTGGTGTGTAACCACCTTTTATACGCCCTTAATACCTGGCTCATACCGTGGTTCCAA  
TACAGCAGCTGTAGGTTGTTCTAGAGAACCAAGCGACTTAGTTGGTCGAAACGCGTCGAT  
GCTAATAGTCGTGACTTCCCTTGCGTACCCTCTCTTAATATCGCTTACAATGATTGGCTG  
TGCCACAGTAACGTCGGCTCGGTGCTTCTTAATCACC ACTTTCTATGTAAACCAGAGAT  
ATGGTCACAGTAATCATTAACTTATCTATATTGGGTGCGGCAATATCCAAAACGTAGAT  
GTAACCTTCTGAATCAATCCTAATAATAAGGATTGCTGTAAAGTCGGCCTTCTTAGATAA  
ACTAAATGCAAAATCCACAGCAGTAAAGATCTTCGCAGGTCTGTCCTTAAAGCAGTATCA  
ACCGTCCCGATAGGTAACGAATTTCTCATCGTAGTATTGGAAATTGCTATAGTTCTAACG  
TGCTGAATCTGGGTCGTATGGGAGATTGTCGCACAAAGCAAAGAAATGAACAGGGTCAAC  
GTATTTAGCTTTCTTCTTAGCCAGAACAGTTTATCAA AACCAAACCTTCGTACCATCACA  
CCCACGAGGAGTACGAAGCCACAAGAACACACCTTCTTCTTGTAGACC GCGCTCAAAAAT  
ATCCCAAACACGTTTTTCCACTCAAGTGTCTTCTCCATGTTTCGTGGCATAACGGGTTGATG  
CTAATTCTTCCATGTGTGCTGAATATCATCAGGCTGATACCGAGTACCACAAGCCTTAGC  
CATACCTCCAGCCTTTTGGATACATTCCATATGACACATAGCAGCAGTTACCTTGCGTCT  
ACCATCCTCAGTATATGCGTTATCTGGA ACTACAACATCATCAGAATTAATAACATACGC  
GTGCCAACCAAGTGGAGTCAGCAGT GAGGCCAGCAATCTTAAATGGAAAGGCACGGACGCC  
TTCCATCATAGCCTTTGGGTGGTCAACTGCGATTGCACTGTTAGTCCATATCCTACGCTT  
ACCCTCCTCCTCGTTATCCATATCCGGCCAGTACAGGCGATGGATGTTGGAAGTCATGAT  
GATCTTAATATAATAACTGCATTT CAGGTAATTCACTGGTAGCAGAGATATACAGAA  
TGTTGTCTCTGGACCCTTAGTCACTC ACCAAGCTTCCCAAAGAGCCATCATGTGAGATTT  
TAAGTGACCACGATGTA ACTGTAGAAGTTGTTAGACCTCATTCCATCCACGCACTTTGC  
CACTTCCCTTGTTGACCTCACCATAAACTTATTGTGGAGTAACCATTCGGTAGATAGTCCA  
GAAGTTAGACTCAGCACCTGCTATAATTACGTCAATGTTACTCACTCATACCTCATAGTA  
GTCGTT CATAGTCTTCTCAAGTTTATCCTTAACCCGGGATGTCATCCGTGTGCGAGGAA  
CAATTTCTTCTTGGTTGGGCGTCTGCCCCACGTTTGTGTTATCCTGCATCGGCACGCC  
ATTTGGCAGCAGCAAAAGACTTCCCATCGCGTGTCAATTTCCATTGCACTGCGAACACCAA  
TAGAGCGCACTTGAACCTCGCCTTCTTCTTCCATTCCCTCGTACATAGCGTAAAATTCAT  
GGTTAGCCTTAAACTTCTTCCATTGTTGCCACGCACCTAAGCATTCCCTCGCAAATTTCA  
TCTCAGTTGGGTCTTCGATGTCTATATCGATAAAGAGCCGTTAAGTGCTTTGTTACTTCT  
CACCTTTATTCATACAGTCTT CACCCAGAATCGTGTGAATCGAGCTAGGCTTGAATCCCT

TCTCTAAGAATATCTCCTGGGTGATACCTCTACTAATAGACTCCTTAAACTCCTTCCTCA  
TCGGCCCTCCTTAATATGGCTTATTACAGAGGTAATATAAAATAAATACTTTACTAATAC  
CAACCGTATTTTAATTTAATGGTCTTAACAGCAGCCCTCCGCGCCATCTATGCTTGGCGA  
GTCGAGTCAAACCTGCCTCCCCATAATTAATGGGTCTCTAGCTACTCTATGTGCCGCTTGT  
TTGCGTTTGACATTATCTTCATTTATACCATGTGGAACAATATCTAAAGGGTATCCAAGT  
AGGACTTATGTATTACAAAACGTAGAAGAAGCTCCATCCCATACTCGTTTACCGGAGGCC  
AGTTCCCTCCGACGTTAATCTTAGTTTAGTCATAGAATCTCCGTAGTTGATTAGCGGACTT  
AACCTTTTACCATCATTGACATTGTTAACGTTAGACGTACCATCAGAGGCAGACCCAGTA  
GCTCCTCCAACCTCACCGCCGAGTGCAGTAGTCTGGTTTCTGAAGCGCCGGTGGGTCCA  
GGTGCCCTGCCACTCCAAATGTACCACCATTACCTCCGTTACGACCTCGACCTGCGTTT  
GTCCCACCGTTAGCACCGGCTAGACCGCTTATTGCTGCTAGTGAGAATCCTTGACCGTTT  
CCCCATTACTACCGGGACCACCGGTAGTGTATGTAGAACTGGTAACTGGTCTAGTTGGG  
TACATTGCGTTAGACTTCAAAAACGCCACACTGGCTCCCTACAAGTTGGAGGCATAGTAC  
GTCCACCCTCCCACGGCTTTAGTGATAGCGTAGGTACCAAAGGCCCAAAGTGTGGACCA  
TACCAACGATATATCTGGGAGTTACCCATAAGTACGCTACAGTTACGAGCCCGAAATCAG  
ATATGATTCCTGTAGCATATGTCCAAGTTCAGATGATGGGTCACGTTGTGTAGATTGA  
GTAGTAAAGAAACCGTTACCACCTGTACCGCCTTTACCAGTACCACCGCCTCCACCGGCG  
ATTGTGCCGTTGTTGGTTAAGTTAATCTTTTAGTAAATCTGTATTTCGTAAGGCAGGGTCA  
CCAGCTTGGCCTACTCCAGTTCCGCCCACACCACGTTAACCATAGATCTTACCATTGCTG  
ATGACGTTAATTGTCTGTCTATAATGCTGTCTGGGATCACAACCTTGTGGAGTGCTGACG  
TTGGTTGAGCACACAATCACGTCGGAGTTAATAACTAGATTATTGATAATCTCTTCTTTA  
AAACCTACAGCCGTAGCTAGGTTGAAACTGGCTGTATTCCGACTGATTGTGTAAGTAAAT  
TCGGTGTTTGGACATATCTCCCCTTCCCCGTGTTAACAACCCAACCAGTCGTGTATTGC  
CCAACCTCCGCCGACATTAAGTTTCATTGTAGACTCTCTGTAAGTACCAGAAACATTTACT  
GCTACTGGCATGGTTCCCTCCTTATACGTAAGTACTGTAGCCAAATACCTTTATCTGCACCACCA  
GCAGGCGCGCTAGAAGATACAGTAATCTTTCGCTTACTAACTGCTGCTAAATCAGAAGCA  
GAACGGGCATCAGTTGCAGCATCATATGCGGCTATCAAACCTGTCAGCGGTTGCATAAGTA  
GTAGTACTTTTTGAGTTACTAGCACTAGATGCTCCTCAACTGTTTCTGGTGCTTGAACCA  
ACCTCAGCTTTAGTAGGCCAACGAGTTGCGTAGTGTGGAATGCCTGTAATCACCGACCAT  
GCTGGAACATAACCAATAGGTTTGTATCTAGCATGAATCTTAACGATAGAATAGGCAGTA  
CCTGCTAACTACAATCCAGTTCTAGCATCTGCAATAACTTGGGCCTTAGTACTTCCTTCC  
AACTTGTCTGCATTTACATCGGTAGCGTTAGTACCTGGAGCACCTCTTCCGTGGGGGTC  
GGTTTAAACCCTTTGTGGTTGATTTTACGCCATGGGAGAGGTTCCCAAGTGGTCTCTATTA  
CAAGATTTGAAATACAAAACCTTACTATTATCCCATACCCAGTTAGTAGTTGGAGTGCT  
GTAGCTGCTGGAGGTCATAAAAATGATGCTAAGTTACTGGAATTTGTTCCCTCTTGCATT  
TTTGGATTGTTGTTACCTAGGGGAACAACACCAGTTAGTTGTGGATAACCGATTCAAACA  
AGAGTGTTAGAAGACCCAACATACATCACACTGATGCACACATCATCAAACGTAACAGCT  
CCATCAAACCTGAGGCAGCGGGTTTATTAGTTGGAGATTATACCCTAACACTACCTCATAT  
AGTCGGCTAGATGACACCATTTTATCCGGCAGTTTTGTTATTGATGAGGTTGCGGCATCA  
TGCATTCCCTCCACTTCCAATACCAACGTTATCATCGACACCCTGACCAGCATTGGTAATA  
TAGACACTTCCCTCGATTAGCCATCACACCGTATCCATCGATCTTTGCCACGCCTCGGTTT  
GGAGTAGTATTTACAGAATCAGGGTTCGATCAGCAGGGGAGCAGTTATTGGATCTCCAGCT  
TAATTTACGGCTCCTCACATTGCTGGAGCTGTTTTGTCCGTATCCGAGTAGAACCGAGTA  
TCGGCTTCTGATTTGTCGTGCAGACTGTTGGCTTCTACTTGACTGGTAACATCACTTAGT  
TGACCATTAACGGACTGTACGCGAGTACCAATCTCTACAATACCCAAGAGGAACCGATC  
CAAACAATCAGGTCAGTGTGCAACACTGTGCGTGTTTACCTGTGATTTGTGTAGATACG  
CGTTTTGGGTTGTTGGTACCTGCAACATAGGCTTTGCCGTTGTGCGATGGCTCAGTTAGA  
GCCATCCCTTGGTTGATTCTTGGGTCGGCTGGGTCTCTCGTCACAACGATGCTTGTGGA  
GTGCTTGAGGCGTTGTCCATCTGTGCCTCACTCGTAATACGGATAGAACCGAAACTACCG  
GCAAGCAAGTCGCTGACGACAACCTTCTCCAGCTCCTCAGTAGAGTAATTTTGAATCATT  
ACGTAATCAGAGTTACTGATAGGCCTCTTTATTGAGGCCGAATCAGGGTCGATTATTTG  
GTATGAATCTTATCCACCCTCGATATCTGCTTATGCAATCAAAGATACTAACTAAATTG  
AGACCCAGTAGTGGTCACTCTGCTTTTTTTTTAAGTTAGTTCCCGGAGAAGTTTCGTATCC  
ATTAAGGATAACTGATATAGTGTTCCTCTCTAGGAGAAGGAATAATAAACGCCCAAGT  
GCCTCCAGAAACACCATAATAAGTTGTGTAATTTGCGCTATCATATGCACATCTGTAAGA  
CCCATACACAACGGAATCATTGACTAGAGTTCTCCAGTCATTTGAACATCAGCAATGAA  
TGATGGCCTAAACGGGGCCAGCGAGACTTGTAATCCTCCAACCTCACCATTGCAGAAGT

CGCAAACGTGGTACTAATCACTCCGAGATGAACACCAAACGGCCGTGCTTGGTCAAGTGG  
AGTAGCTGTTCCACCAGACTTTGTAGTTGACAGTGCAGTAGCTGACCAAATGTTAACTT  
TGTAGCACTTACACCATTTCATCATTTTGTATTGTGGAACCATGAACCGATTCCACCGTTTC  
CCACTCTCCAGTACCATGAAACACGCGGATTCTGAAAACCCCTTGAGATTTGTAGTGCTG  
GATATCAACAGCGAACACATCAGGGTGTGGGTTAATAGCGTTACCCAATGCTAAGTTCCA  
ACTCGTGCCTGTGGTTTCAATATAGCACTCATGAGAACCACGTTGGACTTGGTCTCCTTG  
TGGACCTTTGTCACCTGAGGGACTCTGTGGTACCATTGTACCTCGTGGGCCTTCTGGCCC  
TTGGGGCCCCGATTGGGCCTTGAGGACCTGTTGGCCCTACGGGACCTTACGGACGAATAAT  
ACGTTGAGGACCCTGCGGCCCTGGGGGCCTGTTAAAACCCCTATCCCCTCGCGGGCCTTT  
CTCACCGTGTGGGCCACGTTCCCCTTGGGGACCCTGGATACCTTGAGGGCCCTTGGTTCGCG  
TTGCACACGCTTCTCGCCTTGCGCACCCCGAGCACATTGTGGACCTGTAGGACCGATGGT  
TCCTTGCTCACCTTGAGGTCCTTATGGACCTTGACCCAACGGAATAGCTGGTGACCAATC  
ACCATACGCTGCGCTTGACTTAATAAAGCAAGCGCCCTTAGTCAAAATGGGAGACTGGAG  
ACGCACTGTGATGCGGACTCCAGTTTTAGGAGTTTCAACAAATGATAGACCGCTTCCAGA  
TACCTCAAAGAATCTTGGGCCAGGTATGAGTTGCCATGCCAAACATATAGGTTACTCTT  
CAAGTTTGGAGTGAACAACAAGTGAACCTCTTTGTAGAGCCATGTCCAACAAGCCCTG  
TTCTTGGAAATGTAGAGTCAAATGAATAGTCTGTTGCAAAGTAGTTAAATCGTGGAACCTC  
ATCTTCGTATGTACTCAGACCAATAAATAAACATTGAACATTGATGATCAAATAGTCGCC  
CTTATCACTTTTCGAGCCGACTGGACCAGCAGTAGCGGTAGGGCCTTGGGGATCCGTTAG  
GTCTTCGTAACACCCACGAACCATCTGGATAGCGGAAAGGTAGGTTTCGACCATCCCT  
TTCATGCTCTGAAGATGAACCTTCTGTGCCTGCAGGATCAACTACGCCCTGCGGACCTTG  
AGTGATTACCAAGGACCCAACCTCATATCTACACCTGTATCCGGGTCAATCTTGTTGGC  
GAATCAACTTGAGATGGTAGCTTGAGTGATGTCGTCACAAAATTGGTGGATTGGAGTAGG  
ACCTACTACGCCGTCTGGTTCCTGTGGACCCTAAATACCCTGTTGTCCTTGAACATCCTG  
TAGACCTTGTACTCCAGTTGGGTATTGCGGACCCTTGGGCCTGCCGTGCCCGCAGGACC  
AACTACGTCTAGTGGAGCATAGGAGTCAATGTCCACCCTGTCTGTAGACGTCCGGGACGTA  
GTTAAGGAACCGTACCTTAGTGCACACTGTAGTGTAATCCACTTTTGGAAATAAACGGAT  
ACCGTTTAGATACACTTGGGTAGAGAAAGGACCTTCAACCACCTAAGTACCGATGTCGAA  
GTCCAAGTAACCTCATAACGATAATGTGGAATCCGTGGTCGATCAATACCCGATACATC  
ACCTTCAAAGGTTTTAAGGTCTCCCAGCCAAGGAGGTTCCGGCAGGGTTAATTGGAGCAGG  
TAGGATAATTATCCGGTTGGAGTTCATATCCAACCCTTGTTCCATTAGATTGGAACCAGT  
CCTAACATAGAGAATATTTGATTTTAGGGCCTCCAGAATCTTCTCAAAGTTGGAGTTACT  
TGTGGAGGTGTTAAACCCTCCTCTTGATTCACTAAGAGTGGCAGTCATAGTTATTTAATC  
TCCATAAGATTTATAGAAATAGTTATTACATAAAGTAACTATACTATAAACATGATTAAG  
TATTAATACATTCCAATGTAGAAACATATCAATAGTTAATAATGCCCCCGTACGTTACGC  
AACTACGTTATTCGGGTAGGTCGTATTGCTTTCGTTACTTAGTCTCGTTTGGCATCAGCC  
ACGCAAGTATTCAGCTTACGAACTCTTTAGTAACTACTCATAAATGAAAGATAGAATAC  
GAAGAATCTATGGGGCTGTGGTGAGGCCCCGACTTGTTTACGATAGAGTATCGCCTCGTA  
GAATGAAGCCGTATAGACGTCTAGCGCACAAGCATTTCATATTTGTTTGTGTCATAGA  
TGACAAATACGCAATCTGGAACGCCATAATCTCTGTGGGAAATTTTTATGTTGCTATGAA  
CACCAAATAGAACGCCCGTGACCCCCCTACCTCACTCCGGAGATGTGCATGTACACC  
TTTTTATCTTTATTTGCGCCTTTAGCTCAACTCACACATTTTTGATCGATTGGATCGTTG  
AGCATTAAACATTCACCATGCTTCTCGACAAGTACGAATCTCCCACACTTACACTATTAC  
GGGTCCGCACAGCGATACGCGGCGCTAAGGTATTGCTTTATATAGTATTGGGATAGGCAG  
AGTGTTATGTATATTGCTGTACACGATACGGATAGCTAGCTATTTTCGAGCTATGTGATA  
ATAGGTTATTTAGTTGTATCGTATACACGTATATAAAGAGAGCATTACCGATTATATCT  
ATATTTAGTTATGTGATGTATGTCACCTTGTATCCCAGTTTGGATTGGCGTTAATATTCAC  
ACCCTCGGTAAGGCAACGGCATAACGATATAGAGATAGATGGTTACACTCGTTATCTCTG  
CTCTTTAAAATGTGGTTGCCAACGATTGCTGATTCAAGATAACCTTTACACCGTTCAAT  
GTTTGCAGTGATACGCAGTCCAGTGTTGTTATGGGTTGACTGAGGTAAGCGGCGTTACCA  
ACAACAATCACATACCCTCTAGATGTACCGAACAGGAAGCTAGAAAACACCGCTTGCCA  
CGGTGAGGATGATTGTGTTAACATTGTCACCACGCTCCGAGGAGCAAACCTAGTTAACCGC  
ACGGAGCTCAAAACGGTCTTCTATACTTCCGATATTACCACAGATGTAACATCCGTACAG  
ATGTTGTTGAGGCGACGTCTCGCGTAGGTTGTGAGGGGTTAGACTCTCAAAGGTATTGAGC  
TACGTTGCGCTAGGTTGAGATTTCTGTGACGCTTTATCCAGAAATCGTGCCACTAAGCTTA  
CGGTACGGATTATAACTGCAGTGCAGGATGACGTTGAAATGGTTGGATTTTGTCTCTGGA  
TATTGATAACCCGTCATGAAGTGCGTGATCACCGTCAAACCAAATGTATGCGACAGCAA

ATATCAGCACGCCAACCAGTCCGGCGTGATGAATGGTTATAGGACTGTATATTTAAGGGC  
ATTAGATTACTAATTAATATTTATCTAGATGTTAATTAGTGATCTCTTGTTGAGCTAAAG  
TTTGTGGTTGTCCTTAAATATTTATGGTGAGCGGTTACCTAATCTACTGTATATAATCG  
TGTAATAATGATAACCAATGTGATTGAGTTATAAGTGCTCCGTGTTCAATGTTTACTCAC  
CAGAGAGCTAGTTAAAAGTAGAGGATCGTTTAGTGTATTCACCACCAAGCAAGGAATAAC  
AATGCCAGCCCGAATCACAACCTAACGTTTTAGAAAGACAAGGTTAACCCCATTAATAGCCT  
GTTACGTATTGGTATCAATGCGGTAGGTCGGTATGAGCTGGAAGCTAAGCTACAACGTTA  
TAGATTGGATCAAGTTTTGTGTGCTTCGTTTTCTATTATGCCAGTCTCTGACTACGTAAC  
CCGTAAAGAATTAACCCTGATCTTGACTGGTCTAGTCACTGGTCTAACTCTACCTACTAA  
GTCATTTTCATAGGTGATTATCATGGCACTCCAACCTAACTGAATCTAACTTCAAAGCGAAA  
CTATACAATTGGGTAAAAGGCAGCAAGTTTAATCGTGATGAACTTTAAGAATTTATTGTG  
TTGGGTGAACTACATGCCCAACAAAATGATACTGACTTTACCAGACTGCTCGACGTAATG  
GTCGCTTGTGAGGATGTGAAGGCATTCCTATACATGCTGCATTTGGCTACATCAAGAAA  
GAGATCAACGGTGCAGCATAGAATGTTCAAGGCTAAAGTGTTCAAGAAGCTAAGAAGAGA  
GCGACTCTTGAATACAACATTGGCTACCTAGAATCTGAGGCATGGGACGAGTTTAGAAAG  
ACCACCAAACCCGTAAAAGAAAATGGATATTAGCAATTCGGCTCCACGTTGGGCAATACAA  
CTGCGTGAGGACATTGAGAAAAGGTTTTGCTTGAAGACGGTCACCAAGATAATGCCGAAGAC  
CTATTAATTCCTGGTTCAATTTGTAGAGTTGTAAGCTAGCAGCCATTCCAAATGACTG  
GTAGTTATGGATATTGTACAAAGCCATGATGAACAAGACTATTATGTCTATTAATAATGCG  
TCCTTTTCGATTGTCTCAATTAACCTTTACTGATAATTCGTTTGCCTACATCGTCCGGTGC  
TCATAAGAACATTAGGGCTGAGGATAAATTGACTATTATTGCGATGGTATTGTGACTCTT  
AAGGGCGGTACTGTTGGTAAAGTGTAACCTGCGAAAGATGCTGACGGTGATAACTGCCCA  
TTTGTGAGTTACACGATAACGGCCAAACATTCGCAACCGTTGGTCTAGATTGGATTGTT  
CGTGTGCTCGACCAGTACGACGTTGAAAACCTGGTTGATCACACACCAAACATAGAACT  
ACACCGCCCAAAATAGCTGAAAGCCACCAGCATATGCTATAATACTGAGTGATTTACTTC  
ATGCTTTTTGATTGGGGAGCCTTTGTCATTTTCTTTCACGCAACGCTAGGACAATATCAT  
GCGTATTATCCATTTTGTAAAGCAAAGGCGTCGTAACCTAACGCAAACGTAGTAGCACAGGA  
CGATCGCCTGTACATCAAAGGTAACCTATGTTCCATGTTAGATTCCGGGGTCATTGGGT  
TAATGTTTCGTAGCGATATGGTTGTGGAGGCGGAGACAGCACACCTAACAAACAACTTCCA  
AATGTTAGCTCTGACAGTGTAATCCTAGTTCGAAAAGTCCTATCATCATCATTCCCTCA  
GCGATAAGGAGACGGTAACATTAAGAAAACCAATTCAAACCGTGCCCATAGTCCTGTGAG  
TATAATGTTAAGCAAGCAAACAGCAGACGTTAGACTAATCAAAGTGGTCAATCTAAACTC  
TCGTGCCACTGGTGGTGTGTATGGTGGTTCGCTTGGTTTTTTATGTGCGGCTATTAA  
TGAGGACGGTGCAAACACTCGTAGCCTGTCAACGTGGGAAGCATAACGGTCAACTGTCTGA  
CTCAATAACCACAATGGCAAGACTCCACTAACTGAAAAGGTATTCAATCATGTTCCATAC  
AGTCACTCTTAGGGTAACCGTGCTCGTTATGGGATTGGCTATTCCGGTTAAATGGTCTAAT  
GCTAGTCCGTTCTATCTCAAAGCCGAAGTCATTAGCCTAATGTGAAAAGATTATTACATT  
TTTGATTAACATTTCCACGCTTGTGGCGTGTGCTTAAGATGCCAATCCGGAGCATGAGT  
AATGCTTTCCGCTAAAGTTGTAACCTTAGTCTTACTTATTTACGTGCTTTTACGGAGAAA  
ATACACTATGTGTAACAAACGTTTCTAGTGGTCCGGATGCGCAAGATCGTTTACAAAAGGC  
TTACGCTAATGTTACATCCCGTAGCGCTGTTATTGTCCCCAACGTACGTAATCGGATCGG  
TACAACGCCCCGGGGTAAGTCTGGAAGTACTAAGACTTATCGAACAGCCACACCTCCTCG  
TGGCTTTAATCACTTAAACTGAATAAATATTTAGAGTCCATTATGGAACGTACAATAACA  
CTAGGCGCTTTTTGTTTCGTTGCTACTCCTCGCGAAAATGATTTAGGCGTATCAATAATC  
TATCATGATCGTGAACCTAAAGGCGACTGAGTTCAATCCAAAGCGTGACATGCCTAACGCT  
GAAATGTTGGCAAGTCAAAGTCGTGAAGAAGGTTTATTTTTGGAAGCACAACACTGCGC  
GTAATAGCCCTTATGGTTGGTATCGGTCCAGTACTATTGGATGGACCAGTACGTTACGCC  
TTCTATGCCACTGAAGAGAAAGCAGGCGAGCAATTGATTCTCGAATCTGAATCATTATAC  
GCAACTAAACATTAATCCCCTAACCTGAGAGAACTACCATCACGTGCCCAATATAAGGA  
ATCATAATTGTGTCTATTATCTCTAAAACCTTCTCAGTATTCGGATGAACTGTTGTTCAA  
CAAATCAACACTAAAACGTTTCGTTGGCTCTACCTTTTTAGCCGGTGAAGTAATGGTCGAA  
GTTACTTTGGACGACCCGACCCTGGAAGGTGCAATGGCTGCATTCGAGGAGTTCAGCGAA  
AACCACGCCAAAGGTGCGGCCGTAAGTTCAAAGGAGCTAAGTTCTTCCAACAGGAAATG  
ACCACCAAGAAATCATTGACTACTTGGGCGGTATCATGAATGTTGCATTGGTTGCTCCA  
TGCGAAGCAAGCCGTGAGGTAGGTTGCGTTGTCTCCAAGCGGCGACACCAAGACGGTGAT  
TGGGAAGTTGTTACCTTTAAATGCTTAACCTAGCAGACTATTGCAGTGTGCGGATATG  
ATGCACAGCTACAACCAAGGTACAGCGGAACACTTAGCAGTATCTCTTATGCGGACAGGT

TCATTAGGCTTTACTAGCTCTACATAATCTTATCGGTCTCCTACTTTGGGGGTGGAAGAC  
CTTCCACTAACTCAAGATGAAAGAGAGAAATACCATGAAAAGCATTATTTAAACTCAAAA  
AATCCTCTCTGAAATCGTTAGCGACGTGCTGAAAGCTTGAGGTCATGAGAACCCAAAGCC  
TGAGTGTGAGGGTATACCAAGTAAAAACACTTGGTTAGATGCCCCATACGCCCAATGGAA  
GAAAGGCTTCCAAGTGGATATTCTATTTAGTTGTGGTTTGAAAGACGAGATTCTCAAGCA  
AGCGAGCTACGAATCTCCACGTGTTGTTTACGAACACCCGCACTGAAATAATTTACGAACC  
GATGCACTTCAAAAACAGCAGGAGGTAAGGTAGAGCGCCGACCCTTCTACCAACTGGTAC  
TTTACAGCTGACTATCTCTGCACCGGTGTACATCGAATGGAAGAAGCAACATGATGAGTT  
CACTCGTCAATATGCGTAAGTGAAGATGTGGGAACAACTCGTGCTGACAAAGCCACTGT  
AATCCGTGCTGTGCCAGACAGTGTGAACACCACCAAGCAATAGCTTCTAGAATGCCACA  
GATTGAAAGCTTAATCCCAAGTGGTTATGTAGACCCAAGCAATGTACAACCTACCAGCAAT  
CCTTGCAACCTTACCAACGGGAGAGAAAATTACGAAATCTTTTCTACTGAAAGTATTCTT  
GATTCTACCATTGTGCGTATCGGTTTCGAGCAGAAGCTGAACCAAGTCTAATGATACAAG  
AGCTGCCTTTGTAGAAAACACTGGCATATGTATCACTGATAGATACATTGCAGCGGCAAC  
GCCCAACCTTAAATTTTATGTAGACCATATCTTAGCAACAAAGAAGTCACAGATATATTA  
CTACAGACTAGACAGCACAGAGAAACCAGTGTGGCTGATTATCTGTGGCGATTGGAATC  
TAAAAAGACTGGTGTCAAAGCTTGTAACCTCGCTCTCGAAGCCATGCACGAAGGGTCCGA  
TGAAATGGCTGCCGCTCGCTTTATGTAGAAGCTGTGTAGTGAATAAGTCAAGGGTATCT  
GATTGGATGCCCTTATCGTGTTACTTAATCTATTGGAAACTGTTATGATATATTATCTT  
GGAATCAGTTAAACCTACTATCCTAGTATCTTTCCTACTGTGGCTGTGGTGTAGAACGT  
TGGTTTGCCGTTCTTGGTAATGGTGGGTATATGAACAATAAAGGATACAGACGAGGCAAC  
TACCAATGTGGGGAATCGTATAACTTTGGTACTCTGTCGCCTTGACTCATAACTTGTCT  
TGGTCAATTACAGAAGAATTTCTACCCTTTCATAAGTTTGATGGATGCTGTGATGTTGGC  
TTTAAAGACGCTGCCAATACTTCATAGATTGTGTTATGTTTACTCCAGACGAGATTGAA  
GGTGTCCAACCTTGTAAGATAACATTAATGTTGTCAAATGTGTTGACTTAATACGCCA  
ACAATTACAGACGAGGTTGTATCTCCCGGTGATACCCGTAATTTCTTGAGCAAGTTAGAT  
GGAGCCACGATTACTCATGAGCATGGCGGATGTGACTTAACAAAAAAGCCACCAAGTCC  
GTTAGAAAAGTGTGGTTCTTAGGTCTTCTATGGTCTGACTGCCCATAATTTGTAGAGAAA  
GACGTTTCGTGAAAGTTGGTCTGACATTAGCCTAGGTAATGACCACTACTGCAGCAAAA  
GAAGTAGATGAAGAAGTATTCGACCGCTACCAAAGTATTTACTTCGGTTTGAACCACAAA  
GTCGGACCGGAGGGTGAACAGGTTCTAGTTCATTGGTGGTGGTAAATGTAGAGCATAAGT  
AGATAGTACTTGCTAGTGTCTCAATCATGTTCACTAAGTAAAGTAAAGTAAAGTAAAGT  
AGACGTTTTACGATTGCTTACACTGCACAAGAAGGCCGTAACACTAAAGTAAAGTTTTTC  
TGGACTAAGGCGGAAGACAACGAGATTGCTATGGTTCGATTTCAAATACTATCGCGCAGAG  
CAAACCGACCAACTCATCTTCAATTGGTACGAGATTCACCAAATCACTAACTAAGAAAGG  
TCATATCATCGAGCGCACCCCTGCAAAGAACGCTAACACTGGAAAATAACACCGATGCTCC  
CAATGGACAAAGAGTTACTGTAATGAGCCAAAACAATAAGTAGTATGATGTTGAGGTGTT  
AGCTCACGTATCAGATAGATTTGGCTCTAATGCAATCTGTAGTCACATTGAAGACGAATC  
AAAATTGTTATTAGTATTCAACCACTGTAGTTCATAGTACGTGAGCTTATGTGGGGTTCAG  
TGAACGGGACCTATTCAGTTTTGCTGGAAAAATATCTAACCAATACAGTTTAATAACATGA  
ACCTTGGAGTAGAAGCATGGCGATTACTTGACCGTGTAATTGCTGGCGATTGTGGTAACA  
ACCTAGTAATCCGAGAGTATTGTCCGGTTCCAATTTCTGACCTTAAGACAATCACAATGC  
CAGTGCTACGTCACTAATGGGATGTTACAGTGCCACGGCGCAGCGTTGGTGGGCAGGAC  
TTATCAACGAGTGTTCTACCACACGGGCACTAACTCTCATGATTTTAGGTTACTGAGCG  
AATTGAAAATCTAAACCAACAAATTTCTTGGTATGGTACTCGACTTGGATGTCGAACATA  
ACATTGAATACAAAGAGTTTAGGAATCTCGCGGGTGCTGATGACTTTATGGATGCTCTCT  
ATTCTGAGAGTTACATGAAAATCAGCCGGAAGTGTGGTAGTTATCCAGAGGAATCTGAGG  
AAGCGTTTGGATTAAGAGCCCTTGTTCCTTTAACCACAGAATGCGCTCTCCAAGGAGTG  
GCATTGTTAATCTTCATTTAGGGGAGGGAGTAACTGCTGAACTTGCCCGCACTATGTTCC  
AACTTTGCTGGACCAAGCCCAAGGCCGTTACCTGACCAACCGTGATGGTGGTTTGCCTA  
ACCTGCACGTCTGGAATGAGTGGATGGACTTGTAGACCTAAAAGAAGAAAACGATGGAG  
TCAACTCTCAGGCAGAGGGGTCATCTGACTGTAAATCAGCACAAGCTGAAGGTAAGCCCA  
ACGATAGTGGAGGCGAAAGTGACGAGGGATAAGGTGCAGGAAGTGGCTCGGGAACGCTA  
GAGAGGGCGAAAGTGAAGCAGGTGAAGGGGAAGTACCTCAAGAGCTTATTGCGATGTTCT  
ACGGGGATTCTGGACGTACTTCTACGATGGTAAGCGTGCTTCTGGTATTAACGTTAAGC  
TAACTTACGATTGGGACGCACGAGATACGTCTGGCTAACGTATGCTGACTGCTGAAGAGC  
TCCAACCTAAACACTTTGCAGGCGCCGCGCTAATAACGGCTTAGATGATGTGCTGTCTC

ACCTCAATTTCACTCTGAGTGATAAGGTCCGAAACATCCTCAAAGTTATGTCCAAAGTCA  
ACTGGCAGGGTAGTCAAAGGGAGGCAAGATACATTGCAAAGCCGTTGAAAAAGTAGCGA  
CATGCAGTAATGTTATCTGCCGTGAATAGGAACTGAAGGTTGTATTAGATACGCAAGTAA  
CTGTTCTGTTAGATAGATCAGGCTCTATGTCTGATCGTAGCACGTATCTCCACGGTATGT  
TGGCGTGTGTATGGCGAATGATGCTTTGATCAAAGTCGCCATTCCTATTGGAGTGCTAG  
ACTTTACCCAACTTACAAAGGCTCTAACTCGTACATCCAACATCTGATTACACACCCCGT  
TCGGTCGTCGCGATACGGCTTGTGTCTGTTAGTGTCAATGGATGGAGTTGACTAAGCTT  
ACAATGACGTTGGTGTCTCCTATTATGTAAGCATACTCTCGTGTACTCGCCCCACAGCTA  
AGAGTAAAAGCTTGATTGTGTTAAGTGATGGTAGCCCTGCATGTTTGCAAGCTGCCTCTT  
ACGCATTCACTAAGTAAGTGGTTCGAGTAGATTGTAAGAAATCTCCAGTAGAGATCGACG  
CCATCGGCGTTATGGACGGTCACGTTATACGCATCTACTCACAAATCGCTGTTATCAGAA  
CACGAGAGCAACTAGAATCAGCTCTACTTAACGGCGTTAAAGCTAAAATTCTCGGTTAAT  
AAGGAAAACATATCATTGCAACTATGACAACAGCAACATCAGAAGCTCCACGTTCTGTTG  
TAGCGGTGGCAGCGGCAGCACATATGGCGGTTGCGGCTCGTAAACATGAGTACGTTGCTA  
CGGCTAAACAACCAGAAGCACCAAGAATCCTCCTCTTTTTGAAGATGAGATTCCACAAC  
CATCAGTTAATGGTGTAAAGAGTATGATGAGATTATTGGGCATCCTCTTCCATACGGTG  
AGTTCTATATCCACACCTACAAGAAGGAACATTGGCGGGAATAACTACCATCTCTGATT  
CACAAATTGAAAGCACCATGGAGTTTGTGATGATGACCTTGCTCTTGCTATTATTATGGACA  
TTTAATACTACATACCTGTATTCGCGTATGGCGCCCCGGTAGATGGTACGTCAGTTACAA  
CAGAACACATCTGTGCTCGTCGCGGGTATCCTTGCATGTTCTGTGATGCTATAAGTGGTA  
CACAGCATTGCGACTACGTGGGTGCTCCTTGGGTGAGTGAGGGCAGTATGGAATGGAAAG  
ACGGCCCTATGTCTTTCGCCGTGCGCACATGTTGATTCTTCAGTACGATGAGCCCTTCA  
AAGAGGCTGCACAACTAACATGTGTAGCCAATAACTGCTTGACACTCGTCATAATCTGA  
GACTGTACGCTCATGCTGGCGCTGTTGAGTGTAACCTACATGCTCATGGTAGCTTTTCGTA  
TTAGGTTTGCTGATAACTTCCGTCGTTCTGGCGACCAGTTGGATAGGTTAGCGGCAGAGG  
TACAAGACCAATCTACTGTGAACAGTATGGTGTCCAACGTTTCATGTGCCATACCGAACTG  
AGAAAGCTGAGATAGAAATCCTAAGCCGTAAGTTCCCACAACCTAAGGTTTGGCTA  
CTAAGATTGTTTCTTAGCTAACATGTATGGTACAGGATGGGGGCAAGGAACATACCA  
TGACTTACTCTGTACGTGTTTCTGATTACTAGCTGAATTATAACTGAGTTTAAAGTAACC  
CTGCGTATGCTTTCAAAAGAAGTACTAGTTTCGATGCTGTCTATGACGACGTTGAGAAGAAAG  
AGCTTGAGAAAATGTTGAACATGGTTAAGTTCGACGAGTAAAAACGCTAAGGAGATATCA  
CGGCTTATAATGGTCGTCCGGTCCGTGTGTTTAAACACAGACCGCATTAACAAGCATAAG  
CTCGGGATTGCTTAGAGGAAGAGTATGACCTCAAACACGTCGAAGGAGAGAGTGGTTCAA  
CTATCTTCGCCATAGGCGGTAGATACGGTTGAGGAGACACCGTATCCTACAGACGCGAGA  
GGGAATCTGGTCATGCTCTAGAGTGGATGTTTCAATCAGGTTTCTTGAGGGGCAGAGGGT  
ACGTATACCCACTATTCATTACCTTAGATGACGTGGCCACCGATAAGTACTACTCTGCGT  
AGAGGTCTTCGACTAGGACAATGTTCTACTCTAGTCGTTGTTGCGTGCTAAGTTTCTAAA  
CAAGTTAAAGAACAGGCTATTAAGGCTATTCTTGAAGAGTTTGCAGTCAAGAAACCTCAT  
ACATGCAGATGCACTCAAGAGAGCTGGGTGTATTGTTTCTTACGAGAGATTCATGCGTCT  
CACTACCAGTTACCCCAAGCTGTAATTGCAAAGGTGGCACAGTGGAGGAATCAAAGAATA  
TGTTGAAACCTCACACGAACCAGTGACTAAATAATTGCTAAGTTAGAGGAGTTATTAGT  
AAGATTGATACGCCTTGGTTCCGCTGCAAAGCGTGTGATAAAGAGATGCAACCACATAAG  
TTTCGTGCTCACTGGTAGAATGCTGAAATTCTCGACGTTTGGGAAAGCCTGTGTCTTAAG  
TGTACTGTTAAAGTACCACATAGGTACTCTCGCACTGAACAATAGCACAATGAATCATCA  
GGGATTGATTCACTCACTCCCGTATGCGAGATTCCTCGGTGAATTTATGCACTCATGA  
CATAACAAAGGTTCTGCTGCTGGCAGTTTTAATTCCAAATACCGAGATTAAGGCCACGT  
AGACGACAATCCAGATTGGACTATCGGAGGAACGAAAAATATCTTTCCTGCAAGGAAGG  
GCACAACAACAACCGATTCCGTGTTACCCCGTAGAGAACGGTGTGTACATTGGATACTG  
CCATCAATCCGGTGGTAAGGGAGTCTATCGTCAGAAGATTGCCCGTGTAAAAAAAAGT  
AGCCGGTAGCAGTTCTAAGAAAAACCACCGTGATTATAAACTTCCAAGGACTATTACCAA  
AAACATGTCAGCGTGGTTCGTCAAAGGCAAAAGTGTGCTTGTGAAAAGCCATGCTCACCGA  
TGATGAAGTTAAAGATAGAGGTTTCTGGTACGATACCGAAACAAGTCGAGTGTTACTTCC  
TATCTCTTATTATAGTGAGTATCAGGGATACCGCACTCGTAGAGTGGCGGCTAACGGCGA  
AGCGAAATACCTGCCAAGGTCTAAAGACCGAGAAAATTTTCATGCGGTGCTATAACCAATA  
CACTAGCGCCCGTAATGCGGTGGAAGATGCTCTATCATTTATCCGCATCAGTAGACACAC  
CAGTTGCGTCCGTCTCTTTTGTACATCGATACCAGACAACGTTGTAATGTTAGTCGCGC  
TAATCACAATAAGTACAACATGTGGTATGATATTAACAACACTACAGGCTAAAATCAAGCA

GCTCCAGCTTAAAGCTAATTAGGAGTTGTTGGGTTCCCTTCAGAATGATTAAGCCAGACAG  
AGACCCTACAGAAAATTCTGACCCTGAACTCAAGGAGGTACTATACCTGTAAAATCTAAA  
CTCGCTAATACGGTTAAAGTTGTAAATAAAGGTGGTATCTTCACATCACATTATATTTAA  
GGTGCAAGATAACCCTGCCTCGGTGAATGGCGCTACTCCGAGACGCCTCACCAAATTCGAC  
TTCATTGGACTGCTTCGAGATGCAACTATTGGAAGGGGTGTTGATAATATCTACGCGGT  
CAAACGCTAGTGCTCAAGTATACCTATACGGTGAACGAGGTCTGGAAGTACACCG  
AATGTCAGTGCACAGTATCTGCAATCGCACTAGCCCGGATTCGTTTTTCCACGGTCA  
TGGATCCGATTGAATGGGGACGAACACGATAGAATGCGTGCACGTTTAGTTGAAGCCCGT  
AAGATTGGCAACAGCATTGACGCTGCTTGGTGGCTTTTTGGTGACGACCACCGTGAGAGT  
GTGAAGTGGACGTGTAATCCCGCATTACGCAAGTTAGACACGTTGGATGCGGCTGCAGTG  
TACTCAAATTATCAGACATCAAATTTGGAGTGTAATCATGGGTGGAGAGAGTAAGGTTC  
GAGAGTGGGGTTGCTATACTACTTCTCGTGGGCCTGACTTAACTCACAAACAGAGAGTACC  
AAAGTATTGCGGTGTACAGTTCTGATGCCACTTACGGATTCATTCCGGTTTTGCATGAAG  
TGGCTGATGTTACGACTTGATGGATTTTCAGTATGAGTGGTTAGGTACTCGTAATCCAG  
AATGTATTATTGGGTTCCAGAAAGGTGGTACGTCTCAAACGTAGGAGAGTGGGCAAGTC  
TAACAGTGTTCCGAATGAAACCCACTGGTACTGTTACCGAAATATTGAAGGTGAGCTAA  
GGTTGGTGAGTGATCCACTTGATACAAATGAGCCGTTAGACGCAGTTCGTGCTGCGACAA  
TGTTGTTAGTCTTTGCTGATGAGGAGGCTAAATTATGAGTTTAGACGTAATATTAT  
GGATAGGCGTGATACGTACGAACGTTACTCCCCATTTGGTTCGTGAAGATACTGAAGACCC  
TTGCGTCTGGAAGGTAATCCAAGAGATTGAAACCTGGTCTATAGAGGATGAAGAATGAGA  
AGAAATAGATTGGGATTCCGTTTAGACTTGGTTCGGTACTATTACAGTACGGTCACCTGTC  
TAGTGACACGCTTGATATGTATCGTGCTATCTTTGATAAATTACCAGCTCGCGTTGTTGA  
TGCACCTTGGAAACCCAGTCTGGTTGACAGCTTTATCACTCACGGTTACGGTACAGCAAT  
GGCAGATAAAGCTCTCCGAGCTGCGGACCGCGAGCCGGTTCATGGTTTATGACCTTCAAAA  
AATCGTAGATGATTTGGCCAACTAGTTAGGTTAGTTGTTGAACCTGATTTGTTGTTGT  
AGAGGACTCTATCCAGCATATTTGAAGCGTTTTCCCAACGGTGACGACGATTAGCGTAT  
TCAATTAGTCAACAGGTCAGTTTTTCGTATGCCACAGGATGGTAAGCTGGATGTGTTAGT  
AGCTCGTCTAGAGCTGGTCCAACAACGTACATGGCTTATAACGCTTCTGGTTTTGCTCC  
TCAAATGGCAGAAGATAAAGTTGTGTTGGTGATACCAACGAGGAAGTTGGCGGTCAGGT  
CAAGGTACGTACTGCCACGCGGCTATCAACTGGCCTAGTGCTGACATTGAGCTTCCCTCC  
TTCTGGGGAATCGTCTGCTTATAGGGATTATGTTGGTAACAAAGATAAGATTAGGATAAC  
CGACAAGGAGGACATTAGTGTGCACGATATAGAACAATACATCAAGAAGTACAATGTCGG  
CTTAATAGTTATTGATCAGTTGTGGAAAGGGCACGGGTTTAAACGTGAGACAGCGGCTAC  
AGTAGTTAGCCAAACTAAATCTTTAACTTGGCGCGTGAGATTGCGAAGTAGTATCCCAG  
TGTTATGGTTACTCACAAAGCTAATGCGCAAGCGGAAGCTCAGAAGTGTGTTGGATATGTC  
CATTATGCACGCCATTA AAACTGCTGCACTAGGTGAGGCAGACTCAATTATCATGATGGG  
ACGTAGTCTGACGAGTCTGAGAAAGCAGTTCGCTTCCCTACCATTGCTAAAACTAGAG  
TGCGTTAGGTCCTGATGTGACCCGGCGCTACGTGAAGCACGTTCCGAGTTACTTACCGT  
TGGAGATACTGCTGAAATAAAGGAGTTCTAAATGTGGTTAGACCATTTTCGATGACCCTAA  
TGAGGTTTTTGCTAGAGCGGTGTCATTTCGACTGTGAAAGATCCATTTCGTATTCATGATAT  
TGGGAAGTTATAGGCTCCTACTCTCCATCGTGCAAATAAGATGGTGTGCTTTGGTTGCAA  
AACATTAGAATATGCACCTGTAGGACTTCGTCCAGACCATGCGGACTTCACAACACTCAT  
TCGTGAGAATGGTGTGTTCTTTGGCGGGAGGCCAGAACAATTAGTTCGACTTGTGTTGGAA  
GATGCGAACGTGTCCTGATTTTCGTGATATGTTACCTAACCTATGTATTTGGCCTACCGA  
TTTTGCGGAGTACTTGTTAACTGAACAACCCACAAGATGGCGTCTCTTCTCGAGTTGGC  
TATGAAGTATGGAGGTACATTA AAAGATGACCGTGTGCGCCGAATTTGGGAAAGCTGGAGT  
TGAAACCTCAGACATTCCTTTCCCGATGCTCGAAGAGTATGACAGATATGACGTTATCAA  
CGCTGAACTTCTTTTCCTAGATCCAGTTGACCAAATGATTAAGGAAGGTCTTCTTGATCA  
TACTATGACTCAGCTGGACACGCAAAGGGCTACCAGTGCATGGAATGGCATGGTATGAC  
GCCCAACAAGGCCTTGCTTTGGAATTAGCTAAACCGCTCCAAGCCGTGATAGTACACAT  
TTATGGAGTTGTACCTTCGGTGATGGAAGCTGTAGGTTTTCTAAAGACTCAATGATCCT  
GGGCAGTAACTCACAGATTAGTGCTCTCATCTTGGGTGGTGGAGTTCAAGGACAAAGACAA  
CGATTACATCCACAACGACGATGCTACACTTGCTACCTTCATAGCGGGTGCTCGTGCTGG  
TCAATTTAAGACCAACAACCTTTGGACGCTCCAATGGTATTGAAGGTTTGTA AAAGCTAAT  
CTCTCCGAATGGTAAGAACTGCTCGTATCCAGTAGGCGACGACGCTCGATCTAAAGTCAA  
AGCAGAATCCTTAGGGGACGCTGTAGTAGAACAGTGGGTGCGTGACATTCTCAAATTCG  
CCAATTGCAAAAGGATGTTGACACTGACTATATTTGCTCCGCTTCTCAAGTGTTCCCTGA

TGGTTGCCTAAATGGTACCTATCACCACACTAAAACCTGGTACTGGTTCGATTGTCCTCGTG  
TTCGCCAAATCTGCAAATATCATTAAACGAATGTCTTGTAAAGTTATATGATTAGTGGTCT  
ATTCGGTGTAAAGACTATAGGAGGTAAGTCGTGGGAAGTTGTGTAAACAATGGTTTACAA  
CGAATATACTCGGCGATGAAGGCCGTTGCAAGTGCCTATGAAGGACCGCTTCTCTCGA  
TATGGTGGGAGATGGATTTTCAGTAGAATTCGAATCTTAACGAGACTTCAGAAAAGTGGGCA  
TACCAAACCTGGGACTCGCCAATCTTAACAATAGATAGAATCGACAATGCCAAGAACTAC  
AGACCACAAAATTGTATATGGATAACGCCGTCTGAGAACACGCAACTTGGTACCTTGAAG  
TTTTGGTATGAGAATGATAGGGTAGATCGCTCTATAGGGTATGTAACATAACAATTTTACA  
GACTTTTGTAGGGGGCATTCTTAACCTCAGAGAGTTTTAAAGTAAAGTGGGAAAGAACTAC  
AGAGGTCAAACAACAAAACACCAGAAAGGTTTCACATGGCAGATATTACGCTTTGTATAA  
TCTCCAGATTTCCCATGGAAAAATCATGGAATGTGACTTCTCGCGTCCTGAGGACTTG  
GTGGTGCAGTGTAACTGGCGCCCAATGATGAAGGAAGATATTATTGAGGGTGTGAGA  
TGCCTGTGTCTGCTTCTTGGGTAAATCCAGAATACTCCTTTGAGGAAATCTTAGCAG  
GGTACAGGGCAGAGGCCCGTGTCTCACCAGCCTTCATAAGAATGCCAAGCCTGTAACT  
TTGCTTTGCAATACGATGCTGGTGTAAAGACTGCTGCGGAGAACGCAGGGATCGAAGTAG  
AACAAAGCTCATGCAATCATTATAACAACAACAATCGTCATTGTGTGTCGTACAAGTTCT  
AAGATGATCTAATCGTGCAAGTTAACAAGAGTCGTCAATCCTCTAGTCGTACGGAAA  
TTGGTATGCCGGCTGGTGTGAGTACCGTGATCCAACAGGACGTATCTTTACTTTCT  
ATGAGTCCGATGCTCCTGAGCTTCTGCGTCGTGACTGGTACTACATCCTGCCCAA  
CAGAATGTGTGAACCTACCCGACTCAACCTTTGGCAACTGGTGTATTTGTACCAATGATCT  
TGAGACATATCGACAACTACTGATGACAGACAATTCATAACGCGATAGGTGCCTGTTAC  
TTGGTACAGTACACGATTCTGTAGTGTGATCTTCATCCCGACGTTTCATGAGTATACAG  
CTAAGGCCCTTCGAGCGTTGACGTTACGTACTCCTGAATACACGGAACCTTACCGTACTG  
ATCCGTATGATATGCCGTTGCCTTGTGACGTAGACATCAGCGAGGGCGCATGGTTTAATA  
TGCTTGGATAACAAGTATTAGGACGTTCCATGCAAACCGAAGCACAGAAACGATGGTACGA  
AGAAAACAAAGAGCACCAGCGTGAGATGGGAAGAAAGTGACTATGTAATATCCAGGGTCC  
GCGTCTCTAATTAGGCTACGTCACAAATTAAGAAGATCAACGGCATGACACTAGAGTAA  
TACAACCGTTTGGTAGAATTCTGGATTAACCAATGCCAAATTTGTGGGCGTACTACTGAT  
GGAAGTAAGTTAGACTCGGCTGTGTGTACTGCAACCATGAGACTCGAGAAGGACGA  
GGGTTGATGTGTAGAGGATCTAACCTAATGTTAGGCTATGCTATAGATATTCCAGAGATA  
CTACCAATGCAATAAAATACCTGCTAAAATAGCTGAGCAAACATACATAGATCTTACTA  
ACAATAGGAGATAATTCTGTGACAACTAAGAGTGGTTCAATCACTTCTAAAGCTCGCAAT  
GGTGATTCAATCCAACCTACGTGACTGTACCTGGTACTCAGCGTTCGCTGCTGCTCAGATT  
CCGGCTGAACTTAAAGCAGTTAACTCTGTAACCTTTGGAATATAGAGAGAATGGCCGTTAT  
CGGAACACTCAAGGCAACCTTACGAAAGTAGGTGGTTCTGCTGCTACTGCGAGTGGTGGT  
AAAAGTGCTCCAGCGTCCGGTTTTAGCGGTAATCGTGCTAACGGTGAAGAAGGTGGTTTC  
CCAATCGATCCAATAGCGAATGAACATGCTCTTGACCGCGTAACGCAATTGCTGAGGCA  
AGTTGTCTCATCGCTTCTAAGATTGCTCATGGCACTGAGTTTTAAGATATTGCCGTTGAT  
ACACTCCAACCTAGCAATGACCTTCGAGGCATACTCTACTGGTGTATGGAACGTTTCACG  
ATTGCTTCTAGGACTTCTGGCCGCTCTGAATAAGTATGATTGTATAACCCTTTGGTGCCT  
TAGGGAGCCTTTCTTTTCTTAGGAGGAAATATGTCAGAGAACTTACTCGTATACTTCGT  
ATACTTACTGGTTGTGCTACTGTAACCTGATATTGACCACTTCTTTGACAAGACCTGTCAA  
CAATACGTTATGGTTCAACGGATAGGTGTGAAGGATTACATCCGCAAGGATGAGTTGATT  
CGCCAAGCTCAAGAACGGCAGAAACGGGCGGAACACCATCAACGTCTGGCAGAGTCACGT  
ATTGCCAAAATCAACGACCTGTGGGAGGAATAATTATGAGTTCAGATGATCAATTATCTA  
AGTTGGTAGACGAGTTTGTGAGAAAACATTCGAATAGGCTGGACCTAAAGGTACCGATG  
TACTTAAGAGATAAGCCTACCACAATGTTTTAGGTTCCATCGAACTAGGTTGCAGTCTAG  
GAGAACTAACTCAGAACTTCACAAGGTTATCGACCGGGTGGAACTCGAATAGGGCTAC  
ACAATGACGATTCAGGGAAGTCTCTCACCTCCTAGAGAGGCTCCTAGGCTCAAATGCAGT  
AAGGAACAATGCACCAACTTATCGCAAGCCTATCACGGTAAGGTAGGCTGCATATGTTAT  
GAGCGCGACGATAAAAGCCCTGACGATGTATCACAGAAATCGTTGAACATAAGAAACATA  
GCCACCATCAAACCTATCTAAAGGACTATCGGCTGAAATCGTTTCTACTAACAGTTTTAAA  
GTTAAAACCTCTCAAACGTGTCGGCGATGTTGGTTCTCGTAACTCATCTATTGTGCATTA  
ACTGCTTCTAGGTAGGGTTACAAAACCTTCTGATTTGGATTAGCCCATACGGTTGTCGA  
GATGTTGCAGAAGATATTGTAAGCTATTCTTAATGACAATCTAAACGTTAATCACCGA  
ACTCCAGAGCAAATTGAGGCTTAATTTGACACCATTAGCAGTAGTTGATCCGGACACTCC  
AGCGGTTGCTTCGGCAATTAGCTGTGAAGATAATCACTATTCAACTCTGAAGGGTGATTG



TTATCCACGTAGGAGTGATGCTCTAAATTCGGGACAAGACACTCTAATTCAAATATGGGA  
GGCCACAGCGCCTCCTCACTTCGCTGTATCTCTTTGTGAGAAGGTTATTCAATGTGTTCT  
AGATGATACGCAGTGTGACGATTATGTGTTGTTGATTGGTGGCGGTAATAAGTACCGATC  
GGATTTACCTCACCCAAATGGATACCCTTAGAAGGGCAATCGCACCGACATGCACAAACC  
TATCTATCTTGATGAGTGCAAAAACCTATCTCATGGAGTACCACCCTACGATTGTTTTTTA  
CGTTTTCGAAGCTGACGATGGTAGAGTCAACTTGTTAGTGGGGTTATGGAAGGTAACGA  
TGAAGTTCTGTTATGTCACATTGATTAAGATATGGATATTATTGAAGGTAATCACATGCG  
TTTGAGTAGTAACAACAATGGGAAATACTTCCATGCTGCGTCTACACGGTGAACAAAGA  
AGAAGCTCTACGAACTTCTATCTACAAGTCCTTTCTGGTGACACGACTGATAAATTTCC  
CCGCTATTATAAGTTAACTGGTAAGAAATTAGTTGCTGGTATCGAGTCTGGATTGGATTC  
ACTGACTACTGAATTAATATGCGGAATTACGCTCGCGTAGTCGATTTTAAAGCAAGTAT  
GGGTGACGAGAACATCCTTATCCAAATTGATCGATTTCTCTGGACTCAACGTAAGAAGG  
TGAAATGTGGACCCCTCCTACGGACGTTGAATGGTAATAGCGTTAACTGCCGACTGCCTA  
AAGTACACTGTGACTTACAAATATCTAGCTAGCATTATCGACCGACTAAGTCACAGTGGT  
ATGGATTCTGTGACTCATGTATCTAGAACTCTTTTTTAGTCTTTACAATATGAAGAGTTG  
CGAGCATATGTCGCTGATAAAATGTTTAAAGACCTTAAAGAAGCTTACGGAGTATTTAAA  
GATGAGTCATACTTAAACAAAAATCGTCAAAAGCAAAAAACAACCTTTCTTAGAAAAAAC  
TCGTCATCGCCAACCTTGCTGAGTACCATCGTCGCTAAGAGGAGGAGAACTTCGTGAAGC  
TTAAGCCGCGTACGTGTCGCGGGTCTAAAGGTTACGAGGCCCGCAAGTTGGGATTCCGTA  
GCGGATCCGAGCAAGACTTCGCTAAAACTGACCAGTACCTTAAAGAGTCTGAGACAGAGA  
AAATACCATATCAAGTTACGTTAACTAATCATTATACGCCCGATTTTGTCTTGATTATGA  
AAGACGAACGTAACATGTATCTGGAATTC AAGGTTTCGATTTAGTTTTCCGGCCGTGTTA  
ATATGAAGCGCATCAAGAAATGTTACCTGACTTTAGATATTCGTCTGGTGTGCAAGTGC  
GCACTAACCGGATTACTAAAGTTTCCAAACCAAGGTGTATACAATGGTGC GTTAAAGAAT  
ATATCCTTG CATGTGATTCTAAGGCTAAACCAGCGCACATTCCAAATGAGTGGTTAGAGA  
AGCAGAGCTTAGCAACTCTAATAGTCCTCATCCAGTACCTTGA ACTGATAATGACCTAAA  
GGGTGCTTCGTACTCCACAATAAAAATTGATGGCGTTTGTATGCTCCGCGATGAAGCAGG  
AAACCCACTATCACGTAACGGAAAGCCGTTATATAACTTATAAAATGTACCGAAGGAAAT  
CTCCGATGCAGAATTTTATTCTGAGAGTTGGGCAGAGTCTATATCTCACTGTCGTTCTT  
TGTCACTGCTGTTGGCTACGTTGATGGTGAGCATGTTACTCTCTATTTCCCTGTTGTTGA  
TCATCGTTCAGGTTTAGGTATCCATATCAATCCAGCTGCAGAGGCTTCAACTACTGTTAT  
GAGTCTCCTTTTAGCTGCGGGACACGAGGGTTGACTTCTCCTTGAAATTAATGGTAAAGG  
TAAACTTTACAATTTGAAACCTAACGAGACTTACGATGTTGAAGTCATTGGTATGGTAGA  
GGTACTGGTAAACATGAAGGGCGTTTGGGAGCACTTCTTACTCCAACGGGTAATGTTGG  
TACGGGATTCACTAATAAAGAACATGAGTGGTGAAGGTTACAATATGCAAGTTTTGATAG  
TACACGCCGTAAAATTATTAAGTTCAATGTTGGGAATTGATTAAGCTGGTCAGTTCCG  
TCACCTCGTTATATTCGTTTACTGGAGGATAAATAATGGCCTTTGGCCCTAAAGGAGTG  
GCTCCTGCTTAGAAAGCAATGGTGGAGATAAAAGAGGACACACTTGGTGATGTTATGGCT  
GCTACTGGACAGATTAATTCCACCATGTACGGTGCTCCTCTAGATGATAAATTAGCATT  
CATTCCCTATCACAAGCTACTGTTATGAAACCAAGAGATTTTACTGGGGTACTAGAAGCA  
GCCATTCTTCCAATGATGGAGTTGATAACACAATGACGATTAATACATCAGGTAAAGATG  
ATTACATAACCAGCAACTGTTCAAACATTACTTTATGGCATTATGAATAATATATTTTTTC  
ACAACGGTGATGAGAACGTCCAGCTTATGAAGTTGGAGGCGGAGTTGTGTGAGGTTATCG  
AAGCGTTACATGAGGGTCACAGTCACGA ACTCTGTAAAGAAGAAATCGGTGATATGATTG  
TGGTCTTAATCAATCTGTGTGAACTCCGTGGTTACTCCCTCGATGAATGAGCTAAACCTA  
CATTCCAGAAGACTAGCAAGCGCAAGGGTAAACCATTAATGGGTGGTTTAGTTAATGAAG  
GGGAGATGATGTAATCGGTAGTGCGGACTTACTAGAACCGGAAATTA ACTTGAATGGTAC  
AAACATCTTCCTAACTTCTGGAGTGGTGGGAGCTGGTAAAACGCCTGCCCTAATTAACAC  
AGTAGAACAAAGTGGAAGAAAGAGTCCGAATAACTATTTGTTTATGAGGCGAGAGGTGTA  
TACTCGTGATGAAGGTGCACGTGCGCGGGAAGGACGCACTCGACGGTGTACCCCAATTGG  
AACCGAAGAAGGACTTGTTCCGGGTGCTTTCTTTGTCTGCTGGTATTGATTGTTTGCTCGC  
TGATGGGGCACAATTCTTTAGTCCCGGCTGCATTGAGCTAATCTCCCTTGAGGCAACTCT  
CCACAACATCCCTATCGTAGCATTCTACAGTTTAAAGACTGACTATTTGACAATATCTT  
TGAGGCATGGAAAGAGATTGCTAGGTACGCAAACCGGATTTATGAGTAACGCCACACTTG  
TGAAATGTGTGGA ACTCGGAATGCTGTCCACAATAAGCCTATTGCTGGTTGTGATTCTTT  
GATTGTAGTTGGGACTTATAATCATCGAGCTGTGTGTTCTGTATGTTGAAGTAAGGAGAA  
ACGTGTATCAAGTTCAAATGTGAAA ACTGTGTTGCGGAGCGTGAAGGGTTTTAAATTTGTA

GCCAGCCCAACTAAGTTTGGCGTTAGGTGTTGACGATTTCGATGCATTTCCGACGTCGTTGT  
GAATGCGGTCGTAGTTTCGAAGGCTATCTAAGTAAAAAAGGTAATTACGGTTATTTGCGG  
AAAGAAGCTGACTGTGCTGGCGGCGCATGGAGAATCTGACATTAGTTCCTGTTGTA AAC  
CCTGTGCGATTGGTGCAGGGTAGCTGATTAATCACACACCTTGAGGATGTGACAAATCC  
ACGACTAGAAGAAATTGAGCTGCTTCGGGAGATGATTAATGAATACATTACTTAGTA ACT  
GTTTACGCAATTATTGGTAGTAAAGCTGACTTTAACTCAACACGTAACAACGCTCATAAGG  
ACGCCAACTGTAACCACGTGAAGCAGAAGTTCACACTTTTCACGTAAGCAAGAGGAGTT  
ACGTCACACTTACTTTGATATATTGTTGACACATGCCCAAACGATCTGTATTTCTTATTG  
TGGTACTAACTGAGTAATTGGTTATTTTCATGCCTGTA ACTCTTATATAGATGCTGCAGA  
AACTGACTAAGGCTTTACGTGTCTTAACTGTGGCTGTCACCATAGCTGATTGGTTGTGAC  
TTAGCGAGCCTGTGGTTATCTAGGTAATCCATCAGAGCGCGGATTCAATCATGGGAAGCA  
TGTTGAGGTGATTCGGATAGCTAAACATTGTTTCAATTTAAGGCGGAGCTGGTCTTA  
TGCCCTCACAGCTCTGCCTTTCAGGTGAGAACATGGACCAAGTAGACCAGGGTGCATTCG  
TAGAACTATTAAGGAATTATATAATGGGTGAGGTA ACTGGTATCGGAGATACTGCGCTC  
AATCCACATATGCTATTGGAGATTGCCATAGGTAAGTATGAATCTGTTATTCTCCTTCGT  
TACGACAGGGAGGGTACTTAGAAGGTCGGGCCTGACTAACCTAAAACGAGAGAATTTA  
TTATGGTTACTGGAGCAATTC AACCAAAATAGGTA ACTTAATATGTCTAACGAGGTGATG  
TGATGTGAGAGAAATTGTGGGGAGTAGCTTTCCGATTTGGGCCAGACTTCTCAGTAGAAC  
TTGCGCTTGAGAGTCTGGTTATTGCAACAGGTGGGGCAACGGCCAGTACTAGAGTAACCT  
CTGTCGTATGGACCGGACGTACTTTTATGGACGGGCGGGGTTTGAGTGCGAAACACTATC  
TTTTATACA ACTCTAAAGAAGATGGTTGGTTTATTAAGCTGCGAGTAGCAGTTGAAAGAA  
TGGGTTGAGCAGTGTTTGATGTGGAGGCAATTTCAAACACCACAAAAACGATCCAGTTT  
GGAGTTATTCATGATTGATTTTAGTGAAATGAAGTACACGTTGGAGATGAGGTAGTTGC  
GATGGCTCGTGGTGGT GAGTGTTCACAGAAATAATCAGAGGATTGGTAATTAGCATTAC  
TACTAAGAGAGTTGAGTTATATCAACTGGGTATTGGAGAAAGGGTAATAGATAAAAAGTAA  
AATCAATAGTTTGAAAGTAAGGCGAGTAGAACATGAAAGTGTAGCTGAAGTGAATACAGG  
TAATATTGAATTAGTATGATTA ACTCTCTCTCTACGTAATAGACTCTTCCTAT

>NewGenomeName\_208

ATATATCTTATACTTAAAAAACA CTCAATAAAACCAGGCTACGATTACTACAAATATAAC  
GGAAAGGTAGGTGCGAACAAAAAGTCAGGTGAGCACAGGCAAGACCGTTATCTGTCTACC  
AAGTTAGCGACACAACCTACAGGAGATAAACTCTGAACTTATTATGTGCTAATTTTGTA  
TACAAGTCTAAAGGATATCTCAGATAATTTAGTGAAGATACCTATAATAAATGGAGAATA  
AATCAAAAGTCTTTCCGTCATAAATTCTAACAAGAGGTAATTCTTTGATTTCGATTATTAT  
GAGTTTTCATAGCAGGAAGCATTGCAAGAATGTT CATAGTCACTTCTGGTCAGCATCCA  
ATACACATGAGAGAATATCTGCCTGGCGAGGTCTCATTAGTAACATTGGTTGTATTTTAA  
ACATGCTTAGAGTTCATTGAAAATTTTGATAAACTTTGTTAGATCCCGTCTGGTAGAAT  
GCCCGAATGAAGGTCATGGCCTATAGACCATTTCTAACATTACATTACCAAGAATATATG  
ACGGTTATCTTAGATTAAGTTAAAACAAAGTTATGAGTAAAGTTTTTCGAGTATCGACATT  
TCGAATAGGATCTAATAGATATCTTTAATTTTGTAAAGACATTTACCAGCGACAGTAC  
GTATAGAAATAATGGATAAAGAAGAGACACTAGAACACATTGAAGATTGTAAAGAACTTA  
CTGCTAAACAAAAGACTTTCTATACGATGTTGCGTCTAGCATCTAAAGAAGCGAAGGAAG  
CAGCAGACCTGAAGAACCAGTCAATTCTTTAACTAGTGCGTTTTGTTATGTGGACCTTT  
CCGAGTGTATGGGTGTAATGGCTGCTACACTATAGACGGCCCCCAAGAGGGATGATCTAT  
GCAAATTATTATCATATCTGAGTCACTAAAGACAGAATTA AACATCTTATCATTGAGGT  
TTCAGCTGAGAGATAACTTCAGAAAATACTTGGAGGTA CTTATGACGTTCCAGGAGATAC  
TGATTGGCAACCGGATGCTGATGTTCTTGATTATGAAGTAAATTACTAGGGATAAGAAGT  
GAAAAGCTTGTATAGAGAAATGGAAGACGCGTTTACTTCGCCCCAAAATGCCACCACTAC  
CAAGTTGCCCGCTTGACAACACGTATAGACTATGCTACGACTGCACAGTAGTATACAAA  
CAACTTACACAAGAAAACCTAGAAAACCGATTGTGTCTTTTACATCTCTAAAGAAAGCATC  
AAGCACTGGGCATACTATTCTTAGATTGGCTAAGGAGTTCGAGAAACTAAAGCAAGCAGC  
TCATGGTAACAATGGCGCATAACGAGCGTCTTTGGACACCAGAATTGGACAATACAGGTAA  
CCGTTATGCTGATATCAGATTCTTACCCGCACCTGATGGAGGGTAACTTCCATTCGCTAA  
GATCTGGTCTGATGCCTCAAACCTCGTGGTGGTAAAGGGAATATCGAAAAGTCTTTGCC  
ACCCCTTGGTAAATGAGACACCGTTTCAGAATACTATGCTGAAGGCTGGAACCCTGCAGG  
GGAGGGTTCTTCTCAACGTGCACGAACACGGTTCGCAGA ACTGAAA ACTTGCTAACTACTC  
TAACATTTAAGTTGTGAGTGATCCAGCACACCCTGAGAAGGTGGGTAATGTATTCCGGTA  
CAAATACGGAAAAAAGATTTTTGGTAAACGCGTTGACGCAAGGCGACCTCCATTTGCAGA

GGAGCCACCAATCGATCCTTGCAATTTCTGGAACGGTGCTGACTTCAACTTGAAGATCCG  
CAAGGTCGCAGGTTACCGGAAATATGATAAGTCTGACTCTGCCCTACCCAATACACTAGG  
TGATTATAATGACATACGTATAGGACAAATTTGGAAAGGGGCATAATCTCTTGCTGACTC  
CGAATACCTTAAGATCTCTAAGTCTTATGAACCACTTAAGGGACGTCTTTGTGTAGTCTG  
GGGCAACACTGCTGCAGTAGCACGTCCTGATGAATCTTTTGAAGATGCTAAACCTCATA  
TCCAGATTGAGGATAATAAGATAAAAATTTTAGTGAGAAAGCAGTTGCCTCTGCTCCTGC  
CGAGGATGACGTAAAACCTTCTACTTTGGAAACCTTGTTGTAGAGGACGGATTACCAAT  
TGTCACAACGAGGGTTGTAATGACCCTGCTTTTCTAGTATAATTAACACATAAAGGA  
ATACAACGAAAACCTGCCCCCGCTGCAATCATTTTCATTGCGTCAGTCCCTGTAAAAGCTT  
AAAGCATTGGACAAAGGAGGTATGGTCAAGCGTTTGAATCCTGTAGAGGATATGCATACG  
AACACAAGTATTATCGTTATGACTATCGGAAAGAGTACGTCCCTAGCTCTACTAGATCGC  
CTGGTTACGTCCGACCCTACCGAGCAAAGATTGCAAACCATCTATCTCTGGTGATCCTA  
GCAGATCTCCAACCTGCCCTTCAAGAGTTTACAGAACTCCTTCAGCTGATGGTAATGAGT  
ATAACGAGGGAGCAAGTCTTGGAGGAATCTTAGGAATAGGTGCAGGTGCAGCATTATCAC  
CAGATGATGGTCGTTGGTGGTCAATATCTGTGAGAATTGTCGGTGGATCTATGATGAGTT  
GTGCGATTGATGGAGTTAGTGATGTCATGAACTAAAACCTCTATAACCGAAGAAGATGT  
CGTAGATAAGATAGAGTTTGCTATAAACAGACACAATCGTAATGCAGGACGCGACAATTT  
GGTTTTACCCTTCTGATCATCGAACTCTTTAAAGATGCATTGTGTAGAGTTGTCCGAGA  
GATACCACCACTTATGGGTATCAATGTTGATTTGCTCAAATACATAGTGGAAAGCAAAA  
AGGGGACGTATTAAGCAATTTCAAGATCATGAACAACATCGGATTAGAAATTGTCGCC  
TGGAGAATATTGTCAGTTGATTTACTAGCAAAAATCGTACTCTTTAAAAAAAATGAAAG  
ATGTAGCACTAGTAACATACTTCACTTCTATTTGTTCTGTCATTCGGAGCCACCTATGCAT  
ACATGATTAGGTTGAAGGGTTCTACGGTGGATTCCTTTAAACAAGGCATCAACTGTACTTC  
CCGAATTGCGAGGGGTTAGAGAAGGAGAACAGTCGTTACGAGTGACTTTCAAGGGATATG  
AAGAACTAGCACTAGATGGAGTAAAAAATATCCAGTAAGTGCACAAAGAGACCATGAGT  
CCATGGTACTCTGTTGCCATCTCCTAGATCGTATGGATGAACTTGATGATGAAGACGGTG  
ATGTTGATGACGATGGTGATATCCCTGCTAAACCGTTCGTCGGTCTGTTATCTGAAATT  
GACTTTTAGTTCCCATGAAACGGGAAAAAATTTCCGGGAATAATTTGACCCCTGTAGAT  
TTTTATGTGTGACATAGGTCTTAGACAAGACCGAGTGCCTGAATCGCACATCGTGTTAT  
TTTTAGGACATATAAGTCGACGAATCTAACGCTTCTGACTTAGTTGTTTCATGATGGTCC  
TTATCAATCTCGTCCACCTGATTGTGTGCGAGGGAAAAAATTCGATATACATTCCTTGCA  
ACTTGATTAATCAGAGTTGTATCAGGCAAAAGAATGTTGGAATTAGTTAATTATGATTG  
GAGATTCCCATATCATATAGTGCTCCTTGATGTGCATAGTGGTACATCGATTATTCCTCG  
TGGAAGCTTTCATAGATCTCAATCAGGACAACATGCATCTATTGTAATCACTCAAGCAA  
GAGATACAATGGATTTTATCCTAGTGCACACTTCTATCCTGTATCTTGTGGAGAGACCGT  
CCAACAAGATAATGTTTTAAAGAGTGAGAAACCAGTAACTCATCGCTTAGGAGAATGACT  
CTAAGATATCACCTTTATCTTCAAGAGAACTCCTCTTTAAAAAATTGGACAAGAGACGAA  
TTACTTTAAAATGGGCCAAACTCTATACTTCCTATTGGAAAGATGACAAAACGTATGCT  
TAACGTTATGATGAAGCACGTGATCTAGAAGCCTCTTTTTAATTATCATTAAATTTTAC  
TCATTAGTGCAGCATTCTTAACTTTGCATATTATATCTATGCAATTGGATTTGTCTGG  
CCGTCGCCTTAGACCATCATCTCAAGGTTAGTCCCTGTCTGCTGACTCATCGCTGAATC  
AGAGAACTCATTATATAGTGGAGACTAATAGAAAATAATGTTGGCGACATGCATGGGTTG  
TAAAGTTTTTTTGGTTGGTATGTAATATAGCATCGTTTGTATATCAAGGAACATGGAAC  
CACGTCAATTTACTTTCTAGAAGGGAATATGAAGAAGGAATCAATAGAAAGGGAGTATGT  
TAAGGATAGAAGGGAATGCTCCAGAGAGTTCGATCGAGTCAGTGCACCAGCAGTTGTAAT  
GAAAGTGGATGGTAAAGCTGCGTAAAGTTTGTGGAACCTTGTAATTATCGATTACAGGAGCAT  
GGCGCACTGAAGCGCAAGCTTGTAGTCTGTTGTCTGGATGGGAGAGAACTTATTTCTTC  
CAATTGATGAAGTATTCTTCCCAACTCAAGAGATGAAGTGTGAACTTGATGTTTACGTTA  
CTACACACTGAACTCCTGTACACGGTAAGTTGATCACAACCAAATACGCGTACAGATAG  
GAGACAATGCGAGTCATGCGACTGGCGCAATATATAAGGTATTACTTGGTTTTTTGGTATG  
AGGAGGAAGTGTGAAAGACCAGCGGAAGATGTCTGTTGGCAGCATAAACGAAAGTGTATC  
GCAATGTTACCTTCGATTCACATAACACTAGCTACAGATAAGGTCAAGACGATGGAAAA  
TATTACTGGAAGCATTGTGCGAAAGGAAGCGGAGGACGACCTCATCGTAGATGCTGATGGG  
TTGCAACTAGGATTTATACGTGACATTGTGCTATCTAAAGAATTTATTTTAAAAGCAATA  
TTTTACTAATATCCGCCACGATATCGAGTTCTAGACGAGCCGCTAGA ACTTAAACTAGAA  
CTGCTCAAGCTAGTGGAGAACTAGAAGACGGATTACTACTGGAACCTCGAGCTGGTTGCA  
CGGGTCGAACTGGTTGATTAGTATGCTTGTGGTTACGGACATCGGCTACGGTGCTAGTG

GTGGTTTTGGTAATTCTTGATGATGTTATCGAATTTATTACACCTGGGGTTGCACTGGTT  
GCAGAATGAGCGTTATCGGATGATCTCACTGCAGTATTAAGTGAAGGTAAGAAGCATT  
CGACTAAGATAACCAACACAATCAAAGAATGTATAAGCGATACTGAGAGGTGAAGTCTTA  
ATTTTTACATCATCTCATTATGAATTAGGAGCGTGCGCAATGAGAGTTTCAAACCTTTGA  
CCCATTCTATCTACAATTCCTTTGTTGGGAACCTCTATTTCTCTTTTCAATTCATTTACG  
TCATCCTCATGTTTATAAATACGGGATAAATTGAATCACTCTCACCTTTTGTAGTT  
CCCTCTGTTAAAAATGTTTCGGGAAGTTGAATATACTTAAATTCCTTCTTTGACTAAGACT  
ATTGCATTATAGAAAACATCTTTTGTTCAAAGTGATGCAGACCTTCTGGATCGCCATAC  
TTTTTAACAACCATGTCTTGTAGACCTCCTTCACTTCGTGGCCCTGCTCGTAAAAATAA  
GTAATATTGTTTACCATTAATAACAACCAATCTAAAAATGGATCTCCTGATTCTACTTCC  
GCAATCCCTGAGGGAGTTTCGCCTGCTACTAACGAATATGATGCAAGGAAGGTTGTATAC  
TTCCCTAGATCTACTATAACTATAATTCTACGTCATGTATTTTTTGCTAAACGATAATTG  
AAGGGTTCGTCATTCTTGACACCGCCGCCAACATCTACCTTGCGACGAAAAATAAAATAG  
ACCATTAGGACCCGTTTATGATGTCACATTGTCTGAGGAGACGAACCTCAGTAAATAGTA  
CTTGTAGTTCAACAGTAGGTAGTTGCGTCATGCTCCCGACATTTCTTTTTATTGAAGTAT  
ATTGATTAGCAGGTGTGAAATAAAAAGAGAACCTAGAACATACACATGTATACAGTATAA  
CATGCCAGCACATGTTAGTTTCATGTGCAGCAGTGCTTGAAGTGCCTAAGGCAACACTAA  
ATTCACCTGCCGTTGGAGTCATTCTGATTAATGCCAGTTCATATTGATCAGGAATACTAA  
AAAATATATAACCATGACATTAGACCACCATTATCACTGACAAATTTTTTAAAATTATTGG  
TCGGTTGATACTTGTCAACAGTAGTATTTTCAAGTTTTTAAAGAATCTTTTATATCTCGTA  
AATTAATAAATCACTTTTTTGAGTTACATTGGAACCTACCTTCGGGTGATCACCAACCT  
TTACATATTGACTTATTAATCTGATTTCTTGCGCTTCTTTCTAGATTATTGCAAAGCTTT  
GAAAAGGAATTGACTGTTTGATAAAATTAATTTGACTAAATATCTGCTCAACAGAAGGAT  
TGAATACTTTTCTTCTGTTCAACCTGCTATAGACTTCATGTTTAAATTCGCTAGGTTCG  
GTAGGAAACCAGATTACACATTAGGACGTTATGCAATAGTAAAAGCAAAAAACTCTTGAA  
GCACAGAGCTTCCAGGGTCTTGAAGTGCACCTGCCACGTTTATAAGAGGTGTGCCACTTT  
GAGTTGTATTGTTTCGCCGCCGACCCCCAGTACGTAAAATTGTATCATTATATACTGGTC  
AATCCTGTGCATTAACACCACCACGAATCGCAAGCTATGCTGTTTAAAGGATGAAAGATTG  
GTCTACCGGCGTTTCTAGGAAAATTTTAGGCCGTAATAATCTTATGCTCCATCATGAT  
ATATAGTTTCTTTTCTACGTATTCTTAGGGAAGTTTTCTTTCCCGTAAGACCATCAACTG  
AATCTCCATTAAACTCTGAGGCCATTACCGGCGCACGTAATGCATACCATAAGATTGATT  
CACCTAACC GCCGAGGTGAACAAAGTCATTTGCGAAGATTTCTGTCTGACTATTAACAT  
GGTCTCAATGTGTTTATGAGGTATCAAGGAAAGAATCTGCCAAACTTTCCAAGAGAGTAT  
AAAGGTGCCTCCAATAACGTTATTTATTGATCGTCTTGGCAGTATAAGTTCCTCAAATGG  
TGTGATATAACCTCCACGGTTCAAGAAAGGGGTATTGATGAGCTTATATATCACTATATC  
TCGTCTGTTGATGGTAAAAGACACAGATACCTCCAGAGTTCTGTGTAATGTTAGAAGTT  
AGAAGATGTTTGGTTGAAGTTAAACAATTGTAAGAGACAAAAGCACCAAAAACCTCAGAAA  
CGAGTGTCAAAGCGTTATATCAGCGAAGTCGTGACTCGGAGTGCGAACCAATCAAATGG  
AAAGCAGCATCGGAGTTTTGTAAAGATCAAACCTGGGAATTTATGTTGATCACCGAAAAG  
GAACTTAAAGTATAATGGCCATCATGAACATAGAACTTTAACAGTATCCTTCATATGTAG  
AGTTCTAGCGTTCACGAACAAAGGAGATAATCATTTCGAGTTTTACAGACCTGTGGGCGG  
TATATGTTGCTGCACCTAGATTGTTACAAAGTCATTCGGGACCTTCAGAATGAGGACGTA  
AAACAAAAGATTCTATCCAGAGACTCCACAACCTCCGCAATCTCTTAACTTAGTGTGCTA  
ATCCTATAAACCTGCCAGTAAACATATGACTTCTGGTTCTTTCTTAAGTGTAGGAACAG  
CATTTAAGTATCCCACTGACCAAGCGTACAGTCAGATCTCTATATCTTATATTACGCCAC  
GTTCCCGGTATACTAGAGCAGTTTTAGAAAGAGAGGATTACATGCTCTTCCGCTGAGTCAA  
ATCAATATGTATAATTTGATGATTATTATGGTTGTCCATGACTGCGGGTGTATGAATGGG  
AGAGAGGAGGAGGACAAGATGTAGTGCAAGATGAGAAAATGATCAAAGCATTGAAGGATT  
CGGGTCATCCTTATCTAATTGCAACCCAATATTGAGTCACTGCGGTATGGGACATGAGAA  
ATGTATTTCCGTTTAAACATTGGATGAATTCATAAAAACAATGACACTTCTAGAGCAATGA  
CTCTGTCAGTTGGACTCCTATATGCGCGCTGTCGTCTCCAGTTGCGGATGACTTCAGTG  
ATCCAGGCACATAACAGTTTCTAGTGGAGGTAAGCAATGTACTTCAACTATTCCTGACC  
TTGATAAATATAAATTGTCAGTCGTCTACAACCAAAAATCGACTTTTATTTCCAGATAAC  
CGCAAAAAAATCCCGCCTAAAATTTGACCCCTAGGGTTTTTGACTAAATAACTATCCTG  
AATTGGACCACTCCGGAATTACCTAAGTTGACTGTAACATCTTACACTCTGAAACTACCG  
AGAGATGATAGTACGGTGAATTATAGAACATTCCTCGTCAAAGAAGAGAAACTTCTACTT  
CTCGCAGCTCATTCTCAAACGAAGAAGTGCTAATTGTTGCCATTAAGTTATCACTGCT

GCTTGCACAGATGTCAGGGATATTGATAAAATTGGCAACTTTTACTTAGTATAACCTCTTC  
GTACAGAGCAGAACTAAATCTGGTGGCCACACTGTCAAGCTCACTTTGACCTGCCCTGAT  
GATGGTGAAACGTCTGTTGACGTAGATTTTCTCTTGAAGAAATCAAAGTCAAAAAGACT  
TGAAGTCACAAAACGAATCTTAGAATTGCTGATGAAGTCCCGGTTGCTATGGGGTAGCCA  
AGTTGGGATGGTTTTGTTGGTATGAAGTTTGGTGGTGGTACTGAAGTGCCTGTTAAT  
CAATTTTTTGAATGGGAGGAATTTGCATCAAGACAATTTCTGATTCAGTACAGTTTGAA  
GCCTATCAGGACGTAGCTAAAAAAGCAATTCAAGCCTTCTTTGAAGGTAAGAACGCTCAA  
CAGTATCAAATGGTTCAAGACTTTTTTGAACCTACGCTGAAACTGAATCAGACAGTTAAG  
GTTATGAATCCAAACACAGGTATCGAGAGGGATGGAATTTGGGAGGGATTAGAAAGTTTT  
TTCGAATAGCCCTAATGCAGATGGACTTGAAGACATATTATGGGTGCAATTTTGCTTTAT  
TTTACGCTCACAAGTAGTGTGTAGAATATATTGACGATCTCATGCCATGGTGAAAGGGAG  
TCTATATGAATTTTCTTATTAATACTTACAAGAGAAAGAAACACGTATGACGGAGCAAA  
AGGCACAAGGTGGCTAAGATAACAAGTTTACGAGTTTATTAATGCTGGAGTGGCGCCTCTC  
CAAACCTGCATCGGTTTTTTGCTTCGAGATAGACTATACTTGCTCAAAAAGTCTTGGTAAAG  
ACATTAGAGGGCGTATGACATACAGTCCTTGAATTGGAAAAAATGACCAACTTGCATCTA  
GGAATACAACATAAGACGGATGAAGTGAAACGAGGACAGGACCAGATAAAAACAGATGCT  
GAATCTGAAGAGTTAACATACAAAGTTTTATCAAATAATTTCAATAAAAAGGGAAAACAG  
GCTAAAAAATTAACAAGATAACGATCCGAAGGGTTCCTTTAGTAAAATGTTTGGGTGG  
GTAGCTCATCTGCAATCTCCGTTGGTAGATCGAGCAATAAAAATACTTGTTTTGTTTCTA  
ATTGAAGATTTGTTACAGCATACTGCATATGAAGAAAACCTTAAATAAAATAAAGACCTTC  
CTATGGAAAACAGATTTTGTCTTTAGGAAGATATATGGCTTTGGTAGATGGTTAGTTAGG  
GATAATAATGTAGTTGGTTTTGTCCAAATATTTGGTAATGATACAATATCATTAGGTAGA  
CTTGTGATATCGGTAAGTGTATGACAGGGATCAGTGGGATGCAAGACCTGATGAACCCA  
TTCTGTAGCATTGCTGATATTATCTTTCTAGCAAATCTTATTAGTGCCAGTCGATTTATT  
CCAGGTAAAGATAGATGTTACCCGATTATTAATATTACAGACCTAATTTAATAGCTAGT  
AAGCTAAACTTGACGCGGACAATAAGCGCACATAAACGGATGAATCCTGGTTTTCTCAGT  
GGAGTAACAGAGAGGCTTAAAAAATTGGGAACGAGTGCAGGTAGCCAAATTACTCAGAAC  
ACTACCACAGGTAAAAACCGTCTTGACAGACTTACAGCTGGGGTAAAGCAAGCTGTAAGA  
GCTAGCAAAGGGATTCAATCCTGAACTGGTAATAGTTTTACTAGAGCAGTTGATGGTATA  
AAGATTAAATTTGCAAAAACCTAAGTTTTCTGGAAATGTAAACCCCAATCCCAATCTAAAG  
TTAACTAAACATTATTATAAAGCCAAAAACTATTGAGGTAAAAGCTAAAGCTGGTGGGA  
GGACCACAGGGCACCCCATGCCGATTGATATTGATATAGGAAGTCAAGTGGCATTTTGGA  
TTTATAGAACAGAAAAAATCTCACATTTATCTCATAACAGTTTGTGGCAATAAGCAGGGAG  
GTGCATTTAAAGAAAGTGAAAGGAGAAAAGAAACAAGAGAATATGCTAAATCAAATACC  
TCTGGTTCTTACGGTGTTTTTCAAGAAATTTCTACTCGACGCGGGTGGTAAGCAACGAAT  
TAGGATAAACAACCGTTGGAGATGGAGACTTAATATCTGTAGACAGTGCATTAGATAATT  
GGAACCTGTTGATAGTCCTGCTATGAACATTAATAAGTATAAGCCCTGCTATGTACACATA  
AAACCTGAGAACAAGAGCACTACAAGCTTTGGTGATCTGCAACCAAAAATGATAACAAA  
TGGTGGAAACCAATAACATGCATTAAGCAGATGCTGGTAACCTACCAGAGTCTTTTATC  
GGTGGTATTTTTAGAGCGGTTAAAAATGTATTTAGTGGTATAGTTCACACTGTTACTAGC  
GTTGGAAAGACTGTATGGAATGGTGTAGTCAGGTTGCTTCCAACCCAATTGCATCTACT  
GTAGCGTCATTTATTTCTGGTGCTAACGTTATCGTACCCGCTTTCAACGCAGTAAATTCA  
CGTTGTTCTGGTGATCTCATGGGTCTGCAATATATGCATTTGGTGGTATCAGCAATTGT  
GCTAATATCGATAAAGTTAATGCTACTAATCTAGCTACATGGATCTAAAACCTAAGATTG  
AGTATGGTTGGACAAGGTGTCTCAGAAATGTATCATTGTGCACTCAAGGCAGTATCCAAC  
ATTAGTAGTAGATTTAATGGGTTCTTTGACAGGGCCAGAAATTGCGCGATTGAAAAGGTT  
GGTATGCTATTTTTAATGGTAATATTCGTAAGTCTATTGGTTCTATAGTAGGGCGAAGG  
CCTGGTGTATTGGGAGGTATTGAGAATTTTGGTAATACGTTGAATAAAAATAAATTAGAG  
CATATCTTAGGAGCAGTTCCTGGTCTTTGGAGATTTAGCAAATAAAGTTACTAATAGATTG  
TCAATTCAGCCATTGAATCTATCCTAGATAAATCATGCGAGTCTTTTAGTGCCTTAGCT  
GCTATTGGTACTTTTTGCTGACAAAGTAGGTATGAAGGATGTATATGCAGCTATCATGAGT  
GGTGTCAATCTGGAAACTTTCTTTAAGGATTACCAGAACTTGGTGCAGAAATAGCCGTC  
GATCCGAGAGTTTTAGGTGTAAGTCTGACCCGAGGACGGGATTTATTACAAAATAATCAGTTC  
AAGACAGAGTTTGCAATACAGACGACTAGTGAATTTGTTACCGGTTCCGATGACCGAATAA  
AAAATCGTTGCAGTACCTACTCCTGGGCCAATTGATAGCAGTGATACCCACATAGTAGCA  
CCATCCTCCGCAACTAACAGATATAGGCAACAGAAAAAAAAGGAGTGCAACTAGATTTTG  
ATGAGTTTGTGAGCCTAATGCGGGAGCTAGCACTACTTCTAGAGCTAATCCCAAAGCGG

GGAACAGCGACTTAACTACTGTAATGCAACAACCTACAAGTGCAATTAATACTATGGGAT  
GAGTTGTGAATTCAATTAGCAGCACTATAGTTTCTATAAAAGATGTGCAGATGAGGTTGT  
TGAAGATTGATGAAGAAAGTTTTAAGACAGCATGATTCATCCCCAAATATACGAAAGTGC  
ATCCTCCTCTTAAAATGGTAGCATTTGTTAATTTGTTAAAGGTGATAATACCAGGTTGCC  
TTCAATCACTTTCAAATAGCAAGTGCCTGATAAACTTTTTCTTTCTTTTTCAGTCTC  
TTAAATGGTTATCTAATCCTCAGAATCCAGCTCAGTTTGCTACATGACTTGTAGTTTTG  
CTACAATTTTTAAAGTTATAGCATCTGTCTGCTACAGCTGCTTCTGTTAATTCTATAGAAG  
GACTGTACGATCTTTTAATAGAAGATGCTACATGGATGAAAAGATGAGGTGGTTGCACAA  
GAGCACATGCAAGAATGGGAACCGCATTCTTGGCATTAGCCTGTCTTACAAATCCAAAAG  
GGTTATCGAAGCCTTATCAACCGGGCTATTATTCGCTCACAAGGGTCTCCTTGCTGCCT  
TTGCCAAACTTGCTACCCATCCTATGATTGCAGGTGCAGGACGGTTTCGTCTTCCAAGAT  
ATTCTGATCAAATTCCTGGTGTAGTCAATAACAATGAGGAAACAATTGCAGAGGGTTAG  
TATCAACAACAATTGAACCTGGTGTATGCTATCATTGCCGAGTCTGAGTAAAAAGCACAAA  
GAATCGCAGACCTTAAAAACA AAAAAGAGGATTTTTTCCATCTTTATTGGTTGGTTGGTC  
AAGCTAAAGAAATTGAAAAGTCAATTTATCAATTAGAACTGGGAAAAC TAAAAGTTATG  
GATTTTTTTGAAAAGGGCGGTTATCAAGATCAGCATGCAATGGGTGGTTGGATTACTGGTC  
ATCAGTCTGGCAAGCATGTATCACTAGATGTTAATAACCCTGATTTTATTGGACATGGAA  
GTGAATATGTTACACAGAAGACGGATGGGGGTGCATTGATTGTTTCGTTTCATACTTGTG  
CAACTAAAGAGGATCCCCATCCAACATCTCGAAGAATGAATGAAGCACGACTACTAGGAT  
TTTTTGAAGAAGGTGGTGGGTACAAATAGTTTGCTAAGAGAATGATTAAGATTCATGAGG  
GTTTCAGGCCAACAGCAATACCTGAACCTAATGGTGGAAATTTCAATGGGCTATGGTCATT  
ATATTAACCGTCTCATATTGTCCCTCCTACGATTTGTAGAGCGTTTGCAAAGCAACTGT  
TCCAACAAGATTATAAAGACCATGAAATCGCTGCTATGAAAAAACCTGGTTACCGTAAAT  
CTAGACCTCTACAAAAAGCAGCATCCCTATATCTCACCTATAATTAAGGTGCACGTTGCC  
ATACTGGAATCAGCAACAACATGGCACCGTTCATCAAAGGTGAATTTGATATTGCAGGTT  
ATGAAC TAAAAGTTAATTTTCGGTTTTATAAAGTTGTACGTAAACGATCTACTTTTTTCA  
ACTTGATGAAGAATAAAGGTTTGGGAGACGATTTGGGACAATAGCTTTTAGATAGCGGTT  
CAGTTGTCCCTATGGACGAGTCGAGGTCAAGTAAAGGATTTGATTGGACATTCGGATTAG  
CACAAC TGTGTTGGTGAATACCTGCTGCAGCTGCAACATTAGATTATAATATCAATGAGA  
ATAGACGTAAATGGTTTGGAAAGTATTACGAAAGGTGATTCTTATAGAGTCGTGCATACGT  
CACATGCAGATACAGGTCCTGGATGGGGTATTGACGGAATTACCTATAAATTTGCTCGTC  
GTTTGGTATTCTCCCCACATGCTGCTGAAATGTTTGCTAAGATGAGGCAAACATCAGTTG  
GACTGGAAAAAGGATCTGATGTTGCAAGCAGGGGTAGATCACCATCAAACAATTAATAAC  
ATGACGGTCACAACAAC TCAAGTGCATTGATAGGGCGAAGGTATAAACATTTCTGGTCCTT  
CAAACGCATGGATGAAAAACACTGCTTCTCGATCTGGTTGGCATTATAGATACAGTCACG  
GACCTGGTAGTGGTCACTATGATTATGAGGGTGAAGGTGCAAATAAAACTCCTATCTTAG  
GAACAGCTGGATCTCCTTCATATTTGTTTCATGGGTTTACAGAAAGAAAACGCAAGAAGAA  
AATTACTAGATTCAAGTAGACTATCTGGATTAAGTTTATATGGTATCAATACCGATCAAG  
GAGGTTATGGAAGACCGTTTACTGACATGTTCTCGGAAGGAACATTTGGTAATATGGGAG  
ATTTCTTACAACCCAAGGGTATCAATTAACATAATGGATTCTCAGAATAGGGCGAGGA  
TTGCCCAAATAAATAGTGAACAAATCAGAGTTAAGAAAGTAACTGAACAAAGGAACCAAG  
AAAGAGGAGAAATCGATGCAAAGGCTTCGGAGATTGCGCAGATGGCGTTGGCTGTTGGAG  
ACGCGCAAATCGTTCCAATAGGCAATTCTGTTCGCCGGCTGAGTCGGCGACTAGGAGTT  
TATTAGGTGTTCAAGAAGGTGGAGGAACGGACGCGAATGTTGGTTGAACAAATGGAACAG  
TGTTACGGACTGCTGTTCTCTTTACTTCTATAACAATCCTTTAACAGGTATTTTCC  
AATTCGTAAAAATCTTTAAAAGAAGGGATCTTAGTTAGAGA ACTGTCAGCTCAGACAAA  
GAGA ACTCAATCCATTTACAGAAAAGGTAAAAGGGTGGATACTCAAGATGGAGCATATGA  
CTTAGTTACATTGTTAAGATGTTTTGAAATATATGAAAGTATTGCAATTTCTCCATGGA  
GTACCATATTATTTAAGCTGATGCAGGAGAACTTATAGGATCTTGAGCAGGAATTGAGGT  
ATTTACTACTCAAGTGCGTACCCCGATGAAAGATAGAATTTACAATTCATATCCTAGCA  
AATTC AATCAAGAATTATCAACAGACACACTAATGTAAC TTTTTGAAATAACTGTGTTTC  
TGATGAGTAACTAATCAACGAACTACAGGTGTATTTGGTAATTCTTAAGATAGCTTCAA  
GAATCAAACAGAGGCTGGTGTATCGTAAAGTATCTATTAGGCAAACATTTATAAAACC  
TGAGAAAAAATTGTAAATAGAATACTATTAACGCACAATCTTTATCTCTGCAAAC TGG  
GCGAGTGTGTTGATTTAAATTATCGGATAACACAAACAATGATTCGGAAATCCAGTAAAAA  
GGGTGTTAGGTAAATTGGGGTTCCTTTTTTTCAA AAATGCACTTGGTTTTGATTTTATAAC  
AATTGGCTCTATGACTCACGGTATTGATAATCAAGAAGAAACATCTGAGGCATATATTGC

ATCAGGTTAAAACAATACTATACACATATCATTACACACCTATAAGAAGGGGAGAAGCAGC  
CGATGATCAATTCAAGATAGATCGCAGTGCATTCCCTGAGGCGAAAACTTTTTGTTGGG  
TTTAAGACTTGGTTCTTGGTCTGGATATAGTGTAGGTTTTGACCCTGTATTCATCACCAG  
ATCTGAAATGGGAAGTAGCACAGATTTATATGCAGACGCTTATCCCTATTCGTAAGCTGA  
ATTATGGACAATAATGGCAAATTAGAACGGAGGGAATGCTGATATTCCTCAACAGAATAT  
GGATAATTCCTCTAAAAATGCTGCTAATTTACCTAAACGAGTCAGATACTCAATGCTTCC  
TAATCAAATTTCTGATGCTAACTTTTACAACAAACCTCAAAGAAATTATCAAGAGTTAGT  
TGCATTACAAGCATGTCAATAGATGGTTATTGAATAATTACAACCAAACCACCTGACTAT  
CATCATTCCCTGGCAATTTTGATTTATATGTGGGTTTCGGAGGTTAACTTAAATATCCCTTC  
CACTAATCAAGAGGGTGACACACCTGAAAGAGATCCCAAGTATAGTGGTAGATGGTTGAT  
TGTTGCAGTAGCACAAAAGGGGGTAGGTTTTAACTTTTCATACAGTACTTGCTATAATGAA  
GGCCTCGGATGTGCCGATTATCCCAACAATACCAAGAGGAAGACATAGCACAACTTGACAT  
CCTCACTAACATTTTTTATAATATAAGTATAAATAATTATGTATCATCGAGGTACAAAAA  
TGGACACTATAGACCAACACATAACGATAACGATCTAATCAAAAATCCTCTCATAT  
CACCTTCCGATCGTAGACACTTTAAACAAGAAGTACACGGACTAGAAGAGTATTTAGAGC  
ATCACAAGAGTGAGATTGAAGCGGGAGATCATCCCGATCGAGAAGCACTTGTACTATATC  
CTGATGACAGCCCAAAAGAATCACAATCCCTAGGTAATGACGAGTAATTATGACAGCCAC  
TACACAGAAGTATGTGACATTTCCCTGCTAGTGAGATGAACTCAATAGATTTCCCTGGCAT  
ATGGCAGTAGAAAGTCCCAGATCAATTGTGTGCTAGAACCAGAGACTATATTGCGTCTCA  
ATCTCTCGATGAAAGTGTGGTAATGATAACGCATTGCGAGAGGATCGAAGTACGTTTTCT  
TATGTAAGTCAAACCAAAACATAAAGAACGGTTTAGAGAAGTGTGACGATTACCTAACCCAC  
TGCAGCAACAACATATGCAAATACATGGGGTGCTTTCTAGCGTGCATTAACGAACAG  
TGAGATTAAGTATAAACGACATTGTCTTATCAGGGTTTACATGTTTTCGCCATGTGAAAG  
TAATGGAATGCAATCTGTAATGAGAGAATTGGGACGGACTATATGCTTAAATGAAATGCC  
TGAGGGACAAGCAGAAACAGCAGTCCTAATTGAAAAAATAGAAATCAACCACAGAAGGG  
GGAGATCGTGCTTTTTCCCTGCATCTTTTTCTCATATTCATAGGGGTACCCCTCCATGTAC  
AAGAATCAAGTATATTGCAACTGGTTGGTCTCTTTTTTATACCACCTGGCGGTATTAATAT  
GCAAGTAACAGCAGAGAAAGCGCTTAGACCCTACTACAGGTATTGATCGATATTGCTA  
TACTACACCTGGTGGTGGTATACATGTGAAAGTCGTATAAAGACTTTCAAACCTAGAAT  
ATTCTCATGTCAACTATTAATGTCTGATACGTCCAACGCTGGTCATCGCCAACAGGTGAT  
TTACCTGTCAGTGGAACAATTAAGTGGCTGGCGGCCGACCCATCAACTGACACAGAT  
GAAATTTGTGCTGCTACGGAGGGGACGGTGACTGTAGCAGGTGTTGTGGACACAACCTGCA  
ATTCTAGATAATTCAGGCTATCCGCTTGGTGGTAGTCAAGATCTACAAGTTGTTCAAAGG  
GTTTCGTAACCTACATGGTGAGTTTGGTAGCTCAACTTATCAGAACAACACTAGTAACTTA  
AATGCTATTGGTGATTGGTATATTGACATTTGACTACAAAAGCCAACCCTGCGATTTTG  
TGTCAGAGGCAAACCTAAGATGTATGGTCCTAATCCTGAGAACCAATAGGTTTACTTAAGA  
AGAAGAATCGGTAGTGCTGGTTTTAGTTTCGTTATTTTCATGCCTACTGATCAAATAGCACT  
ATTGTTACATTTGCAGGAATTAAGTGGCAAATGCTACAGTGCCTTCGAAGAAGAGTAC  
TTGTCGGCATTCAATGATACACGAAACCACTCTGCAGGGACGGGACTTCGTTCCAGCAA  
TACTTTGGAGGTTGGGCAGGAAGAACTATCGACTTAAGTAGTCGGGATGCTAACAACAAC  
CAGAACGCTCGTGGTAGGGATGTTACGATCTGCCATGAACTTGCAGCTTAATCTTTAATG  
ACAACGAACTGCCAGCTCAAATCTTTAAACCCCATCATAGGGTGCTCCGATTTCAAAG  
ATAAGACCTGATTGTGTAAGGTTGATGTATGAACGTGATCTGTTAATTCTTGAGTGGTTT  
CCTGAGAATGCGTAGCGTAGACCTACTGTTGCTGAGATAATTGCAGAAGTGGACAGGCAA  
ATGACTGCTTTAAATGCTGGTCCATATAAACGGGATAGACCATCTGAGTATCCAGATTTG  
AAATCACAGGTCGAAATGTTGTATCATGACATCAAGGACAGTACGTTAGGTAGTTGAACA  
CGGATTGCAGCAGTTGAAGCGGTAAAAGCATAACATCATAATCCTTGATGATTGAAGATT  
ATATTATAGCACACTGGACAAATAGCTATCAAGCCCATAACAACACCTCACCATTTTTCTA  
CTGATGAACTTTATCGGAAAAGGAAGAAGGTGGGTATCATTCAACGAATTTTTATAGCA  
GAGACAGAGCTAGTAAACCATATAGAGAAAGTTATCACAGGGTAATGGTAATATCCGTTG  
ATACATTTATTTTAGAAAATTATAACTCAGACTGGAGACCATCCTAGAATTGTGATATGA  
TATTCACATCCGATGGTGAAGCATGGCATGCACACCTAGTAGGGGATAAACGCAATGGTG  
CCAAAGGATATAAGACTGTATTCGAGATCACTGTTTACGGGAATCGACTGTATAGTATGA  
TTCGAGGATAACATGATATAGGTAACATGGTATGGGGTATTGAGGGCATTTAGAAAGTCA  
CTCGCCGTATCGACCCCAAATGAACTTGCAGCGGTATCAAAAATATACAGACCTTTGTTG  
GGATTCTAAATAAACCGACGGTCAATCTTGTGCGAAAAGATGGATTTTTCTGGTGGGTTG  
GCGTAGTAGAACATAACGAAGATCCTATGGAATTAGGTAGGGTCAGAGTTCGTGTGCTTC

GATACTATACTAACGTACGAGGCAGACCAACTACAGCTCTACACACAGAGAATCTACCGT  
GGGCGTTCTGTTTACAACATGCTGTCCAAGCAGATACTCACGGGCGTGATGAAAGTTCTG  
GACAGCTTCAACCCGGCGTAATCGTCATCGCATTCTTTGTGGACGCCGATCAGGCACTGA  
TGCCTATTGTCATAGGAGTTCTTCGTATTAGAAATCAGACGAGACAAAAATTGAACACC  
AAATAGCTTTTACTGGTGAAGCAATGGAGCCGGGTCTTAATGTTAATGCATCTGCATTAC  
GCCCCGCAAAACGAACTTCACAATGGCAAGAAATATAGAAGAGGGTTTCTGAGACAAG  
GTGCGAATAATACATTTTTCGCTCATGGCTCGAAAATACAAGAGCAAGGGGGTCTGTGTTT  
CGCCTAGGAATCTTGGAACTGCTGTAGCTATGAATGGTAGTGAAAGTAGTACTGTGAAAA  
TGATAGCTCCAGTAAAACCAATACACACTGACAATGGGGTTCCTGGTGCTTGGCTATCAA  
TCGAATATAAACTATGATCTTTTATTTAAGATCTTGTGGATCATTACAGGAACCCTAGTAA  
AAAAAGAAGACGGGGACTTCCGCGATCTCATGACGGGAAAAATTGTAATTGCAAACGCGT  
TAACTGGTAAGGTGCAAAAACCTCATGAGTGCTATATTTACTAACTCGTTAGTTCTATCA  
GGCGATCTTTGGCAAACCTTGCAGAACAATTAATGTTATAACTTTACTTGCAGGTCCAA  
CTGGCATGCCATTTGTCAATTTCACTGGTGTATGGCTGCAGTCCATAAGATTTTAAAGTG  
CGTTTTGCATCGTTGATATAGATCTTTTAAAGTCTCAATCAATCTCCTGTTGATAGTATTC  
TTAGCATTGTTGCAAATTCCTTGGAGGTATCATCTTTCCAGTACGAATGGTCATGAGCA  
GTGTTTCAGAAAGTAATTGATGTTATTGTTAGCTCTGTTCAATCTGTTCTTAATAAAGAAC  
TCGGCATTGAAAATGATCTAAAATCTATTATCTCTGGAAAGCTAAAGGCACAAGAACTCA  
TTGAAACATAGCAACAAGGAACTCAAATATCCAACGATCTTCAACGTTTCTTTTATAAAG  
CCATAACTCAGATAACTGGATTGATGGCATTATTTGTTAAGTATGCAGGAAGTAAATGTA  
AACGTTCACTTTACGGTGCTGAAAATGATAAAAGTGAGTATCCTTTGTTTGATACAACTA  
AGTGCCTCCTGAGGAACTCGCTAATATCAATACCATTTCGAGGAGGACATAGAGGTGATT  
GTGGCTAAAATGTTAAGGGTGGCGAATTACTTGATAAAAATAATTTTCGCGAGCAGATCCTA  
ATTTGTCAGCGGCTAATAACTTTGTAAATGGTGCATCTGAATTATATCTTGGCACACCTG  
GTCGTCTAGCAACAATAATCCGTAAAGAAAGTGATCAACATTTTCATCAGTTAAAGGAA  
ATCAATAGGATAGGCTGAATATACTGTCAAGAAAGCATTGCGTATGGAAAAACAATG  
TATCTTCTGATAAAAATAGACAGACAATTAGTTGATTACAGAAAGGGACTAATAGAAGAGA  
AAGATGATGTTCTCGTTGCAGATCAGGCAACGAACGTTGGTAACAGCCCTGAAGAAGTCC  
ATGGCGATCAATGTCGAGCAATTGATGGGTCACGGGGTACTAATAGTGAAGGTGACTATC  
GTTTAGACAGTACAGGTGATTGTCATATTTCTGTCCGGTGGATCCTGTATGCTGTATGCTG  
AAGGTGCAGGTAAACAGGTAAAACCATGTGGAACCTCATCTGGTGA AAAAGCCATTA AAA  
CACATTCATTGACATTTGGTTCGGATGTTAAAATGGATATCGCAGGTGCTGCATTTTCTC  
ATGAAGGTTTCAGAATTTAATATGGGTGCGGCTACTTCAAACTTACTGGATCTAACAGCG  
AAGGTACATCTACAACAACCTAACATTGCTAGTGGTGGAAATTTTATAGACTGCAGAAAAC  
CTGTTGTTATTACTATAACCATCGTTAGGAGAATTAATTA AAAATCCCTCCTTACCCATAC  
CTAGGGTTAAAACGAGTATTCTTAAAAAAGCTGGGGGTTCTATTGAAACATATACGACAC  
CTGGTTTAGATGCAGCAGATGCTATTTGTAGACATTCGTTGCAAAGCCTGCTGGATATG  
CCTTTCCTCAAAATGGTTTGGCATACAAAGACGTGGTTATAACGGGACCATGTCTCGCAA  
CGGCTACAGCGGGTCTTGCTAGTTTAAACAGCGGGTGCAGTAGTTTATATCACTGCAGGGG  
CTGCGATGAACACCACTGCAACAGGAGCAGTATACATAACAAGGGATTAAGATATTCCCAA  
AGTAATGCTATACTATGTGTGTGTTTCGCGAATGCCCTACTTGGTTTGGTCTACAACACCT  
CCGCAGCACGACAGGTTACCCCATGCAAGACACTCAGGTTGCGAAGATGTTTCTTGATTT  
CTCTAGGAGAGCTGTAAAAATCCGAGATGTTGAAGGGTACGACAAAACAATAGAATGTGA  
CTGGAATGAAGAAGGGGTGGAAAGTTTCTCAAACGCTATTTCTCACCTATGTGATGTCT  
TGACACTGATGTTATTACCTATTGTTTTGCAGAATCAGAATGATTGTAACCCATTAAGAT  
TCTGATCCGAACATAACATTTCCGATTTATATCGCAGTAATAACTGTATTGTCTAGCTTC  
AATGGTAGGTACAGAGGCTGCTTTGCAAATGAAGGATTGACACACCCATGTGACGACCAC  
GACGACTAAAACCTATGATTGGACCTATTGGCATTACATTAGATCAAGCAGATGAAAACGT  
GCATTTTCATGATTGAACTAACTGAACACCAAATCGTTTGTGGAAACATACGAGCACCTAA  
GGGATCTGTTATGTTGGTTCTTGTGAATGAAATTGCTCCTGTATATGATGAAATCCAAGA  
GCAAGTCGAGGAGTTTCGTAAACGTATTACGGAGTGAGATGCAGCCTGAAACTAGACCTG  
GCGTGGAAAGGCTTTTTTCAATCAGAACGCAACGTGCCAATAGCAGAAAAAGATGCTACTC  
TAACCAATTAGGAAACGTGGATTAATTTCAATGAATACAGTAATTTCCATGAAACTTCCG  
AACTGGCGACACCACTCAAAAAGGAGAAAAAGAGGGATTTTAAACCTCAAGCACTTCCCT  
GCTGCTAAACAGAGAGTACAAGCACTACAGAAAAGACTGGGAGTGTGGCTGAATCGGTAT  
ACGCACCAGACTTAAAATCTGTTGGGCTTGTTCCTGAGAGTTCAAGTCTCTCTACCCC  
TACTGTCGGGGGACTACAAAAGATCTCTATCTAGAACGAGTGCTCCCCGTCATAACATAC



GAAAATAGCATGACAGTATAAATCACCATAGTTGTGCTCACTGTATTAGCGGGAGCACTT  
ATAAGGTACAAAGATCGGCATTAATGAAAGTTCCTAATACGGAACCCCTTTCTGTTT  
TTGTTTATTGAGGATTTGTATACACAGGCAGAATTGCTTCTAATATGGTGAGAGTAAGAT  
TACTATCAATCTTCTAGGTATATTCTAGATGACAGTACTAATCCTCCTGTGACAGATGAT  
GGAAAACAAAAGACTCGAAAACAAGAAAACCTGGTTGATAATGTTTAAACCATAGACGGAG  
TGTTCTGGTATTTGAAATCTTTGTAGAGAAGTCTTAGGACCTAGTTTCATATGACATAGT  
GATGTTCTTTTACAGTGGAAATATTTCCAAGCTGATATAGTTCCTTACTATCATAT  
TATGATGCTGGTTCATATTATCTTCCACAGCACGATAACACTGTAGTCAGAGTGATATCA  
TTGTTTTAGAAAGCTCCTAAATGTTTTGAAGGCGTGTATTTTGTATTCGAAGATTATAGA  
ATGACTCTTAAATGTTGAAACAACACTGTGCAGTAGCATTTCCTGGCACTTCCAGACATGGA  
GTCAATCCTATCAAAATCGAAGATCAACATAAAGATCTAGGTTTAGGTAGGTACTGTCTA  
TCACATTCTTTGAATTTTAGATAAAGACGTAAGTTCATTCCATACCACACAGACAAG  
TTTGGGCGCAAATGACTATATTTATGATTTTGAAAAAGATCATGCGGCACTTACACCTG  
GCATTTGGATCTCAGTAAGGAGTATTCAAACAAGGCATTATATGTGCGTAACATCCCAA  
CTGATAAAGGTGGATTCTACGATATGTTACCTCTCAGTGGAGTTGTATGGAAACGAGATA  
TTGATTGGTATGATCAGTTGCCATTCGATGTATTCAAACATTCGGAATGTTTTGATTAGA  
ATACTACAGTTGCAGATAAACCTATACGAGGAAGATGTCGGTTCCTTTGGTAAGGATAAGA  
AGATGCTTGCAGGAGCGTATCAGTTCCTATTGCTCCTGCGCCCCCTGAGTTCCTCCT  
TAGATGTAAACTTTTCGGAGCATGATCCCGAACATAGGACACTTAGCAGATTTGCTCTAG  
ACAATGCCACCTTGCAGGACAATAAACAGATGTGAGTTCCTTCCAAAATAGATCGG  
TAGACAGTGATAATCTCAATACAACTGACTTCAAATTTGCAGACTATACTATGCCGTAG  
AAACCCTACTTAAGCGGTGGTCAGTAGGTCACACAGATGAGAGGGCATATATGCCCGGAT  
CAGAAAAGGTAGAAGAAATAGACCGAACAGAGGGTTGACTTTCTTTATAAATAGACCTGT  
ATCAAATAGTGTGATTATCCGCGGGAGCTCGTGAAATATCTCAGCTGGATACAATATCAG  
ATACTGTCTTATTGATTGAAGCCCGTTTACGTGTGGTAGTGTGCGGACCCATTGATCCCTA  
ACAGAAAATCACAAGTAAAGCAACTCTTTCGTGGAGTTGTACAAGGAAATGAGGGATCTC  
CTGGTCTTTATTTTATTTAGACAGCGATCGTGGGCTATATTAATTACCGTACGATTA  
TCGGAGTTGCGTCTGGAGATAGTGGCTTATATTTTAGTAGAGGCTGCAAGACTACA  
GATCTCCGCTATTTGTAACCTTCTGTTGATGATACTGTTTCTAATACGGACATTTTTTCG  
CACCGAAAGGAACGGTAACTGTCAAAGTTACGGGTCTATTTTCTATCGAAGACGGGTCTT  
TTAGCTTAAACTAAGCACAAGGAACAAAGGCAAGATTTCCGGTAAGTAATGTTTATACGG  
GAACTAATACTCGTGTTTTTTACTCCCTGCCATTACATCTGGTGATGGACCACTCTTGA  
TAGGTGCTGATCCACGGAAAACACTAAGAAATAAAACCATTCTTAATGACGAGGACAATC  
CCGTTATTACTAATGGCACTTATGAAGCAATATCTAAAATTAGCTGGGGTCAGACATCAA  
ACGTTAGAAGATCAGTCTTTTTTCTGATGCGGGAACCTGTAACAGCTACAGTAAAAACA  
CTGCAACTGAATCTACTTGGATAGATACAAACGCGGAACAGACAGCATTAGTAAGACTC  
TTGTTAATTCTAACTAGCACAAAGAGGCTGAGGTGGAATCATACTGGGCACAGTTCAAGA  
CTGCGGATCTATCTGCTAATTGAAGTCTTACAGTACCTGATTAATGGGGTTCTCATGCTT  
TCAGTGGTGCCACTCGTGTACGCCAGAACAATACTATAGAAAATTTACTTCTTCAAGATT  
CTACGATTGCTTCAATGCAGACTACGTATTCAGTTGCTAACTCAAATAGTTTTACCAACG  
TAACTGTTGAAATACCTCCGACTGCAAACCTATATAGTACGGGAATTCCCTATACACTTG  
CTACAGAGGCTGCTAAACAGGAGATTTAAAAGAAAACAACGATTAACCTTGTGCTGAGGG  
GTGCAACATAACAACACTGGAGGTAGTGGTACTCTTCTATAGATAATATGACAGCAAACA  
GGACTTTCAGATTCCTTATTTTATGATGCAACTCTGTTATCTACTGAAAACGTGACTAGTC  
ATCACGTTACATTTATGCAGGCCTTAGGGCACCAAACCTTAATGGTTCGCACAAGACAAC  
AACAAATTGAGCTACGCAGGATGTCAACTATAAATGGCTAATCAATATTTACCTGCTTGAA  
ACGAACCGGCAGCGAACCCGAATACGTTGTACTATTCTGCTCACGTTAGTAAGTGTGCAA  
GGACGATCATCAACGTGGCTAAAGATGGAGCAGCATCAGACTACTCTGTTGCTCATAATG  
ATTTTATGATCAGAAGTTAGTAGTAAAGGGTTCTGGAATGGCATAGAATTTACATGAGTATG  
ACGTCATCATTGCATATAAGATGACATTTGACTCTGCCTTTGTTCTGTAGCACGGTGT  
TTACTGGCGGTCTTCAGATTAGGAGTGCTGATAATGAATCAAAGTTTAGACACGAATCTG  
CATTGATTCCTGGTTATGTAGAACTGCTTGTAAAACCTTTTGTCTATCAGAGAGATTACGG  
TTGAAAGTGTTACTGGTACGTTCTTATTGGTAATACTATTACCAAAGGTTCTGGTAGTG  
ATACATCTACTGAAGTAATCTATGCTATAAATGGAACCTTCTTCATGTACGATCTTCTA  
GTCTTACGGATCTTGTGCCGGGTGTAAGTACTGCGGATGACAGGATTGCAAACGGTGCGGGT  
CATCAGCTAGAGTTGCCAGTCGTGGTGTAAAGATCTGCATTTAATAAATTTGTCTTCTCTC  
CCAGATGAGGGGGAACCTTACGACCTTCGTTAGAAATCTGCAGGAAACGGTTTTGAATTAT

TCAACAATAGATAATACAGATTTTCATCTTGCTGAATCTACTAACTAAGGTCACGTTTTGG  
CATTATCAACTACTAGTAATGGTGAAGTGGGGACCAGGCGAAACAACGGGTAACACTGATG  
CTGGAAGTGAATATACTTCTGGTATAACTCCCAAATGCACCATTGGTTCTAGCCGTGTAT  
ACAGTCAATGTGCTTTTCGTATCACTTCACCTACTTTGGTATACTGGAAGAAGTCTATAA  
CTGAAATTGCTTCTAAAAGTAGTTTTGGTGTATCAGAGGCAAATCTTACCACAACCTATA  
CCCCTGCATTCAATGCATTTTATAGATCTATGAGGTAGAGGAACTAGAACTAACTATAGGT  
CTATCTATGTTTCAAGACAGTATCACATCTACTGTTACTGCTCAATCTTCTGGAGCGTAAG  
GTTATGTCCGAAGTTATAGAGGTAATAACTTACATATCATTGAAGGACTCAACTCTGCTG  
ACTTTGCAGGTTTCAAGACACAATCTTAGATAACCCCAAGTTATCTTCTGCAAAAAGTTCTA  
CTGTGACTGTAAGTAGTGTGCGTATTCAACTATTGCTGTGGAAAATAATTACAATATTC  
AACAGTCAACTAACGGTGAAGCATGCACTCGCAAAGAATACTTCTAGTGTTGCTGGACCTG  
GTGGTAGATTGATTATCATAAGCACTACAAAAACAACACCTTTTCCCTTCTGCGTTTT  
AACTTCCCTCAATTGCGTTCAATCCCGGATTTTCGGCAGTTAATTAAGAACGGACAAAG  
CGGATATTTAATGTCGCTAACTAGACTTAAGAATATTATTACGTACAGAAGTGGTTGCAT  
CATATATGTCAAACCCGTCGATTTCCATGCATCAGATTCTATTGATAACAGGATAACCTA  
TGCTTCGCGTCTTTTAAAAGGTTACAAAGAGCATTCTAAGAAGTAGCAACATTTTGATA  
GATATTCGGTTTTGAGCAATGAAGAGTTTGTATGCTTATAGTATCCTGCTCTAGCCTGGCGA  
ATAGATTGTAGACAGTAAACCAGGTGAAGTTTTATAAACGAAGGTTGCATGTATTGTGTC  
CAACTCATACTTAGACTTAACTTCTCATAAGAAGCATTCTATACAAATAGAACTCAGTAGA  
ACGTGGAATTATAGTTCCTAGTGGTTGTTCTTTAGGTGGAACCGACCTTCGTCGTACAAT  
TGTTATTGGAAAATATGGTCCATATCCTACAACGCAAGCTGTAAACGGCATTAAAGATAGA  
AGATCACGTTCCCTCCAAGAACAGCAATCTTCAAAGATACTGGTGGTACTTATTTCTGGCA  
ATACTCTTTGTTTGAAGGTGCAGAAGAGGTTGTATACTTCTAACCTGCTTCCACTAGAAC  
ATTAGCACCTTAATTTTACATCATAGGCTGACTTGTTTTGTAGTGTGCTTACGATCTTAA  
TCCATTTTCAACTCTCAGTTCACAACGAACAGTTCCTTCTGCTGACTTAGCTGTAGC  
TAATATCCTGCGGAGAATAGATTTAGAGATTTATTATCAGAGAGTGTGCAAACTTTTCGC  
CACGACCCCTGTTACTACTGGAGATCCTACAACCTGACCAGATTCAAGTAAGGGTAGAAGA  
AACCCGCAATGTAGGTCTATCTCGGATGAATACCGAGTCTTCCGAATACGAGAAATGG  
ACAGACAGCAACGGATGTCAGTGTGACGAGTTTTATAGCGCCAGAGACCACTGATTTTC  
TGTTGGTGACAACATCAACGTTAGTGGTCTTGCAGGTTCAACTGGATCTCAATCCGATCT  
TGATGTAGGAGTTTATAACGAGTCTTTCAGTGTCTTTGGGCATCAGCAATCTTCTTAC  
TTAGCGGATGGAAACATTCGCCTCCAGAAAGGAAGACGGATCCAACATAACTGTTGAGAC  
CAAGCTTCATACTGCTGACTAAGGATCACCGAATGCATTTAAGCGAACACTTAGAACAGG  
TCGGGGTATGAATGGTGTGCACGCAAGCGGTCCAAAAGCCATTGCTTTCAAGTCAATGGT  
TGTGGCACAGTCTACATGACTGTCAATACAGAAAGACCGAATACCCTTAGTAAGATATAT  
GGCATTGACTGGTAACTATGACGTAGCAACGGGAGTTGATGGTGCACAATTAGAATTTTT  
AGCTGAATATAGAAGAGGATGTGGTCATGAACACATCCAGTGGAGTAACGACTCGGTTCAT  
ACAGGCAGTTTACGTGTTTACCCTGGGATACCAAGGTCATTTCACTGCTCTAAGCGGTGG  
TGACATGTCAATCACCACCTCGAAGTCTAACTTTGGTAAGACTGCTCTCGGATCAGCATG  
ATTCAAAGCAAAAGCAATTTTGAAGTTAAAGCGCGAATGATTACACATATCAGTCCCCC  
AACACCACTCAATACAATTTTATCAAATGCAACAGGAATTAATGGTTCTTTAAATAATAC  
CCTTGCTAATGATCGATCTGTGAAGGGTCTGATTCCAGGTATGACTGTATCTGTAACAAA  
TATCGCTACGAGTGCAATCTTCAAGTTGAATTATCACTATTACTAGAGTAATCACACCTTG  
TGCTGCACATACGTGACCTGTTAACGGGAAGGTAAGCTTTGGTGAGGAGACACATGTGAA  
CTAGGCAAACATTGATATTCAAAAAACTAAAGTACTTAATACTGCACCTTTCAGGACAATG  
GGGAACACCCGGCACAAGACTATACTTATATTGTTATACTGTTGAAGCGTCAGCTCCAAT  
CACTAGAGTTCAAGGTTTTACAGTCCGTGCAAGCCAGACGGAAGTGGTAATAGTGCGAT  
AGCAGATAAAAATAAGAGCTGGTAAGTTACACAAGGTGCATCTTCTACAACCTGTACATGC  
AGCAAACATGTAAACTTATGCTCCTAGTGTATTTGCGCTTGCTGCTAGTGTGACTGGATC  
TCCATTACAAGATGTTAGTAGTACACATACTATCAATGGTGCTGCAGGTTTCAAGTCCGTTG  
TTGGTATCGACGTGCATCTTCTACTAATAACAGTATTTACGAAGTGTAGTAAATAATTC  
ACCATCCAATACAGTCAGTTTTACTCCTACTTCAATTCATCAAGGGAATCTCTGATCCAAG  
AGACTTACATGGTACAAATTATCGTGTACGTTGTGTAATAGAGAAGGATAAGACTAATTC  
GCAACCGAGAGAACCTATCTCTGGTTTCGTATTACAACCTCTTAAAAGTGATACTAAAAC  
ATATAACTTAGTACGTGCATATTATATTTATGCTATCGAGACTTTTCAAAGTCCGACCG  
AGGTGTTCCGGGAAGGAATATATTATCTAGCATTACTATGCGGTTATATTGCACCTACGAC  
ATCTAACTTTGATGATAGGAAGTTCTCACAGACGGTTATCGAAGTATATCATGCATTCGA

CTGACATAATCCAGTTGCTGATCGTCCTGCTGCAATCTGTGAAGCCACCAATGTGTCTAT  
AGGTCTTGTTAATTCTACGGATGGCGCAACTCCGACTGCTGCACTTGACCCGGACAGATC  
TATTACCAAAGATGCCATTATAGTCTTACTGATTGATACTGGTTGGCAGAACCCAAGGTT  
AACTCCAAATTACGACTTACTGAACGTACGTTCGTCAGGGATTGAACAGAGTGCACGGGA  
AGGAGACGAAGAAACCAGTATGACTATTATTAGACAAGTGAAGTGTGGAGGGGTTTCACC  
AATCTACGTAGTGCTTATACGACACTCAATCTTGCGTTCTTGTAAACCATACTTTGCATA  
TCTTGGTTTGGGTCCAGGTAACACTACTCACATGCGTGCCTCAAACCTAAGGTAGAATCTTT  
ATCACCTGAGAAGATCAGAGACTCCCAGTCTATTAAGAAGAAGGAGGAGGTGCATTCAA  
CTCTGGGTAAACTGTAATGGTGAATGCCTCATAGGTAACCAGGTGATCAAACCTTGTGAC  
GGCCAAATCACGAACGAAGATATTGCACAGTTGAATGTTGTTGGTGTGAGAACTCAAC  
CATTGAAACGCTCTCAGAGCCAGTATAGACTGATAAACTGAGTGTTATAGGTGGGGCATA  
TAACTCAATTAATTCTCTGCAGGTCGTGTCACATTCCAAGGTGAATCTCAACTTAC  
AAACTACATAACCGCTAAGAAATTTACTTCTAATAACCATCATGGTATAGTTATTAACCA  
AACCTTACTAGCACCTGAAAATGGAAGTGTACTCCCCGATTTTAGTAATGCCCCAGGATA  
CGATACGCCAGGTTATCAGGATACTGTTTGCAACATCAATTGTTACCAGGTAAGTCTCA  
TGTTGGATTTATTGCGGAGATGCGTGGTATGGGGTTGGTATCACAGATACTGGTCAAAT  
CAATGTTATTAATGACTATCGTGTACGAGGATTGGTCTTGGTGTGTTTCGTACGTATCC  
TCCCAGGTCAAACACCAACGATTGAGTAAGAATTGATGGAGACTTAGTTTTTACTGGAAC  
TGCTGGAGTAACAGCTGCCAAATATAAAAAGAAACAATACACAGGAGACGGCAACCAATT  
GACTTTCGCTGTTAGCACCTACACTGGTGTGCTTCAACACACTGACAAATCTTTAATAGT  
ATAAATAAATCCCTTTGCACAACTCCAGGCACTACCTACACTGTTCTTTCAAATGGTGC  
AAATGTGGTGTTCAGTGGTGGAGACGCACCGCTTCTAGAGACTTTGGGCATAATGTGGA  
ATTACGTATCGAGATAACTAGGAGGGTTGCAACAGAGCATGGCTGTTTAAAGAAGTAGTG  
GAAATCAAATTTACGACAGGTCAGGTGCAATCATCACTACATTCAGTTTCTTAAGCACTA  
ACTCAGTGTGTAGATTACCTGGAGACTCAACTGCAAACAGACCTAGAGGTGTATCTTTAG  
GAACTAACGTGTTAATGCTTCATTAGATTCTGCAGAAATTTGTTAGGCAGATGATGGAA  
CTAGATCCGAATGGTGGTCACCTGTTTCAGGTGGTGTCTCTGCTCTCGGAACGGACAGTA  
TTATTAGAATAACCTATAACTAGCTCAGAAAATAGTACTGTCCGACCTCCAGCAGGAA  
ATTAGTTTGCAAAGGGAACGAGGGCAGGACCACTATCAAAGGAAATGGCAATGCACTTA  
CAGTAGAGTCAGGTGGGTCATTGAGTGTAGACTAAATGCAGCTCAACGTTGGGGCAATAA  
GATAAGTATTGTCAAACAGTTATAATATCAGTGTTCCTTCGGAGAATTCAATTAGTTTTG  
AAACGGGAGCTCAATAAACTCGTACTACTTTAGGAACCAAGTCACATGGTGGATCCTTGTG  
GCATTGCTACAGAGTGGGATAATCAAGTACGAGTCCATCAAAAAGATTTTTGGAGTGAAC  
AAATGGGCTGGAATAGAACATAACAACACCTCCAATTTTCTACATATGTTGGAGGAATA  
TGGTGTACAGCTATTGCTGTAGGAGATATCTGAAGTTAAACAAGCCCCGCAGTAGAAGGAA  
ATGCAATAAATAGAGAAGGTAAATTAAGTGGTATAGATTGCACTCAACCAGAGGGGCCGT  
CAGCGTCCCGAATGTAGTTTAGTAATTATAAATGGAGGTCGTTTGGAAATTTTGTGTTT  
ATGCAAGGACACCAACCTCTCAGGAACATTAGCCTACAGCATCAGTCAGAATTTGTGGAA  
CTTCAGGTCTAGTGCAAGTAATTCATCTAGAACTGAGATGGCGGACAGTTAGACCCAAG  
CATGAAGCACTAGTTCGAGTTATACAGGCCAAAACCTGCATATCGGAAGCCCGCATTAGATT  
TCGGAACATAAGAACGTTTTTATATCGAGCCCACCACCTGTAAACTCTAACAATAGTGCTT  
CTGAAGATAAACGTAGAACTAGAATCTCTACTAGAGATCAAGGGGGTCTCTCTGACAGAG  
GTCCTAATACAGGAACACTAGAGCTTTCAGAGAGCACCATACTTCTGGTGGAAATATATTTG  
TATACGGCAGCAAGCTTGAGTCAGGAAACAAGTTTGGATGCACAGAAGTTAGTAATGGTG  
CATCAGACCGATACTGATGGGTAAAGTGAATGAGTAAAGTAAACGCTGGGATCATTGGGT  
GGTTTATCTAACACTATTGGACAGGGAACCTTACCAGCAGGAAATACGTGTACAGTTGAA  
ATAGACATATATCATCATACAATAGTGTGCAATGAAAGTGCCGACAGTTACGACTCCA  
CAGAGTCCGAATAGTCCAGCTGCAGGTGTAGTGAGATTTAATACTGATCAGAGTTACTTA  
GTCGTTTATACTGGTAGTGCATGGAATGATCTCAGTGGTCTGTTGCTGCTGCAACTTCT  
AATTTAGGAACTCAATTAACCTGCTATTAGTGGTATGGCACACAAGGCCGCGGGAGTA  
CCTTCTGATCATTATTGGATTAAAACCTAATGGAAGTGTATATCAGTATAAAATATATGTT  
GATAATGATCGGAATGGTGGTGTCTGGGTGTTAGTTCCACATATTAGGACATCGGCCTGT  
CAAGTTCACATGACTTCTAATGCTGTTTGTATTAGTAATAGTTTAGTTTGTGATTTGGT  
AACAAAAGGACAACGATAGTTGAAGAGTCATGGATGAACGCTATGAGAGCTGCATCAACT  
GATTCGGGTAGGACTCGAGGGTGGTTGGAGCCACATGATGTTGTTAACCGTGCTGAGAAT  
ATTTTTGTTGATAGTGCTGCTACTCCAACCTGTATCATCAAGTGCTAGTAATCAGCACGCA  
AGAACACAAGTCTCTTCTACATATGAAGGTAGAATCTCTGACAGAGGACCTAACACATGG

TCTAGAGCGTTAGGTCTTGATCTTACTTCTGGTGGTACCTATGTTGCTAATGATAAACAC  
CCAGAACAAGCTAAAACTGCGGATTTAGGTCTAACAGATTGTGTCTATCAAACGGATAC  
TTATGTTTTAAATAAGATGTTCTTTTAAACGTGGGCGAATTAATGGATCTAAGGGGAA  
CAACCGAAAGATTAGAATGGAGACCATTAACAATGTTGTTATCACTAGAACTCTTACTCA  
TAATCGTTGAGATAGATTTACATTTACATTGCAACGACTGAAGAAAGACCAAGTAGTCC  
AGCTGCACGTCATGTAAGCTGTAACATGACTTTTTCGGTATGCTGAGGTTTATAATGGTAG  
TGCATGGTAGTGTGCACGGTTCGGTATTCTTGGAAGTGTAGGAACCGGGGGAAGTCCAGC  
AAAAAATTCCCAACAACCTCGCGGGACTACGTTCTGGTTTATAGAGTTTCCCACCAAGGGG  
TCGCTCAAATATCAAAGTATGTGTATAACAGTAGCTTTGGTGGAGGTCGGGTTCGCGAT  
GACAAGTGTTAGAACATCTACATGTCAAAAACATCTGGATCAAGCTGCCGTTTCGTATTAG  
TGGTACGAATGGTCTTATATTAGATAATACATCAACATCTAAGATAGCAGACGCATGGAT  
CTATGCTCTTGTCTCCGGAGCTAAGTATAATGGGTCTCCTAGATATTGGATGGAAGCCAC  
TGGTCTCAATAAAAATGTATTCATTGTTTCTACTACTCTAGATTTACTCAGTTCTGC  
TACTACTCAGAACGGAAGAACAACATTATCTGACTCCTATCAAGGAACTTTAAATGATCG  
AGGTCCGAACATAGGAAGTGTGGAGAACACCATACGTATGCGGGAACCTACCTT  
CGATTATGGTGGACGCCCTGCGTCAGTGGGCGACTGCGCATTTTCGAGAAGACACTGTAGG  
AGCATCTAATCGTTACCTCCGACTAAAATGATAAATTCATACAAACCGAAGTTTACGAC  
ATGTCTGAATTTAAAGTAGGTAATCTAAAGCATGACAGGCACTCGCAAGTGGTCCCAA  
GGCACCATAGATTCGTATGCAAACCTGGTCTTTTCCAGTTTATATTTCAATTTACTGGTGAT  
GGCGGTGCTGATGAGGTTACAGTCGACTCATTACTTCTTATTGCCGGATATGCAACGACT  
GCATTCCTTGGTAGGGCAACTACAACAAGTCTTGCATGGGATACAGATGATGATGTAATT  
AAAGTTTGGGACGCAACGGAATGGGGAATTCTTGGAAAGGGAGCAGGAATCTCAGGTAAT  
GGTTGACGAGTTTCAAATGTAGGTGGATATACTATCCATACATGTACAAGAGGTGGAGCG  
TTAACGATTGATGGAGAAGGACCTGTCGATGTCCTTTTCGTTTCGTTGTGGTGCAGAGGTT  
GGATCGACTGATGCTTGTGCTAACTCAGGACTAACTTACGGAGGTCCACGTGGAGGAGCA  
AGTGGTTAGGTTCAAGTAACAGGTATGCCTCTCACATCTGGAAGTAATCCAATTAGTTTT  
TGAGGTGCCGGGATTCGCTATAAGTCTGGAGAAAACCCTGGTCATAATGGTTCGCCACC  
ACATTCGATGCACTTGTAGCATAACGGTCGAGCATGCGGGACCTCAGGTCTGGTAATAGA  
CCATGTTGTTCTGGTGGAGCTGGAGGTGGTGCAGGAGGAGGCCGAGGTTACCTTGTC  
GGCGGTTCTGTACAACAATCTGGCGCATCTGGTCAGTCTCGTTCTAATGAACATGGATAT  
CCTGGTGGTCTAATACTAACGCAACATGTTACTTTGGTCTGGTGGAAATAGGGGCACGA  
GGAGCTGGTTCGACTGCTGGAAATGATTGTCAGGCACCTGTTCGAAATGGATGATATAAA  
GTAAATTGTGTACGTAATACACCCTACTTAGGCGGCGGAGGAGGTGGCGGTGGTCATCAA  
GATGCAGGTTCGTGGAGTTAACGGAGGTGCTGGTGGCCGAGGTCAAGGTGGTGGTCTTCT  
AACCGTCCGAATCATAACTATGGTGGTGCAGGTTGACCTGATCGAGGTGGCGGTGGCGGA  
GGAGGTGCAGGAAATCATTGTCCAGATGGGTTCGGGTGTTAATGGCGGTAGTGGTGGTCTG  
ATTGTTAGATACCAGACTCTAACTCTGCAAAGTGGATCGCATCCATCTTAGCGCTCTT  
CCAAGTTTGCATAGGATCAATAGGAGATTAAGAATGAACTCACCCGCAAAGTCACAGCA  
TATATTGAACACAATAGGAATTCCTGTTTCTGCATGGGAACATTTAATTAGTTGATAGCA  
ATGGTAATTTTGATTAGCAGTCAACGTCAGAAGTCTACAAGGGGCTTAAACCTGAATGAC  
ACCAGATAAATCAAGTGATGTTACCTTTGCAGCATAATCATATAAGGACGCTCATCTGA  
TCTTCCCATATCACGGTAATCATTAGCAAATCTTTTATAACTGTTGCAGAGAAACGTCT  
AAACTCCCCTTGACTCTTAACCCGATTGACTATTTATTTTGTGTCACCGTTACGAGGATC  
AAACAAGATGGATCTATTTCTAATGGGCTAGGGTCTGCTTCGGATCTACCTTGATAGAT  
TGAAATTATTTTCCGTCAGCGATCATATCTGCTCCTTCAAATGATGTTGTAGGTCTAGT  
CCTTTCCATATTCAACCGAGATATGTTATCTTGGACAGGCCCGAGTTATAAACGATACAA  
TGGTCGTTTTGCATTGTCACGAGGATCTTAATGGTGCAGAAGATTTGCTGCTCCAATCGA  
CGTACCTGCAACACTTGATACAGGTTATATGAATAAGTTTACACCACGCGGTGACCCAGT  
CAATCAGTAATAGTTTGGAAACGCAATTCAGAAAAAACCCCCAGATAAACAAACGTTCTT  
ACTCCGTGTAACCACAACCTCGATTGAGACTATATTGTGCAACGAGCTCTTGTGTTTGTG  
TTGTAAGGTGAAAGCAAATCTGCGTTTGCATCACAATAACCAAGCAAAAAAAGGGATCC  
TCCTTCATGTAAGTCTTTATCGGTGTAAAGTAATTGATTGTATATTAATCCAGTGCATA  
TATTGATATGGGTATGTGCTCGCCATGAGATCCTAAACCCATAACTTTACCTGCATCTAG  
TTCATGAGACCCAAATGCCATGGATGATTTTGAATGCGCTACCCACCAAGATTACT  
AGAGATATGAGTCATCGCAAGTTTGTGTTAATATTCAAAGGGAACAGCAACGTATCTATC  
TACAACGGTAGAAGCAACAGGATTTGGTGTCAAAGGTTCGAGATAATACTCTGCCATA  
AGTGCCGGATTGACACAGAGCTACCGCAAGAGCTACGCCGGATCCCATTCCGACTTTTAC

AATACAGATTGCATCATGAAATTCAGAGTTAAAAGAAGTGTGTGGTGCTTGGAGTTTATG  
GTGTGATAGTGTGGATAATGATCCTCAGTGACATACTTATTTTCTTTTCGTCTCTACATA  
TAGAGTATATGGCTCATCAGCACTGGAACCGTCCGCCGGTGGCAACATGCCTACACCTGC  
AATACAAATATTACAAGGATTGAAGGTGTCAACGTCAGTCAAACATTGACATGAAAAGGC  
ATCATACTTTCTATTAGATAATCTTTCATTCTCAAGGTGGTAGACAATTTGGCCATTTTG  
ACGTAAAGTAGTAGAGGAGTTATGCAGTATGCTAATACCTAAATTTCTCATAGGATTTCA  
TGAATCCATATACATATATTATAACATGATTTTATAATTATGATATTTAATAAAGTGTGG  
TATGAGACCGATATTCCAGATGAATTTGTAAGACTCGTAGAGAAAGAGTGTAGCCGTAT  
GGTGATATATTTAAGGTAGCGAGTGTAAAGAGAAGGAGAGATATTTGCTACAAGGGATAGT  
CAAACATCTTGGATTCCGGCAGCTAATTGGCTCGCAGGATTCTGTATGTCTGATATATTT  
AAGTCAAAGAGATATAACTTTATGTATGATATAGATGGTATTGTTTCCAATAGCATCCAA  
TATACAGCATATGATCAAGGCTGATTTTATAATTGGCGGCAAGTTGCAGAGCACACTGCT  
GCAGACGAAAATGGTATGTTTAGAAAATTGTGATTTACTTTACAACCCTCGTCTTCTGCT  
TACTCTCAACGTGGTAATATTTAAAACGAAAAACACTGATGAAGAGGTCTGGCTAGTTCCT  
TGACGTAGATGTACATATATTGTGTTTGAAAGTAGAACCGCTCATAGAGCCACAGAGGTT  
AGTGGTGGTTTTTCGTAAGACTCTGCTAAGGTGGGTAATTGGACCGAGGTGGCGATGATAC  
ATTAGAATGATTGGAGTCTTCAACTGAAGTATTTGGCCATAGATCACCTGTTAGTTG  
AAGAGCCCCCTCTTGAACGCAGAATATTTGGATATGATAAAAATGGCAGAATGGAAAATG  
TGGCTTAAACAGGACAAGTTCCAAATAGTCTTGCACGATACAATCACCTGAAGTCTAACA  
AATTATACAAAGGTGTTCAATCAAAAAATGAACCTATCTTAGGGCAGAAGTCATAACCAA  
CATTTTGCTTCGATAGATTTTATTTCAAGGGTCAAGAATTAAGAAACATCATGAGAGAC  
CGGCATCTTTAACCAGTGTCTCAAGGAATCTCAGCACTAGCTCAACAATATCATGGCCAA  
TTAATATGAACTTCTAACGGAGATGTTAAGGAGCTTTACACAAATCCTGGTGATTCTG  
TATTATCTAAGGGTATTGAGTTAGAACATTGGAGACAACCTATTTAAAAGGTACGCCAAAAG  
TTTACTATCACCAAATTGTCATGCACCTTGTAGGGGCAGAGAGATTCCACGCCGAATATG  
CTGCTGAAACTAAGTGCTAAATAACTAAAGTACAACCTAACTGAACATGAAGAAGGTCAC  
ATCACGCTAGGATAAATGATGATAATGTTGTGCGAGAGAGTAGAAACACCTGACGACTTTT  
ATGAAAGTACTGACACAGATGAACTCGATGAACAACGTGCGCTCACAACCTCTGAGATAGT  
TTTTTGGAGTCCCAACTAATTGGGTGAACACCACATACAATTCCGACAGTCGTGGTAGGC  
ATGCAGGTGTTGGGGATATATATCGTCAAGACTTAGATAAGTTTGTATCCGCAAACCAG  
CAGGTTTAGACTCATAAGCTATAGATGAGGAAACCCTACAGAGAGAACCCCTATACCGA  
TGCCCTCTGCTAACGAAGATCGTACTTGGACGTGGAATGAAAAAACTAAAACATGGAAAG  
AACAAAAAGAATGAAAAAACTGTATCAATTTGTCCCGTTTGATGTAGTAATTAATTTATT  
GAGAGGTCTGCTAAATGGACTCTAGATCATGAAACATTTAATTGGAAAGACGGCAGAAC  
TAGCGCAACTATGGAAGAAGTTGAAGGTTCTCTAAACAAAATAAATGAATATGAAGCGAG  
TCTTCTTATATTCTGTAAATAGAAGATCAAGAAGAGTAATCCGATACATGGCAAGATCC  
CGAATTTATCGCGTGGAATTATAAGCACGATCCTGAAGATAGAGGTGTACAGGTCCGAGG  
AGGGAATAAGCTAGGAGAAAGGATAGGTGATAAAGGTGGTGTAGTTCCTGAGTAATTTGT  
GGGTGTCTATTTTTGTCATTACAGAATGAATGACATACAAGAATTCCAACCTGAGGTTGA  
CAATGCGGGTAATGGTTGTTGGTTAGATTGCCTCGAACCCTCAAATTTGCTATATGTCC  
CAGTTTACCACGTAGGCAGTATCATTTGATGGAAACGAGAACACTTCCATAACTTAATGG  
CATAATGGATCCAGTTAAAGAAATGATTGTAGATGGTGTAGATGCTAAAAACCTCAAGTT  
ATAATCTGAATGTACAGTCTACGGGGAAGAAGCAACATATCATACGATGCATGAACACAA  
CACTAACAAAGATATTTGTAGTGAGATATCCTTTGATGTAGAAGAAGAACTTTTTCGTGG  
AAAAAAAGGATCTATTTAATTGTTCTTGTACTGCGTAAAAGTACTTCGGCCAAGTGTAGG  
AGGCGTTTTGAGATTTTCTTCAACTCTTCTCAGGGTGCATACACTCAGAAAAGTAAAT  
GAGACTTAGCTTGAATCTTGCTTCAACACATGAAACAAATTTGTAGTAATGAGTTCTACT  
ATCAGTCGAGAATGCCTGACTTCGATACTCTTAACGAAAGGTTAGACGCAGCTGAACACT  
TTGATGATTCAGATTACACACGGGGCGACCTATGTATGAATGTACGCGAATCATACAATG  
TAAAAGGTTCCCTTGATATTCTAGTCGTTCTAATAACTTTTATGTCTGGTGATCTTAATG  
TTAAATTCAATGCTGACTTTTTCAAGCCTTGGTTGAACGGATATAATCGTGGTGGCTTTC  
AAAAGATACATTATCATGTTGATTGTGACATTGCAGGAGTGGTATCTTTAAGTGATGGTT  
AAGATTTCTCAAATTTTGTCTGGGACGTTCCCGTACATCATTTACTAATCCTTGGGA  
TTAAGATACGCACTAAGATGGAGTTATCCAATATATATTATCCAGAGGTGAAAGCGCGTG  
AGGTTTTGTTGTTTCCCTCACACAGGTTATATGGTGTTCCTCGTCATAATTCTGTGTGCA  
TTAGAAAGAAACTTTCTTTTGTGTTGAGTGCAGTACAAATGTTGAATGAAGTGTATCCAAC  
GATAATTTTTTGTATGATGACATTTGTAATTGGTTCATGTCATTGCATCAATCTTTTTTT

CCTTCAGATGGATCAGAGTGTGAGGATAGAAGGATTATAATTATACCAGAACAACATCAT  
GTTCTGTATAATCATAATTTACTTTATGATGTGGCAGTCTATCTAAAGAAAGTCCAAGCA  
AACGAGAATACAGAGGGTATGATGTACGACCCTAAACCATCTCCTAATTATAGTCATTGC  
ACAGAGTGCACAGCGCAATCTAGCACGCAAAACACCCTGATTCTGATGAACACGTTTTG  
ACAGCTATGCTATACTTCAATGATAACTTCACAGGTGGTAATCCTATTATTGAAGGTGAA  
AAAATCCCACCAAAAATGGAAGTGTGACCCCTTAAAGGAGAGTTAGCATATGGAGCT  
GAAGAACTCACAGAGGGTATTGCTCTGCTATCTCGGTATCGTCTAAAAATCAAATAGGA  
GTAAACAAATATAGATGATACTAGATTGATTCCCTACAACAATGTGCATGGGTCGTTGGG  
AATTATCCCCGAAGATCGTCCAAATCTATCTCCAGTAAAACCTTAGTAGAGACAGAGATC  
ATTGTGCATGGGTCACTCCACATATACCTATACTTGATTGGTAACAACTATTCAAGTTG  
AAGTAAGAAAGTATGTTGAATAGGACGTTTATATCGACATAGGTTTGAGTAGAGTATATA  
ATATGCAAGGTCATGGTCCTTGGTTGATCAGAACTGATAAAGGTGATTACACAGAAATAT  
ATCCTCAGTTTAATTCATTATAAGTGGTGGATATTATTAGTCAGTCAGTGCCCAAGAAG  
GACCTATTCAATTCTATGATGATAAATATGGATTGGTTGGTAGATCTTCAAAGTATTAA  
ATATAACTGAACCTAGTAATAGAAATTCTCATAGAGTAAACGTAGAATGTAAGAATCGAA  
CGATGGTCTTATTTTACTCTCGTCTAAAGCATAGCGTTGCACCCATTCTATTCTGAAGAAC  
TTAGAGTCTTACTAGCATTGACTACACATTAAGGGTGTATTTGATGAAATAGTGAACA  
AGGGAACTATGTGCCAGTTAAAGGAACGGTCCACATGCTCGCCATTTCAAAAAAATTGT  
GTTAGACTAATAGGCTATCGCACACAGAACAATGCCACAGTTTACTCTCAACTGCAGATA  
CGAAGATGAGACCCTGACAAAAAAGCATTGATGCCACATTCATGATGATGTTGTCGA  
TAGCACTGCGGACTTCTACATGGAGTAGGCTATTGAATCGAGGATCTTCAAACGCAATT  
GTAACCCACTCAGGGAACCTGATACATACTACAATTAGTTTACTATGTTACATCCTCATA  
ATGGGTAAGCCATTTTCGGCGAGGTGGTATCGCACAAAGGTTACTACCCCGATGGTAAATCA  
ATCTGAGACAAGAGACAAACAAAAATAGTCGTTATAAAAAATCGAACATGAAAACGGGAGG  
GAATTAAAAAATGAAAGATCTAAACGTAATATGACCGAATGAAAGTTCTGATGTAAAATG  
TCAGTGAGCATTAGACCTCTTACCGAGTCACTTAAGAGACCAGACCTAGATTGGCGTAG  
CGGTGTGTATAATCAGGATTGTTTCAATGAACCGATGCAAATAAGAAAACACGGTGAGAA  
ATATTTTTCAACGTTGAAATGAACACAGAACTTTGAGACCCCGATGAATCCGATACAAT  
AGAACAAGAGAAGTTACAACCCTCGTCCCCTTTGTCTTAATGGAATTAATGTATCTTAG  
ATCCGCTATATTAACCTAAATGCAACCAGAACTATTGAACAAACCTCTATTGTTATACGA  
TTCAAATTTACAGCAACGATACTATGGGGATACAATTATTTATGAATCTCGTTATCAAAG  
TAAGATGATAGAAATTCAGAATAGGGTTGCACAACACTACGTGTTGCGGTGTTATACACATA  
GTGTCTCGTAAAGAAATTAACCTCTCGAAGAACGCAATCAAGACCGGTCAGGATTACCGA  
TTTCTATACTGCGAAGGGGAGTTTCAAATACTCAAGAAGAACTGAGGCAACACAGGGAG  
CGAAGAGATCGACAAAGCTAGCACAGATGCGTGGAGGTGCATACGACGTGTGACAGTTA  
AGTTAGTGACAAACCCTTAGTGACGTTTCTTCTAATATCGCTGATATTACGAATGTGCGAA  
ACAAGCCAACGTAACACTTTCCAGGAAACGGATATACAGCGCAATACGTCTTTATGTCCA  
ACTTAAGTAGTTGAGTTTTGTTTCGACCCACCTATTAATTTTAGACATGGAAGTTCAAGC  
ACGTGTTAACAATTTAAGGACATTCTAACTCGAGAGAGAACTGGTCTATGAAATAAAGA  
ATGTGCTGCTGAAAAGAAGAATGGTTATACCCCATCATTTGAGTTATCATATGGGCTTAA  
GGTAGTGGAGGCTGCTATTATTATAACGACTGGCAACAATACTATTTGCTGTTCTGATAT  
TCTCAGAATTATGAGACATGATAATTATAAACTATTTTTTGGGTGCTACGATTAATTAGG  
AGATCAAATAATATATCACACCCAATCTGAGTTTTTTATTGGACCTAAACACTATCCAAC  
TTTTGGCGGATACATGGATTATGAAAATCTGGAATTGCTTGTAACCTATCTTAAGAGTAT  
TCCACAGGCGGCAAAAGCAGGAGACTTCTAAATTAGTTAGAGACAATTTGCAAGAAAG  
TGTATTATCCTATAAAGCATTATATAGTATCACTCCAGAGGTAGATAGTGAGAAACCAAG  
AATAGCTCAATGTTCTTAAAACTTGATGAAGTAATTGCCAGTGGTGTAGAATATGGACA  
GAAAGATATACCTTTATTCCTCTAATCTTAAAAACGTACGTTTCAGTAATGAGAGCATT  
TGCCGTCCATAAAATACACCTCAGAAAGATATTAAGATGACCCAGATTATCTCGCTAAC  
GAAAGAATTAATGATATAAATCCTAACGGTAGAATTCTTGAACCTACTATAGGCGAAGGT  
TTGATTTAAGATAAGTATGATACGTACAATCTAGAATTGTGTGAACTAGGAGAGGGAAAT  
GATTTGTTACAATATCAAAGAAAATTAATTGGATTATTATTAATCCGTGTTGGTATATG  
GTGCAACCATTTTTATTGCATGCGATGGAAGTGGCGGACAATACGGTATATTGAACCACG  
AGCAATCATTATACTACTAACTTAGAAGAAAAGATATGAGAGCATCTTACTTTGCAATT  
AACGAGATATATATTGTCCCCACACCCACAAAACGCTGGCCACAACCTAGGGTTACAATA  
GCTGCTGTTAATACAATGAGAGATTATAAAGGAAATATTAAGCTTTCGTGTGGGCTGGAT  
CTCTCCTGATATAAAATCACGACATGCTTGATTCCATCGTACAAATGATGTTTAGCGCT

AATTAGTGCATTACAGATTA ACTATTATGAATACAAAGCAGAGACGGAAACAACGTCTAG  
GTATTGCTGATTTATATTATCTTGCGAATATTATTTCAATAGATGAGTGCCATGATGAGT  
GGGAAGTTTGCCCAATACAAAGAGATCACCAATGGAGAGCGAGTACACGAAAGGACAGAG  
ATAAGTCCTCTACACTAGAATCTTCACACTTAGAAGTAGGTGGAGCAGTATTAACGAAAG  
ATTGGTACGACCCACAGACGAAAAAGACATACACAGCAAGAAATATATTTAAA ACTAACG  
GACATACTAGAGACGGACACTGTTGGTCCGATGAACCGCAAGATTGGCAACACTGACACG  
TTCGTCTCAACTATAAGGAACACTAAACAATTATATCCTGATACAAAGATTCCAGGATTC  
ACGACAAAGCAGATGACGCGGAAATTGAATATGATAGAATAGATTGTGCGTATCGTGGTG  
TATATCGAGAGAAGAATATTGTAACCAAATATTATATTTTCGCTTAAAGTTGAACCATTAC  
AACACGAAGCTTTACTATGTTTTTCTAACAAGAATAACCTCGCGATGAAGACAAGTACGG  
TTTACCTCAAGATGTGGGTTAGTGAGATTCAAGACGCTGTTTTATAGGTCCGTAAAGTAT  
ATCTTGATTCTGAATTTAATTGTTGGAAGCAAACAACGCTGCCACACTATAACCCATTAA  
CTTGGGCATCTCTTGTTTCTTATATCAAGTGTAAGCAAGTTCAGAAATAACTAGAAAAAC  
TAAAGGAATTGATATTCAGCGGGGCTAACAAATGAAGTGCTATTTGACCCCAAAATGGAC  
GTGAGGATCGATTTAGTCTCTAAATGTAGCATGGAGAGAGTGGGAACA ACTCAAAGTGG  
GCACGTCAGGCTTTGGTCAGACCGCAGAAATGAACGGAAGTTATCCCTTTATCAATATGA  
AATCATTCCACTATTGGGCATTGATAAATTTATTGAAGGTAAGTATCTCAGTAAGGATG  
GTAGTTTGAGAGGTGTTATCTGGA ACTCATACTTAGAAGGCTTGCAACTTGCTCGGGAAG  
TAGCGCATGGTAGGACAGCACACACGTTGAGTATGCGACATTACCAATAGGGGTGTTCC  
CCGAAGAGGGGAGACTAGACGAGTAGAGGTAGTGCCACACCCCTGGTCAGAGGGGTTTTT  
TTATACTATACTGATTGTATGGAAATGATGGTATGCAACTACGTCCAAACAAGCAAGCG  
CATTCAACCCTACGCGGGAGATTTACGAGGTTCGAAACATGGTTCCTGCTGGTGGTGGTA  
AAAGGTACATCACTATTGCTGATGCTCTTAAGCGATTCAAGTTACCAGTTGCACACACTA  
AAGTTGTAGTTGCACCGCGGATCTTACTTACTAATCTATATCGCTAAGATTTCCCATAGC  
ATAATCTACATGGATATCATAATCACGGTTTTAATGTTGCTCATGTCCTCCAGGCGAAA  
CTCACCATCAGCACAACAAGTCTATTTGAACTCAATACTTGGGTTTACAACAGCAAAA  
CGCACATTTGATATTTACCCCATATCATTACATAGAAACGTCGTC AATGCAGTTGATG  
TAGAAGTTGATAGCATTTTCTTTGAGGAGGTACATAATGGTTGTGGGAAGCAGTTCCATA  
TTGCTCTACCCGGAATAGTCGAGTATGATAAAAGGAGTTACTTCTATTCTGCTACACCTC  
GCATAGGTCATGGTGTATCACTTGACCGAGGTATGAACAACACCC CAGTATATGGTGGTC  
GATTGGAGAAGGTTCCCGCACAGGAACTTGCAAAGTCAGGTGCTATTGTTCCCCCTTAGA  
TTGTTCCCTTTGAGACTCTTAACTCAACCCATCTTGACCAGTGTAATGCTCATGAGATTG  
ATGCTGATAACCCAGAGATATAATCGGTACATTTGATAATAGTCAGAACAACGAGATAC  
TAGTTGCACCACCTAGTCCAAGAGTCTTGTGTAATATGCCCGGAAATACTTATATTCTTG  
AGTATTTCCAGGACATCGGATAAGACGTTATGCACAACACATCAAAGTGGGCCGATATCA  
TCAGTGGCACACAAGTTGGAAGCGAAGAGTTTTTTGCCACACACACTCGGTGGGGTCGGT  
ACGATACTAAAAGATTTCTTATTGTCCACTATACAATACTTTCTTAAAGGTATCAATGCTC  
CAGGATTGACTCGTACAGTTTTGTTGAGAAACCTACCTATCATTGAAATGGCACTAACTA  
GTCGTGGTATCATCCGAGTTCATTCTGATGAACGTA AACCAGTTGGTGTGGTCTCATTTC  
CTGCAGGTCCATTGCACTTATACAGAAAACAAGTTGTA AAAAGTAAGTGTTCCCTACTGGAC  
AAAACCGTGGAGCTGCAATTGGTAGAAGATTGCAGAATGTACTTTACCAAATTCTTGTTG  
ATGGTGTTCCTCCTATCGCTTATGGCTAATGAAATTAAGACCACAAATAGGTACAATTTT  
ATATTGGGGTTATAGGAATTCATTTTCCACTATACATGAGAGAGCCGAGATCTGTGCAAC  
GTCCCCCGTTATTATGGACCGATGGAGTATGGTGGAGAGTAATCATAAATAGGACACGA  
ACAAACACCCGAAGAATATATTGAAGAACTTGTA AAAAGTATTGAGTGAAGTTAAGAATGT  
TTTTGGAGATGATGGCACTCTATACTTAAACATAGGGGATAGTTCTTATAGATTTAGCCA  
TGGTAAAGGTATATAATAGCCTTAACAACAGTATTTACA ACTATAACAAGATATAACTGA  
TCAATCTAACGTACGGGGTAACAAATTA AAAAGGATTA AAAAGAGAAAGACCTTATCGGTAT  
TCCTGGGTTGTCAGCAGTTTCATTACGCAAAGATGGGTAGGATTTTAGGCCAGTTATTAT  
ATGGTATTAACCTAATCCAATGCCAGAAAGTGTAAGAGATAGATGCACCAAAGTACAGGA  
ATATATTTGCTTATTCTCTAAGAACAAGAAACATTAGTATGACAATGTAGCACTGAAAGA  
AACTGCAAAAAGATTGGGGGACTAGTGATAGAACTAAAGGAAAGTATCCTAAGATAGGAAC  
TGTATTAAGTCCGTATACTGGACTCAATAAGAGTCATCCTGCAAAGAATAAAAAGATAAGT  
ATGGTCAGTAACCAATAAACCATATTAGGGAACTCACATTGAAGTATTTCCCCCTGAATT  
AAGTAGACCTTGGATCCAACCAGGGAGAAAGAAAGGACATATCATCCTTGACCCAATTAT  
GGGTAGTGGCACAACAGCAAATGTATCTAATAAATTAGATAGGCATTATGTTGGTTCTGA  
ACTGCATTTAGAATATAAGTCGCTGGTAGATTCAAGATTACCAAACACAGCTCTTAAGGG

CTTTCTGGAGTGTGGTCGTAAACGTAACACTATCGGATGCATATGACGCTATAGTC  
AATTATAGTATATTCATAGGACTGATGTTAATTATGTCAACTAATGCTAGAATCTCACTC  
ACACTTTCCGATAAAACTTTTGTTCAGTATATCGTCATTTGGACGGTTATCCTGATTTG  
TTGGGTGCAGTCTAACGGACCCGTATAACAACTAGAGCCGGTTCTGAATCTCCTCCTA  
GTTGGATCCATGAGTTCATGTTGGACAGACAATGAGTGTGATTTCCAGAGAACGTAATTT  
GTAACCGGGACCATAAACCCACTTACTACTCAGAGAGAGGAGAGTGCATCACCCCCTAGA  
GTCGTACACTCAAATACAGGGTTCCTGGATCATTGTGCCCACTGTAGTGGCGAATTCGGT  
CATGTCTAGGACAAGGAAGGGTGTTCGCTTATGAGACTACAGACCGCCCTGTAGTTGAG  
ATGCCAGGGGAGATAGCAGAATGAAATTTCTAGTGAAAGACATTGAACTCTATTTAAGTG  
ATGCTGGGGACGGAGACCCCGATTTACAATTCACAGAACAATAAGAGTACGTAAGGCACC  
ACAGATGCCTAGGTAGATTGACAGCACGAAATGAAAAACATTTGTAATAAATGATTTTTG  
ATTTTCATAGGTTATCCTGTAGAGATGATTGACACCGAGGTAAAAGCCTGACATCCTACCC  
ACTTCCGATGGTGTACTAAGACGTGGTATTGAAATTATGCTGATGATAGGACAGCAAAG  
AACATTCTGGATAGAGGACGTGGAAAAGATACACCCAGATTTTCCGTTTCGACAGTCTAGT  
GTATGACCCCCACACTCGAGGCACTTAGGTCCCCCATTCCCCACTATCATACCCTATGCT  
CAGAATAGGTGATCAAACAAAAGCAAGACATTCCATTCTACGAGTTCCCCAAATTCCCTG  
TCCTCATTTTATGGTATTTTGGAAATCGTAATCGCACTGGCCACACTTTACGTTGTTAATC  
TAAAGTAGTTCAATAGTCATTTACGCGAGGATATCAACTTATGCTAGATTTTTTATCAGA  
AGTCTTAGGGGATTTTTGCTCTGAGAATGATCTACCAATCATGAGCGCAGATCGCCTATT  
ATATAACATGCATGTGCAGACATCAATATTTCTCAACCCCAAAAAAATTGGTTAACCCA  
TTAAATTGAAGTCTGGAATAATATCCAAGAAAATTCTTCATGAGATCTTTAGCATGAAAA  
CGTAGAACCTGACATTGCAATTACTCAAATGTCTCAGCACTTGTTTAGTGTGATGCGGA  
CCATAGTCAAAGAGGACCGGTATCTAGATGCCCTATCAATTTACGAGGAGAGGGTTCGAA  
ATGGCAAAGACCCTCAGGACGTGGATTCAGAGTTCGCTTTTATCCCTAACACAACACTATTG  
GCGATTTGAGATGTGAGGTGTGAAAGTACGTATTGTGTACATAGGTTTCGCGATTCATAT  
CCTTACTCATTATAAAAAAGACTGGAACAAAACAACACCAAGAGAAGAAACCAGTATCA  
TACTTCTGGAAGTATTAGTGACGCACTTAAGTATTGTGATGATCTTGATGGCCCTGCAT  
TTGTGATGTATGATGACATGATAGAGGCATTTGAAAAAGAAGTATGCTATCCTATGGAGA  
TTTAAATAATGAATTAACGACAAGAGCAAACCTTGAAAAATTTGGTTAGACTCATAATG  
AGTTGAATGAACGCAGATACCATTATGTTGACAGATATGTGCGAAAATATGTCAACTAAGG  
ACTTACTCCACAATATCTTACATGATTTGCGCGATTATGTTTCATGATCAACCAGATGTAG  
AATTTGGTGTGAAAGCGGAAAACACTATTGTGAAGATCCCTATGATGATCTTCTTACTGACA  
GCAAAGAGCATTACATACAGAGATTTTAAAAAACCTTTAGAAGAAAGAAGAAACAATTACT  
AGATTAGGACTAAAAATAAACTTATTAAGTTTGGCTTAGAGAATATCCTAGATGCTTCA  
TTTGCACAACAAACAGAGGGATTAACCTTATGTTCCCTTGGCAGTAGCACGTGATTTTGAA  
GAATGATAAACACAGAACTAACAAAAGGTCAATTTAGAGAAATACTTGATGCAGTGAGGA  
ACTTACGTGATGATTACAGAGATGACTTTAACTTCATAAGGAATTACCCGGTACAGCGC  
AGTTAGATTTGTTTAGTGGAGTTGATGAACTGGCAAGTATTGATACGACAATCAACAAAC  
AATTTAAACAAGTAAAACACTCAATTCGCCAGATTGGCAGTGACTGTCAATTATCGCTACA  
CGTACTAACCATGAGTTAGAAAATAGCCTATAATAAGAATAAGCAACCAAAGAACAAT  
AATGATTCAAGAACCATTGCCAGTTAAATTGAGTGGAGGTCATCTCAACAATAAGGTAAA  
AGTCTATGATCTAGTCTGAGACATGAGTTTTCAACTCAGACCCGAACAGATCGAAGTGTT  
CCAGAAAATTCAATGTACAGAAGTCAACGGAGGATTTTTTCAGCTGAAATCAGTTAGATCA  
AAAGTTACCATCCTTTTTTCATATTAATAAAAAGCGACTCCGACACTAAAGAAGAGCATAGC  
CAAAGTGAAATAATTAGGATGAAGAATGTTATGGCATATGCCTAAACGGTCATGAGAGC  
ACAATGATCGAAGAGGAAGAACCAATTATCTTTATCAGGGCGCATAAGGGAAACTTACT  
TAAAGCGCTTTGTGCATACCCAGAGGACGAGCATTACATATTAATAACAAAATATGGG  
TAGCAGGTGATGTGGCAGGGATTGACCTACGTCATGATGCAGATTAATCAATCCGCATAT  
ATGATTATGACTATGATGGGGCATATGATGGGTAAGAGAATGACAGTTAAACAAGTGTCA  
CGTCCGGTTAACGTCCCACTCTATTATCTTTTATATTAATGGTAATTAAGCAGTTTTTATT  
ATGTTACATTATTTAATTGAAATCCAGATACACCGATCAGAGAACCAGTGAGCGGTTGT  
TGTTATGACATACTATAAGCTATCACACAACAGAACGGTCATGCGGTATTACCATGCGAT  
ACTAAGAATGGCACTAGGTTGATACCGGGCATTATACAGATAAGGATTACTCAATTCAT  
TCAAAGGAGATTTTGAATATGGGTGCTAAATCTGAGATGTGTGCTAATTTTGATGAGACT  
TACATGCAAGAAATGGAATTCGCGAAAGATTCCGATCATTACATTCAAGACTAACGACCC  
GAGCTTCATTACTATTGCGATAGTCCAACAGAATAGGAGTATGATTGGAGAGACGATTAT  
CCTCATGCTGATTGTATGTGCGAAAGCTGTTTAGATATAGCAATTTCAGAATAGAAAATC



ACGTGGAAGTGTGCCAGTTGTGAAAGTGTGACATAATCTCCCTATTCCTATACATTTACC  
TTTATCAGGTTAGTCTCTTCAATAAACGTCATGCACAACCTTTAAAGCATTTCAAAAATAT  
CGTGAATCATTCTCATCGGATCACACCCAGATCTCTTATATCCTATTGAAGGATTACCT  
GGTGAAGAGTTAGCACTTGATACACTCACATACCTAGAATAATGGGCCTGATCTGCCGGT  
CCAGTAAACTGGGGAGAAGCATATAGTTTCGATAATGAGAGAGTCAGAGATTTTGTTTAC  
GCAAGTAGGTGAGTGGCATCAGGAAATTTAAAATTCTAGAGAGCTTTGTAAGTTATAATG  
ATATAACGATCGAAGCGAATACCGTAGAGGCAGCGATCGATCATTATCATCGTGAACAAT  
TTCCCGATAGTGCGGTACAGCCATAGGCTAAGATTTGCGATTTTGAATTTAGGGATATAC  
GTCCAGAGTGATGGATGATTTAACCGGCAAAGAAAAGTTGCTCATTTCAGTTGACTGAAGT  
TAAAAACCTAGGAAACAATTGCCCATCACTTGATGACGAACTAATGGGAATATACCAGAA  
TTTTGACGCTATCACATACGAGGACATATTTGAACAATTCATGGACAGTTCAAATATTAT  
CACATAGTTTGAACATTCACATTATTATGGCCTATAATAGTAGGTTGAACAAAGCGGCTC  
TATGAACAAGACTTATACATTCACTGATGCCACATGAGAGTCATCAATGTAGTGCGCCC  
ATATTTTGACGAGTTTCGCAACCAATCCAAAATACAAAAGCGATTCTGAATGTTTTTATGA  
CTATACTCAAAGAGGCGGAGAACTATTCTTTGGCGAGTAAAATGTCAGTATCACATCAGG  
AGAGCATTCTCGGAACTTGCGACGATGAGGCATGGAGAACTAAGCAAAGAGCATGTTA  
TTACTTACGACCAACTTACAACGCTTGAGCAGAATCCAGACTTCTGTATCCTACGAGAGA  
TCGAAGCAGTAGCAAGCAACAGTTCTAAGGACTTGTGCCAGTGGGAATACGATCACATAA  
TTCCCCATTCAACCCACCTATCCTTTATAATAAGAGTTTCAACAAACAAATCTATGAGA  
AGCACGAAGAAGCAAGCAGGTCAGCTATTTATTTAGGATTGGTCAGACTTCTAAAATCT  
AACCTAGTTGTAGGGGAGACAAAATTGCAATGAGGTGTGTCTTTAATGATTTTGTATC  
CCTCTCAATAATTATGGTCTAGTCTCAGGTTATCAAGCATATAACAGGTCAAACACTTGC  
TAAGGAGATTATTA AAAAATTACA ACTTGC GTACTTTTAGAGGAGTCTACTAATGCAGTTGA  
AGATTATTC AACGTGAGAATTTGAAGCGGGAACCGAAGCACCCCTGAAACAAATTTGACT  
ATACCGTTGTAGTCCCAGATACTAATCTAGGTTATCATGCCCCCTATACAATGGATTTCAG  
CAGTTGCAAATAAAAAGTGCAATGGAGTGGGCAAGCAACTAAGGTCGGGCATGTGTAGAAG  
AGCGATGCCTATAAACAGTGTTTCGCAGTGCGGTCCTGTGACAGATAGATTAGTCGCACAT  
GGTGACTCCATTGTCAATAGTTTAGCGCTATCATAATAGTATATCAAACATACTTGTATA  
AACCATGACAATCTAAGAATACAAAAAATTTATATAAACTCTACTCATATGAGCGGTCT  
TGATGTATCTGAAGAGGCAACATACAGAGTAATCCTTAGAATCCTAGAAGTTGACAATTT  
TAAAAATGTTCTTGTCTTGTGCGACTTCTCAGAATTTGTAAAAGAGTAGTCAGAGTG  
GGGTTTTGATTGGTGTGCTAAGGTCGATTTGCATGACTCTGATCTAGACATTGATAAACT  
AGACAGAATAATCAAACCTGAAAACGGATACATCAGGGGATTGTAATGGGACGTACCCCT  
AAACA ACTTGAGTATATCTTCGCATATCTCAATTTCCACTATGGTGAGAATGAGCATATT  
CAAATGGGCATGATCGAACTTAATGCTCGTATATTCAGACCAGCAGCAAACCAACTACAG  
GAGATCCACGAAAATGACTAGAGCAGAATACGCGTTAGACTTTCAAGCATTTAAAATCCA  
TCGTCTTTCTATGACAGATGAGCAAGAAGCTATAAGCAAATATATTCTAGACGGTCTTTT  
TTATCCCGAATTCGATAAACTGAAAGTAATCGAAGAGACCGCATTAGCTTTACTACTTTT  
AGAAATTCCCGAAGATCTCGAAGAGGACACATCTGAAATTC AACCACTTACTTTTGGATA  
AGTCAACGTACCTTCAGACACTTTGATTAGGGGCACCGGTTGGCCCATATGCGGGTTCGC  
CCGACCTATAACTGTAGTAGAACCAACAAAGAAACCTTTTTATTATGAGCAAAGTCGAAG  
CTACAATGAATTCAATGATTCGCAACGCTAGAGCTTAATCAGAGGGTAATACTTGCACCA  
CTTACGATATTGATGGAGATTGCCTAGTTTATCTACATGCCAATCTTATGGCAACTGTAG  
CCGACTCATTTCATGGCAATCTTTGACGGTCGTTTTCAATCGAATACA ACTAAGTCTAGAC  
TCCTCGCACTGCTACACGAATTCGGACCACACAAAAGTGTTTCGTTAAAAACTTTCAAT  
CGTTTCTCAAAGTACATAACACATTAGTTCCATTTAACACAAATAGTCTAGTATAATGAC  
AGTAACGAAGGGATATGAAAAAATGTTCACTACCGTCCACCCTCTACGCTTTGGGAGAAC  
ATTCTGGATAGAGGCCGGAACAACCTACGTTTCATGACCAACTTATAAAAATGGTGCTAC  
ACATTGGGAAAAATCGGATTGAGTTAGCGAGTCGAGAGACTTAGAAGGGGTTAACCTCGA  
TAAATTACTTGATCTTCTTAAA ACTTGTCTAGAGTAGAATAAATATGGTACGGAGGATAA  
AAGCTAGTGCATTATGTTCTAAACGAGTGTTCTGAATTAGTTGAAATTCATAAGGACGTT  
ACTCAATTAGAAAAGGGAATCGAAGCCACCAATCAAGCGATTAAATCCTGTAACCTAACA  
GAGAACAAGCTTAGACAGAAACACTATAGAGACCTAGACCGGAACTGAATAAACA ACTC  
AATGACATTCTAGTACAAGTCCCATATTATCCGGAACACCGCGAATAGGGGATATAGGCA  
CATTTTCGAGGAGTGATGGGTTTAACTACTCTTAAATGTTAGGATTATATGACCTATTGCA  
TTCACCAGCATAAAAAA ACTCATGAAGACAGAAAACACTGCCGAAGAGCACACTCACAGG  
TCAATGTGCTCAGCTACCGACATGAGTGGCGAATCATCGAAAGACAATTGGAAGTATGTG

AGGATAACGACAAGAGAGTTAACGTCAATGTTATGGGATAGTTATCGGAATTTTTTGATT  
AAACAGCGATGAAATAGAAATGCGGACAATAATTAATATTGAAATAAATCTTAGGGCGT  
GTTTTATCGGTCGGTTAACCTCTGAGAGTATTGCGCCCTTTGCGCGCATCTGAACAATTG  
TCAATTCACTCTAGGATGTGCACAGATTTCCGGTAAGGTCGTGTCATTCTTGGGAGTTAT  
GCCTTATAATAACACAGTTACGGTATAGGAAATCAACTCGTTGCCTTCAACTAAAAATAA  
TATGATCCACCCACTCTACAACGAAATGCATGTATTACTACGACAGTTCTCTAGTATATA  
CGCAGCGCAGATTTATGTTTATGCACTCAGAGTTGAGACATACGAATGGAGGGTACGGAA  
GAACCCGGATATAAGCGTATTTGTTTATCTTAAATCAATCGGTTATCCTTGCATTGGGT  
CCCTCGGTCTCAGTTAGGAGAGAGTTCACCCTGGAATTACCCTATGCGATAATATAAGTG  
ATTCGGAGCTTATCCAAATGTAACACTGAGAACAGCTACTGATTCTTAAAGAAGGCAGTCT  
TATAAGCCCCCTTAAAGTTAAAATCGTCGACTACCCTAACCACCAAAGATTCTCCAGAGT  
ACCTGTGTCATAATTCCTAATTTCAATTTACATCGGTATTAAAAAAACTTTGGAGCATAAA  
AATGCCCTAGAGGACGAGCTAAAAACGAACGAAGAATGTAGTAGTAGGGCAGAGCGGAT  
AGTATGGGCGATTGAACGACGGATCAGACTGGAAGGCTGTTTAGATAACAGAATGTGTAA  
ATGCGCAGGTGCTGCTGCTTCTATATACACTGTAATGTATAAGAATTCAGTATATTCACT  
ATGAAGGGATTGGAAAAGGAATCATCCACTTCATAACCACCTAATTACAGACTATAGAT  
CAAGGGTTATGTCCACAAGTTTACACCACTAATAGCGGAAGATGATTATGGAGACTGAC  
TACTCACACTCCCCTATGAATTGTGCGAAGGGATGGGTTGGAACCTGGGAACTTTACTAC  
GGTATGAACGGTATGATTACGGAAAAGGTTGTATGTTAAAGATAGTTAACGACTGAAAAA  
GTTCAAGAAGAAATTTCTACAGCATGGAAATCTATTAATGGATGTTGACTTGCTCTCAAT  
ACACGGTGAGGGGCATTTGCGAAGCATGTTACCGAACTACCAGAACCAGACAAAACATAT  
GCCAAAGCAGAAGGTAAGGAGACTACCTAAATATCAACGGTAACTATGACCTGATAGAT  
AACCGTCTCAAGAACTACAACCTGGTATGTAAGGACTGCTAGAGGACACAACCATAC  
GCGAAACTCTAATTCCTTAAGGATAATCACAGTTAGGCTACAATCCTGTGGCAGCAGC  
GCAGGACTTGATCACTTACAGTCGAAATCGTACTGCAACACTTGGATATAGTACCCATTA  
TTACCTACCTGCAAGAGAAGCTAACTTGGTCATGTATAATTTCCGGAGTATGTCGTAA  
CACTAGTCAATAATATTTTCAAACAGCATGCGCATGTGGTAGGGCATTAAAGGATCATA  
GTGTATCAATAATAATCTTGTAGATTAGCCTTTGATCATAACCCTTCAGAACTCTCTTT  
TGACTTTGCATACTGTGACGATTTTTTCTTACTTATATGATATGTCTGGTAAAGCGGG  
TCATGTATAAACTCCTGCGTATTATGTTGAAGATGAGATTAAACTACGAGTGGAGGATG  
TGGTACTCGTTATGCTGGTGATAATGAAACCTCTTCAACTAATTGTCTCCCTTGCATTTG  
TCAGCTTACCTGTACCGCAGCGACGACAGACCTTAAGTATAACCCTCCCACAGATGAAAC  
GGGAGAGCCGGACTGCCCTTTTCCCCTTTATTCGGGTTTGGAACTTCTAACATGAT  
CGTTTTCAAGAATGATGCGCTATCCACCCAGATACCCAACGGGACGTTGGACTTTGAGGT  
GGCAGACATGGGTTTCTATCTGTACTGATATATGGAATCAGAACCAACATCAAGGAAC  
GCCATTCTGCCACTGCAAGCAACAACCTGGGTAGAGAATGCTGTAGCAGGTTTCGAGAA  
TGTTCAAGATATATGACCAAAATGGGCCACAGATGACATCTGGTTCTCTAACTATAACAA  
TAATGCAACTACAGGACTTAGGTTAAAGCTTCGTATCGAACCAGAAACGTCTTGATAATCG  
CACTATTAACGGAATTACTTGGGAACTAGCGGAGGTTCTGTGCAATTGATCAGGATATCC  
AGTAGTTGATACATTTGGGCTATCCTATACACCTACTCATACTAAGGGAAGGACAACCTCC  
ATTTCAATTACAAGTTAGGGTAAAAACTGCAGGACAAATCAATTCATATGTAGTTCATC  
AGGTTTTGAACTACTGAGAGCGAATGATACTGTGATTGGACATATCATAACCCGCGTTTT  
CCACACAGGTCAAGAAAACCTTCGAGTATCATGTAGCATTCTTAGAGGGAAACGGTAATAA  
TTTTGCAAAAGATACTCAATATCCATCAAATAGGGAGCACGAAATCACCACAATATCAGA  
AGAAGGCATTCCCGACCTCGAAATCTTGATTGGAAAGTAGAAATTTATCTATAAATCTAT  
GCAATTTGTCACCGCAGCCGTAGATTCTGACGCACCTGACATTCATAACTCCATACAATC  
ACCAGATGTTACACTTACAATCACAGATGGGCGTGTTCCAGGCTCGACGATTGTCAATGG  
AGGGTCTGCTCGGAATCAATTGAGTCCAGAACCTGACCCTGTTGACACTACGCCAGTCAT  
TGAGAGTGGAGAGAACGCGGAACCGAAGGGTACGTTCTTTAATGGATTGCTTACAGCGTT  
AGA ACTTACAATTGCAGGTAGCGGATATGACGCACATAATGCTCCAAAGGCATGGATTCCG  
GAATATGTCCAGGGAACCTCCAAAACCTCAAGGGGATCGTGCCAAAGATGACTATACTCC  
CAACACTTCTAACGAACAAGATATCCAAATCTTGAATAATTTGCCTTAAGCGGGGGGAGT  
TCCAGTCCGGTGCAGACTAATTCGCGACTGATTAACCTCGAACTTCACAAAGTTAGACTCA  
ATTAGGTCTTACAGATAGTGACATAAGAGCAGTTCTTCATGATAATGACGTAAACAGTTT  
ACCAATGGACCCTTCTACGTCTCCAGAAGTGTCAAAACCGAATTTGCGTCTGGATATGC  
GATTTTTGCCTTCCAGGAATGGCAAACCTTCACTGTAAAGACAACCTCTCATCAATATTAA  
CACAGCTCCTGTCCGCAGAAGAGTTCAAAAACCTATGACAAACAGGCTATTCGCTAGATC

ATTGGATACTCTTCGTGACCCTACACAAAATGAACCGAATGGTTTGAGCACTTTGAACGA  
TTCTGGACTTCACGACACCACAAAACCTTTGTGAAAGTTGATAAATAGCAAAGGCGTGC  
AAATAGAGATCCGCTTCTTGATGCAATGACACAAAAAGTGGGTCCTGAGAATACAAAGTT  
TCAAAAATACTTAGTTGAGACTGTTTAAAGGTCCTTAGTCAATCTTACGGACGTAGACAC  
GGGACTAAATATATGATGACACAGTTTAGTGCGGACCCTACGTCAAAAAGTGATCTTAAA  
TGTTAGACTTGATATGCCACCAGTAAAGTCGGGTAATTCACATTTTACTTGTAACCCTCC  
TGCACCTTCAACAGGTGGAACAGCTCCAGGCGGAAATGGCGAAACTATTGTAACTGCTTA  
TCTAATGTCATGTTGACTCGTCCCTGGGTGTCAAGTGTGAAGTTGTATCGGAACTTTATT  
TGTTTTACATTA ACTTGGTCGAGCAGGTGATAACCCTGCCCGTGCAGGAGCAGACTGCCG  
AATTCCTTTCAGAATAACCTGATGGTATTCATTCCACAGCCTCAGGAGCGCGTGGATGT  
GCATTATATACGGGTACATGTACTGGACACGGAGCGGGAACAGGATCTTTCCAACATCCT  
AGTCTTGGTTGAAGAGTATTA AAAAGGTTACCTTGTCCACACGCACATCTTGATGCAAGA  
ATTTCTCCAGACCAGTAGATGCGATGGATAATACAGCAATATGGCCTCCGAATTCGCAA  
TTACCTTTTGCTGCATTAGAACGCAATGTGATTGTTAATGCTATAATGCCTATAAAGGGT  
CTCGCCCTTCTCATTTCGTACCCTACTACAACCTCTCTTACTCACACAGTTGTTGAACCG  
CTTGCAAATGGTGTATGTGTT CATACTACGTCTTCTCCTGCGTGGCACTTTACAGTAGGA  
ACCGCTGGTGGTAGAGAACCAGCACGATGGCATGCTGGAAAATGACTCGCTCCTAGTAAG  
ACCCTATTCATCAATGGTGGCCTAGCAGGAAGAGTGGGTGGTCCCTCTAGGTGACTCTACC  
CTAGCATTACCGAGCCACTCCCGAGTTGCGGGTTTCAGTCCAAATGTTTT CATAGGATCT  
TAATTATGGCAATTAGATTTTACTTGGGTAACACCATTGTGACAACCCCAATGAAAACAA  
GTC AAGGTAGAGGACAGCATAGTAAGTATAGAGTTACCTCTCGTAACAAAGCAACAAATA  
GGTATCGTGGCCAAGGGAAATAGAATGGTACACCGTAACCGTACTGGAATCATATATGTA  
GATTTGTCGGTTCATTTTTATGATCATTAAAATGCATATTGTGCTTATTTAATTAATGAT  
CCACGTTCCGAGAGATCCATTAGCAAAAAATCTGATGAGGGCGGCAACTAATATTGGCAC  
TTCTCGTATTAGATAGCGTTAATGAAAAGATTAGATAAAGATCAAGAGAAAGCTTGTTCA  
TTTACGGATCGCTCACTTGGTATGGTGTAAATGCGAATACACAGGATGAGGCTGTAGTG  
AAAAATGACACTGCAATTAACATGTGATCAAAAATCCAAGTATGAGCACGCGTCGTGAA  
AAACCATTTTAACCTTTGGTAGCATCTCATATACCAAATAATTATGTGA ACTTGTAGAC  
GATTTTACAAGTGATGCTATCAACAAGAGATCATATATCCGATTGAACGGTTTGAACCT  
CGCGTAATTCGACAAGAGTTCGAATACAACCTCGTGATGTTACAAATACATACAATGTC  
ACGATTGTGTTTAAAATAGTTGGAATCCGAATAGCCGAACTATCGAGTTCCTATTACAG  
AGACATGAATAGTGCAATCAAATAACCTCACACCATTAGTCTTTTTAGATATCATAACAC  
CAATCAAATCCTATCTGACAAGTCAGAAAGAATTTACGCGTTATGACTTTGAAGGTTCTT  
CTTAATAGTACCATATCGACCCATTGGCGAGTAATTCATATTACACGGAATTTAATGATA  
ATTAGGCGATGAACGAGGCATTTTTGCCTTATGCTACTATTAGAGATAATGTTGTTAACG  
ATGCAAAAATTTTAAATCAAGTTCGACGTTCAATGACTTCCTCTAGAGCGAACTTAAATC  
TAGATGTACAAACAACACAGTCTGCAGGAGGACATCCTAGCAGTATAACATTA AAAAAAG  
GTGTTTTTGAAGCGGGTCGAAATTATCTTGTTAACATTTTAGACGAGATTTGAAACACTG  
TCAGTCCTAGCACAGGTATTGGCACTTTTGACAATGTGCGGAACATGGACGGCAGTATGG  
ATACCTTTTAATACATTGTAAGTAACCTTGCAACTCTGGTGCATAAAGTCCCTTACGAAG  
ACACAGACATGTCTACTCTTAGTGTAAGAGTAAAACCTACCGAATTATCTAAAACATCTG  
ACTTAAACAGTTAGACTGATACACTGACTGATTAGACTGCTACTACTCGAGCATACTTCC  
TCAATGAAGGTGGT GATACGAGTTAGGAGGTAAAATTTGTTAATGATACTGCAGGTAGAG  
CAATAAACGATGCAGAAGTCGTA CTTTGAGAATATTTGGTGACTTCTGGGACAGGCGCGA  
ATAAAATTACAACATTTTCGTTTCGTTGGACAGATTACTGACAATATAGCAGGTCCCTCTA  
GTCGAACATCAGTCACTTGGAGCATGCAAGAGATGTCATAACTTGGTGCTGCAGCAGATA  
CTTTAGAAGCTAGTAAATATAATGCACCCAGATACTACTCTGCACAATACAGATCAGTAA  
CAGCACAGGATTAGGCCTTAATTGCTGAAAAAGCGTATTCTAACGCCGATTCTGTTCTTG  
CATATGGTGGGGACTTTTTAAATCTCCCAACTTACGGGTAATTCTTTATTGCAATTCAA  
TCAATACTGGTTATTTTCTTAACGAAGCAACCAAAAAGTCATTTTCTGGAGATTTACGAA  
ACTATCATATGGACTCGATTGAACCGATAGTTATTGACCCAGAATAGATGTATTTGTGTT  
TGAAAGTCTTTGCACAATACAACCGAGGCCTTGCATCTAATAGTGCTGATTTTAAA ACTT  
AAATCCAAAACGGAATTAACCATTTGGCAACACAACTCAGATTGATTACTTTAATGCTA  
TTTTCAGAGCACAAGCATTTGAAAACGCGGTGACTTTATCCGATAATAGTTGGAGGGATG  
TGACTTTACA ACTTTCTATCTTAAAACGCACCTACCCGAACACAAATCAGACTAATACTT  
ACCGTATTGCTAGTGGT GATGATATATATTATAGTGCTGCAAGCAATTCGATGGA ACTA  
CTTCTAAAAGGAACCTACATTTTGTT CAGGACCTTTTACACCAGCAGATAGACCAGGGA

TTGAGCAACAGTTTGAACATGATGGTTTTGGCAATTTAAGAACATTATATAACACGGGTC  
ATAAGAAGGTATATACAAATAATGTTGCAGGAACCTTAAAATGTGCTGCAAGTCAAACCT  
GTTTTGGTCCTTTAATATTCGTGGTTCAGGTGTCAATACCCCTCCAACCTGGAGTCATAA  
CAATTACAGATTCCACAACCTGGTGCAGGTTCCGTAACAAATGCAGATTTAATTCCTACAG  
GTCTTCAGATTCCCTCTTCTGTTTATTCGTCCAAACGGTGCATCTACTCCTACTGCAAAC  
CAGGAACCTTATCACTGTAATAAACCCAGAGTTTATTGTGCTGCCCTTATGTACGACTC  
CACCTCCAACAATGCGTCTAAATGGTTCGACGCAATCAGTGTTTAAATAGGGTTGTCACAA  
CTTGTAACAATTGCTGATATCTCAGACGCAGGTGATCTTCCATTCTCTTCATGATTCTAGG  
TGTGAATGAACACTATTAAGGTATCTCAGCCAGTTCCTTTCACAGACTCCAGATTTGATTG  
GAAACGATTATCCATCATTCAATAAATTTATTGAATATTACTAACGTTTTCAACAAAAAA  
CTGGCATAGGGGAGAATATCGTCAATGAGTTTTTCAAATAACTTAATATTGATAAACTTA  
ACATCGATATTCTTGATGGTGGTTTCAAAGTTCGGTGAATGGACAACCTACAACGGCGGATT  
AGATAGTAGTTGAAAACATTGACAGTCTTTTAACTAAAGATGGTTCTGTTTTAATTGGGC  
ATGAAGGAGCATACTATGCATCTACTACAGCATCACCAAAAATTGCTCGGAGCCTTGGTG  
TTTCCTACGAGCAAGTCAAATAAAAAGTGGACGACACATGCAATTCTGCTAGATTCCGTGG  
ATGGCCCTACATTTAGGATTAATTTACATCTCAGGATGGTGCAGTAGCAGCAACTTCTG  
CACTGCACCTTAATTGTTACTACTACGTAAAAATAGTACCATCTCGTGTGCGGTACACCT  
TTTATGCCACTGCTATTGTGTTTACTATTGCTCTTAGGACCAGAATTGCTGCAGAAGACT  
TAGCTTCAACGTAGATTACATATCAAAGTAGTTTGGTTGAGAATAAAAATTGTTGCAATCT  
TTAATTCATGTGCTTCTTTCGGTGAAGGTAAGAGACACTTTCCTATGATACGAAATGGTT  
CTCTTTCAGCACCTGTTGGAGGTGAATATATCTTAGCAATTTACGATCAGCTTCTATTAG  
TTCCTAAAGTAGACTTCTTTACAGAGAAATAGCAGTTTTTCTTCTTACAGCACCTCCCA  
ATGGAAGATTTCTCTCACAATACGAAATGGAAGCACCGGTTCCATCATTGATCTGGTG  
CTCTGGGGTAATATCGTGTGACGATAATGGAACCTTAAACAGGCGTCTCTGTAAAAGCAA  
ATGTTAGTAACTATCGTTTCGAATACCCCTCCTCAATTCACTCTCAACTCCCATGCAGGTA  
GCGTTGCCTCTGTAACCTGCCTCGTGAATGGTATAAAGACTGTATCACTTTTTCGAAGGAG  
GCAAAGTAAGCTGCGATACTAACCCCTCCTGTAGATCAAGTGAAATCACGAACAAAACCTG  
GTTCAGTAGCAGGAACCTTTAAAGCACCTGTTACTAACGGTAGTGTTTCTGAGATCAAAG  
TTATTAGTTCTGGTAATGGATACACATTTACATCTACAAGCACTTTCAAGCATCCTGGCG  
GTGCAATTCAGGCGCCTGTCCAATTGTAGGGGGTTCAGGTATCAGGAACCTTTTCTATCA  
CGGATGGTGGTTTTCGGATATACTACAGTCCTCAAATTTATATTAAGAACCAACGGGAA  
CAAATCCTATTACAGCAACTCGACCTAGTGTCTTGACTGTTTTCGTAAAAACTTCTAGTT  
CAATTAATAATGCAGGACGAGCATAACCACTCCTAGAACATTCCTAGTTGTTCCAG  
TTGGTGAAGAGGTCTTTTATACAGCTGTTGATTCAAAAGGGCATCTAGTAGGAATTTGAT  
TAGTCGATGGTGGTAGCGATTATGAGGACGTACCTTCTGTTTATGTGCGCAGATAATAGAG  
CAGATGCGACAGGAGCGGATGCGGGCGGAACTGATGCTAGTGCAGCTGCTGCTATATTA  
ACGGCAGAGATACTAATATTAATATTACTGCTTTTGGTTCTGGTTATAGTGCACAAAATC  
CTCCTGAGATTGAACATCCAGGACCTCCTAAGGCACAAGCATCTGGAAAAATTGGCCTCC  
ACGAAGTTATTAGATTTAAAGTAAATCAGCCAGGTGAAGGATATACAAAATCAAACCCAG  
TTGGTTGTGCGAGAGCAGCAAGTCGTATCACTTCTGATAGTGAAGATGGTAACGCTGTGT  
TTGCAAACAACACTACAGCATCAGCACATGGGTTGAATTGGGATGTAAAGTGTCTACATG  
CCTTATTTGTAGAAGGTGTAGTAGACAAAGACTGTGGACAGTTTTTTTCTGATGTTCCAG  
GACTAGGTAATGGGAAAATTGATGTTAGAACACGAATGAAGACAATGAAAGATTTCAATA  
CTGCAAAGGAACATCTTTTACAGTATTAATTACCTCTTTAAGCTGCCATATGGTGAACAGC  
CAATTATTAATCCTAAAGATCAAACGATCAATCCCTCTGCAGCTACATGGTGTCTTG  
CAACTAGTTTTCGTGCAACTTTGGTACACGGAGATCCTACCAATATTAGAGACGGTTTGC  
TAAATCAAGATGCTGATATTGCTTATGTTAACGTGGCATCATCGAGTTCTTTGATTGAAA  
ACCCTATGTCTATCATAACTTGTGACGTAGAAATTTTGGAACTGGTTCTACCTGATGACA  
AAATTGCGGGTCTTTTACAGTTCCTTATAAATCACAACCTTGCTGAACCTTTAGGCACTG  
AACACAGTATTATCCCTGTTGCCTCTACAATTGGTTGCCAGAGAGAAACGGTGAGTTTT  
TAATAGGGAATAGTGACGTTGTAAGATATCAAGACAATTCACCCAACCAAGTTTATAGAGT  
GTACACCTTTTGTAAATAATATTGTTGAAGATTGGGATTCTGCTACAGAGGTTGCTGATT  
ACTTCTCAGTTTTTCGTTAAACAAGGCACTCCTCAGGGAGTTGTCAGGAAAATTATTGGTA  
TCGTTGATGCTCAACAAACAACCTTATAGTCACACTGGATCATATCACTTAACTGGTGATA  
AATTAACAGTCTCTAAATTTGGAGGAATATGAACTAATGCTGAACGTAACCTTGGTTGT  
ATAACCTAAAAAAATTAGTTAATATCAGTAGTATTACGTTTTGGTGCTGTTAATAATCAGA  
CCCCAACTGTCACATGTGCTAATAATCATGGTCTCTTAGTTGCAGATCAGGTAACAGTCT

ATGGTGCTAACCCAATCATCTGAAATGGAACCTTGCCTAGTTACATCTAGAGATAGTAATA  
GAGTGTTCCCATATGAATAACTACAACCTGCTCCAATCGTAAATCCAGGTAATATTCTGG  
TATCGGTTGACCGCAATAAAGGAAAGCCTGATGATACAGATGTTTTAAATTCTAACGGTC  
CTTACACAAGTAAGATTCAAATCTCCGTCTCTTATAAGAACTACGTTGACGTCGCTTCTA  
CAAGTATACCCAATAAAGGTCGGACCGTTCCTGGCTCTGCTATTTTGCCACGTAACC  
ATCGGGAATTTAATCGTTTTCCATCAGCGGTAACACTACAATTTCAACAAAGAATAATATAT  
CACCAGGTGTTATTAGATCATGGGTTAATGGTGTCTTCTATATGGTCTTTTACGTCTACAG  
TGAAGAAACCTTCCGGGGCTCTTACTAAGATCTCTATTTCTAACGCATGTTCTGGATATA  
TTGCCGCTTCTCATACAAATATCACATTTTCTGATGGTCGAGGTAGTGGTCCAACATCGA  
GTGTAACCTGTTAGTGGGTCAGTTACCGAAGTTACTCTCACTGCAGGTGGTCTGGATATG  
CTTCTTCTCCTCTACTTTCTATAGCATGTGGTGGAGAATCAGGTGCTTCGGCAACTGCAA  
TCACCCTATAGGTGTTGTATCTAGAGTTTTGATTAACGCATGGTGGAAACCGGATATACAT  
CTCAACCTACTATTACTATGGTTGGTGGTGGAGGAACCGGTGCTAATGGAACCTGCATCTG  
GTACAGGTCTGTTCAAGCTGTATCTATTTCCAATGGTGTGGCGTCTATACTTCAAATC  
CTACTGTCACACTAAGTTCTGGTAGTGGTGCAGTTGCTCAAGCAAACGTTTCAAGAGGGTA  
GGAGTATCTCTATCGTAGTACTTCTACAGGTTCTGAATATACTACAGTCACCATAATTT  
ATATTAAGGAGAAGGTTACGGTTCGGTTGCTCGTGCAACGATTGATGTTGCTGGTGAAA  
ATGCAGGTAGAGTTACGAGTATCGAAATTATCAATAGAGGTATCAGATATGTTCAAGGTTA  
CGACTTTATTTAATTGATACTCTGGTGTCTCTCGTGCTACATTTACAGCAAACGAGTTC  
CATGGACTTAAAACCTTCCAAGAAAGATCTACTCATGAGGCTGCAACGGGAGGAGTATCCG  
ATGGAGTTAATAGCCACCATGCTGGTGAATATGCTCAGTTATCAAACCCACAATGAGTAG  
GATAGCGTCTTGATGATAAGTTATTTACAAATAATGCAGGATTAGTCAGAGAGCAAGGAG  
ATCAATTACCACACTTACCTATGATTAGATGGGCATTTGTTGGTAACCCAATTTCTGGTC  
CATATGGTTTCTCAAACCTGCTGATCAGAGCTCTCCTATTGTTAATCTAAACATATCTT  
ACCAACATAACGCAGAACTCGTATAAATTGCTATTAGAAACCAAATCCTGTGAGAACAG  
CAGGTCTCTTCTTTCTGAAGAATCTCGAGGTACGACTGTTGAAGATTATCAATATGTAT  
TTGGTCAGGGTGATTCAGATCAATATAATGGGCGATTCTATAAGACACCTGAGCATCCTC  
ATGGTTGATATTGCTATTTTGGCACTATTGATTGTAAGTGCAGATGGTAATTTCTATTCTG  
CTGATGTTGTTGGTCTAGTTTCAATCCTGCTGTAGATAGTTGTAATCTAAGTGCTGATG  
GTGTTCCACAAAAAATTCCTAATGCAGTTGTTAGATATCCTTATCCATATTAGAATGTTG  
AAATGGACGTTGAGAGAATCTCAAATGCCTCTACAGATGCTATACCTCTAGAAAAGGGTG  
AATTATTAATAATGTAATGTGGAAGACGATGATGGAAGTGGTATTATTGATCAGAAGGAAA  
CTGATGATCCCGATCAGGTTATTGAAGAACCTCTATTCCAATAGTTTGATTATTTTCTTA  
GAGTAAAACCTTGATGCTGAAGTGGACATTGGAGTTGAGACAATTAATAAATTTGAAGATG  
CATCTGTAACACGATTGACTAGTGAAAATGCAAGGGATTGTTATCAGGGAAATGACACAT  
TAGTATTTGATAACTGATGCTTATGGTTCTGGAGTTTCTGGTAGTGTCTTAGAATCC  
AATGTGCATCAGTATTTACATAAGGTTTTGACGATTGTAGTAGTATGAATTATGGTCTAC  
TTAAAACCTACAAATCCTCGTACTTTAGTTACAAGTTATACAGTATTTGTGGCTTATTCTC  
CTCTAATGGACAGTACTAATGAGTCTTATATCGTACGGCAATATAAAGGTATTGACGAGA  
TTCAACTTACCCAAACTTGCTATGGTTCCACCTCAGATATTCATGCAACAATTATTAAC  
TTGGTAATGGATCGGACGGTAGTCGTAAAGCGGTTGTTAGTAGTGTAGGTTCTGTGACA  
CTGTTAAGTTTCAAATCCTGGTTCTGGAGATACTTCCAACGCTAGAGTTATCTTCTTTC  
GCGCGCAGGTATTCAAGAAAGCAGATAACTATGTTCCCTTTGATTAAAAATGAAATTTATG  
CATCTACCAATGATATATCTATGAATGATAATAAGGAAGTCTTCATTTGGGGCAAACAC  
ACGACATCTCTGATTATCTTGTGCTTTTGTGCAAACTTTCTACAACCTGGTGTTAAAG  
ATTGGAAAGCAACTTTAGAAGTAACTGGTGTCTTAGATTATCCAGTATTCAAAAGTTAT  
ACGTTGATGGTGAGGATATTTTTCGTTGCAGGTAGAAACTATCCTAACTCTTCTTTTAA  
GTCCATACCACCCAGAACTACCTTGGTAACTATGTTGAGGCAGAAAATGGTCTTAGTG  
CAACACTGATGTACCAACGAGCGTATGCAGGTAGTTTTGGATCTACTCGTACAGATGGTA  
TTAACGCACTTAAAAAATTCTCTGATAAAAGGGTTTTTATTGGTGGATATACAAATCCTA  
ACTCTGCAAATTTCTTACGATGCTTTTATTGCGCTACGTGATAACACTGGGACTGTTGCTA  
TTAACAGATAACATAATTCTGCAAATAGTACTGAAAAGATTACTGATCTTGTACCTAATG  
GAAGTTATGTCTATTTCTCTCTGGAGATTGCATCTAGTGTCTTCTGGGACTGCAGTTCAAG  
TTGGATTTGGTAAAGCATCTTTTGGAACTAGTGCAATTGCATTCCCTCATATCAAACAGA  
GTAGTAATCCAGTGAATTCTATCTTAAATTCTAGTATAGCAATGGAGTAATTTGATGATG  
CATAAGTTACTGCTGCCACTCGACACATATCTGATAATACATCTACCCTGGTCTCTGGG  
TAGGTCTATTCAATACATCAGGAGATGTAAATTACGATAAGAGATATACTGTTGCAAATG

GACCCATTACTGCAGCCAGTAAGTATGTTATTGATATGCTTGGTTCGTCTTCAGGTAGCGG  
TTATTAATAATTGCTACAACACTGACTCAGTGCAAACACTGCAGAGTGTTTTAAAATCAGATATA  
CTGGTATAATTAAGGGTTATAGAACTCAACAGTTTACTATTGATAAATATTGAAGGTATTA  
CTGTAAATTCTCTTGCTGTTAATAACTCCGCAGATGTTCCCTCCATTTGGTTAAACTTCTT  
GGGATAGTCTGGATTTATCATCCCATTACATCTGGATCTAACGCTTATACAAATGGTC  
ATTATACTTTAACATATTCATCAAGCAGTATGTGTATCGGTTATGCTGATAATGTTGCGA  
ATATTTAGGGTTACAGCACTGCAGGATCAAAAGCTCCTTGAGTACATTTACCTCTTAAAA  
TTACCTCTGCTCAGTTAGGAACAAATTTAAATTATAATTGGACTATGGAAGTTGTACTTC  
TTAGAGAAGCAAGTTCAGCTCAAACATTATCAGTAACACAACACACATTTGTTTTTATTG  
GTGATGCTGATGACGCTACAGGTGGTATTGGGTTCTACTATGATGTTTCTAGTGGATAAG  
TAGAATTGGTAGTTCCAAATGATACTACTAAGATAAATTCTGCAGGATCTTCACTTCAGT  
CGAAAGTAACTACAATGTTTGCTGATAATACACGGCTATACATTGGACTTACGAAAGAAG  
GTAATCGGTTCACTGCATATGTAACCTGGAATTCAGCTTTTACAGGAAGTGTTTCTAATA  
CATCATTATTCGATAAAGATCTTCTCGTTATTCGCATTACTGGTTGAGATGGAACCTGCAG  
GAACTAGTCGTAAGACTGAGCAAGGTCAATATTTTATAGATCATCTCAGACTTAGAAATA  
GGGCAGTCAATCCTGGCGTACTAACTGATGTCAATTCATTACGACTACAGGTACCTTTG  
CCTTTGAATCTCATTGGGTTAATAGTGGATTGTTTACTACTCACCTTTCTATGTATGATT  
AAATTTTTTACATTGATTGGGGTCAATAAGCTTGATAAAAATGCTGACGCTGTAACAATCG  
GAACTCAAACCTGTGCACACTAAGCCTCAAATGGGATTTGTTTCGAACGAGTGTAAGTGCTG  
TAAGAGGTGTAGATCTTACTGTAAATAACTGTTTACTTTAGGCGAGGCAGCATTCC  
AGAATCTAGAGTTTGATGATTCAGCAACAACGATGAATGCGGGAACGTGTGTCACTTCCCT  
TGAAGCAGGATCTCCGGACTTGTAGAACTGAAACTGTTCCCTTACCAGGGTCTCGAAGAC  
TTTAGCTTACTTCTATTTTCAGAGACACATAGTGCTTGAAAGTAACTCAAACATCTAAGA  
TTGATAATATACCTGAACTTATAATTAATGACTCATTAACTTTACTGTAGGAACAAAAT  
TAAAATTAAGAAATGCAACCTCTGCGGCATTTATTAATAGTGGTTACATTACTACTACTG  
ACAGTATTCATATTAATAATATCCCTTTTTGTTAATTATTACGGTTGGTCTGATGATCTGA  
ATCATGGTCAAATAGTTACAGAGCAATTTAGTGAGCGGTCTACTTATGGCATTGTAGATC  
CTATTCCTGCAGAGGTTAATGAAATTGAAGGATATAGTTTTGCACAAGTAACTAACACAA  
CACCAGGCACAGTTGTTATTGGTCTGAACAAGTATAATGTAGAAGGAACATATAATGCTG  
CAGGGGGACAGATCTTAGAAAGTTTTGCCAAAGTCAAACGACATAGTGGTATTGATCAAG  
CGATTAGAATTGATGATGTTTCTTCATGACGATCTCCGTCTATAGTTGGATCTCAAGTCA  
CAATCACTTCCCTCTGATATTAGTGTTAATTCTGCAGACTCTACTGCTCAAGTCTCCATCC  
CGACCGGTGTTTTAAAGATCGCTGTATTTGCAAACCTTAGCTTACATTTTACAACAGCCTG  
CAATCACAAATAGTGATCAAGTTTATGTAATTACGGGAACATAATCATTACCTAGTTACTG  
GATCAATGATTCTTCGTGAAGATAATCTGAATCAAATTTTTGGTTATAACATATGTTATG  
AATATGATGGCTCTTTGCCATTTTCTCCAATTGTCACTGCCAGAGACTTCGTTTATCAAC  
TTCCTAGTGATGCACTAACTCCATCTGCTACCAGAGTAGCAAATGTTAGTATCTACGTTA  
AGTCTCCCGTTCTTAAAATTTATTATGGGCATCAATACTTGGTTGATGTCAGTCAGTCTT  
AAATGATCTGGGGTAACTAATGTTGCTCTTAAAGATCCTTTAAACAAATTAGAATAATCCT  
GCAAGTCGATAGAACGTGTGGGAACACCTGGGCTTACAGGAGCAGGAAATCCTACTCCTA  
CTGTAAAACCTTAAAGTTGATGAGGGTAGTGTTTCAAAGGTCTCTTATTACACTAATCTCT  
CTTGAACCTGTTGCTGATTTCGCTGTTTCTCATTGAAGTTATCTTGATGTTACTGAATCTC  
CTGACAAGGGTACGTTCTTAGTTCAGTCTGCTCACGATGCTGCTATTACTCGTGGTGCTG  
ATATTATGTGATTTGTTCTTTTCTACTAACCAGGCGCAGCCGCTGATGTAAACCAAGCAT  
CTGATACTACATGTTGTGTTAAGGCAGTTGGTTCTATTGGTGCTATACGTATTGTTTCATC  
AAGGTGGTTTCTATACAAGATTACCCGTTGTTGCTGGAATTCATCTACTATACAAATTG  
AAAGAATAGCTAATAACGCACCAGGCACAGATTATGCTGTAGTAACTTATCTCGCTGTTCT  
GTATTGGTGGTATGGTGAAGGTGGATATCTAGATATTACTGTTACCGAGGGAACTGATG  
CTCCAGAGTAACTATTCCTGGTCAAATTCATCAGTTGTTGTACTATCACCTGGGAAAA  
CTTGTATTCTAGCAACTTTTGAAGTTGAGGCAATTACCGGTATTAATGCATCTGGTTCCA  
CAGGGTCTGGTGCAGAACTAGAAGTTGTTATTTTTGCTTCTGGAACCTGATGCATCTTTTT  
TCACTCAAGGTGATAAATGTGGTAAAATTATGAAACCTATGAACTAGAACTTTGGTAATG  
ATTATCCTCATGACTATACACTACGTCCAGAGAGTACATTCAGACAAAATGTTCAATTA  
CATCAACCAGTATCCTAGGCAGTGTGACAGCTACCGAACCATGTTCTGGATGGTGACAGG  
CACATGCAGTGGTATTTACTGGTGGTGGCGGAAAAGGTGCTGTTGCTGAAGCAACAAC  
AGAATTGTTGTTTATGATTAAATCATTTTTAAAGATCCAGGCGGAACTTATTCTACTACTA  
CTCAAGTTGCTCTTAGATCTTGGTTGAACCATGTTGTAAACCTTGACGAAGGTCTTTTTTC

AGTATGTATTACCGCTTGGTATTGCTAACTGTTCTACGGTCACACTAAATTTTCGTAGAAC  
CTGGTGAACGTGCAGAGTTCCCGCTTGCTGCAGCTACAATCGGTCGTTTGAGTTCGAACAA  
TAACTTTTTACGCAATTGCTGGTACTGCAAACCTCTCTTGAACCAGATCAACAAAACTTG  
CCATGTTTGCATGAAACACACACTCTAGTGATGCTATTTTCATATGTCAATCGCTGATCAG  
GTCGTCAACAATTACACAGAGAATCTTTTGGTATTACTGCTACACCATAACGTTATTAAT  
CTAACTTCTTAGAAGATGAACTTGTTTAGCAAGGTGATTCTTTAGCTAACTCAAGTGCTT  
AAGGTTATGTGTCCACAAATAATGGGTGGCAGATAGGTCCTCGAGTTCTTAAGAAGGTAG  
ATTATGCTGCGGATCTTATTGCAGGACAATGAGCAACTGGTGTATATCAAACGCTTCGG  
GAACGATCAGTGACTTGAATATTGCTATAGGTGTTGTCGAGATAGGTTCTCTCGCTAAGA  
CTACAGGCCGTTGTATTGATGATCTTGGTAAACCTTCTGAAATCATCGAAAAGATGCAA  
AGTCTTACTAAAAGCAAGACTACTCTTATGATTGTAAGCCTCCTGTTTGTATCGGTGACT  
GGCAAGACATTCTAATCAAAAACGTGCAACCTCCATCGTTCAAGTTATTTGGTGAATTAG  
ATGTTTCTGATTACGGACTTGTTCCTGAGAAAGAGACGGATTTCCATCTTACTAACTCTG  
ATGAACTCGCTAGATAAGCCATTGTTACTGACATTCAAAGTTTTGCTTTAGTAGGAGCAG  
TGTATTACGATTCACTAACACAGAAATAATGTTCCGTCAGAAGAGACTTACATCAACAG  
AAAATATGCTGACTTGTGTTGTCCAACGTGTTGATTATATTTCTACTTTAGTTGAAGGTG  
AAAGGCTAGGATTCCCCTAACCCTAGGTGGGACTAATATAGATGCTAATTCTAATCAA  
CGATGATCGTTTTAGATGGTGTGTTGTCAGAATCCGGGCACATCTTTCGATGTGCAAGGTG  
ACTCGATTGTATCCATCCACCCACCAGAACCTCCTGCAATTAACAAATACGTTAACGTTG  
CTATTCAAAATATTCCTACTATGAAAAGTTCATTTGGAATTTTCGGTGGTATTTTCCCAA  
ATCCTGGTAATGAGATGGTTGGAGCAGCAACAGGAAATCGTGAGGCCGTTACCAGTGCTG  
TATAAGATGATGTATTTAGGTTCTTCGGTCAGGGAACGACATGTACTCCTAATCAACTTG  
TCACGGTTGATGCGACAGGGTTTGATTCTTATCTTGCTGCAACTAATCGTGTAACCGATA  
GTCAAATATAGGTTTATCTAATTTTGGTGATACAATTACTGACTTACAGGGTGATACTG  
CTGGAGTCGATTCAATCAATGGACAGAAAGGGCAAGAAACACCTTGAGCACATTTAAGGT  
ATTGTATGGGTCCGTCTACTACGTCATTTGAAGTAGTTGCATATAAGCCGGAGTACATTG  
TCACTGAATCACCTGTAGCTGACGAAACATTTACCACAGGCCTAACTAGCAGTTTGGAT  
GTGTAGTTCTTACTTAATAGTATTACACCGGGATCCCCTCTACAATTTTGAAGTTA  
CTAGTGACATTCTGGAACCACTGCTGTATCACCCACGATGATAATCCTGTAAATGGAA  
CTCAATTTTCTGCCAATAATCAACCAACTTTAATTAACAACACTGGAACATAGCAATCCA  
CCCCTGGTCTTTACAACAGTCAAGTAAAGGAAGCTGTTATAGGTGCACTATCTGGTGTAG  
TTGCTCGTGTTTCGTACAACCTTCTACATATCGAGATCCTGTAACCTCACGAATTTATTAGTC  
AGGTTAATATTTCTGAAGGGTCTTCTTTCTTTTCGTCTATTATTCAACAGGATTACACCTC  
ATGCTTATCCAAACGTTGATCTTGATGATATTTCTAAATCTCAGATAAGAATTGTTGATT  
TTAGAGATAGTCCAACAGATGACCATACTCATTTCCTTCTAATGAAGAAATTGACAATT  
ATGTTATTCCTTACGAGGTTGCTTCGGGTACTCTACAGATTGACACTATGAGTGACTACA  
AATTAGAGGAGGGTAATCAGGATGGAGAATTTGCTACTCGTGAAGTTGCGGTAGTTTCGTA  
AATTAACCTATAGGGATATAGTTGGACTATGTTTATTCATTCTGGTTCGAATTATCAGAA  
CACGTGATCCGAAGGAAGAAGTTATTGGTGCTAACCAAGCAAGAAAAACTGCATACATTG  
GTAAGGTTGGTAGAGTTCTTATAAACGGTGGATATTATCATACTCAGAATTAATAATG  
CATTCTTAACTACAACAAATCACAAGTGAGTTGATGCATGTTGAGGTGTCACACCTGGAA  
CCGAAAACTTACTTTTGTGAGTGATGTTGCTGATTCAGGCAGTGCAGGTGGCGCTGAAA  
CAGGTACGTGTACTGCTGCAATAGGAACTACCTATAACGAGTTGACCGGCGATCTACTGA  
TTGAAATTCGCTATCACTCATTAACTAGTAACACAGTTCTTATCGCTGATAAGCGTC  
TTGGTTTTACTTATGTACAAGGTGGTAATTCGTCTACTAAAACATATCCTCGTAGCACTG  
ACCCTGCATCAGCATCTGCCCGTAATGTAACAGCAGTTCTACCAAGTACAACAACAGTTA  
ACGTAGGCGCAATTACAATTGATGAATGTTTTGTAGTTCGACAGACTTGTATGAATTTGGTT  
TTGGCAGTGCAGCGCTTACAATGGAGTGTGGATAAAACCAATTACGCTTGGTGCAGGAA  
CACGATCTATCATTGATTTTCACTACTGCTGCAATGAAGTGGGTTCTTACCTATATCTTT  
AAGGTGCAATCTAGAGTATTATGGTAATGGTTAAATAGTCATGCAAGGAACAGCAAACA  
TAGTTCCAAATCAATGGTCACACATTGCTATTAGTAAATCAAGTTCTGCAACTCGAATCC  
TTGTTAATGGTGTTCAGATAGTAGTAATTACAGCGAGACCAATTACAACGGAGCGAACA  
CACCAATTAGAATTGGTGTGATACTGCAGGTAATAATCACTTGATTGGATAAATCGATG  
AGCTTAGAGTTTCTATCACTGGCCGTTATACATGGTCATTTACGGCACTTACAGGTTGCT  
TCCAGGGCGATTCAAACGCTGTAATACTCATTCAATTTGATGGTGTATTATTGACAACAGC  
ATCAAGATGCTTGGACTAGATCTGCATCATTTTCTAAGGATGCATAGATCGAGAATGACG  
CACTTCTAGAAAATTCTAGAACAGATGGTACACCTGCGGGGTACGCGGGTAGATCCAAAA

GATACTATAACGCTTCAGATAAATTGCGAAGGTGATATCGTCTTTATCAAGAAAAAAGTTG  
GATATCAAATGAGACATACATATCCAGAAATTGTTATTCTAGGAATTCGCGACCCTCCAA  
CTAAACCCACATATGACGCTGTAACCTCGTCGATTGTCAATGACAGTGGCTGGAAACACAT  
TACTAATGGTGGACAATTTCCACCTCCGTTTGCATCATAACAATCCTTCGACTGATATAT  
TGACTATCACTCAGATTGATCACCGTGTAAACAAATGGTAAGAGCATCAAGATTAAGTTC  
GTAGTATCATAGTTACATATGCAGAAGATAGTAGCGCTCATTATCATCCATATCCTCGTG  
GTACAGATCCTGTTGCAGGTAAGTGGTTGCAAGTTTCTAATGCGACTGCAGATTCATACA  
CAGTTGATGTTGGAACATAATCTCAATCCACAACCTCCGACTTTCGTAAGTGCCTCATCTA  
ATGCGGTTGCTTTTGGAGAAAGATACACTTATGATTTTATAGATCATTCTTTGACATTCAGT  
GTGCCATGGATCGTCATACTGCTAATAAAACTTATGCTCGTTCAACAGATCCTGCATCTC  
GAGATATTGCTCTTCCAATCGAATGATCCTGTTCTACCAATTTAAAATTTAGTGGAACAC  
CCTCACCTTTAGTTAATTTCCAACCAACTAACGCAGCTTCCGATCCCGAAACAGGTGCAT  
TCGTCATGACGACTGCTAATCATACCATCAATATTGGAACACGAGGTAGGTTAACTGCAA  
ATTCAGTCAAGTTACTTGCACACAATATGTTAACAGTGCACAGAAAATTCATCCACGTG  
CAGCTGCCAGCTATGGTCAACCTGATCATGCTTATAATACTGCTCTAGATGTAAGTGCAG  
TCGTAACGACTACGCCAGAAATTAGTAGTCCAGCGCATGTTTCTACAACAGGTCTTTATA  
CAATCAATACAGATGGTAACCACGCATGATGTACTTGCAAAAAGAATTCAAATTGCTGAGA  
AGTCATTTACATTCACATGTGCTTATGGTTGTAATGTTACAGACCACACGTATCCGAGAC  
ACACAGAGCCTGTCACAGGTGAGTGGGTTGAAGTAACCGTTGTTAATGCTGATACATTTG  
GGATTTTTATTGGACCATCTAGAGATACTTCCCTCACATTCGTTTGGTTGGGTGACTGCAG  
GTGCACTAATAAAACAAACTGGAAGTGTATTATTATCGTTGGTGGTTCTTCTGAGGCGG  
ATCAATCTGCTCATCTTATTGTATCTGCTGCATCAAACGCAGTTGTTCAAGGTGGAAATT  
ACTTCCATACATGTGTTTTCGGCTACAAAGCATGCATTGATTATTGACGAAGGGATTAATT  
ATGTAGATAAAATTAGTGATACATTGAATTCGATGATTTCGATATCTTCGTAATGGTTCTA  
ACAATCATGTTTGGGATGCTGCATCTTAATATGTTAATAGTACCTTTCTCCCAGTTAAGA  
TCGCACAAATGGAACCTGCTATTAACAACAACATTATTTGCTTATGATAAAGTTGACGATA  
TGCTTCAGTATGTCATTATAAATGCCCTTTGACCAGTACAAGGTGCTAATGGTATACCCC  
AATTTACTGACGTTTCAATTACGGAGTCATCATACCCTACATTGAATCAGTTTACACCTA  
CTAAGGCAACTTATAAGCCCGGTAAGTGGTGTATGGTTTGGACTATTGGATCTCATTGAA  
AGACCACATCATCAATAGTTAATTTTGCAGTCCGGTGGTGTAAACATCTCCTTCTCACAAAG  
AAGGCAATCATAGTCTACTGCATATCCAAGAAGGACTGGACCTGCTGATAAAGGCAGTTC  
AAGCTGTCATAGCTGTTGGTGGTTGTGTCACAACCTAGCACAGTTAGCGTAAGTAATTCAT  
CAGAAAGAGATCAATATAAGCATAACGTGTTTAAATGCAGTAGCTAATTCTGTAAGTGAAT  
TAACTTATACCACTGGTGACTGTGCAGATGTCTATTCAACTGTTGGTAACTTAATTACCA  
TCATTAGGCATACAATTACAATTGCTTCTGCATCATCACCAGTTGATCATTGGCAAGTG  
CTACTAATGTTGAACCTGCATATGAGAGCGTTGGGGGATCAGTTCCCTGGATCTCCAGAAA  
CAATTTGAGCAGTTGATTATCATACTGCAGTCACTGTTTTCTGATATAAAAATCACATTG  
GTGCTGAGAGGCAATAGCGTTTTCAGAGATCCTGCAACCTTAATCAGACTTAATAGCACAG  
CAATCGTAGATAAAGCTCCGTACGAATTGTTATATCATTTTCTACGTTGGCACAAACAA  
TGCCTCGAGACCAAGGTGGTGAAGCACGGAAGGTACCATACGTATTAAGACTGACTCAG  
ATAATTACTTAGATGCTATCGCAAACGATTCACAAGAAGGTGCTTATGCTGAATCTATAA  
CAGGACCTGGATTCGATCTTCCAAAATGGAGGACTACGTAATATTCGTTCTCAAGTAT  
TCCAATCACTAGCTGATCATGGAAGACTTGCTGAGAATATAAAACAAGCAGTTTATAGGAA  
CCTTAAATCAGGCTAAGACTAACAGTATTGTTGTTGGAGACTGGGGTGTACTGGAGCAG  
GGGTTTCTGGTTTCATAAATGCAGTAACAGCTCGAATTGACGACCACATTACGACTAGTA  
ATAATGGCATTGCTCCAACAGGTTAAGGCTTTGAAACTGCTGACCATCGATTATTCTTTA  
ACAAGCACTTTACAAAGGCAGAACTAACGGTCTTGTTATCCAGTATCTTTTCATATTTCT  
TAAACGCTGTATCCTGTAGTCCAAGTGCTTGGACTGATGAATTAGATCTTGAAGATTAAC  
TTGTTGCTCTTTTTTCTGGTTTACAGGCTGGTGGAAAGAGATAGCACAAATTCAAAAGCAA  
GCAAGTCTCTAACTGCTGCTCTTAATATTCAAACCATTGACAATGTTCTCCCTGCAGCGT  
TAAATGCTATTGGACAAGTTTGAATCCTTGATGAGTATGCGTTTGACAATGGATTATCTC  
CTCCAGCGGAAGCTGGAAGTGCAAACAGTTCTAATCAATTTGCCCGCAATACACTGGTG  
TATCAGCATATAACCGATTCTATGTCACCTTCAGCAGTCGATGATGTTGTATATGCATGGC  
GACGCTTGATTGATATCGTTAAGGTTATATTCTCACCTGCGGGAAAAGGAGCAACATCTG  
CACCTAAACACTGAGTATATAATGCAAAAAACTACACTAATGACTTAAATGATGCAGTTA  
CCAGGAAATTTGGATCTGGTGCATGGTCTACTGATCAATAACACTATGGAGAGTGTAAGG  
TTGGAGACATTGTGCATGATCATATTACAACCTGTTACTTACGATAAATCCACAGAATACC



CATTTACATTAAGTGCTAGTGCGTGTACGTTTGTCAATGGATAACGTTGTTACTTCCAGTA  
GTGGTGGTGAAGCAACAGTTATTGATAAGGACGATGTTAATAAAAATCCTTTATATCAGTG  
GCTTTGGCTGACGTGCTGGGCTGGAACTATTAGATTATCTGCTCCTAGCGTTGCTACAG  
GAAGCACTGCTTTTGGCTGCGTAAGTTGTGCGTGGAATAGGCGTAATAATCCAACCTAACG  
TTAACCTTCTTTATAGAGCAAGAACTTTAAATTTAATATTGAAGGTCTTGTTTGTACTA  
CAAATATTTTCCCTGCTGCCGATAATGTTAATGCTAACGGTTGGATTGCCTCATAAATAA  
CAAATTCAGTAGATCATACTGCTGCTCCTGACGAAGCACAACTGCTGATAAGTTAACTG  
CTTCAACAAAAAATACTGAGCACGACAAGGGAAAGTATATCACTCTAAATTCCTTAAAA  
GCTTTGATAGTGATACTACTAAATTTGAGACCACCCTGGAACATTCGTTACTGATTCTG  
CAGGTGATACTACTCAAACATTTACATATCCAATCTTTATCAAGGCCGCTGTGTATA  
CTAAGACGTAGATATAGCTATCTCTAGATGGCTTTCTTTGTACGCGTCAAAGAGCATTCT  
TTTATCTTGAATTATCAGAAGGAACGAAGGGTTACATCATTACACCTTATCTTGCTGTAA  
CTGTAGGTGCCTTCGGAGTAAGTCCTCATGGTAACGGATGGTATCGTGCTTATATTGCAG  
CAACACTCGGATTTGGATTCTCTCAACTTCGTACACAAGTTTATACTCGAGGTTTAAACG  
GTGCACTCGTACATACAGGTGATGGATATGATGTATTATTTGTTTGGGCTCATAAGCTCA  
TTAGTATAGCCCTTGATACTTATACTGTAGTATCTGGTACATTATCCTATTCATACTG  
ATTATAATATCAAGAAATTTGTTTGGATAACCTTGCAGACTCTAAGGGTAAGGCACTTG  
ACAATATTTCCGCATCTCCTTCGCCTCTTGCATCTTTCTATAAGTTCTATGATGATTCTC  
TTGCTTCAGATTACAATAAATCTACTATTCAAAGATTTATTCGTTATCATTTAAATGATA  
TTACACACCAGTTAGACCCGTCATCTTATTAACAGCTATTACTTACAACGATGCGATCA  
CAGTTCCTACAATCAAATATGGAAATCCGGAGGTTACGATGGTACGTAGTGGCGGTGTTA  
ACCGAGCTTATGGCTTCCATGGGTTACTTAGTGACGAATCCGCCGAACATGCGACTGTTT  
CAGAGAATACTCGTGAAGAAGTTCAAGTTTCAAAGAGATTTAGAATTGATGGTGACATAA  
CTGATGGTCCCTTACACAATGGGTGAACTGTTGCTAAACAGGGTGCAGGTGGTGTATAG  
GTGTGGTATCCGGTTTTAACGAAGATGCAAACATAAGAATGTTTCATGTTCCGGATAACCG  
CACGGGTTTGGGCTGTTACTGACAATATTGTAGGTGCATCAAACCTTGGCCACCGCTCATA  
TTTGTGCTCTTGAAGATCGTGCTCACATCACGGATCTCCAAGGATTGTTTGGGGATGATA  
TCCCACTCAAAGGAGATACATCTTGACCGACACGAGAACAAACAGGCTCCTATCAAATA  
ATGCATCGGTTACAGATAACCTGGAGGTACGCTGACAGTTCCTACTGCAAGTCTACCTG  
GCACATTTGACACCCTGCAGTGGTATAGCCTCAGAGCTCTAGGAAGTATATATATGTCA  
CGCAGATTGATGGTATAGATGTTATGGTGGTATTGAGGCGCTTCCATAGGCAATATTC  
GTCTTGGCATTTCATCTTCTTAATAAGTTGAATGTATTTATGAAAGGAAATAGAGTGTATT  
CAAGTGTGCAGGTCAGCAGCAAACAATTATGTAGTTAGTTCTGGGATGGAGCTTGCTA  
ATAATTACCTACACGACATACCTGTTGGTGGAGTTACCCCTCCAGTTGGAGACGTTCTTG  
GTGACTATTGAACAGGAACAGCAGTACCTCTGTGACAAAATCACTTCACAACCTGTGGTTA  
CTAATACAGGCCGGGGTGTGCAAGAGTTCAAGATATTGAAAATATGGGTTTGAATAAGA  
GATTAGGTATCTCTTGTGTTGTTAGTTCATTTAATGCCAATGAAGGTAATAAATGTCCGG  
ATAATTATGCTTCAGCGATCCTTAATGTTGATGATTTTAAAGCTCGTGTCAAACCTACCT  
TCAGAGGATTAGATGGAGCACAAACATCATTCAAACCTCACTACAATTAAGTAACCTCAAT  
ATCTGCCTGACCCCGAAGGACACATGCTCAGCTTTATTAATGGTATCCTACAACCTCCTG  
GTGCAACTAATCCATACACAGCGTTCTCGGTTACTATTCAGTTCACTAAAGCGCCTGCTT  
TGGGAGCAACCTTTACTGGATTCTACGTTGCTAAACTAAGACAACCTGATGATAGTAGTT  
GCGAGTTTGTATCCACTAAGTCAATCAGTCAACTTGAACGTAATGATGTGTTCTATTCAT  
TTACTAACTGATGGCGTTTAGGTAAGCACAAATGACACCCGAAAACAATTTTATCGTTT  
CAGTGAATGGTGTGATTCAAACGCGGGAATCGATTTTGGAGATTATTGGTTGTTGAATTA  
TCTTTACCGAAGTTCCTCGATTTGGTTCACCATTTGGTTGCTTTCTCTTATGTTGGTTCTG  
AGGCAGCCGGAGGTGCTTTGGAGGTTGTGCCTCCAATTCTACAACGTGGCTTTATTGACA  
TTCAAGGTGAGACTGCAGATAGATATGTGGCTGTTATTGAAACATCACACTCTCTCATT  
CATTTGATTATATTGGATGTGTATTCGGACTGGAAGCTAGCCGAACCGAATCTATAACAA  
ATGGACTTATTAAGAATGTTGACTTACCTGGTGGTGGTTCAGGATACCTTTCAGACGTA  
CGGTACGTGTTGATGCTATCTCAGGTTTTTTGCGGAATATCCGTGCACTAGTTGGTGTG  
GGGGTGTGGAACGCAGTGAACTGAACCTGGATAGCAACATCCTTCAGATGCCGTTGAGA  
CCACAGTCGTTGATGGTTATGTCGGAGATAATCTTGCAGATTATGATGAAGAACTAATTG  
ATCCCGAGATCCAATAAATAACTAAAAATCGTAGCGAGGAATGGCTAAACAAGCACTAGG  
TCTACGTTCCGCATCAAATAAATAACTCAGGCGACACCTGAGCGCTGGTAGTGACACTAT  
CAACGACAATTTTACTGCAATATACGGTGCCGTTGATAATGGAACCTCACTGACTGTTAG  
TGTGACAAACCTTACTGTTGGTTCAGGTGCTTAGATATCACGGGAGTACGTTTTCGCCTTC

TGACTGTACACAATTTACTTCAGCATTAGATGTAAATGGTAAACATATTCTATTCTATTCTAGCGGTTGTATCGTTATTGATCGTAACGGAATTGGCACCGTAAGTATGTCTAATGAAAGTGGCTCAAACACTTTTAATGGGACTACTGGAATAGTAGACGGTCCCTCCAAAAATTCCGTA TAAGAATGAGATTACAACACTGTTGGTGCTGCTCCTGCTGCAGCAAGACATACTTGTTATTTCTTTTCTTTAGATGGGGATTATAATCCATATGTGAACATTAAAAAAACAGCAGGTGGAGC GGGCGATGTAAGATCAGAGGCGGTAACCTAATAGCTGAGTAGTGGATTACTTTAAAAAAT TGAGATGAGTTCTGCAGCTCCAATAATAGCCAAGTCTTACGATGGAATGGAACATATGTA CGTTCCAGCGGATGATTTTCAGGGAACCTCAGAAGGTGCCACTCAAGAGCCTTTCGCTAG CATATTTGTTGGCATTGTGGCACTGCACCGAATACTACAAGAGACTGTTTAACGATTGC AGGTGGAACATAACATCACTACTGCAGTTGTAGATGCCACTTTAACAGTTAACTTCTCTGG AACCTTGACCAGCACTAGATCGGCGATAACTGACCCTGATATGTCAGGACGCACTGAGGG TGATTGATTAATCTATAATGGAATTCCTTGGGTTCTAGTCGATCACCTATCACAGGGTG GGAACCTTGTGGTACTGGTTATGTACACAACATTACGTTCACTGGTCCTGGTTTCTCTAC AGCAACAAATGAACCTCATATCTAGTTGCAAATAGGGGCAAGAGATGCTTTTTATAAGTC TAATAATGGTGGCGCACATACTTAGGATTCAGAGTGCAGCAGGTTTAAGTGGCACACC ATACACCAGTGGTCAAACACTGGTAGTGGAACCTGCAGTCCTTTATTGGACTGTTCTAAGGA TGCGCCTGACATACTTCATTAACAATGCACAATCCTTTCACAAATGAGTGGGACTATCAC CGTTGTAAGTTTCTGCATGACCAGTACTGTTCTGGAACCTGGTGCCATAATCGAACCAAT ATTCGATCAAATGTTTGGTGTCTTGCATTCAAAGCATCTAATGGAGGATCTTGGTACGC CCCTAATGATCCGCCACGTCTCACTGTGCCTGGTTGCTGTAGTCCTGATGAAGTCCCGTT ATCATAGCCAATCATTGCTGCTGATTCTGGAAGAAACACTCAGGTCGGAGTTTGGAAATAG AGGAGAGGGATATTAACATCTCAGATTGCAAATCTTCTGAGCAGGAAGCACCAACCGT TGTTACTTCATTTGATGTCAATAGAGTATGGCAAAGTCATCGTAAGTTTCTTACAACAGG TACGTTTACCTCTGATAGCCGTTGATTAGTTAGTGATAATCACCCCAAACCAACTCAGCA TTGCTTAACTGAAAGACAACCAGCCGGTTCTACAGTTCTCGTTGATAGAAGTTTTTATCA TACGATAAACTACCGTGGTGGAAAGGATGTTTCTTAAAGTTGGTCAAATAGATTTTCAGAA AACTAAAGCTCTTGACGTCATGGCAAATGGGGTCTTACTTCATACTCTAGAATGGGGATC ATCCGCATGAACACCTACAACTTCTCGGCTGATAGTGTAATAAGGCGTGTGTAAAAAA TACTAAGACCCATTATGCGGTAATGATAGTGGTGTATTATTATCAACGAGGTACAAT TGTGAATCAGTGTGCTCTAGCTATTGGTGTATTTGAATGGGGAGATATACAACCTAACAC TTGGAATAATAAACTGGAAAGAGGAACCCTAGTTGTTGGTGTATCTAACTTTGATGAAAC ACGTAGTTCTATTGAAGTAGGTAGAATTGTTGAGGAAGTCCCAGTCACTGGTAGAGGTGA AATTGGTAAGATTGTAAGAGATTATCAGAATAATGTTACTAGAGTTTATAGTAGAGCATT AACAGATTATGCTTTGCAAGAGAATAATCTTCAGTTAGGTTCTACTGGGCTTGAATTTAG AAGCCGTGGTGTATCCAATATCAAGCACTCCTTATAATATTGATTTTGGATCTGGCGCGC AAAGTTCGATCTTTTCACAACCGGTCAATTTTGTATCGCTCCCTAAATATTCAAGTAAC AGCAAATTTTACTGAAATTTAGTTAGTTTCGACGAACTAATCAGACAGGTACATGAAA TCCTATCAGAATTATCGCGCTTCTGGTGGAAACGTTGAATAACGGAACAATATATTACAA TACCACTGGTGTAGCAAAGGCACCTGTTACAGATTGAGAATCAGTTTCTGCTCCTGTATT CTGCTGAAGAGTGTGCAAAAACAAGGATTTATTTCTTTTGTGCTTATCACAGATATAT AGGAGGATATGCAGGTGGTGAATAACCTGACCCTCAATCCGTCTGCAGAAACATATAC TCCTACTAAGCATTATTATACTAGGGTCTTATATCAAAGTAATAGCTCTCCTCCCAACAC TATAGAGAAGTCGAGTCATATTGATGGACACTCAAAAATTCTCGGTGTATATTTTGGTGC TTATTAATTTACGGACGTCGGGGATATAATTCTAGTGGTGCCGTAGCCAAAGAAACCTC TCCTTATCTGGTTGGACCCGCTGCTGAATTAGCGGGTGGTAGTCCTCTGGTGGATAGAGT ACCAACGGTAACCTATGATCTTACCGTCTCTAATGGACAGATCCTTTTTGGAGGCGCTCG TCCAAACTTTTTAGGATTAGATCGCCGTAAAACATACATTTTCGATCAAACGCCGCATC TAATGACAGTCAACACTTACCAACCTCAACTACGCACCATAGTTGGCATGGGCAAATCG TGTTATCATTGGGAATACTCCAAATTTGGAGTCTGGCAATGGCAGATAATATTATATTGA CGGGAGCGTAGGATCCTTTCAATCATATTTGTCAGGTTTTAACTTGGCAACATCTCGTAA GGTACGTTTTACAGATGCTGTGTAATCACCTAATTCGTTATATTTGTTTGGATATACGAC TGCAGGACATGGAATTATCACTGTGCAATAAGGCTAGGTTCTAGGAGATGTGGTAGAAGA TAAGAAGTACGATTCCTCTATAGGGACACTTGATGAATTTATCGGTAATTTGCTGTAAC ACCAGAGTATCCTAAGGGAATCTAGGCATACTTCATGAGTGAAGATAGTAGTGGTAATCC TGCATATTCATATGCTGTTGGTCTTACGTTTTACAGAACCGTACGATTTGAAGGAGATAT TACACCTGCATAACCAACTGTATGCCAACAGATGCAGAAGGTGATGAAGTTCATGCGGA TTATGGTAGTGTTCCTTATAGCAAGATGACGAAGACCGGTGTTAATTTCTTCGGACATGC

GAGAGCAAAAATTCTTCGAGGGGAAGGATCTGGTGCTGTTGGCTCCCCAACAGGTCAACC  
TGTTACTGGTTTAGCAATACTTGATGTTGGTTGAACTTATGCTACTCCTCCAACAATTAT  
CTTTGAAGGTGGTGGTGGACAAGGTGCGCAAGGTGCTGTTGAAATTAATCCTCTCGGTAT  
AGCTACATATAGTACAATCTCAAATCCAGGTGAATTCTACCAAGAACCTCAATTTATGTG  
AACCACAGGTGGTGGTGGTATGGGTGTCAAGCCAGAAGCAACTGTCGATCAAGGTGTTTT  
AACAGCAATTATTATTACATAGCCTGATAATGGATATACTTCAATTCCAACGTTGTCTT  
TACAAATGTAGTAACAATTAATAGAAAATGTAGAGCACGTCAGGCATTTAACCCATCAAT  
CATTTACTTCTCAGGTGGTGTAGAACTGTTACCTCGTATGATATTGAAAAATATGTTGA  
TTCGCCAGATGCATTTCTGGTTCTGGTCAAATGAGCCTGAGTTATGAAACACTCACCGA  
TCACTCTAAATCAGCAGGAAATTTTAGTGGTCTGACAAGGGTTCTAAACGTTCAATTATGA  
TCTACGGGTATTCTTGACGCCTGTCAAATGATTCAATTGGTGGTTCAACTAATAAGTT  
TAATGTTAGTGATAGACTGATGCGTAAAGCTGAAATTGCTACTAATTACGTTGCAAAGGT  
ATTTGACTGGAATCCGGATACCACCGAACTACAAGTTACTGTTGAGGTTGATTAATTAGC  
ATGAACTGACGGTGGTATTACTTATACTGAAAATGCAATCGTACAGTTAATGCGGGAGT  
TGCTTCTAAAGATCCTTCTGGAATCCTAGCTCATAACAGTGCTTACAATTACTGGATCTCA  
TATTTTCTTATTGACAGATTTCGACTTCTCTTTTGGCAGACAGATCTTTCCAAGATATTCG  
ACCATCAGCAGCAGGTGGTGGAACTACTGACCTAGGTAAGACTGGCACTGTTTCATGCTAA  
TCAAATCAGTCTTGGAGGAGGTATCTATAATTCTTTAGATGGTATCGGAGAACATCAAGT  
TAGACCAACTACATCACTATCCCACGTAGGTGATTATGTAAAAGCTAGAACTGTTCCATT  
CACGTATGCAACAATTATGACTGCATGTTCTTTGAGTGATAGTGTTGACCGCACTGCATT  
TCTAACTATCAGACTTGAAGCAGCAAATGGTAATCGTATAAATTATAGCGATGATGAAGT  
TGTAACAAGAGCAACTACTGACGTGAGAGGAACTCTTGTCTTATGAGCCCACAACGAC  
TACAGTAGTTGTGGGTAGGATTGTCCTATTTTCATCGTCGTAATATCAAGGTTGGTATTGG  
GGCATATCGGTATGAGGTTTCTACAGTGGAAGTGTAGTTGATGTTCTTATACAACATGT  
GGTCACAACTACACCGTTGCTCAAACAGTAACGTTTGAATACTGGAACATTCTGCC  
GTCAGGAACTGAATTTCTCACCGCTGCAGGAGACCAAGTTTCTTCTACTACTATCAATAA  
TGCTGGATATGGTATTCAGCAATCTCTTGATAACACATATAACCTACATCCAAAAGTAAC  
ACTACTAATGCGACCGTTGATGCCACTGGTGTGGGTGCAGTTGCACAAGCAATTCTAGG  
AGGTGAGGACCTCGTGGTGAACGGTGGTGGACTATAAAGAATCCAGAGTATTGAATATCA  
AGCAACTGTTAGCTCGGAACCCTCAAATATAACCAGGAGGACGATAGTATGCTAAAACGG  
CAGGCTTCTTAACCGAATAAAAATAGAAGATTTTCTCCAATAAGTTTATAACAGGACTGG  
AAGGTCTGACGCTACTCCGAGTGACGAGGCAGCGGGAAGTGTCTCGTGAACGTTGGTTTT  
TTTTCATGGGTAGCCCTCAGACTTCGGATAATGAAAACCTCGCCCCACAGGCAGTAGACT  
CATTCTCAGAGTTTTTTGGATCGTAAGATGTCATGATATCGATGCAGAGAGTCCTCGCTT  
CTAACACGATTCAGGTTCGTTAGTAATAGACTGGGTTTCCCCAGAACAACACTACATGAG  
GACTAGGTTTACCTATGACATGTATAAACATGACTATTCTCCTACCAAACTGGTGCCT  
CAGGTGCTACCAAGTATACAGCTCAGACTTTTATGTTGTGAATTCACAATATCAAGATT  
ATAAAGTCATCTAAAATGGAACATATCCTTCTGAGCTCAAAGGACGACCTTCCACAGTTC  
AACCTGCAGGTACTTCTACTCCAATTATCGCTACTGGTGTGTTATCGTTGGAATACG  
TGTATCTAATTCCCGTGGCATCGGTTCTTAATGTTTTATCAAATGCCGTCATGCCAGTCT  
TTATCAATAAATTGATAAAGACAAATGCAGTCGTAGGTGAAATTGATAGAGTTATTATCA  
AATACGCAGGTTCCGGTTACAACAACGGAAGTACTGATAATGTTGCAGTTACGGGTGATG  
GAACTGGTTGGTGTGTTTCTATTGTTATAAACGGTGGTAAGACTAGCTCTGCTGTAGTTA  
CTTCTGGTGAATCAGAATATATAGTTGGTAGAATAAGGGTTGACATCATCACTGGTATTG  
GAACAGGAACTGGCGGCATCGTTGATGTTTTCAATCATCCCCAGTCGGAGATGACGCTG  
ACGCATTTGTTGAACTGGATTCTGTCCGTGTAAGATCGACGACATACTAGCATATTATG  
AGGTTGCAGGTGACGTCCCAATCGATAACGCCTATCGTCGTATTGGTCTTGTAGTAATC  
CTGTACAGTATGGAAGTCTGAATTGATTCCTGATTTAACGGTTTCTGCTTCAAAGGCCG  
CACTCATCTCCCCGACATTCCAAGGAACTATGTGCCTGATTAAATTCTTACTCATAAC  
GAGTCATTTGGTTGAACTCACCTTACTCCTCGTGGTTGTGTTATTTATTGCAATGCCACCA  
CTAAAGTTTTGTAATACTATCAGAACGCTATTGATGGTATCTTCCCCGAAGTTACTGGAA  
ATTAAAATGTGTTTGACGGGTCTACCTGCATCAATGGGGCTACTTCTGGTGCAGCTAGTG  
AAGGTCAACCAGATGTTGATTACCCTGACGTTCTAACTCTTCTTGTAGAACATCAAACA  
CGTCAGAATATGAGTGGGGTACGTCGTTTAGCAATGGTTATTCCAACACACTTTGGGT  
GAAATAGTGTTTCATGTAATTTACATAGATATTAGATGAGCAATCACTGGTGCTAACTACC  
AAGTACGAGACATCAAATCGTATTCGAATTGTGAGGGCACAAAACACCAACCTAAACGT  
CACACAATATTACGACAATTTTTAGACGATTCAAACCTTCTATAGAAGTTTGTGGTCA

TCGGTTCACGATTCAAGCGGGGGAACGTACTACGATGCGAAGCATCATGCAAAAACCCAGT  
GGAGAATGTTGGTGCCCACTTGTGTAAGATGGTGCCATGGTTATTCCAAGTCAAGTTGG  
TTATGACCTGACTGTCGATAGCATCCTGCTCCAAGAATCTTTCCAAGCCGCTGATTTTGA  
AAGTTATAGA ACTCAATTAATGATAACATCATCGCTGGTCTTGCTACAGGTCTAAAGTC  
AACAGATCTTAAGAGTATTTCTCTCCAGAACCAGCTAAAGATTATAACACTCTACATGT  
AATGTATATTGAGTCTGTTGGAGCTAACAGTCCTCCAGCAACTTTCGCTAATAATTAACA  
ATCTAATACGGATACTGATATCACTTTTCGGAACACATTGATTCAAGTTGGTTCTCCTTT  
CGTACATCCACTTCATACTGGTGCTCTTCAAAAAGGTTGCGTTGCTTATGTGCAATCTTG  
TGATCTTTTCATCAGCGTGTCTTAGCTGAGGTCGCATATCAATACAGTCTTTTAGATCA  
ATCTGTATGCAACACCTCCCTTCGTTTCGGACTTGATATTCAAGAATTAATCATTGCCAC  
AGACGAAGA ACTTAGACTCAACGATAATGCTGCAGGTAAATCTAACGATGCTCCTCCTGG  
TTCTTATAGATTTAGAATAACCACAGACTTAACGAAGAATCTTCTTACTGATGACGCCGA  
TAAAATCTTTATCGAACTACTTCCTATCAAGGCATGAAAGGTAGTAAA ACTTCTGGCTAG  
AACTGCGTATGATGAAGTATACAAAAGTATTGCAGTTAGATCTTTTGAGGGCGACTGGAGC  
TTACGTTGTTAAAGACTTTGAGGTA ACTGTTAGAGAAAACCGTGATGATGGTTTAAACAC  
TGGCGTATATGCTGCGATTGCTACAGCTACATATGTTGCAGTTCCTGCAGAATCACAGTA  
ATCTGTTGCATGTGGTCTGTTGAGCGTAGGTTAGAGGATATAGAAGTAAGAGATTAGC  
GTC AACCTTCGTTGACTTAGACAAACCTCGTGA ACTGATGGCATAACAGAACACTTTTGT  
TCCATTTGAAATGGGCAACCTTACACCTGTAATAAATGTCTATGGATTCCCTAACGTTGT  
AGGTTCTACAAGCACTAATGCATATCAA ACTGTAGAATTACGTGATGGATTTACA ACTAC  
ACCAGGTGACGCGAATGGTGTGTTATTCGTTCTGCTCGGGTTTCTGTATGGAGCCTGT  
TGTTAATCCTGATAATGTTTTTGGAAAGTGCTCATGATCAATATAAGATGAGTATCTTGCA  
TGCTCCTATGTTCCCAGTTTTTAGAACTAGCAACTGGTCAA ACTATCGGAGCAAGTTC ACT  
CGTTTTTGGGGGAAA ACTCGAGTGAAAGAGCATATCTAGTCCATGCTATTTCTAGTGGTGA  
TTCTCTCATTATATATCAAGTAAAAGGACATGCTCTAGAAGTCGGGATGGTCACTGTAGA  
TTGACACG CAGTGGATACTATCTCTGCATTACGTGGTTCTACATATTCTGTTCTTAGTGA  
TTATGTCTCCAGAGATGAAAGCACAAATGCTGTTTAAAGTTTCTGCAGAGGAAATCTAAGA  
AAATGTTTTACCTGTTGAGCATGAAACCTTTACATACAGCACGACCGGAGGTAATGTTCT  
AACTACCGTTGCCGTCAGTGCTGCTTATGGGGCTAGA ACCGCAGGCGCTGATACTATAGG  
TGCATCTGACGACACTACTGATTCAAATGGAAGAGGAGCAACATGCACATCCGTAATTGA  
CGGGTCTGGTGCTGAAACAATTTCTATTCTTAAGGGTTGTTTGGGGCACGATGTAGATGA  
CACATTTAAACTAGCAGATGCTAAACATGCACGATGCGGTGGTGCTGCACTCACAGTTGA  
TGTTGCTACAGTTGGTCTTCTATTTAGGTTTTACA ACAAATTTCTGCTTTAGATGTAGG  
TCCTGGTCATCAAGTATCTTTTAGTTCCGCATAATTTATTACTGTTCACTCTGTA ACTCG  
TACTGCATTGCTACTACTAATAACATCAAACATCTTGAATTATGGAAGACAACGTGTA AA  
TGTAACAGCTGGTTCTGCTGCTACTTCTGCACACACCTATACTACTGCAGTTGAATTACG  
AACTAAATTGAGTGGAAATCAAGAATGCTGATTTTCTTAGCGATATGCCAGAGCAGTAGGT  
TAAGAGTATTTCAAGATGAATCTATGATTGTTAGAAGAAAATCTGATGCTGAGACTGATGC  
TACTGACTCTATCTCAATTACTTTACCTGAGAATGAACAGCTCCAAGCAGTTAGTGATGA  
GAAGTATGCCTTTACAGTTCTTGCAGGCTCTAACCCACGCACCCAGTTGGTGATCAGAT  
GACTATCAATACTACTAACTCAAGTGCTGCTTAATATACCACATTCTCATCTTCTGAAAC  
AACAACTTTACAGATTGCTTACTTAACCAATCTTACTTCTATTAAGTAACAGCGAATAT  
TTCTAAGAGTTTTACTACTAGAAAAACAAAATCTGGTAATCAGATGTTTGTCTTAAAGG  
TAACAAAACCACTCAAACACTTGATACGCAGAATGATATTTTAAACATATTTAAATCTATA  
CGTAACCAGAATTCAAGAAAGAGATATCTCTTTTGTTTAGTTGACTGGTATCTTCTTCA  
CGCTTTATATGGATCTCTATATGCTATTGGTCTGTTATTCAATCTGTA ACTTTAGTCGA  
ACCTACTATCTTTGTTACAGGAACTAACGTTAGTGGTAGAACTTCAACAGCAATGGCAGA  
ATTTGTTGCTTGTCTTTTAGGGTACCCTGAGTCTTAACGTTGTTAAGATATCTGGTATATT  
CCAACCTGGTGGAAATTCTTGATGGTTATGACAGACATACTACTGAAATCAATACTATTAT  
TACTGTTGCTGCACGATCTGTTATTGTTGATTTCGAAAGTTGTAATTGATAGTTACTTGAT  
AGTAGCAAATCACAGTGGTTTTATGGAGGAAATTCCGATTATTGTTCCGAGGATCGGTAT  
CGTTACTCCGGTTAGAAA ACTAAAATTATAATCGTCTACTCCAGTCATTCTCAA ACTGG  
AGAGTATTTGGGTGGTCAATCTTACCTCGATACATCATGCAGCGATATTCCTTTATGTAA  
AGTTCAATTCCTTGCTGATTTTCGTACACTTTCGACCCGGTGCAAAGCACCTGTTTAAATGA  
CACAGGTACGGTAGCATCTCCGGAATTTGTAAACTATTCTACACGTGACTTTAAGTCCAG  
TGTGATTAAGGTATCTCGAACATGTAATGCTACAGTCTTTGATATTCCAAAATTAATAG  
TAATTTCCGTTGTGATCTTGATTGGTATCTTCGTAGCGTTGACAAATGTATTGTCACGCC

TAATGGTTAGTTCCAAAGTAATAAAGGTAATCTTTCTATAGACCTCAAGAACCTGATTC  
CCTAAAAGATGGTATCCTTATAGCAACAATATCACATACACCATATGGTTTCGATCCACT  
TTCAGAGGTAGTAATTAACGCTCTGATAATAAACGTTATACCATGCGTGATATCGGTGG  
TTTAAAAGGGAGATTAGTTCAGGTTAAATTTTTACATCACTCAACATGCTTGAGACTGA  
TACAATCAATACTCATATCCTTGAGGCTAGTGGTACCTATCGTTTGAAGAATGGATTCAT  
TGTTGACGACTTTGTTTATCATAGTTCGCCTGATGTTGGAGATGGAGATTTTTCTGCATC  
GCTTGACTGTAGACTAGGGTATGCTCGTCACTCACATTACACAACCTAACGAACCTTTAGT  
AAATAATATAACTTGGTCAACTAATTTTTAGCAAACTGGTCCTCTAATTACGTTTCATA  
TACTGAAGAGGCGATTGTTAATCAACCATATGATTCTCGTGTTGAGAATATTACTACATG  
TAACGTTTTTGCCAATATCGGTTATATTACGTTAACACCTGGTTCTGATGATTGTTTGA  
TTCTAATAGACTTGCTTTATCAGTTCACAGATTGAACGTGATTTCTTACAAGTTTCTTC  
TGAATTCAATGTTGATCAAAATGGTTTTGCTACAATCCAATCGGGAGCATGGGAAACTAC  
ATGGACCGATGAAGAAGTCATATCGTATGATGTAAGTAACTAGAACTTTCATTGGTTTTAAA  
AGGTATCGGTAGATGACCCATACCTAACGTTGAGGATGGTCTTTGTATGCGTCGTGTTAA  
TCAGACTGATAAAATCGAAGTTACAGCAGATCAAGTAATATCTCGTGTTTGAACGCAAGT  
TATCCCTATAATTGATCGTCAATCTGTGGGTGATGCTTTTCTTTCTAGCACATCTATGCC  
GTCGTTTCGTTCTATAATCGTTGTGATTAATGGTGCAAGTCTAAATCCAAGAACACGATA  
CTATTCATTCTTAGACGGAAGGGCATCTATTGATTGTGTGATTCTAAGATTATTGAAAT  
TATTAAGACCGTACAGTTCATAGTAGAACAACCTCTACTCCCTTTGGTATTGGTAAAGC  
CGTAACAGCTGAGATTAGTGGTTGTAAGTCTACGGTTGCTGCCCCTGATGATTTTTAAA  
GTTGAATCCTTATGATGACACAACACTTCCCTACTTCCATGCATCTCGAACTGCAGTCTT  
GAACATTGATAGTACTGAACTTTCTAAGCAGGCAATCGGTGACGTCAGTGGGAATATACA  
GGGTCAACAAGTATTAGTTGCAACTTCTGGTGCTCGTGCTGTTGTTAGAGATCGTCGTCT  
AATTTCCGATCGTTTTGGTGAATTATAGGCATCATCCTTTATTCTAATCCTGGTGTAGA  
TATAAACCCAAGGTAGGCAACCGGAACTAGAACTTTAAGACTTTCTACATCTGATTTTTT  
TTCACGTCTTTCTGATGGAGTCGCATCTTCGGCTTAACTGCAGACGATGCAACAGGTCC  
GCGCACCGGATTTCAAGACAATATCTTGGCAATGCATAACGCAGAAATAGTGGATGAAAC  
TGTAGCACTTGAACAAACAATTCAAACAACCTAGAACTTAGAGTAGACAGATTTGTTGGTA  
AGACCGTCTCGCGCAATCCGTCATTGTTGCTCAAGTCGCTTGGCGTGGCCTTACTTCATT  
TCATGTTTACTTCGTTAAAAAGGATGCAAAGATTGCAGCTTCTATGCACATCAGAACAGT  
CTAAAATTATTATCCTACAACAACAATGGTAGCTCTGTCTGATGTTAGGCTTGAACGTGA  
TCAGGTTGAGTTCAGGATCTTCTTCAGTTGCAACTAGATTACCATTTGATGCCTCTCT  
ATATATGCCTCAATGACAAGAACATCGTTTTGTTCTCCTTTGTGACTCGAACTTATATCT  
GATTTGGATTTCTAGAACGGGTGAGATTGAAATCGCTGGTTCCAGAACAATTGCCGAACA  
AGCTTATGCACGTGTTCTACTCAAATCTCAGAACGCTACTACATGGACTGCAGATCAATA  
TGAAGACCTTAAGTTTATTATCAACGCTGCAGCCATCTGTAATTCGGGACTAACTAACT  
TGAATTGCACAATGCAGTACCCGGTAGAGGAAATGGTGGTAAGTTGAATCTTCGTTCTGA  
TGCTATTCTTATATGCCAACAATAATTATTTCTTCCACTTAATTCACAACATTACATTA  
CACTGTGCTTGTGCTATCTATAAAAAGACTACTTTGCCAGAGGTTACGAATACTGCAAG  
AACTGTAAAACCTAGGTGCTGTTCAATTAGCTATTAATGCTATGAGTGGTGACAGGGCAGC  
AGGATCTAATAGTGGTGGAGTAATTTCTAACCGTGTTGATTCTTCTAAGACAGTAGCAAC  
TATGGTTGTGACTGGGGCGTATTCTGGCTTTAGAGTGGGTGAAACAATTACAGGTCCTG  
CTCTACTGCTCCTTCTGCAGAGGTTGGAAGTTGGACTCAGGGAACAATACTCATACT  
TGAATATGTGTCTCCTGCGTTCCTCATCAACAGAACTATTATTGGTGGAACTTCAGC  
CAGAACTGAGACAGTCGGCAGTATAACTTGCTCTGGATACACTGTTGAGTTTGTGCAAT  
CCCGCGATGCTACCCATCAGGAACACCAACCAATTATTCAAACACAGAACGACTCGTGT  
ATATCCTAGTTATCACTGTATGCACAGTACATCTAGCAATGTGATTATTGAAGGCTCTGA  
ATATGACGTTTCCGATACTGCTTTGACTGCATAAATATCTGCTACAAATACTAGTATTGC  
TGCAGGAGCCGCTAATGCAGACCACAAGAATAGTAGCGGGGCTGCTATTGGAACAAGTAA  
CGATTGTTACATTAAGATTAATGATGAACTTATCTCTTATTGTGCAAGCCCTAGACAGAA  
CAAACAGGTACGGTTCATGAACGTGGTGTGAGAGACAACCGTAGCATCCCATGCGGA  
TGAGTCTGTAGTTGAGTGATGTATCTTAGATGGTATTTCTCTAATCGAAATTAACAC  
TCATGCATGACTTGGAGTTGTTACATGGGATTAAGATGAAATTTCCACATCATCTATTGG  
TAGATTAGGACTTCTTGTGGCGGAACCGGTATCGTAGCATCACAGAATATCACTACAG  
CAGTCTTGTTCCTCAGATTCAGACGATGTTTCTTCCCTAAGAGTGACATTACTGCTGGATT  
TAGCACAAGTAGTGGTACGTCTATCAATGAACGCTCTATTTTGTTCAAACATATATCTC  
ACATGCTGGAGTATTTCTAATATTATGTTAAGTCAGGATAATGATTTGATTCCACCACA

ATTAGTTTGTTCAGCAATCAATGAATTTTCTGTAATTAGCGGTGCTAAGTCATTGAGAAT  
GGATCTTACAATGACTACTGTTAAGACTACGATTTCTCCTGTTATTGATACATATAGTAT  
GTCTATCACTTTGGTATCTAACCGTAGCAATAATCCTTCAGATCCTAATACTGCAAACT  
ATTGGTTGGTGATGTACCTGATGCACTCAATATTACTAAGAGTGCAACTCTAACTAACCG  
TTCTGGTGCTATCAGAGTTTAGGTTGTGGGATATCGCCACCCAACAGTGAGATTATGAT  
TCTAGATAGAGTGCGTCATGTTGGAACCTTCTGTTACTATAGTACAACCTTGCATTTGACTT  
TATCCAGCTGCAGATTCTAAGGTTACTGCACGTACAGAAAGAGAAATATATTCATCTTA  
TGAATATGAAGTATCTGGCTTGAGTTTTGATCAATCTCAAATCAACGTAGTGTTAGTTGC  
TCATAATCAGGCATTTGTCCCGTTTATCAAAGGTCTAAGAGCAATCCCTCTTGTGTATA  
ATGAAAATTCCTGTAAAAGACGATGCAAATCGGTTTLAGGGACTCCTATGCGTGTTCATC  
CAGTGTGCAGCTATTTCTCTGTATGAGAAATATGTGGCAGCACATAACGCAGAACAAGTC  
AAGAAATAGGAATGTCTACTTTACAAAATGACGTTTCTGTGTTGAAAACAGATATGAGT  
GAAATTAATCACGCTTACATACGTACGTCAGTCCAAAACAAAACATCATAATGAATGTTGAAA  
AAGTATCACAAGGAGAGATTCTCCATTCAAGGAGAGATATGCAAAGTTGATTGAAC  
AAAATCTACACTCGTCTGCGAAAATTAAGAACAAGAGGTTACTGCACTTAAATTATTGC  
GAGCTATTGAAACAATAGAATATTATACACAGGAAGAGGAAAAGGCGGCTTCTACTACTC  
CTGATCCAGTTCCATCAGAATAATTCGAAAGGGGGACAGTCCCCTTCTTTTTATACTATA  
AGTAATAAATATACCATAATATAATCGACATGTCGTGACTAATGGGAAAGGGACTTAAAG  
TAGGAAGAGGTGGGACACACGGCTGGGCGCATTCTAACCCGATCCTTGCTCAAGGTGAAT  
TAGATATGGAAGTTGAAACGCGTCGTTTTAAGATCGGTGATGGTGTATCTACATGGAACA  
CCTTATGGGACGAACGTCTGGTAGAGTCTACATCTAATCCTGCTGATACTTTAGTTCAA  
GGGATGCTGATGGTAAGCTATCTGCAGGTACCATTACTACTACAGTTATTGATAACCCGT  
CCATTGTGTGCACCTTCGCCTCATCTAGACAAACCCCACTCTCTAATGAGATAACTACTT  
TGGGTATATATGCTGGTTCTCAAATCGTAAATCTTTCTTCTGAATTAGCACCTGTTTCTA  
CATTTCCACAAAACGATGGTACGTCATGCCCTCAGCAACGCACAATACGGTGACTATCC  
ATGCTAAAGGTAGAGTAACCAACGGACAAGGTTTTACTGATTCTAACAACCTGAACTCTTG  
CTGATTATGGACTTGAGGGAACCAATGGGGGAACGTCTTCACAACCATAGGATTTAGACT  
TAGTTGCTGTTGCAGGTTTGACCACTTCTGTTATGATCTTTGGAAGTGCTTGTACTACTG  
TAGCAACTAGTGCTATTACTGGAACCTGCGCCAATAATCTCTGAAAGTGAGTGAGGTG  
TTTCGAGTAACCCAAGTACTCATATAATTGCCACTGCTGTAAGAGCAGGTAACATAATA  
CGGAATCCCAGACATCTGTATCTCGTGCAGGTGGAATGCTGAACCCTTTGACACCGCTA  
CAGTTAAGCCTACTAAGTTTTCTGCTGAAGCCCATGGTTGATTGACAAGTGACAGCAGATG  
TGCCTTTCGTAACGGCTGGAGAAGGTAGTAAGTACGCTACCGCTAATGCACATTCTACTT  
ACGTTAAATATGACATCATAACTAACGTATCAAAGTTTTATCAAGCCTTCACTGGCATTG  
CTGCTGGAGTATGTCCACCATCTGAGAGTAGCGGTGACCCTTGCGAATGGAGGTATCTAG  
CTGCCGAAGCACCCTCCAGATGGGATTGACTACTTTTGCACAAGAAGATTTAGACGTTG  
ACGCGAACGGGCATGTCACCGTCAGCACCGCAGGAGCAGATAATTCACAAATACAAAATA  
ATAAACGAATTTTCACAGAAGGAAAGGCTGTTGAAAATTTGGAAGTAGATAATAAACTTA  
CAACTTTTACCGACAACACCGGTTCTAATGAATTGAACTTTATTAATAAATCAATAATAGTT  
CGGGCAGTTTATTATTTGGTGCTAATAATACTGGTGATATTGGTGGAGGGAAGATCGATG  
TAAATGTTTCGTTATTCATTTAGCGATCCTGATATTGCTATACATGGGTCCGTTGCGCACC  
CTCTAAACAAAACCGGTGATGGTAATCTAACTTTTCGAACTACTGAAAACACATCGTGTG  
CAAGATCTTTAACAGTTTCAGTATCAAACCTAAGGTTCTGAATTAACACAATCACACTTA  
CTGCAGAAGATGTAGTTGATAATGATGCCTCAGTTTCAAACGGAAAAGTTCATGTCAAAG  
ATTATATACTCCAAGACAACAACATTAGTACGTCTAATGCCAATATGCTCGTTAATCCTG  
ATGATGATCGTCCCTGCCAGTCAGCTAGTTCGTGTTTATGGAAATTTACATGTAGATGGCT  
TGACTACGACAATTAATCCAACAGTTAAAACAATTGAGGACCCCAATAATTACTTTTGGTG  
GCGATTCTGCCCCCGGTAGTGATGACTATAAAGATCGCGAACTAGAATTCGGATATTATG  
ACAATCAAGCAAGAATCGGGTTACTTGGTTACCATGATTCTTACACCGACCTCGGAGAAC  
ACGTCGCAGGGTATACACTTTTACACAACGCCACCAATACTTCAGCCGTCTTTAGTGGAA  
TTGGCTCCGCTATAACTGCAGGAAATTTAACACTCACATCAAATACTAACTTAACATCTA  
ATACTACAGGAGACTTACTAGGTACTGGTGGTGATGGTATTGGAGATAATGGTAATATTC  
GTGAATTGCTAGAAGTCGATGGCGCAATCCGCGCTACTAGCACTTCTTGATTTGATCAGA  
ACATAGTATTGGAAGGTGCTTCTAAGACATTTTCATTGAAAATGGTAGTGGCGCATCTA  
AAATACAACCTCACGCTACTATAGGTAATGTAGAAATTTGGAGGTATCTTAACAAATACTT  
GTTCTATTGATCCAACCAGCACATTATATGTTGCATCCACAGTTCCTTATGAAGACACAG  
ATGAAACCACTGTTGCACAGAATGGTTCGAAGTGGTATTTATCAGATTCAATAAGATCATT

ATTGTCCATTTTGGATTTGCGTGCAGGTGAATATGGTCAAGGTGATACAACATTCAAGTATG  
ATGTTTTAATTTTCGTCGTACAAAACCAAAGAGGCAGTGCTACCGAATCATTCCGGTAATA  
GAACCTATCAGAACTCCAGATATAAATTACGTTCCGCCTCAACTGCAGCATATACTCCTT  
CATATGGATCTGATCGTACTTCTAACTTAAGAATCTATCGTGGTGCAGGTACTCTAACTG  
ACCTCCCTATTGGTGTGGATCTTTATATTGGTAAATTAACCTTTGGTGCAGTGATTTCAT  
TCCAAGTATTAGGAGAGTCAGATAAAAACAACAAGTCAAGGAACATTGATACTAGAAGGTC  
AGACAAATATTAATCACCTCGAATCCTAAATGCTTCGAACGAAAAATTTAAGATTCTAA  
ATTGATCTGCTGCAGATAAAATTTTCAGTCGATCCTGATAAGGGTAATACCTTAATTGAAG  
GAACACTTAATGTAAACGGTGTAACTGGTATTGAAGCAGAATTCGCATTTACAAACGGCA  
CGAGAGAGAAGTTCTTTCTCGCTTCAGCCTCAGGTAATCCTCAAATCAAACGCTGTTTCA  
CTGCTGATAGTCATATCGAATTAATTTCAACACTTGATGTTGATAGTAATAACGCCTGG  
TTGCACAACTTACAGAAACAGATAACTCAGCGTTCAGCAGAACTGTAGCTGTGGATGCAA  
CTTTTGCAGTCAGATCAGGAACTACTGAGAAGATGATTGTTGTATCTTCTACAGGTCCCA  
TAGCAACTGATGGAACCTAGTTGTTGCAGGTCTCACCACCATCAATGATGCTCTAATTG  
GGCAAAGTGATAACGAAGTAGTGGATATAAACAGTTGTCCTGGCACAACCTAAGCTTAGCC  
ATGATACTGAAAGACGTAAGAGAAATATTATCGGTTTCGTTGACAGTTGCTGGTGCTACTC  
AGCTTAATAATACTCCTGGAGGTTCTAACGTTACAACCTTAACAAAAATCACTCAGCAAA  
CTCTGACTGGAACCTTATTCTGCGGATGGTGCATTGAAACAATCTGGTGGTGCATGTATCG  
GGAAAAACCTTGCTGTTTCGAGAAGGTCTAAGACTAGATGGAGGCGCTGAACTTACTGGGG  
CTCTTGGTCTTATTAATAGTGCTGATATATCAGGTGCTTTAACAGGTAATGATAGTGTTA  
CAATCACTGCAGAAAATATGATGTTCAAGTTGCTGATTGCATGTGCGGCGACCAAGTATA  
CAATCCATACGGATAACGGTAGCAAGGATATGAAATGAACATTGGAGGTTGCAGGTGGGG  
TAACTGCACCATCTGACTTTACTGTCACCGGTAATAATACCGACACTAGAAGAACAACCTA  
CCGTCCATTCTACGGTCGCAACAAACGCTGACCTTGCTCTTACTGTTTCGCTGTTATGCAG  
CACCCGCGTCTAGAGATTAAGGATCGTGGTACTGAATTTTCGTTATTATGATGGTTCTG  
CTAACGCGCTTTCTTCGGGTTTGATAGATCATCCTCCCAATTCCAATTCCTACCAATTA  
CAAAAAATACTTCTGAAGTTCGCTCAGGAACAGATGGTGCTGTAAGAGCAGGTAGTTTAA  
ACCTTACTGGTGCGGGCACAGCTCTGGAGGTTGATGCTCATGCAAACATTGATGGCCAC  
TATCTGTAGATGGTCAGATTATGTCACAAGCATCTTCAGATCCTGCGCTTGCTATACCAA  
TAACATATAAGATTAATAATCTTAACTTGGATTTACTAGTTGGGGCTACAACCGCAATTG  
TCGCAACTCAATCCAGATTTGATCTTCGTGATTTCATCTGGTGATTTTGTCTGCTCATCACA  
TCCCTGCTGCTAGTGTCGCAAGATCTAGTGCAGGTTTCTTAGGAAGCGCATCCACCGCCG  
ACGCATGGAAGATTGCAAGATCAATCAACTCTAGCGGTGTAGTATCTGGTTTTGTAGTCA  
TCAATGGAAGTGAAATTGGAACACTTACAAATACTTATAGTGATCCAGACATGACTCCTC  
TAGCAGCGATGAGTGGAACCTGGTTATGGCGTACGAACTGCTGCTAACAATTATGCCCAA  
GAACTCTCAAAGTCGCCCCATCCTCTGCAATCTCTCTTTCTCACGGTGAGGGCGTTTATG  
GCAATAGTACACTTAACTTTGCTAGTGCATCGTCTAATTCTGCAAACAAGCTCGTCCTAC  
GAGACGGACCTGGCAACCTTGATGCAGGTACTATTACTGGTGTCTTATCTGGGATTGTCA  
CAGGTAATGTAACAGGTAATGTAACCTGGTTCGGGTATCTGATATCTCAAACCTATGATAGTG  
GTGATCTTACTGAAGGACCTAACCTCTACTACACTAATGAAAGAGTTAATTATAGAGTCA  
ATGCTCTTATTACTGCAGGAACTGTCATTACTTACGCATACGAGGACGCTGCAAATATAT  
ATACGCTGACTGTAAGTCAGTTAGATATCAACATCGATCTTGCAACAGGCGGTTCAACAA  
ATCGATTTACAGCTGCAGCTAGAACTAGAACTCGTTTCACATATGGAACCTGGTATCACAC  
AAAGTTAAGGACCTGTATCAGTTACTCCGTCTGATATTAATATTGACAACGTGTCTCAAG  
GATTAACCTGTTTACTACTGCTGCTAGAACAAGTACACTCATTACATACGGACCTG  
GTATTACACACAGTTTTGGAACTTTTCCCGTTACACAATCAGATGTCAACACTGGTAATA  
GTACTGATGGTACTAAAAAACTACTCATTACTCATGAACGTGTTGATGATAGAGTCGACG  
CTCTAGCTCTTGCTGTAACCTGGTGTAAATAAGTCATATGATAACGCTGGAGGAACTCTAT  
CTTTAGCATTTGACTTTAGTGATTTTTGGTACTGGCAATTTTACAGAGGGTACTAACCTTT  
ACTTTACAAACACTCGTGCTGAAGCAGGGGCACACTTGACAGTTGCTCCTGCGACAGGTT  
CAAACCTTGATGTTTCTTCTCAGTCTACTTCCGATCTTTCTGGAGGATCTTATCACTACT  
ATACATAATCAAGACTTCACGCAAACTTGACAATGCTTATGAACAGCCAAGAGCAACGT  
TAACTAACACGCTACTCGCACCAACAAAAATCTTCACTTGGCTGTCGATTCTAGGCCTC  
GCGCAGTTGTATCCAATGGTGATAATGTTGGAGGTGGTAGTGGATGTAACCTGTTATCTA  
TGGTTGCTACAGATGGTTCAACTACTGGGTCTGGATTGACTGTTGATACTACTGTTTATA  
GTGATGGAAACATCACGACTGCTGCGGCCAATGCAGGTGGTTCTGGATATCTAATTACTG  
ATGGTGTACAGTCACTAACTCCAACGCAGGTAATAATTCTCAAATTGAGCTTGGGTACAT

TATGAGGAGGAACAGGTTATTCTTGGTCTACTGGAGTAGGAGTCACTGGGCGTGACGATT  
CTGCTGCGACTGGTGATATTACTTCATGTGCAGGTGCTTTAACTAACGTTACGGTTTTTA  
ACGGTGGAACAGGATTCATGGCGGGTACACTTATAATTATTGATAATGCTTATGCTACTG  
GAGTTGAGAAGCTGTTACCTAATAGTGCTGCACGGTCTGAACATTCGCCAGGAAGTCCA  
TTGCCGCATCAGCGTCCGCAAATGGATCTGGCGAAACATTAATATCTCTTCTGTCCTTG  
CTTGTGGTGGTATCACTACTGTCGCAACCAACGATGATGGATGTGGTTTTGGCTGAATCTT  
GACTCTTGTCCCTGACTTATGCTACCGCAACTCATATCGTAACAGTAGGAAGCATTGGTA  
CTGCTGACGCATCAAGAACTACAGGAACCAATAACTTAGTACATCTGATTATGGAAGTGA  
ATGCATCTTGTGCCATCGCAAAATCACTGTTGTTGTTGGTTCAATTGGCCCTGCTTCTA  
TCACCGTGACAGATGATGGTAGCGCATTTATCGCCAATGAAACTATCGGAGTTGATGATG  
CTCCAAATGGTGGTGGGGGTGGCGGTCTCTTACATTCGATGTAAGAGCAATCAATGGGA  
GCTCTGTTAGAGTTCGAGTATCCGTGATTCATGGTAACGGTGCAACAGTTAATTGCGCTA  
CCTTAGCTACAAATGCAACTAGAACTCGAACTGACATCACAACGATGGAAGTTGGAGCTA  
CAATTACAGGTGCTAGTTCTGGCACTACAGGTATTATGACTGATCCTGGCACTAACCACA  
TCACAGTCAGTCCCGTTGACGGCTTCTTCAAGAAAGGTGAAGTAGTCAGTGCTAATGGTG  
TACTTACGTACTTTCTCCTAATTCATTTAATAGGTTATGTCTGCTACTAGATCCTTTG  
ATAAGACAGAACTACGAGACTCTGCTGTACGTCGATCAGGACATCCTGCGATAGACATCA  
ACGTTGCTCCTGAGCAATTAATGATTAGATAGGAGAAGCGTATGATTTCTATCAAGCGT  
TTCCTCTGCAGGTAGTCACACATCCTTCATCTTTACTGAAGTTACAGATGCTAGTAAAA  
CAGCAGCAAAAAGTTCAACCCAGCAAGGATCTCCAATTGGTATGAGAACAATAACTATG  
GTGCAGTACTACCTAGCACCTTAGGAATTTATCAGGTATAGACACACATTAGTGCTCCTA  
GTATTGTGCCTGGTAACACGTCCAATATAAAGTATCGTATCTTTCTAAATGATGTATACG  
CTATGACCCATGGTGATATTCTTCATTACTTTATGACATATCAATCTCTTGAGACACTTG  
ATTTTGTAAACAAAGACTAGTAGGAGTAGAAGACTAAGATAAAAACGAGAAACAAGGTAGAC  
TGTATCTCGAGAGGGATTGAGATTCATTGGGAACAGGAGAAAAAATTTTAGTCAAAGTTT  
TCGTACGTCAAGATGCACAAAGTTAGACAGCAATATATAATGATAACTGGTTAAAAGATT  
ATGTTTAAAGCGTTATTTCAACAACAATCGGCTAAAGACCTAGGTAAGGAAGAGGGCATT  
AGATGTTAGGTGGCGTCACAATTAATGGCCTTCATATTCATTAGGACGCGGGTCAATTCA  
AGCATGACCCTGAAGATAACTTTCTGTGCTGCATACTAACTACCTCCTTTGGTCTTCGTGG  
GGTAATCTCTAATGGTCTTTCTCAACTCTCCTACACAAGATTTTGATCAATCAGATTATT  
CAAGCGCGGGACGCTTCAAAGCAAATAGTTCTGCACTGGAACAAAAATTTATTGCACATC  
TAGTGGTTTTAAAGCATTGAAATCTATGGGCCTGATGTTTACTACGTACGGTGAACGAATC  
TCAAGTAAGATACGTACTTTGGAGAGGTCTCGGATTCGCAATTCGATACTGCGAAACCGA  
TTAGAGCATATGTTAATAATGCAGAAGGATGGGAAGGACAGGGTGAGGTGCTTAGCAAT  
TTGGAGTCCGTATCAAACCGAAGAGCGCTTTTATATTCTCCCGTAAGAATTTTAATGAGT  
ATGTGGACGCTAGTGTACGCTTATCGTTCGAAGGGAGTTCAAACGAAGGGGACTTATTCT  
GGTTTCCAACAACAAGGCACTTATTTGAAAAGCAATTCGTAGAAGCAGAAAAACCATTTT  
ATCAATTAGGATACGGATGTGTAGGGGATTGTCAGCGTGAACCTTAGAGTGCAGTGACG  
AAAATCTTGCAACAGGAACCGCAGAGATTAATGCAATCGAAGCTATCTTTGCTAACGCTA  
TTACAGTTAACTTCGGTACTGGAGGGTCTAGCGATTTACAGTTGGTGAAATTGTTTCAG  
GAGGTATATCTAAAGTGAATACGGAAGTTAAAGCAAGGGATTGTGCAAGTAGACCGTTAC  
ATGTGTTTATTAGTTCAGCTGTCTTTACGACACCTGAAACGGTTGCAGGGCAGACCTCAG  
GTGCTGCGTGGACAACAGCATCATAACAATACTAAATAACGTTAATACCGCCAACTCTA  
TTGAAGAAAAGAACGGTCTTCACACTTTGGATAACCATATTATTGACTTTACAGAACTC  
ATCCATTCGGTTCAATTGGTTCCGTTACTAACAATAAATACTAATGTTAGGCACTTCTCC  
AGATCACGGAATTATTAGGAACACTGTCGTTGCTTTTGGAAAGGTTATTCACTAATATTGT  
ATTACCTCGTAATGCCGAAGTTATCAAAGTACTTTTAGGGTTCGGTCTTAAACAAAAACT  
CTTAGGAAGGTTTCGATCAAGTACTACTACAACGAACAAAGGAGCTCAACTTACTCTTCC  
CAGAATTTCTTTTGAATTAGCGGAGGAGCATAGGATAGTTCAAAGAATCTTACACCCAC  
ACAAAAGATCAAGAAGGCACGCAGTTCTACTACAAATAAGATCTTGTCTATGCCTGTTGC  
TTATAACATGGGTTTGGAGCTGGCAATGATCTCTAAAATCAAGAAGAATGTGTTCAAAT  
TTTAGACCGGATTCTCACAATATACCAACCTCCTCTTAATATGGCAGTAAACCTCTTGCT  
GGACTTGACTGAGAATAGAGACGCTCCCTCAGTCAACAAGGGCGTCACATAGGAAGATGA  
CTATGAGGGTAACCTTACGACCAGAAGAGCGATCAGTCATACCTTACAATATACCGCTAG  
AACTCATCTATACGGTCTGTCATCAGCCCCAAAGGTTTACAAAAGTCTAAGACGGCCTA  
CTATACAGAGACCACTACCACCTGTGCGCGAAGAGAATTAAGGTATACTGTTGTTCTTAA  
TTCTCTCACAGCAGATGATACTCACGATTTCCGATTCGGAGAGACTAATGCAGTCTTTAC



AGATAACAAAAA ACTTAACCCTACTAGTGGTGTGACGAGGCAATTTAATCCTGGCGACT  
CCTTTCGATGGTCTCAACGATGCTTTTTGGTACTGAACCTACAAACCTTCGAAAGCATGTG  
GAAAAAATAAAACCAATTCTGCAAAAAACAGAGACTGAAGATGTGAAGCAAGATTACGTA  
ATCTCTCGTGCTGCTTCACATAGCTTACTGAAGAAAGGACAGGAAGCAGTAGATGGCATA  
TTAGAAGTATCACAAGCATCCGATCAGCCTCGTGCGTCAGAAGTTACTCCAACATCGATT  
AAGAACCGAGCAGATAGGTCTGAGAAAATAATAGATCTTCAGAAGAGGATGATAGAGTAG  
GAAGCTGATAATAACAAGAATGCAGCTTTTACAGTAAACAATGCTCTGCTTGTGGTAGC  
ACGGCCGAGTTACAGAAATTGTTAAAGTCGAAAAAAGGAATCAATAAAATGAACAAGAAA  
TAACAACACAGGACACGTCAGTATTAATGTTCTTTGCACGCGTACACCTGAAGCAGGTG  
CAGCTGAATGTCAGCTAATTCAATCACGATATTATAGAGGTGCGATCTATTCCAGGTGCAG  
CAGCTGTAACCTTTCATGGTAGTCCTGAAATCACACTTGCTCAGAATATGTTTCATTCCAC  
TCAAAAGTGGTAAACCTGTTACGCAACACTTGTAGAAGCAGTATCTGTTTCATACTGGTG  
ATTCTATCCTAGGTGAGCATAGTCACTCTACAGGTGATGCACTTCCATTCTCATCTGGTG  
ATTTTATAGCAATTGAAGATGATAGCATAGCTACTGCTATTCAAAGTAACTTCTCTCTG  
CAGGAAGTGTGGTAAAAAGATAACCCTGTAACTGAAACAGAATCGCTACTTATATTG  
GTTTCATCAGGTGCATCAGCAGATAACACTTTTGCCTTCTCACTTCTCAAGCGGCTGGTA  
AAGGAAGCATTAAAGACCGTTGCCGCTACAAATGCAGTAATTATAGAAGATATTATAGTGG  
TTGGTTGTTAAGATGCCCGCTGTAATCAAGAGGTAGAGAGAATACTTAAAGGCATGAAG  
AAGAATCATGATCAATGTAGGAACTCCATGGCTGTCGAGATAAAGCAGTTATGTACGCT  
ACTGCTGAAAAGTTAGCACATAAAGAACAATTGAATGTTATGTACAATCAAGATTTTCATT  
AACTATTCCACGGTAATCCGACGACACGGATGCTATCGAAAGCAAAGTCAAAGACTATG  
GGAAAGATTTATGCTGACCGTAGATCTGCCGAAAAGAAGAATAGAGAACGTAGAAAGACT  
CTTGAGAAAGATCTTAAGAAGAAACGTTTAGGTTACAAAAAAGGTGTAGGGCAGTATAAA  
TATTCCTCAGGCGAGGGAACAGGACGTGAGGTTTCATACGGAATTAGTCCTGTTAAAGGA  
ATCTCTACGAGATGTTTTGGTAAGATCATGCGTCGCTAGGAAGATAGCATTGTCAAGAA  
TCAGTTATCAGTAAGAAGGCAGATAAACCTGTTAGGCTACACGATAGTTAGTCTAGAAAA  
CCATCTGCGTGAATGAACTTAGGTAAAGCAGAAGCAGGCAAAAATCCTGGGGGTTTAGCA  
AAAACCTTTTGGTACTACAGACCCAAAAGGTAAACTCGGTCAAACCTAGCTAACCCGCGATG  
CACCATGGTCACGAATAAAATTATCGAAAAGAACAATGTGGTGATAGTTTCATTGCACTA  
CAGGTGATCTAAAAATAACTCTTCTGATTGGTAGCCAGATTGGGTTTCAGCGGGGTGGTAA  
ATACGCACGTAAACCCTGCGCCAAACAACCTGGACATAGGACCAAACCAAGAGCTCTTC  
CAGTAAGATGAAAGGAACCCTAATTTCAAAGAGGAAGATACTGACTTTTCGTCGAAAAT  
CTGCCAAGATCCTAATCCAATTAGAGAAGGAAGGGCAATCCACGTGAAAACATTATCTAA  
ATAAATACACGAAGGCGAAAAAGGTTCAAGTTAGCCTAAGGTAAAATCTCGCTATTCAGT  
TTGGCCAAGTGGTTATGCAAGCGGTGCACTTGTCAAATGCTGAAAAGTTCCTGCAAAAAA  
TTGGGGGATCAAAGGTAAGAAAGAAGAATTTAATATGAAGGTAAAACCTATTCGAAAATTT  
TTAAGCAGAATGTTGGAAGACTCACAAAAAAGTTGGTATCAAACGAACGGTGATAAGAT  
AGTAAACGATTTTCGCCCAATGAACGAAGCAAAGGAATTCATAGGACCGGACAAAACAGA  
CAGAATACTTATCAAGAAATTGGATAACCCTAGATATGCTAAAAGGTTTGCAGACTAAGA  
AAAGAAGAGTGAGCTTAAGAATCGACAATCAATTAAGGATTAAGCGACTAAGGGTATGAA  
GTTTACTCATGCAGAAATAACCAACGGAGCAAAGAAGTGTGGCCAGATTATGAGAAAAA  
GGGAACGCAAATTGCATTAGGCGTAACGTACAACCGCCGTATTAGAAAGGCGGACACAAA  
CTATGTGAGAGAAAAAGCAGCAGCATGGACTAGTAAAGCAGGAAAAAACCGATCAGACGA  
AGTAAACGACAAAGGCAGAAAAAGTTACGAACGAGAAAAATCCAGGATCCGACCTTAAAGC  
ACCGAGCGACAAAATTGGAAACCCCGCATGGCGTCATTCCGCGCTAAAATTAAGGAAT  
AAAAAAGAAATCAACTTCAAAGAAAACATCCAGCGAACCTGACTTAAGGACTAACATAAG  
CGTGCGTGCTGGGAATTGTTGATCTATCATATGCTGTAGACTGTACCATTAATAATTAGAA  
TCTGTCCGATGTGTAGTGCTACATGGAACGGCGAACAATTAATTTGCCGAAGTCGAAATG  
AGGGTTGCTCTCATGATCTTGTGGGCTAGTACGTAATAATCATGGAGATGAGACTTGTG  
TAAATCCATGTAAAGGATGCTCCAGTTGCCCAACCTGGGGATATCGTCATGGAATGATTG  
ATGTCGTGAGTGAGGGGTATTGTTAAAGATAGTTGGTGTCTAAGTTCTCAATTTGTATTA  
GATTTTCAATAAGAAACAGCAGCAAAAAGAGAAGCGTTGCATTGGAAGTTGCCTATGGTA  
GCAGCGTTCGATAAGATCCTTGCAACATTAGAAATTGTAGATGATGGTAAGATCAAAGAT  
GCTTTTCTAGAAGGTCTTGCATCTTGTACTTGGTTGCAAGTTTGGGAAACACGTAATAGA  
GTATTATTCATACCTGAGATATTTTATGCGGATTTGGCAATAAAAGATATGCATAGAAAA  
GATAACGTACATGTAGATGACGCTAACCGAAATGATACTAATAGAAATATGGGCTTCTTT  
AATAATTGCTGGGATCCCAACATGATGGGTGGTGGATTTATGCATGGTGGTGTAGTACGT

AAATTGAACCCTACAGACTTTTGTGTTTTTCGATCTACGAACTCCTCATGCACCAGCGGAA  
ATAAACTGTGAGCACAAAAAACTAGCGATAGATTTCTCTATTAAGAAAACGAAACAGGCG  
TGCAACTTCAACAGCAATCAACTACACGATAGTGAAAACCTGTAAGGAGGAGAACGCTGATT  
TGTGCATCATACCCGTTTTGTATATACTTTCTCTGGGACATGGGAACCCCAACCAGATATA  
CTGTACAACCCGACACTTCTTATTTCTCTTGCATCAACAGCAGTGTCTACGGGTGCGCCT  
GTATACATTATAGGGGTCAGGAGAAAAAGAAATCGCATCTGATAAATGACAGAGCTAATC  
GCAATTATATTAATCGCTACCGTTGGCATTATTGATTTTAGGTATACAGGTAGAGAGTTC  
CAAAGAGTTTGGGTGCTTGAGAAGATAGCTCGATCGCCCTATTTTTCTCTTTTGAGTGT  
TTACATTTAAGAGACTGAATGGGGGCACGAGGTCCAGAACCCATTTATCTAATGGAGGTG  
CATTATGGTCAAAGACTAAACGAAACCCTACATCTTGAATAACTGGAAAGTCGGGGTGT  
ATCTTTTATTGGACTGATCTCCCTTTCGCCATACTCCTCGTCTTTATCAACTATTGAATC  
ATGGTGGTTTATTATGGGTTATACGCTGTATGTGCTTACGGCCTTAAGCATAAAGTAGTG  
TGGCATGCTGCACACACATATGAGGGATACCTAACACGTTTTCCAGATGACGAGGTCATT  
ACTCGAATCACGGTTGATGAAATTAACCGTGTAAATGAATTATCCAAAGCAATGAAGTTA  
ATTAGACAAGAACCCTAACCCAGAACCGATTGTAAATTAGTATTAGATGCTCTTGGGGAAC  
CTCACCGATGCTTTATCGCAGGTAATAGAATGTTCTAAGAATACGAAAAACCTATTGTGG  
ACTTTGAAAATGCCAGCCGATCGTAACTACGAGATTAGACTAAACCACAATGAATAAATT  
GAACACAGGATTCOAAGCTGTGACTTGCTGCATCCTGACGACTGCTTATCAGAAGGACCA  
GTGGCACAGGTAGCAAATGATGTTAATATGGATTTTGGCTTGCAGCCCATATATGGTCAG  
ATGGATGATCATATAAGGAAATATGTCAAGGCAGCAGGTATTCATCATTAAAATCACTGG  
GTTGAGAAAGAACTAAATGATTTAGACTTATAAAAGGCATGAAAACCTACAGAATCTTCTG  
GACAACCTGACTCCACGTTTTACCACACGTCAGATGCTGTTTACACGCAGGAAAGAAGAAC  
TTCAATCTGCATAAGATGAGTATGTAAAATTGGAATGAGATCTGACTGGAGTTGAAGGGT  
CTAAGGAGGAAATTGAATATGCTGCTTTCGGCGGATGCCGAGGAGATGGTAACCTGACAG  
GTATTTAAGACCACTCTCCACGCAAAAAATGGCGGCGAGGCACGCAATTGACATAGGGG  
ACATATGAGTTCGGTGCAATGACCAAATTGCTGCACCCTCAATGGAGATGAACTATCAT  
GTCCATTATACTGTAGGTAATCACGATAAGCAACATCAACACTATGAAATATGTGAGTA  
GGCTGAAGATGCTTATCCGACCATCAAACAAGCAATCGAAGATTTAGTAGGATTGAATAA  
TCCCACTCAGCAGAATTTTGTATCAAAGAAAATTAATGGTCGCCTGGGGTGGAAATATG  
GATGGAGTTTATACTCGTTGTAATTGTCTCTTGGTATATCTACTTTATACTTAGAATGGC  
ATACAAGGAGATGGTCGAGGGCACCGATTGAACCAGCGAGCGGGAAAAGCTGCTATAACT  
TTAGACTAACGGAGATTAATCGTGTTGTTGACGCCATACTCTTGATGTAACCATTGGTA  
TGGGGTTTCATATATAACAAGAAAGAAAGAGCTAGCATTGGAGGAATCGATACGCAAGAGA  
AAAGACCAAGGGATCTGGACGAGAAGGCATTGGGACTAGAAGCTACAAACTGGATGAAAA  
AAAAATGAGAGCAACTTATTAATGGAGATGCTGATGCCCGTCCACAAACTGAACTTACAG  
GTGGGTTTGGTAAATATGGTAGGTTGCTTGGTTGGTTATACGTTGGCGATGAGGATCAAT  
AACTCAGTGAACCTGATCGTGCAATGATATGCATGGTCGTACGACGGTGGATCAAAAC  
AAAAAACTTCGATGATCTCCGTGAAATGAGACGTAGCTTCGGAACGTTGCTATAGTCTC  
TCATCTCTTATTTGAACTAAGATTTCAAGGTTCCATAATTAGACGAACTTGTGAGAT  
GATGGTGTGTTTACATACAGGTGAGGGGTCCATCTATTATTTTATGTGGAATTCTAAGGGT  
TTAAGAAAGTTACATATAGGAAAAGGAATAACAAATAAAGCGATTGAGATACTACTGT  
GTATCATTTCCAGATCCAGAATTAAGTATCCACTCTTTGGATGTGATATCGTAGAAGCA  
GGTGGAAAGGTTACGGCTGCTATAGTTGATGTGTCACCAGTGCATAAGGTACGTTATAGT  
TTAAGTAATATAACATCTAATTTTAAAAAGAGTAGGCATCTAGCAGAGTAGCGTGAGATA  
TATTCATATGGTGTAAAGTGTGTAAGGTTAGAAAAGGATGAGTACAATATCTTTTTATTA  
TTTTCTAGTGAATACTCAGAGGTAGTCTGACAGATAGTAAGAACAGCATAAAGAGAATTA  
GGCTGGAGAAATACTATGAGGAGATATGACAAGCAGTGATGGTATTGGACATCGGAGATG  
ACCAACCAGAACACTGAGGCGGTGCTATCCCAATGGTTCCATTACCCGTGGGTATCGAAT  
TATATACAGAACTTGCTACTTGACAAACCCAACCTGCGCGTACAGAAATGTTGGAAGCTC  
TCAAGGCTCTTGCCATTGCACCCATAACGAAAGCAAACATGAACGTTGAGGTTTACCTTT  
TCAATCCTGTTGGAATTGGTGAACCTCCAGATGTTCTTGTGCGGATTCAAGAGCAAATTA  
ATTTGATTGCCAATAAGAGGAAAGTTTGGAAAGTACTAGAAAAGTATTTTGAAGTATGAA  
TGAATCTGTATGGTGGAGCTGAATGACTGATGTGTATCTCGGCAACCCAAATCGAAAAAA  
AGTATACACATAAATTGACCTCAAACAAGAATATGTTCCCTGAGGTAGTGAAATGTCAAGA  
TTATCTCATGTACTTTACCAAAAATTGTATCAAGATCATTCTCTAGATGAGGGTCCAGT  
ACAATTTAACATGTATCATTTCACGAGGGTGTGGTATCTAAGTTCATGATCATAGATT  
CAATATCGCTACAATTCCACGACGGTGCATTAAGTGTACAACCTGTTACTGCATACTTAAT

TTGGTATGTGTTATTCAATGCAAATGTTAACGTAGCAATCCTCGCAAACAAAGCAGCAAC  
TACTAGAGAGGTTCTTAAAAGATTACAGTCTAGTTATGAAAACCTCCTGAACTGGATGCA  
AAACGAAATCCTCTAATGGGACACAGCTTCTCTGGAACCTGAAAACGGCAGTACAATATT  
GGCTGCTTATACTACCGCTGCTGCTGTCAGGGGTAGGGCATCTAACGTTATATTTCTGGA  
TGAATTCGGGTTTCATTCCGACTCATTACGCTGATCGGTTTGTAGTTTGTCTTATCCGAC  
TATCTCCTCAGCTAAGTCTAAAAGGTCATGAATATATCTACTCGACAAGGGATAAAAAT  
GTTCTACAAACCCTGGCATGATGCAGAGCGTGGAACGAATGAGTAGGTGCATACGGAAGT  
TCACTGGTGGGGGAGCCACGTAGAGATGATGTAACGAAAGAGTAAACTATTAAGACAC  
ATCAGCATCTCAGTTTCGTGTTGAGTTTGTAGTGTGAGTACTTAGGATCTGCTGATAAATT  
GATTTCTCCTAGTTAGTAGATAATCATGCCATATCATCACCCAATTACATCTGCTCGTGG  
GCTGGCAGGATTTGAACAAGCATTTCAGAGCATAATTAGATTTTTACTGTTACCTATA  
AAGACGTGTTGGTAATGATTACTCCGCATTTGGTGAAATATATACCAAACCTATTCCTTA  
TAAAATGGGTGCCAGATATAAGAACAATGAAATTAACCCAACGTTCCACCAGATATTAT  
CGCGGACATTGCAAAGAATTATAATAACGCATACATCTTATGTGAAGTATAAGTTATTGG  
TGGACAGGTTGGAGATATTATTCCTTTTGTATTTGGACTATGCGAATTTTTTGTATGGCTGC  
AATTGGTGGTCGTGCAGGTCAATAGCTAGGACAAGGTTTTATTCTAAGAAAACCCAAC  
TGCTGTAAAGCTGTAAACAGTAACAAAACAAGTTTGTATGTTGTAACCTTAAAGTATTAAT  
TGAAGATGATAAATCGCTTATAAATGAATCTGACACGATTACGGAATTAACACCGTTCAT  
TGCGAAAGGTCAAACATACCAAGCTGAAGAAGGTTGTAATGACGACTTTCCTATGTGTT  
ACTGATTCCTAGTGGGATGGCAATGCAACCACACTTTACAGAGATGTACGATAACCACGC  
ACGTCCACGAATCTATGAAAATCGGAATGAGATCCTTGAAGTACGATGACACCATTG  
GTTTGTAAACACCCTGAGGGACGATGATTATTTGCGCACGGACAGGACTATGTGTGGAA  
ATTCGCGAAATACGGGGATGAATCCTACGCGTTCGAGTTTAGGTAAGGTTTCTGCAAAT  
AAATAATCTTAGACATCTGATGTTGGAATCCCCCTAGGAGAAAATTAACCATGGCAGCGA  
ATCAATTATCTCAAGGGGTAGTGGTATAGGAGAGAGGACTTACTACGATTACCACACTAT  
CGACCGCTCACGGTAGTGTGCACGCTGCACTTTTTTGGCTCGGTCCTGTTGCAGAAATCG  
TCGAAATCTCCAGTTTATGGGCTCTTGCAGACCAATTTGGAAAACCGAATTGGTATAACT  
ACGAGATTTGGTATATTGCAGCAAACTTTTTCCGTGTGGCGGACTACTAACAACAGTTC  
GTCGTGACTTGACATCGCTAAAAAAGGCAGTTAGTAAGGGAAGTGCATTTAAAGTCAAGA  
ATTTAAGTAAGTATGAAAACACTTACGAAGGTCCTACTACCACATGGTGGTGGGCAACAC  
GAACTTCTGGAACGAAAGGAAACCCTATCGGTGGATTTGTAAGTACGACGAGGTGCAGTTC  
TAATCACTGTTGTTCTGCAACCCTGTTTCCAGGAAACGCTCGGGAATTCGTGGCTGTGGAAG  
CACTCTCCGCAACATCAGGTGATGCAGTTAAAGTATTCGAATACAGCATCGTATTAAGAG  
TCACATGTGTTGTTTCGCGACCTCTTTCCTGGCATCAATATAATTGTTTCAATTTCTGGT  
GTAACCAGACAGTTACAGTGCTTGCCAGGGACCCTCCTAACAAGAGAGTTAACATGGGTC  
TTCCTCTAGGTGGAATCACTGGTATCCTTGTGACGGTCCGACTGTATCTCAAGGAACTT  
ATACTTGTGTGAATGCATCCTCTGGTATTGAAAGAAGGGTATATAGTGGATTAACAAG  
GAAGGAATTAATTCGATACTGCTGATATTATCGCTGATCCTAACTCAAATGCTGTTTCAA  
TCCTTTAGGTTTCGTTCCGAGTGTGCTGAGCGTGAGAATCTACCTGGTGCAAATGGATTT  
ACGTTCTGCTGGTCTTCTACTTTCAGACTTTGCAAATAACGCAGTTGAATTTGGAGATG  
AACTTCGCTTTCTAGTTATGCATATCGATGGTGCTATCACTGGAACAAGTAGTGCTGTT  
TTGAGCGTTTGTATGGGTCTTTAAAAGCATCGGACGCAAAGCCAGGTGTTGGTGAAGCAA  
ACTACTACAAAGGAATAATCGACCAAAGTCTGAGTATATCTACTGGGGTTTACATGAAA  
CAGGAGTACTGAATACAGCTGCTTCTGCTGCTGCAGGAAACTGGGGTTTAGCTGCTGCCT  
CTAGACAGTATAACTTACTACGCCCTGCCGATGGTTCTACTGGTTAGCCTGTGCGACGCA  
CCAGTGTGGGTAATAAGAACAAATGAAAAATACTACTACACATTAAGTCTGGTGTTCACT  
ACGGTATTTCTGGTGGACTTTACAGTGTAAACAAGCACATCTCTTGCAACGGCACATGGTA  
TTGCTGGAGATGCTCAGTCACATAAATTGACTTCATTCATAGTTGTCCATCAGGTGCAG  
ATGATGCTACTGCAATCGCGAAAGTAACTTCTCCAGTTAACATTGCTGAATAAGGAATAG  
ATTCTTTAGTATTCGTTTACCTCCTAGAGGAAACGTAATTGCAGTTACTCACTCTACTA  
CTACGACTGATAATATAGTTATCTTCTTCGATCTATTACCTAGTACGTCTTGCATGGTTT  
TTGAGTTTGGATAAAAAGTATATCTATAATAAGTATAACGATATACACAGATGCGTTCCTA  
CCAACGGTGACATAGCTGGTGTATGTTTACTGACAACCTGAGTTTGAAGCACCATGGTTCT  
CACCTGCGGGTTTTCAACGTGGTTTTTTAAGAACTCCTCTCAAACAAGCCTACACACCAA  
CTAAGATACAAAGAGATCGCTAGTATGTATACAGAATGAACCCTGTCTTATCATTGCGCG  
GTCAAGGCGTCGTCTCTGTGGTGACAAGACTGCACTCGGATTTCCAGCCGCGTATGATA  
CAATCAAGGTACCTCGTCTAGTCCTACCATCGAACGTGTTAGCTCAGGGGCTCCTAAAA

CACAACCTCTTTGAGCAAAACGATGAAGCACGAAGATCACTCTCCTTGAATATCATCGAAC  
CTTATTTTAAGTGAGTTTCACGTCGGGGAGGTGTAAGTACTGACTTCGTAGTTATGTGGGATT  
CCTCGAACAAACCACCAGAGGCAGTCAATCGTGGAGAGCTCGACGCGCAGAGTTTTGTGA  
AACCAACACGCTCAATCAACTACATTACCTTGACATTTCTTGCAACTAGAAGTGGAGTTA  
CCTTCAACGAAGTAGGTACTTAAATTAATGCACCCTTTTTTCAGAGGCTTTCCTCATCT  
GTACCCTCAGAAAATTTTTCTTGGTCTAAATAAAACCGCCGTTGCCTCCTAAAAAAGTGG  
CAAAAAGAGGATCGAATGACGATGTTAAGGCAAATGTCGCTTCAGACTTTGCTCGTCTTA  
AGCTAGTCCAAGTTGATTTACCATTTCCCTCTGGAATCATTAACTATGAAGACCTGGTAA  
AGCATCGTAAGTTCGATGTTACGGAGCGAATCTTCCTTTCGCCAGATTGGTCTTATAG  
AAAGTCCTTACAGAGGACGTACTCTAAAATCGCAGGAGACCGATCGTTTGAACCTAGGA  
CAATCACTGGTATGAATGACAGTAAGTTTGTGCTAAGAACCGCATTGGAATTGTGTACAT  
CAAGCATTCAAGCATCCAGCGAAAAATTCACTTACGCGGCAGGTCTTGGAAACGTTGTTG  
ATTCAAGAGGACACTTTGCGGACATGAATCTTCATCAATTAGTAAGAGAGATTAATCAA  
CAGAGAAATCAAAAATTCTCAAATCCTATACGTTCTATAACATCTTCCCTAGTGCAATCG  
CAGCGAATGACTTAAATTACGGAACAACGTTGCAATCGAAGAATTCACCGTTGAGTTTC  
CAGTTCAGTATTGGTATCCTCTAGCAGACGCCAACGACTAAACCGCTAAATACCACAGGG  
CCAATTATTAACATTTAATAGTGGCCGCACAGCTCTCCGGTTTTTCTACTAGAGTGACC  
GAAGAGGGTCCGTTAGGCACCTTCTTTTTGCTCAAAGAATAGTATGGAAGGATCGCAACC  
TAGGGTAGGCGGCGGTTACGCTGCAAATCCGGTCCGTTTTGATGGCACGGTTCGGAATGA  
GTAAGAAGTACTCTCTCGTTAGAGAGAGATGATTCTTCAACGTCACTGCGCTAGTGGGAT  
AGATGTCTTCGTGAAAGAAAATATTTGTGGCAACTTTGACGACGTTCCCGTCGATGTCGA  
GTTGTCTCGCCTGAAACAATCCGACAAAATTAAAAAAATAATCAGGGTAGATTTGCAGAC  
AAATCTTCGCATGAATGTTTTTGATATTAGGTCGTACGGACTTTTCCGTCGTTGGTGTGT  
CGTTGGAAGATCATTTTACCATAAGGTTATCGATCTAGATAACCCTAGAAATGGTCTTAC  
TGAGTTACGATATTTTGACCCTCGTAAGATTCGTAAGGTTACGGAGTTTGATTTGATACG  
TCCAAACGAACTTACTGCACTGGATCTGAATGCACAACCTTACACAAAAAATTCAGATTA  
TTATCTATAAAATGGTAAGGGGGTGAAGAAATCTGGATCTCAGCAAGGACTTAACATTGG  
TGCAGATTCAATCACTTGTGTCATTGTGGTATACACGATTTCAATAAGAATATGACATT  
AACTCATCTCCATAAAGCAATCAAAGCGGTTAACAAACTCCGTGTGATTGAAGACACTTT  
GGTATTCTATAGATTGTCAAGAGCACCATTAAGAAGAAATGTCTACATCGATGTAGCTAA  
CCGTCGGAAGAACAAGAGGAACAGTACCTCTCTGAAGTTAAAGGTAGGTATCTTAATAC  
ATTGGTGTATGATGCAAACACTGCTGAGATTAAGATGACAGGTAGTTCTTGTCCATGTT  
TGAAGAAGTCTGGTAACCTCGTCGTGAAGGCGGTAGAGGAAGTACTGAGATATCCACCCTTCC  
TGGCGGACGAAATCTTGATGAACTAGAAGACGTTAAGTATATCCGAAACACGTTGTCCAA  
AGCGAAGAACGTACCGGCATCAAGACTTGAGACTGAGACTACCTTTAACCTAGATCGCGC  
TGTAGACTTTACTAGGGACGAAGTAAAGTTCCAAAATTTTATTGCACCTGTCCGCCCGAG  
ATTCTGACAAATGTTTATCTATCTCCGTACAACCTCATCTCGTTCTGATGGGCACAATGAC  
TTTTCAGGATAGGGACGATACCAAAGATCAAATTCATTTGGCTTTTTTGTGCTGACCAATA  
CTTCAATGATCTGAATGCAATCGAAATCCGCAATGTGCGTATAACTCAAGTGACCACAAT  
GGATCCATACGTTGGTAAACACTGGCCTATTGATTATATGCGTAGTCAGGTTGTAACACG  
ACCTGAACAGGACATTAAGGAAATAGAAAACCAGATGGAATCTGAACAAGAACCAGGTTT  
TATACTTGATACACAGCACGCAATGGATACCGCTAGGGATGGTGTCACTGCCCGAATGG  
GGAAGGAGCTCGTCAAGACACTCCTGAAGTAGACGCGGGTGTGCGGAAACTGGGAGAAAT  
CGAAACTATATATAATAATTGTGAAGGTACAATTATGCATACTGCAATTACAAAACATGT  
AGTTCAACAAGTCTTCGTAGACGAAAAATCGAAAGCAGTTGAATGCGTAAATGATGCATT  
GGCTGCAAATGCTTATGATGCCATTCAACCAACAAAGGTAGATGTGCAACGAAGTATGGG  
ATTTGTGCTAGATGATACCGCACAGGAGGCCGACAGATGAAATTGAAGATAACCTATCTGA  
CGAAACTGACCAACCCGAAACTGTTCTCGTTGATTGCCGCAGACCTAAAGTTCCAACAGA  
GGAACCAGTAGGAGCCGTTGCTCACGGAGCACCTTCTTCTGTAGAAGAAGTCTGCTGAGGA  
ACAAACCGATGAGACTATTAGCTGAAGACATTTCAAACCTTGGATTTTATCTGCGAAGATA  
TAGAAGGCAAGAAAAAATACTCCATCGAAGGTGTCTTTCGACGTGCGAAATTAAAAAACT  
GCAACCATAAAAATGTATCCCTTGAAGTTTTTATCCAAAGAAGTCGCTAAATATTATGCGA  
ACTACATGCAAAAAGGGCGTGACCTTGGAGTACTACGTGACCCTGGTGGCCCGTCAATCA  
ACTTTGACCGGCTTTCCCAAAGATTCTTTCTCAAAGGAAGAAGGAAACATCATCCTAG  
GTAAAGTAAAACCTGCTCGAAACACCTATGGGTGGGATTCCAAAGAACCCTTAGATGAGG  
GTGTCTAACGAGGTGCATCATCAAGAGGGATGGGTTCAATTTGTAAAGAAGAGAAGTGTAA  
ATGTTGTTATGGACGACGTTATGCTCGCGACTGAAGCAGACATAGTCGCCGATCCTTCCC

CGCCTGACGCTTTTGTTCAGTGGAGTTATGGAAGGAAAGGAGTAGGTATGGGACACTGAAG  
TCCTAAAAGAATATGCTGTGGCTGTAATTAACATCAAATTGCTCAAGCATCTCTAATTA  
ATCTGAAAGAACGTTGGGTTTCAGCGTTTGAGGCGCGTTTTAAGAGTCTGTGATTTAAAA  
ATAAATACAGACAACGCTTATCTATATAGGAGTTTAAACCTATAGCGGAGACCCTCGATA  
AAGAGCGAGATAACATGGAGCAAGTGGATGAACGCTCTGCTCCTATCACTAATAATGCAA  
AACCGGGTGAGAATATGGACAATTCAAAAGCAGGAAGTACAAATAAAGTCGTGAACGTTG  
AAGGGCCTGAAGCTGCTTAATTGAAAGTCACAAAAAGAACTAAGAACGCAGGTATTTTGG  
CTGCAGTTGCAGTTAAGGAATAGGGTTATAAGTCTCTGAGCACAAAACCAAAGGCTGGAT  
GCGCAAAACAAGAGGAGGTAGTGACGGACGGGGGCGAAAAAGAGGAAATCGCTGAAACGA  
AGTACGCAGTTTCTCAGGATGTTGACGCTCTTGTACAGGGGAAGAACTATCAGAAGAGC  
TCCGAGTCAAAGTAACTACTATATTTGACGCAGCTGTTACTGCCCAAGTTAACTACCAAG  
TCAAAGAGTTGCAAGAAGCGTTTGTAACTGCGCTGCCTGAACAAGTCGCACACGTTTCATA  
CAGAATTGGTCGAGAAGGAGAATGATTACTTGTGTTATGCTGCCGGGCAATGGATGAAGG  
TAAACACATTGCAAATCTAGCATCCCCTCAACACTGAGATGCCAGCAGCGTCTTTCAAAG  
GACTAAATGGTCTCTTCTTAGAGCACAACTTGCAGGGCCTGAGGGGTAGTTCAACTTGC  
TAGATGGAATCACAGGTGACCTTGATGATATGGAAGCTAACTATTCAAACAAGTCGACA  
CTAATGTTGCTTTGAACAAGCGCCTTGGTGAGTTTTTCAAATGGAAATTGGGGACGACG  
CAGCTACTGGACTAGAAGAAACAGAAAAGGAGAAGTTAGCGTCATTAGCAGAGGGTGTTG  
AGCTTAACAAGGAAGAAGGTTTTTCGGCATAAGGTCGAACTAGCAAGGAATCCTACTTTA  
GTAAGAATGCTGAGGTCTTACAAATGCAACTGGGCCTACGGAAGAAAGTTCCGCTCCCT  
TGGTAGAAGATTCTAACACCAGCAAAATGACGAAGTACGTTGATGCTCTCGGTCACTGTT  
CCATATAATTACTACTACCCACAAGTGCTAATTTTAAAATGTGATTAATCAACGTCAG  
GAGAAGTGGGCACACCTTCTAAAACAAGATTCTGAACCTTTGATTGATGATGCACATAAG  
CGTGGCGGAGTAGCACAACTCCTCTAGAACCAAGAACAAGCATTACTTGAATAAGGCCAA  
GTCCTTACAGAGACCCTACATCCCGCAGTTATAGGTGGTTTTCGGTGCCGGTGCGCCTGCA  
CCATGCCCTGTAGCAGCTTTTGCCCCATTATCGAGCAGGCTTATCAGACGATCAAGGCCA  
CAATTTATTGCACAAGTTATAGCAGGTGTCCCGTCAATGTTTGGTCCTACAGGTCATATC  
TTTGAACCAGAACCTAGTTCGGTATTGAAAAAGTTTTCTTCAATTGGCGATTACAGAAA  
GCCTTCTTCAATGAGTCTAACGCAGGTTTCTCTGTTTCTGATGGTAACCGTCTTGCTGAG  
TACGATCCGACTGCCTCTGGTGGTTCGGCCATTAACGATACTGAAGGTGCTAATCCAGGT  
TTTATTACTCATAACCGCTTCAGGAACATATGACCTGACAGGTGACGCTCCAAGAATGAAC  
ACCACTGCTGTTGAAAAACAACAGATGCAGCCGCAGAACTACCTTCGGAGCAATGGGT  
TTCTCAATCGAGCATGTTACTGCTACGGCTAAAGCACGCGTTTTAAATGCAGGGTACAGT  
ATTGAGCTTGCTCAGAAGTTGCAATCAAATCATGGTCTTGATGCAGAGCAGGAGTTAGCG  
GAGATTCTTTCAACTAAAATCCTGGCGGAAATAATCAGGTAAGTTGTTTGAACAAGCTAT  
GATAACGATGTGGTAGGTGCTAAAAGCTTGACTGCTAACGAAGGTATCTTCGACCTTGAC  
GTTGACTCAAATGGTAAATCGTCTGTTGAGAAATTCAAAGGACTTACGATCCAGAATGAA  
ATGGACGCATACGCAATCGATCATCAGACACGTAGACGAACGGGTAATATCGTCTTCGCA  
TCCGCCGGCGATGTATCCACTCTTGGTAAGGCTGGCGTCTAGATTAGGGTGCTGGTCTT  
CAGGGTAACAATAATCTCGATCGTGAGGACACA ACTTAACTCTAGTTGGTACCCTTAAG  
GCAAGAATCAATGTTTACGCTGACCCATATTCAGCAAACGTAAGTGACAAGCACTGCTAC  
CTGCCAGGCTACAAGGGACTGTCATCTTATGACGCAGGATTATTCTAGCGATCATATGCG  
CCTTTTCAAACAAGTCTGAGCAACCAACCCTCACACGTTACAGCAAAAAAATTGCGTTTAA  
CCGAGAAACGGAATGGTTTTCTATTCCATTCGCTCAAGGTCTTACCTAAGTGTCTGCAGCA  
CTTACTGCTAATACTAATGAGGATTGCATAAGAGTTCCCGTTGCTAACTTACTATCATAA  
ATATTATTATTTAACTTTCTAGAGGGTGCTAGACAACCTTTTTTTTTATGCTATACTATA  
TTTATTGGACGCATCACTGCGAGTGACTGAATCAACGAACGGGCATCAAACCTCGATCAGG  
TGATGCGACAGAGGTGGTGCTCAATGCTAGGAAAGACAGATCTAAAAACCAAGTAGGCTG  
TAGGCAGAGTTATACTGCTCGGCTGTAGAAACGCCCTCCGCTTGTGAGTATACAGGAATC  
CCTCCTCCCCCATATATTTTTTTGTAGAAGGATTAAGTACATAGTGAGATTGTCAGGTTT  
CCCACATAAGTAGTAAAAGAGTTATGCTCAACAAGAGGCACTCAACTTTCCTTATTATTG  
ACTTCACAAATGCAGAAAGATCTATGCACAACCTAGTAACATATAATCAATTACCAAGTT  
CGTACGAGGAAGAACACGACACACGGCTAACAGAATACTACCAGTGTTTAATCGAAAGCG  
ACGACCAACAACAGATCTGTCAAAAAATTAGCAGAGAGGTGCGGATGTACCAAATATTCC  
GGAATACTTAGAAAGGGGGCGGAGCAGCTCAGTCATTTAAATGCTACACAGCTCTATCAC  
AATGGAATTATATTATTGATTATACTCCTTATTCTCCTGAGTGGGATGGTAAAAGGCCGC  
TAAAGTAAGCACTGTTTAAATACCTTGACGATTGCGTTTAGAACTATATCGTGATAAATG

ATCTCAAAGATATCCTTGACAATACATCCGATGAAGCGGACAAAGACTATACTAAACTCT  
ATCAAGTATCAGCGAATCTCAGTACAGAATAACGATTGCTTTAAACCCAAAACCGACTAC  
GATTTGCTTCTATCTGAAACCAAATCGTAGGGTGTCAAAATGTCAAACATAAGAAATAA  
TAGGGAGACAAAACCTACCGAAAAGAAATACCACTGATGCTCCTTGGAAAGCCACAACCAC  
GACAGAAAGCAGCAAAACCTGACATGAATAATAGAGGGACTGACGATTTTCTGAATAAGA  
TGGCGTTAGGAGAACGCCACCCATCGGATTATAGAAGCGGGTTCAATGGTGCAGATGACA  
TTTGTGAATGGGCTAACAGAGAGAAACCTAACGTATGGAGACAACGAGACTAATGGCAA  
CTGGTTCCAAGAGGATCTACCAAATCGGAACCTTTCCTTCCCCTATAGGATAGGTTTTGT  
ATTAGATAAGGCAACGGAGTTGTATTCTTTATGTCAACAAGGAGAGATTCAATCAATACA  
TTTAAATGATAAACTTATTCCGACTGCAGGTTTCGTCCCGTTACCTAGAGAAGGCAAGGG  
ACGCTATGGTGATTTGACCGTTGAGGTTATGAAAGATGAAGATGTAGCAAACATAATGAA  
ACTCAACGACTGGCTGCGTGCTTTAGGAACTCCCCTATATTATCATGTGCGTGTTGGATG  
GGAAGCCAAGTATCAACACGCCCCATCACAATACCGAAGATTCTCTGACGCCAGTCTTCA  
AGAATTAACAACAATAACGTAGCGGACTTTGATGTATTCTTCAACGATTTATTTTCATAC  
AGAACTATCAGCACTATCATTTAATGTTTCACTAGGAGGTAACCATTTCATGACTGCACG  
GGCAACTTTTCAATATACTCTATACGAAATAAGGAACGTAGATTTCGAGAACAAGACGATG  
AAGAAGTTCAATCTATAACAAGTGTGAGCATATATGGGGTGTAAAGATAACTCGTATACT  
AAGTCTACAACGTGGGCGAAGAAGCAACCGTCGCCTTTTAAACCATTGAAATACAGGTATT  
ATCGTATCCTCACTTTCTCAGTGAATGATGGTATAAAAATTATTGCTATTCACGAGCTT  
GATCGTCAGGTAGATAAAAATCCAATCCCAGTGGGAAGAAAATGAGGAACAGACGAGAAAC  
ATAATCGGGGCGACAGTAGATTTTTGAGATGAAGGCTGGTCTATCGATATTACAAATCGG  
ATTGTTAAAAGAGGGTCTCAACAACACTAGCACAGGCATGGTTTTTCCAAGCCATGGACAA  
CGACTACAAGAAAATGAAGTGGATCAAGGCACCGCCTTGTCTGTCAGTCAGGATCTCAGAG  
TTCATAGAAGGAGAGCTTTGAACGTGATGATGATCAGGGCGTGTGATTCTGGAACATTT  
CAAGAGGTGTGGAACAAGGATGGTGTATATGACGGAGATTTCAACAGCGAAGAATCTGCA  
AAAATTCCACAACCTCCATAGCAATTATTTGGTGTATCACAACACTCTCTCTTCTATGAAA  
AAAGTAACATAGTTTGAAATGAAACATCTCATAAAAAGAAAATGGTTCTACTAAAAGGT  
AAAGACCCCTCATCAGTCTACAAAGAGACACCATTTGATTTGACACTTACTACAAAAGAA  
GGGCTCGTTATGTTTATTAATCATATGATGCAATCTGCAAAGTACAATTTAAGATAGAC  
TACATAGAATACTTTCAATTGTAGCTTAATAGTATCTTACGAATTATAACCAATCGTCAT  
TTTCAAATTAAGATTGCAATTGAATGGGAAAATTTAAGAGTGGTTGTTATTGAATGACG  
CAGTGACCTACAAAGATGTTATAACCAATACACAGGCGCAGGTTATAAACAATAGGTAA  
TTTCCTAAATACATAATTCGACTAGAGGATAGATTCGTAGCCGAGTCCCATCGAAAAGCT  
GTTAAGAGAGGGCATGGTTAGGAGATAGAGAACTCCTGTCTTGTCTTCTCGTATGATTA  
AGAAAATAAAGGCTTATTCTCGATGGAATCTAAAGATCACAGGTGAAGAACGAATACAGT  
ATAGTGGAGATTGTGACGGTGACTTTCAACATTGGAACATAGATCAACACCCTGACCCAG  
TAAAGGGATTAGTACCAATGTTTAGTATGACACTCTTCTAAATGAATATTACGAAGGAG  
GCGAAGATGATTTGGTGTGATCTCAACCAGTGCCAGATACCAGTCTTAATACTTTTACGT  
AAAATGCATGATCTGCTATATTTTTCCGATGTGATCGAAGGCAGCGGGTACGTCCTATTA  
TAGATTGAACTCCTCAATCTTTAGTGGCATGGTTTTGTGGACCTCCTTCTTGGGCAAAAG  
AATGAAGTCTACCCCAACCTTGAAGCCCAATCCCACATTGATTATGCGTTCGCAGATTTA  
TTTAGCTTCGACGTCGAGTGTGCAACATTTAAGCAGAAGACTAGAAGATATAGAGGATGG  
AACGGTAAGTTTACTTTCTTTTCTCCCGCAACAGGAGAGATAAATGGTGGTCTGTGGAT  
GACTTAACAGACTTGGCGGAAGAAAAGGGATATGAATATAAAAATACAAGATGATCAATAC  
TGTCGTCATCCTGTCACAGCGAATGAACTACTACTCCAATTCGGTGGTAGGGTTTTGTC  
AATTCAGTGCCTTCCCCCGCCTATACCGGTAAGGGATTATCAGGACAAGGCAATTTCG  
GAACCACTAAAATACACCAGACGACTCTTCTACCCACACAGCGTCATGACAATGTTTG  
GTGATTTATGCATTGGGTAGATATAATTTAACCGTTGGTTCGTAAGGTTTCAATACTAGTG  
CCCAATACCTATCTTAGCGATCAATTTTATTAGGTCTTTGAAACATATGGTTGGATGGCA  
AAGAAAGATTACCATAAGATATAGGCAGAGCAAGACAGATATACAGATCACAATGTGATA  
ATCCCGACTTGGCAGTCAGTATATAAACTACGAAAGATATGCTTTCATAGATTTTACTGC  
CTGATTGGTGATGTAGCAAATCATTCTAAGCAAAATCTCTAAGGACATTGGTGTGTAAA  
GTCCATTATTGTCAACGCCTGATTGGTTTTACACGAACTAGATGCTGAGAATGTTAAT  
CAACTTGTATGAGAAGGTTTGTGGGGAGATGTTCTCAAGTTACTAGAATAATCGACTC  
ATGGAGGCAGGGCACATTGCACATTGAAAAGTCAAGGTAGTTCTTTTGAAAAATGAAGAA  
AAATTATTTGAAGGATCTCGAGATGAAATTGAGTAACGAGTTGAACACGAAGGAATGAAG  
AAATTTATCCGTCAATTTGCGCGTGTACTCAAAGGAAATAGCCTTATACTTATCAATTAT

GTCGAACGACATGGTGAATCTCTTGACAAATTGATAAATATTTACACAGTCAGACCCGCT  
TTCTTTGTTTCATGGGGGTGTAGATTTTCGATCATCGCGAAGAAATTCGCATGCTCACAGAG  
GCATCAGATAATGCAATCATTATTGCATCGTATGGTACGTTCTATACTGGCATCAATATT  
AGTAGCTTACTTAAAATTACTCTCGCTGGACCTTCAATATATCGGAGTCGTAATTCACAA  
TCTCTTGAACGAACGTTGCGGAAAGGAGACAATAAATTAAGCCCTTTGTATGATATT  
GCGGATGATATCTCCACAGACAGGGGCAATAACTACTCGTTGAATCTCCCGTTTCGAGAGA  
GACAAGATTTATAATGAAGAGAAATCTAAGTATGTGATCATAGATTTAAAAGTTAAGGCT  
TATGATTAACACGCAAAACACCACGAAGAATTGTGCGGTATATTCTAACTGGTTAGGGG  
GGAGGATATCCTTGCTAAGGCAGTTATGAGAGAACAGCGTGGAGAGAGTTTAATTTTCAT  
GTTTGATCCTGTTAGGGCATTCCCAACGACTAAGGACAACGGGGAGCAAAAACATAAAG  
AGGTATGGGTTTCGGTAAATGGATTCCAATGTCTGACGAAGAATTTTTTATTTAAGAGA  
GAAGGATCTCAGGACCACGGCAACAATGAGTAGAGCTGTCAAACCTCATGTATGATGCGTA  
CATCATCGGCGAAGATGGACATCGAAAGAAAATGAGTGAACGTCAAGGTCCTACCTCTAT  
CGCGCAAGGATATCTAGGATAGATAAAAGACTTCCGTGCCTTCCCTGGTAAAATCGTATGA  
GAAGGAAGTTATATTTTCGTCTGCACCCTTACAGTGTGAGGATAGTTGTCCTTGACAGGTT  
TGCAAGTGTTGCTATAATTAACAAAGACATATTTGTAAGAAGAAATTTTCCCCAAG  
AAGCGATAGCATTATGTCAGCAATCAAGAGATTCTTTCTGGTATTCCCAAGTATAAATCT  
AGCGTAGACCATTCAAAGAAAAGAGCCTCCATAACCTCGTGTGTCAGTCCCTTACATTGGT  
GGTTGCTTTTTAAAGTTTGTGCTCATCTATTATATAGTCCAAACATTATTAATTACATG  
TTAATGATGATATGGTGTGTGATGGTATCCGGAATCGTAGACAGTTTGTGACAACCTTT  
TATCGTGCACAGAGTAGAAATCCCTTTGAATATTCAACACAAATCGTATGCTATGGTCTC  
ATAAAAAGAAGTCTATAGAGAAATGACAAACGGATATTAAGAAAAAATTATAGAAAAA  
TCTGGATACGATCATATATTCACAGCTGACGGAAACACAAAGTCACAGTCTAATCAACTT  
AAATCCCGTGTGCGAAATGAATTCTAAATGATTAAGATTCTCTTAATAACAGATCAACACT  
TTGGAGTGCGGGATGACAACCAACATTTTATCATTTATTACAAAAAGTTTCACAATGATA  
TTGACTTACTTTTTGAATAGCATCTGGCATTAAACAGGTCAATGCTCTTGGTGCTAGCT  
TTGATCGTAGTAGATTCCCTGATCTTTATATCTCTAAACCAAACAAACGAGATGTGTTTTG  
ATCCATTGAGGGAAATGTGTATTCCACTGACCATGCTTGTGGCGACCAGGACATATACT  
ACAAACATACTGCTCGAGCTAATGCCCAAATGAATTACTCCAAGGGTACGACAGCATCA  
CAGTCATTGCGGACCACGATACTGTCACCTTTCATGGTCTACGTACCCTTCTCCTGTCTT  
GGATTTGTGTTGCCAATCGCGAACGGTTTCTCGAAGTTATCCAAGAATCTGGTGCCCATG  
TCAGAATGGGTCATTTGGAGCTTAACGCTTTTGAGGCTGATCCAGGTCACGTAATGGAAA  
ATGGAAGGGATCCCCTGTTTTTAGTAAATCTAAAAGAGTATTCTCTGGACTCTAACGTC  
TGAAATCTAAGCAAGTTAATATCAGATACTTAGGTAATTATTAGCAACATAACTGGTATG  
ACTACGCAACGAATAGAGGTTTTACGTTTTTGATACAGACACAATCAAACACTACTTTTT  
ATAGGAATCCCTTTTATGTTTTTTATAAGCTGTATTATTCTGATGTTTCTCTCCCGG  
CCGAATCAGAAATCACAGGATCACGCGTAACAATAATTGTAGAAGATATAGGAGGGTAAC  
GGAGGTTGACTACAATTTAAAACGCATTCAGTATCTGGGTTGCGCAGATCTTAAGAGTA  
TTGATGTTCTTAGCGTGGAAGTGGAGAATGGCAGTGAAGCGCAATAAACC GAAGACACAA  
TAACCTTGTTAGCCATATATGTAGTAGAGGTAGATTAAGGGTTCAGTAACCCCAATGTTA  
AGTCTGTCATGCGATCACTATATCTGTAGGCATCAGAACGAAAATGTTTGTCCCACTGA  
GAAAACAACACTGGGGATGTCTATGATCACTCTAAGTCATGCTACGAACAGGGTACGAAGAA  
CGTGATTGGTTATGCAGAGCAAGACGGTTCAGTAAGAGATATCGTGCCTCTAGAGGCAGA  
TGACGTTAATCAGGAACCTGCCAATCTGCAAGTATATGCAGAAATCGTTGCGGAGTATTG  
TGGTAATTAAGAGTATTCTTCTGCTATAGTAGAACCTACTGAGTACTCATGCCATAAAT  
CAAATTTGATAAATGATTGTCTATGAAAATATTAAGTGGAAGGATGTTCCCTCCCTCTGT  
GATCCATGGACAGAAATTAGCTCGAATGACTGTCCCTCAACTCTAATTGTTGGTTTCGAAC  
GATGCTGGTAAATCTACTCTCTTAGATGCCTTATGCTGTGTATTATTCAATAGACCTTTT  
ACAAAAATTAGTCGAGGACAGTTCGGAAATAGTATCAATGAAAAAGTTCTGGAGGCCGAA  
CTACTATTTTCTATTAGTGTTTCATGAGTATAGCGTCTGTTGTGTAGGGAAACCTAATGTA  
CTCGGTGTCTACAAAATCAATAACATGGTTGACCAAGAAGCTGTTGCCAAAGACATGCAT  
AAGTCTCTCGAACAATCCGTTCTCAAACCTCAACACTAAATCCCTTACACAGGTCGTCATC  
TCGGGTTAATCCACATTCGTCACCTTCCCTGCAACTCAACGTAACGTCAGGCGAGAAGTT  
GTTGAAGATTTCTTTGACATCAACATTTCCCTCCCAAAGGAATACGATACGAAGAGATCGC  
TTTAGAAATGAAATGTAACCACAGCGGGATTGTGATCATCTCCTTTAATCGTAGAGGAC  
CCTGTAAACAATCAATAGAGAATTACTAGTACTCTTGATGAAGTGAGTGCAACCCGTCAA  
TAAGAGAAGAAAAATCAAACCTAAAACTATAATGAAAAAATAAATAAGGAGAAAAGATA

CGTGATGAACCGAATGAAGCAGTAGAACTCATACTACAGCTTTCAAAAATGTTGATAAT  
CATAAATCAGTATTAGATGACCGTCGTCAAGAATAATCTGATATCAATTCACAATTATAA  
TCTTCCGCCAAACAACCTCTAGTTTTTAAAATCACACGTTGGATGTCTTAGCTGTTTCGCAG  
CAAATTGAATATGAAATCAAGACAGCAGTGATTGGTAATTTAGAAATTACAGGTAAGGAT  
CTTGCAAAAGATTTCAAACGTTTAAACATAAAATTGCTGATGCAGTTAGTGGTGCAGAG  
AGAATGGAAATCCATTCCTGAAATATCATGGAAACTCGTAGTATAGTATCTTCTGCAGCA  
AGAGAGATCGCACGTTGAGACACAGAGAACCTTCACATAAAATGAACTTATATTAGAACTA  
CGAACAAACGGTCCTAACATTAGAGAAGTAATAGTATCTTTAGTTACGGTTCAAAACTAA  
TTAGAAGAAACACAATAATATTGTGGGAAGATACATCAGACTGTTGATGAATGTTAAGTC  
ATAGGAAATTTGTCAAAGGACTCTGGTTTTAAGATTCAGATTATCAATACGTCTGATCCT  
ATTTATCATAATTTAATCAATAAATATCTGCACAACATGGAATTCTTTCATAAGTTCACA  
CTTGATAAAGGATTCAAAGACGTACTTAAAATTAGATTTAGAGATGAATTTTCATATTCA  
TCTTTTCTGAAAGGTGAAAAAGCAAACATTGATTTAGCATGGCTATTTACATGGAGATAA  
GTTGCTCGTAAGAAAAACGCTGTTCTACTAATTTACTCACTCTTGATGAAGTATTGGAC  
AGTTCTATGGAGGCAGGTGGTACTAATAAACTCTTTAAGAATCTACAGGCCTTTGGTATT  
ACAAGTAACCTATTTGTTCCCTCCGTCAAGGGTGATGTCTTATTAGGCAAATTCCTAAGG  
ACAGTTAGATTTGAAGAGAATTATTAATTCTCGCGCATGTGAGTCGACTCGTGAATTTGG  
GAGAGTATGAGCAAGAGCACTTGGAGAAAAGTCTGGAAAGACATCTAAAGAACCGGATCG  
GATGGCTTTAATCTGAACATTTATTTGCCTTCAGTTGGTAGTTACTGATTATTTTATCGT  
AGCAGGTATGATAACACCATGGATCAATCATCAGGTTCCGCCATCATAACACGGCGTGCG  
AATGAAAAACCTGGCACAATAACTATCACATTCTTAACTGGTCTGCTATAATAAGTGAT  
ACGAAACACAGACAGATGATCAATCAAGAAGTAAAATGAACACCCCGCTAAACTACTAGCA  
ATAGCAAACCTCACAGTTGAGCACCGTCAGGTTACAACCTGCATACTTCGATGTAGAGAAT  
CGTGTTCTTTGCCTCCTTATCTGGAAGTCTGCCTCACACACTGTTTACGATCTACTTGAA  
GGTCAAGTGGTAGGAGATCCACTTTATACTCCTGCGGATGACTTGGACTAAAATATTCCT  
AAAGCCCTCATCAGTGTGGTGAAGATGTTCTGTTGGAAACCTAATGAAGCGTACCTAT  
CGTGGTTCGTGCTGACTCTTTCTTTGACCAGTACAACGAAGTATGGAATCAAGATTTCTTC  
GGTGTGAGACATTAGCATCATGAGAAGCTCCCCTGATTGATCGCATGAATCGTTACTTC  
AAAGGCAATCTCAATATGCCTTTCTCAGCTGAAGAGAAAGCATGGGTAAACTGAACTGTA  
AAAACGTAAACGTTACAAGAAGTAGAAGACCTTTCAGATATCTATACGGCTGAGCTGAA  
AAAATGCAAGCAGAGAACGAGCAAGAAGATATGGAAATGGATATTGAGATTGGTAATGGA  
CATGGTAAGATCAGTGGTGGAGATTCTGATACAGAAAAGGACGTCGAAGAGAAAGATTAT  
TCTCAAGAAGAAACATCAGCACCTGATATCGATCCTATTCAACCATGGGATAGTTCAGAG  
AATCCTCTTGAGGACCTATCAGTAGATCTCCATACTTAGTTAAAACCTATCGCTGGCGAC  
AGATCAGATCTCTTCAATGACTTTGATAAAGTGGGCTAATCTGAGAATACTACAGATACA  
GCATTTCAATTATTATTAGAAGCATTTCGTTGATTATGGTGCGAAGGAGTGGGTTTACGTT  
GGTCTTCATAAAGTAGAAATTGATGAACTTCTAGTTTCTTACTCTACAATTCAAAGTGAT  
CATCAAGCATTATTCTCGTTTTACAAAAATCTTGACCACGATGCAGAAACCTATAAGAGA  
GAGTGTCTTCAGTATGCAGAAGGTCCTTACAACAAATTCAAGACAGATGCACAGCAATCT  
GTACACTTTCTTGTCAAACAGTTTGCATGCAGAAATCTGCTGATGATTACAAACGTGCA  
GCCGGATCACCGAAAGATGTTGTCAACACTGCTACTCTTTAGAAATACAACTAACTGAT  
GACATCTGAAAGAAAGTTACAACCTGTTCTGCGGCCAAGAATCATCGGCTTATGCTAAAT  
CTTGATTGGTCTGGTTCTAGGCTGTATCACCGCTTGGATAATGAAAACCTAAGTTTTCAAC  
TTGGTATTGTTCTGTCGTAATCATGTAATCCTTATCAAGTCTAGGTATTCCAGAGGCAA  
TTCTATGGATATAATCATAGTAATAGCAAACAATGGAATTTCTGGTGTGAACTAATGAA  
GGTGTCTTGGTGTTCAAATGATATCACATTTCTTGCATTACTATCTATTAAGTAAAAT  
GCTAATTAACCTGATGATTCCTCGGACAAATTTACTGACAAGTATTTACTATCGGTGGA  
TACCGTTTGTCTGCGATGACCAAATACAGTCGTGGTAGAAGTCCACTTGCAGGAAAGCTGCT  
TTCTGCACTCGTCAGTTGGTAAACGATCTCACGAAGGTAGATAATGTTTCAGACAGTAAAT  
GTTGTATGCTTAAAGTATGGCGAAGCAAATGCAATGTCAGACTGTACAAAAATACCATAC  
AGCACTATCATGCCGGAGATGGGTGAGGAAAAATTCAGACTTGAAGCAATCGATTACTGA  
AGAGATACACTTTTCATTCTTCGTCATTTTGGCACTGGGTATCAACGCAAAGTTAATGGT  
AGTCCATACGAAACTACAAAACGACCGTATGTTCCATGAGAGAAGTTAGTGATGACAAC  
TGGATTGGTATTTGACTCTGCAGTAAAGGCGAGGTATTAATATTGATTCGTACGCTTGGT  
ATGGGCACATAACGTCACGACGAACTTGACAAGCAATGTAAGATACAAAGATTTGCTTCT  
ATCTGAGTTAAAGTTGGATACTACAATCATTGTATAAGCCGGACAGGGGGAAATGGCGCA  
GGAACCTCAAGCCCTCACTGTAAAACAGAAAGGTGAAGTTGCTACCGGAGCACGACTACAA



CGTGCATTCGAATATCGGATGGGTTACAAGTCCACTAACAAAACCTCTCCTCAACGCCTAC  
ATTTAACAGATCGCTTGAAATGTAAGGTGACTCTATTTAATGCGGGAAAAATCTTTGACG  
AAACTGTTACCGCTGCCGATTATGATGATGAAACAAAAGTTGCATTAGCAAGAGATTCCA  
ATCCTACCTTAATGAGTGTGACTGTATTGTTCCGATAAAGAACTGTCCACTTGCTCTACC  
ACTAAGCAGATAGACATGCGATAATACATCTATTAACAAAATAGACTAAGGCTTATGAA  
CCAAACCCTGTGACAACCTGAACAACCTTGTTC AACACCTAACCTCATAATGTTGGAACCTGAA  
TGCGGAGGCAAAGACATTCGTGAGTCAGAGATGATACTTAAACTATTTTATACGACTGCA  
TGTA AAAACACTTAAGTCTTCTAAATCAGGTAAAGGCTAGTGGAATCTAAGCACTCAAAAA  
ATTGAACGTGCGTACGAAGCACCTGCTGCTAGTATATAAGCAAACCTATGTTCCCTAACAAA  
GTTAAGACTTATGTCACTACTGGTAACTTCACTTCTGTAGAGAAAGGTATCTCACTGACG  
AAGTTCTTTCTCTATTTCATTACAGGGCCTTCTGGAAACCGTAAGACTATATCAGTGAAA  
CAGGCATGGGCTGCAACTAACAGGGGGTCAATCCTTGTCAACATCACAATCGAAATTGAA  
GAGGACGATCTTATGGGTGGCCTTCGTCTTAATAATGGCGATAATGTTTGTACAGCGGA  
CCTTGGGTTGAGGCTTTTGATATGGGACTTGTATTACTGCTAGGTGCGATCGACTTAGTA  
TCTAACAAAATTCTTTCTTTGCAAGCCGTCCTTGAAGGTAAAGGTGTATTCCTTAAGAAT  
GTTGGTAGGTATGTAATAACTGCTCAAGGATTTACTGTAATCGCTACTGCTAGCACTAAC  
GGTATCGGTTGCGATCATGCTAGATTCGTAGGAACAAATATTCTTCACGAAGCATTCCGT  
GAGAGATTCCCACTCACATTTGAGTAAGTGTATCCTGCTGCTCCTAGCGAGACTAACATT  
TTGATCAATAAGGGATGTGACCAAGACTATGACGAGAACTTAATCAAGCGGGCAGGTGTA  
ATACGTAAGACATTCTTGGATGTTGGTGTGATGAAGTTATCACAACCTCGTCGTTTGGTT  
AACATTGAGACAGCATAACCAGA ACTTTCGAGATAAGTCGAGAGCAATCACAACCTGTGTG  
GGCCGTTTGGACGATGCTACAAAATGATCCTTCCAAGTTCTTCTACAAAAGTTTACGCA  
GGAGAAGATTCATAGATTACTGATTATCACGAATCGCAATCATTCAAGTTGATTATCAAGT  
ATCATGAAGAGGGGTGCCTAGAAGTACTCCGACATTTCTCGATACCACTTACCATCCAC  
ACTATGCTAGTGATAAGATTCACCCCTTGTGTACCCGATTCATGAGGCGATGCTACAG  
CATTTTGTAGAAATAACTTCTCAAAGGACGCTTTTTGCTTCGATCGAACAGGTAGGGCGA  
GACAAGATCTCTAACAGGTGCTATACTATGGAGTCTTACTCATGTCCTTTTATACAAGGG  
ATCAAGCAAACCACGCGGCAGCAACATTTGCAGCACAGGGTGACTAATTCAGCATGTGAG  
CAATTTCCAACCTACTATTGAAGTCTTTAACAACTTTTGATCAATCAACAAGTCTATTG  
TTATTAACCTGGCAATAAGATTTCAACACTCAGACTTAATAAGGATATTCTCCTTATTG  
CCCGAGTCGCAAAAACAATTTGACTGGCAAATTCCTATCTCTGATATGGGCTTTTTCTTG  
GAGGGTAATCTCTGTTTCACTGTCCGAGCATCGATACTACTGAAACCAACTACCTCACAG  
TAAGTGATCTACAAGGTAAATCCATGACACTTTATCTATATGCTGATCCTGATATGAACA  
CTAAGGCATCCGAAAACGAAATGAACTTGCCATCAGACAATGTTGAATTTAACCTGGAAT  
CTATAATTCGGATGCAATTACAACGTGCTGCGATGGGATATCAACTCCCTGCCCTTTGTA  
TGTATGGGGATAGAGAAAGTATGCAGTTATGTATGACAGGTAAAGAGAATAACTTCCA  
ATTATTATTCAGTAGAGTTTGGAACTAGTACTGATGAGTTTTCTTGATGTTTAAAAGTTG  
AAAACCTGAAAACGTTTATCCGGGAATTATGATTTAGGATTCTCTAAGACAAAGGTTGCTT  
TGTTCAAAGAAGACGGACTGAAGGACTACATGTCTCTAGAGCCTTACACATGAGATGTTG  
GCACTGTGACACAGATCTAAACGGGGGAGGTGACAGCGATTGTCCTAATGCAGAGGATTA  
TAGTTTCGTA ACTATTCTCCACTGCCCTAAGTGCGATTCTTACGTTGAAGTTTCTTATCC  
TAAAAAAGACGAAAGAATTTGATTTTAACTCGATTATGAGAGACCAGACCTTACTGACC  
AGGAGACTCGTCAGCTGTATCATATTTGAAGAGGGGAGCATGGGGCTCTACTGGTTCGCC  
CTTATGCTAACGACATTTGGTCTCATTGGAAATTCAAAACTCAGCCTTAGGCAGTAAAAT  
CATCCCACCATATCTTTGCTATGTACCTTGGTTATCCTCATGAAAAATATTTTCATCGGTA  
TAGATATGTGTCGTAAGTTTCTTGAAAGGGGTGTGACCAGATCAAGGAGAATGGCCAATC  
ATAGCGATGGTTAAAAGTACGATAAAGATGGTAATGAAAAACCCTAATAACCAGATCATG  
TGTTCTGTTATTTAGCTGAGTCGGCTAAAATATTTTCAGAAGGTTTCGAGATATTGTTGTGA  
ACAATAAAACATATGTTACAATGAGGAAAGTATGGCGGGCCTCTGAATGAACTTTTTTGT  
AACTGATGCTTCCCAACAAAGTCTGCTCAGGTATCACCTGATATACACAGCGTGAAGCT  
GGCTCATGAGAGCTGTCAGATGCTTTCTAATGGTGTATCTGATAAATGGGGTCCCGGTTT  
TGTTTCTCTACTTTAAATAGGTGGCACACCATGTAAAACAGATAAGGGGGCTTTTCGTAA  
TCATCCCTGCACTGTACGGGCACAAGATACATGGACATGGTTGATGGTGCATGGTGTATGC  
CTTATGCTGTGAATATACTCTTAGACACGGTGAGATACATAGTTGTCGATCAGCTATCGG  
ACATTGTGACAAAATATTTCTCCCGAGGGTAGCGCTCCAACACATTTTGTTTTCGCAGC  
TCCCGATCATTTAAAGCATGATAACACTAATGACAGTTATACTGCATACAAGTATTATAT  
CAATAGCCAATCATGGGTATCAGATAATTATCAAAGGTTACGTTATAGTAAACCTAACTG

GCCAAATTACCTATTATGAAAGAGTTTTTGTAGCTCGAGAAGTATCGGCCTAAAAACGTA  
GGACAATGGATCTTGCCCGATTCTGTGAAGACCACCTTCAAGAATTTTGTACAGCAGGGT  
GGGATTCGTAACCTCCTTCTATCTGGGACAGCAGGGGTAGGTAGGACAACCTATTGCGAAA  
AGTTTGTGACCTGAACTAGGAGCAGGCTATTATGTTCTCAAGGGAGCCGATGGAGGATGA  
TTCCTTGACACCGTAAGAACCAGGCCAAAAACGTTGTCGCAAATGTCTTACTTACAGCA  
GAAGCAAAGAACGACGTTCTATCACCAGCGACGCAGACCACACTACCCAGATGTTCAA  
CTCTTACTTTGTGCATCGATAGAAGAATTTCAAAGAAGTGTAGATTTATGTTTTCCCGT  
TATTTTGAATAAATAGTTATTGAACCTCTACAACGTAGAACAACCTATCTTAGAGTTCAAC  
GTTTCGATGTAAACTAAACAACAACCTCGCTGCAGAATTCTTTGGTAGTTATAAAGGGCTA  
CTGATTGCAGTCAAAGTTACCTTCTCATAAAAAGTTGTAGCAGAAGTTGTTCTGAATTAT  
TTCCAGACTCCCGAAGGGCTCTTAATGAGTTGCAACGATATGCAAGCACAGGATGTAAT  
GATTCTGGAATCCTAGGAGCACTAGGAGACGCAAATATCGATACTCTAGTTGAATCATTG  
AAAACAAAAAGATTCATTGATGTAATGAAATGGGTTACCAAAAACCCAGATTCTGATCCT  
GTATCTATCATGACAAATCTCTATGATAATGCTTCTAATGTCTTCACAGAACCTAGTCTT  
GCAGCAGCAGTTTTAAACATTGATGAATATCAATACAGGTATGCATGCGTCGTTTATCAG  
GCAATCTATCTCCCTGCATAGTATACTCAAGTGATGCTTAGATGCGATTTCAAGTAACAC  
GTAGTGACCTTAAACAAAAGGTAAAGGAACGTGTCTAAGGTCCTGACTTACCTTGGCACT  
GATAGGACAATGCATACCATCACGAAGAGACTACCGAAGGTAGAACCAACTTTGGTGTCT  
TCTCACATTTAGTCTTAGAGAGACCGGGTTATACTTAGCTGACTACTAAGAAAAATTATG  
ATGACTCACCGTTGTTTCATGATCTATTTGTTTAGTTCAGTAGGGAAATTAACATTGACC  
CTAAAGTAATTTAAAGGGTCTATGTTAACCAGACTACTGTAGCACAGATCAACAAATATG  
CTTCTGGCCAAACAGACCAGGACTTTCCCGTAAGAATATGATAATATACTTAACAGGAA  
CTCATGGAGGTCTTACTAAAGTAGGAAACACCAACTACTCTGGTATGCTTAATGAAGCAA  
TAGTTTGTGATGTTGCTCACGCACACATGGAACATACGACTGTATGACGTATAGTTCTTG  
GCGTCAGTTTTTTATTATTATGCCTTACAAATTTATTAGAAATCGTGGAAGATTACAGC  
ACAGGTAAGTAATGATTCTACTACTGGTCTGGGGTGCTATGGCAGTTGCTGTTGTAGG  
GGGTCAACTATATGTTGAGTCATCCTACAGACAAGTGGCCACATCAGTGATCAGATGGTT  
TGAACAGAGCATAGAGATGATACAACTTTCACTAAAACCTCCAACGGGACGCTTGATGGC  
TGTTCCAATGCCTCATCCAGATTTCTATGTTGATCCTCTGATTATCAGACGATAGGTTA  
AAGACACCACTGACGTATGCTGGCGGGAAGTCTCGTGCTACTAACAGATGGCACAATAT  
TTCCAGACTATAAAGAGTCTGCTGAATTCAGTGAACCTTTTCTTTGAGGTGGATCTGTA  
GCGTTATACTTTACTCAGATGTATCCTCATTTGGAAATCGGGCTCAATGACCTATACGAA  
CCTCTGTATACATTTACGAATCAACTGCAAAAGCATCGTGATGATCTTAGGAACCAACTT  
GTTCAACTCAAGAAAAAATATCCAGGTTTCGTCCTTCGACAAACAATATATGCGGACAAGCC  
AAAGATTATCTTACTACACACCCGAATGATAGCGATTTAAAGGCTCGTACTGTCGCTTTC  
TATGTTTTTAACCCGTTCTCTATTTCTGGTCTCACTGCGTTCTCCTCGTTCAGCAAACAA  
GCGTCTGATTCAGCCTTTTCAATGCAAGGAATTGAAAAAGTACCATACTACGGCTGACAT  
ATCCAAAGGTGGGCAATCTGTATTCTGCAATACGATAAATTTTTTACAGATGATGCTAAT  
GCATTCCTATTCTTATATCCTCCGTATGATATCAAGCCAAACTTGTATGGAAAGAGAGGC  
AGAATGTAGATTGGACTCGGCTACGATTCTTTTGAATAAGGTCTGATAGAGTCGAGTGT  
GATCTAATGATATCTTATAATCCTCCCAGTTTAATAAAGCAAAGATTCCAAGGTTGGAAA  
GCACTAGAATACGATCATTCCATATCATATGATATCTGTAGGTGACTACACGAAAGATCAA  
GGAGAACGCTAATAATTTCTCCTTGTAATTATAGCCTAGGATGAAATACTTCTCTAAA  
GGATTATCTATTCTCAATCGACACCAGCAAACATTATTTGATGGATGAGGATTCTGTATG  
GGTGAAGAACTATCCTTCATATATAATCAATAAATCTCTGTCGCATCATTTGAATACGAC  
CATGTATGCTAATGCCATAAATATCCAGTCTCATGTAGATACACGTTTGAATATGATT  
CTTCATAATTATCCTGAGACCCCGAAAGAAATTTTCGTCTAGGGGTAAGAACTTGAAGT  
GAAAGGTCTTGACCCTGTTATAAAATACTATGGTTATAGCGATGATAAAGAATATCAAGC  
CTTAGAGATCTAAACTGCATCCCAACTTAAACACATTAAGGGTAAACTGAACAAACGAGG  
TAAGACCAGATTAATGAAGTTAACCAAGTACAGTGAATAAGAATGGTATGGTTGTAGTG  
CTAACAAACGTACCATACGCTTTTTCTGAAGGTTCTTGAAACACTTACACGTATCCGTGTA  
GCTTCCCCTAATGAGAAAAAGTTATACCAGTCCTTTCAGATTCGACATAAGAAACGTCAA  
TACTTTATTGTGGAATTTCTAAGAATTATTTGCTCTTGATGGTAAGAAAGTACACCTATCT  
GAGAATGATGTGCCGCGTTGAAACAGAATTATTAATTTACTATATGAGTCGGGACTAGTT  
GAAATTGTAAATTTATCAGCGATCTCCAACCTCTGCTCCATTAAGTTAAATTAACGTATTG  
GCATACAAAGAGATAGGACACTGGCCGCTTGAGTCCAAATATAAGATCGCGAAAAACGT  
CAATACACAGAATGAGATATAGTTTATTGTTATTATTACAGCATAAAGTCAGACGCCAAG

AAAAGAGTGAAATAACCAAACGGTGGCCCTAGTAAAAATCAAAGTGTTTCAGTGAAGATAAC  
AATGAACAACCTTACTATCCTAAGTGCATTCGTACTCCTTGATATTTTGATTTGGAGTGCT  
CTTATCTTACCTTTGAATTAGGTTACGATACCTGGGTGGCTACGAGACGTGATTGATCCA  
ACTTTTAGAATTTCCGGTCGTCACAGGACTCGCAGCGACTATCTGCATACAAACGGGAGCT  
AAGAGAAACAATAGTGGCAGTGGTCGTGTTTCAAACAACCTCTAAGAAAGACAAGGAGATG  
TTTATAGCAAAGCAACCCAGGCAGCACCAACGTAACCATTTCAGTTAGTAGTTCCTACA  
GTTAAATTTACTAGTTATAATCATGCAAAAAGTTATCAACGGGATCGCTCTCTTCTCAGA  
TACTGTGTAACCTTGCTGTAGAGGGACTAGGTGGATATGCATACATCCGTTCCGGTTGCTAA  
CATTGAGGACATCAAAGTGAAAACAATCAATGCCGCACTTGGTGGAGGTAATGGCGTTTT  
ACCTGACATGGCATATACACAACCTACCCCCGTAACCTGGTGCACCAGTTCCTTACCTTG  
ATTACTCTGCACGGTCAGTGGAGATCAATCGGTGTAGTTGGTAGTATTTACGTAGTATCC  
CACACGGCAATAATAGGTTATATTGTCTTTAGAAAAACCGAGTGTCAATTACCTAGGAGA  
GATGTTCCCTGTAGGTGAGTATACTACATATGCCATGTGAGCTGATAAGGATGGCTCTAAA  
ACTAGTTCCTCTGCTAACGATCCTAAGAAAGCATTATTAGTAAGGACATCAAAGAAAAA  
GGTTGTTACTTAGCACTAGCCAGTGCAACTACTAAGATCACTGAAGACCACTTGTACGAT  
GGTATGATTAATCAAAGCGGTGCTGGATCTAACATGAGATCTTGCATTTATCAACCACCT  
CGTTTGACCCACACAATGAGCATAAATAGTCGTTGCTCGAAAAAGTGAAGCCTGTGTC  
CAAGCAATCGGATCAGCAGAGAGTACAGGCCGTCTCGTTGGCACATCTATTGGTGTGCTGCT  
GCTGCACATTCTCTAAGTAGTGTCCCCTTTGTTAGATGGTTCGGTCCTGGCTGGGTGGCA  
ATGTTTGGTGGCAATCCGGGAGCTGATATAGGTGGAAAGATGGGGCAGGCTATCAGTAAG  
GATTGTTAAGTATTTTTCTTCTTAGGACGTTTGAGTGGAGCTAATCCTTTCTTCTCACCA  
TACTAATTACACTGTAACCTATTACGGCTTAAACTAGGTGAATCTTTAGCGGGATTCTTT  
TCTACGATCGTAGTAAGTTTTTTTTATGAGTGGTTTTATAACTCTCAACACGAATGGTGT  
GCAACTCTAGATGCTGGAGCTACCACTGCGATAGATGCTGTTACGCTGACTTGATTTGTG  
GGTGGTAGACATCTTTGAATTGCTGTCATATCCTCATACTACACTACGCAATGACCACCT  
CTACCTTCATGAGCTATAACTCTGATTTCCGCAATTTTCAGGTACATCAACTACCATAGGT  
CGTTTAGGTGCAGGACACGCAATCTCTTTATCAGTTTTTGGTATCGGTGGCACCTATGGT  
GTATCTTTCTTGTGTATGTGGTGGTTAACGACAGGAGGTGGCGGTGCCTCTATGACC  
ACGTGAAATTGATCAGGTGGATAATCCATCGCATAATAATGGCACACCTGCATCACAG  
AATACTAATACTTTATCTTCCCTCGTCTTCAATTATTTTATTACTCTTGTCACTCGGCTGC  
TGTGCTTCCACACAACCTGTCATCTGGATGATCCCTTCTCCTATGGTTACCGTAGGAGGA  
GCTACGAATGTTGTTGAGTGCAATGGTTGTCTCGTTAACCAAGTCTGGAATCTCTCTAATA  
AATATTGTCCTCGTTCGGATGTCTCGCACACTTGCCTTATAGACTTGTGTCTTTGGTGTA  
TCCATACATCATGGGTTTCCCTATTGATATATCTACTAAGTTATCTGGATTTGTGCTGAGG  
ATCTCACGAGCATGAGGAGCAATAACATTAATTTCTACAGAACATCGTCTGCACGAATA  
CAATGATATGGTGTGTTAGGATGGAATGAAATCCACCTTTCTTCAAATTTCCACAATTT  
TTAAGACGACCTGTTTCAACGTCAACGCTCATATTTGCTACCGTTTGATTCGCTACTGCG  
ATATGTTCTGCTGCTACCTCTGTACAATGCTATTGTAGTTTCTGATCTAATCGGCTAGCT  
CGGGTTGCAGATTCACCACCTGAGAAATGATAAATTATCTTTTTGTTCTGTACTTGTAGGC  
ATATGGTATAAAATATTACATGGACTATCAATCACACCCTCATCATTGAGATCTGACATA  
TCCTACACAGGATCCATATAATATGGTTCGTACCGTTTTTCGAGCTGAAGCCGTTCCCTGTG  
ATGTACGCAGTACTATTCAAGGTAGCACCTTGACATTAATGCCATTACCATATGTGTAT  
GTTGTCTGCGGCCATTGTAAAACCTTGTATTGCATGGTTCGTCACTGAGACTGCTGGGTTG  
GCGGTGGGCCTTGCAGTCGCACCGACACCACCAACTGTCTCTGCATTGACAGTCGGAACA  
AAGGGCATGAATCCCGTAATGGCAAATAATGCTATTTACTTAAGATACTGGGAGTCTCTG  
TTACCGAAGTTACCGTTGTTTCCACTTGTATTACGGTGTGGTTTGAAGTCCCTGATACCA  
TGTAGGTCTCGATCTAGTGGAACGCTGTACCTCATGTCTGTATTGTGAAGTTGGATTTGT  
CGTTACCCCCGGCCATATCGAATTCCTCCTTATAAGTTATCAGATGGCTACCATTAG  
TAGGTGACAAAATATCATCTGTAGCTACACCGTGCCCTCTGACCGGCGATTGATAGCCTG  
AGTTACCGTCCATCGAAGATATGGTTCGTCACCACAGTGCAAGTAGTTTCCGTTTGGATGG  
TCATCGAGCCCTGTTGGCACTTTGGCCCCAAAGGGACTGTTATGATTGGGTTAGTAGCAC  
CACCCATAGCTATTAATAGGAATAACTTATATGTATTCCCTCGTGATCATTAGTCAAAAAC  
ACTCATTCCGCTAACACATTGAGCTGTTAAAGAATTACCTTCCCCGACAGTACCTGGTGA  
ACTTGTGCCATGAGTATCAGTAATAGTATGTCTATTTGTGATTGGTGTGTGCTTCCCTGT  
TCCGTCTGTTCCGGCACTTTGTATGGAAATATGACCCCAACTAGCAGGTGCCTCAGTAGA  
ATTGTCACTCTCTTGCATTGATTGGGCAAAGGAGAATGATTTTACAGATGCTAAGTCATC  
AGCTGGAGATGATCCTGTACAACCTATTTGGAACCTCACTAGTTGTTCCGACTGTGCCAC

CCCTATAATAGCGCCATAATCGTTGATACCGAGACCACCTTCTACAGCGCTACCATTGGC  
CGGTGTACGGGTTGTGGTCACGTTATTTCCAGAGATCGAATAGTTAGTGACAATTCGTTT  
CTGACTCACGCTTTGAGGTACCTCAGTAAGATGTAATCTAGATTGGTGTCTAGTCGATAG  
TCCGCCCGCATTGCTGCTGCGCCGACTGTCAAGAGCATCATGAAAGGAATAAATTTTCGT  
CATTTTTTTACTCATTGGGAATCCTGTACTATATAGGTCTGCAAAAAAATACACATATGT  
TCGGCAGGTACCATTTCCTCCCATCTTACTTTATGTTTAAATAGTAGTGTGCGCCTCCGGG  
GACAGACTCAAACACACGCTTATTTAGGGAGCAACATGACTAACTTCTCACCGTGGTCAT  
CTAATGATGTGCAAGCAATGTTTAGCGCTGCAAATAGTTACAGGGTATGATTCGCTGATT  
TCTTCGACAGACTACACGCGTACTGAACAGGTTTACGCTACGGGACATATTGCACCATA  
ATATTGTGAAAGAAGCCGCATAGAAGTGGAGACTAGAACTGGGTCTCGAAGGATGGTCAG  
CAGACGAAAAAGCAGTAGCCATAGAGCAGAAGGTACTACTAGGCAAAATAATGTGCAAG  
AACCAAATTCAAAAGAAGGACAAGATGTGCATAGCGATGTACCATCCAGGTCGTTTGCTA  
GAAGATTTAATCTATCAGATGCCCTTGACCTTGGCAGAGTATCCTTTGTCAATGCAATAC  
TAACAATTGAGATTCAGAAGGTAGTTCAGATCATCAGAAAAGACGAGTCTATGTTATCG  
GTTATCGAAAACCTTTTGCAGTTCTTGACCTGTAATTAAGATACAAAAAAAACACTTATG  
ATATATTAAGTGGGTGTAAGTTCTTTTAAACCAATGAGAGCATTATCATTGGATTGCTT  
CCTTTACTATTCTCAACCGGTTGTGCAAATGCCAGAACAAATGTTGAGTGGTGCAGGTGCA  
TCATTCCCGTCTAAAATCTATACTCGGCGGTTCTCAGACGTAGCAAAAAGCTGGTGGAGCA  
AGAGTAAACTATCCGGCAGTTGGTTCTGGTAGTGGGAGAAAAGCATTAAATTGCCGACAGC  
GTAAACTTCGGTGCCCTGTTGATCCTATTAACAATTGGATATAGAGAGAGTAACAAGA  
GTATTAGTTCAGATACCTATGACAGGAGGATCTATTGCATTTGGACATAACAATCCTGAC  
TGTGATTTATAACTTACACAAAACAGGAAGTTGAATTTGCCATGGGTATCGTCACTTAC  
TGAACGAAATGGAATGTGATGATCAGAGTATGACTAGTGCACATCGTTCAGATGGTCT  
GGTACAACCAACGCATCTATAAGTAGTATGCAAGCATTCTCTCCTACATGGCCACTAGGC  
ACAGTTTAATCTGCAGCGTGGTTAACAGGAGTGGGAGGTACACGTAACCCAGGAGTTGCA  
TGATTAATTAGAAATACACCTGGATCAATTGAATTTGTGAATGAATCATATAATGAGGAT  
CTTGTAAGACCCGCAGCACGATGAAACAAGTGGGGTAACTTTGAAAAAAAATCATTGAC  
GCAGGATCAAAGGCCATTAAGTGTATCAGTCTTGATGAGAAAATTGCAGGAACACATCCA  
AATGCAGAACCAGTAGCAGGGTATCCGATTGCAACTCTAACTCGGGTACTTGCACACGAA  
CCACGTAAGGGTAAGATTACAGCTGCAGTCAAGACAACCTTTATCAGCTCTCTTGAGTGGT  
GAGCAGCAAGATAAAGCAGGTAAGTTATGATTCGTTCTCCTCGTCAAGGTGACATTCCTGAG  
AAGGCAAGAGCAGCAGTTGACTAGGTAAGTTCATAATTTTATAATATATACGTATCCTAA  
TTATCATATGAGTGTAAAGACTCGTGCGAACAGGAAACGGTGAAGATGTTATCTGTGATGT  
TTAGGAGGTCAAACCTAAAGAAGATCCAAGCAAAGCAGTAGCCTCTCAATTTAACAATCC  
ATATATTTTATGCATGCAAGGACATAATAATGCAGTACCTCCAATTCTTGATAGATGATGG  
TGCAGGTGAGACTGTAAGTATAATCAGAGATCCCGATATCTACTTCCAACCTCGGAATCC  
TCTGTCTTGTAACAACAATATTCTTTTGAAGTCAGAGGAAGTGGTAACCGCATATGAGAC  
ATATCCAGAGGACATCTCTAAATACAAGACATTAATCGAGGCAGATGAAGGAAAACCAA  
GCTAAGTCCTGTTTATGAATCAACGGAGTGAATGCCTTAATGGACAGGTAACAAAGCTAG  
ATGAGGAACCAAGCATCCTTCTGGAAAAATCCTATGAAGTAACGACTGTGGATACCATGA  
TTCCGTTTCCAAAATACAGCTCACAACGTGATGTCTTCTTGACATCTGATAATATCTTGA  
GTATACTAGATCGGACACCAACACTGTTTGAAATCTACAATCAGTTATGAGTTCCTTCTA  
CACCAACATTCAACTAGCTGGTGACACTCTACTTTTTCGGAGAGTATGAGAATGGAGACGC  
GGTTCAATATCGCACATCCTCTTCTCCTACCATTTATGATTTGTATAAGAAAAAAGACAA  
GTTTACAACCTTAGCCTTGAGATACGTATCTCCTGGCAAGTTTACATCCAAGAGAAGC  
AAGAGAGTTTATAAAACAGTATGAAAATGTAGATAATTGTGAAGTCCATGGTTACGAGAG  
ATTTGTCTATCACTACAGTCGTCACCAGTATCTAGATGATGTTGACTACCACATTGATCA  
GATGAAAATGTATTCATCGAACATCTAGGTTCTATGTGAAAGAGGATTGCTGGACGTCGA  
AGCAGCAGCAGAAGAAATGCGATCAATCACCATTAAGATATGGTCCCTAGAAAACATTA  
CAGTTGGACAACCTAGAGAGTTTATGATGCACCAGATAGTCTATAGTTGAATGTCTCGCGGAC  
CGAACAAAGAGATGCTTACAACTTTATTACATGGTGGTGCACAACACACTACAGACACTAT  
AACTGGATGGAAAGTTAACTTGTGTTTCGTCCCATACATTACTGGTTGAGTCAATCGTAC  
ATTCGGTGAGAAATGGAGAAAGAATTTATCCCCCTGGAATCGTGCAAATGAAAGGGAAGT  
ATACGTCCAAAGTAGAAGGCATTACGCTCATGATATCTCTGGTTTTAATATCCTCGATTA  
CCTCGAACTATAACCGTAAGTTGAAATACTCAAATCAGGAGTGATACAGACTCGATTACAT  
TGCCTGGGTCAAATCGGGCAAGGAAAAGTAACTCCAGACGCGTCTGAAATATTCAAACG  
CCTCTATACAGCTGATTGCCACAAGTTTATGAAAGACAACATATAACAACGTTGAGTTTAT

GGACCGTCTTGAAGATTAGATGAATTTTTCTTGGACTAGTAATTACAATTTCTAATGATGA  
TAGGTCAAGCTTTGAAGATGGGTAGAGTCTGGTACGTTTGTAGGATAAGACGCCATATGA  
CTATCTTAGAGAAAGAAACCATGTTGTTCCCCCTCGAAAAGCAGCGAAGAAAGATGTAAC  
ATACGCAGGCGCGTATGTCAAAGAACCGATACCAGGATTCTATGACAGGGTTGTCAGTTT  
TGATCTCAATAGCCTGTATCCTCACCTTATTATGCAATCCGATATTTTCGCCCCGAAACACG  
CAGGGACACTAGACTTACCTTTGCAAGCGTTGAGAGAATCCTTGATCAGGAGTTGGTGAT  
ACCGGAAGACTATTGTGTGTGTGCGAACGGTACCATGTATCGAAAAGATATTCATGGTTT  
AGTGCCAGAGATCAAGCCGAAGATCTACGATGGACGAACGATCTAGGAAAAGGAAATGCT  
GGCTGCAAAAACAGCAACATGAAACCACACCATCTAACAACTAGTCGCTGCCATTTAATA  
GTTCAACAAAATACAGATGGCAAGAAAGATTCAACTTAAATTTGCCTATGGTGCTATCGG  
AAAACAATACTTCCGATAGTACAATCTTGCAATTGATGCGAGAATCACTTTGTCAGCGCA  
AATTTCAATCAGTAGTCTCGAAACCACAATGCACGATTATCTCAACGAGACACTCGAAAC  
GACAGGAGAAGATCATGTTATTGCTAGTGAAACCTATAGTATCCACCTTAATCTGGGGCC  
TCTGATCGACGCTGTGTACGATGGGAGAGAGGGCGAATTATTCGAGCATCGTCGGTCAAAC  
TAATAAGGTGAGTGAGGTGGAGCTTGAGACATACATGACTAGTACTAATGAAGAGTTGGC  
CACATATGTAAACGCATCCGCACAGAAGATGGTCATGAAGCGTGAGTATATTGCCAACAA  
AGGTATCTGGACTGCCAAGACAAGATATATTCTCAACGATTGCTATGGTGAGGGTGTTCG  
ACATGAGATAACTAACGTAAGCTCATGGATATCGAAGCGGTTAAGTCTTCTACACATGT  
AGCATGTCAAAAATCTCTGCGTGATTGCCAACAGTTATCATGAATGAATATGAACAGAC  
TGCACAGTGGTTTATTGCTGACTTCAAAAATCACTTTTCTGCCTAACCTAATCTAGACAT  
CTTATTTTCGTAGGGAGTGTAATATTCTAAATAAATGGTTCGAACCCTACAACCATCTATCA  
CAAAGAGACACCTATACATGGGATAGGGGCACTGGTATATCACTTTTATAATATGAAAAA  
CTTACTTACTCACATGTATCCATGAATTAAGATGGAGGGTAGAACAAAATTCGTCTATTT  
GAAGACTCCAAACAAAATCAATGAGAACAGTATCAGTTATCTTTATATGTTCCCGTAATA  
GTTTGGACTTGACAAAAGGTTGATTATGATCTACCATTTTAGAAGAGTTTCCTAGAACC  
CATCAAAGTGATTATGGCCGCTTTTGGTTGCCAACCTAACAAATCGCATCATTGGAATT  
TCTATTTTCATTAATAAGGTTGTTGAATACCAAAAAACATTTGGTATCCCAGATAAAAGA  
GAACAAGTTTTGGACGATGAGTCAGATGCAAAAATGGTTTTAACGTGCTTTGAATCGTACG  
AACGCTCTAACGACAATCACGGAGGTTGACGAGAGTCTCTACTGAAGACTGTTGTAACAA  
TAATTGGAAATGATTATGCATGACAAGTATCTAACGGAGTTTGTGCAAGTGCTACAAAAG  
ATTTTATTGATAATGGTTCTTATGTCTCTTATGCCTTAGGTTCTGGATCAATTTATAGTG  
GGGTGCCAATCAATAAAATCACAGCGATTGTAGGTGCTTCATGAACTGGTAAAACTTTCT  
TTTGCCTTGGCATTGTGCAACACTTTTTAGATTTTGTATCCTGATGCATGTGTAATTTAGT  
TTGAATCTGCGTCAGCTATTTGCAACCAACTGATTTTTGATAGAGGTATAGATTCAGATA  
GAATGATGATCGTTCCTGTGCCTACGATCGACGATTTTACACCTCAAGCCTGCACGATTC  
TTTACAAATAAACGGAGCAGAATGAGTCTGATCGTAAACGGATGATAGTTGTATTACTTT  
CTGGTGGTAAGCATGCTAGTAATAAAGATGTTGAAGACTATGCTAATGACAAGAATGTCA  
GCGATATGATACTAAGTCAATTTATCAAAGGAGCTTTGCGTGTTTCATACGGTAAAATTAG  
GTAGAGCAAACATTCCTATGGTTCGTATTGAATCATAACATATGATGATATAGGAAGTTATA  
TTCCAACGGAATAAATGGGGGATGGAAGTGGACTCAAATACGCTTCATAAACAATTGTAT  
GTCTGTCAAAGAAGATGGAAAAAGATAGTTCAGAGGTTGTTGGAAATATTATCAAATGTC  
GAGCCCAAAAATACCGTCTAAGACAAGAGAATTCTATTGAAGAGACACCGTTATAGTATG  
ATCGTGGACTTTATCGGTATTATGTATTACTAGAAGTGCCTTAAAAGCATGGTGTATTAC  
CACGCAAAAGTAATCTTATTATAGTTGGTCAAACCTTCTGTATATCCAAAATCCCACTTG  
CTTAGCCAGAAAAGTATATTACTGATGTATTATGAAAGCATAAAGACGAGTCAGCAAAGA  
AGGAGTTTCTATATAGTCACTAATCTTACTACTACATTAATGCTATGATGATAGGTTG  
ATATGGGATTACTATAAACATGTACTCCAAACATTCCTGAATCAGATAGACATGTGACT  
ATTATAGATAGAAAACAACGAGCAACCTTTAATGAGTTGAATATCTCTCAAAGCTTTATG  
GCAAAAGATCTTGTATGGTTGGGAATTGAAAAACATATACAGACAGTCTTTGGTGATATA  
ATCAAAGTTGATATAAATGCTTTTTCAGTCACAACCAGATTTTTTCTGCAAAAATATTCTTTT  
GGAGAGTTCAGAATTAACCATCTAATAATGATGGACTAGATCAATTTAAAGATCATGTA  
CATGTACGAGACAATAATGCTACTCGTAGGTTTTTTGTGATGATTTTGTATTTGAATGAC  
GTTGATGATGGTGGGCAAACTATTTTTTCTAGATTGAGCTATGAAGTTTCACCTAAACGT  
GGTAGAATATTATTCTAGCAACATTGCAGGATCGTCACTGATGATTGCCACCTGAG  
TCTGACAAACAGTATATTATTGGTAGTTATTTACAATACCAATGAATCTGGAAGTCACGA  
TTCTATGTCATCGATTGTATAATATGTAGTGTGCCAGGAAGGTTCTTCCTTTATTGGAGG  
TAGATCGTTTTACCGTACGTTCTTACAAGAGCATTTTTTCTTGATGTACATGAATACATTA

GTCAGTCTGATGCATTCCCAATTCTGAACGCACTTAGTATTGAATTTCAATAAAGAAAAG  
ATCGTAGAGAGGAATAATTTCAAGAAATCGTTGAGGTTTTAAATGTCCTATCCGATAATC  
CGAAAGACGACGATTAGATCGTAGTTTCTACAGAAAAGTGGTGTGACAGCCTGCGATCT  
ACCTATAGCTTAGAAAATCTGTAAAGATTGCTGACGCTCAAGATACCAAACACGATAGGA  
GTGCAATTCGCGAGATTCTTGCAAAAAGCATTACGAGTATCATTGAGCAACAAGTCGCTC  
AAGAATATATTGAGAACGCTACTGATCGATTGGAACATTATCATACATAGAAAGACAAGA  
TTCATTTTGATATGGAGTCTTTTAATAAGATTCCCACGGGTAGTGTAGTAGAAAAATCAC  
TAAACATCGTTCTTGAGGAGCAGGTGTTGGTAAATATTTGGCCATGTCACACTATGCTG  
CAACAACCTATATTGCAAAGTATGAATGTTTTATACATTACTTGTGAAATGGCAGAGGAAA  
CCGCTGCAGCACGCATTCATGCAACCCATTTAAATGTTCCGATTCAAATCTCGCTGATC  
TAACACAACCAATCTTTGTAAAAAAGGTTAAAACACTAGCAAAGAAAACCTCATGGTAAAC  
TTATGATCAAGGAATATTATCCAGCGGCAGCACTTGTGGCCGCTGTAAATCGCTGATCA  
ATGATCTTGCATTGAGGAGAAGAATTAACCTCATATTGTCTTAATAGATTCTCTAAACA  
TCTGTGCTTCCCAGAAATACAAACAAAGTATTGTGAATTCTTACATGTATGTTAAAGCAA  
ATGCTGTAGAACTTAGAGGACTTGCGGTAGAATGTAACGTCTCGATTGTCTCCGCGACAC  
AAACGAGGCGTTATGGTTTTGAGTCGACTGATATTGGTCTCACTGATACGAGAGAATACG  
TTGGTTCCCTGCTATTTATGATATCATGTTTGCTCTCATGTCGGCTGAGGACAGTGAGG  
GGTTGGCTAAAATTATGTTCTAACAACCTAATTAATCGCTATAATGCTCCTACTATGAATA  
AAATATTTTCGTGTAGGTATTGTCAGAGCGAAGATGAGGTTTTATGACGGAGAAGAATCTG  
CTCCAGCTGACATTGTTGATTCTGGTCCAGAAGAAGAGAAGGTTGAGCTTGTACACAGAT  
TTACATCAAATACAACTTAAAGTGCATTATAGTACGGGTGATTTGAAGAAGTATTGTGAA  
TTTGTAACCTGCTGTTATATCTGTAGAGAGTAAGAATAGTGGTCATTTCCACGATCGTTTG  
AGAGACTTAGATTTCAAAAAATTCTCCGCACATAGAGCATGAACTGCTTCCGACGGACTA  
TGTGCTGTGTCAGGAGAAGTTACTGAGATAGTAAAGAAGATATTATTTCAAGGTAAACCA  
TATACTGAAGAGAGTGTTATGCATCTGAAAAGTGAACCTAGGTGATGTCGTGTGGTACTTT  
ATACAGGCAGGTATAGTATTAGATGTCTCACCAGAAGAGGTTATAGAAATGAATGTAGAT  
ACGTTGAAGAGCAGATATCCTCGTTGAGAGTTTGTGGCCACAATTCTTAAAATCGTAAA  
CAAGGAGATGTTTAAATGGTAGGATCTGGTGAAAGCCTGGCAGTTGTTAGTGATCTTGCTG  
ACGCATTCAATACTGGTGAAACGAAAGATGCCATTCCAGTATTGATTTGTATTATTGAAT  
ATTATTGGATTAAGTTAAAATCGTTACAAGCTTAGGACTTCGTAAAAAGAAATTAAGAG  
TACTAAAAAAATTATTGTTGATTCAATAGTTCGAAGGTCATCAGAAAGCACACAGATCCT  
GGTGTAGGTAATTTTATCAAGATGAAAAGGTTCTATCTGGAAAAAAGTTTGATCATAT  
GCAATTGACAGCAGATTGTAGTGCTGACAATAGTTGTGCTAGGCCACATACAAAAAAGC  
TGGGACATATAATTGGTTGCCTACTGATGAGTTTCAAGTTCTAATAACGGGTAGGTTTGG  
TGCCGATAGATTCATTCTTATCAAAAACAAAACAACGAGTCAAGTAGTCTCGGCAGATCC  
ACACGCTTAAAGTTTACTTTGCTAAAAAAGTCTTTAACAAAGATGGTAGACTGGGGTATAG  
GTAAGAGTTTGAAATAAATAAAGACAAAGATAAAACAGTATACGGCGACAGACACTAGAG  
AAACTACTAAACAAGATGATGGTTCTAGAGTTTTGTTTCGAATCTGAAATCGCAAGAAACA  
CAGAACCATCCTGGAAAGAAATGGTATAAGTCTATGAAGGATCCGGTCTGAATCGAGAT  
GAACACATCTTAAACAACCTGCAGCATTACAAAAGTTTTTAGGATCTAATGAAGGGTATC  
AATACTCCAGACATAAAGGACTCATGCCTTACATTGAAAACAATGCCAAGAAAGAGTGTG  
GGTTAAGAGTAAAGGATCGTTGGACTCCTATGGATATTGTATTGGTTAAGAAGAGTGTA  
AGGGAGTTGTAGAAGGACCTATAAAATAATTTACTGACATTGATGGAATGAGTCAAGGTG  
CAAACTCGCTCAACTCAATGTCTGTTAGCGTGTAGCATTAACTGTAAAATTTTAAATTG  
GTATAGCTCTGAAAGTTTTTGCAGCAAAGAAAAAGACTGCTAACGCAGATGTTGCCAATA  
TAGGTAGAAGAACTGTTCAACATACCATGGTTATCATGGTTACAACTCTCTGAAGTGTA  
CGGTAAATTTAGGAAGGAACAAGAATTACCCATCTTATAGTGGCGAACTTTGTTGTGATA  
TAGTGACAGCGAAAGGTGGTAAATTACATGGTCCATAAAGAAATTTTCAGTATTCTAACG  
AAAGCAATTTAGTTCAAATAGATCTCACTCCCAATAGTAAAGACGCAGGAGCAAACTTA  
GTAAAGTTTCAAGTCTTGCGTTGAATATATTTCTGGGAGTTTTAAGATTAACCTCGTCCTA  
CTTCTGCAACAAAACCTTAATCATATTCTTAGAGTTGGAGGATGGACAGATAGTCATCAGA  
AATACTGGAATTAATTGTATAAAAAATTAGTTGCATGTCGTATGACTGTTTTTGGAGAAG  
TAGCCGTCTATGAAATTATCCAAAATGACGCTGAATATATCGCAAGAGTTATCGTCCCTG  
CCATATCATACGAAGCTCGTCAGGCAATAGTCGTTCTGCTGCTAGATTCTCGTCTAAGC  
TGATTGCGAAGAAATGGGCACATATGTGGATGGAAATTGCAACGATGTAAAAGATGCAAC  
CGAGGTCCACCGCATTATACGATGGTGCAAAAAAAGAAATCGGCGATGGTAACGGTCTT  
TCCTCAAGATACACTTGTCCAGTTTACAAAGTGTCCACTATTACTCGGATTTCTTTCTAA

CGGTGCTATAATATTATTATATAGACAGAGTACACCTTGCCTGACGAACAGCGTCAACAC  
CTTGAGGATCTGATCTCTTCTGGTTCGTCACGAAGGGTTGGATGCAGTATGGTCTGCACTT  
AACAAACAAGCATTGGGTATTAGGTGGGATGGTGCTCCTGCTATCGTCTTTGGCTCAAAC  
CCTGCAATTGGCAAATTCATCGTTGCAACAAAATGCGTCTTAAACAAGCCCAAGGTCAAG  
ACCTGTTCTGAACAAACAGGTATTGAGGAACCTTAATCTGGCAGCCTGGCGGACATTCTG  
CGCTAATGTCTTTGGAAGCTTCCTCGTAGCCGTGGAATTGTCCACGAGGATTTTCGTCGGT  
GTCGGAGGCGGCAGTGTATATCGCGCTAATAGTTTTGAGTACCGTCTTCCCCATCCGATC  
CTTAGCGATATTATTCTTTCCCCACATTCTTCTTATACCGAAGTTCCTCCAAATCGTGTT  
GGCAGCATTGCCATGATATTCCTTCTATATTATTTGATTTCTACTTTATAGTTAAGGAA  
GAGGCAGATGCATCGGTTGCAAAGTCTCCTTTCTACAATTGGGACAAGGCTCTCAGCAGG  
ATGCGTAGATGCAAAGTTCCTAGCGAGAAGGTACGTGCACATATTCAGAAGCCTATCAAC  
AGTTTTTTCCGTTGTTATTTACCAATTAATTCGCGCCGAAGTTTTGTATACTAATTTCCCT  
GATAAAAATAAGTATGAAGTTGATGGTACTTCATTTCAGAGTGTGCCATAAGTTGTTTTCCA  
TTGAAGCAGGGTTTAATCCATAACATCGCTGTTGATGGAACGTGTGAAATGCTACATCTAT  
GGAAAACCTTCAGAGCAGGAGGGTGTCTAACTGTTGGAGTTCCTCCCGACGAAATTGTA  
GATAGATTGACTTTTAGTAAAGCGCACTTCAACGTTAGTAAAAATTCGACGAATAAAAAA  
ATTTAATGGTTTTCTAATGAAACCACAGAGAACCTTTGCTGCTGACGCAGCGGAAAAAATT  
AAATCTTCCACACGGAGGTTACTGTAAATACGCCAACCCATCTGTGAATTTGACTCACAT  
TTTTAAGTTTGGTAAGCTGGTAAAAAGTCCTGCAAAGATACAGCGGATACACAACAGCA  
TGGCGGAGTAGAAACGGGAGGTGGCGATGGTCGGGTAGGTTAAGGCGCAATATCTATTAC  
ATTTGGAAGATTTATGTCACCTACTATTGGGCACGAGAACTTCTTAAGAAAGTAGCACA  
AGAAGCAAAGTCTGGTGGAGGAGAGTATAGAGTTTTTCCTTCAAGCACTGAAGATCCTAA  
GTAGTCTTCTCTAGATTCTGGAACCTAGGATCAGGTTTATGACACAAGCCTATCCAGACCA  
TGCAAATGCAATCGTTGATGATGACGACTTGAGAACTATCTTTGGTGTGCTTACTGCCCT  
TAACAATGATGGGCATAGTTTAGTAAATATTGTCGTGGGTGGTGATTTCAGTAAGTGAAC  
GATTTTATTGGCAACGAAGTATAACGGTGTCTTATATACATTTGATCCGATTAAGTAAC  
ATTAGCAGGAGATAGAGACCCTGACTCTGAAGGTGGAGACGGTATGTTTGCATCTAAACT  
GAGAAAGGCATCGATGGAACGTGATCCAGACTCTTCAATTAAGGTAAACCTAAAGCGAG  
GTCTAAGGAAGATAAACACACGATGTTTCTAACACTCAGACAATCAATCATTGTCCAGGT  
ATCAGTTGCTGACTTCCCTGAAGGATCATTTCATCTTTATGAGATCGCTCCTAAGTGAGT  
TCCTCAAGGTTTGGAGGTAGCATAATAGGATACTAGAATGTTTGTAGTAGGTACGTTAGT  
TGAAAAGATCAAAACAGGTATTGCAGGTAAGGTTGTTAGGCGTGGCAGTAACTTACCAT  
TTACATTGATGAGCATGATAATCTCTTCCGCTCATGATTGAAAGACCTTGTGGAGACTAA  
GAATCTGTTTATGGATTTCGAGTTTACACCTGCAGGTGAGATAGGAACCAACGAATTAGC  
TGCATCTTATGGTATGATGGCGCCTCGCGGGTACCGAAAGAAGAGAAATAAATAAGTAAA  
CGTTACTAAGTAAGATGGATTTACACAACCTTATCCTTGATGAGTGCTGCATACCAAGCGG  
TGCAGGACACAGAAAAGACTCTAGATCCCGTTGGAAAAGAAGACGGTGGTGTAGATAATG  
ACGGTGATAACGATTCATCTATTAAGTATCTTACGTCGAGTGGTAAGGCAATTGCCAATG  
CAATGAAGAACGAACATCAACTAACACATGAGAATGGAAAAGTCATCGAGCATGATGTTG  
ATGAGGAAGAAGTAGAAGCCGCATACACAGTAATGCATGCTCAAAAGAAGGGTGACACCT  
AAGCGTATCAGAACTTTCAAGAAGGTATGAAAAGTATAGATTGTAAACCTTTATACAAAG  
CAATAGATCATAGGAAAGACAAACAAGAGATTCATCCTGATGGCAGCTTTATATCACCAG  
AAGAATTAGAGAAAGTCGCCGAACACACTAGACACTGGGATGCTAAGATGGAAGAAGGTT  
ATGGTGTGAGGAAAGGGTATTCTAAAGGTGGAGGGGTAAAGGCGCCAAGCATGCAGAAAG  
GAGCTACGGCATTGATGGTCTTAAACAGGCAGCAAGCGAAGCAAATTATAGAATCCGTC  
CTAAACTAAGGCAAACGCGCAGCAGTGTTAAAGTAATGTTATTTTTCAAACGCTTATC  
CGAAAAGAAAATAAAATTAACCTAAATTCTAGGCAGGACGATATCATGGAGGGAGATAA  
AACTCTCACCCATGGCGAAAATTGCGGGGGCTTAAACCATGACGAAAACGTCACGTAGA  
TGAACCTGGCCATGAAAAATCAGTATCTACCGAACAAAATAGTTCAGACAGGATCGGTGA  
AGCCTCAGAAGAAAGCACCAGAAAGCATTCTCAAAGCGATAACTCTGAAAAGAACCTGTT  
AACCATGAATCAATTTCTTGACGGATCATTTTATGGATTTTATAAGGGATCAAGTAAACC  
ATCCCGTCCAATGGGTGCCGTTGTCAAACCTATCTAAACCTAATCCTAAAGTAATAAAAACA  
AAGAGTGATGAATAACGGCGTACGTGAACAGACTAAGTATGTAATTATGAGGAAAGAAAC  
ATATAAGAATACTCATAAAGACTTCAATGGTAGCAGTAAGAATGAACCTAGGGTATCAGT  
TTACTACTCCCGAACAGAAAGCAATAGTGTCAAGATCGGTTATATTCTCTGAAACAAAGTA  
TGCGCGAGGTGCGTCAACCTATGATGCCATGTCTGTGTCAGAGATAAAAGAGCAGTAGGTTA  
CGGTGGTGACGCCATACCTCAAGAGGCGAGGAGTAAGTAAAATGAGGAGAGAATGACGAG

GCATAAAGCATCCTAAATGAAAGAAGAAAACCATAGAGCTGATGCACTTGATGCTGTAAAG  
GGAATCAATCATTGCTCTGTATGGAAAAGGTGCTACCATGAGAACGGGTACCAAGCAACA  
GAGAAAAGTCAGAGGTGCTCAGTATATTGCACGCTCTGGAAAGTATTAGAATATGGCAGA  
TCAGAAAAAGCAAAGTCTACAGTCGCGAAGAAGCATGGGTTTAAAGTCTGTTCACTA  
CACTGATACTATGGCACGTTATGGTGGTACAGATAATTACGTCAAGGGTAGAGGATTCTG  
GTCATGAGCACACCCCTAAACCCATCTCATTGTCCCAATGCTCAGTGTTATTGCTTTGAT  
GATAGGAAATGCAAACCAAGAAGCAAAGGTAGGTACAGTAGGAAAGAATGGTATGTTGGCC  
AAAGAAACGAGAGAGCGAAAAAACGAAATATTTGCTACGGCACAGAAAACCCATACGATC  
CCAAAGTCCAAGAACTCAAGGATGTCATGGCATAAGGAAAAGAAGCAGAAGATATGTTA  
TATAAGACTACTAGAGCAAACGGCGGACGTTTCTATGACAAGAAAGGTTCTGGTTAGTTC  
AAGGACGGAAAGAAACAATACAAGGAATAGCCGATAAACTGTGTAATTACATTTTAAGAT  
TATGATGGGTAATATTTTAATTCCACTGGCATAACAAGGTAATCTATTCTGTGGCCAACA  
TATCCCTGATGATGCAGGAATCGGAGAGGAGCTAATCGATAGTTCTTTGTTGATTATGGG  
CAAGGCAGTGAAACTCACCAATAGGACCGCGGACGACGCTCTAGTTGAAAAAGTAAGGTA  
AGCACTTGCTGCTAAATAAGTCGGGCTTTCGACCCGGTTAGAGATGTCCAGAGACCCCT  
TCTTTCATAAATCACTAGAGGAAAGAACAAGAAATTGTAGCAGTAGCCCATGGCACTTTAC  
GGTGAAAGTGATGCAGACGACTCTAAGCCAAAGTGGGCTCGGAGAGGGGCGGGTGTAGAG  
CCCCGGAATATTTTAGCAACCGCTGATGGTTGGGTTCTTCGTTTTTACATGAATGCCGCG  
AAGACAAAGTTTTGGGATGAAATTTTTGTCTCAGATGATGGGCTTGTATGTGCAGGTTGT  
CGTGGAACAATACCTTGGCTGATGCCGATATTACTGCAGTAGTCTTTGAAGAGACTGGA  
TATGCGGGGGGAGCAAAAGTTGATCTTGTGTGGTCTATAAGGTACCGTTTCACACCGCA  
AAAGCTTCAACTTTTGTCTGTTAGAAATCCTACTGACAGTGCCAACATCACTGCAACTGCG  
GCTGCACAAACAGGTCTAAACCGTGATCAGTTTACATGCACGGCTGCTGCATCTGCTACA  
GCATAGGCTCTCCAAGCACAAGCAATCTCTGGAACAATCGTTGACACCCTGGTGGATTA  
GCCTACGATAACGTATATACTTATGGAGAAGTAGTTTGTGCAGGTGGAAGTGGTTCTAAC  
GCAAATTTACTGCCAGTTAACTAACATATGAAATTTGGCCAACAAAATGAGGATAAATT  
TCTCATGTTCCGCAATTAAGCATCATAAGAATCCTCACTGTGTGACTCGATAGGATTTGA  
TTAAGATATAACACGATTCAAGTATCTTAAATGACTCTTGAGGCGTTATGTGAGAAGAGA  
TCCGTTAACGATTCATCTCGTCATCAATCATATAGTCATCTTATATAATGTTTTAGGTGA  
AGCAGCAACTCCTCTTGTCTTCTTAAATTAAGACATAGAATATTTTCATGTTAATCAAGAC  
TCTACAGATCTATGTGGATAAATATCCAGTTAGGAGGCTCCAGAGTTGGAAACAGACCC  
CGATTTAGAAGAAGAAGTAAACTGGTATAGGCTATGATGACAGCCGGTACAGGCGAATT  
AAGTGGTATCGCAGCTGCGAGAGGTCCTGTTGCGGGTTTTGGACCTGACATGACGATGAG  
AGGTAACCTTAAAAAATTAATGCACCGAAATCTCGTGGCTGTGAAGAAACAGATAGAGT  
AAAGGCTCCAGGTCTTCTAGATTATTCCAACACAAAATTAACGTACCTGAGGTTGGTGA  
AACTATCGTGTCTGCTCATAGGCCTTCTGTACTAAGGGTGAAATTAAGGATGGAAATCAT  
GCCTAAGTATAGGTCCGGTATTAATATATTACGAATCATTCTTGGTGGTGGTGTAGATT  
CTTCATGGACAAGAGACTGATGCACATGAAGAATTTGAAAGAAGGGTCTGAACTAAAGAA  
AGCTAATATAAACGGTAAGACTACTAAGAGCGGTGGTAAGGTAAGAGACCGTGAGAATAA  
AAAAGACGAGGCAGCTGAACAAGCCGCGATAAAGAATGATCCGAAATGCATTGTTGGTAT  
GACTGGAGTAAACTCCGTTAAAGAAGCTGCAGGTGATCAGCACGTGAAGAAACAAATGCA  
TCAGCAAAGATTCATAGCATGAAGAAAAAAGTCAGGTTAAAAAAGCGACAATTACACAA  
ACACTTACGACTGATAACACAACAACCTTGAGAAACAAGCAAGGACTGGAGAAGAACAAGA  
CGCCACAAGGTAATGGCTGACCTTAAACACCGTGATAATTGAGAACTCGCAAAAGTACTC  
GATTCATGCAGGAGAATTCTGTGAAAATGGGGCTACCTCTTGCTTTGTGTAATGAGAAG  
ATAGATAAACAAGACAGGATCGATCAAGCTCTGTTTGATAAGGTTGATAGATGGCATGCA  
GATATTAAGAGAGAGACAGAACAGATAAACATAGGTTGTGAAAGTGACATCGGTAAGATA  
CATCATCGTCGAAGGTTGATACAAAAGAATATGGGGACTATATTCGGAGCAGATGAAATC  
GTAACGTCCCTTGTCTCAGCACCAGGACAGGCAGCTCTGAAGCAGTTGACAAACAATCAA  
AATCCTAGTATGATAACAACAGCGATTATAAGGTCTCCTTGATCGACAATTTCTTTTGCGA  
ACCTACTCTCTTATCGTCTTGACAGACTAAAGCGGGTGAAGAACGGGACGTTCAACTTTA  
GGGGTCCTTATTTGCTGACTCCCCAAAACCTAAGAATAAAACACGAGGTTATTACTTCG  
CTAAGAATACTGGTCTCGTTTTTAAGTGCAATCACCGCGGTGTAGTCACATCGTTTGGTA  
ACTTTTTAAAGGATCAAGCGAGGGACCTTCATTATGAAGACATCATGGAGAGATACAAAG  
ATGGTCTTACAGGTCTAGGTACGAATGTGGCAGATTCTGAGTTTATGTTTCAAAAACCCAA  
TCTTCAAAAAGAAGGTAGAACAACAAGTATTTTCAGAGCTAAATACTTCGCACTCAGCAT  
TAGCATTCTTACCAAACGTCGTATCCCGAGGAAACCTTTCTCGTGATTATACTATGCAG



ATGAGTTTTGCACATCGATTTACAACCTAAAACCTACCTTCCGATATGTCACAATGGATC  
ACCCAAGGATTATTACTCCTTTTATTGAGGGAAAAGTCGAATCGTTTGGATTTCAAGGGA  
GGTGTCTGAATCCGGACGATACTAAGGTAGCTAACAATCATGTTGGATGAAGATCGAA  
TGAATGTTTATGGTCTCGGTCGTGTGAACTTCAACAAGATCCTGTATCTTACTAAAGGTC  
CTCTCGATAGTCTGTTTATCGACAATGCAATGGCTATGCCAGCTGCTGAGGTTGCTAGAT  
AAATAATGAATGGGAAAGAGGAAAACCTTTGTTTAGGACAATAAAAAGCGAAGTAAGGAAA  
CTGTTTACCTTATTGAAAAAGCAATTGATAATTGATAACAAGGAGTAATCTGGCCTAGGT  
GTCTGCAAGAGAAAGATCTAAATGACATGTTCTCTTCTGGACACGACGTGCAATCTACGG  
CAGAATTTTATACATAACCAAGGATCAGAAGCAAATTTAAATTAACCGAATGGAAAAAGG  
TCTGATTAGGGCAAGGACACCCAACCGGATCGACGTCACAAAAAGATGGGGAGGGATGAC  
CCCCTTAGTCCTGAAGAGGGGGCATAAGATCCTAGAACTGCCTGTGAAGGTATTGCAGG  
GGTCGCTGAATCTGCAGTAGAGCTTAACAGCGGTCTTCAATTTTTTGTCCGATTGAAGAC  
AGCAGAAAGTCAAGAAATTTCTTAATCGTTCAGCGAATGGTCTGATCACTCTTGATGTTCC  
TAACTATCATTTTGTACTGCACGATCGCTGCTGTTGGGTCTCAGAAAGGCAGTACATAG  
CGTTTACTAATGGTCAGCCTCCTTTACTTGAGCCTGTCAGGCAGTGTATAGACATAGG  
TGTGTATGATGTGAGTACTGTTTCCAAATATGCTGAAGAAGCATGGAAAAACAGAATTA  
TTATATTGATCACGACAGAGTCTATTTGTTTACATATGCCGGTATTTGTCATGTAGTCGA  
TAAATAACCCGTACAAGATCGTTCATCAGGAGA ACTATAACGAAATTCCACAGTTTATCTA  
TCTGATGGTGGCGATTTTTCTCTCCAAGACGATCATAAATTTTATCGCTTGCTGTATGT  
CTGAAAATACTATGACGCAATCTCAAACACAGACCCAACATTCCAACGCCGATTGTGGG  
AGGAGTGCCTACGCCACTCTGACAATCTGCAAGCTGTGTTTTTGTGTTGATTATGTCAA  
ACTCGGTAGCATTTTTAGCGGTGACATGGCTATTGGCAAGAATGTTGCACAACGCGCAGG  
TATTGGTATCAAGGCGGGTAGAATCCTTGGCGTCAACAACAAAATCCGTAGTGAAGATGT  
AAAACAGACAGGTGCTGGACCTTTTCTCAAAAAGCTTGAAAGTACTTTTCAAGATGCTTAC  
TCAGAATAGCATTTGTGGTGGTACAGCTACAGTCTTCTCCAATCTGGCACCAAGAGTT  
AGTAGATATTCTTGTCTAAAGGATAATAAAGGAAAAGAAGGCAATAGAATAAGGACACT  
AAACTAAAGCCTTCAGATTCGTGCGTTGTTAATAAAAAGACTCATTGATGATCGCAGCAT  
CTCTTTGGTTAGTCCACCTGATGTGCCTGGTTTTTTCCAAGCATTTGGCACTCCTGAGTT  
TGATGAACTTTGTGTATAGTATGAAAATGATCGTGCTATTCTTAGAAAGACTATGATGGC  
AAAGAATCTCATCCTTGATCTATAGAAGGGGAGCGCAGGAACAGATCGCGTTTATATCAT  
GAACGTTTACTGTAATAGTACAGTTCATTATAGATAAAGTAAACATTAGCAATTT  
ATGTCAGGAGATTACTCTTCTACAGATGCTCTTTCGACATATAACATCGTACAGGCAAGCT  
TTGTTTGTGTATCCTATCTGTTATCTACATCGGTAATTTAAAGAACCTTGTAGA ACTTGA  
TGA ACTATGGGAACTTGTGTTCTGTTGCTGTTGATGCATTGAATTATAATCAACAGTATCA  
TGTC AATGCTGGATAGCAAAGTACATTGGATCGTAGATCACTGGGTATTCGTTATATTGG  
AATTGCACATTATCTTGCTAAGAATGGTGCTAAGTATGACTCTCAGAAAGCATTTGACTT  
TGTT CATAAATTTACTGGAAGATTCCAGTATGCTATTCTATGAGCATCGAATCGTATGGA  
AATAGAGAAAGGTCCTTGCTGTTATTTCCGGTCAGCTAATGTATACTGATGGATTTCTTCC  
TAACGATACATATAAGAGTGAAGTAGATGAGATTGTTCCGATTGACCTATCATGTGCTTG  
GGAGAATCTCAGGGGCAGCAGCAAGGAGTATGGACCCAGGCACAGCACTTTGTCCGGCCCA  
GAGGCCTTCGGAGAGCAGTGTGCTTGTGTC AAATGACACAAGAGGAGTCAAACCTCCTAG  
AGACTCCCTGTCCGTTAAGAACGCAAAGAAGGGACCGCGTAAGAAGATTGTACCGTCTCA  
TAACCCTATAAAAAGCAAACCTATACTCTGCTATGGAATATGCATAACATCCATAGTTACAG  
CAAAGTAAGTGGAGTAATACAGATCTGCCTCCATCAGGCAATCAGTGGTAACTCGAGTTA  
CAATCCAAAGAATCATCCTGACGATGTAGTGCCTTTACCTGTGATGCCAAAAAATCTTTT  
GACCACGTACAAATATGGTAAGAAGACTTCATATTACCAACACAGATATAATGCTAGCAA  
AGATGGTGACGATGAACCAAACGTCGATAAGTTTCTCAACGACATACTCACCTCGGAGGA  
AGAAGACTGTGACAGTTGCAAGGTCTGATGCAGAAGTACAAAGAAGGCCAGTATGTTACA  
AGAACA AAGTAAAGACAAACTAAAAACCAATGTCGTTTGGTCAACCCTTAGTAGTCAAAA  
CATATGATGAATATAAGAATCTAGCATTGATAGACTTTCACTATGACAACGCGGGTAGT  
TCGGGAGACCCCAAGAGGTGTCTCTCCTGGAAGATAGATCAGACTATCAAACCTTTACAC  
TAGAGCAGACGCACATCTTTACTTTTAGCTTGA ACTATCAAATCATGCTTGACACAGTTC  
ACGTTGGAGGACGAGGTATGGCTTTCATTCCCTCTTGCTCTCTTCTGACTTGGAAGCAT  
GCATGTCGTTATGGGAGTTTAGGGAAACGGTCGATACTCGTTCCTATACAGACTTCATCT  
AGAATGTATATCCAGATCCTTCAGAGGTATTTGATATTATCTTAGATGATGACATTGGAA  
TTTCTCGTGCCTCATCAATGGCTAGATCGTACGAAGAGGTTATTTATTCAGCATAACGATT  
TTGATAATTGTCAACCATGGTATCTTGCAAGACAAGGACATTTAACTGGGACCTATGAAA

GATACCAACTCAAAGAAAACCTCTATAAGGCTATTGCAAACGCTAACATTCTTGAAGGCA  
TTCGTTTCTATGTCTCCTTTGCGTTTTGCGTTGCTTTTGGCGAAAATAAACTTATGGATA  
GCTCAGGTAAGATTCTCTCTGATCGCTACAGATGAAAGTCGACAACTGGTTCTCAGAC  
AAAATATGCTCAAGAAGCTGGACAAGAGGTGACCACTCCGAAATGGCATAAATCGCAAGAG  
AAGAAAAACCATTCGTTCGTAGATATCTGCAAGAGAAGCTGTTGAAGAGGAGAAGACTTGGG  
CAAGCTATATGTCTAGGCAAGGTATTCTGATTGGATTGAATGTTTCGCTTACTACATAATT  
ATATTGATTGGATTGCTCATCGTAGACTGAGAGCAATCAAATTAGGTCCTGAGTTGGGAC  
AAATTAATGGAAACACTCCGTTGCCATGGACTCAACCCAGTCTAAATAGTAAGGGTCAAC  
AGAACGCTCCACCAGAAACGCGAGATTGAAAGTTATTACGTGGGAGGAAGCAAACAAGACG  
TCCAAGGAGACTCCTTTGCATGATTCTCGCTCTGTCACAGAGTGGGTAGATGAACTTAT  
AATGATCTAGTCGGGTCAGGAAATCAATACGGTCCACAAATTACTGACATGATTTGTACT  
GCTGCTAGGAAAGATGCAACTAAGAGTTTGCACGAAGACTTAGGTAAAGATAAAGATAAG  
AATAAAAGGTGTTAAAGAATACCATAGCGTACCATCAAAGTCAGGAATCTAGGATATAAA  
TAAAATGTACAAGTTAGAGTTGTTCCCAAACGTTTCATCCAATGCACGGACTCGAATTACT  
GGTAGTGATGTTTTCGGAACACGATGCTTACACTTTGCAATATGTTGTAACGAATGGAA  
TCAATAGAGGATTAAGATACTATGCGATGAGAATATTAGTTCAGAGGCGAATGAGTATCA  
GATAGATAACTTCTAAACGACAGCATCAAACCAAATTGTGGAGATTGGCAACTTGCAGG  
CAAGTTATTTCGCGGAACGGAGCGTTCATCCCATGCTCCCTATTATAGTTGCTACCGCAGT  
GACATGTGCAGAGATTCAAACAATAATTGAGCGTGCTCGAATGTATTAGGGAATTGATGA  
ACAATCAAGGCAAGAAATCAATGCAATTTTTCAAGTAGATATAACCAATGCTGTAGCTCT  
TGAGTGTGATTGGTTGGAAAACGAAGAAAGGAAACTCCCTTAAACAGTGCCTAAGTTTA  
GGAGTAAAACATGACTACAATTACTTACAGAGGCGTCAAGTGTGACGCTGAGGCATACA  
AAGCATAGGTTCTTTTATAGCAAGCAAGTAGCTCGCGTCACGATCTAATGGATCGTGGTG  
TGAAGTCCCAGCGTCATTTTCGCATCCCCCTTACTCATAACAGAACTACAAACCATCGG  
GATCATATCCTTCGGGTCTGTTGCTTTTCATGATTATGCTATATCTGGAACGGCGTCTTTT  
GCCTCGCAAGGGACCCACAGTTGCTAAAATCAACTTTGAGAGGATTTCTGGTCTTCCTG  
AAGATGATTCCACTAAACATGATCCAGTCAAGCCCTTGGCTTTTTTAACCGATCGTGGAG  
TGCCTATGCTAAGTGGGTTTACCCACGGTACAATTCGGGGGAGCACAAACCCCGGAACA  
TAACATCTTAATTATGTTAAAATACACACTTAAATCGAAGTCCTTTACGACTTGGGTTTT  
CTATGATAGTATGAATATTATGAATTATGCGAAGGAGCACCACGAACATCTTACTGCATG  
GTGCGGACGTCGTAACGATCTCTCATACTCTTGAGACAAGTTTAATTCGCGGTTTAACTA  
CCAATCCATATCTTATGTTAAAACAGGACAAAATCCTATGGAAGTCATAACGGAAATTT  
CAGATAGATTTTCGCTTCCATGCTTCTATCTTTGCCGAATTGGTAGGTTGAGTGGGTCCTG  
AAGTGTTAGATATGGCAGAGAACAATATCCAGTTGGACCAAACATCAGATGTAGAAATC  
CAAGCACTCCAGAAGGTCTTAGGACATGGTGATACCTCACTAACGAATAAGTTATTGTAA  
ATGTCACTATAGTATTCTCAGCAGCACAATAAATTCTAGCATCTAGAGCAGGTGCAACTT  
AGCTTTCTCCTTGTGTAGGCAGAGTATACGATAACTCATTTCGATGGAATCCAAATGATTG  
AGGAGATTGCAGACGTATTAGCAACTCACGCATGTGACACTAAGGTTCTCGCGGTTTCAG  
CTTGGGAGGTCTAACAAGTATCATCTGCCTTTAGAGTAGGAGCAGATATACGCACTCTCC  
CTATTACTATTTTCAATTAGATGTATTACACTTTACTACAGATAAAGGATTAGTACCGT  
ATGATAGAGACTGGCAGGAATTGCAAGCATGTCTGAAGAAATAAATCGTAGATATCCACC  
CTCTGGTAGAGGCCAAATGAGTAAGAATCATAATCGATCCAGAGTCTTTAGACCCAAACA  
TGAACCCAATAGTGAACATGGCGTTGCAAGTAATGACTGGAAAGCAGGTGCATACTATTC  
ACTCGATAGAGATCTACAAATCCTTTAAGAATATTACTCATGATGGAAACAAATTTAAAA  
ACATTGATATACGGCCTTGACGTTGCAGTAGCAGAGCTTAAAGCTGCGGTCTATCCAGAC  
ACTCGATCAGATCGTATAAGTAGTCTTACTGACGAGCACGCTAGTCATTGTGACATCGAC  
GATGAACACGGACTTGGCGATTGATATTGAAAATCCCTGGCTATGGCAAGGTTAACCTTC  
CACTTCTATGGATATTGGCGATTTATTGCGATTTCGTCTACCGTATTACAATAAGGTTAA  
GGAGACAATCTACAGCCGAATAAAGTATTCTTAGGCCTTTAGTACACCGAAGGGAAAGGA  
AAGAAAACAAAACAAGAAACCGTTTGGAAAAAATATTATGCTGCTTGTCTAGAATTATA  
AGAAGATATTAATTGTATGGAAAGGAAGGGTTTAGACGATACATTTTAAGCCTACATAA  
CACGAAGGGTCAATGCAATTATGAGGAGACCCGACAATCATTTTTCAATAACGTAAGT  
GGAGGCATCAAAGATGGAACCCCTGCATTTTACAACACTCGAACATACTTGGCAGCTGCAA  
GCGTAAAGATCATTTCAATGCTAGACAACCTGCAGATAACTCTTCTATACTCAAGGGAG  
TGAAGGGAGTCTCTTATGGACGAAGAATTCAATATTTTCAGACGCTAGGATCCGCATCAT  
GATAGATCATTAGCATAAATGTTCTTAGCTCGAAGCGGAGGAACGTGGAAGCCACAGGGA  
CAGCAGCTCAGCGGAAAGCGCAACTACCTTCTAAGCAGTCGCTCGTAGGTTCAATTCCTA

CCTGTCTCGTTGACTGCGGGCAACTCAGTATGTACAGGTTAAAATACTTACTACAGCATA  
AAGCTTCTCGCCTTCTCTCGATATCCTAACGGAAGCATTAAACCCGACAGATTATACTGAA  
CACCGAGCATCCTATCCTATGGAATGAACTACTAATACTATTAGAATAAAGGTATTTA  
ACTCTACGGTGATGTAGATGAGTGTTACGAAAAGCTTTTATCCAACTTGAAATCGATCA  
TTTTATGAACTTGAAACCCTTCTAGAACGATGTCCATGCCGTTATGTGTGAGTTGGAT  
ATCTGCCAAGCATTATCCAGATTATCGTATCCAGAAGGCTCACGAATAGACTCTACACT  
ATAGAGACATGTATCTTCTTGCAAATTCAGTTCAACTGGATTATGTAATTGAAGACATTT  
AATACACAAAATGGTGAGACCCTGATCCTGAGGTCACTGCGTACGACGGAAAACGGTATG  
TCGTTTCCGAATCTAATTAATGAACTCCGAATTGTTATTGAGTATCTACCGAACAGTTAC  
TAATAAACCTAACGCCCCACTACAATAACAGTAGCATATCCTAACGTACGGATAAATCCC  
GTATTTGCCATTAGACGTTTTGCTAGACGGTTTTAGGCGCGCAAGCAACTCATAGTCCTA  
GTACCAATAAGCACCCATCGGGGTGCTTTGAATATTATTATATGTTGACTCCGAAATGTT  
AATATCTCAAATGCTTGGCACATGTTAAAACATTAGATATAATTGGAACAATTCTTAATG  
AACTACACACAATGACAACAACCACCGAATCAGGAGGAAGTCATAAAATGTGTCCA  
GAACTCGTCCTCACATTGATGATGACTATCAAGGATACGGAAAGTACCCTGAACTTAC  
CATGGTCTCTTGGCGATGCGTGGTTTTAGTTGCGGGTTATGTCTCTTACGTTACCACAGGT  
AACTTTTTTTTTCGGTGGTCTTCTTGGTTTTGTAATCATGGACCTTATCGCATCAATTGTAT  
ACACACAATCAACACACACCAGGACACCTATCATGACTCTTGAAGCAGAAGGGGTTAATG  
GATGGGCATCAATGCTCGTTTTCGTAGCAGCAGTTGGGGCTTACGTACATCTAGTGAAA  
TCATTCCAGGTTTTTCTATGGATGCATCAAATGCAATAGATGCAGAAGTGCAGAAAGT  
AGTTGCTAAGTAGCTGAACGGTAGATAAGCAACGCTTGGTGAAATGGCGGGGATATGATC  
TTACGTACAACCGGTCAACTGATTCCAGGTTTCGGATAATGAAACGTGGGATTTACGAA  
GAGGAAAAAACTGTGGACACGCGAAGATTGGTCAACTCGAAGCAGTAGTGTAGTATCAG  
TTCACAGGTGTGATCGCACAGGTAGTTTCTAGTAACTATCACGACGTCATGGAAGCGT  
ATAAGCGAGCAATATCTGTACGTTACATTCCTTTCTGATACTTTATTATCACCGCATGGT  
AAACAGAACTGTTGGATTACCGGTATACGCTCACGGATTCATTTAAGGTATATTTATCA  
AGAATCGTGGATTCATACTATGTTGAGTTCGTTTTATGCCTGTCATAACGCTCTTCCTTGA  
TAGTTTTGTATGGTTCGGTGATCTTCCTTGGGAGGACGATGACGATGATTAGGACGGTGC  
CGGAGGAGTAATGATGCCAGTTTATAACTATGAACCTCAACGAGCATCAATACACTATAT  
TATTAGCATCAGGAGTTCACGATGCCTCGTCTAAAGCACTCTATGAAGATATGTAGACC  
CCAAAATGCCCTATGACGAGTTCCTATGTGATCCCGATGGCGAATTGGAGTTTAAAGCC  
GATTACAGCAACAACAGAAGAGTTTGGCGACCTATAGAGGAATCTCGACTTCTCTTTTT  
TATTAATAATCTTATGATAACGTGTTATTGATCATGGCAGCATATACAAATAAACTTC  
CGTATGGGTAGCAACCCGAAGGACTGACGATAAAGTAGTTGAATACTTGAATTCACTTCC  
TCCATGGAACCCGGACATAAGATTCGCAAAGAATTTTGACACTCAAGCAGGTGCCAGAAA  
GTTTCTTCAAGCAGGTGGTAAGAAAGGTAGCCTACGAAAACAATCATGAGACTTCGTGCA  
TTAGACAAATTACCTTATTAGGGATGGTCTGAAGTCAACCCCGAATAAGAAACAATTGC  
ATAGACAATCCTGTGAACGAATCATGTGATCTTTCTATACACCAGCAGGAGTATGCCTTC  
TGCACGAGACATCTGAGTAGAATAGTTGCCTCAGAAAACAAGTATTAATACTGATCTGGA  
TCACTCGTCTTCTCCGTATAGATATATTACTATAAATTAATCAACTGGGTGAGAAAATAC  
TCACCTTTACTATGTGTACCAGTTTAACTTAGACCTATGGGTTATAAGATTGCGTCTCTC  
AAATCCACCAGTGTAGGGATTGATGCGTATAGGGTCTCGCTCTACCCTTTGAGCCCTACT  
GGACAACCTCAAAGGACCAATCTTTCAAGGCAAGGTACGCAAGGCCGAATCCTAGCAGG  
ATGGCTAGAGTTCTGCGAATGGGTAACAAGCAGTAACAACAGACTCTACCTTACTTCGTT  
CGGCGTCTTGATAGTCCCAAGTATATTACAAGCAGCAGCATGCTTCATTGTTGCATTTAT  
TGCTGCACCACCTGTCTGTATCGACGGAATCACGGAACTGTAGAAGGTGCTCTAATATA  
TGGAACAACATCATCTCAGGTGCAGTTGCTACCTCTTCAAATGCAATCGGCCTTCACTT  
AGACCCATATTGGGAAGCCGCTACAATCGATGAGTGGTTATGTAATGGCGGTCCTTACCA  
TTTGGTAATTTTCCACTTCCTAATTGAAATCACTGCCTAAATGGGTAAACAATGGGAGTT  
ATCATACAGCCTAGGTATGGGACGTCGGAGCTGTGTTGCTTAATCAGCAACCGTATCTGC  
ACCATTTGCAGAATTCCTTGTATAGCCATTTGGTTCAGGGTCTTGTCTGAGGGTATTTCG  
TCTAGGAATTTCTGGAACATTCAACTTCATGTTTCGTATTCCACGCAGACCACAACATTCT  
TACGCCTCCCTTTCATATGGCAGGGGTAAACCGGTCTGTTTCGGTGGATCTCTATTCTGCGC  
ACTGCATGCTTACATTTAACACCTACTCTAATGAGAGCGACTACTGCGGAAGAATATCA  
GAACTATTGTTACAAGCTCGGGCAAGAAGAAGAACCTATTATATTACTGTAGTACATGG  
ATACCTCGCTCGATTAATCTTTAAGGTTGCAAGGTTCAACAACCTGAAGAAGTCTACACTT  
CATCCGAGCAGTGGGCCAAGTTGTATGTGTATGGTTAACCTCTATGGGCATCAGTACACG

GGCGGGCGATTTGCACGGATTTAACTTTTACCGATGAGTTGTAGATCGTAATGGTAAGGT  
CATTCCTACCTGTGGTGTCTGTGCTTAACAGAGCAAACCTTGTAAATGGAAGTAATGCTTGA  
GCGTAACGCTCCCCAATTCCAATAAACGTAGCATCCGCTGAGATTACAAACGTTGCTTT  
GAATGCACCAACTATCGGTTAAATTAGTATTGATGGGCACAAGCACAGATCGCTCAATTT  
CTCGTAAAATACGGAGGTTACTTTTCAATAATTGACTACATATACTTTCTTGCAATAGGT  
ATCTCGTTAAGACCAGTATTAACCTAGTCTACATAGAGGGGTAAGACCCTGTTTTTTTG  
TGGCATTTTATTTTCCGTAATGTAGTTTTAGTCCTCTATGAGAGCTACCTCACACTGATG  
CTGAGATAGCAAAGAGCGCACCATGTGCTGTGTGTGATGCTGAGCATTGAGGAAAAGACC  
CTGAACGTGTTGTTACTCTTGATTTGACCGGTTTATATGATAGTATGCAAGAATTTAATG  
GAGAAGTGCCCTCCTTCTTGAAGCGTCAAAGATGTAAACAAAGAACGTATACTGCTGGGC  
CTCTAGAAAGCCATGATTTTGTATGGGAATATCAAGGTGACCGTGGAGAGAATCATGATA  
GTGGTTGGAATTCTGCAGACGCAAATAATGAAGTTAGTTTAGCTAATCCTGTTCCCTCAAC  
CTACATTACCTCCAACAAGTAGTCCCGTATATCATCGGGATATTAGTAATAGATCTCTAA  
CTTTCGTCAATGCTAACGGAACTTTAGTTACAAAACTGCTTCTGGAGTGTCTTCAGCAG  
CTACATTTCCAGGTGAAGGTGAGGAGCCAGGGCCTTCTGAAGCAAATGAGTATGGTGTAT  
GGACTAAGACCGGAGAGTGTACGTTACCAATCGTACGTCAATCAGTAACATATAAATTTA  
GTATCACAGAAACAGGAACCTTATGGATTTACTTATGCTGATGACGAATCTGGATCTGCAA  
CGATTGGAGCCTTGACTACGGCGTCCATCACAAATATTGGTGGTATGACAACCACGGGAA  
GTCCCACGACTGCTACACGATCATTGTCAGGGGGTGTTCATTAGTGACAGTTGTACGCA  
CAAAGGAGGACGATAGTCCCCAACGATAACTGATGATGATTATCTTTGGAGAAATAATC  
CAGGTGGATGGTATCTCAAGATATGTAAGGATGCAGTATGTGGACGTGCACCTAGTATTT  
CTTGGGTAATCTCTGCACCTCATCCTCGGTGGTCATCATTGATGAATCCGTACGTAGTAT  
TTCGAAGTGTGATGACCCTTTACGAGTTGCCGCTCAAACAGCAACTTATAATATAAATA  
CTCCTAGAGCAAGTAATTATGATTTTGGATGTCAGCCAGATAACACTGCTGCATTTTCAC  
TTCATGGAACACCGATTGCGACGTCCACTTCATATATAACAAGTAGCAGTGCCACACTCT  
CTAACTTGAGTGCAGAAATGCATACTCTAATGGCCTCAGTTACTAACGCTACTACATCTG  
GGAACGCCGCTAATACTTGGATAGATAAACCTGGTGGTGTAGCATGAACAATTTCTCAAT  
CTGGTGCTATAACAGGTTTCATCAGTAAATTTTTCTACATCTGGTGACGGAAATCTCTTTT  
CGCTCACTAGACAGGCAACATGATACACACACTCAATCACATAATGGAACCTCCCAATAC  
CCCAACCGATCAAGTAATAAAGGGATAAAAGAAAATTTAGGTGTTGCTGCCGCACACTT  
TGATTGAGCTGTAGATCCAACGGAAAACATTGACGCACCCTTAGACACACATGAATACTT  
TGAAGGAAAGTATAAAGTGCAAAGAATCTTAACTGAAATCCGTAAACGAACACCCGAATA  
ACACGAATCCAGAAGATAACAATCAAACCGCAAACGAATCATTAAAGGGACGCAAGCTTA  
ATAAAAAATGGTGGAGTAGAGAAGCTGCTCTCTTTGCCAAATTAATCAAACAAGAGCCA  
AGAAAAAATTGCGAGAAGAAAACACTTGATAGATTCCCAAGAAAATGTTAGTATAACTAC  
TCGACGCGAAGGACGCCCCCCCCACAAGATTACCGAAGGGCTCAATTACTCCCGCTACG  
GCTCTACAGTTACAATCCTAACGAGAACTCGTGGAGCACTTAACATGTGCAGGTATAAC  
TCTGCAAGAAAATTAGAACAGCAAACCTATTAATTCAACAATGGCTGCAGTCTCTGACGCC  
CCTCGTCTAGTAGCTGGGGCAGCTGTTGTTGGTCCATATGTTACCTCAGAAACACCTGGA  
TCATATCCTGATAGAACATACTCATCCGGTGGATTTGCAGCAGTTGTAGGGTCCAATGGG  
GAAATACCTCGTGGTATCGGTTGGTATAAATCTGGTGGTCTTACTGCAACTCATAAGAA  
TCAACTGATGAGTTGGTAGGCGTTGAATTATTATGATAAATTGGTGGGGCTTACCATAAG  
TGCTAGGGAGAAATTTCTGGCCTAACTAAATCTGATATCGACATCGACTTAACTGCATAG  
GCAGGTGTTAAGTACGTTTTCTAAAGGCATCTATATAATAAGAATCCAATGGACTCTAGC  
AGTCCCTGTTTTATTCTACTAACTTTTATGAATTTACCCTTTACACACGAGAAGGGTG  
TTCTTACTGCACTCAAATCATAACAAGTATTAGAACGAAAAAATATAATCATCGGGAATA  
CTGATTAGGGGTTGACTTTCAACGAGAAGCATTCTAGAATCAATTTTCGTGAGGGATCAAC  
TTTCCTTCAGGGTGTATTAGGTGCCACAAATCTTGGTGGTCAAGCTGATCCAGTTCCATA  
CCTTCGTGATAAGAACCATACCTGATGGAAGAATTTTACTGTCTTGTGAGTCTGCCAAC  
TATGCTGCGTTTGAATTGAAGATATGTCTCCTCAACCCGTAGAATTATGACTTACACC  
AAGATTAAACGTATATAAATACAAGAGGTCTTTGATAGCACAACTGCTAAGGATTTACCA  
TTGACTGTTTCTAATGTTTCTGGATGATTCAAGGTTCGCATCTGACTCTTATAACCAGTTA  
CTTTGTCACCCATATGGGCATCTCAGTAAACCAAAAAGAAAAGATAATCTCAAAGTAACTG  
TCATAGATTTTGATACATGTAATAACAATACCAATGGTATAAGAGACCAGGTTCGTAGCAA  
ACCTGTAAATAAAAATAGCTAAGGAGAGTCCATTGAAATTGCACTAGTAGAATTAACAA  
CAATCGGTGCTTTTATTCTTGGTATAACTGTCTCTTGGTCCGCGAAAGGGTACGTTGAAG  
ATTAATCGAAAACGTTGCCTACCCCAATCGTTCACACATCCTGAGTTGTATGATGAAT

ACGGTGACATGATTCATGATGAACTAATCAATATTCGACCAGAGTAGAGGTTCTTACATC  
ATGAAGATCACGATGACGATTATGATTACCAAATCACGCCTGACCGATCAATTGATAACA  
CTAACTCTAGGGGACTTATTAGTGAGTTCCTACGAAAGGTCTCAAGTGCTAAAATTATCA  
AAGGTATAGTTGTATTGTTGAAGAAACGCAACAGTCCAGAACTCCGGGAACTAGTAATCA  
TCAACTTTGATGAGAGTGTCTACCAGAGCTCCCCGAAGGTGAGTTGCCCTGCACTCGTA  
ATGGTGCCCTTGTAGGCTCAGGTCAGACTAGACTTGAACAAGAATCCAGAGGACTATCGA  
GATTCTTCAAAGAGAGGTGACAATCGTCTCGTGTATGTGAAGAGAGAGTCCATGTTGGGGA  
AAATTCGAGAAGGAATGTCTGTTGAGGAAGCAGAACTTTCGGTTCATGTCAGGACGGAT  
ACATGGGATATAAGTATAAGAGATCCACTGAGGCAATAGTTTCTGAAGCATTTCATCTA  
TTGAATGGGGAGACAGAATTTGAAAGGCGTGTGAGTTTTCAAAGAAAAAAGCACTCCCGA  
TGATGCAAAGGTCAGTCATTACTTTATACCGTCTATTTGGTTGAGTATAACTTGAAACA  
TAAACCTGCCTTTGTACTTGAATCGCAAGTAAAGCAGTAGATCTTTCGGATTATTA  
TGATCTTTATAAAAAGAACTTTGTACAATTTACACACACAGAGGGTAGACTTAACCCTAA  
GTTAAGCAGCGATCGAACACCGAAGCAAGGCAAGCTAAACCAAAGATTAGCGTCTACTTT  
GAGCTTTGAAAAGCACCCCATGCAGAGGAAAAGAAAGAGAAAGAAGCAGCAAAAAGCA  
GTTGCTAGAGTAGTTCAGTTCCTTTGTCCGACCTGCGATTGTGATGGTCTATGGAATTTCG  
TTGAGGCCAAGTATGTTTGGTCTTAGCACTAGTCGGTATCTAATAGCGGTTGGTTTGTAT  
CTGATATCTGAAATTTTATTTGGGAAGTGTGAGTAAAGTATGTTCAATATTTGTAATTCC  
TGTTGCAGAAAAAACTATCGGTGGCGTTGCTAGGGTGAGTAACCCTAAAAGGCAAGAGAA  
CCCTGACGTCCGGGAGCTACTCGAGTATTGAATCAGGAATGGTCATTGGAGTCACTTAGA  
ACAAGCGTACATGCCACGAGAGCTTAAACACGACTTGTGCTATTGGTGCTCAAGTTCTAAG  
GCATTGGTGGTTCACATATCAAGAACTTTCACGGAGGTACACTGACATTTCTCTACTTCA  
AGGGAGCAGCCCTCTTCCAGAACTACGTCATCAAGACCATAAGAGTAGACAGAATAGTAT  
TTATGATGTAGATCCATTCATCAAACACGACTACGAGATAAGATTGCAAAGGCATTGTGG  
AGATCTAGTGAACTCTATAAAGCAATGCTTCCCTCAGGTATGGCATAAGTATGTGCGGG  
AATGGTATTGCCTATGGCAACACCAACTAAAATGTATATGAGTGGATCACTTCGCACTTG  
GGTTCATTTCAATTGATATGCCTTCCGCAAATGGAACACATTAAGAACATATGCAAATTGC  
AGAAGCATCCACACAACATCTTATATGTCAGATCCCAATCATCTCCAAGGCATATGATTA  
TTGTCTTTAAGATGATTGCAAACGTTCTGATGAACAGAACTACAATGACCTACAACCGTG  
TTCGCGGATAGATTTATGCCTCCTTACTCAGAAAGAACTAGAAAACCTCATGAGCAAAAA  
GATCTAAACAAAACCAGGAAAGACCTGAATCCGTGGAGAGAAGATATTCCCGATAGTGAT  
ATAGACTCGCAAGCAGGTGGTGAAGTTATGACCTACGGTGAAGCTAACGTGGAGGACGGA  
TTCAAAGAAGTCATGTCTAAAGTCCTATAAGCACATTCTCACCTGATCTATCTCGTTTC  
ACATAATGGCAAACGCAGGAAAAGGAACTAACTCTCCGAAAACCTTTGCCCAAGGGTATGT  
CGATGAAAGACATGAAACGTAAGAAACCTATCGACCCATCATACTGACAGAGGTTAAAC  
ATCTGACAGATAATCAGAGAGGGTCTTTTGCTCAGTATGCGGTAGGTAGGAACTTGTTAC  
AGCATCGTGCTCAAGGAACCGGAAGAACTGTTATTACTTTATATCTGGCTTAGCGAGAAG  
TACTTGACGAAAACAAGGCGTATGTTAAAATATACAATGTAAGGTCTTTATTTCCCTACTG  
GAAAGATTGCTTTCCTACCAGGTGACCATGAAGATAAATATGCACTAGGTCATATCCAT  
GCAAAAATATCGTCAGGTATCTGCTTAGTACGCCTGATGACGACACCGTTGAAATGGTAT  
ATTATGACTTACGTGCACAAGACACTATTTTCGGTTTGGTCTATTTCTTTTATTCGTTGAG  
CCACTCTTGATTAAGCTATTGTTATTATCGATGAGTTCAGTAATTTAAGCTTTGATGAGT  
CTGATTCGATGATAGCTCGCATAGGTAATAACAGCAAGATTAAGTTCTGTGGTGACATTA  
ACCAGTCAGACCTGAGATGATAGAATGATAAGTCTGGTTTCTCTGACTCTATATAAATTC  
TACACCAGAAGAATGAGTTTTTCATGCATTGAGTTTGATACTAATGATACGGTTCGCTCAG  
GACTCGTCAGCTCTTATATCTTGTCAAATAGAATCTTGGCTTCTAATGTTTACCTTCGT  
TGATGTAGGTAATATTTTCAGTTGAGGTAGACCCAGTGCGTAAATATGGATTACTTATGTA  
TCCTATACCTGGGGGGAAAAAATATTATTCTAGCGTAACTCAGTCACAGCGTTTAAGAA  
CGCACAGTCATTCAAATATTGGAGAACCCGAATAGGTCAGGACGAGCCGCATCGGATCAC  
TGCAAGAGGAACTCGACGAGCAAGGGCATTTCATTACTTTGCGGAAGATTGTTACAAAGG  
TGCATTA AAACTTGACAGGTACTTGCCAAATACTCCATTGTCTGTTAGAATGTTACAATC  
AGCAAAGTCTACACTACACCGAATCTATAATAGACATTGACTCGAGAAATTTCTCACATC  
GCACTATCTCGGTTTAGCAAGTCGAGTGGAGTGCATTGCTGAATTCATGGCGAATCGGC  
AAAGAGCGATTTGATAACGTCCAGTAGAGAAAAAGAGGCAGTTCATATCGAGAACTATTT  
TGGTCAAGAAACGGCATATGCAGGGAGGTTTCTAGAAGGTTTCAGGAATCGAGGTCATGAA  
AATTGACACTGTCATCGGCACTGAAGAAGGATTTCTACACGGATTTGACAAGTACAATAT  
TGATGAACATCTTCAGTTACGTAAAACCTACATCAAAGCATTGTTAGGGCAAGACATGC

CTCAAGAACAACCTTGAGGATAAAATTTTTAACACCTACCAAATTCTCACAAGATTCTGAAA  
GGTTTTTTAAGAAACGTGATTGTCTCATTAGATCCATTAAGCAGTAGTTACATACTGCC  
AGGGGAAAGAGTTCGAGGTGGAGACAGTTCGCAAACCTGATTTCTAAACCGTGTTATGACC  
GTTTGCCTCGCAAGCACAACATTTGAATAATATGAAAGCATCTTTTCAAGGAAAATTAC  
AACTGTGACAGGGTTCGAAGTACGTTAG

>NewGenomeName\_209

ATGATAATCCAAAGGCCCGAGGAGAAGGTCTAAGTATCCGGTAGTGTACAGCGGTATCAT  
GCTGTGATCGCGATTAACGCTCGGACTTTCACTATACTTATGGACGGTGTTTAGAGCGAC  
AAAGTTCTGGAGCCGGTGCGGGAACCGCTGTTCAACGCTGTTGACTCACACATCCAAGCT  
GGTTGCCGTGATACGCCGATTATCATCCACTCCCCAACCGACATCGAGCCTTGGTGTTC  
GTCCGGGATGGTGGTTTAGATATGGACTTAGCGATGGTTGCGCAGACCTTCGTGATGTTG  
GGGACCTCCACTAAGCGTGACTCCAATGAATTAATTGGGGCCAAAGGCATCGGCTCAAAG  
GCTCCGTTACACAGTGACCGACATGTTACGGTCAACCGCGTCAAAAATTATATGAAAATT  
GTTTTCTCGGTGAATAAAAGTGAGGGTATTCCAGTGGTTGTTTCATCTGCGCGAGTCGAAG  
ACTTGAGAGGAAAGTGGCGTTGTAATCAAATTAACGTAGATCCTTCTGAGACCTCCAAA  
TATCGCAAGGGAATAGTGATGTGCCTGCGGTATGCAAAAATTCCTGTGTGAGATCATTAT  
CCTTTTGTGACCTCTGAGATCACTGACCGAACCTACCCGGATCAGTATCGTTATGAGGAC  
ACAGAAACCGGTTGGATGGTAGAAAAGTACGGTTCCTGATCCGACAATGCAGACAGCGTG  
GTTGTGACGTGCCAGCACGCTTATCGGTCTAACTATCTGTGAGTAAAAAGACCTGGTCA  
ATGATGATGCTTTCTATTTCTATCGTGGATTGTGACGTGAACCCTGGTCGTGAATGGACG  
ATCGTAGGTTAGAATGACCGTGGCTTCCGGGATCGCCTCGAAACGTTTGTACGGAGGCT  
ATTGAAGCACGTGGTCAGGAAGTCGTGGAAGAGATTAAGCAGCTAACTACACTGAAAGGA  
GTGCTGGAGTCCATGAAGCGTATCGGTGGCTACTTCTCAACTCGTTACGGGTCGGGGGTT  
ATCGCCGACAAGTTCATGACCACTTTGGGACTTACAGTATAGACAAGTGCATAACTTAT  
GGGAGCAGGTGACTCGCCGTGAAACTGACAATACTTTCGGTTATGCTGCACTTATGAAC  
GATTCGTCACTGGTTTACAACGATGACGGTAAATGCATACCCCCAAATGTAAGTGGCTG  
TCAGAGAACTGCTTCAAACGTGTCTACTTTACGGAACGTATTGAGGCGCTCGAGCTCCTG  
AAAGAGCCGCTCTTCGTTGTAAGAGTGCATAAACTTTTTGAGCTTGTGAAGCGTCGTGTC  
GTGAAGGGTGAAAAGAAGTCCGGTGGGTATGGCTTGTACGAACCTAGTCACAAAGTGTGG  
GTTATCGACCAATATGGTTCTATCAAGAGCGGCCGTATTTCTCGCGCCGACTTTGAGGAT  
ATCGAAGCCTCCATGTGTTACAGTGGGGGACAGGTGAAGGATATTCGTGCTCTTGGTGCT  
TTTCAGTAGCTGCACCGTAAACAACAGCCAGAGACTTTCCTGAAGAACTTGGGGCTCAAG  
GGCAAGATGTAGATTGTGCCTCTTAATCGCAGTGGCTGGCTTACTGATGAAACAAGGTTT  
ATTACCAGAGATGACCTTTATGAGCTTGCAAAAACAGATTCTCATGGAGTATTATCTGAAC  
CAGCGAACAAATTGCTCATCGACTTGTGACAGTTGGTGAAGAGCTTGGCATTGTGGG  
GTTAAAGTTGAGTCCGACTCAGAGTTCAAGCCTAAAGTGAACATGTCTTACTCGCTTTCG  
CACATCAAGGGAACATACGCTCTGGAGAAAAGGCTGAAAGGATTGTCAATGCACGTATG  
CGTATTGGTAAAAGATTTTGGATGTTAAAAAATCTCGAGACCCGCTGCTCAGGTAAGTT  
GACCTGAAGCCCTTCAACACACCAGAGATCAATGAGTATCGACAACCTTATGGATAGCAA  
GCAGAACTAAACGACTCAGTGATCCGTATCCCCTAGCGCGGCGCGTAAGTCTGCAGGAC  
ACAACGGCTTGAAGGTGCGGGACGTTGATTTGTCTCCGGCTGTAAGTCTCGCAACCGGGCGCT  
GGATGGTTGTACCAAAGGACAGCCAAGGGCGCTCTAAGCCTCCAGAGGCAGACATGAGTT  
TCACCTCGGAAGACAAGCCAGCTCAGCCTTACAGTTCTTCGCATACCGTGGTAATGCC  
GTGATTCTGCAAAAAGGGAAAAGAACGCAAAGATCTTTGGTCTGCGACAACATCCGATG  
GTCGTGATAACCAAGGGTGTGGGTAAAACCTCGGTAAGCAGGGGAAGCACTGGGACG  
TCGTCTTTGAGGTTTCCGATCTGTATATCGTGGCTACTGTAACCCTGTTGCCCTGAACCAC  
TCAAGTTCTCTGTGACTGTGTTTATTGAAGAGACCGAGCCGAGGTCGTACGTCGACGAAG  
ATACTGTTGAGAAGAAAGAAACCGCGGTATCATTAGTCCCGGCAATGTTTGCATCTGGT  
CGCATGATGCGACTCACCAGACAATCAACCCTGGCAACGGTATCTTCCGTGATGTGGGTC  
TACTGCTGATTGAGGGTGATATCGAAGGGGCTATCGCGCCGTTTCGAAACAGGTAAGAAG  
CCAAGGCTGCGAAGCATGTGATCTCGGCCCGACCTTAAAGTTACTCGATGGCGTTCTGG  
ACTGGCTCGGTCAGAAACAGGAAAACGCCCTGGCTGATGGCATTCTCAGCGACATTAATA  
ATGTTACGTTAAATGACCTTTATGGTTAGTTCATGTAGAAGCTGGTCCACAACCCGGCTT  
CTGCGTCTGTGAAAATGCTGTATGAGTTTCTACAGAACACGGTCTTGAGATTCTTGAGA  
ACCGTGTGTGAAGGCATATAAAAAGACCACCATCATAACCGATGGACCTCGCGATAGCT  
ACACACGAAAGGTTCCCTAACTATAAAGGGCAACTCATTTCATGCCTCGTAGCATTGTGG  
AAGATAAGCTTTAGCAAACCTTGTATCCAGGGTCTGCATATCGCATCTCTAGAGTACGATG

GTGGGTTTCGGTGTCAACGGACTGATTGAGGTTGCGGTTAACGCTGTTGAGGTTGATCACTG  
TACGTTACGACTACAACCAACAGGAGTGTTCGTTGCTGCCGTTACGAAGTCCTGAAAGGTA  
CAGAAAAACACGTTGGTGCGCCGGATGTTATGGGTATCGGGACGATGGCGGAACCTCTGG  
AAGGGATTTACCTTGAAGAAGAACTAAGGAGGATTGATGTCAGATTTTGGTGTGCGCGT  
TGAGGCTGCCCGTGATGCTGTCATGTCGGGGCATAACGTATTCGTTACGCGACCCGGTGG  
TAGCGGCAAAAGTTACACCATAAAGATTATGCAATCGGTCTACGCAGGGTCTGTCCCTCAC  
AGTAGCCCCTACGGGGACTGCTGCCATTAGCCACAATGTCATGACTGCACACCGTGCCTA  
TTGGCGTACAAGGGGGGTTGCTACCAAAAAGAATACTGAAGAGATTAAGCCTAGGGGGAA  
ACGACAATTGAAGACGAAAGCGCTAAAGATCATCATCATTGACGAGATTAGTATGTTTCAG  
AGCTGATAAGTTGTTGGAAATGGCTTTGAGATTCCGACTCGGAAGAAAGCCACCAATAA  
GCCGTTTGGTGGTTTGCAGATCTGCCTGGTTGCTAACTATTTCCAGTACCCGACCGTCTT  
TATAGAGACAGACAAGGAGACGTAATTCCAGTTCCACTACACAGCATTTCGCTTATTTCTC  
CGATACTTGGAAAGTACGTCAATACGTATCCAATATTACTTGAAATAGTTTTTTCGTCAGTG  
CAGTGTCCATTTCTCAACGATGCCTCATTGTCTGCGTTCGTTGGTTCAGCGAATTCCAGAAAT  
TGTTAAATCCGAGAACACGCGTGTGTTATGATCATGGCAAGCCTCTTGATGCCATAACGAC  
CACATCTACAAATCCTTCTGCGGATAAAGTAAACAAAATGCGTTTTGATGAGGTCCCTGG  
GTTGCCTAAGGTGTACAGTGCGAATACATCTGGTGAGTTTACTCAAAAACCTGTTCCCTGA  
TGAGCTCAAGCGGAAGGAAGGAGCACAGGTAATGTTTACAGTAAACAACCTGTAAAGGCTT  
TGCTGAGCCAGAGTATGTCAATGGTTCGCGGCGATATAATCGAACTCGGTATGGATAG  
TGTAAGGTTTCGTTAGGCATTATGGAGAGTAGTTGATGTAGATGCCCATGGGTGAGAGAA  
TGTGGAATATAACCCAATCAAGGTCAGGACTTCTGATGGTACAAAACCGAAGAGATTGA  
GAAGATCACTATCTGTGAAGACCGAGCTATGCCTATCCGTTTGGGGTACGCTGTCACAAT  
TCATAAGGCGCAGGGCTTGCCTTTACCTGAAATTAAGATAGACATTCGATATGACGCTTT  
TGCACCCGGTATGGCTAATGTTGCTATCAGCAGAGCTACATCAGCTAAAGAATTAGGACT  
ATTGAACAAGGTCAAAGAAAAGGATATTATTGTTGACCAACGTATGGTAAGATTTTATGG  
AGAGACTTTCCAGGTAAATAGGAGATCAAATTATGGCATCTTACTCTCGAAATGAGTTA  
GTCAAGGAGGTCCCAAAGGAACCTTGAAGATAGGAACAACGCCCCAGTCTCAAGTTGAGTA  
AATCCACCGAAGGATCCTACACATAGCCAAATGGCCTCTATTGATTAGTTTATGTCAGCA  
TACGGCTACCTTCCCTCGTTCGTTCCCAATGTCCGAACATTACAACCTCGTTCGTTTGGGT  
TACCAGTCCCTTTTTGGTAAATATTTTAGCTCCCTAGAAGATTGGGTGTCATATCACAAT  
GAGTCTATGTTCCGTGGTAATCCTGTCAGAAGGATTCCAGATCCTTTAAGCTTCGCTCTT  
CAAAACCGTATTGTGGAGCAGGTAACCGTACAGTGTGATAAATCCCGCTATGCAGGTGGT  
TCAGGTATTAATCTCAAAAATTATGGGTGAAATTTTATGAGATTTGAAGTTGAAGATTT  
TCCTGAGCTGAAGAAAGTTTCAACAGAAAAAATGTTGAAACTTCGGGATGTGGCTAATGA  
TAATTATACCGGGGCCATCGTACATGACTAAAGCCTTGTGCACTTCTGGGAAATTA  
AGACGAACTGGTGTGCGTACAAATTCGGAAAAAAGTGTAAATTGGCTGTTTGCCTAGA  
AGGAAGAAGCACATCGTGAAGTCAATGTGTTTCGATTTGAGAAAACGTGAAGCAGGGCATG  
ATATTATCTTCGCATGATTGATGATGGAGAGTATGCAGAGGCAAAGGATTTCTCGGCTA  
TTGATCAATAGGCATAGGGGATTGGTGACCTTATTGTTGTAATCTAGAACAAATCCTCGA  
TGCAGGGAGAGGTTGATTACCACATGATTTTTGTCGTGGAGTCTGTGATTTGAATTGCAC  
TGGGTATTTCCAGCGAACCCCTAACCCCTACGAAGGTGCAGAAGATGAGAAAGTCCCGT  
AAAGTCAAGGTTGAATTTGAGTACATGAACCCAACCGAAGGTGTGGTTGTAGTAGAAGGA  
CTGTATACTGTTCAAAGCCGGACTTATACAGAAAAGAGATCGCTTGGGTTTACAATGGT  
TTTCCGGACTTAGAACACTATGCTGTACTCAAAAACGGCAGCCAGATCGTTCGTTGACATT  
CCAGATGATCTCATGTACCAGACCCTACGTAAACATCTGCGTATTGCAGAGATCGTTGGG  
TGTTTCCATCGTGAGGAGGAGTTCTAATGGACAAAAGTGAAATTAAGTGAATTCG  
ATATGAAGCATAACCAACAAAGAAGACGCTGAAGAGATTCTGGCAGGTCTAATTTATGAGA  
GGTTTGTCTTGACGGGGCGGCACGAAGACGAAGGTTTGTATGATTTTACAATGGTAAAAT  
CCTATAATTGCCTAATCGTTGTCCTTAATACTGATGGCGGCCATACGCCCGCTCACCAGT  
CTCAGGTAGTCATGGGTGCATCAGGGCGAGTTGTTTATTGAGCTCCGTATCAATAAAGTG  
GTGTGGAGCCTTTTCGATGGCTGCGGCATCATTGGGTGGGAGACTGTTAAAAATGGTTAT  
AAGGCATACTGCTTCAACTTTGATGCCGGGGATCATGGTGGTTATGGGGTGGTCAGGGTT  
AAGCATCCTAATATTAAGTAGGTCAATTCTAGGATCACTGAGGGTATGGATCCAGAGAGA  
GGCGGGACCCCTAAGTCAGATATTTCTTTGCATTACCGCCATGTACCGATATGTCAGTT  
AGCGGTGCTGATCATTATGCCTTTAAGGCAGGCAAAGACCCTCTTTTTCAGGTCAATGCC  
GGGATTACATCTAAGGTTGCAGCAATGTTAGGTGATAAGTACGGGTGTCCATACATGATA  
TACAACCCTCTGCGTGTACTGACCTCCAAGTGGAAGAGACCGAACCACATGTTCCATCCC

TATGAGTATGGGGGTTATCTACGCCATGAGGATGTTTCATCCGTTCTTCCCTGAGTCCATT  
AATCCGCGAAACTGATCCCCTAAAAAGACGTGTCTTTGGACGGGTAACGGATGTACAATG  
CCACCCCAAGCCCGTGAGGGTAGCGAAGCGTACTCAGAACAGTATAAAAAGCTGGGA  
GGATAGTCTCCCAAAACAATCCTGATACGTTCTTTAACACCCCGTAGTTTTGCTACTGCG  
GTTTTTCATTCCACCCAGTAAGTGAGGCTCGGGCGTAAGAGTTATTATTAGGTGGTGGTCG  
ATCAGGGCCAACCGATGGAGATACACGGATGCTTCTATCGGCTGTCAAAGTCAGTGGCAT  
CTACCCACAGATCAAACGAACCCGTCGCGAGCATTACCAAGTTACGGGACCCCTGCTGG  
ACAAAGTACAGTGCAGGCTAAGTTTGGTCAATATTCGTTTGACTGATGCAATGGTGGTTT  
TCAAATGTCGGGAAAAGTCAAACCTGATTTTGGCTTTTGCAAATGGAGATCCCATCACGAA  
TGAGTTTTGGTCGTACAACACGGCAGTCGATCGTGCAACTTGGTGGATGTGCTTTAACAC  
AGGAACTTCTTGCTGTTTGAAAACCTATCAGTCTACCATTTATTTGCAGGATAACTCTGC  
TTCTCTACAGGTTGGATTACTGTCACGCATACCGAGGAGCCAGTGGAAACCACATCGCGCT  
TCTCTACGATGGGACCAATCTCCATTTCTATGTGATCGGAAACCGCATTGTATAGCAAGC  
ATGTGCTGGAGGCTGGAGTACAGCTACATCATTTGCAAGGGTGGTGGATGGTGTGGGACA  
AGCGAAGTATTTTCATGGATCAGTTTCGAATTTCCGGTATTGCGAGGGATTACAGTACTAC  
ATTCAGTGTACATTCAGCACCTTTTCGAAATGGATCAGGAGGTAAGTTGACAAATGTCGTG  
GTCGCAAAGCTTCTTCCCAAAAAGTTTGGAGGATGATATGAATTTCTTTTTGATAAG  
GCGTACCACATCCAAGGTGGTATTTCCCTTCCAGGATGCACTTTATGTTGCTGTTGTAGTT  
AGGCCGTTTTAAGGAGGGAAGGAGCAGAATGGTCCGTATTGGGGCTACATTGTGGACTAC  
CGAGACGGAAAGCTATACCGGAAAGTAAACACCCCTCTCAGTTTCGAAACCACAAGCAACCA  
GCGGCAGTTATTGGCAAGCAAGCTCGGTTAATATCCGAAAAGGGATATTGCTCTACACGC  
ATTCATGGGTACAGGTGTTGTAGGCATGCTATCTTGTGGCTGCTTACCACGGAGCAGTC  
CAAATGGTTTGTGGTTCACCATCTCATTTCGTTAAGGGAGACATGCTGTGTTTCCGAT  
GACCGAATAACAAATTTACAACCTCGTTACAAGAGGGAGAAATAGTCGTGAAGGTGGTGGC  
AACATGCCTAATTCTTCCAACAAGTCTTCTGCAAGAAGGGGGGTTGCTTGGGATAGAGGT  
TATCCATCAAAGCCTTGGAGGGCAAGGATAACCGTAGACGGAAAAGTTCTCCTTAAAAGT  
ATGGAGAGTGTCAATCAAGCCTCTCAGCAAAGAGAGTTGAGGGAAGAAGAGTATTGCTAT  
CGAAGATTAAGAGTAATTTTGATTTTTTCGGCCTATCGACAAGGTGGACGGGAAAACCCGA  
AAGCACAAAGATTTGGCAACTACGGCAATCGTGGAGGAAGAGTGAGTTATTAGCAGCGAG  
AAGAAGGGACCCTGGACTATGTAGTCGATGGCACCCGTATTCTGGCAGTTCGAAAATGA  
GTCTCACGCTTACTGCTGCGAAGTATTTTAAAATCCGGTGTGCTGTTTCAGCAAGCGACG  
GTGTAACCCTTACAGTAAGATACTTGCCATATTATCATAAGTACGGTAAGCGTACTGGTT  
ACGAGACACGTGGCTGGTCACTACTAAAGCGGACGAAGGGACGCTTCTCTGGGGGCGGCA  
CGGTAAAGGCAGCATCTCAATTCTTTGGTCAGAATGAAGCTGCTATGGGCGCTGGTCGTA  
ACCACATTTTTGTTCTTGAGGGTGAAGGTAATGTGACTGTTGGAAGGCATGAGGCATTCG  
ATTTTGTCAAAGCTTAGCTGCGATCCCCAATGCCCGAAAGGGATGATTGATGGGGCGG  
CAAGTGTTTCAGACAAGTATCTCTGCCATTCAGGACGGTGGCAAAGCAACAGGTATTCCGA  
CACTGCCTTTAGTCGGATTAACCTGTGGCACGGGTAACGCAGTTGACACCTGGGCTAACA  
ATGAGAAGTTTATCCTTGGTTATGAAAAGTTGTTCTCGGTTTTGCTAACTATGAAGCAT  
CAGCGCTGGAAAAGCACGTAATAATCAAGAAAGGTGAGGAAGTGACAGATGATGTTTTAG  
CATTCTTGCTGTCAGACAACATCTTTGTAGCTCGTAACCCTAATGCACGTTACGATCCGG  
CCGGTGTTAAAGATATTCCAGATATGTACGATGCTGGGAAGGGTCGTGAAATCTGGAACA  
TGTTTTCCGAGGCAGAAGACAGGTATGCCCTGACAGACCGATCAGTCAGAGCAATACCA  
ACATTGAGAACCTTCGTAAGAAGAAGAAAGATGGTGCTCCATTACCAGCTATGCCTCGAC  
TTTATGAGCTGACAGAAGGCCACGTAAGGAGACTTTGGACCCTAACTGGACCAAGTG  
GCGGGGGTTGACGAGCTAGCCCTGCAGGCCGTAATGTATGAAGTGAAGCGGGTGAATTC  
GGTGAACCCCTAACGTGAAGACGCGGGCAATACCGAGCGAAGCCGCAGCGTCACTCCTT  
TTATAAGGAGGGATTATGTGGCAAAGTATAGAAAATCTTGATGGAAACGAAGTTTCTGAC  
AAATGCGAAGTATGAGGGAAGAGACGCTCGACTATAAAACCTGATACCAGTGGGAGATAC  
TAGCGTGTTAGCCTGTGCTGAGAAGGGATAGTTACTCGGTGGATGGTACCCCGTCTTACA  
GCTTTTTGCGTTTTTGGAGCCCTTAGAGGGTGAACCTTATGTGAATCACACAACCGGTGAA  
AAAACGGATAACTCAGTTGACAATCTTGAATGGATAACCTAACGGGCGAATCAAGACCAT  
GCTGTTTTAACAAGCTTGTCTTCTCGTGGTGGAGAACTATGGACATCTAAAGTCACAGTG  
AGTGCAGTCCCTCAGATAGCAAAAACCTTGCAACTTGAATTTCCAGTTTCAGAAGTGGCG  
AGAAGATTCTCTCTTCTTCTTTCGGATTGTAAAAGAATTAATAACAGAAAACCTTGGGAA  
TGGTTACCATCTGAATACGCATTTCTTTTCAGGAAACCCAGAACTAACCCGGCTTTCGGGA  
GAGCGGCGACAGATATACGCCCTGTTTCGAGGATGGCTTCCCAGCAGAGGGTTTTGCCAAC



ATGTTTGGTGTCTTCTAAAACGACGGTACTAAACATCAACAGAGACTTTTGGGAACCTGCA  
ACGACTAGCCGTGAAGCGTGTAAACCGTGTACAACCGAGTGGGTGGAAGCGCAAGGCATGC  
TGAAAGGATGATGGTAAAGTCTGCTCTGCATGGAAACAACGAACAGACCCCGATACGAGA  
TAGGGGTAGGCCAAGGCATAACGAACCTTGC GGAAAATAAGGAAAAGCACAATTTCTCGC  
AAGAGCGAGTATGCGATGGTGGATTATCTTCGCATTCTGGATATGCCTCGTCTTAACGGG  
TGGACGGAGCAAGAGAAGGTTGCAAACAACCGTCTAGATGAGAATGGGGAGGGGTCATAA  
AACCGCCTGTAGGCTGAAGAGTTGCAGGTTGACCCTAAAGCATTTCGTTGCAGATCCTTAG  
CAGTTTCCCCTGAAGAAGAGCACCTTGCTATTCACCGACGGTGCATTGCTGCGGATAAG  
ATTAAGATCTTTGACCACTTCGGTTCTCTCCGACTGATAAGTTGATTCAAAAGCTGGAA  
CTGATGGTGTGCCTCGATGGTTGTAAATGGATTATCCTAGGCCACCTGTCGATGGTGTTC  
TTCGGTATTAAGGCTGACAACGAACTCCGAGATTTGCATAATACCACGACTAAGCTTGCG  
GCATTCTATAATCAGTATGATGTGTTCAATTCTCAGTATTTGCCACATGAAGCGCAAGGGG  
CTTCAGCTACCGAAGAATAAAGACGGTAATCTGCCGCCTTTCAGGTATCCTGTACGTA  
GAAGACCTGCGTGGTCTGCTGCACTGGAACAGCTTTCCTGGATTGTCTGGGTGTTAAG  
CCAGAAGAACAACCAGACCTCTCTCGTCGACGTGTCCGTGTGGTTGTCATGAAGAACCGC  
CCACACAAAAGACTCGGTGTCGCAGACACCATGATCATCGAAGAAAAGGACAAGTCATG  
CATGCGTCTGGTTGGGTATGGGAAAACGGGATGTTCAATCTGGACGGGGAAGCCATGCTT  
CGCCATGAAGGTATGGATCAGACCCTACATCTGGGGGCTCCAGTGGGTAAAGCTATTTTA  
CCAGCACCTGTCGTGGAGACTCCGGTGC GACTTCGATCTGCAGCATAACATGGATGAGGCT  
ACACCGTTTTGATGATATATTATCCGACTGCGAGGTGGGTGTCGATGAAGACCAACTCAC  
CTTTGATAGCAGGAGCATGAAAGGTTCTTTCTAACGAACATCGAAGCTCATGGTCTGTT  
AGAGCAAGTAACCTAAGTACCACTCTACCATTATAAAGGAATACGGTGTAAACAATTGGAA  
TCCGTTTCTAGATCCTGCACACACAGAGTATGAAAGCACCGTAAGATATGCTCGCAGCAA  
GACAGCAGCCAATCTCACGAACAGGTATATGACGAGTTTGAGGCGTTCCTGAAAACACG  
CCGTGGTATTGCGTGTACACACTTTTTGCTTAGGATCTGCGCCTCTGGAAGAAGCTATC  
GGCATTGAGTACGACATGTTCAAAGACCCTAAGTCTCTAGGCACGCTTGGGGATAGCCA  
AGTCAACCTGTCCGATAGTCTTTCTATGAGCCGGTACTTTATCCTGACCGACCGCTACC  
AAATGGCTGTCTGATTCAGTTTGAACCGGGTAACCGGGAAAGGTGACTGTGTTGGAAC  
ACGGGGCGTTATGGCTTGGGGCTTTCGTGTGGCGAACTAGAAAGTTCAGATCGTTGACTG  
GCGTAAGCAGCCGCTCTTGGGGTACGTTAACCTTGTGGGAGCAGACGTTGTGATCAACGA  
ACTGACGTGGAGCTCATTGATAGATGAATCCACTGTTGCTCGTCGGCCCGATGACAAGCA  
GTTCAATTTACACGCCTAAACTCGAAGGTGTTTGCCAGATTAAGTGTAAACGCTTTACG  
TCGCCGTATGCCGACGGATTACCTGATCATTGAGCAAGTGTTCACGGTGTACCTTCAA  
TAAGCATGAGCCGGACAACATTCTAGATCGTATGGAAGGTGTGATGAAAGAGATAGAAGA  
AGACGTTGAACCGTACTTCCCATGAAGGAGATGGCAAAAACCTCAATAACCTAAGTTCCC  
AGCTAACGGGTTTGATGGTGGTGGTAATAACTCCCACCACGGATGGAACCTGGTTACAGAA  
CGAGCTTTGGTATCCGGTTAAACGCGAGGCGCTGGAGTTTAAAGGGCCACCAAAACCCGC  
GTTTCATCAGTAATGGTACGTCAGTGCCTCAGGAGAAACATGCTGAATCCGGAACGGTGT  
TGAATACCCTATGCACATCTGGGATTTTATGCGGGAACAAAGGCATAAAGATAATACCCT  
GATGCCTCTGGCACCGAACCTGATGAAGTTCGTTCAAAGAGGGTAGGCGGAATGGTAAGAT  
GCCTGACCTGATTGTCCCGATGAAGATTTGCAACCAGGACGAGATCAAGAAGTACCAGAT  
CCGCGATGCGGACTGGAAGCCTACCCCGTGGCGTGTAAAAGATGTGACCAGACATCAGTC  
CAAGAAGGCAAGAAGTACCAGAGATGGACGAATTAAGTCAGAAAGTACATTGAGGGGCT  
TGGTGTCTCAGAATATAAGTCTTTGATTATAGAGCATTTAATTAACACAGGCGACAAATT  
CAACATCTAACAGCGCCAGTTTGGTTCATCGGCTTGCCTGACAAGGAGTATGCGGAAAT  
ATTCAAGAAGTTGCGCCGCAAAGCTTTCAGTGACCAACTTCACCTCAGTTGGAGGATAA  
CTTCGGCAAGCTATGTCCGAACGTCAAACGTATGCATGTTCACTTGGCAAAACAGATCGT  
TAAGTGGTTGTCCTGCGTAACCGTTCGTTTCAGTCTCGACCCGATTGATGAGGATAAGAA  
TGAATCAGGTTTGTCTACCAACCACGCCTGGAGTGTAATGGCAAGCTTCTGCCCCAATT  
TTAGGGAATCACCACACCCGGGCGTTGCACGCACACCCTTTGTGCAAACATGCCTAACCC  
AGATCCGAATGTGCTGCTCGGAAAAGAAATGCCTGGATTGTGGGGTGTAAATGACGGGTA  
TTATCAGGTCGGTATCGACGGCTCCAACTAGAGGGCGTGCTCGCCGCATGGGGTGCATA  
AAAGTTCGATGGAGGTGAAGACTTGC GGATCATAGCGAGCGGAGACGATCACTCACGAAA  
CGCTGAAGCGTACACCAAGCTTCAGGTACCCTCGTAACACGTGACGGCGGTAACCGTGT  
AACCTACGATATCTTGTTCGGTGCTAAGGCGGTAAGATTGCAGCGAGGTTCTACATCTC  
CCTTGACAAAGCTCACGCGGTGATTCATGCTTTGTGGGATAGCAACTTCGGAATGAAAGG  
TCGTAAAGCATGGTGTGAGAACTTCTTGGCAGCGACCGGGAAAGGTTGTATTACTGCATT

GGACGGTTCGTAAGCTTTGGAGCCGCTCTAAGCACCCGTTACTGAATGCTCACCTGCAGAG  
CGGCGGTGCATCACTTTTTGACCTTGTAGGCATTCTGCTACACTTGGAAGTATGATGAAGCG  
TGGGTGGAATGATGACGATGTACGTCGCCGGATAAACTACCATACGTATCGTTGCGGCTT  
TTTGAGGTTACTCACATCGAATAACTCCTTTGTTTGTGCGGGAAGGCTATGTTTGACAGTT  
TTGGTAGCCTGTTATCCTATGCTAACCCAGAGCGAAGCCTGTCAGGAATCTCTGAGGCAA  
GAACGTTACAGACTAAATCACTTAACACAATCCAGCTATATGCGAGAAAATACATGAAA  
ACTACCAAACAGGATCGAGACATGCTTATGGCCACTACACTTGGCGATGGATGGTGATCC  
AAGCATGGGCATCTCGAGGTTTGGCACTCTATCCACCAGAAATATTACACATTGATGAAA  
TTTGATCAGATTAAGAAATTTTGTCTATTGGTATGTTATAACCGGAAAAACAGTTTGGTT  
AATGAACAGGTGGGTAAAAGAATAAAAGATTACCTTTCCTAAAATTACCTCGTCGTATT  
TTGTATCCTGAAGGTAAGAAAGTTTTTCAGTGGGAGATAACTAAAGTGACTTGGACCATAG  
CACTTGGCGGTATCGTGCATAGACGATGGAAGTTTAAACGACCCTGACGCATAAGAAGGTT  
GTTAAGTCATCCTCCAGATATACGTTAAGTCTTTGTAATAGCAGAGAGCAATGTTTGCTA  
GTTTCTGACTGGCTAAAATCTCTTAGTGGCGTATGCCCTTGGACAAGAAGTGTGAGGGGA  
GGTAAAGATTTTCGCTCTCTGTATTACAACAGGGGAGGGGACGATTTTTTAGCCAAGTACTA  
CGACCATTCTTGTGAAAAAGCATGATGTATAAAGGTTAGACAAGATTAATACTTGGGTAAAG  
CGAACAAAGTGGCGTTGAAAACGAGAGAAAACCCTTGTGGAGGCATAGATAGTCCGATCCAA  
AGTGAAATCGAATGGCAGGACGTAATGGTGTGCGCGCTATTAACGAACTCGCTAAACTTT  
TGGATGAATACCAGCTCGAGGTTTCATAGGAAAAACTTTATGGAGTGGGAGTGTGATACCC  
TGGACGGTGCTAAGGCTTTTCGTAAGAAGTGGGAAGAAAACGACCGCGTATTTGCCGGGC  
ATGAGTGGAGAAAGGCTGTAAAAGACGACAAGGGTGAAAATGTGAAGGATGCCGAAGGTA  
ATACGGTGTCTAATAGCCTCGTTGGTGAAGATGGGAAGATACACATTCCTTTTGCCTG  
TTGGTGAGATGGTGGTGAATGTGTTGAGAAAGCTGCTTGTATGATGGGTTCTACGGTTT  
ATATCACACGTTCTAACTTCATGGGAAAAAAGTGGGCTGAGTGTCACTAAATTTAACGGG  
GCAGAAGCCCCTGTTCTTGGAGATTATAAAAGTTTGGAGGTGATTCTTGCTACATGTGGCA  
CAAATAAATCGACTCCTGTTATTAATGTAGGTTACACCAACATATCTTCGTCCCCGCAAT  
CATTGACTGTCCCTGCCGTTGTCGATGACTCCAATTAATATGTGTAGGTGAAGGAGGTG  
CAGCACAAACAAATCCACTTCCAACACGTGGAGGTGCGGGTGGAGACTTGGTGTGGAGCC  
TCAACAGCGCAGTTTTTCCCGGAGAGATTTTAAAAGTGTGACACGAACTAATGCAGATC  
GGTCGACGCTTGTGCGTTTGTGTTAGTGGTCCCTTACCCTAGTGGCCGCTGTTCTCCTGT  
CAGGGCCTGACCCGTGCACGGGGCTAGACCCAGATGTGGGTGATGCAGTCATAAATAAAG  
GCTGCACGGGTGGGAATAATACCTCAGTCGATGATATAAAACGTTGCAGTGGCTCAGGTG  
CTCCCGCGGGATATATGCGGTGTGGTGGTGTGATGGCGTTAATGCGTACCCAGCATCAGCAA  
AGTAGGCTCAAGGCCAGGTTTGTGCGGGAGGCGGTGGCGGTGGCTCATGTGGTTATTACT  
TCTCTGGTTCCACATCTGGGTAGAACTCCGGTGCCGGTGGCGGTGTCGGAATCCATGGCG  
TTGGGGACAATGGTCATTCAGGTAGAGGTGGATATTAACCAACAATAGCAGGAGGCGCGT  
CGGGGGAGGCAGACCCTACAGGTGCCAGGGTGTACATTTGGGGTTGGGGCTGGACCCG  
GATCTTCAAACCTCAACTGGTTCTTACAGCGGAGCGGACAATCTGGGGAAATACAGAAAAGA  
GCGAATTCCCAATCAATGCGCGAAATGTATAAATAAACAGGAGGAGGACGTATGATTAAA  
AAAGGTCACTTGATTAGATTGAAACCAGGTGGCCCTGACATGGTTGTTGAGCGTATCTTT  
AAAAGACCGCTGACCTCCAACGGGGTAATCAGAGTCCCTAAATATGATTCCTACTCATGG  
ATGAACGCAAGGAATGTGAAACAGGTTGATGACTTTTCTTTTCCTTCGCTTGAGATTATC  
GGGAGGGATATGAAAGTAAAAGGCGCACAAACATCGGAGCAAACCGTAGATGTGGGACT  
AAGCGATGCTGCTATCAAGTCTGTTGTTTATGGTCAGACCATTGAGTATCTTGCAGATGC  
TGTGGAGGAAAAATTTTTGTACCGCTTCCCTCCCAACTTGCCACCGGAGTTTGACGTTAA  
AAGGACGATCAGGGAAAGTTACCGATCTGGGAATACAGGTAATCTAGCGCTGGTGCACGT  
GTCTGCAGACTGGGATTACGCCAACGATGTTGGACAGGACAAGGCAGTTCGTTTATAGAA  
TGAAGAGCAATGGGAACGTTAAAAAGAGCTGGGTAATATCTCTAAGGTAATTAAGACTT  
GCAAAATGAACGTAATAACTCCCTTGACTTCATGGTTGAACGGTTTTATTTTTAGGGGAGT  
TAAATTACCGGGAAGGTGGTGTATGTAAGAAGCAATCGATTATTCCTTTTGGTGCTTGC  
GGCATGGCCATGTGTGTGGCGTGGCTTTCGCGCTGTCTTTTCAAAAAAAGAAACACACCC  
CGCTGTGTACGTGGTTCGTGCAGTAATCAATGCTTCCCTTACGGTGGATATCTACAGCAT  
CGCCTTAAGCAAATTCACATGCGTGGGGTTAGTCCCTAGGTGATTGGCGGCATTATGGAC  
GTTGCGGTGTTTATCGTTATTGACAGCGCAGATCCCGTCACCCATAATTTAAGGCTAAC  
GGTGAAGGACGACTCGATAACAGTGCTGATGGAGTTGTGCTAGACAACAACCGATCTGC  
GACGGCGGTGCGGTGAAGTTGTCTGTCACCTAACATAAATAAATAAACAAGAGGAGT  
TTCAAATGATAAAATTAACGATTGCTCTGCTGGGTATGGATTTTATTGCATCCGCCAGG

CGCATGAAGATGAGGATTTCCAGACCAAACGCATGTGCCAGTTTGAGATGTGCTACAGGA  
TCTAGCGTTTCTCCCTGATCATTGTTCTCAAATAAGGATAGTATGGGAGAGACCTGTA  
TCGACACGGTAATCCCAAAAAGGATTCTCAGGTCGGGAATGTACTGATCGAAGAGTCTC  
GCTGGTATCAGGGGTCATCTATCAACAGAACCAAAAATCTGTGACCCGTGTCACACTAG  
CCTAGAAAGGTCACAAGGGGAGGTCGTGAAAAGGATTTTCCCAGCCACACTGCTCGCGCT  
TGCTTCTCTGAACAAGCAACAGAGTACTAAACGGATACCTTGGGAAAAGGATCACAGA  
TGGAGGCAATGATGAAATGCTGGATGCGTACAAACAGGGTCTAGAGAGAGCAAAGGCTAA  
GACACCTGAGGTAGAAAATAAAGTAAGAATTGCAGAATTTCAAGTGGCAGCCTCCAAAAT  
GGAACACCAGATGATTATCCTCACAAAAGCTTTTGAAGAGATACAGAATAGGAAATGACT  
TTGACTCGTGGCCCTATCTTGGGAAAATTTGCACCGCTGAACTACGGGCATGTATCATTG  
ATTGCTACGCGGCTTCGCAGGTGAGTTGCCCGTAGCTGTTCTCTGTCATAGAACCAGAAA  
TTTGTGACGCACAACCAGAGTGGATTTCGGCCAACTTGGGTCTCGCTGATCGATATCGT  
GACTTGCTGGATGTTATTGCCGATGAGGGTATAGATAACGTGAAGGTTGACTACATTGAT  
GATTAGAATATACCCGGCTACCCAGAATGAGGTGCTGATTATGCAAAAATGATCCGTGAA  
GAGCATCCTCTCGTTACATACGAGTTTGTCTTCTATTCTGAGCCCGAGTACGAATCTGAC  
TTCAGTGAGTTCTTCCCTGAAGCGCAGCATCTTGTTATCGACTGAGAACGTAAAGCTGTT  
TCTATCGTTGCTACGATGATGAGTACCCACCCGTAACAATTTCTATAACCCTGACATGG  
CCTGCACGGAAACGCTTCATGTAAAAGGTCCGCAATTGGTGGTGTGTTGTGAGAAGTATAAA  
ATGACCCTGACACTACACTTGGCACACAGATTCGGTCCAGCCTGGATTACTGAAATTGAA  
AGACTGATCTGTGAGCGTGATTATCACTCCAGTGAGCTTGCAGGAGTCGTGAGGATTA  
CTGCGTATTGCAATGGAGCCTCTCCAGAAAGAGACGGAGGTGGCTGGTTGGGGTGACCGT  
GGGGTAATGTTATCCGACACCACAAATCTGATCACACACTTCTCTGGTGTATGTGCACAT  
AAGATCTCCTACTCCGAGCTGTTGGTACAGACCCTGAGACGTGATGAGAGCTACTACTTG  
TACGATCTGTTCCGCTTCCCTCACAGCAGGGGTTCCGTGGGTTGCTGATCCTCTTCGTTTG  
CACGATAAACAAGAAGTGCGTAAAGAAACGCATTCGTATCATGATACAATCATAAGGGCA  
TCTTGTGTATCAAGCAAAGTGGTGGTCATCTCCGGGAACGGTTACGAAAAGCGTACTCAA  
AAAGACGAAGAACCTGTACGTAAATTGCTCAATATCAAAGGAGAATAAGATGAACGTAA  
TAAGCCAAGCATGAAGGAGGCTTTTGGTTTTCTGAAAGTTATTTTGGGAAAGGCCCTTGA  
GTTGGCTGAGGGCCATCATGCTTACGCTAACTGTTCGTGAGCAAGGGCTGTCTATAACCAA  
TTGGAATCACAAGTGTGGCACTGACATTTTCGAGGCGAGTTTCTTTCTGCGAGTGTCTGTA  
CAGTGTTTCAGATCCATGTGTACTGGGGCCGACCAGGAACTTCAATTACCTGACGTATGT  
GGCTGGCGACGACACGTGTTTTTCTCTTCGCAAATAATTTGGTTATGATGAGTATGAAGA  
AGCGGCAGACTGGATCATCGCGCACCTGAAAGGTCATTTAGATGGATGACAATAAGCCGG  
TTTTGGTCTGGAAAACCCAAGTAGGTAATCTTTTTCGGTTACCCATCTGTCTGACGGGC  
ATTTACTGCATGCAATCATCTGACTACTGACAGACTCTTGTCTTGATGACAAAACAGCAA  
ATGTGCCGATAACTACGTGGATAGAAGCAATGGCTGTGGAGGTAAACAGCCAGATGGATG  
GTAATGGCTAAGGTTCTTAACTTTTACCATTTTGGTAACGCTATCCCTGAAGGGGCGGAC  
CACTTGGGCCGCACCTTGAAGAAATTTAGCCCGGTGGGTCATAAACTAGCAAACCCATTC  
CCTCTTGAGAAAGGTGGTGGGAATCGTGATGAGGTCATAGAAAAGTACGGTGTGTGGTTG  
TGGGAGAACATCTAGAGAGGAAAAATTCCTTTGCAAGATCTTATTGACTTGGCCGGATAA  
ATCCTTGTATGCCTTTGTTACCGTAGAGATGTCACTGTGATGTCATCATGGCGTCAATA  
GGATGTACCTAGGGAAAGGTTACAAAATGAGTTTGA AAAAAGTTTACACCGTGAATCGAAA  
TAAATAATAACAACGCTGGAGTTAACTCCCTTGTGAACTCTGATGATGTCGGAGGTTTTT  
GTCTGGCAAGTTCAAAGATAAATGGTCAACCGATATCGCGTTTTGAAGTTACTGTTGCAA  
AACAGATGTTTGAATATGTAATCACAAGGAGAATAACATCGTTTATGGTAGAGGTAGA  
AACGACTCAGAATATCCCTGTCAGATGTTCAAGAGGGTAGATGGTTGACAGGCTTTGAAA  
TGGAGATGCCCTTACGATGAACGTTGGATAGGGATCGTTTTAAGATGGAATAGAAAGCAG  
TTCCACAAAAGACACCCTACCTATGCCTGATGCCTAGTCGCGGATGACTGTTCAAGGTTT  
TATGTCTTCATAGAGTGGGTTACACAACAACCGCTGCACGAACAGCGGTTGCAGAAGGAA  
GGTGTCTTCAATTTGACAAAGACATTTCTTTTGGAGGGGAACAAAATTA AACTCCTGAA  
GCATGTGCGCTCCTTTCGAAGATACATAAATACCGCATTGGCCTATTGCATGAACGGGGGC  
CTACCTATGGGTGTAACCAAAAAAGAAAACAGGCAGGTCTATGAGGCAGGGTGCACGGTG  
GACAGGAAAAGAAAGTACTGGGGCGTGTGAGCGACGATCCTTGCTGCTCATGCATTATGG  
CAACTGGAAAAGGCTGAAAAGCTTCAATCTGCGAGCGAGGTATACGACTCCTCTGAATTT  
TATAATGAGCTCACTGCGAAAGACCTACAAGGAAGGGTCGACAGAAA ACTAAGTGACCTC  
CAAAATGTAGAGGAAACA ACTTACTAATGAGGATAAAAAGCTTACATGATGAATCTATTCCG  
TAAAAAAAAGCTGGACCGGCTGTTATGGTTGGTCGAAAATGTATATCTGTGGCTGTTCA

TCGGGTCAGACACCATCGCTGTCGTGTCGATCATCATGAGCGATGAGGTTATTGCATTTA  
TCTCGTCTGTGACAGGTATTATCGGAGCGATCTTCGTTGCAAAAGGTAAACCTTCCATGT  
ATTATTGGGGCTTTATGGCGAGAGTGTTGTACGCAGACATCTCCTTCACGTCCAAACTGT  
ACGCTGAGACAATTATGTACCCTCTGCCATTACCCCGTTGCAGGTGATATGTGGGATTC  
TCTGGGCGAACAAGCGTAATGTCTTTGAAGACGGTGAACGTGCGAATGTTATCAAAAAGT  
ACCTCACCGCAAAGCAGCGCTGCGTGGTTCGGGATTGGCACGTTGGTTGTGATCGTCTTGT  
ATGCAGAAGTCGAACGACTTCACAAAGGAAGTATGCCTGGACTGGATTTCGGCAACAGCGA  
TCCTGTCTGTTCTGGCAACCTATCTGATGACGTCACGTTATGCAGAACAGGGTTACGTGT  
GGATCATTGTGAATGCAATCACAGTCACTTTGTTGTTTCAGATAGCACTCCACCAAGAAA  
CTCAGGGGTGGGCGGTACTIONTGAATGTGGATTACTTTCCTGATAAACTCGATTTATGGTG  
CCTACAAATGACGGAAATACGAAAGAGCTACGTAATGATTGAAATTTGGGAACAGTTGAC  
GATGCCCAATAACTGGGTGCCGGGCTCTGCCATTTCTACTACGATGTTTCGTTTGGGGCAC  
TGTCTTATCTTTCAGGGAAACATGGAAGTATAAAGTTATGGCATAATTAAGTGTGGTTGT  
GTTATTCGGTAAGCTATTTACTGCCTGGTCAACGTTAGAGTGTGGTTATCGCATGTATAA  
AAATGACTGGACCACTTGTGCATAACCTGACGCTGTGGCTTCATTCTATGTGTTTCGATGC  
ACCAACTGAACGGTGTCTTAAACCAGTAGTGTGGATTGCACCAGGTGATGAGATGCAGGT  
GAAGACCTTAACACCAAAAACAAACGTAGACAGGCGAATGTTTATGAAAGCTGAGCGATCA  
GTACAAAAATTTGTAGAAATGTACGAAGCCAGTTCAGGCGAGAATCCAAAGCCGGAAGAG  
CTGTTGATGCTGAAATTTCAAGAAGAATGTGGAATATCTTCCTGTAGATTATGATAAT  
CCAACCAGTTTCTTAAAGCCTTCCGTCAGGTCGATGTCTGCTATGAAGGTTGTCCAGAT  
ATGGTTATCTGGTGCCTGATCTCTGGTGGTGATTTGAACTCAATCTGGCCTGTACTGGCT  
GAGTTTTATGAGTAACTCTTTAAGTGGCTACTGATCCTGTGTAGTTCAAACTCTCTAGT  
GACCATTGGCAGTGGTAACACCACCACAGTGGCCCAGACCTCCATTGTGCATGTTATGAA  
GGGACTTGACCCAGAGGTGGATTATAAGTACGAGCTTAAACCCCTGAACGAAAATGAGAT  
TAGGGATATTGCTACGAAGGCAGTGGCAGAAGCAGCAGCTAAAAAGCTGCTAACCGAGGG  
CCGAGAAGAACGGCGGAAAGAGATAATCGAATAGTTGGGTCCGACAGTAGGAACCGTCG  
CCCACCACCGCCTCCTGCACCACCACGGCGCCGTGTGGTTGTGGATGATATTTCTCTCGC  
ACGCCAGAGACGCATTGAGACTAGTTACAGTCGTGACGATGACGATAGCATCGTAAGCAC  
CGTTTTTGTGCGCCCGCTGTTAATCACTCGTTAAGTAGTGAGCATGGTGTAAAGTTATGG  
GAGGGGCAGTTGTGACTCTGGCAGTTTTTCATGAGGATGTGATTGATAATAAGAAAAACG  
TTTGTAGTTTAAACGCTGATTCCACTACCTCAGTCGAAGAGCCCTTTGTATCGACGATT  
GATTGTGCCAAATGTGGTGTACAAGCCACATATGTAATGGCACTGGAGGATGGTGATATG  
GTCGCAGTAATAACATCTTGTAGCTTCCCAACGGGGATGGATGCTCCTTTTATTAAATCT  
TTCCTGTAAACAGGGAGTTTATGTAGTGAAAAGTTTAAACGGTAGTGGCGCTTTTATTCA  
TCGCATTGAAACTGTGCGCGGATATTGCACGGTCATGGTGGTGGGTCTTGGCACCCTCT  
ACTTCCCGTTCGCGTTTTTTGTAACGATCATAGTTTTGTTTTTCGGCAGTGTCTTTGGTG  
TTGCAGGGGCGCTGCTATTCTGGAGAGAATCGAATTATGTAAGAAAAGATCTCGACAAC  
TGTTTACATACATAGTTGAGAGGGGTAATATAGCACATCAGTCCCAAACGGAGTTTGTAT  
GACTGAGGCAGTAACCCCTATCGAAACCCAAACAGGAAAAGAAAAACTCTTCTCCTCGA  
ACTCGACGAAGGTCAGTTTGGAACGTTTGTCTTCTTTCGAGTGCCGGAGCATTGATCAA  
TCAGTTCATCGGCTATGAGCGTATGCGTGATGAGATGCTGAAGATTATCCGAAGCGGCAA  
CATTACTACTGTGGAGGAAGCTCTTGCTTCGGTGCGTGATCACCTCAATAACTTTATGCC  
AGTAAACGGTTCATCGTCTTCTGCCCTGAATCTACTGAGTCTGGTTGAAGATACATTGAT  
CGATAGACTTTTGGGTGTTAACAGTAATACCCAACAAGAAGAAAATAAGTAATAGGAGAG  
AGATTGAGCGCAAGTAACGAATTCAAAGATCCGATGTCGGGCAACGTAACCCTTCGCA  
TAGCGCAGCATCAAATTCACAGCATCAAACCTGTTAAGAATACAGAGCCTGATGGGGTG  
AAACGTATCCATATCCAAGCGCGAAAGGGTCCGCATGTAAGGTTATCGAACCACCACGT  
ACCATCTGCATCTTGACGCAAGAGAGGTACGGGAGTGCCAACGTTATAGATCCTCAAAGC  
CAGGGTGAGTTGAATGGCTTGGGGGAGAAGAAGCTACATACGAGCCACCCCGACAGAATG  
CAAGTAAAGCTGGACTCTGGTTACAAAGACGTTCTGCCAGGTGTGGTTGCATCTTTGCCG  
CTGCAAGCGAGCACGAATGACGATAAGCCATATGTCAAAGGCTCTCTGATTGGTAAGACT  
TTCAACCTTCTGGACGAAAGATAAACAGGTCAACCTGCACCATGTCTGCAGCCGCAGCCA  
TGTGATCAAGAGCAACAGTCTGGTGGTGGGGTGAAAGCTTCCGGCGAGAGCACCCTTTT  
GCAGGGGATCTGGCGACTGTAAATGATGAGAAGAACGGCCCTGGTTATGTTGTTCTGTCT  
GATGCGCGGGTGCAGACAGGTACAGGTTTCTGGTGCCTGACAGACTTTCTAAATCTTGCT  
GAAGGCACAATCCTGCACGGCTTTAAAGCCTACGCCCCAGGAGGTCAAGGATCTGACTCA  
GGCGGTTAGAAGTCTCGTGTGAATTATGACACTCGTGGTGTAGCTTGTCTCACGGTAAC

AACGACCTTAATTGATAGATGGGTGCAGGATACAAAGTGAAGGATGAACTGGAAACAAGA  
AAAGCCATTAATGTGGAAGTGTAGACATGAAGGCTTTCGTTGCGGGCGGCTACTGGTAAA  
GATGTTGAATCGAACGCAGTTGGAGCGAGTGCAGATAGTGCAATCCTTGTATCACGTAGC  
CGATTAAGTGAACAATCGGAAGTAACTGAGGCAACCATCCTGGAAAGCGCCAAGCAAGTG  
TAAGTAACGCTCTCTGAGCCGTTTATGAGTTCTTACTGGCGACGGCATGCCTGCGGAT  
CAAACCTCAACCACAGACTTATCGGGAGCCTCTGAGCGGCACCGTTGAAGTACCACCTATG  
GATGCTTATGAGCCTCTGATGGACTTTGACGACAATATACACTTTTCCCAATCGGTCTG  
CAATATGGTAAAGACTTGATCCATTGCACTTAATAAATAGAAAAGGCGCCTGTCGGCTCC  
TTTTTGTTTTATTGCGGTTGAGCAAATACAACCTGGTTCGCCGAGGCCACAGGATCTGGT  
GCGCCAGAGAAGTCTGAGCCACTGTCACACGAATCATCAAATGCCTCAACCTCACCTCC  
CTGTAAATAAGACGAACACCACAATGGCCATCACCAACTGCAATACAGGAAAGGAATCCT  
CCCTCATCAGTCCGCACCATATCCCAATTTGTACTTGTAATTCTCCGTCTATTAAGTTA  
GTATCAACGTTTCGCTGGAGAAATTTCCATGACGACAACGTCCGGACCTAGTGAATAGACA  
GGACTGTTTTTATCCATGAACACGAACACTTCACCAACTTCCCGTTGGGGGATGGGATCG  
GTACTCACAGAAAAGATGACAACATAACGCGCAGAAGTTTCTGTGCGCGTTTCAGCATTG  
GCGCCAGACCCTGTTTTAGCAGTCATTGTGATGTCAAATCACCTCTTAAAGGATGGTC  
ATGAGACCAGTTGAGTCTACAGTTGCGATCTTAGGAGTACTCGATGTGAACGAAATATCA  
TAAATCTCAGGATCTACTGGCTCAACAGTCCAAGTAAGTTGACTTCTCGAGCCTTTGATG  
GCGTATGGATTAGACCCTGTGGTGTTCGATCCACAGTTGTCCCCGCACAGGATGCTACT  
GGGATGTTTGTGAACACACCAGTCTATCGGTGAGCCTAAGAAACCATAAAGGTTACTA  
GCGTAATGAAGGTTCCCGTCATAACAACCTTACAATGGCTGATAGAGTTCCCTGGTTAAGG  
ACATCTGTCTTCATCGATCCAATGGATGTCAGCTTCGAAAGATCCCGGTCGGTTCCTATA  
GGAAGTGGAAACATGGGCCCGATCTAACACCATTGTTGATGGTGTGCCAAGGCCAAGTTGA  
TCACGTAGGTCCCAACACCGTAAAGCTTGTATAAACAATCAGGAGTTGCGACTGACCA  
CCGTCGATAACCCTCATTGTCTGGAAAGGACCAATACCCGCTTTCATTGAGTATTGGGCT  
GCCCCGATACCAATCGTATACAATAATGCTGTTTATCATCAACACCTGTAGAGGGCGATA  
GCCATTGAGTTTGTTCGTTTCGCTAACCACTCTTTAACATAGACGGTTTCAGACACAGAG  
GCAAAACTATCGTAGGTATAGTTTTGTCTTTGCGTTGCTGAAGTACCATCTATCTTATGG  
ATGGCCGCAAAAACCCGGAGAAGTCCAATATTGTTTCAGGTACATCACGCAACCATTTACG  
CAGTAAACTCTCACCTGGAGGCACTGATACTTCTTGTGATCGATATTACGCTAGTATTA  
GCAGAGCCAAGGCATCCATTTGTCTTTGACCCGTTTCATAAAGTTTTCCATGTACAACC  
TGCCAGAGTGTGCTACAGAGAGCACAAGAAACACTTTGTAAATTTGCGAGGGATACTGTG  
CATGTGATTGATGAAGGGACACATGACCAAGAAGAACAGATAGACCCAATAACAAGTGAAT  
GGACTGGAGTCCACACAATACTGCCAGCCAACATTGTTGTATTTGACAACGAAGGCTTGA  
CCACCACCAAAAACATCAGCAACACCATTAGCCGCGAAGTGCCAATGATCATTGCAAGGG  
CTTATTTTCGCTTTTGCGCATTCACACGACGCACTATTCCCTTGGCTATAGAGTCTCCCG  
TCAATCAGGAGGATTTCCCGTTGACCTTTTGGTAGCACCAACAACCAGGCCAAGGGTAAAG  
GCCATCCTCTTAACACTACCTGGTGGGAGGGCTTCGGTTCCTCCACCAGAAAATGTCAAG  
AAGAGACATGGAATAAGATACTTTAAATCGTCCTAAAACAAAAGCTGTCCAACGACAGCC  
TTGAATCATTACGGACGACGAACAATTATAGTCTCGATAACGCCGCTTCAACACCATTA  
TAGTTTAAATTGAAGAATTGTCACCGAATCAGCCGTCTCGTTAATTGTTTTGCTGTTTATA  
AGCAAGGAGGTAGGATTTAAAGTCACCGTGTGTCGGCCAGTACCGTCTTGAGTAAGGCAA  
ATCACAGAAGACAAAGAATCTGTTCGTTTCAGCCAAGCACCAATTTTCTAATCCGCATCC  
ACTGTTACGTTGTAGATGTTGGAGTCTCCACTTGTGGATCATGCCGCTGTATAGCTAACA  
ATTTCTCAGTAATAAGTTTCAGGAATTCAACACTTGCTTGGTTTCGGATGGCCGAATCC  
TGTTACGTAAGGCTAATGGCACTTACTGCACCAGTACAGGAAAGAATTACCACTTTGATG  
GTATGACCTGTCAAGTCAACAGGAGGACCAGTAACCGTCCCCTGCATAACAATGTTGTTA  
ACTGTCCTTGTTCCTGAAGCGTTGTTAAGGTTGACGTCACCGTCTACAGTCAGGTTATCC  
TGGACTGTAACATCGGCAAGTACGCTAAGTTCCCTCAATAAACTCAGAGGTACCAGTAACA  
GAGAGATTTCCGCCAACTGGACCATCTCCTTTTCCGGTTGTAATCCACCATATAGACTG  
GTTAACCCACCCACTGAGAATGAACCAGTGATGTTAACGTTACCCGCAGTGAAAACCTCG  
AGGGTTGTAGTACCTGTTACGGTCAGATCACTTGTAAATATCAAGGCCACCGATTGTTTCG  
TTTCCAAGATTAATGACACCCTGACCTATCAGTCACCACCAACGGTGAACCGTCTGCG  
GTTGTAACAGAGTTTGGTGAAATATCAAGTCCATGGAACTGAAGGTGATACCTGTTACG  
GTACCTGTAATATTCAGGTTTTCTACCTCAGTTGTACGTGAGACCTCAAATCTTGGTGCT  
GTAGGACCTTGACTTCAGTTACCACGGATATACACGTAATCGAAGAGGTTATTACTCAA  
CCTGGCAGAGACATGGTCGTATCATCAGCAGCCACCGTTCATTGACTACAATGTCAGTC

TGGTTGCTGAGGGATTCTATCGCACATGGGTCAAGGCGCGTCTTAAAGAATGTCGGATTA  
TCTGCGTCGTTAAATTCGAATGTAAGACCTGACACGTCATGGATCAGGATCATTCTCTGG  
AAACGACCTGTTGAGATATCTGCGTATAGAGGGCCATTAAGGTCGATTGTCCTACCAAGC  
AACAACTATTGAGTATTGTAGCACCCCTTACCGACAGCTATGCAAAGGGAACACTACCA  
CCTGAGATGCTTGACAAGGCGCTTGAATAGCGGTTGTATCAAAGGTAGTTGAGGCAATT  
GTTGCACTGATGCTGTTAGCCGCAGGGGTTGGAGCCTCTGGGTTTCCTGTCAGGATCCGG  
CTGTTGATAGGTGCATGTATACGTGCCGTCGCCGATGCGTCGTAGTACAATCTTCAGTTA  
ACACTGTTAGTTCGGTTTTTTGGTAAACCCTGAGCGGGGCGTGCTGCTGCGGTTGGTGCA  
TATCTCCATTGAACCGGATTTTTGCCATTAAGAATAAAGCTGTTTGAATACTGTGGTC  
TGAGTTGCCGCGATCCACGGCATAGACGGTGTGTTGAAAGAACAAGATGTCAAGAAGAGCT  
TTAGTAACCGTTGGAATGGTGCTACGATCTTCATTAACAACAGTTTCGGATGGGGTTCCG  
TTGACAACCTTCTGGAGGCGTTTAGAGTGTTCACACCCTGATCGACAGCCTGGTCAAAT  
ACAGTCATGGCTGGCACAAGAGTCTCCTTATTAGTCTGGGTATGGTTCTGTACGTTGGGC  
TTCAGTTACTCCCCAGCGTAGAGGGATTAGCTGATTGATTAGTAGCGGGGCAGCAACGGT  
GAGTCCAAAATCCACATGTACCCCTCTATCAACGTTCCATTAATTCCCCAGTAAAGGAA  
AATTGCGGGCATTGAAGCCAAGCCGATATTGCTCCACAACGTTGTGTGAGTAACCCTGTC  
AGGGTCTACGGAAGAGCTCACAATATCATTAAAGAAATTCATTAGTGAGTTAACTTATT  
TCCTCAGGATTCACAATGAACTAACATGGGTGGAACGTTGCAAGAACCACGAGGCTTAC  
CACAGTAGCAGTTTATAGCCACTCTTTAACCGTGTCGTCTTTAAATGATGCACAGAGGAT  
TACTACTTAGATCTCGGTCTGATTTGGAGATTTGATGACGAACTCAATGCAAGTGGCAA  
AATTTATGGAAATTGGATGACTATTATCTGGCAGAAGCGTACAGGCACTGATACGGAAAG  
CCTCAGCTTCGTGCTCCAACCCGACAATACATACGCTGCGGCAAACAGGAGGGGTAAGTC  
GAGGTACCAACATAACGCCATATATAGAGAGAGGTTAAGGGACTGGATATGAATTGAAAA  
CTGCCAGTAGGGAATGTTCTCCAGAAGGATACGGATCATAACAAAAATAGACATGATCCT  
TATACCCTTGTCAGCCGTAAGCAGCAGCACTGCAAAGCATAAAGAAATACAGTGCCGCACG  
TATCATCTACGTTGATTCGCCATGAGAAGCTTGAAGTGTATGCGGAGGTCAGCACGAAGA  
TCGCCCAGGTCTTCTTTAGTGTCCCTACGCATGTCTGAGACGTCATCACTAGCATATTCG  
TATTCCTTCTCCAGAATCTCGTCGAGTTTGTCCATATTGCCCATGTCTGGCTCAATCAAT  
ATGATGTCTCTCATGTCCATCAAGGCGCTCTGGCGTTATTTTGTATTTTACTATGTG  
ATTCTCACGACACCAATTAACAATCTTGATAACGCCCGATCAGCTTTGAGGATGGCA  
AATAAGTCAATAGACATTATAGAATCCTTTTGATCTTGGCTGCTCTTTCAGGCCACGTGA  
TATTAGGCGCATCCTCCGGGTCTGTAGCTAACAGATCAATACGGTATGTCTTTAGCATT  
TGAGAGACGCTTTCTGGGAATCCAAAGTAAATCCTCTCGAAATCAACTCTTCAAGGGCTA  
TAATGTGGTTTTGTAACCCAAGACGCTTTACTGTCCAGAAGAAGTCTTGGCCTGAGAAATAG  
CCTCTTTATTGTAAGCTTTAAAGTCCCCAGAGATGAATTGCACAGCCCCTAAAAAGGATT  
CAATACCGTCAGGAACCTCATCAACAGCAGCAACCTTCATTTGGCCTGGGAAGTATACTG  
ATGGATAAGAAGACACATAACAACCCACATCTCCGGAAGACAGAAGAAGGAACCTTGGTCC  
GCTCTCTCAATTTAGTCATCACTTGCCCTATGTGCTACCAAACCTCCCCGACTGTCTCTA  
TCAGGAATACTACAACCTGACTGCATGAATGCGGGCGTTTTTCGTCCATCTATGTTGGGGTGT  
ATAATCATAATTCACCATATACCTGAGTCATAAATCCTCCATAGTACAGGTTGCAAACAG  
TAACCCATTGGCCGTTATTGAGATACTGTAGTGGTGCAGTGTAGTAATTTGCGCCCCTCA  
ATTCTTTCTCGTTACGGAAAGCCCACCCTGTCATGACGTGACCTACACAAAATCTTGATT  
CACTTACACCTGTGGCAAACCAATTAAGTATAGGGATCTGCTTTACAAGCCAGACATGT  
TTAGTGTGACGTTACCGTTACCATCTGCCGTTGCACGGTTGATTGCTCTCACAACGTTTC  
GACCACCAACTTCCGAGGAGTTGAGGTTTACAACAAGGGAGTTATCGTTACACTGTGCGT  
TTACTACTGGCTTGTAGGGTTGTCAAAGAGCGTGTGCGACAACGTTGTACCCTTGATCGT  
TTCCTGTTCCCGTTAAGGACCATCTCCTGATTCTTGTGGACAGAATACTTGGATCATTCA  
GCGTACGGATTACGGCATTATTTGGGAAGTGTGCAGAGGTTGAAGTGACGCTTGCACCGG  
TCGTACTACCGCTTTCGATAATGGTACCAGTTACCCTACACAGTGCAGCAGTGCCACTGC  
TGGCATTGAACGGCATCATTGTGAAGATTGAGCCATCATAAGGGCCGGAGCGGAAACTCA  
TGCAATCGATGCTCGACGTACCTGGGTCATTACCGATATTATCACCAACTACAAGATCAA  
GGAATGTGGTGTCTGCTGCTGGGTTGATGGTTCGCGCTGTAAGCGTAATCTGATTCGGATG  
GTTTCGAGGTTACAGGCGTAGAACAGATAACGAACCACTCATGGTGTGCGCTGAAAAGTCCA  
CATGTCTGGTATCAGACTCTGTTTTACTGCAAACATCGAGATGCATTCTTGCTACGGCCT  
TGTCTGCACGGTCCGCAAGCTTCTGATTCACACGAAAGAGAGGACTATCGAGACCAGGTC  
CCTCCTCCCCAGTGACATACTTGTCCCATGCGGGAAGCATATTTAGTACGTAGTTAGATT  
CTTCGACTGTTGGCTTTTCATCAAGTCCCTAACTTTTGTCCACAGTTCATCGATAGGTG

GTGCTTACTTTCACTCATGGGTGTAAGGAAGATCTATCTCTCCATCAGCCCAAATCTCAA  
TAGGTACTGTGGGCGCTGCCAGTGTAAGCTCCCTTAAATCAAGGTATCCTCTCCATCAGA  
CACATACGTAAGGTGAGCAAGACCAACCTCTCTGTTTCGGCTTCATGAGTGGATAAACCC  
GAATCCGCGTGCCTGTTTATCGCCTGCTAAACCTAAAGCCGTACCATTTGACTCAGTTGC  
TCTCAGGTGTGTAGGCACAGGCGACATGTCTTGAATCTAATGGAGAGCAGTCTCCAACCT  
GAAATAGGTTTTGTAAATGTTAATATCGAAACGGTAGTTATCACCTTGTATGTGGTAAA  
GCTACCGTCCTCGAACATAACGATTAAGGGTATCGGTAATTTTCAGGTTTTGTCCGGTTCTT  
CTGATTACTAGCCCAAAGGATGATAATGATAGCACTATAGTCCATATCGCGCAAGCCAGC  
ACGCTCAATCCCGACATTCTTCCATATCTCACCTAGTATAACACCTGTCGCATTTTTTCAG  
TAATCTGTCCTCAGACAAGTTGACCCACATTCCATCAAGATTCTAGAGGCGTTCCAGCTT  
AACCGTCATAATTATGACAAAGTTTTCTTTCTTTTCAGAAAAGTACCTGCGATATATTC  
AAAACCTCCGTCAACTAAATCTCGCAGAGTATGGATGTGGTTGACATCGTTTAAATAGTC  
TGCCATACTTACCTCATTAGATGATTTGTTGGGAAGTGATGTCGTGGGTATCTAAAGCAA  
AGGCTTCTGTCAATCCTGCAACAGCATCGCGGCTAGTATAAGCACTGTCAAGTTGGTTCAG  
CATACTAAACCTCCATCAGCACTTGCGTGAAGCGCCCTGCTGAAATAGAGGACCCAACTG  
CGGATACCAACTGGATATTGTAAAGTGTCTCTGCAATGGTGAGAGGATCAACAACGGCTT  
TCAAAGCAGCTTTGAAATTGTATTGCTCTGTACGGACAGGAGCTTTCCCTTTATAACGAA  
GACGGACGGCAGGCTCACGAGCCTGTGCTTTGCTGTGATAGACCCATTCCGCCTGATCAT  
CCTCTGTAGTGACATCATAAAAAACATTACCATAGGATGCGTCGGAAAATGGGATTATGT  
TATAGCGTGCTTCACTGATTTCTTCTGTGTAACCACCACAACTACATCCTCAAATTAG  
ATTCCGCAACTCCAACTGGTCCGTTTCCCCTGTGTTGTTTGAGAATACACGCACCTTGC  
TTAGGTCCTCGACGTTTAAAACGGCACAATAACCCGACGGTCTAGTGGCATCAGCACGTG  
CTGCGGTGCTTTGTGAAGCACGAACCTAGTAAAAAGTGTCTGTCTCAACATCGGTACCGT  
CATTAAACGGCGGTTCATGTTGCTCACGCTGACAAAACCGCTTGGTGTCCGGTGTGATATTCG  
TTACAGTCTTTGTTTCACGAGTCATAGCCCCTGCTCCAGCAGCAATTTCTTCAATGGTAA  
GTGTTTCGCTGGTCCACTACGGGTGATGATCGGAAATCAACACGACTGTTAAGTCCGCTCA  
TTTTCTTGTTAGGGTCATAACCAGATCTACATCGCTCCACCCGCAGAGTTAATGAAGATCC  
TGACTTCGTTTAACTGTGTGGAGTAGTCGACATTGAAATCCTTAGGCGATGACGTGAACG  
CATTTAACGGGGTGCTGTTATTCACCGTATTACGTTGCGACAAGTTCATTGATCTTGTTG  
AACCATCGCTCTGAGTAATCATCTCGAACGTATAGTTACCAAGAACCCAATCTTGTTAA  
GGATTTGTATCGCCCGGATCTTCCCTGCGACAGGAGTGTCCCTTCGTGGGGACGTAGTTAC  
CACTGTCAATGCTATATGTTGAAGAAGTGTAAAGTTCATGCTGTACGGTGTGGTGTGTTAA  
CAACCAGCTGAATAGTCCCTGTTCCCTTTGGTTTTACCACGACGATAAGTTCACCACGAG  
CAAGCAGGTAATCTAGATAAATAATTTCTGCCCTGCAGGTGTTTGTACAGAATACAGAG  
CCGCAGCCAGAAGGGTCAATTGATATTCTCTTAAATTCAAGATTGTCGTAAGTTTGTGCA  
CACCAGTGTTAACCTGCGTGTGAAAGTTTTTCATCAAAGTTCGGATCAGCGATTGATTGG  
TATCTGCGATTAAATCATCGAGGGATGGGAGGGCAGAGCCGTAGTTATTTAATCCATATC  
GAGCAGCCACGGACACCTCCTTACTAGATTTTTGCTCTAAGAAGTTGCTATTTTATCA  
TATTGAGATTTAGTTATAAAGACTTATATTAAGAAATGGGCCCGAAGCACCTTGTTATTT  
AAGTCATTCGCTGGATACTACGGGATTAGTCGAAACAAGAGCCTTGTTCTCAGGTGTGG  
CTGTCTGAATTGGATCTTCAATGTCCAGAAAGAACGGTGTGATCGAAGCACCTTATTGAT  
ATGGCCCTCTGCTAACCGTTGTCTGGAGATCCGCAGCCCCGGGGCCTGCGCCTGGGGTGG  
TAAGTTGCAACCCACAAGTTTTCAATGCACGGTTAGCCCAAGGTTGTCCGGTACTTGTAT  
CTGCGGCAAACCTCAAACATTTTTGAGTCAAGCGCTGTTGCCTTGGTGAAATCATTCCGTT  
CAGGGTAAGAACCCCTGTCTCAACAGCACACATAACCACCGTTCGTCTTCAGAATGATGT  
CCCCTTACC GAATTTCGTTTACTTGAGGAAAATCATCGTTATCAGAAATGTAGGTGCCAG  
CAGCTGCAAGCAGTATGACACCTGTTTTTCCGTTTGTCTTTGAGTGCTGAACCGCATCGA  
AATTACAACCGTATGCTGTAACTGGTTCGAAGGCTACCTGACCGAACTGAGCGTTGGCGA  
ATCCATTATCATGAAGCCTATTGATATTACTGATCACAGCAGCACACCAAGCTCAACGCT  
TTATCGCCCCGCTGCCTCGGCCTGTCCAGCCTCATACTCGCCATAACATGAAACTGTT  
TACTGCGGATGACAGCAAGACGACGTATTGTGACAAGACCGCGATATTTGAAAGTGTGGC  
ACTCAATGTCGCTAACCTCCACATCGTTGGTCCGGGCATCCATAGCACGAACTGGAATAT  
CTACCTGTCCCGGCGGAGTACGTACTTTTCGACAGTGTAAGACACGGCACGGAGACCAA  
AGGTTCCCTGGTTAACACCCCAACAAAATAAATGAATCGGGTAGCACCGTTGACCATTT  
CGCCAGGAACACCATCAATGACAAAGTCTACGCAACAATAACATACGACGCCACCGTATG  
CCTGCAGTGTTCGTTAGAAACGGATGCATAAGGATAAACCTCCACGTTTTCCACCTTAA  
CGTTACGCCAAAGCTTGGAAGGATTCATTGACGAACTCGACGCGTCTTAAAGTTAGGCG

TGATGATCCCCTAACATATTGGTGATCAGAGGCGTAAGAGCCATGCGGTCCCTGCCGCG  
AATCACCCATACCGATACCACAGTTAGGAGCGTTATTTATATTGTGGATGTTCTCGTTGT  
CGATTTCTTCGATTATCAAGCCTCCCCCTTGATAGTGTCTCGGTACAAGGTTATTCTCAA  
TAGCATCGCCTGTAAAATCGGGAAAGTTGAGACTGGCAAACCTGCCCGAGTAACAGGAG  
CGCGTGTACCTTACTGAAGGATACCATACTTACAACCTCTGGACTCACTATACAGAATAT  
CAATTGTACCTTCTACAGTGAGGGCATGAAGTATCGTCGATGCGGTGTTGGTATGGGTAA  
CTCATGAGGAGTGTGTAATGATCCGACGCCGACCATAATGGCGAGTACAAATACCTTTGA  
AGGTCACCCAGCGGAATGTGCTGTTTGATAAATACAAGTACCTGTTGCCGCCAGTCTGGT  
TCAAACCTTCCACCATACTATTCAACACCGTAGATATACACACTTGACTCAAGAACAAGGT  
TCGATCCCCAAGCAGGAAGAGCTTTTTTGTTCATTTGCGTATGCAGCTAAAGCTGTTA  
CGCCGTCTTTCCTTCTTGGATATTTCCCCATAAATTGTGCAGGGGTAACAAAACCATCGA  
GAGAAAGAGCCCCTGTTACCGCTGGTCCACCGATAAAGGATGAGCCATTAACACCTGCAA  
GGTCTCCACGTACAGATGGTTCGTGAAGTACCACGCCCTTCAGCAAACCGCCTGTTG  
ACGGCGGTTTGGAGTCGCCAGGATCAAGTTTCGGGTATGCCACTGTCTATTGATCGATCA  
TGTTGGTTGATCTGTACATCACCCGATCTTTGGGGCAGACGAGCGTCCCCCTCCTTGG  
AGGTAAACAGTCGCACCTACCCGAAATGGGACAACCTATTGTAACATGTTTATTTACGGA  
TTGCATCCAACCTGGTCAACAATCAGGTAGTCTCCCTCGAAAGAGACCGTCGCAGTCGGTA  
AGTCTGAGAATTTGGGGGTAAGTAATAGTTCTGCCATTAATCCTCTTATCTTGTACGGT  
TTCTGTCCATAGCATAAAGACCAAATCCGCTTAAAAATTCCCCGACGTGAAAGTCCAAGA  
ACACCCCATCGTGAGTATCCGCACGATGACCAACAGACCAACACCGAGTCATCGGATGAT  
TCGGAGTCAGAATGATGTAGTTCTTTCGATAAGATCGAAGCAACGTTCTGCTACCAAGT  
CGATGTTAGGGATACGATCACGCATTCCTGCCATCCCAAACATATAACACCCCCCATGA  
ACAAGGCTGACATCTGGCTTGTAAGTCATATTCAGGTGCAAGTACCGTTCATAAGGGT  
TAAAGTTGGTAGCAGTTCTGCCCTCGTTGTTGTCTTGGAAACATTTGAGACAAACAACCC  
CGTTCTATGAAACAGTGAATAGCTTATTTGTAATAGCTTCTCCACGCTGAGACAATTCTT  
AAGCGCAACGACATACATAGGAGAATACACGGGCTTCATATCCATCCCAAGCCTTTTCGT  
TGCAGTGCTACTTTGTGAAGGTATTCAGCTGACCGTAGTTCTTCGCCTCCAACGATCTC  
ATACGACTACCTGCGCCATCGGTCCAGGCATGACCCGATTGAAAGAGTTATAAAACCACA  
TCGGCGAATCATAAAGGAAGTCAATGGTGTATTCAATGTTGCCAGTGGATGTTCTGAT  
CTTTGAATGAATTCGGCGGAGGGTACCGATACCCAGGGTACCGAAGACCACGCCAACCCAC  
CGTACAGTGCCGTGTCCGGGTCACTGATGTTGGAGAACGGGATCAGACCCGGGGGATAGT  
GGAGGCTGTTTGGCTTATAATCAATGATCGCATAGTCGCCAAGGTGCGCACTGTACGGGC  
TGTCGCCGTACATAGTGATACGGAAATAGATAGTAGAATCGTCCCCATCTGTGGAAGTAT  
ACAAGTCAGGAATAGCATTACATAGTACCAATCGATCCGTGCGCTAAAACCAGCAATAG  
GGACGGTGACAGGTGCCAAGTTAATCCGCTTCAGATTATGGAGATCGATTTGGTTTGGTC  
GTGGATCAGTTTCCGGCTGATCTGGTCAATTACTACTTAGTACAAAACCTGGTTGTCGTAA  
GCTGAAGTGTAGTCCGTCGTCCGTTTGTGCGGGTTCATGGCCACCACCTCCGGTTGT  
TTTCATCCGTAATCGTTATGTTGAAGTTATAAGCGTTAGAGCGATATGTAAACTCAGAAT  
GGTCTGATGTTTTCGCTATCGGTCCGCCAGAAAACAAACGTAGAACCTCCATCAGCATGTG  
TGATGAGGGTGCACGGTGGGTCATTAATACTTCCAAGAATACCGCTCTGGTACTCAACGG  
CAACAACATATGTTGTCACCCCAATCCAAAACCATAACCGGGGTCAGCCACCATGTGTAAC  
CACGACCCGGAGGTGTTAAACGAACAAAGTTTGGAGAGGGGGATATCGATTGGTACAATCG  
AGTCAGTACGGCGAGGAAGACCACAACGGTGTGTCACCCCGCCTGATGCAGACTTCGTTT  
TATTGAGGTCTAGTTCTGGTCTGAACAAGAGCCCGTTGCCAAGGTCGTCCTTGCCGGCAC  
ACTGAAAACGCTACTTGGATTTACCGTAAGCACGCAACCAGATCTCCTGCTGTTTCGAGGG  
AAGTTTGGAGCAGATACTGCCTGACGAATACCAATATAACCCTTCCGGGTCACGACTATACT  
CAGGGACCGCTCTGGAGGCGTAAGAGTAATCGTAGCTGATCCCGTCCCTGAACGGAATGA  
TGGCAAAGGTGGATTTGCGGAAAAAATTATGGAAACGGTCAATGTCAGTATAATTGTCGC  
AAACCATCAAACACGCACGCCATCAAAGCCCGCACTTTCTTGTCCGGTGTCTGATACA  
TTACATAATTGGCATCACACCACAAAGTTTCAGCATCATAGGCGCGGGCCTGGAATCGCA  
TCTCAATAGGTTTCGTTGACTGGTCCGTTATGCCGCATCGTGTTCGGGTCCATCTAGTGCC  
CACCATGCTGGTCAGCGTTGCAAGATGCATAGTTCAATTTGAACTTTCCTCTTACCGTGA  
TATCTTTGAGTTGAACAGTCCCCACTACTCCTCTGGGAAACGCTCTTCAAGAATAATAC  
CGTACCAATCAACTTATCTGCCGAGGCTGTCAATGCTCCAATCGACATCCCACTGAGACC  
CATACTGCTCCCAATTTGTCGTCCCATCTGCGTTAGTAGCATATAATGTGGCGATGACGG  
AATTCCATCCAAGATTACCAACATAGGCGAACCACGCCTTGTCAAGCTCTCCTCCCAAT  
GTGGTGCACCATGAGGAATAAAGTCTTACCATTTGACCATGACATAACGGTACCCGTAC



ACCCACCGTGGGTTGGGTATCCATCGTATGTCAGTCGGTATTGTGCAAGCCTTGGCTCTT  
TCCCGTTAATGCTCCAGTTCGGGCGGATACACTGCGGGCGGATCCGGGATTGGCTGACCAG  
CAGAGTCCCAGTCGATTTATGCTTGCCAAAAATCTTCTGCAAGTTCACATTTCCAGGGT  
CGTTGTTAGCAAGATATGCATATGCGCAACCGATGATCCAGGCAGACTGACCCTCGGTAT  
TTGCATCACCGTTAGGCTGGGCTTCTTGAGGGCGTTCAGTTGATAAAGTAACTGTTGTTAG  
CCAAAAAATTCTGTAAGTTCATGATGTAGAGCAGAGCTGTCGGGTCAATGGTCTCTACCT  
TGTTTCTTTCAAGGAAGTGTATGTGACCATCGATCAATTGAATAACATTATCAACGTTGT  
GGCGTAACTGTACAACACTCAACTCCGTCCATACTAAGGGAGCCGTTACACCTATTCCC  
ACCATCATATGTGACGGACTGAAAGATGTCTCTGACCCCGGATTTATAAGAAAGAAATGG  
AACACGTCCATAAATTCTAATTAATACTACTGGCCCATGAATCAAATTCGTCCAGGTACC  
CTCTTTTAAGGACAAGGTAAACGACGGTGCTACGTCCTGCGCCGTTGATGGAGTGGTAAT  
TATGACAACGCGCTGCCCTCCTTTGAAGTTGGCAACAAAAGCATTACCCATGTAAAGGTT  
ACATGTTGGAGTCCCTTGGTCAATGGCCAAGAACGACGAACCTTACCTGGTAATCCGCCGCC  
ACCACTGGAACCAAACCTCTTGCCAGGCGTTCCTCTCTGATGCCGCCTGTAGTTGACGGGGA  
AGATGACATTGGAAGTGTTCGCGGTCAACACCATTCAATGTGTAAGACTTACCATCCGT  
ATCCAAGAATGCAAGGTCCTTCTTGGTTTCACGGAACCCACCCTCAGAAATGAAGACAAC  
TTTCAGAAGACCCAAACGAGTCATGATGTTGTCAAGAGAAGCTTTCCTGGTTGTGTCTGC  
CTGATCCATAACTACATAGTCATCACCAGATACGGTGACGACGGAAGGAAGGTCAGAGCC  
CTTCACCGTTAGAAAAGAATCATCTGTCATTATTCACCCCTAAGTGGTTATCGTTGATGG  
ACTTGCCATCCTCTGTGGTGTATGATCTTATTCTAATCATCCAGTAATCAACCAACCGGAA  
TTGGGTTATCCAGATCATCACCATACCAAGTATTCCACCATGTAGCAGCGCCAGTGCAG  
GAAGACAGAAGTTGATCAAGTAATAAAGTTTGTTCACAGGTTGATCTAACCATCCTCAT  
CAAAAAGAAAGGTTGCACCTTCATCAGGGGTTGGCTAATTATTCTCGTCTTGACCTACCA  
AAAAGAGCCTTACCACTTCTGTTCTTTGATTGTGACTTCATAAAAGGACTGATAACTAC  
GGGTTCTTCTAGCCATAGTTGTATAGAAAGAGGTGAGTTTAAACAATGTCAGTTTCAACAC  
GGGTTACTTCTTGAGCTTATTGTCAATGACAGTCTTCATTCTTTTTCGCTTAAATAAG  
CTCGGTATGGGAAACGAAATGTCTCATAGTAACACGCGTTAACAGCCCCAATCTTGAATC  
ATGGCCCCGGGCGCTGACGAAGGTTGGCCTGGTTTGTCTCGATAAGATTAGCCACTAGC  
AGCCATGAAGGTCTCATTAAATTGGGTCCATAAGGCGATCTGAGTAAAGAGTCGCCATTT  
AAACCTCTAATTGTTGGGTGGGTTAGTATTATGAGAACCACCATCATCTGTCCATGTGT  
AGAGGTGATTATGACGGACGAACCAATCATAGAAATCATCCATATTGACACCAGGTGTTG  
GCATAAAGTTCCCATCTGCTCGAATTTTTGCCCGTTCCTTCTATGTTCCCATCCACCT  
TTGCAGTCGGTATTGCTGCACCATTGATAAAGGACATTTCAACTGCTTTATCAACAATGA  
ACGTTCCAACCGGACCAGGTAATGTAAAATCACCTTCAGGCGTCATGGATAAGGGAACTT  
GGTCTTCCACAACCTCAACTTTGTTTGGGTCGATAGTGATGGCGTTGCCATCACTATGAA  
CACCGATAGTGGACGACCGTCGAAAAAGTCCGTGGGTGGTGTATAATTAGCGTCACCTT  
CATTCCGCTGAGAGAAGGAGAGACTAACCCAGGTCACCAGCCTTCACAGGAAGCGTCAGGC  
GAGCTTTTCTCCCTTTGCTGAAGGCATGGCTAGCGGGACATCGAAAACCGCAGAATACG  
CGTCCACGGTGCCATCTTCGAAGTTTGTGAGGCTAAGAGTTGGACAGTGGCAGAAGGTA  
TTCCGTAATCAGCATCAACCCCGCTTGCCTTTGTCTGTGTGCGTGACGCGAGCTTGC  
TTGTGAACCATTGGTTAAGCGCAGCGTCCATACGATGAATTAATGCCATTATTCCTCCAC  
TACTCCACCACGGGTTTCTGCTAGACCGATCTGAGCCATCCAAACACCACCCTCAAGTTG  
CCATTTGTGGGTGAGGTACACAACCTTTAGACAACCCTGTGTATTTCTGACTTTTCAGGTA  
AATCGTGCTTCCAGGAATGATCGCACCCGTAAGCTCTGTCAACCACAACAAGACTTGCCTC  
TTCTCTGATCTCGGGACGACTTGGACCTTTGTTGGTTTTTGGTTTTCTTTTGGATTTACA  
ATTCGTTTCCAGTCTACGATTTACTGGTTCAGGGTTTTGAGGGGTTTCGTGACTCTTGCAT  
ACCTGACTCTGCACTGCTCTCAAAAACAGCCGTCATAAACCTCTTGCCTTGTGTTGTCAA  
GTCAACTGCACCATCTCGACCACTGAATGTTGATCCCTTATTCTTCGCTAGCATTTCAG  
ATTGTTTCGAGAGTTACCTCCGGAAGACATTGACTGCTGGGGAGTCTGACCACCGAAGTT  
AAGAACCTCCGCAATTGGTAATTTCAATTCTGAGATTATGTCGTTAAACAACCTGTATCAAG  
AGGAGTCCCCTCCTTAAAAGCCATAGCGCTCTTTGCAGTCATAATGCTGGTTCGTTGGATC  
AACCAGGTTCAACTTTGATTGTCTGGTGTGTCCATTCTTTTCATCCCGGACAAATTGCAC  
TGTCACGAAAAAATCATTTGGTGTGACCATCAAACCTCCGTCTCAAGAACAATGGCAAT  
AGACTCCCCCTGGTTAGAATCAAGATAACTAACTGATTTCGTCACTCAGGTTATAAAGCGT  
GACATATCCTTGATTCCGGTCTATGGAGTTATCCGTCTTCCCCTCAAACCTCGATATTTGC  
CGTGCCTTTTTTCGTTACTGACAACATAGGCGTTTTTTGTATCTTGGTTCGGTATAATCAGA  
GATGTTCTTTGGTTTCTGACCAATATAAACAGGCTTGCCCACGGCGAGTCTGAATCTACC

TGATCTGTATGTCGGCATCTGTAAATCCTCGTCTTCAGTTACCTCGTCGTCAGGAGATGA  
ATAAAGGAGTTGCATGTGAGATAAGAACCTGATATTGTATCTCCCCACACGTTTGGTTGA  
CGGGGTGAGTGAAAAGACATGCACTTGCCCTGAAGAAATGATTTCCAAATATTTAGAAGT  
GGCGAAGATGTCGAGAATTGTTATTAATTTGAAAGAGATCATTGTACCAGTGCCAACATC  
CCCTAATGAAACGTTCCAAGATTCGTCTCTCTGGTTCCACTGTAACCTCACATCGTATGT  
TTGACTGTCCATTACCTCACGCATAATTTGGTCAGCAAATCCGCCGAGATCCCATGAGAC  
TGTGATCTTTGACGTTACTTACCTACCGCCTTATCGTAAACAACAATGGAGCCTTCTGAA  
GTCCTAATCATACCATCTGCGATCATCACACCAACAACCTTGTTCTTTCTTAGTAAAGTTC  
CCATTATCCAAAGAATCAGCAATTGCTGACCATAGATCTTTCTGTGGGCCAGCAAATTTG  
GTTTCGTGAGCACTGACTTCAACCTCATTGTTCGGTAGCTTAAGACCACACAAACCCTTTC  
TGCTTGATTTTACCACCAAACCTATTTGGGGTCCGACTAGATTGTCGCCATCGCAGTTTTG  
CCAAGGATGAAGGTGCGGAACCTGCTTGCCTCAAGCTGGGAAAGCAATACAGCGCCATCA  
GAGTTGCTCCGAGAAGCCTCCATCGAGGTTTAAATCTTATTCGCGATGATCTTACCGTCA  
GTCACTAAGGTAACGCTCTGACGATCAGTGGTAAGTCTTTCGAGGACCTAAAGTGCCATT  
TCTGGGCAGCCTGAGGCAACCGAGTTTTGACCGTCTGTATCTGTATCAATGTAGCCTTTT  
TGGATAAGATAAACAGGAGATTAGTTCAGCCTTTGACTGAAAGATAATTTCCCATCTTCG  
ATGGCACCGTGGGCACTGAACTTTACCTTTTCTTACGAGCGTAGGATGTCTTATCGACG  
GTCCTTGTGTACGAGTGTGATCAACAACGTCGAAAATGATCGCCAGGTTGTTGGTGTTG  
TTATTGTCTTTGAGTTCTACGTTTCGACCGCCGTAGTTCAAACCACTGGCGAAGATCGAA  
TACGGCCCCCTCTCCGCTGGCTTCATGGGCTGCGTTGAACTTTTTCTCGACGTTAGCTGTA  
GGCATAACCTTGTTCCGGTTTGGACTGGTTGCTGGATACAAATGCTATGAGTCCACCCATT  
ATACATAATTACGATTTTATCATAAATCTTTAGATATAAGAAAAATAAAGGGGCCGAAGTC  
CCTTTAAATTATTGCGGCAGACTAAAAATTAAGTTGCTGTTCCACATGTTTGCAGCTTCG  
TTCTGTGGTCGATCAACTTCTTCAACTCACCTGCATCGATCTTACTGTGATCTTTCCA  
TTGACAGGTTCCGTTTGAATTTTCGATGGGGGCATTTCCCTGTCGGAGCAGCACCAGGCATC  
ATCGAGTTATGGTTCAGGACGTTGAGTCTATTCTGATCAGTCATTGCTCTCTGACCATTA  
ATAAAGTCAACAAGTTTTACGAATCCACGAGTTTATGTAAGATTACCACGTGCGGTTGTA  
TCTGTGCCGTATCTTGAGTCACTAGACACTTGACCATGGTAGAAGACATAACTCCCGGCA  
AGCATACTTACTCCAGCAATCTACCCATACAGACCAAGCCAACGTGCAGCTTTACCCATC  
TTACCGAGGCGTGGACCATTTCTTTTTTTCTTACCGCTGCCCTCGCCACCGTCATCATGC  
CTACCACTGAAGGTGGTTGTCAGGGATTTTAAAGCTCCGGAGAGTCCAGTCATCTTCGAA  
AGAATTCCGAACATACAGATCAGAACAAAAGCAAGGAACAGAGCACCAACACACCGCCCT  
ACGCATTTCCGTGCAGAGGATAACTCCTCGACATTCTTCCGGAAGATCGTAATGTAACGG  
TCCATGAGGCCTTGGATAAGCACAAATGTATTGTAATCGGTAGAGATCATCTCCATGAAC  
GCGGCAGTGAACCCATCAACGAATTGACCCCCATTGTGAGCCAGCTCCCCGTTGGAGTTA  
AGGATTTTTGCAAGTTCGTTGAACGGGATTGTAAACTCATCCCCAAATCCGCTCTGGAAA  
ACTTTGTTGTGAAAGTCAATCCATGTGAAGGTGCGTCTCTGCATCGCAATACGGTTGCCT  
TAAAATGACTTTTGCAATTCACCACCTTAATTTGCAGACGCGGAATAATACTTGGCTACA  
AAAAGTAGGACCTTCGCAGCTTTCAACTCGCCCCTCTGCATCATATCGAGCAACTTGGTT  
ACGTCGATCCCGGAATCATTGGAAGCCTCTTGGCAAGCCTTGACCAACACCTGTAAACAT  
CACGGAGTACCTTCAGCAAGTTGCTGCTTCAGTCCTTCCGCCTTGATCTGTCCTGAACCC  
ATCATCTGCGGGATTGCGGTAATGCCACTTTGGTATTTCGACCGGATCAACCCGTAAGGCA  
GTAGAGTATTCCGAGAACGCCTTGAAAAGTTAATCGGTTCAGTGATTTACTAACAACACCA  
TCCGATGGGATTGCCATTTGGGTGTAACCCTGCGATGCAATCTTGAGGTCAAGAGGCAAG  
CGTTAGACCGGTCACGACCAAACCTTTATGCGTTTACCAGCTTCTTTGGAGCTATCAGAA  
ATCATTAGCTTGGTGGCTTTCATGCCATGGAAGAAGTACCAGCTTTAACAGCCCTGGCA  
GTGGCATTGAATGCACCGTAGGCTGCCCTAACGCTGATTCAAGTGCTACGAAGCGTTTTTC  
GACCAGTCTGTCAGGGTAAGAGTACTCGCGTTTGCGGGCATGAGTCCAGTCGCCAGTGCT  
TGAAGTTCAGCGCGCAAATTGGAACCTTCAATTGTATTACTGTCATGGATGCGCTCTTTG  
AGAGAATCGTGACTATTTAGTTTTGACGTACAATTGTCACGATATTTAGCACGGAGGCGA  
TCACCTGCTTTTTGCCACCGTAGGTAACCTTGCCCTGCAAGATTACGGGGATGAAACCGATCC  
TCAGGTTCCATTTTGTACGGGCCTGCTGACGGACGGGGAGTTGGTCTTTGGTGACTTCC  
TGTTCAACGCTTGTGCCACCTTGCATTTGACGAGCCGGTGTGCGGGTAGATCTTGGTCG  
AAAACCTTTGTTTGGGTTACCACCGATGCCGGTAGCATTTCCGGGCGTTGGCGCGTTTTGAT  
AGTTGCTCTTGGAGAGCGGGTAGACGTGGAGCCGAAATTGCTGGATTTGTGCCGTAACCA  
GCACCTGTCTTTTCAATCTCACAGAGACGAACCTCTACTCGTTTGTAAATCCGCTTGAGAT  
TCAGGGGATGTTTGTGCGTTCAGTTGACCAACAACCGGCTCTATACGGGGCTTTTGAATT

TTGTCAACTGCTTCACGGGCGCGAGCTTCTTTCTTAGCCATTGCAATAGCATGTGCTGTA  
GTTTTCGTTTGTCTCTGCACGTTCCGTTTGATGTAACCATTTGTTGACAAGGCGTGCCGCGC  
ATTGCAGAACGTCTAAATGGTGCTGCTAGATCCGTGTTACTGGAATAGAACGCCCTCCCA  
GCTTTTTCCCATTCCTCTTCAAATACTTCACAGCTGTCATTGCAGGAGCGAAGTAAGTC  
CCGTCCACGTCCAATATCACTTTGTTGACTGACTGGGTTACGATTATATACGCCACTGAG  
TCCATCTCAATAAAAAAGGTAGGCTTCCGACAAGGAACCAGGCTTGAGATTAACTTCTTC  
TACCACGGGCGCGCCTGTTTGCAGTTTGATAAGGCCTTGCTGTACTTTCTTCTCTCTTC  
CGTGGACATCAGAAACGAATTCTTCCACATCGAGGTATTCATTACGCGCGAGCAGATAGG  
AGACATCAACAGATTAGAGGGAGCTACAGGATTCCCCCTTGAAGTTTTTCAGAGCACGAC  
TCCATATGTAGTGGAACCAAGTCAGTGAGCTGTTTTTCTTCGCATCATCCATAGCTCCCA  
GAACGACTTTCGGAATTTTGGACGGTGTTACTCCGCAGCCACTTCCATTGCCTGATCCCC  
CGAGTTCACTTGATGGGTGTGTACGGGCGACCCAGACGTCCCTGAAGGTCTGTGAAACG  
GTCTTTCGTGAAAGAACAGCCGTCGTTAAGTTCCAGAAATTTAGCAACGAGCTTGATGAC  
GTCCAACATTTTGTCTTGGAACACACCGTCAGTATCTACTGTACCCGCCATACAATGAAC  
GGATACATCTACAGCAAACAATGCGAAAGGTTTTTCGAGGTCATATTGCTCCATCGGTTTC  
AAAGAGGTATAGAATAGCTGTAGGGAGGACATCAATACGGCTCTGGCCTCAAGTCATCAT  
GGAACCAGAAATGGGTGCCACTGGGACGGCTGCATCACTACCGCTCTTCGGAAGGTTTGT  
CATGACCTTCGTTGGAACACAGTGCGGGATAATGAAGATGTGACCTGCGAGGTCGATTTTC  
AGTTGTTCGGTCAAATATCCTTGTACGCTCCTGCGTCTTTCTGGTTTCGTTATAGATGCGT  
GTATAAAGGTTACGTCCCTGTGGCACACGAAACACTTAAACGATAACAGTCAGGCCGGCA  
AGTCCGAAGCCAGCGGATGACAGAGTAGCTGGGTTGAAGTAAGCATCAAGGAGACCGATT  
TACCAGTCCATCTGGCCCCCTTTTGTGCCGTAGGTCAGGTCAGGTTGGTTTGAATCCAC  
CCGATGGTGCTGAGTCCCATAACCCTGAGAACCCTCAAGGAAGACCGGGTAGAAAATCTGT  
CTCGTGCTAGAGGCTTGGTTCTGGCAGTCTGCAGAGTTTCCGTTCCAAGAAGCAATGTTTC  
TGAAGGTAAACCCTCATGACAACAGATTGGTTACGCGACAGTGCGGGCGGATCGCCCAGCA  
TCAACCCCATGGGGGCGACGATGTTATCTTCGTTACGGGCAACGACAATTTTAGTATCT  
GCGGCGCAACCAGTCACACGCTGTGTCAAGAACAGTTTGACTTTTTTAGCGTCAGAC  
GCATATAGCGTTAGGATAGCTGTATCCATATATTAGACTCCTACTGTTACAGTCTGACCG  
GTTCCGGCCTTAGACCCTGTTTTTTCTAACAGAACGGTCATCCGGAACCTAACGAAGAGC  
AAGGGCATGTAGTACACAAGCTCCACTTTCACATTGTTTCAGAGTATCAGCAGCCAGATCG  
CTAGTCGGGATGATCGCACGAAACGGGATTGTGATCATCGGATCGTAGAACACTTTGTTA  
ACGTCATCGTATCCAGTGAGGTTAGAGCTCTTTGCAATACCGACGTAGATCGGGTTGGTC  
ATTATGAAAGATTGCAGATTAGGAAGATCGTCACTACTCATCTTCATGGAGAGACCCATG  
TTAGAACGGCGAGACAAGTATGCAAACACACTTCTTCTGTACGGAATTTTCAGCCAGGTA  
CCGAAACGGACAACGTCAACGTAACCTACCAGAAGCACACTTACCTTCGTATAAGGAGCCA  
ACAATTTTGATCATTTCGGTAGACGTTTCAGATTCTGGTCCCAAAAGGTGATGCGATCACTC  
ACACTCAGAGTTGGAGCGATAACCCCTTCCATTGTCTTCAGGTGGCTTGAGTCACCATAA  
GAAGGGTTGCTGGACGCCATTGCACCCGATACTTCCACCCTCCGGGATTACGCTATCAGCA  
AGATGATCGTACAGGCCGATGGTAGTAACGTACTGCATCGCTTTCAGTGGGTTAGCAATG  
GAGTTGCTAACAGAAGTCTTAACTTTCGTCAGCAGTTGAACCAACGTGCCGCTTTTAC  
ATTGCGTCAGCGAAAGTAACAGCACCAAGGATTGAAGCGTTGGTGAGATATTCAGTGCCC  
AGGAAGTACCAGTTATCAGTTGCAGCCAGGACGTGTGGCAGAACAGAAGACACAGTTTCA  
CCGAAGGAGTTTGTGATGGTCATATTCCCGCTGTAACAAGCAATCCTGCAAGTTCAATCA  
TTTTTTGGCGCGATGGTTACAACCTCCTGCGCTTGCCGTAGCAGTCAGAACAGCTGTCAGG  
GTTGCATCACCATTAAGTGCTGCTGCCAGGGCAGTCGTTACAGAGATTGGGGTAGACACA  
CCAGTCACTTAAAGAATATCTCTCGTCTGATAAGCTCCGGAAACTACGTGCAGAGCGACC  
GGTTTTTCGGTCTCAGTGTGTTTGTCTGTGAAGTCCACGATGGGATTGGTAAACGCT  
TGAGGACTAATCATCAGGTAAGTGGGACGGAATGTACCAGAAAACGCTTTGGTTGCAAAG  
GTGTAAGCTGGGGAACCTGGAGCGAATCCATCATCTACAAGCTGATCGAGTTTCGGTATAA  
GCGCGAAAACGTTTCAGGAAAGGCGTTGTGGATAGCCTGGAATAGCGGGGTTTCAGACCCT  
TTAGTGTCGATTGGTTGAGTACCACGCGTGACTGTAACGTCAACCACCTTGTCAATTATAA  
CCCATCGGTTTCTCTTCTATTTCTGTACACACAGTTATTGACCAGCAGCTCTTTGTG  
CTGTATTCTGGGTGCTTGCGCCCTATACTATCACTACTAAGCCAGAGCTTGTCAATAA  
AGAAGTGGTTTTCTTAGCCTTCCGCTGGGTAGGGATAAACGAGTTCCGTGTTGATCTTC  
TCCAGTTCTTCGAGAGCACAGGGATCTGACTCGATGAAGGACACGTCAGATGTGATTAAG  
ACTACAGCACGGGTCTTAAATTTCTGCCTATGCAAGGGAACCTTAAACGAGAAATTGTC  
GACGTTGACGAGTATGCAAAAAGGAGAGTTGGTTCGGGAAATATTTGTCATACATGAACGGT

GGGTTTCATTGCTTGCCATACCGGTCTTAAGGCGTTGGGAGCTTTACCACGGTAGGCTGTG  
AGTGTTTAAACTACCTCGTAATTATGCTCCGTTATGGCATTGCCTTGAGTATCAACATCT  
TCGTAAGACTGCCAGTCAGTCTGGTCAACTGCCGTCAGGTCAACAAGAGTGAATTCACCA  
TCCACTTTGGGAATCTCATATTCAGCTGCCAAGACAACGTTTCTTTCTGCGGTTTCTTTA  
CAGAATGCTCCCCTCTATTGGTAAGGGCGTCAAAGATTACATCCGGATTGGTGAATCAA  
GCCATTAAATTGCTCCGTTTCGTCCTTTCGGGGACGGTTACTACGTAAGCTCCGAAACGCG  
CGACACCTGTAGTCTGATAATCATCAGATTGAATCACAGGGACCCGCACCATGTCCCCAC  
GGGAATAATTCAGAGTGATTTGGTCAGCTAGCACGTTAGAGCCTTCAACACGACCTTTGA  
GCATCACAGAGCAATAAAAGGTGAAGGAGTCTGAGTGTCTACCTCCTTCTGCATCAAAT  
GTGATGTATAATCTCTTGCCGCCTTACCTGTTAATGGTTGGATAACACACTCAAGAATAT  
CAAACCTTTCAGACTCAAGTTCAACACACTGGTTTTTCGTACCGCTTGCTTACGCCAACTT  
AGGAATATTCTCTGTGTCGCGCTGTAAAGGTTGGGAGATGTATTAATCTATTTTTTCCAA  
TACGTCTGTAACCAGCTGATATGCCCTCGACCCTCTGCTGTTGGATACTCTGAATGTCGT  
GGACTCGATAAGGTCACCATAGTGGTACATCGCCTCACTTAATCCCTAGTCATCGGCCAA  
CGCATCGGATACAATTCTCTTAGGAAACAAACCGGAGTCGATAACGAACTTTATCTTTCT  
AGCATCTGCTTTGCCGGTCTTGTTTCAGCATGGGTGTCGGATTACGACCGCCTGAAACAAC  
GTACCAGATAAGTTCTTTCCGGGAGTTTTTCCAGTTCATATTGAATGCAACTTCTCCGCT  
TGTCATAAAGGTACGGGCAGGAAGACCATTCCAGCCTTATTGATGGATTGCAGCGAGCGT  
TGCAGTTTTAAGACCTGAGTAGTGAGGGTCGTCATAATAACCATATGAAACCTGACGCGA  
AAAAGTTATTGCGTTACTCCGAAAAAGTTCTCACACGGGTGCAGATCTTGCTTACATGT  
TACTTTTGGTCTGATAGCCACATCCATTTAGGTATTTACCACATTATCTTAACAAAATC  
AAAGACCAAGCGAAGGATAAGTAACGAGGCCAGCGGTGATGGTATCTCCGAGGAAGTCAT  
TGTACACCTGTCTTGGGGCCAATTCCCTGCAACATCGAACGGACCTCTTGAGGTCCGGGCTC  
CCTTTCACACGCCAGTGTTTCAGATGACGGACACGACCAATGAGGACTGAAATGGAAACC  
GCCGTGAGACAACCGTCCACATTATCAGGATTGGCCGGTAACCAGCTCAGGAAATCTGTC  
CAGTTCTGGTTTGGAGAACCGCCATTCCCCTGGATTGTTTTCGTCCGCGATCTTTGCCAAG  
CGGTCTGAGATAGATGCCTCTCCAGATTTTACTTCTTGAAGGATTAAGCAACGTACCACA  
TCAACGTGCGGGTAATTAAGAACCCGCCTCATGTGCGAGGTTGTTGATTGAGCGTTGCGC  
AAATTTGCCTTAACCTTCTCGATAGTAAGAAATGCCAGAATTGTTTTCGTCTGGTAAAAGC  
ACTGGGGGTATGGATCCGAGGAGCAGTGGAAATATACGCAATAATGTCTTGGTCTGTCATT  
TTCGCCCTGTTGGGTTGCTCTTCTATGAATCAATATCTTATCGCAAAATAGTCTAATTG  
TCATTAATAACACTTGTCAAGACGTTAAGTTCTGTTATCTCTAAGTGTTCAAACAAAAC  
GGGGAACATTCTAGGAAACGGACTAAGGCAGTTATCTTTTGAATTATCGCTGGAGCACCT  
AACGGGGCGGGAGCTTGTCCGTATGTAAAGAAGCATCTTGATGTTTATAACATCAATGCA  
ATTGAATCAAGTTGGTTATCTCCTGAAGAGAAAACCTGCCAGCGTCCATCGACTTGTTTCGT  
CACGGTTGCGACCAACGGTTCAGGAAAGCATTCAAACCTGGCGTGTGAGTTGTTTCAGACA  
GGTGAGATGGATGAGATAACAGAACAGGCCGAAGTATACCTGTATTTGACTGATGTTGCG  
ATACTTTATGGAGCTGAAGGATGCAAAGGGGCGTACATCTGCACCTATTATAAAAACGGA  
AAAGACCCCGTGTCCCATGTGAATATGGAAGCAGGTTTAAAGTAAGCTTCTAAAATAAAG  
GCCCCGAAGGGCCTTTTGTACGCTATAATCCGAGCGCATTGACGTCTCGCTAGCAGTCC  
GTTAAAGTCTGTTTCGAGAGTTGTAACATCGCTGGCTACGGAATCTACCTGTCCAGAAGA  
TTTCTTAACACCACCGAGCGTGGTAGTTGTTGCTGCGGCAAGTGTGTAACATGCACCCCC  
TTCTACGAGATCAGCAACCGAGATTGAGTTACCAGTACCAACATCGATAAGTTTGGTTGC  
ATAAGCACGACCAGCTACACCAGAAGTTGCCATATTTTATTTCTCCAGATAAGAATTAGG  
AAGGTAATTGCGGGATATTTGAACAGAGATTGCCTGATCCACACTATCAATGTACGTCG  
AGTAAGACTTCATGAACTCGTAAGGAGATCTGGATACGGTGTGATTAAGCTGTCATTT  
CACTATGGGTGAAATCAGCGTTGTAACCAGCGAGGAACGGGGATGGATAGACATTTGTGG  
TTTCAGACCCATCTGCATCCAAAACGTTCTTGATGCTTAACAAAGTTGCAAGATCAATAC  
TATTGTCGCGAACTTGGTACTCCCTGTCATTGTAAGGATACGGGATACCGATGATAAAGT  
CCCCGCTAAGAACAGTTTGAGCATCAGCCTTTATCTTATCTTATGCAGAGACAAGGTTTA  
CCGTACTTTCTTCTTTCAGTGAATCACGTACATCCCAAGATTGTTCCCATGCTTGGATTT  
GGTCTTTGAAAGGTGGAGCGCCTTGAAGTACCGCATCTCCTTCAGGCATTTCTCTCGGAA  
TCACCGGGAAGTAACCTAAGTTCGACAAGGTTTTTCAGATCATATCCAAGAACCGGTGCTGA  
CGTTCGGATTATTCGCTCTGAGGTCAGAAAGATATACCTGATATTGCCCATCAGACGTTT  
TGTTTAGAGGTATCTATGCGTAAACTACCATTTACCCTCCTTGAGAAGGGCGACTTATGCC  
CCTTTATCAATCGACAGTCAAAGAGGTTGTACCTGTCGGGTTTGTACGGTTCCAAAGGCT  
AGTAACAACCGTGCGGGTAGTTCCAGAGTAATCGCTGTGCCGTTTGTCCATGCTAGGTT

GCCAGGGCACGTCATTGACGCACCGGAACCAGAGAACATAATAACGATGGTCAGTGCTCT  
GTTTGGACGTAGGTTAGTAAAGCTGAGGGTATTGTTTGTGTACCGTCAACCTTGAAGTC  
TTGAGACACGCCAACATCCAAAGCCCCAGTCGTAGAAGTAACCAGAAGATCGTAACGATC  
ACGTTTCTGCCACGCATTGTCTACACCGACATAATAGCCTGTATCTGCTGGTGCTTCAAG  
TACCGGAACATCAACCCACCTAGCATATGCTCGAGCTTTCGGGATGGTAGAGGCTGTATC  
GTAAACGTTTCCCTCCACCCTTGTACCCCAGGGAAGCCCAGGCGATAGCAGAGGTTCTCTG  
GAAGTATTCCAATGTGGATTTACTGATGAAGTTATCACCTAGTCGGCCCTCAGCAGGTCC  
TGGGTTACGGGAGAAGTTTCACCAAAGTGTTCCTTGGTCTACTTTAATAACTGGATAACC  
CTGAATACCTTGTGCGAGCCTGTGGACTTTGTGGAACACTACATCGCCGGGACGACCGTGGAT  
ATGTCCCAAGTTGTCATAAAGTGGTTTCAGTCCATCCCCAGAAATCTCCGTCATTCCATTA  
TGCCTTACCAATCTTTCCAGTATAGGGAAGTTCAGTGGTATTACCGAGTTTGCCTAGGGT  
TTCGACCCCAGCACCCATCTGAGCCTCTGGTCCTTGTGCTGCTTGAGGGTCTTCTGAACC  
TGTAAGTACACCCATCTGTTCCGTTGCGGTCCCGCAGAAAACATAAGAATACTCTTTGTT  
CCCACCGGGAGTTTCTGAATACATCCAGCGTTGTCTGGGTTTTGAACATCAAGCAGGTC  
TTCATAAGTCGCAATAACACCTTTAGCAATCATACTATCGCCCATCGGTCTGGGTCACC  
TTTAATTCCAGGATCGCCCTGTGGGCCACGCAAGACTCCAAGGTTTACCCAGTAAGTACC  
ATCGGAAGCAAAAGCTTCTCCAGTGTCCACTGTGATGTTAAGATCTTCAGGTGCTGCGCC  
GGACGGCAAAGCTGCTTGATCGGCTACGGTATCTCTGGCAGTGAGTGCAACGCCATTGG  
ACCCTGTGGTCCTGTAGCCCCTGCGGGACCTTGAGGCCCTTCATCGCCCTGATGGCCTTA  
AGGCCCTTTGGGCCACCAGCACAGTATCACATTTGGGACCGACATCTCCTGTTGCCTC  
GCTGTGACCCTTGCCGCCTTTTGGGTGGACGCATGCACCTAAGTTTATCCATTGAGAATC  
AGCCTGACTCCAATCGTGAAGATTTCAAACACTACAATCCAAGCAGCGCCTGGTGTTCCTGT  
TGCAGCAAGATCTGAAACAGCACCGTTACTCCCAAGAACACGTGCACCATTACCAATTC  
ACCCCGATCAACCTGCGGACGTTGAGGTCTTTGTGGACCGAGAGTTCCAATTAACCAGT  
ATTTCCCTTAGGTCCCTTTGGACGGATAAGTCCTTGGATACCCTGTGGTCCGTTTCCCTCC  
AGCAGGACCCTCAGCCCCTGCAGGACCTGCTTGGCCGTGGTTCGCCCTTTTGGCCATTAGG  
CCCTTGTGGGCCGACATCACCTCGTTCACCTTTAGGTCTTGGACTGGACCAATATCTCC  
CCAAATGTCGTCAGCTGACCAAACCCAAACGTGATTGCCCGTTTAAACAACCCATGCAGC  
AGACACAGCATTACCAAATTGGGGCAATTCGTCTACTGTGCACTTGTTCCTTCAGTTT  
TATAATTGCGGCATCGTTACCATGATCGCCAGTGTTACCTTTAGGTCTTGTATGCCCTGT  
TAAGCCCAGAATCCCTTGCATACCTTGGTTCACCTTTCTCTGCACGGTAACCTTTATCGCC  
TTTAGGCCCTGCCGTCCGGTGGCACCAGTAGCCATTGTGGACAGGCAGGCCCTACATG  
CGCTACAGGTTTCCATGCGTCTGCCTCGCCAGTGCAAACCCACTTCTGGTCTTCGATGAT  
GTAGGTATCGCTTTCGTTTTACCTCGAGTCGGAAGGAGTCATGTGTCAGAAAATGCACG  
CCTGACCACCAATCTTATACCATCTTGCCCTTGAAGTCAAGGGAAATCGCCATGATGAGC  
CCACGCGTCTGTGCAACTGTCTAGTAATGAGTTCCAATTACGTAAGTAACCTTCTCCTG  
CAAGGTTGCCGCTGGAGGTCGTTGGGATGGGTCTCCAATAATTCCTTGGATGTAATTACC  
AACACCCGGATCACCTTGATCACCTGGTTCGCCCTATTCGCCGTTTTCTCCGGGAGGGAC  
AAATAGACCTTCTGCACCAGGGTAGGTATCTACAACACGAACGTTTCCGCTCTTGGTTCA  
AATAGGCATAACCATCTGTGGAGGAGTAACATAACAGCTTTCGACCTGCCAATAGGAGCCG  
GTTATCCCTGAGAGGGCTAATCCCGACAGAAAGTTCGTTAGAGCCACTTACAAGGGCGTT  
ACCGGAAGCAGGATCTACACCAACAGCGGACGTCAGTGGAGTAGTGTAGTTACCATCACC  
GAGAAGTGTTCTTGTGGCCGCATCCTCTGTGCCGAATTGTCCATCGTCCAAAAGGTTCC  
TCCGCTAGTACCTTCCGGAAGGATAGGTCCAGCGTTGACGACCTTATCATTGTAATCTGC  
CATTTTTAACCTTATTTTACAGGCTCTAATTCTTCAAGTGCAGACTTGAAGTCAGCCAT  
CATGTTTTCAAACACTTGTTTTTAGCAAGGGTAGCGCCTGTGGAGGCGGAGAAGTTAGC  
AAGCTTTTTCTTGTGCTCGCTTCTTGTGTCAGCTTATTCTGTTCAATGCTTCTGCTTCAGGCGG  
AATCGCTTCGTAGCCAGCAGATTTCACTTTCACCTCTGCAGTGTGACTGCTTCACCTTT  
AGTACCTACAATTGCCTCCACTGCCTTACCGCGACGATTCGGGTTTGGATGAGCACTGTT  
GAAGAATACTATGTATGTACGCGTGGGAGGGTAGAGTGTCTGCAACCACATCAGGTCC  
AGAGGTCTCAGCGAGCGCCTTGAATTACTCAACAGAGTTGGGGAAAGCCCTTCGGTAGGC  
ACCGACACAAAAGCCGTTTCAAGAGGTAGACGGGCATAAATACCATCATCCAGCTCGGGGGC  
GTAAGTACCGAAGAGTTTACCAATTCCACTATGTTAGGGAAAATACGATAGTTTTGATT  
AGACATAGAATTTCCATTTGGCTACCTTAGTAGAAACAACCTTGACACCGTTGATGAATTG  
GCTGTTATTAAGGCAGACAAATAAAAAGGGAGGGGTGAGTAATCACCACCCCTCTTAGA  
GGTAGCAGTTACGCTGTCTTATGCGAAAGTACGAGTGGAGCGAACAGCAAGATCCGGACG  
GGTGGTAACAGACAGGAAGTAAGTTTCGGACTCAACTTTTTCTTCTCGCAGGTATCCCGA

AGATGTGTACCACAGGTACAGTTCCTGTGCAGGAGTGTTAGCTGCACGAACGTCCTTTCC  
TGGTGCATAGTAAATCTGGAACATGTCCTCGATTCTTGCGGCAGCATGTAAGCTCCACC  
ATCAGGGAAGTAGTTGGAGATATCCTCGATGAAAGTTACGTTCTTCTGCACGAACATCCG  
GTTGTTGGCGTGCTCTGCTCACGACTCAGACGACGACGAAGCGTCTCTTGAGTATAAGA  
ATAGTATTGATATGCGTTCATCACCAGCGGATGAGCGATATGCGCTGAGAACCACTTACG  
AGAAGCCAGAACGACGATACCGTGGTGTGTCCATTGTCCCCCGCATCTTGCATGATGTA  
AGCACGAGCTTCAGCTCCGAGAACGTCAGTAGGGGGGATTTCCACATTGGTAATGGCAAT  
GTTTACATGGTGCTGAGTAACAGCCCATTCCGGTGAAGTAGTTGTACTGCGCACTCGGGTC  
GTGTGGTACCCAAGATTTACACATGATCGCCTGAAGCATTGCTTTTTTCTTTCAGTTGTTC  
ATGAGAGATGCTGAGACGACGAACCACACGAGCAACTACATCTCCTACAGTCTTGGGAAT  
ATCAGTAGTGAAATACTTACGGAAGTTCTGTACGTCTGCCGTAGTGATCTGACGATAAAC  
TGGGAAGAAGGGGATGTGCAAGCTTTTCAGTTGCGCCTGATCAGTGCCAACGTATTTACG  
TTAAGTCTGACGACGACGAGCCGGGAAGTGGGTTACGACTTCGTCCACACGTTCAATATG  
AGCGACAGTCGAAATACCGTGGTACGCGGTGAACAGGACGATTTTGGTGATAAGACGGCA  
CTGACGTGGTACGATTTATGGAGTTGCGCCAAGTTCTACGATCTGGAAGTCATGAGGGCG  
TGCTGCTCCCATTGATATTCTCGTTGGTCTATATTAGATAGACCTCGCTGGGATCTCATC  
ATAGCCGTCCCATTATTTCTCGGTGATTTTCCGACCTTGGGACTCAAGAGCCGCGATAGC  
AGCAGCGTTGAGTGCAGTAGTACCGTAATCGACAACCAGATTGGATTTGTTTCAGGGTTAT  
TCGACGAACTGCCCCAACGAAGTTGTAAGTAGTACATACCACGAAGGCACGCGGAGGATC  
GTAAGCAGCAGCTAGACCACGGTCAAGTATTACACCTAATGCGTCAGCAGCAGCCCAGGC  
GGCAATTGGGTTGCCCCGAGGCGTTCACAATCATACTACTTTCAGACCAGCAACGAACTC  
AATCGGCATTTCCAGGAAGGTGTAGGCCTGGTCAAGCAGTCCGACTTGACCCAGAATGAT  
GTCAGAGTAGTCCCCATGGATTGGATTATCCATTACATTAATCTCCTCGATTAGAGGTT  
TAGTGCAGGGGCTTCACGAACGCGATCTTCCGCTTTCTGGATGTTAGACGGAAGCACGAC  
TTCGGCAGACTTCTTGATGTCATCATAAGTTGGTTCATCGACTTTTCCGTGTTTCAGCAGT  
GCCGAACCCTTTCTTACGGTTTCAACTTCGGTTTCCAGATGGGTAATACGTGCTTGGGC  
TTTTTCCAGAAGAGATGCTACCGTACCGTTAGCGTTTTTCGATGATGAAACCTGCCGGCTG  
TGCCTGGTCAGCTTCATGGGCAAACGCGAAACCTTGTGCTTTAGTCAGAGCGGCTTTCTT  
TTCTACTTCCAAAGCGACTTTGATGATTTCAATTAGCTGCAGGTGCTATAGCTTTGGCCTC  
TTCCAGTTGCTTAACCAGGTGAAGGTTTTCCAGAGACTTGGTTACTTCATTAACATTAGC  
GGACACAGCGGTCTCCTTATTATCTTTGGATGTAACGACTACATGGCGGGTACCTGCTTC  
TTTGACGACCCAGTCACCTCGAGATCTTCCGACTCACGTTCCGAGATGGTAAGACCTAA  
TTAGCTTACTCCCTTTTTAAACAGTTGCTGAAGCTTCAGAAGTTCATACTGTTAAACTAG  
GTCGATTTCTCACCGCTGTGCGCTGCCTTGGCGAGAGAGATTGACTCCATACGCCTTAC  
CAGCCATTCTGGTGCTGTGTGTTACAAGCTTGGGCCACTCATCATCAGGGTTTTTCAGC  
GGCCTCATTTTTCAAGTTCATTTTTAAAGCCAGCAGTTTGTACGCAGTTCTCCATCTTC  
ACGCCACATATAAAGAACTTACGCAGGAACCTTTGAAACTCATGGAACCGGTAACCTG  
TAGCTGCGCCTTGATAACGTCTTCGGTAACCTGATCCGGTTTCTGGAAAGGATTCATTAG  
AACAGATACTGGACGAAATTTGCCGAAAACCTTGTCTCTCATGGCAGTGTGCGACACC  
TTTTTCTATAACGGAATTGGCTTATGCCACTGTCAATTAGTCAACTTCCTCAACATACTCG  
ATATGAGAATCCACGATGGTGATTTCTCCTGTTGATTTGTCTAGTGATCCGGAATACTGA  
ATGCTCAGGCCGCCAACAATGTTGGACTTTTTAAAGGTCCCACAGTACAGGGTCGTTATAT  
TTAACTTTACTTACCCTGGTGCCAGCCTTGCTTACTTGCCCGGTCCCGATAACCACCACA  
TCAAATTCTTTCCGAATCCAAGTCTTCTGGATTGTGAGAGAGACCATCTCAATCATGTGG  
AAGACATTCTTTAAACATTGCCAGCATCGTTTGCCTTATCAAAAGTATCCTTGGCCTGA  
GCGATTGTCTCAGCAGACATCCACACGGCGTGAGCGTCATAGGCATCTGGTTCGTAGATA  
ACTGCGTAAGTTATCATCTGCTCATCAGCGTCTTTCTGGATGCTCAAAACAGAGGTAGAC  
TTGATGATATCAGTCTTAACATTCATCTTGAGATTGTCTTTGGAATCATTCTAGATAGCG  
GCTCCAGGAGGTTGGCCTGAAGCAATCAGGCCATTTGCAATACTCAGTACCTTGTCTTC  
CGAACGAGAGACAGATAAGACGCCGATGCAGGCAGATCAGCAATACTTGTGTATTTTCATC  
ATTTTCCCCGTTGATAATTATTTAAACACCGTTCATTGTCTTTTTCTAGCTATTTTCAGTA  
AGTTGAAATTAATCATCCATATGGGATACGGAATAGTCTCTTGTGGAGGAGATGTTTCTT  
TATCCATTAGCGTTAGAGCCTGATGACATAACCATCACCTGAGCGACTAGTATCCTGACCA  
ACTAGTTTCAAAGTTCATCAGTTCACATATCTTCCGGGATTTCTTCGTCAACAACCA  
ACTTCAAGAATCTTGTGAAAACGTAGGAGATTTAGGAAGATACCCAACAGCACCGATA  
CGCTGCACGAACTTTGAGAAGCCTTCCAGATCGAATTCTTGGATCAGACCTGATTTAAGT  
TTGGGCATGTGGTCTGCTGCGAGACGGAGGGCATTAGTGCAGAGAAGCTGAGGGATCATG

TCCGTGTTGAAATCCTCAACAATGGTGTGCGAGGTCACGGTGAACGAAATGTCCGTGGATG  
GACTGCTTCGACTCAGATAAGTTGGAAGCCCCCTAACCATCGTTACCAAGGTAGATGAAT  
CCAGCGCCAAATCTGTGCGAGAATTGCCTTCAAGCGAGAGCTCACCTGTTCCACTGTACTG  
TACTGCTTACCTGCACCGTCAACCCCTTTAGGAGACATCTTGTACTGTTACCAGCCTGA  
GCGTTCATATCTGAGGGCAGTATGAAGTAGACTTGCTCACCTGCGTTGGTGTGTTGCAGCA  
TCCGCCATCAAGTCTTGAACCATTTACATTCTGGTGAGTGCGAGTCAATCGTGGCCTTG  
TGCTAGATCTGAGAACGGATGTTGAGTTCGTTGATACCACCAAATTTTTGGAAGCACAA  
ATTGTTTCGTCTGTCTCAATCAGAACCCTTTGTAGGGAAATCACGTTAACACCAAACAAGA  
GGCGCAACACCATCAGGGTTTAACTGTGTACCACCAAGACTCATCACCATCAGTTTATAG  
ATAGGAATGAACACTTCATCCGCAGAGGAAGTCAGTTTAGTAACCAGGCTCATAGCACTG  
GAGATTTGCGTCATACCGTTCTGGAATTTGGAAATGGCAATATTACTCTGGTCATTCCCT  
TTCAGGGAGGGCCCATCCTGTTCACTAACCCAAGGTTTTGATCGAGAAGGACTTGATTGT  
GGGCTAAAGGCAATCTTATCAATGGTGATATACCCAGCACATTTATATCGGGCAGAATCA  
GTACGATACACCTTCTAGAAGATGGAGAATGGACACTCCTTAAATGTTTCGGCACTACGA  
GCCATATCGCGAAGAGTTTGCTGGTTGGCAAGGTCCTTCAACGCGTATTCTGCAAACCTCG  
GCTGCATCTTAGAATGGCCCACTGTGCGGATTTTACACGAGTTTGATATCGTTGAACAGT  
TTCGTTACGAAAACAGACTTCGTATCATGCGCCGCGGAAACAGTATGGTCCGGCTTCATA  
GCCTCGACGGTTGCCAGAAAACACGGCCAGCGTAGCTCTTCCACCATCAACACATCGGAT  
TCCGCACCAAGCTGTGAAACAGCAACAGAGGCTAGTTCCGCGGAACGGAGAGGACTACCA  
GCATGATTTTCGTTACCGGTTTTAACCATCACAGATGGTTGTGCAATACATGTTTACAAG  
AGTTAACCCACAGTTATATTCTTCTTCTCCTAGAAATTAATACCGGAGGAAACTGAATCCGCT  
CAGTCACTCTTAGGGGTTGTTGTGCTTATCTCACCATTAGACTTTTCAAGATCAAACATG  
AAGGCTTCAAATGTCTTTGCATCGAAACTGCTTCTGACAATCCGCACCATTGCTGACCGA  
GCAAGTATTGCAAAGGCGTGAAGCGTGTAAGTTTTGAGTTATTCCTTGGCGTCGGGTCT  
CTTCTATCAGAAACCTTTCAGCCAGAATCTCACGAGAGCTGGTTGTGCACTCCCTAATG  
CCTGCTGGACCGGGTCAACGGTGAAGATGATAACAACAGTATCCCCATCGTAATGGGCA  
TGCTTTTTATTGATATCCTCACGTTACCAGCTTCTTACAGAAACGGCCTTGCCTTCG  
GTGGAGTATAGACCATCATCAACCAACGCAGGGCAATCATCACCTGAAAGATAATAACAC  
CCGTCAGATTCTCGACTTACATTCACAGATGAATTAAGTCAGGGTTTCTGGTACCAGAT  
GTTTCGACTGTACCTGCCTTGTGAATGGTCTAACTGACGTAACACCAAGTGGTTGCCAA  
GGAACGTCCTTGAGGTAGGATCGCTGGACATGGATCACACCTTCTGGCCGATCTTTCCAG  
TTTCCATGAAGTAGTTGTGCCATTTGAATTTAGGAAGACCCTCAAGGAAAGCAAGAAAA  
TCTGGGTAGTTGTCAAGCAACGGTGGGTGATGGAAGGTAGTCGCACTGATGAATGAGAAG  
GAAAGTCATTATGGCTTGTACGGATGTCCAAACCGTAGCAAGATTGCTCAATAAGTTCC  
TCTGCTGAATCTCCCCAGAGGAACTACCGTCACCACGAATGAACCAACGGATAATCCCG  
TCGCGCTCCGCTATAGGTAAACCATCATCGTAGAGATACCACTGAATTAACCTTTAATC  
TTGTGGTCCGGGTCCGGGTAAATGCGATGGCCATACGTCCTTGGGTCTATGGATTAGAA  
CGAAGACGAGACATGAGGTATACGATGTGAAACCATTCACTGTGTTCTTCGTCAAAG  
CCAACAAAGGTGTACTGTAAACCCCTGGTGAGAATACTTATCTTTCTCGTATTCCATGTGG  
GACCATTGTACTTTGGCAACAGAAGTGAAAATTGATTCCAGGTCTTTCTCCCTGAAGCGT  
GGTTTCCATTCCGGATCAACCTGTGTATAAATCCCACGTGCTGTATCATGCAGACCACCA  
CCCCCTTCAACTAAGGGGTGTCTTTAGGGAAACATGATGCAGTTCGTTTCGTGCGCGTGA  
GTGATATTTAACGGTATCAATTGAAGCAGGTAGGATTTACCTGACCCCGCCGCACCCCA  
ATGCTCAGGATTTGAGCGTTGCTTTCCAGGATCATTTTCTGGTTAGGGCTGGCAGCTCCG  
AATGTATTACTCAAAAACCTCCAGCTTAAACGGCGTAATTTGGGCTATAGGAGGTAGTTG  
ACCATGAAACTTGATAAAAATAATGCCCTTATGAGGAAGTAAGGGGCTTGTCAATCACTT  
TTGCGGACTAAAAATGTTAAGGACGTATTGTTGCCACGTCCTCAACTTGCTGCGGTGGTT  
AGCAGCATTAGGATGTTGGCCTACATGAGCGCGATGTTCTCTGAGTTAGAAGCACCATA  
TTTCAGGGGATTTAGCTCCACAAGATCATCCATGGCGGCAGCAGCTGGTTGTGCAAGAAC  
CTTTCAGGATGAACTTCTCAAATACCGGAACAATATCCGTCTTCCCCTGACAACCAAC  
CAGTAGGGTGAATCACATCTGCAGTGCCATTAATGCTGTATTCTTTTACCCCAATCTT  
ACGTTATACATGTCAACAAACTGGTTATCAAGCCTTTTCTTCTTGGCTGCATCAGACCTG  
CTCAGAGCGTCTTGCTTTGCGTTAAGCTGTGCCTGCAAGTCTGCATTTTTTACTGCTCT  
TCTGACTGTTTCTTTCAGGGATATGGCTTGCCTGCTGTTGTTTCATCCTTGTAAGACTGA  
CTTTCATCAGTGGTTTGTGCTGTTGCCGATCCTTCCATATTGGATCTGTATTACTACCCCT  
GGATTGGAGGACTGCGTGATCTGCTCGTTATACCAGTGCTCTGCATACAATCTCCCTTCA

ACGAGGATGGCAAGCAGGATGACCACTGCCATTACGTTTACATTGGTTTTTCAGAAACGTC  
AAAGCCATTTCCGTTTGTATCATGAGAATTCCCCATTTGGTATCAATTACCCGCTCGATAT  
TAAGCAGAGTTCTCTCTTCATCTTCGATCTCTGATGCCGCATCATTGTAGGCAGTCCTCG  
TAGGGTCGTTACAGACACCTCAAGAAGGGCAGCGCCAGGTAAGAGGTTAGTTCTCCCC  
ATCTCCCCGTTCTACCGTTCCCTCCCCAACTCTTGTCTACGGTCAATGCGTCCTGCCCGT  
CTACATAAAGGTTTCATCACATGAAGGAAATCTTGTCTGGGTTCTCGTCCAAAAGACCAA  
CTTTGTTCTGTGCTCTACAGCTTGCTCAGCAAGAAGTCGTCAGAAGTACTAACTCCCC  
CCAGAGTTTTTAAAATATGGCCTTCTAGTATTCGTTCTGAAGAGTTTGTACAGGGTAAACA  
TATTTACCTTTTGAAGATCTGTCCAACCACCTTTACCGACCTTCTCAGAGTCCGTTTCAA  
TAACGGGATTGATTTTATCACTAACACTATCCAGTTTATCAAATACTAGCTCAAATGAGA  
ATGGCCTTTCTTTATCGATAAACTCTTAAAGGTTTCGTACCATAACATACCTCTCCGGTGGG  
CCTTGGCATGTTCCCAAGTTTCAATGCTCAAACCTAGCACCAGCAATGCAAAGCTTCATGT  
TCTCCCGCCGAAAGATTGTATAACCGGTAGCGCGTTACTCAGCAGCGCGGAGAAGTCTAA  
TAATCGCGTTATACGTCTTGGGAGTCAATACCAAACCTTCTCAGCGATGTGCTTAATGA  
AACTTCTGTCAAACCTCCCACTGCTGTTTTGCAAAGCTGAATGACCCCATATTAATCGTAC  
AGTCAAACCTTGTCAAATATCATCTGTGCATCATAGAAAAGATCAAGAGCGATAGTATGCG  
GAACCGGCAGATTTTTTATTGGTAAACATGACACTTTTATCGGTCATAACGATATTGTCA  
ATGTTGTCCATCGTACTCTCTTTAACCGTTTGGTTGAATGCCTTAAAATCCTCGATAGAC  
ATGTCTTTCTAGATTGTTGCCAAGGAAACAACCTGACAGGCGTGTGTCGTTTATCTCCA  
GATTTGATCACCAGGGGATTGAAATTATCTTTAGAGCTTCCAGATCGTGAAGCTCCACG  
AAATACTTGAATGACCGAGTAGAAAGGCTCCACTTATGAGTCGCCTCTGAAAGGGCTGAT  
TGACATTTCAAGAGGCTACGATCAGTCGCGTATGCAAGGAAAACCTTCCAGGTTCTCCCAT  
GAAGGGAATTAAGGTCTGTGTCGTTTACTTCTCGGTTGGAGAATAAGGATGTGAGTGTT  
CCAACCGCAACTCTGACATCGAGGCGTTTAAAGGATCTCCATCACCCCGTTTGAATAAGG  
CGGCGGAGGATCAGGTATTCACGTTGGAATTCGTCTTTTGGAAAGATATGAATCATGGTT  
TTCCCTTTAGTAATTAACCATTGGAGTGTACCAGAAAAAAGCCCCGCAATGGCG  
GGGAGAGGCAAAGGAGAGGAGATTGAATATTTAATATGATGAGAGTAAGAAAAGTGGCGA  
AGGCACCTCAACTCGTCGAGGGTGTCTTACCGTTTCCACAGCCAAGGCCTTCTTAAATGG  
CCACTTAGTTATTTGAATGCGTGATCGGGACTCCAACCCGCAACCTTCGGCTTATGAGGC  
CAATATTATCTATATATCGGTTTCACTACCACGCGATTGTTTGGTGGGGAGGGGTGGACT  
CGAACCGCAGACCATCGAATCGTCAGGCAAGCACTCTTCAAACCTGAGTTACAACCCCCAG  
TAATTGGTACTTCTGTTGGCATCGAACCACCGACGCATCCAGTGTAACACAACGTATT  
ACCATTGAACTAAGAATGCAGTAAAGAGGTTGGGCGCCAGGGGACTTGAACCCCTAAACTC  
CGACTTCTAAGCACGGCACGTATACCAATTCCATCAATCGCCCAAATATGTGGATGCCCT  
ACTGTCTTCTGATCATCCAGAATCCTTATCCAGCATTGTAATCGGTCCTGTAGGTCCTA  
TCATGAACCAGGGAGTCGATGCTTATTTGGTGGAGACTAAGAGATTTCGCACTCTTCTG  
ATATCCCCGGTGCACCGAGGTGTCGACTTCCACAGACCCATTCCCTGAATGGTGAAG  
TACCGGGATGCGCACCCCAATTCTCAGCTTCGTGGGCTGATGCTATGTCCTGGTGAACTA  
TACCTACATTAATAATATGATGTTCTCTAGCCTTAACTGAAGCCAGAAGCCATGCTCTC  
TTTGGCTGGCACTCAAAGTCGCAGTAAGGACACTCGGCGATGTTTCATGCTACCTGACATT  
GCGGAATCAGAACCACGACATTAGATTTGATCAAGTGTGATGATTTGTAGTCTTCCAATA  
TCAGATATTTAAATTGGTAAGACCGGCACGACTCGAACCTGCGACCCGAAGCAACCAAGG  
CTCCCACTCTACCAACTTCGCTACGCACTGTTTGTGTAAGATTTAATTCTCACAGAAGCT  
TACAACCTGGTATCACTGGCTAGGTAACAAGTTCTCAGAGCAAAGTTTTAATTTGCAAGGA  
GCTTGTATGGCGAGGTGCAAGGGGATCTAAGCCTCATTTTGGCGGTAGACAATGCGGCAC  
CATTCCCTTGTCATCCATGGCCCCATAAAATCGGCGACGAGTGGAGGATTTGAACCATCC  
TTGAGTTTTACCGACGGCTTAACAGGCCGTCGCCAACCCTAGGCCAACTCGTCATTT  
AACTACATTATCAGGTAACAACCGTTTGAAGAATTATTTTCACTAATTTAAAAATGG  
TGGGTCAAGAGGGTTTTCGAACTCCCGATCCTCGGATTAAGAGTCCGATGCTTTGACTTG  
CGTAACCACTTGGATACAGACCTGGTATTTGGAGGAGAGTGGAGGAATCGAACCCCTACC  
AATCCCAGCCCCGACGGGTTCAAACCTGCTTCTGCACCGTTGGACGGCACTCTCCCTCGA  
GGAAGATGTCAGACTTGAACCTGATTACCCCATTCGGGGCTAGTGTCTCTTTAGCAAAAA  
GATCCCTTGCTGATTATGGTTAATCTTCCAGATGTGGCGGAGAAGGCGAGACTCGAACT  
CTCAAGCCGTTTTAGCATTACAGCACCTTTCCAAGGGGTTTTTCATCACCTGTCGATTTGCT  
TCGCAAATATGGAGGGACCTGTGGGTCTCGCACCCACTTCTCAACGTAACCTGTTGCAC  
ATCATCTCATTAATGCGCGGGCCCTGATGTGCACTATCAAAGAAAATGTTCAAATTTG  
CCAGGGCGTGGAGCATTCGAACCTCCGATGACGACCTAAAACCCCGATGCATTAGGCCAG



CTATGCCAACTCCCTATTGGCGTGAAGGTTAGGAATCGAACCCCTTACGTCTGGTTTTGG  
GGCCACCTTGCAAGCCACTGCAATTATGTTACCCGCACAACGTTTCGCTCCCTGTGCGGG  
GATCGAACACGCAACCCCTAACTTGATAGGGTGGTGACTTTACCTATTTGTCTAACAGGA  
CATATCTAAGGGTCGTATTGAATTCGAACCGTCGCTACCGACTTGGATGTACATGATGCT  
GGACCTCTATCACTAATGACGCATAATTTAGGTGGGAGTACCAGGCTATAGCCGTGGGAC  
CTCTCGATTATCGGTGCGAGCGCTCTACTAACTAACTATACTCCGTTTGTGTTTTGGTGGCC  
CCCCCGGATTGCAACCAGGGACCCCGAAGTGCACGGATTTACGATCCCCTGCAATCACC  
GTTCTGCCATTGAGACAAAATCTTTAGAGCGGTGGAGGAGCATCCGCAAAGAAGCTGATG  
ATCCAAACCACCATCTATTCGATAGGTACAACCTTTAGGAGCCCGAGCTGCTGGTCCTGCC  
GATGCACCAAATCTCAGAACTGCCGCGATGAATGCGATAACAAGAACCATCAAACCCTCA  
TTCAACATATTGTTATCCTCATATTACGATGTTTTGGTTAACCATTTTGTATGAAAGGAA  
CGATGTCGGGAGTGAATGGTTTTGATGGACCCTTCTCCGGAACCTTATTTAGTCATCAA  
CGTTTTTAGTTTTTCTTCACTTTTCATTTTCATCATCGAAGTAATCAGACATCTTTTCTT  
CATCTTTTTCGATGGCGACTCGTGCAATGTTCTCTCTGATGTTGTACTTGGTGTGGAAT  
TCATCGCCAGACCACGTAAAACCTGGTGTGCGTCAGGAATCATGGGGATCACCTTTGTCT  
TGAAGTCAAGAAGCTTCTACTCAAGCTAACTTGC GTTAGACTCCTCTTTTAACGGAAGCC  
CTTTTCCACGACGACGCTTTGTATGCTTTTGTATGCTGCCATAATTAAGCCCACCCATT  
CATATTATCAGAGATGTATTTCACTGTCAAGGGTCTTTTAAACATATTTTACATTA AATT  
TAAAGCTTTTGAGCACTGTGAGGGAATTGAGCCCTCGACATTCGTATTGCAGACGAAGTT  
GTTACCCTTAAGCAGCAGTGCTTGGACGAGGCAGCAGGATTCGAACCCACGTAAAGGAG  
TCTAGCAGACTGCTGGCGACCCGCTTGTCTAAGCCCTATTAATTCTGGTGGCCATGACGA  
GACGCGACCTCGTGAACACTTAAGCGTGAGATTTTAAGTGTCTGTGTATCTCCATTTCC  
ACCACACCTGCAATCATCATTATGAAATACGATACATCAATATCTTTTCCAAGAGAAGG  
TCCACCGAGTTGGATATGCTTACAATATTTCCCTTAGCAAGGCCTCGAACAAAAGGGACC  
AGGTTTTTTATCAGATCTGTTCTTCTTTGTACTTGTGACAATACAAAGTTATAAGCACA  
CCAACGACAGTTCCAATTTATTTCCCTTTGGTCTTAGAGCGCTCTATTATGAGTTGGCCTT  
TCTAGTTAAGACTGGCAGATTAGAGATGTTGTTGCTATTCACATGCCCATCTATGTTGTC  
AACTGTTTCTAAATCTGGATCAATCTCTCTGCGAAGACGCATCTCCATATGCTACTATGA  
GTAGCTTCTTGTATTTGCACTCCGTCATAAAGCTGGATGATAACATGTTGAATGCCATC  
ATCCCTAACATAAGGACATAAAACTTTTTTAATCTTATCGAAATACATATGCGTCAACCA  
GAATGGACAACGGACGCAAAACATGTTTTAAGCTGCATGGTACTCCACCGACCTCCGTG  
CACCTCGAATGGCGCTCTGCGGCCCCAAAGGTCATGATACAGCAACGTGGCCTTTGCCGC  
TCAAAGTCCATTTGTTGGGCGCATTCTCCGCACAGATGATTAGTCTGTGAATCAAATAA  
TCTGAGCTAATGCCCTTTAAAACACACTAAACATCTCATGTCCGGGCTGTAGTCCGGAAA  
CTCGCCATAGTCCAATAGATGTACCGCGTGTGTTGCGACACACTTCGCCTGTACCATTCT  
GCAATAATCGGATCTCGCGATAACCAATCTTCGGAAGCACCCCCAGTAGGTGCATCTAG  
GTTTTAAGATGCTCAAACCCGTCCAGAAGATGTTTGGTGGCCGATCACCGAATCGATCCG  
CCTATGTATTCTCCTCTCACTCCACGCTGGAGGGTATTTTCAGGGCTGGATGATCCTCGA  
CCTTGCTAAAGGTCTTACCCGGCATTGCTCCTCGTACAGGATTCCAACCTGTGCTTATT  
CCGAATCTTGGGACTGCACTACCAACTTGAGCTAACGGGGAATTGTTAGGTGACCCAGT  
AGGAATCGAACCCACTTCTTCGGTTTACTAGGCCGATCCAGCGCCTCTTATGCTTTAGGA  
ACGGGAATGCTGTGTCCGATTA ACTGCCCGGAAGTGTGGTTAGCCATATCTTGTGAGCTA  
ATTACCTTTGACCCAGGATTTGATAATCATCGAAATTTTATCTATGTGTTATGAAGGTT  
TCAAGATTAACGTTGACCTTTGAACTTTAGTCTTTGAGATTTGAACTTTGAACTATCCG  
ATCTCGCGATTGCAAGTTAGTTTCGTTCCGGAGAAGCAGTCCGACGAACAGACGTCAAGGT  
TTCATACTATATGGTTAAGTTCGAGGCAGTTTGACCACCGGCCTCGCTAGAGGCAAGATT  
TTTCCAACCTTCGCTAACCAAAAACAGCCTTTAAAGACTTTACCAGTTGAAAACAGGAATT  
ATGAGATCTTTTTTCATAATTTCCCGCAATTAATTATAGAGTTATCCCTCGATGTGCACTTC  
AGTATTGGCATTGATGTCCGACAGTGCCAAGTCAACCTTGGAAGTGAAGTCTTCGATCTC  
TGCTTCCAGACAGGGGATGGTGTCTGCTGGACCCTGAGGGTAAACGGTAGACGGGGCGCT  
GAACATGAGGGTCCGACCTCCTACGACCTTCAGTTGTAGAGCATCCGGAGACTTGTCCCG  
GCCGATGTACGGTGC GCGCGCCTGTTCCAGTTTAGCTACGAACTCCATATTCTCCTTGT  
CGGGCGAGCCTGAGCATGGTTGTA CTGGGCTTTAGCTTGGCAAGCAGAAGCTCTTTGTG  
CGGAGTGGTGC GTTCGCGTTCAATGGCCTGCGCAACTGTCATCTCCTGGTGACCAACGGT  
CGCCTGGGGGGTTGCGTTGGAATGCACAATGTCCGCTTTAGTTTCGTCACGAACTTTAG  
GACGTCTTGAAGCCCTGATAGTCAGCTTTAGCAGCTTTCTCCAAGGCATCAACACTGAT  
CAGAGAACCAGGGATCTGACTCCAACCCTCAATACCTTTAGCCATCTGACCAGTATTAAG

CTGGTGAACACGTTTCGCGATTTACCTTTAATCCTGATCAGACTAGCCAAAGCGCGGGT  
TACAGACATCTTAGTAGACATATTATACTCCTCTCATTTATTTTTGAATTTTAAAGTTAC  
TGCCAATTATTTGCCGGCTTATTTGTCCGACAGCATACTAGCTTTTGCCAGAGTTGACT  
ACACCGCCTTGCGGACCAGGATCTGCCTGAGCAATAGCGCGACGGTTTTACGCTCAGCT  
TTAAGGTCTGCACGTGTAGCTCCAAGCAGTTCAGTAAGCAATGCGATACGGTCATCTTTC  
GCTGCACTATTAGCAGGTAGTTCGGACATTTCAACTTTGTGTTACATCCCAGATTGGAC  
TTCGCCGCGTTGAGGCCGATTTGAGCACTGCGCTTAACATCAGCAACAGGGGCATAGATC  
GCGTCTTAGTTATTGTCCAGAGCAACAGCCAGTGCATTACGCAGTTCTTCAACCACAGAA  
GGATCGATTGCAACCAGACCCCGAGATTTTACGAGGTTTGACAGAACGCTTTCTGCGTTG  
TCCAGAACCTTGATCTTCAGTTTGGGTTTTCTTCAGCCAGCACTTCGTTAAACTTAACT  
TCCATCTGTCCCAGTTCTTGTTATTTGGACTTGATCTCTGGACTGATCTGCTCCGAGGCT  
GCCGCCATGGCTTGAAGATCGGAAACTGCCTTGGACAGGTTGGATCCAGCAGCGGTTAAA  
GCTTTGGTGGCACGTTTACGTTAGGGAAACGACAGTTTTAGCAGCAGACATTATGTACTCA  
TTTGCGTTAAATTAGGTTTTAAATATCCCACTTACAGGTTGCGTTTGTGCGAGCGAATCTT  
TGATTATTTCTTCGGTTGTCTGGTTGTGTTTGAACCACGACCAGTAATGCCAAAGAATGC  
TAATCGCACGAATGATAAGTATTGTTCAGAAAAATCCAACCGCCGCTCATCGTACAACGTC  
AATCATAGAATCTCAAACCTTCACTAACAACGTGCGCGTTCGGAGATACTATCATCTGATC  
GGCAGGGTGAACAACCTCTACTGCGAAGTCCACAAAAAATTCTGCAACAGTTGCAGTAAC  
ATCAACAGCAGCACCTACAAAATCACCATCCATGCGTAACAGAGATCCGATCATTATTT  
GCTCTGTTATAAAGTTGGTGGGGCATGTAGGTTTTGAACCGTAGACCTTCGGCTTAAAGAG  
GCCGCTACACTTAGCACTGTGGTACTACCCCTAATCTTTACCGTGTTTTTCTAGACGTTG  
CACGGGATCGGCATGCTTGGCACTGCCCTTATTTAAGACGCATCGCCGCATCCAGCTT  
CGTCTATCCCATGCCGGATCAATTACTTCTTACCTTTTCGGCGCTACGGCGCCAACA  
ACCTTAGCGTCTTTAGCTTTATCAGCGCGTTCACGCTTGGTTCCGCCAGTGCGGACAGGA  
TTTGAGGCAGAAATGACCTGACCACCTTCTACGCTGGAAACTGATTCCAGATAGATA  
GTGTTGCCATATTCGGCACGACGCCTTACGTATAGAAACCGTCTTTGTTACACCGCCC  
AGAGGACCGTCATGAGGGGCAGACAGGCTCGGGCAGCCTTGGACTCAAACCTGGAACGGC  
TGTTTGATTACGTCGGTTGCGGAAACGTTCTGGTTTTGCGTTTTTCTAAGCCATGTTTTAT  
TTCTCCTCTATGTTCTAATGACTCGATGACGTTAGTAGTACTGAACTCTCTCAATTCCTT  
TATCTATCGTTTTTTACTTCGTGTTTCATTTCTTACGAAAACAGAGTGAAAGGTCATAA  
CGATCATTGTATGAACCGAGGTTGGCTTGATAGGATCAAATCGGCTTTTCCATGGTTCT  
GACAGAATAGGTTTTTCAATGAAACCAAGAAAAGCTTATACCCGTTTCATTGCATCTCCG  
GCTTGGTAGTTGAGGCAGGAACTAAACCTGCCACCTTTTCATTATGAGGGTAGCGCTCTA  
ACCAACTAAGCTGCAGCAGCATGCCGCCTTGGTGAGATGAATACTACTGGTTATAGAAAC  
CGTTGTCAACACCTTAAAGGAAAAAAGCGCCGGATTTGAATTGCCGGTGTTTCTGGTAG  
TACTTGCGATATGAAGTCCCCTGGTTCGTCAGAGGCGGTTTCGATCGTGCAGCGTCACCG  
CGGACAATCAGAACATCCTGCTTCATCACATCAACGCTTATTGCAGGTGCTCAGCTTTC  
TGGTTGAGAGTTGCAACATGGCCTGACACTTTTTTATGACGCTTATTTTTGTGGCGAGTT  
CACCCAGTACTGCCAGTGTCCCTTTTAGCAGCGCGCCAAGAATAGCCTTTATAAACATT  
TTATTTCTCCTGGATTATGTGCAGCAGTAGTATCTGCATGATCTATTTTACTGCAATAGG  
GCCCAATTTAGTTGAGGCCATGTACGTACCAGAACCATTTCGGTTTACTAACATTGCAGGT  
GGTTGCCTCTTTTGGATCCATTAACGAAAGGGCCGCACACATTACATTCAGTGTGGTAATA  
AAAATTACGGTATGTATGAGTGGGCCAGTCTCTGTGCTTATTGCAAACATTGAGTAAAA  
ATTCTGGGCTCTCATCAGAAGAAATACCCTATCCTCAACCTACGTAAATATCTACGTCGT  
CAGCCTGGCGAATGCCTTCACTGTAATCAGTAAATCCGTCTAATTCGTCTTTCATCTATT  
TACTCCTTTTCGCTTTGGACGTGTAATCGCCGCTTCAGCACGGCGCTGGTTGCCGCTTTT  
AAACTATCCGGGAGATTCGAAGAGCGTACTTGATTATGGAATCACCGTCCACGGGGTAGA  
AATCGGATAAGCCGCCTGCTTTTGCGAAGGATTCAACGGATTACCAAGCCTCAATGCCGC  
AGCCAGTCCTCGAAAAAGCGATGTCATTTGCTTCTGCAATCGCTTCGTCAAGGGTTGGGT  
GGTGTGATTGGTGTCAATGTACTCTACATTATCTAATTTATATAACAAGCTTTACTTTAA  
ACATAATGACCTACAGTTAATTTCTTAAAGATTTTCGAGTGGATTTCGGTAGCGTAGATCTT  
AGCAGTGGTCACTATATTTGTCAATCAAAAAATGCCTGATGCCCTGAAACCACGACGATA  
TTCTTCTAGTGCTAAAGTCGTTGGGTCAAGCTCTTGCTCATGTAGCTTCGGATTATCAAT  
CTCAAGGAAATGTTCTCCAGACCATCAAGGCTGTCCGCCTCACAATCCTTCTTCTGGTC  
TCTGTGGGCAGAGGCACGGTTCGAAATCATAACGACTAACTGGATTCCACACCCAATATCT  
CCTTTTCACTATCTCGCCAAGATCTTGATCCTCATGGCTCCTACCTGTTTTATTTTCGTT  
TTGCAGTTCCCTTTTTTTTTTTCACAACATAATGCTTTCGTCTTTC AACCTTCGTTATGT

TAACATTTCCAGTGTTTGAAGATGCAGTGACATTCCTATTATTTCATTTTCGCGTGTGGATT  
TGTCCATGTTTACCCACGCATTGTTGGCCCTTATCCTGTCATCATCGTCAACAAATTCAG  
GCATTTCTCCAGTCTTACAGAAATGTGCAAGTCAATGAGCCAAGTATCGGTTTCCGTCAC  
TACGTATCACAAGATAACCGTGCTCTCAAACGCAAGAACAACCTTTTTCCACCAAGGCGGG  
AAGTGTCTTGCTTTCTTGAAAAACCCTCTGTAAACCAATTTGAAAATGCCTGTCTGCGGAT  
CGTAATGCAAACGGGTTTTGAGAAAATCTTGCCTTAAACTACGGGCAGGATTCCTCTACC  
AGATCAATTTTTCTTATGTTTCGTGGTTACCCACTCGTTTTTATCATTGCCGGCGTTCATG  
TGCTGACCGCAGCCAAAGAAAATGATGCAAGCGCCTGTGCCGTGGGTGTCATGATCAGCT  
TCAAATGCTTGTTTACAGACTTTGCACTCCATCTTGAAGTCCAAACCTCTTAGGCTCC  
TTAACATAATACGGTTTTTTTTGGTGTGTTATTTTCGCTTAAAGGCAATCACGTAAGTGGGAA  
TCATGCCACATGCATGGTTTTTCCATAGGCTATCTATCAGAAAAGTCCCCGGAAGGGCTG  
ATAATTTAAAGCTGAGAAGATGCCCGATCACGAATCGGTGTAAGTTCTTCGTCAATCACC  
AACTGACCCTTTTCGGAAGACCCAACGGAGTTCGTTATCACGAGGCTGTACCTCACGCACC  
TCCAGATTGTCAACCAGTTTTAACGGATGGTCTTCATCACGAAGAACCTTCAAGACACCT  
TTTTGAGATATCTTACCGAGGTCAGTCTTCGGTCTTTTGTCAACCATGATCTGCTTGCCG  
TCGATATCTGCACCCGTTGCTTACACAGCCATACCCCGTGAATCACGAGTAGTGTACTGG  
GTTGTGTAAGAACCAACACAGTACACCATGTTATTCGAAGGAAAGCCACGATCTTTCACT  
CCTTTAAAGATAGCTTCTGCACGAGCAACAGCGGTAGTGTCCCCGTAGATCAGGCCTACA  
TGACAGTCAAGAAATTTGTACCCTTTGTATTTAACTTCTCCACCAAAGATTTCCAACAAA  
CATTCTTCTGCACCTTTACCTCATGATCTTCAAGACCACAGTCTTGACATCAAAGAAT  
GCATTATATTCATCTCTACCAAATGCGATAATGTTTACCCTCAATCTTAGCAACTTCA  
GCGTTTGCATCAGCCAGTAATCCTGTGTGAGCCTCTGACCAGTCATGGACCACACCCACG  
CAGCCATACCCGGCAAGGAATTGCTCAGGGATACCTGAGTCAGGTCGAAATACAACACGA  
CCTTCACGAGAAAGAATTTCAAGTATACAGATTTCTGCTGCTTTACTGATAATCGCCCAG  
AAGTCAAAGCTATCTGCAACGTTGGAAACTAAACCTTTTCGGAAAAATTGCCGTGAGGTAG  
CGCTTCAGGAACCTCGGCTTCTGCAAGATAACGTTTATAATCATGGCTGAGGAATTCCTGA  
TTTGCTGTGTGTTCTTCAATCTCATTAAACGATGACACCGATATTGGTTGGTGGAACACTG  
TGTTACATGCCACGCTAGACCCAGAAACGAACCTACCTTTCATCTTGGAAATAACGATCT  
GAATAGACACTCGAGGGCATCGGATCAGTACCCATAGTACTGATCCGTTGACCAAATTCA  
GACTGTGCTGCGTCATGTGACCCACCTTACCACGATACGCAAAAACAGTGGTTCTGGAAG  
GGAATATGCAGATTATTATCATATGTTTCAACAGCCGATTACTCAGACAGTTTACGATAT  
TGCGAGAATGTTGTTGCAGTCGTGATGGTTTTCTGTTTTCTGTTGTCTTACACTTTCC  
ACGAATTTAAGTAACCAGTTAAAATACGGATGGGTATTCTGGATAGTGAACATTGGAACC  
TGTACCGGAGCCAGAGTGCCTTCCGGTAAAGGACGAATTTCTGAGGTAGATAACAAAGA  
TCGTGTAGCTTCTCATAACCCACCTTTCCACCACACCCGCTGCAATACTCAGTTAGAAA  
ATTTCTTTATAATCTGAAATTGCTTCTCCCTTGAGCGTTTGAAAAAGTTTTTCATTAGAC  
ATATCGATCAAGAACCACATGATGGATCCGTGAATACTAGCAGACATCACACGGTGGTCA  
GTGTCTGCGAAGTCTATAAAGTGCTTTGCGTGGGGGCGGTCATACTCTCCTGAACAATT  
TCACAACGTTTGTACATAACGAGATGTGACGCGGTTTGTCAAAAATCAGCGAAAGTAATC  
GGGGTTTTGTCTATGCCGAGGTTTGTGCTGGTCTGTGAAATTATTGGGTGCATTCTTGC  
ACCCGTTTTATACTTTGCCAAGAAGTTTCGGACGTTTTTCGGTCTAGTCGTGATATGCATA  
AATTCATCTACACCACCATCAAGATTGACCTGCTTGTGAATGAGAAAAGACCGTATGT  
TACATAAAGGAAAACACGTTTTGCACCGTCTCCTTCGACGCTGGTGCAAGGGCGATGTA  
TATGCGCCACCATCACAACGTTCAACACCGATGACACATTACGACCGGTAACCTCCCC  
GAAGACAGCAGTACCTGTGATCTCGTTAGTTTTTACATCACGGACCTTACCTGCTTCAAC  
AAGCGGAATGCGGAGATGCTCAGAAACCTTCTGCGCTTGTGTACGTGCTCCGGCATCTGG  
TGCTATAATCGGAACATCCCTTGCAGCAAGTACAACCCTATAGGTTGCTGCAAGCTCAAG  
TCCGTGACGCCTGCGAAGCTTGTCTGAAGTGGAGCAGAAACATCAATGCGCGGGTTCATC  
TACGATAAACTTATCAAACCCAAGTGAAGTAAACGATGTTTGCAAAACCTCGATGGACTT  
TCCCTCGCCAGGTTGCATCCAACGATCTCGACGTGCATAGGGGATGTACGGCAGGTGAAG  
GAACTCCTGTGCATGAATATCAATGTTATCTAGTCGAGACCACGCATTGGCCCCGAGAGG  
AAGAGCCATAACTTCCGCAGATGACTTGAATTTTGTGTGATGTCAACAAAACCAAAGTG  
TCCTTCTGGTGCATAACTTAAATCGATCCTATCCTGTTCTTACCACCCTTGAATGTAAG  
GTGATCAACAGGGACTATCAGGTTGTTTACAGACGAAGTGCTAACCTCATTTTATTACTTCT  
CAATTATTTGAATAGCCTTTAAAGTCTCTTGTGCTTGTGGATGATCTATGTGAAGCCGTCAG  
GTAACCAGTCTTGTCCACCAAACAATTTGTTGGATCGCACTCAACTCAATCTGCTCAACTT  
TGGCGGCTTACGCATCGCTTTTGAACAGCTTGGAGTACATCAGTTTGTCTGCAAGAAAC

TTTTCTTTGAGTGTAGGCGCAATATTCGAAAACACAACATGCTAAAAAACTTTTTCCGA  
ATGTTAAGCCTGGGCCTGCAGGCTCTTGAACAAATACGCGACAGGTTCTATCAAATTTTG  
GATTTGTAGAATCACCAAACGAATTACAGTACTGAATACTCTCCGCTTCCATGTCAGAGA  
TGGCGTTTTTCTTCTCGATCCAAACCTCTCGATACAGAGAAGAGAGTGAGCTACCAACCG  
TGGCTCTAGTCAACTCTGTGAAGTTTTTGATATCTTGGGAGGCATAAACCCCGACACCAT  
TCAACACCACAGCCTTCAAAGAACCTTTTCAGACGCACCTATCTCATTCCGGTTTTATAA  
CTTCACGCATAGCATGCTCTATCTAGTGCCAATTATGTAATGCCTGGGTTTTGCATGAGC  
TTTAAAATCTTGAAAACAGAGCGCATGCTGCGTTTGAATCAACGATCCTCTATCCTTGT  
CAAAAACCTGTGATCCTTCCGGTTGAGAATTCTCACGCAACCCAAAAAGATGACACAAGGA  
TTTTTGATATGGAAAGAATACCTCATCAGCACCATCAGGGTTTTAACTCTTGACGTAATC  
ACTCCTCCACAAAAATTCTATCAACCTTTGCAAATGTAGTGGTGAGAGACGGTCAGCAAA  
AAGCCACTGTGTTGGGATAGTGACGTAAGAGCCATCCCTTATGTTAACAGTGTTATCAAC  
AATCTTTATCTCCACCACCATCTACAATTTATTCCACAGCAGATATACTTAGATTGTACA  
CCAACGTAACGGAGATATCAACCTAATTATTCCCAATCGGGAATGTCTAACTATTCCCAA  
AAAGGATTACAATGCTAACCTATCAATTAACCTAACTTATGATCTTTTAAAATTAATA  
ATTAAGATAAGATCTACATAAAAGATATTTAAATAGGATCTATAAATTCTAAAGTTATA  
GAGCCAGTGGCTCCTGTGGGTCAGTCGGGTCAGTTTGGATGAAGAAACATCAGTTGTCAA  
GAGTTGACTTCTCGTTTTGCACCTGTACCATGCTCCTATCGTTATAGAGGAGAGTGTTAA  
TGATGTCAAGTAAACCAGCTAAAGCTGATGGTGATATGGTGTGCGGTAAGAGGCGTCGTT  
CGTCGATGTCCACAGGTAAAGAAACCAACGTTTAAATAAAGATACGTGAAGTCTTTTACG  
TATGCAACAAGGATCAGAAAGTTTGCCTGGTGGTTCCAGATGGCAAATCTGCGCAGGTGG  
TGTATGGAAATTAACGACTCTGTTCCGCGTCGTCACGCAGAGCAAATGTGGTGGTGA  
CTCAGATGAAAGACTTCACAGTGGAGCACATCGGAGGTAATAATCGTGCTCTGAATCTGA  
GTGAGATTCTGATAACGCACTGAGAGCCTCTGTGAGACATTTTATTGGTGTGGTGATA  
CTTGGGGTCTTCGCACCATGTTTATTCAATACAGGGCCGCTTAGAGTTGGTGAGGGCTAT  
TGTGGAGGATTATTTTGAAGCTTAGTCACACAGCTGGGGAGAAATCTGTCTGCAGAGAGG  
CTTTTATGGCTCTCAAGAACATGATCGCTGTGCTGGCAAGCGCTTCAATTCAACACTGT  
ATCTCGACAGCCGTCTGGATATTGGTAAATCAAGGCTGGATTAATGTGTGTACATTCATG  
GTGATCGAAATGTCGTCAAATTGGTGGGCTTGAAGCTTATTAGTGGTCAGCACAACAGTC  
TGCCCATGGAAACCATTACATTCTGTACGCATACCCTACGGAGGACATGGACTAATGAA  
AAAGGACATCAGGAAACTTGTAAAGGCAAACATTCGATCCAACGGCTTTGGTTTTCAATAC  
AAAGGTTGAGGTCATCAAATAAGCCATTCAACGTTTGCACGATCAGGAGGCAGATCCTAA  
CACAGAACCACCTACAAAAGATGAAATTTACTGGCTTCGTGGGTGGGAACTAAATATGCC  
TGAATTGGCAAGGCGTGGACTCACCGAGGTTATGACATTCGCCCAAGAGAACGCCGCTTT  
AGCGCTGTATATCAAACTACGCAAAGCAAGAAAAAGAAATGACTAATATCGATCATGTA  
ACATCAGATACACACGGGTGGCATAACCAATATTATCGGTTTCCGAGCCTGTGATAAGTGC  
CGTAAAACCTGTACGGAGCGAAAGAAAGATGCAACCTGTGTTGTCAAGATTAATGACGAC  
ATGGTAAAACATGGAACAAACACATGAAACCTGGTGTATGTTGTCGCACATTTACGTGAT  
TTTGTGATTGCGTTTGGTAAGCATGTTGAGCCGAGGGTTCAAGACATTCTTATCCCAATG  
AACGGGAAGATCATTTTCGTTTGTAGCAACCCCGACAACCACCCGAAAAAGCCGATATAG  
CGCGAGTTTGGTAACGAAGTTGTTGACTATAAAGAAATTGGACTGATCACATACAAAGAA  
AAAGTTTGGGTGTGTATGTCGCCCTACCTGTTTCGCATCTTAGAATAAATCACACCACGGG  
TCAGTCATGCACCACGGACATAGCCACCTCTCTGATAAAGCAACTGGTGGACGAATCCGT  
TTTGTGGTTGGGATGTCCACGATCGTCCTTTGACTATGCTTGAGGCCGTTTCTTAATGC  
CTTAAAAAGCCTATTTACGATATTCATCACTGTGGCGATGGTAAGCACAACCAAAAACGC  
AATTTCTTCCCTAAGAAAACGTCAAAATCTTTTACCCACAATACCTTTTGCTCCCCGT  
TACAACCAGGCGGAAATCCTTTGCCGACACTGGGTTATGAGGGGAGCTTGTGTGCAGACT  
TACCCTTGTACTTAGGTTTATACTGGTGGTGTGTAAGTCGGTATGACTGTACTTATCATG  
CAGCATCCTCGCACTGAGCAACCAGAACAGGAAATTCTTGACATGGTTGTTGAACTTGAG  
ACATACTGGCTAAGGAATTATGCGTGGTAAGCTTCACTGTTGGGACACCGCATAATACA  
ACGTATTACCAGGCAGATGGTTATGAAAAAAGATCTGAGCTCCCTCTTGGTATCAATAA  
ATCTGATATAATTACACAGAGGGTGGTTGATGGAAAAAGTATTTTCCACCCTGTATATCC  
TAAGTGTGCAACTTTGTGGCGAAGATGTCTTCTAAAGCACAATAAACACCAATAGTATGA  
GAGTGTATCAGTATGCGATAAATGATATGACCTTTCAAATTTCAATTAAGTGGGTCGGTTA  
TACGGATGTTGCTGGCCGCCACTTGGATAAAGGATAACCTCGGTGACGGAAAAATATACAC  
ACCAAAGTCTGGAGCATTTCGTAACACAACAATGTATTCACTTGTTTTTCATCTGTAAAGAA  
AAACGGCAATTATACGATTGGGGTTTCCAAAGAAACCCGCCTTTCGGACACTTTTTACTC

CCACTCCAAAGGAAGGCATATTGATAGTTTCAGAACGGAGACCGATCCTCATAAAGCTTG  
GCAAGTTGAAAAGGGAAATCCTGCAAAATCTCCTGCAATCACAGAACAGCATGTTAGAAT  
AAGATAAAATCGGCCAGACATTATTGTATAAATTGAATATGACATCCTAATGGGAGAAGA  
AACATGCTCTTTAACGTAGACGATCTGGTCGCTAAAAAGCTGGTCACCACGAAGACTTGC  
GCTGATGGCCGGCTCGCTGGCAGATAAGTTCTGTGGCAATTGAACCTTGTCTTCTTGGAT  
AATCTGTGGAACACAGATCAACGTCTCCTGGAATGCCGTGGCAAGGTGGTTAATTCGGAT  
TACAATGTGGTTCTCTGGCCTTTAACAGGATTTTCTATCACTTCGAAAATTGCACAGAC  
GTTCCGGCAGAGAAGGTGGTTGACGCTGTTCTGTAAGTTAACGGATTTATGGCATGCGCT  
GGTGTGTATTAGGGCCAGCTCGTGGTGTCAACTACAGGAACTATGGAATACGGCTTTGTG  
GTGCAGGCGAGGAATAACATCATTGCAGAATGCAATGACTTTGAGCACTTCATTAAGTGG  
ACAGAAAGTGCAAAGGCGACGTTTCATCTTCGAAATCTGTGATTCTTCTGTCCCGCCTATT  
GCTTATGAAGAGCCTGGGGCGTTCCTGATTGGTGCTCGAATCCAGAACCGTGACGGCACA  
AATTTTATGCTGCCTGATGGTGTCTTCGACGGAATCGTGAAGGTTACTATATTCAAGCGT  
CCTGAAGTTTAAACAGATGGTAAAATTTTCCGATCTTGTGAAATGACAAAGCATTGCCGC  
CACGAAGGTTATGTTGTGCGTGAGCCAAACTATCCGTTACGCTTCTTATTGGAATCCAA  
TCCCCTCAGTATCTGGCGAAGACGTTCTTGTGCGTGGTGGTGTAAACAAGTGGGATACG  
ATCAAGGATCATGCCGACAACGCAAAGTAGCGTATTAATGAAAAGTATTACGAACCTGCTT  
GACCATATTCGTAAGTACTACACGAACGATGCTTGGTCAGCTATGGAATTCAGCAGCCT  
CGTAAGTTACTTGAAGATTATTTTACCATAAAAGATCTGTTTGACCGTGGGAGTCCGTCT  
TATGTTAGTGAAAATCGTTGACTTAAGGGAGCCCGTTAATTACGCGCGTGCATATGCCTT  
GTAGATAACAAATTCACAGGATTTTATCAGTTTCCCGAAAATCGGTCAAACCATATCG  
ACGTGTCACGGAGGGGCACTACGATAATGATCTTGGAGAAGATTCTGATCATGATGGGTA  
TTGGGGTTTTCTGGTGCTTGAGGAAAAGATTGATTTTCGGAAAGATGCTCTATGACCGGGT  
CAAGCTGTTCAATCACAAATCGAACCCTTCCGCAGGGCATAAGTTTATGCTGGCTAGAGA  
AAGGTTGGCCCGGTATGGCGTAACCATTCTGAGAAATAAAGACTGACGACAGAGTATGGA  
AAAGATATTAATCGTCCTTCGTGGGGTTGCTGGTGCAGATAAATCAACCGTTGCCGGACT  
CCTGAAGAATGACAGCAACATTCCGCATTACCGAGCGCAAATTTTCCACTATGCTGTTGG  
CGAGTACGGGTGGAAGTAGGAAAACCAGCACAAAGGCGCACTAGAGGTTCCAGAAGAACGT  
TCGCCTGGCACTGGATATAGGTTACGACCGCGTGATCGTTCCAAATACCTCAACCAGCGA  
GAGGGAATTTATACCGTACCTTGACTTGCCTAATGGTTACGGATATCAAGTAATTAGCTT  
GGTGGTTGAAGACTGTCATGGTAACGATTCTATTACAGCGTTCCGCTGGAAACACGAGA  
TGCTCAAGACCGTCTGCTGCGTCACTCGTTGAAATTAATCTCGGAGCAACAAGTGAGACG  
TTTGATTGTTATCTCTGGTGCTGGTTTCGCTACTGAGAGTCGTGTGCGAACGTTCCGTT  
TGAACAGTCAACAGGTAAGGCGTTGTGGGATGAATACGATCTGGAAAAGGTTTGCAAAAT  
CGACGCATTCCGTGGAAACTTCGACCATAACACCCACATGTTTTACTATAAGCGTAGTGC  
TGAAGTCCGACTGTTAATCCACATCTGCCTCACCTTCCCGTTTCACTGGTGCCAACG  
TTATCCAGGGCACGTTGTTAACTTGAACACCTACGTTGAAGATCTTTTGGAACGTGCTGG  
AGTACCGAAAGAGGATACGGTCTCCATCTGTGGATACTTGAAGGAAATCATTGTCCAGGC  
CAACCCGAAAGGTAAGCCGGGGATTAATGATGTAGGTTATAACGAGGTTAATCCTGATCA  
GTATAAATGGTGTAAGCCCGATTTTGTGTTCTTTTGTGAATTTGCACCACGATATAGCAG  
TATGTATGATATCATAGACACCCGTACCTATGAAGATATGGTGATCGTTGTGCGGATGCTC  
AAATAAAGTCACCAACTTCAACTAGGAGTTGTTTCCCTGCTGTTTCGTAGAGGACCCAAGGT  
GCTAGTGGTAAACCCACGTATCAACTGTCTTGTGAGCATGAGCAGTATGATGCCATGGTGT  
GATACAATTCCGTTGTGGTGCTGTAGAGGCATTACAGCAACAACCATCTCATCGGGATTGT  
GGAAGATCATATTGAATGTAAAACAGCATTACAAGGTAAGGACAAATATTCTACCTGCCT  
TTAGATACCCCAACTCTCTACGGCTTTAACTAGGACGGATGTCATCAGCTCTGGAATGTT  
AGAACACAGGACGATGAGGTAATTGTTGAGTTTGGTAAAGTAAATCGAAAGGTACAGCAA  
AAACGTAACAAATGTGAAGTGAAAAGTGTTGGTTCGTGCTAATCAAACAACCTGCTGTATTT  
TAGGCAGTGCCTGAAGCGCGATCAAATGGCAGAAGCAAGTACACCTTGTATATCGTGAG  
ACAAAACACGCGTTACAGACTTAGGAGAACTTCTCTCCCATGCTCGAGCACGATGTAATT  
AACCGTTCGAAAGAATTATTTTACCCTGCTTATGGGCAGACTAAGCCTGATGGAGTACGC  
TCCCTTGTAATCTTGACAAAGATGGTATCCAGTATTTAATAGACGCGGAAACAAGACG  
TATCCTGTTCAAGGTTCGATTGAGGCAGCTGACAAAAGAACTTGCAGACCAAACCTGGGGTT  
GACAGATTGGAAGGTGAACTATATATTCATGGGCTGAGCTTGCAAAAGATTGTTGCTCTG  
GCTAAGAAGTGCCGTACACCTACGCAGATCGAGGTTGTGATCGCAAAGGATTAGCAATCA  
GATCTAAAACGCTAGCACAAAGGTAGTGACACCTGTGAGCAAGTATGGAAAGACTTTGAT  
GGTGAGGAATACGATGTAAGTATTGAACCGGTGAAAGATGTTTGCGGATATGGCGGTTTC

TCAGGATTGGACCTTGAATATCACATTTTCGATATTACTATAAACGCAAACAGCCCCTGG  
CATTTCAGAGCGCCATGATAAAAGCCGACTATCTGATCTTGGTAGCGTGATGTATACTCTT  
GATTGTGAGGTAAATGCACTAAAAATTGATGTTGTTTCGGGGTGTGTTTGGCCTCAATGAA  
GATGCGGTTAAGCGGTGCATTGGGCGATACATGCAAGAGGGTTATGCGCGTGTTATTATC  
CGTAACTTCAAAGGCATGTATGCATGCGGTCAGGGATCTTCCGATCTACAGAAATGGAAG  
CTGTTCCAGGATGGTGAAGGGGAGGGGTCGGACGCTGTGGAGGAAAAAAGGGTGAGGGC  
CTTCTTCTCTGCGAAGCAAAGGCGGAATCAGATTTGACTGTAAGCTGAACGGTACGCGA  
GAAGAACGTTCTCAAGCGAGAATGTTACCTCTGGTTCGGTAAGTTCAGCAACGTCACATTC  
CAAGCAAGGACTGACTACGGTGTTCACAGTTCCCTGTAGGTCAGAGTGTACGCGAAGTT  
AATTCGTAAACATGCGACCCACTATAATGATGGAATTTTATAAGCGAAAACCTCAAGAAG  
TGGAAGCATATGTGTTCAATGGTTCGAGCACTAGAGTTGGACAGGTGACAAAGTGGATGG  
AGACTGGTGTCTGGGAAGACTCAGAGATTACACAAGAGACATCCGTAACATGGATGTGA  
ATGGGACCCAAGCTTGTCTGGTGTATTAGATCGTTAAGGTGGGCGACCAATACCGTACAA  
TCTCACCACAGGAGTGGAGGGACCTGTCTGAGCCTGTTACCGATGAAGAGCGTCTACCGA  
GATCTTACAAGGCTAAGAACGTGGTGTATGGGCGATAAGGTTTLAGATTTAGGGCAAAGAAT  
ATCTCGTCAAAGGGGTCCAGGCAGGTCGTGATGACACCATTCTTGAACCTCGTCGATGGGT  
CTAATGTCCAGATCCGTGCTGAAACTGCTGTGTCAGAGTCAATGAGGTACGTGGGTAAATGAT  
AGGGTATGGACTGGCGTTGCTTGGTGAACAATGCTCACTTGTGGCGCGATTTATCTGCC  
CTACCGATTCCGTAAGATAAGGTCGTTGATATTAGCGACTGGGCTTAGGGGAATATCAA  
GCTTTTACTGATTGTCTGGGCGGTTGTATTGGGTCTTGCAGCGCTGGCCCTTATCGAACC  
TTTCTGGAACACACTGATATGCCCGGTTGAGGACATGCCATAAAGGTTACTACCTCCA  
TTCGTGGTATAACAATGGGAGCTATGGGCGACAAGTGTCTTTTCGTTTCCAAGAACGGAGC  
GCAGCTGCCATTAAGAATTATTCGCGATCAGCCTGATGCTGAACATGCATCCGATGTTGT  
TAGTTAGGGAGAATACATGCACTTCGGTGTAAATTATGAGACCCTACTGTCAAAGACCCA  
ACCGAAAGACATGGTTGAGTATGGTTCGCCATGTAGCTTATTGGAACCACATAGTGCCTGT  
TGATCGTGGAGGCAAGGAGACTCCGTTGATCTGCAATTCTCTTTTGCTCTTCAAGAGGT  
CAAAGAGCTTATGAAGGCTCTTAGCGCAGGTGACCGAGTTGAGGTTGTTGATGGGGCCTG  
TGACCTGTTTCGTGGTCTAACCTATGCTTGGTGGATGCTTGAATCTTCTGGTGTTCGCTC  
GGAGAACTGTCTGAAGCCAGCAAAGGGAGCTCAGTTCAACATCCGTTGAGATGGTAGAGAT  
TAATTTCAATACCCACTTGTGAGTGGAAATCATTTCGCGGCTATCTTGCAGCAGTGGGTGGC  
ATTATGTTCCCGCTCAGATATCAACTTGAATTGCACCATGCGTCAGGTGTTATCGCCTAT  
CGACTCTAAGTATCCGATGATGACACCACAAAGAGAGGCTCACCTTCTCTGAGCTTATA  
TAGTGACGAAGAGTTGCTTACTGCCGAATGCAAAGCTATTGAGAAACAATCCAACAGTAG  
CTACTCTTCAGTGAACGCTGTACGTAGTGGTGAATAATCGTGTTCCTCGGTGGAAAGGG  
TAAGATCATGAAGCCAGGCACTTTAGTAGAACCGAAAATAATTGCTTGACAATAAAGAAG  
GGCCTGTCTAATGGACCCCATCAAGACAGAGAGTAGTAATAAATTGAAAAAGATTTAG  
ACGAAATTAGCAAGGATCTGTTAGCATTGTCAAAACGCCGTAATGTTCAAATAGGTATCG  
GCAACAGGCCGAAATTCAGGCCGAAACAATAAAGTTCCGCTTCACAATGAAGCGTCGTT  
GGGGCGGTGTCAACACGTACGCTTATGAATGCACTCTCGAAAATCTGAAGGCGTAGGTAG  
GGTAAATCGAGAAAGCTGGCGGATAGATTATCGGCATCGAATAAAAGTGTCTGTCAAACA  
GATTTGAATAGCTACACTGAACTGGCTAGACACACAGAGGAGCAACAAAACAATGCCTCA  
TATGCCCTCAAATCAAAGTAGAACTGAAAATAATCCAGCCTTCTGACGATGTAGAGCGTGA  
GCGCCTGAATAAAATGGTCTGGAAGCTCTTGATTTCGAGATCGCCTAAAAGATGCGGA  
GTGCCAATTTAGAGACATCGTTCCAGTTTAGAAAGACAGCCACAATTAGCACCCGAAGGT  
CATCAAGTCCCTGATCAGTGCAGAAATTTGATCTCCAGTATCAGACAGGGAAAAAGCGTAC  
AGATCTCTAAGATCGGGTTCAGCAGATTGCCGAAGCTGATATTCTGGTGGGTCGCGGGAG  
CAACCAATGAAATATTACCTGAATAGTGTGGACTTTTTGTTCTCTTGTCTTCATCTTG  
GGACTCGCAGTACCGGCTCTGGTTTCAGCTAGGGATACACTTTTAGTCATGGGCGGTTTC  
GCCCTTGATTTCTCAGCCCCAGTAGTGGTATGGTGTGCTGGCTCAGAACGGTGTTTATTA  
AATCGCAGGGTTAATGCTTCTAAGTCATAAAGCGTCTACTTGGGAAAAGTTGCAGGCTCT  
CGCCCGTCCGTGAATAAGTCTGCTGCTTCTTACGTATCAAAGATTGTTGATGAGTACGT  
TGACGAAAACGTAAAAACTGAATACAAAATCGAAGACGCCAACCAAACTAATGCTTAAGA  
ACATGAAACATGTACTATTTGCGGGACTGATCGCTCTGGGTGCAATTGGCCTGTCTGGTT  
GCGAACGTGCCTACGTGCTTGCGGGTTACGCTGGCGTAAAGCTTGACCCGTATGGTGCGG  
AAAAGGGTTGCCAGCAACAAGAAGTTGTTGTCGGTGAGTATTGGTTCGACCTGGAACGAAG  
ATATGTATCAGTTGCCGACAATCAACCAGTTAAATAACTACGAGCAGCCGTTCAACTCCG  
AGACCAAGGATGCGATGACGGTATCCGCTAAAATGGGTGTTGAATACTTTGTTGAACGCT

TCAAGGTCACGAAGATTTTCCAGACGTACTGCAAAGGTGCTAAGGAAGTCACAGATGTAA  
ACTTTTGACAGAATTCCTAGGATGCCTTGATGAAAGAAGCTGGCTCAATCGACATTCGTA  
CTATGGCTGGTGATCTTAAGCGTCAGTCGCTTGAACCTGTTACCAAGCAGCTTAAGTCCA  
ACCTTGTTCCGATTGGTATTGTGATTGTA AAACTGTCAGATACCGACGACCCGATTTACC  
CACCGCAGGTAACAGGGTCAATCAACGTCAAGATCGAAGCAACTCAGAAAGCTTTGCTGC  
GTGAGAACGAAATCTAGCATAGCAAGGCTGAAGCTCAGAAACAGATCGAAGGCGCGTGCC  
TCGAAGCTGAATATAAGCGTTTGCAAGCTCAGGGCGAGGCCAACGCTATAGTGGCACAGG  
CAAATGGAAAAGCAGAATCTATTCTGAGGCGTGT TTTGGCTCTGTGTAAAAACCCGGAGA  
TCATGCAACTGAAAGCCATGAACTAGTGAATGGCGGTATCCCGGTATGTATGACCATTG  
GAGCACAAGCCCCGTTTCGTTACTCTGCCAGCAAGTAAGTGACAGTTGACAAAAGGCCCGG  
TGATGATTATCATCGGGTATCAACATAGAAAAAGGAGATTCAAATGATCCGAGTAAAT  
TCCTCATAGCAGTATTACCCTTCTCTTCCCCGGCATTCCGCCACAGTCAACACCCTCACCT  
TGGAGGACGAATACCCCGATGTAAGCTCCAAAGTCTGCATTTACAGTGGTGGTAATCGCA  
CAGAATCCGTTGCTAAGGATGGCGCTTGTACTTGTCTTCCAAAAGGACATTCCACTTAG  
GTGGCTGTTTGA AATGTTCTCTGGTCGGGTTCTGTTTTATGCTTTTACGATGTTGTGGG  
GGTGGTATACTGGCACCCCTCCTGTTAGCATT TTTTACACGGACAGCCATGATGTTGGAAA  
TCCCCGGATGGGGTTAAAGGGTGTATCTTTAAGGGTCTGGGTATTACCGGGTTCATGA  
CATGGAGGGGCAGAAAATAGAGTAACGGATAAGCTTGTTATCTTTTTACCCAACACGAT  
ATCTTTATTATTCATTTTCGCTGTGCCATTCTTTCTGGATTCCAAAGGACCAAGCGGTT  
GTTGCAAAGTTCTGCACTCTAGAACACTCCATGATGTATGAAGAGGCTATGCTGTTAGGC  
GATGCAAATATCACGATGGATATTGCGAATGTTTACCACGCCAAGAGGCTTAGAATGTT  
GGTCGGCGAGTGAAGA ACTTCCACAGCAGCAAAGGGGATGCGATTCGTCGTAATATAGTT  
GTAGATGGTCTTTATGCCCAGATCATGGCGAATCCACCATTAAGGATACAGCTCTTAAG  
CTTCGTAAAGAAGGCATGGTCTTCGTAGAACCATTTCCTACGATCCAATCTGGGGAAATC  
AAGATGGCTGAGCACGACCCACGAGTAGAGGACCCAACCAACTTGAAAGGTCTTATCCTC  
CTCGGAAATTGCTGGAACAAAGCCATCGACCGAGTACTCGGCACTATGGAGGTGGCTTTA  
AATTATAGATTGAACTGGTCCCTAAAACAGATTGTTTCACTAACTAGTGCTCTCACCTCA  
TGAAGTCCAATTGGGTTGGCCGAAGGAAGAAATGTTATGCAAAAAGCTAATTATAAATGTG  
AGATTGGCGGGGGAAAAGGAACCAACACACAGTAGAGTGTCTCGAAATCTGGGACGTTT  
GGAATGGAAAGATCGGGCTAAAAGGTCTGATCGCACTTTGCCGATCGCGCCACGAAGTCA  
AACATATTGCTTTGGCGGGTGTAGTGGTAGGGGGGAAATAGCTCTTCGGCGGGCCATGA  
GGGTCAATGGTGTCTCCAGACAAATTGCAGAACAGTACGTGAAAGACGCTTTGGCTCTAT  
ATCACGAACGTAGTAAACGGGAAACATGAGAATTGAATGTCCGATCTTTGGACGAGTATT  
CGAGTCACGGTTGTGAGGGCTAGTGGGATATCCGTATGATAAAGATTGGAAAAAAAAGT  
CACAAATGACTGTGTGATCGCTTTAGACCTTGACCAGACTTGCATTGTGTCTGCCCTGG  
CGCTGGGGAGCGTACACTAAAGGCTACTCACATCGGTTCTGCTCGATCAAAGATCTTTAA  
AAACAGACCAGAGGTCTGAGGGTCCACCAAGATGGTGGTTCGCGGATGGTTGAAGGACCA  
GAACGCCGATATGGTAGTTAAGGCCAAAGCTGGAGGCCGAGAGTTCGCCCTTGCTGAAG  
AGATGATTTCTTAATCGAAGATATTCAAACCACTGAACCAGTGGAAACCCTGCCTGCATAT  
TCTGAAGACAAAGGTTAATGCTATCTTTGAACAATTGGGAATGGACAGCAGAAATCGCCT  
TGGTGAGCTCGGCGGTGCCAACA ACTTCCGTCTGATGTTACCAGCACCGGAACGTTACAA  
AGGAAACGGTGAATACAGTCTACGCCCTGTGCTGTTTAGGGAAACGTGCGAGTATGCCAA  
AAAGAAGTATAATGCCAAGGTCATTGATAGTGTGCGGCAGATGGTTAGCTGTCTGGTCT  
GATGTATACCGGAAGTGAACACTTCCAGACGACTGGTAAGTACA ACTAGATGGTTTCATC  
GTTTCGACAAGGACCAGAAAGGAACACCGGGTTTACCTTTTGACATGATGCGTGATGGCGA  
AGAGACGAACTGGAAACACCCGATCCCAATAATGTTTCGACGATTCGATGGGTGAGATCTG  
GAGGGAAGGAAACAACGTCAAGGGATGGGGACGTAAGTTCTTTGGCTACCAGATGCTTTT  
CGGTGACAGTTCAGTATATTTTCGAGTCTGATAAATGCTTCGAGATCTCTGGGCGTTCTGG  
AGATACTTCTGCATTCAACCTGGTCAGGCATCTTCTGAACGAAAAGGAAATTTTCGAAGGC  
GATTGTTGACCAGTACCAGACCTGGTTCCCTAAAGAGGTAGAGTTCACCTTCTGGGACGG  
TTTATAGCGCAAGACAACCGCAGGGCAATGGCCTTCAATCATCTTCCAGATTGTTTCCAT  
GGAGCGAACTGTCAAGGACCATACTACACTCACA ACTGAACTTCGTCTCGTGGGGGTTAT  
ATGCTTGAAAAAATGATCATGGGTGCAGTAATGAGGGACACCCAGGCCCTCTCCGTGTCC  
TCTCTGAAGCCAAAATTCATGGTTGCTACGAGGCTGTGTAGAATGCTGGCAACATATGCT  
GGGACTATGTTGTCTTACGGATTATTTCCCTGAGCATGACAAGGCATGCACTGTGCTC  
AGTCTGGAGGAATGTGAGCTTGTGGGGGGGGAGAGATTAGAGCTCCTGACGAGCGCCGCT  
TATGGAGACCTTGAGTGTCTCTGTTGTTGTCCAAGGACGAAGCTATAGGAGACTCCAAT

GAAGTTGGTCTCGCTTGACCAAAGCCTACGTCAATGTGCTGTCGTAATATGGGAACATGG  
AGATCCCGTTGGCAGGGAAATGATCAGGACAGGATGAACACACAGTAAAGGCAAGAGGCA  
GAAGGACGTTGTTGATTTTGCCTACGTTCTTAGCAAAGCCGTTACATTGTGAACAAGAT  
AATAAGCTTGGCAGAGGAGCACAGCATTGACGACTACGTCAGGGAAGTCTCAGTCTTGT  
TACTATGTGTAGTGCAACTAGTGATTTGGCTGGCCTTTTTACTGCATTGTGTACGCATT  
GTGCCAATTTGGTATTTTAGGGTATGGTTCAATCCACACTGTTGTCCCAACATCTGTGAA  
TTCTCTCGCAAGAGCTCTTTTACCGGAACAAGAGCGCACTTATCCGAAACCGAAGGTTGA  
CAAGAAGTAAGGGAAGAAGGTATATCCAAGGGGCCAAGTTAAGATGGAGAAATAGCATA  
GGTCAGGGCTGTTGAGTCCGACATGCCTGGCCGTTTAGATGGTCTTACTGTGAGGCTGG  
AAAGGCGGAATCTGCGGATGCGAGTTTGATCGGGAACAAGTTCATGGAGGGAGTCTCCGT  
AGAAAAAGGTTAAGGGGTCCCGCATCTAGACCCAAGGCAAGGAAGAAACCTGTAGTATTG  
CCATTGACGTCAGGACTTGGGGAAACAGAGGCAAGGCAAATCGCTGCGATTAGCAAGAAG  
TTAATACTTGATCAGGTGGGTCTTGATCCTGTGCTTGGGGCGCCACTTCGCAAATCTTGC  
TTGGAGCATGATCACTTCGATGGTAAATGTCGTGGAGCCTTGAGTCAGTGTGTGAACAAC  
TTCGAAGGATATGTGCTGAAGGCATGGAAAAAGTACGTGTCTGCGTATACAGATACGTCT  
TTGTCCGCAGGGCTCCGAAAGCTTGTGACTATTTGGAACAGGATTTTAGCGGGAGCACT  
ATCCAGGCTGCGTACAAAGTAGATATGCTGAAGTTCTTGTGGAGATATAATAATGACAAG  
ATCATTGAAAGGGCGGAGACTGACCTCGGCATGATCTTGCCCAAAGGTAGTCAGAAGCAT  
GATTGCATAACGCCTTACCTTACAGAGTTTGTGACACAATCAGAGGAAAGATTTGCTGGA  
CAATTTGAGCAAGCGCCGAAGTTCTATTCCTAGAACTCGCGGGGTGGATACGGTTATCG  
AACCTGTTGGAACCGATTATGTGGTTCGGTTCCTACTGATTAACCCATAGAGCCCCAGTG  
GATGATCAAAGCATAACGATGTTGAGGAAGATGCCATCCGTGACTTTGCTGTGAATCATGT  
TGTTTAATTTATCCGATAGGTGTAATGCGGAGTGGAGAAGAAATCCTAGTATTAAGGGCG  
AAAGGTATGAGGAACCTTGAAGTGGTCGTCGATATCTGAGGAAAGAGAGTAAGGTATCT  
CATCTCCGATGATCCTGACTGCGAACCCGATGTTGTCAGAGGCAGCTCAGGCGATCACC  
GAGACAGTCGTTTCGCAATCCATGCGCGTAGCTCTTCCCTGGTGACGTAGAGGTATCACCC  
ACGCTCGCTTGGGTCTTTAACAGATTCAAGGCGTTTGTAAAGACCTTCCCACGTAGAACAT  
GAGCCATATATTTACGCATGGGCGGGTAAGTCCTTGGATAACGCTGCGATTATCAGACTC  
ACGCTGGCGGATTATGAGACGTTCAAACCGATATCCACGACGACCCGGAACCTGGTGGAA  
GAACTGTGGCATATCCTTGTGGAAGGTGGTATTTTCACTGCAAACAACGCACGGTTCGAC  
AAAGGTTTGGCTAACCGACGGTCTTCCGTCCACGGTAAGACTCCGCCTTACCGTACCTC  
GTCTTCGAGACTCTTGGACAGCTGAAGTCGGCTCGCCCCCTGCCCTTCAACGCTCTGGAG  
GCCCGGTGTAATTACTTCGATATAGCTGCCCGTCAACGTCATCACGAAGGGTTCACCTTG  
TGGAATCGGTGCTTCGAGGGGTGAGGTTGCAGCATTGTAAGACACGGAGTCTTACAACAAC  
GGGATATTGCGACATTTGAACTTATCTATTTGAAAATTAGACCTTTTATGAAGAAACAA  
GCGGATGTGACGCTCAATCATGACGATGATGACAACACTGTCCTACGGGACGTCCGTTGT  
AACTCGGATAAGGTTCTTCCCTTTGGAATCTAAGGTGGGGAAAACCTGACTATCAAATTC  
CAGAAATATCGCTGTGAATGCTTTGGTTCTGTTATGCGTAACCGTCGCAACATTCTTACC  
AAGGAAGAGATGGCTAACACGCTTGTGAATATCATATAAGGGCTTCGACCCCTTTGCGAT  
GGAGAGAAGATTGAGTAGAGTTGTCAGCATCAAAGTCCCTGACTCGTTTGATAATGACTG  
GTTGATAAAGCAGCTTCGTGATCTTGACATGCGTCGGGGGGAGTTGGTAGAATCGGAAGC  
TGGTGAAGAGCGCTTTAATCAGATCGGGGCCTGTCTGCACATCGTTAATTTTTTGAAGA  
ATATGCGAGGAACCTGATGGATATTAACGTCCTGAATGCACCGCCGTTGAGCGGTACAAAG  
GACAACTCCACCTATCTGTGCAATGGTGACCCAAACCTGAACCACGAGGAAGTTAAGGAA  
CTTCTGTTTGAAGTGTCTGTAAGGACCGCGCGCATCTCTCGCGACCTGTGGGATGCTATG  
TACTCCCGTCGTAACAAGGAGGTCCCCGGTCCCTACCTGCTGATTGAGGGTGTGAATGTA  
CCTCCTCGTGAGTGGATGATTCTCTGCTCTGAGAAGGTCATCAAACCACTCTCCGGCAAT  
TCGGCGTTTGGCAAGGCAGGGATTGCAAATCCGAAGCACAATTAAGTGAACGATGAGGTT  
ATTGTTTTTTCTGATGGTGGGTTCCCGTAAGAAAGCCGAGAGCTTGCTGATAACGCTTAT  
GCAACTGGTGGTGAGTCTTTCCCTTCCACGTATTCACCGGAGCGGCAATGATTGGGGTAAC  
GACAGCAGGAACCTGGCTATACCTTGACGGTATACGAGGTCATGAGAAAGACTTCGACAAC  
AAAGAGGGTATGTTAATGACTGCGCCGAATCTGTCTTGTAGTGGGCGAGATCAAGCAGT  
TATGTATAAGAGAATGCGTAAGCTACTTAACACCGGTATTGATGTAGACCTAGGGTTCGT  
AGATTCAGGCACACCCCGGCTTCAATGGATGGAGCAGGTATACGGTGTGAAGGCAGATTA  
TAACCGGCCGGATATAAATTCGTAGTGGATGGATTATGATAATCTGTCAAATACTTCCC  
TCCTGCGAAGGTTAAACAGTTACGTCCGTATGAGTTTTGGGAAGATCCGTACCTGTACGA  
CAAACCTGCGTCCCCGCGTCTGGGCTGTTGATGCAGTTGCATGTAGGGCGGCTGCTGGACA



CTTCAAGCATTTCATGTACTACTGCTCGAAAGGCCATTTCTCGTCCAAGGTAAGATTGCT  
GAAACGAGAGATAGAAGAGTTTTTCAGCATCGGAAGTGGAAAGCGGTCATGGCTTTTAGGC  
AACAAAAACGAAGCTGGTATTTAGATTCAAATCATCATTGATGAGCGTCATCAGTTCCT  
GAACCTGTTTGGTCCAGACGTGATTTAGCTCAAGTTCAAGACACCTTATGACCAATCTGA  
AGAGCTTCGCGTTTCTCTCGATCTTGAGGGCGATGCCTGGAACGTCAACAAAGACTTCGT  
GCAGGATATTGCTTAATGAAGAGATGCCCTCAGGAGACTTCGTTGTCCACTATGGGTAT  
TGGGTGGTGGAAATGAGAGGGGACGGTACCTTCTCATATGCTTCAAGGCAACAAGTGAC  
ATGTGTCAGGAAATTCTGTGGATATATCTGGTGTTTAAAGGCGGGATGAACCCGGAAACA  
CCTTACCGAATCAACAAGAGAGGCAAATGAGGCTTCAACCAGACTCTTGCGGTATCATCA  
AAAACGTACGTCTGCGTCGTGCCGAGAAAATACCACCTGTGTTCGGCCTTGATGGTGTAG  
GGATAAACAGAGCAGATCTAGGGATCACCGAAGTTTTCGTTTCCCGTCTTCTCACTGAGG  
CATACTTGGAAATTCACCATCGACGAGGTTGAGGACATGGGTGCCTTCCAGCAAAAAT  
GCACACATCTCAGTCTCGTTCAGGAGAAAGTTATCGAGAACACGCTTGCTAGAGTTTTAG  
AAAATTCAAAGAGTGGTTGTATAAGAACTGCAAGGAGCACAATAATGAAACAAGCTGT  
AGTTGAACGTGTTGTGCGGGATGGTGTGTTGACCGCAGGGTTCGACATAATAAAGTTTTGA  
GCTTGAGTACCCTCGTATCATTACATCGAACTACTGACTCACAGTCTGATTAGGCGGAC  
CGCTATGAGTAGCCGTGCGATCCCGGTCAAAAAGATGATCTAGCAGGTTTACAGACAGACC  
TGCAATGCGAGTTAAGTTAGCAAAGAATCAACCAGGGATGCTGGATGCCGGTGAGCATGT  
CGCACAGCTTGGTGTATGGGTATTCGGCTGAAGAATGGTGGAACTCGCAGGATTAAGTGC  
GGCACGTTTTGTAGCAGAATTCGCAGATGCTGGTTACCACAAACAGATCACGAACCGCCT  
GCATGAGCCTTCCAGCGAATGAAAACGGTCTTGACAGCAAGTGACTTTGAGGATTTCCG  
TTGGTTGAGGGTAGATAAGGATGCCGATCCAACCATCTACGCTTTAGCACAAGCCATGAA  
CAAGGCAGTTGACGCATCAGTAACTGAATATCTGAAGCCAGGGCAATGACACACCCCTTA  
TGTTGATCACCTATACTGTGCGAGAGCAGCCATGCGAAGACACATTTGGTTACCGTCT  
TCTTGACGAGAACATCAATCACTCATCTTGACAGTGGATGTAGCTAAGGGTATTTCTGC  
ATCTTGTTGTGCTCTGGTGTGTTTATCGTGTGCTTAAACAACACGAAAGAAAAGCTTTAGA  
AATTTACGGGGAGCTTTTAAGCGGTAATAAGGTACACGCTTCTCCTTTCGATCATGATGT  
AACCCCGATGAACTGTGAGTTCAGCCACTACGGCTATCACCCATGCAACAATTTGACGGA  
AAACCCAGTTTCTTGGGAAGAAGACATTACCCATATTGATCGCAAAGATCGCCTATGGAA  
TGGGAACAACCGTGGCAGGACTCAGCTGCGTCAGTTACAGCCTAATAACTATGTAGAAGG  
TTCATGTAGCTGGCTAGGGAGGGATTTATCAGGTTGATACTGATGGTAATGTTTGGCCTC  
TTGAAAGGTGGGTTGAGAGAAGTCGCCACGGAAACGAACTTCGCCACAGTTTGTCCCG  
CAAAGAAAAGAACGTGTTCTGCGCATGGCACACGCCATCTGACTGTTAGATGGGCAAACA  
ACGGTGTCTTAAACATTCGGGTTGCATAGGTTGAGTGCTGAGGTGTTCTACCTAACCC  
CACTCAACAAGCCATTTGTGAATAATAAAGATGGTGTGTTAGAGAAACAACAAGGACTCAA  
ATCTTGAATGGGTAACCGAGGAAGAGATCACTGAACATACTATAGAAACAGGGCCGAAGC  
TTGAGAATCTGAGACAACCCGTGCCCGGGCCTTATGTGAGCGAACTGGAGAAAACGT  
AGGATCTAGTTGAGAAAGTTTCTAGTAATAAGTATCTTGGATGTATGAATTGCGGGGAGA  
AAATACTCCCGTTTATAGGCAGAATGGAGATTACATGATTAAGTCAAACGCAAACCAA  
CCCATCTTTTTTCGGTCATTTTGCACTTTCTGAGAACCGTACCTGGATTCGATATAACCC  
AAGACAGTGGACTCCGTACTIONCATGCAGTAAGCTTCCAAGTCACCGATATTTAAG  
TGAATCCTAAGCAGGCAACAATGCTTAAACATAAAAAATGTACGATGTGCGAAGTTGCCCT  
ATCCGTACTIONGTAACAACAATCTTTGTTGGTGACATTCGTCCGGATTATCCGTATGCAA  
ATATGTATAAAGGTGTTGATATTCTCCACGTAGGGATTTACTCCGAGAGCGCCATGTAGT  
TCGTGCTTTATCACCCATAAGATATTACAGTGAATGAGAAGTTTAATTCGCTTAAGTACC  
CCAAGCGTGTAGATTGTCCAGATTTGTTTGTATTTCCGATCGAGAGTGAAGATGAAGCTC  
GTCTGAGTGACGCATTTGGTCTGGGGGAAAAAAGAGTAAAGAGAAGACCAAGTGGAAAGA  
CCGTGGCTTCGATGGCAAGTATCACTACGCCGGGTGGCTCTACTTCAATGATTTAAGCGA  
TGACAGCAACATGTACCACGATGTTTAATATGATGAGTAATCTGGTAAAATAGTTATGGT  
CGCTCCGCCGGGTCTGGCTGATATAACCCGACCAAGAAGTTGACCAAGGTGATAGGCATCT  
TGCTCAATTCGGAGAAAATAAGGAGAAAGTTTGTATCAACGCAGTTGTAAAGAGTGAGGG  
AACGAAGGCGCCATTGGAACCAGAACTCCTGAACAAGGCTGCGATCTTTGCATATGAAGG  
TAAAGGTAACCTGGTGACATATCTCTATGGGCGTCTACAAGCTCCTGTATGATGGTTGCAG  
CACTGGTCAAGGAAACCAAGCCTTGCTCAAAGCCTGCGTGAGCCGAACAGACGACGCACA  
TTCAAGGATGGCTGGGCGAGTTCTGATCGGGCAGATCTATAAAGAAGCTAATGACGGTTT  
CAGCAGGATCCCTGCTCTTTATCATTTCTATCCCGAGATGATTAAGTCGGGTGCTTGGGA  
AGACACTGGGTATGGTCCGATGGAGATTGTGGAAGTTAATAGTGTCAATTCATTCACAA

GGACCTTGACTACGGCGACGCCGTCTGAAAGCAATTGCGTGACAGGTACGGTATCAAAGA  
CAACATCAACCCTCTCCTTTTTGAGTTACCGTAGTTGATGTTTAAGGGAGTTGCGATGGC  
GCTAATTAAGCGTATGCGGTGTGACCGTCGTATAAACGATGTCATTAACATTTATACGTC  
TCTGTGCGAACTGAAGAAACAATGCTCCGACGCCGTATCTGAACGGACTCCGTACCGGTG  
AACTGAATATGTGTCTGTTGCATTATCAAGGGTGACGAGACAGAGAAAAGCTTTGGTGT  
TGATCGTGAAGTTGGGTCTACGTTCACTGTTGCACAGGCAGGTATTGGCTACTACCTCTC  
CTCCCGCTCAATTGGTGCCGGCGTTCGTGGCAATACGATCATAACATGGGTAAACTCCC  
ATAAAACCGTGGCATTGATGCTGGGGTGAAAGAAAACCGTCAGACCACCCAAGGTGGTTC  
GGCTACGATCTCCGTCTGGTCTTGTCCGGCAGATCGAAGAACTGTTGCGCCTTTAGAA  
TTCGCAAACAGTTTCAACAAAACGTATTAACACAATGGACTACTCCATTGGTATTAACCA  
GTCGTTTATGAACCGTGGGTGCAAGAACCTTGACTGGATGCTGGTATCTTACAAGCGCGA  
AGCTCAACTGCCCCAAGATATGTTTACGATGACCATGCAGGAATTTGATGCAGGAATTAC  
TCGTGTGGCAGCGGATTCTAAGATCCCTAAAACCTAGGGTGAAGGCTCCCGATCTGGAAGT  
AGAGAACTTTACCCAAAGAGCAGAAACAGGTCGCCTGTACATATACTGGCCTGTCGAGAT  
GAACCGGAACACGCCTTGCTAGATACTATTTATTCCTCCAACCATTTCCCAAGAAATCTA  
TCTGCCACCAACGGATACAAAGAAATGCGTAAACATCTTTGATAGCCTTGCAGACGATGG  
TGGGGTCGTTCTTGGCTTCTGCAATCTCTGGTTGCTGGGCGTGTTCCTCGGATGACTA  
CGAGAATTTTGGTTATTACACCATTCTTATGAACGACAACGTTATGGATATCCTGGATTA  
CCCGTATGAGAATATGGAACACTCTGCCAAGTCGCGTCGTTCACTCCGTGTTGGTTTGAC  
AAACGCTGCTCATTACATTGCGAAACAGATAGTTGCTTACGACTCCGCTGAGACCAAGCA  
TTTGGTTCATTACCTGGCAGCACTGCACACCTGCAGCGTCCATAAGGCAAGCCTGCGTCT  
TGCGAAAGATCGGGGTGTAGCTTCGTGGATGAACAAGACAAAATACCCACAAGGGTGGTT  
TCCAATCGACGCTACAACAAAGGAGTTGATGGAGATGTGAAGAAGCCAAGTCTCAAGCA  
GGATTGTGGAATATTACGACAAGAGATTACCGAAGTTGGTGGTATCCGCAATAATGGGTT  
TGATACTTATATGGCGGGCGAAAGTTCGTCTGTGGCGACGAACAGTACAAACGGGCTTTA  
CCCGGTGCGAGATCACATTATCCTCAAGAAATCACCGCAAGGGTTTGTGCTGTTTATCGT  
GTAGGAGTATGAAGAACTGAAGGTTTACTACAGCTCTGCGTGGGATATTTACACCAGCGA  
CCTGCGTGACATTTTCGCAGTCATTCAGTGGTTCGCTGGGCAGGCCATACGTGCTGACCT  
CTACATCGATCATAACCAGCTGAAAGACGGATAGATCTCAATGATGGACGAGATGGATTA  
CCGGATCCGTGCAACGAAGATGGGGGTGAAGACTGGGTACTACCTGATCTTGAAGGTTGG  
TGCTGGTGAATCTATCACGCCAGAACTTAAGGCGAAGAAGCAAGCAGAGGAAGAGACCCG  
CAAGGAATATCCACTGATAGCAGACACCTCGGTTAAAGACCCGTAAGTGTGAAGGTTGTGC  
TTTGTAAATACATAAGGGGCTATGGCTCCTATTTTTCCGGAGGAGAGTCAGTAGCAGTAGT  
CAACGGTGAGAACACCGCTCATAAACCTGGTGAATATCTGCTGCTCCTTGGACAACAAAT  
GGGTCTGTATGACACCATCAACAAAAAATACCCACCTCTGTTTGACCCGTACAAGGCTCA  
AAAACAAGAGGATTGATCTGAGGAAGAAGCTGAGCAAAATCAGTCAATCACTGCCTTTTC  
AACCTGTAGCAAGTACACGTCTGATTTTCATGGTGCAGACCCTGATGTGGCAGTGCGAGAC  
AGATACTGTTGCAGCACAGGCGATCATCTGTCTGCTTGCACGTTTCTCACAACAATGA  
ACGTTTTCGCCATGATGATAAAGCAATCTTAGATCAAAGTTCTCCACGCCCTGACTTATTC  
TGATATCATCCGTCAGTGTTCCTCAAACCTATCGGCAAATTTATTGAAAATATTAACAA  
TCTGGCAGTTCTCGAACGTTCTGGTGTGAGCGTCTAGGACATGCTTGAACCTTGAAGTTCT  
TGGAGCAGATCACCGTCTCGATCATGAATCAGTAGACAAAGACCAGGTTCCAGGTTGTAT  
CCTACTTGCAGTGTTCGCGCTGATCGATCTGGAAGAGAAAGACTTTATCTCCAGCTTCGC  
GTGGGCCATGACCTTGGCAGAACACGGTGTGTTTGGTTCGGTCAGCTTGTGCGAGAA  
AATCATGCTGTATGAAATGCTGCACACCAACATGGATCTCAAGGTCATCGATAGCCTTCT  
GACAGACCCGGTCTGGAAGGATAATTTAATGCCATTACGTACGAGATCAATGAGATCCT  
AGACGAAGTGCGAAAAAAGAGTAGCGTTGGGGTGATTACCTATTCGGTAATGGTTCGTGC  
AATCAACGGATTGAACGGGCCGCTCCTGAAACACTGGACTAACTGGAAATGTGCTCCGAT  
TTATGACTATCACGATATTCCAAAAGACTTCAAAGCTCCCAAGCGCGACCTTCTGCCTTT  
TACGTGGATCAGGATGAATCCAAGCCGACAGAAGAACGCAAACCAGGAGCAGACAAACAC  
GGATAATCGTTTAAATGCGTCAGTCAACGATAGAGAGGGTGAAGTCTCGGACTTTTCAGA  
AGTAACATTGGACAATTCGAGTTTTGATATCGGGGTTGCTTACGACCCCAAGTTTCA  
TGTCACTTTCGATGGTGGGCGTGTGATGGCCTTGGATTGTGATGCAAGGTTTCATGCTC  
GCGCAGTCTAAATGATACGGACTGTGCTAAGGTCTTTATTCAGGTCAAAGCCTTTGGGT  
TGTCCGACTTCAAATGCTTCTTGGTGTGAGCAAGGGCGATTGCAACTTGGATACAACGGCAG  
TGGATCAGTCTACGACAGTTGTAACCTTCGTGGCTGATATAGGTGTGAAAAGTTATGACGT  
TGATTATACTGGCAACATCCTAGTTCTTGTTTTTACCTTCGAAACGGAGAAATAATGAGT

AGCAAAGAAAACATATTCATTATGTAAAGGCAAGGACAATTGCCAACCCCTGGGTCCGGGCA  
ATGGAGTTAGCTAAATCGAAAGGTCTGGTGTATTATGTATCTGACCCTTGAAGTGAAGTAC  
ACCAAAGAGGACCAGGTGGCACCATCCTCTGCAGTACTCCCGATAACCGCACCCCGTATC  
TTTACGGATGAGGAAACCAGCACCCGGTACATCGGAACAGCCGAAGAGTTCATTGCATAC  
GTCAATGCAAACACCTGAGGGGGCGGATGAGTGAACGTAATAAACGCTATGGGCGAGTT  
GAAGACTTCTCTCATGAAAAAGTTCAACGAGCGGTTGAGGTCGCTCTGTTAGCAGCAGGC  
ATGAACCCAGAAGCAGAACATCAAACCTGCGGTCCGTCTCGGTCTGCGGACTTTCAGGTTA  
TTCATGACGACACCTGTGAGACATGTTGAGGATTCCCATGGTGAACCTGTAAAACTGTTG  
ATGACAGAACAGCTACTCCGGGACACTGCTCGCGCATAATTGCGTATCGCCATGAGCGT  
GACAACGGGCGTGAAGGAAAGGGAGAACCTTATGCAGATATCACCGGATTCATGGTCCAA  
TCCGCAGAAGAGTTCACCCACGAGCATGCAAACAAGCCAAGCTCGGTCTGTAAACACGCAC  
AGGGACCTATTAGCGGGGATTCTGAGAAAACACGTGGCATTGACTCAGTACTGTCTTAA  
AACCTCGCGGCAGGGCATAACAGAGGGTTTTTCGACATATTCACGACCTTGATTACCTTGAA  
AGCCCGCTGAAAACTGTTTTCGCGGTAATTTGCCGAGACATGCTTGAAAATGGTTACAAG  
ATCGGCAATGCTAAGATTAAGAAGCCGAAATCAATTGGTATGGCAACCGCGGCATTGCCA  
CAAATCATCCAGGCTGTAGCGTCACGCCAGTATGGTGGACAGATCTGTGCTCACATCGAC  
GAAGGTATCAAGCAATACGCTGAAATGAGCTTAATGAAGGATGTGCAGCAGTTCAGAGC  
CAGAGGGACGCCGTTGGTCCGACCAACAAAATGTGTCATGATGCATACCAGAAACTGCTT  
CATCAGGTAACCTACCTGATGAGCCTAAATGGTCAGGCTCCTTTCATAACGATCAGCCTT  
GGTTTGGTCCCCTCAATGTTTCGGTATCTTGATCACTTGTAAATTATCTGACCGTCCACAAA  
CAGGGTCTCGGCGCTGATAAGGTGACACCAGTGTTCGGAAGTTGTGTTCTACTTAAAG  
GATGGTGTAAACATGAATCCAGGCGATCCGAATTATGATCTGAAGTTGCTTGCTATTGAG  
TGTTGTGCTGAGAGAATTTACCCCGACCTCATCTCAGTACCGTTGAACATGCAAGTGACC  
GGATATTCGGACGGCAGGATGACGAGCATGGGTTGTGCGAAGTTTTTTATCTCACGTTGCA  
ACCGAAATTGGAGAAACGTACCATGGACGTTTCAATCTTGGCGTGGTATCCTTAAACTTA  
CCCATGATTGCAGCCGAAGCAAAAAGCAGGAAAACTTTCTTCACACAAACGCTTGATCAG  
CAGATGGAAATGGCTTATTAGACACAAATGCTTGGTCATGTTTCGTCTGATCAAGATTACG  
GCATCCCACAACCCGACATTGTTTCATGGAAAGTACTCTGGGAAGGCGCGGCCCTGATGAA  
AATGTCAGTAAACTCTACTATGACGGGCACGACTCCATTAGTATCGGGTTTGTGCGCCTT  
TATGAGGCTGTGGGAATCCTTTAGGATAAGCCAGTACGCAAGGAGATGGCGATCAATATC  
CTGAGGTACATTAAGGATCTCTGTGCAGAGTTTGAGGCGCGCAGTGGGTTAGGTTTCAGC  
CTGTAAGGAACACCTGCGTAAAGCGTGTGTAATCGCTTGGCAAGCAAGTTACAGGAGATA  
CATCATGGTTTGATTGAAAGAGATAAGTTGAAAACTCTTACCACCGACCTGGGTGGCTC  
AACCGCGACCCGTTTACGTAAGTTCGGATTACGAATCAGGTGTCGACGGGATCTGTAACGGC  
GGTAATATCGGATACGTGGAAATCCCGAACCTGAAGCTCAATATGCAGGCTCTTAAAGCG  
CTTTTTAACTATGTGTACGAGAGCATTATTTCGGGTATCATTACAGACAGAGGCGCAG  
TGCTCTAAATGCGGATTCGGCGGTGCGTTCAAGACGACTGCAAAAAGGATTAGAATGTCCT  
TCTTGCGGGAACCATGAAGAAGGAACGATTTCACTGATTCGTCAAGTTTCAGGATATCTG  
ACAGCACCAAACCTACGACCCTACAACAAGAGAAAGATGAAAGAGGTGCTGCAAAGGGTG  
AAACATGTAGGGATCACTGTGTTTATGAACCAACAGACCTCGTGGACGAAGAGACGGTCA  
AGTGCTCCCTTCGGGCTAGCGGTTGCAGTCACGGATGTCATGGGCGCTTTAACCAAAAAG  
CTTGGTTCGTATAGCTAAGGTCTGCCTTTCAGCACTGCGTATATTCTCAGGATCATCAAAG  
TTAAGGGAAGGCCATTTATCAAGGTCTTGCCGTTACAAGGAGGTGCACCACTTGGCCCGC  
AAAATGTTGATGAGGTCTTAAAAGTTATTCTACGTAACCGTGCAGTATTTGGAGATAGCA  
GGGATATCATTGTGAGGACTGCATACACCTTCGAAGAAGTCCAGAAAAGGTTAAATAAC  
TTGTGGACTGTATAGTGTACGGCAAGTATGAAGAGTGCAATGCTACAACCAAAGGTTCA  
GAGGTTCTGACATCCAGAGGATGTGCGTAAGAATCAACGGTGTGTTGAAAGAGGAGACGT  
AGGTGAGTAAGAAGACACTGCGTAAGGCATAACCAGAATGAACCGTCTCTGGAACCTCATG  
GTATAGAGCATAAGCACAAGCGCATCACTGCGGACGAACCTGATGGAGCTGGTATCTGACG  
CAGCTGCCTTTGGCCACTACTGAGGTACTCCATGACTGTCGTTATCGACGATGAAAAGAC  
CTTTGTACCACAATCGCAACTGGATACGCTGCAGCTCGGAGATTTCGGAGGAACTGGCCCG  
AGACTTTGTGGGCCTTGAGTTCCCAATACTCATCAATCACTTTACGGAACAACTTAGTA  
TCAACTTGAAGCTCTCAAGCAAATGAATGCTGACGCCCTTAAAGGCCAGGAGGCTGCGAT  
GGAGAAAGAGCTTAATGCTGCTCAGGTTAAGCTGAAGAAAGCTCTGTCTGAAGAGGATAT  
GCAGAAAGTGATGGATACGATGGGTGACCTTCTGAAAGAAGCGCTGACACCGAACGTGCT  
TGCTTACGCGATCTATCATGAACGTAACACCATTAAGATTTTCGTGGATTGCCGCCCCGACT  
TGAAACTGCTTCCGAAGAGGCGCTCGTACAGGGCTAATCCGTAACGAGGTCTTCAATGAA

TGATGCAAGTCCGGATATTCAGCGTAAGCTGATCGAAGATGGGTTTAGCGTCGGCTAGTC  
AGTAGCTGATCTATTGTGCGGACCCGCTACACGAGCCGCACTGCAAAAGCGCATTGCACA  
GGCTACCAGTGGAACAATTACGGAGGTACTTAGAACTCACCCAGGCACCACTGGACAA  
AATCTTCCCCGTTGGTGCACGTTCTGGGAGGAGTGGAAGATTACTGAAGCCGCTCAATGA  
CCTGTTTGAAGAAATAGAGATTAATACGGTGAATCGGAAAGCAGGATTCCTGTCTCAGAT  
TGGTGAGGAGTCGGCGGAGCTCGTGTATGGACGTGAACTCGGTAGGGGTGGCTACTTTGT  
CAAGTACGACACTGGTCCTATTCCAGAAAGACTTGGAACACACCCCAGTAAGATCGGGA  
TGGTGCCAAGAACAAGGCGAGAGGACTGATTCAGGTTACCGGGCTCACAAACCAAAAGGC  
TTGCCCTAAGGCGCTCGGTCTCGACCTAGTTAACCAACCTGGGTTGCTTGCAAAGCCGGA  
GTATGCTGTAGCCAGTCCCAGTTGGTATTGAGACACGAGACACATCGAAGCCGTTTGAGA  
TGCTGATGATTTTCGCGAAAATTACCTAGCTGGTAAACGGTAGTACAAATCAACTGGCCGA  
GCGCACAGCCTATGACAAAAAGTCTAAATCTGATCTCACCTCATAACGAGAACCAATATT  
GGAAGATGCAAAAAGGCTCGCGAATTAATACTTTCGGCTGGTCAGCAACAACGTGCAGAA  
GGACAAGTAAAAAACCACCCGCAATTTCGACGGGGAACGTAAACAGCGCCCCGGCTCTGTTT  
TCTCTGAGTGGAAGCAGCAGGTTTACCTTGACAAATTGCAGACATGCAGATGCATAACT  
GCGAAAGGTATCTTCGGGACAGATAGAACCTACCAGGCATCCGCCGACGCTGCCGGCTTG  
CTAAGAAGAAACGAACCTCGACAAGAGGATTGTCGCTCGTCCATGCGTTCAGACGGGTAAT  
ACCTCAGGCTTCAAACCGAGTCCTTCACTGGAAAACTGTTACCCTATGTTGAAACATG  
TTGGATACCATCGCCACGCGCATGGTAGACGGGGCATATTACAATGCCCTAACAGACGGT  
TTAACTGGGCTTATCGAAGTTCAGGAATTGAAAGGATCCGGGGACGATTATTCGTCTAA  
AACAGCTTCTACTGATCGACGAAGCCCGGCAGAGTACCCAGAAGGACTGCTGAGTATC  
ATTACTAGTATTTCCGATAACTGTACACTCGTTGTGATGGCTGATGCCAGTCTGAAAGAC  
ATTTAAGGTCAGTCTGGCTTGGAGGCGCTCGTTGAGTTTAGCTAGCGACGCTACCTTGCT  
GGTGTGGGTGTCGTGTCCTTTGATGACCGGAATGAGCATATGGTTTGGCGTGGTATGGTT  
CGCGACATCGCTCTTGGCCTGATAGCTGACCGTGAGGCCAAACTGTACTGGCCGAAGGCT  
TCTTGATAGGAGGAATAGGGCATATCATGCTGGGGTAGGATCACTGGGAACTCCCCAGA  
GGTTATCAGCGTCATGGAAGACGCTGCTTTCGTCTCGTCACGCTCGGATTCACTCTTCG  
AAGTGGGATCGCTGTAGGAGCGGATGCTGCATTACAGAGAGGGATCCCAAATAAGACGC  
AACTCTTGACCATGGAAGGAAGAAAGAGTATCGGAAACGGTTGGCAAAGATTTACATCCC  
TTGTGACGGCTTTGATTCAGATAACTAAGACCTTTGGGAATTTTGGGGTTATCCCATATG  
TTACCATGATCATCCCATACCATACCAAAAAGCGTAAAAGCGATCAGTCGGTTGGGGAAAT  
CCGTCCGAATTATGAGGCTCTGAAAAGAAAGAGAGGTGCTTATGCACTCCATGCCCGTAA  
TGTGTAGCAAGTTCTGGTAGCTAACTTCCCTTGGTCCAAAGCCCGGTGCCTTCTGCCTTA  
CTATGCTTCAGAAGATAATATTCGCAACCCAAAAGGCGGGACTGCAAGGGGTGTCAATCC  
CGCCAAAAGTCTGCCATGAAGAAGCTTAACCTAACACTCTGGAGCGCTTGGCCTTGCG  
TAAGCAGTTCCTGACCAGTCTTGAGAGCAAATGAGGTGTCCAGGTTTAGAGAGAAGCTGA  
AGCATTCTTCTGCCTTGTGAAGGTTGAAAGAATGGGCTGGGTTACAGGCTAAAATAGGG  
GATAACGGATTTTAGTTCGATGCAGGTGGGGATATTTGTTATGTTTGCACCACAGACG  
ACTCGAAACAATTTAAACATCTGACTGAATCTTTAGAGTACGAGTCCAAGAATACTCATG  
TGGCCCGAGATTCAGTACAGCTGGACAATTCCGGGCTGTTTTACATTGTGGATGAAAGAT  
ACCGAGGCGATAACGGTGAAGGTAAGTTCCTGCAACCTCGATACGAGCAGTATGACAGCT  
AGTAATCATGGGGTTGTTTCCCATCGAAAACCTTATGGAACCTGAGGAATTGTGGTTTTGTC  
GAGCCTGAATTTTTCGAGGAAGAAGTGACTGAGCTTTTACCTTTTACCGTAAGGTAATA  
GCACAGAGTATGTATGACATGAATGATGGGTTTCGTAGACGTATTATCTACAACGAAGAG  
GTGGATAACCGTGATGCTCGCTGGAGGTTCCGGACAGACGAGATCTACTTAATCCTCTT  
ATTTATCTGGATCATCAGGATCGTGAATCGAGTTATGTTAATATCAGTCCGAAGGAACTG  
AATTACATCGCATTGCTGCACACATCAGCGGTAGCCTCTGAAAGGGAAAGAAACGTTCTC  
TGGACATTCAGGTACAGCGGTCAAGTGCTAGTGGACCACGAGACAGGGTACTACATTGAT  
TGGCGGATGAAGACTGTTTACTTTCTAAAAGGCTACATTGCAAACGCGCGGAGGATGAT  
TAACGAGGAACTGAACAGAACTTTGTGCGGTATGCTGCCGGGTATGACTGGGAACATCTA  
TAGCTACCCGTACAAAACCTCACGACCACCTGATCTACATTAATGATCTGTTCATGGCTGGA  
AGAACAACAGGATCGCCTGCAAGTTATCCGCCCCGCAAGCCGTGATGACACAATCCGGGT  
GGTGATTGACCGTCCTCGTGGGGTAGTTTCTGTGCTTTGGCGTATGACAGTGAGATCCG  
GGAGAGTCAGGCACAGATCGTCACCCATGTGGAAGGCAACCTTTGATGTGCCGGGACAGT  
TTTGTGGCTGGACTTTAAAGATAGCACAGTGTACCTCTGACAGAGTTCATGTTCTTAA  
TTATCGGGGCGGCACTAGCGGTGAGGTTGCAAACATGTACGCTCAGATTGCCTTCGAGAA  
GCATTATTTTGAAGCGTATGATTGACACCTTCTACACCGGGCTTCAGACCGATACTGAGAG

AGCAACCATCAGAGGTGGTGGTCGGGTGTGCATGGATGAGATCGACATCGTTAAGCGTCC  
CACCCCGATAATGTTGGATGAGAGAAACATCAAACGTATGCAGCAAGGTCAGAACCCAAT  
AATTGTAGGCGAGAAGAAGGCTAAAGAGGAGAAAAAGTTCGTTGAGAATGTTGACCTGAG  
CAACCTGCCAGAAGATGAGCCTGAGAGCGTTTGTCTGAAGAGTGATGTTGACGGTGAAAT  
GTTCAAATTCATGTTTCCACGCTGAGTGCAAAAGATTTTGATGCCTTCAATGAGTAAGA  
ACTGCAATCAAACGTGGCTCAGATCGGTGCGCTGGCAGCAGGCTCCGAAGCACCTCTGAA  
GGTTACCACTCGTCATAGCCGGAAGTACTGATTGGTGAAGTCCTCAGAACCTCCGAGGAAAT  
CGTTGCAAGTCTTCTGGAGCAAATGGGGGGCTAATGTCTGCACCTTTCAAGAAGAAGGAA  
GATCGTAGGGCATAACGGTGTCTACGGCACCCCAACTTGGGCTGTTGTGGCCATTTTAAAG  
GTTAACCCGAATGATTACACCAAACTTACTTGGAGCCTTGCAGAGGCTCCGGTAGGATC  
TAGAACTTCTGCCTTTGGGATGCGCGTAGGGTAAAATCCATCAGGGCGTATATCATGTT  
AAAACCGGGTAGTACCACGTAGATATGGTTGTGACCACCCACCATACTCTTTGGCGCAA  
GAGTTAATCACCAAGGCACCTGGTGAGGCGGATCTTGTGATCATCATATTGAGACTAGGA  
TCGCTTGAGGGCATGAAGCGTAGGGAGTAGTGGCAGGAGAACCCAATCAGTTCTCTTTCC  
GTTCTTTTTTCAAAGGCCATCATTTTCGGACGATGGAAAAACCGATGGGAGTGGTTATGCC  
TGGATTGTTTGGGACAAGAAAAACAAGCTCGGACTGAAGATATTTAATTTTCGTGGAGCGA  
TAGAGTGACGAATGTCGCAAACAAGATGCGAGAGATCGCAAACAACGGAGAAAAGCAACC  
CCCGGAGTCATTGAAGGAAATGTACGACCAGATAGAGGACGGGATAGCGCAGTGTGTGAG  
GAAGTGAATGTACGGGATGGGACTTTCTCTCCAGTTGACGGAGGGTAAGAATGAGTATTT  
GCCCCGATATTGTTGGCGATATTCGTGGTTGCGGTTTCACAGTCGATATCATCAGCTACCA  
ACCAACAAAACAAGGCACTGCAATAACCTTTTTTCGTAATGTGGTAAATAAACACGGTTCCG  
GCCGGTTTTTTTCGTTTGAAGTACTTGACATGGCCAAAATAAACACTTCCGCTGTTTTTCGAA  
CAGAGGAGAACAACCTTGCATTTTACATTTACTACCGTCCTTTTCGAGACCATCCGCTTCG  
GAGAATACATGCGTGACCTTATACATAACTCGACATAGGAGTAGGATTACTGCCCTGAAT  
GGAAAATTTGGAAAGTTAAACGTTGCAATCGCCCTGCGATTATGTCAACTCGATTAATCA  
AGATGTTGAAACACGGCGGGATTGAGGACGATATGGTTTATCCACTCAACGCAAATAGGT  
CACTAAAAGATCTGTTCAAATACATGAACCAATGGGAGAACTACGAATGAAACAAAGTCT  
TACCAAAGAACAGGCCCTGATCCTGACCGGGTTCACCGGAATCCTTTGCTGTTTCGTTCAA  
CCTGATGCACGAACATGTCGCAAAGGGCCTGGCCCGATCGGTATGAACGCACGAGTATGG  
CAGTAAAGAGTACTCAGCAGAACTGAAGGATATTTATCATGAAGACTTCATGGCTACGAC  
TTACAAAGGGGAATGATGATGACCGAGCTCAATGCCCGTGAAAAGCTTGTAGCGTTAGCA  
GATTGTCTGGGTTGGCAAAAAGAAACCTTTCAATTGGCTTGAATCCCCAGAGCAAACCT  
GTTAAGCTGTACAATTACTGGCAGGAACATGAAGACAGTCTCCCGGAATTGGAAGACGAC  
TACCATGACGAGGAGGGACGCTGCTTGTATTATGTTCCGTAAGACAGCACGGGGTTATGAC  
CCCATGAGCCACGACGCTTCTATTTGGGAAACCTTGGACAAGAGATGTACGACGTTGAT  
AATAAAGACACCGACATCGGCTTTTACTACATCCGACAAACAGTCCGTAAAATGTACATC  
ACCGATGCGGGATGGAAGTTACAAATGCAGTACGGCCTTGTCTAAACTGAAAAAAAACAA  
GAGAAAATAAATGATTAATAAAACATACACCGTTGCAAAGACCTGTGATGTTAGAAAAT  
GGGGACACCCTCCACAGAGGGTCAAGGTGTAACCACAATTGTATAAGTTCCTGCTGATAC  
CGTTTTAGTTGTGTTTCGTCCAAGAAGGCCAGTTGTGTTTATGCTGCACAGTCCGTAGCGA  
TGTATTTCTTACCAAAGGTGGAATAATCCAGACGCAAAGATGGGGTTTTGTGGTGGAAATCAT  
ACACCCAATTTTGCGTTTCCGTATCAAAGGTGTTCCGGTATGAAGCCAACGATTAGTACAC  
AGCAGAAGGACTGCGGATCCCCGAATGAATCTCTATGCACAATTGACTGACGCCAGAAT  
GCTTGGACTGACGACATGGAATAGGCCCGGGAATTTTTAAAACTCACGATCAGGAAGCA  
ATTCTTCTTGTACTGAAGATGCTATTGACAGGTCGCGCACCGAAGTGGTATTATCTAAT  
CTAAGGCAAGGGTGGAAAAGTGTGCAATTTACCTTCTTCATTTAGGGTGAGACTGGTCTT  
GACGAGTATAACATCTTCAGCAACAAGAAATCATTAAAGACACATGTATAAAACATATATT  
CACGAAGATTTCTAAGGAGTGAAGATGAAATTATATTTGGTAGGTGGCGCAGTACGTGAC  
GTTTTGCAGGGCCGTGAAGTCCACGACCGTGACTACTTGTGTTGTGGGTGCAACACACGAG  
CAAATGATGGA AAAAGGCTTCGTCCAGGTTTGCGCCCTCCTTACCGGTATCCCTCCATCCG  
GAGACTAGGGAAAAGTACCCTCTCGCTAGA ACTGAACGTAAGGTTGGAAGTTGTCACAAA  
AGTTTTGACACCTTTTTTCAGCCCTGATGTGAAACTGGCAGAAGACCGGGCTCGTGGGGAT  
CTGACCATTAATGCGATGGCTCGGGATTTGGATACCGCAGAAATCATTGACACGTTCCGGT  
GGTCAATATGATATCGAAATGAAGGTGCAGCGACAAACGAAGTTGGCATTCTAGATGAT  
CCTCTGCGTATTCTGAGAGCTTACAGATTCAAAGCGCAGTTGGTTAAGGCATCGGATCTC  
CATCCGGAGACAAAATCTCTTTGTTAGCAGAACCGTCACGGACTTTAAAGTACCAGTGGC  
GAGGCTATGTGGAAGAGATGGAAAAGGATCTTGGGTCAGATGTCTACCGTTCTATGCT

GAAGCAATGGCAGAACTGGGAGACTAACCAGAACTAAAATCGCTGCGTGGTGTAGAGCAA  
ACTCAGGTGTACCATCCGGAAGGTCACGCATTCATAGACACATTGCTGTGCCCAGATATC  
GCAGACCAGTACGAGGCAAACCCATACGCGAAATTTGCAGTTCTGTGTAACGACATTGGC  
AACGCTGTGACATCCTCCGACTATGGGAACCTGATAGGTTATAAAGAGGCAGGGCGGGCT  
TCGGTAGATGCACTGTGTGAACGTATTCGTGTGCCAGACGAATTCGTTCCGTTGCTCGC  
TACGTGACTGCGCACCATACGGGTGTTAATTGCATCACCCCTCGTAGTGAAAAAAGGGT  
GCAAACCCCTATCACTATTGAAGCTTTGCGTAGCTGCTGGTAATGTGAAGCGCATCTAG  
ACAGCTATGAAGGTCCGCGCCCTGGCAGACGCATCTTTCTGTGATTCAAACGCCGTGGC  
CTGACAAAGGCATCGGATCCTTACCCACAGGGCTACGTTCTAATGGATGCTTTCCGGTGC  
ATTGTGCGATTTGATACCAAAGTCTTCTCCCCTGAAGGTTTGAGCAAGGGCAAACCAGGG  
ACTGAGATCTGGGAAATGAATAAGGTGGCACGTATCGACGCAAACCGCGGCGTCACACTG  
CCTCAAATTGCCTGGAGAGGATTGCTGTACGAAGACATCGAATAAGGAAGAGTACACATA  
CGAGAAACACCACTTTATCGCTGACAAACGCGCCGGGAAGTAGGTTTGTGCATGGTACGG  
CCTCGTAGCCTTAAGGAACAAGGCTAGCGACTGGTACATGGATAAGGGATGCAATTACGC  
CTAGCATCCATCGTACAGAAGCGCCATGTTTAAAGTTCACACCATTTTTCAAGTAGGGGAA  
AAATAATGCCTATTGCGCTTCTAATTTATCTGTGCATTGGTATACTGGCTATGTTGACGA  
TCCTGTCAATTGGACCGGTATGATATGAAGAAGATAAGTTCATCATCCGTCAGCATAGGGC  
TACAGGTGGTAGCCTTTTGGTGCCTAGGACCTTTGTGTTTGGTGGGTGGCACCAATTGCCG  
CGATTTCTAAAGAGAAATTTGTGATCGCAAGGAGAAAGAAGTCAAGAGACGTATGTACGG  
CGTGGCAAATCGACACATTGCTGGCATTACGCAGGTACACAGTCAGCACACGCGACCCG  
TGCGAGGTTCTTGGATTATTCTAAACGCCGGTACAATGCCGGAAGCCTGTTGAGGGCTTG  
GGCTGACCGCGATAAGACCATCGTCGTCCTCTATGGTGGATACCAGTCGACATTGCACAA  
ACTGTGTGACAAGTTGAAACCGCTGAGCAGCACTTAAACCGTAGGCCTCTTTCAGTGAAGA  
GCAGGATGCACTGAACGGGACTATGACAGAAGTAGCTGAAGTATTGGCACAGTACATGTA  
AGGCCCGCAGGATTCCGATGTGGTCAATCTGTACCAACTCGGAAAGTACATCGCCCCTGG  
GGCAGTCAACCAGGACCGCGATGGAATGAGAAAGGTGGTGCCTAAGTACACAGAACCGGA  
CAGAGATCTGATAACAATGATCAAATCATTCCGGCTGAAAAGGGAATATGATGTAAGTAG  
GTGAACTTGACCGCATTTTTATTATCGAGATGATCTGTTCAAATACGCTGATCGCTACTG  
CCGAGATCCGGAGTTTCCGGGTCAAATAACAAAAGGATCCGAATCTCTTTGACCTCCCC  
TGCGGGAAGTGGTAAACGGTGTGAAACATCAACTGTTATAGGACGCCGAATCCTGTTCTT  
CACACTTTATACCCTATTCAACCTGCTTGGTGTGGTATTATTGACCCGTAACCTGGAGGAG  
CGGGGACTATTTCAAGTTGGAGACACGCAGTTGCTCCATTTTCGTCTGCCGTGCCGTTAA  
CGAGGGCTTGATGATGGTAAACCTTGAACCCACATTCTAGTGGGCTGTTTCGTAGGAAT  
CCTGTTCCGGGTTTGGGATTTGAAGACATCTTTCGTCCGCCCTTGCAATCTTGACAGGAGAA  
AGTGATCAAGAACGAAAAGATGCTGGTAGCCATCGGCCTTAATGGTTTTTTTCGTTGTGCA  
TGTATCGGTGAGCTGCTCCGGCTAAGGTGGTTAAATGAAATACGTTCCGGGGGGAGTATTT  
GCAGATTGGTGACGGGGGTTATACTACTGGGTATGAAATGAATTGCGCCCTGGTAAGGC  
GTATCAAATCAAGGAGAATGAGGCGAAAATGCTTGTTAAATCTAGGCCTAATCACCCCGA  
TCCCGCAGACCGTTACTCCATGTCGAAAATGAAGTCGCGGGGAGAGCATGATCAAGGCAGA  
AGAGCCGACAGGCTGGTATCCGGACGAGGTCGTTTTACTGATTTAGGATATCATTCTGTTT  
GAGAGACGATGTGAAATCTTGGAGGCGAAGATCAAGTACCGAGAGCTCTTGAACCTTCTG  
GGATAAAAACCGCCAATCCGATATTGTTTTCTCTAAAGGAGGATTTTGAACCGAAGTC  
TTGGTTGGTTGCTACTTTGACGGCACCGCTGAAGGGACTAAAATCCGAACATCGGTTACC  
GATTTCCAAGGGCTTTTATGTTTCAGTACCGTAGTTCATCCGCACACCATTCTGCAATATC  
AAGGAGTTAACCCTTGCTGACGAAGAAGATGGGAAGATTTATGAAATGACAACCTTCACG  
AAGCTTTTCGTGGAGATGCACACCAACATCAGCGTGCCTATGTTTCGTAGACGGGGAGGAT  
ATTCTCCATAGCTCTGATGGGTATGACTATCTACGTAAACTGGCACCAAGAACGGCTATCG  
AGCAAGGTGGCCATTAGCTTCTCAGGCTATGCAATGGCACAGCCTAAGCGTATGCGTGGT  
CACCATAAAGTGGATCAGCACGCCACCACCTGAAGCACAGCCAACACAGAAGGAGTTTTTC  
CGTTGGTGCATAACGACAGCGACCAGCCGTCCTGAAACATGAGGATTTTCATGCAAGCA  
CCCGACCGCCTGAACAGCTTCTGCATCCTCGTACCTTACGGTTACAACGTTTACGGTGT  
ACGGAGAACTTTAATAGTGCTGGCCTATTCAATGCTTACGGTTCGATTCGTAATCCCGAT  
TAACAGCAACTGACCGCTGCGAATAAAAAGCGTAAGCCTTTGTTTAGCGTAAAATATCTG  
GAAGAAGGGCACACGCTGGCGAAAGAGAAGTACCGGAACCTACTGGAAGTGGAGCGAAAAT  
CGCAATGAGGCTCGTGATGAACTCGAAGTCAAGCTCGGATACGATAGCTAACATGCGATG  
CACCTCGTGCCTGATGCGTATGACGTCAGCGATTTTTGCTGATGGTAAAATCGTGGTT  
AAGAGGCCTGACGCTCAGGAAGTCTTGCTATCCGTGATGGCAAGTGGACACTAGTAGAA

CTTCTTGCTTGGACTGCCAAGAAAGACCATTATATACGCGAAGACCTGTACAAAAAGACA  
GATCTCCCAACAACAACAGTGCTTGAAGTCACCGCTCGTGTACTTATGATCGCTCAAGAT  
ATCTTCTGGGCCAAGATCGATGCTTGAAGCAGTAATCTGTACTCTTAGGGATGCATATGC  
TGTTATTGCTGTGGTATACTCTATAGAGATGGAGAACGCTAAAGGACTCCGTCAGATTCA  
CAAGACCAGGACAGACCATGATTGGTCTGAGATTTACTTCGTGTTCGGGTACGCCTGGCG  
GCGTGGGGCATTTCGCCATTATGTTACGAGGAGAAGTAATGAGACAGCTTGAATTTCTGG  
GAAGAGTGATCGGGGTGGTTGCGGGATGGCAAAGAGAATACAAAATGACCCGTAACCTTCT  
CGGAAGACCCAGAAAACCTGGCCCGAAATGCGCGACCAGGGGGTCTGGCTTGGTCATGTGT  
TTGTGGGGTTACACTGTAACGGGTACACAATATGAGTAAAGGTTTGTAGACGCCAGAGCA  
GGCGTGGATCTTACGCACGCGTTTCCTCTTGCAAGAAGCAACAGGCAACGACCTCAAAGA  
TTTTGCAAAGAATGTTTAAGTTGGTTGTATGCACGATGCGTACCCGATTTGCGGTGGGAC  
GGGTATTCGTAGTGATGGCCTGGGTATGTCTGATCACAGCATCTCCTGCCCTGTACGAA  
GTGCTCTTTCAGAAGTTGATTGGCAGAAAATCCAATCACTTAGGATTGTGAACCTTCGTT  
TGATTGATCCTTCCCTCCTATATAATATTTGCCACGACAATGATGAGATGGAGGTTAATAT  
TATGATAGGAGGAAATATGTTTCAGAAATTGGGTCGCGAACACCCTACCCTACAATAAAA  
CTGGGCAACAGTGCTTGAAGAGAGTTTTAATTGACAGGGATGTTAAAAAGAGCAGCCTTT  
ACAGCATTTCGTGTAGGGCGATTGGAGGTAACCTCGTGGTGTGACACGCAAAAACCTATGA  
AGTACACTTCCCCTGTAGGAGATCTAGGTAAGCTCCATCCTGATGGCTTGGAAACAATCTT  
ACGACCAGTACGAGGGTTTCGAGACGGCGGTCCGGGACATAGCTAGAACAACCGACATCA  
TCATCAACGAGCACAAGAAGTCGCTGGGGTGAGGATACAGAATCAAAGACGGGTTCCGGGA  
ACCTCCTAAACAAGGTTCTCTTTGCCGTTTTTCATTATATACGCAATAATCAGCGTGGTTG  
TGTATTTCTATTCATTATTTTGAGGCGATTGCATGAGGGACAAAGGAGATTATTACAAAC  
AATATGCCGCCCCGAGGCGTGAGATAGACCGTCAGCCTCGATCCAACCAGAAGGCCAAAG  
AAAGACAATTCCAATCATTTCATGACAGAATTGAGGCGGAGAAACGTGCAACAGTCAATA  
GTGAGCGGGACATTTTCGTTTCGTGTAGAGGCCAACCTTGTTTGCAGACGACAGGATACGTG  
ACCCAGGCAATCCTTGGGAGACTGACAACATGCTGTCCCTCCGTGCAAAAATTGTATCTA  
GCCTAAACTGTTGTGATAATATACACGTTATCGCCGCAAAAATTGGACCGTAGTAAGACTA  
ACAACATAATCTACACGAACCGACTGGAGTGGATTAAGGATTTCGGAGACCCTATGCAGTG  
CGAATTAATAAAGCTTTTTGTAAAGGATACAAATCACAGCGTGATCAGTAATCTGCCGGA  
AATATCCCGCGCAGTGGCAAAGTCAAATCCCGATCAGAATGGTCAATCAATTTTCGTTGT  
GAAGGGTAAACACCATGTGTACCCTGCTGGAGTGCTTTATCTAAAGCTTACAATCAAGAA  
TAGGGCAGTAAAAAACGAGCAAATCTCTTTGAAAACAACGAACAAGTATGAGAAAATCTT  
GATTTATACTGATCGAGTATGCATCGGTGAGGGCGAGGTATACAACCGAGATATGTTTTT  
AGCCTCATCATCACGAACAGCTGAAGAAGCCCAATTGCCAAGAATGGGCAAGGGTGCGGA  
TCCTGATATCCTTATGAAAAAATTCGGTAGAGTACCCGGAGGGATCTTGGAAAGGGTTAT  
GTGTGGGATATTAGTTGAGGAGTATGTCTCTGCAAGCGAAGAACGACTTATTGCTTTAAT  
AAGTTAACCCGCCAATGGCGCGTTTTCTTTTATCAGTCGTTTGTCAATTGTTTCAATGACC  
AGACTGTCCGGATCATCAGAACTGTCAGGTTCTCAATTAGAAAGTCCATCGTTGTACGC  
ATCCCCCGGATCTGACCCTCGAACCAAATATCGTCCACCGGGGAAGGTTTACGGATTGGA  
CTAATCTTGGATCGTTCAAGAACTTAACACACCCTGCCGTTTAGATGGAATGTGAGCGGT  
TTCGTGGGACTGAATCTGGCTAGAAGGCAGGTGGTATCCGGGCGCACAAAGGAGGTCTGCC  
TCACTACGTTCCCGGCGACCGCCAGTATCTTCTAAGATCTGCATGGTGTCTCCGTATTGG  
GTTGTTTAAACATCAACTCTGATAACTGTGCGTTAGACAATGGTTGACAAAATATTTAT  
TTCTGCCATAAAGTGGAACAAATTCGGATAGGAGTTTGATAGGTGTGATAAGTATCGAGA  
TGCAAGGGAAGAACTTAGGAACATGATCGAAAGGAAGAAGATCCTTGAAGAAATCCTGAG  
TTTTATCGACCTGTGTATCCATATCAGGAATGGTGCAGGAGAAAGGCTCCCAAGAAAGGGC  
AAACTGCTCTCTTATTATCGAAGCATTAAAACACACTGCACAGAAGATCCTGAAAAGAGG  
TCTTCAATGACGTCCAGTGTCTACGGAATAATGTCTATGGATCCATGCTCCCGCGAGGGA  
GCGTGGTACTGCCCGAAAAGTAAATTACCGTTTTACAAGAAGGTTGAAGTAATTAACAT  
TACAGAAAACTTGGCTATATGCTTAGAGGAGACTTGAGTGTTTGGATGGGGTAAAGGC  
GCAGACATTAACTGATCGGAACCTCCACTTGGACGCTCAACTGGAGCGATACTGGAGAAG  
GAGATCGTTGACAATGCTTGTCTATGTGTCTGAGAATGCTCGCAGGTACTTCGAAAGTA  
CGCATGTATCGTGGTTACCGAGTAAAGAAAGGCGACTCCCCGGTAACGCCGGCTGCAAGG  
CGTGTGCCAGTGGAGGGCGACTTCCCGGTACTTTTACACCATAGATGGTGATAGAATGAT  
CTACCGAAGCTTAAATATTGTGATACATGCACGTGCGTTTTTGCATTGTGATGTGAGTGTT  
ATATGTTGGTCTGGACATGAAGTTTTATCCGGTCATGTACGCCTGTGCTGCGTGTGCGTT  
GGCAGCAGGCTGGTTTCTAACGAAGCATCTCATGGGAGATGAAAAATTCTCTAAAATTCT

TTTCCGTTTTTCTGACATCATCTTGCGGACATACTGCAAAGCATCCGCTACTAGTGGCTT  
CGACGAGAGATCCACAAAGATTCATTTGATTAGTGGTTTCATTCTGATTAGCAATACTAA  
CATCACAAAGAGAAAGAGATGGGCGGCGATACTCTTGCTTTCATCAAGCGCGAGGTG  
TTGCAGGATAGCAATACCTGGAAGTGGCGCTTCAAGAACAAAGGAGTTCAAACGAGAGGGG  
CAAGCTTAAATGGCCGCTGTGCAATATTTCAAGAAGAAAGTCTCTGGATTTTCTGGTATA  
ATAGAGTCTTACACAAGGAGAAGACACTATGCTTTAAAGGGTCTTGGGCGGTAAAGCCCC  
CATCTCCGCCGAATCACCAGAAAGGCAATGGCTGGTGGTGC GGATTTACTAGCTCTATC  
TGAAAGCGATGAGCTGTACGGGAATTGTGGGACGTACATAAGTTTCATTGGTGTGGCCAC  
GACGACTTGGCCGACGATTCTCGATGAGATAGAGGATTTTTTCGTCAGGATTCAGGCAATT  
CCTTGCAAAACTGGGAGATGGAAGATAGTTATTTTTGTGGGCCCAACTCCGTGGCAGGGAT  
CTTTATTGTACGGGCTGGAATGCATCCGTAGAGTTTATCCTGAGACAGGACAATAACAAA  
GATCCCCCTACACAAATTGGTAATGCGGGCGGTATATGCTTTTTGGTGCCATCATTCTGC  
TTCTCACTCTGAAACCGACCCTTACCTGAAGTTACACACCACACAAGGGGAGCCTGAAGG  
GCCTCTTGTGTACCTGCCCGAAGAACCCCATGAATTTTGTCTAAAGAGGCACATCTATTT  
CCTCTTGACGTACACTGTCAGCCCTTATACAATAACCTAAAGAGTCTCAGGTGCTGAAGG  
TCGGCTCGACACCAGCACCAAGGGTGCCTGGCACCTGAGAATTGAATATTTCTCCTTTAA  
CAGTTTTTACGGACATTGGATGTCCTGCTTGTGAACTATAGCACGGCTCCGGCGTGAAT  
GGTTGTACATTTACTAACACACAATGCCCGTTGCACGGGTGAACTCGTGCATTGCTCTG  
CGACACACCATGTTCAAGGAATTGCATTTCTTCGACACATGTAGCCTGAAGTGTGCGATGC  
TGTAACATAACCGCAGGGCGATTAACACAGGCTACCCCGTATACGGGTAAAGATACCAA  
TACCCCCCCCACCCCAACCCGGCGGGTAGGCAAAGAGTCCCTGTCTTGTATCTCTTGGGG  
ACGAAAATATCCGTTGGCTCTATCTTTGATGTGCTAGACGGAGAATCACAGCCACCGAA  
GCTTCTCAAGGATCATTACACAATATCTCAGTCGTCCGATGTAGAGACGATTGCGAGTTT  
TTGGCACGATGATTGCAAGATGATTAGTGGTGTGCCTAATGATCGCCTAATGAAACTATG  
TTGTTTGGATTGGTTAGCTAGCTTACTGCACGATTTGCCCTTGACTTGCTTACTTTTTGCG  
TTGGTTAGTGTATTTTACATTATACACGTTATACGCCCCACAGATCGGACTGTTGCACGG  
GTGATAGTGGCACTATGTTACCTTTGCATCAATGCAGCATTGCAATGACGAGGATGAGCC  
TGCTGTATGTTATCACTGTGAAAGTTCACACCCGTTCCCTATTCATTTTGCGGGGTGATTT  
CTAGATGATAATGCTTTTTCATAATCTTTATAATTTTCGATTTCCATATCAATTTCTGAATG  
AAAATCATTCCGCAAATAGAAATATTTTCTGAATTTACACACAAAACATTTAACAGGGAGG  
GGAAATTGTGTTTAGCAACACCAGCTTTTGGAGCATTTTGCCACATGATAAACTTCTCA  
TTTAGGCCTGTGATGGGCGAGATACCCGGCAATGCTAAAGCATTGAAACGGTAACTTATT  
GTAACGGGCTCCGTATTGCTATAAAGGGATTAATAGAATTTTCCTATTAAGACAAAGC  
TTGACATATAAGTCATCTTTTACGAACAAAAGAAGCCTTTCAGCAGGCCAGCGGACTGA  
ATTACACAACGATTAATCATGGTTTAGCATCCATGAACGGCGATCCATTGCTAATCAAAA  
GACATTGGCTTGCCTCACCTCGCGACACTATAACACAAAGCCCTTACGAGTTGTTTTAGG  
CACGGTAAACAATGTAGAGATTGACCAAAGCGGGTTGGCGAATCTCCTTTGTCTATACAC  
TATAACACGAAAGCGATCAACGTTAGTTGATCGATGTTATCGTGGCGAGTGTGATTATTT  
CATTGCGTAACCTATTGTTAAACGAATTATAATGTAAAGGATTAGTCATAGCTTAATC  
ACGTATGTGATTATATCGTAGCGTCTACTAGCCACCATAACGCGAACGAAAAAAGAAGT  
ATTATCATTGAGTTACTCTCGTGTTATAGTGTCACTCGCTATGCTCGCGCCACTCACCA  
AGATCACGCGTACGATTACTTTTTTGGACAAGATCCTATTTTTGTGCTTAAAATAGACAG  
TTCACACAATGGCTTAGATGAGCAAAGTTATCAAATGAGAGTTAGTATCACATATTCACA  
TGAAACGTTTTAAAATGCGTGGTTTATTCAGTTGATAACATGCGTTATCAATTTTGCCGT  
GTTAGTTGGTCAAAGGCGAGACGCAATACCCTTTTAAAGGCTATTTAACGAGTCTTAACC  
GTGTCGTCTCGTTAGCCTTGCCGTTGTATTCTTTTCTGGGATCTCTCTAAATTCCTTT  
TTTGCATAAATGCCAACGAGGTTAGTGGGAATAAATCTCGGTTCCGATATTGCAACCAAC  
ATAAAAGCGGGGAAAGATTTGGTGTGAGTTTGTGGTGTATGTGTGATATGCAAAGCCC  
CGACATTTCCCGTCTTACTTACAATTTGATAGCCATTGGTCCGGCAATGTTGGACGGTA  
GATCATTATGGTTCGAACCGTTTAAATCTGTGTTATTTACGACCCAATAAAACGCCAATT  
GCAAGGCGTCGATCATGGTGTACCTATCTGTACGGTTGCGTCACTGCGTACAAAGCTGG  
CAATACAGCCATAAAAAACGCTTGACAAAACAGCCGCACATCAAGCCCTGGCTTTGTAAA  
GATTTTGGCATTATCGGTAACGGTGCTTTGATTGACTGTAAACCGATAGGCCGTGCAAAC  
TTCCGCTTTCATCAATCAGTCTACCATTAAGCACATTTTGCGAATCACATATGCACAAT  
GATCGTTAAAATCAAGCGCTCTTCTAATCATCTCTTCTATAGACTCCAGAAATTTAAAGA  
CCAGGGGATCGAGGGTGACGTAGTAATTGATCCACGCTCTCACCTGCTCACATTCCAGGG  
GGCGATCCGTTTCGCTAAAACCTTGACGGGCCGGAAGATTCAAACGTGATTGCATTGTCCA



TCAATTCACTGTAGGCGGTGTCTCAGCGACTTGCCTAGTACTCTACAGGATCGGATTGAC  
AATCAGATTTCGGCCGGATGAATAAAGCAGACAGAAAACCGTTGCTGATTTTAACGCTTTG  
TAAGGGTGTATCGTGCGCTATCCTGGCCGCGCCCTTACAGATCTTCAGGGGTTATTTTCAT  
ACTCCATGATCATTGTCCGGGTCATGTGGTTATGCGCCGTAAAGCCATCACTATTA  
TTCCTCGTAAAAATCGGCCAGGGATTCGAAATATTCAAATTCGCTAGCTACAACAAGCTT  
GACAAGCTCACTACATTTATACGCTTAAGGAAACATGCGCATCGGCGCGTA  
AACCCTTAGTTTCGATTTACTCCCCGACCTTTTGGAGCGGTAACGGGGTATGTATTTTGT  
CAAATTAACCTTTTACATGATCTGGGGTCGACAAGAACGATTGATTGCGGGATAGAATCC  
GGGGTAACTATCAGAGCTTTTGGAGTGCCGGACCTTAAAGCTTAATTTTCGCTTTGCAAACG  
GTGTCGGTCATTTTTCGCATTTGTGGATCGACGTTGTGATCTTTACAATATCACACCGAT  
TTATCACTAGCAATAAGGTTGCGTAAAAATTCAGTCGGACCCGTTGTATTTTAAATCATT  
TTAGTTTAGCTCTCAGATTATGCCGGGGATGTCCCAGGCCTTGTTTTGATTAGTATTCGT  
TAGCATACTTTGTTACACGGTCATCAAAGGCGCTTTGAGCAACAGCACGATCCCAGAATA  
AGTCTTGATTTTGTCTGCTTTGAATGTCCGACTGCATAAACACGGCTTGCCTCGATATT  
CCATATCCAGACATAAACGGCTTTCAATTGCATTAATAACGCTTTGGAATAACAATATT  
GCATACTATCCTTTAACATTTTCGAGCATGTACGCCGCCGCGCTCTCGTCCTGGTCGAGGC  
AATCTGCAGACCAGATACTTGGCTTAACAATTTGCAAATGTGCATAAAGATTTTAAACGA  
TAAACGGCGAAACATCGTTTAAAGATACCGATCAATGATTGCAGTTTATCATTATTGCTGA  
TAGTGATGAACTTTTGCATTTGTGTTTACCTTTCTGATTGCAAGGGAACCATTCCTCGG  
CCTCGAAAAGTTATTAACCGGTCATCGCCTGGCTTGCCAGCTTTTGTGTTATTCATCCTC  
GCCGGAATCATCGCTAAAGTTGAAAATATCCAGCATGTCACCAGCAGCGATCCATAGCAG  
GGCCATTTTCAGGGGGTGGCGATCAAATTTGTGCATCCCGTCTGCCCTTCACGGTTCGAT  
TCCCGTTTCCGCCAGGTAATACCGGATCATTGGTTCGCTGTAAGCTCTCAACTGTAAGCC  
GTCACGGAAATAAGGCAGGGCCTCCACCGTTGACGCTTCACTCTCCTCAGAGTGGGCGAT  
CTCTTCTACCTGTTTCAGGGTCCCGAAAGATGAGTCAGTGCCGACCGCATGAGGACGCCCC  
ATAAACATTTTCTTTTTCATAAATCTTTTCTTCCATTGTGACCGGGGGCGATCCCCG  
GCCTTTAAGAATACTTTGGCCGATCTGGGGTTCGGAGGGAACCGGAAGAACGTCGTTTAC  
CTTCCCAACAGCCACAGCGAATACGTCCTCAGTTTGACGGATCGGCAAACCTGTCAGCCTG  
AATTACGCAGCCGTTTCGCACCTCCAAGCTGATATGAGACGTAATTATCTGTTACTGCCTT  
CTGTGATGCGTGATCAATTGTTGTTTGCCTTCGTTTCATATTGTCGAGGCGATCCCCGTT  
AACAGCGTCATTAACATGGCAAAAACGAATAAAAGTTTACCATCGAAACGACGAAAATC  
ACCTATTGCATTATCGGAACCGCCATTAATGGCAAACAATTTATTTGCAAGTTGCGGTTT  
TAAAACCTCGTTATAGTTGAAAGTTAATAACAGCAGGAGGATGACGAAAGACCACACCAA  
GCGACACATAAACGAGACTCAATGTTAACC GGCTTCTGTAGTGTATACTACTTTGTA  
ACCTTTCTTACCTCTACCAGGTGACCGTGAACCGCTGCCTGCCTTCGCTGGTCAT  
TATTGATCAACGGATCGCGGTTGTCATATGTTTTATGGCATTGGTTCCACATCTGCCGA  
TGGAATACAAGCCGGATCGATATAATCAGGTTACGGCGTAAACCATTAGCGGGCGATCTC  
GGAAGACAGCGGAACATCGTATGATTCAATTACAAAATCATCACATTGCATCACCATAGC  
TGCGCCATAAATAAAGATAACCCGCGAAAACCTCAAACATTTGATTAACCTGATTTTTTCT  
GGTAAAGAATTTGCTTTTTGACGCTTTTTTTCAGCGCCATCTTTCAACTACCAAAAAGGC  
CGAAATGCTCGCCTTTCAGAAGATTATAGCTGTTGTCGTACACGTTACAAGCCTTTTCTT  
CTGTAAAAGTTTTCTTTACAATCCAATCACACTATTACTTCATGGTTCGTAAGGTAATGT  
GACAAGCCATTACAATAGACCCGAATCTGGTCAATTATCCACTAAAATGATATAGATAGC  
CACAGCGGCAAGGATTGCGGCCAAAAAAGCTATCTGCGCCACCACACCCCAAGAATAAGT  
ATAATCCAACATTTTGTACCTCATTCTGGTGGCACCATTCCCCTATGTAGAATT  
ATAGCATATGCGAGGCAGGTGTCAAGCGTTATTCTGTTATCTCGTTTGGGCGGATGTAAT  
CATCATAACGTACACGGGAAACTTGACCGCTTGCGGCAAGAGGCAACGATCACAATCCG  
CCCGTTATCATATGTTTTGAGATGCTCAGGGGTATGGTGGCGGGTAAACTCAACACGCA  
AACGTGATTTAAGCCAATCACGGTTATCAATGCCACTAGCCACACCGAAACCGATTTGCC  
CGTAATTGTGGTAAACCATTTTAAACCAGGAATTGAGATTCAAGCGGCGCGATCTGAGACT  
TGACGTTTTGCATGTTAGTTACCTTTGGTTAGTGTGGTTGGAAACATAGCCGCCCTACGC  
ATTAAAGATAACATAACCACAGCAGGACGCAAGCACTATTTTAAATTATTTTGTGAGA  
ATTGTTCTCATATGCAGCGGTTATGCATGAATCGCGACTATTAGGCAGATAGTTTCATTG  
CAATCCTAAATTTACGGGCCTTTGAGCGGGGAGGGATTATGGGATACCCTGCAAACGCT  
CTAAAACGATTTCTAATCGCTGCCAGGCTTGACGCAGGCAAGTCCATCACTTTGCGGAGA  
TCTCCTTAAACTCACTTGTCTGAATAGACAAACCCTGGAATCATCACGGCCTTTCGTATA  
ATCATCTTGTACGGCTTGCCACAGTAAAGCGCGCTTTCTTTCGTCTAACCGCTTGTTAAG

ATATGGATCGTTGCGGTCCGGCGTCCAGGTTTTGGCTATGCGCTCCGGCTTGTGTAGTTA  
GTCGTTTAGCTGGCATCGCTCGTACACTTCCCCATATCCCAGGAGATCATGCTGCCTTGT  
CATCTTTTCAATGTTGCGCCTATGTTAAACCATAGTTTTATTATCGGGTGTTGTTTGCAT  
GATCAAAGATCCGGCCTTGTCTCGGCTATTTATTAGCTCGCCTTTCGATCATCTCCG  
AGATCTGCTCCTTTGCGGCTTCTTCGTGATACGTGACAACTCCGCCCACTCTTTCTCTT  
CACACAATAAGCCGTTACCCTCGAGATCATTCAACGGACCAGATCGCCGGGTGTGGTAGT  
GGTTGCCGTGGAATCTGTATTCTTAATAATGGTACACTGTGCCTATCCTGTACTCAAAT  
AAACCCACTGCAGGACCCGCCATAACCTGTCCGGTCTCTTGACGTAGATAGCAGAAGCGG  
CCACCAAATCAGGATATTAATACTTACAATAATCCTCTAACATCTCTCCGAGTGACTC  
CAGGTCTTACGTCTAAACACTTTCCGGAGTTCCTAGCCCGTCTTCTGACACGCAAGATA  
AATCTCTGTACCCTTGC GGCTATCCTCAACATAGCCCATATCATCCCAAAAATCAGCATG  
CTATTGAGATTCCAGATCAATATCTGACAGCAGGCAGGAAAGCGCCTTAGCGCCGCCAGG  
TGTTGCAACATAAACACGGGATCCGAAAGTCATTACTTTATTGTGCTTGC GGCTTGATATC  
GTCGCGAGTCCAGTAATTTTGATCAACGATGCAAAGCTTAGGATCTAATTTAGCTCATT  
TCTTGCCTCGGTTGAGGTTAAGCCAGTGTGACGGCCTACACGGTGACGCTTTTCCGTTTT  
AAAATCAGAGCGGTAATCTTCCCGCCTTCTTCGAAACTCACGAAAAACAAATCAGCTTG  
TCATTCTGGAGCTTTGGTAACGCCACCATATTCCGATTTAAAACCGATGCCTTTTTCTTT  
CAAAAAGTAGAAAACGGCAGCATCTTGATCGTTGAAAGTGATTTTGTTAATCAGAATTTA  
TTACCTTTTGTGGTTTGGCACTATTGCCGAGTTATTTCTCATACTTAGTCGCGCATCT  
CTAAAAGCCCCAACAAATGAAGACTCAACAATTATCTAACGATCTTTTCAATAAAGACTC  
GAAGGATGCGATGTCTTTCAAGCAATCATCTAATAGCTTACCGGGGACGATTAGATTGAC  
GATCCGTCGGCTTGCCCTTGATTTACGGCCACAGTTGTCCGTTTTGCCGTGTGAAAGAT  
CGTTAAACCTTGACCGTTACCCATGACTACGACCATTTACACCCCCTTTGATTAGTTGT  
TAGTTACCCGGTACACATGGCGATAAGCGCGCTTCTTACTGTGGGGCGCTTCAGTCACTG  
TTTCATAAGCCAGCGCATAACCAATTTTTTCAAGCCAGTAAAGCGCTGCGCTTTGCCCT  
CGTTTTGTGATTATTTCCCGCGACGGGGCGACTCCAGGACCAACACACCGAAACCAGTGT  
AACCATTTTCGACGGATACCAGATGCCACGGTGAAGTCTGGCGCGCTATTTCTTGATCG  
TGTTTCCGTTAACATCGCGACTAAAATCAAAGGAATCGACAACGACGCAAAGATTCCCGG  
CTTACTTCGTGCGTGACAATGAGCACAGGCGGTTTACAGCGTCATACAGTTTGATAGATG  
TTTTCAAGTTTGCCATAATGTTTGCTTTTTTCAGTTTGCGGGGAAACTCTCCCGCCTTGAT  
TAATAATATAATCGATCAGCCGAAGATTTGCCAGCTATTCGTTGAAGTTTTTTAAATCTT  
TTTAGCGCCTGTCTGTTTCTTGGGTCACGTTGAAACTTAAAGCCGTGCTCACTAGCCCAGC  
GATCCAGGTGGCCCCATCGTGATTTTATTGCGGGCATACTGTAAAGACGTTTCATTGCAA  
CTTGTAAGGCGTAGGAACCGCAACAAGAACGAAGTTCCCGAGACTTGTACAGCGTCGGCA  
AGGTGTGATCTCCGGGGTAGTGAACGAAAGCGCATAACCAAAAATATGTATTACCGTACA  
TCTCTGTAAAGTCAAGCGAATAAAAATTCAAAAATGCGGTTTTGTTGTCTACTGCGTTTT  
TGAAAATCTCTATCATGTTTGCCATTTTCGTTTACCTGCTTTCTTTTCGTCTGGGGATTAT  
GCGCCAGACTCCCGGCGCTTGCCAAATTATTGTTTATCGGGCCATAAACGCCGCTAAGCG  
TGCGGTGATCCGGAATGGCTTCTGCGTTTTCTGGATCCGCTTGCCGTTGGCGTCATGTAC  
ATAGGAGACCCGTGCCGCCTGGCGGTTACGGAAACCCGCTTACATTTCCAGAGCAACAAC  
CAGGGCCGGGGCGCTTTCTTTGCAGCACGTTGATCGGCGGTGTCTGGCTGGCATCAAC  
CATTACGCCGTGGATGACCTGCCAGCGTTTACCCACAGGCGCGGTGGTGCCGTTGGCGCC  
CACTTTTCCGCCGTTGACTTTGAAAGCAGTACGGGCAAGGACGCGAGAATCGAAATAATC  
TTAATGGTGTAACCTCCTTTGTTTGGTTGATTTGTTTTGCTTGTCAAGGTGGGGACATT  
ATAACCCACACATTAGCCAGCGTCAGCAATTATCTTACAGTTATATTTTACCTTTCAC  
AATATTATACGTGTGTCCGGCGTTTCTTTATTGATCAACGTAAATCCGACGATCACGCC  
CTGGAATAAATTTTTCATTGTGTAGGGATGTTGGTCCCGTACCCGGATTGGGTTTTGGT  
TAGTCTTTTTTGTGCTACCACAAATACGCGTCAATCGCCGTAACCTCCGCCAACAAAGA  
GCCGTCATTGGCAATCAAGCAGGTTTCCATTATGTTTACCTCTCGTCAGTTCCGGGGCAT  
GTCCCCCGCGTGTTAGTATGACAACCGATATGGAGTTGGAGATCAAGCTTTTCTTAAGAT  
ATTTTTACGTCTTCAAAGTTTGTGAGGATCTCCGCGCCTTCTTTTTTGGAGCGTCCAG  
CACTTACCGTCGATCCCGTTTTCAGTTGTAAACATCTTTTACTTCGGTCAACGGGTCACT  
TTCGTCTGTTTTAATACGGAAAATAACAACCAATAGACTCATTATCCAGGAGGGTGAT  
CACGTTTGCAGTTGCGGTCACACTGAAACCTTAATCACTGGCGTTTAAATCGCGCTCCAA  
GGCGTCTGTCCGGCCTCGTAAGCACGGCGCGATGGGTTAGCATCAACACGGTTGATCAA  
GTCTGCGATCCGATCTTTCCAGCTGTAGTGGAACGAGATAGCATATTTTTAACTATCGTG  
ATCCGCGTTCCGATTCTTTACAGTGAACCCGCCCTGGTGATCGACAGTCAATTCCCCTT

ATCGCCAAATGTATCATTGTTGTTTCAGCATACAACGTCAACGCAAAAATCAAGGCCGTT  
TTCGGAATAATCGAAAGTTACGATAGTTTACGGTGGCTTCACGTTTTTCAGTGTGGGCGGT  
CGGTGTGTCGCCCTGATGTGATACATAGGAAACGGCATACTAACTGCGGTAGATACCCC  
GGACAAAATCTTTAAAAAAGTTTTTCCTTGATCGTTGTTGCAGCCGGGGGGGATCGTG  
TACTATTTACGGACTGAGACACCAACGGCGGGTAATGAAAATGGACAACGTAAACGTAGT  
AACAAAGCGAAACAATGGTGACCCTCTTCACCTAGGAAACATCGGCAAATCCTTGTGAGTC  
GAGATCGGTGCCGTTGCCTCATGCCTCGCGTATGCTTAACGGCGGATTGTACCGGTGCGAA  
ACTGGTAGCCGGAACGGGCAAATGTTAGCGGATGCCCTGTAAAAAATTTTTGGTCCTGG  
GGCATAGAATCGGGGCCCTTCGGTAAGAGTTAGTTAATAGAAGAGGTAAGGCCACCCC  
ACGGCGAAAACCTCGGGGCTGACGTAACGGGCGGGGGTGCCAGGTCGGAAGGCGCCTCGCT  
GGTACCTCAACCTGATGACATTTGTAAAGATTTGTAAAGACGCTGGATCCGTGGCGTGGT  
TATGCTATTATTTACACATGCCGATGGGTAACGGGAATCGCGAGACAAACAGCTAATCTG  
CCCGATATTGTGCAAATGAAATTGATTCTCATTCAACAAAAAATTTCTCTTGCCATCGCG  
TGTGCATGTGTAAGAAAATTACCGATCCCTAAAAAATTTTTCCGCTCTATAATAAGAATA  
CGTTTTCAAACCTTAACACTCGATCGAGTACCGCGCGGAAAAAATTTTTTCGATAGAAATA  
AACAAATGCGTTTTTCGATTTTGTAAAACCGATCGGGTACCGAATTTTATCCAGAAAAATTT  
TTTTTGCGATAAAGAAAATATCCGATTTTGAATCGAAAACCTCGATCGAGTACTCGGACT  
TAATACCCAAAAAAGGGATTTAACATTTCTGAAATTTTGCCACAATTCCTGTACCGGGG  
CATGGAAAGTCCATTAGTAATCATCCTGTTGCATGGGTGGGGCTTAGGATAAACTGCTGT  
ACTATTCTAAATGTTAAATCAAATAAAATGGATTTACACCCCGGTTATGAGGGAAAACC  
ATTTCAAATCCATTTTCGATTTTCATTTTGATTTCCAGGTCAAATTTCTGCCACAAATAT  
CAAGGGCAAACAACGTCATCTTGAAAAATAGTACGCTTTCAAAATAATTTCTTGAAGCG  
AAATATCAAGTGATTTTCAGATCGTTCTTCCATATATTGTCAGATTCCCATGCAGCACGTG  
CCTTTTCTTCTATGTAAAAATATCCGATATACCTTCCGCTTCGGTCATCTCTAGATCTCT  
TTGCCTTTAACTTTCAAAGTTTTTTGACAAATGTTACATCTCTAGCATGTATTCCATTT  
GAGAAAAATAACTGTTCAACCACACAGGGATGTAAATAAATGTATCAGAGCAGTAAACCT  
TGTTCCCTTCTACCAGCGAATCATTGTCAAGTACTCATACTTGTTGATAATTGTGCGACC  
ACTATGTATGAAAGTTCATAGAATTATGCTATTTATTGACTACATCAAACCCATAAGAAG  
AGAGGTATTTACCGCTGTGGGATCTGTTTATAACCTTGTGCCAACCCTTCAAGGCCGTAT  
GGTGAGGGAGTCTACCATCTATCCGCGTTCTCGTGATAGACGGTGGATCGTTTAGGCCAA  
CAGCACATAACAACTACGATGTTTTGTAGATGGTTTTCGATTCCATTTCAAATCTAAAC  
TCATGCCTTCTCCTAGATATCACACGGTTTTCATTTTTGGTTTTCTTTCGAAAGTATCCG  
TCCACCCACAAATATCATACTCGGCAAGGTGCGACATTTTATACTCCGGATTTTCATCAC  
GAGTTGTATTCATCACCTCCATGAAAAGGGCTTTCATCTCTGAGAGCCTGAAGCGATAGA  
CCAGTTTATCCTTCGTCAAGTTTATATGTATGCTCCCATTCACAGCATCTATTCTTAAAG  
TATCATCACCGTCAAATAAACACAGTGTCTTCCGCAAAGAGTGATCGAGTCCTGAACAC  
CAACTACCGTATTGTATGCAGTGCTACCATGGAGCATAAGCTCAACAACAATAGAACCCG  
CGTAACCAGTTCTCTCTTCTGATTGATCTTGAAAACAGAACCACGCTTCAACTTATTT  
CAACGCGAGACTCAAGAGCGCTGTAAAGGCTGGAGTCTGTGTTAAATTCCCTTACCGCTT  
CTCCCGACCTATACAAAAACCTCATCCGAGATTTCTGCAAGAGCCAGCTTGTTATCAACAG  
ACAAAATATCTTTCTCAGTGTATCTCCCGTTTTGCCAAATGAGATCGGGGCGTCTGTGA  
GAGTAACGACAAGCGCTTTCAGTTGGGTGATATAATGCTTCTAGTCATAAAGCTTTGAAC  
ACTTGGGTAAATCCGTCAGTTAAGAAAGCTCAGACTCTCCTTTCCCGTGTGCTTGTAAA  
ACTCTGCCTCATCACCGTCATCAGTTATAAAATCAAACACTACGATATCTCGTGCTCTGTGA  
GCTCAAATATATTGAGTAACTGGGATTCGAGATCCGGGTGATGGTATTCCTTCTGGGTAT  
GATCGAGAATCTCTGTGGTTTTGAAAACGGTTTTAATCTTACAAGCTTCTGTACCTCTTT  
GTGAGGCGTTTTTAAAAAAGAGCAGTACGTTTCGCTACCCTGTATGTGATAAAGCCCGCAG  
AAGCGTTTCTACGCAACATTCGGGGTATTATGGTGTGATGATCTTACCGACCGTCTGTTG  
GCTCATCTGATACTGAATGTATGCCATGTTTCAATTTTATGCTTTACATCGTAGGGGATTGC  
TATGTTTCCGAACATGAAGTAGTGCAGGTCATATAGCTTCTCTCGGAACTTGGAGGGGTA  
GTAAGGGAATTACATCTACGCACTTGCACAGGCTCAATGAAATAGTTTCAGGCCCTACTTC  
CTCTGAAAGAAAAATGCTGTGTATCAAACGCCACCCCAACTAGGCTTGTCTGACGCATG  
AAGTCGGGTTTTGGTAAACTTATCTTACGCAGTAGGGCTGCTGATGCATCGACCAGTTTC  
ATTGGTAAGTCCAAACCAGAGAGCGACATGAGATACTTGTGCCAGGGCTGTCAACAATG  
TCAATGCTTGCAGCTGCCCGCCAGGACTGAATCCGTTATACTGGATTTCAAGGTGACGG  
ATCACGTGATGTCCTGATCTTTCGACTTTACGTTTATTACCGTAATCGTTCTCCTACCCT  
GTATAGCATGCCCCGGTGTCTTTGTTATACACGGCGGGGTATATCCTCTTTCGACCTTC

GCGATTCAATCTCTCCCCATGTTTCTCTATCCCAAGGGTCATACCCTGGAGGTGTGTTTT  
CATGGGGATCAATACAGGGAAATCATCGATCCAGATATGCGGTATCCACCCCAGCTCTGC  
TCAGTCAGCGGCCTTTTGGCCTCCTCAGCTGTAAATGATGCCTATTCCAAGTCCTTCAA  
CCAGTATCTGATATCATCGTTCCTGTCAGATTCCAATCAGCAGGTCTTGAACCTGGACAGA  
CCAGTCTGAATCTCTTGAACAGAAGAGGTGGACGAACGTCGACCACCTTTCCGGATAAAA  
AGCGAATGAGTCATCCAAATCACGTGCTCTACGCTTTTTTCTCAAATGATTTCACTCAGCC  
CCCATCTCCTCTACGATACTGTCCCACCTTTTTGAACTTCTTGCCAACATAATTTTGAAGA  
CCACGCGGGACTGTTTCTGCGACCTCGTTCGGATCGGAATCGCGAGGGATTCTACACTCC  
TGAAGCTCATGCATGTCTGCTAGGTAGATTGCACAGTAGGTTACATCGGCAATCTCTGCT  
ATTGCGGATTCATCACAACGATAAGGGGCGATTTCAGGGTTCGTGCCAGTTCACCAACTTCC  
TCTACCAGATTCGCCATGACCGAAACAGCAGATCGGGCTTGCGCCCGGACGGAGGACTGG  
GGTACGCGTTCAGCGATTTCAGGTCAATTTAGACTCCTTCTCTTTTGACTTCTCAACCTGAG  
CGGCTTTTGCATCATAATCCCGATCTCCGGTGTACTTCTTGATCTGCGCGTCAAGGTACT  
TGATGGTGTCTGTCAGACAGTTGCTGAGTACGTGGTGTATGCGCCCACTTTCTGACCGACAT  
ACGCCGCCAGCATTTTATAAGTTGTATCTTTCTGAGGCATGAAGTTTCCATAAAACAATCC  
CCAGGAAACAAACCACCATAACCGAACCTAGCAATCTTACGACGACCTATTGTTAGGTGCG  
GCTTAGGCACAGTTTGGCGCTCTGCTTCACGTTGACGAGCTGCTGTCACCTCCCCAAA  
CTGCTAATCGCATCCAACCAGAAGTTTACCATTAGGATAACGTACCATCATTGTACCAT  
CATTATCAATCCAAATGACGACTAACTCATCTCGGGCACCATAATTTGACGATTCCTGAT  
TCACGACAGGGTTCTGCCCCAGAAAGAAATCTAAACCGTACCTTTTTACTATCCGTCTCTT  
CGTAAGTCTTCTGGATTGCATGCATGATAAGATATCCAACCGCTGAAATCAAGAACAGGG  
AGCCCCAACCGCCGTAAGTTCCATCAGTAGTGCGTAAATGAATGAAGAAAATCAGAAATG  
GCCATGACATCAGTTCGTCTCCTATTTATATATATTTGGCGCAATTGTTCGATCGACCATA  
TTTACAATCAGCGCTTGAGGACAGTGCCTCAGAACCCATGAAGGAATCAATCTTGGTCTT  
AATACCGTAGAACTCTATCGCCCAGTTATATTCTTTGGCGTCATCCCATTTCTCTGGCAG  
ATAACACCATGTTAAAAGTATGGTTAATAAATGTGAGGTGAAGACTTTTTACATTTCTCA  
TTAAGATCCGGACTCATTGCCTCATCACGTATGTTATTGATGCCATTGATATTAGCAGGT  
TGGCCAGCCATTTCAAGTCGCTGTGCGAAAGCTTCTCTTGAATCGTCTTCACCCGTAGCC  
CAGAATCGCTCCCGACCAAGGAAAGAACACCAGTATGCTTTTTCCACGAGTCCAACCTCT  
TTAGGGCAGCTATCATCTGTGTAGGTCCAGTGTGCAGCGCCGTAAGCTGTCAGGCCATCC  
ATAGTCCAGTACAGACTTGGCATAACAATCGAAACTGTCATCAACATGACAAGAGCAACTT  
GAGCTACTGGGCCTCACGCGCTACATCGGCACGAGACGTTGAACAGAACGTGTAAAATTA  
ACTATGTTTTCGGCCTTCGAGCCGCCACGTAGTCGATGGGGTAAACAAGTTTGCCTCTGTC  
CCAATCGGCTCCATTCACATTGAACTTCACCACAAATCTGAAGTGCTACGCTATCGCTC  
TATCACTTCTCTTCAAACCAATATACACTAACAAATGCATTAATCACCTCTTTTATTA  
AAGATCTTTCGCTTATAGTTTTTAAAGACCTTATGAGTATTAATTCATATATGTATTCAT  
ATGCAAATTTTGCAGGACACGAGCTGCAAGTTTTGCAACACAACACGGTGTATTTGTGTG  
TGCTCATGCCTCTCGTTTTCCACAGACAAGCAGCCGTGTGTGACCAAGTTTGTATATAGG  
TGCTGATAGACCTTTCAGCAACACCAGTGGCCTCGCTTATCGTCTTGAAAGTTGCGAAAT  
ATTTCTTTGATTTTGTCTCTATGTAACCGGCTTTGTATTTTATATGCAGCAAGGCACGAC  
GATCTGTACACGGCAGATTCTTGAGATGTAACCTCTTTTACCACAAGCTAACCACCTCT  
CGCTCTTTCTGGACTACTGTAACCTCCCCACAATAGACAGGTGATATAAATACTTTGACA  
ATTCCTACAGACTTATCAAAGGATATGCTCTCAATGCACTCTGTGCCACCAGGTATCCTC  
AAACCCATAATTGTAATCTGCCACTTTATCTTCTTTCTAAATGCCCTGCCACGCCTCCA  
TTCTCAAAGCATAACAAATTCCAATGTGAAAACCTTACCTTATTGAGAGATTTGCTTT  
ACCCCTTCACTGGGGTTTTGCGTAATACCTACTTGACAACCTCCATCACTAATCATGCGA  
ATATACTAAGACTGATTTTTAAGACCAGGGCTATATAAGTAAGCATAAAGGGCCATAGTG  
ACTGTTTTATTTTCTCGACCCCATAGCTAGAAACCTCTTCTCTCCAGGTTTCTCAGGCAG  
CGACAGTACAACCTGCCATTCCATCTCACTGTCTAAGAAAACAAGTTTTACAGGGTAATTT  
TTAATATCTCTCCAGAAATCGAAGCATCTTTTTACCTTGCAATAGCAAAGAACATCATCC  
CGAGTCAATTTTTCATGGTGAGTCTGAGATCAGGTATACACATTTGCTTTGAATTTAAG  
ATTTTCATTCAAACCATTCCAAATTCTCGCTTAAGATTTCAATAACATACTTTTTGGCAT  
ATTCATCTCCTCCATCATTATGCCACATGCAGGTAATTCTTCCCGCCATAGTGTACAGAG  
AGCTCTCAAATGGAGAAAGTCCAGGTAATACTAAACATAAGCTCCTCATCTGAGGTGA  
TCTCCAGAGGATTTACCGTGTAATCTGGTGGCATAATGGTCTCCCACTCTACTATCTTGA  
ACTTATCAAGACTCAAGGCTCTTCTGTATGAAGTTGTGAGGTGCTCCCAATTCTCACAA  
CATCATTATTGAAGATTATTCGCACAATTGCCCGGTGTACATGAAAACCAATCCACAC

CGAGACCAACGGCTACGATTTTTATTTTGAGTGCTCATCTAAATCTACCGCCCTTCCCAA  
GCTGAATTAACCTTAGCACGGTTTCAACCGAAGAGGTCCCAAAGTGTATGCCGTTTACGA  
CCCCAGTCTTTTTTCGCGATGACTGAGATCCTCAATATGCTCATCAGTGAAGATTATCACA  
TCTGTTGCCCTTCGGAATGTTATATTCGATGTACGGGAATGCCACAACGGCCATAGTACCG  
CCTGTGGAGGTCACATTGTAGTCCAGCATCTCTTTGATGTGCTCCTGTGTCTACACTTTC  
ACAGCTCCAACCTTCGTTGACCAGCAAATAATGTACACGGAACGTTGTATAAAGCCGG  
CACAAACCAATAAGCTCGTAGAAGATCTTGGTGAGTGTGCTGCTGCGAGATAGAACCTGAC  
ACATCAAACCCATCACGATGTGATTGTAACCTATTGCTTCCTTACTGCCAAGATGATA  
CTTTGCTTGTGGTGATAGCACCGTAGTTTCTTACCCTTGCGTAACAGACCCCGATCTA  
CGAGCAGGTTAACGGAACGAAAGATGCCATATCACACGAGAAATCATTTCGTTGTCTGATC  
ATCTGCATGTCATCAATGGGTTGTTTACGCATCCTGGCTACCACTTCTCGAGACTGCTTT  
GGTCCTACAACACTCGCAGCCTATAATGCAGCCGCGATAAGAGCCGCTGACCATGCCAAG  
TTCTCATCTTTTGCTACAGGACCTTGACACGGGTTTGGATCAGTGGACCCAAGAATGTCA  
CGATCTGACGCATAATCTCCGATACGAGTACCCATTGAGTAACTTCAAACAGCCTTCCCT  
TTGTGAGTGGCGCTGTAAATTTCTTCCGTCGTCATCCCGTGGAAGACCTATCACAGTAA  
CAGCATAACCATAAATCCGAATTCATTATTTTTATCAAAGACTGTTTGCACACCTCCTGGG  
AGAAATCGCATAACCCTGACAACGTGGCCCAAGATCGCTTATCACAATATCTATGTTGATA  
TACTCACCCGCAGCAAATTTGTGCAATCTTGAATCGAAGAACTTACCACGAGCCATATGA  
CCAGTGGTTATATGGCTTGACTCATGGATGAGAATAACCACCACTTCCCTTGGTGTTTTT  
TTACGATAGAATACATTGATATATTTTTAGTAGTCAGGCTTCTGTTCCCTGAATCATGTGG  
GGGTGTTTATCAATTCGGGAAAACAGCTTCTTCTCCGCTCTTCCGGCATAACCATGATG  
AACTTAGGGTAAAAATCCAGGTTGCGGTGGTCAGTGTCCGCAGTCGGCAACCAACACCAG  
TCAGAGATGATCGCCAAAGAACTCAGCAAAGTTCCGTATAATGGAGGCTGTTGTAACAGT  
GCAATACGTACAGATTGAATGACCTTCAGCGCATCTTTCAGAAGCTGCTCAATAATTTTCG  
ATTTCTGCTTTTATACATAATTTCTCTCGAACTAAATAAGCCCATCAATCAAGATGGCCTCA  
GAATATGTGATTTTTGAATGCGCATCAACTCTTTTTTCATCAACGAAATAATCTCTTCCCT  
CCACCCTGAATTCCTCGTCAAGTTTTGGCGTAGGCTCATAGGGGATTGGTAGAACAGCAA  
ACAGTACAATTGCTTCCCCCTTTCCATAATGGGCTTCGTCGACAATCGTTACCCCTCAC  
CAACTCCAATTGTGGGCTTGAACCCATGATCCAGCTTCTTTTGTGCGAGGGGGCCGTTGCTG  
GTAGGCCAAGATGTGTTTCGTACACTATACCACTTTGTTTCGCCAACGCGGTGATCTTCGG  
CAGACTGAGACCTGCCTGGATGATCAATTGGGACATTGCTGTTTCCATTTTCTTGGATAC  
ACTCATCAAATTATCTTTCACAGAGCCAAGTATAAGGTAGAGGATCAGGATTGACTTGGG  
TTCACCTGTCTACAACCTCCCGTGTATCGAGCAGGTGTTACGGACATAATTTTTCTTGGAC  
CTGTGCAAAGTCACACTTGCATTCATCCCGACCTCAGAGAAGGGCATGGAGGAGCTTGC  
ATACGCCAGTGCATCCGCTACGTCATCCGGCAGTTTTGCTGGGTCCGGTGCTTTTTTCTAC  
GTCCTCCTTACAGCCTCGGTTACTGCCTCAGTAACTTCGCCCTTGTGCATATGCTCTTC  
TGCTTCCCTGACTCAGTGTCTTCAATAGCAATCATCCCGTTCTCCTGTAGTGGGATATA  
ATTAGTTTTCCGCATTTCCATATGGTCTTTTTGCATGTTTCGGCATCATTGCCTGCACAAT  
CTCGCGATCAAGCGGTACAAGTATTATGATTGCAAATTTCTTGTCAAACAAACTACCTTT  
CTATTCGTTGGCACGACGGGTCGCAACACAGACGTTTCGCCGCATCTAGCCCTTTGTATC  
GTCGTTCCGTTCAACTGGAGGTTCTTCTAGGTTATAACCAACCTAGGTTACCTTGTGAAA  
CGGCATGTTGGTGTAGTCGCAAGTACCCATAACCGAGTACTTCTAACCCATCTTGCACCA  
ATCATCGAGGGTGAGTGAGAATTCGATACCACGTTTTCTTCTGGGCACATACTTGGTCTG  
GTAACCTCTTTCGAGACTTTTCATCTCGTTTGGTGTATAATTTTTATTTCCAGTCGAACAT  
GTTCTACTCCGGGGTTGTTCCCGTTCTTGTGGGGTGATCTATCTGGCATTCAATCCGCGC  
TGTCATCACTTCATTTCAAATTTCTTACAGTGTATGCTTTGTTTACTTTTGTCTGAGGGA  
AGGATAAGAATGTACAAATTCTAGGTTGATGTTAGACAAGTAAATGCCGTCAAGGTTACA  
GCAGATATCGACCGGAGCTTATTAAGAGATGACCAGAACACTCGCTCCCTGATCGAGCAC  
TGGCCTAAAGAGCACGAGTGCCGTCAAATGGCAATGATGGGTGTCTGGGATACGCCAGGA  
ATGAATACCGATGATTTTTCTTCTGGGTTGCACCCTAGGGTCATCGAAGACAATCCCCCTC  
GCTGAACGACACAAGGGCCTGCTTAAAGGGTGGATAGTAGACATGGGACAATTGCGTGG  
TTCTGGGGTCATGACTGGGATGTTAAGCGGCGGGAGAGCCTGGATAAGAGGTTTTAGACC  
CGTCTCGAGATACATATCAGAGACAGGGACTTTAACTCAAGCCCGTTTCGAGCGGCAAGAG  
GTCTCAAGAGGGAATGTCTCTGCCATTATCCGAGGGCATGGGGATGGGGATCCCTTAACA  
AAGTGGTCTTCTTGGAGGTTTTCAAGTCGTACAAGGGAGTTTCTCAGTTTGTGAGCCC  
CTGATCAGACAAATGGGACGTTGTGAACCAGACCTTTTAATCAAAGAAGAGTTCGCGAGA  
TATGGCTTTGGTTCAAATGCAAGCAGAAGTCAGGAAACGACTTGGATATTCTTGGGTTT

TCCTTGTCTATCGGAGATATTCTTGTTTTTTGGCGATTTCAAGGATTTGCATAACTTGGAT  
GTGCAGTGCACCCACATTGGTCCACACCGTCTTCCACTTGCCTGATCGTGGCGTTAAGGTC  
AAGAATGCCCGTGAAGCGTTTTTGTATTTGCAATAAGAATGTGACATTCTTCCACTTCCGT  
TGGGTTGAAAGACTAAAAATATGATGGCAGGGGAAACTCCCAGCCCGGAAGCGATAATG  
ATGATGGAACCTGGCTGAATATAAAGATGAGATCTGGCTTTGCAACGTTGATGCTTGTGAT  
ACGCTCAAGAGCAAACGTTTTAATATGATGGAGCAACAAAGATCGTCCGAACTCTCAATT  
CCACGACTCCAGTTTTAACCCCGGCGCAAGAACCTGCCCTGGCTATCAAGATCGGAGCAG  
AGGGCCACCTGAATCAGTAAGACAAGGGCGGTAATCCTTATATCCATCATCCCCTGAATG  
TAATGCAATACCTGAATACTGATGTTTTACAACCTGATGGCGATAGCCGTCCGGCACGATA  
TGTTGGAAGATACCGATGTAACGGCTTCTGATCTGGACAGTCTGGGCTTCTCCAACCGTG  
TGGAAGATGCTGTGGTTCTGCTGAGGAAGACCCCCAGTCCAACACCGGAGCAAAATTTTCG  
GAGGCATTGCAAGGAACCTATGATGCGGTCCGTGTGAAACCTGCAGACCTACGCCATAACT  
CTGATGATCGTCGCGTGAATGTCTTACAGATAAGGATGTGTTGCGTGTCTGTAAAAACC  
ACGGTATGTATCTTCTCTGACAAAGATGGAATAACATCATGAAGCAAATGACCTGTCTG  
CACAATGATGAATCTCTTGACACTGCTTCGCTCAAACCTAGTATATTAAGAAAAAGATGGG  
CTTCTGCTAGGGATGGCCTCGTGGAGAGAGATTAAGCTCGTTCTCAAGTTGGAGGAACG  
TGGTTACATTCAGGTAAGTAGCAGATACCAATTTAGCGGGCCGGTGTCAAGGCCCTTTTG  
TGTTTACGATCAAAATCTTTACCAAGTGACTCTAAACAGGAGCAAAGAATGTCGAGCAAT  
CAAGGTTGGACCCACAAAGGCGCTCTCAAAAAACCCCGCTGGGCTGGGCGAGGACTGAG  
AACTTCGCGAACC GCCTCGTCACTGGATGTCTTACCTGGATT CAGGGACAGGAAAAGCA  
GTGAAGTATCGTAAACTGACGGGTAAAGGGCGGGTGGTGACGAATACCTCGACCTTGAA  
TCCCTTAAGGAGCTTTGATATGAACACAACCTTTAGAAGAGGCTATCGAGTTAAGGTGTAG  
AAACGGGCAGAGTGATGAGGAGATTGTGGACTGGCTCTTGAAGCTCTCTGATCGCAAAGA  
AGAACACCTTACATACTATAAAAATCATGCCTTTGAACTGAATTGAGGTTTGAATCAGGC  
ACAGCTTGAAAGTGGTTCGTCGGGTAAAAGTCTCGGTTGACAACATCATCAGGACATGTTG  
GGGAAATTATTTGTATCATAACAACACGCGTTACGGTTATGATGGTAGATTCAATGCATG  
GATTA AAA ACCCTAGCAAAAACAGTTTTTTACAGCACAATATCGAACTCCCCCATCAA  
AGTGCATGGGGAGGTTCTTCTCTGACCAAGAATTGCACCCGAAATGGGAGGGGGTTGC  
TGTTGGTAATCTGTTTGGTAAACGCCTGTTTGCCGTAGAAAAAGACGGGATGTAGATTAA  
CTCTGGTGATACATTCATCATCACTAAGAAGGCGAAGAACAATGCGTAAGTGGAGAACCC  
GGTTTAGTTTGCTTGATCTGTGGGGTCAACCTAATGGTGAGTGCGGCCACAAAAGTGGA  
CGGATACGACAGTTCATCAACTTACAAAAGACATCGCACGTCTAAGAAAACGTAAGTTTC  
CACAACACACGATCGATGGACACGACTGGGATCCTCGTTTGCCGGAGGTTACAGCATGT  
TCGAATAAGTACCGACTCTTAAAGAGCAGCGTGACGTGCTGGACCGTCTCATTGTAAACG  
AAAATGTTTGCTATGATGAGATCTGTCAAATATCGAAAGATACCCCGTTGGCGCAGTTCA  
ACGAGGCTATGGACCTGTTTTATGATTCGAGTGAAAGTAGTTCTGTGTGGGTGGATAAGT  
GAGAGATTTAGAATTTTCAGATGCGGCAGTCATGCCGCCCTCGTACCCGCTTGACTCG  
TCGTGCTTGGTATGCAGTCTTTGGTGCTCAAAGCTTCAGCCATATGAATAAACGTTCTC  
TGAGTATCTTGAACGAGGAGCCAGACGATATACAATGATATTGCCCTGGAGAAATTGT  
GGGAGTAATTCCAATTATCTTGAATCAAGGAGACAAACACATGTGAGTCATAATATTT  
TTTATGATAATCGGATCTCCCGACGTGCCATCCCGGATTTAATGCGCTTCTGTCACCGCC  
GTGGGCGCGCGCTGATGAAGTTCGGTGGTGCAGGCCGAGGAAAAATTCAGGCAATGAGGC  
AGTTCGGAAACTTGCTCTTTGGCGAACGAGACGACAACCTGATCGATTTCCGTCTTTCCG  
ATAAAGAGGGGTCAGATGTTGTGGGCGTCCAGATCAAGGTCACATACGATAAGGGTGT  
CCCGGACCGTTCGTGCGATCCCAACCTTCTGGCCTGAAGAACCAAACTGGATAGGTTTCG  
TGTTCTGGATGAGCTTCTGCATGCTGAAGCTTACGTTGAGAATGTTGCATAACCAGATCA  
TGCTGGCTCCCCGTATTGCCACCTACATGTTCCCGAAAGGAGATGTGTTTGCAGCTGCAG  
GCAACCGTGCCGGCGATGGTAGTCCGGTAAGTATCCTGGAAGCAACTCTGGCCAACCTTG  
TGATCCTGGTTGAAATCAATTAAGTACGTACTGTTTGGCCGCAAGATTCCGGCCTGCACA  
ACGATGTTCCGCCACAACGTTTTTTCGTTTATCGGTGCAACACACGTAACAATGGACAAC  
ATAAGGTGATGTTGGAATCAACGCCCTTCATACGCCACGCCTCCTACTTGGGTTAGCG  
CAAGTGATATCCTGTGCGATTAGGATGAGGGTATCTTGTCCACCCGCCTGGCCCGGGCCG  
CTCTACAAGGATCAGTCGGCAAAGCAATGAGCATGGACGGTTGGTATTATCTCACCCGTA  
GTGCAAACATGTTCTTCCGAGCGGGTTATGGACGGATCTTCAAGAAGCCCACCGGGG  
CAGAGACCTCGGCTGTGTTAAAGACCCTCGGCTCTCGGGGATCAATCTGGTTGCGTACGG  
CAATTCAGAACAAGAGTACGCAGATGATGACGTTATTGTCTTTGCTGCAAACCTTGTTGC  
AGTACCTGTATGCCAATTTCTGTTCAGCATGCGAAGTCATGGAACCGTGATTTCCGGGAGT

CTGTGCCCATGTCATTCATCCACGAGAACTCGTCTGAAAAAGCAATCCTGTTGTCGGGTG  
ATCGATGGCGCTTATGTCCCTAATTGTGGGGTGAACACCCGGTAGTAATGCTGTTTATCA  
CAGACTATCCCAAGAATTTTGTCTGAAGGTTTTGAGGCACGCGTAAGCTAATCCTTGACCG  
TCCCCAGTGGGGCGGTTATTCTCTGCTCATACAAACAACAGCGCGGACAAGCTCAGTGAC  
TGAGTTAAACTGGATAGAACCTCAGACGGCTATGCGTGTAGGTATAAAGGTACGCAACCA  
CTACTTTAATCCAGGGGAGTTGGTAGAGATGACGAACGGGCAAATCGTATGCGAAATCGG  
GTACAACATCGAAGGTTGGCATCATGGCGAGCAAGGGCAGAATGAGGGATGGAGCGCGAT  
AGATTCGTCGACTTAGCTTCGCGGACATTTATATGCTTGATAAACCTGGTCATGAACCTT  
TAGTACGTCTAGGCTTCCTTAACATAGAATATGTGAAGGAGCCGTACGGCCCAGACGCAT  
AGTACTGCCACATCCGTCAAGACCATGGGTTTTGTCAATCTTCTGGATGGCTGCGAAGA  
GTGCTGGGGCTCTCTTAGGCAAGATAGCTGAGCACGACAAAGAATATGGTCTCTGTCTCT  
GGGATTGAGAACAACGGAACAGAATTGTTATCATGAAGGAGGAACCTATGTTACAAGAGAA  
ACTTCGTCCAATGCCTAATTATGCCGATGTGATGGATGTACATTCACGGGATTGCTGTGT  
AAAATGCGGTGCCTTCATTACTGAAGACGGAAATGGGTACAGGTGTCCTGATGTAAATTA  
TGAGGCCGACATCAGTTGCTGGAGTGCTCGTCCTGAATGGGCGTCCCACGTAGCTTGGTA  
CAATCGCTAATGGCAAAGCTCAGATTTCCGCTGAAAGAGATCAACGAGGTGCGGGCGGATT  
GATTGCTTCTACATGGTGATGGCTGGTTATACATACGCGCGTCAGCGTATTATAGTTGTG  
TGTTCTATGACGAACGCTGAATCTCGTGAAAGCATGGAGGCTTTTTAAGAGAGGAGTTAT  
GCATGAACGTAAAAGCAAACCTCAACTACAGCGAGCGCCTAGACCATGCCCTTCTGGAG  
AAGTCGTCGCTATTTAGGAACATGTTTATATCGGGAATTTTCATAGAATTTTATACTTGTG  
AATGGACAGGTGGTGACCTTGAAGATTACGCCTACGAGTGTGATGAGGTCAAGAAATAAC  
ATGTAGAAGAGTGGATAGGCATTGCAGTCGCTTAAATCCTCCTTCTCATTGACACTGAT  
ACCTGTTTGTAGGTCTATAAACCTCTCGCACGTGCTGATTTTCGGAAGGGTTGCTGGG  
ACAAAAAGAAAAGACAGTTATGTAAGGCTTGGTGTAAAGTTGAAGGCACAGGTTTTTAC  
TTCTTGGCCACAGTGTGGTTGGGTTCTTTATTACGGGGTATGGCCCACTTACTTTATT  
GACCTCAAGGATCGAAAAAACATAACAACCGCATTCCAAACCTGAGACATGTCCAGAAA  
TTTGAAACCTTTTATACTTATAGCAGCGGTAAAAAGAACCAAACAGGTTTCCGTGCTGGA  
TTCGTAGATAAAAAGGTTAACAGGACGCAAATACCGTGCCGTGTATAGCAAACCCACCTT  
GGAACATTCGACGCTGCGGAGGAAGCCAATGAATGTTATCAAGAATACCGAAAGACGATT  
TATGACATTGTACTGGAGGACTGAAGCTTTAGCATAAAGTAGGTGACCTGATTGAGGCTG  
TGAAATCTGGGGAGGAGAATGGATTCTCGCATGGCTGCAATTGTTAATACACGATGGGAA  
GCGGGATCGTTTCTTAATCAAAGACGCGTTCACAAAAATGTACGCTTCCGACCTGAAAA  
CTGAGAAGGGCGGCGAGACCAAGCTGGGAACCTGTACCGTGGCCATTTTGGATGTTGGTA  
CTCTCGCAGGATTTAATCTTTACTCACAATACGGCTATAATCATCGTATACAGGGTTTCA  
GGGACCTCGATTAGAATGCCCTGTACGATTCGATGGTTGAAATTAAAAACTCGAACGGA  
GCCAGACAAACAACCCTATGGACATCTCTCGAATCGGCTTCCCTAACCTAGCTGCTGCGC  
TTGCATGGGGTGAAGTGGACTGTGACGCGGAGCAATGATCCAATCAATCTTCCACGATCGTG  
ATGTAACGGTGTATATTTGTGCGGGCAAAAATGATGGTGGAAATTATCTATCTTCTGAT  
CGTTTTATTGGATTGTACATAGTCATTAAGCGGACGCAAAGAGATTTTCGGGAGAGTCGA  
GAGTGTAGATCTCTTTGCTGCTGTATGCATGGGATTACTATGGCCTGTGTACTTCACTAA  
TCTTGTGGTGTGCTGCGATTTATGACCGGAGAGTGCAAAAGATTGAACTATTAGCTGGAATT  
AAGGTCCATGCTAAAAGTGTGGATGCCTATGCAACAAAGGGAACCTATATTTACATACAGT  
GCTCCTTGTGGCAAAGAATATGCACTCATATCGATGACCGATGAAGATCCTAGAGATGA  
TGTTGCCAATCTAGTAAAGACTAATCAGTGGATGGAACCCCTTTGGTGGCAACACTAGCG  
GGATGACTGATGGAAGAAATTGGGGTTATCATTGACACCCACACTGCAACCTTCTGGAAA  
TCTGCTAACGAAAAGACATCATGCCCTTCTGCGGGAACAGCTAAGTCTGCTTTTGGTTCA  
AGTCGATAACAATCCGCTCCGATGACTCTACTCCCAGCAGGACCGAATAAAGCTCGCGAAG  
GTAACCACCGCAGGGGTGATTTTACAGTACGGACAGCGTGGACGTCATCCATGATAAAGA  
TAAAGGCTGCCTGTGGCACTATAAAGCAAAGATCGGTTGGATAAGTTCGGGGCGCTGCAGA  
AACCGCTGAAACCTTGGGTAGCAAATAATCTTTGAAAACCGAATCGTTATTTTGTAGT  
CGATGTTAACTATCTTGTGGTTAAATCTTTAATTGGGGAGATGAGAAACGACAATGAGTA  
AATCTGAAGCAGGTATCGGTCAGACTGAAAAGTAAGCGGTCTTATTGGGGGTAAGCGTT  
TTGCTTGCACACTTACCAATGCACGTCCTTTTTGCGGCTTTGTGGTCACGAAGGATGTTT  
GGTGCATCCAAGGCTTTTGTTCGTGATCTGAAAAATCGAGGCTTCGACAATGCCGAAA  
TCCGAACCTCTGTTGTAAGAAGAACTGATCAATCATGGGCGTGACCTCTACGCCCTCACGA  
TGACCAGTGCTTTTTGACTCGACAACGTGTGCCTGCTTGCATTCCTTGCTTCCGGTGTGG  
CGTGATGACTTCTTAAGCTGCTTTTAGATGCAAAGGAAGATGCTTATCTGTAATAAGGG

GTTTTGTCCGTAGAGGGTACTCTGACCTATCGTGAGGCACCAGAATATTGCCAGGACGCC  
ACGAAACGTTTTTCTCCCGGCGTATGGGTTCTCACCCAAGCTGATTCTGTGATGGCCACC  
ATGCAAGTCGGTTACGAAGTCTGTGTGGAGCAGAAATAATTGACTAAAGCTGTCAAATAC  
CCAAGCACTAACAAGTTCCTGTCGGGTGATGCGTTCGGTCCACGTCCGTCTTACCTTTGGC  
GGTATTGATAATACCGGATGCGTACAGCGTAAGATTGTTAACCCAAGTTCATCCTG  
CTATATGTAGGGACTGGGAAGATCCACGGGACCAAGGTGAGCATTGTATTTTACTCGGAA  
CATTTTCGTTTTGTTTTAGTCCAAAGAACGTTTTTCTGTCTCTTGAGCAGGATAACAGCGGC  
GTCATGGCGTTCATGGTGCCTAAAGCTACTGAAGCACCGATGGAACAAGTTAAACACATC  
TGCCGAATCAACGAAGTCCTGTTTCGAGTTCCTCGGTTCGAAATCGCAGGTGGATGGGCTGGT  
CGCGGTATTCAGAAAGGTGTCGCAGTCAGTCATGTTGAGCAGTTCTTTGCCATCTTCCGT  
GTTTCGATCGGTCAGAAAGAAACCTCACAGAAATGGTTACCACCAAGCGCAATCTCCGGC  
AACGGCCTGCCGGGACAGCGGATCTTTGATGTGCTGGATTCCGGTACTGGTGTGTGCTT  
ATCCAGTTGAACGAACCTGAAATGGTACAGAACGATCTGCCAACGCTGACCTTGCAGTTG  
GAAGCTCCATGCCCTGCTGGTAAGTTCTTATGTGTTGAGGGTGTCCGGTGAAGGGATCGCG  
TGGATTCCAAAGAGCATTGAACTGGCAGAGCATTCCGGTCTGTGGTTCAAAGTGAAAGGA  
GAGAAACAATCTGTCTCGAAGGTCAAGAACCTATCAGAAGTTGATCCGGAACGCCTACAG  
AATATTCGGGATTTTGTCTGAGTCTGCGGTCACTGAAAACCGTCCGGAGTACGGTCTAGGT  
TAAGTGGGTCTCGACCAGAACAAGATCGGTGAGTTCATCGCTTGGGGTTGCCGTGACAGC  
AACAAAGCAAAAAGGTGATTTGCTGGAGGCGAATGCCCAAGCCATGAAGGATGTTGCCAAA  
TTTATCAGGAACAAATCGCGTGGTTAGTACATGCAAAAACCTGAACGAGGGGCTGTGATGG  
ACCTTATCGTATCCACAACCCGTGCGGTTAAATACAAGCCTTTGCAGGCTCAGTGTGAAA  
CTGTAATCTTCTAGGACGAAGAACATGGTAGAAATTATGTGCAAGAACCTGGTACCTTTG  
TCTTCTACTTTCGAAAAGCGAGTTTTGTGAAGAGTAGAAAAACCCACACACAAGTTTTAG  
GTGGGACAGCAAGTAAAGGATCTTCTTTGCCGCAGGGTGATAATCATAACTAGTCGCTGT  
TACTTTAGTGGTCAGGTGTACGCTTTCGACTCTGTGAGTATGTTTTTGTACCCAGAGGAA  
GATTAGGAGGCTGGCAATGCGAATGCGTGAGTCGTTAAATGAGAAGAGAAGACAAATGGA  
GGAAAACGTGGTAAACTCTATAACTATCACTTGCAATAGCATCATCAATGGTAACGTAGT  
TGGTGGTGATATGAACCTTACTTCGCGGGGTGATAACATTTACCTAAAGGGCGAGTTAGT  
TCACTAACGTAAGAGAAGAACATCAGTGGGGTTATTCATAGTGACACCAAGGGTATTTT  
GACCGTTGCTGGTGATGTCAATGTTTAAAGGCGTAAATGCTCGCAATATCAAGACAACCTC  
TGGTGATGGTCATGTTGAGCACGGCGCACTAGGGGACGTTACCACTGTGGACCGGGATGT  
TTATGCATAAAAGATCAAAGGTAATGTGAAAACCTGTCTCAGGCGACATCTCCCGCCGCTA  
ATTGATAGCCCCTTCTTGGGGCTATTTAATATGGACCAAGATTTGAAACTAAAAGCAGC  
AGTCCTGCCAACCGCCAGTGCATTCTCCCTGACTACCACACCAGTCTTAGCCAAAGAAAA  
CGAAAAGAACCCCCAGGTGATTCATGTTTGGAAAAAATATGATACAGTAGTAAACATCTT  
GTCATGTAATATGTATCGTGAAGCCCGTGGTGAAAGCGATCATAGTTTTAAGTCAATAGC  
TTTTGTGCCGCTTAACCGTAAAGACAATGATAAGTTTTATCGGACGGTTAATAAGATTGT  
CTTCCAAACGGGGCAGTTTTCTGTGGACATCCTACAGTACAAGCCTCAAAGTGTATGACTA  
AGATCGTTGGGGAAAGACCAAGGAGTTCGCAGAGGTATTGACCAAGAAAAACAACAATCA  
CAAGATGGTTTTATGACGCCAATGACATCACCAAGGGAACCTACGAATTATCATTCAAAGAG  
GGTTAATCCTTACCGGATCAAGGCGGTGATTTCGCACGGTCAGTATAGATAGCCACATCTA  
CTACAAAGAAAAGCCGGAACCCAGGGAGCCTGAACTTCTGAAGACTTTTTTTGATGCTT  
TGTGTTAGCATTATCCTCTATCTTGTGATACTGTCTATTTATCAATGGATCTTCTGGGAA  
CAAGTGCCAGGAGCGTATCTACATGGCTACCTGGTAGGCATTTACATAGTGCGGAAAGCT  
TTCAAAGAAAACCCCATAAATAATCGGAAATAGAGGACAGCAGG

>NewGenomeName\_210

AGGACTAGTCCATTCGTTTTGGCTCGTACTCGCGATTGATGTCGTCGGCGGTCCCTTTGAC  
TCCCACGTTTCGTCACACGGTGATGAACACGTTCTCGCCATCGAGGTGACTGGGGAGCGG  
TTCCAGGGCTTCGACGATTCGCCGGAGGGTGGTGAAGCGGGGATTCCGCCAGATCCTCCGG  
GAGCTACAATCGGGCAATGCAGTACGCGAGAGCCATCGTCATAACATCGACGCGGTCCTC  
GTAGTGCTGCTCGACGGCAGTCTCGTCGTACACCGTTGATAGGCGGGCGGAGATGTGCTT  
GCGGCTGAACTTGCTACCGTCGGTGACGGCACGGATGTTATCCATAGTGACGGTGAGGTC  
CTTCTCGGACTCGAGCTATGACTTTTCAGAGGGGGGTGGTGTGATGATGGCGAAGACGAACA  
CGAACAGGAACTGGCCGACCATCATGACCAGCCCCCTGCCGACGAGGCGGCGGAGGACCA  
GCCACGATGACCGGTTCCGCTCCCTGCGTGGAGTGTAGGCGTTGTGGCTTTCCATGGCTG  
GGGCTCATCTCAGAACGGCGGTGCGTCGTGGACCGCGCAGACGACCGGCTGGGCTTGTA  
GCTGCGGAGGCGGATCGGCTACATCGCAACGATTGTCGCGGATGATGTACCACACCTTGG



GTACCGGCTCCTGCAGGATCGTGGAGGTGCTGCGGTGCGCGAAGCTGGGGTGGTGCTCGT  
AGAAGGTGCACAGGTCCTGCAGAAGGGCGTCTCCTTCGGCGACCAATCTGAGCACGTACG  
GTTAGAACTCGCTGTCGAGGCCGTGGACCGTGCCAGCCTGCACGAGCGTCCCGCCCCAC  
CGCATCCGCGCTTGCAGGATCCGGTGGTAATGAGGGAGTCGTGCTGATGCTGCCTCT  
TCTGGGATTTCTTTAGCGGGCGCAAGGCTACTCCTCTTCGAGCAGGCCGACGTTCTTCCC  
GTAGGGCACCTCGCAGCGTTGGTCGACTTGAAACGATGTGCGCTGTTCCAGTTCGGCGAT  
GAGCGCCTGAGGTCCTAGAAGATGGTGCCGGTGAGCACCTTGTCCCCGACGTCACCTTG  
GTACAGGTACGTGCCAGCTCGTACGTACGAGCTCTTACCGGACCTCGCTGGTATGCAG  
CAGGCCGACGAAGCCCGCTCGTACTGCAGCGGCTGCAGCTCACCCAGCTTGAACCTCGGC  
CACGATCGCCAGCAGGTTCCCGGCGTACATGTGGAAGTCCTAACCATTCATGGTCTTTCA  
CATTGTCCTGAGTCCCACAATCTCTCTCAACGCGCACTCGGCAACGGGCTTGTACAGGTC  
CTTGCCCACTACTTCGCGGGGCTGTCGGTTCACGATTGTCTACCCGATCCAGAGATGTA  
GTAGCCGGAAGCGATGTGCGCCCCGGTGCAATCACAGGCCCTCGATGGTCCACATCTCGTG  
GCGCAGTACCAACGGTTCCCCGATTGCTAGGGGTCTAGTGCGAATATTCGCTTGTCCAT  
TCGGTACACCTCCTCCCCCCTTCATCCTAGATCAGCGGGCTGAGCCTTGCTAACAAAGC  
CCTTGAGTGTGTCCACGAAGCCTGGTGGCAGGTCACGGGTGACACCCTCATCGTCGGCAG  
CGGCCGTAAATACGAGGTGGCTGTACAGCTCCTGTCCGAGGACGCTCTGGGTGACGGCGC  
GGACGATCGCTCCGCCGTACCGTTTCGGGGCCCCGCTAGACGACCTGGCGCTGGCAGTCGT  
CCTCGACCGTGGAATCCTGTGACAGATGGGCCTGATCGGCGACCCACACCGTAACGTTTCG  
GTGCGAGCTTGATCGCGCACACGGACGAGCTGCCGATCGCGTCGCACAACGCCCGCAGAG  
CAGCCTGGTTCGGAGCCTCCGAGGTCGATGCGCTCGGTGCTGCAATCGGTCTTCAGAAGGA  
CGCCAGTCGTGTCATGAATCTGTCCTCAGTGAGTGCATCGTCGTAAGTTCGAGTGAGTGT  
ATCTACGTGGTTCGGGCTAGCTCCTGGATTTGACGCTGACGGCCTCATCCTGGTCCGGCTG  
GGTGCAGAGGCCAGCTTCGACCAGGCGGACGGCAGGACGGCCGTAGTCCCCTGAAAGTG  
CCACACATGGCCGCTGTCGATCAACTCCTGGGAGAGCCAGATGGTCTGCTCGTCGTCAG  
TTCGTCGCGTTCAAAGGCGATCATGCGGTGCGATTAATTCAATCATCCGTCTGTCTTCTCC  
GCGTGCGGGTGTCTTCGGTAGTTTGACCCCCGCCAGTGGCGGCAACCTGGTGACGGCGG  
CCGGAGTGCAGACGGTGTGGTGCGCCCGGAACAGGCCCTCGGCGTCTTACAGCGCCTTCC  
CGAGGTTGACGATGTGCTGGGCTGCGTCCACTTCGGCCTTGCTCGGGCGGTGGCCGGTGG  
CTTTGCGGTAACGCCGAGTGCAGGTCGTGGGACTGGTACCCGCGCCGGATGTGCTCGG  
CGGTCTCTAGCACCTTGGCGTAGCGCTTAGCGTGCGCGCCCGGGGTCTCTTACCCGA  
CCTCGTTGCCATTGGTGACGTGCACGACGAACGGGTGTGCGTTCGCAATCGGGCAGGACCC  
AGAAGGTGCCGTTACGCGGGCCGGGGGACAATGCCTCGGCTCCCTCCTTGTGGCCGATGA  
GCGCTACGTACTCAACCGCCCCGCTCCGGGAACAGGTCGATGGCGGGCTCTCTGGCAAC  
GATCCCGTTCGCGCATCTGCCGCTGGCTTTGCGGCACGACGGGGATGTGCGCCGGGACCAT  
CCAGCCGACAGAGGCCAGTGCGCCAGGCGGTGGGCGTGCCGGACGAGCGGATGTGCTAGAT  
GATCGTGTGGCGGTATGTGGCAAGGAAGTCGGCGTGGTGACACTCCATCAGGTCGCCGAG  
TCTCGCCTCACGTATGGCGTACCCACCCTGCAGGCGGTTCGATCCGGATCTTCTCATGGCG  
CTCGATAGCCGCTGGCTCCTCCTCGACGCGGATGCTGCTTTGGCGAACTCTCATTTCGCTT  
ACCCCGCAGGTCGCTTTAGTCGATGGTAACGCCGACGGCATCCGGCGGGTTCGGTAATCT  
TCTTCGGCTACGTGATGAATGCCCCCTCGCCCTAGCACGACGGGTGGACGGCCCAACAAG  
TGAGGGCCGAGAACAGTCCCTCGTGGGTGGCGTGGCCGTGTACGATCCGGGCGCGCTGG  
CGGCGGAGACGCGCGGGGTGCCGCTGTCGCCGTCGAACGTCTAGTGCGGGGTGGCGGCAT  
CACCGGTGTGCTGAAAGGTGCTGCATGGGTGCAATGGTGGCGTGTGACGGTCCTCTTTC  
CGCGGTTTCGCGTCCGACCGGGCCGCGCATGGGGCGAAGGCAAGCGTTCAGGCGGCGGGCGC  
CCGCGACGAGCGTGTATGGGTAGAAGCGCTGGGGGGACTTAGTGAACCTCCTTGGGGCTG  
TTCATAAATTGGCGTAGAAGTTGCCCTGTCGTAAGGCGGTGAAGCACTTCAGCTCGAGGT  
CAAATAGGTTCGTCTCCCTAGATGGCTCGGAGGGTTCGGGCCGTGGGAGGATGATGTGCTCG  
GATAGAACCCATAGAACTCCTCCTGCGTGTTCGGCCGAAGATGACGACGGCGCCGTCGA  
TCTGATCGATGAGCAGGGTGTGTAGGGCAGATGCTGTGCCACTGGTCTCTTTTCCCAGC  
GGAATGAGAAGTCTCGGGGGTCTCGGTAACCTCCGCGCGGGCGCTGGGCGATGGCGGCCT  
GGCGCTCGCAGGCGTAGTGCCGCTTGGTGCAGCGCCTGGATGGATCTCGGGTGCGGGCCAC  
GCTTGGCTCCGTAAAGGATGTATCCGAAGGCGAGGCCGCTAGGGAATCCCACGATCAGCT  
CCCCATCTAGTCGGTTTCTGCTTTGCCGACCACCAGATCGATGTGGACGATCATCTCCCC  
TCGGATAACGGGGGGGGGTAGGGCTTTCGGGGTGTTCAGGTCTGGTCTGGTGGAAAGTA  
GGCGCGGCGGGTCTCGGACAAGCGGGCATCCTCGCCGCCGATCTCGGATCGGAGCTGGTC  
GAAGGTGTCGCCCATCGGAATCACTTCCAATTGGAGGTTCGGAGTGGGTGAGAGGATCAGG

CGGCAGGTGCTGCAAGAGGCCTCCTTGAGAGACTGGTTGGTGAGGGGTTTCTCGATGTGC  
AGGACCGTCTTTCGTCAGACGCTACCTGGTCCTCGGGAGGCGTGACCGACAGTGTGCGGG  
TCGGCGGGATTAGCGACGCGGATCGGCTGACTCATGGGTTCGGCTCGGGCAGGGAGTCGT  
CGAGGGCGTCGTGCTGGTCGCGCCGGCCGCTAGATGGTGGCCATCAGGGCGGCGCGGGCCT  
CGGGTTCTACGGTGAGTCGCGCCGGGGTTCGCCGCGTGGATCGCTGAGGCGCTCATCAGTT  
AAAGGGTGAACCTGGCGGCAGAGCATTGATCGGACCCCTTTGCGGCACACCGTAGTGGGT  
GGTCAGGCAGTCGGTGCACGAAGCCGACCCGGTGAAGTGAAGGGGTAGGTCTTCTGCACGG  
CTGGCAGTGGTGGAGGCGCTCGGCCGGCATGGCGTTCTTCGGGAAGCCGACGAGAGTGGC  
GGAGCCCACGATCGGTGCGGTTCATGGCAATCACGTCCAAGATCCAGGAGGAGTAGTTCTC  
GTTGGGACATGCTGCGAGCCTGCGCATGTCCGGTGTTCAGCGGCGACCCAGCTCGCTATCG  
GCCTTGTAGTTTTTCTTGCACCTCGCCGGCCACGGTATAGGCCAGGGTGTTCGACCACCTCA  
CCGATCCGGGCGGCGAAGTGCCGGACGCCTACCTCGGCGGTAGTCTCGACCGGCCGCTCG  
CCCAGGCGACGTTTGGACGGATCTGGCCTTGATCCCTGGGTAGACGTCGGTGCCGCGCTTG  
ATGTCGACGACCCCGTAGTGTCTCGCGGTTCGAGGCACCGTGCCTGGACGCCGAAGCGGGTT  
TCGGTGCGGGTAGACGAGTCGGCCTCCTGCGTTCGTGGCGTAGGTTTTTGGTGGTGCCC  
GGCACCTGACGCGGAAGTGGGGCGAGCCATTCTGCAGAGCTGTGGGTTCAGAAGGCCAG  
CACCGCTCGGAGGACGGTATGGACTTTGTTGTCGAGGGCCTTGAACGTGCCGGTGACGGC  
TCCCTCGGCGTTGCGCGCGGGCGCGGGTAACGCCCTTCACAGTGGACTGGTGATGTGCCCA  
GGTGATGGAGGCCCGTATGACGCCGCGCGCGGTGCCGTTCCAGGTCTTGGCTCGGGAGTC  
GTGCCGGTATATCTACATCAGCTCGTCGCGCTGGTAGGTGGCGATGTCCCGCACCCGGCC  
CTTCTCCCCCGGACGCGGTGCGAGGGCTCCAGGAAATGGAACCAATGCCAGTCGGTGAA  
AGTGGACTGGCCCATCTCGTGGAGGGTGTTCGGAGAAGTTCGGCCCGCGTCTCTTCGTTAAG  
CTTGAGCGCGGAGCGGAACACGTTCGATGCAAAGGTTTCGAGAACCAGGGTGTGAGGGACCCT  
GACCTGTGCATCCTCGGCCTGCCAAGAGCGATGGCCATCGTGTTCGTCGAGACTGTTCA  
GGTTATCGTCCGGCCGTAGGTGGTGGAGAGGATGCCGTCGAGAGAGGTGGCGGGGAGTCG  
CTTGGGCCCCGTAGGTCAAGCCGCTGTCCTAGTCGTGGAGCGTCTCAAGGAAGGACACCTC  
GACCGTGGCCTGGCCGCACGGCCGGATGAAACCTGCGCAGGTGATCTTCAGCTTGTTCGGT  
GAGGATGGCGTAGACCGCTCCGACCAGCCCTCGCGGTGGTGGTGGTGGTTCGACCCGTC  
GGTGAAGACCTTGAAGTCGTGGTGGTGGTGGTTCGAAGCGGGCGATGGCGGGCGAGTCAGGGGAC  
CTGCCGGTTCGTCGACGGGAATGCCGTCAGCGTTCGTGGCCAGTGACCCGCGGTTCAGGTTCGGC  
GGGGACCTCGGCAAGGACGGGGAGCTTGACGCTCTCCCCGTACAAGAGGGCGCGCACCCGAC  
GTCAGCGAGTGGGATGGTCCCCTTGTGGTGAATTCAGGCGCTCGCATTTGTCCTCTGAGCG  
GTAGTCCCAGGCGTGGCCCCCGTTGTCGGTTCATGCTGATCAGGTTTTTGGTGTTCATCCA  
TAGGGAGTTCGACGCGGACATTGTTCTCTACCTTTCGGGTTTAGGCTTCGAAGAGTTCGA  
GTACGTGGGTGAGCTTGTTCGCCGGTGGTGTTCACCCCGGTTCGGTGACCCCGGTGGCGT  
TCTTTGCGGTGAAGCCCGCGATGGTGACGGTGCCTGTGAAACAGACACTGAGCTGAGCGA  
CGCCGCGATCGAAGCGGATGAGGCTGCTTGTCTCGATCGGGCGCTGGAGCTTTGACCAGC  
CGTGCTTGTTCGCGGGCGGGCGCTACGGGCTGTCGTGCGGTTCATGGCGGGGAGTCCCTAGT  
AGTCGCATCGCTGTGGGAGGCGGGCGGACGGGGCCTCGACCTCGAGGATGGATCGGTTCGG  
CGCCGGTGGAGCGTTAGGAGTGGGGGAGGATAAAGGCGATCGCGCTGGTGACGAACCTCCT  
GACGGCGGAAAGCCTCCAGGTGTCGAGGTCGGCCCCGACGGCCAGATCCAGGGGTGGT  
CCCCCTCGATCGAGCCGAGGTCGTTGACGTAGTCGTGGGCGGAGACGATGACCCCGTGGG  
TGAAGTTGAGTGTACCCGCATCCTGGAAATCCGTCCTTGTACTCGTTGAGGACGGAGAAGG  
CGGGGCGGATGGCGGAGCTCATGGCGGGTGCCTTTCAGATGTTCGGATGTGGGGAAGACGC  
GGATCTGGCGACCATGGACCTACCCGAGGATCAGGATGCTTTCGGAGCGGTCCGTGTGCA  
TGTTCCGATTCCAGTAGCTGACGTCCATGGACTGGCTAACGATGTCGACCTCGGTCCAGG  
TGGTCTTGATGTATCGCTTGTCTGTCGTAGCATTTCAGCGGGTTGAGCATAGTAAACGCTT  
CGAATCGGGGTTTCGTGACGCCTATCCCCGCGAAGCCTCAGGGTTCGGAGATGTTCGGTGTGAT  
GGCCTTGCAGGATTGAGATGGGGGAGCGTTTTTCGCTGGCGGAGCCTCCATCCACGGCATCC  
GTAGTCGTAGCGGTTGTCCCTGTTGCGGGAGTCGCAAACCTTCATTGCGTGTTCCTTTGC  
GCTGCAGGGGAAGTTCGGTGGCGGGACGGGCAGTGGCAGCTGGTCTCGCTGGTGGGCCCGT  
CCCGTGTCCCCGCACGCGCTGGCGTATCTGCCGCCCTGGTGGATGAGCGATGCGCAGAC  
CTAGTAGTTGGGCACTCTGTTGAGTGTGACTTCTTATCCAGCGACGGGTCCCTGGCCG  
ACCATCCGTGCGTGGGTGTCCGAATCTACCCGCGGTTCGCTGGCGGGGCTCCTCATCGCCT  
ACCCTCTCGGGGACAGGAGTGGCGCTCTGTTCGATTCTCTCAGTGGGTTTTGGGGGCTTTTG  
GGGAAGCAGATGTGATGACCAACTTCCCCTGGACCCAGCGATAGACAAGGGGTTTTGGC  
GATGTTTGTTCATCAATCCGTTATCGGGTGTTCCTTGCCAGCCCCTTGACCAACAGGCCTT

TGGGCAGGTCAAGCCGTA CTTTCGGCGTGGGGAAGCCTTGTGTCAATTTTCGAGCAGATGC  
TGC GGAAAGAGACCGTGAAGACCGGTACCAACTTCTGACGCTCGGGCCGTGGTTCGGCATG  
CGTAGCTGTTATGAGGGCCGCCAGGCGGT CATCTACACCGGAGTGT CGAAGGACCGCGCA  
GGCGGCCGGTTCGGTAGCCGAGCACGAGGCCGCGTGCAGGATCGTCTGCCAGCACGAGGGC  
AGGTCCGCAGCCGACGTGCGTTCCGACAACGACGTGGGAGCGTCCCGGTGGTTCGGAGGTG  
GACCGGCCGA ACTACGAGCTTCTAATCCGGATCCGGCATCCGTAACAGGGCCCTGGCCACC  
TGC GAGGCTTCCCGAGCGCAGCTCGACCTCGCGGCGTACAACGACCTGCCAGAGCTCGGC  
ACTGAGCGCGACGTCTGTGGTGTACTCCGCCCGCGTCTGTGTCTCACGCGGTCCGAC  
GACCGGTT CATGTGCGCCGACCACATCGGCCTGGAAAAGAAGGAGGTGACCCAGACCCAC  
AAGCGGGT CATGCGGACCCTGGGGGCGAACCCGCAACTCAGGAAGCTCCACGGGGTACAG  
CCGTACGGGTACCGCACCATCCGCCACCCGGACGCAGGCAAGCCGATCCCCGGGAGCCG  
GGCCAGTCGTGTGTCCGGTCGTGCGCGGCCTCGGGGACCGCTTTCTGTGAGCTGTTCCG  
TTGCGGCGCTTCGCAATTGGCCTGAACGCGCCCCGTCTCAAGCCGCAGCAGGACGAGGAT  
TCAACACCTAACATGCTCGGGAGAATGCTGCACAAGCCCCGTACGCCGGACTGCTGACG  
CAACACGGAGAGATCGCCGGCCACGGCACCTGGCCAGCGATCATCACCGAGGCCAAGCAC  
TACCTGATCATGGCAAGTGAGAAGGACCCGGGCCCGCGGAGGGAGCCCGGGGCTCGCCG  
AAGTCCCTCGTCACGAACATCGCGGGGTGCTAGACGTGCGGCCCGACGGTGCAGGAAG  
AAGAAGCAGGCGCGGACCGTGTACGTCTGCCTGTAGATCGGCTGCGTGACGATGACGGAC  
TCTCACGTGGAAAAGTGCGTGAGGTGGAGATGTTCAAGCTGCTGTCCAACCCCGGCGTA  
GCGAGGCGCGTAAGCCAGCAGGGCGACCGCACGGCCTCGGCGGATGCCCTGGTCAAGATC  
GGCTGGATCCGCGCCCGGATGGACGAGTGCGCCGTTTAGGCGGCCAAGGAGGACATAAGC  
CCGCGAGCCTTCGATCTCTTTCAGAGGCAGTGCCTGACCAACATCTCGGATCTTGAAGAG  
GTGTGCAACCAGGGCGTGATCCACCCGTGAGTGGACGACTTCACCGGCCCGTACTCCGAG  
GCGGTCTGGCCGAACATGGAGCTTGACCTGGAGCGCGACATCGTGCGGGCCACCCAGGAA  
GTCACCGTGTGCCCGCAGAAGCTTCAGAGCGAGCGAGATAAGTCGCTGGTCGATGTCCCT  
TG TCACTCATTGCAAGAGCGCCCGCCAGGCTTGAATGCCGGGCGGGAGCTTTGATTTTCG  
AGCTAGACGACGGCTGAGAGCGTGATCGCGTAGGCGAGCCTATTCACCGGAGAGACGTGG  
TACATCAGGTCCTTCGCGTCGTCGGTGTGTGCTGCGGTGGCGAGCAGGCCCGTGCTGAGG  
TTCACGACCTGGCGCAAGCTGATCTCATTTCGACGCTGAGGTGCGATGGGGCGGCGAGCCG  
GATGGGCATCGGCTTCTGCTGTTGCTGGACGTGCTGCGGCGTGGGTGGCAGCGGTGCAAG  
GGCGATGGGTGCCGGCTTGGCAGCCTCATCGAGGACCGTGGCGGGTCCCGAGGTTCGATGT  
GGCCGTGGAACCACCGAGGCACCACCAATCGCGGCGTCGATCGACTCGGGGATGCGCTC  
CGTCCGGCCGGTCAACCCCGCGCCCAACTTCGCACAGGCGCAAGGATTCGAAGACAAGCC  
GCCGAGCTGCGGACTGCTTCCTAGGTTAAATCCAGCTCGGCGAGGCGTTGCTGAATGGC  
CTCGCCGAGGAGGCTCTCGCGCTCGGTTACCGTATCCGGGGTGAGGTTCTTGTAACGGGT  
CACATTGATCATCATTTTCAGGTTTGGCTAACATCTTGGCCGTTTTCTTA ACTCCTTCAA  
CTTGCCGGGTGTAACGCCCTGGCTTGTCTGGGGATTCTGCTATGCTGCCCCGCCAAACA  
TGGGTGTCGCGACTAGGGCCAAAGAATCATGCCCGTACTTTATACATCCGGTTACGGTC  
ACATCAAAGTATGCACGGACCTTAGGGTATGCCAATGGGGCCAATTTGCGATGACTGTGC  
AATGGCGAGGGGCTTGCCCAAATACTGGGGTTGGTTTTTCGTGGGTTC CGCAAGCCAG  
CCCGTGACCATCACACCGGACGACTATCAGGATCCAACCGAACAAGTGATCGAGATCTCA  
GGACGGAGGGCCACACGCCCGACATGAAAGTGATCTTCGTCAAACAAAAGACCACCAG  
TTTTTACTGCAGTCCCAGAGGTTGCACCAAGTCCTTCATCCGTAGGCTGGCTCGAACCAC  
CAGCGATACGCAGAGCGAATGCGAGCCCGCTGTGATCACCTCCGCCGAGCAAACCCATCG  
CCGCCCTTACATCCCTCCCGAGGAATGCGCAGCGGTGAACGAGTAGGTCTTCGTCCACAT  
GTGCCGAGAGGAGTGGCGGATAGCCCGCGCATCGCAGATCCAGGTCACCTCGAACGAGGT  
CAAGCTGTTGGCCCGCACCCCTTTCGTACAGCGCGAGCTCGTAGCCGACGGGGAGGCCGG  
GACCAGCTTGGCTCATA CGGACGAGACCGTGCAGCTTGCCGTCTACCGGGA ACTCCAGGC  
CATCGAGACCGAGCACC GGTC CGAAAGCTCGGCTCCAGAACCACCCGGCAGCCAGGCAG  
CACGTATCCCAAAGTGCAGGAGTCCGATACAGCCCACACCGCAGCCGGGGTGCCATGTT  
TTTTACACCCTGCCTGCACCCGCCTTCGCCAGTAAGTGGGA ACTTCGTCAAGTCCGGATA  
CAGGCAGGACTACCCGCTCGATCCGGTTGACCGCGACGAGAGCGACGCCATCGTCAAATG  
GCAACTCGCCGGGGGAGGAGAGAAACGTGGCATCTACGGTAACCAAGGGCGACCGGAAGT  
CTGCAACAACCCCAAGCAGCGGCACGCACGCTGGCACGGTTGCCAGAGGACAGCCTCCG  
CCGGGTCAACGGGACCCTCGAAGACCACTGCCCCGGGTCCTGGCACTTCCGTGCGAGACGG  
TAAGCGTCGAAATACCTGAGCCACCACAAGAAGTCGGCGACCGTCTGTT CAGAAAACACT  
CAGCGGCCAACGCCGCTCTTTCTCCCGAGGAGCTTGATTATGATGGCGCAAACACCTT

CAACAAACCCGACGACCCGAAGTACTAGGACCTCGACGCCCTCGTTTCAACCCTGATCGGGCG  
CATGGGCTTCAACCTAGAGTTCCTGAGGGCGACCGGGCGAGCCAACCTCCACCCAACAGGT  
CGCTAAGGACGTCGCCTAGGCCGCTCAGCACGCCGGCTGTGACCGAGATCCCGAGAAGGC  
CACTCCCACTTTCAACTTCGAGAACGGCACCTGCACCGAATACCACGATGACTTCGAACA  
GCTGGTTAAGGGCACGCTGCTGGCGTACGACATCGGGCGGATCCAGACCGCCGACCAGCT  
CACCCGGATGTTTCGAGCGGGTCCCCTCAGACGCCGGGTGGTTGAAGGCATGAGGACCGAC  
GAGACCGGCCGCATCCTGCGCGGGGCCCGACCTGGTCGAGACCAAGGGATGGGCACGG  
TACTTTACTCAAGTACCAACAGCGAGCACTGCGTGCTCGGGGCGATCCGGGAGTCCGCT  
GACGACAGCATCTTCGAGACCGCCAAGTCCAGGGCAGCAACGGTACGACTCCTCCAAACC  
CTCCGCGACCGGGGCGTCGAGGGCGACCCGGAGCGGACTCCTCCGGGCTCGCCGAGAGC  
GCCTAAGGCGAGGAGTCCGAGAACATCGTCCTGGTGACCGACTGTAACGACGTCGACGAC  
CGCACAGCGGCTGAGGTCCTCCAGGCCCTCCTTGAGGAGGGCGACCGATGACCGGCATCA  
AGCTCTCCCGGAACAGCATCCCAACCACCCACGAACAGCCCTGGCGGGGAGAACGCGAAGT  
GTTTCGGACAGGACCGGAAGGGGTCCGTAGTCGAAAAGACGCCGAAGGGCCGTAACGCTC  
AGGAGACCAGGGCCAATTTTCGCCAGACGGAGTGATCCGCCTGCCCGGTCAAGCGAAAGT  
GCGAAGGGGTTTCCCTCGACAACCACAACATGGGCGTCATCCGGGCAGGTCTGGGCATCG  
CCGGAGCTCGCGGATCCGATGAGTACTCGCAGGCCGTCCGCAAACCTCGAGACGACAATGG  
GCCGCGTGCCCCGCAAGACCAAGCGCACGAAGCTATGGCCAGACAGTGCGAGAGCAGCG  
CCCGGCCGATGCGTTCACGCGAAACCACCCTGGACTTATTACCTGGCACAATCACCCACT  
GGGCCGAAAGCTATGCAGCACATGCCAGATGCGGCAGTGACGGGCAGATCTGTGACCA  
AGGAATCATGTGCGACACCCCGAGTAGATCCGCCCGAAGATCAACAAGGAGGCATGCCG  
CCACTCGATCAACATCCTGCACTGCGTCGACCAGGATCGCCCGAAGCTCAACGCCCGTCT  
TGAGGAGCTGAAGCAGATCGAGGGCGACTACCTCTCGATCATCCAGGCGGACGTGGACAA  
GTCCGGCGAGTTCGCCCTGCTCGACAACAAGCTGGTTGTACCTGGCACAAGTCGTAACA  
GAAAGGAGTTAACCAGCAGGTGATCAAGCAGCGGTACCCGAGGATTCAGTAGGAGTGGAA  
GAACGAGGTGGAGGTCCGCACCATCACGGCGGTGGTGTGACCCTGCCCGAGCCCTCCGCT  
GACTATTTTCAGATCGACGACCATCACATGGGCCGAATGAGAATCGAGTGCTACCGGGCG  
AGGGGAAACAAGAAGACGCACAAGGAATTGCTGTGGGGTCTGTGGTACCGATAGTGCATC  
CCTGCGTCGACTGCAACGAGCCGCTCCGATACGGCAAGCTGACCCGCTGCAAGCAGTGCA  
TGGAGTTACGCCGGGAGGCGAAGAGCGAACCCCGCACCATGTATGGGAGCCCTGGATATT  
GCCGGGACATGTGTATCACCTGCGACAACCTCGTTATGACCAGCGGTCCGGCTCAAGCGCC  
TGCGGGACGAGCCGAAGGTCGAGTACTGCAACCGTGTGCAAGAATGACGTAGGAAGTGGAA  
AGTCGAGACAGAAGCAGCGTACGTTCCGGTGTAACTCTGCCGGCGCTGCAACAGCGGGC  
ACGAGTACCTACGCATGACGCCGGAGAAGCGGGAAAGCTAGACGCGAGGCCACTCGCACGC  
TCCGCGCCAGAGCCACGTCAGCTGCCGAGCGGCTCAAGACAATCGAGCTAGAGGACGAGG  
TGGGAACTATGTTAAGCCAGGTGCAGCGGCAGGAGTTGCGGGCCATCTGGGCCAACTTG  
GACCTTGGGACAAGGTTCGAGATCTGCGAGACGGTTGACCGAGCACCGCAGTTGCTGCCG  
GAGTTCCTCACCAACTAGCCAGTGCGTGCGGCATGAAGCGCCTCGCACCGCCAGGCGAAG  
GCGTCACCGCCGTCCAGTAGGATCCAGATTGGGTGTGATGTTTCAAACCGCCGAACAGG  
TCGGCGAGCGGGGGCTGCTGTTCTACGCCCGCTTCGCAACCGAGGCAGGCCGTCCGGCGCG  
GCGTGACATCTTCCCGAGCTTCACATCATGGATACTCGTTTCCGCAGACACGTCGTGA  
CGCACGGACGCTGGGTTCGACATCTATCCCGGCTACCCGCATTGCCGGATCCTCTCCACCG  
AGGAGCTGGAAGCCCAGTACAAGCTCAGTAAGAAGAGACCAAAACCCCGCACGGCAAGCT  
GGTCACCACGACAGGCGACAGCACCCACCCAAAGTTCGCGCCCGAGAACTTCCCGAACGA  
CGACCCGGTCTGGGTCCCGCGATCACCGAGGACGGTTCCGGCCGTCTGGATGTTCAAGGA  
CTCGAGCTCGTTTCGAATGGGCGCACACCGCTCTCCGGCGGATCCAGGCAGTCCATGCG  
GCAGGCCGATTGGTTCAGACCGCCTGGACCTCGACACACCCGACGATGAAGTCGCTGACTG  
ATGTTACCCCTCGAAACACTAAAGAAGCTCAATCCCAAGCGATTGCACGTCTTCGTAGGT  
CTCATCTACCTCGCGTGGGCGCTCTTCCGGTGTACTGAACACCACCTCATTCTCAACTCC  
ACCGCTCCTGACCACAAGCCGAAGTGCTGCCACTTCGCCAATTCTCGCCGGGGAAAGGTC  
GCTGTCCGGTTCACGGGTCGCAATGAGCGCGTCCGCGTGTACTTGTACGAGGTCGCCGAA  
GCCGCCGAGGAGGGCGACAGGCCGAGCTCCGACGGGACGGACTTCTCCAAGGGCGACTTG  
AAACACCACGCCTGCAGGGGTTACCAGCGTGAGCCGATCCAGTCCGTGCCATACTACGCC  
CAGGTACGCCGGGAAGGCGTCCGCGGGAAAGCGCAGCCGGCCGGCAGCCGCATCGCCCG  
GACTACAGCCCCGACTGCCGGGAGCTAGCTGTTTTCTCGGCCGATACAGTCCAGTCCGCC  
GTCCGCGAGTTCGAGGAGCGGGGGATGTTTCAGCACCCGCTCCAACTCGAAGGACGTTCCG  
GGCGGCTTCCGGCCGCTGCACTGATAGCCAGAGAGCATGGTTCGTCCTTCAGACCCAGGAG

GAGCGGGAGCCGCTGACGAACGAGCAGCTGGCCAAGGAGCTGGTCTCGAAGCTGAGGGCT  
CTGCCTGATCCGTTTCGGCGAGGACTTGGACATGCTGCCCGTGAACCACGACGCCCTACAC  
CACACGAGCCACTACCGGACGCTCGCCGAGACGATCAGACGCCCGAGCGGGATCGCGGCC  
ATGGACGTCAGCCGGTTGTACCCATTTGGAGAAGGCAACGTGCTGAAGTACCTGCTCCGA  
GCGGGCCATAAGGGCGACCGGCTGGTAGACCTTCGAAAGGCCAGGCAGTACCTGGACGTC  
TCGATGGAAATGGAAGAAGAAGCACGAACCAAAAAGGGGGAGTACAATGTCTGACAACCA  
GGTCGTCTCAAGGCGATGCAGGCGGCCAAGAAAGCGCCCACGCTGCCCGAGGCGATCCG  
CGACCAGTTAGACGACATCCCGGGCGAGCAGACCATGTTTCGAGTTCATCTCCAACACGGT  
CACCGTCTTCGTGGCGCTGGGTATGAGCGTTGAGTTCGACGCTGCAGCAATCGCCAACGG  
ACTGCTAAATCTGGGGTCCAAGAGGTGAGCACGGGGGACGGCCTCGGGAAGAAGGTGATC  
CACGCCCTGTCGCGGACGGAAGTGGGAAAGTACGGGTTCTCCTGCCGGTCGCCCGCGCTG  
CCGCGGATCTAGGGGTGGATGCTCGAGCAGGTTCGAGATCCGGGCCGGCCTGGTCCGCATC  
ATATTCTCATCCCTGCTCGGGGCGCTCAGCAGCACAACGGTGTTCGGGGGAGGGTCTGTT  
GTCCTTTGCAAACCTAATCTACAACACCGTGTGCTCCTGATGGCCAAAACCGCTGGACC  
GACTACCGAGCAAAGAACGAGATCGAGATAACAACGGAGTGTGGGTGACCATGTTCGGAGC  
TTCTTTTCGTGCAGCCCGCGCAGCAGATGGCCAAGGGCCGTCTAGGCATGGAGCAGAGCCT  
CGACGAGATAGGAATGCAGTTTCACACCGCCGATCAGCTCCACTGGCTGGAGAAGCGCAG  
CAGAGAGAAGGGCTACGCGTACAGCGACGGCGAACTTCTCACCCAGTTCGGCAGCATTGT  
CGGTACCAAGAGGGACCAGCGAGGCTGACAGATTTACGACGTCGGCAGTGTGTTCCGGG  
ACAAGCTCCGGCAAACCCTGATCGACGCCGTAATAGCTTGGGAGCCTGCGAGGCCGCGCT  
CTCGGCATATGGAGATCGGGCCGTCTCAGGCCGGTGGCGTTGGTTCCCGTCCGTTGGCAT  
GGTCGATGACCTCCAATCCCCCTCGAACTCGAAGAGGGATCCGCTTCCGTTCGATCGTCT  
GCATGCAGATGCTCGGCACGATGGAAGAGGTAAGGGTTCTGGCCACCTAGGCCCTCGGCC  
GGTAGCGATGGCTCACGTAGGCCAGTTTCTCGAGCCGATCTCCGGTACCTGCTTCTCT  
GCGACAAAGACACGCGGACGGTGATCAACTGGGGGCTCCCCGGTCTCAGTGCATTCAAGA  
AGCACTGCACCAAGAGACCAATCCCGGAGTAGCGCAGCGAGGTCTAAGCTACGGCCTCG  
GCTACCGTTACCTGGGCTACGAGGTGACAAAGGTCGCCATCATCTTCCGCGCGCGCGCCG  
GTTCCCTCTGCTAGTACCACATGTGGATCGAGGACTTCGACCATCAGCGTCACTCCATA  
CGGTCGACCGGCTGAACAACATCCGCTTGGTGGTCGACAGCCTCGCGATCGACAGGTACC  
CCGAAAGGGCACAACATGTCCCGGCTACACTTTGATTACGCTGATGTTTCAGCTCGTGGT  
GGAACCCGAACTCCCGAGGCAACCGTGAATGCCCCGAAACAGCGGGTGATACGAACGGGC  
TGCTGCCCGACACTGGGGGTGCCTGAGGCCGGGCAGCACCGACCACGCCTTCGTAGTGGA  
CACGGTCAATGATACTAACGGCCTGTACCGGTACCGGACGGGCGGACGCCGCGACCCGTC  
GCTGGAGTTCGTGCCACGATGCCCCGACCTCATGGACCTTACCGACAGTACCACCAGTC  
ACCATGATGCTCACCTTCTCGTCCACGACGCGCTCGCCCTCCAGTCATCTCCGTCCAG  
TTGGAGAGGAGATAGCAACGTGCACAACACAAATTATCGCCCTGATCCCTGGCAACACGC  
TCTCATACTCGCTGGAATCTGAGTCAACGGCTCTGGTAAGTGGTCTCTCCCTAGCTCT  
TCCCCCGACCCTGACTGGTACGACCCGATCAGTAAAGCTCACCAACATGAGCAGCTTTT  
ACGCAAAGAACTTCTCATGGGTTTCGACCATATCGGAGGCGTGCCCGACCCCTGGACCA  
CGGCAAGGGGCGACAACAAGCAGTAGCCGGAGGTCACGCAGCAGCGCGACTTCGTCTCAG  
GCGCGACTGCCTTTTGGGACAAGGACAAGCCCGGGCCGAAGATGCGGGCTCGATATCACC  
TGCACACCTAGCAGCGGACCTAACGACCCGAACGTCGATGGCGAGCGGAAGCTCTACG  
TTGACAGCCCGAACGTGCGGAAGGCAATCGCCGCGGCTGTCGGTTCGGCCGCTAGCAACG  
GACTCGCCGTCGACCGTGGACTCGCGTTGACCTACACCCAGGACGGCGTCAAGACCGGAA  
AGGACAATCCGCCTAAGGAGTATTCGGCGCAGTAGGTCCCGCCGACGGGTTAGGTGAACG  
TCGATACCGGTGCGGCCGTCTCGGCAGCTGCACCGGCTCCGGCACCTGCTCGTGCCCCGG  
CACCTGCTCTCGCTCCCGCTCCGACACCCGAGCTGGCCTTACAGCAGACACCCCGGGCGG  
CTGCTCCGGCCTCGGTAGTCGGTGGCCTCCACCCGAGGCCCTGACGGCGCTAATCGCCC  
TGTCGGGCACCCAGGGCAGATCTAGCCACCTCAGGGGCAGGTCGCGATTCTGCGTAGTC  
CCGGCGGGCCCCCTTTATTGTACCAATAGACATTAAGATCCATGGCAGGCACGGTAATCC  
GTCGGATCGTCGTAGAGAGCGTTCGAAGAGGCGAACGTTAGGATCGACGGCTACGGGTGGT  
CGTCCGTGGACCCCGGCGAGATCCAGGGGGAGACGACACTCTGGCCCGGCGGCGACGTCC  
GGACGATGGTCATCCTCGCCCCGCGGTACCTGCTCGACGCGCCGCAGCGCGTCCCGAAG  
AGCTTTAGTCGCTCGAGCGGCTGGATCAGATCCTGTTGACCACCGCGCGCATCGCCCCGAG  
GCGGCACAATCAACTCGTCCGGCCTGGACCACGGTGACGAGTACGCATCCGGGGACTAGA  
ATTAGTCATCACGCACAAGCTGAAGGTCAGCGACCACGAAGTCGGCCGCTGGTGGCGAGT  
TGAGTGCAATCCTTGTGGAGCGAAACACACTCTCCACAAATCGACGTTGGAGCGGGACAT

GGGGGAGGCCGCGTTCTCGAAGGACACCTACGGGCCCCCGCCGGAGGCGTCGACCGAGGA  
GGAGGGGTCAACGTGCGTAGAAGACAGGGCGACTACATGATAAGGAGGAATCAGCGCGCC  
GGGCTCTGGACAGTGCATTGGCGCAACAAGCAGCCGCTCCCGAACTTATCGTTAGACGAC  
GCGCGGGTGACGCTAAACAACATGCTTCGCCTCGAAATCATCTGCAACACGAATGCACGG  
GGCAATAGGAGGGATTGAGATGGCGACACCCGGCCATGCATTCCGCAAGGCTATCTAGCG  
GCTCAAGGAAGACGGCTGGATTGAGGGTGCATGCACACGCCCAGGCGGGAAGTCTCGGT  
CGGAGCGATCCGTCAGGGCGCGCTGCACGCTCTCGGCGGGGACGACGTCGACCATAATCG  
CCAGTAGTTCAAGGACGAGCTGTCCCTGCTGCGCGAAGAGACGGACCGACTCGTACGGGG  
CGTGATTTGCGACCGCTACAACCACTCCAGTATCGTACACTGGAACGACCACGCGCGGCG  
GATGGTGTCCGAGGTGCACGACGCTTTGGATAACCGCACCCGACGTACGCCGAAAGATGGCC  
GGGTCGCTGCTGATATGGGCCTCAGGGTCTGGCACTCTCCGCGCGACGATGATCGCGGTC  
GGCTACCTCAACACTCGCGACGAGAAGGAAGGGCTACCGTACTTCTTCGCGATCCTGTTA  
GCCCTGACGATTGTCTGCTGGTAGTTGGAGGGGTGGTCTCTGAACGGCAGGGCGCGAGTTC  
GAGAACAGCCCCGGCCTTGGCTGAGCGGGTGGAGCTGGAAGTCTGCGAGTGTGCCCACTT  
CCGGTTCTTCCACTATGAGATCCGCTATTGCGACGCCCTGAAGATGGCCACCCGGCTAGCA  
TTAAGGGTAGATCAGACCCTACGGAATGCCGTGCGAGTGCACACCATTCAAGGAGAGCGA  
CGATCGGGGACTACACCCTACAGCACGGCACCGTCGGTGACTTCGAGGAGATCCAGGCGC  
ACGTCTACGGCGCACCCGGCCGAGATAGACGACTACGTGCTGATCCCTGGCAGACACACCG  
AATGGGTTCGTGACCGACGTCGTGCGCGACTTCGCCCCACTCGTGTACAGGGACGGCAGCC  
GGAGGTTGCGGTACGGGTGCACGCTCCTGGAGACGGTCCCATTTGGGCTGTCGCTCTATAT  
CTTCGGCAAGGATTTCTGGGTGCTTGTGCGGGGAGTCACTGGCAACGCCCCCGAGGGTTCGA  
CCTACTAAGATCAACCAGAAGGTTGAACACCTCGCGCGCGAGCTGATGGAGCGGGAGGG  
TTGGGAGAGCTGGCACTGCCAACCCGGCGCCTTCGGCGGTGAGTTCGGATTTCGCCGCAA  
CTCCGGGCGGATCCAGCAATCACACACACGATGAGAAACCAGATTAACAGCCCTTCGGA  
TAGCACGTGACGAACCCGAAGTCGACGCGAGGGGTCGACATGATCGGCAAACCTGCACTTC  
AGGGACTGCTTCGTTTCAGGCGCGCGACAAGAAGGACGCCATGAGCCACGAGTTGGACTAC  
GAAGGCAAAGAGCACGGGTTCGCCGGTCTGCGACCCCCCTCGACGGAGAGATCGTCAGCATC  
TCATTCAAGCCCACCTGCCTGCTGGGGTTATTCCAGCAGCCCGGCTGCACCCGGGACCAAG  
CACTAGCTGAATGTCGACATCGACTACCCGGTGTCTGCGATCGAGTCATCCACGCCGGGC  
CACTGCCACCTGTGCACCGACAAAAGGAGCTGTCCTGGGGCCACACGCTCCGGGTGCTCC  
TGGCACAGGCCTCGGTAGGCATCTTCGAGACGGGCTACTTGGACGCCAGCGGGCGGGCGCG  
CCTGCACACCCCTACGGGTGCCGTGGCTGAAGAAGAAGCATCTCGCACCTTAACGCTGG  
ACGAGACGAACCGATGGCCGTGAAGTTGGCCGCCTGGGTTCGGCTGGTTCGACGAGCGCTA  
TGCAGGTGTACCGGCAGCGCGGCTTCTGATCAAGAACCAGACCACCATGAACCGCTGCGT  
CACGCACGAGCACGTCGACCTGGGGCCAGACGAGGCCGCGGCAATCGGGTGGTTCGCTGAT  
TAAGAAGTCTTAGCAACTGAAGGAGATTCGTAAGACGAGATGAAGGCGGTGCCCTAGCG  
CCCTGGGCCAAATTCTGGGTGGAGCACGAGGGGTTCGGAGTTCACCAAGATATCGACTCC  
CTCGCGCGGCGCAAGGGGCTACGGTTCCCTCGAGATAGACCTAGCCGTCGGCGAGGGGCTG  
GAGATCGGTACGGTCCCAGGCCGACGGCAAGTACAGGGTCTTCGAGAACGGACAAATCACA  
AGACCGACATACGCGCTGACGATCTGCGCGTAACGGAGGTCACGGATGGAGGTCAACCTG  
AAGACGGTCAAGGTGATACCAACGGGCGACGGCGGATGGCCGAGTTGTGTGGCGTTCGAG  
CACGAGGTGCAGATTGCGGTGAAGTACCCGGAGACAGTCGACTCGTCCAGCAAATACCCC  
TTCTGCCAGAACTACCGCGCGGTTGGATCAACGTCGGTGCAGAACCGAGGGCGACGAG  
CTGGGGGGGATCACGGTCGTGTGGCCGAGCCACGAACGTGTGGAACGAGCACATCGAGAAG  
ACCGGCGACTGTTCCGGTCGAAAGCTGAAGACGTGGCGGAACATCTGATCTGGACCCTAG  
TCCCTGGCCCCGGTGGTTCGTCGTCGAGTGGTTGACCGAGGAGAGCGCGTGGGTGGGCCTGT  
GACCGGCGCTCTTCCCCTCGCTATCCTGGATCGCCGGGACACGGGCAGCCGCACTGCGAG  
GCATACTAGACACGGTCTGGGTGCAACTGGGCCACATATAACGAATGGGCTCATCATGTCT  
GTCAGTCGGATCACCCATGACGTTTTTACGCGGGCACCGTTCCCCTGACCGTTCGGATCT  
ATCCTGGACTTCGCGGAGAACCCTGAACGACAGGCCTAGCGACGACCGCGTCGACGACGAG  
ACGATGGGCAAACCTTGGCGCCTCATACTGCGCCACCCGGCGACCGGCCACCGAGCTGCCG  
CCGACGTCCGTAGCACCGAGCGTCGCCCCAAGGGACGTCCGGATGCTGCACGTCAGCCTG  
GTCGCCAGCAAGCCGCACCCGGCTGGACCGCGAGAGTCATGACGTCTTCGACTTCTTCACG  
ACCGAACAGGCCAAGCAAGACAGGGGCCGCTACGAGATCCGAGTACTGGGCGAGAAAGGG  
GGCAACGACTTCTCCGTCAACCAGGGATGCCCGCGATACTGGATCGTGGTGTGCACCGAC  
CCGGTGTCCCTGGAGGTAACCGGAATGGCCGCCCTCGTTCGTGGCCGGAGCTACCCAAGCG  
GGGCAGTACGACAAGGTGCTCACCGATCCCCGAATGCCAGCCTACCGCGAACCCGTCCT

GATCGCGATGAACGGCAACTGCCACGAGGTCGTCCTCGCCGCCGCCAGACCCCGAGCG  
TGGTCAGCTCCTCTGCAACAGGGGGCGTTGCGTCTTCGTCGCCAGCGCGAGCGGTGGGC  
CGTGGGGAGAAAACACAACCTGCCGGTGTGCCGGCGACACAACACTCACTGCCGCGAGTG  
CTGGAATAACAAGGACCACCCAGCTAGCTCGCGGAGCATACTCTAGAGGTCTATTGTGA  
CGCCGGAGAGTATGTACCAGGCGATTGTGGCGGGACCGAGTGAGACCGGCATCCCGGCCA  
ACGAGAACGACGTCCAAGAGTTCACGAGCACCTAGATGACGAGGCCTTATACGTGTCCC  
GGACGGGGGAGTACTCATGAGCGACTTTATCGAGAGGCTGGGCAGTCTCAGCCTGTACCA  
GTGGTACGTGCTGTTTCGTTCTAATGGGGCTAGCGTGCGGGCGCACAGATACGTTTCAA  
GGCCACGGGGGGCCGAGTACTCCGCCCTGAAGGAGGGGGCGCGCCGCTGGCCACCCGACTG  
GTCCAACCGGGTTCGTCGCGTTGCTGTCCATCGTCATCGACGCCGTCGCCTGGACGGTTCG  
CACCTTTTCCAAGCTCTACAAGCTGACCGAGCGGGTAATCGTGTGGAGCGCAGACAAGAA  
CCTGATCAGGTCGACGCGCCGGTTCCTGCGGAAGGGCAGGATCACCGACGAGGCTCCCGG  
CGGCCGTGTCTTCGGACTCGCCACGACGTCAACTCGATTACTGGCATGTTTCGACGCCGA  
AGGCAAACCTGGTTCAGCCTGAAGGGAAGTGGAACCATTAGTGAGCGAAGCAAGCACCAGG  
ATGCGGCTCACGCGGTCTACTCGGCGCCCGAGACGACGTCGTACGTCATCCATGGGGCCT  
AGCTGCCGTTCTCCAGGCGGCATGAGTTCGTTTCGAGCGACGCAGGGGTTCAAGCAGGACC  
TGCCTCCGTACAGCCCGCTCGGGCAGCGTGAGCTGGACCCTTACCACGCTCCCAAGCAG  
ACCGTCTCACCCGGCGCATATCGAACAAGCGCCGGGAGCTTCGGTACCAGAACCGCGCAT  
ACCGTCGGCGCAGCGACTAGCTGGGCTCGAAGGTCACGCTGCTCGAGGACCGGCTCAAGA  
TCTCGTTAAACGCGACGAAGGCCGGCAACCTGAAGATCACGAAGCAGCAGGAGGAGATCG  
ACCTACTGCTCCGACAGCTCACTGCCGCGACCGACGGCGACCGACGAAAGAGGGGAATTCC  
GATGGGCAGGCAAGTGAAGCGGGGCCTCCAGCCGTACCTCGCGCCCGTCACGACAGCGGA  
CATGGGCCGCGACTGGCTCTGGACCGAGGATCAACTGGACGAGTCCCTAGCGAAGGTCGA  
CTTCCAACCTCGCACCCGTGGTAGCGGGATGCGTTCGGTCCGTATCGGGTATCTGCGAAGGGT  
CGGGGTCTACAACCTGCAAGCAAAAACCTGCACAACACCGGCGGTTCCGCCGGGCATCACAC  
GGTGCATCGGGTAACTAAGGAACCGGCGCTCGCCCTCGGACATGAGACGAAGCCCACCGT  
GAACGGGCTAGAGGTCACCTTGGAGTTCGGGAGGGTGTGAGGCTGTGAAATTGGGCGGG  
TTCAACTCGGCCAAATGTAACGAGGTCGTAGTCAACTCGGAGCACGTCATCATCAGCAAC  
CGCTACGGCCTGGATCAGAGCGGGTTAAACCTGATGAACGGGAACGACGTGCTGCTCAAG  
AACCTCGGCCCCATACAGGTCGGCCACGTCTTCGCCGACGGGAGGCTGCTGTGCAACCCC  
GTGTGACGCACGCAAGCACGCCCGCAGGGGTAACCCAGACGATGGCAAGTGCAGTACC  
TGGCCCGGGAGTACGTCTACTCGTCTGGGAACTTCTCCATGCGGGGCTGCGAACACACTGG  
CTACCCTTGGAGGGCACATCCCAGTCCGTGGCCTGCTCTCGGTTCAAGACTTTCAATGAT  
TGAGGAAGTGATCATGTCTGATAGAATGAGATTCGCGGATACGCCGTCACGTTTCGAGGAGAG  
CTGGTACAATGGCTGGAAGTGAATCCAATTGCCGACGAAGGGGAAGTAGTTCGCCGCC  
ATCCGGGTACACGGGCTACGACGCGGGGTTCCCTGCTACCCGTACGTCATGGCGTGGGT  
CGGGAACCGTCCCGACGTCAACGTCGGACTGCGGTTCCCGGCTGAGATCGTGGGCCGGAA  
GGTGGACGAGTATGGCCAGAAGACCAAGGGGTCGACCATAGCCGAGGCCAAAAGCGGCA  
CGGGCTGCGGCCGCGCCGGTGCCTCTACCACGCGGACGGACTCGACATCCGGTATCCG  
CCTGTACCGCATGCCCGCCGACATCCCACTGCACACGGAGGTCAATAACCCCGTACTGAC  
GATCGGCTTCTTCTAGGTCGTCCACGATACCACAGGTTACCGTCTCGTGGCCGTCCAT  
TCGCCGAGAGGTGCGAATGTACGAGTGGCGGAACGAGAAGGTCAACGTGGTACCGGTCCA  
TCCGATCGACGACTTGCCTGAGATAACCGCGCCGTTGGATCGAGGTAAGGTAAGGAAGC  
CCACGCCGAGATACCGTCTCCCGCGATCCATCCAATGCGCTCCGGCAGGTCTCCAGCG  
GAACATTAGCGAGAAGGTCGGCGATGCGTTGCGGGCCTCGAAGACCGATCCCTACTGCGA  
GCCGGGTTACGTCACGACGTCGCGAACGTCAACGTCTTGCGGCTACGGCGTCTGGCGGA  
TAATGGGGAGCGGGGCGTCACCGAGGGGCTCGAGTCCCTGCGGAACCAAGTTCGTCGCGGT  
TACGGGGGACCGGAACACCGAGTTCGAGGCCAACCCCGACGTCAACCGGAAAGTGTACGG  
CCAGCGCGAGCACGACCTGCTCGCCGGCACACCATCGAAGGAGACCTACTACGCGGTGCT  
CGGCGTCGACGACAACGTCCGGCAGTACGAGACCCTGGCCAAGCAGTGGAAGCGGGCCCC  
GACGGACGCCGTCGACGAGGAGCAGCCGCCCGCTCGGATCCGGCCTACGCGGTTCGCGGC  
ATTCGTTTTTCGAGGGGGAACCGATGACCCGTGCACCGAGTCAACCTGCTGCCGACTGTT  
GGCCGCCGACGCGTTCCTGTTTCGGCATGGCAGCGGGGCCCGTCCCGAGTTCGAGCAGCT  
GACCGGAGCGCCGACCGTCGCGGAGATCAAGTCCGGCGGGCAGGCCACGATGGGGACCAA  
TCTGCTCTCCGGCCCCGGCCTGGCCAACGCGCCGCCGTCGGAGCCGCTGATCGACGCGCT  
GCTCTACCGGGGCACTCTCTCAGCTCCCCCGCACGCGGGGATCCGGCAAGATGTTTCG  
CGCGCTTGACATTGCCTGCGCGCTGGCGTCGAACAGAACCGATTGGAACGGCCATGACAT

CCCGTAGAAGCACCCAGGCAACAGCGGATTGGTCCTATACTTCGCGGCCGAGGGGGTCTT  
GGGTCTGTATGCGCGGAACAAGCCGTGGTGTCTATTGCAGGGGACAGGCATCGACCCCCG  
CAGCCTCCACCTCTACGTCTCCCCGTAGGCGGTACAGCTCTGTGCGTTCACGCAGATGGA  
GGAGCTGACCAAAATCGCTCGCTCGCGGACTGCGTGCTACGAAAAGCTGAGCTGCCGGG  
TCTAACACCCGCAGCGTGGACAGATTCCCTGGGCCTGCCGTTCCATCTCGCGAGCTACGCGC  
TGCTGACCCATTTATTCCCGGACCAGGTTCGACTCGAGGGCGGCGTATTCATCTGGACCG  
GCGGCGACGTCCACCTATATTCGAACCACGGCGATCAGGCGACCGAACAACACTGTCGCGCA  
CGCACACTGGCTATCCGTGGCTGCCACTGAATCACCGCCACTCGATCTTCGAGGACACCG  
CCGACGACGTCATAGTGCTCGTCTACCGCCCGCACCCGGTAATCAAGGCCCCCGTGGCGG  
TGTAAGGGGGTGTGGCTGTGACAGAGAACTGGACAAAAGACTCTGCTGCGACGCCAGTC  
TTTCATGTCAACTGGAGCAACTGAATCGAGCAGGTTCGACACGATAAGCAGTTCGACCTTC  
GACGTGTCCGTTCGGAATCGCGTTCGGCTCGACGGCGAATACGACGACGAGTACGACGGTA  
TGGCTTGCAGGCGGACGCCCCGGCCTGAACTACCTCGTCACGAATCGAGTCATCACATCA  
GCTGGTTCGCACTGACGAACGGTCCATCACTATCCGCGTTCGAGACCGGCAACCTAAGGTG  
CTACAATGGCTAACAAAGAACGGGCTCTGGTACTCGAGTATCGCCGTGAAAAAGTACAACC  
GGGAGTGGGTCCCAGGACATCACCGGCAGCCTCGTCTGCCTGCAGACGATGTAGGACTACG  
CCAACATCACGCCGACGGCTTCGTCACCGTGGAGGGCCATGTCCTACTGTCCGCTGGTC  
TCCAGGGCCTGGCAGATCTGATCATCGGCTACGGCAGCGTGAAGGGGTTACCGCGACCA  
AGGACCTCATCGGCATCGGCAACAGCATCAATGTATTAGCCCCGGCCACAGCGTCCTTC  
AGGGCGCGTCCAAGCTGTTTCAGGCCGGAGTCCAGCGCGCCCTAGGCGTCCGTCCGGGGTCA  
TCTCGGCCTCGGCCCTGTCCGCTTCCGCCGACGCCAACTTCTCCTGGGAGGAGGGGGCGCT  
TCGCGACCGGCTCCGGCCCCGACCGTGAAGAACGCCGTTCTGGCGACCTCTGGTGGTGGCT  
CGGCCGTGATGCTGATCCGCAAGGTCCTGTCGCTAGGCACTAGGCCCTCCGGCGCTGCCT  
GGACGCTCTCCGCGACGGCCACCCTTTACTGTTTCGAGAAGCCAAGGGCACCTGACATGAT  
ACGCGGCTACCAAGTTGGGTGCCTTGATAGTTCGGCTTACGGACCCGCGCAGGCAGTAGA  
TACAAACAACCGTAAGTAGGGGGGCTGACATAGACCGCAAGGGAAAGCATCGAGCGCAA  
ACCAACTCGAACGTGAAGCGCTTCGTAGCCACATCAACCGGAGTCGGGGCACTCCACCTC  
GTCTCCTCTGTGCGCAGGCGCTCTGGCTGCGTAGGCGTACGACTGTTCCCTGCGTCGCCAC  
TGCGCGTCCGTAAGTGGTGCATGAACAACAGCAACGGGTTCTAGGCCGGCCTGCAG  
TTCACGCAGTCCACCTGGGACGCGTTCAGCCTGAATGCGCCGCTGGCGTGCTGATCTG  
GCCTCGATGGAGGATCAGATCGCGGCAGCGGAAGCAACCCTGAAGCTGCAGGGCATCGGC  
GCGTGGCGCGTGTGTAGGGCGTACCTCGGCCAGGGTGTAGGCACGCCAGCGCAGGGATC  
GCGCCCGCCACGCCGTCTTACGTCGAGCCTGGGCTCGTCCCCGCACCCGTCGCATCGTGG  
GTGGAGTCTGTCACTTGCACGAAGTCGGAGGGTACCACGGTGCCCACAACGGAGTCGAG  
ATTACTGACCGGATCGGAACCCCGATCTACGCAGCGGGCGGCCGGCTCCATCGACCTCGCT  
GGGTTCAACAACGACCGCGGGCGGTAGCGCAACTACATCCAGCTGGCCGTCGACTACGGC  
GCGGAGATCCAGTACGGCCACATCTCCTAGATCTACGTCAGCGCAGGCGACTACGGCACC  
GCCGCTCCCTGCTCGCGGGCGGTTCGGCAACCCTGGCTCCTCGACCAGTGCTCACCTGCAT  
CTGCGGATTTACGCCTAGGTTCCGGAGGCATACGTGTTCAACCAGGGCTTCGCGCTGGAC  
TGGTCTGGTCCCAGCGGACCGCCCGTCCCTCCGGCACCGACACATGTATCCGCCCTGGG  
GAAGAGGTGCTGGTTCGAGGACGTTCCGGTTCATCCAGTCCACGGCTCCCAGGGGAGTCGAA  
ACGAAGACCGACGTTCCGGGAGACACCCTTTCGCACATCGCTGACGTGTTCCGGGATCGAG  
TCCTGGGATCCCCTCTCGAAACTGAGCAAGGATGCAGTCGAGAAGGCGCATGTGATATAC  
CTCCTCCAGGTACTCCACTTGGCCGGTGAGAACGGGGTTCGGTGGCATGGGTAGCCGAAA  
CTCGCTGAACTGCAGGACGTCTAGGCCCTGGGCGACTGACTACCGTCGAGAGGCGGGCTG  
GGCACGGCGGTTGAGTAGGAAGATCGAACGCCGTCGTGCTCAACGTTTATTGGGCGACGG  
GCGATACGACCTGGCCGCCACCCGCCGACAAAGAGTATTCACGCATGGCTGACGTACTA  
GGTTCGTCATATGCCAACTGATGTCTACACTTCGGACAGTAGCTGGACCTGTCAGGCTGC  
CGTCTCTCCGTTTCATGTTTGGGTCTGGGGAGGCGCCGGTTCGGCGCGGGTGCATCCTG  
GTTCTCCGACAACGGCGTTCGGCGGGTTCGGGCGGTACCTTCGCCTCCAATACGGTTCGCTGG  
CACCCCGGAAAAGTCTACACCGTACCCACGCCACTGGCGGCACCGGACAGGGCTCTAA  
CGCTGGAGTCGGAGGTGGCGCATCCTGGCTCCGTTGCAGATGCACCGTCTACGCCCCGA  
CGGCACCGGCGTATCGAATCGCCAGTCCGGCACGGCCGGTGGGGCGGTCACCTCTGGCGC  
GATCGGCACCACGGTCTGCTACGGCGGCGCAGGGTTCGGACGCTAACAGTCCGGCAAGCG  
GTCCTGCTCCGGAGGCGGCGGCGCCGGCCCGTACGGCTCAGGCGGGCCCGGCGGCACGCT  
CTCTGGCGGCGGTGACCGTAATGGGTCCGGCGGCCAGTTTGGCGGCAACGGCGGCGCGGG  
CGTCGCCATCGACGCGGACCGGGACGCGGACGGCATCCCGGTTCGGCGGCGGCCCTGGTGG



TCGACGAGCCCGCAGGAGGTCATGCGGCGGTAACGGTGGTTCGCGGCGAGGTGTGGATGAC  
TTACGTAACCGACATCCCGCTCAACCAGTCCGACGCCTCTGGCAGACGGCGGACGCGCA  
GTCCGGCATCGCGAAGACCACCCCGACCGACACCCTGTGCTTCGCCGAAATCGGCCCGGG  
GGTCTCGCGGTCGGCATCGACAGATACTGTGCGGTCCGCAACGAATCCGGCATGCCGAA  
GACAACCGACACCCAGGCGGACACCGACACCAGCACTGATCTGGTCAGTCCGTTTCAGCGC  
GCTCATTAGCCTGCTGACACCAGCCATGACGACTATCTGGTCTCGGTCAGCATCACGAA  
AGCCGGCGACACCGAGCAGGGCTCGGAGTCGACCAGCTCTACACCCAACGCCTCGAAGGC  
GAACGACAGCGGCTCCGGCACTGCTGCCAGCACCCCTATCGCGCAGGTCACTGCTGCCTC  
TGACACCGTACCCGCCGACGCCAACGCACACGCCAGCTACAGCGTGGGCGAAGGCGATAC  
CGTTCAACGGCCGACGGCACCGCTGCGGTGGGAACGGACTGTGGAGACGCAGGCTGCGG  
GTCGGACGAGGCATCCACGACGGCGACCGTACCCAGGGCGATACCGGATCGGCGGCCTA  
GACCGTACCCGGCATCCCGCAGACGCCGACGGACACCGCGCACGGGGTCTATGCCAGCAC  
AAGACGGTTGAGCACGGTCGGCTACACCGGGATCGGCACCGACCCCTGCGCAGGTCTCTCT  
CACAGACTACTGGAGAGCCACCGGCAGTGGGGCAGACCTCCTCAGTGTGCGGCTGTTTAC  
GCCCCGACGACGGCGCGACCGGTTTCGACCGGGAACCTCATAAAGGCCGTCAGCGGCATCCT  
CGACGCGCCCCGCCTGCTAACCATCACTCTGGACAAGCGGACGGTGTATGATCCAGCGTGC  
GCGGCAAAGTTCGAGTCGTGGACAGGGAAGTCCGGCTCGACATCGTTGTCCAAGATCTGAC  
GCCGCGCCCGAGCATGACGCACAGCCACGGCCTTTCGCTTGGCGTCCAGCCAGGGATACG  
CACGTCCATGTTGAGGTGAAAGTAGTGACCAGTGTCCGACGAGATGACCGCCGAGCAGAG  
AGCCCTCGTCTCGAGGTCGAGTCAGGCGCCCTGCGTTCGGGCGAGGACAGGGATCAGTGA  
CTACGTGGTAAAGTATCTGGACGGCAACCGGTGCCCGAACTGCGGCATGTCCAGCTCAA  
GAACGGCGACAGGGCCTCACTCGTCTTGCGGCGGCGAGAAGAACCTCGAAGAGACGGCAGG  
CCTACCGCAAGGGAAGAAGCCCGGCGAGGACGACGCATCGAAGATCGGCAACGGCCGGAT  
CCCCGCCCTTCGCTCTGTGCGCCACGACGAACCCATGGTTCGGCAAGGATACCGCGCGAGC  
TCCAGGGGGTACACGTTCGGAGAAGCTAAGGAGGTGAACAGTGGCGGTCCTTCTGGGCGAA  
TAGAATCCACGAATCCTTACGAGGCCACGTCCGGGGGTGGGTTTCTCTCGGCGGGCCGC  
GAATCGTTCGATCCCGCCGCGAGCCTGGCCTGACCCTACATCCCTGGCAGCAGAACATG  
CTGCAAGGCGCTCTCGCCAAGCGCGAGGACACCGTCTACAACCCATACACGGATCAGTCT  
GATTACAAATCGGTTGCACGCGAAGTCGACCTGATGATCTCCCCCAGAACGGTGAAGGG  
TCTCTCCTGGAGGCCCGCGAGCTGGCTAGCCTGTTCTCTTCGGCGTGCGCCTGATCATC  
CACCCGACGCACCAGTTCGATACCAACGAAGCAAGCCTTCGAGCGAATCCTCTTCTGATC  
GAGAACAACCAGGACTTCGCGCCAGAAGTCATGTGGGTCGACCGGTACACGGTGAAGCA  
GGCTTCATGATGAAGAAGCCGAAGGTGTCCTGCCTTCCACTGCAACGACTTCGGTCCCGT  
ACAGGTACCAAGGGCGGCGGCGGCGTCTTCCCGGGTGCCACCCTGGTGCTCGACGAGTCC  
ATGAGCCTCGACCCCGACGAGGTCAATGCGCTAACGCCGACCCTGACGGTCCGAGCGGAC  
TTGCAGATCGGGTACAACGGCTCGGCCGGTACCCGGAAGTCCACGCAGTTCGCGCCGCTC  
CGCCCCCGCGCCATCGGTGGGGGCGACCCGCTGCTCGGGTACGGCGAGTGGTTCGGCTGAT  
CTTTCACCCCGCTCTGCCCGTCCGACTGCGCCGAGCACGGCAAGCCCGGCGCCCCACTT  
ACGTGGGCGAGAGCGAACGCCGCTTCGGGATCCGCATCCAGCAGGAGGGCATCGCGACA  
ACGTTCCGCTCAATGGACCTCGACTCGTTCGCGACGGGGCACCACGCCGTCGGCGACTGG  
CCCACCGAGGGCGAACCGCGGCATCGTGGTTCGCCGAGTAGTACGGGAAGAGCCGCTTCGAC  
GCCAACTCGCAGCTCGGCAACGGCCTCGTCTCGGGGTTCGACGTCGCCCCGGACCGCAGC  
ATGGCGACGAACCTGGCCGGCCGTCCGAACCAGCGCGGGCGTCATCCATCTGGAGATCACC  
GACAACGGGGACAAGGTCTTCGACCACCGGTTCCGCGTCCAGTGGGTGCTCAGGCGGGTC  
ATGCACATCTGTGATCCGGCGCACGAACCGCGGACGATCGACCCCGCCAGCCAGGAC  
GGTGGGCTGATCCAGCGGCTGCAGGACTCGCAGGTCAACGTCATCACCCCGACCTCGCCC  
GAGGACGGCGTGCCTGCGGTGAGTTTCGGTCTGGCATCGAGCCGCGCAGGGATAAGAAG  
GGATACGTCACGCACATAACCCCGGCAGCCCTTACCGCGTCAATCCAGGCCTCCGACATG  
GGGACCGGCGGTGACCTGTGGAAATGGAGCAAGTCGCTCTCGACCCCCCATATCAACTCA  
ACCGACGAGGCTACGCTCGCAGCCTGGGGCAGGAGGAATATGGGCTATACGAAATCCGAA  
ACCGCCGCTATACCATGGGTGATCAGACGATGAGAGGCAGGACTGAATGAGGCGTATCGA  
TCTACAGGTCGTGATCCCGGTCGCGATTGCGCTGGGCGTCACGGTCACGGTGGCCGCCTT  
CGGAGTCTTGACGCGGATGGCCTGAGCGGCAGCGTTTCCCGTTCGCGGTGTTCTTCGTGGA  
GGGCACTGACTGATGACAGAACAGTGGTACCATCTACGCGGCTAGGTACCCCGATCAAG  
CTGCGGTTGGGAATCGAAGAAGTTCGCGCAGTGGTACCGGCAGGACCAACCCCTCGTTG  
GCACAGCGTCAGGGGTAGCGCAACACCGAGGCGCTCGCCAACAACCTTCGCCGGCTACGTG  
CTCGGCGCGTACAAGGCCAACCGCGCTGTCTTCGCGGTAGCGCCGGGCGGATGTTGGTC

TTCGCCGAGGAGCGCTTCTCGTGCCAGCGGTTCCCCGAGGCCGGCCGCCACGGCTACCTG  
TACCGGTGGCTGAACCTAAGGATCCTCGACAAGCCCTGGCCGAACATTTGACCGGGCGAC  
CTGCTGGCCCGAGCGATACAGGACACCGACATGGCGAGCAATCACTACGTGGTCCTCGAG  
GGGAGGTGCCCGAACCCGCGACTGCGCCGCCAGCGGCCGTACTGGGTTAGCATCATCCCG  
ACCCCGCCTCCGGACAATGCAGTGCAGTCCGACGTTCGTCGGGTACCTGTACAAGACCCGA  
GGCTGTGAGAATAAGGAACTCTGGAAGCTGTAGCCGGTCGATCGATCTAACGGTGCCATC  
GCGCAATGGACCTCATCCCCGACCCGGAGGCGCCCTAACGTGGAATGAACTGGTTGACA  
CCGGTTCTCCACGAGATCATGCACGACATCGCGGCCGACGAAGCAGATGGTGAAGTTCTTC  
GAGAACGCGGCCACGCCGAACCACGCTGAGTCGTTCAAGTGGACAGTGACTGCTGAGCAG  
TTCAAGGAGTTCATGGTGCAGCTCCACGACAGCTACGTTCGTCGGTTATAACGTCTACGGG  
ACGCTGTACCTCGGCGACGGCTCGGACGTGCACGTGATCGGCTCCAAGAGGAAGGAGATC  
AACTTCAAGTTGACGCAGCGTCTGTCCGAGTACACATCGCTGCGGCCCTGACTTAACGGC  
ACCCCGCGCCTAGGTGCTTCCGGAGGGCTGCAAGGTACCTCGCTGAACGTATGCCACTAC  
AAGGCGGCGTGCAACAACCTTCGCCGACGCGACGATGCGGCCCCCTTTGGCGCTCGCTGTGT  
GCAGCTTTCTCGGTGCTGGTTGAGGAGTTCGACAACACGCCACTCTAGTACGAGGCGGGC  
GACGTAGAGGTCCTGTAACAGTACCTGAAAGATCACGACGAAATCGCCGCGCAGAACGTG  
TGCGCGATCTCGAAGATCGTCATCCAGGGCTACACGCCGGTGTCAATCTCCGAGGGCGATC  
GTCAAGGAAGACCTCCATATGCTCAAGCACATCGGACTCAGCTCCGTCAAGCTCCAGCCC  
CCCGGAACCAGCGGCCAGGGTGCCTGACCGCACAGACGCTAGGTACCCGGACGAACGAC  
GTCAAGAAGGTCCTGAATCATGTCAAGAACGACCGGAAGGCAGTTGTCGACGTCCCGATC  
CCGAAACAGCCAACAGTCAGTCATGACAATTCGAATTAACCGCGTTCCCAAGGGAAGGGC  
TGACCGAGAGTCGTTCTGTTACTCTCTAGGTGGGGTCCCAGTCAACAAGGCCGCGGGC  
TACGGCGAGAGCCGGACCCTCGAGGAGAACGCGGCATTCTTCGCCCAGGACAACAAGATA  
AACTCGTAGCAAGGCCGCTTACC GAATGAATCGCCAATGGCCCGTTCAAGAAGACCCTT  
CGTTAGCGCAAGCCGAACATGCAGTACGACCATGGCCGGGACTCCCGCCTCAGGGCGGGT  
CCAATCGGCATGTACCAGGACAAGCGCGAAGACGAGCACGGCCTGTTCTGTGTCCTGCCGC  
GTGTTGATAACGCCGTCGTCGTATCGATCCGGCAGGAGATCGAGGGCGGTGCCGGCACC  
GTCTTCTCGATCAAGTTCGCGTACCTGAGACGAGTGGACGGACAAGAACGTCAAGCCA  
GTTGCGGGCAGCGGGATCAGCAAGCTAGTCTGGGAGCTCGGCCACCGCGGACCGCGGGGG  
CGAAAGTCCCCGGAGGTCGCGCTCTTCCAGGCGGGCGCCGGGTCGGCTCCAGCGTAGGAA  
GGAACCTCCTTCGGCGTCGGGGTGACCACGCAGGATCTCGAGGGTTCGCGCCTCCGAGTAC  
CGGCGCACCGTGGCCCCTACGGAGGCCGGGCAAACCGTTCGTTGATGTGTCGAGGGCTGAG  
GCCCATCCCGGGATCGATGTTGCGCCATGACTCCACGCGGAAACCGCGTGGAAATAGGGAT  
GTATCCCCCGGGCTCGCAGGGAAATTCGAATACAAGAATTCGATCGAGAGCAACGGAGCC  
CGGACATGCACCTCGCCTCCATCGAGACGCCC GAAGCGGACGCCGCCCAGTCGTGGC  
ACCTCCAAGCCGAAGACGCCAACACTCCACCCTCAAAGTTGCATTCCCATGACCCTC  
GAAGAAGTGCGGGCACGTCCGGCCGAGATCGGCGTCCGCCATACTACATCGATGCCGAA  
ATCCGCGTTCGTCGAACCTCCAGAAGCCGATTAAGCCATTGGGACGGCCTGGACGGCGAG  
CGCGCCAAGGTCGCGAGCACGTCCGAGCGCATCGAAGCCCGCACCAAGCGATTTGGTCCG  
CTGGCCGACACCGGCAGCACCGGGCGCGGCACCCACCCCGGCACGCAGGGGTTCCACGCC  
CGCCTCGACGTTACGACACCGACGCCATGCGCCTCCAGGCTCGCAGCGAAGAGGACTAC  
GTCGAGCCGCTCCAAGACAACGACCACAGGGCCACGGAGAAGATGCACTTCTCGCCGGAG  
GTCTGGTGCGGCGCGCCCCAGGTGCGGATCCAGCGCCTGCTCGTCAACCTCGACTCGGAG  
GGTGACCTCGCCAAGCGAATGCTGGTCACCGGACCCGAGAAGTACGAGCGGTTCGTTCCGGC  
AAGCCTGCGCTTTGGCAGAGCCTGCAGGATCTGACGGACGAGGAGGCCTGCGCTCTCGCA  
CTGGGTGCCAACGTCACGTCCGGCAACATCGGTGACTTCGCGGTCCCCGTTTCATCTCGAC  
GAGACGATGATCCACCCAGCGCGATCGACAACAACCCGCTGCGTGGCCTGTGCGGTGTC  
GTCCTGATCACCAGCAAGGAGTGCCAGGGCGTCTCCTCCGCGAACGGCATCGTTGTCTCG  
CGTGGCACTGAGGCCTCCGCGACCGACGGCTCCAGCCCGACCCTCGCAGAGCCCAAGGTC  
CGTGCCGACCGGAAATCCGAGTACGTCCCGATCTGGATCGAGATCGCGCATGACTCGTCA  
CCGATGCGTCTGGAGGACACCCTGGTGCTCGGAGAGTCGAAGGACGCGGAGAAGGGCGGT  
TCGTTCTGGCCGGCGACGCCCTGGGCGTCAACCCGCCGGGCTGCTCACAGGCGTCGGT  
TCCGGTCACGAGGTCGCTGGCAGCATCTCGCTGCCAGACCTCCGGTGACATCTAAGCC  
CTGGAGTTGGCGCTGCCGAACCACGTCCTCGCGAACGCTCGCTTCTGGGCCCGAAGGAA  
AACTCTATCCGGGTCCGGCAGATTGACACGACCGGCGGACCTCATCTGTGGGAGCGGCTC  
GGTGCCGGGCGGCCCTCTAAGCTCATATGTTACCCGCGGCATAAGTCGTGCTTGATGGAA  
TGCTACCCCAAGACGGCCGCTTCCACTCGCGTCTGGTTGTTGGCTACTTCCGCATCTTC

CTCAGCGTCGATCGCATCTGCATGAGCATCGTGCTGGTCCCACCCGTCCTCGCGAACGCG  
GGGGGCGCTATCGTGTGACCGGAAATCGCGGCCTGTTCCGCCGTGTGCCGAAAAGCTCC  
AAGATTCTGGTGACGGACGCCTCCCGCGTCCTCAAGACCAAGGCATCCTGATCTACTGAC  
TCCAAAGAAGGGCCGAATTTCTGTCAAAGGTGTTGCTGCCCTTCAGCCGTTAGGAGGGCG  
GCACCAATGGCACTCGGTAATCCTTTAATCACCAAGGATGAGCTGAGAGTCTACATGCAG  
ATCCAGTCGGCCGTGATCCAGCTGGACCAGATGCTCACTGACGCCTGTTCCGCGGATTCT  
GGCGAGCTCGAGCAGCACTGCGGCCGTGAGTGCAGCAAGTAGGACAGGGCCTCCTCGTTC  
ATCTTCCAGATCGAGCGGCCGCGCCAGGTGCGGATTGCCGACTTCCACACCTGCGCTGGC  
CTTGTTATCGAACAGGGAGACGGGCTGGGCAACTAGGATCCGGTCGATAACGCGTGCTCC  
CTTCGGGCCACGTACGACGCGATCGTGGACGGCCTGCCGTGGGCCTAGTACCGGCTCGAG  
TTCCCCGGCTGCGGCCGATTGCTCGGATCGGTATCAGGCCCGGTTCTTCCGCGTTTCC  
GCCAGTGGGGCTGGCCGAGCGCTCGCACCACGGTCAAGCCGGCCACGCTGCAGATCCCC  
GCGCACACGAACCACCTCGCCGACGCGCGCCTCGGCGTGACCGGCAGCACGCAATACGCC  
GGCGTCTTCTTGTGGAGGATCTGCCGATCGTCCCAGCAAGCTCTGCCGGATGGTAATC  
ATTACGATCCTGGTGGGGTGACATGACGACGCTCAGTGAGACTCGTGACGCGCTCACGAA  
GACGATCAAGGCTGGCGTCGACAAGGAGGTGCGCGCGTACGAGACGGTCGAGGAGATGGT  
CAACGTGCCGTGCAACATGGTCGAGCCGATAAACGCCGACTTCGACGGGGGGTTCCAGGC  
GTGGCGGCACCCCTGGGAGCTCTAGATATTCGTGGTCGCTTCTTGTGCAGCAGGTTCCGT  
CAAGCTTCAGAAGCGGGTCGACCAGATGGTCTCCGGCACCGGCCCGAACAGCGTGGCTCA  
GATATTGAACGAGAACTACCCGCTCGGCCTGAACGGCGTCGTGGCGCAGTGCTACGGCAT  
GAGGGGCTACGGCTGCTCGTTCTACTGGGCCAGGGTCGCGCACGTCCGCGTAATCCTGCT  
GGTCCGTGGAACAGTCTATCCACACGCATTAGGAGCTGGCGGCAGCATGTACGCTCTCGC  
AACCAAGGTTCTGGCCGACGATCGCAGCGCGCCTACCCTCGTACTCTCATCGCCGCGGA  
TAGCTCACCGGTCAGCAACGGCCACAACGCATTCTGTACCTCAGCAACACCGGCGCCTC  
GCCTGCGAGTGCAAGGATAACGTGCCCCGGCGCGACCTTCTACGGCGTCGCCCTCCCGGA  
CAAGACGGTCTCGGTCCCCGGCGGGGAGGCGAAGTACATAACCGCTCCGGCGCGGGTACGC  
CAACGATTCCGGCCAGGAGACGATCTCGGTCGCCTGCACCCTCGCGTACCTGGAGGTCGC  
CTCCATCCGGTTCGCCTGATAGCCAGCCCGAACTTCCACAGGCTGCGGGGAGAGCAGGCC  
CCGGAGACAGCACCCACGCCATCCAGACCGGCTGCTACCGGGTCTGGGTAAAGAGCGCC  
CGCCTCGTCGTGAAGCCACGCAAGGTGTCGGGATGTCAGTCGAGCACGCAGTGCCGGCTG  
CAGGCCTCGGGCAACTTCGAAGAGATCAACCAGCGGAACAATAACCGCTGAAGAGCCGGGC  
CACGACAGACCAGACAACATAAAGGAGTAGTGATGATGGCAAAGATCCTGCGCCGGGAAG  
TCGTGATTGAGGTCGATGGGGTGGACTTCGCGGATCACGTTTCGTCCCTGGCGTTTTTCGC  
TCAAGAATGCGGACGTCGACACCCCCACCTTCAGCGTCGGGGGCAAGGAGCATGTGACG  
GTATGAAGGATGACGAGTTCACCGTCAACTTCCAGCAGGACTTCGTGCTGCCTCGGTCT  
ACGCGAAGCTTACCCGACAGAACGGCCGGGAAGACGAGTTCGTTGGTACCCAGCGCCCCA  
GCGCCGGAGCGGGCCGGACTACCAACCCCGAGCACACCTCGACCTGCATCCTAAAGGAGT  
ACCAGGCCCTCGCAGGCAAGGTGCGGCACCTCTACGAAACCAAGGTGAAGTTCCCGACCC  
AGCGCAGCGGCATCTCCCTGTGGGTGCTGACTGGCTAGCGCCCCATGGCGAGCGAACT  
GTACGGGTTACCCCTCCCGATCGATGTCATCGGCGAACTCCCGTTCGCGAGGTTCCAGAA  
GGCGCTCACATCGGCGAACCGGCAGCTCCCGCGCGAGTGCAGGATGAGCGTCAACGAGGT  
CGCACGCGGACTGCACGACGAGGCACGGTATCACTCTCACCAGAAGTTCACCTCGAAGAA  
CTGCCACACCGGGCTTCGTGCGATGGTAGCCGCTGGCGTTCAGATCAACCAGATCGAGAA  
CGGCGTCAAGGTCATGACCGCGGTGCCTGAATCCGACGAGGCGATCAGCCCCGCGGACT  
CGAGGGCGTGAAGGGCTGGCTTACCCCTGTTCCGGCAACAAGGAACTGTAGGTGCGGCA  
CCATCAAGGCTCCGACTCCTGGTTACTCGAGACCATGCGGAAGGGCCGAGCTACGCTGCG  
TAGCCGCCTGGTCCGTAACATCAACGATTCGATGGAGAAGAATGACCACGCAAGCCAAAT  
CAGCTGACGCCAAGACCAAAGCTGGGGCCAGGTCTTTCTGTGCGGGTCTGCCTGGACAC  
GTCTCGCATTTCCCGCTGACCCGCGAAATCCACTGTACGACACACGAAAAGGAACCGCGA  
CTTCATGGCACTTCTCTGGAGGAACGACATCCTCTTCGTCAACGACCTCTTGACCGACCG  
CGTTTCCCTCCCTGAGTTCGGTGGCGAGGTTCTGGCCACACACTGGCTGGCGGTGAGCG  
AGCCGAGTTCGAGGCATCGACCGTCAAGCCGAACAATGGCAAGCAGGAGCAGAACTTCGA  
GAATTTCCGCGCGCGCTTCGTGCGCCTGTGCGTCTTGGGCGAGAAGGGTGAGCGCCTTTT  
CGCCACGCGCGCTGGGGTTTCGATGCTCTGGAACGAGTCCGTCGCCACCCTGCTGCCCGT  
CTTCAACGAGGCGCAGCAGCTGAACGTCAAGACCGTCCCTGACGTGAGGAGTTGACCGA  
ATCTTTCGAGCAGTAACCCGACGAGGTTTCTACTTGCGCAAAGCCGAGACGCTCAGCATG  
ACCATCGAGCAGATGCTGGCGGTAGACACCACTACGGGGAGGGCGGGGTAGGAGGAGTAG

GTACGCGCCTTCGGACCGGTCGGGAAGGGCTGCTGACAGCTAGCCCTCGCCAGGTTCTTT  
GTCAAGCTCGCGATCCTGCACCGTCTGTACGGCGAGCAGTTAGACCACACGCCCTCCCA  
TTGCCTAGCAAGTGCCCCCGCCCGTAGAAGTGCTACAGGCCCGAGGCCGGGGAGGACTCA  
GTAGATCAGGCCGAGTTCGACAGCAAGTTCGGAGACTGAATGATCACCAAAGGCCCGTCCG  
GCCGCTTGCCCATAGCGGCAGCAGGACGGCTCGCTGCTTTTGTACCAGGCGGTAGTTTT  
CGTTGGCAACGCTCACCTCGCTCAACTTCGCGATCAGGAGTAGTTGGGAGGTGACTGCG  
CTGAACAAGGCACGTGATGAGCTGATGGCCCTGCAGGCTCAGATGCGTACGATCTCGCGT  
GGCTCGCTGCACTTCACGGCCGACTCCGACACCGAAGGGGAGAAAGCCAAGACCCCGGAG  
CTGCCCCGATAGGCGCGCGACATCCCGATTGGCATCGACCTAAGCGACGGCCAAACCGCT  
ACGGCGGAGGCCAAACTCGACATCCTGGCGCCCGAACGAGAGGTAGACGTGAGGGTGTAC  
GACGATGACATTTGAAACAAGATGGACCGGAGCTCGGACTCCCTCGAGAACGCCTCAGTC  
TGTGCGGGCGACTTCGGCAACTCGATGAACCGTGCTGTCTTCATGCCCAACGTAGGCATC  
GTGGCGTGCGCCGCGAGTATCGACGTTCTTCGCGGAATGATCAACCTCGTCGGTTCATCG  
CTGACCCGCGGGATGGGTGGAGGGATAATCGCTGTAGGCGGGCCGGCTCTCAAGGAACGC  
GAGGAGATAATAGCGGGTTGTGAGGCCCTGTGTACCTCGAAGAACCCTCAGCCCATTCT  
GCTGCCCATTCGTGGCTGCAACCTTTCCTGCACACCAAGTTCAGGGCCAAGACGAGGATC  
GCGGAACTCAAGACGGTGGGGACAGACCTTTCGCGAGTGGAGCACCGGCGATCCAGCCG  
CACACGTCCGACCGGAGGAATCTCCTCACAACGCGATGCCCGCCGTCCGGCAGGAGCTC  
GAGCCGTCCGGCCCGATGGTCCGAGGGTTCGCCGATGGTCTCAGTTCGCTCGGCACGCAC  
GTCCTAAACAAGTTCGACGGTATGGGAGACGGCGCATCGGGAATCGCACGACTTTGGAAG  
AGCACGTTAGATCAGGTCGGCCTGCTCATGGAGCAGTTCGGCGTCGCTGCCGGGCTGATG  
TCCGCGACGGGCACCGACCTCTGGGATCGAATGCTGACCGGCTTCGACCAGTTCATCGGC  
GGCATCCACGACGGCCTCGTCGACCTACCGCCCGCCGTCGACAAGGGGGTCCGGTGACCCG  
CTCTCAGTCTTCGGACTGGTCGGCGTCGTCTAGCGCGGAACGCTCGGACCGCTGGGCGAG  
CTGGTGGCCGCTATCTCGAACGCCCTCATACTTGTTCGACGGCACCGTGCATGCTCTC  
AGCCACTACATCGGCGCACTGATGTCCGGCCTCACTACGGCGATCGACACGCACATCCCG  
CTTACCCATGCGTTGAAGCCGTTGCTCGTCATGGTCCGGTCAATTTCTGACACAGGCGATA  
AAACAGCTCGCGCCGCTCATCCCCAGATCGTGGACGAACTGGTCTCCGCGCTCAGCCCC  
GCGTTCAGACGCTCATTCCCGCACCGGTTCCGGTTGTCGAGCAGATCACAGTATGCCTG  
AAGCCGCTGCTGGAGATGCTGCCCGGCGTGATCAACACGCTCAACCCGATCGTCGTCGGT  
CTAGCAATCTCGTTCGGCAAGATCACGCAGTGTCTGTCCCCGCTGTTCCCGCACCTCAAG  
CAGATGTACCTCGCGTAGAAGCTGATCTCGACGGGTATGGCTATGGGGCGCGGCATCAAG  
ATCGCAGACGCGGCAATCCGCAAAGCCCTGACGGTAGCGACCGTCGCTCACCCGGCGGCC  
GTCGGGGGGAACAACATTGCGAGGAGCGCCAACCCGATCGGCAAGATTCTCATCTCCATC  
GGCCTCTGGTGGCAGCGATTGTAGGGCACGCGACCAAGACTCAATTCTTCCAGACCGTC  
TGGGCGGCACTGAAGGTGTCGCTGGCGGCTATGTGCCAACGGATGAAGGATGCGTGGGAT  
CCCACCGTCCGATTCTTGGCCTGCGGTGGGAGCAGTTCCTCCGGCACGGTTCGTAACGTG  
GGGAACGCCTCGTGGAAGGTGAGCAAGGTAGCGGCACAGGCTGTCTGGGGATTCTCTCC  
AACCCTGGAGCCAGTTCCTCACGGTCTCAAGGTACCTGGGAGGTTCGTTTGCGGCGTC  
ATCCAGGCGGCCTGGGACGGCTGGTGGTTCTACATCCTAGCCAGTGTACGATCAATTTG  
ACTTGGCTGGAAGTCGCATGTGGTGCCCTGTGGTGCCTGTCCGCGGAGTCTGGGATAGG  
TTCGTACCGATCCACCAACCGCTGTAGCATGGTTCGCTCGACGGGCGTCAAGGTCTTCGTC  
GGGGCGTCTGGGGAGGAATCCAGATCCTCTGGGACGGATTGTGGAAGGCCGTGACTTCA  
AGCTGAAACGACTTCACCGGCTGGATGCGTCCGATATTGGAGTCTTTCAGTGACACCGTG  
GAGCCGTCCGTGAATCTATCTGGACCGCCGTGCAGCTCGCCAGGGAGTTCCTGTGGGAT  
CAGGTAACGCAGAATTAGGATTGGTGGGTCAACCTGTTTCGACGCCGTCGGGCAGCCCTCC  
TGTAACCTGGATCGAGGTTGCAGCCGACACCGTCTGGACCGGTATCACTTCCGCGTGGAAC  
GCCCTCTGGAACGGCTTCAAGGCGATGTGGGAGAACTCTTACAACGCCCTCCGTTCCGGC  
TGGGAAGCCTTCTGAAACTGGAGGCCTGACTTCGCATTTTCGCGTCTGAGGTGCGATCACC  
AGGCAGTGGTGCTAGTTCAAGCTGGATTTTCGAAGGAGTCTTTCAGCACGAAGGTTCGACAAG  
GCCCGGAGATCTGGGATAAAGATCCGCGAAGTTCGGAGCGAAGCCGATCAACTTCGTCATC  
CGCATCTGGAACCTCCACGTCCCCTGTAAGTTCGCCCTCCAGCACTCGTCGACATCGGC  
GGGTACGCTACAGGTTGTCGGGTCGACGGCCAGGGCACGGGAAGTTCGACGACATCAGC  
GCCTGGCTCGCGCGCGGTGAGCACGTCTGCTTTGCAAAGGAAGTCGATGTCGCTGGCGGG  
CACTGGAACGTCGAGCCATTCTGTCGTGACACGCTCAACGGTGTTCGCGCACTAGGACTCC  
GGCGATCCGGCCGCGTGGCTGATCGGCCAGCAGGAGAAGTGCTCGGCTGACCTGCAGGTC  
ACTTCGGCTCAGCTGGACTCGAACGACTACTACGGACAGGGCAAGACGGTGGACTTCTCG

AACGGCGGGCGACTCCGGTCCATCGGAAATGAAGGCCTTCGCGAACTGGAGCGCGGACACC  
TGGGTTGCTAACACTCTCGAGCTCATCGAAACCCCGTTTCGGACGGCACATCAAGGACGGT  
AAAAGCGTCGGCGACGGCATGGGATTATACGGGGCAGGCACGATGGCCATGCACAGGAAC  
CATGTCAACTGGACAGTCGACCGCCCCATTAACGAGGAAGACTGCGGCCCGAGACCGATG  
GGCGAGATCTCGTGCGGCGTCGGCAAAGGCATTACCAGGCGCTTAGAGGAGCTGACCAAG  
CCGATCCTCGGAGGCATGCCGGATCCGTTCTTGTGGTGTTCGGTTTCGCCGTTTCGCAGGA  
TTCTCGGAGGCAGCGGGAACGAAGGTCCGAGACGAGTTCGCGACAAGGCGCGCTGCGCT  
AAGCTTTCATCCGGCGGCATTGCCAGAGGAGACATAGGAGGCTTCTCCCCGACGGGGGC  
CGGCTCGTTCTGTGAAACTCGGCCGTGCGGATCACGAACACGCAGCCACCATCATCGTTC  
GAAGCCTGGCACGGCGGCGCGAACGCGAAGATCACGCGAGAGTCGGGCTGGAACGCGGTC  
TCGTTCAACACCGGGGAGCCGAACGCTGCGCCGGGCGATGCTGCTCGCGGACGGGCCAG  
GTGATCCCGACGACGTTTCGAGGCTCTCCAGGAGCTGGGCCACACCAACCTCGACTCGCTG  
GTGGACAATCTAGCGGTCCAGATCAACTTCATCAAGTCGCGCCACGGCAAGATCGTGAAC  
GTCCTGCAGGCGAAAGGCACCATGGCCCCTCGTGGCTACCGCACAGGTACCTTCTGGGCT  
GCGGCCGGGTGGGACCTCGTCGGCGAAGAAGGAGCCCAGATGGAGAATTTCCGTGGCGGC  
GAGCAGGTCACGCAGTTCGACGACATCACCCGCGCCCGTAAGGACTCCCAGTCTGGACAG  
AGCAAGGAGCTGGAGTCGAAGAAGACGGCAGAGATTCGCACATGGTTGGAGAAGACCGGG  
TCCGAGATCTGCACCTCCGGAGCGCGGTTTCGCGCAGTCTGTCCAGCAGGATATCGAGAGA  
GTGCTTGCCACAGTAGGTATCCAGCCAACTCTCGATGTTGGTACTGCAGAACGGTGCA  
GACGCAGCTGCGTACGCGCAAGAAGCCGCGAATGAGCTTGTTCGTAACCTGGAGATGTTG  
ATCCGGTAGCTCATCGGCACACGGTAATCACAAGGGGCGTGCTGGGGTTCCTAGGAATC  
TGGGTACGCCCCCGTACGCGTAGGGAGACACAACGGCTCTGTTCAACTTGCAGTGGAGC  
GGCGACGGGTTGAACGAGGGATGGAAGAACATCGCCGGCGCCACCGCCATCTGGCAGGCG  
CTCACAATCTCACCGATGCGAGGTAATTCAGTTCCTGCCGTGGAAGGCAGTCGCAGCC  
GTCTGGTTCCACTTCGACACCACCAGCGTCCCCGACGGCGCGATCATCACCCCTATGACT  
GTGAACATGGGGGTGCGCCACGACGCTGCCTCTGCACCGTCCGTTAGGGCCCCGTCGATC  
AAGGTCGCGGTAGTCGCCTAGGACGCCACCTCGCGCTCCCTGACGCGCTCCATCTACCCG  
CCGAGCACACCCACCATCCATGCGATCGCCAGCTACCAGTGTAGCGCGCTCGGCCTGGGT  
TGGGAGGTAAGCGGTTCAACAACCTTCAGTGCCGGATCTTCTCGTACGTTGGCAAGTTG  
CACCGTACCCGCTGCCACCTGCTTTGGTTTCGCATCAAGTACCGGCTGCGGGCCGACCGTG  
GCGATCACCTAACAGTCGGGCACCGTGACCACGCCGTCGCCGAACATCACGGGGACATAAC  
ACGCCGACTCACGGCGATGCGCAGAAGACCGTGGAGCACAAGCTGTTTACGGCCGAGCGG  
TAGGCCAAGGTGTCGTTCAACCCGCACACCGTGCCGCCTGTCTCACAGGACACACTGCAG  
CGCTACCTGCCGAGAGTGCCGCGGCCGACGTCGACCAACTCGAACATCTACTGGGTCTAC  
CTGCGAGTCACGTCGTCGTTTCGGCGCGCGCTCGGTATGGATCGGCCGACAATTCACGGTG  
TGCGGCCCGTCGCCCCGCGATCGCCGGTGTGACGACCTGACGTACGCACTCGGCCGGGCG  
GTGATCACGGTGGTGC CGGACCGCGAGTCGGGCAGCGCGCTCGCTCCACTTGC GGAACACC  
TCGAACGTGCGCAGCGGGGAGGAGGCGGACGCGGAGTTGCCGACCGACCCCCACCCGAAC  
TCCACCACCAACGCAACGATCACCTCAAGTCCGGTGTCTCCTTCCCCGGGGGCACGTCC  
TCGTGGAAGGTGACGGCCACAGCCGGGGGAGCGGCACAGCTGACGACGGACTTCATCGAG  
ATCGAGGTGTCGCTGCCGTTGAGCTCGCGCGCACAGTTCCGGGCGGCGGTCACCGTGCGC  
AACTGCCGAGCGCTGCAGCCGTTCTACGTCGACGTCTACGCCGTGAACGCGGGCTACGCC  
CTGAACGGGAAATTGGTGACCGTCTCGTCGAGCACCTGGGCCGAGGCGTCTCTTTACGGC  
AAACCTTCGGCGAACGGGGTCTAGACGCGGGTCCCCCTAGAGCTTCTGTCAACGTTGGCC  
AGCGAGGTGCCGAACCGGGACACGTCGGCGTCAGCTAAGGCCTGAACACCCCGTGGTCC  
GACGGCAACCACGCCAGCCGACGCTGCCCTCGGCGTACGTCTCGATGGCACAGGGCACG  
CAGATCGGCGCCGTGTTCTTGACGCAGGACGCGGCCTCGACCGCAGTCCCCGCGGCAGCT  
AACGGCACCGGGGCATCTGGTTGGAAGTCTTCAAGATGACAAACAACGGCCTGTCTCAG  
TCGTTTCGGGTGCCGAGCTGTCTGCACCGCGTTCCTGGGGGCCACGTCAGGCGCGAACTTC  
CCGCTGAACAGGCCTGCGGGGACGGCGGGCGGGCGACCTCATGCTGGCGTTCGTCACGCCG  
TCGGAGTTCTGCCTGAACACGCCTCCGGCTGGCCGGGCGATGGTCAACTCGGCGAAAGTC  
GACGACGGCACACGGGCACCACGATGTACGTCCTCAAGCGCACCGCCACGGCGTCCGAA  
CCAGCCTAATGGACCGGTGCCTTTCTGTCCACCAACTCGCTCAGGGAGTCGGCCGTCACG  
GTGGCGTACAGCGCCGAACAGACGTTCTGACGGATACACAGGCCCCCTCAAGTAACGAC  
ACCCTGCTCGGGCTGCAGACACCTTCACTGTACCACACGGACCCGAACGGCTGGCGCGTG  
TATGCCTGCGAGATGTCAGACACCGCATGCGGCGGAGCTCAGACGCCGACTTGCAGTCC  
CCGCTCACTATCCGGCACATCAGTTTCGTGGCCTCGACGTCCCCGTGGTTCACGGTCAAC

ACCGCAGGCTGGTACACGATCAACAAGCCGGCGGGCACCCAGTCCGGTGACGCGCTAGTC  
GCGACGATAGGCTACCTCGGCAACGGCGTAAGAGTGAATCCGCCTGCGGGCTGGAGCCTG  
TTGAACCACACGACGGCGAGCAAATGAGGGCCCTTCCCTAGAGCCTCGCGGTGATCGAA  
CGAGTCGTTGGAGGGTTCGGAGCCGGTTTCCCTGGTCCGGCACTAGCAGGGGGCGGCTCGCTG  
GACCGCTCGACGACCATGCAGTGTCTCGCCTACCGCCACGTTCGGCAACCGTTCCCGGATC  
CTCTCCTCGCCCATCACCCGGCACCCCTCAACTCGAGCGCGCTAGTGACCCGGGCAGGGCGGCG  
AACACGAAAGCGCTGGCGTGGCGTGAGACGGCCTGCGGTGTTCTGTAGGATGCGGCCAAC  
GTCTTCGGCAGCACGAACGAGGTAGCCGAGCGCATGGATAACTAGGTGAACTACTAGATC  
CTGTTTCGGAAGCCTCACTGGCAACGCGGTGCTGAGGGTCCACTCGATCGGCGATGAGTCG  
TCGGGAACGTAACGGTGGTACGAGTATTCGAGCAACGGGCTCGCCGCGAGCGACGGCTTC  
ACCGGCTTCTGCCTCTGCTCGGTACGCCTCCGATCCCGGTGGCCGACGAGACTGCACGC  
ATCGCAGCCGGGCCGGTGGGTTTCGGCGGACCCGTGGGCATCCGCGAGGGTCTTGAACCTCG  
AACGGTGTACGCCGACAGGCAGCCAGTCGATCACCGGCATCTGCACGCCCGGATCCGGC  
ACTGACAAAAGCTCGATGGCTCGCTGGTTCGGCATCCTGAAGCCTGCCAGGGCGCAGCCA  
ATCAGGTACGCGACGGCCACGTTAAACCGCACGGTGCAAGTCTCGATGGTCAAGACCTAC  
CAGATCCCGGATCCCGACTACGTGACGGCGTCAGGATCGTTCACAGGATCGCCGGCTGGC  
ACACCCTAGCTGACGGTGAACCTGTACGGCGTCAAACGCCGCTCGGGCAGCCAGATCGAC  
GCGGGCACGGCGATCCCGGCCCTCGGGTGGACCAAGTCGTGGGCCACGTTCCGCATCCCG  
AGGTCCTCCACGCGCAAGTTGGACGGCGTCTCGGTCTCGGGTATCAGCGTCGGCGAACTC  
GTCTACTGGGATCGTGGCTCCCTGGTGTAGGTCTGTTGATCCGACCCACCGGCCGAGTACC  
ACGCGTGCGGAGCACCTGGTCTGGTTCGATGGCGCAGCTCCAGTAGGCCGACGACGACGGG  
ACCTGCCACTCGGATTGGACTGACTTGCCTGGCCTGCAGCCCAACCCGCCTGCGTTAGAA  
CCCCGCTCTGGCTCGGGCCTCTAGACCGACCACGCTCGGATCACGCTGACCAACCGGAAG  
TACGGCGCTCGCACTATGCCTCTCGTCCCTCGACGGCGACCCAGATGGTGTGCGAGTGGGGG  
CCGCTCAGCCCGGAGTGTACGTATGAGGGTAAGAATACTGGCTCAAGGACATCTCTAAT  
CCGATCAACAATCTTAGGCTTAAGGTGGCCTGAGCCAAGACGCGAGGTGGCTAAGACGAAC  
AGCGCCACCGTGTTCAGCCTATCGGCTCCAGCTACAAGTCGTGCTCGACGAGGGCTGC  
AAGCGCGAGACGTTACCCCTTAGCAGAGGCCGGTACCCACGCGGAACGAGCCGAGCTC  
CCCGAGATACTTACGTCCGGCCCGACCCCTGTTCTGCTGTAGGACATCTACTTGGCCTGG  
CGGGTGCGCCCGGTTCGGGGACCTGATCGAGGTTCGTCCTCCCGACCTAGAACCAGGAGTCC  
GAGCCGCTGCGGAAGATGTCGTGCCAGTTCGTGCAGTTCGCGGGCGGCAGAATGACAAGGA  
GATCCAAATGCCGCGCGCGACACCCGCTTCCCTGGACGAGATCCGACGCGAGTCACTGCGT  
CAACAGCTACGTGGACGTGATCGCTCCGGACCACGAAACCAGGGCGGCTGGTTCGTGATCGA  
GGGCGAGATCAACGTCGACCCGAAAGCCAGTACCGTCGCGCGGGTTCGGATCGACTGCGT  
AGACCTGGACGGCAGCTGCGTACCCTTCGGCAACTAGGGCATCCTGATGCTGCTTGGCAC  
CAGAATAACGCCGTAAGTGAAGTACGCGGACGGCACTGTGGAGGTCTAACACCT  
GGGCTGTTTCGGGTGGGCGGGTATCGCCTTCCCTGAATTAGTTCGAGCCGGGGCGGCAACGC  
GGGAATCCGCAACTCGCTCAGCATGTTTCGACCCGAGCCCGTGTGGTGGCGCGCGACAACAT  
CACCGACACGTCCACGATCGACGGGGGCACGATCATGCTCACGCCGTTCAAGAGGATTCT  
CGGCCGGACGTTCCCGACATAGAGTAAGACGCGGTGTCGAAGATGCTCACGACGACCAG  
CCCGGAGGTCCACACCCCGCAGGTCTACCCGTGGGTGGTTCGCTAGGACCTCGCGAAGTC  
GACCGGCAGGGAGCTGTACTTTGACGACAAGGGCTGGGCGATCATCCGCCCGCCGCCCGA  
TTTCGACGCGCAGCTGAACCCCGACTACACGTAGTTCGCGGGGGCCGGGCTATAACGATGCT  
CGACCTGGCCTCCGAGTACAAGGACGAGCCGGGCTACAACGACGTCGTCGTCGAGGGCCG  
GTCCACGTGCGCCGATCTGCCCCCGGTGCGCCCGGACGAGTGGTACTACGATCCAGCTC  
TCCGACGCTCCGGTTCAGCCCGTAGGGCGGGTAGCCTCATTTTCGTGCAGGACACCAACGT  
CAGGTTACAGGCCGACGACCTGAAGATGGCCGACGCGCTGCACAAAGGCTATAACGGCTT  
CTCGGCCGCGCTATCGATCAGTCTCTGGACGAATCCAGCGATCGAGGCCTGGGACCTCAT  
CCAGGTTCGAGCGGGAATCGTTGAACAAAGCGCGCCACAGCACTGTCAGTCTGTTCAACAG  
CACGCTCTAGAAGGACGGCGTCCGGAGCCTCAAGCCCCGAACACGAAGGGTTGCTTCATG  
ATTGAAACCTACGGACAACCACCGGCGACCGTCTGACCTGTGTAACGCTACTCGTACA  
AGCACTCTCTCAGGTGAACGATGAGCGGAGTACCGACACCTGCGGCGGACATCCCGCAGG  
GGGACATGACCTGAGCTCAGCAGCCGGCAGCGTCCATCCAGCCCAGGCCAGGATCGTC  
AGCGGATCAGCTCGCTGTCGACACGCTCACCCCGCCACGTAGGGCTCGGGCGCTCGTAT  
CGCAGGCGTCTATCGTCCGAGTCGAGGGCGGATACCCGCCAACCAGGACGATCCAGTTCCG  
GCGGAGACACCGCGGCCCTCGATCATGGCGGTCCACTACCTGGACAGCTACGTTCCGCCTA  
CCGGGGAGACGTTGATCGACCTCATGCAGGGGGCGGAACTGTTAGTCTCTGCCAAATGG

TGGACAAACTCGCGGCCGGGGCGAAAGGCTGGCGGGTTCCGGAGCTGACGACGACGTGGA  
ACGCGAACCCACGTTTCATGCGGATCTTGTACCGGATGGTCTACGACAAGGGCGCGCGGA  
ATATTCAGTCACATGGCCGCGTCTGGCGGACCGTCTCCGACACAGGCACGACCCTGTTCA  
CTCTAGCGGGCGGACTACCTGCTAGACGTGCTGCGCGCCTTCGCTGTCACCCGAGAGCACC  
TAATCGGGCGGCGGAACGCGCTGCAGCTCCAGGCGAACACGGACGGAAAGGTGACTATCT  
CCGGCCACCAGCTCGAGACCATGGGTATAAGCCGCTCGGGCGGGCGTACGACCCGGGACGA  
CGTAAACCAACCACTAACCATAATGTGCAACATCGACCACCCTGGTAACCCGGTATTTCG  
TCGGCTGGTGGACGGACTGGGTTCGTGCAGACGGCTGTGGGAACTAATGGCGTCAGCCACA  
ACCACAGCAATCCGATTAACACGCACACTATGACGAACGCGTCTCCCTGGATTGTTGT  
CGCCGACGGCGCGGAGTACGTCCTCTGAACAAGAGGTGCGTACGGTGGGGCGACACAGA  
GCATCTCGACGAGCTCTAGCGCCGCGCGCCGGTCCGAAATACGGCAGTCTTACTGCCG  
GCTCTGTCTGGCGGAGACGGCCAGGGAGCGTAGGCTCCGGCTATCGTACGTAATCGCGGC  
GCTCCAGTACGACGCGATGCTCGAGATGCAGGGCGCCGTCTGCGCCCTCTGCGCCCAATC  
ACCGCCTCCGGGGGGAGGGCTGGCCGTCGACGACAACCACAACCGCTATCCAGGAAAGGA  
GACGTTCCGGCAAGTGACTGCGCGACCTTCTCTGCCACGAACACGTCATGGAGCTCGGCAA  
GGTCCGGAACCTCAAACAGTTGTTGCACAGAGCGAGCGGGTACCTCGACGGTGGTCACCT  
CGATCTGTACCAACTGCTCGGTGAGGTTGGGAAACGCAAGATATAGCCCAGACCAATATC  
AGAAAGAATAGCACCGGGCGATACGGCGCGCAGAGCCGGCTGTTTCGTCATCTGCACCCAG  
GAGGACAACGACACCGCGTGCTCGCTGGAGGGTTACCTGCAGAACCGCCCGTCCGATGTC  
AGCTACCACACTCGATCGACGATACGGAGTGAAACGCGGTGGTCGTCGCGGACCGTTCC  
TCGTGGGCAGTGC GCGATGTGACCGACTACACGGTCAACCTGTGCTATTCCGGTAGCCGG  
GCCTCTATGTCATGTGAATAATGGATCGTCAAGTACAGAAAAGCGATCGATTTCACTAGT  
TGGCTGATCGCACGGGCTGCGAAGCAGTACGGCTTCACGCCCTTTGTCATCGGGCGCCCG  
GAGAACC GCGCGGCCAAGCAGGGCAGATCGACCACTACAGCAACACCAAAGGCCGGGGG  
AACGGCGACCTCGCCAACGTCGGCGGCAGCTACCAGTGTGACGAGCAGCGTAAGGACATC  
GACAAGGACATGGGTAACGCGGGCGCCGCTGCCCGCCCGCCGCTTCCCTATCGCTAGCCCG  
ATCGACGAGTCCGGGACGGCGATCCACTGGCTCGGGGACGCGCTCGATGGCCAGAAACCC  
AGGCCGGACAAGAAGCGCCAGTTCCGGGACTTCAAGAACGGCGTGGTCTACTGGACCCCG  
GCGACCGGGCGCGCTGGGATCCTGGCGGAGCTCCTCAAGAAGTTCGCCGACCTGAAGGGG  
GATACCGGCCCGGCGACTAGCCGACCAATGAGCGCAACAGCCTCAACGGGATGAACGGC  
CTTTCGGAGGGCGTCTGGAGGGATTAACCTGCGGCAACCTGTCCCCAAGTACGGCAGC  
GACGTGGCCTGCTGGACCCACGCCGAGAGGGGCAACCGCTGGGGGGGAAGCGGATTTCGAT  
AACGATCCCCTCGGATGGCCCTCTTCGACCAGCTGCCATTCGACGGCGGAGTCGTCGGG  
TACTTTGAGCACGGCAAGAGCCACTGGCCCGGCAAGCTCAATGTCATCGCACTTCTGACC  
AAGGACGGCTCGGATACACCCCTGGCCGAACAGGGTAAGTAAGAGAAGAAGAGCGCAATG  
ACTCTGCGAGCGAAGACCGCTCACTACCGCCAGGCCGACGGGGCTGGCAGCTGATACGTG  
CCGATGACTCCGACCGCAATCCTCGGGCTGGGCGATTTTCTGCCCTCTGGCACGTCAGTC  
GTCGTCACGACCACGATCGCCATCCTGACCACGGCTCGCATGTGGCTGGCGAGATACGCC  
GACATGATCGACAACGCGGCAGGCTCGATCGACGGACGGCAGCGCGACGTCCGGCCCGAC  
GTGCCGACACGCAGGAAGCACGCTCGGCACCGTGCCTCCGTACCTGGCGCCGGTCTGTC  
CCATGGTCTGGTCTGCTGCTCGGCACGAACGGCATCACGATGTGGCGCACCGGGCGGCTCC  
TCGATACCCGCCACTCGGAGCAGGCGACGGCCATTGCAATCCAGGCAACAGCGACGGCAC  
ACAGCGACTACATCGGCCCGTAGCTCCGCTTCCCCAGACAGTGTCTCGGCCTGCTGGCCC  
CTCAGAAATCGCACATCCATCAAACGAGCGGCAGCGCCGTTAGGCCGTGACGTACATCG  
CCCACCGGCGCTCAGATATGACCCGATCCGTGAAGACGTGCGGACCGCTCCCCAAGTCCC  
CGCGGGCGATCATGCCTGATCGATCGGCCTGACGTTAGAAAGGCCAAACGCCCCCCAGCC  
AAAGTCGTTACGCGGCTCGGCTGGAGGCCCGTTTCTGCGTTC

>NewGenomeName\_211

CTCCGGGCCAGACCTCACTCGTCGCATCAGTTACCAACCGCGACAAAGTCGCCACTGGCG  
GCGTTACGTACGCCATGACCCTGGCTGACGGCCAACTGACCGCCATCACCAAAGTAACTG  
CTCCATAAGAGGTTAGTTATGCCTAAGATCCCACAAGTACGGCCCCCTGGCGCGCTCCGCT  
TTGGCTGTCCTTAGTAACTCCGGAGCAGGCTTAGGTTATATCTCACACGACGAAGGAACC  
GTTTACCGGGCATACTTTCACTCGCTTGGCAAGCCTAACCTCTGCACCGGCCACATTGGC  
CACAAGGTACGCTGAGGGTCAGTCTACAGAGAAGCATAATGAACTGAGCAGCTTCGCACC  
GACGCCAACTCAAATGCCGCTGCTGTTAAGCGCACGATCAAAGTCTCGCTGTACCAGTTC  
GAGTTCGAGGGCGTCTGCTCGTTCTACTACAAGGTCGGGAACTCGTACTGCACCACAAGC  
ACTCTATTCAAGCTGATCAACCGAGGTCGGTACGACGAGGCTGGGCCGCAACTCCTTCGC

CGGCATTATGCCGCTGGGAAGGAATGCTCCCTCCGGGCTAACTACTGCTACGGCGTTTAC  
ACCCGACATCACAAACGAGTACCCACTATGGCAAGGACAATACTGATCCGAGTATCGCTCG  
CGCTAGCCTTTCTCAGGCTCGCTGTGGGCCTCTACGCGACGCACCCGTCTCTATCTGAGG  
CAAGGACAATGCTAGATGAAAAATACTCGCTATACGAGACCTCCGGGCCTCTAAGGCTG  
GAACGCAGGTTTCTGTACGGCTGTGCGTAGGCATGGATCGCAGACTACAGCGTGCGTCA  
GCGATGCCCTCGACAAGGAACCTCGTCACCGCCCRACTCATGAGCATGCAGGCGTTGCCG  
ACAGTTTGGGTATGCGACGCCCTGCAAGCATTGACCCTGACGCACCGTGCCACATCCA  
TTCCTCGCTACGGCGTCTCAGGTGGGCTGTTGAAGGAGCTTGTGGACTACGCAGACGCG  
CTAGATAACTGCACCGGTACCCGGGAATCGGGCCAGGAGCTCTGACCCAAAAATGAATC  
CCACGTGCGCCGGCGCTCCCGGACTTAAAGAACGCGCGGTTCCCCCATATGCCGTGCGCA  
GATTCTCGGGCGCGCGGATTAGGGATGTCTGGTCATGGCCGCTTATCGCTGCTGCTGTGG  
ATATCGACGGGGCGAGTATGGGATCGCTGTGCCCGGCTGTCAAGCGATTTGTTACGATGG  
CCGGGAAAAAGGGACAGGGCACGGCAATACAGGTTGTGTGGCGTTGTGATCGCGCACAGC  
GCGGCAATACGACAAGGGCGGGCAAAAACAAGTGCAGATTGTCATTTTTAGGGTGCGCGG  
AATTGTGAGAACTGGGAATTGTTTTCTAATTGGCCACTATAATTAAGGCAAACGCGATA  
CCCTGCGAATGTTTAGGAGACTCGACGCGAACGGTCATATCTGTGTAGGCCGGGGCAACA  
GCACAGCTCAACCACGCAACAGACCACGATGTCAACACCAGTCTACCATAACGAATGAAA  
GTCCGTAACAGCCGAGCCGGCACACGGTATACGCGCACGCCGGACAGCAGGTTAATGACC  
ACGCGACGCAAGGGAGGATCATAGGGCCAACGATAATCAAAAAGTACTAGACAGACAGGAATA  
ACGGCATATTATGGGCACCACTGAGTCGCGAGACAGCAACCCAGGCGGAGAGAATGAAAT  
AACCGTTGACAGAGACGAGAAACACTGTACACTGCGCAAGATGTTCTATTAGCCGGACT  
TACTGGTACGGTGACACTCTTCTAAGGCACTAGAAACTCTCAAAGCTAAATTGCTAGCTT  
GTCAGAGCGACAGGAAGAGAGAGTGAACAACGCAGGCTGACAAGCTACCCGCTTCACGGT  
AACATCCGCAACACAGCCCCATGCAACACCAGCTTCAACGTCCCAAGCACAGACAGCATG  
TTGAATGTGAGCTAGACATGAACGTGGCCACGCTGTAAGATTAACGGCAGCAAGGCAAAA  
AGGTCAGTAAGAGCCGGGGAGTTCGGGAGCCGTCTAGCATTAGATGGTAGCAGACTGGAA  
CCTAAGTAACGACGGGATCAGCGGCACTTATCGACGATCCCAAAGTCTCGCCGTCCAATC  
CTTAGCTTAACCGCGGGTATTGCGAGAGACTCGATTGCGACCGAGATCCCATGGAGATAA  
CTGGCGCGGGCTTAGGCTCAGAGCAGGTACGAAACGATTACAGCAATACTGACTGTCGGG  
ATGATAGTCACCTAAATTAGGTGCATAGGCGAGAGTACTGCCGATGCCTGTAGCCCGTG  
AAGAACCACCAATACCACGGTGGTTCCTAAAGCCCCTTGTGTTTCATAGTGACCGGATG  
GTGTGTACACACGTTACTAAGACGAGTTCGGCCTTAGAAACTACCGAGGTGCAAATAGTG  
GCTAAGGATTCACCCAGCAGTAAGGTGGAACGACAGCTGCAACGTGACGACAAGAATAA  
GGCACGGAACCTAGCAAGCATATCTGTGACTACAAGTCTCTGCGGTTTCAGGACGACCGCT  
TCTCTGTTGGCTGAGGCGCAAGGTCACATCAAGATGGTGGCTGAGTTGGCCGATGTTAAA  
GGCGATGTCGACGTGACTGCATGGCGCAAGCTCCGCGAGATGCGGGATGTGCGATACTAC  
ACTGATGATTAACGAACGAGCAAGAACGCATGGGATACTAAGCAGACCAAGGCTAAGCCG  
GGTCAGTCTGAGGCGGTGCGTGGTAGGATCACTAATCATCAACGCATTATGGCGGGGCGAG  
TCCGGCAGCGACTCACAAGGTATGGGAATCTAACCATCACTAAGTTAAGTCTTATCGTCG  
GCTCCGCAAACATCATCCTGGCTATTGCATCGATCGGCAAGCGCGGGCGCTAAGCTGGACG  
CTGACATCCACTTGGCCGGTGTGGCCATCCTCGCGCACTTCAATGGACACAACAACGTGT  
CACTGTTGAATGATCGGTCTCGGTGCTGCCGAATGGATCCAGCAACAATGCCTTAGCTG  
AGTGGGCCTTCGCTAACGTTAAGGTGACCATCAACGAAGGCTCGAATAGTAAGGACATGC  
GTTTCTTGTTCGCTTAGGACAAGGTAGCGAACATCGACTTTGCATGGGAGAACGCCTCGT  
ACGAATACGCGCAGACGTCTTCACTGGTCCAAGCGTTTCGACGTCCAAGCGGCCATCGCTC  
AGATTCTGAAGCAAGAGAGCAAGGCGCGGAGGACGACACTTACGTGGAGGTCAAGGTCG  
TAGCCTGTCTAGAACATCTGTCTGGCATGTCCAATGCGACCTAACGACCACACTCCCGAC  
CCAAATCTGGGCGGCACTATTTTCGCTGGTGCCCCAACCTCTGGGGTGCCATGAAACTCA  
CAATCAACCCTATGGCCCTACTCTCTGTGCTGGCGCTCGCTAGCTGCTCTATCAATCCCG  
TAGTGATTCGCGACGCAGTTCTGGCCGTAGACAGCGCCGTGGACAGCCCAGTGGACGCGAG  
CCGAAGTCATGAAAAACTTCGGGATCGGTGACACCCAATTAGCCGGGAGCCCACGGCTGG  
GCATCTTGTGCGGGTGAGCCTTCCATCGGCGCGCACTGCGAATGCCCGTTGTCTGCCGTT  
CGGAGCCGACCTGGTACTGGAAGGCGAGCAGTTGCAATACGGTGAGCTGCACGGACCGGT  
GTTTCGCATCAGGGGTCTAGGGGACATCGGAGCGTAGCTTTGCCCTGGCCCTGGCTCGAA  
GCTCGCCAAACACGAGATGTGTAAGCTTGAGGGCTACGCCAACCGCCTAGGTTAATGAAG  
GACGACTACACGTTGCACGCAACCGCAGCCATTCTAGTGGTTCGCTTTCACAGCTGTGAGT  
GCTGAGTACCTGAGCAGGCTAGAGGTGCAGACTGGCAACCGTAACGCCGACGGCACGCTT



GCGGTGGCGCCGGAAGACTACGATACACTGTGCGACGTCTGGGCTGTTGGCCCCGCGGATC  
ATCAGCAATCAGCACAGCGACACGGTGATCTATGGCGCTGCAGGCAACATCGCCGTCCCT  
AACATGCACGTCTTCGGGCATCTGGTGCAGGGCCTGCCGTTCTCGCGGGGTCATGACTTC  
TCGCTGTCCATGGCGCAGTGGGCGATGATCCGCAAGTACATTCACAACACGGAGTTGCCT  
GAGGTGTGCCGCGTTGTGTTTCATGGACAACACGGTGTGATGTCACTATATAACGAGCGG  
TTTGGTGCCTTCCCTTGTGACCAGACCGAGATTGTGATGCGCTGGCGCGCTGAGCATTGA  
ACAAGTAATGCCCATGTAATGGGCTGCATTCATGGTTTCCTACATCCGGAAAGGCCAGAA  
ATGATAGGAGATACGACATTGCAAGTTCTACGACTGAAACACCCGAGTGAAGGCCTCCGG  
CATTACCGCTGGCTCCATGGTGCCTGCAGTGGGCAGGTTGACAGGGCACAGCGCGATGCG  
ATAAGCATCAGACTAATAATGGGAGCTCGCCGATGACTGGCGTTCACTACCCTTCACAC  
TTGAAGATCGGCTTTGCTAGTCGTTGGCAGGCTCAGAGCTGGTGGTATGAGAACGCACGG  
CGTGAAGCGGCGGCCAACAGCCAAGCTCTTGCTGCGTACGTAGTGCGCGGGCGGTGCTGCC  
ATTCACGGTAACGAGCAGGTGGCATTTCGATCTAGATGTGCGAAAGCTAGTGGCCCATATC  
CACGCATCTGAGTAGGTGAGAGGGAACATCAATATACCGTTAGCTGCGTATGCCGAGGAA  
TGCCTCCAGCAAACGGCGGGCCCCAGCCGGAACAGAACTTTGCTCACGAACCACAA  
CCTAAGCCCCGCGGGCTGCCATCGCACTTCATAAATCAAGCCTTAGTGAGTGGCGTAACT  
CGTTTCGGAGGAGACGTAAACCAGATTCCCAAAGACCCGGCCCCGGTTACGTGGATTCACT  
TTTGATGCTGTACTGTTTCATGCGTGACACGTTTCGATTTGGACGTTGAACTCGCCTAGAAA  
TCCTTCAACGAAATCAGGAGTTCTTCCGGTGGAAAGACTTACTCGAATCGAATAGGACGT  
TGAAGCAATGGCCGAGGCTTGTGCCATTGCCTGCGATTCACTGACGCACTCTGATCCACT  
CTAAGTAGTGGATGAGCCTACGCCGTAATAATCTGCTGTACCGCGAAGGCTTGGACGCCTA  
CACTGGTGTGGATAACTCTCTGTCTGGTGGCCACGACTCTGCCATGCCAGAGGATAGCTT  
TGCCTGTTGGATTACGAGGACGCATAAGCGGCTCGCTCACGACTCACATAAGCACGCCG  
CAATTGTGGCATCGCTCAATGTATTCCGTGGCATGCATGGCCGAAAAGTAGTGCCTCTC  
GACTACGTAACGCGGTGGGTGTAGTAGTTGGCATCGAACATAACTTCGTGAGCCTAATGT  
GGGACGGCCAGACCTTCCACACCCGCATCAACCGTGTGTACCTGACTGTTCTGCCCGAGG  
CAGAGACTGTGAAAGCGGCTGAGAGCAACGACCTGAACAACGTGCACAAGTACATCCTGT  
GTACCCTCCTGCGCAAAGTGCGCGAGACTCGACTAGGCCAGACCGTTCCCGGCCGTCGCA  
CCGATGCTGCCGCTGCCCATCGTCGTAGCCTACAACGAGTACGGCTTTGAAGCGTTTG  
CCTTGCCTGAAGCTGGCCTAATCGTTTCGCGAGAAGAACATAACGAAGTCCCGTTGGGGT  
TCCTGACCAGCATCGGGCACTTCAAGGCAGTCGAGCTGACCAACGCGCGCAGAAAATCTC  
AGAGCTGGCTGGTCCGCTGCCGACTTCGTCCAAACCTCCGCAGGCTGCTCACTCCTGTG  
ACCATAAAGCGCTGTCCGTGCTGAAAGCATGGCGCTCAACTATCCGGGCCAAGGGCTCC  
ACGCTGTGCAGGTACACGCGGGCTCCAGCTGAAGGCCGAGAATGTAGCACCGGAGGAGA  
TCGACACCAATCACACCATTGTGCAGCTGTAGAATGGCGGGCAGCACTCGGATTATGAGC  
TAGCCTTCCCGTGCTAGTGCCTGCGGGCGCTCCCGAACCAAGGCAAGCATCTCGGCCCG  
GACTTTGTTGGCCCGCGTTTGAAGATGCTAAGCTCGTCATCAAGGACGGGTTTCGCTCAT  
ATCACTGTGTACAAGGTAAACTACAGCTAATCGGCCACGTAAACAATCGTGCCCAATC  
GAGGCTTAACCCATGCTGATCAAGATCGCCGTTACCTGATCGCTCTGTCCAAGTTCATC  
GCCGAAGGGGCTGCTGAGCTGCACGTTTCGGCCCCCTGATCATCTCCTGTCCCTCCATGGC  
CGCGAGATCGTAAAGGCGCGCAGCCAGTATAACGCCAACGTCGCAAGGGTGCATGTCAAA  
CCCAAGAGCCGAGCGAGCGTGCCTGGGTCTCTTACGCTACCAGCAGGCCGCGGAGCAG  
CGCCGCGACAAGGCAGCCAAGTTGCTGGACACTCTCAATTGATCCGCTCCGTGACCGGGC  
GCATGCCAAGCGAACCTTAGCTGCCTCGTTTGCGGGGCCGAGCATCCACTTTATCGTCA  
CTGACGACAAGATCACCGGGGAGTTTCGCGGAGCTTGAGCGCCGCGTTGCAGACTCTCCCT  
ACTTCGCCCATCCATAAGGAATCCACCCTATGAACGGACTGAACGTACTCGACCTGGACT  
AACGCTCCGCTGTCACCGGCGAGATCTTGTCCCTTCTGCGACGTGCGCCGGGCGACGACC  
TGCTGGACTACAAGGGAGGTCCGGATGAAGACAAGCGCATCGTGGGACCGGGTAGCGAGG  
GTCAAGAGCTGGGCGGACTGGGAGGCGATGGATTCCAGTTCAGTGGCTTCGGTATCAACG  
CCGAGCTGATCATGACCAAGCTGCGAGCCGTCTTCTACCCTGTGCCGAGCTGTGCTGCT  
AACTTCTTCCCGCGATGCATGGCGGGCCACTGTGCATAAATCCGCAACGAAGACCATAGC  
CAGTTACGCTTTAAGCGCAAGCACGCCAAGTCTATGCGCACGATGGTGGAGCACTGGCGT  
CGATGGCACTGAGTACGTAATGCGCATCCGCGAGGTGTGCATTGCGGGAAATTGTGCACA  
CCAAAATCCATGTTGGAGATACCCATGTAGAACGTACAAACACTGATCACCGTAACCA  
ACGCCAACGAGGCAAAAGTAGTCGAGCTGATTGAGAAGGTGGACAACCTGATCTGGAAGA  
CCACCGAAGCAACCGGCGTGCTGGCCAGTTCAGCAAGTGCAGGCCAACGAAGCTGCAC  
GCTTGAACATCTAAGTCTGCACCGAGGGGTCGTTTCGAGTACGGTTCGTTCTGCCACTGCGC

AAGAGGTGACCGGCAAGGTCATCGCCCTGGTCGAGCTGGAAGGCGGCACCAAGCTGCCGA  
AAGTCATGGCCGTCGAAGACGCAGCCTTGAAGATTTACGTCCTTGCACAGAACAAGTTCA  
ATGCTGTCGACGAGCAGGTCGAGGGCAATCCAGACCCAATTCAAGGCTCACAAGTGTGCG  
ACGCTCCGTCTCGCGCAGTCGTTGGCTGGCCGTTTCGATGTTTGCAGCATTCTCGGCGGCA  
CCGAGGCTGACGCCGCAGTCGCTGGCCTGTAATGCTTGATCCTGGGCTGTTTGTGCCGAC  
AGATGACCTCTTGCATGAGGACTTGATACGGCAGCTGAAGGCGTTGGGGATCATGCCCGA  
CGGCGCAGTAGGGCGAGGCGGAGTTGACCTCCGGGACTTCGACGGTAAGGATCCCCGGCT  
CAATACCGCAGCCGATCTTATCAGGCGTGAACGAGACTGCGTGATCTGGATGCCGTTCT  
GCCTCCGAGGACTAGCGCAGCGTTGGTTCGGGGGTCGTCCCTGTTCCGTTACGAGAAGCA  
CGCCATCGAAGGACCCGACTGACAAAGCACAGAAGCAGTTCTCAAGCATGAATGCTAAGG  
TCTGCACGCCTCGTTGCCAGTAGTGGTTGATCGGGTTATGCTTCCGGTTGCGGTGCGGCT  
GTATGGCATAGAGCTGGAGGTTTTGCGTTGCATCCAGCTTGCACAATATCGTCAAACCTGA  
AACAGGCTAGGGTCACTGGTATCTCGAGCTCGACTCTGTCTTTACTGTGGTTGTGGCCCT  
TAGCAATGAGCATGCTGGAGGTGGCGCAGAGGTAAGGCACACGCCTTCTCCGAGGCTTT  
AGAGGTTCCCTCAGTTGGCTACCGGATCGCCTCTGATTTTTCCGGGTAAGCTGTTCCCTTCA  
CCGAGGCATGTCGGTTATTGAAAGCGTGCGCCACTTGCTTCTGTTCTGGACTGAAGTGAA  
ATGAAAAATGAGTGGCTCGCCTTAGCGCAGCAATTGCCGGTGCGTGGCCACGCAATGCAT  
CCGATTACTGGGGTGATGGCCGTCTGATGGTTCTCTTCCACAACGAAACGTATTGGTGG  
GCGTTCTGCCACCGGTGCGTGAACATCCCTTCAAGTATTCAAACCAATGCCGCGGTTGCAC  
GAAGTCTTCGCGGCAGTGGAAACGGGAGCGGATTCAAGAAAGAGCTTTTGCAACCGAAATC  
CGGCCACCGATGCCAGCGTTGTATGACCTGGCGCAGTGGCCGCTGGAGGCACGGGAATGG  
TCATTCGGGGCTGGGTTATGCCACGCCGTGGCGTCGAAGAGTGGCGCCTACGATCATCCG  
CCGACCCGGCGTGTGGTGTCTCGGTATTTGAAGATGCGCGCTTGACTTTCTGGCAGTCC  
CTCAGCATATACGGAACAACACCAGCAAAGTATCTCAGCCAGCCGGGCGAGCCCGAGTGT  
ACACTCCCGCTGTTTCGGCGGTGGATATGTGATTCCGTCAGGCGAGAACAGGCTGTCTGTG  
TACAAGATCGGAACGGCGCGTTGCACATCTTTGTGCCGAATGGGTGAGAAGCTGCTGCCG  
AAAGCACGGGCCTGGTTGGCAGCTAACGCACAGTACACGGTAGCAATCTGGCTTGACCCT  
GACGGGCCGAGCTGGAGTTCTGCCGCTGAAATCGAGGACTAAGTGTAGATGTTTCGGGATT  
GGATCCCAAGACTTCTAACGGAACGTGACCCAAAGTTGCACAGCTAGCGCGAGATTCCG  
AATGCTTTGGACGTATCGCCTTTGCAATTGATGCTGGGTGCAAAGGATTACGACAAGCT  
GCACCGAGTAGTGAACCTCGCGTTCATTGTATCAACTGACAGCCACGTACATCACTGACCT  
CGGCAGTTACTTCAATGCAGATCCCGAGTGTGATCTGATCCCTGTTAGTCGGGAGATCCA  
CAGGTTCTTCAACCCGATCTGTTACCCACAGTAAAGACCGGAGCAGGCGGCGGCGTACCG  
CGCTGTGTTCCAGCAGATCGAGAAGCCGATCGGGCAGACTGCGAGGTCAATGATCATGGG  
CTTGTTGTTTGAAGTCCAACCTTGTGTATGACTTGCACGACATCGCCGTGCGCTTTTCTG  
TGGTGAAGAAATAAACGTACGCGAGGTGCAGGCGGACAGGCTATCGAAGTTTGAAGCAGGA  
CCTTGAGCGTAGGGCGAAGATGCCTTTCGTGGCGCTTGACGAGTCATTGTTTGAAGCAGGA  
CGTTACCAACGACGGGTTCAAGTGGCGCTGGGCTTGCTACGCCGCGACGATGCGGCCACT  
GCGCCGCGGCGACTTCGGTATCATGGCGGGGCTACCTAACAAAGTGCAAGACGACTGCGCT  
ATCGGACACCCGACGTACGGGGCATCGCAGTGCTAGTTTCGTCTACCCGGACAACCCGGA  
GAGGTACCAGATTCTGTGGCTCAATAACGAAGGGCCGGGCAAACGCATCCTCAAGCGGAT  
GATCCAGTCGGCGTTCGTTTCGGTAAGGCTGAGCTGAACAGGAAGCGAACGGCTGGCAT  
CTTGCGGGAGGAATACGACGTAGCGATCGCCGGTGCTCAGGCTACGATGAACGTCATCGA  
CATCAACGCATGCACGGGGTGGCAGGTAGCGGAAAACCTCAATCAGCCTCCATCCGGCTC  
GGTGATCTTCGACATGGTGGACAACGTGAGCTACGATGATGGCCTTGCGAAGGGGACAC  
GATAACTGAACGGGAATGTGAGGCTATGTATCAAAGGGCGCCCGACTGCGCTATGCGATT  
CGACTGCCAGGTAATCGCTCCGTTGACAGATCAGGGCGGACCGTGCCGGCGGAGAGTATCC  
AACTCTACCGAAGCCCATTGACAGCAAACTGGCAAACAGGTTGCAGCCGATTTTTTTTAT  
CACACTCGGAACGTTAAACGATCCTTCGCTTGAAGCGTTGCGCTTCATTGGGACGACCAA  
GAACAAGCTACGTCTCAAAGCCAGCCACAAAGTCCGCGTGCGAAAAGGGTGATGAACGC  
AGAAGCAGAACGCTATGTCCGGCAATGAATATCAGCCGCCGCGCGTCCGCGCGATTGCAC  
AGGCCGTGTTTTAAGGGATTCGACACTTCTGGCCGGAGGCGCGTTTGCAGCAACCGCTG  
ACATGACAAGGCCGGGATGGATTGGCATAACGCTGCGTGTGACATCTTCCGGGACAA  
ACGAAGTGTTCACTGATTTTCGATTCCTGGTGGACCAGTACTTGCCACCAGCCCATGTGA  
TCGCCAGCACGATGCGGGCGCTCGTTAACTGAGGGCGTACACAAAACGCTCAAGTAATGCG  
GAGTGGAGTTACTCAATACGTGACGTGCAAACGTCGATCGAGTCAACCTTCAGGCAGGAG  
GCGAATCCCTTCCAAGAGAATTGGACGGTGGGGCTAGGTAAGATCAGCACGGAAAAGAA

CCTGCGGCCATCAAGCACTATGACAAGCAGCGCAGCAAGGGATGCCTGGCGCGGTTCTTT  
GAAACCAACCCGGAGTGCAAAGTATTTCGTTTGTCTGCAGTTTGAAGTTTGACGTGCTGCAC  
GGGATCGCCGATGAGCCCGCTGGTCAGGATGCGAGGGTGGGCTTCATCATCCGGGGAAGG  
GAAGTGTGGGACTGTCAGGTCGTCGAGCACCAGCTGAGCGGTCAAGCCCCGTGCGCTCAC  
ATGCTCTCGCTGGACAAGGTGTGAGTGGGTTTCGGCGGGCTCACGAAACACGATGCGGTC  
AAGGACTTGTGGTTGTCTGGGGGTCGAGACAATCGACATTCCCAGATGGCCTGATGATGGAG  
TACCTGTCTGGGCGACATCGGGAACACCTGCAAGAGATTCTCGGACACGTGCTCAAGGTT  
CAGCAGTTCGGGCAATCCCAAAGCATCACGCTGCACATGGGCGCGCTGGTTTTTCACGATT  
GAGTCCGAACGCAAAGCCATGAATGCCGACTACGACTTGGGCTTGAAGCTGGCCGCGGAG  
CTGGAAGAAGAACTGGACGCGTTGATGCTGCGGCTTGACGACTACCTGACTGGCGGGCTT  
CCGTCTCAGTTCAATTGGGGCAGTCGCATCCAGTCGCGGTCGCTGTGTTTTGGTTCCGTT  
GTTAACTAAAAGGCCCGCAAGCGATTTTAGATAAAGACTTCAAGCCGGCTTATGGACAG  
CAAAGTGAAGGCTCACTACCTCAATTTCGGACGGCAGCACTACAGGACAGGACGAGATGAAC  
GACTCTCAGCTCAGCGGTAAGCTGTGCTGACCCTTGTGTCTTTAGCAGCGGCAAGTAC  
GCTTGTGAAGCGAAGACGAATCAGCCTAAGGTTAATAACCTGTCGAAACCGAAGTGCAGT  
CTTGAAGACCGCAATTACGTTTTCCCGAGCTACACCAAGCCGCGAGAGAAGTAGACGATG  
GCCGCTCCGGGAATGTACCACGCTGGCTCTGCCATCATCGAACCTCGCGGCAACCGGGAT  
ATCGCATTCTCGACGAGTAGGCACGCCGTGCCAGACTCGACTACGACGTCGGGACGTTT  
ATCATGAATACGAACGACAAGGTAGTGCAGACAGGGCTGCTGACGCTGGGTCATCCTGAT  
TGTCTGATCCAGCACATGATTAACACGACCAGCACGGTAACGGGCGGTTTCAGTTCCAGT  
AACCCGAACACGCATAACTTGCCGAAGGCAGGTGAAGGCAAGTGCAACGCCAAGGATAAG  
TTCGTGTCCCGGTTTCGAGCCGGAAGGTGAGAACATGCAGTCCGTCATCTCGTCACTGGAC  
ATCTACATCCCAGCGATCCTCACGGATTGCAATCAGATGATCACGGACTTGGTCGCGGGT  
GTTGACACGCACGTTGCACGGCTTGTAAACGACTGCCCGGATGGACGACGTGGAAGCGTAC  
CGACTGTGCCACATTCACCTGGCGGGCGGTGCGGTTAATTTTCGCTGATTGGGTAGGCAAG  
CGGACGAAGGCTAAGCTCCTCTCGTTCCAGCGTGCTTACGGCACAGGCGCAGCGTAGATC  
AGCGAATCGACAAGCTTCCCAATCTAAGAGGGGTACGGACTAATCGAATCGGTGAACACT  
CGCTACCCTGAGATCGAACCGTCTATGCTGATCTGATGTTGAAGATCACGAACCGCAAG  
ACCGCTGCCGCAAGGTAGTTCCACGCCGGGACTTCCC GGCGAATCAGGTTGGCTTCGGC  
ACCGGCTCGTATCGCACACCAGAAGCTTAGCTCTGCACGTACCGTGAGCAGTACGCTCCG  
ACGCTCGTGGTGGAGAAGCCTGGTCCCAAGTCGTCGTTCTCGCCGACGGAAATCAAGAAC  
TACATCGTGATGGGCACTGGCGCTGAGTGGGCGACGTCAGCATCCTGGTTGTTGGTTTCG  
ATGTTCTACCGCCGCAAGTACTGGGGCCGGCTGGACCTTCTTATCAATCAGGTACACGAC  
GCCGCAAATGGTGACACGCATCCGAGAATCCAGAGCGACGTGGCTGCTGTGATCGATTCT  
TACGAGGAAGGTGCAGCACCATTTCATGGGGGCGTACTTAAAGAGGGCGATCCC ACTGCCA  
GTACCAATCGACACAGCGTGGGGCGCCAGCATGGCACACGAGAACGCCGTGACGGCATT  
GACGAACTGTCTTAACCGTTTTCGTGAAGCAATCAAATCGCAATTCATCAATCAAGATGTC  
TGAGAGGTTACACCATCCCCCTGCAATCTATGACCAAGCCGTAATTGCAGCAGCCATCC  
CAGCAGCAGTGGATCAAGAACCTTTCATGAAGGAAGCGCAGAAATCCGGCGGAGGCTGGG  
TACCACCAGCTGCTGTCTGGCTGCATCGTAACGATAGTCGGCTACATCCAAACCGGCATCC  
AGATAGTGCTGCCGAGCAAATGCAATCCGGTCAAGTTACCCAGTGGCCCCGGAAGATCAAG  
TCGATCTGATATTTAGCAACAGCGTCAAGGGACACGGACTGAAGGAGTTGGAGAACGTCA  
CCAAGGTTTCATGAGCGCGTGACCGTAACGCTTAAAGCAGTCGGTGAACGAGCTGTTGTGGT  
CCTACAAAATCTTGAACACTATGAACTATTACAAGACCCCCACGCACTTCGCCCCACTGC  
TCGGCAAGCACTTCATCACCACCATCAGCCACTACCGAACAAGAAGGACCCGCGAGTCGC  
CGTATGCTGGCTTCAAGTGCAAGAATGCTTGTACACCTTCATGGCTCCGACCTACAACC  
CGAACCCGATGGACATGACCGAGATTGCCGTCTGCGCGAAACCGGCGGTGCTGACTCCGC  
TTAAGCTGTTCTGGTGGACTCACCTTCCAAACCGATGTGGGACTCGCTGTTTATCGAAA  
CCAAGTCCGACGACCGCAAGGACGAGGAGTCTGGCGTGGTTACTCCGGGCGCAGCAAGA  
ACCAGTTGCAGGACAAGATTCTCGGCTCAAAGA ACTTTGAAGGCTCGCCAATCTTCGACA  
TCGTTGACGGTACGGACATCGCCGAAACCGACGTGCCGGTTGTACACGATAACCCCGCGA  
CGGAGTCGGCTGCTGTTCCGTCTGACGACGCTGCCGCGGCTGCACTGGGAGCGCTCTAAT  
GGATTGGCTAGAAGCCGCAATAGCTACTTCTGGCGACTAGCCTAGCCCATGCGCGGGCGAT  
CCCGGCCCTAGTGCCGGGACGGCGTGTGCAAATTGATGGTGACTACGCTGCCTAGTTCAT  
GGCGGTGCACGACGATACTATAGCGGCAAGGCGCGTAGAAACCTGATGGAGCGATTTCAG  
CAGCATCAAGGAAATGACCGGGGCGAGCGGTGTGGTTGTCCACCTGTCCGCCGAGGGTTG  
TTCTAAGGCCGCCCGCTTCTTTATTGCCACCGTGCCACCGTATCAGGAACAGCGGACTGG

CTCTGCCCGTCCCTAAGAACTCGCGCAGCTTGGGTGAGTTCATGGAGAGCTACAAAGGCCG  
TGAGTTCACTCCGAAGATTCGGGGCGACCGCGAGTCCGATGACGGGATGGATTACATGCA  
GCAGAAGTGGGTAGCCGAAAGCAAAGGCGAGCTGATCGTGACAGGTACCTGTGAGAAGGA  
CATAAGATAGTATCCCGGCTGGCACATGGAGTGGATGACTTACCAAGTCACCTACGTTCC  
TCAAGGGGCTTGCAGCCGATCGGGCGTAAACGACTTGATCTATGGGCCCAAGTGGCTATA  
GGTGCAAACCCTGCAAGGCCACGGCGCTGATCACACCAAGGGATTGCCGTTCCACCGCAG  
GCCTATCGGAAAGTGAGAATCGGCCGGCGATGCAGGAGCGCTGGTGCGACTTGCGGGTGT  
CGACAACGACGCCGAGACGTTCTGTGCAAGTGGTGGAGTTATACTACACGTCCAACACACC  
AATGGCGGGGCTGTTGCGACTGCTTGAGACGTGGCTGCTGGTATCGCTGCGGGCGTGATCA  
GAAGGCCCCCTTACCGACATGGTGAGGTAGTTGCACGTACGGGATAACCAGAAGGAGCG  
CTTGACAGCGTCGCTACTGCAACATCTGAATCTGGTGGAAAGATTTGAAAGCGGAGGTTAC  
GCAAATTGAAGCTAACCAACAGTCAACTTAAACCATTACGGGACCAGATTCGTTACAGACC  
AGATAGTTTGTGTGGGCACGGCAATTGGCATGTCAGTGTGCTGATGCTGTCTTCGCTC  
ATTGCCACTATCACGGTATTATTTCGCGGTACGCTCCATCGAAGTAGTAATGGCCTTCTCC  
GAGTGCTGGAGAACAAGCGCCAGCGCTTTGGCGGAGGGCGACGTCGCAGAATTAGCAGGCT  
ACATGCAAGGCGCGCGGGCCTAGATCCCTCTGCACGCCACACCACAAACCCGGATGATCC  
ATCCGAGATTCAAGACCGAAGACGAGAAGCGCTTAGCGCGGAACGGCTAGGCCCTTAAGG  
CTCGCGCCAACGCGAGCAAGGATAAGAAATAATGCGCCGGTCCCTGATGCGAGTATTCAG  
CGAGAACAACACACCGAAATTCCTCGAGCCTTTGGTTGGAGCGTGGGCGCGGCTGGCGA  
GTACAATCGAGTGTGGGGCCGAAAGTCCGTACCAGGTGCCTCGTTAGACCGCCTAACA  
CTGGCGTGCAGTGTTCATCGACAACGGCGGCAACAGGGCGTAGACGGTCCGCGAGCTGCG  
CGAGAAGCGTGTGCTTCGCAAGCCGATCCGTTGTATGCTGATCAAGACATCGACAACCC  
GCGCGTGTACAAGTCGACTCTGGTTGTGCCGAATAGCATGCGCCGTACCATCACCGAGA  
TGCCTGACGTTCTGACGGCCGTGGCTGATAACCACCAGCGGGAACCTGACCGTCAACCT  
CGGCAACGATCCGGACAACCATGCGATGTCGTTCCACGAGAGTGCCCCAAAACCTCACAG  
CACAGGCGTTGAACTGGAGAAGAGCAGGAAGTGGTTGCATGAGCGGGCGAAGCTGTTCCC  
GGCCCCACTGGTTTGCATTCCACACACGGTTCATCGCGTGCCGGAAGGACCAGGACCA  
TGGCTTACCGGTGGCGTTGATTCGAGGTAACCGGGAAGTTGGGTTCCCGAACGGCGGTGA  
CGACCTCTGACACTGGGCCCTAAAGCTGGCGAGACAATACTCCGCAGACCGACGTGATGTT  
CAAGCATCAACCGAACGACAGAATTCTGGTAGACGTGGCGCAAAACTCCTGCAACTTGGC  
TGTGGGGTACCACCACGGCAACTTCTCGGGAGTGTACACGGCAAGAAGCACGCGCCTCTA  
CTACCGGATGCACAGAGCATACTGGGCGATTAGGACGACTATGCTTTCGCCTACCGCAA  
ACACGCGCTGCGCAAACCTGTTATTGAGTGCAGAGTCATCCCTCTTCGTCGACCAACGCT  
GGTTCGATGGTTCTTATCAAGAAGGGCCGCTGGAACGGGAGCTTGTAGTATGAGCCTTT  
CTGATATGGCCACGGACTACACTTGCGGAATCCGCCTCGGCCCGTGAAACGGACACACCG  
GCTGTGCCACCCCAAACAGTCGCCGTAATGAGCGAGGTGCCGGGTTGAAATTTGAAG  
GTGGCACAGGGCGCTGGTCGGTGCTTATGGGTGGCATGTCGAAGGCGCTGGCCGATGCGG  
AGGCCGTGTTGACCTTCGGAGCCATGAAATACGCCGCGCACAGTTGGAAGCAAGTGGGGA  
CCAACAAGGAACGCTACCGCGAAGACTTGTATCGCCACATCAGCGCATTGCAATCGTTTG  
ACGTACTTGACCCGAAGAGCAGCCTGCGGCACTGGGATCACGGAGCCTGCAACGCCGTAC  
TCCTGTCCGGACGGGCGAACGTCCAATGAGCGATCCACAAGCCGTAACCTGAATTGGTGGT  
CAACGGCTTGAGCGAAAATCTGCGTGCAGCCATCGACAGCGGCAACCAGTCGTAGGCACG  
GGTATCCTCGGTGCCGACGTTGACAGCACGATCAGCATGCTTCACTACGCAGAACTGAG  
TCAGGACTGTGAAACCGCATTAGGCGATCTCGAGCACCAATACCATGGGTATCCCTGACG  
GTAAGAGTCTCCTACATAGGCGGAAAGAAACGCACAACCTTTAGAGCTAAGGCGCTGGCCG  
CGCTGGCGGAATCCACTCCGGCAAGTGGGGGTTTCGGTTCGAAGTTCGACGCTTGCTCGC  
TGATCATCATGGTTCGGCTTCAACGTAGACCCCATCCTCTCCGTTAGGCGAAGGAACGCG  
TCAGGTTGCCGCACATGCCCGTACACTTCCAGACCAGATCGGGCGCAAACGGGGTTTACT  
TCGGGGAGGAGTCTGACCCGATTAAGCTGTTCAAGGATATTTCCGGCATGTTCCGCCCGC  
AGTAACCCAGTACGAGTTTCAAGCGTGGCGGTTCCGTGCAGTGACCCTGCAAGAGTTCC  
GCACCGGCGGGACTAAGCGTCCGTATGAACTGCGTATGAAAGCTTTGTGGCAAGTGGCTA  
ACTGCGAGTACGGCGTTATTCCAACGATCAAACGTCGCCGGGTAGCCGTAGTGCAGTCCG  
ATATCGACACCATCGTACAGTATGGCTGCAAGCTGGAGCTTGACGGCTTGTGGCGGGGC  
AAGCGGACGGCGAGTGAACCTGCCGGTTTTTACCACGACGGCCGCACCATGAAGCTGAAAG  
ATCCAACAGCGGTGTGCTTCAATTTCGTCGACATCATTGATAGCGTAGGTAACCTTTCGG  
GCATCGTGGGCGCGATCGAAGTACTATGGCGCGGCAAGCACGAACCTGGTCAGCGGTGGCC  
GGCTGATGAACGCCGAGCGATTATAGCTTCAATGAGATACGCAAGGTGATCGCCAACA

TGGCGGAAGTACTTGC GTTCGGCATTACGCCTGACGGTAAACTGCGGGCACGGCGCTAAC  
AGCGCATCCTCGATAACAAGACAGAAGCAAGCGAGCCCTGAAGCAGGCGGACATAGAACG  
GGAGATGGTAGACGGTGGGCGTCGGGCTGCGATGGCGAGGTTTCAAACCGTCGAAGCGGC  
GAATGCTACAGCGAATAATCAGCGTGGTTCCGCCATATTCTGACACTTCATCAAACCTCT  
GTCAGAAGGTCAGGGAGGTTATCTGGACACGGCTGGTCGAGGGCGTGGCAGGAAAGTCGAA  
AGTTCGGCAACGTGGTCAGGAAACGCTGGCGTTGGCGTGCATCACGGTCCGTGTTGTGAT  
CAACCCAAGCCTCTCCGAAGGGGAGGCCGTATTTACTGGTGTGGCTATGGATATTGGCCA  
CTCGCTTTCCAGCCAGGTTGCACTCAGGCAATATGAAGACCAGAACCCCGATCTGTATTA  
CCCGTTGGATCAAGACCATTAGCGCAGCAGGACCAGTAGCGAGTGACACAGGTTCAACGT  
GGTGGCATCCAGTGCCGAGAAGGACGGGACGCGGCTACCGATTTAGGAGCCTGCGTTGAG  
AATGGACATTGGCACCGTGCTGCTGGGCGCTTCTCTGGACTTCGGTATGCTCGAGATATT  
GGATTTAAGATTGAGAGGGAAGGCGACCAAGCACCTCCGGCTGCATCCTGAGCTGCTGGC  
GCTGGTCGAGCAGATCAAGGGATTCGCCTCTGGGGCGTCGCCGTTCCACCTGCGATGCGT  
GGGGCAGGCGAAACCATGGGTTACACCCGACCGATGGCGGCTGGCAAACGATGGCGATGCC  
TCGCACTGTGCCGTGAATGATGGGGGGGTAAGCGACACCCGACCGCCGAGGAGGTTGGGCC  
GCGATTGCATGGAGCGCTGAGGAAGGTGCAGAACGTGGTGTGTGAAGTTAATCAGCGCAG  
TTTGGAGGTTAAGGAGATCGCTAGGGAGCATTTCGACGTACAGGGTGTGTTGGTTAGCGA  
TCGGCGCGGTGACATGCCGGACACGCCTCTGTTTATACAGGCTGCTCCTGTCATCAAGAT  
CGTTGACATGAACGATTTTGAGCTTGCACAATACACCCAGTGGCGACAGGTGGCACGGCA  
ATTGCACACGCTACAGAAGGTTAGGGTAAGGCATCCGAGCAGCCCAACGAAGCTGTCCG  
CGTGGAGCACAAGTACATAGGCATGGCCCTCGGTTTTGTCTTTTGAGTGCTCGATCGGAG  
CCGATTCTATGCCTCTGGACAGGGGCTCTCCCCACAAGGGAACCAGCTTTC AATAGCGCT  
AATCCATTTTGCAGGTCTGCACCACTCAGCACTCCAGCTGGCCTATTCTGGTTCGGGT  
AGCCAGGGCCATCAAGTGGGCGGCTATCAATCTCGATATGCAGCCGGTTCGAAGACCAGAC  
GCAATGGGTGATTGGCAATGCTGATTTTATATGCCGCACCTCTGATCACCCGATCAGCCA  
CCGAGAATGGACGGACGCAGATGTAAC TTTCCAGTTC CGTGGGTGGTCCTTTGAGTACGC  
GGCTTGGTTACGGTATCCTGATTCGTTTCGCACTCGAGTGCCATCGGGATAAGACGACTC  
GTGTAATGTTCTTCAACACTTCTCAGCTATGGTACGAGATAGGGTGGGTGGGCGAGCAAC  
GAACCTCATTCCCAACCGAGTGCAGCACGATAGTTATGTACTAGTTGCCACCACA ACTGC  
TGGAATCGTGCTATCAGATATTGCCGAACGCGATATTGCCAGACGCGGGAAGTCACACGC  
ACTTTCACGGTCGCCGGTCAAATGTAGTTTGATGACCCTGCCCTACGGCTCGAAACGGCC  
CTCCTGCCGGGACTTCTCATGAAGGAGTCCATTGACAATGGCAGCAAGCCAGAGTTCGA  
CAAGCGCGAGAATGCGCCCCGCTGCGCGGAGGCTCTTGTACCAGGTGTAGGATGGCATCGG  
GACGGTGGTTCGTAAAGGGGCGGCAGGCGATGGACTAGTCGCAGGCAGCATCGGCCTTAC  
GTGCGCCGGGAACGCCCCACCCATCGAATGGAGGAACCCTGCTGGGTTCTTGTACGTCA  
GCCCTAACACCATCGGTAAATGCTCAGGGTGAGCGGTCGCAGCCTCTCAGGCAAACGCAT  
CCGCATCAAGGTGCAGACCTTCAAGGACGAGGGCGATCCACGGCGATACAGGAACGGCTT  
CGTGCCTAACTTCATGCATAGCTGCGACGCAGCGCAGCTCACGTTCTTGACGAAGGACTG  
TGACCACGAGGATCGTGGCGATCACGCATTAGTCCACGACGACTATTGCGCCTTGCCAGG  
TGAGGTGCCCAA ACTGCACAGAATCCTGCGTAGGTTCGTTTGGGGACATCGATCTGTACCA  
TGACGCTCTTAAAGCACTGGCGGGCGCAGGTGGCAGGGTTGCCGGATCTTCCAGAGGCCGG  
TGACTTGA ACTTGGTTAACGTAACCCGATCGGTTTACTTGGTCTGCTAATTGCGCCACTA  
TAGCGACAGGAAAGTTTTATGCAGCAGAAAGCAGCGCATCGATTCGCCCGATT CATTATG  
GGCAGGGA ACTCGCGGTTCTCTAGA AACTATTCGCCAGCAGGAACAAGTGATAGAGTCC  
ACCACACAAGAACTGGCGGCCTCTCTATCTCGCCATCGGATGTCCAATACCTGGGATCG  
AGACAGTTATTCAATGAGCTTATTT CGAACAAAGCTGGAACGACCATTCTTGGTTAGTCCC  
AGCAGCTCCGAAGATTCTGCTTTCTGTTTGGGTATTCAAATAGCATGCTCTGTTATGGAG  
AAGGAGTTGGTGAATGGTTAAGACCAA ACTTTGGCTTAATGGGGAGCAGTACGGTTATGT  
CAGTGATGATACCGTGATTACTACTACAGCATGTAAGACCCTGGTAACTTACGCCGAGT  
GAGCTATGTTGAAGCCGGGGAAGAGCCAATCAGCACATCCGAGGCAGGTAGTAAATTGAT  
TGCCTTCGACATGAGCATGGTGCTGCGCGAGACGTTCTGTGACGTTCTTCGACGTTGCTGA  
GCCGTGGTTCGTGGCCGACAAGTACCTTAGCGAAGAAGTGTTTGAGCCGCCACCGGGCAG  
GACGATTGACCTCAAAAAGGTCATTGCGGCTGGCGAAGCTGTTGGCGGCAAAGAGGGCTG  
CCGGTATTT CGAATTCGGACCGCGAGCCAATCCCAGGCAACAAGAACGGGCCCGCTGTG  
TCGTCATATCGATGTCCGGCTGTTGGCGATCACACTACAGAAGTTTAATTGGGATATGTT  
CGGGTAAAGCACTACGCAAGGTCGGCAAGATCATCAAGAAGGCCGACCCGCTGCGCTGCG  
GTGACGCCATTCTGGAATCGGGGGGCTTGCCCACGCTGAACCGCGAAGGCGACAAGAACA

GTATGGACATGGGGCCAGACTGCCGCCAATCACGCCGCGCATCGACGAGCCGAGCAGGCAT  
GACAACAGGCCTACGCATAACGTCTCTCAGCCGAGCAACAAGCGGAAGCTGTTCCGAGT  
AAACCGCAGCTGCTAAACTGTCTGTCAATCAGCAGATGCAGCTCCAGGTGCAGCAGCAGA  
ACGATACGGCCACCCAGTCCGCTCTTACCCCCGCGCCGCAACCGACGCGCGATTCAAGCG  
AACCAATCGGCAGCGGAGGGCGCAGCCTAGGAAAGTACGCCGAGAGTACCTACTGCCACG  
GGAACCGCCAGCGCATCGACCCGGCGTAAGTTCACCGCCAACGCCGCTGCCTCTTCCAAG  
ACCCCGAGCAACCGCCTTTTATTCTTGGTTTTTCGCACAGCCGAATCCGTATCGCAGAACC  
TGCACACCAAGCGTAGAGGCCTACTGGACAGGACTGAGCGCCTCGAAGAAAGCAGGAATC  
CGGGCGTGTGCCCGGATGCGCAGAACGACTTTGGGGCGCCACGCGTTCCTACTACCCGCGTGA  
CGTCACTCGGGCGCAATTTGTCACTGCGCTGCCCAACACACTTATGCCGGCGATCGTCC  
CGGCACCCACCCGAGCTTCCGGCTGGCGATGTTTTAAGTGGTTGCGCAAACATTCGTGT  
CCGAGAACGACCTCCCGATGGACTTGATCACGGAAGTGCTCTCGGAGGCTGAGCGTTATG  
CTTTGCTGCAACTGGAAATGATCGGTGGCCGCGAAGATCTTTATGCGGCCACGACGTACT  
TTGAGATTGTCGGTGACGTGGTGACGGACAGTTCGCAGTAAGGACAAGCTTGAGTTCATCC  
AGCTCATCGGTCTCGCAGTACGCGGGGCGTGCAACCCTGACGTGTTGACCGTGATCATCA  
AGCAAGAGCTGGCGCACTGCGAGGTGGGGCGAAAACGTTCTGGATCACATCTACCCAGGGC  
GCGAAGGCGATATCTATCACACTCGCCATCACTATAACGCGGTGCCGCCGCGTTAAGGGCA  
AGCACCATCACAAATGCACGTTGACCAGATCGAACTAACGTATAGCAGGTTCTGTTTCGA  
CCTACGCTATGGATTACTGCCCGGTGCACCCGCTGACTTGGCGTCTCCCGCTGTGCCAGC  
ATTATGGTGGGGGACGAGTCGCGGTCTACTTCTCGGACATCGGTACACATAAAGTGGTCG  
GCGAGGCCCTGAGCGATGGCTCGATCATGGCTCCGCAATTACGGCGGCTCCAGAACCCAA  
CCTGGATCACCCGCCTCGAGGACTTCGAGAACAGCAAGAACGGCTACGTTATGACCGGCG  
AAGCGAACGACCTTCAACTGATCTTCGCCAACGTGGTACAGCAACGGAACACCGTGGGAG  
CAAGCAGCAACAAATTCCAGCAGCGTCGGGGCCAGGGCTTCCAGCTCAATTCGTCCTGA  
CGCGGCAAGCTGACCGTGAGACCCCCCAAGAAATGCGGGTGAAAGCGATGTAAATGGTAT  
CGACGTTGGGGGGGGTTCCTCCCGAGTTGCCCGCGACCTCCATATCCATCTAGCTAATT  
GGCTGATGAAGAATGCCCGCTGGAACATCAAGGTCACGAAACTGCGCCTGGTGGTGATCA  
CCGGCCTGGACGGACTTAGGCGTAACGCCGATCTGGAACGAGTGACGATCTTCCTTGCGA  
ACGTGACTGAGTGGCAGCAAATCCAGCCGACAGACTCCCATGAAGCTGCAAGAATCCAACA  
TCATAGCCGACGTCGCGGCAGGGCTTGACGTCACCAACAAACGGTACGTTGCATCGGACG  
ATGAAATCCAGCAACGCAAGCAACAACACTGCAAGCGCAACACCCAGAAGGCGTGGATGGCC  
CCGCTGTAGATGCCACTGCACAGGGAACCGCACAACTATCTTCAAACCTGTTTGACCGTAC  
CTACATGGAAGAAGCGGGCGCAGAAGGCCACCCGGCTGGTTGCGCAGTAGCCGCCCCCGGC  
GGCGGCCCGTGCACCACAAACACGCAAGATCCATAGCAGGCTGCTGCAACCGCGATCGA  
ACCATCCGCCGACGCAATCACATACGAGTCCACAGGACACAGCAACGCTCACAAGGCTTT  
GGGCCAGATCGCCGCTGCGGGTACGCGCCCGGATCACCCCTCCCGCGATGGCAGAGCTGGA  
ACGAAACTTCGCCCTGCTGAAACACGCCCTAGCGGCCAATGGAGTGCCGGACAGCGATCA  
TCTGGTGGATATCCTGACCGCAGGTGGATCCGAGGGCCGTCGACGCCGAGGATGCCTTCAA  
CCATCAAGTGACAGGCGACGTTTCATGCGCTGGCGGGTTGCACCGGGCAGTGGACCGCCGG  
GATGGAGTGGGGCCGCGCCAACCTCTGACGAGGCCGGGAAGGAAGCACTGAACGATCTGTT  
CGGTAGTCGGAAGACACACAAGGTCGCGGGCAGCTATCACGTGTCCATGCGCAACCGCGC  
AGGGGGTGTGCACGAACCCGACAGCTGGCGTCTGCAACCTGGATGACGCTTCGGCCCAGGC  
CGGTGGCCGTGCTGTAGAATCTCGCCTGTTCCGCTTACCGTTCTCCGACGAGGCGAAAGC  
GCGGCGCGAGAAGCTGGGCAATGCCTCCGTGACCTAGGGTGAGTACCAAGAAGTGGGCCG  
TCGCCTCTTTCGCTATTGCTTAGCGGCCCGATGCTCTGTGGGCCACTAAAGCAACATGGA  
TACCAGGTAATAATTTCAAACGATGACTCTATGTCGCTGGATAGCTTTTTTCGTAAGTTCG  
ATCCAACGCTAAAATGGGCGGCGCAGACCCGCTTAAACTGATAATCGAAGAATTCGGTGC  
TAGGGCCGACGGAACCTCTGCAACGTCGTTCTGTCTCCGACGCCATAATCACCGTCATGCA  
GAGCAAGGGCAGTGCGACCGTCCCAACTACGGCATCGGTGCAACCCAACTGCAAGCAAT  
TCAACCTGGCAAGACACCGAACGGTGCAGCCCCGAGTTTGCTAAAAAGAGCGGGACGGC  
TGGCCGCACGCTTCCGGCCCCGCGCAATCCTGCCTTTGCTGGATGTGTTCCAACCCAGAA  
CGATGCCCAGAGGGAATCGCGCTGGACCACGGCAAGCGCAATGTCATGCCCAAAGCCCA  
AGCGTTCCTGATCCAAGTTATCATGACCGCTCGCCTAACCGTGAACCCATACGCCAAGCT  
GCCGGCAACGCCGCTGGCACCTGCGTACCTCTGGCCGCTGCCGGTTATGGTGGCCGAGAC  
ATCAAAGCTATCCCATGGCTTCGGACTGCTGTTTCGCGCAGATGATAGAGAATGACGTTCA  
CCCAACCGTCAATGACGTGTGGGTATTCTTTTCGCCAAACCACTTTCTACGCATTGCGCGG  
AGTGGAACAGGTCATCAACGATGAGTACGTGCCTTCCGATGGAACCAACCTCAAGGCTCA

CAACTGCACCGCATGGGCCGTTTCGAGTCGTACCGACTCGGAACCGGGCGTAACTGGTTTGA  
AGGGGCAACAGAGCTGCCTGACGGCGTTCGCTGCACACATGGGCGATGACCACGCTCGCAT  
CTTCACTTAATTCGATGCGGTATTGTTCTCGACCCTCGCCATCGTGGCCCGATCTACCAT  
CGAACTTGAATAGAAGGTGTTCTTCGACGACGTGTCCAGCCACTAGTACGTGGATAGTTG  
GTTGGCATGCGCCTCGGCTCCAAACCTTACCGAATACCCGCGCATCATCGTTTCTCCGTA  
ACCCACACTTGGCCGCAACGGGTTCCCTTAAACGGGAGCCTGTTGTGGGCCATTTTCGT  
AGGTACGCGCGACTGAGGTTTATTAGTGAGCTTGAAGTGGGAAATCGTTGCCATGCCACG  
ATGGGTAAGCTGCCGATCAACTCGCTTGAGAGCAGCTGGAACCCAATTGTGACTAACGCA  
CGGTCAGCGTTCAAAGTCGTTACGATTGAAGAACAGGCCGTAGTTTAGTGGTTCATCATC  
GAAGTCATCGAAATGCAACTACAAGGACCAATGCCCGGAGATGACGTCTGCTACCGACCA  
CCTACCAACTGGCTCTCGCTCTCAACGGAGGCTGATTACAAACCGGCATGGCTTAGCATC  
CGTTACCGAAAACGTACGACAACGGGCGAGCCGAAGTACGCAACGATCACGATCCGATG  
GAAGCCAATATCGTCCGACGCGGTCCGTTTGTTCGACCTGCCAGACAACGCTAAACGGGTA  
ATCCGTGAGAGCCTAGTGTTCAAGTTCAGATGGACTACAAGGGCGACGAGCTAAAGATA  
CAACAGGCTGACAATTGCCACACGGAAGCCTATGCCATCGGGATGGCTCACCCCTCCGG  
CCGGTCAAAGCCAAACTGCTTTATAAAGGCTCGGCTGGTTCGCGGTTAGTGCCTCTCAC  
ATCCCTATCTGAGGGACTGGCCGTTGAAGGTGATATGCGCAAAGGCACAAGCTCTTACGT  
GTCGTTGATCAAGGGCGAACCCGAGCAGGTCGTCCACCAGCGAAATCCCGGACAGTACTG  
GGAGCAAGTCAACATGGTTTCTGACCAAGTACGGGGACTTCCCGTCGCCGGGGTTCCGC  
GATGATGTAGGAACATCAACGACCGGAAATCGCGTTCGACACTCCTTCCCGCGAAGACGG  
CAAGTCCTTCGGCCAGGAGTCCCTGTGTCTCCGCCCTAACGAATACAGCATCATAACCG  
CAAGTGCGCAGTAGCAGGCTCGACCATGCCGATTCTGGTTGTGCTGACTATGATATCCGG  
CAACTTACTGCCAGTTGCCGCCATGGCACTCTGTTCGGGTTAGGCGCCAGACTCATTCAA  
CAGCGTCATCCCAGTCGTCAATCTGGTACTTCGCGCGCCCAAGGACGCAGTATCACGGTA  
CTCCGCAGTGGATCAATTCACCAGGCCACAGCTGCTAACTCGGTGGCCGCTAGGGTGAA  
GGGCGGTTTCGTATGCCCGCACCTACAGGCTGTTTCGTTAAGCGAGACAGCGCTCAGCACCT  
TATCACGGCGCAGTACACCACGGCGACCACGTAATGCGGGCATGCTGGACACCTCGGA  
CATCCCGGAGTCATCGCAGACCCCGAGACGCCAGCCAGACCAAGCCGTCCCGGAACCA  
CCAGAAGCTGGCCAACGCCACTGCGTACGCTTACCGCAAAGACGTGAACTCGTAGATCGT  
TACCTCGGTGGCGGTGGTTCAGCCAACGGCCATAGCTGCTAAGCGGCACGCGTTGATCAG  
CCCGAGCTTCCCGGTAGCTCCGGCCTACTCGGTTTCGACCATCCTAATCGACGGTGGGCA  
GTGCGATAGCTGCGTTGGCGGCGGGACCGGCGAGCAAATCGTCCGCGTGGCGCGCACATT  
GGAAGTTGCGGCGGATTTGACCACGGTTCACCAGACGGGCAAGGTCGTTATGATCAAGCC  
AACGAACGCTAGGTCGGACTACGTCATGGCCATCGTCTAGAACGGCACCAACGAGGCCTG  
GACGCAGGTGATCTGGGAGGAATACCCCGGCGTTCAGATCACGCCAACAGCAGTCACCAC  
AATCGGTGCGGTACACAAGGGAACGTTCTACGTTGCACTGTTGCCAGCGGCACTCGCTGC  
GCTTGC CGGTATCAACGTGCCGCCATGGAAGCCATCGTTCGCCGGGCGACCTGTACAGTCA  
ATCGCTGCAACCGTTCCTAGGCCGGGAAATCAACATCATCCGCATGTTCCAAGGCCGGCT  
GATCATTGTCCCGGGGCTATCGTGTTTCATGAGTAGCTCTGGTGAATATTTTCGAGTTCTT  
CAGCACGTCGGCCCTGAACATTGAGAAGAACGACCCAATTGAAGTTTATCCAATGGGCCG  
CGAAGACGATGTTATGACGGCAGGCACTTTGCTTGACCGAATCCTGACCTTGTTC AAGAA  
GCAGTGCCAATACGCAGTGCCGGGACGTGACGCGATCAGACCGCGGAACGCGTTCGTTGC  
TGTACGGTCGGGCTCCCGCGACCGCAAGGCCTGCCCGCCGGAGTCCAGCGTCAACCTGGT  
CTACTGCGTCCAGAAGCGCGAGGGCAAGCTGACCATTCAACGAATGCAGGCCGGCGCTTA  
TGCTGAGAGTCTGGATACGTTTTAGATCGCACAGTCATTCAACATTAACCTGATTGACGA  
CCCGGTGCAGATTGAGGCGGTAACGTACCACCCGCGGTGTTTGTACGCACGACACCCGA  
CGCCAGCCGCGTTCGGGTATACAGCTACCCCGACTCGCAGTACAACGCTGAGAGGTTGTT  
AAGTAGCTGAAGCAGGTGGACGTTAAGCAAGACGCTGGTTCGTTATTATGGGCATGAAGGC  
GATAGAAGGCGACCTGTACGTGACCACGCTTCGACATCACGTCAATGGGTTCGTGGTACGT  
TACGGATCGTTTCACGATGAACACGGATGTTTCCTGACTGTCAGCTCGACAGCCAGCGCCG  
TTACAGCGCTGCCGGTGCCAGGACCATCGGCAACAACGACTATGCCGAGGTCCTGAGCGG  
CGCCTACAACATAACCGCATCGCGGTATTGGTTGCAGGGCGATACCTTCGGCGAGCGATT  
GTAAGCGTCGCGGGAACAGATCGGGCCAACCTACGATCCAAACCTGCTGATCGGTGCGGG  
GTTTGAGATTTACGTTGTGCTGACCAACCCATATAGCTGGGAAGTGCACGGCAAGGCGAT  
TCTTGACGCGCGACTGACACTGGGCAAAATGAACATCACCGTGTTCGAATCGTCCGCGAT  
GGACGTGAGAACTGCGACTTGGTTAACGCTGACAGCAAAGCCTATGCGGAACTGCTGTG  
CCGGGTTGCGCGTACCGGTAACGATTGGGTACTCAACGTACAGCAAAGTGGCCGACACTGC

GTCGGGCGTGGTAGGAGTGTTCAAAGGAGAGCGGGACTGCAAGGTTATGCTGGCTGGACG  
TCTTTTGTCTCCCCTGACACTCACGGGGATCGAATTGCACGGGCAGCTCTATACATGACG  
GAGACAGTAAATGTTCTGGCTTCCCATCATGATGGCCACTCTGGCGGTCTTGCAGAAAGA  
TAAGCTGAACTGAGATATCAAGACCCAGAACCGCATCAACAAGGCGAACACCTTCGCAGC  
AAACCAGCAGCAACAAGTCAAGAGGACTCTGCCGTCTGAGGAGTGTCCGCTTAACCGCT  
GAACCATCCCATCCAAACACCAGACGCGCTGACCGCCTTCGGGCAGCTGCTCAGCTCGGT  
CGAAGCATAGCGCGCCCCACTTGGCAAGCTGATGACCACGGGCAGCTTTGCTAGCCGTGT  
GAACTCTGCGGAGCTGCAGGGCATACTGGTGGCACCGTTCGAGTACGGCGGGCGTTAGCGG  
TTCTACGACTTGGATGCTTGAGGCAACAATGGGCCTGCGGGCCGATTTCCAGCATCAGGA  
GACGTACCAGATGTATTCCGTTAACCATTGGGCAATCGACGACGTAGAGAAGAAGAACCT  
GTACGACCAGTATGGGATTTTAAAACAACAGAAATTGTTACGTGACGGCGTCGGACTGAG  
AGAAATTCAAGGACCGCTGAAGATTCCAACGAACTCCGGTGGTGACGTGGCGATTGCCAG  
TGCGATGGCTTTCATGCAGGCGGATAACAGCCTGCGCCCCGTTACGCAAGGCCTGCGCGAT  
GGATGCGACTTGCCTGGGCAGTTAGCTCAAATCGGGTTTAAAGTCCACATGGTGTGCGGTG  
TTTGCCGGGCTCCGACGCCATTTCTGTTCTTCCAACCTCGGAGGCAGGACGTAATGGCAACG  
CAATTGGGCCAAGTCATTAGCGGTGGACAACAACGGTCTCAAGTCGCGTTGGCGCCCCCA  
CCGCAGAAGGATAACCAGCGAGCTTCTGTCTAAGATGGCCCAACCGATCTTGCAGAAA  
AAACTGGAAGAAGTGGAGCAGTCGAAGATCGTGGAGGGCTTTC AACGTGTCGCCACACGC  
GAGGCTTATCAGGAGATCAAGGAGGAAGACTCGGTCCTGGCGAACATGTCCGGGCCATCC  
GCGTCCGTAGCTGGCGCAGGCGCAATGACTAAGGTCGAGGGTGTTCATGACCTCAACCCT  
CATATGTATGAGGACAGGCAAGGTAAGGCGAGCATGTCGCCAGACGAGTTCCGGAAGCAC  
GGTGTGCACGGAAGTCACCAGGACTTTACGGGCAATCCCAGTGTGCGATAACGTGGTGCAG  
GCCAGATCCTAGAAGGCCAGGCCCGCAGATGCAAATGCAAGCCGAGGCCAAACCACTCT  
TCGAAGCAGAATTAATCCAAGAACAGCTGCAACGGTATGCTTGAAACTGCCGGTGACAAG  
CTCCACGGCATTGCGCTGCAGTTCGCATAGGGCACTGTGAGCAAGGACGACATCTACTTG  
GCCTAGGCCAGTCTGCTGCTATCCAGCACGCCTAACGCCGGGATGACTCCC GCGAGGTCC  
AAGAGAGCGATGGTGGACAGTGCCGCCCTGGCTTTGAGCAAGGACAACGCGTGCCTTGAC  
CGTGTCTTCCAGCAGACCGTGATGTACAACGGGCTTGACGTTGATACCCAAACCAAATG  
ATAAAGGTGCGCGATTGAGCGGCCTCAAAGATCTTTAACGACTACCGTTTCAATAAGTAC  
AGCGCGGCTATCGGCGTTCTGATGCGCGGTGCAGCTGGGCGTAGTCCGGCAAAGAACCAC  
GAAATGGCTAACCCAGATCATCCAGCGCTACTGGAAGTACAGGACGAGTGCAGCGGGCTCG  
CTCAATATGAAGGACGTGATCAGCATGGCTCGCAGCACGTGCTCCCGCATGTTCAAGATG  
CAGGACAAGGTGGAAGACCTGGCGAACAAAGCGTGCATGCTCGCACGGTCCGAAGGTAAA  
CTGGCACAGCAGGCGACAGAGTTGTTTCAGACCGCCAAGGTCAACTACGCTGAGGGCATG  
GACATTACGCGCACTAAGACGGACGTAGAGTTCTACGAGGGCTTCACATCAAAGTTAGCA  
ACTGGTAAACTGAAAGACGAGCTGGATCTGGCAAGCCAGA ACTACTCCACGTTAAGACA  
TACGTTAACCCGCTATTGCCAGGCATGCTTCTGGAGCCATTCAACCAGATGAGTGGCGGG  
GGCGTCCCGGTGCCGGAGTTCTACCGCACCATGCAGTTCCTTGACGCATGGCTGCGGGCGC  
CAGGAATCCGGTGGTTCGATTGATGAGTACCTCGGTAGCTAGAAAGGCGTGTAGCTGCAA  
CGTACCGGGATTTCGCTGGTACGTTAATTAGCCACAACCTACAAGGAGCCAAGGCAGCT  
TGGGTCACGCCGGTAGTGTGTTGGCCTAAGCTCAGGTCAGTGGAAAACAAGCCCGTGATG  
CTGGAGGCCATCCGCAATCAGATCGAAGGCACGGGCGTAATGTATAAGCTGTATCGCTGC  
TGGATGAAGGTGACGGGCATGTCTGATGCTGCGAAAGTCGTTGTGTTTCAGCATCATATCT  
GGCGATGCGCACGTCTATGTAGATAAACTCGGCATGTCTCCGCAGGGAGCATTACCAGC  
GCACTGGAAGGCTCTGGCCGTACAACCGTTGACACCGTTGGCGCATATGCGATCCCCGAA  
GAACCGAACCCAGCAACACCTGCCTGGACTCAATGGAGCCGACGCTCAGACGATGGAGCGA  
GTGTTTCAGAAGTAATTGCACTCCAGGGATCGTAAGTAGGGCGTGGCCGTCAACTTGGAC  
GCTGCGGACAGCAGCGTGACGAGCGAGAAGGGTGAAACAACACCATGGACTAAAGTGACC  
GACCCGACCAACTGGTACGGCGTTGAGGATGCTGACGTTTCCCTGTTGCGAGTCAAGGAA  
GTAATCGACAAGGATGGCAAGGTTTACGGAGTCTATTCGGGCTTGCTGCTCCGGGACGAC  
AAGACAGCAACCGTGGATTCCACAACCAATCCCTGACAGAATTCAACAAGAAGACACCC  
AGGAACCTCCGCGACATCACTGACAGCCTCCGCAAAGATGGGCTTTACTAGGAGGCAGCA  
TGGCTGACAGTCTCGATTCAATCGAAACCAGGAAAGTAACAGTTGGCCCTGCGGCAACCT  
CTGGCTCAGGCTCGTTGCCGACGCCGACCGCACACATGACTTCAGGCAGGCGAGTACAC  
GCTCGCCGTCTGACGCCAAGGCAATCGCCAAGGGCCAGAAGCCCGCCAAACTTAATGCCT  
TTGAGATGATGTCTGCGTTCCAACAGGCAGAAGAAGGCGCCGACCCGCATTTGATGCCG  
GTAATTCCC GGAGCAAGGCGCGGCAGACGGAGCCGAGGCCAATCAAACGGTTCGTAAAG



ACCCTTTTAAGAATTCAAGCACCAAGATCGTCCGGCAAAGCAGGGCCATGACCGATGTAT  
CAGACCCAGCACCCGGACGCTTACGTAGCGACAATGCTGGACGCAATCAGTTAGAAGCAAG  
CGTACAAGGAATGCGTAGGCCTGGTAGATCAACTAGGCGCCGACGTGCTGGCAACGACTG  
GCACCCGCGCGTTGGTACTGATGCTGAGCGACAACCTACCACGGTCTGCGCTCCTTCAAGG  
ACGACCCGAAGTTCGACAGCCGTGAAGGCCGGTAGATTTAGAGCAAAGCCTTGGGGTCAAG  
AGGACCTCGATTGGGGGGCTAACGCCCGAAGCGAAGACGAGCGGCAGAACAAAGCAGGCCA  
GTTTGCAGGTTACACGGGACCACTCCAAGGGTATCGGGACGCAGGGCGATGGCGTCTGCA  
CCGTGATCAGGCTAACTGGTGGCGTGCTTGATCCTTCGGGGCTGTGCAGCAGGTAGGGGCG  
CGGGTAAGATCGCAAACCTTGACCAAGATAGGCATGGGACTGGGCGCCGTCCAACGCTGCC  
TGATCGGTGCTGCTGAGGGTGCTGCAGGTAACGGTCTGGTGAAGCCAGTATGCAGGGCT  
CTGTGAGCATTGACGCCGGGTGACTACTCCTACTGCGCTGGTTTGAGTGCCCTGTTCG  
GTGGCGACCTCAGCAGCATAACCCGGCGACTGTCTTCTGAGCCGTCTGTACCTCAGGCTG  
ATGCCGTCTATGGCTACACCAAGGACATCACAGAGTCCTTCTTCGACGGTAGCCTCATAA  
TCCACGCAGGGCGTCTGGAGCAAGTTCAGTACCGGCTTCCCGAGGCTAGAACGCCCGAGC  
AGACCACGGAGCTGCGCGTGACGTGTTCAACGACCGGTCCAACGCCTACTGGCAGCAAG  
GCACACGGGCTATGCAAGACATCGAACGCCTCCTGCCTGAGGTAGCCACCACCAAGCTGT  
AGGCAGACGGCTGAGACGAGTTGACAGGCACGCTGACGACGGACCTGGAAGGGCAGTTCA  
GCGACGTTGTGCGCCGGACGGCGGTGGGCGATCATCGGGGATTCACCGCTGCGACCATCC  
CGGACAACGCCAAGCGCCTGATCTTCACCGAGAAGATGCTGCGCAACCTCGCGCACCAGC  
CAAGCGTCGATCAAGCCAAGCTGGATACCTTGATTGGCGAGTGGGTTGCACCGATTGCGG  
ACAGCGCTATGGTCGCAAATTTAGCATGCCGCAATTGATCATTGCTCACAGTGAGCCTC  
CGATCATGAAGTGGATTGTAGCTAACATGGTGGAGTCGCCGTGCGAAGCCGGTGACCCAC  
GCACTACCGCAGCAATAGACCATGCGATCCGCTACGTGAGTACAACAGCTTCAACGCC  
GGTACAACGCGGCGTATAGTGCTTGGCGCTATCGGAGCGGCGGCTCGTTGGTCAAAGACA  
TACTTTTCAAGCCGAAGCACTTCGAGGATGTCAACAACTGGTAAGCACTTCAAGTCCAA  
TCAGCACATCCGGTATCATCGGGGACGCGCATCCGCACGCGCGCTGAGCAGCCGACGCAA  
TGGAGGAGGGTTTCGACCGTCTTGTAGCCGCCAGCGCAGCGCCAAGTCACTCGGTTCCG  
AGTTTCTTCCAGAGGCCAGCATCGACTACACGCCGCGCATGCTGAAAACCCAGTTCATCG  
TAGAACACCGGAAGCACCGTGAGGCGATCCGTGAGGAGATCCGCAGCCAACGGCAGGACA  
CATGGGCGGGCATAACCAAGTGGCCAAGTTCGCTCAAGTAGTAGCGGGCACGTACATCA  
ACCGCGCACGGGTTGAGGGCGCAGTCGGTGCAGCAACCACGGGGTATATGTCTGACCCGC  
ACGCAGCAGGCAACCTGCGAGACGCTTTGCCGCAACACGACATGAGCGAAGCAGACATCG  
TAGGGTACATGGGCTGCGTTGGCTGGGCTGGCGCCAAGCACACCAACGTCGCCTTGCTC  
TCGAGTTGACCAAGGAAATCAAGCTGCCGGATGACACCGTGTTACCATCCGTGGCGCAA  
TCATCAACGCTACCTCCGTGCTGTTCTGCTGCCAATCCCGCTACGTAAACGGCGACGTTG  
CGCTGAACCGCCGTGGCATCATGCGCAAGGAAGGTTTCGACCAGCTCTGTAAAATGCTGG  
TGTTGTCCCCTAAGGGCGCAACGGACAAGCGATGGTCCAACGAGCCGAACGCCTTGGACC  
GAACCATGTTCGGAATTATGGCCAAGCCTTACGGGACCGCGCACCGACTGGCTGACAACT  
TCTGCATCCTGACCGGCCCCAGCGGGCTTGGCCAAGCTGTGATCCCTCAGGTCTCCGCGA  
CTGGGCGGATCGCCGCGCACTAGGGCACATAGAAGGCAACGCACTATGTCAAAGAACTCC  
CACGCCGTGTGGAGGAGTACTGAGGGGCAAGACAAGCGACCCCTTGTATTGCTGGTGC  
ATCCGGGCGGCCCCATCGGCGACTAAGACCGCACTCTTATGCCTTGTGAGTGGTTCGATC  
ACATCCAGTTGGCAGACATGGACGTTGCTGGTGCCTTGACCGCGCACTCCGTGGCGCTG  
CACACGCACAGCACACACTGACCGTGCACCGGTACTTTCAGGCAGTACAGACCCGAGGCG  
TATTGGAGCACATTCTGAACAAGGTCATGCTGTACGCGTACCACAGCACTTACCACTAGG  
CCCGGCACCGCCTGGGGATCAACGACAATTTGATCTCAGCAATCAAAAAGACCTTCGCA  
ACATTTCCGAGTTCGACGCTACTGGCGCACTCAAGGCTTTCGACATCCGCCAGACTGACC  
AGCCTGCCACGATGCTGGAGGCTCCCAAGGTGAACCAGCGTGCTACGAGCCCGATCATCC  
AGAACGACTTCATCGGTGAGCTCCAAGCGTTCGTGCATGACTCGTTCTAGCCAATTCTGA  
CTCAGTTCGCTCGCACTGCCTGATCGCGATGTCGAAACCGTGAAATCCTACACGGTTTG  
ACCAACGCATCGCGAAGGCCCTCGGTACGATGATGGGCCCGAAGTCGGAGCCACTGCCGC  
TGCACCTTCCCGGCGTGATAGCTATATAGGCTCTTATGGCCGGTGACCGCGCTGCCGACT  
ACCGTGAGAACAACTAAGCCCTGATTTGCTGTCCCAGCCACGCTGAACTATGTCTCTG  
TGGCCGGTGCCTGGGCGATACGCTGTATCCTTGCATGGGTGCGTTGGGCACGTAGATGT  
CCGGCGTCCGCTCCGTCTGTGAGGATGTTCTCGGCAACGTACCGGCACTGGGCTACATCT  
CCAACGCCGCGTTAGCGATGAAGGATAAAGACGTGTCCGCCATTATCCAGGCAATGCACG  
GTCGCAACACCGCGTTCCTGCTGCCCGCCGGACACCTGTGCACTGGATGCAGAAGGAGT

GATCTAACCGCTCAGTGGATCAATTTTAATTGGGCCACTATAGCAACCCCAATACCATTT  
TCGGACGCCTCGTGAAAGACTACGTGTCTATTAAGTTCCTCCCGGCAATTGTTCCATCA  
TGCACATGGAAGTCAACTTCGCAGGCAACAACCCCATGTAGACTCTGGTGGTGTACGT  
ATTCCAAACCCGCTGACGAGAAGGCTCAGTTCCTCACTCCCCAACTGACACCACTCCAT  
AAATCGTGCAAGACGAGCCGCTTGGTTACGTCCGGCTCAAGCAACTTCATCACCGTTGAGC  
CTGTGCCAACCGGCGAAATTGTCCGGGTGTACCGCGAGACGGAAGACCGTTACTCGCTGC  
TCAACTTCGTAGCGTTCAGAACGTGACGTAGCGTGATCTTGACGCACTCGCCCGGCGAGA  
CCGTCTTCTCGTTTAAGAAGCGAAGGACGCCGCGCAGTTCGCAATCGACATCGACCGCG  
ACGCAACCCGATACGCCACAGCTGCAACCGGCGCGGCGGTGAAGCTCTCGCACTGGCAG  
GCACCACTGACCGCAACGCTTCGACGGCTGGGGTACGGCAGACACTGCTTCTAACGACG  
CCAAGCAGGCCTTGGTCAACCCCAATAAGGCGGCATAGGACGCGACATCGGCTGGACAGC  
GCGCCACCATCGTGGGGACGCTTGCAGCTGCTGCTCACAAGAAAGGTGACTAGGCTATCG  
TTGCGGCGAACCAGGCAGACGCCAAGGCCAAACGGTCCGAAGGCAGCGGCAACGCAACTG  
TTGTCAAGGCAACCGCTGCTGTGGCAACCGCAACCGCGGGTAACGCCACTACCAAACGGG  
CTGAGTCCACTGTAAACGCGATTGACGGCAAAGCAACACAGGCTATCTACACCACGAACT  
CAGCAACCACTACCGCGAACCAGCCAAGGCAACCGCCGAGGACAGTGCCGCGAAGGGGT  
CCCAAGCATGGGCTACGCCAACGGAGCCGCTGCTGACGTGGCAAACGCTAATACTAAAG  
CTGATCAGCAAATCCAGACCTCCAATAATCAAGCTCAAACGCGGCTGGCAAGGTAAACC  
GCTCCGGCGGTGAGATTACCGGGGTTCCGTTGGTTGATCCGCGTGTGCAGGCAATTGCCA  
AGGCCGACAGCAAGGCGATGTTTGAATAGCACGTTGCTGGGCAGACTGTGCGTATGGCAT  
GGCTGGCCTCTGTGCGGAAACTCCAATACGGCCAGATTTGTGGTAACGAGTCAGAAGTGA  
ATCACGCCATGAACAGCGCATTACAGCAGCGGGAGCGGATCTGTGAGAGTCGAATGGCGGG  
CAGTTTCGTTGGTATCCGTCGATGGCTACCACAACAAGGTCCACCCGCAGCCCGGAGGTT  
ACATCAGTCTTCGGGATAACGTGTCCCTGTCCGGTAACATGACAGTCACCACTGCTGTCT  
ATGTCACCACCTACACTCCTACCCAAGGCTATCAGTACCTACGGCCCGGTGCGGAAGTTG  
CAAACACGCACATCTGCTTCCAGAACCAGCAAGGCGGCCAGCTTACTCTGATCTAGGCCG  
ACTCGGGGTGTACCATGCATTACCGCACTTACGGTGGCCGCGACGCCATGGCGCTCTATG  
CAAACAAGACCGCAGGCTTCAACGCTAACATCCGAGCAACATCTGCCGCTATCTCCGGGC  
GAGTATCTGCGGGGGAGTTGCTGTGCGAGCGGGACTGTGTAGTAAGGCAACGGCGCCTCGT  
GGCTTGTGAACGACGACAACGTGTACGGTGGGGTTTGGGGCCGCTAACTGCCCAACCGGG  
TGAACTCCGAACCTCGTCAACCGTGCCGAGTTCGGCGGTGCTGTCCAGGCTAAAGTAGCAG  
CATTACCGCTGGCCAAGACGGCTCCTACGCCATGCTGCAAACCTCGGGGTATGGTCAACG  
GCGGACCGGATGAACTCCTCGATGGTGATCAGCTCGGCTGGGCGATCTGTGCAGGTGACT  
TCTCGGATATCGTCCGGTACGGCACTTGGCGTGTAAAGGGCCGTGTGTCCACCGGGATCA  
AGGTTGTTTCTAGCCCGATTAGGATGGGGGTTAGCTAATGTAATTTCCGAAGACCTATCG  
GGAAGGGTTCCTGTGTACGGCGTTCGTCGTCCATGGTACGCCGCTGATTCCGGCAAGTT  
CATCCAGTCCAAGTGAACCTGTTTCGAACTATTCTTCCCTTACGCTATCAGCGATCTCGA  
GACTGATCCTTGGGGCAAAGCTTTTTTTGACTATTGCTCGTCCGCTTGGTGTGACCCCTA  
CAAGCGTAAGTCCGACGCCGAGCAAGAAGCAGAAGCCAAAGAAGTAGCCGAGCGACAATC  
TATAAAAGGTGAGCTATCCGACCTGTTTATTGAGGTACAACCTTAAACGTGCGTCCGAGCA  
AAAACCTGGCCCGCCCAACGCGATCCAGCTTAAACTCAAGCAGTCAGAGATCCTCAGCAC  
TGACGCCGATGCATGGTGATTTCGAAATACCCGGACTGCGGTGACGGCGGCCAAATT  
CTCCGACTCTTTTGTGTGCTTCCGCAACACTCCTGTTGTGGATGGGAAGGCGGGTATCTG  
GATTTTGATTACGCAGGCGTCTACCTTTTGGACCCATATAAGATGAAACTATAATGGCA  
GCTGCTAGTGCTGGCCTTGGCAATATGCAACCTTCGTTACCGCTTAGTGGGTGCATCGG  
TTTGAAGCTGTAGAAGTGCCTTCGTAGATGAAGGCTGCGTCCCGTTACATCCAACGAC  
CTTCTGTGACCGGGCGTCTTTTATAGACAACAGCATCACCCCGAACC CGGTGGCGAC  
GAAGACTTGGCCTGACTGGGCGCACAGCTTGCCGCCGGCCTGAATGGTTTCGTGAACCAA  
GTAGAGCTTGACGGTATCCTCAAAGACGTGGTAGGCTGTATATGAGTTCCGAACCTGAGGG  
AACATAAGACGCCGCGCCACGCACAGTTGGCGCTAGTTCAACTAACATTCCAAGCTTCA  
TGCCGTTTCTGACTATCTGCATGAAGTTTTTATTGGATTAGAACAACAGCGATCCAGAAAG  
ACATCGTCCCTGTACCTTGTATCATGGCCCCAAAGACCGGATGTTTCAAGCACATCGCTCTC  
AAGCCCACTCCACCATTACCGCATAGTTCGAGGTGTAGACACTGCTTGAAGTCCAACGTT  
CTCGTGTACGGATTGTCTCGGCATTTGGTAAGCAGGCACACGAAATCTCGCCGCTAACC  
TCCGACTCATTATGAGGATGGAAGTTCTGGCGTGCCTCCGAACCTGACCCGCAACCTGGCG  
ACCGTATATACATGGAGAAGGTTCGAGGTTACGCCAGTCTGAAAGGCTTGGATAAGTCG  
CCTACTTAGCGTGTCCGTCATTGATGATTACACGCAGCGTAACAGAGATGACTTGCTGA

TTGCGGACGGCGTGGAATCCCCCAGAACTCCCCACCGCCACCAACCCCGAGCTTTTGC  
AGCAACAAAACCGTGCCTTCCCGTCCATCGCACTCGACCACGTGGGGCGCCAGCGTTCGTTA  
TAGAAGGTCGGGGCCGAGTGACCTTACCCGGTACTCCGCAGAGAGACGCTCCCTTTTACA  
ACACACTCCCGGCAGCACGCTTTGACGTGCGCAGTAGGCCCGGACGTTACACAACGGTTCG  
AGAAAGAAGCGAGGTATGGCGTGCATCTGGCGCAGTAGAGCAAACAGGGGCATGACCCGTG  
ACCTGTCTCTGCGGGCAGGCGTGGGGCCACCCGAACGTTCAAGCCAACCAGGCGATCATG  
AGCTGCTGGGGCAGCAGCAGTCTCTCCACGGAGACCAAGCAGGGGGCCAGCCAACTTCC  
AGCTCCAGCACATGCTGTGTAAGTACCTGAGCGACATCGAGCGCTACCCACGCAAGGCC  
CTCACGCCGTCGTTATGAATCGCGGCACGCTACTTCCTATGCACTTTGTGCGTGGCATCA  
GCGCTGAGCATTGCAACAGTATCAGGTCGGCTCTCTCAAGTTCCTACTGCTCGACGCCTA  
TTTTCTTCGGCAAGGGGTTGGCTGCTCCTGCATGCCGTGTGCGGGCAATCCACGCCGCTA  
GGGGCAGCAAGAACATTGACGAAACCGGTGTGGCCGTAGTTGACCAGCCCGGTGGTAACG  
TCTCCGTCCGCTCGGTAGAGGGTATCGCCGGCGTGTACGTCGTGGACACGCTTAAGAAGC  
TGGTGGCGTACTGCAAGCTCTGGGAGCCTACCACACTCCGATCGAGATGAACATGGGCC  
ATGGTGCCTTTACACATGTTCTGCTTCTCTGCTACGTTCTGAGGGCGTACCCTGCGCTG  
TGCAAGTGGTATAACAACCCGCCAGAAAGAAGAGCGTATCGCCGACACTCTGGAACCAA  
TCGCAGCCAGTGGCGAACTCATCATGGACGAAAGAGTCGTCACTGACCACGGGCTTCGA  
CCCCCGCCACCCTGCTGGCAAGCGCGAGTTGGTCGCCCTGCTGCACCAGTTCATCAGAT  
TCACACGCGACAAAGGTGCGCTGGTAATCGACGACCGGCTCGGCGTACTGAGCATCGCCG  
TAGCGTACTTAATAAACTCGTGCCCGAGACTCCGCACTCGTAGCGCAATCCGTCCGGC  
CTCAGGAGCTGGTCAAGTTCATGGAAAACCCGCTCAGCCCCAACTGCTACCTCATGGCAG  
CTCAAATGGGCTACCGGCAATGTGTCCATCCTACATCAAGGAAGACGATACGAGGAGATT  
CTCGATTCTGCCATCACGCGGTAACCTCCGTGCCCGCCAGAACTCTGCCACTTCAAGAT  
CACTGCAATCTCCGCAGCCGCAATACCCAAGGGCCTGTCCGGTCTGAACTGTGCCGAGCT  
CGTTGCGTTCGCCACCGCCGCTCTGTACGCCACTCCTGGGGGTGCCGGCCGGAACCCACT  
CGTCGCATCCGTTTCCAACGGCCAGAAAGTTTACACTGGCGGGCGTGACCCACGATCTAAC  
CGTAGCTGCTGGCCAACTGAACGCCTTACCGTAGTCGCTGCTCCTGAAGAGGTGATTTA  
TGCCTACGTTCCCACTAGTAGGGCGCCTTGCCTCTCTGCTGTGGCTGTCCATAGTTTCT  
TCGCAGCAGGCTTCGGCGTTCTCCAGCCCGAAGAAGGAACTGTGAACCGGGCATACTTG  
ATTCAAGTGGAAAGCTTACCATATACACCGGGCACACTGGCCCCGAGGTGCTCTTAGGGT  
CACTCGACAATGCCTTCCAAGGCCCTGAGATGCCTCCCACGGCGGCCAAGTCGGCTGTG  
CCGCTGCTAAGCGCACGATCAACGGCCAGCTGTACCAG

>NewGenomeName\_212

TTTATGTCTAACGATCTTTTTCACTAAAAATGCCTCCAAATCATGGGAGGTTTTTCTACAT  
GCAACAACACTCAACCGCTTCGGACTTCTACCACAAACCAATCATCGACGCTACCAAACC  
TCTCGTTGATACTGCTCGTACGCCAGTGCTATTTCAAACCTCGTAGCCTCCGAATCTGGCA  
ACGGTGCAACAATCGCGTAAGACTGCTGGTAGAAATTCTAAATCAATACAAAAACGGTAA  
TCGCCGTGATGATAATGGTGAGGAATTTCTGAACCCTGAATGCCAACTCGCCACGACAAT  
TGTTTATCGTGCTCACAAAAGGGCCATAACCCTCGCATTAAACAGTACCAAGAGTCACT  
CACTATGGACGATATTATTACAGGCAAACCGATTCCCCAGACTGTCCATTCTGAGCTTCA  
ACTTACTCGTGAAGTCTGTGAGGATTACCGCATTAAATGCATTCTCGATAAAAAGAAGAGTT  
CCTCGAATGCTACAACGCTTTCGGACAACGTGATAGTAATAACACCATAACCAAACAAACC  
TATCGGTACCGCAAACGCGACGTAATGTATGAAACATCTGTCTCTAAACAATGGCCTGA  
ACTGGTAACAGAACGACCCGTTTAAATCTAGCAGAAAGGACTACAACCTATTCTAAGGCTAA  
GGGTACCAAATTTGAGTGGTTGAGGGTCCCTGAGGCATCCACAATGCAATCCCGTCTGTTG  
CTTTACCGTTGAGAGATTGACGATTTTTATGCGTAGTGGCCCCACTGAGGGACTGTATCT  
AGTATTCGATACTCTCACCTTAGCTGATGATCGTATTAAGGACTTCTATGCTAACCCCAA  
TGCTCTTCGTGACTATTTCCGTGATATTGACCGAACGGTTCTCACTGCCTAGGGTTCGCTC  
GGTCCAATATTCATCTACGGACTTTTATCAGTACATTTATGTACCTGAGTATGGCACCGA  
GCATGGCCCTTTACGCTTTCACGCTGTGCATCTTATGCACAAACTTCCCTTGGGTTATAT  
CGAACATAATGTTAGTGAGCTGGAACGTACTAATGGTCAAATAAATTGCTTGAAAAACAC  
ATGGCCTTATCGTTAGTCTATCGCCATCGCAGACCGGTATTCTCAGGATGCTTTCTCTCG  
CGCTGGATCGCTCTGGCCTGTCCGTACAATGCGTTTAAACCTTAAATACACCTCGTACAT  
GGCTGTAGGCTTCTACGTTGCTAAATACGTTAATGAAAAATTTATGGTTGGCATAGCCGC  
AAAAGGCTTGGGAAAGCGAAAATTCGAGGCTACATTAATAAACGCAGATGGCTCTCTTACC  
AAAGAACTATTTTGAATTCAGAGGAGACGCAACTTTGGGATGAACTACTCCGAATGAC  
GACGCCGTCCGAGAAGTGTTTAACTCAACTTACGCCAGTGGGTTACTACGTGACCCCGCT

CACCAACAGCTTGAAGCAGAACGCCAAGTTAGAGCTACTATTGAGGCTGGCAAAGCAATC  
TATAGCCGACGTTTTGGCGGCGCAACGAGTGACGAGCAATCCGCTAAAATTCATGCGCAC  
TTTGACTCGATCAATCTGAGCGTCCTTCTAGAGCATGTAACTCTTGAATGACGCAGAG  
ATTAGCAAATACGGACATTCTGATGAGATTGAAAACACTACGTTACTAATGCAGGAGTTGC  
TGTTGCTCACTTGGCCTTAAATCCCGGTGGACTGCTGGTGCAAATGTAGAAATCCAAT  
CCCAACTTAAAGAACTCGAGGGCGTCTACCGGGGCAACCTTTCGCCATAACCTCAACGTG  
GTAGCAAAGACTGACGCGCTTGATGATGAAATGTGGCTCCATATGATCGGCGCTATTCTT  
AAGGACTGGTTCCTCTATCAACAACATTACGTACATGGAAAAGAGGGCGCTCCTTGACATT  
ATAAATGGACGTGGCCATTATCCACCTTGCCAAATGGCTTACCTTACAAGGGAATGAAA  
AATGACAGCAAATGAGAACCAGTAGCCTTTCAAACGGCTATTCTCTCCATCAAACCTTAT  
TTAGGCAACTTCTGTTCTTGACCTGACTGAGGACGATTTTCAGCTTCTCACTCCTGAACG  
TGTGTGGATTGCAAGTGACCGCTCCCTAGCTCGCCACACTATTGAGGCCTGCGTCTACGG  
AACTCTAGACATTGTGGGATACCCTCGCTTTCTTGCTCCTATTGAGTTTATTACTGCTGT  
CATTTCTTATTATGTTCAACCCATTAACATTCAAACGGCATGGCTTGTTATGGAAGGCC  
TCAACTCACCGAAAACATCATTAATGGTGTGATGCCCGGTTAAAGCCAGTTAACTCTG  
CGCGTGTACCTCGCGTATACTCGACGGAGATACTAAGCTTATTACTTAAGCAGAAAATA  
TGCGCGTGAAAACGGCGCGCTCAAGGAGTGACGGATATCTAAAAATTCTGTACGCCTCT  
CTGGGGGCAAATCTAAAGGTGGTGCCTCTGGTATGATGGCGCCACACAGTTCGGATCTT  
TAAGGGGCTTCTCCCTCTATTTAAGGAAACAATACGTATATCGTACAAACTTCTCTG  
AGCGTATTATGCATGACCTCTCACATCTGGTATTCCACGGTTCTAGAATCGGAGGGCTTA  
AAACGACCTCCTGGACTCCTGTTGTCGCTAGTGGTCTTTCCAAACTGAAATGGTAGGCT  
CTATAAGTCTTCTCCTCTCATTTCGTGGTCTGGATGTCGACTCTCCCGTCGACGTCTTTG  
CTTTGGATATCCCACAGCGTCCCGACTATGGTCAACAATGGGTTGACTTTATGAAGACTG  
GTGTTAACGCTACTCCTCTAGCTCCGGTGACTAGTTCATCTGACAGTGATTCTGCTGCCG  
GTCTTGGCACTATCCCGTAAACTGATTTGAAGGTTCTAAATCCCTTCATAAATCTGATC  
TCAATAATTACAACAACACTTAAAGCCGCCGTGGGCTAATGATCTCCCTATCCTAAGC  
CATCTAAAAGCACGATGATGATTAGAAATGGGACATCCGGCTCGCCAACTTAAAGTCTA  
ACTGCACCGCACCCATGCCTCGTTATTCATTTTCGAAGCAGGATGTCACTACTGGTGATA  
CCACTTTCGATATTATGGGCCTCCAAGCTGCCGATTCCAAACCTCCGCACTGAACAGGAAC  
GTGACAATTTCAAGTCTCGCTACCGCGATATTATGAATGACTTTGGCGGTACACTTCCT  
ATTACGGTGATACCTGTCCTTTGCTCCTGATGCGCTCTGAACTCTGGGCTTCTGGCTATG  
AGCTAGCCGGTTCGACCAACCTTCATTGGGTGAGTTCATGATGATGACGTCGAACAACT  
TTCTTCATAAAGTGCTTCGCTTCTTTGTTCTGGAGCATCGCGTACTTATGACACTATCTG  
TTAATCACGTCCGTCGCACTCACGAACCGGAAATGCACTATCTCGTCGGTGAGGAATCTC  
TGACTTATACTGACATTGTCTGTGACCCTGCTCTTATGGCTATCCGGGATATGCGTTGAA  
ATTAGGTAAAAGACGTCTTTCACTCTGCTGGAACCTGAGAAAATCATAGTTGCCGGAGGTC  
AATGGTATCGTACTCCGCTGACCGCGGCGCTTCCCTTATAACTCTCTTTACGGCTTCC  
CTTCCTATTCTAAACTGCCGTCAAAGGTTATACTCGAACGTGGTACGTCGGAACCGATA  
ACTATGGTTAAATCTTCCAGTCCCTGCAACTTGCACACTGGAACATGCAAACCTAAATTTA  
ACCCTACTGTATAACGTCCACTGCCTACTACTCGTGATGGCACGATGACGTGATAAACT  
AAACCTTGACGCGGTACTAATGTTAATTTGCGCCTGCTCTGGGTAAACAAGCGAATCGC  
GTTTGCTAACTTACGTAAGGAAATCCTCTGGTTTCGAAATTGTCCCACTAAACATAATTC  
TCCGTTTACTTCCAGTCTATTACTGCTACGAAAACCCCTTCGGTTGCTGCTCCGATTAT  
GTCGACACCGGAGATTAGCCGATCTACTATTTCCGCTGACTTAATTCTGACTTCGGCCAA  
TAGACGTTCTTGAGTCGCTTATGTCGTGCGTATTGACGAAACCAAGCCTACCGACAATAA  
GGTCTTATCGGTGCGCGCTTATTTATCTGGCGTACCGTCTGATGCTATTGGTATTGCAAT  
TCACTTTGAGGTGATGACGTCACCGTCCCTCCTGCACTCCCTGCTCTCTCCTCTGCTTA  
TCCGGTGGCAGTCGTCATTTCTGGCGCTGATCTGTCAATTGCAATATGCAGTATCTATTCC  
CACGCAGCCTGTTACTGCTTGAATGCTGTAGATGCTGTTATTATTATAAGGGCCAAATC  
TTGGTGTGGTGACGTCGTTTCCGGCCTCTTATCTGATAATCAGGTGAACCGTGAAACAAC  
CGTATTACAACCACTTAAAGAAGGTCAAATCTATGTTTCGGGGCAATCGCTGGCGGTATTG  
CCCCCTTACTTGCTGGTGGACTTCTGAACAAAGCATTCCGGGGCGGTTCTTCCACTCCCC  
AAACTGGCGTTCAAATTAATGTCTCTCTACAGACAGTCATGTAATGGGTGCTAATGATG  
CTGGTATCAAATCCGATAATCAGCGTCTGATCATTCCAATTGTTAACGAGCTGCTACCC  
AACCTATCTCGAGCGTCTAGCCGATACTGGCAAAGACGCCATAACTTCATTGCTGGCG  
CTGGAGTTAATTAACCTACGGATAAGATCGGAATCTTTAAACCTGTTGCTACTAAATAGA  
AGCATAACGAAAGATTATAGTGCTTCTGCGTTCGCCGAACCTTACCAGGTGTGAAAGTGCTG

GCTCTCGAGCTTCTTCTGCGTGAATGGTTCGATCCGGGATTCCAGAACCAAAAAGGAATTAA  
CTCGGACGGAGCATGACAATCAAAAAGAAATCTCTAAGGTGCAGAACTACACTCAAAGC  
ATATTACGGGATCCAGTCTCTTACATCTCTGCAAAATTCTCCCGGCTCTTTGTATGCTC  
AAAAAGAAATGCTCCGATACAACCACAAACAATCTATGTCACGCGGTGGCGCTATCCTCC  
ATAGCACAAGCCTCACCAAACAACCACAAACTTCAGACATTATGAGGCAAATGCTTACTC  
AGCTCATACCTCAGGTCAACACTTTACAAATGACCAACTCCAAGATCTTACTCGAAGGC  
TGGGCGCTGATATTGATGGTGTTCGTGATAACACTGATTGTACGCATGGAGAAACGGTGC  
GCTCGAAACAGGAGGTCTAAACTCTCGTTACGGTTCCTCACAAGTCGGTTAAACCGCCA  
ATGCTGGATCAAATTTCTTTAGTGACGGATCTTCTGGTATCTTTGATTCTTTTAGTGGG  
TAGATAAAGGTGTGCGCGATACTAAGAACAATTATTGCAAAGATGACACGTCGCATGGCT  
TCAGCCAAAACCAACGTCCCAAATAA

>NewGenomeName\_213

TTTTTGACATTCCCTAAACCCTTATGAGACTCTTGCTTCAACGAATGAAGTAGGAGTCTT  
TATTATGAAACCCGCTTAGCGCTTGACTCATCCGATTCTCGGCTCTTGGTTGTTTAAGTG  
CCCCGTTTATATCCGTTATGAGCACCTTCGTCACGGTCGTCTTATCAAGGTTTCGCGCTGT  
TCGTGATTTGTCCCGCGTCAGCAGCTTATTGCTAACCTAAAAACTGCTTTGACGTTGT  
TATTGCTGAGATTGACGTTACTTATTGTTCTGTCACTTATTTTGAATATGAGGCTGAGGA  
ATATACCGAGTGTGATTCACAAACTATGGATAATATCCTTGCTTATATTAACTCTCCTCA  
TTCCCTTCGCTCTGAGGAGGATTCATCCGTTGATGTTGACGATATGGCGTGGGTTTATGA  
AATTGCGGAGTAAGTTATGGAACTGTTGTCGGAAAATTTATTACGTTGGCTGTTGTTGC  
TCTTATGCTGTATGGAATTGCCCGCTTAATTCTGAGGTTTCCGTGAAGTATTTTAGTCTT  
GTGGATGAACATTATGCTTATTGCCCTGATACGAGGATTTTGCACATTACTCGTAGCCGT  
GTTTCTGACCCTCGTTAAGAGCGTCGCTTGCTTACTGATGAGGAACATTATGCACTTTTG  
GATTGGTTGAAAAATCGCCCAACTTATATTAAGTCTTGACAGGCCTTTAAAATACCCTCT  
ATATTGCCCTCATAGGTTCACTCCGAGGGCTTTTTTGCATGGCTTCTGAAAGCTTCTCTG  
ATGTTGTTAAGTCTGTTTGGTTCGCCCGCTACGGCTAAGCACGCTCATCTTCGTATGGCTG  
TTCAGGTTGATAATCGTAGTCGCCTTCTTTCTGCTTTGGTTTACCAGTGGGTAAAGCGCC  
TTTCCGAAGAGACTCATTGGATGATGAGACTTATGCCCTTATGAAGCTCAGACTGGCC  
TTTTGGAAGATCATATGGCACTGTTTCGGACGTGTGCAGCCCAACTTGATAATAGTCACA  
CTATAGAGCACCGTACCCCTTTGGATGCCGAATGTGTTTTCTGTTTGAATGATTTGCC  
CAGGCGTTCGCTACGGTAAAACGTTGAATTCTCTTTGGACTAAGTATGTTGCTCAATGGC  
CTGAGAAGTTAATTCGTCAAGAGTTAGACATGGTTAAGCCGATATCCTTTAAGGATGAGG  
TTGCTAAGTAGGTGGAGAAGATGCAGGAAAAACACGCAGAAATCGCATGACTCAAAAAG  
TAATTAATTAGATGCGTAGTGCTACCAAAAAGGGCTGGTTTTTTCGTATTTGATACGTTGA  
CATTTGCTGATGATCGTTTGCAGGCTTTAATGAAAACCCCAATGCTCTTCGTGATTATT  
TCAGGACTGTTGGTCGAGCTGTTCTGCGCGCTGAAGGTCGTTTCGGTTAAGGATTCCTACA  
ACGATTGCTATCGCTATCTTTGTGTGCCGGAGTTCGGAGGTCAGCACGGTCGTCTTCATT  
GGCATGTTGTGCATATGGTGCGAACGCTTCCTTTGGGAATTTACGACCCTAATTTTCGTTT  
GCAAGGTACGTAATTATCGCCAGATTAACCTCGTTCCGTGGCATGTGGCCTTATGGCTTCA  
CCCAACCGATAGCTGTACGCTATAAACGTGATTCTTATTCTCGCAAATGTTGGTTGTGAC  
CTGTTGACAAATCAGGTAAAGCAATGCAGAGTAAGCCCTATCAGGCGGTTCGCATGGTATG  
TGACCAAATATGTAGCTAAGCAATCTGACCAGCGTCAGAAAGCTATTACTGAGAGACAAA  
AAAAATGTAAGAATCCACTTATGGCAATCTATCTGAAAAAGGAATTCAGAGTTCGCAGCA  
GCCGAAACTCGGGATGGAGTTACCGTCGATGGCGAATCTCAGCAACAAAGTGCTTCTGG  
AGCTGAGCCGAATCAGCTTCGATTCCAGCCCTCTGTATCAGATACTGAAAGAGAACGCCA  
AAAAGCAATTGCCCTTGAACATCGGCGCGCTGCCTTTGCACGTCATTTGGATGTGCGCT  
CGGAAGTGAGAAGTATGTTGAAAAATATCCGTGCTTTGCTGAAAAAGACACCCGAGTTCA  
ATTGGCAGAGTTCTATCGCTTCAATGACGGTCACCTTAAAAAATGGGGATATTTTTGATG  
TAGCACGTCAATACATTATTGATGCAGGAATTACGCCTTTTGATTTGCGTGCTAAAGCGA  
CTCAAACCTTCGGTGGTAAGTGACCCGGATTTTTCTCAGGAGAAGATTCATGCGGAGCTC  
TACTCGTTACTACGCAAGTTATCGCGCTACTTTGACTAAGCAGCTGATGTTTTTACTAA  
AGCTGACTCTACCAATGATGATGAAAAATGGCTTAAATGCCTTTGGTAATTTGCTCCGTCA  
GTGGTTTCAGATTGAGGATTGGAAAGGCAAGCATAAAGAATTGCTTGACGATTTAAAAAA  
ACGTGATTACATTTGAGCTGTTTCAAGTATTCTTACCCATTAATGTTAGGAGAATCTTA  
TGTCTACTCTTGTTGATACTGATGTTAACTTTGCTACTTCTGTTGCTGCTCCGAAGATGC  
TTCAGGCTTCGGCGGTTCTGGATATTACCGAGGAGGATTTTGATTTCTGACTGGTGATA  
AAATTTGGATTGCTACTACCGCAACCGTACGCGTCGCTGTGTTGAGGCTTGTGTTGATG

GAACACTGGACTTTGTAGGATAACCCTCGCTTTCCTGCTCCTGTTGAGTCTATTGCTGCCG  
TCATTGCTTGTTATGTTTCATCCCGTCAACATTTAGACGGCCTGCCTCATCATGGAAGGCG  
CTGAGTTTACAGAAAACATTGTTAATGGCGTCGAGCGTCCGGTTAAAGCCGCTGAGCTCT  
TGGTGTACACCTTGCCTGTTACGGCGGGCTTCAAAGAAAACGGTTCTGAACGCTGAAGAGA  
ATGCTCGTCAGAAAAGATCGTGCAGGTGGAGTAATGTAATATGAAGAAAAGCTCGTCGTTCT  
CCTTCTCGTAAGAAAAGGCGCTCCTCTCTGGTATGTAGGCGGTTCTCAATTTTAATTAACG  
GGGCTTCGGCCCCTATAAGGATTCTTAAATGTTAATCGTGCAAATTTCCGCTGAACGTAT  
TCCCCACTACCTTTCTCATCTGGTTTTTGGATGCAGGCAAATTTGGTCGTTTAAAGGGTGT  
TTCTTGGACTCCTGTTGTTGCAGGTGATTCTTTTGACCTTGATATGATTGGCGCTATTTCG  
CCTTTCCCGCTTCGTCGTTGGCCTTGCTGTTGACTCTTGTGTTGACCTGTTACGTTTTA  
TGTCCCTCATCGTCATGTATATGGTGAGCAGAGGATTGATTTTATGAAGCAAGGTGTTGA  
TGCTGCTCCTTTGGCCCCGTTCAGTGATCTCGCGGTTGGGATAGTGCTCAGTATCTTGC  
TACTATTCCGCTAGTAAATTAAGGTTGCGAAGTTTCTTCATCAAGGTTACCTGAACAG  
TTACAATAATTACTTTAAAGCTCCGTGGATGGATTACCTGACTTATGCCAACCCGCTCAA  
CATGGAGGGTGAAGATCTTCGTTTTGGTGCTCGTGATGTAACCTTGAAAATAAATTGGAC  
TGCACCGCTTCCCGGATACTGAAACCTCTCACTCTATGGAGACTGAAACCAACTCCAT  
TGACATTATGGGTTTGCAGGCCGCTTATGCACAATTACATACTGAGCAGGAGCGTGATTA  
GTTTCATGACTCGTTATCGTGATATTGTTAACGAATTTGGAGGTAGTACTTCTTATGATGC  
GGATCATCGTTCTTTGCTTGTATGCATTCTGTTTTCTGGGCCTCAGGCTATGATGTTGA  
TGGCACCGACCAAAGCTCTCTCAGTCAGTTCTCCGGTCGTGTCGAGCAGACGTTTAAAGCA  
TTCAGTACCGCGATTCTTCTGCCCTGAGCATGGATCTATGTTTCACTCGCATTGGTCCG  
CTTCCCGCCGACTCATGAAATGGAGATGCATTACTTAGTTGGTAAAGAAGATTTGACTTT  
GACTGATTTGGCTTGTGAACCTGCTTTGATGGCTAACTTGCTCCTCGTGAGGTTAATAT  
GTCTCCGTTCTTCCATTCTGGCAGTGCTAGTGCTAAGTTTAAAGATCGCTGAAGGGCAGTT  
GTATCGCATGCCGCTGATCGCGTTACATTGCCGTATAACTATCTTGATGGTTTTCCGTT  
CTATCGCACGATCCCGTCGGATGCTATTAAGCAGCGCGTTCTGGTTATTACTGATAACTA  
CGCTGAGGCTTTGCAGTCTATGCAGCTTGCGCACTGGAATATGCAGACTAAGTTTAAATTG  
CACCATTTAGCGTAATATGCCGACCACTCGGGACTCTATTATGACCTCTTGATTATGTGG  
GGCTTCGGCCCCCTTAAAGGATATTGATTATGTTTCAAGTTTATGTATCTAAACATGTTG  
CTCCGTTACCTCTGTGAATCGTGCCCTTTTCTATTGCCCTGCCGCAATCCCGAAGTTG  
TTAATTCTCGTGAGATTGTTGCAGGTCGTTCTACTTTTCGCATGGCTTCTTCTATTGCTT  
CTGCTTCCAATGGAAGTGGTTTTGCTTTTTGTTTCAGATGATGGATCCGAATTTCTCCTGATT  
CTCAGCAGATTTTCTCTGTTGCTGCTTCGTTGTCCTTTAGTGTTGATTCGAATTATATTC  
CTTGTATTGTTTCGTTTTGAGTGCAGTGTGCTCAGCCTACCAGCTTTGATATTGCAACCG  
CTGATTTTATTACAGGTTGAGGCTTCTGCCCTTCTCCTCGTGCGCTTAGCCTTCGCGATT  
GTGTTACCGTTGATGTTAAGCCTCGTACTGAAGGCAATAATGTTTTTGTGGTGTGGTTT  
TCTTCTTGCTGCCGCTAATGCTGGTAAACGTCAGTGGTGTGTTTCGATGGCTCAGGTTG  
ACCACGAAGTTACAGCTTTCAGCCGCTTAATTAAGGCTGCCGCACTCCCGGTTAGAT  
GCCCCCTAGTGTAGGGCAGACCGAGTCGTACGGAAATACCCGATAAACTAGGAACGTGG  
AAGGCGCAAGCCGCGTTCCCTCCTGCTAAGCCCCAAAAGGAGTTACAGCGATGTTAGGTTG  
CCGTTGTAGGTGGTATTGCTTTCAGCCTTAGCTGGTGGAGCCGCTTCTAAGATGTTTGGTG  
GTAAACCTGCCGCTCAAGCCGCTACCGAGTCCACTGGCCTTTGTAAGGGTCAAGGCGTTA  
TTGGTATGGATCAAGATGCTGGTATTCAGTCAGCTGTTTCAGGGCTCTAATGTTGCCAATG  
GTCAGATTCCTGCCCCACGCAGACTGGTGGCGTTATGTCTGATGCTAAAAATATGATTA  
AGAATGCTGGTAAAGATTTGCTAGATGGGGTTATGACCGCAGGAAGTGATCGCATTAAAGC  
AGGCATTGGTTGATAAGTTGAGTGGTAAACGATGCAATGAAACAAGGACAAGCAACCCGTTG  
ATTCCTTGGCTGCGGCCTTCTCTGAGCTCAATGCATGGGAACGTGCTGGAGCTGGTGCTT  
CCGGTGCCGATTGGAGTCTTCCGGCCAGAATCAGCAAAGGAGTTGATGCGTATGCAGC  
TGGATACTCAGAAGGATATTGCTAAGATGCAAATGCATAATAATTTGCAGATTGCTGGTC  
TTCAGTCCGCTACTTCTCGCGAGAAAACGAAGGATTCAGTTTATGCTCAGAATGAGATGC  
TTGATTTTTATCAACAGGAGTACAGGCACGCGCCGAGTCTATCCTCGCCAACACTTACC  
TTACGGCTAAGCAGGCTGCCCATGAAATTATGCGAATGGCCCTTACTCGTGCTCAGGAGA  
CTGGTCAGCATTAACTAATAGTCAGATTATGGCAGTGGAGAAAAAAGTTTATGCAGAAC  
TCGGAAAAATTCATCAAGATACTCAAACGCTCGTTATGGTAGCTCTCAAGTTACTGCTG  
CGGCGAAAGATGTTACGAAGATGATTACCGATGCCACTTCTGGTGCTGCCGATTGGGTCT  
CTCAACAGTGGAATTTCTTTTAAAGATGGCAAGTCTAATCGTATTCCCCTCATTACCA  
GAAAATAA

>NewGenomeName\_214

GAATTCGAGTGGTTACTAATCCAGCACCTTTTTAGCCTGTACACATTAAGACAAGATGG  
ACGAATCGCTCGACTTCGCTCGCGGTTTCGTCTACGCCGGGGGGCCGGACGCCCCCGGTT  
GCCCCCTACAACGTGTGGCGCACGTACTGGGGGGCACCTCATCCGTACAGGTGGGTACG  
TCTTCCGTACAGAGTGGTACATCTCAAACGGGAGTCTCCGTACAGGGAGGTACGTCACGC  
GTAGAGGGGGGCACGTCACAGCCAATCAAAGCTGCCACAGTGCAGAGTGGCATTGCCGA  
AAATGCGCGGCGCGAGCCTCTCTAGATATTGAGCGCACATACCGGTCGGCAGTAGCTATA  
CCCATGGCGGTCCGGATGGCTGCCCGGAAACGGCCGACAACCGGCCGGTGGAGTCAGTAA  
ATTGGCGCTTACCTAAGATGGGCAATCTCGGCCAGCGGAGCCGTGCAGGGGCAAGTAAT  
TTCTAATGAGCTCTCTCCAAGAAGGTACTCCATCCGGACAATCAACGGTCTGCAGGGCTC  
CAACAAGTTCACGGCCGATGGAAACGCCTCAATGCTGAGAGATCCGGATTGGTATCGCTG  
AAATGACAATCACCATCTCGCTGTGTGCCTAAGCGATTGTTTCCGCTCCCGCGCTAAGAT  
ATGCAACTGCGGACAATTCACAAAGTACGGGTTTCTAGACTGTTCCGGGCTTGAGGATCG  
CTAAACCCAAGCCTCACTCGAAGAAGCGATCCTGCGACCCCTCCGAGTACATGGTAAGCT  
AGGTGAAAGACAGCTTGATTACCACTACTCCCAGCCGACCCCGAACCGCAAAAAGGCGTA  
AAAGACTGTTAGATGGCAAGACGAGCTCGCAGGCCAGAGGCCAAATTAACCTCCTCAGA  
AGGGGACGGCGGCACCACCTCAAGCAACTTCGACAAAGATGTAAATTTCAACATGAGACG  
AGTGAGCGGTATCGTAGACGAGGTTTAAAGGAGGGGCTTTCACAACCCCCCCCCCGGTACG  
TATAGTGAGAGGCTGCCGAACCCCGTTCTACTATGACTATCCGCTTCTAGGGCTCATC  
TTTCTCACGGAAGGACGCATTCTGCATAAAAACAGGACAGCCGGGGGGTATGCAGCCAC  
ATGTACCGGACGAGTGTGCTAAGATATTCGTGAACCTGAAATCGTTCCTGCTAGCCACA  
ATGAACCTGACCTATGTGAGCCAACCTCGGAGGCCCCATCACCGGTGAGTTGATTGCCGAT  
GGGTCTAGATCTCAAGCTGCGGACAATTGGCCTAAAAGCTGGCTGTCGCAAGATGATAAC  
GAGCCCTGCGGAAGACGATCGGCATTGTGTAGATGGGCCTTAATGATAATGCAGCCTATG  
GACTCTTGCCGGTCTTGAGTGACCCAAAGCAGATGACCCTGCCAGGCATGCGTTCGCATG  
GTTGACGGTTTGCCTGGTCCGACACATTGTAACCCGGTTTCAGCTCTTTGCCACACAA  
AATGTGGGGTCTTCAGCCCCGTGGGGAGTCGTCTCACCCAGGGGGAGTACCTCACGCGT  
AGGGACAATGTTATGTTCTGCAGCGATCACCGAACCAGGTGGCAAGAAGGCCGACAAACG  
CTTACGGGAGGCAGTGCTTATGCGACCGGGAAAATGAGACCCGACGCGCAGCAGTACCT  
GCTATGCCCCAGACCCCTCGATCATCTCCGCTACTACAGCGCAAGGCACGGAAGTCCGC  
TGCAGGAATAGGACGCAAGATTGGTGGTCATGGGACACATATATTCGCTTTGCAACACTG  
ACAGTACACGGCGCACAAATCGTCTTTACCTCCAGTCCAACATTCAGTTTCTAGACGGTCC  
TTCAACCACCCCAAGGCAAGAGGAGGGCGGGGACCCCATGGGCCAGAGATCGCACACACTG  
GGGCCGATCGGAACGGAGACCATCGCAGACAGCTACTTGTACGACCCGCATCCGACCTG  
GACCCTAATTTCTTTACGCTTTACGTAGCGCAAGGCACACATAAGTAGCAACGGTCCAAG  
TTCGGGACAGCTACCTGCGCGCTGAAGTAGGTGGTAATGACGAGCGATGCATGGGCAGTG  
GTACGCGTCCAGTTGTTCTAGCAGCTGGCTAACATTAAGAGGCCATACCTATGGGACCTC  
AACTGGGCGACCAGCACCAGGTACTGGGGTACGCAGCCCTGAAAAAGGGGGGGGGCTAAT  
GTCCCCCCCCCTTAACCCCTCCCCTGGGAGGGAATCCCCCCAGAACCCCTTTTTTATA  
CCACACAATAAACGCAGAAAATAGATTTATCGCACTCTG

>NewGenomeName\_215

ATGGCACACCTAATTTCTAAAATGGCATGTGATACACCTTTTTATGTCTATAACCCACGC  
TACCCTATCTACAGCAACGACCCGGCAAGTTCGGTTCCTTGTGGAAAGTGTCTAGCATGT  
TTGTCCAGACGCACTAGCGTCTGGACCTTTCGTTTAAAACTCACGCAAACAATGCTATA  
TCTGCTTATTTCACTACTTACTTACGATACCAGATATGGACCTATATCAAGTAGGGGT  
TTCCTTACACTCGATAAACGAGACGTTCTACTCTATTTTAAAAGGCTTAGGAACTTCAT  
TCAAAAGATCACGAACCCCTAAAATATTATTTAGCAGGAGAATTTGGAAGCAAAACATTT  
AGACCCCATATCATATCATACTATTTAATGCCAACATCGAACTAATTCATAAAGCATGG  
GACAAAGGAGAAGTACACATAGGGGAATTAACAGAGGCTTCGGCCGCATACACTGCAACA  
TATATAAACAAAGGAAAAGTTATCCCAGTGCACAAAATGATGATAGACTGCCAGAATTT  
AGTGTAATGAGTAAGAAACCAGGACTTAACTATTTATCAGAAAAAATAATTCGATATCAT  
AGAAGCGATATTGAAAGAAATTTACATAACATTGGAAGACGGAAAGAAAATAAGCTTACCT  
AGGTACTTTAGAGAAAAAATTTGGATAGAGCAAGAAAGAATAACAAGCAGATAAACTA  
GCACAAAATTCAAAGAGTTAGAGCAACAAAAGAAACAGAGTACTACACAAAAAATCAA  
AACTGGAAGGATATGAACAACCTTAAAGAAAGTGGAAAAGCCCATAGAATTATTAACAC  
GAAAAACGAGCCCGAGAAGGGCGCAATAAAAATTTAGATCAAGCTTCAGTTAGCAAGAAA  
AACAGAGGAGCAGGAGGAGACATCATCAATGGAACCAAGCCAAACAGTTCAGACATGAC

CTTGTCATTATCAGAACTAGTACAACGATACACCAGAGGACAATCAGTGGCAACCTTTAC  
ACCCGTTTATTACGGAGAAGAGGAAGAATTCGCAGACGTTAGCCGAATGGATCCTATTGA  
GCGCATAGAGTATGCTCGATTAATTAGAGAAAAAATCTCAGATACCAGACACTCCCTAGC  
GGAGCATCAAGCTGGCGACGAAGGAGCAGCTGAGCCGCAAATGAGCGGTTGGCAAGAAAA  
AATAGTACAAACAACCCCCCAAATGTATAATAACAAAATGGTAAAAAAAGGGAAGATTA  
GCGGTACTACCGGTAAACTTCCCGATACGTGGCGCTATGGCAAAAAACAAAAGCGCAAT  
GGCAAAAGGCCTTCGAAGAGGAGGCCAAACACTAATAATCCTTGATATATTAGTGCTAAT  
TGACACCAAGTAAAAACGAGAGCCTGCGAGAGTAAAAACGCAGGTGGAAAATTAACACA  
AAAAACAAAAAAGTTAATGGAGCCAGTAACTACAGCCGCAGCAATCACAGCCGGCGTCAG  
TGCGCTATCGGGCGGACCCCAAGCATAACGCCACAGGAAAACATAACAAAAAATCTCGTGC  
ATTCTCCAGGGACATGTACGAAAAACAAAAGCAGACAATTTGATGTTTTGGGATATGCA  
AAACCAGTATAATTCACCAAAGCAACAAATGGCAAGATTAATAATCTGCAGGGTTAAACCC  
AAATATGGTATACGACAAAGGCGGGGCTATTCAATCTGATGGAAATATACCAACACCAGA  
TGTTCAAGGAGGACAATTTAGAACTCCCGACTTTGGGCCAATATCAGGAGCTGTACAAGG  
ATATTTTGATACTAAAATAAAACAGGCTCAATACGATAACTTAATGGCTGCAAATACATC  
AATTCAACAAGAACCTATTTTAAAAGCTTCACAAACATTGGCAGCAACAGAAAGTAAAAA  
AGGTCAAGCTATAGCCAATGCAATGGCGCAAACAACTTTCAAATTCAGTAGAAGGAGC  
GAGATTAGCAAACACTAGCAAACCAGAGCAAACACACAATATACACTTTCTGTAATGAAAG  
AATGTAAGTCTTTCAGGCACCTACTTTAGCAGCAGCAGTAGAAGATGTATTAAGAATCAA  
AGCAGAAACTGCTAATACAAATGCTGCAAGATGCAAAATAAACCAAACAATTAACAACT  
CCAACAAGATTATAGATTAAGAATTTTAAAGAAGATTTAGCAAAACAAGGGATATACAA  
AAATGACCCTTTATGGTCAAGGGCATTAGCTCAATTCATTGAAGGTCTCACTGGAGGTAT  
TTCTATGAAAGATTTAGGAAAAAAGACAGGAGGATGGTTCAACCAATCAGGATTTAAAAA  
TGTAATAAATCAACAATGTCATGGTGGATGCCCAAATAAAATATTACAAAAAACGTCT  
GATGAAATAAAAAAAGAAGTAAAGGCTTTGATAGATCAAATAAATAAATAGTTTTAGAA  
AATGAATCAAATGATGTGGTAGCATTAAAGCAGATTAGATTCTGTATGTTCTTTACTACAA  
ATTACCCTTATTCATATTAATAACTTAAACAGCAAAAACCAATGCGCTACAGAAGAGGCG  
GAAGATCCCGCAGAAAAGGCTACGGCCGCAGAAAAACATCACTTACGTAGTTAAAAGAG  
GAGGCATAAGACTATAATGGCGAATGCGAACTTACTTAACTCGGTTACAGCTACCTAAAGT  
AGGTAGCAATGTATTCGACCTTTCACATGATGTGAAAATGTTCGTTTAAAATGGGTGGTCT  
TTATCTAACATGTGTAATGGAATGCGTACCAGGTGACAAAATAAAAATAGGCACTGAAAC  
GATGCTTAGATTTGCACCACTTATCGCACCAAGTAAATGTTACAACCTCA  
TTACTTCTTTGTGCCAAACAGAATATTATGGCCAACTGGGAACAATGGATTACAGGAAA  
CTTAGATGTACAAGGACCATGGTTTAGACTATTTCCCTTACCAGCTTCAGGAGGATTACA  
TGTTAAATCTTTAGCGGATTATTTAGGATATCCAACATTGTTAACGCCAAACGCTATACC  
ATATCCGGAGCCTGGAGCTCAAGTAGGAAGCCCTTTCCCTGTAGCAGCTTACAACAAAAT  
TTATAATGAATACTACAGAGACCAAATCTTCAATCTCCAGTTTTAGATTTATTAACAGA  
TGGAGAAAATGATCCATTTAGGAACCTAGCAGCAGGACCTGTTAAAAAAGAGCGTGGCA  
GCATGACTATTTTACATCATGTTTACCATGGGCACAAAAGGTGACGCTGTAACCTATTCC  
AATAGGAGATGTAACCTATCAACTATAATGCAGCTGCTGGAGGAACTGTTATACGACAGGT  
AGATGGCACACCATATATAAACCAAACAGATCTTAATTATTAGATGCTGGAGGACAACC  
TAGAGCAGGAGGCGTAACAGGAACACGTTACAATATAGAAAACCTGCAGCCAACTATCAGG  
AACTGCACAAGCAGCAGATATTAACCTCACTTAGCAGAGCATTAGACTTCAAGAATGGTT  
AGAAAGAAATGCTAGAGGAGGAACAAGATATATTGAATGCATACTTGCTCACTTCGGTGT  
AAAGTCTTCAGATGCTAACTTCAACGTCCAGAATAATTAGGTGGTTCAAAGGTAATAAT  
GGTAATTAGCGAGGTATTATCTACCGCAGAAACAACACTCCCAGTAGGCAACATGGCAGG  
ACATGGTATATCCGTAGCAGGAGGTAATGAATTAAGTACAATGTTGAAGAACACGGGTG  
GATTATTGGAATAATTTCTGTAACACCAGAAACAGCATATCAGCAAGGAATTCATAGATC  
ACTCAGCAAATTAGATAGACTAGATTATTTCTGGCCAACTTTGCAAATATTGGAGAACA  
AGAAGTGTAGGGAAAGAAATTTATGCAAATGGTATTAACATTGGAGAAACATTCGGTTA  
TGTTCCCCGGTATGCAGAATATAAATTCCTTAAATAGCAGAGTAGAAGGAGAAATGCGAAC  
TTCACTTGATTACTGGCACTTATGAAGGAAATTCAGTGCAGCACCAAACCTTAAATGGAGC  
ATTTATTGAATGCGACCCTAGTACGCGAATCTCCGCAGTTGAAGACGGAGAAGTTGACAA  
CATCTACGGACATATCTTTAACAACATTAAGGCGATTAGAAGAATGCCGAAAT

>NewGenomeName\_216  
GTCTAAACATGTCTTTGGACACACCCCACTCTTCGCCATAAGAAGAGTGGGCTGCGGGTA  
GAGTGCCGTGTGGCTTAATCGATTGAATTGTTGAATCGTTTAACTCAGGAGCTACAAATG



CACAGGGTGTCTCGTATGCTGAACCTCTTGTCTCACGATGATTGGTTATCTCAACATGGT  
CACCGTTGTAAAGATGGCCTAAAACGGTTTTTCAACCGGTTGCCTTAGCCTAGTTTTAAA  
TTTCGTTATGTTGCCTCAGGCGTGTATCGTGACCTTTCGTGAAGGCCTGATTATCAGTTT  
GGGTTATTTGGTTTGGACTGGGCTCATGACCGTTGACTGTTTGGAACTTCTAATGGTGAT  
TGTAGCTTACTACAGCAACCATCTCCAACCTATGGCTCGGGTGTGATCATCTGATTGCT  
TCCCTTAAATTTGAATCCGCTGCATAAACTGACCGATATATCTTGTAAAAGATTAAGGGC  
TTGGATAAGCCTTAACCGCTTAACGTTTCAGCGTTCACACAGTGAACCTGTTTTGTATCAG  
CCCGAATTTTTGGTTGTGTATGAAGGCATTGGCCGTTTCATAGTTTTGGCATGGTTTTATG  
TCGGATGAATTTCCGCCTGCTTCTGTTATTACTGCCAGGACTCTAGTCCCCCGGTTCCCT  
CGTTTTTGCAAACATTGTTTAAGGATTTTTGACCCGATCTTGCTCTGTATATGCAGTAT  
AGGTCTTCATTTTCATGGAGAATCAGATCTCGAGCGTAGAGCTTATCAGCACGTTCCGTTT  
TTTAAGCGTTTCGCGTTGTCTTGTGGCACTACTAGAGCTTCACTTTCAAACGTTTAATT  
AAAAGGATTAGCCATGATTGTAATTGTTATTTGTGGTCAAGACCACGCAGCCGATGTTTT  
TAACCGCCCCATTTTCGTTCTTCATCGTGATGTTTCTTTGTTAGAATTCAGTATGGCGT  
GACCCGCGCATCTGTTGATAACTCATTGAATAAGCAGCCCTATGAGATTGAATTTTTATT  
CTTGTCCGCATTTTATAATCTCGGCGGCGCAATTGTAATGATGAGCCTCAGGTACGTGT  
TCGTGCCAAAGACGTTTGGCAGCCGATTGACCCCTGCGGGCCTTCAGCGCCATTTTATT  
GAGTTTCATTTTGGAGATTGTATGTTTTAGTTTTAAATCGGTTGACCTACAATATTTTGAA  
ATGGTCCCTCGAGCTGACACCCCCGTTCTCGATATTCTATGCAGAAATGTCTTAAGACT  
ACGTTTGTATGCTGGACTTCTAGTTCTAGTATGAGCGAAGATGCTAAACCCAGAGCCACA  
ATTAATGTTGAAGCCACTATGTTCCGGCATTGTTTACACCCATTATTAGAGTTATGGAT  
ATTAGCCATTTGGGCTCGTTATTTTTCTTTGTTCCCTAATCCTATTGTTAGGACGAATTGG  
GTTAAGTTTGTGGGGGAGCAGGAAAAGTCTGCAGAACCTATTTCTTACTCTATCCCTCCA  
CAAGTCTACTCAGCTGGGGGATACGCTATCGGATCCTTACAGGATTTCCGTGGCTTACTG  
GGTCTGGGTCAAGCTACGGCTGTTGCTAATGTTTAACTCGGCGTTACCTACCCGCGCC  
TATAATTTGATTTCTAACCAAGGGTTCGAGGGGTGATAATCAGCAGAACTCGCGAGTTGTT  
AACTGAGGTGCCGGCCCTGAGTCTGCACATTCTACTGTTTATGCTATGCCAAGACGCAGT  
AAGCGGCATGATTGTTTTACTGCTTATTTATCAGATTCACGGCAAGGTGGTTCTGCCGTT  
TGTCTTCCTTACGCTCTAGTGACCCTGTTTTGGGTACTGGCTAGACTCTGGGGCTTGT  
GCTGGTGTACTGATTTTAGCTTTCATGCTGAAAGTCCTTATACTATGCGTAATGCTTCT  
TCCTTTTACACTACCAATAGTGGTTCTACTCGTACTGGTTTAGGTTCGGGTTGTTAGTCAG  
AATTTTGTGTTGCTAATTCTGCTTTTTTCAGGAATTCATGCTGATTTGTTGGCTTGAACG  
ACTGTGACTATTAATCAGCTTCGTCATGTTATCATAGTTCAGACTTGCTGCCCGTGAG  
GTGCGCGGTGGTACTCGTTACACTGAGATTTTCCGTTCTTACTTCGGCGTAACTTCGCAG  
GAAGTTCTCTTGCGGCGACATGAGTGTTCCTATTGTGGCTCTCCTCTTATTAGAATTTAT  
CCGACCTCCCAAACCACTGGTACTGGTATTTATGTCCAGACTACCCCTAGGAACATTTA  
GCTTCTAATGGTGTCTCAGGGACACGCCCATGGGTTTAGCCAGTCGGTTGTTGGGGAT  
TTTTGTTTTATTGGTGTTTTAGCTCGTGTGTTGTGTAGACTTATTCGCAAGATTAAGA  
CGTCATTGGAGCCGTTCCACTACTAATGAGTGGTACGTTTCGGCTCTTGCATGCTAGTT  
GAGCAATCTATTGTAATAAGGAAATTGATGTTACTGGTAGTTCGTCTGATTCTAATGTT  
TTTGGTTATTGGGAGCGTTGCGCGCAAGATCGCTAAAAGCGTCAGGAAAGTGCTGGTCTT  
TTTTGTTCAATTGCCGCATGTAATGACGAGCCGTGGGATGATGCGCAGCAATTTACTGCG  
GTGCTACTGTGAATTCAACTTTGATTGAACAGACACCGCGTCTCGCACGCACCTTGAAA  
GTTGGCTCAGCTGCCATTGGTATGCAGTTTTTGGAGAGATGGGTTTTTTAGTGGTTACGCT  
GTCCGTCCACTTCGAATGTACTCTTACCCTGGCTTATCGCTCATTTTTATGCATCTAGG  
ATTCTTATCGGGGCATGATGGAGGGTAATGGTTTTCTGTGTATGTTTGGAAATTTTAAAGC  
GTGTTTTTTTATTAGTTAGTTCAGAGGTTACTGCCATTCTTCTCGTATTGTCTCGGCTG  
GCACTTCTCCTCTTGGGTTAAAGGGTTAGACTGAGCCGAATGCTCCAAATGCTGCATTGG  
GTCATCGCCATAAGGATTTTAAAGAGTGTATGTCTCATAATGCATACCAACGGAAAGTTG  
AGGAAATGAAGGCTGCTGGCCTTAATCGTCTGCTTGTATTGCAAGGTGGTTCGTGCTA  
CGTCGACCTCTGGTGTACGCCATAGGTTGTGAACCCTTAAGCTCCAGGTGCTGCAACCG  
GTTATCAGCCTGCCAAACCCAGTTGCCAATCAGCAAGTTGGTAAGGCGGTTGCTGAGA  
ATGAAAATGCGGAGGCTCATACTATTAAGAAGCGTGATGACGCTGTAATATATCTCGCTG  
ATAGGCAATCCTCTTTGGGTTCTGTGCTGTCGAGCTTTCTTTTTTAACTACTGTCTG  
TCCAAAGTCAGAATATTGCTACCTAGACTAAGAATATTCCTATTGAGGGTGATCGGTTAA  
CTGATGGTATTAACAGCAGGAGTATTCTGTGAAGCTTAATGTAGCGCAGACGCAAACCG  
ACGAGCAGCGTAGGCAGCAAATGTTTGTATCGCATTGAACACTTTGAATTATTCGGAAT

TGCTGGCTGCTGATTTAATTGCTATTCTGCAGGCTGAGAGTTTGGGTCACCCTTTTAGCC  
AGCACAGACCTTTGGTTGATGCTGTTACGAACATTTTACGTATGGGTTCGACGTTAAGGGA  
TTTGGATGCTATTTGCTTCCGCTTATGCCAATTTTGGATGGACGTTCTTACGATTTTGTTA  
TGTAGTGTCTAGAGGATTCTTTGACCCAGAAGCACTCGCTCGAGGAGTCTGATATCAATA  
ATACTTTTGATCTTTTACGAAGACTGGTCTGATACCTGAGCCATTCTCTATGCCTCAGT  
ATGGTCATTATTATGGCGTCTTTGCTTTTGGTCTGCTATGCATGTAGTTCGTCACGAAT  
ACGAGACCTTACTCCGGATGCTCGGAAGAGTGCGTGCTATATTCCCTAATTCCGGTTCAGG  
TATTTTGGGAGTGTATAGTAGATCCATTGAATTCAAAAAAGGTGGCGCGCATTGGTTTGG  
CTCTGCTAGTACCTAAGGCGACTCCTCCGGTTCGACGCAACTCCCCTTGCTTAATCGTCTT  
TTGGCCCAGTTGGCGACTTGATGTAACGGTACCTGTTGACAAATAGTTGTGTTTGCCTTC  
GGCTGGAGTAACTATGAAGTCGATGCAACGTCACCATGCCAATGAACGCTCAAGCCCTTC  
TTCTTTTAAACACAACCTTATCAACGACTAAGCTGATAAATCGCACTGCTGGACCTCTGCG  
CAATGGTATACGCATCAAAGGATAT

>NewGenomeName\_217

ACCGGCCACTTGGAGCCACGGAGCCCCTTGCAGCTATGCCTCCGCAAAAGAGGGAAGCAG  
CCGCTAAGAGGTGGTGCTTACGCTGAATAACTATACCGATGAAGAGGTGTCCGCCGTGA  
AGGCGTGGAACGCGAGTGAGTACCATTACCCTGTCGTTGGACGCGAAAAGGGGGAGAATG  
GTTCCGCGGCATTTGCAGGGCTACAATCATCTAAAGAAGAAGGCTCGGCTAAGCACTCTGA  
AAAAATTACTTAGCCGTGCCATTGGGAGAAAGCTCGCGGTTCCGACAGCGACAACCAGG  
CGTACTGTACGAAAGATGGGGACGTGATACTTACCCTGGGCATGCCGGTGGAAAGGGAACC  
GTAGCGATCTCTCCGGAGCTGTTGCCGCCGTGAAAGCCGGAAGTCGAATGGTGGATATCG  
CGCGAGAGTTCAGTGAAGTCTACGTCAAGTATGGGCGTGGCTTACGTGAACTGGCGCTTC  
TCATTGGACTGAAACCGCGAGATTTCAAACCGAATTTATCGTTGTCACCGGTCCGTCCG  
GCGTGGGCAAGAGCCGTTATGATAATGAGTATCCTAGGACTAAGTTTTATAAGATGAAAG  
GGGACTGGTGGGACGGCTACTCTAACGAGGATGTTGTCGTTATTGACGACTTTTATGGAT  
GGATACCTTTTTGTGAGTTACTGCGTCTCACTGATAGGTATCCACATAAGGTTCCCTGTGA  
AAGGATCGTATGTAGAGTTTACGTCTGAAGGTCATCATAGTGACCAGCAATACGCAACCCG  
ACTCGCGGTACAATGAAGAGAAGTGCTATCTACCCGCGTTGTTTCCGGCGGATAAATAAGT  
GGCTGACGTGGAATGCCATCCGGTTCGAGGATGCACCGGATTGTATGAAGAAGTACCCTA  
TAACTATTGATTTCCGCCCCCTCCCTCATAGTGCCTTTCGAGGAAAGAGCAATCGCGGCC  
AGCCAAGGCGGCCGCGTTCACGGGTACTTTCGCGAGCGCACCGTTCGCGAGCGAAGTTCCT  
AGTGAAGTTCCTCCGAGGAAAACACTTAAAGATGAGGCGATTTATAATTTTTTACACTTAATA  
AATAAAGACAGGAAACAGTAGTGTGTGTCTGTACTTTAGTTAGGGTTTTCGAGGGTGGGTT  
AGGTTTCATATGTCTGAACTCTACATATATCGTCACTTTTGCATGGAATAGTATAGCATCG  
TGGGGCTGGGGCCAACCTGATGGCGAGGCCGTAGTGCTTTACTCGAGAGCCCGAGCTGGGT  
AAGTTTTGCTCTCCTTTCTTCATCAGGGGTATCCATGCGGATCTGGGGTTGGTTAGCCAT  
AGCGCTGCAGTAAAGTTCCTCCGCGTCCGGTGTCCGTGATGGAAATTTGGGGTTCGGGGTTCG  
AAAAGACGCTTGAATCCTTTGCGGAGGTCCCACTGTCTGGCGCCGTCCAGTTTGCTAGC  
GGGTCTGTCTCCAGGCCTGGCTTCTTGAAGAAGTCTTCAAGGTGGTTGTCTTGAATGGGC  
ACATTGTGCCCTATACCATGCCATGATCCCCAGTTCTCGTTTGTAGTGACGCATTTTGAAT  
TTTGCCAGCCGGATCCTGTAGTCTTCGAATGGTAGCCTCCAATTAATTGTTCCCCAGTTCG  
AGGAAGTCGTCCAACATTATGTTGAGGCCGTCGGTAGCCATTTTCAGGGTAGTGTCACCT  
GAGCCGGCGCATTCTTGTCTGTACATGCGGACAACTTGAATCGGTATTCTCTGATAGTT  
CTGTGACCACGCTATTGGTGAGTCTACGTCTGCGCCAGTTACGTCTGCGCCATCGCCGT  
CCAATCGCCTGTGTCTGTGCGCGTCTCCTAGCAACCTGTATGAAAGAGCCAATCACGAGC  
TGTCACGTAACCGTGGCTCCAAGTGGCCGTTGAGTATT

>NewGenomeName\_218

ACCGGCGGGCCGGGCCCATGGGGCAATCTGGCCCCTGGCCAAGCATGCGCAGTAGTGGCA  
CATGCTCGATGGCCGCGCAGCGGCCTTTATTTGCGGAGCATGCACAGCAGGCCGCGCAGC  
GGCCGCTATTTGCGAAGCATCATGGCAGCACGGCGAGACAGCGGAGCCCGTCCGCTGGGGC  
GTTACTCTGAATAACTACACTCCCGAGGAAGAGGAGACCGCTCGCAATCTGATTCATGAT  
GCAGATAAGTACGCGTTTTCGATAATCGGCAAAGAAGTTGTCGAAAGCGGTAGTCTCAT  
CTGCAAGGCTTCATGCATTTTAAAGCAAAGCAGCGGCTTACCGCTCTAAAGAACTTTAT  
CCTCGCGCGCATTTTTCGAAAGCTTCGCGGCAGTGATCATCAGAATGCTGATTATTGTGGT  
AAAGACGGCGAAATACTTACCATGATAGGTACTCCGAGTGATAATAATTCGAGTGATCTT  
GCGGGAGCTGTTGCCGCTGTGAAACGCGGAAGTCAAATGAGTGAAATCGCGCTAGAGTTC  
AGTGAAGTCTACGTCAAGTATGGGCGGGGCCTCCGTGATCTCCGGTTGCTGATTGGTTGC

CCGCCCCGCGATTTCTAAACAGAAGTCATCGTGCTGATTGGCCACCTCGCAGTGGCAAG  
TCAA AATTGGCCAATGAGATGGAAGGGTCTAAGTTCTACAAGATGAAAGGTGATTGGTGG  
GATGGTTATGACAATGAAAATATTGTCAGAATCGATGACTTCTACGGTTGGCTGCCGTAC  
TGTGAGTGCCTACGTCTGTTTGACCGGTACCCTCACCGTGTGCTGGTCAAAGGTGCCTAG  
GTGGAATTCACCAGCAAGAAGATTGTGTTTACCAGCAATCGCCATGTGGATGGGTGGTGG  
AAAGGTGAAATTGAGAAGAGTGCCTTCTACCGACGGATACATGTGTACAAGTTTTATGAG  
ACTGGTGA ACTCAGGGACATGCCCGACACATGCTCCCGCACCCAATCAATTATTCGGCG  
CGAGATGAAAACACCCCCCTCGGGATGACAGTCGTTTTTCATCTTGCGCCCCCGAGTCGCG  
GAGTGC GCGAAGCGAACGGAGCGCGAGTGGCGCGGAGATTGTGCAAGACCGACGCGCGT  
AGCGCGGAGGGAGGAGACCACTTGCTTTGAATTTAATATGCTATCTTTATTAAGAGATC  
CAACAACATTCCTGTCTATGTCTTTTTTCATTGCCAGTAAATGTTAAGCAGTCCCTGAACT  
TTGACAGGTCTTCTTCAGATTTCTTCAACATTATCTGAGCGAACTGCCTGAATGTTACAT  
ATATAGTTATTTCTGCATTATATCTCAGTGCCTGTCCAGGTGAAGGCCAAGAGAATGCCA  
GCCCGTAGTGC ACTACTCTTGTACCGTCCCTCTGGGTCCCTGCTGGCATTCTCTAAAGGTA  
ACCAGCCTGATCTACTGCTATTCAGCCACATTGATGCTGAAAAGTTAGAGGCTGTCATAT  
CTGATATGGTTAGTTGACGCTTTGGGCGTACCAGCCTCTTAAACCCTCTGACCAAGTTCC  
ACGCCCTCGCCCCGTTCCCGTTATCCAATAGGTCTTGCGTTTGATCCTGTAATTTTATAT  
CTTTAACTCTGGGGTCCCTGGACTGGGACTGTGTACCCCCATCCCGTTGCAACTTTTGTTG  
TGACACCTTCAGGCCTCAGCACCACTTTTGCTAAATTAATCCTGTAATCCTCGAACGGCC  
ATTCTGCCGGTATTCATCATGACCTATAAAGTCATTGAGGTTGAAGGTGAAGAAATCTG  
AGGCCACTTTTGTGGGTTAGTCTTGATGGGAAATCCACTGTGAATTGCCGTCTAAGTA  
TAAACAAGTATATTCTGTTCAGTCTGTGCCCTCTTCGGCTCCGGGGCAACCTGTGACGTC  
TGC GCACTCGTCTGTGAAACCGCCTTCTCCGGAAACCGCGTGTAAACACGCTCCTTCTGG  
TTGCTGAGCGACGTACCTAAAATAGGATGGCCCCACGGCCCGCGGTATAGTATT

>NewGenomeName\_219

TCCC ACTACCATGAAGGACCGCGCGCCCTATGCCCTACCTTCGCGTGTCTCCGGGTTT  
CTGCGCGCCTAACAGCGCACGTGCGCTATGCGTCCGTCGTGAATTTGCCGGTTTCGTACCT  
GCGTCGTGAGGATACGGTGCTCGGCGCGAGAAGAGGTTTCGAGGTCGGGTCTACCTTCTGG  
GGCCTCGTAAGCGGGTAGGCGGCCCGGTGGTTCCCTGGTGAAGGCCCTCCTCGCTTCCCT  
GGTACGGGTGAGGTTGACTGGGGTACCCTGTTACTCTCCTCCTCCCCGGGGCTCCCTGA  
CCTCGTTAACCCTGCTGTGCTCTGCTGCGTCACCTGCTCACTGCGATGGCTGCCCTGCCA  
GCACCTTGATTGATTCACCGGGTTCCGTTCTCGAAGGCGGCCTCCTGTTACGCCGAGCC  
TCCAGCGCTCTTTCTTGCCCCGCCGCTATGCTTCTCTCATGCTAGTGCGATCATGCTTT  
GGAACATAAGGATCACTAGGTCGTATAAAGAATTGGTCTTGACAGTCCTACTTCAAGTCT  
ATCGAGTACGCAGCCTTAGTCAGGGCATGAGCAATACGCACTAGCTAACGTAAGGCAAGG  
TATTGTTTCTGGTCTAGCGTTGAAGTGTGGCGGGCAAGTGGACACCCCAACCAGTGCTCG  
TCAAGCAAGGGACGCTGAAGGGTTGCCAAGCGTGACAACCAAGCGGATCCTGTTAGACG  
TAAGTTGGAAGTCAAGGTAGCCGCACCGAACTGCGCTGAGGTGGAGCGTTAACGTGCTAG  
ACTGTAACCCCTAGGCTCTAGGCGTTCCGTCGGCGCTTGACCTTGGTCACGGATAGCCGC  
TGGTTGAAGATGGTAGCTGTTGCTACGCACGGGTCTCGAAGTTAACGCACCAGGCTGCAA  
GGTCCGGCGAGCGAAGGATGGTCGACGCCTTACCGCTCTTTAACTAGTAGAGTCTGATG  
GGAAAGCCCCCTTAACCGGAGTTACTAATATGCGGGAGGAACGCCAAGCTAACTTCGCC  
TCACCCAGAAAGTCGACAGCGAGTACGACGATGACCAATGTATCATGCAAAAGCGGCCGC  
TATTTGCCTTTTCGTATGACACCGTTCCCGCCAGCGTAGGCAATTCGGGTCTGATCTGGT  
AAACCCGCCTCCCAAGGGAGGCTACAACAGCAAAATTAACAAGCGAAACCCAGTCTGTA  
CGAGGGGCTACAAGATAAACGCAAACCGTTACGCGAAGTCAGTGCCCGGGCTCCCGCCAA  
CGTATGAGGTGCTTGTGATGCAGGCCTTCGACTGATTCCAGTCGACAAGTACACTTTGA  
GAGGATTAATCTTACCCGTTGAGGCATATCGGAGAGGCGTTTCGACCGATAGGTGCACACC  
ATTCGCACCCGCCGGGTTTAGTTATCATTGCCATGAGGCCGGAAAGCTATAGAACGGCGTG  
CGTATCCTTACCTTATTGGAGAACCCTTGAACACGGCATGAGGATCCTTCAATGGGTAAAG  
GCAGTCCGGGAGTAATGCTCTGCCCGGCTGATGGACACACATTCCCGAGACCGAACAGG  
AGGAGATGCCATCCAAGTGATTATTACCGCGCTAAATCGCAAGCTATGCCGCAAGGCGAA  
TCGTAAGCAGAGCCGAACCGCAGCCCTCGCGCTTAAACCGAGGCGCGATGCCGAAGCGAGC  
CGAGTACGACGTGGCCTTGCGCTGCAAGCTCAACCATGACGCTAACCGTGCCGACACTTT  
GAATGAGCGGGCGGCTGCCACGAAGGCTGAGCGCCAGCCCCACGAAGTGTGGTCTAATAT  
TAATAGCAACAAGGTGACCGGCTTCTGGACCCCAAGGATGATATCGAAGTGTCTTAGC  
CAGCAGCCTACCAGCGCCCAGGTTCCGCATGGAGCTTTGACCCAGTGCCGCGCCCACGAA

CTCTATAAGGCTATGCGCCGCGGCTACCACTTCGCGATAACGCAATCGATCAACAGGTTG  
ATGTGGCCTTGCTACTACAAAACCGTGC GGACTGTGGCGCAGTAGGAGACCCATCACGCG  
TCCTCGATAGGAAATCCTATCCGCCATGCAACTTGTTGGTATTACTGTCAAGTACCTTGA  
CCAAGCCGTGTAACCTACCGCCTTGGATATCCTCCAGCACGTTGCGGGCTCACCGAGAAGT  
CAGTCTGGCGTGC GCACTCCTGATGGCCTTGCCCAAGAGCGCCCGTGTCAAGGAATTGGC  
GGAATGGTTGCAGAACTAAAGCAAGATCATCGTGAACACTGTAATGGCCACCCCCCGGA  
ATTCCCGCTGGTATTCATCAAGGACGGTAGAACTGACCTATACCGCGCCGACGCCAAGCC  
CTGGTACACCCGCAAGCCCGACCGACCACTGGCCCTCGAGTCCGATTTACCTCTCAATT  
ACGGTAACTCCTGAAGCATGCTGCCGAAGCCGACGCACAGGGGGTTGACGTCATGCGTGC  
CGAAGCCCTGGAGAAGTTTTAGGGATTATTGGGCTATGACACCACTTCGGGCTCACAGCG  
GCGAAGCCAGAACTTCGGAGAATTAGCTATAGGCCAGTGTTACCCCTGAAACAGTATA  
AGATACGTAAGCGATGCACCCGCACCCCGGATAGCTATTTTGTGGGCCGTTGGTTCTACT  
CACGCCTAGGCGAGCCAATGCCGCCATGCTCGGACTGGTCCTAATCACGTCACTCCAGTA  
CACCGCCCGGCAGCCCCGCTAGCTGAAGTTAACTACCTACCAACGGGCGGAGGACAGCCG  
CATTCCGGCTGCACACGGGGCTCAAAAAGCGTGCAGATGAGCGGAGTATGCGCACGGTAA  
TCGAGAACATCCGGCCCGGCGACCGCGGGTCTACCTCAAGGGTGACGCGTGGGGAAAGG  
ACTGGAACGACACCGGTGACACCTACCTCCATACTGGCGCAGTCTGCCACGATTCAATC  
CCATCAGCCAACGTAACCCGGGCAAGTTTTCGCAAGGTGCTGTATTATGCACAACCTTGACG  
GAGGTCTGCCGCGTCCCTCATCGACCACAAGCACTACGCCGTTAGCACCGAGTGGTCAGAA  
TTCATGTATTGTGCATTTTGTCTCGCTCTGATGGAACACTATATCAGCCCGGACGATATC  
TGCGCGGTGGGTGCTGCCTTTTAAGATTACCTGGATGAGTTGGGTGCCCCGCAGGGTTCGT  
CTGATGTACACCGACTTGCATCGTACCGGCACTTCTCCTGAGGATATGAGTTCATACGAG  
TACCCACCCGAGGCCGGTAAAGCGCTCTACCACTTCTGGGACGAGCGCACTCGAAGTGGG  
ATGGAGAATGTACGTCGACGTGTAATAAGTTCTCAACCAAGGCTTCGACGCCGGCCTGAA  
CTGGGCGGGCGAGGACTGCGAGCACTTCATGTGCTACGCCCTATGCCGTGCACTCACTCT  
GCACATCATCAGCTACGACAGGGGCACGGCGGCAGGGAAAGTTATTGGAGCGTACGTGTA  
TAGCCACACCCATTTGCGACCTCAATCGTTGTGGCACTGGGCAGGAAGCTGCGGCAGGC  
CCTGAACACGCCACCTTGCGTCAGGGCATCCTCATAGGTCTGTACCCGGCCTGGATGAA  
CCGCGCGATGCCGTAACCTCGACTTGCAGCCCGAAACCCTTCTAGATTTGGTGAGACC  
ATGCATCTAGCACCTGGTGCGCATTCTCGCATATGGCGACAACGCCATGATCAAGTGCTA  
CTTGGCTATGCCGAGCTGTAAGGGCGTCCGCATCTTCACCGTAGATAGGCTATCCGACCT  
AGCTCAGAGTCTGCAGGCCCTGCGGGGGTACCTGAAGTAGCACTGTAGGATAACACCTGGA  
AACGGAGCACGGGGAGACCAGAATCTACGGTGTGGCCAAGGCCAACGCAAGGTTCCGCGC  
CTTCTACACCCTGGGACATCTCGTATACTACTGAGCGATGACCTACGTGGAGGAAGTGTC  
GCTGTGCAAAACCCAGTGCCTCGACCTTGTGCGCATCATCCAACAGGTGGGCGCCTCCAT  
GAGCCTGATCCAAGGCCTGTAAGGTCTGTTCTTGTCCCTCACTTTTGAACCAAGCCGAGA  
CTGCCCCTGACCGTGTGGACCCCGAACGACCAGGTGGATTTTGGCGAAACCATGCCCGC  
CGTACTGTACTGGGAAGTAAACGGTGCTGACGTGTTGCGGAGCGTGCATTTGCTTGTGAG  
TAACTACCTGTTCTCGGAGTCGGTGTGATCCAGCTGTTCTGTTCTCGCTATGGTGGTGC  
CTCACCGCATGGCGGGTACGACGCGCCCGTACAGATCAGCAGCTACTGCGGAACCTCATA  
TACAGCGCTGTATTTGGCAGTGTACTACCAAGCTGCTGACCGAATAGCAGTGGTGGCTA  
GGACTAGGGCGCAACAGCATTGAGTACATCTATGCGTAAACATGTGTACTGCGTAGTGAA  
GCGCCTTGGCACCGTGC GCGGCTTCGGTGGCCCTCTCGACGCCCAACCCAGCTTCCTCGG  
GAACGTCGATACGAGCGTGACGGTGCAGTAGTTAAAGAGCGACCAGCCGCTGTACTTACG  
GGAGTTTGGAGCACGCGGCGCGGATACTGTTGACGTAGTATGTCTTGGAGGGACCCAGCCC  
TGTAACGTCGAGCTCTCCCGATCCTGGCGTTAACGTTGCAATGCCGGAGGGCAGCACGA  
GGTTCAGGACAACCTATCCCTACTGGACACCACAACACGCTGCACATAAACCAGGAGTTC  
GTGTGAGCAACTGCGCGACCATCGTCGCTATCAACGCCGGCATTATAAGCACGCCGACGG  
AGGCCGCGCCCTTCGAGAGGTAGTGCCTCTCATATAACAAAGCGGCGACGTAAGGAGTCC  
TTATGTACGTAGGACCTACGAGAATCACACCCCTGTAGGGGGAGGCGCCCCGCTAGGTCT  
CGTTCCTCCTAAAGGTGACGCAGACGCACAACCTGTGCATACTTATTCACTATTCCGTAT  
CGGTCCGGGGTCTGCACGAGACCGGGCTGCGTGCAGTTTATGAAGTCCTCCTATCCGACT  
TGGGGCAGGCTGATAAATGTGTGGGTTATCACCACGTATTCAACCGCCGTGGAAGGGCGG  
TGCGCTATATTGTAGCTCCAGTCCTTAGCGCCAGAGAGCGCCTCGCGCTATTCGATGCTC  
AAGCATGAGGGTACAGTGGTTCGTGTCATTTAAACCCGGCCATCTCAGGGGCGTGGTGAGC  
GCTGCCCCGGAACCTCCCGCCTCGCGGGGGACCTAAGCGGCGACGTGCGCTTCAAGGGC  
CCCGGCAGTGATGAAGTGTGACCGCTACTATGAACCTGTACCACGAGACTGAGGCTCTA

GAGCAAGCGCTGGTGGAGGCCGGGTATCAATTGCCGTAGCGGCCAGGATAAACGTGGCTGG  
GAGGTCGTATGACACTGAGAAAATACAAGGTCAACCCGGTGCTATCTTGGCCGGAGCATG  
TTGTGGACGGGCCGCTTTGTGATGAACTGTACTGGGCGAATGATCACCGCCCCGCGCGC  
AGTCACTCGCTGACAGAGACAACCGGGACGACCACGCGGTTTGGCGCCGTGTGGGGCTGA  
ACCCGCGTCGGGTAGAGTGAGTCTGGGTGTGAGTGGCCTAGCGCCGGACTGCCGCACCA  
GTAACCGCTACACGAGAGAGGCAGAAGCCGCCGA ACTCGCCTTTCAACTGGCATGGATAT  
ACAAGACCGTGCCGTTTCGACTTGGCCCCATCAACCGGACGAGCACCAACCTAAGCCTC  
CCCAGTCGGAACCTAAAGTGGAGAACTGTAATGATCGCGTCCACCAACCTCACTGAAGA  
TATGGACACGGATGACGCACTGGGCTGCCCAATCCAAGGCCGCACACGCTACATCACCGC  
TAGGTGTGGTCTCCGCGACCCCTGCATCTCCCTAAGCCTCTTTGTGAATAAAGTAGACGT  
CGATGGGAGTATCGCTATCTCTGAGGGCGTCGACATGACCGTGGTCCTTAGCCTTACCGA  
AAAACCGCTGTGGCGCTGCGCGCGGCCCATAAAGCTGAACTGGAGAACTGCAGTTGGT  
AAAGCATGGCGTCAGATCAGCGGCGAGAACACAGGCATCCGCCGCGTTGATGGCTTGGCT  
GGCAGAGCATTCCGTAAGAACGCCGGTGTGAGTGA ACTCATGGCCTCGCTGCTGCGCCGC  
AATGGTGTGTTCCAGGCGCAGGACCACTCCCGGAAGTCAAAGGAGGCAATATTAGTGGCA  
AGAGCTACACTGTAGA ACTGGGGA ACTATCGCGTGTTCAGCGTAGTAATAGCGACTTCG  
TGCACAGATAACGCCAAGGGCAGTTGAAGCCCATGAGAGAAGCTGACAGCGGTCATAATG  
CCGACCGAGTACTGGCCAATGCCTTAGAGATGGGCATGGTCCTGCCGATTCAGGAGTTAC  
CGGTGGAGAGCTAGCAGATAACGGGTTTTGCATAGAGCACCTCTAGAGATCTGGCGTGTT  
CGCCCCCTTGCCCCCGGCACTACCGGAAACGTGCTACAACCTATCCAACCCCATCCAAA  
TCGGAACGACCGGCTCCCTACCCTCGAAGCCAAGGCCGCCGAGGAGCTTCCTAAGGCCAA  
TGCCCTTCGCGAGCCGAGGGTAACCCTGGAGCGCATCCAGAGGACCGTCTAGCGAGATGC  
CATGCCCTTCAAGATTGGCCGGCAAGACGACATGCCGGTCTGCTCCGGCGTTGTACTGGG  
CGTGGCTAACACAGACGCCGGGAAGCAGATTCGCGTCTACATCGGGGCATGCTTCAACAG  
GTCTACGTACAGTCTCGAGGACTGTCTAACGTGGACGGACTGCGTCCGCAGACTGCCGA  
GTCTACTCAGGACGCTAAGCAGCGAGCCGAGTAGCATCGGTTCTTAGTGCCAGGTGCTCG  
CCAATAACCAGCCCCTGTTGCGGATATCAGTAACCTTCGCACTCAGAGCTCAATTTCTG  
TAACGACGAGTTGAGACCATGAAAGCAGTTAAGAACCTTAACGAGGGAGCTCGTGAGTCC  
CTGAAAGGTAAGCTGGACGCGTATGACATGAAGCTGCGCAGGGCCTTTGACCAGGCGCGA  
CAGCATAACCGAGGCGCTGGGGCCGGTGCCTAGTCCGTGCTCCGGTACCCCGGGGAGAAC  
GAAGACTTGCGCAATGCGCTTGTCCAGGCAAACCACAGATCTCGTGGCTTGGGTGGAGC  
TGGAGTAAGTA ACTCGAGACCATCCAGGCCAGAAAGGGCAAGCAAGAGGACCACGAGGGG  
TTCGTGGAGAAGCTGGACCGGGA ACTCGAGAATGCCGAGGGGCAGATTCAGGACGACAAG  
GTGCGAATCACTTCGATGAAGAGGATAGCCTACGCCCTGTGCGGTACGGTCGTAGGATTG  
CACTGGAAGCTACTCGAGCACTGCGGTTTTGTTTCGAGGTTGTGCTGTCAGGCTCAACGCGG  
GCTGGAGGTCGAGTTAAGTCGGCAAGTGAGGCTAAACGATAGCGTCCACGACTTGACTCG  
GATGCGCACAGCCTGGGCAGTGAGTTCCACCACGACGGGATCGCTGATTTGCCAGGGCT  
CATCGATGATTACAACGCGCTGCTCTCCGAGGCAGAGGGCGCTACCCGGCTTAAGATGCAA  
ATGGAAAAGAAGCCATCAAGATATCCATGGGCCTGCAATACGTGAAGTTCATGCGTATTT  
CCAGGCACTGCGCACCTAGCTGGACGGGGCGCACGGATCGCTGCGCGATATGGACCACGC  
CGCGCGCATTACCTCCTGCTGCCATCAGGGCATGGTAAATCCTTGACGGTGTGGCTAATG  
CCTTGACTTGCGTATTGACGCTATCCACACCTCCACGCAGGCGCCGGTAGGGCGGGAACA  
GATAAAACGTTACCTCACAATGGCCGGGCGGGGGGAGCGGCAGGAGGCAGTGGAGTGGG  
GTTAGCAAATAGCGCACACGAGCTAATCGGCTTGGCTCCGATCTATTATTTCAAAGAAGC  
CGCGCTCAGTTGTCAAACGGACGGCTCATTTTTCACTCGTCAGCACGCCGACGCTGGG  
CCGTATGTTCCGGACCTGGTGGAGGCGCTGGAATGAGTACTCGTGTATATCCCACTGGGC  
GATTCTGACGGCGACTGCTCCAAGATCGTAAAAGCCAAGACTGCCGTCCCCGCCACCGC  
CAGCCGCAATAGATATGGCCCTCCCCGAGAACGATGTTCTGCACAGGGCGCAGCTGCTGG  
CCATCGGAGAAAGCTCCCGCACGTAGCACAACGAGGAGAACCGTGCACGCCCTTTATCA  
GCAACGCCATCGACCGTTAGTGTGCGTACTGTCAACTGGCACGAGGGCGGGCAGGCGG  
TGAAGACACCTGTGCTCGAGGGTGCAGAGGACGAGGTCCAGGAACGCTTCGTGCCATGGC  
CCGACGATGCTGAAAGCGCAGTTTGCGACTAGCTGTACCTCATCGTGTACCGCAA ACTGT  
TAGACAACGGCATCGACCTGGTTACTATGCTGCCAGGGGTGCCCGTTTAGATGAGTCGCG  
TTCAGGGTGGCCTGATCGGCGCCAGTGCAGGGGTTGTTGGGTGCGGCCATAGGCGCAA  
TGCAGCAGAAGTGGTGC GCGTGTCTCAAACCCAGGTGAGCGCCCGGCTCTGTTCCCAACCC  
ACCCGCACGAGCACATTACGAGGCGGTGTCTGCTCACTTAAGACTACCTATTAGCGATGT  
GGATAAGGTGGGATTAGCATGATCCAGAAGCTATTTCTACTACAGCGATCTGGACTCGTG

CGAACAAACGCCCGGGCGCCTCCTCGCCGCAAAGCAGCTGAGGGGCGGAACGCACTCGATG  
GGGGCCGAGCCGGGGCTAACTGGTTGCCAGCCTCCACCGGCCTCTTTCCTGGCATCGGCT  
AGTGAGTTTACACCTTTCATGCCTCACTGGGGTTAGGCCCAAGGATATCCAGACGCCTG  
AGGTACAGCAGATGATAAATGGGACGCCGCACGAATGAGGCGAAAGTCGAGGCTACGGAT  
CGCGCCACGCTGCCGAGGCATAGCCGCAGCGGAAGTTCGGGCAGTACAACCTGTCGCCCC  
GTCAAATGTTACCGGAGCGGGCAGGTGCGCCTTATGCACTTTTATCACGGCTTCTCGCAA  
GACTCACGGGATGTGCAGTGAGCGACCGTGACAAATCGATCCACATGCTCCGGGTCTAGA  
TAAATGAAAATGGTATCGAGAGGCTGTGCGAGCATTACCCGAAGCTAACCAAGAACTACG  
CCACGATTAGTGCGGCCGTAGAGCACCGTACCCTGGCCGAGCGATCGATGCATTCCAGGG  
ACGAGGAATTCATGAGCGGAGCGGGCGACGATGACGATTATGGCTAGCAATACTTTGATC  
CAGCAAGCGATGCGCTAGAAGAAGAACTAACAAAAACCTATTGGCACCGTGCCCTCCGAG  
ATGCTTAGTACCGAGGCGCAGTTCCTATTGGCCTGGGATGTGATCTACCACAAAGGATAC  
CCTGTAAACGAGCACCCGGACATCGGGCGCGCTCCCTTCAATGGTGTGCTCCGGTCCGCA  
TACAGCCGTGAGCAGCTGGCTAAGGAACGCCACGCAATGGAGATCCTGCGCTCGCACGTT  
GACCAAGAATCCAGCACTGGAGTCGTGAACAATTTGCGCGGGGAGGGACTTCGCCATTCGC  
CCGGGTTCTCTGCTCTCCGAGTACAACACCGGGGGCGAGGTTGATCTAGCGTACGAGCTG  
AGTCGCATTGCGCCTGAGACGCAGCGCGTTCGTGGCCAACGGCCCCAGCTCCGAGTGGTTA  
AGGCACAGCATTGAGCAAATCCTGAAACGGGACGAGAAGGACTTCGCCCTAATGTCGGCC  
CTGCATGTCTGGCAGTCGCACATCTAGGGCCTACTGGGAGTCGCCCCAGTGACTTTGACA  
GGGCGCTCCGACAAGAGTAAGACCAGCCTCATTGTATTTCATCCTAGCCCGCTTCGCAGTG  
AAGGTAACCTTAACCTCCGGCCTGGAGTTATCTAACCTGTGGCTCTACATCGAGGGCCAG  
GGTTAGCGCCTGATCCCACCTCTCTACCAGCAAGCCCTCGGGGTGGACATTGACGAGCTG  
GTGGAGATGAGCAACGCAGGCACGCTGAGCTATGCGCACACCTCCTAGGCTGGCATTGTC  
GATCGGCTCAGTTTACAGGATATGACCGGTGCGTGCTTCGCCGCTATTGAGAAGGTCATC  
GAAGCGATAAAGCCCTTTATTGTGCGGTGGGATATTATGTGGAACCTCCCGCTGGGGCCC  
AGCTCCCTGGGTAGGAACCTAGGTCAGTGAGGTGGGGGCGAAGTAGCAACCCGCCCGTGGC  
ATGTCGGTGGCAGACGACGTCGCGAGCCTGGGGTCTGCCAGATCAGACAGGAGAGAGGG  
AACATGCTGTACCAGGCGTACTCTGCGCTCAAGGACAGCAAGATCGGTAACCAGGGCGCG  
ATCGATCTCATGGTGACGATCTGGGCGCGGGAGGACCCTGAGATGCCGTTGCTACATGGT  
ATCAGCACGCCGAAAATCAACCTCCATATGCCCAATATAACCAAGCCATATAACCTCTGAG  
GGATTATTGGCTGCAACGACAGTTCAGATGGACCCGGGTTCTTAATCAGTGGGGAGTTGG  
CGTCTCAGACCTTGCCTAAGAGGGCGGGGCTCGCTCTTATCGTAATCCTACCGAGGCTCGA  
GTACTACCACGTTTCACTCAACTTAACCAACACAAGCCTCACCTATGTGCAAGCGCTGAA  
CTAGCGCCTGAAGATCCACATTAACAATTTACTGTACTCGGGACGATACGGCGATG  
GCCCAAGCAATTACCCTACATTGCGGCCTCATATAGACTGTCAAGGTGGACCCCGAACCG  
GATGACCTATGACTCCGTCTCCAGCTATCTCAGAGCGACGCCTGGTCACAGGTTCTACAC  
GCCCATGCCAACCCCGTGGCCTGGCTGAGCAAATCAGCATGCACGAACCACGGGAGCAA  
ACGAAAGAACACTGATCTCTCACGTCTGCCAGTTCGCTCGGCCTCAATTTGGCCGTCCGC  
GACAAACAACGAGCTCGACTGCGTGTTGTACCTGTATGAGACCCAGGTATAACAGTACTG  
ACAATAACACTCGGCGGAGGCTGTGTAGCGTGCTCTGCTGCGGAGTCCCCGGATCGTGA  
CGAGTTCGGGCGGGTGGCATTTCGTAAGAGGACAGTCGAACCTTATCCTCTCCTGGTACGC  
GTCGCTATGCGTGCGCTGGTTCGCGCCGACTGCTCTGACTAAGGTATTGAACCTCACTCT  
AAAACCTGGAGCGCGTTGGCTGGCAGGACACTATCCGCGGTGAAGTACCAGAACGGGCGCG  
GACGATGTTGGAGCGACCTCGTGCTAGAGGAGGAGCAAAGTACCAGGAGTTCTAGAATTA  
GAACTAAGAAGCCCCGCCTCTGCCATCCTACGGCGCACCTTGGCGATAGACGAGACTAAAA  
AGGCACTGGAGAGGCGTCTGGACCAAGGCACGATCCAGCCATTGGGGAAGGTGGCTGCGT  
CCCGCGTACTGATCCGCCTGAAATGGAAAGGGGAGGCGATGATGACCGCACGCGAGGGTA  
TTGTATTCCAGAGCTTGTCTAGACTTGTGGAGCGCCTTTGTAGCACCTGTTACGCCAG  
CTCCACCCATGTGGAGCGTCTACGACCGGGAGCTCTGGATGAAGCGCAGCCCGTACTAGC  
ACAAGCCCAGCCTACTGCCCTTGATACCCGCCTGCTCGGGCAGCACCTGAGGAACCTGC  
ACATCCTGAAGTTCGTCCTGGGAGTATTCCGGGACTTCGAAGGCCGGGGTGGAGGCGTG  
TTCCAAACGTGCCATCTGAGGCGGAGGTTTGGGACTCTTTGGTTTCTAGGGCCCTCCTC  
CACTCCCCCGCGGATCGAGCGCTCGAGGTTCTGATTATCTACGAGCAGTCTTGACCG  
GCTAAACAGTGGGTGTCATCCAGGAGCGGTCGCAGCGTGCCTGGGCAGCCGGGTACGAGG  
GCCTGGTCTTGAAGCACCCCCACGTCTCACCGCGCAACGGCAAGGTCTCCGGGTGCTGGA  
AGTTGAAACCGGGTTGCCGCGTCGAGTTGGCGCCTATGTCCGAGGCGGATCGCACTGTCA  
TCGGCTACGTGTGGTGAGACCCGGAAGATTAGCACCCCAATAAGCTCGTCGGGTTCTGG

TGGGTATGGAACCCGGGGCTTAAGTGAACGCACCCGAATTGACGCATGACCAGATGGCCT  
GAGACGGCCAGAGCTTAGACGTATGCGCCTATGTCGATGGCATAATCCAAACGCTCTACA  
TTGGGCGCGCCTGTCGCGTCCCCGATATGGAGCGCACTAAAGATGCCTGTATCCGCCACC  
CACACTTCGACGGGTCCGAGATATCCACATGGCCGTACGTCTGAGAGCGTCAGAAAGAG  
TTTTATGTCGTGGCTTGGCCCCAGTCAAAGCGCGGGGTGGTACTTGTGATTGGCTGGGA  
TTCGTTCCGTACCTGGAAATCGACGTAAGACCAGCTGAATGGTGGGCAGTTGGTATGTGG  
GTGCCTCGGAATCGGCAAGGCGAGGGTATTCTACTGGTGGCGTAAATGAAGGTGCGAACA  
ATAGATTTGGAGTACAATAACCATAACCCTGGTACGGGCCGCTAGCGTCCCCGCACAACCCG  
AAGAACTACCTGGCCATGCCCGGTGGCTGAGCCACGGCTACGGCGCCACCCCTGGCTTG  
GTACAGCACCTGAACTTCACTTCGTCCGGGTCTGAGCGCAGTTGATACTGGATCAACCCC  
GACGGGATAGACCTCCGCGTATCACCCACACTGGGCACGACGTGTGCTGCTTCATGACC  
CGTACCGCGACGACCTCGAGAAGTTCTGGAGGCGCAGTGGCCGCGTGCTTTGTACCTAG  
ATCCCGCAGTACATCCTGTCAAACCTCCAGACACGTACCGGAGCATGGTTCGAGCCTGGG  
CCGAAGTACGGTGTTATTAACACGATCGTTGCAGTGAAGGAACGGTGAAGCGGGCGGCAC  
CTACCAGGACTATCGAGCCGAACCTCCTCGCCGACTACGTTCGACGGTCCCGAGGGTTCAG  
GTTAAGCACTCAAGCTGCAGCTTCTCCGGGCTGAGAGCTCTGCTCAAGGCGCGCGTACAG  
CGTGGGTAGGTAGTGTAGCGCTGCGAAGACCTGCTGGCCTACGCTTACTGCGATTTGATA  
TGCCGGGGCCCTGAACACCAAGGCCGTGAGGCCATACAGACGACGACGAGTACCTGAGCTG  
GCCGAGGTTTCGAGGAGAGGTACAGGAGCCCCTGCCAGATTTGCCGAATCAATTGGAGTTC  
AATTGGGGCAGTGACCAGGAACCTTAGCGCTGTACCGATCGGCGCACCGGTGAAATACCGG  
ACGCGCGCACCCCGCACTGAAGCCGGTGAAGCTCGTAATGGACGAGAAGTATTAGTGTGCC  
ATTCTTAGTGACAAATTCATCCCTCTGGTCTCCCTAACCGCGCCGGTCCAGGAGGTGGTT  
GCATACCTAATCCGAGAACACGGCACCCCGGACCATCACAAACCCAGCCAGAACAACGGT  
TAGCTGACAATGCATAAGGTTGAATCTGAGGACCCGCAAATGAAGTGGTAGGATACAGTT  
TTTGTGCCTCCCCGCGGCATCTTGATCCAGCAAATGCCCTCGAAAATCCAGGATGAGCTC  
GCGTACCATGGCTCTGACTCGCGTAAAATCGGGGATTGGACCAGCACCCGCTGCTGTGC  
GACGTGCAGACCCCGTTGTAGAGCACCAAGCTCGGACGTAAGTGGAGGTGGAAGCCTAACAC  
GGGTTTCGATACCGCCGATAAGCTTTAACGCATGGAGTGCCTGGCGAAGCATAACAGCACA  
TACGACTGCTATGTTGAGTTCGAGAAGGAGCGCAAGTTCACGAAGGGCATAGGGATGCTT  
CTGTACCTCGAGCCGGACGGGATCACCTACCACCGCTTCCAGCTCTACGCAACCGTCACT  
GGTTGCCTGTCTCCTCGGACAGGCACCTCGAGATCCTACCGCTAGCCGGCAGCCGCCGG  
GTCAAGGTGAGATGCAAACCCCGCGCCGGTACAGCCGGGTGGATCATCGAAGTGGACTAC  
TGTGCCCTGTAAATCGTAATGTTGGCTGCGCTCAGCGCCGACTAGAACCAGGTGAGGCGG  
CCAGTTAACGGCTCAAACATACGATGACTGCATCTGCCTGCGAAGCTCGGTGAACCCTAC  
GGGGAGGTGCTGCACAAGGCAGTCGAGAACAAGCCGCATCCGGAGGGCTAGCGATACAAG  
CAGATGCGGACTGACACCAAGCCACCTAACTTCGCTGCTCGGTACGGGGCCAGTGCCGTG  
GGTATCGTATACTTCACCGATGTCTCTGACGGGTACCCCATGGATTCCAGGGAAACAGAG  
GCCAGCTTTTTCCCCCAGAGCAGTCTGCACCCGTGGGATTGTGCTTGCTGAGGTTCGACCGT  
ACCGGCGACCTGACATAAGGGCGGCACCCGCGAGCAGCACGGCGCAGACTGGGGCGTGGCGG  
TTCGACAGGCTAGGTTACTGGCAGGCGCTAGGTGGTGCCTTTACAGGTTTCAGGCAATGG  
ACGCAGTCCAAAAAGGAGTTGTGCCACCGGTTTCATCGACTGAAAGGACACCATAAGCGCC  
AACTACGGGTGCCAGGCTCAGGCGGTGTACGTCATGGCTCTATCGGCAGGTTCGGTTACTG  
ATTTCCCCCGTTCCGAGAGCTTCTATCGGACGAGGAGTTCCCGCTAGGTTCGCGTGTGCG  
TTGGTCAATAATGCATACGCTTGGCTGTACTGCGACTTACTCAAATCGGGTATACGGGAT  
GTGGCCCTTCAGGTTAAGGCCGTTATGGAAGGCCCGTTCGAAGTAGTAAAGCGAACCCCTC  
GGCTACGAGATCGCGCAGTTCTCGTTCCCTGCAGGCGCCCATGCAGGGCTCAGCATGGCA  
GATAAGGAGCACAAACACGGAGCAGCTCCACTGTCCCAACCAGGCACTAGGTCTACCGGC  
TGACTGTCTGTACGCAGTATCGCTGGACGCTCTCCATTCTCGTGCAACCCCGAAATCTAC  
TCGGGCAATCGCAGCATAGGGGTTCCCTTCATGGGACTGGACGCGGAGGTCCTATCTGTCA  
CACGGCACAAACCATCCGTTGGAGTACACGTCATGCACGTCCCCACGTACAACGTGACGAT  
GGTATGGCGCGAGTCGCCAAGCACCCCGCAATAGCCAGCCGCGCTGGCGACGAAAGACCG  
CTATTGCTACCTAACGCATCTTACGCAGCGTGGCCACGCCGTAATCATAGAGGACGCCCCG  
GTCCGGTCGACCTCATTTAATCAACCGAAACGCAGTTCAGTGCGGTGTATGTCACCCCACT  
GCCGAATGAAGTATGTGCCAGGAATGACAGGCACTACACGCCCTTGCCAACGACGGCGCT  
GAAACCGCTTATGTAGCCATGAGCCAAGTCTCAAAGGGCAGTGACGTTGGTAAGCTCTAT  
CGCGCAGCCTACGTCTGCGCCGGATTCTGTGCGGTACATCGTGTTCGATGCACGCGTGG  
GATTTCCAGGGTAAGGCCAAGGTTCTGCCCGGGAGACCCCCCTGGGCTTCACACTTTG

GGTGAGGGCTGGCAGAATGAAGACGGCTAACCCGCCGTCATCTAGACCTATAACAGGAGG  
TTCGGCAACAACGAGCAGCCGGGCACGAAGTTTCATTTACGACAGGCTCAACTGGATGGTC  
CACGCCAAGCTATTCGCGCAAATGCTCGGCTACGGCTTCTCTCGTGAAGATCGAGCACAAG  
GGGGTCCAGGAACAGCCCGGTAAGAAGCGCAGTGTCTGATTCTGAACGGGACCGTGGCC  
CCCCTCGCCGTGGTGAGCGAGCAGCCTTACAAGATTACCCACATTAACAACACTACCTGATC  
GTCGTGTTGCTGTGATCACACCCGACCAAGGAAGCCTGGGACTCCATCCACATCGAGTGC  
ACTAATACGACCCCCGCCACGTCCAAGAACTTCTTGAAATAGACGAGCCTCCTGGCTATC  
GACTTGCCTGGCTCGCCCCCGGGCAGCGCCTGTGCGGCACGGGGTACCAGTCGTCCCCA  
GAGAAGGTCGCGTGTATCCAACCCACCACGCCCTCAGTAGCGCATAACGCCGACCCCGCGT  
AGCATCCATAACCGCCCGGGCTATCCGCGCTGCCAGCGCGCCCGTGGCTCCTGCCGTGCCG  
CAGATCCCGGCAGTGCCTCAAGTGCCCGCTGTCCCCCGGTGCCGGTAGCGCCAGTCGTC  
CCGGACTTGCCTTCGAGGGCGGTTCCCCGGCAGGCCCGTGGGGAGCCAGCTAAGAGGA  
CTGTCCGAGCAGTGGAGGTTTCCGCGCTAGGGGACAAGTTCCAAGTGATGTTGCCTAACC  
GCGTAATGCTGTTGGTTAGCGTTGGGGCGGCGTACCGCTCCAGCTCCACTGTGAAGAATG  
TTACCGCTGATGTTTCGGCACGTCTCCATGGAGGCTTTCACCGAACAGTTCTCACCAGGTG  
CCTAGGCCGCGCGCGTGTGACATTGCCGGCCCCGGGTGGTCCGAAGGCCCTACAGGGCCTGT  
ATCCGACGCGGAAGCTGTACAAGGGCACCCGCACGGGTCAGCCTAAACCGTGGTTCTTGA  
AGCCGCTGCGGGACGTTCTGGCCACGGAGAGGCTTTTCGAGAACGGATTCCCCGACAAGA  
TCATGGTCTACCTGCATCGATACCAGGAGACCGGCGACCCCTGGTCCAGGACGGGGTGC  
TCTACGGCGCTGGAGCCGTCAGCAAGTCTGACGAGAAGGACCACCGGGCGACGCTCGCCC  
CGTTCTCTTAGTCGGAGAAGGACAGGATGGATGTAATCCCCGAATCCGACCGCTTTTTCT  
GGCTCAACGTCTGGTTCACGTCCTCTCTATCGCTCCGTGTCACGGGGCATAAGAGGAAGT  
TCTCTTGGGCACTGATGCACATGGGCGAGACGGCCAATCACGGCCGACGCCTGGAGCGCT  
GGCAGGACACGCGCATCGCATAACGGCGGTACCCTGGAAGTGCAGAGGCCCGGTAAAAAAAG  
AGAAAGAGGGCGGCCTTCCATATCTTCTGGGCCTACGCCAAGATCGTCCAGCACACGCTCG  
GAGCCACCCAGGTGCTATGGCTGCGCCGACCGAGCTGGACTCCGCGTACCGCTACATCT  
GTGAACTGGACCTTAGCCCGAGCCTGCGGACGTGGGTAGATCCTTTGAAGGGCTACCACC  
CAAGAGTCTACAAGCAGTATCTGGCGGAGCGTAATTCGGAAACTGTGTAGGACGAAGCTC  
AGGGGCTGGCTGGGCACCCTCCCCACGAACGCGCTTGGATGCCGCTGTCCGCTCTCTGGT  
AAGCCGATCGATTTCGAGCATCGCACGGAAAGCGGTGGTCGATAACCAGCACTATAACAAGT  
GAAATACGGGGCTTCTCTACCGATCCTGGACGGCGGGCGGTAGGTAAGGTCACCAACGCA  
GCCGGTAGGTGGGGGACTTAGAACACTAGCTATGCCCCCCGACCTGCCGTTCTGGAGAAT  
GTGCTCCCGTACCAGAAAAGCTGCGGTACCGGGTTAATGTACCTAGGTCACAATTCGCCC  
GAAGAGGACGCAGAGGTGAAGTGGGTAATACGCAGGAAAGCATCAGCATTGCGCCTCGCA  
TCCGCCCGGGTTCGCACGATTCCGCATAAGGAGACATCCCGGGGAACCACCTCGAAATAC  
GCATGAGTTTCCCGCACGAGCACATAGCCCATGCACTGTGGGCTGGAGGCAGTAACAAGA  
CCCACGCTGGATAACAGCTCAACAATTTGTGACACGGGGTTGCAAGTCGGGAACTACTGC  
GACGATGGTCAAACGGCATAGACAGATTTGACGCATTAGCATGAGTGAAACGTCGGGGCG  
AGCCGGCCGGCTGTGCCACGAGTGCTGCTGGCACGGGGACCCGCACTTTAGAAGACGGCA  
CATGTATTCTGAGCCTCGACATCGAGTCGGGTCCCAAGATTGGTTCGAGTGGGGTGACGCT  
GGGAGCAGACCCTAGGGCTTAACCAGTTCACCAAGGTTTGTAAACATCCGCCGCTGCTGTG  
CGCAGTGGTTGGGGGATCCTAGAATACTCTACTCCGACCTCGCCAAGGCAGACGCCATTG  
CAGATAATCGGAAGCAAGTAGCTGAGCTATATAAGGTGTTGACTGCAGCAGACCCTGTAG  
TGGCACAGAACGGTACCCGATTCGATCGACCGGAGATTCAAACACAATTGGGTATGGCCG  
GTTACAAGACAGCTCGCCAGTTCGGGGTAATCGACACCATGCTCATGGAGAACCAGCGGT  
TCGGCTTACCAGACAAAAGCTGGGGTGGATGACCGATAAACTCTTACCACAATGTCAC  
TCGAGCATGAGAAGTGCCCGGTAAGGAGCTGTGAAACCAGTGCTTGGCAGGCAACCGCG  
GACCCAGGGAGGTGCTGCGGTAATAAAAATTGACGACGTAATAACCGTTGAAGAGGTTGT  
ACTTGATCCTACGCCCTGGTATCAAGGCCATACGAACGTGGCGGTGTTCAATTGATGTGC  
AGGAGATCGCTTGTCCGAAATGCGCCACGCACGACGTGAAGCGCGATGGGTGGACTCAA  
GCCAGTTCGGTAAGGAGGAGCTTTATCAGTGTAAACGATTGAGGCGGTTACAACCGCAGAC  
GGAAAACCAAAAGATCCAAGCAAGTGC GTTATGCCAGCCATCCAATTTAATACACCTAG  
GAACCAAGCGCTACTTCTACGGAGTCCCCAGCAAATATGCGGAGCGTACGGGTATGAT  
TACTGGAGAAAGGAAGGTTCCGGCAGGGGTGGTGGGTACGGTTGGGCGGTTAGATGCGCCC  
TTGGTGGGCGGGGAGAGGAACGACGCGGCCCTACAAGACGGTACCGGCAAGTCAGGCTGG  
ACCGTCCAACCAAACTCAGCCAGGGCCTGGGGTCCAGCATCGCGGGACGTGGTTTCGTCTC  
CTGAACATCGCAGTGCCTCCTATGCGTGAAGGGGGAAAGGAGAACATCCCGCATTCTGG



CGCCTAGGACCGGACGCACGTACGCGCTATGAGGATGCCCTGCATCGCCTCTTCGACCAC  
ATCCGCGACGGTGAGACTCAGGATGGCGAGTGGCAGGAGTGCACACTGGGCTCAAGTTGCC  
ACGAACGCACTGTTACTCTGGCAACTAAATAATCCGAAGGATGAGACTGATCAGTGCGTG  
CCTATCTTGCTTGC GCGGCCAGGCAGCTGCAAACCTGATCCCAGGGAAAGTCTCAATGC  
AGAGGAACTCGACATCACCGAGCTGCGCGAGAACCACACCAGGAGCCTCGATTGAGCCTT  
TGC ACTCGCGGCTGAGGAGTTAGGCGAAAACATGCTTGGCCGCGTGTACCCCAAGACCTA  
AGGTCCCCTGATGATGGAACGTGTCGAAGACCATATGCAGCGCGGGAGGCGGCACAGCGC  
TGAGGCTACTCCCCAGCACCTACGCGAAGTTCAAGAGGCCCTGCGTACCCGCAGGATCGA  
TGCCATCCGAGCAGCACGTGCGCTTACCGCCCCTGTGTACGAACAAGTGC GGGGTTTGACT  
CGAGCTGGTTGTGGAAAAAAGGCACGCGGCCAGTAGCTGATCTGAGCGGATGGCTGCG  
CCGGGGCCATACCGACACCCGCGCCGGTCTGACCATCCGCGTCGACCTGGCGCACGTCAT  
GCGGGACACAGCCAAGTCACCAGCCACCCTATACTGCTTCGGCCACGCCCTAGGGGGGAC  
CATTGAGCTAGACGCTTTGGTGCAGGAGGGATCCAGTACGTCCGCGCTATACCTCGGCCT  
GACTTGGCACTACGTGCGCACAGCTGTCACGATCAGAGAAGGGCACATCCAGAAGATAAT  
GGGTGCTTTGGTACACATCTTGCCGGTAGGTCATTCATACGGGGACCTTACGTCCACTGA  
GTACAACCATCTCGACAAGCACGGCCTCCAGGCGACCATCGATTTCAGGTCGGGAGGACCT  
CGGGCGACAAAGGCAGGGATCCTAGACTCATGAGAATTGCTTCCCTCGCGGCTGAGGTGCG  
GGGGTCTCTCTTTTCGTGCCGCTGGCATTGCGGTACCGCGCATATCATATTCGCTTA  
GCTGATCCTATGGGACGGGGTGGGGAGCTGCGGGGATTGCAAAGATCGTAAGAAGAACGA  
CTTCCAAGCGAGCCGTGTGAACCGCCGAACTCGTACGCCGGTTTGCTGCGACTTTCGGGA  
AGATGTCTTGAAATGCACCGATGTGCTCGCGTGTGCGGACTAGCTTCAAGCCCAGGCTTT  
CAGCATAACACCTCCACCTTGGATCTGATGCAGGACGCGTGGAACAGCGGCCCGCGGTGC  
CCTGGCCGTCCCGTAGCACGACGCACCGCCCGACCTCGCGGACTCATTCCCAGAGACCTG  
GGAGATGCATTAAGAGCCATAGGTGGAGCCGGCGCGCTTTGCGAGTTGGAAGCGCCATCT  
TCACGCCTGTCCCATGGGCATGATGGAACGCCGCAAGCAGAGCAAGACGTCGGCCAGGC  
CCCGCATGTGCCCGCCGGCGCTGCGGGTTCGAATGTGCGTGTGCAAGTCCATCGACAGTGC  
TGGACGGTCTAGTACCGTGGGGTGTGTAACCCGCAAGGCGACGAGATTTGTAAGGAGCT  
GTTGCACCTCCCCGAGTAGCGCCCGCTGGCCAGCGTTCGCATCTATCGCGTAGAAGTGTA  
TATGTCAAATTGCTCCAGTGATGACAGTGCACGTTTCTATGCCCGGTAAGCCTTAGCTGT  
TGAGCGCAAGTTTAAGTTGTTTGGCCCCCTGGAGGCATCGGACTACACGTGATTTGCCGA  
GGCCGACGCCCCCTTCGGGCCATTTCGATGCCTTGTGCAATGGCGCGAGGCCGAGCGATG  
CGCCAACCCATTAATCTACTGCACTGGCCTGCCGATGCACAAGGACTTGACCAGTTCATG  
ACTCCATCACTTCTCAGCGCTGCTCCGCTACCCCGTGGGAGGGGGGCAAGTGCACCTGTA  
CGACCGCGGTGCGGACTCCAAGCCCCACATCCATCGCAAGGGGGCCAAGGTATAGCAGAC  
CGGGATCGACCGAGCCGCACCCGCCCCGGCCTAAAAGGACTAGCACCTGGCCAAGCTCTG  
AACCCAGGCGGATACTCCGCGCACCCTAGCGAAGGGGGCCCGTATTTCAGCGACGTATTTGG  
AGCGGCACCTCGCGGTGTAGCGGATGGCACTGCCGACTGGCTGGAAGGGTATCAGGCGAA  
CGTGCCCGATCTTGTCCATATCTTCGACCTATCATACTACCGTTGCCGTGTTCTGATCCC  
AGAAATAGAGGACGCTGTGCCTGCTACAGCCGCAGAGATGTGGTGGGTACGGGAGCAGGC  
TCGCAGGTCCGCAGGCGACTCACCGATGTTGTGGTTCAGCCCCGCTGGTCTACTGCGCGA  
GCGCGACTACCGCGACTATGTGAAGCACCGGGTTAAGATCAGGTAGTGC GGTATCACAGA  
CACCGTGGTGC GGGAGGACCTGATCCCAGCGGACGCAACCGGCTGCAGAATGGCGTGGG  
AGCGAATTTTCGTACACGCCCTAGACGCTGCGCAGCTGTCTTCACGGCCCCGACTGCTGGA  
GGACGGTGGACTTGCTGTGGTGGGGTTGACTGACAGCGTTGGTGCACACCCCACTAGCCT  
GCATGAAATACTCACTTCTATTCAGGAAGCGTTTGTGCGTTGGTACTCGGAGTTCGATCC  
TGGCACTTTGTTCTGCGTGGGATCGGGCAGGAGGTAGTAGGACCACCGCCGAAATGGTA  
CCTGAACTTGACCCTGTATCGAAGCTCGGAATATGGGTCTCTGTTTAAAGACCCACTATAA  
TTACCAGGAGAAAGTCGGACCCAAATAAAGCGAGGCACAGGTTTCAGTGCACATCAGACCA  
GATCGAATAGTCGCTCAGGCCCTTCGGCTCCCAGCCATCGGCCCTGCTTAGGATGTGCC  
CACAGTTATGTACGAGGCAGGAAGGGATAGCGTGATGGGTGCCTGTAATGTCCGTTGCTC  
AGCGCCGGAGACTTTGCACGCTGCCACCAGTAATCGACC ACTTGC GGTGCAAGCGGTAC  
CCACTAACGGACGCTGGAACATGGATGAGGCGTATAGTGAGTGTTCCGAGCAGCAGTTTA  
GATCCCTTAAGGATCTGAAGAGTCGTA CT CAGGCGAGCGTGTGCTCAATCGAGCGCCTGA  
AGGGCTTGGCCACCATGGGTGGTAGGGCAGCCGGGATCGCTGCAATCGCAGCCGACCATG  
TTGTGCAGGAAGGCGAGTTC CCCGCGGTGCAGAGGCCGTACATCCTGCCTGAGTGCAGGA  
ACTCGGGGGTGACCGCAGCGTCCGCTCGCGTGGA AAGGATTATTGCCCGACA ACTGAACC  
CACCCACTATAGAGCTTACTCACCGGATTGCTCCGGGGGCCTCACAGACATGCTACAGGA

GGTTTCATGGCCAAAACGATGATAAAGGCAGTGGTTTGTGTGTCGTCACCCGGTCAATTTCC  
GGTCGGCTGCGGAGCGGTGGCGGCCTGCTTGCTGGCGGGGAGACGGATGCCTCGAAATCA  
GCACCGCCAGCGGCGGTGGATCAGTAACGCCGTGGAGCCATAAACCCCCAGTTGGGCCTG  
TGCAGGAGAACAGTCTACGATTGATGCTGGTGCCACTGGGCAGTCTCAGCCAGGAGCC  
GGCACTAATGCGCATCGTCGTCGTACCGGAGGTCTCGCATACTCCCTCAGCATTAAATGTG  
GGTGAGCGATGCGACAGTAAGCCTCTGCTATGTTGGGGGTGAACCGGGATACGACTGCAA  
TCCGAAAGGCCGAGGGCTTCGAAAAGTTGACCGCCGCCCCATTGATGGTGCCCCCGCCAG  
ACAAGACCCACCAGACGGAAGTAGTTGATTACGACTTTCCTACTACCCCATCTACCTCG  
TCAACAACCTCGACGGCCAAGGTGGCGCTGACCATGTTCCACCAGGGCCGAGCTGGCTTCC  
AGATCGAGCGGGACGATACGCCACAAGAGCTGGCAGCCGCTAACGACATGGACGAGACCG  
GACACCTCTGTCGCACTGCTGACCCGGTGGCGCCTCGCTCCCCGGCTGCTGTTTCGAAAACG  
ATGGCCTCTCGAAGGTGCACCGCATCCTCGTGCTCCTGGAAGACACATGCAACGCCCGGT  
GCTAACGCGAGCTAGGCACAGGTAAGGTGCTCATCTGGACCATGCAGTTGTAAAGGGTCC  
GCCCCACCTCTCAAGGCAAACCCGCCGTGGTAGACCTCCGCCAGCAGATGCCGTTCCGAG  
AGCTGAGTCCCGAGTTCCATGCAGAAGCCCAGGCGAAGCAGATTGCTAAACGCGACTCAG  
ACAAGTGCGACTTCTACACCTTGACCGACTGGCCCCCTAACCCGAACGGCAGACGTTTCG  
CTATAGAGCACGAGCGAGCAGGTATGCGCGTCCACCCGGAATCGAGCTACCCTGCGCAGC  
CATGCCCGTAAGTCCCCGTTGCGTGGACCGCACCCGACGGCGAGCCATAGGTTTCGAGCT  
ACGTAGAGGAGTACAGTAGCCAATTCTCCCGCGTGTCCGGCTTCAGCGAGCGCCGAGGCC  
TGGACGAGTTGGCGGCATGAGTCTGCTGAACGTCTTGTACGACGCCAGGGGCGGGCCGC  
CGCCTGTGTATCGTGATGCTAAGTCCCGTGACTTCGTACCGGGCCTGGTTTAAACGGTTG  
CGACGTACTTGCACAGCGATTACAAGAAGATCGCCCAGCGCATTGCCAGTGTTCGAGAGCC  
TCGTGATGTGCCTGCATCGGGGATTCAGGTAGAGCGAGAAAGTACGCGACGCTGAACGTG  
TGACGGTTCGAGGAGATTCGTACAGGTGCTGACGAGGCACCTAACCTCCTCGGCGTCTGTTG  
ACAATCTGCTGGCTGAGACGTTGCAGGCGCCACTGGCTTACTTTACATTGCACGAGGCAT  
GGCGGCGTAACGGAGGTATGCGACTCGCTATCGCCCAGGGCGTGTACCGCTTGATCATT  
TCACGGGGAGCCCCGGCGTGGACGAGGAACATAGAGACCGCCACAATCCTCCGCGCAACAC  
TGGAGGCCAGCACTAGCGTCCCGGGTCTGGTGCAACTCACCAAGCGCTTCGACCCGGAAA  
AGCTGGTAGAGCGTATGTCACCCAACAACCCTGTTGACATCTCTATATTGCCGTAATACT  
CTGCCGTTGAGGCTGAGGTAGCCGTGCAGGAAGCTGCCTTGGCAAAGTGACCACTGGATA  
AAGCTAGCCGAGCTCTGGTTGCCGAGACCTCAGCAGGAGTCCTAACACACGAGTTCCTA  
GGCACAACCAGTAGATCGGAAGGCGGCCCAAACGCTGATCCGACTGCCACCCTTGTGCC  
TGCTCCTGTAGCTGGTCCGCCACCTGACGCAGCTGCTGCTGCCGAGGTTGCTCCCTAGGC  
TAAAACCAACCTTCTGGGTTTCGCGGGTTCACAACCGAGCGTGGTATCCTCCTCGCCCA  
CATAGCCTGGGACGTGGTCAGTGATCCGTCTGCACCCGCTAGTACCGGGCTGGTAAACCT  
CATACCGACAGTAAGCACCTGTACCTCGGACGCGCCTTTTGGAAAGGCTATCTAAGAGGA  
AGATTTATGCGTCATCGACGAACGCTATCTAATCGAGGTGCCCAACGAGCAGCAGGCGAA  
GTTGCTTAGAACGGAAGTTCGACGACAGCCTAAGTCAGCACCCCGGACTGGCGGCCGCT  
GCGTGGTCATCTGCTCAAGGACATAACTGGCGGTTAGGAGAATCTGACGACAGCGATAGA  
GGTGTATCTCTGTTGCGGTCAAATCAACGCGGGCCGTGATCGCCGAACCTTATCGACAG  
TGGCGACCTCAAGAAAACCAAGTTCGCACTCATGCCAATTAAGGACTTTTCCACGGACTC  
CGGGCGAGTCGATGGGCATAACCAGTAACCGGTGGGAACCTCAGGTGCGATGCAGTGGCT  
TTCCCGCAGGCTTAAATTGCGGTTATCGATTAGCGCAAACCTCTCCCCGGAGAAGTATGA  
GCTACTGCGTGCCAGCGTCAGGCCGGCACCTAGTGTGGTGGGTGAGTAGATTGAACGAT  
GACGTATCGCGCTGCTAATAACCCCATTCGTTCTGGTTTGGGCCGTGCGAAGGCTGATGT  
TCGCTGGCACATCGAGGAGCCCCTGGGCCTGGTGGAAAGCGAGCTATATGTAAACTCGAT  
GTCCGCAGAGTGTAGGATCGGCCACCCCTGCCAGGCACCCTCCAACCGTCCATCGACCG  
TGTAAGTTGCAAACGCCATCGCGGTCCGTGTCTATGGTGAAGAGCAGGTGGTTCGAGAAGAT  
CGCCAGCGTAAAGCTGAACCTGACCGTGGACACTGTGCCCTTCGCCCGCCATTACATTAT  
CAAGTCCGACGAGAGGCCCTGGCTCCTGATTGTCCGCAAGTAAAGCGCCCGCGCGGACGT  
CATCGCCCTGGCTCGCCAGTACGACCTGGAATGCTGCGGGCAGCCCCGAATTGCGACTA  
CTTACTGGCCCCGGCACATCTTATGGCAGCCTTCCACGATGGTATCCTCCGGCAGCTCTC  
CCTGTCTGGCCTTGCAGCTGATGCCGCCCCCGATGCCGACGTCTGGTAGCAGCTCACGA  
CCAAGGCCTAGAGGCCATGTTTTTCCGCGTCATGGACGACCAGCTGATGTCCGAGGGTGT  
CACCGTGCTAGACATGGGGATCTCCTCGTGCCAGGTGGAGCATGATCCCCTGAGGAACGT  
CGACTTCGACCTTAATGATGGTGGCAACTCCTTAGGCGGTGTCGTCGATCGCCATCCTGAA  
CGGCGTACGTATCGTCGAGAACC CGCGCTTCCCGCAGTCTACGATCGCCTCGAACCCCT

GGGTGCCGACGACAAGGTGGCCGACGCCGTGGTTCGACGCAAGAAGATCACCTTCATCCC  
GACCATGGCCCTTCTCTCGGCCCCCGTGCACCCGGTATCCGTCCACTTCTGGGAAGAAAA  
GAAATACTTCCGCCACTACCGGGACACCTGAGAGGCGTATAACATCGGCCAGCGTCGCCC  
CTGCCCTGTATGGGTTCCCACCCGCTCCCTCACCATGGAGTAAGGGCGGCGTTAACAGCA  
ACGACCTATCCCACGGCGAAGATCCGTTTTTTGTTTCTACTCGCAGATAAAGGCCAACA  
AAAGAGAATCCCATGAGACTTACTTTTTGTTGACGCGGTGAACATCGCCTTACGTGA  
AGCGAGACCCCATGAACTCGGTAGACGAGACGATCCACATGGTGGCACAACAATCTACCC  
GCTATGGAGGACTTTCGCCGAACCACCCACGCGGAGGGAGGGTTCGTTCCACATCTTG  
GACTTCTCCGCAAGTCCCCCGCGTTCGTTAGGTCCTTCTAGACGACGAGTGTCTTGCC  
TTGTACCCAGACGATGTGGAGAAGTTCGCCTGGGCGGGCCGCTGCTTCCGTTTTACTGGT  
ACAGGTTCCCAGGTAGAAGGCGCTCGACTTAAGGGGCGTGGCGTACCCGATACCCCTGC  
CACGAGCGCCCGGAGGGTACGCGCTATCTCGTGGTGTGCCGGTGCGCCTACGCGGGGC  
GTATCGGACTTCGGCGCGTATAGTACCGCCCAGGTCAAGTGTGAACAATCTGGCCGCA  
GGCGAGGAGGGAAGGGCGGTCCGTATCCGGCAGCGGTACCTCACCTGCGCTAGCGTACC  
ACGGCCACGACTCACGACAAGTGAGGTACATTAATGAGTTACTTTGGACGACTGTTCCG  
GCATCTCCTGTTTAGCGTGAGTCAACAGTCTGCCAAGGGTTCGCCTTACGGGGCAGGT  
TTCGCTCTTGACATGCAGAGTCTTCTGGAGAGAAGTCCGCGCCGAAGTCCGGTAGA  
CCTGAGCTTTGAGGCCATCGCCGTTACCGATGCCACCCGCTCGCGTATGCCCTTGCCGC  
ATTCTCGGGGCGCGATGTGCTGCTCCTAGTGGACACACAGGACGGGACGCTGACTATCCG  
CTACGAGTCAAACGCCGAAGTACTGTTCTCGGGGACAACTGCTACCGGACCGTACATA  
AGGGAGAAGCGTCGGGTTTCGCAACACTCGATGAGAGCGTGTTCGTGGCATATACTAGG  
CATCACCCACACACGGCTATAGTCCGGTCCGAGTGCCTACCCGGACCCAATCCGTGCGCG  
CTACCTGTACTTAGTTGCCCGGACATTCTCGAAACAGTACCCCTAGCCCTCACCAACCA  
AGTTACGGGGGTCACAAATTCCCTGGATCTGTACACCTCTGCAACAGAGGCCAGTCAGTA  
TGCCGGAGATTGCGTGACAACGAAGCTCCTCACGGCTATAGATGCAAGTGCAACTATTGG  
TACTGCTGCCGTTATGCGTAATTCCAGAACGGTGCAGGACCTGTACGTTACCGCCCTAGA  
GACAAAGGTGGTGAATACCGACTCAGGCAGCAACTTTCTCCAGGCACGAAATGGTACTAG  
TATCGGGGTAGTCGCCAGCTGCCTGCAAAGCTAGCAGCCGATGAGTATGGGATCGTCAT  
CGTACCGGAGCCGCTAGAAACAGGACTCACATACGCCGTGTGCATATTGAGCGGAAATG  
GGACGAGTGTGAGGCGTACCGTGCACAAGATGCGCTGATGGACAAGCCGCTACGGATCAC  
GTAATCGGCGCCGACCTTCAGCCTGTGCGCATTGAACTACGATCGCCGTGCTTCTGCGGA  
CGTTACGTCGAAACGTGCCTTGAGCGCACCGAGCAGGGTATCTCTGGGCTAACGACGAT  
TCAGTGGCGGTATGTCTTGTGGCTGGTTAGTTTCGTGTGGATGTCCGCAAGCGGGATCCC  
ACTGCGTTGCTTACGGGCCTGTGTCATTACCGAACTGACTACGATCCTATCGAGGTCGA  
GGCTAGTGCTCCAGTGGCCTACCCGTATGAGGACGCCGTGACCTTCAGCAAGTACCTGGT  
ATTCTTCGCCAAAACCCACAAGTGTCTAGTGGCGAGGGCCAACCTTGCCACGAGTCGCGA  
TGCGACAGCGGGGGTACGACAGAGGAGAGCTTCATGGGCCCCAGCTCGCCTTTGATCGC  
TTCGCCACAGTGTCTGGGCCATCCCTGTGGTGGTTAGGGAGTGGTGTGTGAGAGAT  
GCTGGCATGCTAGGAGGGTGTATGCCAAGTGTACGCGAGCGACAGTAAGTTGCTCCTGGC  
GAAGATCATAGTGAGGCCTAGAGGCTTCTTGGCGACTTCCAGAACAACGAACATCGAGGT  
CGTGGTTACCTCGTATCTCCGCGAGTTGGTTGTGCACGAATACCTCAGGCATAGTGGGGA  
GTAGTTCCTCGCCGCGTTGCGCAAGTAGAACTTCCCGCAGGGCAGCATGGGTCCGTACTT  
AAGGGGTGACCGCCTCAGTAAGCGGTTCCAGGATCCGGTTCGGTTCATCCTCGGGGAGCT  
ATTGATGCAACGGCTTGGGGTTGCCCGGAGTATCCAGGTGGACTCCTGGACCTGTCCG  
TGTCGGGGCGGCCAATGCGGCCTAAGAAGCGGCAATCCCACCGTTTGCTGCGGACATGTA  
CCCGGAGGATAGCACCTTCGCAAACAAGCGCCCGGGCGAGTTCAGTCCGTCGGCCAGCA  
CTGTGGGAATCGTCGCGAAGACGGGGCCTCGGTGTACATCAAAGCTCTCGGGACGCAGGC  
GGGAGAATAGTACCTCATTGGATAACGCTACCTCTCGAAGGTAGGGTCTACCAGCCCAT  
CCTTCGGCTCCCCAACGGCGTGTGATCAAAAACACTCGCACTCTTTTGACCCGTCTAAC  
GAAGTCTCTCGAGTATAACGGGGAAGTGACCTTCCGTGTGGCCGATCAGGCACGTGGGTA  
GTCCGCGTAAACGAACACAGCGATCCGCCTCGACAGTCCGGAACGTGGTCTAGGGTGTACC  
AATATCAGCACCGGCAACCTTCGACACCCATGCCCTCGTGCATATGTGGACGGCGCAGGT  
GTCCCTCGAAAATGACCATTAATACGACATGAATATTACCTCCCTGGAGGCACGATACCG  
GTTCAACCAGCGCATTAGGAGGCAGTAATGGCACGACCAGTACTGCTCGCCATTGGCAGG  
TTGTCCGCGAGCCCAAGGTATCTACGGCGGCTTGCAACAACGGCAGGAGATTAACGCACAG  
TATACTACCGAGGATGCCTTCCGCAACAGCGTCTACAGGCTTTCGAGGGCATGGCG  
GCGATAGGGGTGCGGCGCGGAAAGTTCGACGACAGTCCGCCAGTAAACTTCAGTTCCTG

GCACCTGGGCCGACTAGGTGGGTGGCGTTCCCCGCACCGTTCAGGCCGCGGCGGTGGTG  
CAAGGCGGAAGCGTTGACGCAAACCTGGACGAGATTGACCTTCAGCATGCCGACGGATCA  
GTTAAGTTACAGCATCCGCACTTCGCCAAGGGTGCCGACCTGAACTACCGTATCCGTGAG  
CTGTTGCTCCGGCGCCATGGGGGCTTGGGCTAGCTCCAAATGTTTCCGATCACCGGGAGA  
TTCTTTATCTAGGTCCTTGCCCAGGGTGGCCTGTCACAAGGTTCCGCATACGGCTCTCAG  
ACTTTGCCGTTTGGTAATGTCGGTAGCACATCAACCATCAGCGGCGCTTACGGCCAAATC  
GGCGAACCTGTTGCCGGTCAGGCTGGATTCCGGCCGAGCGGAGCGCCTGGGCGACATGAG  
AGAAATATGGCTGAACTCGATACGCCGCGATCGGGTCCAGCTACGGGCAAGCAGGGCCAG  
AAGGGTCGGTTCAACCCACAACGAATGCATGCTAAGCGTCCGCAGTCCTAGGAAAACGGA  
GCGCTTCTGGCGCTGAGTGGCCTGCTCCAGATTGAGAAAAGTATTGTTTACAAGTAGTTC  
GCTTCCGACTTGAAAATGGGTACATGCAGGGTCAGCTTGAACGGATGCTCTGATAGGCC  
CTGTAGGATGTTTACGGGCTATCCGCACGCCCCCAGTTAATCCGGGGCGGGTTCACAGCT  
CAAGACTACCGGAACCGCGAGATTGACATTGGTGAGCGCGAGCAGGCGTTGATCCTAACC  
TAGGAGCGCATGATGTCCCATGAGCAGTTCATACAGGATTTGTTGTGAGAATCCCGGGCG  
ATCCTTTAGGGCATGGCAGACGGCCCGTCTAATCACGTCCATGCCAATTCCTAGCCTCC  
CTGACTCTTACAGGAGGAGGACCTGGGCGGAGCGCAAGCCCAGACATGCAAGGGGGGGGGT  
ATTGAAGAAGTAGGTAAGCGAACCGCCGCGCACGGGAATAGTATCCGGACAAGTTAGGGC  
AAGGCCATGCTAGGCGGTTACTTCGAGGCGCAGCAGCAGTACGACTAGCACATGGTATGC  
TCCTACCGTGACGAGTTTGCCTCAGATGCCCTGCCCGAGTACATGCGGCAGCAGGTGGCT  
GAGCTGTTTCTGATGGGTGTGCTCAGTGAAGATCACCGCGATGTGGTACAGTTATGAAG  
GACTTGGGCTCCTTTACACTCTTGAGTTCACATCCGCTGAAGGAGAACGAGGGGGT  
CGAGGCTGGGAGGGCTGTAACCGCGCCCCGGACCACGTGTGCACCTGCCTCAGCTCTTGT  
GGTTGCGAGGCGCGTGTGCGCCAAGGGGCCATTACGCCCTAGTGCCTGCTGCTGTATCCG  
GCGCAGGCGGCGGCTGCGGGGCACATGACGGCGAGTGAGCAGAAGGATCGGTGCGACGAG  
TGGGAGGCGGCGAGCTCTAGCAAGGCGGCATTTGTGGGTGTCATGCACGCTAAGCCACGG  
GGTGATAAGCAGAGGCTGGACAGTCTTACCCTTCGGTACCCGAGGCCCTTATTGAGCGG  
GACGTACCGGCAGACCGCCAGCAAATGCCAGTGCCGACTAAGGGCGCAACAGCCCAGGGG  
ATGGGGGCACGCCTCGGCCCCCTCGCGAAACGCGTAGATACTGAGGTGAGCGCCGCGTA  
CGCAATTTGACCCTCCACCCGGATGCTGCAGCCCTAGCACCCGTCGAGCTTGGTTCGGGAC  
TTCACGGACGAGTCCATTCTTGTGTTCTCCACGACCCCGGATGGCGAGACAACACTCCTT  
AGCGGCTGGCACGAGAGATTCCATCCATGTTTACGCCAGATGCTACTGTAAGTGCCAAAA  
TGCCTGCCCCGGTGCATAGCCTACGCAGTGCGGCGACGGATCAGGCAGCCTACGAACCG  
CAGGATCAGCCAAGCAGCGAAGTGTGACCCGCAAGCATGAATCGGCTGCCGCGGCTGAG  
ATGGAGACTGGCAAGGTCTCCCCAGTCTGGGGGCTTGTACGGAAGGTAGCAGTACCCGG  
AACGAGGGTCAAGCGTTAGGCTCGCTGCGAGCACGGCCGACCACGCAGGCTTCTGTCCTG  
GCACGACAGCCCCAGGACGCCCGATCAGCGCGCAGTAGGATGGCGAAACTGGCTGCCGCC  
AGACTAACGGAACGCACCCTCGAAGTCAGCCCGGAGGATGGCAAGACCACGCGTGCAGTG  
CTTCCAAGAAATGTCGCACTCGAACGCCTTCTAGCTAACGCGAGAGCCACACAGGAACGA  
GTGTCGCTGCACTCTGGACATTGGACCCCGCAACAGCGACAGGATCCCGACGGGACTTC  
TACACGGGCGGCGTGGGCGTGTGGGCGATGGAAATGTATGTCGATGCCGTCCCCGCAGCG  
TCGGACCTGGTGATTTGGCAGCAGGTCAGTCTGCAGATCACCAAGCACATGGACGGGACT  
GTTGGCAAGGCAAATGGCGGTGACGTGGGTGATATGGTTACGGACGGCGAGGTGAGCAG  
AGTACCTCAGGCCTCACTAGCACGATTAAGTACCAGCGCTTTGTTGCAGTTGCGCCGC  
GATTTTGTAGCAAGAGGATACACGCCTTACTCGGTAAGGATCTTAACGGCGAAGCC  
CAAGCCGTCGGGTAGAACGTCGCTGGGCGCATGAAGTTTGGCGACACGATCACGCGCGAA  
TAAGCCGGGTTCGGGTACCGCGACAGTTCGGGAGGGCACGGCTGTAAGTCGAGCGCATT  
GCGCAGCAGCTGTTGCTGACTACTGTGTGGTTCGAAGTTGTCCTTGGCCTCGCCGTGTAT  
GAGCTGGCGCCGCAACGGGCCCTGGGTTTCGAGATGAACTTCTAGGCAATCAGCAACGAG  
GACTCTGTCATCAACTATCAGCGGGAGCGGAAGACCAAGTGGAAACAAGCTAACCACAGTT  
CGTGGTGTAAACTTCTCACAAAATGAAGGGGAGTGATACGCCCACTTACGGAGGCTA  
TAGGACCAACCCAACAGCTCCAAATATTCAACTCTCCCCGGAGGAAATCGTGCCTGTGAA  
CGCGGGTGCTGACACCTCACTCACTCAGGTAAGGACTCCAGTAGACCCGGGCCTGGCTGG  
ACAGATAGACAAGCAGCACCATCTGGTTCTAACTCCGCCGCTGGAAGCCACGCTTACATA  
TGCTCATCGCACCACTTGGGGTAACTGGCAAGAAAGTCTGCAAAGGAACTAACTTAGTA  
CTTGCGGCAAGCATACTGGACCATCGGGACGAGATGTTCCCCGACGGAACGCCTACTT  
CGAGTTCAAGCGGGAGTACGGCGACAACATTCTTGCCACAATATTCACGATCCCGACGA  
CAAACCTACCGCCCCGGGGGAAGTCACTTAATCTTAGGAAGCGGGCTGTACAGACAAGGA

TATTGCCTTTAAAGAGGGCGGGCGAGGCTCTCCTGGACCTCAAAGGAGTCATCGGCTTCAC  
GAGATGTAGGGTTCGACCCACTGACTATCCTTGCTGATAGCGCAACCTTCTGTATAACCAT  
GGCGCTGAAGATGGGGCTCCTTTTCGCCCTCCATTGCTCACGCGAGTTCTGCTCTGGCTGT  
GTCTGCCATGGACGACCTCGTTTGTAAAGATTATGAGGCCATGGACTACGCTTTTAACTT  
CCGCGTGACTGCCGGGTCCGTCTCCCTGGTGGGTGGTTCGAGGCCTGGACGGGGCTGCGTTC  
CAAAGCCGAGATTCCCAGGCGCACCTGAGGGCATGTTCTCTGGTCTGACGAACTTCCTGTC  
AGCGATCCCCAAACGCATGGGCCACCCCCCGATCCGGCAGAAGTTCTGGCCAATCTGGG  
AGCGGATGCGGTGCGTGGTGCCGGTATCCTTACCAAGGACAATACGGCTAGTACCTTACG  
ATTGAACTCAAAGTTCGTTCGATGGCACCCCTTGCCAAGGAGACGAAGGGTCTGGAGAAGAA  
TTTCGCCAGGTTGACCGTCTTGACACGATCTGTGTCAAATTGGAGGACAGTGATTGTTA  
CGGCGACGCGGGGGATGCCCTTGCGCGGAAGGCGGCAGGGGAGCTGGCCCGCCGAGACGC  
GGACTCGACCCGTTTCGGTGCCTTCATGAACGTGCGCCTCGACACGGACGTGATGCGCCT  
GTACGACGATGACTTGGCGATGATATCCGAGCGGGAGGAGCGGGCTAAGAGCCTGGGTTT  
AGCTGGGTTTAAAGAAATTCACACCGTGCCCCGCCTATTTCCACCGCGCCTTAAGCGAGTC  
GAAGAGGCGGGCGTTAGAGGACGCCTACAGTCGCAAGACCATGGAGAACCTGCTCACTGA  
GAGCATTGTGCGGCGCCTAAACCTGACCAACAAAGAGGGGGAGAAGGTCAGTACCGCGAT  
TCTGACAGGTGGCAGGAACAAGGCCGCTGGCCAGCGCCCCGAGTGCATGGGTGCCCGGC  
CGAAACAGACCCGGATGCAATCAACACCTTGCTCGTGGAGGCCGGTAAAGACGCCACCAC  
GATCAAGAGTGTCATGGGAAGTAGTAAGGGGAAACTTGATGTGGCCGGCATGTCCTAATC  
CAGCAAGACTCGGTTACCGATGGATATGACCGTGAAGATTACCACACCCGGCGGTTCGCAC  
AATCTCCGTGCTGCACATGATTGACGCCGACCTAGGTCGCCTCGCTCTGAACTGCAACCA  
GCAGATGGCAGGTTCGGTCAGGCCTCTTGGCAGCCGGTGTAGGCGGAGACGACGCAAGTAC  
TCAGGCCCTCCGGTGCCGCTACATCGGAACCTTGCTGCATGCAGAACTCATGTAAGCAAT  
CATTTACGAAGGTATGCTCCAGTTCGCCACCTAACGTCAGACTTCACTGGCAACTGCCC  
ACTTGCCGTTGTATTGGTTACAACGGCACTACGGACTAAGAGCCTTGCGCAGACTACCAT  
GCTGGCCGCATCTGGGCTGTGTTAGGTCGCATAGTTCTGGACACTTGCGTGCCCTCACGG  
GGCGGCTCGTAAAAGACGGAGCGCTTCAGACAGTCCCCCGGCGTGGCTGGGTTTCGCCG  
TAAGGCTGGTTGCTTTCCTGACCTGTGCGGCGAGTGGTCTTCGGTGGTTTGTGTCTACCT  
CGCTCGCGAGTCTGGGTAGCTCCCTTCCTTAGTCAGTACGAGGCGAGTCCGAGCTTCCA  
CGACACCTTGCTGGACCGCGTGCGAGACCTTCGCAACCAGGGCGCTCCGCTCCTGGAGGC  
GATGAAGTATGTGCATACGCATAACGCGCGCCTGAACGCCGACTTCAACATGAAAACGAG  
CGGCAGGGTTGGCATGGGCGATCGTAAACGCGTTGCTGATGCTGCGCTAGTCCGGCCTGGA  
CGCCACGGCCCGGGGTTAGATCAAGAGAGCAGTGGATGACAACACCGATTACAACGGGAT  
AATCGTCATGAGTTTGCCTGAGGCGGTTGTCCGCAGGATGCAGACGTTGCCGGACTGAA  
CGGCCGGGCCCCCTCTTGGAATACACGTTCCCTGTGCGGTAGGTACGTTGAAGGCAGCAG  
TTTTGCTCGTAGCCTGCTCGGCAGGTTTCTCGTCTAGCCCCGGAGCTGCGGAATCTTCGG  
ACACCACAAGCTCCTTACGGTACTCTCAAGAACTGAGGGTACACTGGACTGACACTCCG  
CCTAGCCCACCAGTACCCACGCACCATGATGATGGTAGCTGGAAACGAACTGCCCAAAGC  
CCAGTCCGTGGACCTGGAAGCAGAGGGCGCGCCTCATGACCATGGCAAGCAAAGACATTGG  
CTAAACTGCCGTGATTGGCTATCTCGGTGACGCAGCCGGTTTCGTGCGCCTGACGGGTAG  
ACGCGGCGGACTTTCTGTCCCTGTGCCAGGTCTGGCCAACCTCCCCTGGGAGTATTGTACA  
GGGCGGGGGTTACTTGCTCCAAGCTGAAGGCACAGAGGCCCATGCCGATTACATGCAGGC  
TGCGCGTACCGTACTACCTTTCGTGGGACTGATGGCGGAAACTGCACCACTAAAGATCGG  
TTGAAAGGAGTATCAACCATTTTCGCAAACCCCAAGTACATGGGCCGACTACCTAGGCGAC  
GGCCTAGAGGATAACGGACCAAGTCGCATTCCCGTACCGGAAACAGAGAAGCGAGTTTGGC  
ACTCTGGGCGGGGATCCGGCTGCTCTCACATACATCCCAGCAGGTTGTATTCCACCGGCA  
GCTGTCCTTCTAAATGGGGCCGCAATCCGTTTACGGCGTGGCTCTGCGCCATGCCAGTCT  
CGTCACGAGTTCACCCACGGCGTGCCATTACTTCCGCGATCGAGAGACACGAATTATCAT  
CAGTTCTTCTACTCGGTAGCAGAGGGAGTGAATGAGACACATGACACTGCTTCCGAAGCG  
CTGAGTGTTCGAGAGGAGGCCAGAGGGAGTGAAGTAGCCGCCATCGGATTAAGTGGCAGCT  
GCGGCCATTGACACCACGCTCCCGTTGCGTCTAGACCCGCCCAACCCGGCGAAGGTGGAT  
GGGCTGCTTGCCTACGTCCGATGGGTGAGTTGTCCGGTTGGTACTGTCGATCAAAGCATA  
CGGATTCTGGATAGGGGTGGTCCAGACCATCGCGAGTTCGCGCCGTTTGTGATGTGGCC  
AGGCACCCCTTTCTGTGCAATACGCAACTCTAGCGGCCGCTCAGATAGTGAATCCGCAT  
GCGCTCGCTCACTCCGATCTACTAGACTGGCAGGATTGCACTCTGCTGTGGATTCCCTGG  
GCACCGGCTCACATGCCCTCTGGGGACTAACACTTTAAGAGAGGGATAAAGCAGTACATTC  
AGTCTACTAATTGCAGATGATAGCGCTTCACATATTAAGCCCGACTGCTGCGTATACT

GGTACGTATGTCCTCTGTTGTGTGGCCCGCTTAGTTGCATAGCCGCATATAGCCCCCGTG  
TGGTCTGGGTCCCTAACTATAGAGCAGGCCCGCAGCCCTATTCTTGGTGCGGGTAATTTA  
TCTATCACCCGCAACCTGACTGACAGCTGCTTCTTGGTGTTCGGACTAACTAACGCCTA  
GGAGCGTTCTGTGAGGTCATGGAGGTCGCAGGGCACACCCGCGAGAATCTCTGCAGCAACA  
ACTGCGGAGAACGACGGAAGTAGGGTGGCGATCGAAAAAGTAGTCTTTACTGTAGTTCAT  
ATGGCTAGCATCCAAATTGTTTCCGGGACAGTATTAATGAATGGACTGTTAGTACAGTCA  
ATAGTTTCACCGCGTGTGATGACGTAACGGTCACCTTTATAACCAACGCTTGTGTCTAT  
TTTGCTTCCGCTATCACGCTAAGAGCGCAATCTGTAAAATCTCGAACCTCGCCGCCCGT  
TGGGACGACTTGGGAATCATCTTTGGCAAATCTCACGGCCGTGGGACAGACACCTATAAC  
GTCTACACTAGTCGACATAACATCGCCACTGGCGGCGGTGCAGAAGTAGGCTGCGTTCCA  
GTCCGTAATGACCGTCTGTATAACTGCAAACCTTAGGTATGATATTGCCTCTGGTCAACAC  
GGCGAAGACTTCCACAGTAACGCCGAGGATCGCAGCACCCGTAAACTGCACAGTCTCCGGT  
CGACAATTTGGCAGGGGGCGTATTTAGCTACACACAGTGTACACTGACTAACGCCTCG  
GGTGGTTGGATTCTTATATTCGCTGAGATTCTTGGTGGTACGTGCCTTGTAGACCAATGT  
ACTTTTAACTACTACCGACGAGTCGCAGCCTGTTTGTGTGGGGTGTAGATGGAGGTGGA  
AATTACACAGCCTTGACTCCTCATATAACGCAACCCTGTGCATTCCTTATAACAAGGCGCC  
TGTATGCGAGCGTCCAGATTAAGTAAGTCTAGTCCCCTACTGCGCGCGCGTCTGAGAGT  
AGTACAGTTCAGTAAACATACAGTGCAGCGGTCAGGCTATTGATGTATGCTCTCTGGGC  
AAGGAACAACACCACGATATTACATCGGTCCGTATCTCTCCTGGATTTTTGATCGTGGAG  
AGTTTAGCGGCTTTAGCACGTAGCATCACGCCCGTGTCTGGATCTGACCGCTTAAACAAT  
GCCCGATGCGGTTGCCTGTGCTGGGTTATAGGGGTAAAGTAACTACAGAAACCTATGCG  
AGTAACGTTAGTGCTCCAGTCACGTTACGGCACATTTATTCTTAGGACCCGACCGGCCAG  
GGTAATATAACGGCCAGCATTACGCCGGAAGTAGGATTAACGTTCGATTTCCGCAATCCG  
ACCTAAGCGTCTTCAGCGACGTTGGGCCTGTGCACGGAGGTCGGGACAAACTTGAGCTCA  
GGCGTTAATAACCAGCTGAACTGGCCGACGAGTATTTAGGCGGTAGAAATTTGAAATCAA  
CTAGTGATGTTCTCGGGGAATTGCACAGTGTACTGGCGCAGCTTATGTTATACGAGCTAC  
GCCGGTCCCAGTAGCAGGATCCAACGATTCTTTGCCCGCGGCTGTTACGCCTGCTGTCTG  
AAAACCTTCTTTAACGATAACACCATTACGCGGTATCCAACCTCGGTGAGATGACCTAACGG  
AGTTGCACCTGCAGCTCGAGGGTAAATGTGATGGTAGCGTCACGCGTCCACGGACCTAGC  
TAAAGCTAGCCAAGGGCGACGTAGCAGCAGTGTACGGAGAATACCCTGTGGAGGCCCGCC  
AACGGTTTGAACGGGCGCAACCTGTGCGCAGGATATAACGGGGGATCGTGGACTAATGCC  
TAGACGGAAGCGAGTACCTCCACTGCAGCGTGCCCTGGATGCAGGACGTCATGGCATAGT  
TCATCCTCTACGGACCTTAAACATTTATGGTCCCCGCCCAACGCGGAGAGGCTAACACTG  
CCACTGCATGTCTGTTGGGCCTCTGGGACTGGGCGCAGGGCCCCACGCGTATTAGGGTCC  
GCGTCTGTAGCTCCGAGGATAAGGCTTAGGAGAATGGCAAAGTCATGCACGGGCCGATCC  
ACTGCGGGCCGCTATTCCAGTACCTTTCTCGGAAACTACGCAGGGGACCGAACCTCTG  
TGCGGGAGTTCGACGTGCTCTGGCCCTAGGTGGGTGTGGACAAGTCCGCATCCGTGAACT  
GTCTGGGTAGCAACTGGTCCATATAAGAGTATCGTTGAAACCTGTTGATCCCAGCGGATA  
TCAAGATCACGAAGAACGGGTTTACCGCACACGAGAGTGTATGCTCTACACGCTCTCTA  
AGGAGTTCACCTCCATTGTGGCCGACAGGCACGGTCGCATCTTGTACTTGGGTACACCGC  
AACCGTGGGAGACTTTTTACTGCACTCGGACTGTCCGTGCGTTCATTGACCGCTTATGGA  
CAGTTTGCTCACCAAAGACAGCGAGCAGCCGAAGTACGGGGATGGGCCGGGACCCAGGA  
TTCTCGAAAGGATGGGGCGACTCGGGTACAGCTGCGAGACCGGCAGTGGCTTGGACAGTA  
CTCGTGGTTCGTAGTACCGACCTTAGCGGTAAACTCAGGAGGATCTGTGTGATAATGAGA  
TGGACCAGGGGCCAGACACCTTTAAACCACCGTCCCTGTTGAACACCTCCCCCTGAGACT  
CTGCACTTCAGCATTTGCTGCTCCGCGGGCTGATCGTGGCTGACATCTAACATGAGCAAG  
TACCGTGGAGCTGGTTCTGGGCCGCTGAGGCAAGATTCAAGAGCTAATCGCCGCATGAGA  
TACCTTTTTCAGTCTGTGGAGAAGTTCCCGCTAGGTAGAGTTCATGTACACTACGAGCAGA  
TCTAGTCGCTGATCCTGTTACTCGACCCTGCCGGTAACTGCGGGGATGAGCTGGCGTTTG  
AGAAGGACGGTGCAATTGGTCTGTATATCCACGTCGTAGCCTCGCGCGACTTCAAAGAGT  
GCGTCTCCGAAGATGACCTCGACATCCTGATTTCAGTTATGTAATGATTTCCGGGTGAAGG  
TTATCCTGGTGGAGAACGACAAGGGCGGATGTAAGTGTGACCCAGCTCTTTCGTAACCATT  
CTTAGGGCGTTGGACCTTAGGGTCAGAAGAGCCTCCTAGGCGTAGATGTAGACTAGCTGC  
AGAAGACTGAGCTGAAGGACCTCCGGACCATCAACACGATCCGTGCAGTAAAGCAGAAGA  
ATCCCCCTCGCGCCGATTGCAGCTCTGTATACATGGACCCGGAGTTGCGCTAGCAGTACC  
AGTTGTTGCCCGTGATGTGAGCTCGGGTCTTTACCAGATGCGCAGCTTCACCTCTGACG  
CGGCCACCCGGACCGAGGAAGCCTGAATGGATGCTCTTGGAGGGTCCGGTTGCCGAAATCA

TTGGTGTCTTGGTGTATCGACGAGGTTGAGAAACAACAGCGCCGCGGTGCTGCGATAGTGC  
TTGTGTTTTTTCGTAATCCAAATGGCAGGGCGCCGGATGTAGGCCGCTACGCCCGTAGG  
GGCCCCGCGTTATTCGAATGAGCTCGGTAAGATGATAAAGATGACTGATTTACCAAAAA  
CACGGCGCTGCAGGCTATCATGAATCTATCTATTACCCGAATGGCCGCAGCGACCATCCT  
AGGGTACACCGTCAGTGACTGTCTAATGCTTCGTCTGTGCTCTTTTCGGTACTCTAACT  
GGGGTACATCGTGCGGAAGTGTAACCTGCAGGAGCGCGGTACAGTCCGTGGCGTAGATTCA  
AGGCCACCCTGACCTCTGCCGCACTTGCCCTCGTTCCGGGTACGGGCGTCGTGTACAACG  
CATCCGAGTACATAGGTCCAGAGGCCGACCTCCGCATCCTCCCGTACAAGGACACCGGGG  
GCCCCACTACTTGGTCTATGATCAAACCTGTGGGCACCCAAAATGCCTGGTTCACGACCC  
AGGAGTGCGCTGAGGACAGGCCGAAGGCTCTACAGGTGTACTGGTACGCCAACCGCCTGT  
ACTTGCCCCAGGAGGACCCACTGAGCGTCAAAGCGGGTATGCTATACGAGGCGTACTACG  
TCGGTTCGTTCCGGCTTCGCCTGGGAGCGGAACGAGAGGGGTTCGCAAGGTCCCATCTAGCT  
TCCAGGTAGCCCTGGCTTCACGCCACTCTGAAGCGAGCTGCCTAGCCATCCAGGTCCCGA  
GGCAAGGAAAGCACGGGGTAGCCCAAGGTCATAAAGGTATCGGTGCATGAGAGACCCGTCT  
GGGTGCTTGATTACCGTCGCTGGGATTATGATCCGCTGTGCCTGGATGACATTCTTTGAG  
GCTAACGGTAGCGCTGATCCTAGCCCTCGTTGTGGTGGACGGAGCGGGCTTATAGGCAAC  
GAAGAAGGCGCGGAATAACCATCGCACTTCCGAGACCATAGTGTTCGCAGCTATAGGCGGC  
AGAGGCCCGACCTGGGCGTATTCAAGGACTGCTACTGCATGTTCGTGAACTGGGCCAGAGG  
AGTGGCACCAACAGGCCCTGGTTGCGTTGAATGAACGACCTACTTCGGGAGATTCTCGTGT  
GCCTGCTGCGGATCTTAGAGGGCTGTGCGAGCAGCTCAAGTGCTGAACTTGTCCGCTGGC  
AGCGTCCCGCTGCGCAATCAGACACCAAAGTTTAACTGGTCCCTCGGACTGCTAGCGTAAC  
AAAAAGCTGTAGCTCTGTGCAATGCGCTGAACGGATTCATTGACTGAAAGAAAAAACAT  
GAGCATTATTTTCGGCAACTGCTAGACCACAAGTGACACCCAGCGGCAATGCAGTCATCGG  
GCTGCCGTATCGCCACGGCTTCTCTCAGGGTGTATGGGGTCCCGCAGAGTCTTGCCTTGGG  
GGCCACCATGGCAGCCAGGGTGTTCGCGTCTGGATACTGCCTTGTGGTTCGTGGCGAAA  
TGCCGGCGCTGGACAGCCGGCCACTGAGAATGTTCGTGTTTAAAGGGCCAGGCCCTGACCGG  
TTACGCCGCGACCGGAACCCATAGCACCACCGTGACCTTTACAGTAGCATCCAGCGGCTC  
CTCCGCCGTGCGGTTGAATTAAGGCGTCGCCACGCTTAGGGTGTCTGGTTCATAGCGGAC  
GCCTTAGCAGCGGATCGTCTCATGCTGGGGTGCCTAGCTGGCGGCTTGAACCCGCTGTA  
ATGATCCGCCAGACCTCCCTCTACCATGGAGGCCCGCGCGGCCCCACGCTCCTTGGTGC  
CGTTCGCTTCGGCTCCCTGCTGGGAGTACAGTTCGCGTACGATGTGCGGGCGTTGTTGCCT  
CGCGGGTACCCACATGCGTTCGAGATGTTTCGGCTGCACGGCGCATGGACAGGGTCTATTGC  
GGATCTCCCTTCTACTGCCTAGTAACTGGTAGGCGGCCAGTGGTTCCTGGTGCCTTC  
TCTATCCCTTCCCTGGTCCGATTTTCGGTTCCTGGTGCCTTTGGCAACTATCCACCTC  
CCTGGGGCTGCCT

>NewGenomeName\_220

TGCAGGCGGGCTTATTATTACCCCCCTGCCGGGACGGGACATCCGAATAGTAATGGGCT  
TAATACATAAATGGGCCGCAACTAAGCGCACGGTTCAGTATCTTCGTTTCAGACTCGG  
CCCAAATAATCGAACGTGCGCGATTGTTTGGGAAGGACCGTAGGTCCGGTTCGAATGA  
GGAATATTCCTTGCTTCCATAGGAACGATCAACTAAACAAAATCAATCGCTGTTACACGT  
GTAAGAATACTATTAGTTCGCAGAGTTTATAAATACCATTCAAGTTGAAGGGTTTGGTGC  
TCTCTCTCGACTGTCAGACGGTGTGCCATGATGAAGCTCTCCGGGAGGAAAGAAGGGCGG  
AGGTGGAGGAGCCGCATCGCCGCTCCCTCCGACGAAGTATACGAAGTCGTAGGTATGTCC  
AGGAATTTATAGCAGCGTCGTAATAAAGGCGTCTGTATCATCATTGTATTTGTGTATT  
TAAATATTTAAATACCAAACCCTAAGGAATAAACTATATGTTTAAATAAAATAACACATGA  
CAATAAAAGAAAACAATAATAAATAAATTTTATTATGCAAACATTGTATAATTA  
GGTCTGATTAATATACATATATATATGTATATTACAGTGTGGTTAAATAAATGACTTG  
GAAGGAAATAATAATATTAAGATAAACAATAAATAATTTCCGAATACATAAAAAGGGGAA  
AATGCAATTAAGACCTGTCACGTTTACAACCTTTAGAATATTTTAAATGGCCGAAGGCCAGT  
CAGTAGGCAGGTACATCAGTGATTGCTTCGTGACGAAGCAAGGGTACTATGGTAAATAAG  
AAAGCATCTGACAACCTTTAATAGTGGTCCCCTATACAGCTGTCATATGACAGCTGGCAA  
GGATACTTGGGCGGACTCCAAATATATATTTGAAATAACATATAAAATAAACAAGGTATC  
GATACTATTATTAATTAAGAGTTCGGGAAAGAGGAGACGTGCTCCCCACGCCAATTTAG  
GGGTGGGCCATATGTCCCGAGTTAGTGCGCTTACGTC

>NewGenomeName\_221

ACGGGCCACATGGAGGCAGGGAGCCACCATATTGGCACCTGTAAAGCTGCTGCTGCAAA  
GAGCTGGTGGTTTACGTTGGATGACTATACGGCCGAAGGAGCAGCTAACTTGAGGCTCCT

GCTTCCTGGTCCGTTCCAGTTTGTAAATATATGGGAAGGAACGGGTGGAGCAGGGAACCCC  
TCATTTGCAGGGCTTTAGACAGTTTAAAAAGAAGCAGCAACTTAGTCCCTTCAAGAACT  
ACTTGCCCGAGCTCACTGGGAAAAGGACCGCGGCTCAGATCAAAGAACGAGGAGTATTG  
TTATAAGGAAAACGAAGTGATACTCACCATAGGGGAGGCAGTTCGAGGCAACCGGAGTGT  
CCATGCCGGTGTCTGTTCCGGCCGTGAAGGCCGAAAGGAGAATAGTGGATATCGCGCGAGA  
GTTTGGCGTGATCGGCGTCTAGTATGTGCTTGTCTGAGTGATTGGGCACTGATGATTGG  
ACAGAAATCCCGTGTCTCAAGTCGGAAGTCGTTGTTATCAGGGGGCCATCCGGTGTGGG  
TAACTCGAGACTTGACTCTGAAATGGAAGGAACGAAGTGATATAGGATGAAAGGTGACTG  
GTGGGATGGGTATCCCAATGAAGATATAGTTATCCTGGATGACTTCTATGGGGGCCTGCT  
TATCTGGGAAATCTGGAGATTCATGGACATGTATCGACATGGAGCTTCCGTGAAGGGGAC  
TTATGTGAAGTTCACGTCTAAGAAGATTGTCATAAAGAGTAATGCGCACCCGGAAAGTTG  
GTACGGGCCGGATAAGTGTCTCTGGGTGCTTTGTTTCAGGAGGTTCAATTAAGTGGATGTC  
CTGGAATGGACTGTGATTTAAGGATGTGCCAGATGCTAAGAAGAAGCACCCGATCAACTA  
CTAACACTCAGCCATAGGACAAGAGCGTCTTGGAGGTGATTAATAAAAAATGCGCTCCG  
GGTGTGCGGCGACGGACGAAGGCAAAAGCCGCCTGAGACCGCGCGAAGCGCGGGCAGGCG  
CGACCGACAGCGAACGCGCACACCCCGGGTCCGCTCAGGGTCAGCCCCGTCGAGGGGCCG  
AAGGCCCGAAGATCGCTATGCTGTACCCCTTCAAATAAAAAGGCTCCAAAGAATAA  
ATGTTCCGGTGTCTTTATTTAGGAGTTGCTAAGTGAGTTAAGTTCATTTGCTGGAAGTGA  
ACTGGATGGTGACCTTGACCTGCAAGTCCATCTTGTGTGGGGTGGGTTCTGGCCAACTGA  
AGCCTAACCGATTATGTTTGACCCTGATTCCGGAGCTGGGAAGGTTCTGAACACTTTTCT  
CCATAACCGATATCCAGGAGGAATTGGGAGTGTGAGCCGCAGGACCGCCGTGACTTTAG  
CAGCATCAGTGTCCGGTACGCTTAGTTGTGGTCTTGGTTTAAATAGCCGTTTGAAGCCTT  
TGCTGAGACCCCATTTACGAGCCCCGTCCAACCTCGCCAGGGGGTACGCCTCAAGTCTTG  
TCTTTTGGAAAGAAGTCCATAGGTGCTTGTCTAGGATAGGAAGCTTTTGAGTGAACCCTT  
TCCACGCCTCCAGGTTTCGTTGAGGGGTCTGATTTTCACTTTTGCTAACCTGACTCCAT  
AACTTCAAAGTAATCCCAATGGATAGAACCCCAATCCAGGGAGCCTAACAGTATTA  
TGTTAATTCATCAATTCTAAATGACAGCTGAGACCCCTGTCCCTTTGTGTAGTACCT  
GGCCGAAAACCTAACAAATCTGAATCCATCGTCCCTGTTGGTTCTATGGCCCCTCAAGA  
TGGCATGTATCCTTCTCCTCCYCCAGTACCGACCCCTCCATCTCCTTCTCATCGGAG  
CCAGAAGTCGTGCTGCTAGCAGCCTGGTTAAAGGTTTCATCACATCCGGGTTAATAATT  
AACCAGTGGCYCCAGTAGCCGTGRTAGTATA

>NewGenomeName\_222

TCGTTTTGAATACTTATTTTAGGCTTGTTATTACGCATTTTATAGACGCCTTAATTGTTA  
TTTCATAACCAATTTGACACCGTTTAACTAATCAACTATGCACATACCTTGATGTTTTTTATCAG  
AATATAAAGGTGAGAACGTTCCAATTGTTTCTGTGATGTTAGAATGCCTCATTAAGTCCA  
TTAATAAATACATATCTACACCATTATTAATTAATAGCTAGCGTACGAGTGTCTTAAAT  
GGTGTATTTTTAGATTCGGGAATGCAGATTTAAAATGATACGAATAAGTAACGTATCTAA  
TAGGTTCTAAACCCCGAATATAGAATACTTTTCGTCAAAAATTTATATCTTTTAGAAG  
ATTCATTATTAATGTTTTTAAGCATCTCACTAATTAATTTGGTACAGGTCTTATCCCTT  
TAGAGCTTTCTTTTTTTAGATTATATTCAATTTTTCTATTACTTAAATTGATATTCTTAG  
TTACGTTAATTTTCGCTTTTATTTTATCGTAATCTTTCCACTGCAAACCTAAAGCTTCTC  
CTATGCTAAGACCAGAATAAAATAACAGTCTAGTCAGCTGACGAGAAGTATCAGTTGTGA  
TTTGTCTACTTTTTTCATCAAATTTCTCACGAGTGATAAATTTAGCTTGTGGATTTGTTT  
TGGGAATAGGAGTTACCGATAATGTGGGGTCGTATAGGAGCTTGTAATGCTTTTAGGCGT  
AATTGATAACTGCTTTAAAACCTGCCACACAGATCGGGCATAGTCAACAGAAAGACCTG  
CATCGTTTAAACAATAATTCCTGAAAGCAGTACATTACGTAGTAGTATTTGCCACTAG  
GTATATTTCCGAACCTTTCTTTTATGTGAGTATTATATTCTGTAGTTTCGCTTTTCTATTG  
AGCGTGCAGAAAGATTTTCATTTTTTATACGATCAAATATATATATTCAAAGGGTTGAT  
TGTCGAGTATCCATATTTAACATTTTGTATACATTCGCTTTTACGCTAGTTTGGCATCCT  
TCTTACGTTCAAACGCACGCTTCATTTTTTCGTTTGTATTACCCTATACATCTATATATC  
TAATGGAAAAATACCATTTACCTGTATTACCATCCTTATATACTGGCATTTCACTTCTCC  
CTCCTCAAATTTGGCAAAAATGATAAGGGTACGCGGGACACCCTTCAAATTTATATAAA  
AAAAGAGAGAGCGCAGATGCACCGTCTCATGTGCAAAATATTTTACGCGACTTGTCGAATT  
TGAAGCTTGGCGAAATATTTTACGCGGCTTGTTTTGTATATATCTAATATACCATCAAAG  
AGAGTGAAGTTCAAGCGATTTCACTAAGAAATCTAATTTTTTATATGATTTTCAATTTTAT  
GTACTGTTTCTTTTGAATACGAGATTTCTCCGGCAGGGTCATACCTATTAATTTTCGATA  
TTCTGTCCTTGCTGATTGTGGTGATATTTAGAACGTTAGCATAGGTCTTTTTTATACTAGA



ATCGCTCATATCTTTTGGCAACCTTCGAAGATTTTTTTGAAGTCGTCATTCAGCGATGTGT  
TTTCAGCAAGTAATTTTTGATCGTATGGGTTTTCTGCTTTTGACACCTTTTCAAGATTGA  
TAATGATTTTTTTAGCTAAATCCTTACCCGTTACGTCCATTTTTTCCAATACTAAAGTTA  
ACAAATTTTCTTCGATATGCACATTGAATTTACTTCTGGAAGATGTAAGTGGAACTACCG  
TTAATATTGGATTTTTATTTGAATCGTGATTATTGAGTACAATACAAAAATGGTTTCCAG  
AAAACCTCTCTGCCAAAATTAACACCTAACTTTACATAAATTATAGTGCCTTTTTTATATC  
TGGTGTAAATTTTGTTTTCTTTTAACAACCTAACTTGATCCAATAAAAACTCTGAATATT  
CAAGACTCCATGAATTCATATATTTAAATTTGTAAATCTCGCTATTTTGAATCTTTTTAA  
AATCATTAACTGCTGTTTCTAAAGGTGCGCTCTTCCATCCCTCATCCTCCTCACGCCA  
CACAAGCGCTATTAATCAATATCCAGTAATTGTTGTTTTTTGTTATCGAACTCTACCTGA  
GAAATTAACCTCCGACATATAATAATTCTTTATATTTTATTAATTCATCAGCAACAGAAAA  
CTCATTTTTTTCAGAATTGGATGGTTTCATAGAACTTTCTCGAATAGCGATTTGTTCTTGT  
ATTGTTTCCGCCATTCTAGATACAGTGTTTTTTGATATGCTTCCTATAGCTATACTTTAT  
GAACCGTGATGTATAATTATTTTCGCCAAAAGAAGTCCTTTTTTATACGAAGCAGAATTG  
ATTTTCGCGAATGGAAATTCATGAATTTTCAAACCATATATCATACTTTTGTCTAAGAGT  
AACAACTTTCGACCAGTACATACTATTAAGTAGGTATTATTATTGTACAATCCCGAAGTT  
AGATACATTATGTTTTTCAATTATCTTTTAAAATCATAGGTAGTTCTTTCACTTCTTTTTT  
GTACCAAAACAAATCCTCTACACCCATTTTCGCTAAATCTTTGGTAGATTTTAGATAAGTTT  
TCGTCAGATTTATTGCTTTCACTTTCAAATTTCACTTCTTTTCTAGGTTTTCTTTGGTAT  
TCTTTTAAAATTTCTCTTTTGTCTTCCACAGATAGTTGCTTGTATTGCTTCCTTTCTTCT  
TTTATTTTAGTTCCATAAATATTGACTCTCAATCATACTTTCTTTGAACGTTAATCTGCTC  
TCAGGTAATTCTTTCATGTTTCATTTCTCCTTTAATTATATTTCTTTATATTTAAAACTC  
TCAACGGCTCAAATGTAATCGAATACTCGCCATAGTGAGTCCACTACCATATATCTTCT  
TATATAGTTCTATTGCTTCTAATATGTATTCTTCGCTTCATTGTAGATACTCAGACAAC  
CACACAAGTTGCGTACGCCATCATTATAAGCTTCTACAATTTTCGCGTAGCGGTACGGCTG  
ATATAAAGCCGTGTCGTCTTGCCTCATTTCGAACTTACGATTGTTGAATTTTCGATTGAT  
CTAAAAGGTTGCCATACGTCAACTTGTGGTGGGCAAGTTCTTCATATAATACTTTTAATT  
TGTTCTTTTCGGATAGGGAAGGTCTAATAAAAAATTTCTCCTTCTCGATACCAACCATCGA  
AGCCTCGAGGTAATCTTTGTGCTTCTTTCACTTCAACCTCACATTTTCATAAGCAATTTCT  
CGTATTTTCCCATGCGCCAAACCCCTTTGGTGTCTTATTTCTTTCTATCTCTAACCCATT  
TCATAAAATTTTTCGATTTTCATCCCATTCTTTGGGAGTAAATTCATCTTGATTTGCATGAC  
CGGCTATAGTTTCTTGATGAATACTTCTCTCTTCTGTAATTTCTCGATTTAGGTACATTAA  
AGTAATCTGCTAATTGATGGACATTTGATATTCTAGGATATTTAAGTTCTTGAAGCCAGT  
TAGAGATTGTTGATTGACTTACCCCAATTGCTTCAGACAATTCTACTTGAGTAATGTTGT  
TCTCTTTCAGAAGTTGCTCTAAGTTCTCTGATAAAATTTTTCTAGCACTCTGATATTGCA  
TAATTTTCTCCTTTAGTATTACTTAATGTAAAATAATTTACCATACGTAATATCACTTT  
TCAATACAAAATATTACTTTTTTGGAAATAAATATCGCTTTAGGTGTTGACATATTACTTT  
AAGTGATAGTACAGTTGTAATGTCAACGGGAGGTTATCCGAAATGCCAGAAAATTTTAA  
AGAGTTCTCTGTAAAGGTCTGGAGAATAATTCGAATATGACACAACAAGATGTCGCTGA  
TAAGTTAGGCGTTACTAAAAAATTTGTAATAAGATGCGAAAAAGATGACGCAGAATTTAA  
AGGCTTACAATTGTATGCTTTAGCCAAATTATTCAACACAGAAGTTGATTATATAAAGGC  
TAAAAAATTTAACATTAATATCACTTTAAGTGATAAAGGAGGAACTCAGATGCAAGCAT  
TACAAACATTTAATTTTGAAGAATTACCAGTAAGAACATTAACAGTAAATGAGGAACCGT  
ATTTTGTAGGGAAAGAGGTAGCAGATATTCTAGGCTACAAAACCTGGCAATCGCGATATTA  
CCGCTCATGTTGATGCCGAAGATAAGCCGACGTGCCAAATCAGTCCCGCAGGTCAAAGAC  
GAAATCAAACATTCATCAACGAATCGGGTTTATACAGGCTAATCTTCTCATCAAACTAG  
AATCAGCTAAACGATTCAAACATTGGGTAACTTCAGAGGTCCCTACCCGCTATTTCGAAAAC  
ACGGTATCTACGCAACAGACAACGTCATTGAACAAACATTAATAAGATCCAGACTACATCA  
TTCCAGTGTGACTGAGTATAAGAAAGAAAAAGAGCGAACTTACTTTTACAACAAGAAA  
TTGGAGAGCTAAAACCCAAAGCAGACTATGTAGATGAAATCTTAAAGTCAACTGGTACGT  
TAGCAACAACTCAAATCGCGGCAGACTACGGTAGATCAGCCAAAAGTTAAACAACTAC  
TACACGATGCTAGATTACAACGAAAAGTGAATTAACAGTGGGTGCTTTACTGAGACCACA  
TGGGCAAGAGTTACACAGAATCAGATACTATACCAATTGTACGCTCTGACGGTAGAGAAG  
ACACAGTATTACAGACTAGATGGACACAAAAGGCAGATTGAAAATACATGAAATCATGA  
CTGAATTAGGTAATAAAGCTGATTTAGGGGGAGCGTTGATGACACCAGAACAAAAAGAAA  
AGCTAAACAATATAGTATTAACACTTTATGCCGCTAAAGAAAACAAAAGTCAAACATCCA  
CACACAAAGATACTTACTGTGACATATGCAGGCGAGATTGAGCACACTTACGAGGTGCG

ACAGAGAGAACCACCTTGAATCAATGATTGTGTGGGCAATTGACCAAATCGAACAGCACC  
TTGATTTAGACGAAGAAGAATAACACACAATTGAACAAAAAACTTAAGAGGAGGAATTAC  
AAATGAACGCACTATACCAAACAACCCTCCTCATCACAAGGGCAGTTGTGACGTCGAAGG  
TTGTAAGATTGAGAAAAACAAGATTTAACTTAGAAAATTTGATTATCCAAAAATTA  
ATAATGCTCAGAGCAAATCATTGTTGGATATTGCTAGTCACGATCTAAAAGATATTTAAC  
TGTATGCAAAATTTTCATATTTTGTGAGCTTTTAAGCTTTCGTATAAAGCTATTGAATA  
AATAATTTTCGCAAGATACGTTATCAGGAGCATCTTCTTTCGACTTATTTATTCGATCTCT  
AAAAAAGTCACTGTCACGACCGAATTCTGTTTCGGCTTGATTACTAAGTTCACCAAAGAC  
ATTTTGAAAATCATTAATTCATACTTATCACCTCCTTTCACTAGGAGATAACTAAATT  
ATACACAACAAAAAATAAAAAGGAGGAATAGATAGGATAAAAAATAGTTTGCAAGCTAA  
AGCACTTGAAGTAATTTTATCTGTTCTAAATCCAAAGCAGGACAAATAATAAGAGCACT  
GAATAAAGTGCTTGAAGACGAACGTTACATTGCGATTTCGAGGCAGAATACCAGTCCAATA  
AGGTAGAGAAAAATCCCTTATCACGGCTTGTGAGTCGAGAGAATAATGGAGGCACTGAC  
AAAAGAAAATGAGTAACATTTATAAAAACACTACCTATTAGCAGTATTGTGCTTCACAGTCT  
TGGCGATTGTACCCATGCCGTTTCTATACTTCACTAAAGCAAGGTCAATTGCGGGCTTCG  
CAAGTATCGCAACATTCATATTTTATAAAGAATGCTTTGATGACAACAAGGGAGAATGCA  
AAGATGTCAGATAAAGACTAGATGGAAAAAGTTGACAAGAGAAGGAAAGACAAAGATTTA  
ACTGTGAGAGAACTAGGACATTTGCTAGGTTTCTCTGATACTTATTTTATTAAGTTAAGA  
AATGGTTCAAGAAGAATTACGGATCGGAAGAGCGATAGAATTAATCGTTATTTAAAGGGT  
GAATCCGACAATGTAAAAATTCCTAAATATTCACGAGATTCTGAACAAGTAGCATATGAC  
CAGGCATATAAACAAGCTATAAAAAGATCTAGAAGAATTTGTAATAATAAAAAAACTGCT  
ACTTGAGACAACAAGTAACAGTGACAAACACTTAAGAAAAATTTTCATGTTCAATATAAAA  
CGACATAAAGGAAGTGTCAACAATGTACTACAAAATTGGCGATGTATGTCTAAAAGTAAT  
TAGTGTAGACGGATTTCGATTTTAAATTAGCAGTTAAGAAACAAGATTACAGTATTCTAGT  
GAATGTCTTAGATTTAGAAGATAGATTTATCAACGGTATAAATAAACCAGATGAGAATGA  
TCTATACACAGCACTAGACATATTAATCAATTTATTTCTGAATGGATTGAAGAGAACAC  
AGACGAAAGAGACAGGCTAATTAAGTACTGATCATAAGATGGTAGGAGGTCGCTATGAAGCA  
GACTGTAAATTACATCATCCGTCATAGGGATATGCCAATTTATGTAACATAACAACCATC  
TGATAATAATTCAGATGTTAGTTACTCCACAAATAGTAATAGAGCTAGGGGATTTAACGG  
TATGGAAGGAGCGTGTATCAATATGGATTATCACAAAGCAATCAAGAAAACAGTGACAGA  
AACTATTGAGTACGAGGAGGTAGAACATGACTGGACAAACTTTATTTGAACAGTTGAACA  
GTAAAAACGTGAATGATCAAACAGAACAAAAAAATGGAGTAACTTATCTAGGATGGTCAT  
AGGCACACCAAGAGCTGAAAAAGATTGTCCCAAACACTACACAGTAAAAGTACACGAGTTTC  
CAGATCCAGATATTAACACAGAAAATACTTTTGTACCTTATTTGGCTACACCAGAAGGCT  
ATCTTGTACAGGTATCTGTGACTGTGAAAGATAGTACAGAGACTGAGTGGCTGCCAGTAT  
TGGACTTTAGAAATAAATAGCTTGCTAAAGGTAGTGCAACAACACTGTCGATATTAACAAAG  
CGCAAAAACGATGTTTTGTTAAAGCTACGGCTGTACACGTTTAAAGGCTTATATATCTACA  
ACGGCGAGGAACAACCAAGTGCAAGTGACAACGATATTAAGAATTAGAAGAGCGTATCA  
ATCAGTTCGTGAACTTATCTCAAGAAAACCGGCGAGATGCAACTATCGATAAAACGATGA  
GATGGCTAAAAATATCTAACATTAATAAATTAAGTCAAAAACAAATCGCAGAAGCACACA  
AAAAATTAGATGCGGGATTAACAACAAATTGGATAGTGCGGAGAAACAATAATGTTAAACAG  
AGCAGTATTAGTAGGAAGCTTAACAAAAGACCCAGAATTAGGAAGCGCCCCAAATGGCGT  
AAAGGTAGGTACATTCACATTGGCAGTAAACAGAGCATTACGAATGCTCTGGCCGAGCG  
TGAAGCAGAGTTTATAAACGAAGTAGTGTTACGAAACAAGCTGAAAATGTTAAAAACTA  
CCTTTCTAAAGGGTTCGCTGGCAGGTGTAGACGGGCGACTACAAACACGTAGCTAAGAAAA  
TAAGGTTCGGGCAACGTGTATTTGTGACAGAAGTAGTAGCGGACAGTGTTCAATTCTTAGA  
ACCGAAGAATAACAACCAACAACCAACAACACTTATCATCAACAAGACAAGCTCAAAC  
TAGTAATAATCCTTTTGATAATACCACTGCGATTACTGATGATGACTTACCGTCCTGATT  
GGAATGATTAATGCCGAAAATTAAGTTATATCACTCAAGACGACGGCACAACCACAG  
TTGTCATCTCTGATGTTGTATTAGGTAATAAAGAAACATACTACTTGATAACGGATTTG  
ATGTATTAGTCGATGTAAGCGTCATAGATCCATTTGCAATTACCCGCAAGCAACGCAAT  
TGATATTCGCATTGTGTAACGATATAGAAGCTCATACAGGACAACCTCGAGATTATATGA  
GGCAAATGTTCCAAGATTATGTGAAGTTTCTGTATGGGTATGAAGAACGCATATCTTTAT  
CAAATTGTTCTCGAACTATAGCTAAGCAAATTATAGAAGCGATGTTTGAGTTGATTTTTA  
CAAATGCGATTCCATTAATTTATAAATCAAGCAAATTAATGAAAGAAGATAACAATTATC  
TTTAGTGGGCAACTGTTCCGCGTCATTGCATTATATGCGGAAAGCCTCACGCTGACTTAG  
CCCATTATCAAGCAGTCGGCAGAGGCATGAACAGAACCTAGATGCATCACGATGACAAAC

ATGTATTAGCGTTATGTTCGCGAACATCACAACGAGCAACATGCAATTGGTGTTAAGTCGT  
TTGATGATAAATATCACCTGCATGACTCGTGGATAAAAAGTTGATGAGAGGCTCAATAAAC  
TGTTGAAAGGAGAGAAAAAGGAATGAATAGTCTAAGAATAATAAAAAATAGCACTCCTAAT  
CGTCATCATGGCAGAAGAGATTAGAAATGCTATGCATGCTGTAAAAGTTGGAGAAAATTTT  
AAAATCTCCGTTTAGTTAATACAGGTTCTTACAAAAGCTTTACCATAGGCGGACAACCTA  
ATTGAGCCTTTTTTGGATGTCTATTACCCAGGGGCTGTAAAGTAACTTTAATACTTCAAAT  
TCAATGCCAGGAAGTTTACTTATTGTTTCTAGGATGTGTCTGACTTTAACATTCTTTTA  
AAAAATTCTAACCCCGAAACAAATCTTAGTTTTTCTATAAACTTATTAAGTGATTTAAA  
AACTGAGGAGCATAAAAAGTTATTATAAATTCCTTGTGTTGTTAAGTATGACATGTCAAAA  
GTTTCATTTAAAACCCCTAACCTTACTAGGTTATTAATTGAAATTTTCGCTTGATTCTATA  
TCTAACGGAGAGTCTTTTATTAACGTGTCCGATATATTTATTCCGTCATTCTTTGGGTTT  
AAAACCGCTCTATATTTAACGGCAGGATGTACTTGGTGATTCTTTAAATATTTTAAAAGA  
ATAGCATCATTTGGGGATAATTGTATAATTATTTCAACAAATGAATGGTGGGTTAATGAG  
CTTTTTCTGTCATCCATAGATGATGCTATTAGTTTTGCGAACATATTACTTAAAGTTTTT  
TCACTTAACTAAAGCTTTGAAGCTTCTAGAGCACGACCTAGAAGAGGAAATTCTGGTTAT  
TGTAAGTTATTTTCAGGTACAGAAGATATTTCTTTTTTCAATTGTTCTTTGAATTTTTCA  
AATTCTACTTCTTTTGATAAATAACTTTATCCACATAAAGGTGGAATTTCCCAAAGACA  
AGTTTCGGAGTCTTAGAGAATGTTTCTACAGGCCCTTTGGATGCCCTTCAATAATTTTA  
TCAAGACCTTTACCTAAAATGGGATCCATAATCATTACCTCCAATCTAACCCAATAGCG  
ATAATAAAATTATACCAGAAAGGAGATAACGAACTGGTAACATTTAGACCGATAAAAAGAA  
AGTCGCGATTTTGCAACTGTGCATAAATCTTTTGTGTTTCGATAGTAATTTAAGTGCTAAA  
GCTAAAGGGATATTATTGTATTTCCCTATGTGCTTCTGACAATTGGCAAAAATACACGTCA  
GAAGTAGTTAAACATATGACTGTTGGACAAAAATCAATCAATAGCGGCGTTCTAGAATC  
ATGGATAATAAATATGTTTCACAGAATACAAAAAAGAGCTGAAAACGGTGTGTTTAAAGGT  
TTTGAATACTTAGTTTAGGAAAACCAACCGAAATGCCATTTTCGGAAAACGGATTATCG  
GCACACGGGTTTTTCGGAAAACGGAAAACGGAAAACCGAAAAGGGCCTAGTACTAATAAT  
AATAGTACTAATGATGATTTAACTAATAATAACGATACTAATAATGATGGAAGTACATTG  
TCGGGCAACCCGACTGTGTATTCCATGCCCTATAAAGAAATTATCGAATACTTAAATAAA  
AAAGCAGGAAAGCATTTTAAACAAAATACAGCTAAAACAAAAGATTATATTAAGCAAGA  
TGGAATCAAGATTTTAGGTTGGAGGATTTTAAAAAGGTGATTGATATCAAACAGCTAAA  
TGGTTAAACACGGATAGCGATAAATACCTTAGACCAGAAACACTATTTGGCAGTAAATTT  
GAGGGGTACCTCAATCAAAAAATACAACCAACTGGCACGAATCAATTGGAACGCATGAAG  
TAGGACGAAAGTTATTGGGATTAGGGGGATATTATGAAACCCCTATTCTGCGAAAAGATA  
AACGAATGCTTGAAAAAATATCAACCTACTCATGTGCGAAAAGGATTGAAATGTGAGAGA  
TGTCGAAGTGAATACGACTTATATAAGTTTGCTCCTACTAAAAAAAACCCAAATGGTTAC  
GAGTATAAAGACGGTTGCAAATGTGAAATCTATGAGGAATATAAGCGAAACAAGCAACGG  
AAGATAAACAACATATTCAATCAATCAACCGTTAATCCGTCCTTTAAGAGATGCAACAGTT  
AAAAACTACCAGCCACACAATGAAAAACAAGTACACCCTAAACAAACAGCAATAGAGTAC  
GTACAAGGCTTCTCAACAAGAGAGCCAAAATAATGAATATTGCAAGGTTCATAACGTAAC  
GGTAAACGCCACCTAGCATAACGCTATCGCAAAGTACTTAAAGCTAAAGGGCATAACGGTT  
GCTTTTATGCACATAGCAAGGTTGATGGATCGTCTCAAAGCGACATAACAACAAAATGCA  
CTAGAGACTACAGACGAGCTAGTCAGATTGCTAAGTGATATTGCTTTACTTGTCTAGAT  
GATATGGGTGTAGAAAACACATAGCACACTTTAAATAAAAATTTTCAGCATTATTGATAAC  
AGAGTAGGTAAAAAAAACATCTTTACAACCTTACTTTAGTGATAAAGAATAAATCAAAT  
ATGAACTGGCTACGTATCAATTCAAGAATGAAACACAATGCAAGAAAAGTAAGAGTAATC  
GGAGACGATTTTCAGGGAGCGGGACGCATGGTAACCAAAGAATTTTGGAAAATTAACCTG  
AGTGTTTACGATATGTACGCTCAGAACTCTTAGACGAGGCACAGGGCGATGAAAAGAAGT  
TATATGACCTATTTATCCAACAACCTTGCAGACCGTCATACACGGCCCCTATCGTCGGAT  
CTTAAGGAGTGTTAAAAATGCCGAAAGAAAAATATTACTTATACCGAGAAGATGGCACAG  
AAGATATTAAGGTCATCAAGTATAAAAAGAAGGAGAATGAAGTTTATTGGCTCACAGGAG  
CCCATTTACGCGACGAAAAGAAAATTTAGACTGATAGTGACCTAAAACGATTTAAAGGCG  
CTCATGGACTTCTATATGAGCAAGAGCTAGGTTTACAAGCAACAATATTTGATATTTAGA  
GGTGGAAGATGAGTACATAACGCTAAGAAAGTTGAGTACAAAGGAATTGTATTTGATA  
GCAAAGTAGAGTGTGAATATTACCAATATTTAGAAAGTAATATGAATGGCACTCACTATG  
ATCGTATCGAACTACAACCTAAATTCGAACTACAACCTAAATTTGGGAAGCAAAGACCGA  
TTACGTATATAGCCTATTTCTCTTTGTGCAAGGAAGGGAACTGGTTGAAGTTACAGACG  
TTAAAGGTAAGGCGACTGAAGTTGCCAACATCAAAGCGCAGATATTCAGATATCAGTATA

GAGATGTGAATTTAACGTGGATATGTACAGCGCCTAAATACACAGGACAAGAATGGATGG  
TATATGAGGACTTAGTGAAAGTCAGACGTA AAAAGAAAAACAGAAATGAAGGGATCTAATG  
CCACAACAAGCATATAGAAACGCAACGATTGATATAAGAATACCTACCGTAGTTGAATAT  
CAGCATTGATGTTGTGCATAAAGAAAAAGAAACGCTGGCAAAGCGCTTAGATAACAAT  
CCGGACGAATTACTAAAATATGACAGCTTAAACAATAAGACATCCATATATAGAGGTGGAA  
TAAATGAGTATCGTAAAGATTAACGGTAAACCGTATAAATTTACCGAACATGAAAATGAA  
TAGATAAAAAAGAACGGTTTAACTCCAGGACTGGTTGCAAAAAGAGTACGAGGTGGCTGG  
GCGTTGTTAAAAGCCTTAAACGCACCTTACGGCATGCGCTTAGCTGAGTATAAAGAAATT  
GTGCTATCCAGAATTATGCAACGAGAGGCTAGAGAACGTGAAATAGCTAGACAACGACGT  
AAAGAGGCTGAATTACGTAAGAAGAAGCCACATTTGTTTAAATGTACCTCAGAAACATTCA  
CGTGATCCGTA CTGGTTTGAGAATACTTATAACCAAATGTTCAAGAAATGGAGTGAAGCA  
TAATGAGCATAATCAGTAACCGAAAAGTAGATATGAACAAAACGCAAGACAATGTTAAGC  
AACCGGCGCATTAAACATACGGCAACATTGAAATTATAGATTCTATTGAACAAGTTACGT  
CGCAGTACCCACCAAAGTAGCATTTCGCAATAGGTAATGCAATCAAATACTTGTCTAGAG  
CACCGTTAAAGAATGGTCATGAGGGTTTAGCAAAAAGCGAGGTTTTAGATCCATAGAGTAT  
TTGATTTGTGGGACGGGTAACGATGGCAACGCAAAA ACTACTTGATTACGTAATGTCATT  
AGAGGAGCAATTGGATTTAGAAA ACTGCGAAAAATATACAGACCAACAAGTTAAAGCAAT  
GAGTCATAAGGAAGTTGGCAATGTGATTGAAA ACTATAAGGCAAGCATAAGTTATGAAGA  
GCTATACGACGAATGCATGTCGTTTGGTCTGCCTAATTGTTAAGAGGAGTGATGACCATG  
ACAGATAGCGCGCTAAAGAATACCTAAATCAATTCTTTTGATCTAAGAGATAACTGTAT  
CAGGATAACGAACGAGTGGCACATATCCATGTAGTAAACGGCACTTATTACTTTCACGGT  
CATATCGTGCCAGGTGGGCAAGGCGTGCAAAAAGACATTTGATAGAGCGGAAGAGCTTGAA  
ACATATAAAAAGCAACATGGTTTGGAAACGAGGAACACAAGCAACTA ACTTTATATTTAA  
AAGGGCGGAAACAATGAAAATCAA AATTGAAAAAGAAATGAATTTACCTGA ACTTATCCA  
ATGGGCTTGGGATAACCCCAAGTTATCAGGTAATAAAAGATTCTATTTCATATGATGGTGA  
ACGCAACTGTTGTGTGACTTTCGATGTTGATAGCATCTTATGTAATGTGACTGGGTACGT  
ATCGATTAACCATAAATTTACTGTTCAAGAGGAGATATCACAATGAAAATCAAAGTTAAA  
AAAGAAATGAGATTAGGTGAATTAATTAGATGGGCGCGAGAAAATCCGGTTCATCACAA  
GGAAAAATTTTTTTTCAACAGGATTTAGTGATGAATTCGCTCGTTTTTCATCCAAATACA  
AATAAGTGTTTCGACGTCAAGTTTTATTCTAATTGATATCCGCTTCATAGTTGATATTTAA  
AAAGAAGTAACGGAAGACACTAAGGTTGATAGGTTGATTGAATTATCCAGATTCAAGAA  
GGAGACTATAGCTCTATACTATATGAGAACACTAGTATAAAAAGAAATGTTTATATGGCAGA  
TGCGTGCCTACCAAAGCATTCTACATCTTAAACGATGACCTA ACTATGACGTTAATGTGG  
AAAGATGGGGAGTTGCTAGTATGATGTTGAAATTTAAAGCTTGGGATAAAGATAAAAAAG  
TTATGAGTATTATTGACGAAATCGATTTTAAATAGTGGGTGCATTTTGATTTCAACAGGTT  
ATAAAAGTTTCAATGAAGTAAA ACTATTACAATACACAGGCTCTAAAGATGTGCACGGTG  
TGGAGATTTGTGAAGGGGATGTTGTTCAAGATAGTCATTCGAGAGAAGTAAGTTTTATCG  
AGCTTAAAGAAGGAGCTTTTTATATAACTTTTAGCAATGTAAATGAATTA ACTAAGTGAAA  
ATGACGATATTATTGAAATTGTTGGAAATATTTTTGAAAATGAGATGCTATTGGAGGTTA  
TGAGATGACGTTACCTTATCAGATGAACAATATAAAAATCTTTGTACTA ACTCTAACAA  
GTTATTAGATAAACTTCACAAAGCATTAAAAGATCGTGAAGAGTACAAGAGGCAACGAGA  
TGAGCTTATTAGGGATATAGCGAAGTTACGAGCTTGTAACAAAGA ACTGTAGAAGAAAGC  
AAGCGCATGGGATAGGTATTGCAAGAGCGTTGAAAAGATTTAATAAACGAATTCGGTAA  
CGATGATGAAAGAGTTAAATTCGGAATGGAATTAACAATCAAATTTTTGCGGAGGATGA  
CACTAATGAATAACCGTGAACAAATAGAACACTCCGTTATAAGTGCTAGTGCGTATCACG  
GTAATGAAACAGAGGGATTACTAAAAGAGATTGAGGACGTATATAAGAAAGCGCAAGCGT  
TTGATGAAATACTTAAAGGTTTACCTAATGCTATGCAAGATGCACTCAAAGAAGGTATTG  
GTCTTGATGAGGCAGTAGGGATTATGACGGGTCGAGTGGTCTATAAATATGAGGAGGTAC  
AGGAAAATAATTAACACATTAACAATTGATCAGTTAAAAGAGTTATTACAAATACAAAAG  
GACTTTGACGATAGAATACCAACACCAA ACTTACGAGATAGCAAGATTTTCGTATGCGGTT  
GAGTTCCTTTGAATGGTTTAAACACATTGGAAACGTTCAAGAATTGGAAGAAGAAACCAGGT  
AAACCGTTAGACGTACAGCTAGACGAGTGAGCAGACATGTTAGCGTTTGGAGTGAGTATT  
GCTAATCAACAAGCAGATATCATGGAAGAAATTTTAGGTTATTTAGGTGAGGGAGATTTA  
ACCGACTATATAGAACGAGTTGAAATCGATTATAACGACAGTGATGTAGTAGATGAATTT  
ATGTGAACTATAGATGAAATGAATGAAAGTCCATATAGTAGCAACTTCTTTTTACCGTTT  
GCACTAGCGAACAACTACTCCACTATCGATCAACTCATTGACGCATACAAAAGAAAATG  
AAAAGGAACCACGAAAGACAAGATGGAACAGCAGACGCGAGGAAAGGATACGTATAAAGA

CATATTAGATCCGGTCAAGGAGGATTTGGGGTATTGACACAATACTTAGTCACAACATTC  
AAAGATTCAACAGGACAACCATGAACATTTTACTACTGCTAGAGATAATCAGACGTTT  
ACAGTTGTTGAGGCAGAGAGTCAAGAAGAAGCGAAAGAAAAGTACGAGGCACAAGATAAA  
AGAGATACAATTATTAATAGGTCAGTTGTTTGAAGATATAAGGGAGTGTTCGGAAATGA  
CGCATGTTAAAATTAAACTATTTCAAGTGGAGTTTATTTTGTAAAAACAGCTCAACCTT  
TTGAAAAATATGTTGAAAGAATGACGTGTTTTAATGGTTATATTTACGCAAGTACTATAA  
TCAAGCAACCAACGTATATTAACACAGATACGATTGAATCAATCACACTTATTAAGGAAC  
GTGGGAAATGAATGAGCTGAGAATTTTATTACATGACGGTAGTAGTTTGGTACTACATGA  
AGATGAATTATTTGACGAAATAGTATTTGTTTTGGATGATTTTAGAAATGATGATCACTA  
TTAACGATAGAAAAAGATTAGGGCAGAGAACTTGTATTGAACAAAGGTTATATAGTTGG  
GAGTAATGTTGAGGAGGCAGACGATGACTAACCAAATATTAAGACTATTATTCTTACTAG  
CGAGGTATGAGCTAGGTAAGTATATAACGGAGCAAGTATATATTATGCTGACGGCTAATG  
ATGATGTAGAGATGCCGAGTGACTTCGCAAAGTTGAGCGATCAGTCTGATTTGATGAGGG  
CGGAGGTGTCAGAGTAGATGATGTGGTTAGTCGTAGCACTTATATTACTAGTCATCTTAT  
TATTTGGTGTGATGTTGCAAGCTGAACAGTTAAAAGGCGATGTGAAAGTTAAAGAGCGGG  
AGATAGAGATATTAAGAAGTAGATTGAGACATTTTGAAGATTTAACATATTAGTACGGAG  
GGTATTCATGACTAAAAAGAAAGACGGATAAAAATTATCAACAGTTCGGAAATTAGTAGA  
CCAGTTGTGCGATTATCCTAATTATCATAAACAACCTGAAGATTTAAGAAGTGAATACT  
GACACCGTGGATTCCAACAGATACAAATATAGGCGGGGAGTTTGTACCATCTAATACATC  
AAAAACAGAAATGGCAGTAACTAATTATCTTTGTAGTATAAGAAGAGGTTAAAATACATGA  
GTTTAAACAGTGCATGAACGTACAATCAACACCTCAAATAGGAAAGAACGCGAATTCAT  
TCAAGAGTATTATTTAATAAAAAGACTTTGATTGCGGTTTGTATGACCTACACATCTC  
TGAAAGTACAGCGCATAGTATCAAGAAGAAAATCGTGTCTAACTAGCCGATGAATTAGG  
AGAATACTAAATTTAACAGTAAAATGACAGTTTTTGGACACCTATAACGAGATATTATGAT  
AGTGTAGGATATTGACTATCTTACTGCGTTTCCCTTATCGCAATTAGGAATAAGGGATCT  
ATGTGGGTTGGCTGATTAAAGCCATTCCCTTATTTAATTTTAAAAAGCGTATAGCGCGAG  
AGTTGGTGGTAAATGAAATGAACAAATTAATAAAAAGCGACGTTTGTGCTGCAGAAGTAT  
ATAGAATACCTAGTACTGAATGTTATGGCAACGCTACTAAGTCAGCTGCGCATGCCTGAT  
CTAGCGAAAAGACGGCGTACTCACAAGGACAGCGTATGTTGAAGCATTGTGAAATTCAGA  
ATTATATCAAGGAGGTTCAAACAAAACCTTTGACGAGAATATTATGTCAGGTAAGAAG  
TGTTGTATAGGCTAACTAGAACAGCTATAGGAGAACACACGGAAGTTGAAGCTGTCTGTA  
CGAAAACCTGGAGACTATAAATAGAATCCGGGTACTGGCAAAAATGCAATTAGTATACGACG  
AACACATACAAATTGTTACTAAGTCACCGAAAATAAGTGACCAAAAACAAAGCGTTAGAGA  
TGTTAGGTAGACATCACAATTTATTACAGACAAACAAGAAGTCGACCACAAAATACCGA  
TGTTTGTGATATTATCCCGAAGATGATTAGTCATGTATGAAATCCTTGATCTAAAAAA  
TAAATCGGAGTTGGCTAGAATAAGTTTTGGCACAACAAAACCTTTTACCGTGTGTTAA  
AGGTTCAAGGGGTAGCAAGAAAAGTACAACCTACCGCTATTAATCTCATTTATCGAGGAAT  
GAAATATGATTGGGCAAATATACTTGTAGTCAGAAGATTTAGCAACACTAACAAACAATC  
AACGCATACAGATTTAAAGTGGGCAACTAACTAATTAGGCGTTGCTCACTGATTTTAATT  
CAACGAAAGTTTGCCGGAAATAACGTATAAACCTACTGGACAAAAAATACTGTATAAAGG  
TATAGACGACCCATTGAAAATAACATCGATTACTGTTGATACAGGCATTTTGTGTGGGAC  
TTGGTTTGAAGAGGGTTATCAAATAGAAACATTTGCTAAGTTTGGCACTGTTGTTGAGTC  
AATATGTGGTAGCTACGATAGTCCGGAATTTTTCTATCAAATCACAGTCACTTTTAACCC  
GTGGTTCGAAAGCCATTCGTTGAAGCCTACATTTTCTGATGAAGAAACAAAATTAACAA  
TACTTTTTCAGATACAACACCTTATAGTGTTAATGAATGGTTAGACAAAGTCGATATTGA  
ACGATATGAAGATTTGTATCTAAAGAATCCTAGACGTGCAAGAATCGTTTGTGATGGAGA  
TTGGGGTGTTCAGAGGGGCTTGTATTCGATAATTATAAAATGGAAGACTTTGAGTGTTT  
TGAGGAGTTTAAAAGAACGCAAGAAATATCTCCCGAATGGATTTTGGGTTTAGTCAAGA  
CCCTACAACAGTAGTTAGTACGGTTGTAGATTTAAAAAACAAAAGTTATTCATCTATGA  
TGAACACTATAAAAAAGCGATGTTAACTGATGATATAAAACAAATGATTATTAAAAAAGG  
ATTAGGTGATGTAGATATTGCAGCTGATTATGGGGCTGGTGGAGATTGAGTGATCAGTGA  
ATTGAAATCTAAAGGATTAAAGGTATAAAAAATGCGTTGAAAGGCGCTAATACTATTTT  
ACCAGGCATTCAATTCATTCAAGGCTCTGAAGTTATTATACACCCTTCATGTGAACACGC  
TATTGAAGAGTTCAACACTTATACATTTGACCAAGATATTGATGGTAAGTGGTTGAACAA  
GCCTATATATGCTAATAACCATATTATCGATGGATTGCGTTATAGTCTTGAGAAATATCA  
GATCGTACGTAAAAACGTAAAAAGAACATAGAAAGCAAAAACAAAAGTAATTAATCTCT  
AGGATTATAGGAGGGAACAAATGTTAAAGGCAAACGAATTTGAAACGGATACTGATTTAC

GAGAAAACAGAAATTACTTGTTCACGATGAAGCTAATGTTGTTTACACATATCACGGGA  
CAGAGTCTGATTTATTACAAAACATTAATGAAGTAAGTAAATACATTGAACATCAAATGA  
ATTACCAACGACCTAGATTAAAGTTGTTAAGTGATTATTACGAAGGTAAAACCTAAGAATC  
TGGTTGAGTTAACACGACGCAAAGAAGAGCACATGGCAGATAACCGTGTGCGCATGATT  
ACGCATCGTAGATTAGCGATTTTATTAACGGTTATTTTCGTAGGTAATCCGATTCAATGTC  
GAGATGATGATAAAGATGTATTAGAAGCTATTGAGGGGTTCAATGGTTTAAATGATGTTG  
AGTCACACAATAGATCTTTAGGATTAGATTTGTCAATTTATGGCAAAGCTTATGAGTTAA  
TGATTAGAAACCAAGATGATGAAACGCGTTTATACAAGAGTGATGCAGCGAGTACTTTTG  
TCATATACGACAATAAATTGGAGGTAATAGTATCGCAGGCGTTAGATATTTAAGAATA  
AACCAATAGACAAGACTGACGAAGATGAAGTGTTTACAGTTGATATATTTACGTCTCACG  
GTGTTTAGAGATATCCTACCACTAGAACAATGGATTGAAGCTCACACCACGTGAAAACG  
GTTTTGAATCACACTCTTTGAAACGTATGCCTATTGCAGAATTTAGCAACAACGAAAGAA  
GAAAAGGAGATTATGAGAAAGTAATCACTTTGATTTCATTTGTATGATAATGCATAATCAG  
ATACTGCTAACTTCATGAGTGATTTATACGACGATATGTTATTGATTAAAGGTAACCTTCT  
CATTAGATCTGGCTGAAGTAAAAAACAAGAAAGCTAACGTGTTATTTTTTCGGGCCAA  
CCATTTATGAGAATAGGGATACAGGTATCGAAACAGAGGGTTCAGTTGACGGCGGTTATA  
TTTATAAGGAATACGATGTACAAGGTACCGAAGCTTATAAAGACCGGTTGAACAGTGATA  
TACACATGTGTACCAACACGCCTAACATGAAAGACGATTAATTTAGTGGTACGCAATCGG  
GCGAGGCAATGAAACATAAATTGTTTCGGCTTAGAACAACGTACTAAAACCTAAAGAAGGAT  
TGTTTACTTAAGGGTTAAGACGTCGTGCTAAGTTGTTAGAGACAATACTTCAAATACAC  
GGTCGATTGGCGCTAACAAAGATTTCAATACTGTTAGATACGTATACAACAGAACTTAC  
TTAAATCATTTCATCGAAGAATTAATAGCTTATATTGATTCTGGCGGGAAGATTAGTCAA  
CACTTTAAGGTCTCTACTCTCGTTCTTCCAAGACCCTGAATTGGAAGTCAAGAAAATAG  
AAGAAGATGAGAAAGAATCTATTAAGAAAGCTCAAAAAGGTATGTATAAAGACCCTAGAG  
AACTCAATCATGACCCACAAGATGATGATACAAGATACTGTTGATAAAGAGGAATGAT  
TGAAATTGCCTAACAAAACACTCAAGAATATTGGGAAGAACGCGTACGCAAAGCAATCG  
AGAATGAGGTGAAGCGTTATAAAACTAAAGCTGAAGTAATAGAACGTATATTGAATATGA  
TGATTAGGCGCATTGAAAAGAAATCAATGCGTTTATTGTTAAGTACGGAGATTTTGCAG  
GCGTTACATTACAAGATGCACAAAAGATTATAGATGCGTTCGATGTAAAAGCGTTTCAAG  
AAGAAGCAAAAAGATTGGTCGAAAACAAGGACTTTAGCGATAGAGCAAATGAAGAATTA  
AGAAGTATAACACTAAGATGTATGTAAGTACTAGTGAACAGATGTTACAGATTCAAATAGAAT  
TCTTAATTGCTTATGCAATAGCTCAAACAGAATTATCGATGAGGGAATATTTTCAATCAA  
CAGCTTATCGTGTGTTAAGTGATCATGCGGGTATTTTAGGTGAAGGTGTACAAGTAGCTA  
AAGAAGTTATAGATACAGTCGTTGTTTAAACAATTTTCATGGTGTCGTTTGGTCAGAGCGAT  
TATGGACTAATACTGATGCGATGAAACAAGAAGTAGATGAAATAATTGCTAATGTGGTTA  
CTAGAGGTCGACATCCTAAGGAATATGTTAAAGATATGCGCAAGCACCTAAACAAATTCG  
AAGGCACAGCAAGACAAAAGACTGCAGAAATTAATCATTGCTTTATACGGAATCGGCAC  
GTGTTTCGCGCACAATCAAGTACTGACAGCATGAAAGAAATTTACCGGAAGGATATTA  
TGTATACTGCAAAAATTGATAGTAGAACAATATAGGATGCGAGGGGCGTAATGGTGCAA  
TATTCAAAGTTAAAGACGCTAAAATTGGTGTTAATTTCTACCCTATGCATATCCATTGTC  
GTTTACAGATTGTACATTACTACCTAAATCTATGTGCGCCGAAAAACCCAACCCAGAAATGAA  
AAACATAATACTTCGGAGGAAAAGTGAAAATCGATGATTGATTTAAAAGTAAGAGTTTTT  
AAATGCAAGTTAGCATTGTATGATAGTAAATTCGGTGTTTGGAGGATATTGGTATGAGCA  
ATACTGAAAGATACTTTAGAGACATAGCAAGAGAGTTAAAAGGTATACGTAAAGAGTTAC  
AAAAGCGAAACGAAACAGTTATTATTGATTCAAACCTCAGACAGCGTAAGGTTCGGCAGTAT  
TAGCCAATAACGAAAGACAGAAATATAACGAACCACTTTTTAATAGCTAGCACTTAATT  
GTGTTGGCTATTTTTTATGTCCAAAACGTGCTGATGACATAAAAAGCACGCATTGAAAA  
CAGTCGACAGACTATAGATGGAGGTGAATCTCATGGAAGAAAATAAACTTAAGTTGAATT  
TGCAATTTTTTGCAGACCAATCAGATGATCCGGACGAACCAGGCGGAGATGGTAAAAAAG  
GAAATCCTGATAAGAAAGAATATGACGAAGGCACTGAAATAACTTTACGCCAGAGCAAC  
AAAAGGAAATTGATGAAATACTTGAACGTCGTGTAGCGCACGAAAAGAAAAAAGCTGATG  
AGTATGCAAAAAGAAAAAGCAGCAGAAGCCGCTAAAGAAGCTGCTAAATTAGCGAAAATGA  
ACAAGGATCAAAAAGATGAGTATGAACGCAACAATTGGATAAAGAGCTGGAGCATTTAC  
GCTCAGAAAAACAATTAAGTGAAATTCGTTTCAAGCAAGGAAAATGTTAAGTGAAGCAG  
AAGTTGATTTCATCAGATGAGGCTGTTAATTTAGTTGTAACAGATACTGCTGAACAACTA  
AATTGAATGTTGAAGCTTTTTTCTAATGCAGTAAAAAAGCGGTTAATGAAGCGGTTAAGA  
TTAACGCTAGACAATCGCCATTGACTGGCGGAGATTCATTCAATCAATCGACTGAAAATA

AACCGCAAACTTAGATAAAAATAGCTAGACAAAACAGAATTATTA AAAAATTAACGGAGGC  
ATTTAAATGGAACAAGCACAAAATTA AAAATTA AATTTGCAACATTTTTCGGGATAACAAT  
GTTAAACCGCAAGTATTTAACCCCTGATAATGTAATGATGCACGAAAAGAAAGATGGCACG  
TTGATGAATGAATTCACA ACTCTCATCTTACAAGCGGTTTTGGAAA ACTCTGAAATTATG  
CAATTAGGTAAGTACGAACCAATGGAAGGTA CTGAGAAGAAGTTTACTGTTTTGGGCTGAC  
AAACCAGGTGCTTACTGGGTAGGTGAATGTCAAAAAATCGAAACATCTAAAGCTACATGG  
GTTAATGCTACTATGATAGCGTTTTAAATTAGGGGTTATCTTACCTGTAACAAACGAGTTT  
TTGAATTACAATTATTCACTATTCTTTGAAGAAATGAAGCCTATGATTGCTGAAGCATTC  
TATAAAAAGTTTTGATGAAGCGGGTATTTTGAATCAAGGTAACAATCCATTCGGTAATTCA  
ATTGCACAATCAATTGATAAACTAATAAGGTAATTAAAGGTGACTTCACACAAGATAAC  
CTTATTGATTTAGAGGCATGACTTGAAGATGACGAATTAGAAGCAAATCCGTTTTATCTCA  
AAAACGCAAAACAGGAGCTTGTTACGTAAAATTGTAGATCCTGAAACAAAAGAACGCATT  
TATGGCCGTAACAGTGATACATTCGACGGTTTACCTGTGGTTAATCTTAAATCAAGTAAC  
TTAAAACGTGGTGA ACTAATCACTGGAGATTTTCGATAAGTTGATTTACGGTATCCCTCAA  
TTAATTGAATACAAAATCGATGAAACAGCACAAATTATCTACAGTTAAAAACGAAGAGGTC  
ACACCTGTAAACTTATTCGAACAAGATATGGTGGCCATTACGTGCAACTATGCATGTAGC  
ATTGCATATCGCTGATGATAAAGCATTTCCTTAGGTAGTTCGTGCTAATGCAAAAACCATC  
TTCAAATCCAGGAGAAGTTTAATAAATAAATAGGAGTGATAACATGCCCGAAATCATTGG  
AATTGTTTAAGTAGATTTTACAGATTTAGAAGATATCAGACATGTCTATATGAAAGGGCA  
TGTCTACCCTCGCAAAGGTTATGATCCTACGAATGAACGTATAAAATCTTTAGACAGCGT  
TGAAAATAAACGCAATGAGCAAATGATTTACATTGTAATGACAAATTAACCAAAAAAGA  
ACTTGTGCAAAATAGCAAGTTTTGTTGGCTTACAAGTTGATGAAAAACAAACGAAAGCTGA  
AATTATCAACACTTTTGAGTCGCTAGAGTAGGTGGTTATATGACTCCGCTAGCTGATGTA  
AAAAAACGTATTGGTCTTAAAGATGAAAAGCAAGATGAACAATTAGAGGAAATTATAAAA  
AGTTGTGAAAGCCCGTTGTTATAAATGTTACCTATGGAAGCTGAACAAATACCGGAAAGG  
TTTAGTTACATGATTAAAGAAGTTGCAGTTAAACGCTACAACAGGATTGGTGCTGAAGGT  
ATGACATCAGAAGGCGTTGACGGACGTAGCAATGCGTATGAATTGAACGATTTCAAGGAG  
TATGAAGCTATTATTGATAATTACTTTAATGCTAGAACGAGAACCAAAAAAGGAAGGGCT  
GTGTTCTTTTGAGATATGAAGATAGAGTAATTTTTCAATTAGGACAAGTAGCAACTTACA  
ATCCTAAACTAGCGAAAAAGAAAACGCACTAATCACTTATGATGCGATTCCACGCAATA  
TTAACCCCATTTCTAGAGCAAGAAAGCAATTTGAATTTGGCGATGTAAAAAACGAAGTAA  
CTGTCCTGAGGGTCAAAGAATCAATATCTTACCCTGTTAGCCACGGGTTGGTTAATGGCA  
TTCGCTGCAAGATAGTTGATAAAAGGATTTACAGACACGAAACGTCATATTATATCGAAG  
AGGTCAATTGATGAATATAGATGGATTTGACGCACTGTTAAGCCAATTTACGATATGAA  
AAACAACATCGATGATGATGTAGATGATACTTGACAAGAAAACGCCAAAGAATATGTAGT  
ACGAGCTAAATTGAAAGCTAGAGAAGTAAAGAATAAGGGTTATTGGACTGCTAATTTATC  
ACGCAATATCAGATATATAAAATCTGGCGATTTGCAATACACTATCACATCGCATGCACC  
TTATAGTAGTTTCTTAGAGTTTCGTACTCGATACATGGAGGCAGTACCTTTTATGTGGCC  
AGTCTATGAGGTAATAAGAAAATCGACTGTAGAAGAGTTGAAAGCGTTGTTTGAATAGGA  
GATAAAAGCATGACACCAA ACTTACA ACTTTATAATAATGCGTTTGAAACGCTACAAGGA  
TATGGATTCCCTGTTATTTCTCGTAAAGAGATGCAATAAGAGGTTCCGTATCCTATTTTT  
GTAATAAAAATGCCGGAGTCAAACAGAAGTAAATACACGTTTGATAGTTATTCTGGTGGC  
ACGAATTTAGTTCTTGATATTTGGTGTGTAAGTGATGATTTAGGACATCATGACGGACTT  
GTTAAGAGGTGATTGATGATTTAACACCTAGCGTTAAAACAAACGATTATGACTTTGAA  
GTTGATGATACTAACATCACACAGTTAGTTGATGATACTACCAATCAAGATTTGCTACAC  
ACATCAGTAACGATATCGTACAAAACATTTTAAAACACGGAGGAATATTGAATGGCAAAT  
ATGAAAGATAATAATGATCGTATTATATAATTTAGAAAAGCTAGGGAAAAAGTAGATGCT  
ACTAAAATGCTTTTTTTTAACTGAATACGGCTTATCACATGAAACTGATACAGATACAGAG  
GATACAATGGACTGTTCTTATAACACAGGTGGTTCTGTTGAGTCAACAATCTCTGATACT  
GCTAAAATGTGTTATGGTGACGGTTTTGCAGATGAAATTGAAGACGAAGTTGTAGATCGC  
GTATTGTATGAGGCTTGGGAAGTTGAAAGTAGAATACCAGGCAAAAATGGAGATGCCACT  
AAATTTAAAGCGAAATATTTCCAAGGTTTCCACAATAAATTTGAATTA AAAAGCAGAAGCT  
AACGGTATTGAAGAATATGAATGTGAATATGGAGTGAATGGTTCGTTTCCACCGTGGATTT  
GCAACACTACCTGAGGCTGTAACAAAGAACTTAAGCCGACTGGATACAGATTCATGAC  
ACTACAAAAGCAGATGCGTTAACTGGCGAAGATTTAACAGCAATTCCACACCCTAAGGTA  
GATTCATCAACGGTTACTACTAGGAGAGGTATAACAATAGGGCGTTAAGCCCTATTTATTT  
TGTTTCAATTAATCATGAATGGAGATTTTAAAGTTATGAATGTATAAAGTAACGGAAAGTC

ATTAGAATTAAGTGTGGTTTTAAATTTTTAAGAGAAATCGATAACCGATTAGGTTCAA  
AGTTGAGCAAGCTTCTATCGGTCAAGGTGTATCAATGTTGACTGTAAATTTAGAGAGTGG  
AAATCCTGTTGTGATTGGCGAACTTTAAATTGCAGCTACATCTCACTTAAAAACCAAGC  
AATTACTTTTAATAACCTTGCTGAAGCGCTAGATGAAATCGCAGAAAGTATCGGACTAGA  
AGAATTCGGTTCAGATATTTAACGGAGTTGGGAAAGCGACCTATGACCCGAAACCTAGT  
CGGAGTAATGGAAGCGGAAGAGAAACCAGCGGAAGCGTAATATCTCACGACAGAATCGTT  
ATAACTTGCATGTCAACACTTGGTATCACAGATTTGAACGTTATTGAGCACATGACATTA  
ACATAATATAACTATCGAATCTATGCGAAAGAGTATGAAATGCTAACCCAAGAGTTCGAA  
CGTTACAACTTGCCTTTGCTAGTCGTGATGCTGCAGCTACAAAAAATGTTGGGACAGAA  
AATAAACCTAAAGAGGAATATGTTTATAACCACGCAAACGACGTATTGCCTTATGAAGAA  
AATATCCGACTGCTTAACGAACGTAAAGATATAAGATTTAGTAGCGAACGTGATTAATAC  
GAACCACAAAACAATCAATTCTTTAAAGTTATAGCAGAATTTAACAAGCAATAGAAAGAG  
AGGTGTTAATGTGACGGAATATACAATTAAGCGACTATTGAAGCTAGTGTAGCCAAATT  
CATATGGGAAATCGATAGTGCGGTTAAGTCTGTGCAAAGATTTAAACGAGTAGCAGATCA  
AACTAAAGATGTCGAATTAATGCTGATGATAAAAAATTACAAAAAACTATCAAAGTTGC  
TAAGAAGCCTTTAGATGCCTTTAGTAACAAAAAAGTAAAAGCTAAATTAGATGCTAGTAT  
ACAAGACTTACAACAAAAGGTACTAGAATCGAATTTTGAAGTACAACTAAACTCTAA  
AGAAGTTACTCCAGAGATTAATTACAAAAACAAAAAATTGTCTAAAGATATCGCTGAAGC  
AGAAGCTAAGTTATCCGAAGTAGAAAAGAAGCGTGTCAATATTGACATCAATGCTGATAA  
CATTAAATTCAATCGAGTGTTAAAAGTATCTAAAGCTATTCTTGAAGCTTTAAATAGGTC  
CAAAGCCAAAGCTATTTAGATGTAGCCAACAGTGTGCTAATTCTAAAATCAACCGTAC  
TAAAGAAGAGCTTAAAAGAATTCCAAATAAAACTAGATCTCGCCTTGATGTAGATACAAG  
GCTCTCTATAACAACACTATTTATGCGTTTAAAAAATCATTAGACGCATTGCCAAACAAAA  
AACAAACAAGGTAGATGTCGATACTTATGGTTTAAAGAAAGCTTATGCCTACATAATAAA  
AGCAAACGACAATTTCCAAAGACAGAGGGGGAATTTAGCTAATATGTTTCGTGTGTCCGG  
GACTGTAGTTTCTAATATGGTTGGTGGATTACTAACTTCATCTTTTAGCATTTTAATACC  
TGTAATAGCGAGCGTAGTCCCTGTAGTGTGTTGCACTATTAACGCTATCAAAGTGTTAAC  
TGGTGGTGTCTTGTCTTAGGTGGTGTGTAGCAATAGCTGGTGTGCTGGCTTTGTAGCATT  
TGGCGCAATGGCTTTCAGCGCTATAAAGATGCTTACTGACGGCACTTTACAAGCTAGCTC  
AGCAACAAACGATTACAAAAAAGCTTTAGATGGCGTAAAGTCAGCATGGACTGCTATTAT  
AAAGCAAATCAATCCGCTATCTTTACAACGCTTGAAAATGTTTTAAATACTGTTAAAAC  
AGCAATGCAGAGCTTACAACCGGTTTTTAAAGTGGTATTTCAAGAGGAATGGAAGAGGCGTC  
TCAAAGTGTACTTAAATGGGCTCAAATAGCGGTGTAGCATCAAGGTTCTTCAACATGAT  
GAATACAACCTGGTGTTCGCTATTTAACAAGCTATTAAGTGTGCTGCAGGGCGTTCGGTGA  
CGTTTTAGTCAATGTATTACACAAATTAGCACCCTGTTTCGATGGTCCGCTGATTGGTT  
GGATAGATAAGGTCAATCTTTCTCTAACTGGGCTAATAGTGCAGCTGGAGAAAATTCGAT  
TATTCGTTTTATTGAATACACAAAAACAATTTGCCTATCATTGGTCATAATTTTCAAAA  
TGTTTTCGCTGGAATTAACAATCTGACGAATGCATTTAGTGGATCGTCAACCGGTATAAT  
CCAGTCTCTAAAACAGATGCCAGCTAATTTTAGGGAATGGTCTGAACAAGTAGGACAATC  
TCAAGGGTTCAAAGACTTTGTCAGTTATATACAAACAATGGACCACTAATAATGCAATT  
AATTGGGAACATTGCAAGAGGATTAGTTGGATTCGCAACAGCGATGGCTCCTATAGCTAG  
TGCAGTATTACGCATTGCAGTAGCAATAACTGGTTGGATAGCTAACTTGTTTGAGGGCGCA  
TCCAGCTACAGCACAATTAGTTGGCGTCATTATATCTTAAGTTGGTGCATTTAGATTTTT  
AATTGCTCCAATATTTGCGGTAATGGATTTTCGGGGGCCATTAGCAGCAAGATTAGGCGC  
ATTAGTAACTAAGTTTGGTTGGGCTAAACCAGGAACCTTAGTATTAAGTAAGGCAATGAC  
ATCGTTAAAAGGTCCAATAAAGTTAGTTACAGCTATATTCCAATTGTTATTCGGTAAGTT  
TGGATTAATCAGAAGTGCTATCTCAGGACTAGTAACTGTGTTTGGTACTTTAGGCGGTCC  
AAGAACACTAGTAATTGGTGTAAATTGCTGCATTAATAGCTATATTCGTTTTATTGTGGAA  
TAAAATTGAAGGATTCAGAACTTTATTATAAATGCCTGGCATGAGATAAAAACGTTTTAT  
GGTTTATGTTTGAATGTATTACAAGCTGTAGCATCGGTTGTATGGAATGCTATATTAAC  
AGCTATCACTACAGCAGTATCGAATGTTCACAATTTTATAAATGATTGTTTGGAAATCAAT  
AGTCGCTTATTTACAAGGGCTATGGAATGGAATTATCGCTATTGCACCAACAGTATGGAA  
CCTTTTAGTTACAATCATTACAACCTGTTTTCACGACGATAATGACAATAGTTATTACGAT  
ATGGACAGCTATTTGGACGTTCTTAAAGTACAATCTGGAATACGATAATTACAATCGCTAC  
AACGATTTCAATTTGTTGGTCACTGTAATAACTACTGTGTTTACAACAATCATGACAAT  
CGCAATGACAATTTGGAACGCTATTTGGACGTTCTTACAGACGTTGTGGAACACTATAGT  
TACTGTGGCAACTAAGGTTTGAACGCTATCACGACAGCCATCTCTACTGCGTTACAAGC



GGCCTGGAGTTTCCTTTCTAATATCTGGAATACGATTTGGAGTTTCTTTTCTGGTATATT  
AACGACGATTTGGAATAAAGTAGTAAGTATATTCACACAAGTTGTATCACCTATATCCGA  
CAAATGTCTCAAGATTGGGACTTCATTGTCACTAAAGGTATGCAATGGGTATCTACTAT  
ACAAGTACGCTAATTAACCTTTGTTAATAGAGTTATTCAAGGATTGGTTAATGTTGTAAA  
CAAAGTTAGTCAAGGTATGACAAATGCAGTAAATAAAAATAAAAAGTTTTAGAGGAGATTT  
TGTGTCTGCAGGTGCTGATATGATCTGTGGTTTAATTAGAGGTATTGAACAAGTGGCTGG  
CCAATTAGTAGATGCAGCTAAAAAAGTTGCTAAGAAAGCTTTAGATGCAGCTAAAAGTGC  
TTTGGGTATTCACCTCACGTTCCACGTGAATTCATGGATGATGATATGTATTCAATGCTAGG  
TTTCGTTAAAGGTATAGATAATCATTCAAGCAAAGTTATCCGTAATGTTTCTAATGTTGC  
AGATAAAGTAGTTGATGCATTTCAACCTACATTAACCGCACCTGACATCTCTAGTATTAC  
AGGAACTTAAGTAATTTAGGTGGAAGTATAAATGCGCAAGTACAACACACACATTCTAT  
TGGAACATCACCGAACATGAAAAGTGTAAAGTTGAATGTAATGTTAATAACGATGCGCT  
TACTAGTATTGTTAACGGCAGAAATGCTAACCACAATTCTGAGTATTACTTACAAAGGAC  
GTTACAAATGGACATAGAATTAACAAAAAAGATGGTACTGTGATCAAATTAAGTGAATA  
CGGGTTTATCGTTAACAATATAGTAATTGATAGCATGCAAATCAACACAAAGTATCAAGA  
CAAAGAAAATATGAACGGTCGCGTATTAATGGAGAGCAATTATATCAGTAGAGATATTGT  
TGTTACTTGTTTTTGTAAAGTAAAAAATCGTTCAGACCTTGCTGATATGCGAGATATGTT  
GTATTCGTTAACTACTGATATAGAACCAATGTATTTACTTGAAATCAGAAGAAAAGAAGA  
GTTGAATTACAGGTTTACTCAACCAACTTCTCATGATTACGTGAAATTAGATAAAAAACA  
CTTCCCGGATTATGAATATTCAAGACACGATCAACAAATTTATGTAAACGGTAAACAGTA  
TAAAGTTAAGTTTAGCGGAGTTATAAATCCTAAACAAAAAGATAACATCGTTGCTTTGGA  
ATTGAAGTTTGACACTACAGAGGTACCATACGGCGAAAGGATTGGAACAAGCCTAGAGTT  
AGAAGAAAACAAAAAGGTTGGATTGTGGTCGTCTGATTTTAATATTGATTGGCATGTAGG  
TGGGGATAGGCGCCAGTATACATTTGATAATGTTAGTAAAGATACAGTTTTTCTATCATGG  
TAGTGCTCCTAACGACCAATTCAACATGTATAAAAAGATAACAATTATTTTGGGCGAAGA  
TACAGAATCGTTTTGTATGGAACCTAACGCATGCTGAAATAATGAAAATCGAAGGTATCAA  
ACTAAAAGCTGGAGACAAAATTGTTTATGATGGCTTCCGAGTTTATAAAAACGGTGTTGA  
AAGAAGTACCGATACGAATATAGCCCAACCAAAAATTACATACGGAGCTAATAAATTTGA  
GTTTAATCAAACGGTACACAAAGTTCCGTTTGATTTGAAATTCTATCATAAGTAGGTTGTC  
TGAATGACAATAATTGTAAGACCACCTAAAGGTTATTGGCGCACCTGTACCAGTAGAAACA  
ACTTTAGTGAAGAGTTAATGCTGATGGTGTATTAACCTTGTGAGATTCTAGAAAATAAA  
TATACTTATGAAATTATTAACGCTATAGGGAAAAGATGGATTGTTAGTCATGTGCAAGGT  
GAAAACGACAAGAAAGAATATGTAATAACTGTCATTGATAGGAAATCAGAAGGCGACAGA  
CAACTGGTTGAAGGTACTGCTAGAGAGATTCCCTTAGACAAGTTAATGATTGATAGACTT  
TATGCTAATGTAACAGGATCTTTTACAGTAGACAGATATTTTAAACATTGTCTTTCAAGGT  
ACTGGAATGCTTTTTGAAGTCGAGGGCAAAGTTAATCTTCAAAGTTTGACAACGGCAGT  
CAAGGCGACACAAGGTTTCGAGATGATAAAAAAGGTTTGGAACATTTTGCATTAGAATAC  
CATATCACATATGACAAAAGAATGATAGATATAAGTTTGTATTGACGCCTTTTGCAAAG  
CAAAAAGCGTCTTATTTTATTTCTGACGAAGTGAACGCCAACGCCATAAACTCGAGGAA  
GATGCAAGTGATTTTCGCCACCATCATTAGAGGATATGGGAATTATTCAGGAGAAGAAACA  
TTCGAACACGCTGGGCTCGTAATGGAAGCTAGAAGTGCATTAGCTGAAATATACGGCGCC  
ATCCACGCAGAACCATTTAAAGATGGTAATGTGACTGACCAAGAACTATGGCTAAAGAA  
TTACAATCGAGACTGACAAAGTCGTTAAAACAATCTTTGTCTTTGGACTTTTTGGTGTTA  
AGCGAATCATAGCCAGAAGCAGACCCACGACCCGGAGACATAGTACAAATAAAATCTACC  
AACTAGCTTTGAATAATTTACCCCGTATAGTACAAGTTAACACGATTAGGGGTATAAAC  
AATGTAATTGTTAGGCAAGATGTAACGCTTGGTGAGTTAATCGAGAACAACGATATATG  
AAAAAAGTTAATACTGCAGCTAACTATGTTTCTGGATTAATGATGTTAACCTTTCTAAT  
CCTAGTCAAGCGCCAGAAAAGTTGAAAGTCTAAAGTAGCGTCAAGAGCTAAATCAACACTC  
GATTTGATGAGTAGAACTGATCTAATTTAAGACAAACAACAGAAAGTGAGTTCTAAGACT  
GTAAGTGCATCAGATTGCACTATCGTTCATGATTTGATAGATAAATCAAACATTAAGAT  
GAAAAACACTTGGAACGCTTGGCGATTCTGTAGCTCGAGGATCACATTCGAAAACCTAAT  
TTAACAGAAATGTGAGGCAAGAAGTTAAAAGCTAAAACGACCAACCTTGAAGAGGTGGC  
GCAACAATGGCAACAGTTCCAATAGGTAAGAAGCGGTAGAAAACAGCATATATAGACAA  
GCAGAGCAAATAAGAGGAGACCTAATCGTATTACCAGGTACAGATGATGACTGGTTACAT  
GGTTATTGGGCAGGCGTATCGATAGGAACTGATAAAACCGACACTAAAACGTTTTTACGGC  
GCCTTTTGTCTTCAATTGAAGTTATCAGGCAAATAATCCAGCTTCAAAAATACTGGTA  
ATGACAGCTACTAGGTAATGCCGTATGAGTGGTACAACGATACGTCGTAAAGATACGCAC

AAAACAACACTAGCGTTAACTTTAGAGGCTTATGTCAATGCTCAGATATTCCTTGTAGT  
GTATTGGATGTACCAGTATAAGATGCCTATCATAACAGATTATTTTAAGCCATATAATCCA  
GCGTTCAGAAAATCGAGTATGCCAGACGAATTGCATCCGAACGAGAGGGGTCATGAAGTT  
AATAAGTACGAACTTATTAATAATTATTACCAGTTTTACGGATAGAAAAGGAGGAAGACA  
TGGATAACAAATTAATTGCAGACTTAAGTAGAGTCTTTGACTACAGATATGTAGATGAAA  
ATGAGTATAACTTTAAACGTATTTTCAGACATGCTGACGGATTTTAATTTCTCTCTTGAAT  
ACCATTGAAATAAAGAGGTATTTACACATAATGGAGAGCAGATAAAGTATGAGTATTTAA  
CTGTCAACAAGTAGCGTCTCTGATTTTTTTAACGTATCTAAACGGCCGTTTCAGCAATATGG  
TACTAGGTCATAACGGCGACGGTAACAACGAAGTAAAAGACGCGCGCGTTGATAATACAG  
GTTATGGTCATAAGGCATTCCAAGTTCGTTTTGTATCATGATTATTCAACACTAGATGCTT  
TCACTAAAAAAGTTGAGAAAGCTGTAGATGAACACTATAAAGAATATCGAGCGACAGAAT  
ACCGATTCGAACCAAAAGAGCAAGAACCGGAATTCATCACAGATTTATCGCCATATACTA  
ACGCAGTAATGCAACCATTTGGGTAGACCCTATAACGAAAATTATTTATATGATAGAAG  
CTCGTCCAGGTAATCATTACATGTTATCTAGATTGAAGCCAAACGGACAATTTATTGATA  
GATTGCTTATTAATAACAGCGATCACGGTACACACAATGCATATAGATACATTGATGGAG  
AATTATGGATTTATTCAGCTGTATTGTACAGTGACAGAAACAAGTAGTTTGTACGTTTCC  
AATGTAGAACTGGAGAAATAACTTATGGTAATGAAATGCAAGATGTCATGCCGAATATAA  
TTAACGACACATATACGCCAGCGATTTATAATCCGGTAGAAAATTTTCAGGATTTCTAGAC  
GTGAAGTTAAACCCACTGAAGGACAACCTAAGAATTCGTTGAACTTTGTTGAGGTTAGAA  
GTGCTGACCATATTGATAAAGGTATAGACAAAGTATTGTATCAAATGGATATACCTATGG  
AATACACTTCAGATACACAACCCATGCATGGTATCACTTATGATGCAGGTATCTTATATT  
GGTATACAGGTGATTCGAATACAGCCAACCCTAACTACTAACAAGGTTTCGATATAAAAA  
CAAAGAATTGTTATTTAAACGACGTATCGATATTGGCGGTGTGAATAATAACTTTAAAG  
GAGACTTCCAAGAAGCTGAGGGTCTAGATATGTATTACGATCTCGAAACAGGACGCAAAG  
CGTTTTTAATAGGGGTAACTTTTGTACCTGGTAACAACAGACATCACTCAATTTATTCCG  
TCGGCCAAAGAGGTGTTAACCAATTTTTAAAAAAAATTGCACCTCAAGTATCGATGACTG  
ATTCAGGCGGACGTGTTAAACCGTTACCAATACAGAACCAGCATATCTAAGTGATATTA  
CGGACGTTTCGTCATTACTATATCTATACGCAAGACACAAAAATGCATTAGATTTCCCGT  
TACCGAAAGCGTTTAGAGATGCAGGTTGGTTCCTTGATGTACTGCCTGGACACTATAATG  
GTGCTCTAAGACAAGTCTTTACCAGAAATAGCACAGGTAGAAATATGCTTAAATTCGAAC  
GTGTCATTGACATTTTCAATAAGAAAAACAACGGAGCATGGAATTTCTGTCCGAAAACG  
CCGGTTATTGGGAACATATCCCTAAGAGTATTACAATATTATCGGATTTAAAAATCGTTG  
GTTTAGATTTCTATGTCACTACTGAAGAATCACAACGATTTACGGATTTTCGTAAAGACT  
TTAAAGGTATTGCAGGTTGGCTATTAGAAGTAAAATCGAATACCCAGGCAACACAACAC  
AAGTATTAAGACGTAAAAAGTTCCCGTCTGCACATCAATTTTTAGTTAGAACTTTGGTA  
CTGGTGGCGTTGGTAAATGGAGTTTATTCGAAGGAAAGGTGGTTGAATAATGGTAGTAGA  
TAATTTTTTCGAAAGATGATAACTTAATCGACTTACAAACAACATCACAATGTAATCCGGT  
TATTCACACAAACATCAGTTACTATGTATCACATAGAGGAACTGGTGTTTTAAATTTGC  
AGTAACTAAGAATAACAGACCGTTATCTATAAGTTCTAAACATGTTAATACATCTATCGT  
GTTAAAAACCGATGATTATAACGTAGTTAGAGGCGCTTATATTTTCAGACGAATTAACGAT  
AGTAGATGCAATTAATGGGCGTTTGGCCGAATGTGATACCGAATGAATTTTTAAAACATTC  
AGGCAAGGTGCATGCTCAGGCATTCTTTACACAAAACGGGAGTAATAAGGTTGTTGTTGA  
ACGTCAATTTAGCTTCAATATTGAACATGATTTAGTTAGTGGGTTTGATGGTTTAAACAA  
GCTTGTTTATATCAAATCTATTCAAGATACTAACGAAGCTGTCGGTAAACACTTTAACCA  
ATTAGAGCAAAATATGGCTGATACACAGACGTTAATGGCAAAAGTGAATGATAGTGCGAC  
AAACGGCATTTCATCAAATCGAAATCAAGGAAAACGAAGCTATACAAGCTAATACTGCGAC  
GCAAACACTAGTGCAACACAAGCTGACACAGCTGAATTCGATAAAAATAGGTGATAAAGAGCA  
AGCGAATTTTGGACGGGTTAACGAAGTTGAACAACAATCAATGGCTCTGACCTTGTTAA  
GGGTAATTCACAACAATTTGGCAAAAGTCTAAACTTACTGAGGATCACGGTAAAGCAAT  
TGAATCGTCTGAGCAGTCCATAGATAGCGTTTTAAGCGAAATTAACACATCTAGGATTAT  
TCATATCACTAGCGCAACAGATGCGCCAACATTTAAAGATATAGGCATTTAGCGACGCC  
TAAAGAAGAGGGCGTTGATGATGGTTCGAAAGTTTCAGCAACTACGAATACTTTAGGGAA  
ATCAGGCTTGTTAGTTGTTTATGTTGTTGATGACAGTACAGCTCGTGCTAAATGTTATCC  
AGACGATTCAAATGATGAGTACACAAAATATAACATCGGTGGCACATGGTATCAGTTCTA  
TAAAAAAGTTGACGAAGAATTAACGAAGAAATTTGTTGAATAAACGGTTAACAACGCTTT  
GAATCAAGCTAAGCAGTAGGTAGATGATAAATTCGAAACAACGAGCTGGCATCAACATAA  
GATGACAGAGGCGAATGGTCCATCAATTCAGTTAACTAAAATAATGCGCAAGGCGATTT

GGGAGATTTAACTGCTGGTAATTACTATGCAACAAGTTTGCCGGATTTGCCAGGTAGCGT  
TGAAAGCTATGAGGGTTACTTATCGGTATTCGTTAAAGATGATACAAACAAGCTATTTAA  
CTTCACTCCTTATAACTCTAAAACGATTTACACACGATCAATCACAAACGGCAGACTTGA  
GCAACAGTGGACAGTTCCTAATGAACATAAATCAAAGGTATGGTTCAACGGTTGCGCAA  
TGGTGTAGGTACAACAATCAATCTAACTGAACCGTTCACAAACTATTCTATTTGGTTGGT  
AAGTGGAAGTTATCCAGGTGGCGTTATTGAGGGATTCGGACTAACCGCATTACCTAACGC  
AATTCAATTGAGTAAAGCGAATGTAGTTGACTCAGACGGCAACGGTGGGGGTATTTATGA  
GTGCTTACTATCCAAACCAAGTAGCACTACTTTAAGAAGAGATAACGATGTGTACTTTGA  
TTTACGTAAAACATCAGGTTCTGGAGCGAATGTCAACATAGTTACTATAACTAAAAGTAT  
GGGGTGGAAATAATGAAAGTCACATTAACGATAAAAAGTAAGTTATGGGATTCGTCAAT  
ACTGGCGGTTTACGCAAAAAGTTTAGATGTAGATGACAACAATGTGCCTATTAATTTTAA  
GAAGAGTTCGTACCTAGAAAGTTTGTGTACTAACGGCGAAATTAACCTACAATAGCAAT  
TTCGAAAAAGAAGACGTACCGAATGCATGAAGCCAACAAAGTGAGTCAGATTTAAGTGAT  
GAGGAACTTCGCGGAATGCTTGCCAGTATGCAATTGCAGGTGGCACAAGTAAACGTCTTA  
ACAATGGAATTAGCTCAACAAAGCGCTATATTAACACAACCGTTGACTGACCTGAAAAC  
AACAAATCTAGTACTGAGGGGGACGTTTAAACCAATGAAGATGATTTATCCAACCTTCCAG  
GACATTAACCTTTTTATGTGTGGGGTTGCTATAAAAATGACCAAATTAAGTGGTACATA  
GACATGGGTGTAATCGACAAAGAAGAATATGCATTGATCACTGGAGAAAAATTTCCAGAA  
ACAAAAGATGAAAAGTAACAGGTGTAATCCTTGTGGCTTTTTAATTTAACACGAAGTAGG  
TGGCGTAATGTTTGGATTTACCCAACGGCACGATCATGAATGGCGTACTAGAAGATTAGA  
ACCGAATGATAAAAACAATGCTTAGCACTCTCAATGAGATTAATTAGGCCCAAAAACCTCA  
AGAGCAAGTTAACATTAAGTTAGATGAACTTTAGATGCTATCGAGAGGGACAGACAGAT  
AGACGAAAAAATAAGAAAGAAAACGACAAAAATATACGCGATATGAAAATGTGGATTCT  
CGGTTTGATAGGGACTATCTTCAGTACGATTGTGTTAGCTTGACTAAGAACTATGTTTGG  
TATTTAAAGGAGGTGATTACCATCCTTAAAGGGATTTTAGGATATAGCTTCTGGGCGTAC  
TTCTGGTTTGGTAAATGTAAATAACAGTTAAGAGTCAGTGATTCGGCACTGGCTTTTTAT  
TTTGATTGAAATGGGGTTCATACATGGGATAACCCAATCCAAGACTCGAACACCTACAG  
CAAGTGAAGTAGTAGAGTGGGCGTTGTATATTGCTAAAAAGGAAATAGCTATGGATGTAC  
CTGGTTCTGGAATGGGGGCGCACTGTTGGGACTTGCCTAATTAATTGCTTGATAAATATT  
GGGGGTTTAGAACATGGGGAAATGCTGATGCTATGGCTCAGAAATCTAATTATAGAGGTA  
GAGATTTCAAGATAATTAGAAAGACAAAAGATTTTATAACACAACCAGGCGACTGGGGTG  
TTTGGACTGGTGGTTCGGCAGGACATGTAAACATTGTAGTGGGACCGTGCAGAAAAGACT  
ATTGGTATGGTGGGGATCAAAACTGGTATACAAATATTGCAACAGGAAGTCCGCCGTATA  
AAATCAAACACTCTTATCATGATGGACCAGGTGGAGGAGTTAATATTTTGTAGACCAC  
CATATCATCCGGAGAAATCTACGCCGGCTCCTAAACCCGAAGACGAAAGAGATAATAACG  
AAAAAATAATAAAAAAGTTCCGATTTGGAAAGATGTAACAACCTATAAAGTACACTAGTT  
CTAGCCAAGAGGTTAATTATCCAGAATAAATTTATCACTGTATAGTAGAAGGTAATCGAC  
GACTCGAAAAACCTAAAGGAATAAGGATTAGAAACACACAACGATGAGCTCGGTAGAAA  
GTTTATATAACAGTAGGAAGAAATACAGACAGGATGTAGAATATCCCCACTTTTATGTTG  
ATAGACAAAATATTTGGGCACCTAGCAGAGCTGTATTTGAAGTTCCTAATGAACCTGTTT  
ATGTACTTATAGACGTATGTGAAGATTATAGTGCGAATAAAAATGAATTTATTTTAAATG  
AGATTCACGCAATGGCTGTAGCTGGAGATCTGATGGCCAAATATGAGATACCTCTAAGTA  
TTGACAATTTAAAAGTAGACGACAGCATTGGCGTTCGATGCCGGAACATGTTAATTGGA  
ATATGCTTGACAACGGTGTCCCCCTAAAGATAAATACGAAGCATTAGAAAAGGCATTAC  
TTAATATATTTAAAACAGAGAAAAATTATTAATTTTAAAACCTAAACCAACAGTAACAA  
ATTCTAGAATAAAAGTTAAGGTAGATAATAAAAACGCTGATATAGCGAATGTAAGAGACT  
CATCACCACAGCTAATAATGGCTCGGCATCTAAACAACCGCAGATCATAACAGAAACCA  
GTCCTTATACATTCAAACAAGCACTGGATAAACAATGGCAAGAGGTAACCCGAAAAAAT  
CTAATGCTTGGGGATGGGCTAACGCTACACGAGCACAACCGAGTTCAGCTATGAATGTTA  
AACGAATATGGGAAAGTAACACGCGGTGCGACCAAATGCTTAATTTAGGCAAGTATCAAG  
CCGTATCAATTAGTTCGCTTAATAAGATACTTAAAGGTAAGGGGACTTTGAAGAATCAAG  
GTAAAGCATTTCGAGAAGCGTATAAAAAGCACAACATTAATGAAATTTATTTAATCGCGC  
ATGCTTACTTAGAACGTGGATATGGATCAAGCAACTTCGCTAACGCAAAAAGATGGGGTAT  
AGATCTCCTTCGGCATCGGCGCTTACGCAACAATCCTAACTACGCAATGACGTTTGCTA  
GGAATAAAGGTTGGACATCGCCAGCAAAGCAATCCTGGGCCGTGCTAGCTCCGTAAGAA  
AGGTTTACATCAATAAAGGTCAAACACGTTGTACCGAATTAGATGGAATCCTAAGAATC  
CAGCTACCCACCAATACGCTACTGCTATAGAGTGGTTCCAACATCAAGCAAGTACACTCG

CTAAGTTATATAAACAAATCGGCTTAAAAGGTATCTATTTTACAAGGGATAAATATAAAT  
AAAGAGGTGTATAAATGTACAAAATAAAAGATGTTAAAACGAGAATAAAAAATGATGGTG  
TTGACTTAGGTGTCATTGGCTGTCGATTTTACACTGAAGATGAATATACAGCATCTATAA  
GAATAGGTATCAATTACAAACAAGGTCGTATCGCTCTAAAAGCACATGGCTTAACACCTA  
GATTACATTTGTTTATGGAAGATGGCTCTATATTCAAAAATGATCCCCTTATTATCGACG  
ATGTTGTAAAACGGTTCCTTACCTACAACAGACCTAAAAGGTTATCAAACACGCTGGTT  
ATGTTTCGCTGTAAGCTGTTTTTAGAGAAAGAAGAAGAAAAAATACATGTGCGAAACTTTT  
CTTTCAATATCGTTGATAGTGGTATTGAATCTGCTGTAGCAAAAGAAATCGATGTTAAAT  
TGGTAGATGATGCTATTACGAGAATTTTAAAAGATAACGCGACAGATTTATTGAGCAAAG  
ACTGTAAGAGAAAAATAGATAAAGATGTCATTTCTTACATCGAAAAGAATGAAAGTAGAT  
TTAATGGCGCGAAAGGTGATAAAGGCGAACCGGGACAACCTGGTGCGAAAGGTGATACAG  
GTAAAAAAGGAGACAAGGCGCACCCGGTAAAACGGTGCTGTAGAATCAATCAATCCTG  
ACAATAAAATGTGGCAAATTGACCGTAAAGATACAGATATCAAAGCAGAATCTGAGTTAT  
TGGATAAAAACAATATCGCAAATGTTGAAGGGTTAGAAAATAAATTGCAAGAAGTTAAAA  
AAATCAAAGATACAACCTACAACGACTCTAAAACGTATACGGATTCCAAGATTGCTGAAC  
TAGTTGATAGCGCGCCGGAATCTATGAATACATTAAGAGAATTAGCAGAAGCAATACAAA  
ACAACCTCTATTTTCAAGAAAGTGTATTGCAACAGATTGGCTCAAAAGTTAGTACAGAAGATT  
TTGAGGAATTCATACAAACACTAACTGATATATATGCTTCAAAAAATCATAATCATGACG  
AGCGGTATGATTTGTGATCTCAAGCTTTTACTAAACAACAAGCGGATAATTTATATCAAC  
TAAAAAGCGCATCTCAACCGACGGTTAAAATTTGGACAGGAAGATAAAATGAATATAACT  
ATATATATCAAAAAGACCCTAATACACTTTATTTAATTAAGGGGGGATTTTTATGGAAGG  
TAATTTTAAAAATGTAAAGAAGTTTATTTACGAAGGTGAAGAATATACAAAAGTATATCC  
TGGAAATATCCAAGTCTGTAAAAGCCTTCATCTTTTGAATAAAAACCTTACCTAAAAA  
TAAATACCCGGACAGCATAGAAGATTCAACAGCAAAATGGACAATAAATGGAGTTGAACC  
TAATAAAAGTTATCAGGTGACAATAGAAAATGTACGTAGCGGTATAATGAGGATTTTCGCA  
AACTAATTTAGTGTCAAGTGATTTAGGAATATCAGGAGTCAATAGCGGAGTGGCTAGTAA  
AAATATCAACTTTAGTAATCCTTCAGGGAACCTTGTATGTCACTATAAGTGATGTTTATTC  
AGGATCTCCGAAATTGACCATTGAATAATTTTAAATGACTAATTTTTTAGTCGTTTTTTA  
TTTTGGATAAAAGGAGCAAACAATGGATATTAAGTGGAGATTGAGATTTAAAAATAATG  
CAGTATTAACAGGTTTAGTTGATCCATTGTTGTTATTGATCAAACAATCACAGATTTTT  
TCGGATTCGATTTATCAACTCAACTAAATCAAGCCAGCGCATCATAGGTGCTATCCTCA  
CGCTACTTACAGGGATTGGCGGTATTACTGACCCAACGTCAAAAGGCGTCTCAGATTCAT  
CTATAGCATGGACATATCAAGCGCCTAGAGATTGCAATAAAGACGAACAACAAGTTACGT  
GGAAATCATCACAAGACAGTAGTTTAAACGCCGAATTAAGCGCCAAAGCACCAAAGAAT  
ATGATATATCACAACCTTTACAGACGCCTCTAACGCTGTTGGCTTTGATGAGAATGAGT  
ATCATCATGGAGGTGGAGACAATTCAAGCAAAATTAAGTAAAAAAGAGTTTATAGACTGG  
TTGAAAACCTTCTGAAGGAAGACAATTCAATGTGGACTTATGGTATGTATTTCAATGTTTT  
GATTATGTCAATGCTGCTTGGAAAGTTTTGTTGGGATTACTTCTGAAAGGTTTAGGTGCA  
TAAGATATACCCTTTGCAAACAATGTTGATGGACTAGCAACTGTAAACCAAATACGCCG  
GACTCTTTGACAAAACCCGGCGATATGGTTGTGTTTCGGTAGTAATTACGGTGCAGGATAC  
GGACACGTAGCATGAGTAATTGAAGCAACTTTAGATTATATCCTTGTATATAAGCAGAAT  
TGGCTAGGCGGTTGGTGGACTGACGGAATCGAACAACCCGGCTGGGGTTGGGAAAAAGCT  
ACAAGACGACAACATGCTTATGATTTCCCTATGTGGTTGCTCCGTCCGAATTTTAAAAGT  
GAGACAGCGCCACGATCAGTTCAATCTCTACACAAGCACCTAAAAAAGAAACAGCTAAG  
CCACAACCTAAAGCAGTAGAATTAATAATCATCAAAGATGTGGTTAAAGGTTATGACCTA  
CCTAAGCGTGATAGTAACCCTAAAGGTATAGTTATACACAACAACGCAGGGAGCAAAGGG  
GCGACTGCTGAAGCATATCGTAACGGATTAGTAAATACACCTTTATAAAGATTAGAAGCG  
GGCATTGCGCATAGTTACGTATCAGGCAACACAGTTTGGCAAGCGTTAGAACAATCACGA  
GAAGGTTGGCATAACCCCGAATCAAATAGGTAATAAATATTATTACGGTATTGCAGTATCT  
CAATCAATGGACGCAGATAACGCGACATTCTTAAGCAATGAACAGACACCTTTCCAAGAA  
TGGCTAGATTGTTGAAAAAATGGGCATTACCAGCAAACAATAACTCAGATTGCAA  
GATGAAATTACTTCAACATCATGCGCTCATAGAAGTTCGGTTTTACACACTGGTTTTGAC  
CCAGGAACTCGCGGTCTATTGCCGGAAGATAAACAATTACAGCTTAAAGAGTACTTTATC  
AAGCAAATCAGAGTGTATATGGACGGTAAGATACCAGGTGCCACTGTCTTAAGGAGTCA  
AGCGCTTCAAGAAATACAGTTAAACCAGTTGCGAGGGCATGGAAACGTAATAAATAGGGT  
ACTTACTACATGGAAGAAAGTGCTAGATTCACAAACGGTAATCAACCAATCACTGTAAGA  
AAAATAGGACCATTCTTATCATGCCCGGTAGCTTTCCAATTCCAACCTGGTGGATATTGT

GATTATACAGAAGTGATGTGACAAGATGGTCATGTTTGGGTAGGATATACATGGGTGGCG  
CAACGTTAGTACTTGCCTATTAGAACATGGAATGGTTCTGCCCCACCTAATCAGATATTA  
GGTGACTTATGGGGCGAAATCAGCTAGAATGACATAGTCATGTCTATTTAAGCAGGTGCG  
TTACATACCTGCATTCTATTTACATTTAAAGATAAAATGTGCTATTATTTTACTAGA  
TTTAAACATTTCTCTCAAGATTTAAATGTCGATAACAGGCAGGTACTACGGTACTTGCCT  
ATTTTTTATGTTATAATGTAATTACATTACCAGTAACCTATCTGGCTTAAAACACATTT  
CCGGTAGCCAATCCGGCTCTGCAGAGGACTTACTTGCCTGAAGTAGTAAGAAGCTAACTG  
CATATTTAAACCACCCACACTAGTTACTGGGTGGTTGTTTTTGTTCGCCATTATGTTCTG  
TCTACATCTTTTTGCGCAAGTTTTGTATTATGTATATATAGTATAAATAAGGGATATTTT  
AAATGGAAGATAATAAAAATTCAGCAAAAATGTACTAATTCAAAGCTTTATATTTTTTTA  
CTGCAGCTTTTTGTAAATATAGTGACTATTATAACATCTATAAAATTTGAGGTGCTATGT  
TAGGTGTAACACTTTATTTTATGCCTATTGTTCTAGAGAATTACATGAAGAATGTTTACA  
ATAAAGCAACTAAGATTTTGAGAAGAATACGATATATATTTCCAGTTTATTCATATTTA  
TAAACATTTTAATATTTATTTTATGTTATTATATGCCTACATATAAGGTTACCATTAGTA  
AAAGTTGGTATGTTGGTGCTATTATAATAACAACAATACCATTATTTTTTATAAGTATAT  
TAGATATTTTTCTTTATGGATTTAACAACGAGGAAATCAAAGCTAGTAGTGAAACTAAAG  
AGTATTTGAGAAAGAACAGAAAACAAAGTAAAGAACTAAAAATAAAGCAAGAGAAAGTAC  
TGAAAGAGGAAGAACGTC AATTTAAAATAGAACGTTCTAAAAGAAAGGGATGATAGTAAT  
GGTTATAACAATGATAAGCGTTTTTGTATAATTGCTATCTTATTATTTTATTTGTCAGC  
GGTAACTCTTACCGCAGTTAGATCTTATGCTTATAATGTTAAATTTAGTGTACCAACGCT  
ATTTGCAATACCATTAATTTTGGTCTGTACACATATAAAAATTTACAATACTTACAAATT  
GTCTGACAGAAAAAAGCCTTCAGAATGCTTTTATTTATATTTAAAAAATATCCGGTAGC  
AATAGCTATGTTTTTAACTATTATTGCTACAAATATCGCTGAACAAAATGTTAAATTATC  
AAATGGAGCAACTTATAAGAAAACGAAAATTTAAAGCAGAAGAAACGTAAAAAAATGAT  
TAACAAGGTTCTTCAACGTAATACTAATGGAGAAATGCTTTTGGGAATATAAATAAGTTT  
CTTAGTACTTCTTATGATTTTAAATATAAGAGGTTTATTATCTTTTCTTGTTGAAATTATA  
ACCGTACCGTTTAAAGATGCGGTTATTTTTATTCTTATACAATCAACAAAACCATAAGACC  
TATTAATTTAGCAGTGTGGATTTTTATATGTGAAGCTAAAATAACTACAAATGATACCAT  
TTTTGATATCATTTTGTAGTAAAACAGAGAAAATAAGGAAAATAAAAAAGGCAAAAAACG  
CATTAAATCAACGTTTATTGTCTCATGAAATTTAAATGTATATAAATTTCACTTCGCATG  
GG

>NewGenomeName\_223

ACGTAGGGGGCGGGGCGTAGTATTACCTCCGCCCCAGGATCCGAGGAGTCATTTAGACTCG  
CTATAAGCCGTTAGATGTGTATACACGTGGACGATCAGGATCTGTGATTCGTGAAGCGAA  
TCTGACGGGAGATCGTCCGAAGCCTCGTGGTAGGGCCCCCATGTTGCTTGATCTTTATTT  
TAATAAAGTAACGTAACATGCTGTCCATTGCTTTATTCGTTTGCTAGTGGTTTACAGCTG  
TCTTTGCTTCGCCTCGAAGCAAAGGACATTTCTCATGGTCTATAAAAGCTGTGTTCTCCGT  
GTGTAATTCGTCGGAATTATCGAGCGTAAGTCTCGTTCTTGTCTATGGAAGATTTCAAG  
CAACCAAAGCTCTCTTATTGAGTGATAGTTCAAATGAAGGAAGAACAAGATGCTTTCTGG  
AGTGGTGATCATGAGTTTCTCCTTCGCAATGAAGATGTTCTTGGAGAGATGTGAAGACGC  
CATGGAAGGAAATTGCCTGCATATCCAATGCTCCCTACATATGCTCCGATACGCTCGGTT  
CTTAAGATTAAGGCAATTTATGATGTCAGAGTAGATGAATGTAAGTCATGTTTCGCATGAG  
GAAATTAGTAGAAGGGATTATAATCCCAATAAGAAAGAAGGTTTAAAAGACCTGTATGAT  
ACAGGTAATTATAGATATCAAGTTTATTATTCTTCATCGTGTAATAGTGACAAATCAGAT  
TAATAGATAAATAATTACAATTGTATTGTTTCTGCTATTGTTTCATGTTTCATTAATAATT  
TATGTTTTGCAAACCAGAGCTATTCAGAGGTAGAAGACCACTACAATAGATAACATATA  
CATTACCAAGATTTTTGAGAAATATATTATTGTTAATAACTCTGCGAAGCTATATGTCTT  
GGCCCTATGGGCCCAAATGCTCTTAAGCCCAATGAAATTAACACTGAAGTGAGTCAGCTG  
ACGTCAGCAGACTCCTTGATG

>NewGenomeName\_224

TAGTTTTACCCCGTGCCGGGATCAGAGACATTTGACCAATAGTTGACTAGTATAATAGC  
CCTTGGATTAAATGACACGTGGACGCTCAGGATCTGTGATGCTAGTGAAGCGCTTAAGCT  
GAACGAATCCGACGGCAGAGCGTTCACACTTAGCACTAGTTAGCGTACTTAGTACGCGTT  
GTCTTGTGTTGATAAATAGAGTGCTTCTGAACAGATTGTTTCAGAATTTTCATAGCGAGATG  
GATTCTGGTGATGGTTTCAATATGTACTCATATGAAGAAGGTGCTGGAGATCCTTAGAAG  
GAAGTTTTATATAAAATAGGTATTATTATGTTATGTAGTGTAGGGATCGTAGTTTTATGG  
GTTTTAATTATATTATGTTGTGCTGTTCTCGCTATGCTAAATCAACGATGGACGCTTGG

TTATCTTCGTATTCTATTATGAAGAGGAAGATGGCTTCAAGGATTACTGGTACTCCGTTT  
GAAGAACTGGTCCTCATCGTGAAAGAAGATGGGCTGAAAGAAGAACTGAAGCGACGAAC  
CAGAATAATAATCATAATGTTTCATAGATTTAGTTGATATGTTGTAATTTTATATGGAGTA  
ATGAGAATTATTATTCTGTTCTTCGTCTGTGTTTTTAAGCTTTTTCTGTGTTTTTA  
TGGCGTCTGGAGAGAGAAAGGAATAATTGTAAGGTAGACGACGATGTAGTGGATTGCAGT  
TGTCTTTACTTCACCTCAAAGAAAGACACAGTTCAAGTTGTGAGTGTATTGCTTTTGGAG  
GAAGCTTGCTCGAAGCAGCGTATAACTTTAATTTGAATTTGGTTTTGGCGCGTTAGTGAA  
ATTGCGGCTGTAAATGTGTCAAGTTGTGAGTGGCTGAAATAAGATAATAGGTATATTATT  
ATTGTTTTAATTTAATTCCGCGAAGCGATATGTTAAGTGATATATGGAACGAAGCGTTTT  
GATGACGTCATATGTCTCCGTACTIONTACGTCAGCACGGGGCT

>NewGenomeName\_225

ATGACGGAGCCTGGAGCATCGGAGTTCAGTTGGGGACCGGGAATGCATCCGCATCCTGAC  
TTGGACTACGACGCGGGGAAGTCTCTCGCGCCCAACAATGTGGAGACGCTGCACGATCAG  
ATTCGCGATCTGCAGGCGAGCAAGCGGACCAACGCCGCACGCGCTGGAGAGACGATGCCA  
GACATGTACTTTGCACTCGGGAATCCGGATCGCTACGGGCCCAATCCC GCGCTTGAGCAA  
GGCGATGGCAAGCCGGAGCCTAGCCCCACGCCCGAGGAGTCACCGCAGACATTCGCACCC  
AAGCCGTAATCGTTTTGTGCAATAACAGATGTGCAGTCGGTCGGATTCGTGGCTAGGGCGG  
CCACTGCCGGGCCACAGTATTATTGAGGGACGAATCCGCGCCTGACAGAAGAGAATTGCA  
ATGCCACGAGGTGATACCACCAAGGAGCTGACCGACCGCACCGTGGGGAAGCCCGACGGG  
CCAGAGGAGTTCCGCCCCGAGTTTGGAAATCAAGGTCGGAACGTTTACAATGCGTCGCAAG  
GATTTGGACCATCCCACCTATCGCAGCATGCCGTGTCTGATGTTCCATGTGCCGTAGCAG  
TACCGCGGACACTAACGTGTGGAACGTCTCGCGAACTTCTCGGGCGACCCGGACGACTAT  
CGAATCGACAAACACGGCTCCCGGCTGTGTGAGGCTGAGAGGCCGCGACGGTCCACTCGT  
CGCCTCAAGTGTGCAAGCTACCGACAGCCGTACTIONTGCAGCAGCATGGCGCGCGCCTACAC  
GCGCTGGACAAGGTGCGAGTTGATCCCAAGGATCCCAGCACCATGACGCGCATGGAGCTG  
TTGACGCACGGGTACATTGATGTGGAAGACCTCACCGACGACGAACCTCAAAAATGGGCTC  
GTGGCTCCGGGGCGTGGTGGTAATGCAATGATCCACTTGCCCAAGGACGTGTACACGAAG  
ATCGTCAACAGGCACCTTTGACCTTGCCAATGAGCTGATGCTGGAGGGGATGATGCCGGCC  
ATCAAGATGCTCAGAAACATTGCAGAGAAACAAGCACGACATCTACGAAGCCAAAGACCGC  
GTCAAGGCCGCCACCTACATTGTGGACAGAGTGCTTTGTAATCAACCAGATACGGCACTG  
GTGCTGGGTGGTGTGATGGCGGGGCCAGGAGCCCTGGCAGCAGATTGTGGCCGGGATC  
ATGGACAACACGCCTGCGGAATCCCGTGCGGCGCGCGCTCCCCACGGGCCGAGAAGGC  
GCTACGCTCAAGCACGACGGTGAGGCCGAGGAGCTTCTCGATGTTGAGGTTGTGGAAGAG  
TCTGCGGCAGATCATGATTCAGCGACGCCGGAACGCCAGACGACACGGGACCTGATGCG  
AGCGCTCTCATCGCAGCCGTAGCTCCCAATGGAAAGCCCAAGCGCGCCAAGGCCAAGGCCG  
TCTGCTGGCACGAGTGGCACGAGTGGCCCCGAGTGGCACGAGTGAAAAGCCTGCCAAGGTG  
CGGGTCAAGCGGCCGAAGCGCGACGCCAGGTAAGCTTCGCGGTGCGGGGTGGACGCTAGG  
CTGCCAAGCAACCGGAGTGGACCCGGGATGCGCGCAGATTCCCTTCTGTCCC GGGTTTAC  
TCCCAAGAACTGCAGGACTGGCAAGGAGCTGAGCATGGCGAAGCAGGGTGTGCGTCCGGGA  
CATCAACGGTCCCACCAAGCAGGCACCGTCTGTACCAAGGCTGTGCAGCCCCGCGCCGAA  
GACCAAGCAGCACCGGCCCAAGACAGCCTAGGAGGGCACCATGGCCGAGGGCGTGAAGAA  
GCTTCCAAAGCGCAAGGGCACCAACCCCATCCC GCGTGACAAGTGGAACTCTAATGACAT  
CTCTCGGGCTCAGCCCTAGCAGGACCAGAAGCTCCACCTACCACCAAGGGTCCGCACAC  
CGGGACCAACGACAGCTTCAAGTAGCACCTCGCCATGGACACGCTGCCCGTGACGGTTAC  
CCGGAGTGGCACTGTCCAGGTGGCTGGGCGCGGTCCC GCTGGCGAGGCTGTGGTGCTAGA  
GACCACGCTCCAGCTCTGGCGGGCAGCCAACAACCAAGTCGAGCGCGTGGCCCATGCCCT  
CGGGTTACCGGCGCGAACCGACCCGACAGAGTCGGATCACGTGCATGCCCAAGAAGAAGG  
TCACCGGAGCCAAGCTCAAATGGGGTAGCGCTGCCAGAAGCGCGCTCAGCGAAAGTCTG  
CAGAAGCCAGTGCCCGGAAACGGCGCAAACGAGGCCGGCAGGACATTCTGAAGCGCAAAA  
GCCGCGCAGCCGGTAGCTTCTCCGAGGTTTCGCAAGATCTCGGTCAAGGTGGCCAGAGAGC  
ACGACCTGTCCGGTACCGGGCACGGGGCCAACAAGGAGGCCCTACCGTGCCAGTGCAGCCG  
AGAGCCGCAAGATCAAGGCCGCTGGCGGGACGAGCTCGGCCGCCCGCGTCTACAGCACTG  
CCCGCAAACCTTATTACACCGCGCCACGCGGTAAGGCAGGCAACCAAGGCAAGGTGGGCC  
TGAGCTCGCGTAGCAAGGGTTCAGGCTCGTCGTCGGACAAGTTCAAGCAAGGCGATACTG  
TCTATGCGGACGGCGAGTCTGGACAATCAGGAGTTTCCGCGAGGCCAATGGCAATACCT  
ATGTCGATGCCAAGGGCGACAACGGAACCGATCTCTCCGTCGTCATCAAGGGCACCGGTC  
TGGACAAGAAGACCATCCGGACGGCTCTGGGCGATCGCTCGCGTTCCGAGTCCAAGACTG

TCAAGCCTGGCGACAGCGCTGCTGCACATCGCGCCAAGAGCTTCTCTCAGAATGCGCGTG  
GCGTGTTCGATGGGTGGCCGAGGATCGAGCTCCAGAGCGCCAAGGACATGAGCCGCATGT  
CCGACCGCGACTTGCAGAACGCCATTCTGAACGCTCGGACCGCAGCCGACAAGATGGCGT  
ACTCCAACGAGTTGGCCAAGCGCAATCTCGACAAGCACTTTCCCAAGGGGCATCAAGAACG  
CCTCGACAGAAGAGCTGCAGAACAAAGGTGAAGGACGGCACCCTCCGTCTCGGTAAAGA  
CCGCCATCGACGCCGTGCTTGACCGCCGAGCCGAGGCGAAGGCACCCGCGAAGGCCCGTG  
GTGGGCGTCGACCTGAGAAGCCGATCGCCCAGGTGATGAAGCCGCCCAAGGACGCGGTGC  
CGCTGGTTGACAAGAATGGCAATCCGACCCCTTAGGGCGATCCGCCAATACGGGAACGGCA  
AGAAGGAGTCTGGCTATCCCGACGCCGATGATCGTACGGCCTGGAAAAAGCTCGTGGGTC  
GCGATACATACCGCGACTTGAGAGACGACATGACACCGCGCCAGCGCGCCAACCTACCGCG  
AGGAGCTGCAGCGTAAGCTGGACTATCCGCGCATCAGCGACAGTGTCAAGAAGCAGGCAC  
GCGATGAGATGGCTCTGCTGGATGCGCTCGACAAGGGGTCTGGCAGCGGATCCGCGAATT  
CGGGGGATGCCAGGGAACAGCCCATACTTGATCTGCACGACGACGAGCTGCAGGACCTGG  
CCAGCGAGATGGGTCTGCTGGACTTGTACAAGCGGGATCTCAAGGGCGAAGGACACTTCG  
ACCGGAAGCCTTCCGAAATATTCAAGGAAGAGCGCGTTCGCAATGCCATTTAGGGTCTGA  
TGC GTTACGT CGAAGAAGATCTTGGGTACGAGGTCGATTGGGACGAGCAGCGGCTCGACA  
ACGCCCTCAACAACGACCCGCGCATGAAGAAGCTGCGAGCCCTCCTGGCCAAGCTGGGAA  
AAATGACAGGGCCGTCCGAATCCCGGTGCGCCAATCGAACAGAAATCAAGGGTAAGTCTT  
CGGACGATGTGGATACGGCCATTGATGACCTCAAGGCTGCACAAGACAGCAACAAGTCCG  
ACGCCAAGGCTAAGGTGCTCTGGAACGTATTCGGCACTACGACAGCCCCGCCGACTTCA  
AGCCTCCTCGATCTGCACAAGACCACAAACGCCAGAGTCTAGCCTCGTTCCGGGATGTGT  
CCTCGGCGATCAACGGCTCACAGCGCTCTGGCGAGAATATCTCCAGGAACGCCTGGAAGC  
GTGGCGTTGTTGAGGATCTGGCCAGCATGATCAGCGAGTCCACCCTCAAGCGGCCGATCA  
CCGTGCGCCGCTTCATCGGTGAGAGCGCTGGCGGAAGTGGTATTTCGTGGCGACTGTGCAA  
GGGTCAAGAAGCAGCTCGAGTCTGGCACCTTCGAGGACAAAGGCTTTATGTCCACAGAGG  
CCGTTACGCCGGGATACTCGGTGCGCCAGAGGGGACGGCTGTGGTCCAACCGAGGGAAGC  
CCGGTGAGAACGATTTTCGTGCTGGAAATGGATCATCCCAAAGGTTTCAATGCGCTTGATC  
TCAGGATGGAAGACCTCAACGAAAACCATCTCAGCGAGATCCTCCTGCCTCGGAACACCG  
AGTGGGAGGTGACCGGTACGCGCACCGAGGACGGCATCACCGTCTACAAGCTCCGGCCCA  
GCACCAAGCCCACGTATGACGAGGTTCCGTCCAAGCGAAGCAAGAAGTCATGACCAGCAC  
AGCCAATCCTGCTGCTGCACAACCTTGATCGCTGGCAGATTTACGACACCGGGATCGAGGT  
CACCACCCAGCGCGGCCGAGAGCGCCGCAAGGTCTGGGACCTACACGCTGGTCAGCTCGC  
CATTGAGGAGAGCCCTGCGCGTAACAAGGTGGCCACCTGTGGGCGACGCTTCGGCAAATC  
GGACCTGGGTGGCAAGCGGCTGGTTTCGCCCGCATTCCTGGCGTACTACCGACTGGACCT  
GCTCCGCACCACCAACAAGGCGATGATCTACTGTATTGTGGGGCCGGAGTACTCGGACGC  
CGAGAAGGAGATCCGCGTACTGTGGAACACCTTGGTATCATTGGGTGTACCCTTCGACAA  
GCCTGGCAGCTACTACGGTGCCGTTGGCGGAAACATGCACCTGAGCGTGTGGCAGGGCGC  
ATACCAGGTGCATGCCAAGAGCGCCAAGTATCCCGACACGCTCGTGGGTGAGGGCTTGAG  
TGGCGTGATCATGGCCGAGCCCGAGAAGCAAAAGCCGTCCGTGTGGACTAAGCATGTGCG  
TCCGACGCTGGGTGACTTCACGGGCTGGTTCGCTTCATACGTCAACTCCTGAGGGCAAGAA  
CCACTACCAGAAAAGTTCCAGATGGGCCAGGATCCTAACAATCCGGAGTGGGAGAGCTG  
GCGCATGCCAGCTGGGCGAATCCGTACGTGTACACGCGCACGGGCCGTCTGGTTCGCGCT  
GGCAAGCTTCTCCCGCGACGCCATCCCCGACCACGAGTACACGCTCGACCGACACGT  
CACCATCATGCAGCAGCTGATGCGCGAGAACCCGACGGTGTCCGCAATTCAAAATCGTTGC  
GGACCATAAGCTTCGGGTTGACCAAGAGGTGATTCAGCTCGCAGCCGACATGAGCATCGA  
GAGCTTCAACCAGGAGATCGGCGCGGACTTCACCGAGTACGTGGGCAAGGTGTTCAAGGA  
CTGGGACGAGTAATTCATGTTGCAGACCTGGTTGACTACAACGTCAAGCAATTCGGAAC  
CTACTTCATCCCCAATTACGAGACCTATGCAGCTGCGGACTACGGTTAGACAACCCCAA  
TGTGTGGCTAGTCATACAGATTGACAAATGGGGCGAGGTCAACGTCTCCTCCGCGAGATCTA  
CATGTCCGGGCTGACGGCCGATGCGTTCGCTGATGAGATTGGTCGTCAGATGTGCAACCC  
GCCAAACCTTCGAATCTTCTATCCGGACCTCGCTGACCCTATGTCGTCTGAGACCTTGAG  
CCAAAACTCGGCATCCGCGCCGCTGGCGGAACACGTGGTGAGAAGCGTATCCGCCTCAA  
CCTGATTCGACAGTTCCTGAAGCGTGGGCGTAACGACCCACCGACCTCACGGGTATGGG  
ATGGCGTCCGCAGCTGTTGTTTGATCGGAGCTGTGCGAATGCGCGCCGTGAGATGGAGGC  
GTACCCCTACCCTGACAGCACGGACAAGCCGAATCCAAGCTCGCTGATCTATGAGGAGTC  
GCTCAAGAAGGATGACCGTGTGCCGAGGCGCTGGGTGATTCTTCGTGGGGCACTACGG  
CGAGAAGGCGCTGGTGAACGAGCGTGCCGGCACACGCATTTCCAAGGCCAACATCGAACA

CCAGCGGACAAACCGCGAGCGCCGTAGCACCAACGCGCCCAAGGACATCAAGTACCAGCG  
CGTAACGGATGGCGAACATGATGCATACCAGTACAAGAATCCCGACGTGGGTTGGGGTAA  
AGAGCTGCTCGACTGATTCGGAGTAGGATAAACAACCATGGGCCAGGACAAACGCCAATA  
CGGCAGTACGCAACAGCTGCGTGCAGGAGAAGCCAATTTCCCAACGCCGTAAACGGATTT  
TGACAAGGCGCGGCTGGCCAGTTACCGGCTGTACGAGGACATGTACCTACCAACACGTC  
CGACTACCAGGTGATCTTGCGTGGTGGCGACGAAGGTGGCCAGCGGCCATCTACTTGCC  
CAACGGCGAGAAGCTCATCGACGCGAAGATGCGCTTCTCGACAGGGGCTGAAGTGGGA  
GTTCTCCAAGAAGGATGCCAAAGTCGACGACGCCATCAGAGTCTGTTCGACCGGGAGAA  
CTGGGAGCAGAAGTTCGAAAGTCTCAAGCGCTGGACCGATATCCGCGGTGACTATGTGCT  
GCTGCTGATCGGCGTGCAGGAGAAGGACGAGGGATCCAGGCTCTCCTTGCACGAGGTGGA  
CCCAGCACGTATTTCCCGTACGAGGATCCACGTTACCCTGGCCAGGTGCTGGGCGCGTA  
CTTGGTGGATGAGTATCCGCACCCGGATTCCGAGAAGAAGAAGATAAGTGTGCGCGCGT  
CCAGAAGTACATGAAGACGCTCGACGACGACGGGAAGCCAGTCCCTGGTGGCGCGATCAA  
ATACACCGAGGAGCTGTACGAGCCAGGCAAGTGGGACGACCGTCCCGAGTACCTCTCGT  
GCCCCAGCAGCATCAAGAAGCTGAGCACCCCTACTGAGGAAGAGCCTCTGCCCCAACAGAT  
CACGACACTGCCGGTGTTCATTTCCGCGGACACCCGATTATGAACGCGATGTTTCGGACG  
CTCTGGCCTTGCGGGGCTAGAGTCGTTGATTCCAGCTGTCGACCAGACCATGACGGACGA  
GGATCTGATCATGGTGTGTTGGTGGACTGGGCTTCTACGCAACATACTCAGCTCCGCCGCG  
TGATTCGCGCGGCAATATGGTGCCGTGGACAATCAGCCCGCTGGGCATGGTTCGAGCATGG  
CCAGAACAACAAGATCTACCGAGTCAATGGTGTGCAAGCCTTGAGCCTTGCCAGACTCA  
CATGAACAAGGCCGAAGAGGCCATGCAACAACAAGGGCATCCCCGACATAGCTGTAGG  
CGTGGTAGACGCTGCGGTCGCCGAGAGCGGCATTGCCCTGGATCTCAAGCTCAGCGCAAT  
CCTCAGCAGTTGCGCAGAGCAGGAGCTAGAGCTGAAGTCAGTGCTCAAGCAATTCTTCTA  
TAATCTGGTGACGGAGTGGATTCCGGCGTATGAGGGTGTGGGGAATGACGACGCTGACAA  
TAAGCTCAGCGTCACCATCACCTTCCGAGATCCCAAGCCGGTCAACAACGAGAAGCGATT  
CGCACAACTGTTGGAGTTGTGGGAGGCTGGGCTGATCCCTGCGAAGAAGCTCACCGAGGA  
GCTAAGCAAGATCATGGGCTTCGAGCTGACCGAGGAAGACTTCAGGCAGGCCACCGAGGA  
CAAGAAGACCCAGGTCATTGCCCAAGCGCAAGCCGCCGACCCGTTCCGGGGCGCAAATGGC  
AGCAGAACAGGGTATCTCCGACGAGGAGGACGACCAAGCCCTGAACGGACAACCGTTGTG  
AGGAGCTAGCCATGGCCAAGGGTAGGCGCAGCAGCAAGAAGCGCAAGACATATGCCGGCT  
TCAAGTCAAAGAGGTCGTGGCACTGGGCTTTTTCGACCAAGCAGCCCTGGGCACGCGAGA  
AGGCCACAAGACCAAGGGCGGACCCAAGGTCCGTTACCGTCGACTTCCAGAGAGCAAAA  
ACTCTGGTGCAGGCAAGAAGGTCTATAGAAGGAAGAAGCGTTGACGATCGAGCTGGAACG  
TCCTGAGGACGAGCAGGTTTGGACACGAGTTCGCGATGAGCTTCCCCAGGACGCGGTCGC  
TTGCCTGGTGCATATGTGTCAGCAGAGCCCCAGGCCGAGATCTGCGGCGTTATCACCGC  
GAGCCAAGCCATCACCCGATTCCAAATGTATCATCCATGCCAGAACGCGAATTCGTCAT  
GGACCAGGGTGAAGTATGCAGGTGCTGTTAGAGAGAAGGTGATCGGCACCTACCATTCC  
CCACCCGACGGGTGACCCCTGGCCAAGCGCTTACGATACTGATCACATTGGTTACCTGTA  
CCAGCAGGGCTGCCCGTGGGATTACTGCATCGTGACGAATGCAGGAGTGTTCCGATATGA  
GCACAGGGAGAGGCGCGTGGCGGACGACGTTGAATCCAGAGATGAAGATAGTTCATGTGA  
TGCCGGTGGACGACCTGATTGAGCATGTAGAATCGCCGACTGCCCGTGCATCCCGACC  
TCGAGCTGATCGACCGTACCGACGACCATTTTGGACAGATGTACAGCCACAATGCTGCCG  
ATGTTCCGAATGATGAGGCTGAGGAAGAGGATCTGTTTTGACCTCTCCAGTTCGAAGAGCC  
GTCAGTATCACCTCAGCGGCCTCGAAAACTGGCTCCTGAGATACTTGGAGGACAGGA  
GAAATCCGATGAAATCATCGCAACAGCCCTGTTGACGCTGCGGATGATGCGGAACAAGG  
CATA CGCCAAGCCTTGGCGACGACCGACTTGGATCGTTCGACTCGAAGATATCAACTGCA  
GCTTGCAGCTGCTGCTGCACGTGACTCCCTCAAGCTGCTTTTCCGAAACGTGCATTACAGC  
GATCACAGCGGGTCAATCGGAGGCAGCGGTGCGGGCGGTTCGAAGCAGGATTCCACGACGA  
TCTCCGCATTCAGAATCGCCTGTACCCGAACCGCGCTCGGCGCGGCAAGTACGAAGACTC  
CATGCGGCAGAGCGCATCCGGTGGCGTTCAGGCCATGATGACGCGTGTGCAATAGAGCAA  
CTGGCCCCTTATCCAGCGAGTTTAAACACACGCAAGCCCTGGCCAACGGCACGGTTGACCG  
AGTGATCAACTCAGCACTGGTGAAGGGTGTGGTGC GGCCGACATCGCCAAGGCCGTGCC  
CCAGAGTATCACCCCGGACGTGCCTGGCGGAGGCAGCTACGTTGCAATGCGCTTGAGGCT  
CACCGAGATTAACAATGCATTTTCATGCTCAGGCGATTAACGACATCAACACCAAGCCATG  
GGTGGAGCATGTCGAGTGGCACCTGAGCAAAACACACAAGGAGCAGGGCTGTCCGTGCGA  
AGTGTATGCTCGCATCAAACGCTTTCCAAAGGAAGTGATTCCAGACAAGCCCCATCCGCA  
ATGCCCTGCTATATCACGGCTTCGCTGACCCCTGGGAGGAATTCGAAAACA ACTTTCC



GATGGGAATGTACGACAGCTACATCGACAACAATTTGCGGTAATAGGGTAGGGTAATCCG  
CAGGAAGGAACTCTCATGACTGACACATTCTCGCATCGCACGCCGCTACCGGCTTGAAG  
CTGTCTGGCCACGACGACGATGGCGATGGTGACTTCGATGCGTACGACGACGATTCGGAT  
GATTCGGACGACGGTGCATCGCATCGAGGATCGTCTCGAAAGTCCGACGACGGTGATGAT  
CGCGACAGTGGCGATGACGCCAATGATGCTGACGACGACGATCTTCGAGCAGATCTCAAG  
GCGAAGGACAAGAAGATCGCCAAGCTCGAGCGGGACCTCGAAGACGCCCTCGAGATGATC  
GAGGAGGCAGAAACCAAGCGCCGAGGCGAGGTGACGATGACTACGATGACGACCACACC  
GAGTACCACGAGCTGCGCGACGAGAACGACCAGCCCCGCGCTCTGCTCAATGGTCCGTAC  
ATCCGTTCTCAGATCTCGAGCTTCCGCGACAAGGACGGGAATCCCAAATGGGACTGGGAG  
GACCCGAAACCGTGTTCGCGCTTCTGAAGACGGCAGACCTCGAGGTGACGTCAGACG  
GGCGAGATCGACGGTCTGGAGGAGCAGCTGCGAAATCTTGACGGAACAAGCCGTTCTG  
TTGCGGCAGCGCAGCTCTCGTCGTGGCGCTTCCGGTAAAGTTCTCGGTGGCTCCAGCGAC  
AAGAAGAAACCCAGTCGGGAACACCTCGCGTCCGCCTTCTCCGCATTCAACACCATGATC  
TGATTGAGAGGTTGACCCGTGGAGAGGTATGACAAGTCCAACCCCTACGGCGGAGGCTTT  
CGAGCCCCGCTGGCAGCCGACTGGACTGACGCCGACGCTGGCAAGCTGTATGCCGTAGGC  
TTCAACAACGTCGGGGCTGTCGTGAAGGGCGCAGGCCAGTCCGGCGTGGCTGGCGTGCTG  
GTGCTCACCAAGGGGGCCAAGGCCGATCCATCGTGTAAGTCATGAAGTTTGGCGAGGTC  
GTCTAATTCGGTCCCACCTCGGGCACTCCCGGCACTGACTTCGGCGCTGCTGGTACGGCG  
TACTACGCCGACACCAGCACCCGGCGCAATCAACTCCACGTCCGGCGAGGCCAAGGTCAAG  
GTCGGACACACCGTCCGTGCTCAGCGACTGATCGTCGCCGTGGCCGATGGCGTTGTCGAT  
CCTTCGGCGAACGAGGAGTGAGGCAGCCGATGAAAACGCAACAGAAGGAAGAGTCATG  
AGGGAGAGTTTCTCGCGATCATCGCTGCGGTGGGCCTCTCTGGTCATGACAACCAGGGT  
GGCTACAACACTGCCAGTGACATCAAGTACAAGACCCGCGATGGCGTGTGCTACGACAGC  
CTGTGGAACCTGTTAGCAACGTCACGGACGAGTGGAACAAGCACAAGTCCAAGATGGTT  
CAGCTGATCACGTTCCGCGGCTACCAACCGGACCGAGAAGGTGCCGCGCATGGGCCAGTTC  
GGCTTCGAGAAGGCCTCGGAGTTCGGCGTCCCCGAGAGCAAGCGGACCGAGCGGAGCTTC  
TACCAGCTCGCGTACGACTTCGAGGACTACGACCTGGCATTCCGATACACCTGGAAGTTC  
CTGCGTGACGCTCCGTGCTCGCAGATCAAGGCGTACCACAACCAGACTCTCCAGGCCGAC  
GCCAAGCTCATCCACCGCAAGGTGATGGAGGCGATCTTCGAGAACCGCGAGCGCGAAGCG  
GACATCGAAGGCCTGCCCTACAAGGTCTATCCACTCTACAACGGCGACAACATGATCCCG  
CCGGAGTACAACGGCACGACCTTACCACCGGCCACAACCACTACCTGGTCTCCGGTGGT  
ACGAAGATCGACTCCGCCGATGTGGAGATGGCTGCTACCACATCCGTGAGCACGGCTAC  
ACGGAGGAAAACGGCACCCAGCTCATCGCCTTCGCACACAAGGCCGAGATCCAAGAAGTC  
CGTCCGTTCCGCTTCGGGCAGAAGAACAACAACACTCGGCCGGGGCGAACTACGACTTCGTG  
CAGTCGCAGGGCGAATCGCCCCTGTACCTGCCGAACCGGACGGCCTGCTCGGCTAGCAG  
CCGTAGTCGATGTGGAAGGGCTTGCAGGTCAGGGATCCTACGACGACGTGCTCTGGATT  
GAAGAGCCGACCATGCCGGCAGGCTACGTTCTGTTCTGGCCAGTGGCGGAACGCTCGCC  
CAGCAGAACCTCGTCGGCTTGCAGCGAGCACGAGGACGCGGCGTGGCGCGGTCTGCGTCAG  
CTCCCCGGCAACCAGACCCGGTACCCGCTGATCGACGGCTTCTACCAGCGGTGCTTCGGC  
ACCGGTATCCGTGAGCGTGGTGGTGCAGTTGTCTGCAAGGTCAAGGCCTCTGGCACTTAC  
GACATCCCGACCAAGTGGACGATCGGTGGTGGATTGATGAGCCGTGTAATCCCAGAGG  
ACCGTCCGCTGTCCGATGAGGACCGCGCATGGCTCAACGAGCGCAGCATGGGATGGAAGG  
TCGAGCTGATCGACCGCGCCTACCCTCCGGGGTCCGTCAGGGTCGAGGATGACACCTCGA  
CCAAACCGTCCAAGCCGACGGGCGATGACGACGAGGAGGTGGAGGTCGACGAGGCCATCT  
CGAAGTACGTCGAAGACCTCCCAACAAGGACGCCGTCAAGGAGCGCCTGATCCTGGAGG  
AAGTGGAGTTCGAAGACGATGCGAAGCGTGAGGAACTCAAAGGCCTCCTCGCGATCCACC  
TGCAGGAACAGCGGAACGCCGGCAAGGACGTCGAGCTCGGAGACTGATTGTGACCTCCGA  
AGCAGATGTCCAGCTGTTACGACGCATCTGTGCGGGCGTCGATGGTATTTGGGAAGATTC  
CGAGATCTCAGATAACCATCGACGCCACGGGTCTGTCAGCAAGGCAGTGCCTGCTTACTG  
GTCCAAGGTGGTCAATAACACATACTGCTGACCGATGTGAGCGAGAGTGGCAGCTCGCG  
TAACGCAACCATCACCTACCGCAATGCCATGGAGCAGTTGCAACGGTGGGATGAGATCAT  
CAAGGAAGAGGACGCCAAACAGGCAGCCGAGACCGTCCGGTACTGTGAGGTTCAACCGAAT  
TTCGAGGAATTTCTCGTCATGACCGTGTGAGTCAAGTGCAGTGCAGGAAAGGGGATTGGAATTCCTG  
CGTGCTGGCACACGCGCATTTCATCGACGATGATCCGACCACGATCGTCCTCATTCTGGC  
CAAGCAACCCGCGTCGAGAAGCCTGGCGGGCGGATACGATTTACCCCAGTGGCTCCACGA  
ACTGCACAGATCTTCAAGGTCATCAACCAAACTGGCCACGGGTCGGCACTAACCGAGGCC  
CAAGACGGCATCCAGACGCCGGTACGCGAGTACATGCTGCTGGGTGCTCATGATTCTGTG

GCCGAGGTTGGCGACTGGTGGGTCGACGGCAACAATCGGTACAAAGTCACCGAATTCCTC  
GTGGCAAATGGCTACGAGCGCAAATGGCGTGTCCGCAGCGTGGGGTTGGAGCCCAATTAT  
GGCTAAGATCGAGTTCAAGTTCAAGGACATCGCGCTACGCCAGGGGGTGGAAAGACATGGA  
AGCCAAGGTCGACCGCGCCATGAAAGCCACCAGCAATTACCATGCGGTTCGAGGGCACGAC  
CCACATCAAGGAGCATGCTCCCTGTACTGACCGGACGGGTGCTGCGCGTGTGGTTTGCA  
CGCTGTGGCTAGCACTCCACAGCCCCGACCGCTACGAAATCGTGTGTTGCCACTCGGTGCA  
CTATGGCATCTGGCTCGAGATCGCAAACACCGGTTCGGTACGAGATCATCATGCCACAGT  
CCATCACGAGGGCAAGCTCAAGGCTCAGCGTCTTCGCGGCCTCCTGGGGAGACTCCGATG  
AGCAGAGCCGCGAGTGTAGATGCGCTCCGGGCCGATGTTGCGCTCGGGCAAATGCTCGCT  
CCGGGCAACATTCTGACGAACTAATCCAAAGAGGGTCCGCCTAACCATTTGGCTCAAGGG  
CCATTTGCAGTGATTCGTTGGGGTCGCAAACGATTGACCCTGCGGTGAATCGCGGACCC  
AGACACTTGAACATCTGGGTTACATCCCGCAACATCAAAGCACTGACTACACGCGGATC  
GATCGAATCCTCAAGCGCACCAAAGAGATCATGCTGTCTCTGGAAGACGTTGCTGGCGCT  
GATGGGGCCGACTTGGTCAGCACGCGCTTCCCTGGCGGAGAGCGATGATCTCGTTGACCCG  
GGAATCGAAACGATCACGCGCTACGCGACATTCAGCGTGTCTCAGCAGAAGCACCTGAAGT  
CAAGTACCATAACCAACAGGAAAGGATGCTCTCATGGGGAATTAGCTCACCCACCGCCC  
TCGGATGTCAAGCCCGCAGAGGCCTCTGCACCCGAGGCCAGGAATCGTCCTCGGGCAAG  
CGGGAATATCTCAAGTTCGTTGGCACGCGAGAAGATCTCACCTTCGCTGCGCGCCGGCAGT  
CACTACCACATCACCGAGGCACAGCTGGTGGAAAGCCGGTGTGCCGCGCGAAAGGTGCTTC  
AAGTCCAAGGGCTCTGGCAACGATGCGCTCGCGGTGACGGGGGTACCTTCGGCCCCGAG  
ACTCAGTACAAGGTGCCGCTCGACGCCTTCTACAAGGAGGCCGCGACCCGGCTGTTGCAG  
GAGCCGGACATCATCCTCGTTGAGGAGTAGGGAACGCGTGAGTGCAATACCGATGCAAGG  
GCAAGGTTACGGGGAGCTGTGGAAGACGGTCTCCTCGTGTGTTATGTGCTCCCACATCG  
CTTGACAGGAGGGAAGAAGCGATCGTTCGTCCTTCACTACATGGACCCGAACACCGGCA  
CCATCAAATACACCTCGCGACCATAACCGGAACCCATTGAAAGGTAGGGAAAATGGCTATT  
GACACCGCATTGCCCTATGTTCTGAGGGACGTGAAGATCACACCCTATGCAGACGAGGGT  
GGCACCGTTCTCGGCGATACGAGCTACGAGCTGCCGTCCGCACAGACGTTCACTTCAAC  
GAAACTGAGGAGTTCACCGAGCTCCGTGGGGATGACCGGCTGGTAACGACGCACGGCAAT  
GGCGAACAGGTCGACTGGTTCGGTGGAGTCCGGTGGCATCAGTCTGGTCACTGGTTCGATC  
CTGACGGGTGGCCAGTTGATCCAGTCCGGGCTGACCCCGAATCGCAAGGAGATCATGCGG  
ACGCGCGGCACCGACGGGCGTGCCTACTTCCGCGTGGACGGCCAGGTCATGTGCGGAGTCC  
GGCGGCGATATTGTGGCGCGCGTGTACCGCTGCCGCTGCAATGACAAAATCGGCGGTGAC  
TTCGGCGACGGTACTTCCACATCACAGCTGCTCGGGTGTGCGGTGTGCCCTGCTGGAT  
GAGGCGAACGACCTGCTGTACGACATCATCCGTAACGAGACCAAGACGTCGCTGACGCTC  
ACCCCTGAGCCCAACCCGCTGCAGTCGCCGACAGAACCTGTGCGCCGGCACGACCACCGCC  
TCCATCATCGTCTGTGTCGTTGGACGGAAGTCGTTGGCGCGGACGAGTATCGGGTGCAGAAG  
TCTTCGGACGCTGTGTCACCTGGAGCCTCGTCGACGACGTGGAGGACCCACCATCACT  
GTGAGCGATCGCACCGCCAGTACGGCTTACCAGTTCGCTGTGGCGACCAAGGTCGGCAGT  
GCGCTGTGCGGTGTTCTCGGCTCCTTTGCCGGTCACTACGCCTGCCCAAACCTAACCCGAG  
GCTCTCTGGGGCGCAGGGTGTGGCAACTCGACTGCGCCCCATAGAATTCAATCTAGAGCC  
CAAGGAGGCCCTGATATGCCCGAAATCAGCGAGCAAGAGTTCGAAGAGCTCAGACGGATT  
AGAGAACAGACTCTGGCGGAGGAGAATGCCCGCAAGTCTTCAGAAATAGAAGGACAGGCC  
AAAAGGCCGCTCTTGCTGCCCTGGCAGAGGCCGAGGAAGACAAGTTCGCCGTCAAGGGC  
TGGGGCAAGGAAGTCGTCCGTAAGACATTCGACATCCAATGTCCCAGCGGACAGTGTGG  
CACGCCAAGACTTTAACCATCGAGGACGCGATGTCGCTCGGTTTGTGGACAGCCTTGAT  
CTGTTACCAGTACGCTCATGGCTCCGATCATGGCCGACGACGAGGACAAGGAGCGTGCT  
GAAGAAGAGCGGAATGCTGGTCTCCTCAACAGCCTCAAGGATTCTGGCAAGCGTGCCTGC  
TTCTTCGGCACGGTGAACCGTGTGCCGGCGCATTGTATGCTGAAGCCGCGCGTGGTCCCTC  
GAGGACGACGGCATCCTCCCCGAAGGCACTGTCTTCTCCGACGACATCCCGTTCGCTGAC  
AAGATGCACATCTTCCGGAATGTGTTCCGGGGGAATGGGGAATTCCACGATGAACACGTTT  
CGCGAAGGACCGGAAGGCAGCGTGGCAGCTGAACCAGATGGCGCTCCTGTACAGGACGCG  
TCCGAGTGACCTAGTCGGTTTGGAGGATCCGTTGCTGCGATACTACATTGATCGAGGGCT  
GCGGATCTTCGGCGTAACGGTGCAGAACAGGGTCGCTGATGCTGGCCATGCTGCGGGCCG  
TGGCGCCAAGAACAAACCGGTATAGGGAAGCGCTTCAAACCGGTGCGCGCAAGCGCACCTT  
GGCCAAGCTGCTGGGCTAGGACATGGTGAAGTAGCTCAGCTGGCTTCCGAGATCCGGCGAA  
GGCGGTGTGACGTGCCAGAATACGTCCTTGGGCGTGCCCAAGGCAAGATCGTCTTCGACG  
TTGACAAGAGTGGTGTTCGACGCGCAGAAGGCGCGAGGGACCGCATGGAGGAGTCGGCCC

ACAGGTTAGCCGAGGGATTGACGTGGCTGAGAAGTGAACCTCTGCTTGGGAGAAGACCA  
ATCGCAAGGCTGTGGGCACCACTGAGGCTCAGGCGCGTGCCTCGATCGGTACAGCCGCA  
TTCAGGAGGAAGACGAGCGCGCTGCAATTGAGCGTCGCAAGGCCGAGAAGGAGCTCAAGG  
AAATCCTCGATGCCGTAAGGCTACCGAGGAGGAGATCCAGAAGGCCATCGAGAAGACCA  
ACAAGGCCAAGGGCAAAGCGTTACAGCTCGCCAAGGAGCGCAAGAAGGCTGAGCGCGATG  
TCGAGCGAGCTGCAGCTGGCCTGCTCACCGAGCACGAGACCAAGCTCAAGATCAACACCA  
AGGACGCCGATCGGGGCGGCGATCGTTTCTTCGACAATGTTGATCGTCGTTCTGAACGTA  
GTTTCGCGCGTCTTCGCCAAGCTGGGCACAGGAACCATCAAGGCTGGTGCCGCGACGGCTG  
GCGTAGGTGGGCTGGGCGGGTTGCTGGGTGTAGCGGCGTCGGGTGCTACCGGCGTCGCAA  
GCATCGGCATCTTTCAGCTTGGCGCAGCGATCGGTGATCTGTCTGGTGCCTGGGTGTTT  
TGCCCGGCGTCGTGGGTGCAGGTGCCATCGCGATGGGCACGATGCAGCTCGCCACCGACC  
GATTCGGCGAGGCTCTTAAGGACCTCGAAACCGACGACTTCGCCGACGCGATCAAGGAGC  
TAGCTCCGGCTGCACTGTATGTGGCCGTTGAGCTCAACACGCTTCTGCCCGGGTTAAGA  
ACTTCCAGAAGAACGCCGAACAGGGCGCTTTTCGAGCCGCTTAAGGGTGTGACCAAAGAGC  
TGACGACGACCTTCTCGCCGACGATCCAGTGTGCAACTAACCAGATCGCCAACCTTCTTCG  
GTCGCACCGGCGCTGGCCTGGCGGAATGGCTCATGAAGCCAGAACAGCAGCGCGACATCC  
AGAACTTCTGTGGAACACCGTTCGAGGGCTTCGAGCGTCTGTGCGATGCTGCTCAGCCAC  
TGCTGCAGGCATTCACCGATATCATGACGGTGAGCGGCGAATTCCTGCTCCAGATCGGTG  
GTGAGATCGCTGAGGCTGCAAAGGAATTCGCTGGCTGGATCCGCACCATGCGGGAGAATG  
GCGAACTCGCCGCGTGGAACCGCGATGGCCTCGAGGAGCTGAAGACCTTCTTGGTGCGC  
GCAAGAACTTTGGGCTGGGCCTGGTGTACCTCGGCCGCATCGCCTACGAGTTCGGCAGCG  
GTTTCATCGCTCTGTTGAGAACTTAGCCAGACTTTCTTCTTCTGGACGCAAAGTGTTG  
AGGGACAGGAAGTCCTCACCAAGTTCTTCATGGCCACAAGTGAGGCCGCGCGTGTGCTCA  
TGCCACTGCTTGGGAAGCTGGGCACGCTGTTGTTTCGGAACCATCGGAGCAGGATTGGCGC  
GCTTGGGAATTGAGCTCGCTCCGGTCTTCAACTTCTGTTTCGAGACGCTGAATGTCGGCT  
TCCATCATCTGATCCAGGTGCTGATGAATAGCGCACCCAGATCACCCAGTTCCTCGCGA  
CTCTGGGAATTCTTGTGTTTACATCATCAGACAAGTCGGACCGCACTTGCCGCCATTGC  
TCGGGACTATTGCAGATTTGTTCTACAAGCTCGGGCTGGCCATGGAACCGCTAGCGAGCG  
CGCTGGTTCAGGGTGTACCCCTGATCATCAACGCTTTCATGACAAGTGGGACACAATCG  
CCAACAGCCTCAATGGCTTTGCGGCTTCTGTTGCGAAGGCGATTGAGTCTGGTGATTGGT  
CTGATGTCGTTGATCGCATCACGAACCTGTTCCAGCCGTTGGGCGATGCTGCGATGCACG  
CTCTGCTCGACGCTATCAATCGTTGGACCAAGGATATTGGGGAAGCCAGTCTCAAAGTCA  
TGATCGCCTTGGCCGACGAGATCACCCCTGGATCGACATCTATGCCCAGACATGGGGCG  
AGAAGATCGTCAAGGGGCTGCACGACGGCATGGGCGGAGCTATCCCGGTCATCGGACCGG  
TGCCAAGAAGGTCCTTGGGGCGCTGAGCGATTGGTTCCCGAGTTCTCCGGCCAAGAAGG  
GGCCGATTCGGGTACCGGCTGGACGCCGTACCGTGGCAAGGCGTTGATGGAGGGCTTCG  
CCGAAGGCATCCTGGCTGGCGGAGCAAGCACCCAGAAGGCCGTGGGATCGGCCGTGGGAG  
GCGCGAGCGCCGGGATGAACTCCGGCATCAGCGACCTCGTCAAGGACCTCACCGAGCTCA  
CGAGCTTTGGTTCGGAGTCTGCTCAGCTTTGTCCAGGGCATCAGCGACGTCGTGTTCCAGA  
CGATTAAGTTCGCCACCACAGACTTCACGACGGGCGAGAGCACCTGCCAAAGCGCTTCG  
TGCGCAATGTGAGCGATGAAGAGCTCGCCAAGCGTCGTGAGGACAAGGCGTATCGCGACA  
GCCACAAGGAGCAGAAGGAGAGCGGCACCGGTCCCACGGGCGCTCTGTGACGGAACCTC  
AGCGCCTGCTTGAACAGACGCATCCTGGTGGAAACAGGTGAAGCCGCAGTTCCTGTTGATCC  
AGAAGGAAGACGGCACCTGGACTTCTTCGAACAAGGAGTGGGCCAAGCACATTCAGCGTG  
AGTCGGGTGGCAACGCAACAATCACCCAAGGTGTTTCAGGACGCCAACTCCGGCGGGAATG  
AGGCCGAGGGGCTGTTTCGAGGTCACGCCGAGCACTTGGAAGGCGTACGCCGGCACAGACT  
TTGCTCCGAACGCGAAGGCCGCCACTCCGCAGCAGCAGGCGATCATCGCTGCGCGGATCG  
TCCAAAGGAATCCGAGCGGGTCAGACTGGGGTGCGAACCTTCCGGGGCGTGAGGCCCCCG  
AAGAGCTGCTGAGAGGCTTGACGACTGCCAGCGCAACTAGCACGACGAGCAATCCATCGG  
CCAAGTCGAAGGCCAACGCTGCAGGCACCGAGGAAACGCTCAAGCCTGCGACTGGCCTCC  
AGATGGAGGCGATCGGCGACGGTTTTTTTCAAGGACACGAAGACCGAGACCGTCTGTGAG  
AGATCGATGGATCTTATTACAACCTGCACCGATTTGGCCGTCGGCAAGGACGGCAAGTCGC  
TCTCAACGAGGACGGCAAGCCCAACGCCCGCACGAGCGCCAACAAGAGCGCGTCTCGGC  
CATCTGCGCAAAGGCACGGGAGCCGTATGGCCTCAAGCCTGGCACCGATAACGCATGGCT  
ACGGGAATGGCAATGCCGATGTGTTCCCGGAGTGGGTTCATGGCTCTGGCCGCTCAGTTCG  
GCATCAAGGCCAGCACCTACAAGGGTTCATCAGGAGTCTGACCGCACCGAGCCTGGCTATG  
CACCAAATCCGCAGCGCATCAACCGAGGGATTGACAGGGTTCGGTCCGACTAAGAACGTGC

AGGCGTTCGCCGAATATCTCGAGACGATACCGGACGCCCTGAAGCAGGTGATCTGCCAGA  
ACCCCGACACCGGCCGCAAGACCGGTATCGCTGGCGGAAAGATCAACCCTGGATACTATC  
CGCAGGACACCTATGATGTCCACGGCGGCAATGATCCTAGCTACATCCACGGTCACACCC  
GGCAGTCGATGTTCGATCCCCTGGCCGGGCGAGGATTATGTGCCTGGAGAGACGCCGACCA  
GCACGGGTGATTCGATCCTGGACGAACTCCAGAAGATCACGGCGAACACCGAGGAAAGCA  
GCAGCACCGAGGACAAGATGGTGCGCCAATTCCTCGATCAGAATCCGATCCTGAACGAAC  
TCGTCACGGCCGCACAGGATCCCAGCGGCTCAGATGAACAGGTACAGGCTGCCCTGGGCG  
GGCTGCAGACAGCCATCGACGCCCAAACCAAATGGACACGCCTGCCAGTCGGTATCTTG  
CCGATCAGCTGAGTGGCATGCAGAGCCAGATCATGACAGATCGTGGGTTCCGGCGTGGCTG  
ACAATCCTGTTGATGCGGCACAGGGCATCGCCAATGGGGCGATGGGCCTGGTTGGCGACG  
TCTGCAAGATCATCGACGACACGCTCAAGTCCGTTGCGTCGGCAAACGAGATCAGCTCCA  
CTCTTGTTCCGCGGTATTGAGAATACCGAGGACATCATGAAGATCATCGGCAACGTTTCA  
GCTTCATCCAGATGGCGGGAACCATCGCCGAGACGGTGACAGACGGCCTGAACTTCGCGA  
GCTCGATCGCGAGCATTGCCGGCGGAGTACCCGGTGGCCAGGGTGCCGTGGGCGGTCTTC  
AGGCGGCAGCGGCGATCTCGGGAATCATCACGTCGGTGTATCCAATCAGTCAATGCCGCAA  
TTGATCTGGGCCAGGAAGCGTACCGAATCACCAGCGATTCTACGGCAAGTTCCTCAGCT  
ACCTGGTGGGTGCTGGCGAAGGTTCTCTGATGGGCGACATGAGACTCCTTCTGAACAAGA  
ACGATTGGACGCTCGAGGCGTGGTCCGAGGACAATCCCGAGGACAAGCGCAGCCATCAGG  
TTCCGGCCTGGTTGCGGGATGAGCGGAGCGTCGCGGAGCAGGGCGGCAAGATCGGAGACC  
TCAACATGTACATCGGGCCTGGCACAGACCCGAATGAGGCCATGAACGAGGGCATGTGGC  
GCGTGATGACTGACCAGGGAGGGGTGTTACCCAGTAAGTATTAATCTCGAACCTGGCCAG  
TACCAGATCGGAGATCTGGTGTTCGGCCGTGGCACCATGTATCCTGTGACAAGCATTGAG  
ATCCAGAGCTACCAAGTGCAAGCACAGGATTTCCAGGTGATTTCGACGACGAGGTTGCAA  
TTCGGGCAGGACAGCCTGCTGGCCGGCCAAATCGTGTTCGAGCTCGGTGTGTATGATTT  
AAGCGACTCGCCAATGTGGAGCCGTACACACGCCGTGTCTTCCACGAGGAGCCTTTCAAG  
AAGCTCCTGAACAAGCTCGCAGCCGAGTGGCGGGGTGACGACGTCCGCCAGAACTGGGGT  
GCTATGAAGGCGCTGAAATGCTGCGAGCGTGATGGTAAGGTATTTGTGTGGTACGGACGT  
CCCGGCAACTTTACAGACCACCAAGCGATCTCGGAAATCGTCCTTCTTACGGTGACTGCA  
GAGTTTCGTTCGTGCAGACACGCTCATGTACTCCGACAAGGAGTCTGGCGTCGAGGTGCTC  
AAGGGTGATGGCCCGACAATCATCAATCGGGCTGACGGCGAGGCCAAGAGCTGGTTGCGC  
GTGGTGGGGTATGGCCCGCTGACGCATCCGGTCATCTCCATCGGAGACCAGCAGGTTCGAG  
CTTGACGTTGAGTTGGCAGATGGAGAAGCCTTCGAGGGCAGCTCGTATCCTTGGCAGCGT  
CGTGCTATCAACAATTCTGGACAGAACATCAGTTTCGAAGCTGATCGGCGACACCCGGTGC  
CTCGACCGGCTGCAACTCCCTCCAGCCGGAGTTCCTACGCCGGTACGGTGGACCTCCGAC  
GAGATCAACACATGGGTTCGCCGAGCTGGGCAATCAGACCTGGATCGAGACGATCGACGGG  
GTGAACAACCTTCAATCTTCCCAACACCTCCAAGACGATCCATGGCCGGGTGGTTCGTGCGA  
TTTGATCTGTTCAATCCGGAGTTCGCCGAGAAGTTCATCGGCTCGGGCATGCTTGGCGGA  
ATCAGCGCCTGCCTGTACACTAAGAAGACCTTCGCCACGCTGAGCCGGTACTGCGAAGCC  
AAAATCGTTGAGCCGTGGGGTGGTTCGGAGCGGCATCGTCATCATGAGTAATGCCACGATG  
ACCAACTTCGCGCTGCTCCAGGTGACTTCAGGACCCAACAACGACAACCTCAAGATCCGT  
ACTGGCAGCGCCTACAACACATACTTGACCGTCCGGTACAGCTGGAAGAATCCGAATAGC  
TGGAAGAGACGGACGTGGTGGGAATCGGCTCCTCATAACGATGAGGACACCGAGAACC  
ACCTACACAGCGTATTTCAATGGCGATCCGGTTCGCTGAGTGGACCGACGAGGTGAATGTC  
GTCGGCACAGCTGCGACCAATCGGTCACAGGGATTCATCTTCGACATGGACAGTCAGCTT  
CTGACCATCGGCACAGGGTTCAAGGACATTCTGGCCTAAGACACTGGGACGGTGAAGGCT  
CCTACCGGCAGAGTGTTTCGTGCTCTGGCGAGATGCATACACGGTGGCCTCATGAAAGACC  
AGGACCGCAACCGATTTCATGATCGAGGAAGAGCGCACGGGCCGAATCCTCATCCGCGATC  
TTCACGTACAGAATCCGAAGATCCTCAAGAAGCTCAGTGGCCCTTTCGTTATTGAGTTTG  
ATGTCGATCACCGACACCCCTCGGTCCAACACCCCGACGGCACTGGCCCCATCCTGTTCA  
AGCCCTGGGGCCACTGGTGCCATGATGAGCGCGAGATTCGGGGCAAGCGCGTCATCATCG  
CCTCAGCCCTATTCCAGCCTAGTGAGGTTCGACCAGGAGACAGGCCTGAGGAAGGCGCAAT  
GGCAGGGCTTCTCGGGATATCCCAAAAACTTGCCTGGCTACAGACCTGAAATCCTATCC  
CGGTCGATCCATTCGAGATCGTGCACCGCATCTGGACGCACCTCCAGAGCTATAGAAATG  
GCAATCTCGGCGTACAGGTGTAATCTCTTTCGATAGCCAGCAGTTAATCCAAGACT  
TCTTCGCCATCTTCATTCGGCGCGTTGACTTCACCGACTGCGGCGATTACATCAACAAGC  
TGGCTCGCGACATTCGTTTCGACTACTTCGAGGAGTCGGAATGGAACGAGGATCACACAG

CCCTCAACAAATTCATTCGGCTCGATTATGCGCACGGGGATGTATTCCAGGATAATCTGA  
CCTTCCGGGTGAACGAGAATGTGATCCGGGGCAAGAGCAAGATCGAGTCAGAGATTGAGT  
GGACCAGCGACATTGGCATTTCGCGGCTGGTTCCCCGGTAAGGTCTACAGCTCTCAGATCA  
GCAATGCCGACCCAAACCGCTACAGACGTTTCATCCTTGAAGAAGATGCTCGCATCAACA  
GCACCGAGCGGTCTGAAGCCTGGGCGCATCGGCAGCTGACCAGACGTCAATACCCCTCGT  
ACTGGAAAACAATCACCATCAATATGCATCATCCGAATGCTCCGTTCCGGTACGTGGGATG  
TCGGCGACCAGATCAGAGTACAGGGGCTGATGCCGTGGGTCCGATATGTTGACCAGGTGC  
ACAAGATCATTGCGTGTTCCTTGTGAGACGTCGGCGACATGCGAAATGACACTTCGAG  
CAGAAGGCGCATTCAACTACGATCCGAGCTTCTTCGAAGGCAAGCTTCCGAACCTTCTGG  
CGAATCCGAGTTTCACCGCCAGCGTGTTCAACTGGACTGCCGCTCTGGGCAGCTGGTCCG  
GTGACAGCCTGCGAGGCAAGGATTCTCTCGGAGCGGCTCGTGTACGTGTAACGGCCAAG  
AGAATCTGCTCTTGAGCGATGCCGTACCAGTTGCGGCAGGCGATGATGTAACGCTGAGCA  
CGTGGGTGTATTGGCAGAATCTCGTAGCCACCGACGACCCCTCGAGCTGATCCTCAACA  
CCTACAACCTCGGATGTGCAACTGCTCAACACCGTTGTGTTCTATAGCACATCGGGCTCTG  
GAGAGTCGCCGGGCTGGGTACAGCTCAGCAACGCATATACGATTCCCTCAGGAGTCGAGT  
CGATGCGGGCTGGTGGACGAGTGACCGAGGACGCCAAGACCGGGTCTGTATGGTATGACG  
AGTTCAACTTCACGAAGGACGACTGATGCCCTACGAGTACGAGAGCAAGGAATCTCGGGC  
TCTGCGGTCTATCCAGAGCAAGAACTACCCTGACACCAACAAGGATTTTCGTC AAGAATCT  
GAGTCGGCTCAACAGTTCTGCTGACTACATCTCGTCCGACATGATCATCATGCAAAAGGG  
CATGGATGACGCCAATAAGA ACTTCATCGAGCAGATCCAAAGTTTCATCAATGATCTGAT  
CGTTCTGTTTGTGGCGGACAGCCCACGGGCATCGAGCTCGGGCAGCTCAAGTACATCAT  
CCAGGCTCTGGGCGCGCTGTTCCGGCTTCAACGGGCCATTCCCGATGAGCTTGATCAACGC  
GGTGCAGCACTTCTGCCTCGGGTATGTTGTTCCGCTGCCACAGTTTACAGACGTCATCAC  
CGACACCATCATCGCCTGCGCCGAAGAGCTCGGGCTGGACCCAGAGTTTCGTTCGATGCGCT  
GCGCGAGCTCACCGACGCCATCAATGATCTTGGCATGAGCATTGGCGATTTGTTCCGCAA  
TGTTATGTGTATCTTCAACATCTTTCAGATTACAGAGCTCGGTACAGGACCGGTCCGCA  
ACTATGGGATCTGCTGGCAGGCATTTTCGATGGCATCAACGGGAAAGCGCTGCGGCCGGT  
ACTCCTCGCCATCAGCAACTGGACCTTTCGTTAATCGAAGGTCTCGCGTCACTGGTCAA  
CTATCTGGACGACCTGGTTCGACGGCCTTGCCAACGGAAAGTTCCTCAAGATAAACTCACC  
GCGGAATGCGGCAAATCTGTTCCGGGGCTATCGGATCTAATCTTATCAAGGTTCGTTCTGC  
TGGTGCAGTACCAATCGTTCGCGTTGAGCTACTCGACAATCCGCACTTCACCGAGGATGC  
CATCGCTCCGGGCAGCGAGTGGGCCGTGGACATGCTGTCTCCGACCGACAATGATGG  
CACAGGTAGCGCGACCGTGATCGCCAACGGTACGCCGACGCCCTCAACACCGGGGCAAA  
CAAGCACGACAAGATTCTGTCGGCCCCGGACAGCGTATTCCCTTGGGCATCTACATAAG  
TCATGACGGCGCTGTCGCTACAGGACAGGAGACCATTCCGCAGGTTCCGGCGATTCAATGG  
CAACATCCCTATCGTTCGGCCTGTACGAAATTGGATCGTACACTCCTCCTGTGGAAGACCT  
GCCGTGGCCTGGCCACAAGCTCGAGGGTGTCTACACAGTCAAGGAAGATGTGACCCACAT  
CCAGGTGCGCGTGTACGTCACCGAAGCCGCCCGGGCGGGTCCGGTATCGCATTGCCGATGT  
GGATTTCCGCAAGGTCAACGACCTGGCCTTGATCCCTGGTCTGACACAAGCCTTGGAGGC  
GCTCGAGTCTGGCCAGCGTGCTCTGCAGCACGCAATCGCCAACGCGGTTCAGCAACATCCC  
GATCATCGGCGATGGACTCGAGGATCTGATCAATGCGCTACAGAACTTCAATCCGGCCAA  
TATCGCTGGAGCTCTGGGCAGTTCCTGCTGAAGGGCGTCCCTGTTCCGGGATCATCCGACA  
CATGATCGCTGCGGCACGTGGTGTTCGGTGTTCGGCGGTAGCCGAGGATGCCACGCTCGC  
AGACCTGTACAACGCCATGAATGCGGGCGCTCAAAAATGTTCGCGGATCCGACGAGACAAC  
CTTCGTCGATACCACGACATTTCGTTCCGGTGAATGCGGGTACGACCAACTACATTGATGT  
CATCGGCGTGGGCAAGGGCCAGGACGGCATGGACGGCCCCGCGGTGCCGCCGATCCCCGG  
TGTGTTCCGACAAGGTGGGCACCTGGGAAAGGTGCTCGCCACCACATGGGTCAAGGGTGT  
CCACTACGACAATGATCTCACCGGCTTCCAGGTCACCTTCAACAGCAATGGCTCTGTGAC  
CTTCTCGATTCCCGGTTACAGCCTCACCTGTCTCTGCAAGCGGACCTCCGCGCCAATT  
TCAAATCGGAACAGGCTGACACGCCAAGGGGCCGGGCACATGTGTCTACAACGACCGCCC  
ATACGCTGCTGGCGGAACACAGAACCAGCCTGGAGACAACCGGAATTAGACCGGGTGGCTC  
TGGCGCTGGTGGTGGCGTGCTTCAGAGTGGTGGCCGAGGCGGACCTGCCGGCGGATGGGT  
GCGTCGGCGTGCAGCTGAAGCAGAGAATCCGTCTACTGGATCAGACACGACGCCTCCGAC  
CCCTCCGAAAGTTAGCGTTGTCAATGCGACGAATGACACTCTGTATCTGCTCCCGAGCGG  
AAGCGTGGACCAGTAATGGCTAATGATGTCAGCGGCTTGGCCGGATATCTGTTCTACCTT  
GATGACTCAACGGCACCCCTCAACCCAGAGCCGTTTCTGCCGAGCTCTGGTCTGCCGTAT  
CCCATACGAGGCCTTGACGCAAACACTGACTATAGCAATCGCATCTACGTCACGGCGATC

GACAATGCTGGCAATAAGTCCGACCCCATCCCTCTGGAGGAAGCTCTCGACGAGATGAGC  
CCATTCGCCGAGCACGCTCAGCCCCACGCCAGAACAATCGCCCATGAACTCAACTCGC  
ACCACTGCCATCGACAACATCATCAAGCGATGCATCGCGGCTGGTGCCGGTCTGGTGTG  
ACGGTGGGGATTACGAGCCCGTGGGGATACTACCTTGGAAAGCTTCGGTGAGGGCACC  
GTCGACCGACACTTCTCATGGGCAGCCAAATCAACAGCTTCTTCAGCTGGGCTGTGATG  
ATGGCCATTGACGAAGGCCGTCTCTCCCTCGACACCACAATCAACGACATTCTCGACACG  
CCGTGGAGCACGAATCCGACCATTGAGCAGCTGATGATGATGCGGTCGGGCATGTACAAC  
TACCAATCGGACTCGGCATTCGGCCTGCAGGTGGCGATGAACCCTGTAATGTCGTACAGC  
CTGCAGCAAATGATCGCCAAGAGTCGCAACGGCGCCAAGCAGATTGAGCCTGGCGAGAAG  
TATGACTACAACAACGGAACTCGTTCGCTCTAGCATTGATGCTCGAGGAAACGGACCCC  
GAAGGCCGCAAGATCCACGAAATAATCAAGCAGGACATCCTTGATCCGCTGGATCTCGTC  
TACACGAATTTCCCTACTGTCACCAGCGGACCTCCGGCAACTTCTGCCATCCTGTACTCG  
TGGAACCTTCTTGTGTCGCTCATCGGCATCAAGCTCCGCCAGAACGTGACCGTGCAGACC  
CCCAACATCAAATGGGCGGCTGGCTGTATGACCAGTGTGCTTGGCGACATGCTGAAGTGG  
GGCAAGGAGCTTCGCGACTACACGCTGCTGTCACCAGAATCAGCCGATCTGATCCACACA  
ACTCACATCATGTATCCGAGGGCACCCTATGGCCTCAACAAGGACGGTGCAACAGAATTT  
GGATACGGGTTGCACGGCCGTATCAAAGTTGGCTCCTGGCGGGGATCCGACGGCAGTTGG  
ATCGGCTGCGACTCTGCGACAATGTACGAGCCCACCACCGGCACCATCATCACGGTGTAC  
GAGAATTTTCAGACGCCGGGATTGCTTTCCTTGGCCACAGTTTGGCACGAATGCGCGGAG  
TATCTGATGCCGGGGTTCGGTGACGTATCCGGGCTACCAGACCGGCGAGAATCCGGCAGGT  
ACGGTCGGCACATCGCTGAAGAAGCTTGGCACGTTCTCCGAGGGTGCGGTGTGTCTCCT  
GGCACCGAAGGCGTTGAATTCGACTATGCGAGTGCGGTTCAGCACGACTCGGGACGAAACC  
GCAGCATTCAACACGGCGTCCGATGCAAAGGCATTGGTGGCCTGGGTTTCTGCACAAGGT  
AGCACGGACTGGGGAGGCGCAGCCGTCAAGGCCAAGATTGATGGCATTGAAATGGAGAAG  
GTTGTGTCGACAACCGATGGCACCACCTCCAGGAATGGCCTGGTGTGCTTCCGCCTCCTC  
AATCCGCCGACCTGGGCGAACAAGAAGGTCACATTCGAAGGGATGGGATCTCTTGCACAC  
TATTATGCGAATGGCGCAGCCTCGTACAAGAATGTTCGGGTCCTTAGGAGCGCCTGTGAAG  
AACAGGGGTTTCGGGGTTCGTCTGCCAGCCTTACGGTTCGGCGGCACAACATCTTTGGATATG  
GTTTTGGGCGGATACTACTTCCAGGGTGCGCACAACCTCCTTCAACAAGAATGTTTCGTGGT  
GTCAGAGGTCAGGCAGCATTTCGTCAACCAGGGCCTGTTGTTTCGTAGACTCTGCCGCTGGC  
GGAGACGTCACCTTGACCGAGACATTACGAGCTCGATTTCAGTGGTCTGGGAAGGCGTTC  
GTTCTTCGGGCTGAGGAGGGCTGATGGCTGTCGCATGGTGGGCTGAGAGCTTCTCGATAA  
TACAGACCGAGCTTAGCCAGCTGGTCAATGAATCTGTCGGTGACCAGAGCCAGTATGGCC  
TTGCTACCGTTGAACTCCAGAAGCTTCGAACTCAAATGGAGGCAATCGCTTACGACTATC  
TAGTGTGTCGTCGGCGACTGAGTTCATGAAACTCTCCACGAGCGCCTCTGCTGGACAAGTGT  
ATTTCCGCAACATCCAGACAGCCGTGAAGAAGCTCGTGACCCAAGCGCTTGCCGGAGTCA  
CAGCTCCGTTAACATGGCAGGGCACAGGCCCGCTCCCGACAGGCGTCGGCATCCCTGTCC  
AGAACAATTGGACAGCACCGGCTGGAACCGATGTGTATATCGCCGCCGCTCATGGGCCGCT  
CGGGCAGCTTACC GGCGCGACGTTTCGGTGGGGAAGCGGGCACTCTGATGGCAGCAGTGT  
TGCACAACAACAACGCTAGCACAGGACGTACGGCGTTGTGGCGTTTCGCAGGCAAGGGCG  
ACGGCACCAACAAGACCTTCTCCATCACAGGTAGCGGCTATGGTTGGTTCGGTGTGTGCA  
GCGTTGCCTTCTCTGGCGTTGTGTGCGGTCGGAACACCCGTGACCACGTACGGATCGGGCA  
CTTCGCCTTTCGAGGTGGTACGGAACCAGGGGTGCAGATACTCGGCCGAGACGCTGGCG  
GAGCTGGTGTGCGCACACCGAGTGCCTTCTCTGGTGTGACCAACAGAGTCAACCAGAACA  
TCAACGCTTCGAGCCTCGCAGTCAATGAAGTTGAGGTGCCAGGAACAACAGGGGCAACCA  
CGCAGAATTACCCTTATGGGTACATCTTCCCTGCCCTCCGGAATACATAGGAGATCGAGT  
TGAATACAGAGTTGCAGGCGATCAAGGACGCAATGAATGCCCTTGACTTCGATACTGCCG  
GTGATCTGGCCAAGTTGTATGTGCGAGAACCATCCGGAGGAGTTCGTCGACTATTACCAGA  
TTGTGGAGGAGTTCGGCCAACGAGGAAGAAGCGATGGCCAAGGTTCGTGACGTCCATTGAGG  
TGTTGCCAGCTGCAGGCCTCAGCCAGAAGCAGTATCGTGGTGAGACCTTCCATCTGTTCC  
GCTGGGACCCGCAAGAACATTGGCGCCACAACGGAACCTCTGGTGCGCAATCCATTCCC  
CGACTGTGAGGAATGACTGAACATGGCGAAGGCATGTTCTGTCACTCTGGATGTGGCCCA  
GGGAATGCTCGGTGGTAGCACCAGCTACGCCGAAGCTCTTGGGTCCTCGCCAAAGATCAA  
GATTTACTCAGGCACTCCACCGGCCAATGCTGGGGCTGCGCTGAGCGGCAACACGCTACT  
GGCCACTCTCACATGCGCAAGCACGTCTATCGCCAGCCAGAGCGATACTGGCACTGCCGC  
GCGTGCAGCGTGGGCCACGATCGCGTCTGCGGTGGCCGAAGCCACAGGTACGGCCACCTT  
CTTCCGCACCACCGCGTCCGACACAGTGATCGACCAGGGTACCATCGATACTACTGG

TGCAGACCTCAACATGTCGACGACGTCGTTGACCGCTGGGTCCACCATCGCAGTGAGCTC  
GCGACAACAGACTTTCCGTACGGCCATAGGAGACTGCATGGCATTTCATCCAAAAGCAG  
GGCTACTGGAAATCCGAGAATGGCTGGCGCATGTGTGACACAGCCGAATTGGACTACACG  
GCTGTGCCGGGGACCAGCTTCAAGCACGGCGTTCGCAAGGGATCACCCAACATCATTCTC  
AAGGCACTGATCTGGCGTCTTGACAAGATCGAACCCATGATGACGTCGCAAATCGGTTGC  
TACACAGCCGAAAACCTCGATGGCGAACAGCAACCACAACCTCTGCGACGGCGATCGACTAC  
AACTGGAACAAGCACCCCTACCAGAAATGGGGGACATGGCCGCATCCTGCGGCCGTGAT  
AAGATCGTCGACGATTTCCGCGGAATCATCGAGTTCGGCGGTGATTGGACCTCGCCGCGT  
GACGTGATGCACTTTGAGCTGTACTTCGCCGAGGGGCATGCTGGCACCGAGGCTCTCGCC  
AAGGATTTGGCCAATGGCCTATGGGGTATCTGGAAGCCCGGAGCCGCCCCAGCCCCACC  
CCCGCGCCTGGCGAAGGGAACGACGGCATTCTGCGGATCGGCTCCGAGGGGCGGAGGTG  
CTCATGATGACGCGCGTATGAACTCTGTGTTCAAGAATTACCGCGCCATGCCGCTGTTG  
GAAGACGGCATCTTCGGGGCCAAGACCAAGGAAGCTGTCGTCGAGTTCAGCAGCGTTCA  
CTCATTGATGTGGACGGTGAAGTTGGCCCGCAGACCAAGGCGAAGCTCGCCGAGTACGGT  
ATCGTGATGACCGGAGCGACTGCTCCGACCGCTCCGCCAGCCATCGTGCCGCAGAAGGTC  
TGGCCTCTGACCGCCGGTGACCGTGAGATTCGGGAGTACATTGCGGCGCAGCTCGGGCTT  
GGCGACCCGTCGAGGCCGATCAAGCTCGGCAACAACGAGAAGGGCGATGCGCTCACGGTT  
CGAGATCGACTTGCCTTGACGGCTAAGGACATTGAAGAGATCAAGGGAAGGCTGTGCGAG  
TGAAGAATCTGTGCAATTAAGTGAAGGCTGGCATTGCGCTAGTAGGTACGGCTGGCACAG  
CCGTGGCTACCCTCGCAGCTGACGAGAATGTTTCGACCCGCGTGGGGGAATCGGGTGTCA  
CCTGGCTGGCTGTTGCCGGTGTGCGCCTCACGACCGCGCTGACCTGGCTCAAGCGCAACG  
AGCCACGGTCACTGAAGCAGAAGAGATCCTCCGCGTGCAAAGGTACGCGCATCCTCGT  
CCTCCTATGCATAGGAGGCTGGGCGCAGTGGCTATGGTGTGTTACTCGTATTGCCCTGT  
GTGTCCTGTCCGCAGGCTGAGAGCTCAGCCGACGGCAATGACCAGCACCATAGCCACCTG  
TGCAGGGATGAGGAATACGCCAAAAGCATGGGGTCGAGTGTGGACGGGTGCAGAGTGGC  
CCCATATCAATCACGCCTCCGACTGGCGGACACGGTGGGGGAGCTCCGCCCCGAGGTTTG  
ATCGGGAGGATCCTGGACAAAGTAGGGCTGGGAGGGCTCCTCTGATGTTCCGTCCAAGT  
ACTCTCGACGCTTGCAGCATATTACGCAAGCCTCGTCTGATTGAACACGGCAAAAAGT  
ACGTGTGCTGATGATGGGGCTCTGGGTGTGGTCTCTGTCAATTGCTGGTTATTGGACCTG  
TTCCGAACCTCAACCATCGACGAGCTCACAGACTATGTCCAAAACATCCTTGCTTCATGTA  
TCTTCGTCCGCTCGTTCGTGTGTCTGTGCGGCCTCGCCGTCGGCACTAAGTACGTCTCC  
CCAAAGCGGATATCCGCTTGTGCTACCGCTTCCCGTTGTGGGGGAATCCCCGCCTTGGCAG  
GGAGCGTCGGAACGTACGCATGGGCCATCGCCCACAATACTGGCTCATTTTGGGTACTGG  
CGTACGCAGCTTCCATCGGAACATTCATCTGCCTCGGAATCGTCTGGAATGTGCTAGATT  
TGCTCTTCGAGATTGCTCGACTGAATGAGGAGATCAATTACCTCAAATACGGTGCGGGCT  
CTGAAGAGCGGCTAGAGGACAGGGACGATGAACGGAAATGTTGATGTTGGCTGGATCCTC  
ACATTCCTGGCCATCGTGTCTGCTAGCGTGCCAGTGCTTTCCGTTGTCCTTGACTATCGC  
AGCCGCAAGCGTCAGGCAGAGGCAGAGGGCAACAACAAGATGCCGATACCGGGATAAAG  
AAGGTTTCTGAGCAGGAACCTTTCGCAACGGGTTCTGTCAATGAATGATGCCCGCTGGATC  
ACGCGTGAGAAGCGCTGGCAGGAGCGCGAAGACGCTCTCGAGCGCGAAATTCAAGAGCTG  
CGAAAAGAGATGGCTAATTTGCGCTCTGACATGAATGCCTATCTTGAATTCATCGCCAAT  
GATGAGCAGTGGCATTCTATGACCGGATGCACCGCATCCAGAACGATCTCCCTGCGCCA  
CAGGATCGGATCACATTCCAGCAGTTCATGGAGTCGCGCCGAGAGGCAGCGGGGAGGATG  
TAACATGGAACCTAAGGTTGGCTCAAGCGACGCGAACACTGATGGTGAGGTAACCTCCCTG  
GCAGAACTGGGTAAAGCGGCATGCCGCAAGCTATTCGGACATCATGGGCCCCATCGATGG  
GACTATGGCTACTCGGATGCCGACTTCACCCGTGAGCTACAGCGCCTTCTGGGGCTGCC  
GATCACCGGCGTGTTTCGATGATGTGAGAGCCCTGCACCCAAAGATCAATTACCGCTGGAA  
GGGGCAAGGCGCTGGGCAACCAGCCGCACGCCGAAGATCTGGTTCTACTCCAGTCCCGG  
TTCGGGCGCAAACGAATTCGTCCGCCATCGTTCGAGGTCGGCGAGTTCTGCAAGAACGT  
CCTGAAGATCAACCACCAGCCAGTGCATTCGGCCATCGGCGGATATCTCGGACTGATGGG  
TGGCGACCCCAAGTTCAGCTACAACGACGTCATCTATGACCAGTACCAGTCGCTGGAGTG  
GTTGCTGGACAACAATCCTGACACCAAGGACCCAGACGTCGAGGTCTGGTTCTCGGGCTA  
CTCGCAGAAGGCCGACGGCCTCGAAGACGCACTCGAGATCTTGTTCCGGCGATGGGGGATT  
CACCATCCCCAAGACAGGCGAAACCGTGGGTCCGGGTAGGTACCGGCACGTGCGGCCAAG  
AATTAACGCCACCATAACAGTTTGGCAATCCCAGCAAGCAACCCCGGCCCCACGCGCGTCCG  
GAATCGCCACCCGGAAGCGGCATCTCCCGCAATAAGCGGCCGAGTGGCTCAGCATCCT  
CACCTGGGACATCGTCACGACTTGCCAGGGGCACCGGACTTGTACGCTGCCTGCGACGA

TGACATCCGACCGTTGTTCTACGAGTGGTTCATCAAGGCCGACACCGAACGGCCCTTCGT  
CGTGTACACGGCGCAGATCATCATCCCGGCGCTCCTGAATCTTCTGGCTCCATTCTTGGG  
AGGCTTCGGAGGGGTGACGAGCCCGCTGGCTGGCGGGATTCTGGCGATCGCTACCGGCTT  
GCCGATGAACCTGCTCCACGGCCTGCTCAGCGGGGTGGCAGCACCCGACAATGCTCCGAA  
CCCCAAGGTCATCGAACTCCTCAGCGTGC GCGGTGTTCTGACGAACATCCCGCAGCTCAA  
CAAGCTTCTGACCAACATCTCCGGCGTCCAGACGCACGGCGAATACCACCTTCCGAAGCA  
AGAGTTCAACGGCCGCAGCGGAATCCATGCCGGCTGCGACATCGTGGCGGGCTTCCGGCG  
ATAAGGAACACTCATGGAACGCGTGACAGTTTACCAAGACAGCAACAACGAATGGCGCTG  
GCAGTTCATAGCCAGCAATGGCCGGGTGATGGCTCACAGCGGCGAGGGTTACCAGAGCAA  
GCAGGACGCCCTCACAGCGATCTATGCTGTGTTTGGCGGGCTTCCGCCAGAGGTGGTGGA  
TGAGGCTGGCGAGCAGCTCCGGGTAGTGCCGAACGACCCAGCGCTCGAGGCCGCGCTAAC  
GCTCATGACGCTAATGACAGGGGACGACTGGGACCGCCCGAAGCTCGTGAAGTGCTCAGC  
GAGCTTGCGCCAGCACGCTTGC GCAACGCTCGTGAAGCAAGGTGTTGGCGTCCGAGAAGC  
AGAGGCTATCGTGGGCGAGCGGTGGGCCGAAAACGGGAGCCCCGAACCAGCTGATCATA  
GCCTGTAGCTGCAACGGCCGATCGCTCGGCAGAAGCCAACGTAGCACCCAAAATGGATCT  
GTCTCCGGGCACGCCTCCCACCGGCAGGAGCTTCGGCTCAAGGCGCGCAGCCGTATCGA  
CAGATGGCGCAAAGAAAGAGCCGGAGCCCCTGAGGACTCCGGCTCCGATACTTAGCCAGA  
CTAGATTTCCATCGCGGGCTGCTCGTCCCTCCTTCTTGGAGTCCCTGAGCTCCTTTCGAGC  
TGCCTTGACGGTAAACTTGAAGGCTTCGCCGAACCTCGCGATTTCCGCAGACCGGGCCGAT  
GCCCAGGTAGACGCTCAGCTCGTCCGTCAACGTACGGGTGCAGACGCAGCAGCTTCCGTA  
GATTGTGCCGAACCTTTCATCTCCTCGTAGCTCATCCGCTGCTCGGCGGTCAGGCCTCG  
GAGCGGACGCTTGCCCTCGTACTCGAAATGAGCGGTGAAGACGGTGCCAGCAGTCTCGTC  
GTGGCGGTTCTCCTCGACGACGACCAAGCGCTTGGCGACCTGGTAGCCGCGCTGGGTTTT  
GTAGACCTTGTAGATGGTACCGTCCGGCAGCGGGTTCATGCCATCCTCCAGTTCGTCCGT  
GGCAGGCTTCGCCCTTCTCGGCGACCGGGGTGATGTGGGGTCCCTGGATTTTCGATCGTCTC  
ACCAGCCATCTCGGTGGTCCCGATGACCGGATCTGCACCCTTGATGGTCATGCTCTTCAG  
CCAATCGATCGGGTTGCTGGCATCCTTAGAGCTGAAGGGCTTGTAGCAGAACTCGTAGCC  
GTCCGATGCACCGTGGTTGTCGACGACGTACGCCAGCGCAGCGTTGACGCGTTCGCCGAG  
CAGGTCGCTTCTCATGGCCTTCTGATCTCATCCATGACATAACGGGGTGCCGTCCACACC  
CTTGTCGTCGCGCATGATGGCCAGTCGATCATCAGACGGATGGTTCGAAGCGCGAGACAC  
AGCCTTGTGGCGGTAGTCGCTGGCCACGCGCGCTGCTCGAGCAGGTCCTTGATCCAGTT  
GATCTGCTTGTGGTCCGCGGGCTTACGCGTCCGCGTTCATTTTGGATTCCCTTCT  
CCGGTGTCCGAGGCGCTTTGGGTAGCCTCGCTGACAAGACGAGCGTTACGGCAGAAATTG  
CAAATTCGCTACTCCTTCCAAAAGTCAGCGCTCACGGCGCGTGGGTCCGGCTCGCCTACC  
AGGACAAACCTACTGCAGTTGCACAAGACGCCCCTCGGCGTCCCCCAGCAAGCCGCATGG  
CCGCCAGCGCGCGGCTGGTAGTGCAAGGACCACGGGTGTCCGCAGGTGCACTGGTCTACG  
GCGTACCGGGTGTGCGGAGAAGCTGCAGTACCGCATCACCCACTGCCAACGCTCCATC  
AGGCGATGGCCCGGATCAGCGGCAGCACCGCGCGGAGCATGTCGTTCTCCGGCATGCCGG  
TGATGACAGCGACAGTCTTGCCGTCGCGATTGACGGCCCACTTGGCGCTGTGCTCTTCGC  
CGACTGCGAGGGCGTCTGCCACCTAGCGGTCTGCACGGTATGCCGTCACGGTATCGCGCA  
GCGTACGGACGGTGAGATCGTCTCATCGGTGTCATTGCCGGCCAACGCGGAAACGCTCA  
GCGCCTTACGATGCTGTCCACCTTGGACCTGAAGTTCTGGCTGTGGTCCGCGCTGCGGA  
CTGCCCCGGCAACCACCTTGTCCAGGTAGTTGTAGCGGACCAGA ACTTGCTCGGCCTGCC  
CGCGCTCGAAGGTGATCGCACTGGCCACCGTTTTGTGCGCGATCACCTGCTCGCGGGACG  
TCCATCCGAACCTTAGCGGCAACTTCGGCGATCTGCATAACGCTGGTTGACGTTGGTGATGG  
GCATGAGGCCCTCCTGGGCTCGTGC GGATGATTGCACCCCGAACGTTACGCCACCGCGCCG  
ATTGGGGCTACTGCCGTCTACATGCGTCTGTCGTAGGGGTGGCAACAATATTCGGCCCCGA  
GTAGCGCGAATCGGGTTCGACTAGAGTAACGTTTCTCCTGTCCGCCTCCCCACATCCTCAG  
GAGCCCCACTGAGCATCACATTCCAGCCTGGTTCAGCAGGTCGAGGTCTACTCCGGCGACA  
ACGTGCTGCACCCCGAGCCGCTGAAGCCCTTCTGGAATCGCATGGTCGTCACAGCCGGAC  
CCTTCGAGCTGAATAACGGCCACGAGGGGTACCGCGTCCCTCGGTCCGGGGAAGCCGGAGC  
CGTCATTCGACCAGTATTGCAAGGCTGCCAAAGGGATGCGTTCCGTCGCCGACGTCGATC  
CCGAGCTCGCTGCCCGGTACGACGCGTTCGGGAGGTGGGTCCGGCAAGCGATCCGGCTGGC  
ACGCCGCACAGGCTACTGGGTCTGCAAGCGGTGCTGGCAGGGCAACCTTGGCGGAGAGAA  
GTGCCTGTTCCGCGGGAGGGCCTAGTGAGCGAGCTGTGCGCCCTCTCCGGGCACTAGTTC  
GAGGAGCACTACTCGCAGGGCGACTCGAGCGGAAGGCTGGTGCAAGGTTGTGAGGCCGAT  
ATCATCACACCCTGCCAGCCTACAACCACCGCGACCCGGAGCGTTGCGAGTGCGACTAC



GTTCCCTGCGATTGCCCGGGATTTCGAGAGCGAACC CGGACCCGACATCACC GAA  
ATCGACATGTACGACCCCTAAGGACGCTGATGAAGTACATCGACGTGCTAATCACCACGC  
ATAGCACAGACAAAAGCAAGGATTTGGCCAGATCATCATGCCGACTCATATCGCCAAAG  
ATCTTGAGGCTGCTGGCTGGACTGTCCGCAGCACAATCGTTGTGGAACACAAGACGGGGC  
TGACGGCCAATATCGCAACGAGAAGGTTGAGCACCCGCTCGAGAAGGAAGCAGGACACT  
GAAATGGCCAAGGAAAGCATCATCAACCGAGTGCAGAAGCTGCTGAAACTCGCGATGGAC  
CAGAGCGCCACCGAGGACGAGCGCAAGCTCGCCAGGAACGCGCGGACGCGCTGATGGCG  
CAGCACATGATTGACCAGATGGACCTCAAGCCCGAGGACCCCGGTTCGGTTCGCGCTACC  
AGCACAAAGTGGGAGTTCTTCTTCGAGTTCGAGTTCGCAGTGCAGCTAAAGGACTTGCTC  
GCAGCCGTTCGTCGGCACGCTACCTGCCGTGCCACGAGCACGCGCAGGATCGCCAAGGTC  
GGGAGCCCAACATGGTGGTGACCATTGTTGGTACACCTGAGAAGATCGCCTACGCCGAG  
CGCCTGTAGATGGTCGTTTTACAGAGCTTACCAGGAACATGTTCCCGAAGGTGGACCCC  
AACGAGAGCTTCGACAGAAATGTGTACAACCTTCGTGAAGGCTGGCTTTAAGTGGCAGGAG  
ATCCATGAGCTGCTCTGGCGGCACATGGAGGATCCGCATTGGATGGGATTCCCGTTGAAC  
GACCCGTATCCGCCAGAGAAGCAGAGCGAATATAGCTGGCACGCCAAGGTGTATGGTGGC  
GACGGCGGACGTCTGAAGCGTGCATACACTCGTGAGGTCAAGCGTTTCGGCGAAAGCACC  
GCGCACACACCACGCGACATGGCGTGCACCGCCGGGGCTATGTGCAGAGCTACTCGAGC  
ACAATCTCATTGCGGCTGCACGACATGCGGAGCAAGAGCGAGGACACTGTGTGCGTTCCG  
GACAAGTTCGCCCTGGCGGTGCACAGCTCGCAGGACGAAGCTGACGCCGAGTTCTATCGG  
CTGTTCCCGCAGATCGACCCGGAGCACATCCGCAAGCAGCGTGAGGAGATGCTCCGCCAG  
GAGCAAATCCGTTTGCAGAACATGACTCCCGAGGAGCGGGCTCGCGCTGAGAAGGAGCGC  
CTCAAGCGTGAAGAGCGCGCTCGCAAGCACTGGGAGAAGACGCGGGACAAGAGCTACCAC  
CAGGCTGGCTGGGCGCGCGGCAGTGCTGGGGCCAAGACGGTCAATATCAACGACGACACG  
CAGATCCACCACAGCAAGAAGGAGATTGGGTGATGTGGATTGACGACTGGCTCGAGGCAG  
CCTACGAGGAGCGCACCCGAAGCTCCTGACGATCTGGACAACGACGAGTGGTGGCCGGAGG  
ACGATGGTGTGAGTGACCAACGCTCAAGCTCGCGAGTGAACCTCAACGAGGCAGTGATC  
GCCTTCCGGGACGGCTACGTCTACGGCAAGACCCTCACCCGAGCTCTCGACAAGGACATC  
CTCATGGCCGATGCGGCCGACCGGCGGAACGGCCATCTCCTCGAAGTCATCAACGATCAG  
CAGTAGCAACACACCTGACCATCAGCAGCTAGGCTAAGCCTTACCTCGTCTCAGAAGGGA  
ATCTGACACATGAGCAAGACCACCTCAGCAATCGCCACAGGCAAGACCCGCCAGTCTCC  
GCTCTGGCGGAGAAGCACGGCTGGACGGCCGAAACCAAGGAAGACGTCAAGAACGACATC  
ACCACCCTCAAGCTTACACGCGGCATGAGTGGGTTGAGATCCGCTGGGAGGGGAACTCC  
TGCAAGGAGATGCCGACGGTCTGCCACGAAGGGCAGCTCAGGTACGTCCGGAACGTTGCA  
GCTGCGAAGCGCGTCTCGAGGCTACTGCCGAGCAGAATGCGGAGCCTTTCCAGAAGCGG  
ACTGTGGCCAAGCAAACCTGCGCGCAAGACCACGCCTGCCAAGCGGCCTCGCCGGAAGGAC  
AAGCTCGTTGAGGCGATTCCCGACAGCGACGACCGGCAGATCAAGGATGCCCTCCTCGTC  
CGGAAGATCCTATGGCGAAACAGCACGAGCGGCAGTTTGAGGAGGATGTGGTGTGGCC  
GGCAAGAATACGAATGGCCACTACTATGTGTCCACGAGGGTGAGAAACGCCAGATCAAC  
TTCATCGGCGCATATGGTTTTTCGAGCGGTGAAGATTTCTGCGATTGCGCAGGTGAGATAG  
ACAAAACGAGTAGCCCGAAGCGGGTCAATAAGGTACGATTGTCTTATCCAATCGGGAGC  
AAGAAGGGAATCTCAAAATGGACGTTTCGTACCCTCACCTACAGGGATCGCAAGGTTGCCG  
CCCAGCTGGCACAGCGGTCCTCTGACGACCAGCTGACATACCGGACAGCCGAAGGTGCTC  
GACGGGCCAAGATCGGCCGTACCGTGTGGTATGAGATGGCTGCAACTCGTGTGTCTGACG  
GTAGGCAGTACCCCTATTGGCTTGCCAAAGACTCGACTAGCTTCCGTGGCTCATTCTGG  
ACGGCTTCGACCTGTAGTAGCGGAGTCGGGCCGATGGGGTAACGTTCCGGTCTGTCAACG  
ACGAAGGGAATCCAACGAGCGAGCTCAATGTAGGCGATCGAGCGCGAATCCTCAAGGTCA  
TCGATCTGGACAACGACCGCAAGGTCATCACCGACCCCGCCGGGGCACCTGCGCTGTTCCG  
GAGGGTACGGACCTGGAATTGGCGATGTCGTGGTCATCACCGCGAAGACCCTCGGCCAAC  
TGTACGACTACGAAGCCGAATGGGAGATGGAGAAGGGCTACGAGTCTTCCGCTTTCTGG  
CGGAAGAGCTGGAGCCAGTCAAGTGAGTAAGCGCGAGTGGAAGATCTGGTTGGCGGACGG  
CAAGATCGTCCTGCTGACCGACGGGTACGATCCGGCGGTCGTTCGAGAACATCAAGCTGTA  
CTTGCCGACGCCCCGCTCGTTCCGGCGTACCACCAAGACGTGGCACGTCCCCAGATGTG  
GGAGACTAGTGTCCGCTCCGCCAGCTCGCCAATCGGCATCGAGCCGACCTGAAGATGAG  
CGACCAGCTCCGGCTGTGGGCTATGGCCGAGAAGCTCCGGCTGGCGAGCATCCCCGACGT  
CAACGAACACAACGTGCTGCAGCCATCCCGAACATTGAGCGCGAGCTGCCAGCCATGGC  
GGAGGCGCTGAAGGCACGCCCTTCCAGACAGTGGGCGTTCGGTTCGCCGCCACAGCGCG  
GAACGTTCTGATCGCCGACCACCCCGGTCTGGGCAAGACGCTGCAAACGATCGGCCGCTGT

GGCCGAGGGCGGCTGAAAGGACCCGTCCTGGTAGTTGCCGCGACGAAGTCGGCTGCCGT  
AATTACCTGGCCCAACGATCTGAGTCAGTGGGTGCCGGACGACGTCGTGATCCCGATCTC  
GGGGTGCATGAAGCCTGTAGAACGCGCGCAAGCTGTGAGCGCGCCAAGGCTTACGCCGA  
GCACGGCGACAAGCGCGTCTGAGTCGTCACGGCTCCCAACTACGTTTCGCATGCGGGCTGA  
GCTCGACACCTACGGCAACTATGTGTACGAGGGTGGCCAGAAGATTGTGCAGCCGGTACG  
CGAGGCTCTGCAAGGGCTGTTTCGACTTCTAGTGGTCAGCGATCGTCGTGGACGAGTCGCA  
CAAGACGCTCGCCTGCGGTACGGGTAACCGCAAGAAGTGGTCTGCACAGCGCCTGGGCT  
AGAGCTGCTCCGGGTGAAGAAGGATGGGCTGCGGATAGCCCTGAGCGGCACACCCTTACG  
GGCAAGGAAGACAACGCCTACGGCACCTTGCAGTGGCTCCGACCTGACCTGTACACCGG  
ATTCTGGAAGTGGGCTGAGAAGCACTTCCAGATCTACGGCGATGGTTTTCGGACAGATCGT  
GGGTGAGGTCAAGAAGTCAAGAGGAGTTCAACAACAGCCTCAAGCCAGTCATGGTGCGGCG  
CACCAAGGCCGAGGACGTAAGGACCTGCCTCCGAAGATCTATGCCGGTGAGCATCTGGA  
CCCCGAGGACCCGAATTCCGCAGTGGCAATTTGGCTTCCGATGGAGGGGAAGCAGCTCAA  
GGCGTATCAGGCCATGGTCAAGGATGCAGCCGTCAAGCTGGAGAGCGCTGTCCTTTCCGC  
CAACGGCGTCTGGCGGAGATGACGCGTCTGAAGCAGATGGCCGGCTCCTATAGCTATCT  
GGCTATTGCTCCGACAGGAGAGCAGACGTTCCGTCGTCGTAGCCGAGCAACAAGTTTGA  
TTACCTTGTATACCTTCTGAGCGATCGTGGCATCGGTAGTGGCGAGTTCGACTCTACCGG  
GAAGGTGATTGTCGCCAGCCAGTTCACCAAGCTGCTGAATCTGTTCTACGCCGAGCTGAA  
CAAGCTGGGCATCAAGTGCCACCTGCTCACCGGCGCGACTTCGGAGAAGGAGAGGGTCCG  
TATGGCAGACGCCTTCCGGAACACCAAGATTAGCGACGACACGCCGCACGTGTTCCCTGCA  
GAATACCATCGCTGGTGGCGCGTCTATCACTCTGGACGCTGCGGATGATGTTGTGACGCT  
TGACGAAGCCTGGAACAAGGACGACCAGCAGCAGGTCGAAGATCGCGCTCACCGCATCAG  
CCGTACCGACCACACGGTGACCATCCACAACCTTCGCAGTCTGGGCAGCATCGAGGAGCG  
CATCGCCACGAGTGCCTTTGCTCAGTAGCGAAACATCAAGTCCATCATCGACGCAGCGCG  
CGGTGTCGAGTTCGCACTCGAGCTCCTGGAAGGAGTCAAGGCATGAGCACCCCTCAGCGCA  
TGCTTCATCACGGCCATGCTCAGCGGGTCTTCAATGTACTTGCTGGCCTGGCGGATTCAC  
CGCAAGCCTCTCACCAGAGAGGAGATGCGGGACTACATGGAGCGGTATATACACCGGGAG  
GAGGCAGAGCTGGCAGAGCGCCGTCTACAGGCCAGCTCTACAACGCTCGGCGTCGGGCT  
GTGCCGCATCCGGACGCGGGTGCACCCGTGCGGATCACGAGGGTGCACGTGGCTAGAAAG  
GGGAGAGGCGAGCGAGAGGAGTAAAGTCAAATAAAAGTTCGGAAAAATTACCGATTCCGAC  
CGAGAACCAGTAAGCTTCATTCGACGCCCAAAAACCTTCATAATCCCAACGAACAGAAGGA  
AAAACGATGTCCCCGAAGCCCGAGTCCAAAGAGACAAGCACCACCCGCGAAGGCAAGGTG  
CGTTTCGATCCTTTTCGCCAATCCGGGCACCCCTCGCCGAGCAGGAGGCCGCGTGGCTGAAC  
GAGCAGTTCGCCGGCTGAACGTCAAGGCCGGCCACGTCCGTGCGGTCATCAGCAACCAC  
ACTCGCTTCCAGAAGTCCGACCTTAGCCGCCAAGCGCGGGACGCCGCGCGAGCCAAACTC  
GCCAAGGATCGCGAGGCGCGGAAGGCTGCCGCGGAGCAGCGCAAGGCCGACGCCGAACAG  
CGCAAGGCAGAGCGTGAGCAGCGCAAGGCAGAGCGTGCGGCCAAGGCAGCAGCCAAGGCT  
GCCGAGAAGCCGAAGCCAAGCCAGCTGCCAAGAAGGCCACTCAGGCCAAAGCCGTGCC  
AAGCCTGCTCCCAAGAAGCGCGTCTCGCGTCCCCGGAAGCGTACCGGTGACGTGCTCGCT  
GAGGACGCATTCTGATCCACCCACCCCTCGGGGTGGCTGAGCCACTGGGACATGGGGA  
TGGCCAGAGTCTCGGTGGAGGTTTAGCAAGTGCACCTCTGAGCACCGGATCTCCATCAC  
AGGACTCCGGTCAAGTCCAGGAAGTACTCAGCCTCCTCCAAGACAAAAGCTCACTGACAG  
AAGGGAATCTGCAAAGTGAAACGCATCAAGAAAGTCGCGATCGCCGCTGGGGTGGTGACG  
CAAGTCGGCCTCGGAATCCTCAGCGCCGCACCCGAGAACGCCGACTATGTGATGGGGTGT  
GAGCGAGTCCGCTGGGGCTTCTGTTTCAAGTGGGTATCGCACCATCTGCGACGGCCCCAAG  
CTGCCGGACGGCAGCTGGGACCGGACGCGTCTGTAATGGACCCAGCGCACATGGCTGGC  
GGATACTGCTCGGGCAGCAGGTATTACGTCAGCTGCACCCCGAGCTACTGGGTCAACGAG  
AGCACACAACGCCTCGAGACCTATCCGGTCAATTGATGCCACTGTTCTGCCTGGCGAACCC  
GGCTGGCTCCCTCCGGGCACGATCAGGATCCTCTGGTCCATGGCACCCAAAAGCTGACGA  
ACATAAGGGAATCCATGAAACTCAAGGTGTTGACATTCATTGCCTGCGAGCAGCGCGGCA  
CCCCTTCCGGTGGTCCAGAAGCTGGCGAATACGACTACCGAAATCTTCCCTGGCAAGATGA  
CGATTGCCGAATATCTCGTCAAGAAGCTCTGGCAAGTATGTGAATTCGTGTCATCTGGG  
GAGACGACGACGTAATTCTGTGTGGCCCTGATTGCGTCAAGAGCTGGCTCGATGAGGTGG  
TGTCGCGTGGCAACTAGAATCCCGCTGCCCTGCTACGCACGAGCGAACGCACCGTGTAC  
AAGAGGTGCCCGTGGAAAGTGGTACCAGAGCGTGTGTGCGCGGCCCTCGTGCCGAACAATCCC  
CGCCAAGACGCGCGGTGGTTCGGTACTGGCATTACCTGTGCAAGGCCGCGTGGAAACGTC  
CCCGGACGCAAGCGTGGCCGCGACATGCACTAGACCTGGGACGAGTTCTCACAGGGTACA

TTCACCACAGTCAGCTCGCAAGGGCTGGTGAACGACGAATGGGAGAGCGAGTGGGTTGAC  
GCAAACAAGCTGGCGCACGCCATGATTGACACCCACCTACAGGCGTATGGGAACGACGAC  
ACCTGGGAGGTGATCGCTGCTGAGCATCCATTTTCGGTCCTGATCCCGCACCTCGACAAG  
ACAATCAACCATGCGGTGTGCCGGTACGTCGGCACCATCGACCTGATCATCCGCGAGCTG  
GACACCGGCGAGATTTGGCTGGACGACACCAAGACCCGCCGCGCATCTATACCCACCAC  
CTGACACTGTTGGAGCAGCCTGCTGCGTTCGTAGCTGTGGGCACGCACGTCCTCCGGGAG  
CAGGAGATGATTGGCCCAAGGAGCGGGTCAAGGGCATCATCTTCGCCTTCATACGGAAG  
GGCTTTCCGGACGATCGTCCTCGCAACGAGCGCGGGCAGTATTGCAACAAGCCGGTCAAG  
AAGCACTTTGTCGAAGCCATCCTGAATTGTCCGGGGTATGAAGGTCCTCTGAACACCGAG  
CGAGATCTGCTTCGGCTTAAGCTCGACGAACACTGCAACACATCGCCGATGAGCTCAACCTG  
ACTGTTCTGGTCGATGTCTCAGCCAACCAGGGTGCGCCCTGCTGTTGCGAGAGAACTC  
CTGAAGAGCCCGAAGGAGTGCTCACGGCAGATCCGCAGGACCGGGCGAGAAGGTGCTACAC  
ATGAACGCAGTGCGCGCCGGTAAGCTCCCTATCCTCAAGACGCCGCAGGACGACTGCAAC  
TTCTGCGATTACTTCGATCTCTGCGAGCTCGACGAGTCTGGCGGAGACACGGAGTATTT  
GCGTCGCAGGCATTTGTGGATCGTGATGCCTACGCGGATCATCGCGAAGGCGCTGAGAAT  
TCGAAGATCAGCGTCAAGAACAACAAAGACAGGAGTGCAGTATGAGGTGGCCGGTAGCCT  
GAAAGATATGGGCCTCAAGGAGGTTGCAGCCTTCAAGAAACGCGTGAACAGACAGTACGC  
CCTCAATCGCATCAACGGTGGTGACCGAGTCAACCTAATCGAGCTCATCAACAAGGTTGA  
GGCGTACATCATCAAAATGCCTGAAGGCAAACGATGCATCCCGATTTCCACTGAGAAAG  
GAAGGCTGATGGTCCAATCCAAGATCATCAAAGTCGCCGACGACGAGGACTACCTGAATC  
TCTCGTGTACGGTGACTCCGGGGTGGGCAAGACGGTGTCTGCGGCAGTGACGACGAGG  
TGATGTTGCGTTGCGCCGGAAGACAACACTCAGACGGCCTGCTCTCCGCCAAGCTGGCGGGTA  
CCACGGCGGACAAGTGGCCCATCCGGGACTGGGGTGATCTCTTTGAGGCGTACAACACTATC  
TCGACGAGCTCGACGAAATTCCACACAACACTAGATCGTGCTCGACTCGCGGACCGAGATGC  
AGATCATGGCCATGCGGGACATCCTCGATCGTGCCGTCGAGGAGAATCCGATCAGTGATC  
CGGACATCCCGCAGACCCAGGACTGGCAGAAGTATTACGAAATGGTGAAGCGGATGATCA  
AGTGCTTGAACGCTTTGCCGGTCAACGTTATGTACACGGCGCTATCGCGGCAGACCGAGG  
ACGAGGAAGGTAACGAGTTCCTTCTCCCGATCTGCAGGGCAAGAAGGACAACACTACGCCA  
AGCAGGTGGTCAGCTGGATGACCAGCTTCGGTTGCATGCAGATAAAGCGCGTCCGTGTCA  
AGACGGACGACGACATCGCCAAGAAGGTGAAGGAGGTGGGCCGAATCACCTGGAAGGACA  
CAGGTTTGGTGACTGGCAAGGACCGCACCAACGCTCTCACCCCGTACACCGACGTCCGCG  
ATGTCACCGATCCTGAGGATGATGGCCTCACCTCACGGACATCAGGCTCCGCATCGAGC  
GGAAGAAGTCCGGCTCTGCCAAGTCGGCAACCACCAACGTCGCCGCCAGAAAACTGCGT  
CGGCTCGTACTCAGAAGGAGAGTGCATAAATGCCAAGCTCAAGCCATTGGGCATCGGCG  
ATGTCGAGGACATGATCATCACCGAGAACTCCTTCAACACGGAGGTCGTGCCAAGGGCG  
TGTACCAGGCGAAGGTCAAGCGCATGAAGCACGCCACGATCCAGAAGGAAGGTCCGAACA  
AGGGCCAGAGCCGCTTCTGGATCTTGATGGAGGTCGTCGGCCCGAAGTCGACGCCGAAGA  
AGTACATCGGTGCCTCAATCTCGCACAAATATCAACGTGATCGAGTCCGGCGCTGGCTTCT  
GCAACGACTTCCTAACGCGCTGGCCGGACCGGAGCCCGCCAAGCAGGCCGCGCTGAAGC  
GTGCGTTCTGGGCAGCCGACATCGTCGTCGATTCGGACGGGCACGTCATGAAGATCGTCA  
AGAAGCGTGTCAATTGCGACGGCAATGGCGAGCTCGTTGTACCGTCAAGACCAAGCTCG  
GCAAGGACCCTCGTTCGGGCGATCCGCAGGCTCGGGTTGACAAGTTCCAGGTCCCGCAGG  
CTAACGACGACGGCGATGACGACGACCTCGATGAGGACCTAGAGGACGACGATGATCTCG  
CCGATGTCGACGACGAGGATTCGGACGACGATGATTCGGACGACGAGGATTCGGGCGACG  
AAGACGACGAAGACGACGAAAACGACGAAGACGACGAAGACGACGAAGACGACGAAGACA  
ACGAGGACGACGACGACGAGGACGAGGACGAAGACGACGAGGGCGACGAGGACGAGGTCG  
AGGACGAGGATGGTGAATCCGACGCGCGCCGTTCCGAACTCGAAGCCCTGACCATCGCCA  
AGCTCCGCGTCGAGGCCAAGAGGGTCCGGTGTGCCGCCAGCAACGATCAAGGGCCAGTCCA  
AGGACGAGCTCATCGATAACCATTATCGACGCCGAGGCTGACTCGGACGGCGAGGACGACC  
CGTTCTGCTCGGGTGGCACATCGGGTACCTGACAGACGAAACCGTCAGGCTAAGTCGTTG  
TAGGGACGTCCACAGCCCGACCCCAACAACCTTTCAGCAAAGGAGCCATCATGGCCGATGA  
GCGTCGGTGCCTGCGGTTGTATCATGGACTGGTCAATGAAAACCACACATGGCTCTG  
CATCCACTGCGACCTAACATCGAACCTCAGGAGTACGCCTCGTGAAATCTGTTGCCATC  
CTTGGTTGTGGGCCTTCTGGGCTCCTCGTGGCTCATGAAGCCGCCCTGCTCGGCTGGGAC  
TTCCGAATCTACAGCAAGAAGCGCAAGAACTTCTTGTGTTGGCAGCCAATACCTACACGAG  
GCCACCCCGGCATGACAGACCCAGTTGCGGGCAGCGTGGCATAACAACCTTGTGGGTACG  
CCAGAAGGCTATCGGCAGAAGGTGTATGGCGCTGGCTACGATGGCAGCGTGTGCCCGAA

GACCTCGAGCACGATCACTACGCCTGGAACATCCGCCCCACCTACGACAAGCTGTGGAAT  
GCCTATCACGACGAGATTGTCGCCGTGGTGATGGACAAGCGCTGGGAGTCGGCCGAATTG  
TTCCGGAATGGCAGCACTGACTTCCGCCCCGACCTGATCATCAGCACGTTGCCTCGCAAG  
ATCTGGGCCAATCCTGGCGATGTGTTTCGCAAGCCAGAAAGTGTGGGCGATCGGGGATGCG  
CCCGAGCTAGGACAGACCGTTCCGTTTCGAGCGCAAACAGGACAACACGATCATCTGCGAC  
GGCACAGCCGACGTCGGCTGGTACCGGCTGAGCAAGGTGTTCCGGCTACACCACCATCGAG  
TGTCACACGAACGCAAACCTCCTATCCCGAACAGGGGGGAGGTCGAGAAGCCGCTCTGG  
CACAACAGTTCTGGAGCCAGCGAATTCATTCACATCGGTTCGGTACGGCGCATGGGAGAAG  
GGCGTGCTGACAACAGACGCCTTCCACCAGGCCATGAAGTACCTTCGGACAGGACAAGTTG  
GGCTGACCGATGATGGGCAAACCTGTTGTTGGACTTGACATTGATGGGACACTATTCGAC  
TACCATGGGCACGTCTTGC GCGTTGTAGAGGATTGGTATGGCCGACCAATGCCGGACCCG  
CAGGACATCAACCCAGGCCTGCCCTTACAGGTTTATGCGTACGTTCGAAAGCTACGTAC  
CGGCAGTGTAAGCTGGCATAATCGCCAGGGAGGCCGTGAGCGCAGCATGCCGGTGTATGAT  
GGGGCGTTCGGAGCTGACCCGAGCTATCCGCCGCGCTGGCCGGAGAAGTGTGGATCTGTACG  
ACCCATCCATATGTCAAGCTCGACACCCAAGCGCCAAACGCCATAACTTGTTCGGGCGC  
AACAGAATCCAATTCGATCACATGCTCAGCGGGCCACACAAGTATCGCGACCTCGTGAAA  
CAGGTGGGTGCGGACCGAATTGTCGGAGTGCTTGACGACCTGTCAGAGATGTACGAGCAA  
GCAGAAATGTTGGGGCTCAACCCCATCCTTCAGGACCAGCCGTACAACCAACACATCACC  
GCAAACAGCATCAAACATCTGTACCTCGCACAGATCTCATTCTCGCGAGGATCGAAGTG  
TACAAAGAGAAACAGAAGGGAAACTGATGGGCTCGACATATTCATCAGACAATCCGTTGA  
GCTTCGCGCTGTTCCGGCTGTCCCGCCAGGCAGAGTGGCCTGTCTGGCGGAGGCTGGACT  
GGGGATACCCCATCCTGCAACTTGTCCTGGCGACAAGATTGTCCGGGGCGCTGAGGAAC  
TGGACTACCCGGCATTTCGATTTTCGATGAACCAGAGATCAGCTTGCCGTACGATGACGGGT  
CAGTCGGCGGTGTCATTGCCACGCATGTGCTGGAGCATCTGGCTGACCCACGCCACTCA  
TCCGGGAGGTGGCGCGTGTGTTGAACTTCGGGTGCCCATCAACATCCTGGTGCCTCACG  
GTCAGTCGCCGATGTATTTGCAAGACCTCGACCATAAGACACCGTTCGTGCTTGCCACGT  
GGAAGAACTTCCTGCACAACGGATTCTATGCCAACAATTACGGTGAGGGCGGATTGCCGC  
TCAGTATCGGGCGCAAGTTCAAGTTTGCCTCAAGGAGGGCAACGAAGCCATCATCACC  
AGCTCATCAAGGAGTGACAGTGTCCAACGAAAACAAGGGTGTTCGAGTCATTCTGGAAGA  
GCTCACCTCCGAGTACGCCAGTCCGGTGGATGACTTGATCGCCAAACATCTTCAGCGCGT  
GCTAGAGCTGTTCCGGAGCAAGGCGCGCGACTACAGCGACCGCTCCGGCATCTTCGCGGC  
CGAGGTGCTCGGTGCGCCGGGGCAGTTCGCCGAGATCTGGCGCAAGATTCCCAAGCTCAA  
AAAGGGCCTGTGGGACCAGGACGCGCTCGAGGACGAGACCGTTCGAAGAGATGCTGTTCAA  
TCTGATCGGGCATTGCCTGCTCGCGTTGGACATGATCCAGACAGCATGCGGATCGGCCA  
GGCTCCCCGCGGACACTCATGGATACGAGGGTACGAGATCGGCCGAAGTCAGGCGCGTTCC  
TTCTGGCACCGAACGCTTCACTGAATCAGACAAGCGTCCGATCACGGGCAAGCGCGATGC  
GAACGGTGGCCACTTCGTTGCTAGGGCATGGGTGATCGGTGGCACGTCCGGCATCGGGA  
AGGCTTGCGCCGAGCGGCTCGGCCAATACATGGTGACCACGAGCACCGGTCTACGAGTAG  
GGGATTGGGACGTCCGCAGCGATTTGCGATCCATCTTCATACACGATGCGGTTCGATACTC  
CGACCCACATCGTGTATGCTGCAGGCATCAACCATCTCGACTGGATCGGGAATGGTGCGC  
GGAGCCATGTCGAAGTTATCGAAACCAACCTGAATGGATTTCATTCGTCTGATGGACGGCC  
TGGTGCCTTTGGCTACTACAGCACTGGCAAGCTGGGTGGGTATCCGGACCACATAAAGC  
CCAGCATCGTCGTGATCAGCAGTGATGCGGCTGAGCTACCGCGCCGAACCTCTAGCGGGT  
ACTGCGCAAGCAAGGCAGGGCTCAACATGGCCGTCAAGGTGGCTGCCCGAGACCTCGGT  
CGTACGGCTGGCTGATCAATGCCGTCTCGCCGGAGATGACTGCGCCCACGGGCATGAGTG  
ATTACATCGACAAACGTGTTCCGGAAGTGCGAGGTTGGACTCCGATCGAAGCTGCGCAGT  
ACGAGGCACAGCAGGAGGTCGTCCCTGGACGCATCGATCCTCGAGAGGTGGCAGAGGTGG  
TGTTTCGATGTGCTACCGGACCTGAGCACCTCAACGGGTCCATCATCACCATCAATGGCG  
GGCGCTGACCAGCAGGAATTCGGCCTCCCCGAGAGGGGAGGCTGAATTTTCTCCGAAAC  
CACCTATTTCGCGACGGTGTAGTAGGCTTCGGCCCAGTGTCTCGAAGGGAATATTGAGTT  
GAAGGACCTTGAGCTCAGCCAGCCAGACCCAATCCGCGAGAAGCGAATTGGTGAGGAGCT  
CTTTTTTCCAAAACCAGCAATGGCTTGTTCGGTGAAACCGATGAGGTTTCGTATCGCTTCA  
CACCCACTCAACCTTCTCCTACGGCGATGGCTACGGACCAGTCAAGGAGCACGTCCAGCG  
AGTTGCGGAGCTGGGCATGGGCGCTCTGGCGCTACCCGAGCACGGCAACCTGAGCAGCCA  
CGACAACCTCGAGACCGCCTGCAACGAAATTGGAATCAAGCCGATCTTCGGGTGCGAGCT  
GTACGTTGCTCCGCCAGGCGAGAACCGCAAGTGCCATCAGACGGTCTTCGGCGATGAACGA  
GGTCCGGGCTCCAGAATCTGAACCGCATCTTCACCAAGAGCTGGAAGAACTTCTACCGCTG

GCCCACGACCAGCTGGAAGATGTTGGAGGAACACAATGAGGGGCTCATCGTAATTTTCAGG  
ATGCGCCGATAGCGTGCTATCAGGCACGCTGCTGTGTGGTAAGTCTTACGGTGACGAGCG  
ACTCACCGCAAGCAAGCGCGACATCGCTCGTGGCGCAGGGCTTATTGGACGGTACCAAGA  
GGTATTTGGAGATCGGTACTACCTTGAAGCCCAGAGATTTCCAGGACCTGATTGCACTTG  
CGTCTCAATCCGCTCCTCGCACGGCTATCGGACCTCACCGGAGATCGTCTTGTGGAAC  
CGCTGATGTTTATTATCCACGTGGATCCGACAATGATATGCAGAAGATTCTTCACGCGGC  
TCATCGCGGGTCTACTGTGGAGGCTACTGAGGCGTCTGGGAGTATGACATTCTCCTCAC  
TTACCCGGAATCCGACCGAGAAATCTATATGGACCTGGTGGGTACGGGGCTGACCAAAGC  
CCAAGCGCGCAAGCGGTTCTGGAGTCTGGCCGAATCGCTGAGCGCTGTAACGTGATTCT  
GCCGAAGAACCAGCCGATCCGTTTCCCCAAGCCTACCAAGGAAGTTGACGGCACGCAGGT  
GCCGATGAGCGCCAACGAGCTGATCCGTAAGTGGCTCAACGAGGGCTGGCACTTCCGTAT  
GGCGACCAACCCGAACATGCGGAAGAACCGCCAGGCATACAAGGCACGAGTCGAGCATGA  
GCTTGGCATGATGGAGGAGAAGGACTTACCTGATTACTTCTTGGTACTCAGCGATGCGGT  
CCGTTGGGCCAAAGACCACAAGATTCCGTTGGGCCCGCTCGTGGTAGTGCTGCGACGTC  
GCTTGTGTGCTACTTGTTCGGATCACTGAAGTCGATCCGGTGCTCTTCCCGCGCATGCT  
GTTTGAACGTTTTCATTGATCCGACACGTACAGAGCTGCCCGACGTCGACCTTGACTTCTC  
AGACGACCGACGAATCGAAGTCAAGCGCTCCCTAGAGGAGAGGTACGGTGCGGACCGTGA  
TGGTAAAATCGGAAACTTCACGCGTTATCGTGGCAAGAACTCGATCGACTACGTGGCTCG  
CGTGTACAAAATCCCCGTCTGGGAAACGGAAATCGTCAAGAACCTCATCATCGAGCGCCC  
TGGCGGTGACAGTCGTATCAGTGATTCTCTCGTGGATACATTCAACATGTTCCACAAGGC  
CGCAGCAGTTCTGGAGCGTCACCCAGAGCTCGCCAACGCGATTTCGCTGGAGGGAAATTA  
CCGGGGGATGGGAGTTCATGCTGCCGGCATCGTCATTAGTAACACTCCCATCACCGATAC  
CTGCGCAGTGTACGAGCGCAATCGGCCGGCAAACGACGCAGGTCTCGCATAACGACAA  
GAAGGACGGCGAGTATGTCGGCATGCTCAAGGCAGACTTCTCGGTCTGTCGACGATGGG  
CAAGATCGGTATCGCCCTTGACATGATTGGGATGGACCTTGAAGACCTATATCGAATCCC  
TCTTGATGACCAGAAGGTGCTGGAGGCATTCCGGCGTGGAGACGTCACCGGCATCTTCA  
GTTTGGAGGACGAGCTACTCGGATCGTGTGCAGTGACGTTGTGCCGGACCACTTCCAACA  
CCTGGCGGATATCAACGCACTCAGCCGCCCGGGTCCGCTCTTCTCAGGAATGACTGCGGC  
TACTGCGAGGTCAAGCACGGCCGCAAGACTCCAGAGCGGTACCATCACATTCTGGACAA  
TCTGACTGCCTGGACATATGGTTCAGGTGGGGTACCAGGAGCAGGTTCTCAGCACCATCAG  
GGATCTCGGAAGCTTCCCGATGAGCGAGGTCCACAGTATCCGTAAGATCATCTCCAAAAA  
GCTCGGCGAGGCCAGTTCGAGGCCAAATACAGGATGTTTCGAGGACAATGCTTGCCAGAA  
CCACAGCTGCAACCCGGAGCAGGCGCAGAAGATCTGGCGCTTCTGGCGACATCAGCCAC  
CTACTCATTCAACATCGCGCACTGCATCAGCGACAGCATGCTCGCCTACTGGCAGATGTG  
GATCAAGCAAACCACCCACCGCGTTCTATGCGGCCAGCTGCGCAAGCTCAACGACGA  
GAAGCTCTACAAGTTGCTGCGGGATGAGGTGCGGCACAACATGTCCATCCTCCCGCCAAG  
CATCAACGAGTCGATGGCGAGCTGGTCCGCTCCATGGAAGGTGTTGTGCGCGCAGGATT  
ACTTCAGATACCGGGAGTGTGTCCCAAGACATCGGAGGAGATAGTCGAATGGCGCAATCA  
GAAGATCAGGAAGGGACAGAAGGGAATCGCAGCCAGTGCCCCGGACCTCATGTGGTCCGA  
CCTGCTTGAGGTAAAGGGGATTGGCCCCAAGTCCATCGAGAAGATCGTGGCATTCTGCGA  
GGCAGAGGACCCATTCGGGCTCAACAGGGTTCAAGACCTGTTCAAGTCTCTGCGGCGGAT  
CATCAAGCCCGTCAATGGGTATGGGGTGCCAGCGCCTATGCATAACAGCGAGAGCATCCC  
GCGTACCGGCGACCACGACGGCATTGTCTGGATGGGCATCCCAGGGCCAAGA ACTATCA  
GGACTATATCGAGAACCAGCGGTCTCGGTACGGCAAGGAAGAGGCCGAGATTCTCGCTGA  
GATGAAGGCTCCGCATCTGGTCAAGAGCTGTGTGGTGCAGTGCTTTGACGACTATGACGA  
CGACGTGACTGCCGTTGGAATCGCTGGAAGTTCCCCAAGTTTGAGAAGATGCTGGAATC  
GCTGGCCGTTGATGGCAGCAACGTCTCATTGTGCGCGGTCGCAAGCGTGAGGACTTCGG  
AGTGCCACTCCACGTGACGGATGCGTGGGTGCTTGAAGTTGGACGAGGACGTAAGGCTATA  
GTATGGCCAAGAAGAAGAAGCGTGTGGGCAAGCCCGGACCCAAGCACAACCCGCTGAAGC  
TGGTGGGTGGTGGCGAGGACTCGGCCGCACGAGTCATCAAGGTCATCCAGAACATGCTCA  
AGCCGCCAGAGACGGTGCTCGCGCACATCCAGCGCGTAGGGGCTCCGTTCTGGGTAGCAC  
CATTTGGAGTTTCTCAGTAGGGCGAGCAGTACGCGCGTCCGTGCCTGGTGGTGCCGTACG  
ACGACCTGATTTCCGGCCGAGCTGGCCATCTGGCTGCTGGCGGGGAGCTTGCCGAGACGT  
ACACCGAGGAAGCCCGCAAGGCGAGTCTCGCGGCTGCGCGTAGTGTGCGAGGCGCACAGC  
CCAAGAGCGACCTGGACCCACAGCCATTCTGGCCCAGGTCAAGGAGATGCAGCAGCAGT  
TTCACGGCGCACAGTCGCGGGTTGCTGACACAGCATCAAAGATCGAACCACCGAGCTTT  
CGGACGAGGAGCGCGACGAGCTCCTCCGCAAGCTGCGGGGTTAATTCCAACAACAAGAAG

GGAATTACATCATGACCGGGAAAGAGATCGCCAACACTACGCCGACGTGGCGATGTTCAAGG  
CCGAGGAGATCGACCGCACCAAGGGACCGCTGGTGTTCCTGCTGAGCTGCAACAACGATC  
CGCTTGGGAGCATCGCGGCTGCTGCCAAGGCGTACAAGGGCGAGTTCGTTGAGTCACTGG  
CCCAGATCACCGACTACGAGCGCCGGTACTACCTCAAGGAGGCGCAGAAGTCGGTGCATG  
AAATGCCTCTGGAGGCTGTCCAGTTCCTACTCCGCATCACGGGTGTGACTCGCCGGTTCA  
CCCACCAGATGGTCCGGCAGCGCACCCGACGCTACTCCCAGGAGAGCACGCGCTTCGCCG  
TCAAGGAAGACGTCCCAGTCGGATTGCCACCCAGCCTGCAAGACACGATGCGATGGAACG  
AATGGGTTCGAGGAATTTGCGATGGAGATCTATCCAGTTCGCAGCCAATGGCGTGAGTATC  
TTCAGGTCAGGCGTGACCAGGCTGAAGAGTTCGCCGAGACGATGGCCGACAAGGATCAGC  
TCTGGCGTCGTCGGTGGGGTAAGGCTATCGGCCGTCATCGAGGAGGAGTACAACGCTCTGG  
TCAACGAGGGCATGCCAGGCGAGGACGCGCGTGGATTGCTGCCTACGAACCTTCTGACCC  
AGATCAACTACATCACCGATCTGCGTGGCCTCAAAGGCCATGCAGGCGTGGCGCTCTGCA  
CGCAAGCGCAGTTCGAGTGGCGTCAGGTCTGGGCCAGATCGTCCGGGCGATCCGTGAGT  
ACGGGACTACCCAGACGTACATGACGAACGACAATGTCCATGACATTCGGAAAACCAGA  
AGTCGTCGCAGTGGCAGTTCGATGCCTTGGCGGACATCTTCCCGCCGATCTGCAACTACC  
GGGGGAGCTGCCAGTTCAGGCAGACTTCGACCCGCACTGCATAATCCGTGATCGCGTCG  
AGGAGAATGCCGGTATCAATCGGCCGAGCACCAGCTGGGACAAGGAATGGGTCCGACCGA  
AGCCTCTAAGCCCCACTGGCGCTGAGGGTTACATCGGACCGATCTTCCCGGCTGAGTGGC  
TCCTGTATCCCTCAGCGACAAGGACGAAGTGACCATGGAGACCGGCGCATGCCGACTGTG  
TGGGAGGGTGGTCGATCGGGCCGCCCTCACCAACACTGGCTACACAGCTTCATCTGCGC  
GCGATGCAGTGAAGGATTGAAACGATTGAGCGCGAAGCTCATGCCACGACAGGAGGGGA  
TTCAGTTAGGAATCATCGTCATTGATTTGGCCGAAGGGAGGTCGCACCCGTGCCGCTATGC  
GTAAGAAGAAGCGCAACAGAGACAGCGAAGCCGGAATCAACTATTCCACAGCACCGGTCA  
TCGCTGTTGATCCGGACGGAACGACCCGGCTGGTCCCTTCATGTGTGTGGCGCCATTGGCTC  
TCCACGACCCGCGAGGTAATGGTACTCGAGAACATCATACTCATCAGCAAGGCGAGCTCA  
GCCGCTCTGTGCGATGCAATGTGCGCGAAGGCGAAGACCTCTGCGTCGCAGACCTGTATG  
AATTCATCTCGGCTTGGCCCCAGGCCGCTGTGCTGGTGGAGGACTTCGTTATCCGAAGCA  
ACAATCGGAGTCGCGAATTCCTTTCGCCCGTGCAGATTACCGCCGCACTCAAGCAACTGC  
TATGGGCCGACAACCCATACATCATCCGACAGACACCAGCAGACGCAAAGATCACGGCGA  
GCGATGACCGGCTGAAGAGCTGGGGCTTGTACGACAAGCATGGCAGTCTTGGGCACGCAC  
GCGATGCCGATCGGCACGCAATTACATTCCTACGCAAGGCCAAAAGCAACCGGAAGCTCC  
GGGCGATGGCGTGGCCGACCTATTTCGTAGAGGAGCGTATTTATGCAGTCGAAGACGACG  
AACAAAGCTGGGGCCGATGTGCCGCCAGCGTGGCTGGTTCGGGTGCTGGGCGAACACCAG  
CCGCAGATGAATGGGCTGTGATGCACATGCTCTTTGAAGAGCACGGACGCCTTCGCCGCT  
CCGAAGCACTACACAACCTTCTCTGCGGAACATCAAGCGGCCGAAGTACATCGCGCTCTG  
AGTGATGGCGTCGAAGCTCTTTGCGAGGAGGTTCCGGTGAGCAAATCGGACGAGTTCTATG  
CCAAGGCGTTGGTTCGCGCTAGGTGATGCAGAAGCTGCGCCAGCTCACCTCAAGGAGAGCT  
TCGACGACAATCACAACACCTTCTGGTCTCAGCGCGTACTTGCACACTGTGCCTTGGCGA  
ATGCCTAGGTCAAGGTTCGAGAGTGGGAGCTCGGGGTCGAGGCCTGGAACGGGAAGGAAG  
AGCACCAGGCCTCGGTGCTCACCTTCGGCACAGACGAGATGGTCCCGACGTTCCCCGATG  
ACATCGAGGAGCGCCGATGAGGCGCGCGGGCATGAACGACCTCAACGCGACAGTCGTCAA  
GAGCCAGAACGACGCCAATAACAAGATCCAAATCCCAAGGACGCCTTCTCATTCGGGCG  
GACGTGCCCGGATTGCGCTGGCGGGCTACAGTTCAAGTGGGACCGGATGAAGTTCGGGCC  
CAAGCGCAAGGGATGGATCTGTCTGCTGCTACGAGATTGAACTGGAAGGGCTGTCACC  
AATCAATACGGTTCGGCCCCGCATCGGAGGAGGAAGAATGCCCCGTGGAGTAGCGATGACT  
AAGGAGCCAATCGCAAGGGCGGAGGAGCTTTTGAACAAAGGCTGCTCTTACCTCGAAGTC  
TCCCGAACCATCGGCATCGGCGAGTTCAGCATTGCGCTCAAGTTCGCCGGTTCGGGGCTTG  
ACACAAGAGCAGAAAGCCGAGCACAAACGTCTCAATGATCTGTTCAAGCGTCTCGACACC  
ATCTGGGGCTTGGAGAGGGCACAGAGAGGCGAGAGGCGCGCATCATAAGTTCAGTAGCCC  
GCATCGGCCCGAACAGTACGATCAAAAACCGTAACTAGGAGGAACCATGAAGCTCACCGG  
AACTGCCCGGCGAACGTCGCGGGTGAAGCGGGTGGGTAGAGCCAGAACCCGACCAAGCGTT  
CAAGGAGTATGCCCGCGAGCTCGGCACCAAGACCTCACAGCCTTGCGCCGCGTCATCAT  
CCTTTGCTTGCGCCAAGAGGGTTTCCAGATCAACAGCGAAGTGGTTCCGATGCCCGACAG  
ACCATCACACAGGAAGGATTGACCGATGAGCCGAGTGGAGGTGGCCCTCGCGAGCGTAGC  
GCTGTCTGCAGCGATGCTCCTGAGCCAGGCCGCCACTGTGGGCGCAGAGCTCGAGCAGCT  
GTCCGGGAAGGACCAGTTGTACCTCACACGCCTAGTCATTGGCGAGGTGCCATACGGAAC  
GGCTGCAAATGCCCACTCCATTGCACGTCGTGTATGCCCGGCTACCACTGGCGGAAACTG

GGACGCCACCTCTCTCGGGAAGCTCGGCCAAGATATCATCCGCAACAACCCGAAGTTCGA  
CGGCGACTCGGCAGCGAACATCATGGTGTGCGAGCATGACACTGTACTGCCCGAGAACAT  
CCCCGACTGGTTCACGCCGAGACGGCCAAGTATCTCGCCGAGGACGCCGGTGTGGCTGT  
CCCTGTGGCGACGAAGCCTGGTCCCTACAAACCCCTCCCACGCTAGGAGCGTCTGCCATG  
GACACAGCGCCTTTTGGCGTATGTACCGCTGACTTCATCGTCTGGGGGATCACCTTCACG  
CTCACGGCTCTCACAGCTTGGCTGCTGAAGCATGGTTGGCGCGTGAAGACTCCGCTAGAG  
GCCGTGCATCGCACCTTCAACAAGCACGGCATGCCACCAGCGGTATCTGCCACATGGC  
TTTGATCGTACGGCGCACCCTACGCGCTCCGAGGCTATGAGCAGGTGGAAACCCAGGGG  
TGCGGCGAGTGCCTGAAGGAGCTGACCCGCACTCAGTTTACCCACATCACTAGCTGCCCC  
AGCTGCTGGTTCGTCGGGGCGATACCGTTCGGCCCAATAGAAGAATACTTCAATCTCCA  
CCCGAGCAGACGATCTGGGTGCGAGAATGACCATGGCAGCGTCCATCTCCGCAAAGCCTTG  
GAAGAGAAGTGGTCCGAGACCAAATACAAGGTCTGGGGAGAATGGCAGCGAGAATGCAAG  
ACCAAGGACCTGAATCTGATCCGGGAATTTGCGGTGAAGGCTGTGGTGTACCGCACATGC  
CCGAGTTGCGCGTACACATGGTTTGGAGCACTAATAGAAGGGAATACATCATGATAATGAA  
AAACAGTTCGGAGGACGCACTGCGGAAGGCTGCAGCTGCATTTGCTCTGCGTCAAATTCG  
TGAGGTTAAGGAGCGCGCTGCCTACATGCTCGTCCACGGCCTGACCGAGGCCGACGTGAA  
CGGAATGCATGCTCGTGAGGGCTGGGAGCAGCGCGAGAATCTTGGTTCGCTGGATCATCAC  
GCCCAAAGGACTCAAGAGGGTAGTCCCAGACCCGGACGACGTCGTCGGCTGCGTGCCGGT  
TCTCGTCCGAGACCCGGACTACATTGGCGAGCACCCGAGAGCGTAACGAAACGTTGCGCCG  
GTACTAGGATCCGCGCTTCGGCAAGGATTGGTTCGGGATACGTCGGCAAAGTTCCTACCA  
GCAGAGGTTTCGGGAACACAAGGAGCCACAGCATTTACGGCACAAGCCCTATGGGTATCC  
GAACCCGGCCTGGGAGCTGAACTACTCCCAGCGTCAACACCTTCGGCTGGACGCACTATGT  
CTGCCGAACCAAGCATGACGAAAGCTGCCGGTTCACGAAGAGCCCAGAGGAGGTGATGGA  
CTGATGGACTGGAATCTCCTGATCGGCGCTGCTATGGGCGCTGCGATGCGCGCGACGATC  
TCTTTGGTTCGGATGCATCGTCGGATAACATCGTCGGATAACAGAGCAGCCAAAAGGAGGCCT  
CACCAATGAGAGGCGCGAAGGGCTCTGGCCAGGGCACATGGGCAGCGCGCTACGACAGCG  
TGTGCTCGGTGTGCCCGCACCCAATCTTCAAGGGTGATCAAGTTCACAAGGTGCACAACA  
AAGTAGCCCAAGAGGAGTGCCATGCGCTTGATGAGCGTGGCGGGTTCGGCCTTGATGACA  
GCGGCATTGAGCAAGAGCGCCTCGACTGCCGTTACGGCAAGGGCTACGAGGACCCGGCCGA  
GCTACACAGTCCGGGGCCGACGCAAGCACGAACGCAAATGTGGCGAGTGTTCAGATAC  
ATGCAGGAGAATGCGCGTGAAACTCGAAGACACACACGGCAGGATAACGCCGTAAGAGCTT  
GGCCGAGACGATGCAGTACAAGCTCGACTCTGCTTACAAGGCGTGGCGCGATGCCGGTGG  
CAGTGATCCTCGACAGAACTCGCAACAGGGACGGCACAACAGGAACTTCGGCCGGGTTGA  
GGTCTGTGCGGCGCAACTCGGAATACTCAGGGGCACAAGTACAAAACATGAGATCGAGGA  
AGCGGAAAGGCGATAACAGATGAGGAATCCCTTCAAGTAGGGTAGCCCGCAGCGGGTGTG  
TTGGCGTACTGGCTGATGCGGTGGGCGTACCGGATCGTTGAGAGCATTGATCGCGGTCCC  
GTCCCGAAGATAAGCATGTGGACCTTACCTTTGAGCGTGGGAAGGGTGCGGGCGTTCCG  
AAGGACGATCGGGCAGAGCACAAAGGGTTGCAGACTCGTGTACCTCAAAGATCGTGAGTAT  
GACCGTGCCTGGTTCGGAGACTGCGTTCGTCGGCAAAGACGAGGACGAGGACCAAGACGCC  
TTCCTCACCTGGATCTGCCCAGGAGCGGTAAAGCCAAGTACGACAAGAAGTTCGGCAT  
CAATGCCGACTGGCGGAAGACCACGACGCGCGGTCCACGAGGAGCGTACGACAGTCGCCC  
AGACAGCCCAGGAGACCCAGAAGCACCCAGTTGTAAGGGATTCGGGTCACGCTGGCTGCC  
AGACGGCACTTGCCCCGGCTGCGGGAGGCACTGGACCTGCGTGTACCAGACGCGCGACGC  
AAAACGAAACCCCATCGGCACCACCGGAAAACCTACCATACTCCTCACAAGACCACACC  
ATTGGAGGGACAATGAACGATCCAGTCCCGAAGCCGCACAACGGGCGATGAGGAAGGTG  
CACGACTACCAAGGCCAACCATCACCTGATCGTCCCGCCCGTGAGGCGTTGAAGCCG  
ATCCGCGAACTGCACTACCCAGAACCTGATGACCGAGCCCCCTACTGCCCGGAATGCCTT  
GTCGAGTGGCCCTGCGACACCGCCAAGCTGGTCTACACCACCGAGGAGCTGGAGCGATGA  
TCTTATGGCATGCTCGGCGTGAACCTCGAGCGCTCTCGGAACCATCGTTTCCACAATCGGC  
CGGTGGACAAGAGTGACCAAGCTATGTACACCTGGTGGGAGTACATGGACGAGATCGACT  
TGGTGAATGGCGAGAACGACACCATGCGCATCACGGTCATGGACGAAGAGACTCACCTC  
CTCCAGGAGTTCTGCTCCATGAAAAGCCCAAGGTCATTCGCGCAATTCATCAGAGGTTGA  
CACCGAAAATTAGCCTCGAGTACCAGATCAACACAGCGTACGTAGCCCAAAGCACCATCA  
GCCCGCCAGAGGAGATCAGGGCCGACGGGTGGATGGCGCTCGGCCACTACAAGATCCATC  
GGTACTGCATCCGAGGCCGCATCAGGCCTGGTGGAGACGGTTACGAGCCAGATCGCATTG  
TCATCCTGGCGGGTGAGGTACGCCCTCCGGGCACATGGTATCCTTGGTCAGGACAGCCCG  
AGGACGTGCCGAACGAGGTACTTGACGGAACCTACCACGGGATGTTTATGGCAGAAAAAT

AGCCATCCCCAATACCAAATACCATCCCCTCACAGCAAGACAGTACATATGTTCTGTGCG  
TAGGAATCGCGCGGCCGCAAAAGAGAACGCGCGCATGTACAATCTCGGCAAGGTCTATGG  
CTACCTCCACGCTCTCAAGGAGCTCACCACAGCCATCCAAGTGGAAGTCAACTGCGCGA  
AGAGAAGGCGCATCTGGTGTCTCCGAGCGAGCCGCCGTGGACCCTCCACAGCTTTACCTG  
CTGGTTAGAGGGTGAGATGCTTCGAATGAGCAAGAAAAACAGATTCCGCCAGACGAGTG  
GCTCAAGGAGGTCGATCGCGTACAGTCACGCCTAGACCGTCTCACGCGTCTCGGAGGTTG  
AACGACATGGATGTCGAGCTCATGATGGCAGTACGTAACAGCGGGCCACATGGCCTCGA  
CGAGGAGGTTGGAAGCCGCACCCACCCGACAAGCCCAAGGCTGGGCTGATAAACGGTAA  
GGTATCTAGCAGCGAAAATAGGTTCGACCATGCGGGTCTAGGCCTGAGAAGATGGGACACA  
TCGTAACGTGTCAACAGCGCGAAATATCAACAGCGCCAAGCCATTCCGACGCGCGGTAGA  
AGCCTACCGTGAACGGGGCTGGGCGGGAACGCTACCGCTGCCGCCTCGCAGCAAGAAGAA  
GCCTCCAACAGGTTACACCGGGCACACAGCGCCGTACCCGAGCGACCATGACATCGCGAG  
CTGGCTGCGAAAGCCCAAGTACGCCAGGGCAATATCTGTCTGCACCTGGGTCCGGTAGA  
GACGCGTGGGCGGACGGAGAACGCCTGGAGCTCATCGGAATTGAGGTCGATGACTATGA  
GGAGGGTGGCAAGGTCAAGGAGGGCGGCAAGCAGCTCGCCGCGCTCGAGGCCGAAGTCCG  
GCCACTACCCAAGACGTATACCAGCAGCTCGCGCACAGGCGTGAGCGGTATCCGCTTCTT  
CATGGTCCCCGCCAGCACGCATGGATGGGGAAGGCCGCGCCGTACATCGACATTGTCTG  
CAAGACATACCGTTACGCCATCGTATTCCAAGTTGGCACCAAGGCGAGGTCGATGAGGA  
GACGGGGAAGGTCATCACCGAAGGTGGCCAGTACAAGTGGCGCGATCCGCAGGGGCAGTT  
GCTGGATGGGCTAGAAGACATCCCTGACGTTAATGATCTGCCCCCTGCCGATGCGTG  
GGTAGAGCGGCTGAGCCGTGGCGGCATGAAGCTCTCGGACGAGGACGCCGAGGTCGACAT  
GGTTCTGAACGTAGACGAGATGTCCCGGTGGGCCGTGGGTACGTTGCCGGGCAGTGACGA  
GGACGCCAGCCCTGCTCCAAAATGAAAGCGGCAGTTAAGTACTGGCAGGTGCAGATTGA  
GGAGGACGCCTCTAGCCACGACAAGATCACCGGCTCGCACTGGAATCTGGACTGCTTGGC  
GACCGAGGCGCACACCGGCTGGCGGCAGGCCATGGCAGCTGTGGATGCGAGCGTCGCCGA  
AGACACCATCAAGAATCGTGGGAAGCGCGAAATCAGCGAGCTGCGCTCAGAAATCATGCG  
TAGCAAGGTGAATGCACTCCGAAAGCTCAAAGCCCAGATAGACAAGGGCAGGCGCAACGT  
GCTCACGGTGTACACGTGCTACGAGCCCAGCGCAGACGAGCTCGACGCGTTCACCGCCAG  
CCTCAACAGCGCCAAGGCAGCTGCCAGCGAGCCTACCAAGGAGCGCGAGGTCGCCAGCGG  
CGAGGGGCGAGACCGATATTGGCGCGATGGCATGCCCAATGGCACCCCGCTGTACCCCGG  
CGACTACGAGCAAAGCGTCCAGGGCAACGGCGATCACTGGATCGACCTGCACAAGGACAA  
TGCGTTCTACGTTCCGGCGCTGGGACAATGGATCATGTGGACAGGGAAGAGCTGGATCGT  
GGGGGATGGCTGTGCCGAGCGGAGGTACCGACGCGTGAAGGCTCGCCAGCAGCGGTATGC  
CGAACAGCTTATGCGGCGCGCGGCTGAGGTCAAGGCTGCGCAGAATCCTACGGCCAACGC  
GACTGTGGCGATGGCGAAGACCTGGCGTAGCTGGGCCACCCGCAGCGGCGATGTGGGGCC  
GATTGAGCGTGCCCTCAAGGCCGCCAGCATGGAGCTAGGCATCGAAGAAGGCGAGCTCAA  
CGCTAATCCGGCGCTGATCTGCTGCGAGAATGGCGTGCTCGAACTCGATCTGTGCGCCGCT  
CGACTCCCTGGAGGACGAATCCCAGAGCGCTGGGCGCAACGGGGATAGAGGTAGGCGCTA  
CGGACGCAACGGCACTGCAAATGTGGCTAGCTTGGCCGAGGACGACGAAGAGTTTGATCT  
TGACTACGAGGCTGTGGCTCCCAATAGCCATGTGCGCCTGCGAGAGATCCGGCGCGAAGA  
CTTGCTGAGGCTGAGTACTGGGACTAGCTACCTGCCCTGGCAGGAGCTGGTGGCCGGGGA  
GTTCCGGCAAACAGGAAGCGCTGTATACGAGCACGTGGGCACGAGCAGTAGAGATGTATCT  
GCCTGATGAGGAGGTGCGGCTGTTCCCTGCAGAACTGCTAAGGTACAGCCTGCTCGGCCGA  
CAACCGAGAGCGCATCGTCGTGTTTCTGCACGGGCCAACGGGCAGTGGTAAATCCACCTT  
CCTCAACGCCACGCTCAACGAGCTCGGCAAATATGCGGAGGTGCTTGATCTGGGCATCTT  
CAAGGGCGACCGGCAGACCGACCCAGCTCTGGCTTACGCCCTCCCCAGGCGCATTGTGAC  
GTGCTCCGAGGCTAGCCAGCGGAACGTGCCGCACGCCGACATGTTCAAGCGAATTACGGG  
CGGTGACCCGTTGACTGAAGAACTGAAGTATAGCAACGAATCTGTCAAGCGGAAGCCCGC  
ATTTGTACCGTGGATCGCCACCAACATCCCACCCAGCATCCCTGGTGCCGATGCTGCGGT  
GGTTGATCGTACGGTGGTGGTGGCATTTCGATGAGCAGATACGTAACAAGACGTCGGCAT  
GAATGCGATGCTGTCTAGTCCGAGGGCCAAAACGGCTGTGCTCGCGTGGGCGGTCGAGGT  
CTGGGGAATGTACCGGCGCGAGGGGCTGAGGCGCGCTGATTTCCCGGCTGCATTGAAGGG  
TGAGAGCATTGAATTTACCAACCAGTTCTCCGATGTGAGCGAGTTCCTGAGTGAGTGCGT  
GTAGGAGGATCCGATGAGCCTCCGGCGGAAGGCTGAGAGGCGCGCGTGGCGCGTGTGCCGA  
CTGGCTCGAGGAATGGCACATAACGGTCAGCGAGGTGTACGACGTGTACGTCACCTAGTG  
CCAGGAGAACCGCGTTGCGGATCGTAACATCATGAAGAAAAATGGGTTCTCGCGCCACT  
GAAGGACTATGGATATCGGGCCGAAGTTGTCAAGAAAGATGGCTTCACTTCGAGAACTTT



CGCCGGCTTCAAGCTCAACTCTCCAAATGCACGCGTTTTGAAATTACAAAAGACAGCTG  
ATTATTGGACAAGAATGCCTCTGAGACGGGGCTGTTAGGCATTGCGTAACCCAATCAGTA  
ACTACATTTGACCAGCGGAAACACATCATTTTGGTTACTGGCTGGGGTTCGTTTTCACTT  
AGGGCTATACCTACTCTCGTTCTTATACTTCTACCCTGTTTTCCCTACTACCTTTTATCT  
AAAAAAGCGAAACGGGTAACCTCAGGAGGGTATAAAAATGCTGGTAGAGCAATGGATTCCG  
ATTTTTGAGAGGCCCGGAATGCGCTACCGAATAGGTAACCCGACCACAGGCTACATGCGG  
AAACATGTTTCGTTTCGCGTAATTTTCGTTGTGACGGATACCCTGGGAGGGTATCTAGGAGC  
GTAAATTTGTGGGATCAGAGATGGTTTGGACAGCAGCAATCAAGACTGATGGAATTGGAA  
GAATGGC

>NewGenomeName\_226

TCCCGACGCTGATGCGCCACCCAACCCCGGTAGGCCCTCCGCCTGGTGGGCCATTCTCG  
CCTTGCCTGGGTGTTGCCTGGGTCATCCCTGGGACCTTCCGGCTTCGCCGGTGGTGCGGT  
GGGCTTCCCTGGCCTGTCTCCAGCCATTCTACACGGCTCAGCGGGAGTGTCAACCCTTGG  
GCTAGCGCTGTCGCTCTACCGGGCTTGTCCGTAGTACCTGGAGCGCTCCAGCGCGTCCG  
GTGCATGGCCCTGGCTATCTCGTACTCCTGGGATGCCTGCTGCTTCCGCCAGGGTGTCTGC  
ACAGTGCCGGTGGCCCTGCGCGGCCACTGTGCTAGCTGCCTCTGCCATGCCGCGTCCCTG  
CTGGTACCAGGCACGCTCACCTCTGTTCTGTCTGCTCAGCATCCTCTGTGCCTCCTGTGG  
TCCTGTCCGGGTGGTAGGGCGGGAGTGGCTGGCCTTGCCTCACAGCGTAGCCTTGCCTCTT  
GTCGTGCCATGGCTCTACCCGGCTGCTCCCTGGGTATTCCCTGGGGTTGCCTGGGTGGTC  
CTGGCCACTGCCTCTAGGCCACGTACTCTAGTCGCCTCTACCTGTCCTGTCTAGTCCTGC  
TCCCAGTCGCTCCCTGGGTGCTGGTCTGTCTCCCTGACGCCGCACTGGTCCTGCTTTCTT  
ACCTCGCCGCTCCCTCGCCAGCTCGGTCCGACCTGCGGGCGCTGATGGACTCCTATTTGTC  
CATTGCGTGTGACATAACCGCAGCCTTAGTTCATGCGGGTACCAGGGCGATGGCCTAGC  
TGGCTGGATGGACCCTGGCTGTTACCTGGGAACGATAATCCTGGCTAGCTAGACTAAGCC  
TCGGATGCGTGGGTCTGTATAACGTGCGTAGAGGCTCCAGGCAGGGCCTAGGCGGGGTGTT  
GACACAACAGGTAGGCGTCTGTACTAAGCGCCCTGTCTCCACGCAACACCGCCTCTACGT  
GGAGCCTGGAGACAGGGTTGACACACTACCGGGGCATCGGTAGAGTGCGCAGCCAGAGGG  
ACGGAACAACGCTCCCTTCCAAGCGCGGCACATGCCATAGGCGCAAGGGACACGGTTGGG  
TTCCAGGGCAAGACCCACTACGTGTAAGGCCGGCAGGCATCGCTGAGCGGATTGACAGTA  
ACACGCTCAGTCGGTACGATGGGCACCACTCGGCAAGACACGCAACATCAGCTACCGGGT  
TGACACGACAAGGCCGAGTCGCTAACATGGCCACCAGCAACAAAGTGACCCGGCCGATAA  
CATGGTCCGGTAAGCTCCAGCAAACGGGCTGGGCTGGACGGGTAAGACGAGTGAAGCTGA  
CAGCGTAGGCCCTTCGTAGAAGGCAGCCAAGGTGGATCACGCACCAGAAGGTGACCTGTA  
GGAATCGGGCAGCGCCGTAGGACTGCCAGGGGGTCAAGGCTAACCCCGCAAAGAAACAG  
CCGAGCGTTAGGATCACGTCCCGAAGCAGTGTCCGGGGGAGCATCTGGTCCAACCGACAG  
TAGTCGGATGCCTGCAAGCGGAATCAACGGCTGGCCTACGGGCTGGGCAGCCCCTCGCAA  
ATCGGTTGTATCTGGCAAGAGCCATCGGGTTGGCGGATGGTCTGCGAATGGGCAACGATG  
GCTCTTGAGCAGATACAACCAACAGGAGTAACCATGAGCAAGAACGCCGCTGGTGCAGCC  
AAGGCCGCAAGCTACGGGCCGATATGAAACGCTATCTCGCTGGCCACCGTGCCACGAAG  
GTAGCCGAAGTATCGCCATCGGCGACAGCTCCGCACGGTCTGAACTGCGCAAGACGCGC  
GATGTTTCGGTACAGCTCGGACAAGGCAACCACTCCCGGGCACTGCTTCAATCCCAAGGGC  
AAGCACTTTGCCCGTGGTTCCGAAGGCAAGGCACGCAACATCCTCCAGGGCTTCAACGCG  
AGCTCATCCCAAGCAAAGGACTCTGACCATGGCCAACCAACTGACCAGCACCGTCACCG  
CTTTCATCGGTACCGCTGCCATACCAACGCAATCGAAGCCATCCGCGTTCGTGGCAAGG  
AACTCGACGAGGCCTTCCAAGTACCGGACTGTCCATCCTGAACCACGTCGATCTCCACG  
GAGACGTGACCGAAGTCAAGGCGCTGTACGAAGCCATGCCGAAGGGTAGCCGCCGCAATG  
CGCTGGTCGAGTGGCTGACCAAGTTCGGCAAGGTACAGGTGAACACCTAGAAGAAAACCA  
ACAACGAGCATCCGTTCTGTACAACAAGTTTGGCAAGACCTATCTCGACGACGCCACCA  
ACGAACCGTGGTACGGGATCAAGCCGGCGAAATCGCTCGATCAGGAATTCAACCTCGCCG  
CCGCACTCGCCGCTGTCCGCAAGCAAGTGCTCCAGGGCGCAGACCATAGGGAAGGTGATCG  
TCGGCGCTGAACTGCTGAGCGACCGGGAAGTCCCTGGCAGCCAAGGCCGACCCATGGTCG  
AGAAAGCCAAGCGCGCTACTGCCACTAACTAGCTCAAGTCGAGCGCAAGCGAGGCGGGC  
GCTCCGCTGGACCTAGTACAACCTGGAGATAACACGATGACTTTCAAGCGACGTCTGCGAC  
GTCAAATCGCCGTGGCCAGTACAGCCGGCCCCGCCACTTTCCCTACGGCGAGCAGGCCG  
TACAGGAGGCAAAGTAATGGATATCTGGATCGCTATTTCCCTTCCCCGAATTCGGCCTGAA  
CGTTAGCGAGTGCGCCGTGCAATACACCCTGGGCATGATCGCAACCGCCCTGTTTCATCCA  
TCTGCTGCTGAAGCGGTGACTCAAGTCATGGCCCTGGCGGGCGACCCCTCGCCTACTCCGG

GGCAATCGCTGGACTCATCAACAAGCGAGAATTAACCGTGCAAGCTTTGATTAATCTGTT  
GATCGCAATCCCCAAGGACCCGGCATGCCGATTCAACGCAGCCTACAAGGCGCTGTGCGC  
CCATGGCTTCCTTATGGGTGACCTGAGTCGCGGCCACGTCCTGACCCCTGGCGGGTTCAT  
CGTGGTAGGGCGCCGGCGTGACCGTCAAACGCTACGACGAAGCGTATCGCTTGAGGCCCGA  
TCTCTACTCCGCAGGCTTCGACGTGCTGCTGGTCCAGGGCAGCCCGCTGTCCGGGCACGT  
CACCTGCCAGGCGTACGGCTGGATCAACGCTGATTACCACAAGGGCTGCGCGAACGGGGC  
CCCGAGCTTCGACATTGCAGGAACCTCGTACCATGTCCTCGCGTGATCCGTACCGTATCG  
GCCACCGCGTGGGGCTGGGGAACGAGAGCGACCGCTTCCTGGGTGCCGACGCGGCAGGCA  
CCCGGGGCATCATTCAAGCCATAACCCGTCCGTCCCGCTGTATGACGATCTACCACGTAC  
GCTGCGAGCGGACCCTGCGCTTTATCGAGGCCGAGGCCCGTAACGTGCGCTTCATCAGAC  
AGCTACCGACCCGCAAATGACGTGGCTCATCATCGCTGTCGGCCCGTTGGGCGGTTGCGC  
CTTGGTGTGGATTTCGCAAGCGACCGGTGCGTCCCTTGCATTCTACTGACGCAAGGCAGC  
TAAACGCTGGCTTCGCAAGAATCGCCGCACGGCCTTGCGTGGTAGCCGATTCCTCATAGT  
GAATTTGAGCAATCGCATATGAATCCCACTTACGTCGTTTCGTCTCAAGGACGGAAGCACA  
CGCCAGGTGGCCGCGGACAGCATCATACCGGCCACACCTTTGCCGAACTCTGGTTCCCTC  
GGTGGCGCGGTTCGCTATCTACCCGGCCGGTGAAGTACGAGAGGTGCATCGCCCTGACCTC  
GTGAAGGAGGGCGAGAAATGACCGTCAAGACCGTGTATGTCAAGCCTGAAGACCCGGCGC  
CACCAGTCTTGTCCGTAGGACGCCTGTCACCAGGTGAACTCTACAAGGTGGTGACGCCTA  
GCTCGGCAGAGGGCGCCGTTGTGCTGGCGACCAAGCTGACGCCTGCCCTCGCTCAGGCAG  
TCCTCGTACTGCACAGCATGAACCCCGCGCAGTAAGCGGTGGGCACGGCCATACTAAACA  
CGGACTTGCGGTGCCACCGCCTAGGTACCGGCGAGTACATCAAGCTCGTTCAAGGGGAGG  
CCGACCAATGATCGCTTCCCTGTTTCGTACTCGGCCGGTACTGCTGCCTCGGCCTGCTAGC  
AGGCTCCAGCTACTGCATCGCAGTGGCGCCGCGTTTGAGAACCCTACGGAAGTGCAGTT  
ACAGGACGCCTGCCTGATCGGGTGCCTCTGGCCCTTCGTGCTCGTAATCATGGGCTACCT  
AGGGGTGCGATCCTTCTTCTGTGGCGCTCTGGGTGGCTTGCGCCGCCATCGGTAACGTTT  
TCACAGCAAGCGATAAGGAACTGCGATGATCCGTTCCCATGTACACGGCACCAACCGTGA  
GCAACCCCGACTTCACAAGCACACTGAATTGGAGGCGGGCGACCTGTACCAAGTCGTGCA  
GCCCGAGTCCCGTCGGGGCCCGCTGGTGTCTCGGCGTGGGGAGCACGACCGACCGTGCCGT  
CCGCACGGTGGTGGCTGTAGACATCCACGAAGAAGTTGAGGGGAACCTGTCTACTCCGAG  
TCCTACCGTGCTGCGTAACGACACCTGGCGCATGGTGTCTATGAACAAGGGCACCCA  
GACTCACC GCCGAGTGACCAAGGCGAAAGCTGGCGCGCCAGCCTTCCACCGTGGTCAT  
TCTTTGCCGGGAACCAACTCAACTGAGGAGCTACAGCATGACCAACGTCAACACCACCAC  
CGAGACCAGCACCGCTGCCGTCTGAGCGCCAAGCTCATCAAGAAGCCGGCTACCGTGGA  
AGACTTCCGCAACAACGTGGTCTTCCACCACACCGCCCTGGCCAACCTGACCGAGACCTA  
CAACGAGGCGTTCGCTGCCCTGCAAACCGCCGAGCGACTGTCCAGCCTCGTCGCCGGTGA  
CGTTATCACCTACGACCACGACAAGTCCGAGAAGGCAGAAGTGCTGTGCGGCGGAGTAAT  
CAGCGTGGTTCGCCGGCGTCTATCAGGTGCTGGTGCCTTTCAGCGTCAGCGCCCCGGCAA  
GCTGCTGGACGTGAAGGCTGGCGCCATCCGCGCCGTCTAAGCTCCGGCTGCTCCGGCTGA  
ATGCCTGGATGAAGCCATCGCCCAGGGCGAGTAAGGCCCGCACGTAATAGGTCTGGCCCT  
GCCGGGCTATTGAGAGCTAGCCATACCATAGGAGGAGTCAACGTGAGCAAGCACAACCC  
CGAACACATCAGCGGCCCGGTACGCAGCGTGAGCGTAGCAAAGTCTCCCGTCGTCTAGGA  
CCTGGGAGACCGCCTGGAATACGCCCTGGCCGTGTGCCAGGAACGCGCCCAGGATATCGA  
CCCCCTGAGCCGCCGGCTCCAGGCTGCCGAGGGGGCACGCCGCTGGGAGATCGACGCGAT  
TCGCTGCCATCAGGCGACGATCAGTCTACTCCAGAACGACTTGAACGCAGCGCATGATGC  
CCACGAGGCACAAGAGCGCCGCGCTCGCAAGGCAACCATCATGGCCTGGGTATGCCTGCT  
GACCGCAGGTTTGGCCGTCACCCTGAAGCTGGCAGGAGTCTGGCCATGCAGTGCCAAGTC  
CTTTACACGAACCTCGCAACGGACATGTTTCAGCGTACCGGGCTCCAGGTGACCCCGGAG  
ATGCGCCGCGTGGCCAAGAGCCGGGCATTCGCCACTCCTATACGCCAAGAAACAGGCT  
TCGGGCGGGACTTACACCGCCCGTGTGAGCGGCGTACCTGTGACGGTGGTAAGGTGGAG  
GTGCGCCTGGATAACGTGGAGCGCGTACGACCTGTGACTATGCCGATCTAGAGGCGCTG  
GTAGCGGCCAGCTTGTGCTAGGCCGACGCGAAGCGCGACGACGAGTACGAAAAGCTGCTG  
CTCAAGGCATTCCCGCTGGTATCGAAGAAGGCCGGCCCGCTGTCCGCCAAGGACTTCGAG  
GGACGTCTGCAGGATCTGCTCGAAACCAAGCTGGCGGTAACCGTGGCCTGCGCGATGCC  
GGAATAGAGAAGGACGTACCGCTGCACAGCCGGGTACGGAAGTTTGGCGACCTGAATAAC  
GAGATGGGCGCTAAACTGTTTCAGCCTCCAGCAGGGCTTGACCCGGCTGGTGGAGGTAGGT  
CAACGGGCCGGCCTGTATTGGGACGACGCGGAGACTCAGCGATTGCTGACGGTGGGCCCC  
ACCAAGGCCGTCTGTCCGCTCAGCAGCAAGCTGACCGACGTGGGGTATGCCTCCCGTGCT

TCCGTGGCGAAGGCTGAGGCCGAGGCTCGTGAGCGGTGCAAGGCGGGCGGCTAAAGACACC  
TGGCAGGCAGCACCTTCGCAGCCACCATCGCCGGCGGCGTCTGTGGGCAGCGTGCTGACG  
TACCTGCTCGTCTAAGCGACCGGGGCTACTCCGGGGTCAAATCCGAGGGCGTTCCTAGA  
GCGCCCTCTCGTGTGAGTCTGGAGGATCGCGAACATGCAATACTACTGCACGCATTACAA  
CGGATACCGCTTCGGCGTCGAGCTGGAGGACGAAGCCGTGTTCCCGTGCATCAACGGCAA  
GCGGGCGACCTGGGACAAGGTGGCGGCATGTGCCAGTAGCCTTGTGCATTACATGGCGCA  
GGACCTGATTGACGTCGGCCAGCGCAAGTTGAGGGAGATCGAAGATGAGCAAGACGAGTC  
TGTACCCGCTGAACCTGCATCCCGGCCTGATACAGATCAAGACGATCCACGTATTCAGAA  
TCCAGGCGGCGAAGGACGAGCCGAACCTGGTGGCAGTGGTACCTGTGGCAGCGGAAGTACC  
ACACACTCCGCGACAGCCTGGACACGGCGGGGAACTGAGTGCAGATATCGCCGAGTATG  
TCCACCGCCTCCGCCGGAATGGCTGTCGAGATAGGGACATCTGGCGTAACAAGGGCGGCG  
TGCTGGCCCTCTGTGGCTTCAGCCTCGCCGTCGAGATGATTGGCTCCTGCCTCGTGGTGG  
ACAACGAACCTGCGCGCCCTGTGCGTGGACGACCATAACAAGGGGCAGGGTATCGGCGCTG  
AGCTGGTGCAGCGCAGCCGAGCTGGCAGGTGCCGAGCGCCTGAGTTGCTTCGAATTCCTGG  
AACCGTTCTACGCCGGCTTGGGCTGGCGCTCCGAGCGCCGCGAGGCAAACCTGGACTGAAG  
GTCAGCCGGTCTGTGCTGCACATGAGGGCGCCCGGTTATGACGCATGAGGTGATGACATGG  
CTTATCGGAACAAACCGCTGGTCATCGGATCCGACTTCAGTCTGGTGGCCCTGGGCGTG  
CTGATAACGCAGGACAACGGCGGCCCGCCTACGGTACCCGCATGACCTGGCGCCTCCAGG  
ACATGTTTCGAGGCCCGAGGCGTGCGGCGTCCCCTGTGGGAGGAGTGGTATCAATGGCAGT  
GTGCCGCGACTCCTGGCTGAAGCAGACGCGTGCCTCGCCGTAGGCCAGACTGGCAGGGT  
CCGGCACGCTTGGGATGCAAGAGCATGAGACGGGGCCGGAGCAACATGACCGTCAAGAC  
TCTGCCTGACCGTTGGGTGGCGTATTGCTACTCCAGCCAGGAAGGTGGCGTGGTTGAGAA  
AACGCATGTGAGGAGGGTGAATGCGCGGATCAAGAACGCTTTATGGCCAGGCCCGAGGA  
TGCCTCGGACTGGACGCGGGCCGACTGCTTTCAGTCGCTCTATGGTTTGCTGCTGTCCAA  
GGGCATCGACTAAAACGTGATGACCCAGGGCTGCCGCTACTGTACAGCGGAAGGCAGCA  
TCGGCTTATCTTCCCTACCTACGCGGGCTGGAGTGGGCGCGCTACTGCCGACCAAAATCC  
CAAGTGGGTGGGCTACGGGTATCCCGCCCCGATTACCCTGGATGGCCCCAGGAATTATC  
AATGGGCAGGCCATGGGTGCTGACGGAAGAATACTTGTCCGGCGCTGAGGGTGCGGTGGGC  
CTGTACCGAAGTCTTGGCTGTCCGTGTAACGGTACAAGGCTGCGCGTCAGGCTGGCGGC  
GATCATGTTGCAGCAGACCTCTAAGCGCGCCTTCATCTTCTTGGATGGCGACCCGGCAGG  
TGTCCGTGGTACTGCAGGCGTGATGCGCCGGCTCCGCTCCCTGCTTATCGAAGGCCAAGT  
AATACCTACGCCGGACGGGCTCGACCCCAAAGACCTGACCAGCGAGCAGATAAAGGAGCCT  
AGTAATTGGACGTATTGACGCTACACGCACTGAGTGACAGGGACCGCTTCCGCACGTTGC  
GGAGTTTGGTGCCTGAAGGGATGATGGGGCAGGAGACGTGCTTTGCCATCGACAGGATCG  
AGCAATACTGGAAGGTCTACCCAGCGCATCAGCAGGTGGAACCGCAGGCGCTGCGCGAAC  
TGATCAAGCTGCGAGGTGGCTACCAACCGGAAAACTGGCGGTAGTCCTGAACGTCGTCA  
ACCAACTGGACAAGCCGGTAGAGCCGGACTCGCTACAGGGCGTCTGTGCCAGCTCAACG  
AGCTGAATTTTTCAGGGCGGGTGGATGCCCTCCTGGCGCAGTACAACCAGGGCGAGTACA  
TCGACTTAGCGTATGAGCTGCGCCGGCTGAGGGACGATGCCCTGCGCCGCGAAGGGGTCC  
GCACGCCGACTGACTACGTGACGGACGACGTGTTTCGATATCCTGGCCGAGGAGCAGGGTG  
ACCACGGCATCAAGCTGCTGGGGCTGGTGTACCAGCGTATATGAAGGGCCTCCACGCCG  
GGCCTCGGTGCTGGTGGCTACGCCACCGGACGCGGGCAAGACCTCGTTCATGGCCTGGA  
TCGCCGTAAACATTGCACCGCAGCTCAAGCGGTACTTCGACCCAGGCCGGCCATCCTAT  
GGCTGAATAACGAGGGCAAGGGGCGGCGGATCAAGCCGCGCCTGTACTCGGCGGCCTTGG  
GCATGGCCGTGCGCGAGATTCTTACCGTGGACCCGGAAGAGGTACGCAAGCAGTACGCCG  
ACAAGATCGGCGGCGACTCCGAGCTGATTGCGATAAAGGACTTCCATGGTGGGTCCCTGG  
CCCAGGCCGAGCAGGTCATCGACGCGATGAAGCCGGCGGTGGTGTGTTTTGGGACATGATGG  
CTCACGTCAAGGGTGGCCAGCGCAAGGACCAGAACCGCACCGACGAGAAGGAGTATAAGG  
TGGCCGTGCTCCGCGAGATGGCTCTGCGCCTCGACTTCATCAGCTTTATGACGTGGCAGC  
TCAGTAACGATGGCCACGACCAGTTGTTCCCGCCGAAGTTCTGCCTCAAGGATTCGAAGA  
CAGCGGTACAGGGCGCCGTGGATGTGCAAATCCAACCTGGGCCGTCTCAACGGTGCAGGATC  
AACAGGTCATGCGTGGCCTGTCCCTGCCGAAGGACAAGTTCCAGATGGACGGGAAGCCTT  
CGAACGTGAAGGCGATGATTAACCTTCGACGCCGCTCGGTGTCGTTTCTTTGAGAGTGTAG  
ACCATGCAAGCTAATCATAGCCGGGTGCTCGAAGGCACCAAAGAAATTTACTGGGTTC  
ATTGCACTTCCGACCGGGGTCAAGGCCCTGTTGCTGCGCCTGTACTCTGATGCACGGGCC  
AACGAGGGCGTCGCCCGGCCGGTGGGTTCCCTCGCGACCTCATGCATGGCGCCACTGCA  
AAGGAGTTGGACATCGCCCTGTACGGCATGACGCAGTATCACGCTGAAGTGCTCATCACC

AGCGTGCTTCCCTACCCTGGACCCGCGCTTCGTCCGGGAGGGTTGCTGCAGTTCGGAGTAC  
GCCGACGCAGGTGAGGGCGGTAACCTCAAGGGCGTGCTGTCCCTCGTAGGCTGCCGTGGC  
CTGGAGGGCATGGACGTGGATTTAACGACTACGACGCCGACAGCCTTGGCCGGGTGATG  
GAGTCGTTTCGACATCACCATCAACCAGGTAGGCATTGCGTACAACTGGCCCCGACCCCGAA  
GGCGACCCGCGCCTGGGTGTGTACCTGCATAAAGGACGTTACCTGGGGCGTGAAAAAGGAA  
GTCGGTGCAGGCTCAGGTCTGCCGCAACGATGCGAGAAAATGCGAGCCTATGCCGCGTAC  
TACGGATGGGGTAACGTGTGATGAGCAAGCGCGACGTGGTAATGGATAACGAGAAAGGCA  
TCTGGCGTGGTGTGACCAGAACGACAAGGCCGTCGAGGCCTTCATCAAGAAGAACGGGT  
ACGCGATCGTCGAGCCTAAAATCGACGGGTGCCGTGCCATCGTCGGTGCGCATGGCGCGG  
TGTCCCGCAGCGGGCGCCGCTTCCCTTGCCCTGGACGGCCTGGAGGATCGCATCATCGCGA  
AACTGTACAGTCCGGCCTGGACTCCGGTCTGGTGCTGGACTGTGAGATGTACCTGGAAT  
GCATGCCCTTCAGTGAGGCGACCGGGCGTATGGCCCCGAAGACCCAGCTGACCGAGGCCG  
AGCTGAAGTGCCTGCACTTCGCGGTATTCGGCGCCACCCATATCGGCGTGCTCCGCAAGT  
CGCGCAAGTCCCACCCCGTGTACAATGAGCGCCGCGCCATGGTCCGCAGCCTCATGGAAG  
ATTGCCGGCGGGGCGACACCCCGTACTTCTTCCAGGTAGCCGCAACAATCCTGCAGTTCTA  
TGGAGGCGGTACTCCGCTGGTACGGCTACCACCGCTCCATGGGCGTCGAGGGGTTCGATGG  
GGAAAGACCCGAGCCTGACCTACCGAAACGGCAAGGTTGCTGGCTGCTACAAGCGCAAGC  
CGGAGATCACCGTGGACGGGCGTACCGTCCGGTACGTGATGGGCAAGACTGGCAAGAACG  
TGGGCCGCGTCGTGGGCTACCGTGTGGAGCTGGAAGATGGTTCGGCACCGTGGCCGCCA  
CCGGCCTAAACGAGGAGCACATTCAGCTCCTCACCTGCGCCCACCTCAACGCCACATCG  
ACGAGGCCATGACGAACTACGGTTCGATCGTCGAGGTCTCCACGATGGAGCGCTCGACCA  
GCACCCTCCGCCATCCCAGCTTCAGTCGCTTCCGCGACCTGGCCAGTAACCCTGGAGTGA  
AGGTATGAAGATTCGAAAGTCCCATAACCGCAACTACCCGGAAGATATGGCATAACCACG  
CACCAACCGGGTTTGGCTGCTGTATCGGAAGTACGTCATGGGTTCCGTGTTTCATCAGCCA  
GGACGGAACATTCGCGCATCTGCGTCATAGCAGGGACTTGGGACCACGTTGGGTCCGACGT  
TTGGCATCATGCGCGGGACATCCAATACCTCGGGGCGGTCGCCGTAAGTTGCACCGGGT  
CATGCGACGGCTGCGTCGCAATCTGCGACAGGTAGGTGTCAAAGTATGAGAATGCCACC  
GAGGAAGAACGTATGATCCGCTGCTTGTCTGCGGGATATCCACGTACCCTTGTGCCTGCTG  
TTCCCCGGCCTCCGCACCAAGACCCACATGGACCTTCAAGCGGAAGAGCTGTTCGATTG  
ATTGACTACGACCATGCGAAGCTGGGCCGTATGGGACTCTGCCACGCGGTCTCCCTGTAC  
CAACTGACCATATGGGGACCTGAAGGTATGTTCCGCTACCTGATGCAGGAGATTCCCCGC  
CGTGTGCTGGAAGGTCTGCTGGTCAAGGCGCAGCAGTACAGTCAAAGCAACTGGTACAGC  
AAATGACGACTATCCGAATCCTCGACCTCGAAACCGAGAGCTACGAGCACAAGGGGCGCA  
AGGCGTCGCCCTTTGACCCCGCAACTACATCGTCATGGCCGGCTGGCGGGACGATCTCG  
ACGGCAAGGTCCGCCAGAAGGTGGAACATCGCTTCCGCAGCCGGGCCGAAGCCGAAGACC  
CGAACAACCGCTGGTTAAACGTTCGACGGCGTGGACGTGATCGAAGCTCACAATGCCATGT  
TCGAATCGCACTGGTTCTTACCCGCTACCGGGACGAGTACCTGGCCTTCCCTGCGACGCG  
GGGGCCGGGTCTGGTGTACCCAGCAGGCCGAGTATCTGCTGAGTCATCAGACGTGGTTGT  
ACCCGGCACTCGACGAGCTGGCTTCGAAGTACGGCGGCACCCACAAGGTGGACGGCATCA  
AGATGCTGTGGGACCAGGGCGTGCTCACCTCAGAGATGAACCAGGACCTGCTGAGCGAGT  
ACCTGTCCGGCCCCTGCGCTGATATCGAGAACACCGCCCTCGTATTCGACGGCCAGTTGA  
TGAAGCTTACGCCCCGTGGTATGTGGGCAGGTTAGCTGGAGCGCTGCGAGGCCCTGATCG  
GTTTCTCGGCGATGGAGTGCGCCGGCCTGAAGGTGGACCTTGAAGTCGCCAACGTGAACC  
ACGCCAAGCAACTGGAAGAGGTTGCCGGGATCGAGGCTGAGCTGAAGAATCTGATGCCCCG  
ACTTCCCGGAATACTTCGAGTTCAAGTATAACCACCTGTATCATGAGCGCATGGCTCT  
ACGGCGGCGAAGTGCCGTACAAGGGCCGGGTGCCACCCGAAGATGGCCGGTTGGAGAAAG  
TCGACTTCGTGCGCTTCGGTACGGCCAAGCGGGGGACACCAATCGAGAGTACCTCGGTGC  
GGGTCCCCTCAGCCAGGTGATCCTCGACGACGACCAGTGGAAGTACCGGCCATCACCG  
AGCTGGCGACCAGGTACGGCCCCGTCATCACGTTCTCCTCCGGCAAGAACAAGGGCAGCA  
CCAAGGTGTTCCGCAAGGACACGCACATTCCGGGGACCAATTGGGATGACGACCAGCGAT  
TCCGGTTCCCCGGCCTGATCAACGTGACCAACCTGCCGGAAGTAGTGCGTGAGAAATTCC  
TGGGCAAACGCCCAGGTTCCAGTGCGCCCTCACCTGGCGGATGGATCGCCCGTGTTC  
GCTCCAGCGGTGACGCCCTCAAGGCTCTGGAGAAACAGGGCTTCGAGGCGGCCAAGCTGT  
TGATGCGCCTGGTTCGAGCTGCACAAGGACAACTCCTCGTTCTACATCACCCATACCTACA  
ACAAGGATGGGACGATTATGGACACGAAGGGGATGCTCAAGTACGTGGACGACGACGGTA  
TCATCCACCATTCGCTGAATACGACGGCGACGGCGACAACGCGCCTGTAGTCCAGCCGCC  
CGAACCTCCAGCAGTTCCCGTTCGAAGAACGAGGACGACCCGGAAGCCGGCAGCCGCGTGA

ATGAGATGTTTCGTGTGTCGCTTCGGCGCGGATGGGATGATCGGGCAGACCGACTATACCG  
CCCTGGAGGTGGTGTATCTTGGCGGGCGCTGTGCAAGGATCGGAACCTCCTGGCGAAACTGA  
TGGTCGGCACTGACATGCACTTGTACCGCCTGGCAGGGAAGCACACCAACTGGAACGGGT  
TCGACAACGACCAGCTCGTGGCCATCAAGAAGGACCCCAACTACGCGTGGCACGGTCGCA  
TGATGCAGGCTCGGAAGAACATCAAGCACAAGGCATTTTCGGCGCAGTACGGCGCGAGCG  
CTGCTTGTATCGCATTCAACACCGGCTGTACGCTGGAAGAGGGCCAGGAATTCCTGGACA  
ACGAGGCGGGCCCTGTTCCCAGAGTCCATCGCATTCCGGCAGATCGTCCGCGACAGTGCAG  
AGGCCACCAGGCTCGTCATGTACAAGGCCGAGGACCAGATGCCGGCAGGGCGCCTTCAGCG  
AGATGGGGCCGGATGGCAACTGGCGCCAGTACCGCCGGGGATTCTGGCAAGCGCCGGGTG  
GCACCTGCTACAGCTTCCGCCAACAGGAGCGCTGGGACAAGTAACAGCGCAAGACGGTCA  
TGGACTTCAAGGACACGCAGATCGCCAACTACTGGAACCAGGGCGAGGCTGGGTTCATGA  
TGAATGTGAGCGTAGGGCGCATCTTCCGTTGGATGCTGCATCGCCAGGATTCATGGTTA  
CCGAGTTCCTGATCAACAACGTACACGATGCCGTCTACACCGACTGCCACCATGACACCG  
CCGCCGAGGTCAACAATGGCCTGCGCCACAGCATGGCCGACGCTGCCCGCTACATGAGCG  
AGCGCCTGAGCTACGACATCGCCGACGTTCCGTTCCCGGCAGTGGGTGAGACGGGGCGGG  
TCATGTTCAATATGGAGGTGATCCAGTGAAAGAACTACACCCGCTGCACACGCTTGAGTT  
CGTCAAGACATTCTGGACCGGGCCGGGTTCAGCCGTGATTACGCCGTACGGGCCGCAC  
CACCGGCATTGCTCTACAGGCCATTGGCATGGCGCTGTCCCATCCGAGGGAAACTTTGAC  
GTTTCGTGGACCACCCGGACGGCAGCGGGGCAGCACTGGTGGCCAGCATTGAAACCATACT  
GGCGACCTTGGGCTACAAGAACGTCTCGTTTCGACCCACAACCCGTGCCGATGGGCGCAG  
CGTGAGCATCGTCTTCAAGACGCTGCCGAGCGACTGATGACCCTTCCCTACTCCGGCCTT  
AAATCTTCATCCGACACGAGAGAGAACACGCATGACTCAACAACCTAACGCTCTGCAAGG  
CGGCCTCGCCCTGGCCAACAAGGCTGCCGAGACCGCAACCATCGACATGTCCGAAAGCTC  
CACCGGCGGTGGCGGGCGGTTCGCATCTTCCCGGGCGGGCACCGCCATGGGCCTCTTCTGCAT  
GTACATGGAGCTGGGGGACCTCGTCAAGGAATTACCGGGCAAGCTAAAGAATCCGGCGCC  
TCAAATCCGCATGGGCTTCGCATTGTGGGGCGACGTGAACCCGCAGGCCGGTAACCCGCA  
GAGCCGCTCGGACGACCCGTTCCACACCCACGCGGCCGACGGCTCGGTCAAGCCCGGCCT  
GTTCCGTGCCTTCGAGATGACCCTCGGCAACAACGAAAAGTCCAAGACCAAGCTGGCCTT  
CGACAAGATGAACTGGAGCGGGCAGCATACCCACTTCGCTCAGACGCTCGGCCACGCGTT  
CATCATCCCGATTAAGCGCACCAAGATCACCAAGGGCAACAACGCCGGTAAGGAACCCAA  
CGACATGGATTGGGGCGACATCATTAAAGCCCTATAACCCGGTTCGATGGCAGCCCGTATAA  
CGTGCCGGAACCTGCCTATGGTCCATTGTCAGTATTCTTCTTCGACGGGCCGAACAAGGA  
GACCTGGGACGCCCTGTATATCGAGGGCACCTCGGACAACGGCAAGTCAAAGAACTTCTT  
GCAAGAGACCATGCGCTCGGCCACCAACCTTCCCGGCTCAGCCCTGCACATCATGTTGGG  
CGGCGGCAGCAGTCTGATCATCAAGCCAACGAGCCAGGCCGAGGCAGCAACCTGCCGGC  
AGTGCCCAACGTGGCCGCCGATGCAGGCGTAGCAGCAGCCCTGCCGTCTTGGCAGTCCC  
GCAGGCAGTGGCTCAGGCGACCCCAAGCGTGCACCCAGGTGGCGAATGTGGCTGCCCTGT  
GGGAGGTACTGCCGAGGCGCAGAACGTGCTGCCTGACGTCCCGCAGGTGGCCAGGTGGC  
GCATCCGGCACCAAGTCCATGTGCCGTCCGTCCCGGTAGTCACGGAAGTACCGCGGGTTTA  
ATGCGGCTCCCATCGGAAGAGTTCCTGTGAGGACTATCCGAGCAGTTCGACCGTACCATG  
GCAGGCGGGATGTTGGTGTGTGACGCCGACGTTCCCGCTTACGTGGCTTCGGCTACGGCA  
AAGACCCTGGACACTGCGCTCCGGCGATTCTGGAAGATCATACTGGAGCAGCAGTTCCTG  
GCGCACTGTACAGGGATACGGGTCCACCTCACGGCAGCAGGTGAGGCTAAGGCGTACCGC  
GACGTGTATCCGACCATGAAACCCTGCCAGGTCCAGCGCAAGGGGAAGGCAAAGCCCGCG  
CTGCTGGAGCCGCTGCCGGCGGGCTGTGGCCGACGTGCATGAACGAGGCGGGCCCGCTGAA  
GGGATCGACGTTATCTTGCACACGTTCTTCGAGGGCGGATGACGGCAGAATGATGGATGCC  
TACGCCATGCAGGACAAGGCCATCATCCAATCCGACGACAAGGACTTGCCGGATGACGATC  
TACCCGTATTGGGAGATCGATACAGCGTGTGTGAGCAGGATCGACGGGGGCTTCAGCTAC  
CTCAAGGAGGCGTATACGCCGTCCGGTCAGTTCAAGCTCAGAGGGCACGGACGCAAGTTC  
ATCCTGGCGCAGTGGCTCGGCCTGGATACTGCTGACAACATCCGAGGAATCGATCGATT  
AACGGTAAGCTCTGCGGGATGGAGACGGCCTTCGATATCCTCCACCCGTTACCGGACGAG  
GACGAGGCCATCGACATGATACTGGAGGCGTACGCCAACATTAAGCAAAAACCCGCTGGCA  
GAGGCCGAGGTGCTGTGGATGCGCCGAACGCCTACCGACAATGCAGCGCAGTACCTGTTA  
AGCCGAGACCTTCGTCCGGCCTTCCGACAGTGGATCATCGATCTGGAAGCCTACCACGAG  
GCGCTGCTCCAGAAGCGGAGGGAGAGTGACTATGACGAGTGAGCCGAAGGTCTACCAGAT  
ACCCCGCAGCCAACGGAGCACCTTACCCTGGAGCTCTGGGCTGAGCAGGGCAAGCTATG  
CCCGCTCTGCGGTAACCCATCGATATCAGCGTGAAGGACGAGGCGGTGATGGACCACGA

CCACGAGACGGGGCTGGTGCGGGGCGTCCTGCATCGATCCTGTAACACCGCAGAAGGCAA  
GATCACGAACGCGGGCGGGTTCCTGGGGATGCAAGTCGATGAAATACACCGACATCATCCC  
CTACCTTCGTGCCCTCCTGACGTACCTGGAGGAGCCGAAGCATCCGCTGATCTACCCCCT  
GCACAAGACCGACGAGGAGAAACACGAAGCGAAGCTGGCCAAGCCCTGGCAGGCAGCCGC  
CAAACGCAAGGCGGCGATGGCCGTCGCAAGGCACAACGCGAGGAACGTATGAGCAAACCTC  
CGAAGCAATTCACCAATGAGTACCTGCGCAACGTCTATGCCGAGCTGGGTCTCAAGAAA  
GGCGCCGAGCATCTGACCAGGCATTTCGCGCTTCGGCGAAGTGAGCCGCCAGTGCTTCCGC  
AACTGCTGCATCAAGCTGGGCTTCCACGACAGCAGGACACGCGGCACGTACGCCACGAAG  
GGCGCTCTGCACTGGCTGGCCCGAAAGGCCGCCGAGGTAGTGCGCAAGTTCCTGGCGCC  
GTGGGCAACGTGGTTGGCCAGGGTCCGAAGGTAAGTACTGAGCCTGGACATCGAGACCTCGCT  
ATCGAGGGTTGGGTCTGGTTCGCTCTGGAAGCAGACCGTTGGCCTCAACCAGATCAAGCGG  
GACTGGACCATTCTGTCTGTTCTGCGCGAAGTGGATTACAGCGACGAGGTGATCTACATG  
GACTGCCAAGGTGATCCCTCGGACGACATTCACATGCTGGTTCGCTCTGCATAATCTGCTG  
GACGAGGCCGAGACCATCATCGTCCAGAACGGCAAGCGCTTCGACGTACCCAAGATCAAC  
GCCCGTTCTTCCTGAACAAAATGCCGCCGCCGCGACCGTTCAAGGTGATCGACACCTTG  
ATCATCGCCAAGCAGCAGATCGTGTTCCTAGCCGCAAGCTGGAGTACATGACCCACAAG  
GCGTGCACCATCAAGAACTCCTCCAAGGCAAGTTCGCCGAGTCGACCTGTGGGCAGCC  
TGCCTCCAGGACAACCCGGAAGCCTGGGAGGAGATGCGCCTGTACAACATTGACGACGGA  
CGGTTCGATGGAGGAGCTGTACATCCTGATGCTCCCGTGGTTCGTGGGCCATCCCAACATG  
GCCGTGTAATCAACGACGCCGAGCCGACCATCCGATGCCCGAAGTGTGGCGACACGGAA  
GTCAAGCGAGAAGGCTGGGTGCATACGCAGACCCGGCAAGTACTAGCACTATCACTGGGGC  
GGATGCGGTGGCTGGAGCCGAGGGCGGTACACCCGCAACACCTCGGAACACCGCAATGCC  
CTGCTGAGCAACTAAGGAGACACCATGATCGTTCGACAAGTCGTATGAGGTCGCTCTAGCT  
GAGCGCTACAAGACGGGCGCCGCCCTTGACGAACGCAAGGTTCGGCAAACCTCCCGATGCAC  
CTGGTGGTTCGATGGCTTCCCGCTGCTCAGGCGGGAGCTTGCCCGCATGATGCAGTGGGCC  
GCCGAGGTCAAGGGGTACAAGCCGCACGACTGGAAGAAGATGTTCGGTTGGCGAGTTCAAG  
GCCGCACAGCATCGGCGCGAGTCCAATCGCCTGCTGGACGGGCCGCTGGATGACGAGTCG  
GGCCTGATGCACCTCGTGCATGAGGCTTGCAACGCAATGGCTGCCGCCGAGGTGGCCCTG  
ATGGATCGGGAGAGAGGCAATGAGTAAAATCTGTTGGTGTACCCGACTGCACGAGACCGA  
TGAAGGTGTTTCGGGTCAACTGGGCCTTCAACGAGCGGGGCATCGGGGTCAACTACGTCAC  
AGCGTACATCACGCCGGCGATGGTTCAGCCATCGGGACTGGAGCGATGTCATACTGCCGGA  
CATTCTCCGGGAGATGGCGGAGCGCCTGGAGCTGGAAGTGAAGCTGGTGGAACTGCGCTG  
GTTCCGCGCTGAGATTCTGAGCTGCGGGGAATGGCATGACTACCGAGCGGTGACGCTGAA  
TGGGGCGGTTAGCCTGGCCGAGGCCGAGTGGGGTCCCGAGGATATCGGGCGCGTAATCGA  
AAGACGATAGGAGACGGAATGGACGTGATACAGCAGCAGATCGCCACGAAGAGGCCTTG  
GTCGGGGCGGCGCAGAATGACGCCCGCATTGCATTGGAAAAGGCGATTGCCCAAGGGTCC  
ATCGACCGCATCCGGAGGGCGCGTATCATGTTGATGCGGATGCTCTACATCGTGACCGAA  
GCGATCTTCGCCACCAGGAAGCGAAGGCGGCGGGGCCGAGCGAAGCTACGTCACCTG  
CTGCGGATCATCGGCGCCTAGGACCTCGCCGTCATGGCGCTGCGGGCTGGGCTGTTCGATG  
CTCATCAACTACCCAACGATCAGAGCGACGAAGTATTACACCCAAATGGGCAAGATGCTC  
TGTCGCGAGATCGAAGTGCGGTTGGCCTTCAAGGTCAACCATCCCTATTACGACCGGACG  
CTGGACTACCTCAAGACCAGCAGGACTCGCATCGTCCGGCACATCCCGAAGACGATGGAC  
GCTCTTCTGGAAGCGGTGCTGCCCGAAGAGGCGCGCATCCACCTGACCGATGGAGACTAT  
CTCCGCCTGCGAAAGTTCATCGGCGATCCGCTCATCCAGTTCGGCCTATTTCGAGCCGAAC  
CGGTTTGTAGGGCGAGGCCGTACGAGTGTCCACCTGGAGCCGTCGCCGGAGGCCAAGGAG  
TTCCTACAGGACCCATCGGCGGCAATGACCTGGGGCGGCCAGGGCGTATCGTGATGCTG  
GCCCGGCGAGACCCTGGCAGGACTGGTTCGATGGAGGCTACTACAGCGCCAAGGCGCAG  
AAGCACCACGTACTGGTTCGACGCACCAAGCACCAGACCAGGCGGGCACGGCAGATGCAT  
CTCCGCCACCTGGGCCAGGACAAGATGCCCCGAGTCTACGAGGCGGTTCGACGTGCTGCAA  
TCGGTAGCCTACGAGATGAATCACGACGTGTACGAGATCATCGAGCGGTCTTCACCTCC  
GGTGGCGGCGTGCTGGGCCTCCCCAGCGCACGTACCCGGACGAGCCGGAGTTCCCGCTC  
GGCGACGAGGGGGCCAAGGAGAATGCCAGTAAGGAAGAACTGGAGGCCTTCAACCGTTGG  
AAACGATCCGTCCACCGGTGGTACTCCGGGGAGCGAGAGCATAACAGCCAAGCTTCGCGAA  
TTTGCTGCACTCTACTGAGTTGTTTCGAGAGCATCATGGCAAGGCAGTGTATTTCCCGATG  
CACGTTGACTCCCGTGGCCGCATGTAATATTGGGGCACACCCGGATCCCAAGGGTCCGAC  
ATCGCCAAGGCCTGTCTGCGCTTCCGCGAGAAGCGAGTGTCTCGACAAGCGCGGACTGTAC  
TGGATCAAGGTCCACGTCGCCAACTCCCTCGGATGCGATAAGGTGTACTTCGACGACCGG

GCAGCCTGGGTCGATGAGCGATGGGATGACTTCCAGCGAGCGCTCGACGAGGGGCGGAG  
AACTATTCGAGTCTCTTTCCCGAAGCCGAGTCGCCCTGTGCGCCATCGCAGGTCTGCTG  
GAGCTGCGGGCGGCTTACGCCTCCAGCAGCCCCGAAGGGTATGCCAGCGGCTTCATCGTC  
CACATGGACGCCACCGGCTCCGGTCTCCAGCACTACTCGGCTATTCTCCGAGATGAGATC  
GGCGGAGCCTACGTCAACCTCTTACCTCCTGGACTTTCCAAAGCTGACATCTACACCCCA  
GTGCTCGGACTCGTTAATGAGGCTCTGGATAGAGACTGAGCGGAAGGCGCGGATGGCGAG  
GCGCGGGGTTATGCCCTTCTATGGGAAAAAGCTGGTCTAACGCGGAACCTGACCAAGAGG  
CCCTGCATGACGCTGGTGTACGGCACAACGTTCAAGGGCGTTGTGGACCACTGCCTGGAG  
TACCTCGACGAGTCCGGCGTGGAGATTCCCGAGGGGGTCCCGTCATAACCACCTGGGAAGC  
TACATGGCGACGCTCATACTGGTCGCAATCCGCGAGACAGTACCATCGGCAGTCTTCGCC  
ATGGAGAGGCTCCAGCGGCTTGCTAAGGCCCTTCCTGACGCATCCAAGGATTTGCACTGG  
ACCACGCCGCTCGGCATGCAGGTCTTCCAGTCCTACCCGAAGACCGAGGAGGTGCGGGTA  
CGGCTGCGAGCCGAGGCTGTGCGAGTACGTGACCCTGTACGAGGCCAAGGACGAGCTAGAC  
CCGCTGCGCAACGCCAACGGCATCGCTCCGAACCTTCGTGCATGGCCTGGACAGAAGCCCC  
CTGGGACTGACGGCCCTGGCCTCTGCGGCAGAGGGAATCCCGACCCAGCCATCCACGAC  
AGCGTGGGGACCTAGGCTGGCGACGTGGACCGGATGCACGTCCACATCAGGAAGCAGTTC  
GTCACCATGTACAGCGGCCCTGCGTGCTCGTAGAGCTGGCTCGACAGCTTGGGGTAGAG  
GCTACCCCGCACCCGTCGGGGATCGTTGAATCGGGAGGCTGAGCGGGACTCCTGGGCGTTC  
TTCTGCTGAGTAGATTATGTCACCCACATAGGAGCAAGTGCATCCGTCCAGAGGCCTCGT  
AGAGGAAGAGGGGTCAGGGAAGACCCAAGAGGAGGAGAAATGAGAGAAGACGACTACCAA  
GGATTCTAGATAGAGTAGAATAACCATCATAGGAGATATGATAGATGGCTACTATGAAGA  
GTAGAGGGCCAATGATTATGTCACGCACAGTGAAGGATCGAGAACAGGCCAAGGGTAAGG  
CCCACCCTGTGACGTTACCTCTCAGCAGATCGAGTGGCTAGAACAGACCTTCTCCGAAC  
ATCAGATCAGTCTGGAACCACGATGGAAGACATCCAGTTTCAGGCAGGCCGCGCGATG  
TGGTGCGGGCTATCCGCCTGCGTCGCCGCGATGCTATCGCAGTGGAGCGTAAAGGATGAA  
CAAGTCACTCTGGCGAGTCCACGCAAAAGCCGGCGCCCTTCCGAACCTGATGGGGCTCTG  
GTGGCTGGCAGTACAGGAGCTGGAAGAGTTCACACTCTTCCGCTCGAAGGAAGAAGCCCT  
GGAAGCTATGCTCGACAATATCGAGGGCAATGATCGGAACGAGCTGCTGGTATTCCGTGA  
TGGCCAACCTGGCCGGCGGAGACTGCATTGTGTTTCGAGGACGATACTCACGTGCGCCCATG  
CGTCACCGCGGAGTGGCAGTACGTTTTGCCACGCTACCGCAATACAGGGCGTGGCGCGAGG  
GTTAATTCGCGAACTGCACCGGCAGGCCGGCTGGGGTCAAATCCCCCTCGTGTGCTGGGG  
CCGTCGCGAGAGCGAAAGCCGGAATACGATCCACTACCGGAGAGCCAAGCCTTATGGGCA  
AGAAAGTGAAAAAGGTGCTGGGCAAGACGATCATCGGTAAACTCGCTGACGGCCTGCTCG  
GCACTGACCTGAGCGGCGCACACCCGATGCCCGAAAGATGGAAGAGCATAAACGCCTCA  
TGCAACAGCAGGCGGACCAGCTCGCAAGAAACCAGCAGGTTGACCTCACCACCGAGAACG  
TGTCGCAGGTGGACCTAGGAGCGATGGCCGATGACAGTGGCACCGGCAATCGAAGACGCC  
GGAATCAGGCAGGCACAGGCGTATCGCAAACCCTCGGTATCAACTACTGACGAGGTACGC  
CATGAAGTCTACCGCAGCAATGCTGTGGGAGAATCTCCGGGATGGGAGCGTGGAGCAGCG  
AGCTATCGAGTTCGCCAAGACCACGCTACCCTACCTGATGGTTCGATCCCATGTCCGGCAG  
CAGAGGAGACGTAGAGCACGACTTCCAATCTGCCGGTGCCTACTCGTCAACAACCTCGC  
CGCATAGCTGGCGCGGTGCTGGTCCCAGCGGGGATTCCGTTCTTCCGTTCCGAAATTAC  
CGATGCGATCCAGCGGGGAGCCGACAGCCGGCACACTGGCATCACCGAAGTGACTGCTGG  
CCTATCCCGCGTGGATCGCAAAGCAACTCAGCGCCTATTCCAGAACGCCTCCCTGGCGGT  
CCTGACGCAGGTGATCAAGCTACTGATCGTGACTGGCAACGCCAGCTATAACCGCAACAG  
CGACGAGGCCACGGTAGTCGCATGGTTCGCTCCGCTCCTACGCGGTGCGCCGAGATGCGAC  
CGGCCTATGGATGGACATCGTGCTCAAGCAGCGCTACAAGTCCAAGGACCTGGACGGGGC  
GTACAAGCAGGACCTGATGCGTGCGCGTCCGAACCTGTGCGGTTTCGGGCAGGGTTGAACA  
CTACACGCATGTTTCAGCGCAAGAAGGGCACGGCGGTGGAATACACCGAGCTGTACCACGA  
GATCGACGGCGTGCGTGTGGGCGAGGAATGCCGCTGGCCTATTCACCTCTGCCTGTACAT  
CGTACCGACCTGGAACCTCGCCCCCGGGGAGCACTACGGTCGAGTCCACGTGCGAGGACTA  
CATCGGCGACTTCGCCAAGCTGTCCATGGTGTGAGCGAGAAGCTCGGCCTGTACGAGGTGGA  
GTCGCTGGAGGTCCTGAACCTCGTGGACGAGGCCAAGGGCGCGGCGGTCGATGACTACCA  
GGACGCTGAGATGGGCGACTACGTGCCGGGTGGCGCGGAGGCCGTCGGGGCCTATGAGCG  
TGGCGACTACACCAAGATGGCTGCTATCCAGCAGAGCCTCCAGGCTGTAGTCGACCGGGT  
GCACCAAGCGTTCATGTACGGCGCCAACCAGCGCGACGCCGACCGCGTACCCGCCCAAGA  
GGTCCGCATCACTACGTAGGAGGCGGAGAACACGCTGGGTGGCACCTACTCGCTGCACGC  
CGAGAATCTCCAGTCGCCCTGGCGTACGGCTGCCGCTCGGAGGTGGATGCTGCGCTGCT

CCAGGGCTTGATCACCAAGCAGCACAAGCCGGCTATCGAGGCGGGCCTCCCAGCCCTTTC  
CCGGTCCGCCGCTTGCAGAGCATGCTCAACGCATCCCAGGTCATCGCAGGCTTGGCCCC  
GATTGCTCAGCTTGACCCACGCATCTCGCTACCGAAGATGATGGACACGATTTGGGCCG  
TTTCAGCGCCGACACCTCGCAGTTCTACAAGAGAGAGGAAGAGCTACAAGGCGAGGCAGA  
ACAGCGGCGCGAGCAGGCCGCGCAGGCACAGGCCGCACAGGAGACCTTGGTTTGGAGGCGC  
TTCCGACCTGACCAACGCCTCGCAGGAGTCTGATAGATGCAACAGAACGAATAGCAACT  
GCCACAGGGCCTCGCTAACCTGGTTGCCAACGTCCCGCCCGCCGCCGACCCGACCCCAAG  
TCATGTGCAGGTGATGCCGAATCCCGTCATCCAGCCGCAGCCCCAGTAGGCGGCGCAGCC  
GGGACAGGCAGGGTCCGCCGAGCAACTGGCTATCCCAGCCAGCAGCCGCAACCCGTTCC  
GACAAGCGCCATGACGCCGCACTACCAGCCGGTAGCGGTGCCCGCCGCTGGCCAACCCGT  
TGTCCCGAAAGCGCCGGCACAGCCGGCTCCGTTAGCTCCTCCGGCTCCGGGCGCAGTTCC  
TCCCAGAACCTTGAGGTTCCGCCGCCGCCCGCATTCACTCCCAACGGAGAGATCGCAGG  
CACCTGGCGGGGAATTCGGAAGGCGACCCGCAACTGGCGCCGTCCATCAGCGATCTGGA  
AGCGTACACCGACAAGATCGACACCGTTCGGGCCCTTCGGTAAGGCCGCCGAGCACCCGGA  
TCCCCGCTTCATCGACGTGCACTATCTGAAAGAAGCGCTGGGCGAGGCCCAAGCGCAGCA  
CGTCATAAACATGGCGAAGGGCGTTCTGACCTATGTGATGCTCAGGCCAGGCAGTCAT  
GAACCAGACCTATGCCGCCGTCGGCGGTGAGGCTCTGCTCAAGCAGGCCGCTAGCGTCTT  
CAAACAACACGCTGACCCGGCTGCCAAGGCCGCCATCGGTGCGCTGATGGACTCGGGCGT  
TGCTCAGTCCATGCAATACGCCGCGAAGCAGATCGGTGACTTCGCTTAAGGCTCCGGTGC  
CGTGGTTAAGGCGACCCGGCCAACCTCTTGGCGCAGCGGCGCCTGCCCTGGCGGCCCTGTC  
CGCTGAGCAGTACCGTGCCGAGGTCTCGAAGCTCCCCTTGAAGGCAGCGGAAGCCGCCTT  
GGCCGCTCTGCGTGAGCGCCGCAAGGCAGGTATGGCGCAGGGTCTCTAACGACCCTGCC  
TACTCCGGCCTTAAACCAACATCCAAAAGAGAAAGAAACGCATGAGCTTTCTGAACGACC  
TGACCTGTCCGAACTACGCGGGCAAGAACGCGGACGTTGACATCCACCTCGAAAAGCACC  
TCGGCATCGTCGACAAGCACTTCGCCTACACCTCCAAGTTCGCGCCGCTGATGAACATCC  
GCGACCTGCGCGGCTCCAACGTCGTCCGCCTGGATCGCCTGGGTAAAGTCAAGTCAAGG  
GCCGTCGTGCCGGCGAATAACTGGAGCGCAGCCGAGTCGTGAACGACAAGGGGAACCTGA  
CCTTTGACACCCTGCTGTACCTCCGCCACCAAGTTCGATCACCAGGACGAGTGGACCCAAT  
CCTTCGACATGCGCAAGGAAGTCGCCGAGCTGGAGGGCCAGGAAGTGGCCCGTAAGTTCG  
ACCAAGCCTGCCTGATCCAGGTGATCAAGGCCGCTGCGGTGATGCACCCGGTGGACCTGG  
AAGATTCTTCTAGCTGGGCGTGCTGGAGAAGCTGGACCTCACCGGCGTCACCTCCCCCA  
AGGAAGCCGCCAACAAGATCGTCCGCATGCACCCGCAAGGTGGTTCGAGTCCATCATCAACC  
GCGACCTCGGCGATGCCGTCTACTCTGAGGGCCTGACTCCGATGTCGCCTCGTGTGTTCA  
GCCTCCTGCTGGAGAACGACAAGCTGATGAACGTCGAGTACCTAGCCACCCGGCGCTACCA  
ACGACTACGTGAAGTCGCGTGTGGCCATCCTCAATGGCGTGAAGGTGCTGGAGACTCCGC  
GCTTCGCCACCGAGGCCATCGCAGCACATCGGCTGGGCCCTCCACGTCAACGGAAGCGCCG  
AGGAAGCCGAGCGCCTGATCGCCCTGTTGCTCCCGAGCAAGACCCTGATCACCGCCAGG  
TGCGCGCGGTTTCAGCCCAAGATGTGGGAAGACCACGATCAGTTTTCTGTTGGGTCCTGGATA  
CCTCCCAGAGGGACAACATCGGTGCCCGTCCGCCGATAACCGCTGCCGCCATCGAACGGA  
ATGGCATCAACGCCTTCGACATCACCGAGTGATGCCGCGAAACCCCGCACTTCGGCGTGG  
GGTTTCTTCAAAGCGTAATGACCCGCGCAGATTCCCTGCGTGGGTTTTTTGAGCTTTAGGA  
CAAACCTATGCTACTACTCGACGAGTGAATGTCAGCCTGGGCAAGATCGGCGAGTTGC  
CGATCCCGAGCATGGATGAAACGTACCCAACCATGGCCATCGCCCCCCCCGAGTTGGAGT  
ACCAGCGCATCCAGTTGCTGACGCAAGGCTGGTGGTTCAACACCTCGTCGAAGCACAAGC  
GAACACCCGATCCCGAGGGCCGTATCAACCTGTCCAAGGACACCTTGGCGTTCTACCCGG  
ATTCCCCGATCTCCAGTGGGACGGCCAGGGAGTGCGCGACGCCAAAACCCGGCGACGACC  
GTATCGGCAAGGTAGTAGAGGGCCGGCTCGTGATGTCCCCTGAGTGGGACCGTATCCCCG  
AGATTGCCAGCTCGTCATAGCGCACCAAGCTGCCCTGGCCGTGTACACTCACGAGCTCG  
GGCCGGGCGAGACGGCGCAGGTCATCGCCAAGGAGTTGCAGGCGTACCAGAACGAACTGA  
GCCGCATGCACACCCGATCCCGCCCCGCTAACACCCAGGCCAAGCGCAGCTTTAGCCGGT  
GGCGGCGCAGCCTGAGGACCTGACCATGAGCTATAAGCAATCCGCGTACCCCAACCTACT  
GACGGGCGTGAGCCACCAGGTGCCGTTTCGAGCGACTGCCAGGGCAGCTCAGCGAGCAGAT  
CAACATGGTGTCCGACCCCGTGTCCGGCCCTTCGCCGCCGTAGCGGTATCGAGCTGATGGC  
AGACCTGCTGTACTGACCAAGCCCTGGCCGAGGCCGTTCCCTGTACCACACCAACCTGGG  
CGGGCGCAACATTGCGATACTGGTGGCGCAGCACCCGGGGCGTGCTATACCTGTTTCGACGA  
GCGGGATGGCCGCTGCTGATGGGGCAGCCGCTGGTCCACGACTACCTCAAAGCCGCCGA  
CTGCCGGCAGCTTCGCGCCGCCACGGTGGCTAATGACCTGTTCAACGGCAACCTGAGCGT



GAAGCCGGAAGCCGACCGCACTGACGTGATGGGCGTGGACCCCAATAAGGCGGGCTGGCT  
CTACATCAAGGCGGGTACAGTATTCGAAGTCGTTCTCCCTGACCATCCAGGTGAAGGACAA  
TGCCACCGGTACGACTTACAGCCAAACGGCCAACTACGTGACGCCGGACAACGCCAGCAC  
CAACCCCAACCTCGCCGAGGCCCGTTCCAGACGAGCGTGGGCTACATCGCGTGGCAGCT  
CTACGGCAAGTTCCTCGGCGCCCCGGAGTACACCCTGCCGAACCTCCACGAAGAAGTACCC  
CAAGGTTGACCCCAACCAGGCTACGGCTACGGTAGCCGGCTATATCAACCAGCGGGGCGT  
GCAGGACCCCTACATCGCCTTCGGGGGCGACGGGGACATCGTGGTTCGAGGGGTCTACCGA  
TATGGGCAACAACACTACGGCATCGCCTCGGGTGGCATGAGCCTCAACGCCACCGCAGACCT  
ACCGGTCTACTGCCGGGTGCGGGTACGCCGGGCACTGGCGTGCAGTTCATGGACTGGTC  
CGTCATGGCCACTGGCTCGACCAAGGCGCCAGTCTATTTGAGTGGGATTCGGCCACCG  
CCGCTGGGGGGAGCGCGCAGCCTACGGGACCGATTGGGTCTTGAAGGAGATGCCCTTGGC  
CATACTGGGACGAGGCGACCAACACCTACTGCTTGAACGAGCTCGACTACGACCGGCG  
CGGCTCCGGCGACGAGGACACGAACCCACGTTCAACTTCGTCACCCGGGGCATCACCGG  
CATGACGATCTTCCCTGGGCAGGCTGGTCTGTCTCAGGAGTACGCCTGTATGTCCGGC  
GAGCAACAACCCGCACCGCTGGTTCAGAAGTCGGCGGGCGGCGCTCAACGACGAAGACCC  
CATCGAGATCGCGTCCCAGGGCAGCCTGACCGAGCCGTACGAGCACGCAGTCACCTCCAA  
CAAGGACTTGAGCGTCTTCGCCAAGAAGTATCAGGCCGTGGTCCCTGGCGACGGTATCGT  
GACCCCGCGAACGGCGGTTCATCAACATTACGACGCAGTACGACCTCGATACCCGAGCGGC  
ACCCGCCGTACAGGCCGTAGCGTGTACTTCGCCGCTGAGCGTGCCCTGCGCTTCATGGG  
CCTGCACGAGATGGCCCCGTGCCATCCACGGACAGCCACTACGTCCCGAGGACGTTAT  
CAGCCACATCCCGAGCTACATGCCAAGGCCTGCAGAGTACATCCAAGCGGGCGGCCTCAAG  
CGGCTACCTCGTGTTCGTCACCAGTACGGCGGACGAGTTGATTTGCCACCAGTACCTGTG  
GCAGGGCAACGAGAAAGTGCAGAACGCATTCCCTCCGCTTGACGCTACGGCACCAGATCAT  
CGGGACCTACTTCACCGGGGACAACCTGATGGTCTTCATCCAGAAGGGTTCAGGAGATAGC  
CCTGGGCGCGATGCACCTGGACAGCCTTCCTGCACGGGAGGGCCTGCAATATCCGAAGTA  
CGACTACTGGCGGCGTATCGAAGCGACTGTGAGGGCGAGCTGGAGCTGACAAAGCAGCA  
TTGGGACCAGATCAAGGACGCCCCCTGCCGTGTACCAGCTACATCCCGTGGCGGGCGCATT  
CATGGAGCACTACCTGCTCGGCGTGAAGCGCGGGACCATACCAAGGTGATCCTCGACGT  
TCCCGAGGCCGTTGCCGGTTCGGTCTACGTGGTGGCTGCGAGTTCTGGTCCAAGGTGGA  
GTTACCCCGCCAGTGCTGGGGGACCACAACGGCCTGCCGATGACCTTGGCCCGTGCAGT  
ACTGCACCGCTACAACGTCAACTTCGGATGGACCGGAGTGTTCCCTGTGGCGCATCAGCGA  
CACGGCCCGGCCAACCAGCCGTGGTACGACACGACGCCTCTACGGCTATTCAGCCGGCA  
ACTCAACGTCCGGCGAGCCGCTGGTGGACAGCGCTGTGGTGGCCGCTGCAGGCCCGGGTCCG  
TATGGCGACCTCCAAGTTCGAGTTGAGCTGCCATAGCCCCCTACGATATGAACGTGCGGTC  
CGTGGAGTACAACCTCAAGTCCAACCAACCTACAGGAAGGTGTGATGGCATTCTGGCTA  
CCACTACTGGCCGCTGGCGGCATGTCCGGCTCTCCAGCAGGGCCTATCCAACAAGGAAGAA  
CGCCGCAAGAACAAGGCCGAGAACAAGGCCCGACTCAAGACGGACCACGACAACCTGGTC  
GCCGCTGCCCGCGACATCGCCAACCTGGGCGTTCATGGGTGCAAGGTACCGCAAGCAGGCC  
GTGGCATCCCAAGTCGCGGCCAAGCGGCAGGGCATGCACGCCGGCGGGAGCGCCTCGGCA  
CAGGCAGGGGCCTTCGGGGTCAAGGGTGCATCCGTAGATGCGGTGGCCCTGGGCATCGAG  
CGCGAGGTGGGCGAGGCCCTGATCCAGATTGACGATAACCTGGACAACCATATGTGGAAC  
CTCGCAGAGCAGGCACACTCCATCCAGGCCAGGCTAAGGCCGGCCTGCTGGGGCAGAAG  
AGCACAACAGCGGGGCAACGCTCCCCGCTGGTCCCGGCTTGATGTCTGCTGGTTCGGTA  
TACGCAAGCCAATACTTCAAGTTCGGCGCCACGCCTAAAGGAGGCAACTGATGGCGGAAT  
CGAACGTGCTTCCCTAGGAGCTTGGGAACAACGTCCGGAAAGACTCAACTCCAGCCGGGCC  
AGAGCGCCCGGCGCATGGTCCGAGACTCCGAGGTCCACTATAGCGGCCCCAGGGTGGGTT  
CGCCATTCTCGACGGCATACTTGGTGCCGGTTCAGCATATCGCTGGCAAGTGGTTCGAGC  
ACAACGTGCAGCAGGAAGTGCTTCGGGGGCGAGCGTGCCCGCATGGCTGGGGAGGCCGACG  
ACGCCGCAAACAGCAACATCCTGGCCAAGCCCTTGGTGAAGGGCGGCTGGCGCAAGCAGG  
GCTACCGCATCGCCAGGCTGACTTCAGCATGAAGAAGCAGCAGTTTATGGCCACCAAGG  
ACCGGGAGATGACTCCCGAGGGGTTCCGAAATCACCTGTCCGAGGAAGCGGCACACGTGC  
TGGACTGGACCGAGGGCATGAACCCCAACGACGCCCTACAGGCGCTGGCCAGCAGCAGA  
CGGCCGAGGAAAACTCTTCGGCATGCAGGCCAAGGCCTACATGGACTGGTCCATTGACC  
AAGCCGCCCGAGGCTTCCGCACCCAGGGTAACAGCATCCTGGCCAAGGCCGTGCAGGCC  
AGGCCACAGGTGACGGGCTGTCCCGGCAGTTGACCCTGGAAGGGGCGGCCTGTTCTACA  
CCAACATCATGACCTCCGAGGACATCCCGCTGCAGGTGCGCGACAAGGTGGGCATGCAGT  
TCCTGGCGGCCAGCCTGGATATGAACCAGCGGGGCATCTACGAGAGTCTGCGCGACGCCG

GCTTCCTCGACGGCATGGCCTTCGACGACCGACGTGCGCTCAATGGCCTCTACGAGAAGT  
CGAAGGCACAGACCCTGGCCAAGGACTCGATGGCCACGCTACGGGCCGACGCGGACTTCC  
AGCAGCGGGTGGCCAACGGCGCCATCACCGACCTTGCCGAGGTCAAGGCGTATTCTCGGG  
TCATGGTGGCGGAAGGCCGCTGGAGCGACGCACAGGCCGGCTCGTTCATGACCAAGGCTA  
TGACCGGGCTGGGCAACGCACAGCGCATGCAGGGCATCATGGCGGCCCTGGAGGCCGGCG  
ACATCAACGCAGTGCACAACCTCGGGACCCACGTTACCGAGCCCCTGGAGCAGTGGGATA  
AGATGCAGGCGGCCAACGGCTCCAGTCTCACCGATCGGTTGGTACAGGGCACGCGACTCG  
GCCTACGCCTCGGGACCTTCCCAAGGACCTACGGCGAGTCCGTTGGCAGCGCGGTCCGCA  
TGATCCAGGCCGCCAAGGAAGGCGAGGCCAACCCGGAGTTGGTCAACACGCTGAACAGCA  
TCTTCGAGCAGGTGGCCTCCGCGCAGGAGATCAACCCATCTGCCGGCAACGTGATGCTCT  
CGGGTATCCCGGAGGCCGAGCAGGGCGCCGTATCCTGGGCACTCAAGCAGATGAAGATGG  
GCATCGCCCCGGCGCAGGCCCTGCGGGAGTTCAGCGCCAACGCGGAAGTCGTCAAGCAGA  
TGGACGAGTTTGAGAAGGTCCAGAACACCAAGGCCTTCAAGGACAACCTCGGCAAGCAGG  
TCAATGTCAAGTTCGTGAACAACATCTTCGGTTCGGGCCCTGGAACATGCTGACCGGAGAGC  
GCGACCTCAGCAACAACGAGGCCGTCCTAAGCATGTACCGCCTTGCAACCATCGACGAGG  
CCAACCTGGGTGGCAAGCGACCGCAAGCACGGAGGACTTCTACCAGCGTCACAGGCCGGG  
ATGCTCTGCTGGAGATCGCCGCCGCCAACGTCAGCAACCCGGACTATCCAGGTCGGTGAGT  
CCC GCGACCTCAAGGAGGGGGAGCTGTT CAGCCGCCGCGACAGCGCGCCGCTGATCCTGC  
CGATACGCACGACCGCCGAGCAGCTATTCGGCAACAACGACACCGAGACCGTCGGCGCAG  
TCCTGGCCGAGCAGCACAAGCCG CAGGTTGAGGTCTCTCTTGCTACAAGTCCGTGGTGG  
TGTTTGAGTACGACCGCACCAAGTGGCAGCCTACTCGCCGTCGAGTACGACGAGAACGGGG  
TGGCCCTGGACCGTACGCGGGGCGATCCACAGGCCGTGGGTAAACGAAGTGCTCAATCGCA  
ACTCCGACAAGCTGAACGCTAACAGGGGGCGCCGAGTATGGGGCCAACGTCAAGGTCAGCG  
GCAAGGACATTCGCATGAACGGCGGCAACAGCGCCGGCATGTTGAAGCAGGATGTGTTCA  
ACTGGCGTAAGGAGCTGGCACTGTTTCGAGGCCTATCGAGGGGAGGCGTACAAGGTTGCCG  
ACTGTTATAGCGTGGGCCTGGGTC ACTACCTGGGCAGTGGCAATGGTGGGGCAGGAACTA  
CGGTCACGCCTGAGCAGGCCGCACAGTGGTTCGCCGAGGACACCGACCGAGCGCTCGACC  
AGGGCGTGAGGCTGGCCGACAAGCTGGGCGTTACGAACAATGCTTCGATCCTGGGCTTGG  
CCGGAATGGCCTTCCAGATGGGGCGAAGGACGTGCCCGGCAGTTCGCAACACCTTCCAGG  
TGATCCGGGATCGCAACGAGGAGGCCCTTCGAGGCCGGTGT CAGGAACAGCAAGTTGTACA  
CGCCGACGCCAACC GGGCTGAGGCATTCATCAAGCGCAGGGCGCCCCACTTCGATACCC  
CGAGTCAAGTCGGAGTCGACTGGTACAACGCCGTA AAAAGCGGAGTAAGACATGGCAAAGC  
AATTCAAGGGCCGTATGACGCCCAAGTACCCCTCGCCCAAGCACCGCTCGACGAGGCC  
AAGTACACGGTCAGCTCGATGCAGTGTCCACCGTGGGGTTCGACGCCCTGACGGGCGGGC  
AGATCGGAGAACGGAACGTGGCTGCAGGCCAACGTGCCAACGCTCGGGAAC TGGAGCGCA  
TCATCGCAGACCAGAACATGCCGGCCCTTGACCGTGCTTCTGCACTCTGGAACCAGTCCA  
CTCTCGTCGGATGCTGGTGC GTTTTGCTCCAACCCGACGCCAACCTTGCGGCGAACAGCA  
CCGGCGAGGTGGACCCCAACTTCGACGCCGGGACTTACGGGGTCAAGGCGCTCTAGGCGG  
CTGGCATCCAGCCGAGTGACA ACTACCTCCAGATCATGGCCC GCGCCGGCAACGCCGAGG  
ACACGGCCTACGTA CTGTCGAGGATTCAACGCTATGAGCAAGACGAGCAAATGGTGC GGG  
ACAACCCGTA CTGGA ACTTCGCAGCGGGCATGCTGGACCCGGCTGGGCTGGCAGTCGATG  
CGGTTACATTCGGTGCTGGCCGTGTTCTACAGCTCGGTGCTGCTGGGATGGCTGCTGTTG  
GCGGGCTGGCCAAGTCGGGTATGTTGCTGGGCTGGATGACGCAGGTGCCGACGTGGATG  
CCGGAACCTACATCGTCGCTGGCGCTCTCGGTGTTGGCGTGGGTGCTCAGCTGGGGTCTG  
GTGCTGGACGCATTGCCGCCGAAGCCCCAACGCAACCGCATGTGCCGGAAGTATCGGCGC  
CTACTGTCGGGCTGCCAGAAGTAGCGATGACCGCCGAGGAAGCCGCCGCTCGGGGCTACA  
AGGCAGGCGATGTGGAGGACCTGCTGGAAAAGGGCACTGTCTCTGCCGGGTAAACTCCC  
GAGTGGAGCAGGCCGAGATAACGGCCATCCCGCGCCGGGACACTGCCTTCGGTGACGAGC  
TGCACGGCCTGTCCGGGCCGAAGCTGTCGGAGGTGGTGGACCACCTCAAGACCCACGCCT  
AGGTGCCCAAGCCGTTGCGAGGCGTGGCCGCCAAGGTCGCCGCGACGTTGAAGACCCTGG  
TGGGCCTGGGGCAGCGCAACATGTTCCGCGTGGTGCAGGGCGGGCATAACCGCTAGCTCCG  
CCTTCTCAAGCCAAGCACGGCGGGTCTGCTTTCGACGCAGGGATTGGACACTCTGGTCC  
AGCTGCGTGGCAGCACGGCGCCGGGCCGCTGGGCACCAACCTGGTACGGTCTCTCCAGC  
AGGCGGTTACGCCGCCACGCTAGGCGTGATGAATACCGCCCTGCCGGAATCCTGGCGCGA  
TCACTCAAAGGTGGCCCAGTCCATGCAGACCCTGGAGAACGTCCGCGGTAAGGTGCTCA  
ACCCCTTGAAGCAGGACCGGGGCGCCGGTTCGGCAACTGTCCGAGTTCGAGGAAACCCTGC  
TGCGGGGCAACTCCAACACCCTGGCGAACGTCAAGGAGCTGGTGGCCTGGGGCCTGACAG

GCACCCGCTTCCAGAAGACCCTGAACCGGCTGCGCTACGGGGACGGCGGGAAGGGCCTCT  
GGTCCCGGTACGTTCGAGGGCAACAGCAGCCTGCTGGGCCTGCGACCTCATGCGGACACGG  
CGCTGAGCCGCGTCTGGCGGCCTCAGAGACGATCATGGACGCCATGCCGGGGTACACCT  
AGGCACAGGCCAAGCGGGCCAACAAGGGCGCGCCAGCGACCGAGGAGGCCAGCCTGGAGA  
CCATCGTGCGATCCACCTGGGAACGTGCCCGAGAAGGTGCCGGCTTCGTGAACCGATTCT  
TTAGCAAGGCCGACCTCCTGGCACAGCCGGGAGAGGGTGCAGCGGCGACTCCTGAGCCGTC  
TTATCGACGGCTCGGTTTCGTCGGGATAGGTTACCACGAACGACAACGCAGCGAGCTATT  
TGCGCCGCTGCCGCAACTAGTTCGAGGGCTACGTCAAGTCCTACGACGAGATGATGGCGA  
TGGCGATGGCTGAGTAGGGCGCGGGCCTGACCGCTCGGGCACTCAACTCTCGCCGCGCTA  
TGGCCGTCCTGGATCAGCCCAACGAGCAGGTACCCGGGAGCTGCTGCGCAGGGACCGGG  
AGTGGACCGCCTATGGCAGCGTCCGCGTAGACCCGAACCTACCGGCCACCATCAAGGCC  
AGGCGGACCACTCCGACGATAGTCACGGACTGATGGGCCAGCGTGCCCGGGAGGCCGGCG  
TGCCTGGGTTTCGAGAACTTCGCACCACGCCCGGGTACTTCCACCGCTCGTGGAACCTGT  
CGAAGATGGCGCAGATGGACGAGGCGGCCCCAGGCTTGGCTCGCCGCACTATCAGCGAAG  
CCGTATTCGGGGGCATCCCTGGATTGGCACGGGCGGATGCTGACACCATGGCACAGGCCA  
TCGTACAGCGGGCACGAGACCGGGCGACCGGTATCCGCTCTGAGTACATGGACGCGATGG  
GCGTGGCTGAAACGGCCTTCAACCGGCAGGCGCTGGAAGAGGCCAACGTGTCCAGGCCA  
AGTTCGTCAGCATCATGGCGAAGATCGATCAGACGCAGTCCGACCAGGGCACCGTCAAGT  
ACGGCTAGGGCCGGGTGTCGCTGGTCATGACCGCCGAGATCAACCACAACGGCACCGTGT  
ACCGCGTACAGGACCTGATCGACCGGGACCTCAATCGACTGATGTAGAACTATTCAGGCCA  
GTATGTCCGGCCGGTCCGGCGCTGGCTCGGGCAGGTATGCCGGGCGACTCCGAGGTTCGAGG  
CGTTCATCCGTGAGTACCAGCGGGAGGCCCGCGCACCTGGGCACCGACAAGGTGCAGGTGC  
TGACGGGGCAACTGCGGGGCGTCTTCGGGGACTTCACCTGCGACGTGCCGCGCGAGCACC  
AGCTCGGCCCGTGGCTGAGCGGGCCAGCGGGTTGACCAGAGCCACCATGCTGGGGTTCT  
CCGGCGTGTACCAGCTTGCAGAGCTGGCCACGATGGCCCAAGGCCAGGGCGTCTTCAACG  
TCATGAAGGCCATGATGAACTCCCGCGTCCGGGGACTTCATAGGCGAAATGCGCCGTAACC  
CGGACCTCGCCGACGAGATGCAGAGCGTCTCGGCCTGAACCTCGCCAACGACATTCGCA  
TGAGGCCCTGGAAGCGGCAGTTCGACACCTGCCTCGCCAGCCAGGATACTTCATGGATC  
GCTTCTGCACTCAGGTAAGCCGGCTGTCCCGGTCTCAACGGCCTGAAGTTTATCCACA  
ACTGGCAATCCCGCATGAACGCCAACCTCACCGTGAAAAAAGTGGCGCGGGCCCGCGCAGG  
GGAAAAAGCAGCCCTTCGCGTGCTTCAGCAGTACGGGAAGGACGTGGACCAGACGCCAG  
TGCTGGCGCGGGTTCGCGGTTATGTACATAACAGAGCAAGGAACGCTCAATCCATGAATT  
GGGGCGCCTGGAGCCAAGCAGACGTGAACACCGTCATGAACACCGCACTGCGGATCATGG  
ACGACTCGCTGCTGTATGGTAGGGTCTGTCAGAACTCGGTCTTTGCCCGGTCACCTGTCTG  
GTCAAATCCAGGGCCGGTTCGCGCAGCTTCGTGGCCTTCGCGCACAACAAGCTCCTCCGGG  
GAACCTACGTGAACTCCGGCGTGCTTGGCGTGCCCTCGCTCCTCGCATTCCAGTATCCGC  
TCACAGCGCTGGTGTATGGGTGCCAAGGCAGCGATCAACGGCAAGTCCGACAACCTCTGATG  
AAGGCAGCGGCAAGATGGCCATCGGCGGCATCGGCTCCACTCCCGGCCTCGGCTTCACCG  
CCGACATGTGGGGCGTAGTCACCGGGCACTCCCTGAAGTCCGCCCAGGTCTTCGGGCTGG  
GGGAGCACTCCAACGAGGTGTTCCGTGGCGTGAAGGACCCAGTAACCGGCGACGACCCCA  
CAGCCGCCACCGGCGAGATCGTCAGCGGCGCCGAGGGGCATTGCCTTTCGTCAACGTAT  
TCCCGGCGAAAAAGTTGGTGTGGAATCCATCAAAGGGGAATAACGTGGCTCGGTTCAAG  
AATCCCGAGACCATCCACGTTGCAGATGGGGTGCAGACGGTCTTCAGTCTCGACTTCCCG  
TTCCTGCGGCGTGAGGACGTATTCGTCCAGGTCGATAAGATACTCGTCACCGACTATACG  
TGGGTAGACAATAACCAACATCCAATTGGACGTGGTGCCGAAGAAGGACCAAGAGGTCCGC  
ATCTTCCGCGACACGCCCGCCAGGTCCCGGACACACAGTTCAGCCAGGGCATCCCGGTC  
CTGCCTCGATAACATCGACGCGAACAATAAGCAGCTCCTGTACGCTGTGCAGGAAGGCATC  
AACACCGCGTACGTGCTCTCGATGGCGTACTCGACGCGATCCGTATCGCCGAGGAGGCT  
TATCGCCTGGCGCAGGAAGCACTCGACGCCGCAATGAGGGCGCCTCGCCGTGCCCTGGGC  
TTCGCTGAGATAACGACCGTGACCGAGGACTCGGATATCGATCCGAGCTGGCGGGGGTAC  
TGAACCGCTGCATCACTACCGACAAGACTCTGACCTTGACCATCCAGATGGAAGACCCG  
GATGCACCGTGAGTCGAGTTCAGCGAGGTTCACTTCGAGCAGGCCGGTGTGCGTGACCTA  
TACATCGTAGCCGGTCTGGCGTTACCATCAACCGTTTGCAGAACACCACCATGCAGCTC  
TACGGGGAGAATGGCGTGTGTACTCTCAAGCGGCTGCGCGCTAACCACTGGTTCGTGTT  
GGGGCCATGGAGGACGAATAATGCGCGACATTATCGCGGGCATCATGGGCTCCCAAATTC  
GACGGCCCAAGCCCATCCTAGCGACCTACCCGTATCCCATCATGGAGGCGGATAATCGCT  
GGGCTGCTCGGCCCAATATCGTGGCAGCTCTGACCAGGGACACTCTGAAGCAGGTCCGGC

CAGAAGACACGCTGGAGCACTACAGTGCAGCCACCGCTATACTGGGCGCCAGCATGCGCA  
GCCTGACACAAACGGGCTACGGCGGGGCATGGCCGTACCAGCCCGTAACAGGTGTGGCAA  
ATACCACGCTCCGGTCGCTGGTGAAGTCTACTACGGTCGAAGCTCAGCCCTATCTAGCCA  
CGCCGGCGATCCACTCGGCGGACCTGCGGGTAGTGCTCATTATCTCGGATTACGAGGTAG  
AGTCGTTCCATTACACCCTGACCAACCGCCTTGTACAGGCGTAGCTGAAAAATGTTTAAAG  
ACCGAAGTAAAGGGACGTTACACCCTGATTCGCCGCAAGGCGGACGGCTCTCCGGTGGAG  
ACTCTGAAGTTCGACAACATCATTACGAATGCGGGCCTGGATTGGATCGCCGCTATGGAT  
ACCGACCTCAGGGGCGAACGCGTAGCGGTACGCACTTCTAGAGCCGGTCCCACCCCGAGC  
GCACCGGCCATCCCGGAGGTTGTGCAACGCACGTCCGCATCTGCCCTGGTGGAGGTACT  
CCGTAGGGCCTGGATGGCGACTGGCTGTTTTGGCGGAAGCGTTGGAGATTCCCGCAGGGC  
ACCCTAGCTGGTCAAGTCCTGCCACCGTGGGCCTCATCTGCAACTCGGATCGTCGCTTC  
GAGCATAACACGGGTGAGCTGATCCCAGAGATTCCCCGCTGTCGTACACTCGCATCAAG  
GACGCCGCCGGGCACCCTACTACTCTGGTGGTGGGCGCTGACGAGATTCCGGGATGTCCAG  
TACGAGTTCGCGAGCCGGCCCGCAGGAACGGCTGAGGCCAAGTTCGTGATCTCCGGCGTG  
GAACGCACCTTCCGGCTGATCCCACAGCCTTTTGCGAACCCTGCTAATCTCTCCGGGGAA  
CGCTACAGCTTCTACAACACCAAGCCCTTACCAACGGCAAGCACGCCTCCGGCGGCAAT  
GTCCGAGACGCTCAGGGGGAGAAGAAATATCCCAAGTACGTGCGCGGCTCCTACAAGGCG  
CAGATCACGCTCCTTGCCTAGGTCTAGAACGGCAATATGGCTGGCGGCATCACCGGCACC  
GAGGAACTCCAGATTTACAATGGACGTAACATATGTGCTCGATATCAACCCGCCTGTTGTG  
AAGAACAATACCCAGGGGTTACCGTGACACTGGAGTTTACGGTGGCGAGGGCATAACCT  
ATGGCACTGATCTAAGACTTCGACCCGGACCTTGATCCGAAGGCTAAGTCCAAGTTCGTA  
GGTGC GCGAGGCCGTATGGACATCAGGGACGTGTTGGACTTCTGCGACGGTGGTGTGGCT  
AGCCAGGACCCGTCCCAGGGCATGTTGGGCCGCGTGTGGGGAACAGAGCTTCCCAGGAC  
GGGACCTACCTGGGTACGAGGACGGCTCGAACGAGATTTCGCATCAGCGGAGGTTTCGAA  
GAAGGTATCTCCACGATGTACCTCGACTTCGAGAGCAACATGAACTACGTGTGTGCTTTC  
GTACGAGCCGACCGGACTGGTGAATCTCCTACTTCAACGTGCAGCAGGGCCCGCCGGCTC  
CTCGTGGAGCTTGACCAGGATGACCATGCCAAGGTGGCTCTGGACGACAAACGTCCGGGG  
GCTACCGCCTGGGCGCACGCTATCGTGCCCTACACACGCTACGGGAACCTTACGTCCGC  
ACGCAAAATGATAACTACCCGAAGAGCACCTGGAGCTGGATAACCGGCAAGGTATTCCGG  
TCTCTGGTGGAAATGCGGTATGGGCACCCACCTCCGCCTCCAAGTCCAATTCAGAGGGCAC  
ATGTAATGAGTAAAAACCGGACCGCCAGTGCTGAGCGGCTGGGCCTGCTTCACGAGCTGG  
TCTGCACCGTTATCGAGCGCAACTTCAAGTGGTACATGGACAACGACATCCCGATCCCCG  
CATCGCATATCGCTGCCGCCACCAAGTTCCTCAAGGACGACGAGATCACCTGTGATCCGT  
CCGACACCATCCACATCGACCGTCTCCGCGAGGGGATGCGGCAGGCGCAGGCGGAGAATC  
GCTGAATTGACTAGGAGGGCTTCATCACTGGCGAGACCGACGACGAGATGGAACGCCAGT  
ACACCCCTAAGGAGGCAGCATGCCGCCGAAGAACAATTCCAGATAGCCACGAAGTGC  
GGGATATGTCCCCGCGCTTCCGGGACTGCTGCCTGGACGCCATGCTGTTCTTGGGTTCA  
CGATGACCTCGGTGCAGCTCGACATCGCGGACTTCATGCAGGACTCGCCAACAAGGCGA  
CGTTGGTGCCAGCGTGGCTAAGCTAAGTCCATCATCGCCTGTATCTACGTGGTCTGGT  
GCATCGCGCAGAACCCGGCCACCCGTGCCATGCTGGTCTCCGGCTCCGGCGCCAAGGCCG  
AAGAGAACGGCCAGTTGATCACGAAGCTGATCATGCATTGGGACCTGTTGGCGTACCTGC  
GCCCGGAGGCCACATGGGCGACCGGACCTCGGCTACCAGCTTCGATGTGAACTGGGCGT  
TGAAGGGCGACGAGAAGTCGGCCTCCATCAACTGCATCGGGATCACCGCCGCCCTCCAGG  
GCTACCAGGCTGACATCCTGATCCCTGACGACATGGAGACCACGAAGAACGGCCTGACCG  
CAACCGAGCGGGCAAGCTGACGCGGCAGTCGCAGGAGTTCACCTCCATCTGTACCCACG  
GTAAGATTCTGTACCTGGGCACTCCGCAGTCGCGGGAATCCATTTAGAACGGCCTGCCTT  
CGCGGGGCTTCTCATGCGCATCTGGCCGGGCCGGTTCCCGACCCTGGACGAGCAGAAGC  
GCTACGGCGAGTGGCTGGCCCCCTCTATCGTGGACCGTATCTCCCGCCTGGAAGTGAAGG  
GCCACAACCCCGCACAGGCAATGGCCTGGACGGAACCCGTTGCTGGGCCGCGGACCCGC  
ATCGCTACAACGAAGAGGACCCTATCGACAAGGAACTGGACCGGGGTGCCGAGGGCTTCC  
AGCTCCAGTACATGCTGGACACCAGCCTCGCCGACGAGCGGCGCATGCAGATCAAGCATC  
GTAACCTGCTGTTTCATCGACGCGACGCACGAGAGCGTACCCGAGCAGGTGGCCGGGGCTG  
CCGACGAGCGCTTCAAGCTCAAGTTCGACGTCCACCGATTCCCGGTCATCAAGCCTGAGC  
AGTACCTGCGGGCCTTGATGGCTGGCGGCTGGGCACCGCTCCAGCAAATGACGATGTTAG  
TGGACCATGCCGGCGACGGTGGCGACGAGCTGTTCGTATGCCGTGGGCGGGACTCTTGGCC  
CGTACATCCAAGTCGTGAGCATCGGCGGCAGAAAGGGCGGCTTTGCCGAGGAGAACCGGG  
AGAAATGTATCGCCCTGGCTGCGCGCTATGGCGTCAGGGTGTATCTATGTCGAGAAAAACC

TCGGCGCAGGTGCAGTTGGACAGCTCTTTCGCAACCAAATGCGATCCATCGACCCGGACA  
CCAAGTACCCCGCTATGAGGGGATCGGCGTAGAAGACCGCCAGAAGTCCGGTCAGAAAG  
AGCGTCGCATCATCGACGTCTGCGGCCATCATGCAGCGGCACCGGCTGATCTTCCACG  
TATCGGCGATGGATTCCGACCAGTGGCCTGTCAGCAGTACCCAGCGGACAATCGCAATG  
AGCGCTCCGTGTTCCAGCAGATTCACAACATCACCACCGACCGAGGCTCACTGCCGAAGG  
ACGACCGGATCGATGCCCTGAGGGCCTTGTCCGCGAGCTGACACCATCGCTCGTACAGG  
AGGACGAAGCCGCAACCCGCGCTAGTGAAGAGGCTGCCAAGAAGGAATGGCTGAACAACA  
CGATGGGTTACTAAGTCTGTCTTCTGTCTCTCGGGATGGGCGGAGAGCGTTCGCAAGG  
GCCGCCAAAAGGACGAAGACTATGATGATTGATCCCGCCACCGAGGCGGGCAAAGGCAC  
CCTCGCCGTCACCGGCTTGGGGATCGCCGTTTACTCGCCCTTTGAGATCGCCAGCCTCTG  
TGCTGCGGTAACACCGCGCTCTACGTGGGCGCCAGCCATCACCTGCTCCGGCAGAT  
GCTCGATAGCATCGCGGAGCTTCGCCCAGGTTCAAGAAGTGAACAAGCCCTTGCGCGGC  
GCAGCCCTTGCGGCTGCCCTCGCCGGCCTTGTGCGCCCTGGAAGGCAGTGAGACCACCGC  
TACAGGGCCATCGCCGACGTCCCCACCATCTGCTCTGGAACACTGCGGACTCAAGATG  
GGCGACAAAGCCACAGCAGAGCAGTGCTACCAGTTGACGATCAAGTACTACCAGCGCTTC  
GAGCGCATCGTCTGGACGCCATCAAGGTTCCGCTGAACGTGAACGAGCAGACCGCCCTG  
ACGTTCTTACGTTCAACGTGGGTCCAGTCTGTAAAACCAGCACAGCGTACAAGCGCTTC  
AACCAAGGCCTCGCCACTGAGGGCTGCCAAGCCCTGGCCATGTGGAACAAGGTCACGATC  
GACGGCGAGAAGGTCGTATCGAAGGGCCTCGTGAATCGCCGCAACGTGGAGATCAAACAA  
TGCCTCGAACCATCGTGGCAATACTCGTCTTGTGTGGTGGCCCTGGGAGCCTCGTACG  
GCTTCGTCCAGAGTTACCGGGCCTTGGGTATCGCCAGGAGGAGATCAAGTGGCAGACGT  
CCCAGCGGAGGCCCTGGAGGTGCGCTACGCCACCTTGCAGCGCCACGTCCAGGAGGTCT  
CTGCCAGGACCAACACCCCGCGCCGGGAGGTTGACCATGCCCTGGACCAGAACCGCCCGT  
GGGCCGACCGGCCTGTGCCTGCTGCTGTGCTTGGCAGCCTGTGTAACCGCCCCGGCGCC  
GCTGTGCTGTGGGAACACCCACTGATTGACCCTACCACCCAGGCTGGCCTGATCCGCGCT  
GTAGCGGCCTATCAGGACGCCCTGGACCTATGCAACGCCCTGAATCAAGGAGATTGACAT  
GGCTAACCCCGCGAGCAGTACATTGCTGGCCGTAACACCGGCCTGACCTTCTACCAGGT  
GTGACAGCCCGGCACCGACACCCGCATCGCCCTACACGAGAAGGACGAGGCCGGTGTGAG  
GGCAAGGGAACCGCTGTGATCGCAGCAGCCACTGCCCTGGGCGGCGAGGGCCGCGCTAC  
CCCACCGGACCCGCTCACCGCCTACAAGGTGGAGAACCGTGACACCCTGCCCGTGGACGG  
CGGTGGTTCGAGAAGGTGACTATAGCCAACGACGCCATCACCAATGTGCTGTACACCGC  
ACCGGCGGGCTGAGCTTCAGCCCGTCCAACCTGACTCCATCCGTAACACAAGGAACTGAT  
CCATGGCAACCTTCGCCGCTGCAACTCAGTAAGACCTCCGCGCCTTCGCCGGCACCATCG  
AGAACCTGATCCGTCCGCTGGAAGAAGTGGCCCAGGGTTCTGGCTACAACGAGACCAAGC  
TGCAGCTGAGCTGGTCGCACACCTCGATGAGCTGATGGCTGCTGTCGAGTCTGCCAAGG  
TCAAGGTCTACGTGTAGTAGTTCAAGCCGAGCACCTGCATAGGCGGGTGTCCACTGGAA  
CTACTGGAATTTTTATTGAGGGTGTGTGTGGGCTGGGTTGGCTGGTGTGGGCTGGAGTAG  
TACTCCGGGTCTAATTCTGGTATCGTTCGTGTGAGAACCCTCCCGACTCTGATCAGCCCA  
CCCTTCCCCCGTAGGCCCTCCGCCTGGTGGGCAATCCTCGCCTTGCCTGGGTGTTGCCTG  
GGTCATCCCTGGGAGCTTCCGGCGTCCCGGTGGTGCCTGGGCTTCCCTGCCCTGTGCG  
CAGCCATACTACACGGCTAAGCGGGAGTGTGACCCCTGGGCTAGCGCTGACGCTCTAGC  
GGGCTTGGCCGTAGTACCTGGAGCGCTCCAGCGCATCGCGGTGCATGGCCCCGGCTACCT  
CGTACACCTGGGATGCCTGCCGCTTCCGCCAGGGTGTGCTGCGTAGTGTGCTGGTGGTCTGCG  
CTGCCACTGTGCTAGCTCCCTCTGCCATGCCGCGTCTGCTGGTACCAGGCACGCTCAC  
CTCTGTTCTGTCTGCTCAGCATCTCCGTGCCTCCTGTGGTCTGTCGGGTGGTGGTGCG  
GGAGTGGGTGGC

>NewGenomeName\_227

TTAAAATTTTACATTCTTAACCAGATTCATAAAGTCTTGTGCGCGTTTGTAGTTTTGCAG  
AATACGATATCAGTTATCTACAATATCATAACAGTAACGGGCTATTCTCTTTAAACTTCGC  
ACAAACTGCTTTAAATTGTTTCGTTTGTGGCCGTGAATTTTTTCATCACAGATCTTTTTACT  
TTCTTCGTCCATAATCCAACGAGTATGAAGGAGTAACTTGGAAACCTCTTTATTATAATG  
ACGACCGTACCGTCTGTCAATAAATTCTGGAATACAGCGTTATAGTTCATCGTCATGAAA  
CAACATAGTGATCACACCCAGATATTCGCCTTACCCAGATGATTGGACATAACCTTCGT  
CGCAAGACCAGCCAGCTTACGCGAACAATTCTAGCGCACATTCGAATTGTTTCGTC AAC  
GAGATATTTTTGTGTCTCGTTTCGAGTAATAATACTTTGTTACCCCGAAGTGGTCAAG  
CGCCGGATGTAAAGTATTTTCACTATAGATCGATTTTCGACTACGCATTTTCGAATGCATC  
ACCTACGCGGAACATGTGCAAGCCTGATAACTCGGAATCTCTGCCGCTTTCATGTGATG

GCTGGTTTTATGCCAACTGTCACCTATCTTTTCCAAGATATACACGTTAGGCAGCTTGGG  
AGTCGCTTCACGTTGTGTACGCTCGGTCTTCTACGGCTTAACTGCGTTAGCACTCAGATC  
ATCGGCCCCAGAACTTTAATGACTGTCATTTTCAAGATCATCATAATACTGTTTGATGTA  
CTCGAAAGTCTACATATGTTTTTCGTTGCGCTGACGGAAGACGAGTACCTCTTTATTGAT  
GCCGTATTCCTGGACCATGCCGTTAAGAGACAGTGCACGCAGTTTCGGTTTATCGGTATC  
ATCAATAAGACACAAAATATCTTCTTTATCCATCCATACAAATGCGTAATGTTGTATTG  
ACTGCTAACGAAAGCAGGGCGCAATTTACTGATTGTGTGACGAGTACGATACAGAGTATA  
CACCTGACCTTCTACGTCATTAGGCGAATCTTTACCCGCATTCACAAACTTATTATAGAT  
TGCTACCGGATCGTCCATTGTCCGATCTTACCGATCTTGCTAATAATATTGCGTTGCGT  
CGATGAAGACTGGTTCATACATTGAGCAAGTTTACGCTCTGTTTTAATGTTGCGGATCTT  
ATCTTTAACCTTTTCCAACATCATTTTATTGATTTCTGCAATGAGTTTTTCGATGTTTCG  
TTTAGTCTCAATTGACAAGTGAACCTTCTTACACGGTGGCATCAGGTCCAGATCACCCAA  
CTCAAAATTAATGTAAATGGTCTGGTGTGCGGTTTACAACCTTCTAACCATGTTCCGCG  
AACATATTCATACGGGATCGGATACTGGATCTTACCCATGATTGCATATACTACATAGGA  
ATCGTTATCACTCCCATCACAAACATAATAATTATCAAAGCTAGGGAAATAATTAATTTT  
GATTGCAATGATATTGCGTTTGTGTTCCCAAAATGACGCAGTACAAATTGTGCTTCTCG  
ATGCCATGTCTGCATGTCTTTTTCTTTCACCGGAATAGTGATTTTTCAGACCATTGTCTT  
ACAGGTCGGTTCGTCGAAAATCTGCACCATTTTCGGCATAGAGTTTTGCACAAATGCCGT  
AAAGCTATAAGCGCGAACATTGTAATAGTTTACGATTGTAAAGGTGTCGGTATAGCTATA  
AGCAGACTTCGCACCTAAAACAAAAGATCCGATATAATCATTAGTCTGGTCTTTTGTGTA  
TTCAGAGTAAACCGTAAACAGTTGTTCTAATTTCTTCTTAGACAGAATAACCAGTACCATA  
ATCACGCACAGAAAATACGGTTCGTTTGCAGTCGGTAAATGTATATCAAACGGACGATC  
TAATGTTCCGGATTCTTTGTGAGTGTGCGGTAGCATTACATGAAGACTCGCGGACGCAAGC  
ACGCTCACACTATTGATAAGTGTCTTAGAAAGCACCATAAAAGCCTTGCTACTTGCTTT  
CAGTGAAAAATCAACCGCACCGCTCAAGTCACTGCGAAATACTTCTTATTATCAATATG  
CATTTTCATAATATAATCCTCACTTAATTAATAATCTTCTTTGTCCATCTCTGCGTAGATT  
ACATCGCACGCCCATAAATCAATAAACGCATTATATGTCACGGTGCAATCGTTGTCAATC  
ACTTCTTTAGCATATTTCTTGATGTTTTTCGTAGGAACTTGC GGATCAATTTTGTGTTA  
CGAAGGTGTGCATATTCATACCTCAAACATTTTCATAAACATTTCCATCGATTTCTTTTCT  
CGATGGCACTTGGCGATCAGAAAATCAAACCTTCGACTCATTTTCTACTCCTTATACATT  
TTCATCACCCATTGCAGATGAGCTTCTGCGTGAACCAGTTCAGCGCGGCGTTTCTCTAA  
GCACTTGCTGTATTCTTTAAGTTCCCACTGGGCAATTTTCGTTTGTGAGGACTTCTTCATA  
GTAAGCAAGTTCGCCTTTAAGGTCTGAACTTTACGGCTTGCCAATTCGATGCAATGGTT  
ACGCATTTTGTATTCTCCTAAGTAATAACTCGTTTTCGATGGAGACATTATGATATAGCCG  
GATCCAGTGTCAAAGATTTTTAATCTTTTGTCAATGCATCCATTAATCTGCTCTGAGATC  
AGTTCTCGTAAGCACTGATAACCATGATATTTGATGGCAATGTCACGCAGATCATTAAAC  
AGGTCCCGTACTTCATGGTCTGTCAGATCGTCTCTGTATTTTCGATTTGACCGTGTCTTTA  
GGTGGATTGTGGATAACCTGAAAACCTTGTTCTGCAATCACTGCGGCTTCGCGCTGGCGT  
TCATGCTGTACTGTATTTTTGATCAGGTCTGCCTCCATGAACCTTGCCATACTCATCATC  
ATGTTATTCTTTTTGCTCAGTATTAATCCTCATAAAAAGAAAAGGGAGACTCCCATTACA  
GAGAATCTCCCTTGATGTCAACTAAAATTTAAAGATGCAAACCTCCCGTGATGAATTTT  
TGCATATTCATCATATGCTCGAGCGGCTTCCCTCTGAGTGGCAAACGATCCTATGTATTT  
TCTGTATCCGTTTATCCTTATTTGTGCTTGCCACGGTCTTTTGTCTCGATCCTTTGCGATG  
AGTAACACCATTATATATGCTCGTGACCCGTCCGTTTTCTTTTTATTGTACATCTTTT  
TAGTTGTGTTGTCTCCCGTAAATTTGGTGGATTGTTGTTTTCTGGAATCCCGTCTATGTG  
GTCTATTACCTTAACCTGTGTTCCATATTCAGAAACCAGACAATTCTATTTACAAGATA  
TGTAGATGTTCTCTTTTGAACCTTGTTGGAAACATCTATTGCCAAATGACCGCAATTTAA  
CTTTTGTGTTTTTACTTTATCACCGACTTGGTAGAAATATCCCTCTGGTAGACCATTAAA  
AGACGGACTATTTGTTTTGTGATATAGAACACCTTCCGTGTGTCCAAATCTTCTTTTTAA  
TTCCTCTGGAATTTTCAGTATTCAAAATTTTCGCACTTTTTCATATTATGACGCCACCCATG  
CCTTCCCTCATGTCTGAATCTTCACTATAGAGCAAACCGAATAGCTCTTTATAGTTTTCCG  
GTAACGTGATGATCTCCATGACAGGATACTTGATCACGCGATGATTGTCTGATTCTGTGA  
GCGATGCTAAACCTTAGATATATCGAAGGTTGTAACCTTTGATATTATCTCGGTCTGTTCT  
CGAAATCTTCTAGGTCAATTATACCATCGAACATCATCACCTTTCTTTGGTTCAGCAATGA  
TAATAGGTGTTTTGATAAACCGGATTCGTCCATCTTAGTACAATTCAGGCCAACGTGCAA  
AGAAAGAGTCCAGACTAGGTTTAATAGACCCGATCCCGTCCAGAAATCAGCGTCCGGTCATAA  
TCGCAATATTTTTGTATTGCATAACTTCCAAGGCATCAACACCAAATTGCAACCCAGTGA

TCGCCATGATGTTAAAAATTTTCGGCGTTCTTAACGATCTTTGCCTCCGGTTGTTCCACG  
TTGTAAGAGTTTTGCCTCGCAACGGGAAACCTCCATGTATATCTTGTTC AAGTACAGAGA  
TCAGATAGTTGATCGCGGAATCACCTTCCGTGAAAAACAGGGTAATTTCTGCGTCAGTTC  
CAATAAGGTTAGCTTTAACGTGTTTTGCTACCTTAGCGTGTTTTGCTGCCTTTGCCGCCT  
TAGTCGCTGCCGATTTATCTGCTGCCTCTTTGAGTGCCAGGACTACAGCAATAATAGGCA  
TGATAATGTTTTCTTTCTTCGCAATGACTTTAGCCAGCGTTTTAAAATCAAGATCAATAT  
GACGCTTGATATCACCAATTGGGTTAGTCAAGCGTTCATTTGTCTGTGAATCAAAACGAA  
GGTTATGCAATTCACGAACAATCAAAATACAGGTCAATCCAGACTTAACCGCAGCTTTAG  
TAACATCAACCTTATATTCTTTCTTGATTTCGTTTTGCAATCTCTTCACAAAGATCATCTG  
TCACGTAGTCTACGTGTGTTCCCCCGTTTTTGGTAAACAAACCGTTAGCAAAGGATACTG  
ATTTAAAACCTTCTCCCTCGAACGCCGGAAGTGGGCAAGTGAAAAGTTTTTATCTTCAA  
TGACAAACGGAACATCATTGTATAGTTTAGCATAATCCTTGAACCTACTAACAATACGTT  
TACCATTAAACTTAAACGTGATCTTAGGAAGTATTACGCTCAATGATTGCAGACGATCAT  
GAACAATATCTAAAACAGAGTTGTCCAGCATATAACCTTGGAAGTGGTTCGAAGTCTGGGC  
AAAATGTAACCTTTGTTCCCTTCACTTTTTGATGGTTTTCGATGACCATGTGATATTATCAG  
CACGGTTTGTACATTGAACGGTCAATTTCTGTTTCGCCGTCACAGGTACACACCAGTAAACC  
AATCGCAAAAGAAATTCATAACGACGACTCAACACCCTTCATCCCTTGCGTTAATCGAT  
TGGTATCATCAAAGTTAGACCCTGCTTTTGTCCGTGTCCATGCGGCTACAGGTTGCGGAA  
TCTGCGTACCCTCTGGGGTGGTAACCATATGTTGAGGAATACCGCGACCGTTGTCTGTTA  
CCGTAACAATATTGTTTTGGATATCGACGCTAATCACATTGGCAAATTCAAAATTAGTGC  
GAATCGCCTCGTCTACAGAGTTGTCGATGACCTCATAAATGATTTTCACCAGTCCAGGAA  
CATATGAAATTTTTGTCAATTTACCGAACCGGAAACGTCGATGTTCTTCGTAAGTTGTTG  
ATACTATCTACATTCATGCACGCTTAAGGACATGCTCACGATCAGATAAAATGCGAAACT  
CACTCATTATTAACCGCTTCAGAACATAACCATAACTTACTGCAACCGCCACAAAGACG  
GCTGCAACAATCATATTA AAAAATTGAGTGATTGTCAAGTATATCACTCATGACAAGCGCA  
CATATTTATCACAGTACCCGCCATTAATAACGCGCGGGGCAGTTAATTCCTGATTGCATT  
CTTTACCAAATTCAGGGCATTCTGCCTTTTACGTTTCGGAAATTTTCGCGGATTTTCTGAA  
ATTGACCGTGTTCTTCACAAGAATAATCATATAATGGCATATTATCCCCTTTGTTTCTTA  
ACTGACTTTGGATCTGGATTTTCTGGCAAGTCTTCCAGACCCATAGCATAACGTTGTGCA  
TAGATTAGCAGAAGCATATCGCGAGCGCAATCATGAATTGCGTTATGCGCGATAAATCCG  
TCTAGCGTACCATTGGGAACGGGCATTACACATAACCACGATGCATCAATGTACGCTCA  
ATGGCGGTGCGAACATCTCGGATATTCCC GAATCGCACAGGTTCAAGCCTGAAGGGCTCT  
CGTGTATTGTGTGCACGGCGGATCATATCAACTCGTAACGGTATATCAAACGCATTACCG  
CGTGACCACATTACGGATTTAACCGGATCTACTCCTACGGCTTCACAGAATGCGTTAAAA  
CGCGCTAAACGTTCTTTAGTTGATACTTCCGTACCATTTGTGATTAATTGCTTTCTCATG  
CCTTCTGAGGCGGTATTCTTCCACATTCAACCACACGATGATCAAACACCCTTACACCT  
TTCTGGGAAGGAATAACAAATTTTACCAGAAAGGAATTTCTCAACCAGTTCTTTAAATGTA  
GGAGGATTGTGCGGATCTTCTTTAAATACGATTGCCGCCATATTGATAACCGCCCCATCA  
GGCGGATAACCTAAACTTTCAAAGTCAATCATTAAATCCACTGGAAGCATTTTAAATATC  
CTCCGCGATATGCCGGAACA ACTCCAGATCGTTTTTATCCAGAATGAAACCGCTACAATC  
AATAATCCCGTTACCGTAATTATCGGTTAACAGTCGTTCCGTTGCCTTGTGTGCGTGTAC  
TTTGTGATAAAAATTCATTAGATGTTGAGCATAAGTCACAATGAATCTTTTGACGGTTCCA  
CGCGACAATTGATTGTAGATGTATTACATTAGCCACATTATTGATTACAACCATATCAA  
AACCTCGCTTAGTGAAATGCTCGAACATTTTATTGATACATGCAGCTTCACTATCGCCGG  
ACACGTTCCAGCCGTATAGACCCCATCTAAAGCACATGGTAACAGTTCCATTGTGACGGC  
TTACCGTCACATCATTAAATTCTGGGATACTTCGCATAATCATAATAAGTTCCCTCAAATA  
TAGTCTACTCGATACCGCGCACGGGTAACACCAACATATAATAACTGCATTGCCAATTCA  
AAGTCAACATTGTCTGTACACATGCAAGGAGTATATAGGAACACGCGGTCTAAGCTGATC  
CCTTGTGACTTATGAATGGTGCAAGCTGGTAATGCTTTTACATTCAAGAACATAACCCTTC  
ATCGTCCAGAACGAGTCCCAATCGGGTTTAAATTTTGGATTCTCTTTCTTCATTTTCGCGA  
TATTGTCCGGCGACCGTATTCAGATAGATAGAGAAAATGTTCTTCTGACGTTGTTAAGTC  
AGAATGTTGATTTCTACTAAATCCGGTTTATCTGTAGTGATTGAGATTGCATCTAAACCG  
ACTTTCTGATTTAGGATCTCTTTGTCTTCGTCATCATCGACGCTTCCACTTTTCAGAGTG  
TATCCTAAAATTTGGTTGCGGATGTACCCCGTACAACGTAATGTAAATTCGCGCGGTATA  
ACCTCTTTAACTCGGATCATCTGACCATTGTTAAAATAACATTAGGAATGTTCTTCCCG  
CGTTCATGTCGCCGATATTGATCAATGGTTCCTGAGTAACCAGAATTTTCATCTACAATC  
ACTGGTTCATCGGTGTTATAAACGCGCTTACGGACAATTTCAATTGAGTTTTTTCGACGCTC

TTGTTAGTCTAGGCCAGAATACGGTTTTCTAGTAGGTCTTCCGGCGTTTTTACGGTATCG  
AAATAATGCTTCATAAGCTCCGGCAGTGTTAAGCTATGGAATACACCCTCGTTACCGCAC  
TGCTTTTCGAATACCCATTTACCATTACGGACAGCGGTGCGCCACTTCAATTATTGGCGCA  
TTAGATCGTTTTAATCTCTGTAAAGTTCTACATTTCTGAAACGTTTCATCCGTGAAGAAAGGA  
GAGATCGACGTTGCACCGCTCGGATCAACTGGTCGTAACGGTGCAGGATCGCTAACTGCA  
ATAATAACAATTTCGACCGTTGATACTCTTCGTGAGAATATCAAATAGTTTCTTATCGACC  
ATACTCGCTTCATCAACAAGGATGATCTGAACATCATCCAACCTTAGGAGTATCTTTTTGC  
TCAAATACATGAGTTTCTTCATAGTTGGTCGGGTTTAGTCGCAGTAGTGCATGTAAAGTA  
AATGCTTGCCGACCTACCGCTTACTCAAACTTTTTTAGCCTGGTGGGTAGGCGTTGCC  
AAAACCACAGCAGTTACACTACGGCGGACCATTTCTGAACAATGAATTTTCATCATTTCCG  
GTTTTACCAGTACCCGCCGCACCACGGACAGTTGTATGCTTCTTTTGTTCATGCGTTAC  
ATTAGAACATCAAAGCATGTTTTTGCCCGTCTGTTAACATATCGAAAGTTAATACTCTT  
CTCGTTATCCTAAAAGCCTCACCTTGCGAACAAAGATAGTATTGAGTTCTCGCCGTACCC  
GTTCTTTTTTCATATTCAGGAATTTTATATTCGATCCCATCCCGAACAAATTCAGAAGACC  
GGATTATGCCAAATTTTCGTTTAGGTACAACCTTGTATTTTCGGTTCACCCGCCGAGAGAC  
TCTCACAATAATATATCTGATCACACATAGACGCTAACGCCGCAGCATGTGTTTCGCAAG  
ATAGGACGCGACCCTTCGCGTCCAATGAGTATTGAAAGAATCCGTCTTTATCACGATAAC  
ATACAGCAAATACATGCAGTATAAACCTACCTTCGCTTTCATCAATTCAATCCACGAAGC  
ATCAATCGGAAGCCCGTATTTCTCGCGTTCTTTTTGTGCTGGCGTTAAGTTCTCATACTT  
AGAAAGAGATTCATCAAACGCTGGTATATTTAGCACGACTTCGGTATTGTTTGCCAT  
AGCCTTAAGTTTTTCTTTTTCTTGTGATTTTCGCTAAGGGTTTGCTTCAGATCTGCAAT  
TTTCTAATAACGTTCTTCCATACGGAAGAGAGTATTTTTAATAGCTCGCTCGACTGCCTC  
TGTTTTCTCCGGTTCGTTGTGCTTTTTGTGGCGCTCGATTGCCAATTTCTTTTCTTCGAT  
TGCTATTTCTGATTTTTGATGCGATTCTCGTGAAGTTCGATCCACTCTATGTAATTTCG  
ACGTAGGGCAATTTTCATCATCAGAAAGTTTACCGTTAGTTCCTAGTTCCTGGATCTCTTT  
AAGAGATTCGATAGTGTGATTGCCACGGAAAGAATTGTATTTTCAGTTTAACCGGAATTAC  
ATTGCCATCAACATATCCCAGATTGCAATCAATGCGCTCTAAGGAGAGTCCATGATCACC  
TTCACCGAAAGCCTCACCGGAATAGACGCAATGAGTCTGTGCGTAAAAGTTACGCACAGT  
GACTATGCTCATAGAGAAGTCTTTGTTGCGACGTGAAGCACCAGCCATGATAGAGTTCAG  
ACGGAAAACCACCAGCGCCAATTTCTCGTTAGATTTCAAAGCAAACAGTTTCATAATTGA  
TTCTCCTTAGTTGGTATGTGTGTATAATTGTCTATCTCGTTTTCGCTGTCAACACTTAAA  
TTAAATAAAAATTTGTAAATCTCTATCAGATCGTGATTACACGCGTAAACTTCTCGATCT  
CATCAAGGATCATGGTTCGTCCTGTCTTGTATATGCATTTCGCGCTCATCTGCCAACAGAG  
CATACAAAGACAGTCGAGTAGTCGGATTGTCATACTCTTTAGACACCCTCGGTCAATAA  
CATGTTTCGTAATAATTCATGCAAGGCTAGGTAGGTTTTATTGCCATAATCTTTCCTGTTG  
CTTAAACATCTGTTGCAAAGTCCTCTGCTGTTGATTGCAGCGGCGTAAAGCTCATAGGAC  
GCTCTACAACGAAAGAATCACCTACAATTAAGGTATCCAGCTTACGGCTTTCTTTTCGC  
TCACACCGCGATACAAGGCTTCATGATGCACTAACCGCTCAGTCTTTTCAATCAATCCAT  
TAAGGATAGACATATCGATATTTTCTTTAGAGTTCATCACTTACCAATTATGTTAAGTT  
CTTCTGGTGTAAATTGCATAATAAAAAAGCCTCCAATCTTTTCGACGGGAGGCATAATAAA  
ACCATTGATTGAGTTTGTCAATTACAAAGTGTATGTGATCTATAAATAAGTTTGTAGAA  
CTAAAGGAGATCACCAAATGAACTATAAACGTATTTATGATAACCTGATTGAACGTGCTA  
AGACTAAAATATCGCCGGATACACAGAAAAGCATCACATCATAACGACGTTCTATGGATG  
GAAGCGATGACCCTACCAACCTAGTAAGACTTACACCAGAAGAACATTATATGGCACATC  
TTTTGTTAGTTAAGATATATCTAGATAATAAAACTGATATATTCGCTAACATGATGT  
GCGTTTCTTGTCATGGACAAAGACAAACAATAAGCGTCACGGATGGTTGCGTAGAAAAA  
CGGCGGAAGCGCATAGTAAAAGAATACGCGATAGAATGGAGCAAGATCCATAATATAGAG  
CTAAGTTTTTCGGAATGGGCTAGAAAAATGGGTAAAGCCATGAAAGGCGTTAAGCGAGGAC  
CGGAATTTAGCAGAAAGTTGGCAGAAAGAAACAGAAATACCGTGATGAGAGAAGAACTA  
AACGTAAGATCGGGGAAGCCAACAAGAGAAGAAGCGTACAGAAGAATATAAAAGAAAAC  
ATAGTGAAAGGTATAAAGGTGAAGGTAATCCGATGTATGGTAAACGAGGAAAGGACCATC  
CGGCATATGGTACTAAACCGTGGAACAACCAACATCATTTGTTGACCAGAAAGGATGGT  
GTCGGTTCGCTGGCATGTTTTATGACTGGTATCGGAGAGATATTGACCGTGGAACCCATA  
AACTCCACGGTCGTAAGAGAATGTTGGATGAGTTAGGTTTCGTTGGTTGGCGAGAAAAAG  
AGCCAGCCGCAGCAAGACGATCAATTGACATGTTTCGCTAAAGGCTGGAATCCTTATGAAG  
ACCAAGAATGGTTAGATTATGTTAAAACCCGCTTTCCAACGACGATAGTTTTCCGCGCT  
CTTTAACATATAACAAGACAAACAGATCCTTCGCAGTAAGCCCCAACGCCAAGGGTTTACA



CATAATGAAATGGAGTTGGTTCGACGGCTTCTAGGTATGCTTCCAAACGATCCGCCGCAGA  
TAAAACACCAAAGAGGCGGTTTCGTGCTTCCATATGATTGGCTTTCCAGTGTTCACAC  
AGCGCTAGCGTCTTTCCCGTTAGACATAACCACCAACGCAGTATACAGTTCTGGCGTCTC  
GTCGTAAGCGCATTATCATTAGCGCGCATAAAATCTAAAATCTCTCCACATGTTTTCAA  
TTCATCAATTTTTGGTACCCACGGACGGTCATTAGATACCTGGTCTTGTAGTGCTTTCTG  
CATGTCCACCATGCGTTGAAATGGGTTATCACCGTTGGTGATAATTTCTTTATATTTTTTC  
TACTGCAAATTCAGAGTTTCCGCGTTTCTTAGTGTGTACAAGAATTAATTTCTGACAT  
ATTCACCTCATTAATTA AAAAGTACAATATTTTCATAAACCGCATTTTAGCCATCAGACCT  
TGTACGTTGTTCTCTTTGATATAATCCATGATCTGGTCGCGTGTAGCGCCCTCGTCATGA  
ATGATGGCATTAACTGTTTAGAATGCCACGGGCAACGATCCCACAATAACAATCTTTTCC  
CCTGCATTGATAAACTTATCCAGTCGGTGCATTGTATCGGCAGGTCGTGGATCCGCATCA  
AGTACAAACACTCGCTAGTCTGGGAAAGGTATTTTCATCTAATCCCAAAGTACCGCCAGTA  
ATTGCACACCCGTTATCAATAAACAATGAATCGGTTCGGACCTTCTAAGAAATACACTGGT  
TACTCGGATCGGAGCGTTCAAGACCATAGACCTTACTCGCTAACTCATGAGTTTTATTC  
GTCAGATAGTTGGTCTTTCCGTCATCCTTTCTCAATGCTCGCTCCTGAATGGATTCTATC  
TTGTTCTCGCGGTTAAAGATAGGAATCACTAAACGCGGCTCAGGTTGTGGATTCTCGAAA  
GTATCAGCCTTAATGTGATTTGCTACCTTTTGCCATTCTCTCGTTAAATACGGAAGATCC  
CATTTATCGTGGGGAATGCAACGATCACTGACATACTTTATTATAGGATGATTAGACGGA  
AGAGTATCTAATCTCTCGCAGAAAGGCAATGTTTGCACCTTCTTAATCTCCGGCTTTTCT  
ACCTTTTTTAGTGGCTTGAACGTGGTGTCTTGTGGTCGCCTTGTACCTTCGGTCGTTCC  
ATAAGACATTCCTGAATAAGTCCGGCTTATACTGTTTGAGAAATTCACCTAACGGCTGA  
TTGTAGTTACAGTTGAAACAACCATAACGCAAACCTATCCTTATAGGTATAGATACGGAAT  
CGCGCTTGAGTATGATTTTTCTTTGAGTCACCGCAGCTCGGACACCTACGGACCAGCGTA  
AATGAGCTAGTATGCAACCGTTTAAAATCTCGTTTCGCCGTATATGGCTTTTTCCGCTATT  
TCATAATCTGCGTAGTAACCTCATAATAACCACTTATAGCTCAAATTTTCATGAAAGTTCCC  
ACACTTTCATTTTCATTCTCTCCGTTTTTCATCTAAGCCAAATTTGTAGACACTACCATCT  
GGCGATACGAAAGAGAATACACGAAAACGGCCTACCGGGTCAAGTTCTGTAAATTCATAT  
TCTTTTTCCGGCTTCAAAAAGTGCATATGTGTTTTTAAAGACATTTTCATCGTAATCAGTAAA  
GCGCCACCGATGAGAACATGATAATAATACCAGAATACATAACAGTCCCAGAAATTTTTT  
CTGTTTTTGTCTTATATCCAGAAAACCTGAAAAAGACAACACCCGAAATAGCCATCACAA  
GCCCGTAATGAATACAATAAAATTAACCATTGTCTTTCTCCATTTTGCGTTTTTCTTTA  
CCCGCTACACAAGGTCCACGCTTGTAATAGATCCGCTCGTTTCCCCTGCTGCGATCTTC  
TCAGGATTGCCGCCAGCATCGCCAGCGGTCATATCTTCTTTGAGTTTATTTTCTTCAACA  
AACTGTTTAAAACCAATCATAGAATAATCTCTTTCAGTAAGTCAACAATGTGGTCTTTTCG  
TCAGTTTATCCTGATTCTCTACAATCTTGATAACACAAGCGTTAACATCTTTGCGAGTCA  
CGCGGGAGATCGTTTTAATACGATGGAACGGTTCGTACAAATATACTGCTTCATTATAGG  
TCGCAGCAATTTTTTGACGCATTTGCTCTTTATCGGCCATAAAAACAATTGCAATTTTCG  
GATCTACACCAGCCACATCATAAAGTTCGGCGACTCCCCAGCGTCCTCCCGGTTCAATCA  
TCCCAGCGTGTGACCGTTAATAAAGATAAGAATCTCTCCGTTATTTGCGGTTTTAAATG  
CTACATCTTCCGGCGCAATCATAGTCTACATAATATCGTCTCCTTAGAGTTTCATTATAG  
ATCAACCGAACGTAGAAAGCAAATGTTTTGTTTCTTTTCAGTTGTCCTTCAAGGTCTTTTC  
GTTTCTCTTTCAACTGTAGTTTAGCATTGTTTCGTTGTTTTTCAACACCTTTATTAATGT  
GCTTAGTCCAATTATCAATATCAGAATAAGTTGGCATAACCAATTCTCGACCTAATGCGG  
TTGGATGCAGGGTAACAGTACGAAAACCGCAAATCTTCTTAACTAGGTCTGGGTGTAGTG  
TACTATCTACATCTTCCGGTGGCAACTCTATTTCTTCTTTAAGTGGTGGGATCTCGTCAT  
ATGGTTCCAATGCATTTACTTTAATATCAGATACCTCATCAAAGAATCCGCGTACATCCG  
CAGGACATACACAAGCAATTTCCCAACCGTGAGCACGCAGAGAAGTAATATTTTTCACTC  
GCCACCATGTGTGATGATTGATGTGACATTGCCATCGAGGTCCACCGAATTTACGAGAA  
ATTGCTAATCGTCTGTGATATGATTATAAAACTGTGCTTCGGCTGTAGTCATCTCCAGAA  
ACAGATCTCGGATTGGACGACCATCAGGTGCGTTACCTTCCTTGAGAGTATAAAAAGCGAC  
TTACGATCCATTTTGGCGGTAAGCATTAGCGATCATGTTATATCTCCTATAAAAATCATT  
CACCTGCGCCCCGCAGGGCGCATTTTATTAGAAAGTCATGTTTTTTGCTAGCTCGTCGAG  
TTTTTCTCGTTTCTCGGATTGCTGTGCTCTTTGTGGTTTAAAGTTGTGCATTCTCCTGATC  
TGCGATCTGGTTTGGTACTTCATAACCAACGCTGATTGCGTTTCTTCACACCCACGTTAAA  
CCGTGAATAAATAGTTCTTGTACCGTAACGAGACTTGATCTGATTCATGAGTTGGACGCC  
CATTTTAGCCAGGTCTTCGGTTTCGATAACACCCAACATAAAGTTCGGCAGTAGCCGGAAG  
ACCTGCTGATTCAGCGGTATCACTCATGTTAAGGTTCGGACGCATCCCAACCCGCACGGGT

AGTCTGTGCCGCGAGTCCAACCAACAACATTCCACTTAACACAAAATCCTCGCAGTTCTTC  
CGCAATCGCCTTAAGTAGTGTAACTATTTTCAGAGTATACACGCAAGCGAGACGATGC  
GCAAATCCCCAGATAGTCAACAAGCACGACATCAGGTTTAACTGTTTGTGAGTCGCAA  
CTCATTCAATTAACCCCTCAAAGTGATTGGAGTTCGCGCCACCAGTAGGGTACTGCCTGAT  
CATCAATTTTCCAACCGGACGATCTCTGATCTTCTTATTATTAACACGCTTCATGGGTGC  
GGAATATTCCGCCAAAGAAACATTACCATTATCCAATTCATCTAATGTAATGTCAAGCAA  
GTTTGCCTCGATACGTTTGGCTACGACATGCTCTGCCATCTCATATGAGATATAACAATAC  
ATCATAACCACATTCCATATAACCCGCGAGCAAGAGAACAAGCCAAGCGATTTACCAAC  
GTTTACACCAGCAAGCAACTCATTTAGCGTTTTTCTTTCCGCCCTCCTTTTCGTGCTTTT  
ATTCAACATCGGCAGCCTAAACGGGATCTTATTCGCCTTAGTCTGATATAGCGAGAATCG  
TTTTTCAAAGTCATTAAACCAGTCATGACCTACATCAGAATCAAACGTAATGGATAGTGC  
TTCCTGCATGATTTTCAGGAATAGCACCCCTCACTAGGCAATTTCTTATTCTGTTTCTCTTA  
TGGTAGTTGTGCGTTTCGCTGAATCTCTAGCGCCCGTGACATTGCAATATACATGGCACC  
GACACGAATAAATTTTTCGGTTACTTTCATTAACCAATCAAGGTCTTCCGGTGTATTCTC  
AAGCGAATCAAGAAGATTTTTAGCCCCTTCATATGTCGTCTGATTGCCTCTCTCCCTGTC  
TAAAGCAATCTGTAATGCAGTTGGGGTAGGAATATTTGAATATTCGTCTACGGGCTTTCT  
AATCAGCTTATAAATCAGTTTTTCTTCGTCTTCGGTGAAGTAGTCCGCTTTAAGGTGAGG  
CCATACATTTCGTAAAGAATGCGCCATTGTAATCAACTGTGAAAAGATAGTTTTAATCAT  
ACATATCCCCCAACTACACGCATAACAAAGGTCTTGAGTTTATACCAGAAAGTATCTTTT  
TTCATCTTTTCTTCTGCTTCTTTGATCTGCGCTGTTAACGCCTTAATGACGTGTGGATAT  
ACCACATTACGATCTGACGGCGTGGAGTAGTCGACCACAATACCTTTAGTGTATGGATCG  
TATCAACATTATGAATATAGACAATATAATGTTCTCCCTCTTCATCAACAATTATCAAT  
TCCTGAATAACTTTCTTCATTGGTTCTTGAATCAAGCCGTGTGCTTCTTCTAAACTTGGT  
GGTTTCTTATCCATAATATAATGCTCCCTAGATATGAAAAAGGGGCACGTAGCCCCTTTA  
CCACCATTGTTATGCTAACATATCTTCAATTTCTTTGTCAACTGCTTCGTCGTTGATCAC  
TTGCCCCAGCTTATAATGATCGTTGATTGCTTCGTTAAGCTTATCGTTTGTGAGAAGTGG  
TTCCAGAACTCAATGCTATTGGTTTCTTTAGCACGGAACCTGGGTTCTTCGGTTTCCAT  
CTCTCCGGTCTCAGTATTCAGGATTAACGAGAAATACCAGCCGTTTGACGGTTTCACTAC  
CCAGCCTAACTCTACAGCCAACTCCAGCAAACCGGAATAAGGATCGATACCACCGCTAAA  
TGTTACGCTAATCGGGAACCTTAGATTTTTCTTTAACGTTTCGTGATTTTTCCGCATTAG  
GATAAAATCATAACCAGTAATTTTCGGTTCCTTCTTTCTGCTGACGACGACCAATAATGAA  
AACTTCATTGGCTGAATACATCGCGCCCGTACCGCCGACATAACGGTCTTCCTAATCAT  
TTCTTGCGTTTTCGTAAGTGTGTTAATAGCTATGCACGGGAGATCATTATAGTCAGTTA  
CGGCGTAACCATACGGAACAACCCTTTAAGTGCTTTCGCTCGCGTCATATCCTGTGCGGA  
TTTCTCATTAAATCGCGTCTTCAACTTCTTTTTTACATGCTAAGTTACCGATTGAGTCAAC  
AGACATGATCACTATATCTTCACGGTTAAATTGCTCAAGCTGGTTCATGGTTTCAAATTT  
AAGTTCTTCGATGTTCTTGATTGAAACATGCACCACGCGATCAGGATCTACACCCATAGA  
TTCAAGATAATCGGGTGTAAATACCGAACTCAGACGCAAAGAACAACACGCCGCATCAGG  
ATTCTGTTTCATGTATGCACTAACACAAGTTAATCCCATGTTTGATTTAAAGTGCCTCGA  
TGGACCAGCAAAGAAAATCAGACCAGATTGAAAGACTTTTTTAAAGATCACCTGAAAACGC  
AATATTCAGCATCGGGATCTTAGTGCGAGTATTTGTTTTTTCGTTATAGAAGCTGGATTT  
AGGCAGTACCGCAGTAGTTTTTCAGGGTAGAGTTCTTTTTCCGTTTTTCCAGTACAGACAT  
TATTCATACCTCTATTCAGTTAATCCGTAATACTTTAATTGCTTCATTGTTATTGATCT  
TTGTAGTGCTCTTGAATTAACTTTTTTCATCGCGTCAACATTGATCGTCACAAATACTTCG  
TTGCTGTGATTTCCGGGAACCTTTCTTGAAATGCTCTATGCCTTCCTCACGTTACGTTGTA  
ATCTTTTCAATGTCTCTCATAGTATATTTCTCAAGTTGGCGGGTATCGTCACCCAACGCC  
CGCCATTATACACACTTTATCTTAAATGTCAAACAGGTCCGTCAGTGAAGCAACTTTTTT  
ATATTGCAGCTTCGCGAGCCGTGGTAATGTTCTCCAGTGGTTTGACGAAAGTCTTATTACA  
CAACGAAGGCCAGTCCAACCACTTCAACACCTGTGATTCAATTTCTGGCGGAATACGAGT  
ACCAGACAACCAACCAAAAACAGATTTTTTCAAACGGATTTTCGGTCTTTAAACGGTACAAT  
CATAACCTTCTCGCCTTCACGAATCGGATCTAGTCCGAATTTTCGAGCATTACGATTATA  
ACACAATACTCTTAACCGCATAACGACAACCCTTAATCGGATACCCGTTAGAATCGCT  
GTATTTCTGTAGGTTGTTTGCAGATGATACCGCAGCAACATCAAGATAGTCAAGTTCTCT  
AAATTTCTGCTCAAAAATACCGTCGTATTCCTGCAATGACTCTTCACCTTCCTGCAACAT  
ACGGCGAAGACCTTCTTTCAGTGATTTCTGGCATGCTTTAGGGGTGGAGCTACGTTGCGT  
TTCCATGCCACGATTTTTAGCTTAGGTTTCAGCAAAGCGCGTTTCTTCCATATCCCAAAC  
ATTAAGAGCATAACGCTTTTTTACCAGTCCAGAATCCGCCGATACCCGCAGATTTCAACGG

AGGACCAGCCATTGCCTCACGGTCCATAAACATCAAGTGCTCATAGTTTTTCATGTACTC  
GCATAACTCGCGATATCCCTTGTGCGATAATAAGTTCCATTCGATGGTTACCGAAATTATC  
AAGGAAGTCAACAAGTTTTTCGCTATCGTCGAAACGGTCTTCCCCGCCAACCTTATCAAT  
AACATTGTTAGCCAGCACATAAACGGAGTCAGTATCACAATAACGAACATATGCAAAATC  
AGTCGTTCCGCAAAGCTCGTTAAAGTATTCGTTAATCTTACGCTCAATCCACTGAATTGC  
AAGCTGACCGAACAGTGTGATCGCACTAGCGTTACGGAGATCATAAAAACGGAATTTAGG  
ATTCCCCAACGCACCATAAAGGGAGTTGATCAAACTTTACGAGAACGCTGGCTTGTATT  
GCACAAGGTCGACTCGTATCTACATTCTTCCAGTAATTTCTCTAATGCATCTTTACTCAA  
TTCAGAAAGCATCGAATAAAAACGCTTCATCGAAGTCGTGACGCACTTCAACGCTATAGCT  
AATGGTTCCCCCATAAACATGATTTTCATCGTGTAGAATCTCTTAACAGAGCTCAGCATT  
GCGGTCACATGCCAACATCATGTTTTTTTACTGCTTACGCTGATCGAATACCATTTTAAT  
CTCAATCGGTACGATACCGTGAATATCTTTTCTATACATCCATCCCTGAGGCGAGCAAGA  
ATACTAATCACTAGGACGTGGTGCAGTTTTATTGATATACCCGTGCATCGGTGCAGCATC  
AAAAGATCCGGCGATTGTTTCCGGCGAAATATTAACCTGACGGATGATTGATGGATACCA  
TTATGTTACAGCGTGGTTCGCTACTCCC GCGCCCGTTCTCTTGCGAACTGCTACATGTCAC  
CATGTCGATTAGACTATATCATATTCTCTTAGAGAATCCTGCCATTTTGAATCGCTTGAT  
TCTACTCTACACGGTTCGTTACCCTTTCGATAGTCGTTGAACAACCTCCATCTTTAAGCTC  
ATTTTGATCAAACGGTGTCTCTTACAGTATCCGCTATAAATTCTTCACCCTGATACGGAT  
TAGACACCAGTATAATGTAGTCGTTAATGCTTCCCTCGTTATGTATTTTCGTACTTTCTTA  
AAATGTCTTTTATCTCGCGCCTCCAATGTATATCAATATCTATATACATTATAAGACACG  
TTAGCTCAAAATGCAACTGCTGATGATTGTCTCCTTAGAGATTTCCAGCAATTAAGCAG  
GTTATTCGATCACTGTCACCAGTGAAAGCCCCATATCAGTTTAGGGCAGTAAGGTCAAAG  
CTCATCATCCAACGGTAAGCAGTCGGCACAGGTTCTTTTACGAATGCGCCCGGATAAGTC  
TGCTTAGGCTGTATCTTGTTCTCTGGTACTACTTTACCCTCAGCTTTCAGAGATCCGAAG  
ATAATAGCATCCCATACTTTCATCGGGTTATAAACATGGTTAAATTTAATCTTTGCTTAG  
AAACATAGGCTATACACCGGATCGATAAATTCGCGCTTTTTATCAATCGCCAACACACG  
TCAACGTCGCCGATGTTATAATCGAGGTAAGTTGGTGGTCGTCATCACGCAATTTTCGTT  
AACGGCCATCATAATCAAACCTTACCGATTCTGTCTCACATTCAGCAACATAATCTAAC  
GCATACGTTGGTTGAGTCGTAAGCTAAATTTCTTGTACAGGTCAATATAATCAAGGCTT  
TCGATCCCCATGATCGTAAATGCTTCACGCTCGTTGCCAAAATCATCCTGTGAGATTCGG  
AATTTAATCTTACCGCACGGGCTTATACTGATAGCGGTTCTACTTTCGAACCTTATTACTG  
ATACGTTTAAATGATATATGGAATATCGAATGTTTCTGTGTTCCAGCCAGTGAAACCAACG  
GGTCGGTCTTCTCAAAGAATCGGATGTATTCTACCAGAAATTCATCTTCTGTGTCATAG  
ACGTTATAAACAACGTGCTCTACAATATCAGGTCGAAGAATAGACTTGCTTGATTCCCAG  
ATTTACCGTTTTGTCCTTCAAATCAAATACAAAGAAACGATCATGTACGGATTCATAA  
TGCGTAATTGCATCGATAGGATATTTTCGCTTCTTCTGGTTTAGGAAATCTGGGGCAGTG  
ACCTCGATATCAACCCATGCTACACGGATTTTATTTTCGGTCATATCGAATCTCGCCTTTA  
TACGTATCAGACAGATAGGAGATGAGAAAGTCATACATCCCTAGCGCCTCCTGCCCAAT  
TCTCCCATCTTTTGACGCCATTTGTTGGCCTTGCTCAAAGATGGGAATTTTTTTAGCAATG  
CAAGGCTTGCCATAGATATCTTTATAATTCGTAACCATAACCAGGCGCGGCATGATGAAAT  
AAAGTTGGCGTATATTCAACGTAACGCTCTTGTCTTGTCCAGCATCATCAATATAACGC  
TCGTAGATCTTATACCAACTCGCTCACATGACAGTAAATAGATAATATAAACTCCTTCA  
CGTACGAAATACACTCATTATAGGGGAATCGACTTAGTTTGTCAATACCCCTATCCCATC  
AGTATCTTACCGTCCGATCTGATATTTCTCTATCAGCGTCCACTCTTCTTTCTGTTTGAA  
GGACAGTACACGGAAATTATTAACCTTCGGTAGTGTCAAATCACTATCAATCAGAGTACA  
CAGATTCCACTGCGCAAGAAGTTTTGCAATGTTATTAGGGCGTAATTCATCTTCCCACGT  
CATTTTAACTACGACCATCTAATTTCAACAACCTCCTTGAAATGAACGATGTAATAGCG  
CCTTTCTTCTGGAGAATATGACAAGACTGATACAGCGTCTTGTCTCGATTCTTGGCAAT  
GCCGCAGCGGGTTAAAGTTTCTTAAATTTTAAAGGAAGTTTTTCAGGACTAATCAAATTAAT  
TTCAATCATTTTACCACCTTTCTATAATCTTTTTAAGTCGTTACCTTTCTGTCTGATTCT  
TAGTAACACCCGCCAAAAGTTCATCGGTGCGATACGGTTTAAATGTGCTTCAATAACTTGT  
CCCTATATCCCTTTTTCATTAGCAAAATCGAGATAAAACCGGGCGTCATCCATATTTGCAC  
AATATGCTTTTCGCCACTGGCATTAAAACCAATTTTTGGTCCAATTTCTTCTGTAGTTTAG  
CCCATTTACCGTATCGTTCCCCCTTAGAAATCCTCTGTAAAACATAATCAAATGTATTT  
GATCTGGGAGACCATGACCGATAAAATTGATCACCTACGCGCTATATAGGCAATCTGCCA  
GCTGGGAAAGAGCGGTGTTAATCAATCTCTGATTATATGCAGAATTGTTTCCCACATTAA  
CACGCTGGTTATCTAAGGTGATATGATCCATCAGAGCAAATAATGCATGGTTCGGTTTTCT

CGGTGAATGTGTCAGCTAATTCAGACACCTTTTCACAATCACGAGAGCGCCATGCAATTT  
CATGCTCGTTTAATTGTGTATCATCTTCACCGAAAAATTGACGTAACATTATACGAACTC  
CAATTCAACCATCAATTGCATTAACAAAAAGACAATGTGAATCTCTTTATCAGCCGCGTG  
CGTAAACATCTGATTATTTTCACCGACAATCTCCGTGAGACGAATAATAGAAGCTGGCTT  
AACTTGAGTATAGAACTCAGGATAGAGTTTCTTGACAAATTGAGCGTATGTATTGGTATA  
GCGCGGTGCGAGTTTACGCACATTAGCAAACCTGTTTAGTTTTAAGTGCTTCCACCACATC  
GGTAACTTCGGTATTGCTACTTTTCGATGACCATGCTCAATACCCAGCATCAATTTTACC  
ATGTTTAGCGTAGCGGTCCAAAAGTTTCACTACGCGCCGGAAGTCTGGGAAGTTCTGCTT  
AGCCAGTTCGCTAATACGCGCATTTCTTCTACTGGCACACCTTTTTTATCCAGAATTGC  
TTTACACCGGACGATCATTCTTTTCATCATGCGAAGCTGATCATCTTTAGTCGGAGATCC  
AAACGTGATGGGGTCAAACGAGATCGTAACGCTGGGATAATACCTTCTAGATCGTTTCG  
TGTGATAATAAATGTCACGTTGTTTGAGTATGCCTCAGAGAAATTACGCAAGTGTCTTTG  
AGCGTCAGCCAACCCCGCTCGGTCATACTCATCGTTAATAACAACCTTGGCCCTTTTCTCG  
TTTTTCTTCATCGAGTGCTACACTCTGCCAAAACGTTTAATCTCTTCGCGGATAAAAAC  
AATCTTACAATCTGCGCCGTTAACAACAGATAATCACCACCCACATCTTCGCAAAGCGC  
CTTAGCAACGGTTGTTTTACTAGTACCCGGCGATGGGCTATGCAGGATCATCGAAGGGAT  
TCGGCCTTGCTTAAACAATCTGCGCGAAGATTTTTTTATCTGCTTCCGGCAGAATACATTC  
AGAAATTGATTTCCGGATGGTAGTTCTGTTCCCTCTGAAACTCATTTTCATTAACACTCAG  
CATATAATAGCCTCTCACAAATTAAATCATTAAAATGGGGAGTATTTACTCTCCCACAA  
ACATTATATTAGTCGGTGTAGCTGGAGTCTAGGTCACACGCGATCATGTAAGATACGGTT  
TCACTTGCCAGCCATACAGCCTTACGGCGAGTGAAGCTCAGTTTGTAATCGCCGAAGTCC  
GTAGCAACCAGTTTCATGTTATCTTTACGAATAAAGAAATGGAAGTCTGCGGTTCCGGTA  
TATTCGCCCATATCAAGACAAAACATCTCATTAGGATTATTTTTGTCAATCTCTTCCCAA  
CCTTTGATCATCAGACGACCATCAATCGGTAGAAATTCAAGGCGATTCACTTTAAGCTGA  
TTGCTCATTTTTATAAGCTGTTTCAGATCGTCGTTGCTCAGTTCGTAATCTACATCGCTT  
GCAGGTGGAGTAACTCGGCCTTTCCGTGATAGGATAGCAGAAGCACTAGCACCAGGATAA  
TTAATTTTCAGACGATCATTAGACACACGAAAGTTTCCGGTGCGGTTATCAACCGTAATA  
TCTGCTTCATCGCCCACCAGATTCAGAATGCCAGGAAAGAGTTAAGATCATAGATCCCT  
ATTCCGTGTTCCAGTTCTTGATTACAGAGTCGCTTACCATATAACAACGTTTGTATGTTT  
TTGGTGATTAGGACGTATCCTTTTTTCAAGATGATCCCTGGGTTAATAGCGGAAAAGTTT  
TTCAGGGTAGCATTGATTTCTTTAGTCAGTTTCATCAAATCACTTTTATCATGTTAATCA  
ATTAATTACGGGTTTACTTCGTGCTCATTTTGAATCTTTAGCATTCTTTCGATAAATCTT  
TTCTCGGCTTCCCTTATCGGATGAGTGAGTATACTTCAATCCAATGTAAGCTGTCAAGTAT  
TGTTGCTGAGCATAGACAGTACCACGATTCTTTGCGGTCTTTTTTCCGTGCGAGATATACC  
AGATCACCACGAACATCAAACACAAGTTTACGACGAATCACATCATCAACAAATTTATCT  
AGGACAAAATACCACTCAATACACTCTATCCCGTGACGGTAGTTCATTACATCATTATCT  
TTGATATAGTCAAACGGAATATGACATAATTTACTATTTTGTAGGATGAATAGCATTGT  
TCTTTTAAGCTCATTCGTTTCATTCTATCACTTCCCATCAGCAATTGCGATCAGACCAGT  
TATTACTACGCTAGCGGCTTCAATCAGCAGTTCATCAGTGTCAATCTGAAAACCCTTTTC  
GAGAATATCTTTACCTCGAATAGTTTTAGCGCCTTTAGCAATTGAATCATCGTAATACTT  
GCGCATTGCCGGAACCATTTCTTATTGCACCATATCATCAATATGCGCCTACAGTTCAA  
GAGTGCTCGCTGCGGGATAACCTTCATTTAGCTTTATCGCGTTCGCGGCTTGTAGTAG  
CCATGCTTACGGATCTTGTTTCATGGCTCGGTCAAATTCGAGACTGGTTTTCTTGGTCTG  
AATATCTGCTACAGTAATTTTAGACAGGTTTTCGGAAGTAGTCATAATATTAATCTCCAA  
AATAAAATCAGTATATCACGTTCTAAAGTTTGTGCAACCCAGCATCAGGGTAATCAAG  
TTGATCAAAGTTGGGGACCAGCATGAACTTATGATGACGACAAGACAACATTTTTGTTAT  
GTCCGCATCGCTGTATATGCCGTTTTTCATATCCCCATACTAACTACATATTCTTCACC  
GGAATATAGATTGATTAATGTATAAATTCTAACTCCGGCTGCGTTACTCTGTCAAAGT  
TAACATTCATTTAGTGAATCGCCCACGTTTAAACCATCTTGAGATGACTGCTAAAATCAT  
CAGGGTTATGGTCACGATGGCTGATAATATACAGTTATCATCTAACTTGTCAATGATCG  
TATCAAGTGCTTTTACGCCCTGAACGTCCGTAGCCCCATCATAAATTTCTGTCGAGTACCA  
ACAAAGAAATAGTAGTACCAGATACTTTACCAGCAACATCACGCCATGTAAACAGCATCG  
CAAGGTCAATACGTGCCTTTTCGCTTACTGAAATGATGTATACGAAAACCATTCACGCC  
CCCGTGATTTGATTGTTTCGTTAAACTCTTCATCTAGCGTAAAGATATAATCCGCTTCCA  
TGATATCAAGATAATACGCAATCCGATCCTTGA AAAATGGAATATATTTCTTGACGATAG  
ACGCCTTAACACCGGAATCGTTCAA AATTTCTGTTAAAAATCCACGGTGATATTTTTCAA  
GAACTAGCTTTGATTTTTATTAGTAATCTCTACCAGTTCGTGTTCCAGCTTAGCAAGTT

CTTCGGAATTGTCAACCCTTTCTTTTTGCGAGTTCCTGCATTGCTTTCTGGATCTGTTTAG  
CCCGACCTACAGATGCCGTTAAATTCGCTCTCTGTGACTCTATAGCGCGTTTAAATCTCCA  
AGACCTTAGTTTGTGCTGCGTGGAAAGAATTGGCCCTCTCTGCGTATTCTACGCGCTTCT  
CGTCAATCAGAGGCAGTTTATGTTCTGCTTGTGCTTTTTGTTGCGGTACAGCTTGATCAT  
TACCTTGAATGATCGGTTGTGTGCAAGTAGGACAGATCCCCCTTTCTCGTGCATGTGGA  
TAACACGGTCAAAGTCTGGATCTGCGCACCAGTCTGTGCGATAGGCGTATTAATTTTAG  
CAAACGCCGCGCTAGGATCTTCCGGCATAACAACAGACAATAGCTCATCGGTCAAGCGCC  
TTTCTTCGGCTTTAAATGCTTTAGCCGATCCTACCTCTTTATCATAACATATTCTGCAAGC  
GCTGTAGATTCTCGGCACTAGACTTGCTCGCGTCTCTATTTACTTTTTATCAGTGTGGA  
TTTGATGCTGAACGAGATTAGCTTTCATTACCTGCATTTGGATATTCTGGGTAATCTCGC  
GCACATACGCTTTATTCAGTTTATCCATTTTCGCTAGCGTAGCAATATCAAGCAAATCCT  
CGACCACTTCACGGCGACCCGCTGCCGGAAGACTCATAAACGGAACATAACCAGCAGTGC  
CTAAACAACGATCTGTTTAAAGCTGGCTAGGTTTCATTCCTATGATCACTTCATAATATT  
CCTGAAAGTCTTTGGTGCCTGCGCTCTCGTGCATCTTTTGACCGTCTCGATGCACTTCGA  
ATACTTCCGGTTTTTTGACCACTTTTGATATAAAACTCTTTCCCGTCCAGTTCAAGCCAGA  
CTTCGACTAACAGTTTCTTTTTGTTGACGCTGATAATCAATTGGCCTTTCTTGATACTAC  
GAAACGGTTTACCGAACATCACAAAGCAAAGCGCCTCGATCATGGTTCGATTTACCAGCAC  
CGTTAACACCAGTGATTAGTGTCTTTTTGAATCCGTCTAGCTGAATCTCAACAGGTTTCAG  
CACCCACGCTCATTATATTTTGATAGCGCAAGGTTTTAAAATTTAACTTTGCCATTAAAC  
CACTCCGAAATCACACATTCCATAATATTAATGCTAACACATCTTCGTCAATGTTGTAA  
ACACTTGGTGCCTTCACTTTAACTAATGTGTCTCTGCGATCTGGCAGCATGATCACATCA  
TCCAGTGTGCGGGATCATATGTCAGAAAGGGATCAACATAAATACCTTTATTCAATGCC  
AGATATTCGCGAAGACCTTGTATAACCCTGTGTCTAAGGTAGGTCATCGATAGAATCATT  
TTAGTTTATGTTCTCTAAAAATTCTTCAATTCCACCTTGCAGGTCTTCCGCTTGCTGTT  
CCAGAATATCGCGAAATTCACCTACAGTCCAGCGGTAATCACATTTACCAGTCGATGCG  
GGAGAATATACCCTTTATACATTGTCTGTGACGCGTCTAGGCATACCCCACTATGCATGA  
CAGAGATCCAACCTCTTAACGTCAATGGAGTATTCGGAAAATAATACTTGCTGGATTGTT  
TCCACTGGACGAAAGCACCATATACAATCGGATTATATTCACCAACCACACTCTTAATAA  
TGGATTCAACTTTGTGCTTTACAAAGTCGCCAATGCCCATAGTCACCATCAATTCTTGTG  
GGTGAATCACTTTAAGGTAACGACGGTCGCCGTCATCATACCACAGCTTAACCCTGACT  
GACCCACATTTTAGCAATACGCGCTTTCAGATAACCATAGATCGGATTCTTGTAAATATG  
ATTGTTATAGTGTGTACACGTGCACCAAGTCAATAAAATATTCCATTGCTATCGAATCAG  
GATCAGCCGCGACCTTACTCGTATTACATAATATGTTCCCTCGTTCAATTTACATATTGTTT  
AGGTCTTCTCAAAGTTCATCCACTGCTTGTTCAGCACATGACGCAGCGTAAAGAAATAG  
CTTTCGTCAAATTCTATTTCCGCGCGAGGAATAGAGCGATTCTTACACTTAACAGTAGTA  
TCGGTGAGGCGCTTTTCGACCATCATCCGAACCTTCTTCATGCTCTTTGTAATACCATA  
TCAACAGTGATTCCCTTGCCTGGAGCAAACATAGGCAATGCCGCAATTAATTCATAACC  
TTTTGTGCAAGTGTTCATCATAACAGATTCCATAGACCCACGAGCAATAACATTCTGGG  
TAATATCAGCAACCTTACGGGATACGATGTTTGTAGCCCTCTTTGGTGATATTTTCAC  
GATCAAATGGGATTTTCGTATGAGTCCACAAACCATAGTTAGACCGAAATGATGGCATAT  
ACTGACCATCTCGCACAACCTCAAATACATGGATCTTAGTGAACCTTCGACAAACCTTCGT  
TGATTTCTTTCAGTGCCTTAGCAATCATAACAACCTCCAATCAATTTTAGAGAGTATAA  
CGGGGATGTCTCCCCGCGTCAACTAACTTTTTGCGTTATTTGCTTCGGCTAAAAGTTCAT  
CAGAAATACGCTTGACCGCCGCAAGTTCATCCGGATCAAGTTTTTTGTTCTTCCAGATATT  
TATAGACCATCTGAATAGTGCTTTTAACTTCAATAACAACCTTTTCCCTGTGATGCGCTAC  
TCTCCAGTTTATGGACCACCTTTAGCTTGTGTACAACGGCCTCTAACGCGCTTTCTAACT  
TAGCTAACCCATTATTAGCGACCGTTGCGATAAGACGCACACTAAGCCCTTTAAAGCGTT  
CTACATCGATTTTTTCGTCTGACGGGTAAGTGATACGCACATGATAAGTTTTGTCATTCT  
GAATAAACTCTTTTTTGTGTGTATCGGGATCGAATGCCCAAAAACCACGCGGATCGTTTT  
CGTCACCTGCCGTTAGTGTGTATGGTGTACCAATATACGTTACGTTACCGCCATCACTGA  
TAGTATGAAAGTGTCCCGAAAACACTTCACGGTATTTCTTGGAGAACTCCGCGCTATAAC  
CTTCCGATTTTAGCCCTTTATAGAAATAGTAGCCAGACAATTCCAATGGCCTACACACT  
ATTCGCTGAATGAGTTTTGAATAAACTCTAAAATGTCTGATTTATTGTCATCACAAAACC  
ACGGGAACATGTCAAATGATACACCATCAAAGGTAACCTGTTTCCGGTTTATCGATAACTT  
TAATGCAATCATATTGGCTTAACACTTCACGCGGTGCGCTAGACTGAATCTTATGACGTT  
TGAATAGATCATGGTTCCCTATGGTACATAACAGGTGTTTCTAGATTCTTCCAGTAACG  
GGATGACCTTAGTACGGTTAAAACCTCATCGTGCATGAGTATTAGCTTTTCGGCAATCAA

ACCAATCCCCTGTTTGAATCCATGTCTTAATATTATGCTCTTTGGGGTATTCAACCGCTT  
TCTTGATGGTATCAAGAATATACTCATGCACCCACGGATCATCGCCACCGATAACCAGTAT  
GCAGATTACCTAAAAGCAAAATTTTCATTGTCTCTTCTCTCTCGTTTTTCGATCCTCTC  
ACTATATCACAGAAAAAGAAAAAGGGAAACCCCTTGCAGAGTCTCCCTTATAAGAGACAT  
TACAGCATACTTAATACCGTTTGCCGTGACTGACCCACACAACAGAAAGCAGTTCTGGC  
GTGTGTGGCTGTTTGTAGATATCACGTAGTTTTCCGATAGCGTAGATATACGCATCACGA  
TTATCATCGATGATAGCTTGTTTCAGCCCACCGCTTAAGTCGTGCAATCTCTCGCGAGTTC  
TTACGCAAGATCTTTTCCGCTTGCTTAGCGGCTTAGCCTCTAGTTCTGCTTGTACTTTG  
TCCACTGCATTCACTGCAATCTTGTATGCTGTTTCATCGTAAGTCATGTTTTTTTACCTC  
TGGGATATAATCAATTATTAAGAAAATTCACCTTCTGATACATTATAGCTATGTGAGAT  
TGTGCCAGTCAAGGCCTCAAGATCCGGTGATTTGATATTGCACGGATCGATAATCACCGG  
AACGCCGCACTCTCTCAAAAATAATTTGGCGAAATACGGCACGAGGGCAGTTTCAAATC  
TGCTGCTTTCAGCAAACGGGAAATGTTAATTTCAATCTCATAAAATTGGTCCAGGCTAG  
GCAATTCCTCAGTCAATACATCTTCAACCTTTGGCGCTTTCGGATTATTGACCGATTCT  
CGTAGTTGTTGATTTTATCGTAAATGTCTGTATGAATGCCTCATCAGCAATCTGGCACA  
TATCAGCGTCGCGATGGTCATATACATGATGCACAAAATATTTGTATTTTGGCGGCTGTCG  
CTGTTCTCTCTTTTTAATCCGCTGTACCAAAGCATTAAAGCACGCTTGCGTGATGTAAG  
CATGAGGATTTTTATACTTTGACTCGGCAAAATTCATCAAACCTTGACCGCCGCTTCGA  
TTCCGTCGTCGATCATTCTTGGCGCCATGTTTACTATAACCAGATAAGTTCAAACGAC  
GTGATAGTTTTTTAGGGATTTGCATAATTGCTAGACCGATTTGATCGCTCATTGGAACCT  
GCAGCCCTTCTGCTGCAATTCGTTGTTTCCAACGGCAAATTTCTTCGTAAGCTCTTTAT  
TGTTTACATAATCAGACACTTCGCACCCCTCGCTATTATTTAGGAAATAACCCTTCCGGC  
TACTCCCCATTGCCATTATACTTTCTTTGCTTAGTTATCCACACTCTAACCATCTCTACT  
GATTCACCGTCAGACGGATCAAGAGTTTTTCTTTTTTCTGCATGCGATACTTAAATCCG  
TTAAATCTTGCATTCTCTTGTCTCGTTAAAGTCGAACATCTTTTTAAATGATTTTCGCCCT  
TTACGCTCACCAATTCTAGCGGAATCATTCCGGTCTGTTATTACATTGGCATTAGGTAGA  
AACGTTTTTAGCTAATCTACCAACGCCCCATCAGGAACATATAGATTAACATTCTCCTTG  
CTCTCGTTGTCTCTCAGGTTACAAAGCAAACATAATTGAAATGCTGGTTCCCGATAATCA  
GACACATGACGCGCTTTCAAAACCTCGTTTGTCTGGGAGATCGCAACTATTAGCAAGACCT  
TCTAAAATATCAATCTCCCATCGTTGAGGGTTAAAGCCGAACATCACAGCAACATTTTTA  
TGATGAATGTAAGAGTTAAGACCATAAGATCCGTAAGCCATCCGCTACCAATACCATT  
GTGCACGCTTCTCGGTCCCGATTACGGTATAACTGAATTCATCGCCACATTCATTTTTA  
ACCATATCAACAAGACGTTCAAAGGTATTGTTTGTCTTAAGTGGTGACGCGACCAGCGT  
TCGGAGTCAGTCATAAGGATGATGTTAACTCTAGCTGTATTTTGATACTCTTTGAAATAT  
AGTCTGGATTCTACCGCACTCGGAACGAAATCGCAATTCGCATAGTAGCGTAGATACTTC  
CCGCTATATGGATCAAAGAGATTTGCACATGCTATCGTAACCTTTTTAAAGTCTCCCCAC  
GTAACGTGTTTGTATCGTTCAAGTAAACAATTCGACCCATTCTTCCGGTGTCTTTCG  
TTTTGTTTTACCATAACGTTGATTATCTTCTTAATAACGCCTCATAAAGCCCTCGACGA  
GAAGGATCGATCATATCAGTACCATCCTTTGCACTTTCTATCTTTTCTTTGATAGCGGCC  
TTCTCAGAGTCTTTTAGAACTAAGTTCTGTAGGCATTCCGATTTCGTCTGGCGATTGGTTTCG  
CAATGCTTCGGGATAAGTTCAAAGATTAGACTTAAACGGATACTCATTAAATTCAACCAGT  
TGAGGAAGTTCATCAATGTAAAGAACATAATCACCAACATTTTTGAACGTTCCATATAG  
GATAACGCTGTATGTTAATGAATATCACATCAGCACCGTCTTTAACTGATTGCATTATC  
GACGCTTGCCTTAAAGGCTTCTTAGTCTTGTGCTATCGATCAAGACAGCACGACCG  
CCCATTCTTTTACACTTATTGTAATAATTGTTCACTTAAAACACGAGATGGCGAAGCAATA  
ACCGCTTTTCTTTTGTCTTAGGACGTGGGAAAGTATAGCATCAGTTTTCCCCGCGCT  
GGCAATGCGATTAATGTTTCAATCTTCATTAGAAACCCTTACGTCGTGCTTTCTGGCATT  
TCTTGATCAATTTATCAGAGATTTTCGCACTTAGGTGCAATCTCTTTTACACCGAAAGCAC  
TAATGCCAAATTCAGAGAGAATATATTCAACTAAAATTCACGCACACGCGCTTTACCGA  
AATTCACGCCGTTATTTTTCAGATATGTCTGGCCTTCGACTTGCATCAGATCTAAATCTG  
CGTCCGTAATATTGATTTCTTCCATGCGCCCAAATCGAGAATAAACCATGTGTGGGATGG  
CATTGTGTTCTAACATAATATATCTCACTCAAGAATTACTTAATGATACTTACTTTAC  
CAGATCCGTGACAATGAGCACAAACCCATCACACGCAATCCTGTTCTGTTACAGTGTT  
TACACTTCTTCAACGGTAAAGCCATTATATCAAATAAAGCAATAATGAACACCGAAACTA  
AATTCTCAATAATCATAAATCTCCCTAAGTTCTTTATAGCCTCCAATGTGCTCATTGTCA  
ATGTATATCTGGGGGTATACAAATCGGAGGCTCTTTGAGTTCAGCCTCCCCGCCAGTTCT  
TCAATCCTATCACGGTCTGGAATAATGTCAACCCCAACCTGCTTGAATACTGGTTAAGT

GTATACGGAATACCCAGATCATCCAGTAGCTTCATTGCACTTATAACAACCATAACAATGA  
TAAGCCTCTTTTCGGTATGCCGTATATCTCGATCATTCTCAGCCTTTAATCGTTCTAGGT  
CTTCTTCCAGTTCCTTGATCCGTTGGTCACGTTCCAAGTCACGCTGCAACTTAGTGGCGA  
ATACTCGTTTAAACAGATTGTAATCATCGATTTTAAACACTTCTTCTTCGCCATAGCGAC  
GTACAGAACTTCTTAGTTATTGAAGAATTGTTGCATCATTGCTTAGGATGATAGTTCTG  
CCGACACTACCTTAAAATATTGATCTTCAGTAGGGCGAAAACCAATTGCAAGCATAAAGAT  
AAACCTTTTCATTGTCCGGACACTGGTAAGCCTTACCATCGATTTCAATCACAGAAACAT  
ATTCAGGTATAGTAGATGAATAAATAGCTAAGACTTTAAACGAACCGTTCCCGATAAACT  
CGGAGATCACACGATTTCGCATCTCTGGTTGCAAATGCTTTACGCGCTTGTTTCGTTTTTCC  
ACTGATAGGTCATACCAACAACAACATATTACCAACCTCGCTCTTTACCAATCAAAAAT  
TCAACTTCACGACGTTAAATGTCTTCTTGAAGGTTTTTAATCTTCTGGCGATCTTGCAAT  
ATTTTCGGCCATCTTGTCAAGTGCTTCGATGAAATCATCGAAACGTTCAAAGGTTTTACCT  
TCATTTGCTTCGCCAAATTTAACCATTGTCAGGCCGTAACGACTTCTAAACAGACGTTTC  
AACTATCCAACGATTTTAGAATCCGTGGTTATAACTTCCAATTCTTCTACTGCACGAAAG  
AATTTTCTATCAGAATCTATAAACCAGCTAGTTCCTTGTGTTGGCTATCTTCTGTTGCG  
CTCATTAGAGTATGGTCTTTACCATCAATTTCCATTACATCAATTTGCCCTCATGGACTA  
ACATTTGTAACAGTAAAAGGTCTATAATTTATTGCTCGTGCAATAACATAATGAAGGTTA  
GATACGTTTTTCAGCATAATGGCAGAAGTCTGTCATAGCATGCGCATCTTTCCAAGTCTAA  
GTTTTACAACTTCCCATTTCTGGGGAACCTTCTTCAACTTCACGAAAGAATTTTCTATCA  
AATGGACTAAGGAAATATGTTGCAGTCCAAATGTCTTTTCCGTAGCAGTTTTTCGCCGTA  
TGATAAACACCGTCTAGCTCTATTGCATCAATCCAACCGTTACCCTCGATCTCGATGATG  
GTAAATGGCTTGTACCAATAGCTTCCCTAATATCGCTGTTAAGTGGAGAAAGAACACCT  
TCTCCGTTAGTAATAAACTCAGTTTTAGCGTTTTTCGTCTTTCCAGGTGTAAGTTTTACCA  
ATTTCCATTTTCATACTATATTCCCCTTAACCGATTTTATCAAGTTCGTTTAATGCTTTC  
TCTGCTTCCGTATAGCTTGCACCCTTTCCGGCATTTTGTCAAGAAAATCTTTAAACCCT  
TCAAAGGGGAGATATGACGCAAGGCGTTAGCACCGATAGCCGCATGTGATTTGCATTCC  
AAGCGTTTTTATAATTATCCATCGCCAATTTGAGAAGATCAATTAATTTAGATTCTTCT  
GGAATAATAAATTTCTTCAAATCTGCTACGGTCATGATCCAGCAACCAACAAGATAGACCT  
ACATCGGTTGAACTAATAAAGTTCCATCATGAAGATAAACAGCCAGCACGTATCCTGTT  
TTCGCATCAACCGACGCAACTTTAAACGGTAATCTCAGATAAATCAAATAATCAACATCA  
TACCATTTAAAAAATTGTTTTGCAGCTTTTACATCTTTCCACGCATAGGTCTTACCAACT  
TCCCATTTTCATAATATCATCACTCATTTTTTCATACGTGATTCTAATTGGGTCATGCGGTC  
GCGCGTTTTGCTTGTATACGCGGATCGCACCGATGCGGCTAGGCACACCATCAAGCACGCT  
CTTAATTCCTTCTAGGGTAGTAATTTTGGCAATGCTATTATGTAACCCCATCTTATCGAT  
CAACTGAATGTCGTAGGCTTCCATAAGCAGACCCAGGCGTTCTAAAGCTAGGTCTTCTTA  
TTTTTATTCCGATTCTGGAATCTTAGGTTCAATAGTAGCTTCGGTAAAGAAAGGATGCTC  
ACCCGACCAAACACACACCGGAGCAGCCATTAGGGGATTCTTTTAAACGTCATAGAATC  
GAAATGACTACAAATAATAGTAATTTGTGTAACATCACCATCATCGTCAAGGTCTTCTAC  
CTTAAACGGGCGACCAGCCTACAAGTCCACAATACATCTGTTAATAGACGACGAAAATTT  
AGTCAGTTCGGCTTTAGACGCTTCGCATTCAATCTTGTAAGTTTTACCAACTTCCCATTC  
CATAATAATCACCTCAAATAATTTTCACTGGAATACTATTAACAATCTTGTATTGTA  
GATTGTCAGATCCCCGCCACGGCTTCTTCGTTGGCATAACTTTAATATAACGCCCATCGA  
TGAACATGTCAACTGATTCTACAATTTTTCTTTGCTCATCACTCAATTGATCAAGTGTAT  
AACCGGACCATAGCCAAATATCTTTGTTCCGCATCCATGATTTTACTTCATCGATGATCC  
ACTGTACAACCTTTAAATTGCGTTTATAACAACGGATTACCACCTAAGAATGTTAGCCCT  
GAATAAAATAGGGTCTAAGCAGATCCAGAATCAATCCCATTGTATCATGGGTGAATGGTT  
CCCCGTTCTTAGGATTGAGTAGGCTAGCATTAAAGCAACCATCACATGCGTATGAACATC  
CGGTAACGTAAAGGGAGACTCTCACTCCCTCACCGTTAACCATATCACAATCTTTAATAT  
CGGCATAGCGTAGTTTGCCGTATGTATCAGAACTCATATTCAATTACCCCGAACTCGTTT  
CCAATCTGCGCTTTATAGTAACCACCGCGAGATACTAATAGATAAGCTGGGCTTAGGTCT  
TCGTATTCACGGATTTCTACTTGTGCGTTTTTCAGTTTCCCAAATCAGTAAAGTCCATATA  
TTTGATTCTCCTGTAAAGTTGTATCGCGTCTTGATGAATATAGTATAGGGGATCTCGCGA  
TTCCCGTCAAGCATTTATTTAAATTTTTTCGAGAGATTTCCACCACAGGCGGCTGGTAGG  
GACTCTCCGGGAAACATGAAATTGTCATCTGGATAAGGACGAAGCATATTTAAAATAAAC  
TTGAGGCACTCTTCGTAATCTTTACGTTTAAAGATAAATCACATTCTCGCCAGTAGCGATC  
ACACCTTTTCTATATCCATGCTCTTTACGCACAGACTATTGTACAGTATCTTTTTTAAACC  
GGAATCACAACAGGTTCCCAATACCAGCGCATCCGGCTACACCACACGAACAGGACAGG

AAGTATTGACCTTTTGGCTTTGTTTTCCCTCCCACCCGATATTATCCGGATGCCATTTCGTGA  
AACAAAGGCTACAGCATCGTGTGTCTCTTCGATCTGTTTATTGTCAATTCTTACCGTAACC  
ATCCATACAGGGATCTTATTTGTTGGTTCATCAACATAACATGAATCATCATCAATATGT  
TCTCATGTTCATGTCCACATTAATTGATTTTGGCGTGTTCACAGTGTTCGTTGTGCTTTACGC  
TTACGATTCAATAATTAAGACATATTCACCTCACATTATAAACGAAATTGTACGCCATCA  
AAATGAGAACTTGCATTACAGCTATTATAGATAATAAATCCTGTATCTGGCGCTTGTACT  
ACAAATTGACTTGCATTAACAGCGGCAACAGTAAAAATACGATCCGTGAGACTATGTTTA  
ATTTCTGTCCCAACTTCCAATGGTATGTACTCTTCTCTTCGTCCCAACACCAAAGCAG  
CCTTCTTCATAGTACGCCTGAATCTTTTTATCACAATTACACACTTTAGCAAATCAAGC  
GTATACAATTCATGAGAGTTGACGGTATAAACCAACACAGATTGATTATGATAGCGAATC  
ACACACAGGTTATTATCTTCGTAAACGACACAAAAACTACGGATTTGTGTGCCTTCGCCT  
TACTCCAGCAGATATTAACAACCGTTCACATAATAAAGAACTTTCTTTTGTACCAAAG  
CTAGCCAGTGTGCTAGCGTGCACCTTAACAACACTACCCATCACCAATTTCTAACTTGCGA  
ATTTTAATTTCTTTATTCAATATACAAAACATAATGTTGTCTCTCTTGTTTTTCGATGTG  
AGCATTATACACGAGCTAATCCGGTGTCAACACCCCAACGAAAAAGCCGACCGTTTC  
GGATCGACTAAAAATTACATGTGCTTAACGCGGTTTACCATCTCCGAATGTTTCCCGTGG  
TTAACTGGACACAGATCAACAGAACCAAGATATCCACTAACGCGACGGATAACATTCATC  
TTTTCCAGATTGTCATTTCCGCAATCAGGGCAAACAAACCCAGACTCGGTGCTCTCATT  
TCCTTATTAGATCCGCATAGATGACATACATCGGAAGTAGTATAAACACCGAAGTAGTGC  
AATTTATCCATTGCATAGTCTACTACAGTTTCAAGACCTTTGAGGTTGTTTTTCATGTCT  
GGGAACTCAACATAAGAGATCATGCCACCGGACGCCAACCAGTGTAATCTTTCTCAAAG  
TTAATTTTCTCAAATGGTGTGACTTTCCGGTCTACGTCAAGGTGGAATGAGTTGGTGTAC  
CAGTCTTTATCAGTAGCACCTTAACAATACCAAATTGCTCTCTGTCCAGTCGATTAAT  
CGATAGCAAAGGCTCTCGGCTGGCGTACCGTAAAGACTAAACCCAAGTCGGGTTTCGTCC  
TTCCATTTTTAGTATAATGACGCAAGATCTTAAGATTATGTTTACCGTATCGCTGCGCA  
TCTTCCGAATCAAACGGATGAACACCAAACAGGACGCTCAATACCTCATGTAAACCAATA  
TATCCAAGAGAGATACTAGCGCGACCATCCTTCAGCACTTCCAAAATTTTCATCGTTTTGA  
TGAATACGGAAAAATGCACCTTCTGTATACAGTACAGGAGCTACATTGGCTTTAGCCCT  
TTAAAGCGTCTACGCGACTCATAATCGCATCAAAGCAAATAGGCATACGATTAGCTAGC  
TCTTGTTCGAATAGCTCAATTCTCCGCATTACAGACGCTTTACCAGCACGACGGGCGGCA  
ATAAGAGCCATACGCGGAAGATTACAGAGTCACAACACCCAAGTTATTACGTCCGTCTAAT  
ACTGCCTCGCCTTTCTCGTTATGCCACAAACCCAGCAAACCTTCTACACATTATTTGTTCA  
GGGTAGGTCGCTTATCTACCCCGCCTTTCCGGCTGCTACATGTCCGCATGCAGAACAGAG  
TATATCTTCTATCTTTTCGATAGTCTACCATTTCCGGATCGCTTGATGCTACGCCGCTACAT  
TCATCACGGCTAGTCGTTAGGCTTTTCATAGCGGAACCTCATATTCATAAGTATTGATTTT  
TCTACCATCAAGAATTGCAGATACATTTTTACGATGCAAGCCCAATGTTTCAGAAAGACT  
TCTCACGCTTTTAAATGTCTGCTTTGTCCGGTTTCTTTATGGATCGTAGTAACCTTATA  
TGAACGACGTGTGAACCTTATAGCACCCGTTTCTTAACCTTCTTTAGTGTTTTTCGCTGTT  
AGTCCCCACTCAAGGTTAGATGCATCGTTTATAGTTTTATCGTTTTTTTTATGTTTCAC  
ATATCGATAGCCGTTAGGATTCGGAATCCAACATTCAGCCACAATAACATGAACACGCAA  
ACATAAAGGTTTCTTGTCACTCATTACCCTTACTAATGCATATCCGGTATCGTTTTCTAT  
CCAGGTACTIONACTGTTACCTTTAGGAGAAAACACCCGTCATCTTTTCGATACCATATA  
TTCGGTATCACGAATTTTTCTAAGTTCCATAATATATCCTCTTATACACACTGGCGTAAA  
GAGAACATGACCGCTATGTTTAGCACGGGATGGTCTTCTAGAGAGTTCCCCCGTTTAGGC  
AGATTTTAGATGAGCTGTTTCAAGTTTACCATCGGGCTAATCGGAACACTAGATCCAGT  
GATGCTACGGTTACTTTCGCAGAGATATAATCGGGGTAAAGACGCTTACTAGCACATTC  
CAATGCAAGTTGCTTAATGTCGTAGTTCCGGAACCTTCCGGTTTAAAGGTTTAAATCCTTCTTA  
TAAGAACATTACCAGCTTAGGAAACACCGGAGTTATACCGTCTTTACCTAAACCTTTAGT  
TAGACCTTTACAGGATCGCTTTCTGCATCGGTTTTTCTTTCCAGCTAGTACCCTTCCCAA  
GGTTAAAGTCACAAAAGGTGTTTGACCGTTGGTATAGAAAAAAGCGTTGATCTCATATTC  
CAACGCCTGATATCCGTCTAACGTTTCTTTTTCTGTTTTCTCTTGTGCATAGAGAGTATC  
AGCTTTGATTCCGTAGGTTTCGGCATCAGCACAGTGTTTATGATATGTTTTCTTAACATA  
CGGCGCTAACACCTGGTCGATGTGTGCAATTGTGGTCCCGCCATATTGATGACTTGCCAC  
CTGTGCGATAATTTGAGCGGTTACAGCACATGCAACACCGATCGCTTTAGGACTTTCAA  
TTGTGCGCTACCCAATTTAAAACCATTTCTTAACATGTCTTTGAGATTAACAAAACAGCA  
GTTAGTAAACGGCATAGCTGGTGCATAATCCATATCATGATAATGAATATGACCGTCTAC  
ATGCGCTTTATAGATGTGCTCACGTAACACGATTTTCGCAATAAGTTTAGACACAGCGTC



AGCAATCAGATCTCGACGTGTCGGGAATGTTTCGCGCGTCTTTGTTTCGCGTTCCTCTTTGCT  
TACTTCGTTTTCTTTACCCGTGGCGATCTCTGTAATGTCTTTGATTAGTTTTTCCATTGT  
ATCACCTATGAAAAAGCGGGATTTCTCCCGCTCTTTGATAGTTATTTTACCAGCTCTGCT  
AATCTTTTTCTTTAGCTTCTAGTTTCAGCTTTAAGCTGTTTAATCTATTGTGCGTTCTTA  
TTGGCGGCTTCTGCTTACTATTTTCGGATAACCTGATCTAGATACAACTCCCAATCCTAA  
ATATTTTTGATAATGTTTCCGTCAACATGAATTGGTTCGGAGATTCAGTACAGCTTCCAGT  
TTAGTTGCAAAAACTTTAATTACTGGGGTGAAGTATTCATATTCGTTATCTTCAAACCTAA  
CAACCTAGACTTGCATTCTCAATACGAAGATGAAGTTTAAGATCAAGGTCTTTATCATCG  
GTATATAGGTCTTTTATACACCCCATAGAATTAACAACAACCTTTAAAACCAATTTTATCT  
ATACCACCAAAAACATCTTCAAGAATATCAGCAATTGAGCTATTAGCGCAAGTTTGGTTCG  
CTGAATGCGTCAAGGTTTTCTTTAGTTACAGTATACCAAACATCTTGTACCCACATAATA  
TAATCCTCTCGTTGTTAAGTGGGAGTATTTTAGCATACTCCCTTCGCATGTCAAGTACTA  
ACTTTTTCTTTACTGCTTTCACCCCTCTGGCGAATTACTCGAATCTCTCCGATCTCTTTT  
TCAGTCTCTTTAACAATTTCTTTGCGATTCTGAATATCTTTATTGAGATTATCATCAAGT  
TTAGGCAGCATGTCAATCAAGAACCTTTTTAAAGTCTTTTCAGGTTTCGGATAACAGCACCT  
TCACCCATTACCGCCACACCAAAAACCATCCGGCAGATCACCAAACAGTTTAACCAGTTCA  
GACAGATGATCATGGTCTTCTAATGCTTCCCTCCGGTTCAGATGGCAGTTCAACAAAGTTA  
TACCGTTCATCATTGCTGATAAAGTGATACCAGCAAAGCCCGAAAGATTTCCGGTGTATAT  
TCTAAACCATCAATTTCAACCGCGTCAACACTTCCATAATCAACTACTTTAGTTCCTTA  
AATCCTTGTCAGCTTTTGAACCATTTCAACAACATGATTTGATACAGTTACAGCGGTA  
AACCAATATGGCAAATTATGCTGATTTGGCTTGTAGCGTTCACCTACTTTAAATCTCTGA  
CCATCCGCTCGCATAGCATGAAATTGTTGTTTCGTGATTTCCGCGAAGTATTCAAATTCG  
CCACCATCATAACACTAGCCATTGATCACAAAACGATCGGCCTTAACAGTTTCACGG  
TTCGCGGTGATCATGGTAGCTGATCCGTGCAATTCTTCATCAACTAAAAGCCATATTTG  
ACAAAATCAACAAGTTTCATATCTTCTTTGTGATCTGGATCATGCTCTCCCCAGAATCGC  
ATAAATTCTTGCAAACCTTCTGGTGTAAACGAATAACATTTACCTTTTTCAAAGTAAGTC  
GGAATTGCATCCTCTTTCTTGTTCATCGCTTCGTATGACTGTTTTGAGATGCGTTTAAAG  
CATTTACGCTCATCGTGCATAATCATAGTAGCCCAATAATAAACGATATCCTCAGCGGAA  
TAAACTACATCCCAAGGTTCAATAGTAATAACATGACCGTTGTCAACTTTTTCTAATACT  
TTAAAGCCCTTTTCGACGATTTTCAGCAACCCGAATATGACCACGGCGCGTAGCATCGGTC  
AGAATAAATTGAATTGCGAGAAAAGTCTAGAAACTCATCTTTACCACCTTCACGGAATGCA  
TAGTAATGACATTCAAAGAATTTAGCCATAATATAATCCTCTCGTTGTTTAAATGGGAGT  
ATCTTACTACTCCCGTTTCATCATGTCAAGCGTTAAATGACTTTTTTGGATCTCTTTCAGT  
TCACCTACTTTATCGGCGCTGAATTTAGCGTAGGTATCATGTCGAATAATTTCACTTTCA  
AGAAAGGTTTCCAGCCGAGATCTATTTTCAATAAGGAACTCTTTCAGGTCTTCCGCGTTC  
TTTATAAAGATTTTATTGTCAGTAATGTCATCTTCCATCGCAAAGGAGATAGAGCGAACT  
TTACCAAAAAGTTAATCAGAACTTCCAGCGATTCTTCTTGCTTAACTGGTTTCATTTCT  
TCAAACCTGCTTTTTTCGTGATGCGGTTAAAGTATTTGCGCTCGCTTGATCAATCATGATT  
GACGCACCCTCATAATCATGAGTTTCTACCAAATACACTTTACCATAACATTAACCGTA  
AGAACCTTAAAGCACCTGTGAAGCACACCATAACAGGACCTTGTTATGTTGTGGATAGTGT  
TTAACAAGTTCCTCTGCGGACTCAGCATTACGGAAATTGTAATAACGACCTCCTTCAAAA  
ATAGCATCATTTGAAAACCTTAGCTGGATACAATTTATACGTTTTCTGTACCATAATAGGA  
TCCTCTATCATTCTACTAATTGAACAGCACGAACCAGAATGCGGTCACAAGGAAGAAGCA  
TAAATTCCCAACGCGGATCAAAGTCTTTAGCGGTATATGTTTTCCCATCAACCGAGATTT  
CACTTACATAACCAATAGGTGACACTTTAAGAACAGTAAACCCATTCTTGATGACTTCGT  
ATGTATCTTTCAATCCTTCGTAGTCATCCTCTAGGAAGTCTTTACGTGCTTGCTCAGATT  
TAAAAACATAGGCCACACCGGATTTAAACATGTTACGCATTGTTGATTCTCCTTCATGAT  
TAGATGGGAGTACTTTACTACTCCATTTCTTACTGTCAACTACTATCTTAATCTTTGTA  
TAAATTGTTTCTTATACTTCTTCGTGATCTCTTCTCTTGTATCAGCGTCACAGTAATCCA  
AACCTTCTGCGTCCATAATAGCAACCATCTCCGCGCGTGTCAAGCGTGATAATCGTTTTA  
CTTTATCAACAGCATATTGAGGATGTAAATGATTGTTGGTGTAGTCTCCTTTGATGTAAT  
TAACATAGTTTGTAGCCCAAACAACGAAATCAGCACCTAAATCACCAACACCAAACCGTT  
TAAAGTCTCCGGTCAAAGATCCTTCTAGGCGGTTGCAACACGAATGAAGCAATCCCCTTA  
CACGGCCTTGCCCTTTCCCATCTAGATCGTGGTTCGTTGTCAAGATAGTTTTTGCTCATAT  
CCTCAAAGAGTGGCAATTGACAAAGGGGGCAAATACCCCCCTGTTTTTTCGAATAGTTCTT  
GTTTGTACTCTTTAGCACTCTTAGCCGTGAGTAACATAAATTCACCCTCAAAGAAGGTA  
TTTGACCATGAATCTTGTTTTTGCCTACAAAGGATCGGAACTCATCAAAGCCACAAATAT

AATCACCATCATAAGAAATCTGCGGCTTGGTGGCAATAACTTCTACCCCTTCGCGATCCT  
GAATGTCGGGAATGATAGAATCAATCTTTAAAGGGCGACCGTTTTTCGTCCACACCATAAC  
TGACAGGAATATAGATGAAAGGGATCTTACGCGATTACAAAGGCGCTTTGCATTCTGGC  
AATACTTACAGTTGTAACCTTCAAACCAAAAATTTCTACCATTTTGTACCTCAATCTAC  
GTTAGTTACATAAACTTCTTGTGTATCAGAAGACTTACCACCTGAACGATCTAGGCAATA  
GGTCTTATTCAACAGGACGCGAGTTTAAATCATTCCGCTTGATAAAGTCATGGAGATGATC  
ATTTACCTTTCCCTTATGATGTGTGACGTTACTGATACCAAACCGAAAACCACGCTCCAT  
AATAGATTCTACCCACAGATTGAATTTAATCTCTTCCCTCGTCACTCCAGAACTTATTGTA  
TTCCGCAGAAGTGATAACGTACGGCGGGTCCAAATAAACGAAATCACCTGGCAAGATCTC  
GATCTTGTATAGCGACCAGACGTAAAACTCATTCCGACCGTCTTTGTTTTCTTGCTTAAA  
ATTCAGGACACGCTCTACCGCGTTTTCTTAAAAGTCCGGCGACCAAATTAGCATTAAA  
TTCTCCCTTCTGTTATGGCGGTTAATGTTGCTAAAACCTGTGCTGAATCAGAACAACAG  
AGATAGCGGATCTGGATTCTCATTATACTTCTTGCGGAATGCCATGTAAGCGTCTTTATC  
TTCGCGAGACAAACCATTCTCGGCAATAATCCGCTTGATCGTAGAAACCGTGTACAGGACA  
CTCGTCAATCGCTTTGTACGCGTCAATTAAGCGGTGATCATAGTCATTAGCCAGCACATT  
CCCTTCGACGTACAGAGACACGCTCAAGCCGCCACAAAAGGCATCAACAAGCGGTTATA  
GTGCTTAGGGAAATACTTACTAACACCAGGCAATAACTTTTTCTTATTGCCAGTATAGGG  
AATTAACCTAATGCTTTCTTATTATCCCTTCTCAAATAAGCTCTCTCGATCACTACC  
ACTTCGAAAAATTCTTGCCAATCACACGGAAAATTGCAGTTTCCGAAATGATCCTCTTTG  
TAAAATTCTTTACCGGATGGCAGCTTAATATCTGTTACGCTGTAGTATCCGCAACAATCG  
CAGTCACCCTCTGTATATTCTGTTTTAGTCGGAATATCCATCATTGCCAGATACAAAGGT  
ACATCGTCTTGCTCAAAGTTCAGGTAACCTTCAAGGTGCAATGAAACAAAGTTATCATCA  
CCACCGAAAAGGATATAATGGTCATAATCGGATACAGGGTGACCGTGTAATTCCCATTCT  
ACAATTTTAACATTACCACTAAACTTTATACCCATAATCTCAACAAGAAAATGAGTATCG  
TCAATGTAAATCTTACTAGGTGTATGATAAACCATTAATAAACCTCATATCTCAGAGAA  
TAGGATCTCTGTTAGCTTCACTGACTGCTTTCTGAATGTTAGCGTATACTCGAAAGGAAA  
TTCAATACCCAACCTCAAAGAGAGAATAGCCTACCGCCTCTTTATGCTTATCGGTTAGGGC  
GATCCTAACCAATTCCCGTTGAATCTCTTTAGGGCGGTGAGTGGAAAGTAACACGGGTATC  
ATGCAATGTCCAGTCACCATTACGAATCAAGATTAACGGTTTATCGTCATTGAAGATCAC  
CGACCCCTTTCCGGTTCGGTGAGTGTTTTATACTAATCATCAAATTCTAAGAAATATTCTG  
GAACGATATAACCGTTAAAGTGATTACACTTATAAAAATGTGGTGCATTTAATGCTGGGT  
GAGCATTAGTAAAGATTTTACCCTCTAGAAACAGAATGTAATTAATAGGTCTTATACCTA  
CAGAATCAGGGTTCGAAACCTTTTTCTTTTACGTTTACGCCAGCGTTAAAACCTCGTCCAGATC  
GTAACGTAGCCATGATTTACCCCAATTCATCAAGATTATGTTCGCAGCATTTCAGAGTAT  
TTTTCTACTTCTTAATCTTAGTGTGGATCTCAACGATCTCATCTTCACTATCAGAAAGT  
TTAATGGCAATAGCTGTACTTCCCTTGACCCGTCTTGATCGCTTATTCCAGTTCAACCAAC  
ATGTCCGCGTGTTCATAGCAATTCTTACGTCGAACATAAGCGACGGTCAAAGCCTCA  
TCAGCGATTGCTAAAGCATTTCAGGAACACCAACAACCATTTTACGCGTAGACAGCATA  
AAATCACCTCACATTATTTACGTTAACGCCGACATCAATCCAACCTACGCTATTTGGTT  
TAACAGTTTTTACCATAGGATGCATACTTAATCAAGCATGGTTTAAACATCATTATCAAATC  
TTCCTAAACGTACTCCCAAAGCAGGAATATCCATGTATGCGGCTTTATATCCCCATGTAC  
CGTATTCAGAATCAATCTCAACCGGACGGCCTTAAAAGCAGACACTACACCGTGACGGT  
CAACGATAACATAGCGATAGCCAGCCGTAAGATACACAGTTTCGCCGTAACCTTAACTG  
GAGTAGCGGAAGAGATAAACATAATATAATCCTCACACCGTTCATTTGATGCGGTCATTA  
TATGATAACCGCATTTTCATGTCAACAGTTTTTTAAAATCTTCTGCCGGTTTATATCGA  
CCGTCATCGACTGGTTTTGGACTGAATCCTTTATGCGTGCGCGGCTTCGCTTCCGGTTTA  
CCAGCAATCATCAAACCAAAAACATTTACGCCCTTATAACACATAACATTATCAACCACG  
GTCCACGTTATAGGCCATACGATTGCAGCAATACAAAATGCTCCTGTATCGACCTCTTTG  
GTGCCCTGGTCAATCTGGCGTACAAGCAGAATACTAGATACGAGATCATTGCACCAGTA  
GTCCAGATATAAAGCACATTAACAATATCGTGTGCTGTCCCATTATCCTCCTTACATGTC  
TTGCAGTGCATAAAAGCATTTTTTCTTATAGTCATAGAAAATGTCAAAGTATGCTTTTTTC  
CACATACTCGCCATTAATCCAAGCGGCAGTAACAAGCAGAGTGGTCCAGTTAGATCCGCT  
CTCAACGGGAAAGTTTTTAATACCCAGCTTCGCTGCCAAGTCGAACGCAAACCGGACGCA  
ACCACGGCAGGAAGTGATATTGGAAGTTTTGCTTTTAAAGCCACCGCGAGTTTTAGAAAT  
TTCTACTTTAGCGAAAGACAGGTTGCTCATTGATTCTCCTTAATAAAGTGTGTCTCGT  
TTTGATGTGTGTAGTATAGGGGATACGTGATCCCCTGTCAACAAATTTTTTATGATTTTA  
GTGAATTAACCACTACATCAAATGATGGACAGAGAACACCTTATTAACACATACTCAT

CGTGTTTAGGAATAGCGCCTAACCGCTTTATTCCGCTCGCGGACACGATAAACCGTTTAT  
CCGGTGCATTTACCTTACATGCTTCAACAACGCACGGGAAACGCGGTTTCAGAGAGTTCTG  
GATAGTTTTCTGAATCCATCTGGACAATGAATACCCTGTGACATTGATTGTATAATCCTG  
TTTTTGATTTTCATGAAGTTTTCTTCTGTACAATTCGTGCAATCTTCCCTTTCATGATTT  
CGTCGGTCTTGTCTTACAGTTTACCCATTTAACAAGATCTTTACCCAACCTCCAAAGCC  
CATTCTCGGTCTTGTCTTACGTTTTGTAGGTATGGACTTTCTCACACTCTACGAAGTGAT  
GTTGTGTAACAAGACTGATCCCAGGAATGGTTCGGATGTTCCCTTTCATATAACAATAGGA  
CGCGAGACACTATCAATACCTTGTAAATAAGGTGTATCCTGAATCACTTAGAATCATATAC  
GTTTTTCATTTACACATCACAGTTTCCCTCGACCAGTTATTAAGCGAGCAAACCATGACG  
CTTTTCGTGCTTCTTTTACTTTGTGTGCACGAAAACCACTGAAACACCAATTATAATCAT  
CACCGAAACATGATTCAACAGGAACACCCGCATTTTCGTAGTTCTCTGGTCTTTATCATAA  
AACCTTGACATAAGGGTCGACCTTCAACAATGATAGGAAGTTTAATTTTTTGCCTGAAAG  
TATACCAGCACGGTCAATAATTTCAATTTTCTTTTTACATTATCTCCAGAGATCTTCC  
AGCAATATCAATTTACCAGCGCGAACATCTAGGATAAGATGCGGTAGGTGTATGCAGTT  
TTCCACCCCACTCGCTTCAATTTCTGAAGCCGTGACGTAAGCCCATCCGTTTCGCTGTAAT  
AAAGTCTACTTCAACCTTGAGAGGAAAGCAAGACTATTCTATGTCTTCAAATCCGATAAT  
GTGTTTTGTGCTTGAATGTGAATATATCCGGTGATCATTTTTGTGATCTCCTTATACTCA  
ACACACCATCCGCAGGTAGCCCATGATAAACGCTCATAACGCTGGCAGAAATCGGACCAT  
AGATATTGTTTACCGTTCGGCATAGTTGAAATATGCGTTTTCTCTCCAACCTTTCACGAAA  
GCAGTATTCGATCTTGTGAGCTCGACCGGAGTATATCCGAAAGCGGGTTCAACTCAACA  
TCTGAACTAAATGCCAATTTAACAGAATTTGTTTTTCTGACCGCTGTCCGGTTTCCCTTCT  
GGGTACAGCACAGCAGGTTTAGCGGCTAAGCGGATAAACTCAGTATTTTTAATGAACCGA  
ATGTAATGATAACCGTCATATTCCGACACTTGCATAGTAACAGGAAAATCGACATGTGCT  
AAACCTGGTAGATCTCGCATATCATGAAAGGTGCCATCAACTTTTTTATTCTATATTCC  
TCACTCTTCTGTATCATTTCTTTTATATGGTACTATAACAAGATTAATACAGCAAGCACC  
AATTACGTTATGAGCACCACAAGTTAAACATTTATAGTCATGGCACTTATTAATGAATCG  
ACCAAACCTCATAACCGACTAGCGCCGCGTGTACTTGTGAGTCTCGATCTCATCCATATCAGC  
CAATGTTTTAACCTTCATAGTACAATCCTCAAATGGTAGTTTTATGAAGATAGTCATTAC  
ATGCTTTTTAATGCATCAGTCGCGGTGTCATAGCGAGTATTATCATAGCACCAGTAACCAC  
CTGTTAAATGCTAAATCAATCCGTCCTTTGTAGCTTCGATGAGAGACAATTCTTTGAAAG  
TTTGTACTTTCTTTGATGATACTGCACGGTACGGCGTTTTATAGAGTGTAGCTAAAATGC  
GTTTCAGATTGTTCTTCTTTATTTCCAGACAGATCCCAGATGATGTTCTTATATGCTTGA  
TTAATTGTTTCAGTGGTCATCTTTGATTCTCCTTAGTTGGTATGCGTGCATTATAGCATTG  
TGATTATCTTTGTCAACACCCAAAAACA AAAAAGCCTATCCGGAAGGATAGCCCATAAAA  
TTACACGCGAGCACCGTAGATCGTGCCTACTTTATCCCAGCGTGGAGCATTACGAGTAAC  
GGCTTTACCAGCAGCACCCGTTATATGCTGTACCGTTCCCTGAGTATTACATCTTCC  
TCCAGCAGCACCAACGTTACCGCACGCACCGTCTGTATAGGCACTAAGAGACCCCTCACC  
AACAGATCCTTTACCAGGAGCGGAAATGGTACCAGCAGTTGCACCGGAACTCATATGAGA  
GGAAGACCCACCAGCACCGTATGGGCGACCACCGCCACCACCAATACTAGTCGACCCCT  
GTTACCGCCGCCACCTCCGCCACTGCCTCCAGCGATAGCACCGTTATTTGTAATTCGTAG  
ACGTGTACCGATAGCGTTATTGATTGCGTTTTCCACCAGCAGCGCCAGCAGCGTTACTACC  
ACCATTACCCCCACGTCCGTAGACATTCACACCGGAGTTAATGATCAATGTTACATAGTT  
GTTAGTTAACGAGCTAGGGAAGTCAAGACAAGGAACGCCAGTAGATTGGGCAACAATCTC  
ACCAGTGATAGTAATTACTACAGGCGAAGATCCTTGTGCTTTCATCCAGTTAATAAGAGT  
GTCTTTATTGTAAGAGTTACTAGCACCAATGCTTGAATGAATCTCTTTAGAGCGTCCGAC  
CATTGACGACATATACGCCGACCACTAAGCGTACAGCTTCCATTGCGGCACTCATCCA  
CCGTTGACCAGTCTCGGACACGGCAGATGATCCTACCCATCCAGAAGATATTGCCATAAA  
ATTTCTCACAAGAAAAGCCCCATTTAAGGGGCATTGATTGATAAATTTACTTAGATGAT  
CTCTGCTTACCATCCAAGAAGAAAGACCATGTTTTGTTAGGATAGCGAAGCGCCATGA  
TTCGGCAGTTTTAACACCAGTTTCGAACAATTGACGGCTGGTCACTTTAGTCATAACCATC  
TTCGATGGCATCGTTTTCAATAATCATCGGGTACTTCGCGCCACGCATGAAACCGAAGCC  
AGCGGACGATTTGATAATTTAACAGTTGCCATTTTTGATTCTCCTAGAAAGTGTCGTGT  
TTCGATGGGTGTATTATGCAATAACACCGGATCCCTGTCAACACTTTCTATGAAAAATTT  
TTAAACTAATCGAATATAGCCCAGAATTCAGCACCTTTAGCCAGTCTAAAACCTTCCCA  
TTCAAGGTCGCCGTAGTCATAATTGGCAACCATCAACTGACCATTTTTTCATGCAGCAATC  
ATGAGCTAAAATTTGCCCGCATCAACTACGATAGTAATAAACTTTCCTGATTCTGGCGG  
TGTGGAAGACAAAGCGACCATATGACCTTTCAGCTTAGTAAGTGTGGAACAATAAA

ATTCGGGATTACCTTAATACCGTTAAATTCGTCTGTGTCTTTTCATGCCAGACCTCGCAA  
ACACTAATAGCATAACCATGCTGGTTATTCATAATATCAGTTGCATTGTGTTAACGAGCT  
ATATCCTCAAGGATAAATTCTTGTTTATCCTGGTTCAGTTTGGTATCACGCGCAGCCATA  
AGAGCATCAAGAAGAGGTCCAAACTGATTATCTAATTCATCTTCGGTTGCAATGTTTCCT  
ATTCCCTCGTCTATCCGTGATTCTAATGCTTGCTTTTCGTTGATCACTTGCTTGGTATAT  
TCCAACACATCAAGAATATCGCGGGTAACGTAGCCATGATAAGCTATTCCC GCATGAAGA  
TGATCAATTAGTCGTTGAATGTCAATGTTCAATTTGTAACCCTCCTCTGAAAGCACATCCC  
AGATCGTTGAGTCAAGGTGCCTTAAATTCCACATAATAGAGTCATAACTACCGAAGCCAG  
AAGTAAAAATTACATCTCACTGGCGATATGTCTTATGAAAATCGGTTGCTGTCACTGCAT  
CAATAGGCATATCGTCACCTGAAAGCCCCAGACATTTAAGAATAATAACTCTGTTAGCCG  
TTGGCGCGTGCTTAGTCTTTTCAGCATATTTTCGATGCTCCGTTTTGCCTTTGCTTCTT  
TGAAACGTCCAGACCAAATCCC GTTTCGGTATCGATT CATAATAATTTCAATCACATCAG  
TTTGCAATCTTCACGGTCTCCATAATGGTTTTGTAAGCCAGTTTAAGATGATCACCGAAA  
AACCTTGCGGTGTTACCCTTCGGATCGCGGAGCATGGTTTTCTACGATCTCATCGGCAGTA  
ACAATTTCTCCTTTCTTTGCTGTATGTTCTACCATATACTTCAATGTTTCTTCGGAAGCA  
AGTGCTGCGGCTACTGGATTAATCATTTTTTGATTCTCGTCTGTTGTCGATGTGTGCATTA  
TGCTATAACCCTATTCCGGTTGTCAACACCTAAAAACGAAAAAGCCACCCTTTCGGATGGC  
TTGTTGAGTATATTTTATTACAGTCCATTTGTATAGTAGTGTTTGAATCGACCTTTGATA  
AACTAGTTAAACATAGTAACCAATTCACCATCCCTTTCCAATGATAACCCTTCCTCGTCT  
TAGACGGGTCTTCCGATTCCGGTAGTTATTGAACACGCGAAAGTATGAGGAAGGCTAATAG  
TTGTGTTAATGCTAGTATTCTTTTACTTCTGGGATGCATCCCACGGTGACTAACATTAAG  
CCAGTCGAGTTAGTTTATAAATTGTTTTAAAGCATAGAGCTTTAGTATCCTCTAAAACGC  
TCTGTAACGAGCTATAAACATCATTATAAATCTCACTAGCCATTTGCGTTAACTCTTGCA  
AATAGGCAATTTTCGCTAATCTCCTTTCGGGACGACCAACTTTGGCTGATAACGACCAGTGA  
TCCCAATATTGGTTTTAGTGAATTATCAACCAATTCTTGCATTTCAAGATAGA ACTCTT  
CTAGAGCCTTATGTTTTGCATAAGATCCAGGACCCGTTACCCCAAATGCGCAGAATGCA  
TATAAGCAACACTCATCATAACATTCACCGATAAAGCGCTCAACTTTATTAGCCTTTCCCT  
CTTCGGACGTCTTTTGAAAATCACTGAATTTTCATGTTCTAGATTCTCCATATTATGCAAC  
AGAACAATTGTTGTGCGGCAGATCCCCCATAATAATACTGCCTAGAATCCATACTT  
TACTACGACCATACATCTTCATAATATGGGCATGAAATTTCTGGCTGGTTCAATGGAA  
GGAGATATTTTGTGTTAGATATACTATCATTGCGGCGTCGAAATAACCAGTAAAGTCACCA  
GTTGGATCATATTGATCAGCACCGACACTTCCGACCGCAGTCAAGCATATTGCCGCTGTT  
AGAGTTTTGCGAATAAATGACATAAGTCATTCCCCCAGATTA AAAATATT CAGTTATATT  
TATTATCTGGGGCTTTATTTATGATTA ACTCTTATTTGGTAGTACCGTCAATAAAAATGTT  
TACGACACACAGAAACATATTTATCCTCTGCACTAACTTCTATTTGAGCACCATCGCGAA  
TAACATTACCCTCTGTATCTGCACGAAGGACCATTGTTCCCTTTGTTGTCACAATGACAAA  
TAGACTTCATTTTCGACCAGTGTATCAGCAAATGCCATTAATGCCGCAGATCCTTCGAATA  
GATTGCCCTGAAAGTCCGAGCGAAGGCCATAGCACAGTACATGGATATTAGCATCATCAA  
CAAGCGCACACAAGCCTAAAACATGCTCTTCACTCATAAATTGGGATT CATCTACAAATT  
CAGCATCAGGACGCCAGCGATCCGGTCTATGCTTACCTAACGATTCACGATAAACCAAAT  
CGAAAAGCTCATCCGATTTAGCGAACGTGATCGCTGGGGCACTTAGGCCAATTCGGGAAA  
CGACTACACTTTCTGAATCTCGATTAGCAATCGCTGGCTTAAGAGTTAATACTCGCATAT  
CACGTTCTGTATAGTTAAAAGCACTTTGTAACAGAGAAGTTGATTTGCCAGCGTTCACTG  
ATGCATAGTAGAAATATAATTGCGCCATTAATTAATCTACAAAAATCCAACAAGACCTAA  
ACCGATATAAGTGCAGATACCAATAAAAAAGATAATAATGCTCATGGCAAGGATAAACCC  
TTTCAGCGTTTTGGGATACCCGACCCAATATCCC GACCATCTTCTAACCGGATCAGTTT  
ATTGCCTTCAGAGTCCATATCAACGACAACATGTTTCTTTTCGAGATTGCAATAGATATTG  
TTTTACAATCTCTTTCACCCGCCATAATAACAATAACGAAAATAAAAAGTCCACACAACAAG  
ATTAATGATAGTCTCAAGCATTTTCTATCACCTCCACCCAATAAGGTGTTTACTGAAAGA  
CTCCTTCTCCTTCATGATGGTCGCAACCTTTATTGCTACAATACATCCACCAATCCCACA  
TTCCCCACGGTAAACGCTGCGTATCGTCGTTACAGAAAGTGAAGGTAATAGGCCAACCCAC  
ATCTAACCCATCGGCAGTTTTCTTTTCATGTGAGCGGAATTCGGCTTCTTCATAGATGACT  
CCAATATAATCGACATTTACATTTAGGGCAATGCGGTGCTTTCATTTAATACCCGTCTGT  
CTTTGGAACACTAACAGGAGCGGTTTTTATATTGTATTCAGTGAAACAAAGAAAACAAGT  
TACGTTTTCTACAGACTGACGTTTCACCCAATCACCGGAATATAGATCATTTTTATTGT  
CATATTCAACCACCACAATCTTAATGTCTGGAGTAGCAATATTAATGATCTCTTTTACAC  
ATTCCC ACTCAAGGCCACCGATACCGCAACCGATTTTAGGAATATAGAAAGGCTGTATAG

CACCATCAAAAACATCATTGATAGTCTCAAATCCTTTTCAGGATAGCACCATATTCAGCAT  
TTGGACCCGGTTCGGAATTGAGCATATAGATTCACCCCGTACCAGTTATAACCATTAECTT  
GATGCGTCCAGACACTAAACCCACCCAGCTTTTCTACCTTACCGCGAGAAGTTTGCTTAT  
CAGTCTCTAACGCTTTCGCGGAACTCTTTTCGCGATCTTTGCAGCAGTACCAGCACCCATAG  
TATGAAAACAATAACCACCATGAATTAATGACCGTTTCCTTGTTTATAAAGGGCGATTA  
GATCGCCCTTTACAGTATCAATACTCAAATATAAACCTCTCATTAGTACGCGGAAGACT  
ACCCAGCCATAAAAACGGCTTAACAGTCTGTTCGCGATAAGCAAAGCATAAATTGCTTATCAG  
GGGACAGTATCACAAGCTTTCGCTTTTGTATAGCAAAGCTGGCAATACTCAGATCCCACG  
CTCGATTTTTTCGATTTGCGTCTCGACCTTGTTTGTATGCTTCGTCGAGTTCAAGTGCGA  
TAAAATCACTACACATGTTGTCATCATCCTAGAAAGTTTTAATGATCTTTTTTGTGATCT  
CAGATCCTTTGTATTTCGAACTTTGGATAAGGGCGCTAATTACTAGCAAGCGCACCCAGCCG  
AGAACGTCATAGCAATCATAGTAATTATTGTCAACTTTTTTCATATATTCCTCAATAGCCT  
TTAGTCTTAAGAATGCCTTTACGCTTTATATGGTTAGCCTCTTGTTAGTACATCATCAGCA  
TAACCTAACCCGGCTTTATAGTTCCATCCAGCATTGTAAGAAGCTAGCGCGAGTCCGATA  
TTACCGTTTTCGAACATCCAGCCAGTATGCTAACTCATCCATCGCGTAGAATGCAGAAACC  
TCGCGATTCATGAGGAAGTTGATAGTCTGGCGATCACTCATTTTAAACACCCGCGCTTTGCA  
TTTTTCGCTTTTACCGTTCTAAGGTAATTTTGAAATAATCCATTAGCATGATGATTTTTTC  
TCTGGTGCTAAGTTTGCACCCGCGCTTGATTCTTGCCATGCGATACCCGCCAGGATGTGA  
CCTATAACCCTTTCCGTTATAGCGAATATTCGGATGGTCCTTTGTCAACTTACCGCTTTTC  
TCGAATTGCTAGCCGATTTGATAGGCGAAATGTAAATTATCTAGATGGTGTGCTGTAAAG  
TTGTCTATCGGCGCTTTTTTGTATCGGTGCGCTAGTCGATGCGTGTGTAGCGCCAACGGCT  
AGTGACAGACTCAATACTATCGCTTTTAGAAGTTTTAACATTAATTTCTCGTGTTTGGCT  
TAACTTTCTGATTCATACTATTGCCCTATCACAAGAGAGTCAAACATTTTTTTTGAACCA  
ATTTCCATTATTGGTCTACCTTCAAACAACCCGCCGACATTTTACCCGCCAGTCGTTTTG  
GATTCTCTATAACCATTTCGGCAGCATAGACCCGCGATATGGCTTACCCTCTTCGGTTAGAT  
CTACTGTCATCCCGATCCACATGTTACCGTCAGTAACTTCTAATCGATTTCGGTTCGGTCTT  
CCATTTTCAGGAAGTTCGAAGATCTCCGGCAAACGAGTTTCTATCTTATTGAATAGTTTCA  
TTGTCTTATGTTTCATCGATATTACGATCGGTTAGATGGTTCGATCATATGCGGACTAAAGC  
GAATGAAAATAACTCAGCTTAACCATCATTCAAGCACTTTTCTTTGATCTGCGCATTGG  
TTTTGCGCAGTTAGGTTTTCGAAGAATTTACGCGAGCTTACTACGGCGAACATTTACGTTAA  
TTGTTTTCCATTTTATTATCCTTTCTTAAACAATTTGCGAATCCAGTATAACAACGGGATT  
TCTTTAAACTTGAATGTCTCTATAGTTAATTCTTTAGTAGCAAGATGAATACCATAAGCA  
TCATGTGTAACTATATGCCATTTTCTATAGCCGAAATGTGAACAACCGTCTGGATCTAGG  
TTAATAAGAGTTTCTCGCTCACTAGGATTATTTTTCCACAATTTTGTAAATAGGATCGCAC  
ATAATTTCGACCTAGCGTACCATGAATAATCTCACAATGGTAAAGTTTTCCAGCAGTGAGA  
TAGGCGCACCCGTCATCGTTCGGTATAAACAACACTTCTTTAACACTCATTTTAAATACTC  
CTTTGTCGTTTTTCGATGGGGGTATATTACTACCCCGATCATGTGTGTCAACTACTTTTTTC  
AAGATTTTTTTTGATTGCATTCCAATGACCTTTATTTCCAGGTTGTTTTGGTTCTTCGAT  
CAGTGTCTATGTTCTACCGTCTAAGTGTGCACAATTTTTAAGGCTAATAAAAATCTGGTG  
TCGCTTATCAGCACGGATATAACCACTATTTCGCAAATCTTTTCAGGTGGTGTATGTTTATA  
CAGTGTATTAGGTGTAATATACTTTCGCGTTACTATAAGGTGTCATCACATACATCATGGT  
ACTAACTCCCAACGATCACCGGAAGATGAGACCATCCACCATCAAGAAGTATCGTAATA  
CGATAACCTATATCATCTTTGATGTAAGTATTGTCGGTGGATTTTCGTCGTCCTCGTGCC  
GGGGTAAAATCATAACATCTTTCTAGCGTAATATCTTGTCTTTATTGCTATTGGTGTAA  
ACTTGCATTTTCTTAAATCTCCTATATTAATAACCACGGGTATAGTGTTCAGAACAAACG  
GTCAGATGAATATATTCTAATAGATCTTTCCAAAAGTCAACATTTGGTTCTTCCGGCATA  
CCGTTTTTTCATTGCCTCTTCACGCGCGAGTTTAAACACGCTCGTAGAGATCTTTCAATTCT  
TCCCGCGCATTATCAAAGGTTTCATTCTCCTAACTTACACGCTAAAATAGAAGAACGTCGC  
GCGAGCGGGAATTGTAGATCACATGTCTTATAGATTTCAAGTAGCTGATAACCAACACGC  
AGAGCATGAGAAAGATCTTTCCAGTTACTGAAATACTTTTCAGATTTGGCTATCTGCTTT  
TTGAGATAGCCAGACGAACCCACATAACAACATGATAGAATTTATCTCGATGTGTTCCG  
ATGTATTCCATTCTCTGGAGGATTCAACCGACATGTTACTAGGCGCGTGCACCATATCA  
ATAGCGCCGATATCGCCTATACATGCCAGATGGATAAACCGTTTTAGACTGAACATATTA  
ACGTCAATATCGTCTTTGGTGTCTTGGATCCCTTGCCCGCTAGAGCTTTGATCAGAGTGT  
TCTTTCATCGATCCTAAGATAATTTCTTTCGCGAGTCGGAACAAAGATAACCACGATAATCT  
TTATCGGAAGTTTCAGTATCAAGGCCGTATAAGTGAGATCCGAAGACCATTTTAAACAATT  
GTATGCATAAATAAACCTCTTTAGTATTTTACGTTACGTCGAACGCCTTTTCGAATCTG

ACAAATAGCAGACGGTGAAACATTATATTTTCTTGCAAGTTCTACACCCTGCATATAGGG  
AGAAGATAAAATCTCTTCCACTTGGTCGTCGGTAAGTTTTGCGTTTCCGTGGTTCTCTCC  
CCAATTTTTGTTAATCCTTCTTCTTTCGCATGAACAAGATTTCCGGTATCTGTTGTCCA  
TTCAAGATTATAAAGGTCATAGTTTTATTTGTTTTCCATCCTTATACTTAACTACACGGTA  
GTTATTTGGATTCCGAATAAACGCAGCCGCCATAGCTTTATGCATATTCACGGTTCTTCT  
AAATCCATCCGGCTTATAAAATACTGTAAATTTAGAATAACCAGTTTTACCATAAAGACT  
AATATAATTTCCGGTCTCCGTATTTCTAACCCCTACCATGAGAGCTAATCTCAAATTGAGT  
GTAGGGCAACAGCGCATCAATCACTTTCCATTCTTCGACAGGATGGTCATCACAATATCT  
TTAATCATCATATCATCTCATAAAAATAAAGCCAACCCTTTCGGATTGACTTAAAAATT  
TACATTGCTTCCGTAAAGGTGCGCGAAATAATGTCACGTTGTTGGTCTGGAGTCAGTCTA  
TTGAATTTTACGGCATATCCGCTAACGCGAATGGTTAGTTGCGGATACGTATCAGGATTA  
GCAACCGCATCGAGAAGAAGATCGCGACTCATAACATTGATATTAGCGTGTGACCACCT  
TCGACAACCGGAGCACCATTATCTACAATCACCGGACGGAAGCTAGTTGTGTGCAGTGCC  
AGAGAATCGACGTCTTCTGCGGTGATCACATGGTCTTTTGCGAAAGTTTTACTAACAAATT  
ACTTTAGCGCCGATCAGTGCTTTCGGTTCGGATACCAGAATCATAGGCGCGAAGTGTCCA  
CCAATAATAGTACCTTTATGCTCACCTTTCATGATTTGAATTGCTTTAAATTCCATATTT  
CACCTTTATAGATCAGGACGTTTCGTCATTAATTTTACCAACCAAAAACAACCTAGAGTTT  
ATCAGGTTGGACATTACGATTCTTTTTAATTGTAGAACGGAATCGACGAGCTACGCTATC  
TTTATTTTTCATTAGTTGAGACCTCAGCCAATGAAAATAGGTTTGTCTCTACATTACAA  
ATCCCAACACTAAGTCGATTCAATTCTAAAACTGCAATACGCTGTCAGTAAATCCGCGC  
ATGGTAGTATCTAGGATAAACATTGTTTGGTCAAGACTACGACCTCGCCATGTGATCGGA  
TTCAGGAAAGTTCGGATAGATGTACAATCTACATCTGAAATATTCACATTTTACCAGCGA  
CCGCGATCTCGGATCGTTTTGGCATGTTCCCGCGTCGTTGAAACGATAAAGACACTATAG  
CCTTTTCGCGTATAATGTTCAATTAACCTTGATTCTAGCGTCTGTATGCTCTGTCTGACGG  
CCTAAATTGATTGAGACGAGGGAATCTAGGTCATCAGCAATATTGCGTTCGCTTACGGCGT  
TCTATGATGCCATTTACGGCAGATACACACGCAGCATAAGTCAAATCTTTACTTTCTAAT  
TTTACATCAATATTCATGGTAAAGTCTCCAGTGAACGGGGAGAGATCCTTAGATTGTCTC  
CCCGTTGATGGTTAATATTTTATTTTGGATCTGGGAAATTCAATAGAGCATATACTCCAT  
AAAATTTCTAGCTGTATTAGCATAAGCGATTGCAGCTTCGATTTCTGTGTCATATTGTC  
CAAGAACATGTCTTTGTAGGTTGACCATTATACTAGCTCTCCATATCTTACGCAAATCCT  
TCCTGTTACACTTACTAACACCCTTATACACACTAGAAACCTTTTTAGACTACTTCTTTC  
TATTATGTTGATTTTTCGCGTCTTTTGCCTCCCTAAGATTTGGAGGATTGTTATTAGCAG  
GATTACCGTCAATATGATTAATTAATCTAACTTGCCTCCCATGTTCTACAAACCAACAA  
CCCTATGCACGAATAGATGAACGCTAGGAAGACCGTCATCTCTACTATGCCAAAATCTAA  
GATGACCATCTTTATTTGTTCTGACTTTAACTAAATCGCCGTGTTTATATCTACTTCCTA  
ATGGTCGTCCTTTGATAGCTTTACAATCGACTCTATAATATAAGAGACCCTCTATATGAG  
CATATCTAAGTTTTATCTCGTTTTGTAGGGATTTCATCCAGTATTTAAAGCCATATTAT  
AATCCTCACTAAGCCAGCGATTAAGCTGGCTTTATTTTAGTTATACCGGGTCTGGATATA  
CCTTTTTATCGAGTTCCATATGCGGTCCGTCTTTAAAAGTAACCCAATCAACCCCGCAGA  
TAACAGGAACACCCAATTCTCGACCAGCTTGCTTAAATGCATAAGCGATCATAACGGTAGT  
ATTTTCATGATCCATGTTTCCTTATCTTTCGGATACGCTACAACGTGAACCGCGAAACCGT  
GAAGATGACGAGTTTTTCATAGTCTTAGATTTAGCTTCCGCAACATATTTCTCTTGCGTTT  
CTAGACTACGTACACTTTGCGTAATACCAAAGTCGACCCGGAGTCAGTTCTAAAGCACGAT  
GAACGACTTTTACCAGGTCTGGATGTAGACCAACAAGCCGATCTTTGCTTCTTTGAGATA  
ATTTATACATTATTCCTCCCTATGTGAGTGATAATATTTAGATCCCGGCGATCCTGCGT  
AGAGTTCTTGATTAGCACCAATAAGGATAGCGTTAACGACAACCATTCCCAATCAACC  
CACTGATTAATAAATAAATGCTAAATCCGTTTGTAGGCCAAATACAAGCATTCCGATCCAC  
ATACTCAGAGCAATAATCAACATCATGGTAAAACCAAATGCAAATATCATATTTTTC  
TATTCTCTGTTTACGTTTATAAAAGTAATACATTACCTCATCGCGTCCGGTGATCCAACA  
TGCGAGGGCGGTAAACAGCTTTACAATTTCCAACACACCTACTGACGCGGGCGTGTCAAC  
AGACATAGGAACCGTAAAGGCCATAGCTAACATAGCAACGCCACCAATGACATTAAGCAC  
CATTATAATAAGACCGAAGAAAACCATTGTCAATCCTCCGACACAAGAAAACCAAGAATC  
ACGCCAGTGATAAGACATGATGCGCCGCTAATCAGACAACCCTCTCCAAGTGATTCCCAC  
CAGATCAGACAAGCGACAATAACACAGAATCCCCATACTACCGCAATCGCAACATAGGCA  
AGGGTCGCCCCAAACATATATTCGTTTATAATACATCCCATTCACCAACAAATTAGAAT  
AAAGCCATATCAACAGAAACGAGGCAATTGATCCGGCAAGCAAATGACATTAGAGAATC  
CGCCGTCTATCCAGGCGACAAAACAGAATACGCCAGTATAGAAGCATAAACCAAGTACAA

AGCATAACAATAAGCAACCACAGATAAAAACGCCATAGAAAGCCCTCCATCGAGATAAATTA  
GTGCGGGTAGTACATTACCCTACCCGCATTGTTAATCATCGCAGGGCGTGTCTAGAACA  
ATTCCACACCAACCGCTAACCACACCCAAACACACAGCAACAAGCAGATTCATTCGGTCT  
TTTGGAAATCATCGCAAACAGAACACCCACACAGAAAGCCATTACCATTGAAGTTAAC  
ATTTGTTCAACAATTAACACACCTTTAAAGTCATAGACGCATAAAGATTAATGTCAGGCC  
AGTTAGGTTTCGCAATTATACTCAACATCCCACAAATAAAGCGGTTTCGATGTATCAGCCA  
AGTTTTAAAAATCTTCTACCCACATTTCAAGGCTATATGATGGATAAACTAGGCTATCAT  
ATCCGCCGTAACGTTGGCCTACTGGTCGGTCAGTAAAAACTACCTCAAGATCTGGTAATT  
CTTTTTCAAGGATAACCGCCAGCGCATAAATCAGACGTTCTTCTTGTACGCTTCCGCA  
GGACCGTTGTCTGTGGGTTTTTTTTGGTTCACTAGCAAGCACCTCCACATTTTCATAGAAT  
GAAATTTTCACAGACTCAATTTTACCATAAGTGAAGAATGAATATACATTATCGAGATAT  
TCATCGTCACTACAATCACATCAAACCTGCGGATCAGCAACCGCCGCAACATATTCTACC  
AGTTCGTCAATAGAATGCAACATATTTTCATCAACTCGGCTGTATTTGGTTGCATCTGTG  
ATTTTAAAACCACGTTCTCTCACCTTATCAATTAGAATTTACGGGGACTTCCAAACAGT  
TTGCTCATAATATCATCCTCACATAGTTAATCAATGGTCAATAATCTTGCACATTATAAC  
AGAAAGTACAAAGACCGCAACCCACATATAGATCCCAGCAATCAATGCAATTTCCATATC  
ACAATATCCCAGATATAACAACCGGAATAAAAAACAAACATACAGACCAGCGCAAAGAAACA  
AGCATAGACGCTAGAAAATCCAATAGCAGTCTTAGTAATATTCATATTTACAATCCTCAC  
GGCTTAAGTCAAAAGCAATTGCATACAGCATAATGAATATGTTAGCCGATCCGAGAATCA  
ATGCACCCTCACATTTTGAAACTCGCTAATCAAATGTAAACATTATCCATCCGAGGATCT  
TAAAGGCGCAGACCGCGCCTATGTTTCGCTAACCAATTAATCTTTTTTCATAATATACCTTA  
GAAAGAAACAGTTTTCAAGAAATCCAGATTTTTAGTACCGACAACAGGAAAGTAGTGTTT  
TCCTTTTTTCGGTTTTAGAGAAAGCGATTTTCTTCTCTACATGGTGACGGAACCCAGCCAG  
ACGATCACCCAGGTCAAGGCGGCAAGCGTAAGTAGTGCCGTTTTTCGAACGTAACCTCGAT  
TTGAGTTTTGTTCATATTCGCGTTCGTAGTCTTTTGCTGCGCCTTCCGTGTGCTTTACGCTC  
GATGCTTTCGAAGTGAATACTTCGTTTTGCGTTAGCGAATACAGAAGATTCAGAGAAGAT  
AACTTTAACCGATACTGGTGTCAATTTGATACTCCTTAGTAATTCGTGTTCCGTTTCGAT  
GGGTGATTATGCTATACACCCTCTCTCGTGTCAACAACCTTCTTAGTCTTTATGCATAAT  
TTCTAGAGCATTCTTACAGCACCTTTCCAACCTTCCCACATAATGGACATAGTAAGGAA  
GTTAAAGCACCCGCAGTAATCAACCTTTTTAGAGATAAACCATTCTACAAACGCTTCGCT  
CATACCATGCTCTTTAACGGATTCGCGTAATTGTTCAATTTGGTCTTCCATTGTATCACC  
TCAACACCTAACGTTATTCAAACCTCAAACGGTCTATTTCATCCTATTGTAAGTACATAT  
AACAAAGCATAGTTATGTTTTGGTTGGACCGTATCAGATAGACACGTCTTTACAGCATCGC  
GGTCCGAAGGGTCTACACCCTCAGCTTTAAGTATTGCTAAAATCTGGTTATAGCGTACTG  
TTAGTTGTACTAATGGTTTATCCCCCATATTACCCCCTTATAGTTGATCAGCGATGTAAG  
CGTGACAAGCGAGCAGTTTTATTAAATGCACTACCTTTCACTTCGCCTACCATGTTCCCTAA  
CTTCTAAGCGGTTCGGATGGATTTCATCTTTGAGCACCAGCTCTGGTTAGCCAATTCCAGTT  
TACTCATATTTGGTTCCATCTCAAACAGTTCACGCTCAAAGTCGATAATTTCTTTTGCTG  
CGTCTGTAAAGTTAATCATTTTGATTCTGCCGTTTCGTTGATGGGTGTATTGTAGGGGAG  
TGATCCTCCCCTGTCAACACTTTTATCAGAGATATGCTATATAGTTTGCCAGTCCGGCAG  
AGTAATCATTTCGGGATTGCTTTTACGGCCAGTTAAAAACCTGCTCCAACCTTTCTGTTTACG  
CGGATTCTTCGTTATAACCCAGAGTACCAGAATAGCTACTACGTTTTCTTTGCTTACTG  
CATTCAAGTGCTTTAGTGATGCGACGTGCCATAATTTGATTCTCCGTTTAAAGAAAGTGTGT  
TTCGTTTCGATGGGTGTATTATGCAATAGGCCGGATCTGGTGTCAACAACTTTTTTTTAAA  
AAAAATTCTTAGGCAATAAAAAAGCCACTCCGAAGAGTGGCATATAGGGAAGGTAGCGAA  
TCTTGCTTGTCTCCAACCGGCTAGCGGCCTAGCAAGTGATTCCTTTAGCGTACCGGAGCG  
CCCATACGCTGCAATAAATGGGGCTAGGTGACTTCCACATCATTCTAACCGCGCTGTCTT  
TAGTTTCGCTATTATTTATATCGCTTTCTCGCGCGACGTTTTTGTATCTTCTTCTTGTAG  
AGTTAAATGCATCAAATAGACACATGACACTAATAATAAACATAACCGTATTTTTTTACGA  
TATCCCACGGCTTCGCATCAGTACAGATCCCCCAAACGGTAAAAAATGCAAATAGCGCAG  
AAGAGATGACAAGCATGATACTTTCTAAGATATAAAAAGTAATTTTCATGGTTTTACCTC  
AATTCTTCGATATTCATGACACATCCACGCAGTAAGCAAGAATCCTAACACATAAGCAAC  
AAAATACGTTAATGCTACTTCTGGTTCTGTGCTGTGTATCTTCATTAACCAGCTAGAAC  
GGTCTTAAACAATTACATTTAAATAATTAGCCACGCAAATAATTCATCGTTTTGCCCCAT  
TTCGGTTCGAGTCTTTATAAATTTATACATTCGGTAACAATCTCGAATCATCCACGTAACA  
AGAGCACCAGTCAACACAGACAATACACAGAAGAAGTAAAACGGTCCAGTTGCATTATCA  
ACATGAGCATGCCATGTAAAGAAAACACATGCTAAGAATGTAAAGAACATCATAAAAACAC

AAGAAAGCAAATATTTTCATGCTACTCATAGCGCCACCATAACAACAGATCATAAGAAAAC  
CCAACGCAATAACAATTGCATCAAATTTAGTGAACCTCAGGGCCACCTATCAACATCATT  
GTTCTGTTGATTCATAGATCACAGAGCCATCTTACAGCACCACATAAAGGGATCAAAAG  
GCTAGGTCTAAACGAGATTACAACAAGTTTACAAAAATCATCTAAGGTAACACCGCAAGA  
GCTACCCACTGTAACAACACCGATCATCAGACACAGAAAGAAAACAAATGCAACCAGAAA  
CAAAGTATTGCTAACAGTGTAGTGATCATTAGACGCCCCACGACGCTCAATTTCAAAA  
ACTTTTTTACCATCAACGAAGCATGTTACAACCTGCCTAGTTGACTTCCGCAAATTTGTTGT  
GTCACCCACTTAAGGTCAGAGCGAAACAATGTTCTATTAATAACAATGTTTTACCGCTC  
TTATCCTTACCATAAATTTTGCTTTAACCATATCCAATTCCATATTATCACCTTATTTG  
CTAATCGCTAACCCCAATCTGAAGAGAGCACCCGACGCTACAGTATACCCGAAAGTTTCA  
AATGCAGTAAAGATATCTAAGCCACCAGCTAACAGAGTTGCAGTAAACAGAGTACCAGCT  
ACGAACATAAAAGTTTTACCGATAAATTTCATTTTGATTCTCCTTTCTGTTTGTGGG  
CGTATCTTACTACCCCGTTTCATGTTGTCAACTGTTTTTAAGAAAATTTTACTTCGTCT  
ACAATGTCTTTCTTTACATTGATTTCCATTCCGGTCCAGAACACGTTGGAACATGTGCTGC  
ACATACGCTTTCAGGTATTCATTTGATGGCTTGCTATCGAAAGTCTTTTTAGTGTAGTAA  
TCATCACCGAAAGCTACTGTAATTACATTTTCGTCGTCGTTCCAAGCGATATAAGCAAAT  
TTGCAGCTATCCCAGAAGCGAGCACTAATTGCTACTTTTGTGTAATCGAATCCTATTTG  
CTGTGCGATTCAAGAACTACTTTCGCTCCAGTTTCTTTATGAGTGTAGTAGCGGGATACT  
AAGTCAAAGCTGCGGGTGTAGTGACATTCGAATTTATCTTTAAATATCATCATTTTGATT  
CTCCTAAGTGTGTTTCGTTTCGATACGTGCATTATGCTATAGTCGTTGATGGTTGTCAAC  
ACCTAAAAACAAAAAAACCCGAAAAATTTTCGGGGAATAAAATTACAGTTTGGTCGGCCA  
CTCCAGGTCTAGATCTTCCACATACTCATGAGATCGGACAAACTCTAAATCGAACTCTAG  
GTCAGTTCCAAATTTACGCGCACCAACATCATAAGAAGGCGTGATATGCGGTACATATTG  
AGGATACTCCCGCGTCGCGCCTAAAGCAGTGCCGATATCTTGTATGAATTGCATGTAGTC  
GCTTTCAAATGCCAACACAAGCGCATTAGTACCGGATTGAGATTGAAACACTTTCAGATG  
GCATAGAGAGCCTAAAAACTTTTCACCTCTTCTGGGATAAACGGAACATAGACACGAGA  
ATATAAGATAGTGCTATGCAGTTTATCACGAGGAACGGCATTAGGCAGATCGTAGAACTC  
CTGCAATTTTTCAATGCGGTCTAGTGTATCCTCAGTGAATTTAACAGCCGAATATGTACC  
TTAACGGATTCTCGAAACGGGGTCATAATCAAGCCTCCGTGATGAGTTCTACTTCTCT  
TCTGCGTCTTCCGCTGCTTCGTCTTTAGGGAGAAGTGCTTTCACTTCTTCGACAATAGCA  
TCAAGGGAAACAGTCCCGTTTTCGTCTGGCTGAATACCCCGAATGCGTACCAGTTCCATC  
ATTACACGCTCACGATCTTTCAGTTGGCCTTCTAAGAAGACGGCCTTACTTGAGTGTCA  
AACAGAAGTACTTTCAGGACATTAATCATGTGTTTCATGCTTATTGGACATATTCACATCT  
CCTACTTGTTCATAACTTTTTATTAATGTTTCGCGAGAATCGCGCTTTCAAATTCTTCTA  
ATGAACCATTATTTTTGATAATGGTTTCACCGTCAATAGGCAAATTCCTTTTTCGGTGG  
AGTGAGTCAATAACAATACCAGTATCACGCTGAATATGCAACACCTTAGCACCCATAGCAC  
GCACGAGAGCAATTTCAATAGGCTGACGCACATCAACCACTACAAAATAACCTTCTTAAT  
TTTTGCGCTTCATAAACTCATTACGGATAGATTACACCAATAAAGCGGATTGATCAAGT  
TAACCATTATATCAGTACCGAGAGTGGTTAACATGAGACGAATAGACCAGCCGTTATTAT  
GTTTTTCGCCAATCTCACTAACGACCTCGTAAATCTCAGCCAGACGATCACAAGTAAAGG  
AACTACCGCCATACTTCGAATCGAGCATAAGCCGACACTGAATAAACCCTTATGCGCGG  
TATAGGTATCAATAGCTAGATCGGCTTCTCTGTCACGCCCTAACCCGTCAAAGTCAAGAT  
AAGACAGACCTAAGTCTGGTTGACATTCGCACAAAATTTCTTTGATCGGTGCTGCCAGTT  
GATAACTATGTCCATCAATCATTAAACGCAGCAGTATCTTTTCTACTCGCTTTTTACCAC  
AGAGTGCAATCAATTTCAATTATATAAGCTTCTAATTACTTTCTAAAAGCAGGGTGCATAG  
CTTTAATACCTTCCACCTCTGACGATCCGCCGCTGAATTGCTGGGCTAGGAACGATCA  
GTTGACCATCACGTTCAATGCTCATTGAGTTAAAGGGAAGAATTGCAGTACACACCAGAG  
ATTCATGCATATCATCGGTGTATGTTAACTCAAGTTCCCTCAATTGTGATACCAACAAC  
CATAAAAGTTAAAAGTGCACACAATGTTAAGTCGTTCTGTTGTCATCATGTGAACTTGAA  
CGGCTTCTGGCATTGAATCCTTCCACGCAGTGGAGTTACCGTTATTGTAGTCTGCTATAG  
AAAGCATCCATGTGTAAGGTTTLAGATAGCTTTCCAATTTCTCATCAACAATAAACCGGA  
CTACCAACAGGTCAAACCTCCGCATGACTAGACGGATAATAAGCGACCGCCAAACGATATT  
GACCAGAAAATTGCTTAGTTCGGTGGAAATGGTTATAGCCGGAAGTGAACACCTTGAGCAT  
TTAAAGTAAAGCCTTTTGTAGTTGTCCATCTGGAATATTGATCTGCCAGTTGCTGGGGT  
TAGCATAGTTAAAGAGATTAGACATTACTGATTCCTCAAATGAAAATATTTATTAACAAT  
TGTCGCTTTGCGACGGGCCAGAGGTACCGACTACTTTTTAACCCAAACAATTTTCTATT  
ATTCTAAAGATCTTCTTCGTTTTGGTTATGTTTTAACCAATAACTATATTTTTATACCG



TAATAAATGAAACGGGTAATATACGAGGACTTCTTATGACAGAAGACATTTTAATAAAAAC  
TCTATGATCGTCTGGATAACGAAGTAGCAACATTGCGGGGTGAAGTCCTCTATTTGTCTA  
AATGCAATACAGATCTGCTTAAGCAGATAGCAGAAAGGGATGATCAAACAAAATCCCTTT  
CAGGTGCATTACGTGATCGCGACAAGGCATTAGAGATTGTACAGCGTGTAGCAATAAGG  
AAGAGTTAAAAGACTTCTTACATGGTTATGCTCATGCCATCGATCTATAATTA AAAAGCC  
CGTCATTGACGGGCTCAATGTTAACTATTGATCATATCAATGACGTTTTGTAGCTCTGAT  
ATGGATAGCGTTTTCTGTATATCCATCTGGCATATCTTCTTAACTAACACAGAAAGCTTTA  
TACCTTTTTCTTTATTGCACATACTATAGAAAGAGCATCATCACCGTTATCGTATTTTTTA  
TAAAATGTCAACTCATGACGAAATATAGATTTTGAAGAATGGTTTTGTATTCTTTTTATT  
AATCTGTTGTTGGTTATACCAAATTTTATAGCAACCGCAACATCTTCTTTGTATAAAGTT  
TGTACATAAATGTATACAGGTTTATCCTCTTAAATCCATGATTGCTACACATAGGGCAA  
CCGCTATTTTTTGATACGTAGTCTCCTAAGTTTGACGTAATTCATGTCCGCTACTACAG  
CACATTACCAAATTTGGTCTTAGCATTCCCTCTATACACACCGCCAACAAAATCTACAAAT  
GTGTCACCTTTATCAATCGCCTTATCTGTTATTTCTTTACTACTTGCTCAGTTGACTTC  
TTGTTTTTACCTGAACATCGTTAACATCTAGATCCATTA ACTAAAACGAGTGACCGGAT  
GCAGTATATTCATGTCCATTAGGGCATTAACTAAGATATTTCTTTTATAAAAATCTTTA  
TAATCAGACACATAGCCAATGACTTCGTGGTCTTTTTGGTTATTCCACATCTCGGTTAGC  
AACTCTTCGCTATTCCAGCGTTTACCCTTAAACGCAGCGACAGCCATGACCTTGGTAAAGA  
TATATAAATTTCTTAGTAAAGTTTTTGTGCAATCAGGACAATGCATTAGTAATTCTGTC  
ATTTGACCTGTATATCCTTTAGGAATATCGATCAATGTGTATTGTCCGCATATTGACTTT  
AATGCATCATCTATTCTTTCTTTGGTCCAGCGTAAGCGACCAGTGCATTCATGACATTCT  
ACACCCAGTCTAAGAGAATCTAAACTACATATAGTTGACGTATGTCCTTTATCACATTTT  
AACTTAAATCTAGTATCCTTTGCGGTGGTGTATTCTCCGACTAGACCAAACCATTTCATAA  
CAACATGGGATATGTTCAATTGACCTTCTCTATATATACACCGAACGGTCTAGGAACTGAA  
TTGGGTTTTCTTTCTTTAGTCATATTTTTATATCCTGTAAATAAAAAGCGCCGTCACCAGC  
GGCGCTATTTTTATAATCATTAAAACAATTTCCACACCTTACGAGCATCATATTTCTTGT  
CTATGCTCATAAACTGGTAGGTCGGAAGATACACATCCGCGCTCCAATCTTTTGGTGCGA  
TCTCAATCAGTTTTGTTTGGATGGGTCCAGGCAAATATGGTTTGATTATGTGGTCTGCGC  
CTCTCATACCTTTAACATCACTCCATTTAATTTTTAAACGAGTTTTATTACTAAGTGTAG  
GTGTACTCGCGTATTGTGCAACAATGCTTCTAAGAACTGCTGGCGAGCTTTAGGTGGCC  
CATAGTGCAAGTTCAAACCTAGCATAATCTCGTTTCCCGCTTTAGATGTACCAAATCCTA  
GACAGATAATCAAGGGGTATCGGTCAAAGAATGGCAAAGAATCCCGATATTTTTGGGTTAT  
ACGCAGAAGTATAGATCCGTCCCCTTGTGGTATTACTACCTGGTGACCTTTTACACCAT  
ACTTGATGGTCTTCATAAACCCTCCTGTGATTTTTCTTTAGGACGACTCTTTGATACAG  
CACGCATAGACGCACGAAAATCATTAAATCATCATCATTGCGCGTTGCTGCTTATTGAGAC  
CCTTTGCACCTTTGCCTTTTAGTTTTCAACTTCTATTGCTGTTTTAATTTCACTGGCAT  
AACGAGACATACTTTTAGTGAAAGTCGCATAGGCTGTTCCCTTAGAATCTGCATATGCGT  
TAGCTGTCATGCCTTTAGCTTTTGCTTTCGCAAATTCTACACCCAATTCGACCCACTGTT  
AAGACTTTCGTTTTTGGGGTAGACGGCTTTGCGTCTTCTGTGATTATTTCAAATACGCTC  
ATAATATTATCCTCTATTTGTAAAGTCCTTTAAAGCCAACCCTTTCTTTAATGCATGTT  
CGGTGATGATCTTAAACTCCAGGTTATGCTTTTTGGCATAATTTACGGCAACGAACCATT  
TTTCAGTATTTTTGTGTATGTCTATACTTCATGCATATAGCTTTGCTTTGTCTTCGCGG  
TCATTCCTTTTGGCTTCTCCGGTGGCCTTGTCTCTTTAGCTGGTTTAACTTCCCATAAAT  
GCTCCTTGCCATCATCAAACCTTAAGGTA AAAATCCATAAAGTATCTGTGTCTTTTTCCGT  
TTGTTGATGACTCATAAGGAATTACTACGGTCTCAGATCCCCATTGTGCAACTCTGGGAT  
TGCGGTCTAGCCACTGCATGATCCATCTTTCCCTGCTTGAACGGTATGTGATCTTACGTA  
TATCCCCTTTATACTTTTCCCTTATTCTCAGGAACATACTTTCCCTTATAAGTGTTAGATC  
CTCCCATTTTAGCACCTTTTATTATTAATAACATAATACTATTTATCAATTGAGGGTGATA  
AAATGCTCTTTTCTATCTTCCCTGCCATTGAATACAAAGGCAAGATGATTACTGACATTG  
TGCGCAATTACCGCGCATATTTGAACGCAATAATTTCTGATTATAACATACAAACATATT  
ACATTCAAGTTAGTCCACGACCGGCACAAGTTGCAGATGAAGTATACGGAAACCAACAAC  
TTTACTGGATATTGCTGATGCTTAAACGACGTATACGATCCGTTCCATGACTGGATCACCG  
ATAAGGAGACAGCATATGAATCAGCCGGACAACGATATGCAAATGTGCGGAGGAAATCAAG  
GATTATAACCACGTTGGTCTTGACGGAAACAAGTATTGGAATCTTACCGAATATCCGAAAG  
GATCAAGCAATTGGTATGATAAAGGGGATATTCATCATCGTCATTTGCAGTTTCATGGTG  
CATTGTGCGCAGTGGACACACTGGAAGATGCGATCCTCCGTAATGAGGAACGACGCAAGA  
TCAAGATCATAGATCCTACACAAATTAACAATTTATTAACGCATTCATTTCGAGAAATGG

AAAAGGCTGATGTGTAAGGTGATTAATTACGCTAATGTTTGATAACTCCGTTAAATGGTA  
TACCGGAATTGAAGACAACAGGGAAGTCCCATTAATGCTGGGGCGTGTTTCAGGTTAGGAT  
TCATGGTATACATCCCTCGCTATCCGCGCACGGTGACATTCAAGGTCCTCCAACAGAAGA  
TCTATTATGCATTACGCCAGTACAAGATATTACAAGCGCGGCGATCTCCGGTATAGGTCA  
ACGCCCTACTGGTATTGTTGAAGGTGCAATGGTATTTGGATTGGCTTTAGATGGACGTTA  
TTTAAACTGCGTTATTCTGGGTACTATTGCCGGACAATATACAGGGAAGCCACTACTAC  
AGAAGGTTTTTTCGATCCTTCTGCTGCATCCCCTCGTTATATTGGTAATGATGTTAATAT  
TCTTGCTCGTGGCCGTATTAACCCAGAAACCGGATAAACAACAAAACCTGATAGTGTCTA  
TATTCGAGATGAAAACATTGGAGTTGCAGTAAATCCAGACGACGAGCCATTAGACCAAAT  
TCCGGTTCGATGATAATCCTGATTTTACAATAGAAAAAATGCTGAGGGGCGATGAGGGATA  
TCGCGAGCAATGGTATCTTGATTCAGAAGGATATCCGACAATAGGCATCGGGCATTGAT  
CCTTTATAAGAAAACAGTCATCTGGGTATTATCAATAACGAACTTTCTAAGCTGGTAGG  
GCGTGAAGTTACAAACGGAAGACTTACCGCCGAAGAAGTTAGTAAGGTATTTGCTGACGA  
TATAGAAAAGACTCGTTCGTGATATGCGCAAACATCAACGAATTGCACCTGTCTATAATAA  
ATGTAATGCCTCTCGTTGTATGGCATTAGAAAATATGGCGTTTCAAATGGGTGTTGGTGG  
ATTGGGTAAATTTAAGAGTAGTCTTGCTGCGATGTTAGCGGAAGAATGGAAACAAGCCTA  
TGATAGATTACGTCAATCTGTATGGGCTAATCAAACCTCCAGGACGGTCAAGCCGTCCTTC  
TGATATTATTCTGACTGGTAACTTATAATCATATGGCGTAATTGCTCCAAGAAAGAGGA  
ATCTGTTTCTGATGATCCGCGAGCACGTTTGAGAAATGCCCGTATTGCTGCCTATAAGAC  
GCAGAGACCAGAAGAAGACCCAGAAGCACCGTTTACCCGACAAGACACACGAATCATGTT  
TAAAGAGCCTAAGAGTTCGTATTATGCGAGGTATTCTTATAACCATGTGTACGAGTCAGA  
GAGCGGTCATATTATCGAGATTGATGATACTCCTTCTCATGAGCATTATCACCGCAAACA  
TCCTTCTGGTACATTTGAAGAAACCAGACCGTACGGAACGAGGGTAGAAAAGATTGAAGG  
TGATGATTTTCTAATCGTTAAACAAGGCCGGAAGTAAACGCTAAGGGTAATTTGCAAGT  
TCTTGTTGAAGGTGACGCGCAAGTCTATTATATGGGTAAATGTGATGCAAACCGTTCATGG  
TAACGTCACTGAATTTCTTCGTGGCAATGTTAATCAGACCGTTGAAGGTATGGCTAACAT  
GCATGTTTTAGGTGATGTTACCGCTCAACTTGACGCTAATTTAACGGCTAATGTCAAGGG  
TAATGCTGAATTAATGATCGAGGGTAACACTACCGAAACAATTAAGGGTAACTATTATTT  
AACCGTTTAGGGTAATTTAATATGACCGTCAATGGCACTAAATCAGATCAGGTAAATGG  
TAACTGGTCCCGTAATTGTGGTGCAAGCGTTAAAGATATTGCATCTGGTACAGTTCAAAT  
TGATGGTAGCCGATTGATTTTGGGCGAGGTAACATAATGGTTGAAATTATTCCGATGAAT  
TCAAAATTGGAGGATATAAGCGAGCGAGAAATCTTTGAGGTGGTGTCTCTTATAAAGCA  
ACGCCACCGGATGCAAATACCACATACACAATCAAAGAGTTTAAGATCAGCGAGTATCGC  
CCTAGTAAGGGCGTTACCGTTGAAGAACTAAAATATCTGGTGAGGATCGGGATAGTTTT  
ACGCTTGGCGCGGATTCTCTTAAATATATAACGAAAGATAGAAATAAAAAATCTGCCGGA  
GGTTTTGATGATTTACCCGATCCAACACTACCGCAGATCTATATTATTTAACGCTCCTACA  
CGTCTACAGGAGGTTTATACTTATAAAGTAACCCTAACCTTTATCCAATCTGTTTCAGAG  
TCTTCTGGTGGTCTGGTGAAGGAAATAGTGGTGGTTCCAATAGCCGAGAGGGTGCTGGT  
GAAACTAATCCTCCTCCGGTAGTAACCGCACATACAATAGAGAAAGTATATACTCAAACC  
GTTTTTGGAAATTGGCATGTGTGGGCGCAGCAACTAAGAGATTATGTTGATAGGGGTGTT  
TAAAGGCCGATTCTCCTACGATAAGGCTAAAACCTACAGGGCACGGAAACTACCCACCTA  
CCGTAATTAATGCAACTCAATCTAAGGTATTTGTTGAGGGTATCCCTGTATTAGTCGAAG  
GAGACCCAATTACACCACACACAAAAACAACAAAGCCTTATGATACACACGGGGGAACTA  
CGGTCGAAAGTACCCCGAAAGTATTAGTTACCGGAAAGAAAGCAATTCAAATGGCAGATC  
GTATTAGCTGTGGCGATAACCGCCGCTATGGCATCACCGAAGGTATTCATAAAATGACAAA  
GCAAAAGATTACAAAATTCCTGATATTTTTAATGCTGCTACATTCGCTGAAATTAAG  
CGAATTAGCAGACTCGATGAGAAACCAGGAAGAATTTAAAGATTTTGGATTTAATGGTGC  
TGGTATTAACGTATTGATGGACTTGCTCGCATATAACACTCTGTATATTAGCAATTCGC  
TGACGCCGCCCTATATGAATCTTTTATCAGAACGGCAATTAAGCGTACTTCAGCTGTTCA  
AGCCGCGCAAGATTTAGGACATTTGCCAGCAAGTAAAACCTAGTGCATCGACTACAATTAT  
GTTGCACGTAACACATCCTCGAAATCCGGCAAGTATTCGAATCCCACGAGGATCTAAATT  
TATTGCAAGCGTGGATCGCCAGACGTCTTATCCGTTTGTGACTATAGAAGACGTTGGGAG  
CGTTTGGAGTTCAAATGGATTATATACGCCTATGCTTAAAGTCGCACAAGGTCGTATTGT  
TCGTACAGAAATGGTATTTGATCCGAAGAAACAATTTCTGATCCGCGATCCTGATATTGA  
CCGCGCTCAGGTTAAATTGTGGGTAGACGGTGCTGAATGGAAAGACTGGACACGAGAAAG  
CATTGTTAACGCAACTGGTGCAAGCAATATTTTCTATATGCGTGAAACCGTGGACGGTCA  
TACTGAAATCTTCTTTGGTGAAGGTGAATCAACTTTATCTGCTGCTGGCGGTGCACTGGA

AGCAAATTATATTGGTGGACTTAAGCCGTCACCTGGTGCTAATATAGTTATCGAATTTAT  
CAGCACTAAAGGTGCGGAAGCTAACGGATATGTCAATTTACATACGCGGATACAGTGGC  
ATCTATCTCTATTGTA AAAATTATTGAGAATCCGACAAATGATCGTGATTATGTCCGGTAC  
AGATGGTGGTGGTGGTATCCTGAATCAATCGAACGTATCCGTGAACCTTGCTCCGGTAATGCG  
TACTCTCAGCGACGTTGTGTTATTGCTTCTGACTATGAGGTTTTTGTATCTAGCCGTTT  
TGGTAGTAGTGTCCAGGCGGTACAATGTTTCACCGACGGAGAAAAACCTGGTTATGCTTT  
TGTTGCTGTTAAGCCTAAATCTGGCTTGCGTTTGACA ACTGTTCAAAAAGAAGATATGCG  
GGATTATCTGGCAAAATATAATCTTGCCCTATCACGCCGAGCATCATTGACTCAA ACTA  
TCTGTATATTAACGGAATATTATAGTTTCCCTATTCAATCAATGACTTGT CACAATCAGA  
GCAGTGGTTGCGCGGTGCGGGTATTGATCAGATTGATGCATATTATACCAACGAAGTGGA  
AATTTTTAACCTGACCTTTTGT CAGTCTAAAATGCTTGCTCGTATTGACATAGCTGATGT  
ATCTGTGATAGGTTCTAGTGCAGAAATCGAGATGGTGCAGAGATCGACA ACTTCTATCA  
AGCACCTATGGCTGGAATCAAGTTTTTACACCAGTATAAGAGCGGAATCAAGTCTAGTTC  
ATTCAACTTCGAAAAGGACGACAAGCAATATCCGATCCAGTATGTAAGTACGGAAATGAA  
CAAAGAATCCGGTTTAGCTAAATTGCTGGTTGGACCTTTCCCTGTTGGTTCTGCAATCGC  
TTTACCGCAATATCCGGCACTGATTTTGATAAAGAGGTTATCGACGGTGCGGACCTATA  
CTTTGAGGTTGGAGATGTT CAGCATTATGACGACCTTATTTCAAGGGATCTGGGTAAACT  
GAATATCAATAGCGATCGCTTTACTGGCTCATATATTGAGTTGACAGCTAAACCGATTGC  
TGATAACATCTTTACTAATGACGGTTCTTTGATCGTGTTTGAAAACGATCTCCGTCCTCA  
GTACACA ACTATTAGTCTGGAGGCAATTGCTCAATGATTAAAGCGCCTAGTGTA ACTAGC  
TTGACAATAGGAAAATTGTCTGCTAATCAGGCGTATATCACATGGGATGACGTAGGCGAA  
AACTTCTTTTATTTTGTGGAGTTAGCCGAAACCAGGTCACGAGACGGGGAGATCATCCC  
GTCGATGATTGAAGCTGGGTAAACCTGGGATATACTGCCGAACAAA ACTGGTTTGAGGAT  
AAAAACCTTTTGCCAGAATATTATTACAAAATTCGTGTAGCAGTAGCCGCAGAAAGGATTT  
GAACAAAGTAAATGGATTGAAACCGAAGAGTTTCAGACCTTTAAAACAAACGCATATAAT  
TTTTCTATGATGCGAGAGTTCGACCTTGCAAACGAGTTTGTTAAGCAAAAGTTTACATAT  
GATAATCGTGATTATATTA AATTCAATACTGATTTAATTCAAGCATCATTGATGAAGGAA  
GATTTTGTCTTTAGTCCTGAATATGCAAACATGACAAAATTTCAA ACTACTTTGTAGTT  
GATGAGAACTTTCATGAAATACAGGATCACATAGAAAAAGTTTGTACTGATATAAACCGC  
ACTATGTTAGCGGAAATGAACGGTGTTCGTACCTTTTCGAACGGTTCAGCCGATTGTG  
GAAGTGTCAAATGATAAAGGTCAATCTTGGAAGCATAACAAGGCTTTTAATGACCGTGTA  
GGCAATCCGGTTTCCCGTACATGCGTTTATCAGTTTAAACCCACTACTTACGTTTTAGGA  
TATGACCGAATCTTTTACGGACGACAAGCTAGAGATACTCGATGGAGCGCGGACGATGGT  
CGATTTAGTGATGATACGATCACTTTTGCAAAGGTTGGTGACGAGAACGATTTAGGCTTT  
GACGTTGAGATCTGTGGTGTATTTTCCAGATTGACAGGTGACACCACAAAATACGCCGAA  
GCTCTGGCGTGCAGTGACGATTATTTGTGGGTTGGTGCTAAAGATGTTATTGGCCGGATT  
CGTCTTAAGAATACTCCTGTTGATACCGTACAGGGTTTCGCTACGTTTGGAGAAAAAATA  
TTCGATCCTGATGTTATCCCAGTAACAGGAAATGATAAAGCTGTCATTCAGAAAATGGAT  
GTGATCGACGGTAAATTGCTTCTATTTGTTACGGGTGAAGTCAAACGGCGTTATCAAGAT  
CCA ACTAAACCAGAAAACGTTCTTCCGACAGATGATGCGAGTGTATACTTAATAGGGAGT  
GATGGTCTGTCTTTT CAGAGAGTATTTGGCAACACTCCGCAGGAAAGGGAATATATT CAG  
CATGGGTT CAGTAATATGCCAACCAATGGTGATGAGGTGTT CATAAGCCATTGTAATCAT  
CAATTTGAAAGCATTTTACCTGATCCAGAAACTGACGCGAAATATGAATTAGGCGAAGCT  
ATGAAATATTCTCAGGAGCCA ACTTATCTGACTGATAAGAAAATACATCAA ACTACTATC  
AGAGCAAGTTATGATGATTTGCGTATTTGGTAGTTGGGACCGCAAGCGTATTATGATGAG  
GCTGATTATACATGGATGCGTCGAAACGGTGTCCGTGTGTGGATCACA AATGATAATCGC  
CCGTTGGTTGTTTATCCAGAGGTTATCTATACTCAAGAAGATGATACATCTGGCATTCTT  
GACCAAAAATAGGGTCAACCGAGAAGTTTATGATAAAGGGACCGTGACCTGTTATCTTTAC  
AATTATAAATTTGAAGGATTCAAACAATATGCATCCGGTGTAAATGTTCCATAAAAACACG  
GGAGAGATCATAGGAGTCGATCAATTTAATTATCGTGTTCTGTGACCAAGTTAGTGTATAT  
TGGAACCCTACATATGTCGCATTTGTTGCTGAATTGCAAAAATCAGGTTCCGGAGGTTCCC  
TGGGTTCTGTT CATCATGACAGAGAGCAAGATCCAGATTTGCGGCCTATACTGAATAAG  
ATGACGCCTGATAGCTTTTTACTTGAGAACGAAGATTCAGAAAATTCTCTGAATATTAT  
CTGCAATTTCTAAGTGATGGTTCAGGAACATATTA AAAATAAACTAAAAAATGTGATTA  
AACAAATATCCACGCGAGCAAGATGCATATGATTATCTTTGGTCAGAGATAAACAAACGA  
AACATCTATGCAGATAAAAACAAGCGAGATGCGGTGCGTAAGATTCTTTGAATCCTTCAA  
TCAGATTTT CAGTCCACTAGGGGCGTGGAGGCTTCTTACAAGTTCTTGTTGAGTTACTT

TATAATGAAGATGTGGAAATTGAGGTTGAATCACAAGCCGGACTAGAGTATGATATTGTT  
GTTAGTTCAACGAACATTGACGACGATATCGTATGACGCACGATCTATACTCCAACCAGG  
CGGGCTAACGTGACTTATCTTGAAAGGGAATATGAAGGTGGACGTTTACGCTGGCGAGTA  
ACCATTCATAACCAGATCGGGCGGTTTGAAGAAGGTCAAGTGATCAAATCAGAGAAAACA  
GCGTTTGATGGGATGATCCTTGTTGGTGTTCGTGGTAAAGAGTTGTTGAGTAGTTCAATC  
GACTATATCAACCGCTCACGAAGCCAATAAACCATGAAGATTA AAAAGTGCCTTGCCAGTA  
TTGCGCTATGCAAATGGTGTAAATGCGATTCTGTTTCATCCTGTCTGGCTTTGGTTTCATAGGT  
GTTACTCTTCTTACAATGTTTATTAATAGCGGATTCAGTATGATACACGTAGAACTATA  
ATTCAATCTCTGAAAAATTGTAAGTTTGACAGCGGATTGCCTAGCGTGTATCCTGATCGT  
GTTGGTGTATCTTGATGTTGATGGAAATATTAAGATTGACCCACTAACAGGGAAACCATTA  
TACTTAACGTCACCGACAATTGGCGAAGAGTTCCTGTTCCCTGAATATGATCAGGAG  
CACAGCGAATTCTTCCACGGACTTAAAGCAAGCGAACGAAGATTTGCAATGAGTCCACTG  
TTTGACCAGTCGGCGGTAACATTCTCTATGTTCCGTGGACTTGTAGATAAACGGATGCAG  
GATAATATAGGGAATCCACGCGATCCGAAGAATCCGACACAGAGGAAAATTAACGGCTAC  
TGAAAATAGTGTGATCTATCTCTCAATCATTGCTAGCAAATTCAGAACAGAAAACTTCT  
GAACTTCTATAATTCTGTAGGCGATGGAGCAAATCAAATTTCAATTTATGGAACGTTTGG  
ACGTTTCAGAGCCGTGGTCAGAAAACGAAAAAGAGGTGGGCTTTGCCCCACCTTATCCGAC  
CGATTCAACGGCTTGTGTTGTTGACATGTGGACCCATTTGATGGGGGCGGTTAACATTA  
CAAATCACTTCTTGATGCGGTTATCCCTCGTAAAGATTGGGGTGGTACGGGACAGGATAA  
CCCGCGCACATTCTTTATCAATGACATTGTTGTTGTCTACTCAGCACCATATAACCGAAC  
TGATCTTGGTAGCGGCTGGATGGTCTATCGCGTAACCGATGTTCCCTGAACGCGGTTACTG  
CTCGATTTCAAGCATTGACGCTAAAGTAGAGTGTTTGAAGTTGGGCGAAAAGTGGACCCC  
CACTCATGAATCAATTGCGCCACCAGTAGGAAAGGGCGATTCTATTGATATGTGTGATGG  
GTATCGTTGGGAATATCTGTACACAATTGCACCTGATGCGGCGATCAACCGTTGCACCAA  
TGAACAAATTGTTGTACCGTTCCCGATGAACTGCGACAAGATCCGGGGCGTTGGGGCTA  
TGACAATGTGATCACATGGTATAAGGACGGTAATCTTCTTTATCGGCTGAAAGTAGTAAC  
TTTGCGTTTTTCAGGCTTTTATGGA CTCTGCGCAATTCCCAACGACCGCGTTTGTGGGTAA  
TACTGGTTTTCCGTCAGTTAAGCATTATCCTTAACCCATTGGAAAAGAAAGCACGCCCTAG  
CGATCAAGACGTTAAAGCGGTCAAAGATAAATACCGACCGCAAGACTTAGAGCCAAACTC  
AGGCGAAATGATCTACATGAAAACCGACAACCTATCGTTCGGTCAATTAGATCAAACAGA  
ACTTGTCTGTATTGTTTGAAGTCTAAGTGTATGATTTTAAAAGCCAATTCGAGAGAGT  
TGGCTTTTTCCATTGTTGGTGTGACAATCTTATTTGGTTAGGTATAATACACATATCTA  
AACAAACGGTGGATTAATTATGGCACGTCGTAAATTTACAGATAATTGTGAAGCTATTAG  
GTATCCCCTTGCCGTTGGGGTGTGATCGCGAACGGTGAAGATCGGCGAGATCATCGAT  
CATACTCATTCACTAGCCGATTACACCGATCAACTATGGGAGGATATCAACTTCATG  
AATGCCACTAAACGATTCAAGACTATCGACGAAGCTATCTATTTTGTGTATAATCCAAC  
TTCGGTATGTGGGGAAGTAAAGTAAAGTAAAGTAAAGTAAAGTAAAGTAAAGTAAAGTAAAG  
ATAAAGCTAAGTTCCCAATGCAAAGCATTACTATGGTCTACGTGCACAAGATCCTAAAC  
TCTAAGGTACTCATTGGTTTTGTAAACATGATAACCAATGGCACACATACGAAGAGATGG  
ATGAGATGATGAAACAGGGTATTAATTTAGTTATTCTAATTATGACCATCGTATAACTT  
GCATTCGAAAATTGAAACGATGGATTCTGTAAGAATCCGCAATTTAAAAACTTTGTATTCT  
TTATGTCTCATGGCTATTTGGGAAATAGCGTTACCGTCACAGCAAAGATTAATAATGGC  
ACGACTTTCTAAACAAGCACAAAAATTACAAGATCGGGTGTGAGTTGATTAATTCAGA  
TCGCCCATTACATATGAAGAAAAAGAAATTTTGCTATAATAACTATCATGGCGATGGGCT  
AGGCGGTTACAGGTGCATACTTTACCCAGAAAGGGCTTGCATGGGATTTTACCATCGATGC  
ACATTGCACAGGAAAAGTTTTAGATCTTTGTCTGGGATCGGTCGCTTATCTTTCTGTAT  
GTTATATCGTTGTAAGCCAGAGAAGATCGTATGCGTCAACTCAATCCAGAATTTGCGCG  
GATTGGCAAGAGACTAGTACCGGAGGCCAAAATCGATCACCAGCGATGTATTGCAATTTGA  
GTCAAACGAAAAATTCGATGTGGTGTCTGCAATCCACCTTTGGGAAAATCAATACAAC  
CGACACAAAGGATGATTTGAGTACACTGGCGGCCGAATTTGAATTGAAGGTTATGACATT  
AGGCCAGAAGTTTGCCGATGTAGGTTCTTTTATTGTTCTACTGGTTCCGCTGGTTTTGC  
TTCTTCCGGCAGACCTTATTATGACGGGAGCAGGAAGTCTAATAAATATCTAAAATGGAG  
CAAACAAACTGGTTTTGGTACTTACGCCGGATGTGGGATCGATACATGAATCTATCGCGA  
TGAATGGCATAGTACCAACGTTTTAACAGAAGTGGTCGAGGTTCCGGTATTACGAGAAAGA  
AGCTGTAGGAGCGCCTAAATCACGTCCTAACGAACAAATAGAAGAAAATAAGGAGATTAC  
CTTACCGAAACAGGAAAGCGAGTCTGGGACGCTCTCAGATTTGTTTGACATTTAATTATA  
AGCCGTCCTTGTGGGCAGCTTTTTTGTATGATTTTTATAAATAATACATCATAACATGAG

GAATTAACAATGGCACAAGTTCCAATGAAAAGAATAGACACAGGTAAGTCCAGCAATCC  
CAGCACCGGGGACATCCTCTATGACGGCGGTAATAAACTTAACGATAACTTGGATTCTAT  
CTATGACGCATTTGCTGATCAACGGTTTAAAGACGTAGACCACGGCGTAGGAAGAGTGGT  
TATTCATGCAACCGGATACTATCAGAAACATCCACGTCAAAGCTACTCTGGTTCCGCTGT  
TGAGATTGCGAGTCTACACGATATCGATACAACCTCAAGGCGCACTTATTGCTATTCTACC  
TAAAGCAAAGGTCCGGTGAGGGTGTGTTGATTTCATAAATAGTAACGGTAGCCTTTTAAACGAC  
TACACCGATCAATATTCAAACCTCAAGCAGGTGATTCTATTAGCGGGAATTCCGGTGATGC  
TACAATAACACAACCATTTTCAAAAAGTCACTGTTTGGTGTACTGCCGTTTAAAGGTAGCCG  
CGTAACATGGCGCTTGGGTATCGAAAGTATGTTTACCGATAACAACAATGCCATTAGATAA  
AACAGTTAACGTAACGGGAGTAGCAACAACGTTGCTATTGCCCGAGAAACAGAATACGT  
TTCCATCAAATTATTAACCTACCGCTAGCAATACATCCGGTTCAAAAATGCGTTCAAGTGA  
ATCGCTACTGATGATTGATTCTAAAGCCGGAAAGGTTTATGCGACGGAATATGCAGTTTT  
GCAGAAGACAGAAGACGAATTACACACGGTTCGTTATTTTCATCGGTTCCGGCGATAAAGT  
ATATGCAGAGTATAAGGCTACTGGCGAAAATATTCGTTTAGCAGTTAAAGCCGTAGACAC  
TATTAATAATCGGGGTTGCTACATGAAACAATTAATTAATATCGGTAACCTTGTGATGAC  
GGTACAGGTGATTATCAAAGAAAAGGCGGTCAAAGATTAATGACAACCTTGTCTGAACCT  
TATACTAAGCTGGGGGATGGTGATATCCCTTATGCATCCGGCGCGTGGCAAACCTCACACA  
CAACCAGTATTAAAACCAAATTTTGGTGATGCATGGGCGATTAATACAATGAACAACGCC  
GTTTCTGTTGAATTGCCTAAATGTGGAGTTGGTGATTGTAACAAGACAATTAACCTTGGT  
GATGTTTGGCGCTCGTGGGCGTCTCATAACGTAAACTTAAGCCCGCACAAAGGTGATACC  
ATTAAGGGATCTCCAATCGACCGTGGGTTGTATAAGGATTTTATGGATATTGAACTGGTT  
TATTGTGCGCCTGGACGCTGGGAATATATCGGAAACAAGCGAGTTGACACGATCACCACG  
TCTGACCTAAGCACAGTAGCTAAGGAAGTTTATATTGCCAAAGAAGGGGAAACATATTTCC  
CCTAATGTATTTGGTTCTAACACATATAACACTCGAAATGTTTAAAGTATATTATCGAGGA  
AACCTTTTATATTATGGCAAGTCTTTTAGTAATGACTCTAGCTACGGTTCAATTGGTGAG  
GATGGATCACTTGTGAACTTGTGGCAAAGCATAAACTTCGTTTTCCTTGTTCGGCT  
GAGGATACCGTTCAAATTATTACATATATGGACGGAATTGCATCGTTCCGATCTAGTTAT  
ATCACACACACAATTAGGGTGTATGATACCGGAATGACAGCACTAGAACTATTCCTGGT  
GAAGTGTGGGTAGGTGATTTATCGACGAAAAAGAATTTACCAATGCTGATTTGGGAGTT  
AGTAAACGTGATATAATTAACCCAAATTCATTTGAGTTATTAATAAATGGTACTCAAATG  
ATTAAGCTGGTGATTCTGATCTTCCCTTCGTTTGTGTTGTGAAGGTGCTGACGGAGAAACC  
GAAGAGAGTTGCGCACTTGTGGCGGTGAGTGGCTACAGTCTGGAGAAGATTATTCAGT  
GTATTTGATGAGCATAGCATTGTATCAGGGATTAATTAGCTAAAGCGTTGGACAATAGA  
GATACTAGAACAATTCGTTGGTTTAAATAACGATATCGGAACTCTATTAGAATGGGATGGT  
GTCGCCGGACTTAAAGAAAAAGCAGACAAGATTTATCTCAATAACGAAGACGAAGTTAAT  
TTAACAAAACAAATTGGATATACCGACTTCCAGAATCCTAGCCAGAAAAACACTCGTCCG  
GCGGAAGAGTATTCAGGTGCAATTATGGATATATATGCACTGTTTGTATTTTCCATCCG  
ATCGGGACGATATACGAAAACGCACATAACCCAGCTAACCCAGCGACATATATGGGTATG  
GGTATCTGGGTTCCGGTATGCGGAAGGAGACTTCTTGTGCTGGTTGGTCTTCTGATGCCAGC  
GCACAGAAATTTGCATTAACAATAACGATCTTGATATTCTTGGACAACCTACACACTCC  
GCTGGTGGTACTGGTTGTGAAGTTGCCTATCAAATCAAGAAAGATATGATTCCTGAATTA  
CAATCCAACGATCGTGTTTTGGTGAAGACGATAAAGGGTCAATTATCATTGGTGGTTGT  
CAAGTTAACCTTGTGCGGCAGGTCCAGCGTTTACGAAATATAGACAGGATATCGTAAAA  
GTTAATTCTGGAAATGCTGATCCATCAATGATGGGTATTCTTCCCTCATATCGCACCGTT  
CATCGCTGGTTAATGGTAGGTTAATATGATTTCTAAAATACGTTCTAAAGCAAGCGTATT  
TTCTAGCGACGCAGCATTTCGTTTCATACGATCCGGGGTCTAAAGACCCCATTTATTGGAGA  
CATTCCGCAATTGGTGGATTAAACGTAGACCAATCTCGCAAAGGTTCTTTTATTAACAA  
CGTACAATCAGCCATTGATGATTTGTATAGCATTCTATGCTTAGTGTGCGGGGATGTATT  
GGTAACTACATATGCAACCCACCGATAGCGGCGGGACAAATAGAACTCTTTCTTTTAC  
TGGAACGGTAACAAATACACACGATCCAGCCGCGAAAAAAGTTGTGATGGAAGTTTTGGG  
TTATCCATTTGTTGTTAATGTTGGAACATCGAATGTTGCATTATGCGAAATAGCCACAAC  
AAAATTTACTGAATTGAAAGACAAAAGCATCCTGTTCTCTTAAGTTCAGAGGAAAGGCAC  
TGGCAACGATCAAATAGAGATTCAGTATATGGATTAACGCACACGGAGCAACGGTCTGT  
AGAAAAATATGGTATTAGCATTTCGTGGGAAAATAAATCCCCCTGCTCGTTATGGTTATGG  
TGCATGGTCCAGATTGAGAACGGAAGAAAAATTAATTCAACACTATTTTATTTAAGCG  
TATTGCGTAAGGTGTAATAATGATAAACAATTAATCACGTATAAGACGATGCACAG  
TATGTTAAGTTTGACCCTACCGGAAATTGGCCTAGCAATATAAAAAACGTACAAGCGGCA

TTAGCCGCTATTCAGGGATTTGCTATTGCAGGTCTTCCAACGGCAACCGAAGAAAGAGCG  
GGTATTGCTGAAATTGCTACTCAACAAGAAGTAGATGATGGGTTGGATGGAACATAAAATT  
GTTACCCCAAAAACATTGGCTGTTAAGCTGTCCAGACCGGACGCAACAAAACCTTGTCAA  
GGGATCACTCGCTATGCTAATAACGATTAAGCCACGGGCGATACTCCAAATATTGCAATT  
GGTCTGATACATTAACCCATGTATTCAAGAATAAGAAAGCAACGGATACCGTACAGGGT  
ACAATTA AAAATCTGTTCTATGGATGCGGCAAAAATCGGTACTGATGACACTATGGCGGTC  
ACGCCTAAAAAGATGCACGCTGCTATTGCTCAGATTGTTCTTGGGTTTCATTCCAGACCAA  
AACACGGCGACCGAGTCCCGTGAGGGTTTAGTTCGACTGGCGACAAGCCAACAAACGCTT  
GCTGGAACATCAGAGAAGGATTTGCCGTTAGCCCATATGCATTTTCCAACGCAAGAGCC  
AATGAAAATCAGGCGGGTACTGTTAAAATAGCGTTATCCCAACAAATGATTGACGGTAAT  
GACAACACAGTCGTAGTATCAGCACAAAAATTTGCGAACACTAAAGCAACCACTGGACAA  
TTCGGTGTGTTAAGCTAACAGATAACCCAGGATCAGGCGAGGCAAACACAGCACTGTGC  
GCAAACGCTCGTGTATTGCCTCTAAGTGGTGGTGTCTGTTACTGGTGATGTGTATCGTCAT  
AGTGGAGGCGACGGAAACCAGTTGATCATTAAAAATGAACTAGATGGTCTTTGTATGCCT  
ATTGGTGGCATCATTCTTACAGCATTAAACAGTTTCGACCACGCACAATTCAAAATCTGC  
AACGGTCAATGGTTAAATAAACACCAATATCCAGTATTATTTTCACGAATCGGTATCACT  
TACGGCGGAGATGACGGAGACAACCTTGCTATACCCGATATGCGAGGGCTTGTGCTAGA  
GGATGCGACCACGGTCGAGGACTAGACCCAGGTCGTGGATTTGGTACTTATCAAGACGAC  
AGCGTGCAACATATGACAGGTAACCTCCCTGTAGCCAACCGTTGGCGAGGTTGGACTGGT  
GGTGTATTTGCCATCACAGGCGGTCAATGGAGCACGAACTATAAAAACGGTGGTGTGAT  
GATTGGGGTAGTATTGTTAACTTTGACAGCGCAAGAAAGGTTAGAACGTCTGGCGAACT  
CGCGTAAAAGCCTTGCATTCAACTACATGATAAGGGTACAATAACGATCGAACAGTTAA  
ACATCCGAAAGATCCCTAACGTCGATGGTGACCCTGGAGACGGACAGCATTCTATTAGCT  
GGATTA AAAATGGTGAATGTGTAAGCGCAGCAACCACAGAAACAGGACACGAGGGGACGC  
TTAACCGGGCCCTTATGCGATTCAAGAAAATATTGTTCTGTTGGATGATAATTCTAAGG  
CAACGGTAACAAAAGTTAACGAAGTTGTTACAGCAGTTAATGATATTA AAAACTACTTTAG  
GCACGGGTGCTGATGGTAGTATTATTGATATTGTCAATCAA ACTATTGCAAAGGTTGATT  
CTGCAGAAAGAAAATTTAAGAGAACTTCAAGGATATTACAAACCACAGTAGATGAACTGG  
CAGAGACAGGAAAGAAAATTTGGTGTTCGTCCGGCAGCAGACCCTAGTACACGAACAATAT  
ATATTGATATTTCTTTCATCAAACAAGAATTGGGCGCTTTCCCTAACTTCAATATCAACG  
GTTCTCCAGATCCGGGTAGTTCCGGTTCGGTATCGAATATCGAGTTATCCAGAATACGG  
CAGCATTAAACAACCACGGTCAGCGAATCCGCCAACTAGAAAACGACTGGCAAGATTCTG  
GCGTTGGAGAGGTAACAAAACAAGCTAACAAAATGCGTAGCGAGCTAGGCGATACATCAC  
TGGCAACACAGGACAATGTTTATCTTCGTCTTCGCACAAATACTCGCAATATCGCTAGTA  
TATCAAACGAAGTTCAGGAAGTAAAGAAAGCGATTCTATTTGAATCAAGGCCTGATATCG  
GGACTAAAGTAAATAAGCTACAATCTGATTATACCCAGCTTAATGATGAAGTCAACGGCG  
TTGACGCTGGTATCCGTCCTCGTTAACTCTTCTGGAAAGTAATATTGGCAATCCTCAGG  
CCGCTGCACGTATTGATTATCGATTGACTAATCATGAACGCGAATTTGTAGATCTTAAAT  
CTGTTGTGGGTGTTAGTGGTGTGATGGTCTACGTGGTGAGTTTGCACGAATCTCTAAA  
CAGTTGGTACTGAGAGTGC GCGTCATTCTATCGCACGTCGTCTAAA AATTGTCGAAAACA  
CACAGGGACGACTAGAAGCTAGCGTACAGGATATCGAGCAAAGGATCGGCGATCGAGATT  
CCGGTCTAACC GCCGGGGTTATTAAGCTGTCAAGCGACATGTACGGCAATCCAGAAGGAA  
GCACGCAGCTTGAACAAGATGGGATCGGGAAA ACTGTTAAGGAATTGAGCACATCAAATG  
CAAGCAAGGTAACACACGTTCTGATGATGGCTTCCATTATCTACGTAAGCACGGCGTAA  
GGGTT CAGGTCGCATGGGCGGCTGGTGCATTTAAGAACCCGCTCAGATTGATATTACTC  
TCGACGGACAAGATCAATA CAAGGGAATCCCACTAAACGATATGACCGAAGAAGTTCTTG  
CGCGTGAATGGTTAAGAGCGAATTTCTTGTTACGGTTAACGACAAAGGCTTATTCCGTT  
GTGATTTCCGTTGTTCTGCAAATGCGGGACATAACGCTACTTTCTGATGTCGGTATTGCTA  
AAAATGGTCTGATTGTACATGAGGTACGAAATGTTTATTATGGACCTGATGATTTAATTT  
GCTATTCTACCAGTGCTTTCTTAAATATTGATAAGGGCGACCGGATCGATATTCCCATTA  
AGGGCGTATCCGAAGAAGCATTAGCGCAACAGCCACAAATTAAGAGTTCTCTTTGGAA  
TTTCTCCGGTATAAGAAATTAAGGGGCGTTAAGCCCCTTATTCGTTTATAGGTGATATT  
ATGTCAGGATATGTACCCAATTACCCAAGAGAATTA AAAAGACGCTATTCTGCGTCTGTTA  
GGTGCACCAGTAATTAAGGTAGAAGTAACAGAAGTCCAGATTTACGATTGTATTCAGAGA  
GCATTAGA ACTCTATGGGAATATCATTTCGATGGTGTGAATAAAGGATATAAAGTATTT  
CGTGTTAGTGCATAGCAAGCGCAACACGGGGTATTTGATTTAAGCGATTCTGGAGTATCC  
GCAGCAACTAAAATAAATCGAACAAACGTAGGTAGTGC GGCTACGATGGATGGTACTGCC

GTTTATTCGTGGTTTACTGACTTTCTGTTGGGTTTAGCGGGTGGAAATGGCGGTTTAGGA  
TCTGGCTGTAGTAAATTTTACGGACCAAATGCAATGGGCGGTGATCTAGGATATTTTCGAA  
CAGCTTATGAGCTATTGAGCCACTATGCAAAATATGCGTAATCCGCTGCCAGATTATTGG  
TATAATAGCGCAAACGGACAACCTTAAGATAACAGGAACTTACGAGAAGGTGATCTCATA  
GTTGTTGAATTATATGTTAAAAGTTATGTTGATCTACCTGATATGATCGGGCGTGGTTGCT  
GGCTATGCTCATGCGGGAGGATGTTCTACCGCTGGCGGGATTAGCGCCGTTTATGTTAAC  
CCAAGTCTGTTTAAAGCGGGAGTGTGCTGGCATGGGACCGATCCGTGATAACAAGCAG  
GGCGCATATAATAACCGTTGGGTTAAAGACGGCGGACTGCGTTTACTCGTGAGCTATGG  
GGCAAATGTTAGCTCAACATCAAGGGTTGCAATTACCAGGTGGTGTCACTGTTGATGGT  
GTCAGGATTATCGAAGAAGCACGCGCGGATATTGAGAAATTGCGACAAGAATACTACTCGAC  
TTAGATCCTCCGTTCCGGCATCCTCATGATTTGATTTATTGGGGGAGTATTCCCCATTG  
GAGTAACATATGTTTGACAACACTCTTTTTGCTCGCCTTGAATCGCATAAAGGATTATGAG  
ATTACACGACAAACCGAGATTCTCAATCCTTACGTAAATTTCTACCGTCATACAAACACC  
CAGACGTTAGCCGACGTTATGGTCGCCGAAGCTATTCAGATGCGAGGTGTAGAATTATAT  
TACATCCCTCGTGAATTTGTCAAACCAGATATGATCTTTGGTGAGGATGCTCAAAGCAA  
TTAATAAAGCATGGAAATTTGCTGCGTATATAAACTCTTTCGACGGGTATGAAGGTGCA  
GGAAACTTTTTCAATATATGGGTTATACGGCATAACGAAATTAACGTTTACTGTGAAT  
CCTAACCTATTCAAGCATCAAGTAGATGATCAAGATCCAAAATCAGCTGACTTGATTTAT  
TTCCAATGAGTAATGATCTCTTTGAAATTAATTACGTCGAGCCATATCAGCCGTTTTTT  
CAGGCTGGCAACAATGCCATGCGTAAAATTATTGCAGAGAAATTTGTGTATAGCAGTGAG  
GAATTGCGACCAGAATTACCACGCAATGAGGGAATTAATGTTGATGAGTTTGCGGATCTG  
GATCTTGCACCGATCACCAATCTGGACGGGTTAACAGATATCAACTTAGATCAGTACAAA  
CAAGACAAGCAATTCGGAAGCGAAGGACAAGACTTTATTGATCCGATTGCTCCTATTAAT  
GGCAAGCGTTCACCTTTATCCGATTTTTGAAAAATACTTGTATTGATATAATATAAGGAT  
CTAAAGACATTTGAAAAACTATTATCTATACGAAATAAAGAACAATATAAATGGTAAGAT  
ATATGTTGGCATTCTGTTGGTATGATGGTGCATAAAGTCAAGATCCTTATATGGGTAGTGG  
ATTGACTCTCAAGAGGTCTATTAACGAACGGGATAGAAAACCTCACAAAAACGATTCT  
CAAAACGTTTGCCTCATGGAAAGAGGCAAGGAAAGCAGAAAGAGAAATAGTGACAGAGGA  
ATTTGTAAAAAGAGAAGATACCTATATTGTTTCGGTTGGTGGACAAGGTGGAAATACTCA  
CGCTGGGATGAGCGAAGAACGAAGAAAACCTTGCAAGCGAAAGACACGCAAAAGCAAACCG  
AAATACAGTATGGCAGCAAGAATCTAGAGATAAGGTTAGCGCAAGATTCAAAGGTCATAA  
GCTATCACAGAAGCAGATAGACGCGCTCAAGAAGGCTAACACAGGAAAAAAGTTCACAGA  
AGAACAAGTTCAAATAGGTAAAACGTGGCGAGGAAAGAAACGACCAGATATAGGAGA  
GAAGGTTGCGGCAAAATTAACAGGGAGAAAACCTACCCCAAGAACATGTGGCAGCAATAAC  
GCAAAATGCACTCAGAGGAAAACAACACTTTAGGGCAAAAAGATTCTTCATCGACGATAT  
GGAATTTTATATTATGAGTGATGCAGCTAAAAGGTTTGGTATAAGTTATAAAACGGTTAA  
AGCTAGACTTCTCTCAGATAAGTTTCCTACATGGAGATATGAATAAATGTTTTACATTT  
TTACAATTCGTCAATTAGAAGGTATATTGTATTGCTGGGTAATTTATTCTCCGGCGTACA  
AATTAAGGGTGCAGTAGTGACGGTGAGCGTTTTATTAAAGTTCATATCACCTACGAAA  
GAAAGAAAAATTCATGATGAGTCTGGACAAATTTAACAATATCTTCAGCGAGGAGGACGT  
CGCAAAGGTAGAAAATATTTTATCTCGTATGTGTCTTTCTTTGATTGATATGACATACGC  
CCAGAACTTTAAACCAAGGTTGCAAATAAGAGAGTACCAAAATATACGGCTGATGGAAT  
CAGGAGAGTAACACAATATTATCCGGTACCATATAAGTGTACTTTCGAGTTAGGGATTTA  
TACGCGTAACGAAGATGATATGTTTCAGATAATTGAGCAGATTCTTCTTACATCCAGCC  
TCATTTAACTGTAAGATTAAGAACAACACGGTAATGATGTATGGATTGATCGAGATAA  
TCAGGTCACAATTTGTTCTATACTCCAGATGAACTGGTAGGCGAAGATAAGTTTTCTCG  
TCGTCGTCTTGAGTGGGCCATTATGTTTGAGTTCATCGGGTTTATCTATCCTCCAGCCAC  
CGACGTTAAGGGGGAAATCAGAACGATTTCTCTAGATTTTCATGCTAATTCTCGTGAATT  
AACTCCTAGGGGTAATTTTGAATCAGCGGATCATGAAGTTGTTAAACGTGATGTTGAGCA  
AGAAGAATGGGACGAAACTATAAAAGAATCATATTATAGTGATATTCCAATACCAGTTGC  
ACCGACTCCACCGGGTCCACGTATTGTAAGAGAATTTTAAGAGGTAATTAATTATGTCAG  
ATCTAGGCTTAGACATGAAGCAATTAATGAATTTTCGAAAGTCTAGGTCTTCCGGCGACAT  
TCGACGCGCAGAAGATCGAGTGAGCTATAATTCGCTCGTCTTACTCCGGTCTAAAGCC  
ATCCAGAAGATCGTAATATTGGCTAACACGAGATTATAATGAGGCACGTCAGAATATTC  
ATGTTTCAAGATCAGATGATGATGGACGCCGCAAAGATTTATCTTGAACCTGCTAAAATA  
GTGAGTCTCCGAGATTCTACAATCATTTAACGGCCTCATGCAGCAAATGAGCTACAACA  
ATAAAGAAATGCTGAACATCCATAAGGATATGAAGAAAATCACCGAGCAAGCTGGAGAGA

AAAAGAAAGATAGTACCCCAACCGCACCAGTTAATATCCAGAATGCGACCGTCTTTATGG  
GTTTTCTAGTGATTTAATGGATGAAATCGAAGACGAGGAAGCGCGAGTTATTGAAGGCT  
AGACAGTATGAGCGTGATTGAAGGGATTAACGCAATGGCGACGGATGAACACCCGCTACA  
TTTAGCTCATCCGTCTAAACTAGAACTAAAATTGATTCAAATGGTATTGTATGGATTTT  
ATCAAAGCATGATGATAAATGGTATCCTAAACAGTTTTCTGACTATCTGAAATTAACAG  
ACCGCAGAAAACAAGGATGCAAAGCACTGACCCAACAATTATAAGTTCTTTATAGATAG  
TGACAATATTCGCACGCGGTATATGCGGTTAAAGAAATTGCGAAGGGCGAATATTA AAC  
TCAGTATACCCCTGAAATGATCGCGGAGTGGAACGATGACGTAAAGATATTGTATATTT  
CGCAGAAACCTAATGCGCAATTACACACATCGCCTACGGTACAATCAAAGTTCAATTGCG  
TGATTATCAGAAAGATATGCTTAAGATCATGCATGAAAACCGCATGAGCGCACATAAACT  
CAGTCGTCAGCTAGGGAAAACCTACCGCTGTAGCAATATTCCTTGCTCACTACGTTTGCTT  
TAATAAAGACAAAGGGGTAGGTATACTGGCACACAAAGGATCAATGGCAGTTGAGGTTCT  
AGAACGTACTAAACAAGCAATTGAACTATTGCCGGACTTCTTACAGGCTGATATTGTAGA  
ATGGAAGGAGAAATCTATTGTGTTAGAAAACGGGTCTAGTATCGGCGCTTATGCATCGTC  
ACCAGATGCGGTGCGCGGAAACTCCTTTAGTCTCATATGCATAGACGAGGCAGCCTTTAT  
TAGTGCGTGGCAGGACACATGCTTAGCTATTCAACCAGTTATCTCATCCGGTCGTGAATC  
TAAGCTGATCATGACAACAACCTCCGAACGGGCTAAATTACTTTTTATGACATTCGCCACTC  
AGCCATTGATGGTAAAAGCGGTTATGTACCTTATGAGGCGGTTTGGCATTCTGTTAAAGA  
ACGTCTTTACAAAACGCTGATATATTCGATGATGGTTATGAGTGGTCATCTCAGGCGAT  
CGCCGCATCTAGTCTTGAGCAATTCTTACAGGAACATAACGCTGAATTTTTCGGTAGTTC  
CGGTACTCTGACCAGAGCAACCACACTATCAAGATTATCATTTATTGACGACGTTAATGA  
TAACGGGTTTTATCAGTTTGAGAAACCGAAAGAAGGTAGAAAATATGTTGCTACACTAGA  
TCGCTCAGAAGGTGAGGACAGGACTCTCATGCATTGCAAATCATTGATATTACTGAATT  
TCCTTATAAGCAGGTTGCAGTATATCACAGCAATACTACGTCCCTTTTTATATTACCGTA  
TATTGTCTTTAAATATCTCATGATGTATAACGAATGTCCAGTTTATATCGAGCTAAATAG  
TACGGGTGTATCTATTGCTAAGTCTCTTGCGATGGATCTTGAATATGATAATATTATTG  
CGACTCATCCATAGATCTAGGGATGAAACAATCCAGAAAATCTAAAGCAATGGGATGTTT  
GGCACTAATAGACTTAATAGCAAAAAGATAAGCTGATAATTAATCATAAAGGAACCTATTCA  
GGAGTAGCTGACATTCTCCGGTAAGGCAGTAACCTGGGAGGCAGAAGAAGGTTATCACGA  
TGATTTGGTCATGAGTCTGGTAGTATTTGGTTGGTTAACAACCTCAAGAAAAATTCGCCGA  
ATGTGCAGGAAAAGACGAAATGCGGATCGCCTCCGAAATATTCCGAAAGGAATTAGATGA  
AGTGGGGGAAGGATACGCGCCCGTGGTAATATATGACGGTGCAAACGGCATCGAAGAATA  
TAGGCCGCGCGAAGGTCTAACAATGATGTAAATACGATAATGCATAAAAGGATGAGGAAA  
TTCTAACGACTCTATTATCACCGGGTTTCGAAACGACAGAAAGCACCCCTCTCCACTACCA  
TTGTGCAATCTGGGACTGGTCGCGCGGCGCTGGTAGGTAATTTCTATGGGGTCCAGCTT  
TCCAGGCTGTTCAAGTAGCTAATGAAGTTGAATTAGTTAATAAATTTGGTCAGCGGGATA  
ATAACACCGCAGACTATTTTATGAGCGGGGCTAACTTCATCCAGTATGGTAATGACCTGA  
GTGTTGTTTCGTGGACACAATAAAGAAAAAGCAAAAACGCACCTGCCCTAGCTGGTAACG  
TAGAGTTTGAAATCACAAACGAAGGTTCAAACCTATGAAGTAGGCGATACCATCAAGATTA  
AACATAAGCGTCAGGATATTGAAACGGCTGGTAGAGTAACTAAGGTTGATGGTGATGGTA  
AAGTTAAGGGCGTATTTATCCCAACTGGTAAAATTATCGCTCACGCTAAAGCAATCGGTG  
TATATCCAGAACTTGATGGCGGTTGGACGGCAGAGTTCACTTCTTCGTCAGGTAACGATC  
GTGCGGCGCTGTCAGTAACTAAAATTGTTACCGATTCCGGTCTTCTCTTAACGGATCTGG  
AACTTCCAGAGCCACTATCACCAATCAAGATTTTTTACTAAGCTCAAAAAGTATGATA  
TGCCAGCGGTAAGTGCTATCTATGCTGGTGAGATCGGCAACTCTCTGGAAGTTGAAATTC  
TGGCACGTAGCTCGTTCAGTGGCGCGGTAGCACCTGAATTAAGTATCCGTTCCGCG  
GAACTCGTGACGCAGGACGCAACCTAATTCCATATGCACCGCAGAATGAAAATCAATATG  
CGTTTATTGTTTCGTCGAGATGGTGTGGGGTAGTATCCTATGTACTGTCTACTCTGAAAG  
GGGATAAAGACTTATACGGCAATTCTATCTACATGGACGACTTCTTTGCTCGTGGTTCTA  
GCCAGTACATTTATGCAACCGCTCAAGGGTGGGTAGATGGTTTCGGTGGTATTATCTCTC  
TTGCTGGTGGTGTGTCTGCTCACGACGCCAGTACGGGCGACCGTGGAAGTGATCCGTTCA  
TTGGTGCGATGATGCAAGGTTGGGATCTGTTTGCTGAACGAGAATCTATTCACGTAGACC  
TGTTGATTGCTGGTGATGTGCTGGCGATGGCGATGCGTTCTCTACCGTACAGAAACATG  
CTGTTTCCATCCGGTGATTAGCTTCAGGATTGCTTAGTAATGGTTTCTCCGCCGCGTACCA  
CTGATGCTAATATTCGGTCACTACCCCAATCGATAATCTGATCGCATGGCGAGAAGGAC  
ATAGCCATTATTCAGACAACAACATGAACATTAATACCACGTACGCTGTTATTGATGGTA  
ACTACAAATATCAGTATGACAAATACAACGACGTAAACCGTTGGGTTCCGTTGGCTGCTG



ATATTGCTGGTTTGAGCGCTCGTACTGATGCTGTATCCCAGCCGTGGATGAGTCCGGCAG  
GTTATAACCGTGGTCAGATCATGAACGTGGTTAACTGGCTATTGAGCCTCGCAAGGCAC  
ACCGTGATCGTCTGTATCAGGCCGCAATTAACCCGGTGATCGGTGCTGGTGGTGAAGGGT  
TTAGCCTGACGGGTGTTAAAACCGCTACGACTGTTCCCTAGCCCGTTTGACCGCATTAAACG  
TTCGTCGTCTGGTTAACATGCTGAAAAGGAATATCGGCCGATTCGAGCAAACACAACTGT  
TTGAAAACAACGATAACTTTACTCGCGCTTCCCTCCGTATGGACGTTTCGCAATATCTGA  
GCACGATTGCTCTCTTGGTGGCATTATGACTTCCGAGTACAATGCGACACCACGAACA  
ACACGCCGGATGTAATTGATCGTAACGAATTTGTTGCTAGTATGTACATCAGACCAGCAA  
AATCGATCAACTATATCATGCTCAATTCATTGCTGTTGCAACTGGTGTGATTTTCACG  
AAATTATCGGTCCAGATAACCAGGCATAATCAGTAAATTAGCATAGATTAAGTTAAAT  
CAAGGGGGGATTTTCTCCCCGCTCTATTAAGTAATATCAATTATGGCACTCGATTTGAAT  
GATATGACACGCGGTTTCGAGTCTGGCGATTTTGCTCGTCCTATCCTGTTTGAAGTTGAG  
ATCCCGCATCTGTGGCAAACTTTAAGCTGATGTGTAAGGCTGCGACTGGCCCGGCTGCT  
ACCGTAGAAAAAATTGCTGTAGGCTATCAAACCCGTAATAAACATCGCTGGCGACCGT  
GTATACGACTACTGGACCATCACTGTATTCAACGAGGACGCACACAGGATCCGTGATGCT  
ATCGTTGCATGGAGCGATCAGACACATGTCACAGGTTTCGGCGATCACTGGTGCAACTCCT  
GCACAATATAAGAAACAAGCTATTGTTGCTGACTTAACCTTAACACCGAATCTACTAGC  
GAAAAACATTGTACGGTATTTTCCCGACCAACGTTGGTGAAGTAACCCTCGATTGGGAA  
CAAAACAACGAAGTTGAAACGTTTGAAGTTACTTTTGCTATCGATTGGGTAGAATAAATA  
TATTATCATGCGGGGAGAAGTTCCCCGCTTAATTTCTCCCAATTCAAGGTGAATACTGTT  
TAGTAGATTAATAATGCTTGCAGGTTGGGCTGATTTTGACAACGACAAATACGAAGGAGA  
AATTAAGATAAAGCAGAGTCTGTGCGCCGCACCTAAAAACAATGATGGTGGCCACGGAAGT  
AGAAAGCAATGATAATTCACATGCCCGCGCGTGGAAGTCTATGACCCAGCAATTTTACAG  
CACCGACCAGACAATCAGCACAATAAGCAATTGGTTAACACATAACGCGGTTTGATGAA  
TAACCATGAAGTCGATAACGCTGTACAAAATATCGTTAACGATGCGATTGTATTTGAAGA  
AGGTCATGAAGTTGTTTCATTAAATCTTGAGGGGACTGGCTTTAGTGAATCTGTAAAAGA  
GCGCATTAAATGAAGAATTTAAAGATCTTTTAAACACTATCCAGTTTGATAAGCGTGGTCA  
GGATATGTTCCGTCGCTGGTATGTGATTCGCGTATTTTCTTCCAAAAAATCATCGGCAA  
ATATCCAAAAGATGGTATCGTAGAATTACGCCAGCTTGACCCACGAAATCTTGAATACGT  
TTGTGAGAACATTACAGAAGACACACCGGAAGGTAAAATTTATAAAGCAACGAAAGTATA  
TTTCATTTACTGTAGGCAATAGCTCTTATTGCGCAGGTGGTTCGAGTATTCTCTCCTAA  
TAGTCGCGTTAAAATTCCGCGTAGTGCTATTACATACGCTCACAGCGGCTCGATGGATTG  
CGATGATAAAAATATCATTGGTTATTTGCATCGGGCAGTTAAGCCAGCAAAGTACTGTTAA  
ATTGGTGGAAAGACGCAATGGTCGTTTATCGTATCTCGCGTGCACCGGAACGCCGAGTGT  
CTTTATTGATACCGGAAGCATGCACGACCGCAAGTCTACACAGCACTTGGACTCAGTCGC  
ACAGTCTTTTAAAACCGCGTGTGTTATGATGCACCGACTGGTAACTTTAAAACCGCA  
AGCAAATCTATCAATGACAGAGGAATACTGGTTACAGCGTCGAGATGGTAAAGCAATCAC  
CGTCGTTGCTACTTTACCGGGTGCCTCCGGTATTAGTGATATCGATAATATTCGCTACTT  
TAACCGTATATTGTATGAAGCGTTGCGTGTGCCATTGTCACGTAGCAATCTCTCCCATGC  
TAATATCGTGATCGGTGATGATGGTTCAGAAATTAATCGCGATGAGTTGGAATTTTCGAA  
ATTCATTAGAGCTCTGCAATCACAGTTTTCGGAAGTATTGCGCGATCCTCTGAAATATAA  
TCTGATTCTCAAAAATGTAATTACGGAAGACGATTGGGATCGTGAAATAAATAATATCAA  
GGTAGTTTTGCATCGCGACTCTTACTATACAGAAGTTAAAGCCGCGGAAATTTTAGAACG  
TCGAATCGGTCTAATCGAAAGTATTACACCTTACATTGGTAAATATTTCTCTAACCAGAC  
AGTGATGCGTGACGTTCTGAAATATACCGATGACCTGATGGACACCGAGAAGAAACAGAT  
CGAAGAAGAAGCGGACGATCCGCGCTTTAAATAAACTCCCGATGAAACAGAGGATTTTA  
AATGAAACAATTTATCGAAGCAATTTAACTCGCGATGTAACGCCGATCGAAAAAGAATT  
TGATAAGATCATGGAGGCTAAAAAAGCCAGATCATCGAATCCAGCGTGTGCAATCGC  
ATCCAGTATCATGATCGAAGGTGAAGAAGAAAAAGACCGCGATGATGAGGAAGATATGGA  
AGAAGAAGATGAGGACGACGAAGATCGCAAAGACGATAAAAAGGACAAAGAAGACGACGA  
ATAATAGGAAGCCAACATGATTAAGATTTTACTCCTAAGGCTGACTTAGAACTTTTCC  
GCCGGAAAAACAGGAAAAATTGGACATGTTGGCTATGTTTGAGTCAGACGAACTTTTGAA  
AATCGTTGAAGGTATCTCCGTGGATGAGCCGGAAGTACGGTAGCAATGCTGTCTATCAT  
CGACGGAATTAATAAATGAAACAATGGTTAAACATGTAAACGCACGCGGGGAAGTTGA  
ATGTAAGAAAGATCGAAAACCCGTGAGCGTGATGCTTACATGACTACTGGCCTAAGCAA  
AGCTAAACGCCGTCAAATTGCCCGTCGAGCTGAAAAACCAAACGTGCAAATCCATCTAT  
CGAACGTCATGCGGAACGTAAGCGCAAAAAAGCAATGCGTAAACGTAAGGCGTTAGGATT

ATAACAGGAAACAACATGGAAAAGAACGAATTACTGATCGAACAAATGGGGCGTTCCTTGT  
GCTCGCGGTAGTTGGTCATTGCTTGAATCATTTGATGATAAGGCTACAGGAAATCTCTAT  
ATTCAAGGGATTTTCTGCAAGTCGAAACGGTAAACCGTAATAAAGGTTGGTATCCTCGC  
AGTGTCTAGAAAATGCGGTTACTAAATACATACATGAACAAGTTGAGACACATCAAGCT  
CTAGGCGAACTTAATCACCCAGCAAGAGCAATGCCTGATCCATCTAATAGTTGCACCATA  
ATTGAAAATTTGTGGTTCGCAAGGTTATAACGTGATGGGTAAAGGCCATGTTATTGAAGGG  
GATAAAGTCGCAGGTGATAAACTTACTGCACTGATTCGCGCTGGCTGGATTCTGGTGT  
TCCTCCCGCGGATTGGGTTCGGTTGAAAGACTTTGGTCGCGGATACAATATTGTACAGGAG  
GGTTTTGTGTTACGGTTGGTGTGATGTTGTTTGGGGTCCGAGCGCACCGGATGCGTGG  
GTAACCTCTGTGGTTGAGTCAACGGATAGAGATTCTAGCGCGTCAGACGCACCAGAAAGC  
GATAAAACCGAAAAAGTGACCAACCCTACAGACTCACAACAAACCATCGTAGAATCGAAT  
AATAGCGCGTTTATGGCGCTCGCAGAAGCGTTATCCAAACGCTATAAATAAATACGTCTT  
TATCAACAAGAAGGTTATAACCATGCTTTAAGAAATGCTGCTCGAAGAAGCAAAACAGAT  
CACCGTAGACGTTGCTCTCGTTGACCTGTTTGAATCCGTCGAACTGTCGCCGGGAAGTAAA  
AGAAAATTTTGATACTATCGACGCTCAGGTGGTAAAAGTTAATGCTGTTGCTCTGGCAGA  
AAGCCACATTGAAAAAATCGCCGCTAAAGCCGATGGACTGGTAGAATCAAAGGTCGAAGA  
AGCACGCACCGAGATTGAACTAACTGTACGAAGATGCAGATAAATTCCTGAATCAGTT  
AGGCGCTAAATGGCTGGCAGAAAATAAAGAAGCCGTTACCCGTAATATTAAGCGGATCT  
GTGCGAATCCCTGATTGGTTCTCTGCAAGATGTTTTCGTTACGCACAATGTTGTAGTGCC  
GGAAGAATCTGTGGACGTTGTTGCTGAACTTGACGAAGCACTCAAAGAAGAAAAGGAAAA  
AACCTCCGTACCCTTTGATGCCAACTGCAACTTGAAAGCGTAATTCGTGGTATGAAGCG  
CGAACAAGCGATCAATGAAAGCACTCGTGATCTTCCGATACTCAGAAAGAAAAATTAAC  
CGCACTGATTGAAGGTCTGGGATATAGCGAAACCTTCGATAAGAAATTAAGTCAATTGT  
CGAAATGGTGGCTAAGAAAGACGACAAACCACCCAAGAATGAAGAATCACTAAATACTGA  
TGCCGACAAGCTGAATGTTATTGCAGAAGCTGTCGAAGAATGAGAGAAAAAAGCAACTGT  
AGATGCCGGCGTATCTAGCTACCGGAATTCATCTAATGCAATTCACATCTACTAATAAA  
TACTTTAGGTTAACAACAACAAGGTTTAAAGAACCTGACACCGACCGAAGAAGTACTGATGG  
AAAAATGGTCCCGATGCTGGAGAACGAAAAACTGCCGGAATCGCAGCCGCGTCTAAGC  
AGAAACTGGTTGCTAAAATTCTGGAATCTCAGGAAGCGGACTTTGCTGTAGAACCAGACT  
ATAAGGATGAAAAAGTTGGTGAAGCATTCCGGTGGCTTTAACGCAGAAGCCGAGGTTGCAG  
GCGACCACGGTTATAACGCATGTAATATCGCGTCTGGTCAGACTTCTGGTGCATCACC  
ACGGAGGTCCGGCTGTTATCGGTATGGTTCGCCGTGCTATTCCTAACCTGATCGCATTG  
ATATTTGTGGTGTTCAGCCGATGAGCACTCCGACAAGCCAGATCTTTGCAATCCCTTCTG  
TATACGGTGGCGACCCGCTGGCTAAACACGCTAAAGAAGTATTCCATCCGATGTACTCTC  
CGAATGCGTTCCATAGCTCTCTGGCGGCTAAAGATGCAACGACTGTTTCTCCTACTGGCA  
CTGCGTTCAAGAACTAACTCTCAGTACTTCGATGGCCGCAGGTGATAATGTCCACCACA  
CCTTCGCAGAACTGGCATCGCATATCTGCAAAACGATACCGCAGAACAAGTAACCCCGA  
CCAAAGCTGACAGCCAGTCAGATGATGAAGTTGTCATGAAGCTGATGGAAGAAGGTAAC  
TGGCTGAAATCGCTTTCGGTATGGCTACTTCCATCGCTGAATTGCAGCAAGGGTTAATG  
GTTCTCAGTATAACCCGTGGAACGAAATGTCAATGCGTATTGACAAACAGGTTGTTGAAG  
CGCAATCTCGCCAACTGAAAGCCCGTTATTCTATCGAAGTTGGGCAGGAGCTGCGTGCTG  
TTCACGGTATGGATGCTGACGCTGAACTGAATGCTATCCTGGCTAACGAAGTTGTGCTGG  
AATTCAACCGTGAATCGTTGACGTGATCAACCTTACCGCTCAGGTTGGTAAACTGGTA  
TGAATCAGAGCGTTGGATCTAAAGCTGGTGTATTTGACCTGCAAAACCCGATGGATACTC  
GCGGTGCGCGTTGGGCTGGTGAATCCTTCAAGTCTCTGATCTACCGGATCGACAAAGAAG  
CTGCTGAAATCACTCGTCAGACTAGTCGCGGTGCTGGTAACTTTGTTATCGGTTCCCGTA  
ACGTTGTAAACATGCTGGCTTCTGCTGATCAGGGTATCAGTCTTGCTATGAAGGGTGCTG  
CACTGGGTCTGAATACCGACACCACTAAAGCTGTTTTCGCTGGTGTCTGGCTGGTAAGT  
ACAAAGTATTCATCGGCCAGTATGCTCGTCAGGACTACTTACCAGTGGTTACAAAGGCG  
ATAACGAAACGGATGCAGGTATCTACTAGGCTCCGTATGTTGCTCTGACTCCGCTGCGTG  
CAACTGATCCGCAGTCTTTCCACCCGGTCTGGGCTTCAAGACTCGCTACGGCATCGGCA  
TCAACCCGTTTACTGACAGCAAATCCCAGGCGCCGTCCGGTCGCATCACCTCCGGTATGT  
TGAGCAACGACAGCGTAGGTA AAAAGGCATACTTCCGTCGTGTATGTGTTAAAGGTTGCT  
AATATAAGCCATTCCTGAAAACCTCCGGTAGGGTGCAATACCCGACTTAGCATAAACCTTA  
TGACAGTGTAAGTGTTAATTCCAAAGGGAAGACTCGAAAGGGTCTTCCCTTTTTGCGTA  
TTATAACCCGTCATAAATAAGGTTGCAATCCTATACTCTATTGGGAGCTAAAATAGATAT  
ACACAACAACAATTCCACCAATTTTCGTCGTAACCTGCAGGGCAAAGGGACCAATGAATG

AAATGAGCATGCAGGTTGATATTGGGTCGGATAGATTTTTGTAGATATACAGATATGGTGT  
ATGCCGACCTTGTATGACATTCCAGCGTGACGCTGGCGGTAATTTTGGTTTTGGTACGC  
TGTTCCCTGAATTAACCCCAATGCTCCATAAGGAGGAAATGCATGAGTAAGAAAGAAGA  
CAGCTATGTTATGACTCGTAAGGAATACAACGAATTGATGTTAGCATTAGCTTACGCAAT  
TATTCGTTCTGATCATGCAATTAATCTGGTAAACAAAGTTAACCGTAGCGTTGATAATGT  
TTCTAAGAAGAAGTAAGTTTATTTTGGGAATCCTTTCGGATTCTTTTTTCGTTTTGTATAAA  
TATGACATATCCATTAAGGCAAATACAGGATTCATAACCATGACTCATATTTTTACTGAA  
CTGTTGCGGGAATCTACTTCCTCAGTAGCTAACCAGACAGTGCGACCGCAACTATTATCA  
TTAACTCGCGCGGTAAACAACCTGATTTTCTCTGATCTGGTGGCAATCCAGCCAACGGAT  
CAACCAGTATCTGCATTGTACGGCTTACGCTATCTTAATCGTGATGGTCAGATGACTTTC  
CGAACTGCTACAACCTACGGTGGCGCGGCCGGTGATCACACCGAGATTGAAGAGTTTTCA  
AAAGAAAAATTTTATGACGAAGGCGCACTGTTCAAATCAGACAATGTTGTATACGAAGTT  
TTGACCGCTGGTACAGTCGGTGCAGATGCCGAAACTCCGGAAGCTGCAATCTTTAAAGGC  
ATAATGACAAACAAAACCTCGTTTCTATAGCGATTGTGCATCGGTAGAATACTTTGAAGAT  
AAAAACACCGAAATTTTCGTCTACCTCTATGCAGTTTGATAAATGGCAGGTTAATGTAGGT  
TCTCGTAAACTGAAAACCTCATTACGACCGAATTGATGCAGGCTCTTGAGGCAAGCCAA  
ATAAACTCTGAAAACCTGTGAATTGCTCTTCTGGCTACGATCGCTTAAGAAGAGACCAAC  
AAAGATATTATTCAGAAGTTGATCACTGTATCATCTCGCTATAAAATTAAGTGATCACC  
CCTGACGGCGCACTTTCCTCGTTAGCGTACAGGATGCACCAGCACATGCGCGTGAACCT  
TACCGCTATGCTTGCAGAAATGAGCAATCAAATGTTGCGGACTTCTTCTTATCTGGTACA  
TACATTATGGCGTCTTCTCGCGTGGTTGGCCTCCTAGAATCTACCGGATGGATGGAAGAA  
ACCGACAATGTTCTAAGCGAAGGTCGTCTACGTTGCGGTCTGGAAGTGTACGCAGACACG  
ACAGCACCTTTCGATTATATGCTCGTTGGGTGTAAGCACATGATCCGTGATATGGAGAGT  
GTAGGTTCTCTGTTCTACTCCCATATACAGAAGCCCACGGCGCTGGCGCGCATAAAAAGT  
GTAATTGACCCTAATAGCTTCCAGCATCATGTAGCTATTATCTATCGTTATCACTCTCT  
GTCAACCCATATACATCAAAAGTTGATCAGGAAGAACACCTGGTCATAAAGGGTGACGAT  
TGGGGTGAAATGGCTGGACGTTTCAGAAATGTCCTACATTTTAGGAATCGAACTGCCACCG  
ATTGAGATTGACAACGCTTAACTAAATATCTAACCAAGACAAGTCAGATCCGCCCAAAT  
TTTTTCGACAGCGGATCTATTTTCTTGATGATATAAGTTAAATCATGGTATCCCATGTCT  
ACGGGCAACATAAACAGCAATTCTAGTTCCTCCCGAAACTATTCCATTAACCTTCTTTCGC  
TCAGAATATCACACAATCGACAGGATCATCAAGTGTCTAACCCAAGACTTGAGCAACATT  
TCTAGAAAACAGATTTTGCATGTATAACGTTATAGAACGAGGATTATCATAAACGTGTTT  
TAATTCATCCATCGCCAGATTTTTTTTGTCTAAGGTTTGCCATGCAAGAACAACATGACC  
GTTATGCTTGTGGTCATAAAACTTCCAATTTGGAATGAAAATTTTTCTATAATCTGGATC  
GTCATACTTCATGAAAGCATTGTACATACCGTATGCCCTCCAGAATGCGCTACAACGCG  
TTTTTCTGACAATACCCTCCCAATGGTACTAGCCATCATCAAATGTCGCTAGGCGCTTT  
GCTAGAGCCTATTGAAGCACATCTACGAAGTGGTTTTACTCCAAATAGATCTTGTAACCTG  
CTCAAACATAATATTTCTCCATAGAAAGCAATATCATACTACAAGTTAATAACAAATAC  
AAGTATCCGCGTAGCGGAATCGAGCACAGCGAGCAATAAAACACTTCCAGTAATTGATTA  
ATAAATGTTTCGAAACAAATTTTTATTATTCTATAAGATAAGTCTTCGTTTAGATCATAAT  
TTAATGACACCAGTAAAAACTACACAAAAGGATATCGCTACGCGAACTCCTACGGAGTAT  
AACATTTGTGTTACAATATGTAGGCATTAATAATTAACCAAAGATACATTTTCTATGTTT  
TAAAGATCTTTGTTTCGTTTTTATCATAATTTAATCAAACAGTATTAATATTGTGCACATG  
TAAACTCAAATTATGTGAGTAACAGATAACTAAAAACGCCGACCCGAAGAACGGCTAATG  
TTAATTATTTGTTGATAACGATCTGATTTTCGGCTAATGGTAACATTACTCTTAGAGATGA  
TCAGATCATCCGGCACTACGTTAGTTTTGTATTGCTGGAACCGAACAAACATCTGATTGC  
GTTTAGACCCTTCTTAATTTTGTATCTCCATCTGGATATTGTTGCCTACGTGAGCAACCG  
CAATTTACCTTTGTTCTCATAGACCCACTTGTCTGGTAACGTCTCCTGCAAAGCCTTAA  
TAAGTTGCAATGCGTCGTATGCGGTTGAGCTGTGAACTGTCCGAAGGACAGCCGTAC  
CAAGACGGGAGCAGGTGCTCGCCGGGGATTGCCAAACATCAACATTAATTTGCTCAATCA  
GAGTAACACCGCCCTGATCAACTGCTTTGGATGCTTCGAACATTGCCTTTTTTATTGCTA  
CGTGGTTTTTATGGAAATTCATAATTAGTCACCTCCATTGTTTAGTTATTACAGAATATTA  
ATTACAAATCAGGACATTGCCCGTTTGAAGGCGTCCATTATAACAGTGTTATTTGGCTTG  
TCAACACGTTTTTGAACCTTATTTTTAACTTTTTTGTGATATGGTGTTTACGATAAACA  
ACTTTTTACGGCTGGCGTAAGCCTCGCGTGCATCTTTTACCATCAACCATGCCTTAGCC  
GCATCTTGTCCGCTGATCCCGCAATCTTCTTAGCAATATCAACAAAATTAAGACCGAGG  
TCTTCGCGTAGCATGTAAACCATTAACGCTGTTTTCTTGTCCATAACTTCGCCCCATTGA

CGATTAACAGGATAGTGATCAGTACCGGAAACTCGATCATGACAGTACCAATAAACCGGA  
TAAACGCATTTTCTGACTTCCACACATGACATGCGACTAGCTGAAAGACCATTTTGTCAA  
CAAAGCCAGAAAATACATCTCGATTGGTGCTTCTTTGATCAATCGTACAATCTCAGTCA  
TACTTCACCTCATAACATTCATAAACACAACAACGAATAATACAGTAACAGTTATCAACGC  
CATTTTCAACCCCATATTCATAAATTTTTCTTCGCTCACTATGGACAGTAGCATGTCCA  
TGCGTGCCATTATAGGCATCTAAATCGCTCTGTCAAGCACAAAACACAAAAGCCACGCC  
GAAGTATGGCTCATAGATTTTCAATTAAGCAGGATGCGTTTCACGAATGCGTAGAACTCGCT  
CTAACGTATCTCGGTCCAGTTTATGTAATCTTTGGAATGATACATGAAACCATTGCGAG  
ATTCCATGCAAGTGCAATCACTATATTGTTCTTCCGCCGCCGCGATTGTCTCCAGATCTT  
TGCGTACTTGCTGGTTGAATAAACTTCTCGATCACGCCACTCTAACCCAGCCTCGTTGA  
ATTTAACAATCTCGGCAAATACCCACCATCCAATGTAGATAAATGAAGTTTTGCCCCACG  
GGATCGGGTGTACGTATCTAAACATTTTAAACAACCTCCGTTGAACATTTTTGGCTTGTA  
TTGCTGCAACTTCTACTGTTTCATCTTCGATCTGTTGATATAGTTTAGCAACACACCAGA  
ATTTGGCTCTGTCATCGTAAGTAGCACTCTCTTTGAACATATGACCCTCTGGCATGATAG  
AAAATCCTTCCAGTGCTTCGCCGTCCTCACTACCGATTAGACTCGGTGACAGTTGCCCTT  
CGCGCTGCAAATACCAGTTATGTTTGAGCGTCAATTCAGGCATACGGCTAGAATCGGCTA  
CAATGTCTCTGACACAACATGATTAAGTAAGATCTCATTACCTAGTGCCACGGTCTTTG  
ATTCCACCACATCCTGTTCTACGTTCAATTGTTGCCAGGATGATTTTAGTCGATGCGCTAT  
CGGCTGAATTTTCTACTCACCCACACTTTTACAGTATACACGCCCTTCTTATCTGCTT  
TAAATTTTTTGATTGTGCTATTCTGTTTTGTGTCTATAACTTCTTCGCCCTTACTCCAAC  
TATAATGTAGTTCATAGTTGTCTGCTGGAGTCTTCCCACCCGAAAAATTTACTGTTGCAT  
GTAATTCTACGTTTTTTTTGTGATGATACGTATAAATTCGGCGGTTTCGGTGATTTTTACGA  
TTAATTCCGCTTCTTCCATGAGGAAAATTTTCCAGATTCTACTGATTCCATCGTATCAGCAT  
CTTGTACCTTGACTTTATAGCTACCCGCATTTTCCCTTGTTGCGCCTTCTACAGTTAGCG  
TAGCTGTGTTATTTTCATGCTGTTGGACGTCTTTTGTCCATGTATATGTCAAATTGCTTG  
GTAATGGTTCGTCACCCGCTAAAGTCGCCGTTAAGGTGAAACCATAGCCAGCAAGAAAAC  
ATCTTTTGTAGATTGTATTGATACTGTGAAAGCCATATGAAGCCACTCCCATAGAAAAT  
CCGAATTTAATTAATTGAAATATTTGATTGCCATCAACCAGATAACCCTTGCGATATTC  
AATACATGAGTATTAGAATAGTGATGCAACGAGGCCGAAATAGTCTCGATCTCGTCTGGG  
TATTTGTTCTGTTTGGTGTAAATACATTGATTTTGGTAGGCATGTAGTATCCTCTTTTTAA  
TTGCATAACGGAACTACAATAAAAATTATAACAAATATTTTCACAACTTTTATCACCCAAA  
AATTACTTGAGTGTGTGGAATTGGCTATGTTTAGTCTCTAGCACCTTGACAGACCCATCG  
CGTTTGATATAATAGATCAGTGACTTGAGGGTGTGTGTACATACGCGTGCGGGAAACGT  
TCTGGATACTTCATCCAATCTGGAGTATTAACGATCCAGTCGAAAATACACCACGGGCAG  
GAGTAGTAACCACGACCGCCACCGATCAAGCAAATGGTCGGACGGAAGCCAGTAAGATCG  
CAAATGAATCAGTGACATGTGCTAGGGAACGATGCTCTGCTTCGTCAGAGGAAATGTTT  
GCTACCGGAGATTTCACTTTAACTTCCGGTGCTTCTTCAACCTCTGACTTAACTTCTTCG  
ACCCTGGTTCAACTGCTGGAGATTTTTCTTTTGTCTTCCAGGACGATCTCAGGTTCT  
TTCATTGCTTCAACCAGAGACGGATCAACTTCGTGCAATACTATTTTATCATCTGCGGTG  
TCTTCTGCCACAATAAGATCGTTAATACTGGTTTCTGCTGCCGGAGTTTCTTCTTCCATT  
TCGGAAGCCAGTGATGTTAATTCGGTTTCTACGAACTCGATCATGTTCTCTAGTGATAAA  
GTCTTTTTAACCTTAATATCAAATTGTTTTGCGTAGTCAGCTAATTCTGTTTTAGCTGTT  
TTATGTGCTTCTTCTCGTCGGACGCCGCAATAGCGCCGAGTGCTTCGAAATATTCTTTA  
TCAAACATGTTATTATCCTGATTGGGGGTGTTTGTATAAATATTTGTATACTGTATTTAT  
TGAGTGAGGCTATTCGCTATGCAAGATATTAATAATCACTTTGTGAACTATTCGCATGTT  
CAAATTGAATGTAGCGATTCATTTTTATTAGAAATGCGAGATTATTTAGTTTTGAAGTC  
GAGGGAGCGCGGTTTCTAAAACGAGTAAAATACGGAGGCTGGGATGGGCGTATTCGTCTT  
TTAGATTACAACGGAAAGGTGCCAATCGGCCTAACTAAAACCGTGGGAATCTTCGCTAAT  
AATATGGGCTATAGTGTATGGGTAGATCCTCGCTTATTCGAAAAAGAACAAGTTACAGAA  
GAAGAAATTACAAAATGGTGTAATGCGTTAGAATTATATCCGAAGCTAACAGGATCACC  
CCGCATTGGTATCAATCAAAGGCTGTCTTTGAAGGTATCTATCATAAACGCCGTATGTTA  
GTTTTGCCTACGTCCGCTGGTAAATCTGCGATTGGTTGTATGTTGTCTCGCTGGTACTTA  
GAGAACTACGAAGGGAAAGTGCTGACGATCGTTTCTACCACGTCGCTAGTGCTGCAAATG  
CGTGATGACTTTGTTGATTATCGCCAGTTTCTTATGAAGCAATTCATACTAACATGAGA  
GGTACTAGTAAACACATAGGCGATCGCCTGATCGTTGTTAGTACATGGCAATCTGCAAAT  
AAACAACCTCGTGAGTGGTTCCAGCAATTTGGGATGGTTATTGTTGACGAATATCACAAA  
GCCACTACTAAAACCTGGTAAACATCGTTACTGATATGGATCATTGCCAGTATAAGATC

GGCATGACTGGTGCCGCTCGTGACGGCAAAGCTAACATGATTTCAGTATGTCGGGCTTTTC  
GGTGATATTCCTATGATCGTGAGTATTGACCGCCTGATGGATGAAGGGCAGGTGACAAAA  
CTGAAAATTAAGTGTCTTTTCCTTCGTTATACCGATGAGGAATGTAGCGCGGTTAAGGGG  
CAAGAATATGCGTAAGAGAGCAAGTATATTACAGCTAACCCACGACGAAATAAGTTTGT  
TGTAATTTGGCGCTAAAACCTCGCTAAGAAGGGCGAAAACGTATTCCTGATGTTCCGCAAC  
ACTAAGCACGGAAAACCTTATGTATGACGCGTTACAGAAGGTACACGACAAGGTTTATTAT  
ATTGACGGTGGAGTTAAGACAGAAGAACGAGACGAGTTCAAAAAATTAGCGGAAGGGGAA  
ACAGGGATCATTGTGTTGCGTCTTATGGTGTATTCTCTACTGGTGTTCATTAAGAAT  
TTGCATCATGTTATTTTCGGTCATCCAGTGAAGGAATCAACTATCGTTCGCCAGAGTATC  
GGTCGTGCATTGCGTAAACATGCTTCTAAGGATATTGCAACGGTCTGGCATCTTATCGAT  
CATTTGGCGGTTAAGACAAAGAGCAAGAATTCTAAGAAACAGTTTAGCCACCTTAATTGT  
GCTCTTAAACATGCGCTTGTAAGTATAAAAATTTACAACACCGATCTATTTCGAATATGTC  
ACGAAAACAATCGAGATCTAATAAATAGGGGCTTTAATGCCCTTTATTCTACGGAGATT  
AAAAATGATTAGCTTTAAACGTTTTTTGGTTGAGGCAGCTATGGACGGTTTCATGAGTAT  
GATTTAATCTTGTAATACTATCGAGGGATTAATGAACTTGAGGCATATTATGAGAAGCG  
CAAGAAAGAAACAGAATTGAAACCTGCTGATGACATTTTCGATCCGTGAAGCTATCGCTGG  
AAGCCGTAAGCAACTGGAAGCGGACAACGAGCCAGAAGAGGAGCCGGAAGAGGATTTTAA  
AGATATAAAAAAGCCCCATCAATGATCGGGCAAATAAACCAATTAATAATCTGTTATCAA  
CAAATTACATTAACAGCATTGTTTGCTCTAAGAGTTGTTCTTGTTCTTCGCCGTTTCGCAT  
CTTACTAATCGAACGTTCTGTTACTAGCTGTAAGCAGTAGCCAGTGTGAACAGCGCCGT  
TTTCTGTCTGGACTGATAACGCATCCTCGACCGGTTGTTTACAACAAATACAGATATTCA  
TAAAAATTCCTCCTGCATGTATTTAGCGACCAGATTCCAGCATAACGAATTCTATAGCAT  
TCTTGATCGCAAATCCACGAGATTTAACGATATCAAGTGCAGGACCAGCATAATCCATTA  
CCATCTGGAAATATGCAATTTTCGTATCAAGCGGTAAGATCTCGTCATCTGCTGCCATGA  
CAACTTTCAATTCTGATTTCTCATATTCAGCACGACACCAGTCAAGACTACGGTTAGTGT  
AAAAGTCAAGACGATCTTTCATAGCCTTTTTCTTTTTAGCCTCAAGAGCAATAGTCTCTC  
TGTTCCCTCGATGTAATCCTTAACCACTTCGAGTATACTACCGGATTATTCAGCGCGT  
CCCATTGCAACTTAGTCGCATCGATCTTCATGTCAGCTTCTAATTGTTCTTTCAAATCGT  
TTAGGTCCATAATATCCCCTTATTACACTAAGACCTATATCATATCACACAAAAATCA  
CTTTGCAAGTCTTATGCGTAGTTGTTCAAGATAATCTGGGTTATCTATTACTGAAAAGTA  
GATTGATACTATGATTCAGTTATCGTCGTAAGTGCAGGAGCTTCTTCTACTGTCAGGTTTCG  
GACCCGTGGTTCATAGTTCCGGATCGCCTCATAGATGTTTTTTGATAAGGTATCCACTGT  
CAGTGGGTTTCATGTGCTCAAACAGTGATTTATTGAGATGGCATCCACACAGTGGATCAAA  
TGGACGAGATCCCTTGCGAGTAGTACGATCAGTAGAATAGAATCTTTAACCGCTTTAAT  
CCCTATGTTCTTTTTATCGTCGTTATTCCACGATCTGGATATATTGAGATCCAAATCAGT  
ATACATCTGATTAATAGTTGCCCTGTTATACCTCAAAGAAATTTAAGGAAACCGGATAGA  
CTTGATAATGAATATACACCAGATTCCCCGCATTGCAACTTGATCGGTAAGTCTGCTAGCGTG  
ATTTGATTTCTTGTTAGCTCGTCGTTCACTTCTTCCACATTATCCGTGGTAAGCATATCC  
AGCACGCGGTCAAAGTCTGTGCGTTCAGGTAGTCTATATTGAATTGCTGATCGCCGATC  
ACGATATATTCGATACATGCAATTACCATCTGCATCAGATCAACAGCTTCTGCAAACCTTG  
GGTTGACGACACTTGATTTTTACTTGTCTTAAGTCCAGAATATACGGTTCAACTTCTGGT  
ATCTGTGTGCGTGAAACATCAAGAGAGTATACTTACTCTTTATTGCATACACCACACACC  
CAAGTAGCATCAATTTTCATCTTATTGAGGCTGTCACACCATAAGAGAAGAAAAATATAT  
TCTGCTCCGCATTTCTTAGCTCTAATGCATTGATCCCCGTACATTCATGTATGATCTCT  
ATAACAACATCTGACAGCTTGCCAGTCTCTTTGCTGCTACCAGTTTTTGAAATTCGCCG  
AAGGTGAAAGCACGGGCGTGATCAACTTTTCGCCTAATTGGATCTTGAAAAAGTATTGC  
ATAATAAATCACCTTTATAAACACATAGAATTATTTAGTATTTTATAAATACCCGAAAG  
GGGATTATACCATGAATATTATCCCAATAAAAACCTGCCGGAAGGTGTGCAGAGATTTAAA  
GCATTCACGGTAAAAGATTATATAGATTTTCGTTCTGGTGTCAACTGAAATTAAGATGAAT  
CCAGAAGAATAACAAACGATTCTGGATAAGCTATTAGAAGAAATATATCCAGAAGTAGAT  
CCGTCATTCGGTGAATATATTTTCCTGAATGTCTTTACTAGCTCAATAGGTAAAACAAG  
ATACCGCTTTGTTTTACTTGCCCGACTTGCAACAAGGAATGAAAAATGTTGCTTAACTTA  
CAGGTTGAAGCACTAAAACCAATCGTTCTAGTGGCCGCAGGGCTTAAAATAACTTTCCGG  
TATGTTAAACCATCAACCGACTATGCAAAAACCTTGCTGGATGCGATAGAGCGTGTATCT  
GATGGTATAAATGGTTATCTATGGACTGCATTACCGGAAGAAGTTAGAGAACAGGTTATC  
GAGTCAATCTCATTGTGCTGATTTGAAGAAGTTGTTAAGCAGATGCACACAATCAATATC  
GAACAAAAGATATCTTGTTGTGAAAGTCATGACCTGAAATACATAGGTCTTCTTCCATTA

TTCAAATTGTTGTTGAATCCAGAAGAGTTATTCATCTTTTATCGAATAAACCATCTATTG  
GCAAATCAAATTATTCTATCAGTGATCTTATGGATTTGTTACCGATTGAGAGAAACATT  
ACACTGACACTGGTCGATAAAGACGTAAAAGAGGCAAATAATGCAAAGAACGGGGTTTCC  
TAATGTCTCAATAAAACTTTATCAGAATTATGAGGCATTTCTAAATCATCGCTTTATAGA  
GTTGGGGCCTACCTTTGTTACAATGACTCTGCGTGATTTCGATTTCGTGGTGTGAATGAAGG  
ATTGTTGCAATTCTATGATAATAAGGCGATGCATACAAAATTAACGGGAGAGAGATCTT  
TCAGATTTTCGCTATCCACTGCTAATACAGATGAAGTGTTAACC GAATCTATGGGATCTC  
TCATAGTAATGTATCAATTGACCAAAAATCCGACAACATTTTAACATTCCAGTTAAAGAG  
CTATAACGAAACACTAAACCTTAAATGTTCTCGCTCATTGACAAAATAACGCGGTTAATAA  
CGTAACTAGCATGATTGATGCCATCTATAAGGAAGTTCCTTTATGGAAACCTACTATAAA  
GGGTGATAACTTTGTTATTCCTCGTTGTCCGTGGGTTAGTACAATAAATGACTATATGGA  
TTTTGTTAGGGCATAACGGGCAAAGCGTAGAAGCCGAGTCTTTCGTGTATTGCTGGGAAGA  
TTTTGATGGTTAAACGATTGTTGGATACGATACAATATTA AAAAATGAGCCAATACCAGC  
TATAATCTGTGAGCCTAGACTCTTGGGGCAATTTATTGATATGTCGCGTAATCTAATGGT  
TTTTAATTTTGAGTGGCAGACTAAGAGCAATGCTAAAGTTAAAAAATTCACTTAGCAATG  
TGAAATACACCACTATTGATTTTGTACTAAGCAGTATAATAAAAATTATTGTTGGTAATG  
GGGATAATATTGCACACTTTGCTCATGGTGGCGCCTATGGCGATTTAACTTATAAAAATG  
CGTTTTTGGAAAGGTTCTAAACTTGCCACAATAAAACAATATGATTCATATTCTACCGCCG  
TGTGTCACGGTAATTTTTCGTTGCGCCCCGGTATGGTTAGTCGATTCTTTGATGAGAAGC  
AACAAACACGCAATGATTTTATAGTTGACGAAGTGGTGCATGAACGTAGCCGAGAGCAAT  
AATTAACCTCACCTGTATATGATCGGTAACAGCGAAGAATTACAGGAAGTCAAATTTGAAG  
GTAAGATTTAATGACAGAACTAAACCTATGTTCAAATTTGTTGTTCCCTCTAAAAAATT  
AGAGATAAACGGGAAACATATTAAGATCCCAAAGATGGGGATTAAGCAACATCGATTATT  
AAAAGATGTACGTAGCTGTGATGAAACATTAAGATTCTTCTTGATTCAATCTGTCCTGG  
GTTAGACGCAGCCGAGTCTGAGTTGGTTATGCTTAACCTTTGTGCGTTAATGGTAAGGG  
TCTGGAAGAAAAGATGGTCTTAAGTTGTCTGATGTATATTTGTACAGAGACTAAATT  
TCCTGTAATCGTAAAGTCTTTAAATTTAAAAATCCAATGGATACTTCTGACGCCATTAT  
CGATGACGCTGATTTCTTGAGTCATCATTAAACACGATCCTAGCGTAGACTTCCATGATTT  
CCCAGCTTTTATTATGGATTGGGCTACAGGATTAAGAAAACTATTGAACTGGATACACC  
GGAAGGTACCATCTATGGCGGAAATAACATATTAGATCGCCTATCATGAATGACGCATTA  
ACATCTTTTCGCGGGATGCGCAAGGAAGCGGAAGAAAACCCGATTGATAAATTAACA AAA  
TTAGATAAACTTAATTCTCTTTATAATTTGCAAGCCGCTACCGAATTGGTGGCAGAGACA  
GTAGAGCAAAAATCTAATGAAGTTGTTGGTGCAGGATAACACCGCAGCCAATGAA  
TTGACGGCAGATAATACACAATCTACCGCTGGAAATACCCAAAAAACTTACGAAGAATTG  
CAAAA ACTCAATAATTTCTCTTCTCAGATGAATGAGAAATTACGTGGTTTTGTTGTTACG  
ATGGAACGTAGATTTGGTGTGTCAGTAAAATGGCTAGCGCTATTGGTGCAGATTGAAGAA  
GCATTGAAACAACCGGAACAACCGCAAACAATGCCATCACCTCAGTCAGTTTTGCCTATT  
GTACCGGAACCGCCTAACAATGACA ACTATCAAGGTCTTCCAACGAAAAAACTAGATGCT  
GATGACCGAAAGAAAAGAACGCCACAGATAAGCGTAATGCTGATTCTATGGAAAATCTT  
CTTAAAGTTGTTTCGTGGAGGATTTAAAGAAACCATAGGTATCTCTAATAAGGTCTTAGGG  
ATGTTATTCAAGATCGCTTTGACCGCAATGGCAGAAGCCGCACACTGGGGTGCTATTTTG  
ATGGGTATTTTTTTGTCATTGATACTCTGATGGTTCATTT CAGATATTGGAGTGGTTTA  
TTCAAACA AAAATTCAATGAATTTATGGATAAGGTTGGAGGATGGGCTGGTCTATTAGC  
GATATTTTAACTACTGTTTCGTCAGGTTTCGAGAGGAGTTGTCTAAAGGCGAATATGAAGAG  
TTAATTAATCTCTTGTATGGGTATTGGTGATGCATTCTATAAAAACCTTTATCCA ACTT  
GATCGACTTATCACTACGGGTATTGCTAAAATTGTTTCGTATGATCCC GGGCATGGATGAT  
TATGCCGATAAGTTAGAATATGGTGCTTTAAAATCTGCTGTGCTCAAGGCTATACGCCA  
AATGAAGGAGAACTCGAATTAATGGATAAGGTCGACTCTGAACACGAAGAAGACAAATAT  
GGAGAGCACACAGGGTGGACCGGAAAAGCCCGTGATATTGGCCAGGCCATCTGCGAATCT  
TTAAGGATAATGTTAAAGAATGTCTTGTAGTCTGGGCCGGAGAGATCAA AAGGATGTT  
GACGCAGAGAAACGACACGAAGAATTA AAACGCGGAGAATATAAGTCTGTTTCTGCTGAA  
CAACGATCTGCGAGTCGTGAACTTAGAATTA AAAGCGAGGGCGCGATAAATAATATTAAT  
GAAGTTATGGAGAATTTGAGCGGTGACTATGACAAAGAAAGAATGGGAGAGTTGAATAAG  
GATATTGATGTTTACCGTGAGCAAGTTCAAGATCCTACATTAGTTGAAAGTGATCGTACT  
CAGTTAGAGCGTCTTATTGAACAATTTGATGAGATGTTTGTGATAAAA ACTAAGGGTGTG  
GTTCCA ACTAAATCTGTTCCGCAACTGAAACGGAAACAGCAAAAATAAGCGGAACGTACT  
GAACAAATGCAGAAACAAGCTGCAATCCAGCAACAACGACAAATCAGACCTCAAACGTA

AATAATACACAAAGTGTAATAAACAATAGAACTATTA AACAGGGTGCACCAACA ACTAGG  
ATGGATGCCCCAGGTACAATTAATATGGGGAACTTTTAATGAATATTAGTGTTATCAATG  
AGGCCGTTGATAGCTTTAAAGCGGGGGTTCAAACCTCCGCTGGTTTTACCTCAAAAAGT  
AAGGGAAAACATTAACCGCCCAATCCCCGCTGAACGTGCTAGCGGTAATGATGCTAGCG  
GTTATTATATCAACGACTTATATAATTATGGTCAATTTATTCACTGCATACGATTACACAT  
CCCGTATTACTGGATCGTTGCGTGATTTTCAGGAACAAGAAAAATGTTGCTAGCGGTTTTG  
GCGGCAGCGTTAATATCGCTGGTTTTGATTTAAATTTGGGTGGGAGAAATGCTGCATTTG  
ACCGAGAGGCAATTGCTAATATTCTTCTTACTCGTAGTCAATCTGACGTTGACGCTGCCA  
GCCATAAGTTTAATGATGTTGGTGAATCTGTTATTTACGCGGGCGGTGGTACTTTAGGCG  
GTGCTCTTTCTAATATGGCATCTACTGCCGTTTTTTGGTGGTATCGAAAGTATTACTGGTG  
GATACCTTACCGATCATGGTAAACAGATTTATTATACTGCCCCGAAGCATGAATGCGGGTG  
CTGACGCACGAACGAAAACTACGTATGGCATCTAACCCACGTAGTATTGCAGACCTTC  
ACAATATTCTGATCATATACGAAACCTTTTTAGAGTTGTCTTATGGTTCTAGTGGTACTT  
CCAGCACCGCAAAGGAATTAAGCGGAAGTTGATGCGTGGTATAACAATACACTATTGA  
GCAAATCCATAACCAGCCGAGGCAAAGAGAAATGATACGCTGTTTGAAGGGATCACCGATT  
TTCTATCCAACGTAATTACTGTATCTAACCCGACAATACGGATGATCTCTAACTTCGGCA  
AGCGTACATCGTTTGAACGGCGTAGCGATTCAATTTGGTCCCCTCAGATCTCAAGTGTAC  
GTCTGGACAAGTAGCGTGATGGTAAGTTTAATGGCCTTGCTATTTCTCCTAACTTGCCGA  
GTACCTTTGTTCTGGAAGTATTATTTAGAGAGATCTTGACACTTTCCCGTGCTACTATAT  
TTGGCAGTGCGGCATAATGTTTGAATTAATGACTTTAACGAACAAGCAGCTAACCTTGA  
CTTTCAGCGATCTAAGTTATTCAGCGTGGCATTGTCACCCTCCAAGTAATAAGACACG  
AGCGATCCTGGAAAGTATGGGTGGTGCGGTATATGATATTTTACCAAATGCCTTAAATGA  
CTATATCGGGATTACTCGTGGTGATTATACTGACGCATTAACAAATCTTGCTGTACAGGG  
TGTTAGGCGTGCTGTTGATTCATTTGGTGTGCGAAAAGTATCTTTTAGGTGCAATGTCATC  
CCGCGTAGTTCAATCTCTTCTGCGGCAATTGGATGTTGCTACATATGCGCTTGACTGGTT  
CAATATGGCATATAAGACAAGCGGTGTTCTGTTGTATGCTGTTAAGGTTCCAGAAAACAG  
ATTGAATTATGAAATGAACCGTAACCCCGATGCGCCAAACATTCGAATTGCCGGACGTGA  
TTTTGATGCGCTTGTATTGAGCTTAAGAATGGACTCGATCGCATCAAATATAGAGCAAT  
GCAGGATTGGGTAACTCAGTAGAAGCCCCGTTACAGGGCTTCGTGCGCTTCTGTGGA  
CGTTGAAGCAGATATTCAGGTCAACTTACATAACCGAATGGGAGTTCCTCAGACGATCAT  
GATGTTTAATGGTTGTGTTCCCTGTTGGTGTGAGTGCACCGGAATTAACACTATGAAAATA  
CAACGAAATCACAACATTCGATGTTACTTTTCGCTTATCGTTCTATGCAAATGGTGCTGT  
AGAAGAGCAAGCCGCGCGAGGATGGATTGAGGATAAGGCAATAAACGCAATAACAAACAC  
TTTCGGTAATAATGTACTTGATAGTGGGTTATCTTCTGCTGCTAATGCTTTATCGCGTCT  
AAATGGCGTTGGTGGGCGCGTGGTGAATACTGTCACTAACTAGTTCTGATAATCGAAAGG  
CGGGGATAATCCCCGCCTTTTTATTTTGCTAAATCATTGCAATATTTTAGTGCTTAGCT  
TGAAATTCTGCGCTGTTAAGTTCTTACGATGTTACCGGTCATAATCCCCGTTTAAACGCTGCCTT  
CTTGCTTCTCGCTCTATCTGCATGTCAGACAAGATAATACAGCGATCCCCGTGCTTTCATC  
TTCTCAAATTGTATAGACTCTTCTTTCCGTTTGCGCAATCTTCTTGAAGCTTCTTTTCT  
TCCCGTGCTTTCTTCTCCCGCGCTTCTTTGATTGCATCCTTGAACATCTGCGTTTTGTGGT  
GCTAAACGAACTTTAACGCGATCCACGTTTCGCCGTTCCAATTTAGAAATAAAGCATGAT  
TCGATCTGACCATCACTTGCATATGCTGCTTTACATTTACGAAGCAAGAAAACCGGATCT  
GATTTAGCATTATCATAGCTTCCATGTTAGCCCAACCAATAAGAATGAATGCAGCCGCA  
AGACCAATCAGTTTAATCATTTCATTTAGTACCTCACCGAAAATTGTAGATTGACTAC  
GATTCTCATCGCCGAAAGATTCTACTACGTCGTTACCTTGACGCAAGTCCCAGCGCGGTA  
AAATTACCTCACATTCGCAAGGGTCCATGCAATGGACCCAACAACGAAACCTTTATGAT  
CCTTTACATAAATCACCCATGATACATTACAAGAATGTTGCATATTTCCGGTCAATTGATT  
CATATCGATTCTCACAATAAAGGCTAGTGCTGTTTGTAGCAATCCTCCAACATGATCG  
GTGTCATGCTGGTCGATACAAAGTTTGTAAAGGTAACCTCCTTATCTTCAATGATGCGCT  
CTATTGTCTGAATGTCAAGATGTTGACCGCGATCAAGAGTACCGTTTAACTTTTCGGTTT  
TATCCATGACGCAATCCATCAAATCAACAATCTCTGATATCTCATCGGTCATGTCTTCTT  
CGCTTAAGAGAGCACCAGTTACCCATTCGTATTGTTTCAGACACATAATCACAGATTGCTG  
TATATTCTTCTGGGGTTATGTTGTTGTTGTTGTAATGTTTGAATACATTATCTCCAAAAT  
CTTCGGAGTGTACTTCATACATCACATTAATGCTTTTCTTGGCAAATCCATAATCTCGTG  
TCTCACGCTCAAGGAAACGGATAACCTTCGCATAATCATCAAAGTTAATTTGATCGCTGA  
TCATCTCAGTGATCATGTAACCATTAATCCCCTCAATGTCATATGTTTCGATGTAATTAT  
CCATACGTTCCATCATTGATTTCGCGTGATTCTTCCGAAAGACGAAAATCCGGTAATTGTT

TGAACATTTTAAACCTCCCATATAACAGAAAACGGGGCTAGTATAAACTAGTCCCCGAT  
TGAGGCAACCATTATTTCTTAAAAATTACATTTTAAATTTATCTGGCATTGCGTCTACAG  
ATACCAGCTCAGCGATAAGCTGACGTAGAGTTGCCTTATCTGCTTTCTTACGTTCAGTTT  
TAGCTTCGCTAATGAAGCTGGAGAAAAGACAGGTCAGAAGCCGGTTTAAACAACACCTTCAC  
GGATGAATGCATCACCGTCTGAGATCATCTCGCCAGATTCTTGTACTGCTGCCAGTTCAC  
TCTTGTTCATAATATGTGCCTCAATGTATTAAGTATCTTGTGAATCCGTCGATGCCGTGG  
CACGAGTTACCGTATCAAAGGATAACACAACACCGCGAGGAAGTAAAATCTCGCTTTCTT  
TGTAAGCAAATGCTTTGTTACCTACTGGCAATACAGGGATGTTTTCCGCGCCAGCAATGG  
AGAAAGCAACATTAGCGCCACCTTCACCGCGAGAGCCAGCCATAACAATCAACACCAGCAA  
CGGCACTAGCCACGTTTGCATTCCAGCCGCCAAAATGTTAGGTGCAAGGGAAGTGCTCA  
CATAGTTTTTAAAGTAAAACGCTTTTTGCTTACGCGCAGTTTTCCACATTTGCGACCGGA  
AGTCCATAACCAGATACAGAATAGTACCCGGATCAAGTCTAACGCCATAGTTGGAGAAGG  
CATCATCCAGTGCATCGCACATCTTGACCAATTCTTCTGGATCTGAGATTCCTTCAAAC  
CTTCCAGCTTACGGTTCGGTTAGGAAGTTGTTTACAGATTGATGTATGCTGCATCGGCATATG  
CGCTCAACACAAAACCTTCCGCGCCTGGCAGATCAAGATCAATATTTGCCATCATTACAG  
CCATGTTCCCTAGCAATTGCTTCAAACATAACCGGAAGCAACATTACGTAGGGCATAGGTTT  
GAATCTGGGTGATATTACGACGCAGCATTTCAGCTTTTACATCTGCTGGCATAGACTGGT  
CTACTCGATCCATTGCCAGTGGGTGATCTTCTTTTTCGAATACTTCCCTCGCTCATGATTT  
CTTTAAGCGTTTGATTGATGCTGCGATAACTTCCGCAGTCAACGGATCATACTGATCCT  
GAACTTGTGCCAGTTCGCTTACTGCGTATTTTGCATCGGCTTGGCTTTCAAAAATAGTAC  
GCATGAAATCATAGCGAGTGATAATATCACTTATCCAGTCATTCAGAGAACGGGGCGGTTG  
AACGTTCTAAGGCTTGACGATCAATCAGAGGATTAACCTGTTTCTTACGTTCTGCTTCGG  
TGATATCTTCTTCCGGTTTAAAGATTAATTTTTTCTGGATGATTCACATAGTCGCTGTTAT  
AGGTCGCTTGAGTTTTTCAGCCTTTCTTCTTTAGTCAAACGAGATTTAGCCGCTACGCGTT  
GTTCCGCTCCGCGTTTGGTTCTTATTCTGACACAAGACTAGCCGCATACTCTTCATCGT  
TAGTCAGAGATTCACCAGTAGCCTTAGATACCCAGCGATCACCTAAATCACTTTCTACTT  
TAGTGAACAAGGAATCATCAAGTTTGATCCCTTAAATCTTATCAATCGCCATAACCGCGAC  
GCTTGACAACAATAAGCGATCTTTTTGCTGGTCATTACTTCCCTGCTGGAATACTTCAA  
ACGTCGGTGTACGACGCAACAACGCTCTATAACCCGCTTAAACCAGTTCGGTCTTACCTT  
TCCTGCGGGATACGTTAAAACGGAACATAGCAGCGTCTGGTTGCGCTTACGGGCTGTTT  
CCTTACCCACATCAAAGCACTTGACAAAACCTGCAATCGGGTTATCGCCTAGACCATTTT  
TAAGCTGTACAATACGAACGCTTTTGTTCATTTTCGCACAGTACAACATGTGCGGTATTGG  
CACCCATACGAATGATTTTAGCTGTTTTGTTGGTGAAGTTACAAAGACGGACAATCACAT  
CTTATCGCGTGTCTGTACTGCAAAAAGCTGTTTAGGATTCTGCTTAGGCTTTAAGCACT  
GTACCGGGGCAATACTACCAAAGTTTTCTTCTCTTCCGTCAACAGCCATTTCTCGAAAC  
ATTCAATCATTAGATCGTCGATTTCTGAGTTAAACATTTTATATCCTCTAGTTGATAACC  
TATAAACCTATATTTATGAAAACGGGGCTAAACGCCCTTTTTATTATAATGCACCATCG  
AGCAATTGCTCTAAGGTTTATCCTGACTAGTCTTTTTCAATCAGGATATATTTTCCCTACT  
CGTTTAAATACAACCGCGCATATCAACGTATTCTGCGTAGTTGATGGTACGAGTTGTTCCA  
TCTTCCAGTAATGCAGTACCGATTTTCGTTAATGCGGTCATAAATTACGTGCGTAATGATG  
ATTTGATGTTAGCCATTTGATACTCCTTAGTAGTTCGTTTCTGTATGGGTTTATTATGA  
TATACACCCTCTGTTATGTCAACAACCTTTTAGAACAATTTTGAATTAATTCTGATTTGA  
TTTCGCAGAGAACATTTAAAGATTTCTCGTCACCCGCTTTTGTGCTTCTGCTTGCATTT  
TTGAAATGGCTTCAATCTCAGTGCAATTATAAGCCGCTTGAACCTTACGATGCGATGA  
TTGCCGATTCGATGGTTAAGTGTTTCATGTTTATTCTCCTTTCGTTTCGGTATGTGTGT  
ATTATAGGGGATCGATGATCCCCTGTCAACAACCTTTTTGAGTTATTTTTTAATTGCCTAT  
CTTGCAATAGGGCAATCACATGCTGGCGATGTTCTTCCGATAGAGGCACACCGAAAAAGT  
TAGTTTTGTAGACATACTCTAATCGGTCTTCTCGTGTGCTCTCGTCCATCTTGATCGCGG  
GTAATCCGAGATTTTCGGAGACGTCGCTTTTCTGCTGGCGTTAAATCACTGTAATACAACA  
TAGAATCATCATTACCAGCAATGCTAAGCTCTTCCCTTATAAAGGAGAATATTGCCTTTA  
ACCGCTGTTTACCCTCCACGATTTTCGATCTCATAGCGAGAGCCATCATCAACCTTTGCCA  
TTGCGATCGGACCATCCAGAAAATCATTAAATCAGGTTTTTCGATAAACATACGTTTGT  
CTGTGTCCTATACTAATGGACGCTGATAATCTGGGTTTATGTTTATATAGCCATCTTCTA  
ACCATGCATCATAAACAGAGATGAAAAAGTTTTTATGATTGGTATAGTAACGGCGTTT  
GCGTTAAACGGTTCATGTTATAGTCTCCTGAATTGATCATCACGTAATCAATATCTTTT  
AAGAATCATCCCATGAATGCCGGATATTGTTCTTAAAGTCTCCAGATAAGCGCAGGGATT  
GAACGCTCTCCCATCTCGAAGTAAGGATCATATGATCCGTATGCCCAATATGCTACTACA



ATTCCACAATCAGCGTAATAGTATTCTATTTCACTTGCTGGCGACCAAAGTCCATCAATA  
TGAGCGGTGATCTAGCTTTTCGATGTTATGGCTATGACAATCAGGGGCTACGGATGCAATGA  
CCTTGTTTATCGTAATTTGACGTTAGCGAATACTTAAACAATCTCATTATAGATCCTTAT  
TTGCTTCAAATACTGCCTTTGCGAATCCTCGCGGGGTAAGTCACCTTATAGTCTGTGCTT  
TCGTTCCCTTTCCCGCCTAGCTTAGAATGCTGTTTTCTGTACCCTTTATTGATCTGCAACG  
GTTTCTTTTCGGGCATTATAAAGCCTCTTCCGGACCATAAGCAAGTCTTTTTTCGGGTACA  
TATCACGGGCGGCAATATACTCAGGAAACGTAGGATGCTTATCATCTTCCGGCAAATAAC  
CGCGATATTTCCACGGATGGAACACATAATCAGGCTTACGCCACATGCTAAAGATAACGC  
TTACAGGGTTCTCTATCATGTAGGGAACCTCCTAGCCATTCACCCAAATAAGCGGTTATTT  
TAGCTGCCCTTACATCATGAACTTGCATCAATGGTCCTTGCTCACGTTTCTTTCGTTCAA  
AGTGTGCAGCGCTACTAACAATAAATTGGTGCACGGTGGGAACGCACAGATAATATCCG  
GTTTCCCCCATTC AAGGTCCATTGCCCTTTCCAGCCGGTTCAAATCAATCCAGGTGTTTA  
CATAGGTAATGTTTGGATGTTCAAATCTGGGTTTATACTTTTTGTATGTACCGTGGTCCG  
CGTCAACCGCATTAAGCAGACTACCTTATGACCTACTTTAGCCTATTCTAGCCCCATTA  
TCCCCGATCCGTCAAAGTTGCGGAATACTAATTTTTGTTTTACGCTGCCCCCATTTGGTTT  
GATACTAACAGAATCTAAAAGACTTTTGGTAGCCAGTTCGCGGCAAGTTTTTCAGAGCTGC  
AACTTCCAGCCAGCGGCAATCAGGTTATCAATGAGGCTGTTAGCAACTTCTTCGCTCAT  
GAAAGAGCACTGTTTGGCGATGCTGTAGCGTACACGCTGTAATTTACAGGTTACGGAAGCC  
TCTAACGTTACAGGTCTTTAGCGATTTTCTTTGCGGTTTCGATGTTAGCCATAGTTTGATT  
CTCCTAAGTGGTATCTCGTCTTGATGGTTGCATTGTAGGGGAGTTATCCCCCCTGTCAA  
CACTTTTTATAAAATTATTTGTTAATTTCTGGTGC GTTGTAGGATAGTAACCTTCTTTA  
ACTCCGAGATATTTCCGAACCATCCCTACAATCTTCTGTGCTACTACAATGTCAAATTT  
AGAGCATCTTCGCCGTGGGTTTCAATGATATATGCTTCACATGCTGCTTTAGTCTCGAAC  
ATTTTGATTCTCCTATTTTCGTTTCGGTATGTGTGATTATAGGGGATCGGTGGTCCCCTG  
TCAACA ACTTTTAGCGACGGCGACCATGTTTTTTGAGGGTTGCCTTTTTTGTATGCTTTAT  
ATGCCTTATTACCGTTTTTATGTGCTTTTTTTGGTATATGATTGATTTTTCTTATTGTTTT  
TGTATGTTTTCCCGGTCAGTCTTAATTTTCGTTACATTCCACGAAACGGTGTTCGATGTTTTT  
GTGGTATGATCAAACATTTATATTAATTAACCATTTTCGTTTTTCGTTGTTTGTGGTTCT  
TTGGTGTGTTGTTTGC ACTAAAAGACCAGCAAAGAGAATGAGTATAGCGGTCATTAACG  
CAAATATTGTTTTCTTAATCATAATATTCTCCTTTAGTTTCTGCGGGAGTGTGAATATAA  
CACTCCCTTAATATTCCGTTTTATTTCGTGATTAGTTTCGAATTTGGGCATTTTGCACCAG  
TTCAGCCAATCGCCCAGATCTTGGTCATTAATGCTTTTATCTGCTACCATCGTTTTTGT  
TTGATACCCATGTGTGCGTTATGAGTAAGCATTTTTACAGTGA ACTCGATTTTATCGCCT  
TTAGCTTTAACATCCACCAGTTTGGTCCACTGGCTACCAGAACCGGAATGTTCAAACCA  
ACGATGTTTCCGATGTATGCTTCTTTGTTTTTTAGGATTTTCGATTGCTTTGATGAATTAC  
ATTTTTGATTCTCCAGTTCGTTTCGGTATGGGTGTATTATGCTATGTTTTTACTTTGGTG  
TCAACA ACTTTTTTTAGATATTTTCAGAAATAAATTTTAAA ACTTGACGTAAATGTTTTCC  
CATCTTTGATGGTAGCCGGAAGTTCTTCTTTACTTCTGTGCAAGATAGATATTTCCGT  
TCCAAGTGAAAGATCCGTCTTAGTTTACTCGATAGCTGAACATCCACTCGCTATCATTTT  
CGATTTCATATACACACAGAAGGGTGTAAATCGATAAAGCTATTGATTTCAAGGTCAAAGC  
CGTGACGTTTTGCAATGTTGGTAGTGGTTTTAGTCAGTACCATTGTTTGATTCTCCTAAG  
TGGTATCTCGTCTTGATGGGTTTATTATCCGATACACAGGATCTGGTGTGAGTGCCTTTT  
TTAAAATTTTATGCAATAAAAAAGCCGACGCTAAGGTCGGCTATTAAAATCATTAGACA  
AATAATCATT CAGTGCAATCCGGTCCGGCGTATGCTGGTGTACGTCAATCGCAATCACTT  
TAACGCGTGCTTTCTTGC GACCTGGGTTTTCTCGTAACCAAGTGTTCATTACCGTGAACAT  
TTTATACTGCTATGCTTCTTCGAAAGTACGGATCGGACAAGGGTAATCTGCGTAAAGGAT  
CTCTAGGTCCTTCGGTGTATGTA AAAACATACATCATAATTACTGTTCTCTAGTTTATGCAG  
AGACATTCGGAACATTGGGAGATTTTCGCGGGTAAATTCAAAGATATTATCTTTCATAGT  
AGTATCCTCAATAGTTGGATGAGAAGGGGGGCTTAATGCCCCGTATATTA AACAGTCCCT  
TCCTGTACACCGTAGATGAGTTCATCGCTGATAATTTCAATTAATGCGACGGTGTGCATTT  
TCCTGAGTTGCGAAGTTGTCAGCAAGTTCTACTTTAGTTCCGCCATCACGAGTCCATTTA  
GTGATAACTTTACCATCGGCAAATTTGAAGTTCTGCTCTTTAGCTACCGCATTGCGTACC  
AGACGTGCAA ACTTATTTTTGCGGATTGCATTGTGCGTTTTCGTGTGCAGCGTGAACGAAT  
TTGTTAACGTT CAGAGTGATAGTAACGTATGCCATAATTTGATTCTCCTAGTTAGAAAGT  
GTATCTCGTTTTCGACGGGTGTATTATGCTATACACCCGATCCATTGTCAACGCCTTTTTA  
TAAAATAATTTTCGATATCTTTATGATGTTTTTATCGTGCTTGGTCTGCTTCGGCTGGCG  
CTACGTTGGAAGCGATAGTCTTCACTACTGTTGCACCTTTTTTCGGTGTCCGACACCCAAT

GATTATCGAAACTGCTATTATTAACACTTGATAAGAAAATGATTTAATGTTATGGAAAT  
GATAAGTGTAATAACGTACCCTTAGTTCTGAATCTACGTATAGATAGATCACCGCACCTA  
GATAGACCGTCTCACTCGTTCTGTCAACTAACAGTAGAGTATTCGCAATTCTTCTAAAT  
TGTCTTTTGTGAAGAACAATCATAGTATAAGCCTCAATTAACCAAATTAACTTTGGTGT  
GTGGTGGTTGTCTCGTGCCTCGTCCGCTTCTCCGGTGACACGTTACGAGCGAGGACAAT  
AACACATGCTGCCTCTCCGTGATGATAGTTCTTTACCCAATGGTTATGATTTGCGAATCC  
GTGTTTTATTGCGTAAGCGAACGGCTTATACGTCCAGTAGTAACTATAATATCATAACATT  
TAGATCGCTATCAATGTACAAATATGTGCTGTCTTTACATTGCCACTAACAAACAAAAGC  
AAGACGATTGCGAAGATCTGACAATATTTTGTCTGTCAATTTTATAATGTTACTGTTCAT  
AATTAACACCCTCAAGAGTTTTTGAACACATCTATCCATTGTTGAGTATATGCGGCT  
GCTTTCCATGACACAATAACAAGTCGAATAATGGTTTTTGTTCAGAAAAGGACGGGAAT  
TTTGATGCATCTTCCATCATCTTTTCGGCGAACTCTGGTTCGTATACCCGCGGAATCTGT  
TGATATGCTTTGTATTCTTTAAATTTGCTCATAATCATTCACTACCTTACCAGCTTCTTT  
AGTTGTTTTTACATCAACTGCGATAACCCGTAAAGGTTGGTCATGGTTCACCAATGATC  
GTGAATATCGGCTTGTGATTTATCACCACAGGAATCACGACTATAACTTTTACATTTATA  
GCTAATGTGACCGTCATAGTCAACATAAAGGTAATTATCGAAAATCGGCGTGTTTAAGAT  
CATAACGAAAATCTTTCTTTGCGTGTCTTATCCAGTGTTCGAGTAATTCGCAGCATAAGT  
ATATTCCTCTTAGAAAGGGATGGTCATTTCTTGAGCTTGTACATTCTCGTTAGGATTA  
CTTCATCCAACCGATATTGTCTACCAGCATATGCACATTTTTATCCTATCCTACGTGGGT  
AGTCAATACTGTATATGCTTTACCTCAACCATGATTTCCATGTACTTCTGAACCTTCGAT  
AGCTTTCCTTTGATTCTCCATTTGTTGTCTTGATGAGAGTATCTTACTACTCCCTTAA  
TCATTGTCAACTATTATTTGTTAATTTCCGCTGCGTTGCTTGGATAGTAGCCTTCTTTAA  
CACCCAGATATTTTGAACCATTCGCGTGATCTTCTGTGCTACTACGATATCGCATTTC  
GGTAGTCTTCACCGTGGTTTGTACAATGTATGCTTCGCATTCTGCTTTAGTCTGGAACA  
TTTTTGATTCTCCTATATCTCGTTGGTATGCGTGCATTATAGGGGATCACCGATCCCCTG  
TCAACAACCTTTTAAATGCTATATATGAGTATTTTATAAATTTGTCTGCCACTTCATTGGT  
ATGTTTCAGATTCTACGCCTGATTCGAGAACAATAGCTAGGTTCGTTTCGTCATTCCC  
GTACCAATGATTTGATCTTCGATTTTTTTCAATTGGAATTTGGTCACTTTTATCTGTGCG  
ACAAAATACATCTAAATGCTCATCGATGTAAAAGATCCAATCTTCATAAAGAATAACGGG  
TATTAGTAAGATTTTTATTGCCTTCAACAAAAGGTTCCGCTACAAGCAAATTAGTATGTT  
CCATAGTAATTTCTCAAATACACAGCTTCGTAACCTTCCCAATGTCCAACACCAGCA  
CGCTTAACGAAAAGGTTTTCTTTGATGATTTTATAAACGTCTGGATGGATTTAATGCGG  
AGTGAAGGTTTCCATTCTTCGTTGGAATTGCGGCGATATATAAACATTACCAGTTCGC  
TTATATTCAGCAACCATTTAAGACAACACAAAATCTTATCCTCAATTTGTGGGAGTGTA  
TTACCCCTCCCGATGTTGTTATATTACATTACACAAAATGGCGTGTCAATGCTTCTTTG  
CGTTCCGCTAAGACTTTTCGCTCTCGCGTGGCATAACATCAACCGCCAGAACTTCTACAA  
CATCCTCGGACCCTAACAGTGAGTATGGCGTTAGTAGAACTTGGTAACCAGACTACCTT  
ACTCGTCCCATTAAACGCTATCGCTAGCCCACCACACATCACCGTTGATAAAGTTGATGT  
TAAGCACACTACGCCAGATTGAATCAATTACTTTCAATACCGCGCCTTTCATCTCTTCCA  
CGATATGCTCTTCCATTTTGAAGACCTCACCTACCTGAATTTTTGCCATGTTACATGCTC  
ACAATATGTTTAGCTGCATCTTCCAGTTCGTCGATAGTGACACTGTGTGCCAGTAAGTGT  
ACTGGTTGTGGTTCTTACCTTCCATAGTATTGATCAGATGACCGTTTCTGGGTGGAAT  
GTATCGTTGCCGTTCCAAATAGCATAACACATCATCTTCTGTTACGTAGATAATGAGTCCA  
ATCGGTGATTCTGGTTATTGAAAAATTTACCCACTGCATCTTTGCGATTGTTTACGATA  
ACTTTTACTGACTTCATTTAGTTACCTCTCGTTAAATTACATCACAATCACGCCAGCCGT  
TGAAAGTTGATGTTTCAACTGAGCATTTACTGCTACTGTCAAATCAGTGATTTCTTGTGA  
CGCTGCAATCATATAGCCATTGGTGATATTGTTTTGCATCAGTTCAATGGTTTCTTCGTT  
GTAGCGAATTTTAAACGATGATTTTCGTTGAAGTTCATGTTTATTCTCCTAGTTCGTTTCG  
GTATGCGTGTATTATAGGGGAGTTTAACTCCCCTGTCAACAACTTTTTTAAAGTTTTTC  
CATGATAGCGGTCATAATTACATCTTCTGCGCGAGCGGTCAGATTATCAACGTCAGCATG  
TGGGCGGTTGGATGTTACAGAGATATCACCGTTGCGCACTGGTTTGATATTGATATCAAG  
ATGTTCCGTGAAACGTTTCGCCAGTTACAGAATGAATTTTGGTGTAAATTCTTTTCCAG  
TGCCTTGCGAACCTTACGAATCAGGATAGCGATTTTCAGTTGGTTCTCCGCGCTCATGGT  
CTTCTGGGTGTTTATGTTCCGTTGAAGTCAATCATTGGCAGCGTTACGATGTATTTTCA  
TTTTGATTCTCCGTTTAAAGAAAGTGTGTTTTCGTTTTGATGTGTGTAGTATAGGGGATACG  
TGATACCCTGTCAACAACCTTTTTTTAATTATTTTTTCATGAGCTTAATGGCTTCTTCCAT  
AGCCAGCACATATCGATAGTTAGGGTATCGTCTTAGATCGTCATACATTTCGCTTAAGAGT

GGAAACTTCCTTAAACTCTAGGTTTTCTAGATACAGTTGAACAAATTGTTTTCTCTACCAT  
CTCGGCTTTTAGCTTGTCTGCTTGTTCCTGTTTCATATGATTTTCGTAGGACCCAACACCAA  
CAACATGATAAAGGTGATCAACGGGCTAATGATCAATGATAGGATAACATAACCGATAAC  
GCTACGGTTTAAACGGCTTGCGTACATGCCTACCAGGAGAACATAAAGGATATAGATAAA  
CAGAAAGAACATATAATTGTAACCTTATTTTCGCGCTGGTACTTTTCGAAAAAAATT  
CTACTGGCTGGTCATGAATTGACAGCAAGCCAAGCGTTTAGCCGCTCACAATCGCATAT  
TGCCTGAATATACTTCTGGAAAATCTCGCGTATACACTTACGCCAGTATTCTAAGCCCA  
TACAGCTTTTATACAGATTGCATTGTACACACGCCGAGTTCATGTTATCAAGTATATCAT  
GTTCCGGTTTATGCATTCCTACGACCTTATACTTCCACGATCCATCGTCATTACGGGCAA  
TTCGTCCATTTTCATCATAGACTACCTTTGAGCGTCGCAAAACTGGTTTGATGTGGTCTG  
CGCGCCAGCGATCCCCTAGTTCCTCGCCACAATAGGCACAACGTCCATCATATTTTCATTA  
TCAGGATCTGGCGTTGCGCTTTCTTTGACAATTTTTTCGGTTTAGGGGCTTTTCGCCCTT  
CATTATCACACATCGAATACCTCTTTTACTGTATTTGCAGTGGTCTTGTCTCGCGAATA  
CGTTTGATGATTGGGAGAAATAAAGAGAACTCCCCTTCATCTTCTTTACGTGATTTGCTG  
CGGATATACCGGTTGCATGTCATCTAGATGACTTTTCCAATCAGGTTATGACGGTCAGCC  
CATAACAATTCACGGTCGAGTTCATTTTCGACGATCGAACGGAATTACACGTTCAATACCA  
TCATCACCTTTTTTCGGTTGTAGTGTGCGTTAATCCCGATCCGGTGTAGTCATCATTCTG  
CCGCACGCACTACGGACAGTAAAACCGCCTACCTTATTCGGGTCTTTACTATGCGGATAT  
ACATCAACAATTTCCGCGTCGAAGTCAATCACTTCTTTAAATTTAACCCGATCTTTACTA  
CGGCGATCTTCAAATACACCATGTAAACTTTTAAGGATAATACCTTCTAAGCCCATGTTT  
ACATAGCGATGATACTTTCGCGAGCCTCATCTATATTGTTAACTACAGTGTTTTCGATT  
CTCTGAACACGAGGATCGTTAAGTTCCTCAACAATCTGTTTTAGTTCCTTCTAATCGATCT  
TGATATTGCTTAGTTGCTTTCACGTTTCCGTAATACACATCACGGTCGATAACATCCCAG  
ACAGTGTAACAATAACATTGGGCTTCTTCTTTTGGAAATAGTTCCTTTCAGTGATTTGTTG  
AGGATACCATTTACGGTCTGAAGATCTGCAACAACGGATTCTTTTACTGCTTCCGCTACT  
GGCGTTAATGGCATTTCCTCTCCTTCAAATATCCATGACAGAGTACCATCATAAACCCCTT  
TCAACGAAGTCCTGCGCTGGTGTGTTGCGAAAGGGTAGGCATATATACCAATTCCCCTCT  
AGAACAATTCCACGGCCTCGTAGACGCTCTAAAACAGCAAACAATCATCCAGCCCCTGA  
TAGGTATTACCTGAACGGGTATAGATTGCTAATGTTTCCCGTCAATATCAGCCATCCCA  
CGAGCGCCATCGCTTTTAAGTTGTGCATACGCCGGATACTTGATATTAGCAATGGTCTTA  
TCAGAACATGACGATGCAAGGTGACACGGTGTGCTGGGGGATCAGTTTCTTCCATACCTTG  
TTTACAATGGTAGCTGAACAGCCGATTACAGATCACAATTCAGGACCATCATTGCAAAT  
TTAGCATCATCCTCTGACGAGCAAGTCAGAGTATCGGTAAGTACTGTAATGCTGCATTA  
CCAGTACTTGGCGCGTGGCAAGTTTATTTTTTAAGACCTGTAATGCACCGGATAAAGAC  
AATACGGACGAATAACGCGATGGTTTATCGTATTTCTTTACGCCAAACGTAACCTGTTTA  
CAATATGCCAGATAAAAACATTCTTTTCAGTGTTCATGCTTGCAGATTCTTTTCAGGATC  
TTTTCTTTTCAGCGATGTTTTGTCTGTTGCTGCAAGCTGGTTAATGATATTAAGAATTGAC  
ATTTTCACCCCGTTTTGATAAACGCTCACGAATATCATTGAGGATACTACAAAATTCCGA  
TTCAGTCAATATAGTCTTTAACGGATCAGTTCACCTATGCTATGACGTAATTTCTTATT  
TCCTGTAGCGAGTAATGCTGTACAAAATTCTGGGTTATTCCGTGTCATCGTAACAAATGC  
CAGATGTACCAATCTGTAATAAAGCTCACTCATTTCGATCAATCGGGCGACCCTGAAAATA  
TAACATGTAATTCTCAATCTTTTCAGTTCCTTCCGGTCTTTTTTGCTTTGCCACCGTGCAT  
CAAAAAGATTTCTCTTAGTCTCTGAGGGTTCTTAAATCTTAGCCCCTGTAAAAATCCTTC  
TGTGCTGTTAATATCGCAACCAAATAGACGGAAAGGTCTTTTTTTGACATTACTCAAATC  
ACCCAATGGATTAGGTCCACCCGCATAGATATCAATTTCCGAAGTCATTGAAACTAATCT  
CGTAATCAGAGAGAACGGATCATAATAGTCATTAGGAATATCGATAGTAATCGAATGAG  
GATTTACCCATACACCAAACCTGGTCTTCTTCGGTGAATACTTCGGTATGGATTTCTGTTGA  
TGTTTACATTCATAGTTTTTCATAATAAAATTCCTTAATAATCATTAACCTGCAATATCTT  
ATAGCGAAAATATAGGCGTGATTATTTACGCGCTTTAAAATCATTAACCGTAAACTACC  
ACAATATTCTGTTTGTGAGTTACAGTCTTTTCAGGTGATCTCTTCTTCTTCTTACCG  
CCGTTAATAACGTCTGGGTGAGGAACTTTATTCATCTTGCCATGTGGCAGTAGAACAGTT  
TTACCCAGCAATTCTTTATCTACAGTCTCGCCAATATCAATAATCTTACCTACCAGCGGG  
ATCTAGCCCATAGTGCCTTTTGCTCAATAATGATCCCCATAGTGCTTTTTACTTCGGTC  
CCTGCGCTTTCTGCTTTAGCTTCGATAATTACATAATCACCAGTGCTTTAGGAGTTTAA  
TCGGTCATAATTTTATTACCTCTTCAAATCAATACAGTTTAAATGATGAATTATTTATAAA  
TTTTCGACGATCTGCGCGGGAGTCAGCCCCTCTACATTAATCAGACTATCAAGCCCAAAC  
TACGGAAACCTTCAAATGCAATTTCAATTTACTGGCAAAGATGTTTCTGATTCTTTACGCG

GTTTTTCAACATTCGGAACCTAACCCTTTTTTCGTATGTTTTCGAACGGCATCAGTGCCGGAT  
CTAGCGTGGCGATCATCTCACGGACAGTACCATCTTTCTTAGTAATCTGCAAAGAGTGAG  
TACCGACCGAAAACATTTTTCTTTAGTGCTTCACGAAGTGAGATATTATCAACTTGTTTCA  
TCATTATCAATACCCTTCAAATCAGTAAATAATGCTTTTTGGAATACGCGTGATCGTAATA  
TCTGCATTATTCAGAATATCAGCCCAATCACGCCACCATTTCGATCATTTGTGTTGCAA  
TATTATAGATGTTTAATTCCACTGTTTGCAATTTCTTTAGCGCAATCTGCACACGGTGAA  
CCAGTACACCACATACTAGCGCCTTCAATCGAAACACCGCTACGGGCAGCAAACAAAATA  
GCATTTAATTCAGCGTGGATCTCCTTTTTCTGTGACCATGAACTACGATCTGGTCGTTTT  
TCTGGGATCATTTTGCCGTCATCATCCAGCCATCCGTTTTTATCTGCATGAAAGCTACAA  
TTTACTTGCCCTGCTGGAGTTCGTTAATTCCAGTAGAAGTGATTTCGCCCGTCTTTTTTCG  
ATCAGTGCGCCTACCTTCCACGAAACACATTTAGAGTTCTTTGGGATTAGATAGGCGATC  
TGCATGTAAGTTTGTGACTACATAATAATCCTCACATATTAATTAACCGTATACGCGC  
CAGTATTCTACCGATCCGTCGCTATACTGTTTTACATTGAATGTATTCACACCATGATCA  
TTGCTCATAATGACATACACACTGCGACGCTCATCACCAAACGGGTAAATGGGGCGGGT  
TCAATTTCAAATTAACCACGTTTAGGAAGTGCTTCGCCTAATTGCTTTAGTTTATCG  
GTAAACATTAAGTCTCCGTAGTTAACCTGAAAACATTCTACACCTATTGTGCGGTACA  
TGTC AACACTTGACCACGGTCATCTACTGCCAAAACAACATGATAACGCGGTGCAATTT  
CCGAGAAGAAGATCTCTTTCTTACATCATGGTCTGGACCTCGATCATTAGTTTCACGCT  
GGAAGTGATCGCTAGGTTCACTACCCTGTTACGCAGCCATTGCAGAGTATCTTCACCGC  
AAACATCCTCACGCCCTGAGCATGTAATGATACGATAACCATTATCACGATACAGTTTAA  
GTATTTTCGATCACTTGCGGACGCGGTTTATCTTTGACCTTTGTCCAGTCAAACGGAT  
GACGACCGCCCTTATCCGCTAATGTCCCATCAATATCAAAGATCACCGCTTTCGGTAGCA  
TGGTATTCCTTTTGTATACTTCTTGACCCATATATTCCTGCATAAGATAGAAATGGTTGC  
GCAGATGAGAAAGTGGAATTGCTTTCTCGCCGCGATAGAAATTACGTTTCTTTAGTGTCT  
CAGATGATTCATTGAACACTTGTTTCAAGTATACACCGGGTTAAAGTCTTTTGCAAGTTCTT  
TGTAGAATACACGACGTTTTTATTTAAGGTTGGTATCAGAGATAATGATACGCAATCCGC  
GTGATAGAGTCTCGCGAGAAATCATTCTCTGAATAGACTCTACTAGCTTTACTTTTTCT  
TACTATACTTGTATTTCAAAGTGAGTCAACACCAAACAACATAAGACGAAGATCATCAC  
GATTCACATTACGATAAATGCTAAACCGTTTACATGTTTCCATTGCCCATGTAGTTTAC  
CGTACCCAGAACAACCACCGGTTAAATCACTTCGCATTTTCGGAATTATTTCTCCTTCGG  
TTTGC ACTGTTTCTCATTACGTTCTTTGCGATAATAACACATGATCAACTTACTTTCAAG  
TGTGTATCTCTTAACAACAGCCAACCAGACTCTAAATATCTGGGAGTCTCCTCCACGACAT  
AGAAACTCTAGATTTACCGTCTATTGTATCCACTTTCAGGTCAATGTCAACTTATTCTAT  
TGGTGCTGGTAGTGGAGGATGTAATTTCCGGTACTGTGAATAATGGTCCATTGTACACGA  
GGAAAGAGCAAATACAATCGGTACAGCGAAGACATCGATTATGGTGGTCTGAAAATTCTT  
ATGTGCTTTCTTAAACAACCAGTGTATCACGAAAATTGAAAACACCATAAGGATAATAAT  
GCTTGCACCGATCCCAGATTATCAACCAGATTAATAATTGCTTATCTGCTCTTGCGTAGG  
GAATACTTCTATGCTCATTTAGTAGCCTCCTTTAATTCTTCGGTAAACTCCTTAAGTGTA  
TCATTAAGCTGGTTCTCTACCAACTTGGGTTTTTGTGCTACTACATAGCCTCGTGTAGCG  
TCTTTTCAATTGTTTTGTTTTGTTCTTCTGGAACTTAGTTCTTATTCCGTACATCTCCTTT  
TG TAGTGAGTCTACGACCTTCATCTTTTCATCTGTCTTTGTCTTATACTCTGTAAATTCC  
TGATTTAACCGGTCCACCTCTTTTTTATTTCCACCACATATTGCCACCTACCCCCAGC  
AACACAGATATGATAACAATGTATATCAGCTTTGACATATTACCCCCAACGACAAAAGGC  
GGGCAACTAGCCCCGCTTATTATTACCAATCAATCTTATCAGCCGGTATCTGTCTCTGAT  
AATTCATAGATAGTAAGTTTTTCAATTGAAGCCAGAATACGGTCATAATCGAGACCATCAA  
ATGCAATCATCAGACACATGAAAATATATGATTGTGCATCACCATGTTTACGTGATTCTGA  
TAGTCGCATTGGATGCATATGTCTTTCTGTCTTCTACCGCGTGTGCGTTATAAAAATTCTG  
TTGCTGTCGTAAGGCCTTGCGAAGAATGGACCTGAATGCTTCCTCGAATAGCTCAATTC  
GTTCCAGGGCTTCCGGTTCGCCTTCATATGCAGCACGCAAATCATCGGTTTCGCTTTCTA  
CGACATAGTACATCAGGTTACTAGGAAACATCGATGTGTTTTTAATGTTCTGCACAGCAG  
TATACCATTCACTCTTACCGTGAACATTTGACCTTCTTTAGTGCTTGCAACAATTCCTT  
CGCTACCTTCTGCGGTCCGAACCTTCAATTAAGAATATTGCTATAACGCGTTTAAATCAACGT  
GTAACGCATTCACCAGATGAGCACGTAGGATTGCGTCGGCAAAGAGCACTTGATGCGGTA  
CGTAATCTCCTGTGACGTTATGGCGTACATTCAGAAGTGTTAGCGACGGTTCAAATATT  
CTAAAACAATTCGGTTGCTGGGTGCTGTATATTCAAAGTTGAAAGTATAATCAGACCCAA  
TATCGGCGATCTTAGCGCGTAGATCCGCATACTTCTCTGAATACGGAAGACCGTTTGCTC  
TCTCTGCCTGGCTTGAGTACCAGGCCGTTTCGACTTCAACTGAACATATCCGTTATCAA

TGTATGTGCTTACTAGACTACCGTCCATTTTGTCCATGACCATTTCCACATTTTCCGGCT  
TAAAGCGATCGCGATCATTCTCACCCAAATTA AAAA ACTTCTCCATAGGACGAGATGCAA  
TGCGGACAGGTCGGTCTTTATCATCGAATTCAAACATGATCCCGCGACACTATAACGCAT  
CTGGTTTATTTCCAAATTTCCGGTTTGTCTAAAGTATAGATAACTAAAAATGCGCATAACGGG  
TTTGCATCGCCGTA ACTTTCATCTTTGTAATAGAACGTATCAGATCCGTCACATAGTGCCA  
TCAGATTTTTGAACAATGCTAAA ACTTTTTTTTGTGTTTTCATTTGTTGACATAATTTCT  
GTTCCCTTCTGGTTTAAATTTGGTGATCAAAACAGGTTCCCTCGATATCGGCAGTGCTTAT  
AATATCTTTACCCGTTGGATTCTCGATGTACA ACTCAAAGCATTGGCCGTAAGAGAATGT  
TACTGTCTTATCTTCTCTAGTGCCTTATGAATATTCTTACTCTTGCGAGTATCCGCTGT  
TGGTGTGTTGTCTGTTAATGCTCGTCCGGGAATAATTGATCCGCTTCTGAGATTAACAGT  
CTGACCAATCTATAACAGTTCATCATCAACCACAATAGCGTAAAGAACATTTAAACGGTT  
TTTCTGAGGCGGTAGAATCACATCACCATCTTTACTCTAAACATGAATATTTAACGAA  
TCCATAGTTTTCTATTAGCTCATTAAATCATTATCCTTTCCCTCACGTCAACAACAAAGGCGG  
GATTTCTCCCGCCAACCTTATTA ACTTTCCAGATTATCGCGAGCATCGTTACGCTCCTTG  
ATGATCTTCAGGACAAATTCCAGTTTTTCTTTGTTTCAGTGTTTCAGTTTTCCATTGCTTCT  
TTGACGGTAAACACTCCGCCACCTTGCCCGTATACAGTGACAGCGCTTTCACCTAACATC  
GTGGTAAGAAAACGGCCAATTTTCAGTGATTTCGAGAGAAACAATCACCTCACGGATAGTA  
TTGCGATCGTTAATTTCTTCCAGCGTAATATCGCTTTTGTAAAGCGGTTGCTTTAACCAT  
CGGATCAGCATAGTCTCATCTGGGGAGATGGTCATTATGTCCATCGCATGTTGCAATGCA  
GCGTAACCGAAA ACTTTAACGAAAGTCCAGATCGTCTTTGCGAGTTTGAAAGTTAATCATC  
TTGATACTCCTTAGTAAGTTAGTTTCGTTTCGATGGGGTATCTTACTACCCCGTTTCAG  
GCTGTCAACC ACTTTTTAATGACAAGTTCGAATTTGGCTACCTTACGTCTCGTTTATTG  
AAAGCAACCACGGACGGTTTTCAATGTAGAACAATTCTTCGCCAATAATGAATACTGGC  
TGATTGTCAAGGCGACCCATCAGGTCACACTGGAGAATGGTAGTAGATTTCGTATACTTCG  
CCTACTACAAAGTGTTTCGCTGATAGAGTCGGTACAAGTAAATTTCATTTTGTTTCTCCTG  
TGTTTCGTTTCGATGGGGGTATCTTACTACCCCGCTATTTCAGTGTCAACTACTTTTTA  
GTTGTTGTATTCAATTCCACCATTGAGTGAGCTAATCAATTATTTTTGTGTTTCTTTCCAA  
CTTATCCCACCGTTTTTCGAGGGTTTATCAACCGGAATAGGTAAGGTGACTTGTTAAGTG  
AACTCGGTC ACTGTAGTGATTGATGTACTGTTTTCAATTCTAAGTTTCATCTTTTTACG  
ATGAAAAGATGCAATGACTTGTTCTTCTGTTTCCATATGTTCCCTCCGTTTCGATGTGGGT  
ATTATGCTATGGTAAGATCCGATTGTCAACACCCAATAACAAAAAAGTCGCCACTATGG  
GCGACTTTGAACAAACATTAATCATGACCGTGATTTGCAAGATCCGCTCGTGTGCTGTCT  
TTGTGATTACCTACGTCAAAGACACGATAACCATTTTTACGAAGA ACTTTAATCACTTCT  
GGGTTATCCTCAAAGACTCCGACA ACTTTCATCTTTATCAAAGGATTTAATTACCTCTAAT  
TTGATGTGATAATCTTTACGGGAATCATTGCGACCTCTCATAAAGATTTTATCGAAACAC  
ACATCATTAGCGATCAACCATTCCACCGTTTCCATGTAAGCATGTGAACTTCGTCCGGTG  
AGGATGTAAATCAACTGCCCGTTGTTCGGAAAGAGCATTGATAACACGGATTACATCGTAA  
ATGGGGCAATCTCCCCACAGGCGTTGTTATGTTTCGATCCATGACTCGACTTTATCAAGA  
TTTTCGGTTGGCATCTTTGCTAGTCGATGAGTTGGATCTGTGATCGTAAAATCTAACTCG  
ACAAGATATATCATAGATATTTCTGAATCGGTTGTAGTCATCGTCTGTTAAATCGGTAT  
TAACCTGAGACACCAGATAATAATCTCTACTTCTGCGCTGCATTCTGC ACTTTGTCAG  
AGTTTAACCACTTACGCATCCACGGTAAAGGATGACGACGAACACTAAACGGGGCTTTTCA  
GTCCGGCAGCACGCATACGGGAATCTGCCAGGATTCTACATAGGTTTTCAGAATTTCCG  
GTGACAGATTAGGAATTGCCCCATTGCGAATAGGTGGTCTACCCATGCTTTTTCTTGCT  
CCACAACATCCAGAAAGATTTTCGTTGCTTCGCCTTCAAGTTCTTCCGCAATCTGTTTCC  
ACTCATCACCATCAACCCCGTATGCCATTGACGAAAAATGTATTGTGTGCCTTTTAAGT  
GAAGTTGTCCATCACGCGCAATAAATTTTCATGATCTTCGCGTTACCTTCCAGTAAACCAC  
GTTCCGGCTAAGCTGAAAGTACATGCAAAGGACACATAAAAACGAATTGCTTCCAGTGCGT  
TGACGCAGTGTCCACACAGATAAATCGAAGCCATCAGATCTCGTTTTGTATCTTCAAAA  
ATCTTCTTGATCATCTAATGCTGTCTCGTCTCGTTCTTCCCAATAGCCGAGATCTT  
CTTTTGCATTCTCAA ACTTACGAATCCAATAAAGAACAGCATCATAATATTTCCCGATAG  
ATTCCGCTCGCTTATAATAGCAGGTTTATCGATGATCTGGTTCGAACTCACTAGCCGGAT  
CAATGAAACAGTTACGCATAATGTGTGTATAGCTTCGGCTATGAATCGTTTTCGCTGAATG  
TCCTTGTGTTGCAACCATGTATCAAGAGTTGGATCAGATACAATTGGACCAAATGCTGCGG  
ACGGTGCGGACCATGAATAGAATCAAGTAATGTCTTATACTTCAAGTTTTTCAGTAAAGA  
AACACTTTTCAAGGTCACCCATATTAAGATATTGAATGCGGTTCGGTTGCAAGTGAAATTT  
CTTCTGGACGCCAGAAAAATGACAGGGATTTTTCAATTAATTCTTCAAATACTTGATGAC

GCTGAATGTCATAACGAGCGATACCTAAACCGCTACCCCGAAACATCGGTTTCATTCATAA  
TATCAACGTGTTTCACGATTAATAACCGTATTTCCCATTCACATATTCCTCATTTTACAGT  
TATCAAAGTGCCATCGTAGAGCATTGCCTTTATTGGTAATTTTACCGCAATGCGGACAAG  
GAGCTGCCATTGTTGCTTCCCTTTGTCCGTTGTGAAATCAGCTTTCTCATTTCCCTCGCTAT  
GTGGTATTCCTTTAGTTGGCGATGGTTTCCCAAACATAGGATTTTACTTCCCATTCTAG  
CATTTGAAATGTTTAAACGCGTGCTCCTTTGTTTTTGGCTTACGCATGTTAGCTTTTGTCT  
CTTCTGATTTCAATACACCTTTCGAAGATTTCGCTAATCTTTCTTCGCGTTTCTTCTTTCA  
TCGGCTTGCCCTTTCTTTGTTTCAGAGCTAAGTACCCTAGCTTGTTCATATACCCTAGACG  
AAATAATAGAATCTCTTTTATTGGTCTTCGCATTATTTGCTAAACACATCATGCCAAATG  
CTTGTGCCATAGGTCCACCATGAATTTTGGCCAGCAGCTGATGAACCACGAACTGTTCTT  
TTGCTGTCAACTCAATCAGGTTATCAACTTGATCACCGCCAACCATAGATCGCGGTAAAA  
TATGATGTGTTTCTTATATCCTTCAATGGTTCCTCTGATCTTTGCTTTTTCTATGATTG  
CGTCATATAGTTTTGTAAAGTTCATGAATTAATCCTCTTTCCTGTATACCATTATTTATC  
CGGTATCCAGAAGAAGGATTTATTACCTCACTATTATCCGTCAAACCTCCAAACATTTAT  
CATCAGGAGGAATAGCCCTTCTACGCCGTATTCATCCTCAAGGTAGTAGCAAGTCCCAT  
CATGACGAGCATCATATTCATCACCGACAACAAGGCTATCAGCTAGCTCAAATCTACAG  
CAACACATTTTAAATTTGGTCATAATAAAATCCTCACTTGTTTTTGATGGTTGTATTATAG  
CGGGGATTTCTCCCCGCGTCAACACTTATTTTACAGCTTGCAAGATGAGCACCCGCTAGC  
GTCTTCCGTACCATCTGCACCGTCGCGAACGTTCCCATATAACAGGGTTTTTCAGACCGTA  
ATATTGAGCAAACAACATATCATATAACACATCAGCAATATCGACTATACCAGTCTTATA  
TGTGCTTGGATCGTATGATGTATTAGAATAATCGCCTGATCCACAAACATCTTCATGAT  
CGCTGCCAGTGTGCGATAAAGGCTTGTACCTTTCTTGATCATTGTCCAAAGCAGGTCAAT  
AACATCAGCATTATTCTCTACGTTTCGGAATAACCTGATTAATTTGCCCTTCTTTCGATCC  
TTTAAACCGATACGATCCCGCGAGGCGGTTCAATACCGTTTGTGCTGTTAGTTACCTGAGA  
AGACGACTCACAAGGCATCAGCGCCGACAGTGTATTGTTACGAATGCCATATTTTTGCAG  
GTCTTCGCGCAGTTCTTCCAATCCATCTCATACACCGGATCAACCAGTTCCTCTACTGT  
CTTTTTGTACTAGTCGATAGGAAGTTCACCGCGACCATAGCGTGTTCGTGCATCAGTTC  
GCAAGCACCTTCTGTTTAGCCAGTCGCACACTAGCCTTAATCAGAGCATATTGCAAGCG  
TTCAAACGTTTTATGTGTAACCTCGTGAGCGTCTCCATATGTGAAGAAATTATCTGCTAG  
GTATGATGCAAAGTTAGTCACACCAACACCCAGAGAGCGACGTTTTTTGGCTGTCAGAGT  
TTGATCTACAGGATAATCCTGATAATCTAACAGGTTGTCAAGTGCACGCACCATAACCAT  
AGCAATGCGTTCCTACTTCTTCCATATTTTCGATATCGAAATTACCTAAAACATATGCTGC  
CAAAGTACATAGGCTAATTTCTTAATCATCACGACCCATCGGTTTTGTAGGCAGAGCAAT  
TTCATAACACGGGTTAAATTTGTTAATCGGTGCTACATTACGAATAAACGCCCCCGTGAAT  
GTTTCATGTTGTCTGTGAACGTTGGGTAGATTTCGACCAGTGTAAAACGTTTCATTTGCCAC  
CGCTAAAAACAGGTCTTCGGCTTTAACACGAGTTTTACGAACACTCGGATCTTTTTCCAG  
TGTTTTCGTAAAGCTGGCGGAAACCTTCCACGTCTCGGAAGTACAGATCCCAACAACAGCC  
ACCCGCAACAACACTGGACTAAACAGAGTAATGTAATCCCGTTTAAAGGAATCGCTCTACCAT  
CAGGCTATTAACCTGTACGCCGTAATCAAGATGACGAATGCGGTTATCTTCCACCCCCTT  
ATTGTTCTTTAACACAATCAGACTTTCAAACCTCTAAATGCCATATTGGGTAATAGAGAGT  
TGCCGCCCCCGCCACGAATGCCGCCTTGTGAGCATGACTTAACGGCCGTCTGAAAATGTTT  
CCAGACTGGAATAACGCCAGTATGACGAACTTACCATGCCCAGTCTAGATCCTTCCGC  
GCGAATCATGCCAGCGTTGATACCGATACCAGCACGCTTCTAATCTACTTGATGATTGC  
ATGTGCTGTTTCGTTGATGCCCTGCAATGAGTCATCACTTTCGATCACCACACACGAACT  
AAATTGGCGTGTGGGGTACGCACACCTGCCATAATCGGAGTAGGTTAGAGAGATTTGCTT  
ATTCGCAACAGCATTATAAAAATCAATCACGTGTTCAAGACGATTTTCTGTCTCTTCTGG  
ATGCAAGCACATCCCGATCAGCATATACGCAAATTTGGTGTTCGATGATTTTCTTAGT  
GCTGCGATCCTGAACAAGATATTTCTCTTTTAACTGCATCGCACCAGCATAGGTCATTTT  
AAAATCAAGTTTATGGTCGATGAATTTCTCCAGATATTACACTTCTTCATGGGAATACTT  
TTGCAGAATTTTCGCGATCATATTTTCCGGTTGCAATATTACGCTCAATATGGCTGTAAAA  
ATCAATCGGTTGGAATTGACCGTATACTGCTTTGCGAAGCGCTAACATTGCAAGGTTACT  
TGCTACATATTGATAATCGGGTGTCTTCTACAGTAATGTTATCTGCTGCGACCTTAATCAA  
TACTTTTTGGATACCGTTGGTAGACATACCTTTTTTTCAGAAGTGGTTCAACCATATCAA  
CAATTCATATGGATCAAAGTTATGACCTTCGGCTGCCGCTTCCAGAATTTTCATTACTTT  
TTCTTTTTCAAACGGAACAGTCAGACCGGAAGACTTAACAACCTGTTTTAATCGTATTACC  
TCACTTCATATTTTAGCAGGAACAAGTTTATCCTCCATATTGGGGGCTTTCGCCCCCTTT  
GTTATACTGCCATTTGAGCGGTGATCGCAGGATGGCTTTGATAGTTGTGAATTTTAAAAAT

CTTTCGGAGTCTTTGTCAATACCTCGTCTAAAGATTTAAATTCCGGCAACTCAATTATTG  
GTTTATCAAACGGGTCACGGCTTAACTGTTCCATAAATTGAGCAAACCTGGTTTTTTGTAAA  
TGTGGCAATCCCCACACTGATAAACCAGTTCGCCAACTTCTAATCCGCAAATCTTCGCGA  
TGATATGCGTTAACAGTCCATAGCTCGCTACGTTGAACGGATTCCCTAAAAAGAGATCAT  
TCGAAAGCATGAAAAATAAACAACCTCAATTTGTTGTGCTTGGAAACATAAAACTGTACCA  
TCGGATGACATACACCTAGCACAGCATTATGCGTTTCCTGTACGTTCCATCAATCAATGA  
TAATACGACGACTATATGGATCATTCTTGATCATGTCAATCACTTTTTGAAACTGGTCTT  
CCCAAATCTTCGGGCGATAGACATATTCTCCATCGTCTTCAGTGCTTGATGTGTCTACGT  
CCATACTAACAAACATAGTGGTATCCGGTGCTATCATATCCCCACCCAGATAATCACTAT  
CAAGCAGTTAACCGAAATAACCATCATCTACCCATTCTGTATATCCCCACAAGCAATATG  
CATCATTAAACAAAATTAGATTGAGTCCTCCCGTGGTCTGCTACCAGAATATAATCAAACCT  
CTTCATAACGCATACCACGCCAGATATCACATAAACGGTCTTCTGTTTCATTTCGTTGGTG  
TAAAGTCATCTACCCACGGGTGCTTAAATGTATGTGTATATTTGCTCTTAAGGCGCATAA  
TTTTGCTTTACCGTGTGGATGTATCGGTTTTCGTCGCCATGCTATACCATACCTATTAC  
CGACATTATAACCATTGAATCGCAAGGGATTCTTTTTCTTTGATATCAAGACAGTCGCCGC  
GCCAAATATCAAAGGCATCCTCGTCAAACCTTGCCGCCTGTAATTTCTGTAAAGCGACGGC  
GGTCAAGTGATCCCTCCATAAACCATAGCAATTCGCCAATTACAGAGGCTGTAGCCCTCT  
TTTTAGTGGCCAGTAAGGGGAAACCCCTTGCTTAAATCAATTTCGCATTTGTGCACCGAATT  
TAGAGAGCGTACCTACTCCAGTTCGGTCTTCACGAGGCCAGCCATTATCAAGAACATCAC  
GCAATAGTTTCAAATATTCTTTCAATCCACACCCGCCTCTTTCTTATTGATTGCTTACTTA  
CGCAGTTTTGCTACTGTCTCGTCAATGTCTATAAAGATAACACCACGGTCGAATACAGTT  
GCAGGTCTTGAGATATCGCTATTTTCTTGCACAGGAAGCCATGATGAGCTCGTTTCATCA  
TAGAGATATTGTAAACCGTAATAATCTACGGTACTGCGTAGTTTTCACTGGTAGCCGTC  
CATAATTGAATAAATACCGACTTTCAATATTGTTCCCGTCGACAATGTAAACACCGACTAC  
CAGCAAACATCAAAGATTCACCACAATGTTTGCACACATAATCTGTCTGAATTTTCATGT  
TACGCCTTCTTACGTTCTAAAATGTGTTTCGCTGATCAGGTGATCATCAAGGAAGTAATTA  
TGTTCTTCTTTTGTGCAAAATCAAAATATAATTCCTTAATCATTTCCTTAGAGATACCA  
ACATCATATTCGAACGGATCATTAAATTCCTGCTCGTTGAACATATGTTAAGACAATACGG  
TCCGCAAGGTCAACCGCTTTTTCAATCAGGGAAGGTCCACCAATAACGCTTACCAAACCT  
TGCAATTTCTCTATGACTTCTAATAATTCCTTCAATCCACCATCATTAGTAATCGCGGTA  
TACACAACCTGGTTGGTCGCCGTTTTTTGCTTTCGGTGCTGGCTTAATGGTATCGGTGCTA  
ACAACCACATTCACACGACCTTCCAGTGCTTTAGGAAGACTTTCAAAGGTATTACGTCCC  
ATTACCACCGCCGCAAGATCAACATCTCCCATAGTGCGCATTTTATAGTTTTCCATGTCC  
TTTTTGGTTGGACGACCCACGGTAAACCGCCTTTAAAACCAAAGCCCGATTTTCTCTCC  
GACATTTTAGTGTCACCAATCGGAAATACACATTGAATCATAATATAAATCTCCTATCAA  
ACCAGCTTGAGATAGTTTTCGTTAACGTTTTCTTCTGTGATCTCGGTTTTAAACTCATT  
ACAACATCAGGAGAAGCATAATAGCGTTCGGAATAATCCCGCCACATTTTCAGTAGGCTG  
AAACCAACATTAACACCATTTTCCCAGAAACGGAAGATAATTTTATTGCGGTGTAGCGG  
TAATCGCTTTGAATCAAGCTGCCATCACCGCGACGTGATTCATAAACCGTAATACATTCA  
CGGTTAGCGGCTTTAAGACATTCTTCAATATTGCCGCATGAGATAATGTCGGTTGAGTCG  
TTTACGATTTGTTCTACAGTCAACATAAGATAATCCTCTCTTTGTTTCAATCTGTGTATT  
ATACATTAACACATAAGCATGTCAACACCTTTTTTCATAGAGTTTTAGGCAATAAAAAAGC  
CGCCCCGAAGGAAGGCCTTAAAATTCATTACATCCCTAACAGAGCGTCAAGATGATCCAG  
ATCAGCAGCGGAGTTAGTACCGCCACCCAGATCCAGCGATGCCATCAGGTCATCAGCGGA  
AGAATCTTACGCCGTGCAAGCTGCGTTAATAACCAACTACAGTGCTAGCTGCGTTTATACC  
AGCATCGAATGCATTCATCTGTGCGTCAAATCGTCAAGATGGCTGTTAAGCGCTGCCGC  
AGCACTGGAAGCCGCAGCACCAGCTACCAGAGAAACACCCATCGTTTTCTTAAATTTGGT  
TTCCAGTTCATCGAACGTTTTAAACTGGCTAGGCGCGACAATCTCACTCAGGTCAACCAT  
GTTTTCCATCAGGTATTTCTGATATGCTTGGTCTTCACTTTTCGGAAGCTGTGATTGCTG  
CATGATACGAGAATCATCACAGTTCTGGTGTATCAACCTTCTTAGCTTTCGGGAGGAA  
GTTTGCACCGGAGAACACACAAGTTACATCGACCGGAACCTTCAACCATATCGGTATTAC  
GGTCACCATTTGCAACGATCTTATCATAAATTTTCTGACCGAAGCGGAATTTGAATACCTT  
ACCTTCATTTTCTGGTGCTTGAGGATCGTTCAGTACCAGAATATTTGCGTAGTAAGACGC  
TTTCCGCTTAATCAGTTGCAATCTTGTCTTATCGGTATTGTACAGATCTTTTTCGTTAGT  
ATATTTGCACACAGGGCAAGAATCAAATCACCGTGGGTGCTGGAGCAGATTTCCCAATA  
CCATTTGCCATGAACTTTGAAGGAATGTTTTACCAGTTTACAATCGGCAGACCGTCTTC  
TGGCTCAGACGGCAGGAAGCGAATCAGGGCTTACAGTTACCTGCTGCGTAAGTCTTAAT

CTTCCACCCTTTTCGGATCTTCTTTGGAGTAACCGTTGCCACCTTTTCAGTGCGCCCAGTTG  
AGCTTGCAGTTTGGAGAATCTTGGCGTTTAAACATATTCACTATTCCTTCTTTTGATTA  
ATTTACTAGACTATTATACAGAATTAATTTACTTGTCAACTATTTGTTTCTGTTTTAA  
TTGAGATATTTCTTTACACTCTTTAACTACTTAAACAAATAATGCTCTTGCTTTTGC  
GTCAATAACAAGTAGTTTCTTGTACGCCTTCATTTTAACTATAAAGTTTGCAAAATCAA  
GACTTTGGCTACCTTGTCTGTTTCGTCGATCATATTTAGAAAGCTATCTAACACATAAA  
CGACTCAAACGATATAATCCGATTTGGCAGTAGTTTAAAGATACCGCTAGTTTTCGGTTGC  
GGGATTGTATGTAATTAGCTCTTTAAGAGTAAACCCGCGTTTCTCGGAGAAGTATACCAG  
ACTTTTAAATGTCATCGTCAAATCGTGTGCTGCATCGGTTATCGTTCCTATGTATTCCAT  
ATCAAAGCCGTATGCGTCAACATCAGTGATTTACCTACCCATGCATCGGGATTGCTAC  
CAGATTGCTTAGGAATAGGAAGTATAATTCTCTTAGATTGTACTTTTCCGCTAATTTTGC  
GAAATGATACTTTTCTCTGCGTTTATTGAATGCGGCATCAGACAACCGCATCCTCCAATT  
GTATTTTCCGCAATCGTAAACGCCCGTTCATGTGAGCTTTCATCATGCAATATAACATATA  
CACATATTTAGCAATAATTCGCTTATCTGGATCTGGAGGAAGACGGCTTCTGATCATA  
TACCCCTAAAATATCGAGAGTGTGTTTCGGTTCGTCGATCACTCCCTTCTGAGCGTTCT  
ATTTACTATACATTTCTGTGTGTTCTTGTCAATAATGGACACCGGTATATACTTCTGATA  
GTGACCATAATTCGATAGAGTTTTCTCTACAACTGCGTTGTCGCTTCAAGATAAGTCAA  
TCCCTCTTCAACAACCAGTCTTTCGATTGCAAGACCGTTTGTGTTTTGTTTCGCGGCTTT  
TACCTCATGTTTCAGTAAGCATTGAACACCCGAGCATAGAGTTCTACCGCTTCGTCGCGTT  
CTGCTTCGAAGTTTTCGCGCTGTTGCTGGTGATACAGTTTAAACAGAATGCCCCACATTT  
TACCATCGACGCCTAATTTCTTTAGCACGCTTTTTGACCTCTTTGATCCTATCGCCGT  
ATGCTTCGTGAATGGTTTTCTGATCGCTGGCTTCTTAAATCAGTTGTGCCAGGGTATTT  
CGTGCACAGCTTCGTCAAATACTACTTTTTCTTTTTCTGTTTCAGTCATAATATTAACCC  
TCTTTCGTCAATTAATTGAGAACCACGTTTCAGCTTTTGATATTCCGCTAGGACTTCAATTG  
TCACCAACATATTCTATCATCATTTCTCGGATAATGTCAAGTGCTTTTTTCATCACCTGAT  
TTAACTCGACCTCAAGTTCATAGTGAGCCTTTCCATTCTTTCGCCGACTTTGCCGTAA  
TAGAAAGTGTCTTTGCACATTTCCACTATAGCACGTTCAAGGTCAAGTGACAATGACTTG  
CGGTACGTCATTACTTGAATGAAGGAACGATAAGGTTCGGAGTTTACGCCTAGACTATCA  
ACATAATGATAGAAATCGTCCATTGTTCAAAAAGTGATTTCTTCTCGGTTGAATATTCCA  
GATTCACTATCACTTATCTTGACCATAATCAATGATCTATTAACGTCAAGTCGAGCATAA  
ATTCCTTTTCGACGCATTGCATGATCTTCGGTATCATAATAAAATTCGTGTTTTAGAGTG  
TTAGCACGATCTACTAGATTGTACCCGTCATACATTGCTACCCACAAATCACAGATTGTT  
TCGACGCCAATATGTGAGTGTGCATAGTATTTAATTCAAGATCTTTCATATGTCAACCC  
TTAGAACTACCAATTTTCTGCATCATTTTAACTAACGCATTGGTTACAAAATAGTTATA  
AATTTTACCGCGTGGTGCTGGTTTLAGATTTCTCCATGCTAACAAAATTCATATTCGAT  
GTTATCAGGAATAAATTCAAAATCAATAAGTTCGCGGTTTTTCGTCAAAGCGTAGTGCTTC  
TTCTCTGTCAATCAAGACTTTGGATCTTAGGCATCGAAGATTTGCTCTAACCATTTGGT  
TGCTATTGGTTTAGCTCGTTCCTTCCAGTCGTGAGATAATGAAATCACTACGGCACTT  
GATAGAAGCTACACCGTCTTATGCGTCACCCTAACACATTTTACCATAAAGTCTTTGTA  
AGGGCTACCATATTTGCATTTCTCCATGCTTTCTGTACTCGCGCCCACTGTTTCACGTT  
TTTGTATTTGTGCAACTGTGTGTAGTCACCATCGCCGGAGTTGATTAGCACCTGGCGACC  
TTCTACAGAAAACTTTTAGTTATCACAGCGATTATATGATCTGCTTCAACTTTGTCAAC  
CTGAATAACGTGATAAAGGCATGTTCTCTTTAACTCTTCGGTGATCTTATTGATCGCAGC  
AAAGATCATCTCCAATCATGCGGATCTGCGTCTGGTTTTTCTTACGGTTGCGTTTATA  
GTAAGGGGCGATATCACGTGGCCAGTAACGTTTTCTTGAATCAAAGGCAAGTACCGTAAT  
TGGGTATTGCTCTTTGAATTTTGTCAATATAACGCATGGTGTCAACGATAAGATGACG  
AATCATGCCTTCATTAATGGGATCTTCCGGTTTAAAGGTATGCTAGATAGTAGCAATCAG  
AAGCTGCGACATCTCAATCAAATGCACACCTTCCGGCAGTTTATCTTCTGGATCATCGAA  
TAAATCATTACGTGTAGCGGTAGTTTTTGTAAACGGGTTATACGTCATAATTAAGTTCTC  
TCCACTCTCAGAACAACATATTCGCCAAACGAGTTAGATAGTTACAGATCATAACCCGTAT  
TACTCCATAACTCGCAGAATTGCATTGTTTAAATTGGGCACGGAAATATTTATAATCCTCA  
TCAGGGATTTTGTCAACAACCCATTTTGCACCTTCAGACAAATCACTTTAGCCATAATA  
TATCACCTCTTTTGTCTATGAAGGCTCATTTTATAAATATGAACATACTATAAAAGG  
AGACCCAAAATGGAAGATTTTCTCAACATTTCAAGGCCACAATTGGGTTTGACGCTGG  
TAATGAAAAGGTCGTCAATGTAGCATAACAGATAAAAACACATCAACGGATGCGGTCAA  
CGTTGAATTTTTCAATTACCATAATGGTATTACTCAGTATGACACAACCTCGCGGTTATGA  
TCAATACGGAACACTACAATTTTCAAACCGTCCGTATTATGCAAAAAGAAGATATCACAAA



GCCAGCAGGTGATATTGACCCGACTAAAAGGCAAGCACTGCGCACGGACCCACGTTGGGA  
TTATTTTGAAGCAACTTCCAGTGATACTCCTTTAAAGTCTGGTGATTATACCGCAGCAGA  
TGGTCACTTTGCAAACCTTGACTTTCTATATGCCAACTAAACCAGCAGAGGGAGACTAT  
AACAGTAAAAGATATCGGTGGCAAGTGTGGTGTAAACGAATTATCGTTCTTGAGTTCAGG  
ACATGAGTTTTACCATAACGGTAATGTGTATGACCGAAAATGGTATTGCACTACCCCGTA  
TGCAATGAACTATTTTCATCTTTGTTGCGGAATCGTTGGCATGTTTCTCAGACGGGAACAGA  
GCCGCGCGGTATATACTCACAGCCAACGATTGATGCTATTCAAATGCAGAATGGTGATCA  
GGTATTTGTCGTAGTTCGTTGGGTAATATTACCTTAGTGCTTCCTAAGTTTGCCTACAA  
TGGCGACATGATCCAGACTACGGACCTTGACGGATTAACCGAAACCAACCACGTTACGGT  
TAAAGTTCATGAGCACGCAGAAGAACAATCAATTGGCCCATCCGGTCTAAATGAGATTAT  
CGGTAAGCGTAGCGGTGATGGTGTATTCATCTTTGACAAGACGGAAAACGTATGGCGTTT  
GTGGGATGGTGATCAGTCTGTTGCTTAAACCGATCATCGATGACACTCGCTTGCAACC  
TAATAGCTATGGTGCTGTATTTGTTGGTCTGTATGTTACTCTGAGGCTGCCGACCAATGT  
CGAGCCGGGTGATCGTATTCAAGTTTCTATGCAGTATATGCAAGGAAACCAGAATCCCG  
TATCATCACCGCCACTGTGGAGACAAAAATCCTTAGGCAGAAAAACATGGTACCGTTTCC  
AAAGAGTAGCGAGTATCCATTCAATGGGACTGATACATGGACTGGAGTGTCTGAATTGTC  
TTTCAACGCTGCAAATGATTATGTACCTTATCTGGAGTTCCTTATTTCAGAAGGTGCTGA  
TGGTAAGACATACTGGTTGGTGACACATGGTCACCCGATTGTAGAACGAGTAGATCCGAC  
TCGTAAAGATCGTGTTGGTATAATTGCACTGGCTACCCAAACTGAAACGAATAAAAAACA  
TGAAGAGAATCCTAGCGACGAAGTTGAAGTAACACCAAAACTGCTGGCTAATAAAAAACGC  
CAACGAAACTCGACGCGGTATTGCTCGCAGTGCGACTCAAGCGGAAACGCATCAAGATAC  
TGGTTCCAACCTTGCTGGATGATGTTATCGTTACGCCTAAAAAGTTAAATGACTGTGTTGC  
TACCAAAGCCCGTCGTGGTGTAAATGGAAATTGCAACCCAGCACAAAACCAATGAAGGTTT  
AGACGATACCCGCGCTATTCCTCCTAATAAATTAGAAGAACGTCGCGCTTCCATAGATCC  
CGCTGGTATTGCGGAAAATGTTTCAGGCTGGCGGCAGTGCTGCCGCTCGACGTGGCGGAGC  
TGGTACAGGGATCTTTAACATCAATGACCATGCTAAAATTGTTACGCAAAAAAACATCAA  
CGAAGTCAAGGCGACCGAAACTTCCCGTGGTGTGGCTATCTGGCAACTGACGCGGAAGT  
GCAAGGGGCTACAGAATCAAACCCGCAAGATGCTTTACTCATCACGACTCGCACGCTAAC  
GAAACGTACTGCTACCGAATCGCGCACTGGTATCGCAGAAATTGCAACTCAGGAAGAAAC  
AACTTAGGTCAAAGTGATAACCATATCATCATGCCAAAAAAGTTGCATACTCGCCGCGC  
AACGGAAACGTTACACGGTTTAGCAGAAATTGCAACTCAGCCGGACTTTGACGCAGGTGCG  
TGACGATACTCGCATTTCTACCCCATGAAGATTAACCTTCTTTGAGAATGCACAGCG  
TTTGAAAGTTCGATCCGACTCACGGGCTTAACCTTACTGGTGATTTGTGGCAAGGTATCAC  
GATTCGCGGTTTGGATGCAACCGAAGATACAAAAGGAGTCGCTAAAGTTGCTACTCCTCA  
GCCTACGGATGCTGGTCAAGATGATACTACAATCGTCTCGCCTAAAAAGCTGGAAGGCAA  
GAAGGCCACCGAAGGTAAGAAGGTATTACCCGAATTGGCACTCAAGCCGAAACCGTGCC  
TGGTGCCTGGCTAATGTAGCAATTTCTCCGAAGAACATCAAATATGTTGTTTCAGACAGA  
GGATACATGGAAAGCAACCGAAGCGCGTCGTGGTTTCTTGAAAGTTGCTACTCAGGAAAA  
CTGTTTTGTTGGTGATAATCTGCAAGGTTCTACTCAAGAACTAGGAAACGACCAGCATGA  
CGGAATTGCTGTTACCCCTAAAGGATTAACCTACCCACTTGCTAATTTCTTACCTAAGAT  
GGCAACCGCTCAGAATAGTTTGAAATTGGGTAAAGTGGAGGCCGCTAAATGCGCGTGTAG  
AGACATTGACCAGACCATAGAGAGCAATTACACGTTTAATAAAAACGTTAACGTGAACGG  
CAATTTAGATTGCTTAAAATCAGTTTCCTTTGAAACTCTGTCTGTGACTAAGAACTCAAC  
CGACGAGCCGAGTAATGGTCATCTGGTGTGGGTGAGCGTGGAGTTGACGGTCACACCGG  
AATTACCCTGCATTGCACAACCGCATCGGAATGCATGAAAACTCGGGGTCTATTATGGT  
TGGTGGTACTGGAACAGCGCAACTTGTTGATAGTGATGCTATCGCTTTCGGTAAAATCAA  
TGATAGTGGAGTCGTCGAGCATTACGCCTTTGCTATGGAACACAATGGCTACGCGACAGC  
ATATAGAGAATTTATTGCAGGTGTAACCTGTATGCGAAACAAGGCGGTCTATACATTGT  
TGACCAGTCTAATCCGGCAATGACTCGTTCCCCAGATGGTATGCTGAATATCGGTCACGG  
TGGAAGTGTTAACATCAAGGCAGGTCATCAAACGTTAACTACATAGATCGCCGGACAGAA  
ATATCAGATCGTACACGCAGGAAACGCTGATGAAGTTCTTAACCGTCAGTGTGTTAAGGA  
TGGTGGCGATAACAATGGTCGGTAAGCTGACTATGGATAATGCGCCTCTTGTTTCTGTTAA  
GCATGAAGCTAGCGCGGCAACCGCTCCGGCAATCAGCAAGATCGGTTTCTGGAATATGCG  
CGTTACTACCCAGAACATCAAAGAAAGTTATCCAGAGAAAAAAACTGTACTCTGATGCA  
ATGGGGTACTGACGCGGACGGGCTTACCCAGCTTTGGTCCCATATGGTACTCATAAACA  
TTATATCCGTTCCGGTACTGGTGGTCAATGGACCGCATGGGGTGAAATTTACACCAAACA  
GAATAAGCCTACCGCTCCGGAAATCGGGGCAGTAGTTGCAGAAGGTGGTTTAAATGAATTC

TATGACGGTGCCTGACTGGATCAAGGTTGGTAATGTTAAAATCATCGCCAATAATCTGAC  
TCGTACCGTAGACTTGATCTGGGAAGACTAATTAGAGGGGGCGAAAGCCCCCTATGGGGT  
TATTATGACAGAAGATATAGAATTACGCAACACTGGAATAAGGTTTGCGCATGTGACAA  
AGACTCTGCGACATTTACCAGCACTTCAGAAAATAACTCTGTGCTGTATAAGCTGGAAGT  
GCGCGGATCTAATGCGGATTCGACCAACCAGCAAGGATTAGGTTTAAATGGAGTGGAGAT  
CGTTGGCACTTGCTATGAAAATGGCCTAAATTTTAAAGTTCTTACTCCAACCTGGACAAC  
ACACGAAGAAAAGGTATTCTATGGTCGCGGTGCTGTTTTGGCAATGCGTGATTATCTTTA  
CTAGCTGAAAGGTGACTATATCATTGCGATGGCAACACATGGAGAATTGTTTGCAGATCC  
GATAAGTGATGATATATTTTCTAAGCTGGGATCTGTAGCATTCTCGAATCACATTTTGT  
ACAGCAAATGCCTCGTGAATCCTATGCAGCAATTTATTCTACTAAAATTGGTAAAATTGT  
GTGCGAAGGGATGCTAGCAACGCACGGAGAAGGTCAAGATTCGTCTATAGAAATTGAGAA  
AGTTTATGATACTATAGACGATCTTTCCACAACAGGAACACCACAACGATTTTATAGATTA  
TCCGGTTGAATATGTTAGCGAAGATGCCGAACATTCGAGCTAATACATTGGCCTCATGA  
TGAGATCAGCGCACGACTTGAATATTTTAAACATAAAGGCAGGTGACACACTATCAATATC  
CTTTGAATTGTTCCGTGATAGTGCCGACGCCGAGCGAACGTAACAGCGCGTTTCTATCA  
CAACTACTTCACTGATGGACTATATCAAACCTGGCGTTCGTTATAATACCAGCCAGAAGGA  
TCAATGGGAAATGTTTGAAGCCGTCTATACCGTACCGGAACGAGTTTATAGTGTTACCAC  
TGTTTGTATCAGATACCCAACCAACTCAAATGAAGGTTTTGTTCAAATTAGAAACATACT  
AATAACGCCGATCAGCGGAGTCGTCAAACCTACTGGTCCGACTTGATTTGGTGTTAAGGG  
TGTTAGAAACAACTCATATTCACGATAACTGTGATTTTACTAACCCTGTAATGAGTCTTCT  
TAAACTGCCTAGAGATAATAAACACAGCACATAACAACCTTAAAGAGTTCGATGTTGA  
TTAACATTTTAAACAAGCCGATCCTCGTGGTCCGGCTTATAGTTTTATACAGTTGGTTAAAA  
CACAACCGAAACGAAGAAAGATCTTTAGAATAATAGAAAATTTGTCTCGGTTAAAAAAGA  
GTCCGTGCCTACGGCACGTCGCGAAGCGATATTTTGTAAACATTCTATAAAATACTCGGAA  
ATATAACTAATTTTGAAGGTTACTTTATGGCAGATTTGAAACATGGATCTACTGTAGGCG  
GATCTTCCATTTGGACGCAAGGAACTTGACGATCCAGCCAACGGGAGATCAGCTTTTCT  
ACCAAGGTCATAAAAATCGATACCGCTTTTGATAAACCCCTCGACTGCCGATTTAGACGCTG  
TTAGTGCTAAAGACGGTGGCACATTTCAAAGCAGGTCCATTTTGAAGGAAGGTTAAGCG  
TAGGTAGCGCATCGGCTGGAGAAACCAGAACGAACGGGATCTTTAAAGGAAATAGTGATG  
CGGCTAACTTTGATGGTGAAGTTGGGGTTTGCATTCGTGGAAATCTATTGGTTTTGTTA  
ATTCCCCTGATGGCGTTATCATGGCTTATGTTGACACTACCGCAGGTGATTTTAAACTA  
AAGGGACTATCGAAGGGACAACCATTAAAGATACAGGTCAACGCTTCTAGAGCCCTGTTA  
ATAAACCAACGAATAATGATTGAGATTTGGTGTCTCGCCGCGGTGATACCCCTCACAGGAA  
CATATAATTTAAACACTGTCACTGTAAACTATCGGTTGATTAGAAATTAATTGCAAGGG  
AACGTGATTTAATTAATTTTATGATGCGACTAAGATCTATTATGGTAACGTTCTTGATACGT  
TGGTCTTCCGAAGTATAGATGAGCCTACCATTTTGTAAATGGCAGAGAAGGTCGTTTTT  
ATCACACCAACAATAAACCAACTAAAGCCGATGTTGAGCCAGGCAATGTCACCAATGATG  
CACAGGTTAAACGTGCTGGTGATCTTATGGAAGGTAAGTTGCTAGTGCCTAGAATGTTGG  
CGACAAACGATCCGGCTGGTCCTAATCAATTGGTTCGTTTGGAGCTACGTTGGGAGAAAAT  
CAATGGTAGCAAATCCAACCATCATTGGAACGTTGATTGGAACACTCTTATTAATCGCC  
GTATCTATCGTGTGAAAATGCTGGGTCAGGTAATAATCCCGTCTGATAGCTATTATA  
ACGGCGTTTTGATGGTATATCGCCCAGAACATGCGGTCGGAACCTCGTCGAATTGTTACAG  
TGTATTATCCTGAATCTATTGACCATCCGATGTGCTGACGTTTCGTGTTCTAATGAATCAT  
GGACTGCATGGAACATGTAGATCACCGTAAGTTAGCCGCTATTCGCTATGTTAACGTAA  
CTGGCGATACGATGACAGTACCGATAACTGTTCCGGCTGCAAACGGTGTTAGAACAGCTA  
GAGGTGCATATAATGGTGATAACTACTATGCTGGGTTAAATAGTGCCGATGGCACGGCTA  
TGATCCACCGTATCAGCTATATTAATGCCACGGAAGAATTGGGTATTACACATGATTCGA  
CCGCTGTTTTGGTTAAATCGCGTGGCAATACTCAAGCCACAGATCGCTATGAACTTGACC  
ACGAAGGGCATAAACCTACCCATGCCGAAGTTGGCGCGGTTCCACTTAATGCGGTGATTG  
ATTTTGGTACTTTCTAATTTTAGCGGGGATTATATCCCTGCTTTTCTAAATAATATTATT  
CTGATAACCGTTTAAAGGATGTTATAAAAATGGCAGATTTAAACAGAATCCAATTTAAACGT  
TCTAGCACGAAAGGTCGTAAACCTGATGCTACTACAATGACGCAAGGTGAACCTGCTATC  
AACCTGCATGATTATTAATTGTTTACAAAAAATGACTCTGGTTCTATTATTGACTTAAGC  
TGTCCCTCCGATCTATGACCGCGATGTTATCATGGCTGGTAAAGTAAAGGGAGATTATTAC  
AATTTAGGTAAAACCGCCAATTATCTTGAAGATCAGACAGCGAGAGACCTTAACCGTTTT  
GGAGCATTCCGTACCAATGGTCTAGATGGATTTTATAGATTTGACCTTACATGTTCCCTCAT  
TCTGCTGGCGTTCAACATGGTTCGAGGATTTACTTTCCGTTATGCTACTGGCGGATCTCGT

GTTGAAACATATGGGTATAATGCACTGGGACAAAGAGCATTTCAGCTATAAAAATGTATCAT  
GAAGGTGATAAACCGACTCCAGGAGAAGTGAACGTTTATAGCAAACAAGAAGTAGATAGA  
ATGTTTGTAAAAACGTTAACTTTCTACAGGTTCTGGCGATATCGTTGACGGTTATTTT  
AAATTAGCGACTGCGATGATTCCACAAGACGGTCGTAGTGTATTTTTCCGTATTCTTGGT  
GGAAACGGATATAACATTACTGCAAACGATCAAGTTGATATTGTAGAAATTGTTATTTCG  
AGTGGAAATAATCGTCCTAAAGGTGTAAACGTTATTGCACACCGCCGAAATACAAACAAA  
GCATTTGATGTTTTGGCTGTTAATAATTCTGGTGATAACTGTGATATCTACGTGGAATAT  
CAGCGTTACACTGATAACGTTATTGTTGAACTTGGTAAAAGTGTGATGTGAATCTGGTA  
GTCCATGACGTTTCGAGACTTTATTGTTGATCGTCCTGTTGGCGATAATGTTATTGGCGGT  
CGCGCGGTAACCATTTTCAATACCGAAAACAAACGAGGTGTGTTGAGTTTTGACGACAAT  
ACACAAAACAGCTATGATATTGTTACATGAGTAATGATGAAGGTAAGTGGACGAAAATAT  
ATTCGTAAATTCCGTAGTAACTATAATGAAATGATCTGGCATGAGACGGTTCAAGGTAAC  
GTATATCTTTTAGCTACTGGAACACCGACGCAAACGAAGTTCTCAAATACCGACCGC  
ACGTTGCAAACGCAATGCTGATTTTACGCGTGGTAATAATAATGTTTCGTTTACATCGT  
AAAACCGGAAAAAGTAACTATCTGGAATATTATTATGCCCGTGACGGAGCAAATAAACGT  
CAGGGATCTATTGGGTATGGCGATGCCACAACCTAACAGTTGTCAATTATTGACAAACTC  
TCTGAAGGTAATAACCCGATTTTCTTTAACGAGACAGGTCAAATTTCACTTAACGTAGGA  
AAGAGAAAAATTGTTTCATAGCAACGGACAATATATTTCTACCAACGCCTATAACTATCGT  
ATAATTTATGGTAATTATGGGACATTCAGGCGAAATGATAGCGTTAACTTTATCTCATG  
TCCACTGCCGAAAATGATAAATGGTGTACTTGGAAATAGCTATCGACCATTCAATTTACAAC  
CTAACCGCGGCGATGTTCAATTGGGTGGTGTGATGGTAACGAATCGGCATTACCGTTAGAA  
TGTGCTTCCCGTGCCGCTCGCTTGGTAATGACGTTTACATTAAGAAAGGGCTTTTGACT  
TTCGACGCTGGGCGATTAGGATCTCGCGATTATATTAGATTTAATCATTGGGGCGATAGC  
AATAACGGTTCGCGATAACATCCTACAGATTGAAGACAGTCAAGGGCGCACATTTTACCCT  
GAACGTGCTATGGGTACTGGTAACATAACAGCACGTTTAAAGGCTTTGTTTCGTGTTGAG  
TCTGGTGAGATTGCATTTGATGCTAATCGGGGGCCGAGTCTCAATTTACCTTACACACC  
TGGGGTAACGAGCAACGCAAACAGGTTTTTGAATGTAAGGATGCTACAAGTTATCACTGG  
TATACTGAACGTAAGTCAAGGTTGACTGGACTTATTCTGTTTCGTTATGGCGGGTAGTCTA  
GACGTTGGTAGCAATATCACAACTGGTCCGGATATTACGTGTAAACGCGCTGGCAAT  
AAGCACATCTGGTTTAGAGATCCAAACGGCTTAGAGTTAGGCTTGATGTACTGCGATGTT  
GCTGGTGCTATTCGTTCCGTGGTCAGAAACAAGCCCAGGCGTGACATTTGCAGATAAA  
ATGATCCAGTGGGAATCTGGCACTGTATCCGGTGGCGGTAATGGCCCGATTTCGTGGTGAA  
GTTGCTGGCGGTAGTTGGGCTAGCTGGCGTGACCGTGCTGCTGGCCTTATGGTTGGGTGT  
CCTCAATCAACCAATTCCGCTCCTAACATCTGGAAAGCTACTCATTGGGGTCAATATCAC  
ATTGCAGCAATGGGTGGACATGTTCCCTAACGGTACTATCGGGGATGCTATAGCTCGCCTA  
ACCGTTCATGACGCCAACTTTGACTTTAGCGCCTCCGGTGACATGTCCGCAGGGCGTAAC  
GGTTCGTTTAAACGATGTTTATATTTCGTTCTGATGCTCGCCTTAAATTCAAATAAGGAAGAG  
TATAAGGAGCATGCCTCTGATCAAGTTAATCGCTTGACTGCGTACACCTAAGATAAGGTT  
AAATCTTTAACTGACCGTAGTGTTATCGCCCATGAAGTTGGTATTATTGCTCAGGATCTT  
GAGAGAGTATTGCCGGAAGCAGTAACAAGTAAAGGTCGGCGACCCAGATAAAACCAGAA  
GAGATCTTAAACAATTTGTAAGTCTGCTGTCAACGCTCTTTTAATTAAGGCGTTTCAGGCA  
ATGAGCGAAGAATTGAAAGCCGTTAAAGCTGAACTAGCGGAACCTAAAAAGAATTAATGA  
AACTCCAGGGAAGGGAAGTAAAGTGAACCGGCTATGGTCTATAATATCGTCATTGG  
TGCCTTGTATAAATTCGGAATGAAATTATTGTCAAAGTTAATTAGTGAGAAGATGCTCAC  
TAAAATTTTCTTCTATTGCGCTCGTCGTCATGCGGCTTACACCAATACGCCAATTGATGA  
TCGTTTTGTGGAAGAAGTATAAAGGAGTTAATTAAGATCAGTCAGAAGATAGTAACGA  
GCAAGATAAACCTAGTGATAGTGCAGTACCTAAATAAGAGTACATTGTCATAGTTATCTT  
AGGACATTGTATGCAAGTTTCTGAAAAAGGGAAAGACTTTGCTATCTCAAATGTCCTGCG  
CGCTATTTTCACTAAAGACGAGGAGTTGCTCGTACTTCGTGTCTTTGCTGCCGGCGT  
GTTGTCCATATTGGCATTGTCGTTTATAGTAAAAACGAGTTATTTGCGCTTTATAAATA  
GACTCGTTATGAGACTTAAGCTCACATTCTCCAGGTAGAGAAAGACCGCAATTTTGATAA  
TGCCGCGCAGGAGCAGTTACAGATAGTTCATGTATCGGCTGATGCCGATTTTTCTGCTGT  
TTTTAGTTTTTCGTCGAAAACGTAACCTATTTTGTATTATTGGTGGCATATGAAGGAAA  
GCTACCGCATACAATCGATGAAAAGAAATTTAGGCGGGTCCCTATCAATAAACGAGTGA  
AGAATATCGTAGGCATCTTTTAGGTAATCATATTTTACCGATAAAGATTTCCAGTATAT  
TCCATCAAGATAAAAGAAATTAGAGAGTATCGATATAGGGGTTATGTATTCTTGTCTAT  
ATTCATTCTCGACAATGTCTATTATGCTAGTATCTCCATTGCATGGAAGAATAAACCGGA

TATTAACATTGAGAATTTAGATACTCTTTGCAATCAATCTGCCAGAATCCTCGGAAGGAT  
TAGATAACTTAAGGGGGAAGCCTTTAGGCCTCCCATCTTTTTATTGGCGCATAGAAGCC  
CCTGAATCACATTCTGACGCTGTATGATGAAAACAGGTAGCGTACCAGTCATCGGCTTGT  
TTGTCTTCGTCAGAAAACGCGTAATTGCGCTGTATACCGTTTTCTACTTTGACCAGTGCA  
ATAGCTGTTTCTGGAAGATCAATCAATCGGACAAAATCACCATCTTCCCCTCTACACGA  
GCTATATCATAGCCCATCTCAAATATACAATCGCTTGTCTAATTTCAATCTGCAAAT  
TCCCGTATACCTTCTCTGCCAACTTACGTGCATCTTTTAAAATATCTTTCATGTAATGTC  
TATAATTTTTAGCTATATCAATGGTGCAATCAACAAAGAAGTAATAGCGTCGCAGTGCTA  
CCAGTTCAACATCTTCAAGATGACCATTTTTCTCCACTCGCTGAAATGTGTTTAAATTCCT  
TTCGGATCGCGTCCATCGCTACATTAACCTTCTTTATAATATCTTACGTATTATATGCAC  
CTCGACTAATCAAATTTTTGGCTAGGTCGTCTGCTTTTTCTTGAAAGTTGTCAATCTCAA  
ACTCGATCATAATCACCTCTCTAATTACACGCTGTTGTTTCAACATTTTTTCGTAGTTT  
GCTAATTCTATACCTTGTAAGAGCATCACAGTGCAATTTTCAATGATTCATCACCTTCC  
ATAATCAAATTTACCGAAAATATTCTCTGTCATAATTCTTGCTTCGTCGATTATTTTCG  
TCATGTTTATGGTGTAGTTAGGATCATGTAGTGCTTTAATAACAACGAGCAAGGAATCTA  
AAAACACTCGATACCGGGTATATTCTACGCTATTTGTGAATACCGATGTTTTCTCGACTT  
TATCGATCAGATAGCCTAAAACCGATAGCGCCTCGTTTACTTCCCTTGTTACTTTATCGG  
CGATAACAACACCGGACAAAGACGCGGTGTCATTAACCGCGCTGCGTCTTCAATTCGG  
TCGCTTTCATGATTCATATTTGTCATAGTTAAACAGTATATAATCCCCTTACAGATGAA  
AACCCGTTACGATCAACGCATCGATCATAACCGCTAGGAATATACGGTTCGCCCTCTTCTA  
TTTCAACTTTGAATTGGTGCCATTTGCTAATACTTCTTCCGGTCCACCCAGCGATTTCGG  
CGTCTGCTTTAGTTTCATCCATAATCCAACCTAGGCTGCATGAGCGCATAGTTTACATAGT  
CGATTTCTGGGGTGTATGTCATCAATGTTAATCTATTTGCAGTTGACGCGTTTCAGAAGTT  
CAAATTTCTTATTATCAACCTGTACCATGTATGATTCAGTAGTTCCTGGGATCAGTTCCC  
ACACAATGACTACATTTTTTCATAGTTACCTCACTTAACATAGATTTTCTTTAATGCTTT  
CAGGATCGTTGCTTCCGGCGCTTCTTCCGGAGGAGGAAGCAATTCTACCACTTCCCTTTC  
CAACTCGATATAGTCTACCAGGTATTCTACATAGAATGCAAGTGTTTCCATGAAATTAGA  
TGCTACATCCGATGCACCACAAGCTCCTACATGCATTGTATAAACATCACTGCGATCAAG  
TTTGTGGATGCTTCCAGATAGTTTCGGTTATACCAGACTTCCCACACTTTCAGCTTTC  
GCTTTTGGTTGCTGTTTATACTCGGTTTCGTAATGATGAAATTGACGTTGCAAATCATT  
GATAATAACACATTTTTTCGTAATTGTTTTGAATTTCCATGATGTAATCCTCACTTATCGT  
TAAGAAGTTCTAAAACCTTCTGTCGTAATTTGTCAATATTAGTTGATTCAAAAACCTGTAC  
GGTATCCCAGCTTTGATCGTATGATCGCGAGCAATCCCCATATCCCATTGTTCAACCT  
GATAGTATTCAAGGTACGGGTACTGCCGAATGATACCATCGCGATTAAAAATTACCA  
TAATATAATCCTCACGTCAACAACCTTATTCTCGGTTGTACTTCTGCCACTTTCGGTAATA  
CTGTTTGTAAAATTGTTTTACGTTTTACCAGCTTTACTATACATGTTATCTACCATCAA  
GTCAATAAGACCTCCCGGTGTCTGGTAGTTCCCGCTCGGATAAGTTCTTTAATTAAGT  
GTCCTGATGATCTTTGTATACTACGTTAATGATGGTCTTTTCTGCTTCTTCGTCCCGAA  
CATCCGGTGATTAGCTTTCATCGCATCCCACCAATCTTTTGTGTTCTTCATGTTATTAAG  
TTTCATCACTTAACCTCTTCGCAAGTATATCTCCACTCAATACGTTTTTTGTTTCCACCG  
CGCTCCGCATCATAGATATGACGGAATGTCAATTTGCTTTCATCATCAACAAGTTTATTT  
CGTTCGAATTTAGCGCCATGTTTCGCAGAGAATATCATTCCGATTTTATAATCTTCGCTG  
TTGATAATAGTTCAATTATCTGTAATTTCAAATCCATAACTACAGGGTCTTGCATTGTG  
CTGGAGATCATGATTTAGCAATGTCACCTCTCTTAGAATCTTGAATTTTTGCATTTTCGT  
TTCATAATATCATCATCTTCTACACTCATTCCATTGATTGTAGTAATTTTAAACAACCTTC  
GGCAAATGTAGGAAAACGTGGTTTTCTTCCGATTAATTAATTCGGCTGTTTCTCTTCA  
ACCTTCGGTTCTTCCACCGCTTTTTCTTCCCTGTGTCAGTTGTTCTTCTTCAACCTTCGCA  
GAAGTCTCTGAATCGCTTTCTGGTGCTGTTTCTTCTTTAGGTAATACATTCATTAAGTTT  
TGACTTTGAGCGTTATATACAGCCTCCAGTGGCTGAATCTGCCCGATATTGATCATTGTA  
TCACGAACAGTTTTATTCCAGTTGCGTTCGCTCTTGTTTCAGAGACGGATCAATCTTAACA  
GACTTAACATACACCTCATGAAGTTTAGAGTCCAGTGCAGGAGATTGACTCATTAGCACAA  
ATAAACTTCTCTGATTTGGTTGTAGCTTTAGCGCAATCAAAGGACGCAGCGTTAGCACCG  
AAAGCAGTAGCAGACAGAGCGATAGCAGCGATAATGTTTTGATAATATATTCCACAGTG  
TTTTGTCTTGATGGGAGTATCTTACTACTCCCTTAATCCGGCGTCAACTACTTTTTAAA  
TTTCTTCTACAGTAAAATCTTCAATTGTTGTTGTGCTCGGCGAACGTTGCAAGACCAGCAT  
TCTATGCATCATCCTCAGAGAAGAATACACCGTAACGTTTCATATCCTTTAGCGCCTTCAA  
ATTTAACCATGAATTTGTGAGTACGTTTCATTTTGATTCTCCTTCGTTGTCTTGATGAGT

TTAGTATAGGGGATCGCCGATCCCCTGTCAACAACACTATTTTTTAATTTTTACCCGCTCGT  
GCATTAATACGCATTTTCTGCATAGCCATGATCTGGCTTACTGCTTCTTCTTTACGTTCT  
TGCGTGGTAGCGTGACCAGATTCCGCAAACCTCTCCCGCAAACCTCCTCTAGGATCTCGCGA  
ACTTGAGAACGTCCAAAGATGCGGTTTCTTCGTAGCTCATAAGTTCTGTTACTACTTGC  
TCGATAGGTTTCATCTGATTGTCCTTTCGTTTGGTATGGGAGTATAATACTACTCCCATG  
TCTTTACGTCAACAACACTATTTTAAGTTATTTTCGACCTTCACCCATTCCGCGTAGTCTTG  
CGCGGCTACTTTCGGGTTTAGGCCGTCTTCGTACATTGCTTCAAGTAATTCTTCGTGCTT  
GGGCTTATAACCCTAGATAAAGCCTCCACCTGATTTTTCCAAATTTTATACCAGTTCATATT  
ATCACCAGTCAAGAGCGCGTGTCTCTGCGTCTTCCCATGCGTGATCCATAACAGCCTTGA  
AAACATATTCTAGAGGATCATCTTTAGAGAATCCGAAGACTTTAGACGGAATATCTTCAA  
TTGCTACTCCAGCAACTTCTGCATTACGCGCTTGGCAATAATGCAACTCTAAGTTATCGT  
GATAACGACCGCCTAATTTCTCCAGATCATCCCAGCATTTCAGTAACCTACTTTATTTG  
CAATTAACACTTTGCTGTTTTCGTTGCTCATCTTTGATTCTCCTTTTTGTTTGGTATG  
TGTGTATAATGCGAGTCTGGATTGGTGAAGGCAACAACCTTTTAAAATAAAAAAGCCTAC  
CACAAGGATCCGCTTAATAATCAGTTACTTACTAAATATCTTTTTGGCTTCGTGACCCGC  
ATGAGATGCCAGTACCGCAGCCGCATGTGCACTTTTATCTGTGTTGCACAGAACGCCAG  
AGAAACATCACGCCAAAGTTAATCATCTCGTAGATCATATCAATATCATTTTTCATGTTT  
GTTGGCGATGCTATTTCGTGCTTATCTGGTAAGGTAACGGCTTGATCTGTACTGGTTCCGC  
CATCGGGCTAATCGGTTTCGGATCAGGCATAATAGGTGCTGTTGTGGGTGGTGTTTTCCA  
TACACCCTTATTCCACGGTTTAATCCTTGTGTCGTAAGTTTATAAGCATTTTTTGTCTGG  
GTCAACCATCCATGCACGATGAATACCCAAACCATTGAAGAGATGCGTAGTTCAGTCAT  
AATTTATTTCTCTCTGAAAATTCTTTCATCAAGCTGTCGATCTTTGCTCTGTGTCCTGG  
TGTGTTTGTCAATTTCTGCTAATTTGCTCAGAGATTCACTGGTGATCCGGTTGGATTCTTC  
CAGTGTTTCAACGACCATTTGGCACAATCTTTTTATTTTTGTACACAAATGCAATTTAACC  
GCCTTCTGGATATTCTTTCATATTCAACCGTTGTTAAGTTCTTTAAGATCCTTCTTATAT  
TCCTTCATTGCGGTCGTCTTTGTCCAATACTCATATTCACTATGATCTTTATCAGCATCT  
TTGACCAGTCGATCATACTCTTCTTGAGTAACGCTATAAAAATGGCATAGAACTAGCTTA  
TCGGCGTATGGACGCAGTTTTTCATGTCCATTGTTGGATTGCATTACCTCGGCCTTTTTTC  
TTGCCCTGTAGCTCGATTTTCGCCCTTAATTACGCGATCGATAAATTCGGCTTTAGCCATT  
GCATAATTGTATGCTTCCAGGGTTTCCGCTTGATCAATTCAATGCGTTTATCGACATAC  
CCTGATCGGATTTTCGACGAATCGACGGATCAGATCGCTCGCTTCTCGAATACTTCTACT  
AAACCACGTTCAATTAACCACCACTATATTCTGGGCTACTAAATGTGTTAGTTTAAAAACC  
TTCATGATTTGCTCATGTGCGAGCGTGTTCATATTCGCTTTTTGAAATAATCGCGTTTCAGT  
GTTACTACAAATCTCAATTCATCCTTAGAGCAACGGTCATTATACGATAGAATCAGATCT  
TTTTCTTCCAGTGCATCCCGTACCACTACATATTCTTCACGGTCGAAGTGATAAGGAACT  
TCTGATATTGTCAGCTTAGTCTTGCGGTTTAGTTTCATATGTACCCTCAAGAATCACACCA  
TCGCGGTCATCACGAGGGATAACTTTACCCGTGAATTTCCGGGAATTGAATACTATGTTCT  
TTATCCAGTTTTCCGGCAAGTGCTAGCTCTGTGCATTCAATAGGGCTTCCAGTGAATGC  
GGTAAAATGTCAGTTTCATACCCTGTAGCAATAGCACTAATACCATTAGCCAATACCATT  
GGCACAACCTGGCAAGTAGAACGCTGGCGGGATGTGTTCCAGATCTTCGTGCTTAGGTGCG  
CAATTCATATCTTTATAGATTCTAAAGAAGTTTTTCATGCACACGAACAAAGAAATAACGT  
GCCGCACCTGCTTCTGGACTAAACGCGATCCAAAGTTACCTTGACCGTCAAGCAGTGGA  
GTATTATTGCTCCATGTATTTCGCAATGAGTGATCCGGCTTCTACGGCATTAGTTTCCCCG  
TGGTGATGACCCAACCTCAGCAACACCAGATCCAATATCTGCCATCTTACGGAATTCCTTA  
CGGTCGCCTTTACTCTTTTGAAGTGAGCACTCCAATCAAAGCGTTGCACTGGTTTAAAGA  
CCATCGACCAATTGAGGAATCCCGCGTTCCTCGGCAGAATAGATCGCATATTCCTTAGCT  
TCATTATGTACAATGCTTTCAAGGCTGCGGTAAGTAAATGTGTTTGAATTTGACTAATT  
TTATCCATCTTCACCTCATAACGCTTACAAATCACATTCTTGACGTTATCAGATTTATC  
AGCCCAATCCAATAGCCATTTTAAACGGAAGGAGTGACAAAATAAACGGGGCAGCAATCAA  
AGCAAACATGATCCACCTGATAATCAGGGAAACGCAACTGACAAAACCTAGCGATAGTGAT  
CCCGACAAAACAAAATACCATAGAAAACAGAGTAATGATATAGAAAGGCCAGAATACCCA  
CTCCCGCATCTTAACGCCTTTGTATTCTCTGAATTGCTTAAAATCTACAAACAACCTCTCG  
GATAGACGCGTACAGGACCGAAAAATCATCTTTCATTGCTCTGAATGAGCAATCTTCTAT  
TTTGAATGACCTAGCATTATTAACCGCCTTTCATCATTGATACAGGAATTGTTTTCTGA  
TTTGTGTATAATTGGCCTACTTCAATTTTTTCTTGAATCACCACGACGTTACAATATCCA  
CTGTCTTTAAGTTTTTCTGATAATGACGCGCTGTTGTTTCGTGCGGTGATAGGATTGACTGTT  
CTGACCAATTCACCGCAAATAATAGCACCATCTGTACAATTGCCAGTACCGTTCATGCTA

CGACCGTGAACAACAACCACGTCACCGTAAATCACATTTTCGTCGTCGATTTTGGTAAAA  
ACCGTGACCGTCTTAATGTATTCCCTCTAAGAAAGGCCGCGCAAAGCGGCCTATGTTGAT  
TATTGTTCTACAGTATAACCGTTGTTTTCAAGCCACGCAATAACAATATTTTCGCCAATT  
TCATCGAGCATTTCATCAGCGCAGTATTCTTTAATGAAAGTAGATGGATCATTATTGCTT  
ACTACGTGCTGGATCACAACATGTTTCAGGAATTGCGTCTACCAGTTCACTATGATCATA  
TCATTAACGATATCTTCAACACTAACATTATTAACCAAATCAACATCATCCATCGTCACA  
GTAACGCGACCGGACGGACGCAATGAATATTGGCTACTTTCTACTTCAACATGTGCACTT  
TCGCAAGTAACTTTCATATCAATCATAATTAATTCCTCTGTTAGTAATGGCTAAACCCTT  
CGGTCCCATCTTCAACCACATAGTAACGATGACATCGCATTTTGGCATTTCGCATAATCTT  
TCGGGATACTTACAACGTGACGCGGATCAACTTTACATTTAATGATTTCGGCCTCGTCCAC  
CGCCTTAGTGCGGAATATAGTGTTTCGCTGCAACGTGGAGGCCATTAGAGCAATTGCGAT  
CATCATCTGGGTCCACGTCTTTACGATTTATTTAAACCGTGCGCCCTGGGCTATTATCAA  
ACGTATGAGTAAAGTAATCTTTATAATCAACATCAACACGTTTCCATGCATAGAAACAAC  
CATCTTCCCCGATCTCAATGTCGTTGTGCTCTAAGAAGTCAAATAGACGATCTACGGCCT  
TACGGCTAGGGTTTTTCTTGCACTTCTCGAAGAAATTCAGATCGTGCGTATATGGCTTAT  
TCTCTTTAATCGACTCAACAACCTCGACGAGTCAGTTTATTATCAAGAACAATATTATGAT  
AATACACAATACCATTTTCGCTACGGAAAGCACCATGATAATATATTTCAACCTCTTTCT  
TAATGTCAATCAGCGTAATAGCTTTGATGAAATAATTATGTTAATCGCTTCCAGTGGGT  
CATTAAAGTTAACATGCGACGGATCAGCAGCATAAACAATGTCACCACATGTAATAGTAA  
TAAACTTAGTTGAGGCTATTGCTACGATTTTTGAGGAAGTAGTCTCGGGCTTTTTTGCGC  
GTTACCGCCTTTTCTTTACTGGTTTTTCGGCGTGTTTTACGTTTTTCTAGTGCCTTGC  
GACCTTCCGCTACAGCGTCTTTCTGAATCAGTAATACACGGGAGGCAATACGGCGAGATA  
CCCCAAATGCTGCCGCAAGTGCTTCGCGGGTAGTAACTTACCTCCGCCCCACCGTGTAG  
CCAGTTTGATTTGTTTCGCATAATCCAGGCATTGAACGTTACGGTCAGAGACGGTAATTT  
TTGCTTTAGACATAGTATTCATTCCTCTATTAGTTGGGCGACTATCGCCGCCCGATTAC  
ATCATTATAACCAGAATTATTTTGCTGCTACAACCTTGCGGATTGTGCGGTCTGATACATT  
ATAGATTCGTGCCAGGTGCGCTTTAGTCAAGCCGCGAGCGTATTGTTTACGGATGGTTTC  
TTTCTGGATAGAGGTCAGTTCAGTCATAATATCACATC

>NewGenomeName\_228

ACCCCTGCCCCAGATTCAGCGGAGTCAACGAGGCTCCATCTCATCCGTTTATTGAATAAT  
CACGTGTACAATCATGACCTGTGCTTCGTGAAGCGAAGCTCACGGAAGATTGTACACACT  
AACGTTGGGCGCCGACAATGCTTCTCTACTTTTTTAAAAGTAAAGAAAGATACTTTATA  
ATCTTTTATTACTTGTAATAATTTAATCATCGCATTGTGATGAAGCAAAGAAATTTCTC  
TCTCTATATATACCAGTCCTGTTTTAGTTGGGCAAACAACGAAAAATGGTGAGCAATTGG  
CATCGGTCAGGCAGAAAGGGTAGCACAACACTTCGTTCGTGGTTACACAAGGGCTGCCAAG  
TCGGCTGTTCTACCACCATAGTCTCGTTCATCAGTCAGCAGTATTGAAGAAAGATGAC  
GTGTCCGGTAGAGAAATTAAGCCTTAAGGTGCTGTTGCGAGTTACCAAATTCGTAAGGTG  
ATGTAGAGTTGTCCCATGAGGAAACGTCCGGGAGAGCTGGTAAATTATCTGATCGACAAG  
TGTAGTTCACCTGTCGTTAAATAGTCTGCAGCCTTCACGACAGCTCCTCTAATCTGGAAA  
GACAGTTTTCAAGATACGGTACTGCCATAGGCAAAGTTAAAGCAGGATCGAATTCATTA  
GCTGGATCAGATTGTAATAATCGTTCAATAAGTTCATCAGATTTTGAGCTGGCATTAGT  
CAAACACAACATTTGTACGCTATAACGTATAACCATTGCAGCTGTCAAGACTGTATTAGAA  
CATCGAATGTATATTGAAGTTAATACCACTGTGTAATCAGGAACACATGAATATTGAGT  
AAATATTGCATTTGATATATTTACTTCGGGTAGCTGTATGTTTTGTCGTTTGAGTTTCCA  
TATATACCCTTCTTTAATGAAGGGGTAATGTCTTTTTGCCCTTATGTGATGTCATTTGA  
TACCGTGCTGAGCTGGAGCGGGGCTTCGTATT

>NewGenomeName\_229

TTCGCGCGAAGCCGCGTGGCCGGTTCAGTAGTGGAAGAACCCGGATAAAAACAACCGCATT  
GTGCAAATATCGATTAACCTTTGGTGCTGCTGTTTGAAATCTGAACATTCACAGCGGTCAG  
TACGCATCAGTTTTTAAACACGGGACGTCGGAACGTGAAATGGCAAACCTGGCATGGCAA  
AGCTGGAGCAGGCAATCCGATGCGAACATGCCGAAAAGGGAATAACATTACTGGACTGGT  
GCCGGAAGAAAAAGATTAATTACAACACCGACAGAACCCGTATAGTAATGGGCGAAATCG  
ATCATGAAAATGATCATAAATCCGCTCATGAAATAGATCATGACATCTCAGATGAAGAAC  
CCTGCAATGACGCGGGTTCGGGCGTTGAAAGATGTGAAAAAAGCTCTGAAAGAAACAGCG  
CAAATTCGGCAGAAACGAAACGGATTTCGTGGTTCCCGACTATTACCACCTTCAAAGCTT  
GGTCTTAGAGAAACACCCACGGCGTAAGACACGGTGGATATGCGAAGTATCTTGAGGCAG  
ATAACCTTATGGATGATGCGTCCTACATGCTGCTATTCGATGAACTGGAGTTCACCGGGG

CCCGCGCACTTTTCAGTAACTAAGGCACGTAAAGGGATGTTTCGCCGACCTGGAAGAGCCAA  
ATGACGTGGAACCCCGTGTGCTCTTCACGACAGAATACTCAAAGCTGAACAGGCCCTTG  
ACTGGAAGATTGACCGTATCGAGGCGACTGAACGCTCATTGCTGACGAAGGGCGTCTTAG  
CTGACACAGCACCATAACTTCGTGCTGAACGGGAACGAATCCAAGCCGCTAGAGATAAAC  
TCACAGCTGAAACCGATGTTCTGACCAACCAGCGTTCGTGGAGTTGTTACGCCTGTCAGTG  
ACATCGTGTTCATCGCTTCTGAAATGAGTAATTCGGGGAGACTGGATGACATTCGGGCAG  
AATGAACCGCGATGTGATGAGCCGTCAGAAATGACCGAGGCTGAACAACGTCTGTTCATC  
ATGACTAAGTTGAGCAATCCAGGTGGCGGCTCAATCATCTCTTCAAATAACAGAACGAA  
GAAGGTGTACTGGTCACCTTCAGAGTGCATCGACGCAGCGGAGTCGTTCCGGAGCATG  
CACAATAAAAATATTATCCTGATATCGCGCCACCTGGGATTTTCCACAGCCATTGATTTT  
TATCCTCTCAACCAGGCATTATTCATCACGCATCTCAAAGGCGGGATCGTCGTTACAGGAT  
AAAGAGGCTGCCATTGAAATTCCTCCGCACAAAACACTGCTGTACCGTTTGGTCATCGTCCT  
GACTGGCTGAGAGCCTCATTCTCCATCGTTGAAGGTCGCAGCGGTGCCAGCAGTGGCTAT  
AGCCTGTTTGGTACCGGCTCGAGTATCCAGGTGGCAACCTCATTCCATTCACGTACGGTG  
CAGCGCCTGCATTTCTCAGATCAAGGTAATAATTTGCGCGAGATATCCGGTTAAGTCGAAA  
GAACGGCGAACCTGTACGGTTAATGCCGTCTCTGATGAAGGCATAATTTTTGATGAGTCA  
ATAGCGGAAGGCGTGGGTGGTGATTTTACGCGATTAGTTACCGAGCACAGGAGTTCAAT  
GCATCAGGCTTATTGCTGACGGCACAGGATTCCATATTCCATTTTTACGCCCGGTGACAG  
GCTCCTCAATACAGCGCCAGAGTGCCGGAAGCGGGCTGAAGCGGTACGGAAACAAAAG  
ACGTATTTTTCTACGGTTGAGAACGCAATGAACATCACGCTTACTGATGAACCGAAGCAG  
TGGTACATCAATAAGGAAACTGAATAACAAGAGGAAACGAAGCAGGAGTTCCCTCAACG  
CCACAGAAGGCGTTTCTGACGCCCGACTACGTGTTTTTCAGTGCCGAAAGTATATTGCAT  
GCCGAATCATCCTGATCGCCACCTATCATTGTTTATGACATTGAAAATGTTACAGGAACG  
AAGACTAAAGCTCACTCTCCGCGAGAAGGAAATAAAAACGAGTTGCAGCGGACGCTGATG  
AATTATCTGCTGGCATGGGAACTGCCGGATCCGGATGAAGCGTATGTTTGTGGGGCAAAT  
ACTGCCGAAGGGCTGGTGCACGGATACCGCTCATCGCTGGATGTTGTCAAACGCAGTAAT  
GGCGAGCAGGTTGCTCAGTGGTTCGGGCAAGTCGATTCTGAACTTTTTGCTCATTTCATG  
TCGCAGGCTGTGCTATGTATATCAAAGTGTGTGTGGGGCCGGAGCGTAATACTCACGGA  
CATGCAGTTATCCTGAAACTCCGGGAGCTCTATCCGCCACGTTATATATACAACGAATAG  
CATCTTTACCAGGCATATGCCGACGATACGCCCCGCCTTGGCTGGCTGACAACCCGTCAG  
AGCAAACCTGTTCTGACCGATGGAATGAAAACGTTTCTGAATAATGGCATATCAGGGATC  
CCATGCTCAGGCACATTACCGGAAATGAAGACTGACGTTTATGACGCGAAAGGCTCCATG  
AATGCAAAACAGGGATGCTTCGTTGATCAGCTCATGAGGAACGTGATGGCCCAAGAGATG  
CGCGACAGAATGCCGGTGAGGGTAAAACAGACATCGGATCAAGGCAGAACCACACACTGG  
ATGGCTCACGGATGTAATAATGAACTAACCCCATGGCGACGAAAAACGACAATAGAGCCA  
CGCCGCGTTTTTCTCAGTGCCAGTTACAGGCTCTTTGTTCTTCTATTGACAGGCAGCCAA  
AATGGCGTGATGCCGCAAGCAAGGCCTGTGCGTATGACGATGGCTATCAGCTGCCACCGG  
AAGTTCTCAGGTATTGAAAGATCTCGGTAGGCAGCTGACTACCATAACCTCATCGCAC  
CTACGGTCGATGGCGTCTAGGAATAGAGGGCAAACACGGACTGATCTGGTGCTTATGA  
CAAACGACCCAGATGATGAAAATGATAAACTGGCTGAAGCAATGAAAGCTCGATTTGCAG  
CGGCATGCCGCCCTGGCAATATGAATAAAGCCCGCTCTGATGCCTATGCGGAACTAATCA  
AGGCGGGCCTCAGTTGGGTGGAGGTCAGACGGAACAGCAATCCGTTAGAGCCTGAATTTA  
AGGCGTCTACTGTCAGCCGGAATGAGGCTTTCTGGGACTGGCTGAGCCGGGAGGCTGATT  
TAAGTACTGCCATGGCTGATGCCTCGCCGCTGGATGGATACCGTTCAGGCAGAAGCTA  
CATTCTGGGAATGGCTCAGGTTATCGATTAAGCCATTGATGAATGGCGTCGTATTATCT  
ATACCACGGTTGCTGAAGGCCAGCCAGTCCGTTGATGAGTGATGACACGAGTATCAGT  
CATGGGATCGCAAGCAGAAGGAATGTTTTTCAGCGTCAACGCCGTCCTGTGCGGCTTGGGG  
TGGTCTATTACCGTACATGCGAGCGTCTTCCGGTGATTGAACTCAGTAATGCACGGGTGG  
TGGCCTTTGATAAAACAAATCTGACACAGGCGGTAGCTGTGGCATCCGGGTGGGTTCAGG  
TGAAAGCCGGGCGAGTAAGCCGTGTTTCGTGAATTTCTGGTTTGTGCGGCTACACTTTATTG  
TGGATCGCCCCTGTAGTGCTCCGCAGGGGATGTTTCCGCTGGTTCCTTTCCGGGGGATACC  
GAAAGGATAGAACCGGGGAGCTATACGGGCTAGTTTCCCGCGCCATTCTGCACAGGACG  
AGGTGAACTTTCGTGCTATACAGCTGACCTGGTTGCTTCAGGCAAAACGCGTGCTTGTGG  
TCGAGGATCCACCAAGTTGTCAGACAACCACCTAATGGAGCAGATCGAACGTCCGGATG  
GCACTATTAACCTGAACCCGGTCCGAAAAAATTACACAAGTGTCGCAGATGTTTTTCGGA  
TTGAGCAGGATTTTCGGGTTGCCAACCAGCAGTTTCAGGTCATGCAGGAATCAGAAAAAC  
TTATCCAGGATGCCATGGGAGTTTATTCCGGATTTCTTGGGCCGGATTCAGGTGCGACGT

CAGGCGTTGCTATCAGTTACCTGGTCTAGCAGGGGGCGACAACCCTTGCGCAAATCAACA  
CTAACTACCAGTATGGCTGCAAGCAGGTGGTACGACAGTTGCTGCCTTATCATCTGGATG  
ACCTGAAAAACGCCGTAATCATGCAGTGGTGATTTTCGCGCGATACTCGGCAGCGTCGCC  
AGACCATTGTCCGCAAAGATGAAGGAGATAATGGTGAACCTGACCAAAGATAGTTCAAGGT  
TATATACACATATTGCCCTGGCGCCTGTTACGACACACACCAGCGTTTAAGGCACAGCGTG  
AACCGAGAATGTCAGAGGTGATTACAGGGGCTGACGCCTCAGGTGCAGGCTGTTGTGCTCT  
ACCTGTGCGTTAATCTTCTGGATGTGCCGAGAAACAGGAGTATATTGAGCGTTTTTCGTA  
CTGCGGTGGGGACACCAAACGACCGGATGAAAATACGCCGGAAGAACAGGAAGTAGCGG  
CTACCAAACAGGCACTTCATCAACAACAGGCGGAACTCCAGATGCGCGAGGCGGCTGGCC  
GAGTGGCCAAACAGGAAGCTGACGCCGCCAGGGCCCATGCCGCTTGACAACGGGATAATG  
CCAGTGCACAGCGGGAAGTCGCTCTGACACAGGGCCAGCGTTATATGGATGCGCTTAAGC  
AGGCAGATACGGCAGAAATTATCACTGGCGTAAAGAATATGGAAAAGGAGCAGTGCCTTC  
TTCAGTAACAGATGCAGTATACGTTACAACAGCGGATGACGGAAATCTCGCTCTGAAAA  
TCTGTCTTCAATTGAACCCCGTCATAGTACGCGGTTTTTTTGTTCGCGGAGGTACGCGTTC  
CGGGAGCGGTGCGCTTATTCGCAGGGGCCGCGATAACCCTTATTTAATGAATCATCCGGA  
TCTGTCTGATCCACCCACCATGAGCAGTTCTTTATGGATTTTGAATTTTCGGGTGACGTA  
AGCCAGAACTACTAGTAAACTGCTGGACGGACTTGGGGATGTCGATATAGACAGTCAC  
GCACAGGACCCCGTCCCGGAAGAAACCACGGAAAAACATGCGTATGAGGAAGCACAGGCT  
CAGACGGGCGATAACAATGTGGCACCGACGCCGATACCACTGTGGAGCAGACGCAGAAC  
GTGAAGGAGCCGGAAGCTAAGGGGGGGCTCACCCGAGACCGTGAACACGGCATTCCCTAT  
CAAGTCTAGAGGCTGAACGTTCTGTAAAGCAACGGGCCGAACAGGAAGCCGCCTTCTC  
TGTGGGCAGACAGCCGAAGAAAAACGCAGGGCGGAACTGCTGACGTCCTCAGATCCACCAT  
GCCGGTATGAACCCACACCGTTACCGGAAAACGAAAAAATTTCTGATGAGCAGATTGCC  
CGTATCAGGGTGATGTATCGGGAAAATTGTGACGCGTTAGCTTCTCTCATCCATAATAAT  
ATCTATCTCCAGTCCCGTGTTACGCAATCAGCGCAGCAAGCAGAAGGTAATGGTGGTGAG  
GAATTATTACCGGTTCTTGATGCGATGAATGCCGTGCGGGTGCTGAAAACGTGGCAGGAG  
TCCGATCCAGTTCGCTTCTCGGTTGCTGTATCCATCGACGGGAACTCCAGCATGACCCC  
GCATGGAAAGACAATACGCGCACTGAACGTTTTCGCTGAAGTGGCCCGTGGTTCGCAGGTT  
GCTTTCGGGCAAGTCAGTGAGTCGTCGGCTGACAAAAGGAAAACAAAACGGATATCCGG  
ATAACGGCGGAAGAGAACGTGAAGACCGCTGAATAGGAGCAGGCAGTACCTGCTTCCCCG  
TCAGATTTAGGCACCACGGCTTCCGTCGGAACCGGTGATAATTTTGAACGGTTACATGGC  
GCTTCGCATAAAGATGAAGAGGCGATTATGCGCGGTGTGACGAATGCTGAGATAGACGCT  
CTTCTGGAGAAGCTCGGGGAACTTACTGAAAAGAAGTGAATAATTACGACTGTAACAT  
CAGCCCAGGCGAATAAGCAGCATCGGGTGGCGCTGTTTACCGCTGCCAACCGCAATCGCT  
CGATGTTAATATCCTCACCGAACAGCAGGAAGCGCCAAAAGCGGATTCGCCGGACAAAA  
AAAGCACGAAGCAGTTCGGCTCGAGTGCGCCGGTTGTCCGTATCACAAACCTTAACAAAC  
ATGCCGGTGATGAAGTGACCATCAGTATCATGCACAACTCTCTAAACGTTTCGTCGAGGG  
GAGATGAGCGTGTTGAAGGGCGTGGTGAGGATCTCAGCCATGCTGATTACTCCCTGAAAA  
TCAATCTGGGGCGTCACCTGGTGTATGTAGGCGGACATATGAGTCCGGCTGCGCACACAGC  
TTAACCTGGCATCCTCAGACAGAACGCTTCTGGGAACGTACTTTAATGTCCTGCAGGAGC  
ATAGTGCGATAGTGCATCTTTCTGAAGATCGTGGTGATTTTGTGCTGGCGCAGTATTCT  
GCCGACGGCCGAGCACCCCTGAATTCTAAAAGATCATGATAAACGATCTAATGCCTCCGAC  
ACATGACCGTCACTTTTTTGGCGGAGATGCGACAACCTTTGAGCATACTGAAGCGGCAA  
TATTTGTTCTATTGGCCTGGTAGACAATCTAGCCCTGTTCAATTGACGAAATGCCGCATCC  
GTAACAGCCGGTCTTCTGTCCGGTGGTGAACCTCACGGAAAAGCGACACAATAACGTCCT  
GTCCGTGCGCGCCGCGCCAGGGGAGTACTGGTACACCTCGATGTCCGGTAAGGACTGGGA  
CCAGATGATGGTTCTTGCCGTGAACCGTGCAAAAGGTTTTATTATCCGCTTTTCAAAGG  
TGAATGTGCGATGAGGTGCAATATCCTGGATCGCAAGCGAGCGGGGATGCCGATCCGTTT  
CTATCAGGGGTCAAAGGTTCTGGTAACAAAGAAGCGCCTGACGGCAACCACGTAAGATGT  
AGCTGCTGCAACCAATCTTGACCGTGTCATGTTACTGGCGGCTCAGGCGCTGGCCAATGA  
TTACGGTCAGAAGGCGGGCGGTAACCTCAGCATGGTTGAGAAGAAAACGGATATGGATAA  
GCGTACTGAGATAGCAATCCTCTGGATCAACGGGCTGAAAAAGTCCGTCTGCCCGAGAA  
GAACGTCAAGATGCATGATCCGGGCGTGATTGCCGTTGATTACGCCGTGAAGCTCTGATT  
ATTTCCCTTGCTATGCCGGTGTTCGCCCGGCTTTTTTACGGAGTCATTAATTATGCCTA  
AGACTATATTTGCCCGTTCGCTGAGTGAACGGGTGTTTACGGGTCCGCACGGTAATGAGT  
CGGTGTCAGAAGGCGTATTTACGGTGAATGCTGCGGAAGCCGACAGTGTTATTCAGCTTC  
TCTCACTTCCAGTGGGCATCCGTATCAACGCACTCCAAGTGGTTTTAACTGGTGGTCTGG



GTCCTGCAACCGTCAGCATTAAAGTCCGGTGAGCATGCTCTCATCGATAACAGCGATTCTG  
TTTCTGCAAAAATTTGCCACATATGTGCCAGCGGAGCCGTACACCACACTGCGTGACGAGG  
AGCTGGTTACTGTCACCATTAGGACTGCCGCTTCAACCGGCGTCCTGAATATTGTGCTGC  
GTTATCGCCTGGTGGGATACTGATTA AAAACCTTCCGGCCCCGCGTCATGCGCGCTTTTTAT  
CCGGGGAATTATATGAGTGAGAAAATTGCCGCTGTCTATATCGGCCAAAAACCAGTGACA  
AAGGACACCATTACCGGAAGTCGCACGCTGTTCCCACGTCTTGAGCCGGTGCATGTTGAC  
AGCGCTATGGCCTCGCAACTGCTGGGGTTTCCGGATGTCTGGTTTCGTCTGAAGAGCTT  
GGTGATGCTCTGAAAAAGCAACAACAGAATGATCAGTTGCGGCAGGCACAGCAGGCGCAT  
GGAAGAGTCCTTGCTGCGCTGGTAGACGCGGAGAACAGTTTTTGTGTATCTGTTAACGGG  
GAGGAGGTGGATTTAAGTAAGCTCTCCTCAGTACGGCTGACGACGCTGTGTGAGGCAGAA  
GAGCTGGATATTCAGAAAGACCCGAAAGAAACGGCTGAGGCTTCCGTATCCGGATGCGT  
GAGGCATCTCGCCCGCGTGTGCGGAGACTGACCAGCATGGCGGAAGACCGTGACTTTTT  
ACAGTACGTCCGTCGTCATATCATCGATCCACTGAACATTATGATGTCCGGATGCTCTGTT  
AATGGCTGCCGTGACTTTCAGCCGCCAGTCGTTGGTGTGCCGTCGGGAGGCTACTGTTGT  
ACCAGTTGCAGGAAAAGAAATGGTGCTTCCGTATGACAAAGATGCTGAGGAGTGC GTTCA  
TATCAGCCGTATCCCTGAAGATAATCATGAGCTTTTTGTGAGTCCGGATGTGGATTTAG  
AACCGCACGCTCACTGCGATTTGCCCTGTTCTCCCGGTGAGATGAGCGTGCTTTATGTCGT  
CGCTCCAAAAGCCGGACGCAGCCAGATACCCGGATGAACTCCTCACATGGCCACAAGAAGT  
GGCCGCGGGGGCACATGAGCGTCTGTTTCATGCAGACTGGTGTGTCAGGGTCAGATCCGTT  
ACGCGCACAGTATTTTTCTGTGCAGTTTTCTAAGGGGATCCGTCCGGGCATATCGACATAC  
ACTGGCGCCAAGCACGTA CTCTCATACCGCAACCATCTACAGAGGAAGAGGTTTTTTGTG  
CTGACGACGATTACAGAAATCATCGGACGTGTGAATACACA ACTGGTTGAGCCGATGATG  
GTTTGTGCTGGCCCCTGCAGGAATTGTGCGATTATTGCGATGATGCAGTAAGGGTAGTGATT  
CTGGCGAGACCGGATGCTGGCGGAAGCCTGAAAACAATAAATTGTGTTTCATGGGGCCCGT  
CAGGTTTTGCCCCTATGGTGGAAATACACCGTCTTGACGTGATATGCCTCAGTGACGGTAGT  
GCAGTGAGGCCATTCTCCCGGGAGGTGCTGGATGAGCAGGATCCTGCATGAGCCACAACG  
AAGGGTATTCCTGAATATTTTATCGGCAACCACTTGTCCCCGCGCGTTTTCTGGCTGTTT  
CCTGCGCCTGACAAAAAATAAGTAATGATGCAGTGGTTAGCCGCATCCAGGAGGCAGTG  
TATGTTCTGACGCAGCACGATGTTACGCCAGTTCCTACTGGGAGAGGCTTATGTTACCCA  
CTGGTGATGTGGATCTTGTTTAGCGCTTTCAGTTAGGATTCGGCCGGTGGCCGAGAATCT  
GGGCTGGCTGCGCAGCATTATCAGAGTATTGTTGAGCAACTTGGGCTCAAACAGGGGGCA  
GACAGTGCATTGTATGCCCCTAAAAAAGTGTTTAAACGGAGGTGGAGTGTGAGTGTGTTG  
TTTTCGGGGAGGCTGAAATCTCCTGCTGGTGGGCGATATCAGGAGCAAGTATGACCCTGA  
CGGCGCTGACAGTTACACCGGATGCGCGCAGCGGCACCAGTGCCTCGGCAGTGTCTCGTG  
AAGGTGGATATTACGGAATGTCGATGGATCCGGGGCAGTATGCGGTTTCGGTGACGGTGA  
AAGGTAAGACTGCCGTCTACGGACGTTTTCGCTATTGAGCAGACCGCAAGTACGGTGAAAC  
TCAATATGCTGTTACGCCGAGTCTTGTGGGGTTAGCATATCCGGAGAACGGCTGACAG  
ATGTCCGGCAGATACAGAATAATGTGGCTGATGACCTTGCCACTATTCGTGCGCTGAATG  
AAGACACGGAGACCAAAAACACTCAGGCCATACAGGCAAAAAAAGAGTAGCAGCCAGTG  
CGAGGAGTGCATGTGACAGTGCAAAGACGGCAACCAGCAGGACGGCTGAAGCCAGAAGAA  
AAGCCACTGATGTCACTAAGACTGCGACCCGTGCAGTCACAGCAACGACGAATGCAGAGG  
AAAGCTCGACCCGGGCCGGAGAGTCTGAAAAAGCCGCCGGAGCTGATGCAGAAAAAGCCA  
CACTGAATGCTGAAATTGCCAGGCTGGCGCAGGAGAGCGCCGGAGAGATCCTTAAGCGGG  
CAGAGGCTGCCACGGTCAGTGCTGAAGAGGCTAGACGAATGGCTGAGAATGCACGGGGGC  
CTCGGGGGCCTCAGGGAGAACTGGTCCCAGGGGGGATGTCCGGTCTTAATGGCGAAACAG  
GTCCAGTGGTACCTCAACGGCCCCGAGGGCCGAAAGGAGAGCGTGGTGACGTTGGTGCTC  
AGGGGGCTGTAGGGCCTGCTGGTGC GCGTGGTGAGAAGGCCGAACATGGGGGGTGAGGAC  
CGCAGGGAACACCAGGCCTGAAGGGGCATAACCGGAGAGCGGGGGCCTGAAGGGGACCAGG  
GGGATATGGGGCCAAAAGGCGAGAGAGGTGATCCGGAGGGTCTG CAGGCCCGCAAGGTC  
CTAAAGGCCGAACGAGGAGAAGCCGGACCACAGGGACCGATGGGAGCACGAGGTGAGCGTG  
GGGAGACTGGCCCCGAGGTGAACCTGGTCTACAGGTCCGGGAGGCGAACAAGGAGTGA  
CCGGCCCTTAGGGATCTCGTGGAGAGCCAGGTCCGGCAGGCAGCGCTTCGAATGTGGGTG  
ATGCAACGACGGCACAGAAGGGCATTGTGCAGTTAAGCAGCGCAAAGGTCCGTGATGATC  
AAACGAAGGCTGCCACCCTGAAAGCCGTGCAAGGGGCCATGGATGTGGCAAATGAAGCGA  
AAACAAAGGCCGAAGAGGCTGCAGCGGGAGGTGGTGTTC CCGGACCGAAAGGAGATAAAG  
GGAACACGGGGCCAGCAGTCCGGCTGGGTCCGGTGGGTGATAAGGGAGAGCGCGGTGCCA  
CCGGCCCTGTCCGGGTAGCCGGCGAACGCAGACCGGCAGGTGAAACTGGTCCGGCAGGCC

CGCAGGGGCCGAAAGGTGACAGGCGAGAGCGGGGAGACACCGGTCTGACGGCACATGCAG  
GTCCGCAGGGTCCAAAGGGAAATACCGGTGCGGCCGCCCGGCAGGCCAGAGACGCCAA  
AAAGAGAAACAGGTGCGGCAGGGCCGGTGGGGGCGACCGGACCTCAGGGGCGGAAGGGCG  
ACCCGGGGGATACGCAAAGACGGTTCGGTCTGGGGCCGGGCAACATTATTGAGACAAAAC  
GCCATGGCCGGTTCGCGGATACAGATGGCGTACTACCACGGGCGTGACCTTCCTTGACC  
CAAAGATGCCAGACGGGTTTCAGGGTTTTTTCCTGCATTTGCAAGTCAGGTTTGGTGACG  
GGCCGTGGCAGGATGTCAAGGGGCTGGATGAAGTGGGCAGAGATACAGGCAGTACAGCAG  
AATGACTTGAATATTATGAGAAAGCTAATGCAGAGTTTGTGCGGTTGCGGATAGCATGAT  
GGCTATGCAAACAGGCAGTCGCTTACAGCACAACCTGCGACTGGGACCGGCAGAGATTCTG  
GCGTCAGATGAGCAGGGCATAATCCCGGAGCAGGACAGGGTAATCAAACAGGTGGTGATA  
CTGGATACAGATAAAAAGCAGATACCGTGTGTAGTAAGACCGCTGCAAATCTTGCGTGCT  
GACGAGACGTGGGAAAATATTGGCGGGATGAAATAGCCGACAGCTTCACAAAACCGTAG  
CCCGTCTCCGGTTTTTGTGTCATGTATAGGGGGGGGTTACTAGAGAGTGAACATAAAA  
TATATTAATAGGATGGAGTGAAGGATGCCGTGTGATTCTGGTTATAGAGTTTTTTATGCC  
GGAAAATCGCAGAACTATTCTGGATAGTATAGAATCCTTGTTAATAATCTGTGATAGTCA  
GTTGGGCCACTTAATCCGCAGTATGTAGCAGGGACGCCGTTTTATGCAGCTGAATCTGGA  
AACATTGAAAGGGGTACATTGTGTGGCCTTGCCAGTGAATTGGGAATTCACACGAAGACA  
GCGAATAGCTTGCTGTATACGGGAATGGCGGAAAATGGACTGTAAGGTGTGAGTGTGTAA  
CATCTTGCGTGTGCGGAGTGATGCTTCTCGTTGCTACGGCGGCAATGATAATGCAGTGAA  
AACAGGGGAGCAATATGTTCCCCCAAACCGAAAAGAAAATTGCAATGATCAATGAAGTTAT  
TTAATCATCAACAGAATTCATGCGATGCATTTTGTTCAGTGATGCCGATCGCGATTTT  
AGCGAAGTCCATCATATATCCCCTGATTTTTAAGCCTGAAGCAGTCAAAGGACTTTCGAT  
GCCATATATCGATATCACCACGATGCGTGGGAAGATGCCGCGTGTGTGACATCCATGCT  
GCCCCGAGCATTCCGCTGTACTGGCGGAGGACTGCCATTTCCGGTGTGGTGATATTACACC  
AGCATGTCAGATATCCGGGGTTGAGAAAACATTCACAATTAAGCCAATAACAATTTTTCA  
TTAGCGTGTGATTTCTGGTTTGCATGGCCGGATGTGGTGGATGCGATCCGCTCACCGAT  
CGCTCAGGACGCCAACGAGCGTATTTACTACACTGACGGGCGCTTTCCTAAAGTGACTGA  
TGCGACTATTGCCACAAAAGGGGACGTGAATCACCCGACATCATCGTATCGTCTGGGGAT  
CTCCGCGCCGACGACAGCTCCTGTCTGTACTGTTACAGCAGGGCGGTGCTGTTTCAGACGA  
GAACACGGATGGTGATGAATCCCGTTTTAGACCAATACCTTTGTCCAGATTATGGTGA  
GGAAGGTCCGCCAGATCTGGCGTCTTTGGAGGTAACACTCCGTACGCGGGGTACTGTGGT  
ACAACCTGACGCCGGGTCCGGTGCCTTGCATAATGCAGGTATTAACGCCGCCGGATTTA  
TCGCTCTGCATCATGTGGGGGGGGGGCGAGTTTTTTACTTGTGGCTGAATTGTATGCATC  
CGTGCTCAGTTTCACGGACAAGATATCGGCGAAAACCTTGCACCTTCCGTGGTGAAATG  
GGATTACCTGCCGCCACCAGAGAAAATGCCAGGCCTTTGGCTGATGGCTAACGGTATTGC  
CGCCGGGTTTTGCCGGTAATGAAGTGATGTTTGCTGACGCCTATCTGCCGTATGCATCGCC  
GGAAGTGAATCGTGACACGACGGCAGAACATATGGTAGCTATCTGTCAGCTGGGAACGTC  
ACTGGTGGTGGCGACAAAGGGGGGAGCCTTATTTGTTACAGTGAGGTCTCACTGTCCACAAT  
TTCTGGTTCCAAAATCCCTTCAATGCAGGCGTGTCTGAGCAGGCGGATTATGGTTGCGAT  
GGAGGGGTTTTGTGCTGTATGAAGGAACAAATGGCCTGGTGTCTTCTGATGCCTACGGCAA  
TCTCGCGCTGGCGACGGAACAGATTGTTTCACGGGAACAGTGGCAGAGTCAGTCTAATCC  
GGCTTCCATTGCGGCTTATCCCTGGCGAGGTGAATACGTTGCCTGTTACACGTAACCGGA  
TGTTAAGCAGGATGTGTTTGTACTCCGTCCGGTGAACATGGATATCCGTTATAACAGTAC  
ACCATTTGAGTGCGCAGGGGTTGATCTCGCGAAAGATATGATGCGCATGGTGACAGGAGA  
CAAAGAGTCAGTGCTTGCCGGGTGGGCTCTGCCCTCCAGGATAAGGTGGCATCCAAAAT  
TTTTTTATACCCAGAAAGAACCTCTTTTTCTGTATCAGGGTGCAATCTCAAGCGCCTGA  
GCCGCTCGGGATCACCATTATGGCTGATGATGTTTCTGTGATTAATTTTGCGCCGGGTAC  
GTTTAAGGGAAGTGTGGTGAGACGTCCGGCAGCACCCGGGCAAACAGGCAGGTGATGGC  
ATCCGGATTCCGGCAGGTGCAACGAATAACCCTGAGTACATCAATGTCGGAGATGCCGGT  
ATGACCAGAAAACCTTGGCGTGCGGGGAAGGATTTAGCCACTGTCGTGGAGAATATGGAA  
ATTGGAACCGGGCAGCGTCGTGACGGACGTGATGCATTTGTGACCCGTGAGGAAGTGGTT  
GGTCTCAAACCTCGCCCGGCGACGAACATCGGGTGTGTTCTCATATGCACTGAATCCGCGT  
ATTAAGATTGACAGTGCTCTAATGACTGTTGATTTTCTCACAAAACCGTTGAATTTAAG  
GCGATAGGTGGATTTGGCTCGGTTCTTCTGAATAGGATATGCTTAATTTGCGGGGACAT  
TCACTGCCTGAAAGCTAGCGGGGTACGGAGCAGGTCCTTCTGATGCAGTGCTGGTTGCC  
ACGACGACGGGGCAGGTTTACGGCGATCCGGTTGACCCTGGCTGGTCGGGTTTTTACGGG  
ATATGTTTAGTTAACGCGGCAGGAGTGAAAGGTCCATGGAATTCGGAAAATGGCACTCAG

GCACAAACAGAGATCGGCGTGAAGGCCATCATTGACCAGATCCGAGATGACGCTGCAAAG  
TCGCCGGTTGTGTACGAGCTGCATAAAGAAATAACGAACGCGCAGGAGCAGGCCGGTAAAG  
GATGCTGCAATTTAGACAACCGAAGTTACAGGGACTCTAAGGGAAGAAACGACAAGAACG  
ATTGGTGGTATTGAAACCCGCATTAGCACACAGGATTGGTCAACCAGTGAATCGCTTTAT  
CACGTCGACCAGCGCATCACTAAATTTGATAAATAACGCGGGTGAAGCTTTTATCGCACTG  
TGGTCAAAAAAAGCGGGAGTTGATGGTATCACTACGGGGATCGGGATGGTTCGCCTGTTAA  
GACAGTGAAGGCAGAGCCGTAACCTCAAGGTACACTTTCTACGTCGAAGTTGTTTGTCTTT  
GACCCGAATAATCCGGATAACAGAGCCTATCTGTTTGCGGTATTAGGTGGCAAGGGAGTG  
ATCCCGAAAGCAATGATTTATGAGGCGGTGAGTGAAACACAGGTGTTCGCGGAAGGTACTT  
GCGTATGAGGTAATAGCCGGGTTTAGTATCACTTACCCGTTATCCGGAGTGCCGTTATT  
CAGAACAGAACTTTCAGGTTGATTCACAGGGTAACCTGAATATTGGAAGCCTTTTCAGT  
GCTACGTCACAAGGGCAACTGACAAGTCTTTACTCTAATCAGAATGTAGGACTGGTGATC  
CGCAATGATAAAATAGAGCTTTATGACCAGAATGTACGGCTAGCTGTACGAACAGACAGA  
TTACGCGGATCAGGAGGTGAGTATTAGAATACGGTTTTGCCATTTATAACAGAAATAATG  
TTAATGTTACGGGGGTGCTGACTCCAGTAATTTTCTGACAGATTTACAGCGGAGTCTG  
CCTCAAAGACGTACTCTAATAAACCCGACGGGAAAACCTTTCGCGGCCGCATGCTGTGTAT  
TTCCGTGGAATAATGTCTCGGCGGATCGGAAAGTACCGAAGATAACCATTAATGACAATA  
CGGTGTCTGGTTCGAATCTTGAGCAGGGTATAGGATCTTATTTAATACATGCTGGGGAT  
AAGTGTTTTGTCCGGTTTGAGCATTATGAAGGCGAGTGGCAGCTTATGGATAAGTCCAGG  
TTTTGCGCCCCAGTGTCTGATCAACAAAGGCAGCATACCGGCGACTGGAAAGACTTTTTT  
GGAAACATCAATCCCGTCAAGCAAAAGTTGATTCTTCTTTATCAGAACAGAGCAGAAGGC  
CGAGGTCATTTACAAGCATGAACAGAATGATGAATATCATGGACTAGGGTCTCTTGTAAT  
TGTCAGGGGAACGAACCCTGGTTTCACGACGGCTTATGCCTTCGCGAATATGGTTACTCC  
ACCGTCTGAATATGGTATCGCCATGTATAACCCGGACGGTGAGATGATTTATCATAGCGA  
AATGATGCTGCTTGACGCGAAGCTCATCCCCGTTGATATCAAAGTAGAAAAGGACTTTTG  
ATATCCATGCGCAATAATGCCTGCACTAGTCGGGTATTATAACTGGAAATGAACTCCTTA  
TGATCGACCGAAGTATATGTCATCCACTGGTGTGGAGGAAATAAAATATATTGCTGCTA  
GCAATGTTCCGGTGGTGAACATGGGATCTTCGAAAGCCCTATATAGATAAAGGTCCTGGT  
TATTAATACGTCAGTATACGATTAGTTGAAGCGAATTTTTAATGTTCCTTAATATGTCT  
AACAAAATGTACTATTA AAAAGTTTAGCGTGTTATCTGAATACAGGATATCTGTATGAA  
GAGTATAGCAACACTGTTTGTGTTGTGCAATCTCCGGGATTGCCTGTGTAAATTTACCTGC  
ACATGCAGCAGAAGGACAGCATACTTTCTGTGGGCTATGCGCACTTTCAGTTACCGGG  
ACTGGAGGATTTGGTGGAGGATGCGACTGCTCATAACAGGGAGACTTTCAGTCTTTTCGT  
CAACAGAAGCTACTTTTGTTCATTGGGCGAATATACAGATGGTCCGGTTCAGTCGATATGG  
AGGCACGGATAAAAATCCACAGGGCATTGATATCAGGTATAACTACGAGATAACGGATGA  
TTTTGGCGTTATCACCTCTTTACATGGATGCGTTCTGTCTCTAACTCACAGACATTTAT  
TGATGTGCAGTCAGCCGATCATAACCAGGAAGATTAAGAATCCCGCAGCTTCTGCCAAAAC  
GGATATCAGTGCGAAGTACTGGAGTCTGTTAGCTGGCCCTTCTTCCGTGTTAATCAGTA  
CATTAGTTTATATGCGGTGGCATGGATGGGCGCTGCTAAAGTTAGCGCTTACCTGAAAAT  
TAAGGACAATATTAACAGTAGTGGCGGATTTTCTGAAAGCAACAGGACGAAAAAACCTC  
CCTTGCGTGTGCTGCACGTGCACAGTTTAACTGTATGAGAGTGTACTGATGTGGC  
TTACTAAGGTACCAGCTCTAGCGACTGGCGCACGCGTGGCGTTACCGCTGGCATTTCGCCT  
GAACTTCTGACCTTTTTCAGGTAACCGTTTACTCCCCGACGTGATGGCGGGTCTTTTATT  
GCCCCGTACAGAGATAACCGTAAAATATGTGTGGGGGACTTTCGGCTGATGGCGGGAGG  
GTGATCCTGAAGGCCTGATGTGAATAGGACCCGAGACGACTTAAAGTTGACCCGATGCAC  
CAACACTTATTACCTTAGGCAAGTAGAATGTTTGCCTCTCTGTAGAAGGCGTCCAGCT  
CTATGTAGCAAAAAGCGCTTATGACCGTCAACAATTTGCATAACGGTTATCTTCAGCATCT  
GGATGTTGCACGGTTCACAGTGTGAGTTCCGGCTGACTTTGAGGGGAGCGGAGATTGAGG  
CGTTATTACAGAGTAAGCAGTAGGAAAAGCGCGACGGGGACGAGAGTCCCCGTTAACTGG  
TTGCTGATGTTCAACCGATATGGCACCAGTTTCAGGTGAGCGAATGAACGATAAAATTCT  
CTGGTATATTCATCGTGTGTTGTGAGAAATTTCCGGAGCCATGAATTTATGAATGAAGTTAA  
AGACGCCGGCTTTATAAAGCAGGCGTTTAGTTTTGAGGGACCTGATGGCTCTTTGGTGCT  
GCGTTCTGTGCTCAGTGTGATGGTATCCCTTATGTTTTAGTGTGTTGGGCGTTTCTAC  
GGGAGAAACAGCGTTGAGCGTTACCTGCCGGAGGTGAAGACATTAACCCACCTGGCTGG  
CGGACACTCGAATGAGTTACTTACGGCAAGGCCGGGATTGATCCGGCTGGGAAAACGACT  
GGGCTTTGAGCGAATGCCGGATGAGGAGGATTGCTTCATGGTGTTCAGGATAGCGGTCTG  
ACTGCTAAAGTTTTCTTCGTTGTGTTTAAACCAACATTGTAATTCACATTCTGACCCTGC

TCCGGCAAGGTTTTTTGTCAACCAGGGCGCCATTATGGGTGGAAGTGAAGGCGGTGACGA  
TACCAAAGTAAAACCAACAGCAGCGCCAATAGCGCAGGAAGAAGTGGCCTCGAAAGGGTG  
GCAGGATTACAAAATATCCTCCGCCCGGCTGCAGATTACTTCATGGAAAAGGTGGATGA  
CCTGAACAGTGAGCAGCAGTACGACAATTTTGTCTGCAACACAATTCTGGGGTATCAGAA  
ACAATTTGGCGAGGCACGGAAGGATCTTGGCAGCAATCTTACTCAGCCCGGCGTTGATCC  
ATCGAGTGCTCGTTTTAATGCGGTAATGAATGCGAACCCAGAGTGACCAGGTAACCGGGCG  
GATTCACACACACACACGGGGGCGAGATCGCAGGCACATAAGTATGTTGCCCGGCTACG  
GGATGTTGCTGCTCTCGGTGCTGGTCAGAAGGCGGATCCGTTACAGAGTTTTATCTCTCT  
CACAGACAGCAGTCTGGCAAAGCTAAATCGGATACACAGGCGACGTTTACGAAACAGCA  
GGGGCGAACCTCTCTAGTTGGCGCTGGTCTGGGTGCGGGCGGTGGATTTGCGATGCATAA  
GGCTGGCGGTAGCGGAGGAAGTGGCGGTGCTAAAACATCTGGCTCCAGCGGTAATGCTAT  
TCATCATCAGGCTCAGAATCGGAGACTGTAATTATGGACCATGGCAAATACGAAGCTCTC  
GCATCGGCAAGATATTCAGGAGCAGCCCGTCCACATAGTGACTGGCAGACGTCAGCAGCG  
CTGACACCCCAACAAAACGACGACTGGTGAACCAGATATTTGCCCCCGTCCGCAAGGCTG  
GCTGACCTTGGGGAGAACAACAGTCTGATGTATGCACAGCTTGCACGGGTGGGAGGACTT  
GCAACTTCCAGTCCCCGTACAGCTAAGATGGCGCAGGAAAACAAGATGGAGAGAGATGGG  
GTGAACCGCCCCGATAATCCCGACGGTAGTACGCTGGGGATAACGTAATGCGCTGGCAATT  
GCTGGCGCGATGCCTGGTATACGTGAAGCCGAACAGGATCGACTGATGACTATTCTGAAC  
GGGGCTTCTTCACAGCCAGGACAGAAACGGAATGTTGGAGGCCAACTCGTGGCAGCTGAA  
CGTGGCAATATGGGATACGGTTTAGTGGATATTGCAAATCTGTCCGCGCGTGAGGCATTA  
CAGGGAATAAGTGACGGAGTGAGACGACGTGAAGAAATTGGGGCTCCGAACTAAAAGATG  
GCGACGCAACACAAAGCGCAGACCAAGCAGAATAATGGTACGGGCATTGGTACGGGGGCC  
GCTATTGGCGCATCCGTTCTTGGTCTGTTGGTGTCTGTTGTTGGAGCTGTAGTTGGCGGC  
ATTGCTGGATCTTTATTTAAGGAGTGGTGAATGAGCGGATTTGCACAGGGGTACTTGC  
CGGATTCAGCACCGTTGACCCAGCAATGACCCGTCGTCGGGAGCTTGCTCTGCGTGATGC  
ACAGCTTGCCCCGCTACAGAAAATATCGAGCACGATTTTGCCTTGCGCAGGCTCAGTT  
TGAACATAATAAAAACGGTGATCAGCGGAACTTTGATTACAGAGCCAGACTTGACGACCG  
TAATTATGCACGGAAGGAGAGGGCGTTTACGCTATCCAGAATGACCGGAATTCGTCACT  
GGGTATGGAGCAGCAGTACTCCAGCTGCAGAAGTACAACCAGCGACGGCTTGAATATAA  
CGATATGATTGGCCATAGCCAGGCACCAATGGAAGAGCTAGGAAAACCATCTGAGGATGG  
CGATCAGGACGCTGCAACGCTTCTGTTCCGGGCAGCTGCCAAAGGGACATCCATTAATTCT  
TATGTCAAACGAAGGCTATGCAGCGAAAGCGGGTGAGGCCGTGGTCAACCTGCAAAAAAT  
CTTTGGTGATAATACAGACATGGCGATCGATTCGGGGAATACACCGGAAAATCTCGAAGT  
CCTGTCCAGCGTGTGTTGCCCGGAACTACAACAGCGAATCGACATGCCTGATTCAACCGG  
TGACAAAACATAAAAAGAGGCCAGGATTCGCAGTATCGTACCAGCGCAGCAGTAGGGGAG  
GATACTTATTGGCATTGATTTACATAACCGCGATGGCTCCAACGCGCATAAACCTGTAAC  
AGAATACGGCACTGCGCGCCCTGATGATCAAACCGTCTGGCGCTACCCGTTGATAAGGC  
TATCGCTCAGGTCAGGGATGGCAGCAAACCTTACAGAGAAATCGAAAAGTATGTTTAGCT  
TATGCCGAAGCAGCAGGGACTTTACTGAAAGAGCTTCAGAAGGGCGCCAGCAACGTAGC  
CTCGGACGCGACCAAGAATGGCAGTAATGCCAGGCTGCGGTGGATGTATATCATTCTGC  
GACGGGGTCACAACGGCATCAACAGAAAATTCAGCAACAAAACCTGCAGCAGCAGATTAT  
CAACTGGGCAGGTGATGCTCCTGATAAGCTGTCATTTGCCAGAAATGTACCGGCCCGTCA  
GCCTGAAATGCTGGAACCTCAGAATCAGAAATTGCTGGCGAACGGGTATGCGAATTTTCT  
CCGTATGCAAAAGGCCAGGGGGGAAGAGGCCCGAGATGTAAGTGCTTCATATGCATCTCA  
GTTTATCCGTGGACTGAAACAGAATTACGCCAGTAATTCACGATATTCATGATTACCA  
TTTCCTGGAGCCCGGCCATTGTGACGGGTTTTGTTATGGACTCTGTATGGCCGATTCAGA  
GGAACAGCGTCATGAGGCGCAACTCGGCAAGCAGAATCGTAACAGCCTGAACATTCTGCA  
ACCCGCCGAAAATAACAGCTATGAAGCATTTTTCTCTGATCCGAACCGCTGGAAGGATAA  
CAGTACGTCGTGCAGCCTGGGCGTTGTAATTCCAAAAGTGGGTATAGGTTTCGCCAGTC  
CGTCCGGGGAACATGGGAAATGACACGTGGACTTGGTGTGCGATGATTCAGAGCCCGGT  
AAAACAGGCGCGCGTATTTTAAATGAGTTCAGCCGTATGGGTCTGCCGTGTGTCGCAAC  
TGTGCAGGATTTTTTTGCCGGTGGCAGCAGGAGGGCTGATGACGTTATCGATACCCTGCC  
TGATGGCAAATACGCGGTTACTGATACTGTCGGTATAGATCTGAAGGCAACCGGTAAGGC  
TGTCAGTGCTGGGGCCAATGCCTCTGATGAATGGCTGACCGCTAAGATGTCGCCGGGTGC  
AGCTCGTGGGCTGAATGCGCCGATGACCTAAGCCTATAATGAATCTGCGGTCTTGGCGTC  
GAAGGGTGTAACCTGCTTGGTGCCTTTTACCTGATATGGTTGCTGACGGTGTGGCTAG  
AAAGGTGGGTGACGGACCACTGCGAAAATGCTAACCGCCGGGCTGGACTAAAACCTACCT

CGCGGCACGGATGCAAGGGGAGCGAGCCTCCGCACTGGCAGCAGAAGCTGTCACTAAAAA  
AAGGCCGGATTTATTCTAGGGGGACTGATCAACCGTTCCTACTGTATGTGCACAGGGGCA  
GAGTGCAATAGCGGAAGCAGATGCTATTCTTAATGCTGAGTACTCTGAGTTGGCGCAGTC  
ACGGAAAATTCAGCAGACGTTTTTTGTCCATTGAAGCCGACCCGCAGCACGCAGAGCTTCC  
CGATCGCCAGAACATGCATCTGGCAAAGAGCGTGTGGCCGCTGAGGAGCGCACGCAGCA  
GGCAACTGATCCTGAATTGCTGGCGGTGAATGCCACGGCGGCTAAACTGTGGGGCGCACA  
ACTGTTTAATCTGGTGACACGAGGCACAGCGAAGAACGGTAAAACCGGCAGTGTCAAGTAA  
TGCCACGTAAACAGGAGGGCGACTAATGCGACGCAAGGCGGCTATTCTCGCTATCAGCAAAC  
CACGGCATTGCGTGGTACCGCCTGAAAGGGGGTGTACCCGTGGGAGGGCGTGGCTGACGC  
AACGATCGAAGGTGCAGCCTTTGGTGCTGCGATGGGGGCTCCGTTCCGGTGCCTTGCCGG  
ATATCGTGGCTGACGTCAGGCCGCAGAAGAAACCGCCATGCGTGATGCTGAAACGGTGCC  
GCTGGACGACGCAGCCTCGCAACCCGAACCTGTTGATCCGGTGGCGCAGCAGCGTGAAAC  
CATGAAGGGCATGAATCGCGAGCAGCTTCTGGAGCAGTATCCTGATGCGGATGTGGCAAC  
AGAGGGTGACGTATCCGCAGCTCATCACCCGGATGCTGCCAGCCAGTGGTTGAATGAACT  
GGACGAACGGACGAAGCGACAGGCTGCGATGAATGAGCTGAAGGCTAGGCCGCGTTCTGA  
ACTGCGCGAGGCATACCGCAGACTCAGCCAGAAAGAGGGGGCGCACCCAGACTGAAGAAAA  
ATAGTTTCAGGGAATAAGCGGAGGCAGTCGTCCACAACATGAAGTTACGGTGGAAGCACA  
GTCACAGCATGAAAATGGGGGGGATCGTCACGGGAGCATTACCCGACGGTGCCTTGCCGG  
GGACCCGAATGAATTCCGCATTGAAATTAACGGGAATGGAGCGTCAAGACCAGCCGAACG  
CATTGAGAAGGTGCGCCCGGACAACCGTTATTTACGGATGAGAAAAGCGCCATGGGCCG  
TGATTTTTTCCGTAATGTCGCCGCCACCGGACTGAAACCGTCAGTAGTGAAGAAAGGCGA  
GTATCAGTATGCCGTTGAAATGGATATGCCGGCGTTCCTCTGACGATGTGGCAACGGAAAC  
CTTTAACACCCTGGCGGACGAAAAGCGTATTGTTGAAGCTCACCCGATGGAGCAGCCTGC  
GTTTCATGCGTAACTCCCGGTTCCGAGGTTTCATGGGGCATGATACGGAGGTACAGGCCCG  
CCTTGCCCGTGGCAACGCGCCTACGGCAGAGGAGCTTGCGCGTTCACAGATGCATGAAGA  
AGATGCCGGTCCGACAGCAAAGGAGTTAACAGAGAGTCCACGCCTGCCCGCTAACGGCGA  
TTTTCCACCCGGACAGGAATCTCCGTTCCCTTGAGAAGTGGCGCGTACGCTGGATGATAA  
TCTGGCCTGACGTGGTGGTCTTTTTGCAACAACCGGTGAGGTTAAGGGCAAGAGGTTCCA  
GAAAGTACAAGCTCGGGCACCGGAAAACGTCGCTGGTCGACAGGGGGAAACACTCGAGGA  
TGACCTGGTTTTGTCGGGGTCTGCCGTCACCGGATCCGCAGAACGCGAGAGCACCGGTACG  
TGAAGGGCTAGCGGCTCATGAAATTGCGCGTCATGTTTCGTATGCCTCAGCCTGAATCACT  
TCCCCGCACTGTACGGGACTCAGTTCCTGAGCTTGACACAGCAGGCAGAAGTACGCCGACA  
GGCCGGAGGAAATCGTGACATCCCGCAGCCTGAGACAATAGCACCTAAATCTGAATCAAA  
TTTCTCTACTGATAGGGAAGCTACCGTGCGCGGAGGTGAAGTTCGGGTCAAAAAAATTGA  
AGACTTTCTGTAAGAAATTTAGGGCGCGGCAAAACACCGTTATGCACAGCTTGCTGAAAC  
ACTGCGTAAAACGCTGGAAGACAGGGATTCTGTCTCGCAGCCCCACAGCGAACTGTTCCC  
GAAACCGGACTACGCAAACTGGCGAACGCACGTGCCGGTGCTGATACCCTGGCAATGAT  
AGCGCTGTCTCGTAGCAATATTGCGGGCAAGAGGAAACACAATACGGTAGGCTGGGGGCA  
GTGCATAAAAAAAGTACGACACAGTGTATCGGAAATGCTGGACGGATTTGTCAGCGCGAA  
ACGCCTCGCAGAATGGATGGAAGGCAGAATGCCCTCCCGTTGCGCGGATACCTGGCAACT  
GTTACGCACTCTGCCGCCCTCACGGATAGACAGGGCTTCTTCTTATCGGGTCTTATCGGG  
TGTGTATCAGTCGGCAGGAGGGCAGGGTTACGTTCCGACTCAGAGACTTTATTCCTGCG  
CAATAAGGACTATAAGGGGAGTAACCTCTCTTTCTCGGAAAGCAGGGATTAATTAAGTAC  
AAAGGCGAAAGTCTGGTTTGAAGAGCAGGAGGAAAAATCACAGGCGAAAGGTGGTGAAAA  
AACAGCTCCGTCACCGGGTGACAAAATCAGCTTTAACGTTTACCCGATTACCCGCAGTGG  
CGTAGTTTTATCCCTTAGGGTAACAAGAAAATGAGGGTGAGAGTTGGCTTTAAGTCAGC  
CAGTGAGGCGCGTAAGTGCATTGACTCACATCGTGATGAGCTTGTTCCTGACGTTAAGGA  
GTTGCGGGAGATTTGCGCTGAAGAGCAGCGAAACGGAACGAATCGTACCGTACCGGACC  
AGAACGCCGCAAGGGGAATGTTTACCGGGGCCGTTACAGTATGCGTTTGGTTTCCGCGG  
TGTGCAGTTTGGTAAATACGTGGTAGGTCCGCGTCGTCAGGCTGATTTGAACCGGGAATA  
TGAATCGCTGCATGTCCTTGCGGAAGTACTGAATGTACCGACAAGAGCGTTTTTCTCTGAT  
CGGACGTCTTGGCCTGGCATTGTTCCAGTGGTAAGGGTAAGGCCGCGCCACACTAGCC  
ATCAGGTGACGTGGCATTTCGACTTGTCAAAGGCAACGGACCGGGTTCGCTGGAGCAAAA  
ATGGTTCCATTCTCTCGATAATTATTTGGTCGTTATGACGTTTCCAATTTCCGGGAAAAT  
TACGTCAAGTCGCCACTTGATAACGGCAGCACAGCGTGTCCGGGTCATATTTAACGACGG  
CGGGTATGTTGATGCTGAATATCCGGTACGTCAGAAGGTTTACGACGCCTTTAAATGTGT  
GATTGAGGCCATTA AAAACAGCGACATGCCTCGTCGATAAGCGCTTCTCGATGAGGTGCG

CTCAAACCGTACTGGTCACCGGATGTTGAAATGGCGGCACGTGCCTTTGAGCGTTATGT  
TCTGCATCAGGCGCGTATGGCTGCCGTGGAGAATGATTATCTGGTCAAATCCGTAACGC  
ACCTGAGCACAACACAGATAACATCTACGCTTCTCCGACGAATGCGGAAGTGGACGGCGG  
TATTCGTGAGGCATTTCGATCACCTGTTCCGCACCCTGAAATCCCGTGAGCCGGACAAGG  
CGTTGCGTATTATCCCGTAAGGGCGTTACCCGCACACCTGAAGGTAATCTCATTTCGGA  
TGTAAACTGTAGTGCAGGAAAGCCAAAGGCAGCCCGGTCCCAGGTTGAAGCGGTTGCCCG  
TGACGCGATGTGCGGCATTATGGAGAGTGACCTGAAGGTCCGCATGGTGAAGTCACATAA  
AGAGGCTGAAGCGCTGGCGGATGAATTGTTCCATGGTTACGGCAGGGGGCATGCATCCTA  
TCGTCCGGATAAACGAGAAATTGTCCTGGTGGCGAGTAACATCCCTGACGGGTGGACCGC  
TCGCGAGAAGCTGCGTCACGATGTCATTCTCCCTGCCGTGGAGCATGCGGTTACACCAGC  
GGAATATCAGACGATTGTCAATACCGCGCTGAAAACCCGCGACAGTGATAACGTCACCAT  
GCGTGAAGCCTGGCGTAAGGTTGATGCTTCCTATGCTCAGGAATCACCGGAAGTACATGC  
GGGTGAATTTCTGGCACAAATGGCGGACATACAGGCGAATAAATTCGTGGCGGTATGGGA  
GCGTGTGTTGCCCTGGTCAAAGGGGTACTGCGTTCGTACGGAGTTACTGAAGCCGACTGA  
ACTGAACGATATCAGACTTGTTCGAGCGACCATGCTTACGTTAGGCCAGCGTGTGAGGGA  
AGGTTACACCCACGTGAGGATGGCGCGGGCGCATTGTTTCAGTACTCCTGTAGTGGTAA  
ACGTGATAAGTTCAAAGTGCCGGACGGTGAGGGCGAGCGTTATCGTGGTGAGCTTGCAAG  
AAGGATGAAATCGCTGCGCTCCACAGATTTAACGGTAAACATGGGGGGTATCCCGCCGGT  
ATTGCGTGACCTTAGTGCACCGGACTTGCCGCTGGTTGTTTGCCGTGATACTGTGCGGAT  
GTTACCAATGGTGTGATACATGGGGGGCCGATGGATGTTATCGCGTGACTGGCGAAACT  
GATGCACGATCCGGATGCAATTTACAGTTCGGGACAAAAAGAAATGCGGTTATGATGAT  
GCTTGATTACGTGGAGAAAAATGGAGATCCGGTGGAGCCAGTGGCACATATGAAGGCTGT  
CCGGTCGCATCTGGAAATCAACAAGGTAGCTTCTGTTTACGGTACAGAAGATGGAAAAAA  
ACTGAAGAATATGGAAATGATCGGGTTTCCGTTGTACCGGAGAGAAAAATTAAGCCGCGA  
TAACCTTCTGCACAGAGGGCTCCAATTGCCCAAGGGTGAACATTCTTATCGCGGCTCTGC  
GGATAAAATACTCTATCCTGAAGATATTGCAAGGGGGCCGTATTACTCCCGTACCAGCAG  
TCTGACACCGGAAGAGAAAAATTGCCTCGCGTCTTGTGCGCAACATGCAGGATAAATTCCG  
TGCGATGAAAGCTGTACAGGAGAATATCCGTAAGTTTCCGGCAAAGTGGGCTACAGTAA  
CAACGCTGAGTTGGTTAAATAACTCTTCCACGGGAAGGTGGAAAACGACGTGAACGTGAT  
GAAGGAGCGCTACGTTACGCCACTGGCTAAACTTCTTGCAGAATACAAAATTGCGCAAGG  
CGATCTTGATGGGTACCTTACCCCGCCACGCGCCGGAACGTTATGCGCATAACGCGAA  
AATCAACCCGAAAACGCCGGACGGCGCTTCCGGGATGACCTACACCGAACCGGCGGAAAT  
CATGCAGCGTGTATGTAACAGTGGCAAACAGGCACAGTATGTCCGTCTGGCAGGCATTAT  
TGATGATATGGTGGCCCGTCCGCGAGAGCCTATCCGTTAGGACGGACTTGTAGAGACCGG  
TGTGGTGGATGACTGGCAGAACAATTACCGTACTACGTTCCCTAAAAAGTCAGGATGT  
TGACGGTGTGGTGTCACTGCCACGCACAGGGAAGGCCTTACCATCGGCATACATGACAG  
CAGGCAGGCTAAGGGGCGTGATCACTGGCACAGTCTCCGTCCACTTAGGCGATACAGGA  
GCTGGGCGAATCGGTGATCCGCCATCGCAAAAACGAAGTGGGTAACGCCTTCCCTGATACC  
TGTGCAGGATAATCGCGACAAAGATTACTGGCAGCTATTAACCGATGACAGACCGGATAG  
CATCCGGACGATTCTAGAGCGCAAGGACCAGGAAACTGTTGAAACCATTTCGCAAGGTTGT  
TGAACGGCCTGTCCCGATGGCAATGATGGCAGACCGGTACTTACCACCAAAAAGAACGG  
CAAATCTACTACATCTAACTCCATGATCCGCGCGTGATGCGTGCGATGAAGAGTATGGG  
ACCGGAAACCAGAAATGCCTTTGTTTCGTACGTTGGGGAAAGTTAACCGCTTCCCTGGCAAC  
AGTGAACATGTTGTATAACCGGCAATTGCTGGTCACTTCCATCCGTGACGTGCAGAA  
GTCGCTGATGAACCTGATGGCGGAGCAGGGAAGGAGCTCCGGTAAACTGAAATGGCTGGA  
TAACTTATCCGCCCCGGGCTGTGGTGAAAGACAGCCGTAACCATGTTAGGCGTATACGC  
CAGGATGCGTGGTAAAACCCACACGTGATAAAGTGCACAGTGGCAGAAGGTGTTGAAAGA  
GTTTGTGAGGACGGAGGGAAAACCTGGCTGGTTAACACGGGTGACCTCCAAGGCCAGCA  
GAAGGAACAGGATGGCCTTGGCTCACTGGCGAAGCGGGGATCGAAAGGCCAGAGTAGCGG  
GGCGTGGAATTTGTTCCCTAACCTTGACGAGGATGCCACGGTGCGGGTGACAACGCTAT  
GCTTCTTTCTGCCTATAAGCACGCCCGTGATGCCTGTTTGTGACGCCACCAGGCGGAGTC  
TCTTGACAAAAACATGACGGTAACCTTTAACCGTCGTGGTGGAGCAGGGGGCGCTGAGGAA  
TTCGCTGTACATGTTCCGCAACGCCAGCATTACGGGAACGGCAAATCTGCTGAGAACGCG  
CGAACACCTTAATGGTGAGGGACCTTTACTGGAGCGCCTTCCCTGGATGAAGCTGAATGT  
TCTGCAGAAAATCGCGCTTGCCGCTGTCGGAGCAGGTTATCTGCTTGGCTCGCTTAACCG  
CAGCGTGGCGGGTGAGGATGATGATGGGGTAACTGATATGACAAGGTACCGCCTCATGT  
GAAACAGCGTCACCTCGTCATTATTAATCGGTGTTCCGGGGGCAAGGCCGGAGAGAAATA

GAGTATTCCTCTGCCTTACGGGTACAACGTTTTCTTCTGCTCGGGCATACTGCTGAAGG  
TGTGGCGGGCGGGTGACCTGACGGCGTCCCCTGCTGCCTGTAATGTTGTTGGTGGTGTGCT  
TGGTGCATTCCGCCCCGATTGGCAGTGGGGCGTCGGAAACACTGTCCGGGGCACTGGTGAA  
AAATGCAGCGCCGACCAATTCTGCGTCCGTTTGTCTAACCATGCCATGAACGAAAACGTCAT  
GCGGGCGCAGATTTACCAGGAGAACATGCCTTTTGGTACACCAAAAACCTGGCAGCCAGCT  
GCGGAGACGTTCAAAGCCAGAAGCATAACAAGGCCCTTTCATCCTGGCTGAGGGCGTTCTC  
CGGTGGCAGCCAGTAGCGTCCCAGGCGCGGTGGTTCTCACACCGGAATCACTGAAATTCTG  
CATTGAGTGTATCTCCGGCGGGCCAGGGCGCTGCATTTCCAAAACACTACGGTTGCAGCGGT  
TAAATCGCTGAATGGTATTGATATAACGGACCAGCAGGTGCCCTTCTGGGGAAAATTTT  
GCGAGAGGTGATGCAGTATGCAGACGAGCAGAATATGTACGACCGGATGTCACGGGTAGC  
GCAGTATCACGTAGAGCTGAGGAGTCTGACCGTTGTAGAAAGGACAGCGTGCATTGACCA  
GTACTACGGAAAATTGTCAATGAGCGGGCTTATGAATGATTCCCAGGAAAGAGACTGAAGGA  
CTTGCGTAAACAGCTTGATAACCAATTTACGCCGACAGTACTCTCAGTGTGTCCCAACAGTC  
GGCGGTGGTGATATCGGTAGTAGGGGATATGAAAATTGCGGTGCATCGGTCTAACCGCGA  
GTCCAACAAAAAAGTGGGAGGGGATTAACAGAAATGGCACCGTAGGGAAGTGAGGGGGCTG  
ATTAAGAAATAAACACTAATTGAGCTGTAATAACCGGAGCTATCAACACATAGTCAGATG  
GGCATTTCATGTGATCCAGCGAGCCGATTTATGTTTAGTGAAGAAACACTAGCGAAAATG  
GCAGCGTATTTGTAGAAAGAGCATGGCGGATCTATGTGTTTCATTTAGCTGAAGCAGCAA  
CGGTAATGGCGAATGGCTTTTATGAGCAAATAATCTTTATATGTTATTAAGCGATCTGA  
TGTACCCTAGATGATGTTCACTGATCGACGGGAAACAATACCGGCAATCAGAATTGC  
GGATGGAACCTTTAGGCCACGATGAGATCGATGAGGAGTTTTTTGAGCCAGTATTGGA  
GGGCTTTCTTATATCCAAAGATAGGCCATTTGACATCATCCACGCCCTGAAGGACGGGGT  
TTTACAGCGCATCGGATAAGAATCGGTGTTTTGATGAAAAAACCTGTGATAACACACAGA  
AAACCCGTCAGTAAGACAGGCTTAGCAAGCAGGGATGGTTACTTTAATAATTCCAGTGCC  
TTTACATCCACTTTAACACTGCTCAAATCTTTATCAATTTACGCTCAATTCTTACTGTG  
TTTTTCGAAGAAACATTCTGCCCGGCCCATGTGGTGTCTTCGAAATACGTGACAGTTGTC  
CCGCTATTGTCACGAAACTCATAACATTCATCACCCACTTTTTTAACGATGCTCCCTTCA  
AGGATAACCCATGGATCATCCTTCAGTTCTTTTGCCTGCGCTACTGTTGAACGCTATGGT  
TCAGGCCCTGGAGACCGCCCTGCTGTGCAAAAGCGCCAAAAGACACACTAGAAATAAGT  
GCTGCAACCAATACCTTTTTCATTTATAGTCCTCTTGCTGAGATGTACATTCCAACGGCA  
TGTTCAAGTATGGTGGTGCAGCGGGTGCCTTACACATCAGAGGTGGCGGCA  
GATCACTCCCCGCTAGGTCTCTTACTTCTCCGATTTCGTAGTCTACGAAGACAGCGACCT  
CCGTCTGACCGGGTCGGATTCGCACCGCGCAGAGTTCATTCCTCGTTACCAGTGCCGTCA  
CTATGACGGTTAACAGATGACAATCAGGTGGATTAAGATCGCCATGTGCTGCTTCATAG  
CCTGCTTCTCCTTGCCTCTCGGCACGTAAGAGGCTAACCTACATGTGTACAGAATGGATT  
GTCCCTCAGATTAATGTTAGGCGTCTTGCCGGACGCGTAACGTAACTGGGGCTTTTCTA  
TACGTGCCATAGGTGTTTCATGCACGAGGCAGATAGCCTCAAGCACCCGCAGCAATTCTAC  
TTAACTCTTTTTTCCCAGCAAAACGTTTTTATCTCCAGCGAAAAATCGAATACACAACCA  
GCACCACTGCCATTACTGTTCTACATTTGCGAATCCTTCAGGCCGGGTCATTGATTCAC  
TTTCCGCTCAATATTTTAAATGTCAATTTCCGCATACAGTATTGCAGTTCTTGCTGCCC  
CAACCGTGCTTTGGTGTCTTTTCTTACCCTCGAGACTGGCAACAGATTCTCGGAGCTG  
ATCGTGTCTGTTATGAAGCTGTCTAATGCCTCTCACACAGCCTCACCATCGTTCTAACA  
CCGCAGGACATACGGAAATGGGTCCACAACACATCCGCACTGGAGGCACAGGAAAACGTG  
AACCTGTTTCATGAACCTCAATGGCGCGATTCTTAAAGCTCTGTTGTGTGTAGTTTTTCT  
CCCAGTTTCTGCAATGTTTCAGCAGCTTCTGTTTCATCGCGCGTTGATTGCACCAGTGTGAT  
GATATTATCTCTATCATTTTTCTTCAGATCACCTCCTGCGGCGGTTTCAGATAGCGGCATG  
CAGTCTCACGGTTACCACGTCGCACCCGGAATTAACCACCCGTCATTAGCGTCAGGATGC  
CCGGGGATGTAAGACGCCCACTTCATTCGGCAGTCACCTTCCCTGTCAAACCTCCACGTCA  
ATAGGAACGGCTGTTATGGTATCCGGCATTGCTCACTACAACCTTATCCAACCAGCCGGA  
GTTACAGGAGAGTTGCCAGACACCGCATTCTGCTAGCGTTCCAGGTCAACGTATTCTCTGA  
ACCCTGTTTCCGTCGCACGCCTGAAGCCATTGCTAAGCCTTTTGCAGCAATGTGAAAG  
GCACAAGTTCGACCGTCAGCAAATTGCATTTTCGTAGAGGTTAGCAATCTGTTCAAACCTGC  
GTGTGTGGCAACTTATAAGTTTGGCGTACGAGTTTCGGCTTCCAGTTCTGCTAAGCACTTC  
TCTGATGCTTCAAGTAACACAAGGTTATCGCGTACCGCTTCTTCTGTACGGCAACATGG  
CATTCAGTATCAATAAGGTTGTTCTCTGCTGCTCCCAGCTCAACTCTCAGCTTCCCATAC  
GTAAGCGCAATCTCGTCTGTTCTCGTGGTTCGCGGCGTTTGTATGATTGCTGCTTTCTTCC  
CGTACATCGAGCAGTTCCAGCACGGTAGCCGGGTTAGCCTCTGCTATGAATTCAGCGTTG

CATAAGTCTAAGCATCTGTTTGAACCAGGCAGTTAACATGACATTCTGCAATCACGCCAC  
CGTGTTCCTTTCCATTTTGGGAAACAAAACCTCCAGTTAAATAGCCGTGCGGGTGAA  
CAGATGTACGCCATACGATGACGCTTCCTTTAGTTTCTTTCTCTGCCTCTAACGCAGTG  
CCTGATAGTCAATCGTGCTCAATTTACTCTTACTCCGGTATACATGGATTACTACGCC  
CCTCTTGTAATTCGCGAACTGGATCCCCTGGTTCCATTCCGTCAATACCTAAGGATTCC  
AAAACGCGTCTATTGCCTTATGGCGTTGTTCTGCTTACGGCGTTTATTCCATTTTTC  
ATTAACAACAGTAACAGCCATCGTCTCTGCAGACCATGATGAAGAAATATTCAAGGAGC  
GCTAGGCCGGTGTTCAGCACTGTATTAATCGTTGTTGTGGTGTGATGTTACGTAACAC  
ACCTCTGTTTGTGATAAGTTCTATATCCAGCTAGCAACTAGCGCAAGCTCTGCATCCAC  
AACAGCCAGGCGTGGACGGTGTATCTATCGTACCGCCACTGTGCAACAGTGAGTACCAG  
ATGGGGCATTACTTTCGGGTTTGTATTGCTGCGGGGAGAGATTGCGCTGCAATTCTACGA  
TTTCAGCGGCGTTGTGACGAAATCTGGCGATATCGTTTCCTTCAGGCGTGAACAAAGGA  
GCCGAAGCTCCTTTGGTTTTAGAAATCGATTTGACTTGCCCGCAGGCTTTTCAACATGGG  
TCTGGCCCGCTGAACACTCGAACTCGACTGGTCAAGCCCTGCCGCCTCTCTCAGTAGCAC  
ATCACTGTTCTTCGGCACCATGTAGAGGGTCTCATAACGCAATGTCATACAACTTGTACGT  
GTAGGAGGAGTTCAGCTCTTTCACGATCGGATAACAAGTATTGCTGAGGTTCTGGTCTTT  
TTCCAGCCAGAGTTGCATGTAGCAGAGGATGATCATTTCGCGTCCGTGAATCGTTGCTG  
TCATTATGCTTGTGCCGACTACAAGTTGCGCAGTGTCTTGTGCGCACTCGATGAAGTATCT  
ACGTATCTGTGCGCCTTTTTCGTTACGATCTACCATCGCCGCTACTTTGGCTGTATCGAC  
GGTAAGGTTTTAGTCTTTTTCCCTCGCCATAACCTATTTCCCGATTTCGGGGAAATAGC  
TATATAGTCCTGATTTTCAACGAATCCGTACTATTAATAACGTTCTGGAAGCCACGATTC  
AAAGCGTTTACCTACTCCAAGAAAAGTATGTAATCACGGGTATTAACGAGAAGAGTGT  
TTCATTGGCGAAAGCCCCGTTGAACACGGGGATGAGTTGCCTGGTCATGATGACCTCCTT  
ATTTGTTTAGTTCATAACCTCCAGTTAGTCGCTGGCGGTTCGAGGGTCAACTGAGCCAAAT  
AAGAAGCTCAGGGCATAATCCCCTTGCGGGTGTTGTATTACGCCTCTCCACCCGACCTTT  
GTACGGATGTAACAATGCCAAATTCAGGCATTA AAAAGCCGCAAGCTATCGGGTGAGG  
AGCCCGCTTATTTGTTCCGTGCGGTCAGTATGCGATAGCTGTGAAGGATTTGTCAATCAG  
CGGAATATTGATGAACATGTAACCGTAAATGCCTCATGCTGACACTTAACGCAGAGTCGC  
ATCGCAAACCTTGCTCACTTATCGGAAATAACAAATTAATCCCCATAAATGTATGGGGC  
AGTATTGGGGCAAAAAGTGGTCGTTAGGTGCATATTGGGGGCGAAAAACTACCTATAAAG  
AACGGTGTAAAATTGATTTCTTCATGGTCAAATGAAGTGTAAACAGATTGAATAAGATCT  
GCTCTTGGAAGAGCTTCGGTAATTCTGTGTTTTTAATACTTCATGGTTTCAGCACGTCTA  
AGGATATGGTTTATCATATTGAAAAATATAATTTTATTTTCATCCTCCTGGGCACTTTGGG  
GCACGTCTGTGGCACCTGGATTAAGGACATTATTCAGCATGGCAACTTGAGACACGCTCC  
ACTCAGGCCTCCATGCAACATAAACCTTGTAGACCATGCTTGCCTGGAGTGCCCATCT  
GTGATTCATTAATGTGCGGTTTGTCTCGGCAAATAAGCCAGCACGCATAGGGATGGC  
GTGACTGATACGCTTTACGGGATTGGATACCCGCTCTTCTTATTGCTGAATCCCATGTGC  
CTCCGATGGGGCTTACCGCGTAGGTAATACCCGCTTGTATTCTTGCGAACGATTTGCG  
GAGAGAAAATAAAGTCACTCGTGCACAATTGTTCTTCCGTGCTCGCGTAATTGAACAG  
TGATCTGATGCTGCCTGCTAAGACGAGTACGCATCGTCTGGTTCTAAAGTGCTTCACTTG  
CTGCTGCCAGAAGATGTATGAGCCGTTAGTGCCTGCGTCGGTCCTTGGTAGGGTAAAT  
CGCCTATTTTTGTAAAATTACGTCGCACTGTTTTCTGTGCCAGCTGTCAGGTGCATAGCCT  
CCCACGCAAGTGCGGCAATTTACCGTGTGCGCATCCAAGTAAAACAGCCTCTGCCCAGA  
GGTTTTTGGTCTGTTGATGATGGCAGGCATCGATGACACGGCTAAACTCATCACTGGACA  
GTGGATCCGGCAATGGTTTTGATTTCTCAGCGGTGTTCTTGAAGTAAACGGTTTTTTCT  
CCAGATACCCGTTTTTCGGCGCCAAGGCTGAACATTCCGTCTGTTGTTGTCATGTAACAGT  
TCACTGTGGGTACGGTTTTTCTTTTTCGGGACGTGCTGGTTTTGCCTGCTTCCCTCTTCCC  
CGGTCAGTAAATCTTTCCTGATACACAGGAGTTCTTCTTTTGTAAATCGATGACGCCAGCC  
TGCCAGGACCAACCCTCGGTAGCATATTTTTTCATCACTGCTCGATAATGATTTAAGGCGT  
TACTACCCATATCCATTGCTTTCAGAGTAAGCCATTTCTGTGCCAGTTCACCGACGGTGA  
TATCTTTTTTTACCAGGCCATATAGCTTCAGGTTGGGTGAGTTGGGGAGTTCGATCGGCAT  
AATCAAATGTGCCTGTTCTGATTGCAAAGCAGACCGCAGCCCTTAACTCACGACCGTTCT  
TACGGTTTTTTCGGCGTATCGGGCACGCGAAGATTTTCGCGCACTCGTTTACCCCTGTACT  
TAAACGTTATTTGGAGTTCCTCCGTGATTGTCAACGCCGGCTGGAAAGGCTGAATTCG  
CCATTGTTCCCTCCTGCGTCCAAGAGCACGCTCGGATTATACTCTTATGGACACGGTTTAA  
ACATCTTGAGATGGTAAGGGGTGGTTTTTGTATCCAAGTGTGGTGGTAGGAAGATCTTAG  
AGAGCTGCGCTGTTTTTCTTTGGCGTTCCGTGCGGGGGCTATTTGTTTATATTCTCTGCCG



TTCATCCACTCACTGTCCCTGACGCGTAATATTGTACCTTTTCTCAGGCCTGTTACCGCC  
ATTAAAAGCTCCACTCTTACCCAATCATCCGCATTTATTTGTACAACAGGTGTGATGCCT  
GGCTGAATGCCATGGTTCTGTTGGTTTCCTCACTCACGCATAAGTTCCTCTGCATGTGT  
AAGAAAAACCGGCCATCGGGGGGCTTGGTGTCTTTTGTAGTTTTTCAATTCGCATATTGGT  
TACGTCCTAATCGATGCGCACTCCTGGTTTTTCGCCTTTTGATATTGCTAAGTCATAAAT  
TTGCGCGGCACAGTACCCAGTTCGCATCCATGAATCTAAGGCGCGAACAGCCTCGCTACG  
CTTTTTATCTTCTCTCGCATTTTTGATATCGACGAGGAGATCAACGCAATTAAGGCAAAT  
GTGGATTTTGTCTTTACATTTCGATCATGACGGCTTCGCCATGATTTCCGCCACACAGTGA  
GGATAAATCTTCAGCTTCTGGCTGGTGTTTAGATAACGTTAGAGGGTTGAATGTTGAACA  
CGTTATAATCATCTCCAGACAACAAAACCTCGCCGTAGCGAGGTCAGAGAAAAGAAATCCC  
CGGGAGTGCGAGGATTGTTATACCTGGGCGATATTCACCTCTATCGCGAATCCCTTTACC  
GGTTTATCACCGTAGTGCGGATGGGTGATTGTCTTGATTTTCATATCCCTCATAACGGAACA  
TGAATTCTTCGGCTGGAATCGTCGCGGTTCCGGGTATCCCTTTGTGGTAATCAGGCGGTCA  
TACTCGCGGAACATGATTCGCTTATCCAGTTGTTATAAAAACAGGCGATACTCTTCGGTT  
TTCTATCCGGGGATCATGGCATCGAAGTATTCACCTTAAACTGCAAGTCGCAGGTTAGCC  
ACGGTTAACCTCCTGGGGCGGTTCTGGTAGCGGGATCTAGTGAGTTGCTTGGTCAATACC  
ATCACCCGGCTTAATCGTTGCATCTCCGCGCCGAACGGTGCCTGCGGAGTAGCGTGCGGT  
CAATATTAGCGGGTCAACCAGAGAGCTATCGAAATTCACCGAAATAAGCACGTTCTGGCC  
TTTTTCAGGCAATCGAACACTACAGCTTATCCAATTCACCGAGTTACCGGAGATTTACC  
TGCTTCATAAGCGGATTTTCATCCAGTGCCTAAGCGTTGCGTTGCTTTCTCATCCGCAATC  
AACGTCTATTTTTTCTTTTTTTCTGACAACCATTCTTGGAATGAACGCTTGGCAGTATG  
GCTTGCTGGATCACTTCGTGGCAGGCTGATATAAAGTGGTACATTTCCCGGCTTCATCGT  
ATTTTCGGGACAAATAAACGTGATACAACCATATTTAACGTGCTCAATTCCTACTGAGTC  
GATAGTGGCGAATGGTTCAGTGGTCAATGCAGTCAATGCCATTTTCATTAGCGCGGCGCTC  
AATAAAACTCGCACGTCCAGGATGCCGTTACGCTCTTTGATTTATTTAGTCATTTCTTT  
CTCGGTGAACGTTCTCATGTGTTATTCCTTATCTACTTCAACGCCATCTTTCAGCGTGAT  
GCCGTGCCAATCATCAGCCCGACTGGTTAACCTGGCGCATGAATGCTAGGCATATAGAG  
GCTTGCAAGTGTGGTTGCCCTTATCGTTAACAATGTTGGCAACGTGCTCGCGGCTGTATGC  
GCTCAGCGGGTCTAGGAAACTATAAAAATTTCCCTCCGGCTGCCCTGAAATACTTTACAGC  
CTTCACAAGACGATTCCACGCTTTTTCTGTTGTGGCGTCAGGACGCTTAATTCCTTCAA  
AGTTGCCATTTTCAGTTTTCTTATATGGGTATTTTTATTGTGCAGTGTGTTGAACGACG  
CCCATAACCACCTCATTGTACAACCTACTAAGTTCATTTATTTTCCGGTTTGCCGAGA  
CAAAAATTTGCGGGGATATCGGTGTCATTTGCCCGATAAACAGAAATGAGCAGCAAAAAT  
CTGCCGCTCTACTTTGTGCGGGATATTTCTTTTCTGCATAATGTAGGCACATCACTCTCCT  
TTGTTGCACCTCAAATTTTATGCCCTGCCGTAAGCAGCAGCGTTTTGTCTTTGCTTATT  
CGACAGCCATCCTTGCGCGCCTCTTTTGACAGCCAGCCCATGACGTACCGATACAGTCA  
CCGAAGCGTAGCGACTTATCTTTGCCATCTGTACAGTGGAGGCAATCAATATAGAGATGC  
ATGGTGTAACCTGCAGCAATAGCCATATCACTCTCTCGTAGTGCGCAAGTGGTTTTCTCT  
GCGGTTTTGCACCGCGCTGCGCTTTTTGCAAAAATCCACAATCCATCATCCCGTAATATTT  
CATCAACCCCATCCGTCGCTTGGTGTGAGTCTTAGCCACTGCCAGATGCCAGGAGCGTTTCT  
ACGAACGAACAGAATCTTTGCTTTACGGTTTTTTCATCGGTATGCTCTCCTGCATCTCTAT  
GGTGCAGCGACGTGCCGCTGTAATACCGTTATGGCGGGCGCTTTGGTGTGCGGGATGATGTT  
TTGCTGTTATCGCGGAAGCCCGAAAACGAGTCCGATACGGTAACAAGCAGATACATGCC  
ACGCGCACTACTCACCTCTTTTGTGCGACTGCCAGCGGCGCGCTCGGCTACAATTTGTT  
CCCAGACCCACTTGTGAAGCGCCATAAGCTTCTCGTCAATCGGTTAGTATTTGCGATTAA  
AGTAGGCCTGAGCATCATTCTCTGATTCGTCGGGTCATTCGCAAGGACCAACAGTGTGT  
TATAAATCCATGTTGGTCCGTTCTTCGCGTCCGAGTTGCCTGCCATTCGATAATGGCAG  
CCTGCATGACCAGAATGCTTCTCCCGATTAATAGGTACAGTTCTTCGTACCGGTTGCGGA  
TGATATGATTCTCACATTGTAGTTTTACGTTGCGCTTTTCTGAGCCTTCAAGTAACGCCT  
GCTTATCGCGTCGAGCTCCTTCCAGTTCAGCAACATGGCATTCAATCTCAATAAGGTTGT  
TATCTGCTGCTTCAAGCTCAATACGCAGCTGCCAACCAGTAAGCGCAATCTCCTCGTTCT  
CCTGGTGCAGGCGTTTTGATGATTGCAGGTGTCATTCCTGGTCATCCAGCAGTACCAGCA  
CGGAAGCCGGGTTAGTCTATGCCATCATTTTCAGCGTTAGCATTAGCCTGATCATCTGATT  
CAATCAGGCGGTTAACATGACATAAGGCAATCACGCCACCGGGTTCTGCTTTCCATTTTT  
GGCAAACAAAACCTCCTGTTAAATTGCCGTGCTGGTTAACGGATGCATGCCCTACGATGT  
AGCTTCTTTGGTTGGTTTCTCTGCCTTTTCACGCAGTCCCTGATAATTAATTTGCTCA  
CGTCGAACGTCTCTGTTTTCTGATAAGCTATTGCTCCTCCTGGCAACTTGCACAAGTCCG

ACAACCTCAACGGCCAGGCGTCTAAGCTCATCTATGGGATCCCCACACTCACAACACTG  
AGTCGCAGATATAGCCTGGTGGTTCAGGCCGCGCATTTTTATCGCTGTGTTGCGCTGTAA  
TTCTTCAATTTCTGATGTTGAAACAATGAGGTCTGCCATCTTTCATTAATCCCTGATTTG  
TTGGTGAATACGCGTGAGGGTGAATTCGATTAATAAAAAAGGAAGCTGTAGCTCCATGAT  
GATTTTGCTTTACATCTTCTCGGTTCCCTAAAGACGGCGTTTAAACATGCGGATCGCCAGA  
CTTAAATGAGTCGGTGTGAATCCCATTCCGCTTACCGTTTTCGCGGAGCGTCTTCAGTACG  
CTACGGCAAATGTCATCGACGTTTTTATCCGGAAGCTGCTGTCTGGCTTTTTTGTATTCA  
GTATTTGCCTGAGGGGCAATGCTGCGAAGGGCGTTTTCTGCTCAGGTGTCATTGAACCA  
GCCCGTATCGGCAAGCCTAAGCACACACAATATGAAGCTTGCTGCAAGAAATATGCATT  
CTGGTGTATCAAGCCGGGTCTCTCTCGTTTTGCTTCTGCTTTCGCCGCCATCATTACCAG  
CTTTTGTGAATGGGATGTGACTGACGTATGAAATTCTTCGTCTGTTTCTACTGGAATTGG  
CACAAACCTGACTCCAATTTTAGCGAGGCTATGGGACATCTCGATACTCGTTCCTAACTC  
AACGGTAGATGCTTTGTGCATACATCTGCCCGGTTATTATTTATCTCCACAGCCAGCCGC  
TTTGCTTTCAGGGGATTTCCAATGATAGAAAGGCCGTGAAATACCCAGCCTGGCTTTGTA  
ACGGAGTTGACGAAAGTGTCTCACCTACAGGGATGTTATCCTGGGGGTGCTTCATCGCC  
ATTGCTCCCCAAATACAAAACCAATTTTCAGCCAGTGCCTCGTCCAATTCGTCAATCCACT  
CCGGCACCATTTGGTCAAAAACCTCGCCATTTACTTTGCACCCCGCTCAACCACGACATAAT  
GCACGCCTTCACGCTTCATACGTGGGTAATAGTTGACAAAGTACCAGGCATCTTTTCGTG  
TCACCAACATGCTGTACTGCACCTGGGCCCTGTAAGCCGGCTTTATGGCCTCGATACGAC  
CGAGCCGGAACCTCATGAAATCCCGGTAGGTAGACGGGCATTTACAGCTCAAGGCCATTGG  
ATGCACTTCATTAACCATGGGGAGAGTAGGCGGTACTTATACTTTCGTGCGGATCGATGA  
TCTGGGATTCAATAACATTCACTCCGTAAGTGAACCTCAAACAGGGTTCCTGCGTTTTTCT  
CGTCTGTTTCCCCCAGGCCAGTGCTTTAGCGTTAACTTCCGGAGCCACACCCGGTGCAA  
CTTCGGCAAGCAGGTTGTGGAAGTAGGAAATTTTCATGTCAGGCCACTTCTTTCCTGAGC  
GATGGTTTACTATCACGTTGTTAACTTCTGAAGCGGTGATTACGCAGAGCCTTAATTTGT  
GCCATGCATCACCCCCCTTTTCGACAGCTCTCACGTCGATTCCGGTACGCTGCAGGATAA  
TGTCCGGTGTGCATGCAGCCACCTTCTGCTCGGAGGCTTTCTGTTTCAGGAATCCAAGAAC  
CTTCCCTGCTTCGGCCTGTGTGAGTTCTGCCGATGCGCGAATGTCGCGGCGAAATATCTG  
GGAAAAGAGCGGCAATAAGTCGTCATCCCATGGTTAATCCAGGGCGATCAGCAGAGTGT  
AATCTCCTGCATGGTTTCATCCTTAAGCGGAGTGATGTTGCGTTCGGGCTGGCGTGCTGC  
AGTATATGCACTATTTTCGACAATGCGCTCGGCTTCATCCTTGTGCATAGATAACCAGCAA  
TCCGAAGGCCTGACGGTCACACTGAATCATGCCTCTATGCCGTAACATCCGTTTGGGTTG  
CGACTGCCACGGGCGGTGATATCTCTGCCTGCGAGGGTTTTGAATGGTTCGCTCGGCA  
TTCATCCATCCACTCGGTAACGCAGATCGGATGATTAGGGTCCATGCGGTAATCCGGCA  
TGTACAGGATTCACTGTCCCCTCAAAGTCATTGCCATCAAACCTGCTGGTTTTAATTGAT  
GATGCGGGGCCAGCCATCAACGCCACCACCGGAACGATGCCGTTCTGCTTATCAGGGAA  
GGCGTAAATTTCTTTCGTCCACGGTTTAAAGGCCGACTGGTTGGCGACGGTCAACAATGC  
GATGAACTGAGCATCGCTGGCATCACCTTTAAATGCCGACTGGCGAGGAGTGGTGATCAG  
TTCCTCTCGGTGACAGAATCTATGCCCTCACGTTACAGCCTGCTCCACTGCGAGCGTTGC  
GAGTGCTGTACTCTTCCGGTTTATACCTCTGAATCAATAACAACCCGGTGGTGACCACTT  
GTTTCAACCATGTACTCGATGTGTTCTGCCATGCGCTCCTGAAACTCAACATCGGCATCA  
AACGCACGGGCAAGCGCTTTTTTGTGCTGGCCCCGAGGGCGTTGCTAATGATCGCTGCTGAGT  
GATTCAAACAGGGGCTGGGGCAGACCTATTCCCAAGCCGTCTGCCAGCTCTGCCTCTTTC  
TCTTACGGGCGATCTGCTGGTAGTGTGCGGTCCAGCTCTGAGCCTCAAGACGATCCTGA  
ATGGTATAAGCGTTCATTGTTGAACTCCTGAGATAGCGCTGAAAATGTCGCCCGCGAAAT  
GCCGGGCTGATTAGGAAAACAGGAAAGGTGGTTTGTCAATGCTTTAGCTTGATCTCAGTT  
TCAGTATTACTATCCATTTTTTATAGGCGTGCATGGCCTCACGAAACATCTTTTCATCGC  
TAATAAAAGTGGCGGTAGTGAATTTAGTCTGGATAGCCATAAGTGTGTTGATCCATTTTTG  
GGGACTCCTCGCTGATTTAGTATGTCGATAATGCGTTTCCATCCTTACCTCATTACGG  
GTGATTGCTTCAAGTAAAGATTCCGGAAGGGCAGCCAGCAACAGGCCACGTCGCAATGGCA  
TATTGCATGGTGTGCTCCTTATTTATACATAGGGAAAAATGCCTCCAGTGAAGCGTTATT  
GGTATGCGGTAACGGCGCGTTCACGCGGCTTTGATTGCCTAATCAACTGGATCACATATT  
ACTGATGTAGCGATATGGGTAATTTCTTATTCCTACGCTCCCATCCATTGGAGGCCATGCT  
TCCGGACCATTTCCATCATTCCAGTCGAACTCACACAAAACACGATATGCATTTAAGTAG  
CTTGGAAATTGCTATAAGCAAAGAACCTTTCCCCAGCATGATTAATACAGCATTTAATAAA  
GAGCCGAGTTTATCGCGTCCGTTATTCCGAGTTGGATAAAGAAATTATTAATCTGGTGAAGT  
TTTTCTCTATCATTACGTCTGGTTCGATTGAAATTTCTATAGATGCTTTTCAGTCGTAA

TCAATGATGTATTTTTTGGATGTGTGACATCTGTTCATATCCTCCCAGATGAAATTTTCGCC  
ATCACATTGGAGGGCGAAGAAGATTTCCAATATTCAGAACAAGTCGGTACTGTGTAGTT  
ACGAGCGAGATTGCTCCGTGTATTCACTCGGTGGAATGAATACACAGTGCTGTGTTTATT  
CTGTTGTTTATGCCAAAATAAAGGCCAACAGCAGGCAGCCTTGTTGTAATGTTGCAGG  
TATCAAGTAAGTAATTAGATGGAGCGCCATAAATTATGAATTCATCGTGTGTAGGGTCCA  
TCTCCATCTCTTGCCCTATTGCCATTCTTGCGTCAGTGTCTGTCAGCGGGGAAGCATAACA  
CAGCCCCTCACCCATTGTTTTAAAAAGAACTGCAATGGGTGTGGTTTTACTGAATTTG  
CGTTAACGCGAAAATCACAAATCGCAGATTCATGAAATTCATATGTCACCTCTAATTAG  
CGATTTGCTGCCTTGTTTCATTTTCTGGCGGCCGACACAAGTCATCTTGCTGTCAGTTGT  
TTGGATTTCCGGTAGCCTGCCGCTTAAAGAGCTACATTTGGAAGACAAGTTGAGCCTTCA  
TATTTTCTGGTCAAAGTTGTCAGTGTATAACTTCTGCTCTCATCGCTGGTTTTGCGTTT  
CATTGTAAGACGACTTGTGATGGGGTTGGCCTGTGTAGTTTGTTCGGCGCTAATCGCCTCC  
TAACTTTGCATGTGTCCGCGGCCAGCTCTACGGCGAGAAGGTACGGTGCCTTTACATTCT  
GCTTTTCGGGACATAGATTCCCTCCCGAATAAACTTTGGCGATGCCATCTCGAACCTCTTC  
CTGAGTCGGTTGCTTCGGCATCGCATCCCACAGCTTATGTGGTTCGGTGATCTGGCTTTT  
CAGCCACGTAGTCGAGAGTCGACGTTGTTTAAAGAGCCTGCCAGTCTGTTCCAGTTGGCT  
TCCAGCGTCCTGGTGATGCTTAAATAGTACGATATGCACTTCACTTGGTCAATAACAATT  
GTTCTAAGACGGGGCGTTTTTTTTGCAACGTTTTGTATTTAATCGTATTGTTTTATAGCGT  
GGGTGCATTGCCTCGGCGATGTAAGGAAAGTTCACTATTGCGTTGGTTAGTGAGTTGTAT  
CTATTTCTTTGCCAATAAAATACAATTGTTTATGTGTTTTTTTTGGGCGAGAGGAAGAGAAA  
ACCCGGCATGGAGGCCGGGTTGACTATTAGCGGTGTGGCCTTGAGCGATAATGCTCAGAC  
ACATGTTCAAGATTTGCATGCCTTATCCGTTTCATAGGCCTTCACATGAACTGCTCGATCG  
AATTGGTCATTCAAATCGTATGTAGACATCTGTTTTTTCTCATATTGGCGGCAGCCCAAC  
AGCGGCTTGAAAAAATGTTCCAGACGCGCTAAGGTTACATCGCAAATATCGTGTACCTTT  
ACAATGGCTCCTTTTGGAGGCTCTGGTTAACTATATCAATGTGCAACTGGGGAGTTTGA  
CATTGTGTAGAATGCTTTTGAATTATTGAGGCCGAACGTAACCTTCAGCATTGAAGAGT  
TGCCTTCGGCCTATTTCGCTTGTGATATCGTTAGGAATCCCTTTAATCGTTACTATAACCC  
CTGATTCAGGTCGAAGAACTACTGATAGATCATAGCTATGAAAGGCATTAGCCTTGCCCT  
CGACTTTTGTGGTGCGCCAGTCAAATCTTTTCTCACTGGATTATTTGTCAATCGGAG  
TGACTGAGATTTCTTCACCAGACTGGAAAGCTTCAAACCTTTGGATTTCCCTTTGCATGC  
GTCTTTTATATGCAGTATTGCTGCTGTGCTAGTCTTCGGCAGACTTGGCGGTGATGTATC  
GCTCGGCACGCTCATTACATCAAGGTGAGTAACATCACCCATTTCTCTTCTTGGAGTA  
CCGTTAACAGGCGATCGCATGAGTTTTTTTAAATTTTCGAGCGATGTCATCCTTCATTATGT  
TCAGCGACATAAGCTCTTCAAGGAAGTCCTTGAATGGCTGCCCGCTAACGTTTACTTTC  
CCATTTGCTCTCTCTCGAAGTTATTGACTCAGATCGTGTTTATCCAGGGATTGATTTGCA  
TGCAAGACTCAAGTCTTGAGAATTGCCGTCCCAGATACACTCTCAATAAAAAAGGCCGCA  
GCTCTGCGACCTTTCACCTCTTAAATATCTTTTCTCTTACCAAAAAGAAACAGCAGGCTCG  
GTGAGCCCTAACAACTTCAAGTGCATCGGTCAGAGAAAGCTCCGTGCTATACAGGTGTTA  
TTTCATATCTTTTTGCAAGTCAATACATTTTCCATCTGTCCAGAGAGCGGATGCACTTGAT  
TCTAGTTGATGGCGGGACGTTTTTTTACCTGCCTCACCTGCCATAGAGGGCGCTGCTCA  
CCGATATTTATCGGCCGGTTCGTTGATGTTGTCGACAATATTAAGCTCATTACGGTTATAC  
TCAGATGGCCTTATGCTTTCAATGAATATATGAACTTTTTTTTTGACCGCTTGGTACTCAT  
GGCCATTAACTCCATCTATCCTCTTTCCCAAACGTCTCTTCAGGGCATTGGCTGGCGA  
TAACTTTCCCAACAACGGCACAACCTCTGAGTGCATGTGATCAGTGGATATTGCGGGTTTC  
GTGGTTGTAGAAAGAGCTGACCGCTATACCTGATCAGTTTCTTGACGGTAAATTCATCAC  
CACCAAGTCTTGCTATGCAGGAATCGCCGGGCTCAACAACCTTGCTCAGGGTCAACCAGAA  
TTAACATCCCGTCAGGAGAAGTGGTTAGGAACAGTTGGTGCGGACATTGAGTTACCTT  
CAACCTCAAGCCAGAAGGCCGAGTCACTGGCTCTTTTGGATGTGCTTACGAATCTCTCCG  
CATCACCTTTGGTAAAGGTTCTGAGTTCTGGAAAGAACATCCCTGGCTGAACATGAGAAA  
AGACAGGGTACTCATATTGTTTCTTAAATTGGGGCCGATGAGTATCCGCCAACAGGGCGAAA  
GTGTCTCGTTCGTTGATGAATGATTTGTTATCAAAACCTAGGTATTTCAACACCACACCAA  
TATCACTAAGAGTAGGATGATGAGATCCGCGCAACCAGTGTCTTATTACACCCTGCGGCA  
TACCTAGCTACTCGGCACACTTCTGTTGAGTGTGCGGAGCTCTTTCATTCTGAATCAAG  
CCCGTTCATACCATTTTCAATTTTCATGCCCTTATTATTACGCTCGGTACAGGAACCATCCC  
TGCACAATGTGTATTTTCACTTCTATTTGAGAAGTACAAATTGTATTTATTTATTCGTGG  
TACTATGGGGGGCATATGAGCAACCTACGAAAATATCGATAGTCACTGCATTTCTTTCC  
AACAAAACCTTGCTAAGGCACTTGGATGCACACAGGGAGCTATCGGACACTGGGAAGCTGG

TTGTCGCTTCTCAGACCTTAAAACATGCCGTGCTCTTGCTGCGCGTCTAACTAACTTAGG  
CGAAAAGTAAGTCTTGATGACGTGTTCCCGCTGGAGCAAACAGCCGCTTAATAAACGAA  
GCCGTTCTTTGTAACCACGCACATTCGTCTACGTCGCTGAAAAGCAAGACCCAAGATAT  
CTGACCAACCAAGGCCATATGCGTTTCCACGCATACGTCTCAACTAGCTATTCACTACCT  
GAAATCTTAAGAAGTGGAAACAAACAAGTTACAGCAAACCTTTCACAGCGAGAAATTGATCG  
CGCAGAACTGATTTACTCATCAACCTCTCAACGCTCACCTGGCGCGGTCTGGCAAAGAT  
GATTAGCTGACAGGAATCTAAGATAAGAAGAACGGACTGGAGATTAATTGCTTCGGTCTT  
GCGTGCTTTCGGAATGGCAGCAGACATCAGTCCGATAAGCAGGGCTTTAATGTACGCGCT  
TGATGAAATCGCAAGGAAGAAATCCCCGACCGCCACCGAGGATTTTAAACAAATTAATAT  
GCAATTTTGAGGGAATTACTGGATCAATCCACAGGAGCCATTATGACAAAACAACACAGT  
GCTGACCAGGAAAAAAGTCACAAACGCATACTCCGTGCTCGCTTCTGTCTGCTTCAAG  
AAGCCTGGTTCGATTCTGGGCTGAGTTGGAAAAAGTGAAGCTAATGCAGAAGGAGAAAGGT  
CACGAGTAACATATCTAATCTAGCGGAACTCAGAGAGGCAAGAAGGCTACATCAACCGCA  
TCAAAGCAGCGGTAAGGGGTATGCCTTGCTTACCCTGAAAATTATGGATGTGCCGTTTTA  
CAAAGACGCCGAAACATCGCATCTATGGGTACACTTAATCCTCAAAGCAAACATACGCC  
TGAGTATGTAATGACTGACGCAGGAGCAATTCTGGTAGGCAGAGGGAAGCTACGTGGCGG  
TAGAATCTGTATGGCGCTTGGAACAGGACTCAAACCAGATCGTGTTACGTACCTGCCTAG  
AAAGTTCAAGAGACTCGGCGCGAGTGTCTGGGTTTACACGGTAAATTCTCAGTTTTCTC  
GGTAGAGAAATATGTCGTTTATCAGTCAAATTTTGTAACAGCAGATTAGCAACAGATTAC  
GACTTCAAAGCGAGCAATACCAATGCGTGCAAGCAAGACGGTCCCAGCAGATTACGACCA  
AATTACCACAGATAAAGAATATTGGCACATTAGCTCTAAGACTGACGTATTAGAGAGTGC  
CACAGAAGACACAAAGTCTGGGAATAAAAAAGCTCCCCTAGCTGTTAGGATGTTGTCGA  
TGCTGACCACGACTTACTTCCGGAAGCGCCAACCAGCCGCGCACTGAATGACAAGCGTAA  
AATCCAGCTCCGATCGTTCTGGCGCAAAGCCGGAGTTATAACCCGCCAGCTTGACGTGCA  
TGGGTTACGCTACGGGACTGGATAAATTATTCGAGTTACGTATGCGAAAATTGCCGATG  
GATGATCGAAGAGCGCCATAACAATCAGCGCGGAACCGTCTGGCACAAAAGGGGTTTTA  
ATTCCGCCTTAACGATAATACCTACTTGAAAGTTCGTGAGGTTGAATACGTTGATCGATA  
ATTTTTATGCGCCGCCCATAGCATCGAGGCAGATCAGGCAGTGATTGGTGGATTGCTTC  
TGGATGATGACAGCCGTGAGCGCGTCCAGAAAGTTGTGGCGATGCTGATGCCTGATTCAT  
TTTACAGCCGACCACACAAATTCATTTTTCGAAGAAATAACCATAATGCAGTGCGAGTAAA  
AGACAGTAGCTGGCCTGACGCTTTTCGATGAACTGGAGCGCAAATGGTTAACGGCGACTG  
TTGGTGGTTTAGCTTATATCGCTAAGTTCGCTAAGAACACGCCAAGCGCAGCAAACATCG  
TTGCCTAAGCAATGGATGTTTGTGCAACCGTAATGGAACGCCACGCCATCAACCGGACGA  
CTGAAACGACGGAATTGCACTTTTCCCCAACGGAATGAGTTCAACGCAGAAGTACGCAG  
CTAACTTGGCGATTTTCTGGAACTGTCAAACCATGCAAAAACAGGATCGCGTCGCGGCC  
TTCGGTCATTTGGCGAGGTCATGGAAGACTGGGTTAGGGACCTTGAGAAGCGATTTGACA  
CGTCGCGCAACAACGAGGAATGATCACATGGATCCCACCGCTGGACAGGATGCTGTCAC  
CGAAAGGTCTTGTGAAAGGCTCTCTGGTTGTCTTGGGCGCTCGCCCTACGATGGGGAAA  
TGACGGTATACAGCCCGATGGCAATCAATTTTCGCAGTGCATGGGACAAAGCCCGCTCTGA  
CCTTCAGCCCTGATATGCCAGCTGATCAGATACTGTAAATCCTGGTAGGACAGGGGTCAG  
GTGTTAACCCGATTATTTTTTACCTTCCGGCGACAAATGTCGCCGATGACGGCTATCAGG  
GTGACTACGAGGGTGACTGCAACAGGGCCATCGAACCAGATAATCGCTTGAGTGCAATCG  
ACATGCTTTGCGTCGTCGACAAGTCGGGATTATCTCTGGCTCAAATCGTCAACGAACGCC  
GCCGAATCAAACGACAAAGAGGATGCGTTGGTATGGTTCTGGTCGATTATGTTACCCTAA  
TGACCGCTGCGAAGGCCGATCGCAACGACCTCACTTACGTATGATCACCAAAGGACTGA  
AGAACCTTGCCAAAGATCTTGAACCCGTTGTTGTGCTTCTTACGCATCTTAACAGCGCAC  
TACAAAGGCGAACCAATAATCGCCACTACCAAGTACTGACGAGATACACGCCAGATTG  
AACAGGATAGCGATTATTGGGTGGGGATCCATCGTGAAGGAGCTTTTGTATGACAGTGTTT  
CACCTGGTGAAACCGAACTAATCCTACGTCTCAATCGTCATGGCAATACCGGCACGGCGT  
ATTGCATCCAGGCACATGGCGCTATTTATGACAGAGACCAACAGACTGCTGAAATGCGCG  
CAGGTCAACGCGAGGAACAGCCGGCCGAGAAGAAAGGAGGATTGTGATGAATAAAAAACA  
ATTAGCATTCTCGAAAAGGCATGGGATGCACAAATATCATTGCTTTGAAAGAAGAGGC  
AATACCAATTATCCAGACCGAATCGAAAAGAGCCAGGCAGTTATGCGATGGCGCATTCTT  
GAACGAAATTTGGATTACGCGCCAGATGCTAACGTTTAAAAGGTATGATATAAATCATCG  
TGGTATAACGGCGTATCGCTCACGTCTTCTGATGTCGTTGACGTTGATGAAATAGATAG  
GGAGACCAAGCAGTGGCCATCTACATCACTGAGCTAATAACAGGCCTGCTGGTAATCGCA  
GACCTTTTTACTTGGGGGAGAGGGAAGCGAACGAGAGCTACCGTCACTTTGAAAACCTGGT

ACTCAAAGGCCAAAAGGCCAGTTCACGGGAGATGATGAATTGAAAGAGTTTGCTTGGGTGA  
TATGGCAGGCAGCGCGATCTGCTATTGAACTGGATATCGACTGGCCCGAGTCGAATGACG  
ACTTTTGGAAAGGATGGTGAAGAAGGTGCTTATGCGATGGGTTATGAGGATGGGCGTGACA  
AAACGGTATTTGCAGTAATGAAAGCCATCAGGGCCGCAGGAAGCAAAGAAAAGAATTTTCG  
GTTAAGCAGATAACACTTCAATAAATCACTTTTTAGGCGTCACAACCGCTCTGTAGCGAG  
GTAAGCGGGCAAGGCATGCCAATAAGCAGCGAGAATGAAAGGTGCGTCAGAATGTGTG  
TGAGGACGTGCTAAGAAATGAGTACGTTAGCTGACCTTGTGACGGGCTAATTTTCGTTAAG  
AGTAGGTGCGTAGGTATAGGTATCGTTCATCGTCGAGTTCGCCGTTTGATGAGTAGTATT  
AGCATAACCTGCCGCACAACGCTATCCGCGCGACCGTGTCTTCGACGGTTGTTAAAC  
TAAACCATGAGTTAAGCGCAACAGAATTAGCCGGAGTCTGGATTAAAAGTAAAGGAGTG  
AGCATGAGCGACATATCATTAAACCCAGCCAACGCTAAAAGAATGTCCGTTATGCGGCGGT  
AATGCTCGTCGGTGGGTTGAGGCCGGAATAAATATTGAGGTGTGGGGCTATGCAGAATGT  
GACCTCTGTGAAGCCAGGGGGCCTTGGGCCCCATCAGTTGCTTCGGCGGGCTGGAAAATGT  
AACTGGAGAGCTGGAGATGAAGCAAACTTTCTGCTACGCAACGAATCATTGAGAAATAA  
CGCCATAGACGCCATTCCTACTACTACCCATCGACGAAAAGTCACCCTGCGAAGTCCACGT  
TAGAGAACCAAGCGCAGCAAAGCCCAGAATGAACGTATGTGGCCAGTCTGAACGATGT  
TTCTCGTCAGGTGCTATTGCATGGTCAACGGCTGGCTCCGGAAGACTGGAAAGACCTGTT  
CACTGCCCTGTGGTTAAGACCCAAAATCTGGAGCAACGGAGTGTGCCTGGTATCGACGG  
TGGGGTTGTCATGCTTGGCGTGCGTACCAGCAGAATGCGGATGGCCAGCATGACTGAGCT  
TATCGAAGTCATGTTCTGGTTCGCCTCAGAGCCCAACGTGCGGTGGAGTGATGACTACCG  
CCGAAAGTATGAACGGTCACAACGAAACAGAAGGGCGGCATGACTATCAAATGAAATACG  
CCAGCACACGACAAGGACTGCTACCAAACCTCCGCTTTCGCGTCTGATGCACTGGATATT  
GAGTTTGGGTTCTGACTGGATCCAGCTGCGAGCGACAAAAACGCACTGTGTGCTCACTGG  
CTAACTGAGGCTGACGACGCGCTAATTTCTACGGGGATAAATCACGGAGCTGTCTGGAAT  
AACTACCGTCAAGCAATATCTCGCCGTGGGTGAAAAAAGCCGCGGACCAGTGCATACAA  
CAGCCACAGACGGTAGTGATGAATCTGCGAGAGGATATGTAAGTCGGATGGTTCAGCAAG  
GTTCTGGAGAGTGTGGACGACGTTTCGCATGATTGCTGATGGACGGATTAATTTTATGGAC  
CCGTCGACAGGGCTGGTGAAGAAGGGAATCAGCTAAGGCTGAATGTTGCTGATGTGGCGA  
CCATTCATCATTCTCGACGGCTTTTACTATCGGATCCAAAGCGGCATTGAAGGCGATC  
GGGCTGGGCGTAAGGAGGGGTGCATGAGGCGACAGCGACGAAGTAGCACAGACATCATCT  
CCGAAAGCTGGAAATCCCTTCCGTCGATACGCTCCGGAATAAACGCAAGCCAAGCCCAA  
AACATTCTGAGGTAAAAACGTTCAATTGCACAGCTCACCTGTCGGATATCCGGTGGCTAA  
GACATCGGGCGAGGAAATGACAATGCTTTCAATTCAACCTGGATTTGAGCTTAAAACAAA  
ACAAGGCCACATGTTTGGCGAGAAAGAGTCACAACGAAAAATGGTGTCTATCCGGTTGCC  
ATTTCTCAGTATTTATGGGCTAAACAGGGAGGCAACAATTTATTGGCATAACATGCTTCAG  
AGCCGCATTTAAGGACCCAGACTCGTTTGTGAAAAACCACTCGCAGTTCGTTAGGAAAA  
GGGAATCGCCAATATGACATAACATGAAGGCGTATCAAAAAACATGGAAAGAACACGGCTA  
TCGATACCAACAAGACATGGGAAAGCTTGAATCAGACAACCTGGAATTAAGATGAAAGCT  
CGGTGAAGCAATACGAGACATTGATGCCTACAATCGACTTGTAAAGTGGTGACAGCCATGC  
TTAGCCCGTCCCAATCCCTTCAAGAGCAGAAAGAATGCGTCGAGCGGGCTTTAACGTGCG  
CTAACAGCTGTCCGAAGCTGTATGTGCTTGAAGTACACATGTCTGGGCACTGTTGTGCAG  
AACTGATGAGCGATCAGAATAGCTCAATGTACGAGGAAGAACACGATGGCCATACCTGCG  
CGAAGGAAATGCACAATATGCAAGGAGTGGTTTACCCGGAATACTCAAATCAGTGGTGG  
TACTGCCCCGAACACGGAACCTCAGTTAGCACTCAAACCTACAAGGTAAACAGCGAAAAAA  
GTGAAAAAAGCAGCAGAGGAGAAACGACGACGAGCGGAGCAGAAACACAAAAATAAATG  
AAGATTGAAAACCTCGCATTAAAGCCCCGAGTTACTGGATTAACAAGCCTAACAGCC  
CGAAACGCCTTCATCAGAGAATGAGGCCCCGACTTACGATGTATCTCCTGCGGAACGCTA  
ATATCTGCTCAGTGGGATGCCGGACATTACCGGACAACCTGCTGCGGCACCTCAATTCGA  
TTTGTGAACTCAACATTCACAAGCAATGCGTGGGGTGCAACCGGCATGAAAGCGGAATT  
CTCATTCCCTATCTCGTCGAACTGATTAACCGAATCGGGTAGGACGCAGTAGACGACAAC  
GAATCAAACCATAACCTCCACCGCTGGACTATCGAAGAGTGCAGGGCCATCACGGCGAAA  
AAACAGCAAAAACCTTAAAAACCTGTGAATAAGCAGAATTGAGGCGGCATGGCGTTCACAG  
GAAAAACCATTCCTGACATGCTTGTGAGGCATATGAAAATCAGCCCGAGGTACCCAGAT  
TACTGATCTGTAGTCGCAACACGGTCCGTAAATACGCGGGCGATGAAGAGTGAAAAAGAC  
TCGCTATTGTCATCGCTGTTCTCATAGTTCATCGCGGATGTGGTAAAGATACTTAGGCGT  
GATATCCGGCAGGTTCTTGAGTGCTGGGGTGTACGGGCGGCAAATAACCATGAGGCTGTG  
ACCTGGTGACCCATTGCCGCCGATTAAAGGGACTGATCCCCCAAACGTAAAAGCACGC

CCGCAGTGCTGTGCCGGTGGTGCGATGGTGATATGCGGGCTGTATAGCCCCCCTTTAACGG  
AACAAATCGCGATCAGCAAGACTTGCTCGTTGATTATTACGTGCTGTGGGGGACGTTTCATT  
GCGCGGGCACGGATACATGGGTGCTCTGACACCAGGGTAGATCAACGCCTTCACAAAGCG  
GAGGGGATAGTTGAAGATATGCTGATGATGCTGGGAGTGAGGCTTGACGTGGATAGGTCT  
GTTGAGCGTGAATAACCGGGAGGGAGAACCCTCTGTATTTTATCAGCGAATAAATAGTTTA  
GGATCGTAAAAGTCTGCCTATCATGATAAGAGTGGTTAGATTGCCACGCTGCTTCACCCG  
CCGATGCGCGGGTTTTTTTTGTCCCCAGAATCCTGTGAGATAGACGGAAAGTATACAGAAA  
GGAAAGTGCAGACCACAATTAATAAGAAAATCTTAAAAATTGCACATCGCATTATTAGTTT  
TCTAAATATTGTGTATTTTTTTGTATTGCAGGATGACCGTATAACGAAGTTTGGCGTAACAG  
CATTTTGCTCTACGAGTTTGCCAGCCTCCCTCAGTGGATGGCATTACATGGCCGTAACA  
TCCTGGGTATCAATAAAAGTTGTTGTCTACGTACGTCAAGCCGTCGCATCAGATTTGACC  
AGATATGTTAAGGTTGCAGCGCTCTCTGAATAGAATTATCATTTTCGTTACGTTATGGTT  
ACGTTTATCCGGTGCGCCGTAGAACGCCGTCTTCAGAGGATGGAGGATATCAAGAATAT  
AGTTATCGTATGGTGTCTAGGAGTATGATGTAATATGAAAATAAATTCTTTTTAGAGTGG  
TAACTTTTTCTTTGTTATCTTTTCAGTGAATGTGGTTGGGATGGAATTTACCTTAGACT  
TCTCGACCGCAAAGACGTATCTAGATTCGCTGTATGTCATTCGCTCTGCAATAGGTAGTC  
CATTCCAGACTAGATCATCAGGAGCTACGTCATTACTGATGATTGATAGTGGCACAAGGG  
ATTATTTGTTTGCAGTTGGTGTAGAGAGATAAATCCAGAGGCAGGGCGGTTTAAATAATC  
TACAGCTTAATGTAGAACCAAATAATTTATACGTGGCAGGATTTGTTAACAGGACTTATT  
ATGTTTTTTATCGGTTTGTGATTTTTTACATGTTACCTTTCCAGGTACAACAGCGGTTA  
CATTCTCCGGTGACTGCAGTTAACCACGTTACAGCGTATTGCAGGGATCAGTCGTACGG  
GGATACAGATAAATCGCCATTCGTTGACAACCTGTTACCTGGATTTTATGTTCGCATAGTG  
GAACCTCACTGACGCAGTCTGTGGCAAGAGCGATGTTACGGTTTGTACTGTGACAGCTG  
AAGCTTGAGGTTTTTCGGCTAATACAGAGGGGATTTTCGTACAACACTGGATGATCTCAGTG  
GGAGTTCTTATGTACTGACTGCTAAAGATGTTGATCTTACATTTAACTGGGGGAAGGTTGA  
GTAGTGTCTGCTGATTATGATGGACAAAACACTGTTTCGTGTAGGAAGAATTACTTTCG  
GAAGCATAACATGCAATTCTGGGAAGCGTGGCAGTAATACTGAATTGTCATCATCATGCAT  
CGCGAGTTGCCAGAATGGCATCTGATGAGTTTCTTCTATGTGGCCGGCAGATGGAAGAT  
TCCGTAGGAATATGCACAATAAAATATTGTGGGATTCATAGACTCTGGGGGCAATTCTCA  
TGCGCAGAACCATTAGCAGTTGAGTGTGTTAAATGAATAAAACATTATTAATAGCTGCAT  
CGTTTTCATCATTTTCAGCAAGTGCCTGGCAGCGCCTGATTGTGTCACTGGGAAGGTTG  
AATATACAAAATATAATGATGACGATACCTTTACAATTATAGTGGGTGATAAAGAATTAT  
TTACCAAAAGATGGGATCTTAAGTCTCTTCTTCTCAGTGCGCAAATTACGGGGATGACTG  
TAACCATTAATAACCAATGCCTGAAATAATGGAGGGGGATTTACCGAAGTTATTTTTCGTT  
GACTTACAATAGCTCAGCGAAAATAGCAGGCTGAGAGTCATAAATGATTAATAACATCTCA  
AGTCAGTCAGTTGTTGTCGGTCTGATCATGGATGTGTTAGAAATTTTCTGCATGGTGAAT  
CCCCCAGTGCGGGCGGGGCGACTGGTGAACGGTGTGATCTATTTGATGATCGTCAGCGAGA  
ATACGCGGGTTTGGTGGCACCAGGCCGAACCTCACCGGGAGGCACCCGGCACTATGCAATG  
GTACATAGCGCCACTCTCCAGCCCCTCTCCGGAGGGGGCGTTCTTATTGACAAAACAAGCC  
CGCGCAGGGAGAAGCTGGAGGCAAGGAACAAATAACAAAACGTGGAGTAGTATTTTCAGCT  
GGCGAATAATATCCGACAGTAATCACTCTGCGTAATAGCGCGGCCTTTTTTCGTATTGCGG  
GTTGTTGTCTCTTCTCCAGAGTCATGTAGCTTCCGCATTTACAGCACGCTCAACATTT  
TACTCACATTGTTTTCCCGGCCGGGACGATTCATGGCATTTCACACTACGATGCGGTCA  
GGGCGGCATCGCCGTCAGACCTTGGTGTATCCCCTTGCGCAAAAATTTCATGAAGGATGGC  
GACCATACGGTGGGCCGTTTTCTTCGTATACGGATGATGGCGCAGCACTTATTCAGGCCA  
TTGTACAGAAGGTGATGTGAGCACACCTGTTGTGGTGAAGCTGACAGCTGGAGATGGTG  
CAGTAATCAGAGCCACCACTAACCCCGCGTATTACTATGTTGTGGTTCTGGAAGGGCAGT  
CACACGCCATGTTCGTATGGTGAAGGTCTTCTGTTTCCGGAGACATACGACCGTCCGGACC  
CGCCATTAAGCAGCTGGCGTGTGCGAGTACGGTGACACCGGGGGGTGTCGCCTGTAAAT  
ATAACGACGTCATTCCGGCGGACCATTGTCTGGATGATCTGCAGGACATGAGCCGCCTTA  
GCCATCCGAAAGCGGACATTTTCAGAGGGGGCAGTAGGAAACCGTGGGACAGGGGGCTACATA  
TCGCCAAAGAATCTCAGCCGTTTATACAGGCGAATACGGGCATTCTGTTGGTTCCGTGCT  
GTCGGGGTTGTTAAGCGTTCACCACTGGAGGCGAGGACACATACAGTGACGCGAGTAGTG  
CCTCGGAGAATTCAACCCGACAGTGGTGTGGACAAGCCGCTGTATAAGGACCTTATCGGTC  
GATCAAATGCAGCACTGAAGAATTATCCGAAAATGTGCTGTTTGCCGTCGTGTGGATGC  
ATGGCGAATTTGATTTTGGCGGTACGCCGGCAAATCACTCAGCATAGTTTGGAGCGCTCG  
TCGATAAATTACGTGCAGATCTGGCGGAAATGGCAGGTCAGTGCCTCGGTGGCTCTGGTG

ACGGTGTTCCTTGGATTTGCGGGGACACGACGTATATCTGGAAGCAGAACAACGAATCCT  
CGTACCAGACGGTGTACGCCAGCTGCAAAAACAAAACGGAAAAGAACATTCATTTTCGTAC  
CGTTCATGACCGATGAGAATTGGGTGAATGGGCCGTCCAAGAACCCGGAAGTAGACCCGG  
ACATTTCTGGGTATCGGATTTTTCGCGTTTCGAAATGGCGTGACAGCTCAGCCTGCTGGACGT  
CACAGGACAGGGCGAGCCAATCCAGCGCCTGGGCACGCCGTGGCATTATTTCCGACCGTC  
TAGCAACGGCGATTTTTCGCGCATTCCGGAAGAGTGGCGCTAAACGCGGAGGCATCATCGA  
TAGTATCAGAGGTTTCGCCCACATCACCTGCCGGTGCAGAAGCCACAGGCGTCACAACAC  
TGCTCTCTTACCTTGGCAGCGAGTCAGAGGGAAGCCTGAAAGTACAGGGATGGTCAGCCC  
GTGGCGGGAGGGGACCACTCGTCAGCTAGGCGGAGGGAACCGGAGGTTAGCCAGTGAAGC  
TGACCAAGGAAGCCGGTAAATGCACCTGGGTGCTGGAGTACGCCTCGGGCAATGGTGC GG  
ATCTGTTACAGGAAGGGTGGCAGATTCGCTGCCACTTTAAGGTTTCGGGGGTGCTAGCTC  
CGAACCAAGTATGTTATGGCGTTGTACAGGCCGGTATCTTCACTACCACAGGGCGTTGCC  
TGACCAGAGACGGGTGGAATAACCTGCTGGCAGCGTTGTACGTCCAGACAGATGCAACAG  
AAATGAATGTGATATAACCACAATGCGAAAGTGGCGACAAACAACCTGATACTGGGAATCT  
CTGGTGCATTTGATAACGTATGGCATAACGGTGGCCTTCCGCTTTGCCGGGAATAACAGCC  
TTGAGGTGACGCCGGTTATTGATGGTCATGATGGGATAACCATTACGCTGACACAGTCAC  
CGGTCAGTGCATTTGCGGCTGATAAGCTGCATGTGACAAACATTACCAAAGGTGCTACTT  
ACCCGCTGCTGATGGACAGCATTGCGGTGGAAGTGAACACCACAGACACAAGGGCGTGAT  
AAAAAAAACCGTCAGCGACAGGAATCCACGCTGGCCGTGGTTATACCTATTGAGGAAAAA  
TAAAGGAGCGATATATTCGTGCTATGCTTTCTTAAATGATAACGGTTCTTATTGTCAACA  
ATAACGGAAAGAGATTACGACATTTCTGAACCAGTTAAAGCTGTAATTCTGTAGGGTGGT  
CTGTGAGCTGTCTCTGCTATCGGGTGGGTACAGGGCCATGCGTGACTTGTGGCGCAGACA  
GATTGACAAAGGGGCCGCTGAGAAAGTCAGCGCCAGTCAATCAGCCGGATGTAACCCCGA  
AGTGCCGCTCATTTAGCGGGAACCTTTCTTAAATCACATCTTTCGACGAGAAAATCCCATGT  
CAGGAACTGCGTCCCTGGACACTGCTGAAGCACTGCAGGAAGTCCTGCGCGCTGAAGAAG  
TCCGGAGCGCACTGAAACCGAAACATCGGCACAACCTGAAACGCGCCTTGATGCAGAGG  
TTGATGCCAATCTGCATGAGCTCCTGGGCGTACCGGCAGCTCCGGAGCCGGAATGCATCT  
CGGGTGAGGGGAGTGCTTCAGATTGCGGTGACCCACACCGGACAGCGACATGATGATCT  
AAGCATGCGTCAGGGACCGCCGGTTTGTGCCGGGGGTATTTTTTATTGCTTTGACCTTC  
AGATGGCGGGAGAGGGGGTATGTACCAGATGGAAAAAATCACAACAGGGGTGTATTACAC  
CACGTAAGCGGTGGGAATGGGCTACTGGTTCATGCTGTTGATGGACAGGGTTTACCCGTC  
TCAGTGGGCGGCAATAGGCGTGCTGGGGAGTCTGCTGTTTGGACTACTGACATATCTGAC  
GCACCTGTATTTAAAGATTAAGAAAACCGGCGTATGGCGGCACGCGGAGAGTTAGCTGA  
TGAGCAGGAAACTCCGCTATGGTTAATCGGCTGCTGTTCTGGCGCTGATTGCCGCAAGTG  
CTTCTGCGCCTGAAATCCTCGACCAGTTTCTGGATGAAAAGGAAGGTAACACACCAT  
CATCCCGTGATGCTGCGGGCATCTAGACCATCTGCCGTGGAGAGTCCCGGGGGGCTGGTC  
AGCGTGTTATTCATGGCATGAAGCTGTGCAAGGAGAAATGCGACCGGGTTAACGCCATTG  
ACGGTGATAAAGCGCTGGCATGGGTGGAGAAAACATCAAAGTGGCGCTGACCGAACACC  
AGAAAGCGGGGATCGCGTCATTCTGTGAGTACAACATCGGACCCGGGAAGTGTACCCGT  
CGACGTTTTACAGACGAATTAATGCAGGTGATCGAAAAGGTGCCTGCGAACCTATCCGCT  
GGTGGATTAAGGACTGTGGCAGGGACTGCCGTATTCGATCAAAGAACTGTTACGGTCAGG  
TATCCCGTCGTGACCAGCAGAGCGCGCCGGCGTGCTGGGGCATCCTCAGATAAGAAGAAT  
ATTTTGCTGGATAATGAGGATTGCTTACAGGTACGGACAACACGAAATCCTGCAAATTGG  
TAAAATGTAAGTGCATAAAGTCAAACAGTAGTTTAACTGAGGGACCGTGATGATGCC  
TTTGTCAATTTCTGCGCATCTCACGCGCATCTCACAACACAGAACCATTACAGGATGGCCCT  
TGAGGATCCGGTTTGGCTGTGCGGTGCTTTCTGTGGGCTGGTTTCCCTGTGAGACAGGGT  
TCGTCCCTAAAAGGAAATAACCGATAAATATGATGGCCGTGACGTTTACGGCAACTCTC  
TTTATGTAGTTAACACAATGGCCAACGATACGTTCCCATGATACTTGTGCTTGAGGGGA  
GGGGGGTAGCCTGGAAATCACAATGGGTAAAGTAAAGACAGCGTTTTTTCGTCAACTATAA  
CGGAAATAGTTATGGTTGCTGAGGATGGGAAACAACGCAAGAGGGTGTCCAAGCCACTTC  
GAAAGCTTGCCGGCTGCCTACAAACCATTAATCCCAGCAAAGTAAAACCCGAAATCCGCG  
ATAAGGTCATCCGGTATCAGGAAGAGTCCGACGATGTTCTTTACAAGTACTTGCCGAAGG  
GTTTTGTCGTTAATCCCGTAAAATGAGCGTGATGGAAGAACTCAACCAGTCTTGTGCTA  
ACATGAAGCGGGATAAAAACACTGCCAGTGTGTTTGTACCGGGCTGAATGAGTGGAAAC  
AGGTTAAAGCCTCGCATGTCTCAAACCTCCGTACGCTGGTAAATGAAGCCAATATGCTTA  
TTGATTTTGTCTGCCTGATACAGGCAAAGGGAAGATTACAAAGGCGGATTGACGGGGTG  
TCTAATGATATCAGATAAACTCATAACGCTGGTGAAGAGCCTCAGTGTACTTGTGCGCAT

TTCATTTTTAGTCGTGCAGGTTGCCATTTTCTTTTCCAGCGCCTTGCGAGTCCTGACGAT  
ATCGGGACTGGTGGCGTCAAAGCGAGATGAACCGTGTTTCGTTGGGTGGCCATTATTGTCC  
TGGTGGTTGGCTATGGTGCCTGTGACTGGCAACAAACCATTACGGGGACAACGCGCTCA  
CCTATAAAGCGCAGCGCGATAAGAAAGCCAGAGAGCGGGAACAGGGCAATGCCACAGTTA  
CTGACATGAAGGTGCGCCCCGCTGTGGCTGCGCTTGATGAAAAATAATCGAGGGTGT  
TAGACTATGCGAGTGCTGAACATGTAACCTCTCCGTGCCGAAGTTGCCGCTGGTCTTAAGC  
GCCTGCGAATCAACGCGACCTTCTCCGGTACCGTGCGTATAGCCACAGGCACCTCCC  
TGGATAATGCAACCGGCCGAGACTGGCAGGAAACGCTGAACGGGATCATTTTCATCCTCG  
GAGAGAGGCTGGTCACTGTGCAAGAACAACCTGTAAGGAACCCAGAAGTATAATTAATTAGC  
AGTGCAGAGAAAGTTGCCCATATCGATGGGCAACTCATGCAATTATTGTGTGCAATACAC  
CCGCGGTTCCAGCGGAGTATAAATTCCTATAGTAATAAACCTAGCAAACCATTTACGAT  
TATTTGCTGCGTTTCTGTTTTAACAAACATTTTCTGCGCCGCCACAAATTTTGGCTGCCCC  
TACAGTTTTCTTCTGCCCATTTCCAGGAACGACGAAGAGATGGGTCATGGTTCCTTTGG  
TGCAACTGCTTTCTGTTTTCTTTTGAACAGTAAACGTCTGTTGAGCAATTCCTGGAATAAA  
CAGGGCCAGCGCAGTAGCGAGTCGCATTTTCTTCATGGTGTATTCCCGATGCTTTTAGA  
AGGTGCGAGAATCGTATGTTTGGAAAATTAACAAATCCTAAACTATGAGTTGAAATTTT  
ATATAGTTAATATTTATTAATGTATGTCAGGTGCGATGAATCGACTTTGTGTCCCCGGAT  
TAACTAGGTCCACAGCCCTGACGGGGAACCTTCTCTGCGGTAGTGTGCGCGGATAATCAA  
ACCGATGCACACCGGCTATTTTCATTTTTCACCAGATGGGAGCGAT

>NewGenomeName\_230

CAGTCGGTGAAGCTGCTGAGATCATGCGCTGTGTTTGTGACATGCTGTATTTGCAATACA  
AGGCAGAGTATCCTGAACTCAGTAAAACCTCAGATTGCGGATTTGATTAACCGAATTGA  
ATTTCCAACCTCAACTTTAAAGCTGAAAAATGGATGATGAAAGCATGTACCAAGTAATTTT  
TATCGCAATTGTCATAGTCGTGCTTATTGAGTGTTACATGTCCATGTGGGATGACTATTG  
GAACGGTAAATGCAAAAACGAAATCACTGAATTTAACGCATGGCGCAAAAAGTATGACAT  
GACACTGTGGCGAAAAGACCGGAAAGCTGGTCCATTTTCAAGGTGGGTTATTTGTTAGAT  
GACACTTTGAAAGACATCAAATAAGCCAATGCCAAGGTATCAGTTTCCGAAAATTGTAT  
AAAGCTCTAGCTGAAATTCGCAAAGACAATATTGCTAATCCTGATTTTCGATCAAACCTGGA  
AATTTGATGTCTTTGCTTTACAGATCGCAAATGAAAGATGTTAAAAAAAATCCATTTGGG  
AGGACTAAATGTCAACTGTAGCTGTCATTGCGAGTATTGTGCTCATGTTTCGCAAAGACAC  
AAAGTAGTGATATAATGGCAACTACTCTACCAATTCATTATGAGGAATATTAATGTCTGA  
TGAATTCAGGGTTCTAATTCCTCGCGAACACGTAATTCCTCGCCAAATAGGTATGTGGG  
TTCTGTGCGCATATGAACCACATGAGCGATTCTTGTGGTAAGTATCAATCCGTTTCCTA  
TGTTCCGGGCCTGGTAAAAAGCATCGATGAAATCATCGATAACCCGGTTGACGAAGGTAT  
TCGTACCGATTTTAAATTTGCAAATAAGATTGATATTCGCTTTGATTAGCTTGAAGGTTA  
TGTGACGGTAGCGGATAACGGCCGAGGTATTCCTCAATCACTGGTAAACACTCCAGACGG  
AGAAATGCCTAAGCCTGTTGCTGACTGGACACAACTATGGCAGGCTCAAACCTTGATGA  
TCCCAACCGCGTATCAAGGGGGATGAATGGCGTAGGTTCTTCTCTGAAAAACTTCTTCTC  
CAAGATTTCTATCGGTGAAACGTGCGATGGCGAAAACCTTGCTCACTGTCACTTGCTCTGA  
TAGTGCATCTCAAGGCAATTGGGAAACCAAGCCGGGTAAAATCAAAGGAACGTCGGTATA  
TTTCATCCCTGATGGAAAGCACTTTGAAGGAAAAACGATCGATCAGCAGATAGTAGATTT  
CATTTAGATCGAACCAGGGCACTGTCTGTGGTGTACCCGAAGATTCATTCACGATCAA  
CGGTGAAGTGGCTTCAATGAAGTTTGCAGAATACGCTAAAATGTTCCGGGGATGAATCTCT  
CCTTCTCGAAAATGATAATTTTAGCATCGCAATCAGCAATTCTCCTGAAGGATTCCGTCA  
AGTCAGTTTTGTCAATGGTTTGAATATCAAGAATGGTGGTTCCACATCGATTACTTGAT  
AGATGGCATTCTCGACGCACTTATTCCATCAATCAAACGAAAGTATAAAATTGAAATAAG  
CAAAGCTCGAATTAAGAATGCTTGACAATGATCGTGGTTGTTTCGTGGAATGAGTAATCT  
TCGGTTTGATTCTCAGACAAAGGAACGTTTGACCAATCCGCTTGGCGAAGTGAAATCACT  
CATTGAGCTGGATTTCAAAAAGTTAGGAAAGGAAATCATGAACAATGATGCTATCCTGAT  
GCCAATCATCGAGGCTCCTCTTGCTCGTCATCTGGCTGCAGAAAAAGCAGCATTGACGAA  
AGCCAAAAAGCAGCAGCAAAAACCAAAGTCGCTAAGCATATAAAGGCCGGTTCCCTGGGG  
TGACATTTCAAAGAAACAACCTCTGTTCTGACAGAAGGTGATTCGGCCCTTGGTTATTT  
GTTGAGTGTTTCGTGACAGCGAGTTGCATGGTGGATATGCTCTTCGAGGAAAGGTTATGAA  
CACCTGGGGAATGAAAGGTTCTGACGTGCGGAAGAACTGAGAATTGGCCGATATCTGTGC  
AATGATGGGACTCGATTTAGCTAATCCGGATGATGTCGAAAATCGCAAATACAAAATGT  
TGCAATCATGACCGACCGGATCCAGATGGCCAAGGCTCAATTTACCCATGTCTACCCGC  
GTTCTTTAGCCTTTGGCCAAAGTTGTATGATCTCGGTTGCGTCCGATTTGTAAAAACTCC



GATAGTCATTCTTTCTAAAGGAAAGCAGATCAAGTGGTCTTATACCATAACTGAGTTTGA  
AGAGCAAAGGAAATGTACAAAGGTTGGGAACCTTCGATATATCAAAGGATTGGGTTCACT  
TCGCGAACATGAATATTCCGAAGCTGTAACTACCCTCAGTATGATATCGTCGATCTTGG  
GCCCCGATTGCGAAGAATTGTTTCGAAATGCTGCTTGGCGACGAAGCAGAACTTCGAAAACA  
ATGGATGTCACAATGAAATGGGCTCTTCGGAGCCCTTTGTTGTTTTTGAAAAACAGTGTA  
CAACGCTTAAAGTGAATGGTATTATGGCTCCATCAAATCAACCAAGGAGTACATCATGAA  
AATCGTTCGAGTTAAATTCAAATCCCCGGAACATCGTAAAGCTTTTGCTAAATCTGCCTC  
GTACAACGCCGAATTTGAGAAATTCATGCCAGACGAATTTTTGGTTAGGTTTGACCCACA  
CAGAAATGTTCAATACCGTTTGGTCGATTCTGATGGTGTGATGAGCGAGCTGCCGGAATC  
AACCGGTGGTGGCGTAATCATTTCGACGACGAAGAATTCATTATTCATGGAGATTAT  
TGAATAATATCACAATAAAGCAGTTTACAATCGTGAGGCTATGGGATACTATAGCCTCCG  
GTAAACGAACTAGCAAAAACATGTAGTAATTTAAAATGATCAACTTCACCGAAGCGTTC  
GGCAACGTTAAATCCCATGCGATGTTCTTCTCCCCGTATCTTGATACCTTTATAAGTCTT  
TACTGTGTTGAAACTGATTCTCCGTCAGTCTTCATGAACATCAAAGGCACAAAGAAAGCA  
AAGCGTCTCGGCGGCAAGAAAGCTGCTTCATACATCGAATACGTTCAAATTGAATTGTGC  
AAAGGAGAATAAAATGAAAGCACGTTTCGAAGCTGAAGAAGCACATCAGCAGTTCATCGA  
CTACGGCGAAAAGCGTTGGGTAATTGGCCCTCTGGGCGACACAAATAACAACCGTCGCAT  
CGCTCTTCATTTGGGAATGAAAGAGTTCGATGTTGTCAAATCGATTTTCCATTTGCTGG  
CTGGTTCGACATCGTCATTGATGACATGGTGTTCGAGTCTATGGCTAGTGACGAAGTTTG  
CTTCTTCGAGTTCATTGATTGATTAACCTGGCCGGGACGCCGCCCGCTTTTTGTATCAA  
AACAGTTTGAGGCTTTGCCCTTTCGAGCGAAGCTCGAATTTACCCTTTTAGTTATAATAT  
CTATTAAGCCATAAAGGATAAAAATCTCTAGTTCGACGGGGTTCGAACCAGGTAAACCTGG  
CTGAACTCAATAGTTTAGTCAATGATACATTCACATAAGAATAAGGTAATCCAGGTTTC  
AACGCAGTTAATCCAAAATTTAACTTTAACTGTGTCAATTGTAATGTTTACCGTGT  
TAGGATAACACAAGTAGAAAAACAAGGAAGTCATTATGATCCTGCATGTAGAAATAGCT  
GAAGCTCTGGTTCGAATTTGTTCGCATCAACGTACGATTCATGGGTGATGAAGAACTGCC  
GATGAACTGAGCGACGAAGTAAACCCGATTATTGCTAATATCAAAGCTGGTATTGCAACC  
CGCAAAGAAGCTTGGCCGGCTGTGTCAATTTGGGTCTTGTGCACGAAGATAATCTTTATGGT  
TCCGATTGGGGCAAAATGTTTCCAAAATGGAACACCGCATGAAAAGGAACATAGTTAT  
GCAAATCACCTTTAAATCCGAAGAACACCGCAAAGCATTTCACAGTATTGCCAAATGCAA  
TGAATGGATTGGTCACGCTCTCGGTATGGACACATGGGAATGCCGAGAAGAACCGGCAGA  
TGAATATGACAAAACCCAGTATTGGCTGTTCTTGACGGTTTCGGCAATCAGGTCGCTTG  
AGTGTGTTGTGATGACGGGCGTCAGTGTGAAGATCATGCATGGATTTTCTGGGGTGC  
CAAATATTTCTAGATTACTGAATAAAGGAAACACATAATGATTATCGGTTCTAACGAACA  
AGAAGTGATGTTTGGTAATGCACGTTCTAAACGGACCGGGTTTAAAATCCAGGCTGGGCG  
GAAGGCCTTCCAAGTAATTTCTTAAAAGCTTTATAAAGACAAAGCTGAAGCAGTTTACG  
TGAGCTTTCGTGCAACGCGGTTGAAATCCATTGCGAACTTGGAAAAGGACATATTCCGTT  
CAACGTCACCTCTCCCAACTTCAATTTACCCATGGTTCGTAATCCGCGATTTTGTAACTGG  
GCTGACGCAAGAGCAAGTTGATGAAATTTTCACTGTCAATTTTGCTTCCACCAAAGATGG  
TTCCGATGATTCCATAGGTGGTTTCGGCCTTGGTTGCAAGTCTCCATTTGCAGACAGCGA  
GTCGGGTGGCGGTTTCACTGTCAAAGCTATCAAAAAGGCCTGTGTACTGTCTAGAACAT  
GTATATGGATAATGGAGAACCATTTGCTACACCGATGTGACTACTCCGACGCCCGAAGA  
AGATGGTCTCGAGATTCTGGTTCCAATCCCTGAGCACGAACATGCTCGCTGGAAAGTACT  
AGCTCGCAAAGTGTACCGGGCATATGATCGCTGCAAACCTTACATCACAATATGGATGC  
AAGCAGCATTGAAGAATTTCCGAATCAAGATTGTTCTTCAATACTGACGAATTCGCCCG  
TCCAGGAGAAGTGTATGCTGTAATCGGTGGAGTAGTGTACCCGATCCCTCAACGGCTCCT  
GGAATCCGATATGGTATTCCGATATGCTGGTAAAGCTGCATATATCAAGTGCCCTATTGG  
CTCAGTAGACATTGCTCCTTCTCGGGAAGCACTCTCGTTGACCACAGAAGGCGAAGATTA  
CATTGTTGGTCGACTTCGTGATTTTTCTGATAACTATGCCGAATCGGTAAAGAAGGAATT  
TGACGGAATAACCGATAAACGAAAAGCCGTAATTAATGCCAGTGGATAACAACACTATGT  
TCGTCAAGCTATTTAGATTGACCATTGATGGCGAGCGAATTAACGATCTTATTGATCG  
ATATACGGATATGTCAAAGCTTAGTGACATTACGGTTTAAAGCATATCGTGACGGTAGTTT  
GCGCCAGCATATTACGCGTTCGGGATATTCGTGGAGAAGTTCCAATATAGATGCAAATGA  
TGCCTTTGGCATCAGTCGGCGTAAAGTGCATGTTCTCATCAATGATACAGGTGAAGGTAT  
TCCGAGTATGGTTCGGGCGTATCATCATCATATTGGTGATACCATTCCAGTCGTTGTGTT  
GAACTAAACTCGCAAATAAAGCAGAGTGAGTACGCCGATATGGACGAACCATGAAAGC  
TATTTGCGAAAAGTTTAGCGTTGACGAACGCTCAATTCTCAAAGTTAGCGAAATGAATGA

TATTCGAAAAGCATTACCCATACATAAGCGCAAACATCTACTCCTCGCGATGCTAAGCC  
AAACGTTTCAGCGTCATTATATCAATGATTCCGACCTTCGTGACGTTGAATTAATATACAT  
GAAATCCGCTGAAATAAAAGCTCTTGAAGGAATTGCGGTTATTTTCGTATAGCGATACATT  
TGAATGAAATTGCGCTTAAAGCTTCGCAGTATACAATGCGTAGTGCCCCTAGCAGATTGAT  
AGAGATTGGAGCAACCGAAGTTTACGTCATCGATAATGGAAAGCGTTCTGCCCGCTGTGA  
AGGCTCCTCGTTTCAAATGCGGTTTTAAGTGGGCATATGACCAGTACAAAGTGTGCGAAAG  
ATGCTTTTTGATATTCTTAGTGCCGAGTGCCCTAATATCGGAGACTTTAAACAAGCATTTC  
GTCTTAAGCAAATAGGCATTCTTGAATTGATATAACTGAAAAGTTTGACGAAAACAATG  
ATGATTTCTGAAATGATGCATCCCAATGGGTTTTAAATCGGAAATCCCGATTATGCCGATT  
TTGCTGAAATCAAAGAATATGTTGATGAACAGAATAAAAAGTATTCCGAAATGTTCTATG  
ATCATATGGAGTCATTGAAAATTACACACCTGCTATTGTTTGCAGTTGCCGTTAGTGGTA  
TAGCATTAACTCCTGAAATCATGAAAGATATCGAAATTCTCCGGGCTCAGTAAGAACCCT  
TAAAACAAAGAGGTATGATATGGCTAAGCTTAAATTTGTTGAGTGTTTTGATAATGAAAC  
CAAGCAACAGATTTTTGACAATTATTCTCTTGCCAATGTGTCTCAAGCTTATTGGGCAAG  
TGAATACTGCCTATCGATAGATAACAATTGCTCGGGTCTGAAAGAAGTCCGAAATTGGGA  
AATCTCTGCTGCAACGTCAGAGGATTCACCTGCCGAGGAAGAAATTGCTGATAAGCTGGA  
ATGTACATGGATGGCCAATTCCCAGTTCTTTCTGTGACCATCGGCGCCGAAACTTATAA  
CGTTCTGGCGATCACCCACAGTTCATGGAATTCATCAGTCTTCTGGGCGAGGAAAAATA  
CGATGAAGCAATGGAAATGTTGAATATCAAGCGAGGTCTTGAGCGATATGTCTCAGGCGA  
TATGGTTATCGAAGGCGGCACACTGAAGTACAAAGATCTGATCATTGATTCTGGTCTTAC  
TCGTCGCATCGTCGGAAAGATGCAAAACGGAGAACCCTTTCGAGCCGCTCGTTGCATTCTT  
TGAAAATCTGATGGCGAACCCGAGTCGTCGAGCCGTATATCAGCTGTACGACTTCCTGGA  
ACACAACGACATTGAAATCACCGATGATGGTCATTTAATTGCTTGGAAAGCGTGTAAACAG  
CAATTTCAAAGACATGCACACTGGCAAATTCGATAACTCTCCCGAACAGTGGTTAAGGT  
TAATCGCTTCCAGGTTGACGAAAACCCTAACGTTACCTGCTCTCACGGTCTTCACGTTGC  
TGCCAAGTCTTATATCCCTCATTATGGTGGTGGTTCTGGAAAAGTGATCGCATGCAAGGT  
CAACCCAGCAGATGGAGTCGCTAGTCCAACCGACTACAACAATGCCAAAATGCGTTGTGC  
CGGGTATGAAGTTCTTTACGAAGTAACTTCTGACTGCAAAGAAATGAAGCACTACTAATT  
TTCATAAGCCCTCTTCGGAGGGCTTGTGGTAAGGCGTTGTATGAGCTCACCATTGGCA  
TTATATTTTACCAAGACGATGACATTATTGGTTCGGGTGATGGAAATCATAGTTGGATT  
CGCCGAATGACTTACAGAAAGCGAAGAACAATAACTGCAGTTGTTGAAGGAACATCTTGGC  
AGTTACGACCATTCGAAAAAGAATGGACTCATTTCAATTGCTGCTGGCCGAGTGTCTTATG  
ATCAAGATTACAAGAAAATGAAACAAACCATTTCTCTTATAGAAAGCTTTGATTTATCCG  
ATTTTTCATTGTCATATTCTGAAATTGTGAGGAAATTGTAATGACGGTACCGATGAACGT  
ATCCCATGACGAATTTATCGCCCTTCGTATATCCAGCCGTTTGACGCGGTTATTATTCTG  
TCTTCAGATCTGCGACCAACTCAAAAAGCAGCCTGAGACGAGGGATAAGCTTTTTGAAAA  
ACGGAAAAGGAGATATGATGATACCATCCAATACGCTCTCGATGAAGCGGCTGGGAATGA  
TATTCCTCGGCCAGAGCTCATTGATAGAACGGTTCATTCACTGAATGCCGAAATGGGTGT  
CACATATATGCTGGGTGGGGTCTGGGGAGTAGTTGACTGGTTAGACAGTGACAATATCAC  
CTTTGATGTGCCAACACCTGGGTTCAATCTGGAAATCAAGACTTCTTTTGCGAAATGGCC  
AACGATGCATACCGCCGCTGCTAAACCGTATGGCAAATCACAAGGGCTGTGCTTGTACGC  
TGGTTTGC GCGGAGATGCTGATGTTACTTGGTATTGATCATCTATGAATATGCTGGCGG  
TATCACATATAGGCCGAATTACTTCTTCAAAAGCGAGCTATGGAAAATTATCCGTATGT  
GATCTGCGTTTCCAAGCGCGGCGGTGGAGCATAACATCATGAGACAGCACAAACAAATTTGT  
TTATTTTATAACAAGTGGTGTACACTCTGATTGTGCGTGATAAAATGCACCTATCAACA  
ACACTGGAGCATTTTGCATCGAGGAAATGAAAATGAGA ACTCACGATTTTCTGAAAAGAC  
GCGCCAGGCCACGCTGTGCCGAGCAAAGAAAGAGCTGATAGCTGAGCACAGAATGTTTT  
GCTCATTGATCGGTCATCACATCATCATGTGCTATGATCGCGAAGACTCACCTCAGCTCA  
TTCAAGCCAAGAAAGACCGCGATGCAATCGAAAAACTCCTAACGGAGATTACTAAATGAA  
AACTAGTACACATCACGTCACAGCTATTGATGCCCGTGTGTTGGCACTTTTGA ACTTGA  
ACCGGCAAACCTTGCGGATTCAAAGTACACTTTCGAAGAAGTGATGCATAGAATCGGTTA  
GACGATGGTTGATTAGTCAGCCACGCTTGCAAGCTCCCTCGCAGGTATTGAAGCACTTGT  
TTATGAAAACATGATCACCTTCCCTGCTGGGTAACCGGTTGGGAATCACTTCGATGA  
GATGTATGACGTGAACTGGGTTTTCTTTGATTTTGTTCCTTCTGAATAAAACAAGTT  
TACAAACTCGTGGCTATAGGATACTATAGCCTCAAGTTAAACA AATAGATAAACACGGAG  
TATTTTTATGAGCAACTACAATTTCAAATGCGAAACTTCTACCGAAGCCTTCAATTATGA  
TGTCGGCACACGCGTGGTAAAGCCTGGGCAAATAAAACTCTTCGCGAGTATCTGGATGA

AACTGGCGAGAAAGATGCCACCATCACCTCATCAGAGAAGAAAACTGTAAATGGAGTA  
AGTTGTGAAAGGCCCTAAGACATTCGACAGCCAATTCAGGCTACGCGGCGGTTTTGCGCG  
AGACATCAGCAATGGCGAAATCAAGAACGAGCCAATGTTTGTCAACTCAGACTTGGCATT  
CGCGTACCAGAACGGCGGCCCTATCACTCGCAGTTTTATTGAGAATCTCCCGCTTGATTG  
GAAAAGCAATGTGATTTACGATTCGCGTGTTACACATGCTTATGCCTGGGTGGTACCCCGC  
GATTCCCGGATATCACCATGATGACGTGCCGCGCCCGCCGATTCCGGTAGGCCAGCACTT  
TGCAACTGCAGGACAGCCAGACTCTACAATCCTCGTTATCTGTCTCGCCATATCCTTGG  
TTTGGTTATCGGCGATGTCTGTCTACTCATTTTTGCAGTAGGACTATCGGAATTCAGCCA  
AATTCCTGATGGTGAACCTTATCTATCGGCAATGGCATCAGGAAGTCATGACTAAACTCGA  
AACTGGTGAGTTAAGTAAGCATATTGCTCCTGATCTAACTCTTGTAGTGTGTGACTGGCA  
AACCTGACACACTGGGTCAAAGCGGTTAGAAACGGCTGGTGTGGTTTTGGTCGAGTTTC  
TCGCGACACTGATCGAGTTCTGACACCGTCGAATGAAATTCGACGTCAAGTTCAAGTTA  
CATGGAATTCCTGATGGAGGGTTGGTGATGGTTAAGTATCGTTTTGTAGTGAAGAGCAA  
TTCAACGCATGGGCCAAGCCAAATTATGCACAGGAATTCGCATTCGCTTTTGGTTCATGG  
GATACAATCTTCGAAATGGAAGAAATCGGGCGTAAAGTTTGCTCAGAGACTATGGAAATC  
GACGGCGAAATTTACATGACTACTCAATGGTACCCATTCAATATAACAGACCTTGGCCAT  
CGCATCATCGAGGTGAAAGACTGAAACTCTACTTCTTGCAGCACATTGAAATCAAATAGC  
TGGCGTGACTTCTGCGAATTTGAAATCGGAAGTTATGGTGAAAAAGATCATCAAGATGTT  
TGCTTAACAGCTGTGTTAGTTTAAAATACAAGTCAACCAATTGAATAGAGAAAAATATCA  
TGAAAATAATGTTACTGCTCAACGTATTGTTGTTACTGGTGCCCAACGTGTTGGTGCTT  
TTGAATTTGACGCAGGAAAATTCCTTGATGTGAAATTCACTTTTGCGCCTGGCAAGAATC  
GTGAAAGCATTAGCAAGCCCGGCATTTATGTTATCGTTAAAGATGGTGTTGCTGTAGCTC  
GTACTTTTGTGGCCAAACAAGAAAAGAGTGTGGTTTTAACGAGACTATTCGCGAGTAA  
TTAGCTGCTGTTGGAATATACTGACGGTCTTCCGCGGAAGATTTATCGCTCAGTCACAG  
GTCAAAACAAGACACATACGGTTTACCATATCCCGATGTCCTTGGTGCCAAGACTGTTGA  
ATATGCAACAACCTTGAGCTGTTTGAAGATAACACCACCAATATCAGTCGCTCACTGCTG  
TTTCGCGTCAACTGTTTAAAGGTATATAATTCGAATATCAAAAACGATAAGGAAGACCCA  
TGGCATTTAGTTTAGATGATTTTTTTCATCAAGAGCCGATTGTGCCGGTTGCAAACTGG  
CATCTAATCCCGAAACTGCGCCTTGGAAATGAAAGCAAAGATGATGAATTTCTCCCGG  
CAGGAATTACCATCAACCAGGTCACCGATGAAACGGTAATCGAAACTGAAGTACTCGATT  
CTTCGGCTGTTAAAGAAGTCGATGAAACTGAAGTACTTGACGAGCAAATTCGGCAATGCC  
AATCTGAAATTGATTGAGATGTTCCGGCATGGAAGAAAGCCGATTGCAAAGTCATTTAA  
CTAATCTGCATAATCGACATCTGCAATCGATCATCAACAATGAAGCTCTTGAATTTGCGA  
TGTATGCAGTTGAAGAACGTGCAATCCCATCTATCATCGATGGCTTTAAACCGGTTTCGAC  
GCTTTTTAGGTATCGCGCATTGGACTATGCGAACC AAAATAAGACCAAGTTTAAACAAG  
TAGCAGCGTTGCAGGCGGTGGTTCTGAGGCAGGTTATCACCATGGCGAAGGTTCTGCCG  
TAAGTGCTGGACAACCTTATTGCAAATACATGGATCAAGAACCTTACAGTATTGGAAGGAG  
ACGGAACTTTGGTACTCGTCTGTTCAACAAGAAGCTGCACCACGATAGGTGTTTTGTC  
GTGTCCATCAGAATTTCTGGGACATCTATAAAGACATTTCTCTTTCTCCGGTGCATCCCG  
ACCCTGAGCATTGCGCGCCGCTTTTTATCTGTCTGTTATTCCTATGGTTCTCGCGAATG  
GCGTAAAAGGTATTGCCACTGGCTATGCTACTACAATTTTCCCGCACTCTTTCGAGAGTC  
TAGTGAAGTGACACTGGCTGCAGTAAAAGCCAAAGAAATCCCCGAGCCGGAAGTGCAGT  
TCCCATGCTTTAATGGTATAGTTCGTCGAATCAATTCAAATCTATCGAAATCGATGGTC  
TCTATGAGCTAGTTGGACAAACCAAACTCATTATTACCGAACTTCCAGTTCGATATGATC  
GTCTTGAGTACGTCAGTATTCTCGACAAGCTCGAAGAACAGGGAAAAATCGTAGGTTACA  
AGGAACAAACAAGTGATGTGTTTCAGGTTTGAAGTAACTCTCAAACGCTAGGATACATTTG  
TCGAATTGATGAAAAAAATCCGGAAGTTGCACATGAGCGTATCATCAAATGTTCAACC  
CTTGCCAAAATCTTTCGAAAACATCACCGTTCTCGACGAGAATGGAGTATTGGCAGAGT  
ATGAATGGGCCCGCCGATCTGATTCGGGACTTTGTGGAGTATCGCAAAAATACACCACCC  
AGCGTGTTACCTTCGAAAAAGAAATGGCAGAATATTCGAGTGATTTGGCTTGGGCCGGAT  
TTGCCTTTGTAAATGAAGTGATTGAAGAAAAAATTGTTCTTCGTGGAAAATCGAAAGCGC  
AACTTATTGCCGAAGTAAAGTCCAAGCCGAATGTGGCAGGATTTGAAAACGAGCTAGTTG  
GCATGAGCATTTACCGTCTTACTGAAGACGAAACTCACAACTTCAGGAAGAAGCTCTGA  
AACAGACCAAAGAATACTACTGGTTCGAGCACTACTCCAGAAAACGAATATGTTAAAG  
ACCTCCAACTTTAACAAAATAAAAAAAGGCCTCTTCGGAGGCCTTTGATGTTTCTAG  
ACAAAAGTGTGTACAACCTGCTTCAGATTGGATAGAATAGCCTCAAGTTAAACAACCTGTC  
ATGGAGCATATTATGATTTACAAGCGCTGAACAACAATAATCAGCCGGTATTATGAGGAA

CGAGTACAGTGGATGCGCGAAAATCATATCGTTGACGTTACAACCTCCAACCTTATACTCTC  
AAGTTTACCAATCACTAGGGTTATGTTGGTCAATGTCCTTACTCTAACCGTGAAACCAGA  
ATTTAGAAAAACAAAATCAATTTGCAACATGGGAGTCCATTAAAGACACAATCAACCAT  
GAGCTGGCTCACTGGGCAACCGTAGGTCATGGCCACGATTAAGTATGGCAGCAAATGGCC  
GTTTCGTCTTGGAACAACCTCCTGCGAAAACCTTGACCCTTGGCCCCTGCAAAAACCGTAT  
GTCATAATGTGCAAAGGCAAAGTTGTAGGATATTCTGAGGTATTGCCAGTCGGTTCAGAC  
GCTGCCACACGAAACATCAAAGGAAAAAAGAAACAAACTCTTGGATTTTTGGAGTATAAG  
GTAAATCCAGAATTCATCGATAACTCCAACCTGGAGCGAACCAAGTGTCGAAATCCCAACA  
CGAATCAAAAAGACAAACAGCATTATCGCCGATTTTCTCAGCGATCTTTGAGGAAAACCA  
TGGGATTTTTCAAGATAATGCAAAAACCTAGTGTACTCCGTTTGGTATGGTGATACTATAGC  
TTAATACCTAACAAACTGATTA AAAACAACGGAGTATATCAAATGTTCAACATCACAAA  
ATCCAAGTCATGCAGATCAACCTCATGAAGAAAGCTGTTGAAAATTTCCAAAGTCTTGAT  
ATCAACGCAGTAATCATGAATCCGCTCAACAAAATGATGAACAACGAAGTTCTCGATAAG  
CGTGAAATGAATCGCTGCGAACAGTTCTTCAACGACATTAATCAAGACGATCTGATGTGG  
CAAATGCTGCTTGCCTAACTCTCAAATCCATGAAGCGTAAACTTGCTGCAGAGATG  
AAAAAAGCTTAAGTTATTTCAACAAAGAGGTTTACAACGCTAAACCGCTTGATTAATA  
GCTACAAGTTAAACAAACTACCACAAAGCAAACGGAGTATTTGAAATGACCATGACCAA  
ATCGAAGCTATCGCAAAGTTCTGAACAACCTCCAGGATCTCTGAAAACGCTACTTCTGTC  
TTCATTCAAGTTGCAAAGAAAGCTTTTCGTTACTGCTGTTGAACTTGCGGAACCCACTGAA  
ATGAACAAAACGCAGTTTACTCCAATATCGGCGTGATGATGAAAAAGGGTTTGATCGAA  
AAATCGGGCGACGGCTACGTAACCACCGAAAGTAGTGATGCCATTCTCATCGAAGCTGCC  
GAAATGTCGAAAGCTGCCAACCTGAAGTTGAAGCACCTAAAGTAGAAAAGAAAAAAGGA  
ACTCGTGAAGCTCGCGAAATCAGAGTCGAAATGACTAAAAACATCGAGCTCGTGGAGCGG  
CTGCTGTCCAAGCTCGGCATCGAGCACAAGAAAGCAGTCATCAATCGCCAAAACCTACGAA  
ATCAGTCTGAACAAACGCCACGCTGATTGATACCGCAAATTCGAAATTCTCAACCGCGGC  
ATCTTCCGTATCGTTGGTTACAAAGTATCTGAAGAAATCATCAACAACCTCATAACTTTG  
GGTTGTGAAATCAAGCAAGGTCCGGCAAACCTGCTACATCGACATCACCGCGAATGAAAAG  
AACGTTGTTTCGTCTGATGGAAGAAATTCAGCCGCTAACTAATGCGACTAAATACTAGCA  
ACTAAGAAAACCTATCAGCCATCGCATGTTATAATGTGATGGTTGATTTCAATTTGAGGAAA  
AATATGAAAATTTTAATTGTTTGTGCTGGTTGACTGGAGCAACTATTGCGCGTAGTCTC  
GCTGAACAAGGGCGTGACATCACAGTCATTGACAAACGGAAACACATCGGCGGAAACTAC  
TATGACGAAGTTTCGAAATGGTACACTAGTACACAAGTACAGACCACACCTTTTGCATCAT  
AGCGACTTGGGTGTGCACACTTTCCTTTCACGCTGGACTTCCCTGGATTCCCTATGAGCAC  
AAGGCAAAGTTCGAATATAGAGATACATTAACCTCTTCCCGTGAATCAGAAAACACTC  
CAAGAGCTCTATGGTAGTGAAACGGAGCAAGAGGCCATCAAGTATTTGAAAAGGTTGGA  
GACACGAAATCTCCCACTGTTCTGAACTTTTCGATCATTCCGTAGGAAAAGACCTT  
GCCGATATTTCTTTAGACCATACAGAAAGAAATGTGGGGCACTGATCCTAAAAACATT  
GAGTGTGCTTTTGGCGCAAGGATTCCTGCGCACCTATGATGATGACCGCTATTTTAGT  
GATAAGTACTAATATATGCCCGAAGGCGGTTACACTAAGATGTCGGAAAGAATGCTTGAC  
CATGAACGAATTGAGGTCAAATTCGCACGCCATTCGAAAAGGAAATGGAAGCTCACTAT  
GACTTCATTTTCAACTCGATGCCTATCGATGCGTACTATGACTTCAAATGTGGCAAATTG  
CCGTACCGTTCTTTGCGCATGGAAGTAAAACAAGAGAAGCATGATCATGGAATTACTACC  
GAGAATAACTCTGCTTCTGAAGAAGGTCATACCCGTTACACCGTTTGAAGAATATTCCA  
GGCCATGGCGATGGTGACATGGTGACTTACGAGTACCCGTGCGACTACGATGGCACAAAC  
GTGCCGTATTATCCAGTGACTCACGGAAAAGAACTCTATGCTAAGTATGCTGAGCATGCA  
GAGACTGATAAAATGATGTTTATCGGCCGTATAGGTGCATATCAGTTTATCGATATGTGA  
AAAGCAGTTCGCAATGGTCTCGATATCGTTTTCAGATTTTCAAGCATAACTCATAGCCGGC  
CGTTGGCCGGCTTTTCAAAGGGTATAAAATGAAAATTCTTGTAACCTAGCACTAATAACT  
ATCATGCTCGCCCAACTGGCATCTCGAAAACGTTCTCGCTATCGTCTCGTGACTGCGA  
CTACCGGCCTCGTCGAAGCTCTCAAAGATATGGGCCACGATGTTGATCAACGCTTCGTTA  
CCCGAGGTGAAGACCTGAGTGGCTACGACAAAGTCTTCACTGCTTATTTTCGATGCTACTG  
GCGGTATGCAACCAGGTGGTTATGGCGTTTACTGGCTTCTGGCGAATCGTCCCGGCGCGA  
TCATTGTCATTGATGATTGGCAGACTCCCGAACGTTTGAAGAAAGGTTCAA AAAAGTCTG  
ACACTCGCACCCGTGAACAATTTGAAGAAGTTCTGTTCCGCGAAATAATGCTGTACGACC  
AGCACAAACGAAGCTCCTGATGCAATCACTGCTGATCCTTCGCTGAAAGAAGATATCGTCC  
GCGGTTATGCTAAGAACGTCTTCGATTCTCACCGAATTCTGTATTGCGCATTTCGACAAAT  
TCGAAGTTTCCAAGATTTTCGATTATCCACATGAATCTTATTTCGTTCTGTCCCGAATCCT

ATGTTCCCTAGCCCAGATGATCGGGCTGCGCGAAATGGGTCTCGCACGTCAAGATATTTTCC  
CGAACGTAAATGGATTATCGCCGGTATCGGTGGTCTTCTCTACAAAGAAAGCATGTAAGT  
TGAAAGGCAACTTCACTAGGGATGTAGAAGTATTTGGTCGTGCAACTATCGACGTTGATG  
CCAAACTTGCAAAGGAGCCCAGTAATTCAAGCCTACTCGGGTGCCCGCGCTTTTTTCT  
ACCCAGACCAAAACAACTTCGGCTCCAACCTGGTGGCGCAATCGACCACGCCAATGCGCTA  
ATATGGGTGCTGTTCTCTTTATGATGTCTGATGAAGAAGCTTCATTGTTTGGCCCATCTT  
ATATGGGGCTTTTCGATCGAGAAGTTAGAAGCCAAGACTGACGAAGAGCTCGATGATCTTG  
CTGCTCGTCAGAAGGCCGATTATTACAAGTCAAATCCTCTTGACAAAGCAAAGTTAAAT  
CTTCTCTTGATTGATTATGGCGTGATGAGTTTTAAACAAAGCTGCTTCGGCCGCTTTTTG  
GGGAATTTTATGAAGCAAATTATCGTAAGGCTGTTACGCCGATTTCTCGCAACAAGAAA  
TCACTCAAAATGGCCTGGGCACGAGTGTGGCAAGCTGTCATCGAACACCACACTGGGTTT  
CCCTGTCAGTTGATCCATGAGGCTAAACCATGGACAGAATATGATCGGGTCTATGTCAAT  
TTCAATCTCGAGCCCTATGACAGATTGAGTTTGTGGCGGTCCTCAGCCACAATCCGCT  
GAGTTTATTAATGTGCTGAAGGATTCACCGGTGAAGTTGTTGCATTAGACAAACCTTTG  
GCCCGTTTTGGTGAATTCTGCAAAGCACGTTGTTTAAACAAACATGGTGCACCCAACATG  
AAAGTTCCCGAGCTATGGAGAGGAATTGACTGGGATTCCATTCAAGCGCAATTTGACAAA  
GCCACCTGTTTAAACGATGGCTTCTTTGCCGCTTGAAGATGTTACTACTCGGTGATTCTCAC  
AGTATTTCAAGTGTGGCAGCCAGGCTATAAGGCTTATCGCTGCGACGCGCAAACATTACGT  
GGAGCTTTGAAAAGGGGATTGACAAGTTTCTTCTGATAAAGTTTCGGAATTTGACAATT  
TATTTTGAAACATCGACGTTTCGGTATCATTTCGGTTTCCAAAATAACCCGATTTCTGAT  
GTAAGTGTGAAAGCTCGACGAGTATGAAAACAACACTAGTGGGACTAAAGGAGTCTGGACAA  
GTTACCGGAGAAATCCAACCTTGTGCACCTGCTTCTTATTGAAGATGAGTCAAGAAAAATC  
CCAAGAAACAATATGCTTAAACGGAAAATGGTTTAAACGGCAGTTGGGCTGAAAGAAATTCA  
TGATGAACATTTTCAATAATGGATTATCGGAAATAGCATTCAAACACGGTTTCAAGGTT  
CATACTTGCCAAACAGCTGGTATGTTGAAACGTATAAAGACCCAAAATCATTCTTTACT  
CGTTGGAAGCCATTAAAGCTTTGCATCTTGCCTTACCAGTCTATCGGTATGAAGGCTTT  
AAAGATAGCAACACTCTAGTGTGTTTACATCTAAAGGCCTTCGGGCCTTTTTTGGGAT  
AAAAGTGTGTACATGTGTTTTATGCTTGATATTATGGCATTGCTTGATTAAGGAGAGTT  
GAAAATGTCAAACGACCAACATGTTAAAGCGACAATTAACGGCTCGAGTACAAAAGTGC  
ACTGTATCGCTGTCGTGCCATGGGGCTAAAGTTTCCGGGAACAGAAATTTGTGAATTTAT  
CCTTCGTTAAGCATAACAACGACTGGCTGAATTGTGAACATGACGATGGCCTAATGAAATA  
TGCCGGCAAATCGATCCGACCCACCCGCTCGTCGTGACGGTCAAGCAGGCTGGTTCTCG  
GAAAATCTATGTTGACATCATCGGCGAAGATGGTCAACCTTTGGTAGATTGCGAGTACTA  
TGCCTTTGTTCTGAAGATTCCAGCCTCATTGAAAAGTATAGGGACACAGTATGCTTCA  
GAAAATACGATAAAAAGTGAAAATAAATGTCTACTACAATGAGGCTATTGATACTAGAG  
CCTCTTCAAATAAACGAATACACAAACACGGAGTATATAAAATGCAAGTAACCATCAAAA  
ACGGTCTTTACTTTGGTAATGTTGTTAACGGTACTTTTGAAACTAACGGAAACACCTGGT  
GGGATGCCAGCGAGAACGATCCCCGCGAAGGTAAGTTAACGCCGTTCTGAAAGGCAAAT  
CTCGGATGGTTTGGGTAATTTGCAATGACATCGTGATTCCCGAAAGTTTGTGCTGGTGTG  
CTCAAACCTGATGTCCCTGAAGAACTGTTGACGCAATGCGTCCTCGAATCGCAAACCGCT  
TCGATGTAATGGACAAAATGACCTAAGGACTTGTTAAAGGCACCATTTCGTTCTCTGATTA  
TCTCTGGTGCTCCTGGAATCGGCAAGACCTTCAGCTTGGAGATACAGCTGAAACATGCTG  
ATGAAATTGGCGACATCTTTCTCTTCAATCAAAGGAAAGTGCTCTCCCATCGGGCTCT  
ACAACCACCTCTGGGAAAACCGTGATGAAGACTGTGTTGTGGTGCTGGATGACGTGATG  
TGTTCTCAAACGAAGACACTCTCAACGTAAGTGAAGCTGCTCTTCAACTGGCGAAGAGC  
GCATCATCACATGGGGTACTGCCAGCAACTACTTGGCAGAACGCAATATCCCAACAACCT  
TCGAGATCAAAGGTTCCATCGTCTTCACTAAAGCAGATATCGACGCTGAAATCGATC  
GTGGCACTAAACTTGCTCCGCACCTCGATGCTCTGCAGTCTCGCTCCATTGACCTTGTC  
TTGGCGTTCGCACTAGCCGCGAAATCATGGTTCGAGTGGAAGACGTAATCACTAAAACCTG  
ATATGCTGCAAAAACGCGGACTGTCTGAAGCACAAGTTGTCAATGCCTTGGAAATGGATGA  
AAGATAACGTGGACCGCCTCCGCTCTGTATCTCTGCGGACTGCCCTGTACCTCGGCGATT  
TCATCAAGACTGATAGTGATTGGGTGATGTTGCTGAAGTTACTCTCTGAAGTAATACG  
CATGAGCTGGAGGAATTCCTCCAGCTCCTTAATATGGTTATTCGTCTTAGTAAAAAGAAT  
CAAGCTAGTTCACACTGGTTAACCCAAATGGAGAAATGAAATGAATCCGAAAAAATGGTC  
TTATCATGAAGTATTTTGGCAGTGCAGAAGCAAAGCCCCAAATTCACACGGTTTAAAGGTA  
TTCGAGCAAATGCTCTTGAATTTTCAAGCAACTCGAAGATCGAATCGCTGCTGATTGGC  
AGACTCTTGACCAAATTGCTACTCGCCGGCAAACGAACTGCAAGCGCATGAGCTTGCCA

TCAAGAATTTGATGGAACGTCATTCGGCCATAATGAATAATTTGTCTGCTGAGCAAACCTC  
AAGTGAGTGACTCCATCAAAACTGCTCAAATTATGAAGGCTAATATTGCTCAAATTTGCT  
AATAACCAGAGGGCTCTTGAGGAGCCCTCGTTTTTAGGAATCAATATGCAATACAGTTAT  
GGCGAAATTACGAGTTTGGTATTTGCTCTAATATTAATTATGTGGCTTTTGTATAAAGCT  
CGACATTCATATTGGATATTTGGATGCTGTTTGTGGCATGTTTGATTAGGAGAGATTA  
TGAATCCAGTTGCTAAAAATGGCTTCAACAAAGGTGCAGCTCATGTAGACAAGAAACGAC  
GCTTAAAAAAAAGCGCAAACAAAAACATAAGAAGGGGTACAATGATGGAACATAATTATT  
AATGTTTGGAAAATTGTAAGCGTCGCAATCGGCGCATTATCATCATGCGATTGATCGTA  
ATTGCTTTAGCTATCAAAGGCTTTATTTCTGCAAGCGACCAAATCAACGAAAATTTACAC  
AAATGGCAAAGTTTGAATCTTCGGGTGAGAGTTGTTTGGTAATTACAGCATTGTTGTC  
ACCCCTTTGGTCATTGCTCTCCTTCTTGTTTTGTACTCTGTTTTGGCCAATTGTGTTG  
CTGTATATTATCGCAAAATAAAAAGGTATGTACTTTTTGAAAAGATTTTTGTAAAATGTA  
ACATATCAAATTTGCCGTATTGATAAGAGAAACAACATGTCATACAATGAAACAATAAA  
AGAAATCATTTCGAATTGCGTCAGTTCTGATCAAATTTGGCTGTGAAGACATTCTGAACAA  
TCAAGAACTTTTCGTATCGTTCTTGAACGAATTGGGTTTAAAATCACCAAGTGGGGAAGA  
GTTCACTCGAGCTGGTTTTAGGACAAATGATGAAGCGTCTACCTGCTGATCAGCGTGAAG  
AATTAGTAGAAATGTTCAACCAAGGTCATCGCGACATCAACCACCAAATGATCATGTATA  
CAAACAGCAACTAAGGAAATATTATGGAAATCGAAATCGATAAAAAGTACCGTGTAAATCG  
ACGCCTCTCGTTTTGAAAACGAGCACGGCATCAAAAATGGCCATGAATTCTTCGTGGATT  
CGCTAGGCGATGATGGAGATATTTGGTCTCGCGGAATCGCTTGGAAATGGAGTAGACGGCG  
ACAGCAACGATGCTCCATACGCCGGTTGGGCATTGCTGATGAAAGGCTATCAAGATCATT  
GTCCAGAAACACCAGCGGATTACTCAGGCGCTATTGAACAAGAATGAAAAAAGGGAACCG  
TAAGGTTCCATTTGTTTTATCTAGCTCTACTCAAAAAGTCTTTCGGCTTGATTGCAAATA  
ACGAAAAGTTTGTTTTCATTAATTACTGGCTTTTTACGCCAAAACCTTCGATACTGCCCA  
TCATAAACGTTGTCTAAGTTCATATCGCGCAACTGTACATGTATTCAAACCTCACTGTCC  
CCCGCAGGAAGAAACGCAAAATCCTTGTAAATTGCTAAAATGTCTTCTTATAAATGGACC  
ATATATTCAATAGATGTTTTGTTTATTGGACACCCGCCCTCGTCCATATCTACAAGTCC  
AACGGCGTTTTCCCTCCGTGGCGACTATGTCAACGAAATAGTTCAAGTTTCTAGGTCTA  
AAAGAAAATTTAACTGAAAAATATGCTCGATTTGAAACATGTGCTATTTGAAGCTGTTCT  
TGTGTCGCTACCTCAAATTTTCTATCGCGTTCGGCTTGAAGTAATTCCTGGTAATTTCGA  
AAACGAGTATCTCGGTAGACATTGAAGATTTTCGTCCTTGTGTTGTACCAACTGAAACCAAGT  
ATGAATACAAGGATCAGCAAAATTGCCCGATAAAAATACAACCTTCGACGGTGACAGCGTCT  
TTGAACAATCCGTCCAGAATTTCCATCAGAATCCCCGCACGACCAGGGGTTTGAGTTCCC  
TGCGTTTGGTTTTCTATACTCATAAAGTTGTTACTCCTATATAACAGCTCTATTTAATGA  
TTTCGGCACCTAACGGTGCCGAAATGTCATTTATAAGAATCCATTGTGCCAGTCAGTACA  
ACTTTTGCAACTCGCATTGGCCTGTTGGGGGTTTGTCTTTGCCCGAGATGAATTAATCAAT  
TCAGAGTATGCTTTAGACCAGTCCTTATTGGCTTTGAATGCGAGTGATTTTTTGAATCCA  
GATAGACGAGGACCTCCATTTTGAACATTAAGTTACAAATAGCATTTTTTTCTAATAGGG  
TCACAAGCATCATATGCTAATTTGATATTAGGATATTTCTTGATTTCACTTTTACTGGT  
TGAACATCAGAGCTAAACAGTGCCTGACTGCTCAGAGATAACCCCGTTCACCTGG  
CGACCAACCTGCTTACTCAATGTATGGTTTATTAAGGCCATATCGGTTGTCTTCTGGGGT  
ATAATCAGGTGACCTATCCCAACAGTAGGGTACCCTAGATGGTCCCAAGACACTTTCAA  
ACTCTTGCCCTCATCGTAGATGCGCATGTCTTCTAACGTCATATGCTTTCTCCTTAATTAT  
TTTCCGAATATTAACGTGTTTGGTGGCCAGAAAATGATTTAAACAGCTCGCCGTCATACG  
CCGCAAGATGCACGGCACCCGGCAAAGCCATATTAATAATATGGCGACCATGACGAATTT  
GACCTCTATCACCCACATCATGTTGATCAAATTTCTCCATAGTTTCCAACGACTTCAAAT  
GTATTCGGTCTCGGCCCGTTGGATGCGTGAAGTTGAAAGTACGTGAGCCATACCAATCGG  
AAACATATTGATCTGGTGGCGTGTATACTAGATTTTCTCGCCACGGCTGGTTATCCACTC  
TCCATCGTAGATGAACGTATCCGAGATCTCCGCCGCGATGAGACGCCCGGCCAGTTCCGA  
TGTATCCGATTTTTATGATTGCACGTTGTACTCGAGTGAATTCGTTAGAGTAACTGAAAT  
TCTGATTTCTGTTATCCGGATATCTAGAGCCAGACCACATGTAGCACCCGCGATGGCGATC  
TGCTTTTATTGAGGTAACACGATCCCCACCAATTTATAGGTGACGCACCTTGTCCATACT  
AAATGGGCGAAAGTTGTGGGTCTGCCGCGTTGCCTGCGCCAGATAGTCCGGCAAATCGCT  
GGACGTTAGTAAAGCAATTTGGCTTTTTGATATCACCCGGTATAACAATCGCGTTATACC  
CAATGGTCCAAAATCGCCCATGTCGTTGAGACATTTTGCCTCCTAATGTTATATAAAGTT  
CAAGGCAGCGTTCATAGTATCAACTATTGTTCCGCCTTCAGTGGCAGCGAACTCGTAAGT  
TTGAGATCGAACTGTTCCCTTGTGGATTATAACCCCGCGTTGCACACCATCTACGTG

ATACCATCGAGCCTCTGTGCAGTTTTTATATGTGATTCTACCATTTTCGTATACGCACCCA  
TGCCCTGCCGTCGAAAATATGGTAAGATATAACGGTTGTGCCATCTATATAAGTGTAGAC  
TGTCTGACGGGTTGATGCATTATAGCTAAACGTCGCATATGGCGGTGTATTGTTTCCAGT  
GACAACGGATTGTATAGAAGCAATCTGCTTAAGACTGGCCATAACCAGCCAACTGCCCGAG  
GAAACCGGTTGTGCCAAGACCGGCTTTACTCAGAATGTTGGAGCCCCATCGATTGGCCTG  
GAACTCGGTGTTTGCCTGAGACAACCAGCAGGGAACGCTAGGTACGGCCATAATCCA  
CCTTCACCTTCGCCGAGAGTTTCTTGACTGCCCCACCAGTAGCGCAATCAATGAGGAGT  
TTGATAGCGTCAGGATTTCCGGTCCCCTCTCTGTTACTTGAATCCACCACCCAAGTAACAG  
CTTCGGGTAGCCCCTGCTCGACGTTTGTGCAATCAATCCGACCTCTTTTTTGTGCTACT  
CAGTGGCTTCAAGCGTCTGCTTCTTGTGCTAGGAGTAGGCGGTCAGTGTGACACTTTCC  
GTAGCGCGTCACGTACTTCCCCAAAGTTCTTCTTAAGTCGCGGGTCTGACCGGATGTAGA  
CGTCATTCGCGTTACATTCCCTGTCATAATCCCTGCATACGACGCGAGTCCTTGTGTGT  
GGAAGCGGAAGTCCCCTCCCACAAAGTGTAACTGACTGGCAAAGCGGCCTGCCATGT  
GGAAACCGACGCCCGGGCGACTGGCGTTAGCGGGGTTACCGTTCACCTCGATAGCGCACT  
GGTAGTAGTCGTTTCCCACGGCATTATTTGCCACAAACCTGTCGCCTTGTTCACCAGCT  
CGAAAGGCCCTCTCTGGGCACCGGCCTCCTGTCCGCAATCCACGCTTTAGTTCCAGCAA  
AGTTGATAGCAAAGTCTCCGAAGAATCCTGCTGCGTTTCCGTGAGCTTGGTTGAACAGAT  
ATGTCCATTAGTATTCCGGAATGCCCGCAATGTTGGGTCCTTGAAGAATCCAGATTGAG  
GACGGAGATTACAATCGCCAAAACCTGTGGAAATGCCAGTTCCTACGTCCCAAGACCAA  
ATCCTGCCGGAGCCGCACCAACATCCGAGGCAGTCGGCTTGTTCCTTCATGGTAAATCT  
TGATAGTAGCCCCACGTGCGCCACTACGCCATGTGAGAGAGTTATCAGCCCCTATCGTGC  
CCCCAATCCACAGGCGTCTATCTCAGTGCCATCAGGTGCGCTCCACACGATCTCTGCCA  
TGTGACTAGCAGAGTGCCCTACAAGGTCAAGGATCCCTGTGACTCCTAGCATCCCGGATA  
CAGTCCCACCAGCAACAGGCAGAGCCGCGATTTCAGACAGCGACCAAGACACGTCACTCG  
CACCGTTAACGGACTTAGCAGCGTTGCCGATAGTCAGGGTGCGGGCTGTACCCCAGTTCCG  
CCGTGGTGATGTTACCGGAACCGTCAAAGTTGGTGCCGTTAATCTGGCGAGCCGTAGCCA  
GCTTGGTTGCCGTGGCCGCATTGCCAGCAAGAGCGACCGTGAATGTCGGTGCGGTCACCC  
CAGCAGCCACGACCAGCCCTGTAGGCTTTAGTGACATCCAATCGGTAGTGTTCGCTCCGT  
TTACTACTCTGCCACTTGAAGTATTCGTTACCGGTATCCCCGGTTTTGAACCACATGTAGG  
TGTCGGTGTGCTGTCAGAGGCATTCTTGAACCAATCTTCGTGTAATCAGAATTGAAGA  
CGCAGCCCAGCTCGCAGGCAGCATCGACGAACGTAAGCCCACAGGTCATTGCATCGCCAG  
CTTTAGCAACCGCACCAACGTTAGTTGCAGAAATCGAAATATTCGATGTGCCATCAAATG  
AAACACCTGCAATAAGTCTAGCTGTCTGTAATCTAGAAGCCGTAGCGGCATTTCCATTGA  
CTGGAAGAGCTCCTACTGCATCTGGAGTTGGGTTATATCCGTTATAGTAAACACGATTGC  
TTCAGTTATAAGTACCAGAGCTTTTATCAAAATTTCGCAAGAACAATGGTTTTTGTATTT  
CACTTACTTGGCCATTAACCGCAAAGATAGATGTTCCATATGTAACATCAGTTGCACAGG  
CGGTGACGGCTGTTCCGATATCGACTCTAACTCTTATTGGGAAAGCACCTGTTTCAACGT  
AAACAACAAACCAATCTACGGCCTCAGATGGACCGTGGATTGAGTAAATTGCTCTTTCTG  
ATGTAGAATAAATCGTAAACTGGCCTACGGCATAACTTCCACCGTCACCCCATCCACTGG  
CGAGAACATTACCGGTAAATGAACAATTGTTTATTGGAAGTGTGTTGATGGCCAGATAAAG  
TATCGATAAACACAAATGAGTTGGCTGCACCATTTGTTTCAAAAAGAAGTGGAAATATATC  
CTGAACCAGGTGCTCCAGCTGGAAGTGTGATCGACAAATCTTTCACATCTTTACCTGAAG  
CAGTAACAGTCGATTCAACAAAATCACGACGTCCCACAGAATTAGCTTCGGTGCCTTGGC  
CGGCAGACAAAAGAAGCTTTTGGAAACTCAAATTGCCACACATAGTGTGCGCCGATTTTT  
TAACGTAATCGGAGTGTGCATGGCTGTCGTTTGTACTCTCACTGCTAGAGAAGCATTG  
CACTACCGTTCGAACGATAGTGAGCCAGTTGCGCCTCCGGTCAAACCTGATAGTTCTTGGC  
TTTGCTACTTTGATGCAGACACAGCATTGTCACCGGCAGCCAATACACCAATTTCTGCAG  
GAGTAGGTTTATCAGCTTCGGTATAAATCTTTTGGTTTGTCTAATTTAGAGCCTGCCGAGT  
CGTATGCGTATGTGTACATAACAATAACCGATACTTCCGTAATCGAAAGTAATACCACGGG  
CATTGACACCGTTACTGGCCGATGGATGAGAAACGTTAATAGTCAATCCACTGAATCTGC  
CCAGACTGTTATGCCTGATGAATCCGGAATAGCCCATTGACAAGTTATGAGGTGTTCCCA  
TAGCAGACGATTTGCTCAGCAAGTATCCATTTTTTCGCAGTATTGGTGTTCAGTCTGATA  
AATCGTGAATCAGCCTCGCTCTGGTTATAGTATGGATTATCCATAGCCGAGCGTTGGATA  
AGGCCGGTGTGCTAATCAAAAGTCCGCCCGTGTATTGTATACGGCGGAATCAAAGCGA  
ATTTTACTGGTAGTATTCCATCTTGGGCATAACCGAGTACTAAATCAGTTCCACCAGGT  
GCGCCAATATACAGGTTTTTAGACGAGATTGCTCGAATGAACTGGACACTTCCATACTTT  
ATATCAAAGTTTTCCAGTATTAGCGGATACCAACGCTCCTTTCAGAGAAACATCACCATTT

AGATTTAGCGATTTTAAAGTCCTTCAAATGCCCTCGCGCCGTTGGTGTTCAGTAATTGCGAC  
TTTAAAGTTACCAGACGCATCAGTTCCAACATATGACTGAGGCGTATTTCCCTTTGAAAA  
ACGAAAATAAGCAGGACCACTAACGCTTGACTIONAACGCTAATGGGTAATCGGTGGAAGT  
TTCGATGTACAGAACCCCGACATAGTATCGCCAGCACGAGATACTACTTGGAGTTCATT  
TGCACCTGGTTTTGTCGCTTCCGAATAAATTCTTGCACCCTTGTACAGGATAGCATTACC  
GCTTGGTACCAGCGCAAGATTGCCTTGGTGCCAAACAGGTGAACCACCGATCGTGGTTCC  
AACTTTGAAATCTGCCATATGGGCTCCCTTGTTAAACCAATGATTGGGGATTTCTTATTA  
TATTTAAAGCACTCAAATTAATAAACAATCCTGGCTCCAGGTTCAAGCTTGCCTGAACTTT  
TCTTTTTATCCTTTTAGTTATAATATCTATTAAGCCATAAAGGATAAGTTGTGGCAGGGC  
CAAACCTGGAAGCCAGGATTATATATTCTAAGTAAAGCAAACAAGGGCCAAGAGGCC  
TTATTTTTTCGTTAATATCGTTTGAAGTAATGATATTCTTTTGTTCAGATTCAAAGCTG  
TAATACAAGATTTATGTAATTACCGATATTGCTTATGCTATTAGCTCTAATACCAATCTC  
ACCAATTGCTGCATCCGCCACTTTATCATCATCGTCCCTTGTAAACCCGCGCTATAGTGAC  
ATTCGCACACCTGCTGTTCCAGCACTGACACTTGACGGATATCGGTATGCTGCAGAAGC  
AAAAATCTTCGCCCTGAGCTTTGCGTTGGCAGTTTGAATAACCTTCAAATTTTGGCCA  
CACACCTGGGGTTCGGTGTGTGCGTTGCTAGCCATATACTCCTTTTCCATATGCCTGAAGA  
GTCTTGATTCCATACATAAAAAACATCTTCCACCGGCGGTAACACTACAGTCTGGTTCGCT  
GTGCAGCTCGCATTGGATATGATATATTGATTCCCATTGCGTTGTTATATTTTATGACAA  
ATAACGCTTAAATTCGTATTGATTCCCCACTGAGAAATATTCGTTTATGCCATCGACATT  
TCTTGACGGTAATCCACACGCTCCAATATCGACAACGTGGTCAAAAACAACCTTGCAAATA  
GGCATTAGTGTCTTCTGCGAAACTGTTAGGATTATCCCAACAAAATTCTCGTAACAAA  
ACGCTTTAATCTTGTATTGAAAATTGCAACGTACGAACTTCTATATGCTCTCGGAGTAAA  
AAGAGCATCGGATTGTAGATATAGATAAGTAGAACCAGGCCACGACATATCTCCATATTG  
TTTCATGAATGTGTCAAAAATCCTCTGACGATCTGATAGCATCATGCAAACTACTACTAC  
TATATTGTCAGATGGTGCAGACATTAGATATGTTCTTAAAGTGTCAAGATGCTCGGGTCT  
AGCATATATGTCAAACGTCGCAAAATTAGATGCTACTCCGTTGGAGAAATAGTGATAGC  
GTTCAAACCCCTTCCGTACGAAGGCAAAACCGAAACACCATTGATTTTTACGTACGGCAC  
TCTGACACTGGCGTCATCTTTGACTCAAAGTGCCTGTATCATATACTTTATTGCGTTATT  
TTCACCTAAGTTATTTGATTCTACGTAAGATGGCCCAAGATGGGCCATAAATTGTTCTGC  
CATAACGATTCCTTATTCTTCCCAGATAAACTCATCTGTCTTGGTCAAGTTGTTGGCAAC  
GATTTTCACATTACCAATTTTGATCCAATCTCTAATCGTTATATTATTGGAAGATGAACC  
TGTAATATCAACTGCACCTACGTCTTGAGCAGTAGGTTTGTACCCTTGTGATAAATCTC  
GTACTIONAAAGTTTCCGATCTTTACGATTGGATTCTGATTGGGATCAAGACACACAAGGCC  
ACTCGCTGTATCGGTATTTCCGAAAACGAAGTCATTTCCATCTGAGGTAATGTAACGATT  
TGAGTTTTTGAATTGCAAATACTTAAACATTGGCACCGGTGTTTGACAGAAGCATTGCTCC  
AGTCATAGTCGATGTACCAGCACGACGAAGATATGTTGGGTTGAGCTTTGTCTGAGCGTT  
GGCAGTATTAATTACCGGTGATCCATTAATTGTGAAGGCATCAGTAGAGCTTGCCAATAC  
AGCCATTGTTGAAGTAGCATTGACAACCTATGAATCCGCCTGCAACAGATTGTGCAAATTG  
ATTCGCCGCTAATTCGGTTCACCCAGATAAATTCTCACACCTGTGTTTTCTATAACAAG  
GAAACCAGCAGTTGATTTTATATGTTGGGCAATTAGTACATCACCGGCTCTATTAACCTT  
CAGCTTACTAGAGAAAGTTGAACCGTCTTTAGTTGCAATAGCAATTTCACTGCCAGAAAC  
TTCAGAACCACCAACGCCACCTGCAATAAATACCCAATCGTTTATAGCAGCATCACTTCC  
AGCCATTATGGTGATAACCATTGGCTCCATCAGGAGCTCTAGTTTTACGTATTTGACCAGA  
GTATGTCAACGATTATCGATAATCACTCTTGCCTAGTTGTCGTAGCATTGGTAATATC  
TGCAGCTACCATTGCGACAGTAAAAGTCATCCCGCCTGTTACCGTCTGAGCAACAGTTCCG  
ACGGACCCAATCGTTAGCAACAACACCACCAAGTTTCAGTCGGTCTGGGCGGTTGCCAT  
TTTCGGCAAATAGTTTTGCAACGCATAGTTCAGACTCAGCGGACTAACGGCCAGCCCATC  
ATTTGAATATGATGTGTATACTTGGGTTGAACCGACAGTATCGTTTCCAACGAAAGTTAA  
CTCTACTGTTGCTGCTTTGACAAACCCACGGCGTGTTCATTTCTGACCATGGCAGTTCC  
AATTTGCGCTATAGATATGAAGTCTTCTGGACTAACAGCCAAATTAGTTGCTGTTCCAGT  
TCTAACTTCAGCGGTTGTGCAACCCGGATAAATACCGTCCAGAGTTCCTTGTGCTTTTTCT  
TCCATCGAGTTTTTTTTGAAGTTACGATGGTATTGTCTGAACTAGATCCATTTCGCCTCAAG  
TTGGGTTGAAACACGCAATGCCCCACGTTGAGCTCCTGTAGCAAGACTTATTTCAAACAGA  
AACAGTGCTCCAAATGGTTCAGATTGGGTCAAACCATCAGTCGTGTTTACCGAAATTCT  
TGCCGTATTGTTGAAACGATTGTTCAATTTCAATGGAGTGACGATAGTTAAATCGTTTGT  
CGCTGTATCTATTTAGATGTGTCGCAATACGGGCAATACCTGTGATAGTTTCTGTTGA  
CGTGCATGATTCAACTTTTTGGGAGTAATAGCACGGGTATCATCAGTTCGGCATTGT



TTCAGTCTGGGTTGCGATCTCAATCAGATGATGCTTTGATTCTGTGCTCGACGAGCTCC  
CAATCTTTCGGCCGTTACAAGCAAAGGCCCAAGTGGATCAGATGATCCCCCTTAGACTTC  
CGCCTGTGTGGCAATATAACCTCTACCCTTTACTGTTTCGGTGGCCTTGAATTCATCCAG  
GGTTAACGGTGTGACAGCTTTCGACTGATCGGCTTTGTTATAAACACCAGTCCCAGCAGC  
TGAGCGAGTTGTAGCAGCTGTTCCATTTTTAGAAACCACGGCTAAGATACCGGTCAGAGT  
TTCTGACGCAATACGATTATGCAACTTTTTGGGAGTCACAATTGTTATGTCGTCTGTTGA  
GCCGTCTGCTTCTGCTTGAGTGGCAATCTCCGCTAAACCACACCGAGTTTCGGTAGCAGT  
TCTTTCATTTAACTTTTTCGGATTGACGAGAATGTCATCCAAATAAGTTGAAGTGCTTAA  
CTGATTGACTTCAGCGGTTGTTACCAATCGGGCAATGCCACGACGAGTTTCAGGAGCAGT  
CTTCTTAGCTAATGTTTTTGAAGTGACAATAGTTTCGTCATTTCGGGTTATCTTCGTGATT  
TTTGTTTACTTCTGCTTGATCCGCGAGAGCAGCCACGCCAGACGAGCAAGACGAGTTGT  
ATCAACACGTTCAACTTTTTGGTTGAACATTTCCGATCATCCATCCGTATTGCGAAGAAGT  
AACACCCACCAGGGACGGGTCTAACTGTGGGTACATTAGCTCGACATATGGAATGTAATC  
TGTGTCAACACTTATAGAAATAGGTGAAACCAATTCCCACCCATTTGTCATCGGGTATTC  
CGAACGACGCTGGAAGTGCATTTGAGCTTTCGACCCCAACAATCAGCACATTTGAACCTGG  
ATTTACTCTGATTGTACAAGTTTGACCTTTTCTCAGATAATCCATAGTGATTTGATCAGC  
GTCACCTATGGCTACCTCCTCTGGGAGAGTCAGCACGGTGGTCTGACTTGGCAAATTACT  
GTTGCCAGTCACCGGAATGTGTTCAAACGGCAGCAGTGCTGTGTCAGTTTTGGTAACACG  
AATGCGTATCCTTTGGTCTCCATCCCATACTTTGCATGTCAAAGAAGGAAAATCGAATAC  
GAATGACCGGTAACCAGATGTGCGTGATTTCGATTTTGGTAACACCGGTTTCATTAATATT  
GTGACCTGAACCTGGGAAAATCTCAAGAGTCGAGTGGTGAATCGGGTTCATCCCATCAAT  
ATCATTGGTTGTAATTACATCCCATGCCTAGCATGTTTTGGCAGAACAAGACGAATTGT  
TCCTGCAGCAGTACGTCTCCAGGTAACCATCCCTGACTGCAACTGGAATCCTTTAATCGA  
TGGCTCAACAAAATAACTGTTTCAGTACTGGAGCTGCTACATCTACTTTCGATCTCTTTCC  
AGCTGCTTTATAGACGAACATATATTGGCAGAATGGGACAATTGCACGGAAGCGAGCGCC  
GACTGCTGCTTATATTTCGATGACTGCTGTTTCTATAGATACAAATTCCAGATCGTT  
AACACCTGGCTGATCGCCTACGTCCTTTATTACTAAAGTATCGCCATCGACTGGTGATGT  
TGGCAAGTTGAAAACCAGATTGTTGAATCTATTGTCAGTAGTGATATATTGACCAGAACT  
CAACTGAAGTGCGGGCCAGTCGAGTTAATGAACTGCCATGTTGGGTCAACACGGGAGACC  
AGTCCATTTTGTGACGTCGAAAGCTCCAGCCGGGGAAGCAATATCTGCATTTGCGTAATA  
AATTCGACGCTCGAAAATTACAGCATGTTTTGCATCATACCCACGGGTGCTGTCATATTC  
GTAAATTGTGTTATATTTGTGGAATAATCCAAAGCTAACGCCCTCGGACAAAATTGTCTT  
ATCGGCCATTGCAACGTTGATCAGTTTTTTCGCCACCTGCATCAAGGCCGCTTGTGGCGCG  
AAAGGCTTGTCTAACATTTTTGGACCTCTCCTTTTACTAACTTAGTTATTTATGTTAGT  
ATGTCTAGGTGTTCAATAAGAGAAATTGATATGAACTGAAAGGATTTTCATGGGTGCAACC  
ACAAAGGATGATGTCAATATTATTGACGCATCTCAATTAATTATCGCGACAATAATGGCT  
AACTTTACTCCTGAAGATGTAAATGAGCGAATGCTCAGACATTTAATTCTGGATCCGGTT  
CGAAACAACGTCAAAAAGTTCAAAAACGAATATCCCGATACTATTATCGCATTTGACGAT  
TCTGCCAATGGTTATTGGAGAGGTGACATTGCTTGGTATAACAAATTAACCGAAAGACT  
AATAAAGAAGAATCTCCATGGGATTGGGAACCTTCTCTTTAGAAATATCAATAAAGTGGTC  
AACGAAATGCTTAATATCTACCCAGGTGTTAAGATGATAAAACTTGATAAAACTGAGGCT  
GACGATATTATTGCGGGTTTGGTCAAAAAGTTCACCGAGGAAGGTGATGTGTTATGATT  
TCTTCTTCTTACTCTGACTTTACTGAATTGCACAAATACAAGGGTGTCAAGCAATATTCC  
CCTGCTCAGAAGAAAGCAGTAAAGCCAAAATATGGTAGTCCAAAGCATGACGTATTTGTT  
AACTGATTTAGGGTGATGCAAAAGATGGTGTTCGGGAATAAAAGCTCGTGATACATTT  
GTCCTTGATCGTGTCGAAGGTGAACGTGCTCCACCTTGTTCTACCAAGTGGATTAATTCA  
ATCGTTGAATCTGAAGACCCTGGAGCTGCATTGGAAAAGGAAGAATGGCAAAGCGTTGG  
GTTATGAATGTTTCGGTTGCTTGATTTGGATAAAAATTCAGCACATGTTTCGGATCAAAAC  
ATTCAAGCTTATAATTCTGCAGTAGTCAATCCTCGTGGTAAATAGTACAGCTTTTTTGT  
AAACATGGCTTGGTTAACTTCTCGATAAAGTAAATCAATTCTAAGGATATAACATGAAA  
GAACAGAAGAAAAGAAAAGAAAAGTACGAATTCAACCCGGCTGTTTCATTGCGAACGTCT  
CCAAGAAATTATTACCGAAGCATCAAATCTGCGCACCATGCAAGAATCTTATGCTGAAAA  
GGTAAAAGGGCAGCGCAATATTGCCATTACTGAATGCGGTGTTGACGGCAAACCTGTTCAA  
TCAACTGTTCCGGATTTACCACAAGCAGGAACGTGAGCAGTTTGAAGATACTGCCGATGA  
AGTTACTTCAGTGTATGACCAACCCTTTAAAGGCAAATGATGTCAAATCCGAGCAATCGG  
AATGGTAAAAGCGCAAACGGGATAGAGATAGAAAATCTGGTTAAAACCTGGATTGACATAT  
CTGGAAGCATGTGTTTCAGTGGTTGGAAGAAAATCCTTTAGAAATTAAGTGTGCCACAAA

TATATCCGGCGAGCGGTAATTGGCACACTTTCAAAGATATGTGTTCGATTCCGACATGCTT  
AGACCTTCCATTGCAAATCGATGAAACGAAATAGTTTGGACTTTTTGATGTGAGATTTA  
TATGATCGCTCTCCGATATCCGCCTATACCTGATAGATTTATTAGTGCAAAGGGCGCGTT  
TATGCTTTATTTGATAATGAAACAACATATGGCTGGAAAATATGACATAATCAAATATAG  
TTGGAATATGAAAGTACTGATGCTGCGTTTAAATAAACGCAGAGATAAGTACTTCTTTGA  
TAAGATGAGCGATAAATTTACCTTAAAGACTTGACAGAGATATCTCTGGCAACGTTTTT  
GGAAAATTCGAATGGCTGGGCCGTAGATCTTGTCTTCTGCAGATGCAATGGCAGCCATCG  
AGAATTGTTGGGAAGATACATCAGATTCCCCGAAATATACAGGGAAGACCTGAAACACCT  
GGTGTATTTTTTCCAATAAAGTCAATGTTCCGATAGGTAAACTATTGGAGTATAATGAAA  
AAAAACAACCGAGCCCAATTTCAAATTAATCTCCAATCTGGCCTGATCAAAAACAGAAACAT  
ATTTGGTTATTGATTCATTCCTTGGTCTAATCGACAAAATCGATGAGAAAATGTCAGCTG  
ATATAATCTACCAGAATTGGCATAACCAACTTGGTCAATTACCGGAAATTGGTAGTAAAA  
ATAATGACATAGCTAAAGCCAAGTTTATTCAACACGTAAGAGGTTTAAAGCTGAAGTTT  
AGCTATATCAAATTTGATGTAAAATGTAAAAACGCAAAAACAACACTGTCAAAAATAAAATA  
GGAAAATAAATATGTTCAAGCGCAGCGATCCATGTCTGCTTCCAGCACAACCTGGCCGCTC  
TGAAAGGTAATGCAGGTGGTTCGGGTGGAGATAAGAATGAATGGAAACTGAAAAATGATG  
CAGCTGGTAATGGTCAAGCAGTAATTCGTTTCCCTTCCAGGTAAAGGTGATGAAGGTCTTC  
CGTTTGTAAAGCTGATTAACACGGCTTCAAGAAAATAACAAGGGTATATCGAAAATT  
CTTCTTCTACCCACGGTGATTTTGACAACCTGCCCGTTTGCCAACATCTCTGCCGCACTG  
ATTCTTACATCACCACGCTGAAGAATATAAGCTGCTGAAGCGTAAGACTTCTTATTGGG  
CAAACATTCTGGTAATCAAAGACCCTGCCACTACTGAAAATCAAGGCAAGGTGATGAAGA  
TTCGCATTGGCGCAAAGGTAATGGAAAAAACTACTGCCATGATCAACGTCGACCCGGAAA  
TGGGCGAAACCCAGTAGACGTAACCTTGCCTTTTTCGAAGGTGCAAACCTTCGTTTACAGAA  
CCAAGACAGTTGGCGGTTTTACCAACTATGATGACTGCAAATTCCTGGCTCAATCCTAAA  
TTGCAAAGATCAACGATCCCGAATTCCAAAAGTTCCTCATTGATGGCATAGAACATTTGA  
GCAAAAATCGTTGCTCCTTCCGAATTCAAGCCTCTTGAAGAAGTGGAGAAGAAATCAAG  
CAAGTAATGGGTACTTCCAACGCTGCTGGCTCTGCCGTTTCTGCCGCATCTTCTCTGTCT  
AGCGAACTGAGTGACTTCGACGAACAGATTACCTCGTTCGACACTGATGTAGTTCAGCCA  
TCCGTGCCTAATGCTTCTTCTGATCGCGATGACGATCTGGATGCTCTTCTCGGCTAATAT  
AGAAAAGGAACCTTCGGGTCCTTTTTTTGTCATCAAATCTTTCAAAAGTAGGGTACAAC  
TATGCCATACAGTGTAGAATGTCTCCATCAAATCAACCAAGGCGTAATGAAAATGTAAGA  
CATTCTCGATTATCCAGTTGACACCAAGGGTTCGGATTTGCCACAAGAAATTCCTCGCTTT  
GCACGTAAGTCGTTGTGAAAAGACGGTTGCCTGGTTTTGAGGTCAAGATGACTTTTTTCGA  
ATTCATCAACACTAAACCATGTGGCGGTTGGGTTTTGGACTATAAGGCCAATTTTGAAGA  
AGTAAATGGCGTCAAATTCCCAGCAATATCAGATTGGAATTATAAGGAAAATTGACATG  
TCATCGAACAAAGTTCTCATCAAATTCAAATCTCCTAAAGCTCGTGCTAAATTTGCAGCA  
TTCTCTGCAGCTAATAGCGCAATTGCTGAATATATGCAGCATTACTAGCTGACTGCTGTC  
AATAAAGAGAATGGCGATATTGTAATTCTCGAAGATGGCAAAGAATTTGAGCTCGATGGA  
TATTGGACTCCCGCGATTTTTATGTCAGAGCGTCGATATTGTGACATCGAAGTGATTATA  
CTCAAACATTGTTCAAAGGAAATATTATGAAAATTAACACTAAATCTTGGCACTATCG  
TTTTCTGAATTCTCTCAACACAAATATCCCGAATTCTTTATGGCTGTATTTCTGGATAGT  
CGTGTTTACGATCGCATGGATCACCGGCTCGATTTTATTGCTCATTGATTTTTTCAAATC  
TAGTGGTGCCAGAATCTTCGAAGGAATTGGCTTTGCCCTCGCTAATATGGTATTTTTACTG  
GAGCTTTGCCGCTGTAGTAGGTACTGTCACCGTCACATCTGCTATTGTGCTGGTTGTGCG  
AGTAATATTCGGCTTTGTTTGGGCCACAGAAAATTTCAAGCCACCATACAAAGAAGAACC  
GTTGATTATCACCTTTGTCAAGAACAAAAGTCTAAAATTTGCCCGCGTCTTGAATTTGA  
AGACATGAGCAACAAGTCTGAAGAATAAGTTCGCAACCAGTGAGGTGATGATAAAATGAC  
CTCACAATAAATAAACAATCTCCGGCTTATAATGTTTCACTGAGTAAGGAATGATTAATA  
TGATTATTAATAATGTACGACAACCTTGCTTCTATTCGCAAAAATTGCAGATCTTCAGCCGA  
TCCCGGGTGCTGATGCTATCGAATGCGCAACCATCGAAGGCTGGGAAATAGTCGTGAAGT  
AAGGCGAATTCCCAATTGATGATGATTGCGTGTATATCGAAATTGATTCCATGCGACCGA  
CAGATAATCCTGCTTTCAAATTCCTTGAATCCCGTGCCAGGATGTACGAAGGCAAAAATGC  
GAGCTCGAGTGAAGACCATTAACCTCGCGGCCAACTATCTCAAGGTATTGCTTTGCCGG  
TTAACGCATTTACCATCGGAGAACTGCTCGGTGTTTATGGAATGGACCAAAGTATTGACC  
AAATTCCTCGGTATTATCAAATATGAGCCGGCTCAAGACGGTTCCTGGCTGTAACCCGGCCG  
GTAATTTCCCTGTTTTTCAATTCGAAAACCTGATGAAGAACGCTGCCAAAACATTTTAAGCA  
AATACAGCACTCGTTACAAAGATGTTGTGTTCCAAAAGTCTCTGAAGCTGGATGGTAGTT

CTATCACCATGGCCTGGGTAACGGATCCTAACGTGTTCCCTCGAGCTTGGAACCGAAGATG  
AACCATATGCTCACGATTACGACGACGCTCAATTTATCCTAGCTTCTCGTAATCAGGTTT  
TCCGCTATAAGCCCGAAAGCAAGTGGTGGATGGGTGTTGAAAACCTACCAAATCATCGAAC  
AATTGAAGAAGATGGGCAAATCTGTCGCAATTCAGCGTGAACCTGATGGGTCTGCTATCC  
AGTAAAACCGCGAAACTTCGACAAGTACCGGATTTTCGCATTCCGTGCCTGGTTTATCG  
AAGATCAACGTTTTGCTACCGACGAAGAGTTCACGACCTGTGCCGTGCTCTCAGCATGG  
AAATGGTGCCGCAGCTTGGTCGTTGCAAGCCGTTTGAACAATTTGAAACTGTCAAAGAAA  
TGTTGGCTGATGCGGATATCCGTCCACCAACCACAGATTGCTGAAGGTGTCGTTTATA  
AGTCTGTTGACTTTTAAATGGCGAGATGATTCACCTCCAAGCAATCAACAAGAAATTCT  
TGCTGAAATGAAAGGACTATCATGGAAATTAAGAAATTGCAACCTTTACAAGTCTTGTGT  
CCGAAATGCTGGATACATGAAGATTATTGCTACTGCTATTGAGAATTCGATGTCTAATAC  
ATTGGGACTGAAATGCCGCTTTTCACTTGAAGAGATGAAAGAGGTATCAAGTCAATTAAC  
CGTATCCAACCCGGAGGTTCGAGTGTGATTAAGCCGTATTTGCTTTAGGTGTACCGTCCG  
ATTTTCATAAGCATGGAGTTTTTGTATTTGGTAAAGATGGCGATTTACCATGGCCATCGA  
TCCCTGAAGACTTTAAACTTTACAGGGAAAAAACCGATGGGACTATCTATGTTATGGGTG  
CAAAAACATTCCAGTCGCTCCCAAAGAATCTTCCGGGAAGGGTAATGGTTGTTATTGGCG  
ATCCTAAGCGTGAGTGCCGGAACAAATCAGGTGAACCTTCTGATGATTTTCGTCAATCTTG  
ATATTGACTGGATTTCTGTGGTAAAAGAACTATATCCAGAAAATGATATATCGATTATCG  
GTGGCCTTGGTCTGATACTGTCAGTCGCCAACAAATCGTGAAGAACTCCATATCAATTTTC  
TTATGCTTACTTCTGACTATGATACAATTGACCCAACAGTTTATATCACTGAAACCGCAC  
TAGGAGTTGTCATGGGTAAACGGAAAATTAATACTATCGTGTATCGAGTTGATCGTGAAC  
ATTGCACCAAATTAGAGCAGGAATTTGGAAATGATTAATAACACCGATTTAGTATGCGA  
TATTATACCAATGGGCGAAGGAAGACTGATCGCACTGGAATAGGCACCCGTTCCGGTATT  
CGGTGCAATGCTTCGCTTTGACCTCAGCGAAGGCTTCCCGGCCACCACATGCAAACGTAT  
AGCAGTTGTTCCAGTTGTGGGGAAATTGCTGTGGTTTATGGAAGGTTCAACGAATGTGCA  
ACATCGGCGCAAATTGACCTATGGCGAGAACTCTGATCGTAAAACCATCTGGGATGAAAA  
CAATAACAAGCAAGCCGTTGATCTTGGATATTCTGATGGATACCTTGGTCCCGTTTATGG  
CAAGCAATGGCGTATGTTTCGGAAATAAAAACCCGGTTCGATCAGCTGCAAAATGTGATCGA  
TCAAATCAAAGCAAACCCCGACAGTCGTCGCTTTTGGTTCTTGCATGGAATCCTGAAGA  
TATCGATAAATGGCTTTGCCTCCATGTCACTATGCGTCCCTGTTTGAAGTATATGAAGGC  
AAACTCAGTTTGTGATGTGGAGCCAACGATCCGTTCGATGTTGGTCTTGGTCTGCCATTCAAT  
ATTGCGTCTATGCGCTTCTTGTCCATATTGTAGCACGAATTTGCAATTTGGAAGTTGGT  
GAATTGGTATTCTCTGGTGCAGATGTCCACATTTACGAAAATCACCTGAGTCATCTCGGC  
GGTATGCTTTCTCGTGAAGAACGCCCTTGCCTACGTTGAGTTTCCCGGATATTGACAGT  
TTGAGTGATCTGCGTTTACTGGAAGCAGCCGAGTTCCCTCTGGACGGGTATGAACCACAT  
CCAACAATTAATACCGATGGCTGTGTAATGAGTATATGCACCGTTGTAAACGTCAAG  
CATGAAAGATGTGACGTTTCGTATACAGCGAGGCACTATATGGGGTAATCCATACGGAGAA  
CCCCATTGGAACCGGCAGGATTATCTTGACAATTACAAAAGCATTAAAACACCAAATA  
AAAACCTGGGTTTATTACTCTTGACGATTTAGAATCACTACGAGGCAAGAGATTGGGGTGT  
GGTTGCAAACCATTGCCATGCCACGGAGATATTCTTGTCTGATCTAGTTAATCGCATGTGT  
AAGGATGTGCCAAGCGAAGATGATTTTCATATGACATTAAGAAGAACAGGGATTTCATTGAG  
TAGCAGAATTGACCATAGGTAAAACGGCCGTATATTCAGAGATTTTGTCTAAAGACCCA  
TCACTAAAACACATCATTTATTTGTTAACAATTGATGATGAGGTTGTGTATAAATAGTCAA  
ACTAAGAATTTGCACAAACGAATGGACTCATATGCTAATGGCAAGTTTTGGAAAAATACG  
ATCAAGTCACATTTCCAAAAATCCAAGTTTCTGGAAGAAGCAGTAAACTTGGGTAAAGAGA  
GTTTGTGTTCCGAAAAAGCATTGCTTCAAAATCGTTATAACCACTCCTGCTGGGTCAAAC  
GTTATAGCTGACCTAGACGCGGAAGAGAAAAATTTATCGGGATATTTAATCTTGTCTAA  
ATTCAAGGCTGAAGGTTAAATTATGAGCAGAACAACCTGAACTTTTTAATAACTTGATGTC  
TGTTGTGGAAAAATCCGAAAAGGGCAATTTCTACCTCAAGGACGTCATTACGAGTATGGG  
GACAAAAGCTCGAATTTTCAGCTATTTTATCGCTTCATATAACCGATTGGCTGCAAGATGA  
TGCTTTGGAATGTCGAGGCATTATGTTTTGAGCTAAATGATAAAAACGAGCCAGCTCGAAT  
CATGGCTCGCCAATGCAGAAGTTCATCAATCTGAAAGAAAACCCCATGACCATTGGGCT  
CGATTTAACTAAGACGATCGGTTTGTGATGGAAAAAGCGGATGGGTTCGCTGATTAGCAGTTA  
TCATGATCGAGGGTACGTTTATCTGAAATCTAAAGCTGCGGTTTTTTCCGATCAAGCCAA  
TAAAGCAATGGTGTGATGGTGAATTCGCCTGCTTATGAAAAATTGCGCGATGCACTTGTACG  
AGGCGTTCCCGATTTTACTTTCAATATGGAATATGTTGGACCAAGCAATCGGGTTGTCCT  
TCCGAACGAGGAAGAAGAATTGATTGTTCTCAACGTACGTCACAATGAAACAGGTCAATA

TGTAGAATTTTCTACTCTGCTGGATGACCCATTGATTCGTCATCGTATGATCGGGGTTTA  
TCCTTGCCCGGATTGGAGTAAAGTTACTCCCGAAGAATGAGAAGCTGCGACTCGTGCCGA  
GACCGTTATTGAAGGAGTTATCGGTATTATGCCAGATGGCCAGCTGATCAAACCTGAAGAC  
CGACTGGTACTCCTCTTTGCATCGTACCAAAGCCTCGATCAATAACAATAAGGCATTGTT  
CCAAGCCATCAAAGAACGTTCTTCCGACGATCTTCGTGGCCTGTTTTCCGATGATAATGT  
CGTTTTGTCAAAAATCGAGGCCTTTGAATCCGCTTATGTTGATACTGTTGCTAAATACCA  
CAAAATTTGCGCAGAAGTGTTTTACGATTTGCGAGGATTTGACCGTCGAAGTTTTGCTAT  
CGAAGCACAAGCGAGAATGAAAGACTGTGCGTACCTTTTTGGCGTAGTTATGCAACAGTA  
CGGCCGCGATTGGGACGGCGAACTCGCTGTCGAGAAAATCGAATAGCACATCATCAAAGA  
ATACGCAACATACGTTCCAATGGCGTACCGTTAAATAAAGTTGCATAAACTGTGTACATT  
TGACGGTGTAAATGATTAGACTAAATCCATAATCAACATGGAGTTAATCGAATCAATCATT  
ACCATTACACCGTCGAAATACTCATGAACACGTACGCTCTCGGCCGCGAGTTCGGATGGAA  
TTCGAATTTTCGACAAAAACTGTAAAGTTGTAGGATATAATTACTGATTTGCGCAAAGCTG  
CGCATTCTGCAGCCGAAAAGAAAGAAAGGTCCAAATCGTACTCTCGGGAATACTATCAAG  
AAGCTTAAACTAACATTGGCCCAATGGTCAATGAAGTTGTGAACGAGTTGAAAAATGTTT  
TTGCAGGCACACCCGCAAAGGTGTTTATTAACGAAACGATGCCGAATGTCAAGTTCATGG  
GAGCCAAGTTCTATTTTATCTTGTCTCCACTGACTGACTAAATTCGTGTAAACATCACTC  
ATAAAGATGCATGCCGCATGAAGTATGTTTTCCCGCAACATGCCAACTTGATATTCGTC  
AAGGCGGACGAAGCATTGTTGATTGATGGTTTACTCAGAGCGAAGGCATCGCTCTTGTC  
AAGGATTCTGCGAAAATATTGTTAACTTTGAGTTGCTGCTCAGTTGGCTAAAAAGTAAT  
GCGTTATATCTCATATAATGGTCTTAATGGCCATTATGATGAAAAATCAACACGACGAA  
ATCTCTAGGCTAAAAAATAGTTTAGAATCGATGAAATCATTCCAAACTAAGTCGTATGAG  
AATGCAAAACCCGTCCTGAGGCGCTGCTGAAGTCTCCAAAAGCTACAAAGCAAATGGAA  
AAAATTGCGGAAAAGAAACCGCGAATATTAGAAAAACGAATGATTATGGGCTTCCAGAAG  
TTAGCTGATCAACTTCAGGAGAGTACAAAATGAGGTATATCATCATTCTACTCGGATGTC  
TCCTGATGACATCCTGTGCATCTAAGCCCATGTTGCCAAAACCATCGCCGAAACATAAAC  
TCGATAAAACATCGAAAGCAACCGAAAATGGAGCTTTACTAAGTTTTGAGGATCACAATA  
AGTTGGGTGTATGGTTAACGGATGTCAACAGATATGTCAAAGATCAAAAACAAATAACTC  
AAATATGTGAGGATACAATTAATGACTGAACGTTTTGCGATCTCAACAACCTCATTTTGACA  
GTTGGTCATACTAGTTCCGGAAAAGCACCTGGGCAAATGAGCAAGTTTGGGCAAATCCT  
GCGAAATACGTTAGTTTGAATCGTGATGATTTTCGTTTTAGCCTTTTTGGCTGTGCGACT  
TGGTCTGCATACAAGTTCAATAAGCATAATGAGCAACTGGTAACGAATGCTATCCAAAA  
GCAGCGATTGAAGCTATTGCCATGAGCAAGACTGTCATTATTTCCGACACCAATCTGAAT  
AAGACGACTCAAGGAACTTGGAATAATTCGCAGATACTCATAACGTTGAGTTTGTGCTGA  
AATATTTTGCGCCGGCCTTCTGTCTACTCTCATGGAGAGTAATCGCTATAGGCGAGCGG  
GCATTGCCTGAATTCGTTGTGAAGCGTCAATATGACCAATATATGGTTGATTTTGGAGGC  
CAGCGGGTTTATACTCCTAGCTTTGCAAAACCTCGGGCAAGCATTTTTGACCTGGATGCC  
ACCCTGTTTGATAACAGCCAACGGCATGCCTTCGATTGGTTCGAAAGTTCTGGTTGACTCT  
CCCCGTGACTCTGTGCTAGACCTTTTCGAAATGTACGTTGATCGCGGTTATGCTTGCATT  
AACGTTTTCGGGCTGTGATGGTGTCTTCAAGCAGATTCTATCAAGGCTCTGAATAACGCC  
GGTCTTTTCCCTGCGGCCATTACCAACGCGCTGCAGGCGATTCTCGTTCTGATGATATC  
GAAAAGAAGAAATTTTCTGGCAACAGATCGAGCCCAATTGGTGTGCTGTTTCGTGCAATT  
GATGATCGTCAAAGGTTATTGATATGTGGCGTCGTATCGGGCTGGAATGCTGGCAAGTT  
CAACCTGGTGATTTCTGATTCAAATGCCCTCTTCGGAGCGCATTTTTGTAAGAAATCAAT  
AAAAGTACTGTACATGGCGGTTTAGTGTGATAATAATCACATTAACAAAATGGAGCA  
AAAATATGTTTTTTGACACCTACGACACTGCGCTGGCAGAGTTGGAAAAGCGCTGCGGCC  
AATTCCAGAACAAGTTCAAGCTCGCGACAAAATGCGATGGTTGCAATGACTCAAATTA  
GCATCAAGGAATTTGAGTTGGTTCGTCGCAATGGTGCAGGCGGGCGTGACAATAGTTTGG  
TTGCAAGTTGGTTGGCCCAACCTCCTGTGCCGAAGTTTATCATCAGCTGCTCTCGGGTAA  
TCGCATGAAAGATACAAGTGTATTACAACATGCCTATATCGTTGCACAAGAATCTCATTG  
TGTTTCGTGGAAAGTAGGTGCTATCATTTCGAAAGATGGTTCGAATTATTTGACCGGTTA  
TAACGGAACCTCAGCTGGTTGCAACCATGCCAATAGTAATGACCATGCGAAGAAAAGTGG  
TTGGCTTGATTTCTACGGTAAGTTGCCAGGAATGTATCGGCAAGCACACAGTGAGTGGTC  
AAAGGCAAATGAAATTCACGCAGAATTGAACGCCATTCTGTATGTGCGGAAAACCGGGCA  
AAGTATCGATGGTGTGAGAAGCACGTTACTGTTTCTCCGTGTCCAGATTGTGCAAAAAGC  
CATAGCTCAGTCGGGGATTAAGCGAGTCGTCTATAATGAGTTATATGATCGTAATCCGTC  
TGGCTGGGATGACATAATCATTAAGTCTGGAGTGGAAATTAGTGAAAAACGAACAGCTTCT

CAACATTATCAAGAAAATTTACACCACCAGCAACCAAAATTTGAGGAAGTTTTTATGATCG  
TTGGAGTATCTCCTAACGCCAAAGTACTTGAAGTCAAATTCTATGAAGTTAATAGCGTCG  
CAGAAGCTGCCGTTCTGGGAATCGATCCAGAATGGTTTGACGATGTCAAAGCCGTCGTCA  
AAGTTGACAAAAACGAACCGCTGTTTGGTTATTATCCGTGCCTTTTCGGTTTTGTCAGT  
GTCATCCGGATTTTGGCGGATGGTAAAGTGATTCGCACTTCTACTGTAGATAGGGTAATTC  
ATACTCGTGGTGAGTTCGAAGAACGTACTATCGTTTTCACTCGCAATTCTCGTTATGAGG  
TAATTC AATGAAAATTCAGCTCGATACTAAAGCACTCGAATCACTTTTCCCGGAAGGTTT  
GGAAGCTCGTGTAGAACTCCAAAATGCTGTTATTGCTAACTTCGCAAAGAAAATGCAAGA  
AAAGCATCTTGAAGACGTAACACGGGACCAGATTCGTACAGCTGTTCAAGAGGCTGGTGT  
TTCGATGGATTCATATCCATCGTTCGTGACATGCTGAACAAAACGATCACCAACAACGG  
TTGGGATGCATCAAGTGCGCAATTGAAGACCAATTCCAGTTTGGCTCGTGCTATCCATAA  
CTATGCCATTCAGCAAGACCTGAAATTGATGAAGGGTATGGAAGCCTGGGCCAATGAAAT  
GGTTAGTAAAGAACTTGTAAGCGCGAAGAAGCTGGCAAACGTTTCGCTGAGCATTACAT  
CCAAGAAGCTGAAATGAATATCGCAAAGCGAAGAAGCAAGCTTTTGGCGACATCGAATC  
TCGGATTGTTGCTGCCTGTAAGCAAATATGCCGGAAATCATTTCGTGCTGAAATGGCGAA  
TTATCTGAACAAACCAATACTACTGTAAGGAAATAAAAGGTCTAAGCAATATGTACTTCA  
ACAAATGCTGTTCTCTATTTTGGCTGACGGCGAACATGAACTGATTTTTCGAACAGCAGA  
CGATTCGCATCGGGTAATGCTTGCTACTCGTGACACTGTCCTGATTGAGGTTGCTGAAAA  
AGGTGACACAGCTTTTGGCGCAACAGAACCTGAAGAAAAGAAAGAACGCAAAGAAAGTAA  
TAGTTTGAACGTCGTCGTTTACGATTTGGAAGCAAAGCTTGGCGATCGTTCCGAGTCGA  
ACGACGCGTATCTATCAACGGTACTGGTATGGCCACGCTGGCATCTATTATTGGTGCTCA  
ACATCGCAATCAACTCAAATGGGCCACATCGAAGAGCGTTACGTTTCTACCCAAAGCAA  
GGGTTACGTGAAGTTTAAATCCGTTGACCCCGATGAGGTGATCTATATGGTTCGAAAATC  
TTCGCGATTTGAGCTTTTGTCCGACGAACACGGTACCAATACATGGTTCCTTTTAGAAGA  
CGAATCCAATTTTAAATCTGTGCTGCTGTTGCCCATACGATGGGATAACTTATGATTATC  
CCATCAACAAAACAGTTAAAGAGAAAATCATGACTAACGTAACACCTATTGCTCACTTTG  
AAAGCATGATTCTTGAATCAAAAAATTTGGCATCCGCAGGTGATGAAATCATTTCAGATT  
CTGGATTTGTTCTTGAATAGGCGATCTTCTGAAGTTCTCTCACTGCTGAGATTATCT  
CAGTCGGCATAGACGTACCGCACCATTTGAAAGTAGGTATGCAAGTTTTGATTCCAAATG  
GCCGTATGCACAATGTACGCGATCCTCGTTATCTGTCCGGCGAAATCAGTGCGAAGAATA  
GTCGAAAGCTGCCAGCATGCCACTGGAAAGATATTCAAGTCGTGTATGCTTAATTGATTG  
TCAATATAAGATTAACAAATTAACAAAAGGAAATGCAAATGGCTGAGCAAAGAAAGC  
AGTTGAGAAAAAAGTAGAAGCTCCGCAAACCTGGCCGTCAAGGTAACAAGCGTAAATCCAA  
CAGCCGTGTTGATCAAGTTGGTGTATGCTCTGGTAGCTCGTGTTTTGCGCCAAGTCAAACA  
TATTGATCAGTTTGGTCAACCAAACCACGAAGGTCGCAAGCGCCAGAAGTGATTAATGGG  
ACCTTCGGGTCCATTTTATTTTGAAGCGGTTTGAAGGGGAATATAATGCAATACGA  
AAATCCGATTTTACTGATGTGACGGGTTTTGGTTCAATGGACAACCTGGCCTCCC  
ATATTGCGTTCAGAAAAATGGCATTTCGGACCGACGAAATTTGAAAACCTCTGGTTCGACGA  
ACGATTTTCGATTGGGGAAGAATTGTTTCGGTGTCAACGCGCGAATTGCAAATAATTTGAT  
GCGCGAGCATAACAACTCAAATTTCAATCAATATCTTTCTGGAGATGTCGATCCAATCGA  
TGTTGTAATCGAATGAAAGATCAATATGACTTTATTGCCATTACTGCGCTAGGTGATTC  
TAACTGAGCTCTGCTCAACCGGTGTTGCAATCTGAACACACTTTTCCCGGGCACGTTCAA  
AGATATTCTGTGTGTTGACATCGGCGAAAGCAAATGCCGCATTGCATTTCCGTAAAGCA  
AAAATATAAAAATCGTTTGGTTTGTAGTCGATGATTTGGTCAGTAATCTCCAAGATTG  
TCATGATGCGATGTCGCAATTGACTCAAATCCATATGCTTCGAACTGAAGGCGCGCGTGA  
AGTAAAACATGATGTCAACAAATACCACACTGCTAAAAATTTGGTACGATGTTGAAAAGCT  
ATTAGTTCAACTTGATCCAAAATCAAATACAATCGATTTGACTCATCATTTCGACTTGGCA  
AGATAAACCTACCGTCTCTGGGGTAAAATGAAATGCATATTTTAGACATTCTGAACGAAA  
TTTCCTCAACTGATTCGTCAAAGAAAAGAAAGAAAGTCTGAATCGCAACAAAGAAAAT  
AACCTTCTCGATACTGTTTTACCCTTGGGTATAACCGTCAGTTAACGTACGGCATTACG  
CCAAAAGGTTTGAATTTCCGGCGGTTTGGTTGGACTTATGAGTTTGGAAAATTTTCAGCCAC  
GAGCTTGTAATAAAAATATTCCACCCGAAATTTGACAGGTAACGCAGGTATTCCTACATG  
CAACAGATGCTTGATAGTCGGTCAAGTTCTAGTTGTGAAGTTGCCAGTCGTAGTCTTTCA  
AGGGACCTCAACTGTGGAGCATCTGTTGCTCTTGGAAACAAAACATGGCCCCGGCATTATT  
CCTGAACAACCTCAGTTTCTTGCAGCACCATAACAGTGAAGAAGAAATTTGAAGAAAATCCGT  
TGGCCTGCTTTTGTCAATTGAAAGCCGTTGGAGCCCGTTGCATGGCTCTCGTTTCTGCG  
GATGGCTCACAGGTATCACTGGTGTACGGAACGGTAATGAATATCTGAAGTTGTATGAC

ATTACATCACAGTTGAAGGAACTCGCTCAGGTTGTCAGAGAGACTCTGCAACATTATGGT  
GATTTTGTAAAGACGGCGAATTGATTCATCGAGCTCCAATCTCTGCATCTATTAACG  
GCTAAACAACATACAGTGGATGATCTGTTTGAATTCCTGAGACAAATGATGAAGAAGAA  
ATCGAATCAGATCGAAACAAATCCAATGGTTTAAAGTAATAACGCTCTAGATGGAACAATT  
AGCGACGTTGATCAATCAGAAATGATTTTTAACGTATGGGATATTATCCGCTGGAAGTT  
TATTACGAGCGGAAAAGAGCAAATTGTACTACGAGAATCGATTTGCTACTCTTGCTTCG  
CTGACTGAAGCTCTCGATGGTACCCAAATATATCAAAACATTCAACTCATTGAATCCGAA  
GAAGTAGAGACATACGAGCAAGCTACAAAAATTTATCAGAGATATGTTGATCAAGACCGA  
GAAGATATCATTCTTAAAAATAAAGATGGCCTGTGGGCAAACGCTAGAACAAGTGACCAA  
ATCAAGTTC AAGGTAGAAGTAGAAATTGATTTGAAGATTGTCGAAGTTTATCCTCATCGA  
AAAGATGCGTCGAAGGTAGGTGGCTTTGGTCTGGAAGATTCTTCAGCTCAAATCAGGGTT  
CGTTGCGGTTCTGGCTTAAAAGATACAACCCATAAAAAGGTAAATGGCGCTAAAGTCGAA  
ATTCCTATCAGCGAAGAGCATCAATATGACCGCCAGGCGCTTATGCTGATAAAAAATGAG  
TTGATCGGCCAGATTGTTGAATGCAAATGCAATGGATTGCAAGAGAGGAAGGGGCGTAAG  
CCGAATGAAGCAACATTCAAGCTGTTTCTTCTATTTTCCCACTCATCCACGTGACAAA  
ACAAAACCACATCATATCCATGATGTTCTCCAGATGCTATTCTGGACTGAAAAAGGCCT  
TCGGGCTGTTTTCTGTTTCTGTTGTGTGCGTGTGATTGCGGCTTTGATAGTATGAATACG  
TACACA ACTATTGGAGAAATTCACATGATTGTTAAAGTTCGATACAATTTTGAAGAACAC  
ACTGGCGAAGCCGACGACACTCAAACCGCTTTTGAGAAAGCAACTGAAGTTATGCTGTCA  
AAGCTTCCCCAAAACAGAAAACACGTTTTACGCCACTTTTCCAAATGAAAGCCGTTTT  
GGCAGCGGTGATATTCGTGCAATGAATGTTATCCGTATGACCCGTGTTGACCTCATGGCT  
GTTCCGGGCGGACGACTTCGAATTTCCGTTCTTTGTAAAAGTATGTGAATAAGCTCCTTCG  
GGAGCTTATTGAAGAAAATTATGCTAAACCCTCCA ACTGTTGTACCTGTAGCTATTGAAA  
AGCCCATATTCTTCAAATCACTTCCGTCATTGCGCGGATTTACCTTGGACACAATAAATT  
CCCCAATAACTTTTGAAGAATTAGAGTGGGCATGTAAAACGTTAGAATAAGCTCATTATG  
TTAGTAGCTATAGAAACATGCCATGGATGAATTTGGAATTGGAGTCATATGGGCAAGTGC  
GGTTAATTTTTGACTTTCATGGTAAAAACTCCCCAGATATAATTAGAATGTGCAATCGTA  
TAGCCGAGCAACGATGCACCAACAGTTGCATGTGTATTTTGA AAAAATATGACGACTACG  
TGTCTAGCTATTGCGATGAAGAATTTGCAAACGTTTCTGCTGCTTTGCGGTCTGGAATAT  
TCGACGATGCAAATAAAAAATTCGTAACCGAGTGCATACGACGGATGGATTCACATATGG  
CAAGAGGTGAGAATTTTAATAAATCTGTATGGAGAGGAATGTATCTCAATAAGGCAGATT  
ATATGAAATTTAAAGATAGTGGGTCTATTCTCTTTAAAAATTTTCATATCGACATCATTTT  
GCCCGTTTTTTTTCAATTACGGCATTGCGCAATGCAGACATCTCGATTTTAAACGAAATCA  
CACGCGAAATTGTTATCGATGGCGACCCACATCGACCTGTCACTATAAACATGCACATTG  
ACTGTCATAATGTGAAACACCTGATTCCGGGAAACCTTAGTCCCTACCCGGAGGAGTGCG  
AAGTAATCTTGACAAAAACACTGTACTCGTAATGGATGAGATTTTCGAATATGTGTCTC  
ACGTCGACAGTTTTTGTGTTGTTAACGCGAAAGCGGTTCCGTTAAGTCAATTCACTGGAA  
CAACATAAGTAGTGTAATAACATTTTAGACCTATAAGGAAAACAAAATGCTGCTATTTG  
AGATGACAGATGAGCAATTGGATGAGGTATTCGACGGTGGAGTTGGAAAATACCCGCGTGG  
TCAATCTTTTGCCTAAGACAAAAGTTCCGTATGTATTAACATCCAAGTTCCTGGTTTAG  
AAAATCTGGCTTTGCGATTCTTTAATTTACTTCCAAAGGTGATTCCGCGAAGCAAGTCA  
AACCTGGCGACAAATTCATGCAAACACAGGTCATCCAGATTTTCAGAAAAAGTAACACCGC  
AGATTCTGAGAGATGGTCTCGGTAGTGACCCCATTTGGCGCAATGAATATGATAACTGAAG  
AAATCGTTAATATGCTTGTGAGGAATCGAATTGATGCAACGCTTCTGATGTTTCCGACAA  
AGGCACTGAAAGGCCAAGCTAAAAATATTGCGCGAATTACATCCCGGCTTATGCAAAAAC  
GATCAGGTGGAAAGTTTATGGTTTTGTCAGAATTGTTGGAAAGAGGCAAAAAATATACAT  
ACATTATGATTTAGCGAAAATCAACAGGAATTACTAGTGTCAAAGGATTGTAAATTGATC  
CTGAGCTTTATACGTTTTCATCTACCAGTGTAGGCGATGTCGTGATTGCTGAGAAA ACTG  
GTGAAAAAGTCAAAAGGCAGAAGCTATTGCTGGGTCAATTGAAAAGAGAGAAGAAAAAC  
GCTCTACTAAGTCAATGACAACTTCAA AATTCCACGTGTAGATTTGATCAAGGCATTCA  
CAACCAGTATTGCCTCTTCGGACAAGGAAAACAATTACTACGACCAATTTGGTGTTGGCC  
CAGTCGAGAAAAACCGCCA ACTAGCGAGGCTGAGGACGCAGTTATCAATGCTTATAACA  
CGATAACCAAAGAACAAATACGGAAATCGCATTATTACAAATTTCTTAATTTAGCCGCTC  
CTAATTTCTTTGACAAAATTGACTTTGACAAATATGATGCCTCAGGCCATGAATTGCCTG  
CTCTCTATGCGGAGACGGTTCGTCAAACGTCAGAGAAAGCCGCACAGAAATGGGTAGATG  
AAAATATTCCGGATGAACATCTGGGTGTGAAGAAAGGAAAAGTCGATTTTCATGCTTCATA  
AGGAGGTGAGACGCGCTATTATGGAATGGGCGAATTATCTTGGTAACAAATTTGATGATG

CTGTCGGCAGTGTTAAAATGAGAAAAAGATTGCCACCTGAATGTGTTGATGCTATACAAA  
CTTACACTTTGCATGACTATCGGAAGATTAACAATGTTTTTCATCGGCAACCTAAAACCAT  
CAGCTAAAACCGTAAATGATATACAGAATCTCGACAGAGCTTTTGACATTGCAGGAATTA  
AACTTCCTGAGAATCTCAACCTTTGGCGGGGTATGGCATGCCCAAATTATCCAGCTAAAG  
TAGCTTTGGAAAATAAAATGTTTTATTTTTCTAACTACGTGTCGTGTTCTGCTGTTCTTA  
TGGTATTTTTAGGTGGGTGTATTGCCGAGCATGACATTGACATTCTTACTGCTAAAGAGA  
ATGATGAGGCGCAGGTTGAAACAGCCAAAAAACACGGGGCTCATTTCGCATTTGCTATC  
AAAAATGTCCAGGTCCCAGCTCTTATAGTTAACGGGATATCGAATTATACGAAAGAACTC  
GAAATTGTTCTTCCACGAGGAACAATTTTTGAAATAAAAAAAGTCAGTAATGTTGGTGAA  
TTTACTTCAGGAAAAAGGAAATATCTGATAGATTGTTCTGCCGTTTTCAAAAAGTCAAAGC  
GACGAATCAACAGAGATTTACGACGGTGATTTGCTAATGCAAACAGGCGAAGTCTAACTG  
TTCGAAGGTTTTTCTGGATTCATGAAATCTCGCGAAGATGAAGAAAAAGAAAGACTCAA  
GCTGAAAGGATACAAAGAGACAATTTTGTCAACTCTCATCGACTTAGGTGCAGAAAGC  
AAATTTGTCCAGGTAATAGAATAAAAAAGGGAGCCGTATGGCTCCCTTTTTGTTATTCAA  
ATGAACCAAATTTTGACAACCTATCCACCAGCTTGTGTTGCCGAGTTCAGGTAATAAATCAC  
CCTTAAGACAGTCTTCAAGCATTGCTTGATTAACCGCACCAAGTGTTCATGACTCGATACG  
CCAATGTAACGTCAAACGTTGTAATAGCATTGTTATCCTTGTAGCTAAGTTCAGGTGCTG  
ATACGCTAACAGGTATGCGTCCATTAAACATGGACACAGTGTGGGGTATACCGTCTCTGG  
AGTGCAAATTCACTTGTATATCTGCTTCAACATCAGCAGGCAGTGAACGCAGTCCGGGGA  
CAGGGTCTTCGACCGCATTTACCCAATCCAGCATAGCCCGGTAATTGGCAGCCTGATGGT  
CCATTCTGAAACTAATTATGAGAGGATCATACTCGCGCCCCATCAATATGATGTTTGGAG  
CGTCTGAAATTTGTCCCTTTCATAATTTAGCCGGATTTCTGGCATTTTTTACAGAATAAA  
CCGTTAAACCAGTATGTGTATTGACAGCATTGAAAAAGTCAAGCAAATACGTACCGACTT  
CAAATTGACCAAGTAGGGACTGTATAGTTCGAGACGTCATTGCGCCGATCAAATATCTAG  
AAAGACCTGATTTGCGTATGATACTTTTGTGTGCCTTGAACCTATGAGTTTATTCAAGGTG  
CTCGAAAGCAGACCTTGTGTCAACCCGGCAAATCTTTCCCAAATGGAAGATTGTTATAG  
AGATATGCACCGAATCCATCAAGCAAATGGCTTTGTTTTAGATGATGGGGTTGTTGCGAA  
AATAACAGAGAACATATTTGTTCTCTGAAAGTCTTTATTCAATTCTTGTTGAAATTCATC  
TGATTTATACATGATTATTACTCATCATATAGATCAGATCGATTTCAGGGCAAGAATCTCT  
CTGAAAGTGACTTCAAGTACAAAACCTTGAAGGCAAATTAGGTGCTATTGCTAAACCGCCG  
AAGTGACCGTCAGGGCTCTTATCGAACCGTATACTTTGAATTTGCGCTGGCCCAAATACA  
TAAGACCGCATATCAAATGAACTTGTTCACCGAAATTTCTAATAGTCCAAATAATTGGA  
TTAGAAACAACGTTAACATTACTCAAAAATGATGTTATTCTTTCAAACATCGTAGTTTGA  
CCCTGAGTTGCTTCTGGTGTGAGTGGGTAAATGAATGTTTCATTGTATGCTTTATTAAGA  
GTGCTTTTTATTGACTCGCCGTTTTGACTTATTTACTCCTCCGTTTCGAGTAATACGAG  
AGCATTTTCGTAAATTAACAAAATTTGCATTAGGTTCGTATACATTACGAGGCGTTAATTGC  
CAGGTATATGTTTTGTACGATTCTCTGCGCCAGCGTACATTGCCCTGGATGCGATGTAT  
ACTTGCTCACCACGGTCAGCAAATGCTCCCTGGGTAAAAGACTCCAATCCGCCATACAAT  
GCATGAGAAGCCATCGAGCTCAGTGCCCCCGTCACAGAAGTGTGCGCTCGTTCAACCAGT  
GATTGCTGGACATCATTGAATTTCTGGCTAATAGTATCTACATCTGTCTGTCCCCGAGGC  
ATCAGGATGTTAGCTTTGGCTTCCTTGACAACACCCTTACGATAATCGCCAATGTTATTT  
TGACCTGATCTGAACGATCGCAAATCCCAGTCTGTCTGCCGGAATAGTTAAATGCTGAC  
AATATCAAACCGTTTTGATACAAATCATTAAACATTGAAATCTTGCGCAGAGTCATTGCT  
GGATTTCTCTCGGCAGGGAATTGGGCTATGGCAATTTTGCTAATAGGCCTGCGAGGTGAA  
GAACCCGTTGCCGGGTTCTCTCCTTTCAATATTCCGCCTACCACATCCTGAACCACGCCG  
ACTAAAAGTTCGGTACTCTCATAAGATGTTATTTCCCATACCAGGTCCAGGCCAAGATG  
TTCTCGGAGCCTGGACAATTGTTTGATTTTGATTTTGACAATGTTAGCCTTTGTGTGAT  
AGTTGTTTTGAATGGCTGCCTCTTGCTTCTTGCTGTCAACTCTCTTCTCTTTTGTGCGA  
TAGATTTAAGAGTCGAAACCTCTGGTTCAGGAGCAGGTTTTATTGCAGCTGTCGGCACAA  
CCAATGTTTTCTCATGCTCGGCCAAGAATATAGTCTGTTTGTCTATTTGACTCTAAGTT  
GGTCATAAGATTCCCTTAGTCAATCTACCTTCTTGATAAGACTGTTCAACTTCATTGCAAC  
GATCATCGAGCAACTCGCGGTGTTTGTTCATAAATTCAGGAGAAGTTTTATTCTTTTTGG  
CAGTAACGCCAAAATGGTTTATTTTCCCGCTCAGAACGTCATATCTGCAAATGCTCTG  
CTGTAGTATTTTTGGCAATTTCCATGCGTTTTTCACGCTTTTCTTCTCGTCAGGAGTCT  
CTTCATCTTCCCCATTCACTTTACGCCATTGCTTATCAAACCAATTAGCTTCGGTGTTAT  
TTGCGTCTTCAGTTTCGCGTTTTCTAACACGGCCAATTAATTCTTCTCATCTTCTTTTGAAG  
GAGTATATCCGACGTCTGATGCAGCAACTGATATTGCAGAATCTTCGAGCGAATCGGCTT

TTTCATCTGCACCGAGAGCTCTTAATATAGTTGCGCTAAGTTTGGCCAAACCGACCAACA  
TCATATTGACCATATATTTTCATTTGGTCAAGGGCACCTTCGGCAAACGAACAATCATT  
TTGTATATTCATCACTCTTGAAATAATTCATCAGGTCTGTTATAACTCCATGAACATTT  
CAAATGGTGTGCTAAAGAGCCCAATTGATTTTTAAATTCGGCTTAATTCTCTTCAAATA  
TTGTAGTCCAATGAGGAAAATGACGACATAAAACGTGAAATGTCATAATCAAGGAAAACA  
CGAGTGCAGCCATTTTGGCAAATGAGAACGGCAGTCAAAGTGTATTTGAAAAACATTG  
AACTTATTGAATTGGCAACGCTAATAGTTTCTTAAAACCATTATCTACTGACGACACAA  
TACGATCTCCGATTCGGTCAATCGCACGTTCAAATTTGTCTTCTTTGTCTGGTCTAACTT  
TATCCTCTTTTTCTTCTTCTTCTTTGGCTTATCGTTTTTTAGGAATTTGATATCTTCAGAAA  
TAGTTTTCAAATACCCTAAAACCTGGGTTATTTTTGGATGTTTGTCTTCTTCTCTACTA  
CCTTTTTAGCTGTTTGGTCACTAGTGTGTTGTTGCCGTAATTGGATTTTATTCAACATCCG  
CTAAGAAATTTATTTATAGCTTTTCAGCAAATTCAGTTAGTTTGCTAAATGTTTTCTTGG  
AAGTATCTGAAATCTCTTTCAGTGATGATTAGAAATTTCAAGTGGCTTCCGCGGAAAGTT  
CTGTTGCAGCACCAATATTTTCGGTTTCAGAAGTGCTGTTGACTATTTTACGAAGTTCTG  
AATTACCTTGTTCAACTGTTTCAGCTATAAGCTCAGATGAAGCTAAAAGATCGCCAGTGT  
TGTCTGGCGGATTTTCCAAAGCAGTTTTGATTTTAGATTGCTCAGAATCTCTTTCGCTAT  
CTCTTCTCAAGTCTCTTAGTGTCTTTTGGAGTAGCAATTAATTTATTGCAATAATGTTTGA  
GCCACCATTTATTTTGGCAAATGGTGCAGCAACTAAAAAAGTAGAACTATAAAATCTGC  
CCAATCCAATACAAACGCAGGTGCATCTTCGAAATTAAGTCAAACCCGCTTTTTTCTTT  
GTCGTATTGCTTGGTCAAGCATGTCCAATGTTCGATACAAACGTATCAGTTATCATGGGAGG  
TTTGAATAACAGAATATTGCCGTTTAGCTCGAATTCATATTTTGGCGCTAATATAGGCTTT  
GTCAATATCAACGTCAAACCGTTAATGGTTTGAACGGTTCGGCAACTTTTTGTTGAATGC  
CACCAGATGCAAATACCATATCTGCTTCAGCGGCATTCAAACCCGGGCGAATAGAATC  
AAGCCATTCGATCATAATGAGTCTACACCCTGCATATCTTTCAGCAATTTGATATGCCT  
GAAACCAAGTTTTGGAATCGTGATCTCTTTTCCAGTGACTTTTATGTTCTTAGCAGCAGG  
GATAATGTTTAATTTTGGTTTCATGTTATTTGCCTTTCGTTAAAATCTGTATGAGCTTTC  
GAGTTGTTCAAAGATACATATTAGTTATAGATTGCTCTCTGCTTATTTTCATGTATAACT  
TCATCAACGAATTAAGTCTCGCTCTAAATTTGATTTCTTTTGTATCGTAGAATTCAAACGCATG  
CCTGGTACGAGACCAAGTTCTCCGTATGTTTTTGGTGTCCAAGACGCATCGTATTCTGAA  
AATATAAGAGACCTATTCTACTCTTCGGCACCAGGGCGGCTTATTTGGTCATAATATGCA  
CCAGAACGGCTAATACAAACTGAATTTAGCCCTTCGCCAGTAACAACCCGAGCTTGCATT  
TTGTCTATGAATGAGTGGGCATAAAACGAGGTATTCTCGTATGGGTTACGGGTATACGCG  
TTTGCATTTGTCAACCATTCAATATGAAAGCATATTTTTTTATCTACCATCGCAATAGTT  
TCACCAAACAACCGCGCACCGTACGACGTATTGTATTGGAACATTTTTGCTAATAGAT  
TCAAATCTGACATATGAATGCCTAACATATCTTCCCAGACCAATGAAACACTTTCGTAT  
CCAGTCGTTTCGCCAAGTCGTCTAACAACTTGTAGTATGCATTTATGTCCAACACCCAA  
TTTGTCACTGGCACTCTAGTGCCAATCGAATTGATTTCTCGGCGGAGTTTGGGAGTTCCA  
GAATACAAATAATCAATCATCTCGTTCACGGATGCTACAGCATCATTTGTAAACATTCTG  
CTAAACTTGAGATTACGTACCGAATGTATTGAACCAACTGGAATGTTATGATGTTGTCA  
CCTTTCAATTTCTACGATTGCAGAAAGATGTTTGTACCATAACAACCGTTTATAAGTTATT  
TCAGTGTTCGCTCTTTTGGAGAGATGTTTGGATTATTTTCATCACCAGTCAAACGTGTCTGT  
AAACCGTTTGGAGTCATAAATTTGCAGCAGCCCTTCATTTATACCATTTGTTAGACCATCT  
CTCGTGGTCATGGTAATAAAAGTTCCTGCTAATTCAATAAACCTATTCTCCATCGAGGCA  
TCATAATTCTGGTAAAGTTTTATGGAGACATTAGGATGACCAGCGCGTTGGAACAATAAA  
TTTTCTCCTTTAATTTCTTCTCCACCAGGCTGAGAACAAATGGACTTTTCGACTGGTAGCA  
TATTCATTATGTCGTCCAGAAAATAGTCATGTCTTTCTAGCGCTCTGTTTGTCTTGTAAA  
AATTGAATATTTTCATCAGGATTGACCAAACCTCAAACAAATCGAGCATATTAGTAAAAT  
TGATGTCATAATCTTTACAACATCTGATTTTTTTGATTTACTAAAATCGGGTTGAAGGATT  
TTGATAGTTCAACAAATTTCTAGTATGAAATCATATCAACCAATTGGCTGCGGTCATCTT  
CACCCAGTTCATCCCAGGTGTATTTCGTTGTGCCCGTTATATATCCTATCAACAGTCTCAT  
AGAAGAGTACGTCGGGTGAACCTGATTTACGAGGCATACGAAATTTGAACGTTATGTTGT  
TTACCTGCAACTCTGGAGTTTTTGTAGTGGCTCTTGTGTCAACTTCAATCTAAGAGTGTGCA  
TCGACTTGCAGTGCGGGCGTGTGATAGCTGCGCCACAAGTGATTTGCCCAAACCTCCAG  
TAAAAACTATCAGAAAAATATGTTTCAGTTCAAACGGCGTATAATCCGGAAACATTTCTT  
CGAGCAAACGGAAAATATCTCAGATTTCACTAAAGGTTTACTTCTCATCTCATTCTGA  
TCAATAATAAATCACGATATTCTGAAACTGTTATCAGTTTAAATCTGTGTGTGCCGCTCG  
GAAGCTTTATGAGGATTATATTCAATTATAGATACACCCCTTTTAGGTTATTTAAATACAT



TCAGGAGGACTGTATGGACATTA AAAATCACAGTTTGA AATAAGCAAGTAGAACTCCCGT  
GTTGTCGGTGC GCGAATATCTGTCTATCGTAAATGATGCAGATGAAATGATTTGAA AAT  
CAGTTTCAATAAAAATAGGTCAGCCGTTACCGAAACATCTAACTGAGCAAGCTCTCATCAA  
ATTGATAGCGATCTCAAAGAAAAAAGTCATCAA AATGAAATCAGAGTGCACGCTATGTCA  
AAAAGAAAATAAGTTTGAAGTGCATCCCGATATTGTCTGTGTTTCTGATGGATTGGGGCT  
ATCGCATGTTCGCTGGCGGAGTGGTTATCAATATGAGATACCCGATGCTGTTCCGAAGATCG  
GGATTTGTTTGAGAAGATAGACAGATATATAGTGT CATTGAATATGCAGATCAGCTATT  
CAAGTGGGAAGATTCAACAGAAAACGAAAAAGACATTTTATTTAAGCATTGACGTTTTTC  
ACATATTGAAGCTCTCGTAGAAAACTTCAATCTCCACAGGTATATGCTGCAGTTCCAAT  
CGAGTGTGAATGTGGAAATCAATACCCAGCGGTTATAAATGGTGCTAGTAAATTGTTAGA  
TTC ACTGGGGGTAAAATGATTATAAATCTGCTTTATACAGATCTTGAGCCAGATTTCAAC  
CAATCATGGGACAATGATGTGTTAATGACACGAGGAGCTCGTGTGTGAAAAAATTCTATC  
ATAGGGATAGTTTCTACTCCAATTGGTGCGAGACCATTTAACCATACTTTGGCTGCGAC  
TTACCAGACCAGCTATTTGATAACATTACGCCGTTGGTGATAGACACGGTTAGACGAAAT  
ATTCAAACGGCTATATGAAACTTTGAGCCACGTGTAAACAATCTTCAAGTCGACTCAACT  
GGAAATTACGGTAATAACGAACTCATTGTCACAATTCGATTTTCAATTATCGATAATCCA  
GCAGTAATAGACGAAATAAAAATGAAACTTTCAAATTAATTTAGCCCTCTTCGGAGGGCT  
TTTTTGTACGAAAATGAAAGAAAAAAGTCACTGGGAAACAGCATAAATAAAAAGTCGGT  
TGAATTGCTGAAAAGAATGAGATACTCCAGGAAACTGGATGTGAAAATCAATACTGGAGC  
CCATGGCTCCAACGAGCTTGCTCGTTAATTGTTATCCTTTTAGTTATAATATCTATTAAG  
CCATAAAGGATAAGTTTTGGCTAGGCCAGAACCTGGAGGCCAGATTTTACTGTTCAACTA  
TCGATTTATAGTGTTAAACTGGCCACAACACTAAAGGAGAGTAAAACATGATCATCAATA  
AAATTGAAGAAGTTCGTATGTCTTTTCGCAAGCTTGGCTCTGATGGCGCTAAAGCTGCAA  
ATCTTCTCGGTCTAGTAATTGGCCAGCTCCAGCAA ACTCGAGCTAATTCCGACGCTGCAG  
TTATCAAAGTAATCAATTCCCTTTTGAAGGGAATTCGCGAGCGTATTGCTCAAAAATACG  
ATCGGCACGACCTCGCCAATGCATATCGAGAAGAAGTACTTCTTCTCAGTTAATTCCTC  
AAGCCATTACTGACGAACAATATAACTCGGTCGTCAATGGTAAAGCTGTGCTAGACCTGA  
ATCGGGTGAATGGCCCAAATACCAATCTTAACACCCGAAAACTTATGGCAAAGCTGTCAG  
CCGGTGTGAAAGATGGAAAATGGTCTATCCCTGACGCTGCTTCGTTGAAAAAACAGATCG  
AAGTATACATACCTTTCGCTTTGGCCGTAATTTGAGAATAAAAATGAACGATGAAATTTGT  
GTAGTATGTAAACAGTTAGTTCCTAAAGCACTTGTCTGTTACACATCGTTTGGACCAGCG  
CTTCGTGGTCCATGTGCCCAATTATGTTGAAACTTTACCTCTTTCAGAATCTACCGGAATT  
CTTGAAGAGACCGAACTTCTGGTGTAAAGATAAAGAGGCCTGCATACGCAGACCGTTGTTT  
TATCAGAAGTCTACAGGCGGTTTCGCTTTCTTCTCTGGCATTTTGGACTTCACTTCTACGG  
CCAGCGATAGCTTCTCGCACCGAAATATCATCGGTGGGTTTCAATTCAACTTTTTTAACT  
CGCTTGTTGTAATTTTTTCTAGCTCATCTAGTCCTTCTGCTGTTTGACACGCGGCAATT  
TTAGACATAAATGAATCCCCTGTTGCTTCTGCTATAAATTTCTGAAACATTTCCATTGCA  
TCCCTCCTAAAAGAAATTTTATGCAAAGTGTAATTGAATTTTCTTACACATATCTTTC  
AATACGTTGAATTGCGTGTGTCAGGGCGTAATTTTTCTTTGTGTATTTCCCATGAACATT  
GATTATCCCAATATCATCAATAATGGCCATACTGTAGCAATACTCTTGGATGAGTGCTT  
TCTTAAACTCGCCCAATAGTTAGGAGAACAGTTGCCTTCGATTTTACAGGGTGTGCAAA  
AATGATATGATGCAAATTTTTGATTGACACACCAGTAGAGAAAACACCATATGAAGCTAC  
GAAAACATGACCAGTTCACCTTCGTCGATGATTTTCATCTGATCACGGATTTCCGGTGCC  
TGTATATCCAGATATAAATTGAACTTTACCTGGGTCATGAATCTTTCTAAGCGTATTGTA  
CAAAGCCATACCATGCCCTTGCAGGCATAACATCAGAAATGCATTTTCAATTTTGTCTGC  
GATTTTTTTAGCCATCGACCATACAACTTTATTTCTTTTCGTATGATTCGTGATAAATTT  
TATTTCTTCATCATAAGAAAATTTTCTGGCAGAAGTTCGGTCTTCTCTCGAATAACCAAG  
CTGAATACCTTTAACTTGCAAATCAAATACTTGGCCCTCTTCCATTAGCTGTATTGTTGT  
TACTGGTCTAAATATATCCCCAAACATGCCAACAAATTACCCAATGTTTGCTTTTCCATC  
TCGCAGAGAACCAGACAAACCGTATTTAAACGGTATATGATCGACAGATTCGATGATTTT  
CTTTATTTATGTCCCAGTTGATAGATGACACTCGTCTTCATAACACAACCGAATGGGTC  
AAACCATTCTTTTTTCTGCTTAATGGCAGATTGCCAAGTAGAAACATATATCAAAGCATT  
CGAATCTTTTACGGTCCCCTATTTATCCCAAGCATAGCTTCTCGAGGGAAAAGACGCTA  
ATGGACAAAGTCATCAATCATTGTTGACAAGAGATGTCGTTGGAACAATGACAAGAAC  
TTTGTCTTTGTAATTTTCTAAATATCACAGAGACAGCAATGCTTGAATCAGCGATTTATC  
AGCAGATGTAGGCAAATTTAGCAATTTTCTTTTTGCGCATATCCCCTCATACACAGCATC  
AGCCTGATACCAGTGAGGAGTGATTTTGTGTTACCAGAATAAATATCTTTGCTGTTTAC

CCTTGCATCAAATTCGGAACGTGGAATATTTTGTCTTTCCGTGATCAACGGGTCAACAAC  
TATTTTATAATCGTTCTGCTCGGCAAACCTTATTGCTTGAGTGACTAGTCCATAAAGGAAG  
CAAATGATCATATCCTAGCAGGAATATGACACCAGACCAACCTACACACTTGATACGCGG  
AGAAAATTGATAGCCATCTGCTTTAAATGAAGAATACTCCCGCATTTTCATAGAAGATCTA  
GTCTTCGCAAACAACCCTGCCAAAACCTGTAGTTTCCAAATATAATATTTATCATTAAACG  
TCTCTTAAATAAGTCATGTAGGTTTATTTATACAAAGGAATCACCATGAAAGAGAACTT  
TTTAGTCGCTCTGATATCGAATCTCAGTTTGGTTCTATTTCTGTGCGAGAAGGCAAGAAA  
AAACTAGCAGATTATGCTCTCAAGACTTACGACATTAAACTCGGCAGAAAACAAGTCGTTT  
GAAAATATGATGAACGATTTTGAATCTGCTGTCAATGCCAAATTCGAGGCCGCTCGTGCG  
GGAGCTGGAGATGCTGAAGAACTATCGATATGGGAGAACGTGTTGACCTATCAAAGGGG  
ATTGGGCTTGACCCTGCTAAAATGGATATGGAAAATGAAACATCTGAAACAACAGAGCAG  
CCTGTTGTTGCTGAACCATCGGTTGAAATTGTCGATCAAGACCAAGTAGAAGAAAAGCCG  
GCCATCCCGTTTTCTGCCTTGAAAATTGAAGCGACTACAGCAACTGAGACAACCTACCCAA  
GTAGAAGAAAACCGGATTCTGATTTTGTTTTGTTCATTCCCTGACGACTATGCGCCAAA  
GGTCGGCTGGACGGACCAGAAGGTCGAGCATTATTAATGTTCCGTATTGGATACACGAT  
TGGATGCAGGGAAGAAATTGGAACATTGAAATTGCAGAATGTCCATATGACAAAGAGCTG  
TTGAAGTCATTGGCATTTTACATCGAGCGAGATGGTTCCGTGCCATTCGCGAATCACGA  
AATGGCAAATTCATCGTTATTTCTTAAACCGGGGTCTATGACCCCTTCTTTTGTTTAAGG  
AAAAACAATAAGGCAATTACTGCTTCTATCTCTCCACTTGATCCATGCGTTTCGGAAGG  
TAGTGGTGTGACTTTACCGTTACTTTTAGCGGGGATGAGACGGTACAGGAAGTTGATGG  
TTACGAATGGCTTGTGACGGCGTTGCTCAAAGCGGAGAAACATCAACTACTTTAAGCAA  
CACCTATGATTCGGCCGGTTCGTTTACTGTAAAATGCAATGTGACATATGCTCTTGTTC  
TGACGACGGGGCTGAGCCAGTTGTTCTTGCAGCCGAGAGTGCTGCGACCGTTCGAAGAAGT  
ACGCGCACTTGATGGAAAGCATTGGTTCGTTACCCCTTGGCTTTCAAAAACCTCGAGTTT  
CTCGTGGGTTCGTAAGTGGGTGCATGAATGGATGGTAGCGAATCCAACATGGCGTCAAAC  
ACCGGCAGAAAGTCCTTGCCAATCATTACTTTCTCGATTGACCAAGCTGTGGAGGAATA  
CGGCGAATGCTTGATGCAAAAATCCCGTAATGGGTACATTTACAAAGCATCTGCTTATAC  
CAAGTAGAAGGAGCCTTCGGGCTCCTTTTTTGTTTACATTTCTAGAAAAACGTATTATGA  
TGGCTCTGCCAACTTTGGGCAATTCACTAGGTTCCGAATAATTAAGGAATCTTCCTAATC  
GAAAGTGAGGAAATTATGCTGAAATCGGCATTAGAAAATGTGATTTTGGAAAATAGTCAA  
GCCATCGAAGGCAAAGTGCTTGTACCGATGCCAAGAAAATGTTCACTGACCCGTATTTCG  
CCAATTCATCACAGAGCCAAGAACCGTGATGAGCGGTTTCAAATCCAATTTTCGTGATTTG  
ATGTACACTGCAACAACCTTATCCAGTTGCAATTGTCGGCCCGATATGGGAATCGTCGTAT  
TCCCTGATGTATCCGATGATTTTGGCGTAACCATTTTGGTGTCTTTAACCTAATGGCCAT  
AATTTACGTGACGTTATTGTTACTCTGCTTGAACCTCAGGCGTGAATTCAAAAGAAAATG  
GCTCTTGCGCATCTTGCAAACTGCGTGACTGTCCAGATGACGGTATCGATTACAACAGA  
GCACAGTGGTACACTAAAGCTATTTTATGTTTGATGTATGCTCGATTTGCTGATGATCGA  
GAATTTGACATCGAAAAATTTGTAAAATTCGAAAAAGCGAATACGATCGATCCGCTATT  
TCCATAATCTCAGCCGGTGGGATTTTGTCTCAATGCCTCAGTCGATTCAATTTGTTTCTGCT  
TCAGCATTACCGATTACTTTTTCTGAGACACAACATAACGACAAATATTCAAAGATAGTG  
ATTTTCGAACACGGATGCGTCGCTGACCCGGGCAAAATGCATCGAGTTCGTCTGATTACA  
GAAAAAATCAAAGATCGGCTGATCAAAAACCAGCGTCAACAGCTCATGAAATAGTTGTAC  
AATGATGGGCTATGTGTTATGATAGTCCCATCAAATCTACCAAGGAGCATATCATGACAA  
CAATCCACTGCAAAGACGCCTAAATCGAGTTTTATCATGGCTCTTGTACACTCGGCCTTA  
AAGGTGATATGCTTCTCCGCTGAAGCAGCAGACACGATTGCCGACAAGGGCCGGAAAA  
GGAACCTGGACCGTGTGTTTTTCACCAAAGACCACGGTCTAGCCAAGGTTTATGCTAGAC  
GTGCTGCTCGTTCTATTGGCGGCGAGCCAACCTCTATTTTCGAGTTATTGCACCGGTTGACA  
CGGTCTTTATCTCTGAAACGCCGGGCGCGACGGTTTACCATGCTGCCTGGGCTTCTGTTG  
AACAGATTCCATTTGGTAAATTGAGCGACTAGAAAGATGAAATTCGCGACAACCTACTTC  
AATTACCAAACAAACCGTCCGGACGATATCACCAGCGGTGCGATAGTGCCAAAGACAAAA  
GAAGACATTATCGAACGCATCAAAGCTTACGCTGATTCTATTTGTCCGATAGAAGATCGA  
ACCGATGAAAAGGGAAATGACACTCTCAAATCGAAGAGGTTGCCCGACTCCAGAGTCG  
ATGCGTTCGCGGCCAATTCAAGGCACTATAAGGTATTCGTAATGAGATATACTCAAAGG  
ATCTCGCAGATTCCATTAGCTTTGCTGTGGGCGTTCACATTGATCAATTTGACAAAGGCG  
GAAATCCGTATATTTTGCACCCATTGAAATTGCTGCATTGGGCCAGACATGCCAATTAAG  
ACGTTGATGTTCAAATCTGTGCATGCTTCATGATTGTGCAGAGGATAGTTCGCTGGGTG  
TTGCAAAGACACTGGATTTGATCGAGATAACTTTTGGCACCGAAATGCGTAAACTCGTGG

ATATTCTGACGAAGCGTGATGGTGAAAAATTTGATGAATATCTTGATCGTATCAAATTGG  
ACGTCAGATCCGCGAAAGTGAAGTGCTTTGATCTTAGACACAATTCTGATCTGCGCCGAC  
TGAAAGGTATTACAGTCAAAGATCAAGAACGTACCTTGAAATACCAAGTCGCTTATGCCA  
AACCGAATATTTGGATTCAAGAGCAAAAGGATGAACAAAATGCGTAATATTTCTGAGCTT  
TCGTCAGCCGAAAAGGTACAAGTGCATTTTCATGTTTCGTGAAATGAAGCATGGATTTCGTA  
CAAATCGCCAAAATGTAGGAGATTCGCGCGACACATGTCATCGATGTCGTCCAAGACGTT  
GACGAAATGCGCGACAATCATCTGGAAGCTGTTACCCGACAGCCGGTAGTGTATCGGAAG  
CACTTTGTGAATCCCAAACGGCATGAAAATGATGGTCGCTTCAAAGCTCGGCAGCGCGCA  
AAAGGCAAAACTTTTGAGACTTTGCCATCGACATTGACTCCCGAGAAGCTCGCTTGAGATT  
TCTCAAGCCTCGGCCAACATGCCCGTCAGGCCAACAAAGAGAAGAGCTTGAAGCTTTGTTG  
AACAAATACAAGACAAACTGAGGTACGTTCTCCGCGATTTTGGTTAAAATTCTCCATAA  
TGAAAAACCGAAATCACGGAGTATAAAAATGTCATCTAGAATGGATATGCTTAACCGCTA  
CAATGCTATTGCTTCGGCCTCAGTCAAAGCTCCTGAACCTGTCAAAAAGCACCATTTTGA  
AATTCTTCGAGAGAAACGCAGCACCGAAATTGAAGAAAAAATTCAAGCTGAGCGAGATGA  
AGTTGATCGTCAAATTGAATACATGGCTTTCTTCAGCGCAAATCAGCGTACTTGAACC  
GTATCAGGTTAAAGTAAAAAGCTGTGAAGAGCGCGGCTTAGAGTGGCATATAACTTTTCA  
ACATTTTGTGAAATTGATGAAAGTCGAAAAATGTGCATACACAGGTACTGTTTTCCCTAA  
AGACCATGGCCGTTCTACTGAGCGCATAAACCCCAAAGTCGGATACACGATGGAAAACGT  
GGTAATCGTCACTGCTCGTGCAAACAGGAAAAAGGCTCATCTTGTCCAATTTGTTACGA  
AGAGCATATCCCGCTGATATGAAAGTCAAACCTTTTTGCGCAAAGCAATTTATCAATTGG  
AGAAAAATACAAAATGAATTGCATTAACGTTTTGAAAAATGCTATAGTACGTGACGAGTA  
TATGGTATTTCCCGAGAAGTGGACAAATCAAAGTGGTTTTGCTGCCAAAATCATCGAGTT  
GTTCAATGAAAATACTAAACCTGGTGGATCCGCTCCAACAGTTTAGCCAATGGGAAATTG  
GCCATCTACGAGCTATCTTAGCGACATGCCTGGTTTTGTTTATGTTGAAACGCTATGGATG  
GGAAGTGGCGCACGATTATCGTCAATGGTACAAAGATAATCCTGGCAAATTTTGACTGT  
CGAAGTATTCGGCAGCCCTGAAGCGAAATATCCTACATCATTTATGATGAAATACGAAAA  
AGGAATTAATTCAAAGTGTTTTGATCAAAGAAAAGCCCCGACGAGTCGGGGCTATGTTG  
TATTTGCAATTTGTAAATTGATCCGGTTACACCGGAATGATTCTGGGTAATTTACACCT  
AACATATATGACATATCAGATTGACCTACCAAGTTATCCCAATCATCACCTGTTACATTA  
CGTTCACCGGATTGACCTATACGTGTAGTGTACGCGTTAATGGATAAATCATACCGAAGC  
ATAATGCCAACAGATGGTTGCAGTGAGGTGGAGTCATTGATAACTTTATAAGCACCCAAA  
TCATCTGCTTCAATATATGGTGAATAGAACAACGAACCTACTGGTTCAATATCATTGACG  
TAATGCTTACAGCCAGTGATCAGATAGTCAAATGACGGTACCGTATCAACATACACTTTC  
AGCCCGTTGAGCAGAGTTCCTGCTGAAAGAGGATCTTCGTGCGCATACTTCCATCCGGAT  
GCTTCAAGCATAGCAGAAACGCGAGTTGTCCAGAGAACATAGGTTCGCTTCATACGATGTG  
TTTTCTCAGCATCTGATTTTTTCATTTTCGCATGCTTGTGATACAGAGTTCTTCCAATAACC  
GGGGCGTCAGTGCTAGCGGTTATATCCAGAATCCCATTTGGCGAAATATCTTCTACCTTA  
TAGCGGCGCGAAACGGTTATAAGAGTCTGAATAATGTCTATGTTAATATCTTCAGATATC  
ATAGTTGACAGGACATCATCGACTACGCGAACACCATCCATTTTATTTGCTTCAAATCC  
TGCATCAACTCAACACTTATATTTGTCTTAAGTTTGCCTGTGCGAACTGGAAGTGTCCAC  
CGATCAAACCTGAAATCAGTTTCGACAAATGATGATCCACCTTCAAATTTCTTTTGCTAAT  
GCTGCTTCAGACTTGATTCTCAGGTTGCCGAGCATTACAGCATCACCGATTGCATAGGCA  
ATGTTTCCAGTTGACGATGGCAAAGTCAGTGGGTTTGTGGAAGTGTAACCACATCATTT  
GAATCTTTCAAACATACCCCTTAGCCATGGGAGTCTCTAGTTGCGCAAGAGGAATCGAA  
TCCCGATATCCGACTGACCCCATGTAAGTTGCAGCGCTGGAGAATGATTGATTACCGGCA  
GGTTCAAATATTTACACCGTACAGTGTGGAGTTGGCATGTCAGTTTCTAGAATTGCT  
ACCATTTCCGGTAGAAATCAAGTTGTTTGC GGCCCGGGTCAAGCCGACAAGAGCGCGACGG  
CTCTGACGATTTGCCCGGTAGTTGTTGATTCAGAAATCAGATCGTTAATTCTGCTCATG  
TTTTTCTCTTATTGTTTGGCGATTATACGAACTCGTGTAATCGTGAAGTTTGACGTTGAT  
GAAACCAATTCCAAAGCACCACCTTCGTGGCAAATTTCCGTTTTTATGAGCACTTATG  
AATGAGTTGCAGTTTATTGTCTGCGAAGCCTGCCAGATATTCTGACGACAGTCAATGAA  
TCAATATTTACGCCTGCATTAACGGTGAGTTCCAACGAGTTTGCAGGTTCTGCATACCA  
AATGAGCCCGTGATTGCTATTTTATATTGAAGTGACCTGACGCGCCATTTGCAGCTATTT  
GGCATGTCAGTATTTCATTTTGGAAAGATTCATGCATAGAGGACATAACTGGGATATTTG  
ATTTTATTAGCAGCATATATTTTTCCTTATGCAAAAAGGGAGCCCGAAGGCTCCCTTAA  
CCATTCCTTTGTTGTGGAACCAAGTCCTTTTGAATTACAGACCTTTAACCATAACACGGC  
GGAAGTAGGCATTCTTACCAACGCTGTGAGCACCAGGCATACCATTACTGATTCGACTGG

TAGGAGCTTGGGTGCGTGATTCAGCGAACGGGTTAACACCGATGGCGTAACGAGTCTTGA  
AGCCCATGACCGGTTGGAAGCTCTTCGGATCAGAACCACGAAGCGGGGTCAGTGCAACGT  
ATGGGCAGTAGCAGATACCGGCATCCAGGTTGTTGGCACCGCGGTAACCCATGGTGAAGT  
AATCTTGACGGGCGTATTGGTCTGTGTAGACCTTGTAACGACCACCAGAACACCAGCGA  
ACACACCCTTGGCAGTATCAGCGTTCGGGCCAGTAGCCATACCTTGAGCAGCTGGGGTGA  
TACCAGTATCAACCAGAGCCAGGGCAGAACTACGTTACGAGAAGCGATGATGAAGTAAC  
CAGCACCACGACCAGTTTGACGAGCAATTTGTTAGCTTCCTTGTCGACTTGGATCAGCA  
GAGCTTTGTAGCGTTCACCAGCCCAACGAGCACCACGAACATCGATCCCGTCTTGGAAGT  
CAAACACACCGGCAGCAGAACCTACAGTTTGAGTCCAGCCAGATTTACCAATTTGAGCGG  
TGTAGTTAATCCAATCGATAACTTCACGGTTGATTTCCAGCATAACTTCGTTAGCCAGGA  
TTCCGTTTAGCTCGCTGTCAGCATCCATACCATGAACAGCGCGCAGGTCTTGGGCCAGTT  
CGATAAAGCATTGAGGTTTCAGTTGACGAGATTCCGCTTCGTCGGTTTGCTTGTGATAC  
GGAAGCTCATTTTCGTTCCAAGGGTTATCGGTGGTTCCGTTAAATACTTGACGAAGTTCGG  
CGATAGAGGTAGCCATACCTTCAGCAATTTTCAGCCAGTCCGCCGGCAGCAATCTTGGCAG  
TAACCAGGGCATCCAGAGCAGCACCAGTTTCGTTGGTACCGACAGTCACGCTTCGCCAG  
TCACGTTCTGCAGAGAATCTGAACCAGACTCGTAGAAGAAGTGATACACGATATCACCGG  
TAGCAACAGCTTGACCAGCAGTCAGCGTAGCAAACGGACTGCGATCGTCTGCAGTGCTAG  
CACCTTGGCAGCCAGACCTGAATGCCAAGCATCAGGAGCACACATCGGGTGGAAAGCTT  
CCTTAGCACCAGAAGCCAGAGGGTCTTTGCCGTAACAGAACGCAGGGCAAATCCTTGGC  
CAGTAGGACCAGTCATCGGCTGCACACCAGCGATATCGAAGGCGATCAAGGATGGAATTG  
CGCGTCGTACCATGCCGATAACAGCAGGGCCGATGTTTGCAATTGCTCAGGAACGTTGGC  
CAGCAGCAATATTGGTAGGATCGTAACCGTGATCACCAGCAACTTTGGCTTGCATCAGAG  
AGTGACCGAATGCTTCAATAAGTTTGTTCATCGCGATACACTGGATCGGTTTTGGAATCTT  
TTTCCTTAGCTACGAGAATTCGGGCTACAGGAGCTTGCTTCTTTTTACCAGCAATTTTCAG  
GCAGACCTTCACCTTCCCGCAGCGGAGTCCATATGTTTCAGAATTTCTTTGGTTTTTCAGAG  
ACATTGTTATAACCTTTATTGAATTAAGAAGACATACGGGAAGAAGCGGCCAGATAGGCG  
GCCATGGAATTATTTGCCTGCTTGTATCATTTTGCTCAACAATAACTTCGGGTTCGAAG  
TTTACCACAGCTGCAGATTCATCAATATTTAATGCTTGTTCCTGGATCGGTTTTGTTC  
TTTTGACCAGAATTAGCAACCATTTTCGACAATCGCAGACAGTTTTGGTGAATAACTATCA  
CCATATTCCAGGCCTTCAACAAGACTCAGAACTTTTTCTTTCTGTGACTCGGTCAAACCT  
GCAGTAGCTTCTGAAATAGCTTTTTGTTACTTCAGAGAAGAAATTCGCTCTTCCAGAGCC  
AAATTTTATCAACAGCGATTTAATTTTCAGCTGTAGATTCAACCAGCTCAGCATTTCAGTTC  
GTCCATAACATCTACTTGCTCTTCTGTACAGAGACGTTATTTTCAATGAACAGTTCTTT  
GAGACCGGTTGCAAATGCTTCGAACAGCTCAGACTTGATGATTGTGTTCACTTGCAGCGC  
ATTTTTTTTCAGCGATTCTTTGCCAGATGAGTTAAAAATTTATCAGTATCTTCGAAAAG  
TTTTGTTTCAACTTCTATACGGGCTGCTTCAATTCCTTCGGCCAGTTGCGAATCGGCTGA  
AGAAGCAATATCGGCAATGTGAGATTTCAGCAAGCGTGATTGAAGCCGATCGTACAGCCTG  
CTCAAACGCAGTACTGACATTTCTTTTACGGCTTCGTCCAGCTGAACAGACTCGAAAAT  
ACTGTCCAGTTCAACGGCTACCGCGCCAGTTTCTCGCTGGATTCAGCCAGCAGTTTATC  
TTTAAGGGACATTTTCGTTTTTCTTTAGTTCAACATTGAAGCCTATGTTTTTAGCCGATT  
GGCCGAACGCTTCATTAAGTGTGCTTACATTGTTATTTATAGCATCTGTAGGAGCTTCAG  
ATTCTTGTCTTTGCTCTCTCTTAGTAGTTTAAACGTACGCGTGTGGAGCAGATGGCCCC  
AAACAACATCAACAGCTACAGTGAGGCGATAACGCTCCTGAACAAAGCCACCTGTAACTT  
GCCCCAGACCAGTGATGATACTCCCGGAATCCAACCAGCTCGTATATTGGCGGCAAGTT  
TATCACCTGAACCAAATCACCTTCAACTACCCTGGCAGACTCATTACATTATCGCCTT  
CCCACCACAGTTTTTCTACTCTGATTGAAGCCAAATTAGGGCCAGGCATCGGCCCTGCAG  
GATGATTAGTTTCGCCGAGTGATTGTTTAGAATTTATTTGGATAGCAATATAATCGTCGA  
CAGCTTTGGCAAGAACAGCTTTAGGATAAATTTCTCCGTTTCTATTCTTAACGTTAGCTT  
ACCTAAAGATGCCTTCCATATAGAAAGCACCTTTACCATCATCCACTGATTTCGACTACAA  
CTTCAGAACAGGTGCCGCCGGGAATGCGCCATACTTCAATTAGCAGCTCGTCTTCCATCT  
TATGACCCCAATGCTTTACGGCGTTTCAAGGCACGTTTGTGTTTTGCGCTGCGCCTTTCTCC  
CAATGGTTGGTTGAGAGCGCTTAGTTTTTCGCCGCTTACGAGCAATTTGCCTACGAGTA  
GCAGCAGTTAGCCAGTAGTTTTAAATGCATTGCGGTTCCGTGTTTTTCGATCTTTGGTA  
CGAGTACTTCACCTTTCGAATTAACATGTTTGACAATTGCGTCTCAAATGGAAATATTT  
TCAACTGCAGCAATCATTGCCAATGACATATCTGTTTCGTCAGTGAATTTTTGGAAACA  
ACACTGATAATTTGATCGGTGCTAAATCCGGCTTCTACCAAGGATTTAACACGAATCACT  
GCTTGCGCAAATGAGATTCAATGACTGGTTGATTTGCTGAATAGCCGGATGGAATAAGC

ATTTATTCCTCCTCTTCATCTTCATCATCTTCATCGTCATTCTAATCATCTTCGTCGTC  
TCGGGTTTTTCACCTTCGGTAACAACACTGCGCGAGCAATGGCCTGTTTTTCTTCGGCGTCT  
ACTGAGTCTTTCACAAGAGCCATTTTCGCATTAAATTGACGTTTTGCTTCAATCAAATCA  
CCTGGTTAGACAGCATCGATCAATTTCCCATTTAGAAATCGTCCTCGTTTTTCAGGGTTT  
TGGAATCGTTTGACATTCGCCTCTTTTTCTATTTGCTTTTCCTCTTGAGCAATTTGCTCA  
TCAGTCATCTGCAAAATGTTTTTCATGATATAATCATGCGAGACATATTTACCTACATAC  
GGCTCGTTTTTGAGAAAGAGCGTCAACTCGTTGTCGAAGCGTTTCAATATCTTTCAATTTCG  
ATATAATAGGAATCTAGATGGAAATTAACCTTGATGTTATTTATTTGCTCTTCCCATTCG  
CTTTCTAATATGATTTTTCTTGTAATCAAATAGGTTTTGAGCGGGTCAAGGAAAATTTCT  
GCAAATTTGTGTTGAAGCTGAACAATAAAATTTCTGAAATCTAATTCATCGCGGGTGATA  
GACATATCTTGGCCACCAATTACCATTCCGCCATCGTCGCGAGGCATCCGGGACAAAGGA  
ATTCTCAGAGCTTCATAGAGCTTTTTATTGAACCAGCGAAGATCATCCATTTCCCCCATT  
GTTTGGGCGCCTGGAAGAGAAGTAACTTCGGTAACAGATTTACCATCTCTACGCATCAAC  
CAATAATCTCTAGTCCTTGAAAGATTGCGTTTTTGATTTTTTCACAGTACCTGTATTCGAA  
TCGTATACAACACGCTTTTTTCAGGCTCTGCATGATCCATTACGTATTCAGTGGCTTTG  
CGATTAGGCATATTTCTACGTGAATGTAAAAATCACGTCTTTCCGGAGCACGCGTAATA  
CGATATATTACCAAAGCATCTTCTAAGAGTTTTAATTGGTCTGCAGGCTTAACAGCATT  
TGCAGATAACCGACAATCCCACGATCAGAACAATCCTGAAGGCCTGAATGCGCATATACA  
ATGGCACTTGTGCGAATTGTAATGCGTGTGTTTCGGTTCAAACAGTCTGCCGTTATAAGCA  
TAACCTTCGCTGCCGGTGGTATAAACAAAAAATTCGCGATAGCCTTTTACTATCGAAGTA  
ACACCGTCGTCAGCCGTAACGATTTACGATAATATTCGACATGACGTGGGTCTAGCCGG  
CGTAGTTCAACAATGCCTTCTTTAGGATTAGGCATTATTTTATGGATCAATATGCGGGAG  
TCCACATAACCATCTTCGGAACAATGTGTGCGGGTCTGCGAGATACATTTAGCAATCTGCAA  
ATTTTCATCAAACCTCTTCTAAAATTTTGTCTTTGATAGATGAACTAAATTCAGTATCATCC  
AAATCAAGGGATACTACTTTGTGACCCTTTTCATAAACACAGCTTCATTTACGATATTT  
GCTACAGCTCGCTCAACTTCATGATTATTCATGAGTTGGAGATATGTGTTTATGAGGTCC  
TTGGTACCGGAAAGGTTATTATCGATACCAAAAAAATTGTCGCATTAGAGCGTGATATGAT  
GATTCTCCTTCGCGAGCTTCAATATCGGTGGCACCATCATCTTTTTTAGGAGTCGCAATC  
GATTCGTGGCCTTGTTGAGCCGCTCGTCATATTCATTTTGATCGAAACGATCCCAAAAT  
TTAAACAAATCTAAAACCTTCATACAAACTCCTAATCAGGCACCATTATTGCTGACTGTA  
TTTATTATTCCCACCAGTCGAGTGCAAACCTAGTTTCAAATGTACAAACTGTGTTGTTAT  
CATCCCAGTCGAGAGTAACTTCACCAACGTTAGTTGGGAAAAGACCGACAATGGTATATT  
CTTTAGTTGTAATTCCATTACGATCTTTTTGACGAACAGTGCCAGGCTTTTTTATATGCTT  
CTGGAATATCGCCAGTGATTTTCATAACCCATTCCATGAGTCATGGCATTCCAATCGACAG  
TTGCCTGTCGAGTGTTATGGGCCGAATCGTTATAAATCGTAATCGTCCAGTCGTCAAAAA  
TACGGTCACCTGCAACATTAAGTTTGCAGTTCATGTATCCAACCGGGATTTTTTCAACAG  
TGGCTGCCGGCATTGTACCTGCTTTACCTTTAAATTTGAAATTTTGGCCAGGTATGGGA  
TTTCAATTTCAAACAAGTTAGGGCGGGCGAAATCACCGGACTCAAACCCCTGAGGACAT  
CAGTTACGTCCATTATCAACCTCTATGTTTATTTATGGGCCCATATTTGGGCCCAACGCT  
GAATTATGCTAATTGGGCAGGGCCAATTAACCTCGTCAAAGTTAGCACCAGTTGATGTGCG  
TACAAAGTTCAGAGTGATGTAGTTAATTGAACGAGGAGCTTTGATATAAATCGTAGCTAC  
AAATTCATTACTGTCGATAACTTGCCGAGTGTCGTTTGTGTTGATCACAGACCACGCGGAA  
GTAATAAACACCACCAGTGACCTGATGTTGTGCGACATATTGCGAAACTTCATACGGTC  
CTCTGACGAGTAAATGCATCGTTATTTACACAATTCGTAATTAGAAGTATCACCAATCT  
TTTTCTTCAACATGTTGAAGAGGGCGACGAACGTTAATTCGGTCAAATGGAGATGGAACGT  
GAGTTGCCATTTTGTCTCAAAGAGAACAAATCCGTCACCGCCGGCAAATCTGTAACCG  
GGTTAATTGACACTTGATACATGGTATCACGCAGCGATTGCTTAGGTTCAATTGCCAGTT  
TGATGGTGTGCGAAGTTGGCCGCGACGATATCCAGCAGGGGTCATCGATGGATGTCCTA  
CTTGATCGGTGTAGGCACACAATCCGGCAATATCGGCAGAAAGAGTAACCCACAGGTTAA  
TATCATTGTATTTGTCATACTGATAATTATAGTTGCCTGCAATAAAAGCATATGTTGAGC  
TAATATTCATGTTATTGTGCGACAACCTCACCACCAGATGTACACACCATTTGCCATTGGA  
CAATATTCTTAACCGCTTGAGTGGTAGGAACCCCAACAAGTAATTCTGACGGAGGATTGA  
CGAATGCTACACAGTCTTGGCGGTCATCTGCGAGAGCAACGACATGTTTCTGGCCAGTAG  
ATGCAACAGCAGCACCGTCAGATGCACATGCTCCAGCAATCATCAGGTTGACATGCAGAG  
CTTCTCTGTCGGCAAACAGATCCCAACCAGCAATCAATTCATCTGAACCAACAGCATCAT  
TTGCCGAAGCGCCTCCACCGAGCCGGATGATACCGGTAAAGCCAGCAGGCCAATTTCCAC  
TAGAAGCATAAATGAAATTAAGTGAACCATTACGGAAATAGTTCGTCCATGAAATGTATTT

CCATAAACATCTCGATCTCCGCGACGAGTGGACAACACAGTAGATTCGACTACGATGCCG  
TCTCGACGAACAATAATAGCAAATTGGTCATCAGTAATCGGGCCGTATTGAATGACGGTT  
GCGCATTGCTAGTGCGAGTACCACCTAACGGGCTAATTGGGTGGGCTGCACCACTTTGGA  
ATGCGGCCTTAGAAATTATTTCAACTTCGACAGTTGTACCGATTTCCCCGGGATAGACGG  
CTGAAATCAGAGGCATTCCATCTTTGGCAAAATTAGGCAGCACTTTGGTAGAAGTTATAA  
CATCTGGAGCTTCTTCCGAATTAGCAAAAGTAAGTGCAGAATCAACTACGATATTAACCA  
AGGTTAAAGCAGCAGCAGAACCGCCAGATGCGCCCGATACTTCTGCGCGCCAGTTATTTCC  
CGAAGACAGGATATGTTCTCAGCTGTTTGGCTTTTGAATTACTGCAGCTGAAGGAACAA  
ACAAAGCCTTAAATTTACCGTCAGCATCAACTTTAGTTACTTTTCCGCTTCTGTAAACAG  
TTGTGGTGTATACTTAATAGAAACGGTATCACCTACGGTATAACCTTATCCTTCGGTAG  
TAATTGTTACTTCGATTTGGTTAAACAATGGAGATGCGTTGTTAGCTTGCTCCATGTCAA  
TAACGCGCACGAGACGAAGATCATTACCATACTGCAAGAAGTTCATAGCACTCATGTAAT  
ACGGAGCAGTGACATTGTATGGGCTACCAAACATATCAACCAATTCGACTTCATTTGTAA  
CTTGACGCAATTCATAGACAGGACCCCATGCGAATTTGCCGACTAATGCGGCACGGCCAG  
TAGCTGACCGAACGACAGTTGAATTGATGGAAGTGTCTTCATTTCAATGCCAGGGCTCA  
GAAGTGCCATATTTTGGTTACTTGAAGTTAGTTTAAACACATGTTTATTTATTGCTTTAT  
ATTTACACGAACGACATAACCATTACTGCCAACTCCGAACTTTCTTCTCCGCTGTCAACT  
ATAACGACAGGGCGTATAGTCGTTATATAAATTTCCATTTCTTGACGACATATCTCATT  
GCCAATCGCATGTCATCTCTCTGGGTAAAATCAGAAAATCTCGGTTGGGCAGTAAGCCAT  
GCAAATATTACCAATGACATCACCAAGTCATCATGGAAACCGTCTTCGGCTGCCCATGAC  
ACACCTTTTTTCGGAAAATGTCCTCAGTTCCATTATCGTGGCTTTATGGTAAAGCACTAAT  
TTTTCTTCTTCGATTAATCCTTGAGATTAGAACAACCTATGGCATTGACCCCTTAGTT  
TGCTTGATCCCGAGGCCGTTGTACGAGTCACATATAATGTTTTCGTATTCCAGTTCGGAA  
TACAACGACTTAGCTATGGCTACACACGTTGCATTCAGCTCAATATATATGTATGGCTGA  
TAATTCATATTTAAGTACTTGAGCAACACATCAGGGAATATCAGGTGTGACGTGGTGTG  
CTGTGATATACTGCGACCTGTTCTGACGGGAATTCTGTTATGTCCTATATGTGCATAGCA  
TGATAATCTTGCCACGACCTTCAGCAGAGTCAAGTGTGCGATATTTTTATGACCTTCA  
ATTGGTTCCTTAAACATCGTGAAATTGTCTGATGCTGAACTTCTTTCCACGTCATTTTT  
GACAGTTTGAACCCGTTGATCAACGTTCCAGATGTTCCCTGGAAAGCATTATTATGCTCC  
TGTTGAAATGCCTCAAGGCTAGAACC GGCGATTGTCTTGGCTGACCAAGAATATTCGTCG  
TCAAAATATGAATCGCTGCCACCTGTTTTAGAACCATCTGAATACATGCGCTCTTCTACG  
GACGACCATGTTGCGGTATACGGAACAAAACCAGATTTGCTTCCACTTCCATCCGAATTA  
AGGGTAATTGCAGCAGTCCAGATATCGTACCAGTGATTAAGCCCATTTCGGCGTTGTTGTC  
ATCAAAATCTTCGAATGACGACCTGATGATATAACTGGCTGGATTGCTAACCACGCGTCG  
TTGAAGTTGGGAATATAAGCAACTTCGTTCGATGTAATCAGCGCACACGAGTTACCCCGC  
ACAGCATCAGGGGAACTGGAAAATGCACCAATCGCACAAACCAATTTCCAAGAGAGATAGAC  
CCTTTATTCCATTCAACGATACCAGGCTGCAGAAAATCTGGCAATAGGTCCAATGCCTGC  
TTTGTCTATGAAGA ACTTCCGCTCACATGGATGCTTTATGAGAAAGGATACCAACGAGT  
TTAGCCGATTGAAGCAAACA AAAATGTGCCATGAAAATAGCTACTACTGTCGTTTTTTTCG  
AGCTGGCGAGACAAATTTGCTGCCATCAGACGATTGCCAGCCATTATTCTAAGCATATCT  
TTTTGGTAGTCTCGCAATTGGACCCGGATTATGCCATCGTCAATATGCTCAATGCAGCAA  
TAGTTTTCGGCGAATTAACGTTATCTTCTTTGCATCTTTTCGCTCGGCTAACATCTCC  
TTTGTCCAGTTTATTTAATGTTAGCAGGCTTTAGATTCGGCAAACCATTATATCTAGAA  
CGCCTGTTTGTTTTATCTTTAAACGTTCTAACCATTGACGGGTCGTCAGCTTAGATTTTT  
ACCCTCTTACTCCCTGTGATTTCCGATATCTATCAAATGTCGAGGGATAACCACTTATCA  
TCGTGATTTGACAAAATCCATTCCCCATCTTCGCGCATTCTCTCTTTAACGTGGATGGA  
TGGGGCATTGCAATGTGTGATCACTTTCGAAAATATTCATACTTCATCACCCAATTCGA  
GTTCAAGCAATTCATCAGGAGAACCCTTCGAATTCTATAATGTCTCCGCTTTCATCATTTT  
GAACTTTGCCGAGTATGGATGGTTCTGACGATGTTAGCTCTTTCATTTCCCTTGTGCATTT  
TAATGATTTCTTTAATGGTTGACGTCATTTGAGCCTTTGGCTGAGAAAATACTTCAACCA  
TACGTGGACTATCGTCATTTTTTGGCATTTTCCAATGCAATCTTTGCCATGTCCATCATCA  
TTTGAGTTTGAAAATGCATGTTGCGTCTAACAAAGCGTATGGTCATCATCCTGGTCAATTT  
TTCTATTGTTTGGATTTGTTGTCGGTTCTTGTAAGACCAACGGGGCGTATACCTGCACGT  
CTTCCCCGTTGAGTCCCTTCGATACCAGACAATGCCTTGAGACTAGTGAAGTCTAAAAGAT  
CATTCATAGAGTATTTCCCTATCGTGGTTCGAGGCGGTGATTCTGATCGGTATTGTTTGT  
CATACTTCCATCGAACTCCCGTCCCAATCTTGAGCGGGCACTGTTTTTGGAAACA ACTTGG  
TGATCAACTGATTGAAAATGAGTATCTTTGTTTATTTCTTCTTTCATTGCCAAAGAAATCA

AGATAAATCGTTCCAATTTACCTGCAATATTTTTGGTGTTTGCATATAACCAACCAGTG  
AAAATAAACATGGTTGACCATTCAATACGGCCTCGTTGTTAGCCAGGGCCATCTAGCTGC  
TCATCAGTCGTTATGGATATGATAGTTATATGGATATCCCGCCCTTTAATAATTATTTTCG  
CTGTCATACTCAGTTATTGTGCATGAAAAATGTGGTTGAAAGTATGGTAAAATTTGT  
TCAACTATTTGAAATGCATCATCTTCATGTGCGGTCTATATTCCTAGTTCAAACATGAAT  
GTGTATGGCACAGGGATAAATTGCGCCAACGCTTTCCCATTTGGGTTTATTTATCCATTTA  
TCTTGAGTATTTCCAGTTTTTTCCATTGAGTTATATTGCATATCGATCAAATGCAAATTC  
ATTCTAGGAAGAATTGCTTCGACTTTTGCATGTTGAATTCGGAAGTTGGCATCGTAATA  
TCATCAATAGACATTAATAAATTTTTCTATACTTACGTAGGTGATAGGAACACCTTGAAAA  
TAATGCTGGCCATCTCGAAAACGAGAACTTGAATATGACCAAAGAGTTTCATTAGCATC  
AATACATATCGGCGTATTGAGCTGTTATAAAAAATGATTGCCAAACATGACTGTCCCTCAT  
GCCGCCAATGGGACTATTAAGCCGTTCACTGGGTTTGTACCAATTGGATCAAATGGCT  
CTACAAATGGTCTAGCTTTATTTTGCGCCTGAACATTCTCACCAATCTGATCGACTTTTT  
GATCAATTAACCATCTAAATTCGATATTGGCTCCAGGTCTAAACCATTATACGGATCT  
TCAATTTAGGTTTGTCTGGAAGTGGAGCCAATTTTTTACCAGAGTATATGAATTT  
CTGGGCAACAATTACCCTGATTGGATTTTTTCCCATCTGATAAATCGGCGTGTAAAGCTTC  
TACCCATGTTATTTCAAAAAGGCTGTTATCCATTGGCAAATAAATCAGATCACCTAGTTT  
AGGTTCTTTCCATTTACTTGATGCTTGAAAAGGCCTGGGTTGATAGAAATTCTGACTTC  
GTCATTTTGTGATGGCGAAATTTAGAAAAGAACTATGTTGTCCCTCATATGAGTCGAA  
GCTATTGAGCCATGCCGCAAATTTCCATGCTTTTTCAAATCTGCTATTTGGGTCTTCTCC  
AAACACAAGGTCCAAATTTGTATATTCTCTTTTCGAGAGAATAAAATTCCAAGCCTCCCAT  
TTGAATAGATTCTGCAACTAGAGTGTGCTGGAGGGCCTGAGAGCCCTCATACCGATTGAA  
TTTGACATACGGGTTAAGAATATTATGCTCATGTGTTTGTGATATCCGCTTCTGTTTTTC  
TAAAGTAGCGAATAGTGACTTATCCATCATAATTTACCCCATGATAATAGGAGGAGGCC  
ATCCAGCAATTCGAGTCTTACCTAAGCTTATCGATATCTATTCTAGCTTCTTCAATTAG  
GCGTATTCCAGCGATTGTTACACCACCTGGAAGCTACATACCTTGATGTTCCGCTAAAAC  
TTGGCCGTTTAGTTCTCTCAGTTTTTGTTTTTGCCATGTCTTTTACCTAGCGATTATTGT  
ATGAATTATCTTTTGTACATACCATTGGGTTGGCCTGCATAAATTTGGCCATGTGACATAT  
TAGGATTTGCGTATTTTTCGCGCCACTGACGGCACGCTCTCGTCATCTGACATGGCAAACC  
CATATCCAGCCGAGTTCCTGAAAGCATTGAGTCAACATTCGCATACGATTTACAGTAAA  
CATCAAATACCAGCAAATCTCCTTTTTGCAATTTGCCAGCAATTCTCATATTTCCGGTAG  
TACTGTTGAAAAGAAATCAGGCAAAGGAGAAAGCATGTCTCCCATCATGTCTCGATATG  
ACATCAATTGAGTGAAATATCCGAGATCTGCGCCAAAAGCATTAGGCCCATAGCATCGGC  
ATTGGCCGCGAATTGAAGCTCCAGTCATACCATAACAAAATCAGTAAACCACGGATAAA  
CAGCCGTGCCGTCCATGGTTATAATTGACCCCATATTGGTTCGAATTACCTGAGTAACTG  
CAAAAACATTGCCACCTGCAAACTAATTACACCAGTTTTAGCTTGTCTTCGGTTAATA  
CTACTGTTGCATATGTTTTGTGAAATCCATCGTAGTGATATTCACCGTACAATTCGAGAG  
CTCTAGATATTCAAATCAAATACTTGTTTCTCTGTTACTTCGACGTGCACGATAGGTGCAC  
CTAAACGTATAAGTATAGCGTCCTTTAATTCTAACGGGTTATTAGGGGTATATGACATAA  
GTGTCTCCTTTATGATATTTAAGCAAATTATGGCGGAGCCCTTCGAGCTAGCTCGAAAAT  
TTTATCCTTTTAGTTATAATATCTATTAAGCCATAAAGGATAAAGTTTTATTACAATAAA  
GGCTCCCGAAGGAGCTTTGAGATTATGCTGGGACAATAACAGCAGGCATTTTGCCGATAG  
TTATCGAGTTAGCTGAACTTGACACCAGTGCTTTGACATAAATTGCGATGGTATCATCCA  
AAATTACATTGTACAGCCATTTGTGTGCGTAGAGTCTACCGTTAGATCTCAGAGTAAATT  
CTTGCAAATTGGTGTATGGTGAATTCGCGCCGCTTGATGAGCTATTGAGATTTCCAGAT  
TATCTGTTTCTAACAACAGATGTTTCAATTTAGATGCTTGCATTAATAAACCAGCCAT  
CAGTGAATTTGATTTGTCCGATTCAAACATGCAACCGTTTGCTACGGTCTGATCAAAT  
CAACAAATGGAATAATCTTCGACGTTTCAGTTGTAGTTATTTGACAATCTTTTTTTTTCAA  
CAGAAACCATGATGTTAGTTGCTTTAACCCGAAAACCGTTTTTCGTAATACCAGCGACCTA  
CTGCAAGTGGCTTATCTAACTTAAGTTGAAGAGTTTCTCTGCGTTCTTTGACTGTTTTCT  
TAATACCATCTCTTTCAAGTTGTGTAATTCAGCCTCATTACATACAAGTCGGTTGCCA  
TCAGAATGTTTGAAGAAACAAGACCTGAATTTTCATCACCCACACGTGAAATAACCTCAT  
TCAACGATAAAGACATTTGGTTCGTGATTTGTCTGTAAAATGTACAGTCGGCCATTTATAG  
ATGATTGTTCTACGATAGAGCCAATAGCGGCATTGAGATCTGAAATATCCCTGAACTC  
CACTGGAACGTGCTGCCCTAAAATCTGCGTAATTGTTGCAATATTAGAGGTATTTTCGAT  
TGATGTCGTGCAAAATTTGATTTTTGCGTATTAACATCACCGATTTTCTGCTCTACCGCTC  
CAAGACGAGATAACACACCTGTCACAGGGGTATTCATCGTGTTCGCGAGAGAACTCAACG

CACTTTCATTCAACTCCACCCTTGACGCTATCGACACAGGGTTGGAAAAATCGGTTTTTA  
TCTTGATTTGATCAATGTCATCATTACCACCACCTAAAGTATTTTCGATAGCGGTCAATC  
TGGTATAAATCGGAATTCCTGTACCAAGATTAGTATTGCCGACTTCCATCCTCAAATCAT  
ATAAATCAGTCGTCAATTGACCTGCATCTGACTGCGCCATGAATTTTCAAGCGCGGTTA  
TGCCTGGGTGTTTCAGAGACACGGTTTGGTTTACTTGACTAAACCGATACTTTAATCCCG  
AACCTATCGAAGAAGGAGCAGAATTACCGTTTATGTCGAAGCCTGGATATGCACCTATTT  
CGTTTTTCACCCAATACAAATCACCATATACAGATCGAGTTGTGTCGTCTTCGAAATATC  
GATGGCAAAGCTTTTCCGAAGTTGATTCTGAAAGAGAAAGAACACCTGCTAAATTAGTTT  
CAACCTCGCTAATATCTCGCTTGATAGCTAAAATATCATTAGAATTAGCATCGTTTTGGT  
CAATTACCGTAGTATCACCGATTACACGCAAGTTATGTTGGAGAATATTTACCGCATCGA  
CAATCTCATTGATTTTTAAGAATGACTGGGCTTGGTCTTCGTCTAGCTGAATAACGTTCT  
GTTGAATATTAAGTGGAGCCCTGTTGTAACACCGTCGCCGGATGTTTCGGTGGAAAGCGG  
CCGAACGCCGCTCTCCGTTTTTAATCCAACCCTTCGAAGTTGACCATCACCTGGAGTAG  
TATCAACATAAGGAATAACTCCTTTTCGTGATTTTGTCTATCATATTTTTTTCCTCGAGTTT  
TTCTAATCTTGATTTAAGCTCTTTATTAGCCTCAATCAGTAATGCAATGAGAGCCATTGG  
AGAAACACTAAGAGTTCCGTCGTCAAGTGTTTTGACGCCTTATGGTAAAACTTTTTGCAA  
TTGCTGAGCAAAAATACCTGCCTCTTTGCCTATCACGGTATTGTCAGTCAAAGATTTATG  
TTTTGTGTAATCCCAGCGTCAAGGCTATCTATTTTTTACGAGCGCACCTTTGAGAGGCTG  
AATATCAGTTTTGAACCTGATATCGCAACGAACATACATATCGTTAATGGCGATGTTTCC  
GGCTAGCCATAAATGACCACCTGGCCTAAGCGTAGCAATTGTGGTATCTACGTCATTGGT  
GCGAGTTGTCCATCTAAAATACTCGTTGTTATTGTCTCCAACAGCAAAAAGCAAATACGA  
ATTCGTGTCAACGTCACTATCGTTTTTGAATGTTATAGCACCCAAATCGGTTTTTCTATT  
CCACAAAATTCCTTGATTGTTTTCTGTGAAATTGATATTACCAGTCATTGGGCCACCTGA  
GCGATACAACACCTGGGCATTAGCAGAAAGAGCCGTATTTCGCTGTGAGCTTTCAGTATT  
AAGAAGGCGAACTAATCCTTTATGAGTGCTAGTAGCATTCAATATGGAAAGTTTAGCTGG  
AGTAATAACGACAGTGTATCAGCTAGTGCTAATGTTTGCGAATTTGTTGCTACTTTAAG  
CAATCCAGCTGAGCTTTCGTACTTGCCATTCTTGATAAAGTATATGGACTAACAGCATA  
GCCATCTCTAAGAACTACTGCTAAAGCTTGAGCCAATGTGGCCAAACGGACAAATCCGTC  
TGCCTTTCTGTTGCAGTTCATCATGATTCTGAGAAATGCGCAATAGCCTGCTTGGTCTC  
AAGAGGAGTCATAGCAGTGGTATCGTCGGTGCCAGATATTGCCTGGGCAGCAGTCGATAT  
ACGGATTGTTCTCTTGTGCTGTTTTGGTAGAACCTTTATTTGCAATGACAGACCCAGTTT  
CGAAGGTGTTATTGCAGCGGTGTTAATAGATAAGGCCAAAGGTTTCATCATTGTTGCGTA  
ACGAGTATTACCAATAATGGCGTCGGTAGCCTGCGGGCTTACATCGCTATCCCAGAAG  
ATTAAGAATAATAACAGTATTGTCACTCATGCCAGCTGCGGCTTCAGCTTCAGTAGCAAT  
TCTAATGATGCCAGGTACAACCTCAGTTTCTATCGGCAGGCCATTAACAGTTAATGCCCA  
TGGCGTATTTCAATTCAATGCGTCTGATACGGTTTCAACTGAACCGCGCCTATCTGGCCT  
AGAGAAAAATACCAAATCCGCTGAATCCGGAATATGATATTTGATATTGTTATTCATTAA  
CCAATCATCTTGAAGTAGTAAAGATCAAATGAACTGGTTACTGACCCACTAGTAAGAGTT  
TTTGACTCTTACCATATATTTCCCAATTACCATTTCCAGGCTTTCCAGGAACAGTAATT  
TCACGTTGAACAACAATTCCCAACTGCTAAAACCTTTTCGATATTCCCATGCTTAGCCGAA  
TCAATGAATTGCACTTCTATGATGGGATTTGTTGTGCCAGATTGTCTTTGAACAGAATAA  
AATAAAATGCCGGCATCTCGCATTGTTCAAATTTTGCCAAAACCTATGTCGCATACGGCA  
TCAGCGTTAGTTCGAGCGGCAATAACGAAAGGTATACCGTAAACTGTAATGACTGATTTG  
TTTAATTCAGACGGAAGAACAACCTCCGCTAAATGTAAGCATCTCAGCTTGACGAACACCT  
TCTGGGGAAACTTGAACCTGTGAAGTACATATCGCGTTAATAGGCAACATTGTCAGTGT  
TGGAGTTCGTCAATAGCTGATTGCACGTTTGGACAGTTCACACCGTCAATAAATGAGTCT  
ATCGTCGGCCACCTATATTTCCGGCACTCATTACTTGGGTGACCGGTTTGGTTCAGATAC  
TCGATATGAGTTGCTTTCCTAAAGATGTTGTGTGCACTCTCTAATGTTTTTGAATCATT  
ATCCACCCCTTACCATTTGTATGCTGTAATTATCGGAGGAAGAATATTAATGTTTCCTA  
GCGTTGTATTTCCCTTTATTTACAGCAAGAAGTATTCTAAGTATTTTGTATAGCCAGGAC  
CAGATGCATCAGGGTCAACTTGACAGCCGCCAATGATGATATTTCCATCGTTATTTGCGA  
CTAAAACCTTATTGCTTGAACAAGCTCAGGCACATTTTGGAGGAATTAGTTCAACAGATT  
TTGAACCGCATGTTCCACCTGCGGTATGGCTTGGATTACCCTGATTGTCGAGGTCGTTAT  
TGTTTAAACCAAATTCGACATCAGCCTGATTTCGATGTCCATCCTGCAACCAAACGCCCTT  
CAGCATATCTTGTCCATACACCAAACCCCATGTAATCACGTGGGTTGGCAGGGTTGCTGG  
CATTCTCATATATTGTCCCAATCGGATAGATAGCATCGAACAACAGTTGGATATTTTCAA  
TTCTTCCGCTGAAAGTGCCTGGAATAATTTGTGACGTACGCTGGACAGGATTGTCAAAT



CGGTGTATTTCGATTTGATTTTGGTTTATTAATTCCTTGCTCGGTGATGAGGTAAACAGAAT  
CAGCTTTTTCTTTTATACCATTTGGACCTTCCCAACCCAACCGAGTACCAATATCGTTAT  
TCAACCATCTGATGGTGATCATGTCACCGGATTCAAATGTTCTTCCAACTTAATATCGG  
TAATATTGCCGTTGTCATCCAATACGATAGAATAATCAATAGATGACGGAACCCAGTTTC  
CACCATTATCCCAACACATTTGTTGAGTATCGCCAATGGCATTCTCGCAGATCAACATCG  
GCAAATCGCCGGCCCCCTGCTCGATCAAGCATCGTCCCCTTTAGAAGAACTTCAAGCGAAT  
TTGGATTTATTCCATTGTTTGGCTGAATATCGAATTCGTCAATAGTGAAATCAGTGTTTG  
TCGAAATATCTCCAACCCAAATTTACCAGGCTATGACGTTTTTTGTGTTGTTGATGCAT  
CAAAAATTAGAATATGCTTAAGGTTATATGAACTCCGGTAAGAAGCGATTCCATCCATGT  
AGGTGACAATTGTTACAGTACCTCCTTTTTTGTATGTCAATAACACGAATACGAATACTTC  
TTCCATCTAATGGCAGCAATGATGTCAAATTGGCTGGGTCGATAGATCCATAGTTCGAGT  
TTTAGTTTTAAAGTCTCGCCGTAATACAGCAAGTTACCGCGGAGATAGACTTCGAGGTTTG  
CAATATAGTAATTTGTTGTCCCGAACACATTAGGAAAATCGGTTTGACCATCAACAGTCA  
CAACTATTTCTTTTTTGGCAAAGTACTCAAATCGGATGTTGTAATCTTATCGACACTCT  
TGTTCTCTACGATTCCCATCTGCCTGGCGCACAATAGACAAGCTCAACGTCCATCAAAT  
TTTTGTCAAGATTACGAGGATTTGGTGAACCCTTTAACGTATCTCCCGAAGCAGCAACCA  
AGATTACGTTTTGACTTGCACCTGTGCCCCACACATCTCGCAATTTTTATTGCTTTATTGT  
AGTCCGAAACAGATCCTTTAGGCCAAATTGACAGTAATAGAAACAGCGGTGGTGTCTATTG  
CCCATGAATCTCCGAATAATGGAAAATGAGCTCCTACCGAATGATTTGTCCACGCACCTG  
CAGCGAATTGGCGATCTCCGTCGCCAGTTGTGAATAGAGTTCGGTAAAGTTGTTATAGA  
CTTTTTGCCACCACGGCGGAGATAATCGCCGTGGCCATCATCAACAACGTTTCCGATTT  
TGATTATTTCCATTATGATGTTCCCCCAATATTAATTGTGTCAATGGCTTTTATTGAAA  
ACGTGTTTGCACACTGCGAGATTTTACGTCAGCGTAGACGTTATCGCCCGCGCCAATAAA  
GAAACGAATTGTGTATAATTCGTTAGAGGTAGTCTTAAGAACAGCATACTCAGTATTTAT  
AACCGCATTGTATCCGTATCGACTGATATCATGTATTCCGAATTTTTTAAAACTGTGCC  
AGCAGTGTTCGGGCGGCAACCATCAACTTTATCGCAGAATATTCGTTTTTACAAGCAAT  
ACGAATAGTAGTTGCAGTAGTTGTGGCCAAAATAGTTTTTTCAACTGGCAGAATAGAATT  
TCCAAACATTGGGGTTAGTCCGTATTCCCAATATTTTTCTGACCCTTCGATCTTTGTGCC  
CCAGACAAAACCTCTGGCGTATTGAGACGTTATAATAAGGGAGCCAGATGTTCCAAAGAT  
ATTTTCGCCCTCTTGAGGGCGAATTATGAGAGGATTTGACGGAGAAATTGATCCAGAACC  
ATTTATAAAGATGCAACCTTCCCCAACTTTGCATTTGGTAGAGTCATGGTCAACGCTCC  
GGCTGACGTGTCTGCGTCATGCATAGAACCAATATCTAGCGCATTCCCGGCCTAATATTG  
TCGCGATAATTTCTGGTAATATACAGTGGCGTAAAGAAATTGAGAGTCAGCTCCTTCAGA  
AGCTGTGCAATGAAGTCTATAATCACCAAATGTGTTATAGAGCGCATCAATAATTTGGTT  
GAGTTTGACACCACCGTCATAGAGTATATCCCCAGTTGAAGGATTACGTATAACGCCTAC  
ATCAATTCTCTTTTTTGGTAGATTGTAACATTTGTATTCTTAAAATGAGAAAATGATAT  
TGATTTCTTCTGTCTGATCGAGAGCTCGAGTGATAGGCTGTCTATTTTCCATCTATATCA  
TTTTTCTGAATCTTTTTCCAAATCTTCAGGTTTACATGCTATCAGGGTCGCTTTAACAT  
CTGGATCGGACGGCAATGATTTTTTATCTAACGGGTTGATGATTACCCTCATCTGGCGAA  
AACCAGTGTTGCCTGGGAGTGATGCCTCAGGGAAGTATATTGAGTCCATATACGCTCTGA  
ACCGGCGTGTGTCTACTTTAACCCGGTAAATGAGGTCTAACTTATCCGGATACCTTAGAA  
TAGCGTCTTCATACCCCCATCTCGAAGGATCGTCAGAAAGTTCATCCGGGAAAGGCACAA  
CAATATGTTCAATTTGTGCAACTGTTTATTGATACATCGGGCGAAATAGTGTACAGCTATT  
CCTACACATAGCCATCACTCATGTGATTGCCATAGCAGTCCCGCGAGGTGGTTCAATTG  
ATTCATGAGTGGCAGTCCATTTCCACCTATAGTGATACACTCTATTTTGTGATCTATTC  
CCGAGATAGAACACGAACCAATAGAAGGAACATCAACACAGCGGTAAATCATCGAACTAA  
CCGAACGTGTCGGTACGATTGTAGGTAGCCGAGTTGACTAGGACGATATCGTCGATAAAAA  
ATGTCTTTGGATTGTATATCTGATATCTCGCCAATCTTTACTGGGAATTATTGCGTCCA  
GTAGAGATTTATCAATTTTTACTGCACCTAGCATGTTTGTCCACATGTCAACAACGCCAT  
CAACCGAATCATTGGATCTGGAGGTGCAAAGCCGACATCGCTGTGATGCGTTGACCAAG  
GAGTATCACGTCCAATGTGGCGTATATTGTGTTTTTGGTGGGCTCGTCGCTCACCATGT  
CGTAAAAGTTTAGCAAATTTATTGTTCTAAATTTACTAGTCACAATTGCACGATAGAATT  
TACTCATCTATTTTACCTGTCTTGGGTTTTGTGGATCACGAGGATTTCCAACGTCATCT  
TTCAGTCGTTTTTTCATCTAGTCGTCTAAATTTGCGAAAACCTTCACAGCTGGCTGATCAGAC  
AAAGGACTCATTGCAAATCTTCGTTCTGATGGAAGTTTTCTAACCATGATTCTTCTTCA  
GTGTCATATCCAGGAGGAGGAACAAATGGTTCGCCAGCATTGGCCCAACCAAGTATAAA  
GCTTCTCCGGTGGCAGAGTCATGATCAATATTTCCGTCAACGTCTAATTTGGCTACACGG

TCGTATTGCTCAGTTGGGTAACCAGCATCCCATCGATACGTTTTCTAAATTATCGATGAT  
AGTTTCTACATGTTTCATTGATAAACCAGAATTGATGAACATCGTGAGAAGTGTTATTCC  
AACAAATCCAAAACCAACTGGATGTACAAAACGGAGAACATCTTGCGCATATCTGGACGC  
CGGAAGAGTTGACTCTATAGTCATGGTGTAAATATGATCTACCTCGATTGATATTGTCAAC  
CGAATCGCTCATAAGCTCCTTTCCTCTAACCCCTACCAATATTTACCTACGAACGGACT  
AGTTTCGGATTTTATTTGCTGGCGTTCAAAGAATTTACCAATCATATTGTGAATGGTTAT  
TCTCCATTTCCATTGGCCTTCAACGTA CTACGATCGACGTATGTGACGTTTGCACGTCC  
TGTAGGAGTATATATGGCTCTTCCAACAATGTCTTGGCTTATGTTGGTTGAATAAACTAC  
GATGTCATATTCTATTCCATGCTTTGACTCGATGTCGATTTCAACATCTTCGTTATAAAG  
CAATTTGAAAAGGCAGCTATATGATTGTTCAACCCCTTTCGTGGAATAAAAATCGTAGGC  
CCGAGATTCAACAAATCTTGCGACAGAATCTCGCTTAGCTTCATCCAAATAGTTGTTTCT  
TTTTAAAAGTTCTGACCAAAGATATTCATACGCATATTGCTCGCGAGGGTATTTGTTTT  
CATCAAATTGAGCGATTTGTTGTAATACGTCCCGTTTCCGTCCGACAAGAATTGCAGATA  
ATATTTTCGCAAATGCACCAAATTTGGTATCTTCGTACAAATAACTTTTCAGGCATTATTTT  
AGTAACAAGTGGCTGAAGGTCAGGATCCTTTAATCAAACAAATGGAGCACGTGTCCACGG  
AACTTCACGCTCTTGATTGCGAAGCTCAGCTACCATCATGACGTTGGCCGGCGTCCAGAA  
ACCGGATGTAGTATTTGTGACCCGATATGGGAATTCATAATACCCAATTATTTTCGCCCGT  
ATTTTTATTGAAAAGTACCCCATTTGGCATAATTGTTTGAACCGGTAAAGTATACGTTATT  
TGCATACAGTGTTACAACGCCTTTGTTGTAAGTTTCTCTGTTTACCCTTTTAGCACTTTC  
TGTTCCCTTCGTTCGTTCGATAGGGAACGAATATTCGATTTTGGGTAAACAACAAGAGCTCT  
GTCGTTGTGTGTTATCCAACACCTTGTGCTAGAAGGAGCCATCCATGTGAACGCTGCTTC  
GTTATAGTATTGCCGAGAGCCAAGTTTCCACTCTGAATCATCGGCATTGATTCTGAATGT  
TCCCATATGTATTGGGATATCGGAATTATAACCTGGAGTCAATTCGTATCTTACTGCTTC  
AAATACGTTGTCATAAATTGTTTGGTAAATCTAGATCTGGCAAAGTACCTGGATATTTGAA  
GTTTATCTGAGAAACAATAATCTCTTCTCCACTTGTGACATATTGCTATATTCATGCGA  
TATCCAAGTATGGTCTACGCCAATACCAAATAACTTTTCGCCAAGAAGTACCATCGAACTC  
ATAAACTCCAGCAATTGGGTCATGGACATCATTTTTGGGGTTTCTTGGGTCTAGACCTGC  
CTGAGTAACTACGCCAGTAATCAAAGCATAAAGCTTGCCGTTGAATGTATCAAGCTTTTT  
CGTAACAGCCCGTGCGTTTGTGTTATATTGAAAGAGGTTGGGTCAAAAAGTTTCTCATC  
AAATGTTCGGACTAACTGGATCAGTATCAATCGGGGCATTAGATGTATTGATTCTGCGCAA  
CTTATTTTACGCTGCTACATATACCCAATCGTCATCGGCAGCATTATTTTTCTCCCTTCC  
TAAAAATATCACCAGGAAGCCGAGCGTATGAGTTGAATATTTCAACATCAAAGCCAAGAT  
TCAGTTCATCGCCAGTTTTTTGAGAATGTCACACTATCTGAGCTAAATCTGACGTCATCAG  
CTGACCATCTGACATCATTTGCCCTACGACCGTAATAGATGTTATCATATCCAAGAAGAT  
ATGTAGTAGTGCTAGTTTGATATGTTACTGTTCAACTAACGGGGTTGCCGACACGCCCGT  
TGAAAGCTTTGTAATATTTCCAGTTTTGCCCTTTGTCATTCGACACTTTGGCCATTGGCT  
GAAAACGCTCAAACAGATAAAACACGTCGTCATTTTCAGCTAGTATTGTTCTATTTTTGT  
CAACTCACACTTGTTCATAAAGCCTTGTATTTTCGTAATAGTTATCATTTGAAACTATTT  
TGTCATAAAGATTCGTCGCATCAGTAAGTTAATTGCTGAAAACGAAATCTTCGCTCATT  
GCGAAGCCATAATAACATCAGTATTGAAACTGACGTAATTTCCGTTGTTTTTAGAGA  
TTTCTCTCAAAAAGGAAGCGGCAGGTGTGAATTTCTTTCATGGCAGATATGTAGTAGGCAT  
TTTCCGAAAAGGTTTGAACCTCCTCAGTTTCTACCCAATCAGACATCTCAAATCCTTTTC  
CAGAAACGCAAACCTCGCATTTTGTACTATGTGTCTGCTTGTATAGATGTGTCTTCAAACC  
ATTCTTCGACCGCTGTTACACCTAATTGACCCCAACTGGTTCCAGACCCTGCTCTAGTCT  
GCAGAAGTTCGACAATATAGTAAAAATTTGAACCTACATCGTCCCAAGTCAAATATACTT  
GATTCGCCGATAAAATTTGATTTTAAGGCTCGTTACGGCCGGTGCTTTTATGATCATAA  
AATCTCAAAGGGCCGTTAGGCCCTTATTGTGAAATTGCTTCAAGAGTAAGAGCAGTGTA  
CTGTTGACATAAGTCATTCTCAAATACGATAAGAGTTCCATCTTTCGCAAAGATAGTGTC  
ATCAACTGGTAATGCTTCTATTTCTATATATGCTCCAGCAAATGATTCTGCCGGTACAGG  
TAAGACACCAAGGTCAAAGTTTATAACACTGAGAGCATAGTCAACTGTTCCAACCTCATA  
GTACTTGTCTTCCACCCACTGTTGTTTTTGTGAAATCATTAAAAGAGTACTCTGATGC  
AGGAATATCGCCATCAGCAAATGGGCCAATCAAATTTTACCAGTTTGTGACGTAGAAAC  
GTAATTAACCTTCATGCGTTACGTTATTATTGGTGAAGTTGATTGTAGA  
ACTTTTACTGACTGA  
CCCCATTTTTATTAGCATTATCGAAAGATATTCATCCATCGGAGTTTTGAAGAAATTAT  
CTGCGTCCCTGACATGATATATTTACGACAGAAGAGCCGATAATAGAATCATCCGAGGAAT  
CTACACGTGTCAACATCTTTGATTTGGAGAAGTTTTTGTGAAAATATCTACTTCGTCAG  
TGTAATAGCGGTCAATAGAATCAATTATTTGCCCGCGAAGTCATTCTTCAGAGTTATACA

ATTCTGAACGGTTATATGTCACCTTTGATTTTGGATTTGATGTACATGTAATTTGGGTCTA  
TACTGCAGGGGTAATAGGGCGCGAGATTATATTGTGACAAATAATTTTCAATGTCTTCT  
TTCTGAACAGTTGTGAGTCTAAGCCCTTGTTTTGGCTTAATAGAGATGAACGCGTATCCC  
CTTTTCTCACTGTCAGTGGAGGACTGAACGGCTTGGACAACTGAACCAAACCTTGTGAGAG  
ACAAATTACTCGTAGCCGGTTGCAGTAACCCATCTGCGCTGAGATTCTCTCATAACTGGG  
GAAAAGTTCACGGATTCTTTCGATGTCTTGGGGATCACCACCACCCTGAGTACCCACATA  
ATCGGCGTCATCAGTCGGAGTCTCAATCAGATCAGTTATGAAGATATTTTGAAGAGTATC  
GGAGTTTGCGAAATCTCTTGACCCATCTGCTGGCTGACCACGAGTGCTCAAATATTTCGAT  
CACGATTGTTTACCCGATATTTCGGTTTGGAGCCCCCAATGTAACCTTGCTACAAGAGCCCC  
GCCATCGATTTCGGTGCTAGCTTACCTTCGCCAAAGAATATCTCAGTCGTCTGGTCAAC  
GGTCTCACGCATATAAAATACTTTAGAAGAACCCGAAATATCAACCATCGCATTATTGGT  
CCAATCGACCCAAGGTGAACCATCTACCCATACACGAACTTTAGATCTGTTCGATATTGGG  
GTCACGAATCAAAATTTGACTAATTCCAACAAATTTCAACTCAGTTCGAACTATTTCGTCC  
TTGATACACGTTTACAAGGGATTTCGTAAGTATTATTGTGACCACGAATTATTGTAACATA  
GTCGAGAGTAACGAATGGGTACTTATCAGTACGTTCCACCGTACCAACGAATTTAGTTTC  
TCTCGGAATACGAATGCTGGTAGGATTCAACGGGTTTGTTCGCCTTGAGCAGTAAAGTCGT  
ACGAGAAGCAGTACGAGAATCTAGCATATATCCTATGTCCTGAGCATGTTGAACAACCTGA  
ACTTCTTAATAGAGCGGTTCCGGATAAACTCTCGAATAATGCTGAATATAAAAATTGCTG  
AATATAGAGTGTGCAATATGCCAGCAAATCGGTCAAACGTTTAATCTTGAACCAAGTAAA  
GCCATAATCTTTAAATTCATCCTGGTTACCTCACCAGTCAATTAAGTCGCTTTTGGATTTC  
GTCAAAGGTAGCGCCTTTAAAAAATATCTGGGATATTTGTTTTCAATTTTCATCGTATAAA  
CACCTTGCTAGATGATTGCGCAATTGTGTCTCCGCAAGATATGGGATCACAAATTGATAA  
TGGGGTTTTCCACCAACAAAACCTTCGCCGTAGTGGGAATAACGTAGCCGTCATGAAC  
ATCATAAGGCTCAACTGTGTTTCGATGAGGTATTATTCTGTTCGCCTTCAACGAGGACCTT  
TATACCGTCAACAAAACCTTTTCCCTGCGTGGTTTGTATTTGTGTAGAAGGATATGTATC  
ATGGCCAGTTGTCCAAGCCATATCGTATGTCAATCCAGGCATAAAAGGCCCTCCTATGTG  
ATTCTATTTAAGAGCTCCCGGGAGGCATTAATAAAAATAAACAGGAGTGTCACTATATGA  
TTTTTTTCATTTTTTGTACCCAATAGATTATCAGGGTAAATCTACTACTGATATTTTTAAG  
AATTACAGAGCGTATTTTAAATCGTGTTATCGTAAAAACAAGCCTGAAGTGTATTGGATA  
AATGGTTCAACAAGACCTGAAATGTTGGCACATGAGCTTTATGGCAATCAACAGCTATAA  
TGGGTTTTGCTAATGCTAAACGATGTATATGACCCATTTTACGGGTGGATAACAACACAA  
GATGCTGCATATGATTACGCGCAGCTACAATATCCAGAAAATAAGGTTCGAATATCATGTT  
GATGCCAATGGTGAAAAGTATTGGAATTTGGTAGAAGACCCAGAGTTCCTCGAGACATTGG  
TATGATGCTGGAGATACATCTAGATCACATATTCAATATGTTGGAGCACTTCGGGGCGTT  
GCTTCCCTTGAAGCTCAATCTGCTGTCAATGAGCAGAAACGAAAAATTCTGATAATTAGC  
GAAGCTGATATCAACTCGTTCCTAAACGACATGATACGTGAAATGGAAAAGGTTTATGGT  
GCGTTATGTCAAAGGTAAGTACTGATAGATTTTTTACTGACGTTCGTAGAAGATCGTCAGGATC  
CGTACATGTTAGGAAGGGTGAGAGTGCGTGTCCACGGTATTCACCCAGAACAAAAGGTTA  
GAGCAGACAACCTATGGTTTAGCAACCGAGGATTTGCTGTGGATATCAGTAGGCATGCCTG  
TAACATCAGCGTCAGTTTTCGGGTGTAGGCCAAGCTCCAGTAGGCATCGTGACCGGTACTC  
ACGTATACGGCATTCTTGGATGAATTTTAGCAAAAATGGCCTAGTTCTCGGGACATATC  
CAGGCATATATCCAATGGTGCCTGATTTCAATAAAGGGTTTTCTGACCCATAAAGGGAAT  
ATCCTCGGTACGTAGGTTTCAGATGTGAATGTTTTGGCTAGAGGTGGAAGAGAAATAAAAA  
TTTACCAGGCCAAATTGTAAAACAAAACCAAATTGTTCCAGTTGTCGTAGAAGATCAAA  
AACTCAACCGAGATGTTGCACAAGGTGCAGATAGAACACCAAATGACGAAATATACCCAA  
ATCCAGATCCAGACGTAACAATAGAGGATATGTTACGTTATGACGAAGGTATTCGTGGAT  
CGGTTTATTGGGACAGTAAAGGACATCCTACTGTTGGAATAGGTCATTTGATAGTTGACG  
AAAAAACTAGAAATATGACAAGAATAAACCAATTGCTCAGTCAACAAGTAGGCAGGCAGG  
TTAATTGGAGAATAAACGAAGAAGAATGCTCTATGCTGTTCTACCGCGATCTTTCCAGCG  
TCTATTCTAGCATATCTTGCAATTACAAGGTCGGCCCCGGTATATTTCGATGCTAGACGATA  
CTCGTAAAATGGCTATTGTCAATATGACGTTCCAATGGGTGTTGGTGGCGTGGCAAATT  
TCAATATGATGCTTGGATACTTGGCATTAGGCCAATACCATAATGCGGCTGATGCTGCTC  
TCTATTCTTTATGGGCTAGACAACTTCATCACGAGCTCGTCGTGTGTCAGAAGTCATAA  
GAAATCGAACTTGGTGCCATACAGTGGGTCACAAGGATCTGTGCCGTCATTGCGGACGA  
TGAGAATGTTCAAACGGAAAGTGTATCATCAACCGCCCAAGCTCCCTCGTTCACCGAGC  
CTGAATCACCTTACTCGGCTGTATATCCATATAACAAAATGTATGAAAGTGAGTCTGGTC  
TCATCCAGGAAATTGATGATACACCCGGGCATGAAAGCTTAAGAACATATCATCGGACGG

GTACGTTTGAAGAAATACATCCTGATGGAACAAAAGTCACGAAAATTATTCGCAATGATT  
TCTACATTGTCAAGAACGATGGGAATGTTTCATAACGGCGGAAAACCTCAAGATCGTTGTCCG  
ACGGGGATGCTGATATTTTTGTTTAAGGCGATTCTAATAGCACAATATCTGGACATGCTA  
CCCAATTCGTTTCGTGGTAATGTTGACGAGCGAGTAGAAGGCAATGTCAATCAGTATGTGA  
CTGGAAATTCATCGGGGTTAGTAAAAGGCAATCTAAATGCAGATGTTGATGGAAACGCCG  
ATATTAAGTTATGGGTGACTGTTTTAACACGATTGATGGAAATTACACTCTAAAAATTG  
GAGGCATTTTTTCTACCGAAGCTGGTGGAAAGTAGGACAGATGATGTTTCTGGTAATTGGA  
ATAGACAATCGGCCCAAGTATCCTATGTTGCACAAGGAACATTCTCAATTGATGGTTCTA  
GAATAAACTTGAGGTAATTCATGTCAAATATATTACCAGCCTCAGCCGTTTTGCCTGTTA  
AAAGGGAAAATGAAATAGTATCGCAGACATTTAGCGCAAACCTAACTGACCCAGGGGCAA  
CCCTGGATTCTTTGGAAATTAGTGCTATAGATCAAAATGAAGGAATCGTCATTGTCAACA  
ATGGATTTTCAGGACAAAATACTGGAGTTTTTACCCTTAACGGTGGTTTTATCATATCGTT  
TAAAAACCGGAGAACGTGAAACAGCAAATAGATGGGAAGATTTGCCTGATCCACAAACAA  
CGGATTTGTATTCTTTTCTTGCGCCAAGAGTAATGGAAAAAGAATATTCATACCTTGATG  
ATTTAACATACGACGTTGTTACGCCAACTAGAGCCAGGTAAGCCTCCAAGACGAACCAGT  
TAGATATGTGATAAGCAAGACGAATACACAAAAGTAGTTGGTGAGTGGAAACACATGGGC  
TCACAATTTGCGAGATTATGTAAATAGGGGTAGATAAAGGCATATTCTGGAAATTTACGC  
CAAAAACATCGAAAATAACAAGGGCAATGCAGATAAAATCACGTATAGGTCCAGTTGGAA  
AGCGTGTGTCATGAAATTTTGCATCAGTCGCCTTCAGTTTTAGCATGGAATTCTGAAGA  
AGTAATAATCCCATACTTTTCGAATGCTGACGGAAAAGACGAAGATATATCATGGATTT  
TTGGGTATAAGTGTCAAACGGCCTAGTATTCCTGTTTCGAAGTAAAACCCGAAATGGAGTG  
CAGACCTCCCCAGATGAAGTCTACGAATACTGCGAAAGCCAAAACCAATTTATGGCAGA  
AATGTACACGTGGCAAGTGAATACAGATAAGTGGAAGCTGCTAATGCCTTGTGTATGGA  
CAAAGGTTGGAATTTCAAGATAATAACTGAAAATTCTCTTAGAACTCATTTTGGATGGAG  
TTGATAATGATTTTTGACTATATCAATGAAGCTCCACAGAAAAGTCAAGAAACCAATGG  
GTAACATTGGGAATAGAATGGAGAGAAGCAAATCCAAGGTGTATCAGGAAAGGATTTT  
GCAAAATCAAAGGGTCTAAATTATGACACGTTTAGACGCACTATGCTTAAATTCGCAAAG  
CAAATTGATATTGCCATAGAAGTAGAAAGTCTAAAAAATAAAGCGAAATTAATGCACAC  
GAAAAGCATTAGTCATGATAAATGATTTTAGAAGTCAATTACTTTCAAGAGCAGCTGAC  
ACTGGATGAGCAAACAAGAATAAATCTCAAAAATGGTTCAATGATACTGTCAAAAAATCA  
ATTCGCGGTCACATGATATCAAACCCGAAACCAGGGAGAATTTACACTTTTGCATATGAT  
GCAAAGCACAAAGATACTCTCGAATATTGGGATAGATTCCCGCTAATTTTATTTACGGCA  
ATAGGCACATCTTCATCAGGCCCTTAATGTAGGGCTTAAACTTGCATTATATTCCTCTAA  
AAGCTAGACAAAGCTTTTTTAGAAGAATTGCTAAAAAATTATGCAAGCACCGAACGACTCT  
CCAATAAAACGCCTCTGAAAATAAATTGGTCAAATGTTAAAGGAATGAATGGTTCCGACG  
TCATGATAAAAGCATACTACCAGCTCATTTAAAAGGGTCAATGCTAGAAGCGAAACCTA  
GCGACTGGGTGAACGTCATTTACATGCCGCTGCAGCAGTTTATGTGAAAGGCAAACGAT  
ACTCTGCCAAAAGGTAAGGGCACGTGCTTAATGGTAATGGCCTGGACTTCGTCTGGGCC  
ATCTTATTTTATAGATTAAGAAACCGTAAATCTCGACGTAACGAGTTTAGCAGGGTGATT  
CCGGTTAAACCCTGTATGCATTCAGTTATATACAGGTTACTGGCTTGCCAGATTCAAGCT  
TGCTTGCATCATTCATTTTTATCCTTTATGGCTTAATAGATATTATAACTAAAAGGATAA  
AAAGATAAGTTTGAGCAAGCTCAAACCTGTAAACAGGTTTTAATTTTTATGGAGTTTTAC  
AAGGGCTTTAAACAATCAATCGAATAATACTAACTGTACGCTTGATATACCGTCATCTGC  
TGGTATTAAGACCATGCTCATGAACGTGCAATCGGCATCAATACCAGGTTTTTCGTATACC  
TCCGACAGAAATGCCATTATATCTCAGTGAACCTGCTAGACAAAACGTGCCCAGTACAAC  
AACCGAATTTGATCCGTTGATTGTTTCGAGTGTTGGTTGATGAGGATTTTGAAGCATATAC  
CGAAATGTACAGATGGATGCTTTCATTGAATGACTATGCTCGGCAAACCTCCCACTATGTG  
GGCAACGGTTAATCAACCGCGAGCAATAACTCTTCATGTTCTTAATAACTCTAAGCGTGA  
TATAATTGCCTCATTCAATTAACATGGTGCTCGGCCATCTGAAATCGGTGAAATAGAGTA  
TTCTTACGCTGAAGATGGTGATGTTTCAGTGACATTTACAATTACCTTTTTCTTCAAATA  
TTTTGAAATTGAAAAGATGGTGAATTAATACGACCTTTGAGAGTATAATAATGATAATT  
GCGTTATCGGCGAAAAGAGATGTGGAAAAGACACAGTAGGCGATCTATTTGAAAAGAA  
GGTGTTCATAAGTACGCTTGAGCAGAACCTATCAAGATTTTCCTGTACCGTGCAATCCGA  
GATGACAATCGGTTGCCAATGTTTGTCCAAGATTTTGATATGAATGATTTTAAACGGTTTT  
GGTTATGACCGTGAAGAATATTTGCCATTTCTAAATCGGATGTTTTTAGAATTATGCGA  
TCTGCATGGATGCTTGTGTGTGATGACCAACAAATCGATTACACGTATGCGCATACTGGA  
ATTATTTCAGAAGCAGTTCTTGGCAATAAGAAAGCATGATCAATTCGTCGACTGATGCAA

ACATTTGGAACCTGATATTGGTTGCTCAATAAAATAAACGTATATGGTTGCAATATCTAGAA  
AATTTCTATTGAATCACGAAAATGTCGTTGTTACTGACTGTCGGCAAGACTATGAAATG  
TCAGAAATGCGAGAATTTGGAGCAGTAGTTGCTCATATTATTCGTCGTAAGTACTGATTGAGTA  
GATACTCATTCCACCGAAGCCGGTCTTCTATCCGGTCTGGTGATCATATAATTGATAAT  
ACTGGAACGCTTGAAGATTTGCATGAATCCGTTAACAATTTCTTAAAAACACTAAACCT  
AAGGATATAACATGAACGCAGAACAAACAAACCTTCGCTTCCCTGAAAATTCGAGTTCTTG  
ATCTGAGCGAGCAACTTGTGCTACTCAACAACAAGCAAAAATAATTTTCAGATGCCCTCA  
CCAACATCGTCCAACCTTTTGGGTGTGACCCCGGCCGATGGTGAAGATAGCATTGCCCTTT  
CTTCTATTGTAGAAGGAGTAGAAGCTCTGGTTCCTTCTCAAGAAGTTGGAGTGGTAGAAG  
AATAATGTTTACACACAGCTTCGTAGGAACATACGTTGCTTGTAATTTAGTGATGAAAC  
GCTGGATTTTATCCAGCGTATTCAATAAGAAGCTTAGATTGCCAAATCCTGTTCCCTCGAGA  
CGAACTTCATTGACTATCGTTTATAGCAGAGTATATGTTCCATTTATCCAGACGTTTC  
GCCCCAACATTTGGCCTATAATTGCTATCTGAGAATTTTGAAGCTCCAGAAAAGAATTC  
TCTTGTCTGGCGTGTGATTCTCCGTACATGCAAAAACGACATGCGTTCGGCCAGATCCT  
TGGCTCGTCAGCTCATGATTTTGACGAATACATTCCTCACATCACGATTGCAAAAAGACAT  
TGGTCTCTTAAGTATGAAGGATCAGACGACTTCCCTATCGTAACAACACACGAATATGT  
GGAAGAATTACGTGAAACGTAAAGCAAAAAGCAATTAATGTTCAAAGCTGCGAAAATTGA  
TGGAATATGAAATTCATGAACAAAACATTGTTTCAAGAAATGAGAAGTACTGCAAACTTAAGC  
AAAATAAAATGCAAAAAGCAAGTAATTCTGTCCACTGGTTCTACCCTGACTGTATCCGGCC  
GTGCTGTTTCTGTTGAAGTAGGCCCTGTTTTACTCCCGTGTCAAAGGTGAACGTGAAA  
AACCGTAGTCGTTGCTGAAGTTCGCAGTGAAGTGGTTGAAGTTATTGTTTATGAGCCTC  
GCCTCCTGGGTGAAGCTGTGCAAGCTGCTTAATAATTTCAAATGCCCTCTTCGGAGGGC  
ATTTTTGTAAGTATAGGAGAATTTATGCAAATCTTTTTGTTTTATTTGGTGCTCACATAT  
TTGGCAGCATGTACAGTTTTGGCTATTAACGTGATAAAGTATACAACATCAACCTTCAGA  
TGGAATTTTGTCTGGACAAGTGGCCAAAATTGCGGATTTGTATTGACAAGTGCATATGC  
AGCTACATTATTCCGTTTCGCGTTTATGCAGATACAATTGGAAAATAAATGACAGATCC  
GCAAGAAGAATTTTACATACGAAAACATCCGAATTAGTTAAAGTCTGGAGTGAATATGA  
CATAAATGGCAGTTATGGAGGAAACAACAATGAAGAAGTTTGTGTCATCATGTTTCCATC  
AGATATGCCGCCAGATGTTTATTCTGCTCATATTAGCATCATGGTTATGAAACATATGAA  
AGAGCATACTGGCTTAGATGAAGACGATCTTGATGGTCTTATTGGATGGGACTACTTTAC  
GCCTTTGGAATTGTGATGGAAAACGTTGTCATTGCAAGAGTTGTCAGAACAATTGAGTTC  
GATTAACATAAAGCATAGACTTGAGGTATAGAAAATGAAATTTGCACCCGGAAGTGTAAAT  
TCCAGAAGGATACGTCATTAATAAATCACTTCCTGGGAAATTGATGGTGTGATTACGATGA  
TGTCATTCATACCGGCAGGCCAATGAAAGAGATCGAATTCCTTTGAGAAAATCAAACCGAT  
TTTCAGTTCATACCACGACGAAACAATAAAGGCTATGGCAACAAGATTATAATCCTGG  
GATGGCCGCCGATTTGTTTGTGAGATTTTTGTAAAAAATATGCATTCGTTTTTGTCAATTC  
ACGCTATCTAGGGTTGACACCAGATATGTGTGGTCAACTTGATGGCGATTTATACAAATT  
CATTCTGCCATGACAATTTCTACAAAATGGTGAAGAAAACATCACCGGTTATGCCAAC  
AGTATGACTACGATTTTATTTGTGTGTTTCGAGTCTATTGAAATCGAGTATAACCAGTCTG  
AATACGTTGTTCCAAAATACACCTCGTTAAAATTAAGGTTATCTAATGCAATTTTTAT  
TTGAATTTTGCAGCTAGCGTTCGATACACTGCTGTAGCACTGATAGTATATGTTTTGC  
TACATGGTTATGCATTCCTTTGACGAATGGCGGAAAGAAAAGCCCGACTGAAAGTTACCAG  
CAAAAAGCCTATCAACCATGCAGATTTATGGAGCCATTGCAGCAGCATGGCTACCTGTAG  
CTCTTTTCTTGCTATGGAAGCTAATTGCATTCATTTACTTCAAAGTAGTAGTCGATAAAA  
TTTACAAAAGTAGTTTACATTGATGGAAGTATGTTTTATGATAGTCCCATCAAATCAAC  
ACGGAGTAATTTAAATGAAAATCTATCACCCGCAACATATCGCGAAAGTTAACGGTATTA  
CAAAGTTTGACATGATTCGCGGCCATAAAAACCTCAAGAATTTCAATTGCTATATCATGTTTA  
AAGATGGCAAGGTCATTGATTGCAGCTTCAAAAATGTCACGGCACAATTCCGCAATATGG  
AAAAGATTGCTCGTGAAGTAGCATCAGAACATCAATACACTCTGTGAGAAAACAACACAGC  
TCTGACAATGGGTTGACTATAATACCCATCGAAATTGGCCGTGGAGGTAATCAATAACGC  
GTAAGTACTGAGATACTAATACCGAAGGGGGTAAAATGAAAAAAATTTGTTTGGTTTTAGCTCTT  
GCTTTTGCATCTTCTTATGCGATCGCAGATTCAACCAATTTGATAATTGGTTGTCTTTTC  
AAAACATTACGAAAATGATGAAATGATTGAAAAACATCCGGCGATAGGGGTCAAATTTGA  
CAACTTTTCAATAGTATATACGTCGAAAAACTGGATTAATAAACCTTCGGTTCAGTTGTC  
TTATTCTGACACATTTTACACTTATGGAATGTTTGTGATATTGGTTATCGCGTTCGGTTATAT  
GACCGGTTATCGATATGGAACAAAATATGCCAATAACCGATGGTATAATGGTGTGATT  
GGGTGCCGGGATAGCCCCGCTCGCCGCCATTGCTATTTTCGGTAGCTACCCCTATTCCGAG

CGTCAAATTTGTTACAAGCGTAACACCAGTTATTACGATGTTCCGGATTAAGAGTGAAC  
TTGGTAAATTTGAGACCGCAAATGAACTATTTACCCGACTGGTAAAGAAAAACGTT  
AAATCGTGAAACGCCTGAAAGAGTGGCTGTACGCTAATTTTGATTCGTGGGATGCTGAT  
ATATTAGATATTCCATTTAACTCGACTGTACATTGGGGTCTGTGCCATTTGATCAAGAT  
ATCTACAGTGGAAAAGAAACGTTTGTGGAAATTTCTGCAAAACCCTTTTAGAAAAGGAA  
CTCGAGAGCCGAGCTGAGGAGATTTGAATTGAAACCGGCGTTGTAAAACCTGCCCGCTAA  
TCCAAAAGAATGGTTCATTTCTTATATGTGCAATTCGGGTGAACAGCATCTCATGCAAGC  
GTGGCATGATGAAGGCATCGAAGGCGACGGCGTGCATTTTCAGATATCCATATTATTCTCG  
AAGGCGTGGCGAAGAAGTTGACGAGACCGCTGATCTCGTAGTTAGTGAGGATAAGTTACT  
TATTGCGAAACATTTTAAAGTTATCGCTGAAATCGAGCAAAAATTCACATACCAGGCACC  
CATAAATAGATATAACCAAATAACAAAAGGTTCGAGCGCGATGCGGTAAGGAAGCGAAGCGG  
TTACATCCTTAATACTGGACCGAGTAAGTTAGGGCGGATGGACTGGGCTATCGGTAAACG  
GGGAAGCATAGACCCGAGCACCTGGCGTTCTTATGCAAGTATGGTGGGATTGGTATACAC  
TGGAGGCTTAAAACCTCCC GCCTTCGGGATTGTGGGTTTCGAGTCCC ACTACTTGCACCAA  
ATTCAAATTTCTAAAGCATATAGTTTACACGCTTTGGAAATAAGATATTATTA ACTTATC  
GAATGAAAACACGCATTCAGTCTTGAATGGGATAAATGGTGAAAAGCAATGGTTTTCTTG  
GAGCAAGCCTTAAAGTGGACAGA ACTCTCATCCTAGTGACGCAGGAAGTGT TTTGATTTGA  
AAAGAATTTTGGAAGATTGTCCCGAGTTGATTTAAGGCACCGGTCTTGAAAACCGGCGAT  
CGTAGGAATACGGTCCATCCGTTTCAATCGGATATCTTGCTCCAATTGAGGTGCTGTGA  
GCCGAGCGGCTTAAAGGCGGTCTAATGCAGGACATACGAAAGCGTATCGTAGGTTTCAAT  
CCTACCGGCATCCATTAATTATGAGGCATATTGTTTCAGAGTTTCTGGAAATGAGAGGTTA  
TAGTCTCATAGATTAACAAGTTGATTTTGGGGTGATGTAGAATAACGGTTCATGCGGCC  
GGCTGTTAACCGGTGTGGAACTCTACGTTGGTTCGACTCCAACCATCACCGCCAAAATC  
AATTTTCAGGGAACGTTTCGGGTAAATGGTATCCCAAGCGGCTGTAACCCGCTCGCCTCTGGC  
ATTCTTGGTTCGAGTCCAAGGCGTTACACCAATTTAACATGGGAAATATATTTTATGAAG  
CAAGATCTATTTGATAGATACGGATCCTTCTTATTGAAAGAAGGAATACACGGTGATTTT  
GAAATAACTGATGATTTAGTTCATTCGATATTTTCAATCATATCTATCAGACGACTAAA  
TAGCCATTTATACGAAAACGGCAGCTGGGTAAAGAGCATTTCGCGCCAGATGAATTACG  
TTAGAGTATCTTCTCAATTTGTAATATTATCGATCTGGAAAAGCGTCCGGGAATAAATG  
AAGGTTTTGTTTATCTGATAACA ACTCCAGCTTGGCCACATCATTTTAAAATTGGAAGTA  
CAATATCAATACAATATCGATTATCATCGTACCATAGTTATTCAACGGATCGCGATATTG  
ATATGGTCAATTATTTCTTATCTAAATCTAGTTTTCCGGATGAAAAAGCCTTACACAATT  
TGTATGAAGCTGATGACGAGTGGATTTATGACAAAACGGGAGATAAAAATGAAAGAAGCTC  
TGAAATTCTTCAATCATAAGCGCAAAAATAGATAAACAAGTTTTACGAGCATCTCTAACTC  
AATTGGTAGAGTAGCGGACCTTTAATCCGTCAAGTCTGAGTTCGAGTCTCAGGGGATGCA  
CCAAATAACGGTGAGGTATTGCGGTAAAGAGCCGCCCGGCATGTAATCCGGTACCTTA  
CGAGTCTTGTAGAAATCGAAACCAACTCTCTCCACCAGTTTTGCAGTAAAGAAGTTGTAA  
TGCGTTGTCATCAGGA ACTTATGCGGAGTAACGTTTCGAACCATAACGGAATGATTCCAGG  
GTCCTATAATTTGAGCGGCGAGTGTGTGGCCGAGCACCCACCTTTTAGGGCGCCGGAAGA  
CGGGTTCGAGTTCGTAACCGCTCACTGTAATTAGTTTTCAAGTAATCTTTGGTGTGACCTT  
AGTAGAAATGGTAGCTATCCTGGAAGTGACCCAGGGTTTACGGGTTTCAACCCCGTAGGT  
CACCCCAATGATTATTTTCCC GGTAAGGTGTTTATGGATACATGCTAGTCTTCCAAGCT  
TGAGTAGACCGGTTTCGATAGCGGCTACCCGCTCCAAACTCAAGTCACAGGGCTCTAGATT  
CCTAGTAAGTTTTCGCACCCCTGGTTGATGCACTGTCCATTATTGCGCCGTGGCTGGAGCC  
CGCGAGTTGGACAACCGGATCGTCTCCGGCACTTAGATGACCGGCTTTAACAAAGAGAAAT  
CGGGAGACGTCCCGTAAAATCCTCGTACAAA ACTTCTGTAGTCACTCCCGTCAATTTGCG  
CGGTGAAACGAGGAAGTATAGACGGGTAACGAATTC AATCTCAGCGCAGGCAAGTGGTAT  
GTCGTTCCGTTTGGGACGGAATTTTCGGGTGTTTCGATTCACCCCGCTGAGACCAAATTAC  
GTAAGCGGATACTTGGTTGAAAACAAGTTCGTAAAGCCGTGGAATGTGGTAACATCCTCT  
CCTGGCACTATCCAGTGATGCGGTTATCCAGAACGGCGCAACCTGAAGAATTGAGTCAC  
ATCCATAAGGCCCTGACTCCAATTCCTTCAAACACTCTTGT TTTATGTGGCGGTTCGAAACAG  
CCCCGCGTTAAAGACTGAAATCTCGATGTCCCGAGCTGCAGCGCTAGGGAAGAGTGTTCG  
AAGAATTGAACTAACTCTGAGGAACATATTATGAATGTTGTCAA AATTACACCCACGCGC  
GATGCTGTTGTGATCAAACCAATTCATTGGTTCACATGAATTC TGCTATGGCCCATGT  
GATGCTGGTGTGATTGCTAAATTTGCGGTTTGTCAA AAAAGAATGGGAAATCGAT  
AGCAGCTGTATTACCTCCGTCGTTAAGACTTGTCTGAAATTGAAGTTGACACAAACAAA  
ATTTGCGTGACCTGACCGTTGGTGAATTGGTTCACATTTTAAAGCAGATTTGTTTTCCAT

ACTCCAATTGATAGCATTTCGATTGAAAAGTTCATCTAATCTTGTATTTGCTTCATCTAAC  
GGAGATGGCGAAAATATACATGATTAATTGCCGGTTTAGCTCATCTGGTAGAGCTCAGCC  
TTTGTAAACGCTGGGGCGGTCCGTTTCGAGTCGGACAATCGGCGCCAAATTTTACATGAGG  
AAAATATTATGTTATTGGCTTATCAAGTTATTGCTTTTATCTTCTTTTTTTACTCTTGCT  
TGGGCGATTATAAGCGATATTAGGATCCCCTTCCGAAATTGCGGGTAATTTGATTGGCT  
CTGCTTTTGCAGGTGGTTTGTGGCCATTGACGGTACTTATCCATATTTTTTGCATCGCAA  
ACCGCAACCGCTAAATAAATACAAAGGAACGGACTTCTTCGGACCCGTTTCGTTAAGTAAA  
AGGGAAGACCATCTGGATATGACGAGGCCGTTCGGACGGTATCATATCTTGCTGGCCCTTG  
GCCTCCGACGAGGTTTTGTCTGGAAATGGTGCGCCAGATCGTTTCAATATGACATTGGT  
GTTAGCGGTAGCATGCCGGTCTCCCAAACCGTTCGGGCCAGGGTTCGAATCCTTGATGTCA  
TACCAATAGTGGATTTCGCTCAGTAGGTAGAGCACTCGACCGATAATCGAGTGCGCATCGG  
TTTGATCCCAATATCCACTACCAAATTTTTAGGAGAAGTGGATGAGCGGCTGAAATCGCT  
TCCCTGCTAAGAAAGTAAACCGAAAGGTTTCGAGAGTTCAAATCTCTCCTTCTCCGCCAA  
ATGTATCCTAACGCATATTGTTTCAAATTTCTCAATGAGTGATCTTATTAACCTCATACCA  
AAACAGAGTTTAGAGCGGAGCCATAGGTTATTTGGTTAAAATATTCCCCTGGCACGGGAC  
AGCACCGAGTTCGATCCTCGGTGGATCCGCTCTAAATTTTGATGCGATGTAGAGGAGAGT  
TCGTCTCGTCGGGCTCATATCCCGAAAATCAGCGGTTTCGAATCCGCTCATCGCTTCCAA  
CTTCAATCGCTTATTGAACGTGGGAAAATAGCAAAATCTGGGAAAGGGTTCGCGAACCGGA  
ACCTTGAAGTAGCTTTCTAAGTACTTGTGTCTGGCAGTTCACACATACGTATATTTGTG  
ATGGGTTTCGAGACCCTAACAAAGCGCCGAATAACAACGCCGGCGACCGATCGAATGATCG  
TTATCGGCTTTTTTCATCTGACGGCCCTGTAGCTAGACGGTTCGAAGCAGGCGGCTCATAAC  
CGCTCGTAGTAGGTTTCGATTCTACCAGGGTCACCAATTTGGGTTCTTCATTTAATGGGA  
AGACCGTAGGTTGCTTTGCATCCTGATGATGCTATTTTCGATACTAGCAGAACCCACCAAT  
TTGAGGAAAATACCATGGATATCGGATCCGGCGCGCCTTGGCCAACGTGTGCATTGAGTA  
ATTTTGCTCCGCATGAATTCGTTATCGATGGGATTAATGTTTCTCAATAGAAGGATTCC  
TTCAGTCTCTCAAATTCAACTCGCCTGAAATGCAAGAACACGTTTGCCTCTGGTTGGTA  
AAGCCGCCAAATTTACAGGCAAAAAGAAAAACTGGTGGACAGATCAAACCTCTGTACTGGA  
AAGGTACACCGATGCGGCGGCAAAGCGATGCTTATTCTGATTTAATCTGCCGTGCGTACG  
ACGAAATTGCGAAGAATTCGGGATTTCAACGAGCAATCCTAGCCACCCGGAATTTCTCGT  
AAACCCATTCAATGGGTAAAAGTAAAAGAAATGAAACAGTGGGAACTGAACAAGAATTTT  
GTTCAAATCTGTATCGTATTCGATATAAACTCCAAGCCGCTTGATTGCGGCTTTTTAGTC  
ATATGGTCTCTTAGCTCAGTTGGATAGAGCTGCGGCCTTCTAAGCCCCGGGTCATTGGTT  
CAAATCCAATAGGGACTGCCAAAGTAAAGGTGATGTCATGGCGATGATGCACGAAAAATC  
TCATGCCCGAGAGGGAAGGGGCAGTGGAAATGCACGAAGCGAGAATTGGTATAAATCTCC  
ATTGTGAAAAAACACCGGCCCAAATAGAAAACCCGGAGTAGTAAAAGATTAAATTCAGA  
AGATCAATTAACCTGATGAACAGAAGCTTCGCAGGCGTCAACAGGAATTGCTCAGATCAAT  
TGATTAAGGTAATTAATATGTCTCATTGCAACGTATGAAAGATGAGCTGAGTGAATTGG  
TTGTTGACTGCATAAGCTCAACGACTTCATTAACATGTCTGATATTTACAAGACTCTTG  
ATCCTGATGAGAAGTTTCTCATGGAACAACAGTATATCGCGATGGACAGGTATTACGATA  
TGCTAAAACGGCGAATTAAGCGTCAATAATAATTAGGGCTCCTTCGGGAGCCCTTTTCGT  
ATTCTCTCGACGAGGTTTCAACATGAACAAATATTTTCGATTATAACTCTTTCTTCGTAAA  
TGCAATGCGTGTGTTTTGGTCACTTACCCACCGGGGTGCGAGATGGAGGTATTGAAAGA  
TCGATCAGATTTTTTAAAATCGAATAGAACGATATCCATAAATGTTGGTTCGGCAAACCGG  
TAAAACAATTTCAATTTATCAGGCTTGGTACGAATGAAGCAATCATGCCAAAGTCGCAAT  
GGTAGTCATGAACACCCAAAATAAGAAAATGACCAAAAAGTATGGGACCTAAATTCGATAT  
TCTGACTTTTTAATGATATGAAGAGACAATTGGAGATTCTGGATTTAGACAAAGCTCAAT  
TCATCATGGTTGACGAGAGCGAGTTTATTCTATTTGATGAGAACAGGGTGCACGATTTTT  
ACAAATGGGCAAAATTAGTAAATGCCGAATTTGTACTAAAACTTGATGCAGTCTGTAA  
ATTATTCAAGCCTAGTGTTATTATTGCCATATCAAATAAACACACATTACAAGCATTAAA  
AATGTCTAAAGCTACTCACACTATGGATTTTCGGTTCTGGTAAAATCGTTGCTCAGAATTC  
TGGTCATTATTTCAATGTTATTGAGAGTCATGACCCAATGATTCCCACAAATACCAATT  
TCCAGTCAATGACACTTTGGTTCTTGAAGCAAACTAATCGAATTGGAGTAAGCGGCCTT  
AACGCTTATCTTTCACTATGCTAAAAGACATAATGACTGAGCACTATAATCGCGATATTG  
CAGATGACCCAATCAAAGTTGTTAAACCATCGGGCGTAATTTATACGGCCAGTTTGATGC  
AAAATTATCTTACCATCAACTACCTGGAGGAGCGCTGATCGTAGCAGACAGAGATATTG  
CACAGGACATATGGCATGCATGTGATAAACCGAAAATGTTAGATACTTAGTCATTTTGCA  
AAGATAAAATGCATTTTGAGCTTTTGCATAGGCCTCCAGTAATCATATTTGTAACCTTCTG

CCAATGTAGAGAGCATAACGCACTGCTTTATTTTCAAAGACTGGGTTTTCAAATTCTACTG  
AATTTACGGCGTATTACCTCGAACAAATGCGACGGTTATGTCCAAAAATTGAGAAGTCTTA  
TGGGACTTAAAATGTACGAACTTTACAAAACCCTTCAGATGTATCAAAGCAAAGAAGGTT  
GGATTATCAAATAGGCTGAGTTTGCCAAATTGGCAGATGAGCAAAGGCATGCTTTTTGGC  
CATGGGAAGAACCAGTTGTTGATAATGATGCTCAAGATCTGCGCACCAAATTGACACCTG  
GCGAATTGAACGGTCTTACGACCGTTCTTAAACCGTTTACAATTTACGAGCGCAAAGTCG  
GTGAAGATTTTTGGTCAGCACGAATCGCTCGAACATTCGGTCGCCCTGAAATCAATCGCA  
TGGCAACTCTATTTGTCGCCGTAGAAGGTAACCTCGCATGCACCTTTTTACAATAAAGTTA  
ATGAAGTTCTTTATCTGGATGACGAAGCTTGCTACACTTCTTGGAACGAGAGCGAAGAGT  
TATCTCGTCGCATTCAGTCTGTAGGTAATCGGTAGCGGACCCCGATGATGCCAAATCTT  
TTGCAGCTTACACTTTCATTGAAGGTGCTGTACTTTATTCCAGCTTTGCACTCCTCAAAC  
ACTTCCAAGCCCAGGAATGTGGCAAAGACTTGATGCGAAATATTTGCCGTGGTGTGACC  
TTTCAGTTGCAGATGAACATCACCCTCAATTGGTGGAGCAATATTGTTCCAAACACTTT  
GCCGTAATAATGAAAGAAAAATATGGTGAAGATCTCCGGGCAAACCTGAAAAATGGCATT  
TCAACATGGCATATCAAGTGTGTTGATCTCGAGTCTGTGATCATTGATCTCGTTTTCGCTG  
AACCAATTGATGGTATAACTGCTGACGAGCTACGAGTTTTTGTCCAATCTCGAATTAATC  
ATTGCCCTAGAAAATCTTGGTTATGAGCCATTTTCGAAATCGAAAATAACCCTATCGCTG  
ATTGGTTCTATCGCACCATTAATGCCAAGAAATCCATGATTGCTTCACTGGCTCAGGTT  
CGGAATACAACATCATTGGAACCAAGAAGGTTTCTCTGATGGCTGGTAAAATAATTCTG  
CCCTGGTACACCAGGGCAATCTTTTTAAAATCAAGGCGCTTTAACGTCTAAAATTTACA  
ATTCGAATCTTTGTCAGCCGAACGCAAACATATGCAGTCAATTGGCGAAATGCCACAGTG  
GTTTACAACGCAGGGCGATTTGATGTTCTGAAAAATTATAAGTACAAAGGAGAAACCTT  
TCGTGGTGCATTCCGGCGAGTCGCTTCGACACTTGCAAAGCAGGATATCCGGCCAGAAGC  
TGAAGAGCGCTATTTGACCTTCTCTGGTCCGGTAAGCTCACGATGGCTACCCAGTTTG  
CTGTAACACCGGCACAGATCGTGGAGTGCCTGTTTCCTGCGCAGTAAATTCTGTGGGGGA  
CAGTGTCTTGAGTTCTACGAAGGCGAAACGGAAGTCGCAATGCTCGCTAAAACGGTTT  
CGGAACTGCGTCATATCTTGGACACATCCGACCTCGTGGATCCGATATCTCGACCAGCCA  
CAACAAAGCATAACGACTCGTTCCTGTATTTGACAACCTCTTTAACACCAAAAACAAAGG  
TGCAACTGCTTGCCGACGTGGTGAATCGGCCGGTTACGTTGACTTCTCGCATGGTGATT  
CTGGGAACTTCAGGGGTATGTGCTGAAAAACACGGCTTCTGCGCACGTTGGTTGGGTATT  
TGAGAAAGAAGATTACGAAAAGCTTCTGGCTCGCGATCCTGAATATATGGCGCGCTGGAA  
TGAGCTGCTTTATATGCGCGCCCGTACTGGTAAGGGTTATATGTGGAAGAACTGGATCGC  
TAACGATCTGGCTCCACAAGCACTCAAAAATTCAGGTATCCGTATTCGATCAAGCCAGCT  
GTGCACCGAGATCGCATTGCCATCTGACGATATGCATACTTTTACCTGTATCCTGAGCTC  
ATTGAATTTGGCTCGTTGGGACGAAATTAGTGCTGAAGATATCAAATGGGCTGTTCTGTT  
CCTTGATTCGGTACGCTCAGAATTCTTTGAAAAAGCGAAAAAACTCCCCTATGACACTCT  
TCATAAAACTATCAGATTTACCGAAAAAGCACGTGCGCTCGGTCTTGGTACTTTGGGTTT  
CCATACCTATCTCCAGATGAATGATTCCGCGTTCGAATCTGGCGCCGCCACATTCTGAA  
CAATAGCATTATTCGCAAATCAAGGTTTATGCAGAAGCTGCTTCTCGGGAATTAGCAGA  
AGAGCATAGTGAACCAGAACGGTGTGTTGGAACAGGTATGCGTAATGCTACTTTGATCAC  
TATTGCTCCATATATGAGTTCTGCTCTATTGGCTGGTGGTGTATCACAGGGTGTGAGCC  
TCTCGTATGTAACAGCGTCATCCAACAGTCAAATGCTGGTGACTTTGTTTCGCTCGAACCC  
GGTATTGGCTAAAGTATTGTCCGACCGTCTTTCTGATAAAGAAATCAAAGACCTCATGGA  
CAATATTGTCACCTATCATAATGGTTCTGTTCAACATCTGGATATCTTGACAGACCATGA  
GAAAATGGTGTTCAAAACAGCTTATGAGATTGACCAACGTGAAATCATAACGTCTTGCTT  
AGCTTGTCACCGGCACATTGACCAAGCGCAATCAATCAATTTGTTCTTCGCTGCTGATGA  
AAAAGAATCAGTCGTTGCGTCCGTTTATAGAGCGGTTATGGATGACCTCGTCTGAAATC  
TCTTTATTATTTGCGTTCGAGCATGGAGTGAAAGCTTCAACTGGCGAGGGCGGGGTGTTT  
AGCATGCCAGGGCTACTTGCAAGGGGCGAAAGCCCTTTTATAGAACCCTATGTGACAAAA  
TTTGAAACATCATCAGGTCAGAAAATTTATTGTGGTATGCATAAAAGTAGGCATGCTAAT  
CCTTTATCTGACCCCTATTGTGGGTCTGGACTGATTTTAAGAAATGCCATATCAAATAC  
GGTGTCTTGTATAAGATCGGTTGAATGGTTTGAACATTCAACCGAAGTAGAGATGATT  
GAAGCGGAAATTTTGTTAATTTCAAGTATGGTTGATAACCCTAATTGTAATAATATCGCA  
TACGGTGGTTTTGATGGTAATGCTTTACGGTATGCTTCCGATGAGAGAAGAGAAGCATT  
CGCGAAACATCACGCCAAAAAATGATCAAGCGATATAAAGACAGTGATGAAATTA AAAAG  
CACAGCAACCGCATGCGAGTTGCATGTAATCGACCGGAAGAACGGCAAACCGAGCCGAG  
CGACATGCTGAACTTTATAGCCGCCCTGGTTATTCCGAGCGTATGTCCGCAATACAAAA



GAAACGCAAAGCCGCCCTGACGTCAAGGCCAAAAATGCTGAAGGTGTATGAGCGGCGAGA  
AACGCAATAAAATTCTTAAAACAAATTAATATACCGGACGTAATAACTATTATAGATGGT  
CGATTTGTTGAAAAATTCAAAGTTGCGGATGAGTTGTCAACAAAATATGATATCAAATAA  
ACCAAATAAATTTGAGAATTTTCGACCTGATATTAATTCATTGCTGGGATAAATGTGGCT  
CTACTAATTTTATGCGCAATTTTGTCTATGCCAATCCGCTTTTTGGATTTGGGTATATA  
ATTGACGTATTACTTTCAACTGTGATTTCTTTCTTTGTTTTGGAAGGAATTACTGCAATA  
GCTTATTACACAGGGAAAATAAATCATTATCTTTTCGGCGCTGACTGGTGTGCAAACCTG  
CAAACCTCGTAAAACCTATGCTTGCCAATGTTGACTATAAATATATTGATGTCGATTCTGA  
TGAAGGCATAGCTCTAACAGCAAATAACGCAATTCGAGGTTTGCCTACAATGATTAATGT  
AGAAACAACCGATCGTTTTACGGGAGTTCGGATAAACGTTGCGCAATTGAAGCAAAAAAT  
GGGAATTTAACAATGGGCTGTTTCGTAGCCCATTTTCATTTTCATTTTATGGTGTACATCG  
CGAAAAATCCATGTTAGAATAAGTTTGAATCAATAACATATGGCGTATTATCATGAATCG  
CTACAAGCTTCGGAGAATCCTCGAAGCAGAGTTTAAAGAAATCAACAGAAAAATCGAAGA  
AGCTCGGTTGGCTTCTGGTCATGGCCACCGTTTTTCATCTGGAATACACTTATCATTTTCAT  
AGATCACCTTTTGCTTTGCAATATCCATATCGATGATACGCTGAGCTTGATCAAAGGTTT  
GAAGGAAAAAATACACGAAGTTGACGCATACATGTCTCTTCCGTATCCTCCGCATCTTGA  
CGAAAAACGAGTCGAAGGTGTAGAATATCGACCAATTCGCTTAGAAATCACTAATGGATC  
ACTTTCGATTGGAATTACTCCTACCAAATTCGGCCATCATCAGAATACAGTTCTTCTTT  
GACATGTCGAATGGCAATATTCAATTCACGACGTTTAACTTCAAACGTAACACTACAAAAGT  
AATTAATAATGGAGGGGTTATGAGGCTATTGATGATTCTCATGATCGTATTTGCCACACAT  
GTTTATGCCGGTCCGTCGGTAACAGACTTTTCGGGACACTCAAATTTACAATGTGTCGTAT  
GCTTACAACATATGGAAAGGCTTATGACTTGACGGGAGAATTGCGGAGATGTCAATTATCCG  
AATTTCTGGAACGATCGTCATCTTGGCACATTATTCGCTGCTATCGCATGGGAAGAATCC  
TCAGCTGGAATAAAACACTGGTGGAAATATAAAGGGTCATCACGCGTATGGGATGTTTCAA  
AATCTTTACACAACGGTTACATCTAAACTCGACAATAGAGGAATTCCGTACAGACATTGG  
TATCTGAAAAGGAATTTAGAGCGTAAAAGTTCTTCTGCCGAATGGGCTATGGATGAACTC  
TCATACTGTCTCAAGGTTTCGAAAAGGTAAAATTCGGATTGCTCTGGCTTCAAACAACGCA  
GGTTGGAATTACCATGCTGGTTTGAGATATGGCGATCGTGTTTTGGCAAAAAATCAAGAG  
CTCAAACAACGGACTTTATTTACAAATAAATGTTTACAGTTTTGAGGTTTTGGGATACT  
ATAACCTCAGTTAAACAAACTAATCAAATGTGGAGTAAGTTATGGAATTCATCATCAATA  
AGTTCGGTATCGCGTTTATTGTGGCCGTTGAAGTTGATCGTGCTAAATTGGAAGGTTGCC  
GATTTTTGAGTTCACTTTACGATATGAACGTAGCGATGCCAGAAGAATCTTTCGGATGCG  
AGTTTTTGATTACTCGCGATTCCCACGATTTCGCAAATTTTGATTACCCCCGATTCCCGAA  
TTATGATTCACACCGATTTTAACTCGTCTGAAGTCCGCATTGAAACTGAAAGATTCATTC  
GGGAATACTGTTTTGTGAGGTAAAGCGCAATATCATCTTTTGTTATTGCTGGGCGTCCATA  
CGTGGACGCCGTAGATATCGAATTCATCGTGTCCATTACAGCAATGGAAATGACCGTTA  
GGGCTTAGCTCATTCCGGGTGGAGTCGGCTTACAGAGTTATGAGTTCAATGATGTTCTCGC  
ACACGAGGGTGAAATATGAAAAAGCCAATAGCAGCTGTTTTAGCACTGTCATTTTATGGT  
TGCGGCGCGGCCGCTCCTGCAGTAGCAAACATGAAGGAAATGTTCTGGTTTCCTGAAAAA  
TCCGGAGTAATCAAAGAATTTACCGATGAAAATGGCACGTATGAATCTGCTCAGTCCGTT  
TCATGTGATATGCAATACGCACAGAAACGTGACGATTGCCTTGGGTTTTATTTTCAATAGT  
GATTATTGGATAAATTGACTCTGCACGATCTGACGACAGTATTTTATCTTGGTCTGAGGGA  
GTTATGATTAGCTTCGACGGAGTTGTTCAAATCGTTGACTATGTTTCGGACTGGCTCCGCT  
ATCGATAATTGGCGTAAAGATAATCCCGATTTCAACCCGATAGGCAAAGTTATGTCAATT  
ACTACACCTTACGGCTAAGGAGAGTTACATTATGATCGTTAACACAGTCAAAGGTAATG  
CAATCAGTCTGTTTCTGAACGGCGAATATGACATGTTTCCGCATGGTTGTAACATTTTAA  
ACCGAATGGGTTCTGGCATTGCTAAAGAAGTTTCGTGAACGCCTCCCTGAGCTTTGGGAAC  
TCGATCAAAGACAGTTGAAGGTGATCGTTCCAAGCTTGGAACGATCTCGGCCACAAGTT  
ACCCCTATGCTGGCCTTGCTTTAACTTCTATACTGAGGCGACTTACTGGGACCCTAGAG  
ATATGTTGTCCTATGATGCGGCCCGTTCATGCATTGAAACCTTGAACACTATGTGTCAAG  
AAACTGTCGATTTTGGCCTCGGTAAGCCGACGATGTGTATTCTAAAATAGGTGCTGGTC  
TTGCCCGAGGTGATTGGGGCAAATTTGAAGCAATCCTCAACGAAGTAACTCCAAATATTG  
ATATTACAGTGGTGGAAATTCGAGGGCAGTCGGTAAATGGCAACAATGTGGTCCGGTGATG  
AACCGTATCTTGGAAATGTGTAATAGTCGAATTAATTGGTGAAGAATATAAAGGTATTATA  
ATCCATTCATATCGTGACGCCAGCGATGTAGTTCTCGAGAATTACGAGTTGATGTACCAC  
GGCCGAGTGTTTATTGGTCAAACCTCAATGGTGCCGTAATGAAATTTTCAAAGAATTTT  
TGATTGAACTCATAGTCGAATCGCTGGAAAACATCCAGGAGAAGGTCTTCCATCAGAAC

TGTGTGGCAAATATGAAACTTTAGTAAACGAAGTTGTCGACCGCGGGCGCTGGACTGTTT  
ATTACGACTTTGTTTTCTCCTTTGAAAAGGATGGAGTAAAGCGCTATTTTCAGCGAACCAT  
ATGAAGTCGGTGCAACAGAAGAGCAGGAAAGCCCGATTTGGGAAAGTGAACCTGATCTGA  
TGGATGTCAGTGTAGTCGAACCGTATGAAAGTACTACAATTGCATACAAGTGGAAAGAACA  
ATGGCTAAAGAAATAGAACGTAAATGGCTTGTTAAATTCGTTCCAACCAAGAATTTGGAG  
CAGTTTCCTCATAAGCAAATTGCACAATTCTACTTTGATGGTAAACGCTCTCGAAGTGTG  
ATGGAAACTGGCGTTCGTGAAAAATTCATAGAAACAGTGAAAACCTGGCGCCGGTTAGGTT  
CGCGAAGAGGTCGAAAACGAAATCGACAAGAATACTGCATGGGAAGCCCATGATGCTGCC  
GGTTTACCAACTTGTGTTGTTAAAACTCTGTACGAAATCCCGCATGATCATTGGTTAAC  
GATCGAACTCGATATGTTTGCTTGTGGTGAACAGTATACCGAGATCGAATTTGATAACGT  
CGAAGATGCCAATGCATTCATTCCACCGTGCTGGTTCGGCGAAGAAGTTACCAATGATGA  
ATATCACACCAACTATGCGCTTTTCAAGCGGCTCAACGAGGTCTAAACGGCCAGTCTTTA  
TTTTCACTATGCTGCAATGACTTCTGGCAAAGCACACATTTGCTTCAAGTAGCACACAA  
TTACGTAGAACGTGACATGCGTACTACTATCATAAAGCCTGCGATTGATACGCGTCATGG  
TTCAACCGTATCCTTAAGAATTGGTATATCGCGGCCTGCTATTATGGTGAGGCAAAGCGA  
TAGTTTGACCGCCTTAATCAGCAAAGAGCATAATGGGCAGCACATTAGTTGTGTTTAGGT  
AGATGAAGCGCAATTTCTGCTTCCAGAACAAGTCAGCCAGCTTGC GGCTGTTGTAGCCGA  
ACTGGACATTCCTGTAAAGTGCTATGGATTGTTGTCTGATTCAAATGGTAACATATTACC  
GGCAGCAGAACGACTGATGGTTTTGGCAGAAGAAAAGGTTGAGCACAAAACCATATGTTG  
GTGTGGCACCAAAGCTACAATGAACATGAGAATCGATGAGAATGGCAAGAAAGTGTGGGG  
GCCAAGTGTTCGATAGGTGGCAATGATCGCTATATTTCAAGTATGTCGTTAACACTGGAC  
ATTGGGAAAATCTTCAAAAACAATTACAAAAGATGTTTACAACAAGGTTGTTTTGTATAG  
AATATCCTCAAATTAACGAAATGAGAAAGTCATTATGAAAAGTTCTGATGTTTTTTGCC  
AAGTTCAACTTGCTCAAGCTTTTGAACCTGAAGAGTTGAAACGCAGATTAGCCCCGGTTG  
GAAAATTCATTGCCGACGATCTGATTTCAAACGAGTTTTTACAATCACCTTCGCGGGCG  
ATAAATTCCTGGAATTTACACCAGAGATGTCGTCGACTATCTAAGAACTCTTGGATATG  
AGACTCGCACCGAATCTAAATGTAATGAAAGCAATAGCATCGTAACTGCAAACCCCTAAT  
GCAATCAAAGGAAATATAATGCGTACTATGTCCAAAACCTCCCAAATACCAAGAAAAT  
GGGACTTTCTATCGCAGCCGGTCTGCTGACCACAATTACTGCCCTGAATATCTTTAATGT  
GGTCGATGATGGTTCCGTTGCAACCACCACTTTCCTGGGTAACGTTAGCCTGAATATCAT  
GCAGCCCGGTCTGAATATCATCAACCCGCTGGCATCAGTTTATACCTATTCAACTCGTGA  
TCTGAAGATGGACTTCTCAAACGTACAAGTTCCTTCTGAAGATAAACTGAATAATTCTGT  
CGATTTCACTCTGATGCCGCGATTTCGACGGTGAGAAAGCCAGATGGTTCGCATCAACGG  
CGGTACCGAACGTCAGGCCATTGACAAGTACGTAGAGAAGAAATTCGAGAGTACTGTTTCG  
TGAATCCGGCAAAAACATCAAAAAAGCGCAAGATCTGTTTGGCGATGCTACCACTCAGTC  
CATGGGGCAAGACACGATCACAACCTGAAGTCAACGACTATTCCAAGCCGTTTGGTTATGA  
GGTAACCGAAGTGTTCCTGCAAGAGATTACTCTGCCGAAGCTCATTCAAGACCAGGTTGA  
GCAAACCAAATTCGTGAAGAAGCCGTAAACCAAGCCCAAGCGGATCTGGATAAAGCCGA  
AAAAGTGGCACAACAACAGGTTAAGACCGTTCGAAGCTGCGCGTGAAGCCCGTGAACAAA  
CGCGGTTGCTAACGAGCGTGATGCTGATGCAAACTGTACTCCGCTGGTAAGGACGCTGA  
AGCTAACGCTCTGCTGCAGAAGAACATTACTCCTGATATGATCAAATGGCGCCAGCTGGA  
AGTCGAAATGATTCGTGCCAACAAATATCAAGGTGGTGTATCGCAGACTGTGGTTCGGCGC  
TGGTTATGATGGACAAATGCTGATGGACATGCGTTCCAAGTAATTTAACTCGAGCTCCTT  
CGGGAGCCCATTTTGATAAGCTAACTTGTTAAATTGGAATATATTATGTTTAGCCGTGGT  
TTTACTTTAATCGAATTGATGGTATTAGTGGCGATTGTTATCATTCTGTTAGCCATAGCC  
ATACCGGCTTTTTCGCATAACGAAATTTATAATCCGATCGATTACAGCATGCCCTCATGGG  
TTAACAACCGCAATTACGGCAAATGGCGAAGAAATTTCTTGTTTGCCGAAAAAATCAAGTG  
ATCAATAAACAATACTAACAATCGGAGAATAAATGCAAAAGCAACTCTAAATGGGCATC  
ATGGCGGCATTCGTAGCAGCAGCACTTTCTGGTTGTGGCGAGCAACAGTCTGATACATTT  
TCTTATAATGGTCTCGGTGGAGAACCTACGCCTACCGTACAGCGACTTCGGCAGAGCAA  
TGTCAAGAACTGGGTGGTGGTTCGACGGAACAATGCCAACTAGCGTTTAAAGCAAGCAAAG  
GATGAACACACCTCAGCTGCACCGAAATTCAATGACCAAACATCAAGTGAATCTGGCACA  
TGTGCTGTATGCACCAAACACAAATTCAGAATTCGGATGGTAGTTTCAGCGACGTGTTT  
GTTCCAGCTATGGTTGGTATCATTGTTGGCAAATGATGTCAAGCAATGCTCGCCCGATG  
CCAGTATATGCGCCAAGTCGACCCGAAGATCGTCGAAATGGCTTCGGCAGTGCGAATGGT  
TCCTAGGTTCTCCTGGAAAAGGTTCTATCGGTGCAAACAGTTTCAAACCTTCTTTGGC  
CAGGGAAGTATTGCAAACCGGTAGCATCTTCTAAACCTGTTGTGAGAATGTCATCAGGC

GGTTTCGGAAAATCCGGTGGCTTCGGCTCTTCAGGTGGTTAATTACAAAAAGCGCTTTAC  
GGTGATGGGACTATGATTTACTATAGTCCCATCAAATCAATAAGGAGTACATCATGATTT  
ATGCTGGCCAAAAATATCGAATCACCAGACCTGTAAGCGAACAGCACATTGTTGGTGTG  
GTGATATTATAACAATCTCCCAAATCACTAGAAAAAGGCATTCGTTCTATGGATATTTGT  
GTTGACGATGATGGAATTCATATGAAGGAATTCTAATGTTTGAAGTCCCGTACAATATC  
CAGGAGTACTGGGAAAAAGTTCGAATTGTGCTTGGAGCCTGTTTAACTGATTGACGGAATT  
TATCGGATTTTTTGGCGAAATCTCTCTGAATCATCGTTACATTAGCCAAGGTGACGAAATT  
TATTTGCAAGAAGACGAATACGGAAATATCCGCGGTCTTCAGATGACTGGGACGGGCAT  
GAACTGAAATTGGTTACATTTTGTGCCACACGCAGTGGAAGAAATTCCCGGCAAACT  
TACCACGAAGCTTACCGAATTTGGATTGACACTGGTTTGGAGAAAGTAGAATGAAACGCG  
TATAGATTAAGCTCGTAAAGAGTGGTTGCCACAGTTGACTTCTGAAGGTGTTTTGTGGA  
ACGCTACTGAAGAAGGTCCTTATTGGGCCGAAGCAATGGTTCAGCCCAAGTATTACTCCT  
TCACTCGCAAAGAGCAAGAGCAACTCGAGAAAGCCGCAAAACAAAATCCAAGAAATGTGTC  
TTGAGAAGATCGAATGGCTGTTCACTAGCGACGCCAAAAAGCAAAACGAAATTTTCAACA  
TGTTCAATATCCCATACGATTCTCGTGATCAAATCATAACGCAGTTGGAAAGATGACGAAT  
GGGGCCTTTATGGACGGTTTGATTTCAACATGACCGAAAACGGACGCAAGCTTTTCGAAT  
ATAATGCCGATACCCCCACCATTCTCATTGAATCTGCAATTTCTCATTGGAATTGGTTCA  
ACGATCAACGCGAAAAATTCCATCAAGAAGCTTTACAATTTAACGAAATTCATGAAGCAT  
TGGTTAATCACTGGCGTGACATGAGCACTTATAACGCAATTGGCGATAAAATCAGCTTTG  
TAGCTACTACGCTAGTTCATGATTTTGTACAATCGCATACATGGCTGAAACTGCTTCAG  
AAGCTGGAGTGAATGTCAAAGTGTTCGATATCGCCGAAATTCAGCTAGGTGATGACGGCA  
ATTTTTATGACATTGAAGGCCAGCATATAGACACTTGCTTCAAATATATCCATGGGAAT  
GGCTGTATGAAGACGATTTTGACAAAGACATCGATGGATGCAACACTCGGTTTATTGAAC  
CAACCTGGAAAATGATGCTTTCCAACAAAGCACTTATGGTCTTCTTTATGAGCGTTATC  
ATGATTGCGAGTCGTTGGTCCCAGCGTATACAGTAGATGATTTTGACCGATTGAATCTGT  
TCACATATGAAAATCCGAAATGGGTGTCAAAGCCTATTGTTTCTCGGGAAGGATGTAATG  
TTCATATTTTTGAATATGGCGGAGAAAGTGAATTCACCGATGGTAATCACGTAGAAGAAC  
CGCGATTCGTCCAGCAATATATCGAATGGAAAGATTTTCGATGGCTGCTACCCAATGCTTG  
GTGTATGGATGGTAGGTAGCGATGCCGTGGGGTAGGGTATCAGAGAAGATGATAGCCGAA  
TTACCGGTAATAACAGCCGATTTATCCGCACGTTCGTAGAAAATTGACAACTCCAGATG  
ATTTAAACCCTCTGTAATGCGTTAAATATGATAGGAGTATAAACCCATGGATTGGCCAGC  
TGCCTTGTACATATTGGTCAAACCAGTATGCGGTAAAGACAAAGGCTTCAAATAGGCTTTG  
CCTTTGTTTGATAACCATCCAGGAGGGGCCAATGGCCCATTTTTTCGTATGTTAAAATCATT  
TTCAATAATCACATTGGTTTTAGCTCCAATGCACTTCGTAGAGGGCGGACCCTGAAAATGG  
GTCTTATGATGAGTACATGCGTGGCGCTTTAATAGGGTATAGCAATGAAATGGTGGCCTC  
TCCAAATAATTCGGTTGAATTTCTTGAACATTTGAACGATAAATGGAAATCTGCTAAAAG  
CTCTTCGAGTTGTTATCAAAGTGGATATTTTGAAGCAAAGACATTCATAGCAAAGAGAGA  
AGGTCATGGAAGTAAGATTCGGTGATGTTGTAACCTAGAAAACAAGCATTTTTGATGAGT  
TTATTTGTGCGTGTTAATGTCAAGCACATTTGGGCATTCCGAGCACTTTTATGACAAAG  
CCGTATGAAAAGCATATAGCATAACGAATATTTCTATGACAACATGCCAGGGCAGATTGAT  
ATTTTCACTGAATCGTATATGGGTTTACGATTTACATATCGGCCGCGACTCTCCATTTAT  
AATGGAACCTTGGAGTCATTTGTCAACCAACATGCCAGATGGCGGAAAAGGTATCTCCC  
ATTGCACCTGATACGGTTCTCAAAAACACCTCAGATGATATCCAAGAGCCTTGTGCTATG  
ACAATGTATAAACTATCATTGCACTAATTCAAATGCCCTGGTGTGAACCAGGGCCTTTTT  
GTATCCGTCTGAAATAAAATTCAAAATGGTTGTACTCTTACGTTAAACGATTTTAGAATG  
TTATCAGAATCAACCAACGGAGACAACCGATGAAACGTGTTGATGAAATGCCCAAAAATG  
GTCAGATTGTAGTTGTCTGGGTATATGACGGCAAACCTCTGGTCTGAAACCTGGCGCTTGA  
ACAACGGGGTGGTTCGAAATCCCATGGATGATGACACTGGTGTGATGAAATGGCGTACAAACG  
ACCGTTATTACGATGATGGTTATGAAGATCTCGAACTCAACTATATTGTGATTTAAAAAT  
GTCTATACTTCAGGAAATCCACAAGCTGTGCAAAACAAATGGGTGTGGAAGCATCAGAATT  
CAAGATTTTCGCTTATTTGGAAAATTGTGCGCAAACCTGAGTGGTCTTATGGGCTTTTATT  
TGAGCGCGAATTCCTGTTTACGAACATAAAGAAACGGGTTATACTATCGCAGTTCAGTC  
TGAGCGGCATAGAGCTCAATTTGTCAACGAAAACAACGAAGAGGTTACGGGTTGCGCTGA  
AATGATCGTTTCGGCGAGCGAAGTAGAACCTCAGAAAAGCAAACATGGCACACGTTGGCA  
GTTTATGTAACGCTTTAGTCAATTTAGTGTATATTACCAGTACAATGGTTTAGAACAATA  
AGACTGGAAATAAAAACCTCGAGCGCAGCTCGATCGCGAAGGGATAACTAATTGGAGATAA  
TATGCAAATTATCTTTAAGCCTGCAGGCGAAGGTAACCGCCGAAGCAATCAAATCTGC

CTATATGGCAGCAATGAATTACCCTGTTCTTATCGTTTGTCTGAAGAGCATCCAGCTGT  
ACTGAAGCATCGAGTTAACATGTTCAAGTATTCAGAATCCTGCTAACAAAAACCGCTATGA  
CATAGTTACTTGTGGAACCTGCAACTCCCGAAATGTTCTAAGATCTTGGCTTTTTTCGA  
CCGTTGTGGCGCCATTATTCTGGATGTCAACTTCGCAATGAGTCGCGGCCATTGGATTAA  
AGTATGTGCCGAACCTCGATGCATATGGTTATGAAGTAATTGCTACTCAAGAACTTGTTAA  
ACCTGCGCAAAAATCGCACAAAGTGTATCACTGAAATGATCGTGGCCCCCTTAAAAGGCGC  
CATATGGAGGAATTATGAAAACATATCGTTTTAAATCTGATGAAGCTCGACATGAATTTG  
CTGCCATAAGCGACATAAATGCTGCTATTGCTAATAGCGTATGCGATCATGTGTTCTACG  
TAGCTATGCCACGAAATACTATCGATGAGATTTTTTTTCGAAATCGACGGTATTACTTTGT  
TTCCCGAGTATTTTCTCTTTTCTTAGCTAACTAAGTAAAAGAACATTTGGAAGAAGAAA  
GCGCTGGGGATGTTGCTCACGAGATATCCATAAGATATTGGAAAATAACGATCTCGAGC  
AATTGCTTGCAGACAACGCGGCCCTGCGGGAACGCATGTCTAACTTGAAAATCGTCTTG  
AACGTCTTGAACGGTTGGTATAAATGAAATCTACCGCTTTAGCTTATGTTCTTTGGTTTT  
TTCTGGGTGTTTTTGGTATTCACCGTTTCTACACCAGAAATTATGTCACCGGAGCTATTT  
GGTTTTTTACTTGCGGTCTGTTTGGTCTTGGCTGGTTTTGTCGACTTTTTTCTCGCAGCAG  
GAATTTTTTCGACGCGCCACATTGAATGGAGCGAAAATCAGATAGAAATTAATACAATGA  
TTCGTCGAGGTTATTGACATGGTTTATAATTATGATCGTGCTGTTTTTATTGGCCGCTTT  
TTCCAGCTTTTTCCACCGTGGACATGAAATGCTGATTTACAAAGCGCTACAACTGCTAA  
AACTGTTGCTGTTGTCTTCGGGTCATCCCATCGTTATCCAAACACAGTCAACCCGCTTCC  
AACACTGGTTCGAATCAGAATGTTCAAAGCATGGATGAGTAAACAATCTCACTCCTAGCGA  
ACAGGCCAGAATTGTTTTCGGTAATGTTCCCTGACTACCGCTATAACGAGGATCGCCGGCA  
AACAGAAGTTCGTGAGGCCGGGCAGGAGCAACCGGGGGAGCGTATTGCGATGATTGCATA  
CGATCATGATGAAGGTTCTTATTGGATCAAAAACCTTTGGATGGGACCATATTCAATGCAT  
GGGCGTTCAGAATCACGGAAAAGACAACCTCAAATACCCCAATGCGCGATGCATTTCTTCG  
AACCGGTTCTATCCACGACGATTTCCCTATCAATCCGTCAGTGCGGTCATTTCTTTTGAA  
ATTTTGGCATACTGAAGGTTCCGAACCTACGCAGCCGGTTGATGGAAGAACGTTTCGATGTG  
GGACCATGAACTTGCAAAGTTTAAAGATTATCCATACGCTGATGCTCTCAACTGCAATAC  
TGCTGCTGCCGTAGTATTGTGCAACAACCATATTCTGGTTATTAGCCGCACACATGCACC  
CGGCAAAGGTACTCTTGCTCTTCCAGGTGGTCACAAGAATTCCAATGAGACCTTCCGCGA  
TTGTGCAATTCGCGAATTGTATGAAGAAGTTCGGATTGATGTCGATCATCAAAAAATCAT  
TGGGTCTATAAAAAGCAGACGAAGTATTTGATCACCCAAAGAGAACGGCAGAGTTCTGCAA  
ACCGACGGTTGCTTATTATGACGTAATCAACCAATGACGACGGTAGTTTGCCTGAAGT  
TCGTGCTGATGATGATGAAAAAGCAGCATTGTTGGATGCCAATGCATGAATAAAAGAGAAA  
TCGAGCACGTATGTTTGACGATCATGCTGAAATCATTTCGCGCTTACCGGTATCTAGGA  
TACAATTACGGAAAATGTTGTAACATCACTAAAGGAGAATAAAAACGAAAGCAAGCTGCA  
TTCGCAAGAAAATCAAAAAGCAAAAATTTGAGCGCCTTACACCAGGTGATGACGTGCGAG  
ACCAAAATGCTCGTTGGGAAGTTGCAACAGTTTGTGTCATCACTGAAAATCCAATGATTA  
TTTTACGCAAAAAGATGAGTCGAATTCATGTTATTATCGAACTTGCCACTGACTGCAGCG  
AAATGTTTTTCCAGTTTAAAGAAATTTCTCCCGAAGGGATTACCAGCTGGGGTGAAACGT  
CTTAACTTCCGAAATCAAATTCGTCAAGTGGTTCATTTTCGGCGTGATGAAAGAAAACGAAG  
AACTGTTTACACCCAGATTCAAGTCGGCGACGAATTCATCCATCGTAATCTTGATAAAC  
GATACGTGGTTCAATTCATCGCAGAAGTCGGTCTCTAATTGCTTGGGATTTTGATTATC  
ATAGGTCATTTTCGTTAACCGCAACGATTGTGATCAACTTAAAGCATATGACATGAAAT  
TATCTTAAGGTGGAAATTATGCAAAAAGTAGTTTTTGGAGGCCTTACGGCTCTCATCTT  
TACGGTCTCAATACTCCTGAATCTGACCTGGATATGAAAGGCATTTTCATCCCCGATCCC  
AAAGATATTCTGCATGGCCGAGCCAAACGAAGCTATTCCATCACAACCTGGCAACGACAAG  
TCCAAGAACAGTAAGGATGATGTTGATATCGAAATGTTTTTCGCTCCAGCAATTCATCCTG  
GATGCGGCCAAGGGTGAAACCTATGCGCTGGATATGCTGCATTCTCCAAAAGACAAAATC  
TTCACCGACTCGTCTGTTTGGCAATATATCCATCAAACCGGTCTGCTTTCTACACGACC  
AATATGACTTCCTATATGGGTTAGGTTATGAACCAAGCGGCAAAAATATGGTGTAAAAGGT  
TCTCGTTTAGCCGCATTACGAGTAGTAAAAGAGTTCATGGATGCTCTTCAGAATCACGAA  
AACCGAAGACTGCGAGACCTAAAAGTTCCTCTGCCACAAACCGAGTTCTGCTTCTGGACT  
CACGTTGAAGAAAATCCCGACACCATTTTCGTATTACCCATGATGGGCCGTAAGTACATG  
GCTGGTGTAAAGAACGCTGAATTTCTGCGGGGCAGTTGACAAGCTCTGGGCCGAATATGGC  
GTTTCGAGCTCGCAAAGCAGGAGCAAATGAAGGTATCGACTGGAAAGCTCTAAGCCATGCG  
TTGCGAGGCAGTCTTCATTTGCGTGAAATTTACAAAACCTGGCGATTTGAGGTATCCATTG  
GCCGATGCTGAAGAAATCAAACCTGGTTAAAGCTGGCAAACTGTCTTTCGCTGTTATTCAA

GAACGACTGGAAGAAATGGTTGAAGCTGTTGATACGGCCGCAAAAGAATCATCTAAGAAC  
GGAATGCCCGATAAAGTGGACATTGCACCATGGGAAGCGTTTGTCTGAACAGGTTTACGCC  
GAAGCAATGAAAGAATATCTGGCGAGCGAATAATGAAATTGATTCGCTTTAAATTCAAGA  
GTAAGGAAATGCTGACCGAGTATACTACTGGTTAAGACGCCATATTTGGGCAGTAGGTT  
TCAGCGCAAACACAGTTTTTATTGCCAGAATCAACAAACGTGGCCAAGTCAAAGTATTT  
TTGATGGTAAACTCTTAAAGACATTGTTTCTTCGAAAGAAGGTTGGCTTACTTTTGCCT  
CCTTTGAGTTTGAAAAGTTTTGTGAAAAAGTAAGCTAAACGGTTTACATTGTTGGGGCTA  
TGATTTACTATAGTCCCATCAAATCAACAAGGAGTATGTCATGAAAATCACTAAATCAAC  
TAACCTGCAATCCATGGATTTTCGTTGGCCGTGTCGTTAAGGCAGCGCCAGAAACCAAAGA  
GGTAAAAAATTTACCCCGATTTCGAAACCATTCTGCCGGTATTACCGTAGGAATCGTTGG  
CGCATGGGCTGCAATGTGCTTTATTGGCGATATCGATATGGCTCGTAAAATCTTCATTGC  
TGGTATTATCGCTGGCGCGACTTTCTCGTTATGAAAAAGGGACTGATGAAATGATTA  
CCTGCTGAAATGGCAAAAATGGTTGCACAGAATCCGCGAGAAATCGTCAATTCCTATCT  
GTGCATTTTGATGATTTCTTCAATGATAATACGAAAGACACAATGATTGGCAAAGGCGGC  
TATATGTCTGGTGACGCGGGCCAATTCTTTCGTTACCTACGCGAAAAGCAGCCTTTTACT  
CATTTGCATAATGATGACATTATCTAACGTTTTATTGCAGAACTGCGGGGATTGGTCTAT  
AAAGCAGAACTTGATTGTCCACCTATGAGCCCTGATTACCTTTCAGTAGCGTTGGTAACA  
AAATGATCGTTTTGGGGCATTAAATGGAGCTGAAAATAGTTAAAGTATACTTTGAAAGCA  
AACTCCAAGTTGCATCGCGCATCGGTAATAAAGTCGGTGAACCTTGAGATTTTCGCTAAAG  
AATATTGGCTGGTGAATGACGGATTTATATTTCTGGATGACGGGCCAGGTATTTCCGAAA  
ATGATTGTTTCGCTCTGTTATGAAATTTCTCTGGAAATGTCACGTTTCTGATCAAATCACGG  
CGTTTATGGTCGACGACTATGTTTCCGAAAGAGCCAAGGCTATTGTAGTTATTACTGATA  
AGGACGACAAATCATGAATGGAAAAATCTACCCTTCGTTCTCAACGTAAACACCAGCGCC  
GACGTCACAACGACATTGCTCATGTTTCGCAATTTTTTGAACACCTTACAATCCGAGCAGC  
ATGATCGCGATTGGCTCAATCTGGTTTGCATAATGTTCAATGTTAAAACAATGGTCATAT  
GGGATAAAACGTATCAAAAAACAGCCAGGAATCCGGCGTGGTTTTGGCACAAAATTGACC  
GAATTATGAGAGAAAACCATATTCCATGGTGTAAAGCCAACACTGGTATAGCCATATATA  
TGCATGCGAGAGGCGTCTCGCGAGTTGGCGTGTGGGCGTTTTTCTACCGACAAAGGCGTAT  
TGATGCTCGCACGGCTTCTTGAATTTGAAGTTCGTTTCTCTGGTATGGATTTAGTTTTGC  
CGGTGTTGACTCCCTATCGGAACCGTCGGAATACCGAACTTCGCACGAAAGTGGTTCATC  
CTAAGCCTGAAAACATTCATTATGCGACTACCGAAGAAATTGATAGCATGAGAGATACTA  
TTAGCATTGATAAAATGTTAACAGAAATCCCAGCACTCGAGTCACGAATCAGCGCTCTTT  
CTCGGAACTTGCCCAATTGCAAGATAAACTCCAAAATACACGACAAGATGTCCGCGATT  
ATCTTTCGAAAAGTATGGTATTTGATTGAAAAGTTAGTCTACAGTGATGGGAACATTGG  
TAATAATGTTCCCATCAATAAACGAACGGAGTAATGTAAATTTCCATCAAACACTGCTGCA  
ATCAACATTGGGTACATAGCGTCATTTGGATTGTTTTATTTCGATGTATATCGGAAATGCT  
TATGCCGTTCTGGGATTTGCGATGGCAGTTATCGGTTCAACCATTATTGCGAGAATTTGC  
GAATGACTTATTATCCGACAGTTAAGAATTTTTGGAAAATGGTTCGGGATACTTCCAATA  
ATCACTTCAAACCTATAAGCCTGTAGCTGAACGGTTGGCAAATTATCACCCTTCATGA  
AGTTGGTAAATGATATTTTACCGAATCTGATGCCCGCATCGCCTCTCGGGAAACACAATG  
GCATCTCCAAAATCAAGCCGAACACTTTAATATTGATGCCGAAAACAACGTCACGGTTA  
AACGAATTATTTGGCTCAACACCGTGTGTTGAAGCAGATTGTTTTGCAGCGAGACTGGAAC  
TGCTTAGGCATTATGGGGCTGCCGTA AAAATTGATATTTCTGAAAATGGCAGAAATCAA  
TAGTTAGATTTAGCATCATCTTAAGCGAAATTAACCGTGTCAAGCCTGTTGCTGCAGATG  
CAAACATTGTCGAAGAGGCACGATCGGCAGAACCTGTTAATCTCGAACTGAAAAAGAAA  
TTTGCGAAAGCATCTTCTTTTCTGAAGCGATCGGAATAGCTATCAACACTTTTCGAGGTG  
CACCCCACTTTGGCTCTAAACGGTTGAACGAAATTGACAGAGAAATCGCCAAGTTGCAAG  
CACTACGTAAAGAAATCGAAGACAACATGAAAAGCATCAAAAACCTCAATTGGGGCTTAAT  
TATGAATATGATCCGTCCTCACATCGGCGTGAAAGGTATCCCTCTGATCGCAATGACTGA  
TTCTTACAAAATCACCCATTGGAACCAGATGCCTGAAGGTACCGAAGAAGCAGTTTTCTA  
CGTCGAAGCTCGTGGTGGCAAATTCGATGAAATCGTTATCGGTGGCGTGGAAATATCTGCT  
GACCAAGTTTGCAGAAATCATACCAATGATGATATTGACGAAATGGATGCCATGAGCAA  
GGCTCACTTTGGCCAAGACGTATTAACCTTGAAGGTTGGGAGGCAGTCCGCCAATATCA  
AGAACAGCATGGCTGTCTGCCATCCAAAACGATGCTGTTCCGGAAGGTAAGTTGTTCCC  
AGTCAATAATGTTGTGCTGACTGTTTCGTGTCAAAGCAACATTCGGTGGCTGGCGGGCTG  
TTTTGAGCCAATCATTTTGGAGAGCTGTCTGGTACAATTCTACTGTTGCCATGCCGAGCCG  
CGAATGTATCAAATCTATTCGCCGCCACCTGATTGAAACTTCTGACCTGGAAGTAGGCAG

TCCTGAGTTCAACTTTGTGCTGATGACCCGACTACATGATTTTGGTTCTCGCGGCGTTAG  
TTCTGGTGAATCTGCTGCAAACGGCGGTTGTGCTCATCTGTACAACCTCCATGGGTACTGA  
CACTGTGCGAGTCGCTGTATTTTCGCAAACAGATGTTTGGCGCTGAAATGGCAGGCATCTC  
TGTCCCAGCTCGTGAGCACTCCACCGTAACCTCTTGGGGTGCCGATCGCGAAAAAGACGC  
CTACTTCAACTCGGTTGAACTCTTCGGTGCGGGTGCATATTCATTGTGTATGACTCTAC  
CGATTTTAAGAAGGCAATCCGTGAAATCGAGAGCTATAAGGACAAAGTTATCGCCACGAG  
TGGTACTCTGATCGCTCGACCTGACAGTGGTGTATGATCGACAATATCAGTTTTGCCCT  
GGAACTCTGGGCGTAATCTTCGGTTATGAAACCCACAGCAGGGGCTACAAGGTTCTGAA  
TAAGCATTGTCGTATTATTCAAGGTGATGGCATCAACGGTCCCGAAGTTATCGACCGCGT  
TCTGACTGTTATGAAAGCTCGCGGTTGGGCTGCAGAGATTATTGCGTTCGGTATGGGTGG  
CGGTCTTCTGCAAATGGTTAATCGTGACACCTGCAAGTGGGCCATGAAAATGTCTGCCAT  
CAAATCAACGGTGTATGGAAAGACGTATTCAAATGCCAAAAGGCGCTGAATGGAAAGC  
TTCCAAGAAAGGTGAGCTTAAGCTGCGAATCATGGATGACGGCCGCCATTACACCGAAGG  
AACTATCGAGGGTGGTCAAATGCTGAACGACGTAAGCGCCAAAGACGGTTTCGTTGAACT  
TATGTGCAAAGATGCATTCGTCCGGTATTATGATGCTGAAAAGGGTTAAAAATTCAAGAG  
TAATCTGGCTGAAATCCGCCAGCGTACTGCAACTAAATAATCATTCAAATGCCCTCCGAA  
GAGGGCATTGTGATTGGAGAAATCATGATCAACAAAATGATCAAGTGGTATGAGCAAGA  
ATGGCTGTGCAAAAAGAACTAGTCTATGAATAGGAAAATTCATACCTGGTAAAATATTT  
TTCGATTGACGGAGAATTCGGTCATATTCCATCATTTCGGGGCAAATGTATGACCGATA  
TAAGTAAAATCGTTTACGACTCTTATTGTTTCTATTGAATGGGGTCATATCGTTATGTC  
AAAAGCGGAGTGGGAAAGTAATGCAAATCAAATGACAAGAAATGAATTCAAAAAAGCTC  
TAGAAAATAATGACCAATACGAATATCCTCTGCACAATGAAACAATCAACCAATTGCGTT  
CAGTCTTTTCTGTCCCACAAGTTGAATATGTTTATTTGTCATTTCAAGAATATCAATCCA  
TTTTACCCATAATCCCTCATGACGCGAGTATGTATGCGCATAATAATCATGCCAAAGAA  
TTCACCAGGGTGATCGGTGGCAATATCAGAGTTAATCTTTTGTGCGAGAGATCATGAACAA  
ATCAAAAACACGATATTTTGGGACTTTCCTGATATAGAGGAAGTTGAAATTGGAAATTCG  
AAAAATTTTGGCCAAGACGGTAAAATATATAACGCAACAATAGACTACAACACCAAACAG  
GTTATAATGGTGGCAAATGACCCTCAAGTTTAGAAAATTCAAAGCAAAGACGAACGTA  
ATATGTTTAAAGTTACCATCAACTTCAGCGACAAGTTTGATGATAAAACGATTCATTGGG  
AAATGCCAGCTGTTAATTTAAACGAAGCTTCTATTGGAATTGAGCGTCTTGCCATTTTCC  
TGGAAAATGCAATAATCGATACCCAAACGGTAAGGGTGGTCTGGACGATTCACCGATA  
TTCCCGACTACTATCGCTATTTCTGCGAAGAGGAAGAAAGCATAGAAATCTGGGAAAAAT  
ACGGTGTGAAACGCTATGGTGGCCACGCCATGATGGTGAATATCCAAAAAACCTTGCCA  
GCTATGAAATCGTATATACTGAGAACGATTACGTGAAGTACAGTGTAGCCGTGTAATTA  
ATAAGAGCATATGGAGGAATCTTTATGCTCTTAAATTCGAAGTCTGCTGATGAATTA  
CAGAAATTGTCTGAAGAACAACATACCTGCTGTAAATTGTGTGGAAACGAGTTTGACGGT  
CCATACAATAAACAGCATTGGATCACGATCACGATTGCAAGGCCCGAATGCCGGAAAG  
ACTCGAGGTCTACTTTGCAGTAGATGCAATCTAATTGAAGGCATAATGAAACACAAATTT  
ACACGGTCAGGATTAAGGCCAAAGGATGCTGATTACTTCCAATGGATGAGATCGCTATTA  
GAATATGTAGATTCAGATCATTCAAAAAATCCAATACACCCGAATTACGTTTCCGACATG  
ACCAAAAATTTCTCGCGGAAAAACTTGAGTGAATGAACGCCGAACACTACGCGAACGAGGA  
TGTGAATTTGATGAAAAAGATCAAAAAGCTGTTTTGGTCAAAAAATTCAGAAAGCAATTT  
AAGAAGGCCATTCAATGACTACCCGATCACTTGTAATGCAGTTAGTAGAAGGCCAATCTG  
GCCTGCACCACGAAAATGCCACTAAAACGCCGACGTTATCCCGACCATGCGAGATATGA  
TGGCATCTCTCTCCTCAAAGGATTACGCTAAAAGCATTTTGCCATCTCATTTAATCGAAG  
CAAATGATAGTGGAGATATTCATATTCATCTAGATTATGCTTTTACTCTTCCAATGA  
CAAATTGTTGCTTGGTAAATCTCAAAGAAATGTTCAAAAATGGCTTCAAAGTGGGTGCTG  
CCCAAATTGAAGAGCCTAAATCCTTTGGTGTAGCTTCAGCCATTATGGCGCAAATTACCG  
CACAAGTTTCTTCCCACCAATATGGCGGGACTACTCTTGCCAACATTGACCAAGCCCTTG  
CGCCATACGCCATAATGTCATGGAATAAGCATTTCCTGTGCGGCTGCAGTATCATCAGCG  
ACAATGAGAAAATTGAAAAATATGCATACGAGATGACTGCTAAAGAAATCTATGACGGTA  
TGCAAGCTTTCGAATACGAAGTCAACACGATATTTACCACAAATGGCCAAACACCGTTCG  
TGACAATTACATTTGGGATGGGAACCTAACTGGTTCGAAAAAGAAATTCAAAAATCTATTT  
TGAAAATACGAATCACGGGTCTTGGAAGAATGGCATCACACCAGTATTTCCAAAAACTC  
GTTATGTTTCATGGAAGCTGGTATAAACTTAAATCCTGGAGATCCAAACTATGAAATTA  
CACCTTGCTCTGGAATGTTTCAGCCAAGCGAATGTACCTGGACATTATCAGCGCGTAACAC  
AACAGATCCATCACTGGTAGTAAGACTCCTGTTAGTCCAATAGGTTGCCGGTCTTTTCTG

GCTGGTATAAAGTCTGGAGA ACTAGATGGCAGAAACAATTTAGGTGTAGTCTCTGTCAAT  
ATTCCCCGGATTGCTATCGAAGCAAACGGATCACAAGAATCGTTCTTTAACTACATAAA  
GAGCGTTTTGAATTGTCAGTGGAAGCATCTCTTGAACGAATTAACACCCAGAAGGTGCT  
AAGGCAAAGACCGCCGCAATTCTCTACACTGAAGGGGCCCTTTGGTCTATATCTTAATCC  
GGAAGAAGAGTTTTTTGCCGCATTTGAAAGAACGAGCTTCGATTTCAATTGGTTATATTG  
GCCTTCATGAAGATGCTCTGATTATGACTGGCAAATCGACAGCCAATGATCTAGAAGCAC  
GCAATTTTGCCTTTTCGATTGCAACATATCTCGATTTTTCATGCGCAAAGCAAACACTCA  
ACACCGGATGGAAATGTAGTCTTTATTCTACTCCGTCTGAATCGCTGTGCGATAGATTCT  
GCCAGCTGGATCGCAAGAAATATGGTGTATCGAAGGAATTACGGACAAAGATTGGTATA  
CGAATAGCTTCCATATTCTGTTGATGCCGAGTTGAACCCGTATGACAAAATAGATGCC  
AAAAAGAGTTTCATTGTATTGCATCGGGTGGACCTATCAGCTATGTCGAACTACCCAATA  
TGCGAAACAATCTCGAGGCCCTAGAGCAAATTTGGGATTACGCGATGGAAAATCTTTCCC  
TATTTTAGGAACAAACACACCTGTTGGTAAATGCTACGAATGCGGTTTTGACGGTGAAT  
CAAATGCACCTCGAAAGGATTTAGTTGCCCGAGCTGCGGTAACCACGACTCGGCAAAGAT  
GTCAGTTATCCGAAGAGTTTGCAGATATCTGGGTGCTCCGTTGGCGAGAGGCTTCAATAA  
AGGCAAACAAGCCGAGGTTGCATCACGTGTCAAGCATGTGAAATAATTTTTAAAACTTG  
TTTACATTTGTGCAGATGTGTGTTAATATACATCTGCACAACTAAACAGCCCAAATGAG  
GTTATTATGTCTGATTTTAAAGCAAAGTATTGAAACCTTTGAAAAGAAATTCCAGGATATT  
AAGTCCATCCTGGAAACCCCAAGGGATAAAGATGAAGCTCCACAAGCAATCCACAACCTG  
AATTCTATGTCTGAGGAATTCGAATCAATCGCTCAAGCTGTTGCTGATCGATTCCGCATT  
TCCTTCTCGACGGTTGATTATGGATATGGCCGTACATATTATCCTAAAGGTCACCGTTTT  
TGGTCGGAAAGCAACGCCGAAGAGTATGGACAGGGAACCGGGAATGGCTACTGGCTCAGT  
TCCTCTGATATGTGTTAAGGAGAAAAGCAATGGCTCGTTCTAAAGAATTGGTAGAAAAGG  
CAGTTCAACTTCAAAAACCTTCTTGTGTTGAAGTTGAAGCACTGGCAACAGAACATGAATACG  
GCATGGGAATCAACGGCAATGAAGTTGATTTTCGACGACTGGCTGTCAGGCAGTTGTTATG  
GCGACGGTTGTGAAGCATTGTCATTAATGCAGATGGCTCCGTGTGGATGGAAAGTAGTT  
GCTAGTTAAGGGGCTTTCGGATCCCCAATTTGAGGGTTTTGTTATGATTATTGTTGGCG  
CTCGTGCTTTTCAAGCTAGGCTAATTCGTTTTGTTGCTCCTACAGTAAATATGGACCATG  
ACTTCATTGCATAAGAAGAAGAATGGAAGGAATATCAAGTCAGAATGCAAGGTCGGACTA  
TTGAAGTAAAAGCCCGAATGTTTCGAGCTTTCGTCGTCGGTGATGGTAAATCTCGTCGCT  
GTTATGACGAAGCATATATCGTTCAACCTGGCTCGTCCGATGAAATAATTTACAACTCA  
TGGATACTGTTCCCGGTAAAGTCGTATATGCCACTCCTGACATTCTTCTCGCCATGAAAA  
TGGCTCATCGGTTCAAAAAGAACACTCGCAATTTTCATCAAAACGATGATGTACATTCATG  
AATTGCGTGAATTTGGTATAGTCATGTGGCCTGAACACGTGGAAATTTTCAAAAAGCGTG  
AACAGAATCTCTGAATTATGGCCGCCGAAGCTTAACGTCAGTAAAGGCGCATTTTTCA  
AAGACGACATCTATACCTATGATCATGACACAATTCAGGAAGCAGTGGCGGTTGACCGTA  
TTCCAGCATATCGATCATAATGTTGATGGCGCTGAAGTAACGACGTCAAAAGAAAAAT  
TCTTTAATAGCTCTCGTCGTATTGAGTTGATGGGTGTTTATGAAGAATCTTGTGTTTTGG  
CTCTGGGACGTTGTCTTATTCTTTCCAGGAAAAGTTCAACCCCATAAAGCTTTTGAAA  
TGGCCCTTGAGAAAGTATGCACTTCTATTACATCTGGCTGGTTCCGTGAATTTGCGTGGG  
AAAATTATTGTGACGTTATGAAAATTTACGCCGATCGAGTCAGGGCTGGCGACTCATAACG  
ACGAATTGTTCAATCGAAACCAGCATCTCCTGAAAATTCACAGTAAATAAATATGGATTT  
TCACATAGTAGGTATACTGTGCAAGCATAATAGTCCAAAAAAAGTTTCGTCAGAAGTAC  
ATCCCGGCACGTGAACCGGAAAAAGCGGATGAATCCGAAAATCCTAAAACAGACCAATAG  
AAGCTGTTAATAGTTTATGCCAGGTGTTATAATGACCCTGGGCATTTTTGTAAATTGGAG  
AATGTAGTGGATATTGAAATGCATATTGAAGCACAAAACAGATTCGAGAAGCTGAATGG  
TCTGTTTCGCACAGCAAACACGCTCGAATGCGCGAACTGTGAAACGCAGATGTAGAGGAA  
AAAGAACTGGCCGAGTCTAATCTGAACTTATTTTCAGAAGATCATGTTGCTAAAGCTATT  
TCGAGTTATTTGAAGTCGAATGAACATGAGGTAATGCTTGACCGTAGAAAAGAAGTCGCA  
AAACAAAATTTTCGTTGTCCATGTTGCGATACCGATCAAATGCAACTTGTTCATGGGTT  
AATAAAGTAGTTGGTCTTCGATGCCGCAAATGCAACCGGAAATTTATTTGGGAGTCTCCG  
ATATGATGTTTGAAGAAGCAAAGAGTCAATAAATCGCCCTCCCAAACCTTTTCTTTGGTA  
AAGAATATGATGGGACTCATGTAGGCATTTTGGAAAAAATACAGAAATACATTGGTC  
CAGGGGATGCTTATCGAGTGGAGTATCGGGTACTACCAGACGGCGGTGATGTGCTAACTG  
TAGTAGGAATAGCCAATTATAACTGGATAACAAAAGTTGGCTACAGGCTTGATGTGGTAA  
TAACAAGAATCAAACCCACAGAGGCGACGTTAGACCGATGGAGCTGTATCTTTTCGGAGA  
AATGGCATGATTGAAATATACAGAATTGTTTCAGAATCGCACAAATGCCAGCATGCGAC

TTTAGTGTCAAACGTCTTGACGAAGATGGCATCGAATATTCATAGAAAACCTGTTTTGCG  
GGAGGCTAAAACCTGATCTCGGGTTTGGAGTACCAGCGAGACGTCGTCGCTGAACTCAGGCG  
TCGTATAGGGCAACCCAAAGGTTCCCTGGAGCTTCCCAAGGTTTTTGTAAATGGGATATA  
CATCGGCGGTGACAAAGCTCTCCTGGATTATCTGGATTCATACGCCTCTTCGGAGGCCTT  
TTTCGTAAAAGTAGTGTACAAGGTGTTTTTGGCGATGATAAGATAAGTAACAAGTCAAGTG  
AATGATATTTACATTATGATCGATATACCGAATATTATTGAAAATATGAACGAAATGTTT  
GCGATTCTTGGGTATAAGCCTAATAACGGCAAAGCGTTGACAGGCTATGTTGACGCAGAA  
GGCAAAGGCCGCCAACCAATCAATTGGCAAACCTGCTCAAATGGTAGGCTTGAACATCTGG  
TCGCCGCTGTGCCAGCACGAGAAACAGTTTGGAACTACTGCAAGTCCTCAGCAACTTGAC  
GAAGTTCGCATGTTTGCAAAGACAACCAACGAACAATTGGTTGGTCAAATATGCTGGTG  
TATGACAAAAAGAACAACAATTAGAGCAATGTGTTTGGATTGCTAATCCTATGTCAACT  
ATGTGAGAAAATACTATGTCTATGAAAAATGTTGCCGAATTTATTCGTACAAAAATCAAC  
TCGTTTGTCAAGAAAAATACTTCTGTGCAAGACCAATTTGCGAAAGCAGCAGAACAAGTG  
ATTAGCCAAAACACCAGGCTGGAAACGGCACATTTGAAATCCGTTTCAGAAGAAAAACGG  
TGGCGTCAATATGCAAAGATAAGCAAGTTGAGGCGCGGCAAAGATAAATGAAATTCGT  
CTGCTCATGAATCAAATGTTCCCGTCGAAACTCATGTTAAACTTGCTATTCGGTACCGT  
CGTACGGCAGATGCGCTGAATGCCAAAGCCGATGAGTTGGAAAAAATGCGGGACGAGATT  
AAGCTGGAGGTTGTTGAACTCGACAATTCTCGTTTACTGCTGCCTAACTTGAGTTT  
ATCCGCGATACTCGCAATGCAGAAGCGCTGGGTATTTCTTGTCCCGAAGATGTCATCGAA  
TAGGCTGGTCTACCAAAGTCGATGTCAACGATGTTATGATGCGTATCGAAACCTTCAAC  
GGCGATAAACATACAGCTGTAACAATTAGCGAAATTGAATATTATCAATGGTCTGAAG  
TAATTATAAAGGGCCTCCTTGGAGGCCCTTTGAAAATGGAGTATGTTAATGATTTGCTCA  
ACATTAGTAACTCTAGTCGATCCAAATGGAATTACAACCTAACCCTGGTATAATCCGGTG  
ACAACGGTATATACCAACGCGAAAGGCCAATCTATTGACGCATACACCGCCGATTCTATG  
GGATATACTATCAGCAGAACCGAAGAAGCCAAAGAGACGATCGATTCTTTTGTCAAACCTG  
TCTAATGCCGAAATGAAAAAGAATTATCGCGAAATGATAGGTAAAGATCGTCAGATTGAA  
CGTGAAGAGCATGATGGGAGTGCTAAAATGGTTTACGAAACTTTGGCTAGAGCCACTGAA  
ACTGCTGATAGTCTTAGACTCAATAAGATTAACGAGTGATCTTTTGAATTTGAACGCG  
CAGTATCTTCCAACCTGTTTCTGGTATGTCGGCTGCTGCGGCTGCCCTTAAACAAATCTCC  
GGTGGTATTCAAATCGGAGTAGAACGGCGATGGAAGCGGACGTCGGAAGCCAGCCACGGT  
GAAAAGTATATCGCGCATTATAGCATTGCTGCTGATGAGATTTTCCAGAGCCGTTGGTGAC  
GCAATCAAATTCGTCAAACCTCCTGCGGTCTGCACGTCCTCAGTTGTCACATATCGGTCAT  
ACAAAATTGGCTTACACTAAACGGGCTTTAAACAACCGCGAAAGTGAAGTAAAATTTGTC  
AAAGAATGGAATAGCCATTTACCGACGACGTGCTTATCAGTATCATGCTGGAAAAAGGC  
TATAACATGTCGATCAGCTGCCCAAATCAAATATTGCTGTTGGGTGAGTTGTCGAATTAT  
TCCATTCTTAAATTTTCGCGAATTGAAATGTTTGTAGACTCTTGCCGCCGAACCTGCTCCG  
AAGAGAGACTGAAACAGTTTACAAAGACCGTCAGTCGTGATAAGATAATTTAGTTGAAAC  
AAGCATTCAAATTTTCGAGAGGAATTCAAATATGTCTAATGCATTCATTGCTGTTTCGTAA  
CTTTGCTGTACGCACTGCTGCCGCCGAATTCACCGCTGATAATATTCTTGGTTCGTGAAAT  
CACCGAACAAATGATCTACAAAGTTGAAAACACAGTATGGGATGCTATGATGGAAGTGGG  
TGTTACCGGCATTGGACGCCGAGAGATTTCGCAATGTTATTGTGCAATATATCGCGGATGA  
ATTCGGTACCCAGCCGCTTGGCCACACTCCTTCACACGCAGGTTACAAGCAAGTCCCGA  
AGTCGCGTACAAGAAATATCAAGGAAGAGCTCGCAAATCCGCCAAGAAATGTACGGCAG  
AAAGCGATAATTTCTTAGCTCCAAATAAAGTATCTGAAGGCTTTTCGGTGTCTTCCGAA  
ATAGGAATATAACACTGCAATTCATAATTATTGTTTCAAGCCGTCATGCTGGTCCGATTG  
ATCGCTATATTATGGATTTGAAAAATATCGACCGCGTTTCTCCGGGTGGTTGCGAAATGC  
ATATTTTACGTACTACTTCTGGTGCTGATATCATTTTCCATGTTGACGGTTATGACCCCG  
AATTGAACAACGAAGTTCACCGGCACGTTTATTACATTTCGAAAGGCCATTCGTGTGCCGG  
CTGGTGACACCTTGTGCGGAGTTATATAACGAGAAATTATAGCCGCCAGGCCGAGAAAGC  
TGTTAGCGAATTTATCTACATCGAATAATTAATATGAATTTCAAGGGCTTTTATACTGGT  
GTAGGGAGTCGCGAGACTCCCGAACATCTTTGTGCTTTGATGAAAGATATCGCGGGGGTT  
GCTGCGAACAGAGGATATAACGGACGTTCTGGTGGTGCCGTTAAAGCAGATGACGCATGT  
GAAACTGGATTTTTGGCAGTTGCTGACAGTTTAGCCATCGACAATATGGCTGAATTTGAT  
GTTTATCTGCAATGGAAACGATTCAATGGCCGTTTTGCACCAAACATGCTCGTCACAAC  
CTCATTTTACCAAGCGCCAATGAGTGGGACGTCGAGCAAAGCATGAAAACGGTCCACCCA  
ATTTACTCAAAGGAGGTAAATTGACTGGTGGTGCTCTTGCCTTCACTCATACTCGAAATGTT  
TATCAACTTCTCGGATAGAATCTGAAAACACCTTCAAGAAATCTTGGTGTGTTATTCCGGT



CCAACGGATAACGGAGTTTCTGGAGGAACAATACTGTGTGGCAGCTTGCAATGTGTCAT  
GGTGTAGAATGTTATAATCCTTACAACCGAGTTTGACATTGAGCGGCTTAAGGAATTTTTG  
GATCTTTGAACTTTACACTCTCTCCGCTATAACCAGGTGCAGGAAAACTGCAGCTATTC  
TAAATCATATTGTTGAAAATAACGAAAAGGCAATTATAGCCAGCATATCTAGACAATTGT  
CGAAACAATCTTTCGAATACTTTGTCTGGTCTGGGCGGAGAAGGCGAGTTAGTTGACACCG  
ATAACCGCCAAGGCGAAAAGTCGGTACACGAAGCAGTTCTCAAAGCATCCGAAGCATTTC  
ATGTGATTTTTATAACGCGCGCGGCTTTAATGGGTCTTCGAGATATTGATGCTTTAAAAG  
ATTTAATCTGTATATCGATGAGGTTCCAGAATTAACAAGCTTAGAGCGATTTACTTGCA  
CAACATCAGTCGAAATTCATATATTCGAATTGTGCAAAAATAGATGAAACTGGACTATTAG  
AGCTGCGTGATGAGCATCGAAAATCAGTCCAAAAAATGGCAATAGATGGCTTTAGAGGAA  
ATGATGACATTTATTCAACTCTTTTTCCGTTGTATAAAGCACTCCTGACAGGTGTCCCTG  
TCAGGCTGTCAGTAGAGGAAGGTGTGACGCAATGTTATTACGTGAATGACGCGGCAACTG  
ATGATTGGGCAAAATTCAAGTCAATAACTGTCTGTTCTGCAAATTTTGAGCAGACTTTTA  
CTAGCATGATTATGAAGCATTTTAACGGATGGGAATTTGAAGAGTCTCCGCTAGTTGAGC  
GGTTAGCTTTCCGAGTTTATCATAAACTGCTCGCGTAATAATTCATGTAATGTTTGTTG  
ATGATTTGTCTCGTTACAAAGCCGACAAGGAAGTAGATGGGATTTTCGAATTACACTCGCA  
TCGAAACTACTCTCGACACAATCATAAATGGCGATTTCAATTTACACTCGAACTTCTTATC  
GGCCAAGAATGCCAAAGGGGACGGAAGTTCCTTATAACGCGCACGGTCTAAACTAATATT  
CGGATTATACCAATCTGGTTGTGATGTTTTCGTATAATCCGGCGCCTTGGCAAGTTCCAA  
TTTTGAAAGAACTCGCAAAGTCGGTAGGCTTAGATGAAAGTGCAATGGTTGACGCGTACA  
TAGTTTCAAAGTATCTTGAACCCGCATTTCAACTCTGCACAATATGTGATATCCGAAATG  
AACATTCGCTAAAACCCATCAACCGGTATGTTCTGATATGAAATTAGCTCGATATATGT  
TGAGTTATTTGCCGCACGCTGAGATATGTGACGGTAATTCATCGAAAATCACAAACAGG  
TAAAAAGAAATCGAGAATCGTATCAAGCGCTATACCAAATGACAGAGAAAGAAAGGTTGA  
AATACAAGAATCTGCTAAGAAAACCTGGGCGAAAACCTCGATATCAATTCTGCGGGAGACC  
AGGAATTTGTCCAGGACTGGATAATCAAACGCGAGAAAAAGCCAAAAAGAAGGCCTCTA  
CATGAGGCCTTTGTTGTATGCACATGATAACACAGGGATCACTCTGGGGTTATCAGGAAT  
TTTTGATGATAGGGTATTAGTCTAATGACCTTGTTTAAACCTGGTTGATTATAGAAATCC  
TGGCTCCAGGTTCAAGCTTGCTTGAACCTATCTTTTTTATCCTTTTAGTTATAATATCTA  
TAAAGCCATAAAGGATAAGTTTTGGCAGGGCCAAAACCTGCAGGCAGTAAAGTTAAATAA  
GTTTAGCAAGCTTATTAGTATGATATAATCAGTCATAGGAGGAATTGCCCTATGTAATAT  
GTTGACAATGAAGTTCTATAACCAGAATATTTGCAAATGGAAACAAGATATGCGTGATGCA  
GGGCATCACATCAAGATGACAGATGCAATTGGTATAGACATTATGAAGATTGCAAAAGGT  
TTTACCGGATATTCCAACTTGCTGGATATACGCAAAATTGGAAAGACGGAATGATATCT  
GATGCAGTCGAAGCTGTTGTATAGGGATTAGTAAATCTCGATGAAGAAAACCTACAAAAC  
CCCCATGCTTATATCACACAGGCTTGTTACCGTGCCGTTATTGGACGCATCAAGGACGAA  
AAACACGAAATGGCAATCAAATACCGGTATTTTTTGACCAACGTGTATGACGAGCATGAT  
GAGGATATGTCACGATTGGTTGATGAAAATTCATCCAAGACATCCATGGCAAACCTAGTA  
GCCTTTGAATCATCCCTTAAATCTAAAAAGAAAGATAAAGAGGATGTTCTTAATTTGGAT  
TCATTCTATGAAGACGACCGTGAAGATTAATCTTTTACCCATCATTGATTCAACATGCGG  
AGAAATAGAATTATTAAGCGGATTTTCGTAAAACCTCCAATTATTGGATTATAATATTCTTG  
TAGTTTAAAGATCCTGCTAATATTTTCATGGCAGCCGTTTCGAAGTAGAAACTAGGCCAACT  
CGATTGGGATATTGATGTAGACACAATGACAATGGAGATTTTCATATGTCGCCTGATTACG  
ATGTTGACCTTAGCACTGGTGCAGAAGCTCTGACTGAAGTTTATCGGCAAAGTCTCATGG  
ATTTACAAGAACATCTACGAAAAACAAGCTGAAGAAAAAAGCCGCAAAGCATCTTAAACC  
TCATGGGAGAGAAATTAAGCGGCTGAAGAAACATGCTGAACGAGCTCTATTCGCAAACAA  
TAAAGAACAGTATGCGTATGCTATCAGTAAACTTCGTACCCTTTACAAGCAAAGCAACA  
TCCGCATTCTGCAATGATCACTATGTTTGAAACTAGTCGTCCACAAATTGTTTACATGGC  
TAAAGCATATGCTGCTGCCATCCAATCGGCAGAAAAATAGTCAAGCAAATCGCAAACCTG  
TTCCAGTTTGTTCTATTTGATCTATTATAGGCTCCACGGAGCCTATTTTTGTATTAGGAT  
TGAAACATGAACTTTTGCATCTCGGTGATATGCACAATGGCGTAAAAGATGATGACCCT  
TGGCATGAAAACATCGCTGAACACATAATTGACCAGGCTGTTGAATATTCTAAAGCAAAT  
GGGATAACTCAATGGCTTCAAAGTGGCGACTTTTTTGACGTTAGAAAGGCTGTAACACAA  
TGATAATGGAATTCGTCAGGACTCGAATTACGCCCAAATGAAGGAAGCTGGTATTATA  
TGCTATGTGATCGTGGGAAATCACGAGATGAATAAGAAGGATAAAATACATCCAATAGC  
GTAACGGAAATTCTGGGTAAAGATGAAACGTATGTCGGGATTGATAAACCAGACGACGGT  
AATTTCAAGGGCTTGATTACGACCTTATCCGTGGTTGTGTAAAGAAAATGCATCATAAC

ATTTTCGAGTTTGTCAAAAAGTCAGAATCCCCATGGTGTCTTGGTCATTGGGAACTAAGC  
GGATTCTATTTCCACAAAAATATTGCGAGTTTGGGATACAGTGGAGATTCTTTGAAAAAG  
TATGAAAAAGTTGTCTCTGGACATTTTCATACTCAATCAGGCGGTGAAAATATTCCTAC  
ATCGGCACACCTTATACGATTACAGCCGGTGATGAAGATGCCCTCGCGGATTCTGGGAT  
CTTGACACAGAAACCTGTGATTTTGAATTTATCCGAATTCCAATACATAGCACAAACGA  
CTGACTTAGCCTGGTGTACAGTAGAAGAAATTCGAGAGTGTCTCCGGTTGTTCTGTCCGT  
TTGATTGCTAATGAAGTTGATGAAGGCTTGACAAAAGTTGAATTTCTTTTGTCTAAAATT  
GTTTCATGATTTGAGAACCATCAACAAATCTGCCAAAATTGAAGTTGATTCTTCATCTGAT  
ATAACCGATGACGGCGAAACTCTTACTGTGTCTATGGATACTTCTGGTAGTTCGATG  
ACCATAATGGGTTTATTCGCTGAAAGTGTGCAAAATTCAGCATCGGTGCGGAACATAAA  
GAAGCAATCGTAATTATCGCAAATGAACTTTATGCTGAGGCTATTGCATCATGATTGAAA  
TTAAAAAGAAGCAGCTTGGATGTATTTCGAGTTCGCTACAAAAACATCATGTCTTAGGCG  
GTGATCCTATCGATATGTGCTTAACAAATATGCTAAAACATTCTGCACTGGCAAAAATA  
GTGCCGAAAATCGACAATGTTGGACGCAATTTATTTTTCGCTATTCCGGTAAACTTTTTTC  
GAGATATTACAACAAACCGACTGCTGAATGAAAACACTGTCAAAAATTTGTTAGTGGAAC  
TTTGGTTGGAATACGAAGCAAAGGTTTATCCCATTACACGTTGTATTAAGCCTAATAAGT  
TTTCGATAACTTGTGACGGCGTGGCGATAGATGCTGCAGCATCAGTTAAAGATTTTCAGT  
CATATTTCGAAGAAATGATTGGAATGAATTCTACCAGTTTTAAACAGATAGTTGTTTTGG  
GCACTGCTGGATATACGACGTTTATGCAACTAAAAAGCGCCGGAAGGGCCCACTGGTG  
GAAGATTTGCTGGAAGTATCCGTCTTAGCTCAAATAGACAAAACCAATAAAAGCCACGGA  
TTAAGGAGTTAAACCAGGATATCACTTCAGTTGATATGGAAATAAACCATATAAACTCAC  
AGCTGAAAACATAACCAGGATCACCCGAATAACTCTAATGCATCCAATGCTGCTGCTATAT  
CCGACCATCAGGCAGTATATGACACTGCTCGCGAAAAAGCAAAAAGAAATCAAGTCGGCTA  
TTGATTTGCTCACAACGCAAATTACAGAATTCGTGATGCCTGCTTCCCCCGGATCCGATC  
TTGGCAAGTTTACAATGGCTAGAGCAAAAAGCCGCGAGCGCAACAAGAACAATTTTCCGGTA  
TTGCTCATATGCATGAAGATGGTGGAACGTGCCCAACATGCATGCAGCAATTTGACGATC  
CTGAACTGCTAGTGAAATTGCGTGATAAAAATGTCGCAGATCCAAGGTCAACTTGATAAAG  
CCGATATTCGCATAAATGAACTCAACCAAAATATGATAGAGTTCAATGAAGCAGCTGTTA  
ATTTCCGCGATCTTCAGAATAAGTTAACCAACGACAAACAGTCTATTGATCTTTATGTTA  
ACCAAACAAAAGCTGCAAAAAGCTGCAATCGAGCGTCTGCAAGATGAAAGAACAGATTACA  
CTTCGGAAATCGACCAACTCGGGAATAACCTACGTCTAAAATGAGTGCTAAGCCTGATT  
TAGAAAAAGAGAAGCACCGTACGTCTTTGTTAGCTGATCTTTTGCAGGATTCGGGAATTA  
AAGCCGTCATCATGGCCCGCTATATCCGTATTTCAATAATCGCATCTCTCATTATCTTG  
ATATAATGGATGCAGATTTTGGATTTACTCTTGATTCCGAATTTAAAGAAGTAATAAAAT  
CTTCAGGAAGAAGCACATGCGGTTATAACAGTTTTTCTCAAGGCTAAAAGCTCGTATTG  
ACATGGCTGTCATGTTTGTGCGTGATTTAGCATCTGAAGTTTCTGGTGTAGATGCTA  
ATGCCCTGTTTATGGATGCAGTATTTGACGGTCTTCTGATGATGATGCACAACGCTCAG  
TGTTTTCAATCATAGAAAACATGAAAGCCAACGTGTTTATCATTTCGCATGGAGAACACG  
ATCCTCAGAAATTTGACAGACACATTGTAATGTCAAAGCTAGGGAGACCAAGCGTAATGA  
ATGAGGTAATTTTTGATGTTTTATAATCTTCCAACAACACTGCTCCTGAAATAAGAAGTTAT  
AACTTAACTGATGAAAATGGTCATGTTAATTTGATTGTCCTGATGATGACCTGAAACAG  
GTCTTCAGCGAAGAAGATAACCGCAAGTTGAAATCAAATCGCCATGCTTAGTACAATTTA  
GTTGAAATTTTCGACTAATGATTTGCGTGAATAGAAATCATATTAGAATGTTTCGTTATAA  
ACACACTGAGGAATATGTATGCGTAATCAAGCCGTTGTTTTGTACCAGCCGATATCCGC  
CCGATAAGCGATAACGCGTTTGAATAATTCAGATAAAATCCGAAAAGCTTGGGTATCATT  
ATCAGTGATATTCGTGCAAACCAATTGCAAGCTCTTAAGCAGAAAATTCGGTTCGAACTA  
TATGCCGAAATTTGATAAAATGTTCAAGACATGTATATCGATATGCTCGTACGCCGCCGA  
GAAAGCATTTTAGCCAATGGCGGATATCATGTTAAAGGAATGAACGACAAAAAAGTACTG  
GCCAAACAATTTCAATACGACACTGACGAACTGATTATTCAAGCTGCTCAGACTGTCATG  
GCATATTACTAATAAGCTATATCGTAGTTGTGTTATAATTTCAAATACCGAAAGGAAT  
ATGAAATGAACTTACAAAAGCAACACTGTCCGTAATGAAGAATTTTGCAGCTATCAATC  
CATCTCTGCGACTTACCCCTGGCAATTTTCATCATTACCAAGTCGGTAAATGGTGTTCAT  
ACGGTGAAGTTACAATCGCTGATGAAATTGATTCTGAGCTGAACATTTATGACCTTCTA  
ACTTCTGTCTATTCTTGGTCAACTGGGGGAAGGTTCTGAAATCAATCTCTCAAACGGGG  
AAATTGTGATCCAGAATGGTCGTGCAAAAAGTAAATCTGCCTGATGCTGAATCTTCAGCCA  
TCGTGGTTCCGAAGCAACGGCTGCGTATGCCACCGGCTGATGTAGAGTTTGACCTGAAAG  
CCGAAGATTTAGCGGAAATTTCTCAAATCTCTCGAGCGGTTGGTGCAGACCGCATCGCGA

TTACTAATCGCAATGATCATATCGTTATTGATGCGTTTGCCGTGAAAGACGGCGATAACG  
CACGAACCCGATATTCTTTGACCGTCTGTCCATACGAAGGCACCCACAACCTTCAGTTTCG  
TCATCAACCTTGAAAACGTCAGTGCCGTCGTTGCCGATTAATAATTCAATATTTCTTCCA  
ATGGCGCTGCTCAATTCCAGGGAATTAATACCGCATCTGTATTTGTCCTTGAAACATCTT  
CAAAGCACGACTTCTAATAAATCCTGGTGTGATATAATGCGGGTGTAAAAGCCCGCTTTC  
TTTTGAGAGGAATTTAATATGTTGACAGTTAATGCCGGCGAATTCATGTTTGAAAACGA  
ATATCGCCCAGGAACAATCGATGAATGCATTTTGCCAGAATATGACAAAATGATTTTCAA  
ATCTATCGTTAAATCTGGTCGTATCCCCAACATTATTCTACATTCTCCTTCCCAGGCAC  
AGGTAAAACCTACCGGCGCCAAAGCTCTGGTATCAGAAGTTGAAGCCGAGTATCTGTTTCG  
TAACGGCTCCGACGCAAAAATTGACTTTGTTTCGCGATGTTATGACTCCATTTGCAAGCTC  
TAAAACCTATGGCAGCTGGTGGAAAAGGAGTTATCATCGATGAATTTGATCGAGCAGGTCT  
TGCAGATTCTCAGCGTCATCTTCGCTCATTTCATGGAAGCTCATTCCAAAAATTGCACATT  
TATCATTACTGCGAATGATTTGGGTGGAATTAATCCAGCACTTCAATCACGGTGTCTGTG  
TATTCATTTGGTAAAGCCGATCAATCTGATAAAGTCAATATGATGAAACAGATGATTGT  
TCGTGCCCAAGCAATTTGTGATGCTGAAAATATCGAAGTTGAAGATCGCAAAGTTATTGC  
CGTTTGGTTAAAAGAAGCTTCCCTGATTTCCGTAAAACCTGTCAACGAGATAGATTTCTA  
TGCATCCGAAGGTAAAATTGACAGCGGTATTCTGAGTCTGGTTCTCAATACCCGCAACGA  
TATGGAACAAGTCATTGATGCAATTAAGCTAAAGATTTCAAATCGCTTCGTGCAATGGC  
TGGTCTATACACCACTGATTACGCTGGTTTTGTTGAACGTCTATGTAATGCACTGTACCC  
GCTCGTTAATGGTCCGGAAAAAATTCGCATCTACGAAATTATCGGTGAAAACAACCAACT  
GTTTGGCCAAGCCGCAAATATCGAGATTCATGTTCAATATATGTTCAATTCAGCTTGCCGT  
AGAATTACATGGTAACTGGCTTTAAGGAGTTCGATATGAATTTGAATTTCCCTATGGGTG  
ATGATGAGCAACTCAATGAGCACGAAATTGCCTGGAAATCGAAAGATTGGGATGCCGTAT  
CAGCATTAGCTGATTTCGTTCAAAGAACCTGCCGAAAACAATGCATTCGCAAAGTTGGATG  
ATATCACCTACACCAAACCGGAATGATGTGTATCAGATAGTGATTATCCGGCATGGTTTA  
TCAATAATGCTCTTACGATGCATGCCGAAACACTGTATTCCGGCATAACGTCATGAATCTTC  
TGTCAGCATTGCCGGCCCAAGCGCAATACAATTACCTGGTGTCTATCTGTAAGAAATGGCA  
AGATGTACGGCAAATGGCCTAACTAGATGAATCAATCAACGAAAAGCTTTATATTGCCG  
TTATAACAAGCAGCGAATAACGTTGATTTGCATACAGCAAAGACGTATATGCAAATCATGC  
AAAGGCGAAACACTTTGCATGATTTTCTGAAAAGTCAGAAATATATTGTAACCTCCAGCAT  
TTTTTAAAACCTGTTGCGAAAACAGCAAAAAGATCAAACGCAGATGCTTAAGTTTCGCTAACA  
AATTCTAAGGTTTTCTTATGGTCCAAATCGATATCAATCATCCTGATGATTTTCTGAAAA  
TTGCTGTATCACTTACACGAATTGGCATTGCTTCTAATAAAGAAAAGAACTTTACCAA  
GCTGCCATATACTTCAAAGCAAGGCGAACATTTTCATCGTTCATTTCAAGGAAATGCTGA  
TACTAGATGGTCTACCAGTACCAATTTCCGAAGAAGCTATTTCTAGACGAAATAACATTG  
CTTCATTGCGTCAGTCATGGAATTTGTGTAATAACTAACTCCTATTGACTTGTCTATCTC  
ACAATAATTTAGAGTTATTAGCCACAAGCAATAGGGCGAATAGCAACTTATCGCGAAGT  
ATAAATTTGGTTAATGAAATGGCCTCAACAGAGGCCATTTAGAAGGACATATTTTGCAGC  
ATTACACGAACATGGAAGTTATTGGAATACTATATTTGAGCGTTACGTTAAAGACGGTG  
TAATCCTATCGCGAAAACAAATTATCAGCCCACACTCTTTCATCATGCCGCCCCAGGTG  
TAGAGACGAAGGACAAAGACATCTATTGGCTTTTTTTCGTTACCAAAGAGGCATGAAAATA  
TTTGGGAAGCAAAGTAATGGCAAAAACGAATGGCCGAAATTGGCCAAGATGCCAGGGGTA  
TGGACGACTATTGTATTTCTACATCTCCGAAAATTATCGCGGAGTTATTGATTTTGATC  
GTGACAATGTTATTATGGATGTAGTCGATATCGAAGTAACAGCTCCAGAACTCCCTGATC  
CCAAAATTGCAAATATGAAATTGACATGATTTCCCATGTGCGTTTGCACGAGGGGCAAAA  
AGACATATTACATTTTGGACCTTGTTAATGATGTAGGCCATTGGGACCCATCTAAGTCTG  
TTCTAGACAAATATATTCTTGACAATGTCGTTTACATGCCATTCGACACTGAAATTGATC  
TTCTTCTCAACTATATTAACCTATGGAATCATCTACGCCTGATTTGGTGTGTTGGTTGGA  
ACAGCGAAGGTTTTCGATATTCCGTACATTATCACTCGAATTATCAACATCTTGGGTGAAA  
GTGCGGCTAACCATGTAAGTCCGTACGGCAAGATCAGCTCAAAAACAATTACAAACATGG  
ACGGTGAAAAAACCATCTATCCTATCCATGTTTTTGCCTGATGGATTATAGGGATGTTT  
TTAAAACGTTTCAGTTTCGCTGTTATGCCTGGCTACAAGCTAGTTAACGTTGGATATCGCG  
AAGTTAAAGCAGCCAAATTGGAATATGATGGCCCAATTAATAAGTTCCGAGCAGCAGATC  
ACCAACGATATGTCGATTAATGTTGTCGAGATACGGATATGATCCTGTTGATCGATCGCC  
GTCGATGCTTTATTGATCTTATTCTGTCTCTTTGTTCTTACGCGAAAATTTCGTTTCGAGG  
ACGTATTAGGAACTATTAAGGTTTGGGATTCTATCATTTTTAATTCGCTTGTGAGAAAA  
ATGTAGTTATTCCGATGATGAAGGCTAGTCCACAGCAAAGTTTCCCTGGGGCATAACGTAA

AAGAACCTGTTCCCTAGTGCATATCGATATGGCATGAGCTTTGATTTAACATCTCTGCATC  
CGAGTATTCTGCGTCTTCTCAATATCAGCCCAGAGATGATTGCCGGTATGTTTGCACCTG  
CACATCTTGACGACTATATCAATAAGACTGCTCCTAAACCATCTGAAGTTTGTAGTTGTG  
CCCCAAATGGCATGATGTACAAACGGGGTGAAGCAGGTGTACTGCCAGCCGAAATTGAGA  
AAGTATTCTTGCAACGTAAAGCCGAAAAGAAAATGATGCTTGCTGCTATACGCAACCAGG  
AAGCAATTAAGAAAAATTCTGGCTTCCAGGGGCGAAATGGTAGACCACTAATGTTCCGCT  
TTCATATGGGTGTTATATTATGCACCCATCTTGCAGGAATTACATTATGTGGTACATTTA  
CAAAATAAAGAATGAGCTAAACGGCAAAATTTACGTGCGGGTTCACAAATCCGAAGACAT  
GAAAAACGACCCTTACATCGGTTACAGGCGTACGTGTTAAACAAGCAATCGCCAAATATGG  
TGTTGAAAATTTCACTCGGACGACGTTGTTTCGAATTTGCGACAGCCGAAGAAGCTTACAA  
TATGGAAGCCGCCATAGTACTGAAGAGTTTATCAGCCGTCCAGACGTCTACAACGCAAT  
GGTCCGGCGGTAAAGGTGGTTGGGCCACATCAAAAAGCCCGGGCAGCATATGAAAGACCC  
AGTCATGGCTGCTTACATTGGGTGTTGCGTTCGCCGTGCATATGAGCAAGACCCGATTAA  
AAAGCTTATTAGCCTCGGCAATTTCAAAAAGCGTTCGGAAATGAACCGTGGCAAGGCACA  
TTCAGTGGATACTACCAAAAAGCGGTCCGACTCGCCAAACGATTTCTACTCGTATAACAC  
GTCTGTTTTAAACGGTATCGCAAAGTCAGCTGAGCATCGCAAGAAAATGAAAGCCGCTG  
GCCTGAAGAACGCCGCGCAAGCCAAGCAGAGCGTTCGAAAGGCCCTAGTAGCCTCAGGTAA  
TGAGGCATTTCGCTAAAAACAGGCTGGGCAAAACTAATAGCGAAGAAACGAAGGCTAAGAT  
GTCTGAAGCGAAGAAAAAATACGGGGCTGAAAAGCCAAAAGTTATTGTAAAATTTCCACA  
CTGCGGAAAAGAAGGCATCAAGCATGCCATGCTCAGATGGCATTTCGACAATTGCAAACA  
CAAAGAGGCGTAATTATGGAACCTCGAATTATCCGCGACTTCAATGAAGATGAGCTCGCA  
TATTTGAATACTCTTTCAACCGATGAACTTCCCTACCATGATCGTTCGTTGTGAAAAAGAA  
GAACAAAACGCAACACCAACCAATTGTACCACAAAATTTTGATCAGCTCGCTTTACGTA  
GCTTTTTAACACTTCCCTTAACTCGAAGCTCCTTAAACCCGGTGAACGCAGAGAAGCTCTC  
AATGAGACGATCCTGAGCCAAGTCTCGAAAGAGAAAGGTGCAACGACTATCAAAGGCGG  
GTAATACCGAACCGAGTAGAGTACACCCAAGTGGGTGGAAGCGCCGTGTGTGCAGCAATG  
CATTGATATAGTCAGCTCTGCATAGCGATATGCAGCTGTGAGTAAATGTGCGGACGACA  
TATCCACGGTCTTGGATTAGCGACCCAAGGCGAACACCTGGTAGGTAACAACCTTCTTCC  
GATTCTACGATTTGCGAAAAGCTGAAGCTATTACAACCTACGGTAAATTTGGCTATTCCGGT  
GTATTGAGCGTAAACTGAACGAAAATATCAACAATGTTGTCAAATAACTAATGTTGATT  
ATGTGTGTTATATTGATACTGACTCGTTGTATCTCAACATGGAAGCAGTGGTTAATAAAG  
TCGGTATTGACAAATTCCGGGACACCAACCATCTGATCGATTTCCCTTGATAATCTCGGAG  
ATAAAAAGCTCGATCCATTTATCGACGAGTCATACAAAGAACTCGACGATTATATGGACA  
ATGAGCACCATCTCTTGCTCATGGACCGCGAAGCTATTTTTGGAGCTCCATTGGGTTCTG  
ACGGAATTGGTGGTTTCTGGACAGGTAAAAAGCGATACGCTTTGAACGTTTACGATATGG  
AAGGCACTCGATACGCTGAACCGCATCTGAAAATCATGGGTCTAGAACTCAACGATCAT  
CCACACCTTTGGCTTGTCAAAATCGTTTAAAGAGTCAATTCGTCGGTTGTTGCAAGAAG  
GTGAATCTTCTTTGCAAAATTATTGCATTCAATTCAGACTGAAATCAAACGATCGATT  
ATCAAGAGATTGCCGCAGTGTCTTCTGCGAATCATATCGCCAAAAAAGCGGATTCCGGCAG  
GATATCCAATTAAGGAGCTCCGTATCATGTGAAAGGAGCCCTTGATATAACCGGATTG  
CAAAAACCTGACCAATCAATTCCAGAGATTGTTGAAGGCGAAAAGGTAATGGTTATTCTC  
TTCGTGATCGTAATCCATTCAATGAAGCGTGTGTTTGGCTTGCCGTCAGGAACACTAATTC  
GACCTGTCGTAGAAGCCGATCTTTTGAAGTTTATGGATATAAATAAGCATTTTGATAAAA  
CATTCGTTAAACCACTTGCTTCAATTTGCGAAGCTACGAAATCAGATTATGAATTTAGGT  
ATAATTTGTTGACATGTTTGTATTTGAGGAAATAGTATGTGTTAAATGACTGTTCAAG  
ATATTCGGGACATCATGGTGTCAAATACAAATCAAATGAATTTGTTACTGACAAATCCG  
GGTTAAAACTGTGCAAAATTGCCCCAGTTATGTTTAAATCACGATGAAGATCTAATTTTCG  
GTAAACTTAATCACGATAAATTTGAGCGAGAGTTGTCTTGGTATTTGAGTCAATCTCGTT  
ATGTTGCTGATATTCAGGTAACCCAGCAATTTGGGAAGCAGTTGCAGATTGTAACG  
GTATGATCAACTCCAATTATGGCTGGGCTATTTTCAGCGAAGAAAATGGAAATCAGTTTG  
CAAATGTTGTCAAACACCTAATTGAAAATCCATACACTCGTTCGTGCAAACATGATTTATA  
CTCGACCGTCTATGCATACTGATTACAATGCAAATGGTATGTCCGATTTTCATGTGCACCA  
ATAACGTCCAGTACCAGATTCGGGATGGAAAACCTGATTGCAGTCGTTTCATATGAGGTCAA  
ATGACGCTATTTTCGGTTATCTGAATGATTGGGCGTGGCAGGATTATGTTTTGTCAATAC  
TGGTTGATAGTCTTCAATCCCATGAAATCATGGTATAAAAGGGTGATATCTACTGGTGTG  
CCGATTCACCTCATGTGTATGAAAGACATTTTGGCCTGATTGAACAATATATTTCTCAAT  
AATTCTCAATTTACGCATAGCGAGCATAAATTTGCTCGCTATGTTGAGAATCTTTATAGG

GTTGATATAATGTCACCCACAAAGGGAACATTTATGGCATCTACCACTGATCATGAAAC  
TACCAAAAATTTAAAGGAGGCTCATGCTCTTATACAGCATCCTATGGAAAACGTTAAACA  
AGCGCTGCTGATAATCGATAAATCAAGCAAATCACACCTTGTTATATTTTTGATGCTCAT  
ATGCATGATGGAAAACACTGCATGTAGATTACACAGCAGTTAATGAAAATGATGAAATTCAT  
CAACTTGTTCAAGAAGCTATGAATGCACAAGTCAAACAAATTATGAAGGATAAAGAGGCA  
CAAATTGATTGACGCAATCCTTGAAAACCTTACTCTCCAACGATACGTACTTTATTTTCG  
GCATACCCGTACATAAAAGAAGATTATTTTCGACAGTGGGCCTTACCGCGAGATTTTTAAA  
CTCATCCAAAACACGTGAATGAGTACAATACAATCCCAAACAAAACACTGCACTTGCAATC  
GCACTTGACAAAAGTCTATTGATCAAGTAACTCATGACGGTGTGAAGGAAGTTCTGGCT  
CGTCTGTCTTCTAAACCAGAAGATCATGCCTGGTTAACTAAAGAACTTAATCCTGCTGC  
AAAGACCAAGCGATGTATAACGCGTTGTCTAAGGCATTCGAGATACAGGAAAATGCGGCC  
AATCCATTTGAAGAACGAAATAAGAAATTGCCGGATGTTGGCGCAATCGAAGATTTCGATG  
ATAGAAGTATTGGCTATTTTCGTTTGATGGCTCAGTCGGACATGATTGGTTTGAAGGTTAT  
GAACGACGTTATCTGCTTTATCAATCCAAAGCTAATAAAGTCCGGTTCATCTCATACGTT  
CTGAATAAAAATAACCAAGGGTGGTGCAGAACTTGGCACGCTAAATGTTATCATGGCGGGT  
GTCAACGTTGGTAAATCTCTTGGTCTTTGCTCTTTGGCCGCTGATTATCTCCAAACTGGC  
AAAACGTCGTTTATTTCTCGATGGAGATGGCTGGACATGTTGTTGCGAAACGTATAGAT  
GCCAACTTGCTTGATGTCACGCTTGACGAAATAGATGATGGCAACATGAGCTTTGCTGAG  
TATAAAGCTCGGATGGAGCGTCTGAAATCCAGAAATATGGGTCGTTGGATTATCAAGCAA  
TACCCAACCTTCTGGTTCGAATGCTAATCATTTC AACGCGTTTTTGAACGACCTGAAGCTG  
AAGAAAACTTCAAAGCGGACGTTGTTATTGTGGACTATCTGGGTATCTGTGCATCCACA  
CGAATTCGTAGAGGTTCTGAGA ACTCGTATACTTTGGTAAAAGCTATTGCCGAAGAATTA  
CGTGGCCCGGCTGTCCAACATCAAGTTGTTTTGTGGACTGGTGTCAAACCACTCGATCT  
GCATGGGATTCGACCGACATCGACATGTCAGATGTAGCCGAATCTGCTGGCTTACCAGCA  
ACTGCTGATTTTATGCTTGCAGTGTGGAACTGAAGAGTTAGCTCAAATGTGTCTCCAA  
CCGATGATGCAAATAAAATCGCGGTATGGAGATAAACATTGGATTAACA AATTCAAATA  
GGGCGTTAAAAAGGGCAACCAGAGATGGTACGATGTAGAGGAAGAACAATCAAGGCCAGG  
AACGCCAAACACACCTTCTCCAAGACAAGCTGACAATACGAAGGGCAATAACTCAAGACA  
GCATCTTGACGAACTTGCCGCGGCAATGCATTTCTGATAGCCTAACGGCCATCTACATAG  
GAACTGATGATGAAAACATTTCTAGAGTGTCTGGTAAACAGAAAGATCATGTCAATAT  
GGATATACAGGATGACGAAGACGTTGTGGCTGGTGAATCTGGAGGAGACCCCGTCAACGT  
CGCAGCTGGTAAAACGTCTGGCGCAGTCATTTCCCCGGGGCCTAAAGTCCTTCCTAAGAA  
GGAAAAGAAGAAGAAATGATTACGTTTCGAAGCCGCTCAAGAAGCGTGCGAGGCTTTAGGT  
CATGTAGCATTAAAGAATCTTAGAAATCAACCTTATCTTGATATTCTGAAA ACTATCTAC  
ACGAATTGCTTACCAAGCATGATGAAGGATGTCGTGAATGAGATGGCTGTTAGTGCTGCA  
GAAATTGATTCGTA CTGGTTACGCAAGGAAAGCCATTCTCTCGTTTAGAATATGCTCAA  
CACCGTGAAATTCTGTTGGAAGCATGTCGGCACTTGGATGCTAATGGGTTTTTGTGCGAAG  
TATAATGGGGCGAAGAGCCCCATTTGGAGTTATTATGTTTGCTGATTTTTTGTGTTGCCGA  
ACGAGCAATGATGCATTTGCCAAAATTC AAACGAAAGAAGGGAAAGTTCAATTCAAGATG  
TCCAATATGCGGTGATTCATGACGGACATGAACAAAGCCCGCTTTTGGATGTATGAGAA  
GAAGGGCGAGTGGCAAGTTCATTGCTTTAACTGTGGTTATCATAGCAATTTGGGCGGGTA  
TCTAAAGGAGCGAGAAGAAA ACTTTATCGTGAATGGCTATTAGAAAGAAGGAAAGAAAG  
CACTGTCTTCAAGCCAGAAGCAA AATCAGTAGAAAATCTCTTCACCAAAAAGATGCCGGT  
GATTGAAAAGTTAAATTTTTGTGATCGTCTAGATTTGCTACCAGCGAACCACCCTATAGT  
AAAATATGTGCAAAAAGAAAATAACCAGAATCAGCATATAAGCGGTTATGGTTTACTAG  
CGAATGGCAGAAATTGGTAAATTCTATTTACCAGATACGTATACGCGCGAATCACCGTA  
ATATAGGTTGGTTATACCGATATTTGACAAAACGGTGAAATCCAGTCCTTTCAGGGAAG  
AGCTCTCTCAGTAGTCCAAACAAATACTTCACCATCAAGGCTCATGAAGATGCATCAA  
AATTTGGAATGGACACAATTGATGGGAACCGAACTGTATGGTATATGGAAGGACCGATT  
GACTCCCTTTTCATTCCGAATTCTGGAGCTATCACTGGCGGTAGTCTTGCATTAAGTAAA  
GTTCCATTCAAAGCACTCGAGTATGGGTTCTTGATAATGAACCATTTTCATCCTGATACG  
TGCAAGCGACTGTCTAGACTAATTGATGCAGCTGAACGAGTTGTGATGTGGCACAGGTGT  
GCTTGGGCGTCCAAAGATGTAAACGATATGATAATGAAGGAAAATGCAACTGCCGAAGAT  
ATTCTCCAGTATTGCAAGGACACCGTCGTGTCGGGTTTGCAAGCAAACACTGCGATTTGGC  
AAATGGAAGCGTTGCTAAGGCCTCTTCGGAGGCCTTAGTTGTTTTTATTGAACGATGACG  
AACAAAACAGTGTACTATCTCTAAAGATGATACTATATCATCATACCAAACAAACTGA  
TTAAAACAACGGAGTATATCATGACACGTAAAAAACTCGAACATCCTTCTCTATTGTGCA

ATGCTCACCTCATAGGCCGAATGGTATGAGAATCCTCGGGTTGCGAGCATTTTGATCAATA  
GAAACGGAAAGACTGGTAAAATTCCATCAAATTTACCGTTTCGGACAAATAAAAACCCCTC  
TCCGCGGTCGAGGGCATGTAACCTTTCTTTTACACCAAATTGGCTTGGCTACTCGATCGAT  
ATCTGATGCTAATGGAAGAAATGACAAAACGCGGCTATTCCGCGACTGACAATTGGAAAG  
TTGAAATTTTCGTCCATGAAGACGCCCATTTGTTTGGTGAATGGCAACCGTCAGACGATG  
ACATCTCGCTGAGTCGCACAAGAATTTCTGAGATGATTCCCGAAAAGCACAAGTTAACTG  
AAATGCAAATTCAACTACTTAAGCAGATTGACGAATATAAGGAAAAAATGAATGAAATCT  
GAGCTTTATAAACGTGGATACAAATGGGCTTTTGACTTTAGTGAATTTGATCGCGGCGCA  
TTGGAGGCTGTCCGCGATATGCAAAAACGGAGAACAACATGAAAGCTCTGACTATTG  
CTCTATTATTCGCTGCTTCTACAGCTTCTGCTGCTAGCTTCGATTGTCAAGTAAAAAATC  
TGAATGCCACCGAGAAAGCTATTTGCGCTGTTCCAGAAATTTCTTTGCTGGATGATCAAG  
TGGCTGAAGCATTCAAGGCAGTATCGCATCTTCTGAAAGTTAAGGCTGACCAAAGAGCTT  
AGATCAAAGAGCGCAACGCATCAACGTCTTTGTCTTCGCTTAAAGACAATATGACTGACC  
GCATCATTGGGTTGCGAGATTATTGCCGAATTGGAAGGTGTTTCAGAAAAAACCGCATTCTG  
AAATTGTCCGAACCCATTCTGCTAAAGCTACAAGTAATCGACCCGTCGAAAAAGACACGG  
TGGCAGATCTCATTGGCAAGCAAAGCCAGAGGTTGAACTTAGCTTTTCGTGGAAAAACG  
AGGTACACAGATTACCGTGACAAAAATGCTCCAATTTAGATGCGCGACTGTGCGTACAGG  
ATAGTTTCGCAACGATGTGATGGGCAGATTGGTAGCTCAAGCTCGTTCGCTGGTCTAATT  
ACTGAATTCAAATCTGTAGAGTATAAAATCGAAACCGGTTTTATCAATATGACTATTGAT  
AATTTGAAAATGAATATTTAGCAGGGTCGTCAAGTGTGCGAAACTATGGCAATAGGATCA  
ATGAGGTAATACAAAATGTGGATTCTTATTCTCACCATAGTTGGAACAGGGATGTCTTCT  
GTTTATTCTATCCCGTTTTACTCGTATGATTTCGTGTGAAAAAGCTCGACTTGTGTGAATG  
AAAATACTCCTGATTCTAGGAAATACACTGCTGTCCGTGTGCGAAAAGTGATATTACT  
ACAAATAAGATAGGAGAACAATAATGACACCCCAAGTTAATGAATGCGCACAAGTAACTGA  
TAATATGGATAAGGAAGTAAATGCACTGTATGATTGCCTTATTGCCAACGATAATCCTCT  
CAATCGAATGCTTGACATGCAACGTCAACTTCAAATTGAGCTCGCACAACGGCATCCAAA  
ATACAATCGCGACCCACGAGTGCTTAAAACCTTGTTGGCGAAATTCATGACTGGTGTCAAGC  
TCAGGACGATTATATTGCCGACGAAATTCGCGAGCGATATACTGCTCTAGGTGGAATGAG  
TAACCCCAAACCGAATGCCAGCTGGAAACCATGGCGCGCTGAACATGCCGAATATCGCAA  
TCGACTATTTTTTAAATTGTGCGCTAAAGACCAACTCGAAGCAAATTCGAGTTGATTGA  
CCAAATTCACTTTGTTCTTAAACAAGATCATTGCGATGGGCATGGATGGCGATGAAATCTT  
CAAATCTATTATTTGAAAAATGCCGAAAACCTTTGCGCGGCAGGAGAATGGATACTAATG  
CTTGAACAAGATGAAATTGATGAAATCAATCGCTTTCGCGCAAAGTATGTTGAAGAAGGA  
AGGGCGGATATTTACGCCCCATATATTCATTTCAAACAATCAAATATGAGGATTTTTAT  
TATGTATGAAGTCAAATGGATTGAAATTAACAGGGACAATCATGGCGTAACATTTGCTAT  
GAATACACCCAACGGCGTTCTAATCCGTGTTAATTACACTTTTAAAGCGGAAAAGTTTGA  
TATGACATTCATTCATGATATAAAAGTTGTCAATAATCCCAATGGAAATGGATATATTTA  
ATGCCACGGGTGATTCATGATAAAATATGTAATCCAATGGATAGACGTGGAAGGAATCTG  
TCATTTTCTGGATGGCAATTTGTATGGCTAATGTAGTGGTGTGCTATTCCATCATTCTG  
GGAAGATGCCAAAGCTAATATATAGAAAGCGAAAGAAGCCAAAACAGAGTATTTGAAAGG  
AACAAAAGTCGTCAAAAAACGACTAATTGGGCCTCCAACGATAGTCACAATCAACAAGCC  
GTCGGAACATTTGGCCAATGCGCATAAACGAATGTGTGATACAATGCATATCGTTGATAT  
TAATGTGAGGCCAAAACAATGAGGTAAAATGGCAACATATGATGATTTGACTGTTGGC  
CAAAAAGATGCTATTGAAAAAGCACTTCAAGCAGTGAGAACTAACGTCATATTACCATT  
CGAGGGCCTGCGGGCTCTGGTTATACTACTATGACCCGTCTTCTGCTTGAGCGTCTTTTC  
CAGACCGGCCACAAGGTGTTGTTCTCACAGCACCTACGCACCAAGCGAAGAAACAATTG  
TCCAAACATGCCTTGCGCAAGTCATATAACAATTCAGTCTGTCTTGAAGATTAACCCAAGC  
ACTCTCGAAGAAAATCAAATTTTTGAGCAGAAAGGTAATCCTGACTTCTCCAAAACACGT  
GTGCTTATCTGCGACGAAGTATCGTTTTATACCCGCAAATTTGTTGACATTTCTGATTCGA  
AATGTTCCATCTCATTGCGTTGTTATCGGCATTGGAGATAAGGCGCAAATTCGGCGAGTA  
TCAGAAGATGATACGCATGAACTCCGTCCATTCTTCACAGACAATCGATTTCAACAAGCT  
GAATTGACCGAATTAACAACGTCACCAAGGTCCAATCATTGAAGTTGCAACAGATATCCGA  
AATGGCAAATTTGATTTATGAAAAGCTTGACGATTTCTCGTAATGGAGTAAAGCAATTTTCA  
ACGGTCAAAGATTTTCTTTCAAATATTTTCGAAAGAACAAAACGCCCAATGACCTACTT  
GAAAATCGCATAATGGCTTACACAACCAATTCTGTTGATAAGCTAAATTCGGTTATCCGT  
AAACAGCTGTATGGAGCAAACGCTGCGCCATTCTGCGGATGAAATATTGGTCATGCAA  
GAACCGCTCATGTTTGGCATTGACGTTGGTGGCCAAACTCTAAAAGCAGTCATTTTCAAC

AATTGGCAAACGTACGAGTTAGAAATGTGAAACCTTCTCGCAAACGCTTAAAGCAAAA  
GGTGTCCGGCGAAATTGAAGTCGAATGCACAATGCTCGAGTGTGAATCTTATGAAGAAGAT  
GAAGATGACTTTAGACGATCGTGGTTTACGGTTGTTTCATGGCCAAAATACTCAATATGCA  
TTACACGAATTTTTGTCTATTATTGCTGAAAAATATAGAAGTCGTGAAGTTTTCCCAAC  
TGGAAAGACTTCTGGGCAATACGCAATACTTTCACCAACGTTTCGACCCTTGCGTGCAATG  
ACATTTTCATAAATCACAGGGTTCAACATTCGATAATGCATATCTTTTTACTCCGTGTTTG  
CATCAATCTTGCAGAGCCCCGGATGTTGCACAGGAATTGATTTATGTTCGGAAATACTCGT  
GCCCGCTAAAATGTCTGTTTCGTATAAGTAACCTGAAAAAGCGATTAATAGACCAGGTCA  
ACTGGTCTATTTTATCAAAAACCGGGTATCGCTAGAGCGGAACCGTATTACAATACAAAT  
TCGGAGGTTATCTCATAGTGAGTGATGCTTTTGATATGGTATTGCACATTAACCAAAACC  
AAGTGGAGAGTAGATTAGTATGAGCAAAGTGACAGATTTTATTATTGACTGGGAAACAAT  
GGGCAATGCTCCTGATGGAGCAGTAGTTCACCTTGCTTTTTTTGGTGTGTTGAGCATGACCC  
GTACAAACTGCCTACGTTTAAAGATCTGTGTAAACGCGGGCGTCGATTCAAATTCAATCT  
CCAAGAACAACAAAAACATGAGATTCTTTGACCAAGGAACAATCGATTGGTGGAAAAACA  
AGATGTGCAATCTCAAAGCATCTTAAACCATCGAGCGAAGATGTCAGCATCTTGGAATT  
TTATGAAAGCTTCTTGATTTTCTTGCAGCACAAGTGTGTTGACAAGTAAACAGGTGAGGG  
CTGGTGTGCGGGTCAAAGCTTCGATTTTCTTATCATGATCGATGTTATCCGCAAAATTTA  
CAACACTCGTGAAACATTCAAGTACGAACCATGTTTCTTCTGGAAGCAACGTGATGTTTCG  
TACTGCTGTAGAAGCTACTCTGCTGATGCGAGATATGACCATGTGTCCTATGCTGAAGGG  
TGTTTTGGATGGATTTGTTGCTCATAACCCAATTCACGATTGTGCCAAGGCTGCGCTAGA  
ATGGCTTTATTCCAAGCGATATGCTCTCGGTCTCGACGATATCCCACCGGTGATGATGT  
TGACCCACGGAGTGTCCGCAAATGATAGTTGCTTTTGGCGAGGGGTTGAAAAACCCCTT  
CTTTTATCGCACATCACCTGGCGAGATGACAAAAATCAAAGTGCTTATGTTATTAACGGG  
GCATGGGAATTTAACAGGGTGTAGTGGAGTTTTGTGTGTCGAAGGGGATGTTAATTCTCCA  
ATGGAAGAAATCCAAATTGCAATACATGTTCTCAGGCGTTTGTAGTGGTATTACAAT  
GGAATCATTGAAGGGGCTGAAAATGAGGTATCATAATGATTTACGAGCACTACGACGCGAG  
ATAGCTTCTTGAGTACAACGATCCAAACAGCAATGGAAATCCGAAATCGGTTGAATTCAA  
CGATGTGCTGCGGTTTGTCAAACGCAAAGATTATAATGCGCGATATGAAGCGTTGATTA  
AATCTATCGGTGAAATGCTTGGGCATAAGCATCCGACGGCCAAAACCTGGGTAGCAAAAC  
CAAATCCTTTCAGGGATGGTGTACTAGTGGAGATTCGAGAATGAAACAAAATTACGCCTG  
GCTAGCATATCACTTTCGGCTTGCTTCCAGCAAATGGTTGCAAATATGGCACTCGCGTATT  
TACGTTTGCTAACAAATAACCCGCACTTTACAAAATTCATTTGAACTGAAGATTTTTGTGC  
TATTTTGCAGTTCGCACGACCCTGCTTCTTAAGGGCCGCGATGTTGCCGTTTCATGATCA  
TGACAGATTGATTTACGGCTGCTTGTCTGGGGCGGATGAGCTTTTTATCAGAAGTCGAGA  
CACTCGAAAGCTGAAGTTTCAGTTTTGGCTATCAAATCAGCGACTCATCTTGTGTTTGA  
CCGTGTCATCAACACTGTTTTCCGATGGATTCAACGAACCAAATGAGGCCCGAAATGGAT  
CAGCAAGTAAATGTAGAAGTAGTTGTTTATCTGGATATTGACGGTGTCTCAATACGCAG  
GATGATCACATGGAATGGAGAACTGACAAGAACAGTCACCTGTATCGTGTTCGCCATAC  
AATCGTGGCGATTTTACAGCAACCATAGACTCAGTTTTCTGGGGGAATGGCTAAAGAAA  
CATGATGCTAAAGTGTGTTGTAATTAGCTCGTGGGTCGTTTTGCGTGATACTGGAAAAATG  
ATATGAGATTTTCTCGAACTGCCGTATCATTCCGAATCATACTGACTGGCGGTGAAAA  
TCTCGTGGCACTGGTGTACTTCGTTATGTAGCCGATCATAATATCCATAGATGGGTGGTC  
TTGGATGACGCCAAGTGCATGCATGATCTCGATGAGGTCTACTTAGGCACCTCGCTCAT  
ATCAAGGGTGGTCTGAATGAATCATCCTTAGAAGAGGCCGACTTCATTCTTTGACACCTC  
GTGGTCCCGCATCGAGAGTCGCTGGGAAACAGCATAAATAAAAAGTCAGATGAATTGAT  
AAAACAACGAAGTACTAACTGGAATAAAAAGAACCGGGCTTCGCCCCGTCGTGCTTCCAC  
GAATCCAGTTTGTGCTTTCGTCTGATTTATATAGGGGCTCTTCGGAGCCCCTTTTTTTGTT  
TTCAAACAAGTGTACAAGATAGTGCTTCATGATAAAATGACTTTTTGATTAAACAACAAG  
GAGTACTTTTATGATTTACGCAATTAACAACCTCAGTGTAGCATTGCGATTGAAGCCAA  
CATTTGTGCTTATTCGATTGCTTCTAGAGGCTGCCAAGTTTTCTCGTGTGCTGACGATAT  
GTATGCTGCGATGTATCCTCAGGCTGTCGGTTACGAGTATCCCGTCAAGGAAGATGGCGA  
TGCTATCATTGCGAACTCGGACAGACCAACGTTAGCGTAGAAAAAGATTTTGCTGAATT  
TATCTCTGAGTACGAAAATTAAGTGAACAAATGATGTGGCTGTTTTAGAATGGCCACATC  
AAACAACATGGAGTAATGAAAATGCGTATTTCCAAAGATTTATCCTCGACGTAATGTT  
TTCCAACAAGGTTTCTGTTGTTGAGAACTCCCACGAAGAGCATCTCTGCTATAACCACTGT  
TCTATATGTTTTCGAAGGCAATACTCGAATTGCTGTTCTCGAACGTGTTATCACCGCAGA  
AGGTACCACTTGGGTTCTGACAGAAGGTATCTACGTAGAGCTGAAGGGTAAAATCTGATG

GGAGCGCCGAATCATAGATTGCTCCTATGCGAAGAAAAAAGTCATGGAGTTGAAAAGGAA  
TTGTATGAGCTTTTAATCGAAATGAACTCTATTGGTGCAAACAATCAAGACACTTGGGGC  
AAACTCTTTAAGACTAAGGCATACAATGAGTCTCAAGCTCAAATGGCCGAGTATACAGAG  
AAAATTCGCAAAATCATTGCGACTAATTTCCGCAATCTGACACGTACGCGTACGAGCTG  
ATTGGTTTGAGGGGAATTGTGGATGTTTCCATGAAACGTGGACAACGAATTTAGTGAAA  
CTTCAATACGAGTTATAAAAATAAGAATTCGTCTTGTTGATACGAAAGGTTTCATAGATG  
CAAACCGCCAAGACAGTCAACCCTACAGAATGGCAAGGACCATTGTTGAATTTGCAGAAT  
GGAGGCAACTCTGTGTTATAGGCAATGATGGTCCC GAATGGCTTCTCAATGTCTACGGTC  
CATGCTGGCGCGGTAGAATTTCTGCAAACCGCAAGCAATATTTTCGAGGTTCAA AAATGAAA  
CTTAAATTGAAAATCCCTCTCTCCGAATATCAACAACGTTTTTTGCAAAAAGGAAGCGCAG  
AGGTTGTGGGCAAGTACGCTTGA ACTGAAATCCAAATCTGGAGA ACTTGAAGTTCTGGAA  
ACAGAGCCAGACGGGACATTGAGAACAAATGCTACTTTCCTCGGATACCACATTGGAATT  
CCACTCGAAGCACAACGATATTTTGAATTTGAGGAGCAGAAATGATTGATGCCGTTAAAA  
TCGATATGACCAACA ACTTTAACGCTAGGATGGCTGTCCCTCCAAGACCAATGGGTTTTG  
TGCTGGCCAAGCTGATGGAAGAAGTCGGGGAATTTGCAAAGTCGCTGAACCAGCCAGAAC  
GTTGCGATGAACGCT

>NewGenomeName\_231

CTCTCTCTACTTAATAGATTAGTCCGATCAAATACCTGTCAAATCGGTTCTACATATC  
AATAAAAAAGGTAATTCCTATCAATGGAGGACACTGTTGATGAAGTAGTACGAATGAGGT  
TAGTTCTTTTACCCTGTGGTTTGATCACCTGGATTTTGAGACGTGAAAACAATGGCAAAC  
AATAAATACGATGTACTACTCCAGGACAAATACTTGGAAGGAGATACGGACACAAACGAC  
GTGTGCAGCGTTCTGGAAGCGTTTAGCGTTCGTAATAGTGCATGGCAACATTAGATAAAG  
AAAGCTCTCAGGGTAAGAAATAGAGGGCACAAAGCGGTGCTTGAGGACTGCGAAGACAGT  
ATTGAATCTGCTATCCGAGCAAAAGA ACTAGAAACCCAACGGCAATTCATTGAATGGGCA  
GATGCTCGAGGTAACGA ACTAAACATGGGGGGTATCCTCGATTGATAAGAACCTAGCAGC  
TATGTGGATTGTAATCATGCTCCTGTTTCTCATATAGAAGAAAGGGACAATTACGGCCCT  
CATCTTATTCTGGATTACACCACTTCGGA ACTGGCATTAACCAACCAATTATGGCTACTG  
CTGTCATCAAGA ACATGCCTAAGACTCCCACAATGAACCACGATGTTGGAACATTGGTCT  
GGTTGATTTGTTGGGCTTCATTGTTAACGTTGTCCCTACCTACTACATTCTCAACCTTTT  
CTGCTTTCACCTCAAGTTTAGA ACCCATAGAGTCTTCTTTAGCTCCGAGCTGAGTAACTA  
CTTGTA AACGAGCATTCTGGTCAGGAAGTAAAACATCCGTAGCACTCTCTTCAGGAGACA  
GAGAAATACACCCATTAATAGAGAGGACCAGCACTAAACCTGTGAGACGAGCAGAGATT  
TCATCCAGCTTTTTACGTAGGTCATCAATCTCCGTCCGGTATTATTTTCATCTCAGACTGG  
ATAATTACTAAGTACTCATTGATCTGTGCAAGTTGGTTAACAACTCCCTGTTCTCTATT  
TGTTGGCATTGCAACTGACGGACCTCAGTTTCAAAGTGTTTCATCCTTATAAGAGCATGAT  
AGAGTAGTACCACCAATAGCCATTACAACAGAGAGGAACGTACCAATTGGAGCAGGCTCC  
CAGTCTTTTAGCATACGTATCTCGGATAGCGCCCAAATAACCTGCCACAATATTAAGGCG  
CATAGAGTAAGTATTGGAATTCTGGACAAAAGCTGAGCTATCGCAGATGTGGAGAATACG  
CTTAGCCGTATCCC GTTATATTGACGAGAAGAAATACAAGAGTAGATCTTGAGCTCACA  
ACAGGGTATCAGAAGGAGTCCCAAGGTAGGGCCATCTCTGATGTGGAACGGTGCAGATAA  
GAACAGAATCATCACCAAGAGTAGTATAACCACTTTTCATACTGAACCGGTATAGTTTTGT  
TCGTACTGACCTGGCAGATTCGATGGGTCCATTA ACTGTGGAGCACCGTCATCAACCTTA  
CCAGATTATGGGTCTTTGTAGCTAAGTCCTGCCTAGATAGTTTTCGAAGCCTCTGGAGTG  
AAACCTTGTTGTCTAAATTCCTCGAAGGATTTCTCTTCTTCTTAGACAAGATTCTGGCC  
CGTTTCGGAGCACCAACCCCGTAAGGGAGCATTCTCGAGATCGTCTGCCTGCTCTCGTTTA  
ACCTCAAGAAGGTGCTTCCAGTCGATACGACGTTTGATTACCAGGTCTAAGTACTCTTCT  
GGATAAGCAGCAAAGTTCTGCCAAATCCCATGATTTTCTTTCAATACGTTGTACTTATCA  
ACCGATCGAGACATAACATAAGTATCCTCCACACCAATTAATAACCACATTCTCTTTACCA  
GCAGGGCTAGTGTACATAACACGCCGCGCTTGCTCTGGACGGTATTTTGAACCATAGTAG  
AACTGATCTCTCTCAGCGTGGACTAGAATCTTAATGTCAGCTAGGTGGTCTTTTGTGCT  
CATGTACGTCAACGTAACGC ACTGGTACCTTCATCTAGCAAGTGGTCGATAGTGATTTTC  
ATCAACGCTCGATCTCGTGCAAAAGTAACTTTGTCTGAGGAGCTAACCATGGAGTAATG  
TTCGCTGGTGCAGACCGCAAAGCTCTGTCCACAACAGGCTGTGCAGTAGAACAAATTATTA  
CGAATCATATCCAGGTTATAACAACGCCCCACCTTGCTTGTTGTTTAGAGCTAATGTAGTA  
GAAACA ACTGTCTCCGTCTATCCCACCTTTTCAATCTCTATCTCTTATTACGGGTTGGCA  
GTAATACCCACCAGTTCGTGAGTAACCGCACCAAGAGGCTCGCTGTAAGCTGTATCCTAAG  
TTCTGAGATTTAGTCATCAGGTCTGACATGAGTGGGTTGTTCTTAATCAGTGCCTTAGCA



CGTTCATCACCATCCATAGACCGGAAGATGAACTCATTTCATTGAGTCTGGAATAGCGTTG  
TTTTTGGTTAAGTTACTTATGGCACCGTAGTTCTGGGTGCCGCACGCTGTAACCATTGCC  
GCCGCCAAATCCTTTGGAGCTATAACCCATGTCATAGCTCTCTGGTCACTAATCAACGTA  
TTCATGTTTTTCGTTCAACTGTTATACTTGTGGTCACTAGTTTCAAACGTGTCTCGGTA  
ATCGCACCAAGGTACGTAGCAGACTGCATTCAGGTTTTTCGGTAACTGGACAGCACTACGT  
TCTATTCCAATCTCCAGAGCACGTTGTTGGTCCAATCCCAATGTACCATTTGGAGAGTTG  
AACATCGATCGGAAAATCTAAACTTGAGCACGGATAGTCGAGTCACTATTTACCACGTAA  
ATATCATTTGTGAAGTTCTCAGCATTGAGTGTACCAATCTCACTCTGATGCTCTGATTGA  
ATCAAGTTCATTTCAGTATATTGCGATAAATCGAACTCTTACTGAGTCTGTGTTACCTTC  
TCACGATAATCATTACAGGGCTTTCTCTTCTCGAGATAGCTCCGTATCTACCTTACCCAAA  
CTCGAACTGGATTAACCGATGCCAAAGAAAGTAGCACGACGTTACGAAGTTCCTTCGCA  
AAGAATAGCTACTGGTTGTTTGTCTTTGCCATGTTGGCACGGGCTTTCACCTGTGCCGCA  
CGGCGTTGTAAACCAGCTTTAACCTTAGCTGCTTATGCACCCATACGGTTCGAAGTACGGT  
TGACTCTAAGTAGCGATTTATATATGCTGTGGGTTATTTAGAATGTCTCGAGCATCGTTA  
ACGACACTCTGAGAAAATAGATCAAAAACCAATCCTGTGACCAAGGCTCCCGACAGCCTAA  
AAGACTCATGCGGGTGTATCATCTTGAGTACCAGCTTGAATGGGAGTTTGATTATAAGCT  
ACTGCTTGGATAGAGTTGCGTGTGTCAAAGATATTAGTTGCCAAATAACTCTATTGTCT  
TGTAGGGCATCAATTACATCTCCATTGTAACGGTAGGATAAACTATTTAAAGAATCACCT  
GACCTAGGCTGTTTAGTAATCATGCTTCGAATTAAGACTTCTCTTGGTTCGCTACAATA  
AGCAGCTCATCAACTACCGCTTGACGTATTTGGTATAATCAATCGGGTTCATCTGACAGT  
GAGCTATCAATCCAGTTCATAACTAAACCAGTTGCACTCACTCCAGCCTCGCCGTTATTA  
TCCCACGCCTTAGCAATTTTGTTAATAATGCTCTCTTACAAATTGACGTAGTTACACTTT  
AGGTCGCTACGTGCTTTCACTGAATCAAGTGGATCTTGGTATTTACTCACATACGGTGGGA  
CTAAAGCCCAACGCTTTTGTAAAGGCTAGAGCCCCACTAACTTCTTGATGCCGGAATGGT  
TTGCCGTTACCTTTCATGATTGCTTGTCCGTTAAACATTAATAACGCACCGAGTAAGTTA  
CGAGTTGATGTTGTAATCTGTGGCTATGATTTCGTCCATAAACTGAATCATATTAACAGCT  
TCTGGCAGTGTTAAGTCATCCGCAGGTAACGCCACTTTGCCATAAACTGCATGTGCTCC  
AAGAACCCAATTTGGTTAGCACCGAAGCCAAAACACGTCCGTACACACCACTTGCCGCA  
CCTGCCGCTATTTCTGGCAGTGGGCAATCCCCACTAAAGATTTTAGTCAGAGTCTCCCT  
AAAGCATTCAATTTACCGAAGCGAGAAGCAATGCCTGCATCCACACCAAACCCTCTTAGA  
GCTAATCAAGTTATGACTCCTTTCAAAGCTACTATCACCATAGGATTTAGGTCTTGGGGC  
TCTATACCTGCCACGATCAAGCAAATTCAACTTTCAGTTCCCGTAAGTAATGCCACCG  
GATCCGATAAGTATTAGCTTGCCTGTCACTAGGTTTCATCTTATCTTGGGTTGATAGGGTA  
GAGCCTATCCTAGCCTCGATGGATTTAGTAGCAACCTGTTGGAACCTGGAACGGATTTGAT  
TGCCAACGTTTCTGGAACCAAGCAGGGTTAGATTGTGACATATTCTAACGGAATGTTTCT  
GCACGAGCAAGCACTTTTTTCACTGCCATATCATCAATCTTAGCTGCCTTGGTAGCTGCC  
TCCCACCTTACGTAAGCGCTACCAAACGAGATAGGAGAAGTAAACAAATCACCTTGATAA  
AAGAAGAATCGACCTTCTCTAAGAATCGGCTCATCATGGATTTAGTTACTGGAATGTGA  
CTAGCCGGAATGCCGTAGTCACCTTGAGCAGTAACAACAGAATCGTATAAGCTTGACTTC  
TTCCAGCCTAAGTAGAACTCACGAATATCCGGTAAAGTTTTCTCATTACATTGTAAGTGA  
CTCTATAGAAAACGGGGGTCTTTTCTTGGTCTTAGAAGTGTATCTTAGACATTCGCTTA  
ATCCCTTTCAGTGCAGGATTGCCTACTAATTTAAGCTGCTACAGTAGATCCCATAGCCTGT  
ACCAAGAACTGAGCAGGAGATAACAAACCTAGCAAGACGTAAAACGCAGCGCATTGGATA  
TTCTGAGTTGGGACAGATTGGTTAATACGATATACACCTTCTGCCAGTCCCACTTCTCT  
TTACGGTCTAGATACTCTGCTAGAGAATTAGCCATGTTAGACATATCACGTTCCCTCATA  
CTCATAATAGGCATCTTCGGAGATACTTCGTATGAAGAATTAATAGTTGTTTCATAAACT  
AGCGCATCATATATTTTCTCAGTCACAATAGCGCGAGCAGCTTGGAATTTCTCGGTACGA  
ATATCATGACCTGGCTACTTACTAGGTTGGGTCATCAAACGGACTTGTATTGCCAGTTTG  
AATGCGCTGATCGGGTAGCGAGTTGAGACGGTACCATAGTATTGGCCTAACGGTTCGATT  
TGAGAAATGAACTCTGCCTCTATGCATTCCGGACCAAACCTTGATACGTTCCCTCAGCACA  
GCAATACGGAACCTTACCGACTTACACGTTGATAATATCTGCCTCTCGTTCCGCACCATTG  
ATCTCACGGTCACGGAGAACTTTGTAATTCTTTTTCAGCGTTGCGTGCTTTTAGAGTCTCG  
GCGTATCGTTCAGCATCCACTACGTTACCCAAGTAACGGATTGTTATGTTGTCTGCACGA  
GTCTTACTATCTACATTGATTGGAACCTCCTCTGTAATAAAGTGGTAAGCATCCTTGTAG  
ACAAGAGGAATATAGCCCTTACGACTATTTGGAACCAGTGGTTCTAGATCACGAATAGAT  
TCCCGTACCACGACACCTAATTTCAAACCCTCTCTACCTTTCATCCAGAACTCGATTGGA  
GTATCTCGATAAGTCCGTTGATAACCCGTCTGATCCAAATCATCTAACCTTTCACCTGTC

ATGTTGGTGATGATTTCGATCATTAACGGGGACATACACATAGATCTCGTTACGAGCTTCG  
AAACCTTGTGGTGGCACTCGTAGCGCTTTCGTAACCTTTAGCATAACACAGACTGTTACCA  
CTCTGTACAGTTTTGTTTCCACGGTGTAAAGCTCTCTATATAAATCCTCACTCAGCATC  
TGCCAAGCTTGTTGAGCAATCTGGAGCATTGTGGCGTATGCTTTGAATTCAGCATCATTA  
AGTTGAGGTAATCAGGTCTGTCACCTTTCACCAAGTCATGGTATGAATATACCTCATCA  
TTCAGTGTGCCTTACTTTAGAATCCCATCTAGCATTGTGAATGCGTCAGTATTTACACCT  
CTCAAACCTACGTTTCATAGCTGTTTGGAAATCCACTACGAATATTAGCACGTTGACACAAT  
ACACGGGGGAATGTATCCACATAGACTCCACGGTCACGGTCTAGTGAAGTGTGGACTC  
ACTACCATAGCCCTTGCCTTAGCCATCATGCTAATCTTGTCTGTCTAGAAGCCACCACGT  
GCTGTAGCTTTGTTGTGCACCACAATCTCTGGAGTAAAGTTACGTAGTTGAGTTGCACCA  
GTCATAGGGGTAACAATTTCTACTTGGACTTCTCACCTTGTCCGTAGTTTCAAAGTC  
AGGTTACATACTTCGTGTGCGACCGCAATATGAGCAGCAATCATCTCAGCAAATGCTTGT  
TGCTCTCGTGGAGTCAGTGGCACACCTACACCGGCTACCTTCATAGTCTAAGCAAAGATA  
ACAGCAACAGTTGACCAACGTTTCGGACCCTCGTGTGCAATTTCTGGAGCAGCACCTTTT  
AGGATAAATCCCATACTTTGAATAGGAGCAGGAGTAGTAGCTCCGTATAAACGGGACATT  
GATACCGCACTAGCGGTATCCTCCGAACGAAAGGCAACGTCTACAATGGTAGCCGCAACA  
TCTTGCACGTGTGCTACATTTGAGCAGTAGACGATAGACGTTTGAAGCCCTACACTACT  
TTCATACCAGATACGCCTAGCTTAGCTGTGTCTACCTTATCTAGAAGCGAAGCTAGTTGA  
GTGTTGGATTGAGTTCTTGGCCCGTAGCAGACATTAGGATTACCATCTGTTGGACCTCG  
TTATCTGTACCGTCTTGCCTAGGTTTATGCTCCTCTTTAACTGCACGACTACGCTCTTGA  
GGAGGTAATCCCATAAACGGTTCCTGGGTCGGCTAGGCCACCACCGGAAGTAATACAC  
TCAGTGAACCAGTTACCGGCTTCTTGACTTACTTCTGTAGCAAGTCAGCAGATTGAGCA  
CTGTGATAACCCGGTAAGAACATAGCAATTAGGGCAGCCATAGAAGGCATAGGTACCCAC  
AAACGTTTCATCCCACACCTCACCGATTTGACGAAGAACCATAACTGAGTAGCAGCGTCT  
TCCCGTTCCTTCTGGAGTTAGCTTAGTGTCCAGTCTTTCTACGTAAGCCAGCTCGGTACGT  
AGTGCATGGTCATAATCTCCGGACGCATCGTTAGCAATCTTAGTCAGTGGTGCAGCAGAG  
TTAGCTAATACTTGTGGATTATCTCCAGGAAGCTCATCAATAGCCATTGCTGTACCAAGTT  
AAAGGAGCTTCGTTAGCTTCTTGTAGAGAATTTGCTGGACGGACTATTGGGTCAGCGTTG  
GATGCTTTCATATAAGTTTTTCATAGGGTCGTTATACCAATGCAGAACTTACTGGGAGAT  
CCACGAATAGCTACCTCTTTCTTAGATGGAATATGTGCAAATTTGTTGCACTTGTCCCATT  
TCTACTGGATTTGAATATACACCTTCTTCACCAATGGCAATCTCTTTTCTCCTTTAATCA  
TTCTATAACGAACATAACCAGAGTCATCATATTGCATTCCAATGTTAGAAATAGCTCCAAC  
ACTAGTAGCTCCGCTAGAAGCTTTTGAACATTCCGAGAATAACCACTAGCTTCTTAAGA  
TAGGTGACGGGATTGGTCTAAGAATCTCAGGTTAGCGTTGGTCTGTGAGCTATTGGACCC  
CAGTGCACCTGGTTCACCGGAGCTACCGTACGTACCGGTTTGGAGCAGCAGTATGCTCACT  
TCTTGCTCGTTGGATTGCGTCTTGTGTAAAGCAAGGTCAAGTATAGCGGCTTGCTGAAC  
ATCTGCAATCCGAGATTGTACATCTTGTCTTTTTCGTTGATCTTCTGTTGCTTTGCTAGA  
TCCGGCCATGGATACGGCTGTACCAGCGACTCTCGCACCCGCAGCGACAACCTGAGCAGC  
AGCTACGGCAGCGGCATTTGCTGTATCACACCTCCAATAGTTTACTGTAAACGATGTTAC  
CTACGTGATACCCAATTCGTTCTAGAGAGGAGGTAGTAGAAGTTAAGCCAATGGGGAGAA  
CTGTTGTACCGTACCGTCTCCGGAACCTTTCAGTAGGATCCAAAATTCTCTTGAACCTCG  
TAGCACCGCAATACTCTGATTTAAGTATAAACAAATAATTGATGCTACACATTCCTCGG  
TGAATAGGACTTTGAGAACTACATTGTAAATCAGGTATCCGATTGGAGTTTCTTACCAC  
TTACCACACAGATTTCCAGCATAACCGCCGGTAGGGTATTGAAGAAGCTCTTTAGATTCA  
ACTCGAAGACTGATTTACTTGAACGAGGGACTGCCTAAAAAAATTATCCTCAAACAGAC  
CACTAACTTACAATTCCTAAAGAACTTCCGGTTTACTTTCCATGTAAATTTTTATCATT  
CTTAGTACCTCCAGTCACGCCTACTGCCAACCTAACAACCTATAATCCTGGTTTGGGTC  
TGTTCTGACCTCAAACCTGGGATGCCTTACCTGAGCCTCTTATTGCTTTCTGGCCGTGAT  
TTCTTCATAAGGAAACACATTGATACCCTGATTGAGATCCATCGGTCTACGGTAACGGTA  
GTACGGACTGTGACGAGTAATCTCATTCCAGTGCTTGGCCGTAGGAGTATCTGTTGAGTC  
TCAACGAATAGGTAGCAACATGCTAGATTCAGTTTCTCTGGTAACTCCTCCATCTACATC  
TTTGAACCAAGTTTCAGTTCTTAGCATGTGAGTTGCTAGGCTTGTAATTCGTTTACGGCG  
TTGAGTCTTACTAATTTGTGCCGAGAATAAACAGGTAAGCATCTGGATCAACTAGGCC  
GAAGTCTTTAAAGTTATCTTGGTTAAACGAATAGAATCCAAGCGAATCCTCATGACTTTG  
CATTGTTAGGTGCATAGTATCTCTGAACTCTTCATCACCGATTCTACGTACCAATGGGAC  
TGTATCATCAGAAGACTCTACTTTAACCTCTCTCTACCAGCACCGCTAAAGTTATCAAT  
AACTTCTCATTACTAATTAGGTTACGCTATGGAACAAATCCGGTAAGTATATCTGCTAC

AGTAATGTCTCTCTTCAAACGGTTAATCAAGAATGCACCATAACGTAAGATAAATATAAT  
CACTAGGTCAAAGTGATTTGGATTGGCATTTCCTACTAAGTCCACCGGACATAGTTATA  
TTGACGTACTACAGTACCTACCAAATTAACCTTACTAGAAGTAGATAACTCATTATATAA  
GGATTGAATCTTGTGTTCTGGTAGATTCTGGCCAGAGTTTTTCCAGTTGATTGGTATGG  
AGATAGGACTTTGATATCTTACTCTGTGCAATAGAAAACGGTATAACCATATGCCACAAC  
AGAACGTGGAGACACACAACCGTACGCATTAATCTTGTCCACGTGATAACCAGTAGCAGA  
GAACACAACATGTGACGTCCACTCAATAATCACACTCCGTTTCCAGCAAAGAAAAACAG  
ACGTCTGGAAACTTTTTCCATTGCATCAATCTTACAAGCTGCGTTGATTTTTATGAAACC  
ACCGTCTGTATCGACAAGAGTACTGGCTACTTCACTTGTGGCGTCAGTATACTGATAACA  
CTTGTTAATCTCTGCGTTAGATTTAACTAACAGTGAGAAGAATACGTGATTACGGAAATA  
AGGACTTACATCATCAATGTTTCTTGGGGTTGATTGGAATCCTGCATCGAATACTCGACC  
TGCGAATGTTTGAATGGAAGAAGGTTTACCACTAGCTAACACTTGTAAATGACGCTACCGT  
AGAACCACGAGGTGCAGGGGTGTTTCGCCGGTCCCTGACCCATACCGGTAAGTGTACTGTC  
TTTCATCCGACTTAGAGTAACTTTCCGATAGCGAGAGCGACTATCCCTGAAGTACTGTTT  
ATATAACCAGGAAATATCGTAGCCACTAAGATAAGCACCGAATGTGGCATAAGTGGTGCT  
AATCTTTTTAGTATCCCAACCTTGGTTAATTAGCTCGAACAGATAATATGACGATAGGGT  
TTTTGGTCGTTCTTACTTGGAGTCGAACGTCCCCACACATCAGACTTCCAAGGAACAG  
AACCTCTCTAGCTAATACGATATTAGTATGGGGAGTGATAGTGTCTGATTGAATATCCAT  
AATCTGGATTGATATACGGTCTGCATCCTAAGTTGCAAATTAAGAAACCCCTACCGA  
ACCACCATTAATAATAACCTCTGACCTACCTTCTGTTGTTAAAATTCTTGGTTGTTAAT  
TAACAATTTCCCGTCAGATAACGGCTCAACAGATGTATCCATGAAATTTAACTTATCACC  
GAACTGTACTTCCCCATTTCTGGAATGGCACTATAGTGAGTTACCCATAGGTAAACACT  
AGATACTAAATTTTTGTCTGAGCGGTCTACGTAAGAAGGATACAATGTACCTGAATCTGC  
CAAATCCAATATTTTGCCTTCCCCAAGCGTCAGCTTTCGAGAGGATGAAGTTCTCACC  
CTCTCAGAAAGAATAAATAGGCAGATATAGAATGTTCCCTTCTGAGACCATAACCACACTG  
AAACTGATTGTATTCTAGATTTGACTGGTGTCTTGCCATTGGCTTTTGTCTCCTCGTTTGT  
CAGTAGCTAGGCCTTGATTGATGCGTTGGCAAGCGTTCGCTCTTAAGGTGTATTGGCCTT  
TAAGAACTCTGATACTCGACCACCGCCTTCAACCTAATCTCGCATAGAGTACCTTCGT  
TATTGGTAGCCTTACTTTAAATTCCTTTGTTACGGCCATTAATATCTCCCTAATAAGAA  
TTAACGAAATATGGACGACAACAATTTGGCCTAGTTGAAGATGGTGTCTGACGTAGGTA  
GGTAATAAGAAACCACCTTTGGCTTGCCACCTCTTGCAGACTGATACGACGACGATGGATT  
GAAGCCCATTCTTCGAGTGTAGGGGAGTCCATTGGTCTCATTTTGGCACTCAATGCTGTT  
TTCGCTTCACTGAATAGCTATGGGAACATGTCTGCAGATACATCAAGAATCCAATCGTCT  
TTCGTCGGAACTTAGGACTAGTATAAGCGATGCATAAAGGTTTACACTTGTGGATTGTA  
GATCCTGCGTCTTTGTTGTAGCTATCGAATACAAGATACTCATGTTTGAATGAGGTCCAG  
AACTGTTGATCATTACCGTTTTGGTGGATTTACGCAATGACGTTGCCATCACGGACCTTT  
TGTAATCTGGCCCGACCTGGATTGAGAACAGGTTGTCGAACTACGTAGTATTGGATAC  
AGGTACTTTAACTCATTGTAAGATACTGGACGCCGTTTCATTGCGGGTACTATGCCAAG  
TCAGTCATCTCATGTATGTTCTCAGGTAGCTTTAAGTAATTTGGTCTATCCACATCCCTG  
AAACGATGAACTGGACTCCTCGATGATAGTAATCAATCGTTGAGGTGATGATTACGTTT  
TCATATGAAGAAGGCAGGATGTTTCGCCGCTTGTAAACGAGTCAGTGGTATCATTAAATAGAG  
TTGACGCTATCACCATCCGAATCACTCAGCATTCTTTCATGAATCTGAATAACGGTATAT  
TTCATTATGGTTAAGCTGTCTACCACCTCCGGCCTCACCAGCTCTGTGACCAGATTTAC  
CACCATCAGACCGGATGGCACTTCGAGAACGTACTCGTAAGTTACCATCACCATTACCGC  
CACCATTTTTCAAAGTTCTTTTGTGGCCTACGTCTTCCACTCACCTTACGAACTTTTC  
CCTCACGTTTCATCTTCCAGCGAGCCGCATGACGTTTCTCTCGATTCTTCTTTTGTCTA  
GAGTACCTTTGTAATTGTGCTACTCCTGTCTGTAAATACGCTTCTGTGCCCTTACTGAAT  
AACTGAGATTTTAAAGAATTCTCGTATCAGCTTGACTAGCATCGCTGAATTGAACGGCTTC  
ATATTTCACTTTAGCATCACCCGTCAACATGAGGTCAGTACCGACCGCAACAATTGAGTC  
ACGAGACTCCATAAAATCATTCTGGTATTCAGACGGCCACCTACTGAGGATTGGTACAG  
AGTGAAGGTGATTGACGACGTACGATTGGCGTATATACAGCAGTTTAGCTAGAAGGGTC  
AATGGAAATACCTTTTGGAGTTGGAAATGATTCATTGTTGAGTGGGACAAAGTCAGTAGT  
GCCATCACCTTTGGAACCTAACAAATGGGTTTATTGGAGCATTTACAGCTCCTTTTACTTC  
ATGTAAGTAGTCATCTGGAATATTATGATGTTGTAAGTCAGCCCTGGGGATTCTCCTTG  
TACTAGTTAGTAATTTACTTAAGTATTATTTCTTAATGTATCATGTTATACATTACATA  
ATTAATCTACTGGTCTTCTCCACTTCCGGTGAAGTCACACTACACCAAGTAGTTTTGAAT  
CAAAGTGTACACGGAAATATACTGGTAAAAGAAAGCCCTCAGAAGAGGCCCTTGATATTA

GTGATGTACTCGGACTACGGCTAAAGTGTACCAGCTTCGGTTCGGAGACCAGCAATCGT  
TTGAGGACTAATCATGACTCCAATCCGTTTTGAGCTGTCAGATGTGTATTGTATGCATCG  
TACTTTCTCACTAGGTACGACACATATTGGATCAATGAAATCAATGAGTTAACATCACC  
GGAATAACCACCAGTCAGTGACAGCAATCTCGTAGTTCAGACACCGGACTACATGAGAC  
ACCATCCATTGATGGTTCTACATACATTCGCCACTACGCGTCTCCAGCACCTCCGGATT  
TCGACTTACCTGTACTGACATAGTTAAACAATTCTTTCGCACTCTCGTCGATAGGTAGTAC  
TCGAGAGGTTAGGTCTGTTTGTACAAAATCACTGGCAATCTCAGTAAAGTTGAACTTAAT  
TACAGTACCCACGTTTGGTATATTCAACAGTTGTATAGCCGGTAAGGAATTGGGGGTAGT  
GGAGCTGATTCTTATAATGTCAGCTTGGAACTCCGGTAAGGCTTGGTTTTCTGCCGATT  
TACTGTGAGGTTAGGCTTCAAACACTTCACCATCAGTCTGGCTAGGAGAACTAGGAGCAC  
ATTATCTAATGACTCTAGAGTGTGTGGGATATACTCTAAAGCACTATCAGAATCGTGACC  
CGCCACTAGTTTCTCACCCCTGCCCCGACGTAAGAGTTGGGGCAGTCCAACAACCTCTACGTA  
AGTCTCTTACCTTGAGCCTTGCTGACAGCATTCTCAAGAGTTGCTAATTCGTTATCGCC  
CGAATGACGCATCGATAGAGAGTTCGACTCGGACACCATCACTGCCGCCTTAACTTACAA  
GTCTTGTCCGATTCCGTAACCGTTTCCAACGAGAAGTTCGCGCTTGTTCGTAATCAACAGG  
ACTCGGTAGAGTGAAAGTAGCCATTCTACAGGTTGGCTCCTTCGCATATCTCCGTCAA  
CGCGATGGAGTTGTTATACGTTACTCTGAAATGTACGTTAGGAACCTCGTTAGTGCAATA  
TAATCCGGTCTTAAACACCGTCTCACTGTAGGGAACAGTTACAACAATCCAAGGTTGAT  
TAGATCCTCAGATACGATTGTGGTTCTATCTACGTATTCGAGAGGGCCATACTCGCGT  
AACAGAGGAAACAGCATCACTGTCTGAAATTCTCACACCCTGCCAAGATGGGAAATAAGT  
GTTTCTGTGGCCTTGTTAAAGAACCCTATGTTCTGTCCATACTACCGATTTTGTGTGC  
ACCCACTGACACTGCGTTAGATAAAACATCGAGTTCACCCTCAAATTTGGAGAATACACC  
AGCTCCCACGAATTTTCGAGGTAGCCAGATCCCCTTACCAATCACATTGTCTAAACCCG  
ACCATCCATTAGAGGTTCTATATTATTGTCACAGCTATCGGCAATAACAAGCTTCGCGTT  
AATAACACCAGCATTACAATGTCATTTGAGTCCATATCTAGGTCATTTTGTCTTTTGGTT  
TGGTTCACCTTCTGGGTTATCCCTGAATAGAACCTCGTCATTGCGTGCGCCCTCAGTCTG  
CTGGAAATTATGTTTAAATGGTCTCACAAGAACCCTAGGTAACATCACACAGAACGATCTT  
AGCCATGGACTGTCTCCGTAGTTGGATAATTTATTACCTATCAAAGAGATGGGAGATCCT  
AAGGCCTCCTTCGCATTCGATCAACCTATCCTAGATTGAACTTTGACCTTTTGCAGCAGC  
AGCCGCTTTTGGATTGATACCTAATTTACATAACGGACAGTTACACGAACTTTACCTGC  
ATCGGCCCCAGTTGGAGAAGCAGCACATAGCTTGAGGGTAACTTCGGTATCAGCAGGTAA  
AGCACTTACCCAAGTACCTTCTAGAGTAAGTTTAAACAACACCCAATGCTTCCGGTTGTGC  
TTCGAACTGTTTAAACTGTTGGTATCTATTGAACTTTAGAACCTACTGCATTAAGG  
GTCCGGACCAGCTAGAACAACACCTCGGAAACGTGAACATAAGCATCACCGACTAAAGC  
ACCTTTAGGGAGAACTACTTTTTTGGATTCAACATAGTCTTCCGTGAAAGCAGAACCCCA  
AATATCAAAGACCATTTCCATAATGGAACGTTCCGTCTTAATGCCACCTTTTGGTGCGCG  
TGTACCAGGAGGTCCTTAGAAGTTGTAAGTACCAAGAACAGCAAAGTTTTCAAACGGAT  
AATAATCTCGTTAGATTTAATCTAGTAAGGAACCGAACGGGGTACAATCCCTCACTCCGG  
TCATATTATTTACTTGCAAGCAGTCTCAGAAGCGAGCAATGCAAACAGAATGTCTTTAAA  
TTGGATACCGAGACCATAACGACGACGAGCAACGAACTTATCACGGGCAAGCTCTTTCTT  
ACGTTTCAGACTCAAACGAGGAGCTTGACGTTCTGCGTACATTAGAGGTTTCCACTTATC  
ATCAGGAACATCCATACGGATACACGCAACAGCGTTGGTGATTGTACACACCACCTGCCTG  
TTAAGTCACTAAATGTGGCAGACGGTTAGAAGTGGTAATGGACCAGCCGTACAAGTTGGT  
AATGAACGTGTGGCGACGAGCGGAACCGCCTTAAACCTCATCCATAAAGGAGGGGTAGA  
GTCGATAGTACTTGCAGTGATTTGGAACCTGGTATTCAGAGTTGCGTGAACGTTTGGGTA  
AACACTCAGAATACGATAACCTAGTGGAACGTTCTCCTTCTCAGCAGAAAGTTTCAGGTA  
AATCAAGTCTTCTAGTTCGATAGTCTTGATAGTATCTTTAGGGATAGCCTGGCGAGCCAA  
GCCGTTAAGATCGTGAGCATCAGCAGCAGTTAGGCCTTCGTAAGCTACTTGTAGATAGCG  
AGTTTCAAAGTGTCCGTGCATCGCTCGAGTAGACTCTTTAGGCCGCATTGCCATCAGAGT  
ATCGATTTGAGTACCCTCTTGACGTAATTTGTCAGTAACAGACCAAGCACCGCCTTTATA  
GTCAGTAATACGCATCTGTACGTTACCACTCTAGATTGGGTTGTAGACTAGTGGAGTTTC  
TTCTTCCACATCGTGAATAGGTACCGTACCAACAGTTTGAATGTCTAGCACTTCACTAGC  
AGTAAAAGCTGAGACGTTATGATAAATCATTGCTAGCAAGAAATCATCTTGTGGTCTTG  
CAGAATGCTTTTTGAATATTGGTGAGCCTCAATTAATGACGGGAGTTACGAGTATTTG  
TGAACCAGTTGCAGCAGACATATGTAATCTCCTTAAAAATTAGAAAGGATGACAAACTT  
CTTGCCGACCATTATCAGGTAAACCACCTGCACGGAAGGCAGCGGCTAAGTCAGACGTAG  
AAGCTGTTGAACCCATTTTGAAGTCGAGTTGTGGCTCTGGCGGGGTCTGTAATTGCGACG

TGGTTTGGGTAGCTGTTGCAATAACAGTTCGAAGTGGGTGGCTGAGATCCGTCCTTAAAAT  
AACTTCGAACTGGTTTCGGTGATTTACCAGCGAGGTCTATCATAAAATCGAAACCTACTC  
CTAATTCAGCAGCTTTGGCCTTTAGAGCCGCGGTGGCTGTATTGCTATCGCCATATTTAC  
CAATCAGGGGATTAATTACCACTACTTGGTTAGTTTGTGCTTGAGCTTGGGCATCACGTT  
TGTTGAGTAATTCTAACACGGCCTGTTTCATCGAAACCTGCCTGGAGCTGTGAGGCAGTTG  
GTGGTTGACTTACAGTAAGAAACGCTACTACGTCCTCCAGATTCTTAGCTTTCGCTAGCT  
CAGCCTTCAATGGTTCAATCTCTTCTTTGAACGTTGGTTTACAGCTTCGAGATTAGAAA  
TATGCGATTGAACGTGTGGAATACTAGCTAAAGCTGCGTGACAATCCGCGAATTTACGAC  
CCTTACCCACATAAGCCGCAACTTCTGGTTTCAGTTGTGGAGCCGCGAGGAACAGGTGGTT  
ATACGGGTTTTTCGTGGTTCTTGAGCATTAGTCTCTTGACCCTGCCCGGATAAAGTCGCTT  
GGTCAGCCATTTTATTCTCATTATTTAAATTCTTTAACTTAATCACGAAATAATTCTAAT  
AACTTAAAGTAATAAGTCAATAACTTCTTGTAAGGTTTTTTATATACTATTGTATGCAGC  
CTGTTTGAAGCCCAATTAGGGTAATCGAAACCATCCATTCTGATTACTTGTTTTCAATT  
CTCTGCGATACGTTGCCTTAGAATTTCCGCTGTATATCCCTGACTACCTTACTTCCAGC  
GAAATCGTTTTGCGAACTGTTCTTTTGTTCGCCTTACATTCCTTGAGTCCAAACAGTTTT  
CATACTTATCTCATTATACTAACGTTACTTGTGCTACTTGTTCGATTTTTGTTTGAGAAT  
TGCTAACAAGTGCAGAGGTGACGTTGCTTCCATAACTGCAACGTTAGGTTTGAANAATAT  
CCCGACCACGTAAGCTTCGGCGGTGTTCCACCAGGTTAGCCAATTTCTCAGTAGACACAT  
GAGGTTTACTAGCTTGCCAAACGGGAGTATTAGCAATACCCACTAGACTATGTACTACTT  
GCGCTAGTTCTGCAAAGTGTGAGCACCTACAGGACGTGGACGACCTTTTGCTGTAATAC  
CGTCTTTTTTAAACGTTTCATGACGGCTGCCACATAGTCAACAGAGTTAAACACACGAATGG  
TATCAGCTACGTCTAAGTTACGACGAGAATTATCTCACATCGTTTTTCAGACCCTCCTCCA  
TCAGCAGTACTTAACAGTTCATAATCTTCTTTTTGAAGATACGGCCAGCGGCGTTTTGAA  
GTTGTTGAACCTCGAATGCTGTTTTTTCACCGCGAGTTCGAATACCGATAGATTGATGAG  
TAGTACCTGCAAACCTTCCATCTTAACTTCAAGAATCTGAATCTGCATATCTGCTTGTA  
GAGCTTGAGTGGTAGGACCAATCAACTCAACGTCACCATCACCATTGATGTCAATCTTCT  
CAAGTGGTCACCAAACAACCTCCTCAGCATCAGCTTTAACCTTCATTGGAGGATACGCGA  
TTTTGTTCAAACACGCCAGCTTTTAAAGTTTCCAAGGTTGTGATAACGATATTGCATACCTA  
CTTGGTTATATAGTGGTCCCAAATCGTACAGGGTATCTTGTGTAATACGCCCTCCACAGT  
GTAAGATTGGAGCTTGTGCAAACCATGATGGATTCTCTTTTTCTCGATTAGAAACAGGT  
GGTCAAAGATTGTGACTTTCATATTACGCTTATATGTACCTGACAGCGTATGATGTTAGA  
CACCATAGAATCTCGGAAGCGCAACGTAAGGACTTTGTAAGTCATGGTAAAGGTTGCCAA  
ATCCGTCCATAGACCAGCCTACATCCTTTTTCACAGTCTTCCCTGGTGTAAGTGACTAGCC  
GACGACCAAATTTCTCGTCCACGAGCGATCGCGGAAGCGAGAGAGGCATTCACTGGCTGGA  
CCTGTTCCATTTGTAGTAAGGCACCCTCATTCAACACAGTACGAATGATTTCTGGAGAGT  
GAGCAAAGACTCCAGCTACGGGATTAACACAGATATCTTTTTGGTTCGGTGCCTGCTGCAC  
GATGACCCAAAGACGTATCACGAGTAGCGCCGTTACCTCATCCCTGGTGGTTTCTTCA  
CATACGTAACGGTGGCAAACAAGTGCATAGTCACTGAAGTCACTTAGCAGTTCACTCA  
TGATTGTGCGGAATTCCGATTCCCTTAAACCCTGTTATCCATGCATTGCTGACTAGCGTCCC  
CTTTGGCCTCATCCTGCAGGATCTTTCTTCCCCTTCAACCACCGTTCATTTTGAACA  
ATATATTAATGTAGTCGGAGTGTATGTTATCTCGAAACGGACACACCTTAGCTAAAGTAG  
TTTTGTGCTTCCACGATCACGTGCTGTTAGTCGTAGTAGTGGTATCAGAAGCCAAGGTGC  
AGTTACGTAGTTCACTCTATTGAGATAACGACTTCTGACGCTGACTGTTCCAGTTCCTGCC  
AAGAATTAGCAATCTCTCAGCCAAACCATCACGAGTGTCTGCTTAGGATCCGTTGTTGTT  
CAAGAACCTTGCTGATTAATTAATTCCTGCAAAGCTAGGGTTAAATTGAATGATGCC  
GCTTTCACGTTTAGCTCTTGCAGAACGTTGCGGAGGTTTTAACGTGATCTCTACAGCAGA  
GGCTAGAGCCGCTTCAAGACATCATGAGGAGGACCAGACAACACAAGTTCATGCTCAAG  
CATTGGAGTGTAACCACCTTTTCTACGCCCCGTAATACCTTGCTCATAACCGTGGTTCCAA  
TATAGCAGCTGTAGGTTCTTCTATAGAACCAAGCGCCTTAGTTGGTTCGAAACGCGTCGAT  
GCTAATAGTCGTGAATTCCTTGCCTACCCTCTCTTTATTAACGCTTACAATGATTTGCTG  
GGCCACTGTAACGTCGGCTCGGTGCTTCTTAAATGACCACTTACTATGTAACCAGAGAT  
ATGGTCACAGTAATCCTTAATCTTATCTATATTGGGTTCGGTCAATATCCAAAACGTGGAT  
GTAACCTTCTGAATCGATCCTCATAATAAGGATTGCTGTAAAGTCGGCTTTCTTAGATAA  
ACTTCATGCAAAATCCACAGCAGTAAAGATATTCTCAGGTATATCCTTAAAGCAGTATCA  
ACCGTCCCGATAGGTAATGGATTTCTCATCGTAGTATTGGAAATTGCTTTAGATCTAACG  
TGCTGAATCTGGGTTCGTTTTGGGAGATGGTTCGCACAGAGCATAGAAATGAACAGGGTCAAC  
GTATTGAGCTTTCTTCTTAGCCAGAACATGGTTATCAAAACCTAACTTCGTACCATCACA

CCCATGAGAAGTACGAGGCCACAAGAATACACCTTCTTCTTGTAGACGGAGCTCAAAAAT  
ATCCCAAACACGTCTTTCCGCTCAAGTGTCTACTCCATGTTCTGTTGGCACACGGGTTGATG  
CTGATTCTTCCATGTGTCGTGAATATCATCAGGCTGATACCGAGTACCACAAGCCTTAAC  
GATACCTGCAGCGTTTTGGATACATTCCATATGACACATAGCAGCAACTACCTTGGGTCT  
ACCTTCCTCAGTATATGCGTTATTTGGAACATAACATCATCAGAAATAATATCATATGC  
GTGCCAACCAAGTGGAGTTAGCGGTGAGGCCAGCAATCTTAAATGTAAAGGCTCGGACGCC  
TTCCCTCTTACCCTTTGGGTGGTCAACTGCGATTGCACTGTTAGTCCATATCTTACGTGT  
ACCCTCCTCCTCGTTATCCATATCCGGCCAGTACCGGCGATTGATGTTGGAAGTCATGAT  
GATCTTAATAATACTAACTGCATTTACAGGTAGTTCACTGGTACCAGAGATATAAGAAT  
TGTTGTCTCTGGACCCTTAGTCACTACCAAGCTTCCCATAGAGCCATCATGTGAGATTT  
TAAGTGACCACGATGTAAGTGTAGTTGTTGGTAGACCTCATTCCATCCACGCACTTTGC  
CACTTCCTTGTGACCTCACCATAATCTTATTGAGGAGTAACCAATCGGAAGAGCGTCCA  
GAAGTTAGACTCAGCACCTGCTATAATTACGTCAATCTTACTCACTCATACTCATAGTA  
GTAGTTTCGTAGTCTTCCCTCAAGTTTATCCTTAACCCGGGATGCCATCCGTGTGCGAGTAA  
CAATTTCTTCCCTTGGTTGGGCGTCCGCCCCCGTTTGTCTTATCCTGCTTCGGCAGGCC  
ATTTGGCAGCAGCAAAAGACTTCCCATCGCGTGTAAATTTGAATTGCACTGCGAACACCAA  
TAGAGCGCACTTGAATCTCGCCTTCTTTCTTCCAATCCTCGTACATAGCGTAAAATTCAT  
AGTTAGCCTTAAACTTCTTCCATTGTTGCCACTCACCTAAGCATTCCCTCGCAAATTTAA  
TCTCTGTTGGGTCTTCGGTGTCTTATCGACAAAGAGCCGTTAAATGCTTTGTTACTTCT  
CACCTTTGTTTACAGTCCCTCATCCGGAATAGTGTGAATTGAGCTAGGCTTGAATCCCT  
TCTCTAAGAATATCTCCTGGGTGATACCTCTAGCAATAGACTCCTTTAACTCCTTCCCTCA  
TCGGACCTCCTTAATATGGCTTATTACAGAGGTAATATAAAATGAATACTTTACTAATAC  
CAAGCGTATTTTAAATTTAATGGTCTTAAACAGCAGCCCTCCGCGCCATCTATGCTTGGCGA  
GTCGAGACAAACTGCCTCCCCATAATTAATGGGTCACTAGCTACTCGATGTGCCGCTTGT  
CTGCGTTTGACATCATCTTCAATTTATACCATATGGAACAATATCTAAAGGGTATCCAAGG  
AGTTCTTATTTGTTTACAAACGTAGAAGAAGCTCCATCCCACTCATTACCGGAGGCA  
AGTTCCCTCCGGCGTTAATCTTAGTTTAGTCATAGAATCTCCGTAGTGGATTAGCGGACTA  
AAATCTTTACCAGCATTGACATTGTTAACGTTAGACGTACCATCAGCGGCAGCTCCAGTA  
GCTCCTCCAACCTCACAGCCGAGTCCAGTAGTCTGGTTTCCCTGATGCGCCGGTGGGTCAA  
GGTGCCCTGCTACTCCAAAAGTACCACCATTACCTCCGTTACGACCTCGACCTGCGTTT  
GTCCACCGTTAGCACCGGCTAGACCGTTCATTGCTGCTAGTGAGAATCCTTGACCGTTT  
CCCCATTACTAACGGGACCACCGGTAGTGTATGTAGAACTGGTAACTGTTCTAGTTGGG  
CACATTGCGTTAGACGTCAAACCGCCACACGGGCACCCTACAAGTTGGCGGCATAGTAC  
GTCCACCCTCCCAGGGCTTTAGGGATAGCGTAGGTAACAAAAGGCCCAAAGTGTGGACCA  
TACCAAGGATATATCTGGGAGTTACCCCTACGTACGCTACAGTTACGAGCCCAAATCTG  
ATACGGTACCCTGTAGCATATGTCCAAGTTCCAGATGATGGGTACGTTGTGTAGATTGA  
GTAGTAAAGAAACCGTTACTACCTGTACCTCCTTTACCAGCAGCACCGCCTCCACCGGCG  
ATTGTGCCGTTGTTGGTTAAGTTATCTTTTGGTAAATCTATACTCGTAAGGCAGGGTCA  
CCAGCTTGGCCTACTCCTGCTCCGCCAACACCACGTTAACCATAGATCTTAGCATTGTTG  
ATGACGTTAATTGTCTTTTCTATAATGCTGTCTGGGATCACAATTTTTGGAGTGGTGACG  
TTTGTGAGCACACAATCACATCGGAGTTAATAACTTGATAATTGATAATCTCTGCTCCA  
AAACCTACAGCAGTAGCTAGGTTGAAATTGGCTGTATTCCGACTGATTGTGTAAGTAAGT  
TCGGTGTTCGGCATATCTCCATTCCCCGTGTTAACAACCCAACCAATCGTGTATTGC  
CCAACCTCCGCGGACATTAAGTTTCATTGTAGCCTCTCTGTTAGTACCAGAAACAATTACT  
CCTACTGGCATGGTTCCGCCTTATACGGACTGTAGCCAAATACCTTTATCTGCACCACCA  
GCAGGCGCGCTAGAAGAGACAGTAATTTTTCGCTTTCTAACTGCTGCTAAATCAGAAGCA  
GAACGGGCTTCAGTTGCAGCATCATATGCGGCTAACAACTGTCAGTGGTTGCATAAGTA  
GTAGTACTTTTTGAGTTAGTAGCACTAGATGCTCCTCAACTGTTTCTGGTGCTTTAACCA  
ACCTCAGCTTTAGTAGGCCAACGAGTTGCGTAGTATGGAATGCCTGTAATCACCGACCAT  
GCTGGAACATAACCAATAGCTTTGTATCTAGCATCAATCTCAACGTTAGAATCGGCAGTA  
CCTGCTAACTACAATTCAGTTCTAGCATCTGCAATAACTTGGGCCTTAGTACTTCCCTCC  
AACTTGTCTGAATTTACAGCCGTAGCGTTAGTAGCTGGAGCACATATTTCCGGTTGGGGTC  
GGTTTAAACCTTTGTGGTAGATTTTACGCCATGGGCGAGCTTCCCAAGTTGTCCTATTA  
CAATATTTGAAATCCAAAACCTTACTATTAGTCCCATACCCAGTTAATAGTTGGAGTGCT  
GTATCTGCTGCTGGTGATAAAAATGATTCTAAGTCACCGGAATTTGTTCCCTCATGCATT  
TTTGGATTGTTGTTACCTAGGCGAACAAACACCAGTTAGTTTTGGATACCCATTCAGAACA  
AGAGTGTTAGAAGACGCAACATACATCACACTGATGCACACATCACAGACGTAAGAGGT

CCAACA ACTGAGGTAGTGGGTTTATTAGTTGGCGAGTATACCCTACCCTACCCTCATAT  
AGTGGGCTAGATGACACCCTTTATACGGCAGTTTTGTCACTGATGAGGTTGCGGCATCA  
AGCATTTCGTCCTTCCAATACCAACGTTATCATCTACACCCGGACCAGCATTGGTAATA  
TACACACTTCCCTCGATTAGCCATCACACCGTATCCATCGATCTTTGCCACACCTCAGTTT  
GGAGTAGTATTTACAGAATCAGGGTTCGATGAGCAAGGGAGCAGTCATTGGATCTCCAGCT  
TAATTTACGGCTCCTAACATTACTGGAGATGTTTTGTCCGTATCCGAGTAGAACTTAGTA  
TCCGCTTCTGATTTGTCGTGCATACTGTTGGCTTCGACTAGACTGGTAACATCACTTAGA  
TGACCATTAACGGACTGTACGCGAGTACCAATCTCAACAATACCCCAAGAGGAACCAGTC  
CAAACAATCAGGTCCTGTGCAACACTGTGCGTGTTCACCTGTGATTTGTGTAGATCCG  
CGTTTTGGGTTGTTGGTACCTGCAACATAGGCTGTACCGTTGTGCGATGGGTCAGGTGGA  
GCCATACCTTGATTGATTCTTGGTTCGGCTGGGTCTCTCGTCACAACGAAGCTTGTTGGA  
GTGCTTGAGGCGTTGTCCATCTGTGCCTCACTCGTAATACGGATAGAACCAGAACTACCG  
GGAAGCAAGTCGCTTACGACAACCTTCTCCAGCTCCTCACTAGAGTAATTTGATTCAAT  
ACGTAGTCAGAGTTACTGATAGGCCTCTTTACTGGGCCCGAATCAGGGTCGATTATTTCCG  
GTTTGAATCTTATCAACCATCGATATCTGCTTATGCTTTCAAAGATACTACACTAAATTG  
AGACCCAGTAGTGGTACTCTGCTTTGTTTTAAGTGAGTTCCCGGAGAAGTTTCGTATCC  
ATTAAGGATAACTGACATAGTGTCCCTCTCTAGGAGAAGGAATAATAAACGCCCAAGA  
GCCTCCAGAAACACCATAATAAGTTGTGTAATTTGCGCTAACATATGCACGTCTGTAAGA  
CCCATACACGACGGAATCGTTGACTAGAGTACTCCCAGTGATTTGAACATCAGCAATGAA  
TGATGGCCTAAACGGGGCCAGCAAGACATGTAAATCCTCAAACGCACCATTGCAGAACT  
CGCAAACGTGGTACTAATCACTCCGAGATGAACACCAAACGGCCGTGCTTGGTTAAGTGG  
AGTAGCTGTTCCACCAGACTTTGTAGTTGACAGTGCAGTAGCTGACCAGATATTTAACCT  
TGTAGCACTTACACCATTTCATCATTTTGTATTGTGAAACCATGAACCAATTCCACCTTCC  
CCACTCTCCAGTACCATGAAATAGGCGCGATACTGAAAACCTTGAGAATTGTAGTGCTG  
GAAATCAACATCGAACACATCAGGGTGTGGGTTAACAGCGTACTCAATGCTTAGCTCCA  
ACTCGTGCCTGTGGTTTCAAGATAGCACTCATGAGAACCACGTTGGCCTGGGTCTCCTTG  
TGGACCTTTGTCACCTGAGGGACCCTGTGGGACCATTGTACCTCGTGGCCCTTCTGGCCC  
TTGGGGCCCCGATGGGGCCTTGAGGACCTGTTGGCCCTACGGGTCTTACGGACTAATAAT  
ACGTTGAGGATCCTGCGACCCCTGTGGCCCTGTTAAAACCTATCCCCTCGCGGGCCTTT  
CTCTCCGTGTGGGCCAAGTTCCCCTTGGGGGCCCTGGATACCTTGAGGCCCTTGGTTCGCC  
TTGCACACGCTTCTCGCCTTGCGCATCCTGAGCACCTTGTGACCTGTAGGGCAGATGGT  
TCCTTGCTCACCTCGAGGTCCTTATGGACCTTGACCCAACGGAATAGCTGGTGACCAATC  
CCCATACGCTGCGCTTGACTCACTAAAGTTAGCGCCCTTAGGCACAAATGGGAGACTGGAG  
ACGTACTGTGATGCGGACTCCAGTTTTAGGAGTTTCATCAAATGATAGACCGTTACCAGA  
TACCTCAAAGAATCTTGGGCCAGGTATGAGTTGCCTTGCCAAACATATAGGTTACTCTT  
CAAGTTTGGAGTGAACAACAAGTGAACCTCTTTGTAGAGCCATGTCCAACAAGGCCTG  
ATCTTGGAATGTAGAGTCAAATGAATAGGCTGTTGCAAAGTAGTTAAATGGGGGAACTTC  
ATCTTGGTATGTACTCAGACCAATAAACAAACCTTGAACATTGATGATCAGAGAGTCGCC  
CTTATCACGTTTCGAGCCGACTGGACCAGCAGTACCGCTAGGGCCTTGGGGACCCGTTAG  
GTCTTCGTAATCACCCCGCGTACCATCTGGATAGCGGAAAGGTAGGTTTCGACCATCCCT  
TTCAAGCTCTGGAGATATAACCATCTGTGCCTGCAGGATCATCTACGCCCTGCAGACCTTG  
AATGATTACCAAGGACCCAACCTTCATATCTACACCTGTATCTGGGTCAATCTTGTGGC  
GAATATACTTGCATGGTAGCTTGAGTGATGTCGTCACAAAATTGGTGGATTGGAGTAGG  
ACCTGCTACGCCCTCATGTTCTGTGGACTCTGAATACCCTGTTGTCCTTGAAAATCCTG  
TGGACCTTGTACTCCAGTTGGGTCTTGCGGCCCCCTTGGGCCTGCCGTGCCCGCAGGATC  
AACTATCTTAGGGGAGCTTAAGAGTCAATGTCCACCCTTCTGTAAACGTCGGGACGTA  
GTTAAAGCACCGTACATTAGTGCACACTGTAGTGAATCCACTTTTGAAATAGACTGAT  
ACCGTTTAGATACACTTGGGTAGAGAAAGGACCTTCAACCACCTAAGTACCGATGTCGAA  
GTCAAAGTAACCTCATAACGATAATGTGCAATCTGTGGTAGATCAACACCAGATACATC  
ACCTTCAAAGGTTTTAACGTCTCCAGCCAATGAGGTTTCGGCAGGGTTTCATTCGAGCAGG  
TAGGTTAATTATCCGGTTGGAGTTCATATCCAACCTCTTATTCATTTGATTGGAACCAGT  
CTTAACAGAGAGAACATTTGAGTTTAAAGCCTCAACAATCTTCTCAGAGTTGGAGTACT  
TGTGGAGGTGTTAAAACCTCCTCTTGATTCACTGAGAGTGGTAGTCATAGTTATTTAATC  
TCCCTAAGATTTAGAGAAATAGTTATTACATAAAGTAACTATACTATAAACATGCTTAAG  
TATTAATACATTCCAACGTAGAAAAATATCAATAGTTAATAATGGCCACGTAGGTTACGC  
AACTACGTTAAGCGGGTAGGTCGTATTGCCTTCACTTAGTCTCGTTTGGCATCAGCC  
ACTCAAGTATTCATCTTACGAACTCTTTAGTAACTACTCATACATGAAACATAGAATAC

GAAGAATCTATCTGGCAGTGGTGTGGCCCCGAGTTGTTTACTATAGAGTATCGCCTCGTA  
GACTGAAGCCGTATAGACGTCTAGCGCACGAATATTTTCATATCTGCTAGCTGTCATAGA  
CGACAAATAAGCAATCTGGAACGCCATTATTTTCGGTGGGAAATCTTTATGTTGCAATGAA  
CACCAAAAAGAACGCCCGTGACCCCTCTACCTCTCTCCGGAGATGTGCATGTACACC  
TTTTATCTTTATTTGGGCCTTTTGCTCAACTCACACTTTTGATAGATTGGATCGTTG  
AGCATTAAACATTACCATGCTTCTCGACATGTACGAATCTCCCCACACTTACACTATTAC  
GGGTCCGCACAGCGATACGCGGCGCTAACGTATTGCTTTATATATTATTGGGATAGGCAG  
AGTGTTATGTATATTGCTGTACAAGATACGGATGGCTAGCTATGTTTCGAGCTATGTGATA  
ATAGGTTATTTAGTTGTATCCTATACACGGATATAAAGAGAGTATTACCGATTACATATCT  
ATATTTAGTAATGGGATGTATGTCACTTGTATCCCAGTTTGGATTGGCGTTAATATTCAC  
ACCCTCGGTCAGGCAACAGCCTAACGATATAGAGATAGATGGTTACACTCGTTATCTCTG  
CTCTTTAAAAATGTGGTTGCAAATGATTGCTGATTCATGTTAACCTTTACACCGTCCAAT  
GTTTGCAGTGATACGTAGTCCAGTGTTGTTCTGGGTTGATTGAGGTAAGCGGCGTTACCA  
ACAACAATCATATACCCCTCTAGATGAACCGAACAGGCAGCTAGAAAACACCGCTTGCCA  
CGGTGAGGATGATTGTGTTAACATTGTCACCGCGCTCCGAGGAGCAAACCTAGTTAACCGC  
ACGGAGCTCAAAACGTTCTTCTATACTTCCGATATTACCACAGATGTAACATCCGTAAGT  
AGGTTGATGAGGCGACGTCTCGCGTAGGTGTGAGGGGTTAGACTCTCAAAGGTATTGAGC  
TACGTTGCGCTAGGTTGAGATTTTGTGACTCTTTATCCAGAAATCGTGCAACTAAGCTAA  
CGGTACGGAGTATAACTACAGTGCGGATGACGTTGATATGGTTGGATTTTGATCGCTGGG  
TATTGATAAGCCGATATGAAGTGCGTGTCCACCGTCAAACCAAAATGTATGGGAAAGCTA  
TTATCAGCACGCCAACAGTCCGGCGTGATGAATGGTTATAGGAGTGTCTATTTAAGGGC  
ATCAGATTACTAATTCATAATTATCTATATGTTAATTAGTGATATCTTGATGAGCTAAAG  
TTTGTGGTGTCTTAAATATTTATGGTGAGCGGTTACCTAATCTACTGTGTATAATCG  
TTTAATAATGATCACCAATGTGATGGAGTTATAAGTGCTCCGTGTTCAATGTTTTCTCAC  
CAGAGAGCTAGATAAAAGTGGAGTATCGTTTATTGTATTCTCCACCAAGCTAGGTATAAC  
AATGCCAGCCTGAATCACAACCTAACGTTTTAGACGACAAGGTTAACCGCATTAAAGACT  
GTTACGTATTGGAATCAATGCGGTAGGTCCGATGAGCTGGAAGCTAAGCTACAAAGTTA  
TAGATTGGTTCAAGTTATGTGTGCTTCGTTTTCTATTATCCCAGTCTCTGACTACGTAAC  
CCGTAAAGAATTAACCCTGATCTTGACTGGTCTAGTCACTCGTCTAACTCTACCAACTAA  
GTCATCTCATAGGTGATTATCATGGCACTCCAACCTAAGTCTAAGTCTAAAGCTAAA  
CTACACAATTGGGTAAAAGGCAGCAAGTTTAAGCGTGATGAACTTTAAGAATTCATTGTG  
GTGGGTGAACTAGATGCTCAACAAAACGACACTGACGTTACCAGACTGTTTGACGAAATG  
GTCGCTTGAGGATGTGAAGGCTTTCCCTATACATGCTGCATTTGACTACATCAAGAAA  
GTGATCAACGGTGCAGCATCGAACGTTCCAGGCTAAAGTGTTCAGAAATCTAACAAGAGA  
GCGACTCTTGAATACAACATTGGTTACCTAGAATCTGAGGCATGGTACGAGTTTAGAAAG  
GCCACCAACAAGTAAAAGAAATGGATATTAGCAATTCGGCTGCACGTTGGGCAATACAA  
CTGCGTGAGAACATTGATAAAGGCTTGCTTGAAGACGGTCACCAAGGTAATGCCGAAGAC  
CTATTAATAACTGGTTCAATTTGTAGAGTAGTAAGCTAGCAGCCATTCCAAATGAGTG  
GTAGTTATGGATATTGTACATAGCCATGATTAACAAGACTATTATGTCTATTTAAATGCG  
TCCTTTTCGATTGTCTCAATTAACCTTTACTGATAATCCGTTTTCGACATACGTCGGTGC  
TCATAAGAACATTAGGGCTGAGGATAAATTGACTGTGATTGCGATGGTATTATGACTCTT  
AAGGGCGGTAAGTGTACACTGCGAAAGATGCTGACGGTGATAACTGACCA  
TTTGTGAGTTACACGATAACGGCAAACATGCGCAACCGTTGGTGTAGGTTGGATTGTT  
CGTGTGCTCGAACAGTACGATGTTGAAAACCTGGTTAATCACACACCAACCATTGAACT  
ACACCGCCAAAATAGCTGAAAGCTACCAGCATATGCTATAATACTGAGTGATTGACTTC  
GGCTTTTTGATTGGGGAGCCTTTGTTATTTTCATTCACCCAACCATAGGACAAGATCAT  
GCGTATTATCCATTTTGTAAAGCAACGGCGTAGTAACCTAACGGAAACGTAGTAGCACAGGT  
CGATCGCCTGTACATCAAAGGGACTACCTATGCTCCATGTTAGATTTCGGGGTCATTGGGT  
TAATGTTTCGTAGCGATATGGTGATGGAGGCGGAGACAGCACACCTAACAACAAAATTCCG  
AATGTTAGCTCTGACAGTGTAATCGTAGTTCCATAAGTCCATCATCATCATTTCCCTCA  
GCGATAAGGAGACGGCAACATTAACAAGGCCATTCAAACCGTGCCCATAGTCCAGTGAG  
TATAATGCTAAGCAAGAAATCAGCAGACGTTAGACTAATCAAAGTGGTCAATCTAATCTC  
TCGTGCCACTGGTGGTGCAGGTGATGGTGGCCGCTTGGTTTTTTATGTGCTGCTATTAA  
TGAGGACGGTGCAAACATTCGTAGCCTGTCAACGTGGGAAGCATAACGGTCAACTGTCTGA  
CTCAATAACCACAATGGCTAGACTTCACTAACTGAATAGGTATTCAATCATGTTCCATAC  
AGTCACTCTTAGGGTAACCGTGCTCGTTATGGGATTGGCTATTCTGTTAAATGGTCTAAT  
GCTAGGCGGTTCTATCTCAAAGCCGAAGTCATTAGCACATTGTGAAAAGGTTATTACAAT



TTTGATTAACATTTCCACGCTTGTGGCGTTGTTGCTTAAGATGCCAATCGGAGCATGAGT  
AATGCTTTCCGCTAAAGTTGTGCTCTTAGTCCTGCTTATTTACGTGCTTTTACGGAGAAA  
ATAGACTATGTGTA AAAACGTT CCTAGTCGTCCGGATGCGCAAGAACGTTTACAAAAGGC  
TTACGCTAATGTTACATCCCGTAGCGCTGTTATCGTCCCAACGAACGTAATCGGATCGG  
TACAACGCCCCGGGCTAAGTCTGGAAGTACTAAGACTTATCGAACGGCCACACCTCCTCT  
TGGCTTTAATCACTTAAACTGAATAAATATTTAGAGTCCATTATGGAACGTACAATAACA  
CTAGGCGCCTTTTGTTCGTTGCTACTCCTCGCGAAAATGATTTAGCAGTATCAATAATC  
TTTGTGATCGTGAACCAAGGCGACTGAGTTC AATCCAATGCGTGT CATGCCTAATCCT  
GAAATGTTGGCAAGTCAATGTCGTGAAGAAGCTTTATTTTTGGAAGCACCAACTGCGC  
GTAATAGCCCTTATGGTCGGTATCGGTGCAGTACTATTGGATGGACCAGGACGTTACGCC  
TTCTATGCAACTGCAGAGAAAGCAGTCAAGCAACTTATTCTCGAATCTGAATCATTATAC  
GCATCTAAACATTAATCCCACTAACCTGAGAGAACTACCATCACGTGCCCAATATAAGGA  
AACATAATTGTGTCTATTATCTCTAAAACCTTTCTCAGTATTCGGTTGAACTGTTGTTCAA  
CAAATCAACACTAAAACGTTTCGTTGGCTCTACCTTTGTAGCCGGTGAAGTAATGGTCGAA  
GTTACTTTGGACGACCCAACCCTGGAAGGTGCAATGGCTGCATTCCAGGAGTTCAGCGAA  
AACCACGCAAAAAGGTGCGGCCGTA CTGTTCAAAGTAGCTAAGTTCTTCCAACAGGAAATG  
CCCACCAAGAAATGATTTGGCTGCTTGGGCGGTATCATCAAGGTTGCATTGGTTGCTCCA  
TGCGAAGCAAGCCGTGAGGTAGGTTGCGTTGTCTCCAAGCGGCGACACCAAGATGGTGAT  
TGGGAAGTTGTTACCTTGAAATGCTTAACCTAGCAGACGATTGCAGTGTTCGGGATATG  
ATGCACATCTACAACCAAGGTGCAGCGGTACACTTAGCAGTAGCTATTATGCGGACAGGT  
TCATTACGCTTACTAGCTCTAAATAATCTTATCGGTCTCCTACTTTGGGGGTGGAAGAC  
CTTACACTAACTCAAGATGAAAGAGAGAAATACCATGAAAAGCATTATTTAAGCTCAAAT  
AATCCTCTCTGAAATCGTTAGCAACGTGCTAAAAGCTTGAGGTAATGAGAACCCAAAGCC  
TGCGTGTGAGGGTATACCAAGTAAAATCACTTGGTTAGATGCCGCATACGCCCAATGGCA  
GATAGGCTTCCA ACTGGATA TTTCTATTTAGTTGTGGTTTGAAAGACGAGATTCTCAGGCA  
AGCGAGCTACGAATCTCAACGTGTCGTTTACGAAAACGGCACTGAATTAATTTACGAACG  
GATGTACTTCAAAAATGCAGGAGGTAAGGTAGAGCGCCGACCCTTCATACCAACTGGAAC  
TCTACAGCTGACTATCTTTCACCGGTGTACATCGAATGGAAGAAGCAACATGATGAGTT  
GACTCGTCAATATGAGTAAGTGAAGAAGTGGGAACAAACTCGTGCTGACAAAGCCACTGG  
AATCCGTGCTGTGCCAGACAGTGTGAACACCACCAAGCGATAGCTTCAAGAATGGCCACA  
GATTGAAAGATTAATCCCAAGTGGTTATGTGGACCCAAGCAAAGTACA ACTACCAGCAAT  
CCTTGCAACCTTACCAACGGGAGAGAAAATTACAAGATCCTTTCTACTGAGTCTATTCTT  
GATTCTACCATTGTGCGTATCGGTTTCGATCAGAGGCTGAACAAAGTCCTAATGTTACAAG  
AGCTTCTTTGTAGACAACACTGGCAGTTGTATCACTGATAGATACATAGCAGCGGCTAC  
GCCTAGCGTTAAATTTTATGTAGATCATATCTTAGCAACAAAGAAGTCACTGATTTATTA  
CTACCGACTAGACAGCACAGAGAAACCAGTGTGGCTGATTATCTGTTGCAAGTGGAAATC  
TAAATAGACTGGTGCCAAATGTTGTAAACTCGCTCTAGAAGCCATGCACGAAGGGTCAGA  
TGAAATGGCTGCCGCTCGCTTTATGTAGAAGCGGTGTAGTGAATAAGTCAAGGGTATCT  
AATTGGATGCCCTTATCGTGTTCCCTAATCTATTGGAACTGTTATGAAATATTATCTT  
AGAATCCGTTAAACCTACGATCCTAGTATCTTTCTACTGTGGCTTCGGTGCTAGAACAT  
TGGTTTGCCGTTCTTCGTAATGGTGGCGATATGAACAACAAAGGATACAGACGAGGCAAC  
TACCAATGTGGGAATCGTATAACTTTGGTGAGTCTGTTCGCTTGACACATAACTTTTCT  
TGGGCAATTACAGAAGAATTTCTCCCTTTCATAAGTTTGATGGATGCCGTGATGTTGGC  
TTTAAAGACGCTGCCAATACTTCATAGATTGTGTTATGTTTACTCCAGACGAGATTGAA  
GGTGTCAAACCTTGGAAGATAACATTAATGTTGTCAAATGTGTTTCGACTTAATACGCCA  
ACAATTACAGACGAGGATGTATCTCCCGGTGATACCCGTAAATCTTGAGCAAGTTAGAT  
AGAGCCACGATTACTCATGAGCATGGCGGATGTGACTTAACAAAAAAGCCACCAAAATTC  
GTTAGAAAAGTGTGGTTCTTAGGTCTTCTATGGTCTGACTGCCCATAGTTTGTAGAGAAA  
GACGTTTCGTGAAAGTTGGTCTGACGTTAGCCTAGGTAGTGACCACTACTCCTGCAAAACA  
GAAGTAGATGAAGA ACTATTCGACCGCTACCAAAGTATTTACTTCGGGTTGAACCACAAA  
GTCGGACCGGAGGGTGAACAGGTTCTAGTTCATTGGTGGTGGTAATTGTAGAGCATAAGT  
AGAGAGTACTTGCTAGTGTCTCAATCATGTTTCATCACCTGAATAGGATAAAATAAGATG  
AGACGTTTACTATTGCTTACACTGCACAAGAAGGCCGTCACTAAAGTTAAAGTTTTC  
GGGACTAAGGCGGAAGACAACGAGATTGCTATGTTTCGATTTCAAATACTTTTCGCGCAGAG  
CAAACCGACCAACTCATCATCAATTGGTACGAGCCTACCAAATCACTAACTAAGAAAGG  
TAATATCATCGAGAGACCCTGCAAAGAACGCTAACACTGGAAAACAACACCGATGCTCC  
CAGTGGATAAAGAGTCACTGTAATGAGCCAAAACAATAAGGATTATGATGTTGAGGTGTT

AGCTCACGTATCAGATAGATTTGGGTCTAATGCAATCTGTAAACACATTGAAGACGAATC  
AAAATTGTTATTAGTCTTCAACCACTATAGTTCTAGTACGTGAGCTTATGTGGGATTCAG  
TGAACGGGACCTATTAAGTTTGCTGGTAATATATCTAACCAATACAGTTTAATAACATGA  
ACCTTGGAGTAGAAGCATGGCGATTACTTGCCCGTGTAATTGCTGGCTATTGTGGTAACA  
ACCTAGTAATCCGAGAGTAATGCCCGGTTCCAATTTCTGACCCTAAGACCATCACAATGC  
CAGTGTTACGTCCCTAATGGAATGTTACAGTGCACGCGCAGCGTTGGTGGGCAGGAC  
TTATCCACAAGTGTCTCACACAACGGCACTAACTCTCTTGATTTTAAGTTACTGCGTG  
AATTGAAAATCTATACCAACAAATTCTTTGGTATGGTACTCAACTGGATGTCGAACATA  
ACATTGAATAGAATGAGTTTAGGAATCTCGCGGGTGCTGATGAATTTATGGATGCTCTCT  
ATTCTGAGAGTTACATGAAAATCAGCCGGAAGTTTGGGAGTTATCCAGAGGAATCAGAGG  
GAGCGTCTGGATTAAGCCCTTGTTGCCTTAAACCTCAGAATACGCTCTCAAAGGAGTG  
GCATTGTTATTCTTCAATTTAGGGGAGGGAGTAACTGCTGAACTTGCCCGCACTATGTTCC  
AAACTATGCTGGACCATGCCCAAGGCCGTTACCTGACCAAACGTGATGGTGGTTTGCCTA  
ACCTGCACGTCTGCAATGAGTGGATGGACTTGTTACACCTAAAAGAAGAAAAAGATGGAG  
CTAACTCTCAGGCAGAGGGGTCATCTGACTGTAAATCAGGACAAGGTGAAGGTAAGCCCA  
ACGATAGTGGAGGCGAAAGTGACGAGGGATAAGGTGCAGGAAGTGGCTCGGGAACGCCTT  
GAGAGGGCGAAAGTGAAGCAGGTGAAGCGGAAGTACCTCAAGAGCTTATTGCGATGTTCT  
ACGGGGATTCTGGACGTACTTCTACTATGGTAAGCGAGCTTCTGTTATTAACGTTAAGC  
TAACTTACGGTTGGGACGCACGAGATACGTCTGGCTAACGTATGCTGACTGCTGAAGAGC  
TCCAACCTAACCACTTTGCAGACCGCCGCTGTAATAATGGCGTAGATGATGTGCTGTCTC  
ACCTCAATTTCACTCTGAGTGATAAGGTCCGAAACATCCTCAAAGCTATGTCCCAAGTCA  
ACTGGCAAGGTAGTCAAAGGGAGGCAAGATACATTGCAAAGCCGTTGAAAACTAACGA  
CAGGCAGTAATGTTATCTGCCGTGAGTAGGAACAGAAGGTTGTATTGGATACGCAAGTAA  
CTGTTCTGTTACATAGATCCGGCTCTATATCTGATCGTAGCACGTATCTCCACGGTATGT  
TAGCGTGTGTATGGCGAATGATGCTTTGATCAAAGTCGCCATTCCGATTGGAGTTCTAG  
ACTTTACCCAACTTACAAAGGCTCTAACTCGTACAACCAACATCTGATTCACACCCCGT  
TCGGTCGTCGCGATACGGCTTGTGACCTGGTAGAGTCAATGGATGGAGTTGACTTAGCGT  
ACAATGACGTTGGTGCTCCTATTATGTGAGCCTACTCTCGTCTAATTAGCCCCAGAGCTA  
AGCGTAAAATCTTGATTGTGTTAAGTGATGGTAGCCCTGCATGTTTGCTAGCTGGCTCTT  
ACGCATTCACTAAGTAAGTGGACGAGTAGATTGTAAAAAATCTCCAGTAGAGATCGACG  
GCATCGGCGTTATGGACGGTAACGTTTTACGCATCTACTCACAAGCGATGTTATCAGAA  
CACGAGAGCAACTAGAATCAGCTCTACTTAACGGCGTTAAAGCTAAAATTCTCGGTTAAT  
AAGGAAAACATATCATTGCAACTATGACAACAGCAACATCAGACCCACTACGTTCTATTG  
TAGCGGTGGCAGTGGCAGCACGTATCGCGGGTGAGGGCGGTAACATGAGTACGTTACTA  
CGGCTAATAACCAGAAGCACCAAAGAATCCTCCTTTTTTTGAAGATGAGATTCCACAAC  
CATCAGGTGATGGTGTTAAAGAGTATGCTGAAATTATTGGGTATCCTCTTCGATACGGTG  
AGTTCTATATCCACACCTACAAGAAGGAACATTGGCGGGAATAGCTACAATCTCTGATTC  
CACAAATTGATAGCACCATGGAGTTTGATGATGACCTTGCTCTTGCTATTATTATGGGCA  
TTTAATACTACATACCTGTATTCGCTTATGGCGCACCGGGAGCTGGTAAGTCAGTTACAC  
CAGAACACACCTGTGCTCGTCGCGGGTATCCTTGCATGTTCTGTGATGCAATAAGTGGTA  
CACAGCCTTGCGACTACGTGGATGCTCCTTGGGTGAGTGAGGGCAGTATGGAATGGAAAG  
ACGGCCCAATGTCTTTCGCGGTGCGCAAATGTTGATTCCTTCAGTACGATGAGCCCTTCT  
AAGAGGCTGCACAACTAAGGTGCGTAGCCAATTACTGCTTGACACTCGTCATAATATGA  
AACTGTACGCTCATCCTGACCCTGTTGAGGGTAACTTACATGCTCATGGTAGCTTTTCGTA  
TCAGGTTTGCTGATAACGTCCGTCGTTCTGGCGACCAGATGGATAGGTTTCGCGGCAGAGG  
TACAAGACAAATCTACTCTGAACAGTATGGTGTCCAACTTCATGTGCCATACCGAACTG  
AGAAAGCTGAGATAGAAATCCTACGCCGTAAGTTCCACAACCTAACTGAGCGTTTGGCTA  
CTAAGATTGTTTCCTTAGCTAACATGAGTAGTACAGGATGGGGGCAAGGAACTATCACC  
TAACTAACTCTGTACGTGTTTCCCGATTACTAGCTGAACAATTACTGAGTTTAAGTAACC  
CTGCGTATCCTTTGAAAAAGAACTAGTTTCGATGCTGTCAATGACGACGTTGAGAAGAAAG  
AGCTTGAGAAAATGTTGAACATGGTTAAGTTCGACGAGTAAAAACGCTAAGGAGATATCA  
CGGCTTATAATGGTCGTCCGGTCCGTGTGTTTAAACACGGACCGCATTAACTAGCATAAG  
CTCGGGATTGCTTTGAGGAAGAGTATGACCTCAAACACGTCGAAGGAGAGAGTGGTTCAA  
CTATCTTCGCCATAGGCGGTAGATACGGTTGGGGAGACACCGTATCCTACAGACGCAAGA  
GGGAATCTGGTGCTGCTCTAGAGTGCATGTTTAAATCAGGCTTCTTATGGGGCAGAGGGT  
ATATATATCCACTATTCATTACCTTAGATGAGGAGGCCACCGATAAGTACCACTCTATGT  
GGAGGTCTCGGATAGGACAATGTTCTACTCTACTCGTTGTTGCGTTCTAAGTTTCTGAA

CAAGTTAAAGAACAGGCTATTAAGGCTATTCTTGAAGAGTTTGCATTCAAGAAACCTCAT  
ACATGCAGATTCACTCAAGAGAGCTGTGTGTATTGTTTCTTACGAGAGCTTGATGCATCT  
CACTACCAGTTAACCCAATCTGCAATTGCAGAGGTGGCACAGAGGAGGAATCACAGAATA  
TGTTGAAACCTCACCACGAACCAGTGACTAAATAATTGCTAAGTTAGAGGAGTTATTAGT  
ATGATTGATACGCCTTGATTCCGCTGCAAAGCGTGTGATAAATAGATGCAACCACATAAG  
TTTCGTGCTCACTGGTACAATGCTGAAATTCTCGACGTTTGGGAAAGCCTGTGTCCCTAAG  
TATACTGGTAAAGTACCACATAGGTACTCTCGCACTGAACAATAGCACAATGATTCATCA  
GGGATTTCGATTCACTCATTCCAGTATGGGAGATTCACTCGGTGAATTTATGCACTCATGA  
CATAACAAAGGTTCTGCTGGTGGCAGTTTTAATTCCAAATACCGAGGTTAAAGCCCACGT  
AGACGACAACCCAGATTGGACTATCGGAGGGACGAAACATATCTTTCACAGCAAGGAAGG  
GCACAACAACAACCGATTCCATGTTACCCCCGTAGAGAACGGTGTGTACATTGGATACTG  
CCATCAATCCGGTGGTAAGGGAGTCTATCGTCAGATGATTGCCTGTGTTAAAAAAAACCT  
AGCCGGTAGCAGTTCTAAGAAAAACCACCGTGATTATAAACTTCCAAGGACTATTACCAA  
AAACATGTCTGAGTGGTCGTCAAAGGCCAAAAGTGTGCTTGAGAAAAGCCATGCTCACCGA  
TGATTAAGTTAAAGATAGAGGTTTCTTGTACGAGACCGAAACAATTCGAGTGTACTTGC  
TATCTATTATTATAGTGAGTATCAGGGATACCGCTCTCGTAGAGTGGCGGCTAACGGCGA  
AGCGAAATAGCTGGTAAGGTCTAAAGACCGAGAAAGTTTCATGCGGTGATATAACCAATA  
CACTAGCGCCCCTAATGCGGTGGAAGATGCTCTATTATTTATCCGCATCAGTAGACACAC  
CAGTTGCGTCCGTCTCTTTTGTACATTGATACCAGACAACGTTATCAATTTTAGTCGCGC  
TAATCACAATAAGTATAACATATGGTTTGTATTGACAACTACAGGTCAAAATCAAGCA  
GCTCCAGCTTAAAGCTAATTAGGAGTTGTTGGGTCTCTTCAGAATGATTAAGCCAGACAG  
AGACCCTAAAGAAAATTCTTACCCTGAACTCAAGGAGGTACTATACCTGTAAACTTGAAA  
CTCGCTAATACGGTTAAAGTTGTAAATAAAGGTGGTATCCACACATCACATTCTATTTAA  
GGTGCAAGACACCCTGCCTCGGTGAATGGCGCTACTCCGAGACCCTCACTAAATTCGAC  
ATCATTGGACTGCTTCGAGATGCAACTATTGGAAGGGGTGTTGATAATATCTACGCGGT  
CAAACGGTAGTGCTCAAGTATACCTATACTGTGAACGAGGTCTGGAAGTACTAGATACCCCG  
AATGTCATTGCGCCAGTCTCTGCAATCGCACCCAGCACGGGTTTCGTTTTTCCACAGTCA  
TGGATCCGTTTTAATGGGGATGAACACGATAGAATGCGTCGACGTTTAGTTGAAGCCCGT  
AAGATTGGCAACAGCATTGACGCTGCTTGTGTTGCTTTTTGGTGACGACCACCGTGAGAGT  
GTGAAATGGACGTGTAATCCCGCATTACGCAAGTTAGACACGTTGGATGCGGCAGCAGTG  
TACTCAAATTGTCAGACATCAAATTTGGATTGTAATCATGGGTGAAGAGATTAAGGGTC  
AAGAGTGGGGTTGCTATACTACTTCTCGTGGGCCTGACTTAACTCACAACAGAGAGTACC  
AAAGTATTGCGGTCTACAGTTCTGATGCCACTTACGGATTGATTCCGGTTTTGCATGAAG  
TGGCTGATGTTACGACTTGATGGATTTTGAGTATGAGTGGTTAGGTACTCGTAATCCTG  
TATGTATTATCGGGTTCCAGAAAGGTAGTACGTCTCCAAACGGATGAGTGTGGGCAAGCC  
TAACAGTGTTCCGCAATTGGAATCCGATGGTACTGTTACCGATATATTGAAGGTGAGCTAA  
GGTTTGTGAGTGATCCACTTGATACAAATGAGCCGTTAGACGCATTTTCGAGCTGCGACAA  
TGTTGTTAGTCTTTGCTGATGAGGAGGGTGAATTATGAGTTTAGACGTAAGTAAATAT  
GGATAGGCGTGATAGGTACGAACCTTACTCCCCATTTGGGCGGGAACATACTGAAGACCC  
TTCCGTCTGGAAGGCAATCCAAGAGATTAACCTGGTCTATAGAGGATGAAGAATGAGA  
AGAAATAGATTGGGGTTCCTTCTAGACTTGGTTCCGTAATAAATTACGGTCACTTGTC  
TAGTGACACGCTTGATATATATCGTGCTATCTTTGATAAATTACCTGCTCGCGTTGTTGA  
AGCGACCTTGAAGGCAGTCTGGTTGACAGCTTTATCACTCGCGGTTACGGTACTGCATC  
GGCAGATAAAGCTCTCATAGCTGCGGACCGCGAGCCGGTCATGGTTTATGACCTTCAAAA  
AATCGTAGATTATTTGGCCAACTAGTTAGGTTCTGTTGATGAACTTGATTTCGATTGTTGT  
AGAGGACTCCATCCAGCATTTTGTAAAGCGTTTTCCACCGGTGACGACGATTAGCGTAT  
TCACTTCGTCAACAGGTCAGTTGTGCGTATGCCACAGGATGCTAAGCTGGATGTGTTAGT  
AGCTCGTCGTAGAGCTTGTCCAACAACGTACATGCCTTATAACGCTTCTGGTTTTGCTTC  
TCAAATGGTAGAAGATAAAGTTGTGTTGGTGTATACCAACGAGGAAGTTGTGCGGTGAGG  
CAAGGTACGTAATCCCAAGCGGCTATCAACTGGCCTAGTGCTGACATTGAGCTTCCCTCC  
TTCTGGGGCATAAGTCTGCTTATATGGATTATGTTGGTAACAAAGATAAGATTAGTACAAT  
CGACCAGGAGGACATTAGTCTGCACGATATAGAACAATACATCAAGAAGTACAATGTAGG  
CTTACTAGTTATTGATCAGTTGTGGAAGGCCACGGGTTTAAACGTGAGACAGCGGCTAA  
AGTAGTTAGCCAACTAAATTTAACTTGGCGCGTGAGATTGCGAAGTAGTATCCCAG  
TGTTATGGTTACTCACCGAGCTAGTGCGCAAGCGGATGCTCAGAAATGGTTGGATATGTC  
CATGATGTACGCCAGGAAAACCTGCTGCACTAGGTGAGGCAGACTCAATTATCATGATGGG  
ACGTACTCCTGACGAGTCTGAGAAAGCTGTTTCGCTTCCCTACCATTGCTAAAACTAGAG

TGCGGTAGGTCCTGATATAGACCCGGCGCTACGTGAAGCACGTACCGAGTTACTTATCGT  
TGGAGATACTGCTGAATTAAGCAGTTCTAAATGTGGTTAGACCATTTCGATGACCCTAA  
TGAGGTTTTTGTAGAGCGTTGTCATTTCGACTGTGAAAGAACCATTTCGTAATCATGATAT  
TGGGGAGTTATCGGCTCCTACTTTCCACCGTGCAAATAAGCTGGTGTGCTTTGGTTGCAA  
AACATTAGAATATGCACGTGTAGGACTTCGTCCAGACCATGCTGACTTCACAACAATCAT  
TCGTGAGAATGGTGTGTTCTTGGTGGGAGGCCAGAACAATTTGTTTCGACTTGTTGAGGAT  
GATGCGAACGTGTCCTGATTTCCGTGATATGTTACCTAACCTATGTATTTGGCCTACCGA  
TTTTGCTGAGTACTTGTTAACTGAACAACCCACAAGATGGCGTCTCTTCTCGAGTTGGC  
TATGAAGTATGGAGGTACATTAAGATGACCGTGTGCGCCGAATTTGGGAAAGCTGGAGT  
TGAAACCTCACACATTCCTTTCCCGATGCTCGAAGAGTATGATAGATATGACGTTATCAA  
TACTGAGATTCTTTTCCTAGTTCCAGTTGACCAAATGATTAAGGAAGGTCTCCTTCATCC  
TAGTATGACTCAGGTGGACACGCAAAAGGCTACCAGTGAGATGAAATGGCATGGTATGAC  
GCCAACAAAGGCCTTGCTTTGGCATTAGCTAAACCGCTCCAAGCCGTGATAGATCACAT  
TTATGGTGTGTATCTTCGGTGTGGAAGCTGTAGGTTTTCTAAAGACTAAATGATACT  
GGGCAATAACTCACAGATTAGTGCTCTCATCTTGGGTGGTGGAGGTCAAGGACAATGAGAA  
AGATTACATCTACAACGACGATGGTACACTTGCTACATTCATAGCGGGTGTTCGTGCTGG  
TCAACTTAAGACCAAAAACATTGGATGCTCAAAGGGTATTGAAGGTTTGTGAAAGCTAAT  
CTCTCCGAATGGTAAGAAGTCTCGTATCCAGTAGGCGACGACGCTCCATCTAAAGTCAA  
AGCAAAATCCTTAGGGGAAGCTGTAGTAGAACAGTGGATCGGTGACATTCTCAAACCTCCG  
CAAATTGCCAAAGGATGTTGACACTTCCTATATTTGCTACGCTTCTCAAGTGTCCCTGA  
TGGATGCCTAAATGGTAAGTATCACCACACTAAACTGGTACTGGTCGATTGTCCTCTTG  
TTCGCCAACTCTGCAAAATATCATTAAACGAACGTCTTGTAAGTTATATGATTAGTGGTCT  
ATTCGGTGTAAAGACTATAGGAGGTTAGTCGTGGGTAATTGTGTAGACACTAGTTTACAA  
CGAATATACTCGGCGATGAAGGGCGGTTGCAAGTATCCTATGAACGACCGCTACTCTCGA  
TATGGTGGGAGATGGATTTTCAGTAGAATTCCAATCTTAGCGAGACTTCAGAAAGTGGGCA  
GACCAAAATGGGTACTCGCAAATCTTAACAATAGATAGAATCGACAATGACAAGAAGTAC  
AGACCAGAAAATTGTGTATGGATAACGCCCTCTGAGAACACCCAACCTGGTACCTTGAAG  
TTTTGGTATCAGAATGATAGGGTAGATCGCTATATAGGGTTTGTAACTAACAAATTTTACA  
CACTTTTGTAGGGGGCATTCCTTAACTCAGAGAGTTTTAAGTAAAGTGGGAAAGAAGTAC  
AGAGGTCAAACAACAAAACACCAGAATGGTTTCACATGGCAGTTTTTACGCTTTGTATAA  
TCTCCAGATTTCCCAATGGAAAAATCATGGAATGTGACTTCTTGCGTCCTGAGGTAAGT  
GTGGTGCAGTGTAACTGGCGCCCAATTACGAAGGAAGATATTATTGAGGGTGTGATA  
TGCAGTGTGTCTGCTTCTTGGGTAAATCCAAAATACTCCTTTGAGGAAATCTTAGCAG  
GGTACAGGGCAGAGGCCCGTTTCTCACCAACCTTCATAAGGATGCCAAGCCTGTAACT  
TTGCTTTGCAATACGGTGTGTTAAGACTGCTATGGAGAAGGCAGGGATCGAAGTAG  
AACAAAGCTCAAGGAATCATTTATCAATAACAACAAACGTCATTGTGTGTGCAACCAGTTC  
AAGATGATCTAATCGAGCAAGTTCACAAGAGTCGTCAATCCTCTAATCGTCGTAAGGAAA  
TTGGTATGCCGGCTGGTCGTGGTGTGAGTACCGTGATCCAACAGGACGTATCTTTACTTTCT  
ATGAGTCCGAAGCTCCTGAGCTTCTGCGTCGTCGTGAACTGGTGACTTCATCCTGCCCAA  
CCCAATGTATGAACTACCCGACTCAACCTGTGGCAACTGGTGACATTGTACCAATGATCT  
TGAGACGTATGGACAACTACTGATGACTGACAATTCCTAACGCGATAAGTGCCTGTTAC  
TTGGTACAGTACACGATTCTGTAGTATTTGATCTTTATGCCGACGTTTCAGGATTATACAG  
CTAAGGCCCTGGAGCGTTGACGTTACGTAACCTGATGACACGGAACCTTACCGTACCG  
ATCCGTATGATATGCCGTTGCCTTGTGACGTAGACATCAGCGAGGGCGCATGGTTTAATA  
TGCACGGATACAAGTTTTAGGACGTTCCCTGCAAACCGAAACACAGAAGCGATGGTACGA  
GGAAAACAAAGAGAACCAGCGTGAGATGGGAAGAAGGTGGATCTGGAATATCCAGGGTCC  
GCGTCTCTAATTAGGGTACGTCATAGATTAAGAAGATCAACAGCATGACACTAGAGTAA  
TACAACCGTATGGTTGAATCCTGAATTAACCAATGCCAAATTGGTGGGCGTACTACTGAT  
GGAAGTAAGTTAGACACTCGGCTGTGTGTACACCGCAACCATGACACTCGAGAAGGACGA  
GGGTTGATGTGTAGAGGATCTAACCTAATGTTAGGCTATACTATAGATATTCCAGAGATA  
CTACCAATGCAATAAAATACCTGCTAAAATAACTGAACAACATCCATAGATCTTACTA  
ACAATAGGAGATATTTCTGTGACAACTAAGAGTGGTTCAATCACGTCTAAAGCTCGCAAT  
GGTGATTCAATCCAACCTGGTACCGTAACTCGTACTCAGCGTTCGCTGCTGCTCAGATT  
CCGGCTGAACTTAAAGCAGTTAACTCTGTAACCTTTGAATATAGAGAGAATGGCCGTTAT  
CGGAACCCTCAAGGCAACGTTACGAAAGTAGGAGGTTCTGCTGCTGCTGCGAGTGGTGGT  
AAAAGTGCTCCAGCGTCCGGTTGTCGCGGTAATCGTGCTAACGGTGAAGAAGGTGGTTTC  
CCAATCGATCCAATAGCGAAGGAACGTGCTCTTGACCGCCGTAACGTAATTGCTGAGGCA

AGTTGTCACAGTGCTTCTAAGATTGCACATGGCACTGAGTTTTAAGATATTGCCGATGAT  
ACACTCCAAGTACGCAATGACCTTCGAGACATACTCTACTGGTGTATGGAACGTTTGACG  
ATTGCTTCTAGTACTTCTGGCCGCTCTGAATAAGTATGATTGTATAACCCTTTGGTTCCT  
TCGGGAGCCTTTCTTTTCTTAGGAGGAAATATGTTAGAGAACTTACTCGTATACTTCGT  
ATACTTACTGGTTGTGCTACTGTAAGTATGATTGACCCTTCTTTGAAAAGACCTGTCAA  
CAATACGTTATGGTTGAACGGAAAGCTGTGAAGGATTACATCCGCAAGGATGAGTGGATT  
CGCCAAGCTCAAGAACGTCAGAGACGTGCAGAACACCGTCAACGTCTGGCAGAGTAACGT  
ATTGCTAAAATCAACGACCTGTTGGAGGAATAATTATGAGTTCAGATTATCAATTATCTA  
AATTGGTAGACGAGTTTGTGCTGAGAAAACATTCCAATTGGCTGGACCTAAAGGCACCGATG  
TACGTAAGAGATAAGCCTACCACAATGTTTTAGGTTCCATCGAACAAGGTTGCAGTCTAG  
GAGAACTAACTAAGAACTTCACAAGGTTATCGACCGGGTGGAACTCGAATAGGGCTAC  
ACAATGACGATTTAGGGAACCTCTCACCTCCTAGAGAGGCTCCTAGGCTCAAATGCAGT  
AAGGAACAATGCACCAACTTTTGGCAAGCCTACCACGGTAAGGTAGGCTGCATATGTTAT  
GAGCGCGACGATAAAAGCCCTGACTATGTATCACGGAAATCGTTGAACATAAGAAACATA  
GCCACCATCAAACCTATCTAAAGAACTATCGGCTGAAATCGTTTCTACTAACAGTTTTAAA  
GTTAAAACCTACCAACGTGTTGGCGATGGTGGTTCTCGTAACCTCATCTATTGTGCATTA  
ACTGCTTCTACGTAGGGTTACAAAACCTTCTGATTTGGATTAACCCACACGGTTCTCGA  
GATGTTGCAGAAGATATTCGTAAAGCTATTCTTAATGTCAAGCTAAAGGTTAATCACCTA  
ACTCCAGAGCAAATTGAGGCTTAATTTGAAACCATTATCAGTAGTTGATGCGGACACTCC  
AGCGCTTGCTCCGGCAATTAGCTGTGAAGATAATCACTATTCAACTCTGAAGGGTGATTG  
TTAACGACGTAGGAGTGATGCTCCAAACTCGGGACAAGACACTCTAATTCAAATATGGGA  
GGCCACAGCGCCTCCGCAATTTGCTGTATCTCTTTGTGAGAAGGTTATTCAATGTGTTCT  
AGATGATACGCAGTGTGACGATTATGTGTTGTTTATTGGTGGCGGTAATAAGTACCGATC  
TGATTTCCCTCACCTAATGGATACCCATAGAAGGGCAATCGCACCGACATGCACAAACC  
TTTCTATCTTGATGAGAGCAAAAACCTATCTCATGGAGTACCACCCTACGATTGTTTTTTA  
CGGTTACGAAGCTGACCTTGGTAGCGGCAACTTGATGAGTGGGGTTATGGAAGGTTACGA  
TGAACCTTCTGTTATGTCACATTGACTAAGATATGGAGATGATCGAAGGTAATCACATGCG  
TTGGAGTAGTAACAACAATGGGAAATACTTCCCTGGTGCGTTCTACACGGTGAACAAAGA  
AGAAGCTCTACGAACTTCTATTTATAAGTCCTTTCTGGTGACACGACTGATAATATTC  
CCGCTATTATAAGTTAACTGGTAAGAAATTAGTTGCTGGTAACGAATCTGGATTGGATTC  
ACTGACTACTGAAGTACATATGCGGACTTACGCTCGCGTAGTCGATGTTAAAGCAAGTAT  
GGGTGACGAGAACATCATTATCCAAATTGATCGATTTCTCTGGATTCAACGTAAAGAAGG  
TGAAATGTGGACCCCTCCTACGAACGTTGAATGGTAATCGCGTTAACTGCCGACTGCCTA  
AAGTACACTGTGACTTACAAATTTCTAGCTAGTATTATCGACCGACTAAGTCACAGTGAT  
ATGTATTCTGTGCCACATGTATCTAGAACTCTTTTTTAGTCTTTACAATATGAAGAGGTG  
CGAGAATATGTCGCTGATAAAATGTTTAAAGACCTTAAAGATGCTTACGGAGTATTTAAA  
GATGCGTCATACTTAAACAAAAATCGTCAAAAAGCACAAAGCAACTTTCTTAGAAAAAAC  
TCGTCATCGCCAACTTGCTGAGTACCATCGTCGCAAGAGGAGGAGAACTTCGTGAAGC  
TTAAGCCGCGTACGTGTCGTGGGTCTAAACGTGACGAGGCCCCCAAGTCGGGATTCCGTA  
GCGGATCCGAGCATGACTTCGCTAAAACCTGACCAGTCCCTTAAGAGAATGAGACAGAGA  
AAATACCATATCAAGTTACGTTAACTTATCATTATACGCCCGATTTTGTCTTGATTAAGA  
AAGACGAACGTAACATGTAAGTGAATTCAAGGTTTCGATTTATTTTCTCCGGCCATGTTA  
ATATGAAGCGTATCAAGAAATGTTACCTGACTTTAGATATTTCGCTGGTGTGCAAATGC  
GCACTAACAGATAACCAAAGTTTCAAACCAAGTTGTATGCAATGGTGCCTAAAGACT  
ATATCCTTGATGTGATTGTAAGGGTAAACCAGCGCACATTCCAAATGAGTGGTTAGAGA  
AGTAGAGATTAGCAAGTCTAAAAGTCCTCATCCAGTACCTTTAACTGGTAATGACCTAAA  
GGGTGCTTCGTACTCCACATTA AAAAATTGATGGCGTTCGTATGCTCCGCGATGAAGCAGG  
AAACCCAATATCACGTAACGGAAAGCCGTTATATCACTGATAAAATGTACCGAAGGAAAT  
CTCCGATGCAGAAATTTTATTCTGAGAGTTGGGCAGAGTCTATATCTCACGGTTCGTTCCCT  
TGCTACTGCTGTTGGCTACGTTGATGGTGAGCATGGTTACTCTCTAATTCCCTGTTGTTGA  
TAATCGTTTAGGTTTAGGTATCCATATCAATCCAGCTGCGGAGGCTTTCAATACTGTTAT  
GAGTCTCCTTTTAGCTGCGGGACACGAGGGTTACTTCTCCTTGAAATTAATGGTAAAGG  
TAAACGTTACAAATTGAAACCTAACGAGACTTACGATGTTGAAGTCAGTGGTATGGTAGA  
GGGTACTGGTAAACATAAAGGGCGTTTGGGAGCACTTCTAACTCCGACGGGTAATGTTGG  
TACGGGATTCAGTATAAAGAACATGAGTGGTGGAGGTCACAATATCCAACCTTTTGAAAG  
TACACGCCGTAAAATTATTGAAGTTAAAGGTTGGGAATTGACTAAAGCTGGTCAGTTCCG  
TCACCCTCGTTATATTCGTTTACTGGAGTATAAATAATGGCCTTTGGCCCTAAAGGACTG

GCTCCTGCTTAGAGAGCAATGGAGGAGATAAAAAGAGGACACACTTGGTGATGTTGTGGCT  
GCTACTGAACAGATTAATTCCACCATGTACGGTGCTCCTCTAGATGATAATTTAGCATT  
CATTCCCTATCACATGCTACTAGTATGAAACCAAGAGATTTTACTGGAGTACTAGAAGAA  
TCAATTCTTCCAATGATGGAGTTGAGAACAATGAGGATTAATACATCCGGTAAAGATG  
ATTACATACCAGCAACTGTTCAAAACATTACTTTATGGCACTATGAATAATATATTTTC  
ACAACGGTGATGAGAACGTCAGCTTATGAAGTTGGAGGCGGAGTTGGGTGAGGTTATCG  
AAGCGTTCATGAGGGTCACAGTCACGAACCTCTGTAAAGAGGAAATCGGTGATATGATTG  
TGGTCTTAATCAATCTGTGTGAACTCCGTGGTTACTCCCTCGCTGAATGAGCTAACACTA  
CAATCCAGAAGAGTAGCAAGCGCACGGGTACAATCATTATGGGTGGTTTAGTTAATGAAG  
GCGATATGAAGTTATCGGTAGTCCGGACCTACTAGAACCGGAAATTTACTTGAATGGTAC  
AAACATCTTCCTAACTTCTGGGGTTATGGGAGCTGGTAAAACGGCTGCCCTAATTAACGC  
AGTAGAACAAATTGGAAAAGAAACGTCCGAATAACTATTTGTTTATTAAGCGAGAGGTGTA  
TACTCGTGATGAAGGTGTACGTGCGCGGGAAGGACGCACTCGACCGTGTACCCCAATGGG  
AACCCAAGAAGAACTTGTACGGGTGATTGGTTTGTCTGCTGGTATTGATTGTTTGCTCGC  
TGATGGAGCACAAATTCGTTAGTCCC GGCTGCATTAAGCTAATCTCCCTTGAGGCAACTCT  
CCACAACATCCCTAACGTCGCATTCTACAGTTTAAAGACTGACTATTTGACAATATGTT  
TGAGGCATGGAAAGAGATTGCCAGGTACGGAAACCGGATTTATGAGTTACGCCACACTTG  
TGACATGTGTGGAACCTCGGAATGCTGTCCACAACAAGCGTATTGCTGGTTGTGATTCTTT  
GATTGTAGTTGGGACTTATAATCATCGAGCTGTTTGTCTGTATGTTGAAGTAAGGAGAA  
ACGTGTATCATGTTCAAATGTGAAAACCTGCGTTGCGGAGCGTGAAGGTTTTAAAATTGTA  
GCCAGCCAACTAAGTTTGC GTTAGGTGTGACGATTTCGACGCAATTCCAACGTTGTTCA  
GAACGCGGTCGTCGTTTGAAGGCTATTTAAGTAAAAAATGGTAATTACGGTTATTTGCGG  
AAAGAAGCTGACTGTTT CAGGCGGCGCATGGAAAATCTGACATTAGTTCCTGTTGTA AAC  
CCTGTGCGATTAGTGCAGGGTAGCTGATTAATCACACACCTTGAGGATGTCGACAATCC  
ACGACTTGAAGAAATTGAGCTGCTTAGGGAGATGATGAATGAATACATTACTTAGTAACT  
GTTT CAGCAATTATTGGTAGTAAAGATCACTTTAACTGAACACGTAACAACGCTCATAAGG  
ACGCCAACTGTATCCACGTGAAGCAGAAGTTCCACACTTTTCACGTAAGTAGGAGGAATT  
ACGTCACACTTACTTTGATATATTGTTGCCACATGCCCAAACGATATGTATTTCTTATTG  
TGGTACTAACTGAGTAATTGGTTATTTTCATGCCTGTAACCTCATATAGATGCTGCAGA  
TACTGACTAAGGCTTTACGTGTCCTAACTGTGGCTGTCACCATAGCCGATTGGTTTTGAC  
TCAGCGAGCCTGTGGTTATCTAGGTAATCCATCAGAGCGCGGATTCAATCATGGGAAGCA  
TGATGAGGTGATTCGGATAGCTAAACATTGTTTATTGAATTTAAGGCGGAGCTGGTCTTA  
TGCCCTCACAGCTTTGCTTTTCAGGTGAGAACATGGAACAAGTAGACCAGGGTGCATTCG  
TAGAACTATGAAGGAATCATATAATGGGTGACGTAATTGTTATCGGAGACACTGCGCTC  
AATCCAGATATAGTATTGGAGATTGCCATAGGTAAGTATGAATCTGTAATTCTCCTTCGT  
TACGACAAGGAGGGTACTTAGATGGTCGGGCTGTGTTAACCTAAAACGAGAGAATTTA  
TTATGGTTACTGGAGCAATTC AACCGCAAATAGGTACTTAATCTGTCAAACGAGGTGATG  
TGATGTGAGAGAAATTGTGGGGAGTAGCTTTCCGATTTGTGCCAGACTTCTCAGTAGAAC  
TTGCTCTACAGATTCTGGTTCTTGCAACAGGTGGGGAAACGGCCAGTACTAGAGTAACT  
CTGTGCGGAAGGACCGGACATACTTTTATGGACGGGCGGGGTTTGAGTGAGAAACACTATC  
TTTTATACAACTTTAAAGAAGATGGTTGGATTCTTAAGCAGCGAGTAGCAGTTGAAAGAA  
TGGGTTGAGCAGTGATTGATGTGGAAGCTATTTCAAACACCACAATAGACGATCCAGTTT  
GAAGTTATCCATGACTGATTTTAGTGGAATGGAGTACACGTTGGAGATGTGGTAGTTGC  
GATGGCTCGTGGTGGT GAGTGTTCCACAGAAATAATCAGGGGATTGGCAATTAGCATTAC  
TACTAAGAGAGTTGAGTTATCTCAACTGGGTATTGGAGAAGGGGTAATAGATATAAGTAA  
AATCAATAGTTTGAAGTAAAGCGAGTAGAACATGAAAGAGTAGCTGAAGTGAATACAGC  
TAATATTGAATTCGTATAATTAATCTCTCTCTCTACGTAATAGACTATTCCTAT

>NewGenomeName\_232

ATATATCTTTCACTTAAACAAGACTTCATAGAACCAGGCTACGATTACTACAAATATAAC  
GGAAAGGTAGGTCCGAACAAAAGTCAGGTGAGCACAGGCAAGACCGTTATTTGTTTAAAC  
AAGTTAGCGACAAAACCCACAGGAGATAAACTCTGAGCTTATTATGTCGCTAATTTGGTA  
TACAATTCTAAAGGATATCTCAGATCATTTAGTGAAGATACCTATAATAAATGGAGAATA  
AATCAAGAGTCTTTCCGTCATAAATTTTAAACAAGAGGTAATCTTTGATTTCGATTATTAT  
GAGTTTTCATAGCAGGAAGCATTTGCAAGAATGTTTCATAGTCACTTCTGGTCAGCATCCA  
AAACACATGAGAGAATATCTACCTGGAGGGGTCTCATTAGGAACATTGGTTGTATCTCAA  
ACATGCTTAGAGTTCATTGAAAATTTTGCTAAAACCTTTGTTAGATTCCATCTGGTAAAAT  
GCCCGAATGAAGGCCATGGCCTATAGACCATTCTAACATTACATTGACAAGAATATATG

ACGGTTATCTTAGATTTCAGTTAAAACAAAGTTATGAGTAAATTTTTTCGAGTATCGACATT  
TCGAATAGGATCGAATAGATATCTTTAATTTTTGTAAAGACATTTCCACCAGCGACAGTAC  
GTATAGCAATAATGGATAACCAAGAGACACTAGAACACATTGAAGATTGTAATGAACTTA  
CTGCTAAACAAAAGACTTTCTATACAATGTTGCGTCTAGCATCTAAAGAAGCGAAAGAAG  
CAGAAGACATGAAGAACCGAGTCAATTCCTTAACTAGTGCGTCTGGTTATGAGGACCTTT  
CCGAGGGTATGGGTGTAATGGCTGCTACACTATAGACGGCCGCAAGAGGGATGATCTAT  
GCAAATTATTATCATACTGAGTCACTAAAGACAGAATTAACACATCTTATCAATGAGGT  
TTCAGATGAGAGATAACTTCATAAAATTCTTGGAGGTCCTTATGACGTTCCAGGAGATAC  
TGATTGGCAACCAGATGCTGATGTTCTTGATTATGAAGTAACTACTAGGGATAAGAAGT  
GAAAAGCTTGTATAGACAAATGGAAGAAGCGTTTACTTCGCCCCAAAATGCCACCACTAC  
CAAGTTGCCCGCTTGACAACACGTATAGACTATGCTACGACTGCACAGTAGTATACAAA  
CAACTTACACACGAAAACCTAGAATACGATTGTGTCTTTTACATCTCTAATGAAAGTATC  
AAGCACTGGGCATACTATTCTAGACTGGCTAAGGAGGTCGAGAACTAAAGCAAGCAGC  
TCATGGTAACAATGGCGCATACGAGCGTCTTTGGAACCCAGAATTGGACAATACAGGTAA  
CGGTTATGCTGATATCAGATTCTTGCCCGCACGTGATGGAGGGTAACTTCCATTCGCTAA  
GATGTGGTCTGATGCCTCCAAAGCTCGTGGTGGTAAAGGGAATATCGAAAACCTTTGCC  
ACCTCTTGGTAAATAAGACACTGTATCAGAATACTATGCTGAAGTCTGGAACACTGCAGG  
GGAGGGTTCTTATCAACGAGGACGAACACGGGAACAGAACAGAAAACCTTGCTTACTACTC  
TAACATTTAAGTTGTGAGTGATCCAGCACACCCTGAGAAGGTGGGTAATGTATTCCTGTA  
CAAATACGGA AAAAAGATTTTTGATAAAATCGTTGCCGCAATGAGACCTCCATTTGCAGA  
CGAGCCACCAATCGATCCTTGCAATTTCTGGAACGGTGCTGCCTTCAACCTGAAGATCCG  
CAAGGTCGCTGGTTACCGGAAATATGATAAGTCTGACTCTGCCCTACCCAATACACTAGG  
TGATTATAATGACATAGGTATAGAACAAATTTGGAATAGGCAAAATCTCTTGCTGACTT  
TGAATACCTTAAGATCTCTAAGTCTTATGAACGACTTAAGGGACGTCTTAGTGTAGTCTT  
GGGCAACACTGCTGCAGTAGCACGTCCTGATGAATCTTTTGAAGATGCTAAACCTCATA  
TCCAGTTTGGGGATAATAAGATAAAAATTTTAGTGAGAAAGCAGTTGCCTGCGCTCCTGC  
CGAGGATGACGTAAAACCTTCTACTTTGGAAACCTTGTTGTAGAGGACGGATTATCAAT  
TGTCACAACGAGGGTTGTAATGACCCTGCTTTCCTAGTATAATTAACACATACATAAGGA  
ATACAATGAAAACCTACCCCGCTGCAATAATTTTCATTGCGTCAGTCCCTGTA AAAAGCTT  
AAAGCATTGGACACATGAGTTATCGTCAAGCGTTTGAATCCTCTAGAGGATATGCATACG  
AACAAAAGTATTATCGTTATGAGTATCGGAAAGAGTACGTCCCTGGCTCTACTAGATCGC  
CTGGTTACGTCGGACCGTACCGAGCAAAGATTGCAAACCATCTATCTCTGGTGATCCTA  
GCAGATCTCCAACCTGCCCTTCAAGAGTTTACAGTGCTCCTTCAGCTGATGGTAATGACT  
ACAACGAGGGAGCAAGTCTTAGAGGAATCTTAGGAATAGGTGCAGGTGCAGCATTATCAC  
AAGATGATGGTTGTTGGTGGTCAATATCTGTGAGAATTGTCGGTGGATCGATGATGATTT  
GTGACATTGATGGAGTTAGTGATGTCATGAACTAAAACCTCTGTAACCAATCAAGATGT  
CGTAGATAAGATAGAGTTTGCTATAAACAGACACAATCGTAATGCAGGACTCAACTACTT  
GGTTTACGACTACTGATCATCGAACTCTTTAAAGATGCATTTTGTAGAGTTGTCGTAGA  
GATACCACCACTTATGGGTATCAAAGTTGATTTGCTCAAATAGATAGTGAAAGCCAAAA  
AGGGGACTTAGTAAAAGCGATCTCAATATCATGAATAACATCGGATTAGAAATAGTCGGC  
TGGAGAAGATTGTCAGTTGATCTACTAGCAAAAATCGTACTCTTTAAAAAAAACGAAAG  
ATGTAGCACTAGTAACATACTTCATTTTATTTGTTCTGTCATTCGGAGCCACCTGTGCAT  
ACATGATTAGGTTGAAGGGTTCTACGGTGGATTCCTTTAAACAAGGCATCAACTGAACTTC  
CCGAATTGCGAGGTGTTAGAGAAGGAGAACAGTCGTTACGAGTCACTTTCAAGGGATATG  
AGGAACTATCACTAGATGGAGTAAAAAATATCCAGTAAGTGCACAAAGAGACCATGAGT  
CCATGGAACCTCTGTTGCCATCTCCAAGATCCTATGGATGAACTTGATGATGAAGACGGTG  
ATGTTGATGACGATGGTGATATCCCTGCTAAACCGTACGTCGGTTCTGGAATCTGAAATT  
GACTTTTAGTTCCCGTGAAACGGGAAAAAATTTCTGGAATAATTGTACCCCTTTAGAT  
TTTTATGTGTGACATAGGTCTTAGAAAAGACCGAGTGCCTGAAACGCACATCGTGTTAT  
CTTATAGGACATATAAGTCGACGAATCTAACGCTTCTGACTTAGTTGTTTCATGAAGTTCC  
TTATCAATCTCGGCGACCTGATTGTGTCTCAGGGAAAAAATTCGATATACATTCCTTGCA  
AGTTGATTAATCAGAGTTGTATCAGGCAAAAAGAATATTGGTATTAGTTAATTATGATTG  
GAGATTCCCATATCATATATTGCTCCTTGATGTGCATAGTGGTACATCGATTATTCCTAG  
TGCAAGGTTTCATAGATCTCAATCAGGAGAACTTGCATCTATTGTAATCACTCAAGCAA  
GTGATACAATGGATTTTATCCTAGTGCACACTTCTATCCTGTATATTGTGTAGAGACCGT  
CCAACAAGATAATGTTTTAAAGAGTGAGAAACCAGTAATTCATCGCTTAGAAGAATGACT  
CTAAGATATCACCTTTATCTTCGAGAAAAACTCCTCTTTAAAAATCGGACAAGAGACGAA

TTTACTTTAAAATGGGCCAAACTCTACACTTCCTATTGGAAAGATGCCATTACGTATGCT  
TAAAGTTATGATGAAGCATATGATCTAGAAGCCTCCTTTTAATTATGATTTAATTTTAC  
TTATTAGTGCAGCATTACTTAACTTTGCATATTATATCTATGCAATTGGATTTGTCGTGG  
CCGTCGCCTTAGACCATCATCTCAAGCTTAGTCCCCTGTCTGCTGACTCATAGATGAATC  
AGAGAACTGATTATATAGTGGAGACTAATAGAAAATAATGTTGGCGACAAGCATGGGTTG  
TAAAGTTTTTTTGGTTGGTATGTAATATAGCATCGTGTGTTATATCAAGGAACATGCAAC  
CACGTCAATCTACTTTCTAAAAGGGAATATGAAGAAGGAATCAATAGAAAGGGAGTATGT  
TAAGGAAAGAAGGGAATGCTCCAGAGAGTTTCGATCGAGTCAGTGCACCAGCAGTTGTAAT  
GAAAGTGGATGGTAAAGCTGATTAAAGTTTGTGGAACCTTGATTATTGGTTCAGTAGCAT  
GGCGCACTGAAGCGCAAGCTTGTAGTTCGTTGTCTGGATGGGAGAGAACTTATTTCCCTC  
CAATTGATGAAGTATTCTTCCCAACTCAAGAGCTGAAGTGTGAACTTGATGTTTACGTTA  
CTAGACACTGGACTCCTGTACAAGGTAAGTTGACCACAAACCAAAGACGTGTACAGATAG  
GAGACAATGCGAGTCATGCGACTGGCGCAATATATAAGGTATTATTTGTTTTTTGGAATG  
AGGACGAAGTGTGAAAGTCCAGCGGAAGATGTCTGTTGGCAGCATAACACAAAAGTGTATC  
GCAATGTTACCTTCGATTCACATAACACTAGCTACAAATAAGGTCAAGACGATGGAAAA  
TATTACTGGAAGCATTGTTCGAAAGGAAGCGGAGGACGACCTCTTCGTAGGTGCTGATGGG  
TTGCAACTAGGATTTATACGTGACATTGTGCTATCAAAGCATTATTTTTTAAAGCAATA  
TTTTACTAATCTCCGCCACGATATCCAGTTCCACACGAGCCGCTAGAACTTAAAATAGAA  
CTGCTCAAGCTAGTGGAGGAACTAGAAGACGTATTACTACTGGAACCTCGAGCTGGTTGCA  
CGGGTCGAACTGGTTGATGAGTATGCTTGTGGTTACTGATATCGGCTACGTTGCTAGTG  
GTCGTTGTGGTAATTCTTGATGATGTTATCGAATGTATTACACCTGGGGTTGCACTGGTC  
GCAGAATGACCGTTATCGGATGATCTCACTGCAGTATTAAGTGAAGGTTAAGAAGCACTA  
CGACTAAGATAACCAACACAATCAAAGAATGTATAAGCGATACTGACAGGTGAATTCTAA  
ATTTTTACAGCATCTGATTATGAATTAGGAGCGTGCGCAATGAGAGTTTCAAACCTTTGA  
CGCATGCTATCTACAATTCCTTTGTTGGGAACTCTAATTCTTCTTTTCAATTGATTAAAG  
TCATCCTCATGTTTATAAATACGGGATAAATTGAATCACTCTCACCTTTTGTAGTT  
CCGTCTGGTAAAACCTGTTTCGGGAAGCTGAATTGACTTAAATTCCTTCTTTGACTAAGACT  
ATTGCATTATCGAAAACATCTTTTGTTCATAGTGATGCAGAACTTCCGGATCCCCATAC  
TTTTTAAAACCATGTCTTGTAGACCTCCATCACTTCTTGGCCCCTGCTCGTAAGAATAA  
ATAATATTGTTTACCATTAATAACAACCAATCTAAAATGGATCTCCTTATTCTACTTCC  
GCAATCCGTGAGGGAGTTTCGCCTGCTACTAACGCATATGAGGCAAGGGGGGTGGTATAC  
TTCCCTAGATCTACTATAACTATAATTCTACGTCAAGTATTTTTTGTAAACGATAATTG  
AAGGGTTCGTCATTCTTAAACAGCGCCGCAACATCTACCTTGCGTGCGAAAATTAATAA  
ACCATTAGCACCGCTTTACGATGTCACATTGTCTGAGGAGACGAACCTCAGTAAATAGTA  
CTTGATGTTCAACAGCAGGTAGTTGCATCATGCTCCCGACATTTCTTTTATTGAAGCAT  
ATTGATTAGCAGGTGTGCAATTAATGAGAACCTAGAACATACACATGTATACAGTATAA  
CATGCAAACACATGTTAGTTTCATGTGCAGCAGTGCTTGAAGTGCCTAAGGGAACTAA  
ATTCACCCGACGTTGGAGTCATTCTGATTAATGCCGGTTCATATTGATCAGGAATACTAA  
AAAATCTATACCCTGACATTACACCACCATTATCTCTGACAAATTTTTTAAAATTATTGG  
TCGTTTGATACTTGTCAACAGTAGTATTTTCAAGTTTTTAAAATCTTTTATATCTCGTA  
AATTTAATAAATCACTTTTTTGTAGTTACATTGGAACCTACCTTCGGGTGATCACCAACCT  
TTACATATTGACTTAGTAACCTGATTTCTTGCAGCTTTTTTAGTTTCTTGCATAGCTTT  
GAAAAGACATTGACTGTTTTATAAAATTAATTTGACTAAATATCTGCTCAACAGAAGGAG  
CGAATACTTTTCTTCTATTCAACCTGCTACAGACTTCAAGTTTAAATTCGCTAGGACGC  
GTAGGAAACCAGATTACACATTAGGACGATATGCAATAGTAACTCAATAAACTCTTGAA  
GCACATCGCTTCCAGAGTCTTGAAGTGCACCTGCCACGTTTATAAGAGATGTGCCACTTT  
GAATTGTATTGTTTCGACAGACGCACCCCTAATACGTAATAATTGTATCATTATATACTGGTC  
GATGCTGTGCATTAACACCAACACGAATCGCAAGACATGCTGTTAAAGGATGAAAGTTTG  
TTTTACCGGTGTTTCTAGGAAAATTATTTTGGCCGTAATAATCTTATGCTCCATCATGAT  
ATATAGTTTCTTTCTACGTATTCTTAGGGAAGCTGTCTTTCCCGTAAGACCATCAACTG  
AATCTCCATTAAGTCTGAGGCCATTACCGGCGGACGTAATGCATAACATAAGATTGATT  
TACCATAACCGCCGAGGTGAACAAAGTCATTTGCGAAGATTTTCGTCTGACTATTAACAT  
GGTCTCAATGTGTATATGAGGTATCAAGGAAAGAATCTGCCAACTTTCCAAGAGAGTAT  
AAAGGTGACTCCAATAACGTTATTTATTGATCGTCTTGGGAGTATAAGTTCAGCAAATGG  
CGTGATATAACCTCCTCTGTTCAAGAAAGGGGTATTGATGAGCTTATATATCCCTATATC  
TCGTCTGTTGATGGTAAAAACACAGATACCTCGCCGAGTTCTATGGAATGTTAGAAGTT  
AGAAGATATTTGGTTTAAAGTTAAACAATTGTAGGATACAAAAGCACCTAACACTCAGAAA



CGAGAGTCAAAGCGTTATATCAACGAAGTCGTGACATGGAGTGTGAACCAATCACAATGG  
AGAGCAGCATCGGAGTTTTGTAAACATCAAACCTGGGAGTTTTATGTTGATCACAGAAAAG  
GAACTTAAAGTATAATGGACATCATGGACACAGAACTTAACAGTATCCTTCATATGTAG  
AGTTCCTAGCGTTCACGAACAAAGAAGATAATCATTTCGAGTTTTACTGACCTGTGCGCGG  
TATATGTTGTTGCACCTAGAACGTTACCAAGTCATTTCGGGACCTTCAGAATGAGGACGTA  
AAACAAAAGATTCTATCCAGAGACTCCTCAACTCCGCAATCTCTTAAATTAGTGTGCTA  
ATCCTATAAACCTTCCCAGTAAACAGATGACTTCAGGTTCTTTCCTGAGTGTAGGAACAG  
CATTTAAGTATCCCCTGACCAAGCGTACAGTCAAATGTCTATAACTTATATTACGCCAC  
GTTCCCGGTATACTAGAGCAGTTTTAGAAAGAGAGGATTACATGCTCTTCCGCTGGGTCAA  
ATCACTATGTATAATATGATGATGATTATGGTTGTCCATGAATGCGAGTGTATAAATGGG  
AAAGAGGAGGAGGAAAAGATGTAGTGCAAGATGAGAAAATGATCAAAGCATGGAAGGATT  
CGGGTGATCCTTATCTACTTGCAAGACAATATTGAGTCACTGCGGAATGCGACATGAGAA  
ATGTATTTCTTTAACATTGGATGAATTCATAAAAACAATGACACCTCTAGAGCAATGA  
CTCTGTCAGTTGGACTCCTATATGCGCGCTATCGTCTTACATTTGCGGATGACTTCAGTA  
ATCCAGGCCCATACCACTTTGCTAGTGAAGGTAAGCAATTTACTTCAACTATTCCTTACC  
TTGATAAATAAACATTGCAGTCGTCTACAACCAAAAATCGACTTTTTATTTCCGAGATAAC  
CGCAAAAAAATCCCGCCTAAAATTTGACCCCTAGGGTTTTTGACTAAATAACTATCCTG  
AATTTGACCACTCCGGAATTACCTAAGGAGACTGTAACAACGTACACTCTGCAACTACCG  
ACAGATGATAGTACGGTGAATTTTAGACCATTCTCGTCAAAGAAGAGAACTTCTACTT  
CTCGCAGCTCATTCTCAAACGAAGAAGAGCTAATTGTTGCTATTAAGTTATCACTGCT  
GCTTGCACAGATGTCAGGGATATTGATAAATTGGCAACTTTTGACATAGTAAACCTCTTC  
GTACAGAGCAGAACTAAATCTGGTGGTCACACTGTCAGGCTCACTTTGACCTGCCCTCAT  
GATGGTGAACGTCTGTTGACGTGGATTTTCTCTTGAAGAAATCAAAGTCAAAAAGACT  
TGAAGTCCCAAACTAATCTTAGAATTGCTGATGAAGTCCCGGTTACTATGGGGTATCCA  
AGTTTAGATAGTTTTGTCGGTATGAAGTTTGTGGTGGTACTGAAGTGGCTGTTGAT  
CAATTTTTTGAAATGGGAGGAATTTGCATCAAGACAATTTCTGATTCAGTACAAGATGAT  
GCCTATCAGGACGTAGCTAAAAAAGCAATTCAAGCCTTCTTTGAAGGTAAGAACGCTCAA  
CAATATCAAATGGTGCAAGACTTTTTTGAACTACGCTGAACTGAATCACACAGTTAAG  
GTTACGAATTCAAACACAGGTTTCGAGAGTGATGGAATTTGGGATGGCTAAGAAAGTTTT  
TTCGAATAGCCCTAATGCAGATGGACTTGAAGACATATTATGGGAGCAATATTGCTTTAT  
TTCACGATCACAAGTTGTGTATAGAATATATTGACAATCTCATGCCATGGTGAAGGGTG  
TCTATATGAATCTTCTTATTACTACTTACAAGAGAAAGAAACACGTATGACGGAGCAAA  
AGGCACAATGTGTCTAAGATACAAGTTAACGGGTTTATAAATTCTGGAGTGGCGACTATC  
CAAACCTCCATCGGTTTTTTGCTTCGAGATAGACTATACTTGCTCAAAAAGTCTTGGTCAG  
ACATTAGAGGGCGTCTGACATTCAGTCCTTGAATTAGAAAAAATGACCAACTTGCATCTA  
GGAACACAAAATAAGACGGATAAAGTGAAAAGAGGACAGGACCAGAAAAAACAGATGCT  
AAAGCTGAAGAGTTAACACACAAAGGTTTATCAAAATATTTCAATAAAAAGGGAAAACAG  
GCTAAAAAATTTAAACAAGATAACGATCCGAAGGGTGCCTTTAGTAAAATGTTTGGGTGG  
TTAGCTCATCTGCTATCTCCATTGGAAGATCCAGCAATAAAAATATTCGTTTTGTTTCTA  
ATTGAAGATTTGTTACAGTATACTGCAGATGAAGAAAACCTTAACTAAAATAAAGACCTTC  
CTATTGAAAACAGATTTTCTCTTTAGGAAGATATATGGCTTTGGTAGATGGTTAATTAGG  
GATAAATAATGTAGTTGGTTTTGTCCAAGTATTTGGTAATGATAACAATATCATTAGGTAGA  
CTTGTTGATATCGGTAAGTGTACGTCAGGTATCAGTGGGTTGCAAGACCTGATGAACCCA  
TTCAGTAGCATTGCTGATATTATCTTTCTAGCAAATCTTATTAGTACCAGTAGATTCATT  
CCAGGTAAAGATAGATGTTACCCGATTATTAATATTACAGACCTAATTTAATAGCTAGT  
AAGCTAAACTTGAGGAGGACGATAAGCGCAGGTAAACGGATGAAGCCTGGTCTTCTCAGT  
GGAGTAATAGAGAGGCTTAAAAAATTGGGAGCGAGTGCAGGTAGCCAATTACTCAGAAC  
ACTACCACAGGTAAAAACCGTCTTGACAGACTTACAGCTAGGGTAAAACAAGCTGTTAGA  
CCAAGCAAAGGTATTCAATCCTGAGCTGGTAATACATTTACTAGAGCACTTGATGATATA  
AAGATTAAATTTCCAAAACCTAAGGTTCTTGGAATGTAAACCCCAATCTCAATTTAAAG  
TTAACTAAACATTATTATAAAGCCAAAAACTATTAAGGTAAAAGCATAAGCTGGTGGGA  
GGTCCACCGGGCCCCCGTTGGCGATTGATCTTGATATAGGAAGTCAAGCGGCATTTGGA  
TTTATACACCAGAAAAAATCTCACATTTATCTCATAAAGTTTGTGGCAATAAGCAGTGAG  
GTTCAATTTAAAAGAAAGTGAAAGGAGAAAAGAAACAAGAGATTATGCTCACTCAAATACC  
TCTGGTTCTTACGGTGTTTTTCAAGAAATTTCTACTGGACGCGGGTGGTTAGCAACGAAT  
TAGGATAAACAAACCTTGAGATGGAGACTAAATATCTGAAGACTATGCATTAGATAATT  
TGAAGTGTGATAGTCCTGCTATGAATATCAATAAGTATAAGCCCCGCTATGTACACATA

AAACCTGAGAACAAGAGCACTACAAGATTTGGTGTATCTGCAACCTAAAAATGATAACAAA  
TGGAGGAACCCCATACATGCATGAAAGCAGATGGTGGTAACTTACCAGAGCTCTTTATC  
GGTGGTTTTTTTAGAGCGGTTAAGAATGTCGTTAGTGGTATAGTTCACACTGTTACTAGC  
GCTGGAATACTGTATGGAATGGTGTAGTCAGGTTGCTTCCAACCAATTGCATCTACT  
GTAGCGTCATTTATTGCTGGTGTAAACGTTATCGTACCCGATTTCAAGGCAGTAAATGCA  
CGTTGTTCAAGGTGATCTCATGGGTACTGCAATATATGCATTTGGTGGTATCAGCAATTGT  
GCTAATTTCTATAAAGTTAATGCTACTAATCTACCTACATGGAACTAAAAGTTCAGATTG  
AGTATGGCTGGACAAGGTGTCCCAGACATGTATCATTGTGCACTCAAGGCAGTATCCAAC  
ATTAGTAGTAGATTTAATGGGTTCTTTGACAGGGCCAGAAATTGCGCGATTGAAAAGATT  
GGTATGCAATTTTTTAATGGTAATATTCGTGCTGCTATTGGTACTATAGTAGGGCGAAGG  
CCTGGTGTATTAGGAGGTATTGAGAATTTTGGTAATACGTTGAAGAAAAATAAATTAGAG  
CATATCTTAGGAGCAGTTCCTGGTCTTGGAGATTTAGCAAAGAAAGTTACTAATATATTG  
TTAATTCAGCCATGGAATCTATCCTAGGTAAATCAGGCGAGTGGTTTAGTGCCTTAGCT  
GCTATTGGTACTATTGCTGTCAAAGTAGGTATGAAGGGTGTATATCCAGCTATCATGAGT  
GGTGTTC AATCTGGAAACTTTCTTGAACGATTACCAGAACTTGGTGCAGAAATAGGCGTC  
GATCCGAGAGTTTTAGGTGTACTCGACCGAGGACTGGATTTATTACAAAATAATCAGTTC  
AATACAGAGTTTTGCAAAAAAGACGACTAGTGATTTGTTACCGGTTCCGATGATCGTATAA  
AAAATCGTTGCAGTACCTACTCCTGGGCCAATAGATAGGGGTGATACCCACATAGTAGCA  
CCATCCTCTACAACACTAACAGATATAGGCAACAGAAAAAAAAGGAGTGCAACTAGATCTTG  
ATGAGTTTTGTTGAGCCTAATGGGGGAGCTATCACTACTTCTGGAGCTAATCCCAAAGGTG  
GGAATAGCGACTTA ACTACTGTAATGCAACAACATACAGGTGCAATTAAGACTAAGGGTA  
GAGTTGTGAATTCAATTAGCAGCACTATAGTCTGTATAAAAGATGTGCAGATGAGGTTGT  
TGAAAATTGATGAAGAAAGTTTTAAGACAGCATGATTCATCCCGAATAGACGAAAGTGC  
ATCCTCCTCTTAAAATGGTAGCATTTTGTTAATTTGTTCAAGGTGAAAATACCAGGTTGCC  
TTCAATCACTTTCAA AATTAGCAAGTGCCTGATAAACTTTTTGTTACTTCTCCTTCTC  
TTAATGGTTATCTAATCCTCAGAATCCAGCTCAGTTTGTACATGACTTGAAGTTTTTG  
CTACAGTTTTTAAAGTTATAGCATCTGTCGCTACAGTTGCCTTTGTTAAGTCTATAGAAG  
GACTGTACGATCTTTTAAATAGAAGATGCTACATGGATGGAAAGATGAGGTGGTTGTACAA  
GAGCACATGCAAGATTGGGAACCGCATTCTTGGCATTAGCGTGTCTTACAAATCCAAAAG  
GGTTATCGAAACCTTATCAACCGTGCTATTATTACCTCACAAGGGTCTCCTTGCTGCCT  
TTGCCAAATCTGCTACCCATCCTATGATTGAAGGTGCAGGACGGTTTCGTCTTCTTAGAT  
ATTCTGATCAAATTCCTGGTGTAGTCAATAACAATGAGGAAACAATTGCAGAGTGTTTAG  
TATCAACAACAATTGAACCTGGTGTATGCCATCATTGCCGAGTCTGAGTAAAAAGCACAAA  
GAATCGCAGACCTTATAAAACAAAAGAGGATCTTTTCTTCTTTATTGGTAGGTTGGTC  
AAGCTAAAGAAATTGAAAAGTCAATTTATCAATTAGAACTGGGAAATCTAAAAGTTATG  
GATTTTTTGA AAACGGCGGTTATCTAGATGGGTATGCAATGAGTGGTTGGATTACTTGGC  
CTCAGCCTGGCGACCATGTATCACTAGATGTTAATAACCCTGATTTTATTGGACATCGAG  
GTTAATATGTTACGCAGAAGACGGATGGGGGTGCATTGATTGTTTCGTTTCGGACTCGTG  
CAACTAAAGAGGATCCCATCCAACATCTCGAAGAATGACTGAAGCAAGCCTACTAGGAT  
TTTTTGAAGATGGTGGTGGGTACGAATAGTTTGCTAAGAGAATAATTAAGATTCATGAGG  
GATTCAGGCCGACAGCAAAACCTGCACCTAATGGTTCGAATTTCAATGTGCTATGGCCATT  
ATATTAACCGTCTCATAATGTCCCTCCTAATTTTGTAGAGCGTTTGCAAAGCAACTGT  
TCGAACAAGATTATAAAGACCATGAAATCGCTGCTATGAAAAACCTGGTTACCGTAACT  
CTAGACCTCTACAACAAGCAGCATCCCTGTATCTCACCTATAATAAAGGTGCAGGTTACC  
ATACTGGAATCAGCAACAACAAGGCACCGTTCATCAAAGGTGAATTTGATATCGCAGGTT  
ATGAACTAAGAGTTCATCTTCGGTTTTATAAAGTTGTACGTAGACGATCTACTTTTTTCA  
ATTTGATGAAGAATAAAGGTTTTGGGAGACGTTTTGGGACAAGAGCTTTTAGATAGAGGTT  
TAGTAGTCCCTATAGACTAGTCGAGGTCAAGTAAAGGATTTGATTGGACATTTGCATTAG  
GGCACATGTTTGGTGGAAATACCTGCTGCAGCTGCAACATTAGATTATAATATCAATGAGA  
ATAGACGGTATGGTTTGGATAGTATTACTAAAGGTGAATCTTATAGAGTCGTGCCTACGT  
CACATGCAGATACCGGTCCTGGATGGGGTATTGACCGGAATTACCGATAAATTTGTTTCAGC  
ATTTGGTAGTCTTCCACATGCTGCTGAAATGTTTGTCTAAGATGAGGCAAGCATCAATAG  
GACTGCGAAAAGGATCTGATGTTGCAAGCAGGGGTAGATAACCATCAAACAATTAAGAAC  
ATGACGGTCAACAACACTCAGTGCATTGATAGGGCGAAGGTATAAACATCTCTGGTTCTT  
CAAACGCATGGATGCAAAACAATGCTTCTAGATCTGGTTGGGATTATAGATACAGTCAGC  
GACCTGGTAGTGGTCACTATGATTATGAGGGTGAAGGTGCAAATAAACTCCTATCTTAG  
GAACAGCTGGCTCTCCTGCATATTCGTTTATGGATTTACAGAAAGAAAACGCAAGAAGAA

AATTACTAGATTCAAGTAGACTATCTGGATTTAGTTGATATGGTATCAATACTGATCAAG  
GAGGTTCTGGAAGACCGTTTACTGACATGTTCTTGGGAAGGAACATTTGGTAATATGGGAG  
ATTTCTTCAACAACCAAGGGTATCAACTAAACATAATGGATTCTCAGAATAAGGCGAGGA  
TTGCCAAAATAATAGTGAACAAATTAGAGCTAAGCAAGTAAGTGAACAAAGGAACCAAG  
AAAGAGGAGAAATCGACGCAAATGCTTCGGAGATTGTGCAGATGGCGTTGGCTGTTGGAG  
ACGCGGAAAATCGTTCCAATAGGCAATTCTGTTCGACGGCTGAGTCCGGCGACTAGGAGTT  
TATTAGGTGTTCAAGAAGGTGGAGGTACGGTCGCGAATGTTGGTTGAACAAATGGAACAG  
TATTACGGACTGCTGTTCTTCTTTACTTTCATATAACAATCCTTTAACAGGTATTTTCC  
AATTCGTAAAAATCTTTAACAGAAGGGATCCTAGTCAGAGAAGTGTGAGGTCAGACAAA  
GATAACTCAATCCATTTACAGAAAAGGTGAAAGGGTGGATACTCCAGATGGAGCATATCA  
CTTAGTTACATTGTTAAGATGTTTTGAAATTTATGAAAGTATTGCAAATCCCTCCATGGA  
GTACCCTATTATTTAAGCTGATGCAGGAGAAGTATAGGATCTTTAACAGGAATTGAGGT  
ATTTACTATTCAAGTGAGAACCTCTATGAAAGATAGAATTTACAATTTAGATCCTAGCA  
AATTCATCAAGAATTATCAAGAGACTCACTGATGTAACCTTTTTGAAATAACTGTGTTTC  
TGATGAGTATCTAATCAACGAACTACTAATGTATTTGGTAGTTCTTAAGATAGCTTCTA  
GAAGCAAACAGAGGCTGGTGCTATCGTAAAGTAATTATTAGGCAAACATTTATAAAACC  
TGACAAAAAATTGTAAATAGAATACTATTAACGCACAATCTTTTATCTCTGCAAACCTG  
ACGAGTGTGTTGATTTAATTTATCGAATAGCTCAAACAATTATTCGGAAATCCAGTAAACA  
GGGTGTTATGTAAATTGGGGTTCCTTTTTTCAAAAATGCACTTGGTTTTGATTTTAGAAC  
AATTGGCTCTATCACTCACGGTATTGTTAATCAAGAAGAAACATTTGAGGCATAAATTGC  
ATCAGGAAAAACAAGACTATACACATATCATTACACACCTAAAAGAAGGGGAGAAGCAGC  
CGATGATCAAATCAAGATAAATCGCAGTGCATTCCTGAGGAGAAAAACTTTTTGATGGG  
TTTAAGACTTGGTTCCTTGGTATGGATATGGTGTAGGTTTTGACCCTGTATTCATCACCAA  
ATCTAAAATGGGAAGTACAGATTTATATGCAGACGCTTATCCCTATTCGTAAGCTGA  
ATTATGGACAAGAATGGCAAATTAGAACAGAGGTAGTGCTGATATTTCTCAGCAGAATAT  
GGATAATTCCTCTAAAATGCTGCTAATTTACCTAACGAGTCAGATACTCAATGCTTCC  
TAATCAAATTTTTGATGCTAAGTTTCACAACAAACCTCAAAGAAATTATCAAGAGTTAGT  
TGAATTACAAGCATGTCAATAGATGGTTATTGAATCATTACAACCAAATCACCTGACTAT  
CATCATTCTGGCTATTTTGATTTATATGTGGGTTTCGGAGGTTAACTTAAATATCCCTTC  
CACTAATCAAGAGGGTGACACACCTGAAAGAGATCCCAAGTATAGTGGTAGATGGTTGAT  
TGTTGCAGTAGCACATAAGGCGGTAGGTTTTAACTTTCATACAGTACTTCTATAATGAA  
GGCCTCGGATGTGCCGATTCTCCACAATACCAAGAGGAAGACATAGCACAACTCAACAT  
ACACAATAACATTTTTTATAATATAAGTGTAATGATTATGTATCATCGAGGTACACTAA  
TGGACACTATAGACCAACTCATAACATAGCGATAATGATCATATCGAAAAGCCTCTCATAT  
CACCTCCGCTCGTCGACACTTCAAACAAGAACTACACGAACTAGAAGAGCATTAAAGC  
ATCTCAAAAGTGAAATTGAAGCGGGAGATCATCACGATCCAGAAGCACTTGTACTATAGC  
CTGATGAAAGCCAAAAGAATCACAATCCCTAGGTAATGACGATTAATTATGACAGCCAA  
GACACAGAAGTATGTGACATTTCTGCTAGTGAGATCAACTCAATAGATTTCTTGGCAT  
ATGACAGGAGAAAGTCCCACATCAATTATGTGCTAGAACCATAGACTATATTGCGTCTCA  
ATCACTCGATGAAAGTGTTGGTAATGATAACGCATAGAGAGACGATCGAAGTACGTTTCT  
TATCTAAGTTAAACCAAAACATAAAGAACGGTTTAGAGAAGTGTGACGATTACCTAACCCAC  
TGCAGCAACAACATATGCAAATACATGGGGGGTCTAAAGCGTGCGTTTTTAAACGAACAG  
TGAGATTAACCTATAAACGTCATTGTCTTATCAGGGTTAACATGTTTCGCGATGTGAAAG  
AAATGGATTGCAATCTGTAATGAGAGAATTGGGATGGACTATCTGCTTAAATGAAATGCC  
TGAGGGAGAAAGCAGAAACAGCAGTCCTAATTGAAAAAATAGAAATCTACCACATACGGG  
GGAGATCGTGATCTTCCCTGCATCTTTTTCTCATATTCATAGAGGCACCCCTCCAAGCAC  
AAGATTCAAGTATATTGCAGCTGGTTGGTCTCGTTTTAGACCACCTGGCCGTATTAACAT  
GCAAGTAACCCAGAGAAAGCGGTTAGACCCTTACTACAGATATTGATCGATATTGCTA  
TACTACACGTGGTGGTGGTGTACATGAGAAAGTCGTATAATGACTTTCAAAGTCTAGAAT  
ATTCTCATGCTAACTATTAATGCCTGATACGTCCAACGCAGGTCATCGCCAACAGGTGAT  
TTACCTGTCAGTGGAAACAATTAATCGGCTGGCGGCGACACCCATCACCGGACACAGAT  
GCAATTTGTGCTGCTACGGAGGGGACGGTACTGTAGCAGGTGTTGTGGAGACAACCTGCA  
ATTCTAGACAATTCAGTTTATCCGCTTGGTGGTGTGTCAGAATCTACAAGTTGTTCAAAGG  
GTTTCGTAACCTCATATGGTGAGGTTGGTAGGTCAAGTTATCAGAACAACGCTAATAACTTA  
AATGCTATTGGTGATTGGTATATTGACATTTGACTACAAAAGCCAACCCTGCGATTTTG  
TGTCAGAGGGAGACTAAGATGTATGGTCCTAATCCGGAGCACCAATAGGTTTACTTAAGC  
AGAAGAATCGGTAGTGCTGGTTTTAGTTCGTTATTTTCATGCCTACTGAGCAAATAGCACT

ATTGTTAGATTTGCAGGAATTA ACTGGCAAAATTGCTACGTTGCCTTCGAAGAAGAGTAC  
TTGTCGGCATTCAATGATACACCAATCCACTCTGCAGTGACGGGACTTCGTTCCAGCAA  
TACTTTGGAGGTTGGGCAGGAAGAACTATCGACTTCAGTAGTCGGGATGCTAACAACAAC  
CAGAACGCTCGTGGTAGGGACGTTACGATCTGCCATGAACTTGCACCTTAATCTTTAATG  
ACAACGAAAGTGCCAGCTCAAATCTTTAAACTCCATCATAGGGTTCTCCGATTTCAAAG  
ATAAGACCTGATTGTGTATGGTTCATCTATGAGCGTGATCTGTTAATTCTTGAGTGGTTT  
CCTGAGAATGCATAGCGTAGACCTACTGATGCTGAGATAATTGCAGAACTTGACAGGCAA  
ATGACTGCATTA AATGGTAGTCAATATCAACGTGATAGACCATCTGAGTATCCAGATTTG  
GAATCACAGGTAGAAATGTTGTATCATGACATCAAGGCCAGTACGTTAGTTAGTTGAACA  
CGGATTGCAGCAGTCTAAGCGGTAAAAGCATCACATCATAATCCTTGATGATTGAAGATT  
TTATTATAGCACACTGGACAAATAGCTATCAACCACATACAACACCTCACCATTTTTCTA  
CTGATGAACTTTATGGGAAAAGGAAGAAGGTGGGTATCATTCAACGAATTTTTATATCA  
GAGACAGAGCTAGTAAACCATATAGAGAAAGTTATCACAGGGTAATTGTAATATCCTTTG  
ATACATTTATTTTCGAAAATTATAACTTAGACTGGAAACCATCCTAGAATCGTGATATGA  
TATTCACATCCGATGGTGAAGCATGTCATGCACACCTAGTAGGGGATAAACGCCTGGTG  
CCAAAGGATATAAGATTGTATCCGAGATCACTGTTTACGGGAATCGACTGTATAGTATGA  
TTCAAGGATAACATGATATAGGTAACATGGTATGGGGTATTGAGGGCATTTAGAAAGTCA  
CTCGCCGTATCGACCCCAAATGAACTTGTAGCGGTCTCAAAAATATGCAGACCCTTGTTG  
GGATTCTAAATAAACCGACGGGCAATCTTGTCCGAAAAGATGGATTGTTCTGGTGGGTG  
GCGTAGTAGAACATAACGAAGATCCTATGGAATTAGGTAGGGTCAAAGTTCGTGTGCTTC  
GATACTATACTATCGTACGAGGCGGACCACTACAGCTCTACATACAGAGAATCTACCGT  
GGGCGTCATGTTTACAACATGCTATCCAAGCAGGTACTCACGGGGATGATGAAAGTTCTG  
GACAACCTCAACCCGGTGAATCGTCATCGGATTCTTTGTGGACGCCGATCATGCACTGA  
TGCCTATTGTCATGGGAGTTCTTCGTATGCAGAAATCAGACGAGACAAAAATTGAACACC  
AAATAGCTTTTACTGGTGAAGCAATGGAGCCAGTTCTTAGTGCTAATGCATCTGCATTAC  
ACCCCGCAAACGAAGCTTCACAATGGCAAGAAATATAGAAGAGGGTTTCTGAGACAAG  
GTGCAAATAATACATTTTGCATTCATCTCTCGAAAATACAAGAGGAAGGGGGTCGTGTTT  
CTCCTAGGAATCTTGGAACCTGCTGTAGGTATGAATGGTAGTAAAAGTAGTACTGTGAAA  
TGATAGCTCCAGTAAAAACAATACACACTGCCAATGGGGTTCCTGGTGCTTGACGATCAC  
TCGAATATAAACTATTATCTTTTATTTAAGATATTGTGGATCATTCCGGAACCCTAGTAA  
AAAATGAAGACGGGGACTTGC GCGATCTCATGACGGGAAAAATTGTAATTGCAAATGCGT  
TAACTGGTAAGGTGCAAAAACCTCATGAGTGCTATATTTACTAAACTCGTTAGTTCTATCA  
GGCGATCTTTGGCAAACCTTG CAGAACAATTA AATGTTATAACTTTACTTGCAGGTGCAA  
CTGGCATGGCATTGTCAATTCGCTGGTATTATGGCTGCAGTTCAAAAGATTTTAACTG  
CCTGTTGCATCGTTGATATAGATCTTTTAAGTCTCAATCCATCTCCTGTTGATAGTCTTC  
TTAGCATTGTTGCAAATTTCTTGAGGGTACCATCTTTCAAGTTCTAATAGTCATGAGCA  
GTGTTTCAGAAAGTCATTGATGTTACTGATAGCTCTGTTCAATCCGTTCTTAATACAGCAC  
TCGGCATTGAAAATGATCTAAAATCTATTATCTCTGGAAAGCGAAACGCACAAGA ACTCA  
TTGAAACATAGCAACAAGGA ACTCAAAGATCCAACGATCTTCAACGTTTCTTTTAAA AAT  
CCATAACTCCCTTTACTGGATTGTTGGCATTATTTCTTAAGTATGCAGGAAGTAAACGTA  
AACGTACAGTTTATGGTGCTGAAAATGATAAAAGTGGGTATCCTTTATTTGATACA ACTA  
AGTGCCTCCTGAGGA ACTCGCTAATATCAATAGCATTTCGAGGAGGACGTAGAGGTGATT  
GTGGCTAAAGTGTTAAGGGTGGTGAATTA CTTGATAATATAATTTCCGAGCAGATCATA  
ATTTGTCAGCGTGTAATAACTTTGTAGATGGTGCATCTGAATTAGATCTTGGCACACCTG  
GTCGCTATAAACAATAAGCCGTAAAGAAAGTGGAAACAACATTTTCATCAGTCAAAGGAA  
ATCAAATAGGGTAGGCGGAATTTACTGTCAAGAAAGCATTGCGTAAGGAAAGAACA AATG  
TATCTTCCGATAAAAATAGACAGACAATTTGTTCCCTTACAGAAAGGGACCATCAGAAGAGA  
AAGATGCTGTTGTCGTTGCAGATCAGGCAACGTACATTGGTAAAAGCCCCGAAGAAGTCC  
ATGGCGCTCAATGTCGAGCAATTGATGCGTCACGGAGTACTAATATTGAAGGTGACTATC  
GTTTAGACAGTACAGGTGATTGTCATATTTCTGTCCGGTGGATCCCGTATGCTGTATGCTG  
AAGGTGCAGGTAAACAGGTGAAACCATGTGGA ACTCCATCTGGTGA AAAAGACATTA AAA  
CACATTCATAGACATTTGGTTCTGATGTTAAAATGGATATCGCAGGTGCTGCATTTTCTC  
ATGAAGGTT CAGAATTAATATGGGTGCGGCTACTACAAAAGTTACTGGATCTAACAGCG  
AAGTTACATCTACAACA ACTA ACTTTTCTAGTGGTGGAAATTTTATTGACTGCAGAAA ACT  
AGGTTGATATTACTATACCATCGTTAGTAGAATTAATTA AACTCCCTCCTT CACCCATAC  
CTAGGGTTAAAACGAGTATTCTCAAGAAAGCTGGGGGTTCTATTGAAACATATATGACAC  
CTGGTTTAGATGCAGCAGATGCAATTTGTAGACATACCGTTGCAAAGCCTGCTGGATATG

CTTTTCCTCAAAATGGTTTGGCATACAAAGACGTGGTTATAACAGGACCATGGCTCGCAA  
CGGCTACAGCGGGTCTTGCTAGTTTAAACAGCGGGTGCAGTAGTTAATATCACTGCAGGGG  
CTGCGATGAACACCACTGCAACAGGAGAAGTATACATAAAGGGTTCATGATAGTCCCAA  
AGTAGTGCTATACTATGTGTGTGTTTCGCGAATGCCCCACTTGGTTTGGTCCACAACACTT  
CCGCAGAACGACAGGTGACCCCATGCAAGACACTCAGGTTGCGAAGATGTTTCTTAATTT  
CTCTAGGAGAGCTGTAAAAATCCTAGATGTTGAAGGGTACGACAAAACAATAGAATGTGA  
CAGGAATGAAAAAGGAGTGAAAGTTTCTCAGACGCTATTTCTCACCTTTGTGATGTCTT  
TGACACTGATATTATTACCTATTGTATTGCAGAATCAGAATGATTGTTACCCATTAAGAT  
TTTGATCCGAACATAACATTTCCGATTTATATCGCAGTAATCACTGTATTGTCTAGCTTC  
AATGGTAGGTACAGAGGCTGCCTTGCAAATGAAGGATTGACACACCCATGTGACGACCAC  
GACGACTAAAACCTATCATTGGACCTAATGGCATTACATTAGATCAAGCAGATGAAAACGT  
GCATTTTCATGATTGAACTAACTGAACACCAAATAGTTTGTGGAAACATAACCAGCACCTAA  
GGGATCTGTTATGTTGGTTCTTGTGAATGAAATTGCTCCTGTATATGATGAAATCCAAGA  
GCAAGTCGAGGAGTTTCGTAAACGTATTACGTAGTGAGATGCAGCCTGAAACTTGACCTG  
GCGTGAAAGGCTTTTTTCATCCAGAACGCAACGTGCCAATAGCAGAAAAAGATGCTAATC  
TAACTAATTAGGAAATGTGGATTAATTTCAATGAATACTGTTATTTCCATTAATTTCCG  
AACTGGAGACACCACTCAAAAAAGGAGAAAAAGAGGGATTTTAAACCGCACGCACTTCCT  
GCCGCTAAACAGAGCGTACAAGCATTACAGAACAGACTGGGAGTGTGGCTGAATCGGTAG  
ACGCACCAGACTTAAAATCTGTTGGACTGGTTCCCGTGAGAGTTCAAGTCTCTCTACCCC  
TACTGTCCGGGGGGCTACAAAAGGTCTCTATCTAGAACGAGTGCTCCCCGTCATAACATAC  
GAAAATAACGTGACAGTATAAATCATCATAGTTGTGCTCACTGTATTTGCCGGAGCGCTT  
ATAAGGTACAAAGATCGGCATTAATGAAAGTTCACCTCGAATACGGAACCCCTTTCTGTTT  
TTGTTTATTGAGGATCTGTATACACAGGCAGAATTGCTTCTAATATAGTGAGAGTAAGAT  
TACTATCAATCTTCTAGGTATATACTAGATGCCAGTACCAATCCTCCTGTGACAGATGAT  
GTAAGACAAAAAGCTCGAAAACAAGAAAACCTTGTGATAATGTTTTCCAAAAGGGGGAG  
TGTTCTGGTATTTGAATTCCTTGTAGAAAAGTATTAGGACCTAGTTTCAAATGTCATAGT  
GATGTTCTTTTACAGTGGAATATTTCCAAGCTGATGAAGGTCACCTTTTACTATCATAT  
TATGATGCTGGTTCATAGTATCTACCACACCACGCTAACACTGTAGTCTGAGTGATATCA  
TTGTTTTAGAAAGCTCCTAAATGTTTTGAAGGCGTGTACTTTATACTTGAAGATTATAGA  
GTGACTCTTAAATGTTGAAACAACCTGTGCAGTAGCATTTCCTGGCACTTCCAGACATGGA  
GTCAATCCTATCAAAATCGAAGATCAACATAAAGCTCTAGGTTTAGGTAGGTACAGTCTA  
TCACATTCTTTGAATTTTAGATAAAGGCGTACTTAGTTCATCCATAACCACACAGAAAAG  
TTTGGGCCACAAAAGACTATATTTATGATTTTGAAAAAGATCATGCGGTACTTACACCTG  
GCATTTGGATCTCGGTAAGGTGTATTGAAGCAAAGGCATTATATGTTGTAACATTCCAAA  
CTGATAAAGATGCATTCTTCGATATGTTACCTCTCAGTGGAGTTGTATGGAAACGAGATA  
TTGATTGGTACGATCAGTTGCCATTGGATGTATTAACATTCCGGAATGTTCTGATTAGA  
ATATTACAGTTGCAAATAAACCTATACTAGGAAGATGTCCGTTCTTTGATAAGGATAAGA  
AGATGCTTGCAGGAGCGTATCAGTTTACTATTGATCCTGCACCCCCTGAGTTCTCCGCCT  
TAGATGTAACTTTTCGGAGCATGATCCCGAACATAAGGCACTGAGCGGATTTGCTCTAG  
ACAATCTACACCTTGCAGGACAACCTAAGTAACAGATTTGTGTTCTTCGAAAATAGATCGG  
TAGATAGTGTTAATCTCAATAAAACTGACTTCAAAAATTTGCAGACAATACTATGCAGTAG  
AAACCCTACTGAAGCGGTGGTCATTAGGTCACACAGATGAGCGAGCATATATGCCAGGAG  
CAGAAGAGGAAGAAGAAATAGACCGAACAGAGGGTTGACTTTCTTTATAAATAGACCTGT  
ATCAAATAGTGTGATTATCCGCGGGAGCCCGTGAAATATCTCAGCTGGATAACAATATCAG  
ATACTGACCTATTGGTTGGAGCACTTTTCCGTGTGGTAGTGTCCGACCCATTGATCCCTA  
ACAGAAAATCACAAGTAAAGCAACACTTTCGTGGAGTTGTACAAGGAAATGAGGGTTCTC  
CTTGTCTTTATTTTGAATTTAGACAGCGATCGTGGGCTATATTAATTACCGTACGATTA  
TCGGAGTTGCGTCTGGAGATGGTGGTTTATATTTTAGTAGAGGCTGCAAGACTGCAACTC  
GAACTCCGCTATTTGTAACCTGCTGTTGATGATACTGTTTCTAATAACGGACATTTTTTTTCG  
CACCGAACGGAACGGTAACTGTCAAAGTTACGGGTCTATTTACTATCGATGATGGGTCTT  
TTCCCTTAGACGAAGCACAAGGACCTCAGGCAAGATTTCCGGTAAGTAATGTTTAAACGC  
GAACTAATAGTCGTGTTTTTACACTCCCTGCCATTACATCTGGTGATGGACAACCTTTGA  
TAGGTGCTGATCCACTGAAAACACTAAGTAATAAAACCACTTTCATGACGAGGACAATC  
CCGTTATTAATAATGGCACTTTTGAAGCAATATCTCAAATTAGCTGGGGGCAGACATCAA  
ACGTTAGAAGATCATTTTTTTTTTCTGATGCGGGAACCTGTAACAACACTACAGTAAAAACA  
CTGCAACTGAATCTACATGGATAGATACAAACGCGGAACAGACAGCATTACAGTAAGACTC  
TTGTTAATTCCAAACTAGCACAAAGAGGCTGAGGTGGAATCCTACTGGGCACAGTTCAAGA

CAACTGCTCTATCTGCTAATTGAAGTCTTACTGTTCCCTGATTAAGGAGGTTCCCATGCTT  
TCAGTAGTGCCACTCGTGTACGCCAGAACAATACTATTGAAAATTTACTTCTTCAAGATT  
CAACGATTGCTTCAATGCAGACTACGTATTCAGTTGCTAACTCAAATAGTTTTACCAACG  
TAACTGTTGAAATACCTCCGACTGCAAACCAATATAGTACAGGAATTCCTATACACTTG  
CTACAGAGGCTGCTAAACATGAGACTTAAAATAAAAACAACGATTAACCCTGTGCTGAGGG  
GTGCAACATCACAACACTGTAGGTGGTGGTACTCTTTCATAGATAATATGACAGCAAACA  
GAACTTTCAGATTCCCTTATTTTGATGCAACTCTGTTATCTACTGAAAACGTGACAAGTC  
ATCACGTTACATTTTCATGCAGGCGTTAGGGCAGCAAACCTGTAATGGTTCGCACAAGACAAC  
AAGAATTGAGCTACGCAGGATTTCAACTAAAAATGGCTAATCAATATTTACCTGCTTGAA  
ACGAACCGGCAGCGAACCCGAATACGTTGATCTATTCTGCTCACGTTAGTAAGTCTGCAA  
GGACTTTCATCAACGTGGATAAAGATGGAGCAGAATCAGACTACTCTGTTGCTCATAATG  
ATTTTGATCAGAAGTTAGTAGTAAAGGGTTCTGGAATGGCATAGAATTTACATGAGTATG  
CCGTCATCATTGCATATAAGAGGACACTTGACTCTGCCTTTGTTCTGTCAGCACGGGGTT  
TTACCGGCGGTCTCCAGATTAGGAGTGCTGATAATGAATCAAAGTTTAGATACGAATCTG  
CATCGATTCCCTGATTATGTAGAAGTCTGTTGTAAGGCTTTTGCTATCAGAGAGATTACGA  
TTGAAAGTGTTACTGGTACGTTCTCTATTGGTAATACTATTAGCAAAGGTTCTGGTAGTG  
ATACATCTACTGAAGTAATCTATGCCATAAATGGAACCTATTCTTCATGTACGATCTTCTA  
GTCCTTCACGGATCGTGTGCCGGATGTACAGCTGATGACAGGATTGCAAACGGTGCGGGGTG  
CATCAGCTAGAGTTGCCCGTCGTGGTGTAGGATCTGCATCTAATAAATTTGTATTCTCTC  
GCAGATGAGGGGGAACCTACGACCTTCGTTAGAAATCTGCAGGAAACGGTTTTGAATCAT  
TCAACAATAGATAATACAGATTTTCATCTTGCAGAATCTACTAACTAAGGCCACGTTTTGG  
CATTATCAACTACTAGTAATGGTGAGTGGGGACCAGGCGTAACAACGGGTAACACTGATG  
CTGGAACCTGCATATACTACTGGTATAACTCCCAATTGGACCATTGGTTGTAGCCGTGTAT  
GCATTCATGTGCTTTTTCGTATCACTTCACCTACTTTGGTATACTGGAAGAACTCTATAA  
CTGAAATTGCTTCTAAAAGTAGTTTTGGTGTATCAGACGCAAATCTTACCACAACCTTATA  
CCCCTGCATTCAAAGCATTTTATATCTATGAGGTAGAGGAACTTGAACCTAATACTACGT  
CTATCTATTTTCAGAACAGTATCACATCTACTGTTACTGCTCATTCTTCTGGAGCGTAAG  
GTTATGTCCGAAGTTACAGAGGTAATAACTTACATGTTGTTGAAGGACTCAACTCTGCTG  
ACTTTGCAGGTTACAGACACAATCGTAGATCACCCCAAGTTATCTACTGCAACAATTTCTA  
CTGTGACTGTAAGTAGTGTGCTTATTCAACTATTGCTGGGGAAAATAATTACATTAGTC  
AACGGTCAACTAACGGTGAGCGTGCAGTCGCAAAGAATACTTCTAGTGTGCTGGACCTG  
TTGGTAGATTGATTATCATAAGCACTACAAAAACAACACCTTTTCCCTACTTGCGTTTT  
AACTTCCCTCAATTGCGTTTAAATCCCCGGATTTTCGGCAGTTAATTAAGAACGGACAAAG  
CGGATAGTTAATGTCGCTAACTAGACTTAAGAATATTATTACGTACAGAACTGGTTGCAT  
CATATATGTCAAACCCGTCGATTTCCATGCATCAGATGCTATTGATAACAGGATAACCTC  
TGCTTCGCGTCCTTTTAAAAGGTTGCAAAGAGCATTCTAACAAAGTAGCAACATTTTGATA  
GAGATTGGGTTTGAGCAATGAAGCGTTTGACGCTTATAGTATCCTGCTCTAACCTGGCGA  
ATATATTGTAGACAGTAAACCGGGTGAAGTTTTATAAACGAACGTTGCATGTATTGTTTC  
CAACTCATACTTAGACTTAACTTCTCATAAGAACGTTCTATACAACTATAATTACAGTAGA  
ACGTGGAATTATAGTTCCTAGTGGTTGTTCTTTAGGTGGAACCGACCTTCGTCGTACAAT  
TATTATTGGACAATATGGTCCATATCCTACAACGCAAGCTGTAACAGGCATTAAGATAGA  
AGATCATGTTCCCTCCAAGAACAGGAATCTTCAAAGATACTGGTGGTACTTATTTCTGGCA  
ATTCTCTTTGTTTCGAAGGTGCAGAAGAGGTTGTATACTTCTAACCTGCTTCCACTGGAAC  
ATTAGCACCTTAATTTTCACATCAGAGACTGACTTGTTTTGAGTGTGCAGACGATCTTAG  
TCCATTATCAACTCTCAGTTCAAAGGAACAGTTCCCTCTTCTGCTGACTTAGCTGTAGC  
TAATATCCTGCGGAGAATGGATTTAGAGATTTATTATCAGCGAGTGTGCAAATCTTTCGC  
AACGATCCCTGATACAACCTGGAGATCCTACAACCTGACCAGATTCAAGTAAGGGTAGAAGA  
AACCCGTAAGTGTAGGTCTGTCTCGGATGAATACCGAGTCCCTCCGAACACAAGAAATGG  
ACAGACAGCAACGGATGTCACTGTTGACGAGTTTGATAGCGCCAGAGACCACGGGTTTTTC  
TGTTGGTGACGACATCAACGTTAGTGGTCTTGCAGGTTCAACTCGATCTCAATCCGATCT  
TGATGTAGGAGTTTATAACGAGTCTTTCACTGTCCTTTGGCCATCAGCAAACGTCTTCAC  
TTACCAGATGCAAACATTCCCCTCCGGAACGAAGTCGGATCAAACATAACTGTTAAGAC  
CTAGCTTCATACTTCTGACTCAGGATCACCGAATGCATTTAAGGGAACATTTAGAACAGG  
TCGGGGTATGAATGGTGTGCACGCAAGCGGTCCAAAAGCAATTGCTTTCAAGTCAATGGT  
TGTGGCACAGTCTACTTACTGCTCATTACAGAAAGACCTAATACCCTTAGTAAGATATAT  
GGCATTGACTGGTAACTATGACGTAGCAACGGGAGTTGATGGTGCACGATTAGAAGATTT  
AGCTGAATATAGAAGAGGATGGGGTCATGAACACATCCAGTGCAGAACTACTCGGTCAT

ACAGGCAATTTACGTTTTCACTGCGGGATTCCAAGGTCACCTTCACTGCTCTAAGCGGTGC  
TGACATGTCAATCACCAACTCGAACTCTAACTTTGGTAAGACTGCTCTCAGTTCAGCAGA  
ATTCAAATCAAAAGCAATTTTACAAGTTAAAGCGCGAATGATTACACATATCAGTCCCC  
AATACCCTCAATACAATTTTATCAAATGCAACAGGAATTACTGGTTCTTTAAATAATAC  
CCTTGCTAAGGATCGATCTGTGAATGGTCTGACTCCAGGTATGACTGCATCAGTAACAAA  
TATCGCTACGAGTGCAATCTTCAGTTGAATTATTACAATTACTAGAGTAATCACACCTTG  
TGCTGCACATACGTGAACTGTTAACGGGAAGGTAAGCTTTGGTGAGGAGACATATGCCAA  
CTAGGTATACATTGATATTCAAAAAACTAAAGTACTTAATACTGCACTTTCAGGACAATG  
GGGCACACCCCGCACAAAGACTATACTTATATTGTTATACTGTTGAAGCGTCAGCTCCAAT  
GACTAGAGTTCAAGGTTTTACAGTCGGTGCAAGACCAGACGGAAATGGTAATAGTGCGAT  
ATCAGATAAAATTAACATCTCGTTAGTTACACAAGGTGCAACTTCTTCAACTGTACATAC  
AGCAAACATGTAACTTATGCTCCTAGTGTATCTGCGCTTGCGGCTAGTGTGACTGGATC  
CCCATCACAAGATGTTAGTAGTACACATACTATCAATGGTGTGTCAGGTTTCAGTCGGAGG  
TTGGTATCGACGTGCATCCTCTACTAATAACAGTATTTACGAAGTGTTAGTAAATAATTC  
ACCATAACAATACAATCAGTTTTACTCCTACTTCAATTCATCAAGAGAATCTCTGATCCAAG  
AGACTTACATGGTACAAATTATCGTGTACGTTGTGTAATAGAGAAGGATAAGACTAATTC  
GCTACCGAGAGAACCTATCTCTGGTATCGTATTACAACCTCTTAACAGTGATACTAAAAC  
ATATAACTTAGTACGTGCATATTATATTTAAGCTATCGAGACTTTTTCAAAGTCCGACGG  
AGGTGTTCCGGGAAGTAATATATTATCTAGCATTACTATGCGGTTATATTGCACCTACGAC  
ATCTAACTTTGATGATAGGAAGTTCTCACAGAACGTTATCGAAGTATATCCTGCATTCGA  
CTGACATAATCCAGTTGCTGATCGTCCTGCTGCAACCTGGGGAGCTACCAATGTTTCTAT  
AGGTCTGGTTAATTCTACTGATGGTGCAACTCCAAGTCTGCACTTGACCCGAACAGATC  
TATTACCAAAGATGCCATTATAGTCTTACTGATTGATACTGCTTGGCAGAACCCAAGGTC  
AACTCCACATTATGACTTAGTTAACGTACGTCGTCAGGGATTGAACAGACTGCACGGGA  
AGGAGACGAAGAAACCAGGAAGACTATTATTAGACAAGTGAAGTGTGGAGGGGTTTCACC  
AATCTACGTAGAGCTTATACGACACTCAATCTTGCCTTCTGGTAACCATACCTTTGCATA  
TCTTGGTTTGGGTCCAGGTAACACTCAACTGCGTGCCCTCAAACCTAAGGTAGAATCATT  
TTCACCTGAGAAGATCAGATACTCCAGTTTATTAAGAAGAAGGAGGAGGTGCAGTCTA  
CTCTGGGTTAGACTGTAATGGTGATTGCCTCATAGGTAACCAGGTGATGAAACCTGTGAC  
GGGCCAAATCACGAACGAAGATATTGCACAGTTGAATGTTGTTGGTGATGAGAACTCAAC  
CATTGAAACGCCCTCAGAGCAAGTATAGACTGATAAACTGACTGTTATAGGTGGGGCATA  
TAACTCAATTAATTCATTCTCTGCAGGTCGTGTCACATTCCAAGGTGAATCTCAATTTAC  
AACTACATAACCGCTAAGAATTTTACTTCTAATAACCATCATGGTACAGTTATTAACCA  
AACCTAACTAGCACCTGAAAATGGAAGTGTACTCCCCGCTTTTAGTAATACCTCAGGATA  
CGATACGCCTGGTTATCATGCTATTGCCTACAACATCAATTGGTTACCTGGTAAGTCTCA  
TGGTTGGATTTATTGCGGAGCGGCGTGGTATGGGGTTGGTATCGAAGATACTGGTCAAT  
CAATGTTATTAATGACTCTCGTGTACGAGGATTGGTCTTGGTGTGTTTCGTACGTATCC  
TCCCAGGGCAAACACCAACGATTGAGTAAGTATTGATGGAGACTTAGTTTTACTGGAAC  
TGCTGGAGTAACAGCTGCCAAATATAAAAGGAAACAATACACCGGAGACGGCAATCAATT  
GACTTTCGCTGTTAGCACCCACACTGGTGTGCTTCAACACACTGACAAACCTTTAATAGT  
ACTAATAAATCCCTTTGCACAACTCCAGGCACTACCTACACTGTTCTTTCAAATGGTGC  
AAATGTGGTGTTCAGTGGTGGAGACGCACCGCTTCTAGAGACATTGGGCATAATGTGCA  
ATTACGTATCAAGATAAGAAGGAGGGTTGCAACAGAGCATGGCTGTTCTAAGAAGTAGTG  
GAAATCAAATTTACGACAGGTCAAGTGGAATCATACTACATTAGTATCTTAAGCACTA  
ACTCAGTGTGTAGATTACCTGGAGGCTCAACTGCAAACAGACCTAGAGGTGTATCTTTAG  
GAACTAACGTGTTAATACTTCAATTAGATTCTGCAGAAAGTTTTAACGCAGATGATGGAA  
CTAGATCCGAATGGTGGTCACCTGTTTCAGGTGGTGCTCCTGCTCTCGGAACGGACAGTA  
TTATCAGAACTAACCTATAACTATCTCAGAAAATAGTACTGTGCGGACCCTCAGCAGTAA  
ATGAGTTTGCAAAGGGAACGAGAGCAGGACCACTATAAAAAGGAAATGGCTATGCACTTA  
CAGTAGAGTCAGGTGGGTCATTGAGTGTAGAATAAATGCAGCTCACCGTAGGGGCAATAA  
GATGAGTATTGGCAAACAGTTATAATATCAGTGTTCCTTCGGAGAGTTCAATTAGCTTTG  
AAACGGGAGCTCAATAAACTCGTACTACTTTAGGAACCCGTCCTTGGTGGATCTTTGTG  
GCATTGCTACAGAGTGGGCTAATCAAGTACGAGTCCATCAAAAAGATTTATGGAGTGAAC  
AAATGCGATGGAATAGAACATACCAACACCTCCAATTTTCCTACATATGTTTCGAGGAAGA  
TGGTGTACAGCTATTGCTGTAGGAGATATCTGAAGTTAAACAAGCCCTGCAGTAGAATGAA  
ATGCAATAAATAGAGCAGGTAAATTAAGTGTATAGATTGCATTCATCCAGAGGGGCAGT  
CAGCATCCCGAATGTAGTTTAGTAATGATGATAATGTAGGTGGTTGGGAATTTTGTGTTT

ATGCAAGGACACCAACCTCTCAGGAACATCAGCCTACAGCATCAGTCAGACTTAGTGGA  
GTACAGGTCCTAGAGCAAGTAATTCATCTAGAAGTGGCGGACAGTTAGACCCAAG  
CATAAAGCAATAGTTCGAATTATACTGGCAAACTGCATATCGGAAGGACTCATTAGATT  
TCGGACCTAAGAACGTTTTTATATCGAGCCCAGCACCTGTAACTCGAACAATAGTGCTT  
CTGAAGATAAACGTAGAACTAGAATCTCTACTAGATATCAAGGGGGTCTCTCTGACAGAG  
GTTCTAATACAGGAAGTGGGTTTTCAGAGCGCACCATACTTCTGGTGGAAATATATTTT  
TATACGGCAGCCAGCCTGAGTCAGGAAACAAGTTTGGATGCACAGAAGTTACTAACGGTG  
CATCAGCCCAGTACTGATGGGAAAAGTAAAATGAGTAAAGTAAACGCTGGGAGCATTGGGT  
GGTTTATCTCACACTATTGGACAGGGAACCTTACCAGCAGGAAATACGTGGACAGTTGAA  
AGAGTCATATATCATCATCACTATAGTGGTGAATGAATGTGCCGACAGTTACGACTCCC  
CAGAGTCCGAATAGTCCAAGTGCAGGTGTAGTGAGATTTAATACTGATCAGAGTTACATA  
GGGGTTTTTACTGGTAGTGCACGGAATGATCTCAGTGGTCTGTGCTGCTGCAACTTCT  
AATTTAGGAAGTCAATTAACCCCTGCTATTAGTGGTATGGCACACAAGGCAGCGGGATTA  
CCTTCTGGTCTTTATTGGATTA AAACTAATGGAAGTGTAATCATGATAAAATGTATGTT  
GATAATGATCGGAATGGTGGTGGTTGGGTGTTACTTCCACATATTAGGACTTCGGCCTGT  
CAAGCTCACATGGCTTCTAGTGCTGTTTCGTATTAGTAATAGTTTAGTGCGCTAATTTGGT  
AACAAAAGCACCACGATAGTTGAAGAGTCATTGATGAACGCTACGAGAAGTGCATCAACC  
GATTCGGGTAGGACTCGATGGTGGTTCGGAGCAACATGATGTTGTTACCGTGCTGAGAAT  
ATGTTTGTGATAGTGCTGCTACTCCAACCTCCATCATCAAGTGCTAGTAATCAGCACGCA  
AGAACACGAGTCTCTTCTACATATGAAGGTAGAATCTCTGAAACAGGATCTAACACAGGG  
TCTAGAGCGTTAGGTCATCATCTTACTTCTGGTGGTACCTATGTTGCTAATGATAAACAC  
CCAGAACAAGCTAAAAACTGCGGATTTAGGTCTAACAAATTTGCGTCTATCGAACGGATAC  
TTATGTTTTAAATAAAATGATCCTTTTTAAACCTGGGCGAAATAAAATGGATCTAAGGGGAA  
CAACCGAAAGATTAGAATGGAGACCATTAACAATGTTGTTATCACTAGAAGTCTTAGTCC  
TAATCGCAGAGGTAGATTTACATTTACATTGCAACGACTGAAGAAAGACCAAGTAGTCC  
AGCTGCAGGTCATGTAAGCTGTAACATAACTTTTCGGTATGCTGTGGTTTATAATGGTAG  
TGCATGGTATTGTGCACGGTCGGGTATTCTTGGAACTGTAGGCACCGGGGGAATTCCGAC  
AAAAAATTCTCAAAAACCTCCCGGACTAGGTTCTGGTTTATAGAGTTTCCCACCAAGTGG  
TCGCGCAAAATATCAATTGTATGTGGATAACAGTAGCTTTGGTGGAGGTTGGGTTCGCGAT  
GGCAAGTGTTAGAGCATCTACATGTTAAAAACATATGGATCACGCTGCTGTTCTGATTAG  
TGGTACGAATGGTCTTAGCATAGATAATACATCACCATCTAAGATAACCAGACGCATGGAT  
CTATGCTTTTGTCTCCAGTGCTAAGTATAATGGGTCTACTAGATATTGGATGGAAGCCAC  
TTGTCTCAATAAAAATGTACTCTTTGTTTCTACTACTCTAGATTTACTTAATTCTGC  
TACTACTCAGAACGCAGGAACAACATTATCTAACTCCTATCAAAGAACTTTAAATGATAA  
AGGTCCGAACACAGGAAGTGGAGGTTGGAGAGCACCATACGTATGCGGGAAGTCCCTT  
CGATTCTGGTGGACGCCCTGCATCAGTGGGCAACTGCCATTTTCGAGAAGACACTGTAGG  
TGCATCTAATGATTACCTCTGACTACAATGATAAATTCATCCAAACCGAAGTTTTCCGAC  
ATGTCTGAAATTAAGTAGATAAATGTAAAGCATGACAGGCACCCACAAGTGGTCACGAA  
GGCACCTTAGATTCGTCTGGAAACTTCTCTTTTCCAATTTATATTTTCATCTACTGGTGAT  
GACGGTGTGATGAGGTTACAGTCGACTCATTACTTCTTATTCCCGGATATGCAACGACT  
GCATTCCTTGGTAGGGCAACTACAAGAAGTCTTGCATGGGATACATATGATGGCGTAATT  
AAAGTTTGGGACGCAACGGAATGGGGAATTCTTGGAAAGTGAGCAAGAATCTCAGGTAAT  
GGTTGATCAGTTACAAATGTAGGTGGATATACTATCCATACATGTACAAGAGGTGGAGCG  
TTAACGATTGATGGAGAACGACCTGTGATGTCCTTTGCGTGCGTTGTGGTGCAGGATGTT  
GGATCGACTGATGCTTGTGCTAACTCAGGACTAACTTACGGAGGTCCACGTGGTGGAGCA  
AGTGGTTAGGTTCAAGTAGCAGGTATGCTTCTCACACCTGGATGTAATCCAATTATTTTT  
TGAGGTGCCGGGAATCGTTATCAGTCGGGCGAAAACCCCTGGTCAAATTTGTTTCGACCTCC  
ACATTCAATGCACTTGTATCATAACGGTTCGAACATGCGGGGCCGAGGTCTGGTAATAGA  
CCATGTTGTCCTGGTGGAGCTGGAGGTGGAGCAGGAGGAGGTTCGAGGTTACCTTGTCCA  
GGCGGTTCTGTACAACAATCTGGTTCACCTGGTCAAGTGTGCTTCTAATGGACATGGATTT  
CCTGGTGGTCTACTACTAACGCAACATGTTAATCTGGTCTGGTGGAGTAGGGGCAGGA  
GGAGCTGGTTCGAGTGCTGGAAATGATCGTCAGGCACCTGTTGGAAATGGAAGATATAAA  
GTAAATTGTGTAAGTAATACACCCTACTTAGGCGGCGGAGGAGGTGGCGGTGGTCATCAA  
GATGCAGGTCGTAGAGTTAACGGAGGTGCTGGTGCCGAGGTACGGTGGTGGTGGTCTTCT  
AACCGTCCGAATCATAACTATGGTGGTGCAGGTTACCTGATCAAGGTGGCGGTGGCGGA  
GGAGGTGCAGGATATCATTGTCCAGATGGGTCCGGTGTAAATGGCGATAGTGGTGGTTCGG  
ATTGTGAGATAACCAGACACTCTAATTCTGCAAAGTGGATCGCATCCAACCTTAGCGCTCTT



CTAAATTTGCATCGGTTCAATACGAGATTAAGAATGAACTCGCCCGCAAAGTCACAGCA  
TATATTGAACACAATAGGAATTCCTGTTTCTTCATGGGAACATGTAATTAGTTGATAGAA  
ATGATAATTTTGGATTAGCAGTCAACGTCAGAACTCTACAAGGGGCGTAAACCTGAGTGAC  
CCCAGGTATATCATGTGGTGTACCTTTGCAGCATAATCATATAAGGACTCTCATATTA  
TCTTCCCATATCACGGTAATCATTAGCAGATTCTTTGATAACTGTTGCAGAGAAACGTC  
AACTCCCCTAGTCTCTTAACCCGATTGACTATTTATTTTGCTGCACCGTTACGAGGATC  
AAACAAGATGGATCTATTTCTAATGGTCTAGGGTCTGCTTCGGATCTACCTTGATAGAT  
TGAAATTATTTTCCGTCAGCGATCATATCTGCTCCTTCAAATGATGTTGTAGGTCTAGT  
CCTTTCCATATAACAACCGAGATATGTTATCTTGGACAGGTCCGTGTTATAAACGATACAA  
TGGTCGTTTTGTATTGTCACGAGGGTTCATCGTGGTGCAGAAGATTTGCTGCTCCAATCGA  
CGTACCTGCAACACTTGATACAGGTTCTATGAATAAGTTTACATCACGCGGTGACACAGT  
CAAACAGTAATAGTGTGGAACGCAATTCAGAAAAACCCCCATATAAACAAACGTTCTT  
ACTCCCTGTTACTTCAACTCGATTGAGACTATATTGTGCAACGTTGGTCTTGTGTTTGT  
TTGTAAGGTGAAAGCAAATCTGCGTTTGCATCACACTCACCAAGCCAAAAAAGTGATCC  
TCCTTCATGTAAGTCTTTACCGGTGTAAGTAATTGATTGTATATTACTCCAGTGTCATA  
TATTGATATGGGTATTTGCTCGCCATAAGATCCTAAACCCATAACTTTACCTGCATCGAG  
TTCATGAGACCCAACCTGCCATGGATGATTTTGAATGCGCTACGCTCACCAAGATTACT  
AGAGATATGAGTCAAAGCAAGTTTGTGTTAATATTCAAAGGGAACAGCAACGTGTCTATC  
TACAACTGTAAAAGCAACAGGATTTGGTGCTCAAAGGTCTTAGATAATACTGTCCCATA  
AGTGGCAGATTGACACAGAGCTACTGCAAGAGCTACACCGGATCCCATTCCGACTTTTAC  
AATACAGATTGAATCATGAAATCCAGAGTTGAAAAAGTGTGTGCTGCTTGGAGTTTATG  
ATGTGATCGTGATGGATAATGATCCTCAGTGACATACTTATTTTATTTTCGTCCTACATA  
TAGAGTATATGGCTCATCAGCCATGGAACCGTCAGCAGGTGTCAACATGCCTACACCTGC  
AATACAAGTATTATAAGGGTTGAAGGTGTCAACGTCAGTCAAACGTTGACATGAAAAGGC  
ATCATACTTTCTATTAGATAATCTTTCATTCTCAAGGTGGTAGACAATTTCCGCCATTTG  
ACGTACAGTAGTAGAGGAATTATGCAGTATACTAACACCTAAATTTGTCATAGGATTTCT  
TGAATCCTTATACATATATTATAACATGATTTTATAATTATGTCATTTAATAAAGTGTGG  
TATGAGACCGATATTCCAGAGGAATTTGTAAGTCTCATAGAGAGAGAGTGAAGCCGTAT  
GGTGATATATTTAAGGTGCGAGAGTGAAGAGAAGGAGAGATGTTTGTACAAGGGATAGT  
CAAACATCTTGGATTCCGGCAGCTAATTGGCTCGCACGATTCTGTATGTCTGATATATTT  
AAGTCAAAGAGATATAACTTTATGTATGATATAGATGGTATTGTTTCCAATAGAATCCAA  
TATACAGCATATGATCAAGGCCGATTTGATAATTGGCGGCAAGTCGCAGAGCACACTGCT  
GCAGACGAAAACGGTATGTTTAGTAAATTGTGATTTACTTTACAACCCTCGTGTTCTGAT  
GACTCTCAAGGTGGTAATATTTAAACGAAAAACACTGATGAAGAGGTCTGTCTAGTGCCT  
TGACGTAGATGTACATATATTGTGTTTGAATAAGAACTGCTCATTGAGCCACAGAGGTT  
AGTGGTGGTATTCGTAAGACTCTGGTAAGGTGGGTAATTGGACCGAGGTGGCGATGATAC  
ATTAGAATGATTGGAGTCATTTCAACTGAAGTATTTGGCCATTGATCACCTGTTAGTTG  
AAGAGCCCCCTCTTGAACGAAGAAAATTTGGATATGATAAAAATGCCAGCATGGAAAATG  
TGTCTTAAGAAGGACAAGTTCCAAATAGTCTTGCACGATACAATCACCTGAAGTCTAAAA  
TATTATACAAAGGTGTTCAACCAAAAAATGAACCTATCTTAGGGCAGAAGTTATAACCAA  
CAATTTGCTCCGATAGATTTTATTTCAAGGGTCAAGAATTAAGAAACATCATGAGAGAC  
CGGCATGTGTAACCAGTGTCTCAAGGAATATCAGCACTAGTGCAACTATACCATGGCCAA  
TATAATATTAACCTCCTAACGGTGATATTAAGGAGTTTTACACAAATCCTGGTGATGCTG  
TATTATCTAAGGGTATTGAGTTAGAACATTGGAGACAATTTAAAAGATACGCCAAAAG  
TTTACTATCACCAAATTTTCGTGCACCTTGTAGAGGCAGAGAGATTCCACGCCCAATATA  
CTGCTGAAACTAAGTGCTAAATAACTACAGTACAACCTAACTGAACATGAAGAAGGTCAC  
ATCACGCTAGGATAAATGATGATAATGTTGTGCGAGAGAGTAGAAACATCTGACGACTTTT  
ATGAACGCACTGACACAGATGTACTCGATGAACAACATGCGCTCACAACCTCTGAGATAGT  
TTTTTGGAGCCACAACCTAATTGGGTGAACACCACATACAATGCCGACAGTCGTAGTAGGC  
TTGCAGGTGTGGGGGATATATATCGTCAAGACTTAGATAAGTTTGTATCCGCAAACCAG  
GAGGTTTACTCATAAGCTATAAATGAGGAAACCCACAGAGAGAACCCCTATACCGA  
TGCCCTCCGCTAACGAACATCGGACTTGAAGTGGGATGAAACAACCTAAAACATGGGAAG  
AACAAAATGAATGAAAAAAGTGTATCTATTTGTCGCTTTTGTATGTAGCAATTAATTTATT  
TAGAACTCCTGCTAACTGGACTCTAGCTGATGAAACATTTAATTGGAAAGACGGCAGACC  
TAGCGCAACTATGGAAGAAGTTGAAGTTTCTCTAAGCAAATAAATGAATATGAAGCGAG  
TCTTCTTATATTCTGTAAATAGAACATCAAGAAGAGTAATCCGATACATGTCAAGATCC  
CGAATTTATCGCGTGAATTATAAGCAAGATTCTGAAGATAGCGGTGTACAGGTCCGAGG

AGGGAATAAGCTAGGAGAAAGGATAGGTGGTAAAGGTGGTGTAGTTCCTGAGTAATTTGT  
GGGTGTGTATTTTTGTCATTACAGATTGAATGACAAACAAGACTTCCAACCTGAGGTTGA  
CAATGCGGGTATTGGTTGTTGGTTAGATTGCCTCGAACCACGCATATTTGATATATGTCC  
CAGTTTACCACGTAGGCAGTAGCATTGATGGAAACGAGAACACTTCCATAACTTAATGG  
CATAATAGACCAAGTTAAATAAATGATTGTAGATGCTGTAGATGCTAAAAACGTCAAGTT  
AGCATCTGAATGTACAGTCTACGGGGAAGAAGCAACATATCATAACGATGCATGAACACAA  
CACTAACAAAGATATTTGTAGTGATATATACTTTGATGTAGGAGAAGAAGTTTCCGTGC  
AAAAAAGGATCTTTTTATGTTTTCTTGGACTGAGTAAACTACTTCGGCCAAGTGTAGG  
AGGCGTTTTGAGATTTCCCTCAACTCTTCTCACGGTGCATACACTCAGAAAAGTAAAT  
GAGACTTAGATTAAATCTTGCTTCTACACATGAAACAAATTTGTAGTAATGAGTTCTACT  
ATCAATATAGATTGCCTGACTTCGATACTCTTAACGAAATGTTAGACGCAGCTTAGCACT  
TTGATGATTACAGATTACACACGGGGCGACCTATGTATAAATGTACGCGAATCATACAATG  
TCAAAGATTCCCTTGATATTATAGTCGTTCTAATACTTTTATCTCTGGTGATCTTAATG  
TTAAATTCATGCTGACTTTTTCAAGCCTTGGTTGAACGGATATAATCGGGGTGGAATTC  
AAAAGATACATTATCATGTTGATTGTGACATTGCAGGAGTGGTATCTTTAAGTGATCGTG  
AAGATTTCTCAAATTTTGTTCGGGGAGGTTCCCCCTACATCATTTACTAATCCTTGA  
TTAAGATACGGACTAAGATGGAGTTATCTAATATATATTATCCAGACGTGAAGGCGCGTG  
AGTTTTTGTGTTTCCCTCACACAGGTTATATGGTGTTCCTCGTCATAACTCTGTGTCAA  
TTAGAAAGAATCTTTCTTTAATGTTTCGAGTGACTAATGTTGAATGAAGTGTATCCAAC  
GATAATTTTTTGTATGATGGCATTGGAATGGTTCATGTCATTGCATCAATCTTTTTT  
CCTTCAGATGGATCAGAGTGTGAGGATAGAATGATTATAATTATACCAGAACAACTCAT  
GTTCCGTATAATCATAATCTTCCTTATGATGTGGCAGTCTATCTAAAGAAAGTCCAAGCA  
AACGTGACTACAGAGGGGATGATGTACGACCCTAAACCATTTCTAATAATAGTCATTGC  
ACAGAGTGCACAGCGCCAATCTAGCACCCAAAACACCCTGATTCTGATGAACACGTTTTG  
ACATCTATTCTATACTTGGATGATAACTTCACAGGTGGAAATCCTATTGTTGAAGGTGAA  
AAAATCCCACCAAAAAATGGAAGTGTTGACCCCTGAAAGGAGAGTTAGCATATGGACCT  
GAAGAAGTCACAGAGGGTGATCGCTCTGCTATCTCGGTATCGTGTA AAAATCAAATAGGA  
GTAAACAAATATAGATGATACTAGATTGATTCCCTCCAACAATGTGCATGGGTCGTTTGG  
AATTATCCCCCAAGATCGTGCAAATTTATCTCCAGTAAACTTGGTAGATACAGAGATC  
ATTGTGCATGGGTCACTCCACATATACCTATACTTGATTGGGAACAAAGTATTCAAGTTG  
AAGTAAGAAAGTATGTTGAATAGTACGTTTATATAGACATAGGTTTGAGTAGAGAATATA  
ATATGCAATGTCATGGTGCTTGGTTGCTCAGAATTGATAAAGGTGATTACACAGAAATAT  
ATCCTGAGTCTAATTCATTATAAGTGGTGGATATTATTAGTGAGTCAGTGCCCAAGAAG  
GACCTATTCAATTCTATGAAGATAAATATCGATTGTTTGGTAGATCTTCAAAGTATTAA  
ATATCACTGAACCTAGTAATAGAAATTCTCATAGAGTACACGTAGAATGTAAGAATCGAA  
CGATGCTCTTCTTATACTGTCGTCTAAAGCATAGCGATGCACCCATTCTATTCAAAGAAC  
CTAGAGTCTTATTAGCATTGACTACACATTAAGGGGGTATTTGATCGAATAGTGAACA  
AGGGGAACATATGTGCCAGTTATATGAACGGTCCACAGGCTCGCCATTTCAAAAAAATTGT  
GTTAGACTAATGAGCTATCGCAAACAGAACAAATGCCACATTTTACTCTTATCTGCAGATA  
CGAAGATGAGACCCTGACAAAAAATGCATTTGATGCCACATTCATGATGATGTTGTGCGA  
TAGCACTGCGGAGTTCCTACATGGAGTAGCCTACTGTTTCGAGGATCTATCAACGCAATT  
GTAACCAACTCAGGGAACCTGATACTACTACAATTAGTTTACTATGTTACATCCTCATA  
GTGGGTAAAGCCATTTCCGGCGAGGTGGTATGGCACAAGGTTACTACTCCCATGGTAAATCA  
ATCTGAAAGAAGAGACAAACAAAATTAGTCGTTATAAAAATCGAACATGATAACAGAAGG  
GAATTA AAAAATGAAAGATCAAAGCGTAATCCGACCTAATGAAAGTTCTGATGTAAAATG  
TCAGTGAGCATTAGACCTCTTACCGATTCACTTAAGAGACCAGACCAGATTGGCGTAG  
CTGTGCGTATAATCAGGATAGTTTCAATGAACTGATGCAAGTAAGATAACACGGTGTGAA  
ATATATTTCAACGTTGAAATGAACACAGAAGTTTGGAGACCCCGATGAATGCGATACAAT  
AGAACAAGAGAAGTTGGAACCCTCATCCCTTTATCTTAATGGAAATAAATGTATCTTAA  
ATCTTCTATATTAGCTTAATTGCAACCAGAAGTATTGAGAGAACCCTCTATTGTTATACGA  
TTCAAATTTACAGAAACGATACTATGGGGATAAAATTATTTATGAATCTCGTTATTAAAG  
TAAGATGATAGAAATTCAGAATAGGGTTGCACAACGACGTGTTGAGGTGTTATACACATA  
GTGTTTCGTAAAGAAATTAACCTTTGAAGAACGCAATCAAGAACGGTCAGGATTACCGA  
TTTCTATACTGCGAAGGGGAGTTTCAAATACTCAAGAAGAACTTAGGCAACACAAGGAG  
TGGAGGAGATCGACAATGCTAGCACAGATGCGGGGCGGAGCATAACGATGTGTGACAGTTA  
AGTTAGTGACAAACCCTTAGTGACGTTTCATCTAATATCGCTGATATTACGAATGTAGAA  
ACAAGCCACGTAAAACCTTCCAGGAAACGGATATACAGCGCAATACGTCTTTATGTCCA

ACTTAAGTAGTTGAGTTTTGTTGGACCCTCCTATTAATTTTLAGACATGGAAGTCCAAGC  
ACGTGTTAACAATTTAAGGACAATGTAACCTCGTGAGAGAACTGGTCTATGAAATAAAGA  
ATGTGCCGCTGTAAAGAAGAGTGGTTATACCCCATCATTTGAGTTATCTTATGGGCTTAA  
GGTAGTGGATGCTGCTATTATTATAACGACTGGCAACAATACTATTTGCTGTTCTGATAT  
TCTCAGAATTATGAGACATCATAATTATAAACTATTTGTTCCGGTGCTACGATTAAGTAGG  
AGACCAAAAAATATATCCCACCCAATCTGAGTTTTTTTATTGAACCTAACACTATCTAAC  
TTTAGGCGGATACATTGATGATGAAACCCTGGAATTGTTTGTAAACCATCTTAAGAGTAT  
TCCAAAGGCGGCAAAAGCAGGAGACGCTTCTAAATTAGTTAGAGACAATTTGCAAGAAAG  
TGTATTATCCTATAAAGCATTATATAGCATCAATCCAGAGGTAGATAGTGAGAAACCAAC  
AATAGTTCAATGTTCAATAAAACATGACGAAGTAATTGCCAGTGGTGTAGAATATGGACA  
GAAAGATATATCTTTATTCCTCTAATCTTAAAAACGTACGTTTCCGAAATGAGAGCATTG  
TGCCGTCCATAAAATACACCTCAGAAAGATATTAAGATGACCCCAAGATTATCTCGCTAAC  
GGAAGAATTAATCATATAAATCCTAACGGTAGAACTCTTGAACCTACTAGAGGAGAAGGT  
TTGATTTAAGATAATTATGATACGGACAATCAAGAATTGTGTGAACTAGGGGAGGGAACT  
GATTTGTTACAAAATCAAAAGAAAATTAATTGGATTATTATTAATCCGTGTTGGTCTATG  
GTGCAACCATTTCTATTGCATGTGATGGAAGTGGCGGACAATACGGTATATTGAACCACG  
AGCAATCATTATACTACTAACTTAGAAGAAAAGATATGAGAGCATATTACTTTGCAATT  
AACGAGATATACTGTCCCCACACCTACAAAACCCTGGCCACAACCTAGGGTTACAACCTA  
GCTGCTGTTAATACAAAGAGAGATTATAAAGGAACTATTAAGCTTTCTTGTGCGTCGGAT  
CTTTCCTGATATAAAATCACGACATCCTTGATTCCATCGTACAAATGATGTTTAGCGCCT  
AATTAGGGTATTACAGATTAATTAATGAATACAACGCAGAGACGGAAGCAACGTCTCG  
ATATTGCTGATTCATACTATCTTGAGAATATTCTTTCAATAGATGAGTGCCATGATGAGT  
GGGAAGTTTGCCCAATACAAAGAGATCACCAATGGAGAGCGAGTACACGAAAGCACAGAG  
ATAAGGCAACTACACTAGAATATTCACACTTAGAAGTAGATGGCGCAGTATAAACGAAAG  
ATTGGTACGACCCAGAAACGAAAAAGACATACACAGCAAGAAATATATTTAAAACCTAGCG  
GACATACTAGAGACGGACACTGTTGGTCCGATGATCCTCAAGTTTGGCCATACTGACACG  
TTCGTCTCAACTATAAGGAACACGAAACAATTATATCCTGATACAAAGATTCCAGGATTC  
ACGACAAAGCAGATGACGCGGAAATTGAATATGATAGGGTAGATGATGCGTATCGTGGTG  
TATATCGAGAGATGAATATTGTAACCAAAGATTGTAGTTTCGCTTAAAGTTGAACCATTAC  
AACACGAAGCTTTACTATGTTTTTCTAACAAGAATAACCTCGCGATGAAGACAAGAACGG  
TTTACCACAAGATGTGGGTAGTGAGATTGAAGACGCTGTTTTATAGGTCCGTAAAGTAT  
ATCTTGATTCTGAATTTAATAGTTGGATGCAAACAACGCTGCCACACTATAACCCATTAA  
CTTGGGCATATCTTGTTTCTTATATCAAGTGTAAGCAAGTTCAAGAATAACTAGAAAAAC  
TAAAGGAATTGATATTCAGAGGGGCTAACTATGAAGTGCTAGTAGACCCCAACAATGGAC  
GTGAGGATCGATTTAGTCCTCTAAATGTAGCATGGAGAGAGTGGGAACAACCTCAAAGTGG  
GCACGTACAGGCTTTGGTCAGACCGGAGCAATGAACGGAAGTTTTCCCTTTATCAATATGA  
AATCATTTCCACTAGTGTTTATTGATCAATTTATTGAAGGTAAGTATCTCAGTAAGGATG  
GTAGCATGAGAGGTGATATCTGGAACCTACTTAGAAGGCTTGCAACTTGCTCGGGAAG  
TAACACATGGTAGGACAGCACACCGTTGAGTATGCGACATTACCAATAGGGGTGTTCC  
CCGAAGACGGAGACTAGACGAGTAAAGGTAGTGCCACACCCCTGGACAGAGGGGTTTTT  
TTATACTATACTGATTGGATGGAAATGATGTTATGCAACTACGTCCAAACAAAGCAAGCG  
CCTTCAACCCTACGCGGTAGATTTACGAGGTTGAAACATAGTTCCCTGCTGGTGGTGATA  
AAACGTTACACGATAGCTGATGCTCTTAAGCGATTCAAGTGACCAGGTGCACACACTA  
AAGTAGTAGTTGCACCACGTATCTTACTTACTAATCTATATCGCGAAGATTTTCCAGAGC  
GTAATCTAGATGGATATCATAATCACGGTTTTGATGTTGCTCATGTTCTCCCAGGCGAAA  
CTCACCACATCAGCACAACAAGTCTATTTGGACTCAATACTTGGGTTTACATCAGCAAAA  
AGCACATTTGATATTTACCCCATATCATTCACTTAGAAACGTCGTCAATGCAGTTGATG  
TAGGAGTTGATAGCATTTTCTTTGATGAGGCACATAATGGTTGTGGGAAGCAGTTCCATA  
TTGATCTACCCGGAATAGTCCAGTATGATAAAAGGAGTTACTTCTTTTCAGCTACACCTC  
GCATAGGTCATGGTGTATCACTTGACCGAGGCGGAACAACACCTGAGTATATGGTGGTC  
GATTGGAGAAGGTTCTCGCACAGGAACTTGCAAAGTCAGGTGCTATTGTTCCCCCTTAGA  
TTGTTCTCTTTGAGACTCTTAACTCAACCCATCTTGACAAGCGTAATGCTCATGAGATTG  
ATGCTGAAAACCTCAGAGATATAATCGGTACATTTGATAATAGTCAGAACAACGAGATAC  
TAGTTGCAGCACCTAGTCCAAGAGTCTTGTGTAAGATAACAGTAAATACTCATATTCTTG  
AGTATTTCCAGCACAAATGGATATGACGTAATGCACACCACATCAAAGTTGGCCGATATCA  
TCAGTGGCACACAAGTTGGAAGCGAAGAGTTTTTTGACACACACACTCAGTGGGGTCCGG  
ACGATACTAAAAGATTTCTTATTGTCCACTATACAATATTTTCTTAAGGTATCAATGCTC

CAGGTTTGTCTCGTACAGTTTTGTTTAGAAACATACCTATAATTGAAATGGCACAAAGTA  
GTGGTCGTAGCATCCGAGTTCATTCTGATGATCGTAAATCAGTTGGTGTGGTCTCATT  
CTGCAGGTCAATTGCACTTATACAAAAACAATTTGTAAAAGCAAGTGTTCCTACTGGAC  
AAAACCGTGGAGCTGCAATTGGTAGAACATTGCAGAATGTAGTTTACCAAATCCTTGTG  
ATGGTGTTCCTCCTATCGCTTATGGCTAATGAAATTAACCACAAAAAGATACAATGTT  
ATATTGGGGTTGTAGGAATTCAGTTTCCACTATACATGAGAGAGCCCAGATCTGTGCGAC  
ATCCCCCGTTATTATGGACTGATGGAGTATGGTGGAGAGTCATCATAAATAGAACACGA  
ACAAACACCCGAAGAATATATTGAAGAAGTTGTAAAAGTATTGAGAGCAGTTAAGAATGT  
TTTTGGAGATGATGGCACTCTATACTTAAACATAGGGGATAGTTCTTATAGCTTTAGCCC  
TGGTAAAGGTATATGATAGCCTTAACAAACAGTATTTACAACCTATAACAAGATATAACTGA  
TCAATCGAACGAACGGGGTAACAAAATAAAAAGGATTAAGAGAGAAAGACCTTATCGGTAT  
TCCTGGGTGTGTCAGCAGTTTCATTACGAAAAGATGGGTAGGATTTTAGGCCAGTTATTAT  
ATGGTATTAACCTAATCCAATGCCAGAAAGTGTAAGAGATAGATGCACCAAAGTAAATGA  
ATATATTTTCTTATTCTCTAAGAACAAGAAATATTAGTATGACAATGTAGCACTGAAAGA  
ACCTGCAAAAGACTGGGGGACTAGTGATAGAACTAAAGGAAAGTATCCAAAGATAGGAAC  
TTTATTAAGTCCGTATACTGGAATCAATAAGAGTTCATCCTTCAAAGAATAAAAAGATAAGT  
ATGGTCAGTAACTAATAAACGATATTAGGGAACTCACATTGAAGTATTTCCCCCTGACTT  
TATTAGACCTTGGATCCAACCAGGGAGAAAGAAAGGAGATATCATTCTTGACCCATTTAT  
AGGTAGTCGCACTACAGCAAATGTATCTAATTAATAAGATAGGCATTATATTGGTTGTGA  
ACTGCATTTAGAATATAAGTCACTGGTAGATTCAAGATTACCAAACACAGCTCTTACGGG  
CTTTCTGGAGTGTGTTTCGTTAACTTACTCCACACTATCGGTTGCATATGACGCTATAGTC  
AATTATAGAATATTCATAGTACTGATGTTAATTATGTCAACAGATGCTAGAATCTCACTC  
ACACTTTCCGATAAAAACCTTTTGTTTAATTTATCGTCATTTGCACGGTTATCCTGATTTT  
TTGGGTGTAGTCTAACTGACCCGTATAAAAAACTAGAGCCGGTTATGTATCTCCTCCTA  
GGTGGATCCATGAGTTCATGTTGGACAGATAATGAGTGTGATTTCCAGAAAAAGTAATTT  
GTCAAACGGGACCATAAACCTACTTACTACTCAGAGACAGGAGAGTCAGCACCCCCTAGA  
GTCGTACACTCACATACAGAGTTCCTAGATCCTTGTGCCCACTGTTGTGGCGAATTCGGT  
CATGTCTAGGGCAAGGGAGGGTGTTCGCTTATGAGACTACAGACCGCACTTTAGTTGAG  
ATGCCAGAGGAGATAGCAGAATGAAATTTCTAGTAAAAGACATTGAACTCTATTTAAGTG  
ATGCTGGGGACGGAGACCCCGATTTACAATTCACAGAACAATAAGAGTACGTAAGGCACC  
ACAGATGCCTAGGTAGATTGACAGTAAGAAATGAAAAACATTTGTAATAAATGATTTTCG  
ATTTTCATAGGTTATCCTGTAGAGATGATTGACACCGAGGTAATAGCCTGACAACCTACCC  
ACTTCCGAAGGTGCGACAAAGACGTGGTATTGAAATTATGCTGATGAGAGGACAGCAAAG  
AACATTTTGGATAGAGGACGTGAAAAAGATACACCCAGATTTTCCGTTTCGACAGTATAGT  
GTATGACACCCACAGTCGAGGCACTTAGGTCCCCCATCCCCACTATCATACCATATGCT  
CAGAATAGGTGATCAAACAAAAGCAACACATTGCATTCTACTAGTTCCCCAAATGCCCTC  
TACTCATTTTATGGTATTTTCGGAATCGTAATCGCACTGGTCCACTTTACGTTGTTTCAGG  
TAAAGTATTTCAATAGTCATTTCCACGAGGATATCAACTTATGCTAGATTTTTTATCAGA  
AGTCTTAGGGGATTTTTGCTCTGAGAATGATCTACCAATCATGAGCGCAGAGGACCTATT  
ATATGTACCTGCATGTGCAGACATCAATATTTACAAACCCCAAAAAAATTGGTTGATCCA  
TTAAATTGAACTCTGGAACAATATCCAAGAAAATTCTTAATGAGATCTTTAGCTTGAAAA  
CGCTAGAACCTGACATTGCAATTACTCAAATGTCTCTGCACTTGTTTAGTGTGATGCGGA  
CCATAGTCAAAGAGGACCGGCATCTAGATGCCCTATCAATTTACTAGGAGAGGGTAGCAA  
ATGGCAAAGACCTTCAGGAAGTGGATTCAGAGTTCATTTTATCCCTAACACAACCTATTG  
GCGATTTGAGATGTGAGGTGTGACAGTACGTTTTGTGTCACATAGGATCCCGATTCATAT  
CCCTTACTCATTATAAACAAGACAGGAACAAAACAACACCAAGAGAAGAAACCAGTATCA  
TACTAATGGAAGTATTAGTGACGCACTTAAGTATTGTGATGATCTTGATGACCCTGCAT  
TTGTGATGTATGATGACACGAGAGAGGCATTTGAAAAAGAAGTATCCTATTCTATGGAGT  
TTTAAATAATGAATTAACGACAAGAGCAAACCTTGAAAAATTTGGCGAGACTCATAATG  
AGTTGAATGAACTCAGATACCATTATGTTGACAGATATGTTCGAAAATATGTCAACTAAGG  
ACTTACTCCAGAATATCTTTCATGATTTGCGCGATTTTGTTCACAATCAACCAGATGTAG  
AATTTGGTGTGATGAAGCGGAAAACCTATTGTGAAGATCCCTTTGATGATCTTCTTACTGACA  
GCAAAGAGCATTCAAACAGAAAATTTAAAAAACCTTTAGAAGAAAGAAGAAACAATTACT  
ACATTAGGACTAAAGAATAGACTTATTAAGTTTGGCTTAGAGAATAATCTACATGCTTCA  
TTTGTGCATCAAACAGAGGGATTAACCTATGTTCACTTGGCAGTAGCAGGTGATTTTGAA  
GAATGATAAACACATAACTAAAAAAAGGACAATTTAGAGAAATACTTGTGCTGTGAGGG  
ACTTACGTGATGATTACAGAGATGACTTTAACTTCATAAGGAAGTACCCGGTACAGCAC

AGTTAGATTTGTTTGTAGTGGGGTTGATGAACTGGCAAGGATTGATACGACAATCAGCAAAC  
AATTTAAACAAGTAAACCTCAATTCGCCAGATTGGCAGTGACTGTTAATTATCGGGTCACA  
CACTACTAACCATGAGTTAGAAAATACCTATAATAAGAATAAGCAACCAAAGAACAAT  
AATGATTCCAGAACCATTGCCAGTTCAAATGAGTGGAGGTCATCTCAACAATAAGGTA  
AGTCTATGATCTCGTCTGAGACATGAGTTTTCAACTCAGACCCGAACAGATCGAAGTGTT  
CCAGAAAATTCAATGTACAGAAGTCTACGGAGGATTTTTTCTACTGAAATCAGTGAGATCA  
AAAGTTACCATCGTTTTTTCAGATTAATAAAAGCGACGCCGACACCAAAGAAGAGCATAGC  
CAAAGTGAAAAGATTAGGATGAAGAATGTTATGGCATATACCTAAACGATCATGAGAGC  
ACAATGATCGAAGAGGAAGAACCAATTATTCTTTATCAGGGCGCATAATGGAAACTTACT  
TAAAGTGCTTTGAGCATAACCCAGAGGACGAGCATTACAGATTACTAACAAAATATGGG  
TAGCAGGTGATGGGGCAGGGATTGAACTACGTCAAGATGCAGATTTGTCAATCCGCATAT  
ATGATTATGACTATGATGGGGCATATGATGGGGAAGAGGATGACAGTTAAGCAAGTGTC  
CGTCCGTTTACCGTCCCCTACTATTATCCTTTATAGTAATGGTAATTAAGCATTCTTATT  
ATGATACAGTATTTAATTGAAATCCCAGAGACACCGATCAGAGAACCAGTGAGCGGTTGT  
TGATAGGACATATTATAAGCTATCACACAAAAGAGCGGTCATGCGGTATTACTATGCGAT  
ACTAAGAATGGCACTAGGTTGATACCGGGCATTTTTACAGATAAGGATTACTCAATTCAT  
TCAAAGGAGATTTTTTAAAATGGGTGGTAAATCTGACATGTGTGCTAATTTTGATCAGACT  
TATATGCAAGAAATGGAATGCCCGAAAGGTTCCGATCATTACATTAAGACTAACGACCC  
GAGCTTTATTACTATTGCGATAGTCCAACAGAATAGGATTATGATTGGAGAGACGATTAT  
CGTCTTGCTGATTGTATGTGCGAAAGCTGTTTTGATATAGCAATCTCAGAATAGAAAATC  
ACATGGAAGTGTGCCAGTTGTGAAAGTGTGACATAATCTCCCTATTCTATAACATTTACC  
TTTATAAGATTAGTATCTTCAATAAACGTCATGCACAACCTTTAAAGTATTTGAGAAAT  
CGTGAATCATTCCACATCGGATCACACCCAGATCTCTTATATACTATTGAAGGATTACCT  
GGTAAAGAGTTAGCACTTGATACACTCACATAGCTAGAATAATGGGCCTCCTCTGCCGGT  
CAAGTAAACTGGGGAGAAGCATATAGTTTCGATAATGAGAGAGTCAGAGATTTTGTTTAC  
GCTAGTAGGTCAGTAGCATGAGGAAATTTAAAATTCTATAGAGGTTTTTAAAGTTATAATG  
ATATAACGATCGAAGCGAATACCGTAGAGGCAGCGATCGATCATTATCATCGTGAACAAT  
TTCCCGATAGTGCGGTACAGCAAAGGGCTAAGATTTGCGATTTTGAATTCAGAGATATAC  
GTCCAGAGTGATGGATGATTTAACAGGAAAAGAAAAGTTGCTCATTTCAGTTGACTGAAGA  
TAAAACCTAGGAAACAATTGCCCATCACTTGATGACGAACTAATTGGAATATACCAGAA  
TTTTGACCCTATCGCATACGAGGACATATTTGAACAATTCATGGACAGTTCATATGTTAT  
CACATAGTTTGAACATTCACATTATGATGGCCTATAATAGTAGGTTAAACAAAGCGGCTT  
TATGAACAAGACTTATACATTCATAATGCCCACATGAGAGTCATCAATGTAATGCGCAC  
ATATGTTGACGAGTTGGTAAGCAATCCAAAATACAAAACCGATTTTGAATGTTTTTATGA  
CTATACTCATAGAGGCGGAGATCTATTCTTTGGCGAGTAAAATGTCAGTATCACATCAGG  
AGAACATTCGCGGAACTTGCAGCATGAGGCATGGAGAACTAAGCAAAGAGCATGTTA  
TTACATACGACCAACTTACACCGCTTGAGCAGAATCCAGACTTCTGTGTTCTACCAGAGT  
TCGAAGCAGAAGCAAGCAAAGTTCTAAGGAGTTGTGCCAGTAGGAATACGATCACATAC  
TTCCCCCATTCAACGCACCTATCCTTTATAATAAGAGTTTCAACAAACAAATCTACGAGC  
AGGACGAAGAAGCAAGCAGGTCAGCAATTTATTTAGGATTGGTCAGACCTCCTAATATCT  
AACCTAGTTGTAGGGGAGACAAAATTGCAATGAGGTGTGCCTTTAATGATTTTGTATC  
CCTCTCAACAAATATGGTCTAGTCTCAGATTATCTAGCATATAACAGGTCAAACACTTTC  
TATGGAGATTTTTTAAAATTACAACCTTGCGAATTTTTAGAGGAGTGACTAATGCAGTTGA  
ACATTATTCAACGTGAGAATTTTAAAGCGGGAACCGAACCGCCCCTGAAACAAATTTGACT  
ATACCGTTGTAGTCCAGATACTAATCTAGGTTATCATGCCCCCTATACAATGGATTCAG  
CAGTTGCAAATAAATGTGCAATGGAGTGGGCAAGCAACTACGGTCGGGCATCTGTAGAAG  
AGCGATGCCTAGAAACAGTATTTCGAGTGCGGTCTTGTGACAGATAGATTAGTCGCACAT  
GGTGACCCCATTTGTAACCTAATTTAGCGATATCATAATAGTATATCAAACAAACTTGTATA  
AAACATGACAATCTAAGAATACGAAAAATTTATATAAAACACGACTCATATGAACGGTCA  
TGATGTATCTGAAGAGGTAACATATAGAGTAATCCATAGTTTCCTAGAAGTTGACAATTT  
TCAAATGTTCCCTTGTCTTGTGCGAGACTGCTCAGAATTTGTAAAAGAGTAGGCAGAGTG  
GGTTTTTGTATGGGTGTTCTAAGGTCGATTTGCATGACGCTGATCTAGACATTGATAAACT  
AGACAGAATCATCAAACCTGAATACGGATACATCAGGGGAGTGTAATGGGACGAACCCCT  
AAACAACCTGAGTATATCTTCGCATATCTCAATTTCCACTATGGTGAGAATGAGCATATT  
CAAATGGGCATGATCTAACTTAATGCTCGTATATTCAGACCAGCAGCAAACCAACTACAG  
GAGATTCACAAAATGACCAGAGCAGAATACGCGTTAGTCTTTCAAGCATTTAAAAACCA  
TCGTCTTATATGACAGATGAGCAAGAAGCTATAAGCAAATATATTCTAGACGGTCTTTT

TTATCCCGAATTCGATAAACTAAAAGTAATCGAAGAGACCCGCATTAGCTTTACCACTTTT  
AAGAATTCCCGAAGATCTCGAAGAGGACACATCTGAAATTAACCCACTTACTTTTGGATA  
AGTCAACGTACCTTGAGACACTTTGATTAGGGGCACCGGGTTGGCCCAGGTGCGGGTTCG  
CCGACCTATAACTGTAGTAGAACAAACAAAGAAACCTTTTTATTATGAGCAAAGTCGAAG  
CTACTATGAATTCAATGACTCGCAACGCTAGAGCTTAATGAGAGGGCAATACTTGCCTA  
ATTACGATACTGATGGAGATTGCCTAGTTTATCTACATGCCAATCTTATGGCAACTGTAG  
CCGACTCATTTCATGGCAATCTTTGACGGTCGTTTTCAATCGAATACAATAAGTCTAGAC  
TCCTCGCACTGCTACACGAATTTAGACTACACACAGAAGTGGTCGTTAAAAACTTTCAAT  
AGTTTCTCAAAGTACATAAGACATTAGTTCCATTTAACACAAAGAGTCTAGTATAATGAC  
AGTAACGAAGGGATATGAAAAAATGTTCACTACCGTCCACCCTCTACGCTTTGGGAGAAC  
ATTCTGGATAGAGGCCGGAAACAACCTACGTTTCATGACCAACTTATAAAAATTGTGCTAC  
ACATAGGGAAAAATGGGATTGAGTTAGCGAGTGGAGAGACTTAGAAGGGGTTAACCTCGA  
TAAATTACTTGCTCTTCATAAAACTTCTCTAGAGTATAATAAATATTGTACGGAGGATAA  
AAGCTAGTGCAATATGTTCTAAACGAGTGTTTCGGAAGTGTGAAATTCATAAGCACGTT  
ACTCAGTTAGGAAAGGGAATCGAAGCCACCAATCAAGCGATTAAATCCTGTAACCTAACA  
GAGAACAAGCTTAGACAGAAACACTATATAGAGCTAGACCGGAAATGAATAAACAACCTC  
AATGACATTCAAGGACAATTCCAATATAATCCAGAACACCGCACATAGGGGATATAGGCA  
CATTTTCGAGGAGTGATGGGTTTTAATCACTTTTAAAGGTTTGGATTATATTACCTATTGCA  
TTCACCAGTATAAAAAAACTCAAGAAGACTGAAAACACTGCCGAAGAGCACACTCACAGG  
TCAATGTGCCCATCTACCGACATAAGTGGGGAATCATTGAAAGACCAGTGGAAAGTATGTG  
AGGATAACGACAAGAGAGTTAACGTCAGTGTTGTGGGATAGTTATCGGAATTTTGGATT  
AAACAGCGATGAAATAGAAATGCGGACATTAATTTAATATTGAAATAAATCTTAGTGTGT  
GTTTTATCTGTTCGGTTAACCTCTCAGAGTAATGCGCCCTTTCACGCATCTGAACAATTG  
TCAATTCTCTCGAGGATGTGCACAGAATTCCGGTTAGGGCGTGTTCATTATTGGGAGTTAT  
GCCTTATAATAACACAGTAAAGGTATAGGAAATCAACTCGTTGCCTTCAACTAAAAATAA  
AATGATCCACTCACTATAACAACGAAATGCATGTATTACTACGACAGTTCTCTAGTATATA  
CGCAACGCAGATTTATGTTTATGGTCTCAGAGTTGAGAGAGACGAATGCAGGGTACGGAA  
GAACCCGGATATAAGCGTATCTGTTTATCTCAAATCAATCGGTTATACTTGGGATTGTGT  
CCCTAGTTCTCAGTTAGGAGAGAGTTACCCTGGAATTACCCTATGCGATAATATAAGTA  
AATCGGAGCTTAGCCGAATGTAACACTGAGAACAGCTACTGATTCTTAAGAAGGCAGTCT  
TATAAGCCCTCTTAAAGTTGAAATCGTCGACTACCCTAACCACCAAAGATTCTCCAGAGT  
ACCTGAGTCATAAATTACTAGTTTCATTTACATCGGTATTAAAAAAACTTTGGAGAATATA  
AATTCCCCTAGAGGACGATCTAAAAACAACGAAAAATGTAGTGGTAGGCAAGAGCGGAT  
AGTATGGGCGAGTGAACGACCGATCAGGCTGGAAAGGTGTTTAGATAACAGAATGTGTAA  
ATGCGCGGGTCCTGCTGCATCTATCTACACTGTAATGTATAAGTACTCAGTATATTCACG  
ATGAAGGGATTGGTAAAGGAATCATCCACTACATAAGCAACTAATGACAGACTATACAT  
CAAGGGTTATGTCCACAAATTTACACCAATAATAGCGGAAGATGATTATGGAGACTGAC  
TACTCACGCTCCCCTATGAATTGTGTGAAGAGATGGGTTGGAAGTGGGAAATTTTACTAC  
GGTATGAACTGAATGAATACGGAAGAGGTTTTATGTTAAAGAAAGTTAACGACTGAAAAA  
GATCAAAAAGAAATTTCTACAGCCTGGAAATCTATTAATGGATGTTGACTAGCTCTCAAT  
ACACGGTGAGAGGCATTTGAGCAGCATGTTTCCGAAGTACCATAACCAGACAAAAGATAT  
GCCAAAGCAGAAGGTAAGAAGACTACCTAAATATCAACGGTAACTATGACCTGATAGAT  
AACCGTCTCAAGAACTACAACATGGTATGTAAAAGGACTGCTTGAGGACACACCCATAC  
GCGTAACTCTAATTCCTTAAGGATAATTACAGTTAGGCTAACAAATCCTCTGGCAGCACG  
GCAGGACTTGATCACTTACAGTCGATATCCTACTGCAACACTCCGAGCTAGTACCCATTA  
TTACCTACCTGCAAGAGAAGCTAACTGGTTCATCTATAAATTTCCGGAGTATGTCTGTA  
CACTAGTCAATAAATTTTTCAAACAGCAGGGGCATCTGGTAGGGCATTAAAGGATCATA  
GTGTATCAATAATAAATCTTGTAGATTAGCCTTTGATCATCCCGCTTCAGAACTCTCTTT  
TGACTTTGCAAACTCTGACGTATTTTTCTTACTTATATGATATGTCTGGTAAAGCGGT  
TCATATATAAACTCCTGCGTATTATGTTGAAGATGAGATTAAAACTACGAGTGGAGGATG  
TGGTACTCGGTATGCTGGTGATAATGAAACCACTTCAACTAATTGTCTCCCTTGCATGTG  
TCAGTTTACCGGTATCGCAGCGACGACAGTCCTTCAGTATAACCCTCCCACAGATGAAAC  
GGGCGAGCCGGACTGCCCTTTCCCCTTTATTCGGGTTTGGAAACCATCTAACATGAT  
CGTTTCAAGAATGATGCGCTATCCACCCAGATACCAATCGGGACGATGGACTTTGAGCT  
GGCAGACATGGGTTTCATCTATCTGTACTGATATATGGATTGAGAAGCAACCTCAAGGAAC  
GCCATCCCTTCCCCTGCAAGCAACAACCTGGGTAGTGAATGCTGTAGCAGGTTTCGAGGA  
TGTTTCAGATATATGACCAAAAATGGGCCACAGATGACATCTGGTTCCTCTAACTATTACAA

GAATGCAACTACGGGACTTAGGATAAAGCTTCGTATTGAACCGAATCGTCTTGATAATCG  
CACCATTAACGGAACTAATGGGGAAGTACTAGCGGAGGTTCTGAGCAATTGATCAGGATATCC  
AGTAGTTGATACATTTGAGCTAGCCTATGCACCTAGTCATACTAAGGGAAGGACAACACTAC  
ATTTCAATTACAAGTTAGGGTAAAAACAGCAGGACAAATCAATTCAATATCTAGTTCATC  
AGGTTTTGAACTACTGAGAGCGAATGATACGGTGATTGGACATATCATTACCCGCGTTTT  
CCACACAGATCAAGAAAACCTTCGAGTATCATGTTCGCATTCTTAGACGGAAACGGTAATAA  
TTTTGCAAAAAGATACTCAATATCCATTGAATAAGGCGCACGAAATCACCACAATATCAGG  
AGAAATCATTCCCGACCTCGAAATCTTGATTGGATAGTATAAATTTATCTATAAATCTAT  
GCAATTTGTCACCGCACCCGTAGATTTTGACGCACGTGACATTTATAACTCCATAAAATC  
ACCAGATGTTACACTTACAATGACAGATGGGCGTGTTCCAGGCTCGCCGTTTGTCAATGC  
AGGGTCTGGTCGGAATCAATTGAATGCAGAACCTGACCCTGTTGACACTACGCCAGTCAT  
TGAGAGTGGAGAAAACGCGGAACCGAAGGGTACGTTCTTTAATGGATTGCTCACGGCGTT  
AGAACTTACAATTGCAGGTAGCGGATATGACGCACATAATGCTCCAAAGGCATGGATTCCG  
CAATATGTCCAGGGAAGTTCCCAAATCTCAAGAGGATCGTGCCAAAGATGACTATACTGC  
CAACACTTCAAACCAAAAAGATATCCAAGTTTTGAATAATTTACCTTAAGAGGGGGGAGT  
TCCAGTCGGTGTAGACTAATTCGCGACTGATCCACCCGAAACTTAACAAAGTTAGACTCA  
ATTAGGTCTTACAGATAGTGACATAAAAGCAGTTTTTTCATGATAATGACGTAAACAGTTT  
ACCAATGGACCCTTCTACGTCTCCAGAAGTGTACAAACCGAATTTGCGTCTCGATATGC  
GATTTTTGCCGTCCAGGAATGGCAAACCTTCACTGTAAAGATAACTCGTATCTATATTA  
CACAGTCTCTGTCCGCAGAAGAGTTCAAAAACCTAGGGCAAACAGGCTATTCCGCTAGATC  
TTTGGATACTCTTCGTGACCCTACACAAAGTGAACAGTATGGTTTGAGCATTTTGAACGA  
TTCTGAACTTCACGACACCGCAAAAACCTTTATGAAAGTTGATAACTAGCAGAGGCGTGC  
CAATAGAGATGCGGTTTCATGATGCAATGACATAAAAAGTGGGTCCTGAGAATACAAAGTT  
TCAAAAATACTTAGTTGAGACTGTTCAAGGTCCTTTAGTCAATCTTACGGACGTAGACAC  
GGGGACTAAATATATGATGACACAGTTTAGTGCGGACCATACGTCAAAAAGTGATCTTAAA  
TGTTAGACTTGATATGCCACCAGTAAAGTCGGGTAATTCACAATTTACTTGTAACCCTCC  
TACACCTTCAACAGGTGGGACAGCTCCAGGCGGAAATGGCTAAACTATTGTAACCTCCTA  
TCTAATGTCATGTTGACTCGGCCCTGGGTGTCAAGCGTGAAGTTGTATCGGAACTTTATC  
GCTTTTACATTAACTTGGCCGAGCAGGTGATAATCCTGCCCGTGCAGGAGCAGACTGCGG  
AATTCCTTTCACAATAACCTAATGGTATTCATTCCCACAGCCTAAGGAGCGCTTTGATGT  
GCATTATATACGGGTGCATGTACTGGACACGGAGCGGGACCAGGATCGTTCCAACCTCCT  
AGTCTTGGTTGAAGAGTATTA AAAAGGTTACCTTTTCCACACGCACATCTTGATGCAAAA  
ATTTCTCCAGATCAGTAGATGCGATGGAAACTACAGCAATATGGCCTCCGAATCCGCAA  
TTACCTTTTGCTGCATTAGAGCGCAAGGTGATTGTTAATGGTATAATGCCTATAAAGGGT  
TTCGCTCTTCTTATTCGTCACCCTACTCCAACCTCTCTTTCTCACACAGTTGTTGAACCG  
CTTGCAAATGGTGTATCTGTTTACTACTACGTCTTCTCCTGCGTGCCACTTTACAGTAGGA  
ACCGCGGGTGGTAGAGAAGCAGCACGACGTATGCTGGAAAATTATTCGCTACTAGTAAG  
ACCGTATTCATCAAAGGTGGTCTAGCAGGAAGATTGGGTGGTCTATAGGTGACTCTACC  
CTAGCATTACCGTGCCACTCCCGAGTTGCGGGTGCAGGCCAAATGTTTTTCATAGGATCT  
TAATTATTGCAATTAGATTTTACTTGGGTAACACCATCCTGACAACCCCAAAGAAAACAA  
GTCACGGTGGAGGACAGCATAGTAAGTATAGAGCTACCTCTCGTAACAAAGCAACAATA  
GATATCGTGGCCAAGGGAATAGAATTGTACACGGTAACCGTAGTGGAATCATATCTGAA  
GACTTGTGGGTTCAATTTTTATGATCATTACAAAGCATATTGTCGTTATTTAATTAATGAT  
CCACGTTCTGAGAGATCCATCAGGAAAAAATCTGATGAAGGCGCCAACTAATATTGGCAC  
TTCTCGTATTAGATAGCGTTAATGAAAAGATTAGATAAAGATCAAGAGAGATCTTGTTCA  
TTTACGGAACGCTCACTTGGTATTGTGTTAAATGCGAATACACAGGATGAGGCTGTAGCG  
AAAAATGACACTGCAATTAACATGTGATCAAAAATCCAGGTATGACCACGCTTCGTGAA  
AAACCATTTCAACCTATGGTAGGCTCTCATATACCAAATAAATTATGTGAACTTGTAGAC  
GATTTTACAGGTGATGCTATCGAACAAGAGATCATTTATCCGATTAACCGGTTTGAACCT  
CGCGTACTTTGACAAGAGTTCGAATACAACCTCGTGATGTTACAAATACATACCATGTC  
ACGATTGTCTTTAAAATAGTTGGAATCCCAATAGCCGAAACTATCGAGTTCCTATTACAG  
AGACATGTATAGTGCAATCAAATAACCTCACACCATTAGTCTTTTTAGATATTAAGCAC  
CAATCAAATCCTGTCTGAGAAGTCAGAAAGAATTTACGGGTTATGGCTTTGAAGGTTCTT  
CTTAATAGTACCTTATCGCCTCATTAGCGAGTAATTCATATTACACTGCATTTAATGATA  
ATTAGGCGATGAACGAGGCATTTTTGCCTTCTGCTACTATTAGAGATAATGTTGTTAACG  
ATGCAAAAATTTTAAATCACGTTCCACGTTTAATTACTTCTCTAGAGCGAACTTAAATC  
TAGATGTACAAGCAACACAGTCTGCAGGAGGACATCCTAGCAGTGTAACATTA AAAAAAG

GTGTTTTTGAATCGGCTCGATATTATCTTATTAACATTTTGAAGAGATTTGAATCACTG  
TCAGACCTAGCACAGGTATTGGCACTTTTGACAATGTAGGGTTCATGGACGGTAGTATGG  
TTACCTCTCAATAAATTGTAAATAACTTTGCAACTCTGGTGCATAAAGTCCCTTACGAAG  
ACACAGACATGTCTACTCTTAGTGTAAGAGTAAAACCTACCGAATTATCTAAAAAATCAG  
ACTTAAACAGTTAGACTGATACACTGACTGAGTAGACTGCTGCTACTCGAGCATACTTCC  
TCAATGAACGTGGCGATACGAGTTAGCAGTTAAAATTTGTTGATGATACTGCAGGTAGAG  
CCATAAACGATGCAGAATTCGTACTTTTGAATATTTGGTGACTTCTGGCACAGGCGCAA  
ATAAAATTACAACAGTTTCGTTAGTTGGACAGATTACAGACAATATTGGCGGTCCCTCTA  
GTCGAACATCAGTCACTTGGAGAATGCAAGAGATGTCACAACCTGGTACTGCAGCAGATA  
CTTAGAATCTAGTAAATATAATGCCCCAGATACTACTCTGCACAATACAGAGCAGTAA  
CAGCACAGGATTACGCCTTAATTGCTGAAAAAGTGTATTCTAACGCCGGTTCTGTTCTTG  
CATATGGTGGGGACTTTTTAAATCTCCCCATTTACGGATAATTCTTTATTGCAATTCAAA  
CCAATACTGGTTATTTCTTAACGACGCAACCAAAAAGTCATTTTCTGCAGATTTAAGAA  
AATATCATATGGACTCGATTGAACCTATAGTTATTGACCCAGATTAGATGTATTTGTGTT  
TGAAAGTCTTTGCACAATACGACCGTGGCGTTGCATCTAAAAGTGCTGATTTTAAAATA  
ATATTCAAACGGAATTAACCATTGGGCAACACAACTCAGATTGATAAATTTAATGCTA  
TTTTCAGAGCACAAGCGTTTGAAAACGCGGTGACTTTATCCGATAATAATTTGAGTGATG  
TGACTTTACAGCTTTCTATCTTAAAACACACCTACCCAAACACAAACCAGACTAGTACTT  
ACTGTATTGCTACTGGTGATGATATATAGTATAGTGCTTCAAGCAATTCGGATGGAACTA  
CTTCTAAAAGGAAGCTATATTTGTTTCAGGACCGTTTAGACCAGCAGATAGACCTGGGA  
TTGAGCAACAGTGTGAACATGATGGTTTTGGCAATTTAAGAAGATTATATAACACGGGTC  
ATAAGAAGGTACATACAAATAATGTTGCAGGAACTTTAAATTGTACTACAGGTCAAACCT  
GTTTTGGTCCTTTTAAATATGATTGGTTCAGGTGTCAATACACCTCCAACCTGGATTTGTAA  
CAATTACAGATTCCACAACCGGTGCAGGTTCGTAACAAATGCAGATTTCAATCCTACAG  
GTCTTCAGATTCCTCTTCTGTTTATTCGTCCAACGTTGCATCTACTCCTCCTGCAGAAC  
CAGGAACCTTATCACTGTAATAAACCCAGCGTTTACTGTGCTCCCATTTATGTACGAGTC  
CACCTCCAACAATACGTCTAAATGGTTTGACGCAATCAGTGTTTAAATAGGGTTGTCACAA  
CTAGTACAATTGGTGATATCCCAGACGCAGGTGATCTTCCATCCTCTTCATGATTCTAGG  
TGTGAATGAACATTAATAAGGTATCTCAGTCAGTTCTTTCACAGACTCCAGATTTGATTG  
GAAACGATTATCCATCATTCAATCAATTTATTGAATATTACTAACGTTTTCAAGAAAAAA  
CTGGCATAGGGGAGCATATGGTCAATTCGTTTTTCAAATAACTTAATATTTATAAACTTA  
ACATCGATATTCTTGATGGTGCTTCAAAGATCGGTGAATGGACAACCTACTACTGCTGATT  
AGATAGTAGTTGAAAACATTGACAGTCTTTTAACTAAAGATGGTTCTGTTTTAATTGGGC  
ATGAAGGAGCAGACTATACATCTACAACAGCATCACCAAAAATTGCTCGGTGCCCTGGTC  
TTTCCTACGAGCTAGTCAAATTAAGTGGACGACTCATGCAATTCTGCTAGATTCCATGA  
ATGGCCCTACAGTTAGGATTAATTTACATCTCAGGATGGTCCAGTAGCAGCACCTTCTG  
CACTGCCTTAATTGTTACTCACTACATAAAAATATTACCATCTCGTGTGCGGTACACCT  
TTTATGTCACTGCTATTGTCTTTATTATTGCTCCTAGGACCAGAATTCCTGCAGAAGACT  
TACCTTCAACGTAGATTTTCATATCAAAGTAGTTTGGTAGAGAATAAAAATTGTTGCAATCT  
TTAATTCATTTGCTTCTTTTCGGTGAAGGTAAGAGACACTTTACCATGATACGAGATGGGT  
CTTTTCAGCACCTGTTGTAGGTGAATATATCTTAGCAATTTTCGATCAGCTTCTATTAG  
TTCCTAAAGTAGACTTCTTTACAGAAAAATACCAGTTTTTTTTTCTAACAGCACCTCCCA  
ATGGAAGATTTCTCTCACAATACGAAATTGAAGCACCGGTTCCATCATTGGATCTGGTG  
CTCTGGGGTACTATCGTGTGACGATAATGGAACCTTAACTGGCGTCTCTGTAAAAGCAG  
ATGTTAGTAATTATCGTTTCGAATACCCTCCTCAATTCACTCTCAACTCCCATGCAGTTA  
GCGTTGCCTCTGTAACCTGCACTCGTGAATGGTATAAAGACTGTATCACTTTTCGAAGGAG  
GCAAAGTAAGCTGCGATACTAACCTCCTGTAGATCAAGTGAATCACCAACAAAACCTG  
GTTCTGTAGTAGGAACTTTTAAAGCACCTGTTACTAACGGTAGTGTTTCTGAGATCAAAG  
TTATTAGTTCTGGTAATCGATACACATTTACATCTACAAGCACTTTCAAGCATCCTGGCG  
GTGCAATTCATAGGCGCCTGTCCAATTGTAGGGGGTCAGGTATCAGGAACCTATTCCTATCA  
CGGATGGTGGTTTTCGGATATACTACAGTCCGCAAAATTTATTTTAAAGAACCATCGGGAA  
CAAATCCTATTACAGCAACTCGACCTCGTGTCTTGACTGTTTGCGTAAGAACTTCTATTT  
CAATTAATAATGCAGGACGAGGATACATAACAACCTCCTAGAACATTCCTAGTTGGTCCAG  
TTGGTGAACAGGTCTTTTATAACAACAGTTGATTCAAAAGGGCATCTAGTAGGAATTTAAT  
TAGTCGATGGTGGTAGCGAATATGAGGACGTACCTTCTATTTATGTCGCAGAGAATAGAG  
CAGATGCGACAGGAGCGGATGCGGGCGGAACTGATGCTACTGCAGCTGCTGCTATATTA  
ACGGCAGAGTTACTAATATTAATATTACTGCTTTTGGTTCTGGTTATAGTGCACAAAATC



CTCGTGAGATTGAACAAGCGGGACCTCCTAAGGCAGAAGCGTCTGCAAAAATTGGCCTTC  
ATGAAGTTAGTAGATTTAAAGTAAATCAGACAGGTGAAGGATATACAAAATCAAACCAG  
TTGGTTGTGCGAGAGCAGCAAGTGGTATCACTTCTTATAGTGAAGATGGTAACGCTGTGT  
TTTCAAACAACACGACAGCGTCAGCACATGGGTTTAAATTGGGATGTAAAGTATCTAGATG  
CTTTATTTGTAGAAGGTTTAGTCGACAAAGACTCTGGACGGTTTTTACCTGATGTTCCAG  
GACTAGGTAATTGGAAAATTCATGTTAGAACACGAATGAAGACAATGAAAGATTTCAATA  
CTGCAAAAGGAACATCTCTCAGTATTAGTTACCTCTTTAAGCTGCTGTATGGTGAACAGC  
CAATTATTACTTATCCTAAAGATCAAACGATCAATCCCTCTGCAGCTACATGGTGTATTG  
CCACTATTTTGCCTGCAACTTTGGTACAGGGAGATCCTACCAATATTAGAGACGGTTTGC  
TAAATCAAGATGCTGATAATGCTTATGTTAACGTGGCATCATAGAGTTCTTTGATTGAAA  
ACCCTGTGTCTATCATAACTTGTGACGTAGAAATTTTGGTACTTGTCTACCTGAAGACA  
AAATTGCGGGTCCTTTTACAGTTCCTTATAAATCACAACCTTGCAGAACCTTTAGGCACTG  
AACACAGTATTATCCCTGTTGCCTCTACAAATGGTTGGCCAGACAGAAACGCTGAGTTTT  
TAATAGGGAATAGTGACGTTGTAAGATATCAAGACAATTCACCCAACAAGTTGATTGAGT  
GTACACGTTTTGTTAATAATATTGTTGAAGATTGGGATTCTGCTACAGAGGTTGCTGATA  
ACTTCTCAGTTTTTCAATTAACAAGGCACTCCTCAGGGAGTTGTCAGGAAAATTGTTGGTA  
TCGTTGATGCTCAACAAACAACCTTATTCACTGGATCATATCACTTACCTGGTGATA  
AATTAACAGTTTCTAAGTTTGGAGGAATAGGAACTAATGATGAACGTACTAGTTGGTTGT  
ATAACCTAAAAAATTAGTTAATATTAGTAGTATTACGTTTAGTGGTGTAAATAATCAGA  
CCGCAACTGTCACATGTGCTAATAATCATGGTCTCTTAGTTGGAGACCAGGTAAGTCT  
ATGGTGCTAACCGAATCATCTGTAATGGAAGTTTCGTAGGTACATCTAGAGATAGTAATA  
GAGTGTCCCATATGAATCACTACAACCTGCTACAATCGTAACTCCAGGTAATATTCTTG  
TATCTGTTGACCGCAATAAAGGAAAGCCTCACGATACAGATGTTTTAAATTCTAACGGAC  
CTTACACAAGTAATATTCAAACCTCTGTCTCTTATAAGAACTACGTTGACGTCGCTTCTA  
CACGTATACCGGACTAAAAGGTCGGACCGTTCCCTGGCTCTGCTATTTTGCCACGTAACC  
ATCGGAAATTTAATCGTTTCCCATCAACGGTAACTACAATTTCAACAAAGAATAATATAT  
CACCAGGTCTTCTTTGATCATGGCTTAATGGTGTCTTCTATATGGTCTTTTACGTCTACAG  
TGAAGAAACCTTCCGGGGCTTACTAAGCTCTCTATTTCTAACGCATGTTCTGGATCTA  
TAGCCGCTTGTCATTCAAATATCACATTTTCTGATGGTCGAGGAAGTGGTCCCACATCTA  
GTGCAACTGTTAGTGGGTCTGTTACCGAAAGTACTCTCACTGCAGTTGGATCTGGATATA  
CTTCTTATCCTCTACTTTCTATAGCAGGTGTTGGAGAATCAGGTGCTTCCGCAACTGCAA  
TCACCCTATAGGTGTTGTATCTAGAGTTTTGATTAACGATGGTGGAAACAGGAAATACAT  
CTCAACCTACTATTACTATGATTGGTTGTGGAGGAACTGGTGCTAATGGAACCTGCCTCTT  
GTACAGGTCCCTGTTCAAGCTGTATCTATTTCCAATGGTGTGGTGTCTATACTTCAAATC  
CTACTGTCACACTAAGTTCTGGTAGTGGTGCAGTTGCGCAATCAAACGTTTCAAGGGTA  
TTAGTATCTCTATCGCTATTACTTCTACAGGTTCTGAATATACTACAGTCACTACAATTG  
ATATTAAGGAGAAGGATTCGGTGCAGGTTGCTCGTGCGACGATTGACGTTGCTGGTGGAA  
ATCCAGGTAGAGTTACGAGTATCGAAATTATCATTAGAGGTATCAGATATGTTCAAGTTA  
CGACTTTATTTAATTGATACTCTGGTGTCTCGTGCTACATTTACAGCAAACGTGTTCC  
CATGGACTTAAAACCTTCCAAGAAAGATCTACTCATGATGCTGCAAAGGGTGGAGTATCAG  
ATGGAGCTAATAACCACCATGCTGGTGAATATGCTCACTTATCAAACCCACAATGATTAG  
GATAGCGTCTTGCTCATAAGTTATTTACAAATAATGCAGGATTAGTCAGAGAGCAAGGAC  
ATCAATTACCACCCTCACCTATGATTAGATGGGCATTTGTCGTTAACCCAATTTCTGGTC  
CATATGGTTTCTCAAACCTGCTGATCAGAACTCTTCTATTGTTAATCTATACATATCTT  
ACCAACTTAAACGCAGAACTTGTATAAATTGCTATTAGAAACCAAATCCTGTTAGTACAG  
CAGGTCCATTCTTCTGAAGAATCTCGAGGTACGACTGTTGTAGATTATCAATATGTAT  
TTGGTCACGGTGATTTAAATCAATATAATGGGCGTTTCTATAGGACACCTGAGCATCCTC  
ATGGTTGATATTGCTATTTTGTCACTATTGATTCTACTGCAGATGGTAATTCTCTATTCTG  
CTGATGTTGTTGGTCTAGTTTCAACCCTGCTGTAGATAGTTGGAATCTAAGTGCTGATG  
GTGTTCCACAAAAAATTCCTAATGCAGTTGTTATATATCCTTATCCATATTAGAACGTTG  
ATATGGACGTTGAGAGAACCTCAAATGCCTCTACATATGCTATACCCCTAGTAAAGGGTG  
AATTACTAAAATGTAATGTGGAAGACGAAGATGGAAGTGGTATTATTGATCAGAAGGAAA  
CTGATGATCCAGATCAGGTTATTGAAGAACCTCTATTCCAATAGTTTGATTATTTGCCTA  
GAGTAAAACCTTGATGCTAAAGTGGACATTGAAGTTGAGACAATTAATAAATTTGAAGAGG  
CATCTGTAACAGGATTGACTAGTGAAAATGTAAGGGTTTGTATCAGGGAAATGAGACAT  
TAGTATTTGACAATACTGATGCTTATGGATCTGGAGTTTCTGGTCGTGTCTCTAGAATCC  
AATGTGCATCAGTATTAACATAAGGTTTTGACGATTGTAGTAGTATTAATTATGGTCTAC

TTAAAACTACAAATCCTCGTAATTTAGTTGCAAGCGATACAGTTTTTTGTGGCTTATTCTC  
CTCTAATGGACAGTACTAATGAGTCTTATATCGTACGGAAGTATAAAGGTATTGGCGAGA  
TTCAACTTACTCATACTTGCTCTGGTTTCACCTCACAGATTCATGCAACAATTATTA  
GTGGTAATGGATCTGACGATAGTCTTAAAGCGGTTGTTAGTAGTGTAGGTTGTGTCGACA  
CTGTTAATTTTCGTAATCCTGGCTCTGGAGATACTTCCAACGCTAGAGTTATCTTCTCTC  
GTGAACAGGTATTCAAGAAGGCAGATAACTATGTTTCATTGATTA  
AAAATGAAAATTATG  
CATCTACTAATGATATATCTATGAATGATAATAAGGAAGTCTTCATTTGGGGCAAACAC  
ACGACATCTCTGATTATCTTGTGCTTTTGTGCAAACTTTCTACA  
ACTGGTGTTAAAG  
AATGGAACGCAACTTTAGAAGTA  
ACTGGTGCTT  
AGATTATCCAGTATTCAAAAAGTTAT  
AGGTTGATGGTAAGGATATTTTCGTTGCAGGTAGAACTATCCTAACTCTTCTCTTTGAA  
GTGCATACCTACCAGAACTACCTTGGTAACTATGTTGAGGTAGAAAATGGTCTTAGTG  
CAACTGAAATACCAACGAGCCTATTCAGGTAGTTTTGGATCTACTCGTACAGATGAAA  
TTAACGCACTTAAAAAATTCGCTGATACAAGGGTTTTTATTGGTGGCTATACAAATCCTA  
ACTCTGCAAATTTCTACGACGCTTTTATTGCGCTACGTAATAAGACTGGGACTTTTGCTA  
TTAACAGAAAACATAATTTCTGCAAATAGTACTGAAAAGATTACTGATCTTGTACCTAGGG  
GAAGTTATGTCTATTTCTCTCTGGAGATTGCATCTAGTGTCTTCTGGGACTGCAGTTCTAG  
TTGGATTTGGTAAAGCATCTTTTGGAACTAGTGCAATTGCATCTCCTAATATCAAACAGA  
GTAGTAATCCAGTCAATTCTATCCTAAATTCTAGTATTGCAATGGAGAAATTTGATGAGG  
TATAAGTTACTGCTGCCACTCCACACATATCTGATAATACTTCTACCACTGGTCTCTGGG  
TAGGTCTATTCAATACATCAGGAGATGGACATTACGATAAGAGATAGACTGTTGCAGATG  
GACCTATTACTGCAGCCAGTAAGTATGTGATTGATATGCTTGGTGGTCTTCAGGTAGCGG  
TTATTA  
AAAATTGCTACA  
ACTGACTCAGTGCAA  
ACTGCAGAGTGTATTA  
AAAATCAGATATA  
CTGGTATAATTAAGAGTTATAGA  
ACTCAACAGTTTACTATTGATA  
AATATTGAAGGTTTTA  
CTGTAAATTTCTCTTGGCTGTTGATA  
ACTCCGCAGTTGTTCCCTCTATTTGGTTAACTTCTT  
AGGATAGTCTGGATTTATCTTCCCATT  
CACATCTGGGTCTACCGCTTATA  
CAACTGGTC  
ATTATACTTTAACATATACATCAAGCAGTATGTGTATCAGTTATGCTGATAATGTCGCGA  
ATATTTAGGGTTACAGCACTGCAGGATCAA  
AAGCTCCTTGAGTAAATTTACCTCTTAAA  
TTACCTCTGCTCAGTTAGGAACAAATTTAAATCAGAATGGGACTATTGAATTTGTA  
CTTC  
TTAGAGAAGCAAGTTCAGCTCAAACATTGTCAGTAA  
CACACACATTAGGTTTGATTG  
GTGATGCTGAAGACGCTACTGGTGGTAATGGGTTCTACTATGATGCTTCTAGTGGAGAAC  
TAGATTTGGTAGTTACAAATGATACTACTAAGATAAATTTCTGCAGGATCTGCAATTCCGT  
CGAAAGTAACTACAAAGTTTGCTGATAATACACGGCAATACATTGGACTTACGACGGAAG  
TTAAGCAGTTCACTGAATATGTA  
ACTGGAATTC  
AAGCTTTTACAGGAAGTGT  
TTCTAATA  
CATCATTATTCGATAAAGATCTTCTCGTTAGTCGTATTACTGGTTGAGATGGAGCTGCAG  
GAACTAGTCGTAAGACTGAGCAAGGTCAATATTTTAAAGATCATCTCAGACTTAGAAATA  
GGGCCGTCACTCCTGGCGTACAACTGATGTCAATTCATTCACGACTACAGGTACCTTTG  
CCTTTGAATCTTATTGGGTTGATAGTGGATTGTTACTACTAACCTTTCTAAGTATGATT  
AAATTTTTTACATTCATTGGGGT  
CATAAGCTTGATA  
AAAATGCTGACGCTGTAACAATCG  
GAACTCAA  
ACTGTGCACACTAACCCTCAAATGGGATTTGTTCGAACGAGTGTAAGTGCTG  
TAACAGGTGTAGATCTTACTGT  
TAATAATACTGGTTTGACTTTAGGCGAGGCAGCATTCC  
AAAATCTAGAGTTTGATGATTCAGCAACAACGATGAATGCGGGCACTGTGTCACTTCCCT  
CGAAGCAGGATCTCTGGACTTGTAGA  
ACTGAAACAGTTC  
CGTTACCAGGGTCTCGAAGAC  
TTTAGCTTACTTCTACTTT  
CAGAGGCAGATAGTACTTGAAAGTAACTCCAACATCTAAGA  
TTGATAATATACCTGAACATGTAATTAGTCAATCATTTACCTTTACTGTAGGAACAAAAT  
TAAAATTAAGAAATGCAACCTCTCCGGCATT  
TATTAATAGTGGTTACGTTACTACTG  
ACACTATTCATATTA  
AAAATATCCCTTTTTGTTAATTATAACGGTTGGTCTGATGATCTGA  
ATCATGGTCAAATAGTTACAGAGCAATTTAGTGAGCGGTCTACTTATGACTTTGTAGGTC  
CTATTCCTGTAGAGGTTACTGAAATTGAAGGATATAATTTTGCACATGTA  
ACTAACACAA  
CACCAGGCACAGGTTATATTGGTCTGAACAAGTATAATGTAGAAGGAACATATAATGCTG  
CAGGGGGACAGATCTTAGGCAGTTTTTGCCAAAGCCATAACCACATAGTGGTATTGAGCAAG  
CGATTAGAATTGATGAAGTTTCTTCATCACGATCTCCGTCTATAGTTGGATCTCAAGTCA  
CAATCACTTCCCTCTGATATTAGTGTTAATTCTGCAGACTCTACTGCTCAAGTCTGCATCC  
CGACCGGTGTCTTAAAGATCGCTGTAATTGCAA  
ACTTAACTTACATTTTACAACAGACTG  
CAATTACAAATAGTGATCAAGTTTATGTAATTACAGGA  
ACTAAGCATTACCTAGTTACTG  
GATCAATGATTCTTCGTGAAGATAAATGGAATCAA  
AATTTCTGGTTATAACACATACTATG  
AATATGATGGCTCATTGCCATTTTCTCCAATTGTGACTGCCAGAGACTGCGTTTACCAAC  
TTCCTAGTGATGCACTAACTCCATCTGCTACCACAGTAGCAAATGTTAGTATCTACGTTA

AGTCTCCCGTTCATAAAAATTTATTATGGTCATCAATACTTGTGTTGATGTCAGTAAGTCCT  
AAATGATCTGGGGTAACTAATCTTGCTCTTAAGATCCTTTAAACAAATTAGAATTATCCT  
GCAAGTCTGTAGAACGTGTGGGAACACCTGGGCTTACAGAAGCAGGAAATCCTACTCCTA  
CTGTAAAGCTTAAAGTTGATGAGGGTAGTGTTCAAATGTCTCTTATTACACTAATCACT  
CTAGAACTGGTGCTGATTCGCCCGTTCTCATTGAAGTTATCTTGATGTTACTGAATCTC  
CCGACAAGGGAACGTTCTTAGCTCAGTCTGCTCACGATGCTGCTGTTACTCGTGGTGCTG  
ATATTATGTGATTTGTTCTTATCTACTAACGAGGAGCAGCTGCTGAGGTAACCAAGCAT  
CTGATACTACATGTTGTCTTAAGGCAGTTGGTTCTATTGGTGCTATACGTATTGTTTCATC  
AAGGTGGTTTCTATAACAAGGTTACCCGTTGTTGCTGGAATTAATCTACTATACAAATTG  
ACAGAATAGCTACAAACGCACCAGGCACAGAATATGCTGTAGTAACCTTATCTTGTGTTG  
GTATTGGTGGTGATGGTGAAGGTGGATTTCTAGATATTACTGTTACTGAGGGAACTGATG  
CTCCCGGAGTAACTATTCTGGTCAAATTCAGTTGTTGTACTATCACCTGGTAAAA  
CTTGATTCTAGCAACTATTGAAGTTGAGGCAATTACCCGGTATTACTGCATCTGGTTCCA  
CAGGGTCTGGTGCAGAACTAGAAGTTGTTATTTTTGCTTCTGGAACCTGATGCATCTTTTT  
TCACTCAAGGTGATAAATGTGGTAAGATTATGAGACCTATGAACTAGAACTTTGGTAATG  
ATTATCCTCATGACTATACTACGTCCAGAGATTACATTCCGACAAAATGTTCAATTA  
CATCAACCAGTATTCTAGGCAGTATTACAGCGACCGATCCATGTCCTGGATGGTGACAGG  
CAGATGCAGTGGTATTTACTGGTGGTGGCGGAAAAGGGGCTGTTGCTGAAGCAACA  
ACTAAGATTTGTTGTTTAGATTAAATTATTTTTAAAGATCCAGGCGGAGCTTATTCTACTACTA  
CTGCAGTTGCTCTTAGATCTTCGTTCAACAATGTTGTAAACCTTGACGTAGGTCTTTTT  
AGTATGTATTACCCCTGGGATTGCTAACTGTTCTACGCTCACACTAAAGGTCGTAGATC  
CTGGTGAACGTGCAGAGTTACCGCTTGCTGCAGCTACTATCGGTTCGTTGAGTTCGAACTA  
TAACTTTTTACGCAATTGCGGGTCTGCAAACGCTCTTGAACCAGATCAATAAAAACTTG  
CCATGATTGCATGAAACACATACTTAAGTGATGCTATTTTCATATGTCAATCGGGGAACAG  
GTCGTCAACAATCACACAGAGAATCTTTTGGTATTGCTGCTACACCATACGTTATTACAT  
CTACCTTCTTAGAATAAGAACTTGTTTAGCAAGGTGATTCTTTAGCTAACTCAAGTGCTC  
AAGGTTATGTGTCTACAAATAATGGGTGGCAGATACGTCCTCGAGTTCTGAAGAATGGAG  
ATTATGCTGCTGATCTTATTGCAGGACAATGAGCAACTGGTGTGCATATCTAACGCTTCGG  
GAACGATCAGGGACTTGAATATTGCTAAAGGTGTTGTTGAGATTGGTTCTCTCGCTAAGA  
CTACAGGGCGTTGTATTGATGATCTTGGTAAACCTTCTGAAATCATCGAAATGATTCAA  
AGTCTTACTAACATCAAGCCTACTCTTTTGATAGTAAGCCTCCTGTTTTTATCGGTGACT  
GGCAAGACACACTAATCAAAAACGTGCAACCTCCATCGTTCAAGTTATTTGGTGAATTAG  
ATGTTTCTGATTACGGACTTGTTCCTGAGAAAGAGACGGATTTCCATCTTACTAACTCTG  
ATGAACTCGCTAGACAAGCCATTGTTACCGACATTCAAAGTTTTGCTTTAGTAGGATCAG  
TCTATTCAGCATTCACTAACACAGAAATAATGTTCCGTCAGAAGAGACTTACATCTACAG  
AAAATATGCTGACTTGAGTTGTTCAACGTGTTGATTATATTCCTACTTTAGTTGATGGTG  
AAAGGCTTGGATTCCCACTAACAGTAGGTGGGACTAATATAGATGCTAATTCTAATCAA  
CGATGATCGTTTTAAATGGTGTGTTTCAGAATCCCGGCCCATCTTTCGATGTGCAAGGTG  
TGTCGATTGTATCCATCGACCCACCAGAACCTCGTGCAATTCACAAATACGTTAACGTTA  
CTATACAAAATATTCTACTAAGAAAAGTTCATTTGGAATTCTCGGTGATATTTTCCCAA  
ATCCTGGTAATGAAATGGTTGGAGCATCAACAGGAAATCGTGTGACCGTTACCAGTGTG  
TATAAAATGCTGTATTTGGGTTCTACGGTCCGGGAACTACATGTACTCCTAATCAACTG  
TCACAGTTGGTGCCACAGGGTTTGCTTCTTATCTTGCTGGAATAATGGTGTAACCGATA  
GTCAAATATTGGTTTATTTAATTTTGGTGAGACAATTACTGACTTACAGCGTGATACTG  
CTTGAGTCGTTTCAATCAATGGACAGAAAGGTCAAGAAACCCCTTGAGCACATTTAAGAT  
ATTGTATGAGTCCGTCTACTATGTCATTTGAAGTAGTTGCATATAAGCCGGAGTACATTG  
TCACTGAATAACCTGTAGCTGACGAAACATTTACTAGAGGCCAAAACCTATCAGTTTGGAT  
GTGTAGTTCTCTTACTTAATAGTGTTACACCGGGAGCCACTATACAATATGTGAAGTTA  
CTAGTGCACCGTCTGGAACCACTGCTGTATCACCCACGGTGATAATCCTGTTAATGGAA  
CTCAAATTTCCGGCCAATAATCAACCAACTTTAATTAACAACACTGGAACATAGCAATCCA  
CCCCTGGTCTTTACAACAATCAATTAATGAAGCTGTTATAGGTGCTCTATCTGGCGTAG  
TCGCTCGTGTTATTACAACCTTCTACATATCAAGATCCTGTAACCTACCAATTTATTAGTC  
AGGTTACTATTCATGAAGGTTCTTCTTTCTTTTCGTCATTAATCAACAGGATTACACCTC  
ATGCTTATCCAACCGTTGATCTTGATGATATTTCTAAATCTCAGATAAGAAGTGTTGATT  
TTAGAGATAGTCTAACAGATGACCATACTCATTTCCCTTCTAATGAAGAAATTGGCAATT  
ATGTTATTCCTTACGAGGTTGCTTCGGGTA  
ACTCTACAGATTGACACTATGAGTGACTACA  
AATTAGAGGAGGGTAATCAGGATGGGGAAATTGCTACTCGTGAAGTTGCGCTAGTTCGTA

AACTAACGTATAGGGAGATAGTTGGAATGAGTTTATTCGTTCCCTGGTTGAATTATCAGAA  
CACGTGATCCGAATGAAGAAGTTATTGGTGCTAAGCAAGCAAGAAAACTGCATACATTG  
GTAAGGTTGGTAGAGTTCTTATAAACGGTGGATATTATCATAGATTACAGAATTAATAATG  
CATTCTTAACTGCAACAAATCACAAGTGAGTTGATGCATGTTTAGGTGTCACACCTGGAA  
CCGAAAACTAACTTTTGTGAGTGATGTTGCTGATTCAGGCAGTGCAGGTGGCGCTGAAA  
CAGGTACGTGTACTACTGCAACAGGAACTACCTATAGTGAATTGACCGGCGATCTACTGA  
TTGAAATTCGCAATCACTCATTAAACAACAAGTAACACAGTTCTTATCGCTGATAAGCGTC  
TTCGTTTTACTTGTGTACAAGGTGGTAATTCGTCTACTAAAACATATTCTCGTAGCACTG  
ACCCTGCATCAGCGTCTGCTCGTAATGTAAGTGCAGTTATACCAAGTACGATATCAGTTA  
ACGTAGGCGCAATTACAATTGATGAATGTTTTGCAGTCGCAGACTCGTGTGAATTTGGTT  
TTGGCACTGCAGCGCTTACAATGGAGTGTGGATAAGACCAATTACGCTTGGTGCAGGAA  
CATGATCTATCATTGATTTCAATACTGCTGCAAATGAAGTGGTTTCTTACCTATATCTTT  
AATCTGCAAATCTAGAGTATCATGGTAATGGTTAGATAGTCATGCAACGAACAGCAAACA  
TAGTTCCAAATCAATGGTCCACACGTTGCTATTAGTAGATCAAGTTCTGCAACTCGAATGC  
TTGTTAATGGTGTTCAAGATAGTAGTAATTACAGCGAGACCAATTACAACGGTGCAGGACA  
AACCAATTAGAATTGGTGATGATACTGCAGGTGATAATCACTTGATTGGATAAATCGATG  
AGCTTAGAGTTTCTATCATTGGCCGTTATACATGGTCAATTTACGGCACCTACAGGTTTCT  
TCCAAGGCGATTCAAAGGCGGTAATACTCATTCAATTTGATGGTGTGTTTATCGACAACAGC  
ATCAAGATGATTGGTCTGGATCTGCATCATTTACTAAGGATGCACAGTTCGAGAATGACG  
CACTTCTAGAAAATTCTAGAAAAGATGGTACACCTGCGGGGTTGCGGGGTAGATCCAAAA  
GATACTATAACGCTGCAGATAATTGCGAAGGTGATATCGTCTTTATCAAGAAAAAAGTTG  
TATATCAAATAAGACAGACATATCCCGAACTTGTTATTCTAGGAATTCGCGACCCTCCAA  
CTAAACCCACATATGACGCTGTAAGTCTGTCGATTGTCAGTGGCAGTGAAGTGCAGGAAACACAT  
TTACTAATGGTGGACAACCTCCACCTCCGTTTGCATCATAACAATCCTTCGACTGATATAT  
TGACTATCACTCAGATTGATCACCGTGTAAACAAATGGTAAGAGCATGAAGATTAAGTTC  
GTAGTATCATAGTCACATGTGCAGAAGATGGTAGCGCTAGTTATCATCCATATCCTCGTG  
GTACAGATCCTGTTGCAGGTAAGTGGTTGCCAGTTTCTAATGAGACTGCAGATTCATACA  
CAGTCGTTGTTGGAACATAATCTCAGTCTACAACCTACTTTTCGTATGTGCCTGTTCTA  
ATGCGGTTGCTATTGAGAAAGATACACTTAAGATTTTAGATCATTCTTTGACATTCGCTT  
GTGCCATGGATCGTCATACTGCTAATAAAACTAATCCTCGTTCAACAGATCCTCCATCTA  
GAGATATTGCTCTTCCAATCGAATGATCCAGTTCTACCAACTTAAAATTTAGTGGAACAC  
CCTCACCTTTAGTTAATTTCCAACCAACTAACGCAGCTTCCGATCCCGAAACAGGTGCAT  
TCGTCATGACGACTGCTAATCATTCCATCAATATTGGAACACGAGGTAGGTAACTGCAA  
GTTCACTCAGATTTATTTGAACACAATATGTTAACAGTGCACAGAAAATTTATCCACGTG  
CAGCTGCCAGCTATGGTCAACCTGAACATTCTTATCATACTGCTCTAGATGTAAGTGCAG  
TCGGAACGACTACACCAGAAATTAGTAGTCCAGCGCATGTTCCCTACAACAGGTATTTATA  
CAGCCAATACAAATGGTAACCACGCTGATGTAAGTTCGCGACAGAAATTCAAATTGCTGAGA  
AGTCATTTACATTCACATGGGCATATGATTGTAATGTTACAGACAACACGTATCCGAGCC  
ACACAGAGCCTGTCACAGGTGAGTGGGTTGAAGTAACCGTTGTTAATGCCGATACATTTG  
CGATTGATATTGGAACATCTAGAGATACTTCTCATATTCGTTTGTGTTTGGTACTGCAG  
GTGCACTAATAAAACAAACTGGAAGTGTATTATTATCGTTGGAGTTTCTTCTGAGGCGG  
ATCAATATGCTCATCTTATTGTATCTGCTGCATCATAACGAGTTGTTCAAGGTGGAAT  
ACTTACATACATGTTTTTCGGCTACAAAGCATGCATTGATTATTGACGAAGGTATTAATT  
ATGTAGATAAAATTCGTGATACATTGAATTCGATGATTTCGAGATCTTCGTATTGGTTCTA  
ACAATCATGTTTGGGATGCTGCATCTTGTATGTTAATACTACTTTTCTCCAGTTAAGA  
TCGCACAAATGGAACCTGCTGTTAAACAAACATTATTCGCTCATGAAAAGTTGGCGATA  
TGCTTCAGTATGTCATTATAAATGCCCTTTGGCCAGTACAAGGTGCTAATGGTATATCCC  
AGTTTACTGACGTTTCAATTACGGATTTCGTCATACCCTACATTGAATCAGTTTACACCTA  
CTAAGGCCACTTATAATCCTGGTACTGGTGTAAATGGTATTGACTATTGGATCTCATTGAA  
AGACCACATCATCAATAGTTAATTTTGCAGTCCGGTGGTGTACATCTCCTTCTACAAAG  
ATGGCAATCATCGTCCCTACTGCGTATCCAAGAAGGACTGGACCTGCTGCTAAGGCAGTTC  
AAGCTGACATCGCTGTTGGTGGTTGTGTCAACTAGCACAGTTAGCGTACGTAATTCAT  
CAGCAAGAGATCAATATAAGCATAACGTGTTAAATGCAGTAGCTAATTCTGTAAGTGAAT  
CACTTATAACCACAGGTGTCTGTGCAGATGTCTATTCAACTGTTTGTAACTTAATTACCA  
TCATTAGACATAACAATTACAATTGCTTCTGCATCATCACCAGTTGATCATTGCGCCAGAG  
CTACTAATGTTTAACTGCATATGAGTGCCTTGGGGGATCAGTTTCTGGATCTCTAGAAA  
CAATTTGAGCAGTTGATTATCATACTGCAGTAACAGTTTCTGATATATAAATCACATTG

CTCCTGAGACGCAATAGCGTTTCAGAGATCCTGCAACCGTAATCAGACTTAATAGGACAG  
CAATCGTTGATAGAGCACCGTACGAATTGTTATAACATTTTCCTACGTTGGCACAAAAA  
TGCCTCGAGACCAAGGTGGTGCAAGCACGGAAGGTACCATCCGTATTAAGACTGACTCGG  
ATAACTACTTAGATGCTATCGCAAACGATTCACAAGAAGGTGCTTATGTTGAATCTATAA  
CAGGATCTGGATTTCGATCTCTTCCAAAATGGAGGACTACGTTATATTCGTCTTCAAGTAG  
TCCAATCACTAGCTGATCATGGAAGACTTGTGAGTATATAATACAAGCAGTTTTAGAAA  
CCTTAAATCAGGCTAAGACTAACAGTATCGTTGGTGGTGACTGGGGTGTACTGGAGCAG  
GTGTTTTTGGGTTCAATTAATGCGGTAACAGCTAGAATTGACGACCTCATTACGACTACTA  
ATAATGGCATTGCTCCAACAGGTTTCAGGCTTTGGAACACTGACCATCGATTATTTCTTTA  
ACAAGCACTTTACAATGGCAGAAATTAACGGTCTTGTTATCCAGTATCTTTCATATGTAT  
TAAACGCTGTATGCTGTAATGCAAGTGCTTGGACTGATGAATTAGATCTTGAAGATGAAC  
TTGTTGCTCTTATTTCTGGTTTACAGGCTGGTGGAAAGAGATAGCACAATTCAGAAAGCAA  
GCACGTCTCTAACTGATGGTCTTAATATTCGAACCATTGACAATGTTCTCCCTGCAGCGT  
TATATGGTATTGGACAAGTTGGAATCCTTGATCAGTATGTGATTGAAAATGGATTATCTC  
CTCCAGCGGAAGCTGGCAGAGCAAACAGTTCTAGTCAATATGCCCCGCAATTCCTGGTT  
TAGTAGCATATAGCGATTCTATGTCACCTTCAGCAGTCAATGATGTTGTATATGCATGGC  
GACACTTAATTGATATCGTAAAGGCTATATTCTCACCTGCGGGAAAAGGAACAACATCTG  
CACCTAAACAATGAGTGAATAATGCAAATTATTAACACTAATGACTTAAATGACGCAGTTA  
CCAGGCAATTTGAATCTGGTGCATGGTCTACTGATCAATAACACTTTAGAGAGTGTAAGG  
TTGGAGACATTGTGCATGATCATATTACAACTGTTACTTACCATAAATCCATAGAATATC  
CATTTAGATTTAGTGCTAGTTCGGGTACGTTTATTGGTGGATACGTTGTTACTTCCAGTA  
GTGGTGGTGAGGCAACGGTTATTGATAAGGACGGTGTTAATAAAATCCTTTATGTCAGTG  
GAATTGGATGACGTGCTAGGCTGGCAACTAATCGATTATCAGCTCCTAGCGTTGCTACAG  
GAGGCATTGCTTCTGGCTGCGTAAGTTCGCGATGCAATAGGCGAAATAATCCAACACTAACG  
TTAACCTTCTTGATAGAGCAAGAACTTTTAATCTAATATTGAAGGTCTTGTTTGTACTA  
CAAATATTTTCCCTCATCCCGATAATGTAATGCTGACGGTTGGATTACATCATAAATAA  
CAAATTCAGTAGATCATACTGCTGCTCCTGTGCGAAACACAAACTGCTGATAAGTTAACTG  
CTTCAACAAAAAATACTGAGCACTACACGGGAAAGTATATCACTCTAAATTCCTTTAAGA  
CTTTTGATAGTGATACTACTAAATTTGAGACCACCACTGGAACATTTGCTACTGATTCTG  
CAGGTGATACTACTACGCAAACATTTACATATCCAAGTTTATCAAGGCCGCTGTGTATA  
CTAAGACGTATATATAGCTATCTCTAGATGGTTTTCTTGGTACACGTCAAAGAGCATTCT  
TTTATCTTGAATTATCAAAGGAACGAAGGGTTACATCTTTACACCTTATCTTGCTGTAA  
CTGTAGGTGCCTTCGGAGTAAATCCTCATGGTAACGGATGGTATCGTGCTTATATTGCAG  
CAACACTCGGATTTGGCTTCTCTCAACTTCGTACACAAGTTTATACTCGAGGTTTTAACG  
GTTCACTCGTACATACAGGTGATGGATCTGATGTATTATTTGTTTGGGCTCATAAACTCA  
TTTGTGTAGCCCTTGATCCTTATACTGTAGTATCTGGTAAATTATTCGATTCAAACACTG  
ATTATAATATCAAGAAATTTGTTTTGGATAACCTTGCAGACCCTAAGGGTAAGGCACTTG  
ACAATATTTTCACATCTCCTTCGCCTCTTGATCTTTCTATAAGTTCTAAGAAGCTTCTC  
TCGCATCAGATTACAATAAATCTAGTATTCAAAGATTTATTCGTTATCATATAAATGGTA  
TTACACAACAGTTAGACCCGTCATCTCATTATACAGCTATTACTTACAACGATGCCATCA  
CAGTTCCTACAATCAACTATGGAAATCCGGAGGTTACGATGGTACCTAGTGGCGGCGTTA  
ACCGAGCTGATGACTTCCATGGGTTACCTAGTGACGCATCCGCCGAACATGCGACTGTTC  
CAGAGAATACTCGTGAAGACGTTCAAGTTTCTAAGAGATTTAGATTTGATGGTGACATAA  
CTGATAGTCCTTTCACGATGGGTGAAACTGTTGCTAAACAGGGTGCAGGTGGTGTATAG  
GTGTGGTATCCGGTTTTAACGACGATTCAACCTATAAGAATGGTCATGTTTCGTGTAACCG  
CAGGGGTTTTGGGCTGTTACTGACAATATTGTAGGTGCATCAAACCTTTGCCACCGCTCATA  
TTTGTGCTCTTGAAGATCGTGTTACATCATCGACCTCCAAGGACTGTTTGAGGATGATA  
TCCCACTCAAAGGAGATGCATCTTGACCGACACGACAACAAACAGGCTCCTATCGAAATA  
ATGCAGCGGTTACAGATAACACTGGAGGTACGCTAACAATTCATACTGCAAGTCTAACTG  
GAACATTAGACACCACTGCAGTGGTATATCCTCAGAGCTCGAGGAAGTATATTTATGTCA  
CGCAGATTGATGGTTTTAGATGTTAAGGTTGGTATTAGGCGCTTCCATAGGCAATATTA  
GTCTTGGCATTATATTCTTAATAAGTTGAATGTATTTAGGAAAGGAAATAGTCTGTATT  
CAATTGTTGCAGGTCAGCAGCAAACCAATTATGTACTTAGTTCTGGGATGGAGCTTGCTA  
ATAATTACCAATACGACATACCTGTTGGTGGAGTTACACCTCCAGTTGGAGACGTTCTTG  
GTGACTATTGAACAGGAACAGCAGTACCTGTGTGACAAAATCCCTTTACAACCTTTGGTTA  
CAAATACAGGTTCGGGGTTCGGGCAAGAGTTCAAGATATTGAAAATATGGGTTTTGAATAAGA  
GATTAGGTATCTCTTCTGTTGTTAGTTCAATTAATGACAATGAAGGTATTAATGTCCGG

ATAATTATGCTTCAGCGATCCTTAATGTTGATGATTTTAAAGCTCGTGGCAAACCTACCA  
TCAGAGGATTAGATGGAACACATACATCGTTCAAACCTCACTACAATTAAGTAACCTCAAT  
ATCTGCCTGACCCCGAAGGACACATGCTCACCTTTATTAATGGTATCCTTCAACCTCCTG  
GTGCAACTAATCCATACCCAGCGTTCTCGGTTACTATTCAGTTCACTAAAGCGCCTGCTT  
TGGGAGCATCCTTTACTGGAGTCTACGTTGCTAAACTAAGACAACCTTGATGATAGAAGTT  
CCGAGTTTGATCCATTAAGTCAATCAGTCAACTTGAAACGTAATGATGTGTTCTATTCAT  
TTACTACTAAGTATGATGGGGTTTAGGCAAGCACAATGACACCCGACAACAATTTTATCGTTT  
CAGTTAATTGTGTGATTCAAAAGGCGGGTATCGATTTTGAGATTATTGGTTGTTGAATCA  
TCTTTACTGAAGTTCCTCGATTTGGTTCACCATTGGTTGCTTTCTCTTATGTTGGTTCTG  
AGGTAGCCGGTGGTGTCTTCGGAGGTTGTGCCTCCAATTCGACAACGTGGCTTTATTGACA  
TTCAAGGTGAGACTGCAGATAGATATGTGCCTGTTATTGAAACATCACACTCTCTGATTA  
CATTTGATTATATTGGATCTGTATTCGGACTGGAAGCTAGCCGAACCGAATCTATAACAA  
ATGGACTTATTAAGAATGCTGACTTCACTGGTGTGGTTTCAGGATACCCTTTCAGACGTA  
CTGTACGTGGTGTGCTATCTCAGGTTTGTAGCGGAATATCCGTGTACTAGTTGGCGTTG  
GGGGTCTGGAACGCAGTGAACTGAACCTGGATAGCAAAATCCTTGAGATGCCGTTGAGA  
CCACAGTCGCTGATGGTTATTTTCGGAGCCAATCTTCCAGATTATGAAGAAGAATAATTG  
ATCCCGAGATCCAATAAATAACTAAAAATCGTAGCGAGGAATGGCTAAACAAGCACTAGG  
TCTTAGTTCCGCATCAAATGATATCTCAGGCGACACCCTGAGCGCTGGTAGTGACACGAT  
CAACGACAATTTTACTGCAATATACGGTGCCGTTGGTAATGGAACCTCACTGACTGTTAC  
TGTGACAAACCTTACTGTTGGTTCAGGTGCTTAGATATCACGGCAGTACGTTTTCGCCTTC  
TGACTGTACACAATTTACTTCAGCATTAGATGTAATGGTAAATATATTCTCTTCCATTC  
TAGCGGTTGTATCGTTATTGATCCTAACGGAATTGGCACCGTAACTATGTCTAATGAAAG  
TGGCTCAAACACTTTTAATGGGACTACAGGAATAGTAGACGGTCCCTCCAAAATTCGTA  
TAAGAATGAGATTACAACCTGTTGGTGTGCTCCTGCTGCAGCAACACATACTTATTATTT  
CTTCTCTTAAGCTGGGGATGATAATCCATATGTGAACATTAACAAAAACAGCAGGTGGAGC  
GGGCGATGTAAGATTAGAGGCGGTAACCTCAATAGCTGAGTAGTGGATTACTTTAAGAAAT  
TGAGATGAGTTCTGCAGCTCCAATAATAGCGAAGTCTTACGATGGACTGGAACCTAAGTA  
CGTTCCAGGGTATGATTTTCAGGGCACTTCAGTAGGTGCCACTCAAGAGCCCTTCGCTAG  
CATATTTATTGTCATTTGTGGCACTGCACCGTATACTACAAGAGACTGTTTAAACAATTGC  
AGGTGGAACCTAACATCACTACTGCAGTTGTTGATGACACTTTAACAGTTAACTTCTCTAG  
AACGTTGACCAGCACCATCAGCGATAACTGACCCTGATATGTCAGGACGTACTGAAGG  
TGATTGATTAATCTATAATGGAATTCCTTGGGTTTCGTAGTCGATCACCTATCACACGGTG  
GGAACCTTTGTGCTACTGGTTATGTACACAACCTTACGTTCACTGGTTCCTGGTTTCTCTAC  
AGCAACAAATGAACCTCATATCTAGTTGCAAATAGGGGCAAGAGATGCTATTGATCAGTC  
TAATAAGGGTGGCGCACATCCAATTAGGATTCAGAGTTCAGCAGGTTTAAAGTGGCACACC  
ATACACCAGTGGTCAATCTGGTAGTGGAACCTGCAGTCCTTTATTGGACTGTTTCTACGGA  
CGCGCCTGGCATACTTCATTAACAATGCACAATCCTTTCACAAGTGAGTGGGACTATCAC  
CGTTGTAAATTTGTGAATGACAAGTACTGTTTCCGGAACCTGGTGCTATAATCGAACCAAT  
ATTCGATCAAATATTTGGTGTCTAGCAGTCGAAGCATCTAATCGAGGATCTTGGTACGC  
TCCTAATGATCCGCCACGTCTCACTGTGCCTGGTTGCTTAACTCCTGATGAAGTCGCGAT  
ATCATAGCCAATCATTGCTGCTGATTCTGGAAGCATCACTCAGGTCAGAGTTTTGAGTAG  
AGGAAAGGGACATGAACCTCTCAGATTGCAAATTTTTCCTGAGCAGGAAGCACCACCAACGT  
TGTTACTTCATTTGATGTCAATAGAGTATGGCAAAGTCATCGTAAGTTTCTTACAACAGG  
TATGTTTACCTCTGATAGCCATTAATTAGTTAGTGATAATCACCCCAAACCAACTCAGCA  
TTGCTTAACTGAAAGACAACCAGCCGGTCTACAGTTCTCGTTGATAGAAGTTTTTATCA  
TACGATAAACTACCGTGGTGGTAAGGATGTTTCTTAAGTCGGTCAAAGAGATTTTCAGAA  
AAATAAAGCTCCTGACATCATGTCAAATGTGGTCTTACTTCATACTCTAGAATAGGGATC  
ATCCGCAGGAACACCTACAACTTCTCAGCTGATAGTGTAATAATAGGCGTGTGTAACAAA  
TACTAATACCTATGATGCGGTAATTGATAGTGGTGTTTATTATTATCAACGAGGTACAAT  
TGTAATCAGTTTGCTCTAGCTAATGGTGTATTTGATTGGGGTGATATACAACTCTACAC  
TTGGAATATTAACCTGGAAAGAGGAACCCTAGTTGTTGGAGTATCTAACTTTGATGAAAC  
ACGTGGTTCTATTGAAGTAGGTAGAATCGTAGATGAAGTCCAGTCACTGGTAGAGGTAA  
AATTGGGAAGATTGTAAGAGATAATCAGAATAATGTTACTAGAGTTTACATTAGAGCATT  
AACAGGTGATGCCTTGCAAGACCATGATCTTLAGTTAGGTTCTATTGGGCCTGAATTTAG  
AAGCCGTGGTGTGATCCAATATCAAGCACTCCTTCTAATACTGATTTTGGATCTGACGCGGC  
AAAGTTCGATCTTTTCACAACCGGTGAATTTTGTATCGCTTCCCTATATATTCAAGTAAC  
AGCAAATTATTTACAGAAATTTAATTAGTCTGACGAGACCAATCAGCCAGGTACAGGAAA

TCCTATCAGAATTATCGCGATTCTGGTGGAAACGTTGAATAACGGAACAATATATTACAA  
TACCACTGGTGTAGCAAAGCACCTGTTACAGATTAAGAATCAATTTAAGCTCCAGTATT  
CTTGCTGAAGAGTGTTGCCAAAACAATGATTTATTTCTTTGCGCTTATCACAGATATAT  
AGGAGGTTACGCGGGTGATGAAAATTACCTGACCCTCAATTGATCTGCAAAAACATATAC  
TCATACTAAGGATTATTACTAGGGTCTTATATCAAAGTAATAGCTGTCCTCCCAACAC  
TATAGAGAAGTCGAGTTATATTGATGGACACTCAAAAATTCTCGGTTTATCTTTTGGTGA  
TTATTGAATTTACGGACGCCGGGGATATAATTCTAGTGGTGCCGTAGCCGAAGAAACCTC  
TCCTTATCTGGTTGGACCCACTGCTGAAGTAGCGGGTGGTTGTCCTCAGGTAGATGGAGT  
ACCAACGGTAACCTATGCTCTTACCGTCTCTAATGGACAATTCCTTTTTGGAGGAGCTCG  
TCCAAACTTTTTAGGATTGGATCGCCGTAAAACATACATTTTCGATTAAAACGACGCATC  
TAATAACAGTCAACACTTACCAACCTCAACTACGTACCATAGTTGGCATGGGCAAATCG  
TGTTATCATTGGGAATACTCCAAATTTGGAGTCTGGCAATGGAATATAATATTATTTGA  
CGGGAGCGTAGGAACCTTTCAATCATATTTGTAAGGTTTTAATTTGGCAACATCTCGTAA  
GGTACGTTTTACAGTTGCTGTGAATCAACTAATGCGTTATATTTGTTTGGTTATACAAC  
TGCAGGTCATGGAATTATCACTGTGCAAGAAAGATAGGTTCTAGGAGATGTGGTAGAAGA  
TAAGAAGTACGATTCCTCTATAGGGACATTTGATGAATTTATCGGTAAATTTGCTGTAAC  
ACCAGAGTATCCTAACGGAATCTATGCATACATCATGAGTGAAGATAATAGTGGTAATCC  
TGCATATTCATATGGTGTGGGTCCTACGTTTTACAGGACCCTACGATTTGAAGGAGATAT  
TACACCTGCATAACCAACTGTATGCCCAACAGATGCAGAAGGTGATGAAGTTCATGCGGA  
TGATGGTAGTGTTCATATAGCAAGATGACGAAGAACGGTGTTAATTTCTTCGGACATGC  
GAGAGCAAAAATTTCAAGGGGAAGGATCTTGCTGTGGCTCTCTACAGGTCAACC  
TGTTACTGGTTTAGCAATACTTGATGTTGGTTGAAGTTATGCTACTCCTCCAACAATTAT  
CTTTGAAGGTGGTTGTGGACAAGGTGCACAAGGTGCTGTTGAAATTAATCCTCTCGGTAT  
AGCTCCATATAGTACAATCTCAAATCCAGGTGTATTCAACCAAGAACCTCAATTTATGTG  
ACCCACAGGTGGTGGTGGTATGCGTGTCAAGCCAGAAGCAACTGGCGATCAAGGTGTTTT  
AACAGCAATTATTATTACATAGCCTGATAATGGATATACTTCAATTCCAAACGTTGTCTT  
TTCAAATTTAGTAACACTTAATAGAAAATGTAGGGCACGTCAAGCATTAAACCCATCAAG  
CATTTACTTCTCAGGTGGTGTAAACTGTTACCTCGTATGATACTGAAATATATGTTGA  
TTCGCCAGATGCATTTCTGGTTCTGGTCAAATGAGCCTTAATTATGAAACACTCACTGA  
TCCCTCTAAATCAGCAGGAAATTTTGGTGGTCTGACAAGGGTTCTAAACTTTCATTATGA  
TCTACGGGTTATTCTTGACGCCTGTCAAATGATTCAAATGGTGGTTCAACGAATAAGTT  
TAAGGTTAGTCATAGACTGATGCGTAAAGCTGAAATTTGGTACTAACAACGTTGCAAAGGT  
ATTAGACTGGAATCCGGATACCACCGAACTACAAGTTACTGTTGAGGTTGATTACTTAGC  
ATTTACTGACGGTGGTATTACTTATACTGACAATGCAATCGTACAGTTAATGCAGGAGT  
TGCTTCTAGAGATCATTCTGGAATCCTACCTCATACTGTGCTTACAATTAAGATTCA  
TATATTCTTATTGACAGAATCTCCTCCTCTTTTGGCAGACAGATCTTTCCAAGATCTTCG  
ACCATAAGCAGCAGGTAGTGGAATTAAGTACCTAGATAAATACTGGCACTGATCATGCTAA  
TCAAATCAGTCTTGGAGTAGGTATCTATAATTTCTTTGGATGGTATGGGAGAACATCAAGG  
AAGACCAACTACATCACTATCCCACGTAGGTGATTATGTAAGGCTAGAACTGTTCAATT  
CACGTATGCAACAATTATGACTGCATGTGCTTTGAGTGATGGTGGTGGTGGTGGTGGTGGT  
TCTAACTATCAGACTTGAAGCAGCAAATGGTAATCGTATAAATTATAGCGATAATGAAGT  
TGTTAGAAGAGCAACTTCTGACGTGAGAGGAACTCTTGTTTCTTATGAACACACAACGAC  
TACAGTAGTTGTGGGTAGGATTGTGCCATTTTCATCCTCGTAATATCAAGGTTGTTATTGG  
GCCATATCGGTATGAGGTTTCTACAGTGGAACCTTTAGTTGATATTCATATACAAAATGA  
GGTCACAACTATAACCGCTGCTCCAACAGTAACGTGTGAAAATCCTGGAAACACTCTACC  
GACTGGAACCTGATTTTCTCACCGCTGCAGGAGACCAAGTTTCGTCTACTACTATCAATAA  
TGCTGGATATGGTATTCAACGATCTGTTGACGACACATATAACCTACATCCAACAGCAAC  
ACTCACTAATGCGACTGTTGATGCCACTGGTGTGGGTGCAGTTGCACAAGCAATTCTAGG  
AGGTGAGGACCTCGTGGTGAACGGTGGTGGACTATAAAGAATCCAGAGTATCGAATATAA  
AGCAACTGTTAGCTCGTAACCTCAAATATAACCAGGAGGACGATAGGATGCCAAAATGG  
CAGACTTCTTAACCGAGCAACATAGAATATTTTCTCCGAATAACTTTATAACAGGACTGG  
AAGGTCCTGACGCTACTCAGAGTGACGTGGAAGCGGGAACCTGCCCGTGATCGTTTGTAAT  
TTTTCATGGGTAGCCCTCAGACTTCGGATAATTAATACTCGCCCCACGGGCAGTAGACT  
CATTCTCAGAGTTTTTTGGATCGTAAGATGTCATGATATCGATGCAGAGAGTCTCGCCT  
CTAACACGATTCAGGTGCTCGTAGAATAGACTGGGTTTCCCCAGAACAACTACGTGAG  
GACTAGGTTTACCTATGAAATGTATAAACATGACTATTCTCCTACCAAAACTGGTACTT  
CAGGTGCTACCAAAGTATACAGCTCAGACTTTTTATGTTGTGAATTCACAATATCAAGATT

ACAAAGTCATCTAAAATGGAACCTATCCTTCTGAGCTCAAAGGACGACCTTCCACAGTTG  
AACCTGCAGGTACTTCTGCTTAAATTATCGCAACTGGTGATGGTTATCGTTGGAAATACG  
TGTATCTAATTCCCGTGGCATCGGTTCTTAAAGTTTTATCAAATGCCGTCATGCCAGTCT  
TTATCAATACATTGATAAAGCCAAATGCAGTCGTAGGTGAAATTGATACTGTTATTATCA  
AATACGCAGGTTCCGGTTACAACAACGGAACCTATGATAATGTTGCAGTTACGGGTGATG  
GAATTGGTTGGTGTGTTTCTATTGTTATAATCGGTGGTAAGACTTGCTCTCGTGTAGTTA  
CTTCTGGTGAATCACAAAATATAGTTGGTAGAATAAGTGTGACAACATCCCTGGTATTG  
TAACACGATCTGGCGGCATCGTTGATGTTTTCAATCATCCCCAGTCGGAGATGAATCTG  
AAGCATTTGTTGAACTGGATGCTGTCCGTGTAAAGATCGACGACACGCTAGCATATTATG  
AAGGTGCAAGTGACGTCCCAATCGATAACGCCAATCGTCGTATTGGTCTTGTTAGTAATC  
CTGTACAGTTTGGAACTTCTGAATTGATTCCTGATTTAACGGTTTCTGCCTCAAAGGCCG  
CACTCATCTCCCCGACATTCCAAGGAATCTATGTGCCTGATTAATTAATTACTCATAAT  
GAGTTATTGGTTGAACCCACCTACTGCTCGTGGGCGTCTTATTTATTGGAATGCCACCA  
CTAAAGTTTTGAAATATTATCAGAACGCTATTGATGGTATCTTCCCCGAAGTTGTAGGGA  
ATCAAATGAGTTTGACGGGTCTACCGGCATCAATGGGGCTACTTCTGGTGCAGCTGGTG  
AAGGTCAACCAGATGTTGATCACCTGACTTTCATACTCTTCTTGTAGAACATCAAACA  
GGTCAGCATATGAGTGGGGTACGTAGTTTAGCAATGGTTATTCCAAACCACACTTCCGGT  
CAAATAGTGTTCAGGTAAATTACATAGATTATAGATGAGCAATCACTGGTGCTAACTACC  
AAGTACGAGACATCAAATCGTATTCGAAATGTGATGGCACAAAACACCAACCTAAACGC  
CACACCATATTACGACAATTTTTAGACGATGCAAACTTCTATCGCGGTTTGTGGGCA  
TGTGTTCCCGATTCAAACGGAGGAACTTACTACGATGCGAAGCATCATGCAAAACCCAGT  
GGAGAAGGGTGGTGCCCACTTGTGTAAGATGGTGCCATGGTTGTTCCAGGTCAAGTTGG  
TTAGGACCTGACTGTCGATAGCATCCTGCTCCAAGAATCTTTCTTAGGCGCTGATTTCTGA  
AAGTTATAGA ACTCAATTAATGATAAGATCATGGCTGGTCTTGTCTGCAGGTCTAAAGGC  
AACAGTTCTTAAGAGTATTTCTCTCCAGAACCAGCTAAAGATTATATCACTCTACATGT  
AATGTTAATTGAGTCTGTTGCAGCTAACAGCCCTACAGCAACTTTCGCTAATAATGAACA  
ATCAAATACGGATACTGATATCACTTTCGGAACCACTTTGATTCAAGTTGGTTCTCCTTT  
CGCACAACCACTTCATACTGGTGCTCTTCAAAAAGGTTCCGTTGCTTATGTGCAATCTGG  
TGTATCTTTCATCAGCGTGTCTTAACTGAGGTGCGATATCAATACAGACTTTTAGATCA  
ATATGGATGCAACACCTCCTTTCGTTTCGGGCTTAATATTCAAGAATCAATCATTGCCAC  
AGAAGAAGAAATTAGGCTCAACGATAATGCTGCGGGTACATCTAACTATGCTGCTCCTTG  
TTCTTATAGAGTTAGAATAACGATAGATTTAACTAAGAATCTTCTTACTGATGACGCCGA  
TAAAATCTTTATCGAACTCCTTCTATCAAGGCATGAAAGGTAGTAAAACCTTCTGGCTAG  
AACTGCGTATGATGAATTAGACAACAGTATTGCAGTTGGATCTTTTGAGGGCGACTGGAGC  
TTACGTTGTTAAAGACTTTGAGGTA ACTGTTAGAGAAAACCGTGATGATGGTTTAAACAC  
TGGCATATATGCTGCGAGTGCTACAACAACATATGGTGCAGTTGCTGCAGAATCACAGTA  
CTCTGTTGAATGTGGCGCTGGTGTAGGGTACGTTAGAGGATATAGAATTAAGAGATTAGC  
GTC AACCTTCGTTGACTTAGACAAACCTCGTGA ACTGATGGCAGAGCAGAACACTTTTGT  
TCCATTTGAAATGGGCAACTTTACACCTGTAATAAATGTCTATGGATTCCCTAACGTTGT  
AGGTTCTACAAGCACTAATGCATATCAA ACTGTAGAATTAAGTGATGGATTTACA ACTAC  
ACCAGGTGATGCGAATGGTGTGTTATTTCGTTCTGCCCGGGTTTCTGTATGGAGCCTGT  
TGTTAATCCTGATAATCTTTTTGGAAGTGCTCATGATCAATATAAGTTGAGTATCTTACA  
TGCTCCTATGTTCCAGTTTTTCGAACTAGCAACTGCTCAA ACTATCGCAGCAAGTTCACT  
CGTTATGGGGGAAA ACTCGAGTGATAGAGCATATCTAGTCCATGCTATTTCTAGTGGTGA  
TTCTCTCATTATATATCAAGTAGAAGGACATGTTCTAGAAGTTGGGATGGTCACTGTAGA  
TTGACACGGAGTTGATACTATCTCTGCATTACGTGGTTCTACATATTCTGTTCCCTCGTGA  
TTATGTCTCCAGAGATGAAAGGACAAATGCTGTTTAAAGTTTCTGCAGAGGCAATCTAAGA  
AAATGTTTTACCTGTTGAGGGTTAAACCTTTACATACAGCACTACCGCAGGTAATGTTCT  
AACTACCGTTGCCGTCAGTGCTGCTTATGGGGCTAGGACCGCAGGCGCTGATACTATAGG  
TGCATCTGACGACACTACTGATGCAAAGGGAAGAGGAGCAACATGCACTACCGTAATCGC  
CGTTTTTGGTGTGTAACAATTTCTATTCTTAAAGGGTGGTTTTGGGGCACGATGTAGATGA  
CACAGTTAAACTAGCAGATGCTAAACTTGGAGGATGCGGTGATGCTGCACTCACAGTTGA  
TGCTGCTACAGTTGGTCTTCGATTGAGGTTTTACAAACA AATTCTGCTTTAGATGTAGG  
ACCTGGTCATCAAGTATCTTTTAGTTCCGCATATTTTATTACTGTTCACTCTGTCACTCG  
AACTGCATTCGCTACTACTAATACATCAAACATCTTGAATTATGGAAGTCAACTTGTA AA  
TGTACCAGCTGGTTCTGCTGCTACTTCTGCCACACCTATACTTCTGCAGTTGGATTACG  
AACTAAACTGAATGGAATCAAGAATGCTGATATTCTTAGCGATATGCCAGAGCAGTAGGT



TCAGAGTATTTATGATGAATCTATGATTGTTAGAAGAAAATGTGATGCTGAGACTGATGC  
TACTGACTCTATCTCTATTACTTTACCTGAGAACGAACAGCGCCAAGCAGTTAGTGATGA  
GAAGGATACCTTTACAGTTCTTGCAGGCTCTAACCCACGCACCCAGTTGTTGATCAGCT  
GACTATCAATACTACTAAGTCAAGTGCTGCTGAATATATCACATTCTCATCTTCTGAAAC  
AACAACTTTACAGATTGCTTACTTAACAAATCTTACTTCTATTAAGTAACAGCGAATAT  
CTCTAAGAGCGTTACTACTAGAAAAACAAAATCTGGTAATCAGATCTTTGTTCTTAAAGT  
TAACAAAACCACTCAAACACTTGATAATCAGAATGATATTCTAACATATTTAAATCTATA  
CGTAACAAGCATTCAAGGTAGAGACATCTCTCTTTGTTTAGTTGACTGCTATCTTCTTCA  
CGCTTTATATGGATCTCTAGATGATATTGGTCCGGTTATTCAATCTCTAACTTTAGTCGA  
ACCTACTATCTTTGCTACAGGAACTAACGTTAGTGGTAGAACTTCAACAGCCATGGCAA  
ATTTGTTGCTTGCTTTTAGGGTACCCTGAGACTTAAAGTTGTTAATATATCTGGTATATT  
CCAACCTGGTGGAAATTCTTGATGGTTATGACAGTCATACTACTGAAATCAATACAATTAT  
TAATGTTTCGTGCACGAGCTGTTATTGTTGATTCGAAAGTTGTAATTGAAAGTTACTTCAT  
AGAATCAAATCACACTGGTTTTATGGAGGAAATTCGGATTATTGTTTCGGAGGATAGGTAT  
CGTTGCTACGGTTAGAAAACATAAATATTATAATCGTCTACTGCAGTCATTCTCAAACCTGG  
AGAATGATTGGGTGGTCAATCTTACCTCGTTACATCATAACAGCCATCTTCTTTGTGTAA  
AGTTCAATTCCCTTGCTGATTCCGTACACTTTCGACGAGGTGCAAAGCACCTGTTAATCG  
CACAGTTACGGTAGCGTCTCCGGAATTTGTAAACTATTCTACACGTGACTTTAAGTCACG  
TGTGATTAAGGTACCTCGAATCTGTAATGCTACAGTATTTGATATTCCAAAATTAAATAG  
TAATTTCCGTTGCGATCTAGTTTGGTATCCTCGTAGCGTTGACAAATGTATTGTCACGCC  
TAATGGTTAGTTCCAAAGTAATAAAGGTAAATCTTTCTATAGACCTAAAGAACCTGATTC  
CCTAAAAGATGGTATCATTATAGCAACAATATCACATACACCATATGGTTTCGATCCACT  
TGCAGAGGTAGTAATTAACGTTCTGATAATAAACGTGATACCCTGCGTGATATCGGTGG  
TTTAAAACGGGAGATTATTTACAGGTTGAATATTTTACATCACTCAACATGCTTGAGACTGA  
TACAATCAATACTCAAATCCTTGAGGCTAGTGGTACCTATCGTTTGAAGAAGGGATTTAT  
TGTTGACCATTTTGTATCATAGTTTCGCTGATGCTGGAGATGGAGAGTGTTCCTC  
GCTTGACTTTAGACGAGGGTATGCTCGTCACTCACATTACACAACCTAACGAACCTTTAGT  
AATTAATATAACTTGGTCAACTCATTTTCAGCAAACCTGGTCCCTCTAATTACGTTTCCAAA  
TACTGAAGAGGCGATTGTTAATCAACCATATGATTCTCGTGTTGAGAATATACTCCCTG  
TAGCGTTTTTGCATTATTGGTCGTATTACGTTAACACCTGGTTCTGATGATGGTTTGA  
GTCTAATAGACTTGCTTTATCTGTTCAACAGATTGAACGTGATTGCTTACAAGTTTCTTA  
TGAATTCAATGTTGATCAAAAATCGTTTTGCTACAATTCAATCGGGAGCATGGGAAACTAC  
ATGGACCGATGGAGAAGTCATATCGTCTGAGATAACTAGAACTTTCATTGGTTTGTAAA  
AGGTATCGGTAGATGACCGATACCTGACGTTGAGGATGGTCTTTGTATGCGTCGTGTTA  
TCAGACTGATAAAAATCGAAGTTACTGCAGATCAAGTAATATCTCGTGTTTGAACGCGAGT  
TATCCCTATAATTGATCGTCAATCTGTGGGTGATGCATTTCTTTCTAGCACATCTATGCC  
GTCGTTTCGTTCTATAATCGTCGTAATTGATGGTGAAGTCTAAATCCAAGAACACGATA  
CTATTCATTCTTAGACGGAAAGGGATCTATGGATTGTTGATTCCTAAGATTATCGAAAT  
TATTAAGACTGTACAGTTCATAGTAGAACAACCTCCACTCCCTTTGGTATTGGTAAAGC  
CGTAACAGCTGAGATTAGTGGTTGTAAGTCTACGGTTGCTGATCGTGATGATTTTTTAAA  
GTTGAATCCCTATGATGACACAACACTTCTACGTCCTATGCAGCTCCAACCTGCATTCTT  
GAACATTGATAGTACTGAATTTTCTAAGCAGGCATGCGGTGACCTCAGTGGGAATAGCCA  
GGGTCAAGAAGTATTAGTTGTAACCTTCTGGTGCTCGTGCTGTTGTTAGAGATCGTCGTCT  
AATTCCCGATCGATTTGGTGAAGTATAGGCATCATCCTTTGTTCTAATCCTGGTGTAGA  
TATAATCCCAAGGTGGGCAACCGGAACCTAGAACTTAAAGACTTTCTACATCTGATTTTTT  
TTCACGTCTTTCTGATGCAGTCGCATCTTCGCCTTAACTTCATAGGAAGCAACAGGTCC  
GCTCACCGGATTTTAAAGAAAATATCTTGGCTATGCATAAGTCAGAAATAGTGGATGAAAC  
TGTAACACTTGAACAAAACAATGCAAACAACCTAGAACTTAGAGTAGACAGATTTGTTGGTA  
AGACCGTCTCGCGCAATCCTTCAGTGTTGATCAAGTCGCTTTGCGTGGCCTTACTTCATT  
TCATGTTTACTTCGTTAAAAAGGATGCAAAGATTGCAGCTTCTATGCAAATCAGAACAAT  
CTAAAATTATTATCCTACAACAACGATTCTAGCTTTCTCTGATGTTAGGGTTGAACCTGA  
TCAGGTTTCACTTCTCAGGATCATCTTCAGTTGCAACTAGATTACCATTTGATGCCTCTGT  
ATATATGCCTCAATGACAAGAACATCGTTCTGTTCTCCTTTGTGACTCGAACTTATATCA  
GATTTGGATTTCTAGAACTGGTGAGATTGAAATCGATGGTTACAGAACAATTTCCGAACA  
AGCTTATGCAACCGTTCTACTCAAATCTCAGAACGCTACTACCTGGACTGCAGATCAATA  
TGAAAACCTTAAGTTTATTATCAACGCTGCAGCCATCTGTAATTCTGGACAAACTAACT  
TGAAATGTACAATGCGGTACTCGGTAGAGGAAATGGTCGTAACCTTAAATCTTCGTTCTGA

TGCTATTCTTACATGCCAACATAATGATTTCTTCCACTTAAGTCCACAACATTACCTTA  
CACAGTTGGGTGTCGTATCTATCAAAAGACTACTTTGCCAGAGGTTACGAATACTGCAAG  
AACTGTAAAACCAGGTGGTGTTC AATTAGCTATTAATGATGTGAGTGGTGACAGGGCAGC  
AGGATCTAATAGTGGTGGAGTAATTTCTAACCGTGTTGATTCTTCTAAGACATTAGCAAC  
TATGGTTGTGACTGGGGTGTATTCTGGCTTTAGAGTCGGTGAAACAATTACAGGTCACTG  
CTCTACTGCTCCTTCTACAGAGGTTGTAAGTTGGACTCAGGGTAGGAATACTCATACT  
TGAATATGTGTCTCCTGAGTTTACTCCATCAACAGAACTATTATTGGTGGAACCTCAGC  
TAGAACTGAGACAGTCAGCAGTATGACTTGCTCTGGATACAATGTTGAGTTTGCTGCAAT  
CCCAGCATGCTACCCATCAGGAACCTCAAGCAATTCTTCAAAACAAGAACGACTCGTGT  
ATATCCTAGTTATCACTGTATGCACAGTGC GCCTAGCAATGTGATTATTGACGGCTCTGA  
ATATGACGTTTCTGATACTGCTTTGACTGCATAAATATCTGCTACATATAACAAGTATTGC  
TGCAGTAGCCGCTAATGCATACCACAAGAATAGTAACGGTGCTGCTATTGGAACCAGTAA  
CGTTTGTTACATTATGATTAATGATGTAATTATCTCTTATTGTGCAAGCTCTAGACAGAA  
CCAAACTGGTACGGTTCATGATCGTGGTGATGGAGTGACAACCGTAGCGCCCCATGCGGA  
TGAGTCTGTAGTTGAGTGATGTATCTTAGATGGTATTCCTCTAATGGAAATTA CTAACAC  
TCATGCATGACTTGATGTGTTACATGGGAATACGATGAAATTTCCACATCATCTATTGC  
TAGATTAGGACTTCTTGTTGGCGGAAGAGGTATCATAGCATCACAGAATATTCAATACAG  
CAGTCTTGTTCCCTCAGATCCAGACGATGTTTCTTCTAAGAGTGACATTACTGCTGGATT  
TAGCACACTTAGTGGTACGTCTATCAATGAACGCTTTATTTTGATT CGAACATATATCTC  
ACATGCTGAAGTATTCTCTTAGATTATGTTAAGTCAGGATAATGCTCTGATTCCAGCACA  
ATTAGGTTGTT CAGCAATCAAGGAATTTTCTGTAATTAGCGGTGCTAAGTCATTTAGAAT  
GGATCTTACAATGACTACTGTTAAGACTACGATTTCTCCTGTTATTGATACATATAGTAT  
GTCTATCACTTTGGTATCTAACCTTAGCAATAGTACTTCAGATCCTAAA ACTGCAAAAGT  
ATCGGTTGGTGATGTACCTGATGCACACAATATTA CTAAGAGTGCAACACTAACTAACCG  
TTCTGGTGCTATCAAAGGTTAGGTTGTGGGATATCGCCACCCAACAGTGAGATTATGAT  
TCTAGATAGAGTCCGTCATGTTGGATCTTCTGCTACTATAGTACA ACTTGCATTTGACTT  
TATTCCAGCTGCAGGTTCTAAGGTTACTGCAACTACAGAAAGAGAAATATATTCATCTTA  
TGAATCTGAAGTATCTGGTTTGAGTTTGATCAATCTCAAATCAAAGTAGTGTTAGTTGC  
TCATAATCAGGCATTAGTCCAGTTTATCAAAGGTTAAGAGCAATCCCTCTTGTTGTATA  
ATGAGAATTCCTGTAAAAGACGATGCAAATGGTTTAGGGACTCCTATGCGTGTTCCATC  
CAGTGTGCTGCTATTTCTCTGTATGAGAAATATGTGGCAGCACATAACGCAGAACAAAGTC  
AAGAAAAAGGAATCGCCTACTTTACAAAATGACGTTTCGGTGTTGAAAAGAGATATGAGT  
GAAATTAATCACGCTTTTTTACGTCAGTCCAAAACAACATCATAATGAATGTTGAAA  
AAGTATCACAAGGAGAGATGCATTCTCCATTCAAGGAGAGATATGCAAAGTTGATTGAAC  
AAAATCTACACTTGTCTGCGAAAATTTAAGAAAAAGAGGTTACTGCACTTAAATTCTTGG  
GTGCTATTGAAACAATAGATTATCTTACACAGGAAGAGGAAAAGGCAGTTCTACTCCTC  
CTGATCCAGTTCCATCAGAATAATTCGAAGGGGGGACAGTCCCCTTCTTTTTATACCATA  
AATCATAAATATACCATAATATAATCGACATCTCGTGACAAATGGGAAAGAACTTCAAT  
TAGGAAGATGCGGGACACACGCCTGGGCGCATTCTAACACGATCCTTGCTCAAAGTGAAT  
TAGGGATGGAAGTTGAAACGCGTCGTTTTAAGATCGGTGATGGTGTATCTGCATGGAACA  
CCTTATGGAACGAACGTCTGGTAGAGTCTACATCTAATCCTGCTGATACTTTAGTTCAA  
GGGATGCTGATGGTAAGCTATCTGCAGGTACCATAACTACTACAGTTATTGATAACCCGT  
CTATTGTGTGCACCTTTGCTTCAGCTAGACAAATCCCACGCTCTAATGAGATAACTGCTT  
TGGGTATATATGCTGGTTCTCAAATCGTAAATCTTTCTTCTGAATTAGCATCAGTTTGTA  
CATTGCCACATAACGATGGTACGTCATCCCCCTCCGCAACGCACAATAAGGTGACTATCG  
ATCCTAAAGGTAGAGTAACTGACGGACAAGGTTTTACTGATTCTACCAACTGAACTCTTG  
CTGATTATGCTCTTGAGGGAACCAAGGGGGGAACATCTTCAACAACCACATGATTTAGACT  
TAGTTGCTGTTGCAGGTTTGACCAATTCTGTTATGATCTTTGGAAGTGCTTGTAATACTG  
TAGCAACTAGTGCTTTTACTGGA ACTGCGCCAATAATCTCTGAAAGTGTGGGTGTCGGTA  
TTTCGAGTAACCCAAATACTCATATAATTGCCACTGCTGTAACAGCAGGTA ACTATAATA  
CGGCATCCCAGACATCTGTATCTCGTGCAGGTGGAATGCTGAGCCCTTTGGCACC GCTA  
CAGTTAAGGCTACTAATTTTTCTGCTGAAGCCCATGGTTGATTGACAAGTGCAGCAGATG  
TGCCTTTCGCTACTGCTGGAGAAGGTCGTAAGTACGCTACCGCTAATGCACCTTCTACTT  
ACGTTAAATATGACATCATAACTAACGTATAAAAAGTTTATCAAGCCTTCACTGGCATTG  
CTGCAGGAGCATGGCCACCATCTGAGAGTAGCGGTGACCCTTGCGAATGGAGGTATCTAG  
CTTCCAAGCACA ACTGCAGATGGGATTGATTAGTTTTGCACAAGAAGATTTAGACGTTG  
ACGCGAACGGGCACGTCACCCTCACCACCGTAGGAGCAGATAATTCACAAATACAAAATA

ATAAACGAATTTTCAAAAAACGAAAGTCTGTTGAAAATCTTGAAGTGGATAATAAACTTA  
CAACTTCTACCGACAACACCGGTTCTAATGAATTAACCTTTATTA AAAATCAATAATAGTT  
CTGGCGGTTTATTATTTGGTGCTAATAATACTGGTGATATTGGTGGACGAAAGATCGATG  
TAAATGTTTCGTTATTCATTTATCGATCCTGATCTTGTTATAGATGGGTGAGTTGCGCACA  
CACTAAACAAAAACGGTGATGGTAATCTTACTTTTCGAACTACTGAAAACCTCATCGTGTG  
CAAGATCTTTAACAGTTTCAGGATCAAACCTATGGTTCCGGAACCTAACACAATCACACTTA  
GTGCAGAAGATGTAGTTGATAATGATGCCTCAGATTCAAACGGAGACGTTTCATGTGCGAAG  
ATTATTGATTCCAAGACAACAACATTAGTACGTCTAATGCCAATATGCTCGTTAATCATG  
GTGATGATCGTCTGCCAGTCAGCTAGTTCGTGTTAATGGAAATTTACATGTAGATGGCT  
TGACTACGACAATTAATCCAACAGTTAAAACA AATGATGATCCCATAATTACTTTTGGTG  
GCGATTCTGCCCCGGTAGTGATGACGATAAAGATCGCGGACTGTAATTCTGATACTACG  
ACAATCAAGCAAGAATTGGGTTACTTGGTTACCATGATTCCAAGAGCGACCTCGGAGGAC  
ACGTCGCAGGGTATACATTTTACACAACGCCACAAATACTTGAGCGGTCTTTAGTGGAA  
TTGGGTCCGATATAACTGCAGGAAATTTAAAACCTCACAACA AATATTA ACTTAAACATCTA  
ATACTACAGGAGACTTACTAGGTACTGGTGGTGATGGTATTGGAGATAATGGTAATATTC  
GTGAATTGCTAGATGTCGATGGCGCAATCCGCGCTACTAGCACTTCTTGATTTGATCAGA  
ACATAGTATTGGAAGGTGCTTCTAAGACATTGTCATTGAAAAATGGTGGTGGCGCATCTA  
AAATACA ACTTCACGCGACTTTAGGTAATGTACAAATTGGAGGTATCTTAACGAATACTT  
GTTCTATTGACCCAACCAGCACATTAGATGTTGCATCCCCAGGTCCTTATGAAGACACAG  
ATGAAACCACTGTTGCACTGAATGGTGGAAAGTAGTATTTATCAGATTCAATAAAAACATT  
ATTGTCCATTTAGATTTGCGTGCGGTGAATATGTTCAAGGTGATACAGCATTCAATAGTA  
ATGTTTTAATTTTCGGCGTACAAAACCAAAGAGGCCAGTGCTACCGAAGCATTCCGGTAATA  
GGACCTATCCGCACACCAAATATAAATTACGTTCCGCCTCAACTGCAGCGTATGCTCCTT  
CATATGCATCTGATGATACTTCTAACTTAAGAATCTATCGTGGTGCCGGA ACTCTAACTG  
ACCTCCCCATTGGTGTTGATCTTTATATTGGTAAATTCAACTTTGGTGACAGTGATTCAT  
TCCAAGTATTAGGAGAGTCAGATAAAAACAACAAGTCAAGGAACATTGATACTAGAAGGTC  
AAACA AATATTAATGACCCTCGAATCCTAAATGCTTCGAACGAAAAATTAAGATACAAA  
ATTGATCTGTTGCAGATAAATTTTCAGTCGATACTGATAAGGGTAATACATAAATTGAAG  
GAACACTTAATGTAAACGGTGTA ACTGGTATTGAAGCAGAATTCGCATTTACAAACGGAA  
CGAGAGCGAAGTTCTTTCTCGCATGAGCCTCAGGTAATACTCAAATCAAACGCCGTTTCA  
CTGCTGATGGTCATATCGAATTA AATTCAACACTTGATGTTGATAGTAATAAGGCACTGG  
GTGCACA ACTTACAGAAACAGGTA ACTCAGCGTTCAGCAGA ACTGTAGCTGTTGATGCAA  
ATTTTGCAGTCAGATCAGGAACTACTGAGAAGATGATTGTAGTATCTTCTACAGGTCCCA  
TAGCAACGGATTGAACTCTAGTTGTTGCATGTCTCACA ACTATCAATGCTGCTCTAATTT  
CTCAAAGTGATAACGAAGTAGTTGATATGCACAATTGTCCTGGCACA ACTAAGCTTAGCC  
ATGATACTGAAAGCCGTAAGAGAAATATTATCGGTTCTGTTGGCAGTTGCTGTTGCTACTC  
AGCTTAATAACTCCTGGTGGTTCTAACGTTGTAACCTTAACAAAAATCACTCAGCACA  
CTCTGACTGGA ACTTATTCTGCTGATGGTGCAGTGTAACAATCTGGTGGTGCAGGTATCG  
GGAAAAACCTTGCTCTTGGAGAAGGTCTAAGAGTATATGGAGGCGCTGAACTTACTGGGG  
CTCCTGGTCTTATTAATAGTGCTCATATAGCTGGTGCTTTAACAGGTAATGATAGTGTTA  
CAATCGCTGCAGAAAATATGATGTACAAGGTGCAGCTTGCATGTGCAGCGACCAAGTATA  
AAATCCATACCGATAACGGTAGCTCGGATATGAATTGAACATTGGAAGTGGCAGGTGGGG  
TAACTGCACCATCTGACTTTACAGTCACCGGTAATTATACAGACACTAGAAGAACAATTA  
CCGTCCATTCTACAGTCACAACAACGCTGACCTTGTCTTACTGTTGGGAGTGATGCAG  
CACCCGCGTCTAGAGATTA AAAGGATCGTGGTACTGAATTTTCGTTATTATGATGGTTCTG  
CTAAACGCGCTATCTTCGGGTTTGATAGATCATCCTCCAATTCCAATTCTACCAAGTA  
CAAAAAATACTTCTGAAGTTCTCTCAGGAACAGATGGTGTCTGTAAGAGCAGGTAGTTTAA  
ACCTAACTGGTGTGGGCACAGCTCTTGATGTTGATGCTCATGCAAACATTGATGGCCCAC  
TGACTGTAGAAGGTGAGATTATTTACAAGCATCTTCAGATCCTGCTCTTGCTATCCCAA  
TAACATATAAGATTAATAATCTTAACTTAGACTTACTAGTTGGGGCTACAACCGCAACTG  
TTGCAACTCAATCCAGATTTGTTCTTCGTGATTCCACTGGTTATTTTGCTGCTCATCAA  
TCACTTCCGCTTGTGTCGCAAGATCAAGCGCAGGTTTCGTAGGAAGCGCATCCACCGCCG  
ACGCATGGAAGATTGCAAGTTCACACA ACTTTAGCGGTGTTGTATCTGGTCTTGTAGTCA  
TCAATGGAAGTGAAATTGAAACACTGACAAATACTTATACTGATCCAGATCTGACTCCTC  
TAGCAGCGATGAGAGGAACTCGTTATGGCGTACGAACTGCTGCTAACAATTATGCCCAA  
GAATTCTCAAAGTCACCGCATCCTCTGCAATCGCTCTTACTAACGGTGAGGGCGTTTATG  
GCAACAGTACATTTAACTTTGCTAGTGCATCTTCTAATTCTGCAAACAAGCTCGTCCTAA

GGGCCGGACCTGGCAACCTTGGTGCAGGTCCTTTTACTGATGTCTTATCTGGGTTTGTCA  
CAGGTAATGTAACAGGTAATGTAAGTGGTTCGGGTATCTGATATCTCACACAATGATAGTG  
GTGATCTTACTGAAGGACCTAACCTCTACTAACTAATGAAAGAGTTGACTTTAGAGTCA  
ATGCTCTTACTGACGAAACGTTACTTACGCATACGATGACGTTGCAAATATAT  
ATACGCTGACTGTAAGTCAGTTAGATATCAAGATCGATCTCGCAACAGACGGTTCAACAA  
ATCGATTTACAACCTGCAGCTAGAAGTACAAGTCTGTTTCACATATGGAAGTGGTATCACAC  
AAAGTTGTCGAACTTTATCTGTTACTCCGTCTGATATTAATATTGACAACGTATCTGAAG  
GATTAACCTAACCTTTTACTACTGCTGCTAGAACAAGTACACTCATTTCATACGGAAGT  
GTATTACACACAGTTTTGTAACTTTTCCAGTTACACAATCAGATGTCAACACTGGTAATA  
GTAAGTGGTACTAAAAACTACTCATTACTCATGAACGTGTTGATGATAGAGTCAACG  
CTTTAGCTCTTGCTTGAAGTGGTGTAAATAAGTCATATGATAACGCTGGAGGAACTCTAT  
CTTTAGCATTGACTTTAGTGATTTTACTGGAATTCTACAGTAGGTAACCTTT  
ACTTTACAAACTCGTGCTGATGCAGGGGCAGACTTGACAGTTGCTGCTGCGACAGGTT  
CAAACTTGATGTTTCTTCTCAATCTACTTCCGATCTCTCTGGAGGAACTTATCACTACT  
ATACATAATCAAGAGTTCACGCAAACTTGACAATGCTTATGAACAACCAAGAGCAATGT  
TAACTAACACGCAACTAGCACCTCAAAAAATCTTCACTTTGCTGGCGATTCTAGGCCAC  
GCGCAGTGGTTTCCAATGGTGTAAATGTTGGTGGTGGTAGTGGATGTACACCGTTATCTA  
TGGTTGCTACAGATGGTTCAGCAACTGCGTCTGGATTCACTGTTGATACTACTGTTTATA  
GTGATGGAAACATCACGACTGCTGCGGTCAATGCAGGTGGTTCGATATCTAATTACTG  
ATAGTGTACAGTCACTAACTCCAACGCAGGTAATAATTCTCAAATTGAGCTTGGGTACAT  
TATGAGGAGGAACAGGTTGTTCAATGGTCTACTGGAGTAGGAGTCACTGGGCGTGACAATT  
CTGCTGCGCCTGGTGATTAATCTCAAGTGCAGGTGCTTTCACAAACGTTACGGTGTTTA  
ACGATGGAACAGGATTCACGGCCGGCAAACTTATAAGCATTGCTAATGCTTATGCTACTG  
GAGTTAAGAAGCTTTCACCTACTAGCGCTGCATGGTCTGAACATTCAACAGGATCTGGCA  
TTACCACATCAGCGTCCGCAAAATGGATCTGGCGAAACATTAAGATCTCTTCTGTCATTG  
CTTGTGGTGGTATCGCTACTGTCGCAACCCACGATGATGGATGTGGTTTGGCTGAATCTT  
GACTCTTTTCACTGACTTATGCTAACGCAACTCATATCGAAACAGTAGGAAGCACTGGTA  
CTGCTGACGCATCAAGAACTACATGAACCAATAATTTAGTACAGCTGATTATGGTACTG  
ATGCATCTTGTGCCAACGCAAAATCACTGTTGTTGTTGGTTCAATTGGCTCAGCTTCTA  
TCACCGTGACAGATGATGGTAGCGCATTATCGCCAATGAAACTATCGGAGTTGATGATG  
CTCAAATGGTGGTGGCGGTGGTGGTGGTCTTACATTTCGATGTAAGAGCAATCAATGGGA  
GCACTGTTACAGTTCGAGTATCCGTGATTCATGGTGCAGGTGCAACCGTTGATGTCGCTA  
CCATAGCAACAAATGCAACTATAACTCGACCTGACATCACAACGATCGAAGTTGGAGCTA  
CAAGTACAGGGGCTACTTCTGGCACTACAGGTATTATGACTGATCTTGGCACTAACCA  
TCACAGTCAATCCCGTTGACGGCTTCTTAAAGAAAGGTGAAGTTGTCAGTGCTAATGGTG  
TTACTACAGTACTTTTTCTAATTCAGTTAATAGGTTATGTCTGCCACTACATCCATT  
ATAAGACAGAGCTACGAGACTATGCTTTACGTTCGATCAGGACATCCTGCGATAGACATCA  
ACGTTGCTCCTGAGCAATTGGATGATTAGATAGGAGAAGCGTATGATTTCTATCAAGCGT  
TTCCTCTGCAGGTAGTCACACATCCTTCATCTTTATTGAAGTTACAGATGCTAGTAAAA  
CAGCAGCAAAAAGTGCAACCCAGCAAGGATCTACCAATTGGTATGATAACAATAACTATG  
TTGCAGTACTACCTAGCACCTTAGGAATTAATCAGGTATAGACACACATTAGTGCTTCTA  
GTATTGTGCCTGGTAACACGTCCAATATAAAGTATCGTATCTTTCTAAATGATGTATACG  
CTAGGACCCATGGTGTATTTCTTCACTTTATCACATATCAATCTCTTGAGACACTTG  
ATTTTGTAAACAAAGTCTAGTAGTATTAGAAGACTAAGATAAAACGAGAAACCAGGTAGAC  
TGTATCTCGATAGGTATTGGGATTCATTGGGTACAGGAGACAAAATTTAGTCAAAGTTT  
TCGTACGTCAAGATGCACAAAGTTATACAGCAATATATAATGATAACTGGTTAAAAGACT  
ATGTTTAAAGCGATATTTCAACAACAATCGGCTAAAGACCTAGGTAAGGATGTGGGCATTC  
AGATGTTAGGTGGCGTCACAATTAATGGCCTTCATATTCATTAGGACGAGGGTCAATTCA  
AAAATGACCTTGAAGATAAATTTCTGATGCTACTACCTACCTCCTTTGGACTTCGTGG  
GGTAATCTCTAATGGTATTTCTCAACTCTCCTACACAAGCTTTTGATCAATCAGATTATT  
CTTGTTCCGGGACGCTTCAAAGCAAATAGTTCTGCACTGGAACAAAAATTTATTGCACATC  
TAGTGGTTTAAAGCATTGAAATCTATGGGCCTGATGTTTACTATGTACGGAGAACGAATG  
TCAAGTAAGATACAGACTTTGGAGAGGTCTCGGATTCGCAATTCGATACTGCAAAACCGA  
TTAGGGCATATGTTAATAATGCAGAAGGATGGGAAGGACAGGGTGAGGTAAGTACTAGCAAAT  
CTGGAGTCCGTATCGAACCGAAGAGCGCTTTTATATTCTCCCGTAAGAATTTTAAATGAGG  
ATGTGGACGCTATTGTCACGCTTATCGTTCGAGCGGTGTTCAAACAAAGGGGACTTAATCT  
GGTTTCCAACAACAAGTCACTTATTTGAAAAGTAATTCGTAGAAGCAGAAAAACCATTTT

ATCAATTAGGGTACGGATGTGTATGGGATTGTGAGCGTGAACCTTTAGAGTGCAGTGACG  
TAAATCTTGCCACAGGAACCTCAGAGATTAATGCAATCGAAGCTATCTTTGCTAACGCTA  
TTACAGTTAACTTCGCTACTGGAGGGTCTAACGATTTACAGTTGGTGAAATTGTTGCAG  
GAGGTATATCTAAAGTGAATGCTGAAGTTAATGCATGGGATTGTGCTACTAGACGGTTAC  
ATGTCTTAATTAGTTCTGCTGTCTGTACGACACCTGAAACGGTTGCAGGACAGACCTCAG  
GTGTTGCTTGGACAACAGCATCATAACAATACTAAATAACGTTAATACCGCCAACCTTA  
TTCAAGAAAAGAACGGTCTTGACACTTTGGATAACCATATTATTGACTTTACCGAAACTC  
ATCCATTCGGTTCAATTGGTTCCGTTACTTACAATAACCATCTAATGTTAGGCACCTCCTCC  
AGATCACGGAATTGTTAGGAACACTGTCGTTGCTTTTGGAACGTTATTCAATAATAGTCC  
ATTAGCTCGTAATGCCGAAGTTATCAAAGTACCTTTAGCGTACGGTCCTAAACAAAAACT  
CTTAGCAAGGTTTCGATCAAGTACTTATACACCGAACAAAAGAGTGCAACTTACTCTTCC  
CAGATTTTCTTCTGAAATTAACGGGGGAGGATAGGATAGTGCAAAGACTCTTACACCCAC  
AAAAAAGATCAAGATGGCACGCAGTTCTACTACAAATAAGATCGTGTCTATGCCTGTTCC  
TTATAATATGGGTTTGGAGCTGGTAATGATCTCTAAAGATCAAGAAGAGTGTGTACAAAT  
TTTAGACCGGATTCTCCCAATATACCAACCTGCTGTCAATATGGCAGTAAAACCTATTGCC  
GGAGATGACTGAGAATAGAGACGCTCGCTCAGTCCTCAAGGGCGTCACATATGAAGATGA  
CTCTGAGGGTAATCTTACGACAAGAAGAGCGATCATTACACTTACAATATACCGCTAG  
AACTCTACTATACGTACCTGCATCAGCCCCAACGTTTACAAAAAGTCTAATACAGACTA  
CTATACAGAGACCAAACTACATGCGCCCGAAGTGAATTAATCTACACTGTTGTTCTTCA  
TCCTCTCACAGCAGATGCTACTGACGATTTCCGGAGTCGGAGAGACTACTGCAGTCTTTAC  
AGATAACAAAAACTGAATCCTACTAGTGGTGTGACGAGGCAATTTAATCCTGGCGACT  
CCTTACGATGGTCTCAACGATGCTTTTGGTACTGAACCTACAAAACCTTCGAAAGCATGTG  
GAAAAAATAAAACCAATTCTGAAAAAACAGACACTGAAGATGTGAAGCAAGATTACGTG  
ATCTCTCGTGCTGCTTCACATAGTTTACTGAAGAAAGGACAAGAAGCAGTAGATGGCATA  
TTAGAAGTATCACAAGCATCCGATCAGCATCGTGCCTCAGAAGTTAGTACAACAACGATT  
AAGAACGGAGCAGAGAGTTCTGGGAAAATAATTGATCTTCAGAAGAAGATGATAGAGTAG  
GAAGCTGATAATAACAAGAATGCAGCTTTTACAGTATACAATGCTCTGCTTCTTGGTAGC  
ACGTCCGAATTACAGAAATTGTTAAAGCCGAAAAAGAAATAAAATGAACAAGAAA  
TAACAACACAGGACACGTCAGTATTAATGTTCTTTGGACGAGTACACCTGAAGCAGGTG  
CAGCTGAATGTCAGCTTTTTCAATCAGGCTATTATAGAGGTCGATCTATTTACAGGTGCAG  
CAGCTGTAACACTTCATGGTGGTCTGAAATCACACTTGCTCAGAATATGTTTCATTCCAC  
TCAAAGTGGTAAACCTGTTCAAGCAACACTTGTAGAAGCAGTATCTGTTTCATGCTGGTG  
ATTCTATCCTAGGTCAGCATAGTCATTCTACAGGTGAGGCACTTCCATTCTCATCTGGTG  
ATTTTATAGCAATTGAAGATGATAGCATATCTCCTGCTATTCATAGTGACTTCCCTCCCTG  
AAGGAAGTCTGGTAAAAAGTTTACTGCTGTAATCTGAAACAGAATCGCTACTTATATTG  
GTTTCATCTGGTGCATCAGCAGATAACACTTTTGCCTTGTACCTCCTCAAGCGGTTGGTA  
AAGGAAGCATTAAAGATCGTTGCCGCAACAAATGCAGTAATTATAGAAGCTCTTCGAGTGG  
TAGGTGATTAAGATGCCCGCTGTAAATCAAGAGGTAGAGCGAATACTTAAAGGGATGAAG  
AAGAATCATTATCAATGTAGGAACTCCATAGCGATCGAGATAAAGCAGTTATGTACGCT  
ACTGCTGAAAAGTTAGCACATAAAGAACAATTGAATGTTATGTACAATCAAGATTTTCATT  
AACTAGTCCACGCTAATCCGACGACACGGATGCTATCGAAAGCAAAGTCAAAGACTATG  
GGAAAGATTTATGCTGATCGTGGAACCTGCCGAAAAGAAGAATAGAGAACGTAGAAAGACT  
CTTGAGAAAGATCCTAAGAAGAAACGTTTAGGTTACAAAAAAGGGGTAGGGCAGTATAAA  
TATTCCTCAGGCGAGGGAACAGGACGTGAGGTTTCATACCAAATTAGTCCTGGCAAAGGA  
ATCTCTACGAGATGTTTTGGTAAGATCATGCGTCGCTAGGTAGATAGCATTGTCAAGAA  
TCATTTATCAGTAAGAAGGCAGATAAACCTGTTAGGCGACACGATAGTTAGTCTAGAAAA  
CCATCTGCGTGAATGAACTTAGGTAAGCAGAAGCAGGCACAAATCCTGGGGGTTTAGCA  
AAAACCTTCTGGTACTACAGACACAAAAGGGAACTCGGTCAAACCTAGCTAACCCGCGATG  
CACCATGGCCACGAATAAAATTCGAAAAGAACAATGTGGTGATAGTTTCATTGCACGA  
CAGCTGTTCTAAAAATAACTCTTCTGATTGGTAGCCAGATTGGGTCCAGCGGGGTGGTAA  
ATACGCACGTAAACCCTGCGCCAAACAACCTGGACAAAGGACCAAACCCAAGAGCTGTTT  
CAGTAAGATGAAAACAACCCTAATTTAAAAAGAGGAAGATACTGACTTTTCGTCGAAAAA  
CTGCCAAGATCCTATGCCAATTAGAGAAGGAAGGGCAATCAACGTGAAAACAGTATCTAA  
ACAAAGACACGAAGGCACAAAAGTTTCAAGTTAGCCTAAGGTAAAATCTCGCTATTCAGT  
TTGGCCAAGGGGTTATGCAAGCGGTGCACTTGTGAAATGCCGAAAAGTTCGTGCCAAAAA  
TTGGGGGAACAAAGGTAAGAAAGAAGAATTTAACACGAAGGTAAAAGTATTCGAAAATTT  
TCAAGCAGAATGTTGGAAGACACATAAAAAAGTTGGTATCAAAACGAACGGTGATAAGAT

AGTAAACGGGTTTCGTCCAATGCACGAAGCAAAGGAATTCATGGGACCGGACAAAGCGGA  
CAGAATACTTATCCAGAAAATGGATAAGCCTAGATATACTACAAGGTTTGCAGACTAAGA  
AAAGAAGAGGGAGCTTAAGAATCGACAAGCAATTAAGGATAAAGCGACTAAGGGTATGAA  
GTTTACTCATGCAGAAATAACCAACGGAGCAAAGAAGTATTGGCCAGATTATGACAAAAA  
GGGAACGAAAAAAGCATTAGGCGAAACGTACAGCCGCTGTATTA AAAAAGGAAGACACAGA  
CTATGTGAGAGAAAAAGCAGCAGCATGGACTAGGAAAGCAGGAAAAAACCGATCAGACGG  
AGTAAACGACAAAGGCAGAAAAAGTTACGAACGAGAAAAATCCAGGATCCGACCGTAAAGC  
ACCGAGCGACAAAATTGGAAACCCCCGCAGGGCGTCATTCTGCGCTAAAATTAAGGAAT  
AAAAAAGAAATCCACTTCAAAGAAAACATCCAGCGAGCCTGACTTAAGGACCAACATAAG  
CGTGCGTGCTGGGAATTCTTGATCTATCATATGCTGTAGACTGTACCATTA AAAATTAGGA  
TCGGTCCGATGAGTATTGCTGCATGGAACGGCGAACAATTATATTGCCCAAGTCGAAAAG  
AGGGTTGCTCGCATGATCTTGCTGGACTAGTACGTAATAATCATGGAGATGAGACTTGTC  
TAAATCCATGTAAAGGATGCTCCAGTTGCCCAACCTGGGGATGTTCGTCATGGAATGATTG  
ATGTCGTGAGTGAGGGGTATTGTAAGATAGTTGGTTTTGTAAGTTCTCAATTTGTATTA  
GATTTTAAATAAGAAACAGCAGCAAGAAGAGAAGCGTTGCATTAGAAGTCGCCTATGGTA  
GCAGCGTTCGATAAGATCCTTGCAACATTAGAAATTGTAGATGATGGTAAGATCAAAGAT  
GCTTTTCTAGAAGGTCTTGATCTTGATTTTTGTTGCAGGTTTTGGAAGCACGTAATAGA  
GTATTATTCATACCTGAGATATTTTATGCGGATTTGGTAAAAAAGAGATGCATAGAAAA  
GACAACGTTTCATGTAGATGACGCTAACCGAAATGATACTATTAGAAATATGGGCTTCTTG  
AATAGTGACCGGGATCCCAACACGATCGGTGGTGGATTTATGCATGGTGGTGTAAAACGT  
AAATTGAGCCCTACAGACTTTTGTGTTTTCGAACTACGAACTCCTCATGCACCAGAGGAT  
ATAAACTGTTAGCACAAAACACTAGCGATGGATTTCTCTGTAAAGAAAACGAAACAGGGC  
TGCAACTTCAACCGCAATCAACTACACGATAGTGAAAGCTGTAAAAGGAGAACGATGTTT  
TTAGCATCACACCCGTTTGTATATACTTTCCCTGGGACATGGGAACCCCAACCAGATATA  
CTGTACAACCCGACAGTTCTTATTTCTCTTGATCAACAGCATTTTCTACGGGTGCGACT  
GTATACATTATAGGGGTCAGGAGAGAAAGAAATCGCATCGGATAAATGATAGAGCTAATC  
GCTATTATATTAATCGCAGCCGTTGGCATTATTGATTTTAGGTTTACAGGTAGAGACTTC  
CAAAGAGTTTGGGTGCTTGAGAAGATAGCTCGATCGCCCTATATTTCTCTTTTGGGTGTT  
TTACATTTAAGAGACTCAATGGGGGCACGAGGTCGAGAACCCATTTATCTAATGGAGGAG  
CATTGTGGTCAAACACTAAACGAGACCCTACATCTTGTATAACTGGAAAGTCGGGGTTGT  
ATCTCTTATTGGATTGATCTTCCTTTAGCCAAACTCCTCGTCCTTATCTACTATTGAATC  
ATGGTGGTTTATTATGGGTTATATGCTGTATGTGCTTACGACCTTAAGCATAAAGTAGTG  
TGGCATGCTGCACCTACATATGAAGAATACCTAACACGTTTTTCCAGATGACGAGGTCGTC  
ACTCGAATCACGATTGATGAAATCAACATGTAAATGAATTATCCAAAGCAATAAAGTTA  
ATTAATAAAGAACCCTAACCGAACCAGACTATAAATTAGTATTAGATGCTCTTGGGAAAC  
GTCACCGATGCTTTATCGCAGGTAATAGAATGTTCTAAGAATACGAAAAACCTATTGAGG  
ACTTCGAAAATGCCAGTCTATCGTGGCTACGAGATTAGACTAAATCACAATGAACAAATT  
GAAGACAGGATCCAAAGCTGTGACTTGCTGCATCCTGACCACTGCTTATCAGAAGGACCA  
GTGGCACAGTTAGCAAATGATATTAATATGGATTTTCGCTTGCAGCCCATCTATGGTCAG  
ATGCATGATCATATAAGGAAATATGTAAAGGCAGCAGGTATTGATCAATCAAATCACTGG  
GTTGAGAAAGAACTGAATGATTTAGACTTATAAAAAGGCATGAAAACACTACAGAATCTTCTG  
GACAACACTGACTCCACGTTTTACCACACGTACGATGCTGTTGACACGAAGGAAAGAAGAAC  
TTCAATTTGCATAAGATGAGTATGTAACATTGGAATGAGATCTGACTTGAGTTGACGGGT  
CTAAGTAGGAAATTGAATATGTTGTTTTCGGCGAATGCCGAGGAGATGGTAACCATACTG  
GTATTTAAGACCACTCTCCACGCAAAAAATGGCGGCGAGGCACAAAATTGACATAGGGC  
ACATATGAGTTCGGTGAAATGACCAAACCTGCTGCACCCTCAATGGAGATGAACTATCAT  
GTCCCATTATACTATAGGTAATCACGATAAGCAAATCAACAATATGAAATATGTGAGTA  
GGCTGAAGATGCTTATCCAACCATCAAACAAGCAAGCGAAAATTTAGTGGGATTGAATAA  
TCCACACTGAGCAGAATATTGTATCAAAGAAAATTAATGGTTCGCTCTGGGGTGGAAATATG  
GATGGAGTTTATACTCGTTGTAATTGTCTCTTGGTATATCTAGTTTATACTTAGAATGGC  
ATACAAGGAGATGGTCGATGGCACCGATTCAACCAGCGAGCGGGAAAAGCAGCTATAACT  
TTAGACTAACGGACATTAATCGTGTTGTTGACGCCATACTATTGATGTAACCATTGGTA  
TGGGGTTTCATATATAACAAGAAAGAAAGAGCTAGAATTGGAGGAATCGATACGCAGGAGA  
AAAGACCAAGGGATCTGGACGAGAAGGCATTGGGACTAGAAGCTACAACTTGATGAAAA  
AAAAATGAGAGCAACCTATTAATGGAGATGCTGATGCCCGTCCACAACTGAACTTAAAG  
GTGGGTTTTGGTAAATATGGTGGGTTGCTTGGTTGGTTATACGTTGGCGATGATGATCAAT  
AACTCAGTGA AAACCAGATCGTGCAATGATATGCATGGTTCGTACGACGGTGGATCAAAAC

AAAAGAATTTTCGATGATCTCCGAGAAATGAGACGTAGCTTCGGAACTTTGCTATAGTCTC  
GCATCTCTTATTAGAATAAGATTTCAAGGTTACCACAATTAGACGACCTTGTGGAGAT  
GATGGTGATGTTTCATACAGGTGAGGGGTCCACCTATTATTACATGTGGAATTCTAAGGGT  
TTAAGAAAGTTACCTATAGAAAAAGCAATAACAAATAAAGCGATTGAGATACTACGCTGT  
GTATCATTTCAGATCCAGAGTTAAGTATTCCACTCTTTGGATGTGATATTGTAGCAGCA  
GGTGGAAGGTTACTGCTGCACTAGTTGATGTGTCACAAGAGCAGAAGGTACATTATAGT  
TTAAGTAATATAACATATAATTTTAAAAAGAGTAGGCATCTAGGAGAGTAGCGTGAGATA  
TATTCATATGGTGTAAAGTGTGTAAGGTTAGAAAAGGATGACTACGATCTCTTTTTATTA  
TTTTGTAGTGAATACTCAGAGGTCTTCTGACACATAGTAAGAACAGCATAAAGAGAATCA  
GGCTCGAGAAATACTAGCAGGAGATATGACGAGCAGTGATGGTATTGGACATCGGATATG  
ACCAACAAGAACAACACTGAGGCGGTGCTATCCCAATGGTTACATTACCCGTTGGTATCGAAA  
TATATACAGAACTTGCTATTTGACAACCCCAACCTGTGGGTACAGAAATGTTGGAAGCTC  
TCAAGGCACTTGCCATTGCACCCATAACGAACGCTAACATGAACGTTGAGGTTTACCTTT  
TCAATCCTGTTGGAATTGGTGAACCTCCAGATGTTCTTGTGCGGATTCAAGAACAATA  
ATTTGATTGCCAAATAAGAGGAACGTTTCGGAAGTACTAGAAAAGTATTTTGAAGTATGAA  
TGAATCTGTATGGTGGAGCTGAATGACTGATGTGTCTCTCGGCAACCCAAATCTAAAAAA  
AGTACACACATCAATTGACCTCAAACAAGAATATGTTCCCTCAGGTAGTGAAATCTCAAGA  
TTATCTCATGTACTCTACCAAAAATTGTGTCAAGATCATGTCTCTAGATGAGGGTCCAGT  
ACAATTTAACATGTATCATTTCACGAGGGTGTGGTATCTAAGTTTCATGATCATAGATT  
CAATATCGCTACAATTCCACGACGGTCTATTAAGAGTACATCTGTTACTTCATACTTAAT  
TGGGTATGTGTTATTCAATGCAAATTTTAAACGTAGCAATCCTCGCAAACAAGCTGCAAT  
TGCTAGAGAGGTGCTTAAAAGATTACAGTTTAGTTATGAACACCTCCTGAACTGGATGCA  
ACACGGATTCCCTCTAATGGGACACAGGTTCTCTGGAACCTGAAAACGGCAGTACAATATT  
GGCTGCTTATACTACAGCTGCTGCTGTCAGGGGTAGGTCATCTAACGTTTTTAAAGTCTGGA  
TGAATTCGGGTTTATTCCGAATAATTACGCTGATCAGTTTGTAGTTTTCTTTATCCGAC  
TATCTCCTCATCTAAGTCTAAAAAGGTTAAGAATATATCTACTCGACAAGGGATGAAAAT  
GTTATACAAACCCTGGCATGATGCAGAGCGTGGAACGAATGAGTAGGTGCATAAGGAAGT  
TCACTGGTCCGGGGAGCCACGTAGAGATGATGTAACGAAAGAGTAACCTATCAAAGACAC  
ATCAGCATCTCAGTTTCGTGTTGAGTTTGAGTGTGAGTACTTAGGATCTGCTGACAATTT  
GATTTCTCCTAGTTAGTAGATAATCATCCCATATCATCACCCATTTACATCTGCTCGTGG  
GCTTGCAGGATATGAACAAGCATTTCAGAGCATAAATTCGATTTTCACTGTTGACGTATA  
AAGACGTGTTGGTAATGGTTACTCCGCATTTGGTGGAAATATATAACCAAACTATTCCTTA  
TAAAAGGGCTGCCATATATAAGAACAATGAAACTAAACCCAACGTTCCACCAGATATTA  
CGCGGACATTGCAGAGAATTATAATAACGTATACATCTTATGTGAAGTATAAGTTATTGG  
TGGACTGGTAGGAGATATTATTCCTTTTGATTTGGACTCTGCGAATTTTTTTCATGGCTGC  
AATGGGTGGTTCGTGCAGGTCAATAACTAGGTCAAGGTTTTTATTCGTAATAAAACCCATCT  
TGCTGTCAAGCTGTAAACAGTACCAAAACAAGTTTGATGTCCTAACCTTAAAGTATTAAT  
TGAAGATGATAAATCGTTTATAAATGAATCTGACACGATTACGGAATTAACACCGTTCAT  
TGCGAAGGTCAAACATACCAAGCGGAAGAAGGTTGTAATGACGACTTTCCTATGTGTTT  
AGTGACTCTTAGTGGGATGGCAATGCAACCACACTTTACAGAGACGTACGATAACCACGC  
ACGTCCACGCATCTATGAACAACGGAATTAGGTCTGGAACCTAGACATGATACCATTG  
TTTTGTAACATTCCGGAGGGACGATGATTATTTTGCACGACGTACAGGACTATGTGGGGAA  
ATTCGCGAAATACGGGGATGAATCCTACGCGTTCGAGTTTAGGTAAGGTTTCTGAAAAAT  
AAATAATCCTAGACATCTGATGTTGGAATCACCTAGGAGAAAATTAACCATGGCAGCGA  
ATCAATTATCTCAAGGGGTAGTGGTATAGGAGAGAGGACTTACTACGATGACCACACTAT  
CGACCGCTCACGGGGGTGTGCATGCTGGACTTTTTTGGCCCGGTCTGTTGCAGAAATCG  
CCGAAATCTCCAGTTTATGGGCTCTTGCAGAGCAATTTGGAACCCGAATAATTATAACT  
ACGAGATTTAGTATATTGCAGCAAAAATTTCTTCCGTATGGCGGGGTTACTACAACAGTTC  
GTGGTGACTTGACATCGCTAAAAAAGGCAGTCAGTAAGGGAACCTGCATTTAAAGTCAAGA  
ATTTAAGTAAGTATGAAAACACTTACGAAGGTGCTACTACCACATGGTAGTGGGCAGCAC  
GAACTTCTGGAACGAAAGGAAACCCATATCGGTGGATTTGTAATTGACGCAGGTCCAGTTC  
TAATCGCTGTAGTTCCTGCACCTTGTTCAGGAAACGGTCGGGAATTCGTGGCTGCGCAAG  
CACTCTCCGCAACATCAGGTGATGCAGGTAAGTATTCCAATACAGCATCGTATTAAGAG  
TCACATGTGTTGTTGGCGACCTCGTTACTGGCATCAATATAATTGTTTCAATTTCTGGTT  
GAAACCAGACAGTTACAGTGCTTGCTAGGGATCCTACCAACAAGAACTTGACTTGGGTC  
TACCTTCCGGTGGAATCACTGGTATCCTTGTGATGGTCCGACTGTCCTCAAGGAACTT  
ATACTTGTGTGATTGCATCCTCTGGTATTTAAAGAAGGGTATGTAGTGGTTTAAACAAAG

GAAGTATTA AATTCGATACTGCTGATATTATCGCTGATCCTAACTCAAATGCTTTTTTAA  
TCAGTTCGGTTCGTTTCGGAGTGTGCAGAGCGTGAGAATCTACCTGGTGCAAATGGATTT  
ACGTTCCCTGCTGGTCCTTCTACTTCAGTCTTTGCAAATAACGCCGTTGGATTTGGAGATG  
AACTTCGCGTTCTAGTTATTGATATCGATGGTGTATCACTGGAACAAGTAGTGCTGTT  
TTGAGCGTTTGATGGGTCTTTTAAAAGCATCGGACGCTAAGCCAGGTGTTGGTGAAGCAA  
ACTACTACAAAGA ACTAATCAACCAAAGTCTGAGTATATCTACTGGGGTTTACATGAAG  
CAGGAGTATTGAATGCAGCTGCTTCTGCTGCTGCAGGAACTGGGGTTTAGCTGCTGCCT  
CTAGCCAGTTTTACTTACTACGCCCTGCCGATGGTTGTACGGGTTATCCTGTTTCGACGCA  
CCAGTGTAGGTTCTAAGAACAATGAAACATACTACTACACATTA ACTGCTGGTGTTCACT  
ACGGTATTTCTGGTGGACTTTACAGTGTAAACAAGCACATCTCTTGCAACGGCACATGGTA  
TTGCTGAAGATGCTCAGTCACATCCAATTGACCTCATT CATAGTTGTCCATCATGTGCAG  
ATCATGCTGCTGCAATCGCTAAAGTAAGTTCTCCAGCTAACATTGCTGAATAAAAAATAG  
ATTCTTTAGTATTCGTTTCACCTCCTAGAGGAAACGTGATTGCAGTTTCTTACTCTACTA  
CTACCCTGATAATATATTTATCTTCTTCGATCTATGACCTTGTACGTCTTGCATGGTTT  
TGGATTTTGGATATAAGTATATCTACCATACGTATAACGATGTACACAGATACGTTTCTA  
CCAACGGTGACATTGCTGGTGTATGTTTACAGACA ACTGAGTTTGAAGCACCATGGTTCT  
CACCTGCAGGTTTTCAACGTGGTGTTTTTAGAACTCCTCTCAAACAAGCATAACACCAA  
CTAAGATACAAAGAGATCGCTTGTATGTATATAGAATGAACCCTGTCGTATCATTGCCCG  
GTCAAGGCATCGTCCTCTGAGGTGACAAGACTGCACTCGGATTTCCAGCCGCGTATGATA  
CAATCGAGGTACGTCGCCTAGTCCTCACC AACGAACGTGTTATCTCAGGGGCTCCTAAAG  
CACA ACTCTTTGAGCAAAACGATGAAGCACGAACATCACTCTCCTTGAATATCATCGAAC  
CTTATCTTAAGTGAGTTTAAACGTCCGGGAGGTGTA ACTGACTTCGTAGTTATGTGGTATT  
CCTCGAACAACCCAGCAGAGGCAGTCAATCGTGGAGAGCTCTACGCGCAGAGTTCTGTGA  
AACCAACACGCTCAATCAACTACATTACCTTGACATTTGTTGGA ACTAGA ACTGGAGTTA  
CCTTCAGCGATGTAGCTACTTAAATTA AATGCACCCTTTTTTTCAGAGGCTTACCTCATCT  
GTACCCTCAGAAAATTTTTCTTGGTCTAAATAAAACCGCCGTTGCCTCCTAAAAAAGTGG  
CAAAAAGAGCATCGAATGACGACGTTAAGGCAAATGTCGCATCAGACTTTCCTCGTCCTA  
ACCTAGTCCCAGTTGATTTATCATTTCCCTCTGGAATCATTACTCATGAACACCTGGTAA  
AGCATCGTAAGTTCAATGTTACGGAGCGAATCTTCTTTCTCCAGAGTGGTCTTATAG  
AACGTCTTACAGAGGACGTAGTCTAAA AATCGCAGGAGACCGATCGTTTGAACCTTGG  
CAATCACTGTTAACAATGATAGTAAGTTTGTGCTAAGA ACCGCATATGAATTGTGGACAT  
CAAGCATTCAAGCATCCAGCGAAA ACTTCACTTCCGCGGCAGGTTTTGGAAACGTAGTTG  
ATGCAAGTGGACACTTTGCGGACATGAATCTTCAGCAATTAGTAAGAGAGATTAAATCAA  
CAGAGAAATCAAAAATTCTCAAATCCTATTCGTTCTATATCATCTTCCCTAGTGCAATCG  
CATCGAATGACCTAAATTAAGGAAACAACGTTGCAATGGAAGAATTCACCGTTGAGTTTC  
CAGTTCAATATTGGAATCCTCAAGCAGACGCCAACAACTAAACCGCTAAATACCACAGGG  
CCAATTATTA AAAACATTTAATAGTGGCCGCACAGCTCTCCGGTTTTTCTACTAGAGTGACC  
GAAGAGGGTCCGTTAGTCACCTTCTTTGGTTCAA AAGGATAGTATGGAAGGATCGCAACC  
TATGGTAGGCGGCGGTTACTATGCATATCAGGCCGTTTTGATGGCCCGGTTAGAAATGA  
GTAAGA ACTGATCTCACGTTAGAGAGAGATGATTCTTCAACGTC ACTGCGCTAGTAGGAT  
AGATATCTTCGTGAAAGAAAATATTTGTGGCATCTTTGACGACGTTTCGCGTCGATGTCGA  
GTTGTCTAGCCTGAAACAATCCGACTAAATTAATAAATTAATCAGGGTAGATTTGCAGAC  
AATTCTTCGCATGCATGTTATTGATATTCGGTCGTACGGGCTTTTCCGTCGTTGGTGTGT  
CGTTGGAAGATCATTTTACCATATGGTTATCGATCTAGATAACCCTTGAAATGGTCTTAC  
TGAGTTACGATATTTTGACCCTCGTAAGATTCGTAAGGTTACGGAGTATGATTAGATACG  
TCCAAACGAACTTACTGGACTGGATCTGAATGCTAAACTTACACAAACA ACTTCAGATTA  
TTATCTATAAAAATGGTAAGGGGGTGAAGAAATCTGGATCTCAGCAAGGACTTAACATTGG  
TGCTGATTCAATCACTTGTGTTGCCATTCTGGTATACAGGATTTCAATAAGAATATGACATT  
AACTCATCTCCATAAAGCAATCAAAGCGGTTAACAAACTCCGTGTGATTGAAGACCCTTT  
GGTAATCTATAGAATGTCAAGAGCACCATTTAGAAGAATTGTCTACATCGATGTAGCTAA  
CCGTCGGAAGAACATAGAGGAACAGTACCTCTCTGAAGTTATAGGTAGGTATAATAATAC  
TTTGGTGTATGATGCAAACACTGCAGTGATTAAAGATGACAGGTAGTTCAGGTCCATTTT  
TGAAGACGTCTGGTAACTTCGTCGTGAAGCCGGTAGAGGAACTTAGATATCCACCCTTCC  
CGGCGGACGAAATCTTGATGAACTAGAAGACGTTAAGTATATCCGCAAAACGTTGTCCAA  
AGCGAAGAACGTACCGCCATCAAGACTTGAGACTGAGACTACCTTTAAACTAGATCGCGC  
TGTAGACTTTACTAGGGACGAAGTAAACTTCCAAAATTTTATTGCACCTGTCCGCCAGAG  
ATTCTCACA AATGTTTATCTAGCTCCGTACA ACTCATCTCGTTCTGATGGGCACAATGAC



TTTTTAGGATAGGGACGATACCAAAGGTCAGATTCAATTTGGCTTTTTTGGCTGACCACTA  
CTTCAATGATCTGAATGAAATCGAAATCCGCAATGTGCGTATAACTCAAGTGACCACAAT  
GGATCCATCCGTTGGAAAACACTGGCCTATTGATTATATGCGTAGTCAGGTTCTAACACG  
ACCTGAACAGGACATTAAGGAAATAGAACAACAGATGGACTCTGAACAAAAACCATGTTT  
TATACTTGATACAGAGCACACAATGGATAACCGCTAGGGATGGTGTCACTGCCCGAATGG  
GGAAGTAGCTCGTCAAGACACTCCTCAAGTAGACGCGGGTGTGCGGAAACGGGGAGAAAT  
CGAAACTATATATAATAATTGTGAAGGTAATAATTATGCAGACTGCAATTACAAAACATGT  
AGTTCAACAAGTCTTCGTAGACGACAAATCGAAAGCAGTTGAATGCGTAAATGATGCATT  
GCCTGCAAATGCATATGATGCCATTCAAGTAACAAAGGTTGAGTTCGAACGAAGTATGGG  
ATTTGTGCTAGATGATACCGCACAGGATGCCGCAGATGAAATTGAAGATAACCTCTCTGA  
CGAAACTGACCAACCCGAAACTGTTCTCGTCGATTGTGCGCAGAACACAAGATCCAACAGA  
AGAACCAGTGGGACCCGTGGCTCACGGAGCACCTTCTTCTGTAGAAGAACTGCTCGAGGA  
ACAAACCGATGAGACTAATAGCTGAAGACATTTCAAACCTTGGATTTTATCTGCGAAGATA  
TAGATGGCAAGAAAAAATACTCCATTGAAGGTGTCTTTCGACGAGCGTAATTAAAAACT  
GCAACCAAAAAATGTCTCCCTTGAAGATTTTATCCAAAGAAGTCGCTAAATATTATGCGA  
ACTACATGCAAAAAGGGCGCGCCCTTGGAGTACTACGTGACCCTGGTGGCCCGTCAATCA  
ACTTTGACCGGCTTTCCCATAGATTCTTTCTCAAAGGAAGAAAGAAACATCTTCATAG  
GTAGAGTAAAACCTGCTCGAAACACCTATGGGTGGGATAACAAAGAACCCTTACATGAGG  
GTGTCGAACCAGGTGCATCATCTAGAGCCATGGGTTCAATTTGTAAAGAAGAGAACTGTA  
ATGTTGTTATGGACGACGTTATGCTCGCGACTGAAGCAGACATAGTCGCCGATCCTTCCC  
CGCCTGATGCTTTTGTGAGTGAATTATGGAAGGAAAGGAGTAGGTATGGGACAATGGAG  
TCCTAAAAGAATATGCTGTGGCTGTAATTAACATAAAAATTGATCAAGCAACTCTAATTA  
ACCTGCAAGAACGTAGGGTTTCAGCGTTTGAGGCGCGTTTTAAGAGTCTGTGATTTAAA  
ATAAGTACAGACAACGCTTATCTATATCGGAGTTTAAACCGATAGCGGAGACCCTCGATA  
AAGAGCGAGTTAACATGGAGCAAGTGGACGAACGCTCTGCTCCTATCACCAATAACGCAA  
AACCGGGTGAGAATATGGACAATTCAAAAGCAGGAAGTACAAACATAGTAGTGAACGTTG  
AAGGGCCTGAAGCTGCTTAAATGGAAGTCACAAAACGAACTAAGAACGCAGGTATTTTGG  
GTGCAATTGCAGGTAAGGAATTGGGGTACAAGTCTCTGAGCACAAAACCAAGGGCTGGAT  
GCGCGAAACAAGAGGAGGTAGTGACGGACGAGGGCGAAAAAGAGGAAATCGCTGAAACGA  
AGTACGTCGTTTCTCAGGATGTTACACGCTCTTGTACAGGGGAAGAAGTATCAGAAGAGC  
TCCGAGCCAAAGTAACTACTATTTTTGAAGCAGCTGTTACTGCCAAAGTAACTACCAAG  
TAAAAGCGTTGCAAGAAGCGTTTGATACTACGCTGCCTGAACAAGTCGCACACGTCCATA  
CAGAATTGGTTCGAGAAGGTGGACGATTACATGTGTTATGCTGCCGAGCAATGGATGAAGG  
TAAACACATTGCAAATCTAGCATCCCCTCAACACTGAGATAACCAGCAGCGTTCTTCCAAG  
GACTAAAAGGTCTCTTCTTAGAGCACAACTTGCAGTGCCTGAGGGGTAGTTCAACTTGC  
TAGATGGAATCACAGGTGACCTTGATGATGTGCAAGCTAACTATTCGAGCAAGTCGACA  
CTAATGTTGCTTTGAAAAGCGCCTTGGTGAACTTTTAAAAATGCAAATTGGGGACGACG  
CAGCTACTGGACTAGTAGAAACAGAAAAGGAGAAGTTAGCGTCATTAGCAGAGGGTGTG  
AGCTTAACAAGGAAGAAGGATTTGCGCCATAAGTTCAAAACCTAGCAAGGAATCCTACTTTA  
CTAAGAATGCTGAGGTCTCTACAAATGCAACTGGGCCTACTGAAGAAAGTTCCGCTCCTT  
TGGTAGAAGATTCTAACACCAGCAAAAATGACGAAGTACGTTGATGCTCTCGCTCACTGTT  
CCATATAATTAACACTACTACCCCAAGTGCTAATTTTAAAATGTGATTAATCAATTTAG  
GAGAAGTGGGCACACCTTCTAAAACAAGATTCTCTACCTTTGATGGATGATGCACATTCG  
CGTGGCGGAGTAGCACAACCTCTATAGAACCAAGAACAAGCATTCTTGAATAAGGCCTA  
GTCCTTACAGAGACCCTACAAACCGCAGTTATAGGTGGTTTTCGGTGGCGGTGCGACTGCA  
CCATGTCTGTAGCAGCTTTTGCCCCCTTAGTGAGCAGGCTTATCAGACGATCAAGGCCA  
CAATTTATTGCAAAAGTTATAGCAGGTGTCCCGCCAATGTTTGTCTCTACAGGTCATATC  
TTTGCAATCAGGACCTAGTTCGGTATTGAAAATGATCCTTCAATTGGCGATTACAGAGAA  
GCCTTCTTCAATGAGTCTAACGCGGGTTTCTCTGTTTCTGATGGTAACCGTCTTGCTGAC  
TACGATCCGACTGCCTCTGGTGGTTCGGCCATTAACCTATGCTGAAGGTGCTAACCCAGGT  
CTTATTACTCATACCCCGGCAGGAACATATGACCTGACAGGTGACGCTCCAAGAATGAAC  
ACCACTGCTGTTGAAGAACTACAGATTCAGCCGCAGCAACTACCTTCGGAGAAATGGGT  
TTCTCAATCGAGAATGTTACTGCTACGGCTAATGCAAGCGCGTTAAATGCAGGGTACAGT  
ATTCAGCTTGCTCAAAACTTGAATCAAATGACAGTCTTGTATGCCGAGCAGGAGTTAGCG  
AAGATTCTTTCAACTAAGATCCTGGCGGAAAGAATCAGGTAAGTTGTTTGAACAAGCTAT  
GATAACGATGTAGTAGGTGTTAAAAGCTTGACTGCTAACGAAGGTATCTTCGACCTTGAC  
GTTGACTCAAATGGTAAATCGTCTGTTGAGAAATTCAAAGGACTTAAGATCCAGATTGAA

ATAGCCGCATACGCAATCGATCATCAGACACGTAGACGAACGGGTAATATCATCTTCGCA  
TCCGCCGACGATGTATCCACTCATGGTAAGGCTGGCGTTCTAGATTAGGGTCCTGGTCTT  
CAGGGTAACAATGATCTCGATCGTGATGACACAACCTGCAACTCTTGTTGGAACCCTAAG  
GGAAAGATCAATGTTTACGTTGACCCATATTCAGCAAACCTAAGTGAAAAGCACTGCTAC  
CTGCCC GGCTACAAGGGACCGTCATCTTCTGACGCAGGATTATGCTAGCGATCATATGCG  
CCTTTTCAACAAGTCAGAGCAACCAACCCTCACACGCTACAGCAAAAAATTGCGTCTAAT  
CCGAGAAACGGAATGGCTTCTATTCCATTCGCTCAAGGTCTTACCTAAGTGTCTGCAGCA  
CTTACTGCTAATACTAACGAGTATTGCATAAAGAGTTCGGGTTGCTAACTTACTCTCACAA  
ATATTATAATTTAAGTTTCTAGAGAGTGCTAGACAACCTCTTTTTTTTATGGTATACTATA  
TTTATTGGACGCATCACAGCGAGTGAATCAACGAACTGGCATCAAACACGTTTCAGG  
TGATGCGACAGAGGTGGTGTCAATGCTAGGAAAGACAGAACTAAAAACCAAGTAGGCCA  
TAGGCAGGGTTATACTGCACGGCTGGAGAAACGCCCTCTGCTTGTGAGTATACAGGAATC  
CCTCCTCCCCCATATATTTTTTTGTAGAAGGCTTAAGTGCTTAGTGAGATTTTCAGGTTT  
CCCATATAAGTAGTAAAAGAGTTAGGGTCAACAAGATGCACTTAACTTTCCTTATTATTG  
ACTTCATAAATGCAGAAAGATATATGCACAAGCTAGTAACATATAATCAATTAGCAAGTT  
CGTACGAGGAAGAACACGACACACGGCTAACAGAATAGTACGAGAGTTTAAATCGAAAGAC  
ACGACCAACGACAGATCTCTCAAAAAATTAGCAGAGAGGTGCGGATGTAACAAATATTCC  
GGAATACTTAGAAAGTGGGCGGAGCAGCTCAGTCTTTTATATGCTACATAGCTCTATCAC  
AATGGAATTATATTATTGATTATACTCCTTATTCTTCTGAGTGGTATGGGAAAAGGCCGC  
TAAAGTAAGCACTGTTTAAACACCTTGACGATTGCGTGTAGAACGATATCGTGATAAATG  
ATCTCATAGATATCCTTGACAATACATCCGATGAAGCGGACAAAGACTATTCTAAACTCT  
ATCAAGTATCAGCCAACTCAGTACCGAATAACGATTGCTTTAAACCCAAAACCGACTAC  
GATTTGCTTCTATCTGAAACCAAATCGTAGGGGGTGAAAATGTGAACTATAAGACATAA  
TAGTGACACAAAAACTACCGAAAAGAAATACCACTGATGCTCCTTGGAAGCCACAAGCAC  
GACAGAAAGCAGCAAATCCTGACATGAATAATAGAGGGTCTGACGATTTTCTGAATAAGA  
AGGCGTTAGGAGAACGCCACCCATCGGAATATAGAAGCGGGTTCAATGGTGCAGATGACA  
TTGGTGAATGGTCTAACAGAGAGAAACCTAACGTATGGAGACAACGAGACTAATGGCAAA  
CTGGTTCCAAGAGGATCTAACAAATCGAAACTTTCCTTCCCCTATAGGATAGCTTTTGT  
ATTAGATACGGCAACGGAGGTTTATTCTTTATGACCACAAGGAGAGATTCAATCAATACA  
TTTAAATGATAATCTTATTCCGACTGCAGGTTTCGTCCCTTACCTAGAGAAGGCAAGGG  
ACGCTATGGTGATTTGACCGTTGAGGTTATCGAAGATGAAGATGTAGGAACTAAATGGA  
ACTCCCCGACAGGCTGCGTGCTTTAGGAACTCCCCTGTATTATCATGTGCGTGTACGATT  
GGAAGACAAGGATCAACACGCCCCATGACAAGACAGAAGATTCTCTGACACCACTCTTCA  
AGTATTAACAACAATAACGGAGCGGACTGTGATGTAGTCTTCAACGATTTATTTCCCTAC  
AGA ACTATCACC ACTATCATTGATGTTTCACAAGGAGGTA AACCATTCATGACTGCACG  
AGCAACTTTTAAATATACTCTATACGAAATAAGGAACGTATATTCGAGAACTAGACGATG  
AAGAAGTTCAATCTATACACGTGTGAGCATATATGGGGTGGTAAAGATAACTCGTATACT  
AAATCTACAACGTGGGCGAAGAAGCAACCGTCCCCTTCAACCATTTAAATACAGGTATT  
ATCGAATCCTCCCTTCTCAGTGGAATGATGGTATAAAAATTATTGCTATGCACGAGCTT  
GATCGTCAGGTAGATAAAAATCCAATCCCTGTGGGAAGAAAATGAGCATCAGACAAGAAAC  
ATAATCGGGGCGACAGTAGATTTTAGAGATGAAGCCTGGTCTATCGAAATTACAAATCGG  
ATTGTTAAAGGAGGGTCTCAACA ACTAGCACAGGCATGGTTTTTCCAAGCCATGGACAA  
CGACTACAAGAAAATGAAGGGGATGAAGGCACCACCTTGTGCTCAGTCAGGATCTCAGAT  
TTCCTAGAAGGAGAGCTTTCAACGTGATGATGATCAGGGTGTGTTGATTCTGGA ACTATCT  
CAAGAGGTGTGGAACAAGGATGGTGTATATGACGGAGATTTCAACTGCGAAGAATCTGCA  
AAAATTCAACA ACTCCATAGCAATTATTTGGTGTATCACAACACTCTCTCTCTATGAAA  
AAACAACATAGTTTGAAATGAAACATCTCATAAAAAGAAAATGGTTCTACTATAAAGGT  
AAAGCACCTCCTCAGTGTACGAAGAAACACCATTTGATTTGAACTTACTACGAAAGAA  
GAGCTCGTTATGTTTATTAATCGTATGATGCAATCTGCAAAGTACAGTTTAAAGATAGAC  
TACATAGAATACTTTCAATTGTAGCTTAATTCTATCTTACGAATTATAACCAATCGTAAT  
TTTCAAATTAAGATTGCAATTGAATCGGAAAAATTTAAGAGGGGTTGTTATTGAATGACG  
CAGGGACCTACAAATATGTTATAGCCAATACACAGGCATAGATTATAATTAATAGGGAA  
TTTCCTAAATACACAATTGACTAGAGGATAAATTCGTAGCCGAGTCCCATTTGAAAAGCT  
GTTAAGAGAGAGCATGGTTAGGAGATAGAGAACTCCTGTCTTGTTCATCGTATGATTA  
AGAAAATAAAGGCATATGCTCGATGGAATCTAAAGATCACAGGTGACGAACGAATACAGT  
ATGGTGGAGATTGTGACGGTGTCTTTCATGATTGGAATATGGATCAACACCCTGACCCAG  
TAAAGGGATTACTCCAATAGTTACTATGACACTCTTCTAAATGAAAATTACGAAGGAG

GCGAAGATGATTTGGTGTGATCTCAACCAGTGCCAGATACCAGACTTAATACTATTACGT  
AAAATGCATGATCTGCTATATATTTCCGATGTGATCGAAGGCAGCGGGTACGTCCTATTA  
TAGATTGAACTCCTCAATCTTTAGTGGCATAAGTTTTGTGGACCTCCTTCTTTGTCAAAAG  
AATGAAGTCTATCCCAACCTTGAAGCCTAATCCCACATTGATTATGCGTTAGCAGATTTA  
TTTACCTTCGACGTCGAGTCTGCAACACTTAAGCAGAAGACTAGAAGATATAGATGGTGG  
GACGGTAAGTTTAGTTTCTTTTCTCCCAGCAACAGGAGAGATAAATGGTGGTTCGTGTGGAT  
GACTTAACAGACTTGGCGAAAGAAAAGGGATATGAATATCGAATACAAGATGATCAATAC  
TGTGGTCATCCTATCACAGAGAATGAACTACTCACTCCCAATTTCGCTTGTAGGGTTTGTG  
GATTCACCGCGTCTTCCCCCGCCTTACCGGTAAGGGATTATCAGGACAAGGCAATTTCG  
GAACCACTAAAATACACCAGACGACTCTTCCATCTCCACACAGCGTCAGGACAATGTTTG  
ATTATTTATGCATTGGGTAGATATAATTTAACCTTTGGTCGTAAGGTTTCAATTGTAGTG  
CCCAATACCTATCTTAACGATCAATTTTATTAGGTCTTTGAAACATATGGTTGGATGGCA  
AAGAAAGATTACCATAAGATATTGGCAGAGCAAGACAGATATAGAGATCACAATGTGATA  
ATCACGACTTGGCAGTCAGTATATAAACTACGAATGATATGCTTTCAAAGATTTGAATGC  
CTGATTGGTGTGATGAAGCACATCATTCTAAGCAAAATCTCTAAGGACATTGGTGCCTAAG  
TTCCATGATTGTCAATACCGGATTGGTTTTACAGGAACACTAGATGCTGAGAATGTTAAT  
CAACTTTTATGAGAAGGTTTGTGGGTAGATGTTCTCATGTTGCTAGAATTAATCAACTC  
ATGAAGGCAGGGCACATTGCACATTTAAAAGTCAAGGTAGTTCTTTTAAAAAATGAAGAA  
AAATTATTTGAAGGATATCGGGATGAAATTGAGTAACGAGTTGAACACGAAGAAATGAAG  
AAATTTATCCGTAAACTTGCCTTGTACTCAAAGGAAATAGCCTTATACTTATCAATTAT  
GTCGAACGACATGGTGAAGCTCTTGACAAATTGATAAATATTTACCCAGACAGACCCGCT  
TTCCTTGTTTCATGGGGGTGTAGATTTTCGATCATCGCGAAGAAATTCGCATGCTAACAGAG  
GCATCAGATAATGCAATCATTATTGCATCGTATGGTCCGTTCTATACTGGCATCAATATT  
AGCAGCTTACATAAAGTTTCTCTCGCTGGACCTACATTATATCGGAGTCGTAATTCACAA  
TCTCTTGAAGGAACGTTGCGGAAAGGAGACAATAAATTTAAAAGCCACTTTGTATGATATT  
GCGGATGAAATCTCCACAGACAGGGGCAATAACTACTCGTTCAATCTCCCGTTTCGAGAGA  
GACAAGATTTATAATGAAGAGAAATCTAAGTATGAGAGCAGAGATTTAAAAGTTAAGGCT  
TATGATTAACACGCAAAACACCACGAAGAATTTTACGGTATATTCTAACTGGTTAGGGG  
GGAGGATATCCTTGCTAAGGTAGTTTTGAGAGAACACCGTAGAGAGAGTTTAAATTTTCAT  
GTCTGATCCTGTTAGGGCATTCCCAACGACTAAGGACAACGGCGAGCACAAAACATAAAG  
ACGTATGGGTTTCAGTAAATGGACTCCAATGTCTGACGAAGAATTTTTTATTTAAGAGA  
GAAGGATCTCAGGACCATGGCAACAAAGAATAGAGCTGTCAAACCTCATGTATGATGCGTC  
CATCATCGGCGAAGATGGACATCGAAAGAAAATGAAAGAACGTTAAGGTCCTACCTCTAT  
CGCGCATGGATATCTAGGAAAGATAAAAAGACTTCCGTGCCTTCTGGTAAATTCGTATGA  
GAAGGAACTTATATTTTCGTCTGAACCCTTACATCGTGAGTATAGTTGTCCTTGACAGGTT  
TGTCAGTGTTCGATAATTTAAAACAAAGAAATATTTGTAAGGCGAAATTTTCCCCAAG  
AAGCGATAGCATTATGTCAGCAATCAAGAGATTCTTGCCGGTATACTCAAGTATAAATCT  
AGCCTAGACCGTTCAAAGAAAAGAGCCTACCATAACCTCGTGTCAATCCTTACATTGGT  
GGTTGCTTTTTAAGCATTGTTGCTCATCTATTATATAGTCCAACTTTATTAATTACATG  
TTTCATGATGATATGGTGTGTGATGGTATCCGGAAGTGTAGACAGTTTATTGACAACCTT  
GATCCTGCAAAGAGTAGAAACCCCTTTGAATATTCAACACAAATCGTATACTATGCTCTC  
ATAAAAAGAACTGCTATAGAGAAAAGACAAACGGATATTAAGGAAAAAATTATAGAAAA  
TCTGAATACGATCATATGTTTCATAGCTGACGGAAACACAAAATCACAGTATAATCAACTT  
AAATCCCGTGTGCGAAATGAATTCTAAACGATTAAGATTCTCTTAATAACAGATCAACACT  
TTGGAGTGCGGCATGACAACCAACATTTTATCATTTATTACAAAAGATTACAAATGATA  
TTGACTTACTTTTTGAAAAGCATCTGGCATTAAACAGGTCAATGCTCTTGGTGCTAGCT  
TCGATCGTAGTAGATTCTGACCTTTATATCTCTAAACGAAACAAACGAAATGTGGTTTG  
ATCCACTGAGGGAAATGTGTATTCCACTGACCAGGCTTGTGGCGACCAGGACATATACT  
ACAAACATAGTGCTCGAGCTAATGCCCAAATGATTAACCTCAAAGGGTACGACAGCATCA  
CAGCCATTGCCGACCACGATACTGTAACCTTTCATGGTCTACGTACCCTTCTGCTGTCTT  
GGATTTGTGCTGCCAATCGCGAACGGTTTCTCAGAGTGATCCAAGAATCTGGTGCCCTTG  
TCAGAATGGTTCCTTTGGAGCTTAACGCTTTTGGAGGCTGATCCAGGTCACGTGATGAAAA  
ATGGTAGGGATCCCACTGTTTTTAGTAAATCAAAAAGAGTATTCTCTGGACACTAACGTC  
TGAAATCTCAGAAAGTTAATATCAGATACTTAGGTAATTCTTAGCAACTTAACTCGTATG  
ACTACGCAACGAATAGAGGTTTTTACGTTTTTGTATACAGACACAATTAAACTACTTTTT  
ATAGGAATCCCTTCTATGTTTTTTATAAGCTGAATTATTATTCTGATGTGTCTCTCCCGG  
CCGAATCAGAAATCACAGGATGACGCGTAACAATAATTGAACAAGATAAAGGAGACTAAC

GGAAGTTCGACTACAATTTAAAACGCATTCAGTATCTGGGTTGCGCAGATCTTAAGAGTT  
TTGAAGTTCCTTAGCGTGGAACTGGAGAATTGCAGTGAAGCGCTATAAACCGAAGACACAA  
TAACCTTGTTAGCCATATATGTAGTAGAGGTAGATTAAGGGTCAGTAACCCCAACGTTA  
AGTCTGTCATGCGATCACTATATCTATAGGCATCAGAACGAAAATGCTTGTCCCACTGA  
GAAAACAACCTGGGGATGTATATGCTGACTCTAAGTCATGCTACGAACAGGGTACGAAGAA  
CGTGCTTGGTTATGCAGAGCAAGACGGTGCAGTAAGAGATATCGTGCTTCTAGAGGCAGA  
TGATGTTAATCAGGAACTTGCCATTTCGGCAAATATATGCAGAAATCGATGCGGAGTATTG  
TGTAATTATGGGTATTCTTCTGCTATAGTAGAACCTACTGAGTTACTCATGCCATAAAT  
CAAATTTGATAAATGATTGTCTATGAAAATATTAAGTGGAAGGATGTTCCCTCCCTTTGT  
GATCGATGGACAGAAATTAGCTCGAATGACTGTCCATCAACTCTAATTGTTAGTGCGAAC  
GATGCTGGTAAATCTACTCTCTTAGATGCATTATGTTTTGTTTTATTCAATAGACCTTTT  
ACAAAAATTAGTCGAGGACAGTTAGGAAATAGTATCAATGAAAAAGGCCTGGAGGCTGAA  
CTACTATTTTCTATTAGTGTTTCATGAGTATAGCGTCTGTTGTGTAGGGAAACCTAATGTA  
CTCGGTGTCTACAAAATCAATAACATGGTTGACCAAGAAGCTGCTGCCAAAGATATGCAT  
AAGTATCTCGAACAATCCGTTCTCAAACCTCAACACTAAATACCTTACACAGGTTCGTCATC  
TCGGGTTAATCGACATTCGTCACCTTCCCTGCAACTCCACGCAACTGTCAGGAGAGAAGTT  
GTTGAAGATTTATTTGACATCAACATTTCCCTCCCAAAGGAATACGATACGAAGAGTTCCG  
TATAGAAATGCAATGTAACAACAGCGGGATTGTGATCACCTCCTTCAAATCGTAGAGGAC  
CGTGTAACAATCAATAGAGATTTACTAGTACTCTTGATGATGTGAGTGCAACCCGTCAA  
GAAGAGAAGAAAAATCAAATTAACAACCTATAATGAAAAATAAAATAAGGAGAGAAGATA  
CGTGATGAACTGAATGAAGCAGTAGAACTCATACTACAGGTTTCAAGAATGTTGATAAT  
CATAAATCAGTATTAGATGACCGTCGTCAAGGATAATCTGACATCAATTCAGAATTATTA  
TCTTCCGCCAAACAACCTCTAGTTTTAAAATCACATGTTGGATGTCGTAGCTGTTTCGCAG  
CATATTGAATTGGAAATCAAGACAGCAGTGATTGGTAATTTAGAAATTACAGGTAAGCAT  
CTTGCAAAAGATTTCAACCGTTTAAACACATAAAATTGCTGATGCAGTTAGTGTTGCAGAG  
AGAATGGAATTCCATTCCCTGAAATAGCAGGGAACTCGTAGTATAGTCCCTTCTGCAGAA  
AGAGAGCTCGCACGTTGAGACACAGAGAACCTTCACATAAATGAACTTATATCAGAACTA  
CGAACAAACAGTCCTAACATTAGAGAAGTAAAAGTTTCTTTAGTTACGGTTCAAACCTAA  
TTAGAAGAAACACAATAATATTGTGGGAAGATACATCAGACTGTTGATGAATGTTAAGTA  
ATAGGAAATTTGTA AAAAGGAATCTGGTTTTAAGATCCAGATTATCAAGACGTCTGATCCT  
ATTTTTCATAATTTAATCAATAAATAACTGCACAACACGGATTTCTTCCATAAGTTCACA  
CTTGATAAAGGATTCAGAGACGTACTTAAAAGTAGATTTAGAGATGAATTTTCATATTCA  
TCTTTTCTGAAAGGTGAAAAAGCAAACATTGATTTAGCATGGCCATTTCCATGGAGATAA  
GTTGCTCGTAAGAAAAACGCTGTTCCCTACTAATTTACTCACTCTTGATGACGTATTGGAC  
AGTTCTTTGGAGGCAGGTGGTACAAATAAACTCTTGAAGAATCTACATGCCTTTAGTATT  
ACAAGTAACCTATTTGTTCTCTCCGTCAAGGGTGATGTCTTATTAGGCAAATTCCTAAGG  
CCAGTTAGATTTGAAAAGAATTATTTCTCGCGCATGTGAGACGATTCGTGAACCTTG  
GAGAGTATGTGCAAGAGCACTTGGAGACAAGTTTGGCCAGACATATAAAGAACCGGATCG  
GATGGCTTTAATCTGAACATTTATTTTCCCTTGAGTTGGAAGTTACTGATTATTTTATCGT  
AGCAGGTATGATAACACCATGGATCGATCATCAGGTTCCGCCATCATAACAGGGCGTGCG  
AATTA AAAACCTTGCACAATAACTATCACATTCTTAATTGGTCTGCTATACTAAGTGTAT  
ACGAAACACAGACAGATGATCAATCAAGAAGTAAGAGGAACGCCCGCTAAACTACTAGCA  
ATAGCAAACCTCACAGTTGAGCACCGTCAGGTTACAACCTGCATACTTAGATGTAGCGAAT  
CGTGTCTTTGCCTCCTTATCTGGAAGTCTCCCTTACACACTGTTTACGATCTACTTGAA  
GGTCAAGAGGTAGGAGATCCACTTTATACTCCTGCAGATGACTCGGACTAAAATATTCT  
AAAGCCCTCATCAGTGTGGTCGAGGATGTTCTGTTGAAACCTAATGAAGCGTACCTAT  
CGTGGTCTTTCGTGAGTCTTACTTTGACGAGGACAACGAACCTATGGAATCAAGATTTCTT  
GGCGTCAAACATTAGGATCATGAGAAGCTCCCCTGATTGAGCGCATCAATCTTTACTTT  
AAAGACAATCTCAATATGCTTGTCTCAGCTGAAGAGAAAGCATGGGTAAACTGAACTGTA  
GAAACGAAAACGTTACAAGAAGTAGAAGACCTTTCCAGATATCTATAACGGCTGAGATGAA  
GAAAGCCAAGCAGAGAACGAGCAAGAAGATATGGAATGGATATTCAGATTGGTAATGGC  
CATGGTAAGATCAGTGGTGGCGATTCTGATACAGAAAAGGTAGTTGAAGAGAAACATTAA  
TCTGAAGAAGAAACATCTGCACCTGATATCGATCCTATTCAACCATGGGATAGTTCAGAG  
AATCCTCTTGAGGACCTATCAGAAGATCTCCATACCTAGATGAAACCTATCGGTGGCGAC  
GGATCAGATCTATTCAATGACTTTGATAAAGTGGGATAATCTGAGAATACTACAGATACA  
GCATTACAATTATTAGTAGAAGCATTAGTTGATTATGGTGAGAAGGAGTGGGTTTACGTT  
GGTCTTCATAAAGTAGATATTGATGAACTTCTAGTTTTCTTACTCTACAATTCAAAGTGAT

CATCAAGCATTATTCTCGTTTTACAAAAATCTTGACCACGATGCAGAAATCTATAAGAGA  
GAGTGTGTTTCAGTATGCAGATGGTCATTACAACAACTCAAGACAGATGCACAGCAATCT  
GTAAACTTTCTTGTCAAACAGTTTGCATGCAGAAATCTGCTGATGATTACATACGTGCA  
GCAGGATCACCGAAAGATGTTGTCAACACTGCTACTCTTTAGAAATACAACTAACTGAT  
TACATCTTAAAGAAAGTTACAACCTGTTCCCTCCGGCTAAGAATCATGGGCTTATTCTCAA  
CTTGATTGGTCTGGTTCTAGGCTGTATCACCTCTTGGATAATGAAAATAAGTTTACAAC  
TTAGTATCGTTGTGTCGTAATCAGGTAACCCTTATCAAGTCTATGTATTCCATAGGCAA  
TAATATGGATATAATCATAGTAATAGCAAACAATGGAATTCTGGTGTGAACTAATGAA  
GGTGTCCCTTGGTGTTCCAAATGATTTACAGTTCTTGCATTACTGTCTATTAAGTAACT  
GCTATTTAACTTGAAGATTCACCTCGGACAAATTTACAGACAAGTATTTACTATCCGTGGA  
TACCGTTTGTCTACGATGACCAAATACAGTCGTGGTGGAAAGTCTACTTGCAGAAAGCTGCT  
TTCTGCACTCGTCAGTTGGTAAACGATCTCAAGAAGGTAGATAATGTTTCAGAAAGTAAAT  
GTTGTATGCTTAAAGTGATGGGGAGGCAAATCCAATGTCAGACTGTACAAAAAGCCCATAG  
AGCACTACCATGCAGGAGATGGGTGAGGAAAAATTCAGACTTGCGCGAATCTGTCACTCA  
AGAGATACAGTTTTTCACTTCTCGTGATTTTGGCACTGGGTATCAACGCAAAGTTAATGGT  
AGTCCATATGAACTACAAAAACGACCGTATGTTCCACGAGAGAAGTAAGTGATGACAAC  
TGGATTGGTATCTGACTGTGCAGTAAAGGCGAGGTATTAATATTGATTCGTACGCTTGGT  
ATAGGCACATAACGTCACGACGAACTTGACAAGCAATGTAAGAAACAAGATTTGCGTCT  
ATCTGAGTTAAAGTTGGATACTCTCAATCATTGTATAAGCCGGACAGGGGCACTGGCGCA  
GGAATCAAGACCTTACTGTAAACAGAAAGGTGAAGTTCTTACCGGAGCACGACTACAA  
CGTCCATTCGAATATCGGATGGGTTTTAAGTCCACAAACAATCTCTGCTCAACGCCTAC  
ATTAACAGATCGGATGAAATGTAAGGTGACTCTATTTAAGGCGGGAAAAATCTTTGAAG  
AAACGGTTACCGCTATCGATTATGATGATGGAGCAAAGTTGCATTAGCAAGAGATCCCA  
ATCCTACCTTAATCAGTGTGACTGTATTGTTCCGATGAAGAAGTGTGCACTTGTCTTACC  
ACTAAGCAGATAGACCTGCGATAATACATCTATAAACAAAAATAGACTATGACTTATGGA  
CCTAACCTGTGACAACCTGAACAACCTTGTAAACACCGAACTCATAATGTTGGAAGTAA  
GGCGGAGTCAAAGACATTAGTGAGTCAGAAATGATACTTAACTATTTTATACGACTGCA  
TGTAAGACTTAAAGTCTTCTAAATCAGGTATAGGCAAGTGGAAATCTAAGCAGTCGAGAA  
ATTGAACGTGCGTACGAAGCACCTGCTGCTAGTATATAAGCAAACGATGTTCTAACAAA  
GTTAATACTTATGTCACTACTGGTAACTTCACTTCTGTAGAGCAAGGTATCTCACTGACG  
AAGTTCTTCTCTATTACATGGCCTTCTGGAAACGGTAAGACTATATCAGTGAAA  
CAGGCATGGGCTGCAACTAACGGGGGGTCAATCCTTGTCAACATCACAATCGAAGTTGAA  
GAGGACGATCTTTTGGGTGGCCTTCGTCTTAATAATGGCGATAATGTTTGTACAGCGGA  
CCTTCGGCTGAGGCTTTTGATATGGGACTTGTATTACTGCTAGGTGCGATCGACCTAGCA  
TCTAACAAAATTCTTTCTTTGCAAGCTGTCCTTGAAGGTAAAGGTGTATTCCTGAAGAAT  
ATTGGTAGGTATGTAATAACTGCTCAACGATTTACTGTAACCGCTACTGCTAGCACTAAC  
GGTAACGGTTGCGATCATGGTAGATTCGTAGGAACAAATATTCTCAACGAAGCATTCCGT  
GAGAGATTCCCAATCACATTTGAGTAAGTGTATCCTTCTGCTCCTAGCGAGACTAACATT  
TTGATCAATAAGGGATGTGACAAAGACTATGAAGAGAACTTAATCAAGTGGGCAGGTGTA  
ATACGTAAGACATTCTTGGATGTTGGTGTGATGAAGTTATCACAACCTCGCCGTTTGGCT  
AACATTGAGCCAGCATAACCAGATCTTTCGAGATAAGTTGACAGCAATCACAACCTGTGTG  
TGCCGTTTGGACGATGCTACAAAATGATCCTTCCAAGTACTTCTACAAAAGTTGACGCA  
GGAGCAGATTACAGAGTTTACGGATTATCACGAAGCGCAATCATTACAGTTGATTATCAAGT  
ATCATGAAGAGGGGTTCTTAGACGTAACCTCCGATACCTCGATACCACTACTATCCAC  
ACTATGCTAGTGAGAAGATTCACACTCTTGTGTGCCCCGATTCATGAGGCGATACTACAG  
CATTTTGTAGAAGTAACGTTTCAAAGGACGCTTTTTGCTTCGATCGAACAGGTAGGGCTA  
GACAAGATCTCTAAAAGGTGCTATACTATCGAGTCTTACTCATGTCCTTTTATACAAGGA  
ATCAAGCAAACCACGCGGCAGCAACTTTTGCAGCACAAGGTGACTAATTTAGTATGTCAG  
CAATCTCCAAACCTACTATTGAAGTCTTTAAAAACTTTTGTATCAATCAACAAGTCTATTG  
TTATTTAACCTGGCAATAAGATTTCAACACTCAGACTTAATAAGGATATTCTCCTTATTG  
CCCGAGTCGCAAACTATTTGATTGGCAAATTTCTATCTCTGATATAGGAGTTTTCTTG  
GAGGGTTATCTCGGTATCACTCTCCGAACATCGATACTACTGGAACCAACTACGTCACAG  
TAAGTGATCTACAAGGTAAATCCATGACACTTTATCTCTATGCTGATCCTGATATGAATA  
CTAAGGCATCCGAAAGCGAAATGAACTTGCATCAGAGAATGTTGAATTTAACCTGAAAT  
CTATACTTCGGATGCAATTACAACGTGCGGCGATGGGATATCAACTCACTGCCCTGTGTT  
TGTATGGGGATGGAGAAAGTATGCAGTTATGTATGACAGGTAAAGAGAATGATACTTCCA  
ATTATTGTTTCAGTAGAGGTTGGAAGTACTGATGAGTTTTCTTGTATGTTTAAAAGTTG

AAAAGTGAATACTCTTATCCGGGAATTATGATTTAGGATTCGGTAAGACAAAGGTTGCTT  
TGTTGCAAGATGACGGACTCAAGGACTACATGACTCTAGAGCCTTACACATGAGATGTTG  
GCACTGTGACACAGATCTAAACGGGGGAGGTCACAGCGATTGTCCTAATGCAGAGGATTA  
TAGTTTCGTAACCTATTATCCACTGCCCTAATTGCGATTTTTACGTTCAAGTTTCTTATCC  
TAAAAAAGACGAAAGAATTTTATTTTAAACTCGATTATGAGAGACCAGACCTTACTGACC  
AGGAGACTCGTAAGCTGTATCGTATTTGAAGAGGGGAGCAAGGGGCTCTACTGGTTCGCC  
CGTATGCTAACGAGATTTGGTCTCATTGGAGATTCAAACTCACACTTAGGCAGTAAAT  
CATCCAACCATATCTTTGCTATGTACCTTGATTATCGTCATGAAAAAGATTTTCATCGGTA  
TAGATATGTATCGTAAGTTTCTTGAAAGGGGTGTGACCAGATCAAGGAGAATTGCCAATC  
ATAGCGATGGTAAAAAGTATGATAAAGATGGTAATGTAAAACCCTAATAACCAGATCATG  
TGACCTGTTATTTGCTGAGTCGGCTAAAATATTTAAGAAGGTTTCGAGATATTGTTGTGA  
ACAGTAAAACATATGTTACAATGAGGAAAGTATGGCGGGCATCTGAACGAACATTTTTGT  
AACTGATCCTTCCCAACGAAGTCTGCTCAGGTCGCACCTGATATACACAGCGTGAAGCT  
GTCACGTGAGACCTGTCAGATGCGTTCTAATGGTGTGTCTGATAAATGGGGTACCGTTT  
TGTTTCTCTAATTTAGATAGGTGGCATAACCATGTAAAACAGATAAGGGGGCTTTTCGTAA  
TCATTACTGCACTGTATGCGCACAAAGATAAATGTACATGGTTCGACGGTGGTTGGTCATGC  
CTTTTGCTGAGAATATACTCTTAGACACGGTGAGATACATAGTTGTCGATCAGCTATCGA  
ACATTGTGAAAAAATATTTGCTCCTGAGGGGAGCGCTCCAACACATTTTGTTCGCGAGC  
ACCCGATCATTTAAGCATGATACCACTAATGACAGTCATACTGCATACAAGTATAATAT  
CAATAGCCAATCATGGGTATCAGATAATTATCAAAGGTTACCTTATAGTAAACCTAACTG  
GGCAAATTAATTATTATGAAAGAGTTTTTGTAGCTCGAGAAGTATCGGCCTAAAAACGGA  
GGACAATGGATCTTGCCCGAATCTGTGAAGACCACCTACAAGAATTTTGTACAGCAGGGT  
GGGATTCGTAATCTCCTTCTATCTGGGACAGCAGGGGTCGGTAGAACAACCTATTGCGAAA  
GGTTTTGGTCTGTACGAGGAGCAGACTATTATGTTCTCAAGGGAGTCGATGGAGGATGA  
TTCTTTGACACCGTAAGAAACCAGGCAAAAAACGTTATCGCAAATGTCTTACTTACAGCA  
GAAGCAAAGAACGACATTCCTATCATCGGCGACGCAGACCACACTACCCAGATGTTCAA  
CTCTTACTTTGTGCATCGATAGAAGAATTTCAAACGAACTGTAGATTCATGTTTCCCGT  
TATTTTGAATACATAATTAGTGAACCTCTACAGCGTAGAACAACCTGTCTTAGAGTTCAAC  
GTTTCGATGTAAAACCTAAACAACAACCTCGCTGCAGAATTCTTTGGTAGTTATAAAGGGATA  
CTGATTGCAGTCAAAGTTACCTTCCAGAAAAAGTTGTAGCAGAAGTTGTTCTGAATTAT  
TATCCAGACTCCCGAAGGACTCTTAATGAGTTGCAACGATATGCAAGCACAGGATGTAAT  
GATACTGGAATCCTAGGAGCACGAGGTGACGCAAATATCGATACTCTAGTTGCATCATTG  
AAAACAAAAAGATTCATTGATGTATTGAAATGGGTTACCAAAAAACCAGATTCTGATCCT  
GTCTCTATCATGACAAGTCTCTATGATAATGCTTCTAATGTCTACACATAACCTAGTCTT  
GCAGCAGCAGTTTTAAACATTGCTGAATATCAATACAGGTATGCATGCGTCGTTGATCAG  
GCAATCTATCTCCCTGCATAGTAACTCAAGTGATGCTTAAATGCGATTTAAAGTAAACAC  
GCAGTGATCTTAAAAAAAAGGTAAAGGAACGTGTCTAAGGTCTGACTTACCTTGGCACT  
GGCATGACAATGCATACCATCACGAATAGACTACTGAAGGTAGTACTAACTTTGGTTTCT  
TCTCACATTTAGTGTGAGAGAGACAGGGTTATACTGAGCTGACTACTAAGAAAAATTATG  
ATGACTTACCGTAGTTTCATGATCTATTTGTTTAGTTTCAGTAGAGAAATTAACATTGACC  
CTAAAGTAATTTAAAGGATCCATGTTAACCTGACCCTGTATCACAGATCAACAAATATG  
CTTCTGGCCAAACAGACCAGGACTTTCCCGTAAGAACATGATAATATACTTGACAGGAA  
CTCATCGAGGTCTAACTAAAGTTGGAAACACCAACTACTCTTGAATGCTTAAATGAAACAA  
TCGTTTTTGACGTTGTTACGCACACATGGAACATACGACTGTATGAAGAATAGTTCTTG  
GCGATAGTTTTTTTTAATTATGACTTACATATTTATTAGAAATCGTGAAAAGATTACAGC  
ACAGGTAAAGTAATGATTCTACTACTGGTCTGGGGTGCTATGGCAGTTGCTGTTGTAGG  
TGGTTAACTATATGTTGAGGCTCATAACAGACAAATGGCCACATCAGTGGACAGATGGTT  
TGAACAGACCATTGAGATGATACAGCTTCCACTAAAACCTCCAACGGGACGCTTGATGGC  
TGTTCCAATGCCTCATCCAGATTTCTATGTTGATCCTATGATTATCATATGATAGGTTA  
AAGACACCCCTGACATATCCTGGCGGGAAGTCACGTGCTAATCAACAGATGGCACAATAT  
TTTCCAGACAATAAAGAGTCTGCTGAATTCAGTGAACCTTTTCTTTCAGGTGGATCTGTC  
GCGTTATACTTTACTCAGATGTATCCTCATTGAGATCGGGCTCAATGACATATACGAA  
CCTCTGTATACATTTACGAATCAACTGCAAAAGTATCGTGATGATCTTAGGAACCAACTT  
GTTCAACTCAAGAAAAACGATCCAGATTCGCTTTCGGCAAACAACCTTATGCGGACAAGCC  
TAAGATTATCATACTAGACACCCGAATGATAGCGATTTAAAGGCTCGTACTGTCGCTTTC  
TATGTTTTTAACCCGTTCTTTTTTCTGGTCTCACTGCGTTGTCCTCGTTCAGCAAACGA  
GCGTCTGATTCAAACCTTTTTAATGCAAGGAATTGAAAAAGTACCCTCTACGGATGACAT

ATCAAAAGGTGGGCAATATCTATTCTGCAATACGATAAATTATTTACAGATGATACTAAT  
GCATTCCTATTCATATATCCTCCGTATGATATCAAAGCAAACCTTGGATGGAAAGAGAGGC  
ACAATGTAGATTGGACTCGACTACGATTCTTTTGAATAAGATCTGATAGAGTCGAGTGT  
GATCTAATGATATCTTATAATCCTCCCAGTTTAAATAAAGCAAAGATTCCAAGTTGGAAA  
TCACTAGAATATGATCATTCTATAATATGATATCTGTAGGTGTCTACACGGAAGATCAA  
GGACAACGCAAATAATTTCTCCTTTTAAAATATGGCATATAATGAAATACTTCTCTAAA  
GGATTATCTATTCTCAATCGACACCAGCAAACATTATTTGATGGATGAGGATTCTGTTTG  
GGTGAATAACTATCCTTCATATGTAATAAATAAATCTCTGTGCGCATCATTTGAATACGAT  
CATGTATGCTAATGCAATAAATATCCATTCTCATGTAGTTAAACGGTTGCAATATGATTT  
CTTCATAAATATTCTGAGACCCCGAAAGACATTTTCGTCTAGGGGTAAGAACTGGAAGT  
GAAAGATCTTGACCCTGTTCAAAAATACTATGGTTATAGCAATGATAAAGAATATCAAGC  
CCTAGAGATCTTAACTGCATCCCACTTAAACACATTACAGGTAACTGAACAAAGGAGG  
TAAGACCAGATTAATGAAGTTAACCAAGTACATTGGAGTAAGAATGGTATGGTTGTAGTG  
CTAACAAAAGTATTATACCCGTTTCTGAAGGTTCTTGAAACACTTACTCGTATCGGAGTA  
GCTTCCCCTAAAGAGAAAAAGTTATAACCAGTCCTTTCAGATTCGACATAAGAAACGTCAA  
TACTTTATTGTGGAATTTCTAAGAATTATTTGCACTTGATGGTAAGAAAGCACACCTATCT  
GAGAATGATGTGCCGCGTTGAAACAGAATTATTAATTAATATATGAGTGGGGACTAGTT  
GAAATTCTAAATTGATCAGCGATCTCAAACGCTGCTTCATTAAGTTAAATTAAGTATTG  
GAATACAAACAGATAGGACACTGGCCGCTTGAGTCCAAATATAAGATCGCGAAAAAATGT  
CAAGTCACAGAATGACATATAGTTTATTGTTATCATTACAGCATAAAGGCAGACGCCAAG  
AAAAGAGTGAAATAAACAAACGGTGCCCCAGGAAGAATCAAAGTGTTCAAGTGAAGATAAC  
AATGAACAACTTGCTATCCTAAGTACATTCGTAGTCCTTGATATTTTGATTTGGAGTGCT  
GTTATCTTACCTTTGAATTAGGTAACGATACCTGGGTGGCTACGAGACATGATTGATCCA  
ACTTTTAGAATTTCCGGTCTTACAGGAGTCACAGCTACTATCTGCATTCAAACGGGAGGT  
AAGAAAAACAATAGTGGCAGTGGTCGTGTTGCAAACAACCTCTAAGAAAGACAAGGAGATG  
TTTATAGCAAAAGCAACCCAGGCAGCACCAACGCAAACGATTCAGTTAGTAGTTCCTACA  
GTTAAATTTACTAGTTATAATCATGCAAAAAATTATCAGCGGGATCGCTATCTTCTCAGA  
TACTGTGGAACCTTGGTCTAGTGGGACTAGGTGGATATGTATACATCCGTCCAATTGCTAA  
CATTGAAGACATCAAAGTGAAAACAATCAATGCCGCACTTGGTGGAGGTAATGGCGTTTT  
ACCTGACATGGCAGATACACAACCTACCTCCATAACTAGTGCACCAGTTCGGTTACCTTG  
ATTACTCTGAACGGTCTGTGGATATCAATCGGTGTAGTTGGTAGTATTCACGTAGTATCC  
CACATGGGAATCATAGGTTATAGTGTCTTAGAAAAACCGAGTGTCAATTCCTAGGAGA  
GATGTTCCCTGTAGGTGAGTATACTACATATGCCAGGTGAGCTGATAAGGATGGCTCTACA  
ACTAGTTCCTCAGCTAACGATCCTAAGAAAGCATTATTAGTACGGACATCAAAGAAAA  
GGTTGTTACTTAGCACTAGCCAATGTAACCTACTAAGATTACTGAAGACTACTTGTACGAT  
GGTATGATTAATCAAGGCGGTGCTGGATCTAACAAAGAGATCTTGCATTTATCAACCACCT  
CGTTTGACCCCAATAATGAGCATAAATAGTCTCTGCTCGAAAAAGTGAAGCCTGTATC  
TAAGCCATCGGATGAGCAGAGAGTACAGGGCGTCTCGTTGGCACATCTATTGGTGCTGAT  
GCTGCACATTCTCTAAGTAGTGTTCCCTTTGTTAGATGGTTCGGTCCCTGGCTGGGTGTCA  
ATGTTTGGTGGCAATTCGGGAGCTGATATAGGTGGAAAGATGGGGCAGGCTATCAGTAAG  
GATTGTTAAGTATTTTTCTTATTAGGACGTTTGAATGGAGCTAATCCTGTCTTCTCACC  
TACTGATTACACTGTAACCTCGTTACGAGTTAAACTAGGTGAATCTTTAGCGGGATTCTTT  
TGTACGATCGTAGTAAGTTTTTTTATGAGTGGTTTTATAACTCTCAACACGAATGGTGT  
GCAACTGTTGATGCAGGAGCTACCACTGCGATAGATGCTGTTACGCTGTCTTGATTAGTG  
GGTGGTGCACATCTTTGAATTGCTGTCAATCCTCATACTACACTACGCAGTGACCACCT  
CTACCTCATGAGCTATAATTCTTATTTCCGCAATTTTCAGGTACATCACCTACCATAGGC  
CGTTTAGGTGCAGGACACGTAATCTCTTTATCAGTTTTTGGTATCGGTGGCACCTATGGT  
TTATCTGCTTCTTGTGTATGTGGTGGTTTAAACGACAGGAGGTGCCGGTGCCTCTATGACC  
ATCTGAAATTGATCAGGTGGATAATCCATCGCATAATATAATGGCACACCTGCATCACA  
AATACTAATACTTTATCTTCCCCGTCTTCAATTATTTTATTACTCTTGTCACTCGGCTGC  
TGTACTTCCACACAACCTGTCATCTCGATGATCCCTTCTCCTATGTTTAAACGTAGGAGGA  
GCTACGAACGTTGTTGAGTGAAATGGTTGTCTCGTGAACCAGTCTGGAATCTCTCTAATA  
AATATTGTCCTCGTTCGGATGTCTCGAACACTTGCGTTATAGACTTGTGTCTTTGGTGTA  
TCCATACATCATGGGTTTCCATTGATATATCTTCTAAGTTATCTGCATTTGTGCTGAGG  
ATGTCACGAGCATGAGGAGCAATAACATTAACCTTCTACACAACAACGTCTGCACGAATA  
CTATAATATGATGTGTTAGGATAGACTGCAATTCACCTTTCTTCGAATTTCCACAATTT  
TTAAGACGAGCTGGTTCATCGTCAACGCTAATATTTGCTACGGTTTGATTCGCTACTGCG

ATATGTTCTGCTGCTACCTCTGTACAATGCTATTGTTCGTTTCTGATCTAATCGGCTAGCT  
CGTGTTGCAGATTCACCACCTGAGAAATGATAAGTCTCTTTTAGTTCTGTACTTGCAGGC  
ATATGGTATAAAAATATTACATGAATTATCAATTACACCTTCATCTTTGAGATCTGACATA  
TCCTACACAGGATCCATATAGTATGGGTCGTACCGTTTTTCGAGCTCAAGCCGTTCTGTG  
ATGTACGCCGTAATATTCAAGGTACCACCTTGACATTAATGCCATTACCATATGTGTTT  
GTTGTCTGCGGACCTTGTAGAAATTGTATTGCATGGCTCGTCACTGAGACTGCTGAGTTG  
GCGGTTGGCCTTGCAGTCGCACCGACACCACCAACTGTCTCTGCATTGACAGTCGGAACA  
AAGGGCATGAATCCCGTAATGGCAAATAATGCTATTTACTTAAGATACTGGGAGTCTCTG  
TTATCGAAGTTACAGTTGTTTCCCCTTGTATTACGGCGTGGTTTGAAAGTTCTGATACCA  
TGTAGGTTTTCGATCTAGTGGAAACGCTGTACCTCACGTCTGTATTGTGAAGTTGGATTTGT  
CGCTTACACCCGGCCATATCGAATTTACTCCTTCAATAGTTATCAGATGGCTAGCATTAG  
TAGGTGACAAAATATCATCTGTAGCTACACCGTGCCCACTGACCGGCGATTGATAGCCTG  
AGTGAGCGTCCATCGAAGATATGGTCGTCACCACAGTGCAAGTAGTTACCGTTTGGATGG  
TCATCGAGCCCTGTTGGCAATGTGGCACCAAAGGGACTGTTATGATGGGGTTAGTCGCAC  
CACCCATAGCTATTAATACGAATAACTTATATGTATTCTCGTGATGATTAGTCAAAAAC  
ACTCATTTTCGCTAACAAATTGAGCTGTTAAAGAATTACCTTCACCGACAGTACCTGGTGA  
AATTGTGCCATGAGTATCAGTAATAGTAGGTCTATTTGTGATTGGTGTTCGTTTCTGA  
TCCGGCTGTTTCTGCACCTTTGTGTGGAAATATGACCCCAACTACCAGGTGCCTCAGTAGA  
ATTGTCACTCCCTTGCCTTGATTGGGCAAAGGAGAATGATCTTACAGACGCTAGGTCAAC  
ATCTGGAGATGATCCAGTACATCGATTTGGAAGTGCCTAGTTGTTCCGACTGTGCCAAC  
GCCTATAATAGGGCCATAATCGTTAGTACCAAGACCACCATCTTCGGCGCTACCATTGGC  
CGGTGTATGGGTTGTGATCACGTTATTTCCAGATATCGAATAGTTAGTGACAATTCGTTT  
CTCAGTCACGATTTGAGGTACCACAGTTAGTTGTAATCTAGAGTGGTGTCTAGTCGATAG  
TCCGCCCGCATTTGCTGCTGCGCCGACTGTCAAAGCATAAATGAAAGGAATAAATTTTCG  
CATTATTTTACTCACTGGGAATCCTGTGCTATATAGGTCTGCAAACCATCCACATATGT  
TCGGCAGGTACCATTTCCTGCCATCTTACTTTATGTTTAAATAGTAGTGTGCTCCTCCGGG  
GACAAACTCAAACACACGCTTATTTAGGGAGCAGCATGACTAACTTCTCACCGTAGTCAT  
CTAATGATGTCGAAGCAATTTTTCAGCGCTGCAAATAGTTTCAGGGTATGATTCGATGATT  
TCTTCGACAGACTACAAGCGTACTGAACAGGTTACCTACGGGACAAACCGCGCCATACA  
ATATTGTGAAAGAAGCCGCATAGAAGTGGAGACTAGACCTGTCTCTCGAAGGATGGTCAG  
CAGACGAAAAGCAGTAGCAATAGAGCAGAACGTAAGTACTACTAGGCAAATCTAAAGTGCAAG  
ATCCAAATTCAAATTAGGACAACAAGTTCATAGCGATGTACCATCCAGGACGTTTGCTA  
GAAGATTTAATCTATCAGATGCCCTTGACCTCGGCACAGTATTCTATGTAAATGCAATAC  
TAACAATTGAGATTCAGAAGGTAGTGCCAGATCATCAGAAAAGACGAGTCTATGATATCG  
GTTATCGAAAACCTTTTGCAGTTCTTAACCAGTAATTAAGATACAAAAAATCACTTATG  
ATATATCAAGTGGGTGTAAGTTCTTTTAAACCAATGTGAGCATTAGCATTGGATTGCTT  
CCTTTACTATTCTCAACCGGTTGTGCAAATTCAGAACAATGTTAAGTGGTGCAGGTGCT  
TCATTGCCGTCTAAAATCTATACTCGGCGGTTCTCAGACGTAGTAAAAGCTGGTGGAGCA  
AGAGTAAACTATCCCGCAGTTGGTTCTGGTAGTGGCAGAAAAGCATGAGTTGCCGATAGC  
GTAAACTTCGGTGCCCTGTTGATCCTATTAACAATTTGATATAGAGAGAGTAACAAGA  
CTATTAGTTCAGATACCTATGACAGGTGGTTCTATTGCATTTGGACATAACAATCCTGAC  
TTTGATATATAACTTACACAAAACAGGAAGTTGAATATGCCATGGGTATCATCACTTAC  
TGCAACGAAATGGGATGTGATGATCAGAGTATGACTAGTGCACATCGTTCAGATGTTTCT  
GGTACAACCAACGCATCTATAAGTAGTATGCAAGCATTCTCTCTTACATGGACACTAGGC  
ACAGTTTAACTGACAGCGTGGTTAACAGGAGTGGGAGGTACACGTAACGCAGGAGTCGCA  
TGAGTAATTAGAAATACACCTGGATCAATTGGATTTGCGAATGAATCATATAATGAGGAT  
CTTGTAAGACCCGCAGCACTTTGAAACAAGTGGGGTAACTTTGAAAGAAAATCATTTGAC  
GCAGGATCAAAGGCCCTTAACTCGATCAGTCTTGATGAGAAAGTTGCAGGAACACATCCA  
AATGCAGAACCAGTATCAGCGTATCCGATTGCAACTCTAACTTGGATACTTGCATATGAA  
CCACGTAACGGTAAGATTACAGCTGCAGTCAAGACAACCTTTATCAGCTCTATTGAGTGGT  
GAGCATCAAGATAAAGCAGGTCAGTTATGATTTCGTTTCTTCAAGGTGACATTCCTGAG  
AAGGCAAGAGCAGCAGTAGACTAGGTGAGTTCATAATTTTATAATATATCCGTATCCTAA  
TTATTATATGAGTGTAAGACTCGTGCGAACAAGAAACGGTGAACATGTTATCTGTGATGT  
TTAGGAAGTCAAAAATAAAGAAGATCCAAGCAAAGCAGTAGCCTCTCAACTTAAACAATCC  
ATATATTTTATGCATGAAAGGAGATAGAAATACAGAACCTCCAATTCTTGTAGATGATGG  
TGCAGGTGAGACTGTAAGTACAATCAAAGATCCGGATATCTACTTCCAACCTCGGAAGCC  
TCTGTCTTGTAACAACAGAATTTCTTTTGAAGTTAGAGGAAGTGGTAACCGCATTTGAGAC



ATAACCAGAGGACATCTCTAAATACAACATATTAATCGAGGCAGATGGAGGAAAACCAA  
GCTAAGTCCTGTTTCGTGAATCAACGGAGTGAATGCCTTATTGGACAGGTAACAAAGCTAG  
ATGAGAAACCAAGCATCCTTCTCGAAAAATCCTATGAAGTAACGACTGTGGATACCATGA  
TTCCGTCTCCAAAATACAGTTCACAACGTGATGTCTTCTTGACATCTGGTAATATCATGA  
GTATACTTGATCGGACACCAACACTGTTTGAAGTCTACAATCAATTATGAGTTCTTTCTA  
CACCAACATTCAACTAGCTTGTACACTATACTTTTCGGAGAGTATGAGAATGGAGACGC  
GGTTCAATATCGCACATCCTTTTCTCCTACCATTTATGATTTGAACAAGAAAAAAGACAA  
GTTTACAACCTAGCTTGGAGATACGTGTCTCCTGGCAAGTTTCACAACCCAAGAGAAGC  
AAGAGAGTTTATAAAACAGTATGAAAATGTAGATAATTGTGAAGTCCATGGTTACGAAAG  
ATTTGTCTATGACTACAGTCGTCACCAGTATCTAGATGATGTTGACTACCACATTGATCA  
GATGAAAACCTATTCATCGGACATCTAGGTTCTAAGTGTAAGAGGATTCCTGGACGTCGA  
AGCAGCAGCGGAAGAAATGCGGTCAATCACCCTAAAGATATGGTCCCTAGAAAGCATT  
CAGTTGGACAACCTAGAGAGTTTGGTGCACCAGATAGTCTATAGTTGAACGTCTCGCGGAC  
CGAACAAGAGATGCTTACAACTTTATTACATGGTGGTGCACAACACACTACAGACATTCT  
CACTGGATGGAAAGTTAACTTGTGTGTCGTCACACATGACTGGTTGAGTGAATCGTAC  
ATTCGGTGCAGAAATGGATGAAGAATTTATCCCCCTGGAATCGTGCAAATGAAAGGGAAGT  
ATACGTCCAAAGTAGAAGGCATTAAGCTTATGGTATCTCTGGTTTGAATATCCTCGATTA  
CCTCGAACTATACCGTAAGTTTAAATACTCAAATCAGGAGTGATATAGACTCGATTACAT  
TGCCTGTGTCAAAATCGGGGAAAGAAAAGTAACTCCGGACGCGTCTGAAATATTCAAAGG  
CCTCTATACAGCTGATTGCCACAAGTTTATGAAAGACAACATATACAACGTTGAGTTTAT  
GGACCGTCTTGAAGATTAGATGAATTTGCTTGGACTAGTAATTACAAATTCTAATGATGA  
TAGGGCACGCTTTGAAGATGGGTAGAGTCTGGTACGTTTGTAGGATAAGACGACATATGA  
CTATCTTAGAGAAAGAAACCATGTGGTTCCCCCTCGAAAAGCAGCGAAGAAAGATGTAAA  
ATACGCAGGAGCGTATGTCAAAGAACCGATACCAGGATGCTATGACAGGGTTGTCAGCAT  
TGACCTCGATAGCCTGTGCCCTCACTTTATTATGCAATCCGATATTTCCCCCGAAACACG  
CAGGGACACTAGACTTCCCTTTGCAAGCGTCCAGAGAATCCCTAATAAGGAGTTGGTGAT  
AGCGGACGACTATTGTGTGTGTGCAAACGGTACCATGTATCGAAAAGATATTCATGGTGT  
AGTGCCTGAGATCAAGCCGAAGATCTACGATGGACGAACGATCTAGGAAAAGGAAATGCT  
GGCTGCAAAAACAGCAACATGAAACCACACCCTAACAACACTAGTCGCTGCCATTTAATA  
GTTCAACAAATTACAGATGGCAAGAAAGAGTCAACTTAAAGTTGCCTATGGTGCTATCGG  
AAATCAATACTTCCGATACTACAATGTTGCAATTGATGCGCCAATTACTTTATCAGCGCA  
AATTTCAATCCGTAGTCTCGAAACCACAATGTACGATTATCTCAACGAGACACTCGAAAC  
GACAGGAGAAGATCATGTTATTGCTAGTGAAACCTATAGTAGCCACCTCAATCTGGGGGC  
TCTGACCGACGCTGTGTACGATGGGAGAGAGGGCGAATTATTCGAGCATCGTCGGTCAAAT  
TAATAAGGTGTGTGAGGTGGAGCTTGAGACATATATGACTAGTTCTTATGAAGAGTTGGC  
CACATATGTAAACGCAACCGCACTGAAGTTGGTCATGAAGCGTGAGTATATTGCCAACAA  
AGGTATCTGGACTGCCACGCCAAGATATATTCTTAACGAGTGGTATGGCGCTGGTGTCCG  
ACATGAGATAACTAAACGTACGCTCATGGATATCGAAGCGGTTAAGTCTTCTACTCATGT  
AGCATGTCAAAAATCTCTGCGTGATTGCCAACAGTTATCTTGAATGAATATGAACAGCC  
TGCACAGTGGTTCCTGCTGACTTCACAAATCATTTTTCTGCCTAACCTAATGTAGACAT  
CTTATTTCTGATAGAGAGTGAATATTCTAAATAAATGGTAGAACCTACAACGATCTATCA  
CAAAGAGACACCTATACATGTGATAGGGGCCTGGTATATAACTTTTATGATATGTAAAA  
CTTACTTACTCACATGTATCCATGAATTAAGATGGAGAGAAGAACAATTCGTCTGTTT  
GAAGACTCCAATAAAAATCAATAAGAACAGTATCAGTTATCTCTATATGTTCCCGTAATA  
GTTTGTACTTGACAAAAGCTTGATTATGATCTACAATTTTACAAGAGTTTCTTAGAACC  
CATCAAAGTGATTATGGCCGCTTTGGTTGGCACCCCTAACAAATCGCAACATTGGAATT  
TCTATTTTCATTAATAAGTTGTTGAATACCAAAAAACATTTGGTATCCCAGATAAAAGA  
GAACAAGTTTTGGACGAAGAGTCAGATGCAAAATGGTTTTAACGTGCTTTGAATCGTACG  
AATGCTATAACGACAATCACGGAGGTTGATGAGAGTCTTACTGATGACTGTTGTAACAA  
TAATTGGAAGTGAATATGCATGACAAGTATCTGACGGAGTTTGTGCAGGTGATACAAAAG  
ATTTTATTGATAATGGTTCTTATGTCTCTAATGCCTTAGGTTCTGGATCAATTTATAGCG  
GGGTGCCAATCAATAAAAATCACAGCGATTGCAGGTGCTTCATCAACTGGTAAAACCTTCT  
TTTGCTTGGCATTGTTCAACACTTTCTAGATTCTGATCCTGATGCATGTGTAATTTAGT  
TTGAATCTGCGTCAGCTATTAGCAACCAACTGATTTTTGATAGAGGTATAGATTCAGATA  
TGATGATGATCGTTCCTGTGCCTACGATCGAAGATTTTACACCTCAAGCCTGCAGGATTC  
TTGACAAATAAACGGAACAGAATGAGTCTGATCGTAAACGGATGATAGTTGTATTAGTTT  
CTGGTGGTACGCATGCTAGTAATAAAGATGTTGAAGACTATGCTAATGACAAGAATGTCA

GCGATATGACACTAAGTCAATTTCTCAAAGGAGCTTTGCGTGTTCATACGGTAAAATTAG  
GTAGAGCAAACGTTCCCTATGGTCGTTTTGAATCATACATATGATGTTGTAGGAAGTTATA  
TTCCAACGGAATAAATGGGGGATGGAAGTGGTCTCAAAGACGCTTCATTAACAATTGTAT  
GCCTGTCAAAGAAGATGGAAAAAGATGGTTCAGAGGTTGTTGGAAATATTATCAAATGTC  
AAGCCCAAAAATACCGTCCAAGACAAGAGAATTCTATTGAAGAGACACGGTTATATTATG  
ATCGTGGACTTTATAGGTATTATGGATTACTAGAAGTGCCTTAAAAGCACGGTGTATTAC  
CACGCAAAGTAATCTTATTATAGTTGGTCAAACCTTCTGTATATCCTAAATCCACTGTTG  
CTTAGCCAGAGGAGTATATTACTGTTGTATTTCATGGAAGCATTAGACGAGTCAGCAAAGA  
AGGAGTCTCTATATAGTCACTAATCTTACTCACTACATTAAAGGCTATGATGATAGGTTT  
ATATGGGATTACTATAAACGTGTACTTCAAACATTCACCGAATCATATAGACATGTGACT  
AGTATAGATAGAAAACAACGAGCAGCCTTTAATGAGTTGAATATCTCTCAAAGCTTTATG  
GCAAAGATCTTGCATAGTTGGGAATTCAAAAACAACACAGGCAGTCTTTGGTCATATT  
ATCAAAGTTGATATAAATGCTTTTCAGTCAGAACCAGATTTTTCTGAAAAAGATTCTTTT  
GGAGAGTTCAGAATTAACCATCTAATAATGATGGACTAGATCAATTTAAAGATCATGTA  
CATGTAGGAGACAATAATGCTGCTCGTAGCTTTTTTGTGATGATTTTGTATTTGAATGAC  
GTTGATGATGGTGGGCAAACATAATTTTTCTAGATTGAGCTATGAAGTTTCACCTAAACGT  
GGTAGAATATTATTACTTGCTACATTGCAGGATCGTCACTGAGGATTGCCACCTGTG  
TCTGACAAACAGTATATTGTTGGTAGTTATTTACTATACCAATGAATCTGGAAGTCACGA  
TTCTATGTCATCAATTGTATAATATGAAGTGTGCAAGGAAGGTTCTTCCTTTACTGAAGG  
TTGATTGTTTTACCGTACGTTCTTACAAGAGTATTTTTCTTGATGTACATGAATACATTA  
GTCAGTATGATGCATTCCCAACTCTGGACGCACTTAGTATTGAATGACAATAAAGAAAAG  
ATCGTAGAGAGGAATAATTTCAAGAAATCGTTGAGGTTTAAAATGTCCTATCCGATGATC  
CGAAAGACGAAGATCAGATCGTAGATTCTACAGAAAAGTGGTGTGAGGAGCCTGCGATCT  
ACCTATAGCCTAGAAAATCTGTTAAGATTGCTGACGCTCAAGATACCAAACGCGATAGGG  
GTGCAATTCGCGCAGATTCTTGCAAAGCATTACGAGTATCATTGAGCAACATGTCGGTC  
AAGAATATATTGAGAACGCTACTGCTCGATATGAACATTGTGATACATCGAAAGACAAGC  
TTCCTTTTGATATGGAGTCTTTAATAAGATTCCCACGGGTGGTTTAGTAAATAAATCAA  
GAAACAACGTTCTTGGAGGAGCAGGTGTTGGTAAATATTTGGCCATGGGACACTTTGCTG  
CAACAACCTATATTGCAAGGTATGAATGTTTTATACATTACTTGTGAAATGGCAGAAGCAA  
AGGCTGCAGCACGTATGCATGCAAACCTATTAATGTTCCGATTCAAATCTCGCTGATC  
TAACACAACCAATCTTTGTAAAAAAGGTTAAAACACTAGCAAAGAAAACCTCATGGTAAAC  
TTATGATCAAGGAGTATTATCCAGCGGCAGCACTTGTGCGCCGCTTTAAATCGCTGATCA  
ATGATCTTGCATTGAGGAGAAGAATTAACCTCATATTGTCTTAATAGATTCTCTAAACA  
TCTGTGCTTCCCAGAGATACAAATGAAGTATTGTGAATTCTTACATGTATGTAAAAGCAA  
ATGCTGTTGAACTTAGAGGACTCGCGGTAGAATGTAACGTCCCGATTGTCTCCGCGACAC  
AAACGAGGCGATATGGTTTTGAGTCGACTGATATAGGTCTCACTGATACGAGAGAATACG  
TTGGTCTCCCTGCAATTGCTGACATCATGTTGCTCTCATCTCGGCTGAGGACAGTGAGG  
GGATGGCTTAAATTATGTTCTAACAACCTATCAATCGCTATAATGCTCCTACTATGAGTA  
AAATATTTTCGTGTAGGTATTGACAGGGCGAGGATGAGGTTTTATGACGGAAAACAATCTG  
CTCCAGCTGACCTTGTGATTCTGGTCAAGAAGAAGAGAAGGTTGAGCTTGTACACGAT  
TTACATCAAAGACAACCTTAAGTGCTTTATAGCACGTGTGATTTGAAGAAGTATAGTGAA  
TTTGTAACCTGCTGTTATGTCTGTAGAGCGCAAGTATAGTGGTCATTTCCACAATCGTTTG  
AGAGAATTAGCTTTCAAAGAATTCTCTGCACATAGAGCATGAACAGCTTCAGACGGACTA  
TGTGCTGTGTCTGGAGAAGTTACTGAGATAGTACAGAAGATATTATTTCAAGGTAAACCA  
TATACTGAATAGTGTGTTTTCCATCTGAAACGTGAACTAGGTGATGTCGTGAGGTAGTTT  
AGACAGGCACGTATAGTATTAGATGTCTCACCAGAAGGGGTTATAGAAATGAATGTAAT  
AAGTTGAAGAGCAGATATCCTCGGTGAGAGTTGTTTGCCACGACTCTTAAAATCGTAAA  
CAAGGAGATGTTTAATGGTAGGATCTGGTGAAAGCCTGGCAGTTGTTAGTGATCTTTCTG  
ACGCATTGAATACTGTTGAAACGAAAGATGCCATTCCAGTATTGATTTGTATTATAGAAC  
GTTATTGGATTAAAGTTAAAATCGTTACAAGCTTAGGAATTCGTAAAAAGAAATTCAGAG  
TAGTAAAAAAAATTATTGTTGATTCAATAGTCGAAGGTCATCAGAAAGCACACAGATCCT  
AAGGTTAGGTAAACTTTATCAAGATGAAAAGGTTCTATCTGGAAAAAAGTTTGAACATAT  
GCAGTTGACAGCAGATTGTAGTGCTGACAATAGTTGTGCTAGGCCACATACAAAAAAGC  
TGGGTCATATAATTGGTTGACTACTGATGCGTTTCAAATCTAATAACGGGTAGGTTTGC  
TGCCGATCGATTCTTATCAAAAACAAGAAACGGGTCAAGTAGTCTCGGCAGATCC  
TCCCCCTTAAGTTGACTGTGCTAAAAAAGTCTTACCCTAAGATGGTAGACTGGGGTATAG  
GAAAGAGCTTGAAATAAATCAATACAAAGATAAAAAAGTACACGGCGACACACACTAGAG

AAACTGCTAAACAAAATGATGGTTCTAGAGTTTTGTTTCGACTCTGTAATCGCTAGAAACA  
AAGATCCATCCTGGAAAGAAATGGTATAAGACTATGAAGGATACAGTCCTGAATCGAGAT  
GAACACATCTTAAAAAACTGCAGCAATACAAAAGTCTTTAGGATCTTATGAAGGGTATC  
AATACTCCAGAGATAAAGGACTCATGCCTTACATTGAACACATTGCTAAGAAAGAGTGTG  
GGTTAAGAGTAAAGGATCGTTGGAATCCTATGGATATTGTATTGGTCAAGAACAGTGCAA  
AGGGAGTTGTAGAAGGACCTTTAAAATAATTTACTGACATTGATGGAATGAGTCAAGGTG  
CAAACTCGCTCAACTCAATGTCTGTAAGCGTGTAGCATTAAACTGTAAAGTTTTAATTG  
GTATAGCTCTGAAAGTTGTTGCAGCAAAGAAAAAGACTGCTACCGCAGATGTTGCCAGTA  
CAGGTAGAACAACCTGTTCAACATAACCATGGTTACCATGGTTACAACTCTCTGAAGTGTA  
CGTTAAATTTAGGAAGGAACAAGAATTACCCATCTTATAGTGGCGAACTTGGTTGTGATA  
TAGTGACAGCGAAAGGTGGTAAAATACATGGTCAATAAAGAAATTTTTAGTATTCTTACG  
AAAGCAATTTAGTTCAAATAGATCTCACTCCCCTGGTAAAGACGCAGGAGCAAACTTC  
GTAAAGTTTCAAGTCTTGCCTTGAATATAATTTCTGGGAGTTTTGAGATTAACCTCGTCCTA  
CTTCTGCAACAAAACCTGAATCATATTCCTAGAGTTGGAGGCTGGACAGATAGTCATCAA  
AATACTGGAATTAAGTTGTATAAAAAATTAGTTGCATGTCGTATGATTGTTTTTGGAGAAG  
TAGCCGTGTATGAAATTATGCAAAATGACACTGAATATATCGCAGTAGTTATCGTCCTTG  
CCATATCATATGAAGCTCGTCAGGCAAATAGTCGTTCTGCTGCTAGATTCTCGTCTAAGC  
TGATTCCCAACAAATGGGCAGATATGTGGATGGAAATTGCAAAGATGTAAAAAATGCAAC  
GGAGGTCCAGCGAATTATACGATGGTGCAAAAAAAGAATTCGGCGATTGTAACGGTCCTT  
TCCTCAAGATACACTAGTCCAGTTTACAGAGTGTCCACTATTACTCGGATTTCTTTCTCA  
GCGTGCTATAATATTATATAGACAGAGTACACCTTGCTGACGAACAGCGTCAACAC  
CTTGAGGATCTGATCTCTTCTGGTTCGTCAGGAAGGGTTGGATGCAGTATGGTCTGCACTT  
AACAAACAAGCATTGTATATTAGGTGGGATAGTGCTCCTGCTATCGTCTTTGGCTCAAAC  
CCTGCAATTGGCAAATCTTTCGTTGCAACGAAATGCGTCTTTAACAAACCCAAGGTCAAG  
ACCTGTTCTGATCAAACAGGTATTGAGGAACTTTAATCTGGCAACCTTGCAGGACATTCTG  
CGCTAATGTCTTTGGAAGCTTCTCGTAGCCGTGGAATTGTCCACGAGGATTTCTGTCGGT  
GTCGGAGGGGGCAGTGTATATCGCGCTAATAGTTTTGAGGACCGTCTTCCCCATCCGATC  
CGTAGCGATATTATCCTTTCCCCACATTCTTCTAATAACCGAAGTTCCCTCGAAATAGGGT  
GGCAGCATTCCGCATGATATACCTTCTAAATTATCTGATTTCTACTTTATAGTTAAGGAA  
GAGGCAGATGCATCGGTTGCAAAGTCTCCTTTCTACAATTGGGACAAGTCTCTCAGCAGG  
ATGCCTAGATGTAAAGTTCCTAGCGAGAAGGTACGGGCACATATTCAGAAGCCTATCAAC  
AGGTCTTTCCGTTGTGATTTACCAATTCATTCCGCAGAATTTTTGTATACTAATTTCCCT  
GATAAAAATAAGTATGAAGTTAATGTTACTTTCATTTCAGAGTGTGCCATTAGTTGTTTCCA  
TTGAAGCAGGGTTAATCCATAACATGGTTGTTGATGGAACCTGTGAAAAGCTACATCTAT  
GGAAAACCTCTAGAGCAGGAGGGTTTTCTAACTGTTTGGAGTTCCTCCCGACGAAATTGTA  
GATAGATTGACTTTTAGTAAAGCTCACTTCAACGTTAGTAAAAATTTCGACGAATAAAAA  
ATTTAATGCTTTTCTAATAAAACACAGAGAACGTTTGCTGCTGAAGCAGCGGAAAAATT  
AAATCTTCCACACGGAGGTTACTGTAAATACACCACCCCATCTGTGAATTTGACTCACAT  
TTTTAAGTTTGGTAAGCTGGTAAAAGTCCAGCAAAGATACAGCGGATACACAACAGTA  
TGGCGGAGAAGAAACGGGAGGTGGCGATGGTTCGGGTAGGTTAAGGCGCAATATCTGTTAC  
ATTTGGAAGATTTAAGTCACTACTATTGGGCACGAGAACTTCTTAAGAAGGTAGCACA  
AGAAGCAAAGTCTGGTGGAGGAGAGTACAGAGTTTTTCCTTCAAGCACTGAAGACCCTAA  
GTAGACTTCTCTAGATTCTGGAACATAAGATCAGGTTTATGAGACAAGCCTATCCAGACCA  
TGCAAATGCAATCGTTGATAATGACGACTGGAGAACTATCTTTGGTGTGCTTACTGCCCT  
TAACAATGATGGGCATAGTTTAGTGAATATTGTCGTGGGTGGTGAATTCAGTAAGGGAACT  
TATTTTGTGGCAACGAAGTATAACGGTGTCTTATATACATTTGATCCGATTAAAGTAAC  
ATTAGCCGGAGATAGCGACCCTGACTCTGAACGTGGAGAGGGTATGTTTGCATTGAAAAT  
GAGAAAGGCATCGATGGAAGGTGATCCAGACTCTTCAATTAAGGTAAACCTAAAGCGAG  
GTCCAAGGAAGAAAAACACACGATGTATCTAACACTCAGACAATCAATCAATGTCCAGGT  
ATCATTGCTGACTTCCCAGAAGGATCATATCATCTTTATGAGATCGCTCCTGAGTGAGT  
TCCTCAAGTTTTGAGGGTAGCATAATACGATACTAGAATGTTTGTAGTAGGTACGTTAGT  
TGAAAAGATCAAAACAGGTATTGCAGGTAAGGTTGTTAGGCGTGGCAGTAACTACACCGT  
TTACATTGATGAGCATGATAATCTTACGCTCATGATTGAAAGACCTTGTGGAGATTAA  
GAATCTGTTTATGGATTTCGAGTTTACACCTGCAGGTGAGATAAGAACCATCGAATTAGC  
TGAAGGTTATGGTATGATGACGCCTCGCGGATACCGAAAGAAGAGATATAAATAAGTAAA  
GGTTACTAAGTAAGATGGATTTAAAGAAGTTACCCTTCATGAGAGCTGCATACCAAGCGG  
TGCAGGACACAGAAAAGACTCTAGATCCCGTTGGAAAAGAAGGCGGTGGTGTAGATAATG

ACGGTGATAACGATTCATCTATTAAGTATCTTATCTCGAGTGGTAAGGCAATCGCCAATG  
CAATGAAGAACGAACATCAACTAACAGATGAGAATGGAAAAGTCATCGAGCATGATGTAG  
ATGAGGAAGAAGTAAAAGCCGCATGCACAGTAATGCATGCTCATAAGAAGGGTGACACCT  
AAGCGTATCAGAAGTTTCAAGAAGGTATGAACGGTATAGATTGTAACGTTTATACTAAG  
CAGTAGATCACATGAAAGACAAACAAGAGATTCATCCTGATGGCAGCTTTATATCACCAG  
AAGAACTAGAGAAAGTCGCAGAACACACTAGACACTGGGATGCTAAGATGGAAGAAAGTC  
ATGGTGTGAGGAAAGGGTATTCTAAAGGTGGCGGGGTAAAGGCGCCAAGAATGCAGAAAG  
GCGCTACGGCATTGAGGGTCTAACAAGGCAGCAAGCGAAGCAAATTATAGAATCCGTC  
CTAAACTAAGTCAAACGCGCAGCAATGTTAAAGTAATGTTATCTTTCAAACGCCTATC  
GGAGAAGAAAATAAAATTAATACTAAATTCTAGGCAGGACGATATCATGGAGGGAGACAA  
AACTCTCACCCATGGCGAAAATTGCGGGTACTTAAACCACGACGCAAAACGTACATAGA  
TGAACCTGGCCATGAAAAATCAGTATCTACCGAACAAAAAAGTTATGACAGGATCGGTGA  
AGTCGCAGAAGAAAGCACCCAAAGCCTTTCTCAAAGCGATAACTCTGAAAAGAACCTGTT  
AACCTTGAATCAATTTTCATGACGGATCATTTTATGGATTTTATAAGGGATCAAATAAACC  
ATCACGTCCAATGGCTGCCGTTGTCAAACCTATCTAAACCTAATCCTAAAGTAATAAAACA  
AAGAGTGATGAATATCGGCGTACGTGAACAGACTAAGTATGTAGTTATTAGGATAGAAAC  
ATATAAGAATAGTCATAAAGACTTCAATGGTAGCTAAGAGTGAACCTAGGGTATCAGT  
TTACTACTCCCGAAAAGAAAGCAATAGTATCAAGATCGGTGATATTCGCTGAAACAAAATA  
TGAGAGAGGTGCGTCAACCTATGATGCCATGTCTTTCAGAGATAAAAGAGGAGTAGGTTA  
CGGTGGTGACGCCATACCTCCAGAGGCAAGGAGTAAGTAAAATGAGGAGAGAATGACGAG  
GCATAAAGCATCCCAAATGAAAGAAGAAAACCCTAGAGCTGATGCACTTGATGCTGTAAA  
GAGAGCAATCATTGCCCTGTATGGAAAAGGTGCTACCATGAGAACGGGTAGCAAGCAACA  
GAGAAAAGTCAGAGGTGCTAAGTATATGGCACGCACTGGAAAAGTATAAGAATATGGCAGA  
TCAGAAAACCAAACCTGTTACAGTCGCGAAGAAGTGTGGGTTTAAGTCTGTTCACTA  
CACTGATACTATGGCACGTTATGGTGGTACAGATAATTACGTCAAGGGTAGAGGATTCTG  
GTCATGAGCACACCCCTAAACCCATCTCATTGTCCCAATGCGCAGTGTTATTGCTTTGAT  
GATAGGAAATGCAAACCACTAACCAAAGGTAGGTCAGTAGGAAAGACTGGTATGTTGGCC  
AAAGAAACGAGAGACCTAAAAAACGAAATATTTGCGACGGCACAGAAGAACCATACGATG  
CCAAAGTCCAAGAAACGCAAGGATGTCATGGCATAAGGAAAAGAAGCAGAAGATTTGTTA  
TATAAGACTACTAGAGCAAACGGCGGACGTTTCTATGACAAGAAAGGTTCTGGTTACATC  
AAGGACGGAAAGAAACAATAACAAGGGATAGCCTATATACTGTGTAATTGCATTTTAAGAT  
TATGATGCGTAATATTTTAATTCCACTGGCATAACATGGTAATCTATTCTGTTATCAACAA  
TAACCCTGATGATGCGGGAATCGGAGAGGAACTAATCGATAGTTCTTTGTTGATTCTGGG  
CAAGGCAGTGAAACTACCAATTGGTCCGCGGACGACGCTCTAGTTGAAAAAGTAAGGTA  
AGCACATGCTACTAATTAACCTCGGGCTTGCACCCGGTTAGAGAGGTCCGAGAGACCCCT  
TTTTTCATAAATAACTACAGGAAAGAACAGAATTGTATCAGCAGACCCATGGCACTTTAC  
GGTGAAAGTGATGCAGACGACTCTAAGCCAAAGTGGGCTCTGAGAGGGGCGGGTGTAGAT  
CCCCGGAATATTTTAGCAACCGCTGATGGCTGGGTTCTTCGGTTTTACCTGAATGCCGCG  
AAGACAAAGTTTTGGGATGCAATTTTTGTCTCAGATAATGGGCTTGTATGTGCAGGTTGT  
CGTGGAACCAATACCTTGGCTGGTGCCGATATTACTGCAGTAGTCTTTGAAGAGACTGGT  
TATGCGGGTGGAGCAAAGTTGATCTTGTGTTGGACTATAAGGAACAGTTTCACATCACA  
AACGCTTCAACTTTTGTGTCGTCAGAAACCCTACTGACAGTGCCAACATAACTGCAACTGCG  
GCTGCACAAACAGGTGTAACCGTGATCCCTTTACATGCACGGCTGCTGCATCTGCTACA  
GCATAGGCTCTCCAAGCACAAGCCATCGCTGGAACAATCATTGACACCACTGGTGGATTA  
GCATACGATAACGTATATACTTATGGTGAAGTAGTTGGTGCAGGTGGAAGTGGTTCTACC  
GCAACATTTACTGCCAGTGAACATAACATATGAAATTTGGCCAACTAAATGAGGATAAATT  
TCTCAAGTTCGCCATTAAGCATTATAAGAATCCTCACTGTGTGACTCGAGAGGATTTTGA  
TTAAGATATCACACGGTTCAAGTATCTTAAATGACTCTTTAAGCGTTATGTGAGAAGAGA  
TCCGTTAACGATTCATCTCGTCATCAATCATATAGTCATCTTATATAATGTTTTAGGTGA  
AGCAGCAACTCCTCTTGTCTACTTTAATTAAGACATAGAAAATTTTCATGTTAATAAAGAC  
TCTACAGATCTATTTGGATAAATATCCAGTTGGGAGGCTCCCAAACCTTGGAACAGACCC  
CGATTTAGAAGAAGAACTTAAACCGGTATAGGCTATGATGACAGCCGGTACAGGCGAATT  
AAGTGGTATCGCAGCTGCGAGAGGTCTGTTGCGGGTTTTGGACCTGTCATGACGATGAG  
AGGTAACCTTAAAAAATTAAGGCACCAAAATCTCGTGGCTGTGAAGAAACAGATAGAGT  
AAAAGCGCGAGGTCTTCTAGATTATTCCAACACAAAATTAACGTACCTGAGGTTGGTGA  
AACTATCGTGTCTGCTCATAGGCCTTCTGTACTAAGGATGAAATTAAGGATGGAATCAT  
GCCTATATATAGGTCCGGTATTAATATTTAACGAATCATTCTGGTGGTGGTGCTAAATT

CTTCATGGACAAGTGACTGAAGCACATGAAGAATGTGAAAGAAGGGTCTGAACTAAAGAA  
AGCAAATATAAACGGTAAGACTACTAAGAGCGGTGGTAAGATAAGAGACCGTGTGAATAA  
AAATGACGAGGCAGCTGAACAAGCCGCGATAAAGCATGATCCGAAATGCATTGTTGGTAT  
GACTGGAGTAACTCTGTAAAGAAGCTGCAGGTGATCTGCACGTGAAGAAACAAATGCA  
TCAGCAAAAGACTCATAGCATGCAGAAAAAAGTCAGGTTAAAAAAGCGACAATAACAAAA  
ACACTTACGACTGATAACACAATAACTTGAGAAACAAGCAAGGACTGGAGTAGAACAAGA  
CGCCACAGGGTAATGGCTGACCTTAACACCGTGATAATTGAGAACTCTCAAAGTACTC  
GATTCAATGCAGGAGAATTCTGTGAAAATGGGGCTACCTCTTGCTTTGTGTAATGAGAAG  
ATAGATTAACAAGACAAGATCGATCAAGTTCCGTTTGATAAGGTTGATAGATTCCATGCA  
GATATGAATAGAGAGACAGAACACACAACATAGGTTGTGAAAGTGAAATCGGTAAGATC  
GATCATCGTCGAAGGTTGATAGAAAAGAATATGGGGACTGTATTCGGAGCAGTTGAAATC  
GTAACGTCCCTTGTCTCAGCACCAGGACAGGCAGCTCTGCAGCAGTTGTCAAACAATCAA  
AATCCTAGTATGATAACAACAGCGATTATTAGGTCTCCTTGATCGACAATTTTTTTGCGA  
ACCTACGCTCTTATCGTCTTGACAGACTAAAGCCGGTGAAGAAAGGGACGTTCAACTTTT  
GGGGTCTTATTTGCTGACTCCCCAAACCTAAGAATAAAACACGAGGTTATTTCTTCG  
CTAAGAATAGTTGTCTCGTTTTTAAGTGCAATCACTGCCGTGTAGTCACATCGTTTGTA  
ACTCTCTAAAGTATCAAGCGAGGGACCTTCATGATGAAGACATCATGGAGAGATACAAAG  
ATGGTCTTACAGGTCTAGGTACGAATGTGGCAGATTCTGAGTTTAGTTATCAAACCCAA  
TCTTCAAAAAGAAGGGAGAACAACAAGTATTTTCAGAGCTAAATACTTCGTAATCAGCAG  
TAGCATACTTCAGCAAACGTCGTATCCCGAGGAAACCTTTCTCGAGATTATACTATGCAG  
ATGAGTTTTGCACATCGATTTACAACCAAAAACCTGCCTTCCGATATGTCACAATGGATC  
ACCAAGGATTATTACTCCTTTATTTGAGGGAAAAATCGAATCATTGGATTTCAGGGA  
GGTATCTGAATCCGAACGATACACTATGGTAGCTAACAGTCATGTTGTATGAAGATCGAA  
TGAATGTTTATGGTCTCGTTCGTATCAAATTCAACAAGATCCAGTATCTTACTAAAGGTC  
CTCTCGATAGTCTGTTTATCGACAATGCAATGGCTATGCCAGCTGCTGAGGTTGCTAGAT  
AAATAATAAATGGGAAAGAGGAAAACCTTTGTTTAGGATAATAAAAAGCGGAGTAAGGAAA  
CTGTTTACCTTATTGAAAATGCAATTGATGAATGATAACAAGGAGTAATCTGGCCTAGGT  
GTCTGCAAGAGAAAGATCTAAATGACATGTTCTTCTTGGACGCGACCTGCAATCTACGG  
AAGAATTTTATACATAACCAAGGATTAGAAGCAAAATTTAAATTAACCAATGGAAAAAGG  
TCTGATCAGGCCAAGGACACCCAAACGGATCGAGGTCACAAAAGATTAGGAGGGATGAC  
ACCCTTAGTCCTTAAGAGGGATCATAAGATGCTAGAACGTGCCTGTGAAGGTATTGCAGG  
GGTCTCTGAATCTGCAGTAGAGATTAACAGCGGTCTTCAATTTTTTTGACGGATTGAAAAC  
AGCAGACAGTTAAGAAATTCTTTATCGTTCTGCGAATGGTCTGACCACTCTTGATGCTCC  
TAACTATCATTTTATTACTGCACGATTGCTGTTGTTGTGTTTCAGAAAGGCAGTACATAG  
CGTTACACTAATGGTCAGCGTCCTTGACTTGAGCATGTCAGGCAGAGTATAGACAAAGG  
TGTGTATGATGTGAGTACTGTTTCAAATATACTGAAGAAGCATGGGAAAAACGGAATTA  
TTATATTGATCAGCAGAGACTATTTGTTTACATAATCCGGTCTTCGTCTGGTAGTCGA  
TAAATATCCCGTACATGATCGTTCATAAGGAGAACTATACGAAATCCACAGTTTATCTA  
TCTGATGGTGGCGATTTTTTCGCTCCCAAGGCGATCATAAATTTTATCGCTTGCTGTATGT  
CGGAAAATACTATAACGCAATCTCAAACACAGACTCAACATTCCAACGCCTATTGTGGG  
AGGAGTGCGTACGCCACTCTGACAATCTCCAAGCTGTGTTTTTTGTTGTTGATTATGTCAC  
CCTCGGTAGCATTTTTAGCGGTGACATGGCTATTGGCAAGAATGTTGCACAACGCGCAGG  
TATTGGTATCAAGGCGGGTAGAATCCTTGGCGTCAAGAACAAAATCCGTAGTGGAGATGT  
ACAACAGACAGGTGCGGGACTTTTTCTCAAAGCTTGAAGTACTGCCAGATGCTGCAC  
TCAGAAATAGCATTTGTGGTGGTACAGCTACAGTCTTCCCAATCTGTCACCAAGAGAT  
AGTGGATATTCTTGTCTAAAGAAGAATAAGGGAAAAGAACAATAAGAATAAGGACACT  
AACTAAAGCATTTCAGATTCGTGAGTTGTTTAATAAACGACTCAATGATGATCGCTGCAT  
CTCTTTGGTTAGTCCACCTGATGTGCCTGGTTTTTTGCCAAGCATTGGAACCTCTGAGTT  
TGATGAACTATGTGTATAGTATGAAAATGATCGTGCTATTCTAGAAAGACTATGATGGC  
AAAGAATCTCATCCTTGATCTATAGAAGGGGAGAGCTGGAACATATCGCGTTTATATCAT  
GAACGTTCACTGTAATAGTCACAGTTCGATCATAGATAAAGTAAACATGAGTAATTT  
ATGTCAGGAGATTACTCTTCCAACAGATCCTCTTCGACATATACAGCGTACAGGAGAGCT  
TTCTTTGTGTATCCTATCTGCTATCTACGTCGGTAAGTTAAAGAACCTTGAAGAACTTCA  
TGAACTATGGGAACTTGTGTTTCGTGGTCTTGATGCATTGAATTATAATCAACAGTATCA  
TGTCATGCTGGAAAGCAAAGTACATTGGATGGTAGATCACTGGGTATGCGTTTTATTGG  
AATTGCAAATTATCTTGCTAAGAATGGTGCTAAGTATGATTCTCAGAAAGCATTGACTT  
TGTTCAATAAATTTACTGGAAGATTCCAGTATGCTATGCTATGAGCATCGAATCGTATGGA

AATAGAGAAAGGTCCTTGCGGTTATTTTCGGTCAGCCAATGTATACTGATGGATTTCTTCC  
TAACGACACATATAAGAGTGAAGTAGATGAGATTGTTCCGATTGACCTATCATGTGCTTG  
GGAGAATCTCAGGGTCAGCAGCAAGGAGTATGGACCCAGGGACTGCCCGTTGTCGGCCCCG  
GAGGCCTTCGAAGAGCAGTGTCTAGTGTCAAATGACACAAAAGGAGTCAAACCTCCTAG  
AGACTCCCTGTCCGTTAAGAACGCAAAGAAGGGACCGCGTAAGCGGATTGTACCGTCTCA  
TAACCCTCTAAAACCAAACCTATAACCCTGCTATGGAATACGCATAACATCCATCGTTACAG  
CAAAGTAACTGCAGTAATACAGATCTGCCTCGATCAGGCAATCAGTGGTAACTCGAGTTA  
CAATCCAAAGAATTATCCTGACGATGTAGTGCCTGTACCTGTGATGCCAAAAGATCTTTT  
GACCACGTACAAATATGGTCAGAAGACTTCATATTACCAACACAGATATTATGGTAGCAA  
AGATGGTGACGATGAACCAAACGTCGATAAAGTTTCTCAACGACTTTCTCACCTCGGAGGA  
AGAAGACTGTGACAGTTGCAAGGTCTGATGCAGAAGTACTAAGAAGGACAGTATGTTACA  
AGAACAAAGTAAAGTCAAACCTAAAACCAATTTTCATTTGGCCAACCCTTAATAGTCAAAA  
CATATGATGAATATAAGCATCTAGCATTGATAGACTTTCACTATGACAACCTCGGATATT  
TCGGGAGACCCCAAGAGGTGTCTATCCTGGAAGATAGATCAGACTATCAAACCTCTAAAC  
CAGAACAGAAGCACATCTTTACTTCTAGCTTGAACAATCAAATCATGCTTGACACAGTTC  
ACGTTGGAGGACGAGGTATGGCTGTCATTCCCTCTTGCTCTCTTCTGACTGGGAAGCAT  
GCATGACGCTATGGGAGTCTAGGGAAACGGTCCATACTCGGTCTTATACAGACCACATCT  
AGAATGTATATCCAGATCCTTCAGAGGTATTTGATATTATCTTAGATGATGACAATGGAA  
TTTCTCGTGCCTCACCAATGGCTAGATCGTACGAAGATGTTATTTACTCAGCATAACGAGT  
TTGATAATTGTCAACCATGGTATCTGGCAAGACAAGGACATTTAACTGGAACCTATGAAA  
GATACCAACTCAAAGAAAACCTCTATAAGGCTATTGCAAACGTTAATATTCTTGAAGGCG  
TTCGTTTCTATGTCTACTTTGCGTTTTTCGCTTGCTTTTGCGGAAAATAAACTTATGGATA  
GCTCAGGTAAGATTCTCTCTCTGATGGCTACAGATGAAAGTCGACAACCTGGTTTTTCAGAC  
GAAATATGCTCAAGAACAGGGCAAAGGTGACCACTCCGAAATGGCGGAAATCGCAAGAG  
AAGAAAAACCATTCGTCGTAGATATCTGCAAGAGAATTGTTGAAGAGGAGAAGACTTGGG  
CAAGCTATATGTCTAGGCAAGGTATTCTGATTGGATTGAATGTTTCGCTTACTACATAATT  
ATATTGATTGGATTGTTTCATCGTAGAATGAGAGCAATCACATTAGGTCCTGTGTTGGGTC  
AAATTAATGGAAACACTCCGTTGCCATGGACTCAACCCAGTCTAAATAGTAAGGGTCAGC  
AGAACGCTCCGCAAGAAACGTAGATTAAGGTTATTTTCGTGGGAGGAAGCAAACAAGACG  
TCCAAGCAGACTCCTTTGCATGATTCTCGCTCGTTCACTGAGTGGGTAGATGAAACATAT  
AATGTTCTAGTCGGGTCAGGAAATCACTACGGTCCCGAAATTACTGACATGATTTGTACT  
GCTGCTCGGAAAGATGCAACTAATAGTTTGCACGAAGACTTAGCTAAAGATAAAGATAAG  
AATAAAAGGTGTTAAAGAATACCATAGTGTACCATCAAAGTCAGGAATCTAGGATATAAA  
TAAAATGTACAAGTCAGAGTTGTGACCAAACGTTTCATCCAATGCACGGACTCGCACTACT  
AGTAGTGATGTTTTCGGGAGCACGATGCTTCACACTTTGCAATATGTTGTAACGAATGGAA  
TCTTTAGAGGATTAAGATACTAAGCGATGCGAATATTAGTTCAGAGGCGCATGAGGATCT  
GATAGATAACTTCTATACGACAGCATCAAACCAAATTTGTGAAAATTGGCAACTTGCAGG  
CAATTTATTCGCGGAACGGAACGTTTCATCCCATGCTCCCTATTATAATTGCTACCGCAGT  
GACATGTGCAGATATTCATCCATTAATTGAGCGTGCTCGAATGTATTAGGGAATTGATGA  
ACAATCAAGGCAAGAAATCAATGCAATTTTTCAAGTAGATGTAACCAATGCTGTAGCTCT  
TGAGTGTGATGGGTACGAAAACGAAGAAAGGAACGTACCTTAAACAGGGCACTAAGTTTA  
GGAGTAAAACATGACTACACTTACTTACAGAGGCGTCAAGTGTGACGCTGAGGCATACA  
AAGAAGAGGTTCTTTTAAAGCAAGCTAGTAGCACGCTTCACGATCTAATGTATCATGGTG  
TGAAGTCCCAGCGTAATTTTCGCATCCCCCTTACTCATAACAGAACTACAAACCATCGG  
GATCATATCCTTAGGGTCCGTAGCTTTCAGGATTACTATATATCTGGAACGGCGTCTTTT  
GCCTCGCAAGAGACCCACAGTTGCTAAAATCAACTTTGAGAGGATTTCTGGTCTTGCTG  
AAGATGATTCCACTAAACATGATCCAGTCAAGCCCTTGGCTTTTTTAAACCTATCGTGGAG  
TGCATATGCTAAGTGGGTTTACCCACGGTACAATTCGGTGGAGCACAACCCTGAAACA  
TAACATCTTAATTATGTTAAAATACACACTTAAATCGAAGTCCTTTACGACTTCGGTTTT  
CTATGATAGTATAAATATGATGAATTATGCGAAGGAGCACCACGAACATCTTTCTGCATG  
GTGCGGATGTCGTAACGATCACTCATACTTTTGGAGACAAGTTTAAATTCACGGTGTAACTA  
CCAACCCATATCTTATGTTAAAACAGGACAAGATCATATGGAAGTCATAACGGAAATTT  
CAAATAGATTTTCGCTTCCATGCTTCAATCTCTGCCGAATTTGGTAGGTTGAGTCGGTAACTC  
AAATGTTAGATATGGCAGAGAACAATATCCAGTCGGACCAATCATCAGAAGCAAATTC  
CAAGCACTCCAGAAGGTCTTAGGGCATGCTGATACCTCACTAACGAGTAAGTTATTGTAA  
ATGTCACTATAGTACTCTCAGCTGCACATTAATTTCTAGGATCCAGAGCAGGTGCAACTT  
AGCTTTCTCCTTGTGTAGGCAGAGTATACGATAACTCATTTCGATGGAATCCAAGTCATTG

AGGAGATTGCAGACGTATTTGCAACTCACGCATGAGACACTAAGGTTCTCGCGGTTTCAG  
CTTGGGAAGTTTAAACAAGTATCATCTGCCTATAGAGTAGGAGCAGATATACGCACTCTCC  
CTATTACTGGTTTCAATTAGATGTATTCACACATTAATACAGATAAAGGATTAGTACCGT  
ATGTTAAAGACTGGCAGGAAGTGCAAGCATGTCTGAAGAAATAAATCGTAGATATCCACC  
CTCTGGTAGACGCCAAATGAGTAAGAATCATATCGATCCCAGAGTCTTTAGACTCAAACA  
TGAACCCTATAATGAACATGGCGTTGCAAGTAATGATTGGAAAGCAGGTGCATACTATTC  
ACTCGATAGAGATCTACAAATCCTTCGAGAATATTACTCATGATGGAAACAAATTTAAAA  
ACATTGATACACGGCCTTGACGTTGACGTAGCAGAGCTTAAAGCTGCGGTCTATCCAGAC  
ACTCGATCAGATCGTATAAGTAGGCTTACTGACGAGCACGCTTTTCATTGTGACAGCAAC  
GATGAACACGGACTTGGCGATTGATATTGAAAATCCCTGGCTATGGCAAGGTAAACCTTG  
CACTTCTATGGATATTGGCGATTTATTGCGATTTCGTCTACCGTATTACAACCTAAGGTAA  
GGAGAGAATCTACAGCCGAATAAAGTATTCTTAGGCCTTTAGTACACCCGAAGGGAAAGGA  
AAGTAAACAAAAACAAGAAACCGTATGGAAAAAATATTATGGTGCTTGTCTAGAAGTAAA  
AGAAGATATCAAATTGTATGGAAAGGAAGGGTTTAGACGATACATTTTAAAGCCTACATAA  
CACGAAGGGTCAATGCAATAAAGAGGAGACCCGAGAACCATTTTTCCATAACGTACTTAG  
GGAGGCATCAAAAGATGGAACCCCTGCATTTTACAACCTCGAACATACTTGGCAGGTGCAT  
GCGTAAAGATCATTTCATGCTAGACAACCTGCAGATAACTCTTCTATATTCTCAAGGTAC  
TCAAGAGAGTCCCCTTATGGCCGAAGAATTCAATATTTTCAGACGCTAGGATCCGCATCAT  
GATAGATCATTAGCATAAATGTTCTTAGCTCGAAGCGGAGGAACTTGGAAAGCCACAGGGA  
CAGCAGCTCAGCGGAATGCGCAACTGCCTTCTAAGCAGTCGCTCGTAGGTTCAATTCCTA  
CCTGTCTCGTTGACTGCGGGCAACTCAGTATGTACAGGTAATAAATAATGACTACAGCAGA  
AAGCTTCTCGCCTTGTCTCGATATCCTAACGGAAGCATTAAACCCGACAGATTATACTGAA  
CACCGAGCATCCTATCATATGGAATGAACTAGTAATACACTATTAGAATAAAGGTATTTA  
ACTCTACGGTGTAGTAGATGAGTGTTACGAAAAGCTTTTATCCAAACTTGAAATCGATCA  
TTATTATGAAACTTGAAACCCCTTTTAGAACGATGTCCACGCCGTTATGTGTGAGTTGGAT  
ATCGGCCAAGCATTTCATCCAGATTATCGCATCCAGAAGGCTCACGAATAGACTGTACACT  
ACAGAGACATGTATCTTCTTGCGAATTCAGTTCAACTGGATTATGTTATTGAAGACATTG  
AATACACAAAATGGTGAGACCCTGATCCTGAGGTCACTGCGTACGGCGGAAAACGGTATG  
TCGTTTTCCGAATCTAATTAATGAACTCCGAATTGTTATTGAGGCTCTACGGAGCAGTGAC  
TAATAAACCTATCGCCCCACTACAATAACAGTAGAATATCCTAACATACGGATAAATCCC  
GTATTTGCCATTAGACGTTTAGCTAGACGGTTTTAGGCGCGCAAGCGACTCACAGTCCTA  
GTACTAATCAGCAGCCTTCGCGGAGCTTTGAATTTTATTATATGTTGATTCCGAAATGTT  
AATATCTCAAATGGTTGGCACATGTTAAAACATTAGATATTATTGGAACAATTCTTAATG  
AAACTACACACAATGACCACAACCACCGAATCAGGGGGAAGACATGAAATGTTTCCAAC  
GAAACTCGTCCTCATATTGGTGATGACTATCAAGGATACGGAAAGTACCCTGAACTTCAC  
CATGGTCTCTTGGCGATGCGTGTTTAGTTGCGGGTTATGTCTCTTACGTTACCACAGGT  
AACTTTTTCTTCGGTGGTCTTCTTGGTTTGTAACTTGCACCTTATCGCATCAATTGTAT  
ACACACAATCAACACACAACAGAACCGCTATGACGACACTCGAAGCAGAAGGAGTTAATG  
GATGGGCAGCAATCCTCGGTTTCGTAGCAGCAGTTGTGGCTTACGTCACATCTAGTGAAA  
TCATTCCATGTTTTTTTCTATGTATGCATCAAATGCAATAGATGCAGAACTGCAGAAAGT  
AGTTGCTAAGTAGCTTAACAGTAGATAAGCACCGCTTGGTGGAAATGGCGGGAATATGATC  
TTAGGTAACAACCGGTCAACTGATTCCAGGTTTCGGATAATGAAACGTGGGATTTTCGAA  
GAGGAAAAAACTGTAGACGCGCGAAGATTGGTCAACTCGAAGCAGTAGTGTAGTATCAT  
TTCACAGGTGTGATCGCACCAGGTAGTTTCTAGTAAACTATCACGGCGTCATGGAAGCGT  
ATAAGAGAGCAATATCGGTACGATACATACCTTTCTGATACTTTATTATCACCGGATGGT  
AAACAGAACTGTTGGATTACCGGTATACGCTCACGGGTTTATTTAATGTATATTTATCA  
AGAATCGTGGATTCATACTATGTTGTGTTTCGTTTATGCCTGTCATAACGCTCTTCCTTGA  
TAGTTATGTATGGTTCGGTCATGTTCCCTTCGGACGACGATGACGATGATTAGGATGGTTC  
CGGAGGAGTAATGACGCCAGTTTATAACTATGAACCTGAACGAGCATAAATACACTATAT  
TATTAGCATCAGGAGTTCAAGATTCCTAGTCCTAAAGCACTCTATGAAGATATGTAGACC  
TCCAAAATGCACTATGACGAGTTACTATGTGATCCTGATGGCCAATTAGAGTTTAAAGTA  
GATTACAGTAACAACAGAAGAGTTTGGGGACCTATTGAGGAATCTCGACTTCCTCTTTTT  
TATTAATAATCTTATGATAACGTGTTATTGATCATGGCAGCATATACAAATAACACTTC  
CGTATGGGTAGCAACCCGAAGTACTGACGATAAACTAGTTGGATACTTGGAGTCACTTCC  
TCCATGGAACCCCGACATAAGAATCGCAAAGAATTTTGACAGTCAAGCAGGTGCCAGAAA  
GTTTCTTCAAGCAGGTGGTAAGATAGGCAGCCTACGAAAACAATCATGAGACTTCCTGCA  
TTAGACAAATTACCTTATTAGGGATGGTCTGAAGTCAACCCGGAATAAGAAACAAATTGC

ATAACAATCCTGTGAACGAATCATGTAATATTTCTATACACCAGCAGGAGTATGACTTC  
TGCACGAGACATGTGAGTAGAATAGTTGCCCTCAGAAAACAAGTATTCATACTGATCTTCA  
TCACTCGTCTTCTCCGTAAAGATCTATTATTATAAATTAATCAACTGGGTGAGAAAATTC  
TCACCTTTGCTATGTGTACCAGTTAACCAGACCTATGGGTATTAGATCGCGTCACTC  
AAATCCACCAGTGTAGGGATTGATGGGTATAAGGTCTCGCTCTACCCTTCGAGCCCTACT  
GAGCAACCTCCAAATGACAACCTTTTCAAGACAAGGTAGACAAGGCCGAATCCTAGAAGG  
ATGGCTAGAGTTCTGCGAATGGGTAACAACCACTAACAACAGACTCAACCTTGCAGTATG  
CGGCGCCTTGATAGTCCCAAGTATATTACAAGCTGCAGCATGCTTCATTGTTGCATTTAT  
TGCTGCACCACCTGTCTATATCGACGGAATCACGGAACCTGTAGCAGGTGCTCTAATATA  
TGAAACAACATTATCTCAGGTTCAAGTTGCTACATCTTCAAAGCAATCGGCCTTCACTT  
CGACCCATATTGGGAAGCCGCTACAATCGATGAGTGGTTATGTAATGGCGGTCCTTACCA  
TTTGGTAATTTTCCACTTCCTAATTGAAATCACTGCCTACATGGGTAAACAATGGGAGTT  
ATCATACAGCCTAGGTATGGGACGTCCGAGCTGTGTTGCTTAGTCAGCACCCGATCTGT  
ACCATTTGCAGAATTCCTTGTATAGCCATTTGGTCAAGGTTCTTGTCTGAGGGTACTCG  
TCTAGGAATTTCTGGAACATTCAACTTCATGTTTCGTATTCCACGCTGACCACTACATTCT  
TACGCCTCCCTTTCATATGGCAGGGGTAGCCGGTCTGTTCCGGTGGATCTCTATTCTGCGC  
ACTGCATGCTTCACTTTTAAACCCCTTCTCTAATGAGAGCGACTACTGCGGAAGATTCTCA  
GAACTATGGGTACAAGCTCCGGCAAGAAGAAGAACCCATAATATTGTTGTAGTACATGG  
ATGCCTAGGTAGATTAATCTTTAAGGATGCAAGTTTCAACAACCTGAAGAACTCTACACTT  
CATCCGAGCAGTGGGCCAAGCTGTATGTGTATGGTTAACCTCTATGGGCATCTGTACACG  
GGCAGCGATATGAACGGATTTAACTTTAACCTATGAGTTGTAGATCTTAACGGTAAGGT  
CATTCTACCTGTGGTGTGCTGCTTAACAGAGCAAACCTTGTAAATGTAAGTAATGCTTGA  
GCGTCACGCTCCCGACTTCCAACCTAACGTAGCATCTGCTGAGACTACAAAGGTTGCTTT  
GAATGCACCAACAATCGGTTAAATTAGTATTGAGAGGCACAAGGACAGATCGCTCAATTT  
CTCGTAAATAACGGAGGTTGCTTTTCAATGCTTACTACATATACTTTCTTGCAATAGGT  
ATCTCGTTAAGACCAGTATTAACCTAATCTACATGGAGGGGTAAGACCCTGCTTTTTTA  
TGGCATTTAATTTTCCGTAATGTAGTTTTAGTCATCTATGAGAGCTACCTCACACTGATG  
CTGAGATAGCAAAGAGGGCACCATTTGCTGTGTGTGATGCTGAGCATTAGGAAATGACC  
CTGAAGGTGTTGTTACTCTTGATTTGACCGGTTTATATGATAGTATGCAAGAATTTAATG  
GAGAAGTGCCCTCCTTCTTGAACCGTCAAAGATGTAAACAAGAACGTATCCTGCTGGCA  
CTATAGAAAGCGATGGTTTTGTATGGGAATATCAAGGTGACCGTGGAGAGAATTATGATA  
GTGGTTAGAATTCTGCAGACGCAAATAATGAAGTTAGTTTACTAATTCTGTTCCCTCATC  
CGACATTACCACCAACAAGTAGTCCCGCATATCATCGGGAAATTAGTAATAGATCTCTAA  
CTTTCGTCAATGCTTACGGAACCTTAGTTACAAAACCTGCTTCTGAAGTATCTTCAGCAG  
CCACATTTCCAGTTGAAGATGAGGAGCCAGGGTCTTCTGAAGCAAATGAATATGGTGGAT  
GGACTAAGACCGGAGAGTGTACGTTACCAATCGCACCTCAATCAGTAACATATGAAATTA  
GTATCACAGAAGCAGGAACCTTATGGATTTATTTATGCTGCTGACGAATCTGGATCTGCAA  
CGATTGGATTCTATACTACGGCTTACATCACAAATATTGGTGGTATGACAACCACGGGAA  
GTCCACGAGTGCTACACGATCATCGTCAGGGGGTGTTCATTAGTGACAGTTGTACGCA  
CGAAGGAGGACGATACTCCCCAACGATAACTGATGATGATTATCTTTGGAGACATAATC  
CAGGTGGATGGTATCTCAACATATGTAAGGATGCAGTATGTGGAAGTGCACCTAGTATTT  
CTTGGGTAATCTCTGCTCCTCTTCCCTCGGTGGTCATTCATGAAAACGTACGTAGTAT  
TTCGAAGTGTTAATGACCTTTACGAGTTGCCGCTCAAACAGCAACTTAAAATATAAATA  
CTCCTAGAGCAAGTAATTATGATTTTGGATGTCAGCCAGATAACACTGCTGAATGTTCCC  
TTCATGGGACACCGATTGCGACGTCCACTTCATATATAACAAGTAGCAGTGCCACACTCT  
CTAACTTGAGTGCAGAAATCCATACTTTAATCGCCTCAGTTACTAACACTACTACATCTG  
GGAACGTAGCTAATACTTGGACAGATAATCCAGGTGGTGCAGCATGAACAATTTTTCAAT  
CTGGTGCTATAACAGGTTTCATCAGTAAATTTTTCTACATCTGGTGACGGAAATCTCTTCT  
GGCACACTAGAAAGGCAACATGATACACACACTCAATCACATAATGGAACCTCCCCATTAT  
CCCAACCGATCAAGTACCTAAAGGGATAAAAGAAAATTTAGGTGTTGCTGACGGACACTT  
TGATTTAGCTCTAGATCCAACGGAAATCATTGACGCACCCTTAGACACACATGAATACTT  
TGAAGGGAAGTATCAAGTGCAAAGAATCTTAACTTAAATCCGTAAACTAACACCCGACTA  
ACACGAATCCAAAAGTTACAACCAAAAACAGCAAAACGAATCATTAAAGGGACTCAAGCGTA  
ATCAAAAATTTGTAGACTAGTGAAGCAGTTCTCTTTGCCAAATTAATCAAAAACAAGTGCCA  
AGAAAAAATTGGGAGAAGAAAACACTTGATAGATTTCCAAGAAAATGTGAGTATAACTAC  
TCGACGCGAAGGACGCCCCCCCCACAAAGATTACCGAAGGGCTCAATTACTCCCGCTACG  
GCTCTACAGTTAAAATCCTAACGAGAACTCGTGGAGCACTTAACATGTGCAGGTATAAC



TCTGCAAGAAAATTAGAACAGCAAACCTATTAATTCAACAATGGCTGCAGTCGCTGAAGCC  
CCACTTCTAGTAGCTGGGGCAGCTGTTGTTGGTCCAAATGTTACCTCAGAAACACCTGGA  
TCATATCCTGATAGAACATACTCATCTGGTGGATTTGCAGCAGTTGTAGGGTCCAATGGG  
GAAATACCTCGTGGTATCGGTTGGTACAAATCTGGTGTCTTACTGCAACTCATAAGAA  
TCAACTGATGAGTTCGTAGGCGTTGAATTATTATGATAAATTGGTGGGGCTTACCATAAG  
TGTTAGGGAGAAATCGCTGGCCTAACTAAATCTGATATCGACATCGACTTAACTGCTAAG  
GCAGGTGTTAAGTTCGTTTTCTAAAGGCATCTATCTAAAAAGAATCCAAGGGACTCTATG  
GGTCCCCTGTTTACTCTACTAACTTTTATGAATTTTACCCTTTACACACGAGACGGGTG  
TTCTTACTGCACTCAAATCATAACAAGTATAAGAACGAAAAAATATAATCATCGGGAATA  
CTAATTAGGGGTGACTTTCAACGAGAAGCATTCTAGAATCAATTTTCGTGAGGGATCAAC  
TTTCCTTCAGGGTGCATTAGGTGCCACAAATCTTGGTGGTTCGAGCTGATCCAGTTCCATA  
CCTTCGGGATAAGAACCATACTTGATGGAACAATTTTACGGTCTAGTTGAGTCTGCCAAT  
TATGCTGCGTTTGAAATGAATATATGTCTCTTCAATCCGTAGAATTATATGACTCACACC  
AAGATTAAACGTATATCAATACAAGAGGTCTTTGATAGCACAACTGCTAAGGATTTAACA  
TTGACTGTTTCTAATGTCTCTGGATGATTCAAGGGCGCATCTGACGCTTATAACCAGTTA  
CTTTGTCTCCCAGGTGGGCATCTCAGTAAACCAAAAAGAAAAGATAATCTCAAAGTACCTG  
TCACAGATTTTGACAGATGTACTGTTATAACCAATGGTATAAGAGACCAGGTTCGTAGGAAA  
ATCTGTAAATAAAAATAGCTAAGGAGAGTCCATTGAAATTGCACTAGTAGCATTAAACA  
CAATCGGTGCTTTTATTCTAGGTATATCTGTCTCTTGGTTCGCGAAAGGGTACGTTGAAG  
ATTTAATCGAAAACGTTGCCTACCCACAATCGTTCACACATCCTGAGTTGTGTGATGAAT  
ACGGTGACATGACGCATGATGAACTAATCTATATTCGACCAGAGTAGAGGTTCTTACAAC  
ATGAAGATCACGATGACGATTATGATTACCAAATCACGCCTGAACGATCAATTGATAACA  
CTAACTCTAGGGGACTTATTAGTGAGTTCCAAGAAAGGTCTCAAGTGCTAAAATTATCA  
ACGATATTGTGGCATTCTTGAATAAACGCAACAGTCCCGAACTCCGGGAACTAGTGATCA  
TCAACTTTGATGAGAGTGTCTACCAGAGCTCCCCGAAGGTGAGTTGCCCTGCACTCGTA  
ATGGTGCCCTTGTAGGCTCAGGTCAGCCTAGACTTGACCAAGGATCTAGAGGACTATCGC  
GATTCTTCAAAGAGGTGACAATCGGCTCCAGTATTTGAAGAGAGATTCCATGTTGGGGA  
AACCTCGAGAAGGAATGTCTACTGAGGAAGCAGAACTTTTCGGTTCATGTCAGGACGGAT  
ACATGGGATATAAGTATAAGAGATCCACTAAGGCAATAGTTTCTGAAGCATTTCCATCTA  
TTCAATGGGGAGACAGAATTTGAAAGGCGTATGAGTTTCAAAGAAAAAAGCACTCCCGA  
TGATGCAAAGATCAGTCATTACTTTACACCGTCTATTTGGTTGAGTATAAGTTGAAACA  
TAAACCTGCCTTTGTAATTGCAATCGCAAGTAAAGCAGTAGATCTTTCGGATTATTA  
TGATCTTTATAAAAAGAACTCTGTACAGTTTACACACTCAGAGGGTAGACTAAACCCTAA  
ATTATGGAGCGATCGAACACCGAATCAAGGCAAGCTAAGCCAAAGATTAGCGTCTACTTT  
GAGCTTTGAAAAGCACCCCATGCAGAGGAAAAGACAAAGAAAGAAGAAGCAGCAAAAGCA  
GTTGCTAGGGTAGTTTCAAGTTCTTTGTCCGACCTGCGATTGTGATGATACTATGGAATTCG  
TTGAGGCCAAGTATGTTTGGTCTTAGCAATAGTCGGTATCTAATAGCGGTTGGTTTGTAT  
CTGATATCTGAAATTTTATTTGGGAAGTGTGAGTAAAGTATGATCAATAGTTGTAAGTCC  
TGATGCAGAAAAAACTATCGGAGGCGTTGCTAGGGTGAAGTAACTAAAAGGCAAGAGAA  
CCCCGACGTCGGGGATCTACTTGAGTATTGTCTCAAGAATGGTCATTGGAGTGACTTAGA  
ACAAGCGTACATGCCTCGAGAGATTAACACGACTTGTGCTATTGGTGTCAAGTTCTAAG  
GCATTGGTGGTTCACATATGAAGAACGTTACAGAGGTACGCTGACATTCCTCTACTTCA  
AGAGAGCAGCCCTCTTCCTGAACTACGTCATCAAGACGTTAAGAGTAGACAGAATAGTAT  
TGATGATGTAGATCCATTATCAACACGACTACGAGTTAAGATTGCAAAGTCATTGTGG  
AGATCCAATGAGACTCTATAAAGCAATGCTTCCTCAGGTATTGCATAAGTATGTGCGGG  
AATGGTATTGCCTTTGGCAATACCAACTGAAATGTATATGAGTGGATCACTTCGCACTTG  
GGTTCATTTATCGATATGCCTTCGCTAATGGAACACATAAAGAACATATGAAAAATGA  
AGAAGCATCCACACAACATGTTATATGTGAGATCCCAATCATCTCCAAGGCATATGATTA  
TTGTCGTTAAGATGATTGCAAACGTTCTGATGAAGACAACACTACAATTACCTACAACCGTG  
TTCGGGGATAGATTTATACCTCCTTACCGAGAAAGAAACAAGAAAAGTATGAGAAAAAA  
GAACTATAACAAGACCAGGAAAGACCTGAATCCGTGGAGAGAAGATAATCTCGATAGGGAT  
AAAGACTCGCAAGCAGGTGGTGAAGTTATGACCTACGGTGAAGCTAACATGGAGGACGGA  
TTCAAAGAAGTCATGTCTAAAGTCTATAAGCACATTCTCACCTGATCTATCTCGTTTC  
ACATAATGGCAAACGCAAGAAAAGGAGCTAACTCTCCGAAAACCTTTGCCCAAGGGTATGT  
CGAGGAAACACATGAGACGTAAGAAACCTATCGACCCATCATACTGACAGAGGTTAAAC  
ATCTGACAGATAATCAGAGAGGGTCTTTTGTAAAGTATGCGGTAGGTAGGAACTTGTTAC  
AGCATCGTGCTCAAGGAACCGGAAGAACTGTTATTACTTTATATCTGGGTTTCGCGAGAAG

TACTTGGCGAAAACAAGGCGTATGTTAAAATATACAATGTAAGGTCTTTATTTCCCTACTG  
GAGAGATTGCTTTCCTACCAGGTGACCATGAAGATAAATATGCACTCGGTGATATCCAT  
ACAAAAATATCGTCATGTATCTGCTTAGTATGCCTGATGACGACTCCGTTGAAATGGTAT  
ATTATGACTTACGTGCACAAAACACTATTTTCGGTTTGGTCTAATTCTATTATTCGTGGAG  
CCACTCTTGATTAAGCTATTGTTATTATCGATGAGTTCAGTGATTTAAGCTTTGATGAGT  
CGTATTTCGATGATAGCTCGCATAGGTATAGACAGCAAGATTAAGTTCTGTGGTGACATTC  
ACCAGTCAGATCTGAGATGATAGAATGGTAAGTCTGGTTTCTCAGACTCTATAAAAATTC  
TACAGCAGATGAACGAGTTTTTCATGCATTGAGTTTGATACTAATGATACGGTTCGCTCAG  
GAATTGTCAGTTCTTATATCTTGTCAAATAGAATCCTGGCTTCTAATGTTTCACATTCGT  
TCATGTAGGTAATATTTTCAGTTGAGGTAGACCCAGTGCGTAAATATCGATTACTTATGTA  
TCCTATAACTGGGGGAATAAATATTATCCTAGCGTAACCTCGGTCACAGCGTTTAAGAA  
CGCACAGTCATTCAAATATTGGAGAACCAGAATAGGTCAGGACGAACCGCATCGGATCAC  
TGCAAGAGGAACTCGACGAGCAAGGGCATTTCATAACATTGCGGAATATTGTTACAAAGG  
TGCATTA AAACTAGACAGGTACTTGGCAAATACTCCATTGTCTGTTAGAATGTTACAATC  
AGCAAAGTCTACACTGCACCGAATCTATAATAGACATTGACGCGAGAAATTTCTCACATC  
GCACTCTCTCGGTTTAGCAGGTTCGGGTAGAGTGCATTGCTGAATTCGATGGCGAAACCGC  
AAAGAGCGCTTTCATAACGTCCAGTAAAGAAAAAAGGAAGATCTTAGCGTGA ACTATTT  
TGTTCAAGAAACGGCATATGCAGCGAGGCTTCTAGAAGGTTTCAGGAATCGAGGTCATGAA  
AATTCTCACTGTCATCGGCACTGAAGAAGGATTTCTACACGGATTTGAAAAGTACAATAT  
TGATGACCATCTTCAGATACGTAACACCGACATCGAAGCATTGTTAGGGCAAGACATGC  
CTCAAGAACTTGAAGGATAAATTTTTAACACCTACCAAATTTCTCACAAGATACTGAAA  
GGTTTTTAAAGAAAAGTGATGGTCTCATTAGATCCATTAAAGCAGTAGTTACATACTGCC  
AGGAGAAAGAGATCGAGGTGGAGACAGTTAGCACACTGATTTCTAATCCGTGTTATGACC  
GTTTGCACGCGAAGCACAACATTTGAATTATATGAAAGCATCTTTTAAAGGAAAATAAC  
AACTGTGACAGGGTTCGAACTGCATTAG

>NewGenomeName\_233

AGGATAATCCAAAGGCCCGAGGAGAAGGTCTAAGTATCCGGTATTGAACAGCGGTATCAT  
GCAGGGATCGCGATTAATGCTGAGACTTTCACTATTTTTATGGACGGTATTTAGAGCGAG  
AAATTTCTGGAGCCGGTGCGGGAACCGCTGTTCAACGGTGTGACTCACGCACCCAAGCT  
GGTTGCCGTGATAAGCCGATTCTCATCCACTCCCCAAACGACGTTCGAGCCTTGGTGCTCC  
GTCCAGGATGGTGGTTTAGATATGGACTTAGCGATGGTTGCACAGACCTTCATGATGTTG  
GGGACCTCCACTAAGCGTGACTCCAATGAATTAATTGGGGCCAAAGGCATCGGCTCTAAG  
GCTCCGTTACACAGTGACCGACATGTTTACGGTTCACAGCGGTTCATAAAGGATGTGAAAGCT  
GGTTTCTCGGTGAATAAAAATGAGGGTATTCCAGTGGTTGTTTCATCTGCGCGAGTCGAAG  
ACTTCAGAGGAAAGTGGCGTTGTAATCAAATTAACGTAGAACCTTCTGAGACCTCCAAA  
TATCGCAAGGGAATAGTGATGTGCCTGCGGTATGCAAAATCCCGTTTGAGATCAATTAT  
CCTTTTGTGACCTCTGAGATCACTGACCGAACCTACCCGGATCAGTATCGTTATGAGGAA  
AGAGAAACAGGTTGGATGGTAGAAAAGTACGGTTCGGTATCCGGCAATGCAGAAAGCGTG  
GTTGTGATGTGCCAGCACCTTATCGGTCTAACTATCTGTGAGTAATAAGACCTGGCCA  
ATGATGATGCTTTCTATTTCTATCGTGGATTGTGACGTGAACCCTGGTCGTGAATGGACG  
ATCGAAGGTTAGAATGACCGTGGTTTCCGGGATCGCCTCGAAACGTTTGTACGGAGGCT  
ATTGAAACACGTGGTCAGGAGGTCGTGGAAGAGATTAAGCAGCTATCTACACTGAAAGGA  
GTGCTGGAGTCCATGAAGCGTATTGGTGGCTACTTCTCAACCCTTACGGATCGGGGGTT  
AACGCCGACAAGTTCCATGACCACTTTGGGACTTACAGTATTGACAAGTGCATAACTTCT  
GGGAGCAGGTGACTCGCAGTGTA ACTGACCATACTTTTCGGTTATGCTGCACTTTTGAAC  
GATTCGCCACTGGTTTGAACGATGACGGTAAATGCATCCCCCCTAAATGTAATGGCTG  
TCAGAGAATTGCTTCAAACGTGTCTTCGTTAGGGACCGTATTGAGGCGCTCGAGATCCTG  
AAAGAGCCGCTCTTCGTTGTA AAAAGTGCATAAACTTTCTGACCTTGTGAAGCGTCGTGTC  
GTGAAGGGTGAGAAGAAGTCCAGTGCGCATGGCTTGTTCGAACCTAGTCACAAAGTGTGG  
CTTATCGACTAATATGGTTCTATCAAGAGCGGCCGTATTTCTCGCGCCGACTTTGAGGAT  
ATCGAAGCCTCCATGTGTTACAGTGGGGGACAGGTGAAGGATATTCGTGATCTTGGTGCT  
TTTCAGTAGCTGCGCCGTAAACAACAGCCAGAGACTTTCTGAAGAACTTGGAGCTCGAG  
GGCAAGGAGTATATTGTGGCTCTTAATCGCAGTGGCTGGCTTCTGATGAAAGAAGGTTT  
ATTACCATAGATGACCTTTATGAGCTTGCAAATCAGACTCTCTTGGAGTATTATCTGAAC  
CAGCGAACCAATTGCTCATCGACTTATCGACAGTTGGTGAAGAGCTTGGCATTGTGGG  
GTTAAAGTTGAAACCGACTCAGAGTACAAGCCTAAAGTGAACATGTCTTACTCGCTTTTCG  
AACATCAAGGGA ACTTACGCTCTGGAGAAAAGGCTGAAAGGATTGTCAATGCACGGATG

CGTATTGGTAAAAAGATTTTGGATGTTAAAAAATCTCGATACCCCCTGCTCAGGTAAGTT  
GACCTGAAGCCCTTCAACACACCAGAGATGAATGAGTAGCTACAACCTTATCGATAGCAA  
GCCGAAACTAAACGAGTCAGTTATCCGTATCCCCTAGCGCAGCGCGTAAGTCTGCAGCAC  
ACAACGGCTTGAAGGTCGCGGACGTTGATTTGTCTCCGGCTGTAICTCGCAACCGGGCGCT  
GGATGGTTGTACCAAAGACAGCCAAGGGGCTCTAAGCCCCAGAGGCAGATATGAGTT  
TCACCTCGGAAACGAAGCCAGCTCAGCCTTCACAGTTCTTCGCATGCCGTGGTAATGCC  
GCGATTCTGCAAAAAGGGAAAAAGAACGCCAAGATCTTTGGTCCTGCGAAAACATCCGATG  
GTCGTCATAAACACACGGGTGTGGGTAAAAACCTCGGTAAAGCAGGGGAAGCACTCGGATG  
TCATCTTTGAGGTTTTCGATCTGTATATCGTGGCTACTGTAACCCTGTTGCCCTGAACCAA  
TCAAGGTCCCTGTGATTGTGTTTATTGAAGACACCGAGCCGAGGTCGTACATCGACGACG  
AGACTGTTGAGAAGAAAGAAACCGCGGTCATCATGAGTGCCGGCAATGTCTGCATCTGGT  
CGAATGATGCTAATCATCAGACCATCAACCCTGGCAACGATATCTTCCGTGATGTGGGTC  
TACTGCTGATTGAGGGTGATATCGAAGGGGCTATCGCCCTGTTTCGAAACAGGTAAGTAG  
CCAAGGCTGCGAAGGATGTCGATCTCGGCCCCGACTTTAAGTTACTCGATGGGGTTCTGT  
ACTGGCACGGTCAGAAACACGAAAGCACCCCTGGCTGATGGCATTCTCAGCGACATTAATA  
ATGTTACGTTAAATTACCTTTATGTTTAGTTTCATGTAGAAGCTGGTCCACAACCCGTCTT  
CTGCGTCTGTGAAAATGCTGTAAGACTTTCTTCGGAACAACGGTCTTGAGATTCTTGAGA  
ACGGTGTGTGAAGGCATATAAAAAGACCACCATCATAACCAATGGACCTCGCGATAGCT  
ACACACGAAAGGTTCCCTAACTATAAAGGGCAAATCATTTCATGCCTCGAAACATTGTGG  
AAGATAACCTTAACCAAACCTTGTATCCAGGGTCTGCATATCGCCTCTCTAGAGTACGATA  
GTGGGTTCCGGTGTCAACGGACTGATTGAGGTTGAGGTTAACGCTGTTGAGGTGATCAGTG  
TACGTTACGACTACAACCAACAGGATTGTCGTTGCTGCCGTTACGAAGTCTGAAAGGTT  
CTGAAAAACCCGTTGGTGCGCCGGATGTTATGGGTATCGGGACGATGGCGGAAACTCTGG  
AAGGGATTTACCTTGAAGAAGAACTAAGGAGGATTGATGTGAGATTGTGGTGTGGGCGT  
TGAAGCTGCCCTTGGTGTGTCATGTCGGGGCATAACGTATTCGTTACGCGACCCGGTGG  
TAGCGGCCAAAGTTACACCATAAAGACTATCCAATCGGTCTACGCAGGTTCTGTCCCTCAC  
AGTAGCCCCTACGGGGACTGCTGCCATTATCCACAATGTCATGACTGCACACCCTGCGTA  
TTGGCGTACAAGGGGGGTTGCTACCAAAGAATACTGAAGAGATTAAGCCGAGGGGGAA  
ACGACAATTGAAGACTAAAGCGCTAAAGATCATCATCATTGATGAGATTAGTATGTTTCAG  
AGCTGATAAGTTGTTGGAAATGGCTTTGAGATTCCGACTCGGAAGAAAGCCACGAAATAA  
GCCGTTTGGTGGTTTGCAGATCTGCCTGGTTGCTAACTATTTCCAGTACCCGACCCGTCTT  
TATAGAGACAGACAAGGAGACGTAATTCCAGTTCCACTACACAGCATTTCGCTTATTTCTC  
AGATACTTGAAGTACGTCAATCCGTATCCAATATTACTTGAAATAGTTTATCGTCAGTG  
CAGTGTCATTTCTCAACGATGCCTAATTGTCTGCGTCTGGACAGCTAATTCCAGAAAT  
TGTTAAATCCTTGAACACGCGTTGTTATGATCGTGGCAAGCCTCTTGACGCCATAACGAC  
CACATCTACAAATGCTTCTGCGGATAAAGTAAACAAGATGCGTTTTGATGACGTCCCTGG  
GTTGCCTAAGGTGTACAGTGCGAATACATCTGGTGAGTTTACTCAAAAACCTGTTCCCTGA  
TGAGCTAAAGCTGAAGGAGGGAGCACAGGTAATGTTTACAGTAAACAACCTGTAAAGGCTT  
TGCTGAGCAAGAGTATGTCAATGGTTCCCGCGGAGAGATAATCGAACTCGGTATGGATAG  
TGTGAAGTTTCGGTAGGCATTATGGAGAGTAGTTGATGTAAATGCCCATGTGTGGGAGAA  
TGTGGAATATAACCCAATCAAGGTCAGGACTTCTGATGGTACAACAACCGAAGAGATTAA  
GAAGATCACTATCGGTGAAGACCGGGCTATGCCTATCCGTTTACTGCGCTGTCAGAAT  
TCATAAGGCGCAGGGCTTACTTTACCTGAAATTAAGATAGACATTCGATATGGCGCTTT  
TGCACCCGGTATGGCTTATGTCGCTATCAGCAGAGCTACATCAGCTAAAGACTTAGGACT  
ATTGAACAAGGTCAAAGAAAAGGATATTTTTGTTGACCAACGTATAGTAAGATTTTATGA  
AGAGACTTTCCAGGTAATAGGAGATCAAATTATGGCATCTTACTCTCGAAATGAGTTA  
GTCAAGGAGGTCCCAAAGGAACTTGAAGATAGGAACAACGCGCCAGTCTCAAGTTGGGTG  
AATCCACCGAAGGATACTACACATAGCCAACCTGGCCTCTGTTGATTAGTTGATGTCAGCA  
TACGGCTACCTTACTCGTCGCCCTCCACAATGTCCGAACATTACATCTCGTCGTTTTGGT  
TACCAGTCCCTTTTTGGTAATGGTTTTGGCTCCCGAGAAGATTGAGTGTACATAACACAAT  
AAGGCTATGTACCGTGGTAACCCCGTCAGAAGGATTCCAGATCGTTTAAAGCTTCGCTCTT  
CAAAACCTTATTGTGGAGCAGGTAACCGTACAGTGTGATAAATCACGCTATGCAGGTGGT  
TCAGGTATTAATCTCAAAAATTATGGGTGAAATTTTAAAGAGATTTGAAGTTGAAGATTT  
TCCTGAGCTGAAGAAAGTTTCAACAGAAAAAATGTTGAAACTTCCTGATGTGGCTAATGA  
TAATTATACCGAGGCCATCGTCACATGACTAAAGCCTTGTTCATTCTAGGAAATTAA  
AGAGGAACTGGAGTTGCGTACAACCGCGGAAAAAACTGTTCAATTGGCTGTTTGCCAAGA  
AGGAAGAAGCACATCGTGAAGTTAATGCGTACGATTTGAGAAAACGTGAAGCAGGGCATG

ATATTATTCTGCGCATGATTGACGATGGAGAGTATGCAGAGGCCAAAGGATTTCTCTGCTA  
TTGATCAATAGGCATAGGGGGTTGGTGACCTTATTGTTGTAAATCTAGAACAATCCTCGA  
TGGAGGGAGAGGTTGATTACCACATGATTTTTGTCTGGAGTCTGTGATTTGAAGTGAAC  
TGGGTGTTTCCCAGCTAACCCCTACGAAGGAGCAGAAGATGAGAAAAGTCCCTT  
AAAGTCAAGGCTGAATTTGAGTACATGAACCCAACCGAAGGTGTGGTTGCACTAGAAGGA  
CTTTATACTGTTCAAAGCCGACTTATACAGCAAAGAGATCGCTTGCCTTACAATGGT  
TATCCGGACTTAGAACACTATGCTGTACTCGAAAACGGCAGCCAGATCCTCGTTGACATT  
CCAGATGATCTCATGTACCAGACCCTACGTGAACATCTGCGTAATGCAGAGATCGTTGGG  
TGTTTCCATCGTAAGGAGGAGTTCTAATGGACAAAAGAGAAATTAATACTAGTTGAATTCA  
ATATGAAGAATACCAAGAAAGAAGAGGCAGAAGAGATTCTGGCAGGTCTAATCTATGAGA  
GGGTTGTCTTAACGGGGCGGCACGAAGCCGAAGGTTTGATGAATTTTACATTGGTAAAGT  
CCTATAATTGCCTAATCGTTATCCTTAATACTGATGGCGGCCATACGCCCGCTCACCAGT  
TTCGGGTAGTCATGGGTGCATCAGGGCGCGTGTTCATTGAGCTCCGTATCAATAAAGTG  
GTGTGGAGCCTTTTCGATGGCTGCGGCATCATTGGGTGGGAGACTGATAAAAATGGTTAT  
AAGGCATACTGCTTTATCTTTGATGCCGGGGATCATGGTGGGTATGTGGTGGTCAGGGTT  
AAGCATCCTAATATTAAGTAGGTCAATTCTAGGATCACTGAGGGTATGGATCCAGAGAGA  
GGCGGGATCCCTAAGCCCGATATTTTCTTTGCATTACCGCCATGTACCGATATGTCAGTT  
AGCGGTGCTCATCATTATGCCTCTAAGGCAGGCAAAGACCCTCTTTTTCAGGTCAAAGCC  
GGGATTACATCTGAGGTTGCAGCAATGTTAGGTGATAAGTACGGGTGTCCATACATGATA  
TAAAACCCTCTGCGTGTACTGACCTCCAAGCGGAAGAGACCGAACCACATGTTCCAACCG  
TATGAGTATGGGGGTTATCTTCCCATGAGGATGTTTCATCCGTTCTTCCCTGAGTCCCTT  
AAACCGCGAAACTGATACCCTAAAAGACGTGCCTTTGGACGGGTAAACGTTTTTACAATA  
CCACCCCAAGCCCGTTCCGGTAGCGAAGTGTTACTCAGAACAGTATAAAAAGCTGGGA  
GGAAAGTCGGCCAAAACAAGCCTGATATGTTCTTTATCACCCCGTAGTTTTGCTGCTGCG  
ATTTTTCAATCCAACCAGTAAGTGAGGCTGGGCGTAAGAGTTATTATTAGTTGGTGGTCG  
ATCAGGGCCATCCGATGGAGATACACGTATGCTTCTGTGCGCTGTCAAAGTCAGTGGCAT  
CTACCCACAGATCAAACGAACCCGTCGCTAACATTACCAAGTTACGGGACCCCTGCTGG  
ACAAAGCACAGTGCAGGCTAAGTTTGGTCAATATTCGTTAACTGATGCAATGGTTGATT  
TCAAATGTATGGAAAAGTCAAACCTGATTTTGCCTTTGCAAATGGAGATCCAATCACGAA  
TGAGTTTTAGTCGTACAACACGGCAGTCGATAGTGCAACCTGGTGGATGTGCTTTAACAC  
AGGAACTTCTTGCTGTTTGAACCTATCAGTCTACCATTTATTTGCAGGATATCTCTGC  
TTCTCTACACGATGGATCACTGCCACGCATACCGAGGAACCAGTGGAACCACATCGCGCT  
TGTTTACGATGGGACAAATCTCCATTTCTATGTGATCGGAAACCGCATTGTATCGCAAGC  
ATGTGCTGGCGGCTGGAGTACAGGTACATCATTGCAAGGGTGATGGATGGTGTGGGATA  
GGCGAAGTATTTTATGGATCAGTTCCGACTTTCGGGTATTGCCAGGGATTCAGGTACTAC  
ATTCATGTACATTCAGCACCTTTCGAAATGGATTAGGTGGTAAGTTGACAGATGTCTGTG  
ATCGCAAAGCTTCTTCCAACAAAAGTTTGGGGATAATATGAATTTCTTTTTTGATAAG  
GGGTACCACATCCAAGGTGGTATTTACTTCCAGGATGCACTTTATATTGCTGTTGTTGTT  
AGGCCGTTTTAAGGAGGGAAGGGGCAGAATGGTCCGTATTGGGGCTACATTGTGGACTAC  
CGAGACGGAAAGCTATACTGGAAAGTAAACACCCTCTCAGTTCCAAAGCAGTATCAACCA  
GCGGCAGTTATTGGCAAGGAAGCTGGATTAATATCCGGAAGGGGATATTGCTCTACACGC  
ATTCATGGGTACAGGTGTTGTAGTCATGCTATCTTTTGGCTTCTTACCACGGACCAATC  
CCAAATGGTTTGTGCTGGGTGGCCATCTCAATTCGTTAAGGGAGACATGCGGTGTTTCCGAT  
GACCGAATAACAAATTTACAACCTTACAAGAGGGAGAAATAGTCGTGAAGGTGGTTGC  
AGCATGCCAATCTTCCAACAAGTCTTCTGCAAGAAGAGGGGTTGCTTGGGATAGAGGT  
TATCCATCAAAGCCTTGGAGGGCAAGGACAACCGTAGACGGAAAAGTTCTCCTTAAAAGT  
ATGGAGAGTTTCAATCAAGCCTCTCAGCAAAGAGAGCTGTGGGAAAAGAGTATTGCTAT  
GGAAGATTAAGAGTACTTTTGTCTTTTCGGCTTATCGACAAGGTGGACGGGAAAACCCGG  
AAGCACAAAGATTTGGCAACTACGGCAATCGTGGAGGAAGAGTGAGTTATTAGCAGCGAG  
AAGAAGGGTCCCTGGACTCTGTAGTCGATGGCACCCGTATTCTGGCAGTTCCTAAAATGA  
GTCTCACGCTTACTGCTGCGAAGTATTTTAAAATCCGGTCTGCTGTTTCAGCAAGCTACG  
GTGTAACCCTTACAGTAAGATACTTGCCGTATTATCATAAGTACGGTAAGCTTACTGGTT  
ACAAGACACGTGGCTGGACACTACTAAAGCGGACGAAGGGACGCTTCTCTGGGGGCGGCA  
CGGTAAAGGCAGCATCTTAGTTCTTTGGTCAGAATGAAGCTGCTATGGGAGCTGGTCGTA  
ACCACATTTTTGTTCTTGAGGGTGAACGTAATGTGACTGTTGGGAGGCATGCGGCATTCG  
ATTTTGTCAAAGCTTTAGCTGGAATCCCAATGCCCGAAAGGGATGATTGATGGGGCGG  
CAAGTGTTTCGGACAGTTATCTCTGCCCTTCAGGACGGTGGCAAAGTAACAGGTATCCCGA

CACTGCCTTTAGTCGGATTAACCTGTAGCACGGCTAACGCAGTTGACACCTTGGCTAACA  
ATGAGAAGTTTATCCTTGGTTATGAAAAAGTTGTTATTGTTTTTGTCTAACTATGAAGCAA  
CAGCGCTGGAATAGGCACGTAAAATCAAGAAAGGTGAGGAAGTGACAGATGATGTTGTAG  
CATTCTTGCTGTCAGACAACATCTTTGTAGCTCGTTAGCCTATTGCACGTTACGGACCGG  
CCGGTGTAAAGATATCCAGATATGTACGATGCTGGGAAGGGTCGTGAAACTTGGAAACA  
TGTATTCCGAGGCACAAGACAGGTATGCCCTTACAGACCGATCAGTCTGAGCAATACCA  
ACATTGAGAACCTTCGTAAGAAGAAGAAAGATGGTGCTCCATTACCAGCTATGCCTCGAC  
TTTATGAGCTGACAAAAGGCCACGTACTGGAGAGCTTTGGACCCTAACTAGACCAAGTG  
GCGGGGGTTGACGAGCTAGCCCCTGCAAGCCGTAATGTATGAAGTAAAGCTGGTGAATTC  
GGTGA AACCCCTAACGTAAGACGAGGGCAATACCGAGCGAAGCCGAAGCGTCACTCCTT  
TTATAAGGACGGATTATGTGGAAAAGTATAGAAAATTTTGATGGAAGCGAAGTTTCTGAC  
ACATGCGAAGTAACAGGGAAGAGACGCTAGACTATAAAACCTGATACCAGTGGCAGATAC  
TAGCGTGTAGCCTGTGCCGAGAAGGGATAGTTACTCGGTGGATGGTACCCCGTCTTACA  
GCTTTTGCTTTATTGGAGCCCATAGAGGGTGAACCTAATGTGAATCACACAACCGGTGAA  
AAAACGGATAACTCAGTAAACAATCTTGAATGGATAACCCAACGGGAGAATCAAGACCAT  
GCTGTTTTAACAAGCTTGTTCCTCGTGGTAAGGAAATATGGACATCTAAAGTCACAGTG  
AGTGCAGTTCTTCAGATAGCAAAAACCTCTGCAACTAGAATTCCCTGTTTCAGAAGTGGCG  
AGAAGATTCTCTCTCCTGTTTCGATTGTAAAAAGAATTAATACAGAAAAACTTGGTAA  
AGGTTACCATCTGAATCCGCATTCTTTAAGGAAACCCATAACTAACCCGGCTTTCGGGA  
GGGCTGCGACAGATATACGACCTGTCCGAGTATGGCTTCCCAGCAGAGAGGTTGGCAAC  
ATGTTTGGTGTTCCTAAAACGTCGGTACTAAACATCAAGAGAGACTTTTGGGAACTTGCA  
ACGACTAGCCGTGAAGAGTGTACGGTGTACATCCGAGTGGGTGGAAGCGCAAGACATTC  
TGAAAGGATGATGGTAAAGTCTGCTCTGCATGGAAACATCCAACAGACCCCGATACGAGA  
TAGGGGTGCGGCAAGGCATAACAAACCTTGCTGAACATCAGGAAAAGCACAATTTCTCGC  
AAGGTCGAGTATGCGTTGGTGGATTATCTTCGCATTATGGATATGCCTCGTCTTAACGGG  
TGGACGGAGCGAGAGAAGGTTGCAATCAACCGTCTTGATGAGAATGGGGAGGGGTCATTA  
AACCGCCTGTAGGCTGAAGAGTTGCAGGGTGTCCCTAAAGCATTTCGTTGCAGATCCTTCG  
CGTTTTCTCACTGAAGAAGAGCACCTTGTCAATCCCCGACGGTGCATTGATGCGGACAAG  
ATTAAGATCTTTGACCACTTCGGTTCATCCCCGACTGATAAGTTGATTGGAACGCTGGAA  
CAGATGGTGTGCCTTGATGGTTGTAATGGATTATCCTAGGCCACCTGTCGATGGTGCTC  
TTCGGTATTAAGGCTGACAATGTACTCCGGGATTTGGATAATACCACGACTAAGCTTGCG  
GCATTCTATAAGCAGTATGCTGTGTTCAATTCTCAGTATTTGCCACATGAAGCGCAAGGGG  
CTTCAGCTACCGAAGAATAAAAACGGTTATCTGTGACTTTTCAGGTCTCCTGTACGTAAG  
GAAGACCTGCGGGGTTCTGCTGCACTGGAACAGCTTTCCTGGATTGTCCTGGGTGTTAAG  
CCAGAAGAACAACCAGACCTCTCTCGTCGACGTGTCCGTGTGGTTGTCATGAAGCACCTC  
CCACACTAAAGACTCGGTGTCGACAGACCATGATCATCGACGAAGAAGGACAATTCATG  
GATGCCTCTGGTTGGGTATGGGAAAACGGGATGTTCAATCTGGACAGGGAAGCCATGCTT  
CACCATGAAGGTATGGATCAGACCCTACAACCTGGGGACTCCAGTGGGTAAAGGCTAATTA  
CCAGCACCTGTCGTGGAGACTCCGGTGCAGACTCCGATCTTCAGCATAACATGGATGAGGCT  
ACACCGTTTTGATGATATATTAACCGACTGCGAGGTGGGTGTCGATGAAGACCAACTCAC  
CTTTGATAGCAGGAGCATGAAAGCTTTCTTTCTAACGAACATCGAACCTTATGGTCTGTT  
CGAGCGAGTAACTAAGTACCACTCTACCATTATGAAGGAATACGGTGTAAACAATTGGAA  
TCCGTTTCTAGATCCTGCACACACAGAGTATGAAAGCACCGTAAGATATGCTCGCGGCAA  
GACAGCAGACAATCGCACGATCCGGTCATATGACGAGCTTGAGGCGTTCCTTAAAACACG  
CGTTGGTATTGCGTGTACACACTTTTTTCTTAGGATCTGCGCCTCTGGAAGAAGCTATC  
GGCATTGAGTACGACATGTTCAAAGACCCTAACTCTCTAGGCACGCTTAGGGATAGCCA  
AGTCAACCTGTCCGATACTCTTTCTATGAGCCGTTTACTTTACCCTGACCGACCACTACC  
AAATGGCTGTCTTGATTGAGTTTGGATCCCGTTAACCGGGAAGGTGACTGTGTTGGAAC  
ACGGGGCGTTATGGCTTGGGGCTTTCGTGTGGCGAAGTAAAGTAAAGATAGTTGACTG  
GCGTAAACACCCGCTCTGGGAGTACGTTAACCTTGTGTGAGCAGACGTTGTGATCAACGA  
ACTGACGTGGAGCCATTGATAGTTGAATCCACTGTTGCTCGTTGGCCCGATGAATAGCA  
TTTCATTTACACGCCTAAACCCGAAGGTGTTTGCCAGATTAACCTGAGTAACGCGTTACG  
TCGCCGTATGCTGACGGATTACCTGATCATTGAGCAAGAGTTCCACGGTGTACCTTCAG  
TAAGCATGAGCCGGACAAAATTCGAGATCGCATGGACGTTATGATGAAAGAGATAGAAGA  
AGACGTTGAACCGTTACTTCCCATGAAGGAGATGGCAAAAACCTCAATAACCTAAGTTCCC  
AGCTAACGGGTTTGTGTTACTGGTAATAACTCCCACCAGGGATGGAAGTGGTTACAGTA  
CAAGCTTGGGTATCCGGTTAACCGCGAGGGCGCTGGAGTTTAAAGGGCCCAAAAACCGC

TTTCATAAGTAATGGTCACGTCAGTGCACAGGAGAAACATGCTGCATCCGGAACGGTGT  
TGAAGACCCTATGCACATCTGGGATTTTATGCGGGAACAAAGGAATAAAGATAATACCCT  
GGTGCCTCTGGCGCCGAACCTGATGAAGTCGGCCAAAGAGGGTTTGCGGAATGGTAAGAT  
GCCTGACCTGATTGTCCCGATGAAGATTTTGAACCAGGACGAGATCAAGAAGTGCCAGAT  
CCGCGATGCGGACTGGAAGCCTACCCCGTGGCGTGTAAAAGATGTGACCAGAAATCAGTG  
CAAGAAGGCAAGAAGTACTGACTCAGAGATTGACGAATTAGTCAGAAAGTACATTGAGGAGCT  
TGGTGTCTCAGAATATAAGTCTTAGATTATAGAGCATTTAATTAACACAGGCGTCAAATT  
CAACATCTCACAGCGCCAGTTTGGTCATCGGCAAGCGTCTGACAAGGTGTATGCGGAAAT  
ATTCAAGAAGATGCGCCGCAAGCTCTTCAGTTACCATCTTCACCTCAGTTGGAGGATAA  
CTTCGGCAAGCTATGTCCGAACGTCAAACGTATTCATGTTCACTTGGCAAACAGATCGT  
TAAGTGGTTGTCACTGCGTAACCGTTCGTTTTCAGTCCTCGACCCGATTGATGAGGATAACAA  
TGACTCAGGTTTGTCTTACCACCCACGCCTGGAGTTTCATGGCAAGCTTCTGCCCCAATT  
TTAGGGAATCACCATCACCAGGCGTGGGAAGCACACCCTTTGTGCAAACATGCCTATCCC  
ACATCCGAAGATGCTGTTTGGAAAAGAAATGCCTGGATTGTGGGGTGTAAATGACGGGTA  
TTATCAGGTCGGTATAGACGGCGCCAACCTAGAGGGCGTGTCTCGCCGCATGGGGTGCATA  
CCAGTTCGATGGCGGTGAATACTTGGCGATCATAGCTAGCGGAGACGATCACTCACGAAA  
CGCTGAAGCGTACACCAAAGCTTCAGGAACCCTCGTAACACGTGACGGCGGTAAAGGTGT  
AACCTACGATATCATGTTTCGGTGTAAAGGCGGTAAAGATTGCAGCCAGGTTCAACATCTC  
CCTTGACAAAGCTCACGCGGTGATTCATGCTTTGTGGGATAGCAACTTCGGAATGAAAGG  
TCGTAAAGAATGGCGTGAGAACTTCTTGGCAGTGACCGGGAAACGTTGTATTACTGGATT  
GGACGGTCGTAAGCTTTGGAGCCGTAAGCACCCGTTACGGAATGCTTACCTGCAGAG  
CGGCGGTGCATCACGTTTTGACCTTGTAGGCATTCTGCTACACTTGGAACTGGTGAAGCG  
TGGGTGGAATGATGACGATGTACGTCGCCGGATCAACTACCATACGTAACGTTGCGGCTT  
TGTGAGGTAACCTCACATCGAATAACTCCTTTATTCGGCGGGAAGGTTAAGGTTGACAGTT  
TTGGTAGACTGTAATACTATGCTAACCCAGAGCGAAGCCTGTCAGGAATTTCCGAGACAA  
GAACATTCACAGACTAAATCACTTAACACAATCCAGCTATATGCGAGAAAATACATGATA  
ACTACCAAAAAGGACCGAGACATCCTTATGGCCACTACACTTGGCGATGGATGGTGATCC  
AAGCCTGGGCATCTCGAAGTTTGGCACTCTATCCACCAGAAAATATAACACATTGATGAAA  
TGTGATAAGATTAAGAAATTTTGTCTGTTGGTATGTTATACCGTAAAAACAGCTTGGTT  
AATGAACAGGTGGGTATAAGAACTAAAATATTACCTTTCCTAAAATTACTTCGTCGTATT  
TCGTATCCTGAAGGTAAGAAAGTTTTTCAGTGGGAGATAACTAAAGTGACTTGGACCAGAG  
CACTTGGCGGTATTGTGCAAAGACGATGGAAGTTTAAACGACCCTGACGCATAGGAAGGTT  
CTTAAGTCATCCTCCAGATATACGTTAAGTCTTGGTACTAGCGGAGAGCAATGTTTGCTA  
GTTGCTGACTGGATAAAATCTTACTGGCGTATGCCCTTGGACTAGAAGGGTTCAGGGGA  
GGTAAAGATTTTCGGTCTCTGTATTAGAACAGGGGAGAGTAGGATTTTTAGCCAAGTAATA  
CGACCATTCTTGTGAAAAGCATGATGTATAAAGGTTAGACAAGATTAATACTTGGGTAAG  
CGAACGAGTGGCGTTGAAAACGCTAGAAACCCTTGTGGAGGCATAGATAGTCCGATCCAA  
AGTGAAATCGTATGGCAAGAAGTAATGGTGTGGACGCTATTAACGACCTCGCTAAACTTT  
TGGATGAATACCAGCTCGAAGTTCATAAGAGAACTTTAAGAAGTGGGAGTGTGATACCC  
TGGACGATGCTAAAGCTTTTCGTAGAAGAGTGGGAAGAAAAAGGCCGCGTATTTGACGGGC  
ATGAGTGGCGAAAGGCTATAAAAGACGACAAGGGTGAAAATGTCAAGGATGCCGAAGGTA  
ATACGGTGTATAAGGGCCTCTTTGGTGAAGATGGGAACATGCACATCCACTTTTGCCTG  
TTGGTGAGATGGTGGTGAATGTGTTGAGAAAAGTCTTGTATGATGGGTTCTACGGTTC  
AAATCACACGTTCTAACTTCATGGGTAAAAAGTAGGCTGAGTGTCACTAAATTTAAAGG  
GCAGAAGCCCCTGTTCTTGGAGACTATAAAAGTTTGGAGGTGATTCTTGCTACAAGTGGA  
CAAATAAATCGATTCTGTTATTAATGTATATTACCAACATATCTTCGTCGCCCGCATT  
CATGGACTGTCCCTGCCGATGTAGAGGACTCCAATTAACCTTGTGTAGGTCAAGGAGGTG  
CAGCACAAACAAATCGACTTCCAAGACGTGGAGGTGCGTGTGGAGACTTGGTGTGGAGCC  
TCACCATCGCAGTTTTTCTGGAGAGATTTTAAAGGTGTTTACACGAACTAATGCAGATC  
GGACGACGCGTGTAGGTTTGTAGTGGTACTGTACCACTAGTGGCAGCTGTTCTCCTGT  
CAGGACCTGACTCGTTCACGGAGCTATACCCAGATGTGGGTGATGCAGTCATAAATAAAG  
GCTGCACGGGTGGGAATAATACCTCAGCCAATGATATAAAACGTTGCAGTGGCTCAGGTG  
CTCCCGCGGGATATATGCGGTGTGTTGGGGATGGCGTTAATGCGTACCCAGCATCAGTAA  
TGTAGTCTCAAGGCCAGGTTGGTCAGGGAGGCGGTGGCGGTGGCTCATGTGGTTATTACT  
TCTCTGGTTCCACATCTGGGGAGGACTCCGGTGCCTGGTAGGGGTGTCGGAATCCATGGCG  
TTAGGGTCAATAGTCATTGAGCTAGAGGTGGAATCAACCAACAATAGCAGGAGGCGGGT  
CTGGCGAGGCAGTCCCAACAGGTCCGAGGGTGGTAAGTTTGGGGTGGGGCTGGACAGC

GATCTTCAACCTCAACGGGTTCTTCAGCGGAGCGGATAATCCGGGGAAATACAGAAAAGA  
GCGAATTCCCAATCAATGCGCGAAAGGTATAAATAAATAGGAGGGGGATGTATGATTAAA  
GAAGGTCAGTTGATTAGATTGACACCAGGTGGCCCTGACATGGTTGTTGAGCGTATCTTT  
AAAAGACCGCAGACCTCCAACGGGGTAATCAGAGTCTTTATATATGATTTCTGCTCATGG  
ATGAACGCAAGCAATGTGAAACAGGTGGATGACTTCTCTTTTCCTTCGCTTGAGATTATC  
GAAGAGTGCTATGAAAGTAAGAGGCGCACAAACATCGGAGCATAACCGTAGATGTGGA  
AAGCGATGCTGCCATGAAGTCGGTTGTTTATGGTCAGACCATTGAGTATCTTGCAGATGC  
TGTGGAGGAAAAAGTTTTGTACCGCTTCTCCCAACTTGCCACCGGAGTTTGACGGTAA  
AAGGACGATCAGGGAAAGTTACCGATCAGGGGAATACAGGTACACTAGCGCTGGTGCAAGT  
GCCTGCAGACTGGGATTAAGCCAACGATGTTGGACAGGACAAGACAGGTTCGTTTATAGAA  
TGAAGAGGAATGGGAACGTTAAAAAGAGCTGTGTAATATCTCTAAGGTAATTAACGACTT  
GCAAAATGAACGTAAAAGACCCTTGACTTCATGGTAGAACGGTTTTATTTTTGGGGAGT  
TAAATAACCGGGAAGGTGGTGTATGTAAGAAGCAATCGATTATCTCTTTATGGTGCTGGC  
GGCATGCCCATGTGTGTGGCGTGGCTTTGGCGCTGTCTTTGCAAAA  
ACTGAAACACACCCCGCGGTGTACGTGGTTTGTGCGAGTAATCAATGCTTCCGTTACGGTGGATATCTACAGCAT  
CGACTTAAACAAATTCACATGCCTGGGGTTAGACCCTAGGTGATTGGCGGCATTATGGAT  
GTTTCGGTGTTTTTCGTTATTGACAGCGCAGATCCCGTCACCCATAATTTTAAGTCTAAC  
GGTGAACGACGACTCGATAACAGTGCTGATGGAGTTGTCGTAGACAACAACCGATCTGC  
GACGGTGGTCGCGTGAAGTTGTCTCGTCACTAACCCCTAAAGAAATAAGCACAAGAGGAGT  
TTCAAATGATAAAATTAACGATTGCTCTGCTGGGTATGGATTTTGTTCAGCCGCCCATG  
CGGAAGAAGATGAGGATTTCCAGACCAAACGCATGTGACCGTTTGAGATGTGCTACAGGA  
TCGAGCGTTTCTCCCTGATCATTGTTCTCATAATAAGGATAGTATGGTAGAGACCTTTA  
TCGACACGGTAATCCCAAAAAAGGATGCTCAGGTCGGGAATGTACCGAGCGAAGAGTCTC  
ACTGGTATCAGGGGTCATCAATCAACAGAACCMAAAATCTGTGACCCGTGTACACTAG  
ACTAGAAAGGTCACAAGGGGAGGTCGTGAAAAGGATTTTCCAGCCACACTGCTCGCCTT  
TTCTTGCTCTGTACTAGCAACAGAGTTCTAGACGGATACCTTGGGAAAAAGGATCACAGA  
TGCAGGCAGTGCTGAAGAGCTGGATACGTACAAACGGGGTCTAGAGAGAGCAAAGGCTAA  
GACACCTGAAGTAGAAAATGAAGTAAGAATTGCAGAATTTCAAGTGGCAGCTTCCAAAAT  
GGAAAACCAGATGAATATCCTCACAAACGCTATTGAACAGATACTGAATAGGAGATGACT  
TTGACTCGTGCCCTATCTTGGGAAAATTTGCACCGCTGAACTACCGGGATGTATCATT  
ATTTCGCTAGGCGGCTTGGCAGGTGAGTTGCCCGTATCTGTTCTGTCATATGACCAGAAA  
TTTATTGACGCACAACCAGAGTGGATTCGGCCAAAGTTGCGTCACGCTGATCGATATCGG  
GGCTTGCTGGATGTTATTGCCGATGAGGGTATAGATAACGTGAAGGTTGAGTGC GTT  
GATGAGTATAACCCGGATACCCTGAAGGAGGTGCGGATTATGCAAAACTGATCCGTGAA  
GAGCATCCTTTCGTTACATACGAGTTTGCTTTCTATTCTGAGCCCGAGTACGAATCTTAC  
TTCAGTGAGTTCTTCCCTGAAGCGAAGCATCTTGTTATCGACTGAGAACGTAAAGCTGTT  
GCTATCGTTGCTACGATGATGTGTTCCACCCGGACTACAAATCTCTAACCTGACATGG  
CCTGCACGGAAACGCTTCATGTA  
AAAGGTCGCCATTGTTGGTGTGAGAACTGATAAA  
ACGACCTTGACACTACACTTGGCACACAGATTTCGCTCCAGCTTGGATTCTGAAATTGGA  
AGACTGATCTGTGAGCGTGAGTATCACTACAGTGAGCTTGCAGAGGAGTCGTGAGGATTA  
CTGCGTGTGCAATAGAGCATCTCCGGAAGGAGATGGAGGAGGCTGGTTGGGGTGACCGT  
GGGGTAATGTTATCCGACACGACAAATCTGATCAGACACTTCTCTGGTGTATGTGCAGAT  
AAGATCTCCA  
ACTCCGACCTGTTGTTGCGGACACTGAGACGTGATGAGAGCTACTACTTG  
TACGATCTGTTCCGCTTCTCACAGCAGAGGTTCCGTGGGTTGCTGATCCTCTTCGTTTG  
CACGATAGACAAGAAGTGCGTAAAGACACGCAGTCTTAGCTTGAGACAATGATCAGGGCA  
TCTTGTGTGACTAGCAACGTGGT  
GATCATCTCCGGGAACGGTTACGAAAAGCGTACTCAA  
AAAGACGAAGAACCTGTACGTA  
AATGCTGAATATCAAAGGAGAATCAGATGAACGTAAC  
TAAGTCAAGCATGAAGTCGGCTTTTGGTTTTCTGAAAGTTATTTTGGGAAAGGCTCTTGA  
GTTGGCTGAGGGCCATCATGCTTACGCTTACTGTGTCGTGAGCAAGGGTTCTCTATAACCAA  
GTGGAATCACAAGTGTACACTGACATTGCGAGGCGAGTTTCTTTCTTCGAGTGTGCGTAA  
CAGTGTT  
CAGATCAATGAGTACTGGGGCCGACCAGGAACTTCAACTACCTGACGTATGT  
GGCTGGCGACGACACGTGTTTTCTCCTGGCAAATACTTTGGTTAGGAGGAGTATGAAGA  
AGCGGCAGACTGGATCATCGGGCACCTGAAAGGTGATTTAGATGGATGAAAATAAGCCGG  
TTTTGGTCTGGAAAACCCAAGTAGGTAATCTTCTTCGGTACACCCATCTGTCTGACGGGC  
ATTTACTGCATGCAATCATCTGACTACTGACAGACTCTTGTCTTGATGACAAAACAGAAA  
ATGTGCCGATAACTACGTGGATAGAATCAATGGCTGTGGAGCTAAACAGCCAGATGGATG  
GTAATGGCTAAGGTTCTTA  
ACTTTTACCATTTTGGTAAGGCTATCTCTGAAGGGGCGGAC

CACTTGGGCCGCACCTTGAAGAACTTTAACCTGGTGGGCCATATACTCCCAAACCCATTC  
CCTATTGAGAAAGGTGGTGGGAATCGTGTGAGGTCATAGAAAAGTACGGTGGGTGGTTG  
TGGGAGAACATCTGGAGAGGGGAAATTCCTTTGCAAGATCTTATTGACTTGGACGGATAA  
GTCCTTGTATGCCTTTGTTACCCGTAGAGATGTCCCTGTGATGTCATCATGGCGGCAATA  
GAATGGACCAAGGGTAAGGTTACAAAATGAGTTTGA AAAAAGCTCACACATAAATCGAAA  
TAAATAATTACAACGCTGGAGTTAACTCCCTTGTGAACTCTGATGATGCCGGAGGTTTTC  
GTCTGGCAAGTTCAAAGATACATGGTCAACCGATAGCGCGTTTTGAAGTTACTGTTGTAA  
AACAGATGTTTGAATATATAATCACAAAGGAGAATAACACCGTTTATGGTAGAGGTATA  
AACGACTCAGAATATCCCTGTCAGATTTTCAAGAGGGTAGACGGTTGACAGTCGTTTAAA  
TGGAGATGCCCTTACGATCAACATCGGATAGGGATCTTGTTCAGATGGAATAGAAAGCAG  
TTCCACAAAAGACAGCCTACCTATGCCGGATGCCTAATCGCGGATGACTGTTTAAAGGTTT  
TATGTCTTCATAGAGTGAGTTACACAACAACCGTTGCACGAACAGCGGTTGAAGAAGGAA  
GGTGATCTTCAATAAGACAAAAGACATTCTTTTGGAGGGGAACAAAACCTAACTTCTGAA  
GCATGTGCGCTCCTTCGAAGATACATAAATACCGCATTAGCCTATTGCAAGAACGGCGGC  
CTACCTATGGGTGTAACCAAAAAAGAAGACAGTCAGGTCTATGAGGCAGGGTGCAGGGTG  
GACAGGACCAGAAAATACTGGCGCGTGCGAGCGACGATCCTTGCTGCTCATGCATTATGG  
CAAATGCAAAAAGGCCGAAAATCTTCAATCTGCGAGCGAGGTATACGAGTCCTCTGAACTT  
TAGAATAAGCTCACTGCGAAAGACCTACAAAGAAGGGTTGACAGAAAACCTAAGTGATCTC  
CATAATGTAGAGGAAACAACCTTGCTAATGAGGATAAAAAGATTACATTATGAATCTATACG  
TAAAAAAAAGCGGGACCGGCTTTTATGGTTGGTCGAAAAATGGATATCTGTGGCTGTTCA  
ACGGGTGCGCCACCATCGCTCTCGTGTCGATCATCATGGGCGGTGAGGTTATTGCATTTA  
TCTCATCTGTGACAGGTATTATCGGAGCGATCTTCGTTGCAAAAAGGTAAACCTTCCATTT  
ATTATTGAGGCTTTATGGCGAGATTGTTGTACGCAAACATCTCCTTCACGTACAAACTGT  
ACGCTGGCACAATTATGTACCCTCTGCCATTCCTCGTTGCAGGTGATAGGTGGGATTC  
TCTGGGCGAACAAGGGGACTGTCTTTGAAGACGGTGAACGTGCGAATGTTATCAAAAAGT  
ACCTCACCGCAATGCAGCGCCGCGTGGTCGGGATTGGCAAGTTGATTGGGATCGTCTTGT  
ATGCAGAAGACGAAAGACTTAACAAAGGAACAATGCCTGGACTGGATTCCGCAACAGCGA  
TCCTCTCTGTTCTGTCAACCTATCCGATGATGTTACGTTATGCAGAACAGGGGTACGTGT  
GGATCATTGTGAATGTAATCGCAGTCACTTTGTTGATTCAGACAGAGCTCCACCAAGAAA  
CTCAGGGGTGGGCGGTACTTGTAAATGTGGATTACTTTCCTGATAAACTCGATTTATGGTG  
CCTTCAAATTACGGAAACACGAAAGAGCTACGTAATGATTGGATTTTGCGAACGGTTGAC  
TATGCACAATAACTGGGTGCCGGGCTCTGCCATTTCTACTACGATGTTTGTTCGCGCAC  
TGTCTTATCTTTCAGGGAAACATGGAAGTATAAAGTTATGGCACATTTAATGTTGGTTGT  
GTTATTCGGTAAGCTATTTACTGCGTGGTCAACGTAGAGTGTTGGTTATCGCATGTATAA  
AAATGACTGGACCATTTGTGCATAACCTGACGCTGTGGCATCATTCTATGTGTTTCGATGC  
AACAAAAGAACGGTGTCTAAACCAGTAGTGGGGTTTGCACCAGGTGTTGAGATGCAGGT  
GAAGACTTTAACACCAAAACAACGTAGACAGGCGAATGTTTATGAAATCCGTTTCGAACA  
GTACAAAATTTTTAGAAATGTACGAAGCCAGTTCACGCGTGAATCCAAGCCGGAAGAG  
CTGTTGATGTTGAAATCTTCAAGAAGAATGTGGAATATCTTCCTGTAGATTATGATAAT  
CCAACCAGTTTCCATAAAGCCTTCCGTCAGGTGGATGTCTGTAATGAAGGTTGTCCAGAT  
ATGGTGATCTGGAGCCTGATCTGTGGTGGTGATTTGAACACAATCTGGTCTGTACTGGAT  
GAGTTTTATGAGTAACTCTTTAAGTGGCTACTGAGCCTGTGTAGTTCAAACCTCTTAGT  
GACCATTGGCAGTGTAACACCACCACAGTGACCCAGACCTCAATTGTGCATGTTATGAA  
GGGACTTGACCCAGAGGTGGAATATAAGTACGAGCTGAAACCCCTGACAGAAAATGAGAT  
GAGGGATATTGCTACGAAGGCAGTGGCATATGCAGGAGCTAAAAAGTTGCTAACCGAGGG  
CCGAGAAGAGCGGCGGAAAGAGATAATCGAATAGTTGGGTGCCACAGTAGGAACCGTCG  
CCCACCACCGCCTCCTGCACCCCCACGTGCCCGTGTGGTTGTGGATGATAATTCTCTCGC  
ACGCCAGAGACGCAGTGAACTAGTTACAGTCGTGACGATGACTATAGCATCGTAAGCAC  
CACTTTTGTGCGCCCCCTGTTTATCCCTCGTTAAGTAGTGACCATGGTGTAAAGTTATAG  
CAGGGGCAGTTGTAACCTCTGGCAGTTTTTTTATGAGGATGTGATTGATAATAACAAAACG  
TTTGTAGTTTAAACGCTGATTCCACTACCTCAGTCGAAGAGCCCTTTGTATCGACGATT  
GATTGTGCCAAATGGGGTGTACAAGCCACATTTGTAATGGCACTGGAGGATGGTAATATG  
GTCGTAGTAAACAACATCTTGTAGCTTCCCAACCGGGATGGATGCTCCTTTTATTAACCT  
TTCAATGTAAACAAGGAGTTTATGTAATGAAAAGTTTAAACGGTACTGGCGCTTTTTTTCA  
TCGCATTGAAACTGTGCGCTGATATTGCACGGTCATGGTGGTGGATCTTGGCACCCTCT  
ACTTCCCGTTCGCGTTTTTATGTAACGATCATAGTTTTTGTTTTTTCGGCAGTGTCTTTGGTG  
TTGCAGGGGCGGCTGCTATTCTGGAGAGAATCGAATTATGTAAGAAAAGATCTCGATAAC



TGTTGACATACATAGATGAGAGGGGTAATCTACTACATCACTCCCAAACGGAGGGTTGAT  
GACTGAGGCAGTAACCCCTATCGAAACCCAATCAGGACAAGAAAACCTCTTCTTCCTCGA  
ACTCGACGAAGGTCAGTTTGGAAACGGTTGTTCTTCTTTTCGAGTGCCGGAGCACTGATCAA  
TCAGTTCATCGGCTCAGAGCGTATGCGTGATGAGATGCTGAAGGTTATCCGAAGCGGCAA  
CATCACTACTGTGGAGGAAGCTCTTGCTTCAGTGCATGATCACCGCAATAACTTTATGCA  
AGTAAACGGTTCACCCCTCTTCTGCCCTGAATCTACTGAGTCTGGATGAAGATACATTGAT  
CGATCGACTTCTGGGTGTTAACAGTGATACCCAACAAAAAGAACTAAGTAATAGGAGAG  
AGATTGAGCGCAACTTACGAATTCAAAGATCCGGTGTCTGGGCAACGTAACCACCTTCGAA  
TAGCGCAGAATCTAATTCAACATCATCAAACCCGTTAAGAATACAGAGCCTGATGCGGTG  
AAACGTACCCATATCCTAGCGCGAAATGGTCCGCCTGCAAAGGTTATCGAACACCACGT  
ACCATCTGCATCTTGACGCAAGAGAGGTACGGGAGTTACAAAGTTATAGATCCTCAAAGC  
CAGGGTCAAGTTGAATGGCTTGGGGGAGAAGAAGCTACATACGAGCCACCCCGACAGAATG  
CAAGTAAAGCTGGTCTATCGTTACAAAGACGTTCTGCCAGGTATGGTAGCATCTTTGCCG  
CTGCAAGCGAGCACGAATGACGATAAGCCCTATGTCAGAGGCTCTGTGATTGGCCAGACT  
TTCAGCCTTCTGGACGAAAGAAAAACAGGTCAACCTGCACCATGTCTGCAGCCGCAGCAA  
TGTGATCAAGATCAACAGTGTGGTGGTGGGGGAAAGCTTACGGCGAGAGCACCACCTTT  
GCAGGGGATCTGGCGACTGTAAACGATGAGAAGAACGGCCCTGGTTGTGTTGTTCTGTCT  
GATGCGCGAGTGCAGACAGGTACAGGTTTCTGGTTCGCTGACAGCCTTTCTAAACCTTGCT  
GATGGCACAATCCTGCACGGCTTTAAAGCTTACGCCCCAGGAGGTCAAGGATCTGACTCA  
GGCGGTTAGAAGTCTCGTGGGAATTACGACACTAGTGGTTTAGCTTGTGCTCGCGGTAAC  
AACGACCTTAATGGACAGATGGGTGCAGGATACAAAGTGAAGGATGAACCTGGAAACAGGA  
AAAGACATTAAGAGAGGAACTGTAGACATGAAGGCTTTCGTTGCGGAGCGTACTGGTAAA  
GATGTTGAATCAAAGCAGTTGGAGCACGTGCAGATAGTGCAATCCTTGTAGCACGTAGC  
CGATTAACCTGACAAATCGGAAGTAACTGAGGCAACGATCCTGGAAAGCGCCAAGAAAGTG  
TATGTAACGCTCTCTGAGCCGTTTATGAGTTCCTTGACTGGCGACGGCATGCCTGCGGAT  
CAACCTCAACCACAGACTTCTCGGGAGCCTCTGAGCGGCACCGTGGAAGTACCACCTAAG  
GATGCTTATGACCCTCTGATGGACTTTGACGACTATATACACTTTGCCCAATCGGTCTG  
CAATATGGTAAAGACTTGATCCATTGCACTTAATAAATAGAAAAGGAGCCTGTCCGGCTCC  
TTTTTGTTTTATTGCGGTTGAGCAGATACAGCTGGTTCGCCGAGGTCAACAGGACCTGGT  
GGCCTGAGAAGTCTGAAACACTGTCACACGAATCAACAAATGCCTCAACCTCACTCTCC  
CTGAAAATAAGACGAACACCACAATGGCCATCACCACCTGCAATACAGGAAAGGAATCCT  
CCCTCATCAGTCCGCCCATATCCCGATTTGTAAGTAACTTCTCCGTCTATTAAGTTA  
GTATCAACATTCGCTGGAGAAATTTCCATGCTGACAACGTTCCGGACCTGGTCATTAGTTA  
GGACTGTTTTTATCCATGAACACGTACACTTCACCAACTTCCCTTTGGGGGATGGGATCG  
GACTCACAGACAAGATGAAAACATAGCCCGCAGAAGTATCTCTGAGCGTTTCAGCATTC  
GCGCCAGACTCTGTTTTAGCTGACATTGTGATGTCAAAAACACCCGCTTAAAGGAAGGTC  
ATGATACCACTTGAGTCTACAGTTGCGATCTTAGGAGTACTCGATGTGAACGAAATATCA  
TAAATCCCAGGATTTACTGGCTCAACAGTACACGTAAGATGACTTCTCGAGCCTTTGATG  
GCGTATGGAATAGACCCTGTGGTGTTCATCCGCAGTTGTCCCCGCACAGGATGCTTCT  
TGGATGTTTGTGAACACACCAGTCCATCGGTCGACCCTGAGAAACCATAAAGGTTACTA  
GCGAAAGGAAGGTTCCCGTCATACAACATACAATGGCTGATAGAGTTCCTGTTAAGT  
ACAGCTGTCTTCATCTATCCAATGGATGTCAGCTTCGAAAGATCCCGGTCGGTTCGTATA  
GGAACCTGGAACATGGGTCCGTTCTAACACCATTGTTGAAGGTGTGCCAAGGCCTAGTTGT  
TCACGTAGGTCCCCATACCGTAAAGCTTGTTATCAACAATCAGGAGATGCGACTGACCA  
CCGTCGATAACCCTGATTGTCTGGAAAGGACCAATACCCGCTTTCATAGAGTATTGGGCT  
GCCCCGATACCAATGGTATATAAATAATGCTGTTTATCATCAACACCTGTAGAGGCGATA  
GCCATTGAATTTGTTTCGTTTCGCTAACCACCTCTTTAACATAGGCGGTTTCAGTCACAGCG  
GCAAAACTATCGTAGATATAGTTTTGTCTTTGCGTTGCTGAAGTACCATCTATCTTATGG  
ATGGCCGCAAAAACACGGGGAAGTCCAATATTGTTCTGGTACGTCACGCAAGCATTACG  
CTATAAACTCTCACCCCTGGAGGCACTAATACTTATTGGGATCGATATTACGCTAGTATTA  
GCAGAGCCAAGGCATCCATTTGTCTTTGACCGGTTTCCATTAAGTTTTCCATGTACCACC  
TGCCAGTGTGTGCTACAGAGAGCACAAGAAACACTTTGTAAATTTGCGAGGGATACTGTG  
CATGTGGTTGATGAAGGGAAGCTTGACCAAGAAGAATAGATAGACCCCATACAAGTGAAT  
GGACTGGAGTCCACACAATACTGCCTGCCAACATTGTTGTATTTGACAACGAAGGCTTGA  
CCTCCACAAAAACATCAGCAACACCATTAGACGCGAAGTGCCAATGATCCTGGCAAGGG  
CTTATGTTTCGCGTTTGCACATTACACGACGCACTATTCCTTGGCTATAGAGTCTCCCC  
TCAATCAGAAGGATCGCCGTTGACCAATTTGGTAGCACCATCAACCAGGCCAAGGGTAAAG

GCCATCCTCTTAACACTACATGGTGGGAGGGCTTCGGTTCCTCCACCAGAAAATGTCAAG  
AAGAGAGATGGAATAAGGTACATTAATCGTCCTAAAACAAAATCTGTCCGATGACAGCC  
TTGAATCATTACGGACTACGAACAATTATAGTGTGATAACGCCGCCTTCAACACCATTA  
TAGTTTAATTGAAGAATTGTCACCGAATCAGCCGTCTCGTTAATTGTTTTGCTGTTTATA  
ACCAAGTAGGTAGGATCTAAAGTACATTGTGTGCGGCGAGTACCATCTTGAGTCAGGCAA  
ATCACAGAAGACAAAGAATCTGTGCTTTCAGCCCAAGCACCAATTTTCTAATCCGCATCC  
ACTGTTACGTTGTAGATGTTGGAGTCTCCAATTGTGGAACATGCCGCTGTATAGCTAACA  
ATCTCCTCAGTAATAAGTTTCAGGAATTCAACACTTGCCTTGGTTCGAATTGCCGTATCC  
TGTTACGTAAGGCAAATGGCACTTACTGCACCAGTACAGGAAAGAATTCCCACGGTGATG  
GTATGACCTGTCAAGTCAACAGGAGGACCAGTAGCCGTGCCCTGCATAACAATGTTGTTA  
ACGGTCTTTGTTCTGAAGCGTTGTTAAGGTTGACGTCACCGTCTACAGTCAAGTTATCC  
TGGACTGTAACATCGGCAAGTACGCTAAGTTCCTCAATACACTCAGAGGTACCAGTAACA  
GAGTGATTTCCGCCAATTGTACCATCTCCTTTTCCGGTTGTAATCCACCATATAGACTG  
GTTAACCCACCCACTGTGAATGAACCAGTGATGTTAACGTTACCCGCGATGAAAACCTTCG  
AGGGTTGTAGTACCTTTTACGGTCAGATCACTTGTAAATATCAAGGCCACCGATTGTTTCG  
TTTCCAAGGTTAATAACACCACTGACCTATCAGTCACCACCAACGGTGAAACCGTCTGCG  
GTTGTAACAGAGTTTGGTGAAATATCAAGTCCATTGATACTAAAGGTGTTACCTGTTACG  
TTACCTGCAATATTCAGGTTTTATACCTCAGTTGTACGTGAGACCTCAAATCTTGGTGCT  
GTAGGACCTTGACTTCAGTTACCACGGATATACACGTAATCGAAGAGGTTATTACTCACA  
CCTGGCAGAGACATGTTCCGGATCATCTGCAGCCACCGTTCGGTTGACTACAATGTCAGTC  
TGGTTGCTGTGGGATTCTATCGCACATGGGTCAAGGCGCGTCTTAAAGGATGTCGGATTA  
TCTGCGTCGTTAAATTCGAAGGTAAGACTTGACACCTCCTGGGTCAGGATCATTTTCTGG  
AAATGACCTGTTGAGTTATCTGCGTTTAGAGTGCCATTAAGGTCGAGTGTCTACCAAGC  
AACAAACTATTGAGTGTTGTAGCACCTTTACAGACAGCTATGCAAAGAGAACTACCA  
CCTGAGATGCTTGACAATGCGCTTGCAATAGCGGTTGTATCAAAGGCAGTTGAGGCAATT  
GTTGCCCTGATGCTGTTAGCCGCAGGGGTTGGAGCCTCTGGGTTTGCTGTCAGGATCCGG  
CTGTTGATAGGTGCATGGATACGTGCCGTCGTCGATGCGTCGTAAGTACAATCTTCACTTA  
ACACTGTTAGTTCGGTTTTTTGGTAAACCGTGAGTGGGGCGTGCTGCTGCGGTTGGTGCA  
TATCTCCATTGACCCCGATTTTTGCCATTAAGAATAAAGCTGGTGGAATACTGTGGTC  
TGAGTTGCCGCGATCCACGGCATAGGCGGTATTTAAAGAACAAGTTGTCAAGAAGAGCT  
TTAGTAACCGTTGGAATGGTGCTACGATCTGCAGTAACAACATTTTCGGATGGCGTTCCG  
TTGACAACCTTCTGGAGGCGTTCAGAGTGTTCAACAACCTGATCGACAGCCTGTTCAAAT  
TGAGTCATGGCTGGCAAAGAGTCTCCTTATTAGTCTGGGTATGGTTCTTTACGTTGGGC  
CTCAGTTACTCCCCAGCGTAGAGGGAATAGCTGACTGATTAGTAGCGGGGCAGCAACGGT  
GAGTCCAAAATCCACATGTACCCCTCTGTCAACGTTCCATTAATCCCAGTGAAGGAA  
AATTGCGGGCATTGAAGCCAAGCCGATATTGCTCGATAACTTTGTATGAGAAACCTCTC  
AGGGTCTACGGAAGAGCTCACAAAAGCATTAAAAAATTTCAATTAGTGAGTTAACTTATT  
TCCTCAGGATTCACAATAAACTAACATGGGCGGGAACGTTGCAAGAACCACGAGGCTTAC  
CACGGTAGCAGTTCATAGCCACTCTTTAACCGTATCGTCTTTAAATGATGCACAGAGGAT  
TACTACTTACATATCGGTCTGAAATGGGGATTTGATGACAAAACCTCAATGCAAGTGCCAA  
AGGTTATGGAATTGGATGACTATTATCTGGCAGAAGCGTACAGGCACTGATACGGAAAG  
CCTCAGCTTCGTCGTTCAACCCGACAATACATACGCTGCGACAAACAGGAGGGGTAGGTC  
GAGCTACCAACATAACGCCATATATAGAGAGAGGTTAAGGGACTGGATATGAACTGAAAA  
CTACCAGTAGGGAATGTTCTCCAGAAGGATAGGGATCATAACAAAATAGACATGATCCT  
TATCCCCTTGCCAGCCGTAAGCAGCAGCACTGCAAAGCATAAGAAATACAGTGCCGAACG  
TATCATCTACGTTGATTCGCCATGAGAAGCTTGAAGTATTGCTGAGGTCAGCACGAAGA  
TCGCCCAGGTCTTCTTTAGTGTCCCTACGCATGTCTGAGACGTCATCTCAAGCCTATTCCG  
TATTCCTTCTCCAGAATCTCGTCGAGTTTGTCCATAGTGCCCATGTCTGGCTCAATCCAT  
ATGAAGTCTCTCTCAAGTTTATCAAGGCGCTCTGGCGTTATTTTGTAAATTTGACTATGTG  
ATTCTCAGGACACCAATTAACAACATCGTGATAACGCCCAATCAGCTTTGATGATGGCA  
AATAAGTCAATAGACATTATAGAATCCTTTTGTATCTTGGCTGCTCTTTCAGGCCACGTGA  
TATTAGGCGCATCCTCCGTGTCTGTAGCTAAAAGATCAATACGGTATGTCTTTAGCAGTA  
TGAGAGACGCTTTCTGGGAATCCAAAGTTAATCCTCTCGAATTCAACTCTTCAAGGGTTA  
ACATGTGGTTTGTAAACCAAGACGCTTTACTGTCCAGAAGAATTCGGCCTGAGAAATAG  
CCTCTTTATTGTAAGCTTTTAAAGTCCCCAGAGATGAATTGCACAGCCCCTAAAAGGGATT  
CAATACCGTAAGGAACTTCATCAATAGCAGCATACTTCATTTGGCCTGTGAAGTATACTG  
ATGGATAAATAGACACAAACAACACATCACAGGAAGACAGAAGAAGGGACTTGGTAC

CCCCCTCAATTTAGTCAACACTTGCCCTATGTTCGTACCAAACCTTCCCCGACTGTCTCTA  
TCAGGAAACTACAACACTGACTGCATGAATGCGGCGTTTTTCGTCCATATATGTTGGGGTGT  
ATAATCATAATTCACCATATACCTGAGTCATAAATCCTCCATAGTACAGGTTGCAAACAG  
TTACCCATTGTCCGTTATTGAGATACTGTAGTGGTGCAGTGTAGTAATTGGCGTCACTCA  
ATTCTTTCTCGTTACGGAAAGCCCACCCGGTCATGACGTGACCTACATAAAATCTGGATT  
CCTTACACCTGTGGCAAACCAATTACCGAAAGGGATCTGCTGAACAGAGCCAGACAGGT  
TTAGTGTGACGTTACCGTTACCATCTGCCGTTGCACGGTTGATTGCTCTCACAACGTTTC  
GACCACCCACTGCAGAGGAGTTGAGGTTGACAACAAGGGAGTTAACGTTACACTGTGCGT  
TTACACTGGCTTATGGGCTTGTCAAAGAGCTTGTTCGACAAACCTTGTACCCTTGAACGT  
TTCCTGTTCCCGTTAAGGTCCATGTCCTGATTGTTGTGTACTGAATACTTGGATCATTCA  
GCGTACGGATTACGGTATTATTTGGGAAGTGTGCAGAGGTTGCAGTGACGCTTGCACCGC  
TCGTAACCGCTTGCATAATGGTACCAGTTACCCTACACAGTGCAGCAGTGCCACTGA  
TGGCATTGAACTGCATCATTGTGAAGATTCAGCCATCAGAAGGGACGTAGCGGAAACGCA  
TACAATCTATGCTCGACGTAATTGGGTCATTACCGATATTATCACCAACTACAAAATCAA  
GGAATGTGGTGTCTGCTGCTGGGTTGATCGTCGTGATGTAAGCGTAAGCTGATTCCGGATG  
GTTTCGAGGTTACGGCGTAGAACAGATAACGAACCACTCATGGTGTGCGCTGAAAAGTCCA  
CATGCTGGTATCAGACTCTGTTTTACTGCAAACATCGAGATGTATTATTCCTGCGGCCCT  
TGTCTGCACGGTCCGCAAGCTTCTGATTACACGAAAGAGAGGACTATCGAGACCAGGTC  
TCTGCTCACCAGTGATATACTTGGCCCATGCGGGAAGCATATTTAAAACGTAGTTAAATT  
CTTCAACTGTTGGCTTGTCAATCAAGTCCCTAACCTTCGTTCCACCGTTCATCGATAGGTC  
GTGCTTATTTTCACTCATGGGTGTAAGGAAGATCTATATCTCCATCAGCTCAAATCTCAA  
TAGGTACTGTTGGCGATGCCAGTGTGACGCTCCCTTAAATCAAGGTATCCTCTCCATCAGA  
CCCATAACGTCAGGTGAGCAAGACCAACCTCTCCTGTTCCGGCTTACGAGTGGATAAACCC  
GAATCCGCGTGCCTGTTTATCGCCTGCTAATCCAAAAGCCGTACCAGTTGACTCAGTTGC  
GCTCAGATGTGTAGGCATAGGCGACATGTCTTGAATCTCATGGAGAGCAGTGTCCAACCT  
GAAGTAGGTTTTGTAAATGTTAATATCGAAACGGTAGTTATCACCCCTTGATGTGGTAAA  
GCTACCGTCCACGAACATACGGTTAAGGGTAGCGGTAATTTACAGGTTTTGTCCAGTTCTT  
CTCATAACTAGCCCAAAGGATGATAATGATAGCACGATAGTCCATATCGCTCAAGCCAGC  
ATGCTCAATCCCGACAGACTTCCATATCTCACCTAGTATAACACTTGTGCGATTTTTAG  
TAATCTGTCCTCAGACAAGTTGACCCACATTCATCAAGATTTTAGAGGGCGTCCGGCTA  
AACCGTCATAAGTCTGACAAAGTATTCTTTCTCTTTCAGAAATGTACCTGCGAGATATTC  
AAAACCTCCCTCATCTAAATCTCGCAGAGTATGGATGTGGTTGACATCGTTAAATAGTC  
TGCCATACTGACCTCATTAGATGCTTTGTTGGAAAGTAATGTCGTGGGTATCTAAAGCAA  
AGACTTCTGTCATTCCTGCAACAGCATCGCGGTTAGTATAAGCACTGTCAGGTTGGTCAG  
TATTCTTAACATCCACCAGCAATTGCGTGAAGCGCCCTGCTGAGATAGAGGACCCAACTG  
CGGATACCAACTGGATATTGTAAGAGTATCTGCAATGTTGAGAGGATCAACAACGGCTT  
GCAAAGCAGCTTTGAAATTGTATTGCTCTGTACGGACAGGAGCTTTCTTTATAACGAA  
GACGAACGGCAGGCTCACGAGCCTGTGCTTTGCTGTGATAGACCCATTCCGTCTGATCAT  
CCTCTGTGGTGACATCATAAAAAACATTACCATAGGTTGCGTTGGACAATGGGATTATGT  
TATAGCGTGCTTCACTCATTCTTCTGTGGAACCACCACAACTACATCCTCAAACCTTAG  
ATTCCGCAAAACCAAACCTGGTCCGTTTCCCTGTGTTGTTTGAAGAATACACGCACCTTGC  
TTAGGCCCTCGACGTTTAAACGGCACAAATAACCGCAGGTCTAGTGGCATGAGCACCTG  
CTGCGGTGCTTTGTGAAGCACGAACCTAGTAAACAGTGTCTGTCTCAACATCGGAACCGT  
CATTAAAGGCGGTGATGTTGCTCATGCTGATAAAACCGCTTGGTGTGCGGTGTGATATGCG  
TTACAGTCTTTGTTTACGAGTAATAGCCCCTGCTCCAGCAGCAGTTACTTCAATCGTAA  
GTGTTCTCTGGCCCAATACGGGTGATGAATGGAAATCAACACGACTGTTAAGTCCGCTCA  
TGTTCTTGTAGGGTCATACCAGATCTACATCGCTCCACCCGCAGAGTCAATGAAGATCC  
TGACTTCGTTTAACTGTGTCGAGTAGTCGACAATGAAATCCTTAGTCGATGACGTGAACG  
CATTTAACGGGGTGCTGTTAGTCACCGTATTACGTTGCGACAAGGTCATTGATATTGTTG  
AACGATCGGTCTGAGTAATCATCTCCAACGTATAGTTACCAAGTACCCAATCTTGGTTAT  
GGATTTGTAGCGCCAGAATCTTCCCTGCGACAGGAGTGTCTGCGTGGGTAAAGTAGTTAC  
CACTGTCAATGCTATATGTTGAAGAACTGCAAATCATGCTGTACGCTGCGGTGTTGTTAA  
CAACCAGCTGAATAGTCCCTGATCCTTAGGTTTTAACACGACGATAAATTCCACCACGAG  
CAAGCAGTTAACTAGATAAATAATTTCTGCCCTGCAAGTGTCTGTACAGAATACAGAG  
CCGCAGCCAGAAGGGTCACTTGATATTCTCTTAAATTCAAATTTGTCGTAAGTTTGTGCA  
CAACAGTGTAAACCTGCGTGTAAAGTTTTTCATCAAAGTTCCGGATCAGCGATTGATTGG  
TATCTGCGATTAAATCATCGAGGGCTGGGAGTGCAAAGCCGTAGTAATATTATCCATATT

GAGCAGCCACGGACGCCTCCTCCTTAGATTTTTGCTCTAAGAAGTTGCTATTTTTATGA  
TATTGAGATTTAGTTATGAAGGCTTATATTAAGAAATGGGCCCGAAACCCCTTGTTATTA  
AAGTCATTCCGCTGGATACTACGGGATTATTCGAAACAAGAGCCTTGTTATCAGGTGTGG  
CTGTCTGAATTGGATCTGCAATGTCCAGAAACAACGGTGTGATCGACGCAGCTTATTGAT  
ATGGCCCTCTGCTAACCGTTGTCTGGAGATCCGCAGCACCGGGGCCTGCGCCTGGGGTGG  
GAAGTTGCAACCCACAAGTTTTAAATGCACGGGTAGCCCAAGGTTGTCGGGTACTTGTAT  
CTGCGGCACACTCAACCGTTTTTGGAGTCAAGCACTGTTGCCTTGGTGAAATCATTCCGGT  
CAGGGTAAGAACCCCTGTCTCAACAACACACATACCACCGGTCGTCTACAGAATGATGT  
CCCCTTACC GAATTTCGTTACTTGGAGACAATCATCATTATCAGAAATGTAGGTCTTAG  
CAGCTACAAGCAGTATGACACCTCTTTTTCCGTTTGTCTTGGAGTGCTGAACCGCATCGA  
AATTACAACCGAATGTTGTTAACTGGTCACAGGCTACCTGACCGAACTGAGCGTTGGCGA  
AACCATTATCATGAAGGCTATTGATATTACTGATCACAGCAGGACACCAAGCTCAACGCT  
TTATCGCCCCGCCTGCCTCAGCCTGTCCAGCCTCATACTCGCCAATACCATGAAACTGTT  
TACTGAGGATGTCAGCAAGACGACGTTTTTGGCACAAGACCGCGATTTTTGAAAGTGTGGC  
ACTCAATGTCCCTACCCTTACATCGTTGGTCCGGTCATTCATAGCACTAACTGGAGTAT  
CTTCCAGTCCCGGAGCAGTACGTACATTTGCGAGTGTAAAGACACGGCACGGAGCAGCAA  
AGGTTCCCTGGTTCACACCCCAACCAAAAATAAGTGAATCGGGTAGCACCGTTGACCATTT  
CGGCATGAACACCATCAATGACATAGCCTACGCAACAATAACATACGACGCCACCGTATG  
CCTGCAGTGTTACGTGAGAAACGGATGCATAAAGATAAACCTCCACGTTCTCCACCTTAA  
CGTTACGGCAAAGCTCGGAAAGGATTTCATTGACGAACTCGACGCATCTTAACGTTAGGCG  
TAATGATCCCACTAACATATTGGTCATCAGAGGCGTTAGAACCATGCGGTCCCTGCCGCG  
CATCACCCATACCGATACCACCGTTAGGAGCGTGATTTATATTGTGGATGTTCTCGTTGT  
TAATTTCTTCGATTGTCAAGCCTCCCCCTTGATAGTGTCTCGGTACACCGTTATTCTCAA  
CAGCATCGCCTGTAAAATCGGTAAAGTTGAGACGGGCAAACCGTGCCCGAGTAACGGGAG  
CGCCTGTACCTTACTGAAGGATACCATACTTACAACGTCTGGACTCACCATACAGAATAT  
CAATTGTACGTTCTATAGTGAGGGCATGTTGTAACGTGATGCGGTGTCGGTATTGTTAA  
ATCATGAGGAGTCTGTAATGATCCGTCGCCACCATAATGGCGAGTACAAACACCTGTGA  
AGGTCACCCAGCGGAATGTGCTGTTTGATAAATCCATGTACCTGTTGCCGACAGTCTGGT  
TCAAACCTTCTACCATAACCATTCAACACCGTCGATATACACACTTGACTCAAGAACAAGGT  
TCCATCCCCAAGCAGGAAGAGCTTATTTGTTCTCATTGCGTATGCAGCTAAAGCTGATA  
CGCCCTCTGTCGTTGTTGGATATTTCCCCATAAATTGTGCAGGGGTAACAAAACCATCGT  
GTGAAAGAGCCCCAGTTCCCGCTGGTCCACCGATAAAGGATGAGCCATTCACACCTGCAA  
GGTCTCCCCGTACAGATGGTTCGTAACCTGACCACGCCCTTACCAAAAACCGCCTGTTG  
TCGCCGGTTTGGAGTCGCCAGGATCAAGTATCGGGTAAGCCACTGTCTATTGATCGAGCA  
TGTTGGGTGATCGGGAGATCACATGATCTTTGGGGCAGACGAGCGTCCCCCTCCTTGCA  
AGGTAAACAGTCGCACCAACCCGAAATGGGACAACATATTTGAACATGTTTATTTACGGA  
TTGCATCCAACCTGGTCAACAATCAGGTAGTCTCCCTCGAAAGAGACCGTCGCAGTCGGTA  
AGTCTGAGAATTTGACGGTAAGTAATAGTTCTGCCATTAATCCTCTTATCTTGTACGGT  
TTCTGCCCTAGCATAAAGACCAAATCCTCTTAACAATTCCCCGGCGTGAAAGTCCAAGA  
ACACCCCATCATGAGGATCCGCACGATGACCAACAAACCAATAGCGAGTCATCGGATGAT  
TCCGAGTCAGAATGATGTAGTTCTTTCGATAAGATCGTAACAACGTTCTGCTACCAAGT  
CGATGTTAGGGATACGATCACGCATTCCTGCCATCCCAAACATCTAACACCCCCCATGA  
ACATGGCAGACATCTGGCTTGTAAGTCATATTCTGGTGCAAGTACCGTTCCATAAGGGT  
TAAAGATGGTAGCAGTTCTGCCCTCGTTGTTGTCTTGGAACCATTTAAGATAAACAACCC  
CGTTCTTTGAAACGGTCAATAGCTTATTTGTAATAGCTTCTCCACGCTGAGAAAATTCTT  
AAGCGCAACGACAAACATAGAAGAATACACGGGCTTCATATCCATCCAAGCCTTTTAGT  
TGCAGTGCTACTTTGTGAAGGTGTTTAGCTGACCGTAGTTCTTCGCATCCAACGATCTC  
ATACGCATACCTGCGCCATCGGTCCCGGCATGACCCGATTGAAAGAGTTATAAAAACCACA  
TCGGCGAATCATAAAGGAATTCAGTGGTGTCAATCAATGGTGCCCTGTGGATGTTCTGAC  
CTTTGAATGAAGACGTCGTAGGCTACCGATACCCAGGGTACCGAAGACCACGCCAACCAT  
CGTACAGTGCCGTGTTCCGGGTCACTGATGTTGGAGGACGGGATCAAACCCGGGGTATAGC  
GGAGGCTGTTTGTCTTATAATCTATGATCGCACAGTCGCCAAGCTGCGCACTGTACGGGC  
TGTCCCCGTACAGAGTGATACGGAAAAACATAGTATAATCGTCCCCATCTGTGGAAGTGA  
ACAAGTCAGGAACAGCATTACACAGTACCAATCGATCTGTGCGCTAAAACCATCAACAA  
GGACGGAGTCAGGTGCCAAGTTAATCCGCTTCAGATTACGGAGATCGATTTGGTTTGGTC  
GTGGATCAGTTTCCGGATGATCTGGTCAATAAGTACTTAGTACAAAACAGGTTGTCTGTA  
GCTGAAGTGTAGTCCGTCGTCCGTTTGTGGCCGGGATCATAGCCCACCATCTCCGGTTGT

TTTCATCCGTAATCGTTATGTTGAAGTTATAAGCGTTAGAGCGATATGTAAACGCAGAAT  
GGTCTGATGTTTCGCTATCGGTCAGCCAGAAAATAAGCGTAGAACCTCCATCCGCATGTG  
TGATGAGGGTGCACGGTGGGTCATTAATACTTCCAAGAATACCGCTCTGGTACTCAAAGT  
CAACAACATATGTTGTCACCCCAATCCACAACCATAACGGGGTCAGTCACAATGTTCGTAAC  
CACGATCCGGAGGTGTTAAACGAACAAAGTTTGAGAGGTGGATATCGATTGATACAATCG  
AGTCAGTACGGCGAGGAAGACCACAACGGTGTGTCACCCGGCCTCATGCAGACTTCGTTT  
TATTGAGGTCTAGTTCGGGTCTGAACAAGAGCTCGTTGCCAAGGTCGTCCTTAACGGCGC  
ACTGAAAACGCTACCTGGATTTACCGTAAGCACGCAACGAGATCTCCTGCTGTTTCGAGGG  
AAGTTTGAGCAGATACTGCCTGACGAATACCAATATAACCCTTCCGGGGTCAGACTATACT  
TAGGGACCGCTCTTGAGGCGTAAGAGTAATCGTAGCTGATCCCGTCACTGTACGGGATGA  
TGGCAAAGGTGGATCTGCGGAAAAACTTATGGAAACGGTCAATGTAAGTATAATTGTCAC  
AAACCATCAAACACGCACGCCAGCAAAGCCCGCACTTTCTGGCTCCGGGGATCTGATACA  
TAACATAGTTGACAGCACACCACAAAGTTTCAGCATCATAGGCGCTGGCCTGAAATCGCA  
TCTCAATAGGTTTCGTTGACTGGTTCGGTTATGCCGCATCGTGTTCGGTCCATCTAGTGCC  
CACCATGCTGCACAGCGTTACATGATGCATAGTTGAATTTGAACTCTCCTGTTACCGTGA  
TATCTTTGAGTTGAACAGTCGCGCACTCCTCCTCTGGGAAACGCTCTTCAAGAATAATAC  
CGTACCAATCAACTTATCCGCCGAGTCTGTCAATGCTCCACTCCACATCCCACTGAGACC  
CATACTGATCCCAATTTGTCGTCCCATCTGCGTTAGCAGCATATAATGTTCCGATAACGC  
AGTTCCATCCAAGGTTACCAGCAAAGGCGAAGCACGCCTTGTCAAGCTCTCCTCCCAAT  
GTGGTGCACCATGAGGAATAAACGTCTTACCATTTGACCATGACATAACGGTACCCGTAC  
ACCCACCGTGGGTTGGATATCTATCGTATGTCAGTCTGTAATGTGCAAGCCTTGGCTCTT  
TCCCGTTAATGCTGCAGTTCGGGGCGATACACTGCCGGCGGGTCTGGGATTGGCTGGCCAG  
CAGAGTCCCAGTCGATTTATGCTTGCCAAAAATCTTCTGCAAGTTCGCCATTTCCAGGGT  
CGTAGTTAGCAAGATATGCATATGCGCAACCGATGATCCAGGCAGACTGACCCTCGGTCT  
TTGCATCACCGTTAGGCTGGGCTTCTTGAGGGCGTTCAGTTGATAAACTAACTGTTGTTAG  
CCAAAAAATTCTGTAAGTTCATGATGTAGAGCAGGGCTGTGGGGTCAATGGTCTCTACCT  
TGTTTCTTTCAAGGAACGTATGTGACCATCGATCAATTGAATAACATTATCAACGTTGT  
GGCGTAACTGTACAACACTCAACTCCGTCCATACTAAGGGAGGGCGTAACACCTATTCCC  
ACCATCATATGTGACGGACTGAAAGATGTCTCTGACCCCGTTTTATAAGACAGAACTGG  
AACACGTCCATAATTCTAATTAATACTACTGGCCCATGAATCCAAATTCGTCCAGCTACC  
CTGTGTTAAGGACAAGGTAACGACGGTGATACGTCCTGCCCGTTGATGGAGTGGTAAT  
TATGACAACGCACTGCCCTCCTGTGAAGTTGGCATCAAAGCATTACCCATGTGAAGGTT  
ACATGTTGGAGTCCCTTGGTCAATGGCCAACAACGACAAATTTACCTGGTCAATCCGCCGCC  
ACCACTGGAACCAAACTCTTGCCAGGCGTCTCACTGATGCCGCTGTGGTTGACGGGGA  
AGATGACATTGGAATTGTTTTCCGGTAAACAGCATTCAATGTGTAAGACTTACCATTCTG  
ATCCAAGTATGCAAGGTCCTTCTTGGTTTGACGGAACCCACCCTCCGAAATGAGGACAAC  
CTTCAGAAGACCCCAACGAGTCATGATGTTGTCAAGAGAAGCTATCCTGGTTGTGTCTGG  
CTGATCCATAACTACATAGTCATGACCAGATCCGGTGACGACGGAAGGAAGGTCAGAGCC  
CTTACCCTTGGAAAAGAAACATCTGTCATTATTCACCCCTAAGTGGTTATGGTTGATGG  
ACTTGCCATCGTCTGTGGTGATGATCTTATTCTAATCATCCAGTAATCTACCAACCGGAA  
TTGGGTTATCCATATCATCCCCATACCAAGTATTCCATCATGTAGCAGCGCCAGTGCGAG  
GAAGACAGAAGTTGATCAAGTAATAAAGTTTGTGTTGCCAGGTGATCTAACCATCCTCAT  
CAAAAAGAAAGGTTGCACCTTCAGCATGGGTTGGGTAATTATTCTCGTCTTGACCTACCA  
AAGAGAGCCTTACCACTTCTGTTCTTTGATTGTGCCTTAATAAAAAGAAATTGATAACTCC  
GGGTTCTACTATCCATAGTGGTATAGAAAGAGGTGATTTTAAACAATGACAGTTTAAACAC  
GGGTTACCTCCTTGAGCTTAGTGTCAATGACAGTCTACATTCCTTTTTTCGCTTAAATAAG  
CTCGGTATGGGAAACCAAATGTCTCATAGTAACACGCGTGACCACCCCAATATTGAATC  
ATGGCCCAGTGCCTGACGAAGGTTGGCTTGGTTTGTCTCGATAAGATTACAGCCACGAGC  
AGCCATGAAGGTCTCATTTTACTGGGTCCATAAGGATTTCTGAGTAAAGAGTTGCCATTT  
ACACCTCTTAATTGTTGGGTGGGTTAGTATTATGAGAACCACCATCATCTGTCCATGTGT  
AGAGGTGATTATGACGGACAAACCAATCATAGAAATCATTCATATTACACCTGGTGTG  
TAATAATGTTCCCATCTGCTGAAATTTTTGCCCGTTCACTTCTATGTTCCCATCCACCT  
TTGCCGTCGGTATTGCTGCACCATTTGGTGAAGGACATTTACCTGTTTTATCAACAATGA  
ACGTTCCAACCGGACCAGGTAATGTAAAATCGCCTTCAGGCGTCATGGATAAGGGAACCT  
CGTCTACCACAACCTCAACTTTATTTGTGTCGATAGTGATGGCGTTGCCATCACTATGAA  
CACCGATAGTGGACGACCGTCGAAAAAGTTCGTGGGTGGTCTTATAATTAGCGTCACCTT  
CATTCAGCTTAGAGAAGGAGAGACTAACCACGTCACCAGCCTTCACAGGAAGCGTCAGGC

GAGCTTTTCCTCCCTTTGCTGAAGGCATGGCTAGCGGGATATCGAAAACCGCAGAATACG  
CGTCAACGGTGCCATCGTCGAAGTTTGTGAGGCTAAGAGTTGGACAGTGGCAGAAGGTA  
TTCCGTAATCCGCATCAACCCCGCTTGCCTTAGTCCTGTGTGCGTGTGCGGAGCTTGCG  
TTGTGAACCATTTGGTTAAGCGCAGCGTCCATACGATGAATTAAGGTCATTACACCTCCAC  
TACTCGACCACGGGTTTCTGCTAGACCGATCTCAGCCATCCAAACACCACCCTCAAGTTG  
CCATTTGTGGGTTCAGGTAACAACCTTTAGAAAACCTGTGTATTTCTGACTTTTCAGGTA  
AATCGTGCTTCCAGGAATGATCGCACCCGTAAGCTCTGTCACCACAACAAGACGTGCGTC  
TTCTCTGATCTCGGAACGACTTGGACCTTTGTTGGTTTTTGGTTTTCTTTTTGGGTCTACA  
ATTCTTTTCCAGTCTACGATTGACTGGTTCAGGGTTTTGAGGGGTTGGTTACTAATGCAT  
ACCTGACTCTGCACTGCTCTCAAAAACAGCCGTCCTAAACCTCTTGCCTTGTGTTGTCAA  
GTCAACTGCACCATCTCGACCACTGAATCTTGATCCAGTATTCTTCGCTTGCCTGTCAAG  
ATTGTTTCGAGAGTTACGTGCGGAAGGCATTGACTGCTGGAAAGTCTGACCACCTAACTT  
AAGAACC GCCGCACTTGGTAATTTCAATTCTGAGATTATGTCGTTATCAACTGTACCAAG  
AGGAGTCCCCTCCCTAAAAGACCTAGCGCTCTTTGCAGTCATAATGCTGGTCGTTGCATC  
AACCAGGATCATCTTTGATTGTCTCGTGTGTCCATCCCTTTCATCCCGGACAAACTGCAC  
TGTTCCAGAAAAAATCATTGGTCTTGACCATCAAACCTCCGTCTCAAGAACAATGCCAAT  
AGACTCCCCCTGGTTAGAATCAAGATAACTAACTGATTCGTCACTCAGGTTATAAAGCGT  
GAGATATCCTTGATTGGGTCTATGGAGTTATCCGTCTTCCCCTCAAACCTCGATATTTGC  
AGTGCCTTTTTCGTTACTGACAACATAGGCGTTTTTTGTTTTCTTGGTCCGTATAATTAGA  
GATGTTCTTTGGTTTTCTGTCCAATATAAACAGGCTTGCCCACGGTGAGTCAGAATATACC  
TGATCTGTATGTCGGCTTCTGTTAATCCTCGTCTTCAGTCACCTCGTCGTCAGGAGATGA  
ATAAAGGAGTTGCATGTCATATAAGAACCTGATATTGTATCTTCGCACACGTTTGGTTGA  
CGGCGTGAGTGAAAAGCCACGCACTTGCCCTGATGAAATGATTTTCGAAATATTTAGAAGT  
GCCGAAGATGTCGAGAATTGTTATTAATTTGAAAGAGATCATTGGAACAGTGCCAAGATC  
CCCTAATGAAACGTTCCAAGATTCGTCTCTCTGGTTCCTACTGGAACCTCATCTCGTATGT  
TTGACTGACTATTACCTCACGCATAGTTTGGTAAGCAAATCCGCCGAAATCCCAAGAGAC  
TGTGATCTTTGACATTACTTACCTACCGCCTTATCGTAAACAACAATGGAGCCTTCTGAA  
GTCCTAATCCTACCATCTGGGGTCATCACACCAACAACCTTGTCTTGTCTAGTAAAGTTC  
CCATTAACCATAGATTCAGCAATTGCTGACCATAGATCTTCTGTGGGCCAGCAAATTTG  
GTTAGTCGAGCACTGACTTCAACCTCATTGTCCGGTAGCTGAAGACCACACTGACCCTTTC  
TGCTTGATTTTACCACCAAACCTATTTGGGGTCCGACTAGATTGTCGCCATCGCAGTTTTG  
CCAAGTATGAAGGTGCGGAACCTCCTAGAACTCAAGCTGGGAAAGCAATACAGCACCATGA  
GAGTTGCTCCGAGAAGCCTCCATCGAGGTTTAAATCTTATTCTCGATGATCTTATCGCAA  
GTCACTAAGGTAACGATCTGACGATCAGTGGTAAGTCTTTCGAGGACCTAAAGTGCCTTC  
TCTGGGCTGCCTGAGGCAACCGAGTTTTGACCGTCTGTATCTTTATCAATGTAGCCGTTT  
TGGATAAGATAAACAGGAGATTAGTTCAGCCTTTGACTGAAAGATAGTTTCCCATCATCG  
ATGGCACCGTGGGCACTGAACTTTACCTTTTCTTACCAGCGTAAGATGTCTGATCGACG  
GTCCTTGTGTACGAGTGTGGTCAACAACGTCGAAAATGATCGCCATGTTGTTGGTGTG  
TTATTGTCTTTGAGTTCTACGTTTCGGCCGCGTAGTTTAAACCACTGGCGAAGATCGTA  
TATGGCCCCTCTCCGCTGGCTTCTTGGGCTGCGTTGAACTTTTTATCGACGTTAGCCGTA  
GGCATACTTGTTCGGTTTGGACTCGTTGTTGGATACAAATGCTATGAGTCCACCCATT  
ATACATATTACGATTTTATCATAAATCTTAAGATATAAGAACAATAAAGGGGCCGAAGTC  
CCTTTAAATTATTGCGGCAGACTAAAGATTAAGTTGCTGTTCCACATGTTTGCAGCTTCG  
TTCTGCTGGTCGATCAACTTCTTCAACTCACCTGCATCGATCTTACTGTGATCTTTCCA  
TTGACATGTTCCGGTAGGAATGACGCTGGGAGCATATCCTGTCCGAGCAGCACCAGGCATC  
ATCGAGTTATGGTTCAGGAAGTTTACTGATCAGTCATTGCCCTCTGACCAGTA  
ATAAAGTCAACAAGTTTTACGAATCCACCAGTTTATGTAAAGATTACCACCTGCGGTTGTA  
TCTGTGCCGTATCTTGAGTCACTAGACACTTGATCATGGTTCGAAGACATAACTCCCGGCA  
AGCATACTTACTCCAGCAATCTACCCATACAGACCAAGCCAACGTTCTGCTTTACCACC  
TTACCGAGGCGTGGACCATTTCTTTTTTTCATACAGCTGCCCTCGCCACCATCATCATGC  
CTACCCTGAAGGTCGTTGTCAGGGATTTTGAAGCTCCGGAGAGTCCAGTCATCTTCGAA  
AGAATTCCGAACATACAGATCAGAACAAAAGCAAGGAACAGAGCACCACACATCACCT  
ACGCATTTCCATGCAGAGGATAACTCCTCGCCATTCTTATGGCAGATCGTAATGTAACGG  
TCCATGAGGCCTTGGCTAAGCATAAATGTATTGTAAACGGTAAAGATCATCTCCATGAAC  
GCCGCAGTGAACCCATGAACGAATTGTCCCCGATTGTGAGCCAGCTCCCCGCTGGAGTCA  
AGGATTTTTGCAAGTTCATTGAACGGGCTTGTAAACTCATCCCCAAATCCGCTCTGGAAA  
ACTTTGTTGTGAAAGTCAATCCATGTGAAGGTCGGTCTCTGCATCGCAATACGGTTGCCT

TAAAATGACTGTTGTAATTCACCACCTTAATTTGCAGCCTCGGAATAATACTAGCCTACA  
AAAAGTAGGACCTTCGCAGCTAGCAACTCGCCCCTCTGTATCATATCGAGCACCTTGGTT  
ACGTCGATGCCGGAATCATTTAAAGCCTCTTGGCAAGCCTTGACCGACACCTGTAACAT  
CCAGGAGTACCTTCAGCAAGTTGCTGCTTACTCCTTCCGCCTTGTCTGTCTTGACCC  
AACATCTGCTGGATTGCGGTCATAACACTTTGGTATTTGACCGGCTCAACCCGTAAGACA  
GTAGAGTATTCCGAGAACGCCTTGAAAAGTTAACCGATCAGTGATTTACTAAGAACACCA  
TTCGATGGGATTGCCATTTGGGTGTAACACTGCGATGCAATCTTGAGGTCAAGAGCCAAG  
CGTTAGACCGGTCACGACAAAACCTTCATGCGTTTCCCAGCTTCTTTGGAGCTATCAGAA  
GTCATTAACCTGGTGGCTTCCATGCCATGGAAGAACTGACCAGCTTTAACAGCCCTTGCA  
GTGGCATTTAATGCACCGTAGGCTGCCCTAACGCTGATTCAAGTGCTACGAAGCGTCTTC  
GACCAGTCTGTCAGGGTTAGAGTACTCGCGTTTGCCGGCATGAGTCCAGTCGCCAGTGCT  
TGAAGTTCAGCACGCAAATTTGAAAACCTTCATTGCATTACTGTCAAGGATGCGCTCTTTG  
AGAGCATCGTGACCATTTAGGTTTGACGCACAATTGTCACAATATTTAGCACGGAGGTGA  
TCACCTGCGTATGCAACCGTAGGTACCTTGCCCTGCAAGATTACGGGAATGAAACTGATCC  
TCAGCTTCCATTTTGTACGGGCCTGCTGACGGACGCGGAGTTGGTCTTTGGTGACTTCC  
TGTTCAACGCTTGTGCCACCTAGCATTGACGAACCTGTGCTGCGGGTAGATCTTGGTCG  
AAAACCTTTGTTTGGGTTACCAACGATGCCGGTAGCATTTCGGGCGTTCGCGCGTTTTGAT  
AGTTTCTCTTGGAGAGCGGTTAGACGTGGAGCGGAAATTGCTGGATTTGTGCCGTAACCA  
GCACCTGTCTTTTCAATCTCACGGAGACGAGCCTCTAGTCGTTTGTAAATCCCCTTGAGAT  
TCTGGGGATGCTTGTGCGTTCAGTTGACCAACAACCGGCTCTATACGGGGCTTTTGAATT  
TTGTCGATTGCTTACGGGCGCGAGCTTCTTTCTTAGCCATTGCAATAACATGTGCTTTA  
GTTTTCGTTTGTCTGTCACGTTCCGTTTGTATGTAACCTTTTGTGACTAGGCGTGCCCGC  
ATTGCAGAGCGTCTTAATGGTGCTGATAGATCCGTGTTACTGGAAGAGTACGCCCTGCCA  
GCTTTTTCCATTCACTCTTCAAATACTTCACAGCTGTCATTGCAGGACCGAAGTAAGTC  
CCGTCCACGTCCAAGATCACTTTGTTGACTGACTTGGTTACGATTATATACGCCACTGAG  
TCCCTCTTAATAAAATAGGCAGGCTCCCGACAAGGAGCCAGGCTTGAGATTCACTTCTTC  
TACCACGGCGCGCCTGTTTGCAGATTGATAAGCCCTTGCTGTACTTTCATCCTCTCTTC  
CGTGGACATCAGAAACGAATTCTTCCACATCGAGGTATTCATTAGCTTGAGCAGATAGG  
AGACTTCAACAGATTAAGGGAGCTACAGGATTCCTTGAAGTTTTTCAGAGCACGAG  
TCCATAAGTAGTGGTACCAAGTCAGTGAGCTGCTTTTCTTCGCATCATCCATAGCTCTCA  
GGACGACTTTCGGAATTTTGGACGGTGTTACACCGCAGCCACTTCCATTGCCTGATCCTC  
CGAGTTCACTTGATGGGTGTGTCACGGGCGTCCCAGACGTCCCTGAAGGCCTGCGAAACG  
GTCTTTCGTGAAAAACAGCCGTCGTTAATTTCCAGAAATTTAGCAACGAGCTTGATGAA  
GTCCAAGATTTTGTCTTGGAACACAGCGTCAGTATCTACTGTACCCGCCATACCATGAAC  
GGATACATCTACAGGAAACAATGCAACAAGTTTTTTCGAGGTCATATTGATCCATCGGTTT  
AAAGAGGTATAGAATAGTTGTAGGGAGGGCATCAATACGGCTCTGGTCTCAAGTCATCAT  
GGAACCAGAAATGGGTGCCACTGGGACGGCTGCAGCACTACCGATCTTCGGAAGGTTTGT  
CATGACCTTCGTTGGAAACCAGTGCGGGATGATTAAGATGTGACTTGCAAGGTCGATTTT  
AGTAGTCGGTCAAATATCCTTGTACGCTCCTGCGTCTTTCTGGTTGCGTTATAGATGCGT  
GTATAAAGGTCACGTTCTGTGGTACACGAAACACTTAAACGATAACAGTCAGGCCAGCA  
AGTCGGAAGCCCGCGGATGACAAAGTAGCTGGGTTTAAAGTAAGCATCAAGGATACCGATT  
TCCCAGTCCATCTGGGCCCTTATGTGCCGTAGGTCAGGTCTGGTTGGTTTTGAATCCAA  
TCGATGGTGCTGAGTCCTATACCCTGAGTACCTTCAAGGAGGACCGGGTAGAAAATCAGT  
CTCGTGCTAGAGGCTTGTCTGCCAGTTTGCAGAGCTTCCGTTTCAAGAAGCAATGTTT  
TGAAGGTAAACCTCATGAAGACAGATTGATTACGCGACAGTGCGGGCGGATCGCCCAGCA  
TCAACCCCATGGGGGGGATGATGTTATCTTCGTCACGGGCAACGACAATTTTCGTATCT  
GCGGGCAACAGTCACACGCTGTGACATCAAGAACAGTTTACTTTTTTTGGGTCAGAC  
GCATACCGCGTTAGGATAGCTGTATCCATATATTAGATTCCTACTGTTACAGTCTGACCG  
GTTCCGGCCTTAGACCCTGTTTTTTCTAACAGAACGGTCATCCGGATCTTAACGAAGAGC  
AAGGGCATGTTGTACACAAGCTCCACTTTCACATTGTTTACAGAGTAGCAGCAGCCAGATCG  
CTAGTCGGGATGATCGCATGATACGGGATTGTGCTCACCGGATCGTAGAACACTTTGTTA  
ACGTCATCGTATCCGGTGAGGTTAGACTGCTTTGCAATACCTACGTCGATCGGGTTGTTT  
ATTATGACAGATTTAGATTAGGAAGATCGTCATCACTCATCTTCATGGAGAGACCCATG  
TTAGAACGGCGAGACATGTATCCGAACACACTTCTTCTGTACGGAATCTCAGCCAGGTA  
CCGAAACGGACAACGTCTACGTAACCTACCAGAAGCACACTTACCTTCGTATAAGGAGCCA  
ACAATGTTGATCATTCCGGTAGACGTTTACAGATTCTGGTTCCAAAAGGTGATGCGATCACTC  
ACACTCAGAGTTGGAGCGATAACACCTTCCATTGTCTTACAGGTGGATTGAGTCACCATAA

GAAGGGTTGCTGGACGCCATTGCACCGATACTTCCACCCTCTGGGAATACGCGATCAGCA  
AGATGATCGTACAGGCCGATGGTATTAACGTACTGCAGCGCTTTCAGTGGGTTAGCAATG  
GAATTGCTAACAGAAGTCTTAACCAGTTCGTCAGCAGTTGAACCAACGTGCCGCTTTTAG  
ATTGCGTCAGCGAAAGCAACAGCACCAAGGATTGAAGCGTTGGTGAGATATTCAGTGCCC  
AGGAAGTACCAGTTATCAGCTGCAGCCAGGACTTGTGGCAGAACAGACGACACAGTTTCA  
CTTAAGGAGTTTGTGATGGTCATATTCCTCGCTGTAACAAGCAATACTGCAAGTTAAATCA  
TTTTTTGGCGCGATGGTTACAACGCCTGCGCTTGCCGTAGCAGTCAGAACAGTTGTCAGG  
GGTGCATCACCATTAAGTGCTGTTGCCAGGGCAGTTGTCACAGAGCTTGGGGTAGATACA  
CCAGTCACTGAAAGAATATCGCTCGACTGATAAGCTCCGAAAACACTACGTGCAGAGCGACC  
GGTTTTTCGGTCTCAGTGTGTTGTTGTCCTGTGAAGTCGACGATGGGATTGGTAAACGCT  
TGAGGACTAATCATCAGGTAAGTGGGACGGAATGTACCAGAATACGCTTTTGTGCAAAG  
GTGTAAGCTGGGGAACGTGGAGCGAATCCATCCTCTACAAGCTGATCGAGTTCGGTATAA  
GCGCGAAAAAGTTCAGGAAAGGCGTTGTGGATAGACAGGAACAGCGGGGTTTCAGACCCT  
TTAGTGTCGATTGGTTGAGTACCACGCGTGACTGTAACGTCAACCACCTTGTCAATTATAA  
CCCCTGGGTTTCGTCTACTCTATTTGTGTACACACAGTTATTGACGAGCCGCTCTTTGTG  
CTGTATTCTGGGGGCTTGCGCCCTATACTATCACTAATAAGCCAGAGCTTGTCAATAA  
GGGATTGGTTTTCTTTAGCCTTCCGCTGGGTAGGGATAAAGGAGTTCGGTGTGATCTTC  
TCCAGTTCCTCGAGAGCACAGGGATCTGATTGATGAAGGACACCTTACATGTGTTCAAG  
ACTACAGCACGGGTCTTAAATTTCTGCATATGCAATGGAACCTTAAACGAGAAATTGTC  
GACGTTGACGAGAATGCAAAAAGGAGAGTTGGTCGGGAAATATTTGTCATACATGAACGGT  
GGGTTCAATTGCTTGCAATACGGGGCTTAAAGGCGTTGGGAGCTTTACCACGGTAGGCTGTG  
AGTGTGTAAACTACCTAGTAATTATGCTCCTTTCTGGCATTGCATTGAGTATCAACATCT  
TCGTAGGACGGCCAGTCAGTCTGGTCAACTGCCGTCAGGTCAACAAGAGAGATTCACCA  
TCCACTTTGGGAATCTCGTTTTTCAGCTGCCATGACAACGTTTCTTTCTGCGGTTTTCTTA  
CAGAATGCGCCCACTCTATTGGTAAGGGCGTCAAAGATTTTCATCCGGATTGGAGAATCAA  
GCCATTAATTCCTCCGATCGTCCCTTCGGGGACGGTTACTACGTAAGCTCCGAAACGCG  
CGACACCTGTAGTCTGATAATCATCAGATTTAATCACAGGGACCCGACCATGCCCCAC  
GGGAATAATTCAGAGTGCTTTGGTCAGCAAGCACGTTAGAGCCTTCAACACAACCTTTGA  
GCATCACAGAGCAATCAACGGTGAAGGAGTCTGAGTGTCTAACTCCTTCCCTGCATCAAT  
GTGATGTTTAATCTCTTGCCGCCTTACCTGTTAATTGTTGGATAACACACTCAAGAATAT  
CAAACCTTTCAGACTCAAGTTCAACACACTGGTTTTTCGTACGGCTTGCTTACGTCAACTT  
AGGAATATTCTCTGTGTCGCGCTGTAAAGGTTGGGCGATGTATTAATCTATTTTTTCCAA  
TAAGTCTGTTACCAGCTAATATGCCCTCGACCCTCTGCTGTTGGATACTCTGGATGTCGT  
GGACTCGATAAGGTCACCATAGTGGTACCTCGCCTCACTGAATCCCTAGTCATCGGCCAA  
CGCATCAGATAACAATTCTCTTAGGAAACAAACCGGAGTCGATAACGAACTTTTTCTTTCT  
AGCAGCTGCTTTGCCGGTCTTGTTGTGCATTGGTGTGCGGATTACGGCCGCCTGAAACAAC  
GTACCAGATATGTTCTTTTCGGGAGTTTTTCCAGTTCATATTGAAGGCAACTGCTCCGCT  
TGTCATAAAGGTACGGGCAGAAAGACCATTCCAGCCTTCTTGATGGATTGCAGCGAGCGT  
TGCAGTTTTAAGACCCGAGTAGTGAGGGTTCGTCATAATAACCATATAAAACCTGACGCGA  
ATATAGTTATTACGTTACTCCGAAAAAGTTCTCACACTTGCGCAGCTCTTGATACATGT  
GACTTTTGGTCTGATAGCTACATCCATTTAGGTATTATAACCACATTCTCTTAACAAAATC  
AACGACCAAGCGAAGGATAAGTAACGAGTCCAGCGGTGATGGTATCTCCGAGGAAGTCAT  
TGTACACCTGTCTTGGGGCCAATTCCAGCAACATCGACCCGACCTCTTGAGTTCGGGCTC  
CCTTTCACACGCCAGTGTTACGATGACGGACACGACCAATGAGGACTGAACTGGAAACC  
GCCGTGAGACAACCGTCCACATTTTCGGGATTGGCCTGTAACCACCTCAGGAAATCTGTC  
CAGTTCCTGGTTTGGAGAACCGCCATCCACCTGGATTGTTTCGTCACCGATCTTTGCCAAG  
CGGTCTGAGATAGATGCCTCTCCAGATTTTACTTCTTGAAGGATTAAGCAACGTACCACA  
TCAACGTGCGGGTAATTAAGAACCCGCCTCATGTGGCAGGTTGTTGATTGACCGTTGCGC  
AAGTTTGCCTTAACCTTCTCGAAAGTCAGAAATGCCAGAATTGTTTCGCTGTTAAAGC  
ACTGGGGGTATGGATCCGAGGAGCAGTGGAAATATACGCAATAATGTCTTGGTCTGTCATT  
TTCGCTACTGGTGGGTTGCTCTTCTATGAATCAATATCTTATCACAAAATAGTCTAATTG  
TCATTAATAACACTTGGCAATACGTTAAGTTCTGTTATCTCAAAGTGTTCAAACAAAACCT  
GGGGAACATTCTAGGAAACGGACTAAGGCAGTTATCATTTGAATTATCGCTGGTGCCCTT  
AACGGGGCGGGAGCTTGTCCGTATGTAATGAAGCATCCTGATGTTAATAACAACAACCA  
TTTGAATCAATTTGGTTAACTTCTGAAGAGAAAACCTGCCAGCGTCCATCGACTTGTTCTG  
CCCAGATGCGACCAACGCTTCAGGAAAGCATACAAACCTGGACTCTCAGTTGTTTCAGACA  
GGTAAGATGGATGAGATAACCAGAACCTCGCGGAAGTATACCTGTATTTGACTGATGTTGCG



ATACTTTATGGAGCTGAAGGATGCAAAGGGGCTACATCTGCACCTTTTTTAAAAACGGA  
AAAGACCCCATGGCCCATGTGAATATGGAAGCAGGTTTAAGTAAGGTTCTAAAATAAGAG  
GCCCCGACGGGCCTTTTGTACGCCATAATCCCAGCGGATTGAAGTCTCGCTAGCAGTCC  
GTTAAAGTCTGTTAGCAGAGTTGTAACATCACTGGCTACGGAATCTACCTGTCCAGAAGA  
TTTCTTAACACCACCGAGCGTGGTAGTTGTTGCTGCGGCTAGTGTGTAACATGCACCCCC  
TTCTACGAGATCAGCAACAGAGATTACAGTACCAGTACCGACATCTATAAGTTTGGTTGC  
ATAAACACGACCAGCTACACCAGAAGTTGCCATATTTTATTTCTCCAGATAAGAATTAGG  
AAGGTAATTGCGGGATATCTTGAACAGAGATTGCCTGATCCCCACTATCAATGTAAGTCC  
AGTAAGACTTCATGAACTCGTAAGCAGATCTGGATACGGTGTGATTAAAGCTGTCATTT  
CACTATGGGTGAAAGCAGCGTTGTAACCATCGAGGAAGGGGAATTGATAGACATTTGTGG  
TTTCAGACCCATCTGCATCCAAAACGTTTTTGTATGCTTAAAAAAGTTGCAAGATCAATAC  
TCTTGTGCGCAACTTGGTACTCCCTGTCATCGTAAGGATAAGGGATAACCGATGATAAAGT  
CCCCGCTAAGAAAAGTTGGAGCATCAGCCTTTCTCTTATCTTATGCAGAGACAAGGGTGA  
CCGTACTTTCTTCTTCAGTCAAATCACGTACATCCCAAGGTTGTTCCCATGCTTGGATTT  
GGTCTTTGAAAGGTGGAGAGCCTTGAGTGACCGCATCTCCTTCAGACAGTTCTCTCGGAA  
TCACCGGGAAGTAACCTAACTCGACAAGGTTTTTCAGAACATATCGAAGACCCGGTGCTGA  
CGTTCGGATTATTCGCTCTGAGGTCAGAAAGATCTACCTGACATTGCCCATCAGACGTTT  
TGATTAGAGGTATCTATGCGTAAACTACCATTTACCCTCCTCGAGAAGGCGACTGATGCC  
CCTTTATTAATCGACAGTCAAAGAGGTTGTACCTGTCGGGTTTGTACGGTTCCAAAGGAT  
AGTAACAACCGTGCGGGTAGTTCCCAGAGTAATCGCTGTGCCGTTAGATCATGCTAGGTT  
GCCAGGGCACGTCATTGACGCACCGGAACCAGAGAACATGATAACGATGGTCAGTGCTCT  
GTTTGGCCGTAGGTTAGTGCAGCTGAGGGTATTGTTTGTGTACCGTCAACCTTGAAGTC  
TTAAGACACGCCAACATCCAAAGCCCCAGTCGTAGAAGTACCCAGAAGATCGTAACGATC  
AAGTTTCTGCCACGCATTGTCTACACGGCCATAATAGCCTGTATCTGCTGGTGCTTCAAG  
TACCGGAACATCAACCCACCCAACATATGCTCGAGCTTTCGGGATGGTAGAGGCTGTATC  
GTAACGTTTCCCTCAACCCATGTACCCAGAGAAGCCCAGGCGATAGCAGAGGTTCTCTG  
GAAGTATTCCAATGTGGATTTATAGATGAAGTAATCACCTATTCGCCCTCAGCAGGACC  
TGGGTTACGGGAGAAGTTTACCAAAGTGTTCCTTGGTCTACTATAATAACTGGATAACC  
CTGAATACCTTGTGGAGCCTGTGGACTTTGTGAACCTACATCGCCGGGACGACCTTGGAT  
ATGTCCCAGTTGACATAAGTGGTTTCAGTCCATCCCCAGAAATCTCCGTCTCTCCATTA  
TCCCTTACCAATCTCTCCAGTATAAGGAAGTTCAGTGGTATTACCGAGTTTGCCTAGGGT  
TTCGACCCCAGCACCCATCTGAGGCTCTGGTCTTGTGATGCTTGAGGGTCTTCTGAACC  
TGTATAGTCACCCATCTGTTCCGTTGCGGTCCCAGTGAACATAAGAATACTCTTTGTT  
CCCACCGGGAGTTACTACTACTTCCAGCGTTGTCTGGGTTTTGAGCATCAAGCAGGTC  
CTCATAAGACGCAATAACATCTTTAGCACTGATACTTACGCCCATCGGCCCTGGGTCACC  
TTTGATAACCAGGATCACGCTGTGGGCCACGCAAGACTCCGAGGTTTACCCAGTTAGTACC  
ATCGAAAGCAAAAGCTTCTCCAGTGTCCACAGTGATGTTATGATCTTCAGTTGCTGCGCC  
GGACGGCCAAGATGCTTGATTGGCTTCGTTATCTCTGGCAGTGAGTGCAACGCCCGTTGG  
ACCCTGTGGTCCTGTAGCCCCTGCGGGACCTTGAGGCCCTTCATCGCCCTGATGGCCTTA  
AGGACCCTTTGGGCCACCAGCCCCAGTATCACATTTGGGACCGACATCTCCTGTAGCCTC  
TCGGTGACCCTTCCC GCCTTTTGGATGGACGCATGCACCGAAGTTTATCCATTGAGCATC  
AGCCTGACTCCGGTCGTGAAGGATTGAAACTAGACTCCAAGCAGCGCCTGGCGTTCCTGT  
TGCAGCAAGATCTGAAACAGCACCGTGACTCCCAGGAACACGAGCACCATTACCTGTTTC  
ACCCGATCAACCTGCGGACGTTGAGGTCTTTGTGGACCGAGAGGACCGGTTAAACCAGT  
ATTGCCCTTAGGTCCCTTTGGACCGATAGGTCTTGGATAACCTGTGGTCCGTTTCCCTCC  
AGCAGGACCCTCTGCCCCCGCAGGACCTTCTTGGCCGTGGTCCGCCGTTTGGCCATTAGG  
CCCTTGTGGGTCGACATCACCTTGTTCACCTTTATTTCCCTTGACTGGACCAATATCTCC  
CCAAATGTCGGCACCTGACCAAACCCAAACGTGATTGCCCGTTTAAACAACCCATGCAGA  
GGGCACAGCGTAACCAAATTCATGCAATTCGTCTACTTTGGCTCTTGTTCCTTGAAGTTT  
TACAATGGCGGCATCGTTACCATGATCGCCAGTGTTACCTTTAGGTCCTTGATGCCCTGT  
TAAGCCCAGAATCCCTTGCATACCTTGGTACCTTTCTCTGCACGGTAACCTTTATCGCC  
GTTAGGCCCTGCCGTCCGGCGGCACGAGTAGCCCCTTGTGGACAGGCAGGCCCTACATG  
CCCTACAGGTTGCCATACGTCTGCCTCGCCAGTCCAAACCCAGATCTGGTCTTCGATGAT  
GTAGGTATCGCTTTCAGTATTACCTCGAGTCGGAAGGAGTCATGTGTCAGAAAATGCAAG  
CCTGACCACCAATCTTATACCATCTTGCCCTTGAAGTCAAGGGAAATCGCCATGATGAGC  
CCAAGCGTCTGTGCAACTGCCTAATAATGAGTTCCAATTACGTTAGTAACTTCCCTCTG  
CATGGTTGCCGCTGGAGGACGTTGGGATGGGTCTCCAATAATTCCTTGGATGTAATTTCC

AACACCCGGATCACCTTGATCACCTGGTCGCCCTAATCGCCGTTTTCTCCGGGAGGGAC  
AAATAGACCTTCTGCACCAGGGTCGGTCACTTTAACACGAACGTTTCTGGTCTTGTTCA  
GATAGGCATAACCATCTGTGGAGGAGTAACATAACAGCTTTCGACCTGCCAATAGGAGCAG  
GGTATCCCTGAGAGGGGTAATCCCGACAGAAAGTTCGTTAGGGCCACTTACAAGGGCGTT  
ACCGGAAGCAGGATCTACACCAACAGCGGCCTTCAGTGGAGTAGTGGAGTTACCATCACC  
GAGAAGTGTACTGTGCCCCGTCTCCTCTGTGCTGAATTGTCCATCGTCCACAAAGGTTCC  
TCCGCTAGTACCTTCCGGAAGGATAGGTCCAGCGTTGACGACCTTATCTTTGTAATCTGC  
CATTTTTAACCTTTATTTTACAGGCTCTAATTCTTCAAGCGCAGACTTGAAGTCAGCCTT  
CATGTTTTCAAAAACACTTGTTTTTAGCAAGGGTAATGCCTGTGGAGGGCGGAGAAGTTAGC  
AAGCTTTTTCTTTGCTCGCTTCCCTTGTGCTGACTTTATCGTTCAGTGCTTCTGCTTCAGCCGG  
AAGCGCTTCGTAACCAGCAGACTTCACTTTCACCTCTGCAGTCTTGAGTTCTTCACCTTT  
AGTGCCTACAATTGCCTCGACTGCCTTACCGCGACGATTCGGGTTTTGGATGAGCACTGTT  
GAAGAATACTATGTATGTACGCGTGCAGGGTAGAGTCTTCCGCATCCACATCAGGTCC  
AGTGATCTCAGCAAGCGCCTTGAATTACTCAACAGAGTTGGGGAAAGCCCTTCGATAGGC  
ACCGACACAAAAGCCGTTTCAGAGGTAGACGGGCATAATTACCATCATCCAGCTCGGGGGC  
GTAAGTACCGAAGAGTTTGAAGTATCCACTATGTTAGGGGAAATACGATAGTTTTGATT  
AGACATAGAATTTCCATTTGGCTACCTTAGTAGAAACCACTTGACACCGTTGATGAATTG  
GCTGTTATTAAGGCAGACAAATAAAAAGGGGGAGGTGACTAATCACCACCCCTCTTAGA  
GGTAGCAGTTACGCTGTCTTATGCGAAAGTACGAGTGGAGCGAACAGCCAGATCCGGACG  
GGTGTAAACAGACAGGAAGTAAGTTTCGGACTCACTTTTTCTTCTCGCAGGTATGCCGA  
AGATGTGTACCACAGGTACAGTTCCTGTGCATGAGTGTAGCTGCACGAACGTCATTTCC  
TGGTGCATAGTGAATCTGGAACATGTCCTCGATTCTTTGCGGCAGGATGTAAGCTCCACC  
GTCAGGGAAGTAGTTGGAGATATTCTCGATGAAAGTTACTTTCTTCTGCACGAACATCCG  
GTTGTTGGCGTGCTCTGCTCACGGACTCAGACGACGACGAAGCGTCTCTTGAGTAGAAGA  
ATAGTATTGATATGCGTTCATTACCAGCGGATGAGCGATAAGCGCTGAGAACCACTTACG  
AGAAGCCAGAACTACGATACTGTGGTTGTGGCCATGGTCACCCGCATTTTGCTTGATGTA  
AGCACGAGCTTCAGCTCCGAGAACGTCAGTAGAGGCGATTTCTCATTGGTGATGGCAAT  
GTTTACATGGTGCTGAGTAACACCCCACTCGGTGAAGTAGTTGTACTGCCCTCTCGGGTC  
GTGTGGTACCCAAGAATTACACATGATCGCCTGAAGCATTGCTTTTTCTTTCAGTTGTTT  
ATGAGAGATGCTGAGAGGACGAACCACACGAGCAACAACATCTCCTACATTCTTGGGAAT  
GTCAGTAGTGAAATACTTACGGAAGTCTGTACGTCTGCCGGAGTGATCTGACGATAAAC  
TGGGAAGGAGGGGATGTCGAAGCTTTTCAGTTGCGCCTGATCAATGGCGACGTATTTACG  
TTAACTCTGACGACGACGAGCCGGGAAGTCTGTTGCAACTTCGTCAACACGTTCAATCTG  
AGCGACAGTCGAAATACCGTGGTACGCGGTGAACAGGTCGATTTTGGTGATAAGACGGCA  
CTGACGTGGTACGATTTATGGAGTTGCGCCAAGTTCTACGATCTGGAAGTCATTAGGGCG  
TGCTGCTCCCCTTGTTATTTCTCCTTGGTCTATATTAGATAGACGTCGCTGGGATCTCATC  
ATAGCCGTCCCATTTCTCGGTGATTTTCCGACCTGGGCTCAAGCGCCGCGATAGC  
AGCAGCGTTGAGTGCAGTAGTACAGTAATCGACAACCAGATTGGATTTTTTCAGGGTTAT  
TCGACGAACCTGCCCAACGAAGTTGTAAGTAGTACCTACCACGAAGGCACGAGGAGGATC  
GTAAGCAGCAACTACACCACGGTCAGTGATAACTCCTAATGCGTCAGCAGCAGCGGAGGC  
GGCAATTGGATCGACCGAGGCGTTCACAATCATACTGCTTTCAGACCAGCAACGAACCTC  
AATCGGCATTTCCAGGAAGGTGTAGGCGTGGTCAGCCGAGTCCACTTTACCCAGAAAGAT  
GTCAGAGTAGTCCCATGGATTGGATTATCCATTCCATTAATCTCCTGGACTAGACGTT  
TACTGCAGGAGCTTCACGAACGCGATCTTTCGCGTCTGGATGTTAGACTGAAGCACGTC  
TTCGGCAGACTTGTTGATGTCATCATAAGTTGGTTCATCAACTTTTCCGTGTTACAGCAGT  
GCCGAACCCTTTCTTACGGTTTCAACTTCTGTTTCCAGATCGCTAATACGAGCTTGGGC  
TTTTTCCAGAAGAGCTACTACCGAACCGTTAGCGTTTTTCGATGATGAAACCTGCCGGCGG  
AGCGTAGTCAGCTTCATCGGCAAACGCGAAACCTTGTGCTTTAGTCAGAGCGGCTTTCTT  
TTCTACTTCAAAAAGCGACTTTGGTGATTACATTAGCAGCATCTGCTTTAGCTTTGGCATC  
TTCCAGTTGCTTAAACCCGGTGAAGGTTTTCCAGAGACTTGGTTACTTCGTAAACATAAGC  
GGACACAGCGGTCTCCTTATTATCTTTGGATGTATCGAATACATGGCGGGTACCTGCTTC  
TTTGACGACCCAGTCACCTCGAGATCTTCCGACTCACCTTCGGAGATGGTAAGACCTAA  
TTAACTTACTCCCTTTTTAAAGAGTTGCTGAAGCTTCAGAAGTTCACTGTTTAAACAAG  
GTCGACTTCCCTACCCGCTGTGCGCTGCCCTGGCGAGAGAGATTGACTCCATTCGCCCTAC  
CAGCCATTCCCTGGTGTGTGCGTTCCAAGCTTGGGCCCACTCATCATCAGGGTTTTCAGC  
GGCCTCATTTTTCAATTTTCAATTTTTAAAGCCAGCAGTTTGACAAGCAGTTCTCCATCTTC  
GCGCCACATATAAAGAACTCACGCAGGAACCTTTGAAACTCATGGTACCGGTAACCTG

TAGCTGCGCCTTGATAACGTCTTCGGTAACCTGATCCGGTTTCTGGACAGGATTCATCGC  
AACTGATACAGGACGGAAATTTTCAGAAAACCTTGTCTCTCATGGCAGAGTGCAGACACC  
TTTTTCTATAACGGAATTGGCTTATGCCGTTGTCATTAGTCAACTTCCTCAACATACTCG  
ATACGAGAATCAACGATGGTGATTTCTCCTGTTGGTTTGTCTAGTGATCCGGAAAACCTGA  
ATGCTCAGGCCCCCCACAATGTTGGACTTTTTAAAGGTCCAACAGTACAGGGTCGTTATCT  
TTAACTTTAGTTACTCTGGTGCCAGCCTTGATTACTTGCCCGGTCCCATAAACCATCACA  
TCAAATTCTTTCTGAATCCAAGTCTTCTGGATTGTGAGAGAGACCATCTCAATCATGTGG  
AAGACATTCTCTTTAACAATGCCAGCTTCGTTTGACGTATCAAATGTCTCCTTGGCCTGA  
GCGATTGTCTCAGCAGACATCCACTCGGCGTGAGAGTCATAGGCATCTGGTTCGTAGATA  
ACTCCGTAAGATATCATGTGCCCATCAGCGTCTTTCTGGATGCTCACAACAGAGGTAGAC  
TTATTGATATCAGTCTTAACATTCTTCTTGAGATTGTCTTTGGAAGCCTTCTAGATAGCG  
GCTCCAGGAGGTTGGCCTCAAGCAATCAGGCCATATGCACTACTCAGTACCTTGTTCTTC  
CGAACGAGAGACAGATAAGCCGCCGATGCAGGCAGATCAGCAATACTTGTGTATTTTCATC  
ATTTTCCCGTTGATAATTATTTAAACACCGTTCATTGTCAATTCCTAGCTATTTTCAGTA  
AGTTGAAATTAATCATCCATATTGGATACGGAATAGTCTCTTGTGGAGGAGATGTTTCCT  
TATCCATTAGCGTTAGAGCCTGATGACATAACCATCACCTGATCGACTGGTATCCTGACCA  
AGTAGTTTCAAAGTTCATGAGTTCACATATCCTCCGGGATTTCTTCGTTAAAACCACCA  
ACTTCAAGAATCTTGTGATAACTGTGGGAGTTTTAGGAAGATACCCAACAGCACCGATA  
CGCTGAACGAACATTGAGAAGCCTTCCATATCGAATTCTTGGATAAGACCTGGTATCAGT  
TTGGGCATGTTGTCTGTCGCGACGGAGTGCATTCAGTGCAGACAAGCTGAGGGATCATG  
TCCGTGTTGAAAGCCTCAACAATGATGTGATGTCACGGTTAACGAAATGTCCGTGGATG  
GACTGCTTCGAATCAGATAAGTTGGAAGCCCCCTAACCCAGCGTTACCAAGGTAGATGAAG  
CCGGCGCAAATCTGTGCGAGAATTGCCTTCATGCAAGAGCTCACCTGTTCCAGTGTACTG  
TACTGCTTACCTGCACCGTCAACCCCTTTAGGAGACATCTTGTACTGTTACCAGCCTGA  
GCGTTCATATCTGAGGGCAGGATGAAGTAGACTTGCTCACCTGCCTTAGTGTTTGCAGCA  
TCCGCCATCAAGTCTTGAACCTTTTCATATTCTGGTGATTGCGAGTCAATCGTGGCCTTG  
TGCTAGATATGAGAACGGATGTTGAGTTCGATGATACCACCAAATTTTTGGAAGCACAA  
ATTGTTTCGTCTGTCTCAATCAGAACCCTTTGTACGGAAAGCACGGTAACACCAAACAAGA  
GGCGCGACACCATCAGGGTTTAACTCTGTACCACCAAGACTCATCACCATCAGTTTATAG  
ATAGGAATGAACACTTCATCCGCAGAGGAAGTCAGATTAGTAACCAGTCTCATACCACTG  
GAGATTTTCGTCATACCGTTCCTGGAATTTGGCAATGGCCACATTACTCTAGTCAATTCCT  
TTCAGGGAGGTCCCATCCGGATCACAACCCAAGGGTTTGGGCGAGAAAGACTTGATTGT  
GGGCTAAAGGCAATCTTATCAATGGTGATATACCAGCACATTTATATGGGGGAGATTCA  
GTACGATACACCTTCTAGAAGATGGAGAATGGACTCCTTAAATGTTGCGGACTACGA  
GCCATATCGCATAGAGTTTGCTGGTTGGCAAGGTCCTTCAACGCTTATTCTGCAAGCTCG  
GCTGCATCTTAGGATGGCCACTGGCACGCTTTTACACGACTTTGATATCGTTGCACAGT  
TTCGTTACGAAAACAGTCTTCGTATCATGCGCCGCGGAGACAGTATGGTCCGGCTTCATA  
GCCTAGACGGTTGCCAGAAAACACGGCCAGCGTAGCTCTTCCACCTTCATCACATCGGAT  
CCTCCACGAAGCTATGAAACAGCATCAGAGCCTAGTTCCTGCGGTACGGAGAGGACTACCA  
GCAAGATTTTCGTTACCGGTTTTAAACCATCACGGATGGTTGTGCAATTCATGTTGACAAG  
AGTTAACCCTCTCTTATATTCTCTTGTACAAGGTCGGAGGAAGAATTTTCGGGATAACA  
ACAGGTCTGACGATCTTCTTCTTCTCCTAGAAATTAATACCGGAGGAACTGAATCCGCT  
CAGTCAATCTTAGGGGTTGTTGTGCTTTGCTCACCATTAACTTTTCAAGATCAAACATG  
AAGGCTTCAAATGTCTTTGCATCGAACTGCTTCTGACAATCCGCAGCATTCTTGACCGA  
GCGAGTATTGCAAAGGAGTGTAGCGTATAAGTATTGAATTATTCCTCGGCGTCGGGTCT  
CTTCAACCAGAAACCTGTCAGCCAGAATCTCACGGGAGCTGGTTATGCACTCCCTAATG  
CCTTATGGACCGGGTCAACGGTGAAGATGATAAAAACAGTATCCCCATCGTAATGGGCA  
TGCTTTTTAATGATATCCTCACGTTACCAGCTTTCATACAGAAACGGCCTTGCCTTTTCG  
GTGGAGTATAGACCATCATCAACAAACGGAGGGGTGTAATCACCTGAAAGATAACAACAC  
CCGTCAGAGTCTTGACTTACATTCACAGATGCATTAAAGTCAGGGTTTCTGGTACCAGAT  
GTTTCGTACTGTACCTGCCTTTTTGAATGGTCTAACTGACGTAACACTAAGTGGTTGCGAA  
GGAACGTCCTTGAAGTAGGATCGCTGGACATAGATCACACCTTCTGGCCGAACCTTCTG  
TTCCATGAAGTAGTTGTGCCATTTGAATTTTAGGAAGACCCTCAAGGAAGGCATAAAAA  
TCTGGGTAGTTGTCAAGCAACGGTGGGTATGGAAGGTAGTCGCACTGATGAATGAGAAG  
GAAAGTGGTTATGGCTTGTACGGATGTCCAAACCGTAGCAATATTGCTCAATAAGTTCC  
TCTGCTGAATCTCCCCAAAGGAACCTCGCCGTCACGACGAACGAACCTACGGATAATCCCG  
TCGCGCTCCGCTAGAGGGAACCATCATCGTAGAGATTCCACACAATTAACCTTTAATC

TTGTGGTCCGGGTCCGGGTAAATGCGATGGCCATACGTCTTGGGTCTATGGATTCAAGAA  
CGAAGACGAAACATGAGGTATACGATGTGAAACCCTTCATACTGTGTTCCCTTCGTCAAAG  
CCAACAAAGGTTTACTGTAACCCCGGGTGAGAATACTTATCTTTCTCGTATTCCATGTGG  
GACCATTTTACTTTAGCAACATAAGGGAAAATTGATTCCAGGTCTTTCTCTCTGAAACGT  
GGTTTCCATTCCGGATCAACCTGTGTATAAATCCCACGTGCTGTATCGTGCAGACCACCA  
CCACCCTTCAACTAAGGGGTGTCTCTAGGGAACATGATGCAGTTCGTTTCGTGCACGTTA  
GTGATATTTAACGGTATCAATTGAGGCAGGTAGGATTTACCGGACCCCGCCGCACCCCA  
ATGCTCAGGATTTGAGCGTTGATTTCCAGGATCATTTTCTGGGTAGGGCTGGCAGGTCCG  
ATTGTTTTACTCAAAGACCTCCAGCTTAACGGCGTAATTTGGGCAATAGGAGGTAGATG  
ACCATGAAACTTGATAAAAATAATGCCCTTATGAGGAAGTAAGGGCCTTGTC AATCGCTA  
CTGCGGACTAAAATTGTTAAGGACATATTGATGCCAAGTCCTCAACTTGCTGCGGTCGTT  
AGCAGCATT CAGGATGTTGGGCTTCATGAGCGCGCTGTTCTCTGAGTTAGAACCACCATA  
TTTCAGGGGATTCGGCTCCACAAGATCAACCATTGCGGCAGCAGCGTGTGTGCAAGAAC  
CTTTCAGGATCAAACCTTCTCAAATACCGGAACAATATCCGTCTTCCCCTGACAACCAAC  
CAGTAGGGTGACTCACATCTGCAGTGCCATCAATGCTGTATTCCTTTTACCCCAAGCTT  
TCGTTCTACATGTCAAACAACTGCTTATCAAGCCTTTTCTTCTTGGCTGCATCAGACCTG  
CTGAAAGCGTCTTGCTTTGCGTTACGCTGTGCCTGCAAGTCTGCATTTTTTGCCTGCTCT  
TCTGACTGTTTCCCTCTCAGGGATTTTGCTTGC GGTCCTGTTGTTCAACCTTGTAAGATTGA  
CTTTCACCCTTGGTTTTCTGTTGCCGATCCTTCCATATTCGATCTGTATTACTCAACCCT  
GAATTGGAGGACTGCGTGATCTGCTCGTTATACAAGTGCTCTGCATACAATCTCCCTTCA  
ACGAGTATGGCAAGCAGCATGACCACTGCCATTACCTTTACATTGGTCTTCAGAAACCTC  
AAAGCCATTT CAGTTTGTATCATGAGAATTCCTTAGGGATCGATTACCCGCTCGATAT  
TAACCAGAGTTGTCTCTTCATCTTCGATCTCTAATGCCGCATCATTCTAGGCAGTCCTGG  
TAGGGTCGTTACAGACACCTCAAGAAGGACAGCGCCAGGTAAAGAGGTTTGTCTCCCC  
ATCTCCCAGTTCTACCTTGCTCTCCCAACTCTTGTCTACGGTCAAGGCGTCCTGCCCGT  
CTACATAAAGGTTCAACACATGAAGGAAAACCTCGTCGTGGGTTCTCGTCCAAAAGACCAA  
CTTGGTTCCTTTGCTCTACAGCTTGCCCTCAGCAAGAAGTCGTCAGAAGTACTAACTCCCC  
CCAGAGTTTTAAATATGTCCTTCTAGTATTCTTTATGAGGAGTCTGTACAGGGTAAACA  
TATTTACCTCTTGAACATCTGACCAACCACCTTTACCGACCTTCTCAGCGTTCGTTTCAA  
TAACGGGCTTGATCTTATCACTAACACTATCCAGTTTATCAAATACTAGCTCAAATGAAA  
ATGGCCTTTCTTTATTGATAAGCTCTTCAAGGTTTCGTACCATAACATACCTCTCAGGTGGA  
CCTTGGCATCTTCCCAAGTTTCAATGCCCAAACCTAGAACCTGCAATGCAAAGCTTCATGT  
TCTCTCGCCGAAAGATTGTATAACCGTTAGCGCGTACTCATCAGCACTGAGA ACTCTCA  
TAATCGCGTTATACGTCTTGGGATTCAATACCAAACCTTCTTAGCGATGTGCTTAATGA  
AACTTCTGTCAAACCTCCCACTGCTCTTTTGCAAAGCTGAATGTCCCATATTTAAACGTAC  
AGTCAAACCTTGTCAAATATCATCTGTGCATCAGCGAAAAGATCAAGAGCGATAGTATGCC  
GAACCGGCAGATTTTTTATGGGTAAACATGACACTTTTATCGGTCATAACGATATTGTCA  
ATGTTGTCAATCGTACTCTCTTTAACCGTTTGGTTGAATCCCTTAAAATCCTCGATAGGC  
ATGTCATTCTAGATTGTTGCCAAGCAAACAACTGACAGGCGTGTTCGTTCGGTTTATCTCCA  
GATTTGATCCCAGCGGATTGACATAATCTTTAGAGCTTCCAGATCGTCACGCTCCATG  
AAATACCTGAATGACCGAGTAGAAAGGCTCCACTTATTAGTCGCCTCTGTAAGGGCTGAT  
TCACATTTCAAGAGGCTACGATCAGTCGTGTAAGCAAGGAAAACCTTGCAGGTTCTCCTAT  
GAAGGGAAGTAAAGGTCTATGTCGTTTACTTCTCGGTTGGAGAATAAGGATGTGAGTGTA  
CCACCCGCAACACTGACATCGAGGCGTTTAAAGGATCTCCATCACCCCGTTTGGAAATAAGG  
CGGCGGAGGAACAGGTATTCACGTTGGAATTCGTCTTTTGGCAAGACATGAAGCATGGTT  
TTCCCTTTAGTAATTAACCATTGTAGTGTACCAGAAAAAATAAGCCCCGCAATGGCG  
GGGAGAGGCAAAGGAGAGGAGATTGAATATTTAATATTATGAGAGTAAGAAAAGTGGCGA  
AGGCACCTCAACTCGTCGAGGGTGTCTTACCGTTTGCACAGCCAAGGCCTTCTTTAATGT  
CCGCTTAGTTATTTGAATGCGTAATCGGGACTCCAACCCGCAACCTGCGGCTTATGAGGC  
CAAGATTATCTATATATCGTTATCACTACCACGCGACTGTTTGGTGGGGCGGGGTGGACT  
ACAACCGCAGACCATCGAATCGTCAGGCAGGCACTCTCACAACCTGAGTTACAACCCCTAG  
TAATTGGTACTTCTTGGTGGCATCGAACCACCGACTCGTCCAGTGTAGACACAACGTA  
ACCATTGAACTAAGAATGCAGTAAAGTGGTGGGCGCCAGGGGACTCGAACCCCTGAACTC  
CGACTTCTAAGCACGGCACGCTACCAATTCATCAATCGCCAAAATATGTGGAAGCCCT  
ACTGTCTTCCCTGATCAGCCAGAATCCTTATCCAGCATTGTAATCGGTCCTGTAGGTCCTA  
TCATGAACCAGGGAGTCGATGCTTAAATTTGGTGGAGACTAAGAGATTTCGCACATTTCTG  
ATATACCAGGTGCAAGCGAGGTGTCGACTTCACGCAGAGCCATTCCCTGAATGGTGCAAG

TACCGGGATTTCGCACCCCAATTCTCAGCTTCGTGGGCTGTTGCTATGTCCTGGTGAAC TA  
TACCTACATTAATAATGTGATGTTCTTTACCCTTAACTGAAGCCAAGAAGCCATGCTCCC  
TTTGGCTGGCACGCGAAGTCTCAGTAAGGACACTCGGCGATGTTTCATGCTACCTGACATT  
GCGGAATCAGAACCACGAGATTAGATTTGATCAAGTGTGATGATTTGTAGTCTTCCAATA  
TCAGATATTTAAAATGGTAAGACCGGCACGACTCGAACCTGCGCCCCGAAGCAACCAAGG  
CTCCCACGCTACCAACTTCGCTACGGACTGTTTGTGTAAGTTTTAGTTTCTCATAGAAGCT  
TACAACTGGTATCACTGGCTCCGCAACAAGTTCTCTAAGCAAAGTTTTAATTCGCAAGGA  
AGTTGTATGGCGAGTCCGAAGGGGATCTAAGCCTCATTTCGCTCGTAGACAATGCGGCAC  
CATTCCCTTGTGACGCCATTGCCCCATAAAAATCGGCGACGAGTGGAGGGTTTGAACCATCC  
TTGAGTTTTCACTCACGGCTTAACAGGCCGTCGCCAACCACTAGGCCAACTCGTCATTT  
AACTACTTTATCAGATAAAAACAACCGTTTGCAAGAAGTATTTTCACTAATTTCAAATGG  
TGGGGGAAGAGGGTTTCGAACTCCCGATCCTCGGACTAAAAGTCGGTTGCTTTCGTCTTG  
CGTCACCACTTGGATACAGACCTGGTGTGGAGGAGAGTGGAGGAAACGAACCCCTACC  
AATCCCAGCCCCGACGGGTTCAAACCTGCTTCTGCACCGTTGGACGGCACTCTCCCTCGC  
GGAAGATGTCAGACTTGAAGTATTCTCACCATTTCGGTGGTAGTGTCTCTTTCGCAAAA  
GATCCCTTGCCTGATTATGGTTAATCTTCCAGATGTGGCGGAGAAGGAGACACTCGAACT  
CTCAAGCCGTTTTAGCATTACAGCACCTTTCCAAGGGGTTTTATCACCTGGCGATTTGCT  
CCGCAAATTTGGAGGCACCTGTGGGTCTCGCACCCACCTCCTCAACGTGACCTGTGCAAC  
ATCATCTCATTAAATGCGAGGGCCCCAGATGTGCACTATCAAAGAAAATGTTCTAATTTG  
ACAGGGCGTGGAGCATTCGAACCTCCGATGGCGACTTGAAGCCCCGATGCATTAGGCCAG  
CTATGCCAACTCCCTATTGGCGTGAAGGTTAGGAATCGAACCCCTTACGTCTGGTTTTGG  
GGCCAGCTTGCAGCCACTGCAATTATGTTACCCGCACAACGTTTCGCTCCCTGTACGGG  
GATCGAACACGCAACCCATAACTTAACAGGGTGGTGACTTTACTTATTTGTCTAACAGGA  
CATATCTAAGCGTCATATCGAATTCGAACCGACGCCACCGGCTTGGAAGTACATGATGCT  
GGACCTCTACTAATGACGCATAATTTGGTGGGAGTACCAGGCTATAGCCGTGGGAC  
CTCTCGATTATCGGTGAGCGCTCTACTAACTAACTATACTCCGTTTGTGGTGGCC  
CGCCCCGGATTGCAACCAGGAACCCCGAAGGACACGGATTTACGATCCACTGCAATCACA  
GTTCTGCCATTGAGCCAAAATCTTTAGAGTGGTGGAGGAGGATCAGCAAAGAAGCAGATG  
ATCAAACCACAATCTCTTCGATAGGTACAACTTTAGGAGCCCAAGCTGCTGTTCCCTGCC  
GATGCACCAAATCCCAGAACTGCCGCGATTAATGCGATAACAAGAACCATCAAACCCTAA  
TTCAACATATTGGTTTCCTCATATTAAGATGTTTTGGTTAACCATTTTGTATGAAAGGAA  
CGATGTCGGGACTGAATGGTTTTGATGGAGCCTTCTCCGGAACCTCATTTCAGTCATCAA  
CGTTTTTAGTTTTTCTTCACTTTTCATTTTCATCATCGAAGTAATCAGACATCTTTTCTT  
CACCTTTTTCGTTGACGACTCGGGCAATGTTCTCTCTGATGCTGTACTTGGTGTGGAAAT  
TCATCGTCAGACCACGTAAAACCTGGTGTGCGTCAGGAATCATGGGGATCACCTTTGTCT  
TGAAGTCAAGAAGATACTTCTCAAGCTAAATTGCGTTTGACTCCTGTTTTAACGGAAGCC  
CTTTTCTACGACGACGCTTTGTATGCTTTTGTATGCTGCCATAATTAACCCACCCATT  
CATATTATCAGAGATGATTTCACTGTCAAGGGTTATTTAACATATTTTACATTAAATT  
TAAAGCTTTTGAGCACTGTGAGGGAATTGAGCCCTCGACATTCGTTTTGCAGACGAAGCT  
GTTACCACTTAAGCAGCAGTGCTTGGACGAGGCTGCAGGATTCGAACCCACGTAAAGGAG  
TCTAGCAGACTGCTGGCGACCCGCTTGTCTAAGCCCTATTAATTCTGGTGCCCATGACGA  
GACGCGAACTCGTGAACACTTAAGCGTGAGATGTTAAGTCTCCTGTGTATCTCCATTTCC  
ACCACTCCTGCAATCATAATTCATGAAATAAGATACATCAATATCTGTTCCAAGAGAAGG  
TCCACCGAGTTGGATATGCTTACAATATTTCCCTTAGCAAAACCTCCACAAAAGGGACC  
AGTTTTTTTTTTCAGATCTGTTCTTCCCTTTGTACTTTTACATTATAAAGGTATAACCACA  
CCAACGACACTTCCCATTCTTTCCCTTTGCTCTTAGAGCCCTCTATTATGAGTTAGCCTT  
TCTAGTTAAGACTGGCAGATTAGAGATGTTGTTGCTATTCACATGCCCATCTATGTTGTC  
AACTGTTTCTAAATCTGGACCAATCTCTCTGCGAAGACGCATCTCCATAAGCTACTTTGA  
GTAGCTTCTTGTATTTGCACTCCGTCATAAAGCTAGATGATAACATGGTGAATGCCCTC  
ATCCCTAACATAACGGACATAAACTTTTCTAATCTTATCGAAATACATATGCGTCAACCA  
GTATTGACAACGGACGCAAAACATGTTTTAAGCTGCATGGTGACTCCACCGACCTCCGTG  
CACCTCGAACGGCGCTCTGCGGCGCCAAAGCTCATGAGACAGCAACGTGGCCTTTGTGCG  
TCAAAGTCCATTTGTTGGGCTCATTCTCCGCACAGAAGATTAGTCTGTGAATCAAATAA  
TCTGAGCTAATGCCCTTTAAAACACACTAAACATCTTATGTACGGGCTGAAGTCCGGAAT  
ATCGCCATAGTCTAATAGATGTACCGCGTGTGGCGAGACACTTCGCCTGTACCATTCT  
CTAATATTCGGCTCTCGCGATAACCAATCTTCGCAAGCAGCGCCAGTAGGTGCGTCTAG  
GTTTTAAGATGCTCAAACCCGTACAGAAGATGTTTGGTGCCGGATCACCTAATCGATACG

CCTATGTATTCTCCTGCCACTCCACGCTCGAGGGTATTTTCAGGTCTAGATGAACCGCGA  
CCTTGCTAAAGGTCTTACCCGGCATTTCGCTCCTCGTACAGGAATCCAACCTGTGCTTATT  
CCGAATCTTCGGACTGCACTACCAACTTGAGCTAACGGGGAATTGTTAGGTGCCCCAGT  
AGGAATCGAACCCACTTCTTCGCTTTACTAGGCCGTTCCAGCGCCTCTTATGCTTTAGGA  
GCGGGAATGCTGTGTCCGATCAACTGCGCGGAAGTGTGGTTAGCCATATCTTGTGAGCTA  
ATTACCTTTGACCCAGGATTTTCGATAATCATCGAAATTTTATCTATGTGTTTTGTAGGTT  
TAAAGATTACACGTTGACCTTTGAACTTTACTCTTTTAGATTTGAACATTGACCTATCCG  
ATCTCGCGATTTCGAAGTTAGTTTCGTTTCGGAGAAGCAGTCCGACGAACAGACGTCAAGGT  
TTCATACTATATCGTTAAGTTCGAGGCAGTTTGAACACCGGCCTCGCTAGAGGCAAGATT  
TATCCAACCTTCGCTAACCAAAAACAGCATTAAAGACTTTACCAGTTGAAAACAGAAATT  
ATGAGATCTTTTTTCATAATTTCCGCAATTAATCTTAGAGTGATCCATCGATGTGTGCTTC  
AGTCTTGGCATTGATGTCCGACTGTGCAAATTCACGTTGCAAGTGAAGTCTTCGATCTC  
TGCTTCAGACAGGGGATGGTGTCTGCTGGACCCTGAGGGTAAACGGTAGACGGGGCGCT  
GAACATGCGGGTTCGGACCTTCTACGACCTTCAGTTGTACAGCATCGGGAGACTTGTCCCG  
ACCGATGTACGGTTCGCGCGCCTGTTCCAGTTTAGCTACGAACCTCATATTCTCCTTGT  
CGGGCGAGCCTGAGCATGGTTGTACTGGGCTTTCAGCTTCGCAAGCAGAAGTTCTTTGTG  
CGGAGTGGTGCCTTTCGCTTCAATGGCCTGCGGAACTGTCATCTCCTGGTGACCAACGGT  
CGCCTTGGGGGTTGCGTTGGACTGCACAATGTCCACTTTCAGTTCGTCACGAACCTTCAG  
GACGTCTTGCAAGTCTGATAGTCTGCTTTAGCAGCTTCTCCAAGGCTTCAACACGGAT  
CAGAGAACCAGGGATCGGACTCCAACCCTCAATACCTTTAGCCATTTGACCAGTATTAAG  
CTGGTGAACACGTTTCTCTATTTACCCCTTAATCTTGATCAAACCTAGCCAAAGCGCGGGT  
TACAGACATCTTAGTAGACATGTTATACTCCTCTCATTTATTGTTGAATTTTAAAGTTAC  
TGCAAATTATTTGCCGGCTTATTTGTTCGGCACAGCTTGCTAGCTTTTGCCAGAGTTGACT  
ACACCGCCTTGGCGACCAGGATCTGCCTGAGCAATAGCGCGACTGTATTCACGCTCAGCT  
TTAAAGTCAGCACGAGTAGCTTCAGGCAGTTCAGTAAGCAATGCGATACGGTCATCTTTC  
GCTGCACTATTAGCAGGTAGTTCTGACATTTCAACTTTGTGTTACATCCCAGCTTGGAC  
TTCGCCGCGTTGAGGCCGATTGGAGCACTGCGCTTAACATCGGCAACAGGGGCATAGATC  
GCGTCTTAGTTATTGTCTGTGCAACAGCCAGTGCATTACGCAGTTCTTCAACAACAGAA  
GGATCGAGTGCAACCTGACCGCGAGATTTACAGCAGGTTTGACAGAACGCTTCTGCGTTG  
TCCAGAACCTTGATCTTCAGTTTGGGTTTTGCTTCAGCCAGTACTTCGTTAAACTTAACT  
TCCTTCTGGCCCAGTTCTTGTGTTTGAACCTGGATCTCTGAACTGACCTGCTCAGAGGCT  
GCCGCCATGGCTTGAAGATCGGAAACTGCCATTGACAGGTTGGTTCCAGCAGCGGTTCCA  
GCTTTGGTGGCACGTTTCGGTTAGGGAAATTACAGTTTTAGCTCCAGGCATTATGTACTCA  
TTTGCCTTAAATTAGGTTTTAAATATCTCACTTACAGGTTGCGTTTTGTGCGAGCGAATCTT  
TGATTATTTCTTCGGTTGTTCGGGTTGTGTTTCGAACCACGACCAGTAATGCCAAAGAATGC  
TAATCGCACGAATGTCAAGCATTGTGCAAAACATCCAACCGCCGCTCATCGTACACCGTC  
AATAATAGAATCTCAATCTTCACTAACAACGTGCGCGTTCGGAGATACTATCATCTCATC  
GGCAGGGTGAAGAACCTCTACTGCGACGTCCACAAAAGATTCTGCAACATTGGCAGTAAC  
ATCAACAGCAGTACCTACAACATCACCATCCATGCGTAACAGAGATCCGATCATTATTT  
GGTCTGTTATAAAGTTGGTGGGGCATGAAGGTTTCGAACCTTAGACCTTCGGCTTAAAGAG  
GCCGCTACACTTATCACTGTGTTACTACCCATAATCTTTACCGTGTTTTTCAAGACGTTG  
CACGGGATCGGCACGCTTGCCACTGCCCTTTATTTGAAGACGCATCTCCGTATCCAGCTT  
CTTCTATCCCCATGCCGGATCAATTACTTCTTCTTACCTTTCGGCGCTACGGAGCCAACA  
ACCTTAGCGTCTTTAGCTTTACCAGCGCGTTCACGCTTGGTTCTGCCAGTGCGGACACGA  
TTTGAGTCAGAAATGACCTGACCACCTTCTACGCGGCAAAGTGATCCCTGATAGATA  
ACGTTGCCATATTCAGCACGACGCTTCTTACGTATAGAAACCGTCTTTGTTACACCGCCC  
AGAGGACCGGCATGAGGGGCGAGACTGGCTCGGCGACGCCTTGGACTCAAACCTGGAATGGC  
TGTTTTGATTACGTCGATTGCGGAAACGTTCTAGTCTGCGTTTTTTCTAAGCCATGTTTTCT  
TTATCCTCTAAGGTGTAATGACTCGATGACGTTAGTAATACTGAACTCTCTCACTTCGTT  
TATCTATCGTTTTTTACTTCGTGTTTCATTTCTTACGCTAACCGTGTGAAAGGTCATAA  
CGATCATTTGTATAAACCAGGTTGGCTGGATAGAATCAAATCGGCTTTTCCACGATTCT  
GACAGACTATGTTTTTCAGTGAAACCAAAAAAAGCTTATACCGTTTTATTGCATCTCCG  
GCTTAGTAGTTGAGGCAGGAACTAAACCTGCCACCTTTCATTATGAGGGTAGCGCTCTT  
ACCAACTAAGCTACAGAACTATCCCGGCTTGGTGAGATGAATACTAATGGTTATAGAAAC  
CGTTGTCAACACCTTAAATGAAAAAAGCGCCGGATTTGAATTGCCGGTGTTCCTCGTAG  
TACTTGCGATATGAAGTCGCCTGGTTCGTCAGAGTCCGGCTCGATCGTGAAGCGTCGCCG  
CGGAAAGTCAGAACATCCTGCTTCATCACATCAACGCTTATTGCAGGTGCTCAGCTTTC

TGGTTGAGAGTCGCAACATAGCCTGACAGTTTTTTCATGACGCTTATTTTTGTGGCGAGTG  
CACCCAGTACTGCCAGTGTCCCCTTTAGAAGCGCGCCAAGAATAGCCTTTATAAACATT  
TTAATTCTCCTGGATTATGTGCAGCAGTAGTATCTGCATGATCTTTTTACTGCAAAAGG  
TCCCAATTTAGTTCAGGTCATGTCCGTAACAGGACCATTTCGGTTTACTAACATTGCAGGT  
GGTTGCCTCTTTGGATCCATGAACGGAAGGCCGTACACATTACATTGAGTGTGTAATA  
AAAATTACGATATGGATGAGTGGGCCAGTCTCTGTGCGCACATTTCCAACATTGAGTAAAA  
ATTCTGGTCTTTTCATCAGAAGAAATACCCTATCCTCAACCTACGAAAATATCTACGTCGT  
CAGCCTGGCGAATGCCTTCACTGTAATCATTAATCCGTCAAATTCTTCTTTCATCTATT  
TACTGCGTTTCGCTTTGGACGTGTAATCGCCGCTTCAGCACGGCGCTGCTTGCCGCTTTT  
ATACTGTACGGGAGATTGGAAGAGCGTACTTGATTATGGAATCACCGTCAACGCGGTAGA  
AATAGGATAAGCCGCCTTCTTTTGCGAAGGATGCAACGGATTACCAAGCCTCAATGCCAA  
AGCCAGTCCTCGAAAAAGCGATGTCATTTGCTTCTGCAATCGCTTCGTCAAGGGTTGGGT  
GGTGTGATTGGTGCTCAATGTACTCTCCATTATCTAATTTTTATAACAAGCTTCAATTTAA  
ACATAATGACCTGCAGTTAACTTCTTAAGGATTTTCGAGTGGATTCCGGTAGCTTAGATCTT  
AGCAGCGGTCACTATATTTGTCAATCAAAAAATGCCTGATGCCTTGAAACCACGACCATA  
TTCTTCTAGTGCTAAAGTGGTTGGGTCAAGCTCTTGCTCATCTACCTTCGGGTTATCAAT  
CTCAAGGAAATGTTCTCCAGACCATCAAGGCTGTCCGCCTTACAAGCCTTCTTCTGGTC  
TGTGTGTGCAGAGGCACGATCGAAATCATAACGGGTAACCTGGATTTTACACTCAATATCT  
CCTTTTCACTATCTCGCCAAGATCTTGATCGTCATGGTTCCTACATGTTTTATTTTCGTT  
TTGCAGTTCCTTTTTATTTTACAACATAATGCTTTTCGTCTTTCAACCCTCGTTATGT  
TAACATATCAAGTGTGTGAAGATGCAGTGACATTCCTATTATTCATTTTCGCGTGTGATT  
TGACCATGTTTACCCACGCATTGTTGGGCCTTATCCTGTCATCATCGTCAACAAATTCAG  
GCATTTCTTTCAGTCTTACAGAAATGTCCAAGTCAATGAGCCAAATATCGTCTTCCATCAC  
TACGTATCAGAAGATAACCGTGCTCTCAAACGCAAGAACACTCTTTTCTCCAAGGCGGG  
AAGTGTCTTCTTTCTTGAAAGACCCTCTGTTAAACCATGTGAAAATGCCTGTCTGCGGAT  
CGTAATGCAAACGGGTTTTGAGAAAATCTTGCGTTAAACTACGGGCAGGATTCCTCTACC  
AGATCAATTTTTCTATATTCGTGGTTACCCACACGTTTTTATGATTGCCGGCGTTCATG  
TGCTGACCGCGGCCAAAGAAAATGATGCAAGCGCCTGTGCCGTGGGTGACAAGATCAGCT  
TCAAATGCTTGTTACAGACTTTGCACTCCAATCCTGACTGGTCCAAACCTCTTAGGCTCC  
TTAATATAATACGGTTTTTTTTGGTGTGTTATTTTCGCTTAAGGCAAGCACGTATTGGGAAC  
TCATGCCACTTGCATGGCTTTTCCAGAGGCTATCTATCAGAAAAGTCCCCGGAAGGGCGG  
ATAATTTAAAGCTGAGAAGATGCCCGATCACGAATCGGTGTAAGTTCTTCGTCAATCACC  
AACTGACCCTGTGGAAGACACAACGGATTTTCGTTATCACGAGACTGTACCTCACGCACC  
TCCAGATTGTGAACCAGTTTTAACGGATTGTCTTCATCACGATGAACCTTCAAGACACCT  
TTTTCAGATATCTTACCGAGGTCAGTCTTCGGCTCTTTGTCAACCATGATCTGCTTGCCG  
TCGATATCTGCACCCGTTGCTTACACAGCCATACCCCGTGAATCACGAGTAGTGTTCAGT  
GTTGTGTAAGAACCAACACAGTACACCACGTTATTCGATGCAAAGCCACGATCTTTCAGT  
CCTTTAAAGATAGCTTCTGCATGAGCAACAGCGGTAGTGTCCCATAGAACAGGCCTACA  
TGACAGTCAAGAAATTTGTACCCTTTGTATTTAACTTCTCCACCAAAGATTTCCAACAAA  
CATTCTACTGCACCTTTCACCTCATGATCTTCAAGACCACAGTCTTGGACATCAAAGAAT  
GCATTATCTTCATCCTCTACCAAAATGCGATAATGTTTACCCTCAAAGTTTCGCAACTTCA  
GAGTTTGCATGAGCCAGTAATGCTGTGTGAGCCTCTGACCAGTCATGCACCACACCCCGG  
CAGCCATACCCGGCAATGAATTGCTCAGGGATACCTGAGTCAGGTGCAAATACAACACGA  
CTTTCACGAGAAAGAATTTCAAGTATCCAGATTTCTGCTGCTTTAGTGATAATCGCCCGG  
AAGTCAAAGCTATCTGCAACGTTGGAAACTATACCTTTTCGGAATAATTTCCGTGAGGTAG  
CGCTTCAGGAACCTCGGCTTCTGCAAGTTAACGTTTAAATCAAGGCTCAGGAATTCCTGA  
TTTGCTGTGCTTTCTTCAATCTCATTAAACGATGACACCGATATTGGTTGGTGGAACACTG  
TGTTACATGCCGCGATAGACCCAGAAACGAACCTACCTTTCATCTTGGAAGAACGATCT  
GCATAGACACTCGCGGGCATCGGATCAGTACCCATAGTACTGATCAGTTGACCAAATTCA  
GTCTGTGCTGCGTCATGTGACCCACCTTACCACGATACGCAAAAACAGTGGTTCTGGTAG  
GGAATATGCAGTTTATTATCATATGTTTTCATCAGCCGATTTCTCAGAAAGTTTACGATAT  
TGCGAGAATGTTGTTGCCGTTGTGATGGTTTTCTCGTTTTCTGTTGACTTCACACTTCC  
ACGAAGTTAAGTAACCAGTTAAAATACGGATGGGTATTCTCGATAGTGAACATTGGAACC  
TGCACCGGAGCCAGAGTGCCATCCGGTAAAAGACGAATTTCTGAGGTAGATAACCAAGC  
TCGTGAAGCTTCTCATAACCCACCTTTCCACAACACCCGCTGCAATACTCAGTTAGAAA  
ATTTCTTTATAATCTGAAATTGCTTCTCCTTTGCGCGTTTGAATAATTTTTTATTAAAC  
ATATCGATCAAGAACCACATGATGGATCCGTGAATACTAGCAGACATCACACGGTAGTCA

GGATCTGCGAAGTCGATAAAGTGCTTTGCGTTGGGGGCGGTCATACTCTCATGAACAATT  
TCAGAACGTTTGTACATACATCGAGATGTGACGCGGTTTGTCAAATCAGCGAAAGTAATC  
GGGGTTTGTCTATGCCGCATGTTTGTCTGCTGGTCTGTAAAATTATTGGGTGCATTCTTGC  
ACCCGTTTATACTTTGCCAAAAAGTTTTGGACGTTTTCTGTCTAGTGGTGATATCCATA  
GATTCATCTACACCACCATCAAGATTGACCTGCTTGTGAATTAGAAAATACCGTGTGT  
TACATAAAGGAAAACACGTTTTGCACCGTTCTCCTTCAACGCTGGTGGAAGGGCGATGTA  
TGTGCGCCAGCAGCACAACTTCTTGACCGATGAAACATTACGACCGGTAACCTCCAC  
GAAGACAGCAGTACCTGTGATCTCGTTAGTTTTTACATCACGGACCTTACCTGCTTCAAC  
AAGCGGAATGCGGAGATGCTCAGAAACCTTCTGTGCTTGTGTACGTGCTCCGGCATCTGG  
TGCGATAATGCTAACATCCCTAGCAGCAAGTACATCCCTATAGGTTGCTGCAAGCTCAA  
TCCGCGACGCATACGAACATTGTTCCGAAGTGGAGGAGATACATCAATGCGCGGATCATC  
TACGATAACCTTATCATACCCAAGTGAGTTAACGATGTTTGCAAAAACCTCGATGGACGA  
TCCCTCGCCAGGTTGCATACCACGATCTTGACGTGCATAGGGGATGTACGGTAGGTGAAG  
GAAATCCTGTGCATGAATATCAATGTTATCTAGTCGAGAGCAAGCATTGGCCCGCAGAGG  
AAGAGCCATAACATCCGCAGACGACTTGCATTTTGTGTGATGTCAACAAAAACAAGTG  
ACCTTCTGGTGCATAACTTAAATCGATCCTAACCTGTTCTTTACCACCCTTGAATGTAAG  
GTGATCAACAGGGACTATCAGGTTGTTACAGACGAGGTGCTAAACTCATTTTATTACTCCT  
CAATTATTTGAATAGCCTTTAAATTCTCTTGTGCTTGTGGATGATCTATGTGGAGCCGTCAG  
GTAACCAATCTTGTCCACTAACAAATTGTGGTATCGCCCGCAACTCAATCTGCTCAACTT  
TGGCGGCTTACAGCATAGCTTTTGAACAGCTTGGAGTACATCAGTTTGTCTGAAAGATAC  
TTTTCTTTGAGTGTGGCGCCATATTCCGAAAACAAAAAGCTATAAAAACTCTTCCGA  
TTGTTAAGCCTGGGCTGCAGGCTCTTGAACAAATACGCGGCAGGTTCTATCAAATTTG  
GATTTGTAGAATCACCAAACGAATTACTGTACTGAATACTCCCGCTTCAATGTCAGAGA  
TGGCGGTTTTCTTCTCGATCCAAACCACTTGATACAGAGGAGAGAGTGAGCTACCAACAG  
CGGCGCTAGTCAACACTGTGGAGTTTTTGTATCATGGGATGCATAAACCCCGACACCAT  
TCAACACCACAGCCATCAAAGAACCTTTTCAACAAGCACCAACCTCATTCGTTTTTATAA  
CTTACGCATAGAAGGCTCTATCTAGTACCAATTATGTAATGCCTGGGTTTTGCATGCGC  
TTTGAATCTTGAACCCGAGCGCATGCTGCGTTTGTATCCAAGATCCTCTATTCTTGT  
CAAAAACCTGTGATACTTCCGTTGACACTTCTACGCAACCCAAAAAGATGACACAAGGA  
TTTTTGATATGGAAAGAATACCTCATCAGCACCATCAGGGTTTAAAGTCTTGAAGTAATC  
ACACCTCCACAACAATTCTATCAACCTTTGCAAATCTGGTGGTGAGAGACGGTCAGCAA  
AAGCCACTGTGTTGGGATAGTGACGTAAGAGCCATCCCTTATGTTACCAGTATTATCACC  
AATCTTTATCTCCACCACCATCTACAATTTATTCCACAGCAGATTTGATTAGATTGTACA  
CCAACGTAACGGAGATATCAACCTAATTATCCCAATCGGGCATGTCTAATTACTCCAAA  
AAAGGATTACAATGCTAACCTATCAATTAACCTAACTTATGATCTTATAAAATTAATA  
ATAAACATAAAATCTACATAAAAGATATTTAAGTAGGATCTATATATTCTAAAGTTGTA  
GAGCCAGTGGCTCCTGTGGGTCAGTTGGGTCTATTTGGATGAAGAAACATCTGTTGTCAA  
GAGTTGACTTCTCGATTTGCACCTGTACCATGCTCCTATCGTTATAGAGGAGAGTGTTAA  
TGTTGTCAAGTAAACCAGCTAAAGCTGACGGAGATATGGTGTGTGGTAAGAGGGCGTCGTC  
CGTCGACGTCTTACAGGTGAAGAAACCAAACGTTTAAATAATGATACGTGAAGTCTTTTACG  
TATGCAATAAGGATCAGAAAGTTTGCCTTGTGTTTCCAGATGGCAAATCTGCGCAGGTGG  
TGTATGGAAATTACTACGACTCTATACGCGGTCAGCCACGCAGACCAAATGTGGTGGTGA  
CTCAGATGAAAGACTTGACAGTGGAGCACATCGGATGTAATAATCGTGCTCTGAATCTGA  
GTGAGATTCTGATAACGCACTGAGCGCCTCTGTGAGACATGTTATTGGTGTGATGATACA  
CTTGAGGTCTTACACCATTTTTATTAGTACAGGGCCGCTCAGAGGCGCTGAGTGCTAT  
TGTGGAGGATTATTTGAAGCTTAGTCACACAGCTGGGGAGAAATCTGTCTGCAGAGAGG  
CTTTTATGGCTCTCAAGACCATCATCGCGGTGATGGCAAGCGCTTCAATTCAACACTGT  
ATTTGACAGCCGTCTGGATATTGGTAACTCATGGCTGGATTAAGGTGTATACATTCATG  
GTGATCGTAATGTCGTCAAATTGGTGGGCTTGAAGCTTATTACTGGGCAGCACACAGTC  
TGCCCATGGAAACCAATACATTCTGTACGCATACCCTACGGAGGACATGGCCTAATGAA  
AAAGGACATCAGGAACTTGTAAAGGCAAACATTGGATCCAACGGCTTTGGTTTTCAATAC  
AAAGGTTGAGGTCATCAAATAAGCCATTCAAAGTTTGCACGATCAAGAGGCAGATCCTAA  
CACAGAACCACCTACAAAAGATGAAATTTACTGGCTTCGTGGGTGGGAACTAAATATGCC  
TGAACCTGGCAAGGCGTGGACTCACCGAGGTTATGATATTCGCCCAAGAGAACGCCGCTT  
AGCGCTGTATATCAAACCACGCAAAGGAAGAAAAAGAAATGACTAATATCGATCATGTA  
ACATCAGATACACACGGGTGGCATAACCAATATTATCGGTTTCCGATCCTGTGATAAGTGC  
CGTAAAACCTGTACGAACCGAAAGAAGATGCAACCTGTGTTGTCAAGATGAAAGACGAC



ATGGTTAAAACATGGAACAAACACGTGAAACCTGGTGTATGTTGTCGCACATTTACGTGAT  
TTTGTGATTGCGTTTGGTAAGCATGTTGAGCCGCGGGTTCAAGAGATTCTTATCCCAAAG  
AACGGAAAGATCATTTCGGTTGTTAGCAACCCCGACAACCACCCGAAAAAGCCGATATAG  
CGCGAGTTTGGTCACGAAGTTGTTGACTATAAAGAAATTGGACTGATCACATACAAAGAA  
AAAGTTTGGGTGTGTATGTCGCACTACCTGTTTCGCATATTAGAATAAAGCACACCACTGG  
TCAGTCATGCTCCACGGACATAGCCACCACTCATATAAAGGCAACTGGTGGACGAATCCGT  
TTTGGGGTTGGGATGTCCACGGTCGTCCTTTGACTATGCTTGAGGCCGTTTCTTAATGC  
CTTTAAAAGCCTATTTACGATATTAATCACTGTGGCGTTGGTAAGCACAAACCAAAAACGC  
AATTTCTTCCCTAAGAAAACATCAAAAATCTCTTTACCCCAATAACTTTTTGCTGCCCGT  
TACAACCAGGCGGAAAATCTTTGCCGACATTGGGTTATGAGGGGAGCTTGTGTGCAGACT  
TACCCTTGTACTTAGGTTTATACTGGTGGTGTGGAAGTCGGTATGACTGTACGTATCCTG  
CAGCATCCTCGTACTGCGCAACCAGAACAGGAAATTCTTGACATGGTTGTTGAACTTGAG  
ACATACTGGCTCAGGAATTATGCGTGGTAAGCTTCAGTGTGGGACACCGTAGAATACA  
ACGTATTACCAGGCAGATGGTTATGCAAAAAGATCTCTGCTGCCCTCTTGGTATCAATGA  
ATCTGATATAATTACACAGAGGGTGGTTGATGGAAAAAGTATTTTCCACCCTGTATATCC  
AAAGTGTGCAACTTTGTGGCGAAGATGTCTCCTAAAGCACATAAACACCAATAGTATGA  
CAGCGTATCAGTATGCGATAAATGATATGACCTTTCCAATTACATTAAGTGGGTTCGGATA  
TACGGATGTTGCTGGCCGCTACTTGGATAAAGGATAACCTCGGTGACGGAAAAATATACAC  
ACCAGAGTCTGGATCATTTCGTAACACAACAATGTATTCACTTCTTTTCATCTGTAAAGAA  
AAATGGCAATTATATGATAGGGGTTTCCAAGAAACCCGCTTTTCGGACACATTTTACTC  
CCACTCAAAGGAAGGCGTATTGGTTGTTACAGAACGGAGACCGATCCTCATAAAGATTG  
GCAAGTTGAAAAGAGAAATCCTGCAAAAATCTCTTGAATCTCAGAACAGCATGTGAGAAT  
AAGATAAAATCGGCCAGACATTATTGTAGAAATTGAATATGACATCCTAATGGGAGAAGA  
AACATGCTCTTCAACGTAGACGATCTGGTCGCTAAAAAGCTGGTCACCAAGAAGACTTGC  
ACTGATGGCCTGCTCGCTGACCTATAAGTTCTGTGGCATTGAACTTTGTCTTCTTGGAT  
AATCTGTGGAACACAGATCCACGTCTCCGTGAATGCCGTGGCATGGTGGTTAATTCGGAT  
TACGATGTGGTTCTCTGGTCTTTCACCAAGATTTTCTAGCACTTCGAAAATGGCACAGCC  
CTTCCGGCAGAGAAGGTGGTTGACGCTGTTTCGTAAAGTTAATGGATTTATGGCATGCGCT  
GGTGTATTATTAGTGCCAGCTCGTGGTGTCAACTACAGGAACTCTGGAATACGGCTAGGTG  
GTTCAGGCGCGGAATCACATCATTGCTGAATGTAATGTCTTTGAGCACTTCATTAAGTGG  
ACAGAAAGTGCAAAGGCAACGTTCAACTTCGAAATATGTGATCCTTGTGTCCCGCGTATT  
GCATGTGAAGAGCTTGGGGCGTACCTGATTGGTGTCTCGAATCCAGAACCGTGACGGCACA  
AATTTTATGCTGCCTGAGGGTGTCTCTCGACGGAATCGTGAAGGTTACTATATTCAAGCGT  
CCTGAAGTTCAACAGATGGTAAAATTTTCCGATGTTTTTGAATGTCAAAGCATTGCACC  
CACGAAGGTTATGTTGTGCGTGAGCCAAACCATCCGTTTCAGCTTCTTATTGGAATTCAA  
ACCCCTCATTATCTGGCGAAGACGTTCTTGTGCGTGGTGGTGATAACAAGTGGGATACG  
ATCGGGGATCATCCCGTCAACACAAAGTAGCGTATTAATGAAGAGTATTACGAACTGCTT  
GACCATATTTCGTAAGTAATACACCAACGAGGCTTGGTCAGCTTGGGAATTACAGCAGCCT  
CGTAAGTTACTTGAAGATTATTTTACCATAAAAGTTCTGTTTGACCGTGGGAGTCCGTCT  
TATGTTAGTGAAGATCGATGACTTAAGGGAGCCCGTTAATTACGCGCGTGCATATGCCTT  
GTAGATAACAAATTCGCAGGACTTTTTTTCAGTTTCCCGAGAATCGGTCAAACCATATCG  
ACGTGTCACGGAGTGGCACTACGATAATGATCTTGGAGAAGATTCTGATCATGATGGGTA  
TTGGGGTTTTCTGGGGCTTGAGGAAAAGATTGCATTCGGAAAGATGCTCTAAGACCGGGT  
CAAGCTGTTCAATTCACAAATCGAACCCTTCCGCAGGGCATAAGCTTATGCTGGCAAGAGA  
AAGCTTTGCCCGGTATGGCGTAACCAATTCTGAGAAATAAAGACTGACGACAGGGTATGGA  
AAAGATATTAATCGTCCTCCGTGGGGTTGCTGGTGCAGGTAATCAACCGTTGCCGGACT  
CCTGAAGAATGACAGCAACATTCCGCATTACCTAGCGGAAATTTTCCAGTATGCTGTTGG  
CGAGTACGGGTGCAAGTAGGAAAACCAGCACAAAGGCGCACTAGTGGTGCCAGAAAAACGT  
TCGCCTGGCACTGGATATCGGTTACGACCGCGTGTCTCGTTTCAAATACCTCAACCAGCGA  
GAGGGAATTTAAACCGTACCTTGACTTGGCTAATGGTTACGGATAACCAAGTAATTAGCCT  
GGTGGTTGAAGACTGTCATGGTAACGATTCTATTACAGCGTTCGCGAGGAAACACGAGA  
TGCTCAAGAGCGTCGTCTGCGTCACTCGTTTAAATTAATCTCGGAGCAATAAGTGAGACG  
TTTGATTGTAATTTCTGGTGTGGTTTCGCTACTGAGAGTCGTGTGCGAACGTTCCGTTT  
TGAACAGTCAACAGGTAAGGCGTTGCGGGATGAATACGATCTGGAAGAGGTTTGCAATAT  
CGACGCATTCCGTGGAAACTTCGACCATAACACCCACATGTATTACTATAAAGCGTAGTGC  
TGAAGTCCGACTGTCCATCCACATCTGGCTCACCTTCCCGTTGCACACTGGTGCAAACG  
TTATCTAGGGCAGGTTGTTAACTTGACCCCTACGTTGAAGATCTTTTGGAACGTGCTGG

AGTGCCGAAAGAGGATACGGTCTCCATTTGTGGATACCTGAAGGAAATCATTGTCAAGGC  
CAACCCGAAAGGTAAGCCGGAGACTAATGATGTAGGTCATAACGAGGTTGATCCTGATCA  
CTATAAATGGTTTAAGCCCGATTTTGTGATCTTTTGTGAATTTGCACCATAATATAGCAG  
GATGTATGACATCATAGACACCCTTACCTATGAAGATATGGTGATCGTTGTCGGATGCTC  
AAATACACTCACCGACTTCAACTGGCTGTGGTTTCTGCTGTTTCGTAGAGGACCCAAGGT  
GCCTGTTGTAAACCCACGTATCAACTGTGTTGAGCATGAGCAGTATGATGCTCATGGTGT  
GTTACAATTCCGTTGTGGTGCTGTAGAGGCATTACAGCAACAATAATCTCATCGAGATTGT  
GGAAGATCATATTGAATGTAAGACAGCATTACAAGGTAAGGACAAATACTCTACCTGCCT  
TTAGATACCCCAACTCTCTACGGCTTTAACTAGGACGGATCTCATCAGCTCTGGAATGTT  
AGAACACAGGGCGATGAGGTAAGTGTGAGTTTGGTAAAGTAAATCGAAAGGTGCAGCAA  
AAACGTAACAAATGTGAAGTGAAAAGTGTGGTTCGTGCTAATCAAACAAGTGTGATTTT  
TGGGCAGTGCCTGAAGCGCGATCGAAATGGGAGAAGCAAGTACACCTTGTATATCGTGAG  
ACAAAAGACGCCTTACAGACTTAGGAGAAGTCTCTCCCATGCTCGAGCACTATGGGATT  
AACCGTTCGAAAGAATTATATGACCCTGCTTATGGGCAGACTAAGCCTGATGGAGTACGC  
TCCCTTGTATTCTTGACAAAGATGGTATCCAGTATTTAATAGACGTGGAAACAAGACG  
TACCCTGTTCAAGGTCGATGGTGGCAGCTTACAAAAGAAGTTCGAGACCATACTGGGTTT  
GACAGATTGGAAGGTGAAGTATATATTCATGGTCTGAGCTTGCAGAAGATTGTTGCTCTG  
GCTAAGAAGTGCCGTACACCTGCGCAGATCGAGGTTGTGATCGCAAAGGATTAGCAATCA  
GATCTAAAACGCTAGCACAAAGCTAGTGACAAGTGTGAGCAAGTATGGAAAGACTTTGAT  
GGTGAGGAATAAGATGTAAGTATTGAACCGGTGAAAGATGTTGGCGGATTTGGCGGTTTC  
TCAGGATTGGACCTTGAATTTACATTTTCGATATTAAGCTAAACGCTAACAGCCCCTGG  
CATTACAGAGCGCCATGATAAAAGCCGACTATCTGATCTTGGTAGCGTGATGTATCCTCTT  
GATTGTGAGGTAATGCACTAATAATTGATGTTGTTTCGGGGTGAGTTTGGCCTGAATGAA  
GATGCGGTTAAGCGGGGCATTGGGCGATACATGCAAGAGGGTTATGCGGGTGCTATTATC  
CGTAACTTCAAAGGCATGTATGCATTCGGTCAGGGATCTTCCGAACTACAGAAATGGAAG  
CTGTTACAGGATGGTGAAGGGGAGGGGTCGGACGCTGAGGAGGCCGAAAAGGGTGAGGGC  
CTTCTTCTCTGCGAAGCAAAGACGGAATCAGATTTGACTGTAAGCTGAAGGGGACGCGA  
GCAGAACGTTCTCAAGCGAGAATGTTACCTCTGGTTCGGTAAGATCAGCAACGTCACATTG  
CAAGCAAGGACTGACGACGGGGTTCCTCAGTTCCCTGTAGGTCAGAGTGTACGCGAAGTT  
AATTCGTTAACATGCGACCCACTATACTGATGGAATTTTATAACAGAAAACCTCAAGAAG  
TGGAAGCATATTTATTCAATGGTTCGAGCACTAGAGTTGGACAAGTGACAAAGTGGATGG  
GGACTGGTGTCTGGGAATACTCAGGGATTACACAAGAGACATCCGTAACATGGAGGTCA  
ATGGGACCCAAGCTTGTCCCGGTGATTAGATCGTTAAGGTGGGCGACCAATTCCGTACAA  
TCTCACACAGGAGTGTAGGGACCTGTCTGAGCCTGTTACCGATGAAGATCGTCTACCTA  
GAGCTTACAAGGCTAAGAACGTGGTAATGGGTGATAAGGTTGATATATAGGGCAAAGAAT  
ATCTCGTCAAAGGGGTCCAGGCAGGTGGTGTGATGACACCATTCTTGAAGTCCGGCGATGGGT  
CTAATGTCCAGATCCGTGCTGAAACTGCTGTATGAGTCAATGAGGTAGGTGGGTAATGAT  
ATGGTATGGACTGTTGTTGCTTGGTGAACAATGCTCACTGGTGGCGCGATTTATCTCCC  
CAACCGAGTCCGTAAATATAAGGTCGTTGATATTAGCGACTGGGCTGAGGGGAAGATCAA  
GGTTTTCTGATTGTCTCGGCGGTTGATTGGGTCTTGCCACGCTGGCCCTTATCGAACC  
TTTCTGAAACACACTGACATGCCCGGTCGAGGACATGCCATAAAGGTTACTACCCCCCA  
TTCGTGGTATAAGAATGGGAGCTATGGCGATAAGTGTCTTTTCGTTGCCAAGAACGGAGC  
GCTGCTGCCATTAAGAATTATTCGCGATCAGCCTGATGCTGAACATGCATCAGATGTTGT  
TAGTTAGGGACAATACATGCACTTCGGTGTAAGTATGAGACCCTACTGTCAATGACCCA  
ACCGAAAGAAATGGTTGAGCATGGTCCGATGTAGCTTATTGGAACCACATAGCGCGTGT  
TGATCGTGGCGGCAAGGCGACTCCGGTTGCTCTGCAATCTCTTTTGTCTTCAAGTGGT  
CAAAGAGCTTATGAAGGCTCTTAGCGCAGGTGACCGAGTTGAGGTTGTTGATGGGGCCTG  
TGACCTGTTAGTGGTCTCAACCTATGCTTGGTGGATGCTTGAATCTTCTGAGGTTTCGCTC  
GGAGAACTGTCTGAAGCCAGCAAAGGGTGTCTCAGTTCAACATCGGTGAGATGGTAGAGAT  
TATTTTCAATACCCCTTGTCTGTGGAATCATTGCGGCTATCTTGCAGCAGTGGGTGGC  
ATTATGTTCCCGCTCAGATATCAACTTGGATTGCGCCATGCTTCAGGTGTTATTGTCTAT  
CGACTCTATGTAACCGATGATGATACCACTAAGAGAGGCTCACCTTCTCTGAGCTTAGA  
TAGTGACGATGAGTTGCTTACTGCCGAATGCAAAGCTATTGAGAAACGGTCCAACAGTCC  
CTACTCTCAGTGAACGCTGTACGTTCTGGTGAATAATCGTGTTCCTCGGTGTTAAGGG  
TAAGATCATGAAGCCAGGCACGTTAGTAGAACCAGAAAATAATTGCTTGACAATAAAGAAG  
GGGCCTGTCTAATGGACCCCATCAAGACAGAGAGTAGTAATAAATTGGAATAGATTTCCG  
ACGAAATTAACAAGAATATTTTAGCATTGTCAAACGCCTTAAATGTTCAAATAGGTATCG

GCATCAGGCCGACATTCAGGCAGAAGCAATATAAGTTCCGCTTCACAATGAATCGTCGTT  
GGGGCGGTGTCAACAAGTACGCTTATGAATGCACTCTCGAAAATCTGAAGGCCGTATGTAG  
AGTCAATCGAGAAAGCTGGCGGAAAGATTATCGGCATCGTATAAAAGTGTTTGACAAACA  
GATTTGAATAGCTACACTGAACTGGCTAGACACACAGAGGAGAAACAAAACAATGCCTCG  
TATGCCTAAAATCAAAGTAGAACTGAAATATTTCCAGCCTTCTGACGATGTAGCGCGTGA  
GCGCCTGAAAAAAATGGTTCAGGAAGACCTTGATGCGAACATCGCCTAAAAGATGCGGT  
GTGCCAATTCAGAGACATCGTTGCAGTTGTGAAAGACCGCCACAACACTAGGACCCGAAGGT  
CATCAAGACCCTGATCAGTGCAGAATTTGATCTCCAGTATCAGACAGGGAAAGAGCTTAC  
AGATCTCGAAGATCGGGTTGAGCAGATTTCCGAAGCTGATATTCTGGTGGGTCGCGAGAG  
CCACCAATGAAATATTACCTGAATGGTGTGGACTTTTCGTTTTCTTGTCTTCATCTTC  
GGAGACGGAGTACCGGCTCTGGTTTCAGCTAGGGATACACTTTTAGTAATGGGCGGTTTC  
GCCCTTGTATTCTCAGCCCCAGTAGTTGTATGGTACTGGCTCAGAACGGTGTATATTA  
AGTCGCAGGGTTAATGCTGCTAAGTCTTAAAGCGTCTACGTGGGAAAAGTTGCAGGCTCT  
CGCCCGGTCCGTGAATAAGTCTGCTGCTTCTCACGTAGCAAAGATTGTTGATGAGTACGT  
TGACGAAAACGTCAAAACTGAATACAAAATCGAAGAGGGCTACCATACTAAAGCTTAAGA  
ACATGAAACATATACTATTTGCGGGACTGATCGCTCTGGGTGCAATTGGCCTGACTGGTT  
GCGAACGTGCCAAAGTGCTTGCGGGTTACGTAGGCGTAAAGCTTGACCCGTATGGTGAGG  
AAAAGGGTGGCCAGCAACGAGAAGTTGTTGTTGGTGAGTATTGGTGCACCTGGAACCAAG  
ATATTTATCAGTTCCCGACAATCAACCAGTTAAATAACTACGAGCAGCCGTTCAACTCCG  
AGACCAAGGATTCGATGACGGTATCCGCTAAAATCGGTGTTGAATACTTTGTTGATCGCT  
TCAAGGTCACGACGATTTACAAGACGTACTGCAAAGGTGTTAAGGAAGTCACAGATGTAA  
ACATTTGACAGAATTTCTAGGATGCCTTGATGAAAGAAGCTGGCTCAATCGACGTTTCGTA  
CGATGGCTGGTGTGTTAAGCGTCAGTTGGTTGAACGTGTTCCCAAGCAGCTTAGGTCCA  
ACCTTGTTACGATTGGTATTGTGATTGTA  
AAA  
ACTGTCAGATACCGACGACCCGATTTACC  
CACCGCAGGTAACAGGGTCAATAAACGTCCAGATCGAAGCAACTCAGAAAGCTCTGCTGC  
GTGAGAACGAAATCTAGCGTAGCAAGGCTGAAGCTAAGAAACAGCTCGAAGGCGCGTGCC  
TGGAAGCTGAATATAAGCGTTTGCAAGCTCAGGGCGAGGCCTACGCTATAGTGGCACGGG  
CAAATGGAAAAGCAGAATCTATTCGGAGGCGTGTTTTTGATCTGCGTAAAAACCCGGAGA  
TCATGCAACTGAAAGCCATTA  
ACTAGTGGAAATGGCGTTACCCCGGTATGTATGACCAGTG  
GAGCTCAACCCCGTTCTGTTACTCTGCCAACAGGTAAGTGACAGTTGACAAAAAGCCCGG  
TGATGATTATCATCGGGTGTTAACATAGAAAAAGGAGATTCAAAATGATCCGGGGAAAAA  
TCCTCATAGCAGTATTACCATTCTCTTCCCCGGCATTCCGCCACAGACAACACCCTCACCT  
TGGAGGACGAATACCCCGATGTAAGCTACAAAGTCTGCATTTACAGTGGAGCTAATCGCA  
CAGAGTCCGTTGCTAAGGATGGCACTTGTACTTGTCTTCCAAAAGGACATTGCAATTAG  
GTGGCTTTTTGAAACTGTTCTTTGGTTCGGGTTCTGTTTTATGCTTTTACGATGTTGTTGG  
GGTGGTATACTGCCACCCTCCTGTTAGCATTCTTCACACGGACAGCCACGATGTTGGAAA  
TCCCCGGATGGGTTTAAAGGGTTGTATCTTTAAGGGTCTGGGTATTACCGGGTTCCTGC  
CATCGAGGGGCAGAAATGAGAGTAACGGATAAGCTTGTTATCTTTTTACCCAACACGAT  
ATCTTTATTATTCATTTTCGCTGTGCCATTCTTTCTGGATGCCAAAGCACCAAGAGGTT  
GATGCAAAGTTCTGCACTCTAGAACACTCCATGATGTATGAAAAGGCTATGCTGTTAGGC  
GATGCAAATATCGCGCTGGATATTGCTAATGTTTACCACGCCCAAGAGGCTTAGAATGTT  
GGTCGGCGAGTGAAGAACATCCACAGCAGCAAATGGGATGCGATTCTCGTAATATAGTT  
GTAGATGGTCTTTATGTCCAGTTCGTGGCTAATCCCTCCATTAAGGATGCAGCTCTCAAG  
CTTCGTAAAGGCGGAAGGGTCTTCGTAGCACCATTCCCTACGATCCAATCTGGGGAAATC  
AAGATGGCTGAGAACGACCCACGAGTAGAGGACCCAACCAACTTGAAAGGTCTTATCCTC  
CACGGAAATTGCTGGAACAAAGCCATCGACCGAGTACTTGGCACTATGGAGGTGGCTTTA  
AATTATAGATTGAACTGGTCCCTAAAACAGATTGTTTCACTAACTTGCGCTCACACCTCA  
TGACGTCCAATTGGGATCGCGGAAGGAAGAAATGTTATGCAAAAAGCTAATTATAAATTTG  
AGATTTGCGGGGGTAAAGGAACGAAACACACAGTAGAGTGTCTCGAAATCTGGGACTATG  
GGAATGGCAAGATCGGGCTAAAAGGTCTGATCGCACTTTGCCCATCGGGCCACGAAGTCA  
AATATATTGCTTTGGCGGGTGTAGTGGTAGGGGGGAAATAGCTCTTCGCCAGGCCATGA  
GGGTTAATGGTGTCTCCAGACAAATTGCAGAACAGTACGTGAAAGAGGGTTTGGCTTTAT  
ATCACGAACGTAGTAAACGGGAAACATGAGAATTGGATGTCCGATATTTTGACGAGTATT  
CGAGTCACGTCTGTGAGGGCTAGTGGGATATCCGTAAGATAAAGATTGGGAAAAAAAAGT  
CACAAATGACTGTGTGATCGCTTTAGACCTTGACCAGACTTGCATTGTGTGTGCCCTGG  
CGCTGGGAAGCGTACAATAAAGGCAACTCACATCGGTTCTGCTCGATCAAAGATCTTTAA  
AAACAGACCAGAGTTCTGAGGGTCCACCAAGATGGTGGTTCGCGGATGGTTGAAGGACCA

GAACGCCGATATGGAAGTTAAGGCCAAAGCTCGAGGCCGAGAGTTCACCCCTTGGTGAAG  
AGATGATTTCTTAATCGAAGATATCCAAACCACTGAAACAGTGGAACTGCCTGCTTAT  
TCTGAAGACAAAGATTAATGCTATCTTTGAACATTTGGGAATGGACAGCAAAAATCGCCT  
TGGTGTGCTCGGCGGTGACAACAACCTCCGTCTGATGTTACCAGCACCGGAACGTTACAA  
AGGAAAAGGTGAATACAGCCTACGCCCTGTGCTGTTGAGGGGAACCCGCGAGTATGTCAA  
AAAGACGTATAATGCCAAGGTCATTGATATTGTTGCGGCAGATGTTAACTGTCTGGTCT  
GATGAATACGGGAAGGGAACACTTCCAGGCGACTGGTAAGGACAACACTACATGGTTTCATC  
GTTTCGACCCGGACCAGAAAGGAGCACCGGGTTTACCTTTCGATACGATGCGTGATGGCGA  
AGCGAAAACTGGAAACACCCGATCCCAATGATGTTTCGACGATTCGATGGGTGTGATCTG  
GATGGAAGGAAACATGGTCACGGGACGGGGACGTAAGTTCCTTGGCTACCAGATGCTTTT  
CGGTGACAGTTCAGTATATATCGAGTCTGATAAATGCTTCGAGATATCTGGGCGTTCTGG  
AGATACTTCTGCATTCAACCTGATCAGGGATCTTCTGAACGAAAAGGAAATTTTCGTAGGC  
GATCGTTGACCAGTACCAGACCTGGTTCATAAAGAGGTAGAGTTGTCCTTCTGGGACTG  
TTTATAGCGCAAGACAACCCGACGGCAATGGCCTTCAATCATCTTCCAGATTGTTTCCAT  
GGAGCGAACTGTCAAGGACCATACTACACTCACAACACTAACTTCGTCGCGTGGGGGTTAT  
ATGATTGAAAAAATGATCATAGGTGCTGTAATGAGGGACACCCAGGCCCTCTCCGTGTCC  
TCTCTGAAGCCAAAATTCATGGTTGTAACGAGGCTGTGTAGAATGCTGGCAACATATGCT  
GGAACTATGTTGTCTTACGGATTATTTCCCTTGACGATGACAAGGCATGCACTGTGCTC  
AGTCTGCAGGAATGTGAGCTTGTGGGGGTGGAGAGATTAGATCTCCTGACGAGCGCCGCT  
TATGGAGACCCTGAGTGTCTCTGTTGTTGTTCAAGGACGAAGCTATAGGAGACTCCAAT  
GATGTTGGTCGCGGTTGCCCAAAGCCTACGTCAATGTGTTGTCGTAATATGGGAACATGG  
AGATCCCGTTTGCAGGGAAATGATCATGACAGGATGAACACACAGTAAAGGCAACAGGCA  
GAAGGACGTTGTTGGTTTCGACTACGTTCCCTTAGCAAAGCCGTTACATTGTGAACAAGAT  
ATCAAGCTTGGCAGAGGAGCACAGAATTGACCACTACGTCAGGGAAGACCTCAGTCTTGT  
TACTATGTGTAGTGCAACTAGTGATTTGGCTGGCCTTTTTTACTCCATTGTGTACGCATT  
GTACCAAGTTGGTATTTTAGGGTACGGTTCATCCACACTGTTGTCCCAACATCTGTGAA  
TTCTCTTGCAAGAGCCCTTTTACCGGAACAAGTGCGCACTTATCTGAAACCAAAGGTTGA  
CAAGAAGAAAGGGAAGAAGGTATACCCAAGGGGCCAACTGAAGATGGATAAAACGCATAC  
GATCAGGGCTGTTGAATCCGACATGCCTGGCCGTTTAAATGGTCTTAAAGCTCGCGGCTGG  
AAAGGCGGAATCTGGGGATGCGTGTGGATCGGGAAAAAGTTCCTGGAGGGAGTCTCCGT  
AGAAAAAGCGTAAGGGGACCCGCATCTAAACCCAAGGCATGGAAGAAGCCTGTACTATTG  
CCATTGACGTCAGGACTTTGGGTAACGGAGGCAAGACAAATCGCTGCTATCAACGAGACG  
TTAATACTTGAGCAGGGGGGTCTTGATCCTGTGCTTGGGGCGCCACTTCGCAAACCTTGC  
TTGGATCATGATCACTTCCATGGTAAATGTCGTGGAGCCTTGAGTCAGTGTGTGAACAAC  
TTGGAAGGATATGTGCTGAAGGCCTGGAAGAAGTACGGGTTTGCGTATACAGATACGTCT  
TTGTCCACAGCGCTCCGAAATCATGCTGACTATTTGGAACAGGATTTAAACGGGAGCACT  
ATCCATGCTGCGTACAAAGTAGATATGCTAAAGTTCCTTGTGGAGATATAATTATGACAAG  
ATCATTGAAAGGGCGGAGACTAACCTCGGCATGATCTTGCCCAAAGGTAGTCAGAAGCAT  
GATAGCATAACGCCTTACCTTACAGAGTTTGTCTGACAATCAGAGGAAAGATTTGCTGGA  
CATTTTGAGCAAGCCCGCAAGTTCTATTACTAGAACTGGCAGCGTGGTTACGGTTTTTCG  
AACCTGATGGACCCGATTATGTAGTTCGGGTCCACTGATTAACGCAAAGAGGCGCAGTG  
GATGATCATAGCATAACGATGTTGAGGAAGATGCCATCCGTGATTTTGCTGTGATTGATAT  
TGTTAATTTATCCGAGAGGTGTAATGCGGAGTGGAGAAGAAATCCTAGTATTAAGCGG  
AGAGGTATGAGGAACCGTGAAAGTGCTCTTCGATATCTGAGGAAAGAGAGTGAGGTATCT  
CAAATCCGTATGATCCTGACTGCGAACTAGTATGTTGCAGAGGCCGCTCAGGCGATCACC  
GAGACAGTCGTTTCGCAATCCAGGCGCGTAGCTCTTCCCTGCTGACGTAGAGGTAACACCC  
CCGCTCGCCTGGGTCTTTCAAAGATTCAAGGCGTTTGTAAACACCTTCCCACGTAGAACAT  
GAGCCATATATGTACGAATGGGCGGGTAAGTCCCTTGATAACGCGGCGATTATCAGACTC  
AAGCTGACGGATTACGAGACGTTCAAACCGATATCTACGACGACCGCGAACTGGTTGAA  
GAACTGTGGCATATCCTTGTGGAAGGTGATATTTTCACTGCAAACAACGTACGTTTCGAC  
AAAGGATGGGCTAACCGACGGTCTTCCCTTCCACGGTAAGACACCGCCGTCACCGTAACCTC  
GTCTTCGATACGCTTGGACAGCTGAAGTTCGGCTTTCACCATGCCATTCAACGCTCTGGAG  
GCCCGTGTAAATTAATCCGATATAGCTGCCCCTAAACGTCAGCACGAAGGGATCACCTTG  
TGAATAGTTGCTTCGAGGGTGAGGTTGCAGCATTGTAAGAAACGGAGACTTACAACATC  
GGGGATATTGCGACACTTGAAGTTATCTACTTGAAAATTAGACCTTTCATGAAGAAACAC  
GCGGATGTGACGCTCAATAATGACGATGATGACAACACTGTCCTACGGGACGTCCGTTGT  
AACTCGGATAAGGTTCTGCCTTTGGAATGTAAGGTGGGGAAAACCTGACTATCACAATTC

CAGGCATATCGCTGTGAATGCTTTGGTTCTGTTATGCGTGACCGTCGCAACATCCGTACC  
AAGGAAGAGATGGCTAACCCGCTTGTGAATATCATATAAGGGCTTCGACCCCTTTGCGAT  
GGAGAGAAGATTGAGTAGAGTTATCAGCATCAAAGTCCCTGACTCGTTTGATAATGACTG  
GTTGATAAAGCAGCTTCGTGATCTCGACATGCGTTCGGGAGGAGTTGGTAGAATCGGAAGC  
TGGTGAAGAGCGCTTAATCAGATCGGGGCCTGTCTGCACATCGTTAATCCTTTGCAAGA  
ATATGCGAGGAACTGATGGATATTAACGTCTGAAAGCACCGCCGTTGAGCGGTACAAAG  
GACAACTCCACCTATCTGTGCAATGGTGACCCAAATCTGACCCACGAGGAAGTTAAGGAA  
ATACTGTTTGAAGTGTCTGTAAGGACCGCTGGCATCTCTCGCGACCTGTGCGATGCTATG  
TACTCTCGTCGTAACAAGGAGTTCCCGGTCCTGCCTGCTGATTGAGGGTGTGAATGTA  
CCTTCTCGTCAGTGGGGGATTCTCTGCTCCGAGAAGCTCATCAAACCATTCTTCGGCAAT  
TCGGCGTTTGGCAAGGCAGGGATTGCAAATCCGAAGGACAATTAAGCGAACGATGAGGTT  
ATTGTTTTTTGTGATGGTGGGATCCCGTAATAAAGCCGAGAGCTTGCTGATCACGCTTAT  
GCAACTGGTGGTGAGTTTTTCCCTCCACGTATTCACCGGAGAGGCAATGATTGGGGTAAC  
GATAGCAGGAACTGGCTATACCTTGACGGTATACGAGGTCATGAGAAAGACTTCGACAAC  
AAAGAGGGTAAGTTAATGACTGCGCCGAATCTGTCTTGAGTGGGCGTGATCAAGCAGG  
TATGTATAAGAGAATGCGTAAGCTACGTAACACCGGTATTGATGTAGACCTAGGGTTCAT  
AGATTCAGGCACACCCCGGCTTCAATGGATCGAGCAGGTATACGGTGTAAAGGCAGATTA  
TAACCGGCCGGATATGAATCCGTAGTGGATGGATTATGATAATCTGTCAAATACTTCCC  
TCCTGCGAAGGTTAAACAGTTACCTCCGTATGAGTTTTGGGAAGATCCGTACCAGTACGA  
CAAACCTGCGTCCCCGCGTCGGGGCTGTTGATGCAGTTGCATGTAGGGCGGCTGCTGGACA  
CTTCAACCATTTCATGTATTACTGCTCGCAAGGCCATTTCTCGTCGACGGTAAGATTCTT  
GAAACGAGAGATAGAAGGGTTTTTCAGCATCGAAACTGGAAGTGGTCATGGCTTTTAGGC  
AACAAATAACGAAGCTGGTATTAAGATTCAAATCATAATTGATGAGTGAATCCGTTCTT  
GAACCTGTTTGGTCCAGACGTGATTTAGCTCAAGTTCAAGACACCTTATGCTCAATCTGA  
AGAGCTTCGCGTCTCTCTCGATCTTGAGGGCGATTACTGGAACGTCAACAAAGACTTCGT  
GCTGGATATTGCTTAATGAAGAGATGCCCTCAGAAGACTTCGTTGTCCACTATGGGTAT  
TGTTGGTGGAAATGAGAGAGGACGGTACCTTCCACATATGCTTCAAAGCAACAAGTGAT  
ATGTGTCAGGACATTCTGTAAAGATATCTGGTGTTTAAAGCCGAGATGAACCCGGAAACA  
CATTACCGAATCAACAAGAGAGGCAAATGAGGCTTAAACCAGACTCTTGCGGTATCATCA  
AAAAGGTACTTCTGCGTCGTGCCGACAGAATCCACATGTGCTCGGCCTTGATGCTGTAG  
GGATAAACAGAGCAGATCTTGGGATCACCGCAGTTTTCGTTTTCCCGTCTGCTCACTTAGG  
CATACTTGGATTATTCACCATCGACGCGGTTGAGGCCATGGGAGCCTTCCAGCAAAAAT  
GCACACATCTCAGTCTCATTACAGGAGAAAGTTATCGAGAAAACGCTTGCTAGAGTTTTAG  
AAAAATACAAAGAGTGGTTGTTTAAAGAACTGGAAGGAGCACAATAATCAAACAAGCAGT  
AGTCGCACCTGTTGTGCGGGATGGTGTTTTACCGCAGGGTCGACATATTACAACTTTTGA  
GCTTGAGTACCCTCGTATCATTACATCGAACTGATGACTCACAGTCTGATAAGTCCGAA  
CGCTATGAGTAGCCGTGCGATCCCGGACAAAAGATGATCTAGCAGGTTACAGACAGACCC  
TGCAATGCCAGTTAAGTTAGCAAAGAATAAACCAGGGATGCTGGATGCCGGTGAGCATGA  
CGCACAGCTTGATGATGGGTATTCGGCTGAAGAATGGTGGAAACTCGCAGGATTAAGTGC  
GGCACGTGTTGCAGCTGAATTCGCAGATGTTGGTTACCACAAACAGATCACGAACCGCCT  
GCTTGAGCCTTTCCAGCGAATAAAAACGGTCTTGTGTCAGCAACTGACTTTGATGATTTCCG  
TTGTTTGGAGGGTAGATAAGCATGCCGATCCAACCATCTACGCTTTTGCAGAAGTCATGAA  
CACGGCAGTTGACGAATCAGTACCTGAATATCTGAAGCCAGGGCAATGACACACCCCTTA  
TGTTGATCACCTTTACTGTAGGAGAGCAGCCATGCGGAGACACATTTGGTTACCGTCT  
TCTTGACAAGAACATCAAATCACTCATCTTGACAGTGGAGGTAGCTAAGGGTCTTTCTGC  
ATCTCGTTGTGCTCTGGTGTTTTATCGTGTGCTTAAACAACAGAAAGAGAAAGCCTTAGA  
AATTTACGGGAAGCTGTTAAGCGGTAATAAGGTACACGCTTCTCCTTTTCGATCATGATGT  
AACCCCGATGAACTGTGGGTTTCAGCCAGTACGGCTATCACCCATGCATCAATTTGACGGA  
AAACCCAGTTTCTTGGGAAGAAGACATTACCCATATTGATCGCAAAGGTGCTTATGGAG  
TGGGAAGTACGAGGCTGGACTCAGCTGCGTCAGTTACAGCCTAATAACTATGTAGAAGG  
TTGATGTAGCTGGATAGGTAGGGATTTATCAGGTTGATACTGATGGTAATGCTTGGCCTC  
TTGAAAGGAGGGTTGACAGAAGTCGCCACGGAAAACGAACTCCGCCACAGTTGGTCCCCG  
CAAAGAAAAGAACGTGTTCTGCGCATGGAACACGCTGTCTGACTGTTAGAAGGGCAAACA  
ACGATGTTCTTAAAACATTCGGGTTGCATAGGTTGAGTGCTGAGGTGTACCTACCTAAC  
CACTCAACAAGCCATTTGTGAATAATAAAGATGGTGTTTTGGAGATACAACAAGGACTCAA  
ATCTTGAATGGGTAACCGAGGAAGAGATCACTGAACATACTATAGAAACAGGGCCGAAGC  
TTGAAAACACTGAGAGAACCCATCCCCGGGCGTTATGTGAGCGAACAACACTGGAGCTAACAT

AGTATCTGGTTGAGAAAGTTTCTAGTAATAAGTATCTTGGATGTATGAATTGCGGGGAGA  
AACTACTCCCCGATTATAGGCAGAAAGGAGATTACATTATTAAGTCAAACGCAAACCAA  
CCCATCATTTTTTCGGTCAATTTGCACTTTCTGAGAACCGTACCCGGATTTCGATATAACCC  
AAGATAGTGGACTCCGTGCCGGCCTTTATGCAGTACGTTCCAAGTCACCGATATTGAAG  
GGAATCCTAAGCAGGCAACAATGCTTAAACATAAAAAATGTACGATGTGCGAAGTTGCCCT  
ATCCGTACCGTAAAACAACAATCTTTGTTGGTGACATTCGTCCGGATTATCCGTATGCAA  
ATATTTATAACGGTGTGATATTCTCCAGGTTGGGTTTTACTCCGAGAGCGCCATGGAGT  
TCGTGCTTTATCACCCATAAGATATTACAGTGAATGAGAAGGTTAATTCGCTTAAGTACC  
CAAACGTGTAGATCGTCCAGATTTGTTTGATATTCCGATCGATAGTGAAGATGAAGCTC  
GTCTGAGTGACGCATTTGGTCTGGGGGAAAAATGAGTAAAGAGAAGACCAAGTGGAAGA  
CCGTGGCTTCGATGGCAAGTATCACTACGCCGGGTGGCTCTACTTCAATGATTTAACCGA  
TGACCGCAAGATGTACCACGATGTTTAATATGATGAGTAATCTGGTAAAAATTTTATGGT  
CGCTCCGCCGGGTCTGGCTGATATACCCGACCAAGACGTTGACCAAGGTGATAGGCATTT  
TGCTTAATTCGGAGAAAAACAAGGAGAAATTTAGATCAATGCAGATGTAAAGAGTGAGGG  
AACGAAGGCGCTATTTGAACCAGAACTCCTGAACAAGGCAGCGATCTTTGGACATTAAGG  
TAAAGGTAACCTGGTGACACATCTCTAGGGGCGTCTACAATCTCCTGTATGATGGTTGCAG  
CACTGGTCAAGGAAACCAAGCCTTGCTCAAAGCCTCCGTGAGCCGAACAGACGACGCCCA  
TTCAAGGATGGCTGGGCGAGTTCTGATCGGGCAGATTTACAAAAAGCTAATGACGGTTT  
CAGCAGGATCCCTGCTCTTTATCGTTTCTATCCCGAGATGATTAAGTGGGTGCTTGGGA  
AGACATTTGGTATGTTCCGATCGAGATTGTGGAACCTAATAGTGTGAGTCATCATTCCAA  
GGACCTTGACTACGGCGACGCCGTCTGAAGCAATTGCGTGACAAGTACGGTATCAAAGA  
CAACATCAACCTTCTCCTTTTTGAGTCACCGTAGTTGATGTTGAAGGGAGTTGCGATGGC  
GCTAATTAAGCGTATGCGGTGTGAGCGTCGTATAAACGATGTCATTAAGATTTATACGTC  
TCTATCGGAACTGACGAACAATGCTCCGACGCCGTATCTGAACGGACTCCGTACCGGACG  
AACTGAATATGTGTCCTGTTGCATTATCAAGGGTGACGAAACAGAGAAAAGCTGTGGTGT  
TGATCGTGAAGTTGGGTCTACGTTCACTGTTGCACAGGCAGGTATTGGATACTACCTCTC  
CTCCCGCTCAATTGGTGCCCGCGTTCGTGCTAATACGATCAAACCTCATGGGTAAACTCCC  
ATAATACCGTGGCATTGATGCTGGGGTGAAAGAAAACCGTCCGACCACCGAGGGTAGTTC  
GGCTACGATCTCCTTCCCTGGTCCCTTGCCGGCAGATCGAAGAACTGTGCGCGCCTTTAGAA  
CTCGCAAACAGTTTCTACAAAACGCATTAACACAATGGACTACTCCATTGGTATTAACCA  
GTCGTTTATGAACCGTGGGGCCAAGAACCTTGACTGGATGTTGGTATCTTACAAGAACGC  
AGCTGAACTGCCCGAAGGTATGTTACGATGACCATGCAGGAATTTGGTGCAGAAATTAC  
TCGTGTGGCAGCGGATTCTAAGATCCCTAAAACCTGGGTGAAGGCTCCCGATCTGGAAGT  
AGAGAACTTGACCCACAGAGCAGAAACAGGTCGCCTGTACATATATAGGCCTGACGAGAT  
GAACCGGAACACGCCTTGCTAGATACTATTTATTCCTCCAACCATTCCTCAAGAAATCTG  
TCTGCCACCAACGGCTACAAAGAAATGCGTAAGATCTTTGATAGCCTTGACAGACGATGG  
TGGGGTCGCTCTTGCGTCTGCAATCTCTGGTTGCTGGGCGTGTTCCTTCGGATGAGTA  
CGAGGATGTTGGTTACTACACCATCTTATGAACGACAACGTTACGAATATCCTGGATTA  
CCTGTATGAGAATATGGAACACTCTTCCAAGTCTCGTTGTTGCTCGGTGTTGGTTTGAC  
AAACGTTGCTCATTACATTGCGAAACAGCTAGTTGCTTTCCGGTCCGCTGAGAGCAAGCA  
TTTGGTTCATTACCTGGCAGCACTGCACACCTGCAGCGTCCAAAAGACAAGCCTGCCTCT  
TGCGGAAGAGCGGGGGGTAGCTTTCGTGGATGAACAAGACAAAGTACCCACAAGGGTGGTT  
TCCAATCGACGCCTACAACAAAGGAGTTGATGGAGATGTGAAGAAACCAAGTCTCAAGCA  
GTATTGTGACTATTACGACAAGAGATTATCGAAGTTGGTGGTATCCGCAATAATGTGTT  
GGATACTTATATGGCGGACGAAAGTTCGTCTCTGGCGACGTACACTACGAACGGGCTTTA  
CCCGGTGGGAGATCACATTATCCTCAAGAAATCACCGCAAGGGTCTGTGCTGTTTATCGT  
GTAGGAGTATGAAGAACTGAAGGTTTATTACAGCTCTGCGTGGGATAGTAACACCAGCGA  
CCTGCGTGACATTTTCGCAGTCATTCAATGGTTCCCTTGGCAGGCCATAAGTGCTGACCT  
CTACATCGATCATAACCAGCTGAAAGACGGATAGATCTCAATGATGGACGAGATGGATTA  
CCTGGTCCGTGCAACGAAGATGGGGGTGAAGACTTGGTACTACCTGATCTTGAAGCTTGG  
TGCTGGCGAATCTATCACGCCCGAACTTAAAGGCGAAGAAGCAAGCAGAGGAAGAGACCAG  
CAAGGAATATCCACTGATAGCAGACACCTCGGTAAAAGACCCGTAAGTGTGAAGGTTGTGC  
TTTATAATTCACATGGGGGTTTGGCTCCTATTTTTCCGGAGGAGAGTCAGTAGCAGTAGT  
CAACGCTGAGAACACCGCCATAAACCTGGTGAATATCTGCTGCTCCTCGGACAACAAAT  
GGGTCTGTATCACACCATCAACAAAAAATACCCACCTCTGTTTGACCCGTACAAGACTCA  
AAGACAAGAGGATTGATCTGAGGCCGAAGCTGAGCAGAATCAGTCAATCACTGACTTTTC  
AACCTGTAGCAAGTACCCGTCTGATTTTCATGGTGCAGACCTGATGTGGCAGTGCGAGAC

AGATACTGTTGCACCACAGGGCGACCATCTGTCTGTTTGCACCTTTCCTCACAACAGTGA  
ACGTTTACCCATGATGATAAAGCAATCTTAGATCAAAGTTCTCCACGCCTTGACTTATTC  
TGATATCATCCGTCAGTGTTCCTCAAACCTCTCGGTAAATTATTGAAAATATTGAAAACAA  
TCAGGCAGTTCTCGAACGTTCTGGTGTGAGCGTCTAGGATATGCTTGAACCTTGAGGTTCT  
TGGAGCAGATCACCGTCTCGATCAGGAATCAGTAGACAAAGGCCAGGTTTCGAGGTTGTAT  
CCTACTTGCATTGTTCCGCGCTGATCGATCGGGCAGGGAAAGTCTTTATCTCCAGCTTCGC  
GTGGACCATTACCTTGGCAGAACACGGTGTGTTTGTTCGCGACAGTTTGTCCAGAA  
AATCATGCTGGATGAGATTCTGCACACCAAGATGGATTCCAAGGTCATTGATAGCCTTCT  
GACAGACCCGGTCTGAAAGGCTAATTTTAATGCCATTAGGTACGAGATCAATGAGATCCT  
TGCCGAACTGCGAAAAAAGAGCATCGTTGGGGTGACGACCTGTTCCGGTGTGGTTCGTGC  
AATCATCGGATTGAAGGCGCCGCTCCTGAAACACTGGACCAACTGGAAATGTGATCCGAT  
TTATGACTATCACGACATAACAAAAGACTTCAAAGCTCCAAGCGCGGCCTTCTGCCTTT  
TACGGGTATCAGGATGAATCCAAGCCGGCAGAAGAAGGCAAACCAGGAGCAGACAAACAC  
GGATAATCGTTTAAATGCGTCAGTCAACGATAGAGACGGTGAAGTCTCGGACATTCCAGC  
AGTCACATTGGACAATTCGAGTTTTGATATCGGGGTTGCTTACGACCCACCAGGTTTCA  
TGTCACTTTCGTTGGTGGGCGTGTGCATGGCCCTGGATTGTGATGTCAAGGTTTCATGCTC  
GCGCAGTCTGAATGATGTGCACTGTGCTAAGGTCTTTATTCCAGATCAAATCCTTTGGGT  
TGTCCGACTTCAAATGCTTCTGGGTGAGCCAGGGCGATTGAAACTTGAGTACAACGGCAG  
TGGATCAGTCTACGACAGTTGTAAGTTTGTGGCCGATATAGCTCTGAAAAGTTATGACGT  
TGATTATACTGGCAACATCCAGTTTTTGTTCCTTCGAAACGGAGAAATAATGAGT  
AGCAAAGAAAACATATTCATTATGTAAGGCAAGGACAATTGCCAACCTGGGTCCGGGCA  
ATGGAGTTAGCTAAATCGAAAGGTCTGGTGTATGTATCTGACCTTGAAGTAAACTAC  
ACCAAAGAGGAACAGGTGGCACAATCCTCTCCAGTACTCCCGATAACCGCACCCCGTATC  
TTTACGGATGAGGAAACGAGCCCCCGGTACATCGGAACAGCCGAACAGTTCATTGCATAC  
GTCAATGCAAGCACCTGAGGGGGTAGATGAGTGAAAGTACTAAAACGCTATGGGCGTGT  
GAAGACTTCTCTCATGAAAAATTTAAACGAGCAGTTGAGGTCGCTCTGTTAGCAACAGGC  
ATGAACCCAGAAGCACAGCATCAAACCTGCGGTCCGTCTCGGTCAGCGGACTTGCAGGTTA  
TACATGACGACACCTGTGAGACACGTTGTGGATTCCCATGGTGAAGTGGAAAGTCTGTGC  
ATGACAGAACATCTACTTCGGGACGCTGCTCGAGCGTACATTGCGTATCGCCATGAGCGT  
GACTACTGGCGTGAAGGAAAGGGAGAACCTTATGCAGATATAACCGGATTCTTGGTCCAA  
TCCGCAGAAGAGTTCACCCACGAGAATGCACACAAACCAAGCTCGGTCGTAAACAAGCAC  
AGGGACCTATTAGCGCGGATTTTGAGAAAACACCTGGCATTGACTCAGTTACTGCCTAAA  
AACCTCGCGGCAGGGCGTACAGAGGGTTTTAGACATATTCACGACCTTGATTAGCTTGAA  
AGCCCGCTGAAAAACTGTTGCGCGGTAAATTGCCGAGACATGTTTGGAAATGGTTACAAG  
ATTGGCAATGCTAAGATTAAGTAGGTGAAATCTATTGGTGTGGCAACCGCGGCAATGCCA  
CAAATCATCCAGGCTGTAGCGTCACGCCAGGATGGTGGACAGATCTGTGCTCACATCGAC  
GAAGGTATCAAGCAATACGCTGAAATGAGCTAAATGAAGGATGTGCAGCAGTTCCAGAGC  
CAGAGGAACGCCGTTGGTCCGACCAACAAAATGTGTGCATGATGCATACCAGAAACTGCTT  
CATCAGGTAACCTGATGAGCCTAAATGGTCAGGCTCCTTTCATATCGATCAGCCAT  
GGTTCGGTCCCCTCAATGTTTCGGTATCTTGATCACTTGTAAATTATCTGACCGTCCACAAA  
GAGGGCCTCGGTGCTGATAAGGTGACCACAGTGTTCCCCAAAGTTGTGTACTTCTAAAG  
GACGGTGTAAACATGAATCCAGGCGATCCGAATTATGATCTGAAGTTGCTTGCTATTGAG  
TGTTGTGCTGAGAGAATTTACCCCGACCTCATCTCAGTACCGTTGAACATGCAAGTGACC  
GGATATTCGGACGGCAGGGTGACGAGCATGGGTTGTCCGAGTTTTTTATCTCACGGTGCA  
ACCGAAATTGGAGAAACGTACCCTGGGCGTTTCAATCTCGGTGTGGTATCCTTAAACTTA  
CCCATGATTGCAGCCGAAGCAAAGCAGGAAGAAGTTTCATCACACAAACGCTTGATCAG  
CATATGGAAATGGCCTATGCGACACACATGCTTCGTCTTGTTCGTCTGATCTAGATTACG  
GCATCCCACAACCCGACATTGTCCATGGAAGGTAATCTGGGAAGGCGCGGGCCTGATGAG  
AATATCAGTAAACTCTTCTATGACGGCCACGACTCCATTAGTATCGGGTTTGTCCGCCTT  
TATGAGGCTGTGGGAATCCTTTATGATGAGCCAGTACGCAAGGAGAGGACGATGAATATC  
CGGAGGTACATTAAGGATATCTGTGCAGAGTTTTAGGCGCGCCGTGGGTTAGGTTTCAGC  
CTGTAAGGAACACCTGCGTAAAGCGTGTGTAATCGCTTTGCAAGCAAGTTACAGGAGATA  
CATCCTGGTTTAAATTGAATGAGATAAGTTGATAAACTCTTACCACCGACCTGGGTGGCTC  
AACAGCGACCCGTTACGTAAGTTCGGATTACGAATCAGGTGTCGACGTGATGATTTACGGT  
GGTAATATCGGATACGTGCAAATCCCGAACCTGAAGCATAAAATGCAGGCTCTTGAAGCG  
CTTTTTAACTATGTGTACGAGAACATTATTCTGGTATCATTACAGACAGTGGGTTCAG  
TGCTCTAAATGCGGATTCAGCGGTGCGTTATACACGACTGCAAAGGATCCGAATGTCCT

TCTTGAGGGAACCATGAAGAAGGAACGATTTCACTGATTCGTCAAGTTTCAGGATATCTG  
CCAGCACCAAACCTACGACCCTACAACAAGGGAAAGATGGAAGAGGTGCTGCAAAGGGTG  
AAACATGTAGGGATTACTGTGTTTATGAAACCTCAGACCTCGTGGACGAAGAGACGGTCA  
CGTGCTCCCTTCGGGCTAGCGGTTGCAGTCACGGATGTCATGGCCGCTTTAACCAAAAAG  
CTTGGTCGTATAACTAAGGTCTGCCTTTCAGCACTGCGGATATTCTCAGGATCATCAAAG  
TTAAGGGAAGGCCATTTATCAAGGTCTTGCCGTTACACGGAGGTGCACCACTTGGCCCGC  
AAAATGTTGATGAGGTCTTAAAAGTTATTCTGCGTAACCGTGCAGTATTTGGAGATAGCA  
GGGATATCATTGTGTGGACTGCATACACCTTCGAAGAAGTCCAGAAAGGGTGAAATAAC  
TTGTGGACGTTATAGTGTACGGCAAGTATGAACAGTGCAATGCTACAACCAAAAAGGTTCT  
GAGGTTCCGACAACCAGAGGATGTGCGTAAGAATCAACGATGAGTTGAAAGAGGAGACGT  
AGATGAGTATGAAGACACTGCGTAAGGCATACCAGAGTGAACCGTCTCTGGAACTCCGTG  
GTATAGAGCATAAAGCACAAAGCGCATCAGTGCGGACGAACCTGATGGACCTAGTATCTGAAG  
CTGCTGCCTTTGGCAACTACTGGGGTATTCCATGACTGTCGTTATCGACGATGAAAAGAC  
CTTTGTGCCACAATCGCAACTGGAAACGCTGCTGCTCGGAGATTTCGGAGGAACTTGCCCG  
AGACTTTGTGGGCCTTGATTTCCCAATACTGATCAATCACTTTACGGAACAACTTAGTA  
TCAACTTGAAGCTCTCAAGCAAATGAACGCTGACGCCCTTAAAGGCCAGGAGGCTGCGAT  
GGAGAAAGAGCTTAATGCTGCTCAGGTTAAGCTGAAGAAAGCTCTGTCTGAAGAGGTTAT  
GCAGAAAGTGATGGATACGATGGTTGACCTTCTGAAAGGAGCGCTGACACCGAACGTGCT  
TGCTTACGCGATCTATCATGAACGTATCACCATTAAGATTTCTGTGGATTGGCGCGCGACT  
TGAAACAGCTTCCGAAGAGGCGCTCATAACAGGGCTAATCCGTAACGAGGTCTTCAGTAAA  
TGATGCAAGTCCGGATATTCAGCGGAAGCTGATCGAAGGTGGGTTTAGCGTCCGGCTAGTC  
AGGAGCTGATCTATTGTGCGGACCCGCTACACGAGCCGCACTGCAAAAGCGCATTGCACA  
GGCTACCAGTGGAACAATTACGGAGGTACTTAGAAACTCACCCAAGCACCCTGGACTA  
AACTTCCCCGTTGGTGCAAGTTCTGGGAGGAATGCAAGATTATTGAAGCCGCTCAATGA  
CCTGTTTGAAGAAACAGAGATTAATACGGTGAATCGGAATGCAGGATTCTGTCTCGGAT  
TGGTGAGGAGTCCGCGGAGTTCGGGTATGGACGTGAACTCGGTAGTGGTGGCTACTTTGT  
CAAGTACGACACTGGTCCTATTTCGAGAAAGACTTGGACACATACCCAGTAAGATCGGGA  
TGGTGCCAAGAACAAGGCGAGAGGACTGATTCAGGTGGCCGGGCTCACAAACCAAAAAGGC  
TTGCCCTAAGGCGCTCTGTCTTGACCTCGTTAACCACCCTTGGTTGCTTGCAAAGCCGGA  
GTATCCTGTTGCCAGTCCTGGTTGGTATTGAGACACGAGACACATCAAAGCCGTTTGAGA  
TGCTGATGATCTCGCGAAAATCACCTAGCTGGTAGACGGTAGTACAAATCAACTGGCCGA  
GCGCACAGCCTATGACCAAAAAGTCTTAATCTGATCTCACCTCATAACGAGAACCAATATT  
GGAAGATGCAAAAAGGCTCGCGCATTAAAACCTTTCGGCTGGTCAGCAACGACGTGCAGAA  
AGACAATTA AAAAACCACCCGCCATTTCGACGGGGAACGTAACAGCGCCCCGGCTCTGTTT  
TCTCTGAGTGGAAGCAGCAGGTTTACCTTGACAAATTGCAGACTTGCAGATGCATAACT  
GCGAAAGGTATCTTCGGGACAGATAGAACCTACCAGGCATCCGCCGAAGCTGCCGACTTG  
CTAAGTAGAAACGAACTCGACAAGATGATTGTCCCTCGTACATGCGTTCAGACGGGTA  
ACCTCAGGCTTCAAACCGAGTCCTTCACTGGAAAAACTGTTTCCCTATGTTTCGTAACATG  
TTGGGTACCATCGCCAAGCGCATGGGCGACGGGGCATATTACAATGCCCTAACAGACGGT  
TTTACTGGGCGTATCGAAGTTCAGTAATTGGAGAGCATAACGGGGCCGATTATTCGTCTAA  
AAAAGCTTCTACTGATCGACGAAGCCCGGCAGAGTACCCAGAAAGGACTGCTGAGTATC  
ATTACTAGTATTTCCGATAACTGTACACTCGTTGTGATGGGTGATGCCAGTCAGAAAGAC  
ATTTAGGGTCAGTCTGGCTTGGAGGCGCTCGTTGAGTTTATCTAGCGACGCTACCTTGCT  
GGTGTGGGTACCGTGTCTTTGATGACCCTAATGAGCATATGGTTTGTCTGGTATGGTT  
CGCGACATCGCTCTTGGCCTGATGGCTGACCGTGACGCAAACTGTACAGGCCGATGGCT  
CCTCGTCAGGAGGAATAGGGCATATTATGCTGGGGTAGGATCACTCGGAACTCCGCCAGA  
GGTTATCAGCGTCATGGAAGACGCTGCTTTCGCTCTCGCCAGGCTCGGATTCACACTTCG  
AAGTGGGATCGCTGTAGGAGCGGATGCTGAATTACAGAGAGGGATGCCAAAATATGACGA  
AACTCTTGACCATGGAAGAAGAAAGAGTATCGGACACGGTTGGCAAAGATTTCAATCCC  
TTGTGACGGCTTTGATTCAGACAACCTAAGACCTTTGGGACTTTTGGGGTTATCCCTTGTG  
TTACCATGATCATCCCATACCATAACCAAAAAGCATAAAAGCGATCAGTCGGTTGAGGAAAT  
CCGTCCGAATTACGAGGCTCTGAAAGGGAAGAGAGGTGCTTATGCACTCCATGCCCGTAA  
TGTGCAGCAGGTTCTGGTAGCAAACCTTCTTGGTCCTAAGCCCCGTGCCTTCTGCCTTTA  
CTATGTTTCAGAAGATAATATTGGCAACCCAAAAGGCGGGACTGCAAGGGGTGTCAATCC  
CGCAAAAAGTCTGCCATGAAGAAGCTTTACCTAAACACTCCGGAGCGCTTGGCCTTGCG  
TAAGCAGTTCCTGACCAGTCTTGAGAGCAATCGAGGTCTCCAGGTTTAGAGAGAAGCGAA  
ATCATTCTACTGCCTTGTGAAGGTTGAAAGAATGAGCTGGGTTCTGGCTTAAAATAGGG



GATAACGGATTTTAGTTTTCCGATGCAGGTGGGGATATTTGTTATGTTTGCACCACAGACG  
ACTCGAAAGAGTTTAAACATCTGACTGAATCTTTAGAGTACGAGTCCACGAAAACATCATG  
TGGCCCGAGATTCAGTACAGCTGGACAATTCCGGGCTGTTGTACGTTGTGGATGGAGGAT  
ACCGAGGCGATAACGTTGAAGGTAAGTTCCTGCAACCTCGATAGGAGCAGTATGACCGCT  
AGTAATCATGGGGTTGTTTCCCATCGAAAACCTTATGGAAGTGAAGAATTGTGGTGTGTC  
GAGCCTGAATTTTTCGACGAAGAAGTAACTAACTTTTTACCTTTTACCGTAAGGTAATA  
GCACAGAGTATGTATGACATGAACGATGGGTTTTCCGGAGACGTATTATCTACAACGAGGAG  
GTGGCTAACCGTGATGCTCGCTGGAGGTTTTCCGGACAGACGTGATAAACTTAATCCTCTC  
ATTTATCTGGATCATCAGAATGGTGAGTCGAGTTATGTGAATATCAGTCCGAAGGAACTG  
AATTACTTCAAATTGCTGCACACATTAGCGGTAGCCTCTGAGAGGGCAAGAAAAGTTCTC  
TGGACATTCAAGTACAGCGATCAAGTGCTTGTGGACGCCGAGACAGGGTACTACCTTGAC  
TGGCGGATGAAGAATGTTTAGGTTCTGAAAGGCTACATTGCACACGCGCGGAGGATGAT  
TAACGAGGAACAGAACAGAACTTTTTCCGGTATGCTGCCGGGTATGACTGGGAACATCTA  
TAGCTACCCGGACAAAACCTCACGACCACCTGATCTACATTGATGATCTGTCATGGCTGGA  
AGAACATCAGGATCGCCTGCAAGTTATCCGCCCGCAAGCCGTGATGACACAATCCGGGT  
GGTGATTGACCGTCTCGTGGGGTAGTTTCTATCCCTTTGGCGTATGACAGTGAGATCCG  
GCAGAGTCAGGCACAGATCGTCACCCATGCCGAAGGCAACCTTTGTTCTGCCGGGACAGT  
TTTGTGGATGGACTTTAAGGATAGCACAGTGTACCTCTAACAGAGTTCATGTTCCATAA  
TTATCGGGGCGGCACTAGCGGTGAGGTTGCAAACATGTACGCTCAGATTGCATTGAGAA  
GCATTATTTGATCGTATGATTGACACCTTCTGCACCGGGCTTCAGACCGATACTGAGAG  
TGCAACCATCAGCGGTGGTGGTCCGGTGTGCATGGATGAGATCGACATCGTTAAGCGTCC  
CACCCAGTGATGTTGGATGAGAGAAACATCAAACGTATGCAGGAAGGTCAGAACCCAAT  
CATTGTAGGCGAGAAGAAGGCTAAAGAGGAGAAAAAGGTCGTTGAGAATGGTGACCTGAA  
CAACCTGCCAGAAGGTCAGCCTGAGAGCGTTTGTCTGAAGCGTGATGTTGACGGGGGAAT  
GTTCAAATTCATGTTTCCACGCTGAGTGCAAAAGATTTTGATGCCATCAATTAGTAAGA  
ACTACAATCAAACATGGCTCAGATCGGTGCGCTGGCAGCAGGCTCCGGAGTACCTCTGAA  
GGTTACCACTCGTAATAGCCAGGAACTGATTGGTGAAATCCTCAGAACCTCCGAGGTAAT  
CGTTGCAAGTCTTCTGGGGCAAATGGGGAGCTAATGTCTGCACTTTTCAAGAAGAAGGAA  
GATCCCAGTGACATACGATGTCTACGACACCCCACTTGGGCTGTTGTGCCATTTTAAAG  
GTTAACCCGAATGATTACACCAAACTTACTTGGAGCCTTGCAGAGGCTCCGGTAGGACC  
TAGAACTTCTGCCTTTGGGATGCGCGTAGGGTAAAATCCGTCAGGGCGTATATCATGAT  
AACACCGGGTACTACCACGTAGATATGATTGTGACCACCCCACTTCTTTGGCGCAA  
GAGTTAGTCACCAAGGCACCTGGTGAGGCGGATCTTGTGATCATCATGTTGAGACTAGGA  
TCGCTTGAGGGCATGAAGCGTAGGGAGTAGTGGCAGGAGAACCAATCAGTTCTCTATTC  
GTTCTTTTTCAAAGGCCATCATTTTCCGATGATGGAAAAACCGATGGGAGTGGTTATGCC  
TGGATTGTTTGGGACAAGAAAAACACGCCCGGACTGAAGATATTTAATTTTCGTGGAGCGA  
TAGAGTGACGATTGTGCGAAACAAGATGCGAGAGATCGCAAACAACGGAGAAAAGCAAAC  
CCCGGAGTCATTGAATGAAATGTACGATCAGATAGTGGACGGGATAGCGCAGTGTGCGAG  
GAAGGGGATGTACGGGATGGGACTTTCTCTCCAGTTCACGGAGGGTAAGAATGATTATTT  
GCCCCATATTGTTGGCGATATTCGTGGTTGCGGTTTTACAGTCGATATCATCAGCTACCA  
ACCAACAAAACAAGCACTGCAATAAACTTTTTCGTAATATGGTAAATAAACCTGGTTCG  
GCGGGTTTTTTCGTTTGTGTACTTGACATGGCCAAAATAAACACTTAAGCTGTTTTCGAA  
CAGAGGAGAACAACCTTGCATTTTACGTTTACTACCGTCTTTTCGAGACCATCGGCTTAG  
GCGAATACATGTGTGACCTTATCCATAACTCGATATAGGAGTAGGATAACTGACCTGACT  
GGAAGATTTGGAGAGTTAAACGTTGCAATCGGCCTGCGAGTATGTCAACTCGATTAATCA  
AGATGTTGAAACACGGGGGGATGGAGGACGATATGGTTTATCCACTCAACGCAAATAGGT  
CACTAAAAGATCTCTTCTAATAAATGATCCAATGGGAGAACAACGAATGAAACAAAGTCT  
TACCAAAGAACAGGCCCTGATCCGGACCGGGTTCACCGGAATCCTTTGCTGTTTCGTTCAA  
CCAGATGCACGAACATGTCGCAAAGGGCCTGAGCCGATCGGTATGAACGCACGAGTACGG  
GAGTAAAGAGTACTCCGCAGAACTGAAGGACGTTTATCATGAAGACTTCTTGGCGAGGAC  
TTACAAAGGGGCATAATGATGACCGAGCTCAATGCCCGTGAAAAGCTTTTTACGTTAGCA  
GATTATCTGGGTTGGCAAAAAGAAACCCTTACAATTGGCTTCAAATCCCCAGACCAAAC  
GTTAAGCTGTACAACACTGGTAGGAACATGAAGACAGTCTCCCGGAATTGGCAGACGAC  
TACCATGACGAGGAGGGACGCTGCTTGTATTTTCCGTAAGACAGCACTGAGTTATGAC  
CCCCTGGTCCACGACGCTTCTATTTTGGAAACCCTTGGACAAGAGATGTACGACGTTGAT  
AATAAAGACACAGACATCGGCTTTTACTACATCCGACAAACAGTCCGTAAAATGTACATC  
ACCGATGCAGGCTGGAAGTTACAAAAGCAGTACGGCCTTGTCTCAACTGAAACAAAAGAA

GAGAAAATAAATGATTAATAAGACATACACCGTTGTAAAAGACCTGTGATATTAGAAAAT  
GGGACACCCTCCACAGAGGGTCAAGGTGGTATCCACAATTGTATAAGTTCCTGCTGATAC  
CGTTGTAGTTATGTTTCGTCCAAGAAGGCCAGTTGTGTTTATGCTCCACAGTCCGTAGCGA  
TGTATTTCTTACCAGAGGTGGAATAATCCAGACGCAGAGATGGGGTTTGTGGTGAATCAT  
ACACACAATTTTTCGCTTCCGTATCAAAGGTGTTCCGGTATGAAGCCAACGATTAGTACAC  
TGCAGAAGGACTAGGGATCACCGCATGAATCTCTATGCAAATTGACTGACGCCAGAAT  
GGTTGGACTGACGACATGGAATAGGCCCGGAATTTTTAGAAAATCACGGTCAGGAAGGA  
ATTCTTCTTGTACTGAAGATGCTATTGAGAGGTCTCGCAACGAAGTGGTATTATCTAAT  
CCAGGGCAAGGGTGGAAACAGTGTGCATTTTACCTTCTTCATTTAGGGTGAGACTGGTCTT  
GACGAGTATAACATCTTCATCAACAAGAAATCATTAAAGACACATTTATAAAACATATATT  
CACGAAGATTTCTAAGGAGAGAAGATGAGATTATATTTGGTAGGTGGCGCAGTAGGTGAC  
GTTTTGCAGGGCCGTGAAGTCCACGACCGTGAATAATTGTTTGTGGGTGCAACACACGAG  
CAAATGATGGAAAAGGCTTCGTCCAGGTTTGCGCCTGCTTACCGGTATTCCCTCCATCCG  
GAGACTAGGGAAAATACGCGCTCGCTCGAACTGAACGTAAGATTGGAAGTTGTCACAAA  
AGTTTTGACACCTTTTTTCAGCCCTGATGTAAAACCTGGCAGAAGACCTGGCTTGTGGGGAT  
CTGACTATTAATGCGATGGCTCGGGATCTGTATAACCGCAGACATCATTGACCCGTTCCGGT  
AGTCAATATGATATCGAAATGAAGGTGCAGCGACAAACGAAGTGGGCATTTCTTGATGAT  
CCTCTGCGTATTCTGAGAGCTTACAGATTCAAACCGCAGTTGGTTAAGGCATCGGATCTC  
CTTCCGGAGACAAAATCTCTTTGTTAGCAGAACTGTCCCGACTTTAAAGTACCAGTGAC  
GAGGGTAAGTGGAAAGAGATGGAAAAGGCTGTTGGGTGAGATGACTTCCGTTCCATGCT  
GAAGCAATGGCAGAACTGGGAGAGTTACCAGAACCAGAATCGCTGCGTGGTGTAGAGCAA  
CCTCAGGTTTACCATCCGGAAGGTCAAGCATCCATACACACATTGCTGTGCCTAGATTTCC  
GCAGACCAGTACGAGGCAAACCCATAAAGCGAAATTTGCAGTCCTGTGTACGACATTGGC  
AAGGCTCTGACATCCTCCGACTATGGGTACCTGATAGGTTATGAACAGGCAGGGCGTGCT  
CCGGTAGATGCACTGTGTGAACGTATTCGTGTGCCAGACGAATTCGTGCCCTTGCTCGC  
TACGTGACTGCGCACCATACGGGTGTTCAATCCATCTCCCCTCGTAGTGGAACAAGCGT  
GCAAACCGCGATCACTATTGAAGCTTTGCGAAGCTGCTGGTAATGTGAAGCGCATCAAG  
CCAGCTATGAAGGTCCGGGCCCTGGCAGACGTATCTTTCTGTGATTCAAACGCCGTGGC  
CTGACAAAGGCATCGGATCCTTACCCACAGGGCTACGTTGTGATGGATGCTTTCCGGTGG  
ATTGTCGCATTTGATACCAAAGTCTTCTCCCCTGAAGGTTTTAGCAAGGGAAAACCAGGG  
ACTTAGATCGGGGAAATGAATAAGGTGGCACGTATCGACGCAAACCGCGGCGTCACACTG  
CCTCTAATGGCCTGGAGAGGAGTGCTGTACGGAGACATCGAATAAGGAAGAGTACACATA  
CGAGAAACACCACTTTATCGCTGACAAACGCGCAGGGAAAGTAGGGTTCTGCATGGTACGG  
CCTCGTAGCCTTAAGGAACAAGGCTATCGACTGGTGCAGGGATAAGGGATGCAATTACCC  
ATTGCATCCATCGTACAGATGCGCCATGTTTAAAGTTCACACCATTTTTCAAGTAGGGGAA  
AAATAATGCCTATTGAGTTTGTAAATTTATCTGTGCATTGGTATACTGGCTATGTTGACGA  
TACTGTGCTTGGAGTGGTATGGTATGAAGAAGATAAGTTCATCATCTGTCAGCATAGGGC  
TACAGGTCGTAGCCTTTTGGTCTCCCGGACCTTTCTGTTTGGTGGGTGGCACCATTGCCG  
CGATTTTTAAAGAAAATTTTGTATTGCAAGGAGAAAGAAGTCAAGAGACGTATAAACGG  
CTTGGCAAATCGATACATTGCTGGCATTACGCAGGTACCCAGTCAGCACACGCGATCGC  
TGAGAGGTTCTTGGATTATTCTCAACGCCGGCGCAATGCCGGAAGCCTGTTGAGGGCTTG  
GGCTGACCGCGATAAGACCATCGTCGTCTCTATGGTGGATAACAAGTCGACATTGCACAA  
ACTGTGTGACAAGTTCAAACCGCTGAGCAGCACTTATCCGTAGACCTCGTTCTGTGAAGA  
GCAGGATGCACTGAACGGCGCTATGACAGAAGTAGCTGAGGTATTGGCACAGTATATGTA  
AGGCCCGCAGGATTCCGATGTGGTCAATCTGTACCAACTCGGAAAGTACATTGCCCTGG  
GGCAGTCAACCAGGACCGCGATGGAATGAGAAAGGTGGTGCCTAACTACACAGAACC  
CACAGAGCTGATTAGTATGATTAATCATTCCGACTGAAAAGAGAATATGATGAATGTAG  
GTGAACCTTGACCGCAATTTTATTATCGAGATTCTCAGTGCAGATACGCTGATCGCTACTG  
CCGAGATCCGGAGTTTTCGGGTGAGAATACAAAAGGATCCGAATCTCTTTGACCTCCCC  
TGCGGGATGCGGTAAACGGTGCTGAACAACAAGTAAAGGACGCCGAATTCTGTTCTT  
CACACTTTATACCCTATTCAACCTGCTTGGTGTGGTATTACTGACCCGTAACCTGGCGGAG  
CGGGGAATATTTCAAGTTGGAGACACGAAGTTGCTCCATTTTCGTCTGCCTTGCCGTTAA  
CGAGGGCTTGATGATGGTAAACAACCTGATCCGACATTCTAGTGGGCTGTTTGAAGGAAT  
ACTGTTCCGGGATTGGGATTTGGAGACATCTTACGTCCGCCCCTGCAATCTTGCAGGAGAA  
AGTGATCAAGAACGAAAAGAAGCTGGTAGCCATCGGGCTTAATGGTTTTTTTCGTTGTGCA  
TGTATCGGTGAGCTGCTGCGGCTAAGGTGGTTAAATGAAAGACGTTCCGGTGGGAGTATTT  
GCAGGTTGGTACGTGGGTTATAACTACTGGGTATGCAATGAATTGCGCCCTGGTAAGGC

GTACCAAATCAAGGAGAATGAGGAGAAAATCCTTGTTGAATCTCGGCCTAATCACCCCGA  
TCCCGCAGACCGTTACTCCATGTCGAAAATGAAGTCGCGCGAGTGCATGATCAAGGTAGT  
AGAGCCTACAGGCTGGTATACGGACGAGGTCGTTTTATTGATTTAGGATATCGTTCGTTT  
GAGAGACAAGGTGAAATCCTTGGAGGCGAAGATTAAGTACAGAGAACTATTGAATTTCTG  
GGATAAAAACCGCCAATCCGATATTGTTTTCTCTTAAGGAGGATTTTGAAAACCGTAGTC  
TTGGTGGGTTGCTACTTTGACGGCACTGCTTAAGGGACTAAAATCCGAACATCGGTTACC  
GATGTCCAAGGGCTATTATGTTAAGTACCGTAGTTCATCCGCACACCATTCTGCAATATC  
AAGGAGTTAACCCTTGCTGACGAAGAAGATGGGAAGATTTCATGAAATGACAACTTCACG  
AAGCTTTTCGTGGAGATGCACACCAACATCAGCGGGCCTATGTTTCGTAGATGGGGAGGAT  
ATTCTCCAGAGCTCTGATGGGTATGACTATCTACGTAAACTGGCACCAAGACGGCTATCG  
AGCCAGGTGGCCTTTAGCTTCTCAGGCTATGCAATGGCACAGCCTAGGCCTATGCGTGGT  
CACTATAAGTGGATCAGCACTCCACAACCTGAATCAAAGCCAACCCTGAAGGAGTTTTTC  
CGCTTGGTGCATAACGACAGCGACCACCCGTCCTGAAACATTAGGATTTTCATGCATGCA  
CCGGACCGCCTGAACAGCTTCTGCATCCTCGTACCTTACGGTTACAAAATTTACGGTGTT  
ACGGGGAACCTTTAATAGTTCTGGCCTATTGAATGCTTACGGTTCGATTCGTAATGTTCGAT  
GAACAGCAACTGACCGCTGCGGATAAAAAGCGTAAGCCTTTGTTTAGCGTAAAATGTCTG  
GAAGAAGGGCACACGCTGGCGAAAAGAGAAGTACCGGAACTACTGGAAGTGAACGAAAAT  
CGCAATGAGGCTCGTGATGAACTCGAAGTCAAGCTCGGATACGATAGCTAACATGCGATG  
CACCTCGTGCCTGATGCGTATGACGGAAGAGACTTTTGCTGATGGTAAAATCCTGGTT  
AAGAGGCCTGACGCTCTGGAAGTCTTGGTCTCCTCGTATGGCAAGTGGACACTAGTAGAG  
CTTCTTGCTTGGGCTGCCAAGAATGACCATTATATACGCGAAGACCTGTACAAAAGACA  
GATCTCCACCAACAACAGTGCTTGAAGTTCGCCGCTCGTGTACTTATGATAGCTCAAGAT  
ATCTGCTGGGCCAAGATCGATGCTTGAAGCAGTAATCGGTAACCTTAGGGTTGCATATGC  
TGTTATTGCAGTGGTATACTCTATAGAGATGGAGAACGCTAAAGTTCTCCGTCAGATTCA  
CAAGACCAAGACAGAGCATGATTGGTCTGAGATTCTCTTCGTGTTTCGGGTACGCCTGGCG  
GCGTGGGGCATTTCGCACATTATGTTACGAGGAGAATGAATGAGACAGCTTGAATTTCTGG  
GAAGAATGATCGGGGTGGTTGCGGAATGGCAAAGAGATTACAAAATGACCCGTAACCTTCT  
CTTAAGACCCAGAAAACCTGGGCCGAAATGCGCGACCAGGGGGTCTGGCTTGGTCATGTGT  
TTGTGGGGTTACACTGCAAGGGGTACACAATATGAGTAAAGGTTTGTAGACGCCAGAGCA  
GGCGTGGATCTTACGCACGCGTTTCTCTTGAAGAATCAACCGGCAACGACCTCAAAGA  
TTTTGCAAAGAATGTTAAGTTGGTTGTATGCACGATGCGTACCCGATTTGCGTAGGGAC  
AGGCATTCGTAATGATGGCCTGGGTATGTCTGTTTGCAGCATCGCCTGCCCTGTACGAA  
GTGTTCTTTCAGCTGTGGATTGGCAGTAAATCCAATCACTTAGGATTTTGAACCTTTGGT  
AGATTGATCCTTCCCTCCTATATAATATTTGCCACGACAATGATGAAATGGAGGTTAATAT  
TATGATAGGAGGAAATATGTTTCAGAATTTGGGTCGCGATCACCTACCGTACAATAAAA  
CTGGGCAACTGTGCGTGAAAAGATTTTTAATTAACAGGGATGGTAAAAGAGCAGCCTTT  
ACTGCATTCGTGTAGGGCGATTGAAGGCAACTCGTGTGTTGGCACGCATAACCCTATGA  
CGTACATTTCCCTGTAGGAGATATAGGTAAGCTCCATCCTGAAGGCTTGGAACAGTCTT  
TCGACCAGTACGAGGGTTTTGAGACGGCGGTCCGGGACATATCTAGAACACACGACATCA  
TCAACAACGAGCACAAGAAGTCGCTGGGGTGAGGATACAGAATCAAAGATCGGTTCCGGGA  
ACCTCCCAAACAAGTTACTCTTTGCCGTTTTTCATTATATATGCAATAATCAGCGTGGTTG  
TGTATTTCTTTTCATTATTTTGAGGCAATTGCATGCGGGACAGAGGAGATTATTACAAAC  
AATATGCCGCCCCGAGGCGTTATATAGACCGGCAGCGTCGATCCAACCAGAAGGAAAAG  
AAAGACAATTGCAAATCATTTCATGACAGAATTGAGGCGGAGAAACGTGCAACAGTCAATA  
GTGTGCGGGAGATCTTCGGTCGTGTAGAGGCCAACCATGTTTTCGACGACAGTATGCGTG  
ACCCAGGCAATCCTTGGGAGACTGACAACATGCTGTCCCTCCGTGCAAAGATTGTATCTG  
GCCTAAACTGTTGTGATAATATCCAAGTTATCGCCGCAAAGTTGGACCGTAGTAAGAATA  
ACATCATTATCTACACGAACCGACTGGAGTGGATTAAGGATTCGGAGACCCTATGCAGGA  
CGAATTAATAAAGCTTTTTGTAAACGATACAAATCACAGCGTGATCAGTAATCTGCCGGG  
AATATCCCGCGCACTGGCAAAGTCAAATCCCGCTCAGAATGGTCAATCAATTTTCGTTGT  
CAAGCGTAAACACCATGTGTACCCTGCTGGAGTGCTTTATCTAAAGCTTAGAATCAAGAA  
TAGGGCAGTAAAAACGAGCAAATCTTTTTGATAACAACGAACAAGGATGAGAAAATCTG  
GATTTATACTGATTGAGTGTGCATCGGTGAGGGCGAGGTATACAAGCGAGATATGTTTTT  
AGACTCATCATCCCGACCAGCTGAAGAAGCCGAATTGCCAAGAATGGGCAAGGGTGCGGA  
TCCTGATATCCTTATGAAAAAATTCGGAAGAGCACCCGGAAGGCTCTTGGAAAGGGTGAT  
GTGTGGGATATTCGTTGAGGAGTATGTGTCTGCAAGCGAAGAACGAGTTATTGCTTTAAT  
AAGTTAACCCGCCAATGGCGCGTTTTCTTTAGTCAGTCGTTTGTCAATTGTTGCAATGACC

ATACTGTCCGAATCATCAGAATCTGTCAGGTTCTCAATTAGAAAAGTCCAACGTTGAACGC  
ATGCCCCGGACCTGACCTTCGAACCAAATATCGTCCACCGGGGAAGGTTTACGGATTGGA  
CCAATCTTGGATCGTTCAAGAACATAACACACCCTGCCGTTTAGATCGAATGTGAGCGGT  
TTCGTGGGACTGAATCCGGATAAAAGGCAGGTGGTATCCGGGCGCACAAAGGTGGTCTGCC  
TCATTACGTTCCCGGCGACCGCCATTATCTTCTAAGATCAGCATGGTGTCTGCGTATTGG  
GTTGTTTAAATCATCAACTCTGATAATTGTGCGTTAGTCAATGGTTGACAAAATATTTAT  
TTATGCCATAAAGGGGAACAAATTCGGATAGGAGATTGATATGTGTGAGACGTATCGAGA  
TGCAAGGGAAGAAGCTTAGGACCATGATCGAAAAGTAAGGAGATCCTTGAACAAATCCTGAG  
TGTTATCGACCTGTGTATCCAGACCAGGAATGGTGCAGGAAACAGGCTCCAGGAAAGGGC  
GAACTGCTCGCTTCTTATCGAAGCATTAAAACACACTGCACACAAGATCCTGAAAAGAGG  
TCTTCAATGTCGTCCAGTGACTACGGCGTAATGTCTATGGATCCATGCTCCCGCGAGGGA  
GCCTGGTACTGCCTGATAAGTAAATTACCGTTTTACAAGACGGCTGAAGTAATGAAACAT  
TACAGAAAACTTGGCTATATGCTCCGAGCAGACGTGAGTGTGGATGGGGTAAAAGGC  
GCAGGCATTAAGTATCGGAACCTTCACTTGGACGCTCAAGTGGACCGATACTGGAGAAG  
GAGATCGTTGACAATGATTGTTCTATGAGTCTGAGAATGCTCGCAGGTACTTCGAAACAA  
CGCATGTATCGTGGTTACCGAGTAAAGAAAGGCGACTACCCGGTAACGCCGGCTGCAAGG  
CGTGTGCCAGTGGAGGGGAGACTTCCCGCTACTTTCACACCATAGATGGTGTAGAAATGAT  
CTACCGAAGCTTAAATATTGTGATACATGCACGTGCGTATTGCATTGTGATGTGCGTGGT  
ATATGTTGGTCTGGACATGAAGATTTATCCGGTCATGTACGCATGTGCTGCGTGTGCGTT  
GGCTGCAGGCTGGATTCTAACCAAGCATCTCATGGGAGATGAAAAATTCTGTAAAATTCT  
TTCCGTTTTTCTGACATCATCTGGCGGACATATTGCAAAGCATTTCGCTACGAGGGGCTT  
CGACGAGAGATCCACAAAGATTCAATTCATCAGTGGTTTCATTCTGATTAGCGATACTAA  
CATCACAAAGAGAAAGAGATGGGCGGCGTTATAACTCTTGCTTTCATCAAGCGGGAAGTG  
TGGCAGGATGGCAATACATGGAAGTGGCGCTTCAAGAACAAGGAGTTCGAACGAGAGGGG  
CAAGCATAAAAGGCAACTGTGCAATATTTCAAGAAGAAAGTCTCTGGATTTTCTGGTATA  
GTAGAGTCTTACACAAGGAGAAGACAATATCTTTTAAAGGGTCTTGGGCGGTACGGCCCC  
CATCACCGGCGGAATCATCAGAAAGGCAATGGCTGGTGGTGCAGGATTTACTTGCTCCATC  
TGAAAGCGATGTGCTGTACGGGAGTTGTGGGACGTACATAAGTTTCATTGGTGTAGCCAC  
GACGACTTGTCCGAAGATTCTCGATGATATAGAGGATTTTGGTCCGGATTCAGGCAATT  
CCTTGCAAACTGGGAGATGGAAGATAGTTATTTTGGGGGCCCAAGTCCGTGGCAGGTAT  
CCTTATTGTTCCGGCTGGGATGCATCCGTAGAGTTTATCCTGAGACAGGACAATAACAAA  
GATTCCCCCTACACAAATTGGTAATGCGGGCGGTATATGCTTTTTGTTGCCATCATTCTGC  
TTCTCACTCTGAAACCGACCCTTACCTGAAGTGACACACCACACAAGGGGAGCCTGAAGG  
GGCTCTTGATACCTGCCCGAAGAACCCCATCAATTTTGTCTAAATAGGCACATCTATTT  
CCTCTTGACGTACGCTGTCAGCCCTTATACAATCACCTAAAGAGTCACAGGTGCTGAAGG  
TCGGCTCGACACCAGCACCAAGGGTGCCTTGCACCTGAGAATTGAATATTTCTCCTTCAA  
CAGTTTTTACGGACATTGGATGTCTGCTTGTGAACTGTAGCACTGCTCCGGCGTGAAT  
GGTTGTACATTTCAATTAACACACAATGCCCGTTGCACGGGTGAACTCGTGCATTGCTCTG  
CAACACACCATGTTTAAAGGAATTGCATTTCTTCGACACATGTAGCCTGAAGTGTGATGC  
TGTAACATAACCGCAGGGCGGTTAACGACAGGCTAACCCGTATACGGGTAAAGATACCAA  
AACCCCCCCCCACCCCGGCGGGAAGGCAAAGAGTCCAGTCTTGTATCTCTTGGGG  
ACGAAAAATATCCGTTGGATATATCTTTGATGTGCTAGACGGAGAATCACACACTCCGAA  
ACTTGTCAAGGATCATTACACAAGATCTCAGTCGTCGATGTAGAGCCGATTGCGAGTTT  
TTGGCACGATGGTTGCAAGATGATTAGTGGTGTGCCTAATGATCGCCTAATGAAGCTATG  
TTGTTTGGATTGGTTAGCTAGCTTACTGCACGATTTGCACTTGACTTGCTTACTTTTGGC  
TTGGTTGGTGTATTTTACATTATACACGTTATACGCCCCACAGATCGGACTGTTGCACGG  
GTTATAGTGGCACTATGTTACCTTTGCATCAATGCAGCATTACTATGACGAGTATGAGGC  
TGCTGTATATTACTGTGAAAGTTCACACCCGTCCTTATTTCAGTTTGTGGGGTGATTT  
CTAGATGATATTGCTTTTTCATCATCTTTATAATTTTCGATTTCCATATCAATTTCTGAATT  
AAAATCATTCCGCAAATAGAAATATTGTCTGAATTTACACAAAACATTTGACAGGGACG  
GGAAATTGTGTTTAGCAACACCCTGCTTTTGGAGCAATTTGCCACATGATAACAATTCTCA  
TTTAGCCCTGTGATCGGCGAGATAACCCGGCAATGCTAAAGCATTGAAACGGTTCCTTATT  
GTAAGTGGCTCTGTATTGCTATACAAGGGATTAATAGAATTTTCCTATTAAGAAAAAGC  
TTGACACATAAGTCATCTTTTAAAGAACAAAAACAAGCCTTTCAGCAGGCCAGCGGCCTGA  
ATTACGCATCGATTAATCATGGTTTAGCATCCATGAAAGGCGATCTATTGCTAACAAAAA  
GACATTGGCTTGCACCACCTCGCGACACTATAACACAAAGCCCTTACGAGTTGTTTTAGG  
CACGGTAAACAATGTACAGATTGACCAAAGCGGTTTTGTGAAGCTCCTTTGTCTGTACAC

TATAACACGAGAGCGATCAACGTTAGCTGATCGATGTTATCGTGGCGAGTGTGATTATTT  
CATTGCGTAACTATTCATTGTAAACGACTTATAATGTAAAGGATGAGCCATAGCTTAATC  
ACGTATGTGATTATATCGTAGCGTCTACGAGCCACCATAACGCGAGCGAACAAAAGAAGT  
ATTATCATTTGCGGTACTCTCGTGGTATAGTGTCACTCGCTACGCTCGCGCCACTCACCA  
AGATCACGCGTACGATTACTTTTTGGACAAGTTCCATTTGTGTGCATAAAATAGACCG  
ATCACACAATGGCTTCGATGAGCAAAGTTATCAAAGGGAGTTATTATAACGTATTCACA  
TGAAACGTTTTAAATGCGTGGTTTATTAGTTGATAACATGCGTTATCAATTTTGCGGT  
GTTAGTTGGTCACAGGCGATACGCAATACCCTTTAAACGCAATTTAACGAGTTTTAAC  
GTGTCGTCTCGTTAGCCTTGCCGTTCTATTCCTTTCCCTGGGATCTCTCTAAATTCCTTT  
TTTGCATAAATGCCAACGAGGTTAGTGGGAATAAATCTCGGTTCCGGTATTGCAACCAAC  
ATAAAAGCGGGTAAAGATTTGGTGTGTGTTTGTGGTGTGTTGTGTGATATGCAAAGCCG  
CGACAATTCGGCCTTACTTACAACATGATAGCCATTGGTCCGGCAATGTTGGACGGTA  
GATCAGGATGGTCAAACCGTTTAAATCTGTGTTATTTACGACCCCAATAAAACGCCAATT  
GCAAGGCGTCGAGCATGGTGTACCTGTCTGTACGGTTGCCTCACTGCGTACAACGCTGG  
AAATACAGCCATAAAAAACGCTTGACAAAACAGCCACACATCAAGCCCTGGCTTTGTAA  
GATTTTGGCATTATCGGTAACGGTGCATTGATTGACTGTGAACCGATACGCCGTCGAAAC  
TTCCGCCTTCATCAATCCGTCTACCATTACGCACATTTTGCGAATCACATATGCACAAT  
GATCGTTAAATCAAGCGCTCTTCTAATCATCTCTTCTATAGACTCACAGAATATAAAGA  
CCAGGGGATCGAGGGTTACGTAGTAATTGATCCACGCTCTCACCTGCTCACATTCCAGGG  
CGCGATCCGCCCGCTAAGACTTGACGGGCGGAAGATTTAAACGTGATTACATTGTCCA  
TCAATTCAGTGTAGGCGGTGTCACAGCCACTTGCCCTCGAACTCTCCAGGATCGGATTGAA  
AATCAGATTAGTCCGGATGAATAAAGCAGACAGAAAACCGTTGCTGATTTTCACGCTTTG  
TAAGGGTGTATCGTGCCTATCCTAGCCGGGCCCTTACATATCTTCAGAGGATATTTTCAT  
ACTTCATGATCATTTGTCCGGGTTATGTGGTTATGCGCCGTAAAGCCATCACTCTTAA  
TTCATCGTCAAATCGGCCAGGGATTCGAAATATTCAAATTCGCTAGCTACAACAAGCTT  
GACAAGCTCACTACTTTTATACTCTTAAGGAAACATGCGGATCGGCGCGTAACTATAGAT  
ATCCGTTAGTTAGATATACTCCCCGACCTTTTGAGCGGTAACGGGGTTTGTATTTTGTG  
CAAATTAACCTTTACATGATCTGGGGTCGACAAGAACGATTGCCTGCGGGATAGAATCC  
GGGGTAACTATCAGGGCATTGAGTGCCGGATCTTATAGCCTAATTTGCTTTGCAAACG  
GTGTCGGTCATTTGCGCATTGGTGGATCGACGTTGTGATCTTACAATATCACACCGAT  
TTATCACCAGAAATGAGGTTGCGTAAAAATTCAGTCGGACCCGTTGTCTTTTTAATCATT  
TTAGTATAGCTCTAAGATTATGCCGGGGCTGTCCCCGGCCTTGTTTTGGTTAGTATTCGT  
TAGCATACTTTGCTACACGGTCATCGAAGGCGATTTTAGCATCAGCACCATCCCAGAATA  
AGTCTTGATCTTGCTGCTCTTGAATGTCTAACTGCATAAACACGGCTTCAGCTCGATATT  
CCATATCCAGGCATAAACGGCTTTCAATTGCATTAATAACGCTTTGAAATAAACGATATT  
GCATACTATCCTTTAACATTTTCGAGCATGTACGCCGCCGCGCTCTCGTCCTGGTCGAGGC  
AATATGCCGACCAGATGCTCGGCTTAACATTTTCAAATGTGCATAAAGATTTTAAACGA  
TAAACGGCGAATCATCGTTAAAGATTCCGATCAATGATTGCAGTTTATCATTATTGCTGA  
TAGTGATGAACTTTTGCATTTGTGTTTACCTTTCCCTGATTGGCAGGGAACCATTCCCTCG  
CCTCACGAAGATATTAACCGATCAGCGCCTGGCATGCAAGGTTTTTTTTTATTATCCTC  
GCCGGAATCATCGCAAAGTTGAAAATATCCAGCATGACACCAGCAGCGATCCATAGCAG  
GTCGATTTTCAGGGGGTGGCGATCAATATTGTCGATCCCGTCTGCCCTTCACGCTCGAC  
CCCCGTTTCGGCCAGGTAATAACGGATCATTGTTGTCGCTGTATGCGCTAAACTGTAAGCC  
GTCACGGAAATAAGGCAGGGCCTCGACCGTTGACGCCTACAATCCTCAGAGTGGGCGAT  
CTCTTCTACCTGTTCCAGGGTCCCGAAAGATGAGTCAGTGCCGACCGCATCAGGACCACC  
ATAAACATTTTCATTTTCATAAATCTTTTCATTCCCATTTGTGACCGGGGGCGATCCCCG  
GCCTTTAGGAATACTTTGGCCGCTCTGGGCTTCGGAGTGAACCGGAAGAACGTCATTAC  
CTTCCCAACAGCCACAGCGAATGCGTCCTGAGATTGACGGATAGGCAAACCTGTCAGCCTG  
AATTCCGTAGCCTTTTCGCACCTCCAAGCTGATATGCGACGTAATTATCTATTACTGTCTT  
CTGTGATGCGTGATCAATTGTTGTTTGCCTTCGGTTCATATTGTCGGGGCGATCCCCGCT  
CACAGCGTCATTAACATGGCAAAAACGAATCAAAGTTTTACCATCGAAACGACGAAAATC  
ACGTATTGCATTATCGGAACCGCCATCCATGGCAAACAATTTATTTGCAAGTTGCGGTTT  
TAAAACCTCGTTATAGTTGAAAGATAATAACAGAAGGAGGATCACGAAAGACCACACCAG  
GCGACACATAAAACGCGACTCAATGTAAACCGGGTCTTCTGTAGTGTACTACTTTGTA  
ACCTTTCTTGATTCACTTCTACCAGGTGACCCTGAACAGCTGCTTGCCTTGTCTGGTCAG  
TATTGATCAACGGATCGCCGTTATCATATGTTTTTATGGCATTGGTTCACATCTGCCGA  
TAGAATACAGGCCGGATCGATATAATCAGGATCACGGCGTAAACCATTATCGGCGATCTC

GCAAGACAGCGGATCATCGTGTGATTCAATTACAAAATCATCACATTGTATCACCATAGA  
TGCGCCATAAAAAAAGACACCCGCGAAAACCTCAACCATTGATTAACCTCATTTTTTCT  
AGTAAAGAATTTGGGTTTCGACGCTTTTTTCAGCGCCATCTTGCAACTCATCAAAAAGGC  
CGAAATGCTCGCCTTTCAGAAGATTATAGCTGTTGTCGTACACGTTACAAGCCTTTTTCTT  
CTGTAAAAGTTTTCTTTACAATCCAATCACACTATTACTTCATGGTCGTAAGGTAATGT  
GACCAGCCATTACAATAGATCAAAACATGATCAATTATCCACTAAAATGATATAGATAGC  
CACAGCGGCAAGGATTGCGACCAAAATAGCTATCTGCGCGACCACACCCCAAGAATAAGT  
ATAATCCAACATTTTGTTTACCCTCATTCTGGTCGCACCATCGCGGCCTATGTAGAATT  
ATAGTATATGCGAGGCAGGTGTCAAGCGTTATTCTGCTATCTGGTTTGGGCGGTAGTAAT  
CATCATAACGTACACGGGAAAACGTGACCGCTTGCAGCACGAGGCAACGATCACGATCCG  
CCCGGTTATCATATGTTTTGAGATGCTCAGGGGTATTGTGTAGGGTAGACTCAACACGCA  
AACGAGATTTAAGCAAATCACGATTATCAATGCCACTAACACACCGAAACCGATTTGCC  
CGTAATTGAGGTAACCATTTTAACCAGGAATTGAGATTCAAGCGGGCGCGATCTGAGACT  
TCACGTTTTGCATTTTATTTACCTTTGGTTTGTGTGGTTGGAAACATTGCGGGCCGTAAGC  
ATTAAGGTAACACAACCACAGCAGGACGCAAGCACTATTTTAAATTATTTTTGTTGAGA  
ATTGTTCTCATATGCAGCGATTATGCATGAATTGCGACAATTAGGCAAATAGTTTCACTG  
CGATACTAAATTTACGGGCCTTTGAGCGGGGAGGGATTATGGGATACCCTGCAAAACGCT  
CTAAAACGATTCCCTAATAGCTGCCAGGCTTGCAGCTGGCCAGCGCATCACTTTGCGGAGA  
TCTCCTTAAACTCACTTGTGTGAATAGACAAACCCTGGAATCATCACGCCCTCTCGTATA  
ATCATCTTGTACGGCTTGCCACTGCAAAGCGCGCTTTCTTTCGTCTAACCGCTTTTTAAG  
CTGTGGATCGTTGCGGTCCGGCGTCCATGTTTTGGCAATGCGCTCCGGCTTGCGTAGTTA  
GTCGTTTAGCTGCCATCGCTCGTTCCTTACCTTGCCTATCCAGGAGATCATGCTGCCTTGC  
CATCTTTTCAATGTTGCGCCTATGTTAAACCCTCGTTTTTATTATCGGGTGTTATTTGCAT  
GTTCAAAGATCCGGCCTTGTCTCGGCTATTTCTTTAGCTCGCCTTTCGATCATCTCCG  
AGATCTGCTCCTTTGCGGCTTCTTTGTGAGACGTGACAACCTCCGCCCCACTTTTTCTCTT  
CACACAACAAGCCGTTACCCTCGAGATCATTCAACGGGCCAGATCGACGGGTGTGGTAGT  
GGTTGCCGTGGAATCTGTATTCTTAATAATGGTACACTGTGCCTATCCTGTAICTCAAAAA  
AAACCCACTGCAGGACCCGCCATAACCTGGCGGGTATCTTGCTGTAGATAACAGAAGCGG  
CCACCAAATCTGGATATGAAACACTTACAATAATCCTCTAACATCTCTCGGAGTGACTC  
CAGGTCTTCACTTGTAACACTTTCCGCAGTTCCTCGCCCGTCTTCTGACACGCAAGATA  
AATCTCTGTACCATTGCGGCTATCCTCATCATAGCCCATATCAGCCTAAAAATCAGCATG  
AGATGGAGATTCCAGATCAATATCTGACAGTAGGCAGGAAAGCGCCTTTGCGCTGCCAGG  
TGTTGCAACATAAACACGGGAACCGAAAGACATTACTTTATTGTGCTTGCCTTGAATC  
GTCGCGTGTCCAGTAATTTGATCAACGATGAAAACCTTAGGATCCAATTTAGCTAATTC  
TCTTGCCTCGGTTGAGGTTAAGCCAGTGTGACGGCCTACACGGTGACGCTTTGCCGTCGT  
AAAATCAGAGCGGTAAATCTTCCCGCCTTCTTCGAAACTGACGAAAAACAAATCAGCTTG  
TCATTCTGGAGCTTTGGTAACGCCACCATATTCGCTTTAAAATCGATGCCTTTTTCTTT  
CAAAAAGTTGAAAACGGCAACATCTTGATCGTTGAAAGTCATTTTGTTAATCAGAATTTA  
TTACCTTTTGTTTGGTTTGGCACTATTGCCGGGTTATTTCTCATACTTAATCGGGCATCT  
CTAAAAGCCCAACTATGAAGACTCAACAATTAGTTAATGATTTCTTTCCAGAAAACTC  
GAAGGATGCGATCTCTTTCAAGCAATCTTCTAATAGCTTACCGGGGATGTTTAGATTGTC  
GATCCGTCGGCTTGCCCTTTGTTTTACGGCCACAGTTGTCCGGTTCGCCGTGTGAAAGAT  
CGTGAAAACCTTCCCGTGACCCATGACTACGACCATTTTCGCACCCCTTTGATTAGTTGT  
TAGTTACCCGGTACACATGGCGAGGAGCGCGCTTTTTACTGTGGGGCGCTTCAGTCATTG  
TTTCATAAGCCAGAGCATAACCAATTTTTTCAAGCCAGTAAAGCGCTGCGCTTTGCCCTT  
CGTTGTGTGATTATCCCCGCGACGGGGCGACTCCAGTACCAACACACCGAAACCAGTGT  
AACCATTTTGGACGGATAACCAGATGCCACGGTGAAGTCTGGCGCGCTATTTCTTGATCG  
TGTTTCCGTTAACATCGCGACTAAAATCAAAGGAATCGACAACAACGAAAAGATTCCCGG  
CTTGGTTCGTGCGTGGCAATGAGCACAGGCGGTTTACAGCGTCATACAGTTTGATAGATG  
TTTTAATGGTTGCCATAATGTTTACTTTTTCAAGTCTGGCGGGAAACTCTCCCGCCTTGAT  
TAATAATGTAATCGATCAGCCGAAGGTTTGGCAGCTATTCGTTGAAGTTTTTTAAATCTT  
TTTTGCGCCTGTCTGTTTCTTGGGTCACGTTGAACTTAAGCCGTGCTCACTAGCCCAGC  
GATCCAGGTGGGCCATCGTGATTTTATTGCGGGCATAAGTGTAAGCGCTTTCATTGCAA  
CTTGTAAGGCGTAGGAACCGCAACAAGAACGAAGCTCCCGAGACTTGTACAGCGTCGGCC  
AGGTGTGATCACCGCGTAGTGAACGAAAGCGCATAACCAAAATATGTATTACCGTACA  
TCTCTGTAAAGTCAAGGGAATAAAAATTCAAAGTGCGGTTTTGTTGTCTACTGCTTTTT  
TGAAAATCTCTATCATGTTTTACATTTCTGTTTACCTGCTTTCATTTCTGCTGAGGATTAT

GCGCCAGTCTCCCGGCGCTTGGCAAATTATTGTTTATCGGGCCATATATGCCCCCTAAACG  
TGCGGTGATCTGGCATGGCTTTTGCCTTTCTGGATCCGCTTGCCGTTGGAGTGATTTAC  
ATAGGAGACCCGCGCCGCTGGCGGTTACGGTAACCCGCTTACATTTCCAGAGTAACAAG  
CAGGGCCGGGGCGCTTTCCTTTGCAGCACGTTGATCGGGCGGTGTCTGGCTCGCATCAAC  
CATTACGCCGGGGATGACCTGCCAGCGTTTACCAACGGGGCGCGGTGGTGCCGTTGTCGCT  
CACTTTCCCGCCTTTGCCTTTGGAAGCAGTACGGGCAAGGGCGCGAGAATCGAAATAATT  
TTAATGGTGTAACCTCCTTTGTTTGGTTGATTTGTTTTGCTTGTACGGTGTGGACATT  
ATAATCCACACATTAGCCAGCGTCAACAATTATCTTACAGTTATTTTTTGACCTTTCAC  
AATAATACGTGTGTCCGGCGTTTCTATATTGGTCAACGTAAATCCGACGATCACGCC  
CTGGAAATTAACCTTTTCATTGTGTAGGGATGTTGGTCCCGTACCCGGATCGTGTTTTGGT  
TAGTCCTTTCTGGTGCTACCACACAGGCGCGTCAATCGCCGTAACCTCCGCCAACAAAGA  
GCCGTCATTGGCAATCAAGCAGGTTTCCATTATGTTTACCTCTCGTTAGTTCCGGGGCAA  
GTCCCCCGCGTGTTAGTATGGCAACCGATATGGAGTTGGAGATCAAGCTTTTCTTAAGAT  
ATTTTTCACGTCTTCAAAGTTTGCAGGATCTCCGCGCCTTCTTTTTTGGAGCGTCCGAG  
CACTTCACCGTCGATCCCGTTGCAGTTGTAACATCTTTTACTTCGATCAACGGGTGCT  
TTCGTGCTGGTTTTAATACGAAAACTACAACCAATAATCTCATTATCCAGGAGTGTGAT  
CACGTTTGCAGTTGCGGTCACACTGAAACCTTAATCCCTGGCGTTTAAATCGCGCTCCAA  
AGCGTCTGTGCGGCCCTCCTAAGCGCGGCGCGATGGGTTGTCATCAACACGGGCGATCAA  
GTCTGCGATCCGCTCATTACAGGCTGTAGTGGAACGAGATAGCCTATTTTTAACTATCGTG  
ATCCGCGTTAGTATTCTTTACAGTGAACCCGCCCTCGTGATCGACGGTCAATTCCCCTT  
ATCGCCAAATGTATCATTGTATTTCAGCATAACAACGTCAACGTAAAATCAATGCCGGT  
TTCGGAATAATCGAAAGTTTCGATAGTTTACGTTGGCTTACCTTTTCAGTGTGGGCGGT  
CGGTGTGTTGCCCTGATGTGATACATAGGAAACGGCATACTAACTGCTGTAGATACCCCA  
GGACAAAAATTTTTAAAAAGTTTTTCTTGGATCGTGGTTGCAGCCTGGGGGGGATCGTG  
TAGTATTTAAGGACTGAGACACCAACGGCGGGTCAAGAAAATGGAAACCGAAAACGTAGT  
AACAAAGCGAAACAAGGGTGACCTTCTTACCTAGGAAACATCAGCAAATCATTGTCAGTC  
GATATCGGTGCCGTTGCCTGATGGCTCGCGTATGCTTAACGGCGGATTGTACCGGGCGAA  
AGTGGTAGCCGAAACGGGCAAATGTTAGCGGATGCCCTGCAAAAAATTTTTGGTCCCAG  
GGCATGGAATCGGGGCGGCCTTGGGTAAGAGTTAGTTTCATCGCAGAGGTAACGCCACCC  
ACGGCGAAAACCTCGGGGCTCACGTAACGGGCGGGGGTGGCAGGTGGGAAGGTGCGTCCGCT  
GGTACTTCAACCTGATGACATTTGTAAGATTAGTAAAGACGCTGGATCCGTGGCGTGGT  
TATGCTATTATTTACACATGCCGAGGGGTAACGGGAATTGCGAGACAAACATCTAATCTG  
CCCGATATTGTGCAAAAAGAAATCGATTCTTATTCAACAAAAAATTTCTCTTGACATCGCG  
TGTGCGTCTGTAAGAAAATTACCGATCCCTAAAAAATTTTTCCGCTCTATAATAAAAAATA  
CGTTTTCAAACTGAACACTCGATCGAGTACCGCGCGGAAATATTTTTTCGATAGAAATC  
AAAAATGCTTTTTTCGATTTTCTAAAACCGGTCCGGTACCCAGTTTTATCCAGCAAATG  
TTTTAGCGATAAAGAAAAAATCCGTGTTTGAATCGAAAACCTCGATCGATTACTCGGACT  
GAAAACCCAAAAAAGGGATTTAACATTTCTGAAATGTTGCCACAATTCCTGTACCGGGG  
CATGGAATTCATTAGTAATCATCCTTTTGCATGGGTGGGGTTTAGGATAAACTGCTGT  
ACTATTCAAATGTTAAATCACAATAAAATGGATTTACACCCCGGTTATGAGGGAAAACC  
ATTTCAAATCCTTTTCGCATTTTCAATTTGATTTCCAGTTCAAATTTCTGCGACAAATAT  
CAAGGGCAAACATACCTCATCTTGAAAAATAGTACCCTTGCAAAATAAGTTCTTGAAGCG  
AAATATCAAGTGATTTACAGGTCGTTATTACATATATTGTCAGATTCCCATGCAGCACGTG  
CCTTTTCTCTATGTAATAAATATCCGATATACCTTCCGCTTCGGTCACTTCTAGATCTCT  
TTGCCTTTAAGTTTCAAAGTTTTTTGACAAATGTTACATCTCTAGCATGTTTTCCATTT  
TAGAAATATAACTGTTCAACCAGACAGGGATGTATATACATGTATCAGAGCAGTAAGCCT  
TGTTCCCTTCTAGCAGCGAATCATTGTCAGGTACTTATACTTGTGATAAATTGTCGCACC  
ACTATGTATGAAAGCTCATAAAATAATGCTATTTATTGACTACAACAACCCATGATAAG  
AGAGGTATTTACCACTGTGGGATCTGTTTATAACCGTGTGCCAACCCCTTCAAGGCTGTAT  
GGTGAGGGAGTCTTCCATCTATCCGCTTTCTCGTGATACACGGTGGTTTGTGTTAGGCCAA  
CAGCACATACTAACTACGATGTTTTGTAGATGGTTTTGATTCCATTTCCAAATCTAAC  
TCATACCTTCCACCTAAATATCACACGGTTTTTCATTTTGGTTTTCTTTCGGAAAGTATCTG  
TCCACCCGCAAATATCATACTCGGCATGGTGCAGCATTTTATACTCTGGATTTTCATCAC  
CAGTTGGAGTCATCACCTCCATGAAAAGGGCTTTCATCTCTGAGAGCCTGAAGAGATAGA  
CCATTTTATCCTTCGTCAAGTTTATATCTATGCTCCCATTCACAGCATCCTTTCTTAAAG  
TATCATCAACGTCAAATAAACACAGTGTCTTTCCGTAAGAGAGTGATCCAGTCTGAAGAC  
CAACTAGCGTATTGTATGCGGTGCTACCATGGAGCATAAGCTGAACAACAATAGAACCTG

CGTAACCAGTTCTCTCTTCTCCTGATTGATCTTGAAAACAAAACCACGCTTCAACTTATTCC  
CAACGCGAGACTCAAGAGCGCTGTAAAGGCTGGAGTCTGTGTTAAATTCCCTTACCGCTT  
CTCCCGACCTATACAAAGACTCATCAGAGATTTCTGCAAGAGCCAGCTTGTATCAACAG  
TCAAAATATCTTTCTCAGAGTATCTCCCCGTTTGCCAACAGAGATCAGGGCGTCTGTGA  
GAGTAACGACAAGCGCATCCAGTAGGGTGACATAATGCTTCTAGTCATAAAGCTTTGAAT  
ACTTGGATGAATCCGTCAGTTACGAAAGCTCAGACTCTCCTTTTCCGTGTCACCTTGAA  
ACTGTGCCTCATCACCTTCATCAGTTATAAAATCAAAGTAAGATAGCTCGTGCTCTGTGC  
GCTCAAATATCTTGAGTACCTGGGAATCGAGATCCGGGTGATGGTATTCCTTCTGGGTTT  
GATCGAGAATCTCTGTGGTTTGAAACCGGTTTTAATCTTACAAGCTACTGTACCGCTTT  
GTGAGGCGTTTTAAATAGAGCAGTACGTACGCCTACCCTGTATGTGATAAAGCCCGTAG  
AAGCGTTTCTACGCAACATTCGGGGCGTTGTGGTGTGAGATCTTACCGACCGTCCTGTTG  
GCTCATCTGATACTGAATGTATGCCATGTTTATTTATGCTTTACATCGTAGGGGATTGG  
TATGTCTCCGAACATGAAGTAGTGCAGGTCATATAGCTTCTCTCGGAACTTGGAGGGGTA  
GTAAGGGAATTACATCTACGCACTTGCACAGGCTCAATGAAATAGTTCACGCCCTACTTC  
GTCTGAAAGAAAGATCCTGTGTACCAAACACCACCCCAACTAGTCTTGTCTGACGCGTG  
AAGTCGGATTTGGTCAACTTATCTTCACGCATTAGGGCTGCTGTTGCATCGACCAGTTTC  
AGTGGTACGTCCAACCAGAGAGCGACATGAGATACTTGTGTCAGGGCTGTCAACAATG  
TCAATGCTTGCAGCAGACCGCCACGACTCAATCCGGTATACTGGATTTCAGGTGACGG  
ATCACGTGATGTTCTGATCTTTCGACTATACGTTTATTACCGTAATCGTTCTCCTACCCT  
GTATAGCATGCCGCGGTGTCTTTGTTATACACGGCAGGTAAAATCCTCTTTCCGACCTTC  
GCGATTCAATCTCTCCAATGTTTCTCTATCCCAAGGATCATAACCCTGGAGGTGTGTTTT  
CATGGGGATCAATACAGGGAAATCATCGATCCAGATATCCGTTATCCACCCAGCTCTGC  
TCAGTCAGCGGCCTTTTGCCCTCCTCAGCAGTAAATGATGCCTATTCCAAGTCCTTCAA  
CCAGTATCTGATATCATCGTTTCTGTCAGATTCCAATCAGAAGGTCTTGAAGTGGACAGA  
CCAGTCTGAATCTCTTGATCAGAAGAGGTGGACGAACTTCGACCACCTTTCCGGACAAAG  
AGCGAATGAGTCATCCAATCACGTGCTATACGCTCTTTCTCAAATTATTTCTCTCAGCC  
CCCATCTCCTCTACGATACTGTCCCACTTTCTGAACTTCTTGCCAACATAATTTTCAAGA  
CCACGCGGGACTGTTTCTGCGACCTCGTTCCGATCGGAATCGCGAGGGATTCTACACTCC  
TGAAGCTCATGCCTGTCAGCGAGGTAGATTGAACAGTTGGTTACTTCGGCAATCTCTGCG  
ATTGCAGATTCATCACAACGATAAGGGCGATTTCAGAGTTCGTGCCAGTTCACCAACTTCC  
TCTACCAGATACGTCATGACCGAAACAGGAGATCGGGCTTGCGCCCGGACGGAGGACTGG  
TGTACGCGTTCAGCGATTCCGGTCATTTAGACTCCTTCTCTTTTGACTTCTCAGCCTGAG  
CGGCTTTTGCATCAGAATCCCGATCTCCGGTGTACTCCTTGATTTGCGCGTCAAGGTATT  
TGATGGTGTGTCAGACAGTTGCTGAGTACGTGGTGTGATGCGCCCACTTTCTGACCGACAT  
ACGCCGCCAGCATTATAAGCTGTTTCTTTCTGAGGCACGAAGTTTCCATAAACAATCC  
CCAGGAAACATACCACCATACCGAACCTAGCACTGTTACGACGTCCTATTGTTAGGTGCG  
GCTTAGGCACAGTTTGGCGCTCTGCTTACGTTGACGAGCTGCTGTCACCTCCCCAAA  
CTGATAATCGCATCCAACCAGAAGTTTACCATTAGGATAACGTAATCATTTGACCAT  
CATTATCAATCCAAGTACGACTAACTCATCTCGGGCACCATAATTAGACGAGTCTGAT  
TCACGACCAGTTCTGCCCCAGAAAAATCTAAACCGTTCCTTTTTACTATCCGTCTCTT  
CGTAAGTCTTCTGAGTTGCATGCATGATAAGATATCCAACCGCTGAAATCAAGAACAGGG  
AGCCCCAACCGCCGTAAGTTCCATCAGTAGTGAGTACATGAATGAAGAAAATCAGAAATG  
GACATGATATCAGTTCTTCTCCTATCTATATATATTTGGCGCAATTTTCGATCGACCCTA  
TTTACAATCAGCGCTTGAGGGCAGTGCCTCAGAAGCCATGAAGGAATCAATCAGGGTCTT  
ACTACCGTAGAACGCTATCGCCAGTTATATTCTTTGGCGCTATCCCTTATCTCTGGCAG  
ATAAAACCCTGTTAAAAGTATGGTTAATAAATTTGAGGTGAGGACTTTTTACATTTGTCA  
TTAAGATCCGCAATCATTGCCTCATCACGTATGTTATTGATGCCATTGATATTAGCAGGT  
TGGCGAGCCATTTCAAGTCGCTGTCGCACAGCTTCTCCTGAATCGTCTTACCCCGTAGCC  
CAGAATCGCTCCAGACCAAGGAAAGAACCAGTATGCTTTGTCCCACGAGCCCAACTCT  
TTAGGGCAGCTATCTTATGTGTAGATCCAGTGTGCAGCGCCGCAACCTGTCAGGCCATCC  
ATAGTCCAGTACAGACTTGGCATAACAATCGCAACTGACATCAACATGACAAGAGCAACTT  
GAGCTACTGGCCCTCACACGCTACATCGGAACGAGACGTTGAACAGAACGTTTAAAATTA  
ACTATTTTCTCCCTTCGAGCCGCCACGGTGTGATGGGGTAAACAAGTTTGCCTCTGTC  
CCCAATCGGCTCCATTCACATTGAACTTCCGCACAAATCTGAAGTGCTACGCTATGGCTC  
TATCACTTCTCATCAAATCAAATATACACTAACAAATGCATTAATCACGTCTTTTATTA  
AAGATCTTTCGTTTATAGTTTTTAAAGACCTTATGTGTATTAATTCATATACGTATTCAT  
ATGCAAATTTTGCATGACACGAGCTGCAAATTTTGCACACACACGGTGTATTTCGTATG



TGCTCATGCACCTCGTTTTCCACAGATAAGCAGCCTTGTGTGAGCAAGTTTTTTATAGAGG  
TTCTGATAGAACTTTCAGAAACACCAGTGGCCTCGCTGATCGTCTTGAAAGTTGCCAAAT  
ATTTCTTTCATTTTGTCTCTATGTAACCGGCTTTGTATATTATATGTAGCATGGCGCGAA  
GATCTGTACACGACAGATTCTTGACATGTAACCTCTTTTACCACAAGCTACCCACCTCT  
CGCTCTTCTGGACTACTGTAACCTCCCCACAATAGACAAGTGATATAAATACTTTGACA  
ATTCCTACAGACTTATCAAAGATATGCTCTCAATGCACTCTGTGCCACCAGGTATCCTC  
AAATCCCTAATTGTAATCTGCCACTTTATCGTCCTTTCTAAATGCCCTGCCACGCCTCCA  
TTCTCCAAAGCATAACAAAATACCAATGTGAAAACCTCTACCTTAGTGAGAGATTTGCTTT  
TCCCCTTCAGTAGGGTTTTGCCCAATACCTACTTGACAACCTCCATCAGAAATCCGGCGA  
ATATACTAAGACTGATTTTTAAGACCAGGGCTATATAAGTAAGCATAAAGGGCCATAGTG  
ACTGTTTTATTTTCTCGACCCCGTAGCTAGATACCTCTGCTCTCCAGGTTTCTCAGGCAG  
TGACAGTACAACCTGCCCTTCCATCTCACTGTCTAAGAAAACAAGTTTTACAGGGTAATTT  
TTATTATCTCTCCCAGAATCGAAGCATCTTTTTACCTTGCAATAGCAAAGAACATCATCC  
CCAGTCAATTTTTCATCGTGAGTCATGAGATCAGGTATACTCATTGCTTTGAATTTAAG  
ATTTTCATTCTAACCATTACAAATTATCTCCTAAGATTTCAATAGCATACTTTTTGGCAT  
ATTCATCTTCTTCATCATTATGCCACATGCGGGTAATTCACCCGCCATAGTGTACAGAG  
AGCTCTCAAATGGTGGAAAGTCCAGGTAATAACTAGAGATAAGCTCCTCATCTGAGGTGA  
TCTCCCGAGGATTTACCGTGTAATCTGGTGGCATAATGGTCTCCCACTCTCCTAGCTTGA  
ACTTCTCAAGACTCAAGGCTCTTCTGTTGGAAGTTGTGAGGTGTTCACAATTCTCACAAC  
GATCCTTTTTGAAGATTATTCGCACAATTGCCCCGGTGTACATGAAAACCACATCCACAC  
CGAGACCCACGGCTACGATTTTATTTGAGTGCTCATCTAAATCTACCGCCCTTCCCACA  
GCTGAAGTAAACTTAGCAGGGTTTCCACCGAAGAGGACCCAAAGTCTATGCCGTTTACGA  
CCCAGTCTTTTTTGGCGATGACTGACATCCTCAATATACTCATCAGTGAAGATTATCACA  
TCTGTTGCCCTTCGGAATGTTATATTCAATGTACCGGAATGCCACAACGGCCATAGTACCG  
TCTGTGGAGGCCACATTGTAGTCCAGCATCTCTTTGATGTTACCTGTGTGTACACTTTC  
ACAGCTCCAACCTTCGTTGACCAGCAAATAATGTCACACGGAATGTTGTATAAAGCAGG  
CACAAACCAATAAGCTCGTAGAAGATCTTGGTGAGTCTCGTCTGCGAGATAGAACCCTGAC  
ACATTAACCCATCACGATGTGCGATTGCAACCTGTTGCTTCCTTCCCTGCCAAGATGATA  
CTTTGCTTGTGGTGATAGCACCGTAGTTTCTTAACACTTGCGTAAACCCCCCGATCTA  
CGAGCAGGTTAACGGAACGAAAGATGCCATATCACACGAGAAATCATTGCTTGTCTGATC  
ATCTGCATGTCACCAATGTGTGGTTTACGCATCCTGGCTACCACTTCTCGAGACTGTTTT  
GGTCTTCAACACCCGCAGCCTATCGTGCAGCCGCAATAAGAGCCGTTGACCATGCCACG  
TTCTCATCTTTTGTACTAGACTTTGACACGGGTTTGGATCAGTGGACCCAAGAATGTCA  
CGAACTGACTCATAATCCCCGATACGAGTACCCATTGAGTAACCTGAAACAGCATTCCCT  
TTGTGAATGGCGCTGTAATTTCTTCCGCGTCATCCCGTGGAAGAGCTATCACAGTAA  
CAGCATGCCATAAATCCGAATTCATTATTTTTATCAAAGACTGTTAGTGCACCTCCTGGG  
AGAAATCGCATACCCTGACAACGAGGTCCAAGATCGCTTATCACAATATCTATGTTGATA  
AACTCATCCGCAGCAAATTTGTCGCATCTTGAATGGAAGAACTTACCCCGAGCCATAGGA  
TCAGTTGTTATATGGCTTGACTCATGGATGAGCATAACCTCCACTTCCCTTGGTGTTTTT  
TTACGATAGAATACATTGATATATTTTTTGTAGTCAGGCTTCTGTTCCCTGAGCCATGTGG  
GGGTGTTTATCAATTCGGGAAAACAGCTTCTTCTTCCGCTCTTCCGGCATAACCATGAGG  
AACTTATGGTAATAATCCAGGTTGCGGTGGTTCAGTGGCCGCAGTCGGTAACAACCACAG  
TCCGGGATGATCGCCAAGAAGACTCAGCAAAGTCCCGGATAATGGGGGCTGTTGTAACAAT  
GCAATACGTACAGGTTGAATGACCTTCAGCGCATCTTTCAGAAGCTTCTCAATCAGTTCCG  
TTTTCGACTTTATACATAATTTCTCTCGAAATAAATAAGCCAATCAATCAAGATGGCCTCA  
GAATATGTGATTATTGAATGCAAATCATCTTTGTCATCAACGAAATAATCTCTTCCTT  
CTACCCTGAATCCTCATGCAAGTTTTGGCCTAGGCTCATACGGGATTGGTAGAACAGCAA  
ACAGTACAATTGCATCCACCTTTCATAATGGGCTTCGTCGACAATCGTTAGCCCTCAC  
CAACTACAATTGTGGGCTTGAAACCATGATCCAGCTTCTGTTGTTTCAGGGGCCGTTGCTG  
GTAGGCCAAGTTGTGTTTCGTACACTATAACCACTTTGTTTCGGCAACGCGGTGATCTTCGG  
CAGACTGAGACCTGCCTGGATGATCAATTGGGTCATTGCTGTTCCCATTTTGTGGATAC  
TATCATCAAATTATCTTTCACAGAGCCAAGTTAAGGTGGAGGATCAGGATTGACTTGGG  
TTCACCTGTCAACTACTCCCGTGTATCGAGCAGGTGTTACGGACATATTTTTCTCGAC  
CTGTGCAAAGGTCACACTTGAATTCATCCCGACATCAGAGGAGGTCACGCAGGAGCTTGC  
ATACGCCAGGGCATCCGCTACGTCATCCGGCAGTTATGCTGGGTCCGGTGCTTTTTCTAC  
GACCTCCTCCACAGCCTCGGTTATTGCCTCAGTAACTTCGCCCTTGTGCATATGCTCTTC  
TGCTTCTGACTCAGTGTCTTTCGATAGCAATGATCCCGTTCTCCTGTAGTGGGATATA

ATTAGTTTTCCGCATTTCCATATGGTCTTTTTGCATGTTCCGGCATCATTGCCTGCACAAT  
CTCGCGATCAAGCGGTGCAAGTATTGGGATTGCAATATTCTTGTCAAACAAACTACCTTT  
CTATTCGTTGGCACGACGGGTCGCAACACAGACGTTTCCACGCATCTAGCCCTTTGTATC  
GTCGATCCGTTCAACTGGAGGTTCTTCTGGGTTATAACCCGCCAAGGTTACCTTATGAAA  
CGGCCCGTTGGTGTAGTTGCAAGTACCCATAACCGAGTGACTTCTAACCCATCTTGCACCA  
ATCATCGAGGGTGAGCGAGAATTGATAACCACGTTTTCTTCTGGGCACATACTTTGTCTG  
GTAACTCTCTTCGAGACTTTTCATCTCGTTTTGTGTATATTTTTATTTCCAGTCGAACAT  
GGTCTACTCCTGGGTTGTTCCCGTTCTTGTGGGGTGAACATCTGGCATTCAATCCGCGC  
TGTCAAACTTTCATTTCAAATTCTTTACAGTGATGCTTTGTGTACTTTTTGTCTGAAGGA  
AGGATAAGAATGTACAAATTCACCGTTGATGATAGACAAGTAAATGCCCTCAAGGTTACA  
GCAGATATCTACCGGAGCTTATTA AAAAGATGACCAGAACACTCGCGCCCTGATCGAGCAC  
TGGCCAACAGAGCACGAGTGCCGTCAAATGGCAATGAAGGGTGTCTGGGATACGCCAGGA  
ATGAATACCGATGATTTTCTTTCTGGGTTAAAGCCTAGGGTGATGGAAGACAATCCCCTC  
GCTGAACGACACAAGGGCCTGCTTAAAAGGGTGGATAGGAGACATGGGACAATTGCGTGG  
TTCTGGGGACATGACTGGGATGTTAATCGGGGGGAGAGCCTGGATAAGAGGTTTTAGGCC  
CGTCTCGAGATAGATGTCAGAGACAGGGACTTTAACTCAAGCCCGTTCGAGCGGGAAGAG  
GTCTCAAGAGGGAATGTCTCTGCCATTATCCGAGGGCATGGCTATGGGGATCCCTTAA  
AGGAGTTCTTCTTGGAGGTTTTCAAGTCGTACAAGGGAGTTTCTCAGTTTGTGTAAGCCC  
CTGATTAGACAAATGGGACGTTGTGAACCAGACCTTTAATCAATGAAGAGTTCCGCAGA  
TATGGCTTTGGATCAAATGCAAGCAGAAGTCAGGAAACGACTTGGATATTCTTGGGTT  
CCCTTGTCTATCGGAGATATTCTTGTCTTTGCGATATCACGGATTTACATAACTTCGAT  
GTGCAGTGCACCCACATTGGTCCACACCGTCTTCCACTTGCCTGATCGCGGCGTTAACGTC  
AAGAATGCCCGTGAAGCTTTTTTTGATTTGCGATAAGAATGTGACATTCTTCACCTTCCGT  
TGGTTTTGAAAGACTAAAAAATATGATGGCAGGGGAAACTCCCAGCCCGGAAGAGATAATG  
ATGATGGAACCTGGCTGGATATAAAGATGAGTTCTGGCTTTGCAACGTGGATGCTTGTGAT  
ACGCTCAAGAGCAAACCTTTAATATGATGGAGCAACAAAGATCGTCCGAACTCTCAATT  
CCTCGACTCCAGTTTTAACC CGGCGCAAGAACCTGCCCTGGTTATCAAGATCGGAGCAG  
AGGGCCACCTGAATCAGTAAGACAAGGGCGGTAATCCTTATATCCATCATCCCCTTAATG  
TAATGCAATACCTGAATACTGATGCTTTTCAACTGATGGCGATTGCCGTCGGGCACGATA  
TGTTGGAAGATTCCGATGTAACGGCTGCTGATCTGGACATTCTGGGCTTCTCCAACCGTG  
TGGAAGATGCTGTGCTTCTGCTGAGGAAGACCCCGTCCAACACCGGATCAAAAATTTG  
AAGGCATTGCAAGGAACTAAGATCCGGTCCGTGTGAAACCTGCAGACCTACGCCATAACT  
CTGATTATCGTCGCGTGAAATGTCTTAAAGATAAGTATGTGTTGCGTGTCTGTAAATACC  
ACGGCATGTATCTGCTTCTGACAAAGATTGAAGAACATCAAGAAGCGAATAACCTGTCGT  
CACAATGATGAATCTCTTGACACTGCTTCGCTCAAATATTATATTAGGAAAAAGATGGG  
CTTCCTGCTAGGGATGGCCTCGTGGAGAGAGATTAAGCTCGTTCTCAAGTTGGAGGAACG  
TGGTTACATTCAGGTAAGTAGCAGATACCAATTTAGCGGGCCGGTGTCAAGGCCCTTTG  
TGTTTACGATCAAAAATTTTTACCAAGTGACTCTAAACAGGAGCTAAGAATGTCGAGAAAT  
CAAGGTTGGACCCACAAAGGCACTCTCAAAAACCCCGCCTGGGCTGGGCGAGGACTGAG  
AACTTCGCGAAGCGCCTCGTTACTGGATGTCTTACCTGGATTTCAGAGACAGGAAAAGCC  
GTGAAGTATCGTAAACTGACGGGTAAGTGGTGGGTGATGATGAATACCTCGACCTTGAA  
TCCCTTAAGGAGCTTTAATATGAACACA ACTTTAGAAGAGGCTATCGAGTTAAGGTGTAG  
AAACGGGCAGAGTGATGGGGAGATTGTGGACTTGCTCTTGAAGCTCTCTGATCGCAAAGA  
AGAACACCTTACCTACTATAAAAATCATGCCTCTGAACTGAATTCAGCTTTGAATCAGGC  
ACAGCTGGAAAGTGGTTCGTCGGGTAAAAGTACGGTTGACAACATCATCAGGACATGTTG  
AGGAATTTATTTGTATCATAACAACACGCGTTACGGTTATGATGGTAAATTC AATGCATG  
GATTA AAAACCTAGCAAAAACAGTTTTTTACAGCCCAATATCGAACTCCCCCAGGCAA  
AGTGCATGGGGAGGATCTTCTTCTGACCAAGAATTGCCCGGAAATGGGAGGGGGTTGC  
TGTTGGTAATCCGTTTGGTAAACGCCTTTTTGCCGTAGAAAAAGACGGGATGTAGATTAA  
CTCTGGTGATACATTTCTACTAGGAAAGCGAAGAACGTTGCGTAACTGGAGAACCC  
GGTTTAGTTTGCCTGGTCTGTGGGGTCAACGTAATGGTGTGAGTGC GGCCCAAGAGTGGA  
CGGATAAGACAGTTCATCTACTTACAAAAGAGATCGCACGTCTAAGAAAACGTAAGTTTC  
CACAGCACACGATCGATGGACACGACTGGGATCCTCGTTTGACAGAGCTTCACGACATGT  
TCGAATAAGTACCGACTCTTAAAGAGCAGCGTGAAGTGCTGGACCGTCTCATTGCAAACC  
AAAATGTTTGTATGATGAGATTTGTCAACTATCGAAAGATTCCCGGTTGGCGCAGTTCA  
ACGAGGCTATGGACCTGTTTTATGATTGGAGTGAAAGTAGTTCTGTGTGGGTGGATAAGT  
GAGAGGATTAGATTTTTAGATGCGGCAGTCATGCCGCCCCCTCGTCACCGCTTGACTCG

TCGTGCTTGGTATGCAGTCTTTGGTGCTCAAAGCTTCAGCCAGACGAATAAACGTTCTC  
TGAGGATCTTGCAACGAGGATTCAGACGATATAACAATGATATTGCCCTGGAGAAATAGT  
GGAAGTAATTCCAAAATATCTTGAAGCAAGGAGACAAACACATGTCGAGTCATAATTTTT  
TTTATGATAATCGGATCTCCCGACGTGCCATCCCGGATTTAATGCGCTTCTGTACCGCC  
GTGGGCGCGCTGATGAGGTTCCGGTGGTGCAGGCCGAGGGAAAAGTCAGGCAATGAGGC  
AGTTCGCTAACTTGCTGTTTGGCGAACGTGACGACAACCTGATCGATTTCCGTCTTTCCG  
ATAAAGAGGGGTCAGATGTTGTGGGCGTTCAGATCACGGTCACATACGATAAAGGGTGT  
CCCGGACCGTTCGTGCGATCCCTACCGTCTGGCCTGAAGATCCAAACTGGAAAGGTATCG  
TGTTCTGGATGAGCTTCTGCATGCTGAAGCTTACGTTGAGAATGTTGCATAACCAGATCA  
TGCTGGCTCCCTTAGTGCCACCTACATGTTCCCGAAAGGAGAGGTGTTTGCAGGTGCAG  
GCAACCGTGCGGGCGATGGTAGTCCGGTAAGTATCTTGGACGCACCTCTGGCCACCGTG  
TGATCTGGTTGAAATAGATTAAGTCCCCACTGTTTGGCCGCAAGATTCTGGCCTGCACA  
ACGATGTTCCGCCACAACGTTTTTGCCTTATCGGTGCAAACACACGTACAATAGACAAC  
ATGAGGAGATGTTGGAAATCAACGCCCTTCATACGCCACTCCTCCTAGTTGGGTTAGCG  
CAAGTGATATCCTGTACGATTAGGATGAAGGTATCTTGTCCACCCGCTGGCCCGGGCCG  
CTCTACAAGGATCAGTCGGCAAAGCATTGAGCATGGAGAGTTGGCATTATCTCACCCGTA  
GTGCAAACATTGTTCTTTTCGAGCGGGTCTGGACGGATCTTTCAAGAAGCACATCGGGT  
CAGAGACCTCAGTTGTGTTAGGGACCCTCGCCTCTCGGGGATCAATCTGGTTGCGTACGG  
CACTTCAGAACAAGAGTAGGCAGATGATGACGTTATTGACTTTGCTGCAAACCTTGTTGC  
AGTACCTGTATGCCAATTTCCGGTCAGCAAGCTAAATCATGGAACCGTGATTTCCGGGAGTT  
CTGTGCCATGTCACTCATCCACGAGAACTCGTCTGGAAAAGCAATCCTGTTGTCGGGTG  
ATCGATAGCGCTTATCTTCTAATTGTTGGGTGAACACCCGGTAGTAATGCTGTTTCATCA  
CAGACTACCCAAGAATTTTGCAGAAGGGTTTGGAGGCACGCGTAAGCTAATCTTTGACCG  
TCCCCAGTGGGGCGGTTATTCTTTGCTCATAACAACAACGGCGAGGACAAGCTCAGTGAC  
TAAGTTAACTGGATAGAACCTCAGACGGCTAGGCGTGTAGGTATAAAGGTACGCAACCA  
ATACTTTAATCCTGGGGAGTTGGTTCGAGATGACGAACGGGCAAATCGTGTGCGAAATGGG  
ATACAACATGGCTGGTTGGTATCATGGCGAGCCAGGGCAGGATGAGGGATGGAGCGCGAT  
TGATTCGTAGACCTTGCTTCGCGTACATTTATATGCTTGATAAACATGGTCATGAACTTT  
TAGTTCGTTTAGGCTACCTTAACATAGAATATGTGAAGGAGCCGTACGGCTCAGACGCAA  
CGTACTGCCACATCCGTCAAGACAATGGGTTTTGTCAATCTTCATGGATGGCTGGGAAGA  
GTGCTGGGGCTCTCTTAGCCAGGATAGCTGAGCACGACAAAGAATATGGTCTCGGTCTCT  
GGGATTGAAAACAACGGAACAGAATTGTTATCATGAAGGGGAACTATGTTACAAGAGAA  
ACTTCGGCCAATTCCTAATTATGCCGATGTGATGGATGTACATTCACGGGATTGCTGTGT  
TAAATGCGGTGCCTTCACTACTGAAGACGGAAATGGGTACAGGTGTCCTGATGTAAATTA  
TGAGACCGACATCAGTTGCTGGAGTCCTCGTCCTGAATGGGCGTCCCACGTATCTTGGTA  
CACTCGCTAATGGTAAAGCTCAGAGTCCGCTGAAAGAGATCAACGAGGTTTGGCGGATT  
GATTGCTTTTACATGGTGATGGCCGGTTATACATACGCGCGTCAGCGTTTTATAGTTGTG  
TGTGCTAAGACGAACGCTGAAGCTCGTGAAGCAGGGACGCTTTTTAAGAGAGGAGTTAT  
GCATGAAAGTAAAAGCAAACCTTGAACCTACAGCGAGCGCTTAGACCATCCCCTTCTGGAG  
ATGTCGTCGCTCTTTTGGAAAGACGTTTATAACGGGGTTTTTCATAGAATATTATTCTTGTG  
AAAGGAAAGGTGGTGACCTTGACGATTACGCATACGAGTGGGATGAGGTCAAGAAAGAAC  
ATGTAGGAGAGTGGATAGGCATTGCAGTAGCTTAAATCCTCCTTCTCATTGACCCTGAG  
ACCTGTTTGTCTTGGTCTATAAACCTCTCGCTCGTCGTGATTTCCGAAGGGTTGCTGGG  
ACAAAAGAAAAGACAGTTATGTAAGGCTTGGTGTAAAGTTGAAGGCATAGGTTTTTAC  
TTCTTGGCACCCAGTGTGGTTGGGTTCTTTATTACGGGGTATGGCCACTTACTTTAGT  
GACCTCAAGGATCGAAAGAAAGATAACAACCGCATTCCAAACCTGAGGGATGTCCAGAAA  
ATTGAAACCTTTTATACCTATATCAGCGGTA AAAAGAACCAAACAGGTTTCCGTGCTGTA  
TTCGTAGATAAAAAGGTGAACAAGACGCAAATACCGTGCCGTGTATAGCAAAACCCACCTT  
GGAACATTCGACGCTGCGGAGGAAGCCAGTGAATGTTATCAAGAATACGGAAAGACGATT  
TATGACATTTTAGTGGAGGACTGAAGCTTTAGCATAAAGTTGGTGACCTGATCGAGGCTG  
TGAAATCTGGGGAGGAGAATGGATTCGGGCATGGCTGCAATTGTTAATACACGATGGGAA  
GCGGGATCGTTTCTCTAATCAAAGAAGCGTTCACAAAAATGTACGCTGCCGACCTGAAAA  
CTGAGAAGGGCGGCCAGACCAAGCTGGGAACCTGTAGCGTGGCCATTTTGGATGATGGTA  
CTCTCGCAGGATTTAATCTTTACTACAATAACGACAATAATCATCGTATACAGGGTTTCA  
GGGACCTCGATTAGAATGCCCTGTACGAATCGATGGTTGAAATTA AAAA ACTCGAACGGA  
GCCAGACAGACAACCCTATGGACATCTATCGAATCGGATTCCTTAAACTAGCTGCTGCGC  
TTGCAGGGGGTGACTGGACTGTCAGCGGAGCAATGATCAAATCAATCTTCCACGATCGTG

ATGTAACGGTGTATATTTTGCCGGAGCAAAAGTGATGGTGGAAATAATCTATCTTCTGGT  
AGCTTTCCTGATTGTACATATTCATTAAGAGGACGCAAAGAGACTTCGGGAGATTCTGA  
TAGTGTAGATCTCTTTGCTGATCTATGCATGGGAGTAATATGGCCTGTGTACTTCACTAA  
TCTTGTGGTGTGCTGCGATTTATGACCGGAGAGTGCAAAAGATTGAACTATTGGCTGGAATG  
AAGGTCCGTGCTATAAGTGTGGATCCCTATGCAACAAATGGAACCTATATTTACATACAGT  
GCTCCTTGTGGCAAAACAATATGCACTCATATCGATGACCGATGAAGATCCTAGAGATGA  
TGTTGACAATCTAGTAAAGGCTAATGAGTGGATGGAACCCCTTGGGTGGCAACACCAGCG  
GGATGACTGATGGGAGAAATTGGCGTTATCATGGACACCCACACTGCAACCTTCTGGAAA  
TCTGCTAACGAAAAGACATCCTGCCCTTCTGCGGGAACAGCTAAGCCTGCTTTTGGTTCA  
AGTCGATAACAATCCGCTCCGTTGACTGTAGTCTCAGCAGGACCGATTTAGGCTCGCAAAG  
GTAACCACCGCAGGGGTGATTTTACAGTAAGGACAGCGTGTACGTCATCCATGATAAAGA  
GAATGGCTGACTGTGGCACTATAAAGCAAAGATCGGTTGGATAAGTTCGGGCGCTGCAGC  
AAACGCTGGAACCTTGGCAAGCAAATAAAATTTGAAAACCAGAATCGTTATTTTGTAGT  
CTATGTTAACTAACTGGTGGTTAATTCTTTAATCGGGGAGATGAGAAAGGACAATGAGTG  
AATCTGTAGCAGGTATCGGTCAGACCGAAAAGGAAGCGGTCTTCATTGGTGGTAAGCGTT  
TTGCTGGCGCACTTACCAATGCACGTCCTTTTTGCGGCTTTGTGGTCACGAAGGATGTT  
GGTGCATCCAAGGCTTTTGTTCGTGATCTGAAAAATCGCGGCTTCGACAATGTCGAAA  
TCCGAACCTCTGTTGTAAAAGAAGTATCAATCATGGGCGTGACATCTACACCCTCACGA  
TGACCAGTGCTTATTGACTCGACAACGTGTGCCTGCTTGCATTCTTGCTTCCGGTGTGG  
CGTGATGACATCCTTAAGCTGCTTTTAGATGCAACGAAAGATGCTTCTCTGTAAGAAGG  
GTTATGTCCGTAGAGGGTACTCTGACCTTTCGTGAGGCCCCAGAATATTTTCAGGACGCC  
ACGAAAAGTTTTCTCCCGCGTATAGGTTCTCACCCAAGCTGATTCTGTGATGGCCACC  
ATGCAAGTCGGTTACGAAGTCTATGTGGAGCAGAAATAATTGACTAAAGCTGTCAAATAC  
CCAAGCACTAACAAGTTCGTCGGGTGATGCGTTCGGTCCACGTCCGTCTTACCTTTGAC  
GGTATTGATCATAACGGATGCGTGCAGCGTAACAGTGTTAACCCAAGTGTGATCCTG  
CTATATGTAGGGACTGGGAAGATCCAAGGGTCCAAGGTGAGCATTGTATTTTACTCGGAC  
CATTTCGTTTTGTTTCAGTCCAAAGAACGTTTTCTGTCTCTTTAGCAGGATAACAGCGGC  
GTCATGGCGTTCATGGTGCATAAAGATACTGAAGCACCGCTGGAACAAGTTAAACACATC  
TGCGGAATCAACGAAATCCTTTTCGAGTTTCCGTTTACATGGGAGGTGAATGGGCTGGT  
CGCGGTATTCAGAAAGGTGTAGCAGTCAGTCAGGTTGGGCAGTTCCTTGGCCATCTCCGT  
GTTGCGATCGGTCAGAAAGACACCTCACTGAATTGGTTACCACCAGGCGCTATCTTCGGC  
AACGGCCTGCCGGAACAGCGGATCTTCGATGTGCTGGATTCCGGTTAGTGGTGTGTGCTT  
ATCCCGTTCAACGAACCTGAAATAGTACAGAACGATCTGACAACGCTGACGTTTACAGTTG  
GAAGCTCAATGCCCTGCTGGTAAGTTCTTATGTGTTGAGGGTGTCCGGTGAAGGGATCGCG  
TGGATTCCAAAGAGCATTGAACTGGCAGAAGATTCCGGTCTGTGGTTCAAAGTGAAACGA  
GAGAAACGTTCTGTCTCGAAGGTCAAGAACCTATCAGAAGTTGATCCGGAACGCCTACAG  
AATATTCGTGATTTTGTGCGAGGGTGCAGTCAATGAAAACCGTCTGGAGTAGGGTCTAGGT  
TACGTGGGTCTCCACCAGAACAAGATCGGTTGAGTTCATCGGTTGGGGTTGCCGTGACAGC  
AACAAAGCAAAAAGGTGATTTGCTGGAGGCGAATGCCCTAGCCATGAATGATGTTGCCAAA  
TTTATCAGCAACAAATCGCGTGCTTAGTACATGCAAAAAGTGTGAGCGAGGGGCTGTGATGG  
ACCTTATCGTATCCACAACCCGTGCGGTTAAATAACAAGCCTTTGCAGGCGCAGTGTAAT  
CTGTAATCTTCTAGGATGAAGAACATGGTAGACATTATGTGCAAGAACATGGTACCTTTG  
TCTTCTCACTTCGAAAAGCGTGTTTTGTGAAGAGTTGAAAAACCCATACACAAGTTTGAG  
GTGGGACAGCAAGTAAAGGATCTTCTTTGCTGCAGGATTATAGTCATAACTAGTCGCTGT  
TAATTTAGTGGTCAAGGTGACTCTTTCGATTCTGTGAGTATGTTTTTGTACCCAGATGAA  
GTTTAGGAGGCTGGCAACACGAATGCGTGAGTCGTTATATGAGAAGAGAAGACAAATGGA  
GGAAAACGTGGTAAACTCTATAAGTATCCCTTGCAATACCATCATCAATGGTAACGTAGC  
TGGTGGGGACATGAACCTTACTTCGCGGGGTGATAACATTTACCTAAAGGGCGAGTTAGT  
TCACTCCACGTAAGAGAAGAACATCAGTGGGGTTATTCATAGTGACACCAAGGGTATTTT  
GACCGTTGCTGGTGTGCAATGTTTAAAGGCGTAAATGCTCGCAATATCAAGACAACCTTA  
TGGTGTGTTAATGTTGAGCACGGCGCACTGGGGGACGTTACCACTGTGGACGCGGATGT  
TTATGCATAAAAGATCAAAGGTAATGTGAAAAGTGTCTCAGGCGACATCTCCCGCCGTTA  
ATTGATAGCCCTTCTTGGGGCTTTTTAATATGGAGCAAGATTTGAAACTAAAAGCCGC  
TGTCCTGCCAACCGCCAGTGCATTCTCTGACTACCACACCAGTCTTAGCCAAAGAAAA  
CGAAAAGGACCCCCAGGTGATTCATCTTTGGAAAAAAGATGATACAGTAGTAAACATCTT  
GGCATGTAATATGTAACGTGAAGCCCGTGGTGAAGCGATAATAGTTTTATGTCAATAGC  
TTTTGTGACGCTTAACCGTAAAGACATTGATAAGTTTTCTCGGACGGTTAATAAGATTGT

GCACCAAACGGGGCAGTTTTTCGTGGACATCCTACAGTACAAGCCTCAAAGTGTATGAGTA  
AGATCGTTGGGGAAAGACCAAGGAGTTCCCAGAGGTATTGACCAAGAAAAACAATAA  
CAAGATGGTTTATGACGCCATTGACATCACCAAGGGAACACTACGAATTATCATTCAAAGAA  
GGTTAATCCTTACTGGATCAAGGCGATGATTTCGCACGGTCAGTATTGATAGCCACATCTA  
CTACAAAGAAAAGCCGGAACCCAGGGAGCCTGAACCTTCTGAAGACTTTTATTGATGCTT  
TGTGTTAGCATTATCCTCTATCTTGTGATACGGTCTATTACTCAATGGATCTTCTGGGAA  
CAAGTGTAGGAGCGTATCTACATGGCTCCCTGGTAGGCATTTACATAGTGCGGAAAGCT  
CGCAAAGAAACCCAGAAATAATCGGAAATAGAGGACAGAAGG

>NewGenomeName\_234

AGGACTAGTCCATTTCGATTGGATCGTACTCGCGATTGATGCCGTTCGGCGGTCCCTTTGAC  
TCCCACGTTTCGTCCACACGGTGATGAACACGTTGTAGCCATCGAGGTGACTGGGGAGCGG  
TTCTAGGGCCTCTACGATTCGCCGGAGGGTGGCGAGCGGGCATTCCGCCAGATCCTCCGG  
GAGCTTCAGTCGGGCAATGCAGTACGCGAGAGCGATCGTCATGACATCGACGCGGTCCTC  
GTAGTGCTGCTGGACGGCAGTCTCGTCTGATACATCGTTGATAGGCAGGCGGAGATGTGCTT  
GCGGCTGATACCGCTACCTTCGGTGACGGCACGGATGTCATCCATAGTGACGGCGAGGTC  
CTTCTCGGACTGGAGCTATGACTTTTCAGAGGGGGGTGGTGAGGATGGCGAATACGATCA  
CCAACAGGAAGTGGCCGACCATCATGACCAGCCCCCTGCCGACGAGGCGGCCGAGGACCA  
GCCACGATGACCGGATACGCTCCCTGCGTGGAGTGTAGGCGTTGTTGCTTTACATGGCTG  
GGGACTCATCTCAGAACGGCGGTGCGTCGTGGATCGCGCAGACGACCGGCTGGGATTGTA  
CGTGCGGAGGCGGATCGGCTACATCGCAACGATGGTTCGCGGATGATGTACCACAGCTTGG  
GTACCGGCTCCTGCAGGATCACGGAGGTGGTTCGGTTCGCGAAGCTGGGGTGGCGCTCGT  
AGAAGGTGCGCAGGTCCTGCAGAAGGGCGTCTCCTTCGGCGTCCAATCTGAGCACGTACG  
GTTAGAACTTGCTGTGAGGCCATGGACCGTGCCAGCCAGCACGACCGTCCCGCACCCAC  
CGCATCAGCGCTTTCGCGAGGTATCCGGTGGTAATGAGGGAGTCGTGCCGATTCTGCCTCT  
TCTGGGAGGTTTTTAGCGGCGGCAAGGCTACTCCTCTTCGAGCAGGCCGACCTTCTTCCC  
GTAGGGCACCTCGCGGCGTTGGTTCGACGTGAAACGATGTGCGTTGATCCAGTTCGGCGAT  
GAGCGGCCTGAGGTCGTAGAAGATGGTACCGGTGAGCACGTTGGTCCCGACGTCACGCTG  
GTACAGGTACGTCGCCAGCTCGTACGTCAGCAGCTCTGGCCGGACCTCGATGGTAAGCAG  
CAGGCCGAGGAAGCCGCCTTCGTAAGTGCAGCGGCTGCAGCTCACCCGGCTTGAACCTCGG  
CACGATCGCCAGCAGGTTCCCGGCGTACACGTCGAAGTCCTATCCATTCATTGTCTTTCA  
TATTGTCTGAGTCCCACAATCTCTCTCAACGCCACTCGGCAACGGGCTTGTACAGCTC  
CTTGTCCACTACTTCGCGGGGCTGTGCGTTACGATTGCCTACCCGATCCAGAGATGTA  
GTAGCCGGAAGCGATGTGCGCCCCGGTGAATCAAAGGCCCTTGATGGTCCACATCTCGTG  
GCGCAGTACCAACGGTTCCCCGATTTGGTTGGGGTCTAGTGCCAATACTCGCATGTCCAT  
TCGGTACACCTCCTCCCCCCTTCGTTCTAGATCAGCGGGCTAAGCCTTGCTAACAAGC  
CCTTGAGTGTGTCCACGAAGCCTGGTGGCAGGTCACGGGTGACGCCCTCATCGTCGGCAC  
CGGCCGTAAAACGACGTGGCTGTACAGCTCCTGTCCGAGGACGCTCTGGGTGACGGCGC  
GGACGATCGCTCCGCCGTACCGTTTCGGGGCCCTCTAGCCGACCTGGCCCTGGCAGTCTG  
CCTCGACCGTGGAATCCTGTGACAGATGGGCCTGATCGGCGACCCACACCGTAAAGTTCG  
GTGCGAGCTTGAGCGCGCACATGGACCAGCTGCCGATCGCGTCGCACAACGCCCGCAGTG  
CAGCCTGGTTCGGAGCCTCCGAGGTCGATGCGCTCGGTGTTGCCATCGGTCTTCGGAAGGA  
CGGCCAGTCGTGTCATGGATCTGTCCTCAGTGAGTGCATCGTCGTAAGTTCGAGTGAGTGT  
ATCTACGTGGTTCGGGCTAGCTCCTGGAGTTGACGCTGACGGCCTCCTCCTGGTCCGGCAG  
GGTGCAGAGGCCAGCTTCGGCCAGGCGGACGGCAGGACGGCCGTAGTACCCGTGAAAGTG  
GCACACATGGCCGCTGTCGATCAACTCCTGGAAGAGCCAGATGGTGTGCTCGTCGTCCAG  
TCCATCGCGTTCAAAGGCGATGATGCGGTCGATTACATCAATCATCCGTCTGTCTTCTCC  
GCGTGCGGGTGTCTTCGGCAGTTTGACCCCCGCCAGTGTTAGCAACCTGGTGACGGCGG  
CCGGAGTGCTGACGGTGGGGTGCGCGCGGAAAAGGCCCTCGGCGTCTTCTGCGCCTTCC  
CGGGGTTGACGATGTGCTGGGCAGCGTCCACTTCGGCCTTGCTAGGCCGGTGGCCGGTGG  
CTTTGCGGTAACGCCGAGTTCGAGGTCGTGGGACTGGTACCCGCGCCGGATGACGTCGG  
CGGTCTCGAGCACACCTTCGCGTAGCGCTTCGCGTGCGCGCTCGGGGTCTCGTACCCGA  
CCTCATTGCCATTGGTGACGTGCACGACGAACGGGTGTGCGTTCGCAACCGCGCAGGACCC  
AGAAGGTGCCGTACAGCGCGCCGGGGACAAGGCCCTCGGCTTCTCCCCGTGGCCGCTGA  
GCGCTACGTAACCCGCCCGCTACGGGAACAGGTTCGATGGCCGCGTCTCTGGCAAC  
GATCGCGTCGCGCATCTGCCGCTGGCTTTGCGGCACGACAGGGATGTCGGCCAGGACGAT  
CCAGCCGCTAGGCAAGTGAGCCAGGCGGTGGGCTTGCCGCACGAGCGGATGACGTAGAT  
GAGCGTGTGGCGGTATGCGGCAAGGAAGTCGGCGTGGTGACACTCCATCAGGTCGCCGAG

TCTCGCCTCACGTATGGCGTACCCACCCTGCAGGCGGTTCGCTCCGGATCTTATCATGGCG  
CTCGATTGCCGCTGGCTCCTCCTCGACGCGGATGCGGCTTTGGCGAAGTCTCATGCGCTT  
ACCCCCGCAGGTCGCTTTAGGCGATGGTAACGCCGACGGCATCCGACGGGTTCGGTAATCT  
TCTTCGGCTACGTGATGAATGCCCCCTCGCCTTAGCACGACGGGTGGACAGCCCAAGAAG  
TGAGTACCGAGTACAATCCCTCGTGGGTGGCGTTCGCTGTGTACGATCCGCGCGCGATGT  
CGGCGGAGACGCGCGGGGTGCCGGTGTGCGCCGTGAGCATTAGGGCGGGGTGGCGGCGT  
CACCGGTGTGCTGCAAGGTGCTGCATGGGTGCAAGGCTGGCGTGTGACGGTTCTCTTTC  
CGTGGTCCGCGTCCGACCGAGCCGCGCATGGGGCGAAGGCAACCGTTCAGGCGGCGGCGC  
CCGCGACGAGCGTGTATGGGCAGAAGCGCTGGGGGGACTTAGTGAACCTCCTTGGGGCTG  
TCCATACATTGGCGTAGAAGTTGCCCGTCTGTAAGGCGTTGAAGCCCTTCTGCTCGAGGT  
CAAATCGGTGGTCTTCTAGATGGCTAGGAGGGTTCGGGCCGAGGGAGGATGAGGTGCTCG  
GATTGAACCCATAGAACTCCTCCAGCGTGTTCGGCCGAAGATGACGACGGCGCCGTCGA  
TCTGATGGATGAGCAGGGTGTGTAGGGCAGATGCTGTGCCACCGGTCTCTTTTCCCAGC  
GGAACGAGAAGTCGCGGGGGTCTCGGTAACCTCCGCGCGAACGCTTGGCGATGGCGGCCT  
GGCGCTCGCAGGCGTAGTGCCGCTTGGTGC GCGCCTGGATGGATCTCGGGTGC GGGCCAC  
GCTTGGCTCCGTA AAGGTTGTATCCAACGGCGAGGCGGCTAGGGAATCCACGATCAGAT  
CCCCATCTAGTCGGTTTCTGCTTTGTGACACCAGGTCGATGTGGACGATCATCTCTCC  
TCGGATAACTGGGGGGGGTAGGGCTTTCGGTGTGGTTCAGGTCCTGGTTCGTGGTTCGAAGTA  
GGCGCGGCGGGTCTCGGACACGCGGGCATCCTCGCCGCCGATGTCGGATCGGAGCTGGTG  
GAAGGTGTCGGCCATCGGAATTA CTTCAGTTGGAGGTTCGGATTGGCTGAGAGGATCAGG  
CGG CAGGTGCTGCAGGAGGCCTCCTTGAGAGACTGGCTAGTAAGTGCTTTCTCGATGTGC  
AGGAGCGTCTTTCGTCAGACGCTACGTGGTCTCGCGAGGCGTGGCCGACAGTGTGCGGG  
TCGGCGGGATTAGCGACGCGGATCGGCTGACTCATGGGTTCGGATCGGGCAGGGAGTAGT  
CGAGGGCGTTCGTGCTGGTTCGCGCCGGCCGTAGATGGTAGCCATCAGGGCGGCGCGGGCCT  
CGGGGTGTACGGTGAGTCGCGCCGGGGTCCCCGCGTCGACCGCTGAGGCGTTCATCAATT  
AAAGGGTGA ACTGGCGGCTGAGCATTAGATCGGACCCTTTGCGGCACACCGTAGTGGGT  
GGTCAGGCAGTCGGTGCATGAAGCCGACCCGGCGAGTGAGGGGTAGGTCTTCTGCAGGG  
CTTGCAGTGGTAGAGGCGCTCGGCCGGCATGGCGTCTTCGGGAAGCCGACGAGGGTGGC  
GGAGCCCACGATCGGTGCAGTCATGGCAATCACGTCCAAGATCGAGATGGAGTAGTTCTC  
GTTGGGACATGGTGCAGCCTGCGCATGTCCGGTGT CAGGGGCGACCCAGCTCGCTATCG  
GCCTTGTAGTTGTTCTTGC ACTCGTCCGTACGGTATAGGCCAGGGTGTGACCCACCTCA  
CCGAGCCGGCCGGCGAAGTGCCGGACGCCTCCCTCGGCGGTAGTCTCGACCGGCCGCTCG  
CCC GCGACGTTTGGACGGATCTGGCATTGGTGCCTGGGTAGACGTCGGTGACGCGCTTG  
ATGTCGACGACCTCGTAGTGCTCGGGGTGAGGACCCGTGCCTGGACGCCGAAGCGGGTT  
TCGGTGC GGGCAGATGAGACGGCCTCCTGCGGTCTGTGGCGTAGGTTTTTGGTGGTGCC  
GGCACCTGACGCGGA ACTAGGGGCGCGCCATTCTGCAGAGCTGTGGGT CAGAAGGCCAC  
CACCGCTGGGAGGACGGTATGGACTTTGTTGTG CAGGGCCGTGAACTTGCCGGTGACGGC  
TCCCTCTGCGTTGCGCGCGGGCGCGGGTAACGCCCTT CACAGTGGATTGGTGATGTACCAA  
GGTGATGGAGGCCTGTATGACGCCGCGCGCGGTGCCGTTCCAGGTCTTGGCTCGGGCGTC  
GTGCCGGTATATCTCCATCAGCTCGTCGCGCTGGTAGGTGGCGATGTCCC GACCCGGCC  
CTTCTCCCCCGCACCGGCTGCGAGGCGTCCAGGAAATGGAACCAATGCCGGTCCGTGAA  
AGTGGACTGGCCATCTCGTGGAGGGTGTGCGGAGAACTCGGCCCGCGTCTCCTCGTTAAG  
CTTGAGCGCGGAGCGGAACTCGTCGATGCAGAGGTTTCGAGAACC GGGTGTGGGGGACCCT  
GACCTGTGCATCCTCGGCCTGCCAAGAGCGATGGCCATCGTGTTGTGCGAGACCGTTCC  
TGTTAACGTCCGGCCGTAGGTGGTGGAGAGGCTGCCGTGAGAGAGGTGGCGGCGAGCCG  
CTTGGGCCC GTAGGTCAAGCCGCTGTCCTCGTCGTGGAGCGTCTCAGGGAAGGACACCTC  
GACCGTGGCCTGGCCGCACGGCCGGATGAAACCTGCGCAGGTGATCTTCAGCTTGTCCGT  
GAGGATGGCACTGACCGCTCCGACCAGCCTCTCGCGGTAGTGGTGTGCTCGGACCCGTC  
GGTGAAGACCTTGAAGTCGTGATGGTTGTGCGAGCGGGCGATGGCGGCGCGTCAGGGGAC  
CTGCCGGTTCGTCGACGGGAATGCAGTCAGCGTTGAGGCCAGTGACCGCGGT CAGGTGCGC  
GGGACCTCGGCAAGGACGGGGAGCTTGACGGTCTCCCGGTACAAGAGGCTCGCACCCGAC  
GTCACCGATTGGGATGGCCCCCTTGTAGTGATTCACGCGCTCGCATTGTCTCTGAGCG  
GTAGTCCCTGGCGTGGCCCCGTTGTGCGT CATGCCGATCAGGTTGTTGGTGTTCAGCCA  
AAGGGAGTTCG CAGCGGACATTGTTCTCTACCTTTCCGGTTTAGGCTTCGAAGAGTTCGA  
GTACGTGGGTGAGCTTGTGCGGTGGTGTTTACACCCCGTCCGTGACCCCGGTGGAGT  
CCTTTGCGGTGACGCCGCAATGGTGGCGATGCGTGTGAAACAGACACTGAGCTGCGCGA  
CGCCGCGATCGCAGCGGATGAGGCTGCTTGTCTCGATCGGGCGCTGGAGCTGGGACCGGC

CGTGCTTGTTCGCGGGCGGGCGCGACGTGCTGTCGTGCGGGTCACGGCGGGGACTCCCTAGT  
AGTCGCATCGTTGTGCGAGGGCGGGCGGACGGGGCCTCGACCTCGAGGATGGAGCGGTTCGG  
CGTTGGTGGAGCGTTCGGAGTGGGAGAGGATACGGGCGATCGCGCTGGTGACGTACTCCT  
GTCGGCGGAAAGCCTCCCAGGTGTCGAGGTCGGCCCCGCAGGCGTAGATCCAGGGGTGGT  
CCCCCTCGACCGAGCCGAGGTCGTTGACGTAGTCGTGGGCGGAGACGCTGGCCCCGTGGG  
TGAAGTTGACTGTCACCGCCTCCTGGACATCCGTCTGGTATTCGTTGAGGACGGAGAAGG  
CGGCGCGGATGGCGGAGCTCATGGCGGGTACCTTTCAGATGTCGGAGGTGGCGGTGACGC  
GGATCCGGCGGCCATGGACCTACCCGAGGATCAGGGTGCTTTCGGAGCCGTCCGTGTGCA  
TGGTGCGGTTCGAGTAGCTGACGTCCATGGACTGGCTAACGATGACGACATCGGTCCAGG  
TGGTCTCGATGTATCGCTTGCCGTCGTAGCAGATCAGCGGGTTGAGCATAGCGAACGCTC  
CGAATAGGGGTTTCGTGATGCCTATCCCCGCGAAGCCTCAGGGCTCGGAGATGTCGGTGAG  
TGCCTTGCGGATTGAGATCGGGGAGCGTTTTTCGCTGGTGGTGCCTCCATCCACGGCATCC  
GTAGTCGTTGGGGTTGTCCCTGTTGCGGCAGTTGCAAACCTTCATTGCGTGTTCCTTTCG  
GCTGCAGGGGAAGTCGGTGGCGGGCCGGGCGAGCGACAGCTGGTCTCGCTGGAGGGCCCCGT  
CCCCGTGTCCCCGCGCGCGCTGGCGTCTCTGCCGCCCTGGTGGATGAGCGATGCGCAGAC  
CTAGTAGTTGGTCCCTCGGTTGAGTGGTGTGACTTCTTATCCGGAGACGGGTCCCTGGCCG  
ACCATCCGTGCGTTGGTGTCTAATCTACCCGCGCTCGCTGCCGGGGCTCCTCGTCGCCG  
ACCCTCTCGGGGCAGGAGTGGCGCTCTGTGATTCTCTCAGTGGGTTTTGGGGGCTTTTG  
GGGAAGCAGATGTGATGACCAACTTCCCCTGGACCCCAGCGATAGACAAGGGGTTTGA  
GAGGTTTGTATCAATCCGTCATCGGGTTGTTCTTGCCAGCCCCTTGACCAACAGGTCTT  
TGGGCAGGTCAAGCCGTACTTTCGGCGTGGGGAAGCCTCGTGCCAACCTTCGAGCAGATTC  
TGCGGAAAGAGACCGTGAAGACCGGTACCAACTTCTGACGCTCGGACCGTGGTTCGGCATG  
GGTAGCTGTTATGAGGGCCGCCAGGCGGTACCTACACCCGAATGTCGAAGGACCGCGCA  
GGCGGCCGGTTCGGTAGCCGAGCACGAGGCCGAGTGCAGGATCGTCTGCCAGCACGAGGGC  
AGGTCCGCAGCCGACGTGCTTTCGACAACGACGTGGGAGCGACCCGGTTCGTCGGAGGTG  
GACCGGCCGAACACTACGAGCTTCTGATCCGGATCCGGCAGCCGGTACAGGCCCTGGCCACC  
TGCGAGACCTCCCGAGCGCAGCGCACCTCGCGGGCGTACAACGACTTGCCAGAGCTCGTC  
ACTGAGCGCGACGTCTGTGGTGAACCTCCGCCCGCGTCTTATCATCACGCGGTCCGAC  
GACCGGTTTCATGTCGCCGCACCACATCGGCCTGGATAAGAAGGAGGTTCGACCCGACCCTC  
GAGCGGGTTCATCCGGACCCTGGGGGCGAACCCGCAGCTTGGGAAGCTCCACGGGCTCCAG  
CTGTACGGGTACCGCACCATCCGCCACCCGGACGCAGGCAAGACGATCCCCCGGGAGCCG  
GACCCAGGCGTGTGTCCGGTCTTGCGCGGCCTCGAGGACCGCTTTCGCGAGCTGTTCCG  
TTGCGGCGCTTCGCAATTGGCCTGAACGCGCCCCGCTCAAGCCGCAGCAGGTCGAGGAT  
TCAACACCTAACATGCTCGGGAGAATGCTGCACAAGCCCCGTAGGCCGGACTGCTGACG  
CAACACGGAGAGATCGCCGGCCACGGCACCTTGCCAGCGATCATCACCGAGGCCAAGCAC  
TACCTGATCATGGCAAGTGTGAAGGACCCGGGCCGCGGAGGGAGCCCGGGACCTCGCCG  
AAGTCCCTCGTCACGAACGTCGCGCGCTGCGAGACGTGCGGCCCGACGGTGCAGGAAG  
AAGAAGCAGGCGCGGACCATGTACGTCTGCCTGTAGATCGGCTGCGTGACGAAGACGGAC  
TCTCACGTGGAGGAGTGCCTCGAGGTGGAGATGTTCAAGCTGCTGTCCGACCCCGCGTA  
CGGAGGCGCGTAAGCCAGCTGAGCGGCCGCAAGGCCTCGGCGGATGCCCTGGTCAAGATC  
GGCTGGATCCGCGCCCTGATTGACGAGCGCGCCGTTTAGGCGGCCAAGGAGGACATAAGC  
CCGCGAGCCTTCGATCTCTTTCAGAGGCTGTGCTCACCAACAGCTCGGATCTTGAAGAG  
GTGGCGAACAAGGGCCTGATCCACCCGAGGGTGGACGACTTCACCGGCCCGTACTCCGAG  
GCGGTCTGGCCGAACATGGAAGTTAACCTGGAGCGCGACATCGTGCGGTCCACCCAGGAA  
GTCACCGTGTGCCCGCAGAAGGTTTCGGAGCGAGCGAGATCAGACGCCGGTTCGAAGTCCCT  
TGTAACCTATTGCAAAAGCGCCCGCCAGGCTTGAATGCCGGGCGGGGGCTTTGATTTTCG  
AGCTAGACGACGGCTGAGAGCGTCATCGCGTAGGTGAGCCTGTTACCCGACAGAGACGTGG  
TACATCAGGTCCTTCGCGTCTTCGGTCTGTGCTGCGGTGGCGAGCAGGCCGGTGTGCGG  
TTCACGAACTGGCGCAAGCTGATCTCGTTCGTCGCTGAGGTGCGATGGGGCGGGCAGGGC  
CGGGGGCGTTCGGCTTCTGCTGTTGCTGGACGTGCTGCGGGCGTGGGTGGCACCCGGCGCAAG  
GGCGAGGGGTGCCGGCTTGGCAGCCTCATCGAGGACCGTGGCGGGTCCCAGATGTCGATGT  
GGCCGTTGAACCGCCGAGGCATCACCTAGGCGCGGCGTCCGGTTCGACTCGGGGATGCGCTC  
CGTCCGGCCGGTCTCCCCGCGCCCAACTTCGCACAGTCGCAAGCATTCCGAAGATAACCC  
GCCGAGCTGCGCGACTGCTTCCCTGGGTTAAATCCAGCTCGGCGAGGCGTTGCTGAATGGC  
CTCGCCGAGGGGGCTCTTGCGCTCGGTTACCGTATCCGTGTTGAGGTTCTTGTAAACGCTT  
CTCATTGATCATATTTTCAGGTTTGGCCACCATCTTGGTTCGTTTTCTTCACTCCTTCCAA  
CTTGCCGTGTGTAACGCGCTCGCTTGTCTGGGGATTCTGCTATGCTGCCCCGCCCAACA

TGGGTGTCGGGACTAGGGTCAAAGAATCATGCCCGGTACTTTATACATCCGGTAACGGTC  
ACATCAAAGTATGCACTGTCTTCGGGTATGCCACTGGGGCCAATTTGTGATGTGTGTGC  
AATGGCGAGGGGCTTGCCCAAATACTGGCGTTGGTTTTTCGTGGGTTCAGCAAGCCAG  
CCGGTGACCATCACCACCGACGACTATGAGGAGCCAACCGAACAAAGTGAGCGAGAGCTCT  
GGACGGAGGGCCACACGCCCGACATGAAAGTGATCTTCGTCAAACAAAAGACCACCAG  
TTTTTACTGCAGTCCCAGAGGTTGCACCAAGTCCTTCATCCGGAGGCTGGCTCGAACCAC  
CAGCGATACGCAGAGCGAATGCGAGCCCTCTGTGATCACCTCCGCCGAGCAAACCCATCG  
CCGCCCTTACCTCCCCCCCCGAGGAAGGCGCAGCGGTGAACGAGTAGCGCTTCGACCACAT  
GTGCCGAGAGGAGGGGCGGATGGCCCGCGCATCGCAGAACCGGGTCACCTCGAACGAGGT  
CAAGCTGTTGGCCCCGACCCCTCTTCGTATAGCGCCAGCTCGTAGCCGACTGGGAGGTTCGG  
GACCAGCTCGGCGCATAACGGACGAGACCGTCGAGCTTGCCCTCTACCGGGAACCTCCAGGC  
CATCGAGACCGAGCACCGGTCCGAAAGCTCGGCTCCAGAACCACCCGGCAGCCAGCCAG  
CACGTATCCCAGAGGTTCGACGAGTCCGATACAGCCCACACCGCAGCCGGGCTGCCATGTT  
TTTTACACCCTGCCTGCACCCGCCTTCGCCAGAAAATGGGAACTTCGTCAAGTTTCGCATA  
CAGGCAGGACTACCCGCTCGATCCGGTTGACCGCGACGAGAGCGACGCCATCATCAACTG  
GCAACTTGCCGGGGGAGGAGAGAAAACGTGGCCTCTACGGTTACCAAGCGAGCCCGGAAGT  
CTGCAACAACCCCAAGCAGCCGCACGCACGCAGGCACAGCTGCCAGAGGACAGCCTCAG  
CCGGGTCAATGGGTCCCTCGAAGACCGGTGCCCCGGATCCTGGCACTTCCGTTCGAGACGG  
TAAGCGTCGAAATACCTGAGCCACCAGGAGAAGTCGGCGACCGTCTGTTCCGAAAACACT  
CAGCGGCCAACGCCGCTCTTACTCCCGAGGAGCTTGATTATGATTGCGCAAAACACCTT  
CAACAAACCCGACGACCCGAACCTAGGGCCGCGACGCCCTCGTTTCAACCCTGATCGGCCG  
CATGGGCTTCAACCTAGAGTTCCTGAGGCGACCGGCGAGCCGACCTCCACCCAACAGGT  
CGCGAAGGACGGCGCCTAGGCCGCTGAGCACGACGGCTGTCACCGAGATCTCGAGAAGGC  
CAGTCGCACTTTCAATTTTCGAGAACGGTACCTGCAGCGAAGACCACGATGACTTCGAACA  
GCTGGTGAAGGGCACGCTGCTGGCGTATGACATCGGCGCGATCCAGACCGCCGACCAGCT  
CTCCCGGATGTTTCGAGCGGGGCCCTCTGACACCGGGTGGGTGAAGGCATGAGGACCGAC  
GAGACCGGCCGCATGCTGCGCGTGGCCGCCGACCTGATCGAGACCAAGGGCTGGGCACGG  
TTACTTTCCTCAAGCACCAACAGCGAGCACTGCGTGCTCGGGGCGATCCGGGAGTCCGCT  
GACGGCAGCATCTTCGAGACCGCCAAGTTCAGGGCAGCAACGGTACGACTCCCCAAACC  
CTCCGCGACCGGGGCGTCGAGGGCGACCCGGAGCGCGACTCCTCCGGGCTCGCCGAGAGC  
GCCTAACGCGGGGAATCCGAGAACATCGTCCTGGTGACCGACTCTAACGACGTCGACGAC  
CGCACAGCGGCTGAGGTCCGCCAGGCCCTCCTAGAGGCGGGAGCCCGATGACCGGCATCA  
AGCTCTCCCGGAACAGCATCCCTACCACCCTCGTCCAGCCCTGGCGGGAGAAGGCGAAGT  
GTTTCGGGCAGGACCGTAGGGGGCCCGTAGTCGAGGAGATGCCGAAGGTCCGGAACGCTC  
AGGAGACCAGAGCCAATTTCCGCCAGAGGGAGTGATGCGCCTGCCCGGTCAAGCGAAAGT  
GCGCAGGGGTTTCCTTCCACAACCAACATGGGCGTCATCCGGGCTGGTGTGGGCATCT  
CCAGAGCTCGCGGACCCGTTGAGTACCCGACGGCCGTCCGCAAACCTCGAGACGACAATGG  
GCCGCGTGCCCCCGAGACCAAGCGCACGAAGCTATGGCCAGACAGTGCGAGAGCAGCG  
CCCGGCCGATGCGTCCACGCCAAACCACCCAGGACTTATTACCTGGCACGATCACCCACT  
TGGCCGAAACCTATGCAGCACATGCCAGATGCGGCAGTGACGGGCAGATCTGTTCGACCA  
AGGAATCATGTGCGACACCACCGAGTAGATCCGCCCGAAGATCAACAAGGAGGCATGCCG  
CCAGTCCATCAACATCCTGCACTTCGTTCGACCAGGATCGCCCCGAAGCTCAACGCCCGTCT  
CGAGGAGCTGAAGCAGATCGAGGGCGACTACCTCTCGATCATCCAGGCGGACGTGGACAA  
GTCCGGCGAGGTCGCCCTGCTCGACAACAACCTGGTTGTACCTGGCCAAAGTCGTAACA  
GAAAGGAGTTAACCAGCAGGTGATCAAGCAGCGGTGCCCCAGGATTCAGTAGGAGTGGAA  
GAGCGAGGCGGAGGTCCGCACCATCAAGGCGGTGGTGTGACCCCTGCCGCATCCCTCCGCT  
GACTATTTACAGATCGACGACCATTACATGGGCCGAATGAGAGTCGAGTGCTACCGGCCG  
AGGGGAAACAAGAAGACGCACAAGGAATTGCTGTGGGGTCTGTGGTACCGATAGTGAATC  
CCTGCGTCGACTGCAACGAGCCGCTCCGATACGGCAAGCTGACCCGCTGCAAGCAGTGCA  
TCGAGTGACGCCGGGAGGCGAAGAGCGAACCCCGCACCATGTATGGGAGCCCTGGATATT  
GCCGGGACATATGGATCACCTGCGACAACCTCGTGATGACCAGCGGTTCGGCTCAATCGCC  
TGCGGGACGAGCCGAAGGTCGAGTACTGCAACCGTGTGCAACAATGACGTAGGAAGTGGA  
AGCCGAGACAGAAGCCGCGTACGTTCAAGTCCAACCCCTGCCGGAGCTGCTACAGCGGCG  
ACGAGTACCTACGCATGACGCCGAGAAAGCGGGACGCTAGACGCGAGGCCACTCGCAGGC  
TCCGCGCCAGAGCCACGTCAGCTGCCGAGTGGCACAAGACAATCGAGCTAGAGGACGAGG  
CGGGGAACTATGTTAAGCCAGGTGCAGCGGCAGGAGTTACGGGCCATCTGGGCCAACTTG  
GACCTTGGGACGAGGTTCGAGATCTGAGAGACGGTTGACCGAGCACCGCAGTTGCTGCCG



GAGTCCCTCACCAACTAGTCAGTGC GCGCGACATGAAGCGCCTCGTACCGCCAGGCGAAG  
GCGTCACCGCCGTCCAGTAGGATCCAGACTGGGAGTCGATGTTTCACACCGCCGAACACG  
GCGGCGAGCGGGGGCTGCTCTTCGACGCCCGCTTCGCAACCGAGGCAGGCCGTGCGCGCG  
GCGTGGACATCTTTCGCGAGCTTCACATCATGGATACTCGTTTCAGCAGACACGTTGTGA  
CGCACGGACTCGGGGTGACATCTATCCCGGCTACCCGCATTGCCGGATCCTCTCCACCG  
AGGAGCTGGAAGCCAGTACAAGCTGAGTGAGAAGAGACCAAGACCCCGCACGGCAAGCT  
GGTCACCACCACAGGCCACAGCACCCACCCCAAGTTCGCGCCCCGAGAACTTCCCGATCGA  
CGACCCGGTCTGGGTGCCCGCGATCACCGAGGACGGTTCGGCCGTCCGGATGTTCAAGGA  
CTCGAGCTCGTTGGAATGGGCGCACTCCGCTCTCCCGCGGATCGAGGCAGTCCTCCTGCG  
GCAGGCCGAATGGTCCGACCGCATGGACTTCGACACACCCGACTACGAAGTCGCTGACTG  
ATGTTACACCCCGAAACTACAGAAGCTCAATCCCAAGCGATTGCACGAGTTCGTAGGT  
CTCATCTACCTCGCGTGGGCGATCTTCCGGTGTACTGAACACCACCTCATGCTCAACTCC  
ACCGCTCCTGACCACAAGCCGAAGTGCTGCCACTTCGCCAATTAATCGCCGGGCAAGGTC  
GCTGTCGGCTTACGGGCCGGAATGAGCTCGTCCGCGTGCATTTGTACGAGGTCGCCGAA  
GCCGCTGAGGAGGGCGACAGGCAGAGCTACGACGGGACGGACTTCTCCAAGGGCGACTTG  
AAACCCCGCCTGCAGGGGTTACCAGCGTGAGCAGATCCAGTCCGTGCAATACCACGCC  
CCCGTACACCGGGAAGGCGTCTGCGGGAAGCGCAGCCGGCCGGAAGCCGCATCGCGGCG  
GACTACAGCCCTGCCCGCCGGGAACTAGCCGTTTTTTTCGGCGGATACAGTGCAGTACGCC  
GTCCCGAGTTCGAGCAGCGGGGGATGTTTCAGCACCCGCACCAACTCAAAGGCCGTTCT  
TACGACTTCCGGCCGTGCACTGGTAGCCGGAGAGCATGGTTCGTCCTTCAGACCCAGGAG  
GAGCGCGAGCCGGTGACGAACGAGCAGGTGGCCAAGGAGTTGGTCTCGTAGCTGAGGGCT  
GTGCCTGATCCGTTCCGGCGATGACTTGGACATGCTCCCCGTGCACCGCGACGCCCTACAC  
CACACGAGCCACTACCGGACGCTCCCCGAGACGATCAGGCGCCCGAGCGGGATCGCGGCC  
ATGGACGTCAGTTGGTTGTACCCATTTGGAGAAGGCAACGTGCTCAAGTACCTCCTCCGC  
GCGGGCCATAAGGGCGACCGGCTGGAAGACCTTCGAAAGGCCAGGCAGTGCCTGGACGTC  
TCGGTCGAAATGGAAGCAGAAGAACGAACCAATAAGGGGGAGTCCAATGTCTGACAACAA  
GGTCTTCTCAAGGAGATGCAGGCGGCCAAGAAAGCGCCCACGCTGCCCGAGGAGATCCG  
CGACGAGTTAGACGACATCCCCGGCGAGCAGACCATGTTTCGAGTTCAGCTCCAGCACGGT  
CAGCGTCTTAGTGGCGCTGGGTATGAGCGTTGAGATCGACGCTGCAGCAATCGCCAACGG  
CTTGCTATAACTGGGGTTCAAGAGGTGAGCACGGGGGACGGCTTTGGGAAGGAGGTGATC  
CATGCCCTGTCGCGGAAGGATGTGCGGAACTACGGGTTCTCCTGCCGGTTCGCACGCGCTG  
CCGCTAATCTAGGCGTGGATGCTGGAGCAGTTCGAGATCCGGGCCCGCCTGGTCCGCATC  
ATATTCTCATCCCTGCTCGGGGCGCTCGGCAACACAACGGTGTTCGGGGGAGGGTCTTCT  
GCTTTCGCAAACCTGATCTGCAACACCGTGTGCTCCTGATGGCCAAAACCGCTGGACC  
GACTACCGAGCAAAGAACGAGATCGAGGTACAACGGAGTTCGGGTGACCATGTTCGGAGC  
TGCTTTCGTGCAGCCCGCGCAGCAGATGGCGAAGGGCCGTCTAGGTATGGCACAGAGCTT  
CGACGAGATAGGAATGCAGTTTCACACCGCCGATCAGCTCCAGTGGCTGGAGAAGCGCAG  
CAGAGAGAAGGGCTTCGCGTACAGCGACGGCGAACTTCTCACCCAGTTCGGCAGCATTGT  
CGGTACCATGAGGGACCAGCGAGGCTGACAGATTTCTCGACGTCGGCAGTCTGTTTCGCGG  
ACTAGCTCCGGCAAACCTGATCGACGCCGCAATAGCTTGGGAGCGTGCAGGGCCGCGCT  
CTCGGCATATGGAGATCGAGCCGTCTCAGGCCGGTGTTCGGTGGTTCCCGTTCGGTTGGCAT  
GGTTCGATGATCTCCAATCCCCCTCGAACTCGAAGGGGGATCCCCCTCCGTCGATCGGCT  
GTACGCAGATGCTCGGCACGATGGAAGAGGTAAGGGTCTGGCCATCGAGGCCCTCGGCC  
GGTAGCGATGGCTACGTAGACCAGTGTCTCGCGCCGAGCTCCGGCACCTGCTACATCT  
GCGACAAAGACACCCGGACGGTGATCAACTGGTAGCTCCCCGGTCTCAGTGCATTCAAGA  
AGTACTGCACCAAGGGACCAATCCCGGAGTAGCGCAGCGAGGTCCAAAGCTACGGCCTCG  
GCTACCGTTACCTGGGCTACGAGGTGGACAAGGTCGCCATCATCTTGC GCGCGCGCGCGCCG  
TTTACCTCTGCTAGTACCACATGTGGATCGAGGACTTCGACCATCAGCGGTCACTCCATA  
CGGCCGAGCGGCTGAACAACATCCGCTTGGTTGTCGACAGCCTCGCGATCGACAGGTACC  
CCGAAATGGCACAACATGTCCCTGCTACACTTTGGTTCTCGCGGATGTTTCAGCTCGTGGT  
TGAACCCGAACGCCCGAGGCAACCGTGAATGCCCGAAACAGCGGGTGATCCGAACGGGC  
TGCCGCCCAGACACCGGGGGTGCCTGAGGCCGGGCAGCACCGAGCACGCCTTCGTAGTGGA  
CACGGTCAACGGTACTACCGGCCCTGGACCGGTACCGGACGGGCGGACCCCGCGACCCGTT  
GCTGGAGTTCGTGCGCCACGATGCCCGACCTCATGGACGTGTACCGACCGTACCAGCATT  
ACCATGATGCTCACCTTCTCGTCCACGCGCCCTCGCCCTCGCAGTCATCTACGTCCTG  
CTGGAGAGGAGATAGCAACGGGCACAACACATATGATCGCCCTGATCCTTTGCAACACCC  
TCCACGTA CTGCTGGAATCTGAGTCGACGGCTCTCGTAATTGGCTCCTCCCCTAGCTCT

TCCCCGACCCTGACTGGTCACGACCCGATCAGAAAAGCTCACCAACATGAGCAGCTTTT  
ACGCAAAGAACTTGCTCATGGGTTCGACCATGTGCGGAGGCGTGCCCCACCCCCTGGACCA  
TGGGGAGGGGCGTCAACAAGCAGGAGCCGGAGGTCAAGCAGCAGCGCGACTTCGTCTCCG  
GCGCGCCTGCCTTCTGGGACAAGGACAAGCCCGGGCCGAAGGTGCGGCTCGTTATCACCG  
TGCACATCTAGCAGCGCGACGTCAACGACCCGAACGTAGATGGCGAACGCAAGCTCTACG  
TTGACAGCCCGAACGTGCGGAAGGCAATTGCGGCGGCTATCGGTGCGGCCGCTAGAAATG  
GACTGGCCGTCGACCATGGACTCGCGGTGACCTATACCCAGGACGGCGTCACGACCGGCA  
AGGACAACCCGCCTAAGGCGTATTCGGCGCAGTAGGTCCTGCCGACGGGTGAGGTGAACG  
TCGATAACGGTGCGGCCGCTCTCGGCAGCCGACCCGGCTCCGGCACCTGCTCGTGCCCCGA  
CACCTGCTCTCGCTCCCGCTCCGACACCCGAGCTGGCCTTACAGCAGACACCCCCGGCGG  
CTGCTCCGGCCTCGGTAGTCGGTGGCCTCCCACCCGAGGCCCTGGCGGCGCTAGTCGCCC  
TGTCGGGCACCCAGGGCGGATCTAGCCCACCTCAGGGGCAGGTCGTGATCCTGCGTAGTC  
CCGGCGCGCCCCTTTATTGTACCAATAGACATTAAGATCCGTGGCTGGTACGGTAATCC  
GTCGGATCGTCGTAGAGATCGTCGTAGAGGGCAAGGTTACGACCGACGGCTACGGGTGGG  
CGTCCGTGGACCCCGGCTAGATCCAGGGGGAGACGACACTCTGGACCGGCGGCGACATCC  
GGACGATGGTCATCCTCGCCCGGCGGTACCTGCTCGACGCGCCGCAGCGCGTCGGCGTAG  
AGCTTTGGTTCGCTCGAGCGGCCGGATCAGATCCTGTTTACCACCGCGCGCATCGCCCGAG  
GCGGCACAATCAACTCGTCCGGCCTGGACGACGGTGTCGAGTACGCATCCGGGGACGAGT  
ATTAGTCATCACGCACAAGCTGAAGGTCTGCGACCACGAATTCGGCCCCTGGTGCCGAGT  
TGAGTGCCATCCCTGTGGAGCGATAACAACACTCTCCACAACCTCGACGTTGGAGCGGGACGT  
GGGGGAGGCCGCGTTCTCGAAGGACACCTACGGGCCCCCGCCGGAGGGCGTCGACCGAGGA  
GGAGGGGTCAACGTGCGTAGAAGACAGGGCGGACTACCTGATAAGGAGGAATCGGGCGCGCC  
GGGCTCTGGCCAGTGCATTGGCGCAACAAGCAGCCGATCCCGAACTAATCGTTAGACGAG  
GCGCGGGTAACGCTAAACAGCATGCTTCGCCTCGAAATCATCTGCAACACGAATGCACGC  
GGGAATAGGAGGGATTGAGATGGCGACACCCGGCCCATGCACTCCGCAAGGCTATCGAGCG  
GCTCAAGGATGACGGCTGGATTACAGGGTGCATGCACAAGCCCGGCGGGAACCTGCTCGGT  
CGGAGCGATCCGTCAGGGCGCGCTTACGCTCTCGGCGAGGACGACGTCGACCACAATCG  
CCAGTAGTTCAAGGACGAGCTGTCCCTGCTGCGCGAAGAGACGGACCGACTCGTACGGGG  
CGTGATTGGCGACCGCTACAACCACTCCAGTATCGTACACTGGAACGACCACGCGCGGCG  
GATGGTGTCCGAGGTGCACGACGTCTTTGATACCGCACCCGACGACCGCGAAAGATGTCC  
GGGTCGCTGCTGATATGGGCATCAGGGTCTGACACTCTGCGCGCGACGATGATCGCGGTC  
AGATACTCACCGCTTGCAGCAGAGAAGGAAGCGCTACCGTACTTCTTCGCGATCCTGTTA  
GCCCTGACGATCGTCTGCTGGTAGTTGGAGGGGTGGTCTCTGAACGGCAGCCGCGAGTTC  
CAGAGCAGCCCCGGCCTAGGCTGAGCGGGTGGAGCTGGAAGTCTGCGAGTGTGCCCGCTA  
CCGGTTCTTCTACTATGAGATCCGCTATTGCGACGCCCTGAAGATGGCCACCGGCTAGTA  
TTAAGGGTAGATCAGACCCTACGGAATGCCGTGCGAGTGCACACCATTCAAGGAGACCGA  
CGATCGGGGACTACACCCTACAGCACGGCACTGTCCGTGACTTCGAGGAGATCCACGCGC  
TCGTCTACGGCGCACCCGGCCGAGATCGACGACTACGTGCTGACCCCTGGCAGACACACCG  
AATGGGTCGTGACCGACGTGTCGCGGACTTCGCCCGACTCGTGTACAGCGACGGCAACC  
GGAGGTTGCGGTTCCGGGTGCACGCTCCTGGAGACCGTCCATTGGGCTGTGCTCTACAT  
CTTCGGCAAGGATTTCTGGGTGCTTGTGCGGGGAGTCACTGGCAACCCCCCGAGGGTTCGA  
CCTACTAAGATCAACCAGAAGGTTGAACACCTCGCGTGCGAGCTGAAGGAGCGCGAGGG  
TTGGGAGAGCTGGCACTGCCAACCCGGCGCCTTCGGCGGGCAGTTCGGATTTCGCGGCCAA  
CTCCGGGCCGATCCAGCAATCACACACACGATGAGAAACCAGATTAACAGCCCTTCGGA  
TAGCACGTGACGAACCCGCAGTAGCAGCGAGGGTTCGACATGATCGCCATACTGCACTTC  
AGGGACTGCTGCGTTCAGGCGCGCGACAAGAAGGACGACATGAGCCACGAGTTGGGCTAC  
GAAGGCAAAGAGCACGGGTGCGCCGGTCTGCAACCCCCTCGACGGAGAGATCGTCAGCATC  
GCAGTCACGCCACCTGCCTGCCGGGGTTATTCCAGCAGCCCGGGTGTCCGGGACCAAG  
CACTAGCTGAATGTCGACATCGCCTACCCGGTGGTTCGCGATCGAGTCATCCACGCCGGGC  
CACAGCCACCTGTGCACCTACAAAAGGATCTGTCTTGGGGCCACACGCTCCGGGGTGTCC  
GGGCGCAGGCCTCGGTAGGCATCTTCGAGACGGGCTACTTGGACGCCAGCGAGCGGCGCG  
CCTGCACACACCTGCGGGTGCCGTGGCTGAAGAAGAAGCATCTCGCACCTCTAACGCTGG  
ACGATAACGAAACGATGGCCGTGAAGTTGGCCGCCTGGGTGCGGCTGGTTCGACGCGCGCTA  
GGCACGTGTACCGGCAGCGCGGCTTCTGATCAAGAACCAGACCACCATGAACGGCTGCGT  
CACCCACGTGCACGTAGACCTGGGGCCCGGACGAGGCCGCGGCAATTGGGTGGTTCGCTGAT  
CAAGAAGCCCTTGCAACTGAAGCAGATTCGTAAGACGAGTTGAAGGCGCTGCCCTAGAG  
CCCTGGGGGAAATTCTGGGTGGAGCAACAGGGGTTCGGAGTTCACCAAGAGATCGATTCC

CTCGCGGGCGCAAGGGGCTACGGTTCCTCGAGTTAGACGTAGCCGTCGGCGAGCTGCTG  
GAGATCGTTACGGTCCGGGCCGACGGCAAGTACATGGTTTTCCAGAACTGCCAAATCACA  
AGACCGACATACGCGCTGACGATCTGCGCGTAACGGAGGTCAGAGATGGAGGTCAACGGG  
AAGACGGTCAAGGTGATGACCAACGGGCGACGGCGAATGGCCGAGTTGTATGGCGACGAG  
CACGAGATGCAGGTTGCGGTGAAGTACCCGGAGACAGTCGACTCGTCCAGCAAATACCC  
TTCTGCCAGAACTACCGGCCGCGGTTGGATCAACGTTCGGTGCAGAACCGAGGGGCGACGAG  
CTGGGGGGGATCACGGTTCGTCTGGCCGAGCCACGAACTGTGGCACGAGCACATCGAGAAG  
ACCGTCGACGGTCCCGGACGAAAGCTGAAGCCGTGGATGAACATCTGATCTGGCCCCTAG  
TCCCTGGCCCGGTGGTTCGTCGACGATTGGTTTACCGAGGAGAGCGCGTAGGTGGGCCTGT  
GACCGGCCGCTCTTCCCCTCGCTATCCTGGATCGCCGGGACACGGGCCGCGCACTCCGAG  
GCATACTAGACACGGTCTGGGTTCGAACTGGGCCACAAATACGAATGGGCTCATCATGTCT  
GACAGTCGGAACACCCATGACGTTTTTACGTGGGCACCGTGCCCGCTGACCGGAGGATCT  
ACCTTGGACTTCGCGGAGAACCTGAACGACAGGGCTAGCGACATCCGCGCCGACGACGAG  
ACGTTGTGCGAACTTGGCCCGTCATACCTGCGCCACCGGCGACCGGCCACCGAGCTGCCG  
CCGACGTCCCTAGCAGCGAGCGTAGCCCTAAGGGGCGTCCAGAAGCTGCACGTCAGCCTG  
TTCGGCAGCAAGCCGACCGGCTGGAACGCGAGAGTGATGACGTCCTCGACTTCTTCACG  
ACCGAGCAGGCCAAGCAAGACAGGGGCCCTACGAGATCCGAGCACTGGGCGAGAATGGG  
GGCAATGACTTCTGCGTCACCCAGGGATGCCCGCGCTACTGGATCGTGGTGTTCACCGAC  
CGGGTGTCCCTGGAGGTAACCGGAAAGGCCGCCACGTCGGGGCCGGAGCTACCCAAGCG  
GCGCAGTACGACAAGGTGCTCACTGCTCCCCGAATGCCAGCCTACCGCGAACCCGTCCT  
GATCGGGATGAACGGCAACTGCAACGAGGTTCGTGCTCGCCGCCGCCAGAGCCCGAGCG  
TGGTCAGCTGCTTTGCAACAGGGGGCGTTGCTTCTCGTCGCCCAACGCGAGCGGTGGGC  
CGTGGGGAGACAACACAACCTGCCGGTGTGCCGGCGACACAACACTCACTGACGCGAGTG  
CTGGAATAACAAGGACCACGCCAGCTAGCTCGCGGAGCATAACCCTAGAGGTGTATTGTGA  
CGCCCGAGAGCATGAACCAGGCGATCGTGGCGGGAACGAGTGAGACCGGCATCCCGGCCA  
ACGAGAACGACGTCGAAGAGTTCACGAGCACCTCGATGACGAGGCCTTATACGTGTCCC  
GGACGGGGGAGTACTCATGAGCGACTTTATCGAAAGGCTGGGCAGTCTCAGCCTGTACCA  
GTAGTACGTGCTGTTTCGTTCTATTGGGGCGAGCGTGCGGGCTCACAGATATGTTTCGTC  
GGCCACGGGGGCGGAGTACTGCGCCCTGAAGGACGGTGCGCCCGGCTGGGCACTCGACTG  
GTCCAGCCGGGTCGTCGGGTTGCTATCCAGCGTCATCGACGCCGTCGCCTGGACGGTGGT  
CACCTTTTTACGCTCTACGAGCTGACTGAGCGGGTAATCGTGCGTAGCGCAGACAAGAA  
GCAGATCAGGTCGACGCGCCGGTTCCTGCGGAAGGTCAGGATCATCGACTAGGCTCCCGG  
CGGCCTCGTCTGCGGACTCGCCACGACGTCAACTCGATTACTGGCATGTTAGTGGCCGA  
AGGCAAACCTGGTTCAGCCTGAAGGGAAGTGGAACCATGAGTGAGCGGAGCAAGCACCTGG  
ATGCGGCTCACGCGGTCTACTCGGCGCCCGAGACGACGTCGTACGTCATCCAAGGGGCCT  
AGCTGCCGTTCTCCAGGCGGCATGAGTTCGTACAAGCGACGCAGCGGTTCAAGCAGGACC  
TGGCTCCGTACAGCCCGCTCGGGCAGCGTGAGCTGGACCCTTACCACGCTCCCAAGCACG  
GCCTTCTCACCCGGCGCATATCGAACAAGCGCCGGGAGCTTCGGTACCTGAACCGCGCAT  
ACCGTCGGCGCAGCGACGAGCTGGGCTCGAAGGTCACGCTGCTCGAGGACCGGCCAAGA  
TCTCGTTCAACGCGACGAAGGCCGCAAGCTGAAGATCACGAAGCAGGAGGAGGAGAGCG  
ACCTACTGCTGCGACAGCTCGCTGCCGCGATCGACGGCGACCGACGAAAGAGGGGATTCC  
GATGGGCAGGCAAGTGAAGCGGGGCGCCTGCCGTACCTCGCGCCCGTCACGACAGCGGA  
CATGAGCCGCGACTGGCTCTCGACCGAGGATCAACTGGACGAGTCCCTAGCGAAGGTGGA  
CATCCAACCTCGCACCGTGGTAGCGGGATGCGATGGTGCATCGGGAATCTGCGAAGGGT  
CGGGGTCTACAACCTGCAAGCAAAAACCTGCACAACACAGGCCGTTCCGCCGGGCATGACAC  
GGTGCATCGGGTAACCTAAGGAACCGGCGCTCGCCCTCGGACATGAGTCGAAGCCCACCGT  
GAACGGGTTAGAGGTCACCTTGGCGTTCGGGGAGGGTGTGAGGCTGTGAAATTGGGCGGG  
TTCAACTCGGCCAAATGTAACGAGGTCGTAGTCAACTCGGAGCACGTCATCGTCAGCAAC  
CGCTACGGCCTGTATCAGAGCGATTTAAACCTGATGAACGGGAACGACGTGCAGGTCAAG  
AACCTCGCCCCCATAAGGTCGGCCACCTCCTCGCCGACGGGAGACTGCTGTGCAACCCC  
GTGTGACGCACGCGAAGCACGCCCGCAGAGGTAACCCAGACGATGGCAAGTGGAGTACC  
TGGCCCGGGAGTACGGCTACTCGTCTGGGAACTTGTCCATGCGGGCTGCGAACACACTGG  
CCATCCTCGGAGGGCTCATCCCGGTCCGTGGCTTGTCTCGGTTCAACAATTTCAATGAT  
TGAGGAAGTGACCATGTCGTAGAATGAGAGTCGCGGATATCCGACACGTTCCAGGAGAG  
CTGGTACAATGGCTGGAAGTGAATCCAATGGCCGACGAAGGGGAAGTAGTTCCCGCCTCC  
ATCCGGGTACACCGGCTACGACGCGGGGTTCCCCTGCTACCCGTACGTCATGGCGTGGGT  
CGAGGACCATCCCGACGCCAACGTGGGACTGCGGTTCCCGTCTGACATCGTGGGCCGGAA

AGTGGACGGGTACGGCCAGAAGACCAAGGGGTCGACTACAGCCGAGGCCAAAAAGCGGCA  
CGGGCTGCGGCCGCGCCGGTGCCTCAACCACGCAGACGGACTCGACATCCGGCATTTCG  
CCTGTACCGCATGCCCCGCCGACATCCCCTGCACACGGAGGTCAAGAACCCCGGACTGAC  
GACCGGCATCTTCTAGGTTCGTCACGATCACCACAGGTACACCGTCTCGTGGCCGTCAT  
CCGCCGAGAGGTGCGAATGTACGAGTGGCGGAACGAGAAGGTCAACGTGGTACCGGTCCA  
TCCGATCGACGACTTGCTGAGATAACCGCGCCGTTGGATCGAGGTACTGGTAAAGGAAGC  
TCACGCCGAGATCACCAGTCCCAGGATCCATTCAATGCGCTCCGGCAGGTCTGCAGGG  
GAACATGAGCGGGAAGGTTCGGCGATGCGTTGCGGGCCTCGAAGACCGATCCCTACTGCGA  
GCCGGGTTACGTCACGACGTCGCGAACGTCAACGTCTTGCGGCTACCGCGTCTGGCGGA  
TCAAGGGGAGGGGGGGCGTACCGAGGGGCTCGAGTCCCTGCGGAACCAGTTCGTCGCGGT  
GACGGGGGACCGGGACACCGAGTTCGAGGCCAACCCCGACGCCAACCGGAAAGTGTACGG  
CCAGCGCGACCACGACCTGCTCGCCGGCACGCCATCGAAGCAGACCTATTACGCGGTGCT  
CGGCGTCGAGGACAACGTCCGGCAGTTCGAGACCCTGGCCAAGCAGTGGAAAGCGGGCCCC  
GACGGACGACGTAGACGAGGAGCAGCCGCGCCGTCGGATCCGCCCTACGAGGTAGCGGC  
ATTCTTTTCGAGGGGGAGCCGATGACCCGTGAACCGAGTCAACCTGCTGCCGGAGTGTT  
GGCCGCCGACGCGTTCCTGTTTCGGCGTGGCAGCGGGGCCCGTCGCCAGTTCGAGCAGCT  
GACCGGAGCGCCGACCGTCGCGGAGATCAAGTGCGGCGGCGAGGCCACGATCGGGACCAA  
GCTGCTCTCCGGCCCCGGCCCTGGCCACCGCGCCCGCTCGGAGCCGCTGATCGACGGGCT  
GCTCTACCGGGGCAGCCTCTCTCAGCTCCCCCGCACGCGGGGATCCGGCCAGATGTTTCG  
CGCGGTGCACATTGCTGCGCGCTGGCGGCGAGCAGAACCGATTGGAACGGCCATGACAT  
CCCGTAGAAGCACCCCGGCAACAGCGGATTGGTCTATACTTCGCGGCCGAGGGGGTCTT  
GGGTCTGTACGCGCGGAAGATGCTGTGGTGTCTATTGCAGGGGACAGGCATCGACCCCCG  
CAGCCTCCACCTTACGTCTCCCCGTAGGCGGTACAGCTCTGTGCGTTCACGCATATGGA  
GGAGCTGACCAAAATCGCTCGCTCGCGGACTGCGTGCTTCGAAACGCTGAGCTGCCGAG  
TCTAACACCGCAGCGTGGACATATTCCTGGGCCTGCCGTTCCATATCGCGAGCTACGCGC  
TGCTGACCCATTTCTTCCCGGACCAGGTTCGACTCGAGGGCGGCGAATTCATCTGCACCG  
GCGGCGACGGCCACCTATATTCGCACCACGGCGATCAGGCGACCGAACAACTGTCGCGCA  
CGCACACTGGCTATCCGTGGCTGCCACTGAATCACCGCCACTCGATCTTCGAGGCCACCG  
CCGACGTCGTCATAGTCCTCGTCTACCGCCCGCACCCGGTAATCAAGGCCCCCGTGGCGG  
TGTAAGGAGGTGTGGCTGTGACAGACAACTTGACAAAAGACTCTGCTGCCACGCCAGTC  
TTGCATGTCAACTGGAGCAACTGAATCGAGCACGGCGACACGATAAGCGGTTTCGACCTTC  
GACGTGTCCGTCGGAATCGCGTTCGGCTCGACGGCGAAAACGACGACGAGTACGACGGTC  
TGGCTTCCAGGCGGGCGCCCCGGCCTGAACAACCTCGTTACAAATCGAGTCATCACATCA  
GCTGGTTCGCACTGACGAACGGTCCATCACTATCCGCGTTCGAGACCGGCAAGCTAAGGAG  
CTACAATGGCTATTAAGAACGGGCTCTGGTACTCAAGTATCGCCGTGAAAAAGTACAACC  
GTGAGTGGGTTCGAGGACATCACCAGCAGCCTCGCCTGCCTGCAGACGATGGAGGACTACG  
CCAACATCACGCCGACTGCTTAGTACCGCGGAGGGCCATGTCTCTGTCCGCTGGTC  
TCCAGGGCCTGGCCGATCGGATCATCGGCTACGGCAGCGTGAAGGCGTTCACCGCTACCA  
AGGACCTCATCGGCATGGGCAACAGCATCAATGTATTACGCCCGGCCACAGCGACCTGC  
AGGGCGCGTCCAAGCTGTTACGCCGGAGTCCAGCGCGCCGTAGGCGTCTTCGGGGTCC  
TCTCGGCCTCGGCCCTGTCCGCTTCCGCCGACGCCAACTTCTCCTGGGAGGAGGGGGCGCT  
TCGCGAACGGCTCCGGCCCCGACCGTGAAGGACGCCGTTCTAGCGACCTCTGGTGGTGGCT  
CGGCCGTGATGCTGATCCGCACGGTCTGTCGCTAGGCACGAGGGCCTCCGGCTCTGACT  
GGACGCTCTCCGCGACGGCCACCCTTTACTGATCGAGAAGCCAAGGGCACCTGACTTGAT  
ACGCGGCTATCAAGTTGGGTGCCTTGATAGTTCGGCTCACTGACCCGCGCAGGCAGTAGC  
AACAAACAACCGTAAGTAGGGGGGGCCTGACATAGACCGCAAGGCAAAGCATCGAGCCCAA  
AACAACTCGAACGCGAAGCGCTTCGTGCGGACATCAACCGGAGTCGGGGAACTCCACCTC  
GTCTCTCTGTGCGCAGGCACTCTGGCTGTGTGCGCGTACGACTGTTCTGCGTCGCCAC  
TGCGCGTTCGCGTAACTGGTGCATGAACAACAGCAACGGGTTCTACGGCGGCCTACAG  
TTCACGCAGTCCACCTGGGACGCGTTCAGCCTGAAGGCGCGGCCTGGCGTGCTGACCTG  
GCTTCGATGGAGGATCAGATCGCGGCAGCGAAAGCAACCCTGAAGGCGCAGGGCATCGGC  
GCGTGGCGCGTGTGTGGGGCGTACCTCGGCCAGGGTGTACGCACGCCAGCGCTGGGACC  
GCGCCCGCCTCGCCGTCGTACGTCGAGCCTGGGCTCGTCCCGGCACCCGTCACATCGTGG  
GTGGAGCCTGTCACTTGACGAAGTCGGAGGGCTTCCACGGTGGCCACAACGGAGTCGAG  
ATTACTGCCCGGATCGGCACCCCGATCGACGCAGCGACGTCTGGCTCCATCGACCTCGCT  
AGGTTCAACAACGACCGCGGCGACTATCGCATCTACATCCAGCTGGCCGCCGACTACGGC  
GCGGAGATCCAGAACGGCCACATCTCCTAGATCTACGTCAGCGCAGGGCGACTACGACACC

GCCGGCTCCCTGCTCGCGGCGGCCAGCAACCCTGGCTCCTCGACCGGTCCTCACCTGCAT  
CTGCGGATTTACGCCTAGATTCCGGAGGCGTACTTGTTCAACCAGGGCTTCGCGCTGGAC  
TGGTCGGGTCCCAGCGGACCGCCCGTCCCTCCGGCACCGACACCTATATCCGCCCTGGG  
CAAGAGGTGGCGTTCGAGGACGTTCCGGTAATCCAGTCCACGGCTCCCAGGGAGTCGAA  
ACGCAGACCGACGTTCCGGGAGACACTCTTTCGCACATCGCTGACGTTTTTCGGGATCGAC  
TCGTGGGATCCCCTCTCGAAACTGAGCAAGGATGCAGTCGAGAAGGCGCATATGATCTAC  
CTCCTCCAGGTACTCCACTTGGCCGGTGAGAACGGGGGTGAGTGGCATGGGTAGCCGAAA  
CTAGCTGAACTGCAGGACATCTAGGCCCTGGGCCACTGGCTACCGTCGAGAGGTGGGCTG  
GGCACGGCGGTTGAGTAGGAAGCTCGAACGCCGCGGTGCTCAGCGTTTATTGGGCGACGG  
GCGATACGACCTGGCCGCTACCCGCCGACAAAGAGTATTCAGGCATGGCTGACGTA  
GGTGGTCTATATGGCAACTGAGGTCTACACTTCGGACAGTAGCTGGACTTGCCAGGCTGC  
CGTCTCTCCGTTACAGGTCTGGGTCTGGGGAGGCGCCGGCTCCGGCGCGGGTGCATCCTG  
GTTCTCCGACAACGGCGTCGGCGGGTTCGGGCGGTACCTTCGCCTCCAAGACGGTTCGCTAG  
CACCCCGGAAAAGTCTACCCCGTACCGACGCCACTAGCGGCACCGGACAGGGCTCTAA  
CGCTGGAGTCGGCGGTGGCGCATCCTGGCTCGGTTGCAGATGCACCGTCTTCGCCCCCGG  
CGGCACCGGCGTATCGAAGGGCCAGTCCGGCACGGCCGGTGGGGCGGCCACCTCTGGCGC  
GATCGGCACCACGGTGTGCTACGGCGGCGCAGGGTTCGGACGCTAACCAGTCCGGCAAGCG  
GCCCCGCTCCGGCGGCGGGCGGCTCAGGCTCGTACGGCTCAAGCGGCCCCCGGCGGCACGCT  
CTCTGGCGGCGGTGACCGCAACGGATCCGGCGGCCAGTTTGGCGGCAACGGCGGCGCGGG  
CGTCGCCATCGACGCGGACCGGGAGGCGGAAGGCATCCCGGTCGGCGGCGGCCCTGGTGG  
TCGACGAGCCAGCAGGAGGTCAAACGGCGGTAACGGTGGTTCGGCGGAGGTATAGATGAC  
CTACCTAACCGACATCCCGTCAACCAGTCCGACGCCTCCGGCACGACCGCGGACGCGGA  
GTCCGGCATCGGAAGACCACCCGACCGAGACCCTGTGGTTCGCCGAAATCGGCCCGGG  
GGTCTCGCAGTCGGCAACGACAGATAACGGCCGCGTCCGCAACGAATCCGGCATGCCGAC  
AACAAACCGACACCCAGGCGGACACCGACACCGGCACTGATCTGGTCAGTCCGTTTAGCGC  
GCTCATCGAGCCTGCCGACACCGGCCAGGACGACTATCTGGTCTCGGTGAGCATCACGAA  
GGCTGGCGACACCGAGCAGGGCTCGGAGTCGGCCAGCTCTACACCCAACGCCTCGAAGGC  
GAGCGAAAGCGGCTCCGGCACTGCTGCCAGCACCTTATCGCACAGGTCACTGCTGCCTC  
TGACACCGTACAGCCGACGCCAACGCACACGCAAGCTACAGCGTGGGCGACGGCGACAC  
CGGATCATCGGCCGACGGCACCGCTGCGGTTTCGAACGGACTGTGGAGACGCAGGCCGCGG  
GTCGGACGAGGCATCCATGAGGGCGACCGTACCCAAGGCGATAACGGATCGGGGGCCTA  
GACCGTACCGGCATCCCGCAGCCGCCGACGGACACCGCGCACGGGGACGAAGCCTGCAC  
AATACGGTTGAGCACGGTTCGGCTACACCGGCATCGGCACCGACCCTGCGCAGGTCTCTCT  
CACAGCCTACTGGAGAGCCACCGGCAGTGGGGCAGACCTCGTCAGTGTGCGGCTGTTCTC  
GCCCCGACGACGGCGCGACCGGTTTCGAACGGGAACTCATAAAGGCCGTCAGCGGCATCCT  
CGACGCGCCCCGCCTGCTCACCATCCCTCCGGACAAGCGGACCGTGATGATCCAGCGTGC  
GCGGCAAAGTTCGAGTCGTGGACAGGTAAGTCCGGCTGGTTCATCATTATCAAAGATCTGAC  
GCCGCGCACGAGCATGCCGCACAGCCACGGCCTTTCGCTCCGCGTCCAGCCAGGGATACG  
GACGTCCATGTTGAGGCGAAAGTAGTGACGAGTGTGACGAGATGACCGCCGAGCTGAG  
AGCCCTCGTCTCGAGGTTCGAGTCAGCCGACATGCGTTCGGGCGATGACAGGGATCAGTGA  
CTACGTTCGTAAGTAGCTGGACGGCAACCGGTGCCCGAACTGCGGCATTTCCAGCTCAA  
GAACGGCGACACGGCCTCAATCGTCTTGGCGGCGGAGAAAGAACCTCGAAGTGATGGCAGG  
CCTACCGCAAGGGAAGAAGCCCGGCGAGGACGACGCATCGAAGATCGGCAGCGGACGGAT  
CCGCGGCCTTCGCTCTGTTCGGCCACGAGGAATCCATGGTTCGGCAAGGATAACGCCCGAAC  
TTAAGGGGGTACACGTTCGGAGAAGCTAAGGATGTGAACTGTGGCGGTCTTCTTGGCGAA  
TAGAATCCACGAATCCTTGACGAGCCAACGTCCGGGGGTGGGTTTACCTCGGCGGGCCGC  
GAATCGTTTTCGAGCCCGCCGCGGAGCCTGGCCTGACCCTGCATCCCTGGCAGCAGAACATG  
CTCCACGGCGCTCTCTCAAAGCGCGAGGACACCGTCTCCAACCCATAACAGGATCAGCTC  
GATTACAAATGGGTTGCACGCGAAGTTCGGCCTGATGATCTCCCCCAGAACGGTGAAGGG  
TCTCTCTGGAGGCCCGCGTGTGGCTAGCCTGTTCTTCTTCGGCGTGCGCCTGATC  
CACCCGTTCGACGAGTTCGATACCAACGAAGGAAAGCCTTCGAGCGAATCCTCTTCTGATC  
GAGAACAACCAGGACTTCGCGCAACAGGTCATGTGGGTTCGACCGGTACACGGTGAAGAA  
GGTTTCATGATGAAGAAGCCGAAGGGGTCCAACCTTCCACTGCAACGACTTCGGTCCCCT  
ACAGGTACCAAGGGCGGCGGCCGCGTCTTCCCGGGTGGCCACCCTGGTGTTCGACGAGGCC  
ATGAGCCTCGACCCCGACGAGGTCAATGCGCTAACGCCACCCTGACGGTCCGACCGGAC  
TTCCAGATCTGGTACACCGGCTCGGCCGATAACCCGGAAGTCCACGCAGTTCGGCCGCGTC  
CGCCCTCGCGCCATCGGTGGGGGCGACCCGCTGCTCGGGTACGGCGAGTGGTTCGGCTGAT

CTTTGCACCCCGCTCTGCCCGTCCGACTGCGCCGAGCACGACAAGCCCGGGCGCCCCACGT  
ACGTGGGCGAGGGCGAACGCCGCTTCGGGGTCCGCATCCAGCAGGAGGGCATCGCAACA  
ACCTTCCGCTCAATGGACCTCGACTCGTTCGCGACGGGGCACCACGCCGTCGGCGACTGG  
CCCACCGTGGCGCAACGCGGCATCGTGGTCCGCGAGCGGTACGGGAAGAGCCGCTTCGAC  
GCCAACTCGCAGCTCGGCAACGACCTAGTCCCTCGGGGTCGACGTCTACCCGGACCCGACG  
ATGGCCACGATCCTGGCCGGCGGTCCGAACCGGGCGCGGCGTCCATCTGGAGATCACC  
GGCAACGGGGACAAGGTCTTCGACTACCGGTTCCGCGTCCAGCGGGTGTCTCAGGCGGGTC  
ATGCACATCTGGCGAATCCGGCGCACGAACGCGGCAGCGATCGACCCCGCCAGCCAGGCC  
GGTGGGCTGATCCAGCGGCTGCAGGACTCGCAGGTCAACGTCATCACCCCGACCTCGCCC  
GAGGACGGCGTGCCTGCGGTGAGTTTCGGTCCGGCATCGTGCCGCGCAGGGATAAGAAG  
GGATACGTCACGCACATAAGCCCGGCAGCCCTTACCGCGTCAATACAGGCCTCCGACATG  
GGGACCGGGCGGTGTCTCTGGAAATGGAGCATGTGCGTCTCGACCCGCCATATCACCCCT  
ACCGTCGAGGCTACGCTCGCAGCCTGGGGCTGGAAGAATATGGGCTATACGAAGTCCGAC  
ACCGTCGCTATACCATGTGAGTTCAGACGTTGAGAGGCAGGACTGAATGAGGGCGTATCGA  
TCTACAGGTCGTGATCCCGGTTCGCGATTGCGCTGGGCGTCACGGTCCAGGTGGCCACCTT  
CGGAGTCTTGACGCGGATGGCCTGAGCGGCAGCGACTCCCGTTCGCGGTGTTCTTCGTGGA  
GGGCACTGACTGATGGCTGAACTGTGGTACCATCTACGCGGCCTAGGTCACCCGATCAGC  
CTGCGGTTGGGAATCGAAGA ACTCGCGCAGTGGTACCGGCAGGACCACCAACCCTCGTTG  
GCACAGCGTCAGGGGTAGCGCAACACCGAGGCGCTCGCCAACA ACTTCGCGGGCCACGTG  
CTTGGCGCGTACAAGGCCAACCTGGCTGTCTGCGCGGTAGCGATGGCCCGGATGTTGGTC  
TTCACCGAGGTGCGCTTCTCGTGCCAGTGGTTCCTCCGAGGCCTGCCGCCACCGCTACCTG  
TACCAGTGGCTGAGCCTAAGGATCCTCTACAGGCCCTGGCCGAACATTCGACCCGGCGAC  
CTGCTGACCCGAGCGATAGAGGACACCGACATGGCGAGCAATCACTACGTCGTCCGCGTG  
GGGAGTTGCCCGAACCCGCGCCTGCGCCGCCAGCGGCCGACTGGGTGAGCATCATCCCA  
ACCTCTCCTCCGGACAATGCAGTGCGGTCCGACGTAGTCGGGTACCTGTACAAGACCCGA  
GGCAGTGATAACATGGA ACTCTGGAAGCTGTAGCCCGTCGCTCGATCTAACGGTGCCATC  
GCGCAAAGGACCCTCATCCCCGACCCGGAGGCGGCCTAACGTGGAATGAACTGGCTGACA  
CCGGTTCTCCGCGAGATCATGCACGACATCGCGGCGACGAAGCAGATGGTGAAGTCCTTC  
GAGAACGCGGCCACGCCGAACCACGCTGAGTCGTTCAAGTGGACAGTGACTGCTGAGCAG  
TTCAAGGAGTTCATGGAGCAGCTCCACGACAGCTACGTCGTCCGGCTATAACGTACACAGG  
ACGCTGTACCTCGGCGACGGCTCGGACGTGCCCGTGATCGGCTCCGAGATGAAGGAGATA  
AACTTCAAGTTGACGCAGGGTCTGTCCGAGTACACATCGCGGCGGCCTGACTTAATGGC  
ACCCTGCGCCTAGGTGCTTCCGGAGGGCTGCAAGGTACCTGGCTGAACGTATGCCACTAC  
AAGGCGGCGCGCAACA ACTTCGCCGACGCGACGATGCGGCCCTTTGGCGCTCGCTGTTT  
GCAGCTTTCTCGGTGCTGGTAGAGGAGTTCGACCACCCGCCACTGTAGTACGAGGGCGGGC  
GACCTCGAGTTCCTGTGACAGTACCTGTAAGATCTGGCCGAAATCGCCGCGCAGAACGTG  
TGCGCGGTCTCGAAGCTCGTCATCCAGGGCTACACGCCGGTGTCAATGTCCGAGGGCGATC  
GTCAAGGAAGCCCTCCATATGCTCATGCACATCGGACTCAACTCCGTCAAGCTCCAGCCC  
CCCGGAACCCGCGGCAAGGGTGC ACTGACCCGGACAGACGCTAGCTACCCGGACGAACGAC  
GTCAAGAAGGTCCTGAATCATGTCAAGAACGACCCGGAAGGCAGTTGTGACGTCCTCCGATC  
CCGAAACAGCCAATAGTCAGTCATGACAATTCGAATTGACCGCGTTCCCAAGGGAAGGCG  
TGACCGAGAGTCGTTCTGTTACTCTCTAGGTGGAGTCCCGAGTCAACAAGGCCGCTGGC  
TACGGCGACAGCCGGACCCACGAGGATAACGCGGCTGTCTTCGACCAGGACAACAAGATA  
AACTCGTGGCAAGGCCGCTTACCCGAATGAATCGCCAATGGCCCGTTCAAGAAGACCCTC  
CGTTAGCGCAAGCCGAACATGCAGTACGAACATGGCCGGGAGTCCCGCGTCAGGGCGGTG  
CCAATCGGCATGTACGAGGACAACCGCGAAGACGAGCACGCCCTGTTCGTGTCTGCCC  
GTGTTTCGATAACGCCGTCGTGCAATCGGTCCGGCAGGAGAACGAGGGCGGTGCCGGCACC  
GTCTTCTCGATCAAGTTCGCGTACCTGAGACGAGTGGACGGACAAGAACGGCAAGCCA  
GTTTCGCGGCGACGGGATCAGCAAGCTACACTGGGAGCCAGGCCACCGCGGACCCGCGGGG  
CGCAAGTCTCGAGAGGTCTCGCTCTTCCAGGCGGGCGCCGGGTCCGGCTCCAGCGTAGGAA  
GGAACCTCCTTCGGCGTCTGGA AACACGCGGGATCTCGGGGGTCTCGCCTCCGAGTAC  
CGGTGCACCGTGGCCCCTACGGCGGCCGAGCAAACCGTCGTTTCGATGTGTGAGGCTGAG  
GCCAATCCCGGGATCGATGTTCCGGCCAAGACTCCACGCGGAAACCGAGTGGAAATAGGGAT  
GTATCCCCCGGGCTCGCAGCCGAATTCGTATAACAAGATTCGATCGAGAGCGACGGAGCC  
CGGACAGGCACCTCGCCTCCACCGAGACGCCCGAAGCGGACGGCGCCCGCAGTCGTGCC  
ACCTCCAAGCCGGAAGCCGCCAACA ACTCCACCCTCAAAAGTTGCATTCCCATGACCCTC  
GAAGA ACTGCAGGCACGTCCGGCCGAGATCGACGTCCGCCATCCTACATCGATGCCGAA

TCCCGCGTCGTCGAACTCCAGAAGCCGATCAAGCCCAGTGGTACGGCCTGGACGGCGAG  
CGCGCCAAGGTCGCGAGCACGTTTCGAGCGCATCGAAGCCCCGCACCAAGCGATTTGGTCCG  
CTGACCGACACCGGCAGCTCCGAGCGCGGCACCCACCCCGGCACGCAGGGGTTCACGCC  
CGCCTCGACGTTACGACACCGACGCCATGAGCCTCCAGGCTCGCAGGGAAGAGGACTAA  
GTCGAGCCCCCTCAAGACAACGCCACAGGGCCACGGAGAAGATGCACTTCTCGCCGGAG  
GTCTGGTGC GGCTCGCACCAAGGTGCGCATCGAGCGCCTGCTCGTCAACCTCGACTCGGAG  
GGTGACCTCGCCACGCGAATGCTGGTACCGGCCCGAGACGTACGAGCGGTTCGTTCCGGG  
AAGCCTGCGCTTTGGCAGAGCCTGCAGGATCTGACGGCCGAGGAGGCCCGCGCCCTCGCA  
CTCGGTGCCGACCTCACGTCCGGCAACATCGGTGACTTCGCGGTCCCCGTTTCATCTCGAC  
GAGACGATGATCCACCTCAGCGCGATCGACATCAACCCGCTGCGTGGCCAGTTCGCGTGT  
GTCCTGATCTCCAGCAAGGAGTGCCACGGCGTCTCCTCAGCGAACGGCATCGTTGTCTCG  
CGTGGCACTGAGGTCTCCGCGACCGACTGCTCCAGCCCCGACCCCGCAGAGCCCAAGGTC  
CGTGCCGACCGGTAATCCGAGTACGTCCCGATCTGGATCGAGATCGCGCATGACTCGTCCG  
CCGATGCGTCTGGAGGACACCCTGGTGTCTCGGAGAGGGCAAGGACGCGGAGAAAGGCCGGT  
TCGTTCCCTGGCCGGCGACGCTCTGGGCGTCAACCCGCCGGGCCTGCTCACAGGCGTCCGGT  
TCCGGTACGAGGTCGCTGGCAGCATCTCGCCTGCCAGACCTCCGGTGACATCTAAGGC  
CTGGAGATGGGGCTGCCTAACCACTACCTCGCGGACGCTCGCTTCCCTGGGCCCGAAGGCG  
AACTCTAACCGGGTCCGGAAGATCGACACGACCGGCGGAGCGCATCTGTGGGAGCGGCTC  
GGTGCCGGGGGCCATCTAAGCTCATATGTTACCCGCGCCATGAGTCGTGCATGATGTAA  
TGCTACCCCAAGACGGCCGCTCTAATCGCGTCTGGTTCGTTGTCGACTTCCGCATCTTC  
CTCATCGTCGATCGCATCTGCAGGAGTATCGTGTGGTCCCACAGGTCCCTCGCGAACCCG  
GGGGGCGCTATCCTGTGACCGGAAATCCCGGCCTGTTCCGCCGTGTGCCGCAAAGCTCC  
ACGAATCTGGTGACGGAAGCCTCCCGCGTCCACAAGAGCGAGGCATCCTGCTCTACTGAC  
TCCAAAGAAGGGCCGATCTCTGTCTAAGGTGTTGCTGCCCTTCAGCCGTCAGGAAGGCG  
GCACCAATGGCACTCGGTGATCCTTACATCACCAAGGATGAGCAGAGAGTCTACATGCAG  
ATCCAGTCGGCCGTGATCCAGTTGGATCAGATGCTGACTGACGCCTGTGCCGCCGACTCT  
GGCGAGCTCGAGCAGCACTGCGCCCGTCAGTGCAGCAAGTAGGACAGGGCCTCCTCGTCA  
ATCTTCCAGATCGAGCGGCGGCCAGGTGCGGATTGCCGACTTCCACACCTGCGCTGGC  
CTAGTTATCGAACCGGGTGACGCGCTGGGCAACTAGGATCCGGTCGATACCGCGTGATGC  
CTTCCGGGCCACGTACGACGCGATCGTGGACGGTCTGCCGTGGGCCTAGTACCGGCTCGAG  
TTCCCGGCTGCGGCCGGATTTCGCTCGGCTCGGTATCAGGCCCGGTTCCCTCCGCGTTTCC  
GCGCAGTGGGGCTAGCCGAGCGCTCGCGCCACGGTCAAGCCGGCCACGCTGCAGATCCCC  
GAGCACACGAACCACCTCGCCGACGCGCGCCTCGGCGTGACCGGCCGCACGCAATACCC  
GGCCTCTTCCCTTGTGGAGGATCTGCCGATCGTCCCGACGAAGCTCTGCCGGATCGTAATC  
ATTCCGATCCTGGTGGGGTGACAGGTGACGCTCAGTGAGACTCGTGACGCGCTCACGAA  
GCCGATCAAGGCTGGCGGCGACAAGGAGCTGCGCGCGTACGAGACGGGCGAAGAGATGGT  
CAATGTGCCGTGCAACATGGTCGAGCCGATAGACGCCGACTTCGACGGTGGGTTCAGGA  
GTGGCGGCACCCGTGGGAGCTCTAGGTATTCGTGGTTCGCTTCTCGTGCAGCAGGTTCCGT  
GAAGCTTCAGAAGCGGGTCGACCAGATGGTCTCCGGCACCGGCCGAACAGCGTGGCTCA  
GATAATGAACGAGA ACTACCCGCTCGGCCTGAACGGCGTTCGTGGCCCTGTCCTACGGCAT  
GACGGGCTACGGCTGCTCGTTTCGACTGGGCCAGGGTTCGCGCACGTCCGCGTAATCCTGCT  
GGTCCGTGGAACAGTCTATCCACACGCGTTAGGAGCTGGCGGCAGCATGTCCGCTCTCAC  
AACCAAGGTTCTGGCCGACGATCGGAGCGCGCCTACCCTCGTACTCTCATCGCCGCGGA  
TAGCTACCCGGTCAGCAACGGCCACAACACATTCCTGTACCTCAGCAACACCGGCGCCTC  
GCCTGCGAGTGCAAGGATTACCTCGCCCGGCGCGACCATCTACGGCGTCCGCTCCCGGA  
CAAGACGGTCTCCGTCCCCGGCGGCGAGGCGAAGTACATAACCGCTCCGGCGCGGGTACGC  
CAACGAGTCCGGCCAGGAGACGATCTCGGTTCGCTGCACCCCTCGCGTACCTGGAGGTCCG  
CTCCATCCGCGTTCGCTGATAGCCAGCCCGAACTTCCACAGGCTGCGCGGAGAGCAGGCC  
CCGGAGACAGCTCCCCATGCCATCGCGACCGGCTGCTACCGGGTCCCTGGGTAAGAGCGCG  
CGCCTCGTTCGTGAAGCCGCGCAAGATCGTCCGGATGTCAGACGAGCACGCAGCGCGGCTG  
CAGGCCTCCGGCATCTTCGAAGAGATCAACCAGCGGAGCAATACCGCTGAAGAGCCGGGC  
CACGATAGACCAGACAAGATAAAGGAGTAGTGATGATGGCAAAGATCGTTCTCCGGGAAG  
TCGTGATTGAGGTCGATGGGATGGACTTCCCGGATCACTTTTCGTCCCTGGCGTTTTTCG  
TCAAGAATGCGGACGTGACACCCCCACATTCAGCGTCGGGGGCAAGGAGCAGGTCGACG  
GTATGAAGGATGACGAGTTCACCGTGAACCTCCAGCAGGACTTCGACGCTGCCTCGGTCT  
ACGCGAAGCTCTACCCGCTGAACGGCCGGGAAGACGAGTTCGTTGGTATCCAGCGCCCC  
GCGCCGGAGCGGGCTGGGCTACCAACCCCGAGCACTCCTCGACCTGCATCCTAAAGGAGT

ACCAGGCCCTCGCAGGAAAGGTCGGCGACCTCTACGAAACCAAGGTGAGGTTCCCGACCC  
AGCGCAGCGGCATCACCTCTGGGTGTTCTGCCTGGCTAGCGCCCCATGGCGAGCGAACT  
GTCCGGGTTACCCCTCCCGATCGATGTCATCGGCGAGCTCCCGTTCGCGAGGTCAAGAA  
GGCGCTCACATCGGCGAACCGGCAGCTCCCGCGCGAGTGCAGGATCAACGTCAACGAGGT  
CGCACGCGGACTGCACGACGAGGCTCGGTATCACTCTCACCAGAAGTTCACCTCGAAGAA  
CTGCCACACCGGGCTTCGTGCGAAGGTCGCCGCTGGCGTTCAGATCAACCAGATCGAGAA  
CGCCGTCAAGGTCATCACCGCGGTGCCTTAATCCGACGAGGCGATCAGCCCCCGCGGACT  
CGAGGGCGTGAAGAGCTGGCGGTACCCCTTGTTTCGGCAACAGGGAACTGTAGGTGCGGAA  
GCGTCAAGGCTCCGACTCCTGGTTACTGGAGACCTTGCGGAAGGGCCAAGCGACGCTGCG  
TAGCCGCCTGGTCCGTAACATCAACGATTCGATCGAGGAGAATGACAACGCAAGCCAAAT  
CGGCTGACGCCAAGACCAAAGCTGGGGCCAGGTGTTTCTGTGCGGGTCTGCCTGGACAC  
GGCTCGCATTTCCCGCTGACCCGCGAAATCCACTGCACGACACACGAAAAGGAACCGCGA  
CTTCATGGCACTTCTCTCGAGGAACGACATCCTCTTCGTCACCGACCTGTTGACCGACCG  
CGTCTCCCTCCCGTAGTTTCGGTGGCGAGGTTCTGGTCCACACACTGTCTGGCAGTGAGCG  
GGCCGAGTTCGAGGCATCGACCGTCAAGCCGAACAATGGCAAGCAGGAGCAGAAGTTCGA  
GAACTTCCGCGCCCCTTCGTGCGCCCTGTGCGTTCGTGGGCGAGAAGGGTGAGCGCCTTTT  
CGCCACTCGCGCTGGGGTTTCGAGGCTCTGGAACGAGTCCGTCGCCACCCTGCTGCGCGT  
CTTCAACGAGGCGCAGAAGCTGAACGTCATGACCGTTCGCTGACGTCGAGAAGTTGACCGA  
ATCGTTTGAGCAGTAACCCGACGAGGTTTCTACTTTCGCCAGGCCGAGACGCTCGGCATG  
ACCATCGAGCAGATGCTGGCGGTAGTCTCCAGTACGGGAATGGCGGGGTAGGAGGAGTAG  
GTACGCGCCTTCGGACCGGTCGGGGAGGGCTGCGGACAGCTAGCCCTCGCAAGCTTCTTT  
GTCAATCTCGCGATCCTGCTCCGTATGTACGGCTAGCAGTTCGACCACGCGCCCCTCCCA  
TTGCCTAGCAAGTGCCCCCGCCCGTAGAAGTGCTACAGGCCCGAGGCCGGGGAGGACTCA  
GTAGATCAGGCCGAGTTCGACAGCAAGTTTCGAGACTGACTGATCACCAAAGGCCCGTGC  
GTCGCTTGCCCATTCGCGCAGCACGACGGCTCGCTGCTTTTTTTACCAGGCGGTAGGTTT  
CGTTGGCAAGGCTCATCTCGCTCAACTTCGCGATCGGGAGTATTTGGGAGGTGACTGCG  
CTGAACAAGGCACGTGATGAGCTAATGGCTCTGCTGGCTCAGATGCGTACGAACTCGCGT  
GGCTCGCTGCACTTCACGGTCGACTCCGACACCGAAGGGGAGAAAGCCAAGACCCCGGAG  
CTGCGCGCACAGGCGCGCGACATCCAGATTGGCATCGACCTAAGCGACGGCCAAACCGCT  
ACGGCGGAGGCCAAACTCGACATCCTGGCGCCCAGAACGAGAAGTCGACGTGAGCGTGAAC  
GACTATGACTTCTCGAACAAGATGGACCGGAGCTCGGACTCCTTCGAGAACGCGTCAGTC  
AGTGCGGCGGACTTCGGCAACTCGATGAACCGTGTCTGTCTGCGTGCCCAACGTAGGCATC  
GTGGCGTTCGCCGCGAGGGTCGACGTTCTTCGCGGACTGATCAACCTCGTCGGTTCATCG  
CTGACCGGCGAGATGGGTGGAGGCATAACTGCTGTCGGCGGGCCGGCTCTCAAGGAACAC  
GAGGAGATAACAGCGGACTGGGAGGCCCTGTGTACCTCGAAGAACCCACAGCCCATTCT  
GCTGGCCATTCGTGGCTGCAACCTTTCCTGCACACCATGTTGAGGGCCAAGACGAGGATC  
GCGGATCTCAAGACGCAGGGGACAGACCTTTCGCGAGTGGAGCACCGGCGATCCAGCCG  
TACACGTACGACCGGAGGAATCTCCTCACAAACGCGATGCCCGCCGTCCGGCAGGCGCTC  
GAGCAGTCCGGCCCGATGGTCCGAGGGTTCGCTGATGGTCTCCTTTCGCTCGGCACGCAC  
GTCCTAAACAAGTTCGATGGCATGTGAGACGGCGCATCGGGATTCGCTCAACTATGGAAG  
AGCACGTTTCGATCAGGTCGGCCTGCTCATGGAGCAGTTCGGCGTTCGCTGCCGGGCTGATG  
TCCGCGACGGGCACCGACCTCTGGGATCGACTGCTGACCGGCTTAAACCAGTTCATCGGC  
GGCTTCCACGACGGCCTCGTCGACTTCACCGACGCCGTGACAAAGGGGGTTCGGTGACCCG  
CTCTCAGTCTTCGGACTGGTTCGGCGTCTAGCGCGGAACACTCGGACCCCTGGGCGAG  
CTGGTGGCCGGTATCTCTAACGCCCTCATACTTGTTCTCGACGGCACCGTGCATGCTCTC  
AGCCACTACATCCGCGCACTGATGTCCGGCCTCACTACGGCGATCGACTCGCACGTCCCG  
CTTCCCATGCGTTGAAGCCGTTGCTCGTCATGGTTCGTTCAACTTCTGACACAGGCGATA  
AAACAGCTCGCACCGCTCATGCCCCAGATCGTGGACGAACTGGTCTCCGCGCTCAGCCCC  
GCGTTCCAGGCGCTCATTCCCGCAACGGTTCGGTTCGTCGAGCAGGTACAGTATGCCTG  
AAGCCGCTGCTGGAGATGCTGCCCGGCGTGATCAACACGCTCAACCCTATCGTCGTCGGT  
CTAGCAATCGCGTTCGGCAAGATCGCGCAGTGTCTGTCCCCGCTGTTCCCGCACCTCAAT  
CAGATGTACGTCGCGTGGAAGCTGATCTCTACGGCTATGGCTATGGGGCGCGGCATCAAG  
ATCGCGGACGCGGCAATCCGCAAAGCCCTCACGGTACCGACCCCTCGCTCACACGGCGGCA  
GTCGGGGGGAACAACATTGCGAGGAGCGCCAACCCGATCGGCAAGATTCTCATCTCCATC  
GGCCTCTGGTGGCAGCGATCGTATGACACGCGACCAAGACTCACTTCTTCCAGACCGCC  
TGGGTGGCACTGAAGGTGTGCTCGCTCGCGGCTGTGTGCAAATGGATGAAGGATGCGTGGTAT  
CCCACCGTCCGATTCCTTGGCCTGCGGTGGGAGCAGTTCCTCCGGCACGGTTCGTC AACCGC



GGGAACGCCTCGTGGAAGGTGAGCAAGGTAGCGGCACAGGCTGTCTGGGGATTCCCTCGCC  
AACCACTGGAGCCAGTTCCTCACGGTCCTCAAGGTCACCTGGGAGGTCGTTTGCGGCGTC  
ATCCAGGCGGCCTGGGACGCCTGGAGGTTCTACATCCGAGCCAGTGTACGATCAATTTG  
GCTTGGCTGGAAGTCGCCTGTGGTGCCCTGTGGTGCCCTGTCCGGCGAGTCTGTGATAGC  
TTCGTACCGATCCACCAACCGCTGTAGCATGGTCGCTCGAAGGGCGTCAAGGTCTTCGTC  
GGGGGCGTCCGGGGTGAATCCAGATCCTCTGGGACGGATTGTGGCAGGCCGGGACTTCA  
AGCTGAAACGACTTCACCGGTTGGATGCGTCCGATGTTGGAGTCCTTCAGGGACACCGTG  
GAGCCGGTCCGAGAATCTATCTGGACCGCCGTGCAGCTCGCCAGGGAGTTCCTGTGGGAT  
CAGGTCACGCAGAATTAGGACTGGTGGGTCAACCTGTTGGACGCCGTCGGGCAGCCCTCC  
AGTAACTGGATCAAGGTTGCAGCCGACACCGTCTGGACCGGTATCACTTCCGCGTGGAAC  
GCCCTCTGGAACGGAATCAAGGCGATGTGGGAGAACTCTTACAACGCCCTCCGTTCCGGC  
TGGGAAGCCTTCTGAAACTGGAGGCGTGACTTCGCATGTCGCGTCTGAGATGCGATCACG  
AGGCAGTGGGGCTAGATCAAGCTGAATTTGGAAGGAGTCTTCAGAACGAAGGGCGACAAG  
GCCCGCGAGATCTGGGATAAGATCCGCGAAGTCCGGAGCGAAGCCGATCAACTTCGTCATC  
CGCATCTGGAACCTCCACGTCCCCTGTAAGTTCGCCCTCCCAGCACTCGTCGAGATCGGC  
GGGTTTCGCTACCGGTTGTTCGGATCGACGGCCAGGGCTCGGGAAGGTCCGACGACATCCGC  
GCCTGGCTCGCGCGCGGTGAGCACGTCTGTTCTCCAATGGAAGTCGATGTCGCTGGCTAG  
CACGGGAACGTCGAGCCATTCGTCGTAACACGCTCAACGGTGTTCGCGCACTAGGACTCC  
GCCGAACCGGCCGAGTGGATGATCGGCCAGCTGGAGAAGTGCGCGGCTCACCTGAAGGTC  
ACTTCGGCTCAGCTGGACTCGAACGACTACCACGGACAGCGCAGGACGGTGGACTTCTCG  
AACGGCGGGCAGCGCGGTCCATCGGAAATGAAGGCCTTCGCGAAGTGGAGCGCGGACACC  
TGGGTGGCTAACACGCTCGTGCTGATCGAAACCCCGTTCGGACGGCACATCAAGGACGGT  
AACAGCGTCGGCGACCGGATGGGATTATACGGGGCAGGCACGATGGCCCAGCACAGGAAC  
CATGTCAACTGGACAGTCGACCGCCCCCTTAACGAGGAAGAGGGCGGCCCGAGCCCGATG  
GGCTAGATCTCGGGCGGGCGTCGGCAAGGGCATTACCTGGCCCTTAGAGGAGCTGACCAAC  
CCGATCCTCGGAGGCATGCCGGATCCGTTCTTGTGGTGTTCGGTTCGCCGTTTCGAGGA  
TTCTCGTAGGGAGCGGCAACGAAGGCCCGAGACGAGTTCCTCGACAAGGCGCGCTGCGCT  
AAGCTTTCATCCGGCGGCATTGCCAGTGGAGACATAGAAGGCTTCATCCACGACGGGGAC  
CGGCTCGGTCTGTGAAACGCGGCCGTGCGGATGACGAACACGCAGCCAGCATCATCGATC  
GAAGCCTGGCAGGGCGGGCGGAACCGGAAGATTACGCGAGAGTCCGGGATGGAACGCGGTC  
GCGTTCAACACCAGGGACCCGAACGCTGCGCCGGGCGATGCTGCTCGCGGCCGGGCCAG  
GTGATCCCGACGACGTTTGGAGGCTCACTAGGAGCTGCGCCACACCAACATCGACTCGCAG  
GTGGACAATCTAGCGGTGAGATCAACTTCATCAAGTCGTAACGGAAGATCGTGAAC  
GTGCTGCAGGCGAAAGGCACCATGGCCCTCGTGGCTACCGCACGGGTACCTTCTGGGCT  
GCGGCCGGGTGGCACCTCGTCGGCGAAGAAGGAGCCAGATGGAGAAATTCCGCGGGCGCC  
GAGCAGGTCACGCCGTTTCGACGACATCATCCGCGCCCTTAAGGACTCCAAGTATGGACAG  
AGCAAGGAGCTGGAGTCGAAGAAGAAGGCAGAGATTCGCACATGGTTGGAGCAGACCGGG  
ACCGAGATCTGCACCTCCGGAGCGCGGTTTCGCGCAGTCTGTCCAGCAAGATATCGAGTGA  
GTGCTTGCCACAGTAGGTATCCAGCCAACTCTCGATGTCGGTACCGCAGAACGGTGCA  
GACGCAGCTGCGTACGCGCAAGAAGCCGCGAATCAGCATGTCCCGTACCTGGAGATCTTG  
ATCCGGTAGCACATCGGCACACGGTAATCACAAGGGGCCTGCTTGGGTTCACTAGGAATC  
TGGGTACGCCCCCGTCAGGCGTAGGGAGACACAACGGCTCTGTTCAACTTTCAGCGGAGC  
GCCGACGGGTTGAACGACGGATGGTAGAACATCGCCGGCGTACCGCCAGCTGACAGGCG  
CTCACAATCTCACCGATGCGAAGTACTTTCAGTTCCTGCCGTGGAAGGCAGTCTCAGCC  
GTCTGGTTCCACGTCGACACCACGCGGCCGACGGCGCGATCATCACCCCTATGACT  
GTGAACATGGGGGTCGGCCACGACGCTGGCGCAGCACCGTCCCTTAGGGTCCCGTTCGATC  
AAGATCGAGGTAGTCGGCTAGGACGTCACCTCGCGCTCCCTGACGCGCACCATCTACCCG  
CCAAGCACCCCAACATCCATGCGATCGCCAGCTACCAGCGTATCGCGCTCGGCCTGGGT  
TGGGATGTACAGCGGCTCAACAACCTTCAGTGCCGGATGTTCTCGTACGTTGGCAAGTTG  
CACCGTACCCACTGCCACATGCTATGGTTTCGCATCAAGTACCGGCTGCGGGCCGACCGTG  
GCGATCACCTAACAGTCGCGCACCGTGACCACGCCGTCGCCGATCATCACGGGGACATAC  
ACGCCGACTCACGGCGACGCGCAGAAGACCGTGGAGCACAAGCTGTTTACGGCCGAGCGG  
TAGGCCAAGGTGCCGTTCAACCCGCACACCGCGCCGCTGTCTCACAGGACACACTGCAG  
CGTACCTGACGAGCGTGCCGCTGCCGACGTCGACCAACTCGAACAACACTACTGGGTCTAC  
CTGCGGGGCACGGCGTTCGTCGGCGCGCGCTCGGTGTGGATCGGCCGTTAATTCACGGTG  
TGCGGCCCGTCGCCCGCGCTCGTCGGTGTGACGACCCGACGTACGCACTCGGCCGGGCG  
GTGATCACGGTGGTGCCGGACTGCGAGTCGGGCAGCGCGTCCACTTGCAGAACACC

TAGAACGTGCTCAGCGGGGAGGAGGCGGGCGCGGAGTTGCCGGCCGACCCCCACCCGATG  
TTCGCCACCAACGCAACGATCACCTCAAGTCCGGTGTCTCCTTCCCCGGGGGCACGTCC  
TCGTGGAAGGTGACGGCCACAGCCGGGAGAGCGGCACAGGTGACGACGGACGTCATCGAG  
ATCGAGGTGTCGCTGCCGTTGAGCTCTCGCGCACAGTTCCGGGCGGCGGTACCCGTGCGC  
AACTGACGAGTGCTGCAGCCGTTCTACGTCGACGTCTACGCCGTGATCGCGGGATACGCC  
CTGAAAGGGAAATCGGTGACCTACTCGTCGAGCACCTGGACCGAGGCCTCTGTCTACGGC  
AACCTTTCGGCGAACGGGGTCTAGACGCGGGTACCCTAGAGCTTCTGTCAACGTCGGGC  
AGCGAGGTGCCAACCGGGACCACCTCGGCGTCAGCTAAGGCGTGAACACCCCGTGGTCC  
GACGGCAACCACGCCAGCCGCAGCCTGCCCTCGGCGTTCGTCTCGATGGCACAGCGCACG  
CAGAGCCGCGCCGAGTTCTTGACGCAGGACGCGGCCCTGACCCGACGTCCCCGCGGCAGCT  
AACGGCACCGGGGCATTTGGTTCGAACTGCTTCAAGATGACAAACAACGGCCTGTCTCAG  
TCGTTCCGGGTGCCGAGGTGTCTGCACCGCGTCCCTGGGGGCCGCGTCAGGCGCGGACTTC  
CCGCTGAACGTGCCTGCGGGCACGGCGGCGGGCGACCTCATGCTGGCGTTCGTACGACG  
TCGGAGTTCTGCGTGATCACGCCTTCGGGTGCCCGGGCGATGGTCAACTCGGCGAAAGTC  
GACGACGGCGCCACGGACACCACGATGTACGTCCTAAGCGCACCGCCACGGCGTCCGAA  
CCAGCCTAATGGACCGGTGCCTTTCTGTCCACCAACTCGCTCCGGGGGTCGGCCGTTACG  
GTGGCGTACAGCGCCGAACACACGTTCTGACGGATAACAGGCCCGCCTCAAGTAACGAC  
ACCCTGCTCGGGCTGCAGACACCTTCACTGTACAACACGGACCCGAAAGGCTGGCGCGTG  
TATGCCTGCGAGATGTCAGACACCGCCTGCGGCGGAGCTCTGACGCCGAACTTGCAGTCC  
CCGCTCACTATCCCGCACAAACAGTTTCGTGGCCTCGACGTCCCCGTGGTTCACGGTCAAC  
ACCGCAGGCTGGTACACGATCAACAAGCCGGCGGGAACCCAGTCCGGTGACGCGTTAGTC  
GCGACGATAGGCTACCTCGGTAACGGCGTAACAGTGAACCCGCCTGCGGGGCTGGACCCCTG  
TTGAACCACACAACGGCGAGCAAATGAGCGCCCGTCCCTAGAGCCTCGCGGTGATCGCA  
CGAGTCGTTGGAGGGTTCGGAGCCGGTTTCTGGTCCGGCACTAGCAGGGTTCGGCTCGCTG  
GACCGCTCGACGAGAATGCAGTGTCTCGCCTACCGCCACGTGACAACCCCTTCCCCGTTT  
CTCTCCTCGCACATCACCGGCACCCTCAACTCGAGCGCGCTAGTGACCGGGCAGGCGGCG  
AACACGAACGCGCTAGCGTGGCGTGAGACGGCCTTCGGTGTTCGTAGTATGCGGCCAAC  
GTCTTCGGCAGCCCGAACGAGGTAGCCAGCGCATGGATAAATAGGTGAACTACTAGATC  
CTGTTCCGGAAGCCTCGCTGGCAACGCGGTGCTGAGGGTCCACTCGATCGGCGATGTGTG  
TCGGGAACGTAAGGGTGGTACGAGTATTCGAGCAACGGGCTCGCCGGGGGCGACGGCTTC  
ACCCGCTTCTGCCTCTGCTCGGTACGCCTCCGATCCCGGTGGCCGACGAGACTGCACGC  
ATCGCCGCGGGGCCGGTGGGTTTCGGCGGACCCGTGGGCCTCCGCGAGGGTCTTGAACCTG  
AACGGTGTACGCCGACAGTCAGCCAGTCGATCACCGGCATCTGCACGCCAGGATCCGGT  
ACCGACAAAACCTCGATGGCTCGCTGGTTCGGCATCCTGAAGCCTGCCAGGCGCCGCCA  
ATCAGGTACGCGACGGCCACGATGAATCGCACGGTGCACGTCTCGATGGTCATGACGGAC  
CAGATCCCTGATCCCGACTTCGTGACGGCGTCAGGATCGTTCACAGTATCGCCGGCTGGC  
ACACTTACTGACGGTTAACTTGTACGGCGTCAAACGCCGCTCGGCAATCAGATCGAC  
GCGGGCACGGCGATCCCCCCCCCTCGGGTGGACCAAGTCGTGGGCCACGTTCCGCATCCCG  
AGGTCTACCACGCGCAAGTCGGACGGCGTCTCGGTCTCGGGTCTCAGCGTCGGCGAACTC  
GTCTACTGGGATGGTGACTCCCTGGTGTACATCGTTGATCCGACCCACCGGCCGAGCACC  
ACGCGTGCGGAGCACACGGTCTGGTCGATGGCGCAGATCCAGTAGGCCGACGACGACGGG  
ACCTGCCACTCGGATTGGACTGACCTGCCTGGCCTGCAGCCCAACCCGCCTGCGTTCGAA  
CCTCGCTCTGGCTCGGCGCTCTAGACCGACCACGCTCGGATCACACTGACCAACCGGAAG  
TACGGAGCTCGCAGCATGCCTCTCGTCCCTCGCCGGCAACCAGATGGTGTGGGAGTGGGGC  
CCGCTCAGCCCGGTGTGCACGTATGAGGGTAAGATCTACTGGCTCAAGCACATCTCTAAC  
CCGATCAACAATCTTAGGGTTAAGGTAGCCTGAGCCAAGACGTTAGGTTGCTAAGACGAAC  
AGCGCCACACTGTTCCAGCCTATCGGCTCCCAGCTTCAAGTCGTGCTCAGCGAGGTCTAC  
AAGCGCGAGACGTTACCCTTCAGCAGAGGCCGGTACCACGCGGAGCGAGCCGAGCTC  
CCCGAGATACTTACGTCCCGCCCGACCCTGTTCTGCTGTAGAACATGTACTTGGCCTGG  
CGGGTGCGCCCGGTTCGGGGACCTGATCGAGGACGTAATCCCGAACTCGAACCGGAAGTCC  
AAGCCGCTGCGGGACATGTGCTGCCAGTTTCGTGCAGGTTCGCGGGCGGCAGAATGACAAGGA  
GATCCAAATGCCGCGCGGACACACCGCTTCTGGACGAGATCGGACGCAGTCACTGCGT  
CAACAGCTACGTGGACGTGATCGCTCCGGACCACGAAACCCGGCGGCTGATCGTGATCCA  
GGGCGAGATCAACGTCGACCGGAAAGCCAGTATCGTTGCGCGGGTTCGGATCGACTGCGT  
AGACCTGGACGGCAGCTTCGTGCCCTTCGGGAACAGGGCATCCTGACGCTGCTCAGCAC  
CAGAATAACGCCGTACTGGAGCATGAAGTACGCGGACGGCACCGTGGAGGTCTAACACCT  
GGGCCTGTTCCGGGCGGGCGGGTATCGCCTTCTGAATTCGACGAGCCGGGGCGGCAACGC

CGGAATCCGCAACTCGCTCAGCATGTTTCGACCGATCCCCTGTGGTGTTCGCGCGACAACAT  
CACCGACACGTCCACGAGCGACGGGGGCACGATCATGCTCACGGCGTTCAAGATGATTCT  
CGGCCGGACGTTCCCCGACATAGAGTAAGACGCGGTGTCGACGGTGCTCACGACGACCAG  
CCCGGAGGTGCACACCCCGCAGGTCTACCCGTGGGTGGTGCCTAGGACCTCGCGAAGTC  
GACCGGCAGGGAGCTGTACTTTGCCGACAACGGCTGGGCGATCATCCGCCCGCCGCCCGA  
TTTCGACGCGCGGCTGAACCCCGACTACACCTAGATCGCGGGGCCGGGCTATACGATGCT  
CGACCTGGCCTCCGAGTACAAGGACGAGCCGGGCTACAACGACGTGGTTCGTCGAGGGCCG  
GTCCACGTGCGCCGATCTGCCCCCGGTGCGCCCGGACGAGTGGGACTACGATCCCAGCTC  
TCCGACGTTCCGGTTCAGCCCGTAGGGCGGGTAGCCCCATTTCTGTGCAGGTCACCAACGT  
CAGGTTACAGGCCGACGAGCTGAAGATGGCCGACGCGCTGCACAAAGGCTATAACGGCTT  
CTCGGCCGCGCTATCGATCAGCTCCTGGACGAATCCAGCGATGGAGGGCGGGGACCTCGT  
CAAGGTTCGAGCGGGAATCCATGAACAAAGCGCGCCACAGCACTGTCAGCTCGTTCAGCAC  
CCCGCTCTAGAAGGACGGCGTCCGGAGCCTCAAGCCCCGAACACGAAGGGTTGCTTCATG  
ATTGGAACCTACGGACAACCACCGGCGACCGTCTGACCTGTGTAAACGCTACTCGTACA  
AGCACTCTCGCAGGTGAACGGTGAGCGGAGTACCGACACCTGCGGGCGGACATCCCCCAGG  
GGGACATGACCTGAGCTCAGCAGCCGGCAGCGTCCATCCCAGCCCAGCCCCAGGATCGCC  
AGCGGATCAGCTCGCTGTCGACACGCTCACCCCGCCACATAGGGCTCGGCGCTCGTAT  
CGCGGGCGACTATCGTCCGAGGGCAGCGGCGGATACCCGCCAACCGGGACGATCCAGTTCG  
GCGGGCAGACCACGCCCTCGATCATGGCGGTCCACAACCTGGACAGCTACGTTCCGCCTA  
CCGGGGAGACGGTGATCGTCTCATGCAGGGGCGCGAACTGTTAGTCTCTGCCAAATGG  
TGGACAATCTCGCGGCCGGGGCGAAAGGCTGGCGGGTTCGGGCGCTGACGACGACGTGGA  
AACCGAACCCACGTTTCATGCGGATCCTGTACCGGATGGTCAACGACGAGGGGCGCCCGGA  
AGATTCAGGCACATGGCCGCGTCTGGCGGACCGTCTCCGACACAGGCACGACCCTGTTCA  
CTTAGCGGGCGGACTACCTGCTCGACGTGCTGCGCGCCTTCGCTGTCACGCGAGAGCACC  
TAATCGGGCGGCGCGAACGCGCTGCAGCTCCAGGCGAACACAGACGGAAAGGTGACTATCT  
CCGGCCACCAGCGCGAGACCATGGGCCTAAGCCGCGCGGGCGGGCGTACGACCGGCACGA  
CGTAAACCAACCACTTACCCATAATGTCGAACATCGACCACCCTGGTAACCCGGTATTCG  
TCGGCTGGTGGACGGACTGGGTTCGTGCAAACGGCTGTGGGAATAATGGCGTCAGCGACA  
ACCACAGCAATCCGATTAACACGCACACTATGACAATCGCGTCTCCCTGGATTGATTT  
CGCTCGACGGCTCGGAGTACGTCTCTGAATAAGAGGTGCGTACGGTGGGGCGCACTGA  
GCATCTCGACGAGTTCTAGCGTCCCGCGCCCGGTCCGAAATACGGCAGTCGTAACCTACCG  
GCTCTGTCTGGCGGAGACGGCCAGGGATCGTAGGCTGCGACTATCGTACGTAATCGCGGC  
GCGCCTGTACAACGCGATGCTCGAGATGCAGGGCGCCGTCTGCGCCCTCTGCGCCCAACC  
ACCGCCTCCGGGGGGCGGGTTGGCCGTCGACGACAACCACAACCGCTATCCAGGAAAGGA  
GACGTTCCGGCAAGTGACTGCGCGACCTTCTCTCCACGAACACGTCATGGAGCTCGGCAA  
GGTCCGGAACCTCAAACAGTTGTTGCACAGAGTGAGCGGGTACCTCGACGGTGGACACCT  
CGATCTGTACCAACTGCTCGGTGAGGTTGGGAAACGCAAGATATAGCCCAGACCAATAAC  
AGCAAGAAAAGCAGCGGGCGATACGGCGCGCAGATCCGGCTGTTTCGTCATCTGCACCCAG  
GAGGACAACGACACCGCGTGCTCGCTGGAGGGTTTCCTGCAGAACCGCTCGTCCGGTGT  
AGCTACCACCACTCGATCGACAATAACCGAGTGCAACGCGGTGGTTCGTCACGGACCGTTC  
TCGTGGGCAGTGCGCGATGTGACCGACTACACGGTCAACCTGTGCTACTCCGGTAGCCGT  
GTCTCTATGTCACGTGACTAATGGATCGTCAAGTACAGAAACGCGATCGACTTCACTGGT  
TGGCTGATCGCACGGGCTGCGAAGCAGTACGGCTTCACGCCCTTTGTCATCGGGCGCCCG  
GATAACAGCGCGGCCAAGCAGGGCAGGATCGACCCTACAGCAACACCAAAGGCCGGGGG  
ATCGGCAGCTCACCGACGTCGGCGGCAGCTACCAGTGTGACGAGCAGCGCAAGGACATC  
GACAAGTATATTGGTCACGCGGGCGCCGCTGCCCCCGCCCCGCTTCCGATCGCCAGCCCG  
ATCGACGAGTGCGGGACGGCGATCCACTGGCTCGGGGACGCGGTCGATGGCCAGAAACC  
AGCCCGGACAAGAAGCGCCAGTTCCGGGACTTCAAGAACGGCGTGGTCAACTGGACCCCG  
GCGACCGGCGCGCGTGGGATCCTGGCGGAGTTCTCAAGAAGGTCCCCGACCTGAAGGGG  
GATAACCGGCCCGCCGATTAGGGCAGCAACGAGCGCAACAGCCTTAACGGGCTGAACGGC  
ATTTCCGAGGGCGTTCGTGGAGGGATTAACCTGTGGCAACCTGTCCCCTAAGTCAAGCAG  
GACGTGGCCTGCTGGACCCACGCCGAGAGGGGCAACCGCTGGGGGAGTAGCGGATTCGAT  
AACGATCCGCTCGGATGGCCACTGTTTCGACCAGCTGCCATTCGACGGCGGAGTCGTCCGG  
TACTTTGAGCACGGCAAGAGCCACTGGTCCGGCAAGCTCAATGTCATCGCGCTTCTGACC  
AAGGACGGCTCGGATACACCCCTGGCCGAACAGGGTAAGTAAGAGAAGAAGAGCGCAATG  
ACTCTGCGAGCGAAAACCGCTCACTACCGCCAGGCCGTGCGGGGCTGGCAGCTGATCCGTG  
CTGATGACTCGGACCGCAATCCTCGGGCTGGGAGATTTTCTGCCCTCTTGCACGTCTGCC

GTCGTCACGACCACGATCGCCATCCTGACCACGGCTCGCATGTGGCTGGCGACATACGCC  
GAAATGATCGACAACCTCGGCAGGCTCGATCGACGGACGTCAGCGCGACGTCCCGCCCGAC  
GTGCCGAAACGCAGGAAGCATGACCGGCACCGTGCGCCGCGTACCTGGCGCCGGTTCGTCA  
CCATGGTCTGGTCTGCTGCTCGGCACGGACGGCATCACGATGTGGCGCACCGGGGCGGCTCC  
TCGATAACCCGCCACTCGGAGCAGGCGACGGCCATTGCAGTCCAGGCAACAGCGACGGCAC  
ACAGCGACAACCTTCGGCGCCGTAGCTCCGCTTCCCCAGACAGTGTCTCGGCCCGCTGGCCC  
CTCAGAAATCGCACATCCATCAAAACGAGCTGCAGCGCCCTTAGGCCGTGACGTACATCG  
CCCACCGGCGCTCCGCCATGACCCGATCCGTGAAGACGTCACGACCCCTCCCAAGTCCC  
TGCAGGCGATAATGCCTGATCGATCCGCTGACGTTAGAAAGGCCAAACGCCCCCCAGCC  
AAAGTCGCTCAGCGGCTCGGCTGGAGGTCCGTTTCTGCGTTC

>NewGenomeName\_235

CTTCGGGCCAGAACTCACACGTTCGCATCAGTTACCAACCGCGAGAAAGTTGGCACTGGCG  
GCGTTACGTACGCCATGACCCTGGCTGACGGCCAACTGACCCCATCACAAAGTAACTG  
CTCCATAAGAGGTTAGTTATGCCAAAGATCACACAAGTACGGCCCCCTTGCGCGCTCAGCT  
GTGGCTGTCCTTAGCAACTCCGCAGCAGGCTTAGGTTATATCCCACACGACGAAGGAACC  
GTTTACCGGGCATACTTCACTCGATTTCGACAGCCTAACCTCTGCACCGGCCACACTGGG  
CACAAGGTACGCTGAGGGTTAGTCTAAAGAGACGCACAATGTGCTGAGCTGCTTCGCACG  
GACGCCAACTCAAATTCCGCTGCTGTTAAGCGCACGATCAAAGTCCCGCTGTACCAGTTC  
GAGTTCGAGGCGCTCTGCTCGTTCTACTACAAGGTCGGGAACTCGAACTGCACCACAAGC  
ATTCTATTCAAGCTGATCAACCAAGGTCGGTACGACGAGGCTGAGCTGCAACTCCTTCGC  
TGGCGTTATGCTGCTGGGAAGGAATGCTCCGTGCGGGCTAACTACTGCTACGGCGTTTAC  
ACCCGACATGACAACGAGTACCCACTATGGCAAGGACAATACTGATCCGAGTACTGCTCG  
CGTAGCCTTTCTCAGGCTCGCTGTAGGCCTCTACGCGACGCACCCGTCTCTATCTGAGG  
CAAGGACAATGCTAGATGAAAAAAGACTCGCTATACGCGACCTCCGGGCTCTAGGGCTG  
GAACGCAGGTTTACGTCACGGCTGTGCGTAGGCTTGGCTCGCAGAGTAAAGCGTGCGTCA  
TCGATGTACTCGACAAGGAACCTCGTCACCGCCGACTCCTGAGCATGCAGGGCGTTGCCG  
ACAGTTTCGGTCTGCGAAGCCCCTGCAAGGATTGACCCTGACGCACCGTGCCACATCCA  
TTCCTCTCTACGGCTTCCACAGACGGGCTGTTGAAGGTGCTGGTGGACTACGCAGACGCG  
CTGGATAAGTGCAACGGTACGCGGGGATTCCGGGCCAGGAGCTCTGACCCAAAATGAATC  
TCACGTGCGCCGGCGCTCCCGGACTTAAAGAACGCGCGGTTCCCCCATCTGCCGTGCGCA  
GATTGTGCGGGCGCGCTGATTAGGGATGTCTGGTCTTGCCGTTTATCGCTGCTGCTGTGG  
ATATCGACGGGGCCAGTATGGGATCGCTGTGCCCCGCTGTCAAGCGATTTGTGACGATGG  
CCGGGACAAAGGGACAGGGCAAGGCAATACAGGTTGTGTGGCGTTGAGATCGCGCACAGC  
GCGGCAATACGACAAGGGCGGGCAGACACAAGTGCAGATTGTCTTCTTTAGGGTCCGCGG  
AATTGTGATACCTGGGAATGGTTTTCTAATTGGGCCACTAGAGTTAAGGGAAACGCGATA  
CCCTGCGAATGTTTAGGAGACTCGACGCGAACGGTTCATATCTGTTAAGCCGGGGCAACA  
GCACAGACCAACCACGCAACAGACCACGATGTCAACACCAGACTACCATACCGAATTA  
GTCCGTAACAACCGAGCCGTCACACGGTATACGCGCACGCCGGACAGTAGATTAATGACC  
ACGCGACGCAAGGGAGGATCATAGGGCCAACAATAATAAAAGACTAGACAGACAGGAATA  
ACAGCCTATTATGGGCCCCACTCAGTCGAGAGACAGCAACCCAGGCGGAGAGAATGTAAT  
AACCGGTTGACAGAGACGAGAAACACTGTACTACTGCGCAACATATTCTATTAGCCGGACT  
AACTGGTACGGCGCCATTCTTCTAAGGCACTGGAAACTCTCTAAGCTAAATTGCTAGCTT  
GTCAGAGCGACAGGAAGAGTGAGTGAATAACGCAGGTTGACAAGCTACACGCTTCACGTT  
AACATCCGCACCACAGCCCCATGCAACACCAGCTTCAACGTCCCAAGCACAGACAGCATG  
TTGAATGTGAGCTAGACATGAACGTAGCCACGCTGTAAGATTAACGGCAGCAAGGCAAAA  
AGGTCAGTAAGAGCCGGGTAGTGCGGGAGCCGTCTAGCATTAGATGGTAGCAGACTGGAA  
CCTAAGTAACGACGGGATCAGCGGCACTTCTCGACGATCCCAAAAGCCCCTCCATC  
CTTAGCTTAACCGCGCGTATTGCGAGAGACTCGAATGCGACCGAGATCCCATGGAAATAA  
CTGGCGCGGGCTTTGGCTCAGAGCTGGTACGAAACGATTACAGCAATACTGACTGTCGGG  
ATGATAGTCACCTAAATTAGGTGCATAGGCGAGAGTGACTGCCGATGCCTGTAGCCCGAG  
AGGAACCAGCCAATACCACGGTGGTTCCTAAAGCCCCTTGTGTTTCATAGTGACCGGATG  
GTGTGTTACACACGTTACTAAGACGAGTCGGCCTTAGAACTATCGAGGTGCAAATAATG  
GCTAAGGATTCACCCAGCAGTAAGGTGGAACGACAGCAGCAACGTGACGACAAGAATACT  
GGCACGGAACCTTCGCAAGCATATCTGAGACTACAAGTCTCTGCGGTGCAGTACGACCGAT  
CCTCTGTTGGCTGAGGGCGCAAGGTCACATCACGATGGTGGCTGAGTTGTCCGATGTTAAA  
GGCGATGTCTCAGTGACTGCATGGCGCAACCTCCGCCAGATGCGGGATGTGCGATACTAC  
ACTGATGATGAACGAACGAGCAAGAACGCATGCGTTACTAAGCAGACCAAGGCTAAGCCG

GGTCAGTCTGAGGCGGTGCGTGGTAGGACCACTAAACATCAACGCATTATGGCGGGGCGAG  
TCCGCCAGCGACTACAAGGTATGGGAGTCTAATCATCACTAAGTTAAGTCTGATCGTCG  
GCTCCGCAAACATCATCCTGGCTATTGCATCCATCGGCAAGCGCGGCGCTAAGCTGGACG  
GTGACATCCACTTGGCCGGTGTGGCCATCCTCGCGCACTTCAATGAACACAACAACGTGT  
CACTGTTGAATGATCTGTATCGTTTCGCTGCCGAATGCATCCAGCAACAATGCCTTGGCTG  
AGTGGGCCTTCGCTAACTTTAGGGTGACCATCAGCAAAGGCTCGAATAGTAAGGACATGC  
GTTTCTTGTTCGCTAAGGACAAGGTAACGAACATCGACTTTGCATGGGAGAACCCCTCGT  
ACGAATACACGCAGACGTCTTCACTGGTTCAAGCGTTCGACGTGCAAGCCGCCATCGCGA  
AGATTCTGAAGCAAGAGGGCAAGGCGCGGAGGATGACACTTACGTGGAGGTCAAGGTCTG  
TAGCCCATCTAGAACATCTGTCTGGCATGTCCAATGCGACCTAACGCCACACTCCCCAC  
CCAAATCTGGGCGCCGCTATTTTCGCTGGTGCCCCAACCTCTGGGGTGCCTATGAAACTCG  
CAATCAACCCTATGGCCCGACTCTCTGTGCTGGCGCTCGCTAGCTGCTCTATCAATCCCG  
TAGTGATTCCGCACGCAGTTCTCGCCGTAGACAGCGCCGTGGACAGCCAGTGGACGCAG  
CCGAAGTCATGAAAAACGTCGGGATCGTTGACACCCAATTAGCCGGGCGCCACGGCGGG  
GCATCTTGTGCGGGTGTAGCCTGCGATCGGCGCGCACTGCGAATGCCCGTTGTCTGCCGTT  
CGGAGCCGTCCTGGTACTGGAAGGCGAGCAGTTGCAATACGGTGACCTGCACGGACCCCT  
GTTTCGCATCAGGAGTCTAGGGAACATCGCAGCGTACCTCTTGCCTGTGCCTGGCTCGAA  
ACTCGCCAAACAAGAGGTGTGTAAGCTTGTAGGGCTACGCCAACCCGCTAGGTTAATGAAG  
GACGCCTCCACGTTGCACGCAACCCCTGCCATTCTAGTGGACGCCTTCAAAGCTGTGAGT  
GCTGAGTACCTGAGCAGGCTTGTAGGTGCAGACTGGCGACCGTAACGCCGACGGCACGATT  
TCGGTGGCGCCGGAAGACTACGAAACACTGTGCGACGCTTGGGCTGTTGGCCCGCGCATC  
ATCAGCAAAGAGCACAGCGACACGGTGATCTATGGCGCGGCAGGCAACAGCGCCGTCCCT  
AATATGCACGTCCTCGGGCACCTGGTGCAGGGCCTGACGTTCTCGCAGGGTTCATGACTTC  
TCGCTGTCCATGGCGCAGAGGGCGATGATCCGCAACTACATTCGCAACACGGAGTTGCCT  
GAGGTGTGCCGCGATGTGTTTCATGGACAACACGGTGATGATGTCGCTATATGACGAGCGG  
TTTGGTGCCTTCCCTTGTAAACCGGACCGAGTTTGTGATGCGCTGGCGCGCTGAGGAGTGA  
ACAAGTAATGCCCATCTAATGGGCTGCATTCTGGTTTCTACCTCCGAAAGGCCAGAA  
CTGGTATGAGATACGACATTGCAAGTTCTACGACTGGAACACCCGAGTGAAGGCCTCCGG  
CCTTACCCTGGCTCCATGGTGCCTCGAAGTGGGCGAGTTGACAGGGCACAGCGCGATGCG  
ATAAGCATCACGGCTAATAATGGTAGCTCGCCGATGATTGGCGTTGACTACCCTTCACAC  
TTGAAGATCGGCTTTGCTAGTTCGGTGGGAGGCTCAGAGCTGGTGGTCTGAGAACGCACGG  
CGTGAAGCGGCGGCCAACAGCTAAGCTCTCGCTGTGTACGGAGTGCACGGCCGTGCTGCC  
ATTCACGGTAACGAGCAGGTGGCATTTCGATCTAGATGTGCGCAAAGGTAGTGGCCCATATC  
CACGCATCTGAGTAGGTGAGAGGGAACCTCAATATACCGCTCGCTGCGTATGCCGAGGAA  
TGCCTCCAGCAAACGGCGGGCCCCGCCCCAGCCGGAACAGAACTTTGCTCACGAACCACAA  
CCTAAGCGCCGCGGGCTGCCATCGCACTTCATACATCAAGGCTTAGTGCGTGGCGTAACT  
CGCTTCGGAGGAGACGTAAACCAGATTCCCAAAGACTCGACCCGGTTACGTGGATTCACT  
TTTGATGCTGTAATGTTTCATGCGTGAGACGATCGATTTGGACGTTGAACTCGCCTAGAAA  
TCCTTCAACGAAATCAGGAGTTCTTCCGGTGGAAAGACTTACTCGAATCGATTGGGAGGT  
TGAAGCAATGGCCGAGGCTTGTGCCTTTGCCTGCGATTACTAACGCACGCTGATCCACT  
CGAAGTAGTGATGAGCCTACGCGGTAAAATCTGATGTACGGCGAAGGCTTGGACGCCTA  
CGCTGGTGTGGATACCTCTCTGTCTGGTGGCCACGACTCTGCCATGCCTGAGGATAGCTT  
TGCCTGTTGGATTACGAGGACGCATAAGCGGCTCGCTCACGACCCACATAAGCACGCCG  
CAATTGTGGCATCGCTCAATGTATTCCGTGGCATGACTGGCCGAAAAGTAGTGCACTCTC  
GACTACGTAACGCGGTGGGTGTAGTAGTTGGCATCGAACATAACTTCGTGAGCGTAAGGT  
GGGACGGCCAGACCTTCCACACCCACAACAACCGTGTGTACCTGACTGTTCTGCCCGAGG  
CAGAGACTGTGAAAGCGGCTGAGAGCAACGACCTGAACAACGTGCACAAGTACAGCCTGT  
CTACCTCCTGAGCCACGTGCGCGAGACTCGAGTAGGTGAGACCGTTCCCGGCCGTCGCA  
CCGACGCTGCCGCCCGCCCAATCGTCGTAGGCTACAACGAGTACGGCTTTGAAGCGTTTG  
CCTTGCCTGAAGCTGGCATGATCGTTTCGCGAGAAGAACAATAACGAAGTCCCGTCCGGGT  
TCCTGACCAGCATCGGGCACTTCAAGGCAGTCGAGCTGACCAACGCGCGCAGCAAGTCTC  
AGAAGTGGCTGGTTCGGCTGCCCGACTTCGTCCAAGCGTCCGCAGGTTTCTCACTCCTGTG  
AGCATAAAGCGCTGTCCGTGCTGATAGCATGGCGCGCAACTATCCGGGCTAAGGGTTC  
ACGCTGTGAAGGTACATGCGGGCTCCAGCTCAAGGCCTAGAACGTAGCACCCGAAGAAGA  
TCGACTCAAATCACGCCATGGTGCAGCTGTAGCATGGCGGGGAGCAATCAGATCATGAGC  
TAGCCTCCCCGTGGTAGTGCTCTCCGGGCGCTCCCGAACCTAGGCAAGCACATCGGCCCG  
GTCTTTGGTGGCCCGCCGTTTGAAGATGCTAAGCTCGTCATCAAGGACGGGTTTCGCTCAT

ATCACTGTGTACAAGGTAACAACAGCTAATCGGCCACGTAAACAATGGTGCCCAATTC  
GAGTCTTAACCCATGCTGATCGGGATCGCCGCTTACCTGATCGCTCTGTCCAAGTACATC  
GCCGAAGGGGCTGCTGAGTTGCACGGTTCGGCCCCTGATCATCTGCAGTCCCTGCATGGC  
CGCGAGATTGTGAAGGCGCGCAGCCAGTATAACGCCAACGTCGCAAGGGTGCATGTCAA  
CCGAAGGGCCGCAGCGAGCGTGCCTGGGTCTCTCAGCTACCAGCAGGCCGCGGAGCAG  
CGCCGTGACAAGGCAGCCAAGTTGCTAGACACTCTCAATTGATCCGCTCCGTGACCGGGC  
GCATGCCAAGCGAGCCTTAGCTGCCTCGTTTGCGGGGCCGCAGCATCCACTTTATCGTCA  
CTGACGACAAGATCAACGCGGAGTTCGCGGAGCTTGAGCGCCGCGTTCGCCACTCTCCCT  
ACTTCGACCATCCATAAGGAATCCAACCTATGAACCGACTGAACGTACTCGACCTGGACT  
AACGCTCCGCTGTCACCGGCGAGATCTTGTCCGTTCTGCGCCGTGCGCCGGGGGACGACC  
TGCTGGACTACAAGGGAGGTCTGGATCAAGACAAGCGCATCGTGGGACCGGGTAGCGAAG  
GTCAAGATCTTGGCCGACTGGGAGGCGATGGATTCCAGTTCAGTGGCTTCGGTATCAACG  
CCGAGCTGATCATGACCAAGCTGCGAGCCGTCTTCTACCCTGTGCCGAGCTGTGCTCGCT  
AATTTCTTCACGCGATGCATGGCTGGCCACTGTGCATAAATCCGCAACGAAGACCAGAGC  
CAGTTACGCTTTAAGCGCAAGCACGCCAAGTCTATGCGCTCGATGGTGGAGCACTTGCCT  
CGATGGCACTGAGTACGTAATGCGCATCTGCGGGGTGTGCATTGCGGTAAATTGTGCACA  
TCCAAAATCCATGTTGGAGATAACCCATGTAGAACGTACAAGCACTGATCACCGTAACCA  
ACGCCAACGAGGCAAAAGAAGTCGAGCTGATTGAGGAGGTGGACAACCTGATCTGGAAGA  
CCACCGAAGCAACCGTCGTGTTGGCTCGGTTCCAGCAAGAGCAAGCCAACGACGCTGCAT  
GCTTGAACATCTAAGTCTGCACCGAGGGGTCTGTTGTAACGGTTCGTTCTGCCACTGCGC  
AAGAGGTGACCGGTAAGGTCATCGCCCTGGTCGAGCTGGAAGGCGGCACCAAGCTGCCGA  
AAGTCATGGCCGTTGAAGACGCAGTGTGAAGATTTACGACGTTGCACAGAACAAGTTGA  
ATGCTGTGACGAGCAGGTGAGGGCAATCCAGACCCAATTCAAGGCTCACAAGTGTGCG  
ACGCTCCGTCTGGCGCAGTCGTTGGCTGGCCGTTTCGATGTTTGCAGCGTTCTCGGCGGCA  
GCGAGGCTGACGCCGAGTCGCTGGCCTGTAATGCTTGATCCTGGGCTGTTTGTGCCGAC  
AGATGACCTCTTGCATGAGGACTTGATACGACAGCTTAAGGCCTTGGGGATCATGCCCGA  
GGGTGCAGCAGGGCGAGGGCGAAGTTGACCTCCGGGACTTCGACGATATGGATCCCCGGCT  
CCATGCCGCAGCCGATCTTAACAGGCGTGAACGAGACTGCGTGATCTCGATGCCGTTCT  
GCCTCCGAGGACTAGCGCAGTGTGGTTTCGGGGGTCTGCCCTGTTCCGTTACGAGAAGCA  
CGCCATCGAAGGACCAGACTGACAAAGCACAGAAGAAGTTCTCAAGCATGAATGCTAAGG  
TCTGCACGCCTCGTTGCGAGTAGTGGTTGATCAGGTTATGCTTCCGGTTGCGGTGCGGCT  
GTATGGCATAGAGCTGGAGGTTTTGCGTTTCATCCAGCTTGACAAATATCGTCAAACCTGA  
AACAGGCTAGGGTCACTGGTATCTCGAGCTTGACTTTGTCTTTACTGTGGTTGTGGCCCT  
TAGCAATGGGCAGGCTGGAGGTGGCGCAGAGGTTAAGGCACACGCCTTCTCCGAGGCTTT  
AGAGGTTCTCAGTTGGCTACCGGATCGGCTCTGATTTTTCCGGGTAAGCTGTTCTTCA  
CCGAGGCATGCCGTTATTGAAAGCGTGCGCCACTTGTTCTGTTCTGGACTAAAGTGAA  
ATGAGAAATGAGTGGTTCGCCTTAGCGCAGGACTTGCCGGTGCGTGGCCACGCAATGCCT  
CCTCATTATTGTGGCGATGGCCGTCTGATGGTTGTCTTCCACAACGAAACGTATCGGTCG  
GCGTTCTGCCACCGGTGCGTGAACATCCCTGCAGTATTCAAACCAATGCCGCCGTTGCAC  
GAAGTCTTCGCTGCAGTGAACGGGAGCGGCTTCAATAAAGAGCTGTTGCAACCGAAATC  
CGGCCACCGATGCCAGCGTTGTAGGACCTGGCCAAGTGGCCACTGGAGGCACGGGAATGG  
TCATTCAGGGGCTGGGTTATGCCACGCCGTGGTGTGCAAGCGTGGCGCCTACGATCATCCG  
CCGACCCGGCGTGTGGTGTCTAGGGATTTGAAGATGCGCGCTTGACTTTCTGGCAGTCC  
CTCAGCATATACGGCACAACAGCAGCAAAGTATCTCCGCCAGCCGGGCGAGCCCGAGTGT  
ACACTCCCGCTGTTTCGGCGGTGGATATGTGTTCCGTTAGGCGAGAACAGGCTGTATGTG  
TACAAGACCGGAACGGCGCGTTGCAAATCTTTGTGCCGAATGGGTGAGAAGCTGCTGGCG  
AAAGCACGGGCGTGGTTGGCAGCTAACGCGCAGTACAAGGTAGCGATCTGGCTTGGCCCT  
GACGGGACGAGCTGGAGTTCCTCCGCTGAAATCAAGGACTATGTATAGATGTTCCGGGATT  
GCATCCCAAGGCTTCCTAACGGAACGTGATCCAATGTTCCACAGCTAGCGCGAGATTGCA  
AATGTCATTGGACGTATCCCCTTTGCAATTGATGCTGGGTGCAAGGATTACGACAAGCT  
GCACCGAGTCGTGAACCTCGCGTTCATTGTATCAACTGACAGCCACGTACATCACTGACCT  
CGGCAGTTACTTCAAGGCGGATCCCGAGTTTGATCTGATCCCTGTTAGCCGGGAGATCCA  
CAGGTTCTTCAACCCGATCTGTTACCCACAGTAAAGACCGGAGCAGGCGGCGGCGTACCG  
CGCTGTGTTACAGCAGATCGAGAAGCCGATCGGCGAGACTGCGAAATCAATGATCATGGG  
CTTGTGTTTGTGAGTACAACCTTGTTCATGACTTGCACGACATCTCCGTGCGCTTTTCTCTG  
TGGTGAAGAAAAAATGTACGCGAGGTGCAGGCGGACAGGCTATCGAAGTTTGTGAGCAGGA  
CATTGAGCGTTGGGTGAAGATGCCTTTCGTGGCGCTTGACGAGCCATTGTTTGTGACGAGGA

CTTTAGCAACGACGGGTTCAAGTGGCGCTGGGCTTGCTACGCCCCGACGATGCGGCCACG  
GCGCCGCGGCGACTTCGGCATCATGGCGGGGCGACCTAACAAGTGCAAGACGACTGCGCA  
CACGGACACCCGCACGTACGGGGCATCGCAGTGCTAGTTCCTCTACCCAGACAACCCGGG  
GAGGTACCAGATTCTGTGGCTCAATAACGAAGGGCCGGGCAAGCGCATCCTCAAGCGGAT  
GATCCAGTCGGCGTTCGGTTTCGGTACGGCTGAGCTCAACAGGAAGCGAACGGCTGGCAT  
CTTGCGGGATGAATACGACGAAGCGATCGCCGGTGGTCAGCCTACGATGAACGTCATTGA  
CATCAACGCATTACGGGGTGGCAGGTAGCGGAAAACCTCAAGCAGCCTCCATCCGGCTC  
GGTGATCTTCGACATGGTGGACAACGTGAGCTACGATGGTGGCCTTGCGAAGCGGGACAC  
GTTAACTGAACGGGAATTTACAGGTTATGTATCAAAGGGCGCGCGACTGCGCTATGCGATT  
CGACTGCCAGGTACTCGCTCCGTCTCAGATCAGGGCGGACCGTTCGGGCGAAGAGTATCC  
AACTCTACCGAAGCCCATTGACAGCAAGACTGGCAACCCAGGTGCAGCCGATTTTTTTAT  
CACACTCTGAACGTTAACTATCCTTCGCTTGAAGCGTTGCGTTCATTGGCAGGACCAA  
GAACAAGCTACGTCTCAAAGCCAGCCATAAAGTCCGCGTGCGAAAAGGGTGATGAACGC  
ATAAGCAGAACGATATGTCTGGCAATGAATATCAGCCGCCGCGCGTCCGCGCGATTGAAC  
AGGCCATGTTTTAAGGGATTCGACACTTCTGGCCGGCGGCGCGTTCGCGTGCAGCCGCTG  
ACATGACAAGGCCGGGGTGGATTGGCATAACGCTGCGTGTGAGCATGTTCCGGAACAACA  
ACGAAGTGGTCACTGATTGCGTATTCCTGGTGGACCAGTTCTCGGCACCAGTCCCTGTGA  
TCGCCAGCACGATGCGGGCGCTCGTTAACTGAGGGCGTACACAAAACGCTCAAAGAATGCG  
GATTGGAGTTACTCAATCTGTGACGTGCAAACGTCGATCGAGTCAACCTTCAAGCAGGAG  
GCGTATCGCTTCCAAGAGAATTGGACGGTGTGGGTAGGTAAGTCAAGCAGGAAAGAA  
CCTGCGGTCATCAAGAACTATGACAAGCACCCGAGCAAGGGATGCCTGGCGCGGTTCTTT  
GAACCCTACCCGGAGTGCAAAGTATTCGTTTGCTGCAGCTTGAAGTTTGACTGGCTGCAC  
GGGATCTCCGATCAGCCCGCAGGTCAGGATGCGAGGGTGGGCTTCATCAACCGTGGCGGG  
GAAGTGTGGGACTGTCAGGTCGTCGAGCTCCAGCTGCGCGGTCAAGCCCCGTCGGCACAC  
ATGCTCTCGCTTGACAAGGTGTGAGTGGGTTTCGGCGGGCTCACGAAACACGATGCGGTC  
AAGGACTTGTAGTTGTGCGGGGTCGAGAGAATCGACATACCCGATGGCGTGATGATGGAG  
TACCTGTGCGGGCGACAACGGGAACACCTGCAAGAGATTCCTCGGCCAAGTGCTCAAGTCT  
CAGCAGCTCGGGCAATCCCAAAGCATCATGCTGCACATGGGCGCGCTGGTTTTACGATT  
GAGTACGAACACAAAGGCATGAACGCCGACTAAGACTTGAGCTTGAAGCTGGCCGCGGAG  
CTGGAAGAAGAAGTGGACTTGTGATGATGCGACTTGACGACTACCTGACTGGCGGGCTT  
CCGTCTAAGTTCAATTGGGGCAGTCGCATCCAGTTGCGGTCGCTGTGGTTTGGTGCGGGT  
GTTAACTAAAAGGCCCGCGAAGCGATTCTAGATAAAGACTTCAAGCCGGCTTATGCAAAG  
AAGACTGAGGCGCTCTACCTCAAGTCGGACGGCAGCACTATAGGACAGGACGAGTTGAAC  
GCCTCTCAGCTCAGCGGTAAAGATGTGCTGACCCTTGTGTCCTTTAGCAGCGGCAAGAAC  
GCTTGTGAAGCGAAGACGAAACAGCCTAAGGTTAATGACCTGTCGAAACCGAAGGGCAGT  
CTTGAAGACCGCAATTACGTGTTCCCCAGCTACACCAAGCCGCGAGAGAAGTAGACGATG  
GCCGCTCCGGGATTGTACCACGCTGGCTCTGCCATCATCGAACCTCGCGGCAACCGGGAC  
ATCGCATTCCCTCGACGAGTAGGCACGCCGTGCCAGACTCGACTAGGACGTGGGGACATTC  
ATCATGAAGACGTACGACAAGGTTGTGCAGACAGGGCTGCTCACGCTGGGTATCCTGAT  
TGTCTGATCCAGCACATGATTAACATGACCAGCACGGTAACGGGCGGTTTCAGTTCCAGT  
AACCCGAACAGGCATAACTTGCCGAAGGCAGGTGAAGGCAAGTGCGACGCCAAGGATAAG  
TTCGTGTCCCGGTTTCGAGCCGGAAGGTGTGAACATGCAGTCCGGCATCTCGTCACTGGAC  
ATCTGCATCCAGCGATCCTCACGGGTTGCAAGCCGATGATCACGGACTTGCTGGCCGGT  
GTTGACACGCACGTTGCACGGCTTGTAACTGACTGCCGGGATGGACGACTTGAAGCGTAC  
CGACTGTGCCTCATTAGCTCGCGGGCGGTGCGGTTGATTCGCTGCGTGGGTAGGCAAG  
AGGACGAAGGCTAAGCTCCTCTCGTTCAGCGTGCTTACGGCACAGGCGCAGCGTAGATC  
AGCGAATCGACTAGCTGCCCAATCGAGGAGGGGTACGGACTAATCGAATCGGAGAACACT  
CGCTACCCTGAGATCGAACCGTCTATGCAGATCTGATGTTGAAGTTCACGAACCGCAAG  
ACCGCCTGCCGCAAGGTAGTTCCACGCCGGGACTTCCC GGCGAATCAGGTTGGCTTCGGC  
ACCCGCTCGTATCGGACACCAGACGCTTAGCTCTACACGTACCGGGAGCCGTACGCTCCG  
ACGCCCGTGGTGGAGAAGCCTGGTCCGAAGTCGTCGTTCTCGCCGACGGACATCAAGAAC  
TACATCGTGATGGGCACTCGCGCTGAGTGC GCGACGACAGCCTCCTGGTTGTTGGTTCGC  
ATGTACTACGGCCGCAAGTACTGGGGCCGGCTGGTCCCTTCTTATCAATCAGGTACACGAC  
GTCGCAAATGGTGACGCGCATCCGAGAATCCAGAACGACGTGGCTGCTGTGATCGATGCT  
TACGAGGAAGGTACAGCACCATTCATGGGGGCGTACTTAAAGAGGGCAATCCC ACTGCCA  
GTACCAAGCGACACAGCGTGGGGCGGGAGCATGGCACACGAGAACGCCGCCGAAGGCATT  
GACGAACTGTCTTAACCTTTTCGTGAAGAAATCAAATCGCAATTCATCAATCAATATGTC

TGAGAGGTTACACCATCCCCGCTGCAATGTAGGACCAAGCCGCAATTGCACCAGCCGTCG  
CAGCAGCAGTGGATCAAGAACCTTTCATGAAGGAAGCGCAGAAATCCGGCGGCGGCTGGG  
TTCCACCAGCTGCTGGCGGCTGCATCGTAACGCTAGTCCGCTACATCCAAACCGGCATCC  
AGATAGTGCTGCCGAGCAAATTCAATCCGGCCAAGTTCGCCAGTGGCCCCGAAGATCAAG  
TCGATCTGATCTGCAGCAACAGCATCAAGGGACACGTAAGGAGTTCGAGAACGGCA  
GCAAGGTTTCATGAGCGCGTGACCGTAACGCTCAAGCTGTCCGGTGAACGAGCTGTCGTGGT  
CCTACAAAATCTTGAACACGATGAACTATGACAAGACCCCCACGCACTTCGCCAACTGC  
TCGGCAAGCACTTCATCACCCCCATCAGTCACTCCCCGAACAAGAAGGACCGGCAGTCGC  
CGTATGCTGGCTATAAGTGCAAGACTGCTTGCTACCCCTTCATGGCTCCGACCTGCAACC  
CGAACCCGATGGACATGACCGAGACTGCCGTGCTACCGAAACCGGCGGTGCTGACTCCGC  
TTAAGCTGTTCTGGTGGACTCACCCCTTCAAACCGATGTGGGACTCGCTGTTTATCGAAA  
GCAAGTCCGACGACCGCAAGGACGAGAAGTCTGGCGCAGTTACTCCGGGCCGAAGCAAGA  
ACCAGTTGCAGAACAAGATTCTCGGCTCAAAGAACATTGAAGGCTCGCCAATCTTCGACA  
TCGTTGCCGGTACGGACATGGCCGAAACCGAAGTGCCGGTTGTACACGATACCCCGGCGA  
CGGAGTCCGGCTGCTGTTCCGTCTGACGTGCTGCCGCGGCTGCACCGGGGGCGCTCTAAT  
GGATTGGCTAGAAGCCGCAATAGCTACTGCTGGCGACTAGCCTAGCCCATGCGCGGCGAT  
CCCGGCCCTAGTGCGGGGACGGCTTGTGCAAATTGATGGTACTACGCTGCCTACTTCAT  
GGCGGTGCACGACGATACCGATAGCGGGAAGGCGCGTTCGAAACCTGATGGAGCGATTACG  
CAGCATCAAGGAAATGACCGGGGCGAGCGGTGTGGTTGTCCACCTGTCCGCCGAGGGTTG  
TTCTAAGGCCGAACGCTTCCCTATTGCCACCGTGCCACCGTATTAGGAACAGCGGACTGG  
CTCTGCCCGTCTAAAACTCGCGCAGCTTGGGTGAGTTCATGAAGAGCTACAAAGGCC  
TGAGTTCACTCCGAAGATTTGGGGCGACCGCGAGTCCGATGACGAGATGGATTACATGCA  
GCAGAAGTGGGTAGCCGAAAGGAAAGGCGAGCTGATCGTGACAGGTACCTGTTACAAGGA  
CATAAGATAGTATCCCGGCTGGCACATGGACTGGATGACTTACCAACTCACCTACGTTCC  
GCAAGGGGCTTGCAGCCGATCGGGCGTAAACGACTTGGTCTATCGGCCCAAGTGGCTATG  
GCTGCAAACCCTGCAAGGCCACGGCGCGGATCACACCAAGGGATTGCCGTTACACCGCGG  
GCCTATCGGCAAGTGAAAATCGGCCGGCTATGCACGAGCGCTGGTGTGACTTGCGGGTGT  
CGACAACGACGCCGAGACGTTCTGCGAAGTGGTGCGGTTATACTACACGTCCAACACACC  
AATGGCGGGGCTGTTGCAACTACTTGAGAGGTGGATGCTGGTATCGCTGCGGCGTGATCA  
GAAGGCCCCCTCACCGACATGGTGAGGTGGTTGCACGTACGGGATAACCAGAAGGAGCG  
CTTGACAGCGTCGCTGCTGCAACATCTGAAACGGGTGCAGGATATGAAAGCGGAGGTTAC  
GCAAATTGAACCTAACCAACAGTCAACTTAAGCCACTACGGGACCAGATTCGTTACAGACC  
AGATAGTTTGTGTGGGCATGGCAAGTGGCATGTCAGTGTGCTGATGCTGTCTTCGCTC  
ATTGCAACTATCACGGCATTATTCGCGGTACGCTCCATCGAAGTAGTAATGGCCTTCTTC  
GAGTGCTGGAGAACAACCGCAAGCGATTTGGCGGAGGCGATGTTCGAGAATTAGCCGGCT  
TCATGCAAGGCGCGCGGGCCTAGATCCCGACGCACGCCACACCACAAACCCGGATGATCC  
ATCCGAGATTCAAGACCGAAGACGAGAAGCGCTTAGCGCGGAACGGCTAGGCCCTGAAGG  
CTGGCGCCCATGGGAGCAAGGAGAAGAAATAATCCACCGGTCCCTGATGCGAGTGTTACG  
CGAGAACACACACACGGAAATTCCTGGAGTCTTTGGTTGGAGCGTGGGCGCGGCTGGCGA  
GTACATTCGCGTGCCGGGGCCGGAAGGGCGTACCAGGTGCCTCGTCAGACCGCCAAACA  
CTGGCGTGCGAAGTTCATCGACAACGGCGGCAACAGGGCGTAGAGGGTCCGCGAGCTGCG  
CGAGAAGCGTGTGCTTCGCAAGCCCGACCCGTTGTATGCTGATCAAGTCATCGACAACCC  
GCGCGTGTACAAGTCGACTCTGGTTGTGCCGGAATAGCATGCGCCGTACCATCACCGAGA  
TCCGCTGACGTTCTGCAAGCCGTGGCTGATAACGACCAGCGGGAAGTGAAGCGTCAACCT  
CGGCAACGATCCGGACAACCATGCGATGTCGTTCCACGAGAGTGCCCCAAAACCTCACAG  
CACAGGCGTTGAACTGGAGAAAGGCAGGAAGTGGTTGCATGAGCGGGCGAAGCTGTTCCC  
GGCTCCACTGGTTTGCGATTCCAGCCACGGTTCATCGCGTTCGGGAAGGACCAGGACCA  
TGGCTTACCGATGGCGTTAATTCGAGGTAACCGGGAAGTTGTGTTCCCGAGCGGCGGTGG  
CGACCTCTGACACTGGGCCTAAAGCGTGCAGACAATACTCCGCAGACCGACGTGATGTT  
CATGCATCAACCGAGCGGCGGAATTCTGGTAGACGTGGCGCAAAACTCCTGCAACTTGGC  
TGTGGGCTACGACCACGGCAACTTCTCGGGAGTGTACACGGCAAGAAGCACGCGCCTCTA  
CTACCGGATGCACAGAGAATACCTGAGCGATTAAGACGCCTATGCTTTCGCTACGGCAA  
ACACGCGCTGCGCAAACCTGTTATTGAGTGCAGAGTCATCCCTCTTGGTCGACCAACGCT  
GGTTCCGATGGTTATTAACAAGAAGGGCCGCTGGAACGGGAGCTAGTAGTATGAGCCTTC  
CTGATATGGCCACGGACAACACTTGCAGGAAGCTGGCTCGGCCCGTGAAACGGACACACCC  
GCTGTGCCACCCCAAACAGTCGCCGTAATGAGCGAGGTGCCGGGTTGAAATTTGAAG  
GTCTCACAGGGCTCTGGTCCGGTCTTATGGGTGGCATGTCGAAGGCGCTGGCCGTTGCGG



AGGCCGTGTTGACCTTCGGAGCCATGAAATACGCCGCGCACAGTTGGAAGCAGGTGGGGA  
CCAACAAGGAACGTTACCGCGAAGCCTTGCATCGCCACCTCAGCGCATTTCGAATCGTTTG  
AGGTACTIONGACCCGAAGAGCAGCCTGCCGCACTGGGATCACGGAGCCTGCAACGCCCTAT  
TCCTGTCCGGACGGGAGAACGACCAATGAGCAATCCACAACCCGTAAGTGAATTGGTGGT  
GAAGGGCTTGAGCGAAAATCTGCGTGCAGCCATCGACACCGGCAACCAGTCGTAGGCACG  
GGTGATCCTCGGTGCCGACGTTGACAGCACGATCAGCATGCTTCACTACGCAGAAGTGGAG  
TCACGACTGTGAAACCGCATTAGGCGATCTCGAGCACGAATACCATGGGTATGCCTGACG  
GTAAGATTCTCCTACATAGGCGGAAAGAAACGCGCAACTTTAGCGCTAAGGCGCTGGCCG  
CGCTGCCGGAATTCGACTCGGGCAAGTGGGTGTTCCGGTTCGAAGTTCGACGCTTGCTCGC  
TGATCATCATCGTCCGCTCAGCGTAGACCCCATCCTCTCCGGTTAGGCCAAGGAACGCG  
TGAGGTTGCCGCAAATGCCCGAACACTTCCAGACCAGATCGGAGCTAAACAGGGTTTACT  
TCGGGGAGGAGTCTGACCCGAATAAGCTGTTCAAGGATATTTCCAGCAGGTTCCGCCCGC  
AGTAACCCCGGTACGACTTTGAAGCGTGGTGGTTCGGTGCAGTGCCCCTGCAAGAGTTC  
GCACCGGCGGGACTAAGCGTCCGTATGAACTGCGTATGAAAGCTTTGTGGCAAGTGGCGA  
ACTGCGAGTACGGCGTTATTCCGACGATCAAACGTCGCTCGTGGCCGTAGTGCAGTCCG  
ATGTCGACTGCATCGTACAGTATTGCTGCAAGCTGGATCTGGACGGCTTGTGGCGGGG  
AAGCGGACGGCGAGTAACTGCCGGTTTTTACCACTACGGCCGACCATCAAGCTGAAAG  
ATCCCAAAGCGGTGGGCTTCAATTCGTGACATCATTGATAGCGTAGGTAAGTATAGG  
GCATCGTGGGCGCGATCGAAGTACTCTGGCGCGGCAAGCACGAACTGGTCAGCGGTGGCC  
GACTGATGAACGCCGAGCGATTAGAGCTTTCAGTGCAGTGGGCAAGGTGAACGCCAATA  
TGGCGGAACTACATGCGTTCGGCATTACGCCTGACCGTAACTGCGGGCACGGCGCTAAC  
AGCGCATCCACGATAACAAGACACAAGCAGGCGAGCTCTGAAGCAGGCGGACATAGAACG  
GGAGATGGTAGACGGTGGGCGTCCGGCTGCGATGGCGAGGTTTCAAAGCGTCGAGGCGGC  
GAATGAGATAGCGAATAATCAGCATGGTTCGCCATATTCTGACACTTCATCAAACCTCT  
GTCAGAAGGTCAGGGAGGTTATCTGGACACGGCTGGTCGAGGTGTGGCAGCAAAGTCGAA  
AGTTCGGCAACGTGGTTCAGGAAACGCTGGCGTTGGCGTGCATCACGGTCCGTATTGTGAT  
GAACCCTAGCCTCTCCGAAGGGGAGGCCGTATTTACTGGTGTGGCTATGGATATTGGCCA  
CTCGGTTTACAGCCAGGTTGCACTCAGGCAATATGAAGACCAGAACCCCGATCTGTATTA  
CCCGTTGGTTCAAGACCATTAGCGCCGACAGGACCAGGTGCGAGCGACACAGGTTCAACGT  
GGTGCATCCACTGCCGAGAAGGACGGGCCGCGGTTACCGACTTGGGAGCCTGCGTTGAG  
AATGGACATGGGCGCCTTGTGCTGGGCTCGTCTCTGGACTTCGGTATGCTCGAGATATT  
CGTTTTAAGGTTGAGAGGGAAGGCGACCAAGCACCTCGGGCTGCATCCTGACCTGCTGGC  
GCTGGTTCGAGCAGATCAAGGGATTCGTCTCTGGGGCGTCCCGTTCCACCTGCGATGCCT  
AGGGTAGCCGAAACCATGGGTTACACCGACCGATGGCGGCTGGCAAACGATGGCGATGCC  
TCGCACTGGGTCGTGCATGATGGGGGGGTAAGCAACACCGACCGGCGAGGACGTTGGGCC  
GCGATTGCATGAAGCGCTGAGGAAGGTGCAGAACGTGGTGTGTGAAGTTAATGAGCGGAG  
TCTGGAAGTTAAGGAGATCGCTAGGGATCATTTTCGACATACAGGGTGTGTTGGTTAGCGA  
TCGGCGCGCTGACATGCCGGACAAGCCTCTGTTTATACAGGCTGCGCCTGTCGTCAAGAT  
CGTTGACATGAACCAGTTTGAGCTCGCACAATACACCCAGTGGCGCCAGGTGGCACGGCA  
ATTGAACACGCAACAGAAGGTTAGGGTAGCGCATCCGAGCAGGCCAACGAAGCTGTCCG  
CGTGGCGAACGAGTACAAAGGCATGGCCCTCGGTTTTGTCTTTTCAGTGCTCGATCGGAG  
CTGATTCTATGCCTCTGGCCAGGGGCTCTCCCCACAAGGGAACCATCTTTCAATAGCGCT  
AATCCATTTTGCAGTTCCTGCACCACTCAGAAGTCCCGCTGGCCTATTCTAGGTCCGGGT  
AGCCAGGGCTATCAAGTGGGCGGCTAACAATCTCGATATGCAGCCGGTTCGAAGACCGGGC  
GCAATGGGTGATTGGCAATGCTGATTTTATATGCCGCACCGCTGATCACACGATCAGCCA  
CTGAGAATGGACGGATGCAGATGTAAGTTCAGTTCCGTGCGTGGTGGCTTTGAGTACGT  
GGCTTGGTTACGGTATCCTGATTCGTTTCCCACTCGACCGCCACCGGGATAAGACGACTC  
GTGTAATGTTCTTCAACACTTCTCAGCTATGGTACGAGATAGGGTGGGTGGGCGAGCAAT  
GAACCTCATTCCCGACCGAGTGCAGCACGACAGTTATGTACTACTTGCACCACTACTGC  
TGGAATCGTGCTGTCAGATCTTGCCGAACGCGATATTGCCAGACGCGGGAAGTCACACGC  
ACTTTCACGGTCGCCGGTCAAATGTAGTGTGATGACCTGCCCTACGGCTCGAAACGGCC  
CTCCAGCCGGGACGTCCTCGTGAAGGAGTGCATGGACAAGGGCAGCAAGCCAGAGTTCGA  
CAAGCGCGAGAATGCGCCCCGCTGCGCGGTGGCTCTTGTACCAGGTGTAGGATGGCATCGG  
GAAGGTGGTTCGTAAAGGGACGGCAGGCGATGGACCAGTCGCGGGCAGCATCGGGCATCAC  
GTGCGCGGGGAACGCCCCACCCACCGAATGGAGGACCCCTGCTGGGTTCCGTGTACGTCA  
GCGCTAACACCATCGGTATATGCTCAGGGTGAAGCGGTCGACGCTCTCAGGCAAACGCAT  
CCGCATCAAGGTGCAGACCTTCAAGGACGAAGGCGATCCACGGCGATACAGGAACGGCTT

CGTGCCTAACTTCATGCAGAGCTGCGACGCGGCGCAGCTCACGTTCTTGACGAAGGAATG  
TGACCACGAGGATCGTGGCGATCGCGCATTAGTCCACGACGACTATTGCGCCTTGCCAGA  
TGAGGTGCCCCGAATTGCACAGAATCCTGCGTAGGTCGTTTGGGGACATCCACCTGTACCA  
TGACGCTCTCAAAGCGCTGGCGGCGCAGGTGGCAGGGTTGCCGGATCTTCCAGAGGCCGG  
TGAFTTGAFTTGGTTGACGTAACCCGATCGGTTTACTTGTCTGCTAATTGCGCCACTA  
TAGCGACAGGAACTTTTATGCAGCAGAAAGCAGTGCAATGATTCGCCCCGATTCATTATG  
GGCAGGGAFTTCGCGGTTCTCTAGAACACGATTCGCCAGCAGGAACAAGTGATAGAGTCC  
ACCACACAAGAACTGGCGGCCTCTCTATCTCGCCCATCGGATGTGCAATACCTGGGATCG  
AGACAGTTATTCATTGAGCTTATTTCAAACAAGATGGAACGACCAATTCTTGGTTAGTCCC  
AGCAGCTCCGAGGATTCGCTTTCTGTTTGGGTATTCAAACAGCATGCTCTGTTATGGAG  
AAGGAGTTGGTGAATGGTTAAGACCAAFTTTGGCTTAACGGGGAGCAGTACGGTTATGT  
CAGTGATGATCACCGTGATTACTACAGCATGTAAGACCCTGGTAACTTACGCCGAGT  
GAGCTATGTTGAAGCCGGGAAGAGCCAATCAGCACATCCGAAGCAGGTAGTAAATTGAT  
TGCCTTCGACATGAGCATGGTGCTGGGCGAGACGTTCTGTTGGCGTTCTTCGACGTTGCTGA  
GCCGTGGTTCTGTTGGCCGACAAGTACCTGAGCGAAAAAGTGTTTGACCCGACACCGGGCAG  
GACGATTGACCTCAAAAAGGTCATTTTCGGCTGGCGAAGCTGTTGGCGGCAAAGAGGAATG  
CCGATAGATCGAGTTCGGAACGCGATCCAATCCCCGGCAACAAGAACTGCCCCGCTGTG  
TCGTCATATCGATGTCCGGCTGTTGGCGATCACACTACAGAAGTTTAATTGGGATATGTT  
CTGGTAAAGCACTACGGAAGGTCGGCTAGATCATCAAGAAGGACGACCCGCTGCGCTGCG  
GTGACGCCATTCTGGAATCGGGGGGCTTGCCCACGATGACCCGCGAAGGCGACAAGAACA  
TTATGGACATGTGCCAGACTGCCGCCAATCACGCCGCGGATCGACGAGCCGAGCAGGCAT  
GGCAACAGGCCGACGCATAACGTCTCTCAGCCGAGCAACAAGCAGGAAGATGTTCCGCCAGT  
AAACCGCAGCTGCTAAACAGTTTGTCAATCAGCAGATGCAACTCCAGGTGCAGCAGCAGA  
ACGATACGGCCACCCAGTCCGCTCTTAACGCCGCGCCGCAAGCGACGCGCGATTACAGGCG  
AGCCAATCGGCAGCGGAGGGCGGAGCCTAGGAAAGTACGCCGAGGGTACCTACTGCCACG  
GGGACCGCCAGCGCATCGACCCGGCGTAAGTACAGCGCCAACGCCGCTGCCTCTTCCAAG  
ACCCCGAGCAACCGCCTGTCATTCTTGGTTTTCTGCTCAGCCGAATCCGTATCGCAGAACC  
TGTACACCAAGCGTAGAGGCCTACTGTACAGGGCTGAGCGCCTCGAAGAAAGTAGGAATC  
CGAGCGTGTGGCCGGATGAGCAGAACGACTTTGGGTGCGACGCGCTCACTACCCGTGTGA  
CGTCACTGGGCGCGCAATTTGTCACTGCGTAGCCCAACACACTTTTGATGGAGATCGTCC  
CGGCACCCACCCGTTCTTCCGGCTGGCGATGTTTTAAGTGGATGCGCAAACATTCGTAG  
CCGAGAACGACCTCCCGATGGACTTGATCACGGAAGTGCTCTCGGAAGTTGAGCGTTATG  
CTTTGCAGCAACTGCAAATGATCGGGGGCCGCGAAGATCTTTATGCGGGCCACTACGTACT  
TTGAGATTGTCAGTGACGTGGTGACGGACAGTTCGAGTAAGGACAAGCTGGAGTTCATCC  
AGCTCATGGGGCTCGCAGTACGCCGGGCGCGCAACCCTGACGTGTTGACCGTGATCATCA  
AGCAAGAGCTGGCGCCCTGCGAGGTGGGCGAAAACGTTCTCGATTACATCGACCCAGGGC  
GCGAAGGCGATATAGAGCACACTCGCCATCACTATACGCGGTGGCGACGCGTTAAGGGCA  
GGCACCACATCACAATGCACGTTGACCAGATCTAACTAACGTAGAGCAGGTTCCGGTTCGA  
CCTACGCTATGGATTGCTGCCCGGTGCACCCGGTGTCTTGGCGTCTCCCGCTGTGCCAGG  
ATTATGGTGGGGGACGAGACGCGGTCTACTTCTCGGACATCGGTACGCATAAAGTGCTCA  
GCGAGGCCCTGAGCGATGGCTCGACCATGGCTCCGCAATTACGGCGGCTCGAGAACCCAA  
CCGGGATCACCCGCCTCGAGGGCTTCCAGAACAGAAAGAAATGGCTAGGTTATGACCGGGC  
CAGCGACCGACCTTGAATAATTTTCGCCAACTAGGTACAGCAGGGGAACACCGTGGGGG  
CAATCAGCAACAAATTCCAGCAGCGTCCGGGGCCAGGGCTTCCAGCTCAACTCCGTCTGA  
CGCGGCAAGCTGAACGTGAGACCCCCCAAGAAATGCGGGTGAAAGCGATGTAAGTGGTAT  
CCACGTTGGCGGGGGGTTCTCCCGAGTTGCCCGCGAACTCCATATCCATCTAGCTAATC  
GGGTGATGAAGAATGCCAGCTGGAACATCAAGGTCACGAAACTGCGCCTGGTGGTGATCA  
CGGGCCTGGACGGACTTAGCCGCAACGCCGATCTGGAACGAGTGACGATCTTCTTGGCA  
ACGTGACTGAGTGGCAGCAAATCCAGCCGACAGCTCGCATGAAGCTGCACGAATCCAACA  
TCATAGCCGACGTCGCAGCAGGGCTTGACGTCACCAAAAAACAGTACGTTGCAGCGGACG  
ATGAAATCCAGCAACGCAAGCAACAACACTGCAAGCGCAACACCCACAAGGCGTGGATGGCC  
CCGCTGTCGATAACACTGCACAGGCATCCGCACAACACTATCTTCAAACACTGTTTGACCGTAC  
CTACATGGAAGAAGCGGGCGCAGAAGGCGCACCCGGCTGGTTGCGCATTAGCCGCCCCGGG  
GGCGGACCCGTCGACCACAAACACGCAAGATCCATAGCAGGCAGCTGCAGCCGCGACCGA  
ACCATCCGCCGACGAATCGCATAACGAGTCCACAGGACACAGCATCGCTCATAAGGCTTT  
GGGCCAGATCGCCGCTGCGGGTACGCGCCCGGATCACCTCCCGCGCTGGCCGCGCTGGA  
ACGAAACTTCACCCTGCTGAAACACGCCCTAGCGGCCAAGGGAGTGCCGGACAGCGATGA

TCTGGTGGATATCCTGACCGCAGGTGGAACCGAGGCCGCCGACGCCGAGGAAGCCTTCAA  
CCATCAAGTGACAGGGGAGGTTTCATGCGCTGGCGGGTTTCACCGGGCAGTGGACCGCCGG  
GATGGAGTGGGGCCGCGCCAACCTCTGACGAGGCCGGGAAGGAAGCACTGAACGATCTGTT  
CGGTAGTCGGAAGACACACCAGGTCGCGGGCAGCTATCAGGTGTCCATGCGCAACCGCGC  
AGGGGGTGTGCACGAACCCGCAGCTGGCGTCTGCAACCTGGATGACGGTTCGGCCCCGGG  
CGGTGGGCGTCTGTAGAAACCCGCTGATCCGCTTACAGTTCTCCGACGAGGCGAAAGC  
GCGGCGCGAGAAGCTGGGCAATGCCTACGTGACCTAGGGAGAGCGCCAATAACTGGGCCG  
TCGCCTCTTTCGTTAATGCTTAGCGGCCCGAGGCTTTGTGGGCCACTAAAGCAACAGGGA  
AACCAAGTATCGCTTTCAAAGGATGACTCTATGTTCGAGGATAACTTTTTCTGATGTTGG  
ACCCAACGCTAAAATGGGCGGGCAGACCCGCTTGAAGTGAAGAATTCGGTGA  
TAGGGCCGACAGGACACTGCAACGTCGTTCTGTACCGACGCCATAATCTCCGTCAAGCA  
GAGCAAGGGCAGTGCACCGTCCCCAACTACGGGATCGGTGCAACCCAGCTGCAAGCAAT  
TCAACCGGGCAAGACACCGAACGGTGCAGCCCCGCAGTTTTCTAAAAACAGCGGGACGGT  
TGGCCGCACACCTCTGGCCTGCGCCATCCTGCCTTTGCTGGATGTGTTCCAAACCCAGAA  
CGATGCCCGAGAGGAAATCACGCTGGACCACGACAAGCGAAATGTCATGTCCAAAGCCCA  
AGCGTACTGATCCAAGTTATCATGACCGCTCGCTTTACCGTGAACCCATACGCCAAGCT  
GCCGGGCAACGCCGCTGTCACCTGCGTACCTCTGGCCGCTGCCGGTTATGGTGCAGACAC  
ATCGAAGCTATCCCATGGCTTCGGACTGCTGTTCCGCGCAGATGATGGAGAATGACGTTCA  
CCCAACCGTCAACGACGTGTGGGTAATCTTTCGCCCAACCACTGTCTACGCATTGCGCGG  
AGTGGAACAGGTCATCAACGATGAGTACGTGACTACCGATGGAACCAACCTCAAGGCTCT  
CAACTGCACCGCGTGGGCCGTTTCGAGTCGTACCGACTCGGAACCTGCGTAATTGGGTTGA  
AGGGGCAACCGAGCTGCCCGACCGCGTTCGATGCACACATTGGCGATGACTACGCTCTCAT  
CTTACCTAATTCGATGCGGTATTGTTCTCGACCCTAGCCATCGTGGCCCGATCTACCAT  
CGAGCGTGAATAGAAGGTCTTCTTCGACGACGTGTACAGGCACTAGTACGTGGATAGATG  
GTTGGCATGCGCCTCGGCTCCAAACCTTGCCGAATACCCTCGTATCATCGTTTTCTCCGTA  
ACCCACGCTTGCCCGCTACGGGTTCCTCAACCGGGAGCCTGTTGTGGGCCATTTTCGT  
AGGTACGCGCGACTGAGTTTTATTAGTGAGCTTGAAGTGGTAAATCGTTGCATTGCCACG  
ATGGGTAAGCTGCCGCTCAACTCGCTTGAGAGCAGCTGGAACCCAATTGTGACTAACGCA  
CGGTCAGCGTCCAAAGTCGTTACGATTGAAGAACAGGCCGTAATTTGGTGGTTCATCATC  
GAAGTCGTCAAAATGCAACCACACGGAGCAATGCCCGGTGATGACGTCTGCTACCGACCA  
CCTACCAACTGGCTTTTCGCTCTCAACTGAGGCTGATTACAAACCGGCATGGCTTAGCATC  
CGTTACCGAAAACCTGTACGACAACGGGCGAGCCGAAGTACGCAACGCTCAGGATCCGATG  
GAAGTCAATATCGTCCGACCCGGTCCGTTTGTGACCTGCCGGACAACGCTAAACGGTTA  
ATCCGTGAGAGCCTATTGTTCAAGTTCTAGATGGACCACAAGGGCGACGACCTAGAGATA  
CAATAGGTTGACAATTGCTAAACGGAGGCCTATGCCATAGGGATGGCTGACCCCGGCCGG  
CCGGTCAAAGGCAAACCTGCTTTATAAAGGTTTCGGCTGGTTCCGCGTTTGTGCGCAATGAC  
ATCCCTATCTGAAGGACTGGCCGTTGGAGGTGATATGAGCAAAGGCACAGGCTCTTACGT  
GTAGTTGATCAAGGACGCATCCGAGCAGGTCGTCCACCAGCGAAATCCCGGACAGTACTG  
GGAGCAAGTCAACATGGTTTCTGACCAAGTAGGGGGCCTTCCCCGTGCGCGGGGTTCCCT  
GATGATGTGCGAACATCAGCGACCGGAAATCGCGTTCGACACTCCTTCCCGCGAAGACGT  
CAAGTCGTTCCGGCAGGAGTGCCTGTATCTCCGCTTAACGAATACAGCATCATAACCG  
CAAGTGTGAAGCAGCAGGCTCGACCATGCCGATTCTGGTAGTGCTGACTATGATATCCGG  
CGACTTACTGCCAGTTGCCGCCATGGCAATCTGTGCGGGTTACGCGCCAGACTCATTCAA  
CAGCATCATCCCAGTCGTCAATCTGGTACTTCGCGCGCCCAAGGACGTAGCATGACGGTA  
CTCCGCAGTCGATCAAGTACCAGGCCACAGCTGCTAACTCGGTGGCCGCTAGGGTGAA  
GGGCGGTTTCGTATGCCCGCACCTACAGTCTGTTCATTAAGCGAGCCAGGGCTCAGCACCT  
TATCACGGCGCAGTACACCACGGCGACACGTAATCCGGGCATGCTGGACACCTCGGA  
CATCCCCGAGTCATCGCAGACCCGGAGACGCCAGCCAGGCCAGCCGTCCCCGAACCC  
CCAGAAGCTGGTCAACGCCATTGTGTAGGCTTACCGGAAAGGCGTGAATTAGTAGATCGG  
TACCACGGTGGCGGTGGTTCAGCCAACGGCCATAGCTGCTAAGCGCCAAGCGTTGATCAA  
CCCGAGCTTCCCCGGTAGCTTTGGCCTACTCGGCTCCACCATCCTAATCGACGTTGGGCA  
GTGCGTTAGCTGCGTTGGCGGGCGGACCGGCGAGCAAATCATCTGCGTGGCCCGCACATT  
GGAAGTTTCGGCGGATTTGACCACGGTTCACCAGACGGGCAAGGTCGTTATGATCAAGCC  
AACGAACGCTACGTCGGACTACGTCAAGGCCATCGCCTACGACGGCACGAACGAGGCATG  
GACGCAGGTGATCTGGGAGGAATACCCCGGCGTTCAGATCACGCCAACAGCAGTCGCCCC  
AATCGGTGCGGTACACAAGGGAACGTTCTACGTTGCACTTTTGCCAGCGGGACTCGCTGC  
GCTTTCGGTATCAACGTTGCTCCATGGAAGCCATCGTCGCCGGCCGACCTGTACAGTCA

ATCGCTGCAACCGTTACTAGGCCGGGAAATCAACATCATCCGCTTGTTCOAAGGCCGGCT  
GATCATGGTCGCCGGGGCTATCGTGTTTCATGAGTAGCTCTGGTGAATATTTTCGAGTTCTT  
CAGCACGTCGGCCCTGGACATTGAGAAGAACCACCCAATTGAAGTTTATCCAATGGGCCC  
CGAAGACGCTGTTATCACGGCAGGCACTTTGCTTGACCGAATCCTGATCTTGTTCOAAGAA  
GCAGTGGCAATACGCAGTGCCGGGACGTGACGCGATTAGACCGCTGAACGCATTCGTTGC  
TGTACAGTCGGGCTACCGCGACCGCAACACCTGCCCGCCGGAGTCCAGCGGCAACCTGAT  
CTACTGCGTCCAGAAGCGCGAGGGCAAGCTGACGACACAACAAATGCAGGCCGGCGCTTA  
CGCTGAGAGTCTGGATACGTTCTAGATCGCACAGTCTTCAACAATAACCTGATTGACGA  
CCCGGTGCAGATTGAGGGCGTAACGTACCCACCCGCGGTGTTTGTTCGCACGACACCCGA  
CGCCAGCCGCGTTAGGGTGTACAGCTACCCAGACTCGCAGTACAACGCTGAGAGGTTGTT  
AAGTAGCTGAAGCAGGTGGACGTTAAGCAAGACGCTGGGCGTTGTTATGGGCATGAAGGC  
GACAGAAGGCGACCTGTACGTGACAACGCTTCGACATCACGTCAATGGGTCGTGGTACGT  
TACGGCTCGTTTCACGATGAACACGGATGTTCTGACTGTCAGCTCGACAGCCAGCGCCG  
TTACAGCGTTGCCGGTTCAGGACCATCGGCAACAACGACTATGCCGAGGGACTGAGCGG  
CGACTCCAACATAACCGCTTGGCGGTATTGGTTGCAGGGCGATACCTTCGGCGAGCGATT  
GGACGCGACGCGGGAACAGATCGGGCCAACCTACGATCCAAACCTGCTGATCGGTGCGGG  
GTTTCGAGATTTACGTTGTGCTGAACAACCCATACAGCTGGGAAATGAACGGCAAGGCGAT  
TCTTGACGCGCGACTGACACTGGGTAACATGAACATGACCGTGTTCGAATCGTCCGCGAT  
GGACGTGAGCAACTGCGACTTGGTTAACGCTGACACCAAAGCCTATGCGGAACCGCTGTG  
CCGGGTTGCGCGTACTGCTAACGATTGGGTAACGTAAGCAGGTGGCCGACACTGC  
GTCGTGCGTGGTAGGCGTGTACAAAGGAGTGCGGGACTGCAAGGTTTTGCTGGCTGGACG  
TCTTTAGTCTCCCCTGACACTCTCGGGGATCTAATTGCACGGGCAGCTCAATACATGCCG  
GAGACAGTAAATGTTCTGGATTCCCATCATGATGCCCACTCTGGCGGTCTTGCAGAAAGA  
TAAGCTGAACAGAGACATCAAGAACCAGAACCGCATCAACAAGGCGAACACCTTCGCAGC  
AAACCAGCAGCAACAAGTCAAGAGGACTCTGCCGTCTGAGGAGTGTCCGCTTAACCGCAT  
GAACCATCCGATCCAAACGCCAGACGCGCTGACCGCCTTCGGGCAGCTGCACAGCTCGGT  
CTGAGCATATCGCGCCCCACTTGGCAAGCTGATGACCACGGGCAGCTTTGCTAGCCGTGA  
GAGCCCTGCGGAGCTGCAGGGCATACTGGTGGCACCGTTCGAGTACGGCGGGCGTTAGCGA  
TTCTACGACTTGGGTGCATGAGGCAACAATGGGCCGGCGGACCGATATCCAGCATCAGGA  
GATGTACCAGATGTATTCCGTTAACCATTGGGCAATCGACGACGTAGAGCAGAAGAACCT  
GTACGACCACTATGGGTTTTTAAAACAACAGAAATTGTTACGTGACGACGTGAGACTGAG  
AGAAATTCAAGGCCCGCTGAAGATTCCAACGAACTCCGGTGGTACGTGGCGATTGCCAG  
TGCGATGGCTTTCATGCAGGCGGATAACAGCCTGCGCACGTTTCAGCAAGGGCGGCCCGAT  
GGATTCTACTTGGCTGGGCAGTTAGCTCAAATCGGGTTTAAATCCACAAGGTGGCGGCTG  
TTTGCCGGGCACCGACGCCATTTCTGTTCTTCCAACCTCGGAGGTGGGACGTAATGGCAACA  
CAATTGGGCCAAGTCATTAGCGGTGGACAACAACGGTATCAAGTCGCTTTGGCGCCCCCA  
CGGCAGAAGGATGCCACCAGCGAGCTTGTGTCTAAGATGGTCCAACGGATCTTGCAGAAA  
AAACTGGAAGAAGTGGAGCAGTCGAAGATCGTGGAGGGCATTCAACGTGTGCCACACGC  
GAGGCTTAGCAGGAGATCAAGGAGGAAGAATCGGTCCTGGCGAGCATGTTCCGGGCCATCC  
GCGTCCGTAGCTGGCGCAGGCGCAATGACTAAGGTCAAGGGTGTTCATGACCTCAACCCT  
CATATGTATGATGACAGGCAAGGTAGGGCGAGCATGTGCGCCGACGAGTACCGGAAGCAC  
GCTGTGCAGGGAAGGCACCAGGACTTTACGGGCAATCCCGATGTCGATAACGTGGTGCAG  
GCCAAGATCGTAGAAGGCCCCCGGCCGAGATGAAAATCCAAGCCGAGGCAAACCACTCT  
TCGAAGCAGCATTAAACCAAGAACAGCTGCAACGGTATGCTTGAAAGTGCCGGTGAGAAG  
CTCCACGGCATTGCGCTGCAGTTCGCATAGGGCACTGTGAGCAAGGACGACTTCTACTTG  
GCCTAGGCCAGTCTGCTGCTATCCAGCACGCCAACGCCGGGATGACTCCCAGCAAGTCC  
AAGAGAGCGATGGTGGACAGTGCCGCGCTGGCTATGAACAAGGACAACGCGTGCCTTGAC  
CGTGACTTCCAGCAGACCGTGATGTACAACGGGCTTGACGTTGATACCCAGATCATAATG  
ATAAAGGTGTGCGATTGAGCGGCCTCAAAGATCTATAACGACTACGGTTTCAATAAGTAC  
AGCGCGGCTATCGGCGTGCTGATGCGCGGTGCGGCTGGGCGTAGTCCGGCAAAGAACCAC  
GAAATGGCTAACAGATCATCCAGCACTACTTTGACGAGACAGGCAGTGAGACGGGCTGG  
CACAATATTAAGGACGTAATCAGCATGGCTCGCAGCACGTGCTCCCGCATGTTCAATATG  
CAGGACAAGGTGGAAGATCTGGCGAACAAAGCGTGCATGATCGCACGGTCCGAATGTAAA  
CTGGCACAGCAGGCGACAGAGTTGGTTCAGACCCGCAAGGTCAACTACGCTGAGGGCATG  
GGCATTACGCACAACAAGACGGTTCGTAGAGTACTACGAGGGCTTCACATCAAAGTTAGCA  
ACTTGTAACCTGGCAGACGAGCTGGATCTGGCAAGCCAGAACTACTCCACGTTAGGACA  
TACGTTAACCCGCTATTCCAAGGCATGCTTCTGGAGCCATTCAGCCAGATGAGTGGCGGG

AGCGTTCGGGGCCGGAGTTCTACCGCACCATGCAGTTGCTTGACGCATGGCTACGGCGC  
CAGGAATCCGGTGGTTTCGATTGATGAGTACCTCGGTAGCTAGAACGGCGTGTAGCCGCAA  
CTCTAGCGGGATTCGCTGGTCACGTTACTAAGCCACAAGCTACAGGGAGCCAAGGCAGCT  
TGGGTCACGCCGGTAGTGTGTTGGCCTAAGCTCAGGTCGGTGGACAACAAGCCCGTGATG  
CTGGAGGCCATCCGCAATCAGATCGAAGGCACGGGCGTAATGTATAAGCTGGATCCCTGC  
TGGATGAACGTGCCGGGCATGTCTGATGCTGCGAAAGTCGTTGTGTTTCAGCGTCATATCT  
GGCGATGCGCACGTCTATGTAGATAAACTCGGCATGTCACCGCAGGGAGCATTACCAGC  
GCACTGGAAGGCTCTGGCCGTGCAACCGTTGACACCGTTGGCGCATATGCGATCCCCGAA  
GAACCGAACCAGCAGCACCTGCCTGCACTCAATGGAGCCGACGCTCAGACGATAGAGCGA  
GTGTTTCAGAAGTAATTGCACTCCAGGGATCGTAAGTAGGGCGTGGCCGTCAACTTGGAT  
GCTGCGGACAGCAGCGTTACCAGCAAGAAGGGTGAAACAACACCATGGACTAAAGTGACC  
GACCCGACCAACTGGTACGGCGTTGCAGATGCTGACGTCTCCCTGATGCGAGTCAAGGAA  
GTAATCGACAAGGATGGCAAGGTTTGGCGGAGTCTATTCGGGCTTGCTGCTCCGGGACGAC  
AAGACAGCAACCGTGAATTCCACAACCAAATCGCTGACTGAGTTCAACGAGAAGATACCC  
AGGAACCGCAACGACATCACTGACAGCCTCCGCAAAGATGGGCTTTCATAGGAGCCAGCA  
TGGCTGACAGTCTCGATTCAATCGAAACCAGGAAAGTAACAGTTGGACCTGCGGCAACCT  
ATGGCTCAGGCTCGCTTGCCGACGCCGACCGCACACATGACTTGAGGCAGGCGAGTACAC  
GCTCGCCGTGACAGGCCACGGCATTCCGCAAGGGCCAGAAGCCCGCCAAACTCCATGCCT  
TTGAGATGATGTCTGCGTTCCAACAGGCAGAAGAAGGCGCCGACGCCGATTTGATGTGCG  
GTAATTCCCGGGAGCAAGGCGAGGCAGACGGCGCCGAGGCCAATCAAACGGGTCACAAAG  
ACCCTTTTAAGAATTCAAGCACCAAGATCGTCGGGCAAAGCACGGCGCTGAACGATGTAG  
CAGACCCAGCACCCGGACGCTTACGTAGCGACAATGCTGGACGCAAGCAGTTAGAAGCAAG  
CGTACAAGGAATGCGTAGGCCTGGTAGATCCGCTAGGCGGCGCAGTGCTGGCAACGACTG  
GCACCCGCGCGTTGGTACTGATGCTGAGCGACAACCTACCACGCGATGCGCTCCTTCAAGG  
ACGACCCGAAGTTCGACAGCCGTGAAGGCCGAGAGATTTAGAGCAAAGCCTAGGGCCAAAG  
AGGACCTCGATTGAGGGGCTAACGCCCGAAGCGCAGACGAGCGGCAGAAACAAGGAGGCTA  
GTTTGCAGGTTACACGGGACCACTCCAAGGGTATCGGGACGCAGGGCGATGACGTCTGCA  
CCGTGAGCAGGCTAACGGGTGGCGTGCTGATCCTTCGGGCTGTGCAGCAGGTAGGGGCG  
CGGGTAAGATAGCAAAGTTGACCAAGATAGGCATGCGATTGGGCGCCGTCCAACGCAGCC  
TGATCGGTGCTGCTGAGGGTGCTGCAGGTAACGGTCAGGTGGAAGCCAGTATGCAGGGCT  
CTGTGAGCATTGCGCGCCGGGTGACTACTCCTACTCCGCTGGTTTCGGTGCCTGTTCG  
GTGGCGACCTCAGCAGCATGACCCGGCGACTGTCAGCTGAGCCGTCTGTACCTGTGGCTG  
ATGCCGTCTATGGCTACACCAAGGACATCACAGAGTCCTTCATCGACGGTAGCCTCATAA  
TCCACGCAGGGCGTCTGGAGGAAGTTCAGTAGCGGCTTCCCGAGGCTAGAACGCCCGAGC  
AGACCGCCGGAGCTGCGCGTGACGTGTTCAACGAGCGGTCCAACGCCTACTGGCAGCAGG  
GCACACGGGCTATGCAAGACATCGAACGCCACCTGCCTGAGTTAGCCACCACCAAGCTGT  
AGGCAGACGGCCGAGACGAGTGGACAGGCACGCTGACGACGGATCTGGAAGGGCAGTTCA  
GCGACGTTGTGCGCCGGACGGCGCTGCGCGATCAGCGGGGAATCACCGCTGCGACCATCC  
CGGACAACGCCAAGCGCCTGATCTACACCGAGAAGATGCTCCGCAACCTCGAGTACCAGC  
CAAGCGTCGATCAAGCCAAGCTGGAACCTTGATTGGCAAGTGGGTTGCACCGATTGCGG  
ACAGCGCTATGGTCGAAATTTAGCATGCTGCAATTGATCCTTGCTCACAGTTAGCATC  
CGATCATGAAGTGGATTGTATCTAACTTGATGGAGTCGCCGTGCAAGCCGGTTACCCAC  
GCACTACCGCAGCAATAGAGCATGCGATCCGCCAACGTGAGTACAACAGCTTCAACGCC  
GGTACAACGCGGCGTATGGTGTTTGGCGCGATCGGAGCGGCGCCTCGTTGGTCAAAGACA  
TCCTTTTCAAGCGGAAGCACTTCGAGGATTTCAACAAACTGGTAAGCACTGCATGGCCAA  
TCAGCACAGCCGGTATCATAGGTGGCGCGCATCCGCACGTGCGCTGAGCCGCCGACGCAA  
TGAAGGAGGGTTTCGACCGTCTTGACGCCGACCAGCGCAGCGCCAAGTCACTCGGTTCCG  
AGTTGCTTCCAGATGCCAGCATCGGCTACACGCCGTGCATGCTGAAAACCCAGTTCATCG  
AAGAACACCGGAAGCACCGTGAGGCGATCCGTGAGGAAATCCGCAGCCAACGGCAGGACA  
CATGGACGCGCATAACCCAAAGGGGCCAAGTTCGCTCAAGTAGTCGCGGGGCACGTACATCA  
ACCGCACACGCGTTGAGGGCGCAGTCGGTGCAGCAACCACGGGGTATATGTCTGACCCGC  
ACGCATCAGGCCACCTCCGAGACGCTTTGCCGCAACACGACATGAGCGAAGCTGACATCG  
AACGGTCCATGGGCTGCGTTGACTGGGGTGGCGGCAAGCACACCAAACGTCGCCTTGCTC  
TCGAGTTGACCAAGGAAATCAAGCTGCCGGACGACACCGTGTTACCATCCGTGGCGCAA  
TCATAAACGCTACCTCCGTGCTGTTCTGCTGCCAATGCCGCTACGTAAACGGCGAGGTTA  
GGCTGAGCCGCCGTGGCAACATGCGCAAGGAAGGTTTCGACCAGCTCTGTGAAATGCTGG  
TGTTGTCCCCTAAGGGCGCATCGGACAAGCGCTGGGCCAACGAGCCGACCGCCTTGGAAC

GAACCATGTCGGAACCTTATGGGCAAGCCTTACGGGAACGCGCACCGACTGGCTGACAACT  
TCTGCATCCTGACCGGCCCCAGCCGCCCGGGCCAAGCTTTGACCCCTCAGGTCTCCGCGA  
CTGGGCGGATCGCCTCGCACTTGGGCATATAGATGGCAACGCACTATGTCAAAGAACTCG  
CACGCCGTGTGGAGGAGGTACGGAGGGGCAAGACAAGCCACCCCTTGTACTCGCTGGTGC  
AACCGGGCGGCGGATCGGCGACTAAGACTGCACTCTTATGCCTTGTGAGTGGTTCGATC  
ATATCCAGTTCGCAGACATGGACGTTGATGGTGGCGCTTGACCGCGCACTCCGTGGCGCTG  
CACAGGCACAGCACATACTGACCGCGCACCGGTTCTTTCATGCAGTACAGACCCGAGGCG  
TATTGGAGCACTTTCTGAACAAGGTCATGCGGTATGCGTACCACAGCACTTACCACTAGG  
CCCGCCATAGCCTGGGGATCAACGACATTTTGTATCTCCGCCATCAAAAAAGACCTTCGAA  
ACATCTCCGAGTTCGACGACACTGGCGCACTCAAGGCTTTCGACATCCGCCAGACTGACC  
ACCCTGCCACGATGCTGGAGGTTCCCAAGGGGAACCAGCGTGCTACGAGCCCGATCATCC  
AGAACGACTTGATCGGCGAGCTCCACGCGTTCGTGCATGACTCGTTCAAGCCAATTCTGA  
CTCAGTTCGCTCGGACTCCCTGATCGCGATGTCGAAACCGTGAATCTTACACGGTTTG  
ACCAACGCATCGCGAAGGCCCTCGGTATGAGGATGGGCCCGAAGTCGGTGCCACTGCCG  
TGCACCTTCCCCGCGTGATAGCTATATAGGCTCCTATGGCCGCTGACCGCGATGCCGAGT  
ACCGTGAGAACAACTACGCCCTTATCTGCTGTCCCGCGCCACGCTGAACTATGTCTCTG  
TGGCCGGTTCGCTGGGGGTTACGCTGTATGCTTGCATGGGTGCGTTGGGCACGCAGATGT  
CCGGCGTCCGCTCCGTCTGTGAGGATGTACTCGGCCACGTACCGGCACTGGGCTACATCT  
CCAACACCGCGGTAGCGATGAAGGATAAAGCCGTGTCCGCCATTATCCAGGCAATGCACG  
GTCGCAACATCGCGTTCCTGCTGCCCGCCGGACACATGTCGCACTGGATACAGAAGGAGT  
GATCTAACCGCTCAGTGGATCAATTTAATTGGGCCACTATAGCAACCCCAATACCATTT  
TCGGACGCATCATGACAGACTACGTGTCTATCAACGAGTTCACAGGCAATTGTCCCATCA  
TGCACATGGAAGTCAACTTCGCTGGCAACAACCCCGATGTAGACTCTGGTGGTGTACGT  
ATTCCAAACCCGCTGACCAGAAGGCTCAGTTCCTCACTCCCCCACTGACACCACACCAT  
AAATCGTGCAAGACGAGCCGCTTGGTTACGTCGGCTCAAGCAACTTCATCACCGTTGAGC  
CTGTGCCAACCAGGTTGAGATTGTTCCGGTGTACCGCGAGACGGAAGATCGTACTCGCTGC  
TCAACTTCGTAGCGTTCCAGAACGTGACGTAGCGTGATCTTGACGCACTCGCCCGGCAGA  
ACGTCTTCTCGTTTGAGAAGCGAAGGACGCCGCGCAGTTCGCAATCGACACCGACCAG  
ACGCAACGCGATATGCCACAGCTGCAACCGGCGCGGCGAGTGAAGCTCTCGCACTGGCAG  
CCACCACTTATCGCAACGCTTCGACGGCTGAGGTCACGGCAGACGCTGCTTCTAACGACC  
CCAAGCAGGCGTTGGTCAACCCCAATAAGGCAGCACAGGACGCGACATCGGCTGGACAGC  
GCGCCACCATCGTGGGGACGCTTGCAGCTGCTGCTCACAAGAAAGCTGACTAGGCTAACG  
TTGCGGCGAACCAGGCGAGCGCAAGGCCAACCAGGTTCCGAAGGCAGCGCAACGCAACTG  
ATGTCCAGGCAACCAGGCTGCTGTGGCAACCAGCAACGCGGGTAACGCCTCTACCAAACGGG  
CTGAGTCCACTGTCAACGCGATTGACGGCAAAGCTACACAGGCTATCTACACCGCGAACT  
CAGCAACCACTACCGCGAACCAGGCAAGGCAACCAGGACAGTGACGCGAAGGGGT  
CCCAAGCATGGGCTACGGCCAACGGAGCCGCTGCTGACATGGCAAGCGCTAATACTAAAG  
CTGATCAGAAAATCCAGACATCCAAGTAATCAAGCTCAAACGCCGCTGGCAAGGTAAACC  
GCTCCGGTGGTCAGATTACCGGGGTTCCGGTGGTTGAGCCGCGTGTGCAGGCTATTGCCA  
AGGCCGACAGCAAGGCGATGTTTGAATAGCACGTTGCTGGGCAGACTGTGCGTAGGGCAT  
GACTGGCCTCTGACGGCAAACCTCCAATTAGGTCAGATTTGTGGTAACGGGTCAGAAGTGA  
ATCACGCCATGAACAGCGCATTACAGTAGCGGGAGCGGTTCTGTGAGAGTCAATGGCGGG  
CAGTTTAGATGGTATCCGTCGATGGCGACCACAACAAGGTCTACGCGCAGCCCGGAGGTT  
ACATCAGTCTTCGGGATAACGTGTCCGTGTGCGGTAACATGACAGTCACCACTGCTGTCA  
ACGTCACCACCTACACTCGTACCCAAGGCTATCAGTACCTACGGCCCGGTGCGGAAGTTG  
CAAACACGCACATCTGCTTCCAGAACCAGCAAGGCGGCCAGCTTAGTCTGATCTAGACCG  
ACTCGGGGTGTACCATGCATTACCGCACATAACGGTGGCCGCGACGCCGTGGCGCCCTATG  
CAAACAAGACCGCAGGCTTCAACGCTAACATCCGTGCACCATCTGCCGCTATCTCCGGGC  
GAGTCTCTGCGGGGGAGTTGCTGTGCGAGCGGGACTGTGTGGTAAGGCAACGGCGCCTCGT  
GGCTTGTGAACGACGACCACGTTTACGGTGGGGTTTGGGGCGGGCAACTGTCCAACCGGG  
TGAACTCCGAACCTCGTCAGCCGTGCCGAGTTCGGCGGTGCTGTCTAGGCTAAAGTCGCAG  
CATTACCGCTGGCCGAGACGGCTCCTACGCCATGCTGCAAACCTCGCGGTATGGTCAAGG  
GCGGCCCGGATGAACTCGTCGACGGTGATCAACTCGGCTGGGCGCTCTGTGCAGGCGACT  
TCTCGGATATCGTTGGGTACGGCACTTGGCGTGTAAAGGGCCGTGTGTCTACCGGGATCA  
AGGTTGTTTCTAGCCCGATTAGGATGAGGGTTAGCTAATGTAATTTCCGAAGACCTATCG  
GGAAGGGTTCCTGTGTACGGCGTTCGTGTCGACGGTACGCCGCTGATTCCGGCAAGTT  
CATCCAGTCCCAAGTGAACCTGGTGCGAACATAACGTCCCTTAAGCTATCAGCGATCTCGA

CACTGAACCTTGGGGCAAAGCTTTTTTTGTCTATTGCTCGTCGCTTGGTGTGACCCCCTA  
CAAGCGTAAGTCCGACGACGAGCAAGCAGCAGAAGCCAAAGAAGTAGCCGAGCGACAATC  
TATGAAACGTGAGCTATCCGACCTGATGATTGAGGTACAACCTTAAACGTGCGTCGCCAGA  
AAAACCTGGCCCGCCCCAACGCGATCCAGCTCAAACCTCAAGCAGTAAGGGATCCTCAGCAC  
TGACGCCGCATACATGGCGATTTCGCAATACCCGGACTGCGGTCGTCGGCGGGGCCAGATT  
CTCCGACTATTTTGTGTGCTTCCGCAACACTCCTGTTGTGGAAGGGAAGGCGGGGCATCTG  
GTTTTTGTATTACACGAAGCTTCTACCTTTTTGACCCATATAAGATGAAACTATAATGGCA  
GCTTCTAGTGCTCGCCTTGGCAATATGCAAACCTTCGTTACCCTACTGGGTGCATCGG  
TTTGAAGCTGTCGAACTGCGCTTCGTAGATGAAGGCTGCGTCCCCTTACATCCAACGAC  
CTTGCTGTCGACCGGGCGTCTTTATAGACAACAACATCACCGCCGAACCCCGTGGCGAC  
GAAGACTTGCCCTGACTGGGCGCACAGCTTGTGCGCCGGCCTGAACGGTTCCGTGAACCAA  
GTAGGGCTTGACAGTATCATCAAAGACGTGGTAGGCTGAATGTGAGTTCCGAACTGAGGG  
AACACAAGACGCCGCGCCACGCACAGTTGGCGCGAGTTCAACTAACATTCCAAAGCTTCA  
AGCCGTTTTTCGATTATCTGCATGAAGTTTTTTTTGGATTAGAACAACAGCGATCCGGAAAG  
ACAGCGCCCTGTCCCTTGATCAAGGCCCAAAGACCGGATGTTTCAAGCACATCGCTCTC  
AAGCCAGCCCCACCATTACCGCATTGTTTCGAGGTGTAGACACTGCTTCAAGAGCAACGTT  
CTCGTGTACAGATTATCTCGGCATATGGTAAGCAGGCACACGAAATCTCGCCGCTAACCG  
TCCGACTCATTATGAGGATGGAAGTTCTGGCGTGCCTCCGAACTGACCCGCAACCTGGCG  
ACCGTATATCTAGGGAGAAGGTCGAGGTTTCAGACCAGGCTGAAAGGCTTGGATAAGTCGC  
CCTACGTAGCGTGCACCGTCATTGATGATTACACGCAGCGTAACAGAGATGACTTGCTGA  
TTGCGGACGGCGTGCAATCCCTCCAGAACTCCCCACCGCCACCAACCCCGAGCTTTTGC  
AGCAACAAAACCGTGCCTTCCCATCCATCGCAGTCGACCCTGTGGGCGCCAGCGTCGTTA  
TAGAAGGTCGGGGCCGAGTGACATTACCCGGTACTCCGCAGAGGGACGCTTCCCTGTATA  
ACACACTCCCGGCAGCACGCTTTGGCTTGCGCCACAGGCCCGGACGTTACACAACGGTGC  
AGAAAGAAGCGACGTATGCCGTGCATCTGGCGCAGTAGATCAAATAGCGCATGACCCGTG  
ACCCGTCTCTGCGGGCAGGCGTGGGGCCACCCGAACGTTCAAGCCAACCAGGCGATCATG  
AGCTGCTGGGCGACGACGCACTGCTCTCCAAGGAGAATAAGCAGGGGGCCAGCCAACCTTCC  
CTCTCCAGCACATGTTGTGTAAGCTCCTGAGCGACATCGAGCGCTACCAACGCAAGGCC  
CTCACGACGTCGTTATGAACCGCGGCACGCTACTTCCTATGCACTTTGTGCGTGGCATCA  
GCGCTGAGCATTGTGCGACAGTATCAGGTCGGCTCTCTCAAGTTCCTACTGCTCGACGCCTA  
TTTTCATCGGCAAGGGGTTGGCTGCTCCTGCATGCCGTGTGCGGGCAATCCACGCCGCTA  
GGGGCGGCAAGAACAGTGACGAAACCGGTGTGGCCGTAGTTGACCAGCGCGGTGGTAACA  
TCTCCGTCCGCTCGGTAGAGGGTATCCCCGGCGAGTACGTCGGGGACACGCTTAAAGAAGC  
TGGTGGCGTACTGCAAGCTCTGGGAGCCTACCAGACTCCGATCGAGATGAACATGGGCC  
ATGGTGCCTTTACACATGTTCTGCTGCCTCTGCTACGTGCTGAGGGCGTACCCTGCGCTG  
TGCAAGTGGTATAACAACACGGCCAGAAAGAAGAGCGAATCGCCGACACTCTGGAACATA  
TCGCAGCCAGTGGCGAACTCATCATTGACGAAAGCGTCGTCACTGACCACCGGGCTTCGA  
CCCCCGCCAGCCTGCTGACAAGCGCGAGTTGTTTCGCCCTGCTGCACCAGTTCATCAGAT  
TCACACGCCCCAACGGTGCCTGGTAATAGACGACCGGCTCGACGTAAGTACTGAGCATCGCCG  
TAGCGTACTTAATCAAACCTCTTGCCCGAGACTCCGCACTCGTTCAGCAATCCGTCCTTC  
CTCAGGAGCTGGTCAAGTTCATGGAAAACCCGCTCAGCCACAACCTGCTACATCAAGGCTG  
CTCAACTGGGGTACCGGCAATGCGTCCATCCTACAGCAATGAAGACAATACTAGGAGATT  
CTCGACTCTGCCATCCCGCGGTAACCTCTGCGCCGGCCAGAACTCTGCGACTTCAAGAT  
CACTGCAATCTCCGCAGCCGAAATACCCAAGGGCCTGTCCGGCCTGAACTGTGCCGTGCT  
GGTTGCGTTCGCCACCGCCGCTCTGAACGCCACTCCCGGGGGTCCCGGCCGGAACCCAGT  
CGTCGCATCCGTTTCCAACGGCCAGAAAGTTTACACTGGCGGGCGTGACCCACGAACTAAC  
CGTAGCTGCTGGCCAACCTGAACGCCTTACCCTAGTCGCTGATCCTGAAGAGGTGATTTA  
TGCCTACGTTCCCACTAGTAGGGCGCCTTGCCTCTCTGCTGTGGCTGTCCATAGTATCT  
TCGCAGCAGGCTTCGGCGTCTCCAGCTCGAAGAAGGAACTGTGAACCGGGCATACTTGG  
ATTCAAGCGGAAAGCTTACCATATACACCGGGCACACTGGCCCTGAGTTGCTCCTAGAGA  
CACTCGACAATGCCTCCCAAGGCGGGCAGCTGCCTCCACGGCCGCAAGTCGGCTGTCCG  
CCGCTGCTAAGCGCACGATCAAAGGCCAGCTGTACCAG

>NewGenomeName\_236

TTGATGTCTAACGATCTTTTCACTAAAAATGCCTCCAAATCATGGGAGGTTTTTCTACAT  
GCAACAACACTCAACCGCTTCGGACTTCTACCACAAACCAATCATCGGCGCTACCAAACC  
TCGCGTTGAAACTGCTGGTACGGCAGTACTTTACAAACTCGTAGCCTCCGAATCTGGCA  
ACGGTGCAACAATCGCGTAAGACTCCTGGAAGAAATTCTAAATCAATACAAAAACGGTAA

TCGCCGTGATGATAATGGTGAATTATTTCTGAACCCTGAATGCCAACTCGCCACTACCAT  
TGGTCATCGTGCTCACAAAAAGGGCCATAACCCTCGCTTTAAACAGTACCAAGAGTCATT  
CACTATGGACGATATTATTACAGGCAAACCGATTCCCCAGACTGTCCATTCTGAGCTTCA  
ACTTACTCGTGAAGTCAGTGAGGATTACCGCATTAAATGCATTCTCGATAAACGAAGAGTT  
CGTCGAATGCTAGAACGTCTTCGGACAACGTGATAGTAATAAACTATAACCTAAAGCC  
TATCGGTAACGCCAGACGAGACTTAATGTATGAAACATCTGTCTCTAAAGAATGGCCTGA  
ACTGGTAACAGAACGACCAGTTTAATCTAGCAGAAAGGACTACAACCTATGCTAAGGCTAA  
GGGTACCAAAAATGAGTGGTTGAAGGTCCTTGAGGCATACATAATGCAATCCCGTTCGTGG  
CTTTAACGTTAAGAGATTGATGAATTTTATGCGTACTGGCCCCACTGAGGGACGATATCT  
AGTATTTCGATACCCTCACCTTAGCTGCTGATCGTATTAAGGACTACTATGCTAACCCCAA  
TGCTCTTCGTGACTATCTCCGTGATATTGACCGAACGGATCTCACTCCCTAGGGTTCGCTC  
GGTCCATTATTCATCTACGGACTTGTATCAGTACATTTATGTACCTGAGTATGGCACCGA  
GCATGGCCCTTTACGCTTACACGCTGTGCATCTTATGCACGAATTTCCCTTGTGTTATAT  
CGACCATAATGTTAGTGAGCTGGAGCGTACTAATGGTCAAATAAATAACTTGAAAAACAC  
ATGGCCTTATCGTTAGTCTATCGCCATCGCACACCGGTATTCTTAGGATGCTTTCTCTCG  
CGCTTGACCGCTCTGGCCTGACGGTACTATGCGTGTAACCCTTAAATACAACTCGTACAT  
GGCTGTAGGCTTCTACGTTGCTAAGTACGTTAATGAAAAATTTATGGTTGGCATAGCCGC  
AAAAGGCTTGGGGAAGTGAAAATTTGAGGCTACATTA AAAACGCAGATAGCTCTTTTACC  
AAAGAAGCTAATTCGAATTCAGAGGAGACGCAACTTTGGGATGAACTACTCCGAATAAC  
GACGCGGACCGAGGAGTGTTAATCCAACCTTACGCAAGTGGGTTACTTCGTGACCCCGTT  
CACCAACATCTTTGAGCAGAACGCCAAATAAGAGCTACTATTGAGGCTGGCAAAGCAATC  
TATAGCCGACGTTTTGGAGGCGCAACCAGTGACGAGCAATCCGCTAAAATTCATGCGCAC  
TTTGTCTCGATCAATCTGAGCGTCCATCCTAGAGCGTGTTAACTCTTGAATGACGCAGAA  
ATTAGCAAATGCGGCCATTCCCTGATGAGATTATAAACTACGTTACTAATGCAGGGATTGC  
GGTTGCTCACTTGCGCCTTAAATCCCGGTGGACTGCTGGTGGAAAATGTAGAAATTCAAA  
CCCAACTTAAAGA ACTCGAGGGCGTCTTCCCGGGCAACCTTTCGCCCTAACCTCAACGTG  
GTAGCAAAGACTGACGCGCTTGATGATGAACTGTGGCTCCATATGATCGGCGCTATTCTT  
AAGGACTGATTCTCTATCAACAACATTACGTACATGGCAAAGAGGCGGTCATTGACATT  
CTAAGGGGACGTGGCCATTATCCACGTTGCCAAATGGCTTACCTTACAAGGGAATAAAA  
AATGACAGCAAAGAGAACCCAAGAACCTTTCAAACGGCTATTCTCTCCATCAAACCTTAT  
TCAGGCAACTTCTCTTCTTGACCTGACTGAGGACGATTTTCAGCTTCTCACTCCTGAACG  
TGGATGGATTGCAACTGACCGCTCCCTAGCTCGCCACACTATTGAGGCTTGCCTTACAG  
AACTCTGGACATTGTGGGATACCCTGGCTTTCTTGCTCCTATTAAGTTTATTACTGCTGT  
CATTTCTTATTATGTTTCGACCCATTAACATTCAAACGGCATGGCTTATTATGGAAGGCC  
TCAAATCACCGAAGACATGATTAATGGTGTGATGCCCGGTTGAAGCCAGTTAACTCTG  
CGCGTTTACCTCGCGTGTACTCGACGGAAATACTAAGCTTATTACTTAAGCAGAAAATA  
TCCACGTGAAAAACGGCGCGCTGAAGGAGTGACAGATATCAAAAAATTCTGTTTCGCTCT  
CTGGGGGCAAATCTAAAGGTGGTTCGCTCTGGTATGATGGCGCCACACTGGGCGGATCTT  
TAAGGGGCTACCTCCCCTCTATTGAAGGAAACAATACGTAGATCGTACAAACGTCCGCTG  
ATCGTATTACGAATGACCTCTCACATCTGGTATTCCAAGGTGCTAGAATCGGAGGGGTTA  
ATACGACCTCCTGGACTCCTGTTGTCGCTACTGGTTCTTTCCAAACTGAACTGGTAGGCT  
CTATTAGTCTTTCTCCTCTCATTTCGAGGTCTGGCTGTGACTCTCGCTTCGACGTCTCTA  
CTTTGGATATCCCTCAGCGTCCCCTCTATGGTCAACAATGGATTGACTTTATGAAGACTG  
GTGTTAACGCTACTCCTTAGCTCCGGTGACTTGTTTCATCTGGCTGTGAGTCTGCTGCCG  
GTCTTGGCACTATCCCGTAAACGGATTTGAACGTTCTAAATCCCTTCATAAATCTTATC  
TCAATAATTACAACATCTTATTTAAGCCGTCGTGGGCTACTGATCTCCCCTATCGTAAGT  
CATCTACAAAGCACGCTGATGATTATAAATGGGGCATTTCGTCTCGCTAACTTAAAGTCTA  
ACTGCACCGCGCCCATGCCTCCTTATTCATTTACGAAGCAGGATGTGACTACTGGCGCTA  
CCACTTTCGATATTATGGGCCTCCAAGCTGCCGATTTCCAAACTCCCACTGAACAGGAAC  
GCGACAATATCAAGTCTCGCTACCGCGATATTATGAATGACTTTGGCGGTCACACTTCCT  
ATTACGGTGATACCTGTCCTTTGCTCCAGATGCGCTCTGAACACTGGGCTTCTGGCTATG  
ACCTCGCCGGTTCTACCAACCTTCAATTGGGTCAGTTCTATGGTCGCGTCTAACAAACCT  
TTCTTCATAAAGTGCCTCGCTTCTTTGTTCTGGAGCATCGCGTACTTATGACACTATCTG  
TACTCACTTCCCTCGTACTCACGAAATGGGAATGCTCTATCTCGTCCGGTAAGGAATCTC  
TGACTTATACTGACATTGTCTGAGACCCTGCTCTTATGGCTATCCGGGAGATGCGTTGAA  
TTTAGGTAAAAGACCTCTTCACTCTGCTGAAACTGGGAAATTCAAAGTTGCCGGAGGTC  
AATGGTATCGTACTCGGCCTGACCGCGGCGCCTTACCTTAGAACTCTCTTTACGGCTTCC



CTTCCTATTCTAAACTGCCGTCAAAGGTTATACTCGAACGTGTTACGTTCCAACCGATA  
ACTATGGTTAAATCTTCCAGTCCCTGCAACTTCCACACTGGAACATGCAAATTAATTTA  
ACCCTACTGTATAACGTCCAATGCCTACCACTCGTGATGGCATCATGACGTGATAAACT  
AAACGTTGCACGGGTAATAAGTTAGTTTGCGCCTGTTCTGGGTTGAACAAGCTAATCGC  
GTTTGCTAACTTACGTAAGGAAATTCTCTGGATTACAATTGTCCCCTAACTTAATTA  
TCCGTTTACTTCTCAGTCTATTACTGCTACGAAAGCACCTGTGGTTGCTGCTCCGATTAT  
GTCTACACCGGAGATTAGCCGCTCTACTATTTCCGCTGACTTAATTCTGACTTCGGCCAA  
TACACGTTCTTGAGTCGCTGATGTGCTGCGTATTGACGAAACCACGCCTACCGACAATAA  
GGTATTATCGGTCCCCGCTTATTTATCTGGCGTACCGTCTGATGCCATTGGTATTGCAAT  
TCGCTTTGAGGTCCATGACGGCACCGTCCCTCCTGCACTCCCTGCTCTCTCCTCTGCATA  
TCCGGTGGCATTTCGTCATTTCTGGCGCTGATCTGTCATTGGAATATGCCGTCTCTATTCC  
CACGCATCATGTTACTGCTGGTAATGCTGTAGATGCTGGTATTATTATCAGGGCCAAATC  
TTGGTGTGGTGACGTGCTGTCGGCCTCTTATCCGATAAGAAGGTAACCCTGAAACAAC  
CGAATTACAACCTCTTAAAGAATGTCAAATATATGTTCCGGGGCAATCGCTGGCGGTATTG  
CCCCCTTCTTGCTGGTGGACTTCTGAACAAAGCATTAGGGGGCGGATCTTCCACTCCCC  
AAACCGGCGTTCATATTAATGTCCTCTCTACAGACAGTGATGTAATGGGTGCTAATGATG  
CTGGTATCAATTCCGATATTCAGCGTTCTGATCATTCCAATTGTTAACCAGCTGCTACCC  
AACCTATCTCGAGCGTTCTAGCCGATACTGGCAAAGACGCCATAATCTCATTCGCTGGCG  
CTGGAGTTAATTAACCTACGGATAAAAATCGGAATCTCTAAACCTGTTGCTGCTAAAGAGA  
AGCATACGAAAGATTATAGTGCTTCTGCGTTCCCGGAGCTTGACCGGTGGGAAAGTGCTG  
GCTCTCGAGCTTCTTCTGCTTGAATGGTCGATCCGGGATTCCATAACCAAAAAGGAATTA  
CTCGGATGGAGCATGACAATCAAAAAGAAGTCTCTAAGATGCAGAACTACACACAAAAGC  
ATATTACCGGTTTCCAGTATCTTACATCTCGGCAAATTTCTAACGCCTCTGTGTATGCTC  
AAAAAGAAATGCTCAGATACAACCACAAAGAATCTATATCACGCGGCGGCGCTATCCTCC  
ACAGCACAAGCCACACAAAACAACCACAACTTCAGACATTATGAGGCAAATGCTTACTC  
AGCTCATACCTCAGGTCAACACTGTACAAATGACCAACTCCAAGATCTTACTCGAAGAC  
TCGGCGCTGATATTGTTGGTGTCTTGATAACACGGATTGTACGCATGGAGAAACGGACG  
GCTCGAAACAGGAGGTCCTAACTCTCGTTACGGTTCCTCACAAGTCGGTTAAACCGCCA  
ATGACGGATCAAATGTCATTAGTGACGGATCTTCTGGTATTTTTGATTATTTTAGTGGGG  
TAGATAAAGGTGTGCGGGATACTAAGAACAATTAGTTCAAAGATGACACATCGCATGCCT  
TCAGCCAAAACCAACGTCCCAAATAA

>NewGenomeName\_237

TTGTTGACATTCCCTAAACCCTTATGAGACTCTTGCTTCAACGAATGAAATAGGAGTCTT  
TATTATGAAACCCGCTTACCGCATGACTCATCCGATTCTCGGCTCTTGGTTGTTTAAGTG  
CCCCGTTTATATCCGTGATGAGCACCTTCGTCACGGTCGCTTAAACAAGGTTTCGCGCTGT  
TCGTGATTTGTCCCCGCGTCAGCAGCTTATTGCTAACCTAAAACTGCTTTGACGTTGT  
TATTGCTGAGATTGACGTTACTTATTCTTCTGTCACTTATTTTGAATATGAGGCTGAGGA  
ATATACCGAGTGTGATTCAGAACTATGGATAATATCCTTGCTTATATTAACTCTCCTCA  
TTCCCTTCGCTCTGAGGAGGATTCATCCGTTGATGTTGACGATATGGCGTGGGTTTATGA  
AATTGCGGAGTAAGTTATGGAACTGTTGTCGGAAAGTTTATTACGTTGGCTGTTGTTGC  
TCTTATGCTGTATGGAATTGCCCGCTTAAATTCTGAGGCTCCCGTGAAGTATTTTAGTCTT  
GTGGATGAACATTATGCTTATTGCCCTGATACGAGGATTTTGCACATTACTCGTAGCCGT  
GCTTTTGACCCTCGTTAAGAGCGTCGCTTTCTAACTGATGAGGAACATTTTGCACCTTTG  
GATTGGTTGAAAAATCGCCCACTTATATTAAGTCTTGACAGGCCTTTAAAATAGCCTCT  
ATATTGCCCTCATAGGTTCACTCCGAGGGGTTTTTTGCATGGTTTCTGAAAGCTTCTCTG  
ATGTTGTTAAGTCTGTTTGGTTCGCCGCTACGGCTAAGCACGCTCATCTTCGTATGGCTG  
TTGAGGTTGATAATCGTAGTCGCCTTCTGTCTGCTTTGGTTTACCAGTGGGTAAAGCGCC  
TTTCCGAAGAGACTCATTGTTGATGATGAGACTTATGCCCTTTATGAAGCTCAGACTGGCC  
TTTTGGAAGATAATATGGCACTGCTTCGGACGTGTGCAGCCCACTTGATAATAGTCACA  
CTATAGAGCACCGTACCACTTTGGATGCCGAATGTGTTTTCTGTGTGAAATGATTTGCC  
CAGGCGTTCGCTACGGTACAACGTTGAATTCTCTTTTTGACTAAGTATGTTGCTCAATGGC  
CTGAGAAGTTAATTCGTCAAGAGTTAGACATGGTTAAGCCGTTATCCTTTAAGGATGAGG  
TTGCTAAGTAGGTGGAGAAGATGCAGGAAAAACACGCAAAAATCGCACGACTCAAAAAG  
TAATTAATTAGATGCGTAGTGCTCACAAAAGGGCTGGTTTTTCGTATTTGATACGTTGA  
CACTTGCTGATGATCGTTTGCAGGCTTTTAATGAAAACCCCAATGCTCTTCGTGATTATT  
TCAGGACTGTTGGTCGCGCTGTTCTGCGCGCTGAAGGTCGTTCCGGTGAAGGATGCCTACA  
ACGATTGCTATCGCTATCTTTGTGTGCCGGAGTTCGGAGGTCAGCACGGTCGTCTTCATT

GGCATGTTGTGCATATGGTGCGAACCTCTTCCTTTGGGAATTTACGACCCTAATTTTCGTTCC  
GCAAGGTACGTAATTATCGCCAGATTAACCTCGTTCCGTGGCATGTGGCCTTATGGCTTCA  
CGCAACCGATAGCTGTACGATATAAACGTTATTCTTATTCTCGCAAATGTTGGTTGTGAC  
CTGTTGACAAATCAGGTAAGCAATGCAGAGTAAGCCCTATCAGGCGGTTCGCATGGTATG  
TGACCAAACATGTAGCTAAGCAATCTGACCAGCGTCAGAAAGCTATTACTGAGAGACAAA  
AAAAATGTAAGAATCCACTTATGGCAATCTATCTGAAAAAGGAATTCAAAGTTCGCAGCC  
GCCGGAAACTCGGAATGGAGTTACCGTCGATGGCGCATCTCAGCAACAAAGTGCTTCTGG  
AGCTGAGCCGAATCAGCTTCGATTCCAGCCCTCTCTATCAGATACTGAAAGAGAACGCCA  
AAAAGCAATTGCCCTTGAACATCGGCGCGCTGCCTTTGCACGTCATTTTGGATGTGCGCT  
CGGAAGTGAGAAGTATGTTGAGAAATATCCGACGTTTTATGAAAAAGACACCCGAGTTCA  
ATTGGCAGAGTCCTATCGCTTCAATGACGGTCACCTTAAAAAATGGGGATATTTTTGATG  
TAGCACGTCAATACATTATTGATGCAGGAATTAGGCCTTTTGATTTGCGTGTCTAAAGCGA  
CTCAAACCTTCGGTGGTAAGTTACCCGGATTTTTCTCAGGAGAAGATTCATGCGGAGCTC  
GACTCGTTACTATGCAAGTTATCGCGCTACTTTGACTAAGCAGCTGATGTTTTGACTAA  
AGCTGACTCTACCAATGATGATGAAAAATGGCTTAATGCCTTTGGTAATTTGCTCCGTCA  
GTGGTTTCAGATTGAGGATTGGAAAGGCAAGCATAAAGAATTGCTTGACGATTTAAAAAA  
ACGTGATTACATTTGAGCTGTTTGAAGGTTTCTTACCCATTAATGTTAGGAGGATCTTA  
TGTCTACTCTTGTGCTACTGATGTTAACTTTGCTAATTCTGTTGCTGCTCTGAAGATGC  
TTCAGGCTTCCGCTGGTCGGGATATTACCGAGGAGGATTTTGATTTCTGACTGGTGATA  
AAATTTGGATTGCTACTACCGCAACCGTACGCGTCGCTGTGTTGAGGCTTGTTGTTATG  
GAACACTGGACTTTGTAGGATAACCTCGCTTTCCTGCTCCTGTTGAGTCTATTGCTGCCG  
TCATTGCTTATTATGTTTCATCCCGTCAACATTCAGACGGCCTGCCTCATCATGGAAGGCG  
CTGAGTTTACAGAAAACATTGTTAATGGCGTCGAGCGTCCGGTTAAAGCCGCTGAGCTCA  
TGCGGTACACCTTTCGTTTTACGGCGGGATTCAAAGAAACGGTTCTGAGCGCTGAAGAGA  
ATGCTCGTCAGAATCATCGTGCAAGTGGAGTAATGTAATATGAAGAAAGCTCGTCGTTCT  
CCTTCTCGTAAGAAAGGCGCTCCTCTCTGGTATGTAGGCGGTTCTCAATTTAATTAACG  
GGCTTTCGGCCCCCTATAAGGATTCTTAAATGTTAATCGTGCAAATTTCCGCTGAACGTAT  
TCCCCACGACCTTTCTCATCTGGTTTTTGATGCAGGCAACATTGGTCGTTTTAAAGGGTGT  
TTCTTGGACTCCTGTTGTTGCAGGTGATTTCTTTGACCTTGATATGATTGGCGCTATTCG  
CCTTTCCCGCTTCGTCGTGGCCTTGCTGTTGACTCTTGTGTTGACCTGTTACGTTTTA  
TGTCCCTCATCGTCATGTATATGGTGAGCAATGGATTGATTTTATGAAGCAAGGTGTTGA  
TGCGGCTCCTTTGGCCCCCTGTTCAAGTCTCTCGCGGTGGGGATAGTGCTCAGTATCTTGC  
TACTATTCCGCCTAGTAAATTAAGGTTGCTAATTTTCTTCATCAAGGTTACCTGAACAG  
TTACAATAATTACTTTAAAGCTCCGTGGATGGATTACCTGACTTATGGCAACCCGTCTAA  
CATGGAGGGTGAAGATGTTTCGTTTTGGTGTTCGGGCATGTAACCTTGAAAATAATTGGAC  
TGCTCCGCTTCTCCGGATACTGATACCTCTACTCTATGGAGACTGAAACCAGCTCCAT  
TGACATTATGGGTTTGCAGGCCGCTTATGCACAATTACATACTGAGCAGGAGCGTGATTA  
GTTTCATGACTCGTTATCGTGATATTGTTAACGAATTAAGAGGTAGTACTTCTTATGATGC  
GGATCATCGTTCTTTGCTTGTATGCATTCTGAGTTCTGGGCCTCAGGCTATGATGGTGA  
TGGCACCGACCAAAGCTCTCTCAGTCAGTTCTCCGGTTCGTGTCGAGCAGACGTTTAAGCA  
TTCAGTACCGCGATTCTTCTGCCCTGAGCATGGCTCTATGTTACACTCGCATTGGTCCG  
CTTCCCGCCGACTCATGCAATGGAGATGCATTACTTAGTTGGTAAAGAAGATTTGACTTT  
GACTGATTTGGCTTGTGAACCTGCTTTGATGGCTAACCTGCCTCCTCGTGAGGTTAATAT  
GTCTCCGTTCTTCCATTCTGGCAGTGCTAGTGCTAAGTTTAAGATCGCTGAAGGGCAGTT  
GTATCGCATGCCGCCTGATCGCGTGACATTGCCGTATAACTATCTTGATGGTTTTCCGTT  
CTATCGCACGATCCCGTCTGATGCTATTAAGCAGTGCCTTCTGGTTATTACTGATAACTA  
CGCGGAGGCTTTGCAGTCTATGCAGCTTGCAGCACTGGAATATGCAGACTAAGTTTAATTG  
CACCATTTATCGTAATATGCCGACCACTCGGGACTCTATTATGACCTCTTGATTATGTGG  
GGCTTCGGCCCCCTTTAAGGATTTTGATTATGTTTCAAGTTGATGTATCTAAACATGTTG  
CTCCGTTACCCCTGTGAATCGTGCCTTATCTATTGCCCTGCCGCCAATCCCGAAGTTG  
TTAATTTCTGGTGAGATTGTTGCAGGTCGTTCTACTTTTCGCATGGCTTCTTCTATTGCTT  
CTGCTTTCAATGGAAGTGGTTTTGCTTTTGTTCAGATGATGGATCCGAATTTCTCTGATT  
CTCAGCAGATTTTCTCTGTTGCTGCTTCGTTGTCCTTTAGTGTTGATTCGAATCATATTC  
CTTGTATTGTTTCGTTTTGAGAGCACTGTTGCTCAGCCTACCAGCTTTGATATCCAACCG  
CTGATTTTATTCCGGTTGAGGCTTCTGCCCTATCCCTCGTGCGCTCAGCCTTCGCGATT  
GTGTTACCGTTGATGTTAAGCCTCGTACTGAAGGCAATAAGGTTTTTGTGGTGTGGTTT  
TCTTCTCTGCTGCCGCTAATGCTGGTAATGTCACTGGTGTGTTTCGATGGCTCAGGTTG

ACCCCGAAGTTACAGCTTTGCAGCCGCTTAATTAATAGGCTGCCGCACTCCCGGTTAGAT  
GCCCCCTAGTGTAGGGCAGACCGAGCCGTACGGAGATACCCGATAAACTAGGAACGTGG  
AAGGCGCAAGCCGCGTTCCCTCCTGCTAAGCCCCAAAAGGAGTTACAGCGATGTTAGGTT  
CCGTTGTAGGTGGTATTGCTTCCGCCTTAGCTGGTGGAGCCGCTTCTAAGCTGTTTGGTG  
GTAAACCTGCCGCTCAAGCCGCTACCGATTCCACTGGCCTTTGTAAGGGTCAAGGCGTTA  
TTGGTATGGATCAAGATGCTGGTATTCAGTCAGCTGTTTCAGGGCTCTAATGTTGCCAATG  
GTCAGATTCCCTGCCCCACGCAGACTGGTGGCGTTATGTCTGATGCTAAAAATATGATTA  
AGAATGCTGGTAAAGATTTGCTTGATGGGGTTATGACCGCAGGAAGTGATCGCGTTAAGC  
AGGCATTGGTGGATAAGTTGAGTGGTAACGATGCAAGGAAACAAGGACAAGCAACCCGTG  
ATTACTTGGCTGCGGCCTTCTCTGAGCTCAATGCATGGGAACGTGCTGGAGCTGGTGCTT  
CCGGTGCCGGATTGGAGTCTTCCGGCCAGAATCAGCAAAAAGGAGTTAATGTGTATGCAGC  
TGGATACTCAGAAGGATATTGCTAAGATGCAAATGCATAATAATTTGCAGATTGCTGGTC  
TTCAGTCCGCTACTTCTCGCGAGAAAACGAAGGATTCAGTTTATGCTCAGAATGAGATGC  
TTGATTTTAATCAACAGGAGTCATAGGCACGCGCCGAGTCTATCCTCGCCAACCCTTACC  
TTACGGCTAAGCAGGCTGCCACGAAATTATGAGAATGGCCCTTACTCGTGCTCAGGAGA  
CTGGTCAGCATTAACTAATAGTCAGATTATGGCATGGGAGAAAAAAGTTTATGCAGAAC  
TCGGAAAAATTCATCAAGATACTCAAACGCTCGTTATGGTAGCTCTCAAGTTACTGCTG  
CGGCGAAAGATGTTACGAAGATGATTACCGATGCCACTTCTGGTGCTGCCGATTGGGTCT  
CTCAACAGTGGAATACTTTCTTTAAAGATGGCAAGTCTAATGGTATTCCCCGCATTACAA  
GAAAATAA

>NewGenomeName\_238

GAATTCGGAGTGGTTACTAATCCAGCACCTTTTTAGCCTGTCCACAGTATGAGAAGATGG  
ACGAATCGCTCGACTTCGCTCGCGATTCTCTACGCCGGGGGGCCAGACGCCCCCGGTA  
GCCCCCTACAACGAGTGGCGCACGTACTGGGGGGCACGTCATCCGTACAGGTGGGTACG  
TCTTCCGTACAGAGGGGTACATCTCAAACGGGAGTCCCCGTACAGGGAGGGACGTCACGC  
GTAGAGGGGGGCACGTCACAGCCAAACAAAAGCTGCAACGTTGCGAGAGTGGCATTGCGA  
AAATGGGCGACGCAAGCCTCTATATATATTGAGCGCACATACCGGCCGGCAGTAGCTACA  
CCCATGGCGGTCCGGATGGCTGCCCGGAAACGGCCGACCACCGGCCGGTGGGGTCAGTAA  
ATTGGCGCTTAGCGAAGATGGGCAATCTGGGCCAGCGGAGCCGTGCAGGGGCAAGTAAT  
TTCTAATGAACCTCTCCAAGAAGGTACTCCATCCGGACCATCAACGGTGTGCAGGGCAC  
CAACAAGGTCACGGCCGATGGAAACGCCTCAATGCTGCGAGATCCGGATTGGTATCGCCG  
GAATGACAATCACTATATCGCTGTGTGGCTAAGCGAGTGTTCGCTCCCACGCTAAGAT  
ATGCAACTGCGCACAATTCAGAAAGTACGGGTTTCAAGACTGTTCCGGACTTGAGGATCG  
CTAAACCCAAGCCTCCCTCGAAGAACCGATCCTGCGACCCCTCCGAGTACAGGGTCAGCG  
AGGTGAAAGACAGCTTGATTACCACTACTCCCAGCCGACCCCGAACCAGCAAAAAGGCGTA  
AAAGACTGTTAGATGGCAAGACGGGCTCTCAGGCCGAGAGGCCAAATTAACCTCCGTCAGA  
AGGGGACGGCGCCACCACCTCAGGCAACTTCGACAAAGATGTAAACTTCGACATGAGAGG  
AGTGAGCGGTAGCGTAGACGAGGTTTAAAGGAGGGGCTTTCACAACCCCCCCCCCGGTACG  
TATCGTGAGAGGCTGCCGAACCCCGATCTACTATGACTATCCGCTTCTAGGGCTCATC  
TTTCTCACGGAAGGACGCATTCTGCATGAAAACAGGACAGCTGGGGGGTATGCAGCCCAC  
AAGCACCGCACGAGTGTGCGCAAGATATTCGTGAACCTGAAATCGTTCCTGCTAGCCACA  
ATGAACCTGACATACGTTAGCCAACCCGGAGGCCCATCACCGGTGAGTTGATTGCGTAC  
GGGTCTAGATCTCAAGCTGCGGACAATTGGCCTAATTGCTGGCTGTCGCAAGATAATAAC  
GAGTCCTACGCAAGACCATCGGCATTGTGTAGATGGGCCTTAATGAGAATGCAGCCTATG  
GACTCTAGCCGTTATTGAGTGATCCAAAGCAGATGACCCTGCCAGGTATGGGTGCGCATG  
GTTGAGGGCTGGCGCCTGTTCCGACACATTGTAACCCGGTTTCAGCTCTTTGCCACTCAA  
AATGTGGGGTCTTCAGCCCCGTGGGGAGTCGTCCCTCCCAGGGGGAGTTCCTCACGCGT  
AGGGACAATGTTATGTACTGCAGCGATCACCAGAACCGGTGGCAAGAACGCGGACAAACG  
CTGACGGGCGCCATTGCTTATGCGACCGGGGAAAATGAGACCCGACGTGCAGCAGTACCCT  
GCTATGCCCCCAGACCCCTCGATCATCTCCGCTACTACAGCGCAAGGCACGCAAGTCCGC  
TGCAGGAATAGCACGCAAGCTTGGTGGTCATGGGACACATATATTCGCTTTGCAACACTG  
ACAGTACACGGTGCACAACCGTCTTTTCTCCAGTCCAACATTCAGTTTCTAGACGGTCC  
TTCAACCACCAAGGCGAGAGGAGGCGGTGACCCCATGGGCCAGTGATCGCACACACTG  
GGGCCGATCGGCACGGAGACCATCGCCGACAGCTACTTGTGACACCCGCATCCGACCCG  
GACCCTAATTTCTTTACGCTTTACGTAGCGCAAGGCACACATAAGTAGCAACAGTACAAG  
TTCGGGACAGCTACCTACGCGCTAAAGTAGGTGGTAATGACGAGCGATGCATGGGCGGTG  
GTACGCCTCCAGTCGTTCTAGCAGATGGCTAATATGAAGAGGCCCTACCCATGGGACCTC

AACTGGGCGATCAGCACCAGGTACTGGGGGACGCAGCCCTGAAAAGGGGGGGGGGGCTAAT  
GTCCCCCCCCCTTAACCCCCCCCCCTGGGAGGGAATCCCCCCCAGAACCCCCTTTTTTAGA  
GCACACAATAAACGCAGAAAATAGATTTATCGCACTCTG

>NewGenomeName\_239

ATGGCACTCCTAATTTCTAAAATGGCATGTGATACACCTTTTTATGTCTATAACCCACGC  
TACCCTATCTACAGCAACGACCGGCAAGTTCGGTTCCTTGTGGAAAGTGTCTAGCATGT  
TTGTCCAGACGCACTATCGTCTGGACCTTTCGTTTAAAACTCACGCAAACAATGCTATA  
TCTGCTTATTTTATTACTCTTACTTACGATACCAGATATGGACCTATATCAAGTAGGGGA  
TTCCTTACACTCGATAAACGAGACGTTCTACTCTATTTTAAAAGGCTTAGGAACTTCAT  
TCAAAGATCACGAACCTCTAAAATATTATTTAGCAGGAGACTATGGAAGCAAACATTT  
AGACCCCATTCATATCATACTATTGAATGCCAACATCGAACTAATTCATAAAGCATGG  
GACAAAGGAGAAGTACACATAGGGGAATTAACAGAGGCTTCGGCCGCATACACTGCAACA  
TATATAAACAAAGGAAAAGTTATCCCAGTGCACAAAAATGATGATAGACTGCCAGAATTT  
AGTTTAATGAGTAAGAAACCAGGACTTAACTATTTATCAGAAAAAATAAATTCGATATCAT  
AGAAGCGATATTGAAAGAAATTTTATAACATTGGAAGACGGAAAGAAAATAAGCTTACCT  
AGGTACTTTAGAGAAAAAATTTGGACAGAGCAAGAAAGACGAATACAAGCAGATAAACTA  
GCACAAAAATTCAAAGAGTTAGAGCAACAAAAAGAAACAGAGTACTACACAAAAAATCAA  
ACACTGGAAGGATATGAACAACCTTAAAGAAAGTGGAAAAGCCCATAGACTTATTATACAC  
GAAAAACGAGCCCTAGAAGGGCGCAATAAAAATTTAGATCAAGCTTCAGTTATCAAGAAAA  
AACAGAGGAGCAGGAGGAGAAATCATCAATGGAACCAAGCCAAACAGTTCCAGACATGAC  
CTTGTCATTATCCGAAGTAGTACAACGATACACCAGAGGACAATCAGAGGCAACCTTTAC  
ATCCGTTTATTACGGAGAAGAGGAAGAATTCGCAGACGTTAGCCGAATGGATCCTATTGA  
GCGCATAGAGTATGCTCGATTATTAGACAAAAAATCTCAGATACCAGACTCCCTAGC  
GGAGCATCAAGCTGGCGACGAAGTAGCAGCTGAGCCGCAAATGAGCGGTGGGCAAGAAAA  
AATAGTACAAACAACCCCCCAAATCTATAATAACAAAATGGTAAAAAAGGGAAGATTA  
GCGGTACTTCCGGTAACTTCCCGATACGTGGCGCTATGGCAAAAAACAAAAGCGCAAT  
GGCAAAAGGCCTTCGAAGAGGAGGCCAAACACTAATAATCCTTGATATATTAGTGCTAAT  
TGACACCAAGTAAAAACGAGAGCCTGCCAGAGTAAAAACGCAGGTGGAAAATTAACACA  
AAAAACAAAAAAGTTAATGGAACCAGTAACTACAGCCGCAGCAATCACAGCCGGCGTCAG  
TGCGCTATCGGGCGGAGCCCAAGCATAACGCCACAGGAAAACAAAACAAAAAATCTCGTGC  
ATTCTCCAGGGAGATGTACGAAAAAACA AAAAGCAGACAATTTGATGTTTTGGGATATGCA  
AAACCAGTATAATTCACCAAAGCAACAAATGGCAAGATTA AAAATCTGCAGGATTAACCC  
AAATATGGTATACGACAAAGGCGGGTCAATTC AATCTGCTGGAAATATACCAACACCATA  
TGGTCAAGGAGGACAATTTAGA ACTCCCGACTTTGGGCCAATATCAGGAGCTGTACAAGG  
ATATTTTGATACCAAATAAAAACAGGCTCAATACGATAACTTAATGGCTGCAAATACATG  
AATTCAGCAAGAACCTATTTTAAAAGCTTCACAAACATTGGCAGCAACAGAAAGTAAAAA  
AGGTCAAGCTATAGCCAATGCATTGGCACAAACAACTTTCAA AATTCAGTAGAAGGAGC  
GAAATTAGCAGACGAGCAAACCAGAGCAAACACACAATATACACTTTCTGTAAATGAAAG  
ACAGTCAGTCTTTCAGGCACCTACTTTAGCAGCAGCAGTAGAAGATGTATTAAGAATCAA  
AGCAGAAACTGCTAATACAAATGCTGCAAGATGCAAAATAAACCAAACAATTA AAAACCT  
CCAACAAGATTATAGATTA AAAAGAATTTGAAGAAGATTTAGCAAAAACAAGGGATATACAA  
AAATGACCCTTTATGGTCAAGGGCATTAGCTCAATTCATTGAAGGTCTCACTGGAGGTAT  
TTCTATGAAAGATTTAGGAAAAAAGACAGGAGGATGGTTCAAGCAATCAGGATTTAAAAA  
TGTA ACTAAATCAACAAAGTCATGGTGGATGCCCAAATAAAAATATTACATAAAAACGTCT  
GATGAAATAAAAAAAGAAGTAAAGGCTTTGATAGATCAAATAAATAAAAATAGTTATAGAA  
AATGAATCAAATGATGTGGTAGCATTAAAGCAGATTAGATTCTGTACGTTCTTTACTACAA  
TTTGCCCTTATTCATATTAATAACTTAAACAGCAAAAACCAATGCGCTACAGAAGAGACG  
GAAGATCCCGCAGAAAAGGCTACGGCCGCAGAAAAACATCACTTACTTAGTTAAAAGAG  
GAGGCATAAGACTATAATGGCGAATGCAA ACTTACTTACCTCGGTT CAGCTACCTAAAGT  
AGGTAGCAATGTATTCGACCTTTCACATGATGTGAAAAAGTCGTTTAAAATGGGTGGTCT  
TTATCCAACATGTGTAATGGAATGCGTACCAGGTGACAAAATAAAAATAGGCACTGAAAC  
GATGGTTAGATTTGCACCACTTATCGCACCAGTAATGCACAAAGTAAATGTTACTACTCA  
TTACTTCTTTGTGCCAAACAGAATATTATGGCCAACTGGGAACAATGGATTACAGGAAA  
CTTAGATGTACAAGGACCATGGTTTAGACTATTTCCCTTACCAGCTTCAGGAGGATTACA  
GGTTAAATCTTTAGCGGATTATTTAGGATATCCAACATTGTTAACGCCAAACGCTATACC  
ATATCCTGAGCCTGGAGCTCAAGTAGGAAGCCCTTTCCCTGTAGCAGCTTACAACAAAAT  
TTATAATGAATACTACAGAGACCAAAAATCTTCTATCTCCAGTTTTAGATTAATTAACAGA

TGGAGAAAATGATCCATTTAGGATCCTAGCAGCAGGACCTGTAAAAAAGAGCGTGGCA  
GCATGACTATTTTACATCATGTTTACCATGGGCACAAAAAGGTGACGCTGTAACCTATCC  
AATAGGAGATGTAACCTATCAACTATAATGCAGCTACTGGAGGAACTGTTATACGACAGGT  
AGATGGCACACCATAGATAAACCAAACAGATCTTAATTATTCAGATGCTGGAGGACAACC  
TAGAGCAGGAGGCGTAACAGGAACACGTTACAATATTGATAACTGCAGCCAACTATCAGG  
AACTGCACAAGCAGCAGATATTAACCTCACTTAGAATAGCATTAGACTTCAAGAATGGTT  
AGAAAGAAATGCTAGAGGACGAACAAGATATATTGAATGCATACTTGCTCACTTCGGTGT  
AAAGTCTTCAGATGCTAAACTTCAACGTCCAGAATACTTAGGTGGTTCAAAAAGGTAAAAT  
GGTTATTAGCGAGGTATTATCTACCGCAGAAACAACACTCCCAGTATGTAACATGGCAGG  
ACATGGTATATCCGTAGCAGGAGGTAATGAATTAAGTACAATGTTGAAGAACACGGGTG  
GATTATTGGAATAATTTCTGTAACACCAGAAACAGCATATCAGCAAGGAATTCATAGATC  
ACTCAGCAAATTAGATAGACTAGATTATTTCTGGTCAACCTCTGCAAATATTGGAGAACA  
AGAAGTGTTAGGGAAAGAAATTTATGCAAATGGTATTAACATTAGAGAAACATTCGGTTA  
TGTGCCCGGTATGCAGAATATAAATTTCTTAAATAGCAGAGTAGAAGGAGAAATGCGAAC  
TTCCTTGATTACTGGCACTTATGAAGGAAATTCAGTGCAGCACCAAACCTTAGATGGAGC  
ATTTATTGAATGCGACCCTAGTACGCCAATCTTCGCAGTTGAAGACGGAGCAGTTGACAA  
CATCTACGGACATATCTTTAACAACATTAAGGCGATTAGAAGAATGCCGAAAT

>NewGenomeName\_240

GTCTAAACATGTATTTGGACACACCCCACTCTTCGCCATATGAAGAGTGGGCTGCGGATA  
GAGTGCCGTGTGACTTAATAGATTGAATTGTTGAATCGTTTAAACCCAGGAGCTACAAATG  
CACAGGGTGTCTCATATGCTGAACCTCTTGTATAACGATGATTGGTTATCCCAACACGGT  
CACCGTTGTAAAGATGACCTACAACGGTTTTTCAACCGGTTGCCTTAGCCTGGTTTTAAA  
TGTCGTTATGTTGCCTCAGGTGTGAATCGTGACCTTTCGTGAAGGCCTGATTATCAGTTT  
GGGTTATTTGGTTTGGACTGGGCTCATGACCGTTGACTGTTTGGGACTTCCAATTGTGGT  
TATAGCTTGACTACTGCACCCAGCTCGAAGTTATGGCTCAGGTGTGATCATATTATTGGT  
TCCCTTAAATTTGAATCTGCTGCATAAACTGACCGATATATCTTGTAAAAGATTAAGAGC  
TTGCATAAGCCTGAACCGCTTAACGTTTCAGCATTCCACACCTGAAGCTGTTTTGTATCAG  
CCCGAATTTTTGGTTGTGATTAAGGCATTGGCCGTTTCATAGTCTAGGGATGGTTTTATG  
TCGGATGAATTTCCGCCTGCTTCTGTTATTACTGCCCAGGACTCTAAACCCCGGTTCCG  
CGTTTTTGCAAAACATTGTTTAAACGAGTTTTGACCCGATCTTGCTCTGTACATGCAGTAT  
AGGTCTTCATTTTCATGGAGAGTCAGATCTCGAGCGTAGAGCTTATCAGTACCTTCCGTTT  
TTAAGCGTTCGCGTTGTCTTGTGGCACTGCTAGAGCTTCACTTTCAAACGTTTAAAT  
AAATAGATGAGCCATGATTGTATTTGTTATTTGTGGTTACTCCCACGCAGCCGATGTTTT  
TAACCGCCCCATTTTCGTTCTTCATCGTGATGTTTCTTTGTTTGAATTCCTGATGGCGT  
GACCCGCGCATCTGGTGATAACTAATTGAATAAGCAGCCCCATGAGATTGAATTTTATTT  
CTTGTACGCATTTTAGAATGTTCGGCGGCGCAATTGTAAATGATGAGCCTCAGGTACGTGT  
TCGTGCCACAGACGTTTTGCAGCCGATTTGACTCCTGCGGGCCTTCAGGGCCATTTTATT  
GAATTGCATTTTGAAGATTGTATGTTTTATTTAAATCGGTTGAGCTTCAATATTTTGAA  
ATGGTCCCTTCAGCTGACACCCCGTTCTCGATATTCTATGCAGAAAAGTCTTAAGACT  
ACGTTTGTATGCTGGACTTCTAGTTCCTAGTATGAGCGAAGATGCTTTACCCGGAGCCACA  
ATTAATGTTGAAGACACTATGTTCCGGCATTGTTTACACCCATTTTTAGAGTTATGGAT  
ATTTGCGATTTGGGCTCGTTTTTTTTCTTTGTTCCCTAATCCTATTGTGAGGAGGAATTGG  
GTTAAGTTTGTGGGGGAGCAGGAAAAGTCTGCAGAATCGATTTCTTACTCTATCCCTCCC  
CAAGTCTCCTCAGCGGGTGGATACGCTATCGGATCCTTACAGGATTTCCGTGGCTTACTG  
AGTCTGCGTCAAGTTACGGCTGCTGCTAATGTGTGACAATCGGCGTTACCTACCCGCGCC  
TATAATTTGATTTCTGACCAAGGGTTCGAGGGGTGATAGTCAGCAGAACTCGCGTGTGTT  
AACTGAGGTGCCGGCCCTGAGTCTGCACATTCTACTGTTTATGCTATGCTAAGGCGCAGT  
AAGCGGCATGATTGCTTTACTTCTTAATTATCAGATTCAGGGCAAGAAGGTACTGCTGTT  
TCTCTTTCTTTACGCTCTAGTGACCCTGTTGTGGGTTACTGGCTAGACTATGGGGCTTGTC  
GCTGGTGTACTCATTTTAGCTTTCATGCTGAAAGTCCTTATACTATGCGTAATGCTTCT  
TCCTTTTACAATACCAATAGTGGTTCTAATCGTACTGGTTTAGGTTCGCGTTGTTAGTCAC  
AATTTTGTGTTGCTAATTCTGCTTTTTTTCAGGAATACATGCTGATTTGTTGGCTTGAACG  
TCTGTGACTATTAATCAGCTTCGTCATGTTATCATATTCCAGACTTGTGCCCGGTGAG  
GTGGGCGGTGGTATTCGTTACATTTAGATTTTCCGTTCTTACTTCGGCGTAACTTCGCAG  
GAAGTTCGCTTACGGCGACATGAGTGTTCCTATTGTGGCTCTACTCTTATTAGAATTTAT  
CCGATCTCCCAAACCACTGGTACTGGTATTTCTGTCCAGACTACCCCTTAGGAACATGTA  
GCTTCTAATGGTGTTCCTCAGGGAGACGACCATGGGTTAAGCCAGTCGGTTGTTGGTGTAT

TGTTGTTTTATTGGTGTTTTAGCTCGTCGTGTTGTTAGACTTATTCGCAAGATTAAGA  
CGTCATTGGAGCCGTTCCACTACTAATGAGTGGTACGTTTCGGCTCTTGCGATGCTTGT  
GAGCAATCTATTGTAGATAAGGAAATTGATGTTACTGGTAGTTCGTCTGATGCTAATGTT  
TTTGGTTATTGGGAGCGTTGCGCGCAATATCGCTAAAAGCCTTCTGAAAGTGCTGGTCTC  
TTTTGTTTCAGTTGCCGCATGTAAGTACTGACGAGCCGTGGGATTATGCGCAGGAATTTACTGGG  
GTGCCTACTGTGAATTCACCTTTTATTGAACATACACCGAGTCTCGTTCGCACCTTGAAA  
GTTGGCACAGCTGCGATTGGTATGCAGTTTTTGCTAGATGCGTTTTTTAGAGGTTACGCT  
GTTTCGTCCTTCCAATGTACTCTTTACCTTGGCTTATCGCTCATTTTTTATGCATCTAGG  
ATTCTTATCGGGGCATCATGGAGGGTAATGGTTTTCTGTGTATGTTTGGAAATTTTTAAAC  
GTGGTTTTTATTTCAGTTAGTTCAGAGGTTACTGCCATTCTTCTCATATTGTCTCGGCTG  
GCGCTTCTCCTCTTGGGTTACAGGGTTACACTGAGCCGAATGCTTCTAATGCTGCATTGG  
GTCATCACCATATGGATTTAATGAGTGTATGTCTCATAATGCTTACCAACGGAAAGGTA  
AGGAAACGAAGGCTGCTGGCCTTAATCGTCTGCTTGCTTATTTGCAAGGTGGTTCGTGCTA  
CGTCGCCCTCTGGTGCTACGCCGTAGGTTGTGAACCCTTAAGCTCCAGGTGCTGCAACCG  
GTTATCAGCCTGCACAAACCTCAGTTGCCAATCAGCACGTTGGTCAGGCGGTTTCTGAGA  
ATGAGAATGCGGAGGCTCATACTATTAAGAAGCGTGCTAAAGCTCCAATATATCTCGCTG  
ATAGTCAATCCTCTTTGGGTTCTGTGCTGACGAGCTTTCTTTTTTTAATCTACTGTCGT  
TCCAAAGTCAGAATATTGCTGCCGTGACTAAGAATATTCCTATTGAGGGGGATCGGTTAA  
CTGATGGTATTAACAGCATGAGTATTCTGGGAAGCTTATTGTAGCGCAGACGTAACCG  
ACGAGCAGCGTAGGCAGCAAATGTTTGCTATAGCATTGAACACTTTGAATTATTCGAAAT  
TGCTGGCTGCTGATTTAATAGCTATTCTGCAGGCTCAGAGTGTGGGTCACCATTTTAGCC  
AGCACAAACCTTTGGTTGGTGCTGTTACGAACATTTTACGTATGGGTCTACGTTAAGGTA  
TTTAGATGCTATTTGCTTCCGCTTATGCCAATTTTGATGGACGTTCTCACAATTTTGTTA  
GGTAGTGTCTAGAGGATTCTTTGACCCAGAAGCACTCACTCGAGGAGTCTGATATCAATC  
ATACTTTTGATCTTTTTACGAAGCCTGGTCTTTTACCTGAGCCATTCTGTATGCCTCAGT  
ATGGTCATTATGATGGCGTCTTTGCTTTTGAGTCCGCTATGCACGTAGTTCGTCACCAAG  
ATGAGACCTTACTCCGGATACTCGGAAGAGTGGGTCTTATATTCCTAATTCCCGTCAGG  
AATTTTGGGAGTGTATAGTAGATCCATCGAATTCAAAAAAGGTGGCGCGCATTGGTTTGG  
CTTTGCTAGTACCTAAGGCGACTCCTCCGGTCGACGCACCTCCCGTTGCTCAATCGTCTT  
TAGGCCCAGTTGGCGCCTTGATGTAACGGTACCTGTTGACAAATAGTTGTGTTTGCCTAC  
GGTTGGAGTAACTATGAAGTCGATGCAACGTCTCCATGCCAATGAACGCTCAAGCCCTC  
TTCTTTGAAACACAACCTTATCAACGACTAAGCTGATTAATCGCACTGCTGGCCCTCTGCG  
CGATGGTATACGCATCTAAGGTTAT

>NewGenomeName\_241

TACAACACGGCTTCCGATACGATGATATGAATACTTGACATGTAATTTTTCTCCTACCTT  
AATTAGTTATCCGTGAGAACACACGGGTAACCTATTTTTATGTATTGATGTGACATAGAG  
ATGTGACATGAGTACATAAACTCAAATAAATAACAAAACATAATCATTAGGCAGTGTTA  
CGCAGTGTCTTTTTTATACGTCAAACAAAGGTGTTAACCCTGAGAGTAGGTGGTAATA  
TACGATGACGAACTGAATCTTAAACAACAACATTTGTTGATGAGTACATTAAGACAGG  
CACTGCTTATCAATCGGCAATCAAGGCTGGTTATAGTGAGAAATACGAAAATCAAGTAG  
TCATAAATTGTTGGAAAATGTGGGAATAAAAGCAGAAATAGACAAACGAATGGAAAAACT  
TAAAAAAGACACAATCGCAGATCAAGACGAAATACTTCAATATCTTACTTCTGTATTACG  
TGGAGAGGTAACAGACCAAGAGTTGATACCTATTCAGGTTGGAAGAGGGCAAATGGAAGT  
AGAAGAAGTAAAGGTCAGATACAAACGCTAGAACTAAAGCAGCAGAGTTATTAGG  
TAAGCGATATATGATGTGGACAGACAAACAACAAATCGAAACAACCTGCGACGGTACAGTT  
CAATGACGATATCGATTAATCTATCCGAACCTGTTACCTAAACACTTTCATAGCTTGTGGA  
AAGCGACTAAAGATAGAGAGAAGCTTAAACATAGTAGCTAAAGGTGGACGTGGTAGTGGTA  
AGTCCTCTGATATATCTATTATCATTACACAGTTAATCATGCGTTATCCTATGAATGCAG  
TTGTAGTACGTAAGACAGACAATACATTAGCTACATCAGTATTTGAGCAAATTAAGTGGG  
CGATAGAAGAACAAGGTGTCGCACCTGTTCAAAGTTAAAGTGTGCGCAATGGAAATCA  
CGTATGTTTCTAGAGGGAATCGGATTATCTTTAGAGGGGCGCAGAACCCTGAGCGATTAA  
AGTCGTTAAAAGATAGTCGGTCCCTTTTTCTATCATGTGGATAGAGGAGTTGGCAGAAT  
TTAAGACAGAAGATGAAGTCACAACAATTAATACTCTATGTTACGTGGAGAACTAGACG  
ACGGGTTATTTACAAGTTTTCTTTAGTTACAACCCACCTAAGAGAAAACAATCGTGGG  
TTAACAACAAATACGAAACCTCATTCCAACCGGATAATACGTTTGTACATCATTCAACGT  
ACTTAGATAATCCTTTTATATCTAAACAATTCATACAAGAGGCAGAGAGTGCTAAAGAAC  
GTAACGAACAACGTTATCGTTGGGAATATATGGGTGAAGCTATCGGTAGTGGCGTTGTGC

CGTTTAAACAACCTTGCAAATAGAGAAGATACCTGATGACTTATACAAGACATTCGATAATA  
TACGTAATGCAGTTGACTTTGGTTATGCTACTGATCCACTAGCATTGTACGTTGGCACT  
ATGATAAGAAGAAACGTATTATCTACGCAGTTGATGAACACTATGGTGTACAAATAAGCA  
ATAGAGAGTTTGTAACTGGTTAAAACGTAGAGGTTATCAATCTGATGAGATATACGCAG  
ATAGCGCTGAACCGAAGTCTATTGCAGAGCTGAAACAAGAACACGGTATCAAGAGAATTA  
AAGGTGTGAAAAAAGGTCCTGACAGTGTAGAACACGGGGAACAATGGCTTGATGATTTAA  
CTGCTATTGTGATAGATCCTAACAGAACGCCTAATATAGCGAGAGAATTTGAGAATATCG  
ACTATGAAACTGACAAAGACGGCAACGTCAAACCGAGATTAGAAGATAAAGACAACCATA  
CGATAGACGCCACTAGATACGCCCTAGAGCGTGACATGAGGCAGAATAAACTTAGCATA  
TTACGTAAACGAGGTGATTAGCATTAACTGGCCATGGGATAAACCATATCACGAACAAGT  
GGTAGAACAAATCAAACCGAAGTATGAAACGCAAGAAGAAATGATATTGCGCTTAGTTAG  
AGAGCATAAAGAGAACATAGACAATATTACAATGGGTGAAAGATATTATAATCATCACCC  
AGATATATTAGACGCTCCTTTCAAAGAGATGTGAACGGCGACTACGACGAACTAAACC  
AGACTGGCGCATGTATACTAACTACCATCAAACCTTAGTAGACCAGAAAGTAGCATATGC  
AGTTGCTAATCCTGTGACATTTGGTGTAGATAATGACAAAGCATTAAAACAATAACA  
TACACTTAATCACAAGTGGGATGACAAATTAGTGGATATATTAAGTGTGCAAGTAATAA  
AGGTATCGAATGGGTTCAACCTTATGTAGATGAAGAGGGAGAGTTTAAAACGTTTCGTGT  
ACCTGCAGAACAAGCTGTACCTATTTGGACTAATAAAGAAAGAGATGAACTGCAAGCGTT  
TATCCGTGTATATGAATTAGACGGAGCAGAACGCGTTGAGTATTGGACTAAAGATGATGT  
GACATTCTATGAGTTGAAAGAAGGACAACCTTATCCCTGATTTCTACCGTAGTGAAGATCA  
TATAACAACCTCATTATTATCAAGGTAATAAATTGATGAGTTGGGGACGTGTTCCCTTTAT  
TCCGTTCAAGAACAACCCGCAAGAAGTATCTGACTTATTCATGTATAAGACAATCATAGA  
TGC GTTAGATAAGCGATTATCAGATACACAAAACACTTTTGACGAATCAGTAGAGTTAAT  
CTATATCTTAAAAGGTTATGAAGGCGAAGATATGAAAGATTTTCATGCATAACCTTAAATA  
CTATAAAGCGATTAGTGTTCAGGGGAAAGTGGCTCCGGTGTAGATACTATCAAAGTAGA  
AGTGCCTATTGACTCTGTTAAGGAATACACGAAGATGTTACGTGATTACATTATAGAGTT  
TGGACAAGGTGTAGACTTCCAACAAGATAAGTTTGGTAATAGCCCAAGTGGTATTGCACT  
TAAATTTATGTACAGTAACTTAGACTTAAAAGCTAATAAATTGAAGAACAACAACTTAC  
TGCATTACAAGAGCTATTGACAGTACATTATCGACTTCTACAGATTAGATGTGAGAGTGCA  
AGACATCGAGATTACATTCAACTTCAATGTAATGGTTAATGAGTTAGAAAACCTCTCAAT  
CGCTATGAATTCTACAGGGTTATTATCTAAAGAACTATTCTTGGTAATCATTTCGTGGGT  
ACAAGATCCTGTAGCTGAAATGGAAAGAATAGAGCAAGAAAACATAGAACTCAATCAACA  
ACTCCCTGACATTGAGGAGGGATTGAATGACGAACAACAAGACAATCCGAAGATAACCA  
ATCAGAATGACATAGATAACTACATCGACAACTGGTTAATCAAGCAGAGAAAGAAATCG  
AAATACTATTTGCTAAACGTTTGAAAGAAATCAAACAGATTATTGCGAATATGTACGAAA  
AGTACGATAGAGATGAACCGAAAGTCACATGGACTGAATTTAATAAATAACAACAGGCTCA  
ACAAAGA ACTTAAATCGTATAGGACAGATGTTATCTCAAGACTACAGAGAAGTCGCTAAGG  
CTATCAAACAATCACAACAGAACGTCTATATCGAAAAGTACATGATGAGCCTATTTTTGT  
ATGAAGTAGCAAGTCAAACGTCTATGAACTTTGATATACCTACTTCGCAGACAATACAGA  
CGGCAATTGAACAACCTATTGAGTTTATTAAGTTAGTACCTACACTGCAGAAACATCGTG  
ACGATACATTAACGTTATTCGTACACACATAACACAAGGCATTATGAGTGGTGAGGGAT  
ATTCTAAGATAGCTAAAGCATTAAAGAAATGATTTAGGTATGTCAAAGCTCAATCAGTGC  
GTGTAGCTAGAACAGAAACAGGGCGTGCATTGTCACAAGCTGGATTAGATAGCGCAATGG  
TAGCTAAAGATAATGGACTCGATATGAAGAAACGTTGGTATGCTACTAAAGACACACGCA  
CACGTGATACACATAGACACTTAGACGGCACTTCAGTCGATATTGAAGATAACTTTCATT  
CTAGTGGTTGTGTAGGTCTGCACCTAAGTTATTTGTAGGTGTAGCTAGTGCAAAGAGA  
ACATCAATTGTCGTTGTAAGCTTCTTTATTACATAGACGAAGATGAATTACCTACAACGA  
TGAGAACTAAAGAAGATGGCGTAATACCTTTCACTAACTATAGAGAGTGGGAGAAGAATA  
AACGGAAAGGTAGTGTCTGATTATGAGCGAAGATAATTTAATTAAGTTATATTTCTTAAA  
AGATTACATTCTTGTATTCACTCAGACGGTAGTGAAGAAAGAAGAAAGTATAAAGAAGG  
TGTTTAGATGGAGTTTAAACGTTAAAGGTTAATATTGACGCTGATGAAGCAATTGAGAAATT  
AGAGCGTATCAAACA ACTATATGAAGAAATTAACCGATTAAAGAACGATAGATCAGTTGT  
AAAGGTAGGAATAAGCAACGAAGCTAACACAGAACAAATTA AAAATCACATTAATAAAAAG  
TAATGCTGAAAATGCAAATTTTAACTTATTCTAGCTAACACTAAAATGTGTTGGCTATTT  
TTTATGCCCAAAAATGCTCAAGGCGTTAAAAGGTGCAAACCTCATGGTGGATAAGACCACC  
GTAATAAAAAAATGTGAGGAGTAGTAATAATGAAAAGAGAATTTTTACGTGGTTTAGGTGT  
CGAAGAAGATGCTATTCAAAGATTATCGACGAACATCATGAAGGTTTGCAATCATATAA

AGAGAAGGCAGAGAAAGTTGATTCACTAAAAGAACAATTAGACACTGCTAACGAAGAAAT  
TAAAAATCGTGATAATCAAATTGAAGAACTCAAAAATAATGTTGGTGATAACGATGAACT  
TAAACAAGAGTTAGAAAAATATAAAGAGCAAAACGCCAACTACGATCAAAAACCTCAAAGA  
CGTTCAGTTAAATAAAGCTATCGAAGTATCTTTAGCTAAAGAAAAAGCAATTAACCTGA  
ACAAGTAATCAAATAATCGATAAAGGTAATTTAGAAGTAGACGACAACGGAAATGTTAA  
AGGGTTAGATGATTACATGAGTGAGTTTAAAAAAGAGAATGAGCATTATTGTTGAACAATC  
TAAACCAAGTGGACGCACACCGGATGACGGTGGAAACGCCTCAAAAACAGAGGCATGGAC  
GGAATTTTTATAACAGGAGTGAAAACAATGAATAAAGAAATTA AAAATGCTACTGGCAAA  
TTGAAATTAATTTACAACACTTTGCTAATAAATCAGTAGAACAGGAGATACTTTATTA  
AAGAACAAGCATGTTGGCATATTAGAAAAAGTTACTGCTGCTAATTCTTATTCAGCACCG  
GCAGTTATTAGTAATGACGCTATTTTCATGCAAGGGCGATCTTTCACAGTAATTAAGGT  
GATGTAACAGAATTAAGGACTATAAACGTAATGCAACTAACGAATTTGACCACCCACAA  
ATTCAAGAAACAACATACTTCCTAGACCAAGAAAAATATTGGGGACGTTTCGTTGATGCA  
CTAGACAGAAGAGATACAGAAGGAAACATTGATATCAATTATGTCGTTGCTAAACAAGCT  
TCAGAAGTAGTTGCGCCTTATTTAGATAATTTGCGTTTCGCTACGTTAGCGCGTAATAAA  
GCTAAACACCTAACTGTTGGTAGTGGTGCAGATGCTCAATATGACGCAGTTTTAGACGTT  
TCTGTGGAATTAGATGAGATTGGTGCTGGAGCAAGCAGAATCCTTTTTGTACACCTAAA  
TTCTATAAAGGTATTA AAAAGTTTGTATCGAATTACCTCAAGGAGATAATAGACAACAA  
GTTTTAGGTAAGGGCGTGCAAGGCGAACTAGATGGATTTACCATCGTAAAGGTACCATCT  
AAAATGTTACAAGGTGTAGAAGCTATGGCAGTTATCGGGGAAGTTATGGCATCTCCTATT  
CAAGCTAACGAAGCCAAATTGAATTCATATGTGCCTGGAATGTTTGGTACTTTAGCAGAA  
CAAATGTTATATACTGGCGCTTTTGTTCCTGAACACCTACAAAATATATATTCACTATT  
GGTGGTAAAGAAGTTGAAACTAATCGTGATGGTGTAGACGCACATGCAGACGAAACAAAC  
GCATCAGCAGATACAGGTGCATAAAAGGAGGTAGTGACGTATGTATAAAGTAATCGAATA  
CTTCACAGACTTACAAGATAACAACACTACGAATATAACGTTGGAGATACGTTCCCTCGTAA  
AGGTTTAAATGTAAGTGATGAACGATTAGTCGAACTATCCACAAAAGAGAACCGTCAAAA  
CAAGCCCCTTATTGAGCGTGTAGAGAGTGATAAAGACTTAAAAGGTATGAAAGTATCAGA  
ATTAAGAGAACTCGCTAAAGAACGTGAAATAGAGGGCTTTTCTAGTATGAAAAAAGATGA  
ACTCATTGAAGCATTAGGAAGTGTTGAGTAATGAACGCACAAGACGTTAAATTATTAAC  
AATCTCTCACTCGATGATACTTCAAATGATGAAACAATCGAATTACTTATTGAAAAGTAT  
CTGAATGTAGCTGAAGAATATTGTAATCAAACATTCAATAGGAAGTCATTACCTAGTAAT  
GTAGAGAAATTCATCGCTAATTGTATTAACAAGGTACGACTAGTAATATTTCTTCACGT  
ACTATGGGGACTGTGAGCTACACATTCGTTACTGATCTACCTAAGGAAACATACGGGTAC  
CTTAAACCATTTAGACGCTTACGTTGGACTGGTTATCATGTTTAAATCCATTAATGAGTT  
TCCTCATAACAATCGAATTAGGCTCAAGAGAGGTTGTAGGAGAGTATCCACGTGAACGAGA  
GCGCTTTAAGAGCGAAAAACAATACAAGGATTTATGGATACTCCCACTTCATCTGAACA  
ACTCAAGTTTCATCAAATGAACCAATCATAACGACAGAAACCTATATACTCCGTACAGCCT  
GCCAATAACTAACAAAACCTTATTCAAATACAACGGTAAAACCTTACGAAGTAGTAGGAGA  
ACCTGTACGACCAAGGCGGACAACAAGAAATCAATCTTACTCGGTTGAAAGAGTGTCTAT  
TGGCTAAGGTTAAATATGGCAATTGGGAATTAGTTAAGGAACTTGAGGATTTGAAAAAG  
AAACGATTAGATGGGCTAAAAAAGGTATAGCCAAGACAACAACAATTATTCACAATTCAA  
TAGTTAGTAACATGCCTGTTGATACCGGTTATCTTAGAGAAAGTGTTTCTATGGACTTTA  
AGAAGGGCGGATTAACAGGCGTTATTAATATCGGCAGTGAGTACGCAGTTTACGTCAACT  
ACGGTACAGGGATATACGCAGTCGGTCCGGGTGGTAGTCGTGCAAAGAATATCCCGTGGT  
GTTACAAAGACGCAGACGGACATTGGCACACAACCTAAAGGGCAACATGCACAACCCTTT  
GGGAACCAGCAATTGATGAAGGTAGAGCGTTTTTCAACAAGTATTTTTCATAAGGTGGTT  
AAGATATGTGGGTATCAGTAGAACGGTATCTGTTTAAACAAGATATATAACAATTA AAAA  
GCAACCCTATCATCAAAAACAGCTTGGTGGTAGGGTTTTTGTATTGCGTTCAAAAAGACG  
CTGTTTACCATATATCGTTGTGGGTGAAACAAACGTCACTAACAAAGAGACAACGACAA  
GTATGTTTGAAGATGTAGGCGTTACATTGCATGTTTATAGCCAAGCTAGAAATAGAGATG  
AAGCCTCACAAATCATCCAATACTTAGGTTTTGTACTTAACTCTGAAATAGAAATAAATA  
ACTATTCATTTATAAAAAGTCGAATTGATACACAAGAAGTGATAACTGACATTGATCAGT  
ACACGAAGCACGGTATCATTCGGCTTATTTTTAAATACAGACACAATACTTTACAAAGGA  
GTGTAACGAATGGCGCAGAATAAATATATTGCAGCGTTACAAATCGCTGACAAAGATTTA  
GCGAGCAAGCTAAAAGAAGAAGATGCTATTCTGTTAGCTAGTTTAGCTGAAGGTGGACAC  
ACAATCAGTAATGATTTAGCTGAAATGATTACAGGTGGCAAAAAGACTATGGTCGTAAC  
TCTGTAGAAGAAGAAATCAAGTTAACTGTTGACCGTGTTCTGCGACAAAGGTCAAGAA



GCTTTAAAAGAGTCAGTTAAAAACTTCAAACAGTTACGTTTATGGATTTGGGAAGTTAAA  
AACGTGATGGTAAACATCACGGTACTTTCGCTTATGTAATTGTAGAAGAGCACGAATGG  
TCATTTGATGATGAGGATGACAAAATCGAAATCACTGCAAAAAGTTAAATTTAACAGTGCA  
GACGGTTCTGTTGATTCATTGCCACCAGAATGGCTCAATCCTAGTGCTGCCGCTCCTACA  
GTTGAATGGGAAGATATGGGAGCTTATACAGACTCATAACGAAAACCGTACACCTAGTGCT  
GGCGCATAAGTTTTACGAGGGCATTAAAGCCCTCTATTTTTTTGTACAAAATAACAGAAAG  
AGGTTAAAAAATGACTGAAAATACATTCAATCCTATTACTGAATTAGAAATCAACGGAG  
AAGAAGTCGAAGCTAAAGCGACTTTTTTATTTCGATAAAGCGGCTAAGAAATTTGCTAAAG  
ATGAGCAAGACGAAAATGGTAAAACAATAAAGTGTCTGGTTTTAATGCTATTTATAATG  
GCATTTTAGAACGTGATCCAATCGCAATTGCTGATTTTTGGGAATGTGCAACAGCTTATC  
TAGGTAAGAACGCACCTAAACGTGAAGATATCGAACAAACACTAATGGATATTATCGAAG  
AAAAACAAGACTCTATCGAATTATTACAAGGTGCATTGCAAGTATTAATCATAGTGGTT  
TTTTCAAGCAGAAATCACGTCTATTCTGGACACAAATGAATTCAGCACCATCTATGGTCA  
AAGAAGAAGAGAAAGAGTCTACGAAGAACGGTATCGAGTTCATGAAGAACAACACTACAAAG  
AAATCATGGGCGAGCTACCTTACTAGATTATTCAGAAATACGGCAGATAACCAGTCAATA  
CATAGGCTATCTTCCTTATGATGAATTAATGAGTTTGACGCCTAATGAATGGAAAGACTG  
GGTTGTAGGTCGCAGACTGGCGTTACTTGATGAACAAGAAAATTTATTGTTGGTGCTCA  
AGCTAACGGTCTTGTGCAAGCTGGTAAATCACTTAAACGATTACAGAAGCAGTTAGAGCG  
TGCAAGATACGAAGTACGTGGACAGTCAGAAGAATACGAACGTATGAAAGAACGTAAGTT  
AGCACATAACAAACGCATTAGAAATGTTTCAGAAACAAGGTACACGACGCTTTATGAATTC  
ATTACGCAATACTAGTCAAAAAGGAGGTTAGCCATGAATAAAAACCTTTATGGCTCGTATA  
TCGGCGATCATTACAGATTTCCAACGGAATATCAGAAAAGCTCAACGTATGGCTAAAAC  
GAAATACCTGACGAGATTGAAACACAAGTCGATGCGAATATCAGTAAGTTTAAACGAGCC  
TTAAACACTGCAAAAAGCAATGGCTCAACGTTGGCGAGAACATAACCGTTGATATAGACGGT  
AACAAACAACCCTATCAAACGAGCAATTGCAGTAGTTAAAGAGAAATTACAGCAATTAAGA  
GATAAAGAAGTAGACATAAAAGGTAACAACAACCCCTTAAACGTTTCAGTATTAGGTGCT  
AAGGCTATGTTGGCAACCTTACATGATAAAACGGTAAAAGTTAACTTTGATACAAGGGGA  
ATGACAAGAGCTCAAGTATTAAGTACTAGAGCTTTAAGTCAGTCTTTAGATGAATACGGCGAC  
AAAATGGATAGATTAGCTACTCGTATTCGTACATTTGGTACTGTGTTGGACAACAATC  
AAAGGTGTGCTAATCGCTAGTTTTCAAGGACTTATTCCTATCATAGCTGGATTAGTACCC  
GCCATCATGGCAGTAGCTAACGCATTAGGCGTAGTTGCTGGTGGTGCATTAGGTGTAGCT  
GGTGCATTTGGTATTGCTGCAAGTGGTGCCTTTGCATTTGGTGCTATGGCAGTAAGTGCA  
ATTAATAATGTTGAATGACGGAACATTACAAGCCACTGCACAAACAAGAAGATATCAAGCG  
TCTTTAGAACAAGTTAAGTCAACTTGGGAAGGCATTATCAAGCAAAATCAAGCACAGATT  
TTCAACACACTATCTAATGCTTTAGATACAGTTAACGTAGCTTTAGGGCGTATGAAACCA  
TTCTTAGCAGGTATCTCTAAAGGAATGGAACAAGCGTCACAGAGTGTCTTAAAATGGGCT  
CAAAACAGTCAAACCTGCTAGCAAATCTTTAACATGATGAATACAACAGGTGTTAAGACA  
TTCAACACATTATTAAGTGCTGCAGGACGCTTTGGTGACGGACTTATTAATGTATTCACT  
CAATTAGGTCCACTATTTTTATGGACTGCTAAAGGCTTAGATAATCTAGGTAAAAAGTTC  
CAAACCTGGGCTAACAGTGTAGCAGGTCAAATGCTATTAATCTTTTATTGAATACACT  
AAAATAATTTACCTAAAATAGGTCAAATATTTGGCAATGTATTCATGGGTATTGGTAAAC  
TTGATGAAAGCATTGCTCAAACAGCTCTAATATCTTTGATTGGCTAGTTAAAATGACT  
GCTAAGTTTAGAGAATGGTCTGAACAAGTCGGTAAATCTGAAGGGTTTAAAAGTTTGT  
CAGTATGTGCAAGAGAATGGTCCAGTCATTATGGATCTAATCGGTAATATCGTAAGAGTT  
TTGGTTGCATTCGGCACTGCAATGGCGCCAATAGCAAGTGTTATATTAAGTAGTAACG  
GCATTAGCTGGTTTCATAGCTAAGTTGTTTGAACACACCCTGCTATAGCTCGAATGGTT  
GGTATAGGTATGATACTCGGTGGTATGTTGTGGGCTTTACTAGCACCAATCATTGCAGTA  
AGTACATTGCTATCTAATGTGTTTCGGTGTAGGTTTAAATCCAAACTATCGGTAAAATGTTA  
GCTTTTGCTAGAAACACTCAAATACTTAGAAGTGCCTTAAACCTAGTGAAAATCGCATT  
AGACTTCTCATGAGCCCTATTAGTACAATTATGCGTATCTTACCTATGTTAAGTGGCGCT  
TTCCAAGCATTGGGTGTAGCTATAGGCGCGATTTTCATGGCCTGTATTGGCTATCATAGGC  
GTTATCGTTGCTTTAATAGGTATTATTGTTTGGTTATGGAAAACGAACGAGAATTCAGA  
AAAACCTTGTGTTGAAGCTTGGAACACAATTAAGATACGATAATGAACGCTGTAAAAACA  
GTGATTAACCTGGTTTAAATCAGTTCAGAGCGTCTATCGAACAAACGCTCCAACCAATTATG  
CCTATCTTACAAATGTTAGGACAAGTTGCAAACCAAGTTCTCGGCTTCTTATTCATCAGC  
CTCATCAATGGTTTAGTAACCTGCTTTCCAATCTCTTTGGACTGTGATTTTCAGTAGTATTC  
ACTGCGATAGGTGGAATACTACAAGCTGCTACGCAATTGATTTTTCGGTTTGTACTGCA

TTAATACAGCTCCTTACCGGAGATTTTTCTGGCGCTTGGCAAACCTTACAAACTACGATT  
TCTAATGTAATGACTACGATTTGGAATACCATATTGTCAATTTGGGGCCAAATTTCTAAC  
TTCATATTCAATGTTTTGAACAGAATACTTGGTACTAATATTACAAGTTGGAACCAAATT  
TGGTCTGCGATTTCAAGGTGCAGTTACTAGAATATGGAATACAGTATCAAGTTGGTTTTCA  
CGTGTAGTTTCAACTGTTGCTCAAAAAATGATGCAAGCATTAAAGTCGCATCATTTCTGGT  
GGTGTCTCGTTGGGTTTTCAAGTATCATTCTGCGATGAGTAGATTTGTTCAAGGCGTGGTT  
AGTGGTTTTGTTAGAGTTGTATCACAAGTGGCTTCTGGTATGGGTAGAGCTGTTTCCAAA  
GTCAGAAGTTTCTTCGGTTCGTTTTACAGAAGTAGGGAGATACTTAATGCAAGGACTAGCT  
AACGGAATCATGAAAGGTGTTAGTTGGGTAGTTAAAGCAGCTAAAGGTGTAGCAGAACGT  
GCAGTAAATGCAGCGAAAAGTGCGTTAGGCATTGCATCACCTTCTAAAGTGTTTAGAGGA  
ATTGGTGAATATGTATCTCAAGGTTTAGGTATTGGTATTATGGAACAAAGCAATAGTGCT  
ATTAATGCCAGTCGTCGTTTAGCGAAAAGATGTAACCTAACGCATTTAGCCCTGATTTAAAC  
ACTGATTTAACATCAGACTTAACAGGTGGATTAAATAGCGATGTGAACGCACATATGAGT  
AAAGACGTACGTCATAGCATGCAAGAGAACAATAAACCTATCGTTAATGTGACTGTTTCGT  
AATGAGTCAGATATACCGGCCATTAATCTTACATTGAAGATTCCTCAACTCAAAGACGCA  
AGTTTCGGATTATTTAAAGGAGTGATTGTTAATTGATATTACATGATGTTGAAGTTTAC  
AAAAATAAAGAACGTTTACGTATTAGTAACAATCGCTTTACTGGTACTGCGTTGAGAGTT  
GTTTCTTATGATGTAAAAGGAGCAGGGTATGAACGTAAGTTTGACGAAATTGATCGTGTT  
AACGGTAGATTTACAACGCTACTAAAGAAGAAAAGAAAAGTATATCTATGACTGTTAGG  
TACGATGTAGAAAAGATAGCTTATGCTTCTCATTTAAAAGCGAACATACAAGCTATGCTA  
AGAGGTCATTTTTATCTTAGAGAATTAGCAGCATCCGAAAGTGAAATTAATTTGAGAAT  
ATATTCGAACCTAAGGAACAATCTTTTGAACCTAGAATATGTTGACGGTAGGCAGATACTT  
GTTGGCTTAGTTAATGAAGTGTCTTCGATACTACTAAAACGTCAGGTGAATTCACACTA  
GATTTTCGAAACGATTGAATTACCATACTTTGAGAGTATTGGGTATAGTACAGATTTAGAA  
AAAGAGAGTGGTAATTTGAATAAATGGGGTATTCCAGACAAAACCCGTTCAACACATCT  
CATAAAGAACGTAGATACACATTCTATGACACTAAAGTTGGCGATGTATATTACGGTGGT  
ACAGCTGAAATTAACCAATTTAACCAAGATAGTGTTGTAGAAATGACACTTGGAGAAAAT  
GTCAGTAAAAATGATAGCGATGGTTTTAACTTCTATATGACACATAGTGACATTATGAAA  
ATAAGTGGATTAGAATTGAGAGCCGGTGTATGTTATCAAATTTGACGGCATTATGTATAT  
CGTAATAACTTACGCATTGATGATTACAACAAGACAAAACAACAACCTGTATTAATGCCT  
GGTTGGAATACCTTCCATACTACTAAGAACTTCAAAAAATTACGTTTAAACATAAAAAGA  
TATTACTTGTAAGGAGGTTGCTTAATTGCCAATATTATTAAAAACGTTACAGGGCATTGG  
GCAATCCCTACCTGTAGAAAACAAAATTAACGAGAAATTAATGAAGATGGCTCCTTAGA  
AATAGAAATGGTAGAAAACAAAGCTACATTTGACGCTATAGGGGCTATTACTAAAATGTG  
GACGATTACAGGTGTTGGTGGTGTGCTGATGACCTAAACGAATACCGTATCGTTATGTTAGA  
CAAACAACCTGTAGGTCAAAGGAAAAGTTAACAATCAAAGCGCGTCCTGTTGAATTAGA  
CGACCTAAACAATTTAAGGGTGTACGAAGTATATAATGGGAGTTTTACAGGAAAAGCTA  
CTTTGATTTAGTTTTTAAAGATACTGGATATAAGTACGAATTACACGCTAAGGTTTCATC  
TTCTAGGTTTGAATCTAGGTAACCACGACACTAATTTAGAATTATTCAAAAAGGTTT  
GGAAAGATATAACTTAGAATATGAATATAACGCCAAAACAAGACGTTTCATTTATATGA  
TATTGTTCAAAGAAAAGCTAACTATTACATTAAGCAGGTGTCAATGCTAATAATGTAAA  
AGTTCAAGAAGATGCTTCTAAATGTTACACATACATTAGAGGGTATGGTGGTTTTGATGA  
GCAACAACCTTTCAACGAAGCTAGCTTGAATATGAGTATACACACCCCTTAGCTGACTT  
AATAGGCAAACGCCATGCACCACCTGTTATAGATGGACGCATAACTAAAGGGGATACACT  
GAAAAAGCTATGGAGTTAGTTATACAAGAAAGTTTAAAACGTCGTGTAACACTAGATTT  
CATTTCTTTGCAAAAACATTTTAAAGAAGCAGTGCCTAGAGTTGGGGATATTGTGAATGT  
AATTGATGATTTAATAGGTTTAAATGAGTTTGTGTTAGAATTATCGAAATCACTACACAACG  
AGATATTAACAACAAGATTATAAAAACAAGACGTAGTACTTGGGGAATTCAGATTACAAGA  
TAGATATATGAAAGCAGTAAATACTGCTGCAAATTATGTTAAAGCTATTAAGTCTAACAA  
ATCTGATCCAGCTAAAGACTTAAGGATGATTCAGCTCAAACAACGCAAATACTAAGAC  
TGCACAAGATTTACAGAAGAAAACCGATGAAATAAAAAGAAGATTAGAAAGCGCGCATGC  
TAAGAGTGTTACAACCTGCAAACGGTACTATTGTTACGACTTTACACCTAAATCTAAGAT  
TAGGAAAGTTAAAACAATAGGTAATTTGGAGATTCTGTAGCTAAAGGTTTCAGGTGCTAA  
AACCAACTTTACGCAAATGTTAGCTAAGAAGATTAAGGCTAAGTCAACTAACTTAGCTGT  
TAGTGGTGCAGACAATGAGCACAAACAAGAGAATAGCATATATGAACAAGCGACTAAAAT  
TAAAGGTGATTTAATCATTGTTCAAGGTACAGATGACGACTGGACAAACGATATTCAAGA  
TAGGCACTATAAAAACGGATACTAAAACGTTTTACGGTGCCTTTTATAGTGCTATCACTAA

AATCAAGAGTAATAACCCTAACTCTAAAATAATTGTTATGACACCTACTAAACAATGTTA  
TATAAAAGACGGCAAACCGTAAGAAAAGACACTACTAAGAACGATTTAGGGTCATACTTT  
AGCTGATTATGTAGATGTTCAAATAGACGCTTGTAACGAACTGGATATACCTGTGTATGA  
CGCTTATCATTCAACACAATTCAAACCAATATACCTTCGTACAGAAAATCGAGTATGCC  
TGACGGGGTACACCCTAATGAAAAAGGGCAGGAGGTCATTATGTATGAATTGATTA AAAA  
CTTTTATGGTTTTTATGGCTAAGGAGGTCAAAAAATTTGAAATTAGATAACTTAATTACG  
AACTTCACTCGTACTTTAGTCAAAAAGTTTGTAAGTCAACTTGAGAATAACTTCGAACAA  
ATAAAATACTGGACTAATAAAAAGTGATGATAGCTTTAACGAGCATTTAACCACTCAAAAA  
AATGCGCATACAACTGATCAAATCAAACACAAAACACTACAAAAGGTAAAGATGTTGTATTA  
TCTAATCATGAAAATTATCAAGATGAACTTATTGAACATCTTGTGTTAGGACATAATGGA  
GATGGAATACAAGAATTAAGAGCAAGTCACACATCAATGGACGCTCAAAGTTTCGATTCT  
TTACACCAACGTCTATATCACGACTTTTTAAGAGAAAAGTAAACGCTAGAGAAGA ACTAAGA  
GCCGACTTAACCAAGAAAATACAACGTATTGTTAATGTTGATGATTTCCGGAGGAGATCCA  
ACAGGACAAAAAGACAGTACAAAGGCATTTCAAGACGCATTAGGTAACGGCAATGTACAG  
GTA ACTATGAGTGGCGGTACTTACCTTACAACAGGTATTA AAAATGCCTAACAACTCTCGT  
TTGGTAGGACAAGGTAAAGACATTACTACTATTAAGCTAATGGATAAAAACACCAGCAGAG  
AACATAGGTATCACTAACTTAAAAATGAGTGGCGGAGCTGAAAACATTTCTTTAGAAAGT  
TTTTCGTTCAACGGGAATAAGTTTAGACAAAATAAAAACACTTAAAGCTACCGGTGGTTCT  
CGTTCATCTAACATTAGATTTGCGGGTGTA ACTAATGGATATATCTATAACGTTAAATCA  
TATGACGCTTTACTACACTGTATCGATGTAACATATGCAAATGACAATTACTACTCGAA  
GGCGATGGAAACAGAGTGCCTTACGCATTAGAAAAGTAAGCATATTCATATTGATAATTGT  
GAGGTATATGGTTGCGGAGATGATGGTATCACTACCCATCACTCTCGTTACATTACAATT  
TCTAATTGTTATGCACATACACCAACAGGTGGAAGTAATAACAACGGTGTAGAAATTGAC  
GATGGCTCACAATATGTGTTCTTATCAAACAACAGAACCAAGGTA ACTTCGGTGGTTTA  
GAAATCAAAGCACACAGTAACACAAGTGCTGCAAGTGGCGTATTCGTTAACGGTCACGTA  
TCAATCGAAGATACAAGAGCTTACAACATTCGACACATCGGTCATCATAGAGCTAAAACG  
GACAATAAAAAGTTTGACTGCTTATGACGTGGTGCTAAATAATTGCTTAGCTTTAAACCCT  
AAATACAATGGTGTGTATCCAGGCTCAACACCTAGAGCATTATTAATCAGTGCTTATAAA  
AATGTATCAGTCAATAATTTCACTGCAATTGGTGATGATGATTTCCGAAAATTAGAAGT  
GGAAAAC TAGATAAAAAACAACCAGCAATAGCCATCCAATTCATGTCCGAAAACATCTCG  
CTTAATAATATTAATGTGCGTAACTTTAAAAATGCAGAAGTAGATATTAGATTATTTGGC  
GGAGATAATAGACCTTCAAGAGTTATTTTAAACAATATCAATATTTGGAATTCATCTAAC  
AATATCGGTATCGGTGTTGGAAGTAAATATACGATACTAAAATAACTAATTGTA ACTTA  
CACGGCAATGGTTCAGGTATAGGATTACGTTTGACAAAATAACCACGCTATGATTAGTGGT  
ATCACAGCAAACAATTATTCAACACCTGCATGGATAGCCGGCGAAAATAACGACACACCT  
CCTACAGTTGGAAAAGGTGGTGCTAGTATAGCGTCTACAGGAAGTGCAGGCGTAGCTAAT  
GCTAGTGCAGTTATTGCGTCAACAGGTGGTTCGAAAGCATA CAGTAATCGTAGCTTTGTA  
TTAGGTTCTGGTGCTAACTCCAAATCTTATGGATCACGTAGTGGTATTATCAACTCGTTA  
AATTCAGAAACAGACAAGTCAGGACACACACAATTAATTCTTAATAGTAATCGTGTTAAG  
TCACCTGGTAACTATCATGTTGTCGCTGGATATGGTTCTAGTGGTAATGCTTCTACATCT  
AACATTA AATTTGATTTAAGCACTTATTCAGGAACTTAACTTTAGCCGGTCAACTTAAA  
CAAGATAGTGCCGATATCGCAGAGTTATTTGAGTCACAAAATGGATTAGCAATCGATTTA  
GGA ACTATCGTTACATTAGACGGCGATAAGATAAGAAAAGCGCAACCTAATGACACACCA  
ATTGGCGTTATATCTGGA ACTGCTGCATTGGTAGCAAATGAAAAACATTCCACCATAAAA  
GATAGATTTTTAAAAAATGAGTATGGAGTAACGATTACAAACAGAAAACAAGTTGAATTT  
GTAGACGATGAAGGAAATGTTTCTTTCGAATGGCGTGACATACCAGTAGAAAACCCTGAA  
TATAACGACAAAATCGATTATCAATCACGTT CAGAACGACCTGAATGGAATGTAGTCGGA  
TTATTAGGTCAAATCTACACGAACATTGAAAAAGACGTTATACCAGGCGACTATATCAAC  
GGTAGAGCAGGTGTAGGATATAAAGATAATGTGAATGGTAAAGGTCGTGTCATGAAAATA  
ACTTCTGAATACACTGAAGAACGTGGATGTGCAATAGCATTAGTATTGTGGGGTGCTAAA  
TAATGGAATTAGAAAAGTAGGTAACTTGATTTAAACGAAGA ACCATATTTACAACCGA  
TATCTAATAGAGGTATCGGTTTTTATAATCTCGATAAAAACACTGCTAAATTTCAATTTG  
TAGTACAAAAGACAACAAACCTTTGTTAATCAGCGATAAGAATGTTAAAGGTTATGCTT  
TCTTTAAAGCTGCGAACGGAACAGAAGAAAACGACCTAGTACATCAGGTGTATTAGACG  
TAGAATTCATTGATCCAATGAAAGGATTAATAGGTGTTACGGTACCTCAATGGTTTTCTGA  
AAAACGTTGTGCTGATTCTGAAGTGTGGGTGAAATTTACTTATCACTCAACGATGTAACA  
ACGTAGGAAAAGACGACACTGTTGTGTTAGGCACTTTTAAATTCACGGTACGCGACAGTC

TTATCAATCAAATCGAAAGTGATATCAAAGTATCTTATATTCGAATGTTTGATGAATTGC  
GTTCCGAATTAGAAAAGAAAGTGCAACAACCTTAAGCAAGATATAGGCGATACACAAACGT  
TGATTGAATCTATTAAGCAAACAGCTGAAGAATACCTCATTAAAATAAACAAGGCTCAAG  
CAGACGCTATTGTTTCAATTACAGACGCGTTAATATCGTCTAACCAAAGCATTGACCTAG  
AGAGAGAAGAAGCTTTAAGACAAATTGATGCTAAACGTGACGCTATCAAACGGATTATG  
ATTTAGCTTCAGATACATTCCAAAAAATTATGATAGCAATGTGGACGCTTTTAATTCAA  
ATGTTAATCAAGCTAACACAACAATTGATGAAAAGCTACAAATATTTAATGAAACCCTTG  
AAAGAGATGGCTTTACTACTCCTGAATATGTAGAAAAGTAAGTTTACAGAAAAGGATTGGC  
AAAAATTTAAATTAACAAATGATGATGGTACTAATTTTTATGATGCCAACCTACAAATAG  
ATTCGACAATAACGAACAATTAATGTCTTTACCGATAGGAACTAGATATGTTGTTCTTA  
CTTTGAACAATCCAGCTGGAACAAATAATAATGGGTGGTTAACAAAGTACAAAAGAAATG  
GAGATGCTGTTCTAATAACAATACCAACCTTACAATCAACTGTAATCTACCAAAAAAGAT  
TTTATAAGAGTTGGAGCAAATGGGAACGTGTTGGTTCAGATGTTGTAGATACTGGTTGGA  
TTGATTTACAACACTAGTGAACAGTGCCTCGCCTCATAACGACTTAGTTTCCAAAGGTGGAT  
TTACTAGTGCGTACAGAACAATCACACAGAATGGAGTTACTAAGAAAATGTTACGCATTA  
ATGCTACAACACTATCAAACATGGACAGACTATTGCACTTTTACCTAAAGAATTCGTCAAAA  
ACTTAATGTTTTTCTCAATAAGTGCACCTAGAAAACAAAACAGCGGACGTATTTTCGTTGA  
ACACATCAGGAACAGTGAATTTTGACGCTACTGTAGATCCATCAGCGTGGACTGATACAG  
ATTATATTTACGGTCAATATGAATGGACGGAGTGATGAAATGAAAGTAGTTTATTTATGG  
AAAAATGGACAAGCAATTATTGTTCAAAAAACGAAGAAGATGAATATGTTTATCCTGAT  
GAAAAATGGACAGAGAACCAACCTCCTCAAGGTATTATCTTACCTTGCTATTATGACGGT  
AAACAATGGGTTGGACAAACCCAAGATGAGCTAGAAAAGATGTTGCCTGAAGTAGAAATT  
CCTGTTGATGACAAAGATATTGCTATAGCTAAATTAAGCTTAGTTGTGCGATTTACAA  
GAAGAAGTTATGAGTTTGAAGCAGAACATCGCACTAATAACTGAAGAACAAGCAAATCAA  
AAATTGGGGGAAGCGTAATATGGATAAAGTAGTAATCGATTTATATAAGAAAAAATTATA  
CACTGACGAAACTTTCAAAAAGTTTGTAGAGTTGGTTGGATTACTCCGGAACAATTTAA  
AGAACTACAGGTAAAGATTACGAACCACAAGTTAAATAGCTTGTGGTTTTTATTTAAG  
TGAAGTAGGTGTTTATATGACAGAAAGTAGCCAAAGAGGGGATTACGAAAGACGTATAAA  
AAGATTGGAAGATAACGACGAAAAAATCTTCAACTCTTGGAACAGATAAAAGACGGACA  
ACACAATCAAATTTGATTAATCAAAAAATGAATTCACCTTGGACTCTATCAACAGAGA  
GAGAGAATTAGAATCTCAAAAACAAAAAAGAAAATCAAAAAAACATCAAAGACATTAAT  
GTGGGTTTTAGGATTGGTTGGCACTATAGCTGGTTCTTTAATCGTAGCAGTATTAAGAAT  
GTTTTTCGGTGTAAAGGAGGTGAGTTACCATGTTTCGGATTATTTTTAGGTGCAAGTTT  
TTGGGAATGTTTCTGGTTTGGTAAATGTAATAATTGAGAAACAAAGCCGGCTTTTTAGT  
CGGCTTTTTATTATGCCGGAATGAGGTGGATATATGGGATTACCTAGTCCTAAAAGAAG  
AAAACCTACTGCTTCGGAAGTTGCAGCATGGGCAAAAAGGATGATTGGCAGAAGAGTTGA  
TGTAGACGGTTATTATGGCGCCAGTGTGGGATTTACCAAACACTATTTTCAATAGATA  
TTGGCATTTTAAAACAACAGGAAATGCGATTGCTATGGCATGGTATAGATATCCTAAAGG  
CTTCAAATTCTATAGGAACACTAGAAACTTTGTTCCGAAACCTGGTGACATGGCAGTTT  
GGGAAAGGGCTCCTTTAATAACGGTGTGGGCATACTGCTGTTGTCATAGGTCCATCTAC  
CAAAGTTACTTTACTAGTGTGGATCAAATTTGGATTGGTGCAAATAGTTATACAGGCTC  
ACCTGGTGCGAAAATTAACATAGTTATAACGGTATAAGTGGGTTCGTCAGACCTCCCTA  
CCACGCAGAACTAAGAAACCATCGAAACCAAGTAGTACACCGTCCAAACCTTCTAATGA  
CAACACTCCTAAAAACACAAAAGAACAACAAAACCTATAACTAAAGAGATTACCAAAGT  
TTCCTATACATCATTTCGCATACGATTTAGACGATGATTTGGAATATATTTATCATTACAT  
GGTTGAAGGGCAAAGTTGATAGGGAAGGTAAGGTTATATATCAAAAGAGAGTACACA  
TATGCGTCTGTTGAAGAATTGATTTACAACGTAATAAATATGTGAATGAAGATGAATA  
CCCTCATGTATATATTGACCGTGAGCGTGTATGGACACCTAGACCTGATTCAGAAGAAGC  
ACCAGAACATCCAGGTTGGCTTGTATGGAAGTTTGCAGGAGGACAAACGGATAGCAAACG  
CCAATTCATGCTCAATCAAATCAGAGCGTTAATCTACGGCGTTTGGTTGTTAAGTTGGAG  
TAAGGTGAACTTTCTGAATCGTCAATCAAAGCAGATCCTAACATATGGCGTCTATGAA  
AGATTTAATCAATTACGACTTAATCAAAAATGGTATTCCTGATGAAAGTAAATATAAAGA  
AGTCGAGAAGAAAATTATCGGTTTATATTTGAAAAGAGATAAATTACTTACAGAAACAAT  
TACTACAACACTACAAAGACAAAGATAAAAATTAACCTAAAACCTTCGGTCGACAATCC  
TTCACAGAACGATAAGTCGACAGGTAACGACAAACAGAACTTCAAATAAACCTCGTGT  
AGTTGTAGAGAAAAGTAAATATACTTTCCAACAAGCGCTTAATGCACAAATGGCACATGG  
TATGCCTCAAAAATCTTACAGTTGGGGTTGGGGCAATGCTTCTAGGTACAAACAAGTAA

GTATATGAACCCTAACACTATATGGAATAGTTCAGTACAAAGGTATCAAATGTTGGATTT  
AGGTAAGTATCAAGGTATACCAGTAAGTAAGTTGAATAAGATACTTAAAGGTAAAGGTAC  
TTTATCCGGTCAAGGTAAAGCTTTCGCAGACGGTTGTAAGAAATACAACGTAAATGAAAT  
ATACTTAATTGCTCACGCATTCTTAGAAAGTGGATATGGCCGTAGTAACTTTGCCAGTGG  
ACGTTATGGTATTTACAATTACTTTGGTATTGCAGCATATGACAATAACCCTAATGCTTC  
CATAGCTTACGCTAGAAGACAAGGTTGGACGAGTCCACGTAATGGTATTATAGGTGGGGC  
TAAGTTCGTTAGAAAACAATTCTTTAATCAAGGTAAGAACACTTTGTACCGAATGCGTTG  
GAACCCTAAAAACCCCGGTCGTATGCAATATGCTACTGCGATTGAGTGGTGTAAATTTCCA  
AGCAACAACAATAAACAGTTTATACAAAAAAGTAGGATTAAGGTATGTATTATATCAG  
AGATAAATATAGATAAAAGGCTACTACTGACGGTGGGTAGCCTTTAATAATTGAAAGAG  
GTGTGTATATGTTACAAAACTTACAGATGTTGCTACTAATATAAATGTTAGAGTACAGC  
TGAGAACGGTTTTATTGGCGCTAATTTTTATACAGAAGATGACGGATCAGCTTATATAAG  
AATCACTATCAGAGATAACAACGAAGTGTTAGATTTTAAACAAAACCTGATATGACTCCTCG  
TTTAGATTTGTTTAGTTCAGACGGTCTATATTCACTAATGAACCGTTAGAGATCATTTT  
ACCTGAATACGGCGTCATTCAATATAAGGTGTCTGACAATGTCATTAACACGCAGGGAA  
AGTAGACGCGAAATTATTCTTAGCTAATGAAAAGGATAGTGTTCACGTCGCTAACTTTTA  
TTTCACTATCACAGATAGTGGAAATGACTGGACCGATTGGAAAAGAAATACATGTAGATTC  
ATTACAAGATTTAGTTAGAAACGTTATGAAAGAGAATGCTATAGGATTATTAGATGATGA  
TTTCAAAGATAAGTTAGAGAACGATTTGAAAGTATATATGGAAGAAAATGCTGATACATT  
CAAAGGAGAACAGGGTATACAAGGTGTTCTGGAAAAGACGGTAAACCATTCACGTATAA  
CGATTTACACAAGAACAATTAGACCAGTTAAAGGCTAAAGGTAAGTACTGACACAGGCTGGCA  
AACACTTCCTCTTGTGAACGGAATTACACAAGCTGGGACACTTAACAAGCCAATGTATAA  
ATTAATCTCTATTAATGATACAGAAATGCTATTTATAAAAGGTGCAGTAAGTTCCATTAA  
CAGTAAAGAAATGATTTTTGCGAAACTCCCGAAAACATCTCGGATAAGGTGAAAGATTA  
TAAACAATATACAAAAGCGGGCGTTAATTCATCTCAATTAATCATCTACAACGTGACTAT  
AACTCAAAGTGGAGATTTAGAAATAACATTTGACCCTAAAAGTGAAGCAATGCCTTATGG  
CGCTTATTACATCGAAGGAATAGTCGTTTTATAGGAGGCGGGAATATGAAGACAAAGCAA  
ATTTATTTTTATGATGGCACACCATTTAGTTATTGAAAATCACAATGGAGAAATGGAA  
TATCCTAAAGGACAATGGACTGATATAGAACCCTCCAGAAGGAATATACTCCTTGTCAT  
TTTGATGGTAAACAATGGATTGGCAATACTAAAGAAAATTGGGAAGACTCACAAACCGAAA  
AGCGAAAATGAAGATACGACAAATAAAAACAATGAAAAGAAGATATTATAGCTGACCTA  
TCTTTAGAGTTGTTAAAAACTCAAGAAGAATTAATGGATGTTAGAAAAGATATATCAGAT  
TTAACTATTCAAATTTTAGGAGGCACAACAATGCATGATATCGGAGTTAAATATTATAA  
AATGGGTTACTACACTAACGAACAATTTGCTTTATTTGTAAAAAGAGGGTTTGTAAACC  
GGAAGAATATTTAGAGTTAACAGGTATTGAATATGATCCAGAAAAGTGAATGTATAGAA  
TAATTGACAGCCGACGTTTTGCGTTGGCTTTTTAATTTATCTAAAAGGAGATATGAGTAT  
GAAAACAGATGTAGGTTCAATTGTAAGAACAATCGTATTTATTTTAGCTTGGGTAAACCA  
ATTTTAGCTACGAAACATATTTACACTATTCGGTAGACGAAGTACTATCAGTTCTAT  
TATTACTGGTGAATTTCTTTGTGGACTTGGTGGAAAACAATAATTTCTCTCACGCAGC  
ACAAAAAGGACAACAAAAATTGCATGAAGTTAAAGCAGGTACAGAAAACACAAATGGTAA  
AGCACCAATTGGAGGTAATGATTAATGACAAATAAAACTAGAAGTCAAGCGCATGCTTAT  
TTAGACAGGTTAAAAGGTTATTGGTGGGATTTTCGACGGTGTATTGCGCACAAATGTTTT  
GATTTAGCCAATCAATATTGGTACTACGTAACAGGTCATACTTTAAGTGGTATGTACGCT  
AAAGATATACCTTTTGTTAATGATTTTAAACGGATACGCGAATGTTGTAAAAAATTATAAC  
TCTTATATTCCTAAAAAAGGTAAGTTAGTTGTTTTCTTACGAATATGGTAACGGATGT  
GGTCATGTTGCTATTATAGAAAGTGCTACTCAAATTATTTCTATAGTTTGGATCAAAT  
TGGTATGGCGGGGCAAGAAATAATCCGCCAGAGGTTGCTCAAACAATATACCACGAATAT  
CACCTGATATGTATTTTGTAGAACCCTCTGTATTCTAAAGAAAACAAGTAAGTAAAATT  
AAAGCAAAAACAATAACCTAAACCTGTAAAAAAAGTTAAAAAAAGAAAAGTGATGATC  
GTTGCTGGTTCATGGGTATAATGATCCTGGTGCTATTGGTAATGGTTATAACGAACGTGAT  
TTTATAAGAAAAACATTGTTGATAATGTATCAAATATTTGAAAGATGCAGGACATACT  
GTTGGTATATATGGAAAAAGCAAGATATGTATCAGGATACAGCCTATGGAGTAAGAGTC  
GGTAATCACAGAGATTATGGCTTATATTGGGTAAAATCTCAAGGATATGATACTGTTATT  
GAATTTCAATTTAGATAGTGCAGGTCCTAAAGCTACAGGTGGACATACAATCATTCCAGCC  
GGTTATCCTGCTAATATAACGGATAAAAACATCCAAGCAGCACTAAAACAAAGTGTGGT  
ACTATAAGAGGGATAACTCAACGTAACGACTTATTAACCTGTAATGTTGCTAATGATATT  
GGTATAGACTATAGACTTGTGAATTGGGGTTCATTACTTCATATAAAGATATGAAGTAT

ATTAATGAAAATATAAAAACCTTTTCACAAAGTCAATAGCAAGCGCTATTAACGGCAAGCCA  
ATTGGAGGTACAAGTGCAGGTAAAGTTAAAAGTGTAAAAAAAACATGGGATTGGAAAGGT  
AGATTTTATCCGAACACAACAATTAAGTTAGAAAAAAACCCAACGGCGAAATTGTAGAA  
AAAGGTTCTTGGTTGTACGGAAAAGACGATTGGGTAGATATTGTTCAATTATACAAAGAC  
ACTAAGAAAAAATTATGGTGGGGTAAATTCAAATATCCAACCAATCCTAGTTCTGGTTAT  
TTTTATTGTGCTTTAGGTGAAATCACCGACAAACAAGAACGAATAAAAAAAGAAAAGAAA  
TTATATGGAAAGATAAAGTGGCAGTACTGTATTAAGCGGGGGAACCCGCTTTTTTTACAT  
AAAAAGTGGTATACTTACCACAAGGTGATTAATATGAAAATAATAAATAATAATTTTACA  
TTTCACAAAGGTAAAAAATTGGATAAATTTAAGTGGGCTACCAAGGAAGAAAACAAAAAGA  
GGCGAACAAATTATTTGGAAAAATTCCATAGGTTATAATGTGAATTATTTTTTTGAAGGT  
ATCAGTGGAGATATAAAAAATATTAGACTCTTACAGGAAAAATGATGAAAGATATTTAAAA  
GTGGAAGTAAAAACGAAACATATGAAATACGTTTCATCTAACTTCAAAAATTGCGAAATA  
AAGAAAATTGTGACTGATGGTTATAAACATAATTTAGGATTTATTATAAATGGTTGTAAA  
GTAATTGGTAAAAGACTTAATCCAAGAAGTAAAGAAAGAGAATATAAAATGTTGTGTCTA  
AATACAACTTGACATTTTATAGAAGAGAATCAAGAATAGATGTCGGTGCGCCAAGTCCA  
TACATTAGCGGTAAATATGTTTATGAAGGAAATTGGTTATACAACGAAAAAAATGTTTTA  
CCTTTTTTAAAAGATGTTAATGATGCAAAAAAATATACAAAGTTCTCAAGGAGAGAAATA  
AATTGCGTTTGCCTAATTGTAAAACGAAAAACAACGCCTGTTAATAACTTGGTCCAA  
CAAGGTTTCTTTTGCCACGTATGTTCTACTAACATATCATATCCAGAAAAATTAATGATT  
GCTTTATTAATGAAAATAGTGTAGTTTTTGAATATCAAAAAATATTCCAAGATCTTAAA  
CCAAAAGATTTGATTTTTACTTACCAGAATATAATTTAGTTATAGAAACCCATGGAAAG  
CAACATTATAAAGAAAACGAAATTTGGTATAGAAAATCTAAGGAATCTGATGTTGTAAAA  
ATGAGTTATTGCAAAAAGAAAACATAAAATATGTTGAAGTGGATTGCAGTTTATCTGAT  
TACAACTTTATAATGAATAACATTAATAAAACTGAATTGAAACATGTACTAAAATTATAT  
GACAAAGAAAATATAATAAAAAGAATAAAAAGAATTAGAGCAAATAAAAAGATGTGGATGAA  
ATAATTAACACTATACAAGAATGGTAGAAACCTTACATATATCAGTCGAAATGTTGGATTA  
ACCAAATGGAAAATAGAGGGGCTATTGAAACGTCTGGGATATATTGCACGCTAATTCATA  
TCGGGTTATAAGTATATTAATAACACTGGAAATGATATAATTGAATTACCACGTCATTAT  
ACAAGGGTAGTCGCTATGGCTACCCTCTTATAAATTATAATTATGTCTATAATATGTAGA  
TGTTAGATTGATATTAAAAAACATAGTTTAACTACTACATTGGTTACACGGTCTGTGCTAC  
AATTAATTACATACAATTTAATCTTTTTTTACTCCTTTATAAATTTTGCTACCACGTTT  
TTTATGAGCGTGGTTATTTTTACGGAAGTATACACATTAATATTAATCGAGTGTCTATA  
CTTCCGTACATAAGTTAATAAAATTCTATATCATTTATTTTGATAGAATGCCTGTTTTTA  
AGTTTTACATAATCTATGTCAATAGATTTAATAGCCATTTTAATAAAATCTGCTTTATCT  
TCCAACGAGAATATTTCCATGATTCCAATAATGCATTTTTAAATTTTTTTATCTTATCT  
ATATCTAGTGATTTTCTGGGTAATAATTCTTTTTGCTTTTCATATTCTGCTATTGTTTCG  
TCTGTTTCTTTAATCAATTCAAATAATTCTTCTTCTTGCAATTAACCCTTTAGCATATAAT  
TTATGATACCTTTTACGTTGTTCCATGATCTTGTCTATATCAATAGTAACGACATCGTCT  
TTTTGTTTTGTCTTTACTTCATATTTATCTAAGTCTAGTTTAGATAGGTAATCACGAAAC  
ACTCTCAATGCTTCATTCTCTGAAAAACCGAAACTTTGTTTTTTAGTCTTACATGTGTTG  
CAATAATATGTTTTATAAGTAACATAACCCTTTCTTTCTTTCTTTGTTGCTGTGTTTATT  
GTTAATGTGCCACCACATCTCGGGCAAATAAATTTACCTCTGAACACTGATACGTGACTG  
ACTATTTTAGTATTGATTTCGTTCTTCTAGCCTTTCTTTTATTTGTTGATACATTTCTTCG  
GTAATAATAGGCTCGTGAGAGTTTTCTATAAATACATCTCCCCAAGTATAATGACCTCTT  
GTTATAGGGTTTCTTAGCGCTCTCGTTATTGTTCTATCTTCCACCTTTTGCCATTAGGA  
GGTGGTATATCTGAATCGTTAATTTTCTAGCTATAGCTTTTGAACACTTACCTTTCATC  
ACTTCGTCATATGCCATAAAACTACTTTTTTATAATCATTAGGAATGTAAGTGTATCT  
ACACGATCATAATAAAAGGGTGGTGGTGTGAGTATCATACTTGTTTAATCGCTGCGCGT  
TTACCCATCATAACACGCTCTCTAATGGTTTCTCTTTCCACTCTGCCATAGCACCAACT  
AACGTAACAAACAGTCTACCCATAGCTGTAGATGTATCATAAACTTCAGTAGCACTTCTG  
AATGCTACGTTATTCTGTTTGAATACCTCTAATAAATCAAGTAGATCACGCACATTACGT  
GTAAGCCTGTCTAACTTATACACTAAAATAAATCAAACCGTTAATATCATTATCATA  
CGTTGTAATCCGGTCTGTACGCTTAGCGCCAGAGAAACCAGCGTCGATAAATACGTCT  
GATACACTCCAGTCGTTTATCTCGCAAAATGATTTGAGCTTTCTTTCTTGTCTTCAATA  
GAATAACCATGTTCTTTTTGTTCTAATGTACTGACCTGACACGAACGTAATAGCTACGT  
TCATAATTCATCACCCCTTAAAAAAGTAAAAAATAATAAGGGTAGGCAAGCTACCCATG  
AATTATTATATTTTTCCGTCCACGCTCATTGCCACTCCATTTGTAGTTGAACGTGGT

AATGGTTCCTTTAAAACCTTCTACGATCTACACCTTGATTTTGATTATTTTGCGGTACTTTC  
TCCATTTGTGACTCATTGTGAGTAGTTGTTTTCGTTCTATTCCATTCGTCAATTTCTGAT  
TGGGTCATGTAACCATTATTATTTTGCATTTGTTGGTTGTTATTAGCTTGTGCTGATTG  
TTTTTTTGTGTTGCTTGAGCTTGTTCACCTTGTGATCGTTCATTATTACCATTATTA  
CTTTGAGTTTTGCTATTGTCATTTTATAGATGTGCTTTCAGATTTATTGCTAGTAGTATCA  
TTGTTAATACCATCTGAACTAGATTGTTGTTTATCGTTCATTAGTGTTTTTGTTTGATTCA  
TTCTTACTATCTGATTTCTTCGGACCATTTCGACTTCTTATCTGATTTACTTTCAGACTTC  
TTATTATCATCTTTATTTCGAGTTATCCCATTTTGTCCACATGCACCTAATACTAATAAG  
CTTGCAAATATTAATAAAATAAAACCTTTTTTTCATTCTACGTTTCTCCTTTTTTATATTTCTT  
TATATTTAAAACCTCTTAACGGATCAAATGTAATTAAGTATTCTCCGTAGTTAGTTCCAA  
TGCCATATTTGTTTTTGTAAATGCTTCAATATTTCTGCTATATACTTTTCGCTTAATTGAA  
CGTATTCAGCTAATTCATATAAGTTACTAACCCATAGTTATGCGCCTCCATAATAATGC  
GCAAAGGTAGAGCTGCTTCATATCCATAACGCCTAGCGTAGTTTTCAAATTTGCGGTTA  
TATCTTTAGATTGATCTAAGATGTTCCGTATGTAAGTTTATGATGTGCTAGTTCTTCGT  
ATAATACCTCAGCTTTACGTCTTTCAGACAGGTTTTTATCGATAAGTATTACTCCATCTT  
TATAAAAACCACTATATCCATTAGGTAACGAGTGTGTGTCTTTAATTTTAAATGTGTTCAT  
TCTTAGTAAGTAATTCTTCGTAATGTGACAATAAAATCAATCCCTTTATTTATCTTCGTT  
TTTAAATCTATCAATCAAACCTTAAAATATAGTCTACATCCTCCTTTTTTAGCTCGCCTTC  
TAAATGCGCGGCTAGTGTGTTGAGGTTCCCTCGATTTTCATTTCTTTTCTTCCACTTAACTC  
ATCCAAAGATACGTTAAAGTAATCCGATAACGCGCTAGCATGTTCCATAGAAGGGCTAGC  
AACACCTTTTTCCCATCGATCTATTGATGCTTTTGAATAATTAACCTTCATATTTTGCATT  
AAGTCTGTCACTCAATTCTTTAATGATAAGTCAAGTACGTTTCTTAATTTACTAAGGTT  
GTCTGAGAAATTAGTCATGTTTTTACTCCTTGTTTGTTTTTTACAACTTATTATATAAG  
TTTGTCTCATATTTTGTCTCATATTTGCAACACATTTTACAAATTTATTTCTCAAAAA  
TGAAATTTATTCGTTGACAACGAAACAGTCGCCTTGTATAGTAATTAGTGTAATCTCATA  
AATGAGACGAAAGAGGTGATAAAAACATGAATAAAAAGAGATATCAAGATTTACGAAATT  
TCATTGATGAGAGTAAGTATTCTCATAAAGATGTCGCTAACATGATTGGTATGAATCCTG  
CACGCTTTAGTCAAAAAGATTAATAAAAACAAAAGCAATTTTACTATTGATGAAGCAAGTG  
CGATTTGCGATGTTTTAGATATTAGTATGGATGATTATTTTTTTAATCACAATGTCTCAA  
AAATGAAACGAGAACCACAAACAACCTTAAGGAGGAATTCAAATGAAAGAAGAAAAATTGA  
TGCGATTTTAAAATAATAGAAGGCATGCCTAAATACGAGTGGGACAGAATTGCACATGA  
AGTTAGCAAAGCTTACAGCCATAAGACCGTCAAGGTAGAGCTTGACAGTCATAGCTGTAA  
ACAATTAGAAAATCACTTAGTTAAAACCTTGAATGAAACTAGGGTGGATTCGGTAATTCA  
CATTATCAATTTAATGTTGATGTAGTTGAAATTGAACAAGTTATCGATTTGTTCTTTAT  
ACCAAAGATTTATATCTGTATATGCGTTATCAATTACAACATCATTGATTGATCAGATAGAT  
TTACCCATTCGCCAAGTAAACAAGCATAAAATATTTTTTATAAAAATCACCTCCTTTTATAA  
GGAGTATAGCAGAAAGGAGCATAAACAATATGCAAGATTTACAAGTAATAGAACATAATA  
ACGAATTTTATGTAGACAGTCGAGAAGTAGCAGAAATGGTTGATAAACAACATAAAAATT  
TAATAAGGGATATAGATAATTACAAAAGTGTATTATTACAAAGCTCAAATTTGAGCTCTG  
AAGATTACTTTGTAGAATCGAGATATTTAGGAGAAAACGGCAGGTATACAAAACATTATC  
TTTTAACTAAAAAAGGTTGCGACATGGTAGCAAATAAAATGACTGGTTCAAAGGTTGTTT  
TATTTACAGCAATGTATGTAGACGCATTCCATAAGATGGACGAACATATCAAGCAATCTC  
AACTGAATGTACCACAAACACCAATGCAAGCATTAGAAATGATGTTCAAAGTACAGAAAG  
ACCAAGAACAATTTAATAAAGAAATGAAACGTGAAATCACTGGAATTAGAAATATTGTAG  
GTATTGAAACTAAGAATTGGCGTAACGATACTAACAAAATGCTAGGTGCAATAGCACAAAC  
ATTTAGGTGGTGGAGAGAAACATCAGAAAGTAAGAATTGAGGCTTACAAGTTACTTGAAG  
AAAAGGACGTTGCAAGTTAGAACAACGATTAAATAATCGCAAAGCAAATAATGCTTTCAC  
AAGGTGCGACTAAGTCACAGATTAATAAACTTTCAAATTAGATGTAATTACTGATGAAC  
CAAGATTGATTGAAATTTATATTTTCAAGTATTAAGAGTATGGCAATCAAATATGGCGTAG  
ACGTAAGTCAATTTGAACTATAACCCACAATCGAACAAACAACCTTAAAGGAGGCTTAGCT  
ATGCTAAAAAACTAAAAATAGCACTCCTAATCGTTCATCTTGGCGGAGGAGATTAGAAGT  
GATAGAAAACGAACAGTAAAAGTTAGTGCCAGTATAGACGAAAAACAATTAACAAAAATT  
GTAAATGAAGAAAATGCAAAAATGGATCACTTATTTTCTAATTATACACGAAAGGAATG  
GTTTTTATGCCACCACACATTCAACAAATGCTATTTGATTTTGCATTAGAAAGAGGTTAT  
ATCGAAAACTTTTAGAAATGAAAGAAGAGTTAGAAATGAAAGAAGAGGATGATAAATGA  
AATATCTACTAAGCTACATGACGATGTTTCATCGCAATGATCATCACATTACTTTTAGGAG  
GTGGTTTCACAACAGTATTAGGAATTGCAATGTTAACGCTTATCTTTAGCACATTCTTCT

GGGAACAGTGGTTGAAAACAATAAAAAAGACTGAAAGACGCGCCAACGCCTAACAGTCTA  
AAATCAAAAATTTATCAAAATATACAACCTTAAATATACAAGTGGAGGAGAGAAAATGCAA  
GAGGTAATTACAGTCAAGTTGACTAGAGAAGAATACTCTCAACTAATCAAAAAGCCAAATA  
GATTTAGATTTCTTGCAAAGTGACTACGACTTTTTAAATAAACGTTACGAAGATATGTGC  
GATAGATATTTTGAACCTAGAAAAGACTTCAGAAAAGCTATAGAATCGTGCAAAACACAA  
AGCGAAACAATCAAAGTCATGGATAGAACAATCGACATGCTGCGTAAAGGAGTGATTGGG  
ATTGAAAGAAAACAGTGACGTATCTAATTAATTGAAAGACGCTCCTTTTCGACCTGTATAT  
CACTAATAAACCTAATAATGAAGAAGATACCTCTTATTCAAGAGATAAACGTAGAGCAAG  
AGAATTTGCAGGACTAGAAGATGTGAGTATCGACATGACAAAGCATAACAGCAATTA  
GACAGTAACAGAATCAACTGAGTATGAGGAGGTTAAGTATGACTGAGGAAACACTATTTA  
ATCAATTAATCAGAAAGATGTAAACGACCATGTAGAAAAGAAAAATGGATTAACCTACC  
TAGCATGGTCATACGCTCATCAAGAATTAAGAAGATAGACAGTAACTACAGTATTAAGA  
CACATGAATTTGTACACCCTGACGTACCACAAGACAACCTATTTTGTACCTTATTTAGCTA  
CTCCTGAGGGGCTATTTTGTACAAGTGTGAGTAACTGTGAAAGGACAAACAGAAACAGAGT  
GGCTTCCAGTATTGGATTTTAGAAAACAATCTTTAGCAAAGGGTAGCGCGACAACATTCG  
ATATTAATAAAGCTCAAAAACGTTGTTTTGTTAAAGCTGCAGCATTACATGGTCTAGGAC  
TTTATATATATAACGGGGAAGAAGTTCCGAGCGCTAATGATAATGACATAACAGAATTAG  
AAGAACGTATTAACCAATTTGTCACTTTATCTCAAGAAAAAGGCAGAGATGCAACACTAG  
ACAAAACAATGCGTTGGTTAGGTATTCAAAACATTAACAAAGTTACTAAAAAAGATATAG  
CAAATGCACATCAAAAACCTAGATGCAGGACTAAAACAATTAGATAAGGAGAATTCGAATG  
ACTAATTTAACTATTTTAAACAGGACGTATCACTAAAGATTTAGAACTTAAACAAGCAGGA  
CAAACACAAGTAACTAACTTTTCTATGGCAGTAGACAATCCATTCAAAAAGATGACACA  
TCATTCTTCGACATCGTAGCGTTCGGTAAAACCTGCACAACCTATTAACGACTATTGCGGT  
AAGGGAAGCAAAGTTTTAATCGAAGGCAACTTGAAGCAAGACCGTTTCCAAGATAAAGAA  
GGTAACAATCGTTCAGTAGTACGAGTGATTGCAAATAGAATTGAATTCCTTAGATAGCAA  
GGTAGTAATCAATCTAACAACCAATCCCCAAAACGAGGGCAAGCACCAGCAGGCAATAAT  
CCGTTTGCTAACGGCACAGATATAGAAAATTCAGAATTACCGTTCTGATTGGACTGATTA  
GATGGTAGTAATAAAAAACTACATTACAGAAGATGACGGTACAACGACTGTAGTCATCAA  
AGGAGTAGAACTAGATAACAAAACATCTTTACTTTTAGACAACGGTTACGAAGTAGAAGC  
AGATGTAAGAGTTGTAGATCCATTCAAGATTACAGATAAGCAGCGTAGAAAAGTATTTGC  
TCTCTGTAACGACATAGAAGCTTACACAGGACAACCTCGTACTATATGAGGTATATGTT  
CATGGATTACGTAGAAGTCTATACGGCTACGAAAAACGCCTCTCTTTGAGTGATTGTAC  
TAGAGAACAAGCGAGTCAAGTTATAGAAGTCATTATTGACTGGGTGTTTCATAACAATAT  
CCCCTCAACTATAAGACAAGTGACTTACTTAAGAATGATAAGGCGTTTCTTTACTGGTC  
GACAGTCAATCGTAACTGTGTAATATGCGGTAAACATGGGAACTGGCACATCATAAAGC  
GATTGGTAGAGGTGCTAATCGTAAGAAAATGGATCATTACGGTTTTGAAGTGCTGTGTCT  
ATGTAGAGAACATCATCAATCGCAGCATGATATGGGCGTAGAAAACCTTTGATAAATTACA  
TCACCTTGAAAATTCGTGGCTTTCAGTAGATGAGCGCTTAAACAAAATGTTGAAAGGAGT  
TAAATAATGGCAGTTTTTAGAGTTTACAAGAACTGGGAACTTCGTAACCTGTACACAAA  
AATTTTATTCATGACGATAACCTAAGCTGGAAAGCTAAAGGAATATTACTTTACTTATTA  
AGCCGACCTGATGACTGGCAAATATACGAATCAGAATTAGTTAGACATTCAACTGACGGA  
CTTAGTGGCCTTAAAACCTGGCATAAAAGAATTGGAGAAAGTTGGTTATATTCAACGAACT  
AGAAAGCGTGATGATAAAGGTAGGTTGAAAGAATATGAATATGCTGTCTATGAAAAACCT  
AACCACATTCGATTTTCCAACGTAGGAAAAACCTATATAGGAAAAACCTACGTAGGAGAA  
TCGCACACTACTAATAATAATAGTACTAATAATGATTTAACTAATAATAAAAACACTAAT  
AATGTGACAGACGAGACATCAAAATCATTTC AATATATTAGTAATAACTTAGAAATCATA  
CAAAGTCCATTAAGCACAACAACCTAGAAGAAGCTATAAAGGATTTTAAAGATAACAAA  
CTAGAAATCGTTATTGTAGCTACTGATTACTGCAGAGAAAATAGCAAAGGTGTTAACTAC  
CTTATCAAAGTATTAGAAAACCTGGAGTAAAGACGGTGTGATACTAAAGAGAAAGCAATA  
TCTAAAGTTAAACCTAGAAACAATAAAGAAGATGATTACCTAGCTAAGAAGAAACAGGAA  
CTATTAGGAGGTTAGACATTATGTCAATGACTGAACTAGAGGCAATTGAAATATTAGAGT  
TAATAAATAATGTCTACGATATGAAATTCAATAAAATTAAGTACAATCTTTGGGTAGAAC  
AACTCACACAATATGGGGATTTTCGACAGAACACTACACAAAACAAAGAAATATGTTAGAG  
AAAGTCGTTATAAACCTACGATTGCACAAATTATTGATCGCAAACCACCAGAAATGAAAA  
GCGCAGTGATACCAGAAGAACAGACTGATAAATATAGAATGCAGCACGATAAAGAGTTTA  
GAGAGAGAAGGCGACAATTAAGAAAACAATGGCAAAGATGAAAGAGGATTGGGGGTTAG  
ATGATGAGTATTGATGTGTTGAGTACCGAAGAATCTATTATATCTAACCTCATGCGTAAC



CCAGAGTTACTAAGTAAATTCAGATTGAAACCTGAAATGTTTACTGATGAAAAATTAAGA  
GTGTTTCATTGAGTATGCACTAGAGCAAGGGAAAGTCGATGTAACCAAATCTACTTTAAA  
AGTCGTGATGATAATGAATTTATATCTACTGACCGATTAGGTCGTTTATACAACCTCAGAT  
GGCACTGACAAGGCATTTTTTATGGACGACCAATTGAACCTATTACAAGAATACGTTTTG  
TCACAAGCTCGTGAGAAGCTCACAGAGTATCAATCAATGCCGAGTAAAGAAAATTTAAT  
TATTTGGTAGAGGAATTAGAGAAATTAAGAGGTATGACAATAAAAAAAGCAGACGCTACT  
GATAGTTTTCTAGCTGAAGTTGTAGAAAATATTTTATCTGATGAACCAAACAATTTGTT  
AAAACCTGGTATTGCTTCTATAGATAACAAAATCATTGGTTTTGAACCAGGTCAGTTGAAT  
GTATTAGGTGCAAGACCTTCGTTAGGTAAAACCTTCTCTTGCATTAACGATGATGTGGAAT  
ATCGCGCAGCGTGGGTACCCTACAACGTTCTTTAGTTTTAGAACTGGAGGTAACAATATC  
GTTGAGCGGTTAGTCGCAACAATAACAAATATTCCACTATCTAAAATCAAGCAAGGAAAC  
GGATTGAATGACGATGAAGTTTCATCGGTAATGTCTGCTATAGATCAAATTAAAAAATGT  
AATCTTTAAAGATTGAGGATCAAGCTCAAATGACACCACAAGACGTTAGAGAAGTCGCA  
TCTCAAAAAACAGACAAACCTCACGTTATATTTATTGATTATCTTACACTCATGCAATCA  
GATGTTCCCTCAACGTGATAGACGATTAGAAGTTGAAAAAATTTCTCGTGATTTAAAAATT  
ATAGCTAAAGAAACAGGTTGTATCATTATCGCGCTATCTCAATTAAGTAGAGGTGTAGAA  
AGTCGTAGTGATAAACGTCGGATGATGTCAGATTTAAGAGAAGCAGGAGGAATTGAGCAA  
GACGCGAATATGATTTTCTTCTTATACCGTGACGATTATTACGACCAAGACCAACAAGAC  
AACATTACAGGTAAGTCGGAAATTGAATTCATTATTTCTAAAAATAAAGACGGAGAAACA  
GGGTGGCACACCTCGATTTCTACAAGAAAACGCAGAGGTTTTATGGATGAAAGTTTATG  
AGTATCAGAAACTGTTAGGCGTTTTGTATCGAGAGGATTATAAAGAAGATCCAATCATAG  
CCAAAATATTAATTGAGTCTGGATGGGCGATTAATAGACTGCTTGACGCCGGAATCATT  
AACCTTTCGACGATTACGAAGAAGTGAAAGAGTTAATCATGAATGAAACAAAATGGAGGC  
AACCAGATGGGACTTATCGACGGACTTAAAAAGCAATACATGTTGTATCAAATTGATGGT  
TGGGAGATGTGTAGTGTAACGCCGTTAGGAGAAGATACATTCAAACTAGGTAACCTATGCA  
GGCATACACTTTAGAAACACATTTTCAGGAATAGTAACGAAAGATGAGCTAGAAAACTG  
AAACGCAAACACAAGTTGTTTCAGAAAAGAAGAACTGCAACAGCAAATGACAATTAACGAA  
TTATTATTTGAGGTGGAACCTTTGAGTAAATACAATTCTAAAAAAGTTGAATATAAAGGT  
TTTGTGTTTCGATAGCAAAATTGAATGCGACTATTACCAACATTTAGAACGTAACCTTAGGT  
AAGGGATATGATCATATCGAATTACAACCTAGATATGAGTTGATACCTAAGTTTGATAAC  
CAACGTAAAACAGAATATATAGCCGACTTTGCATTATGGAAAAATAACAAGCTGCTAGAA  
GTGATAGACGTAAAAGGTATGCCAACAGAAGTAGCGAAGTTGAAAGCGAAGATATTCAGA  
TATCAAAACAGAGAAGTACCCTCACGTGGATATGTAAAGCACCTAAATATACAGGTCAA  
GAGTGGATAACGTATGAAGAATTAATTAAGGTACGCAGAAATCGTAAAAAGGAGAAGATG  
AAGAATGGTAAAGATTAACGAAAAGTAGCATTAGAACCTAAAGAATTTTTAAAGTATTT  
ATTAAAAAAGAAGAAACAACAGTAGAGTTAAACGGTTATACGAGTGATGGTGAAATATT  
TTCATTCGAACCAGAAGTAACTATAAATGAATTTGTGAGTTATTACCCATATGACAATAC  
TTACACGGTAGAAATCGAAGAAGAAGTTACGGAAGAAACAAAACCTCCCTAAATGTTTAGA  
AATTTCTTTTGATCGAAAAAGTGGCAGAGACGTGGCGGTCGTTTCATGAAAATTGCTCGGT  
TAAACAATTAACCTGATAGAAATCCTGAACATTCCTAGATATAAGAACTATCCATCTAGT  
AAACGATGACGGAACGGTTGAACTCATCTGGAAAGATGGCGAAATGGTAGGTGATGAGCA  
ATGGCTAACAGAGAAGAAACAATTGAAGTTGAAGCGCACTCAAAGTGAGATGTAATAT  
CCAGTATGGATAACAATCATATTACGAGAGATGAAGAAAAAGAGCGGATTTTAGATTTA  
ATCAGTAAGAACCCTGACAAAGAGTTGATGAGCGAAGATTTTAAACTAGTTGAATTAATA  
GAGGTGGAATAAATGGAAGCAACAAAATGAGAGTTAAAAATAAATACTTCTCTATTACA  
CCTAATGTAGTAGAGAAAATGAAAGAAGCAGATATCAATCCCGATATCTTAAGACAAAGA  
TTAGCTTCTGGTTGGAAGTTTGAAGATGCAATAGAAGCTCCTTTGGGAGTAAGACGTAGT  
GAATGGGATAGTTTAAAACCTAAAGAGGACGGAATCGCTAGTTATAAAGAGAGAATGGCA  
CAACGTAGATTACAAGAGTTGAAACGTAAGAAACCACATTTATTACAGTGCCTCAAAAA  
CACCTCGTGGTGAATGGTGCAAGCATCTTATGGAGAATGACATATTCCCTAGAAAGGTG  
GTTAGATCATGAGTGTGGAGATTTAAGTATAGGAGAATATATAAAATTTTCTGATAGAG  
ACAACAAGCAAAGGTACGGGCAAGTATTGAACGTATATCAAGATGTATTTTATTTAAAAT  
ACGTCGCGGTAGTAAAAGTTGATGGTATTGGCACTATTAATAAGACGATAACTATGACT  
TTATTAGCGTACCTAAACCAACTAGCAAAGAAGTGGAAAAGACATTAGATGACAAGGTTA  
ACCACCCGTCACATTATACGTATGGAGATATAGAAATAATGGATTTTATAGAGCAGGTCA  
CTAAAGATTATAAACCAGAGTTAGCATTGCTATTGGTAACGCAATCAAGTATATAAGTC  
GGGCTAATCGTAAGAACGGTAAAGAAGATTTAGACAAAGCACGTTGGTATCTAACAGAG

CATTTGAGAAGTGGGAGGGGTAAGCATGGTGTATATGTACGAACCATTTAGCCACACAGT  
GACTAAGACAGACCTATCTCATTTACACAACATTACAGGTATCCACTAAACACACTGTG  
GTACCAAAAAGAACGTGGCACATATAACGATAAGCTGAAGTGTTTCTTTACCGACACAAT  
GCCTAGAGTGAATAAGAAACAGGAGTTTAAACGAAAGAGTTGTAGCAAAGATGAAATTTG  
GAAGTACAGCGAGAAGTATGATCTATACGTAAGTAACTTAGGCAGAATGAAAAGACCTGA  
TGGTAAATATAAATTTGCGAATGGTTGTAACGGTATTTCCACAGTTATTTATAAGAATAA  
GAAGTATCGTGCAGCAGATATTGTATATGAAACGTTTATCGGTAACCTTAAAAACGGATC  
ACACGCATATCCGAAAGATAGTAGATACAACAACCTTTATTGCAGATAACCTATTCCAATC  
TACATTACAAAAATATAGAGTGTATCGCAGAAATAAAGGTGTATCTAAACCAGTATATCT  
TGTCGATAATAACAACCAAATTGTTGAAGAATTCGCAAGTACAGTAGAAGCTCAAAGGT  
ATTATTCATCGACAGACGCAACATTGCTAGAAAGTGCAACCGTAGATATGTGAGTGACGG  
ATTAATGTATATGTGGGCGGACGAATACGAGAAGATGAACGCATGATACTATCCGACACA  
ATCAACCAACGCTATCGCTACAACACACAAGGTAAGACGCCTACAGAGATACAACAGGAA  
TTACGCAAGTTAGGTGTCAAAGGCTTTGTGGTTAAGATAGCAGGAAACAGAGTGACGATG  
AAAGTTAGTGAACACGATATTA AAAAGAACAGGGAGTGTTTGAGATAGATATAAAAAATC  
ATTTATATACTTTCCAAGCTATATGTACCAATGTAGTTGACGGTGACACGATAGATATTT  
TACTGGATTTAGGCTTCAAGACAACCTGCAGAACGTAGAGTGAGGTTACTTAATGTAGATA  
CACCTGAAAGAGGTCAAGAGA ACTATAAAGAAGCTACCGACTTTACTAAATCGTGTGTAG  
AAGGCAAGAAGATATACGTACAGACATACAAGAGCGATGTTTTCGGTAGGTATCTCGCTA  
ATGTGTGGTATGAGAACGGGAAACGTAGTTTGAATGATGAGTTAAGAAATGCAGGGCTAT  
TGAAAGAGAATTCTAAATGGAATGAGGGATAGGAATGGCAGAAATAACTAAAGAACAATT  
ATTAGAATTTATCAGGAATAAAGACTTAGATTTAGACGAAAGCTATCCGCGTAGTGATTG  
GTGGAAGTTCAGAGATGAACGTGACTCATAACAAGAAACAACGTGATGAACTCATCAATGA  
TATGGCAGAAATTA AAAAGAAGGCAGAGGCGTTTGATGGAATAAATAAGTTAAAGGACAA  
TATAAAGTTCATTAAGATGTATCGCTATCACATGCTAATGAAGAACCTGTTAATCAAGA  
AATGTACTGGGTTCAATTCGCTTATGGATAGTTTGTGTTAGAAGAATTGGAGGCCAACCATGA  
AGGAAAAGATTATAAACATGCATGGCTAGAGTTGAAAGAAGAAATGCTTTTTCAATATCC  
GATAATACTTCATATGACAAAAATGGCTGATGGTAAAGAAGATGAAAGTTCATTATTTCA  
ATTAGGAGA ACTTCTTAAACGCATGGACGAACTCGACGGAACACACGAGTTTCAAATTT  
ATTAAGTGATTTGGAGGCTTGAATGGACAATAGAGAGTTTATCCAACGCTGCATAGTAT  
CATCTACAGCTTTTACAGGACACGATGGGTGTTTACTAATCAAAGAGCTTAAACGAAGTAT  
ATCGCAAGGCAGAGTTGTACGACAAAATAGTGGAAAATAAATCAAAGAGTTTAGTAGAAA  
ATGGAGGAACAATAAATGACTAAAGA ACTAGAAATTAATTATTATCAGAAAACGCGACT  
ATGCCTAAGAGAGCAAATTTACAGATAGCGGATTAGATTTGTATGTATCAGAAACGATT  
AATATTCCTGCACACGCAACTAAAGTAGTTAAACAGATATAGCAATTAATCTACCTTAT  
GGGTATGAGGCACAAGTAAGACCTAGATCTGGTAAATCACTTAAACTAAATTGCGCGTA  
GCACTAGGAACAATAGACCAAACATAACCACAAAGAAATAGGTATCATCACAGACAATATA  
GGTGATGAAGATATCACAGTAGAAAAAGGTGAAAGACTAGCACAGTTAGTTGTAGCACCA  
GTTGTATATCCTACACCAAACAAGTTGATTGGTTTGAAAATGAAAGCGACAGAGGTGCG  
TATGGAAGCACAGGAGAATAAAGACATATTAGAAAAAGTGAAAGAGGTGCTGGGGAAGTG  
AAATTATTAAGTTTAATTGCAATCGGTTTTTTGACAGTGCTTCTAGGTTGGTTTATTGAA  
TGTA AATTTAAGACCAAATTTTTAAATGCGATTAGTGA ACTCGCAGGGGTGTTTTTTGATT  
GTCGTGGTATTACTAATCGGACATCATTCCGATAACTCATTGACAGCAACTGTTATGATA  
CTTGCATTATTCTTATCGATTATAAAAAACATGTGATTAATAAGGAGTGATACCATAAA  
ATGCCATTAGATAAAAACAAGAGTGTTAATGATGAACGGTATTTATAAAGTTGATGGAAAA  
GATAATAATGATGAATTCATTCAATATAATGATTTCTTAAAGCATAAAACTTTCTTTCAA  
TGTCCTAAATGCAAAGTTTAAATGTAGAGGTTGATAATTTATTTGTTGAAAAAATTGCA  
TTTAATAATACTAAACGATGCTTAGACTGCGGTTATTTAGTTGTATCTGATTTTTCAAGGA  
GGAGAAGAATGATCAAACACATTTGAAACTAATATTCACATTGGCGATGTATGAAATCG  
GTAAGTTTTTAGGCAGAGAGTTGTATTATAAGTTAACTGCTAATGATGAGGTGGAAGTGC  
CTAAGGACTTTGACGAGAATGACCACGCTCATTTAAATGGCATATACGGAGGTTATTA  
TATTGGGTGAAATTATATATATGATTACAATTATAACATTGTCTATAGTCTTTGTTTTAA  
TGGAGATATTTATAATATATCTTTTTGTTGAAGGAATTAATAACAAGGAATATGTAACGA  
TTGGGTTTTCCGTTACCATGTTTTTACTTTCTATCTTGCTATTTTTTACACTTTTTATATT  
TTGGGATTTTAGGAGGTTATTAATGTGATTTGGATAAGTTTTTCATCGGTAATAATTGTG  
TTAGTACTGTGATTTTTTGCTATATATAAGTGGATTAAAGCAGAGAAAAGAGTTAATGAG  
TTACAGGAAGATAAACATGGATTGCAATTAGATAAGTTACATTTAGAAAGAGAGGTATCT

TGGTTGAAAAATAAGGATAATAAAAAACAACATAGGCAAATACGTGGTTGAGTTAAAAAAA  
GGAGTATATTTAGTGAAAAATATATAGGTAGTTATGGAAACACATGCATAATCACTGAC  
AATGTATTTGAAGCTTTATCTTACGACGATTTATATTCAGCTAAAGAAGATGCATGTAGT  
TTAACGGACGTGTACTAGAACACAAACCTAATTTAGAGGTGGTCAAACAATGTGGGGCG  
TAATAGCAATCATTATATTAGTTTTACTACTATTTGGCTCTATACTTGAACAGAATGATC  
TAAACATCAGTTAGAAGTGAAAGAGTATGAAATTGAAGTGTTAAGAGATAAGTTGGAGA  
ATGGAGGGTAAGTATGATAACGATTGAACGACACGATATAAAGAAGTTAGAAGATTATAT  
CAAGAACATAGAACGCTACAGACGAGAGTTAAAAGTAAGAGAGTATGAACTACTAGAAAA  
TCACGAACCCGAGAATGTAGGAGCAGGTAAGAGTAATATACCAGGTAATCCTATCGAGAG  
AGAATCAATTAAGAAGTTAAGCGACAATCGTTATAACAACCTACGTAACATTGTAAAAGG  
TGTAGATAAGCTCATTATGAATCAGATGAAGACACACAAGACTTAATGCGCTTGAGATA  
CTGGGAATGTCCGATAGGTTGTAGTGAGTGGGAAGATATAGCTGAATACTTCGGAACAAG  
TAAGACGAGTATATTAAGACGACGTGACGCGATGATAAATAGATTGGCAGAATTCATAGG  
TTATGTGTAAGGTGGACTTTTGAAGTGTGTAAGTCCGTTTATAATCGGTGTATTATGATA  
TTGTAAGAATTACCTCACAAGACATAGTGTTTATCCTTTCGCACTATGGTGGGGTATTCA  
ATATCGAAGTGATTGGATAAGTGTTTATCGTCCTTGATTAGACGTTGCGCATCCGATTGC  
TTAACTATCCGTCAGGGTGGCGGGTAGTTTTATTGAATCT

>NewGenomeName\_242

ATGAAACTCGGTTCAAGACACAACCAACACAGCTTCGCACAGATCCCAAGCGTTCACACA  
ACTCGCTCAAATTC AACCGCTCCTTCGGA ACTAAAGACACCTTCAAATTCGATGACCTG  
ACACCAATCTTCATCGACGAGATCCTACCCGGTGACACAATCAACATGAACACAAAAACA  
TTCATCCGACTTGCGACTCAAGTAGTCCCTGTTATGGACAGAATGATGCTCGACTTCTAT  
TTCTTCTTCGTCCTTGCCGACTAGTATGGGACA ACTGGGAAAAATTCAACGGAGCACAA  
GACAACCCATCGGACTCAACGGACTATTTGATCCCAACAATCACAGCACCCGCTGGTGGC  
TTCGAAAACATGTCCATCTACGATCACTTCGGAATTCGACACAAGTTGCAAATCTCGAG  
ATAAATGCTCTACCTTTCAGAGCTTACAATCTTATCTATAACGACTGGTTCCGAGACCAA  
AATCTTATCGGAAAAATCGCCGTTCTAAAGGAGACGGACCAGACAACCACGCGGACTAT  
CAACTACTCAAAGCCGCAAACCCGACGACTACTTCACAAGCGCACTACCTTGCCACAA  
AAAGGCATGGCTGTAGAAATGCCAATCGGCAACTCTGCACCAATCACTTACGTTCCAAAC  
GCCGGAAACGGACCATAACCTCACTTCAACTGGGTTCAA ACTCCAGGTGGACCAGGAAAC  
AACGGAGCACTCTCACAAGTAACCTTCGGCGGTCAA AAAAGCTATATCAGCAGCCGGAAT  
GACCCTATCGGCTATGACCCACAAGGAACACTCATAGCAGACCTATCCTCTGCAACAGCC  
GCAACCATCAACCAACTAAGACAAGCAATGATGATGCAATCTCTGCTTGA ACTCGACGCA  
CGCGGTGGAACACGCTATGTTGAAATTCTTAAATCTCACTTCAACGTCATTAGTCTTGAC  
TTCCGCCTACAACGTCCAGAATATCTATCTGGCGGAACTATTGATCTCCAACAGAATCCA  
GTTCCACAAACGTCTTCATCAACAACGGACAGCCCACAAGGTAACCTCGCCGCCTTCTCA  
ACGGCCTCAGAATTCGGAAACAAAATCGGATTCTCAAATCGTTTCGTAGAACACGGATAT  
GTCCTAGGCTTCATCAGAGCCCGTGGACAAGTAACCTACCAACAAGGCCCTCACAAAATG  
TGGTCACGTCAAACAAGATGGGACTTCTTCTGGCCTAAATTCCAAGA ACTCGGTGAACAA  
GCTATCCTTAACAAAGAAATCTACGCACAAGGAAATGCTACCGACTCGGAAATCTTCGGC  
TATCAAGAAAGATACGGTGAATACCGCTTCCGTCCATCTGAAATTAAGGACAATTCCGC  
TCTAACTTCGCTGAAAGCTTAGACGTATGGCACCTTGCCGAATACTTCACAGTGAAACCA  
TCACTGAACAAA ACTTTCATTGAAAGCAACACACCAATCGAGCGATCTCTCGTAGTA ACT  
CGCCAGATTATCCAGATCTTATCGGAGACTTCTGGTTCGACTACACTCACGTTAGACCA  
ATGGTCACTTACGGAGTACCAGCTACATTCGGACGCTTCTAACCAACTATCCCCGCATCA  
GGTCCC GGACGACGCCGGGGCCTTACGTCGTAGGACGCGACTATCAACAAAGGAGAC  
CCAATGGCACTACCCGCACTCGTAGCAGCAGCAGCACCCGCAGTAATCGGCGGAATCGCC  
TCATACTTCGGACAACAAGAAACAAACGCAGCAAATGCCAAACTTGCA GTATGGCAAACC  
AGAGAAAATCAAGCTGAAGCCGCTCGCAACAGAAAATGGCAAGAACA AATGTCAA ACTCT  
GCCACCAAAGAGAAGCAAACGACCTTCAAACAGCAGGTCTAAATCGACTTCTCACAGCA  
ACAGGCGGAGCCTCAACTCCCTCAGGCGGACAAGGACAAGCCGCCGGAGCAACAATGGAA  
AATTCACTTAAAGCTGGAATTACAACAGCCTTTGAAGCAAAAACA ACTCGGTATGCAAATA  
GAGCGACAGGAAAAAGAGCTGCAAAACCTCGCCGCTCAA ACTCGCAA ACTGAACATAGAC  
GCAAAAGTCGCTGAAAAAAGGATCCCAGAAAGCGACCTTAAACAAAATTTACAACAAAC  
TTTTACCGGTCATCGATCGTGTTATTA ACTTAGAAGACTCAAACGGCCCAAGACTTTCA  
AATCTCAGAGAAGAGAAAAACCAATCAGATGCCCTTAAAGAATGGGAAACTGAATACA  
TGAAACAATTCCGCAACA AAAACCATCAA ACTACAATCAGGAAAACCGTAATGAAAAAAT

CGAACTCAGACCCAACGGAACCAAACCTCGTTCACACTGTAAACGAACTACCACCTGAAAC  
TGACCAAAGTTTCGGGAAAGAATGTGACATAAACTTCATTGTCAAGAAATTTATTA  
TAAAC TGGACAAATTACACACCTAGCTAGACGCCAAGGATTCTATGGCGATCAATCCTCAATTCC  
AGACTTCCAACAGCTATGGACACCGTAACAAAAGCACAACAAGCCTTCGACGAACTACC  
AGCACACATGCGCAAACGGTTCGCAAACCTCACC GCATGAACTCATGCAATTCTTACAAGA  
TCCAAAAAACC GAGATGAAGCAATTTCACTCGGACTTATGGAAATGGTAGAACTCCGCA  
GCAAGCACCTCAATCAACGACGAACCAAACGACGACTAAACCCGCGCCAGCAAGCGGAGA  
ACCTACCCCTGTACCTACCCCTAGGGACGCGACGATCGCGGCCCAAGAGCCCACAGCG  
GCTCCGGAGCGCGGGCCATGGATGGCCCCCGTCGGGAGACTTCCACCGCAGGAGCGTAT  
GGGTGGACCCCTTGACTGAAGAGGAAGAGGGTTCGGAAGATATTTCTCCGAAGCCCTT  
GACTTAAACAAACCAAACCCTTTATTACCAACCAAACCGGCGTCGAAAGACGCATCGA  
CCGGGGCAAACGTTGCCCAAAGGAGACACAAATGCAACTAAAAGTATTCTCTATCAGAGA  
CTCAAAAACCTGGAGTATATGGGACACCGTTCTATCAACACACTCACGGTCAAGCTGAAAG  
ATCCTTTCAGCAACTAGCAAAAAGACCCACAATCAACAGTGGCAAACCACCCCGAAGACTT  
CGATCTATTCCACCTTGGGGAATACGACGACCAAACCGGGAACCTGACCCCACTGGACAC  
ACCGGAACATTGCGTTAAAGCAATCGACCTAATCAAACAGCAGTAAAAAAGACGCAGTTC  
GGCTACGGACCCTACTTGTGTAAAGTAGCCGAACTCACAGAACTCAAGTTTCTGGACCA  
AATACCGATAGGTTTAAAAAAGGAGAAAACAATGGAAATCCCTGTTTTAGACCCAACGAC  
CCTCATCCTAGCCTTGACACTTCTAATCTTAAAATCTTACCCTCTGTTTTAAGACAAACT  
CGCAAGATTACAAAAATTTTAGGAGTTACACCCATGAAAAGAAAACCAATGAGCCGCA  
AGGCCTCTCAAAAAACCTTCAAAAAGAACACAGGCGTTCAACGCATGAACCATCTCAACC  
CACGCGCCATGCGTGGTGGCATTAGACTATAAAAAAATAGGCCCTATACAATGCACTGTA  
TAAGACCCATAAAAAGCCGGTTTCAACGCAACCGGAGACATAGTCTATTCTAGCAAAAAA  
TCAGCAAAGAGCTAGCCTCTTTCGCTTTCATGTGAAAATGCATCCCTTGCCGACTTA  
ATATGGCAAGAGAAAAAGCAATCCGGGCTTATCACGAGTCCCAAATGTGGGACGACAACA  
TATTCCTAACGCTCACTTACGACGACGAACACCTCAAATCAGACAGACTCCAATGGATAG  
ACTTTGATCTATTCATCAAAAAGACTTAAACGAAAAACTGAATCGCGGCCTCTCAAAAAGAAA  
ACCGCCGCCACTACCCTACATGGTACAGGTGAATATGGAGACAAAACCAAACGCCCTC  
ACTGGCACGTCCTTATCTTCAACTTCCGGCCAGACGACGCAAAAAAGCATTACGTTACAG  
AACTCGGAGAACAAGTATATACCTCAGAATTCATCAGAGACCTTTGGACTCATGGCAATA  
TTGAATTTGGCTCTGTTACTCTGGACTCTGCTAGCTACGTTGCGGTTACGCTGCAAAAA  
AACTGGCCACGGAACGACCAAGACCACGACTATCACCCAATTCACAACACTTCAAAAA  
AACACGCCATCGGCAAAAAATGGATTGAAAAATACCACGAACAAACATTCTCACGAGGAT  
ATGTAGTCCTACCAACGGCTCACAAAGGCCGATCCCTCGCTACTATCAAGACTGGTACA  
AAAAAAACCATCCCGAAAAATGGATGGAATATGACGCAAAAGTAAAACCTTAAATCAAAAG  
AACTTGCAAGAAATGCAATCACGAAAGGACCAACTCGATGACTTCGCAAACCTTCATAAACT  
ACAGAGGCGGAACAAATTACCCGCTCTCACGCACCCAAGTAAAGCTCGCAATTCTTAAAT  
CAAATTCAAACAACCTTCAGGAGAAGTTAAAACCT

>NewGenomeName\_243

GTAGTATTACCAGCGCACTTCGGCAGCGGCAGCACCTCGGCAGCGTCAGTGAAAATGCCA  
AGCAAGAAAAGCGGCCCGCAACCCATAAGAGGTGGGTGTTACCCTTAATAATCCTTCC  
GAGGAGGAGAAAAACAAAATACGGGAGCTTCCAATCTCCCTTTTTGATTATTTTGTTC  
GGAGAGGAAGGTTTGGAAAGAGGGTAGAACTCCTCACCTCCAGGGGTTTGCGAATTTTGT  
AAGAAGCAGACTTTTAAACAAGGTGAAGTGGTATTTTGGTGCCCGCTGCCACATCGAGAAA  
GCGAAAGGAACCGACCAGCAGAATAAAGAATACTGCAGTAAAGAAGGTCACATACTTATC  
GAGTGTGGAGCTCCGCGGAACAGGGGAAGCGCAGCGACCTGTCTACTGCTGTGAGTACC  
CTTTTGGAGACGGGGTCTTTGGTGAAGTGTAGCCGAGCAGTTCCCTGTAACGTATGTGAGA  
AATTTCCGCGGGCTGGCTGAAGTTTGAAGGTGAGCGGGAAGATGCAGCAGCGTGATTGG  
AAGACAGCTGTACACGTCATAGTGGGCCCGCCCGTTGTGGGAAGAGCCAGTGGGCCCGT  
AATTTTACTGAGCCTAGCGACACCTACTGGAAGCCTAGTAGAAATAAGTGGTGGGATGGA  
TATCATGGAGAAGAAGTTGTTGTTTTGGATGATTTTTATGGCTGGTTACCTTGGGATGAT  
CTACTGAGACTGTGTGACCGGTATCCATTGACTGTAGAGACTAAAGGCGGTACTGTTCTT  
TTTTTGGCCCGCAGTATTTTATTACCAGCAATCAGGCCCCCGAGGAATGGTACTCCTCA  
ACTGCTGTCCAGCTGTAGAAGCTCTCTATCGGAGGATTACTACTTTGCAATTTTGGAAAG  
ACTGCTGGAGAACAATCCACGGAGGTACCCGAAGGCCGATTTGAAGCAGTGGACCCACCC  
TGTGCCCTTTTCCCATATAAAATAAATTACTGAGTCTTTTTTGTATCACATCGTAATGG  
TTTTTATTTTTATTTATTTAGAGGTCTTTTAGGATAAATCTCTGAATTGTACATAAATA

GTCAGCCTTACCACATAATTTTGGGCTGTGGCTGCATTTTGGAGCGCATAGCCGAGGCCT  
GTGTGCTCGACATTGGTGTGGGTATTTAAATGGAGCCACAGCTGGTTTCTTTTATTATTT  
GGGTGGAACCAATCAATTGTTTGGTCCAGCTCAGGTTTGGGGGTGAAGTACCTGGAGTGG  
TAGGTAAGGGGCTGCCTTATGGTGTGGCGGGAGGAGTAGTTAATATAGGGGGTCATAGGCC  
AAGTTGGTGGAGGGGGTTACAAAGTTGGCATCCAAGATAACAACAGTGGACCCAACACCT  
CTTTGATTAGAGGTGATGGGGTCTCTGGGGTAAAATTCATATTTAGCCTTTCTAATACGG  
TAGTATTGAAAGGTAGGGGTAGGGGGTGGTGCCGCCTGAGGGGGGGAGGAAGTGGCCG  
ATGTTGAATTTGAGGTAGTTAACATTCCAAGATGGCTGCGAGTATCCTCCTTTTATGGTG  
AGTACCAATTCTGTAGAAAGGCGGGAATTGAAGATACCCGCTTTTCGGCGCCATCTGTAA  
CGTTTCTGAAGGCGGGGTGTGCCAAATATGGTCTTCTCCGGAGGATGTTTCCAAGATGG  
CTGCGGGGGCGGGTCCTTCTTCTGCGGTAACGCCTCCTTGGCCACGTCATCCTATAAAAG  
TGAAAGAAGTGCCTGCT

>NewGenomeName\_244

ACTCCCCTCGCCTCCATTGAATGGATTTTATAGAATCCAATAGTATTAGAAATCGCTCAA  
TAGAGCGGTTTTTCTTTTCTCTAGTCCGATATGATACGATAACAATCTGATAAAAGGGAGG  
GAGAAAAAGAGGGAGAAAAAATAAAAAAACCAGTTTATTAATACTGGTTAAAAATCAATA  
TAATCGGAAAATTGTTGCCCTATTTTATCTTTAGCAAATTTAGTGATATGAGTATAAATG  
TTCATTGTTGTTTTTAAATCTGCATGCCCTAGGCGATATTGAACTTGTTTTAACTCATA  
CCAGATTCAAAAAGTAAGCTTGCCTGAGTATGTCTAAATGCATGAATTCTGATTGGTTCA  
ATTTCTTTTTCTTTGGTTATCTCTAAAAGCCATTTTCTAGGTTTTGAAGGTGAAAGCATC  
CCTCCATTTTCAGATTCAAAAATTCGTGTGGATTCAGGATAGGTTTGGTGCAATTCATCA  
AGGATTTTACAAGTTTTTTCGTCAAGGCTTAACAATCTGTTTGAATTAGCTTTAGGGGGA  
AGTATTTCATATCCTACAGGAGAATGAGAAATAGCTTTGTTGATATCAAGAGTTGATTTT  
CTATAATCTTTCCATTCAAGAGCGAGAAGTTCACCTTTACGAATTCAGTAAAAGCAAGG  
ATACGAAATAAAGCTATTTTCTTAATATCATTCTGTTTTTTCTACTAAAGCCATAAAATCT  
CTAATTCATCGGTATCATAAAAGTCTTTCTTTTCTTCAACTTTTTTCTTAATACCTTGA  
GACGTCACAGGAAGCGCTGGATTAGCTTGTATGTAACCTTAGCAGAGCAGCGTGATTAAAT  
ACCTTGCGAACCAATTCCGAAGAGTTTACGAGCGAATTTAAGCTTCTCAGATAAATCATT  
CTAAAGTTTTGTAACTCCATGGGTGTAATACTGATAGTTTTGTGCTTCCATGACGGGT  
AAGACATGTTTTTCAAAGCTCGAGTAGTTTTGTAGTAAGTGCTGTTCTGTACTTCCTTT  
TCATAAACCAATAGCCATTCATCATAAAGTTCTTTAAACGTCATAGAACTTTTTGGCGTA  
GGATTGTCAATTTCTTCTTGGATATTATGCAAAGCAGCTCGGGCATCAGCTTTGGTTTTA  
AAGCCACTTTTTTCAGCGTACTGGCTTTTACCGTTCTTTTTTCCAATATAAGCTTTGAAT  
TTATAAGCAGTAGTACCATTCTTCTTTTTATATGCTTTTATTTCCAAAGTTGCTTTTTAT  
ACCTCATTCTGATAAAATGGTATAGTAAAAGCTTATTAAGCCTTTATACTATTTTA  
TAGTTTAAATCCACCCTCTCCGTCCAAAGTTTGGGTGGTTTTTTTGTCTAATTTAAGT  
TCAAAGTAAAATCGTAAGTATGATTTGAATTATCGTCATCATAGTTGTCAGTTTCATAAG  
AAGCACTAAAATTAATTCTTAAAGATTTTATATCGTTAACGTCATTAAGTTCTTTTAGAG  
GGTAAGCTGCATAGCCTGACGTTTTAGTCCCTTTCATCAAGTCACCAGCAAAGCGTTCCG  
TTGTGTAATTACCACGTGTCTGTAATCCAGTATTAGTGCTAACGTGAGCTTCTTCTGGAT  
AAGCCGTAACATCTTGTGAGTATTATCAATATTGTAGTGTACTACAGCAAACCTTGAT  
ATTCATCATCGCTATAATCTTTATAGCCAGATACTTTAATAATGTCTACTTTGTCAACTG  
AAATATTAAGACCAGCCATGAGTTGTCAGACCAATTTGCAGAATAACTCTTTGTAGCAA  
CAAGGACAGCAGAGTCAGCTCCATTTTCATCAGCTATTTCTTATATTGGCTATCTATTA  
AAAGATTACTATCAGATTTTTTAGATTCTTTGCTTTCAGAACTGAAGCTTTTCTGAAG  
TTTTTTCTACTTTAGAAGTGTCTTCTGAAGTTTTAAAAGAATCATTCAATGTTTTAGCAT  
AAAAGCTTGAGTTGCCATAACAATTACAATGCAACGATTGAAATAACTAACTTACAA  
TGCTTAAAGTTTTTTTTGTTTTTTCGGTTTATTATTAATGCAATAATCGCTAGGATGAATC  
CAATAACTGCAAGTATAGCAGCAAAGTTATTTACAATTGGCACCCAAGATAGAATCAATG  
CTAAAATTTCCAATAATTAAGCAATGAGCGCAAGAACAATGTTCTTTTTTTCTTTTCCA  
TTAAGTTTATATTTCTAACCTAGCTTTTAAACGAGATTCGAGATATTGCTCGTAATTTTA  
CTTATTTAGTTAGTTCCCAATAATAGCTGGAATTCTTTTCTGCCATATTAAGAAATTA  
TGACTTAGATGATAATGATCCAAAAATTGGTAAACATTAATAGCTTCAATTACATCAAAA  
TAACTAATGTAATCTACGATATAATCATGCATTTCTTGCTTATTTATACTAACTTTTATT  
TCATCTTCAAATATTTCAAGTATAGCTTCATGCAGCTCTAAATATTCATTTTTGATGATT  
GACTCAGCCAATTCAAAAGGTGCATCTGTTGTATTCACAAACACATTGAAATATTCATAG  
CTTCCCCCATTGGCTTCAAATATTTCCCAAAGCAGAAGAATCGCTTCGTGGTTTGCTCTA

ACTTCTTGTGGATTGATTGCATCAAAAATATTTTTCCACGATGGTTATCTTTATTAATGATA  
TGAATCAATTCATGAGCAACTTCGAAAGGAGTTGCTTCATCAGAATTATAAATCATTACC  
CTAGCATCAACATTAACAACCTGCCGGTAGTGGCATAGATTTAATATCACATATTTTGAAT  
CCACATTTTTCAATTTCTTCAAGGAGATATTCTAAAAGCTCCTGTCTGCTCATAGAAACC  
TCCTATTTGTCTTCTAGCTTTTTCTAGAGCTTTTTTCATAGCTTCTTTTACTTCATCA  
GTTAGAGGTCTGCCATCAAATGAAACCCACTTGTCCCAATCAACTTTATTATCATCCACT  
AAATCTGCAAGGTCAAATTTTTCTTGTTCGTTTTTAATAGAAACAATTTTAGATTTCTGC  
TCTTCTTGTCTTTTAATTGAACATTTGCAGTCTCTAAAACCTATTTTTTGTCTTGGCTCT  
TCGAGTTGTGAACGATTTGATTTATTTCTTCTACTATAGGAGACTGTTTTTTTTGTTTTA  
TTAGGCATTTTATCTTTAGATATACCTAACAGATACTCTGTAGATATTCCTAGGACTCTA  
GCAAATCATCAGCACGATTCAACGGGAATTCTCTACTAAAATTTAAAATATCTAGATATA  
GCAGATTTTCGCCATATCAACTCTTCTAGCTAATTCAGATATGGAAAGATTTTGTATCT  
TTTTCATCTATTAGTATTCTTACAATTTCTTCATTTGTTTCGCATGATTTTCTCTCTATAA  
ACTTGATAAAAACATTATACCCTGTTCCCGAAAAAGCACAAAGATGTAAACGAAAAAAGT  
TTTTTTGTTTTTTTTTATACTTTTCTGTTGACAAAAGAGAACGATAGTGATATTATTGA  
TTTGTTCCCGAAAAAGAACGAAAGGAGAAATGAATATGACTATTGATTTAAACAGAATCA  
AAGCAGAACGAATCGCAAATGATTTGACACAAGACGAAGTTGCTAAGCGAATGGGATGGA  
AAACACGAGCCGCTTACGCAAACGAGAAAACGGCATTGTGTCTATTGGGGCTAATGAGC  
TTATCAAATTGGCTTCTATTTTTGGATACGATAAAGAAGATTTAGGCATTTTTTTTTAAAG  
CAAACGTTCCCTGAAAAAGAACGAAACTAGAAAGGATTCAAAAATGAATCAATTAATTACA  
ATCACACAAAACGAAAAACAACGACCAAGTAGTAAGCGGTCGTGAACACTACATGAATTTTA  
GATATAACAGAACGATACTCAACGTGGTTTGAACGGATGCTCAAATATGGTTTTGTTGAA  
AATATTGATTTTGTGGGGTGTAAAGTTTTTAACACCCTAGCTAAACAAGAAGTTCAAGAC  
CATGCGTTAAAAATTGACATGGCCAAAGAAATTTCCATGATTCAGCGTAACGAAAAAGGG  
AAACAAGCCCGTCAATATTTCAATTGAAGTTGAAAAAGAACTCAAACAACATCTTTTACCG  
CAAACCTGAAACAACAATCGCATTACTCGCTCAAGGAAACGTGAACCTGAATAAAAAG  
GTCGAACAATCGAAAATTCAGTTCTTGATTTGACTGACCGATTTCGGACTTCCTTCAAAT  
AAAGCTAAAGTTTTGCAAAGAAAGTAGCAAGCAAAGTTTATATGTTTACTGGTGGTAAA  
TATTCAAATGCTCATAAGAAGTTAGGAGCTAAGGTATTCAGAGAGTTTTATAAAGATTTG  
AATAACCGCTTCGATGTTGTTAAATATAGCGATATTCATTAAAGCCGTTATGATGAAGCA  
ACAGAATATCTTGATATGTGGCAACCATCTTTCAATACAACGCTTGAATTCGTGGATTG  
AACTCACAAACCAGCTTTGACTTTGAAGCTTAGAAAGGAAAGCTCATGTTTGAAGAAATG  
ATTCAAAGCTGAGAGATTCAGTTAGAGGAATTGTTTTAGATTCATGCACGACTATATC  
TCCAATGACGGGAAGTATCCTCTTGCTTTAACTCAAAAACAAGTTATGGAGCTGATTGGC  
TGTAAGGATGAAAGTACCTTCGCTATTTCAATTTAAAGAACATTTGAAATTTGCTGAAATG  
AATTACGGGAAATCAGGGACAAAGTGGTCAAGGGATTTAGTTATTGAATGGTTCAAAGAA  
CCACGAAATTTGCAATTGCAAAGACGAGGTAAATAAGATGACCTACACATACATAGTCAA  
CCCAGAAACGGGCGAAATCCTGTTTACCTATTTACGACCTAATCACACAAAACATTCG  
AGCAATCAAGCTCATTGCTAAGAAGTTAAATGCGGTACTCCGGTAGAAAAGAGAGATTTT  
GAATAAAGAAATAGAAAAGTTAGCTAACAACATAAAGAAATAATTAACAAAACATCAGA  
TCTTGCTTTGAAGCAAAAATGATGGTGATATAAGAAAAGCTCGCAAATGGCTAAAAGAGCA  
ACTGTTTTATACAGCTGATAGGGCCACAAACGAGCTTATCAAATTATCAATAGATAATAT  
TTTAGATTAAGGGTGTCTTCTAACGAAACAATTGCTGAAGTTTTATAAGTATTTTT  
AAAATCTAGTCCGATAGCAAACCAGTCAGTACTACCAAAAAGTCCCATCAGCCCAATATG  
TTGATATGATGTTCTAAATCTGGAGAGTCTATGTTAGAACCTGAAAAAATCCTTCGGC  
ATAATATCCATCAGGATCTTTATCTAATGAATTCGAAGCGCTTATTCTGGTTTCTTCAGA  
AATAACGATTGACTCACCATTAGAAAAATGTACTTTAACAGACATCAACTTTCCTCCTTT  
CCATAAAACTAAGCAAATACCGCAAATATCTGCTCACAGTAATTATAGCACTCGGAGGAT  
TAAAACACATACATAGAAAGGAAATTAATGCACACACAAATTATGAATGGACGAGAAGTC  
CTGACAGTTCCAACAGTCATTGGATATAAACATTATGACTTAGAAAAAAGAGAAGTAGTT  
GGAGAAGTTATTGAATCTACTTATCGAAGAAAAGACGGAAACAATGTACATTATCCGCAGA  
TCACGAACAGAACGAGAAAAAGCTGCTATGCTCAATTCGTGCTTGTCTGACTGGGGATAT  
TAGTATGAGCAAACAACAAAAAGCCCTGCATGGCACGCAGAGCAAGTAGGAAATTCGCC  
AAAACCTTCTACTTAAATTATACCACGAATGCCTAGAAAATGAAATGGAGAATTGAAATG  
GACTTACAACCTTATACCAGTAGATGGCGATGGACAAAGGGTTGACTTGAATCCATCGGCT  
ATAAAAGATATGGATAATATCACACTTACAGAATTCTTAGCTCAGGCAAAGATTATAGCT  
GACCTTTATAAAAAGGGCGAAACTGAGGTTAAAAAGCGACTCGATGAGGGTCAACAATTT

AATCGTTTGAGTTATGGTAAAGCAGCACAACAAAAGGTTTTAACCATGACTAATAAACAG  
AAATATGACTTAGTTAAAGCTCATGGTTGGGATTGTGTAGAGCCAATTACTTTCCTAAA  
CTCAAGAGCAAGTTTGGAGATGGAATAGAGCAAGAAGCTTGAGCAGTCCATTGTTTATAAA  
GATAAGAAAGCACCTCTTAAATGGGATGCGTGAGGTAATCATGGCAGATTATGAAGAAC  
AAATGCTTGCCTTACAAAAACCTTTGCAACCCAGACCGAGTAGTTTGGAGAGTTCAACAAT  
CAGGATTTTCTAAACAAGGGAAACCTTGGGCTATGGTTCTTGCTTATATGGATAATCGGG  
CAGTTCAAGAACGTTTTGATGAAGTTTTTGAATTGCCGGATGGAAGAACGAATTCAAAA  
CAGCTCCAGATGGCGGGACGTTATGTGGTATATCCGTTAAGTTTGGAGACGAATGGGTAA  
CCAAATGGGATGGCGCAGAAAATACTCAGGTTGAAGCAGTTAAAGGTGGGTTATCTGGAT  
CAATGAAGAGAGCAGCTGTCCAATGGGGAGTAGGTAGATATTTATATGACTTACCTACCA  
GTTTTGCTCAAACCTCACTTGAAAAGACTGATGGTTGGAACAAAGTTTTTGATAAAAATT  
CAAAAAAGAAGTTTTGGTGGAAGAATCCACAGCTTCCAAGTTGGGCTTTACCTCAGAATT  
CAAAGGTTCAAAATACAAAAGCTGATTTTACTGAAGAAGAGATACCAAATCCACCTAAAT  
TATATGTTGTTGGTAAAGATAAAAAAGAATTTGATGAAAAAAGCTTCAAGCCGTAGTTA  
ACAAAATGGCTATTATTGCCGAAAAGACTATGGGGCAAGTGTTGATGAACAAAATGATT  
GGCTAAAAATGCCACTTGATGAAGCATAAATGATATCGAAAAATTCGTAGATATAAAAA  
AGGAAGAACAAAATGATTAACAATGTCACTCTAGTAGGGCGAATTAATAAGAACCTGAA  
CTTAGATATACACCACAAAATAAAGCAGTTGCCACTTTTACTCTTGCAAGTTAATCGAGCA  
TTTAAAAATGCTAATGGAGAAAGAGAAGCTGACTTTATCAATTGTGTTATTTGGGGTAAA  
TCAGCCGAAAAGTTGGCCAATTGGACTCATAAAGGTCAATTAATCGGAGTTACTGGTAGT  
ATTCAAAGTTCGAACTACGGAACCAACAAGGTCAACGAGTTTATGTAACAGAAGTCATT  
GCAAACAATTTCCAAGTACTTGAAAAAAGCAATCAAGCAAATGGTGAACGAGTTAGTAAT  
CCAGCTGCAAAACCACAAAATAATGATTTCTTTTGAAGTGATCCAATGGAAATTTTCAGAT  
GATGACCTACCATTTTAATTAACAACCAGGTGCAGCGTGCCTAACAATGCTTAAATTCG  
AGGGGATAGGCAATGCGCAACATCCCCAGCCTTTAATTTGAAAAATAAACTTGAAATA  
AATATAGAAGAAAGGAGTGTAAGGATTGGCAAGACCAACAAAACAAGGAATTGACTATTA  
TCCAAAAGATGTAAAAGCAAAATATGATACCAAATTTAAGTACGTAGAATCAAAGAACAC  
AGTGATTGCTAGACTTGTAATTTACGAATTATGGGATTTAATTTATGCAGAAAATGGTTA  
CTTTTTAAAGTTTGATAATATCCAAAGAGTTTTATTCTTAGGAGATTTACCAATAAATGA  
TGAGCAGCTCACAGATATTTAGATAGCTGTTTTGAAATTGGATTATTTGAAAAGGGACT  
TTTCGATAAATATCAAATACTTACATCTGAAAGCATCCAAAAAAGATATATGGAAGCTGT  
AGGTGCGCAGAGCTAAAGTTCCCTATAATTTCTCTTACTTTTTATTGCCGAAAAACAGTTA  
TCGCAACATTAAGTTAGTTAATGACTACATTAAGTAAATGATGACAATAACTCGAT  
TAATGACAACATTAATCCACAAAGTAAAGTAAAGGAAAGTAAAGTAAATAAAAGTAAAGT  
AAAAGAAAATAGAGAAAAGGAAAACAAAACAATAACCAAGAAATCTTTTCTCGCTTTTT  
CGAACTCTTTTCAAAGTTAATAAAAAAACATTTCCAAAAGAGCAATGGCTTTACAAGT  
TTTTCTTGACTTACCCCAATTTCCAAAAGATTGCATTGTAAAAGCGCTGAGAATTACAT  
TCAAGATTATATAAATAATCATTCCGGATGACCTAGATGGTAACTATAGTGTTAATCCGTA  
TGAGTTTTTGGATAATGTAATGTTTCATGAATTACCAAGAAGAAGTCAAAGCAGATACTGG  
ATATGACGAGGATTTGGGATTCTAGGAGAAATATATGCAGTCAATGGCAGATGGAATCCG  
AGAGTTCCATAAAAAGAGAGAAGTTAAAACAGGTCTATTTTGTGAAAAACATCAAGAAAC  
CGAGCTTGTTAGATATAAACATCCAGTAAGTATAGATTATGATCCGTTGATTCATGGAGA  
TTTAGTTGATGGTTTGCAGGTAACCTCAATGAGTTATTGTACAGAATGTGCTAAAGAGGG  
AATATACCAACATCACCAACAATCAAGTGCTGAAATAAAAGCAAATGAAGATTTCTTGAA  
TAAAAGTAAGTATGGAAAATATAGCTTGCTTAAAACACAAAGCCTTGTGGGCAAGAAATC  
GCTCTGGTTTGCACGTTTCAATACTTTTAAAGACAAATAGCTTAGAAGAGCAAAATGTGTT  
AAATCAAGCCCAAAGAATAGCCAGAGAGTACACTCAAGGTGAGAGGTTTAAACTGTGTT  
TGTTGGCGGAGCTTGTAGAGGGAAATCTCACTTAGCAATGGCCATCTTGCAAGAAGTAAA  
TGAAAACCTTAAAGATAATAAATTTCTCAACATTGTTTATCAATATTAGTGAATTAATTCG  
AGAAATTAATAAATAGTTGGAATCACTCTGATACCAAAGCAGAAGAAGAAGACTGACAAC  
ATTAATGCGAACAGTTGATTTGCTTGTTATTGATGATTTAGGAACTGAAAGCACGTTTTTC  
TAAAGATAATAATTGGGTACAGGGTGTTATTTACAATATTTACAACGCAAGAGAAGGTAA  
TACGATTATCACATCAAATCTTACTGGTAAAGAAATGCGTTTCATCTTATGACGATAAAAT  
AGTTTCTCCAATCATGGAAGGCTCAAAAAATAGTGTCATTAATTTGAGGGGAATTACTGA  
CAAGAGGAAAAGTAAATGAAAACAATAATCATTGAGCAGTGGGAAAACGAACATTACCCA  
CTCGGAACAATTAATAAAGCAGAAGCTGGCAGAGAAAAGTGGCAGATGAGATTCTTTTTATA  
CTTAATCGCATGGCTCAGATGCCTGCAATTGCTAGATTTGGAGAAGTAAATGAAGTTTCA

GCAAACAAAAAGTCAAATATGGAGCAAAGAAAACAACGGTAGATGGCATTGTATTTGA  
TAGCAAAGCTGAATCAATCTACTATTTGCAACATAAAAATGATGAGCGGATGACCATGCA  
AGAGAAGTTTGTCTTATGGATAAATTTAGATTGAACGGAAAACCTTTATAGAGAAATAGC  
TTATAAAGCGGACTTTGTTTTTCAGAAATGAAGCTAATGAGATTATCAAAGTTGTCGATGT  
AAAAGGCATGGTCTACCTGAATTTAAAATGAAAGCAAATTATTTGCTAACAGATATGG  
AATTCCAATAACAATTGCTAAGAAAGTAGCAAGAATAAATATGTTTCGAGGAGAGCGAAAT  
ATGATTA AAAACCGAACACGACAATGTTTTTGTCTTATATTGCCAAGACAAAAAATAGTA  
ACAAACGGAAAGTTATTACGAGTTGAGTTAGGGTTCCCTTATCAAATTATGTCATTTAGA  
TATGTCGGAGAAAGCTCAACAGAATATACACGAGGTGACTTTTATAACGTTATTGATTGC  
GGCCCGCATTGGCATACTAATGAAATTGTAGTTTGGGTTACCAATAATGGGCATCCTGAA  
ACTACTGATGTTGATTATTGTACCGCTTTTAGTTTTGATACCTTTTTGTCTGATTTTGAA  
TATGACAGTAAATATCTTGAATTAATGAATAAGGTTGAAAACTACAAGAAAATCTGGAT  
TCTGTAAAAATGGCACTGAAGAACATTTATAATCAACCTGAAGATGATGGAATTATCAGC  
ATTGATGAGTATCCATCACAAATTAGATACTATGCTAAAAAATCACTCGAAGCAATTGGA  
GAAAAAATTGATTA AAAACAAATTTTGTACTTTGAAAAAGCTGTATGGATTGGCAAGAAA  
TAATAATTTCAACGCTAACCACAAAGAGTTATCTGTGAAAATCAGCGGTGCAACTAAGCA  
CAATCACGAACTTTCTCAGCTTTACTTAGATATTTGCAATAAATAAACCATTCAAAGCA  
AATGAAATGGAAAGATTTATACAAAATACTTGAAGAATTAATTCCAGGTTTAGCAATTGA  
ACTTTAATAGCTCTAATTCATGAAAATTACGGTTACATTGAGCGCTTAAACCGTTTCATG  
GATAATTTATCACGAACAAGCTAAAAGTGCTTAGAAGCTAAAATATGAGGTATAAGTTAT  
GTCAATGGAAGACTATGAAATGTTTGAAATGCCGCTACTGAGCGAAGAATCGTTCATCG  
AATTACAGAAAAAGAAAAACAGGAATTCGGAGAAGAACATTCCAACGTTATGGTTTTGG  
TTCAGTAAAACAATGGCGAACTGTAATGATGATTGAAGCCAACCTTGTTATAAATTCAG  
TGGTTCAAGCTATTGGGATTTAAAAGATTTTATCAGTAAATATTTTGAGAGTGCTAAACG  
TGAGACTTTTGAATTAAGTGGCGGGAGTCTTGGTGGTGATTTTTATTAATAAATTTGAAA  
GGCTTTAATTATGGGATATTACGACACAAGAAATGAAGCTAGGCGAATCAGTAAGCTTGC  
TAGTCAAATATATCGAGTGAGCAAACCAAAAAAGAATTTGAATTAGATAGACAAAGCAA  
GTTTAATCAGGAAATGCAAGCTGAGTTTACGAAAAAATTA AAAAATTAGGAGAAAAAAA  
TGGTAGTTAAAGTCTTTGATGCTTATATTGAAGGCGAAAAAAAAGCAACCGGAACAATTG  
ACGAGATAGCCGATTACTTTGATATTTCCCGCAACTCTATCTCATTATGGATAAAGAATG  
GGAAAGACCCTAAAAAAGCTAACCCTAAATATAAGCACGCTATTTTAAATAAAGAAAAAA  
CTAAAGAGCTTATGGAACAAAAGAAAAAAGAAGAGCGCAAACCTTCCCGCTTCTGTTTATG  
ATTATTATGATAAAGGGGAATTCATAATGACAGGAACTGCTCGAGAAATTTCTCAATTTT  
TAAATATTGGCAAACATAACGTATATTCATATATCCAAGTTGGTAAGCACGCTTTTGATT  
ACAGAAAAACAAGAAAACATGCGATTTTAAACGAAGCAGAACTAGAAAAAGATTTCCAT  
TGCTTTTCAGTCTCATCAGAAGAAGAACTTATTGAAACAAAAGAAAAAGAACGTAGAAAAC  
ACGAAACAAAAGAAGAACGTAGGTTGCGAAGAAATATCAGAGCGCAAATGGCAATCGAAA  
ACTCAAGAAAAGACGACAGTGTCTTTAAATAAAGGAAAAACAACAATGAATAAAAAAATT  
AATCACAACAGCAGTAGTCGCAGCAGGAATCTTTGGTTCAGCAACTTTTGGAGCTTATGC  
AGCTAATGCATGGGCAGGGCATCAAATATGGTAGCTGTGCAACAGAATATCTCTATCTT  
GAAACAACGCTTGCTAGACCGAAACGAACAGCTTAAACAGGCTAATAATAGCTCACAGCA  
ATATGCAGACCAACTGAATCAATTGAACAACCGAATCAACCAGTTGAAAGACCAAAATCAA  
TCAAGATAACTCAAACCTTGCAAAATCAAGCTGCTAGCTATCAAATCAACTGAACGTACT  
CAATCAGCAAAAAGAAGAGGTTGCTAGACAGTTGAATCAAGCGAACCAAGATAAGGCTAA  
CATGGCGCAACAGATTAGCGATTTGAACTCAAAGCTAACTGCAGCTCAACAAAAGACTGA  
CGAGCTATCACAGGCGGTTACCGATGCGCAACAGACTAAAGATTTGTCAGACGACGCTGT  
CAATGCTACGAAGTGAGGTGAGAAATGACAAATTTATACGATGAAACAGTCACGATTTTA  
GAAAGCCACGATAAAAACAATTGCCGATATTGAATATATTGGTAGTTCAGAGACAAAAATT  
AATACAAATAAAGCGCTCGAATTGATGAAAAAAACGAATTATCATAGTGGTTATGGCGGT  
CAAGAAATAGCAGAAAACCTAATGATTAAGGGGAATGGTTTCATCATGACACGAGGGGAA  
TATGATGGCTCTGAATGGTGGGATTATATGCAAACAGACCCGTCTTTACCGCAAGTAGAG  
AGAGAAGTTAAAAGTTTTAAAGCAAACATAGGCTGGGAAAGCTTAGAGGAAATTAATGGC  
TTGGAGGACACGAAAAATGACTAAGTTTGAAGAAGAATTTAAAGCATTAACTAGTTGGGA  
CTGGGTAAATGTTGATTTAATTCAGCAGATATTAACAAGATTCGGTAACTGGCACTCAGA  
CGAAGAGTTTCAGGCTGAAAAAGATGCTAGAAAAAAGAATATGAAATTCATCAAGATAT  
TTATTCTAAAACATCGAAAAAATTAATAAAGCTGAGTTAGAAATCACTAATTTAAAATC  
CCAACCTCAAACAGCAAGCCCTGCCAGTCGTGCCTGAGTGTGTGGCAGGAGCTATTGAAAG



TATACCGACCATTACTCAGCGTTCGAAGCTATCTCACTAATTAACGCCAAAGTTAATGC  
ACTTCCCGAAGAAAATGAAGATTGGCTACCTGTCTACAATTGGCTTTGTGAGGGTGTGGA  
AAACCAAGATGTTTTTCGCTCTAGCATTATCACTGGCAAATATGAAGTCGAAAAACCGCA  
GCTGTTCTATTTGAAGAATAAGCTGACAGGTATGTGGCTAATGCGGGATGAAGTAGATGA  
AGTATATCCATACGACCATACTTTAACAGATGCCACAGAGGTAAATTCACCCAGCAAGA  
AATCGACAGCATGGAACTGGGAGCTATGAACAGATTGAGGTGGCGGAATGAGTGAGAAA  
AAATATTATGTGAGGCTTGCCGAAGCTTTTCAACATGGCGGGAAATATCTTGTACAACCTT  
GGATTTAATGGAAGTACTATTATTTTACAGATACAAAGGTTCTGCTGCTGAGAACTAT  
AATCAAAATAGTTTCACAAAATCAGAACTTGGTAAAATCATGGGCGGTGCGATTTATAAA  
GGGTGTATTTTGGCAGATGGGCATGAGTTTGTTCGGATTGTAAGCCATGGATTAACCCG  
CTTATTGAGCTTGTGCCTGTGGAGGACGGAGAATGACAAGAAAATTTAAAAAACTAAACG  
GAAATGCGACTATTCCAGAACGAGCGACAGAACATAGCGCAGGATATGACATTTTCAGCAA  
GTGAAACAGTTACGATTCAACCTGATGAAATTAATAATGGTAAGTACAGGTCTAGCTGTTC  
AACTCGGACATGACGAAGTACTGAAATTATATGACCGCTCAAGCAATCCAGTTAAGCGTG  
GCATTGCATTGATTAATTCAGTAGGAATTATCGATTTCAGATTACTATCCGCAAGAATTTA  
AAGGATTATTTATGAACATCTCAAAGAGCCTGTAACCATTTCTAAAGGTCAAAGAATAA  
TGCAAGGGGTATTTGTCAAATACCTTACAACAGACGATGACAACGCAAATGGAAAGCGTA  
CAGGCGGATTTGGTAGCACTGGGGAGGTGTAATAAATGATGAAGCAAACAACATGTTATG  
GCTGTGATAAACCAATCGAACCTGAATGGCTTCCAGAAGGAGAATTTATTGTATGTGATG  
AATGCTCTTCAGACACTGACAGCCTTTTCGGTTGAAAACTCCAAGAACAGCTTAACACTG  
CGAAAAAGGCACTGACAGAAATAGCTTATACCAGACAAGAAATTTGGCGAGGAGGCACAT  
TGGTCGGATTTGAAGCAACAAAAGATGCAAAAATAGCTTATGATGCACTCGCAGCGATTG  
GATGGGATGGGTGCTCAGTTGGTCTAATAGTTAAGAGTGGATTGACAAAAGAAGAAGCTTG  
AAGGGAGCGGCGATGAGTGATTTAGTGAAAGTGGTGGAGGGATGACAACAGAGGAAATAG  
TACAAAACCTACCAATAAAGTTGTTAAAGATTATATTCAAAGAAATTTGATAATCTGATGA  
CGAAAAAGAAAATGCGGATATTAACGCACATAAACTTGTGAAAATGGGAAATCTGTGA  
GAACATCAGCATATTGGAAATCAGTAGGAAATGCAGAGTTTTACATTAAGAGATTTACC  
CAAAGTTGAGCACTTTAGCAGAAATTGATAGGCTTTTCCATTGGTCGGATCATTTACATC  
AAGAACAATTAATAATTTGTTAGTAAATATCCCAAAGTTATGGAAAAATACAGACAAACTA  
ATATCGCTGGTCAATGACTGGTGGGGAGGGATTAATGAATAATGAATTGCCAGAATTAT  
TAATACGAATCATAAAAAGCCGCAATGATTGCTATTCCCATTGGGGACTTATTATCATGG  
CTTTTATCATATTCATTTTCAAATAATGATATTAATAAATGGTGGAGGAATTGAAAATGAA  
ACTAATGTGTAAGCTGTTTCGGGCATAAGTGGGAACCATTGCCATTTACAATGACTAGAGA  
TTACTGTGAGAGATGTTTTATCGAAAAAGAAAATCCTCACGGTTGTACTGGAATTT  
CAACCGCTCAGACCTTGACGAGTCAGAGAACGTGTTCCCTGAAAAATGGCTTGATAAACA  
TATGGATTGAGGTAGGAAGTGCATAAAAAAATAAGAGATTACTTGACAAAATTTATTATA  
TGCTCGTTTGTCTAATGACTGCTTCTAATATGATTAGTATGTTTTTTAAAAATGCAACA  
ACTAGCGATTGGATTTAACTATTGTTATTTCTTTAATCGCAGCATATCAAAAATATGGAT  
TGAGGTGGAGATGAAAGATAAAGTTATTAAGGGTTAATAAGAGGAGCATGTTTATCAGT  
CTTTTACCTCATATTTGAACATATTTCTAGAAATTGGGGATTGGCTGAAACAAGACAATT  
TCTTTATATATTAATTATGATTCTCTATTTATGGAAGGATAATTGAACGCAAAAAAAGCC  
CAAGCTGACCAAGCTTGAGCGAAATTGTGAATTCTAACGTTTATATTTTTATGGTCTAAC  
AAATTATATCATACTGAGCTAGGAACTCGCTAAACTCAACTGGAGGGAAAATGATAACAG  
CAATTGCACAGATAATGACATCTATCTCAATAATAATTTTATTGGTTCTTATAGTTTTTA  
CCAATAAACGTCTGGCTCAATTAGAAGTTAAGATTGAACGTTGTAGAGATTTATACAACG  
GAATAGATTTAGTACCCTTCGTGTAATAAATTAATTATCTTGAAGGAAGCATCAAAGCTT  
TATATAAATAAAGTATTGTTTAAAGCGTGGATGGTGGAGTAGAGAAGGAGAAGTTCAGG  
AAGAATATTTCTTTACCAAAAAACAAGCGGATAAGTTTATTGATTCTAATAATCTAAAAG  
AAGTAGTAATTATTAGATTAGAGGATAATGAAACTGAGATAGTTAAATAAACAAAAAAG  
CGCACTGCAATGCGCTTCGGCAACTGAATTTCTAACTTAATTATACCACAAAAGGAGAAT  
TTGATGAATGGCAGATAAGTTAGATAGAATTATTGGAGATTACGTTAATGGCAGACTTGA  
AGCCAGAATAAAAATCAATTGAAAGTAGATATCTTTATAAGCAAAAAGTAGATAACTTAGG  
CAATCGTACAGCTTATTCTGGTGGTTCGGAACAGTTAAGTCATGTTTTAAATAAAGAAGC  
GCTTGAATAATGATGAGGAATACATCAAGCTCAAAGACCTGATGTACCAATTCAGCTTGTG  
GTACGAACCTTTAATTAAGGAGGAAAAAGAAATAATCAAGCTAAAACACTGTGGTTACGG  
TGGTTTTACATGGTACAGAGTAATGATGGAACCTTGATAATGAAGGGATTGAGATTTCAGA  
AAAGAAAGCTAAGTTTATTTATTATCGATTTCAGAAAAGATATAAACCTCATATTGGCTA

TTTCATTTGAAAGCATGGGTCAAATTGGGATAAAAACGACACGAAAAAGGCACGAAATTG  
GAGTGTGCTCCTTATTTTTGCTGATATACTTGTATTATGAAGTAAAAGGCCAAAAGCACA  
AATTTTCGAAAAGTAAGGTTGAATTTGCTTCATAAGCTTGTAGGGTTCGACTCCCTGAC  
TTGCTATTATATTTTATTACAGGTTGTCCAGTGGGCAGCCTTTTATTGTTGGAGGAATAA  
GATGGATCTTGAGCGACCTAAAAGAATAATGCTCCTATGAAACCAAAGAACGTAAGAT  
GATTTATGTTGAGACTAAATACGGTGTATTGTAAGATTGAATATAGCGATAAAAAATGGGG  
ATCAATTGTATCTCAACTAAGCAATGGTATGCCATGGATTGCTGCAGGTGAATACTTGCT  
TAGAGTTGATGATATAGTGTTAATTAAGGAGATAGCTAAATAACATGCCAATGACTGGAC  
GCTGTCGTGAGCCTAACTGCCACGCTGTAGTTGTTAGACCACTGCACTATTGTACTAAGC  
ACGCTGATAAAGAAGCAGCATATCAAGCAAGCAGAGAGCGATGGACTAATCGTACTAGTA  
ATAGTAAACGATACAAAGACTATGATCGAATGAGAAGTAAAGATCCATTTAAAGCAGAGC  
AACATAAGTTCTATCAAGGCCAAACAATGGCGCTCAATAAGAGAGATTGCACTCAGACGTG  
ACAACATTTATGTCAGTATTGTTTGAATCATAAGCGAGTTAGAAGTGGTAACATAGGAG  
ATCACATTGTCCCTTATGAAGTAGAGCCTGAGAATCGGACTAAGTACTAGCTAACATTGCAA  
TAGCTTGTAGTAAATGCCACACAGCTAAGACAAAATGGGAACAACCTTTATTATGGAAGT  
GAATGGGGAATAAGCTAAAGAATGCTATCCCTATCAGAAATGTAAGAAAGACTTGCCAGATT  
TTCAAAAAAATATTCGATAATTTTTAATAACCCCTCCCCCGTATCTTTTCACAGGGGAAAC  
CACACACATAGGTATCGTCTTGCGTGAAAACCCATTTTTCAAAAATTTTTATATAGGGGGG  
GTCAAAACACTAAAAGAAAGGAGAAAAAATGACAGCTAAGAAGTTCAAAGACAGTAATGA  
CGGGAAGTTGCTCTATCGTGCACCTAAGCACCTTTCTCCTCTCGCAAGTGCTTGTGGCG  
TAAACTGTTCCCTTTCTTGAGGAACAAAAGCCAGTTGATAAGATTGATTGTTTTAGT  
TGAAATGTACTGTACTCAGTATGAAATTTATAGAAATTCATATGAACATCTAAAAAACA  
TGGTGAGGTTCAAGAAATTTATAAACCAATTCAAGATATGACTGGTGAATTTATTGATAG  
ACAGTTCCAAGGATTTAAACGTAATCCAATGACTCAAATTTACTCTGATGCAATAAAAA  
TCTTACAAAGATTGGTTCTGAGCTAGGTTTATCGCCAAAATCACGTTCTGAATTGATAGA  
GCTTAACATGCAAGATACGAATGAAAAAAGCACTAAAGATAAGATGAAGGCATTCTTTGA  
TGGAGGTGATGATGATTACTGAGTTAGCTCCTACAAAACAATGAATAATCTTATCATTG  
AATTTAAAGTTGATTTAACGCAGGACCACGACGTCTTAGGAGCTTATCATAGTATTGATT  
TTTCAGAAATACGTGCTAAATATAGAGACCCTGGCACAAGATATGCATTCGCAGTATTAG  
ACGGTATAACAAAATCTGGGTATCTAACAAAATTAGCAGCATTTAGGCATTTAAGAGACC  
TTCAAAGAATTGGACGCGAAGATTTTCCTTATAGATACTCTAAAAGGAAATAAAAAATT  
TACTAAAAGTTGCTTCAGTTGTCCCGAATGTTGATACAGGCGAACCAACTGAGCTAATGC  
CTTGCCAAAATTCATTATGTGTATGCTGATAGGCTGGAGGAATAGCGAAGGTGGAAAAA  
GGTTTACCGTCGCTATAATATCAGTATCTCGTGGGCAAGGTAAAACCTTATATTCTAGCAA  
TTTTGATGGTTTATTCATTTTTATTTGAAAGTCTTGGTTTATCAAATCAGGACTTTTTAG  
TTTCCTCGATAAACTTTAAACAGACAAGCAAATTGTTTGGATATGTTAAGACGATGCTTA  
AGACAGTTATAAAAATTGAACCATTTAAAACAATTGCTGCTGAAACAGGTTTGACTGATC  
GTTCTATTCTGAATGATGAAGTTGTCATGAAGAAAATGAATAATAAAATTCGTGCTATTT  
CTCATGAAGCTGGTCAATATGATAGTTTTCACTTTACAACCTGCTATTTTTGATGAAATCG  
GAGAGGTAACATAAGAGAAAAAATTTCTAAAATTTGTTTCTGGGCAAGTTATGGTTGAAA  
ATCATCAGTTTGTACAAATTTCAACTTCCTATCCAGACCCTAGCGTTCCTTTTAGAAAAG  
ACCAAAAACACTTCAAGAAGCTATGGAAAAAGATTGGGATAGAGAAGCAGATACTTCTT  
TGTGTTTGGTATGGGCGCAAGATGATTTATCAGAAACATTCGAGCCAGAACTTGGGTAA  
AATCAAACCCTCTTCTTGAATTGGAAGATAAAAAAGATATTTTATTAAGGATTGATTG  
ACAAACGAAACAGTGACTTGTTACAAGGGCACTACATGATTTTCAAACCTAAAACCTTA  
ATATGTGGCTTCAGCAAGATGTTGATAGTTACTTAAATCTTGCTGATGTTGAAAAAGCTA  
TTATTCCTGAATTTAGCATTTCATGGGCAACGCTGTTATATAGGTATTGACTATTCAATGA  
TGTCAGATAATAACAGCGATTGCTTTTCGTTTTTCCTTATTTAGATGATGAAGGAAAGCCTA  
AGTGGCATGTTGAACAGCATTTCGTTTGTTCATTCCAAGAGCAGGTTCAATTGATGCTA  
AAGAAAAACAAGATGGTATTAATTATAGAGAACTAGAAAAATATGGTTTTTGTACAGTCA  
CAAGCCACCAACAAGGGCTAATCAATGATGATGAGGTCTATGAATGGATTGTAACTATA  
TTGAAGATAACGCATTGGATGTTATCTTTTTTGGTTACGATGCAATGGGTATCACTAAAG  
TAATTCAAATGCTCATGAATAATACGGGCTATAATTTACAACCTATCCGTCAAAGAACGA  
GTGAGTTGAAAGATCCTACAAAATTTTTACAAAACCTATTTGTAGAGGGATCTATTAGTA  
GGCTAGATGATAAATCATGGAAAAATCGCTATTAATGCGGTTTTACGTGAAGATTCAA  
TAGGAATACAGGTAGATAAACGAAAAGCAACTTTAAAATTTGACGTTGTTGATGCGATTA  
TTGATGCTTTATTTCAAGGGATGTATCACTTTGAGGATTATGGTATGGCAAATGATAAGA

GTTGGAAAGTTGAGCATATGACACCAGAACAAGTAAAAGAATGGGTTACTAGCCAAGAAT  
CTGGCTTATTAGACCTTGATGACGGAATAGATGATGATTGGGGATTTCGATGAAGATTTTT  
AAAAACTTATTTTCTTTAATTTGGAAAATATTTGATGTACTTATGTTTATTGCTTTTGCA  
GTAACCATAACAGTAACAATGTTTATGTGGAATATAACAGCTGGAGGAATTACTTTATCA  
GTTGTTTTTATTTTAGCAGGATTAATTTCCGAGTTTATAGAAAAGAAGGGAGGTAATTGA  
TTTTGCCAATATTAAACTTTATCAACCAAACAATGATCCGCCAGAAGTTGGTAGTGTTT  
AAAGCTATTTTCCAGATGGAAATGATGCTCAAATAATGGAAAGTTTGCTTGGAGATAATA  
ACGAATGGGTTTTCAGCTCGTGCAGCATTAAAGAAATTCAGATTTATTTTCTATTATCTTGC  
AGCTATCTAGTGATTTAGCAATAGTTAAAATCAATGCTGAAAAGAAAAGAATCAAGGAA  
TCATTGATAATCCAAGTACTAATGCTAATAAACATGGATTTTGGCAATCAATGTTTGCAC  
AGTTGCTTTTAGGAGGCGAAGCATTTCGCTTATCGTTGGAGAAATGCTAATGGCGCTGATA  
TGAAATGGGAATATTTAAGGCCATCTCAAGTAAATACTTATTATTTTCGAGTATGAAAACG  
GAATGTATTATAATACACTTTTGATGACCCTAAAATAGAACCTATTTTACAAGCTCCAC  
AGAGCGATTTGATTCATATGAACTACTATCAATTGATGGTGGTAAAAGTGGAAATTAGTC  
CACTTTACTCTTTGAGACGTGAATCAAAAATCCAAAGAGCCTCTGATAGATTAACAATTA  
GTTTATTGAATAGTTCATTAAATGTTTCTGGTGTACTTACTGTTAAAGGTGGTGGACTTC  
TTAGTGATAAAGATAAAGCATCTCGTTCTCGTTTCGTTTATGAAACGTTCAAGAAGTGGTG  
GTCCCGTAGTATTAGATGACCTTGAAGAATTTACAGCACTAGAAATTAATCAAATGTAG  
CTCAATTATTATCACAAACAGATTGGACTTCTAAGCAATATGCTAAAGTATATGGGCTTC  
CTGACAGCTATATTGGTGGACAAGGTGACCAACAATCCTCAATTCAACAAATAAGTGGAA  
TGACGCAAGTGCATTAAATCGCTATTTAAGACCTGCTATAAGTGAATTAGAGTATAAGT  
TAAGCGACCACATAAGCGTTAACATGAGACCAGCTATTGACCCTCTTGGTGATAATTACT  
TATCTACTATTAGTACTGCTACAAGATGGGGTGCATTGGCTGAAAATCAAGCTACATTTG  
TCTTGCAAGAAGCAGGATATATTCCTAAAGACCTACCAGCTCCTGAAAATACAAATAAAA  
AGACAACTGGCCAAAGTAATGAGCCAGTACCATAGGAAAGGAGGTGGTCATGGTGATTAT  
TCTTAGAAAGGAGGTAAATGATGACAGTAATCGACATTAAAGGAGATGTAGTTGATAATA  
GTTACGGAATGATGTATGACTGGTTTGAATCGATTATACAAGTCCATCTAAAGTTAATG  
ATGCCTTAGTAAATGCTGATGATGAAGAAATTGTTTTAAATATCGCTTCTAATGGCGGAG  
ATGTATTTGCAGCTTCTGAGATTTATACTGCTATTAAGATGAATGGTAAACCTGTAACGT  
TAAATATTCAAGGATTGGCAGCATCTGCAGCTTCAGTAATTGCAATGGCTGGAGATACGG  
TGAATATCTCTCCAACAGCCCAATTGATGATTCATAAGGCTATGAGTGGTAGCCAAGGGA  
ATGCTGACGATTTTGAACAAGAAGCTAAAGTTTTAAATGGTGTGACCAATCTATTGCTG  
CGGCTTATGAATTAAAAAGTGGTATGAAACAATCTGATTTATTGCAGTTGATGTCTAACG  
AAACATGGATGACAGCTCAAGATGCAGTTGATAAAGGATTTGCAGATAATATTATGTTTG  
TGGATGCTAATAAACCAGTATTTTCTAACTCAATCGGCAATATTCCAAGTCTGATAAAC  
TTAATGAATTTATGAATTTTATGAATTTCAAAAATCGGAATAACCCTCCGAAAGAAGAAC  
CAATTATAGAAAACAACAAGCTGATTTACGTTCTCGTAAGTTGGCTATTTTATTAGAAA  
AATAAAGGAGACTCAAATGGGAGTTAAATTAACAGTAAATCAATTGAACGAAGCATGGAT  
TGCTTCAGGAGATAAAGTCACAGACTTTAATGACCAAATCAACATGGCTCTTAATGATGA  
TAATTTTTTTCAGCAGAGGCTATGTCAGAATTAATAAATAAACGTGATAATGAAAAGTTTCG  
CCGTGACGCATTGAGAGAACAACTTGTGAAGCTCAAGCTGAGCAAGTAGTTAATATGCG  
TGAAGAAGAAAAGGTCCATTGAACAAAAGCGAAAATGAACTCAAAGACAAATTTGTAA  
AGACTTCGTGAATATGGTTCGTAACCCTATGGCGTTTATGAATACCGTTTCATCTAAAC  
TGAAACTAGCGGAAGTGATAGTGTGCTGGACTTACTATTCCGCAAGATATCCGTAAT  
GATTAACACATTGGTTCGCCAATATGACTCGCTACAACAATATGTACGTGTTGAGAGTGT  
TTCTACTTCAAACGGTAGTCGTGTATATGAAAATGGACTGATGTAACCTCCGTTGACTGT  
AATGGATGCAGAAGATGGAATAATCCAGACCTTGACAATCCTCAGTTGACAATTATCAA  
ATACTTGATTAACGTTATGCGGGAATCATCACTGCAACGAATACATCACTTAAAGATAC  
AGCAGAAAATATTCTTGCATGGTTATCAAGCTGGATTGCTAAGAAAGTGGTTGTGACTCG  
TAACCAAGCGATTATCGAAGTAATGAAAGCAGCACCTAAAAAACCACAATCGCTAAATT  
TGACGATGTTATTACTATGATTAATACAGCGGTTGATCCTGCGATTATCGCCACTTCAAG  
TCTTTTACTAACCAGTCAGGGTTGAATAAACTTGCTTTGGTTAAAAGTGGTGAAGGTAA  
ATATTTGCTCGAACCCAGACCCAACAAAACCTAATTCATATCTAATTAAGGTAAACAAGT  
TATTGTTGTTGCAGATCGCTGGCTTCCAAATACTGGATCAACAGTTTATCCACTTTACTA  
TGGAGATATGTCGCAAGCTATTACATTGTTTGGACCGTGAAAACATGTCATTACTTCCAAC  
AAATATTGGTGTGCTGGTGCATTTGAAACTGATACTACTAAAATTCGTGTAATCGATCGCTT  
CGATGTTAAAGCTACTGACTCAGAAGCTTTAGTTGCTGGTTCATTTTCTGCAATTGCAGA

CCAAGTAGGTAACCTTCAAAACTACAACGTCTACTGCCGTATAATCAGGAGGTATTTAAAT  
GAGTGTAACCTGTTGATGACTTACTAGATCAGTTATCAGAAGATGATGATCGCAAACCACA  
ACTTCAAATTTATTTTGATACAGCTACAGCATATGTGAAAAATGCAGTGAGTTCTGATAC  
AGTTGATGCTCCATTTTTCAATGTAGAAAACGTTTCTCCAATTTATGATGTAGCTGTTCT  
TAGCTATTCGATGGATTTGTGGATTAATCGTTCTACAACCTATGCCTCCTACTACGGCTGT  
AGATCATATGGTTGGACAGTTGAGAGGCTTTTATTCTTCATGGAAGGAGGCCGCAAGATGG  
TCAAACTTACAAACCGAATGATTTTAACAGAAAATGTAAGATTGGAGTTACTAAAACAG  
TAACGGTTCCAAGTGGAGGCAAGATTGAAAAAATTGACCCAGCAACGGTTTTAAATGTTC  
GATTTGCGGCTAAAATGAGATCACTTGCCTTCAATTCAGATAATTGGTACAACCTACGG  
CTGATACATTCGACATTGCAATTAGACATAATAAGCTAGTTACAAAGAAAATGTTTGTTC  
AAATAGATGATGTTCTTTACAATATTATTAATATTTCTTCGGATGAATCTGCAAAGCTTA  
TTAAATTTGATATTTGACTCTTCAAGCGAAGAAGAAAGGAGCTTAATATGGTTTCATTT  
TATGATGCGATGCAGCTTATTGTGATAGAGCTGAAGAATTAAGTACAAAAATGTCTGTA  
GAAGATAAGGCCGGAAGTTACAAAGGCAGGCCGCTAAAGTTTTTGGAGCAAGCATTGGCTTAT  
GAAGTTAGAAATAGGCACTACCGTCATCGTGATACTGGAGAAGATCCACATTTAGCGGAT  
AGTATTGTTATGAAAAATAAGAATATTGACGGAGTTAAAGATGGTCAAAGTGTTGTAGGA  
TGGGAAAGAAGTACGGAAAAAGGTACTCATACAAAGGTTATATCGCCAATATCATTAAAT  
AATGGTAGTCGCTTTCCTCAGTTCACAACACGTTCTGGAAGAAAGTACAAAAAGCCCGGT  
GAAGTTGCGGTTTCATGCAGATCATTTTATTGAAGAAACAAGAAAAAATCCTATTGTTTCAG  
CAAGGAATATTA AAAAGCTGAAGCTGAAGCAATGAGAAAAATAATTAATAGAAAAAAGAAG  
GAGAGTAACTTATGAAAAGACCAGTTGAAATTGTTCAAGACATAATTGCAGCTAGTGACT  
TTCCGCATGATGAAATCTTCTTGATTCTATTCTAGTGAAAAATTAGATTCTAGTAATG  
AAACGCAAGTTTTACTTACAGAATCAGATAATGGACCAAGTGATTATGGTAACTCAGATT  
TTATTTCACTCATGTATGGTGTTTATATTCAAATCTTTTACTCGAACGCTGAAGATTCTG  
GTATAAATATTGTTCAAAGCGAAATTAATCTGATGAAATCATTTATAAATAATGATTGGC  
TTATTGCGCAATCAAAAAGTCACTATATAGACCCTGATACAGGGCAAATTATTA AAAAATT  
TAACGGTGCAACGCATCATGACGTTAAGCGAGATAGCAAATAGCTAACTCGTTTTTTATT  
TAAGAAAGGAATTTAAAATGGCAACAAAAGGTTTAAAATGGTTACACTTGCTCTATTGG  
ATGATAAAGGAGTGATCGTTAAAGGAGAACTGGTTTATCTACCAATGGAGTCTTCCCAA  
TTACTGATGAAATGTTAGGTACAAAAACTGCAACATCACTAATTTATCAAGCGCTCCAA  
CAATGATTTATGGTAATGATGGTCAAGTAGATGCAGATATTGCAAAGGTA CTCTCAG  
TAGCCTTTGCATTTAATGGTCTACCAGTAGATATTA AAAAACA AATTGCTTGGTCTGTAA  
ACGATACTAAAGGTGGTTATACACAAGGAAGTATTCCAAAAGTAGCAGTCTTGATTCAA  
CAACTACAATCGGTACTGCGAAGCCACAATATGTTGCTTTTGCTGCTGGTAAAATGAACG  
AAACAGCAATGAACTTGCAAACAATACTAATGCAGTTGTTTCGTGTTGATGACGCATTGA  
CATTTACTGCATTCTCTGTAAGTCGTTGGGGCGGAGAAGCTGTCAAATCTTTGATGGTG  
GAGATTCAAATTTACTGAAGACGTGATGATGAAAGATGATTTAATGGTTATGCTGGAG  
TTGGAGTTTAATAAATTATACAACGACTACAACCTAGACATTAATAATTAATGGCGGAGT  
AATCCGCTTTTTATATGGGATAGATAGACGGTCTATTATATTAGGTTTCGATACCTGACTA  
TTCCTTTACAAAAAGTAAAATAGAGGAGATATACAATGAAATTATCATTACCAGAAATTA  
GAGAAGAATCATTTGAAGTTAAA ACTTCAATTAAGAACATTA AAAAAAATGCATGCTTATC  
AGTTAGGATTAGCAGAACATCAAGAGAACTCGCTTCAGCTCAGGATGGAACGCTAGACG  
AACTAACGAAAGCAATTGCCCTTGATGATCAGTTTGTATTATACTGCTGAAAAATTTA  
TTTCGGAAGTCCTAGGCCTAAATAAAAAAGAAATAGATAAGTTTGAAGAAGAAATTGAAC  
GCGACCAACTTATGAAGCTTCAATCAAACTCGTTCTTTTACTTCAAGGCTATAATGATG  
ATCAAATCGATACTATGTTTACTGAGGAGGTTGATTCTGCCGAAAAAAAAGTTCAAGCAT  
TGAAGAACGAAAAGTCTACCACCACAACCAATTAATAGACTTACAACCTATTTGAAAAAAA  
TATTATCGAAAATTGGCACTGGACATTAGAACAAGTTGATAATCATGATTATTATGACTT  
AATTGATGTGTTTAAAGCTAATGAAGATAATAAGATGGCTTCATTTGATGATTTGAAGAA  
GATGTTCCGGACAATAATATTCATGTCAATACCTAATATTTAGGTGTTTTTTTATACTCAA  
AAATTAGAAAGGAGTAAAATGGCAGATATAATGGTTGATTCAGTCACCACAGGGATTGA  
CTTGAATGAGACAAAAGCTGTTGAGGCTATCAACCGCTTAAAATCAGCAGTCAAAGATAG  
TACTCGTGAATGGCAGATTAATGAAGCACAGGCTAAATCTGCTGGAGATGCTGTTTCTGC  
ATCAAATATCGCTATGAAGGTCTTAGTGAAGCAATGGAAAAGCAAAAAGCTTATATTGC  
TAACCTTTCAGAAGGTATGAAGACAATCAATAGAAATACTGATGCTGGTGAGAAGGCTTA  
TCAAAAATATAATGCTCAATTA ACTACAGCAGAACGTTCTCTTGCCTCAATGACAGGGCA  
ATTA AACCGTGCAAATCAGCTTACGAGTATCAACAACTGGTATTGAAGATTTAAATAA

ATCTCTCAGTGCTAATGATAAACTCATGTCAGTCTCAAATTGATTTATATGAGAAAACCTCG  
TAATAAAATGGGAGCTGCTAAAGCTGAAGTTTCTGGTCTATCTACGTCATACGCAAAGCA  
AACTGAAATTTATAGAGCCCAAGTAACTGAGCTGAAACGGTTAGAAGCTGCTGAGGGTAC  
AAGTTCAGAAAACGCTTGTTAAGCAAAAAACAAGGGTAAATGAAGCTGCTTCGTCATTAAT  
GAACTACAGAAATAAACTTTTAGAAGCTAACTTGGCAGTTACAAAGATGCAGCCGTTTAA  
TTCTGAGTCTCTCATTGGTAAAGGTTTAAATACTGTTTATCAAACAACCTGAGAAAGCTAC  
TGATGTAATGGCAGCAGGATATCAGAAAAGTAAAAAGTGCAGCTTATCAAAGTGCTTTTGG  
GATTGCTGCAATTGGTGCAGCTGCAGTTAAGGGCGCACAAATGGCCTCTGAACTTCAAAA  
CCAATATAAAACAACCTTTTAACTTATTAGTAACTGGTGGCGAACAAAGCTAAAGAAGCTCA  
AGAAAATGTCAACAAAATGCAAGAGCAGGGTTCTGAACTTTCTGTTAAGTATGGTAAAAC  
TCAAAAAGAAATAGCAGATGGATATCAAGA ACTTATTAACCGTGGCTATACAAGTTCCCA  
AGCGTTGGCCGCATTACCTACAATGTTGCAAGCGTCTGTTGCTTCTGGTGATGACTTTAC  
TGATGTTGTTTCATAATTCTACTGCTGCTCTTGAAGCTTCGGGATGCGTTCAAATGATGT  
TGCAGGTATGACGAAAAATACTAAAGAAGCTGTTAACCAGATGGCTTATGCAGCAGATAT  
GACAGCAACTGATTTCCAAAATATGGGTGTAGCTATGGAGTATGTAGGGGCATCGGCTCA  
TCAAAGCAAATTAAGTTTGTGAGAAACAGCCTCTGCAATTGGTATTCTTTCTAATAATGG  
TCTTGAAGCTGATAAAGCAGGTAAGTGGACTTAGAAAAGTTATTGTTTCACTACAATCTCC  
AAGTAAAGATGCTGCTGAAGCACTATCTGGAATTGGGCTAAGTACAAAAGATTTTGTAGA  
CCAAAATGGAAATATGAAGTCAATGACTGAAATTTTCGGATTGTTAAACCAACATACAGA  
AAAATAAGTTCAATCCAAAAGGACAAATCTTCCATGCTTTATTTGGAACAACCGGTCA  
ACAAGCGGGTGCAATTCTTTCTGAAAATGTTAAACAGTTAGGGCAACTCGATGACAAGGT  
TAAAAAGTCAGCTGATGGTCAAGGGTATGTTGTTAATCTTGCAAATAAGAATATGCAATC  
TACTCAAATGAATTAACAATTCAAAGCAGCTGGTGAAGGCTGTTTTAATTATGATTGG  
TCAAAGGTTCCCTGCCAGTTTTATCTGACGCAGCCACTTCAATGGCTAAGGCATTTAATTC  
TAAAGAGGGCAAGCAAGGACTTGAAGAAATAGCTAAATGGATTGCGGAAATATTCCAAAA  
GCTCGTTGATACTGTCAAATTTATCGGAACTCATAAAGATGAAGTAGTAACCTTTGGTAA  
AATCTTTGCTGGAATTTGGGCCACTAAGAAAATTGGAGATGTTATTGTATGGCTTAAAAA  
ATTGAAAAATCTTTACTTGAATTCAAGCTATTGATGCATTATCAGGAGGTTTAGGAAC  
AGGAGGCATTAAGCTTCTGTAGGTAAAGGTGTCGCTACTGAAGCTGGAACAGTTGCTTC  
AACAGTAACAAAAGGAGGCGTAGCTGCTGAAGGTGAAGCGTTAGTTGCCTCTGGCAGTTT  
ATCAAAGCAACTTCCTTAATTCCAAGATTATTAGGAATTATTGGCTCTGTTGGCGGAAG  
TACAGTCTTGTCTGGCGGAATAAATGCAGGAGCTGAATTACTCAGTAAAGATAGTACAGC  
TCAAAGACTGGCGGAGTTGCTGGCTCACTCGGTGGAGCAGCAGCAGGTGCAGCTATTGG  
TTCTCTTATCGCTCCTGGTATCGGTACAGCAATTGGTGCAGCGATTGGCGGAATGGGTGG  
TAAAAACTTAGGTAAAAAGCTTGGGGATTTGATTAATAATGGATTAAAAGAATCTTCACT  
AAAAAGTGAAAAACTACCAGTTGTTAAGTTTGACCCTAAAGCACCAACAAAAGATATGAA  
AGAGTTCTCAAGGACTACCAAGGTTTCTTGGATAAAATTAATAAGGCATCAAATGTTGA  
TATTGTCGATGAGAAATCACTTGA AAAAGCAAAGAAAGCAACTGCTGATGCTTATGCACA  
AATGTCTAAAGATATTGATAAGTTTTATCAAATCAAGAAAAGGATTCTAAAAGCAAAT  
TGATATTCTAGTAAAAAATGGTGTAACTCAAGCTCAGGCAGATAAAATGTATAAAGG  
TCAAAAAGATTCAGACGATAAGCAGAAGGTAGCTCAGAAAAAGAATCTTGATGAGATGAA  
GAAGAATACTGATAAATATTATTCGGATGTGGCAAAATCTCAAAAAGTTATGACACACA  
ATCTCAAAGGATGCTAGTAACCATGCTAACCTAATGAAAAAATTAAGTCCGTAATAC  
TTCTGAACTTCTCAAATAGAGAAA ACTTATGGCAAAAATTCTCCTGAATATCAACAAGA  
AATGAATAAAGAAATTGCTAAAGAAAATAGTGATTTTAATAAGGCTCAACAAGCTGCTAA  
GAAGAAACATAATGAAGCGATGAATAAGCTTGA AAAAGATTATGCTAAAACGCAAACCAA  
AGCTGAAGAGCAGATGAATAATCAAATTAATACTGCTACAAA AATTGCTCAAATAAACA  
GCTTGATTTACTTGATGATTTAAAAAATAAAAAAGGAAAATTAATCAAAAACAATTAAT  
TGATACGCTTGAAAAGGCTGACGATGAATATAAAGGTGTTAAGGATAAGGCTCAAAGCA  
AAAAGATGAAGCTGTTAAAGCAGCTAACGAAAAATACAAGAAGACAGTAGCAGCAGCGGA  
CAAAGAACGGGCAGAAAACGGATCAATGTCTAAGGCACAATATGATGAAATTGTTAAAAA  
TGCTCAAAGCAAAGAGATGATACAATTT CAGCAGCTAAAAGCAACAAACAGAGGTTAC  
TGATAAAGCACAAAAA ACCCATGATAAAACAGTTGAATTAGCGAATAGTAAAGCCGATAA  
AAATGTTAAAGCTGCAGCTAAAGAGCAAGGAGAGACTGTCGAACAATATACAAAAGGATT  
TAAGGATTCTAGAAATTTAATCAATTCATTGATGGAATTAACGGAGTTCTTAACTT  
CTTACATAAAGGTTGGGGGAATATTGGTCATGTAAGCCTCAAAGGTTTTGCGACAGGTAC  
TCGTGGTTTAGCGCAAGATGAAACAGCTTTAGTTGGTGAAGAAGGATTTGAACTTGCTCA

TCATCCAAGCCGTGGTATTTTTGCGAGTTGGACAACAGGGCCCTGAAATTCGTAACCTTGAA  
AGCTGGTACTTCGATTCTTCCTCACTCAATGTCAAAGAATTCTTATCATTAAACAGCTAA  
TTTACCAGCTCATGCTGACGGTGTATCTGGCTTCCTATCAGATGCGCTTGGATGGGTAA  
ATCAACATATAAAGATGTCACAAGTGTTATTTCAAAGGACCTAAAGGAGTTGTAGATGC  
TATTTATAATGGCTTAGGATTAGATGATTTAGAAAATGATTTTTCCGCCAGTTGTGACTAG  
GATAGCAAAGGGGTCAGCTCAAACAGCACAAGATAATTTTATAAAAATTCTTACAATCATT  
CTTCAAAAAAGCTGAATCGGATGCAGGAGGATCACAAGGTTCACCATCTGGTTCTGGTGT  
TCAACGTTGGGCTGGACAAGTTAAACAGGCGCTTGCAGCTAACGGCTTGAGCACAAGCCA  
AGACATGATTGACCGTGTGCTCCGTCAAATTTCTTCTGAATCAAGCGGAAATGAAAAAGC  
CGTTCAAGGGAACATCGGAGATATTAACAATATCACTGGCGACCTTGCTAAAGGGTTGAT  
GCAAACAATCTCCTCAACATTCAACGCCAATAAATTCCCTGGTCACGGTGATATTTTTAA  
TGGTTACGATAACTTATTAGCTGCTCTTAATTATGCTAAAAAACCTATGGCCCAAGTTT  
GTCATTCCTTGGAAATGGGCATGGCTATGAAAATGGCGGGATCATAAATGCTCATGGATT  
CTATGAAATTGCTGAAGGAAATCGTCCTGAGATGGTTATCCCCTTGATCCACAGAAGAA  
ATCGAGAGCGACACAATTATTGAATCAAGCAAGCCAAACGATTAATAACAATCAAGGTTA  
TTCAAATAATGTTACTGATTTCTCGCCAGTTTTAGCTTTGCTATCCAATATATTTAACTC  
CATTGAAGATGTTAAGAAAAATCCTCTAATTGCTTATGCTTTATTAGATGGGCGTAATGT  
GTCTCAGGGGTTAGCTCCTTATATGAATCAAGCCTTAACTGACTATGTAAATCAACAAGA  
TAGATTGTGGGGTAAAAATTAATAATGGCTTTTTTCAGTTAAATTTAATGATGTAGATTTA  
TCGACAATCGTTGATGGTTTTACAGCAATTACAAGAAATATAGGGGCTGGTTGGACGAAT  
ACGGTTCAACCTAATCCTATTATTGGCGCTGATTTACGCAAAATTCAATTAATTCGAAA  
TCAATTACAGTTAACTTTATTGCAAATGTTAAATTAGACCGTTTCACCTCTGTGAGAAAG  
GCTTTGGCTAGTGCTTTAAATGTAAAGCAACCAGCTGCTTTGATTTTTGATGATGATCCT  
AATCAAGTTTGGTGGGCTGTTCTGATGGAACGCCAACATTAGATGAATCATCATTTTAT  
CAAGCTGTAGGTTCAATTACATTTTTAGTTCCGAGCGGAGTTTCAGAATCAGTCGAAACA  
AACGTTCTAAATGCTTCCAATTCTGGTGGTCAATTAGGAACAATTACTAATAATTCAGAT  
GGCTCTGTAGATATTGAAATTAATAACACAGGCAATCTTGAGACATTTCCAACAATAGAA  
ATTACCAACGTTTCATGAGAATGGGTATATTGCAATTGCTGGTCAAAATGGAGCAATTGAA  
ATAGGAAATAGGCAAGAAGCGAATGGTGCTACACATGCCTTAAGTGAATATTTGTATAAT  
AGCAATTCTGATTTAAGTTTTTCTAAATTTAAAGATGCAACCGGGACTGCTAATCCTCAA  
AATTCAGGACTTGGGACCAATGGAACGATTAGTTTTCAAAGTGATGGACTAAGATTTGCA  
ACTCAAGGGACAATGTCAGGATCTCAATTTGCAGGCGGTGGAATGAAAGTTATGACGCTA  
CCGGCTGATTCTAATGGTACGTTGGTGCTGTTAACTTCTATTACACTTTAATTTATTT  
GCTTGGGCGGGAGCTATGGGCCAAACAGGAATCCTCCAAATTCTATTTACTGACATCAAT  
GATAAGTTGGTGGCTGGTTATGGGATTACCAAAGTGACATGAGTGGAAATAGTGCTAAA  
TGTTCAATTTGGGTTGGAGGTAATACTCCTAAAGAGTACACATCATTTGGATTTGAAACA  
AACAAATGCCGAAAAAATCAAAAATATCCTAATAATATGTTTAATAGCTCAACTGGAGAT  
GCCGATTTTTTGAAGAAGGAGCAAACCTTAGGCTTTTATTGGTACGGAAGTCGTAAAACA  
ACCTATGTTCCAGAACTTGCGGATGTTGAAGTTTCAAAGTTTACTTGTACCTTGGACAA  
TTTTAAGGGTTCGAACAAATTTATCAATAATTTATCAATTAGACAAGTAAATCTTACTAAA  
AATAATGTATCTGTTTGGAAAGATGTTCTAATCGTTATGCAGCCAACCTCTAAAATTACT  
GTTAATATGAACGGAAAAGACACAGTTGTTATCAACGGTATGCCAGCTATTCAAGAAAAA  
ATTAGAGGAACTGAGCCTTTTTCAATTCCTCCCGGTAGAAGTACATTAATAAATCTTGCAG  
TCCACATGGAATACCACTCCACCAATTGTTCAAATATCATATAAAGAAAGGAACTTATAA  
TGGAATAGTCGTTTCATGATAATACACTTAAACCGTAGCAGTTATCAATAATGATATTC  
CGATTCTACCTTCTTTTTTCAATGATAATTGGCATCGGTATAAAGACCAAGGAGCAGAAA  
CATTTATATTTACTGTAAATAAATTTATCAACGGCCAGTTACAAGATTACTGCCGTTTTT  
TAAATGAACAAGCTTACATTAGTTTTACTTATGATGGCATTGACCACTTATTTGGAGTAG  
AAAATGTTCAAGAAAGTGATTATCAAATTACTTTAACTTGTCTTCATTGAATTTAGAAT  
TAAGAAATGAGCAAGCCAATGCCTTAGTCAACACATCAAGCCATAATATTCAATGGTACT  
TTGACCAAATGGGATTAATCGCAAATGCTCAAATAACTATTGGAACCTAATGAAGTCTCAA  
GTCTGACACGAACAATTAATTATGATGGGCAGGAAAGTAACTTGCCCGTCTAATATCTG  
TGATTGGAACTTTGATGCAGAATTTGAATTTATTACACATTTAAATGATGATGGAACAC  
TTGATTCCATCATTTTTAAATATCTATCGTGCCAATGATGGAGTTAATATCCAGGGTGTG  
GAACAAATAGAAATGATGTCTCTTTAAATTTTGGGAAAAATATAAGTGGAAATTACAAGAA  
CTGGAGACACAATAATTTATTCAATGCGACAACCTGTCCTGGATCAGATAATTTAACT  
GGAACAGCTCTAGTTTTAGTTACAAAACGAGGATGGAGTCGAAGAGTTTTATAAAGAG

CTGGTAGTGACACAGCCTATGCGCCTCTTTCTCTTAATTTATTCAAATCTCAAATCAAGT  
CTAATAATGGTGATAAATGGATTTCGTAAGACTTTCAAACAGAATACACCAATGTTAATG  
ATATGTGGGGCTATTGCGTAAGTCAATTTAAACAATTCGCTTATCCGACAGTACTTATG  
AGGTGTTAGCGAATAGTAGCTTAGTTCTTGAATCGGTTGGTAATGATCGACCTTTGTCCA  
TTGGTGATAACCATCAATATTCAGATGATAACTTTATGGATTCTGACGGAAATGTAGGTT  
TGCTTTTATCAGCTAGGGTTTCTGAAATGGAGATAAGTTTTAGCAATCCGACATTAATA  
AGATTACTTTTTCAAATTTTAAAAACAACAAGTGAAGCTTCTGCAGATATTCAAGCCA  
TCGTCAATCAGTTAGTCGATGCAGCTACTCCATACAGAGCAGAGCTTACAACAATAATG  
GCACACAGTTCAAAAACGGCACTGGATCAACAACCTTAGCAGCTCATATTTTCAAAGGTT  
CTGCAACAACCTGAAACTATCGCTGACAGTTACGAATGGTTCGAAAGATGGAACGATTGTTG  
CGAATGCTCAGACTATCACAGTTGATGCCAGCGGAGTAACTGATAAAGCAGTTTACAGCT  
TTAAAGCGACAGTTGCGGGTAAAGTAGTCGCAAGTCAGTCGGTGACTATCACTAATGTGG  
ATGATGGAACCTAGCCCGATTAATCTAGTTATTGATTTCATCTAATGGCTATCAATTTAAAA  
ATAATATCATTAACTACTTTCTACTGCGATACTTTATCAAATAATAAAGAAATTGATA  
AAGATGGAACAAAATTTGCTTATATATGGACTAAAATACTCTGACGGAACAGTAGATA  
CTGCTTGGAATCTTGCTCATCAAACAAGTCAGAAATCAATTACAATCACAAATAGGGATA  
TTTGGCAGAGAGCTACATTTGATTGTACTGCTGAACCACTTAATTAATAGGAGGAATAAA  
ATATGTCAATTGTCTCAAGTGGACAAATCACAATCACCGATTTATCAGATGGTATGCAAC  
TCAACGCTTTTATCACAGCGAGTGGGGTGACTACTCAAACCTTATGATGCAACAGCTCAA  
CATGGTCACCAAGTTATGCGACTACTCCACAAGTTTTAACGCTCAACCTTACTAAAGCAG  
GTAGTACAACCTTCTGTTATTGGTGGAATTTCAAGGAAATATTACTTGGACACGAGCAGATG  
GAACGACAACAACAACCTATCACTTCAACTACTAATACTGATACTCAATATATGAGCGGAA  
GCGCAAATAGTGTATTGACAACAAGTCAATGTCCCAATTGCTAACTCAGCGTCACGAT  
TCACTGCTTCTGGATTATGGGTTGACCCTAATACAGGTTTTAACGTTCCGTTCTCAGCTG  
TTTTAGATTTAACTGTTGTACAACCTTGCTAAATCAGCTGTTCTTGCGAATGTTTATGCTG  
GAAATGGTGGAGCGTTCTACAATTCTATGCCTGCAAGCTTAACAGTTAACGCCGATTTAT  
ACAAAGGAGGGCAACTTTCTGCAGGAAACAAGCAAATATTCTTCGGTTATGCAGATAGTA  
CTGTAACCTACAACCTGGTTCAACTGGCTATAACTCAAACCTTGGATTAGGTTGGCATTAT  
GTAATTCATCTACAACCTGGTCAAACCTCCCAATGTAGCAGCGGGAACAATAACAACCTTCTC  
AAGGGATATTAACAGTTCTACCAACGGCTATTACGAACCTCACAAACATTTAAGGCAGTCA  
TTATTGACCAAGCACGTGGTACAGCAGGAACTGCAGTTAGTGGTATATGTACTCTTCTTG  
ATTATACAGACCCATTAACCTTGTACGATTGATAGTACAGCAGGTAGCATTTTTTAAAAACG  
GTTCTGGTACAACAACACTTACTTGCCGAGTATTTCAATCTGGTGCTGAAATTGATACAG  
CTGGAACAACCTATACTTATAAATGGTCTCAACGTAATCAAAATGGCGTATTAAATGCTA  
ATTTTGGCGGTACAGGCAATCAATATAAAACTGGTAAAACAATTAGTGTGCGGCGACTG  
ATATCAATGTCAAAGCTCAATATACATGCGAGGTGAATCAATAATGAAAAGTACATTTTA  
TGCCAAATATTGAACTTGGGGGAGAAATCACACAAGTTAGCTTTGAAGCAGCAAGCGCAAG  
TGATGTGATTGAACAAATCTGGCGGACTTATGGTATCTCCACTCCAATTATTGAAATTTG  
GGCGGAGGTAACATAAGCAGATAGTACAGCAAGCAATAGTCTCACCATAAGTAATGTTAATG  
ATGGGACAATAACTCATAACAGCGTATGCTTATAGCGCTGATGGTACTGACAGATTCACAA  
CGGTTTACCCTAACTTGAATTTACTAGAGGGCAGTAAAGATTTTAGTGGGGATTGGTGGC  
TTGTTGAGCGCTCTGAAAACGATGGAACATATAAAGGTCTAACCGTTAAAAAAGCGAAG  
GGCCTGGAATTAATAAGCAATTTATAGCACCAAGGACGGTATTTACACATTTTCAGCTT  
ATGTTAAAGGTTTCAAGGAGATTCGGCAGATATACATAGGTCTGTTACTTTAAACAGTGTA  
CTGGTAAAATCGTGCCTGATAAGTTCGATGGGTAACAACCTTTGCTTGGTTGAGAGATTCTT  
TTCAGGTAACCTTAAAGCTGGTGACAAGATTTATGCACAATATAATGTAGCTGGTAGCG  
GTGTTTTATGGAATGCTGGTCATAAGTGGGAAGAAGGCTCTGCTGCTACTGATGATTTAA  
CTGCTAATTATCCTAACTTGAACCTTATTGGAAGGAAGTACAAAATACACTAAAGATAATC  
CCAAAACATTATCTTCAAATTTACTGATGGTTGGTTTTTTGTGGATGATGTTTTTTGTAA  
AAAATTTAAAGCAGGAACATATAACCATGAGTGGTAAAGCTGATGCACCTTGGACTGTTC  
ATGACACAAGTGGCGCAAAAAAAGGTAAGTTGGACTATGGTTGGTGTCAACAACACCTG  
GATTAATGTGAATATAAGTTTAGGTGACACAGTTCTTAAAACAATCGAAGTTCCAAAAG  
ACGGAGATTATTGCGTTAGGATTAATACCTATTCAAATGGAAAGGATATAGAACTCATA  
AATTTTGGGATTTTAAACTAGAACCGGTTCAACCGCCACACCATGCATGCCGAGTAAAA  
ATGAGTTACAGGAACAATTGACTCCTTGGATGCCTTCATTAAGTGAAGTCACAACCTCAG  
ACTGGCCAAAGTATAGAGGAGAATACTCTGATATGTCAAGCGAACAGTCGACATATCCAT  
ACGACTACACTTGGAGTCTGATACGAGGGAATGATGGGAAAGATGGGGCAGATGGTTCATG

ACGGAAGAGCAGGTAAGGACGGCGTTGGAATAAAAACCACTGTTATCACTTACGCTATTT  
CAACAAGCGGAACGACAGCACCAAACTGGTTGGACAAATTCAGTCCCAGTCTTGTA  
AAGGTCAGTATCTTTGGACTAAAAGTGGTTGGACTTATTCAGACACTACAAGTGAAACAG  
GATATTCAGTAACCTTATATTGCTAAAGACGGAAACGACGGTAATGACGGAATTGCTGGTA  
AAGATGGTACTGGTATCAAACTACGACCATTACGTATGCAGGCTCAACAAGTGGAACAA  
TAGCACCTCTAGTGGTTGGGCTACAACAGTTCGACAGTTGCAGCAGGTAGTTATCTCT  
GGACTAAGACTGTTTGGGCTTATACGGATAATACTAGTGAAACAGGATATTCAGTCGCTA  
AAATGGGAAACAATGGAGCAACAGGACCGCAAGGCCCTCCTGGAAGTAATGGTGACCCCG  
GTAAAATTGTTTCCAATACTGAACCAACAACACGCTTCAAAGGTTTACTTGGAAAGTATA  
TAGGTATGTCTGACCTTACCGCAAGTGATGGAACAGTGATTAAGCCAAATACAGAGTATT  
ACTATAATGGCACTCATTGGGTGATTAATACTATTTTAGCGTCAATAACTTTGCGGCTGAAT  
CGATAACATCAGATAAAATTGACGCAAAAAATTTAATAATTAAGTACTGATGGTGAATTCGTAA  
GTACAACAATAATGGCCCAGTTACAACCTCTACAGAAATCAAAGATAATCATATTGCAA  
TTTCAAAGACGGATGGAACGTGTAACACAAAAAATGATTTGGCAGTTGACACCGAACAGG  
GCTTTGCAATGAAGTTCACGAACAATACTACTGGGTAACTAGAGAAGCTTCAGTTAACT  
TTCAAGGAGTTTCCACTAGTGATTCAAATGGGAATTATGCTCAACTCACACCTCAAGGCA  
CAAATTATCAACTGACGTTCTTGGACTAATATCACTCGCTCGAGTGGAGTAGGAACAT  
CTGGAACCTTACGTGCAAGAATAAATAACGGTGTTTTTTATGCACAGTCGAAAGACGTTA  
CAATCCCTTCAATAGCACCCAACAGTATTATAACAATTGGTACTATGTCCAGTAAATTTA  
GTGGTGTCTTGGATTTGATACGTTAGGGTACTATATTCGATAGGTCAACTTAGCGTTG  
CGAGTGTTACAGTCGGTAATGATGGGAAAATAAACATTGGTAATCCCAATCCAACGACCA  
TGAGTGGCAAGGTAATTCAGTTTTCAATAAATATTCATTAGGATAAAGAATAGAAAGTA  
GGGGTTATGGAGGAGCAAGCATGGCGAGAAGTACTCGAACGATTAGCTCGAATTGAAACA  
AAGTTGGATAACTATGAAACAGTTAGAGATAAAGCAGAACGAGCGCTTTTAATAGCCCAA  
TCAAATGCAAACTTATAGAAAAAATGGAAGCCAATAATAAGTGGGCTTGGGGCTTTATG  
CTTACTCTTGCCGTAACCTGTTATTGGATATATAATTACTAAAATACTTTAAAAGGAGTCC  
CAATGAGTTTAGATAATTTCAAAAAGCAAACCTATTACATGGGATATGATTAACCAGGCAT  
TTGAACAGCCTATTCAAATTATGGAGGGAGATGTCAATGCAAGAACGCTACTTCTTAAGA  
TAACTGATAATGGTCTGTACTTACTTAAACAGGTTATTCAGTAAAATTAACCTATCAAT  
ATATGTATAAATCTCAATCAGGTTTTATTATGTTGACTCCTAATGATATATCCAAGGGAG  
AATTCACGCTTATAATTCCTACTGAGATGACAGTATCAGGATTAATAAAATCAAATTTAA  
TACTTCTAAACGAAAGTTTAGAACAAGTTATTGTGAGTAAAGAAATTTAACATTTATATCAG  
ATGATTCTACAGTTACAGATTTAGCTCGAGAAGTGAATAATAAGATTGATGATTTTACAA  
AATTATTATTTGAAAACATGCCACAAGTGTGCGTAGTGAGTTAGATGATTTAAATGCTC  
AACTGAATCAAATAAGAGTAATATTGAGCTTAAAGCAAATTTAGCTGATATGACGAGCT  
TACAAAGTGCAATGACAGAACTTAAAAATGAAGTAGAAGCATTGGTATTAGTCTGAAA  
ATTTAGTTACTATAAAATCGCTATTAGACGCAATCGCAAGTAACGCCAGTGAATCAGAAG  
TAGCCGAACATAAATTCAGTAAAGGTTTTAACAAGTAATATTTCTCTAATGAGTAACG  
GAGATTACTCCCCTAAAGCTAATCAAACGGATTTAGAAAGTTTACGGCATACTGTTAATA  
ATCAATCGGCGACTGTTTCAACAAAAGCTAATCAAACGGATTTGGATAACTTACAAGCAA  
AGGTAAATCAAGCTGAAACTGATGTCAAACAGCAATAACAAAGGCTACCGAAGCGCAAG  
CGAACAGTTTACCCTAATGGCAATGCGGTCAGTGCAAGTAAATTGGAAACAGCTAGAA  
AACTTAGGGTAAATCTTCAAACCTTCTGCATATCAAATTTTGTGATGGGACTGCTGATGTAG  
ATAATATTGGGATTGTAGGGGCACTTCTTATTGCAAATGGAGGTAAGTGGCAATCCAAGCG  
CTTATGCTTATGGGTTGAATTGCAATATTAATACTGATTTTACTGTTCTGGAATGAAGA  
TTTATACTAGAGCTGTCAACACAAATCAAGCTAATATGTTTATATTGCAATCTGTATGGG  
CTAAAATGCACCGTCAGTTGGTGTGTATGTAGTAATTTGTAGCGTTACAAAGTATAATG  
CTAATGGAAATATGAGTATGACTGCTCTAGCAAATGGAACAATTTATACTGCGACAGTTC  
CTTATACTTATACTGAGCCAACACTCAACTACTCAAGCCATTTATACTACTACAGCTACAC  
CAAATTGGGTTAAAGTTTTAAACGAAAATGGAAAAGGCACTGACTATGCACAACCGCACC  
CAGTTGGTTCAGTAGTCACAAATAACTCAAACCTCATTATCTGGCTACACGACCGGAACAT  
GGGAAAATATCGGTTTCAGCAGTAGTTGGTTCAACAACAATATATTATTGGCAACGCACTG  
CATAAAAATATAAAAAATAGGAGAAAAACATGAAAACAATTGATAAAGGAACACTTACA  
CGTACAATCTTACTTGTATTAGCGTTAGCTAACCAACTTTTAAACAGCTTCAGGACACTCT  
GTAATTCCAATAGATGATGCCACAGTAACAAATATCATCTCAACTGGTTTCACCGTAGCA  
ACTGCACTCGCTTCATGGTGGAAAGAATAATGACTTCACTCATGCAGCTAAAAAAGGAACT  
GAACTAACTAAAAGTTTTAAAAAATGGAGATAGTGTTCAGTAGTTAAGGCATCTGATTCT



GACCACGAATTCACAGAAGGAGGCGAATAATGTCAAGTATTGAAAATATGATTGCTTGGATGCAAGCACGAAAGGGTAAGGTAACCTTACTCAATGACCTTGC GAATGGGTCTTAGAAGTTATGACTGCAGCTCGTCAGTATTCTTTGCAATGATTGCTGGAGGTTTTCTGTCAGCAGGTTCAATGGGTAATACTGAAACCTTGTGGGAATGTCAGGAACAAAACCTGAAAGAAATCAGTCGAGGAGAAGTCCAGCGTGGCGATATCTTCATTTACAGGTA CTCCAGGAGGTTACAGCTGGTTCGGATGGACACACTGGTATTTTTCTAAGCAATGGCTCATTCACTGCTCTTACACTCA CAATGGAATTGCGGTTGATACGAATGATGCATACATGAGTACTCGCTTGCCACATCACTTTTATCGGATTGTTGGTTCAGGTT CAGCAAATGCTGACAGCAAGCCTCAAATGGTTACAT TAAATGTTGATGGTCAGTTTGGAAATGCGACTGCTAAACGATTGCAAGAATACTTTGATA CAGCTGGGAAAGATGGAGTAATCAGTCACCAGTACAAACAAACCTTTAACCAAATATTTATGCTGCTCAGTTTGATTCACTGACTGGTTCAAACGTGGTTAAAGCATTGCAAAGAT TCTTAGGGATCGGACAAGACGGACTGTTTGGCCAAGGTACAATTAAGCTTTACAAAAGC ACCTTGGAAACCACACAAGACGGAACAATTAGCCCAGTTTCTGATTCTGTCAGAGAATTAC AACGTCGATTAATGCGAATAAATTATAAAAATTAACCCTGACTTCGGTCAGGGCTTTTT TGTTAACAAATGTTACTGTTTTTCTTAAAATAAATTAGTATAATATCCTTATCATAAATG CTATTTCAAATACAAATACAAATAACTAAGTATTTTCGGGAGAGATAAAGTGCCCTTTTCC AAAGCGAGGGCGCTTTTTTCTTGACAACGGAAATGGAAAGTTATATAATTTTTTACATCCC AAAAATACTTTTTTAATAAATTCATTCCCTTAGCGTCCCTCTCCTAACTGGGGCGCTTTT TTTATGCTATAATATAGTCGGGATGTTTGTGAGATTTTCATCTCCTTTCTAGAGTCAAGCC ATTCTTCGGAGTGGCTTTTTTCAAATAAAAAGCTCTAGCTGGATGACTTCAAGGAGTCC AACTAGAGGATGATGAGTGTTAGTACAATTTTCAGAAAAAATTTAGTTTATGCAAAAAATA AGAAGTACTAACAATTTAAATATTATCAATTTTTTCAGATAAATTGTCAATTATTTATTGTA TTATGCTATATTATAAGTGTCTCCGTTTAGTGTCTAGGCGGAGATTTCGGTTCTTTAGCTC AGTTGGAAGCTAACCGTTCGGTTCGCTGGTTCGAGTCCAGCAAGAACCATAAATAAATGGA GAGTGAAAAAAGAGGGGGAAATCTTGCTAACTCTTTTATAAATAATGTTTTTAAAACTCC CCTCGCCTCCATTGAATGGATTTTATAGAATCCAATAGTATTAGAATCGCTCAATAGAG CGTTTTTTGTTTCT

>NewGenomeName\_245

CATGTTACGAGTAGATTATGCATGATGAATTTGATGGGTTTTGAATACTGCCGCCAACTA TGGCGGCTTTATTTTGCATGGTACTATTACCACAACGGTA ACTATTACCACGGTGGTTAT GATGCCTGCTGAACCTAAAACCTATAAACGCAAATCAACGCAATTTAAGCCGCTCACAGC AATGCAGGAGGCTTATTGCCAGTCATACATCAAAACGCCTGAAAACCAGACTCAGGCAGC GATTAACGCAGGATTCTCCCAAATACAGCGGCAGTTAAAGCCAGTGTTCATGATGCGCGA TGAACGCATTCAAAAACGGATTGCCGAGTTGATGGAGGAGCGCAACAAACGAATGCGCGT CAGTGCTGATTACGTTCTCATGCGCCTGGTGGAGATCGACCAGATGGACGTGATCGATAT CCTCAACGACGATGGGAGCCTTAAACCAATCCGTGAGTGGCCGAAAATCTGGCGCACTAC GCTTAGTGGCTTTGATCTGTCATCGACCATCATGAACATGAACGAGGATTTCGATAGAGAC AATCCTCAAAAAAATTAATGGCCTGACAAGGTGAAGAACCTCGAACTGATTGGTAAGCA CGTCGACGTCAACGCATTCAAAGAACGCCTGGATGTTAATGTGAATGTGACAATTGCTGA TCGCATAGCGGCAGCCAGGAAGCGACTCAAAGAACGTCAGGATGGTAATCAGTGACAGAT ACAGCGTTATCTCCTGAAGAGCAGTTGATCGAGGATATTGCAGGGTTCACTCACGATCCG CTTGGCTATGCCCTCTATGCGTTCCTGGTGGGGGAAAGAGGGGACTGAATTAGCACATGCC ACCGGTCCACGTCAGTGGCAGGCTGATGCGTTCCGAGAGATACGTGATCACCTGCAGAAT CCAGAGACGCGCTATCAGCCGCTTATGCTGGCACGCGCTTCGGGTCACGGTATTGGTAAA TCCGCATTCATCTCAATGCTGATCAACTGGGGCATGTCCACTTGCGAGGATTGTAAGGTC GTGGTGACCGCCAACACCGACAACCAGCTACGAACGAAGACCTGGCCGGAATTATCAAG TGGTCGAACCTTGCTATCACGAAAGACTGGTTTACCTGTACCGCTACCGCGATGTACAGC AATGACCCTGGGCACGACAAGCGGTGGCGAGCTGACGCAATCCCCTGGTCTGAGCACAAC ACTGAGGCATTCGCCGACTACACAACGAGCGCAAACGCATCATCGTGGTATTCGACGAA GCATCCAACATTGCCGATCTGGTGTGGGAGGTAGCAGAGGGTGGCGTGACGGACGAAGAC ACTGAGATTATCTGGGTGGCATTTCGGAAACCTACACGTAACACCGGGCGTTTCCGCGAA TGTTCGCAAATATAAACACCGCTGGAAAACCTGCGCAGATTGACAGCCGGACGGTGGAA GGCATAACAAACAGCAGTTGCAGAAATGGGTTGATGACTACGGGGAAAGGCAGCGACTTC GTTAAAATCCGTGTGCGCGGCATATCCCGGATGCATCTGAATTGCAGTTTATCCCTACC GGCCTTACTGACGAGGCAATGAAACGGGTGGTAACCGCTGCGCAGGTTGCACATGCTCCG GTGATAATCGGCGTTGACCCGGCATACTCCGGCGTTGATGACGCTGTGATATACCTGCGG CAGGGGCTGCACAGTAAGGTGCTGTGGACTGGCAACAAGACCACTGACGATCTGATTATG

GCGAAGCGTATCGCTGACTTTGAAGACCAGTACCAGGCTGACGCAGTGTTTCATCGACTTC  
GGTTACGGAAGTGGTCTGAAGTCAATCGGTGACGGCTGGGGTCGTACATGGCAACTTGT  
CCGTTCCGGTGGCGGTCTACTGACCCGCAGATGCTCAACAAGCGTGGGGAGATGTTCAAC  
TCATGCAAGACATGGCTGAGGCTGGGCGGGATGCTGGATGACCAGGAAACAGCGGACGAC  
CTGTCGACGGCAGAGTACAAAGTTCGAGTGGACGGTAAAATCGTTATCGAACCGAAGGAA  
GATATCAAGGAGCGGCTTGGGCGTTCGCCGGGTAAAGGCGATGCGCTACTGCTGACGTTT  
GCGTTCCCTGTGTCTAAGCGTCTGCGAATTCCCGGGCAGCAGAACCAGCAAGGCAAGGCC  
ATTACAGATTACGATCCCTATGCTTAATCCGTTAGCGGGGATAATGACGGAGATATCCTC  
TGGTGAGGATAAAACAAAGCCAGCTCATCGGCTGGCTGTTTGTGACATGTCACGGTGTTA  
TTGCTCGCTTAACTTCTGCTTCAGCAAGTAACCTTCAAGCATCCAGATTTTGTGTTGACG  
ATTCTGCCGGGCAATCTTCCGACCAATTTCCGCATCAAAGTTTTCCGGGCTTGCACAGGC  
GCTCTCTCCGGTGACGGTGAAGCCGTTGCGCAGCACCAGAACGCAGAACGTCAGCAGAGA  
AAGTGATTCGTGCGGCTGGTAGTTTACCTCTCCGCCAGTATGTTTCGCTTTTATGGCTAC  
GCCAAAGACACCATCTTCTGCTGTGAAATATGCCTCCTGAGCAATAATGCTCTCGATATG  
GTCTGGCGTAACGCGCGGGCGCGGCTAAACCTTTAGCCTGAATTTTCAGATTCAATGTCTTT  
GTCACTCATAGTCTGATCTCACCTTAAAAAAATGCCCGGGCAACCGGGCGAACTGGAAGC  
AATGAGTTATGCCTTCCGTGGCTGTACTGGTTTACAGCATGAAGTCATCGCAATGGCGTC  
CTGCTGTAAAAAGGGCGGTGATAGTCCTTCAAGGGAAACCATCACCGCCAAGCCCCTGGA  
ACTTCTGGCATCACGGTCCTTAGGCGTGATTCTGGCGTGGCATGCAGGATTCGAACCTGC  
GACCAACCGCTTAGAAGGCGGTTGCTCTGTCCAACTGAGCTAATGCCACAACGCTGAGAG  
CACTTAGCCTGTAAAGGCGCCACACTTTGTGCGGGCTCCATAAATGCTCTCATCGTTGTA  
CCCTCGTCTTCCGAGGCGTCCACACCGAATCGCCGGGATGGTGAATCCCCGTGCGCGGA  
ATAAAACCGCTCGACTTGCACATTCCGGCTACCTGGTTCGTTTGCTCGAGCAAGGGAGGG  
TGCCCTTAAACGTATCCAGACCGCTATCGGCGCATGTGCCATAACCGCTACTGCTCAA  
ATAAAAGCTCACTCCACCTGTTCAATTTAACGACAAGCCAGTCAGGTTAATAACCGGAAT  
GAACTCTTTGCTTACCTGAAAGGTAATAATTTCGTGCGTTAAATGTCAACTATCTACGATA  
AATAAATCATATGTGGTTAAATTGGTAATAATTTAATTGCGTACGGAGTCATTGATATGT  
GCATGGGTAGCTCACCATCAGTGCCTGCAACACCAGAAGTTCAGGCAGCACCACAGGAGC  
AGGATGCCGCCGTTGTTGATGCCCGCGACGAAGAAACACGTCGCCGTCGCGCTGCTGCTG  
GTCGTAGTTCTACGCTGCTTACCGGTTCTCAGGGCGACACATCAACCGCTAATACCAGCG  
GTAACACGCTGCTTGGTCAGTAACCGGAGTCATTGAAATGGCGGAAACAACACTAAAGAGCG  
ATTGAACAAACAGTTCGCACAACCTGAAAGCGAGCGTCAGTCGTTTCGAGCCGCACTGGCG  
CGAGTTGAGTGATTACATCAACCCGCGTGGTTCCCGCTTTCTGACTTCTGAGGTCAACCG  
TAACGATCGACGCAATACACGCATTATTGATTTCGACCGGGACTATGGCGGCGCGCACTCT  
CGCCAGCGGCATGATGTCAGGCATCACAAGCCCCGCGCGTCCGTGGTTTCGCCTGGCTAC  
GCCAGATCCTGAAATGATGGATTATGGCCCTGTTAAGTTGTGGCTTGAGGCGGTGCAGAA  
CCGCATGAACGATATGTTCAATAAGTCGAATCTCTATCAGTCGCTGCCGCAGTTATACGG  
AAGCCTCGGCACATACAGCACTGGCGCAATGGCGGTGCTGGATGATGACGAGGACATCAT  
TCGTACAATGCCATTCCCGATAGGCAGTTACTACCTGGCTAACTCACCTCGTGGCAGTGT  
GGACACCTGTTTTTCGCAAGTTCTCTATGACTGTTTCGTCAGCTTGTTTCAGGAGTTCGGACT  
AAATAACGTCAGCGAATCCGTAAAAAGCATGTGGGAAAGCGGCACCTACGAGAAGTGGAT  
TGAAGTGATGCATTCGGTTTACCCGAACATTGACCGCGATACATCGAAGCTGGATAGCAA  
GAACAAGCCATTCAAATCGGTTTATTACGAGGTTGGTGGCGATAACGACAAGTTGTTGCG  
TGAGTCCGGATTTCGATGAGTTTCCAATTATGGCTCCGCGCTGGGAAGTTAATGGCGAAGA  
TGTTTATGGATCATCATGCCCGGGTATGCTGGCGCTTGGACCTGTTAAGGCATTGCAGCT  
TCTCCAGAAGCGCAAGTCGCAGTTGATTGATAAAGCCACCAATCCGCCGATGGTTGCTCC  
GACTTCCCTCAAGAATCAGCGCGCCTCCCTTCTTCTGCGGACATCACGTATATCGATCA  
GATTACTGGTCAGGATGGCTTCAGGCCTGCTTATCTGGTTAACCCAGTACAGCAGATTT  
GGTAGCAGACATTCAGGACACTCGTCAAATCATTAACAGCGCCTACTTTGTGCTGATCTGTT  
CATGATGTTGCAGAACATCAATAACCCGCTCAATGCCTGTTGAAGCGGTGATCGAAATGAA  
AGAAGAAAACTTCTGATGTTGGGGCCGTTCTGGAGCGCCTGAACGACGAATGTCTTAA  
TCCTCTCATTGATCGCTCTTTCTCGATGATGGTTCGTAATAAACATGCTGCCGCCACCGCC  
AGACGTGATGGAAGGTATGCCCTGAAGGTCGAATACATTTCCGTCATGGCTCAGGCGCA  
GAAGTCTATCGGCCTGTCCAGTCTGGCGTCTACGGTCAACTTCATTGGTCAACTTGCGCA  
AGTGAAACCAGAAGCTCTCGACAAACTCAACGTTGATCAGGCGATCGATGCATTTCGCTGA  
TATGTCCGGAGTGTCTCCAACCGTCATTGTTCCGCAGGAACAGGTTGAGCAGGCTCGCCA  
GCAACGGGCACAGCAGCAACAGCAGCAACAAATGATGGCGATGGGGATGGCGGCGGCACA

GGGGGTCAAGACGCTAAGCGAAGCTAAAACCTTCGGATCCGAGTGTTTTGTCAGCTATGGC  
GAATGCAGTTAGTGGTCAGGGTGGGCAATCACAATGACAGATTACGAAGACGATCAACTG  
AAAGAAGAAAACGCCCGTAAGCAACGTGACATGGCACAGCGTGAAATTGATGACATTCGC  
TTTGTGTCATGAGCTGTGAACAGGGGCGTCGGGTTGTCTGGTCGGTACTGGAGAAAGGCCGT  
GTGTTTTCCGCTATCTCGCCGATGGACGCTATGGCAATGGCATTTAATGAGGGGCAACGC  
AATCTGGCGCTGGAACGTTTTCAGCGCGTTATGGCGCATTGCCCTGAACAGTATTTGAAG  
ATGGCCAAAGAGGCCAGTGAACAGGAGTGATCATGAGTTTATTTGAGCGTTTGCTGTATC  
GCCGTCTTTGCAATGAGCAACCAGTCGATGGTGGAGTAGTTCCGGCTGCGTCAGAACCGT  
CAGCGCCTGCAGGTGATAACCCTGCTCCAGTTGGTGATCCATCACAACAGGAAGGTGATA  
AGCCACAACCTGTTGCTGATGGCGATAAACCTGCTGATGACAAAAAGTCTGAAAACGATA  
AGCAGGATGAAAAAAGGACGGCGATAAACAGAGGGTGCGCCTGAGAAGTACGAGTTTC  
AGGCTGCCGAAGGCGTAGAGCTGGATACAGAAGCGTTGAAGGAGTTCGAGCCGGTGGCTC  
GAGAATAAACCTGACCAACGAGCAAGCGCAAAAGCTGGTTGATGCTTATCCGAAGATTC  
TGGCAGGTGTTACAGCAGCGCCAGGCAGAAAGCCTGGCAGAAAACAACCGAGCAGTGGGCTG  
CGGATATAAAAGCTGACAAAGAAATCGGTGGCGACAAGTTGATTTCTAACCTTAGCGCCG  
CACAGCGTGCCTTGACCAGTTCGGGACACCTGAACTCAAAGAATATCTGAACACCACCG  
GGCTGGGTAATCACCTGATCTGGTCAAACGTTTCGTGAAAATCGGAAAGGCGATGTCTG  
AAGATGGCATGGTCACCGGTGGTAATGAAGGCCAGCGTAGTGCGGCCGAAGTGCTCTATG  
GCAAATAAGAGAGGAAATGACAATGGCTGTTAAAGGCTTAACTGCGCTAACGCTGGCTGA  
CTGGGGTAAGCGCGTCGATCCAAACGGGAAAGTCGATAAGATTATCGAGCTTCTCGGTCA  
AACTAACCCGATCCTTCAGGATATGCCTTTTGTGCGAAGGGAACCTTCCTACCGGACACCG  
AACCACCATTCTGTTTACCTTCAGCTACCTGGCGTTTGCTGAACTATGGTGTACA  
GCCAAGCAAATCAACCACAGTGCAGGTACCGATTCCGTTGGCATGCTGGAAACCTATGC  
TGAAGTCGATAAGTCACTGGCTGATTTGAACGGCAATACCGCCGAATTCCGCCTGTCTGA  
AGACCGCGCATTATTGAAGCGATGAATCAGCAGATGGCGCAGACGCTGTTTTATGGTGA  
TTCCAGCGTTAACCTCAGCAGTTTATGGGACTGTCCTCCCGCTATTCCAGTCTGTCTGC  
GGGTAATGCTCAGAACATCATTGATGCTGGTGGCACGGGTACAGATAACACCTCAATCTG  
GTTAGTGGTGTGGGGCGAAAACACCGTGCATGGCATCTTCCCGAAAGGGAAGAAGGCTGG  
CATCCAGATGGAAGATAAAGGCCAGGTGACACTGGAAGATGCTAATGGCGGCAAGTACGA  
AGGCTATCGCACCCATTACAAATGGGACAACGGACTTGCTCTGCGTGACTGGCGTTATGT  
TGTTTCGATTGCAAACATCGATGTCAGCAATCTTTCAGAACCTTCCTCTGCCGCAAATAT  
TGCGAAGTTGATGGTTAAAGCACTGCATCGCATTCCAAACCGTGGCATGGGCCGCCCGGT  
GTTCTACATGAACCGCACTGTAGGCCAGGCTCTTGATCTGCAGTCTCTGGAGAAAACATC  
TCTGGCTATCAGCGTAAAAGAGACTGAAGGCGAGTGGTGGACTTCATTCCGTGGTGTACC  
AATCCGTGAAACTGATGCGCTTCTGGAACAGAAAGCCCGCTGGTGTAAACGCCTGTTATT  
AACCTGTGGGTCGTAACAGACCCACTAATGGAGAAAGAAGATGATCACCGACAAACTGTT  
GATGTTCTCCGAAGCTCAGGCGGTTACGAATACCGCGGCTTCTACTGACGTAATCGATCT  
CGGTCCAATTGACGGAAAACGTCGTGATATCGGCGTGGGTTACCCGCTTGAGTTTTGGGC  
GCTGGTTAACGAAGCCGCCACGGCAAGTGGTGAAGCAACTGTAAACATCCAGTTGCAGAC  
GAGTGAGAATAACAGCTCATGGACCACTATTTATGATAGTGGTGCCTGGCAAAGACCGC  
CCTGACAGCAGGTAAACGAGTTGTTTCTGCAAAGGTGCCTGCCGGTGTTCAGCGATATCT  
GCGTGTTAACTACTCCGTGCAACTGGCCACTAACGGCTGGCGAATTCAGTCTGGTAT  
CAGTCTTGATGTTGATGCCAATACGCCGTATCCGATCCGCTCAAAGTAAGTGGTTAAGG  
TGATATCGATGTCAGGTGAGAAACCAAGATAACCGCGTTCTGCGCCTCTCTCATATCCATA  
ACACTCTGTGGCCGGAGGGGGCAGAAATCGAATACGAAGGTGAGCCTGGTAGCGCACTGG  
AACCTGTTAACGATGCAGCCAGACAGGCAAAAGCAAAGGTAGCAGGAAAGGTGTCAATGG  
CAGCAACCAGTACCAAATCATCAACGATGTGTCAGATGATGGTGAAGCTGGATAAGCTCC  
GTGAAGAGTACGAATTGCTCTTTAACGAGAAGCCACACCATAACGCCAAAGCCGAAACGC  
TCCGCGAGAAGATCGCAGATAAGCGTAAAGAACTTGGCGTGTAAGCCTCGCGGATCAGAC  
AAGGGGCTTCGGCCCTTTATTGCAGGAGTGATATGGAACCTCGTAAACCTCAAACCCGG  
CACTGACAGCTACCAGGATGAGAGCGGAGAAACCAGAACTCGCGATGAATACCCGTGGGG  
GCTGTGCATCACTCTTAATAACGACACATTGAATAAGCTGAAGGCGCAACCTAAGGGCGT  
CGGAACGGAAGTGATGATAACTGCAAAGGCTGTTATTCGAGGCCTGTCTGCCAGAGAAAC  
TAACGATGGCGTTAATCGCAGCGCCGATCTGCAGATCACTGATATGGCGATCGCTCCTGT  
TTCCGGGGATGTAGAAAATCAGCGGCTGAAACTCTGTACGGTAACGGAGGTGAGTGATG  
GCCTCTGTAGTAGAGATCTGTAATCGTGCGCTGTCCAATATTGGCAACAGCCGAGCATT  
AACAGCCTGACGGAAGCCAGCAAGGAAGCGGGGAATGTTTCGCTGCACTTTGAGGCCTGT

CGTGATGCTGTGCTTTCTGATTTTGACTGGAACCTTTGCTACCAAACGCGTGGCGCTTGCA  
GATACGAGCAATCCACCGCTGACTGGGAATATGCGTACCAGTACCCGTCAGATTGTCTG  
CGCATTACTGAAATTATGCTTCCTGGTGTACGCAATCCAACAGCAGCAATGCGCGTTCAG  
TACGAAGTTGGTGCAGACACCAACGGAACAGGAAAGTTGATCTACACAGACCAGCCTCAG  
GCATGGCTCAAGTATGTCTCTCGCGTTACAGATGTGAACATGTTTGATGCCATTTTTATG  
GAGGCGTTGGCCTGGCGTCTTGCGGCAGCTATTAACATGGCGCTGACTGGGAATGCAGAC  
CTCGGTACGTTTGCCCTCAATATGTACAATCGCGTGATTCTTAGTGCTGGCTCGCATAGC  
CAGAATGAATCACAGGAACCACAGCCACCGGTTGATGAGTTTACCATTGCGAGGTTGTCC  
TGATGGCTATCAGTTGGATCCAGCCCAGCTTTGCCGGTGGTGAGATTGGACCGTCGTTGT  
ACGGGCGTATTGACATGGCGAAGTACCAGGTAGCATTGCGCAAGTGCGATAACTTTATCG  
TGCGGCAGTATGGCGGCGTTGAGAATCGACCTGGTACGCGTTTTGTCGGTGCCGCCAAT  
ACCCAAATCGGAAATGCCGCCTGATCCCGTTCCAATTCTCGACGGTTCAGACTTATGCTC  
TGGAGTTCGGACACCAGTACATGCGCGTTATCAAAGATGGTGCGTTGGTGCTGAACAGCA  
GCAATGTTATTTATGAAATTGCCACGCCATATACTGAAGCCGATCTGTTCCGAATTAAT  
TCACGCAAAGCGCCGACGTGCTTACGCTGGTTCACCCGGCATAACCCGCCGAAAGAGCTGC  
GCCGCTATGCGCATGACAACCTGGCAACTGGTGTGATGTGGTAACGAAGAACGGGCCATTTG  
AAGATATCAATATTGATGAGTCATTGACGGTTTATGCCAGCGCCAGCACCAGGGACAATTA  
CGTTAACGGCAAGCGCCTCTATTTTTGGCGCGGAGCAGGTAGGCAAATTGTTCTATCTGG  
AACAGCCTGCAGTGGATTCTGTGCCGGTATGGGAAACCAGTAAGAGTACGTCGATTGGCG  
ATATTCGCCGTGCAGACAGTAATACTACTATCGCGCCGTTACAGCAGGCAAAACAGGCACTT  
TGCGCCCTTCGCATACAGAAGGCACATCATGGGATGGCTGGGGCGGATCCGGTGATGATG  
ATACTGGCATTGAGTGGGAGTATCTGCACAGTGGTTTTGGCATTGCCCGTATAACTGCTG  
TAAATGGCACTACTGCAACTGCTGAGGTGATTTCTATATCCCTTCGCAGGTCGTTGGCG  
AGGATAATGCCAGCTATAAATGGGCTAAATATGCCTGGAACAGTGTTAACGGTTATCCTG  
GCACGGTTGTTTATTATCAACAACGTCTTTACTTCGCCGCATCGACAGCGTTCCTCAGA  
CTATCTGGGCCAGCCGTACTGGGGATTATAAGGATTTTGGCAAAGCAATCCTACGCAGG  
ATGACGACAGAATTATCTACACCTATGCCGGGCGTCAGGTTAATGAGATCCGCCACCTGA  
TTGATGTCGGTTCGCTGGTGGCACTGACTTCCGGAGGTGAGTACGTCATCACCGGCGACC  
AGAACAAGGTGTTAACCCCATCATCATTTGCATTTCAGCTCTCAGGGATCAAATGGCTCAA  
GCAACGTCCCACCAATTGCCGTGGCGAATATTGCTCTGTTTCGTCAGGAGAAAGGCAGTG  
TTGTCCGTGATCTGGCCTACTCATTTCGATGTTGACGGCTATCAGGGGAACGACCTGACCA  
TCCTTGCCAATCATCTTTTTCAGAAGCACAGCATTGTTGACTGGTGCTTCTCTATTGTCC  
CTTACTCCAGCGCCTTCTGCATTTCGTGATGACGGTAAATTACTGGTGATGACCTATTTGC  
GTGATCAGCAGGTTTTTGCATGGGCACCACAATCCAGTACCGGAAAATATGAAAGCACAT  
GCAGTATCAGCGAAGGAAATGAAGATGCGGTGTATTTCTGTCGTTAACCGAACCGTTAACG  
GGCAAACAGTGAGATACATCGAGCGACTGTCCAGCCGTTTATTTACCAGCGATGAAGATG  
CTTTCTTTGTTGATTCTGGCCTTAGCTATGATGGAAGAAACACGTCTGACAGAACGATGA  
CCATCACTGGTGGTTCGGCGAATGGGATTACCTCGCGGAATATAACAATCAGTGTTTCTG  
GTGGTGCGTACTTCACCAGTAGTGATGTTGGTGCGCAACTACAGTTCCTTATACCGGAG  
CTGATCCTGATACTGGCTATGAAGTGTCAAAGAATTACGTTGCGACATTATTTCTGTAA  
CCAGCAATACCGCAGTAGTGGTTCGTGCTAACAGGAACGTCCCGCCATCCCTCAGGAATG  
TGGCCACCACGAACTGGCAGATGGCGCGCCGGACATTTGGCGGCTTGTTCTCATCTTGAAG  
GCCAGACCGTAAACATCCTCTCTGATGCGAACGTGGAACCACAAAAAGTGGTTTTCCGGAG  
GTGCCGTCACGCTGGAATCACCGGGGGCTGTTGTGCACATCGGCCTGCCAATAACTGCTG  
AATTCGAAACACTGGATATCAACATTAACGGACAGGAAACGCTGCTGGACAAAAACAGG  
TGATCCCGTCCGTTACTCTGGTTGTGAATGCCAGTCGCGGAATCTGGGCGACTACGCCC  
GCGGTAAATGGTACGAATATCCACAGCGTGAATTCGAGTTCACGATGATCCTGTTGATG  
ATGCTACCGGAAAAGTAGAAGTGAAACTGGACAGTAACTGGGGCAAAAACGGGCGTGTA  
AAATCCGTCAGCTTGACCCGTTGCCGCTGTCTGTTCTTGCCGTTATTCCTCGCCTTACTG  
TTGGGGGATTCTGATGATCTATGTTCAAATTATTCGCTACCGAAGAGCATCTTCAGAT  
GATTTTGCCGGATGTTTCGTCAGGCTGATATTGACGAACTGTATGCGGTATCGCTGATGAC  
TACCGAAGATGCGCTGCGCGTTGGTCTTCGCACTGCGACTATGGCCTGGTCAGGGTTCGC  
GAACGGAGAACTGGTAACCATGTTTGGTGTATCTCCGGCGTCAATGATCGGTGGCAATGG  
TACGCCCTGGCTGGTAGGAACCAGCCGATTGAAAAATATCAGAAGACATTTCTGCGCCA  
CTGCCGCCCTGTATTGCAGCAGATGCTGGCAGTTTATCCGCGCCTGGAAAACACTACGTGCA  
CGAGCGAAACCATGTTGCCAAAGCATGGCTGCACTGGCTTGATTGAGGCTTGAAGAAGC  
CGCGCCTTATGGTGCTCTTGGTCTTAATTTCCACAGATTCACATGGAGAGAAAATAATG

TGCGATCCGGTTATTGCTGGTGGCGCAATGCTCGCCATGAGTGGCATTTCAGGCATACACC  
CAGTATCAACAGGGAAAGTATGCCTCGAAGGTTGCAGAAGCGAACGCAGATATAGCCACA  
GCTCAGGCAAATGATGCAATAAACAGAGGTAACGCTGAAGCTGAGCAACGACGCAGAGAG  
ACCCGACAGCGGCTTGGTACACAGGCGGGGACAATGGGGGCTACCGGCGCTGATTTATCT  
ACAGGTAACGCGCTGGATATATTTGGCGACACTGCCAGTTTGGCGCTCTTGATTGCTG  
ACGACGGTGAATAACGCGCAACGCGAGGCTTACGGTTATCAGGTCCAGGCTGCCAACTAT  
AAAGCAGAAGCCAGTTCAGCCCGTAAACAGGGGAATGTGGGAGCAGCAACAACATTGCTC  
ACTGCGCCTCTGAAGGCATACGGTGCCTACCAGATGTTTGGTGGGACGTGGAGTCCGTTT  
ACTCAAAGCACTCCTGCGCCAATCGGGGCAGCAGCAGGAACCAGATTACCCGGAGGATTA  
TAATGCCAGTCGTACCAACAGTATCCGGACGTACAGGTTGAGAGTCGTGGAGTTCAGTCAG  
CAGGCTTGCAGACGTTTTCTCAGCAAGGTATTGGTGATGCTTTTGTTCGGGCAGGGACAG  
AGGCAATTGATGTTTTGGGGCAGGCAAAACAGCGTGCCAATATCGCTCTGGCTCAGGAAG  
CATCTCTTAACCTCAGTCAGATAAGCAGCGATCTGCTGAATAATCCTGAAACAGGATTGC  
TTAACCTGAAAGGGAAAAATGCTATTGGAAAAGGCCATGAGTATACGCAGCAGTTTGATG  
CTCAGGTGCAACAACACTGGCTATGTCGCTGCCGGATGAACAGGCTCGTAATGCTTTCATGC  
AGCAGGCGCAGCAGCAGCGCATTACAGTTCACACTACGCAGGCCGGGCGACACGAGATAGGGC  
AAATTAATGCCTACGAAGAAGGCCAGTTTCAGGGCAGACTGCTGAACAATGGTAAAAATG  
CCGCAGCATTGTATGGCGACAACGCCGCATACGTATTGGCTAACAAGCAAACCTTCCAGC  
AAATTGAGGAGTACGGTGTTCACGTGGCTGGAGCAACGAGCAAATCCAGGCCAAGAAAA  
TCGAGTTTAAAGAGAAGGTTGCTGATGCTGCATTGTCCAGTGGTCGGCAAACAATGCGA  
CCGCATTCATCCAAAGTAATGGCGAGTTAAGTGATACTGCTGCTGGAGCTCGCCGTGCTG  
TAGCAGATAGTGACTCTTCCGAGCGTGCCCGTGGCATAACGCAACAATAACCCAGGAAATC  
TCGAATACAGCAAAACTAATCCGTGGGTAGGCCAGACCGGTGATGATGGTCGATTTGCTA  
AATTCGAAACACCTGAACACGGGATTCGTGCATTAGGGCGGAACCTGATGTCGTATCAGA  
GGCAGGGTATTGATACCGTCAGCGAGATAATTAATCGCTGGGCACCGCCTGCTGATAAAA  
ATGACACTATGTCGTATATCAAAGCAGTGTGCGAACAACCTGGCGTTTCTGCTGATGAGC  
CTCTCGATGCATCTAATCCTGATACCCTGAAGGCGCTTTGTGCAGCCATTATCCATCATG  
AGAACGGTAGCCAGCCATACAGTGATCAGCAGTTAACTGCTGGTGTGTCAGTGCAGCACTTG  
GTTTATCAACAATTCCAACCAACACCAACCGCTATACCGGTAATGCAGCATTTCGATGCGG  
CATCTCCTGAGGCGCAGGCAAGTTTTATGCGACAGGCGGATCAACTGCGTCGGCAGCAGC  
AGGCTGAATATAAAACGATGATTGACAGCCAGGTTTCGCGATGCGACAGCTGCGTATATGC  
GTGGCGTTGAATTTCTAACCACCTGGTGAAGGCTGATTTTATTGTCAGCTTATGGAGTAA  
GAGAAGGAAACCTGCGATATACCGAGTTCAGAAATACGCAAATCGCCGGACAGTATATAG  
GCTCTTCCGCAACATGCCGACAAGCAGCATTACAGCATATGTTGAGCAATTACGCCCGG  
ATACTGGTGAGACAGGGGAGGGTTATGCGGCACGAGCCGCTCTTTATGACAACGTTGTGT  
CGGCTGCAAGTCAGGTGATAAAGCAGCGACAGGCTGATCCTGTACAGTTCTCTCTTCCG  
CCGGACAGGCAAAGCCTATCGACATGAGCAATAAGGATAACTTTGGACAGAGCGTTGCC  
TGCGTGCTGCTCAGGTCAGTGACCTTGCTAAGTCATATGGCACTCCACTGACGTTCTTTT  
CCAAAGACGAGGCCAATCAGATCGGTGTTTTCTTTCTGTGATGCGCCCGTTTCCCAACAGG  
CAGCATATCTCGATACCATCAGGCAGAGCACTGGTGGTGGGCAGGTGTATATGTCAGCAC  
TACAGCAGATCAGTGCCAACGCTCCATCTGCTGCCGTTGCCGGGATACTGATGGATAAGC  
CAGGTGGTATTTTGGCAGAAAAAACTGGTTTAATCCGGATGTTTCCGTGTCTCCAGAAA  
CCGCTGCGCAGACAATTCTTGCTGGCGCGGGCGGCTCGTAAAGGTAAGTACTGATGACGCGAAAG  
GTATTCCGATGCCTAAAGATGCTGATCTTCGCCTTGAGTTTTCTGACATGGTGAAGGATG  
CATTTGCTGGTGTGCTCAGGGGGCATCAATGGCATAACGAGATCGCAAAGGACTATTACG  
CTGGTGTGATGGCGAAAAAAGGCGTGGTATCAGGCGAAATTGACAATGATATCTGGAAAC  
AGGCTGTTAACGTAGCTACAGGTGGCGTGCATGACTATAACGGAATGGGGAATGTTCTTT  
TGCCGTGGGGAATGTCTGCAGAGCAATTCGATAAGCAGGTTAATCAGGCTTGGAAATGAAC  
AAGTTGTTGGCACAGGGATAAAAACACCGCCTGGTCAGTATGGTTTGC AAAGTTACGGCG  
ATAGTCAGTACCTGGTGAAACTTGGTACTGGTTATCTGCTAAAAGATGATGGTTCTCCCG  
TTGTTCTTGATCTGACACAGAAGCGTCAGAGATTCTCCGGAGATATTCCGCAATGAGTTA  
CTTTGGCCTTAATCCAGTAAACCAGAATCAGCAGCTTGACGAAGCAGCATTAAATCCAGT  
TGGCTTTAACAGCGATGTTGGTTTTTTTCGACAATGCTGTAGGAGCGGCATTGTCTGGTTT  
GTAATCCGGGCTGGTGGCAAAGCCAGATCAGTTGCTATGGGCAGGGATGGATAAAAATCGT  
ATCCCCGATTGCTCAGCTTGTTAACGAAAACACCTCGCTCAATGACACTTCAGTTTCATA  
CATTGCTGAGCAGAGAAAACACTAGCAGAGCAGCAGGTTAAGCGGCTGACGCCTGATGCCGC  
GACAACCGGAATCGCCGGGCAGGTCCTTTATGGGTTGTTTCGATATGGGCGGGCAGGCTGT

TGTCGGTACAACGCTCGGTGGTCCGGTCGGAGGTGCTGCGGCGGTAACCTTCTCTACAGGG  
TTTTTCTGAGTTTGAACGGTTGACAGCACAGGGTGTGATTTTCAGGACGGCGCAGGAAGC  
GGGATTAGTGCAGGGTATTACTGCTGGTGCTGGAACACTGATCCCTATGAGCCTCGGGTT  
ACGTGCTGGTGGTGCCTGGCGGAAGGTGTGGCGGCTCAGCTTGCAGCGGACGGGTGAAAG  
TTCAGTGCAGCGCCGAGCAACAGCAGTACGTGCAACGCCAGATAATTGCCATGCCCG  
AGGTACAAATATTGCGTTCGGTATGGCACAGCGTGGGCTTACTGCAAAAACGCTTCGTGA  
TGGTGGCTATAGCGAAATGGCTAACCAGTATGATGTGTTGGATCGACAGGCAATTGCTAT  
TGATGCTGTTCTTGGGGTGGCGTTTGGTGGTGTGCGCAGATTTATTAACCTCTCGAGGCGA  
GTCTACAAGCGCACCAAATTTTTACCAGTTGATGTCGATGCTGCACTGGCGGCGAATGC  
CGCTCATCATGCTGAAATTGATATTGCTCCCGGCGTGCCGAGCAACGTGCTTTCGCGCAA  
TTCTCACATTCAGGCTCTGCGAAAAGCTATGTCTGATGTTAGCCAGGGGAGACCTGTAGA  
CGTTGCCAGCATTGTTGAGTCTGCATCTTTCAGTGAAATTCTAGGGCGCAAGAGTCTGCT  
GTCTCAGGCAGTTAATGAGGCTCTGTATCTGTAGATGATGGAGTAACGGCGCGCGCTAT  
AGAAAATCGGTTGCTTGAAGAACAGGCCGCGCAGCTTTTGCCGCGTGCGGATAGACAGGT  
TTACCAGTCTGAAATCGCTAATAGCCAACGAATTATTGAAAATCTCACTGAACAGCGCGC  
ACAAATTCTTGCAGAAGAGCCAACCGGTAGCGGTAAGGCTTTATCTCGTGCTCGATCAGA  
TAAACAGGCCAGACTTCGCGATAATTGACCAACGAATCCGGCAGGCACAAGAACGCCTGGA  
ATTTTCTCGTAACGCGTTGGCACCGCATGAGCCTGGTGGTCAGTTTTTTGAAGCTCGAGC  
AGAACTGGCACGGCGACTGCAGGTAGAAAGTGAACCTAATGCTCAGGCTGTTTCATTCTA  
TAAAACAGCAGATGTCAGGACGCCAGACGAAGTAGCTCCTTTTGAGCCTGATAAAATATT  
GCAACAGGCAGAACAAAAAATGATGGCGGATCAGGCAGGAGATATTGATCTGCGCATAGC  
TGAAGACTCGCTGCTTGAATCACCTGACATGATAATTACCGTGCTGGATGATGATGGTAA  
TCCACAATCGCGCAGCGCGCGTGAAGTACTGGATGAAGCGAACAGGGAAAGTGAGCAGGC  
AATACAGGATTCCAGCCTGTTTGGATGTCGCTGTGGCGTGTTCCTTGAGAGGTTAAATTA  
ATGAGACAGGAATGTATAACAAGCGGTCCAGCAGGCGGCGCAGCGCACGTTAACAGCGCGA  
GAAATACAGAACATTGAAGACCGCATTTATCGAAATATGCGCTCCATTGCTCGTGATGAC  
CCGATGTCGTGGAGACAACCTTCCGAATCAGAGCGGCTATATCGTGACAGCACAAATTGGCA  
TCTGAAGAATTACAGCGAGAAGCGGCATTAAGAAACGTCGTGTGGCCCTCACTATAGCC  
GCACGTCAGAGATTGGATAAATTTATCAATAGCTATCAAGGGGCTGATGGGAAACTTGGC  
GCTCTTAACCGTACTATTGCTTTAATGCAGACGGTAAATCGAATTCCTCTCTGTTGAG  
TCCAGAACAAAAGCCACTCGTGATTATGCATTGAGTCAATTGCAAGAGGCATTTGAAGCA  
GTTGATCCTCGCTTTTTTGGCCTGTTTGAAGATGAAGCTGGCGTGCGTGACCTGGTATAT  
GAAATGCGAGGGCAAAATACTGGCAATGCTAAAGCAAGAAAAGGTGCTAAGGCGTGGAGA  
GAAGTGACAGATCTACTGCGCCGCGGTTAATGATGCTGGTGGGGACATTGGCTATCTC  
GAAAACCTGGGGGATCCCTCAACATCATTCTATGGAAAAGGTTGGGGCGGTATCAAAGGAT  
AAGTGGGTTAGCGATGTTATAGGTAAGCTGGATCGCAAATATTATATCCGAGCCGATGGA  
CAACTGATGAACGATGCCGAGTTGTCTGCATTTCTTGGAGAGGCTTATAACACGATCGCT  
ACTGGTGGGCTGAATAAGCTTACTGATACCGGAATGCGAATTTCCGGCGCACGTGCTAAC  
CGTGGTAATGCATCACGACAGATAACATTTCAAAGATGCAGATTCCTATCTGCAATATCAG  
CAACTTTATGGCGATCGCTCTCTATGGGAAATCATGGTTCGGTCACTTGGAAAGGTATCAGT  
AAAGATATTGCACTGGTGGAAACATATGGCCCAAACCCCGATCATGTTTTCCGCTCTCTT  
CTTGATCAGGTGAAGGCAGAAACGGCAACAGCTAACCCGAGTAAAACCGGTAAAGTCGAG  
CGGCTGGCGAACACACAGAGAATCTGTACAACCTTATTTCCGGAAGACACAGCCTGTA  
GCGAATCCGCACATCTCGCGATGGTCTGACAATATCCGCAACTGGCTGGTTGCCAGCAGA  
CTCGGATCCGCGTTGCTGTCATCGTTCTCTGATCTTGGAAACCATGTATCTGTCTGCGAAG  
GTTACCAACCTTCCAATGAACCAGTTATTCGCAACCAGCTTGAAGCTATGGACCCAACG  
AACCGTACAGAACTTGCAGCGGGCGCGCCGCGCTGGTCTGGCGATGGAATCTCTACTTGGC  
AGCGTTAACCGCTGGGCGATGGATAAATATGGGGCCGTCAGTGTCTCGTTGGGCGGCAACG  
GCGGTAATGCGTGCCAGTGGGCTTACAGCATGGTCAGATGCGCACAAGCGCGCCTATGGC  
GTAACCATGATGGGAAGCCTGGGAGAAGTAGTGTCACGGACACCAGACCTTCGTAGCCTC  
GATGATTCTGATTTTTCGTATCCTGAAAAGCAAAGGGATTACTGACACAGACTGGAGCGTA  
TGGAAGTTGGCGAACAGGAGGACTGGGGGAACGGTAATAATACGATGCTGACACCGGAA  
AGCATTATGCGTATCCCTGATTCAGCAGTTAAACATCTTGGTGAGCCTGAACGCGTGAAG  
TTTGAGGCAATGCGTAAACTGCTCGGTGCCGTAACCTGAAGAAGTTGATATGGCTGTTATT  
ACACCGGGAGCACGTGAGCAACTGATAACCGGTTCTGGTATTACAGCGTGGAACATGGAAA  
GGTGAATTAACGAGAAGTGTTCCTGTTTAAATCGTTCCCTATCTCGGTTGTTATGCGT  
CACTGGTCACGCGCTATGGGTATACCGTCTGCTGGTGGGCGTGCGGCATATATTGCGACG

TTTATTGCCAGTACGACCATTCTTGGCGCTTTGTGCGCAGCAACTTAACGACCTTGCGTCT  
GGTCGTAATCCTCGAGAGATGACAGGAGGAGATGCCGCAAATTCTGGCTTGGTGCTCTA  
CTGAAAGGTGGTGGTCTTGGCCTTTACGGTGACTTTTTATTGTCAGATCACACTAGGTAC  
GGAAGCGGCGCGCTGGCGTCGATGCTTGGCCCCGGTAGCTGGTCTGGTTGATGACGTAGTG  
AAGATTGCTCAGGGCATAACCGTTAAATGCTGTGGAAGGGAAGAATGAGCAGACTGGTGGT  
GATCTGGTTAAGCTGGGGAAAGGTCTGATGCCAGGTGCGAATCTCTGGTACTTAAAGGCG  
GCTCTCGATCACATGATCTTTAACCAGATGCAGGAGTATTTTTACCAGGTTATTTGCGT  
AAAATGGAGCAACGTTTCGAAGAAAGAGTTTAACCAGACATACTGGTGGCGACCACAGGAT  
GTCACTCCGCAATAAGGATGAGAAATGATTGCTTTTATTCTTGTGTGTTTGGCGCTTGT  
GCACTTGGCGTTATGAACCGTAAATGTATCATTGACTATGGCGAATTTGCTGTTGCAGTT  
ATTTTGATATTATCTGGTGTAGCAGGGTACATAGGCTTGTACATAACGTGAGCGTGACATG  
TCACAGGCCGCTTTCGCGGCCTTGTTTTTAACGAATGCCGCCTCCGCCCCTCAGAAGAAC  
CCTGCCTTGTGCTTGTACTCCGCGTGCCTGATATCACGCAGGCATTTGCTCACA  
CCGACGATGTAGCAGAACATGGTGGTTCAGCTCCGCCGCCGCGCCTGATACATCATGCCCG  
TCGTCTTGTTCATCAGCAGTGAGTGCTCCGTCAGGCCGAGAACCAGACGGCGAATGAA  
TCAGGCTACGGTAGCCGGGCTTTCAGTGGGGCAGTGTAGGTTTTGTTCTCTATCTTCATCG  
CCTGCATTACTGCTGACGCCGTGGCGTTGGCTACCTGGTCCGGCAACCATCTTTATGCGTT  
CTTCCTGCGGGAGCGAGTTTTTAATGTAACCTCCGGTGCGGCGGATCTGAGGAAGAACCT  
CACCTGTAACCCATTTACGAAAGCGGTAGGGGATAGTGCCTGGTGTACCCGCATCGCGGC  
AGCGGAGGATCAGTGTGTAGAGTCCCTGACTCGGAGATGATGATCGATTCTTGCTCACCGC  
CAGGGGTGTCGGTTGAAGCGACACCCTTCTCATCATCAAGTTTTCGAACAGCATCTC  
GATGGTTTTGCTATGCCTATAGCCCGACAAACATCTGAAGCGATAAACCATGGCTCACCAT  
TAATGACGATTACCCGTATATCGGCTTGGGATTCGAAAGAAAAAATGGACGTGCTTTTTG  
TAGCTGTCATAGTGGTTACCTTTTAGTCTGGTTAATCACCCTACCTACGCCAATCGGTT  
GGTGGTGAACGTGTCAGGGTTGGCGTAACCGGCTAAAAGGACCCGGCGCACCTTTCGGTG  
CCCCACACAGCCCACCATAATACGAATGTGACCGTGCTATACGCATAAAAAAACCGCTT  
GCGCGGTGAATGCGCCTTTTAGTAACCCGGGACGCCAATCCCGGCACTGGATTTTGCCAG  
TGCCCGATTACTATGGCACAATAGGAGTGCTTATATTTACCTTTGCGGTAAATATAAGCA  
CTCCACTTGGTAATTGCAAACCTTATCTGGTTTGTTCGTAATTGTTCCGGCACAATAGT  
CGAGATGTGTTTGCAGATCCCGCATGGACATCTGTGAGCTGGTGACGTAGTTAATCAGTG  
CAGTCAGTTCGGCAAGTGGGCCATCGACATTAATCCATCCTTATCGAGATCCCGGAGTA  
ATTTTCATCAAGTGCATCCCTCCACCAGTGACCTGACGCCTCCCGGCGTGTGAATCCTTT  
CGGTAAATCCGTCTTCCAGTGGATAGTGATACTGCGGCATCTTATCTTCTCCATGCAATA  
ACTGTATAAATACACAGTAGCAAATAATTTGTTTGGCTATCCAGCACGTTTTTGCGAATCAC  
CTGAAAGGTAATATCTGTTTCGTATTTATGTGTTATCTATCCATATGTGGTTTTTCAGGTA  
ATAGAATAACCGGATATGCGGCGCAACGGGTGCTGCGACTATCTGGAGATTTAACATGAC  
GGTCTCAACCGAAGTTAACCACAACGAATACACCGGTAACGGTGTACGACATCATTTC  
GTATACCTTTAGGGTTTTCAAGGAATCTGATCTGGTAGTACAGGTTGTTGACCTGAACGA  
TAACATCACTGTTCTGACGCTGGATACTGACTACACAGTAACCGGGCGCAGGGGGATATGA  
AGGTGGTAATGTAATACTTGCAACAGCTCTGGCTAATGGTTACCAGATTTCCATATCACG  
TGAACGTGTCGGTTACGCAGGAAACAGATCTCCGTAACCGGGGAAGTTCTTTGCTGAGGT  
GCATGAGGATGCGTTTGATAAGCTGACAATGTTGATTACAGCAGGTTTCGTAGTTGGTTAG  
TCTGGCGCTACGTAAGCCGTCATTTGTTGCTAACTATTACGACGCAATGGACAACCTATAT  
TCGTAACCTTCGTGACCCTGTAAGACCGCAGGATGCGGCTACAAAAAATATGTTGATGG  
GGTTCGAGAAACAAACCTGAGCAGAACGCTACGAACCCCTGAGCCGATACCAGCATTGCC  
GGGAATTGAGCAACGTAAGAATAAGATTGTTGCAATGGATGATACTGGAAATCCGATAAT  
GGTTTTGCCTGAATCTGGTTCGGCTACTGATGTAATGATCCAGTTAGCGGCAAATGATGG  
ATTTAAGTTTATTGGTCAGTGCCCTGATATATTGACACTAAGAACAATAGAACCTGAAAA  
AAATGGTCAAAGGATCACGTTGCGACAGCATAACGATCGGAACTGGGCTTGGTGGAGGGGT  
ATTCAGAGCTGTACTTGTGGAACCTGGCTATACCGATGATGATGGTGTGTAATAAAAAAC  
AGCAGGTGGTTCTGTATGGTTACGGGTTAATGCAGATAAGGTTAATCCGTTTATGTTTGG  
GGCCACTGGCGTGGCTGATGATACAGCAGCACTGCAAAAGATGCTTGAATGTGGCAGGGC  
GGCTGAGCTTGGCACAATGTCTGGAAAGCATCTAATCTTGAAGCTAAATAACAAGTCGTG  
TTCATATCTGGGTCTGGTCTACACGTTTCCAGGATAGAGCAAATATCTGGGGCAACAGG  
CGCGTACTGACAATTACTCAGGATTGCAGCCTGATTTATTTGTCCGATTGTGGCCTGTA  
TGGGGATGGAATAACTGCGGGAACAAGCGGGGTAACGATGGAGACAGGAAACCCAGGTGG  
GGCACCAAGCTATCCATTCAATACCGCCCCTGACGTTTCGTAGGGATCTTTACATTAGCAA

TGTTACATTACAGGATTTGACGAGTTAGGATTTGATTATCCTGAAACGAATTTTTCCGT  
CTCAACGCATGGATTATTCATAAGAAACATTAAAAAACCGGGGCTAAGATCGGAACTAC  
CGATTTTACATGGACAAACCTTCAAATTGATACGTGTGGGCAGGAATGCTTAGTGCTTGA  
TGGTGCTGGTAATTGCAGAATTATAGGTGCCAAATTAATTTGGGCTGGTTCAGAAAATGA  
AACACCATATTCAGGATTACGTATTTCTAATTCACAAAATGTAAACATGACAGGAGTTGA  
GTTACAGGACTGTGCATACGATGGATTGTATATTA AAAAATTCAACTGTTGCTATCAGTGG  
GTTGAATACTAACAGAAATAGTGCATCATCAAATCTGTCATACCATAATATGGTTTTTGA  
AAACAGTATAGTAACTGTAGATGGTTATGTTTGCCGTA ACTATGCTGCTACATCGCTATA  
TGATCTAAATTCACAAGCCGGAATGTGAGGTGTATTGGTTCCGATAGTACCGTATTGAT  
AAATGGTATTTACGAGTCAGAAGTAAACAGCGAACGACTCATGGGTGACAATAATCTTAT  
TCAGCCATATTCTGGTGATTTAATAATAAATGGCCTAAAAAACTATTATACATATACAGG  
AAGCGTAAAAACAATATTCCTACATTTGACGGAGTCGTTACAACCGCAACATATGTAAG  
CGCTCCTTCGATACTAGGGCAAGGAAACATGCTTAAGTTAACGCAATCAAACAAGGATAA  
GTTATTATTTTCTGATAAAGTATCGAGACATGGGTGTACAATCGGCCTTGTTCTAATCCC  
GTCATTTACGGGTGCAACA ACTATGACAGCTTTCACTCTGGGGAGTGGATATTCGCCCTC  
TGAAACTCTGCTGTTATGCAATTTATAGTTAACTCCAGTGGTGTGCAGACTATAGCAAT  
ATTATTATCCGGTGATGGTATAACTCAAACGTTAACAAGCGATCTGACAACGGAGCAAGC  
GTTAGCTTCAGGAGGCGTATATCATTTTTCGATGGGATTCGCTCCAGGCCGATTATGGTG  
GTCTATTATTGATATAAATACCGGAAGGCGTATACGACGGGCGTACAGACAACCAGATCT  
TCACGCCGCATTTAATAGCATATTC AACAGCGGAACATCTTCTATCACCGCATTTTCAGG  
ACCATTAGCAGGTGATATTGCATGTGAAGGGGCAGGTTTCGCATGTTTATGTTGGCGGTTT  
CTCATCTGAGTCAGACTACGCAGCGAGCAGAATGTACGGATTATTTACCCCAGTAGACCT  
GGATAAACAATACTCATTCCGCACGCTGAACGGAAATATTTAATATAGTTGGTTGTCATA  
TTACACGTGACAACCCAAATTTTCTTAAAAAACTACGATGGCTAATGAAATTAAGAACA  
CGATAAAAGAAAGAGGAATAACGATAAACATCTCTGGATGGATCGAATATTTATCAAGCA  
AAAATCTCCTGAGTATGTCAATGATTAATGGATGGACAAGATAAATCCCTAGTGTGCAGG  
GAGAAATAAATTTCACTATGTGTAATATCGTTTTGTTTTAACAGGGGTGTTTATCATGA  
ACACCATAAAACATATTGCAGACATGGCAATAAACAAGACGAGTTATCATAAAACATCT  
GGTTTACCGGTCCCCTGTAAACAGAAATATCTTTGTTATAAAAGCGGTCGCAAACGTAC  
ATGCAGTCAGCATAATGGTTAACATTATTTTGTGAGTTTGTGCATGTTAACTTGATTAT  
CTAAAATTATCTTCCCTAGAAGCAAGTACACAGCAAGGCTGGAAAATATACTAACTTGAA  
ATAGATTGTTGATATTTAAATTCAATCCAAGATATACATTTAATAAACTAAAGAATAAAA  
GAAGCATCCATAACCATACTAAAATTACAACATCTATTTTATTTGAGTGTAATAGAAAT  
TACTAAGTAATGGCATAATGATAACGAATCCAATGGCTGCATATAAGTACCACATATGAT  
AGAATATCTGCGATCGAAAAAATAAATTA AAAAATGATTTACATCTATGGGGAAACTAT  
TTACATGTGAACGATATAAGTAATATATCGCCGACCAGAAAAGTAGAATAATGAATAGCC  
GATTTGCTCGTTTTAATGACGAATTCATATTTGTACTTTCTTTAATAAGCAAAGCCCCAG  
AAATCATAATGAATAACGGTACAGATATTCTGGTAAAAGATTCTATTATATTTAATATAT  
CCCATCCTGATGAGCCTGTTTCATTCATACCTATAATTACAGAATGAAGAACAACCACCA  
AAAAGCAAGCAGCCACTCTAATCAACTCAATATTCAAATTCCTTATCTTTCATGACCAGGT  
ACGTTAAGCTGTATTATTTCAATAAATAATATCACCTATCGGGTAATTTTCGATAGGATCA  
ATTCTAAGTTATTTAACCATATATGGTTTATTGTGTATAATGGACTACCAACTAAGGG  
GGTTCTTTATGCACAGTAAACGGTGGTAATTATGTCAGCAGGGCTAACCAGTGAGTCATT  
AAATCAGTGGCTTAGCATGGGGTCTCTTGCTGCAGTAATTGCAGGTGTTCCGCCAGAAGT  
TGCCTTGGTGCTCTGGCTGGTGCGGTAATCTTTGTTACCTCGGCAGTTGAGTATCCAAT  
CCGTCGCCGCGTGCTCCTGTCGTTGCTCAGCTTCTCTGCGGCCTTCTCTTCTACAAACC  
CACAGCGTCGATCCTTATCGGCTTTGCCAGCCTGATCCCTACCATCACTCAGGACTCTTT  
CGAGAAAGGGATCGTCTTCTCTGCTGGCGCATTCGTGTCAGCAATAGTCGCAGTGCGCAT  
TGGCATCTGGCTCTATACCGTTCTGACAATCCACGCGAGTTAATTCCGGGGAGAAAAGA  
CGATGACAACCTCATGAGCTGCTTTTGCTTATTGCTAATGCGGTTATCTGTTTCATGTATAG  
CGATCCGCGTCGGTACGTTCCGGCGTAACGGTTCACAACATCGCAGATGGGGAGGGTGGA  
TCGCTTACTTCTCATTGTGGCCGCTGCCAGCATCCCGGTACGTGCCGCGTACGCTTTCT  
GGTACCACACGCCAATGACCGACGATCTTTCGGAGGTTGTCATCAACGCTGTCATGCTTG  
CCGCCGTTCTGAAAACCCGCGGTAACGTCGTGCAGATTTTCAAATAACGAGGTCTCAAC  
ATGGAGATTAAACAATTCCAGCGAGCTGCTGGTATTAGCGAGGCGCTGGCCGCACGCTGG  
TTCTCGCATATAACTTCTGCGATGAAAGAGTTTGGTATCAGCAAAGCTGAAGATCAGGCA  
ATGTTTATTGCTCAGGTCGGGCATGAGTCTGGTGGTTTCATCCGGTTGCAGGAGAATTTT



AACTACAGTGTACCCGGACTGGCTAACTTCGTTCCGGGCTGGGCGTCTCGCTCAGGGACAG  
GCCAACGCATTGGGTCGCCGCGCAGGCGAACCTCCATTGCCACTCGAGCGCCAGAGAGCG  
ATCGCCAATCTGGTGTACAGCAAACGCATGGGTAACAATGCTCCCGGCGATGGCTGGAAT  
TACCGTGGGCGCGGGCTTATCCAGATTACCGGTTTGAATAACTATCGTGATTGCGGAAAC  
GGTCTGAAGGTTGACCTGCTGGAGAGCCCTGAATTGCTGGCGCATGACGAATATGCGGCT  
CGTAGCGCAGCGTGGTTCTTTGCCAGCAAAGGATGCATGAAGTATACCGGCGATATTGCA  
CGTGTAACTCTGATTATCAATGGTGGCCGGAACGGCATCGACGACCGGCGCGCGCGGTAC  
ATCACTGCCAGTAAGGTGCTGGCGGTATGATCTGGGCATTCGCAAAGCATACTGGAAAC  
AGTTAATTATCGTGGTGTGCTTGTGTTCTGGTCATATCCGGAATTGTTGCTTGGAAATG  
TGCACGGTAGCCGTCAGTACGACGCCGGGTATGTGCAGGCGAAGGAAGAGCGCAAAGCCG  
AAGATGAGAAAGTTCGTCAGCACTACGAACAGGAGAAAGCGATCAATGAACGTGAAGCGC  
AGCAGAGGATCGACCAGGCGCGCAATGATGCTCTTGATGCTGCCGCTCGCGCTGGCCGGT  
TGCAGAAACAGCTCGTTGCCATCCGTGAGCAGCTCAGGCAGTATAACGCCATTGTCGGCG  
CTGGGACGTCAGCCGCAGACACCCGGAGTTTTGCTTGCCGACGTGCTCAGCAAATCTCTCG  
AGAGAAACAGACAACCTGGCAGAGTATGCTGACCGGGCAGCCGAAGCCGGAAGAGTCTGCG  
AAAAACAGTATGACACCCTGACAAGATAGCATGGCATTTTTTCATGGTACTGATTTCCGGT  
GACGGTATATAAAACGGTACTAAAAAAATGAAGTTTTGGAAAAATGTTATCACTCAATTG  
GTTATGGTTGCCGTAATAATTGAGTGGGAATGATTAACAGCTAACTCATAGCAACTCAT  
TCCTATTCAGATACTAATTTAACCTCTGTTTTTACAGAGGGTTTTTGTTTTTATGTATT  
CATTTCTATTCACTCTACACCATATTTTTCGGCGGTACAGGTGACGGTATTACCTTAAAG  
GTATACTCTCATAACCGTCATGAAAATGGTTTTTATACGGGTGAATTGTGCTTACCGATAC  
AAAATTA AAAAACCTCAAGCCACAGGACAAACTGTACAAAGTTTCCGATCGTGACGGGCT  
GTATGTAGCTGTGCTTACGTCAGGTACGGTCTCGTTTCGCTATGACTACCGTATCAACGG  
TCGCCGCGAAACACTGGTAATCGGGCAGTATGGGCGTGACGGTATCAGCCTGGCAGAAGC  
GCGAGAAGAACTGATTGCTGCAAAGAAGCTGCTTAAAGCAGGCCAGTCACCGGCTGCGGC  
TAAACGTGACGGTATCAAAAAGATTCGTGGTGCCGAGACGTTTGCGGTACATACCGACAG  
TTATATGAAACACGTCATCCTGGCTGAAAGTACCCGCGCAATGAAGCAGGCAGTGATCGA  
CCGTGACATACTTCCGGTTCTTGGCAACAAAATGATGGCTGAAATTACCACATCGATGGT  
TCGTGATTTGTGTGACAGGATTGTGCAACGCGGTGGTTCGGGCAACAGCAGTGACGGCCAG  
GGAGATCATCAGCAGCGTATACCGTCACGCCAATGACCGTGGTCATGGTTTGTTTAATCC  
TGC GGCTGACATTAACCTTCGTCTATCGCCATATTTAAACCACGAGAGCGAACACTGAC  
ACCAGAAGAAATTGGCCTGTTCTTCCGCACGCTGGATGCCATTGGTGCTATGGGCACTAT  
GAAAATGGCTTTAAAGCTGGTGCTTATCACTATGGTTTCGTAAAGGGCGAATTCACCAACGC  
AACGTGGGATGAAATAGATTTTAAAAAATGGACATGGACAATTCCTTCAGACCCGCATGAA  
GGGAAGCCGGGCGCACGTTATTTACCTGCCTAAACAGGCTCAGGATATATTGGTCGGGTT  
GCAGATGTGCGCTGGTGGAAAGTGAATATCTGGTTCCTGGTCGTTACAATTTCCGGAAGCC  
ATTATCTAATGCCGCGCTGAACTCTCTGATCGACAGAACGGTGAAAATAATAAATGAAGA  
TGGTGAGCATATTCAGGGCTTACCGTACACGATATGCGCCGTACAGCCAGTACGTTGTT  
GCATGAGGCTGGTTATCCTTCAGACTGGATTGAAAAGGCTCTGGCACATGAGCAGAAAGG  
TGTGCGCGCCGTATATAACAAAGCGGAATACGCCAGACAGCGCGCCTACATGTTGCAGCA  
GTGGTCCGATATGATTGATTCTGGATTAACGGGGAGCATAACGGATCTGATTCCGTTCTC  
CCCGTCGAAGTTTGAGAAGTGGATGGCGGGGGAATAACGTTTAATTATTCTGCTGATTTT  
CTTCCATCTCGGCTTCTGCTGCCAGTGATTCAATTTTATCTGCGAATATTGCTGACAGTG  
TTGCAAATTCAGCATCAGTGACAGCGGGAATTGGAACAAACCTTATCCCGCTGTGTGCAA  
GCATGTTTGCAGTTTCAAGGCATTTCTTAAATCTGCTGGTGTGATGCCCTGTTTCATGCTGC  
ACGCTCCTGCCCTGGTTGTCTGTTGGTGACAGCGGAGCATTGCTGAATGCATTTGTTAA  
TCCGCCAATATCCAACGCGTATCCAGGGTGTAGTTGCACTGCCGGGTCTTCGCACTGATT  
ACCCCAAACATCGAAGCCATGAGACGACTGGCGGGCGAACAGTTCAATGCGAGAAACATC  
GCCTAACAAATTGCACAAGTTTTTACGAACGACATCTGGTTTTTCTTGAATGCTCAAGCCG  
CGGTGCGGTAAATGACTGAACGATCCCTGCATTAATGCGCGTAGGTAGTTTTCCCTTTAC  
CGAAACAGGCAATCTTCACTATTGGCGCGAGTCATGTGCCCCATACCCATAACCAGTTT  
ATCTGGTTGTCGACTACCACATTTTATCCACGTGAAGCCCTTCATCGTCATCAGACGAAA  
TCCCCAGGCTTCAACAACCTTTTAGTGCTTCGAGTGGTTGTGTTGGCACCCACCACATGGC  
CAACAGACAGTTTTTCATCGGCCAAATCCCACGCAGGAAGGCGGCAGATATCCAGCACACT  
CATAACCGGATATTTAAAACCGGCACCGCGATTACCATCTGCGGCTTTGTCCCGGTATAC  
CCAGGGTGGATCTGCATAGATTAGTGTGTATTTCTTAGTCATAAACCACCCACAAACATC  
CTATGCCGCTATAGTCGCCACGGCGAAGGCCGTTACCTTTTGTGATACATTGGTCCCTGC

GAACCGCGATCCTTGCACGTTCAACATCACCAGAAGCAACATCCATACACTGAAGCCAAA  
GGTGAGCGGCAATGCGGAACTGCCCTTTTTTCTCTCTTTCAATCGCGCGTTTTTTCGATCT  
CTATCGCCGCAGGAGTAACGGCGACAATCTTTGACGGACTGCGCATTGAAACCTTATTCA  
TGTGATATTTTTCAAGTCGGCTTAACTTTCTCACTTAATCCAACCCTCTCTGAAAATTA  
TGCCAGCAGATAAAGCCATGCTGAAACAGAGGCCAGGAATAAGTACCATCCTGACCATTT  
GCTCCAGTGCCTTAGCAGCGCACTCATGCAGCGTTGCTCACGGGACGATATACACGTTGC  
TGAACAGGAGGTTTTTACCCTGGAACCTCTGCCGGGCTTGCTGCCTGACGTTTCATCAAGC  
CAACGCTCAACTTCGTCACGGTTCCATGCGCAGCGTTTGTGAGTGATATAACCAGCGTTTA  
GGAAATTCCTTCCGCGCTCCATACGGTTCGATAGTGCTCCATGACAGTGGCACCACCGCC  
AGGAGTTCCTTCTTACCTAATGCACCTTTCATAAATACCTCTCTTGGTTGCAGTGCGGGC  
CGTGTGGCGCCGCGGTGGTGGTTACATAGATGTTTCGTTTAATTCTTCCCGACGAACGCT  
GTAACGTCGGTGGCTTTTGCCAGCAGTTCGTCATCATCTGAAAGTTTTTGTGCAATGTA  
TTTGTAAAGCCTTATCCAGTTCGGAGACAGTGCTGTAATTCATCGCTGCGCTGGTAAAGGC  
CATCAGCATTCTTCTGGATCACGGCTATCCGCTTACGAGTTTGTCTCATCAGGCTTTTT  
CACTGGTTTAGCGTTGATCAGACTGTTTATTCCCAGCAGTGGTCGTTTTCGGAGTAAT  
GTCTCGCTCAACGCGCGGTGCCGTTTCTGTAATTCGTCTGGTGTGTAGACGCCCATGAT  
TACGTCAGGACAGTGCAAGCGAGACCAGCGTTTTGTGCGCAAGGTATGCGAGTTGTTGTT  
CGGATCACTGGCCAAAGTGTGGAGTTTCTTACCTGTGCTTGAGACAGCATTAACTCAAG  
CACTCGAGGTTGATCCTCGCCCTTCATGGTTGCCATACGCGAACACCGCAGCCTTCTTC  
GTCTTTTAGAGTCCAGCCTGGTGGGATATATGGATTGCCGTTTTTGGATGTTTTCTCAAC  
AACTTACCGATCACGCGTTCCACGGCCGAACCACTCGTAGTTGATGCGATCTTTTGT  
TGGCGACATCGTTGAGATAACTGCGTTTACTAATTGGGCTTCATAACCTAGCGTGCCGTT  
CACAACATGGGTTTTCTGAGCCACGGCAAACGGGTTTATTCCCCTGCGCAGCCTGCAT  
TGCCACGGCCATGCAATCAGCTGGTTTCCCGGCGAGGTGCGCCGGTACCGTTACGCGGCT  
TTGCGCCATTACCTCGGCGAATTCATCAGTTGGTTCAAGCCGTCTGGGCTGAAAATAGT  
TGCAGCAGTTCCAGCGATTGCTGTGTCTACTGGTGCCTGATGTTTGCATGTCGTTGCT  
CATATGTACATATCCTGTTTTGCGTGCCCACTCAGGGCGTTTAAATGATTTCCACACCGCC  
CCATTTCATATTTATGCGGCATTCGTGATAGGTATTAGATCCCAGGCGGAACAGAGCGTG  
CCCAGCATCGACATCCGGCGCATCCAGCTCGAACACGCGTACCGGATACCGACCACAATC  
AATGCTTTCGCTCACGGCAAGAAAGAAAAAACCATGCGGCTGACCAGTAACCCTCATTGC  
GCCTTCGCGGTACATTGCGTCTGCACGTGGTAGCGGAATTCCTCGATGTGGCGTGCAAA  
ACGGTCCATATCTGCAACCTTTTTACGTCGACGATCACGTTGTGCTCGTTCAGCCATTT  
GTCTGGACGAATGCGGCACAACCTACCAGTATCTTCATCATTCCAGTACATTGATGCTTC  
GCAGAAACCAGGTGCTTCCAGCATCCAGCGTGCCGCCGGGTGAGCCATTGCGCTATCAGG  
CATCAGCTCCAGTTTCCGCCACTGCTCGGCATCAAGTACCGTAATCCCATATCCGCTAC  
ATCACGAAGAAATGCTTCTTCGTGAGCTTTACCTTGTTTCGTCCGACGATCGAACTTCGG  
TGAAACAATGAAGCGTTTGTGCAATTCCTCAGGCTCCAGAAGCAGACAGTGCAATGCGGT  
TCCAATATCCAGTGCAGACTTTTTCTCTTCGTTCTTGGTGTGCTGCCTGGACCCATTTAAG  
AAGCGACGGATTCTTGGCAACCATGTCCAGTTGCGACTTACTCACGCCGTCACCGGCGTG  
GTAGTCTTCGTTGCTGATGTGCAATAAATTCCCAGTTTCATGCCGCGTCCCTCTGTCCA  
TCAAGCTGATCCGCCAGATCCCAGCGGGCGATAATTGCCATTGCCTCTCGCCGATAGGCA  
TCCATCAGTTCTTCGAACTCAGGGCTGTCTTTAGCAGCCTCCAGTACTTCCCTGACGAACG  
CCTTTGCCTGTTACAACGTCAAAGTTGAGGACAGTTGATGAAGTCGGATGCTCTCAATC  
AGTTCAACTTGTGCGTCATATAGCTGTTCTGACAGGCGGTAGTCCTTGTGCAATGCCAGC  
ATGATTTTTTGAAGATTTTTCTGCTGATTAACGTTTATTATCAGCCCTCCCATATCTCGT  
TATCGTTGGCTACATCGCGAGCTTCTTTGCTGACGAAAGCCACTTAATGCCTTCTGTA  
AGGTGCGGAACTTCCAGCTCATGAATCCGCATGCAGTAACGCAGTACCAACCGTTGATGA  
TTTTCCACTGCATAACTTGTACCTCGGTCTGTTACCGTTGAGGTAATAATTATGCGTAT  
CTGGTTTGTGATGTCATAGATATGAGTTAAAAAAATTACCCGTTAGGTAATCGAATAGGCA  
ATAAAAAAGCCGCCATAAGGCGGCTTACTTACTGAAAAATATGATTTTTATTGTTTGT  
TTTTCGTTCTGGTTGATGACAAATTCAATGTAACCTTTCGATCTTTGCCTTCTCTGTTTCAG  
GTAACAATGCGTAGCGCGAGCGGTCATAGTTGATAGTCGCGGGGTCGTGCGGGTGAATCA  
GTAATTCATATCCGTGACGCCAAATGCGGATGCAACATTCTCCAGGGTGGAAATGGAAA  
CGCTGACCTCATTGTTAACAGGCGGCTGATTGTTACCTGGGCGACGCCGGATGCGCGGT  
GAAGTTTTCCCTGCGTTGAAAGGTCGCGGCTTTCGCTCATCCAGCGTTCCAGGTTGTGAG  
CCGCCAGTTGACCAATGTCGCTTGGTCCGACAGGCTGAAAACCTTCTGAGAAAGCGAGC  
GATCGATATCAAGCCAGTTACGGGGTTTATTGGCGGCAGCTTCAATTTTTTCGCGCAACCT

GGTCGCCGATAACCTTCTTGCCAAGAGCCAGCGGTTTACCAGATTTGCCTGAGTTCCAA  
GTTTTTCTGCCATCCGCGTCTGAACACCATTGAATTCACGGTCGATCAAGTCGTTGAGAT  
TTTGCCTGCGGACGTCCTGGATACTTTTCATTTTCTGGAAAATCGCCTCATATATGAATC  
AGTAGATGATTCAATTTAAAGCAATATTACCCAACAGGTAAATGCACCCCATAGGTA  
ATCCTTGATTTTTGTTACCTTATGGGTGAATATTTATTATCTGAAATAAATATCAGGCAA  
TAGCTATGAGCGATAACGGACATTTTCGATTTCAAAAAGCACTGGCTTGCCTTACTCCGG  
ATGAGCGTGAAGCCTTCGCACAGGAAGCCGGAACGACGAGTCACTATATCCAGACTCACT  
TAACAGGTAAGCGCAAAAATGCCAGGTAAGGTATTGATGAATGGGCTTTTTAAAGCCTGTA  
AAACAAGACAATGGCTGCGCTCAAAAGCAGAACTGGCATACTTCTTCTACTCATGATATC  
CAGCCACAACCCTCTGTAGACCGCCATCCGGCGGTCTTTTCATATCTATTCGTACCTCAA  
AGGTAATAAAAAACCAAATATGGTTGATCTTTTTTTTTGTGTCAGCACAAAATAACCGTAA  
TCCCAATACTAATAACAGGGCTTACCATGGAAATCATTACACGTATTGATGCCGCAAAGC  
GCGGACTTAAACGCTATTACACCGGAAAACAATGTAAGCACGGACATGACAGTGAACGCT  
GGGTTTACAACGGACACTGTGTTGAGTGCACCATGGAATCAAACCGTCGCATCAGGGCAG  
AGATTAAGCAGATCATGATTAATTCCTCCCCACAACACTCAAGCTGATAGCGGAGATTA  
TCATGAGCAGACATGCAACAGATTGGGCTTGGGAGACAGATCCAGGCAGCTCATCATTAA  
AGCTCATACTGCTCTCGATGGCTGACAGAGCCGATGAATATAACCTCTGCTACCCAGCA  
TAGAACGCCTCGTTAAAGACACTTGCCTGAATAAAAAAACCGTGCAGGCCGGGCTTATAT  
CGCTCATGAAAATGGGGCTTATTTTCAGATACCGGAGAGAGAAAGGGAGCGACAAAAGAG  
TGCGGGTTTTCTCTCTTAATATAACCAAAAACGGGAACATTAAGGCAACCGAGAGGGGG  
TCAATGAACCCGAAAACGGTAATGTTACCGAAAACGGGAATATACCAAAAACGGGATGT  
TGAATGATCCCAAAAACGGGATGTTGAATGATCCCAAAAACGGGATCCAGAACCAGTCAT  
ATAACCAGTCATATAACCAGTCATTTAACCAAGAGAGGGAGAGCAGGACAAAACGGGG  
ATTCTGTGCATCATGACCCCGGCGCAACAACGCCGTGATGAATAACTTTGTTCTCTTG  
GTGGGCCAGGGCAATTAGGCAAATTTGTCATGCATGAACAATGGCAGCCATCAGATGACT  
TTCTTCGGAAAAGCTCATTGCAGGGGATCTACCTGGACAGTCTGCCAACGGCACAGGAAC  
TTGCAGAGTTCAGAATTTACTGGATGGCTGAGGGTAAGGCATACCATCAGGCACAGTGGG  
AGCAGAAGCTGGCAAGGCGGCTGCAGATTAGCAGACAGAAGCAATCAACATTACCTGATA  
ACAACGTTCCGCACTGGAACAGCCCTGAAGCATGGGAGGATTTCTTGTGAACAACGTTTT  
TACCGCGATACAAAACCGTGACGGAGAAGCCCTTTCTCGCATGTCAGGTTATGAGCATCA  
GTACACCAACAATGACAACGTGGTGAACATGTCAGCAGAGAGGCTTGTGATGCCCTTTT  
CAAACAGCTGAAACAACCTGTTTCCGGCGGCAGTGGTAACCAACCTGAAGACGCCAGAGCA  
GGAAGTTGCTGCAAAAACAGCAGTGGATTGCTGCGTTTGCCGAAGGGGGGATCCGAACCCG  
TGAACAGGTTTCTGCTGGTATGCGCCACGCCCGCGCCAGTGAGTCTCCGTTCTGGCCGTC  
GCCAGGGCAATTCATCAAGTGGTGTAAAGACAGCAAGATGGTTCTTGGCGTCACCATTGA  
CGATGTGATGGCGGAGTTTACCGGTACAGCAAGGAAAAAGTTTATATCCTGGTGGTCC  
CGAAAGATTTCCCGTGGCGGCATCCGGTTATGTA  
ACTGGGTCGTATGTGATACCCGCGTGC  
AATGTATCAGCGCCAGCTTAGCGAGATTGAGGTTGAGAAACACGCGCGCAGGCTGCTCGA  
TGATTGGGCGAAAAGGTGGCTTCCGGACAGCAGATACCCGATCCGGTGATCAGCATA  
GGCAAAGCCAGAACCCATGAGTACGCTCCGGACACAGGGAGAGATGTTTACCATCCACC  
AGGGCGAAGTTTCGGGTGCATGCCTAACGCCGCCACCCTGGGGGGAATAACACCGGCGCA  
GTGGCTGATGGAGGAATACAGGCGAGGAAAGGCAGCAGGATTTATCAAGTAATACCAGCG  
CGATAGCGCATTTTTTTACGCTCAATAGTTACCTAATGGGTAACAAAATATTCTTAGAT  
CTATTGATTTTCGTGTCTTATGTGGTTTTTAATTACCTTAGAGGTAAATCATGAGAAAACA  
GATACAGGCTCTTGGTCTGACTCAAAAACAGGCCAGATGAACAAAACAGAATCTGCGTATTG  
CCAGCACCTTGAGCAGCGTAAACGTGCAGGGGAAGTCGCTGGTATCCGGTTCGAGGGTAT  
CAAGCTGCGGCTGGCTGACAACACGTTTTTATACGCCCGATTTCTGCTGTGATGCTCGCCAC  
CGGAGAGATGGAAGTGCACGAAGTGAAAGGTTTTCTGGACCGACGACGCCAGGGTGAAAAC  
CAAAGTCGCCGAGATCAGTATCCGTTCCGAATCATCGGGGTAACGGTTAAACCAAAGAA  
AGCAGGTGGTGGCTGGAATATCGAAGAGTTCTGAATCGACGATCTTTTTAGTTATCAATG  
TAATCAATAAGTTATGTGGATAAGCGAGGGTAAAGATGGAAGTAATATCAAAGGGTTAG  
TTCCGCGGGCATGAGATGGCTTCGGAACCTGAAAGCAGAATGTGGTGCCGTTGATATGC  
GTAGTGTGGCAAAGCTGATCAGCGATTTGGCAACGCAACTGGAAGTGCAACTGGTGCCTG  
CTAATGCGATGGCGGCGGAGAATGCGGGGCTGAAGGCGATATGTGATGACCGTCGCAGGT  
TCATCATGAATGGGGTGCAGATGGGTTATATCAAGGTGCCAGCAGCGGAAACAGATCCAG  
ACCTTGAGACAATTCGCATTGCTATATCACCACAAAAGCCCATTCCAGCCACCGATGCTT  
TCCTGGCTGAAATTCGTGCGGAAGCACGCAACGAGGGGATTA  
ACTATAACCGCAAGCCGTC

TTGCTGCTGCTTTCAATCACGGATTTATCAATAAGTCTTTACGTGAAGTTTTTCGACGTTA  
CACGCATGATTCTGTGTCAGCGAAAGAAGAGTTGGCTAATGAACCACACCCGATTGATGGCC  
TGTCCGGTGAATATGCGGAGAAATCCCTAGAAGAATGGGCGGAACAGATTCGCAAAGGAG  
GCAACCAGTGAGCGGAAAAAGAATGACTAACAGAGAGCTTGTTGATGCCGCGATTAAGCT  
TGCTGGTGATTTTTATTCAATGATGGGGTACGCGCATCGCCCTGGATTCAAATATTGGGA  
ATCACCGCATCCGCAAGAGCAACTGGTATTTCAAATGGCCTGCCGTGCTTTTGAGGTTAT  
TCGCGGTTCTGATGTGATGGACGCCGTTGCCGACTTGGAGGATGAAGAGTGACCCAAATT  
AACTATCAGGCACTGCGTGAAAAGGCAGAGAAAGCAACTAAAGGAAGCTACATCGTAGGG  
CATACTCTGTTAACCAGCACGGCAATTTAACAGGAGTTTTTGTGGCCAAAATGGAAA  
GGAGAACCCGGTGGTGTGATTGCGGAATGTCATGTTAACTGCCTGATTGAATCAGATGCT  
CAGGCTTATGCAAACGCTGAATTCATAGCAGAGGCTAACCCGGCTACCGTGCTGGCACTG  
CTGGATGAACAGGAAAGAAACCAGCAATACATCAAACGCCGTGACCAGGAGAACGAGGAT  
ATTGCGCTAACGGTAGGGAAACTGCGTGTTGAGCTTGAGGAAGCAAAATCAAACCTCAAC  
GAGCAACGCGAGTATTACGAAGGTGTTATCTCGGATGGGAGTAAGCGTATTGCTGAACTG  
GAAGCACGGGAAATAAAGCCAGCCAAAGGTGAAGTCTTGTGCGTTGTTTCTGGTTTTACT  
GGTTGCGGAAAAAGCGCCATTGCCGGGGAAATAGAAATCGCGATGAAGGCTATTGGTGTA  
CCGGTTAAGTGGACTAATGGCGATGCAGAAAAGCGCATGACTGGCGCTGACTGGCTGACA  
GCGATTGAGATGTACAAACCAACTGTGCGCATCGTGGAAGTTAATGTGCCACGCGCCGCT  
GGCATTTCGCATCAAAGGAGGTGAGTAATGCGTGTGGCATGTATCGGCTTGTTACCGTATC  
CGACTCGATTTTGGGCTTCTGCGCTAATTGCAAAGCCGCATGTCTGATGGCTGACAACA  
TCATCCCTGCACCAAAGCGCCGCATAACCGGTATTGCGGCTGCACGACGCGAAGCAAAGA  
AACGCAGGAGAGCAAACGATGAAAAACCGTAAGGCCAAAATTCTGTTAGCTCGCAGAAA  
CGGTGTTGGGGTCTGGCGCTGGTTGAGGATTAGTAACAGACGAGTGAGGTTGACGGGGTG  
TTGCGGGGTGATGGGGCACAGTTGTTGCAAAAAGCCAGCGCGTCACAGAACAGGCGGAA  
GAAAGGGTACGCAGTAAGATGAAAAACCGTAAAGCAAAGATGCTTATTTCCCGTGTATAC  
AGACGTTGCTATCCCAGCCAGTGGTTGAGAGTTAGCAATCGCCGTGTGGTGTTGTACTTA  
TATTCTGGAATTGCCAGAGAGGGAATCAAAGATAAGCGCAGCGCGGCGCAAACCGCTGG  
AAAACCCACCTGCGCGCTAAAGGAGACTGATATGGCTATTGCCGCAAGTTACACCATGCA  
TCTCTACTGTGATTGTGCGCCAGTGTACAAATGGTAAATATCAAACGCCAGACTTCGGTGA  
GTATATCGGTACGTCATGGGCTGGCTGTGCAAAAAGAGGCCACGTAAGGATGGCTGGCGAAT  
AAGCAAAGACAAAACGCGTGCTTTTGCGCCCGGCATAAAGTTTTGAGGATTAATAAATG  
ACCACTATTACCAAAGAGTTCACCAAAGAGCAGTTGATTGAGCAGGCTAAGAAGAATATT  
GAGGTTCTTCGCGGTGCGGTGGAAAGAGTCCCAGGGCGCTTCTGATGCGGGCGTTATTAC  
CTCAAGCTGGCCGAAATTACGCTGGCATCGCTGGAAGCAGAGCCAGTTGCTTATATTTTC  
AAACATCCGGCCGGGAAATTATTCTGGGCTTTAACGGATGAAAGCAATAAAGAGCAAGCG  
GACGTTATTCCTGTTTATGCCGCCCTCCGGTGCCAGTAGTACCTGAAGAAAAACCAATG  
CCTAACGCTCTAAGCATGCTTGAAAGAGAGATCACACAACCTGATTGGTGATGCGCAGGAA  
GCCACTGTTACTGGCTATGAGTTAATCGCTGAAGCTTGGCGTTTGATGGATGGACAAGAC  
CCTAAAACAGCGATTGGCATAGCAAGGCTTCGAAGTATTTAAATTCCAATATTGTAGAA  
AAAGTTGATGATGACCGTATTGAGGCGGTTAAGGCTGTGTTGCGTAGACTGGCTGGCAAC  
TCTCCGGGAACTCCGGATAGTTGGGTTATGGTGCCGAAGGAGCCAACCTCAGGCCATGATT  
AAAGCGTGGCTATCAGAGATTGCTAACTTTCGCGGTCATGCTGCTGGTTACAGGGCTGCT  
ATAGAAGCAGCACCACAACCTGGAGGTTAACCGTGGCTAACCTGCAACTTGCCGTCAAAGG  
TGAATACTTCGATGCCATGATTCGCGGAGAGAAAACGGAAGAGTATCGCCTGTGTAATGA  
CTACTGGAATAAGCGAATTATGTTCCGGGAGTATGACCGCCTGATTATCAAAGGGATA  
TCCGAAGCGCGACGATTCCAGCCGTAGAATTGATGTTCCGTATGACGGATATGAAATCAA  
GACAATCACACATCCGCACTTCGGCGATAAACCAGGTAAGGTATACGCGATAAAGGTAAA  
TATTGATGGCTAAATCAGCAGCAGAGCGCAAAGCCGCTCAGAGAGCCAGACAAGCTGCAT  
CTGGTGTGCGTAAGCTGGAAATTGTGCTTGTGCTCAGGAAATTGAAATGCTGGAGCGTA  
ACTGTGCTACGCGTCGCCCCGGGCGTGCGCCTTACGAATTTGGTGAGTATATAGCGTTAC  
TGATCCGCCAGGATGATGCACGCGTGCACGGGCGTATAAAATCGATCAGCAGAAAACGTT  
GCGGTAAGTGCGGCGAGAGAGTTCAGTTAATTCATGCCCGTGTAATGGTGACTCGCAAT  
GCTGGGTGACTAAAGGCTGGCATGAAACGAAATTAATAGTGTGA

>NewGenomeName\_246

CGGTGTGGGGTCTTCTCCGCAGAAATGTTAAAAAGTCTCATGAAGGAGGGAGGGCTTGA  
AGTGGAATATAACATAAAGAAGTTAGAAAAAGAATTGTTATCAAAGGTTGATACTACTAG  
TCAGAAAGAGCTTGAAAAAGTCAATCGCTATATTAATTAATACGCATATATTATGAGTT

AGATAAAAGCATTGAAATGGATGGTGTCTGTTGTTGTCCTGAAACGGCTCGCAAAAATT  
CACGAAAATAATCCAGCGATAACAAGAAAAAATCGAATCAACACTTCATTATTATCTAT  
TGAGCGTTCTTTTATATTCAAAGGCGAAAATGATAAACAAGATGGTAGTGACTTGATATG  
ATATCAAATAAACATGTCGATAACTATATACAGTCGTACGAAAGCGGGAAAATACTACTC  
AATAAAGAACGTGTAGACTTGATAAATCACTTGCAAGAACATGTTCTTAGTAGAGATGAT  
ATATATTTTGTATGAGACACAGATAGAAAATTATATTTCTTTTAGTGAAAAATGGTACTTC  
CCTTTGGACAACTGGGAAAAGTTTATTGCACCATTTATTTTTTTGTATTTTAAAGAAGAT  
GATGAACTATTTTATGAAGAGTTCTTTATAACACTTGGTCGTGGTGGCGGGAAAATGGT  
TTTATAAGTACATTATCTAATTATTTTATAAGCCCTTTGCACGGAATCAATAATTATGAT  
GTCTCTGTAGTAGCAAATTCCGAAGATCAAGCGAAAGTTAGTTTTAAAGAAGTATTTAAT  
ACAATAGACGGTAATCCCAAATTGGAAGGTAGTTTTGACGCGTGGAAAGCCCAAATTATA  
GGTAAAGCAACAAATAGTGTGTTTAAAGTTTCAAACATCGAATGCGAAAATAAGATGGT  
GGTCGTGAAGGCTGTGTTATTTATGATGAAACGCATGAATATGAAGATAGGCCAAATAATT  
GATGTATTCTCTGGAGGGCTTGGCAAAGTCGCGAATCCAGAGAATTTTTTATTGGCACT  
AATGGATTTGTGAGAGCGGGGTTTTATGACAAGTTGGAAGAACGCAGTAAAGCAATTTTA  
AGCGGCGAAAATCTTAAACGATCGCATGTTTCTTTTTATTTGTAAGCTAGACGATCCGGCA  
GAAGTCAAGAATGAAGCTATGTGGGAAAAGCAAATCCTGCTTTTGAAAAGCCATTAAGT  
CCTCGTTCTAAACGCTTACTAAATAAAGTTAGAAAACAATATGAAGCATTAAACGAATAAT  
CCAAGCGGCAGAGAAGCATTTCATGACTAAACGAATGAACCTTCCAGAAGTAGACTTGGAA  
AAGGTAGTAGCACCGTGGGAAGATATTCTCGCAACTAACCGAGAAATGCCAGAACTCCAA  
AACCGAGCTTGTATTGGTGCATTTGACTATGCAAGCGTTAAGGACTTCGCGGCTGTTGGA  
TTGCTGTTCCGTGTAGGAGATGATTATATTTGGAAAACACATTCCTTTGCTAGAAAAGGA  
TATTTGGATATCGCAAACCTTAAACCGCCATCAAAGAATGGGAAAAGCAGGGATTACTG  
ACAATTGTAGATGAACCTACAATCGACCCTCGTCATGTGGTCAATTGGTTTGTGAAATG  
CGAGAAACACACGGTATTCAAAAAGTAATTGGAGATAATTTCCGAATGGATCTCATGCGC  
CCACTGTTTGAAGCAGAAGGATTCGAACTGGAGATTATTAGAAATCCACGTGCAGCTCAT  
AGTTTGCTTGCTCCGCGAATTGAAACACTGTTTGCTAATCATCGTATTGTATTTGGAGAT  
AATCCGTTAATGCGTTGGTATACAAATAATGTTGCAGTGAAAATCAAACCGGATGGGAAT  
AAAGAGTACCTCAAAAAGATGAACACAGACGTAAGACAGATGGATTTCAAGCATTGTG  
CATGCTCTTTGGCGTGCAGGATGAAATAGAAGATATGGATGTAGAAGAGGTATTGAACATG  
CTTAATGCCATTACGTTTTAGGAGGTGATAAATTGGGATTCTTTTCAGAACTGTTTAAAA  
GAAATAAAGAAATTGAGTGGATGTGGGATTTAGACTTTTTAGAGGATAAAACTACAAAAG  
TGTACTTAAAAAAAATGGCGTTAAATACATGTGTAAAACATATCGCCAGAACTATTGCTA  
AATCTGATTTTAGGTTAAAAAATGGAGAACTAGTGTGCGGGATAAATTGTATTATAAGC  
TAAACATTCGTCCAAATACAGATATGAGTTCAAGCTCTTTTTGGGAGAAGGTTATTTATA  
AACTAATCTATGATAACGAGTGCTTAATCGTCCTTTCAGATACGGACGATTTTTTAAATCG  
CTGATAGTTATGTGAGAAAAGAGTTTGCCTTTTTCCGGATGTTTTTGAGGGAGTTACTG  
TTAAAGATTATCGTTATAATCGCAACTTTAGTATGGATGATGTTATTTTCTTAGAATATG  
GAAATGAACGATTGTCGGCATTACGGATGGGATGTTTCAAGATTATGGAGAGTTGTTTG  
GAAAATGATTCGCGCACAAATGCGTAATTTTCAAATCCGCGGAGCTGTCAATTTCAAAA  
TGGCTGGTGTAGCAGATAAAGATAAACAACAAGCTACAAGAATACATTGACAAAGTAT  
ATGCCTCGTTTAAACAACAATGAAATTGCGATTGTTTCTCAATTGGAAGGCTTCAATTATG  
AAGAATTTGGAACAACAAGCGTGAATAATAGTCAAAGTTTTGATGAAGTTAAGAAGTTAC  
GTAAAGAAATGATTGACTATGTGGCTAGTATTCTCGGCATTCTTCTTCTTTGTTGCATG  
GTGACATGGCAGACTTGAGTAAACAATATGAAAGCTTATATGGAATATTGCATTGATCCTC  
TCACTAAAAGCTAGAAGACGAATTGAACGCTAAATTATTTACTTTCAGTGAGTTCTTAG  
CGGGTGAACATATCAAATCATAACAAAAAAGACATTATAGAAAATGCAGAAGCTGTAG  
ATAAGTTGGTTGCCTCTGGTTCATTTAATCGTAATGAAGTTTCGAGAATTATTGGGCGCTG  
AACGAGTAGATAATCCGGAATTAGATAAATATTTAATTACTAAAAACTATCAGTCAGCAG  
ATGAAGGAGGTGAGGATGGATGAAAAGAATTGATGTAAAAGGAGTTGTCGTTTCAAATGA  
TGACAAATGGATTTATGATTTTTTCGAAATGGACAGCGTATCACCTAATGATATTAGCGA  
AGCATTGAAAGATACCTTTGAACCTGCTGAAGTTGTCATTAACAGTGGGGGCGGTGATGT  
ATACGCTGGCAGCGAAATCTACAGCACTCTCAAAGAATATGCAGGAGATGTGACTGTTAA  
AATTGTTGGTCTAGCAGCTAGTGCAGCTTCGGTAATTGCAATGGCTGGCAATACAGTTAA  
GATTGCGCCAACCGCTCAGCTTATGATTCATAACGTTTCTTCAGTGGTGAGCGGTGATTT  
TCGTGATTTTCAACATGAGTCTGATGTGCTAGAAAATAAATAAATCAATTGCTAGTGC  
TTATATGTTGAAAAGCGGTAAGGCAGAATCAGAAGTATTAGAATTTATGAATGCTGAAAC

ATGGTTTACAGCAGAACAGGCGAAAGAGCATGGTTTCGTTGATGAAATTATGTTTGCAGA  
AAAAGCGCCAAAATTAACCGCGAGTATAACATCTACCATGTTACCTGAAAGTGTAATCAA  
TAAAATTCGGAATTCGAAACCAGTCGGAACAGGTTGGCACGAAGCGAAAGGATTATTGAC  
TAAAGACGATGTTTACATAACATGATTAATGAGGCATTGGAACAAAAAATATTAAGAAGA  
GAAACCGCAAAAGGAAAATAAAAATCCTTTCAAACGGTTTCTTTTTTAATACCCAAAAAT  
AGGAGGAAATAAATTATGACTATCAAATTAAAAAACAACCTCGCGAATTACGAGGAAAAA  
CGGACAGCTTTTGTAAACGCTGTTAAAAACGAAGACACGCAAGAAATTCAAATAAAGCA  
TATGTGGAAATGGTAGACGCGATGGCAGCTGATATTATGGAACAAGCTAAGAAAGAAGCA  
CGTCAAGAAGCGGACGCATATATTTTCAGCTAGCCGAACAGACAAAAATATCACGAATGAA  
GAAATTAATTCTTCAATGATATTAATAAAGAGGTTGGATATAAAGAAGAAACATTGCTA  
CCACAAACAGTCGTTGATGAAATCTTTGAAGATTTAACAACTGAGCATCCTTTCCTTGCA  
TCTATTGGAATGCGCACGACTGGTTTGCCTACTAAGTTCTTAAAATCCGAAACTAGCGGG  
GTAGCGGTTTGGGGTAAAAATCTTCGGCGAAATCAAAGGTCAATTAGACGCTACGTTACAGC  
GATGAAGAATCTATTCAAACAAGCTAACTGCTTTTGTAGTGGTTCCTAAGGATCTTGAA  
AAATTCGGTCCAGCATGGGTTAAACGCTTTGTTGTTACTCAAATTGAAGAAGCGTTTGCT  
GTTGCACTCGAAAGTGCGTATATTGTTGGGGACGGTAATGACAAACCCATCGGCTTGAAT  
CGTAAAGTTGGGAAAGGTAGTACGGTAGTAGATGGCGTATATGCTGAAAAAGCAGCTACT  
GGTACACTAACGTTTGCTAATCCAAAAACAACCTGTGAATGAATTGACAGATGTGTATAAA  
TACCACTCTGTTAAAGAAAATGGACATCCATTAAATGTTGCAGGTAAAGTTACGTTACTA  
GTCAATCCGACAGACGCATGGGATGTTAAGAAAACAATACACAAGCTTAAATGCGAATGGT  
GTATATGTTACGGCACTTCCATTCAATTTGAACATTATCGAATCGTTGTTCCGTTCCAGAA  
AAGAAAGCCATTTCTTATGTGGCAGAACGTTACGATGCACTGATTGGCGGACCATTGGAC  
ATTGGTACTTACGATCAAACGCTTGCCATTGAAGATCTCAACCTATATGCTGCAAAAACA  
TTTGCATATGGTAAAGCAAAAGATGATAAAGCTGCTGCTGTGTGGACACTAAATATTAAT  
CCAGCAGAACAACCTCCGGAAGGGTGATTGTAAATGGCTAAGTTCAAAGTGTTAAAGAAA  
TTAAGGATAAAGAAACCAGAGAAGTCTATGAAAAAGGAACAGAAATTGAATTGACTGTG  
AAACGTGCAGATGAAGTCTCTGATAATTTGGGAACTTCTTTTTTAAAGCGATTGGATGAA  
CCAAAAAAGACAAGAAAAGTAGGTGCTGTGCATGGAAGTATCAGATGACCTTCTTAAA  
AAATTTAAAGAGCGTATGCATATTTCTCACAATAGCGAAGATAGCAATTTAAAGAGTTG  
CTATCTTTTTCTATTGCTGATTTACAAGAAAATGCGGGCTGTTAATGTAGATGAACAT  
GTTAGGGCAAGAGAATTGGTCATTGATCGTACTAGATACGCGTATAATGATTCGATAGAA  
TTCTTCAATGAAAACCTTCAATCACAATAACTAGCTTAGGTTTCTCTCTCTATGTAGCT  
GAAAGTGGTGAATCTGATGAAGTTTCAGTTTAAACCTCAAAAAGTTTCAGAGCGGGGATTT  
ACGTACTCCGGTTGTTTTTTTTGAATATCAGCCGGCAAGTGGTCCCTGAACCAGGTGAAAT  
AGAAAAGATTACCCTTTTTGAATGTTTTGCAGAAGTTTATAAACCATCCATGAAGGACTT  
AGAAATTTTACATGGCACGGGAACAAAAGAAGCTGTCACAATTAATATTCGAGACACTAA  
AGGTGAGTATACAGTTAGTAACAAACATTATGTAGAAATATTAGATTATCGTTATTTGGG  
CAAAGATTTAATGTGATTGATGTTAGCCCAGACTTGCAAAAATAATCGCTTTGTAAATAT  
ACTTCTGGGGGTTCAAACATGAGTGTAGAAGTTACTGGAGTAGAAGAGTTGGAAAGACAG  
TTAGTCAGTTTATTTGGACGAGAAAACCTTGCCGCAATTAGTAGACCCTGCTTTAATTGCA  
GGTGCTACTCTTGTAGCAAAAACACTTAAAAGTGAATTTGTTCAATTTAAAGATACAGGC  
GCATCTATTGATGAAATCAATATAGAAAAACCTTCGTATGACAAAGGGGTAAGAAGTATA  
AAGATTGACTGGAAGGTCCTAAAGACAGGTACAAAATAATTCATCTCAACGAATATGGT  
TATACAAGGAATGGTAAAAAATCACACCAGCAGGAACAGGTAGTGTGCCAGGTCACTA  
AGAATATCTGAAAGAGCTTATAGGGCAATTGTACAGAAGAAAATAGGTGATAAACTATGA  
TTGATATTTTGAATGTCATATATACAACATTAAGTAAAAACGATATCATTACACTACTT  
GCGAAGAGAGAATTAATATTATGATTTTCCAGGCACAGGTGATTCTACAAAACCTTCT  
TGTTAATAATACCTTTAGATGTTCCAATACCAACTAATTTTTCCAGTAATGAATCCAGGA  
TGGAAGATTTTTTAGTACAAATTGATGTGCAATCTAACGACAGATTAATAGTAAAAAAA  
TACAAGACGAAGTTAGAAAAGAAATGAAACAAATAGGATTTGGACAACCTCGCTGGTGGTT  
TAGATGAATATTTCCAGAAACAGGGCGATTTGTAGATGCACGAAAATATAGCGGATTGC  
CCTACAACTATATCAATAAAAAATAATAGGAGTGAAATAAATGATTACAACAATCGGAT  
TTGAAAAAGCAACTTTTGGAAATTTATGATGAAAAAGACGAAAAGGTAACAGAAAAAGTAG  
AAGTAAATGGTAAGAATAAAAAAGGTGGTACGGTTGAAGCTGATATTTCTGGTCTTGATG  
CTGAAGCTATTAAGTTTTTCGCTTCGAACGGTCCATACTACATTTCCAAAAAAGGTTCTG  
GCGATGTTAAGCAAACAATCGGTATCATGGAACCTCCATTTGAATTAGGACAGAAGTTAT  
TAGGTCGTCAAAAAGAAATGCAGATGGTATTGTAACCTGTAGGGAAAAACACTGCTCCACCAT

ATGCGTCATGCGTGATGGAAAGTGAAACGTTGCGAGGGGAGCCGGTGTTCCTTTGCTTTAT  
TAAAAGGAAAATATGGACAAGATGACGTTAAATTAACACATCTGAGGACAAACCAAAGG  
AACCTGAAGCAACTAGTCTCACTGGTGAATTTGTTTATAATGATGCTGGGGACGTTTTCG  
CGATGGCTGTGGGCGAAGAATTCGAGATAAAAATTTACAGCATGGCTTTTCCTGGTTTTG  
TTGAAACACCAGTAGTACCGGAAGGATAAAAAATTTAAGAGTAGGTGAAATCCTACTCT  
TTTTTGTGACCAAATCATAAAAAAGGTGGAGAAAATAGTGATTAACTAGAAATATTT  
AATAAAAAAGAAAAAAGAAAGAGCTATATGAGAGAGAAGATACATCTGTAATTGAATTA  
GAAGAATATTGGAAACTACAAGAAAAAATTAGAGAATACATCAATACTTCTGACGATCCA  
AAGAAAACGACAATTTTGGAAATGCAGTTAAAATTTATTGTGAAATTATTTGATGATGAA  
AACATTACAATAGATTTTCTTAAAAAAAATATTCCTTCGAAGAAATTAACGATACGTTG  
GTGTCTGTCTTTCGGGAGATTTACCAGATGAATACGAGGATGAAGATGGTGGAGATGAG  
GAAGCAAAGTAATAACGCTTACCGAGTTTTTGTCCGATCTCGATGCAATTAGGCGTACT  
GCATGAAAGAGTATGGCTGGACAATTCGAGAAACAGATAATCAAGAGTATAAGAAGTTAT  
GTCGTCTGATAATCGAAAAAGAAGAAGCAAATCAGAAAACAACAAAGTTTCACTTGTG  
ACTTTGTATCACAATATCAAGATGTCAATTGAGGAAGGGGGTAAATAATGAATAAACTTC  
AAGGATTGTGATTAACCTAGACCTAGATGCTACTAGAGTGGACGAGGGAATGAAAGGGT  
TGAAGCGGACCCTCGGCTCTGTGAACAGCGAAATGAAAGCGAATCTTTCGGCATTGGA  
AGGGAGAAAAAACTTTATCCCGATATGAAACAGAGCTAGATGGTCTTAATAAAAAGTTAT  
CTGTTCAAAGCAAAAATGGTTTCTCAAATAAAAACGATTTTAAAGATTTAGAAAAACGAA  
ATGCTTCTTTAAATGGAGAGTTGAAAGAGTCTAATAAAAACGTTAACTGAGTCAAAAAAC  
GTTTTGAACAGCTCTCTAAATCTGGTAATGCAACTGAAAAAGAATTAAGAAGCAGAAA  
AAGAAGTCAATTCAAATCAAAAAGCATAACAACAACTTAACAAAGAATTACAACAATGC  
CAAAGCTTTAGCAGCAGGGAAAAAAGCAGTAAATAATGAAGTTGCAAATTACAATAATT  
TGCAAAGGAAGATTGATACTACCACAGAATCTTATAAGAAATTCAAGAGAGAGCAAGCTG  
TTAAAAGCTCACCGTGGGGAGCAGTGACTCAAGATTTAGACAAGTATCAAAAAAAGTTAA  
ATGAGACAGGAGATAAACTTGTGCTTTCGGTAAAAAAGGCAGTTTGTACATGGCTCCAG  
TTGCGCTTGGTTTAGGTTTCGCAACAAAAAAGCGGCAGACTTTGAGCAACAAATGTGCA  
ACACTTTATCTGTATGTCTCCTGGGGAGGTAAATGAATATAAAGATGCTTTAAGAGAAC  
TTGCTATTCAACAAGGTGCGGATACGAAATACTCCGCATTAGAAGCCGCACAGGCACAAG  
AAGAACTTTTAAAGGCAGGTCTTTCAGTTAAAGATGTTATAAAAGGCGGATTGTCTGGAG  
CGTTTTATTAGCAACAGCTGGCGAGTTAGATTTAGCGTCAGCGGCAGAAATTGCAGCTA  
CAGTTTTAAATGCGTTCAAGGATGATAATTTGAGCGTGGCGGATGCGGCAAACATTCTAG  
CTGGTGCAGCAAATGCTTCTGCCACAGGTGTAGAAGAAATGAAGATGTCTTTACAACAAG  
TTTCTGCTGTTGCCAGTGGCGTTGGTCTCTCATTGACGATACATCAACAATGTTAGCAG  
TATTTGCGCAGAATGGTTTAAAAGGTTCTGATGCAGGTACCTCTCTAAAACGATGCTAC  
AAAGGTTGCATCCTACAACAAAAGCGGCATGGCAACAATTTGATGCTCTTGGGTTAAGCA  
TTGTGGACAATGAAACTGCTATGAAAGTATTGCAAGAAAATGGTGTTAAACCACTCTCGA  
ATGATACAGATAAATTAATGGGACAAATTCAAGATTTAGCTAAAAGTTTGGCAGGTCCAA  
AGGCAAGTGCTTCTAAAGTGAACAAAGAATTTGAAGAATTGACCGTTGCCACTGGCGCAG  
TCCACTCCGCATTTTATGATACAAACGGGGAATTAATAATCAGCAGAAGAAATATCTGGTC  
TATTGCAAAGCAGTCTAAAAGATTTGAACTCCGAACAGCGTAGTGACGCGCTAGGTGCTA  
TGTTTGGCTCCGATGCAGTTCGTGCTGGGAATATTGCTTATCGTGAAGGCGCGGATGGAA  
TAAAGAAAATGCGCACTGAAATGGGAAAAGTAAGTCTGATGACGTAGCTAAAATGAAAA  
TGGATAATCTGAAGGGTACTATTGAAGAAATTTCTGGTGCAATTGAGACCTTTGCTATCA  
GCATTGGAACATCATTGACTCCGGTATTACGTGGTCTAGGAAAGTACATTCAAAAAGCAG  
CTGATTGGTTTAAATGGTTTGAATGATAGTACTAAAACGGTTATCTCTACAGCAGGTGTAG  
TTGCGGTAGCGATTCCGGTTGCTGGACTAGCATTGATTATTGCAAAGGGGCAGCGG  
CTGCTATCTCACCTGTAAAGAAATTAACAGCAGCGTTAGCAGAAAACCTCTGTTGCTGCTG  
GAACTAATGCAGCGACTACGCAACTTGCTGGAAACGCTTTGCCGGTAGCTGGAGGGAAAG  
GTAAAGGTTTCTTAGGTAAAGCTGGCTCGTTTTTTTAAAGGAAGCAAAGGAACAAAAGCGC  
TATCTACGGCTGATATGGCTGGTGTATTTGCGAGTTATAGCAAATTCGGAAAAATTGGGG  
CTGTTTTGAAAGGATTAGGCAAGGTATTACCCGGCATTGGGATAGCCTTATCCGCTAGTC  
AATTGATTGGTATTAATAAAAAAATGCAGGGGATAAAGCTGGTAGTGCTGCCGGAAGTT  
TAGCAGGAGGCGCAGCTGGTGCAGCAATCGGAACAGCAATTGCCCTGGAATCGGAACCG  
CGATAGGTGCGGCAGTTGGAGGTATTGCTGGTACTAAATTTGGGCAGGCGTTTGGTAAAA  
AAATACAGAAGGAAATACCTGAATATAAAGCTAAATTCGATTTAATTTGGGAGGCACTTT  
CATTCTCAGCAAAAAGAACATCCTATTTTATTGAATCCGGTTAATCAAATTAACGATCAA

TTAAATGGCGAAAGCAGGATATGCGGCTATAAAAGATGTGTTTGCTAATCCTTTGAAAA  
CGGATATTTCCGGAAAAGGTATTAGTAAAGATACAGCAAAAAATGTAAATTCCTTATAAAA  
CTATGTCTCAAACGCAATCTCTGAATTGAAGTATTTAGAAATGTCTGGGGATGTAATCA  
CTAAATCAACATCTGCTAAAATTAGCAAAAATTATAATGGGATGGTTGCTAGTCTGAGA  
AATCCTTTGAGAAGACTAAGAAAAGTACTGATAAGAATTTAAATACTTTGTCAAAGAATA  
GCATGTTATCAGAAGCAGACATAAAAGCGGTTAAAGAGAAGCAAGCAAAAAATACAAAAAT  
TGTCATTAGATGAAGTGAAGAAAAACAACGAAAAAATCCAGAAATTAATAAAGACATGG  
CAGCCAAAAATGCAGATATTACTAAAAAGGAAAAAGCGGATATAAAAGCTATTAACGACA  
AAGCGGCAAAAGAAGGCAGAGTTTTAAACCGCTTCAGAGGAACAGCAAATTACGAGCATCA  
AACGTAATGCTGCAATCAACGAAAAGCTAGTAATCAAAGTTATAGTAATCAAATACAAA  
CAATTGCTAAAAACAAGAAACAGCAGTGGTTAGTACGTTATCCAAATCAGCAAAAAGAAC  
AAAAATTAATTCTAGGCAAGTTAAAGGACAGTAGCGGTAATTGAGCGCAGAACAAGCTT  
CTAAAGTTGTAAAGGAATCAAAACGTTCTAAAGACGGCGCTGTAAAAGAAGCAAATAAAA  
AATACAAAGAAGTTGTTGCTGCTGCTGACAAAGAATATTATGTGAATGGAACACTATTACGA  
AAAAGCAACATGATGATATTGTAAAAAAAGCAAAAAGCCAAAAAACAATCAGTAAGTG  
AAGCAAAAAAATGCATAATGGCGTTGTTGATCAAGCAAAAAAACAAGCCTCTGGTCACC  
TGAAACAAGTAGATTGGGAAACTGGAGAGTCTTTGTCCAAATGGGATAACTTCAAAGCAG  
GTTTAGCTAAAGTAATTAAGTCTGTACAGGTGGAATAAATAAAGTATTAATAATTCTTTA  
GTTTACCTACCATAACCAGAATGGAAACCAGCAGGTTACAACAATAACACTAAAACCTCAA  
AATCATCTAGCAAAAAAAGAACGTCGTATGGTAGTCAGCTAGCAATGGATTACACAGGTT  
CTAATAATGCATCCGGACAAATTATGGCTGGCGAAGAAGGATTTGAGATTGCATATAATA  
AACGCAAAGCACAGCACAAATTTAGGTGCAAATGGTGCAGAAATAACGCATGTTGCGC  
CAGGTACTAAAATTTTGAATCATGCAGATTCAAAAAAGTCATGCAAGGCGGACTTGGTA  
AAACATTGCCTGGCTTTGCGAATGGGAATTCATCCATTAATGATTTTTTAAAGTGACGCAT  
GGGATGGAACAAAAGCTGTAGCTGGGAAAGTAGTTGATTTTTTCTAAAAAAGCATTTCGATT  
GGGCAGCGCATCCTATCAAAAATTTAAATAAACTTTTTGGTGGTTTTATCTGCAGGCGTGA  
AAATGGGGAACGATGGAAATTTAGGTTCCGATGTGCTGAACTATTTGAAAAACAGTATCG  
GTTACCTCTAGAAAAAATGCTGTCTGGTTTTAAAGAAACGGCGCCAGTGGCAGGACCGG  
CTGGGAAAGGTGCTTCGGCGTGGTCTAGTGTTATTAAGAAAGCTGCTCTAGCCATGAAAG  
TGGATTTGTCCGGTGGTGAATTAAGGGATTATAGCACAAATTCATCGTGAATCTGGCG  
GGAATGAAAAAATAACTCAGTCATCTGCTGTTGTGGATGTTAATACTACTATCAGGTAATC  
CAGCTAAAGGATTGCTTCAATATATCCCACAAACATTTAATGCGTATAGAATGAAAGGGC  
ATAACAATATATTTTCTGGTTATGACCAGTTACTAGCTTTCTTCAACAACACTCATCGTGA  
GAAACGATTTACCTTATGGTAAACGAGGTTGGGGACCACGAGGGCATCGTCGATTTGCTA  
ATGGTGGTTTTGTAAACAAAAATGAAATGATAGAAGTTGCTGAGAACAATAAGCCAGAGG  
TCGTCAATCCCCTTACTCGAAAAAACCAGCAGTTCAATTAATTAAAAAACAAGAAA  
TTATAGGAATGAATGATGGCGGTAGTGTCACTATCAATAATAATAATAGTAATAATAATA  
ATAATTTGATTTTGAAGAAATGAAAAAGCAAAATGAATATTTAAAATTACTTCTGATGA  
AAAGCTCTAAAATTGTTATTGATAAAAATTCTATAATTGAAACAGCAAATGAGGGGCTTAG  
GTGTCAAATGGAGCCGAAGCAACTATGAAGATGGTGGTGTACATTCTAATGAAGATACC  
AAAAAATCAAGGTGGGTATTGATACTAAATAAAAAATAATGAAAAAGAGCTCACGAGTTT  
ATCGGGGCTCTATTTTTTGAAGCAGAACAAGAAGATTTAAACTACAGAGCACTTGTACA  
AACGTCAGAAATCAATGATGGCGAGGTGCCAATATCTAATTTTTTTGACCCTTTTACACT  
AAAACCTCTTTTCTACTTCAAGGGGAGGGATGAAAAAGATTTAAATTTATTAGTACAAGA  
ATTAAGACAAGAATTAGCTATAAGGAATTCTTACTATGTTGTTTCATAGTGATTTGCCAAT  
GTTTAAATATCCTTGCAATCAGGCAAGTTTCGAAATTGAGAGAAATAACAATTTCTGATGC  
GAAAATATCAATTTCTTTCAGAGTCTTCAAAGGTTATAAAGAATCCCTTCTAATACTACT  
TTCGGCACAGCTTATTGATAATAACTGGGGATTTGGTATGGGCTTAGAAATGCAAGATTT  
AAGTTATACACATGAGACTAAAAGCTTTGATATTTTTAACGCAGGCTTAGAAATTGACCC  
ACGTTTACAGCATAACATTAAGATAGCTTTTTCTGGAATTGTGACAAACAATTGACGAT  
ATACAATCAAACAACAGATGATTCTTTTATTATAATGGAAATTTAAAAAATAAATAT  
TTTATTATTGGACGGTGTTTACCCTTTGGTAGATGGAGCAAGGTGTGGTAAAAATACAAA  
TAATGGAATTGTAAGACTTGCGAAGGGAAATAAATAGTATAAAAAATTGAAGGTGCAAATGA  
TTTTAAAATTAGTTTTGCTTTTCATTTTCTCTACAGATAGGAGTTTTTTATGTCTGACGT  
ATATGTAAGAACAGCAACCGGTAAGGTTTCAGGAAGTCCTTCTCTCATAGCAATTTCAA  
AATTGATTTTCAAACAATGTTAGTTGGAATTGTAGCTTTTCAGCATTTTTAAATGACAA  
AAGTAAAACAGCTTACGATTTGATACAAAATGAAAATATAATCATATATGAGGGACAACA



ATATGTGATAAAAAGAATTGAGCCTAGTTGATGAATGGACAAAAGAAGTATTCGCGCAACA  
TATTGCTTGGGAATTTCAAACCATATTCTCGCAGCATCAGAGGAAGAACAGAAAAATGT  
TAAATACACTTTGAAACAATACCTCGAAAAGTCAACCAAAGGAAATATTTTTGACTATTC  
ATTTGTTATTCACGGTTCCTTTCCACAATAACATTTGAGAATGACATCGGTGGGAAAAA  
TGGAATTGAATTAATCAAAGAAGCATGTGAACAGTTTGGATGTTTTTTTTATCCTGATAA  
CAAATTTTACATTTATATAGTGAAAACATGTACTATAAATCAAGTGAAGTTACGTTGCG  
CTATTTATTTAATACGAAAGATGTCAAAGTATCAGTTAATACTAATGAGTTACGCACTCG  
TATTAAGCATATGGAAAAAAGAAAACAACAAATGGAAAATATTCTATTCGTAAAAACAAC  
AGATTTAACATTAATGGAACATTTATTAACAGGAACCTGGTATGCAGAAAATCCAAC  
TTAAGCACAAGTTTTAGCGCAAATGTCAATGTGCATACGATGGTGACTCTATCTTTTT  
TGATTTGAAACAAGGAAATCATGGAGGCATTGTTGAATTGTTTTTTGACGGCAAAAATGT  
AGGGAAATATCCAGTGGTCATCAAGCTCAAATCAAGACAAATTATTATCACTAATAA  
TGCTAGCAAAGGGGATCATGTAATCACTTGTAATTTAGCAATGAAGATAGTGAACATAA  
AATGAGTAGTAAAACAGTTACTGAATATATAACAGATGTCAAACGGGAAAAAAGGTTAA  
AGTGACAAAACAAGTAAAAACACCAAATTTGGTTATATGTAGGCACAGCGACAGGCAATGT  
TACATGGAGTGTATATAACACTACAGGAAACAATAAATATTATGCATTTGTTGATTACAT  
TAGTCCTAATGCCAATTTATATGGAATTCGTGAAGCGAATAGTGTTTTTTGAAGAGAAGTA  
TTCTGATGACAAAGCCTTGCTAGAATTTGCAAAAAAACAATTTTAGATGTTCCAGAAAC  
TTCTTTAGAACTAACTTATACTGGTACAGAAGACTTAAATCCGCGAGATACGATTCGCTT  
TATACATGAGCCGCTGGGGTTTAAACACAGATTTGAAAGTTGTGTCTATAACCAAGCCTCA  
TGGGTTATCAGGACAGCCTATTACTGTTAATTTAGTAATACAAAAAAGACATAGTAAA  
AATACAACAACGAATTGCCCAAATGGCTAAATCGGCATCTTTGAAAGCATCTAACTCTAT  
TAACAGTATAACCATGTTGCAAGATTCTATTTCTGATCAAGCTTTAGAAAGCGAAGTTGT  
GGGGGAGGTGGAAGATATTTAATGACAGAAATTAGAGTATTAATAAATAACGGTGATATT  
TATTATCCACAGACGCATGCTCAAGCGGTTATGAATTTAAATGAAACTATCACTAAGGAA  
ATGAATCAAACGTGTTTATTATAGAAATCGCGAGTCCAAACGGGACAGTCTTTAGT  
TTAAGTGTACTAACGATGGTTTATTAATATTATAGAAGATGTATCTGAACAGGAGGTA  
AAATAATGTCAAGAATTAATTTAAATACGAGTGACATAGGAGTCAGTTTAAACAAGGGCAA  
ATATGAATGCCATAATTGATAATTTTAAAGCATTCAAATTTGTTTAAACGACAACACTACA  
CAAATTATAATAATCACAAAACCTAAAGATAATGGAGCCCACACTACAAATCAAATAAATG  
TAACATCATCATAACGTTACAGAAAAATTTAGAATGGTTACAAGAGACAATTGACAATC  
TAGTGATTGGAGCAAATGGTGACGGTGTGCTGAAACAAAACAAGCTAGAGTTAGCTTTT  
TTGATAATAAAGCTTTTGAACAGTTAATAGTCGCTTTTTTTTCAGATTTTAAATTTGCAT  
CTGATCGTTTACATGAGTTAGATGAAAATTTAAATAAATACATTACCAATGTTAAATTGT  
TTGGTGCTATAGGCGATGGAGTTAATGATGATACTGAAATTATTCAATCATTATTACTAA  
GTAATAAACAGAGCTTTTCATTCCCTAATGGGACCTATGCAATCAAAAAAATCTATATG  
TACCTGCTAATACAACAATAACATTTGAAAGCAAAGATGCTATTTTTTAAACGTATGTCAA  
GTGATGTTAATTAATTTATTTATCAATTATGAAGATGGAGTTCCGCACAAGAACTATGATG  
GTAATGGAAATATAAATATTTTTGGTGGAAACGATTGATATAAATGGTGCTGAATTTCCAA  
CAGTTTGTTCGCGAGTGATGTTAAGGCATGCTGATAATTGTCATTTTAAAGATATGCTAG  
TTCTAGATACAGTAAATGGACATGCATTTGATGTCAATGGGTGTGCAAAATATTTATTTG  
ATAATGTAGAATGTCTAGGATGGAGAGACGTGACAGTCGATAAATCATTGATAGCGCAAG  
AAGCCTTTCAACTATCTGTTGCTTCCGAGGATGTTTACGATATAGCTGTTCAAATGCTT  
ATTCTAATAGAGAGATTTATTTTAAATAATTGTAGAAGTGGTAATTCGAAAACAGCAGGTA  
GCGTGGCATATAATGTAGCAATTGGTAATCATAGCGCGTACACGGTTCCGAACGGTGTA  
ATATATACATTACAAATTGTCAGTTTGTGTTGGCAATTACTATGCTATTCGACTTTTTG  
GGTTTAAAGAATGTATTTGTGCGAGGATTGAAAGTGAATGATTATCTAGGTTTAAACAGCAT  
TGCATAGTAGTGCGGGTTTTACTTATAATCCTGATTTAACAAAAAATCTATAGTGTAGATA  
TGACAAGTGAGAATATACATTTTAAAGATGTTGATTTTTTATTCGAAAAAATAAATACAG  
ATAGACAAGCTATTCTAATTGTTGGTTCTACAAGTGAAGAAGGAATTAGGTTGAATTATT  
CAAGGAAAATATCTTTTAAACAATGTAAGAATGAATGGAACATACGAACGAACAACCAACC  
TCGCGTATATAAGAGATGCTATTTCTGTAATGTTTGATAATTTTACGGCTTACGATTTTT  
TAGCTGGAATAAGAGGGACAAGAAACGAGTTTATTAGTTTTTCAAGGATTTCTTTAGATC  
ATATTTCAACAGAAGCTGTTTATTTTACAGATACTAAGTTTTTTCAGAAATCACTACGTCTT  
CTTTTGTAATTGTGCTATTGACAATAGCAATGGAGTCGTTAGTTTTTCTAATGGGTGTG  
CTAATAACACAATAAGTGGTAGTAATATCCGATTGGGTGGATTAGGAAATCAAAAATATG  
GAGTTGTAATGACAACCTGATACTACCCTGTCATTCATTTAACAATTTTTTAGAAGGAA

TGATAGGGGCCGAGCAACAAGCGGAAGTAAATGCTATAATGGTTCATTATTCTATGAAG  
GTTCAAAAATGTACGTTGGATTGGTTGTAACCGGAATGTTTCAATTACAAGAAATAACCG  
CATAAGGAGGAAGATGATGACAATAAAAAAGATTGGTACAACCTAACTTGAGACTAGCGC  
ATATTATCAACCTATTGGAAATACTGGCATTAAAGTTTTGGAATATGGATTCTAATACCTC  
AATTCTTCAATTTCAAATAACAAGAAATAATATTGTTTTACCTTTAGGCTTAAACAACGT  
CATTGCTTATATTACTCTAATAGCAAGCGATGGAAGTCATTTAACTGATACATTAGAAAT  
CATTGATGAATTGAAAGGTATTTTATCATATCAAATTTCCAATGATTTTTTAAATGCACAC  
AGGAACAGTTCAGGGGCAGGTTTATATTAGTGTGAATAACACAGAAGAGACAGTAACGGA  
AGCTGAGTTTATTTTTGAGATTGAAGATGCATTAATCAACAAGATAACAAGTGATATAAA  
AATAAAATATATTCGTATTTTTGATGATTTAAAAAAGATATTGAAAAAATAAAAAA  
AATCATTGCTGATATTGACTCAGGAGATGATTATGTAACAGCTATACAAAACGTGTCTAT  
TGATGCCACCACAAAATAAATGCGAAGTATGACGACTTACAAACACGATTTCGACAATTT  
AAATCCCTCGCAGCTCGCAAAAAAACAGGTGATACTTTCCTGATCATTGCAATTTGA  
CGGAGTACCAACAATCTTTCAAGCGAAGCAGAGCAATGCTTGGTGGTATCGTCTAACATC  
AGAAAATAGCACAACTTGTGAGCAATCTTTGTTTCCAACAATTGTTTCAGGTATAAACGG  
CATTCAAGGAGCTGGTTATAACTTTAAACAGGCATACTTGAAGTTAAATAACGTCGATGT  
AGAAACAGTTACAGGTGCGCAAGCGAAAGCGGATCAAGCACTTGCTGATGCAAAAGCAGA  
TTCACAAGCAAAGCAAATCAAGCTTTAATAGATGCGAACATCTATACAGACAACCTCGAG  
TAAAGAAAAGCTCGTATGGTCTGGTTCGTCCTACTTTCTTGATACGCATACCTTCAGCTG  
GGACGCCGCAAAAGTAAACACGGTGTGTTACTAGAATTCTCACGTTACGACCCTGGGAC  
TGGCGTTTTAGATTATGGTTATATACAGTATTTCTTCTCAAAGAATATCTAGTAAGAAA  
CAACAATAAAGCGACGTGGTTAAACATGCCTGGCGCTACAGATGGAGCGAAAAAACGGT  
TAGGCTAACACCAACAAGCGTCAGTGGAGATGCAACAAATGGTCAAGCACCAAGCACGAG  
TTACGCATTAAGAACAGTAGCAATTTTTTAGGCAGGAGGTAATTAACATGAAGTCATTTG  
TTACAGTTAACAATGACGGCTATATTGATATGTGGAGCAGTCAAAAAGTCGAAGGATTTA  
TAGAAGTTGAAACAGCAGAAAGTAACATGAATCTAATTAATGTATGTAAAGTTGAAAATG  
GTAAAGTGATTTTAGATGAAAAACGGCAGCAAGAAATTATTGCTAACCAAGATTTAGAAA  
AAACGGAAGTAGAAAAATTAAGAGAGGAATTACTACTCAAGAGGCATTAGCCGCAC  
TATTTGAAAGTAATTTAGGGTGAACAATATGGCTTATATGATACCGATTTATGTAAATCT  
AGTGATGAATAGAAGGAAAACAATTGAAGAAGTTCCTTCGAATTTGCGAGGTCAGGTAAA  
AGCGAAAGTGGATGAGCTGAAACAAGAAGAACAACGAATGAAGATAGAAGAAACAGAAAC  
AGAAGCCGAGTAGGCTTATTTTTATAGGGGATGATTAATGAAGAAAGCCTGGGTAAAAA  
TCAAATTGCAACTATATGATAAGCCATATAAAGAGTATTTGAGTATTCTTTATTTATTAC  
AGGTTAGTTTATTCAGCATGGTTACGGGTGGTTTCTTAATCGTCAAAGGCGATGAAATTA  
TTGAGCAGAGTAAAACCTACAAATTAATGGCAAACCTCATGACAATGGATACATGGGGTT  
TTTTGTTTGTGATCAGTTCTGTTTTGATCTTCATTGCAGCATTTCAGAACAAGGCTA  
AATTTATCAATATGCTGATAGGAGGACTTGTGCGGGTGGTTTGTCTCTTTTTATATGCAA  
GTGCAAGTGCTGAAAGTCAAGCGACACAGCTATGGCCTATACGCTACGGATTAAGCGCTT  
GTTTTAATCTATTTGTATCAATCGCAGGAGGCTGGGAGTTATGGAGGATGAAAAAGATAG  
AAAAAGATATGTGACCCGGCTCGATCTTTTAGAACATGGCGATAAATAAAAAAGAGAT  
CAGAACCAGAAATCAAGGAGGTTGATAAAAATGTAGACGAACTGAGGGAAGATATGGGCGA  
GCTAAAAGATTTAGTATTACCAATTTACAGGCGCTTTACAGCAAATTTGTAGATAATACCAA  
AGAGACTGCCGTATCTTTAAAAGGAGTTATCGAAAAGCAACAAGCACATGATATTGAAAT  
GGCAGAGTTTCGTATTTCCAGCAAACAAGGAAAGAAGCGAGAAGGAAATACAACAAT  
AATCGTGGCGATCATTGGGGGTATTTGTACCATAATCGGAACAATGCTCACGGTTGCACC  
ACTAATTTGGCATTAGGAGGAATAATAAATGAACAAAATCAATTGGAAAGTAAGATTTCA  
AAATAAAGTGTGGGTAGTCGCATTAATTGCGGCTATTTTCTTTGTAGTTCAAGCAGTCTT  
GTGGGTGTTCAATATTGAATGGGACTACAACGACCTATTACAGCGCATCATTACCGTGGT  
TACGGGAGTGGTTGCTGTAGTAGGCTTAATTATTGATCCTACAACCGCAGGAAGCAAAGA  
TAGTACTTAGTGATGAAAAGAAAGGATGATAAATAATGACTATGTATTATGAAGAAAGA  
AGCAGAAATAACATTGCTAAACTTGCTGCAAACACGAGAGCAAAGCGCTGGAATGGTTT  
AACTGGTGTGTA AAAATGGGATTGAGGTTTTAGTATATGAGACTATTCGAACGAAAGAG  
CAACAGGCTGCAAATGTCGCTAATGGTAAATCTCAAACGATGCGCTCGTACCATATCGTT  
GGCCAAGCTTTTGATTTTGTAATGGCAAAGGTA AAACTGTGGATTGGGGTGGCTATAAA  
ACAGCTAAAGCGAAGAAAGTTATCGCAAAGCAAAGCACTTGGATTTTCATGGGGCGGT  
GATTGGAGCGGTTTCGTTGATTGTCCACATATGCAATATGAATATAAAGGTTATGGTACA  
GATAAATTCACAGCGGATAAACTGGTTGCTAACAAATAAAACTGGTAAGCAAGGGGTTTAT

GCTCGAGATTTCTTAAACATTCGAACTAAAGCAACATGGGATAGTCCTGTGGCTTTTAAA  
GTACCAATTTACTACTATGCGCAAATCCTCTGGGATACAAAAAATGGGGATTGGGTACAA  
ATTGAATTTCAAGGTAAAAAAGGGTGGTACAAACCATCATTTAAGGAGTATTGGTATGAG  
AAAGACCCATGCACCTCTTATATTTGTGTAGCGGATGTCAATTCAGAAAAAGCTCGAAG  
TGGGATAGCCCCGTTGCACAGAAAAAGAAAAAGGCGAAACAGTTCGCATGGTAAAAAAG  
GCTAAAAACGGTTGGTTAGAGTTTGGTTTGACAAATGGAGTTATCGGTTATATCCCAAAC  
TCCGCAAAATATGTGAAGAAAAAATAGGAGGCAACAAGATGGCACA AAAAAGATATATGCG  
TGTATGGTAGTTTGCCAATTTATAATGTGAAATCTGGTAAAAGTAGGAAAATTGTGGTT  
ATTTACCGCGCGGAGCAATCCTCAAATATGAGGGCGGGGGTTACGTGATATTCCGAAAAA  
TAAAAGGTTATACATCTTTAACAGATAGACTTTGTCCTGTAAGTTCTAGCGGCTGGGTTG  
CTGCGGTTTCTAAAGTTTCGAAAAAGATTCCTTCGAAACCGAATGGTGCAGGAACAATAA  
AGATTTACAGAATGAAATTATTAGAGTTTGGCCATCAAGTTCAAAAAATGGCTGGGTGC  
GCTGTGCGGTGGAAAAATGATGGTTGGTTCTGGTCATTTTATATTAAGACTTCCGATTATA  
TCAGAGTAGACAAAATGGCATAACGATAATATTGCTAAATTTACAACCTTATAAACTCTAT  
GACCTCTTAGTGATTATCTAGGAGGTCTTTTTGTTTTATAAAAAGATACTTTTGTGATAC  
TTATAAAAATGTGAATTAGATTACTATGGAAGTAGTGATTTTAAGATAAAAACTAAAATA  
TTTTAACTGTTAATGAAACCCTCTGTTTCAAGGGGTGCAAAGAAGGGCGCAGAGGTATT  
AAATTTGGCTTTTTATTTATTTTTGAGTTACAGGTTGTATCTTTTTATAAATCTTCCAA  
ATGGGAAATACAAGGACATTGTAAGTTGATCAAAATTGACGTTGAATTTTGATTTTGG  
AAAAGGTTTACAAGTACGCTTAAAGTGTATTAGAATGATATAAGATGTAGTACTACAA  
GTCACTTCAATTGGATGTTAATCCAAAAAGGAGGGTTTAAAATGAAGGACGTTACTTTAT  
TTGCCCGTTATTTAATCCATAGCTATGAGAGCTATTTCGAGATCTTTATTTGAGAACAGTG  
AAATGAAGTTACAAAACTAATATATTTGGCTCAGCGCCAAAGTATAGCTTTAACTGGCG  
AAATTTCTATTTCAAATGACATTCAGGGTGGAAAGCATGGTCCTGTTGTACCAGAATTA  
GATATTTCTTAGAAAATGGGTATACCCCTTATGAAGGCGAACCATTATCTGAAACAGAAA  
AGTATATTATAGACAATGTAGTAAACACATACGGAAAGTTTGAAGCATGGTCTTTAAGAG  
AGATGACACATAATGAATTGTCATGGAAAAATAGCAGAATAGGATTAATGATGAAGATA  
GCGGTTGTGAAGTTTTAAAGCTAGAGGATATTGAAAAAGATGCTGAGAAAAGTTAGAATTT  
TTGACCATCAATACGGCATGTATCTTGATGAATTTGAAGATTTTAAACGAAGAGGTGCTTC  
GATGACAGATTCTTCAGATTTAATAGGTACTATTAGAACCCTCAAATTTCCATATTATGA  
TGTTAGAGAAAAGAAAATGAAGTATAAGTCTAGACCGATTTTAGTAATCAATGCAGAAAA  
AGATTTAATTCCATGCGATTTGACGGTTTTACCAATATCGAGAGTAACTGAAGAGCGTCA  
TATTCATGAGGAATATGATTTAAAAGTTCTCAAGTCTGACTATCCTCTTCTGAATTTGAA  
AGAAAATAAGTCATATATACGAACGCACAAAGTCAATACTGTTAATAGTAATGATGTTGC  
AAATAAAGAAATGTCATCTTTAAAAAATACGTACCCTGATTTATACAGTGTAGTATTGC  
TAAAGTTAAGCAATTCATTGACGAAATTAACCTAACCCACTCGGTGGGCTTTTTTTAT  
GCAAAAAAACACCCTGAAAGCTCTCATTACAGGATATTGTCTAATGAAATTTTCAGT  
TTTTCTCTGCTTTATTGCAATTTCTAGTTCTTCCAAATCCTCTAAAGTTGCTTTTTTCTT  
GATGAAAGATCGTGCAGCTGAACGGCTTTTTAAATAATTCGCATGTTCTTGTTTTTTTC  
TTGCCAACTTTTTATTTGCTTTCAACTGTGCATCAGAAGTTGTTTTATCTTTCATTTAAAT  
CACTTCTTTTTATAAGGTATACTAAGCAGACTAATGTCACGAGAATAGCTGCTATAGTT  
AAAACAGTATTTTGAAAGTAGCTAGCCAACCCATTTACAGCAATAACAATTAATATAATC  
CAGATATATTTATTCATAATTTATGAAAGGCATGTTATAATTTATTAGAGGGAGGGGAAT  
TTCACCCCTCTGGTTTACTTGTCTTGTTTTTATCTTCTTGCGTAATGTTACGAGCGCT  
ACTGCAAGAGTGATAATTTGAGGACTGTTTTTATTTCTCTAAAACATCCTTCACTATC  
TCAACTCCTTTCTATATTCATATTATAATACATGTATTATATAAAGTCAAACATTATTTT  
TAACTTTGTATCTTTTTGTTCTTGATTTTAAAGAACGTTTGTTCGTATAATGTTAGCAAGA  
GGTGAAGTAAATGTATAACTTATTTGATGATATTTTAGAACATTCAATAGTATTAGCAGA  
TGCGTTAAAAAGAAATTGGTCAATAGAAGTACTGTTTTTAAAGAATAATCATCATGTGCG  
ATACAAGTATGTCGTGCCTGTCCACATTGATAACGAAAAACACATTGTGCAACTTGAACG  
CTTTGACGAACGAATAATTGACATTAATATAGAAGATATAATTAGTTGTGAGATTATGTC  
ATGAGAAAATATAGCTTTAATGATTTTAAATATATATGTTATGTTGAAGGGAAGAAGAAA  
GCTGTAGAAAAATCTTCTCTGGACTACTTGAAACAAAAAAGTTAAAAGCTTTTTATAGA  
AAAGTAGACAAGAAAGATATAGATTTAAAACCTATTTATCAAGAGTATTTATTTCAATGT  
AAAAACAATAATATTTACAACACATAAAACGTTTGTGGCAAATTTGTGGCAAACACA  
TTGTAAATTGCTATATATCAACGTATATTAATCCCTCTCAGGACGTTAAGTAGTAATGTT  
AAGAAATCTCTAAAACATTGAAAAGCCTTGATGTTAAAAGGTTTATGAATGTTTTAGAGA

TTTTTTTATATCGTATAATACCCGTTTTATTTCAGTCGTTTTTGTGGCATTGTGGCAAAA  
TTTGTGGTGTTCGTCTGTTTTAGTGTGAAAAAGCATCTACTTTAGACTGATTATGT  
TGACGCAAATTAGAACTTAGATGACTATAGTATTTAATGTTGTATTAATATCATCATGA  
CCAAGCCTATCCGCGACATATATTATATCCATACCAGCTTCTACACATAAGCCGGTATGC  
GTATGTCGTAGCTTGTGTAATGTCACTGGTTCAGAATCAATTGTATTACATATCTTCTTT  
AAAGCTTTATTACATGACGCGTTGTCAATGGGCTTATTGTGATAAGTGATGAATAATAAC  
ATCAACGGATTCTTTATATCGTGTCTTTTATATAAGCAGTATGCCATGTAAGATAAGAC  
TGAAATATTGAACTGTTGAGTTATCAATATAGATCACTCGTGATTTTTTTTGTCTTCGTA  
TCAATGAACGTGTTAGTATACTTGTAAATCCCACGCTTTATTGACCGTTATAGAACGTTTA  
GTGAAATTAATATCCTTCTTTGTTAGTGCAATAATTTCTTCGAACCTCATGCCTGTCTGG  
ACAGCTAGAAAGATAACTGCTCGTGATACAGAATGGAATTTTGCAAGTTCTTCTAATAAT  
AAATGAACCTTGTCCGTTTCCATGAATTGCGCTTTTGTTCGCTACGTCCTGTCCGCTT  
ATATGAGCGCCTGTGGCTGGGTTTTTCTTCATGTAGCCTAAATGGACAGCTTTATTA  
ATCGCTCTAATTTTGGCGTGCCTGGTGTCTACAGTGGATATTGCATAGTCTACAGATAAA  
TGATTAATAAATTGTTGATACTGCACAGCATCAATCGAATTAAGTTTAATTTTTTTCATTG  
AAATAATCAACGAACTGATTATAAGCAAGATCATATAAATTAATTGTAGATTGACTGCTT  
TTCCATCTTTAAAAGTTTTTCATGAATAGTGTATAAAAATCTTTGAAGTTCCATTCTTTT  
AACGAACTACTATCATGCTGAACTTGTTTAATAATTTAGATGCTTTATACATTAAGTTT  
GTTTCACTGGTATCTGTCAAACGCTTTTCTTTCCATTACCGTCGACTTTTATGCGCAA  
CGAACGGCGTATTTTCCGTTTGTAAATTTTTTTATCTTCATTAATACCACCACCTGTTA  
TTTTTGGAACATATGTTCTTTTGAAGGGTATAGCAAATTAATGGTAAAATGAATTTGCATA  
CTCTATGTGTGTAGTTAGAAACGCTTATCTCTGTGCGGGGAGGGCGTTTTTTTTTGTATT  
TAAGTGTTATTCTTGCATCATAATCTTTAAATGAATCTTCTTCGTAATTATCTGTTTCAT  
AATTAGCAGACCAAGTTAATCGTATTTCTTTTATATCAGATACATCATTAAACGTTGGAA  
GTATATAGACAACAGCGCCGTTTTTATTTACTCCTTGCATTAGTTTCGCCACCCAAATCAT  
CACTATTAATCATAGAAGCATCAATTTGCTTCCCATCAGCAACTAGTACTCCTTGATCTG  
GATAAGTGTTAAAATCAATTTCACTGTTGTTATTAAGTTCATAATTTACAACAATTAACC  
CTTCGCGCTCTTACCATCCTCTGCAAGTTTAGCGGAATCAACTTTAAATACAGAGACTG  
AACTTATTTTTGTTTGCAGACCTTTCCAATCATCGCTCCAAGATGTAGCATAGTCTTCGC  
TATCAATAATACCGCTATCGCTTTCTTCTCTTCGGCTGGCGCTTCCTCAGTCAAACCCT  
CGGATTCATTTGCAGTAGAAGTACTTTCTTCTTTACTTTCTTCTTTAGCGTTATTAGATG  
AATTTCCACATGCTGTTAGACCAAAACTAAATACAGTTAATAAACCTACTAACAATAATA  
ATTTTTTCATCCCAATTCTCCCTTTATTATTTTTTTATATAAACACAATAGTGTAATAAC  
CTAACAAGCAATAATTTGAATGCTACTTTTAAAAATAATTACATAGCCATTGCATTCAAC  
TGTATTTCCGTATTTATTTTTATAATATTGATAGAATGTTTTAAAAAATCTTCTGTCAC  
TTCTAAAAAATCTGCAACTTCATAGTATTCTGTGTAACCTTCATAATAAGAATCAATTAT  
TTTTCGCAAAGGTACTAGTGATTCATAAACCCTTCCCTGGCAAGTTTTTCTTGTTTTCT  
ATCATTAACTGTTTCCCTGTTTAATAATATTGCCAACAGTCAAATGATGATGACCAAGTTC  
CTCTGCCAATGTACAACGCATTTCAACATCACTCTGATTCGGATTTACAAAAATATGTTT  
ATTGTAATACAGCCCCTTGTGAGAATTTTCCATTTTTGTATCTTCTATGATGGTTAATTC  
AGGATATTGCTCTCTGTATTTATCTAACCACATACTTTCAACTCATTTCCTATTTGTATT  
TTTGTGTAATGAAATCAATATATTCAAGAATTTTTTTTCATGTCTTCTTCGGTTGCCGCGG  
GATCAATGTGCGCCGCCAAAGTTGCTGCTTCCGGCGGGATGTCATCTAGGAAAGGATATT  
CAGTACGACCAAGTAAATAATCAGTTGACACATTGAAGTAGTCAGCGACTTTCTGAAGTT  
TATCCGATGAAGGATTGTTTTGCTTCCATGAATATATAGAATTTTACCAAATCCAACAT  
CAGATTCTAATTTGAAACAGGAATGCCACGTTTTTTACATAATCTTTTACTCTATCAA  
ATACTGTCATTGCAACCACCTAGATAAGCATATGAAAATAAATTAAGAATTTTGTAGAA  
AATCATTGACTTCTATTGAAATCTTTAATATAATTTGTTTATAAGCTAATTATTTAGCTA  
AACAAAGACAACAAACAACCCCATAAAATACTCGTTCCCAACGATTAATGGCTTTTGATT  
AGGCTTGTTTAACTATGTTTACATTCTACAATAATCTTTAATACTTGTCAACATTATGCT  
AAATAATTAGCAAATTAGATAGAAAGGAGCAAAACCATGTCAGTAGAACATCAGCGTTTT  
GCGGTTGCGGTTTACGCAAATTAAGCAATTAATATGAAACAATCTGATTTAGCGAAG  
ACATTGAATATTAGCAATCCGTATTTGTCAGATATTATAAACGGCAAGCGCGAAGCGTCG  
AAAGTTAGAAAAACATCATTGAAATTTTAGAATTGGAAATTCACGAAAGGAGCGAATGA  
AATGGGTCGTCCTGTAAAGAACAACATAGAGCTATAAATTTCTTGTATGGTGTGGGAC  
ATTAGAAGAATTCGCACAAGCTAGTCCAAGAACTTACGGTTGGTGGTTAGATAACATAAA  
AGACTTTCCAGAGCTTGCAGAATTTAGCAATTTGGGCTACGAAAAATCAACGTGAAGCGTG

GGCATTGATGCAGTAAAAGCGAATGATTGGCTGATTA AAAAATTTGTATATAAGGAGGT  
CTGAAAATGATTGATGAAGTCGAAGTATTACTTGCCGAAATACGAAAATACGACCCAAAT  
TACGTTCCGAAATCGGTTGGAAAATATTTGCTAGTTGAACTTCAATCAAGGCATTTAGAT  
CATCAAATTAATATAAGAAAAGACCTAAGTACAAGCATAGATTCGCGAATTCGATTGAG  
CGGCATTGGTAAAAGAAAACCCACAGCTATAAATAGTAAGTTAGAGCTTACTAAAAC TG  
TGAGTTACGAAATAATATTTAAATTAATTATATCACAGTTGTGGAGATAAGAGAATGAAG  
AAATTCATAAGTGAGCATGAAAATAAAATATTACTTTTTCTGTTTTGTTTCCAAATCGGA  
GCATTACTGTCAGTCACATATATTGTAGCGGAGTGGATTA AAAATATTCTTGAAATGAGGT  
TTTTGAATGAAGTTATTACGATTTTTTGGGCTAATAAGTATTGATGAAAACGGAAATGAA  
TATATTGAAAATCAGATAGATACACATTGGTTTTGTTTAGCTTTGACTGTATTAATCGCA  
CTTGTTGTAGGAATCGGTGGATTGATACTAAATGGCTGAATTAATAATGATTGTTGCTTT  
GATACTTCTATTAATGCTGCTTGCAAGGAGTGATAGAGAATGAATGTAGAAAATCCGCTG  
GTAGTAGACGATTTGTGGGACGATGGATTTTCGACACTGAGGAATGAGGCGAAGACATGAC  
ACTAACACAGAAACAATTAATAATTTAATCGGAATAAAAGAATCATATCAAGCATCTGA  
TGCCTAATGAAAATTTTGTGTTGATAGAGAAAACGAGAAGAGATATTTAAACAGTTTTT  
ACAACATGATACGCATTTAGAAAAGATTGGTTTCACGTCTATTTTGAAGAAGAGCATGC  
GAATAAAAAGAAATATGCACAAGATTTTACACCAACTGAATTAAGTAGTGTTCATCGCA  
ATTAGTAAGAGGATTAACAGACAGTCAGGGAGGAACAAGACTAGATGTTGCCGCTGGTAC  
GGGTAGTTTAAACGATTTGCAAATGGTACGAAGATTGCCTAAAATATTCGCCGTTTGATTA  
TCTACCATCTATGTATTTGTATCAATGTGAAGAATTATCGGATCGTGCCTTACCTTCT  
TCTTTTCAATTTATTAATTAGAGGAATGAACGCAACAGTTATTCACGGGGATGCGCTAAC  
AAGAGAAGCGAAACAAGTGTATTTCAATCAAACGATAAAGACGATTTATTAATTTTAG  
TTCTTTCAACATCATGCCACACAGTGAAACCGTAGAGAAGGAATTTAATATTCATAAATG  
GCTAGAACCAGTTATCGAACATATAGAAAGCCCTCTTTCAGTAGCTGATAGATATTTAAA  
TGAGTTAGAAATAGAGGACGAAGAAGCATCACAATTGAAACTTTTTTAGGAGGGAGAACA  
TGACTAAGAAGCAAAAAGAAATACTATTTTGTGACTATTTTGAAGAGTGGGTGCAAGTGT  
ATAAAGTTGGAGCAATTGCAAAAATAACACTAGCTAAATATTATAATGCAGCAAAAACAAC  
TTCGAGATATATGCCAAAACCTTTTTATCTCAGATTTTGACAGACGAGAATATCAACGAA  
TTATTAATGTTTATGCTGAAACACATGAGAAACAGACAGTTAAAGATTTTCATCATCACG  
TGAAAGCGTGCATTAAAGATTTGTTTCACGATGGATTAATAGATAAAGACCCAACATACC  
GAGTTGTTATCAAAGGTGCAGAACCGACAAGAGCGAAAAAACGCAAATTTTTACAGAAAG  
ATGAGTTATCGAAGTTATTACAATCACTCGATACGAGCCAAATTGGCTTCGGATGGTTCG  
TATTGCTAGTAGCTAAGACCGGGATGCGCTATGCCGAAGCTTTAGCCATTACTCCTGCTG  
ATTTTAACTGGACAGCACAGACTATATCTATCAACAAAACATGGGATTACAAATATAACA  
AGGGATTTGCTAAAACGAAAACATTGTCGTCAGTAAGGACCATTAAAATTGATTGGCAGA  
TTGTCGGGCAGTTCAAACAACCTGATAAAAGATTTACCAGAAAATGAACCCATTTTCGTTG  
AAAAATTTGGAGACGGCACTTACAAACGTCAATTTAATTC AACCATCAACAATTTTTTAG  
CTGCTAAATGCAAAGAAACAGGCATTACACAGATTAGCTTTCACGCATTACGGCATAACG  
ATGCAAGCGTATTGCTGGCAGAAGGTGTTTCGATTTCATACGATTTCAGCACGATTAGGAC  
ATGCTGACGTAGGTGTCACACAAGAAACCTATGCGCATGTGTTAGACGAATTACAAAAGA  
AAGATGATCAAAAAATGTTATCTGTTTTGATGCAGATTGCTTAGTGAGGTGATTAGATGC  
GAAAAAATTTGGACGGATGAGGAAATCAGAGTTTTACAGAATAATTACGAATACGTAGACA  
CTGAAATAATAGCTAATTTTTTAAATCGCTCTTATCATTCAATAAAAAACAAGCGGCGC  
GACTTGGAATCAGTAAAACCTCGGAGTGGACAGAAGATGAGGATATTTATTTAGAGTATT  
TTGTTTATGAAAACGACGACAATATTAGCAAAGCTGCCGAATTTTTAGGACGTACAAAAG  
ATGCAGTTATAAACAGACTAGTGAAGTTAAGAAAAGAGATTCTTCAGTTTCTTTATTA  
GGCGTCCGTGGACCAAAAAGAAGATGAGATACTAAAAAATAATTATATTATTATGTCGA  
ATGACCAATTAGCTGAACGATTAAGAAGAACA AAAAGCCTCTGTAACAGGAAGAAAGGTAC  
AGTTAGGACTGACAAACAACACATGTCTAAAGAAGATGACAAAATCATTTCGGCATCTTG  
GAAATCAAGGTTACACAATCAAAGAGATTTTCAGCAGAAATGAATTTGCCTTATTGTTTAA  
TTAAAACCTATATAAGAAATCACAGAATCAATTATAGAAGGGAATCAAAAACGAGATGA  
ACGGTTGGCGAAAAGAAGCAGATGCGACATATTCGCATTATATTA ACTCTAAAAAATCA  
AGGAGGAACAAGCATGAGATTTAAAAAAGGCGATAAAGTAGAGTTTATTTACAAAATAA  
GAAAAGCGCAGGAGAAATAAATGGAGTTTATCCTGGAACACAAGAGGTGTCTATTAAGCA  
AAGCGATTCTCCGGTAGATTTGTTATTTTCAGATAAAGCTGTAGTAAAAGTTGAAGAACA  
AGAACGTATAGTAGTTCCGCAATTTGTAGCTGATTGGATAAGTCGTCGTAGACAAGAAGG  
ATACAATTTGATCTGGTCGATAAGCTATGAAAATAATGATATGCCTGATGAAATGTATGA

ATGGTTAACTTCAACAGCTGATAATCAAGAACTACTCGCCCGCGCGTGGATGGACGGCTA  
CGAAGTCGAGAAAGAACCGCTTTATTATGTACAACCTATTGACCACGCAACTGGTTATCT  
AAATGTTTATTATGATAATCAGAACTTGTAGGTAGTAATGATGAAGCAAGTGAGTATAA  
AACACAATTCACAGAATCAGAGATTAAGCAATGAATAAAGGTGAAGCATACTGGTTACT  
TAAGGAACCTGTTGAGGAAGTGGAGGGTGAAGCATGATGACAGTAGCCGAGTTAATAGAG  
AACTAAAAGAGCTTCCAGCTAATGCAGAGATTTTGCTAACCATCGGATGGAATCACTCG  
GAAATAGAAGAAGTAGGCTGTATCGAAAATGAACGTAACGTTTATATAAGCGGCTGGTGA  
AGCGGAGGGTGAAGCATGAGAGAGATTGAGATTTACGGCAACATACACGAAAATCCGGAT  
TTGTTGGAGGTGGCGGAATGAAACGAGTAAATGAACGACAAAAGAAGAAATGAAAAAAT  
TGGCAGATTTAATTATCGAAAACCCTGATTTACCAGTTGTTACGATGACGGATAACTTTG  
ATGATAAGGGGACTAGCGTTTGGACAGCAGGCTGTTGCTGCGAAGTAAGTATTGATTACA  
TTTATAGTCCTAAACAACGTGATTTACTTTTACGGTCTAGAGATGATAGACCATATGTTA  
AAAGTTTTGATTATTATGAAGCAATAGAAGAAATGAGTGAAAGAATACATCCTCATGACG  
ACACGAGTAGACCAGAGGAAATTTGGAATAGTCTTGATTGGATAAAAAGTCATTTTAGTGT  
ATTCGGGTCAATTAGAAAAAGTAGATGATGTCTATAAAGAACGTTGGGTGGCGGAATGAA  
CGATAAAAAAGTAAGATTCTACGTTTCTACTGGTATGCACGGATCACTTGAAACAGAAAC  
ATTTCTTTTGAAAACGGACTTGAATATTGAGTTCGATATATTAACACTTGAACAATTAGA  
AAAAGAGATTACAGAGGCTTATGACGACTGGTTAGTAAATAATATTGACTCTGGTTGGTC  
TATCGAGAAAGAGGTGGCGGAATAAATGGGAGTGAGTATTGATTTATACAGTTATGATTA  
TGAAGCGCTTGTGGAAGGCATTCAAAGCTATACAAAAGCGGAAAATACGGAAGTTATAAG  
AAAATACTTCTAATAGGCGGAAATGTCGTAGGTGATAAATATATCATTTTAAACAATGA  
ACTCTGGGAAGATAACAGTTCATATTACAACGTTCCGAACGCTTTAGAGCGTTTGTATAA  
AGTTGATGATGTCTTTGGAAAAATCTTCTGTACTTTTGATGATAGGTTCCGGTAGAGAGAC  
GCTAATTAATGGTTGTGATACCCCGAAGAAATATTAGAAGAGGTGATGGAATGACGACA  
TTTAAACCGAGAAACATCCTAAGTTGGCGCAGTGGATTGCCTTACGATAATACGAGATTT  
TCAATAGGTAGACCTCCAGCAGGCGGACAACATAGTGATGAATGGTATAACGGAGAAATG  
AATGTAAATGTAATCAGCATTGAATATATACTGCCTAATCCAATCACGGAAAGCACAGGA  
AACTATATTATCAAGTTGGAAGATGATAGGAGAATTGTTATCTCCGAAGAAATTCCGTCT  
TTTATTGAGGAGGTGGCGGAATAATGAACATACAAGTAGGAAGCAAAGTAAAAACAACAT  
ACAAAACAAAGTTTGTAAAAAAGGTGAGTACGGAACAGTTAAAGAAATATATGATGTTG  
TTAATATCCCGTTACAGCATTAGTAGATTTACGGCATTCAACAGTTTGTTCCTCATT  
GAGATTTGGAGGTGGCAGAATGAATCAAGCAGAAGTACTAGATGTCGTTATAGAAAAGCATGA  
GAAATGGTTACGTGATGGATATGGAGAACGTGCAAATTTAAGAGGTGCAAATTTAAGACG  
TGCAGATTTAAATGGTGCAGATTTAAATGGTGCAGATTTAAATGGTGCAGATTTAAATGG  
TGCAGATTTAAATGGTGCAAATTTAAGAGGTGCAAATTTAAGTTATGCAGATTTAAATGG  
TGCAAATTTAAGAGGTGCAAATTTAAGTTATGCAGATTTAAATGGTGCAGATTTAAATGG  
GATTAATTGGCAGGATGTTGTCGGTCTAACTGTAATAGCTGTACAAATTAATACTACGAG  
AAAAACAATCAAATAGCGTATATCAAAGAGCTGGAAATCTGGACGACTGGATGTTTTCA  
AGGAACCTTTAGAAGAATTGAAAGATTCTATTGAGCAGACTCACGATAACAACGACTTTTT  
AAAACGTAGATACTATCGCGCGATTAATTATATTTTGACGGAAGCGGATTTTGAAGAGGA  
TTTGGAGGAGGAAAAATAATGGAAGAAAAAAGAATGGTAGAAATCAACGGAATTAAGATG  
GAAATAGACATGAGAACAGCTGTACGGGTGGATGAATTTAAAGTAGGAGACAACATCAA  
GTGTTAGACAAGAAGTACTCTAATCAAAAACCTTTATGACGGAGTAATTGTAGAATTTTAA  
AACTTCAAAGATTTACCTACAATTCAAATTGCTTATTTTGAACGAGATTGGTTCGGGGTCT  
GAAATTAATTTCTAAACATTAATTCAGAAAGTGATTCTTATGAAATTCTACCAGCTTCA  
GCACACGAGTTTGGATTAGAAAAAAGCGCAGTGGTAGAAAAAATGAAACTGGAAATTGAG  
TCTAAAAAAGAAGAAGCGGCAATACTGCAAAGTAAATTGAACTGGTTCGAAAAATTTTAT  
GGAAAGTATTTTCGCGAAAGGTGAGCTGGAGTGAAAAATTATCACGTCATCTTTTCAGAGG  
AACTATATTTTGTAAAATATCCACTTCTCAATTTCACTAAATATGGGGTAACTTTTCGAGG  
AGTTGAAAATATCTACTATCAAACGTCTAGGTAATGTTTTTCCCACATATAGAGTAGACA  
AACGTCATTATGAGCTTAAACAATTTAATAAGGTTTCGAAATCAATAGACGAAATGACAT  
ATAGAATTAATAATTAACAGATTTTCATATTGTTGTAGAGGAGGATTAATAGTAATGAC  
AAAACAATCATCATCAACGAAGCAAACAGTTTACTTCACAGAAAAAGCAAAGAACTAAG  
TAAATCAATCATCAAACGCCTAAAGATCTCGAACGTTTCGCGATTGGGCTGGATAAATT  
ATCGCAAGATATGTGGGATTATAAAAATGAAGTGGAGGGATTAAATGAGTATTCAACCG  
GGCGATAAAGTAGAAGTGCAGGATAGGGCAGGGGTAGCTGAATTATGTGTAGACGGAGAG  
CAGTTTCATGTTCTGATTAACAACAATGGTCTGCTTACTGTTGAAGATGAAGACGGATTT

TCATCCTTTAACATACCAGCAACTCAAGTCAAGAAAATGAAAGAAAATAGGAATAGTCAA  
TTAGTAAATGAGCTATATGAACAATCAGACTCAGTAAGTTTTAGTATATATAATGCAGAT  
ACAGATAAAGCTAAGATGTTTGTATCTAATGTAAATAAGCCACAATTTGACGAAAGAAAC  
AATGTGAAGTGGTATTCTGCATCAAAAGGCCAAAATAACAGCAACAGCATTTTTGAAGGA  
GATGATTAATATGACAACACTTTATTCCATTCAAGAAAAGTATCAACAGTTATTAATTT  
AGCTGAGCAATTAGATCCGGAGGCATTAAGATACCCTTGAAAGCATTGAAGATGAATT  
AGAAACAAAAGCAGAAAATGTTGCGTTTGTATTAAAGAATTAGAAGGGCAATCACTTAT  
TTTAGATGTAGAAATTAACGTTTATCAGAACGAAAAAACACGATTAACAATAATGTGAA  
GCGACTGAAACAATCACTACATGATGCTATGCTAGTTGCTAATAAGCAAAAAATAAAAAC  
GAATCTATTTACATTAGATATTCGGAAAAACCCTCACAGTGTGTTTGTAGAAGATGAGAG  
TAAGTTAATTAATTATTTAGTTGAGCAACCTAAAAATCTGGATAAACTAAGTTAAAAGA  
TGAATTAATAAAGGCATTGATGTACCGGGAGCTGTTTTGGTTCAAACAGAAAGACTACA  
AATAAATAAAGGAGGGATTTTATTGTTAGAAATAAAAAGTGCATCAACTTTGCAAGATGT  
AAATAAAGTACTAGACTTATATATTCAGCTCCAGGAATCGGAAAAACAAGTACGATTAATTT  
TTAAGTGGCAAAACATTAGTAGTTGATATTGATAGAACAACTGGTGTCTGAAAGGTAA  
TGAAAATATTGATATAGTCACTGCCGATACCATGACGCCCTTTACCCTTTCCACAGTT  
GTTAAAGGAAATCAATGACAATTATTTGAAGGAATACGACAATATTGTGATTGATAATAT  
TTCGGAATTGGAACGATCCATATTGGCTCAACTAGGAAAAGAAGGGAAAAACAACCGCGT  
GCCTTCAATGGCAAATTATCAGCAAATGCAATTTATGATGATTGATGCTATCAGATATTT  
AAAGTCATTTGGTAAAAATATTTTGATAACAGCGTGGGAACTTCGGATCAGTGGCAAAC  
TCCGGAGGGTCAGATCTACAACCGGTCATACCCACAGATTTCCAATAAAAATCTTACCAA  
TGCAATGGGGCTATGTGATGTAGTAGCTAGGTTGGTTTATGATTCCGGAGGAAGACAAACG  
AGGCTTTATTCTTCAACCAACGAATGCTGTTTTTGCTAAAAATCAAATTGATAGTCGAAA  
GGGCTGCAAGCAAGAAGACCTATTCAAATCGGTGATGTTGATGCTGAAGCTTAGAGATT  
ATCAAATCGATAACAATCAACGAAGTAAGGGAGGCTTTTATTAGAGGGTGTAAACGTCCGT  
TAGTTGTTTCGCCCTGTGGTTAGGTTTCAGGCAAATCGGTTATTTTAGCAGAGATTATTAG  
GCGAACCACAGAAAATAAAAATCATGCTTTATTCCTGGTACACAGGAAAGAATTGATTGA  
TCAGATTCAAAATACACTTGAAGTGAGTGGGGTCGATATGAAACACGTCACTTTAGGAAT  
GGTTCAGACCATTTGTTAGACGGTTAGATCACACACCTCAACCAGAATTAATAGTCATTGA  
TGAAAGCCATCACATCTTAGCGAACAGCTACAAAAAATCATTGAATACTTTCATGAGGC  
ACGAGTTATCGGATTTACGGCAACACCTGTCCGAATTAATGGCGGGGGATTAGGCGATAT  
CAACGATACGTTGATTGAGAAAGTCAATGCCAAATGGTTGATTGAAAATAGCTTCTTATC  
ACCTTATAAGTATTTTGCACCGGAAGTTATTCAAACAAGTAAGTACTTAGACATCAAACGAAC  
CGGGGAATATGACATCACACAATTAGACGATCAGTTCAATCAACGAAAAGTATGGGGAGA  
CGTGATCAAGCATTATCAAAAATTAGCCGACGGACAGCAAGCTATTCTTTACGCTTCTTC  
TCTCTATCAAAGCCAAAAAATGGCAGCTAGTTTTGAACAAGTGGGTATCACTGCAGCACA  
TATTGATGGCAAAACACCAAAGGCGGAACGCGATCACATTATCCAACAGTTTCGAAATGG  
CGAGATTAAGTGCTATGTAAGTACTTAGATTTGATTGGCGAAGGATTCGATGTGCCAGACTG  
TTCTACTGTGATTATGTTACGCCCGACACAGTCACTATCACTGTATATCCAGCAATCAAT  
GAGAGGGATGCGATACCGAACTGGCAAAACAGCTATCATTATTGACCATGTTGGAATGT  
CAATCGTTTTTGGTTTGCCGGACATGGAACGAAAATGGTCCTTAGAAGCGAAAAAAGGGAG  
TAACAGCAACAAAGCAGAAGCACCTGTAAAAATTTGCCCTGACTGTTTTATGACAGTTTT  
GTCTAGCAGCAAACAATGCTCACATTGTGGTCATGAATTCAAAGTAGAAGTAAAACCAAT  
ACAAGTTGACGAGGCAGCAGAGCTACAAGAAGTAACAGAAGCAGTTTTTAAAGTAAATTA  
TAGTAGTCCAAGCGAATGTACGAACATGAAAGAATTATATGAATATGCAAAAAGAACAAA  
TTATAAAGAGGATGGGCATTCATCAAGGAAAAGCAAGAGGATTTATCAAATAAAAACG  
AAAGAAGGAATTTAAAAATGTTTAAAGTAGATCATAATGATGTTTTTCACAAATGGAGTAG  
AAAATGGTACGTATGAGGTGGTTTTATACAACGCAAATGAAGATGCGACAAAAAATGGAG  
CGGAGTTCATTAATATTGATTTAATTATCCGTAATGATGTAAATCAAAAATTCAGAATG  
CGCATATTTTTACCGAGTATGGAAAGCAAAAGCAACAATGAATATAGTCGAACGGCAT  
TAAATACAATCGCTAAAGCAATCCAATTACCTAACGGCAAAGATTATAATACATTGGATG  
AATTATTAAGACCTGTTAACTAAGACATGCCAAGTTACTGTGAAAAATGAAGAGTCTG  
AGTATAATGGTCAAATTTATAAAAATTTAAATGTGAAAGCGTGGGCTGAAAGTAAATTA  
CTGGACCATTACAACATGTATTTAAAAAGAAAGATGCTGAACCTATGCCAGAAATAAACG  
AGAGTAATCTACCGTTCTAAGCAATGAGAGGAGCGCACAAACGTGTATGAACAAATCCG  
GACGAATTAAAAAAATTAACAATGGTGCCTTTTCAACTTGTTTGGGATGAAGAGCGT  
GGCAAAAATAAAAAGATTCCAATGAACGCAAATGATGGTTCCTATGGAAATAGTGTGGAT

GAGCGAACTTGGGCAGACTTTGAACTGCCCTTACTTCTCTCAACAAATATCAATTTGAT  
GGATTAGGATTTTATTTTAAAGCACCGTATTTTGGCGTTGATATAGATGATATTCAAGAC  
GACATTCAAGATTATTTATACGGAAACACAGAAAACCTAGCTGCTGAATTTATTCAAACA  
CTCTCAAGCTATACCGAGTACAGTGTGAGCGGAACAGGAATTCATATTATCGCAAAGGA  
AACTTCCCAGAAGGTGGACGTCGTAAAGGAAATATCGAAATGTACCCAGATGGTCGTTTT  
TTTGTATGACAGGTCAAGTAATTGATAACTACAGACAAGTCAATGAAGCGACATCTGCA  
ATACAATATTTGCATACGAAATACATTGGGACTAATGAAGTAAGACAAATAAATAATTTA  
CAATCTACAGTTGATTTGCCTGTAAGTGATATTATTCAACGTGCTGAACGAAGTAAACAA  
GGCGACAATTTAAACACTTTACGACGGATTATGGGATGGATTATATCCCTCACAATCC  
GAAGCAGACTTAGCTTTTGCAAATATGCTGGCATTTTGGACAGGATGTAATGCAGAAAAA  
ATGGACGAAATTTCCGTTCAAGTGGTTTGTATCGAACAAAATGGGACCAAAAACGCGGT  
GCGCAACTTTACGGTGAAATGGTTATTAATAAAGCTATAACTAATACCTCTGAAATTTAC  
CAACCTGGCAGTGAAGTAGAAGGATATTCTATTTCTATCAAAAATCAGAATAATACAGCA  
CGTAAAGTATATGGGCTGGATGATACTGGTAATGCAGAACGTTTTTCGTGATAAATTTTAT  
GATATTGTCCGTTTTTCATACATTAACAAAGGGTTTTATTACTACGATTCAAAGTGTGG  
AAATACGATAATATAGGGGCTGTA AAAACACTTGTTCGATGATGTAATTAAGATATGAAA  
AGCGAATTTGCTTACATGGATAATGAATCAGATGCAGAAAAAGCGTTCATGAAGCACTTA  
AAAGCAACTAGAAGCAATAAAGGAAAAACGAACATGTTGAAAGAAGCGCAACATTTAATG  
CCAGTTTTGCCCGAAGAATTCGATCGCTACAAATATTTTTTGAACACACAAAATGGATAT  
ATCAATTTGCAAAATGGTGAGCTTATCAATCATGATAGGCCAAAAAATGTTTACAAAAATC  
AGCAACATCGAATATACAGATAAAATTGACGCACCGCTTTGGCAAGCGTTTTTAAATGAT  
ATTTTTGCAGGCGATAAAGAGTTAATCAATTATATGCAAAAAGCAGTCGGTTATTCTCTC  
TCTGGATCTACATCGGAGCAAGTAATGTTTATCCTTTTCGGAAATGGACGTAATGGGAAG  
TCTGTTTTTCTCGACATTATCAATGACATTTTCGGTTCTTATGCAACCAATATACAGCCG  
CAAACAATCATGGTCAAACAGCAATCCAGTAATGCAAATAGTGATATTGCCCGATTACAT  
GGAGCCAGGTTTGTTACAACCACTGAACCAACGAGGGTGTGCGTTTAGACGAAGGACTA  
GTTAAACAGCTCACAGGTGGCGACAAGGTCCTGCACGTCATCTATATAAAGATGAATTT  
GAATTCACGCCAGAATTCAAAATCTGGATGGCAACTAACCACAAACCAATTATTTCGAGGG  
AGAGATGATGGGATTTGGCGTCGATTGCATTTAGTACCTTTCACAGTAAAAATTCCTGAC  
GAAAAAGTAGATAAACAGCTAAAATATAAACTCCGCAGTGAATTAAGTGGGATATTGAAC  
TGGGCTGTAGAAGGCTTCCTTAAATGGCAAAGGGAAGGCTTGGGAATGCCGAAAGCAGTT  
GAAAATGCTAGCTCTGAATATAAATCAGAAATGGATGTTATTACCGCATTATATCGAGGAT  
TGTTGTGATGTGAGAGAAGGCGAAAAGGTAAATGCCAAAAAATGTATGAAACATATCAT  
GAGTGGGCGAAAGAAAACGGTCAATATTTAATGAGTAGTACGAAATTTGGGAAAGAAATT  
GGAATGAAGTTTACTAAGAAAAAACTAAAACCGCAAATGTATACGAGGGCATTACTTTA  
AATGACGATTATTATAATTTGAACTTAAATTTTTAAAAAAGGTGGAGGGTTTGTTC AAC  
TATCCACCCTCCTTTAGCCTTAGAGGCGCAATGGTTTTGGCTACTTAATTTCTTAGGAGG  
TGGATAGTTTGGGTGTTTTTCCATAAACCTTCTACTTTTTTCCCTCCTAGTAATACTTTTC  
CTATTTTACTACCAACTATCCACCTTTTAAAAAAGAAGTAGTTATAAAGGTAGTGATACC  
AATGGATTTT CAGAGGTGGAGGGTTTGTTC AACTATCCACCAACTATCCACCTTTTTT CAT  
CAATTTGACCAAAGGAGTGATCAAATGACAGCAGAAATGGATATACAGAATTCTATACGT  
TTAGA ACTTTCCCGTCATGGGCATTATGTTTT CAGAGCCAACGTGGGCAAAGTTAGAATG  
CCAAACGGACGAATATTTGATACAGGATTACCGAAAGGCTTTCCAGATTTATTTCGGATTT  
CGCGGAACAGATGGAAAAATGTTTTTTATTGAAGTGAAAAATGAGATAGGGAAATTACGA  
CAAGAACAGAAAAACTTTCAACAAGCGATGGAAATAACACCAGCTATTTGTGGAGTTGCT  
AGGAGTGCGGAGGAAGCGTTGAAAATAGTGGAGGGATAACAATGTTTACCTATTTTCGAA  
AATTTATAACAAATGGAAATTTAATCAAGGGATATACATTGAACCTACGAGTTTCTATG  
TGATAATTCGCTAAACAAGGAGGATAAACA AATGAAAATATATCACACAGAAACACAAG  
AAGATTACGATGAATTGCTGAAAAAGCTGGAAAAAGAAGGGTGTGCTGGTGGTCTCTATA  
GAGTTATTACGCCAGATGACTCACGACTTTGGAGATATTATAAGCAAAATACTGTTGTAT  
ATGTAAAGGAAAAAGGAGTGAGCTATGGGGACACTAATTATGCTAAAGATGAGTACCCCA  
ACATAACCAATTGAAAAATACAAAGTGAAACAAGACGAAGTTGCAAAGTGGTTCGGTGGCG  
CTACAAATGCCATGAAAGCATTTCATCCAATGGAGTATCTATGAAAAACGAAAAATAACG  
ACAAAGTAAATAATCCTGCACATTACACAGCAGGCGGTATTGAAACGCTTGACTACATTA  
AAGCTAAAGTAAATGATTATCCTAGTTATGCCGCCGGAATATACTTAAATACGTTTCCC  
GCTATGAACATAAAAACGGCATTGAAGATTTAAAAAAGCGCAGTTTTTATTTGAATGATT  
TGATTGAATGGATGGAGTGATACAATGTCAAACGATTA ACTAAAGCGCAATTTCAATAT



ATAGAAGATGAGCTTAGACATTACTACGATACCAAAAAAGAGTTAGAGCAGTTAAGGTTA  
AATGTTATTACAGGTTTCGATATATCAAGAATACTCAGATGAAAACATCGGTGGTAGTTCT  
TCAGGAAATATTAGTAATCAAGTAGAACAAAGAGTTACATTGTTAGATATGGATATTCAA  
ATACAACGTATGAATAAGGTTGTCAGGGTCATTGATAAAGTGATTGCAAACCTAAACGAG  
AATGACAGGATGGTTATTAAGCTTCGTTACTGGTCACGTGAAAGATACACATGGGAACAT  
ATTGGAATGAAGTCTCATATGGGCAGAGCGACAGCGATAAGACATCGAGACGTTGTAATA  
AAAGAAATTGGTAGGTTTCTTGGATTTTAATTGTGAGACGAAAGTGAGACTTTCGGGGTC  
GCTTTTCGTGATATTATTGTAGAGTAGAGAAGTGAAGATGATTACAAATAAAATAATATA  
TTAAGTCTGCACTTCACTTCTCATCTATAATCACATGATGATATAGCAGGAGGTTGCTAT  
ATTGCCCGGCAGAGGCTTTGTATCTGGCCACTAGTCCCAACAGGTGACGACACTCCTGTT  
CAATCTCCGTCTGCAACCACATAGCGGACGTTAAACACACGTTGGGAAGACATAAGCAA  
AAGTGTCTATAAATAATTATAAGCGCATACTCGTGGTGGAATAGGTAGACGCTAATCAGA  
TATAAGAGAGCTATTCGGGGCTGATAAGTAGTTACGATTGAGCGAATAGAGGTGGAAAGT  
AGGTCGTATGCAGTACACCTACCCATAGCAGTAAAACGAGGCGTTCGTGCCACGCCTATC  
TTATATTATGCAAGGTGCAAATCCTTGCCGAGTATATATTAACCACACACACCTCTTGA  
CAATGTGGAACGGGTCCTGTATCTAGTGACGGAAATTCATTCCGGATTCGACTGGATGAA  
ATACAAAGTATTGACGAATACTACCGTAGAAGTATTCAGGTCTCATAACTACGGATACAT  
AGAACAATGAAGTCCAGCACATTGCGTGTGGGGCTTTTATATAGGGGTGGATTAATGCTA  
ACACAAGCAGAACGTCATACATTCTATAAGTCAAAGGCATGGGCAAGCATAACGTAAAGAA  
GTATTAAGCGTGATAACTATGAGTGTCAAGAGTGCAAGAGGCAAGGCAAGGTGTTTACT  
GATTATCATGACCCGGACAAGCATAAAAGACTCGATGTGGACCATATTAAGGATTTAGAA  
CATCATCCTGAACCTGCGCTTGATATAGACAATCTCACTACTCTATGTGTAAAGTGTCAT  
AACAAAAACATAATCGCTTTCATTTAGAAAGGAAAATAAATAAATGGGTGAATGATGAA  
CGATGGTGACACCCCGGGTCAAAGGTTTGCACTTTAATTTGGCTCTGGGGAA

>NewGenomeName\_247

AGCAGGGGGGCTTATTATTACCCCCCTGCTCGGGGCGGGACATTCTGTGATGGGCTGGG  
CTTTATGCGGCCAAATAAGCCCATAAAGCCAGATCTGGGCCATTTAAGGGCCCGTGGTT  
TGAAAATGTCGCGTTCCCGCCTAAATTGTTTGCTTGCCCTGCAAGGAAACGAAAACCTCTA  
TAAATAGGGTTGTTCTCTGCTTGTAAATACATCAGGCGCAAATCTTTTGCAACGATGGA  
TTGGATGGAATCACAATTCAAGACATGTACGCATGGCTGCGACTGGAAGGCGATAGCTCC  
AGAAGCACAAGATAATATACAGGTAATTACATGTTCCGATTCAGGTTACGGAAGAAAGAA  
CCCTCGTAAGGTTCTTCTGAGGAGTATTAGATAGGGTTCAATGGAAGCTTCAGAGGAAG  
TAATAGAAATGTTTCGAGGCTTCATATACGTGTCTGTAAGACAGGATGATGGCCAAATGAG  
ACCAATTATGGTTCGTTCCATTTCGGAGGGTATGGATATCATAACGACTACTATTATTTGA  
AGGACAATCCAGTACGAATTGTGAGATAGTGTGCGACTATATTCCGGCCGGTCAAGACTG  
GAGCAGAGATATGGAGATAAGTATAAGTAACAGCAACAATTGTAATCAAGAGTGCGATAT  
CAAGTGTTATGTAGTATGTAATTTAAGAATTAAGGAATAAWATTGTTGCCGAAGGTCTGT  
TATTTGAATGTTGAGATAAGGAAAGGGGCGGCGAAGCATGTGTGTATAATAACATATAAC  
ACACTATTATATATTTTTGTAAAGAATAAAATTATGACCTGTCAGATTAAGTTTAGAATGA  
ACTGAGGCCGAAGGCCTCACCGAGGCCGAAGGCCGTCAGGATGGTTTTACAAAATAATTA  
TAAGCACCTGTACTAAGTACGAAGAGCGGTATAATATCTGAAAGGAAAAAATAATAATAT  
AATAAAAATATTATGATGTCCCAAATAGCAGAATGCTAAAGGAACAAAAGGATGCTCTA  
AGTACAGGGTTGCGTGCTCTGGACGCCACTTTAGTGGTGGGCCAGATGTCCCGAGTTAGT  
GCGCCACGTC

>NewGenomeName\_248

CTGCCGCGCCTGTTGCCGTCACCTCGGCGGCTCTGATATCGCATGGCGAGCATCCAACCG  
GAGTCATCCATGCGCGCCGCTAGTTCCCCGCTCACAGCCGTCTCATGGGCGGCAGTTTCC  
GCAGTGGCCTTCTCATCGGGAGCGGCGGCGGCAAAGTTTCTCTCTGTTAAGCTGCCCCCA  
GCAGAGCTGGCATTTCATCCGGGCGGCATTGGCGGCGGTGGCTATTGCCGGGCTGTGGCGA  
TACGCGACGCGGATCAGGGAGGCACGCGATCTGGGCTGGCATGCCATTCCGGCTCGTGCTT  
GGTGTGGTCCCGGTTACTCGTTCATGCACGCGATCACGCTGGCCCCGATAGCGCTCGTC  
AGCCTCATCTACTTCTCGCGTGTGCTGCTGGTCCCGGTCGCTGCGCGCTTCATGCTGGGG  
GAGCGGGCCGGCTGGGCAATCTGGGCTGGAGCAGCGCTGGGTACGGTCGGCGCTCGTTGTG  
TCCGCCGGGGGCGCTCCATCTGTCGATCTCGGCCTGGGTGCCGCAATCGCTGCCTTGGCC  
GCCATCTCTTCCGCTGGCTCTCAGGTCGCGGTCAGGCGTCTAACCGCGAGCAACGACCCG  
GCTCTGATCGTCCTCATCTTCTCCATCGGGTCGGCACTGGCCCTTGGCCCCGCGGCGGCC  
GCCCTGTGGGTCCAGCCCACGATCCCCGACATCCCGGTCTTGGTCCGCAATTGGCGCCTTC

GCTGTCGTTGCTCAGTTCGCAGCCGCCAAGGCGTTCGCCGCTGCCCGGCCCGTTTCGTG  
GCCCCGTTTCGACTTCTGACGGTCCCGGCATCGGGCGCGGCTGGAGCGGTGCTGTTTGGC  
GAGGTCCCCGGCTTGGAGATGGTGGCTGGTGGTGCCTTGGTAATCGCCGGGGCGGCTTTG  
GTCGCGTCGCTTGGGAAAACCGGCCGGTAGGTTGTAAGATTAGTATATCTATTTTGCATT  
GCTTTGGCTGACCGGTCTAAATGCCTAGTGCGGTGCACAATCCTAACCAAATGAAAGGTT  
TGGTTCGCATCGGGTTTTTAGAAAGTCAGGATTTTCAAAGGAAATTCATCGCCGCATACA  
CGGATATGCTGCATTTTCCCGTGCCTAAGCTGCCGCATGTCCAACCTTTGGATATGACAA  
TCTCGATTATCATGCTAGCGTCGCATGAGTTGTCTGCTCGCTTGGTGTTCGCGCATGGTG  
CCCCTTAGCCTTCCTTTGGATATCCCAAGCGCGGCTTCGGCGTTGATCGAGGCCGCATCG  
GAGATTGGCGGAGCGGTGTTATGTACACGCATGACGACCGTATTGCTTGGGCGAACGAC  
GCTCAGCGGCGTCTTGTGCCGATCTTCGCTACGACGCCTCGGAAACCTACGCGACGATC  
TTTTGGCGCATGCTGGAGACGGGCCGCATCGGGAACACGATGGCGGCAAGAAATCCTCAG  
CAATGGCTGGATTTCCGCCGTCGCCACCCGGCACTCGATGGCGAACATGGAGTTCGTGAAC  
ACCTACCCATGGGGGCAAATGCTCGTCTCCCAACTGCGACTGGACAACGGCGTGAGCATC  
CAGGCGCGCGTTGACCTCGCGATAGCTGGAGTTGACCGGTATTTCAACGCTCCGGCGGTC  
GGTGTGGCGTGGTGTGATGGCTGCCAAGGCGCAACGCGAAATGAAGACCTTCCAGGCCACG  
TTAGACGGCCTGGAGCTGGGATTGGCGCTCGTGAACCGCTCAGGCAGCATCATCCACGCA  
AATGGTAGCATGCGGGACCTGATCGAGCAGCGTGACGGCTTGAAGAGGGCCGCCAATCGC  
TCCCTGTGCGCCTGTGATCAGTGCAGACGACATGGTTCTTCAGCAGGCGATTGAGGCGGCG  
GCCGAGCGCCCAATACGGACGCCCGTCTGCTCCCAATCCGGCGCCTGAATGGGCGCTCC  
CCGCACCTCCTAGCGGTGTCCTCTGGGGCTTCGCCGGGAACGCGGTTCGTGGTGGTGTGCG  
CGTTTCGGCGAGAGCATTGACGATATCGCGTCAGCGCTTCAGCAGGCGTTCAACCTGACG  
GCAGCGGAAGCCCAAGTGACCGCAAGGCTCGGGGCGGCATGTTCGATTGCCGAAATCTCG  
CAGGAGCGAGGAGTGTGAGAAGGCACGGTCTACAATCAAGTAAAGGCAATCAAAGCTTCT  
CTGCGTTCGGTCAAGTTTCGCCGCAAAGGTCTTCACGACATTTTCAGCATTGGTTCATGAAG  
GTAGCGGCGATTGCCCGCGCGTTTCGCGCGCATAACTAGGAGGATGGTTCGGGCTATGAG  
CAATGTTTACGATTTTCAGCAAGCACAAGAGCGCCCTGCAAAAGCGCACCCGGCTTCACGGC  
CGACCAGAACGAGCGGGCGTGGGCCGATCTGGGCATTCTCCTGGAGGGCATGCAGAAGAA  
CCCGAGCGCCCCGTTCCCGGTGACCGCCGCGCCGACGAAGCTCTGCATCTGCTTCTGGA  
GGATGACGCCCGCATCAGTGATCTGACGGTGTCCCTGTTTGGCGATGGCGCAACGATCAT  
TCATGATCCGACTGCATATGGGACGCCGGCCTTCGCCTCCGCCTGGGCCAACACCCGTGG  
GGCCTTCGCCGCGCATGGCGTCGATCTTCCGGCCGATTACCGGGACGCCGACAAGAGCGA  
CCCGCGCAGCGCCGCGCGTGTGGTGGTGTGATCCACAAGGCAGCATAAGTTCTACGCCCC  
GGCGGCTTCGGCTGTCCGGGGCGCATCCCTCTATCGCCCCGCCAGCGGCGGAGGGATGCGGG  
TGTTAGCGCACCCCAGAGCCTCAGCGGATAACCCCGCTGCCAGAGATAGCGGCCGGCTGT  
TCCCGCCGCGCCATTGCTCCGCTCCGCCGTCCAGCGCCGCGCAGAAATAACATATATGG  
GGGTATTCAGATGCACAGAGCCAAGCCGTCCAGAGCGCCAGAAATGTTACAGCCTTCAGC  
CATAGACATAGGACCGCGAACTTAGCGGTAAAGATATTGTTCCCTAGGTTTCGCGTTATGTT  
CTAATTTGGCGACAAGGGAGGCGGCGGAATGGCGAAGGCGGATGTGCAAGGTCAGCCGCG  
GGAAACGCAGGCGGACAGGGTTCTGGCGATGGTGTGAGATTTTTTCGGCGCTCCGCGTCAGC  
GAGTGGCAGCGTTGAACATGAGCCGAAGCAGCGGCTTGGCATTGTCAACGGACAGCTCAC  
CCGGCTGTCCGCCGCGAGCTACCTCCTCCTGGTACCATCGGCAGAAAGTGGCGACCAAGT  
CGCCCTGATCGATTGCAGTCATGGGGAGCTTCGCTTCAGCGATCATCTCGGCTAAAGCGC  
GAACCGTCGCTCTGACGTGCTCGACCGGGATGCGATCAAGCTGGGCTCCGCTGGCGGGGG  
CGTCCGGAGTCGTGGGGATGCCAGCGAGGGCTAGAGTCTCGTGCTTGGGGACGCCGTGCT  
CTGCGAAGGCGTCCGCCAGCTTCTTGGCGATATCAAGCGGAAGGTGCTCATCCCGAAAGA  
GGTTGGGATCCTCGTAGCGCTGGTAGCTTGAGCCGCCCTTCAGGCCGATTGCCTTGGCCG  
CTTTCTCCATGGATAAGCCGGCGCGGTTGCGTAAGACGCGTAACTGTTCCGGTGACGTGCA  
TCGCGGCCCCCTTGTAAACGCGATACACGTTGCACGTCCGGACTCACGCTTTCCACGTTGA  
CGTTCATACGTGAAAAGCGTATGGTTTGGTTCATGACCAAGCCGAACACATCATCAGCCG  
ATTTGGCACGATCAGCGCCTTGGCGCGCAAGCTCGGTCACAAGCATCCGACCACCGTCCA  
GGGTTGGAAGAGCGTGGCTGGGTTCCCGCAGACCAGCAGCCGTTGGTCTTGAAGGTGGG  
AGCCGATCTGGAGCCCCCGCTGACCCCGCAAGATTTCTTCGAAGGTGCGCGAGAGCAGGC  
GGCAGGCAATGGCCTGCGCCGCTCCGCCTCCAATGAAGCCCGAGCATAAGGACTCCGGCC  
ATGGACCGCTATCTCTGCGCTCTCCTGTCCTTCGGCGGCTCCTGTGTGTGCGGCGCTGATC  
TACAGCGCCACGCACAACGGCTTGGTTCGGTGTGTCAGGTGTGCTTTTCTGCTCCTGTGC  
GGGGCTTTTCTGCTTCCGCTGGAGGACTGAACCATGACCGGTCACGCCTGCCTCCTGGCT

GCTCGTTTCGCCGCTCTGGCGCCGCGGACAGACTCCCAGCTTTCGAACCCTTGTC AATCC  
TACGAAATCGCTGGGAGTGCAGTACGCGCGCATGGGGACGGGTGGCGTCTCCTGTCGG  
GGGGTGGGCTACCGCTTTGTCGCGGCGCTGCGCGGGTGGGCTTTGGACGGGATGCTGATG  
CTGGCGATCTGGGCGGCGCTGATGCTGCTGGTTGCTGCGCCGGTCTATCTGGTGGTGGCC  
GTTGGCCGTCTGGCGCACGCGATTAGCGGGGTTCCGTGACATGCCCGCCACGGAACGCAC  
GAGCTTCGAGCGCAGCGGCACCGGCCAGCATCTCGGCACGGACCTGGGGTGGTCTTCTA  
CGGCTGCGGCGAGGCGCATGGCTGCGGCATCGACCAGCAGGTCCAAGGGGCTCTTGAAGG  
ACATCACGGGTTTCGTCTCCGCTTTTCGAGGCGCAGTTCAATGGCAGCGGCCGTGCGAGTCA  
GGCGCGCCACCAATTTTCCGCCGACGAGGTGATAGCGGGCCTGTCCGCGGAACCACTCCG  
CGCGCTCCAGGCCACTCGGCATTCGGTCCGGCGCGCATCTACTTGGAGCCTTCGACGCGCT  
CCGGGAAGAACTCGCGGTCAAGTTGCTGAGCAATGTTTTTCGAGAACTTTCGTCTCTGCG  
GCGAGCGGTGAGCAATCACGCTGAGAAGCTCTTGAATAGTTTTACAAATGCGGCGGTCTG  
TGGGGTTCGGGGATTTTGTGTTCCATGACCGCCATTTTACCCATCGGGGGTTGAACATGGA  
AACCACTCAAACCGGTAAGA ACTTGCCTGAAACCGGCAACATCTTCCAGAGAAGAAGCG  
CAAGCCGCTGAGGGACATCCTCGCCGACGCGCTGGACAAGGCCATCCACTACCAGTTCGC  
CCCCTGGAGAGGCGGTA AAAAGGCATTAGCCGCCACGACGGAGCGGGCCGAGAAGACGGC  
CTACA ACTACCTGTCACGCCAGACGATCATGTCCGCCGTGGACCTGCTGATGATCGTAGT  
CCGGCATCCGCCTTTCCTCGAAGCGCTGATGGCAGAGGTGCGCCGTGCGCTCGCTCACAA  
CGGGCAGGAAGGGCAGGCGAAGAAGCTCGTCTCCCGCATCACCAAGGCCGTTGGCGAGCG  
CCGCCGGGCCATGGGATCGGCCATCGGATCCGCCATCCGCCCGCGCTTCCGCCGTACAA  
GGAGGCCGTGTGATGGGCATCTCGAAGAAGCGGGACCGGTGCGCGCCGCACTCTACGTG  
GAAATCCAGAAGCTCTACGACAGGGGGCTGAATAGCAAAGAAATCGGCGACGCCTTGCGT  
ATGTCCGCGGTCCAGGCGGCATCAAACATGAGCCGGATGGGATTGGAAGCGCGCCCGCCG  
GAGAAGGTCAACAAGGCGTCCGGTGAAGAAGCCGTCCAAGGATGAAACTCCGGAGCCGGTC  
AAGCTGATGACCAAGGCCGAGATCGCCGCGGCTGCCGGGTGGCGACCGCTGGGAAACCGG  
GATCGGGTCACTCTGGAGATGGACATCTCGAAGGCTCTGGCCGCTGTGCGTCAAGACCCG  
TCTGACGAGGAGGCCAAGACTCGTCTCCGCGTCTGATCGCCAAGCGGGACAGCGACGAT  
TGCGCCCGCGATGCGGTGCGGGTGGCGGCATGAGCGCCTGCACCGTCAACCCCTTCATCC  
GTGAAA ACTGGAGCCCGACCATGGCCGAAGTTGATGCCCGCAAGGCTCGCGCCCGCTGGG  
CCTTCCAGCCCTCCGTCCCGCACAAACAAGACGCCGCTTCTGTGACCCGACCGCGACCGCG  
CTTCGATTGAGGCAGCCGTTGCCGCTGGCAAGGTCCGCCGCGTCCGGCTTCGACGGGAAGG  
AACTCGTCTGATGCCCGCCGCGCCGGCATCTACTGTCCGACCTGGGGCCTTCCGCGCT  
CCGTCAGGTTGACGCCTTCTCGTCCGACGCGGGCGCGGAAGGAGATGCAGGCGCGCGG  
CAACAAGTTCGGTGCCAAGCGCGAGACCGTGGACGGCCTGTCTTTCGATAGCAAGGCCGA  
GGCCGCCCGGTACGCAGAACTGAAGCTGGAGGAACGCGCCGGGCTTATCGCCGGGCTGCG  
CCTCCAGGTCCCCTACGAGATCACCGTCAACGGCGTCCGCATCGGGAAAGTGGATCGCCGA  
CTTCGAATAACCGCCGGGCTGGCGAGACCGTGACGGAGGACGTCAAGGGCGTCCGGACTCC  
GGTCTACCGGCTCAAGAAACGCCTCGTGGAAAGCCCTGTACGGCATCCGCATCACGGAGAT  
CCAAGCATGAGTGACGTTGGCGAAATCGCCGCCGACCGCCTGAAATCCTTCGTGAAAGA  
ATAGAACGACTTGAGGAGGAAAAGAGCGGTCTCCAGGAGGACATCAAGGAAGTCTACTCG  
GAAGCCAAGGGCACCGGGTTCGACGTCAAGATCATTCCGGCAGATCATCCGCTTGCGGAAG  
ATGGACAAGGCCGACCGGCAGGAACAGCGCGCCATCCTCGAAATGTACGAGGAAGCGCTC  
GGGATGACGGAGTGAGGACGCGAAATGTCCGCATACCCAACCCCGTTGCCGATCTCCTG  
CGCTTCCGTGAGCGCCTGAAATCGGCCCGCATCGACCAGAAGATGACGCAAGGCGACGTC  
GCCCGCCGGATGGGCAAGGACCTCGCACCGTCCGCCGCTGGGAGAACAACGAAGGCGAG  
CCGTCCCTGACGGAGGCCGCTCTGTGGGCTCACGCCGTGGGCGTCCAGATGCTTCCGCCG  
GTCCCGTTCGATCTGGTGGCCCGCGCCGCTGGTGGCCGTGGCCGCACGAAACGGGATGCC  
CTGTGCGCCATGCAGGCCGACGTCAACGCCGACCTTGCCCAAACCCGCGCCTCCAACCTG  
AAGGGGAGTGCCACAGCATGAGCAAAGAGGACATCGCCGCCATTGCTGCGGCAGCCGTCA  
AGCTCTCCACGATGCCCGCAGCCCCGGTCCATCGCATGACCGGCCCTCTGACAAGGGGG  
GCGCGAAATGAGCAAGGCACGCAAGCCATCCGCCGCCGTTTCCGCGTCCGGCTCTCGT  
TCGGAACAACGCCGCATAACGGTCCCGCGTCGAGAACGCCATCCCGGGCGGCAATCCTGAA  
CTGCATCGTACGACCGCCCTTGCTGATGGCATCGCTCCGCCGACCATGACGGTGCCTA  
CACCCCGCGATGCGTGACCTGATCGCCGCCGTCGATGACCAATTCGCGGTCTGCCGTG  
GCCACGCGCCGGCTGCTGATCGACGCGGTGGATGACGTGCTGGCCTACGCGGTGACCAA  
GAACGGCGTGAGCATGTCCCCGCGCTCCCTGGTGTGGCCTGCCTGTATTGGCTGTGCC  
CATCGCGCAGAACGCCGACCGGCAGCGCGCCGTTCATGAACCCAGCCTTCTGCGGGCCTT

CCCTGCGCTCCTCGCCGACGCGCAGGGGGCCAACGACTACGTGCAGTGCAGCGAGGAGGC  
CGGCTGGATCGCCGAGATCATCCGCGTCCGCTGGAGTCCCTTGGCCTGTTTCGTCGGCGC  
CGCCAGCCCGTGGGGGTGGCGGCATGAAAGGGACAGTCGTCAGCCTCTGCGACCGGACA  
GAAACATGGTCCGCCCGTGGATCGAGGCCGGCTATCACGCAATCACCGTCGATCTCCAG  
CCGGCGGCGGCGATGAGCGGGCGGACGCACATTTCGCGCCGACCTGACCGCCCTGCACGAG  
GACTTTGCGGCCCAATACGAGCCCGCTGCCGTTTTTCGCCTTTCCGCCCTGCACCGACCTC  
GCGAACAGCGGGCGCCAGGTGGTTCCGGGACAAGGGGGCTCGCCGGGCTGATAGGCGCCCTG  
CGCCTGGTGGAGCAGGCCCGCCTGATCTGTGAGGCGTCCGGCGGCCCGTGGATGCTGGAG  
AACCCCATGGGGCAACTCAGCACCTACTGGCGCCAGCCCGACCACAAGTTCAATCCGTGC  
GACTACGCCGGCTACAGCCCGGACCCGGACGAGGACAGCTATAACCAAGCTGACGTGCCTG  
TGGACCGGGAACGGCTTCCGCATGCCCTGCCGGACCGTAGGCCGGCGGCCAAGGGGAGC  
AAGATGCACCTTCTGCCGCCCGGGCAGCATCGGGCGGACCTCCGCTCCGTGACCCCGTTG  
GGCTTCGCCTATGCCGTTTTTCGCGGCAAACCGCGCTCGCCCGGCCACCCCATAGCCGCG  
GAGTAGGGCGCATGACCCTGACCGCAATCGAGGTTGCCGCCGAGCACTGCGCGTGGGGCGC  
GTAGGGGGCGGCTTTTCAGCCCGTCAGGTGGTGGAGAGCGTCAACGGACGGAAGGTCCCGC  
ACCGCGCCTCCATCACATGGCAAGACGCAAACGTGGTCATCGCGGCGTGGTGGGAAGCCA  
TGAGGTATCAGAGAAGGAGGGCGGCGTGACTACTCGTCCAGCGTAACGCCCTTCTCGCC  
GATGAACCGCACGCCAGCTTCCTCGAACGCCTTTTGGACGGCGGCCGACCCGCTTTGCGCT  
CTGCGTCGGCACGCCGTCTCCGTTCTGCATGCGCTGGACCGTCGCCCAAGCGACCCCGGA  
CTTTTCGGCCAGAACCTTCAAGTTCCAGCCGAGCAAGCCGCACGCCGCCCGTATCTGTGCG  
CCCCGTAATCATGGAGGCGATCCTTCCCAACGAAAACGTAGGAACGCAAGCCTCAATCTG  
CATGGTTATGGCCCGAATGATATTGGAAATCGCACATCGCTCAGGTATGATAGCCGTTAT  
GGGTAAGATAACAACCTTGAGGGTGGCCGAATGATCCGTGACGTGCGCAATAGCGCACG  
GATTTTTGCTGACCTGGAGAGGAACATCCTTTCCGGCGGTGCAGCATGAGCCAAGCCCCG  
TCCATGCCGGTCTTCCAGACGCCCTGATAGCCGACACGACCGACCTCAACATGGAAGAG  
TTCGGCGCGTACTGCATGATCCTGATGGTGACATGGCGGAACAACGGTCAGGCGCTGCCG  
GATGACCCGGCGCGGCTGGCGCGTGTCTGTGCGATGACGGAAAAGCGATGGACGGAGCGC  
GTTGGACCGGTTCTGGCCCGGTTCTTCGACCTTTCGAGGGGGTGTGGCGTCAGCATCGG  
CTTGAAAAAGAGTGGAATTTTGTGCGGAAACAGCGCGCCTCCAGAGCGAGAAAGGGGAAG  
AAGTCAGCGACAGCTAAGGCACTGAAAAACAACGAAACCACTTCAACCGCGGTTGACGAG  
CGGTGTGAACCGAACGCCAACCCCAACCCCAACCCATAAAGAACTTACCTTAGAGGCT  
GAAGCCTTAAGGCTACGGTCATCGCCTTCCCCCTGGGCCAAGACCCTTCGCCGACGAAG  
CCGCAGAGCCAAGACCTGAACGCCCTGTTTCAGCGAGTGGTGGCAGTTCGTCCCGCGCAAG  
GTGAGCAAGGGGCAGGCCGAGAAGGCGTACAGGGCCGCCGTCAAGCACACCGACCCCGCC  
GAGCTTCTGGCCGGCATCAAACGCTTTGCGACCGACTGCCAGGGCAAGGACCCGCGAGTTC  
GTGGCGCACCCCGCAACTTGGCTGAACGGCAAACGCTGGCTTGATGAGCCCGGCCCTGCCG  
CTGAACGGAGGCTCGAATGCCCAACGTCACCTTCGCTGCCCGCGAAACCCAGAACAGGCA  
ACTCACCGTCGCCGGAAGCCCTCGCCAACGCCTTGGCTCGCCGCGTGGCAGCCGGCGGA  
GGAGGTGCCGGTGCCATTGAGACGGTTCGCCAAGCCATCACGGAGCACGAGGCTTCGCT  
TGAGCCGGCGGACATGCGGGTGGTGCATCGTGGAACCTCGACAAGGTGTGCGCTGTGCACGG  
AACGCCGGCCGGCTGGGACGGCATGGTTCGACGACTATCTGGAGGCGTTCGACGGCGTGCC  
ATTCGACCTCGTGAAAGTGGCGTGCAAGCATGCCCGGCTTGACCTGAAGTTCTTCCCCAA  
GCCCCCGAACTGCGCGCGCCGATCCGGGATGAGTTGAACGCCCGCCGCGACACGCTGCG  
CCGCTGCGCACGGCGGAGATGAAGGCCAAGCCCGCCAAGCACCAGCCCGAACCGCCGCG  
CGAGCGCACCCCGGAAGAACTGGCCGCCGTGCGCCGCGGAAGGAAGCCGCCCTACAGGC  
CCTGTCCGCCGCCCCTGTGAAGGCCATGCCCGCCGAGCGTGACGACCTGAAGCCTCAGCG  
AGACGACAGCACCGCCGCGCCCGCCGCGGAGTAGCCGAAGGTCTTGCCGGCTTCCGGAA  
GGTGGAGCGCACCGCCAGCCGTGGGGGAGACTCACAGTGACCGAACCCCTACTACGCCTAT  
TCCGCCAAGAGTCGCGCCACCTGAAGCGGCTTGCCGAAGCGGGCCGCGACATGCCGGCT  
TGCCAGAAGATCGCCGTCACCGCCCGCTGTTTTGCCGATGGCCTGATGGTTCATGCCGTTT  
TGGGTGCGCATCAGCCTTGTCTCGCGATCTGGAGGCATGGCCGGCTGCTGGCCTACTTC  
GCGTTCTTCTCCCGGATGGACAAGGCCAAGCCCGGCGCCGCTGACGACGCTTGGGATCAG  
ATCATCCGTACATGCTGGACGGGAAGGACACCGAGCAACCCGGTTCGGTCGGGGGCTTC  
TGCCAGCGGGAACCTGGACATGTTTCGTCGGATACTGCGCGACGCGCGCCGATGGAGGGA  
TGACAGCATGACCGAAACCGCTATTGTCGCTCTGGTGCTTTTCGGCTGGTGGCTGACGGG  
GGCCGCGTCCATCGCGGCTTACCTGATCTGGTCAACCGACAGGCTGAACCGGAAGTATCC  
GAACCAGCGGCCTGACCCTCTGCTGACGGTTGGTGACCTGATCCCCATGACCCTGTTCCG

GTGTGCCGGGTTATTGGCTGCCGCCGCGTCGCGGCTGGGGCTCTGGCGCTCATCGTCAG  
CGAAGGTTCGCTTTTCGCGAAAGGTTCTGATCCCTGGCCGGCGGATGGCTTCCCGATGACG  
ACCACCCGCGAAATCTGCGCTGCCAGAAGCGCGTCGCCTCGCTTGTGCGCTCAGGACTG  
GCGGACAAGGAAATCGCCCGAGACATGGGCCTGTCGCTCGGGGCGACGAAGGACCGGGTA  
AAGCGCTTCTCAGCCACGCCGGAGCCCGCAACCGCGTCCAACCTGACCCTGTGGTGGCTG  
CGCCAGACCGGCCAGCTTCGGGAGACTGCCAATGATCTGCGGGCGCTGAAGCCCACGCCA  
CCGCCGCCGACCAGCGGTTTCATGACCTACGCCCGCCATCAGGCCGCCAAGTCCAAGGACC  
CGTGCAAACAGGTTCGGCGCCGTCGTGGTTCGGCCCGCTCGGGCGAGATCCGGGCAATCGGCC  
ACAACCGGCTCCCCGGTGATCGGGACTGCCCGGACACCTACGCAGACAAGCGCCGCAAGC  
GTGAGCGGATCGTCCACGCCGAGGTGGTCCCATCACGTCCGCGGGCGGGGCCGGTGTGCG  
CTCTGGACGGCGGCACCCTCTTCGTACCCACCCGTGCTGTGCGGACTGCGCCCGGATGC  
TGGTGGAAAGCGGGGATCGTGGAAGTCGTCTGGCCGGAGCAGGCGACCTTTTCGGAGCACT  
GGCAGGAGAGCTTTCGGGAGGCGGAGGACGAATTCGCTCGGGCGGGGGTGAAGGGTCCGGA  
GGATGGTAGCATGACGCGCGTTCGTCTGCGGTGGCCGTGACTACCAGGACCACAAGCG  
CGTGTTTCGCCGAACTGGACCAGATCCACGCCGAGCGGGAAATCAGCGTCGTGATCCACGG  
CGCCTGCATTCAGCGCGGCATGCTGTCCGGCGCCGACCGGTGGGCAGAAGCGTGGGCCAT  
CGCTCGGGAGGTCCCGTACTGGGGCTTCCCGGCCCGCTGGAACATCGACGGAGGCGGCAA  
GGCTGGACCGATGCGAAACGCCCGGATGCTGGAGAAGGCCAAGCCGCACATCGTGGTTCGG  
CTTTCCCGGAGGGCGCGGCACCAACGGCATGCTCAGGATGGCGCGCGAGGCTGGCGTGAT  
GGTGATCGACGCCGCATCACAGCCGAACGTCACTGGATAGCGTTTCCCACCGATCCTGGG  
CGCGCTGGATAGCCTCCGCCCGAAAGGATGCTTCACGATGGCTGAGGTAACCAGAACGCG  
CTCCACGGCCTTCTAATCGAGACATTCAATCCGACAAAGGATGCTTTCGAATGGTGATG  
CATTCCAGGGGCGCCCCACCCGAGATAAACCGCCGCGCGACCATTTCCCGGTTGACGCGG  
AATGGGCAAAGCTTACACTTTCGCGCGCGCGCGAGCGGGTGTATGGTGTATTCACGTAGG  
TGGACCCACTAGATACGGGGGCGCGTGATGCAGGCAGCGAACAGAGCCTTACCCCGGCG  
GAGTCGTCCGTGCTCCGCCACCTGTGCGGGCGGGGATCGCCGAGCAACAAGATGATCGCC  
GTGCGGATAGGCTGTTCTGAGCGGACGGTGGAGGCGCACATTCGGGCGGCATCGCACAAAG  
CTGGGGGTGGCTGGCCGTGTCGGGCTTGCCGTGTGGGCTGTGAGGAACCTGCCCGCTGAG  
CAGGTGGCCGCATGAGCCGCCGATCCAAGCGCCCCAAGGCGCAGCGCACTGGCTGCCCA  
TTGCCGACTTGAGGGCGATGCGTCCGGACGACAAGGACCGGCCGGCGCTTGCCGCCAAGG  
TCGTGGGGATGATGCGGTTCAGGCGTCTACGGCCACGAGGACGGGGTGCCCGTGCTGCTCA  
CCCAAGCGCAGCGCATCGCCGCTCTGACGCCCTGACCCCGCGGACTGGCGGGCCAGCC  
AGCCGAGTGCCGATGCCGCCGAGCGGTGGACGGACGGCCAGCCGAACACGGTACGTCAC  
GCCCCACCATCTGCCGAGAGGCGCTGACGGTGAAGCGCGCGGCCACGCTGGACAACCGCG  
GCTGGGTCTGGAACGCCGAAGTCGTCCGCCTCCACCTCGCCGAAGCCATGGACACGATGC  
GCCGGATGCGGTTCCCGGCCAACGAGGTCCCGTCCACGAAAGTCGCGGCGTGCATCGAGT  
TCGCCAGGACGCGGGCGGAGTTGGAAGCGCTCATGCTGGACTGGCTTGGCGACGTGAAGG  
CTCTGGTAGCCGCACCAACGCCCAAGGAGTTGCGCAGCCTAGACGAGACGCTTCCCTGGC  
TCTACGCCGTGACCGATTGGCGGCACCGCATCGTCGCCTCGCTCCGCGCCTCCGGCATGA  
GCTGGAGATCCGTGGCGGCGAAGGTCAATCACGAGATCGCCCGCCGCACTGGCGGTGAAG  
GGATCAGCTATGAGACGGCAAGGCGCTGGGAAGAGAAGGCGGTTGACCAGATCGTGAAGG  
CGCTGAACTCGAAACGCCACGCTGCGGCCTAGGTGAAATCACCTACGTGATTTTTCTTGG  
TGACAACTTGAGGCGGTTTAGGGCATAACAGTTAGATATGATTTTCGCGACACGCCCGCAGG  
GTGAACTCCGGCGCGGGCGTGTCTGCATCTGGAAACATCTTTCCGAGATACCGCAGGCAT  
CGCGTCTGGCTCCCCCGCCAATCCTCCGTCCCCCGCGGTTTGCCTGCGGTACCCCTAC  
AGGGCCACCGGCTGGAGGCCCCCATGACCCATGACAGCGACTTACGCCGCGTCCCGCCG  
ATTGGGGCGTGTGATGCCGCCGCTGAGGTGAGCTTAGTGCCCGCGCATCCACCACCCCA  
GCTCGTAGAGACGACGGAGCAGCCGATAACCGGTGGGTGGGGACGGCGGAGAAGGTGTG  
GGCCACCACGCACCCGGTCAACCAAGGGCTCGCCATCGTCGGCGTGTGCTCTTCAGCGT  
CGCTCTGATCCGGGCTGCTGCGCCGAAGCTGGAAACGCTGCTGCGCATCTGGAAAGGGCA  
GGGCGACAAAGGGACAGCAGATGTCCCGGCGCAGCCCTTACCCCGCCGCCCGAGCCAC  
GGAAGCCGACAAGCGGATGGACCAGCTCCTGGCCGTGACGCAGGACATGGCCCGCAAGCT  
CCAGAAGGTCGAGCAAGGAGTGACAACGTCTCCGCTGAGGTGTCAGTCCTCGACAAGCG  
CATAGGCCGCATCGAGGACCGCTTAACGAGCGCAGTGACCAGGGAAGAGATGCGGATAGC  
CCTGGATTTAGTCAGTGAGCTTGCCAAGGCCCGCTGAGCGCAACCGACGCGAGCGGCTTT  
TCGGCGCCTTCCGGGTATCGGCCCGGTGATTTTCGACACTTTCGCAGACCTTGAGTTGAG  
CCTCGCAATTTGAGGGCTGACGCCATGGCAATCCGCTGTGCTGAAACGTGCCTCGAC

GGGGAATGCACCTGCCGCCCTCTTCCCACGATGACGAGATGGCCCCGCGTGGATGCGATG  
AGCCGGGGCCCGCGTGCCGATGCGATCCGCGCCGAGACAAACGCCGCGATGGATGGCCGG  
GATTTCCCGTTGAGGGATCGTCTTGACGAACTTGTGTGCAGGCCACCGAACTCGCGAGG  
CTGTCATGAAGACGCTGAGCCAATCCCTGGAAGACGCCACGCGCATCATCGGCAGCTTAC  
ACCCGCCGGGCCGCGGGCCACCGCCTTCTCGGACAGTCCTTGGTCAGTACACAGCATCA  
TCCCTGATGGCTGGGTCGGCATGGTGTGACGACACGGACGACGAACTGGTCTCGGTTG  
ATACGTCATCGGCGAACGGCGACATTACCCTGCATGGCAATGGCCGTGTGGTCTGTTGCC  
CCTCCCGCTGGCCCGGTGGGATAGGCGAGGAACCGTTGATGGGGGAGCCGGCATGAGCGA  
CGACACCAATCTGGTTGGCCTGCTGTGCGGTCGCCCTGAGATGCTGTGCGACCTGATCGG  
CATTGAGCCGGGGCATCGCGTCATCGGAACCGCCATCGCTGCGGACGGAAGCGTAGAGCT  
TACCATCGCCGGCCCGAGCATGCCGCCGATGGAAGACGGCGTGGCGAAGCGCGTTTCGCAT  
GCTGTGACCCGGGCACGCATCGGTGACGGCCCGCTGGGAACACGCTCCCGACAAGGAATG  
GGTCGCTCGCCCGTGACCCTCTCCCTCCTCATCTCTCCACCACCTCCCTCCTGGCTATA  
GCCGCTGCTCTCATCGTCGCTCGGAGGTAACGGTATGGTCGGCGGAACGTACCTAGAACG  
CCCGCATCGGAAGTGGTAGAAAAGAAGCGGGCCGACACGCTGTTGGAGCAGCGCCGCCGG  
CCCTAACCACAACCGATGTTGGAGCATCGACGATGGCTGATGCCACGGTACAGCAAGCCA  
CCAAGGTTTGCACGAAGTGCGGCGCTGAGAAGCCGGCGACGCTAGACAACCTCCACAGGC  
ACAAGCTTGGAAAGTATGGCCTGAACCCCGTGTGCAAGCCGTGCCTCCTTGCCTCTCATG  
CGGAGCGACGCACTAGGCCCGAGAACAAGGCGCGGATGCAGGCATGGCGCGACGCCAACA  
AGGACTACGTGAAGGCGTACAACGCCGAGTACCGGAAGGACCACAAGTCCACGGAGTATG  
TGGCGGCGTGGCGGGCGAAGAACCTGGACCATGCGCGGGTCAAGGTGGCTGCGTATCAGA  
GGATGAGGCGCGGACTGACCCGGCCTACCGCATGAAGTGCCGCCTGTCCGCTCGCTTGA  
ACGCGATGCTGAAGGACAAAGGCGGTGCAAGGCGGAAGAGCTGCTGGGCTTACCAGAG  
ACCAACTGATGCGTCACCTTGAACGCCAGTTCACGAAGGGCATGTGCTGGGAAGCGTTCA  
GCCGCGGCGAAATCCACATTGACCACATCGTGCCGGTATCGGCTTTCAACATCACGAGCG  
TGGATGACCCGGACTTCAAGGTGTGCTGGGCGCTGACCAACCTGCGGCCGATGTGGAAGG  
TCGACAACATCAAGAAGGGCGGCAAGCGCCTGCATCTGCTGTAGCGGATCGCATGAGGGC  
TGGCCGGTAGGTGTGAGATGACGGCCAGTTCCTACTACCAGTCGCCGCACTGGAAAGCCC  
TGAAGCTTGAGGCGCTGAAGCGCGACAAGTTCGCTGCACGGTGCCCGGCTGCGGTGCCA  
CGCGCGCCACGTCACGGCTGACGGTGGATCACATAGAGCCGAGGCCAAGAGGGCGAGGCGG  
AGCCGACCGACAAGGACGTGCTGCCAATCTCCGGACACTATGCAAGACGCACGATAATC  
AGGTCATGCAGAACAGCGACGGACGGCGGCGCGGTGGCGGGAGCTTCACTGTCGGTGGGT  
GTGATGAGGACGGCTTCCCCATCGATCCAAGCCATCCGTGGAGAAGGGGGCGATAGCGCA  
TGCAGATCGGCCGCATCGAAGGCGCAACCCGCGTGTGGGCAAGTCGCAAGGATACCTTG  
GGCTGCCGCTGCGTGACGAAGTGATAGACTGCCCTGTCAACGGGGCGAAGACGCCTTGCA  
TGGTCACGGCTTGGACGCCGACGCCAGATGAGATCGAGCGCATGGTGTGAGGGGCTCCAG  
TGTACCTTCGAGTGCTTGGGGTGTGCGACCCTCCAGTGATGCTGACGGTTGGCGATGCGC  
CAGAGGGCTGACACCCCCATAACGGGTCGCATCTTTGGGCCGATTTGGGGTGGTGACCG  
GTCCAGGGTTGAATTTTCCCGCGCAACACAACCAAGAGGGGGTCTATCGGCCAGTAGCC  
GAGAACCCCGCATCAATGTTGGAGTATTGCCCGATGACATACGGTGTCAATTCGGGCGGC  
GGTGCTGACATCGCTGAGCCCGATTGGGAGCGGCTTATCCCCGATCCCGAAAACCTGAG  
CTGGCGCTGAACGATTGGCGTGAGGTGGCTCATCAGGAATGGCTGCGTGTACATCCGCT  
CTCCGTGAGGCCGGAACGCTGGCCCTGAGAACCGCCACCAACTCCAACGGCTGGTACTC  
GCCTACGTCCGCTTTGACATCGCCGCGGCGCAAGTGATGCGGATGGGGGCGGTGAAGCTG  
TCCACCAAAAAGGTGCCGATGCTGAACATGTGGCAGGTGGAAATGCGCGCCGCTGATGGC  
GATGCCACCACCGCCGAAATGGAGCTTGGCATACCCCCACGGCGCCGCGGGCGGCTACT  
AAGGTCAACCGTCAGCAGAAGCGAGCGAGCAAGGCCGATGCGTACCTCGTCAAGAAAGCC  
TGATGGTCCGTTTCGACCCTGTAACCGCGTGGGCGCGTGTGTTGGTGGATGGCAAGATCAC  
GGCAGGACTGACGACGATAGGGGCGGCTGAGCGGCATCTGCGGGACCTGAAGGACGGCCC  
GAAGCGCGGTCTTCATTGGGACCTGAATGCTGCGCTGCATGTGGTCAACTGGTATCCAAC  
CATGTTGACGATCACGGCCGGCGCGAAGGCCGGGGAACCGTTCATCTGTTGCCCCACA  
CATGTTCCGCCACCGTTTCGTTGTTTGGCTGGAAGCGCGACGATGGTTCGCCGCGGTTCCG  
AACGTTCTGGTTCGAGACGGGAAAGGGACAGGCCAAGTCCCCGTGGATGGCAGCGACTGG  
CTTGTACATGATGCGCTTCTGCGGCATCCCTCGGTTTCGAGGGCTACGCAGTCGCCGGAAC  
GGAAAACCAGTCCGGTATCGTCTCGGCGATGCAGCGGCGCTGTGCCGGGCCAGAGTGCC  
GGATGAAGAGCAGACGCTAGAGCAATATGCCGCTACCAACTCCGTGGCACAGGAGACCT  
GACGTGGCAGATTGAATGGGATGGCAGCGACGAAGGCTTGGGCATCTGCAAGTTCGCAA

CGTGTCCAGCGGTTTCGAGCATCAGCGGGCCGCGCCCGTCTTGGTGGCCGGTGACGAGAT  
CCACGAATGGGACGACCCGTCGATCCTGGAGATGTGGACGGCGGCCATCATGAAGATGCC  
GGGAGATCCGCTCATGTTGCTGGGGACCAACACCCCGGCGTCTGACCAGATCATCGGTAC  
GGAGCAGTCCGACTACTACACGATGGTCGCCAAGGGTGAGTTCCAAGACGACGCCTCGCT  
GGCCCTGATCTGCACATGTGACGAAGGAGACGACCCGCTCGCCGATGAAACGGTGTGGCG  
CAAGGCACTACCCGCGCTGGACATCACCTATCCGGCGGCCAACGTCCGGGACGAGGTGGC  
GAAGGCGCAGGGTTTGCCGGGCAAGGCGACGACGCTCAAGCGCTTGTCTTCGGCTTCCG  
CATCGGCGTGGCGGATGGATGGATCGACCTCGACTTGTGGCAGTCCTCGCTTGGTGTGCT  
GGATGAGGACGAGCTTGCCGGGCTGCCGTGCTGGCTCGGTCTTGACCTGTCCAGCCGGAA  
AGACCTGACCGCCCTTTCGGCTGTGTGGGAGCGGCCTGACGGCCATCTGTTGGCCCGCAT  
CTACTACTGGACGCCC GGCGCAACCATCATGCAGCGGGAGAAGGTTGACAGGGCGCCGTA  
CACGCAGTGGCGGGACAAAGGTTTTCTGGTGGCGACGCCGGGGCCGACAATCCCGAAGGC  
GTGGCCGGCAATGGAAACCAAGCGGATGGTCGACCGCTACAACGTGGTCCGGCATGGCCTA  
CGACCCCGCGCAGATCCTCGATTTTCGAGGAAGCATGCACCGAAGCTGGGCTAAACATCTG  
GAAGTATGAAGGCCCGAATGAGCCGGCTGGCGGCGGCCTGATGATGGTTCGGCATGGGCA  
AGGCTGGAAGGGATTGGACAATCCGGCCCTACTGAACATGCCAACTGGTGTGAAAGCGCT  
GGAAGACGCGATCCTGAACGGAAAGCTGACCATCGAGAAGAACCCGGTAACGAATTTCTG  
TTCGGCCAACATGTCTTTGGCCCCGGAGCGAACCCAGACCAGAAGGTGCCGAACCGGGC  
AAAGGCGCGGGGACGCATCGATGGGATGGTTCGCTGATCGAAGCTATCAACGGAGCGCG  
CTCGAGCATCACGGGCGGGGCATCGGCTGGGCCGGAATCATCATCCTCTAACGAAGGCT  
TTCCCATGGCGCAGAGAGAAACCAAGGGCCGCTTGGCTGCGGGCGCTGTCCGACCTGTGC  
GCCCTGGCGGGGGCCGGGTTGGTGTCTACGGGGCGTGGCTGGTCTATGAGCCGGCCGGC  
TTCATCGTTAGCGGGGCGATCCTGCTTGGTGTGCGGTGTGATCGGCGCGCTGCGGAAAGGT  
GTCTGATGGCTGGGCTCTTGCAAACTGCTGGGCGGACCAGTCGAGCGCCGCGCAACCG  
GCATGGATATGGACCTGTGGTCGCTGCTTCTGGGTGGCGGCGTAGCGTCCAAGTCCGGGA  
TCAACGTCACCTACGACGAGGCGCTGAAGTGCTCCACGGCTCTCGCCGCGGTGCGGGCGC  
TGTCGCAGGGCATCGCGCAATCGTCCTTCGGGCTGTTCAAGCCGACTGTCGATGGTCCGG  
GAATGGAGCCGGCGATCAAGCACCCGCTCTATCGGCTGCTGTACCGTCAGCCGAACGAGT  
GGCAGACCTCCTACGAGTTCCGCGAAACCCTGATGATCCACGCCGTGCTGACCGGCAACG  
GCTTTGCCTTCATCAACCCGGGTTGGCGGAAGGGTGGTTCGAGCTTATCCCGCTCCTGCCTG  
GGCAGGTGAGCATTGAGCAGAAGGCTGATTACTCTTGGTCTACCGGGTCACGTTCCGCCG  
ATGGACGGTACGCCGAACCTGAAGCGTACCGACGTTCTGCACCTGCGCGGGCTGAGCTGGA  
ACACCTATTCCGGCATGGACACGCTGCGGCTGGCGCGAGAGGCAATCGGCCTCGCGGTAG  
CCACCGAAGAGACCCATGCCCGTCTGCACTCCAACGGGGCGCGGCCTGGGGGCATCCTGA  
CGGCGGACGGCAAGTTGGAGCCTGATCAGGTCGCCCAGATCCGGGCGGCATGGCAGCAGG  
TCCAAGGTGGCGTCCACAACGCCATGAAGACGGCCATCCTGTCCGGTGGCCTGAAGTGGA  
CGCAGTTGTCCATGACCGGTGTGGATAGCGAACACCTCGCCACGAGGCGTTTCCAGATCG  
AGGAGGTCTGTCGCGACCTGGGGGTGTTTCCGCGAGATCGTTGGTCACTCGGACAAGACGT  
CCACCTATGCCAGTGCTGAAGCCTTCTTCCAAGCGCACGTGACGCACTCGTTGGCGCCAT  
GGGCTGAACGGCTGGAGCAGGCGTGTGATCGCGACTTGTGACCGAAGAGGAAAAGGCCG  
CCGGCTACGCGACCAAGCTGGACATGCGCCAGATGGAGCGCGGCGACACCAAGGCCCGAA  
CCGAATACTACGCATCCGGCATCAATGCGGGATGGCTCGTTCCGGAATGAGGCGCGCGTTC  
GCGAGGGTCTGAACCCGCTTCCCGGCCTCGATGAACCGCTTACGCCGCTCAACATGGGCG  
CCGGAGACGGAGGTCAGAAGCCTGCCGATCCGGCTCCAAGAAGACGGTCCGGCGAAGCAA  
AGGCCGGGCGGGTGTCTCGGCCAGCAATGAGGGGCGGATCGTCCGCCCGCCGTGACGAAC  
TCAACACGGTGCTCGCACAGGTGCAGGCGGAGGCCACATGAACAAGCTCGAAACCAAGTC  
TGGCCGGTCCGGCAAGCATCTTGCCGTGCTTGGCCGGGAACCTGAAACTGGCAGGACGACAA  
GCCCGGTCTGGTCACTGGATACGGCTCCGTCTTCGGCATCAAGGACAGCTACGGCGATAT  
CGTCCGCCCCGGCGCCTTCAAGGCCAGCCTTGGCGACTGGAAGGCCAAGGGACGAATGCC  
GGCGATGCTCTGGCAGCACGACTTTCGAGCCTGTGCGCATGTGGACGGAGATGGAAGA  
GGACGGGATCGGACTCCGCTGCTCCGGACAGCTCCTCCTGACGGTGGACAAGGGCAAGGA  
GGCTTACGAGCACCTGAAAGCCGGAACGGTCCGGCGGCCTCTCCATCGGTTTCAAACGGT  
CGAACGGACCTGGAACCTACGAGGAAGAGACGCGCACCCCTCAACAAGGTGAACCTGTGGGA  
AGTGTGCTCGTCCACTTCCCGGCCAACGACGCCCGCCCGGTGAGCGGCGTCAAGGGCGT  
TGACCGGTTCTCCACCATTCCGGAATTCCGAGGACTTCTTCCGGGATGAAGGCCGGGTTCTC  
AAACGCCCAAGCGAAGGCCATCGCCTCGCGTGGGTTCAAAGCCGCATCGGATGCTCGGGA  
TGAGCCTGATGGGCTGGCGGCCGTGCTGGCTGCCCTTCGATCAGCCAACGCCGCAACCAA

CCTCTAACGGAGCTTTCCCATGCCCGATTGCCTGTACATCCCGGCCGACATCGAGAAGAA  
GGACGCCGGCAACATACTGCCGAGATCGAGCGCGAAATCCGCTCGCTGGGCGGCAACGT  
CAAGTCCCTTCAGGACAGCGTGAACCGCGACCTGGAGGCCGTTTCGCAAGGTCGCCGAGGA  
AGCCAAGGGCGCCGTCGGCCCCGAGGTCAAGTCGCAGATCGACGCGCTGACCGAGTCCGT  
TCTGCGGAAGATGGACGAGGCCACCAAGCCGGTGACCGACCGTCTCGACGGCCTGGAAGC  
CCGCTTCAACCGTCCGGGAGCCGGCGGCTTTGGCGGCAACGGCGACGATGGGCTGGAGAA  
GCGCGCCGCGGAGTTCGCCCGCACCGCCCTGTGCGGTGCGCGGCAATCTCAATCCCGGCGT  
TGTCCTGGATGCCAAGTCCATCAATGTGGACGGCTACAAGGCGTGGGAGCAGTCCTTCGG  
CCTGTATCTGCGCTCCAAGGACGACCGCGCCATCGAAGAAAAGGCCCTGACGGTCGGCTC  
CGATCCGAACGGCGGCCAGCTCGTTCACCGCGACCAAGCAACCGCATCATTACGCAGGT  
CTACGAGACCTCGCCGATGCGCCAACTCGCGACCGTCGAGACCATCGGCACGGACTCTCT  
GGAGATCCCGAACGACCTCGGCGAATTCGACGCTGGTTGGGTTGGCGAGACCGAGAGCCG  
CGGCGAGACCGCCACCTCCACGCTCGGGCGTTCGCGCATCCCGGTCCACGAGATCTACGC  
GAAGCCGAAGGCGACGCAGAAGATGCTGGAAGATGCGTCGATCAACGTCGAAGTGTGGCT  
TGCCGGCAAGATCGCCGACAAGTTCGCTCGCACCGAGGCGTCCGGCGTTCATCTCCGGTGA  
CGGCGTCAAAAAGCCCCGCGGCATCCTGACATATCCGAGCGGTACCAGCGGCGCCAAGAT  
CGAGCAGATCGCCAGCGGCGGCGCCACCTCGATCACCGCCGATGGCCTGATCAACCTGAT  
GATCGCGCTGAAGGACTACTACGCCTCCGGCGCTTCGTGGCTGATGCGCCGCGCGACGGT  
CGGCGCGGTCATGCTGCTGAAGGACGGCGACGGCCAGTACATCTGGCGTCCGGGCTGGA  
GGCTGGCAAGCCGTCCACCCTGCTCGGCTCCCCGGTCTATCAGGCTGCGGACATGCCGGC  
GGTTGGCGCGGGCGCCCTGCCATCGCCTTCGGCAACTTCCGCGCCGGCTACACCGTCTGT  
GGATCGCCTGGGCATCACCGTCTGCGCGACCCCTACTCGGCCAAGCCCTTCGTGGAGTT  
CTACAGCCGGAAGCGCGTCCGGCGGCGACGTGGTGAACCTCGAAGCCTTCAAGCTGATGGT  
CGTGTCCGGCTCCTAAGCGGCGTTCGAGCAGACAATCGAACGGCGGCCTTCGGGCGCCTT  
CTTCGCATTCAAGGAGACATGCGCGATGCGCGACATGATGACCCACTGCACGCCGAAGCG  
CTGCATCAGCCC GGCTGCGGCCACCACCGACAATACCGCGTGGGTTCGGCCAGATCATCGA  
TATCCAGGGCTACGACAGCCTGACCTATCTGATCGAGACCGGCTCGCTGGCGGATGCCGA  
CGCGACGTTCACTGTGCTTCTGGAGGAGAGCGACGCGTCCGACATGTCCGGCGCCGCGGC  
GGTTCGCTGATGTGGACCTGCTCGGCACCGAAGCCCTGGCGTTCGTTACGTTCCGCCGACGA  
CAACAAGTGCTTCAAGCTCGGCTACGTCGGCAACAAGCGGTACACCCGCCTGACGATCAC  
GCCGGCCAATAACAGCGGCAACGCCTTCGTGGCGGCTATCGCTCTGCTCGGCCATCCGGC  
GCAGCGACCCACGGCGAACCCGCGGCCTGACGACACGATAGGGAGGCAGAAACCCTGCC  
TCCCGCTCTGTGAAGGAGATAGCGGCCATGGCCGACGCGACTTACCAGACCAAGGTCTAT  
GACAACTCGGCGGCGACCAAGATGGTTGTGCTGCGGCGGGTTCGATCAATGTGGAGACC  
GGCGGCAAGGTTCTTGCCAACGGCACACAGGCTGCGGCGATCACCGACGTTGCGACCGCG  
GGCAGCGCCACGGCTGCGGCGAACGCCACGGCGATCAACAGCATCCTTGCTGCCCTGCGC  
GGCGCCGGCATCATCGCGAGCGCCTGATGCGCGCCCGTGTGCTGAAGCCGTTCCCCTACT  
CGGGGGACGGCATCCGCATCGAAGCCCTGAAGGAGGGGCAAGAGGGCGGACATTCGGGACG  
ATCTGGTGGCGGGCCTGACGGCGGAAGGCTTCATCGGTCCGGTTGGTCAGGTGGCCCAGC  
CCGTCGAGACGGTTACTGCCGCATTGACCCGTCCACCGCAGACGCCGAAGCCCTACGCA  
CCTTCCTGGCTGAGCGTGGCGTGTCCGTCCACCACCGCACCGGCCTGGACAAGCTCCGCG  
AGATGGCTGCCGCTGAACTGGCGAAGGATTGACCATGCCGACCCTGACCGTCTCCGCTGC  
CGTCGCTGATCGCTCGCTGGTGACGCTGGCGACGGTCAAGGCCGAACCTCGGCATCACGGA  
CACGACGAACGACACGCTGCTCACGCGGTGGATCAAGGAACTGTCCGACAACGTGAGCGA  
GGTCTGCGCCGTGGCTGCGGACCAGCTCGGGCGCCGACGTTCCCTACCGAAGCCGTGAC  
CGTCTCCTATCGGTCTGGGGAAGTGCCATGCGGCACCGACCCGGCCCCGCTGATCCTGCC  
CTGGCGCATCCCCTTCAGCGTCTCCACCGTGACCGTTGACGGCGTGGCCCTGACCGTCTGC  
CGACGACGTGGAGGTTGAGCCGATGGCCGGGCTTCTGTACCGGCTGGACAGCAACGGCGA  
GCGCACCCGCTGGGAGCGCGCCCGAGTGGTAATCACCGGTTCCGGAGGGTGGGCGCAGGG  
CGACATGCCAGCGGCACTCTCCAGCGCCGTCACAGACGCCGTGCGGTACAGGTGGTTCCG  
CCATAACCGGGGCGACGGCGACCCGCTGTTGCGGAGTTACGAAAACCCGGACGTCGAAAA  
ACTGTCGTGGGTTGACCCCGACAAGCTGGAGACCGTCAACGGCCTACCTGCCGCCGTGGT  
CGCCCGGCTGTCCACCTACACAAACACGGTGATCGGATGAGCGCCTACGACCGTTTCGCC  
GCGTCCCTGCGCCGCGCCGGCCGCCAGATGTCGCTGAAACGCCGCGTCCGGGACCAGCACG  
ACAGTATTCGTGGAGGCAACCGTTTACGGCAAGGCGCGTTTCTACCAGCCTACGGAATTG  
ATCGGGCTGGTGAAGCAGGGTGACCGGCGCATCCGCATTTCCAGGCTGACATCGCTGCG  
GCGGCTTGCCGGGACCTCCAAGGTCGCTGACATATTGGATGGCGGTACTGTCCAGGGG



GCTGAAGCTCTGTACGAAGGAGAACTCTTGTTCGGCTTCGTCGTCTGGGTGAGGGGGTAA  
TCATGGCGAGCGTAATCGTCTATGACGCCATCCGGGCCAAGGTGGAAGCAGACTGGTCCG  
GCACGCCGGTATCGTGGCCGAACGAGGCATTCGATCCGCCGCCGGGCGACCATTGGATCG  
CACTCGAATTCGAGGGGGCGGCTTTGGTCTCAGGAGAGCATCGGTGGGGGAGATCCTGCCG  
AAGAGCGGTGGGACGAGAACGGCAGCATCTGGGTCCACTCCATCGCCCCATAGGCGTCG  
GCGAGAGGACGCAGCGTCTGAACGCCACCAACTTCATCAATATGTTCCGCGGCACCGAGA  
TCGGAGCCATCGAGTTTCAAGACTGCGAAATCGCGGCCGGCGGGCGCCGATGACGACGGGG  
CGTGGTGGCGCATCACCGGACGCATCGACTTTGTGAGGAAGTGACCATGGACAAGTACAC  
CGTTGCCAAGCCTTTCACGACGCTGACCCGCCGCTTTGCGCCGGGGCAGGAAGTCACGGA  
AGCCGACATCGACGGCGCCCTTACCATCGCCGACTTGGTCAAGCTGGGCTGCGTCTCCGC  
TCCAGCCAAGCCGACGAAAGCGGCCAAGGAAGCCCCATCGGCGGAATGACCGCCTGAACC  
ATCGATCCCGTCAGCCGCCCTTCGAGGCGGCTTTTCTTTTGGCTGAGGAGAGCCGCCAGA  
TATGACCAGTTCGAACCGCGTCCAACCTCGCCGCCGTGGTCGAGGCCACCATCGGCACCAC  
CCCGAACACGCCGCGCATGCGTAAGGCGCGCATCACCGGGGAAAGCCTGTCCTACACGCC  
GACCTTCGTCGACAGCGACGAGATCCGCGCCGACCGGATGACCGCGGGCGCCGATCCAGGT  
GTTCAAGGAGAGCGCGGGCGGGCGTCAATGTGGAAGTGCATTACCCCGTTCCGGACTCTGT  
GCTGTCCAACCTTCATCGCGTCGACGATGTTCCGGGACTGGATCAACACGCCGACCCGCTA  
CAACGACGGCACAGCGGACAGCGTCATCACGGATATCGGCACCACCGCCAACACGATCAC  
GTTTCGCAACGGGCTCTGCCTTCGTGGTCGGCCATCTGGTGCGCAACACCGGCTTTGGCGT  
GTCCGGGAACAACGGCCTTTTCCCGGTGACGACGGGGCGGCACAACGTCTCTCGTCTCGAC  
GGGCGCCAGCTTCACGGCCGAGACGGCGCCGCCCGCAGAGGCCCGCGTCAAGGTCGTCCG  
CTTCCAGGGCACACCAGGAGACATCACTGCCACCGCCACCGGCCTTGGGTTCGACCACGAT  
GAACTTCACGACGCTGGGCATCTCCCCGGCATGTTTCATCAAGATCGGCGGCACCGGGAC  
GGCATTCCGGTTCGGGACCGAGGCACTGAACACGTGGGTTCGCGTTACCGCGGTACCCGC  
CACCGCCCTGACGCTGGATCATCTGCCGTCCGGATGGGACCACCGATAACCGGAAGCGGCAA  
GACGATCCGGGTGTTCTTTGGCGACTGGACGTACAATGGGACAGCCAAGATCGGCCTGAC  
CATCGAGCGCGGTTTTCTGGGGCAGGCCACGCCGACCTACATCGTGCAGCGCGGCATGGT  
CGCCAACCAGATGCAGGCGCAGGTTCAAAGCCGGCAGAAGATCAACGCCAGCTTCGACTT  
CATCGGCATGACTGGCGGCAGAGCGCGACACGCTGGACGCGGTTCGCGATGAGGCGCC  
GTCGCCGTCGAGCTATCCGGTGATGGCGGCCAACGTCAACGTCCGGTCGGGTGAACGAGAA  
CGTTCCGCCGTATCGTCGCCGAATTACGTGCGTGAAGTGGCCTTCACCATCAACAACAA  
CATCGCCGGCATTGAGGCCGTGGACAGCGACAGCTTCCAGGGGCACCGGGAAGGCGAATG  
CATGGTGTCCGGCACCATCAACACCTACTTCGGTTCTGATGCCATCCTGGCCCCTTCTA  
CGCAGGCACACAGTCCAGCCTGAACTTCCGGGTGGCGAAGAACAGCCAAGCGCTCGTCTG  
GCAGTTCGTCATCACCTACAACAGCAACGGCAATCCGAATGCCGCCGGTAAGAACCA  
GGACGTCATGTTGAACCTGGGCTGGAAGTCCAGCGTGGACAGCCTGATCGGTTGCCACGT  
CGCTGTGCAGCGCTTCGACTACTACCAGGACTAACAGCATCCCGGCGACCAACGGGAAAG  
AGGCTGCCTGACCGGGCGGCGATGCGGTTTCGCGCGAGCCGGGGCGGGTGTGTTGGTCCGCA  
CCCGCCCGCATCGCGCATCCTCGACCAACCGACCAAAGGAATTCGACCATGGAAAGCCTC  
GACCATCTGCTCCTTGACGAAGACGTGTCCACCGCCGGCCGCTGGGTGCAGCCCGATCCG  
GACCTCCCGCTGCGCATCAAGACCAAGGGTCTCACCGACGAGTATTTTCGACGCGCAGGCC  
CGTATGCAGCGCTCCGCGGCCAAGGGCTTCAACGGCGACACCGAGCGCCTTCCAGCTCC  
ATGAAGCGCGACATCAACGCCAAGTGCCTGCTGAAGCACTCGCTGGTGGACATCGAGAAC  
TGCATCATCGGCGGGAAGTCCCTGACCATCGAGGAGTTCGGCGACCTGATCCAGACGGAG  
CGCGGAAAGCGGCTGCTCGGGCTGGCGTTACGGCTGCCGGCATGGCGCACGAGGCGCAG  
AAGGCCGAGCAAGAGGCCGCGGTGGGAAACTAACAGCGGCGCTCCGGGACAGCCTCAACC  
GCAAGTCAGATGCCATGGACTGGCTAAGTGACATAGCGGATGAGGACCCGGAGGCGGCAG  
AGCTTCTGGCCGAGCGCTTCAAGGATGAAGATCCTCCCGTCAAGCCCCTGCCGTGGTGCA  
TGTGGGCGTGGCGAGCGTGGCACCGGCTGAAGCATGACCGGCAATGGCGCGGCGGTGGCA  
TGGGGCCGGCGATGCCAAGCGGCATCCCTTACTCGTCAAGTGTAGCTGCCTACGCAGACCGCC  
ACGGACAGGACGCGGACGGCCTGTATCTGCTGATCGCGGCCATGGATGGCGTCTATGCCG  
AGTGGTGGGACGAGCAGGTCGAGGCGGCCAGCAAGAAGGACTGAGGCCATGGGGAAAGGCG  
GCGGCGTTCAGCGGACAGTTGAAGGTGTTGTTGACCAAAACCTGTCCCCACAGGCTCAG  
TCCGCCGCCCTGGCGAAGGCCGCAAAGGACAAACTCCGCGAGTTGATCCAGACCGGACGC  
GCCTCGGACAACCTCCGCCGCTTCGTTCGACGGCGCGGAAGGCGTGGTGGAGGACCGCGTC  
GGGCCGGCGCCGCATGGGCAAATCGTCTACCGTTTCAACGCTTTGGGGGCGATCAGCACA  
TTCGCCTTGAGCTTCTCGTGAACCGCTCGCCGCAGAAGTCTGGACGCTTCCGGAAGGGC

TTCTATCTGGGCATCGACGGCAGGTTTCGTCCCCATGGGCGCAGTTCAATCCGGACGCGCTG  
ACGGCCAACGTCAAGGAAATCGTCATCGGGAACGTCGAGCCGTACGCCCGCAAGGTGGAC  
GTCCAGTTGATCGGCGGCAGGAAGATGACCTTCTCGGTGCCGCCGGGGCTCTACGACGAT  
GCCGTGAAGGCCATCCGGTCACGCTATGGGTCTCTCGTGGACGTGAAGCGTGTGTACACC  
ATGCGCTTTCCCAACCAGTACGTTCTGAAGCAGGAGCAGCACCACAAGTCGGGGCCGGTAC  
CAAGGAAGGTCCCAGCAAGCGGGCAGGAAAGCCCGTTGAAAGCCCCGCCATCGTCATCACG  
CCGAGGCGGTAAGGTCGCCTAACCGGGCGGCCTCTACTTCTTGGGGCGCTTGGGGGTGG  
GCTGGATAGGGCGGTGCGGGTCGGTCGGCTTGGATGCTTCTTGCACGCGCCGCAAATACG  
CGGCGTCAACATCATTGGTGACTTTCATCTTCCTCAGCCACGGATCGGAAGAGGGCGGCGC  
CTGGATCATCGGAATTGATGGCGTCGATGACCTTCTGATCCGCGCCTGCCTTGGCTGCC  
ATTTCGCGCGCGACGGCGCGCAGGGTCGCGATGTCCTCTTCGAGACGGTCGATGGTCTTGT  
CGCCCTTCAGACCCCTCTCGACGATGAAGCGGATTGCTTCAGCTTCCGATCTGAAGCGGT  
TCTCAAACCGGAAATCGTCGATGGCCTGCCACAACCTCCGGTGGCAGCGAGACCATCTTCC  
GTCCGGCCATGGTGCGGGGCTTGGCTCATGGGCGGCGAAGCTAACTGAAAGCAACGTACCT  
GTGTACCACTTTTTGCGTTGACGAGAGCGAAGGTGTAACGTACCTTCGAACCGTTGTACC  
ACTTAACCGCAGGAGGCGGGGGAATGGCAAAGCCGCGCACCATGTATGGGCGCAAGATGG  
TGTCTTCCGGAGGTGATGTGCAGGGAGGTGACGAGTACCGCTTTGCGCACCCGGTTCA  
GGAACGAGTCCGACGCGCTGCGCAGCCTGATTGAAGCCGGGCTGCGATTTATGAAGGCCG  
GTGCGGACCATGCGACGGCCTGAAACGAAAAAGCCGACGACGGGGCTCGGCCTAGGAACC  
ACCCCGACATCGGCTCTCAACACTTACCCAAGAGGACAAGTTATGTGCGACAATATGGGG  
CATAATGAGCCCGAGAGCAACCGGGAAACCGGCCATGGAAAGGTGCCTGTGGTTCGCGTCG  
AGTGATGCGGCGCCATTGCCTACAAGGGCGTTCGGGTGATGACGACCGGCCGTCTGGCG  
GCAGCTTACGAGACCGACGAGAAGGTGTTGCAGAACAACACTCTCGGAACCAAGTGC GG  
TTCAAAGAGGGGGTGCACCTCTTCAAGATCGTCGGCAAGGAGCTGCGCGATCTGAAGACT  
GACCCTCTTGGGAGGGTTCAGTTCGACAAAACGCGCCCCGGCTCTGATCCTCTGGACCGAA  
CGCGGCGCCCGTCGCCACGCGAAGATCTTGGACAACGACATCGCGTGGTTCGGTGTTCGAG  
GAGCTGGAGGACACCTATTTCCCGTGAAGGAGGAGCGGGCCATCTCCGCCAAGCCGGCG  
CCGCGGATCGCGGTGCGCCCCGGTGTTC AAGGACTTCTTCTCTATCGGTTCGGCTGATCGGC  
ATGGACCGCAATCAGGCGGCTCTCGGCGCCAGCCGTGCCACGCGTCACCTGACCGGCATC  
GACCCCTGGAGATGCTCGGCGCTCAGCAGCTTGTGCGCGCCGACGAGGAAGACGACCTG  
TCGCCGACCGACATCGGCGTGAAACTCGGCGGCAAGTCAGGGATCGCGGTGAACAATCTC  
CTGGCTCAGAACGGCTTCCAGACCGGATGGCGGGACAGCAAAAACCGTCCGCATTGGGAG  
CCAACCGATAAGGGCAAGCCGTTTCGCCGTCTGGAAGGACACGGCGAAGAAGCACAGCGAT  
GGCACTCCGGTTCGTCAGCTTCGGTGGTCCGCAGGGATTATCCGAGCGCTGGAAACCGAG  
ATTGGCAATGCCAAGGCTGTGGGGTGAGGCCATGCAAAAAGCCTATCCACACCGGGAATAT  
AAACGGCAAGCCGGTCCGCTTCTTCGCGACGCCACTGAACGATGGGCTACCGGACTTTC  
GTGGCATTCCACAAATGACTTGATGTCGGCTTGTAACTGGACGGTACTGCCCGGCAACA  
CTTCATGAGGATGGCGCAACGGGACCACGTTGGGACCATGCAGACTATCGCCACGCCGGA  
CGGTGTGGTGACGGTGGCGCCGCACTATCACGCTCAAGGCTTTGTGATGCCATGGTCCA  
CGTGAAGCGGGTGAAGAAGCGCGCGCGCGCCGACTACGACATGGCAATTATGGAGGCTGG  
CAAGGCCCTGTTTCCGATGGGCATGTCTTCGAGTACATGATCGCCGCATTCCACCGCTG  
GTCCGACACCAAGCCGGCCGTAGCCGGGGAGTAACCCGCCATGCAGCAAACCACACTGAC  
CCGCCGGGGCATCCTGGCGGGAACGGCTCTTGGCCCTGGCCGGAGCCAACGCAACGGC  
GACTCGGGCGCTTGTGGGGCCGTCGATCCGGACGGGGACGCCCCGTTGCTGGACATCTG  
CCGACGTTGGCGCGAGATGGCGTTGGTGATCGACGGCATGGCCGATGAGCAGGGAGGTT  
CGTACGGATCGCCTTGAAAACGCCTGCGACGAGCGGCGCCGGTTGGCGAATGCCATCAC  
CAACCACCGTCCCCAGACCGCAGCGGGAGTTCTGGAAAAGCTTCGCGTCTTCTGTGAGTT  
CGACGAGGAGCGGTTTCGACTGCGATCCGGGCTCGCTGAATTGGGAGGACAGGCTGTTCTT  
GTCCGCCTTGGCTGATCTGGAGCGATTGGTTGTGGGAGGCATCGCCTGACCGCGGCCTGA  
CAGGGCAGGGGCGGCCGGTAGAGGGGGCCGCCCTTCTATGGAGATGTGAAGTCAGCGGAAA  
GTCGACAATGCCTCGTCGGCTCTCGCTGATACTTCAACCAATGCATAAGCGTAAAATGGT  
TTCCATGGAAGTCTTGAATTGTCATAAGCAGTCGAAAGTGAGCCAATTGATTTGAAGAAC  
TCTGTGGAAGCCTGTTTGAAGAAGGGAAATTCGTTTTCCAGACTGCTTCAGGGCAAAGA  
TCCCAATTTGTTACGGTGGCGCGAAGAGCGTCAATCAAACAAGCGTGGAGCTTCTGTC  
TGCGGATTTGATATCCCTGCTCTTTCGCCATGTACAATTCAACGATCACAGCCTTGGCA  
AGCGCGGTCACTCTTTCGCGGTCTGTTCCGACATCGATGGCCGTCCGTACGCGCGCTATC  
TCACGAACTAGGCTTCTTTGTCAGCCGCCTCCGCCACGGGGGATAGAACGGAAATGAAT

AACCCTGCGATAAGAATGGCGCGCATGGGAAAGCCTCAAGTGACATTGAGCGAAAGAGGA  
TGCCCGTAAGGGGCGAATGAGTCGATACCCAGAGATTGAACCGCAGGGGGCGCCCGGCACA  
GCCGAGGCGCCTTTTCGCATTGGAGCTGCTGAGATGACGGATCAGATCGCCAGCCTGACG  
GCAAAGTACGACGATCAAGTATCGGCCGGAGCGAAGGCGGCGGCTGATGCGTTGACCAAG  
GTTGGGAACGCTGCCGAGTACAGCGAGCAGCGGGTCACGCGGGCAGCAAAGAGCGGGCAG  
CAGCTTACCCGTCAGTACGACGAGCAGGAGCGCCTTGCCACGAAGCTCGACGCCGTCACG  
GCGAAGTATGCCCCTGATCTGGAAAGCCTCGAAAAGAGCGAGCTTGATGCTGCCGAAAAG  
GCGCGCCTGCGCACGAACATCATGGCGCAGCAAGAAGCGGCCATTGAGAAGACGACCGCT  
GCCCATGAGCGATATGTCGCGGGCCTGCGCGCTGCGAACGCGTCGGCGAACGACAACCTTC  
TCTCGTGGCATGGTACCCGCGTCTGCTGCGCAGGCGGCAGCGATGGACAAGTCCACCGCA  
TCGGCCCGTTCGCTTCAACGCCGTGGTCCAGCAGTCCGGCTACCAGATCAGCGACGCCGCC  
AACCAGATCGCGACCGGGACGAACGCCTGGACGGTGTTCGGTATGCAGGCTGGTCAGTTG  
CTCGGGACTCTCGGGCCGATGGGGGCTGCTCTTGGCGCCGTGGTCAATGTCGGCGGGCCT  
GTGGCCGGGATGATGTCAAAGAATGCTGAGCAAGCGACGCTGTTTAAACAATGTTCTTGAG  
GTGTTTGAGGGGCGTGCCAAGGAAACCGGGAAAAGCCTCGACACGCTAGCGGACAAGTAC  
AACAACTTTGGTTTTGAACTTAGGGAGCTTACAAAGCTATCCCTTGAGGCGGATATTGAT  
AAGCAGACAAAGAAATTCGCCAAAGATTTGCTTCAGCGTGGGACACGATTAGGTTACC  
GCGATCAACGGGAGCGCTGAGGTTACCGCCGCACTTCGCCAACTCGGTCAGGACAAGGAT  
CTAGCCGGCTTCTGGGAAAGCTGCAAACCCTAAATCGCGATGCCGCCATTAAGCTTCTG  
CAAGATGGTGACATAAAAACCTTCTCAAGATGAACGAGGGGATCCGATACTCTGTGCGT  
GAACTCGCCAATATGAACAGATCGGCCACTGACGCACAGAAAGCGCTTCTCGGCTATGCT  
GATGCTGCAAAGGAGGCTGCAAAGTCGGCGGGCGGAACTTGCTACGGCGCAGGCGCGTGCT  
GGTGCCTCCATGTTTATTAGGAACGTGACCTTGATGCCAAGATAAAGGCTCTGAAGGGC  
GGCGAGGCGCCATGAAGGCTTACAGTGAGGAGCAGGTTAGGGCGCAGGCGCGCAGTAAA  
GCCTACGACGATGCCATCCATTCTGGCTTGTCCACTCTCGACGCCACAGCGGAGGCCAAC  
CGGATCGCCGCCAAGGCCGTTCAAGTCCACCGTATGGAGCTGGAGAACGCGGAAAAGCAG  
AAGGCCGCCAACGCCGCCAGCCGCAAGGCTGAGAGCCAAGCGGAGCGGGACGCCAAGGCA  
TACCAGAAGGTATCCGAGGAACTGGACCGCGGCATCGCCGAACAGCAGCGCTTGGCCGGT  
GTCGTGGGGCAGAGCGTCGCGGGCAGCGCGAGGGCGAACACCGAGACCAAGATCGCCGAA  
GCTCTGTGCAAGGCCACACCACCGCGTCGACGGCAGAGGGGAAGGCCATCGCTGGAAAG  
GTGAGGGAACAGGAGAAGTGGAGGGCAGCGACCGCGGACGCCTCGGTCTTGACTCCTCC  
AAGCGCCAACCTCGCCTACGCGGAAAAGGAACTGTCTCTGATGGGTGAGGCCGAACCGATC  
CGGGCGCGGGCGATGCAGTCGTTCCAGATCCAACAGGAGGCAGCGGAGAAGCTAAAGTCG  
ACAACCTCCCGAAATTGTCGCGGAGTGGGTTCGTCTACAGGAGCAGATCGCCGACACTGAA  
GCCATCAAGTCGTTCCAGTTGGAGGTTCAAGCCACCGCCAAGGAGATGTCCCGCGACATC  
ACCGAAGCGCTCTTGGACCGGGAGTCGAAGTGGAGCGACCTCGGCAAGACCATTGGCAAG  
CGGATCGCTCTTGGTCTGATCGAGGCGAACTTTGTCCTTCCGATCACCACGGCCGTTGTG  
GGAGCTGTGCCGGGGCTGTTCCGGTATCGCCTCCCCAGCAAACCAGAACGTTGCCAATCCG  
GGCGGCGTGGCCGGCGCTGCCAGTACGCTCGGGACGGCAAGCAACGCGCTGTCAGCCGGC  
CAGAGCCTTTACAACGCTGCCACGGGAACAAACACGCTGGGCACGATGGCGAACAGCTTT  
GCCACGTCCGGGATGGGCTACAGCATGGGGCTATCGTCCAATGCGGTGGCTCCCGGTACG  
GGCATCGCTGCTGGCTACGTGGATACTATCGGTGCGACGCAGATTACCAACGGCATGACG  
TTGACCGGCAGCGGTCAGGCAGTCACAAGCACCCCTCGGCACTATCGGAGCGGCAGCCCT  
TACGGCATTCTGGGCGGCCTCGCCGGGTCTACATCGGGTCAAAAACCAACTCGCACTTG  
GCGGGCGGCCTCTCGGGTGC CGCGCTCGGTGTGCGGATCTATGGCTGCCGGCACAGCCGCG  
ATGGGGGCCATGGGCATGGGTGCGGCGGCATCTGCTGCCGGGGTTAGCGGTATGGCCGGC  
GCGACTGCGGCCCTGTGCGCGATCCCGGTCTATGGCTGGATTGCGGCTGCGGTCTAGCC  
GCGGTTACCGCCATCGCCGGAACCTCAGAAGAAGGAGTATTTGCGCGCCGCGACCTGGAGC  
AAGTTCGACCCCGGCGCGGGAACGGAGCTGGGGACCGACACCGCTTTCGAAGCACATGGAC  
GCGGGGCCGGTGGTTGACCGCAAGTATGCGATCAACTCGGGCATGCGCACGGCCATGCAG  
GCGTCCGGCCTCGGTTTCGCCGGGGACGGCATGTGGCTCGGGGTGGACTACGATCAGGAC  
AAGCAGCGGTGGCGGACAAACCTCGCCGGTTGGGACAACGGCATCACCGTGTCCAGCTCG  
CAGGACCCGGCCAAGGCCATCGTCGACACCCTGAAGTGGCTTGCCAACAACGCGACCGAA  
GACCGAGACCTCCGCCCCGCGGATAAGCTGGGGCGATATCCCGTTGTTGGTTGGCGACAAG  
AACGTAATTACCGCTCTACGCAACACCAAAAACACGACGATTGAAGAAGTCGGCAAGGAC  
ATGGAGGCGGCTAGGACGTGACTGACGTCCAGAAGACCACCGCCGAGGTTACAACCTAC  
TTCAACGACGCCGTGCAGCAGATGCTTACAGTGCGCAGCAAGCGGCGAAGCAGATGGAG

GAGAGCTATGTAGACCTCCTCGATCGCGTGTCCGGCGAATGGCCTGGAGGAGCGAGGGAAG  
GCGCAGGAGATGCTGCGCCAGTCCATGGAGGCGTTCGCTTGGCATTGACGACACCACCACA  
GCCTTGCGAACCTTCTGACGCCGACTGAGCAGGTTCCGGTGCAGTTCACCGCTCTCCAG  
CCGACGCTGACGGCTCTGGGCTACACCGCCGAACAACAGGCCGGTATCTTCGACAAACTC  
GCTGCCAAGGCCAAGAAGTCGGTCTCAGACACCTACGACGCGCAAATGCGTGACGTGCGT  
GGGCAAGGCTTTCTTGACGAGCTGTGGGGGGTGCGGCAGTGGTGGAAACCAACGCCCTG  
CCGGTCTGGACTCCGGTTCGCAACCCGAACGACCTCTACGAGGCTAAGGCCAAGTCGATC  
ATCGAAGGGCTGTCCGACAGCCAGATTGACGACGTCGTGTCTACTTCAAGGACCTTGAC  
CCCGTCATGGCCTCCTTGGCGGAAAGCCTGCGCGGCACCACCAAGGCCGGCCATTGAGGCG  
CAGAAGGCAGTGCAGGCCAACGCCGACAGTCTGACGGCATGGCTCAACGGACAGAAGCTC  
GGGGATGCTTCGTCCTTGTCTCCTTGGGAGAAGATGCAGGAGGCGCAGCGGCAATTCACC  
GATGCGATTTCTGCGGCTCGGAAGAGCGGGCAGATCTCCGGAGCAACGAGGGCCGCGGAC  
ACCCTGCTGTCTGCATCCAAGCCGGCGCTCGTCATGGGCACGGAGGGATACAGCCAGCGG  
GAGGCGTGGATCACCTCCACGCTGAAGAACCTCGGTTCATGAGCTGGGCCTGCCCGGCTTC  
AGGACAGGCGGTTCCCTTCGACGTCGGCGGATGGGGCGGCGTGGACAGCACTCTGGTCCGC  
TTCATGGCGACGCCGGGGGAGCGGGTCACTGTACGCGGCCCGGCCAGCAGGCGCAGTAT  
CAGACGGTGGTTGTCCGGGACAACGAGGACGTCGTCAGGGCTCTGTGCGCAGATGGTCCGC  
GTTCTCTCCGACAAGCTGGACAACGTCACGGCGGAGCTGTCCAGCCTGAAGGCCGAGAAG  
CGCAAGGACACCAACCTCGAACTGATGAGGAAGGCTTCATGACCTGGGGAACTTCTCTT  
GGGGGACGACGCCATGGGGCGTGCGGGGCTTTGCGGCCCTGCCGTCCCCTGCGGCGTTCA  
CCGCGGCTACGCAGGACAGCGAGTGCAGCGCCGTGTTTTGGTGGAGATGCTGCCTCGCA  
CCGGGGCTACGGCCACCGTTCGCTTACAAGCCGCTGACGTGGGGCACCTACGCGTGGGGCA  
CCCTGCCATACTCTGCGCGCCGATCCGTCGATCCGCATCGATTGGTCGGATCGGGATT  
GGACCAGCCGTCCGGACGACACGCGGGCCAACATCCACTTTGAGGGCAGGGCAGAGGGCGC  
CGCAGTTCGACCGCAGCATCCCCATCGTACCAGGGAGCGGTCCGGCCGCGGTGTCCATCG  
GCGAGCTTATCGGCGTCAACGCCGATGGGGCATAACGACACCTACCCAGACGCCTACGCTG  
TTGACGCCACGCTGTCCGGGTCTTGCCTGCCGAAGCGCTCCAGCCTCTACAGCGAAG  
CCGCCGTGGTCTTACGCGGTCAAGGCTTGGACTGGTGGGCGGATAGCTCGCTCCACGTCA  
GGATGCGGGATAGCGGCTACCTCTTGGACGTTCCCTTGTGTGCGCTTACGGAGGGACCG  
GCGGCATTGACGGCGGGACGGAGTTGGCCGGCAAGGTGATCCGGCAAACATACGGCCTAT  
GCCGCAACATCACGGGCGACCTGATAAACTCGTCGCTCCTGATATAACCGCGGCCATGACC  
GTCTCGCGCAGGCTGTGGATGCCGTCTACATCAGCGGCGTGCCGTTGACATGGGACGGAG  
CCACCTACAGCAGCTATGCGGCCTTGGCTGCGGCATCTGTCCCGTCTGGGCAATACACCA  
AGTGGCTCGGCTCTGACGGCTCCGGGTGGCGGCTTGGATCGTCTCCAGGCGGAACGGTCA  
CGGCAGACGTCCGCGGCGATGCCGTTGGCGGCTACGTCTCCGATAACCGCTGGCGTGATCC  
GGCGGCTGTTGGAGCGTGGCGTGTCAACGGCATCCTTGGCGCTGTCCAGCTTTGCGTCAA  
TGGCTTCTACCTGCCGGGCACCATCGGCTATCACGTCTCCAGCCAGCGGAATATCTCCG  
CGGCTGCGACGGAGGTTGCGATAGCCGCCGCGGCTTGGTGGGGGGATGCCGGAGACGGTC  
TCTTTTCGGTGGGCCGTCTCGCCGCACCGGTCCGGTGGAGGGCTGGCCTTTGGGCCGGAGC  
AGATTGTTGATGAGGTGGAGCCTATGGCTTTGCCTGATGACATCGCCCCCTGCATCTGGC  
GTGTTGACGCCGATATCGCCGCAACTGGACGCGGCTCCAAGGGACCGATATCGCGCCTG  
TCCCCTCCGTCCCCACGGAGCAGCGACGGCAGGAACCTTGCAGCGCAATCCAGGCGGTCCG  
CGGTGGCGCTGATCGAGCGTCAGGTGAGAAACCAACTCGCCAAGCCGCTCGTGATCGAAA  
GCCTGTTTGACGCCGAGGCCGACGCAACGGCGCTCTGCAACAACCTTTTGACGCTCTACC  
AGCAAGGCCGCGCTACTACCGGGTGCCGGTGGGAATGTCCGGGCTACCTGCCTCGTCTCG  
GCGACACCATCAGCGTCACATGGCCCCGCTGGGGTCTGGCCGGCGGCAAGTCGCTGCGGG  
TGGTCCGGCAGCGGGCGCAGGGCCGCAAGGTGGATCTGCTCTGCTTCCGATAGCCGGGGC  
GTCAAACCTGCAACGACACGGGGGGCTGAGCGCAAGTTCGGCCCCTTTTTTTCATGAACAGG  
AGGTGCCGCATGGGCGGCTTGGTTGATATCCCGCTCAGCCGCCTGACCGTGGCACGAGCG  
GGCACACAGGCATGCGCTTTAACAGCGCCGGGGTGTGGAGGCAGTGGCCGCCAACACG  
GCGCGCATCGACTATGGCACTTACACGCTGACAAGCACGGGCGGCCAGGATTGGACGGCA  
ACGCCAAATCCAAACATGCTGCTGGGGCCAGAGGATTTCCGGTGGCTCCGCATGGAGCAA  
ACGGCGGCAACGGTTTCCAATAACACCGCGACCGCGCCGGATGGCACCTTGACCGCGGAT  
AAGCTCACGGAGGATGGCACCAACGCTGGTTCATTACCTTGGTTCAGTCGTTTCATGGTCTG  
GCCGGCTCGACCTACACGCTGTGCTGTCATGTTAAGCCAGAAACCCGCTCGCAGATCGCA  
TTGATCCTGACGTCTGGCTTCAACGCGGTCGCCAACAGATTGCGGTTTTACGCTGTCA  
GGGGCTGGATCGTATGCCGTGACGAGCGGTTCCGCCGCTTGCCAGATCGTCCGCTCGGACT

GACGGCTCGTATCGGGTATCCATCACGGCGACCGCCGATACGACGGTGGGCGCATTCTGT  
CAGCTTCGCCCTCGCCAGTGGCGGGTTCGATCACCTATCAGGGCGACGGCGCATCAGGACTG  
TACATCTGGGGCGCCAAGATGGAGATCGGCAGCACGGCGACTGGATACCAGCCGGTCACC  
CCAGCCTGCCGCGGCTACTGGCCGAGCCGACGCGGACCAACAGCATCCGCAATCCGAGG  
TGCGAGGGTGTGTAGCCGGATCGCCCGGCACTCTGCCGACCAACTGGTCATCCACGGCG  
AGCGCTGGGCCGGTCAACGGCATTACGCGGACGGTGGTGGGTTCCGGGACCGAGGACGGC  
ATCCCCTATGTGGACGTCCGGTTTTTCAGGGACGCCGACGTCTGGCAATCAGTACGTTGAC  
GTGACGCTGGAGACCAGCAGCCCCACCGCGGGCGGCTGGGCAGTCTTGGGCGGTGTCAGCA  
TTCCTGCGCGTGATCGCCGGCTCTGTGTCTGGCCTATCCCCGAAATCATCGCCTACGGC  
TCTCCTGGCTTTTTCGGACAACGGAAGCGTCAGCGCCAGTGCGGTGACAGGCTCCCCGTTG  
CGACAGCAGCGGTTTTCTGCTGGCGAAGACCTTCTCCGACGCCGGAGTAACAGGCATCTCT  
CCCCGCGTTGCCCTGACTTTCCCTCAGGCACAGCGGGCGACGTAACCCTGCGCATCGGC  
CTGCCGACAGTGTGAGCTGGGGGGCGGGGCATCGTCTCCGATCCTGCCGCCGGTCAGCGCA  
CCCGCTGCCAGCACCCGCAACGCCGACTGGCCACATTCGCGCTATCCACGCTCCCGAGT  
TGGAATTCGTCCGAATGGACGCTGGTGGTTGAGCACGAAATCATCGGCCTATTGCCAAGC  
CAAGTCGTGGCAGGCATCGGATCCACCTTTGGCGCATCTGTCTACCTGTCCTACGGCAGT  
GCGACGCCCTTGGGTGGGGGGCCGGATACGGCACCGGCGTGTCTTTCCCGACGACATCG  
GCAAGCGTCGGCGTCCATCGCAACGTCAATTGCCATGGGCGGCACTACCGCGCTCATCTCG  
GCGGACGGCGGGACCACCGCAACAGTAACCGGCATCGCTCCACCGACAGGTGCGACGATG  
ATAGGGATCGGCAACGCGCCGTGGTCGGCAAGCAACTCGGTCGGTGGATAACATCCGCCGC  
CTGCAATACCTGCCACGCAAAGCCAACTCTACTGAGGTCAGGTCTCTTTCAGGGCGGCACG  
GACATCACCGGGCAGACGGTCCCAGGACGGGTAACCTGCCTGCTGTCTGGGTCAACCAC  
TTGGACGCCGCGGCAACTGTCGTGTCTCATCGTCTATGCGACGGGGCTCGGGCCGGAG  
CGGCTCAAGGACCCACAGGCACGCAAGCGGATGCGCACGGCGGCCGGGGTGGTAACGCCG  
ACGCTGAGTGTGATCTCGGATCAACCAAGGAGGTGCGCGTGCTGGCCGTCTCCAGCCT  
GACGACCCCGGCTATATCGACGCGGACGGAAACCCCGTGGGTTACATGGCCTCGACGGAC  
ACGATCCGGCACCGTCTTGATGCCACCACCGCCGGGACCGGGGCGCTTTACGACAGCCAG  
TATTACCGGGACGCAAGCTATATCGCCGCGACGCTCGACCTGAACTTCACGGCGCAGTCG  
TACCGGGAATTCCAGAACGACGTCAGCAGCGGGATCGTCTCGGGCTACGGCCTCAGCGCG  
CACGTCTTGCCGGCGACCGTACAGCCCCGCTACTGGCAGTGCATGTGTCCGCCACGTCT  
CTCTCCACGACGCCGGGCTATCTGGACATTGGGCGTCTGTGGGTGGGGTCCGCATGGCGA  
CCGACGCGAAACTTTGCCTACGAGTGGAGCGATGAGTGGACGGACCTGTCCGAGACAACC  
CAGGTCAGGCGCTCCGGTCAAGAGTTCGTGGATTTCCGCCCAAAGAAGCGCGTCTTGACA  
TTCGGCCTGAAGGCCCTCACTGAGCCAGAGGCCAAAGTGTTTCATGAAGGAGCTTGGCCGC  
ATCATCGGCACTAGCAAGCAAGTACTATTCATAACAAGAGCCGAACGGTGCTTACCAAGGC  
TATGAGTCTATCATCGGTGATTGGTTGAAGTCTCGCCAATCACCCAGCCAACTTTGCG  
CTTTACGAGCGCGTCTTCCAAATCCGCCAATCCCTGTGAGGCCCAACCATGCTCTATGAT  
CGCGTTGAGCAAACCACAATCACACAGGGACCGGCACGCTGTCCCTGGTCGCCCCATCC  
GACGCCAGCCGCCGACGCTTTGTGCAGGCGGCGGGGTCAGGGACACAGGTCTTCTACTGC  
ATCGAGACAATCGACGGGACCCAATAACGAATACGGCATCGGCACCTGCACGGCGGGGTCG  
CCGGACACCTGACCCGGACGACGGTTCTGCTGTCCAGCAACAGCAATGCGTTGGTCAAC  
TTCCTTCCGGGACCAAGCGCGTGTCTCGACGCTTCCGGCTTCTCGGAGCGGCGTCACG  
TCGCGCTCGCTGTGCCCAACGGTACCAGATGCTTCCGGGGGGCGCGCTCCTGCAATGG  
GGTACCGGGAACGCTGGACCCGGCGGCCAAGCATCACGTTCCCGGTGGCCTTCCCCGTG  
GCGTGCTTGTGGTGACCGCCGGCACCGCGAACGGGGCGTCATACGGCGGGTACATCTCG  
GTGGACAACAATCTGGTCACCAGGACGGGCTTTGTGCGCTATGCCAGTGGCGGGCGCGGTG  
ACCTCTAATTTCTTCGCCATCGGATACTGAGGAGCGATCATGCTTTATGCAGCTTCGACC  
GGCGGGTTTTACGACCGCGCCATTCATGGCGACACCGTCCCCGCGGATGCCGTCGAGATC  
ACCGACGAAGAGTATGCAGCGCTTTTTGACGGACAGTCTCTTGGCCAGCGGATTGTCCCA  
GGGCAAGACGGCAGGCCGACATTTTACACCCCGACGCTCGACGACACCAAGGCGGACAGA  
AAGGCTGCGGCCACGGCGCGTCCAGACCGAGCGCGACCGCGGCGTGGTGGTCAACGGC  
AATCGCTGGCACTCGGACAAGGGCTCTGCCGATGACATCGCCACGGCGGTGCTATGGCC  
CGCCTACAAGAGGCCGGGCGAGGGCGATGGCACCTTCCGCACGATCTGGAAGACGGCGGAC  
GGCTTTGTGTCCGTCACACTTTCGGACTTGTGGCGGCTGGTCTGGCGGTTCGGAACTTC  
GTGCAGGCGTGCTTTGCCAACGAAGCGGTTCATCTACGCCGCAATCGACGCCGCGGAGACA  
ATCGAAGATGTGAATGCGGTTTTCGTTGAAAGCGGTTGGCCTGATGACGGCGGCCCAAAG  
GATGCCGCGACGATCAAGGCCATTCAGCAAGCGAATGCGAGGCTGGAAAGGAGAGCAAAA

GAAGTGAAGCACAGGGCGATTACACTGGTGCACAACTTCTTAGACTTTCCATCAAGGAG  
ATTTAAAACATGGCTACCGGGTTCCGCAGGTTAGGCAACGGTGACGGCGGGGCTTCTCGTC  
AAGGACGCCATCGCCAAAGTACACGCGGCGCACGATGCGCTTGTGCAGGCCAAGGCGATG  
GCTTCGGCCGTGTTGGCTCGCGGCACAGCGGCCGAGATGGAGGGCGCTGAGTTCGGCGCT  
CAGTCTGGGGAAGGGCAGGCCGTCCACGACGAGGTGCATAGCCTCGCCGATGCGCTGTCC  
ACCTTCATGGACGACAACGCCATTCTGTTGGCGAGGTTCAATCCGGGGCGGCTGATCCGCC  
GCCGCGACAACCTTTCCAAACGGGGCCGCTCCAGCAATGGGGCGGCCTTTTCGCATTTCTGGA  
GGACCCCATGACCGATCCCCTGTGCCCCTGCTGCCCTTGCCATCGTGAAAGAGGGCGGAGGG  
GCTGTATCTGACCGCATAACCGTGTCCGGCGGGAGTACCGAGCGTGGGGTGGGGCCACAC  
GGCTGGTGTGAAGATGGGCCAGACCATCAGCCGGGCGCAGGCCGAAGCCTACCTTGCTGC  
GGACATGGCCGAAGCGGCGGCGGCGGTTGACCGTCTCGTCAAGGTGCCGATCACGGACAA  
TCAGCGGGGCGCGCTGTGAGCTTCGTCAATGAACCTGGGGGCGCGTAACCTTGACGAGGTC  
CACGCTTCTGCGTCTCCTGAACCAGCGCGACTATGCCGGGGCTGCGGACCAGTTCGGACG  
CTGGGTCTACGCCACCGTCAATGGCGTGAAGACGGAGCTTCCGGGATTGGTGAAGCGCCG  
GGCCGCGGAGCGCGCGCTTTTCTGACGCCCTGACTCCCTCCCGGTGGTATAGTAGAGGT  
GCCGGTTCGGGTGGGCAAACACCCGGCCTAAACCCAGCATGAAGGACCATGCCGTGACCG  
ACACCAAAGCACTCTACTCGAATTGGCCGCCCGCGTGAAGCGGCGGAAGGGCCGTGCG  
GGGAATTAGACGCGCGGATCGAACAGCGCCTCCACCCGCGAAGCCTGTTCTTCTTGACC  
CAGGTTTCGGTTCGGTTCGCGTGAAGCGTGAACCGAAATGGGGTGTCTGGCAGACTTTACGA  
TTGATGGATGGGACGACTTCCGGGCCGTAGCGGATGCGTTCGGCGCCCCGAGCTACACGG  
CAAACGCCGATGCGGCGTTCAGTTGTTCCCAAATGGATGGAGCGTGACCGTCCAGTGGT  
TTCACGACGGCTATCCTGTGGTACGACCAGCGCGAGCCGTGACTATGGCCGCGAGAGCG  
TCAGTGCAGGACGCCATGGTGACGGAGCGCACGCCAGATCGGTTCGTTGCCGCCGCTCTCC  
GCGCTCGCGCCGCTCTGAAGGCGGAGGGCTAACCCATGACCGACAAGCAGCCACTGCGTG  
ATTACATGGCCGGGAACGGCCACGATATAGACAAGGCCACATCGCGAGAAGTGTCCAGTT  
GGCCTACAGTGAGTATTTTCGACACAAAATTCATCCTGGAGTTCGAAAGAAGACCGGC  
CATGGCATGCCGAGAAGTCCAAGGAGCTTGAGCGCTTGTGAGTTGAGCGGAAGGCGGATG  
AAACCGCCGCGCTCTTCGCTGGCCTCGTTCGATGCCGTGAGGAATGCTGACACTGGAGATG  
ACATCACCCGCTACAAATCCATGTCGATTGACGCGCAGAGGCCATCCTTGGCGAAATCG  
TGCGCTCATGCGAGGCTGAGTGCGAAGAAGCCGGTGACGAAATGGCCTATCGCGAGGCTG  
CCGGATTTGTCGATGAGTTCACGAAACTGTCCGCTGCTCTCCGCGCCTTAGCGGCAAAGG  
AAGGCTGAGGGATGACAGCGGTAGCCAAGAGCGTTCATGTCATATCAGGTGGAAAGCCTTC  
CCGGATGTGCTGGTACGTCACATATGTCGAGTGGTTCGATGGGACGATAACGGCGGTTG  
ACGGTCTATGCCCGGAAGACATCAAGAGATCGGCGAACAGCGAGAAGCCTGATCCCGTGC  
CATTACGGGGGGCGCCGCATCATCCGATAGCGCCGCTCCATGCCACTTCCCCACCCAGC  
CCGCCCAGACTCCGCGGCGGGCTTTTTCGCGTCCACCTGAAAGGAGACACACCATGTCC  
TGGCTCATCGAGAACATCGGAACCGTCTACATGATCGCATCGTCCGTGGTTCGGCACCGCG  
GCGGTGATTGCTGCTGCCACCCCGACGCCAAAGGATGACGAGTGGGTTCGCAAGGCGCGG  
AAGGTGCTCGACCTGCTGGCGTTCAACGTGGGGAACGCGCGGAACCGGTGAATGACAACG  
GGCGGCCCTGGCAAGCCGCCCGCGTCCATACCCATCCAAATGCAGGGGCATTGTGCCACA  
GGCCCCATCCAGCGGAAGGGCCGCCGTTATGCTGAGTTGACCGCGGATTGCTTTTTGGG  
CATGATGCAGTTAAGAACGGCAATGACCGCTCATTTAAAGACCTTGCTTCTTAAAGCTG  
AACTACAAGTGCCTGGGCATGGAACGCCAGTGAGAGCAAAGACTCTCCTGGCGGCCGAGC  
CTGCGGCACTGATGCGCGACTTTGCGCGACGGCCGAATTCCTCACTCACTACTGATACT  
GCCACTCCCTAAATCCGTTACGCGCACTGAGCGTGGCTGGCTGAGCAGCTACGTGGACAC  
TCCCCGATCATGGTGTACCACCACCGAAGACCGGGGAGAGCCACTTGGGAACCTAACCGCG  
GCACTTGATCCTGACGCGGTGCGTGCTTTCTGCAAAAAGCGTGAGCATTATAGCGATTGA  
TCGGTGAAACGGCAAGGGCCGCCCGGTTAGGAGGCGGCCCGCCAGTGTGGGGTATTTCG  
CCGTGGCGTTCTGATCCACCGCTACTATACCCACGTCACGCCGCTGATGTTGGCGACG  
ATCAAGGTTTCGCGGAGCGGTCCGGGGGTATTGCAGCCTTCCACCCACTTCAGACTCTCTG  
CCCTATCGTGCGGTGTGTGGGCACCGCCGACGAGCTTCCGCCGCTCCGCAACTCGTGTGC  
CCCGCATGAGCGAGGCGAATTCAGTGGGGGCTGTTATCGCGGCATTCCGTTTCGCTCGGT  
CGGCCCCCGCCACCTGTGCCACTCAGTTAACGCCCACTGGCCCCGACGGTTGCAGCGGGC  
AGGATCACGCCTGCACCTTGGTATCGTGTACCGCGCTCAAGGCCCGCGCTAGCCCAGGA  
CCGGCGGATTGATGGTCCAAGCCATCGCCGCAACTCCCCAGTATACAGCGTTGCCGAGT  
CGCTGTCACTACTTGGCGGAGTCTCGGTTAAGTTCCTCCCGTCAAGTGCATCAAGAGGC  
TCAATCTCTTGACAGAGCCTCGATCATATCCATCCGCGTACCGCCAGATCGTACATGTT

TGTAGGCGCATCCAGA AACTCGGCGGACTGCCCGGTCAGCTTCTCAAGGCGCAAGGCCATT  
CCCGGCGTCACGCTGCGCTTTCCTGCGCCAGTTTCGTTGATGGTCAGGCGCGACACTTTC  
AGCATGTCGGCCA AACTCCTGCTGGGTCAGCCCGTATTCCTGAAGGACATCGTTGGCGATG  
AACTTTCGGGATGTGTTGGGACGCGTGTCAATCCCCCTCCTTCTGCGCCAAGGCTGCGC  
ACCAATCCACATAGGCCCGTTCCAGGCTCAGGAGGAACCACGGCGACACCCCCAGAGCCT  
TCGCCATGGGTTTCGGCCATGCTGCCCATCCGCAATGCCGGATCATCGACGTTTCAGCAGGA  
AATCGATGGCCAGCATGTCGGCTCCGCGCTGCTCCACCGATTGGACCGGCGTCATTCGCG  
TCACGAATTCCTGAACCGACAGCCCCGCGCGGCCAGTTTCGTCGCGGATGAAGTGGCCCA  
CCGGGAACGCCTCGGCTGCGATCCGCTCACCCATGCTCGCTCTCCCTCTCTCCCGCTGCC  
CGGATAGCGGCTGCCATGGCCTTCCAGTTTCGGCAGGACGCTTTGCCCGATGGGCTCGAAG  
TGTGCGGACACCGCTCTGTACAGCGCCCTGTCTCATCGCTCACGCAGCCGGTTCGGCGTC  
TCGGCGATCACGCCGATGCGGTGCAAAAGCTCGGCGGCTGCCAGCCTTCCGCGCTCCTCT  
GCGTCCCGGATGGCGGACAACACCACTGGCACGCAGGCTTGCGCATATGCCCGAACGTCG  
CTCTGGTCCGTCGAGAAGGCGTCAACAGGCGCGAAGTCATCGGGCCACGGACGGCACATG  
CCGCCCTCGGCGATGGCCTTGCACAGAGCCTCGGCAAGCTCTCCCCTCTGCTCCGGCGTC  
ATGTCAGCCATTGGCGGCCTCCATCTCGCTCGCACACCCTTCGCACAGCGGGCCAACCTC  
TCCCCGCTCGCGTCTTCCCGATAGATGCTGTCCTCATGCCGTCCGGCCCCGGCCGGTCTC  
TGGCTCGCAGACCACGCAATGCTCAAGGGTGCAGCCGGGATACCGGGCGTTGACGGCGGC  
GTGGGCTTGTGGCTGAGAGCGGTGCAGAGGCCACGGTCCCGATCAGCCTTGATGTGGTC  
TATCCAGTCAGCCATTGGCGGCCTCTCTGTGCTTGGAGAGCGCGGGCGCGGCCAAGGTTCG  
TCACGACGAAGCGGTCCATGGATATGCGCCCGAGTCCGGCCCCGACCATGGCGCGCACCCG  
CCCCATGCTCACCGGCCCCATCCATGACCACGTACCCTGTTGCCGTTGTCAGCCCCAAGA  
GCCGGGCTGTGTCTTCGTCAGCCTCGGCACATCCCCATGTCCCTCACGGCTTCTCCG  
CCATCTGGTAGTCTCGTCTGCTCCTCGCATGGGGATCATCGGTGCGCTCCATCAATCCA  
GCGCTCAAGGCGCCCCATTTCCCTTCCGTAAGTGCAGGCCAGCACCGTTCCGAAGATGCC  
TGAGAGCGACACGAATGCGCAGGCCACGCCGATCATCTTCCAGAAGTCGTTGACGTCCAT  
TTCGATCATCGGTGCGCTCCTGTGGGGCTGGAGAGAGACGCCAGTTCCTTGAGGTACGCG  
GGGAGGGCGTCGATTGCCTCGTCCAGAGCGTCTTGTGCTTCTGCTCGGCAATCTCAAGT  
TCGAGGCCGCACAGGTCCGTGTCGTGGACCACGCTGCGCATGGCAATGGCGTGC CGCACC  
ACCTCCTTCAGCCGGGCGACCTGGAGGGACAGGGCGTTCGCGCTCGGCCCTCCACGCCGGCA  
ATCTCACCAACGAGCCGTGCCGTGCTCTCGTCAAGCTGGTTCGGCTAGCCTCTTGGCGTGT  
GCAGCCAGTAGGCGGTGAGAGGGGACAAGCGCGGGGATGTCGGTGTGTCGCTGCCTCG  
ATGAAGCGGCGGTTGGCGGCAACCTGCGCGGGCTCCGTCCAGTCGCATTCCGCTCCGGCC  
CGTTCGAGTTCAATGGACTTAGCCCCGGCACGCGGACTTCTCTTCCCTCGCTGGCGACGCCG  
TTCCAGCATCCATCGAAGATGAGGGGGAACGGATGGTTCGGCGTCTGGGGTATGCGCATAA  
ACATGGCCCCAATCTGGATACAGGCGGCCGGCTGCCTCTGCTTCCGGTCCACCCATCCAA  
GTGCCGCGGGTGGCGGCGGCGTGGCGCGCTTCTATCTCAGCGATCTGGTCTTCAGAGAGG  
ATCATGGGGCGGACTCCCGAGTGATGACGGGCATTTCCGCCACGCTACCGGCCATCCCG  
TTTCCGGGTTGACCAGAAGCGTGTCCGCTCGCCGTGACGGATGTTGTTGAGGTTGGTCA  
GCGCCTCTTGCTGCTTCTCGACCAGGGACAGCAGGGCGGACACGTCGGCAACAAACAGAT  
GGGTGCCGGCGCCGACCAAGCCGGGGGCGCCTTTGTCCCAGCGGGTTCAGGCGGGAAA  
GAGCTTCGCGGGGGTTCGGTTCATGGGGCGGACTCCATCAGCTTGGCGCGGGCCTTCAGGCA  
GGCGAGAGCTTCGCCCTTCAGTTTCGGATCGGCAGAGTAGAGCGGCGCTCCGTCCACCCA  
GGCGCCGTTACGCGGCACCCAATGAGGCCGATGTTGCAGTGCTTTCCGCCATGGCTTTC  
TAGGCAGTTTCCCGGCCATCCGTTCCGGCAGGTTCCCGGCTCGCACATCTCCATTCCGTG  
GATAGCTGCATGCACATCGCCATCAAGGTTGCGGGATTGCTTGGCGAAAGGCTCGCGCCC  
CGTTCGCTCCTCCAGCCTCCCTATCAGGGAGAGGAGTTCTTACGGGTGGCGGTTCATGGG  
GCGTCTCCGTAGCGGCGGCGATCATGGAGCGGTACATGTGCCGGAGAGCGTTCGCTCCG  
ACATAAGGCGCGGTCGCTCCGCGCAGAAGCATCTTGTGCGGTTCGGTCTCTCGGCACGACC  
ACGGAGCCTTCAGGGAGGACAGCGCGGGCGGCGGATAACCACGCAGCGCGCTCCCAATCC  
CCCCTTCTGCTGCAAGTATTGGGCCGCGTTTGGAGGCGGTTGTGCTGGCCGGATTGTGGGTC  
AGGTGGTGCGCCACGCGATCCGCTTGGCGGCTTCGGTTCAGATGGTTCAGCCATGGTCCGC  
TCCCTTGCTGTCCGGGGCGCCCGCAGAGGCGCGCTTAGGCAACTCAAGGCCAGCAGGGC  
GGCGGCTTGGCGGATGGCGGACGCGCTTAGGCCGCTGGGAAGGCCGTACCTATACCCCAA  
GGCTCTCTTGAAATCGAGCCACGCATCTTCCGCCTCAATCCTGGCCCCGCTCTTCAGAGAG  
TATTCTGTTCTGTCTCCAGCGGTTCAGGAACGCGCGGCAGATCGAGTTTCCCGGTTGGG  
CACGTACACCCGCAAATCTTCCATGTCGATGCGCATGTCTTCTCGCGCATGCCGAACAGA

CGGGGTGGCGACGTTGGCCCACTTGCGCCCGACCTTCGTGATGACGCCTTCGACCTCGCC  
GCCGATGAAGTCCAGCACGAGCTTCTGTCCGACTTCCAGCTTAGCCATCACTCCCCTCCC  
TTCTGGTCCGCAGCGCGCTTGCCACGCGACATTGGCTTTCGCCATTGCAGTCCTGACAC  
ACCCACGCATCCCAGAATGCCTTGGCCTCCCGGTATTCTCGTTGGAGATGTCCCAGCAC  
AGGTTGATGCCGCAGCAGTTGCATATCGGGCGTGACGCCGCCGGGTATCGTGCCGCGGTGA  
ATGGTGACGCCCATCACTCACCCCTTTCATGTCCGGGGGCGCTTCCTTGAGGCGGACGC  
CAGCACCCCCAGGGGGCAACGGCTCTCCGGGCTCTATGAACTCGACCCCCGCCGACAAGA  
AAGCTCCGATGATCTTCTTACCCTCTCGTGAGCGGGGCGCTTCGACTTCCCGTCTTCGA  
TCTTCTGGACGAGCTGCGGCGACAGGCCAGACCGGCGGGCCAGTTCCTCGCGGGTCCAGT  
TCAGCAGCGCGCGGGCGGGCGGAAGGGTGTCCGGCGTGTACATCCAGGCGGGATAGCACG  
GTCCGGCGAAGCCAACAACGTTTCATGCCAATTCACCTCTAAGCGTGCCGTTGACGATCA  
TGACTGTAGCTGTTATAACTACACATGTCAAGCGACGGAGGATAGATGATGGCCCTCACA  
CCCGAACAGAAGCAGGCCAACAAAGGAAGAGCGGCGCATCCGCGACAAGGCGCACCCGCGAA  
CGCTGCGATGCGCGCGAGGCTGCGAAGAAGGATGGGCTTGGCGATATCGCCGACAGCGAA  
ATCATGCTCCGCCTCCACGCGGCGCAGGTCGAAGAGAAGGATCTGATGCGTGATCGCGAC  
TACGAACTGGCCGAACTGGATCGTGAGATCGCCCGATTGAAGGCGAGGCGCGAAACGATA  
GCCGCCGAATGGCACGCCAAGTGGGGAGTGGTTCGGGAGCAGGTTTCGCGCGGCCTGGAAC  
GAGAAGAATGCCGCCGAAGCAGCTTTGGAAAAGCGCCTCGATGAACAGTTCCCCGACCTG  
ACCGGCGGCGCCCGCAGCTCTGCGGTGATCTGGGACGAGCGCCGCAAAGCCCTGTCCGCC  
TAACCCACCCATCCCCGAGGTATCCATGACCACCGACAGCGCCCTTGAGCGCATAGCCAA  
CTGGCTTGAGACCAGCGGCGGAAAGCTGAGCCGCACACAGGTTCAAAGATGATCGAGTT  
CGCGCGGGCTGAAGCCGCTGAACCGACCCACGGCGAACTGACCAAGGCAGCAGAGCATGT  
CCTCGAACTCGGGGAAGCCCTGTTTCGATGGGGAAGTACAGGGGCTGGTTCGGCAGGCTAT  
CGATGATTTGCGGGCCGCCCTCCACTCCCGAAAGCGGAGCGGGGAAGCAGACGGCGAATG  
GATCTACATCGTCGAAGTCTGGCGCCACCCTCCGGGCAAACGAGACGGCGCTGAGCCATT  
CCCGGTTCGCGACGGGGCACACTCCGCAGGCCGCCCTTGATAGGGCACTGGCCTATGGTCA  
GGCCATCGGCATGACCTCCGCCTAGCCTCACCAACTCCACAAGGAGGACGACATGACCAA  
GGCAAAGCCGAAATCCAGACGACGAACGCCACCTTCCACGTCTGGCAGATGACGGAGGC  
GGAAAGCGCCGCGCCCATCGAGTTCCACATGCAGATCACGGGCCAGGGGATGCGTGCGGT  
CTCCCTGGATGCCGAGCAGGCGGAAGCGGTTCGGCGAGGCGCTGATTGCCGCTGCGAAGGC  
CGCCAGGAAGAAGGCCAGGCGCACCGTCCAACCGTTCGCCGCTAACCGCCCCAGCACAC  
AGGAGGACAGGACACATGACCGACATGAACTGAAAGACCAGCGAGTTCTTCTTCTGGCG  
TCATACTGCGGCGGTGACACCCAGGATGCACGGAGGAGCTTCCCTGTGACGAATGTCTC  
CGCATGTGCAACGTCGCCGTGGCGTCTGGCGAGTTCAACGTCATCGCCGGCATGGACTTC  
CTGCGTCACATCCGCAACCGCGCCGACTCTGTTGCGTTCGACCCCAACCGCCGTCCTCC  
AAGGAGGACAAGCATGGCAATGACGAAGGCCGAAAAGGCTGAGATGGAAGCGCTGCGAGA  
GGCACGCGATCTGGCGCGGGCGCTTCGGTGGCCTGAGTATGCCGAACCGGCGATGATCCC  
GCCTCCGGATTTTCAGCGGCAGCCACACGTCGCGTTGGCTCTTCAACACGTATCGCCTTAC  
GGCACAGCTTGGCGGTATGGGCGATGCCGTTTACCGTGCGTGGTTCGGAGAGTACCACGCA  
CGGCGATGGGCAATCTCCTATTCCGCACCGCTCAGCCACGCAGGGCGGCGTGCACCTCTT  
CGCCACACGCCTTGATGCACTGAAGGCGTTGCGCCTCGCCGTTACCGAAGAGTTTCGCGCG  
GAAGCTCGCGCGGGTTGACGCAGAGATTGCCGCCGAGAGCGCCAAGGCTGACTGACCGTC  
CTCCCTCCTACCAGGGGAGGGGATCACCCCTCCCGCCCGTGCCATTGGCTCCCGCAGCGC  
CGCCCGGAGCTGGTCACGCTTCGCCAGCACGGCGGCCTCGTCCTCTGCCCGAGCTTTTCG  
CCCGGCGCCCGCTTCGAAGCCCAGCACGGCGTTGACCAGCAGACGCCCTCGTCGTCAGC  
GGCACCGTTGTAGGCCGCGCAGACAGGCGGCGTGCAGCCCGCCGGTTCTCGGTGCCCGCC  
TGAGTTGATCGCCTGGATAAGCTCTGCGTAGTTACCAGCCACCTTAATCTTCGAGTCG  
TACGCCCGCATCGTCGTGAGCTTCCCGCCGCACTCCTTGACACACGACCTTGCGGAGCGCG  
TCCAGGGTTCGGATAGTCCGGCCCAAACGCTCGACCAACACGGCCACGTCCAGCCGGAAC  
GACCGCTTGCACGGCCCGCAGTCGGCGTGGATGACGTGGTTCGGACCTGATGTTGCCGAGT  
ATGTCGCGGATCTCCATGCGGCGATGGTGGCATGGGAACGGGCGGGGAACAAGAGGATGC  
TCGCATATTCCGCGTTTTTCCCCTCTTGTTCAAACCGCCACACACCAACGTAATGATTTT  
GTTGCCGTTCAATCTGCGACAACGATATGTCTTTTCAGCGCCTTTTCAAAGGCTTGTAAG  
GCGCTTCGAACGCCGGAGCGTCGAAGGCTCCAATCGCGTTCGGAGGCAAGCCGTCGCTGCT  
CCGCTTGCCGCGTATAGCGCTAACCTCGTTCATCGTTGAATGGCCCGTGATCGCCATAA  
TCTGGCGCGCGCTGCACCCGGCTTCGGCGAGTTTGGCTGCGGCCGTTTTGCGCAATCCGT  
GAAGATTGCAGCCATTACAGACCAAGCTTGTCTGCCTCATTGCGGAACGCGCAGGAGAGAA



CTTGCGGAGGCCATGGCGTCTGTCCGTGCTGGTGAGGATTGTGACGGACGGCAGTGGCG  
TGGCATCCGACTTCCAGATGGCAAGATGGCGTTCTAGGGTCGGATGCAGGGGTATCCAGA  
GGTGCGCGCCAGTTTTCTGCTGCACGACGTTAATGCCGCGTCTGAATGTCCCCCAGG  
TCGCCCAGCAAAGGTCGCGCGGGCGTCCCCGGTGAACAGGGCCATGACGAACACACGGC  
GCAGGGCCTCGTAGGCGCTCTGGTAGAACTTGTCCAATTCAGCGTCCGTCCACCGCCGCC  
ATTCCCCTGTCTTCAGCCGTGGGACGCGATGGGACGGGTCTGTTTCGATCATTTCGGGT  
CAAGGGCAAAGCGGCAAACGGCACCAATTGCAGTTATGACTTGGTTCGCCGTTGCCGGGG  
AGTGCGCAAGATCATCGCGCACTCTCATGATGTGTGCGCCGCCGCAAGCCGGAGAATTCT  
CCTGTGCATAGTCATGCAAGCGGTCGAAAGCGGCCTCGTATATCTTCTTCGTGGCCGGCG  
CGAGCCGCTGGTATTCCGGGGATAGCCGGTATCGACCAATCACCCACCAAGCGTCCCCT  
GCCCCGTAATTCCCCCGCTTCATTCCCACGGCGTCATCCCATCCGCTTTGACCGTTTCGTT  
TTCGCATGGCCCCCGGCCTCCAGTTTGTGTCCCAGCCGGAGGAAGCGGACGCCGCGGGC  
AAGGCAGAGTCAAGGTCATCCACGCGCCATCGCTTCGCGGACACGCCGGGATACTGGACG  
GGCTTAGGTTCGACGGACGGCAGGAAGCGCTGCGATCATTGCGCTGAACGTCTTGTGCGAG  
ACGCCAAGGTGCTTGGCGGCGTCTTCGTGGTTCAGGTAGCGGGAAGTCTGTGCGCCCATC  
CTACTCCCCTCCCTGCGCTGCGCCGACAGCGGGCGCTTGCTGGGCAATAGCCGCCCGAAG  
GCTCTTGGCCCGCCAGCCGCTTTTCGAGATCGGCTATCTCCCAATCGATCCCAGGTGAT  
GACGTGGCCGGCTGGCACGACGGACAGGCCATCCACATCGATGTACCGGCGCGCCTCGTC  
GGCGGTGAAGATGCCGGCCTCAGACAGGTGGTTGGTGTAGCCCTGGGCCTTCGGTCGAAA  
CCATCCGCCATGCCGGGAGATGAGGTACGGTCCATCCTTGATCCGCTTGCGGGCGACGGC  
CACGGACTCGGTCCACGTCAGGCCGGCCCCGCTTCTTCACGCTGATGCGCTCACCCATTCC  
CGCTCCATGCGCTTCCCATGCCGGGCATTCGGTTCGCGGGCTTCCGTCCTGAGCGCAGT  
CTTCAGCGCATGACCATCCACAGCCTGAATAGGTTCATCATGCCTCTGTGTCATAATCGG  
CCGGCTCAGGCGGGACCCTGTTAGCGCACGTCTGGCACGACCGCGTGACCGGGTTCGGA  
AGCACCGTGCCTCATGGGCGAGGACGGCGGGCCCGTTTCGCACGGACGTGGCCGCAGCCGT  
GTTGCGATCGGTATGCGGTGAAGGCTTCAGCCACGGTTCGCTCCCTGCGCTTCCCGGTGA  
TGGGAGAGGGCGGAGCGGCCTGCCTGGGTGAGCGATGGCCGCACCATGAACCTGCTGGCC  
GGCTTCATGGATGCCAGTCCCAGCAGAATGTGCCACGACACCATGGCCGCGGTGAAGGCC  
GTCATCACGCCGCCCTTCTTCTCGACGTCGGCGATCCACCAAGGTGACGCGCCTCGGGC  
TCCGTCAGCTTGCCTCACCCATTGCTCCCCTCCGTCTCGGTGGTTCAGGAGGCCGGCAGA  
GCGGGCCTTGGCGAGGGCGGTGCGAGCCCGGATGATGTCCGCGTCTTGTGCGGCTTCCAC  
CATCAGGTGTTGGTCGAGGTAGTTGCTGGCGTAGCCGATGACGTTATCAAGGGCTTCCA  
CAGCGCGTCCCCTCGGCCTCCGCCTGGGTGGCGCGGTCTTCAATGTTTCGGCAGTGGC  
GAGGAGTCCGTTGCCGACTTCCGTCGTCTTAGCCAAGGATTTCTGTGGCTTCTAGAAGCAT  
CGCTCCAGAGCCTTGACGCGCGTGGACAGGGCGTCGAGAGCGTCGGCGACGGCTGCCGC  
GGTCCACTTCCCTCGCTGCGTTGGAAAAGAAGACCAACCTCGTGTGCGGGATGTATTTGGC  
GAGTTCTTCCGCGCTCAGCGGGGCGGTGTCGGTGGTTCATGGCTCGTCTCCCGCCTTGATC  
TTTTCAAGGGCCTCGCCATGGTTCGTAGCCGGCGTTCGTAATAGGGGCGCCATTCGTCGGCT  
TCGAGGTTGCTGGCGGTTCATCCCCACATGGCGGGCAGCCGTTTCATCCATTGCTCAAAG  
GTGCTGTTGGACTTGGTCTGCATGTCGGTGGTGGTTCATGGCGGTTCAGTCCCTCCCGGTAGA  
TGACGGCGACGCCGTTGCGCGCTGGGGCGGACGTCGAATGGTTCGCGGCTGCGGGCGGGTGG  
TGGTCTTGTGCTCATGGGTGTCTCCTGTGCGCTCAGCGCGGCGCGTTCATGGTGGATGCA  
GATGCCGTCCGCTTGGCGAGGACGAAGCCTTCCAATCGCTTTCAGCCGCGCACCCACGG  
CCCCTTCATGCCGGGCGTCCGGTTCGCTCGTCCGGTAGCTGCCGCATGTTGCGCAGGAGGC  
GCCGGACGCGCGCAGGCCGCGCAGCTTCAACTCAGCCTCAGCCGCTGGCGGAGCTGCTG  
ACGGCGCTTGGTGGCGCCGGGACGGTTCGCGACCACGGCCATTCGCGCGGGAACATCTC  
GGCGGGCAGTCCGGAGCGGGGATCATCGGTGGAAGGCGGTTGCTGGATCATGGGGCCTCA  
GAGCGGCGCAGGGGTGGTGGAGGGAGAGGGGCGGCGCAATGTCCTTCGTGCGGGCGAT  
CTGACCGGAGAGCGCGACGCGAGCCTCGTCCGATGATTGCGCCTCGTCAGGGTGCCTCG  
CGTCAAAGCGTTCACGGTCCCGACGTAGCGCTGCGCCGCTTACCAGCCTGACCAGCCC  
ACCTCCCTCCAGCCTCTCCGCCAGAAGGACGGCGTTGCACCCAAGGTGCTCGGCAAGCTC  
TAGGACGGCGTTGTCGGAGGCTTTGGCGAGGCGGGCGTTACCCTTCGGCTCTTCGAGGCT  
GTGTCCACAGTGGGCATCGAACTCGGCGAGTACCCACGGCTCTGCGTCTTCGGGATCATC  
AGCGCGGACGACGTTGTTTGCCGCGCCGTCGATGATCCGCTTCCCCTTCGTGTACTCCGG  
TTCGCTCATGGGTGTCTCCTGCGGGCGGTGGCCTATTGCGACTTCAAGAAATGAATGACC  
TCATCACGAAGTCTGTGCACTCGTCATCCCCGCGACGAAAATCCTCTCGCATCGGAATG  
CCAAGCGCCAGCGAGCAACCTGTGAGCCGTCGTCAAAGTCTTCAGGAAGATTTGACACA

ATCCAGGTGCCGCCGATGTCTATATCAACGTCATCTCCATTGTGTCCGTCAATGACGGTT  
GAGCCTGTCCAATTGTCCGTGTCTGCATAGAAGCAGACAGCGGCACGGAGCTTGTCCGCT  
TCAGTTTTGAGGGCGGCTATTTCCGCGAGAGCGTCTTTCAGCTTCATTGATGTTCTCATG  
CCGATCAGCGTCGGCGCGTTGCCCTGTGGGGAATGGTGAGGGTCAGGCGGTGCCTTGGCT  
CGCTCGTCTCGGCGCTCGGCGCCAAGGTCGTATCCGTGCCGCCAAGCGCGATGACCGTTC  
TCGTCC TTCACGCTGTACGGGTTGTTGTTTGGCCTTCCGCCGATGCCCCATCCAAAGCCT  
TGTTTCGTAGGCGATGCAGATCAGGTAAGCGTGTCTGCATCGACCTTCATTCCACTCTCC  
AAAATCCGTTGAAACGCCTGAGATTGCGGCGCGTGAAGTGTGAGGCGGAGGTGGCTTTCCG  
CGATAGCGGCGCGGCCCTGTCCAAGCCTCGTGCTTGGCGTCTGATGCGAACGACTT  
CCACCAGCGCTTCCAGAAGCTCGGTGCGGCGAGCGAACAGCGGACCATCATGTTTGGCGT  
TCGGTAGCTGACACTCTTCGATCCAGGCGACGCCGTAGCCACGCCCGACTTCCGGGTTGT  
CGGAAAGGATCGCGAAGCCGTCTCGGCCATCGCCGCAACGGAATTCGACGAAGCGATGAG  
GGCCGGGCGTGTACGTACACTGTTCTCCGGGAAATGTGTTGGCGTCTTCTTGACGGCA  
TAACGGTATGCCAATGTGCACTAGCGTCAACGGGAAAAGTGTGCCATTGTGCTATCGTC  
AAGGCGCCGTTGCGGTGTGCCGTTGGCGCTGCTAACTTTGGAGCATGGACCACACGATGT  
TTCTCGCATTCCTTGACCGCCATGGGCTGACACAGGTTGAGTTCGCCGATTGGCTGGGGA  
CGAAGAAGGGGACTGTCTGGCGCTGGACTCTGCCGCCGGACGATCCCAACAGCCGGGCCG  
TGCCTATCGGGGTTCCGCGCCTTCTGCATCGCGTACGACGTGATGCCGGAGAAGGTCCGCA  
AGTCCGTCCTGGCGGCGCTGAAGGCTGCTTCGTCAGCCTCTCCAGATCAGGGGAGCTAGG  
CGGCCTGACCGGCTTGC GCGGACAGCGTGGCGGGGTCGGTGCCGATCAGCCCGGCGATTA  
CGTCCAACACGCGGTCTTTCGACTCCTGGAACGTCTTCTTGTCATGGACCGGTAGTTCT  
GGCTCTTGGCCGTCCACACGGTGATCACGGCGTCGGTGGTGGTCACGATGGCGAACTCGA  
TTTGGCTTTCCAGACGGCTGGCCACCGGACGGCTTCGGCTCGGCTGGAGCATGGGAAAT  
CCACACTGGTCGCGTAGCCGGAGCGGATCAGGGCGTATTTCCGAAGGTGTTCCGGGGTTCG  
GAAAGCGCCGCGTCTGCTCATCTGACAGGTTCTCCACGCCTTGGCGATGCAGGCATGAT  
AGTGCCGGTGGGACGGGGCGGAGCGGTCTTCGATCTCGGAGAGTCTGTACACCTGCCCA  
CGACGAACAGCTCGTCGCAGCGCTTGGCGAAGCCGGGGAGAGGAGTGAATGCGTCTCCCT  
GCCACTGGAACGGGATAGGGTTGGTCATGGAACCGGCTCCAGAACGGGCTGTCCTTCCA  
CAGCTTCTCCGCCAGCACACGGCCATACTCGGGATGGCCCGTCTTCTCGCGGAAGAACGC  
TTCTCGTTCCTCGTGCCGGTGCACCCCGCCGTCACCAACATGATGATGGTGGCAGAGGGG  
CAGGAGGTTCTGTCGTCAGAGCGACGCTTCCCGCCACGGATGCCGACCCAGGGGATCAG  
CAGATGATGACCGGCGACGGGTCCGTTGCACTCGCCGAGTTGCCAGAGGCAGCACAGCAT  
TCCGGCGACGTCCTTCTGTGCTTGTGCTTCTCGTAGCGGCCCGGCTTGACGCGCCCGAC  
CTTCCCACCCTTGGGATCGCCAAGGCGCTGTAGTCGATGCCGCTGGGCTGGCGGGGCTG  
TTGGCGGCGCTGGAGCATGGACGTCACTCCGCCGCTGTGACGGAACGGAGGCCATCAGC  
GCGCGCTTGC GCGGTCCTTCGCGTCGGTAACCGCGGCCTTCTGGTCCGACGTCATCGGG  
TGCATGTAGCCCTGCGCCGCTGACCACAGGTCACGGAGGGCGTCCAGCGATCCGCAGCGA  
CCGAACCTCGTCCGTCAGCACGCGGGCGGCCTTGGTTCGAACACGGCGGCCACGGCATCC  
TGTTCCGGCCTTCCGATCTTGCCGAAGTCGGTCTTACC CGCTCCACAGCCCGTCCGAGG  
TGTTCCCGTCTTGGCCCCGCGCAGGGCCTTCGTCATTTCCGGCGACGATGGCCTTGGGG  
TCGGGCTTCTCGTCTGACGCTTCTCGGCGAACTCCCGCTCAACGTCCTGGCGATATTT  
AGGTCGTCGAACTGTCCCATATGGACGTCGCCGCCGACGCCAAGCTGCTTCATTGCGTTG  
CCGAGAGCGTCGGTATAACGACTTCTTCGCCGCTTCGTCGTCGAGGGACAGCTTCCCGTCA  
TTCCGGGACTTGGCGATGATGTCGCCACCGACGCCCCACACGACTTCCGACTTACCCCG  
TTGTCCAGATAACCAGAGACCGACCGTGCAATAGATGGCGATCTCGGAACCAGCCGACTGA  
ATTAGGTATTCGGGCTTGGTCATGCCCCAGCCGATGCCGACCGGGCCAAAATGCTCCGTC  
ATCTTCTGCGTCGCATAGATCGGCTTGTATGGCAGTCCCGCGAAAGCCCGCCGGTGCGGGTG  
AACTGTTTGGTGTGAGCCGGGTCAGTCTTGTACAGGGGGTCCCAATGGCGGAGATTGTG  
GTCATTTCCAGGGCTCTCGGATCTTGTGCATTTCCGAGGGCTTTGGCAGCGTCTTCCAGAC  
GACGCAGGGCCGGGGACAGCGCTTCCATGGTCTCCAGGGACAGGCGCCCGCTTGGCGAGGG  
TGAGGAAGTCCAGATGGCGCCTTCCGTCTCGTGGACCACCGCATCGGGTATGGGGATGT  
CCTGCGGACCCTTGTGCTAGGGCATGGTCAAACCGCCCTCTTCTTCTCGTGGATGACCAC  
ACCGGGAAGCGCATCGCTGCGCGCTCCGCCGTCCACCAGACGCTTGGCCTGGGCGGACAG  
GAACTCGTCCATCACGTCGCGGTGAGCGGTCCAGAGGTAGCGGGCGAATGCGGTGGCGTC  
GGTGATCTCGGGTCCGTTAGCTGGTGCAGCGAGACGGCCCGTCCAAACACACTGCTGCC  
GGCCTTCCGCCCGTCTGTTCTCCGCTTGGTAGCGAAGCGCTCGGCCTTCTTGGCGTCTT  
CACCAGGGCCTCGGCGGCGGCGCGCTGCTCCAGGTTGGCGGCGTCCGGCGGCGCGCAACGC

CTCCTGCGCGGGCGGGCCTTCTCCTCGGCTTCCCTTGCGGGCCTTGTTCGGCGGGCGGCGCA  
CTTCTCGGCCTCCAGCTTCTCCAGCCACGGCTGGAGGGCCTTCTTGCACGCCTCAGACGC  
CAAGACTGTCTTGCCCTTACCGACTTGGTATTGCCGATCAGGGCGTTGTACCGCGCTTG  
GATTTTCGGCCTTCGCGTCGTCGTGCGGGCGGGCCTCGTCCTTGCGCGCCTCGTCCGCCTC  
CTTCTCCGCGGGCGGGATCAGGTTTCAGCAGGTTGCCGATGTACATCGGCCATGCCCTGCGA  
GTTGACCGGCTCGCCGTCCAGATACAGGGCGGGCCTCGTCGTAGAGCTTTCGGATCTTGTG  
GCGGACGATCTCGAACGGCGTCGGATCGGGAGGAGCGCCGTTGCTGCCGATCACGGCGCG  
CGGGTTCTCGGCGGCTTCGTGCGGTGACGATGCGGGTGATGGCGTTCATCGCAGGCTCATC  
GGCTGGCTGTTTTTCGAAGATGCCGGCCACGTCTCCGGCGGGCGTCAGAGAGGCACCCATCC  
ACCCAGCCCAGACCATCCACGCCGGAGCGGATCAGGTCGGTGGTGTGATGACGCGGGCCTCG  
GCGATCTTGCGGTGGAGGGCGGGCAGCTGTTTCGCGGCACTCCGGGTCGGTCGTGCGGGTG  
ACGAGCATGGGCCTTACTCCGCAGCGATGGTGAAGGGGATGGAGCGGGTGGCGACGAAGC  
TGTCCAGGGCGGGCAGGCAATGCTGCTTCGAGCCGTAGCCGACAAGCTCTCCGTCGCCGA  
AGGTCTTGGCGTAGGCGTGCACGGTCCACAGGCCAGCGGGACCGATGGGGCGGTTTCGAGT  
AAGTCGCCTGGAACCACAGGCCGGTGGCCTTCGTGGCAGCATCAATGGCGGTGTGCGATTT  
CCTTGTCCATGGATCACCTCACAGGGCGAAGAGGAAGGAGATGAGGAGCAGCAGCGCGGC  
CCACTCGGTTCAGGAATTGGCGGGCGGTCAAGGCGTGTCCCTCACGGCAGGAAGAAGTTGA  
CGGCCGCATACAGGCCGATGCCGATGGTGGTGAAGGCGATGGAGGCTGCCCTGGTGAAGA  
CGATCACGAAGGCAAGCTCGGCAGCGTCCATGTACGCTTCCGCGATGGGTCCGCTGACGG  
CGGGGTCTTCGAGGGCGGAGCGCATCACGCGGTCTCCTGCGAGGCTTTCGGCTTGCCGGT  
GCCGCTGCACACATCGCATTTCGCGGTAGGTCGTTCCGTCAGTTACGGACCACGACTTAAT  
GACCTTTCGGTTCCTTGGCAGCGGTGGCACAGGCCGGTTCGGCTTCCCATGCCAGTTG  
AAAGGCGCGAAACTCATTGTGTCGTGCACGGTCACCGGCATTTTCGGTTCGGCATCGCGCGC  
GGACCACTTCGGGTGGCCTTTCGCGGGGCCGCGCTTGAACGTCTCGGTGACCACAGCGCC  
GGTCACGATGATGTAGTCGCCCTTGCCTGCGCAGCGGAACGCCTGCCATGTGTGCGGGCAT  
GCCGATCTTGCGGCGGGCGCAGAGTTCCATCAGGTCGATATGGCTCATAGGGTTGTCTCC  
CTTGGTCTCGGCTATCGCCAGAGCCCCGTAAGGCCCTCGCGGTAGCCGGCGGGCGCTGGT  
ACTGCCGCCGGTCCGTAGATGAGGTTCCGGGATGACGCTCCCGGAAGGCGGGTGGTGTAG  
CTGCCAGCTTGCCGCCGTCTTCCCTTTGCCGATGCCGACTTCAAGGCCGCTAGGGCGCA  
TCGGTCATCGGGTCTGGCGTGGATTGGCGAGGTATCCTTTTGCTTAGCGGGCCGATCCGCC  
TTGGGATGGCCTGCCGGCGCCGGTTCGTTTCAGATGCCAGGAAATTCACGATCTTCGTGGC  
GTTTCGGTCTTCGCATTGTGACCTGACCCTTTCATGCTCGGCTCCGCGCTCGTCACGGCCC  
GGTGAGGGGTTGTCCCTCTATCGCCTCAAGCCCCCGCTTGTTCATGGCGGGTAAGGGGGC  
TGTGTGCGGTGAGGCCCAGATAAGCTCCGGGATGGAGGGGGTTCAGAAGGGGATAGGGGGCTT  
CGTTGAGGCCGTTGAGGTGGCAGAAGACCCAGTTCGCGTGCTCGTCGGGCTTGCTCCAGC  
CGTCCCGCTCCTGCTTACGGTCAGCCAGCTCGCGGTTCATCTGCCGCGCAGTTCCGTCCA  
GGGCGTAGTCGGCGGGCGGCTCTTCTTCTTCCACTCCTGGCATCCACGCCAGCCAAGCAA  
AGAAAGCGGAGGCGCGGTTTTGGTTGTCTGGGTTGGCAAAGCGCCAGTTTCGTACAGCA  
TCACTTCCCCCGTTCGAGCGGCCCGGGCAGACCATCCGCGCAGGACGGACACCGGCA  
ATCGGTGACGAAGGCTCCCCAGGTCTTGGCCCGCTTTCGCTGCGGTCTTCGTCCAGCC  
GACCGCGCGCAGGTAGCGCATTCCGGGCTGGATGGTCACGGAGCAGCCGATGAAGCCGCC  
GTCACAGCGCCGTGGCCTCCTAGCCGTCCGCCAGCCATGCTGATGCCGCGGGCCATGTC  
ACGCCTCCCCCGTGGCGGTGGCGGCAGAGAGGGCAGCGCGGGCGGGCGGCCAGACGGGCAG  
CGCTACGATCTTCGACCGCTTGACCCATAGGCGCAGGCGGTTCGGCGACAATCGGCGGCA  
GGTCCGGCCAGAAGCTCATCCCCAGCCTCTTCGTAATGCTCGGCGATCGTCATCCAGTCTT  
CGCCGTCCAGATCGTTGATGGAGTTCAGTTCGCTCAGCGTCGCGGCATTCGACATGAT  
GCCGACGCACATACTCGCTGCCTTCGTAGACACCGCGGTATTCGGCATAGACGGTCCCGG  
CTGCGATCTCGGTGTTGCAGCCGTGCGAGATGTGCGACTTGCGGGCGGTGGGCGTTTTGC  
TCGACAGGCGCGTCATGGTGTCCCTTCTTCGTCTTCTCCCTCCCTTGCTGCGACAGAG  
CGCGCTGGGAGGGGGTGGTGGGTGCGGTTAGGCGGGCCTAGTAGTGGACCTGCGCCGTC  
ACAAGCTCGCAGGCGATGACGGAGACGCGGCAGTCACTGCCCTCCATGAGCGCGTCCCTGC  
ACGTCCCGCATGGGCAGGCCGAGAGCCAGCTTGTTCGGCGAGGTCGCGAAGTTCGTCTTCG  
TCAATCGTGGCGCGTGGTTCGGCCTGCCGTTCGTTGGTGGCGCGGCAGCGCAGGTTG  
AGCGTCACTGTGATTTCTCGGTTCATTGCGGGCCATTGACTCCCCCTCGTTGAAATCCCCC  
TCCCCAGAAGGCCCGGGCGGCAGCGAGTGCCTGCCCGCCGGGAAGTCTGAGGAGGACAAC  
GCCCATCCGGGCCGGAACACCGCCCCACCGTGGTACCGGCTGATACCGAAGAGGGGTGGT  
GTGAGAGGAACCATACGCGATACACGTACGTTGCGTCAACGCGAAAAACGTATGAACTGA

CTTTTTTTAGCAATTCCGCGCGGCAGGGTGTGCTAAAGCCAATCTTTGCGACACC

>NewGenomeName\_249

AGGCGTGGCGGGGGACGACTGCGCGCGCCGGCGAATGAGCCGATGCGGCCAGGAAACGC  
CATGTCCTCCTGGCGGCAAGCTCTAAAAGCACAAACCCCTGCTAAAAAGCAGGGGTTGTCA  
TCGGACTGAAACACACCCTGGCGCGTTTTTTTTGCCTGTGGCTTTGCTGGGCGTACGTGTC  
GTGCCTGAGAGGAAAAATCACGTCATGCAGAATGAAGTAGGCACCTACCAATATTCGCGAG  
TCGGGTTTATTTTTTTTTTCGCCAATACTAAGGCGTGGTTGTAGCCAAACAGTTCAGGAGC  
AATAACATAATAACTCCCAAGGTCAGATGGCGGTTCGGCCCTTCAATCATAGGAATGACAC  
CATGAACGATATCGACACGATACCAATGCGTGGGGACGTTGGAAAACGGCTCAATACGG  
AACCACCTGCTGGTTCACTGAAAGTACCCAGTACGGGCGGAACAAGGACACTCGCAGCTA  
TATGCAACATCAGACCAACGTTTCCGCGCCGAAGGACTTGGTTTACTCCAACCTTTGTGCA  
GCAGGACGGCGGTAGCACCCCTGTTGGGGCAGTACGACATGATCAACGAAGGCAGCCAAGT  
GATTGAACTTGCCGTCAACTTGCAACAAGGGTTAGTGGACACCTTCACCTGGAGCGTAC  
TGAGCAGTTGAAGGTCGGTGTGGAAGTCAAGGTGAAGGCGAACATTCCCCTAGTGGGCGG  
CGCTGAGATCACCAGTACGGTGAATTGTCACTGTCTCTACCCAAGGGGCGAGTACCAG  
CAAGTCTTCCAACCTATGGCGCCTCTACCAAGGTGCTTATTTCCCCACATAGCCACGGCTG  
GGGAGAGGTTGCCTTGAGCTTTACTGAGCTGCGCACTCAGTGGGTTCGGTAATGTGCGGGCT  
TCAAGGATATGTGGCAATTTGGTTCAACAACAAGTTCGCATTGAACAACGATGGCGGATTA  
CCACTACCTGTGGTTCATTCCCGTGGAGCAGGTATTTTGGGAGTGCCTCCAGCACAACAT  
AGTCAATACCTCGGGCTATGTCGTACAAGGCAATGGAGTGTGGCGCAAGCCACAGGCAC  
CTTCCATAGCAGCGTGGGCTTGAACCTGAAGACCATCGCGCACGAGCGGCCCTATCCGGA  
AACCTCGGAGGCGGTGAGAACATTCTATAATTATGCCAGTCTGGTTCGGGACCTAGAAAC  
CCGAGTCCGCTCGGCAGAGTAGAAAGCCGTAGGAAGTCTGGAACGGTTTCTGTCCGTTAA  
ACGTAGAACGCTTGGCGTGTGCGCCAGGCGTTACAGGTTGCTGACAAAGCCCTGGCCAC  
AAGGCCAGGCTTTGTATTTAGTGATTCTCTCATCTTCTCCCTAGTACCCCTTGCTCGGACA  
GCTTTCTCCTTTACGGGGTGATATTGGAGACGCTGATTACAAGCCTGGAGCGTTCGAACTG  
CGGAACCTCACGACCTCCTCCCGATCATCTCATTAACTGCTGCAGGCGCGTCTGCAT  
TGGCGCGAGTTCCAAGCTTGCCAGACCGCTGCTGCGTTCGCTAATGGATCCGAACCCACC  
AGCGTTCTGCGGCACCACCCCATCAGCTGCGGATAGACCCGCGAGGCCGGCGAGCTGGTC  
GTCGCGGCTGATGTTCTTGATTGAGCCGAACCTCGTCTTGGCCGCCACCTCGCTGACCGG  
AATCAGTTGGATCCCTCCTTCTTCCCGTTCGGCGCGTAGACGAACAGGTTGCGGAAATT  
GCCAGGCCCTTCGCGGTCTTCAGCGCCGTGCGCAGCGCGTCGATGTCTTCTCATTCTG  
TGCGGCGTTCGGTTCATGTAGAGGATGAAGCCGGCGTGGCTGCCGTTGTTGTAGTACTTACG  
CCGGAACAGCGTGGCCGACTCGTTCAGCAGGGCGCTCTGTAGGGCGCAGAACCCTCCGG  
CACTCCGTAGATTTCTGATTGATGTCGGCCTCGCGCAGTTGGATCACGCTGCCCTTCTC  
GAATTCGTGCTCATCTTCCAGCTGCGCACCTGGTAGAACGTCTCCAGATCGGTGCCGCG  
GCGCATGTACTTGGCCAGCGGCCTGCAGCGGCATCCGCGTACCCAGGCGAGAACGAGG  
CTGCTCGAGGTATGCCGAGCCAAATGTCAGCCAGTCCAGGGAGAAGTCTCGAACGTCGC  
CCGGCTGAGCAGGCGGTGCGGGATGAAGGTCTTGGCCAGCATGTTGCGCTTGAACCTCAG  
GCCCCACTGCAGATAAACGCTCGACCCACCGACTTGGCCAGCCCCTCCATAGACAGCGG  
CGGCTCGTACCACCGCCGTTTCGGCCAGCACTCGAGATAGTCGAGGATGCCCCGGCCGTC  
GAGCACCGGCATCGGATACCCGAAGGTGAAGGCCTCGGCACGGCCACCCTGGCGCGGGAT  
GAACTCGCCTTCTGCGGCGACTGGACTGTAAGTGGCTGCTGGCGGGCGGTGGCTGCGACG  
TTTGCTCATCCGAAAATCTCCATGCGGCCGGTATTCGCGGGGGTCTGCCCTCGAGCGGC  
TCGTTTTGCAATGCGTGAATAGCGCCAGGCCAGATCGGCGTGGCCGGTGTGTCGTTG  
CGGCCGGCGGTATAGGTGAACTGGCGCCCACCGGCCGTGATGGTCTTGGCGGATAGCCATC  
AGCGCCTGGGCCAGGTTCGGTCCAGCCGGCGTCAATTCGAGGCGGCCGTTCTTGATCACT  
GACCAGGCCTTCATGACCAACTGCGTCTTACCTCGGGCGAGTAGCTGAAGGTGCGCACC  
CCCGGGAAGAAGTGGCGCACCAAGCTGCGCGACGCCAGAGCCATGCCGGTGGTGTGACG  
CCGATGTAGGTGACCCAGTAGCGCTGGGTACCTTGGCGGATGAACTCGGCCTGTTTCGGCG  
AAGTCCTTGGCGCGGAATTGATGGCGCTCCAGCACGCGGAACCTTGGCGCCCGGTACCGCC  
GGAGGCGCCACCACCAGACCCGCGGTGTCGCCCCTCGGCGGGGTCATAGCCAGC  
CACACCTGGCGATACCCGAACGGCCGACGCGAACGGCTTGTAGTCTCCGACCACAGG  
TCCCAGCTATCGACCATGCACGGCTGCAGCATGGTCAACGGGAAAATGCTCGCGCCGTCG  
TCGACGAAGTGGCACATCAGCAGGTTCTGGAAAGCCTCGGCGTCTACTCGAGACGCAGC  
TCGTGATGTCGAACAGATCGCAGCCACGGGCTCGGCATCGAGGATGGTGACGATCTGG  
CGCCAGATGCGGTCTCGCACAGTCGCCCTTGCTGCAGGGCGTCATGACTTACGTGATC

TTGATGCGATCGGCGGCGGCTTGCCCTTGTTGAAGCGCTCGCCAGTCCAGAATGTGTAG  
GCCTCATGCGCCATCGAACTGGGCGTTCGAGAAGTAGGTCCGGCGGTAGCGCTTCTGCATC  
GCCATACCGCTGGCGACCTTGTTGAGCTCCTTGAACCTGAACTGACGTCCAGAAGAAGTTCGTCG  
AAGTAGAAGTTGCCGTGGTAGCCCTGGGCAGTCCGCGCGTTGGTGCCGAGGAAGTGCAAT  
TCCGCGCGGTTTCGGCAGGATGATCGGGTTCGCCCTTTCAGTTTCGACACCTACCGCATCGCGC  
GCGAAGGCCTGGATATACGCCTTGAAGATGTGCGCTTGGGCTTGGTGGCCGACAGGAAT  
ATCTGGTTGCGCCCCGTTTCCAGCGCGTTCGATCAGCGCCTCGCGGGCGAAGTAGAACGTG  
GCGCCGATCTGCCGCGACTTGAGAATCACGCGGGTTCGCTGATTACCCGCGCGGTACCAG  
TCTTTCTGGTAGTCGAAGCAACCGTTCGAGGAAGGCCTCGACCAGTTTCTCGGTTCAGTTCC  
TCACTGATGTCGTTGCGCTTCCGCTTGGGACCTTCGTTACGCTTGGCAAGCTCG  
GGGTTTCAGGTCGGTTTCCGTACCACCGCCCTGGTAGCGCTGGATCCGCGCCTGGCGCTCA  
AGCTGCCGATGCAGCAGGTTCGATTTCCCTTGTAGTACCCGCGGTCTTGCCGTCCTTCAGG  
ATCAACTGAACCAACCGGGCTTCCAGGGCGCCCCGATCCGTTCTACGCTGTCGGCCCCG  
TCCCATCCGTCGCGGTCCTTCCATGAGTGAAGGGTCTTGTCTTCTCGCCAGGTGGTTCG  
GCGATGTCGCAGACACGCCAGCCATCCAGTACAGGAATTTGGCCTGGCGGCGGTTGTCA  
CGGATGGGAATTTTCGACGGCAGCGTTCATGGCGCAGATGCTGCCGCCACCCCTCGCCCCT  
CAGTAGCGCCGCCCTTGTAGCTCCGCGCCCTACAATCCCGCTTGATTGCTGGGCGCGC  
GCGCGTCCCGAACATGCCCTCATTGCCATGCACCCCGCATCAGCCGCATTGAGGACTCC  
CGGCATGAAGAAATTCGCGAGCAAATGGTTCCGCATCGCCGTCGAAGGGGCGACCACGGA  
CGGCCGCAACATCGAGCGCGACTGGATCGAGCAGATGGCCGCGCAGTACGACCCGAACAC  
CTACGGCGCGCGGATCAACTGCGAGCACATCAAGTGGGCTGGCCGGCTGGTGGAGTTCGG  
CGCCTATGGCGACGTGCTGGCGTGCAAGGCGGAAGAGATCGACATCAACGGGCAGAAGAA  
GCTGGCCCTCTTCGCCAACTGGAGCCCAACCAGGCGCTGCTGGAAGTGAACAAGCAGCG  
GCAGAAGGTCTACACCTCGGTTCGAGATCGATCCCAAGTTCGCCGACACCGGCAAGGCCTA  
CTTGGTTCGGCCTGGCCATCACCGACTCCCCCGCCAGCCTGGGTACCGAGGCGCTCTCCTT  
CAGCGCCAAGAACGGGACCCTCGCCAGCCGCAAGACCAATCCCGACACCCTGTTTCAGCGC  
TGCCGAAGAGGGCACCCCTCGAGTTCGAGGAATACGAGGACAAGCCCTCGGTTCGGCGCAGC  
GCTGTTACCAAGGTCAAGGAACTGCTCAAGGGCAAGGAAGCCCGCACCCAAGCCGAGTT  
CGGCCAGGTTCGGCGAGGCGTTCGAAGCGATCGCCGAGCACAGCCGCGACCTGGGTGAGCA  
ACTCGGCGAGCAGAAGAAGCAGACCCAGCAACTGGCCAGCCAGTTGGACAAGGTACCAA  
GGAAGTGGCGGACCTCAAGAGCACCCCTCGATAGCACCCGGGACCACAGCCAACAGCAGCG  
GCCCCCGGTACCCGGTGGCGGCAGTGTGCGCCCTGACCGACTGCTAACCGTCCCCCGCCCC  
GGTATCCAAAGGAAAAGCACCATGCGCAACGAAACCCGCAAACAGTTCGACGCCTACCTG  
GCGCAGCTCGCCAAGCTCAACGGCGTGAAGTCCCGCCGTCAGACCTTCGCCGTCGAGCCG  
AGTGTCCAGCAGAAGCTGGAGCAACGTATTCAGGAGTCCAGCGAGTTCCTGAAGCAGATC  
AACGTCTACGGCGTCGACGAGCTGCAGGGCGAGAAGATCGGCATCGGCGTCAGCGGCACC  
ATCGCCAGCCGTACCGATAACCTGGCGACGGTGTACGCAAGCCGCGCGACGTGTCCGCG  
CTCGACAACCAGCGTTACGAGTGCAAGCACACCGACTTCGACACCCGCAATCACCTACGCC  
ATGCTCGACGCCTGGGCCAAGTTCCCCGAGTTCAGGCCCTGCTGCGCGACGCGATCCTC  
AAGCGCCAGGCCCTCGACCGCCTGATGATCGGCTTCAACGGCACCCAGCGCCGCGGCTACC  
ACCAACCGCGCCGCAACCCGCTGCTGCAGGACGTGAACATTGGCTGGTTCCAGCAGTAC  
CGAACAACGCTCCGGCACGGGTAAGGAAGGGGAAGACCACCGGCAAGGTGGTAGTC  
GGCAACGGCGCCGACGCCGACTACAAGAACCTCGACGCCCTGGTGTTCGACGTGGTTCAGC  
AGCCTGATCGATCCCTGGCACCCGCGTACCCGGGCTGGTGGTGTATCCTCGGCCGCGAG  
CTGGTCCACGACAAGTACTTCCCGATGGTGAACAAGGACCAGCCGGCAACCGAGAAGATC  
GCCACCGACCTCATCTGTGCGAGAAGCGCATGGGCGGCCTGCCGCCGGTGGAAAGTGCC  
TACGTGCCCCGAGAAGGGCCTCATGGTACCACCCCTGAAGAACCTGTCGCTCTACTGGCAG  
ATCGGCGGTTCGCCGCCGCTACCTGAAGGAGGTACCGGAGAAGAACCAGCATCGAGAAGTAC  
GAGTCCAGCAACGACGCCTACGTGTCGAGGACTACGGCCTCGGCTGCCTGGTTCGAGAAC  
ATCGAAGTCGCGGAGTAGATGACATGGCCTTTCAGTCCCGCCAAGGCGCACTTCTGCGCG  
TGACCGCCGCTCAAGAGGCGGGCGGCCACTGCCCGCACCCAGGGCATGGAAGGCGCGAACG  
CCTATGAGCTGCAGCTCGCCAGCTGTATCAGGATCGCAGCCGCTGAAGAACATCCAAT  
CCGACGAAGGCAAGGCAGCGCTCAAGGTTCGAGCTGCTGCCGGTCTACCAGCCGTACATTT  
CCGGCGTGTGTCAGGCCGCAAGGGCGCCAGGACGAGGTGGTTCACCACCGTCATGCTCT  
GGCGCATCGATGCCGCGGATTACGCCGGCGCCCTGGACATCGCCGACTACGTGCTCGCAC  
ACGACCTGGTTCATGCCCGACCGCTTCGCGCGTACCCGCGGCTGCGTCATCGCCGAAGAGA  
TCGCCGAGGCCGCGCTCAAGGCACAGAAGACCGGCGGCAGTTTCGACCTTGCAGCCTTGC

ATCGCACCCCTCCTGCTCACCGACCAGGCCGACATGCCCGACGAAGCCCCGCGCGAAGCTCT  
ACCTCGCCGCCGGCCATGCCACTCTGGAAGGACTTTCTGTAGAGAGCCCCGGCCAACCCG  
GGCAGGTGCAAGCCGGCATCGATCTGCTCAAGCGCGCGATCCAAGTGCACGACAAGTGCG  
GCGGGAAGAAGGATTTGGAGGCCGCGAACGGCTCCAGAAGAACTGACCGCCTCTGGCG  
GTTGACCGAGCGTACCCCGCGCCCCGCGGGCTCGGGGCGGATCTGCCAGGTCTCTCCTT  
CCTGAGCAGTGACGCCCCGACCACGGCGACCTCAAGCGAGCAGCAGCATGAGCGGATTC  
ATCGCCAACGGCCCCGGTCCCAGCCGGGCACATCAACAGCGATCCCTTCTGGCCCACCATC  
GAGCTCGAGCATGTGCGCGCGAACCTGCGCATCGACTCCAGCGTCGATCCAGCGCGCCTC  
GAAGTTGCGGTCATTGCCGCGGTGATCAGCGTCAACCGCGAGCTGCGGGCCTGGCGCCTT  
GAGAAGATCGCGGCCGGCTATGCCGAACCTGCCAGGTGCCGTCCGACAAGGTGCGGGAT  
ACCTCCGAACCTGGTGCAGCTGTATCTGCGCGCAGTGCAGTCTGCCACCGCCGCGAAGTG  
GCCGAGCGCTACCGCTGGTACGACACCACCAGCGGCAACGACAAGGCCAGGACATC  
GCAACCACCATCGACGACTACCGCCGCGACCAGCGCTGGGCGATCCGCGACTTTCTCAAG  
CGTCCCCGCACGACGGTGGAGCTGATCTGATGAACGAGCCAAAGATCATCGACTGGAACG  
AAATTTCCCGCTTGGGGCTTCTGGAACGCATCAACCGGGAATCATGCACCCGCTCGGCT  
ATGCCGTGTGCCGCGAGGTAGAAACCGGTGCTCCCCAGGCGCGCTCGTCTCGGACGACG  
GCCCGTTCTGTTTATCCCGATCAGCTCAAGCACCAGGAGTGCAACTAATGGCCACCGTGAT  
CGTAACCAGAGCGACACCGTCGAGGGCGCTGTGCTGGCGGCACTACGGTTCGACCCGCGG  
CGTGACCGAGGCGGTCCTCGAGGCGAACACGGCCTGGCCGACCACGGCCCCACCCTCCC  
CCCTGGCCTCAAGGTCACCATGCCGGACATTCCGACGGCCGCCCGGAACGGCAGATGGT  
GAACCTATGGGACTGACCACTTTGCAAGGAACCACCCCGCATGGCTGACCTCACCACCAC  
CGCCACGGCCGGCGCCATCATGGGCCCTCGGCCCTGGGCGTAACCCTTCCGGTTGACGGCGG  
CATGCTGTTCCGGTGCCTGCTCGGCGCCTGGCTGGCCACCGGCACGAAGCAGGACCTGAA  
GGCCTGGTCGCGCCTGCTGTGCTGATCCTGCCGACCTGCGTCGGCTACCTGTTTCGAGA  
TGTCGCCCTCGCCCGTGTGCCCTGGCTGACCAACCTGGCTTTCTCTGCCTTCGTCTGCGC  
CCTGGTGGTCATTCCCCTCAGCCTCAAGGCGGTGCGCCTGGGTCGACAAGGTGCACTTCGA  
CGACCTCTGGCGCCGCATCCGAGGAGGTGCTGACATGCTCATGACTGCCGTTCCGTTGA  
TCGCCGCCCTGGCCTACATCGCTGCCGCGCTGCGCCTGGTCTGCTACCAGCGCTGCGGCG  
CCCGCTTCCGCCGACGCGTCTCGTTGCTCGCCAGCCTGCTCGGCGCATCCATGGCCATCT  
GCGGCCCTGGAAATCCTGCTCTACCGCCCACCGGTCAGCATCTGGCACGCCATCGTCGCCA  
CCCTGCTGTGCCTGCTGATCTTCCGTTCCCGCGGCAACGTGCGCCGCCCTGCTGAGGCCAT  
CCGCATGACCCTTCGATATGGTGACCGCTCTCAAGAGGTCTCCAGCTTCAGCGTCGACT  
GAACACCTGGGCCGGCGCCAACCTCTACGAGGACGGCCACTTCGGCGCCGCCACCGAGGA  
CGCGGTGCGTGCCCTCCAGCGTTCGCATGGACTGGTCGCCGATGGCATCGCTGGCCCCGAA  
GACCCTGGCCGCCCTCGGCGGCGCTGACTGCTCGCACCTGCTGCAGAACGCCGACCTCGT  
CGCCGCCGGAGCTCGCCTCGACCTGCCGCTGGCGACGATCTATGCAGTCAACCAGGTGCA  
GTCGAACGGCCAGGGGTTCCCTGGGCAACGGCAAGCCGGCAATCCTGTTGCAACGCCACAT  
CATGTACCGCCGTCTCGCCGCCACGATCAGGTCACCGCCGACCAACTGGCCGCACAGTT  
CCCCGCGCTGGTGAACCCTCGCCGGGCGGCTATGCCGGCGGCACCGCCGAGCACCAGCG  
CCTGGCGAACGCTCGCCAGATCGACGATAACCGCCGCCCTGGAGTCGGCCAGTTGGGGCGC  
CTTCCAGATCATGGGGTTCCACTGGCAGCGCCTGGGCTACGTCAGCGTGCAGGCCTTCGC  
CGAGTCCATGGGGCGTAGCGAGTCGGCTCAGTTCGAAGCGTTCGTCCGCTTCATCGACAC  
CGACCCGGCGCTACACAAGGCGCTGAAGGCTCGAAAATGGGCCGACTTCGCCCGCCTCTA  
CAACGGCCCCGACTACAAGCGGAACCTCTACGACACCAAGCTCGCGCGAGCCTACGAGCA  
ACACGCCAACTGCGCCGAGGCCAGCGCGTGAGCCTTCTGCGCCAGGTGTTGTACAGCGCC  
GCCCTGCTCGGTGCTCTCGGCTTGCTCCTGTGGGTACAGCAGCAGCGCATCGACCTGGCG  
CAGGCCCGCCTGGCCCAGGCCGAGTTGGCGAGGAAAGCCAGCGACGCCAGCTTTCCCGC  
CAGGCCGGCACCATCACGGCCCTCGAGGCCGCCCTTTCCCGCGAGCGCCAGGCCAGGCC  
GACCTGGACCAACAGCGGCAGCAGCTGCGCCAGGCGCTGGCCATCCGCGAACGCTTGATC  
GAGGACCTGAAACGTGACGATGAACCTATCGCCAGTGGGCTGACCAGCCTCTGCCTGAT  
GTTGCTCGCCGGCTGCAACAGCGCCCCGCTATCACCGGAGCGGGCCGCTTACCATCAGTGG  
CTGTCCCGCCGTGACGCCCTGCAGCCTGGAGTCAGCGGCACCGAAGGACAACGGCGGTCT  
ACAGACTGAGGTCGAGCGTATCGGCCTGGCCTGGGCCGAGTGCGCCGCGAAGGTGACAT  
GATCATCCGCACCCAAGGGGCTACCCATGAACAAGCCCGATAGCCTGAAAGCGCATCTGC  
TCGCCGCCGTGCCGGAACCTCAGGAACAACGGCGACCGCCTGGTGATATTCATCGACAACG  
GCCGGGTCCGCGAGCACCTCGGCCGAGAGCCTGTCCTTCGAATACGCCTATGACCTGCAGG  
TGATCCTCACCGACTTCGCCGGGCACCCCGACAGCGTGTCTGCGGCTGCTCGGCTGGC

TGCTGGTGAACCGATCGGATCTACTGGCCAACCTCACCAAGGTGCAGGACGGCATCACCT  
TCGAGGCCGACATGCTCGACCGCAGCAAGGTGACCTCGGTATCGTCCTGCAACTGACCG  
AGCGTGTCTCGTCAAGCGCCGCGAGGATGGCCGCTACGATGTGAGTCACCCGGAAGAGC  
CCCAGCTCACCGAGGCCATCGAGGTGATGGGCCGATGCAGATGCTCGCCAACGGCGAGC  
TGCTGGCCGAGTGGACGCCGCGAAGCCCACCGAGGCCGTCATGCTCGAGACGCCGCGAGA  
TCAGGCGCCCGGCCAATGGCTGACAGCCTCGAGGCTCTGGAAGACTGGGCAGGGCCGATT  
CTCCGCGCCCTCGAGCCAGGCCCTCGTGCTGCCCTCGCGCGTTCGCTCGCCCGCGATCTA  
CGGCGCAGCCAACAGAAGCGCGTGATGGCACAGCGCAACCCCGACGGCAGCGCCTATGAG  
CCACGCAAGAAGCGCGAAGTGGCGGCAAGCAGGGCCGTATTCGGCGCAAGATCAAGATG  
TTCCAGAAGCTGCGCACGGTGCCTATCTGCGCGCCAAGGGCGACGCCAGGGCGATCACG  
GTTTCCTTCGCTGGTCGGATCGCACGCATCGCGCGGGTTCACCAGTACGGGCTGAGGGAC  
CGTGCAGGAGCCTGGCGCTCCCGAAGTCAGCTACGCGCAGCGTCTCCTACTTGGCTTTGAT  
AGCAGCGATATGGAAACGATCCAGAATGGAATTTTGGCGCACATAGACGCAAACCTCTCCC  
ATTTAGCCTCGACGGGCTGTCTAATATCGAGACAACGAAATGAAAGAATCCCTAACAAAC  
AGAAAATTTGAGAACATATTAATAAATAATAGAAAAAGAATTATTCACAAGCGAGTACCC  
AGCATATGCAGCCTGCATGATATATCCCCAGACAAGGATAGTCACAACCTGCATTGCCTGC  
AACCTCGCCGGCAACGTTATAAACCTCAAAGACGCTGCAGACTTACTATCAAAAAGCACC  
AAAAGTCTATCTTACCCAGCAGACGAAGCTTTTGCAGAAAAAACCTATATATTATGGCTG  
TATTTGCTATCCGAAAATATACATGAAGTATTGAAATTAATATCCTACCCCAAGATATT  
AAAAACAAGGACTTCAAAAATACAATAACCATAAACGGTGGGCAAACCTTCTCAAACAC  
CCAAAAGCATTCTCCTCACTCACCACCCTGCCTATTGTGATCCCGCCACCCTACCATTT  
GAGCCTCACCATTCAGATCTAGAAGGAATCACAATAATTGATGATAGATTTATCAACAAA  
TTCTACTCAGGAGACAAAAACAACAAGAGCTTTACACAACCTTACAGAACAACCAATCA  
ACCTTGGTCTTACTCCCTGATCTAGAAATTCTCACCAAGGGTATTGCAGACGAGCTAAAC  
CAACTTAGCGAAAAAATAAAGCACAAACAATGAATACTCCAAAATCTTAACAGACAAAGCC  
TCCATTGAAGATTACTTAAGCGGGCGCCCAAGCAGACTCGTCGGACTAGGGTAGCGACTAT  
TTGTAGTCACCTACAGTACAGGCTTAAAAGATTCACGCAGCACAAAAACATAATAACAT  
CGGTGGCATGAACGACTTCGCCGCTCTCTCCCGCATGATCGAGAACCTGATCCGCCTCGG  
CACCATCGCCGCGGTGGACCATGCCGCGCAGCGCGTCCGTGTGTTGACCGGCGACCTGCT  
GACCGGCTGGCTGCCTTGGGCATCGCCGCGGGCCGGCGCCGACCGCGAATGGAACGCCCC  
CACCTGAACGAGCAGGTACTGCTCTTCAGCCATCCGGGCAGACCGCCAATGGCGTGGT  
CCTGACCGGCTTGTTCAGTGACCTGATCCCGCCCAACGGCGACCGCGACGCCCTGCATCG  
CACCACCTACCGCGACGGCGCGGTGATTGAGTACGACAGCGCAGCCACCACCTGCGCGC  
AGTTCTTCCCGCCGGCGGTACCACCGAACTCATCAGCGACGGCGGCATCCGCATCGTCGG  
CGACATCACACACCAGGGCGACTACATCCAGACGGGCAACCAGACCGTACCGGCAAGGT  
CACGGTGAGCGTCGACGTGATCGCCAAGGGCATCAGCCTGGTTCGGTCATACCCACGGCGG  
CGTCATACCGGGCGGCGCTACGACGGGGAAACCGCAATGAATGCCCATACCGGCGGGCGCC  
CTCGCCCGCTTGGCACACATCCGCCAGTTCGATCGCCGACATCCTCACAACCTCGCATCGGT  
ACCCGCGTCATGCGACGCGAATACGGCAGCCAGTTGCCGGAGCTGATCGATGCTCCGTTT  
AACGACACCACCCGCCTGCAGGTCTATGCCGCCACCGCCATGGCCCTCATGCGCTGGGAA  
CCGCGCATCCGCCTGAGCCGTGTCCAGATCACCGGCCAGAACCTGGCCGGCCAGGTGCTC  
ATGGAGATTGACGCCACCCTGGTGGACAGCAACGAGCCGCACAACCTGAGCATCCCCCTG  
CAGATGGGCGCCAGCGCATGACAACGAACCTTCGTGCGCATCGACCTCAGCCAGTTGCCGC  
CACCACACGCGGTGGAGCAGCTGGACTACGAGCAGATACTCGCCGAGCGCAAGGCCTACG  
CCATCAGCCTCTGGCCGGAGGATCAGCAGGGCGAAATCGCCGCCCGCCTCGCCCTGGAGT  
CCGAACCGCTGACCAAGCTGCTCGAGGAAAACGCATACCGCGAAATGCTCTGGCGCCAGC  
GGGTCAACGAGGCGGCTCTCGCCAACATGCTGGCCAGCGCCCAGGGCGCTGACCTCGACC  
AGCTCGCCGCGAACTACAACGTCAAGCGCCTGGTCATCCAGCCTGGAGATCCGTGCAAGG  
TGCCGCCCGTGGCGGAACTGCTGGAGTCCGACGACAGCCTGCGCGAGCGGGCGCAGATGG  
CCTGGGAAGGCCTCAGCACCGCGGGACCGCGTAACAGCTACATCTTCCACGCCCGCGCCG  
CCGACGGTTCGCGTTCGGCGATGCCTCGGCCGTCAGCCATCGCCTGCCGTTGTGCTGGTGA  
CGGTGCAGGCCGCCAGGGCAACGGCAGCGCCCCGGCGGACCTGCTGGCCATCGTCGACG  
CCTACCTCAACGACGCCGACCGTCCGCCCGTTCGCTGATCGCCTAACAGTCCAGTCCGCC  
AAGTGCTCGAGTACCGTGTGACGCGACGCTTACCTGGCCACCATCGGCCCGGAGTCCG  
AGCCGATACTCGATGCCGCCCGGGCCCGCTTACGGCCCTACGTCCATCAGCGTCCGACGCC  
TGGGCATGGAAGTGTCCGAATCGGCGGTGCATGCGGCCCTCCACGTGGAAGGCGTGCGCA  
AGGTCACGCTCAGCAACTGGTTCGGACATCGCCGCCACACCAGCCCAGGCGCCCTACTGCA

CCGGAATTACGCTGACGCTGGGGGATGAGTGATGCCAGCTTGCTCCCACGCAACGCCAC  
CGAACTTGAGCGCCTGGCCGCCGAAGCCCTGGCGCAGATTGAGCGGGTACCGATCCCATT  
GCGCCAACTGTGGAACCCAGCACCTGCCCGGTCGCCCTTCTGCCGTACCTGGCCTGGGC  
GTTCTCCGTCGATCGCTGGGACAGCACCTGGCCGGAGCGTGTGAAGCGCCAGGTCATTCG  
GGATGCCTACCTCGTCCACTCCCACAAGGGAACCTTGAGCGCCCTGCGCCGCGTGGTTCGA  
GCCCGTTCGGCTCGCTGACCGACATCCTCGAGTGGTGGCAACAGACCCCCGCCGGCGTCCC  
CGGCACCTTCGAAATCACCGTCGACGTCAGCGACAACGGTCTCGACGAGGAGACCGTGCT  
CGAGCTCGAGCGCCTGCTCGACGACGTGCGCCCAGTCAGCCGACACCTGACCCGCCTGGA  
CCTGCGCATCACGCCGGACATCCTGGCCCGCCACGGCCTGGCGACGATCGACGGCGACAC  
CCTGGAAATCAGCCCCCTGGAAGCAGTGATATGACGAGTCCCAAGTACGGCGGCCTGCTCA  
CCGACATCGGCGCGGCAGCGCTGATCGCGGCGAGCGAGGCCGGGAAGAAGTGGCAGCCCA  
CCCATATGCTCATCGGTGACGCCGGCGGCGCGCCCGGCGAGACGGCTGACCCCATCCCCT  
CGGCCGCTCAGACCAAGCTGATTCGCCAGCGCTACCGCGCTCAACTGAACCGTCTGTTCG  
TCTCCGAGCAAAGCGCAAACGTGCTGGTTCGCCGAGCTGGTACTGCCGATGGCCATCGGTG  
GATTCTGGATACGGGAGATCGGCCTCGAGGACGCCGACGGGAAGTTCGTGGCGGTTCGCA  
ACTGCCCGCCAGCTTCAAGGCCAGCGTCGAGAGCGGGAGCGCGCACCCAGACCATCC  
GCGTGCAGATCATCCTATCCGGCATGGAGCACGTCGAACTGATCATCGACGACGGCATCG  
TCTACGCCACCCAGGACTGGGTGACGGCGAAGGTTGCCGCGGACTTCAAGGGACGCAAGG  
TGCTGGCCGGCAACGGCCTGGTTCGGCGGTGGCGATTTGTCTGCGGATCGCACCATCGCCT  
TACCAGCCTCCGGCGTGGGTGCCGGCACCTACCGTGCGGTCAACGCCAATGGCA  
TCGTCACCGCCGGCAGCAACCCGACCACGCTGGGCGGCTACGGCATCACGGACGCACTGC  
ATGCCAGCGAGGCGGTCACTACCCCGACGGCGAACAAGCTGCTCAGGCTGAACGCGGCCG  
GGTACTACCGGCCTCGATTACGGGCAACGCAGCCACTGCCAGCCGGCTTGCAGCGCCCA  
TCACGCTCAGCGCGAGCGGCGATGCAACGTGGTTCAGCTCGGTTTCGATGGGGCCACAAACG  
TCAACGGAGTCCTGACGCTGGCCAACTCCGGCGTCAACCGCCGGGACCTACGCGAAAGTCA  
CGGTGAACGCCAAAGGACTGGTTACCGGAGCCACTGGGCTTGTAGCGAGTGATATTCCGG  
CCCTTGATGCCGGAAAAATCACCTCCGGCATCTTACCTGCTGCCAGAGGCGGTACCGGCA  
ATGGTATTGGTCAGGCTGCAACGGCGGTCAAACCTCGTCGCCCTTCGTACGATCTACCTCG  
GTGGGGACGTCAGCGGCTCGACAACGTTTCGACGGTAGCGCGAACGCTGGAATCACGGTCA  
CGTTGGCGAACTCGGGTGTAAATGCCGGCTCCTACCCCAAAGTCACTGTTAACGCCAAGG  
GGCTGGTTACCGGTGGCGGTGGCCTGACGGCAGCAGACATTCCTGCGTTGGATGCGTCGA  
AGATTGCGACCGGTGACTCGATCTTGAACGCTTGCCGTTGGTGTGCGAGGGACTGGCCA  
CGGCAGTGCATACCAGCGTTGATCCCAAACCTCGGTGGTTCATTCCGCTGGTACTGACCAATC  
ACGCGAATGGCCCAGTGGCTGGCCGCTACTACTACATCCAGACGATGTTCTATCCGACCG  
TCGAAGGCAACGCGACGCAGATTGCAACCGGCTATGCCGGCGTGGCTGACATGTACGTTT  
GTTATGCCTACGCTTCCCCCGCAACGACCGATTTCGTCCAAGCGGGAGTGGTCAGCCTGGG  
TCCGCTGCGATCTGGGCGGTGCCTTCGCACACGCGCCCGATGGCGAGCTGGGTGGCTATG  
TCAATCTGGACTCGATGATTGCTTCGGGCTGGTGGCATCAACCGTTCACCGCAAACGCCA  
AGAACGGGGCGAACTATCCCGTAGGCGAAGCAGGTTTATTGACGGTTCATGCTCCAACCG  
CCTCGATGATCTATCAGACCTATCGTGGCTACGCCGCCGGCGGTCTGTACTGGCGCTGCC  
GCTACAACGGAACATGGTCAGCTTGGTATCGTGCATGGGACTCCGGCAACTTCAACCCGG  
CCAACCTATGTGGCCAAGTCGGAATACTCCTGGGCGTCTTGCCTGGGAAGCCATCGAATT  
TCCCACCCAGCGTGCACGTTCACTCTGCAGCGAGCAGGGGCGTGAGCGGGTGGTACAAGA  
ACAACGATACGGGGGTGATATTTAGTGGGTGAACCTGTCTATCGGTGACCACCCTGGGG  
GAGTTATCGATCGGGTCGTGACGTTCCCCATTGCCTTCCCGAATGCCTGTCTACATGTG  
TTCCAACCTGTTAGAGAAAACGGCCGTCCTGCCATTCCCCTCAACTGTAACGGTTGACG  
AAAAAGCCAGAACGGCGACCAACTGCACCATCGTTTCAAGTGAGTACATCGGGAATGTGC  
AGAACTTCGGCATCAATGTTTTTCGCAATTGGCTATTGAGGTGGAACATGTTCTTTTTATTG  
CCCGAAGACTGGCGGCTTTTACTCTCCAGAGGTACATGGTGAACAAATGCCAGCGGAATC  
GGAGCTTTGGCCTCTGACGGATGAAGAGTACGAGGCACTGCTCGACGCTCAGGGCCAGGG  
ACTGTTGATCGTCGCTGGCGAGGATGGACAGCCGGTTCGCCACGCCACCACCACCTCTCGG  
AGACGAGGCTCTGGCAACGATCGAGCGCGATTGGCGCGACCGCCAGCTCGACGACACCGA  
CGCCCTGGTTCGCACGTCACCGCGACGAGCTCGAGGTTGGTACCACGACGCTCAGCACTGA  
GCAGTACCAGGCGCTGCAGGCGTACCGCCGCCAACTGCGCGACTGGCCGGAGTCCGGTGA  
GTTTCCGCTCGCAGAACACCGGCCGGCCGCACCGGACTGGCTCGAAGCCCTCTTCGCAGA  
TGCGCTCTTGTAGCTTCACGCCGTACAAGCTTCCCCTCGCCCCTTCGCCGCGCGCGCG  
GCAGCCTGTGCAGTGTATCCAACCACTGCACAGGCACACCCCATGGCCGCTGACCAATA



TCATCACGGTGTCCGGGTCCAAGAGATCAATGACGGGACCCGCCCATTCGCACCATCGC  
CACCGCGATCATCGGCCTGGTAGCCACCGCCGAAGACGCCGACGCCACCGCCTTTCCACT  
CGATACGCCGGTACTCATCACC AACGTGCAGGCTGCCATCGGCAAGGCGGGCACCAGCGG  
TACGCTGCCCGCAAGCCTGCAAGCAATCGCCGACCAGGCCAACGCCGCCACTGTGGTGGT  
GCGGGTGAAGCCGGGCGAGGATGAAGCCGCGACCAATAGCGCGGTTCATCGGCGGGCGTCA  
CGCCGATGGCAAGTACACCGGCATGAAGGCCTTGCTTGCCGCCAAGGCCCGCTTGGGCGT  
GGTACCGCGCATCCTCGGCGTGCCGGGCCTGGATACCCAGCCGGTTCGCTACCGCACTCAT  
CGCCATCGCCAGCAACTGCGCGCCTTCGCTTATGTCTCCGCCAGCGGCTGCAAGACAAA  
GGAAGAGGCCACCGCCTACCGCGAGA ACTTCGCCGCGCGCGAAGCCATGGTGTCTGGCC  
GGACTTCCTGACGTGGAGCACCGTGGTCAACCAGACCGTGCCTGCGCCAGCTGTTGCCCA  
GGCACTGGGCTTGCGTGCCCGGATCGATCAGGAGGTTCGGTTGGCACAAGACCCTGTCGAA  
CGTCCCGTCAACGGCGTGACCGGCATCAGCGCCGACGTGTTCTGGGACCTGCAGAGCCC  
CAGCACCGACGCCAACTACCTCAACGAGAACGAGGTACCACCCTGGTGCAGGAAGGGGG  
ATTCCGTTTCTGGGGTTCGCGCACCTGCAGCGATGATCCGCTGTTCCGCTTCGAGA ACTA  
CACCCGCACCGCCCAGGTGCTGGCCGACACTATCGCCGAAGCGCACATGTGGGCGGTTGA  
CAAGCCCATGCACCCGTC ACTGGTGC GCGACATCCTTGAGGGCGTGAACGCGAAGTTCCG  
CGAGCTCAAGGGGCTCGGTCTGATCATCGACGCCAGGCCTGGTACGACCCCAACGTGAA  
CGACAAGGACACGCTCAAGGCCGGCAAGCTGCGCATCACCTACGACTACACCCCGGTGCC  
GCCGCTCGAGGACCTGACCTTCTTCCAGAAGATCACCGACAGCTATCTCGTCGACTTCGC  
CAGCCGCGTCAACGCCTGACGCCAGCGCTCCCCGGACGGGGAGCCGACCCACCTGATTC  
CCGGAGAGCCCTACCATGGCCATGCCGCGCAAGCTCAAGAACATGAACCTCTTCAACGAC  
GGCGGTAGCTACCAGGGCGTTCGTGAAGTCTGCACCCTGCCCCGCTGGCCCGCAAGATG  
GAGGCCTTCCGCGGGGGCGGCATGAACGGCCCGGTCAAGGCCGACCTAGGCTTCGACGAT  
GACGGCATCCAGTTCGAGTGGACCCTCGGCGGCCTGGATCTGACAGCCCTCAAGCAGTAC  
GGCGCAGTCAGTGCCAACGGCGTTCATGCTGCGCTTCGCCGGCTCATTCCAGCAAGACGAT  
ACCGGCGAAGTCACGTCCGTCGAAATCGTTCGTTCCGCGGCCGGCACGAGACCATCGAAATG  
GGTGACGCCAGCCCGGCGAAGACACCGAGCACAAGATCACACCACCTGCAGCTACTAC  
AAGCTCGTCGTCAACGGCGAGGAAGTCATCGAGATCGACCTGCTGAACTTCGTCGAGAAG  
GTCAACGGCAAGGACCTGCTCGAGGCACAGCGCAAGGCCATCGGCCTGTAATCCCTTCCC  
GCCGGCCCGGCCGGCGGTTTCTCTCCCCCTTGGATACCGACGCCCATGAAAACCGAACAG  
ACTCCCGCTGACCTGCAGAACGCTCCCGACAACGTCGTCCCCCTCGACCAGCCGATCAAG  
CGCGGCGCCAGTCCATCGAATCGCTACCCTGCGCAAGCCCTCCTCTGGCGAACTGCGC  
GGCCTGCACCTGCTCGACCTGCTGCAGTTCGATGTGGCCGCGACCATCAAAATCCTGCCG  
CGCATCAGCCAGCCGACCATCACCGAGCCCGAGGCCACCGGCATGGACCCGGCCGACCTC  
CTTGCTGCGGCCAGGTGATCGCCGGTTTTTTGCTGCAGAAGCGGGCGAAGGCAGCCTCC  
CTGATCGCGTAGAAAACGCCATGGCCGACCTGGCCGTGACGTTTCACTGGGCGCCGGACC  
ATATGGACCGGCTCTCGCTACCGAACTGATGGAGTGGCGCGAACGCGCCCGGGTACGGA  
GTTCCGCGGATGGCGAATGACCTGCAGCTGCGCGTGTGCTCAGCGCGATCGACAGAGCC  
ACCGCGCCCTTGCCTCGCATCATGCAAGGCAGCGACGCGACGGCCCGGGCGCTCAAGGCA  
ACTCGCGAGCGCCTGAAGCAGCTCAACGCTCAGCAGAGCGACGTGCGCGCCTTCCGCACC  
CAGCGCGGCGCCCTGGAGCAGGTACGACCCGCGCTGGCCGCGCAACAGGCACGGGTGAAA  
GCACTGGCTCAGCAGATGGCCGCCGCCGGCAACCCACCCGCGCGCTCACCCGCGACTAC  
AACCGGGCCATCCGTGAAGCCGGTTTTCTCAAGCAGCAGCACCTGCAGCACAGCCACGCC  
CTGCAGCAACTGCGCACGCGCCTCAGCAACGCCGGCATCAGCACCCGCAACCTCGGCCAG  
CATGAGCGCGACCTGCGCGCGCAGATCCAGGCGGCCAATGGCGCCATCAACAGCCAGGCG  
CAGCGCTTACGCAACCTCAGCCAGCAGCAGGAGCGCCTGACCCAAGCCCGCAACACCTAC  
AGCCGCGGCATCCAGAGCGCTGCCGCGCTGGCCGGCACCGGCATGGCGGCACGCGCGACG  
GGCATGTACACCGGCGACAAGCTGCGGCAGATGCTCGGCGTGGGCTACGAGTTCGACGCA  
ACGATGTCCGCCACCCAGGCGGTGACTCGCATCGAGCGCAAGGACGATCCGCAGATGCAG  
GCGCTGCGGCAACAGGCCCGCACCCCTGCCGCTGTCCAGCAAGTTCACCGACAAGGAAGTC  
GCCAGGGCCAGTACTTCTGGGCCGACCCGGCTACAACGCGAAGCAGATCCTCGGGCGCC  
ATGCCCGGCATGCTCAACCTGGCAGCCGCGGGCGACATGGACCTCGGCGACACTGCTGAC  
ATTGCTCGAACATCCAGACGGCGATGGGGATTCCGGCAGAGAAAATGGACCAGGTGGCC  
GACGTA CTGACTGCGGGCTTACCCCGGAACAACGTCGACATCCGCATGCTCGGGGACTCG  
CTGAAGTACTCCGCCGGCGTCCGGCCGCGAGTACGGCCAGAGCCTGGAGACGGTACCACC  
GCCACGGCCCTGCTCGGCAACGCTGGCGTCCAGGGCAGCATGGCCGGCACCTCGATGCGC  
TCTGTTCTGACCCGCCTGGGCACGTCCAAGGCGGTAGCCAAGCTGGGCGTCCAGACCAAG

GATGCCAACGGCAACATGCGCGACATGCTGGACATCCTGAAGGACATCAACAAGAAGACC  
GCCGGTATGGGCAACGTACAGCGCGGCGGATCTTCAAGGACATCGCCGGGCAGTACGCG  
GTGACCAGCTTCGGCACCCCTGATGCGCGCCGTGAGGGCGGCCAGTTCCAGACCATGCGC  
GAAAGCCTGAACAACCTCCGAGGGCGAGGCCGCGAGGGTCCCGCGACCCAGTTGGACAAC  
CTCAAGGGCGACATGACCATGTTGCATGCGGCCCTGGAAAACATTTCCGGTCGAGCTGTT  
GACAAGAACAGCCCCTGGCTGCGCGAGCTCGCCGCCGACCTCAGTCACCTGCTGCACAAC  
ATCGGCGAGTTCCTGAAGGCCAACCCGCAGGTCAGCAAGGGCATCGTCATCACCGTCGCC  
GCGTTTTTCGGCGCTGATGGCTACCGTTGGCAGCCTTGCCATCACCCCTCGCCGGCATTCTC  
GGCCCGATGATCGCAGTCCGCTTCATGCTCGGCACCATCGGCATTCGCCTGCCCGGTCTG  
ATCGGCCTGCTGAAACTGCTGTTTCGCACCGATCCGCATGCTGGCCGGCCTGTTGATCGGC  
CCGCTGGTGACCGCCCTGCGCGTCGTGAGCATCGCGCTGTGGGGCCTGGCCGCCAACCCG  
GTGGTCCCTGGCAATTGCCGCGTCGTGGCGGTGCTGGCCGGCGCCGCGTACCTGATCTAT  
CGCAACTGGGACGCCGTCAAGGCGTACCTGCTCGGGATGTGGGAAGAGATCCAGGCGGGC  
CTGAACGGCGGGATCGGCGGGATCATCCGCATCCTCCTCGACTTCAACCCACTCGGCCTG  
ATGTACCGCGCCTTCGCCGGCGTCCCTGGGCTACCTGGGCATCGACCTGCCGGCGCGCTTC  
AGCGACTTCGGCAACATGATCGTCCAGGGCCTGGTGAACGGCCTGCTCGCCGGCTTAGGG  
CAGATCAAGCGCGCCGTCCAGCGCGTCGGCGGGCGCCGCGATCGACTGGTTCAAGGACAAG  
CTCGGCATCCATTCGCCGTGCGGGGTGTTCCGGACCTGGGCGGGTTCACCATGGCCGGC  
CTGGCCAGGGCCTCGGCGCCGGCCAGGCCGGCCCGCTGGGCGTGATTGCACGTCTCGGC  
CAAGGCCTGGTCAGCGCGGGCCGTCAAGGCTGTGCGCCGGCCTCGACGGGGAGTTTGCCCGA  
GGCTCCCGCCCTGCGATCACGCCACCGACGTTTCGACCAGCCGCTGCTGGCCATGCTGGGC  
GACCTGGGCAAGAGCGCCGGCGCCATCGGTGCCCTGGTGCTCGGCGCCAGCGCCCCGGCG  
CAGGCCATCACCATCGACAACCGTCCCCCGGTACGCTCGGCGCCAGCGGCAGTCAGTATC  
GGCGGGGACACTTACTACATCACCATCCAGGCCGGCGCGGGCAGCGACACCCGACACCTG  
AAACGCACGCTCAGCCAACCTGCTGGATGAGCGCGAACGCAACAAGGCGGGCGCGCCTGCGC  
GCCCCCTGCAGGACCGGGAGTAACCACAATGATGCTGTCCCTCGGGATGTTTCGTCTTCA  
GCCTGCACACGCTGGCCTACCAAGAGTTCAGCGGCAGACCGAGTGGCGACACGCCAGCA  
GCAGCCGCATCGGTGCCAGCCGGCGCGCCAGTTCGTCCGGTCGCGGGCAGCAGCGGATCA  
CCCTGCCCGGGCGTGCTGCTGCCGGAGCTGGCCGGCAGCGCGTTGAGCCTGGACGTA  
GGCAGATGGCTGACACCGGGTCGGCCTGGCCCATGGTCGAGGGCACCGGACGCATCTACG  
GCCTGTGGGTGATCGAACGCGTCACCGAGACGCGGACACTCTTCTTCGCCGACGGCACCC  
CGCGGGCGATCGAGTTCCTCCCTCGAGCTCAAGCGCATCGACGACGGCCGCACCGATCTGC  
TCGGCTCGGTCCCTCGGTACCGCCGGCAACCTGCTGAGACGCATCCTGTGATCGATGCCGC  
CCTCGCCCGCGTGACGGGCTACCTGACCAGCGCCGTGACCGAGTTGCAGCGCGACGCCGG  
CTATCCGGTGCCGGTGTTCGGCTCACGGTCGACGGCAACGACATCGCCAGCTCATCAG  
CCCACGACTGATCGCCCTGGACCTGACCGACAATCGCGGCCTCGAGGCCGATCAGTTGAG  
CGTGACACTCAGCGATCATGACGGGTGCTCGCGATCCCCCGCGCGGGCGCCGTGCTGCA  
CCTCTGGCTGGGCTGGAGTGACAGCGGACTGGTCGACAAGGGCACCTACACCGTCGACGA  
AACCGAGCACAGCGGGCGCGCCGGACGTGCTCAGCATCCGCGCCCCTCAGCGGACCTGCG  
CAAGGGCCTGAAGGTCAAGCGCGAACGCGAGTTGGAGCAGCCCGAAGACGCTGGGCGACGT  
GCTCACCGACATCGCCCTCGGCAACAACCTGAAGCCGGTGCTCGCGCCGGCGCTGGCGGG  
CCTGCCGATCCTGCAGCTGGACCAGGCCAACGAGTCCGACGCCAACCTGCTGACACGCCT  
GGGCGAGGACTTCGATGCGGTGGCCACCGTGAAAGCCGGCTGCCTGCTCTGCCTGCCGGC  
CGGTGGCGGCAAGACTGCCAGCGGCCTGGCGCTGCCGCACATCAACCTCACCCGCCAGGA  
TGCGGACACCGCTACCTGCAGGCCGACCGCGACAGCTACGACGGCGTGCGCGCGTA  
CTTCTACGACGTGAACAGCGCGAAGAAGCAGGAGGCAATCGCCGGCGCCAAGGGTGACAA  
CCTGAAGGACCTGCGCCACACCTACAGCGACCGCCAGAGCGCCCTGCGCGCCCGCCCGCGC  
CGAGTGGAACCGCCTACAGCGTGGCAGCGCCACGCTCAGCTACGCGCTCGCCAGGGGCCG  
GCCGGACCTGATCCCGGAACTGACCTACACCCTGCAAGGCGTGAAGACGGAGATCGATGC  
GATCATCTGGTACGGCGGCAATGTGCAGCACAGCCTCAGCGCCGACGGCGGTTACATCAC  
CAGCCTGGAGCTGGAAAGCAAGCTGCCCGAGGACCTGGTCAGCGACCTGGCCGACGACAC  
CGGCGGCGACTACACCGGCATCATCGCCTACTACCGCGACGAGAAGAGCGGGACGGAGAA  
GACCATCACCGCGGGAGACCAGAGCAAGCCGCGCCGCCTGCGCTACTTGTACAGCACCAA  
GGGACGCGGAAGCGGGCTGTGGATCGGGAGTGGATGCGATTAAAAAAGACACAAGCCTA  
AAAAGGCGCCGTCCAACAAGTATCAGTCATTTGTTCTGTTGCGGGGAGTCTTTACATCAT  
TACCTTTTACCCAAGACAACCTGGGTTTTCCGGCTGAGGAATTTGTTTGCCTAGCTTCACTAT  
AAGACTTCGAAATATACTTAAAGGTCAGCTCAGACCTCATAGAGTCAACGGTAAAAAGTA

ACGGCACGCTACTCAGCGATGTTGCCGCCCTAAATTTTTTATCAGATTCTTCGAGATAGA  
AGTCAAAACCCACATATTGAAAAAAAAGGCTGCCCTCGATCAAAGTTGGAAAAACAACCC  
CGTACTTTTCAAACCAGAACGAGGGCACCCTCTAACAATGTAACCTTGAAGAAAGCTCC  
CTCCAAAAGAACTTTTCGCATCTCATCTACGAGAGAGGGCTTTAGAGAAATCGCATGAC  
AGAAGGTCCACCCTTCGAACGTTGCCCTCCAGAACATGCCAATCGCAAAGTGGTACAAC  
CTTGTGACTTTATAGCCGGCAGAAAGTTCGCCCTACACTAAAATTAGACCTCTTCCGT  
ATGAAGTACTCGAAAACAAATTCAGGAAGGGATCAAGCTCTTATAAAGAATATTGTA  
CTGGCGAAGGAAGCATCTTCTTTTATCAATTTTTAGCGCTGACGATATAAAGTAATCCT  
CACCTTTGGTTGACATAAGCTGTTACATGAACACTACATAAAAGACGCTTGAAAATCTGCC  
TGCCATCGAGAAAACACTCTCACCTGCTGCGGCCGCACTAATATTTTCGTGCCATCGA  
GTTTAGAGCTATTGAAATACTTATAGATCGCCTTTGGCAGTAAATGACTTTTGCACAAAT  
ACCTTATCTCTCCGTTATCAGGACCACATAGCTTACATCCCCCATCACATCATCATT  
CATTTGCCATATACTCCCACCCCAAAGTAATCAACGAACTAGCACTTATGCTCCTGCT  
GGACACGCCACACTCTTCCGCTCGTAACCGTTAAGTTCAGATAATGAGTCTTCCGCACTC  
CCAATCAAGCCCCATCTATATTTTCGGCCAACTTTGATGCTTGAGTTACTTTTTTCAGATA  
GATAAATATAGGTAGAAAAAGCACCTACAAGCCCTGAGATTCTATGTGCCCAGTCTGGTT  
CTTTATCTACCTCCACAGCCCTTAAAGAAAGCCTCAGCTTCTCAAGCTCCTCTTCTAGCT  
TTTCAGCGTCCGGTTCTAGGTGATGGGCATAGATATTTCTCACAACATTCAAGCGTTTGA  
CAGCCCCCATATCCAATCATCCACATCTGGATTTGGGCAAACAGCAAGCGCCCGAG  
TTATTGATATAAGCTGACTAAAGCTTAACTTTGCCCTTGCAAAATGATCCGGATTTGGCA  
GCAATGACATACAGAAGTCGCGCATCAGCTTCTCAACTATCAAGTGCCCTTTAAATAA  
CCGTCAGATCATCAGGATTACCAGTAAAGTGTTTTCCGCACCATCCATCGCTGTCCGGC  
TAACTCCGAGAAGATATAATCTAAATAATAGTCCATTGACTTCCACCTCCCCCAGA  
ATAATTACTCACTCAAGCTAGGCTCCAGCCTTGCAAGCTAAACGCTTCTGCTCATAGTCT  
TTTTGGTGCCCTTCAGTTCAGGCAATGGATCTTCCATATCAGCCTGTACCACCAGATCG  
GACAACCCCATCCCAAAGCCTCATAGGCCTTGAAGCAGGTTTCGTTGGCGCTGCTGCGG  
ATACCAGGGCGGTACCGGTCCAGATCGCCAAAACCTCAGTCACCTGGTCAACACTCGAG  
GCCTGCAACGCGTCCAGCATTCTCTGGTGCAGGTTGTCCATCAGTTCGACCTGGGCGGCC  
GAGTCAGCCACCGCAACACACGAGACCATCAGTCCGACCGCAGCGGCCGTTCCCTTGAGC  
CAGTTCATACGTCCCTCTTTCACAGTGGGGCCTTCGGCTGCGACCGAAAGCCCATCAA  
TCAATGCCCCCTGAGAGCGCACGCCAACCGCAGCAGGTCCAGTTGGTCTGCTCGCTCAT  
CTGGCTAAGGCAGATAAGCAGGGCAGTAAGCACGATGGGGTTCGATGGGGTTATCCATTGG  
TCTACTCCTTTGACAGGCCACCCGGCGACACGATGTCACCGTGATAGCAGCCCGGGAGTA  
CCCCATTCTTCACATAGGCCCGCGTGCCAGAAGCAGAAATCCACGGTAGGTGCCCCGGGA  
TTTTTTCCCATGCTGGCGAGGTGTCTATTTGCTTGTACGACGCGACTCAGTTGACTCTG  
AGATACCTCGCCCCACCCGTAGGTATGCTATTCGGTCTTCTTCCCTCCATGGACTTGATGT  
ACCTCAGCACATCAAGTTCCTCCTGACTGAGTTACTCAAGCTCCGCAGGCTGGCGACGCC  
CAGTTATAACGTAAAGAACATCGACTCCAAGCTCAGCAGCCACAGCTAGAACTGAAGCCC  
CAATATCCCCGCCACCACCTTCGTAACCGGCAATAGTCCGCTTGGCCACTCCGACGCGCT  
GGGCAAACCTCATCTTGGTTCAGCCCAATACGCTTTCGCTCAGCCTGTAGCCGAGCGCCGA  
TCTCTTCTTGAAGGATGCAAAAAAATTCATCTCCGCTATTGACCAATGCAGAAACGTG  
CATCATTCTTCGGTTGTCATCACACGAAATTGCACGAATCTGCACTATGCCGAACGCCTA  
CCCGACGGAGCAAGCCCGCGAGGCAGCCCGCAAACACATATCTCGACTGGGCCTTTCACT  
CCGGGAATGGGCCGAAAGAAACGGCCTAGGAGAAAGCACCGTCTACGCCGTTCTCAACGG  
GCAAAAGAAGTGCTGCGTGGCGAAGCCACCGCGCAGCCGTGTTGCTCGGGATCAAGGA  
CGGAGTAATTGCACAGTAATGGCCACCAGCTTTGAGAGACACCAGAAGATGAAACGCCCCG  
CTCCTAGAAACGCGGCCGAGGTGGTTCAGCGCGATCATCGGCGCCTACCCTGGCGGACGC  
GAATGCGCCGCGCCCGCCTGGGCCTCGACCTGAAGAAGTTCGACAACCACGCCTACGAG  
AACGCCGGCAGCAAACCGCTCAGCGACGACCAGTTGCTCCTGCTCGAGCAGGAAACCGGC  
ACCAGCCACTTCCCCGAGTATGTCGCCACCTATACGGCGGCATGTTTCGTGCAGATGCC  
GAGCAACCCAACTCGACAACCTCGACCTGTACGCCAGGGGCGTCGCCACCGCCATCAGG  
CGCGGTGAGGTCGACCGCATCATCGCCGAGGCGCTGCGCGATGGAGAGATCGACGAGGCC  
GAACTCGCCGAAATCATTGTCGCTCACCGCAAACCTGGCCGCACGACATGCCGAAGTC  
GGCGCAGTGATACCTTGCACCGGAGGGTCAAGGCGTGAGCGTCTACAAGCTCGTCTGCC  
CCTGCTGCCACAGCCGGATGCGGATCCGCTCCTCCGAGGGCCAAACCCCGTGCTTCCGCT  
CGATGTACGCGCAATGCACAAACGCGCTCTGCGGCCACCTTACCGGCTCCCTGAGCT  
GGGACTACCAGCTCAGCCCCTCGGGCCTCGAGCGGCCAATGCTGGTGTCTCCCATGGCAC

CTTCGAAAACCCGTCAACTGGCACGCCGCGACCTCGCGGCCGCAACCAACCAACTGGACC  
TGCTGGATCATGTGGAGTGCATGCAATGAACAGCACCAACGACTACCGCAGCACCATGCA  
GCAAGCCGCCGACGCGTACCTGCAGGCCAACGCCAACAGTATCTTTCCTCCGGCTCCGA  
CCGGTTGTTTCGATGCCTGTGTCAACCATCTGGCCAAAGGCCTCGAGGTCCCACAATTCAT  
GGCCGAACAACCTCGCCCAGCGCGCCTGGGACGAGGTCTTCGCTGGACCAGAGCCGATCTG  
GCTGGGCATCGACTGGGGCCAGGGAGACGACGAGGTGGTCTACCTGATCGACACCCGCGAG  
TCACTGCCGCTTCCCGATCCCGGCCGCTATCTGCCCCGCGCACCTGCTCAAACAGCGCCC  
CCAGCACACCCAGTAATCCCTGAAACACGCCCTACCCACTGATGTGGGTTTGGGGAAGTT  
ACGCCCAGAATTCGAGGTATCCCGCCATGAGCGGCCACATTTCAATCACCGTCGAAGTCG  
ACCAGAACCAGGCTGAGAAGTACCTGCTCTGGCTGGTCAGCCAGTACGAAGCCGCCATGG  
CCGAGTGCTGGTACGACGATCGCTACCGCTATACGCCGACAGGGGCTGCGCGGCAAGCGCA  
TCCTCGAGGACCGCCCACACATTGCTGGCATCTGCCGGACGATCCGCGAACTGCGCAAGC  
AGATTCGGGGGCGCGCATGAAGGAAATGGACCGCGAGCTCAAGGCCGACGTGCTGCGCCG  
CCTACAGGATCAGTACGGCCTGACGCCGATCAAGGGCACGAAGTACATGCGCAAGGGCGA  
GTGCCCCGACGTGCGGCAAAAAGGAGCTCTACACCCTGGTTCGACAGCCCCTGGTTCATCCG  
CTGCGGGGCGCGCAAGTGCAGGCGACACCTGGCACATCAAGGAAATCTACCCGGAGCTCTT  
CGACGACTGGAGCAAGCGATCGCCGGCCACCGACAAGGAACCCGCCGCTCGGCCCGGGC  
GTACCTGGCCCATGCCCGCGGCTTCGACCTGGCGCTGATCGATGGCTGGTACAGCCAGGA  
AACTACTGGGACCGCGACCTTGAGATCGGTAGCGCGACAGTACGCTTCCCGCTGAAGAA  
AGGCGGCTACTGGGAACGCCTAATCGATCGCCCCGAGCCGCTTCGGCAAGAAGAAGGCCCG  
CTTCAAGCCGGGCGACAGCCCAGCGCGGCGTCTGGTGGTGCCCACCCAGCGTCGACCTGCA  
GGAGGTGAAGGAGCTGTGGATCGTCAAGGTATCTTCGACGCCATCGCGCTGCTGCACCA  
CGGCATCGACGCCGTGTCGGCCATGAGTTCCAACGCCTTCCCCGAGCAGTCTTTGCGCGA  
ACTCGCGACAGCCCGTGGCGGCAAGCTGCCGAACTGATCTGGGCGCTGGACAACGAACC  
CGGCGCCACAGGTACACCCGGCGGTGGGTGACCGAGGCGCGCGCCCTGGGCTACGTCTG  
CGAAGCAGCCCAACTACCGCAACGCAACAACCGCAAATTCGACTGGAACGACCTGCACCA  
GCGCTGGATGTTTCATCGATGACGCGGCCGAGCGCGTTCGCGCAGATCGAGAAAGACCTCAA  
GACCGCGCGTCATGAGGGCGCGCTGCTGATCGCCGAGAGTGCCGCCGAGAAGGCCCTGCT  
GATGTACGACTGGGGCAAGCGCGGTGAATTCACCTTCCGCTTCGCCAACCGCCTCTACTG  
GTTCAAGCTGGATATCGAGAAGTTCAACAAGGCCATGCAGAGCCTCGAGGACAGCGACAA  
CCACGACGACCAATTGCTGAACCAGAAACAGATGCGCGACAAGGCCCTGCAGCAAGCCGG  
CGGCGTTCGTGGAAATCGCCAACCTGCTTCCCCCAGGCCCTGTACTTCCAGCGCAACGAGGT  
CACAGACGAGAGCTGGTACTACTTCCGCATCGATCGCCCCGACGACGAGAGCGTGAAGAA  
CACCTTACCAGTGCCAGGTTCGCGGGCGCCAGCGAGTTCAAGAAGCGCCTGCTCGGCCGT  
GGCCGCCGGTTCGATCTTACCAGGACGCGGCGCGCAGCTTGACCAGATCATGAAGCTGCA  
GCTCACCGGCTTGAAGACGGTGGCCACCATCGATTACCTGGGCTACAGCCGGGAGCATGC  
CTGCTACGTTCTGGGCGACGTGGCGGTGCGCGGGCGGTGATCGAGAAGGCCAACGCCGA  
AGACTTCTTCGAGTTCCAGAAGCTGCGCCTGAAGACCCTGCAGCGCTCGATCAAGCTGCA  
GATCGCCACCGACGCCAAGGACTACCGCCCCGAGTGGCTGGACTGGCTGTGGACCTGCTT  
CGGCGCCAAGGGCCTGGTGGCGCTGGCATTCTGGTTCGGCTCGCTGTTTCGCGGAGCAGAT  
CCGCGCCGAGTTCCAGTCTTTCCGTTTCTCGAGGCCACCGGCGAGGCCGGTGCAGGCAA  
ATCCACGCTGATCACCTTCTGTGGAAGCTGCTCGGCCGGGCGGACGAGGAAGGCCAGGA  
CCCGTCAAGATGACCAAGGCGGGCCTGCGCCGCTGGCTGACCCAGCTGTGCAACATGCC  
AATGGTTCATGCTCGAGGCCGACCGCAGCGACAACAGCCGCGCCGGCGGCGCCGCAAGTC  
CTTCGACTGGGACGAGTTCAAGCCGCTGTTCAACGGTTCGCGCGTTGGGCGTGACCGGCCA  
GAAGACCGCCGGCAACGAGACCTACGAGCCCCCTTCCGCGGCACCCTGGTGATGAGCCA  
GAACGCCACGGTGCAGGCCTCCGAAGCGATCATGACCCGTATCGTGAAGCTGCACTTCAT  
TCGCCCCGAAATCACCCGCGAGAGCCAGGCCGACGCCGACAACCTCAACCACCTGGGCGT  
GCTCGAGGTCAGCCACTTCTGCTGATGGCCATCCGCGCCGAGGCCCGCGTGCTGGAGTG  
CTTCCGCGAGCGGCTGAAGGTTACAGCGCGACGCTGCGCGCTCTGAAACAGATTTCGTAT  
CGAGCGGCTGATACTCAACCACGCGCAGATGATGGCCCTGGTTCGACGCGCTGCGCCTGGT  
GGTGCCGCTGTCCGAGCACCAGCTCGCCTGCGCTCAGCAGACCCTGATGACGATGGCCCT  
GGAGCGCCAGGACCGGTCAACGCCGACGCGCCCCGAGGTGGCCGAGTTCTGGGAGGTCTA  
CGACTACCTCGAAAACCTCAGCGAAGAGCCGGTGCTCAACCACAGCAAGAACCCCGGAAC  
CATCGCCATCAACCTCAACGAGTTCGTGAAGCTGGCCGCCGACCACCGCCAGAAGGTGGC  
CGACGCGGCAACCCTGCGCGACCTGCTGAAAGAGTCCCGCCGGCACAAGTTCATCGAATA  
CAAGGCCGTCGACAGTGCCGTGCGTTCGGCACACGCCCGCCAGAACCCTCTACCAACCG

ACCCAGCACCGTTAAGTGCTGGATTTTCCAAGCCTGACCGGCGCGGCAACGCCGGAAC TG  
CAACCCCAAAGGAGAGACACCATGCAACCCCTCCCCACGACTATCTGCAACTGATCCAC  
GACTTCCAGACCAGGCAGCAGGAGAACGAGGTAGCCGGCCTCACCGCGCTGAAACGCCTG  
CTGCCGATCGCCCAGCGCGACAGCGGCCAGAGCGGCGTGATCGGTTCGGTTCCTGCTCGGC  
CTGTACAACGGCCAAGCCCACCGCTTCGACCTCACCGAGCTGCGCGGCCCTCGACCCAGCG  
CTGTTTCGATGCGTGCCTGTCCGTGCTGCGTATGGACTACGCCCCGAAACAGGAAGTGCAT  
GAGTACTTTCGAAGACGGCGACGCGATCTGGCAGGACCTGAGCAAGCGCTGGGCCGCGAGCG  
ACGCTTGCAGCATAAGGAGGCTGACTGTGGATGTGATCGACCAAGCCAACGAACGGGCCG  
AGAACATGGTCCAGGCCGCCCTGGCCCAGCGGACAAACACCCGCCTGGCGCCCAGCGCCC  
TCTGGTGCAGGACTGCGGAGAGCAGATACCCGAGGCCCGCCGCCAGGCTGCTCCGGGCT  
GCGAGTGCTGCATCAGTTGTCAGGAACTGCGCGAGCACCCCGCGCGGGCGCTGAAGAAGAG  
GCACCAGGGAGCGGCAACTCCCTGGCGCCAACCACCCCAAAGGAGAGACACCATGCAAGC  
GAATCAGCCTCAAGGCGGGCGGCCAAGGCTAGCACAACCACGTGCGGCGGCTCGCACTCG  
CCCAGCGATGGCCAGCAAGCGGCTGGACCTTCCGAGCATCTGTGATATCTGCGGCAACGC  
ACGTTCCACCGGCAAACACCAACGCTGCAGCCGAATTCGCCAACAGGCCAAGGCTGTCTGA  
GTGGGCCAGCTACATGGCCAACCTGGCGGCCAGGAAAACGCAGGGAGGGCGGGCGGCATGC  
TTAAGCGTACCCTCTACCACTTCCACTTCTGCTGCGGCCCTGGGCGGGCGGCCGAGGCT  
TCAACCGGGCGCGTCCGCGGGTTCGGCAACGTCGAGGCCCATTTGGGAATGCCTTGGTGGCA  
TCGACGTGGACCCGGCCGGCCTCCGCGACTTCGAGCGCCTGGCCGGTGTCCCGGGCACCC  
TGCTGGACCTGTTACCCGCGACCAATACATCCGCTTCCATGGAACGGAGCCTCCCGCCG  
GTTGGCGGGAGGCAACCCCGGAGGAAATCCGCCGCGCCGCCGGCGGGCGCCGACCGGATG  
CCGTGTTTCATCAGCTCGCCCTGCAAAGGCGCCAGCGGCCCTGCTGTCTGGAGAAGATGAGCC  
TGACTCCGAAGTACCAGGCGCTGAACGAGTTGACGCTGCGCTGCATCTGGCTGATGGGCG  
AGGCATGGGCTGATGACCCGGTGCCGCTGATCGTCTTCGAGAACGTCCCGCGTCTGGCGA  
GCCGCGGCCGGCACCTGCTGGACCAGATCAACAGCCTGCTCGGTGGCTTCGGCTACGCCG  
TGCGGAAACCACTCACGACTGCGGCGAGCTGGGCGGTCTGGCCCAGTCGCGGAAGCGCT  
TCCTGCTGGTGGCGCGGCACGTCGAGAAAGTGCCGCCCTTCTGTACGAGCCGGAGAAGA  
AGAGCCTGCGCGCCGTGCGCGACATCCTCGGCCGATGCCGCTGCCCGGCGATATCGACG  
CCGCCGGCCCGATGCACCGTGTGCCATCCCTGCAGTGGAAGACCTGGGTTTCGCTGGCAC  
TGGTGCAGGCCGGCAGCGACTGGCGCAGCCTGAACGACCTCGCCGTGAGGACGGCTACC  
TGCGCGATCTGATCATCGTCCCGAAATACCGGGCTGGCTACATGGGCGTGCACGGTTGGA  
ACGACAGCACGGGCACCATCGCCGGTTCGAGCAGCCCCACGAACGGCGCATTCTCTGTCTG  
CGGACCCGCGCGCGCCGGCAAACGCCCTGCAATACCAGCAGTACGGCGTGCGCCGCTGGA  
CCGACACCTCGGGCGCCATCATCGGCGTCAAGTCGCCCCGGCCAAGGCACGTA CTCCGTCTG  
CCGATCCCCGCGGCCAGAGTTTCGGCAAGTACCCGGTACCCGACTGGGACGGCCCAGCCG  
GCACCGTGATCGCGGCCAGTACTACCGGCCAGGGTGCATTTGCTGTCTGCGGACCCGCGCC  
ACCGTGGCCCTGCCAAACACTCTAACGAGTTCCGCATCGTGCTTGGGACCGCCACGCAC  
AAGCGGTCACCAGTGCCATGGCACAGGCCAGTGCGTGCAAGACCCGCGCGTGCTCAGCC  
GGACGAAGGGAGACCCGTATCTCACTGGCGGCCACTACGGCGTAGTTGGGTTTCGACCAAT  
CCGCCGGCGCGGTGTCGGCCAGTGCGCGGCACGACAACGGTCGATGGAGCGTGGCCGATC  
CGCGCATGCCGAAGGCGAACGACCGGCTGACCTGCATCATCCAGTCGCTGGATGGCACCT  
GGCACAGGCCGTTTACCACCCTGGA ACTCGCCGCGCTGCAGAGCTTGGTGCACCCCGAAG  
AGCAGTTGGTCTCTGACGGCCTGAGCGACAGCGACTGGCGCGAGCGGATCGGCAATGCGG  
TTCCGCCGGCTGCGGCCGAGGCCATCGCCGGCGTGATGGGCACCACCCTGTTGTTGGCTG  
AGGCTGGCGAGACCTTCTGCTCAGTAGCACGCCGATCTGGGTGCGTCAGGTCGCCGTTG  
GACTGAGTATTTCAGAACCTGCTGGGAGTCTCTGAGGAGAAACAACATGCACGAACTATT  
GAAGATGTTAGACAGCCCAGGAGCCTGCTGAACTTCTCGCTGGCAACCCTGGCCGTCCT  
GGCCTTGTACTTCGTAGTGGTGACCGGTTCGGTAGAGAGCTACCAGAAACAGGCAACGAAT  
CTTCTTGGCCCCGCTTGCGGGCCTATTTTTTTGGAGGCTTGGTAGCCTGAACGCTTGGTGTG  
GATCAGGGGAACAGATGGCAGACGGAGTCGAGGTACGCGGAAAACGGATCAGGATCTAC  
TTCCGCTACCAGGGCGAGCTGTGTAGGGAGTCCATAACCAGGGGACGCAACGCCCGAGAAT  
ATAGCCAATGCCGAACGGCTGGCCGGCATCATCAACTACGAGATCAAGCAAGGAGTCTTC  
AGCTACAGCCGACACTTCCCGGACTCACCCGGGTGAAAAGCAACACCTTGGGCCATTAC  
ATCGACCTCTGGCTCGATATCAAACGCAACCAGATTGCCGCCAGCGGCTTCCGCGGCTAC  
ACCAGCCGCGTGGAAACCCACATCCGACCTCGCTGGGGTGACAGCCAGGCCGACAGCATC  
GACCACCTGGATATTCAAGACTGGGTGCAGAACACGCTCATGCCAAAGCTGCACAACAAG  
ACGGTGCAGAGATCGTCAGCAACCTGCGGCAGATCTTCCGGCTGTATCGAACTCGGAAC

CGGAGCGCGCACGACCCAACAGACGGCATCGTGATCACTCTTCCGGATGCGGATGACCCA  
GACCCATTCCTCGAGAGGAAATCGACCTCATCCTCGGTACCGAAACCGCGCGCATCGGT  
GAGCTGAACCTGGCGGAATTCATGATCTGGAGCGGCCCGCGTCAGCGAGGCCATAGCT  
CTGGCCTGGGAAGATGTCGATTTGGACACGGGGACCGTGGTTTTCCGCCGCGCTCGTGTA  
CGCAGCCAGTACAAGGTCACCAAGACTCGCCGATCGACGAGGAAGGTCCAGCTACTGGCC  
CCGGCGCTGCGCGCACTGCAGCAGCAGGCCAAGCTAACCCAGACGCCTTCCGCCCGTACAG  
ATCGAGGTGATAGACCGCGACAACCGGACCAGAAAGCCTAACGGGTACGCTTCGTGTTT  
CACAAAGTGTAGCGGGGCGGCGTACTCCACGTCGGATACGCTGCGCAACGGCTGGTGG  
CATGGCCACCTCAGGAATGCGGGCGTCCGCTCGCGTGGTCCCAATCAGTGCCGCCACACC  
TTCGCCAGCCAGATGCTCAGCAGCGGCATCGCCACTCCCGAATGGATCGCGGACCAGATG  
GGGCACACCTCGACGGCGATGATCTTCAAGCATTACGCCAAGTGGATCAGCAAGGACGGC  
CCCGACATCGTAGGTCTGCTGAATCAGGCGCTGAACTTTCCTGAAGCAACGAAAAAGGG  
GCCCTGCGGGGCCCTTTTTTCTGCGCCTCGTTCCCAGTTTGTTCCTCAAATCGTTCACTC  
CTGAGAGTGGGTTCGAATGGAAACATCAATGAAAACAGCAGGTTATATGGCGGAGGCGGTG  
AGATTCGAACTCATATGAAACGCCCAACCTCGCTGGAGGCCGCATTATTCCTGGGCCCT  
ACTGTCCATTTTCACTCGCGTTTGTTCCTCAGAGTGTTCCTCAGCGTGTGCGAGAGAGCCTG  
GAAGCCTGCCGTCAAACCTGCCGTCCAGGGCAACAGCCGGATTTTCATGTTGACCCATTG  
AAATGGGGTAATTTTGGTAATCTCTCTTTGAAGAATGAATTTTACCTTTAATTTCAATA  
GCTTATGAAAAACCCTTAAAGGTAATAATATGGTAATTTTGGAGTAATCGAATTACCTTT  
CTCGAAGGTAAGTCTCTCAATTCACCATCCCCTTAAAAATCAATAAGTTACAGAAAAATT  
ACCTTTCCAATTACCCTAAATTACCTTTCAAGGTAATCGCTGAAAGCCAGGAACCACGCG  
GCCTTCAGTCATCTTCAACTGTCAAATTACCAAATACCTTTTCCCAAGGGGTGCGAGAG  
AAAACCAGGCAAGGAGAAGGCTTTGGCCGCTCCCAGAAAAGCACCTGCTCTGCAGGGTTT  
CGCAGGGATTCATCGCCGAGAAAAGCCACCAGCAGCGCCCGCCAAGCCTGCTGGCTGGGG  
TCCGAGAAAAGTGCAGAAAAGAGGTCTATTTAGAGCGGAGGCGTGGCGGGGGGACGACT

>NewGenomeName\_250

ATTACGCATGAGCTTGTGGGTTCATAAAGCTCTCAGGAATAAGGGTTGACGTAGCCCG  
GAATCAGGGACTTCTCCTCTCTGGACAGGCCGCCACACTAAGAATTCAAACAGAACATG  
GGCGCTGCCCGTAAGCCTGAAGTACTGGCCCTGCAGAAGGGACGCCGCGCTGCCTGATAC  
ACTGAACACATCAACACGGAGCAACCATGAACATCTACCTCCCAGACGTTGCCTACGCCA  
AACAGGAGCTCGCCCGTTGCATGGCATCCGAGCCTCCCTCGCCCGCAACATCGTGGCCT  
GTAGGACCGATTACGTAAGCGTCAAGAGCGCTGAGACGTGGGTCAAGATCTATCAGGCC  
GCCTTAAGGAGAATGTGCTCCCAGCCATCAAGAAGTGTGAGTCTTACATCAGGCTCCACA  
GCAACTGATCAACCAACACCACCACCACCACCGGAGACACACCATGACCAACGAACAA  
CGCGCGAACGCTGCAATCCGCCGCTACCAAGCCGAGCAGCGCAAGCAGCAGCTCTTCTAC  
TTTGCTGAGATGGCTCTCACCCGCACGGAGGCTCTTCAATGCCTCAGGGAGGCTGCCCTG  
CTTGAGGCTTTCCACAATGTTTGAGTTCATCGTCTTGCTATACTCATTTGGTACCTCGC  
AACTGACAAATGATCAAGTCTATGATGTCACCGTTGTGATCGACGCCGGCATCCCCCA  
CAGTCTCAGCTACTGGGCTCCAATGCCCGGTGAGGTCGTGATGGCTTGCAGCTGAAGCTT  
AAACCCTGGATTGCAGGGGTTACTAGAGGTCCTCAAACCCCAACAATGGAGCTAACACCA  
TGCCATCTGATGTCATCGTCCGTCAGTACATCCAACGCTATGTGCTGACCATCGTGCCTG  
TCCTGGATGCTGATTCACAGCCGGGCGAGGTGACCCGGGTCTATGTAGACCGGGCCTATCG  
CGGCTACCTCAAGGAGGCTGCTGCCAAGCAGTTCGTTTATCGGGCTGAAGTTGACCGTCT  
CACCCGTAACCTTTGATCATCATGAGCATCTACCAGGACTATAGGCAGAAGGCCCCACAA  
GGGGCCTACAAGCGCCACAAGCCGGCTTCCAGACTGTTTGGGTACAATCCCACCTACAG  
CAGGCCGAAGCCCGTACAGAGGCTCTCAGAGCCCAGCACATTGAATCCACCGCCACCTTC  
TGAACACCATGAGCTATCACCACATCGATATGGACTCCTTCTACAGAGCTGCGAAGATG  
CTTATTACAACGAGCTCGATTGGCAGATCATGCTCTGCGACGTGACCGACGTTGAGCTGG  
CCCAATGCTACGAAGCATCCCTTGATGGAAACGGCCCTGTGCCTCTGTATCTCGTACCT  
GGGAGAGCAGCACCGGGGCTGACCTTTGATGAGCTCGAAGGTCTGCTCGACCACCAATA  
CGCCTAATACCGGGCGCAAACCATTCACCATCATCCGCCATTTTGCACATGATTAAGTTC  
GTCACCCCTAGTCACTTCGCTGACGCTGGTTGTCCGTAAGTACTTAGCAGCCGGCCCGGCAG  
GGGCAGCACCGAAAGCCAGGACCTACGAGAATCCCCATAAGAACGTCCTACGTACCGTGG  
TAAGGGCTGGATTCAATGTCCAGTTTGATAAGGGTGAATGCCTCAAGAACCCGAACCTCT  
TCGGGTACGTAGCACCGGGCCCAAGATCTTCATGATCTGCCTGAGGAACGCCCGCTTCG  
CTGGCCAGGCCTACCGGACAATCCGTCACGAGGCCCTGCACGTTGCTCAATACTGCAACG  
GCTGGCGGCCCTCAAGCCTGATCTCAGTGATTACTTCATCAGCCGCGCACAGGATAACG

GCTGGCATA TCCTCGGCTATCCAGAACACCAGTGGAGGGTCGAGGCTGAGGCAAGAGTCT  
GGCTGATTGGTACTCAGCACAAGAAGTTACCCGCACACTCCGTAAGTATTGCTTCTGAGC  
CTATGAACGAGACCGAACTCATCGCCCGCAACTCCGGCGAGAGACTGAACAGGGAGTTG  
AGGCACGTAAAGCGTCTCAAGGCTCCCAAACAATAGGGCCGAACAGAGGGCCTACGCATCA  
TCCACCGTCTACGGGCAGCAAGCCCTCAGACAGGCCACAGGGGTGATCGCTGAGCACATG  
GCTAAGAGCCTTGGCAATGCTGCTAAGGGCCGGGGTGGCCAAGACTTCCGGGTCTGCTTC  
ACCCACCTCAAGAGTGCAGACACAGAGGTGCTGGCAGTGTAGCACTCAAGGTTGCGCTC  
GACCAGCTTGCTCAGGATGACAAGCCACACCTCAAGAGGTGGCGGCATCCATCGGTTCA  
AGCCATTGAGGTTGAACTCAAAGCTCCAGTGGTATCAGCAGCAGGACAAAGACCTGTTCC  
GTAATGTCACTAACGGCTTCCACCCTCCACCGGCACCCGCCAGAAGGCAACGGTCTACA  
ACCTGCGCTTCAACAAGGCTGGCATCCAGTGGAAAGGGCTGGGGACGCACAGTCCACTTCA  
AGGTGGGCAGCTGGGCACTCCGCTCCATCACTGAGACCACGGATGGATAATCAAGGAGA  
CCATCAAGATGCCACGCTCACAGAAGTGCATCCTGAGATTCTCTCGAGAGTTCATTGGCC  
TTCGCGATGCACTAATGCAGCGTGCCTAGAGCTGAGCTTCTGTCTCTGGCCTATGGTCT  
GCCACCTAATGACTGGACAGACGAGGGCCGGGGCGGCTACCTCACCGAGGAGATCAGGG  
GCACAGCACCCATGATCCGCAAGGTGGGCAAGCCAATTGGTGACAGTAAGCAGGGAACGA  
TCCCTGTAGAGTTCCTCAACAACCTGCAACGACAGTCTTACCGTATAAACCGCGGCAATAC  
TGGCTGTGGCTAATTGGTGCTACGACAACAGCAGGACAGTGGGGAAGTTCATCCACGATC  
AACCTAGGGAACGGCTGGACTCCTTCAATGGAGATCCCAAGGCCGAGCCTGAGAGGTTCA  
AAGAATGGAAGAGGATGCAGAGGTCTATTGATGATTTCAATGCACAACCTTTTCAACGTA  
ATTGGAGAGCGACGGAGACTATGTTTCGTTGCTAATCAATACGATGATGAGGTGTTCTGGA  
TTCCCTGGAGCTTCGATTACCGAGGCCGTGTTTATCCACAGAACACACAACCTCAACCCAC  
AGGGTACCGACTTCGATAAGTCACTGCTCCTCTTTGCTGAGGAGGGTGAAGTCGATGAGT  
ACTGGCTGGCATGGCATGTGTGTACCACTTACGGTAACGACAAGCTAAGCCACAACGATC  
GTGTTGCATGGACACAAGAAAACCATGAGTTAATCACCATCATCGCTGAGGATCCTATTG  
GTGCTATCTCCCTTTGGGAGGGTGTGGGGAGCCTTGATGTTCCCTGGCTGCCTGCATTG  
AGTATCACGCTTGTGTGATCACTGGTGCTAAGCAGACCAGTGGGCTGCCAATCGGCATTG  
ATGCCACCTGTAGTGGCCTACAGCACCTCTCTCCATGACGAGGGATGCAGTAGCAGCCA  
AACAGGTGAACGTGATTAGAGGGGATCAGGATGGCCCCTCAGACGGTTACAAGACGGTGG  
CTGAGGCCGCCATCAAGTACATCGAAGACGAGAGCATCCACCCCTACATGAATAGAAAGA  
TCACCAAACGAACAGTGATGACTGTTCTTATGGTGTGTCTCGGGATTCGGCTCGTGCCT  
ACATTCGCGAGGCCTTGCATGATGCTGGCTTTGATCTCTCGACCAAGGGCCGGTTAGGGC  
AAGTGACTGATGCGGTGTATCGCAAGGCTGTCCCTGAGGTGTTTCGCTGGTCCCGTTGATG  
TGATGAACTGGCTGCAGCAGACCGCTATGGATCTGCTTGATGCTGGGGCAGAACAGATCG  
AATGGACCACACCCTCTGGCTTCAGAGTGGTGCAGGACATCCGCAAGCCCAGGACAAAGC  
TGATCAAGACGACCCTCATGGGTAGTGTCCAGCAGATCAGGGTTGCCGATGGCTTCGCCG  
GTCCTGACCGCCAGCGCCACAAGGGTGGCATTGCTCCTAACTTGGTGCACAGCTTAGACG  
CCTCTCTCTTGCATCTGATGTTCTACGAGTACGACAAGCCCTTCACGGTTCATCCATGACT  
GCATCCTGGGACGCTCGTGCGACATGAACGAGATGATGGCAGGGATCCATGGGTTGCTAT  
TGACGAATGAGGAGAATGCAGCTGCCTTACCTTCGAGCTTATGGCGGAATGTGGACTCAT  
CAGCAATCTCTTGCAGGCGAGGATCCAGAATCTCACCCTCTCAGTGAAGTAACGCTTCT  
TCTCTTGGTTCAGGAGGGAACGGAACACGTCATCGACGTTATCACCGTCAGCTTCCTCAA  
TAGCCCTACGCATCATGTTTGAGTTGAACTCGAAACGGGAGCTAATAGCAGATGCGAAGG  
CGTCTTCAGCTTCCATGAGGGGGCCAGACCAGGCCAGAATGGGGTTATTCTTGAGGTCAT  
ACATCATGGACTCAAAGCCCACAGCAGCCTTACGAAGGGGTTGTTGGACATCTCTGCAT  
ACGCTTGGTGCCTGCGGAGTTGCTCCAGACCAGAGGTCACCTTCTGTCCGGTCTTGCTGT  
TCTTCAGTTGTCTGCTTACCTTTCTTCCATGCATCAACACTCAAGCGCCATGCATCAG  
CCACAGTCTGATTAATACCGTGGAAGGCTGCGAAAGCCTCAGCATTCTTCTTGAATCCAC  
TACCAATAGCCAGGCTCATGGGACGGTAGACCGCCATGAACAAAGATGATAGTGAGTTAA  
CCAGATGGGTCTCAGGACCACTCAGCAGGCTGTTGTACATGTTGCCAGCAGCTGCTCGG  
TGATGCCAGATCCAATGGACTTCTGGATAGATAACCAGGTCCTCAGGACGTCCATCAGCCA  
GATTCAGCTGGAGAGCCATGCGATAGGCCTCTTGCTTAGCTGCAGGGTCACCCGAGGTGG  
CAGCTTCCAGCATCTGATCGAGCTTCTTAGTTGCAGCCTCGTACTGACGATTCAGCTTCT  
GTACATCTACATTGGGGAGGGGGTTGTCGATGTCAACCTCATCCAGCTTGATCTTGTGT  
TCCACAGTGAACGGCCCTGATAGGACACAGTCTCCTTGTGGATCTTCATCAGAGCCTTCT  
GTTGGTTGATGAGGCGTGCAGGTCATCCGCGATGTCCATGCCTGCATCGAACTTCTGGG  
TGATCCCCTGCACGTTGTTCGGAGATAGCCTTAGCAGTATCCTTCATCATCTGGATCACAC

CCACCAGCTGGGCATCACTCAGGATCTCCTTACCGTACTGATCCTTAGCTGCACCTTTGA  
TCTTGCTGAAGTCGATGGTACCGGATCCACCAGTGACCATCTGAATGAACTCATTAGCTT  
CCTGAGCTAACTGCTCCACAGGCTTGCCCACTACCTTCGACAGGTTGTTGAGGGGCACAG  
AGCCATCCTCGATCATCTGCCTCAGGATCTTCTGGGTGTAGTCGTCAGTACCCTCGGCAA  
TCATGGCGAACTTAGCGTCCGTCATCACACGCTGAGCGGTGTTAGGAGCACCATAACCAG  
TGTCAGCCACAGCAGAGGCAGCAGCGTCCACCTTGTGGTAGGAGCTGGGCCCATAGGGG  
CACGGGCAGTCTGGCTGCGAGCGTGCATACCTTCGGTCAGCTTCAGCTCATCAGCACCAC  
CAGTTGGGATGTACTCAAAGTCAGCATTGCGGAAGATGCCTTCCTGATCGAATAGGCGAC  
CAAGCATCTCAGCTTCAGCTTGTGTGGGAACCTTACGGGAGAGCTCCAGGACGGGGCGGG  
CTTGCACACGCTCAGAGATCCAACCACCGATGAACACGTCATCGCGGGTCAGAGGTCATA  
GAACTGGCTCATGAAGCAGCAATGCTGTCATCATCCAGCTTGTCCAGGGACACGCCATCA  
ATGGCAACCATCACACCGTCAAGTGGGAGCTTGACCTGTGGTGGGATCAATGGTGAAGCCA  
CCGGTCTCAGGGAGGCGCTCGATAGCCTCATCCAGGCCACGATCCGGGGCTCTTGGACA  
ACACGGGTTCCAGGGGTGAACTTCTCAGGGAAACAGCAGCTTCACATCATCGATGGAGACA  
GGAACGCCATTAGCGGCCTGCTCATAACAGACGCATGAAGTTCTCCTGAAGGATAGAATCC  
TTAGTCATGGCGACATAGTCTGCACCCTCCTCCAGCATCCGGCGGTAGCCAGTGAACCTTG  
CTGTAGTCAGTCTGAACCTTAGGCTTGGCAATACGAACCTGAGAGGGATCAAACAGGAAT  
GTCTCAGTACCAGCCCCACGCTCATTGGTTTGGAAAGGTGGGATCATAGCGGACACCCTGA  
TACTGACCACCTTCAGACAGGAGCTCGCGGAGCTTCTTCTTACTGGCAGCATCGATGTCC  
AGACCGATGTCCTCGAAGGTCAGGTCGGTGTGTTGATGTCAACATCCTTACCCGTGGAG  
AGGTCATAGTACCGATAGCCGATAACATTCTCATCCATGAACTGCTGCATCGGGCGATCC  
ATGTCGCGGATGCTCAGCCCCTGGGTGTGATCTCCAGCACCTCAGAGCCATAGGACTTG  
GCATAGGCCATATCGTTGGCAGTGTAGACACCAGATCCGAGGATGTTGGTACCTTCAGAT  
CCACCTTGGAACACCCCTACGGATAGTTCAGCAGCTTCAGGGGAGGTTGCATGGTAGA  
CAGGGCTGGGGCGCTGCACATCAGCCATAACGCTGGCGTACGTGCTCGATTGCCTCTTGGG  
CAGTCTTACCAGCATTACCGGCACGCTCAACGGCCTCCTGATGCTTCATGAAGCCGGTCT  
CTGCAGCCTTGGCAATCTCAGCATCTGTAGCCTTGCCTGCACGGGCCCTGTTAGCCGCTC  
TAGCGCCTGCAAGGAATGCTCCCATGCCATCGATAGCAAAGCCCAGTACAGAGCCCTCAG  
CGGCGGTCTTAGCCATCGCTGTGAGTGGGTTGTCATCCTCCTGCACAGCCAGGGCAGTCA  
GCCACTGGGGATAACATTCCGGGGGCATAGTCCTGGATCAGAGTGGAGAGGTTGCCTTAC  
CAGAGGAAGCGCTAACCATATACCAATGATGCCAGCACGGGCACCTACCAAACCAGATT  
GAACAATAACCCGCGCCCTTGGCGGCACCAGCGAAACCTCCGCTCGCAGCCATGACAGTCG  
CAACTTCCAGGAACCTTGGGTAACCTTTCCTGCAGCTGTTTTTCGCACCAATTTTCATCTT  
TTCCAAGGTCCCCTTAGCCCAGGAATACTTGGAAATCGGGTCCGAATTGAAAGATGTCAT  
CCTTAGCCTCAGGCTTCCACTCTTGGTTAACTAGACCTGGGAAGACTTGGCTGTGTGCC  
AAGGATCTCCAGAGTGTTTAAATGTGTTCTCAGCGGCCCTGCAAGGGCTCCTGAGACGAC  
TCCGGTGATCTCTGGGGCCAATCCCTCAGCGTTACGTAACCTCGTCCAGCTGCTCGGCAGC  
CTCACCCCTAGCAGCAGCAGCTCTTGGGCGATCTGATCGGCAGTCTTGTCTCAGTCAG  
TCCGAGGCAGTCCGATGTGTTACCAGATCAGCACCGGGAATACCGATGTGCTCTTCCA  
GGAATTCTCCACACCAGAGACCTGGGCAGAGGGCCCGAGAGCTCCGGGTCCCTTCTTCT  
CTTCTACAGGGCCACTGGCTACTGGAGGGGCAGACTCAGGGGCAGGGCTAGGGGCAGACT  
CAGGCTGAGGGGCAGGAGCTGCTGGCTGCTCCACCAAAGGGGCGGATGCCTGAGCAGCTT  
TAGCCTCCTCGGCCAATCGTCTCATCTTCTTCTTCTTATTCTCAGTCTGAGCTAGTGCCT  
CAAATGAGCGTCAATCTGACTTTGCAGATCATCGTTCATGGCGTACCATTAAGCGTTGG  
GAACTGTGCCGTGGACGAAAGCGTACCGTTCGTCATCAGGAAGCTCGATCACGGTGC  
CGGGTCCGGCACACGTCGCGGAGTTGTCAGTTACATTCTCAATTACACGTCGCGCCATTC  
CGGAGAACGACAGGCATAACAGACCGGCCATCAGGTGTGGCGAAGTCTACACCGAAAGAT  
CCTCGGTTTCTATGCGCTTGGTCGTTGTGCGTACGACTGTGCCTTGTGAGAGTGGCTTG  
ATTCCAGATGCTGTCTGGACTCCTACATATCGATCGAGGTCTGTGCGCTTCATACGAGCC  
GATCTGTCACCATAAACACCACCTGGCTTCACCGGCTTCACATCGAGGTGGGGTCCCCTA  
GAACCATAACCCACGACTTTCAATCCGATAGATCGGTGAGCCCCATGAGCCTGTAGTGTTA  
GAGGTGCGCTGTACTGTGGGACGGTTATTGTCTAACTGGCGAGCGTATTGGAAACGCTA  
CCCTCATGACCATAACCCAGTACCGCTTGGAAAGCCCAACGAAGATCAGCATCTGAGCTG  
TTGGGATTCATGAATGTCCGGTATGCATCCGGATAACTTGCCTTCATTTCTTTGAGCATA  
GCTTGAGCCTGCTCTTGCCTAGAAAGCTTGGTTGATAGGCTTACCAAGAATACGCTCAATG  
TTGCGTAGACGGAAGTGACCCTTCTCAGCGTCATCCATCCATGATACGATCCCACCATTA  
CGGTCAGATCCATCACCTTGTACTTCACCCAGGTACGCTGACCCTGCCATGAGGATTCT



TGCATGATGTTCCCTGCCAGGTAGGCAGCACCCCTTGTGGGGGATTCCCATAACCACGAAGC  
ATGGAATAGCCCTGCTTCATATCACCAGCAGCTGGGGCCTGTGTAGGGGCCACGGCAGAT  
CCACTGGGGGATATTTAGCTGCCATCAGAGCGGCAGGTGAGGGGAAGTCCATACTTCTT  
AGCCTGTGATGCGATCACCTCATACTCAGAGATGCCGAGCTTACGGGCAATAACACCAAC  
ACGCTCACCCAAAGGCTGACCTGCTGCATAACGCTTCATCTCCTCTCGGAGTTGCTCAGC  
GCGGAACAGGAAGTTACGGGAGGGGTTGAGTTGAGCAGGGGTAGCAGAGCTCAGATCCCC  
TGTACCCACCTGTGAGAGGCTCCAGGAGCCGTCTTGGCCTTGAAGTGCATTGTCCAGGGC  
ACCTGCACGCGCAGGAGGGTTGAGAGGGGCCTTGAAGCCTCTAGAGCCGGTCTCGCCATC  
TTGAATGGTGAAACGGTCTGCTTCAGGTAATGCTGTAGACGCTGCTCTGCATAGGCATA  
CTGAGCGGTTGTTTCTGTGGCAGAGATCTCACCACGACGGATAGCACCTGCCAGATCCTT  
CTTAATCAGGTCCTGGAGAGCTCCGGTACGGGTAGCGATCTGTCCAGCAATCTCCTTAGC  
AGCAGCAGACCCAAGGGTTGTACCCTGCTCTGTATTGCTGAGGAGAACTTCTTTGATCTG  
CTTCTTAAAGTCAGCATCCACCACCTGACCAGCAGTCTTGGTTGCTGCGGATGACTCACC  
ACTAGGGCCATACTGTTTGGCCACTTTGTCTGGAGATGTACCCCTCACGACGCCACTCCTC  
GATCACCTCGGGAGGGATCGGGTTTCCAGCAGCAGCACGAGACTCAATCTCAAACCTCCAG  
CTCAGGACGGTGTGGATACCTTGACCCTGGGTGAGAGTGTGATCTCACGACGGGCAGC  
TTCTGTACCAATAGCACTCAGCCTAGCGATAGCATCTTCCCTGGACAGTTCGCCGTGGAG  
GTAAGTGTGGGTGATGCTGGTGAGCTCCTGCTTCTGGACCCTCATGCGATGGTTCGAATTG  
ACCCATCTTGTCTTCTCAGCCTCACGAATGGCATTCTGTAGATCTGCCCCATAGGTCTG  
ACCGATGGTCTTACCAGTGTGGGGTTCACAACAGCATTGCGGAGCTGTCTGAGGGCCTC  
TACGTCGCCGTTCTTGACGAGACGTTGACGGATAGCTGTGTAGGCCTTCTGTGTGTTTACG  
AGCGCTATAGCCACGGGTGCCATTGCCTGTAGAGAATGCAACAGCATCACGAGCCTGATC  
CCAGAGGGCCTGGCCGCCAATGCCGGATATGGAGAGGGCATCGAGCTCCTGCTCGGTTAT  
AGCTGCACCTTCGTCCTTGAGGAATGAGGCACGACGACTAGCCAAAGTCTGGGCAGCATT  
GCCATAGGCCTGCTTGAGGACCCCGGCCAGCTTAGACTTCTGGAAGTCTAGTCAGGTTGCC  
AGCCATGCGGACCTGCTGTTGGATCAGCCACGAATGAGAGCATTACGCTCACGGGGGTC  
TGAGGGGATCTGGCTGGGATCCGCCTGCATCACGCCGAGATCTACAAGGGCAAGCCCCTT  
GAGGATTGGGCTGAGCAGCAGGACGTTGAGATCCCTGATGGTCTGATCAAGGACACCCTC  
GATCTAGACCTGGTTAACGAATCCCCTTATTTCTTCTGCTGATGAGTAACCAAACCCTGA  
TGGAGCGGATCGTGGACGCCGTCGATCGTGACGACTACGCATCCGCCGAGGCTCTGGTGG  
AGCTGGGCAACTATCTAGAGGCCTGCTTCTACTGGACTGAGGATAACCGATGAGGATGAAT  
CCTTCGTGGAAGGGGAGGGAATTTGATCCCTTCTTCTGCTCACCCGACTCAACTACCG  
CTACAACACCATGACCCAAACCAACTACACCGTTTTTCACCCAAAGCCGAGATCGATGCCTT  
TGACGCGGAAGAGTATGCCCTATTCCTCGCTACCGGCACTCCTACACCCGAGGAGCCCCT  
GGCCCCGACGGCGCTTGGCTACGTCGAAATGTTTCAGAGAGTTTGATCTCTGATCTCTTAG  
AAAACACTATCCACGCACTCTCTACAACCACCATCATCAATGGCTGATCGCAACCGCTAC  
GTTTTCGAAGCAACCCTGGAAGGATTCATCAACGTCTACGAAGACGAAGGTAATTC AAC  
AACCGTTGCTTCTCATTCAAGCTCCCGAAGGACGTGATCGAGGCAGCTGAAGCTTGACCG  
CGAAGAGCTCCTGGAGTGGGCTAAGTTCGAAGGCTCCCAATCCCCGCCGCTGTGAGGTAGC  
TCTCAGCAAGTGGGATGATGAGGGCCTGGTGAAGTACAGCTACAGCGAAGAGAAGCCCAA  
GGCTATCCCCGCTTTTGTGGATACCGAAGGCTCCCTGATCGACAAAGCTGTGCTTAAGGA  
TGTCGCAAGGGCACCAAGGTCAAGCTGATTGTTTCAGCAAGGACCCTATGTGTTTGGCAA  
CAAGGTCGGTACCCGCTGCTGGTTAAGGGTGTCCAGATCATTGAGCTCGCCTCTGGCAA  
TGGCTCTGTTGATTCTGGGGACATGAGCGCCGAGGACGTGGCCGCCATCTTCGGCACCAC  
CTCCGGCTTCAAGCAGTCTGATCCTCAAGTCCGCAAGGCTGCAGAAGCAGAGCCCAGAC  
CACCGAATCCTACGACTTCTGAAGTATGAACGACAACCTCAAAGAATCTGGCCTTCTTT  
CACGGAGGGTCAGTGCCCTCGAGAAGAAGGTTAACTCTCTCGAAACTACCGTGGCAGAGA  
ACACTGTTCTCATTGAGAGGTTGTCAGAAGTAGTTCGAACTTACCCTCAATAACCAGAAAT  
ACTTCAAGGAGAATTGGGCACAGATCCAGTCAAAGTTAAAGGGCTTTGAGAATTGTCTGT  
CTGTCTTTGAAGAATATTTGGCAAACCTAAACCGGCATGAATTATCGATCAGGTCTTGA  
GGAGAAAGTAAGCAAGTGGTTAGATCGGGAGAATGTACCCTACCTCTATGAGGTGCAAAA  
GTTTCGATTATGTAACCTTCTTCAAAGTACACTCCCGACTTCTTCTTACCTAACGGCGTCAT  
TCTAGAGGTCAAAGGTTTCTTCAAAGCCTTCTGACCGCCGAAAAGATGCTAGCAGTTAAGG  
CTCAACATCCTGAGCTTGACCTACGCTTCGTCTTCCAAAGAGACAACACTCTCACCAAAG  
CATCCAAGACCACATACTCTATGTGGGCCGAGAAACACGGCTTTCCTTGGTGCATCTACC  
CCAACATTCCACAACAATGGCTAACCTAATCTTCAAAGATTGATGGGTTCTGCTTTGACCT  
CGAACAGGAGGGTTATGAAGAGGAGGAAATCTTCTCTGCTCTCCTGGAGTACCTCGAAAT

ACATGAGGAGTTGAGGCATGTATGACGAAACCCAAAACGAATTCACACGCCATGAACCGT  
GCCCTAACTGTCCAGTTCTGACGCTCTTGCTCGTTACTCTGACGGCGGCGGTATTGCT  
TTTCATGTGGGTACTCGGAACGTGGCACCGGACAATCCACCCATACAAGTAGAGCTCCTA  
TGATTCCACTCGAAGGTGACTTCCATCGGATCCCTTCACGCAACCTGACAGAGGAAACCT  
GCCGTAAGTTCAACGTCCGCGTAAATGATGGCAGGATTCAATCCCCTACTACGACAACCT  
CCCGCCAACTGGTGGGCTACAAACATCGTGGCAAGGAGAAAGACTTCCGCTGGCAAGGTA  
AGAACCCTGACAACCAGCTCTTCGGCCAACAGCTGTGGGGCAAGGGTAAGGCTATTGTGCG  
TCACCGAAGGGGAGTTCGATGCTCTCTCAGTGTTCCAAGCCCGTAAGAAGTGGCCCGTAG  
TCAGCGTCCCAATGGCGCACAAAGTGCAAAGAAAGCACTGGCAGCACAGCTCACCTACT  
TGCTGAACTTCGAGGAGATTATCCTCATGTTGACAAACGATGATGCTGGCATCCAAGCCG  
CTGAAGAATGTGTGTCTCTGTTCCCTGCGGACAGGGTCTTTACTGCATTCATTGACGGCT  
ACAAGGATGCTAGTGAAGCTGTTTCTGCCAAAGACTATGACGCCGTTACCCAGGCAATCT  
GGAATAAGTCCACTTACACACCAAAGTCGATCATTGATGGCCGAACACTATTCGATGTCG  
TCACCACACCTCTTCATGGTCCGGATGCTGAGTACCCTTTTGCTGCTCTTAATTCCACCA  
CTGGTGGTCTTCGCCTTGAGAGCTCGTCACCATTACCGCTGGCTCCGGCACAGGTAAGA  
GCACCCTCTGTGGTGAGATTGCCGTCTCGCTGATCAATCAAGATCAGAGGGTTGGTTACA  
TCGCCCTAGAGGAGAGCGTAAAGCGCACCGGCCCTCCGTCTCATGACGGTGGCTGCCAATA  
AACCATTGCACCTAAACAATGAGCTACCAACCGATGAACTTCGGACGGCTTTTGATTGCA  
CTCTTGGTACTGGCCGCGTATTCCCTACGTGATGGCTTTGGGTCTGTGATCCTGACAGTC  
TCCTCAATGACATCCGATTCCTACCAAGGCGCACGAAGTTCAATGGATAGTATTGGATC  
ACTTTCAATTCTGCTAAGCGGAAACGAGAGTACCGACGAGCGCAAATGATCGACATCG  
TCATGACCAAACCTTCGAAGCTTCGTGGAAGAGACCGGCATTGGGATGATCCTGATCTCCC  
ACCTGCGAAGAAACCAAGGCGACAAAGGACACGAGGACGGAGCACAAGTGTCACTCTCCC  
AGCTTCGTGGCTCCCATAGCATCGCTCAGTTGTCAGACCTTGTCAATTGCCCTTGAGAGGG  
ACATCTCGAAGGGAGACAACCGATCACAGCTAAGGGTCTAAAGAACCGCTTCAACGGGC  
AGACAGGGCCCGCTGGTGGCCTTTCCTACTCTGTAGAGACTGGCCGCATGATCGAAGCCC  
TCGATTTGAGGACGACAAACCCACCGCACCTACTGACTATGGCGACTTTTAAGCTCACG  
CTCTTACCAAGAGGGACTGCGGTCCCTGCAAGCGGGTGAAGAACTACCTCAGGACACAT  
AACTACCTGGACAAGGTCAACATCCTTGAGAAGGAGAATCATCCTGCTCTGGTGTCTGCC  
TTTGATCTGGATGTATATCCCACGCTTGTGCTTAGTAACGGCACACAGATGATCCGCAAG  
TACGAGGGTTCCAATCTCGTGCTTATCAACCTCCCTGACGAAATCTATGAAGCTAGCCTT  
TGACATTGAGACCGATGGTCTGATCCCAGATCTCACCATCATCCATTGCATTGTGCTAG  
GGACATCGACACTGACGAGGAGTTCGCTTCGATGGAAGTGGGGATTACCCATCCATCAA  
AGAAGGCCTGGAGCTTCTCTCCAAAGCTGATGAACTCTGGGGACACAACATCGTCAACTA  
TGACTATCCTGCTATTCAGAAACTCCACCCTGATTGGACGCCTCCGTCCTGTACAAGGGA  
CACACTCATACTGTCTAGACTGTTCTTACCGATCTCCTTGACAGAGATTTCCGCAGCCG  
TCCGGCGCTCATGCCCGGAAACCTGTATGGAAGACATAGTCTTGAAGCTTGGGGGCACCG  
CTTGGGGCACCAAGAGTGAGTTTGGAAAGAGTCTCGAAGGTGATTGGTCAACCTATTC  
ACCAGAGATGCTCGAGTATTGTGCACGAGATGTGGAAGTCAAGTGTGCACTGGCCAAAAC  
CTTTGTGCCTAAGATTCCTGAGTATCAGTGGTCTGTTGACACTGAACATGAGATTGCCAG  
AATCATGTCCTGGCAGGAACAGATGGGTTTCCCGTTTGATGTCCGCGCGGCACAGGCTCT  
TGAAGGCAAGCTGCGGTTAGAACTCGACACGCTGTCAGACGACATGCGTGAAACATTCCA  
CTTTGTGGATGGCGGAGTGATGACTCCGAAGAGGTGCAACAAGGTTTCGTCCTACTTCTCGA  
AAACGCACCATTCTGCAAGCTACGAGAGTTCAACCCAACCAGCCGACACCACATCGCGTG  
GGCTTTCGAGCACCATCGTGGGTGGGAGCCTAAGGAGCGGACCGCAGGAGGTCAGCCCAA  
GATCGATGATGAGATCCTCCGGGAGATCAACACCAAGGAGTCACTGGCATTCCGCCGAAT  
CCTTGAACCTCAGAAGCACCTCGGCCAGCTCTCTGAAGGTAAGAATGCTTGGCTCAAGCT  
CGAGCGTAAAGGCCGACTTCACCCTCATGCGTGCTTAAACCAACACCGGTAGGCAAGC  
TCACATGAGACCCAATCTCGCACAAAGTACCTTCCGCACATGAGTATCGATCCCTCTTCAA  
GCCAGTGATAACCACCTGCAGGTTGGTAGTGACGCCAGTGGCCTTGAGCTACGGTGTCT  
TGGCCACTACCTTAGCCGCTACGACGGTGGTAAGTTCGCAGAGGAAGTGGTTAACGGAGA  
CATTATACGGCTCTGGCTGAAATCTACGGGACTGATCGTAAGTCTGGAAAAGGCGTTAC  
CTATTGTCTCATTTATGGTGGTGGTAACCATAAACTTGGCCTTACGGCGGGCGCTTCTAA  
AAGCAGTGCTCAAGGAAGGGCCAAGAAATACGTGGAAAGATCATGCAAGGCCTATCTGG  
TTTCGCAGATCTCAACGCCGCAATACAAGAGCGTGCTAAGTCTGGCGTCTGAAGGGCCT  
AGACGGTAGGCCAATCCGCTGCAGGGTAAGAACCATGCAGCTCTTAACTATCTGCTCCA  
ATCCGCTGGAGCAATCATCTGCAAGCTCTGGGTTATCCGCACTCATGAGCTGCTGCAAGA

GGCTGGGATTGATTACTATCCCCTGGCCTTTGTGCACGATGAGCAACAGCTGTCTGTTAG  
AGCCGATCAGGCTGAGATGGCTGCACAATTAACCACCCTCGCCATGAAAGATGTCGAACA  
CCAAGTCAAATTCAGATGTGCCCTTGACTCCGAGTACCAAATCGGAAACTCCTGGGCCGA  
TTGCCATTGATCCCAACAGGTTAGGGGATATGGCAGAACAGCTAGTACAGCAACTAGCTC  
ATTGGAAGGGGTGCGAGGTGTTTCAGGAATGTGGGATGTACAGGTCCAATAGACCTGGTCA  
TATACCACCCTAAACTTGGACTCCTGCCAATCGATGTTAAGTGTATGACGGAGAGGTTAG  
ACGGAACCTGGTGCAACCCATCAATAGCATCAGTACCTGCCGATGTTTTTCTAGTCTACG  
TCAGACCAAAGGGTGTATGTCAGGGACTGGAAGGTGCAATGGAGGAACACTGCTAGGGGAA  
TTCACTCCGCAGATCGTCTGTCTATATTTGCCCTCCTGGTTGGGAAAACCTTCTGGGACA  
ATGACCACCGAAACTACTCCACTAAATGAAACCTCTACCCTTCTGATTGATGCTGACTA  
CTTCCTCTACCGTGCTTGCAACACGGCGGAGGATGAGTTGGAGTTTACTTCGAGACCAC  
ACTGGTTGTCCGAGACTTCCGCAAAGGTCAGCAGATCTTCCGTC AATCCATCAAGGACTT  
CACCACGAAGTTCGACACCGACAAGGTTCTCCTCACGTTACAGATTCTAGGAATTTCCG  
CAAGGATGTGGAGCCCACCTTACAAAGGTAACCGCGTAAAGCGTAAGCCATGTGGTTATAA  
GAAGCTGAAGAACTGGGCCATGAAAGAGTGGCCCTCTGTGATGAAACCTGGTCTCGAAGC  
TGATGACGTTATGGGCATACTTGCCACTAACGGATCACTCGACAACCTTTGTTCTTATCTC  
ACCAGATAAGGATATGGCTCAAATCCCCTGTGCGATCTACGATCTCAAGCATGAGTACAC  
CCAGACCCAGAGAAAGCCCATGAGCTCCTCTACCTTCAGTGCCTTACTGGTGATTCAAC  
TGATGGCTATAGCGGCTGTCCTGGCATCGGTCCCAAAGAGCTTTGGCAATTTTAGGTAA  
GGTCAAAGATGGTAATTACTGGCCTAGCGTTGTTGCTACTTATGAGGAGGCAGGACTCAA  
GGAGGCAGATGCTGTCCGCAACCTTCGCTCGCTAACATCCTTAAAGCTGAACACTGGGA  
CACTAAAGCCCAACAACCTATCCTCATCACCTCATGACCCTGATCCTCTACCCACCGTG  
CTCCTGCTGTTTGTGGGAGCTTTGTACGCTGAGTTCGACCCTTGGTTCAAAGAGCTCTGC  
ATCATCCTCTGGCAGGCCATCGCCATTGAGCTGCGGAAGATCCCATTCTCATTCGTATG  
GAGTGGGACATCTTCTGGATGAAGCGCAATAAGAAGAAGTACCTCAAGATGGCCGAGCAA  
ATCCGCAAGCAACTTGAAGATGAGACTAACCGCTAAAGA ACTCACCTCTTTTCGCAACCA  
CCTACTTGCTAAGAGGGCCTATGCCAACGCCGACATCCCCCTGGGCTACAAGGTCTGGGA  
ACCCTGGATGAAAGGCACCCTCCAGAAGTTGGAGGATGAACTCTACCCACAAGAAGGAGA  
TCTTATCTGATGTCCAAGTATTCACCAAGCCACTACAAGAAAGGTTCCATCGAAGTATGG  
GACTTCATCACTGACCAAGACCTCAATTACCTAGAGGGTAATATCGTCAAGTACCTCTGT  
CGTGCCGGCTCCAAGCCACATGAATCACGTATTGATGACCTGCTAAAGGCCAAAGCTTAC  
CTCCAGAACTCATCGACTCCACCTCTGACCATGACCTCACTCTTAAAGCAAGCGATCGA  
ATTCCGTACAAGTGATGGGGCAGGAAATCGGAACCTCGGACGATACGGTCATTGCCCGGC  
AACTCCGTCTGATTACCGAGGAGTTCAAAGAGTTCAATGATGCAACAGACAACGAGCCTG  
CTGCTAATCAACTCAAGGAACTTGCTGATCTTGTCTACGTTGCTTTTCAGTATGCTGTTG  
CTAGAGGCTGGGAGCTTGATGAAGCACTTGATCGTGTGCACGAGTCGAACCTGTGCAAGT  
TAGTCGATGGGAAACCATTACGCCGTGAAGACGGTAAGGTCCTGAAGGGCCCCAATTACA  
AACCACCCTACGTTGAAGATTTAGTTAATGTTTCCGTCCAACGCACCCTCCGCAAACCC  
CGTCTTCTATCGCACCTACAGCCGAAGGTTGATGGTTCGGAAGAGAGCTGGGATGATGT  
GGTAGAGCGGGCCTCATCAGGCCTTGCTGCAGTCGGTAAGTTTACCGAAGACGAGGCAGC  
TCTCGTGCAGCAGCTGCAGAACCTCCATAACCCTTGCTAGCGGACGCTGGCTGTGGGT  
TGGGGGTACACCCTGGATCTCCAAGCCGGAGA ACTTCTCAGGAGCCTACA ACTGCACCTC  
CACTGATCTGGTGGATCCTGAAGCCTTCGCACTCCAGATGGAGTTGTTGATGATGGGCTC  
CGGTACTGGTGCTGTTATTGAACCACGCACATATAACCAGCTGCCTACAGTTGAGACCCG  
CCTGGATCTCTACGTGATGGACAACCTCGGCACAAACCCGGGGTGGACAGAGAAGACTTA  
TCAGTCGGGCAACTTCATCTACATTGGAGACTCTCGCCAAGGGTGGTGCGATGGCCTCCT  
CCTGATTCTCAAGAACGCCTTCTCCCTTTCCCCACATGAGTTTAGAAACATTTCTGTTGA  
TCTTAGTTCTGTCCGACCCGCTGGTACTCCTATTGCTGGGTTTGGTGGTGTGAGCAATCC  
TGACGGTTGGCTGAGACCTACCGACGAGTCGCGAGGATTCTGAACAATGCGAAAGGAAG  
ACGACTCACCTCAGTCGAAGCGTGCCTCATTCTGGACGAATCGTCACTTGCTGTTGTGGC  
TGGCAACGTCCGCCGGTCTCCTGGTATGCGTCAATTCAGTCAGGATATGCCGCTGCTGCG  
GTGGCTAAAGACAACCTCTGGGTCTGTGATTCGGAAGGCAACTGGAAGATCGACCCCGAG  
CGGGATGCTCTGCGGATGGCCAACCACCCGTGTCTTTCACTCACGTCCCTCCCTCGCT  
GAGGTCACTGCTAGTGTCCGTAAGCAATTCGAATCAGGGGAAGGAGCGATTCAATACGCC  
CCAGAAGCTATCGCAAGGTCTAACGCTGATGTGCTTGACAGCCTGTCCGCCCGCCGAGAT  
TTCATTGCAACCTACGAGGATGATCCCGAAGCCGCGCGTGCCTGCTCTCGCGTTTATCG  
GGAGATGTGGGTTCGGGAACTCGACCACCGCTTGCATCGTTACGGACTTAACCCCTGTGGG

GAGATCCTCGGCAAGGACTTTCACTGCAACCTCAGTGAGGTGCACCTGAACACCCTGGAC  
CCTGATGACACCGATGCCAGGTAAGGCTTCCAGGCCGGAGCTCTGGCAGCTGGTGCT  
CTCCTCCACCAAGTTCACAACCGAGCGTTATCAGTACAGCCGGGAGCAGGATCCCATC  
GTGGGTGTGAGCTTCACTGGACTGTTCGACTTCTGTGTGAATAAGTGGGGTGTGAGTGG  
CTCCGCTGGTGGTCCCTGGGACGTCCCTTCGTGCCTGAGTTCATGAGTTCGTGCTGGGT  
GAAGCCCGGCTCCTAGAGTTCCTGGAAAGGCGTTCGTCAGGAGACCCTAGAGGCCTACTGT  
GAGAAGCATGGGCTGAAGATGCCAACCGCTACACAACCGTTCAACCTGCTGGTACTAAG  
TCGCTGCTAACCGGGGCATCCCCTGGCTGGCATCCGCCTAAGTCAGCCCGGTTTCATCCGT  
CGTATCACCTTCGCCCGGGAGGATCCCCTGGCGCTGGCATGTATCGACTATGGCTATACA  
GTGGTTCCTTCGCAATCCTCACGTGATGAAGAAGGTAACCTGCTGAATGATCCTTGGGAT  
GAGCGTGTGAAGGAGTGGCTGGTGGAGATTCCCCTGAGACTGTCTGGGCTAACAAAGCCT  
GGTTGTGATCAGTATGAGCCCAACACCTTCTCTGTGAAGGCACAGTTCGACTTTTATATG  
CAAGTTCAGAAGTTCCTGGACTACACATAACACCTCTGCTACTCTAGAATTTAGAGAAAAT  
GAGATCGAAGAACTGTCTGAACCTATTTATCGGGGATGTGGCGATGGCTACATCTCAGCT  
GCTCTCCTCGCTCGCTTCGATGCTAACGAGACTTTCCTTCGCTTGCCATTTGAGCCGATC  
GATAGGGAGACATACTTCCGCCTCCAGACTGAAGTTAACAGCTTCCGGGAGATGGACTTC  
CACGATGCAATGGCTAAGCACTTTGATGCTCAGCATGTGGAGCATGGGCCAGCAGCCTGT  
GACTCTGACAAGTGTCTTCTCGAAGAGAAGAAATGAACGACCCAATCCAACAATTCAGTG  
GAGATACCCAGGTAGCTAAGCTCCTGTCCGAGCTGGAGAATTTATTCCCTCCGGTAACCTC  
CTACACCTACAGATGAGATAGCCTCGATCATGTATCGATCGGGGCAACGCTCTGTCTGTTG  
AGTACATTAACAATTAAGTGGAGAACTAACATGTGTATGGGAGGAGCACCTAGTGTGCCT  
AAGCCCGAGCCCTCCACCGCCGGCTCCCCTCCGCTCCGGATCCAGTTCTGCCACAG  
CAGCCTGGATGTTGGCTGGGAGGGTGGCATGGAGCTCCTGAGCACTGATGCGCTGGGTGG  
AGATCTGTTGGTAGGTTGTGCTGTTGTTTCAGCTCACTAGCAACGATCTGCCCTCATCAT  
TAGGAGACTCAGTCATTCACCTCATTGCTGACCTCAGCCGAAGCACGAGCACCAGCATTG  
ATCTGGATTTCCTGATCACTCAGGGCTTCTGCTTTCAGCTTGTAGCTCAGGAGGCAGCTCT  
GTGGCTGTCTCATCCATGATGAAATCGAAGTAGCCTTCATCCCAAGCTTCAGCTTCCTGA  
CGCTGTTTGTCTAACTCAGCCTGACGCTTGGCTCTCTCGTTGAGCTCATGAACCTTAGCG  
ATACCTGTTGCTGTCTGACCGACAATGCCGGAGATGCTCTTCATCATGTCTCCACGATGC  
TTAGCCTCGGCCTGCTGCAGCTTGAGGGCAGTCATCTGGGCTTTACCCGTCAGACTGTCT  
GAGAATGTCTTTGTCTTTGCATCCCGGACCATTTCTCCTCGGTCCTGGCTGCTGCACGCTTT  
TGATCGTTGAAGGCCTTGCCTTGAAGGATCCGAATCCGAATCCTGTCTGTGCTGCCTCTG  
TATTCGGATTGGAATGCCATTAGAACCAGTTATAAAGTAGGTGTACCGATTGGCCCTCCAC  
CTGGGGATGCCACTAGGGCGGGGTGTAGAGGTGATTGAGCAAGGGAATTCAGGCATCTG  
CATCAGCGTTAGCACGCTGTGTGGAAGCCACCTGATTACCACCTCGGCGGATCTAGCAG  
CAGACTTAACCATTGCATCCTGTTTCAGCTTGTTCGATAACCGCCTTGACGCTCAGCGTCCA  
TAGATAGCAAACCAACACTCTGACCAAGTCCGACCTGTGGCCAATACTGAGCCCTTAGCAC  
CAATCTGCTTGGCGTAGATCTCTTGGGACTTAAATGCAGCTTTAGTCCGAGCTTCATCTA  
GCTTGGTTTGTCTGCTCCATCGATGCCGAATTCTGGGCATCCATGTTGTACTTCAGCTGAT  
CCTGATAGGCCCGCATAGACCGATCACGTTGAGCCGCTGACCCACATACTGGTTAGCCAG  
TTCTTGGTTAGGGTTCTCAGCTTGTGACGTTGTGTTGTTGTTGTTGTTGTAAGTGCAGAGCAGCCTGCTG  
CTGCTGGAAAGCCATCTGTTGTTGGGCCTGTGCCACTCCAATGACGGATGTGGCGATGCC  
TGCAATGCTACTGATGGCTCCCAAAGCAGGAGCAAGTGCTCCTAGGAAGAGGCACATTTT  
TTCACGAATTCTATGTAGGGTTTGTATAAAGGTGCTGGTTGTACATAACCGAAGTCTCTA  
AAACCTAGTTTCTTAAGTAACCGCCTATGTAAGTGGTTGTCTTGGAAACAATATTATAG  
AGAATATCGTAGTTCCTGGATACTTTTGGCAGCCACCCTTGGCTCCCTTCAGTAGGGCA  
ATAGGATTCCTCTCAATGGCCTTTGTACAGACCATCCAGATCTCTCCACTCTGTTGCC  
ATATCAACCAGCCCGGCAACACCAGCGATGGACCCGTCTGGGGCCACCATTGCGGTGACA  
TTCTCGCTTACGTCGAGGGACAGGTGGAGGGCCAGGACGGAATGTCCTAGACCCTCGATC  
TCTTCCTGTCCTCTTGCCGGATGTTCTGGATTAGCTCGGTGATGTCGGCCTGGGTGGCA  
GGCCTGTTGTTATCGGATTGTGGCATAACCTCGTTTGTGTTGTAGATCCCTTGGAAAGCTGTA  
AGAGGTGAGTCCAGAGGGGTATGGATTGGCAGAGGTGAGAGTTACGAATGTCTGGCTACC  
AGGAGCAGCCATTCCCATGTA CT CAGTACCAGACACCCTCATAGCAGCCTCATCTGCATT  
GTATGCATCAGAGTCGATAGGTGTGAGGTATCCAGCATAAGGTTTCGTAGCCCTGCAGATT  
CACAAAGACGGAGATGCCTGATGATTGGTACATGTCAAAGTAGACACCTTGAACCATCAC  
ATCAGAGATCCTATCTGGACGCCCCGTATTCTTAATGAAGAAGTTGGGTAGATCCAGCTC  
CATCTGATAGGTCAACCCCATCTTGAATGGTCTTCCATTAGGAACCTTGAATAGGCCATC

AGGTTGCATGACGTGGAAGTCATAATCACCTGCATCATTATCTGTGTATATGGTCGTGAT  
TAGACGCTCACCGCCTGCGAAGTCATCCCAGTTAGTAGCCACCTGATAGGTGGTCTCCCG  
GAAGTCAGAACCTACGACAGTCAGGTAGTCAGTGTTTGTGGAGTCGATCATCTTATCCAC  
ACGGGGTAGATAGGTGAACTCTCCAGCAGTGATGGGGTCTCCATCCTGATCCATCATGTA  
GGAGCGGCACAGAGTTACCACGCTGTTGCGGGGATTCCAGTTGACCATATACAGGAGGTT  
GGCATAAGCCTCAGCCTCAATGATCTTGATCTTCGTAGTACCAGGTAGTCCAACCAGCAA  
CCTTACGCTCTTGGCCTTCATTGAAGAACCGGAAGACGTAGACGTTCTACCCTTCTTAG  
CATTACCGAAGAACACCGTGTCAATTGTTTCATGCTAGCGGTGCTCCAGGTGAGCCCAGAGG  
GGATCAGCCGGGGAATGACCCTACTGCTATCCTCGATCACTGGAGTGCCCTTAGCGGACT  
CTGTAGACAGCTCGTAGACGCTGCTGTAGGTACCCATGTTGGTGGGGAAGATCATCGACA  
CACCAGTCTGGACTGGATCAGCCTTCGACTCATAGGTGTAGTTGGAGATCTTATCCAAGG  
TGGCCGTCTTAGGGCCAAACGACTCATCAGGGGAAGACAGTCGGAACCTGGGCTTGATTAC  
CAAACAGAATGGCTCCAGAGGTACTGCTGATGGCAGCCTCTAGCTTCACCGGCTTGGTGT  
CTGAGGTGGCCATATCAATAGGATCAGCATCCGAAATGGTCACACCTGAGGTGGCGTAGA  
AATTAAGTAATCACCAACCTGGCTCATGATCACAGCATCCTGTGTTCAGGAACCCAAGCC  
TGTTCTTATACATGAACATCCCGTAGATAACCATTACCTGATTCGGTAAAGGTGGGATGGG  
GGTTAGTATCTTCAGAACCAACAGACCTGTCAGCCCAGGTCTTTCCGTAGCTGCTGTTGT  
TCAGGCTGCTAAAGGTGAAGTCTCCTAGAGCGTTACGGACAAGTACGTGGGGCATGGTGT  
CATCCACCAGACCACCGTCGTCTCCGTTCTTCACGGTCTCAACCCAGTAACCACTACCAG  
GTACATCAGCATCCTCAACATCAGTCTCGAACTTGACGTAGTAGTCATCAACCTCAGTGT  
CCTGAGTGTACGCACAGCTACTTGGTAGTCATTCCAACACTTAGTGGGGAGCTCGGCCA  
ATGTGTCAACAGAGTACTTGATTGACTCCAGGCCAGTACCCTTGTACCACCTCTGGCAC  
TCATCGTGAACCTCATCAGTTCTGGTTGGGTCAGAATACCTCACCTAATGACATTACCGA  
TGGATTTCGGCAGTGAATGTCCCTAACCCATTAATCGCGGCAGACAGACCTGTGACAATGT  
CAGAAGTACTAGCGCCACCACCGGACTGATCGACAGGTGTGGTGAACCTGAGCGGTGCCCA  
GGTTGGCATAACCTTGGACTGGATCTGCTTAGTTACTTTGATGTCCCAGCCCTCGCCAG  
AAACATCCACACGGATGGTGTCTGGGAATGGGGAGGTGTTATTACCAGGAGTCAGGAGGG  
TTACATAAGGGATGTAGTTGTGGCCATACTCCTCACCGTCATCGACAAGGAATGCACGTG  
CTTCAACCTTAACCTGAATGACAGTCTGTTCCATTCCAGTTGTTGACGGTTGTCTCAC  
CAGCTTCATCAGGTGATCCATCGCCTTCTTACGCTTAGTCTTTGGGGCCTGCATCTCTT  
GCACAGCCCATCGTCTCTGCTGCCAGAATCCTCTGTAGCAAAGTCAACGATGTAGGAGG  
TACCATAACCAGCAGCACCAATGGTGACCAGGCCCTCAGGGCGGCGGCTGAACGATCTAC  
TCCAGGTAGTTGGTTGAACATTTGGATTGGACAGGAAAGTGTAGTCACCGATGGTCAAGG  
ATCGGATAGCTTCCCAGTCAGTCTCATCGCCAGGGAAGTACTCTTCTACTTCTCCACCGA  
CGAACGAGACCGCCCGCTCAACCCCTGCCTTCAGGTCAAACACACGTATGCGTAGATCAC  
CTGACTCATTAGCACCTTACGATAGATAGCCACATAGTAATGCTCCCTTGCGTACGCA  
TGATGGGGATCCACTTGGCCCTCTTGGGGATGCCAGTGACCTGCATAATCAGCTCAGTCC  
CGGGACGCTTTAGAGCTCCAAAGGTTGGGTCTAGCTGAACGTTTCTAGCTTGCTTTACTT  
GCCAGGTAACCTGAGGGGATCAGGCTGCTGCGAGATCCCACCCAGTAGATTGGGCACCA  
TTTGTTCAACTGCTGCCATCAGAATCTCCAGAGAGTTTTCGTAGGTACATAGCCTCGGAA  
GCTACGGGTCCCATCAGGATTCTGGAAGACGTTCCAATCTCCCTGCTGGGTTTTCATAATC  
AAGTGCGGTTGCGCGTGCCTGCTGCTTCCATCTGTCCGTACTTGGCAATTTCTGTACT  
GCCAGTTGTACGCATGGCGAATAGGTTACTTGCGCGAATAGTAATATAGTTTCTGATGGC  
GTTTGGGATGTCCTCAAAGTCGAATAGCCAGACGATGTCTAGCTTCAGCTCATCCACATC  
GAACTTATAGGTGTGGTTGCGCTTGTATAGAGCTTACCGTTCTGATCACCACATCGTA  
AGTCTGTGGGCCAACGGAGATCCCATGACACCACATTCTCGGGGAGCAAGAACTCGTTAT  
CACTATTGGGGGGTCAAGTGGGTAATCCAGCTCACGGTTAAAGATCCAGCCCTCAGTCAGC  
ACATCACTGGTACTTGTTCAGAACAGTCTTAGCTAAGGCGACCTGAGGGTTAGTGTTG  
TTGATGTTGACAATAGGTTGCTGGCCGATGTTGGTCAATTTTTACATTTAGAGCATCGAGC  
TCTGAAGTTCTTTTATAGGAGCCATTAATTTACTTAGGAAATGGGAAGTCCAAAGGACC  
CCGAAGGGTCCGATGGATATAAATCAGGCAGCGCGGAAAGCACCCAGCCACACCAGTGCGG  
AGATGGTCGGAGCCATAGCGAGCTTACCGACGATCAGGTCGCCTGATACTGAACATGGA  
AATCACCAGAGGTGGTCTCGATGGAGGGAGCAATACTTCCACAGTATCAGCAGCTTCTT  
GTGGAACACGAGTCCAGCACGGTCAGTGATGGCGGGACGGTAGGAACCATTGTTCTCACC  
GGAGGTAGTTGCGTCACCGGGATCGGTCACCAGGTTCTGTGCCATAGAGGGAGGCAAGAAC  
GTTGGACTTGTAGATCCGGATGCCAGCGTTGACGTACAGACCCTTACCGGTGTTTCATGTC  
ACCCTGAGTGTTACCGATTTACCGTTTCAGGATGTTGGTGTCAACGGAGGAGATCAGGCT

GTAGTACTGACGAGGAGACAGCACGGCAACACGTCCGTCCATAGGAGCAGAACGCTCGTC  
GAGCACAGCAGCAGCTTTCGAAGAAGCCGTCACGATGGCCTGAGCGTTGTTGGTGTACC  
AGCACCGATGTTGACGGAGAAGCCGCCGTCTTGGCCGGTCACAGGGGCAGCAGCGATAGA  
AGCAGAAGCCAGCACGCGAGCAATGCGCTCGTCATAGTGGATAGCCAGAGCTTCACCGAT  
TTGCTTGGAGATCTCGGAGCGGGTGTCCACTGAGCGAGGATCTCGTCCAGGTCATAGAC  
GAACTGGGAAGCAACCAGAAGATCATCCATGATGAGTGGTCTTCTCGTTGGACTTCAGTC  
CATCGTCGCCCAGGATGGGGGTTCAGGGGTGTGGTACCCAGCAGTCAGCTTACCGCTGA  
AGAGGAACTGCTTGGACTTACCACCGCGCAGAGCATAGTTACGAACGAGGGCCCTTGAAGA  
ATGGTGGCGTCGTTGAATGCATTGAAGACTTCTCCGGAGAAAAGCTTCAGAGCGGTTGCG  
TAGCGGGTATCGTAATCCTGAGCGGAAGTACGGCCACCGTCTGCTACGTTAGGGCCTACC  
CAGCCCGAATTGATGTTAGTCATTGATTTAAGAGATAGATCAGTTGAAAGTTGGAAAGTT  
GGCTTTCAAACGGCGATCCATTTAGTGAGAGGTATCCACCGTAGCGGGCTCACTCTTAC  
TCTGTATCTTTGTTTCTTTAGCCTAGGTTTTGCTCATGAGAGACAGTTTTAGGCCTTGT  
CCAGGGCAATAGCTAGAGGGGGAATCGAATCCCCACTCCCTTACAGGAGGTCTCCAGAC  
CTAGCCAGCTTAGCTTCCACATCCTGACGGTATGCAGGATCAGAGCTATAGCGGGGATCA  
GCAATCGCCCGAGCCAACCTCAGCGTTGGACGGAACGATCCTTAGTTGGGCCTTGGGACTT  
GCGTCCAGTTACCAGAGGAGCTTCATTACCCTCGGCAGCAACACGACGGTTGCGGAGAGC  
TTCAACTGCAAACCTTGTGGCTACAGTGTGGCCACTGTTACCACGCCCCTTGAAGTCAGA  
GATCTCCTCAGCTGCCAGGTTGTTGGCGGCCAGCCGACCAGCTCCTGATAAGCTTCAGC  
ACCACCAACGGACTGCAGGATGGCGGCCTCATCGGCGGCCTTGACCTGCTGCTGTTGCTG  
TTGGGCTGCGTTCTCTTGGTAGAACTTCAGGTAATCCTTAACGAGCTCCTTGGAGTCCAT  
GTTGGACAGGCCTCAACGGTCTCATCAGAGAGGGCCCCAGTCTCCGCGTACTCCTTGGAG  
TAGTCACGGAGGCCTTACCCACGTCAGAGACCTCGACCTCCTCCTCGACAGGAGCTTCT  
CAGAGGCCTCTGGCTGCTCCTCAGCGGGCTCTTCTCAGGTTTCAAGGTTCTCCTGTCCTA  
ACTTCTTCTGGAGCTCCAGGTAGGCCTTCTCAAGCTCCTCAGGAGTCTTGAACCTGCCAG  
CCAGGGGCTCAGCCTCAGCCTCAGCCTGCTCAAAGCGGCGGAGCTTGTCTTTCAGCTTCAG  
CGGCGGCGATCTTCTCACCAGCCTCTAGTGCAGCCTTCTCAGCCTCAGCTTGTGCTGAGT  
CGGGGCCTTCATCAAATGGATTGAACTCGGTTGTAGCCATTTAGATCAGTGATAGGTGGT  
TGTTACGTTACCGAAGGTGGGGCGAACCTTACCCTTCTTGCATACTTACCAGCAGAGGG  
CTTGGAGGTACCATCAACCCTAGTCCGGACGGTGTAGTCCACGGTCTTCTCGGACACCTC  
ACGCTCGATTGCTACGGGCTCAACACCCTTGTCAAACGTCGCGTTAGTGTTACGCGCCCCG  
CCTGCGCTTCGGCGCTGCTGGTTTCGGATTCTGCTGCTCCGGCATCTTGTGCTCCTTCTT  
GTTGTTGTTGTATCAATTGCATGGCCTGCTCAGCCATAGGCGTCTTAGCCAGCTGACCGG  
CCTGGTTAATCAGCGAAGCCTGAACCATGTCTTGCTTCTGCTGATCGCCCAGCTGCTTCA  
TCGTTTCTGGGCTGTTGATCAGCTGCAGGGTGTGATACCCCTGGGCTGCTGCCAGGCGCT  
TGATGAACTCAGTGGGGTTGATGTACTTCATCGCGATCTCAGGGCCCATAGTCTGCGCCA  
GAGTGGTGATGAATTCATCAGCTGTTGCTTGTCCAGGACCCACACCCACAGAC  
CAGCAACCACAGTGGGTTGAACCAGATCCTTGGGAAGTTGAGGGAGCTTGCAGCTGCTTCT  
GGAGCAGGTGGAGCTTACGGGCCAGGTACGGCTGGAGTAGTTCAGTTGTGAGGTTGCTGT  
AGATAACCGCCGATCTGCTCGTTCAGCTCCTGTACTGTGGCTTGCACCTCAGTGGCAGTCG  
TCCTCTCGGACTGGCGAACTTGCAGCATCAGGAAGGCATCAGAGATCCGCTGCTCAAGCT  
TCTGGATCATCTCCAGTACTGTGCGGAAGTCAGCAGCCTTGTGGCCTGCACCACAGACA  
CATCATCAGGACGGCCCTGGATGATCGCGCCATTGGCTGCTAGGGCCAGGTTCTGGGGCT  
TGGTGGTTGCTGATGGTGAAACCATAAACACAACCTTGGCAGAAGCTGCAGAGCCTTCGA  
CCATAGCTTGTGAGAGGGCCTCGAGAGACTTGAGGTCTCCCATGAACTCCTCAACACGTC  
CACGACCATAGGCCTCACCGTCAACGATGTTGAAGCGGAGGGGGATCCAGGGGTTGTGGG  
TGTAGGGGGCGGAGCTGTTACTACCGGGGATCACCTTGCCATCGCACTCTTGGTGCCACT  
TGACTTGGCCATCCTTCCGGCACACATAGGTGTAGACCAGGGCATCATTGCTCTTGCCTT  
TGTCTTACCACCCGGAGCTGTGACGCCATCTTGGGGCCGTCTCTCCGACAGCGTTGG  
AGTCTGGAGCTCCCTCGAGCCCACCCACCTTCTGGAATTCCTCAGGTAGGAGGCTGCGAT  
CAATCTGTTCTTCGGTAACGATCTCCATGACGTTACCTTCTCCGTCTCGACTAACGACGA  
AACGGTCAAGCGGATAGAGCTTGAAGTTCTTCTTCCCTTGGTACAGGAGAGCATTTCCTG  
TGACGATGAGATGCTTCATTGCCATCTCTAAGTGAACACGGTCACTTGATTCTGCAATGT  
CTTGGGTGACGATCCGCTCAATGCGGCTGAGGCTCAGGTCAATCTCTGACCGGGCCTGCT  
CATCCATCCCAGGTTGTCAATCTCAGCGTCGTTGATTTGCAGCTTAAAGAAGCTCGTGT  
TGACAGGGAATAGGCTCAGCATCAGCTTGGATGCGAGCACGTTGACACCTTTACTACCGA  
CGGATTGCCAGGGAGTCGGCAAGTACCCACCCTGCACATGCCCTCATCGGTGAGGATAT

ATGGCAGAGTGAGCCTCGCTGATTGTCTACCGGAATCCAGGTAGTCTTCTCTATCCGCC  
GAAGCATCATGTA CTTAGCTTGAGCGGAATGTTTCATCAGGTAGGAATGTTAAGTGATCC  
AGACTTCTTACCACCACCAGCAGAAGCACCACCAGTGTTGACGGTCTGCTTGGGGATGGT  
CAGGGATGAAGTTCCCCGGGCGGACTGCTGGGCCTGCCACGTTTCGGTCTTCTGTGCTGT  
CACCTTGGGGGCTTCAGCATCTGCATTCACCAGCTCGGGAGGTGGGGCCACAGGGGGCCG  
TGGGGGATCCGGAGCGGGCGCGGGAGCCGGCGGTGGAGGGGGCTCGGGCTTAGGGCACACT  
AGGTGCTCCTCCCATACACATGTTAGTTCTCCAGTAATTGTTTAATGTA CTAACGACAG  
AGCGTTGCCCCGATCGATACATGATCGAGGCTATCTCATCTGTAGGTGTAGGAGTTACCG  
GAGGGAATAAATTCTCCAGCTCGGACAGGAGCTTAGCTACCTGGGTATCTCCAGTGAATT  
GTTGGATTGGGTTCGTTCA TTTCTTCTTCTCGAAGAGACACTTGT CAGAGTCACAGGCTGC  
TGGCCCATGCTCCACATGCTGAGCATCAAAGTGCTTAGCCATTGCATCGTGGAAGTCCAT  
CTCCCGGAAGCTGTTAACTTCAGTCTGGAGGCGGAAGTATGTCTCCCTATCGATCGGCTC  
AAATGGCAAGCGAGGGAAAGTATTTGTCTACCAAGGCACAAGGTACCGCAAGATTGTTTA  
GAGAAAAGATAGA ACTTATTCGACATTTGGTTTACTGGGTACAATAGGGTTCGCGGGTGC  
ATTCTTAATTACAATGAAAGCATCATTGTTATACTTGC GGGTTCCTTTTAGAGGAGCCCA  
TTTGGTGCCAGCACCATCAATCTCATAGACAGAGGTGCCACCAATCTCTACATGGATGTC  
GACATTACGAACATCCCATCCAAGAGCAGCAACTGCTTCAACGAGAGCGTCTTCAGTAAA  
GCGCATCTTCTTGGTCTGCGAGGAGGGTAACGTC ACTGGTAGGATATGCTGCACAGGGAA  
GCTTCGGAATGCCATGCAACCGGGCGAGCTCCTGTTTGGCGTAGGCAACGTCTGGGAGGT  
AGATGTT CATGGTTGCTCCGTGTTGATGTGTT CAGTGTATCAGGCAGCGCGGCGTCCCTT  
CTGCAGGGCCAGTACTTCAGGCTTACGGGCAGCGCCCATGTTCTGTTTGAAGTTCTTAGT  
GTGGCGGCCTGTCCAGGTAAGCTCGCGGGCTTGT TCTTGGTTGGCTTAGCACCAAGGAC  
CCATGTGCTGTTGGTTAGTTTCATGACGGTAGAAAGACCCGCTCGTTGCGGGCCAAAAGA  
ACCGAGGACCTTTGCGGTGTACGTCAGCTGTCAGGCTACGTCTCGGTTCA TTAGATTTTA  
ATTAACCATCAGGTCGGCAGCGCTGGTCTCAGCAGACGCTTTATCCTTCCAAGGGCTCTC  
GCTTCAGCCATCCTCGGCCCCAGTGC GGGTTTTACCCTAGGGCCTCTGGACGGTACTT  
AAGTTCCCGTCGAGCCCTCACCTGGAAGGTGTATTGGAAGAGAGAGGAGAAGTTGTCTGG  
TCTTCTCTTGTCTTCCGATGTATTCAGTATGGCCCCGTGTTTCCGGGCTACGTCAACCCTT  
ATTTCTGAGAGCTTTATGAGA ACCCAAGCTCGATGCGTAGTGGGCGGCCATAGCCTG  
CAGCAGCCAGGTGGCTGAGGGCTGACTTGAGGTCTGTGT CGATGATCGGCAAGGTCACCG  
TGCCCTGCTTGTGCTTAGCTCTGAATGTGGCGTGGAAGAGGTGTTGGGTGTGGGTCATGA  
TGCAGTGGTGGCGCATGATGGTGATTGTTGTGATGATGCTGAATAGGATGAGACCGATGT  
GCGGTGTCTCAACGTTGTGGCTGTGTCTCGGGTGCATAGACTCTGATGGCGGTGGCTAGT  
AGGACGGTGGCGAAGGCCAATGGTAGAAGCATGATTGGT TACTCTCTCGATGTCTTTATA  
GTAACCGCCCTCCTGTCTTTGGATAGGGCGGTTAACCGAACTTACATCAGTTCATGTCG  
ATGACGGTGTAGTTGTAGCAGTCGCAGGCCAGGCAGCCATAAGGCTTGGCGTCATGGTGC  
TTCATGAAGAAGGGCTCCTCCTCAGGATCGAGAGTGATGCAGACTCCTTCGCCTGCGAGC  
TCGTTGAACAGGAAGGCCATGAGCTGCTCTTCGTCCTGCTCCTCGAGGCCGGTCCAATCA  
TCATTGATGAGGGCTGGGGCCAGTGGACTGGCAGTTGGTAGATGGTGGTGTCCGGTCATG  
GTTGGTGTTCCTCTCTCTGAATTCAATATACATGAAAAGGGGCCGGTTGCCAGCCCCCTT  
AACAAATGGTTCATACAAAGGATGCTTCGACTTGGGTCTCGGTGATCATCACGCTCTTTG  
GTAGCAGCGCTCCTTGTAAGCTCCGGCCAGTTCATAGACCTTGGCTTGGGCTCCGGTCTC  
CTCGTCCAGCAGTACCTCGATGATCATGGTGTCTTCGGTGCAGGCAACCACCTCACCCAT  
CCAACGTCCCCGTGCTTCGTAGATGGTGTGACCATGTGGGAAGAACTTGAGGGCGAGGCG  
CTCAGCGGTCTGGCGAGCGATCTCAGGGTGGAGTTGGCCGTTGGTGTGAGGCCACAGTA  
GATACGGAAGAGTTTCATTGGGTTGTTCCCTTAACTGAATTCAGTATGGCCCCTGAGCTA  
CGAAAGCGCAAGGGCCAGTGA CTAAGACTAGATGAGAGTCTTAGAGCTGCTGATGATGG  
TGATTATCAGAGCTGGTTGAAGTAAGCAGCCATATCATCAACGTCCTTCTGAGTGAAGGT  
GGAGTTGTTGATGTCCTGGATGAAGGTCATGATCGTCACTGGGCAGTGTGCTGTTAGG  
ACCATCGGGGAACGAAGGGTGCACCAAGCCGAAGCAGTGGCCCCACCTCGTGGTAGATCGT  
GCTCTTGGTGTGTAGCCCTGGGGCAGGACCTTCTCCCAATACACAACGAAGTGGTTGTC  
GCCGGGCTGCTCCCGTGTGTCATGCACGCCAGAGCTCCATCGGTCACCGTGCCCCACTG  
ATCGAAGTCGATGATGCGGTGGAAGGAGGGTCCAACCTTGTCTCGGTGTCCACCTCAAC  
GGCATTGATGCCGACGGCTTCAGCTGCGTCCTCGATTGCCTTCTGCAACGGGTGATCTG  
AGTGTGGTTCATCTTGTGGCTATTGGTACCACGCATGATGCCATCGCGATCGATGTAGTA  
CTTGACCTCACCTGCTGCAACCCAGTCACGCGGATGTCATCACGCGGGCTGAAGGGTGCA  
CCGTTAGCCAGTGCCCAACGCTCCCAGTTGCGAAGGTCACCGATGTCAGTAACGAAGATC

GTGCTCTTGTACTGAGTGTATGCACGAGTCGAACGGAACCTTATACTCATAACATGTCCTGA  
AGGCCGCTGATCAGGCCGTCAGTCTCGGACTTATGGTAAAATGTAAGTACTGCTGGGAGTTGTC  
CAGGTAGATAACCCACCAGGTTGTTGTCCCGATAAGCACGGATGTCTGCGGGATAGGTGCA  
GACACAACGATTGAATGCACCCTCGACGCCATACTGAGCACAAGCTGCCTCAAAGCGTCC  
AAGTGCGTGGTCAGACCAGATGCAAACGTTAGCGCCTTTCAGGCTGGAGGAGCGAAGGTT  
GTAGAAACCCCGGCTGCCGCCTTGACTTCGTGCCCGCACATCGCTCGTGCTTGATCGTCA  
CGCTAGGGTTCGATGTAGACCTTAAGGGCAGAGTTGTAGTTCTGCTCGTAGACTGATGCTG  
CCATGTTTGTGTTATGCAATATGTACGACCATGTGGCTAGGCCTTGCTCCCGTAGGGTG  
ACAGCTGTATAGCTCTGCTTGCGCGTAGTTGTGGGGGAATGGTGGCTCCCGGTGATGAT  
GATGGTGGTGATTACAACCCACCAAAGCCTGAGGCGTTCTCACGCTCCTCAAGCGAATAG  
TTATGGTTCTTGATACGCTCTTCCTTAATCTTAGGATACTTGACTGACTCTGGCAGGTAC  
TTCATTTCAACCATCCTATCAACCTTCTTCTTGTAAATCAATGAGGTTGGCTTTATCTATG  
CTCTCCACACCATAATGTTTATTGGTGTACATCTCCTCCTGATAGCGTCTGTATTGATTC  
CTAATCCCTTCCATGGGCTGTTGGGTACCTTGGCCTAGTTTGGCGGGCTCGTAGGCTGCC  
TCAACCCCAATGAGAGGTTGTTGAGTGTGCTGTCTGCACCTCGTTGGTGTAGACTGCA  
TCAATGAATTGGTTCGTTGCTTGTGTTGTCCTGTGAATGATGTGAGGGCTGCTAGTTGC  
CCAAACTTGAGAGTGTGCTGTCCATGATGATAGTGAATGGTTAGTCTTCGTCAAACCTTG  
AACATAGTGGCCTCCTGCCAATCGTCAGGGTCTAGTATCCACTCACGCTCTACGCTTATG  
GTGTCCTTGATGATTGTTTTCTGCTCATCAGTGAGATCATCCAGTTGCAATCGTCGGGA  
ATGACTGATGTTCTCCTGTCTAGATATTGCCAGATTGTTGTGGTTTGGCCGATAACAACA  
TCTCTGTACCGCTGTGTGCTGTCCTTAGGATTGTTTCATGGTGTGTTGATAGATAGTGTG  
GATGATTCGCAACAGATGGAGTGACATTTGCGTGCCAGCCCAGCTGCTGCGCGTCCCGCC  
CGCGAGCGTGGCCTGCCTGGCCCTGTGAGGCCGTTACCCGGGCTCCATGCCGGATTGTA  
CCTGCGAGAGGGTAGAGGCCCTTAGAGCCCCTGCTAGCGCCCGCTCAGAGGCCTAGAGG  
GGGGCCCGGTCCGATTCCAGCAGCAGAGGGGGGCCATGGGGGGAGCGCTAGCTGCCGGGT  
AACACGATACGGGTTTCAGAGATTTCTGTCAAATACTCCGAGATATACGTTCCCCCTCGA  
AGAGCTCCCCGACAGCCCCGTTAGGGGCGGGTAGTCGGGAGCGATGAGAGGGGGTGGCAT  
TTTTTCAGAGCTTCGGGGAACACTCCGCAGCGGTCTTAGGACGGCCCTCAAGGGCCAGCC  
TGATGGATTCCACCAGAATGGGATTACCAGCCGTCTGAGCGGCTTGTAGGGCCCTTAGAA  
GGCGTTCTCGATGTTCTCCTTGAGGGATCATGACATAAACCGCAGCTTTAGCCACGTTGGG  
AAGGTTTGCATAACAACAGGTTCTTACACTCCTCAGCAATCAAGCGATGCTCTTCCTGGGT  
TCCATTACCACACCGAAGTTGGCAGTAGTGGATCCAGGAGCGGATAGTACCTGACATGTA  
CAGTTTGGTTGGTGTGTTGAGAGGAAGGATACCTCGGGCACACTCCTTAGCAACACCATA  
GGAAAGCATCCTCTGGTAAAGCACACGAGTGGTCTCAAACACCTCATCAATCTCAGACTG  
GAACTCAGCAACAATCTCAGCAGGGAGATCATCGATGGAGTTCTGTCTGTTCTTGGTATC  
TTGCCTCCGACGCTCTGGAACCTTCGAACTCACCAAGATCAGCAACAGCATAACGCTGAGA  
GAACTCTTGAAAGAGAAGGAACGGTGACGGAGGATCTGTGGAGCTATAGCTCTAGTAGT  
CTCAATCTCCACAACCATATGAGCCATTTGGAATGGGCTCCAGTGGCCATGCTTGATTAA  
GTATCTAATTAGTCGATCAGCTGGGTCTCCTAGCTTTGCATCCTTGTTAGATACTCTAGC  
TAGATAGGCTATCAACTCCTCAGCATCTGGTGTACTGAGATCAGGCTTACCTTAGACAT  
ATTAAGGTAGGATTGAACAGGGTGGATTGGTGTGGGTGTTGGTGTGATTGTTGTGCTGT  
GGTCTTGGTGTTCATATTGTGTCCCCTGGGTTTCCACCGGGTTCAATATAAAAAAGGGGC  
CCCCGGCAATTCCACAGGGCCCCTATTACCGCAATCCACACAGGAGGGCACCCTCCCC  
CTGCTTACTGTCACCAATTAGCTCTAACTCCAGTCCCAGACACGGTTCTGGGCAGGTTTT  
ACACCTTTGAAAGAGAGGCCTAAAACGAGCCTATCTGTAGCAGCTTTAGCGTCGTTTTCG  
AAGGCATCCATCATCGCCATCCATTCTTACGCAAGGCTTGTGCTTTGTGAGCG  
CTTTGAGCCAGGGCATCAACGAACCATTGCACGCCTTGTGCCAGAGCATCGACGCGGTCA  
TCATGTTTACAGCACCCTTCTCTCTGCACATAACGGGACATCTGGTAGCCGAGCATGTAC  
TCAAGACGTTTTTCCGGAGGAGCATCCGGATTAGAAGCATAATCATATTCCACACCTTA  
GGGTCGATAAATCAGCTTGTGTTGGTTCATCACCGGCTCTAGGGTTTCGATGATGCGTTCT  
TCTTTGCGGACAGTCGCTCGGACCTCTTCTGTTGAGAAGCCTGCACCCATTTGCTGGATA  
TGTCTGTTAAAGAGTTCGCAGACCATAACCATCTCCGAAGTTGGACTCAACCAGGAGTCGG  
CTAGCTTTGTATCGCTTTCCAGACGGACGATGTCTGATAATGTTGCATCGGAATAGCCA  
TCACGATAAGCCTTAAGGTCACGTACAAAGACGTAACCATTGGCCTGGGATAGCACCACA  
GCCACAGTCTCGTCTGTACCGCGTCCAGAAGGGTCTACAGAGACGATTGTCTCATCATAG  
TCACACATAACCCTCATCGATGTACATCGGCCCGTAGAAGCGATCTCCGGGCAGTCCTACG  
GGGTTGAGGGTCTTGATCATATAGCGGGGATCAGCGGACCAAGCATAACCGCTCAGCACAC



TCTTGACCGAGGGGAGTAACGATCAGATCTTGGAACTTAAGGGGGAACCTTCTCAGCATCA  
GACAAGCTAGTATCTAGCATGAACTGAAGCATGAAGTTAGAGCGGCCATAAGCAAGCCT  
CCCTCTCCAGCAAGATCTAAGATCAAGAGAATCGGCTATCGGTGGGTGGATCCTTTCTCC  
ACTCCTTTCTCGATGTCTTCAACCAATGCTGGGGCGAAGGGAGGGCCCTCATAAGCCGGA  
TAAGGTCCTTGGGATAAGCCGTGCAAGGCCAGACGAACGGGCGATAGGAGCGCTCTGCGA  
GCTTCCTGTAGATCGTGAACGTTGACTGCGGCGTACCGAGGAATAGAATGCGTGAGTCGT  
CATCCGGGGTGAGGATAGATTCTGCCTCTGTAACCAGTTGTAGGAGTTTCTCACGTTGCA  
TGTCGGTGGCTGAGTTTGCAGGAACTTCGACGTCATCGAAGATCATTAAAGTGTGCGCGTG  
ATCCTGTATCTGGCCCGTGATACCGACGGACTTGACTGAGGGCGCTTGGTGGGGCTTCG  
CGGGCCCAACGTCGAATGAGATCCGGGACCATCGTTGGTCCGAGTCTTTCGGTCCTAGAT  
GATTCAGCCATGAGATGTCCAGGATGAGTTTCTGGCAAAGATTGAGAAGTTATCCGCCC  
TTTCCTTTGAGGCTGAGATAACCATAATCTTCTTGTCCGGATCGTTGAAGAGCACCCAGA  
GGACGAAGGCAGCTGTAATCCAGGATTTGCCAACGCCTCGGAAAGCGCTGATCTGTAATC  
GTTTCGGTCCATGTTGGAGGTAGTCTGCGATGTGAAGTTGAGCCCTAGTGGGCTTAGGTA  
GATCCAGCTCGCGCCAGACCAGAGTCAGGAAGACCCGAAAGTCCTCCTTTATCTGTGTTT  
CTAATTGTTGGAGGTCCATTATGCTATGCGGTGTAAACTCAAACGAGCTTGAATTGAGCC  
AAGTACGTTAGGGGTCTTCTGACATTGGAGTGAGATCAGATCATTCACTGAGAATGTACC  
AATGGTAGATCCACCACAACCACCAGTGTGATAAGTTGAGTCACGGGTGTAAGTAGCAAG  
ATGGGAGTTGGCAATCGTGCTGCCATTTAACTGGAGAATGGTTTGGATGTCCTTCTGTTA  
TTACCACTGGTCTGGTATCCGTGCCATATAACATGTATCACATAGGTTCCAGCAGTATCA  
ATCCGAACCTTACCGCCTGTCAGCGTCATCCCTTGGGAGACCTCAGTGGAAATTAAGACC  
ACATCCTGCATTGTATCCTGGATGGACTGAGCAGTGCTGTTAGTGACAGTGATGAAGGCA  
GGAGTAAACCCACTACCCAGATCAGAGGTCATCGCAATCGTACCACCCTTATCAGGGAAA  
GACACCGTGCGGTTAGCCGTGATGTTCTCCATGTTTCAGAGCGACCCTATTGGACCCATCC  
TTTTTCAGGAGGCGGAGCTGATTACCAGCACCCACGATGATGTGGTTACCAACAGTCATT  
GTGAGGTTGCCTGTGGGAGTAACACCGATGTTTCGAACCCGAGGTACGAGATCGTGGCCAC  
AGAAACGTCGCCAGTGAGATCACCAATGAAGGTAGGAGCCGTTAGTGTGCCATTCAGGGG  
GTTAATCAGGAACGAGCCGTTGTACTTCAGGGATGCCTGGCCATTAGAGCCTGGAGCATA  
GATGATCGCACGGGAAGCACTGGCGATGTCCGAGTTGATGTCAACGGTCAGAGCGGCAGT  
GCTCATCGGACCTTCAGGACCTTCAGGACCCTGAGGACCTTGAGGGCCTTCAGGACCAAT  
GGCCCCATCAGCACCGTCAGCCCCTGGGTTACCTTGGGGACCTTGATCGCCCGGGTTGCC  
TTGGGGGCCTTGAGCACCTGGGTCGCCAGTGTCTCCCTTGTACCCTTTGGTCCCTTGAGC  
GCCATCAGCGCCATCAGCACCTGGGTTACCTTGGAGACCCTGGGGACCTTCAGGCCCCGGT  
AGCCCCATCAGCACCGTCGTTACCTGGATCACCTTTTAGCCCCCTGAGGACCGGCATCACC  
TGTGTCACCTTTAGGTCCCTGGGGGCCAGCATCACCTGTGTCACCTTTATCACCTTTTGG  
ACCTTGAGGACCCGGAACAGTGGAGTCTGCACCATCGGCCCTGGAAGGCCCTGTGGGCC  
CTGTAGACCCTGCTCGCCCTGGATTCCCTGTGGACCCTGGGCTCCGTCTGCTCCATCGGC  
TCCTGGGAGTCCCTGAGGGCCTTGTAGCCCCTGCTCACCTGCAGGCCTTGAGGACCCTG  
GGGGCCAGTATCACCTTGGAGACCTTGAGGGCCTTCTGGGCCTTGGGGGCCAACAGCACC  
GTCAACACCGTCAACACCCACGAAGGTCACCGGTAACGAAGCCGAGGCCATCATCAGAAG  
TGAAGGTCACAACACCAGTCAGGGGATCATAGGATCCACCTGTCCAGCCTAGGCCATCAA  
CACCATCTACACCATCTGCACCGTCAGCTCCAGGAGGTCCCTGTGGTCCAGGAGCGCCTG  
TTGCATTTGTGATGCTGTTTGCATAGATCTTGATGTGAGCACCAGTGTGTTGAGTCAACTC  
CCCAGTACCACCAGGACTCAACATCTCCGCTATAAGTCCAGTATCTACCATCGAGGGTTG  
TTGTATCCCCTGGAGTGGGGTTAAGAGGAAATGCCATAGTTAGAATGTAGGACGAATCAT  
AAGGCCATTGGATCCCCGTGAGAGGGGCTAGGAAGGGGCTGAGGGGGCTTTGGGGTAGA  
TGGTACCTGAGGGGTCACCTCCCGCCTTTGAGGGGCTCCAAGGCACCTCTCCCGGCGTA  
TGC GCGTGC GACACTCTCAGCAGCACTCATGCGCTTGTGCAAGTGGGGCTTACCTGGGCG  
TAGATAACCCTGGCCACTAGCAGCAGATCCTGTGAAGGCCTTAGCAGCTTCAGCAGCAGA  
TGCATACTTGCGGGAGGAGAACTTCTCCAGAGGCTTCGACCAGGACACCAGGGACTTACC  
TGGAGCAGGGTCATGCTTGCCCTTATACTCCTCAGCCATATACTTAATCTGCCACGCCAT  
CGAGTTAGGATCGGCACCAGACCGTAACGCTTCTGTGCGTGCGCGGTCATAAGCAACCCG  
GCGGGGTCCGGTGTATTGCATCATGCCTCGGCCAGCCTTGGCGTCCCTTCTCCACCACATC  
TAGGTTTCATCAGGTCCTGGGAGCCAGTCTCCACCATGATGGATCCGATAGCACCAGCAGC  
CTGCTCATGACTCATTGGTGGGAGTCCGTAAGTCTTTGGCAAAGCCTGTTTTGCTTGTGAA  
GTAGTTGTAGAGGGTGTCTGTGTTCTTTGATCGGATGATCGGGAATTCTGCCATGGGGAT  
GAAATAGATATGATGTGAGGCCAGGGACCTCAGAGGGCTCTGTATGCCTCTCAGGCGGG

AGAAGACCCTCGGGGGTACGAACGGTCTCGTTGTA CTCTCGAATGGCCTTAGAGACGCTT  
GTGGAGGCCTTAGCGTTCGATGTATTTGAGTTCTAGCCACTTCAACCACGAAAGGCAAAG  
AAAGCGATAGGCAAGGGCAGCTTCTTGAGCCACCCTGCCATGAATTTGAACTCATTGAGA  
TAGAACTCAATAGGTTTCATTTCTTCTTTTAGGGAATCCTCTCTTCATAGCCCTGT  
AGCTCTTGGGAGATACAGTGGAAATCTTCTTGGACCTGGAAGTACCGGCCTTCTTACGCT  
TGTTGATGTTTCTGTAGAGGCTCATTAGCACTTCCAACGACGACGGGCTGCCTTACCCCG  
AGGTCCAGTCCAGCCACGTGAGCGGGCACAGAAGGACTTCTTACGGGCACCACCACCAGG  
CTGTGGGGCTTTGAGATTTGAACCAGTTTTACGATTGATGCGGGCACGGCCTTTTGCAGT  
AAGGCCGCCTTTCTTGGATTTGCATCCATTCTTGATCCCGCATCCTTTTCATGGCTCCTTT  
CTTTTTAGAAGCCATTGCTATCAGCTATTGTCAACGGAAGTTGCATAACCGATGCTGTCA  
GCAGCAACAACGTGCTGGCGGGCTGCACACTCACTCAGGAGGTCAAGCACAAGATTAATA  
TCATCAGCTGTGGACACGAGTCCAAGAGCGGTAACAGCAGCAGCATCCAGTTTGTAGGAT  
CCACCTTTCTTCTTCTCGGTAGACCAAGTTGAGGCGGGGCGGACTACAACAGAAAATGTT  
TCAGCAGTCATGATTAAGTAACGAGGAAAAAGATAGAGGTTTCGACTATACCTTCTACTG  
ATTTCGACATCAGCCAGGGTACATTTGGCCCTGATGAGTCCTGTAGAGTTAAAGGTCAAAG  
TCGAGAGGCCTGAGTCAGCAGGGGTGAAGACTACATCACCACCGGTTGCCGTCCAGGCGA  
ATGTGGGCGTAGCATCTCCCAAGGACCGGACAATGACGTTCTTAGAACCACCGAGACTTA  
CAACGATGGGGTCATCATTTCGAAGTCATAGGGTACACCGTCGATGACTACAGAGAGAG  
GTTTCGATATTTGGAACAATCTCGACAATCTCATCACCGGCAACGGTGTAAGAAAGACCC  
GCCCTTATCGGCGCGGGCAGTCAAACGATCCGCAAACACTAGCCATTCGTTTTAGGTA  
GAAAGGTAGTGTCTACTGGCATCAGGCTTCGGGCACATCAACAAAGTCATTAGCAGCGCC  
GTTACCAGGGAGCCTGTGGCGTTGCCAAGGGTATCGACCACAGCAGGGAAAGTATCCTC  
GCCAGACGGGCATAGGTGGTCAGATCTGCGTAGTACTCGTGAGTAGTGAAGTCTTCACC  
GGTCTGGAAGAACTCATCGACCTGAGGGCCAACGAGGACCTGGTCAGAGATGATGAGGTT  
GTTACACCACCATCCCAAGCAACACCACCAATGTTGGTAGAGACGGCCTTACCCACGCA  
CAGGGAAGAGCCAACCTGGTTAGGGGTGTAGGTGTTGCTAGCGATAGCCAGGTTAGCCCG  
CATTGCATACGTACCCGCAGCAGGATCACCCAGGTAATACTTCAGGCGACGAGTGGTAGC  
TCATGCGTGAACAGGAGGCGGCTGGTAGCGTTGGGGGCATACCAGGTGTTAGCACCATGC  
TGGAGGTTAGCGTCACCAGTGACGTACATGCCCCAGTTGGTACCACCACGGCGGAGGAAG  
ATAGCGTTGTTTCCGTTGGAGAACAGCGTCATCATCTGGTTGTCAGACGCGCTATCGGTC  
AATCCACGAGGGTCAGGCCAATGGACCAGTTCTGGTTCCAGTTGAGGATGTTCTCGGTA  
CCACCACCGAGTCCAGTGAACCTCGATGTAATCGTTGGCACCATCGAGCTCGATATATCTG  
CTGGCCTGGTTACCAGCAGCCTGCAGGTCTTGGATGGCTACAAAGTCCTGGAGATCGAAC  
GAGTAGACAGCAATGCCGACACCAAGGATCAGGACAGCGTTGGTCAGACCCGGGGTGGGT  
ACATAATCATTTCGTAGCGACTGCCTGACGGGCGTCTTCTACTGATTGAAAGAAGCGGCTG  
AAGCGATTAACCTCGGTACCAAGGCCACGCAGGGCCAGAGTATTGATACCAAGTACGTCA  
ATAATGTTTGTAGTCATCCGGCTTGTGCTGTGTTAGCGTATAGAGCTCCCGTTGCGAGGC  
CAGACAGTACTTGGAAGTCATAGACCCTTGGTCATTGACTAGCAGTGTGCTGGGGTCTT  
CGTCCGGGGTTGGAGTGAAAGAAACAGTGATGGAGGTA CTACTCCGCCGGGATCGGCGT  
CATAGATGTACGACCATGCACTTCCATTGTAGGTGTAAACTACACCTCTCTGAGTGATTT  
GATCACCCGGTTGGTAATCCATAGCTTAATTGGAATTCCGCAAGGGACATAGATCCCTTG  
TCTTGATTACATCTTCGACAAGCAGTGGTCACATTGGATGCATCCCAACGTGCCCGCCT  
TTGCAGCGAGGTA CTATGTGGTCTAGAGTTAGGTTGTCTTTAGAGCCACAATATGTACAT  
GTGTATCCATCCCGGGCCATGATGTTGTCTCTCCACATCCGTTTCGCATCTGATGCGCGG  
AAGGTGAGGAGTTCATGCATGAGGCTTCGGGGAGTTCCATCTGTGGCTCATTGTGATTT  
ACTTACGTTTGGGTCGTCCTCCCGCACCCCTGGCGGGCACGGTTTCTCTTAGGTGATTCAC  
GAACCAGTTTTCTGATTTGGTGTGCGAATAGTCCTTGCCGCCCTTCCCATAATTGCCGT  
CTTTGCGGCGGGCTGCATTCAGTTCGGCTCGGTA CTCTTCGCGGCTGTGCTCTTGTTAC  
GCTTGCGTTGAGCAGCGTTCTTCTTCGCTCGTGCTTTGGGTTTGAACGATAGTATCTGG  
CTGACTTACCAGGATTCGATGTACGTCTAGGAGCCATTAGAGATGCCTCTGAACGTCTTC  
AAATGTCAGGTCGTCGGGGACGAGGCCTGCCAGAGCTGCCAGGGGGCTGTTAGCTACAGC  
CACCCAGTAATGTCATTCGACTTTAACCAATCAGAAGCGGCCCGGAGGTCCGGCGGTAGT  
CGCCTCTCCAGACCGGATCCGGTTGATTAGCTCTGTGGTAAGCAAGCTATGAAGGAGATC  
GAATTGATCTTCGGAAGCTCGCTTAGCCATATCACTCTCCAGTTCGCGGAGAGTCTTAG  
CCCAGAAGCTCAGCAGCTTTACGGACTTCAGCAACCTTCTTCATCTTCCTTGCGGGAAGG  
CTTCAGGCTGTCAATCAGAGATTTGACCAATTGGGCAATAGAGTTCTCCTTGAGCTTGGA  
GGCACCAATCACCTCTGATGCCACAAAGGCTACAATGAAGCCGACTGCTTCGTAGCCGAG

TTTGATTCCAAGAATTTCAATCATGGTAGTACTTGTCCCTTAATGCGTTGGATTTCTACTT  
TGTTTTCTGAGACATGGGCATCGAGTTTCTCCTCCATACGGTTGAGAGTGTCCCACAGTC  
TCATGAATTGGCCTGCTACATCAGCCTTACTGACGTAAGTCTGCTCTGATACCTTTAGCTCAA  
GACGGTTGATCTTTTCGAAGGTTGTATCAATCCTTCGGTGTAGCAAAGTATAGCCCCAG  
CGATGGCAGATAGAAGTAGGGCTACAAGATATTCAGGCATAATGTATTCGCTTGTGTTGA  
GCAACGGTGTCTCACAGAACACGTTGACAGAGCCTATACTTACTAAGTCTGTCCCTCGTATC  
CATTCCAGCCTCCGTTAATGCGGGCGGCATACAGCATCGAATCCCTGGGTCTGAGCTACCG  
CGAGGAGGCGGTTCTCTTTGATCCATGTTAATGCACTCATAAACGGGTACGTTGTGCTGA  
CATAATCAACACCCTCCATCACACGTGGGTGAGCGAGGGCCTTACTGAGACGGGAGTAGT  
TTATCTCCCAGTGAGTTGTAACACACCGGCCCTTATAACGGGGACCATCTCCGGGGTG  
GACATTTCCGAGATCGGAACGGCCTTCATATGCCACCCGCTAGCGATCTCCTTCATATA  
CTTGAGGTTAGCAGTCTCATGAAGGATGTTAGCAACCAGCATCCGGGTTGCATCCAGGTC  
CTTATCGAACCAGTTTCCCGGAGGAGGCGGTTAAAGTCATCCACCTCCAGCTGTGTGAA  
GAGCTCTTCCGGTATCCGGTGTAGATCTTCTAGGGTTTGTATGGGATATAAAGCCTCCCAC  
CGGGCCTGTGGGGCCTCAGGAGCGCTTCTATAGGCCTGTAGGAACTCATCTACCACGTG  
TGCAGGTAGGCGAGCCTCGAGCTCATCCAGGCTGCCTGCTGGTGTGGGAGCTCCTTATA  
GTATTTGGCAGCGTCTCTTAGAGCCATAGGTGTTTCAAGGGCGTCGTTAATCCACACCAC  
TCATCCTTATCAGTACGACAGAGGATTAGGGCATGCTCGTTGTTCTTTGCGGGGAGCTTC  
AGTGTGGCCTTGCCTTGCTTGTGACATAGTGAGAGGCACGTTTCACATCGATTGGATAG  
AATGTTTCGCCATCCCAAACAACGATGTCAATCGGCCATCAGGCGTCACATTGCGGAAG  
ACCTCAAAGCCTGCATCCACCAGGGCGGCACAGGCTAGAAGTTCAGCAGAAGCACCACGC  
TTATGCGTTGAGATCATTGAGTCGTCTTCCAGTTCAGCGATACGGTCTAAAGCGGTCTT  
CAGCGCCACATGGAGTAGAGCTGGGACCTGGTGTGCTGCATGGAGAAGTATCCATCAGT  
GGGGTTGGGTACACCAGTTACAGAGTCGATCAGCTCACCTCAACAGAGTTAGATTCATC  
GAATCCAAGCATGTTGACGAAGCCAGCACCAGCAACCTCCTGGGCGATGAGCCATTCTGC  
AGACAGAGTCTCGTCCATCCTTCCAGTAGTATGACTTTGGCCGCACTTCATTCACGAAGC  
GGAGAGCATCCTCTTCAGCGATGGGTGCGACATCCCTCTTCAGCGGCGGTCAGACTTAGC  
GTCGAACTGAAGGGCACGGATACGGCCATCAGCCTGGAGAGACATATCGAAGGTCTGTAC  
ACCAGCGTTCAGTCCAGTCTGACCCTGTTGATTCAGGTAGCCGAAGTTGGAGTGAAAGGC  
CTGAGTACCAGTACCAAGTCGCACCCGGGTACCATTGTCCACATAAATGGATGAGATAAC  
CGTAGTCTTTTGTAAAAGCTGCTAGAACCAACAGACCTAAACACCTCAGTGGTTCCCCAA  
CGAACGTATCATTGTTGAAGTTGTAGTTGGTGGTACCCTTGGTGTGTTGTTACTCAACGGTG  
TCAAAGCTGAGCTTTTCTGGAGTGACGCTGCCATCACTGGAATGCCTGTGATGTATCCCA  
CATCGTTGTTGAATGTGCAGATAGGATCTGCTGTACAGCAACGTTGATGTGTCGTCATTAG  
ATCCGACAGGTTACCGCGGATGTCAGGCTTGTGGTGGCATTGTTGTAGTTCAGGTAATG  
GCTACCGTCTTCCCATCCAACTTATCAGCATCCAAACCGGAGCCAGTTCATCCACCGT  
GAGGAGAAGGGTAAGGATCTCGCTGGCTGTCTGATCGCCCGTGGCATTAGCTTCCATGCC  
ATCCAACTTGGTACCATCGCCAGACACATCGCGACCATCGACAGTGCCAGTCACAGTGAT  
GTTGCCAGTTACAGCAGCACCACCGTTGAGGTTAGCCACTGGGGCCACACGCATCTTAC  
TTGGAGTGATACGCCAGAGCTTATCCAGGGTGTACCATTGAGCACCTTGACACCATTGT  
TCTGCTTGACCATCTTACCACCAGCTCCTCCGAAGAAGAAGCCACCCTACCTGAGGGGT  
CCAGCTCCAGGGAAGCACCGCTGTTTCATGGCCACAGAACCATCACGCTGGAGGAATTCCA  
GAGCGTCAGTGGGATTCACATAGCGATCATCGGGATCGTTGGCATCATAAGAGATGTACT  
CCCAAGTCACCCAGTTGCGTTATAGAGGATCTTGACGTTGAGACCTGAATCACCCACAA  
AGCCTGCTGGTAGGCTGTAAAGAGGGTTAAATGATTCAATTCCAGTTGAATCAACGACTG  
TTACAGCGTCTTGGTCACTAGGACTTCCAGGAATTGCTGCTACATTGGCGACCTGTTCCA  
ACAGAACGGCCTGTGACACAGCGTCAGCACGGCATTAGCAGTGGAACAGCAGCAGCAGAA  
TCAGTGATAGCTGTGTTTACTGTGTTAGAGCCGTGGTGGCGTTGGAGTCAGCAGTTGTA  
GCAAGTGCCAGAGCTGATGTGGCATTGCCATCAGCGGTGGTGGCCAGGGTAAGAGCTGAA  
GAAGCATCACTAACTGCCTGGGCAGCATCAGTCTCAGCCTGTTGAGCGGCCGTGCATAGC  
CGCTGTGGCGTTCACATTAGCTGTTGTGGCGTTGTCATTAGCTGTGGTAGCCTGCTGAAT  
AGCATCATTTGATGTAGTCAGGGCTGTATTAGCCGTAGTCTGCGCCGTGTTTGCAGTTGA  
AAGTGCAGTATTTGCAGTTGTTTCAGCCGATTAGCGGTAACAGCAGCGCTAGAGTC  
CGCAGCAGCCTGATCAGCAATGATCTTAGTCTGAATAGCAAGAGCCTCGACATCAGTCAC  
CACAGACTCAGCGCGTGCAGACACGGTAGCTGATTCCCTGGGCGATGTAGATGGATTGTT  
GAAGTTGTCGTTGAGATCGACAGCCTTAAACAGGAGCACCTGGGCTGAATGCAGCATATGC  
TGAGTCAGAATCAGTTTCCCGAAGATCTTGATGAAAAATCTCAGCGTTAGTGGGGGCA

GGTGGTGCAGAGTTGAACTGCACCGTGCTTGAGTTAGCTAACGACCACCCATAGGTAGCA  
TCATCCTGCTCCTTCTCATCATATACACCAGTGGTGTGCTTGAGAATACCCACCTTAACG  
TGGGTTTGATCAATATAGTCGAACGGGAACGAGAAATTAGTTGTAGTCCCGTCCCCATTG  
TAGTAAACTTCAGTGATTACTGTCATGGATTAGTTCTTGTGAAAGTTTCTGAGGTCTTCT  
GCGGTACGGGTACGGGCTTGATCCTTCTACGTTCTTCTTACCAGCTGCTGTATCCAGA  
CGAGAGTTCTTAGAACGGATAGCTTGCAGGGCCATGTCTCGATGCTTCATGATTACCTCA  
TTCAGCTCGATGTATGCACTCTGCTGAGCATCAGTACCAAGGTTTCCACCCTTCTCAAAC  
ACACCAGTTACATCCAGGTCTCGCCCACGGGCCCTACGTAGCTCCTCTCCATACTTATCG  
TAGCCGCGTACCTTGATTAACCTTCTCCAGCTCCTTATACAGAGCACCCTACCCATCAAT  
CTGGAGAGCTCAGAGCGCTCCTGGGCAGTCAACTCCTCACCAGATGTGGTCTTGAGGATG  
GTCTGAGAGTTGTATCCCAGAGTCTCAAGGGTGTACGAACAATGTCAGTACCACGCTTA  
TGCACATTGATGGGGGAGATGGCGTTATAGAGACCTTGATTACCAGAGGTACAGGAGAA  
CCATCCAGCCAGTCGTAAGTGTCTTCTAGTTTGAAGATGCTACCTGTTGCTTGGTCA  
GCAAGACGTTGCCACTGTGAATCATAGTAATCACGGTGTGGTTCATCGCATTAGCCAGA  
GCACGACGTGCAGAGGCCATAGGAATGATGTTGTTGATGATCTCAGCAGGCACCAGACCA  
GCCCTTCCAGGTTGAAACCAGGACGGAGTAGCTTGGATAGGGGATCCAGACCAGAGAAC  
ACCGACTTATCAGTGAAGTTCTGGGCAAAGGCATAGGTCATATATGAGGCCAGGAACTGT  
GCCTTGCTCTCATCAATGAAACCTTGCTTCAAGGCCATAGGTTACATCAGCAGCAGCCTGA  
ATGACAGAGCTGAAGGGTTCATACGCTCATAGGAGATCCACTGATCGCCTACTTTGAAG  
GAACGAGGCTGATGGTTACGGAGCCAGGCGTCACGCTCTGGGCCAGTAGCAGGGCCACTA  
CCTGTGATCAGGCCTTGGCCTGCCATGAGGGCAGCGGACAGCATGACAAAGCTGCCAGTA  
GCAGCACGACCCTTGAGGATAGCCTTAGCGGTCTCGTCAGATCCGGCCATGACGTCCTGC  
CACTCCTTAGTGAATACTGTCAGAGGGGTAGACTCAGCCGTAAACACCATGATGTTGTGG  
CCAGTCTTACAAATGGGAAGAACGGACGGATCCATGGGTTGCTATTGACGAATGAGGAG  
AATGCAGCTGCCTTACCTTCGAGCTTATGGCGGAATGTGGACTCATCAGCAATCTCTTGC  
AGGCGAGGATCCAGAATCTCACCCTCTCAGTGAAGTAACGCATCTAGAGAA

>NewGenomeName\_251

TCTCACAGTTCAAGAACCCAAAGTACCCCCATAGCCCTCCTAAAGCCACCTAAAGCCAG  
CCCTACCCCTAGGGTTTAACTTTCGGTTAACCTTGGGTATCTCCTCAAGTGGCCTATAGG  
ATAGCCTAAAGTGTTGCCTAAAGTCAATACCTAAAGTGATTGGGTGGCTTAAAGGAGGCCT  
TAAAGAGTGTCTAGTGTACCAGTTCGATAGTACATCTCTATGTGTCCCTATCTGTTAGC  
CTCATAAAGTAAACCCTAAAGCCACTACCTAAAGACCAGACCTAAAGCCATCACCTAAAG  
AGCGACGCTATCTTAAAGACAACCAGACCGATAGACCCATTGTTAACCTGTAGTGATGCC  
CTGTAGTTATCTGTAGTCATTTTCAATTAACCCTCACTAAAGGGAATAAGGGATACTTAAAG  
GGGGAATTAGGGATTTAATAAAAAGATTAATAATTAATGGTTGACTTTAAGTAACCCTTAA  
GGCTATTATTCATCACGTCAACGGGACAACGGCCTTAAAGCCACTCCCTGAGATACCGGA  
GTCAACCGGATAAGTAGACAGCCTGATAAGTCATACGAAAAACAGGCATTGACAACGCAA  
GGTAACAAGTAGTAAGATGCACAACATAGCGTCAACCACCAAATCGGTGTCTTCTAGGTG  
ACTTAAGCGCACCCACGGCACATAAAGCTAAACAAAATGGTTGACAACATGAAGTAAACAC  
GGTACGATGTACCACGAAATGACGGAACAGTGAGGCGGGACACTGAAAGCCGCTAGGGTC  
TAACGAAACCAGACCGACACGCAAATCATAGTAGGTTTAAATAAGCGGTAAGTGTATTACT  
TCCCTTGTGTGCCGCCGAATGGCATCAGTACACACGACAGGCAGTACGGAAAGTGACACG  
ATGCAGTGCTGCCATGATTTGATCGCTCTTTAACAATCTGGATAATAGCTCTTGAGTGTA  
CCGATGTATAAGCGAATAACTCAAGGTCGCACTGAAAGCGTGGCCTTTATGATATTCACT  
TAACACGAACTAACATGAGGTAACACCAAATGATTTTCACTAAAGAGCCTGCTAACGTCT  
TCTATGTACTGGTGTGAGCTTTCCGTTCTAACCTTGATGATGAGGTGAACATGAGCCGCC  
ACCGCCACATGGTAAGCACTTTACGTGCCGCACCGGGTCTTTATGGCTCCGTTGAGTCAA  
CCGATTTGACCGGGTGTATCGTGAGGAAATCGCAAGCGCACCGACTGAGGAAAAAACGG  
TTCGTGTACGCTGCAAGGACAAGGCGCAGGCGCTGAATGTTGCACGCTTAGCTTGCAATG  
AGTGGGAGCAAGATTGCGTACTGGTATACAAATCACAGACTCACACTGCTGGTCTGGTGT  
ACGCTAAAGGAATCGACGGTTACAAGGCTGAACGTCTGCCGGGTAGCTTCCAAGAAGTAC  
CAAAGGCGCACCGCTGCAAGGCTGCTTTACGATTGACGAGTTCGGTCGCCGCTGGCAGG  
TGGCCTAACATGAATCGTTATTACATCAACGTACCGGGCTGGGGTGGGTCTCTGACCTGC  
TACGGATAACAACGAACGGGACGCACGGAAACGCTTTAGAGAACAACACGGCTTCGGAAGG  
CTTCCTAATGGGACGCGCCTATGGCTGGACGCCCGTGATTGGTAAGTGATAGACTCAAGG  
TCGCACTGTATGTGTGGCCTTTATGATTATCACTTATAGGACTAACACCATGAGTAACT  
TCTGGCAACATCTAAAATAGAAGGCCAATGCACCGTAACACTGCGTGAGTATTACCACGG

GTCAATGGGAAGCACCTATGTTGTGCGATACGGTAAACAGGTACACATTGGGTAAACCC  
GATTTTAGCACAAGAGGATTATCAAGCCTGTGTGATACACCAAGCAACATGTGCGGGCTG  
GAATGATTGACATTACAGGAGGATTAGGAATGGTTATCTTTATCGCTGTCGCACTCTTTG  
CGGTCGCTGGCTGGTACTCTGAGTCACGCAAGGCCGCTCGCTATCATCGCAAGATGGTTA  
AACTCATGGAACACTTGGACGCAGAAGGGCGAGGCCGCGAGGCTATCGAACTGGTGAAAC  
ACGCATGATGATTCTCTATCGCACTGGTCTATCTGTGCATCGCAATGTACTTTATGCG  
AGACTTTAAGCGCGGTCTGGCAATACACAAGGCAACGCTGAGTTACTTTAAGCGCGGTCT  
GGCAATACACAAGGCAACGCTGAGTTACTTTAAGTGGGGATTTCATCCCACGGTTTACGGT  
TCGTGAACGCAACGGACGCTTTAAGGCCAACAAGGTAGGAGTATTCTACATTGCTACGCA  
CTAACTCAAAGCACGTAAAGACCGCACTGTATGCGATGGCGTATGGTGCATCGAAACGCA  
AGGTCAAACGCATCTTAACGAGACACCGCAAGATGACCGCACGACAGGCTGCAAGCGCTG  
TCAAATGGGCTGAATTTACTCTTTACTCTTTACAGATAACAGGACACTGAACGATGAC  
TTTCACCGAAGCACAAGCCGCACTCGAAGCTATCCGCAACCTACCGATTGAGCGCCTGAA  
CGAACGCCAGCCCATGCTGGTGGCTCTTGCGGGCTGCTATCGTGAACGCTGAGACCCAAGA  
CGGCGAACTGACGCAGGCCAAGGGTAATTGGGGTCTGGAGTCTATGGACTACTGGCAGAC  
ACTGGCTGAGCGTATGCGTGATGTTGGATTTGTACGCTTGGGCAACGGTCACTTTAGCGC  
AGCATATGAGCACGCATTGTTACCGGGCAAGGTTATCAAGGTAGGCTTTAAGAAAGAGGA  
TTCAGGCGCTGCCTATGCCGCATTCTGCCGTATGAATCAGGGTCTGTGAGGGCATCCCTAC  
GGTGTACGACATTCAGCGTCATACAGGCTGCTACACGGTGGTCTTGACTATCTGACACC  
GCTTAATGACTGGTGCTACGGTGAAAGTGATAAGATTTCGTCACCACTTTACAGGCTGCACA  
GGAAATCATTGAGGAGGATTGCTTCGATACCGCCGAAGAGTACCCGATAAGCGAGGGCTT  
CATTGAGACCTGCAAGGATATCCGCAAGTTCTTCTTAGGCATCGCATCGTTCGATTGTCA  
CAGCGGGAACATGATGAAAGACCAGATGGGACGCCTGATTATCACAGACCCGGTATCATT  
CAGCGCAGACGACAAGTTAAAGCCGGGTGAGTCCACTGTGACCCGGATGAACTCATCGC  
TGAGATTGAGGCGCTGAGAGCGCAGGAAGCGATTGACCGCTGTAAGGCACGCAAGGCACG  
CCGTGACCCTAAAGGAGACTTTCAGGTAGCACGTAAGCCCGTGCCAAGTGGCGCAGAAA  
GGCCTCTAAGCGCGAGAAGCGCAACGCTAAGGTGCTCGCTAAGATGCGCATGGATGCTAA  
TCAGAATCGCAGGGATGAGCCTAGGGCGCGTATGGTGTGGGGCGATAAGCACTGGCGCAA  
CGTTGGATGCACCACAATAACCTAACTTTGCAGAACTGGAGCGCCGCGCTGCTGCGGC  
AATGATGATGCATGACGAGGTGCGCATTAGTGGGGCAAACCGTTACACATAGACGCATA  
CCTTGACAAGCGTCTACAAGGCTGATAGAGTCTTATCTTACAGGTCATCAATCGGTGGCC  
TGAATAGGTACGATTTATTCACAATGAGGTAAGCAATGAACATCATCGAAAACATCGAAA  
AGAATGACTTCTCCGAAATCGAACTGGCTGCTATCCCGTTCAACACACTGGCAGACCACT  
ACGGCAGCGCATTGGCTCGTGAACAACCTGGCTTTAGAGCATGAGTCTTATGAGCTAGGCG  
AGCGCCGCTTCCTCAAGATGCTTGAGCGTCAAGCGAAAGCTGGTGAGATTGCAGACAACG  
CAGCCGCTAAGCCATTACTCGCTACGCTTCTCCCTAAGTTAACCGCACGCATCGTTGAGT  
GGCTCGAAGAGTACGCTCGAAGAAAGGCCGCAAGCCAGTAGCCTATGCACCGCTCCAGT  
TACTCAAGCCGGAAGCCTCCGCGTTTATCACACTCAAGGTCATCCTTGCGTCACTGACCA  
GCACGAACATGACAACCATTAGGCCGCTGCTGGTATGCTGGGGAAGGCCATTGAGGATG  
AGGCACGTTTCGGTCGCATCCGTGACCTCGAAGCGAAGCACTTCAAGAAGCACGTTGAGG  
AACAGCTTAACAAGCGCCACGGGCAAGTCTACAAGAAAGCCTTTATGCAGGTGGTTCGAGG  
CCGATATGATTGGTCGCGGGCTGCTGGGAGGTGAGGCGTGGTCTAGCTGGGATAAAGAAA  
CCACGATGCACGTAGGGATTGCGCTGATTGAAATGCTGATTGAATCCACAGGTCTGGTGG  
AATTACAGCGCCACAACGCAGGTAACGCAGGCTCTGACCATGAGGCACTGCAACTGGCCC  
AAGAGTACGTGGACGTATTAGCGAAGCGTGCAGGCGCTCTGGCGGGTATCTCTCCGATGT  
TCCAGCCGTGTGTCGTACCGCCGAAACCTTGGGTAGCAATCACCGGGGGCGGCTATTGGG  
CTAACGGTCGCAGACCTTTGGCACTCGTCCGCACTCACTCTAAGAAGGGACTGATGCGCT  
ATGAGGATGTTTACATGCCAGAAGTTTACAAGGCGGTCAACATCGCACAGAACACCGCAT  
GGAAAATCAACAAGAAAGTTCTTGCGGTTGTCAATGAAATTGTTAACTGGAAGAATTGCC  
CGGTCGCAGACATTCCATCGCTGGAGCGCCAAGAGTTACCGCCTAAGCCGGACGACATTG  
ACACCAACGAGGCAGCACTCAAGGAGTGGAAGAAAGCCGCCGCTGGTGTCTACCGCTTGG  
ACAAGGCACGAGTGTCTCGCCGTATCAGCTTAGAGTTCATGCTGGAGCAGGCCAACAAGT  
TCGCAAGCAAGAAAGCAATCTGGTTCCTTACAACATGGACTGGCGTGGTCTGTGTACG  
CTGTGCCGATGTTCAACCCGCAAGGAAACGACATGACCAAGGGGCTGCTGACCCTCGCTA  
AAGGCAAGCCAATCGGTGAGGAAGGTTTCTACTGGCTGAAAATCCACGGTGCGAACCTGTG  
CGGGTGTGATAAAGTTCCCTTCCCTGAGCGCATCGCGTTCATTGAGAAGCACGTAGACG  
ACATTCTGGCTTGCCTAAAGACCCAATCAATAACACTTGGTGGGCTGAGCAGGATTAC

CGTTCTGTTTCCTCGCGTTTTGCTTCGAGTATGCAGGCGTTGCGCACACCAGGTCTGAGCT  
ACAATTGCTCTCTGCCGCTGGCGTTCGATGGGTCTTGCTCCGGTATCCAGCACTTCTCCG  
CGATGCTCCGCGATGAGGTAGGCGGTTCGTGCGGTTAACCTGCTGCCAAGCGAAACCGTGC  
AGGACATTTACGGCATCGTTGCACAGAAAGTAAACGAGATTCTCAAACAGGATGCAATAA  
ACGGCACACCTAATGAGATGATTACCGTGACCGACAAGGACACCGGGGAAATCTCTGAGA  
AGCTCAAGCTGGGAACCTCAACGCTGGCGCAACAGTGGCTGGCATATGGTGTAAACCGTA  
GCGTAACTAAACGTTTCGGTCATGACGCTGGCTTACGGTTCGAAGGAGTTCGGCTTTCGTC  
AACAGGTAAGTGGACGACACCATTACGCTGCGATTGACAGCGGTAAGGGCTTGATGTTCA  
CCCAACCTAACCAAGCGGCTGGTTATATGGCTAAGCTGATTTGGGACGCGGTGAGCGTGA  
CCGTAGTCGCAGCGGTTGAGGCGATGAACTGGCTCAAGTCTGCCGCTAAGCTGCTAGCTG  
CTGAGGTCAAGGACAAGAAGACCAAGGAGATTCTTCGCCACCGTTGTGCGGTTCACTGGA  
CTACGCCGGACGGATTCCCCTGCTGGCAGGAATACCGCAAGCCACTCCAGAAGCGTCTCG  
ATATGATTTTCTTAGGGCAATTCCTGCTGCAACCGACGATTAATACCCTCAAGGATTCAG  
GCATTGACGCACACAAGCAGGAGTCTGGCATCGCTCCTAACTTTGTTCACTCACAGGATG  
GTAGCCACCTCCGCATGACGGTTCGTTTATGCTCACGAGAAGTATGGCATTGAGTCCTTTG  
CGCTAATCCATGACAGCTTTGGGACTATTCCGGCAGACGCTGGTAAGCTCTTTAAGGCTG  
TGCCTGAAACGATGGTTCTCACCTACGAGAACAACGATGTGTTGGCAGACTTCTACGACC  
AGTTTGCAGACCAGCTTCATGAGACCCAACCTGGACAAGATGCCACCCTCCGAAGAAAG  
GTAAGCTGAACCTACAAGACATTCTCAAGTCCGACTTTGCCTTTGCATAACAAGCACTTA  
GCATTAACCCTCACTAACGGGAGACTACTTAAGGTCTCCCTTAAGGTAAGAGATTTT  
AATTAAGATAACTAAGAGGTTTACTTTATGATTACTTTATGTGTCGCAATCGTTCTTAT  
CGCTACACTCTCAATCGTCATCGCTAAGCAGCGCTCTGAGTTAATCAAGCTGGATGCCCG  
ATATGATAGTGCGAACCACCACCGGAAAGAAGTGGATGCAGCACTTGGGCGGTCAACCGA  
TGAGGTTAAGACCCTTAAGCGCCAGCTACAGCACGCCGAGCAAGACGATAAGAACCCTG  
CGAAACAATCCGAGGTCTACGTGAAGAAGTCCGGGAGTTGCGCCAGACGATTAAGAGCG  
CCACGCTATCCACGGCATCAAGTTCGTAGCGAACGTTCCGATGAAGGGCTGGACGCCAC  
CGAGTTTAAGCTGGGTCTTGGTAAGTGCAGTCTGGAAGTGGCGAGTCTAGTGTGGGAAGA  
GAAGTCTGACCGCTATGTGTTGACTCAACGCCACACCGACGGAAGCCGAAAGGTCTTTGA  
GTACAAGAAGGAAGACGTGCAAGGAAGAATCGAAGTGTCTACCCTGCCGTTAAATAACC  
CTCACTAACGGGAGAGTTAGCCTCAAGGTTCATCACCGACGGTGGCCTTTGTGATTAACCT  
TCAATACACATCAACATGAGGTAAGATACTATGCGTACCAACTTTGAGAAATTTACCAAG  
CGCGATTCAGTGGTCAACGAGCATGGCGAACAGTGGCAAGAGCGCCGTGACCGCATGAAG  
AAACGCCACAAGCAACAGCGCGGTAACCTCACAGAAACGGGAGTGGAACTAATGATGATGG  
GACGTATCTATAGCGGCAACCTGAACGATTACAAAGATGCGGTAGCGCGTCTACAGGAAG  
ACCATGACGTGACCGTGAAGGTGGAGTCATTCAGCTATGAAAACCCAGCGAAGATGTGCA  
GGTCATCCGGTGAGGTTCTCCGTGTGTTACACGCTCCGGGCATCCGGTGGCATCCAGAA  
CCTTCGAGCACAGCGACAGTGATGTACAAATCAACGCGCAGACTGCATGGCTCCGTAAGG  
TTCACAGCGATTTGAAACACTGGAAGTAATAACCCTCACTAACAGGAGAATCCTCAAGGT  
CATCTTAATTGGTGGCCTTTGTGATTTCGAACTGATTAACCTTTCAACCAATGAGGAACAAC  
CGTATGAACATCTTCAAGACCAACCCATTCAAAGCTGTGTTCATTCGTAGAGTCTGCCGTT  
AAGAAAGCGCTGGAGACCTCCGGCTACCTGATTGCGGACATTAAGTATGATGGCGTGCCT  
GGTAACATTGTGGTTGACAACGTGGCTGAGGCCGATGGCTGTCCCGTGTGTCCAAGTTC  
ATCCCGCGCTGGAACATCTGAACGGTTTCGATAAGCGCTGGCAACAACCTGATGAATGAT  
GACCGCTGTATTTCCCTGATGGCTTCATGCTGGATGGCGAACTGATGGTTAAGGGCGTA  
GACTTCAACACAGGGTCTGGCCTACTGAGAACCAAGTGGCTCAAGAAGAACAACCTTCATG  
TTTGACCGTGGTGGTGTGAGCCACTGAAAGGTTCCAAAGTAGCCTTTGAGTTAGACCCC  
AAGCTACTCAGTGTTTCGCTGTATGCTGTCTTCCGATTCACATTGCGGAGTCTGGCGAG  
GACTACGATGTACAGAACCTACTGATGCCATATCATGTGGAAGCCATGCGCTCTCTTCTG  
GTTGAATACTTCCCGGAAATCGAGTGGCTTATCGCTGAGACCTACGAGGTCTACGATATG  
GATTCGCTGACTGAACTGTACGAAGAGAAGCGTGCCGAAGGTCACGAGGGTCTCATTGTG  
AAAGACCCACAGGGCATCTACAAGCGAGGCAAGAAGTCTGGCTGGTGGAAAGCTCAAGCCT  
GAGTGTGAGGCTGATGGTATCATTACGGGTGTCAATTGGGGAACCGAAGGTTTAGCCAAC  
GAGGGCAAAGTGATAGGCTTTAGTGTGCTTCTTGAGACTGGTCGTTTAGTAGACGCCAAC  
AACATCTCTCGCGCACTGATGGACGAGTTCACAGCCAACGTTAAGGCACACGGTGAAGAC  
TTCTACAACGGGTGGGCCTGTCAGGTCAACTACATGGAAGAGACCCCGGACGGCTCCCTG  
CGTACCCTAGCTTCGAAAAGTTCGAGGCACTGAGGACAACCCTCAAGAGAAAATGTAA  
CCAACCTCACTGGCTCACCTTCACGGGTGGGCCTTTCTTCGTTCTAGGGAATTAACCCTCA

CTAACAGGAGACACACCATGTGGCTTATCCTATTCGCTATCGTCGCAACGCTGGGATTA  
TGGTTGCCGACGACGACATTTGGCCTGATTGTTAAGGAGACAACATCATGCGTTTACACT  
TCAACACATCAAATGGTATCTTTTCGGTTCGCCGTGAAGACCGCTCTACAGCAGTGGCCT  
CTGAGCGCAACGCTAAGCTGCCGCTGATTGGCTCGGTCGTCCTTGTGCGCTCGTGTT  
ACCTACTGATCACTCGTGGAGAGTTCATTAAGGCGATGAACAAAGAGCGCCCGCATCTGG  
AAGCCGTGGTCACTTGCTGGCCTCGCATCCGTCTGTTCGTTAAGTGGATTAAGGAGGTT  
TGTAATGTTACAACATCATTGGAACAAACCAGATTTAGAGGCTCGCTTCCCGGTTAACTC  
TGCTGTGCGATACTCCGGCGACTTCTCAAGCGTCTTCTAGGTATGAGCGGAGTGGTAC  
TGGTCACTCGAACACAGGTCGCGTTAAGGTTTCGCTTCGGTAATCAGCACGCTGAGTTTCT  
TCCGAACAACCTGATTCCGCTGCCTAAAGATGACGTTAAGACTCCGAACGTGGAAGCACC  
GAAGTCAGAAGTCAAGTCTGACGTAACCCACCCTAACCCTACATGCTGTTTCGACAACGT  
GGAAGCCATTGAGGTTATAGCCCGGTCAATGACCGTCGAGGCGTTCCGTGGGTACTGCCT  
TGGGAACATCCTGAAATACCGTCTTCGTGCTGGTAAGAAATCCGAACCTGGCAACTATGGA  
GAAAGACCTCAATAAAGCTGCATTCTATCAGGAACTCTTTGACAAACATAAGGGGCTGTG  
CTATGACGCTTCGTGAATGCTGCGATTGGTGTGCCGCTAAGTGAACCAAGCTATTGAGG  
ATGGTGACAAGGCGGCTGCTGACGCTTACCAACAACGTACGCGCTGTGGGAGCGGCGCT  
TTAAGGAGGCTCAAAGTGGAGCAACGTGAACAGAAATACCTTCTGACGATAGAAGGCAAC  
ACCGAGTCTTTGAGGTTCCGGTATTCGCCCGGTCTCTCGAAGAGGCAACGCTACAGGCT  
GAACATTATGAGGACGCTGGGTTTCGTAGTGACTCGCATCCGTCCAGAAGTGAAAGCCTAA  
TTACCCTCACTAAAGGGAACAACCAAATCATTAAACCACAAAGGAGAAACATTATGGCTGG  
TTTCAAGAAGAAAATCTACACCTCTGGTCTTGGCACTGCTGAGCCTTATGCTTACCTGAG  
TAAGCCGGATTATGGCAACGAAGAGCGTGGCTTCGGCAACCCTCGTGGTGTCTATAAGGT  
AGACCTGACTCTTTCCAATAAAGACCCGCGCTGTCAGGCGATGGTCGATGAAATCGTGAA  
GACTCACGAAGAGGCTTATGCTGCTGCCGTGGAAGAGTTCGAAGCTAACCCGCCGAGGT  
ACAGCGTGGTAAGAAACCACTGAAACCTTACGAGGGCGACATGCCGTTCTTCGATAACGG  
TGACGGTACGACTACCTTCAAGTTCAAATGCTATGCGTCTTTCCAAGATAAGAAGACCAA  
AGAGACCAAGCACATCAATCTGGTCGTGGTCGATAGCAAAGGTAAGAAGATTCAGGAAGT  
GCCGATTATCGGTGGCGGCTCCAAGCTGAAAGTGAAATACTCTCTGGTTCCTTACAAGTG  
GAACACCGCTGTGGGCGCAAGCGTCAAGCTGCAACTGGAGTCCGTGATGCTGGTTCGAACT  
GGCTACCTTCGGCGGTGGCGGTGAAGATGAGTGGGCTGATGAAGTCGAAGATGGTGGTTA  
CACTGCGAGTGAATCCCGTCAGTCCCGCGATGAGCAGGAGTGGCAGGAAGACGAGCACGA  
AGAAACCCCGGATGATAACGAGGACTTCTAATGGCTGGCGCATAACGCTGCGCGAGGTGTA  
CGCAAGGTCGGGGCTTTCCGCTCCGGCCTAGAAGATAAAGTCTCAAAGCAGCTTGAGAGT  
AAGGGAATTAAGTTCGACTATGAGCTTTGGCGTATCCCTTACGTATCCCTGCGAGTGAC  
CACTTATACACTCCAGACTTCTGCTACCTAATGGCATATTCATTGAGACCAAAGGGCTG  
TGGGATTCCGATGACCGCAAGAAACACCTTTTGATTTCGTGAGCAACACCCTGAACTGGAT  
ATTCGCTTGGTCTTCTCAAGCAGCCGCTCAAAGCTCTACAAAGGTAGCCCAACAAGCTAC  
GCCGAGTGGTGTGAGAAGCATGGCATTCTGTTTGCTGACAAGCTAATTCCGGTGGAGTGG  
CTCAAAGAACCCAAGAAGGAGGTTCCGTTTCGATAAATTTAAGACTAAGAAAGGAGTAAAG  
AAAATGGCTAAAGTTCAATTCAAACCACGAGAAACCACGGAGGCAATCTTTGTACATTG  
CTCAGCAACCAAGCCAAGCCAGAACATTGGCGTTCGTGAGATTCGTCAGTGGCACAAAGA  
GCAGGGCTGGTTAGACGTAGGATATCACTTCATCATCAAGCGTGATGGCACTGTGGAAGC  
AGGCCGCGATGAACTGGCTGTAGGTTCCACGTGAAAGGTTACAACCACAACCTCCGTAGG  
CGTATGCCTCGTGGGTGGGATTGATGATAAAGGCAAGTTCGACGCCAACTTTACACCTGC  
GCAAATGCAAGCGCTGCGTAGTCTGCTGGTACGCTGCTGGCGAAGTATGAGGGTTCACT  
CCTTCGTGCTCACCATGACGTTGCATCCAAAGCCTGCCCGTCTTCGACTTGAAGCGCTG  
GTGGGAGAAGAACGAACCTGTTACATCTGACCGAGGGTGATACCATGAGGATGATTTGTA  
TTCGCTGTGATAAGCCGTTGAAGAGTCGTGTACCGTCACGTCAGTGTGAGTGCAGTGC  
CAATCAAGGCGGAGGAACACACCGAGGAATAATTAACACTCACTAAAGGGAGACTTAACG  
GTTTCCCTTTGTTTCGCACTATTGATTAAGGAATGTACAATGGAACGAGAAGACGATAGTA  
TCTTTCTGTTTCATGCTCCATGTGAAAACCTGTGGGTCTTCTGATGGTAACTCTGTGTACT  
CTGACGGGCATGAATGGTGCTTCGTGTGTGAACATCGAGTACCCGCAAACGAAGAGCGTG  
AAGCAAAGTTATCAACGAGAAGACGTACAGGAGGCAGCAAGCCTATGAGCTATGACGTAT  
GGAATTCGGTGACAGCAACGGTCGATACTCTGACCTGACTGCCCGTGGCATCTCGAAGG  
AGACATGCCAAAAGGCTGGCTACTGGCTGGCGAAAGTGGACAACCGAATGTATCAGGTTG  
CCTACTACCGAGACCAGAACGGCTCCATCGTGTGCGAGAAGGTGCGCGATAAAGGACAAGA  
ACTTTAAGACCACCGGAAGCCACAAGAGCGATGCGCTGTTCTTGAAGCACCTCTGGTCTG

GCGGTAAGAAAATTGTGGTCACTGAGGGCGAAAATTGATGCGCTCACTGTGATGGA ACTCC  
AAGACTGTAAGTACCCGGTCGTATCATTAGGTCACGGTGCCTCTGCTGCTAAGAAGACAT  
GCGCCGCTAACTATGAATACTTTGACCAGTTCGAGCAGATTATCTTGATGTTTCGACATGG  
ATGACGCAGGCCGTAAGGCAGTCGAAGAGGCCGCACAGGTTCTCCCGGCTGGTAAGGTTG  
GTGTTGCCGTGTTGCCGTGTAAGGACGCCAACGAGTGTACATCATGGGTGAAGACAAAG  
CAATCTTGAGCAAATCTGGAACGCGAACCCCTTGGGTGCCTGACGGTGTGTTTCTGCGT  
TGTCCTCAAAGACCGCGTTAAGGAAGCTATGACCTCCGAGGACGCTGTAGGTTTATTAT  
TCGATGGCTGTCAAGGCCTGAACGATAGAACCCTGGGTGCTCGTGGTGGCGAAGTCGTTA  
TGGTCACTTCCGGTTCGGTATGGGTAAAGTCAACGTTTCGTTTCGTTCAACAGGCTCTGGCTT  
GGGCAAGCGAATGGGTAAACGTGTGGGCCTAGCGATGTTGGAGGAATCCGTTGAGGATA  
CCATTCAGGACATGATGGGCTTGAACAATAAGGTTTCGTTCTGCGTCAGTCTGATGAAGTCA  
AGAAGGCTATCGCAGAGGACGGACGTTTCGATGAATGGTATGATGA ACTATTTGGAGACG  
ATACGTTCCACCTTTATGACTCCTTTGCGGAGGCCGAAGCTGACAGGCTGTTAGCGAAGC  
TGGCCTACATGCGAACAGGCTTAGGGTGTGATGTTATAGTGCTCGACCACATATCAATCG  
TCGTGTCTGCCTCTGAGGAATCGGATGAGCGTAAGATGATTGACCGCCTCATGACGAAGC  
TCAAAGGGTTCGCTAAGTCAACTGGTGTGCTCGTAGTGATTTGTC ACTTGAAGAACC  
CGGAGAAGGGAAAACCACATGAAGAAGGACGCGCTGTTTCTATTACTGACCTACGTGGTA  
GCGGTGCCTTGCCTCAGTTATCTGATACTATCATCGCCTTGGAGCGTAACCAGCAAGGTG  
ATATGCCTAACTTGGTGTGTTGGTTCGCCTGCTTAAGTGTCGTTTCACTGGCGACACTGGAA  
TTGCTGGGTACATGGAATACAACAGAGAAACCGGGTGGCTTGAACCGTCTAGCTACACTG  
GCGAAGAAGGAGAAGGAGATACTGGCTGGACTGAACAAGACGGACAATCAGACTTCTAAA  
GGATGCCCGTGTGGGCATTCCGATTGCGATGGAATCATGTACCACTAATTAACCCTCACT  
AACGGGAACAACCATTAACCATAGGAGACACATCATGTTTAAATTCATTAACGCTTTAG  
GTAAGCTGGTAGTTAAACTGTACTTCATCGAAGCCAAGAAGCTGGACAAGAAGGCCAAAG  
CTGATTCACAGCGAGCCATTGAGTTGGCGAAACAGTCCCGTGAGAAAATCCGATGCGGCTG  
TTAGTGGCATCCACAAGTCGGCAGCGATTGCAGCCAAAGCACAATCCATGAGCAAATTCT  
TTGAGTAAGGAGCGCACACTATGAGCAAGTCAATCACCCACGCAAACACCATCCGTCTGC  
CAGACACCGCTGACCAGTTCTCCCGCCGAGTACACATCAATGTGCGTGGTGAGAAGGTCA  
CGATGGTCTACCGCTGGAAAGACCACAAGTCTCCGAAAGCACACACTCAACGAATGACCT  
TGGATGACAAGCAGGTCGGTTCGCTTGATGGGTGCCCTGACTATGGCTGCTGACAAGGTGG  
TCGGTGATAACCGTGAGCGTCTGGTAGAGTTCGGCGCTGGTATGCAAGAGATTATCGAGA  
AGTGATAAACTCAAGGTCGCCCAAGGGTGGCCTTTATGATTATCATTTAGCACGAAACCA  
AAGGAGGGCATTATGCTCGTAAGTGACATTGAGGCCAACAACCTCTTAGAGAAAGTCACC  
AAGTTTCACTGTGGCGTTATCTATGACTACCGTGATGGTGAGTATCATAGCTATCGTCCG  
GGCGACTTCGGGGCGTATCTGGATGCGCTGGAAGCCGAGGTGAAGCGAGGTGGGCTTATT  
GTTTTCCATAACGGTCACAAGTATGACGTTCCGGCTTTAGAGAACTCGCAAAGCTGCAA  
CTCAATCGTGACTTCAAGTTACCCCGTGAGAACTGTATTGATA CATTGGTACTCTCGCGT  
TACTTCATGCGAACCTTAAAGACACAGACATGGGGCTTCTTCGCTCCGGGAAACTACCC  
GGTTCGTCGTTCCGGTCTCACGCTCTGGAGGCATGGGGCTATCGCTTGGGTGAGATGAAA  
GGTGAATACAAGGACGACTTCAAGGCTATGCTGGAAGAGCAGGGCGAAGAATATGTTGAT  
GGTGCTGAGTGGGTTTCGTTCAACGAGCCGATGATGGCGTATAACGTTCAAGACGTTGTG  
GTC ACTGTCAA ACTCTTAGAGAAATTCCTTACAGACCTCCACTACTTCCCTGCGGGTATG  
GACTTCACGAAGTACGATGCGGATTTATTCTGGCGAGAAGCTGGCGAGTCTGTGGATATT  
GAACATCGTGACGCGTGGCTTTTAGCGAAGCAGGAGCGTAACGGCTTCCCGTTCAACACC  
AAGGCAATTGAGGAACTTTATGTAGA ACTGGCAGCGAAACGCGCCGA ACTTCTGCAAAAAG  
CTAACCGAAACGTTTGGCTCATGGTATCAACCGAAAGGCGGTAAGGAACTCTTCAAGCAC  
CCACGGACAGGCAAGCCGCTGCCGAGCTATCCTCGCGTGGTCTATCCGAAACAGGGTGGC  
GTGTACAAGAAGCCTCGTAATAAGGCACAGCGCGAAGGTCTTGAACCTTGCGACTTGGAC  
ACGAGGGATTACATGGAGGGTGTCCATATACTCCGGTAGAGTTCGTTACGTTCAAGCCA  
AGTAGCCGTGACCACATTCAGAAGAACTACAGGAGGCCGGATGGGTTCTGAGAAGTTC  
ACCGAGAAGGGTGCCTGTGGTGGACGATGAGGTCTTGGAGCATGTACGAGTGGATGAC  
CCTGAGAAGCAGGCGTGCAATTGACTTGATTAAAGAGTACCTGATGATT CAGAAGCGAATC  
GGTCAGGCGGCAGAGGGTGACAAAGCGTGGTTACGTTATGTTCAAGATGATGGTAAGATT  
CATGGAGCCGTTAACCCCTAACGGTGCAGTTACTGGTCGTGCTACTCATAGTTTCCCAAAC  
CTTGCAACAAGTACCCGGCGTTTCGTTCTCCTTACGGGGAGCAGTGTCGTAGCGCTTTTGGT  
GCTGAACATCATTTGGATGGGATTACTGGCAAGCCGTGGGTGCAAGCGGGGATAGACGCC  
AGTGGCTTAGAGTTGCGCTGTCTGGCACACTTCATGGCTCGTTTCGATAACGGAGAGTAT



GCGAATGAGATTCTCAACGGTGACATTCACACCAAGAACCAGAACGCTGCGGAACCTCCCA  
ACGCGAGACAACGCCAAGACCTTCATTTACGGGTTCTTTACGGAGCAGGAGATGAGAAG  
ATTGGTCAGATTGTTGGGGCAGGGAAGGAGCGCGGGAAGGAACTCAAGAAGAAATTCTTA  
GAGAACACCCCGGCGATTGCAGCGCTACGAGAAGCTATCCAACAGTCTCTCGTTAAGTCT  
TCCGCTTGGATTGGCGCTGAGCAGAAAGTACAGTGGAAGCGCCGTTGGATTAAAGGTCTG  
GATGGTTCGCAAGGTTACAGTCAGGTCTCCACACGCAGCGCTCAACACATTGTTGTCAGTCT  
GCTGGTGTCTGATTTGTAAGTTGTGGATCATCAAGACCGAAGAGATGCTCATTGAGAAA  
GGCTTGAAGCATGGCTGGGATGGTGACTTTGCGTACATGGCTTGGGTTACGATGAGATT  
CAGGTGGCCTGCCGTACAGAGCACATCGCTCAGATTGTTATTGACACCGCGCAGGAAGCT  
ATGCGTTGGGTCGGAGAGCATTGGGCTTTCGTTGTCGTTTAGATACCGAGGGTAAGATG  
GGCCGAATTGGGCTGTCTGCCACTAACAATAGGAGAAACATTATGGCAATGACCAAACA  
CTTTAAAGTAACCTTCGACGTTACCGCTGTGATTGACAGTGAATCCGAGAAGAATCTGAA  
CGAGTTGCTGGTAGACCTAGCTAAGAAGGCCGGGGCTGGCGAGAAGCTGAATCCGTTCAA  
ACAAGAACTGCTTATTCAAGGCCTGACACACGGGCCGGAAGGTGCTGCTGCGTTCTGTAT  
CAAGCAAGGTCTCCGTGAGTTTATCCGCGATGGTCACAGTGAGTTAAGCTCTACCGAGCA  
GAAGCTGATGAGATTCTCACCTGCAACTGTGCGAGAGGTGTTCAAATGAGTGAATACCTG  
AAAGTTCTGGCAGCTATCAAAGGTTGCCCTAAGTCCTTTCAGTCGAACTATGTGCGAAAC  
AATGCGGCTCTCGTAGCTGAGGCCGCTTCTCGTGGACACATTAGCTGTTTGACTGTGGGC  
GGTCGCAATGGTGGAGCATGGGAGGTCACAGCCTCTGGTGTGCGCTTCTGAAACGAATG  
GGAGGTTGCGTATGATTATGCCTAAGAGTGACACCGTAACGATGACCCGTGATGCGTGGA  
ACGATGTTAGCGCGTACATTGATAAGCTGGAGAAAGGCCTAGAGTTCCTGAATGCGCTTA  
AGGCGTGTGGTGTGGATAATTGGGACGGATACTCTGATGCAGTCGAAATGGTTTACGGGG  
AGGATGACGAATGAGCCTAATCACATTGAAAGACTTCGCGGAGATGCGTGAAGGTAATCC  
TATGGAGAAGGGAGTGCTGGTCATGGATGGTGACTGGTTGGTATATCAGTCAATGGCTGC  
TGCCGAAGTTGAGACGGATTGGGGAGACGACATTTGGACTCTTGAGTGTGACCACGCCAA  
GGCACGGAGCATTCTCGATTCTGCAATCGAATCGTACCGAACCCGTAAGAAGGCTTGGAG  
TGACGCTATGGTTGTTCTGGCGTATACCGACGATGTGAACTGGCGTAAGGTAAGTGGTTGA  
TGAGACCTATAAGGAGAACCGTAAGGCGACCCGTAAGCCTGTGGGCTACCGTGACTTCT  
GTCGAAGCTGTGGGAGCGCGATGAGTTCATTCACATCAAAGAGGACATGCTGGAAGGTGA  
TGACGTTATGGGTATCATTGGGTCTGGTCACGAGGTCTTCGGCTTCAAGAAAGCTGTGTT  
GGTCTCCTGTGATAAGGACTTCAAGACTATAACCGACGTTGACTTCTGTGGTGTACCAC  
TGGTAACATCTTGACGCAGACCAAAGAGACCGCTGATTGGTGGCATCTCTTCCAGACTAT  
CAAGGGCGATATGACTGATGGCTACTCCGGGATTCCCGGTTGGGGTGACACGGCAGAAGG  
TTTCTGAAATGACCCGTTTATTGTGGAGCCTGTAGAGTCCGTGTTGAAGTCCGGTAAGAA  
CAAAGGGCAGACTGTCACTAAGTGGGTGAAACGCGCTCCTGATGCGACTGAGAGCCTGTG  
GGACTGCATCGTATCCATTGGTGCCAAAGCTGGGATGACCGAACATGAAATCATTAAAGCA  
AGGCCAGATGGCACGCATTCTTCGCTTCGAGGAATAACAATTACATTGACAAGGAGATTA  
CTTATGGACGCCGCGAAGCTGATTACCATCGCTGTGCTGGTAGGTATGCTGGCGCGAGGT  
CTCTGGATGTTTCGCTCTCATAGTCCGAGACGTGAAGCGAGACTCCGAGATTAAGTGATAC  
ACTCAAGGCTCTCTGTATTAACCCTCACTAAAGGGAAGAGGGAGCCTTTATGATTATTAC  
TTAAAGACTTAACTTAAAGAGGTGAATTTATGTTACAACCAATTAATCATGTTTTAACTC  
ATCCCGATGATATTCCTAGTATGCCGCGTGCAGCTAAAGAGTATCTACAGGTGCGCTTCA  
ATCAGGCTTATGTGATGGAGTCCGGGGAGTACCGTGCCTCCGCGCTGCTGGTACTCTG  
AGTCTTTCATTGCGGGTGTGATGCATGGTCTGTACCTTGCCTCTCGAACACTTGATGAGA  
TTGAGGTGCGTAAAGAGCAACTGAGACAGGAGTAACGATATGTGCTGGAACCGAAGGTG  
AAAGTCCCTAAGATGGACACTAACCAGATTCGCGCTGCTGAACCAGCACCTTTGACTGAA  
CCTCCGAAGTCTGTGGTATGGGGAGGCGATGATGACGAGGACACCAGTGTGTCTTCTCT  
GAGGTGCCAACCACACCGAGCAGCGGTAAGAGCAGTCTCAAGGTAAAGCTGGATGACAGC  
GCAGCCAAGAACAAGAGTAAATCCTCCATTCGCTCCAAGGCGTTTGGGTAAGTGAAGTCA  
AGCATAGGGAGAAACATCATGGGATTCTTCAAGAAAATCAAGAAGGCCGTTAAGAAAGTT  
GTGAAAGAAGTTAGTAGACCAGTCGAGAAGGCCGGTAAGGAAGTGGGCAAGGTGGTTGGA  
GGCGCGCTGGGTGCAGGTAAGCAGGAGATTATCCAACAAGAGGCTCCTGTACCAGTAGTC  
GCTGCACCGCCACCAGCACAGGTTGTAGATGTACCGGAACAGGATAAGGCTGAGGGTGAG  
GATGAGGCGCAAACCGAAAGCGCACGTAAGAAAGCACGCGCTGGCGGTAAGAAGTCTCTG  
AGTGTAGCCCGTAGCTCCGGCGGTGGCATCAACATCTAAGGAGGACTGAATGGCTGATTC  
AAAACGTACAGGATTGGGCGAAGACGGTGCTAAAGCTACCTATGACCGCCTAACGAACGA  
CCGTAGAGCCTACGAGACTCGTGCGGAAAACACTGTGCGCAATACACCATTCCGTCCTTGT

CCCGAAGGAGTCCGATAACGAATCTACCGACTACACGACTCCGTGGCAGGCTGTAGGTGC  
GCGGGGTCTTAACAATCTGGCCTCTAAATTAATGCTGGCACTATTCCCGATGCAGTCGTG  
GATGAAGCTGACCATTAGTGAATATGAGGCGAAGCAGCTTGTTGGAGACCCTGATGGACT  
CGCTAAGGTGGACGAAGGTCTGTCTATGGTTGAGCGTATTATCATGAATTATATCGAATC  
CAACAGCTACCGTGTGACACTCTTTGAGTGCCTCAAGCAGTTGATCGTGGCAGGTAATGC  
ACTGCTTTACTTACCGGAACCAGAAGGCAGCTACAATCCGATGAAGCTGTACCGATTGTC  
TTCTTATGTTGTCCAAAGAGACGCATACGGCAATGTGTTACAGATTGTCACTCGTGACCA  
GATAGCCTTTGGTGTCTCTCCCGGAAGACGTTCCGGTCTGCGGTAGAGAAAGCTGGTGGTGA  
GAAGAAGATGGACGAAATGGTTCGATGTGTACACCCATGTGTATCTCGATGAAGAGTCCGG  
CGATTACCTCAAGTACGAGGAAGTAGAGGACGTTGAGATTGATGGCTCCGATGCCACCTA  
TCCTACTGACGCTATGCCCTACATTCCGGTTCGCATGGTTCGCATTGATGGCGAGTCTTA  
CGGTCGCTCCTACTGTGAAGAATACTTAGGTGACTTAAGGTTCGCTTGAGAATCTCCAAGA  
GGCTATCGTTAAGATGAGCATGATTAGCGCGAAGGTCATCGGTCTGGTGAACCCGGCTGG  
CATTACGCAGCCACGTAGATTAACCAAAGCTCAGACTGGTGACTTCGTTCCGGGTCGTCG  
AGAAGACATTGACTTCCTTCAACTGGAGAAGCAAGCTGACTTTACCGTAGCGAAAGCTGT  
GAGTGACCAGATAGAAGCACGCTTATCGTATGCCTTTATGTTGAACTTTGCGGTGCAACG  
AACAGGTGAACGTGTGACCGCCGAAGAGATTCGATACGTTGCGTCAGAAGTGGAAAGATA  
GCTTGGTGGCGTCTATTTCGATTCTGTCTCAAGAAGTCAATTGCCTCTGGTTCGTGTGCT  
CTTGAAGCAGCTCCAAGCAACCTCGCAGATTCTGAGCTACCGAAAGAAGCCGGTGAGCC  
GACTATCAGTACAGGTCTGGAAGCAATCGGTCGTGGTCAAGACCTCGATAAGCTGGAGCG  
CTGTATCTCCGCTTGGGCTGCTCTGGCCCCTATGCAGGGAGACCCGGACATTAACCTTGC  
TGTCATTAAGCTGCGCATTGCTAACGCCATTGGTATTGATACTTCTGGTATCCTACTGAC  
TGACGAGCAGAAGCAAGCACTGATGATGCAGGATGCGGCCCAAACAGGTATCGAGAACGC  
TGCCGCCACTGGTGGGGCTGGTGTGGGTGCTCTAGCGACCTCAAGTCCAGAAGCTATGCA  
GGGTGCAGCAGCACAGGCTGGCCTAGACGCCACCTAATAACCTCACTAAAGGGAGACCT  
CATCTTTGAAATGAGCGATGACTAAAGGTTGGAGTCCCTTTGGTTTCCCTTTATCTTTAAC  
AACTTAGGAGATTTAACAATGGCTGAATCTAATGCAGACGTTTATGCGTCCTTCGGTGTG  
AACAAACGCGGTAATGACCGGAAGCACACCTACTGAACACGAACAGAATATGCTGAGTCTC  
GATGTTGCTGCCCGTGATGGCGATGATGCAATCGTACTTAGCGAGGAACCGAGTTCCCAT  
AACGATGACCCATATGCATCCGGTGTAGACCCGTTTCGCTGATGGTGAAGACGATGAGGGC  
CGCATTACAGGTTTCGTATCAGTGAAGATGGTAATGAAGCCGAGTTCGACACCCGGTAGCGAT  
AACGCTGAGGTGGAGACCGAAGGTGAGGCCGCTGAGTTTGAACCGCTGGGTGACACTCCA  
GAAGAACTGAGCCAAGTACTGAGCAGTTGGGACAGCACGAAGAAGGCTTTCAGGCGATG  
GTCGAGCAGGCCGTTGAGCGTGGACTGAGCGCAGAGTCTGTGACTCGCATCTACGAAGAG  
TACGAAGCCGATGGCATCTCTGAGAAATCCTACGCGGAACCTCGAAGCTGCTGGCTATAGT  
CGTGCCTTTGTGGACTCCTACATCTCCGGTCAGGAAGCCCTTGTAGACCAGTACGTCAAT  
CAGGTAGTTGCCTTTGCTGGTGGTAAGGAGCGCTTTAGCGCAATCCATACGCACCTTGAA  
GCAACCAACCCGGCTGCGGCTGAGTCCCTTGAGACTGCCATGATGAACCGAGACTTGGCG  
ACTGTCAAAGCAATTATCAATCTGGCTGGTGAAGAGCTACACGAAGAAATTCGGTAAGCCT  
GCCAACCGTAGTGTTACCAAGCGTGCTACTCCGGTTAAACCTGTAGCTCGTCAGAAAGAT  
GGCTTTACGAATCAGGCTGAGATGATTAAAGCTATGAGTGACCCGCGTTACCGTAGTGAT  
GCTGCCTACCGTCAAATGGTAGAACAGAAGGTTATCGACTCCAGTTTCTAATTAACCCCTC  
ACTAAAGGGAGAGACCATAGATGACTACAATGGTTGAATCACCTGAGCACAGAAGTGTG  
GGTCACTCCCGTAGGTGAAACATTGAGAACCAACTCGATTCAAGTAGTAACCAAACCTTTT  
CTTTAAATTAACATAAGGAGATTCAACATGGCTAACAAATCAAGGCGGACAGCAAATGGT  
ACTAATCAGGGTAAGGGTCAGTCCGCAGCGGACAAATTGGCGCTGTTCTGAAAGTGTTG  
GGCGGTGAAGTCCTGACGGCTTTCGCTCGCACCTCCGTGACCATGCCTCGTCACATGCTG  
CGTCTATTGCTTCTGGTAAGTCCGCACAGTTCCTGTGATTGGTTCGCACCAAAGCTGCT  
TACCTGAAACCGGGTGAGAACCTCGATGACAAACGTAAGGATATCAAACACACCGAGAAG  
GTAATCCACATTGATGGACTGCTGACTGCGGACGTTCTGATTTACGACATTGAGGACGCG  
ATGAACCACTACGACGTTTCGCGCTGAGTACACCGCACAGTTGGGTGAATCTCTGGCGATG  
GCGGCTGACGGTGTGACTGGCTGAACTGGCTGGTCTGGTTAACCTGCCGGACGCCTCC  
AATGAGAACATCGAGGGTCTCGGTAAGCCTACCGTACTGACTCTGGTTAAGCCGACCACT  
GGCGACCTGACTGACCCGTTGAGCTGGGTAAAGCGATTATCGCTCAGTTGACTATCGCT  
CGTGCGTCTCTGACCAAGAAGTACGTTCCGGCTGCTGACCGTACCTTCTACACCACTCCT  
GATAACTACTCTGCGATTCTGGCCGCTCTGATGCCGAACGCTGCAAACCTATCAGGCACTG  
ATTGACCCTGAGCGCGGTACTATCCGTAACGTGATGGGCTTCGAAGTGGTTGAGGTTCCG

CACCTGACCGCTGGTGGCGCTGGTGATACCCGTGAGGATGCCCGGCTGACCAGAAGCAC  
GCTTTCCCGGCGACTTCCAGCGCTACCGTTAAGGTTGCTCTGGATAACGTTGTGGGCCTG  
TTCCAGCACCGCTCTGCGGTTGGTACGGTCAAGCTGAAAGACTTGGCTCTGGAGCGCGCT  
CGTCGTGCGAACTATCAGGCTGACCAGATTATCGCTAAGTACGCGATGGGTACGGCGGT  
CTGCGTCCAGAAGCTGCTGGCGCTATCGTGCTGCCAAAGACTTCGGGGGCTTAAGGGTAG  
CGCCTTTGAGTATGAACGCGGAGAGTGAAGTGGAGCCGACCCAAGAGGTAGCCGCCGAAG  
TAGCTCTCACGCCTAACAGAAGGCCGCCATTACTCGTGCTCGTAACAAGGCACTTAAGT  
CTCAATAACAACAAGCAAACCCCTTGGGTTCCCTCTTTGGGAGTCTGAGGGGTTTTTTGC  
TTAAACCCTCACTAACAGGAGGTAACATCATGCGCTCTTATGAGATGAACATTGAGACCG  
CAGAAGAGCTATCAGCCGTCAACGACATTCTGGCTTCCATCGGTGAGCCACCAGTATCGA  
CCCTTGAGGGTGATGCAAATGCTGATGTTGCAAATGCTCGACGTGTGCTCAACAAGATTA  
ACCGACAGATTCAGTCACGAGGATGGACATTCAATATTGAGGAAGGTGTGACTCTTCTAC  
CGGATGCGTTCTCTGGTATGATTCCATTTAGCTCTGATTATCTGTCCGTAATGGCAACCA  
GCGGTGACACCCAATATGTCAACCGTGGTGGCTATCTCTATGACCGCTCTGCGAAGACTG  
ACCGATTCCCATCTGGTGTTCAGGTCAACCTGATTCGTCTGAGAGAGTTCGATGAGATGC  
CTGAGTGCTTCCGAACTACATCGTTACCAAGGCTTCCCGTCAGTTTAAACAACCGCTTCT  
TCGGTGCGCCGGAGGTAGACGGAGTGTGTCAGGAAGAGGAACAGGAAGCGTGGCGTGCGT  
GCTTCGAGTACGAACTAGACTACGGCAACTACAACATGCTGGACGGTGACGCATTACCT  
CTGGTCTACTTAACCGCTAATAACAAGGAGGCTCTATGGCTCTCATTAGTCAATCAATCA  
AGAACCCTCAAGGGTGGTATCAGTCAACAGCCAGATATTCTCCGGTTCGCTGAACAAGGTA  
GCGTACAGATTAACGGTTGGTCTTCTGAGTCCGAGGGTCTCCAGAAGCGCCCACCGATGA  
TTCACCTTAAGACCCTTGGTGTCTGCTGGGTATGTGGGTGCGCAACCTTACGTTACCTCA  
TCAACCGTGATGAGTTCGAGCAGTATTTTCGTGGTGTTCACTGGTGAAGACATTAAGGTAT  
TCGACCTCGACGGTAAGGAGTACCAAGTACGTGGAGACCGCTCATATGTTTCGTACAGCTA  
ACCCACGAGAAGACCTTCGGATGGTAACTGTGGCTGATTATACCTTTGTGACTAACCGCA  
AGGTGGTTGTACAGAGTAACGACCAATCGGTCAACCTTCCGGGCTTTAAAGACCAAGGCG  
ATGCGCTGATTAATGTTTCGCGGTGGACAATATGGGCGTAGACTCTCAATCGAGTTCAACG  
GGGCTGAGCGTGCTGTGTACAACCTACCGGATGGTTCACAACCAGCACACGTTAACGAGG  
TTGACGGTCAGGCTATCGCTGAGAAGCTGGCTGTGACGTTGAGGAACAACCTTGGGAATC  
CAAACAACGAGCAAGACCCGAATAAGTGGCGCTTCAACGTTGGCCCCGGATTTCATCCATA  
TCCTTGCGCCAAATAACGATAACGTTTGGGGACTACAGACTAAGGATGGTTACGCAGACC  
AGCTAATCAACCCTGTAACCCATTACACTCAGTCGTTCCAGAAGCTGCCTATTAACGCGC  
CAGATGGGTACATCGTGAAGATTGTTGGTGATACCTCAAAGACTGCCGACCAGTATTACG  
TTAGTTTCGACCTCAACCGTAAGGTGTGGGTAGAAACAATTGGATGGAACACAAGGACTC  
ACCTACATTACCACACGATGCCTTGGGCACTTGTTTCGCGCTTCTGACGGGAACCTTTGACT  
TCAAGTACCTTGAGTGGGGTGCTCGTACTGTGGGGGACGATAACAACAACCATAACCCAT  
CCTTTACCGGACAGACAATCAACGATATTTTCTTCTTTCGTAACCGTTTGGGATTCTTA  
GTGGGGGAGAACATCATCTTGTCTCGCACCTCGAAATACTTCAACTTCTTCCCGGCATCCG  
TGTCAAACTACTCCGACGATGACCCAATCGACGTTGCGGTTAGTCATAACCGGGTGTCAA  
CCTTGAAGTATGCCGTTCCGTTCTCAGAAGAGTTACTCCTGTGGTCTGACCAAGCGCAGT  
TCGTTCTGACAGCCTCTGGAATCCTTTCGAGTCGCTCCGTAGAGTTGAACCTTACGACGC  
AGTTCGACGTGCAAGACAGGGCACGCCACATGGTGTAGGACGTAATGTATACTTTGCGT  
CACCTCGCGCTTCTTTCACATCCATTAACCGATACTATGCGGTACAGGATGTAAGCTCTG  
TGAAGAACGCAAAGGACATGACGGCTCACGTTCCGAACTACATAACCGAATGGAGTATTCA  
GTATATCGGGGACAACCGCTGAGAACTTCGCGGCTATCCTTACGAGCGGAGCACCGAACC  
GAGTGTATATCTACAAGTTCCTCTATATTGATGAGGAAATCAGGCAGCAGTCGTGGTCTC  
ATTGGGACTTTGGGGACAACGTTACGGTGTGTTGTCAGCACAGGTGATAAACTCAACAATGA  
CTGTATTGATGAGCAATGAACATGCTGTGTGGATGGGACGCTTACACTTCACGAAGAACT  
CCATAGACATTCCGGGAGAGCCTTACAGATTATACATCGACGCTAAGAGGAAATACACCA  
TCCCTGCCGGGACGTATAATGATGATACCTACCAGACGTCCATAAGCCTCGCAACAATTT  
ATGGGATGAACTTCACTAGGGGTAGAGTGTCTGTGGTCTTTTCTGATGGGAAGATTGTAG  
AGATAGACCAACCAATCAACGGGTGGAGTAGCGACCCAATACTGAGACTTGATGGAAACC  
AAGAGGGACAAGTAGTCTACATTGGGTTCAACATCCCGTTCACTTATACGTTCTCGAAGT  
TCCTCATCAAGAAGACTGCTGAGGACGGCTCGACGGCTACCGAGGATATTGGTCGTTTAC  
AGCTTCGGCGTGCGTGGGTAAACTATGAGGACTCTGGAGCGTTCACCATCCGTGTGAACA  
ACCTGTCCCGTGAGTTCATCTACACAATGGCTGGTGTCTCGCTTGGGTTCTGACAATCTGC  
GTGTTGGCAGGTGCAACATTGGCACAGGGCAGTACCGCTTCCCGGTTGTTGGAAACGCTC

AGACGAACATAGTAACACTATCGAGTCAGATGCATCAACACCACTGAACATCATTGGGTGCG  
GCTGGGAGGGGAACACTACCTTCGTCGTTCTTCTGGCATTAACTTAAAGTCTCCCTGTGGT  
GAATTAACCCTCACTAAAGGGAGACACTAATAGATACGAGGGGTAAAGCATTATGTACA  
TTACAAAGTGTTTACAAATCCATGCCGACAACCTTCAGCCGTCCATAGAGGACATTCTGG  
AAGCTGAGGCACTAGGTGTTGAACCAAAGGTAATTCCTGATGAGAACACTGTGGCAATGC  
TTAGCGATAACGCTGTGTTGGCAATCGGTGGCAATCAGGGAGACCGAGTGTGGTTCCTTA  
CCTCTAAGTACGTCCCCTGTTTACCTTGAAGGAGCGCTTAGAGTTTCGTAGACTTATCA  
TTGAATATCGTGATATGATGCTGAGCCAGTACGAGTCCATTTGGAATTCGTTTGGGTAG  
GCAATAAGTCACACATTCGTTTCCTAAAGACCATAGGCGCGGTATTCCATAATGAGTTTA  
CCGCTGATGGTCAATTCCAATTATTCACTATCAGTAGGAGGTAACACTATGTGCTGGATGGA  
AGCGATTCTATTGCCATGATGGGTGCCCAAGCTCTAAGTAGCCAGAACAGTGCTGACAA  
GGCGCGAGTGGCACAGACCGAAGCTGGACGCAGACAGGCAATGGAGATGGTCAAAGAGAT  
GAATATCCAAAATGCCAACGCCTCGCTGGAACAACGGGACGCCCTTGAAGCTGCATCCTC  
TGAGTTGACTACACGTAACATGCAGAAGGTACAGGCTATGGGAACCATCCGTGCAGCTAT  
TGGCGAGGGTATGCTCGAAGGTGAGTCCATGAAGCGCATCAAGCGTATCGAAGAGGGCAA  
CTACATTAGGGAGGCAAATAGTGTACCGAGAATTACCGCCGAGACTACGCGAGTATCTT  
TGCGCAACAGTTGGGACGCACTCAGTCCACAGCGAGTCAAGTCGATGCAATGTACAAGAG  
CGAGGCCAAAGGTAAGTCTGGTCTGATGCGTGTACTAGACCCTCTGTCCATTATGGGTCA  
GGAAGCTGCAAGTCAATATGCGGCTGGTGGATTTGACAAGAAGGGTGGAAACCAAGCAGC  
ACCTATCAGTGCCGCCAAAGGAACCAAGACCGGGAGGTAATAATGGCTAGTAACTAAAT  
AGTGTTTTAGGCAACATGGCGACTCCCGGTATGGAACGACTCCGGGGCGTCAAAGGTATG  
GACTACCGGGCAGCAACCATTGAGGCTGAACAACCAAGAGCGAGTCTTCTGGACTCCATT  
GGTCGATTGCTAAGGCTGGTGCCGATATGTACATGGCGAAAGATGAACGTGATAAGCAA  
CGAGCCGATGAGCGCTCCAACGAGATTATCCGTAAGCTGACCCCTGAGCAGCGCCGACAG  
GCTATCCAGAATGGTACACTGCTGTATCAGGATGACCCATACGCAATGCAAGCCTTGAAG  
TTCAATACCGGGCGTAACGCTGCGTTCCTCGTTGACGATGAGGTTCAACAGGCCATCAA  
GAGGGTCGCTTCCGTAACGCTGGAAGAGATGGAGCAGTATCGTCACTCACGCCTACAGGAG  
CACTCGAAGTCGTTGCTGAGCAGTTCGGTATCAATGAGATGGACGAGGAATACCAGAAG  
GGTTTCAACGCGAATATCACCGAGCGTAACATTGCTCTGTATGGGGCACATGATACCTTC  
CTGAGTGACCAAGCGCAGAAGGGTGCAATCCTGAACTCGAAGGTTGAACTCAACGGTGT  
CTATCTGACCCTGACCTACTGTCTCGTCCTGAGTCCGGTGAGTTCTTCCAGAACTACATT  
GACAACCTCCTTGGTGACGGGGATGACCGACAATCAGGCTCAACAGGTTATCTCTTCGTCC  
CTGAATGACGTGCTACAGCGTCCGGGTGGTGCCGCTTCTTGCAGAACATTGAGAACCGC  
AAGGTGACTCTTAATGGCGCTACGACTACCTATCGTGAACCTGATGGGTGATGAGCAGTGG  
CAGGCAATGATGATTAAGGCACAGCACACTCAATTCAGAACAACGCGAAGTTAACCGAG  
AAGTTCCGACTGGATATTAACCTCAGCGCTTAACCAAGCAGACACTGGTAAAGGCTGGGAG  
ACTCTTCAAGGTATCAAGGCCGAACCTCGATAAGATTCAGCCGGGTGAAGAGATGACTCCT  
GAGCGCGAGTGGTTGATTTCCGCACAGGAACAGATGCGCACACGCTTCAAGCAGGAACAG  
GCTGAGACAGCCAAGCTGATGGACAAGCAACAGAAGACCTTGAATAAATCTTTGGTCATC  
GACAAGCAGTTCCAGAAGCGCCTCAACGGTGAATACGTCTCGACAACTATAAGGACATG  
CCGACCAACGAGAACACTGGTGAGTTTACACATAGCGATATGGTCAACTACGCGAACCAG  
AAGTTAGCGGAAATCGAAGCGATGGACTTAACGCCAGAACAGAAAGACAACTGAAATTG  
GACTACCTACGGGCAGACTCCAAGGAGGGTGCTTTCCTGTCAGCGTTTGGTGAGATGATT  
ACTGATGCTGGAAACGAATGGCAGGCTGCGGTGATTAACGGTAAGATGCCTGAGAGCACA  
CCAGCGATGGACAACCTTCGTGCGATCCGCAACACTGACCCTGACCTGATTGCCTCTCTG  
TATCCTGACAAGGCCGAGTTGTTCTGACTATGGACATGTTGGATAACCAAGGTATCGAC  
ACGCAGGTTCTTATCGACGCTGATAAGTCCCAGCACAGAAAGACCAAGGAGATGCAGTTT  
GAGGATGACCGAGCGTGGGCTGCTATGATGAACGATTCAACGAATCCTCAAATCAAGTAC  
ATGCCTTCGAGTGTCCAAGGTTACGCGCGGAAGATTTATGATTCCGTGAAGTACCGGACA  
GGGAACCCTGACATGGCAACAGAACAGGTCGCAAAGTTCTCTCTGATTCAACGACTACG  
TTCTCCAGTAGTGATGTTGATGGCGATACCTATGGTGTCTGCGAAGAACATCCTGACT  
GTTTCGGATGACCCTAAGTCGTGGGAGCAAGGGAAGAACATTCTGGACGAAGCCATTAAG  
GGAATCACAGCGGCGAACCCTTGGATTACCAACAAGCAACTGACGGTGTACCAGCAAGGT  
GATTCAATATACCTGATGGACACAACCGGACAGGTTTCGATTCGGTATGACCAAGAGTTG  
CTCCAGCGTGAGTACCAGCGTACCGCACAGATGCAAGCTGAGGCAGCACGAGAGAAAGCC  
CTCAAAGAGGCCAACAAGCGTGCCCAATCAGCCGTGTACCACAGGCGCGTGAAGAAGCG  
CGTAAACGTGTCCAAGAGAAACGGAAGAAGACTCCGAAGTACATCTATGGACGTAAAGAA

GACTAACAGTGATAAGGAGGCTCCATGAGCTACGATAAGAACAACCTAGCGAGTTCGAT  
GGTTATTTCAAAAAGCGGCAGACAAACATGGGGTCTCCTATGACCTGCTTCGTAAATTA  
GCATTCAATGAGTCCAGTTTCAATCCAAAGGCCAAATCACCAACTGGCCCGAAGGGTCTC  
ATGCAGTTCACCAAGGGTACAGCCACTGCGCTGGGACTCAAAGTCACTGATGCAGACGAT  
GATGACCGTTACAACCCGGAGTTGGCTGTGGATGCAGCCGCTCGTCACCTGAGTGACCTC  
ATTCGTAAATACGATGGGGATGAGCTTAAGGCAGCCCTAGCGTACAACCAAGGCGAGGGA  
AGAAATGGTGCCCCTCAGATGCAGGCCTACGACAAAGGTGATTGGGCCTCAATCTCTGAG  
GAAGGTCGTAACACTATATGCGTAACCTGATGGACGTAGCTAATAGTCCTCGCAAGGGGGAC  
TTGGAGGCGTTCGGCGGTATCACCCCAAAGGCTAAGGGCATTCCATCGGGGGATGCATTT  
GCTGGAATCGGGAAGAAGCAGACGGTAGGCACTGACCTGCCGGAGTCAACGGGATTCAA  
GTGGAGGGTAAAGAGCAGCAAGCGCCTAACGTTCTTATGCTAAGGACTTTTGGGAAAAG  
ACTGGAACAACACTGGACGAGTTTAACTCACGCTCTACCTTCTTCGGAATTGGCGATGCA  
ACAAGTGCGGAGCTTCATAACTCTGTACTTGGAGTTGCTTTCGTCAGCCCGTAGCGAC  
GATGGTTTTGATTTGTTCAAGGACACCATTACGCCTACCCGTTGGAATAGCCATACGTGG  
ACTCCAGAAGAGCTAGAGCGAATCCGTAAGGAAGTGAAGAACCCCGCGTACATCAACGTA  
GTCACTGGAGGCTCTCCTGAGAATCTGGACGCCCTCATTAAAGATGGCGAATGACAACAT  
GAGATGGATGCGCGGTCTGCCGATGCTGGTGTGGTGCCAACTTACTGCTGGTATCATC  
GGCGCTGGTGTAGACCCGCTGAGTTATGTACCGCTAGTAGGCGTAGCCGGGAAGGGTCTC  
AAGGTGGTTAACAAGGCTTTCATTGTGGGTACTCAAAGTGCTGGCCTCGCGGTTGCCTCT  
GAGGGTCTCCGTACATCAATCGCTGGTGGAGAAGCCACTATGCTGATGCTGCTTTAGGT  
GGTCTCTTGTGGTGTGGTATGAGCGCAATCAGTGATGCTATCGCTGCTGGTGTTCGC  
CGTCCCGTGGGACTGAGGTAGTTAATGACTTCGCTCCTATGGCACACCGCTTGGGAAGCC  
CGTGAGACCGCTCTGAACACTGGTGGGGAAGACCTGACCCGTATGCCTAGCGAGAACCGT  
GTGTTTCGACCGTGAGCACGCTGGCGTTGAGTATTCACCTCTGGAGACCGAGCCGGGTGCC  
GTTGTGTTGCCTCAAGGTCAAATCCTGAGCGACACCAACCCACTGAACCCTCAGACTCTT  
AGCGAGTTCGAGGCGGTCAACCCTGAGCGTGCCGCTCGTGGTATCTCTTTGGGTGGTTTC  
ACTGAGATTGGCTTGAAGACTCTCCGCTCTGAGAACCCGACTGTTTCGCTCCATTGCGAGT  
GACCTTGTGCGTTCTCCGACAGGGATGGAATCAGGCTCTAATGGTAAGTTCGGTGCAGT  
GCTTCTGACATTAAGGAGCGGCTCCACGCGAACAATCAGCGCACCTACAATCAGCTTTAT  
GATGCTGTGCGTACTGCAATGAAAGACCCTGAGTTCTCCACAGGTGGTGGCCACAATGAGC  
CGTAAGGAAATCCGACAGGAAATCTACAAGCGTGCAGCCTTGGCGATTGAGCGACCTGAG  
CTTCAAGCAAACCTGACAAAGGGTGAGCGGAACGTGATGAACATCCTCAAGCAGCACTTT  
GACCTCAAACGTGAAATCATGGAGAACCCGTCAATCTTCGGCAACACCAAGGCGGTGAGT  
ATCTTCCCCGGCTCACGCCACAAGGGAACCTACGTGCCAAACGTGTACGACCGCGCTATC  
AAGATTGAGATGGTTAAACGTTACGATAATGATGGCTTGCAGCGAGCAATCGCGGAGTCA  
TGGTTGACGTCTTATCGTGCTCGTCCAGAAGTCAAGGCGAGGGTTCGATGAGTACCTGATG  
GAACTTAACGGTCTCAAATCCGTGCAGGAAGTTACGCCTGAGATGGTGCAGAAGCACGCG  
ATGGATAAGGCGTATGGTATTTACACACTGACCAGTTCTCTGCCTCCTCTGTCATTGAG  
GATAACATTGAGGGTCTGGTGGGTATCGAGAACAACAACCTTCTTGGAAAGCCCGTAACATG  
TTCGACAGTGACATGGCGGTGACTCTCCCTGATGGTAACACGTTCTCTGTGAATGACCTG  
CGTACCTATGACATGGCTGAAATTCTGCCTGCATACGACCGACGAGTAGATGGTGTGTT  
GCAATCATGGGCGGTTCGGTAAGACTACCAAAGACCTGAAAGATGAAATCATGGCGCTG  
GATAAGCAGTCAGAGGGTAACGGCACACTGAAAGGTGAAGTGGAAGCTCTCAAGGACACC  
GTGAAGATTCTGACTGGTCGTGCTCGTAGGAACCCGGAAGGCGCTTGGGGTACAGCCCTG  
CGTCCGTAAATGACCTCACGTTCTTTGCTAAGAACGCCTATATGGGCGCACAGAACGTT  
ACTGAAATCGCTGGTATGCTGGCGAAGGGTAACGTCTCTGCGATAACTCATGGCATCCCT  
ATGATTAACGATTGGGTCAACCGTGGTAAACCGCTTCGTGCCTCTGAGATTAAGGAGATA  
CACGGGATGGTGTTCGGTAAGGAAGTACCAACTAATCCGTCCGGGACGTGAAGACCAC  
GTGCGCCGACTCCGGGAGTCTACGGACACCAGCGCTGCGGTTGCCAATGTGGTTCGGTACG  
ATTCGTTTCGGCACTCAAGAGTTGGCTGCACGCTCTCCTTGGACAATGCTCCTAAACGGA  
ACATCAAACACTACATTCTTGATGCTGCCCCTCAGGGTGTGCTTGGGGATGTGGCTGGAGCG  
GCCCTTGCTGGGAAAGCCTCTAAGTTCGGTAAGGCAAACACTACCTTAAGTCTGCCTCTATC  
AGCCCTGAGCAGTGGAAATGGAATCAAGCAGTTGTTTCAGAGACCATGCGACTCGTAGAGAA  
GACGGTAAGTTCACCATTCGTGACAAACAGGCTTTCGCTAACGACCCACGTTCAATGGAC  
TTGTGGCGACTGGCTGACAAGGTGGCGGATGAGACTATACTGCGACCTCACAAGGTTTCC  
TCACAGGACTCCAAAGCGTTCGGTGCAGGGGTGAAGATGGTGTGATGCAGTTTAAGAACCTC  
GTCATCAAGTCCCTTAACTCCCGGTTTCGTCCGTAGCTTCTACGAGGCAACTAAGAACAAC

CGTGCGTTAGACCAAGCGTTGACTCATATCATCTCCTTGGGTCTAGCTGGTGGTTACTAC  
GTTGCGCAGGCGCACCTTAAGGCCGCAAGCCTACAGGAGCACAAGCGTAAGGAGTACCTT  
AAGAACGCACCTTGACCCTAAGATGATTGCTCATGCGTCAATCTCTCGTAGTTCACACTTA  
GGCTCACCATTGAGTATCTACGACATGTTGCTGGGATGGTTGGTAGCGATACCTATAAG  
TACACCCGCTCTACTGTGCTCCCTAAAGAGTCCGAGAAGCGTGACCCTAACAAAGGCAATG  
ACAGGTAGACAGGTGGCTTCAACTATCGCGGGTGCAGTTGGTGAGCAGGTTCCGGGGTTA  
GGTTTTGTGGGTTCTGTGGGTGCAACAGCAATTAACGCAGCTTCCCTGCTATCTTCTCCC  
AACAAAGGCAACCGCTCTGGAGTTCCGTACAGGCCTCTTCAACACCTCTCGTGAGTTGATT  
CCTAATGACCCGCTATCGCAGCAACTCATTATGAAAATCTACGAGGCCAACGGTATCCGC  
ATAAAGGAGACGCCGAAGAAACAATAAACCCCTACTAAAGGGAGAGAGGTCACATTCTGG  
CCTCTTCTCTCTTAATGCTAATTTACAAAGGAGGTCACATGGCTACAACCTATTAAGACCG  
TGATGACTTACCCGCTGGATGGCTCCACTACGGACTTTAATATTCCGTTTCGAGTATCTAG  
CGCGTAAGTTCGTCAGAGTGACCCTTATCGGTGTTGACCGAAAGGAACTCATCTTGAATC  
AGGACTACCGTTTTGCGACTAAGACCACAATCTCCACAACGAGAGCATTGGGGCCAGATG  
ACGGTTATAACATGATTGAAATCCGTCGATTTACCTCCGCTACCGATAGGCTGGTTGACT  
TCACCGATGGTTCAATCCTTCGGGCATACGACCTGAACATCTCTCAGGTCCAAACCCCTC  
ACGTTGCTGAGGAAGCACGTGACCTTACCGCTGATACTATTGGCGTTAACAATGATGGGA  
ATTTGGATGCTCGTGGTCCCGTATCGTTAACGTAGCTGACGGAGTTACTGATGGTGACG  
CCATCTCTGTAGGTCAGGTTAAACGTATGAACCAGAACTCGTGGAAGCACGTAATGAGT  
CCTTGCAGTTCGTAATGAAGCAGAAGGTTTCCGCAATCAGGCCTCTACGAGTAAACAGG  
CTGCTGCTACCTCTGAGTCGCAATCATGGAATCATTCTGAGCGCTCTCGGACATTTCGCTG  
AGGCAGCTCAAGGTTCTGCTAACTCTGCGGGACAGTCAGCTACCAATGCGAACAACGCTA  
TGCAGTCTGCTGGTCAATCAGCCACGGATGCTAGTAACTCTGCTGCTCAGGCTAAGGCCT  
CTGAGGTTAACGCAAAGGCCTCTGAGGTTAACGCTAAGCGTGATGCTGACGCGGCCCTGC  
TGGCTCTGCAATCCACTGGTAACGTACCTGTGGGTACAGTCGCCATGATTACCCACACCA  
AGATTCCACTGGTTGGGTGCGTGCTGGTGAGGACTTCGACGTTAATACTTACCCGGCGT  
TAGCTGAACTGTTCCCTAGTGGTCGTA CTCTAGCTTCGATGACCGCTATCCTATTGGTA  
ACTCTACCGTATTGACTCCGGGTCAGCTTATTGACCAATCAGTACCCGCCACAGTCACA  
CCTTCGACGTGCCTGTCAACGTGTCAGGTGCTACGGCTGCTGGTGGCGAATATCGCGCCA  
GAACGTCACACGAAGGGGATCACAGTCATGGGTTCTCATTGCCTATCCAGAACAACACTG  
GTGCTTATACTGGTCGTCTGGTTGGCGGTGGCAACAACCCTAACTACCCGCAAGACCTGC  
GCTTTAACACTGGTGGCGGTGGTGCTCACAGTCATGAGTTCTATGTTCTTACACAGTC  
ACACGTTGAATGCATCTGGGCGTGCTGCTGGCTCCGCTCTTTCGTCAGGTATTGGAACT  
CACCGTATGTCCGTCCGTATTCCACTGTGGTCATCTTCATCATCAAGGCCGCTCAAGGTG  
TTGACGATAAAGGACGCAGCAATGCAGGTGGTGGGCACTGTGGTTGGACGAGTGGACGCTC  
TGGAGAACTGGCAGAAAACCTCAAGTCCGTTGTTGAGAACGGTTCACCAACCTCTGGAA  
ACGGCGGGCCTTGGGAACGTA CTGTGTACACTGCCAGACTGACTTCGGTCTCAACCGCT  
GGCGCACGCTGAGTGGTTCGTCATGGGGAGAAGTAGTCAACTTACTTAATAGCTCCGGCG  
TACTTAAAGGGTATCCGCAACGTCTTGTGTTGACTTCACGGTTGAGGTAATCGATAGCT  
CTGACCTAATCGCCAAGGCTGGTATATATAGTCCAATGATTATGGCCAGAATCGTGTATC  
ACAACGGCACCAACTCTGGTGATATACTTCCCGCTGCCACCTCAAGCTCTGCGCACGCGA  
CAAACGGGTGGAACATTAAGATGGCTACACGATTGTTGTATGGTACTGATGGCGGTCAAC  
CAGTAGTTGAGATTGGTGCCTTCAAGGATGGTCTGACCAGCAGACGGCAAACGTGCCAG  
TTAAAGTAGGCTTGCGCCTCGTTCACGTGTTCTAAGGAGGACATAATGTTATCACTTGAT  
TTCAACAACGAGGCCATTAAGGCTGCACCCATTGCGGGTGTGGCTGGTGCTGATGGTGTG  
GCCCCCTGTTCTGGGGGCTTTCTCTCAACGAATGGTTCTACGTTGCAGCTATCGCCTAC  
ACAGTGGTTCAGATTGGTGCCAAGGTGGTTCGATAAGATTATTGATTGGAAGAAAGCAAAT  
AAGGAGTAACCTATGAGCGACAAGACTTTAATCAAGCTGCTGGAGATGCTGGACACGGAG  
ATGGCACAGCGTATGCTTGTGACCTCCAGAGCGAGGAACGCCGAACCTCCGCAGCTTTAC  
AACGCAATCGGCAAACCTGTTAGACCGCCATAAGTTCCAAATCAGTAAGCTGACCCCGGAT  
GAGAACATCCTTGGCGGTCTGGCGGTGGTCTGGAAGACTACAACAAGTGGTCCGGCCCT  
AATGGTCTGACTGATGATGAAACAATCACGCTACAGTAAGTGACATACTCAAGGTTCTCC  
ACGCGGGGAGCCTTTATGGATGTTATTTGGTGCATCTATGTAAAATCTGAAAATTGATGG  
GAGGTGTTATGCTAAAACCTTTACGCGAGCGCACTCCCTTGGGTACTCGCCGGGACACTCT  
TTATGGGTGGCTGGCACTTAGGGTCAACCCATGAGAGAGCAAACCTGGAAGGAGGTAATCC  
AAAATGAATACATTGCGAAAACAAAAGCAACCGCAGCAACTCAGGCAGAGGTCAGTCGGG  
TATCCCGTGAGTACCAAGAAGAGATTGCAGCCATTGAAGGCAGCACTGATAGGATGCTTA

ATGACCTGCGTAGTAATAATAAGCGGCTGTCAGTCCGCATCAAGACCCTTACCGGACTAC  
CAGAAGATAACGGTAGATGCGAGTTTAATGGTCGAGCCGAACACTACACGAGTCAGATGCTA  
AGCGTATTATCGGAATAACCCAAGCTGCTGATGCTCACGTAAGGGCGCTCCAGCGTACTA  
TTAAGGAGATGCAGAATGAGCGACACCCAAGCAAACCGTAATGCGCTAATCATCGCGCAG  
CTTAAGGGCGACTTTGTGGCCTTCTGTTTCGTATTGTGGAAGGCTTTGGCTCTCCCGCCA  
CCGACTAAGTGTGAGATTGATATGGCCCCGGTGTCTGGCTAACGGAGACAACAAGAAGTTT  
ATCCTACAGGCTTTCCGTGGTATCGGTAAGTCATTCATCACCTGTGCGTTCGTTGTGTGG  
ACGTTATGGCGTGACCCTCAGTTGAAGATACTGATTGTCTCTGCATCCAAAGAACGTGCG  
GACGCTAACTCCATCTTCATCAAGAACATCATTGACCTGCTGCCATTCTTGGCTGAGCTA  
AAGCCTCGCCCCGGTCAGCGTGAAGTCTGTGATTAGTTTCGATGTTGGCCCTGCCAAGCCT  
GACCACTCTCCGTCTGTGAAGTCGGTGGGTATCACTGGTCAGTTGACTGGTAGTCGTGCT  
GATATCATCATAGCGGATGACGTTGAGATTCCGTCTAACTCCGCAACTCAAGGTGCCCGT  
GAGAAGCTGTGGACTCTGGTGCAGGAATTTGCTGCGCTTCTGAAACCGCTGCCGACTTCT  
CGCGTTATCTACCTTGGTACACCTCAAACCGAAATGACCTTGTACAAGGAACCTCGAAGAT  
AACCGTGGGTACACCACAATCATCTGGCCTGCGCTCTATCCGCGTAGCCGTGAGGAAGAC  
TTGTACTATGGCGACCGTCTGGCCCCGATGCTCCGCGAAGAGTTCAACGATGGGTTTCGAG  
ATGCTCCAAGGTCAACCGACTGACCCCGTGGCGTTCGATATGGAAGACCTGCGTGAGCGT  
GAGTTGGAATACGGTAAGGCTGGCTTCACTTTGCAGTTCATGCTCAACCCGAACCTGAGT  
GATGCCGAGAAGTACCCCTTACGCCTCCGTGACGCTATCGTGTGCGGTCTGGACTTCGAG  
AAAGCCCCAATGCATTACCAGTGGCTTCCGAACCGTCAGAATCGCAATGAAGAGCTTCT  
AACGTGGGACTTAAGGGTGATGATATTCATAGCTATCATTTCGTGCAGCCAGAACACTGGA  
CAGTACCAGCAACGCATCCTCGTGATTGACCCAAGTGGTTCGCGGTAAGGATGAGACAGGT  
TACGCAGTGTGTTACCCTGAATGGCTACATCTATCTGATGGAAGCTGGCGGGTTCCGC  
GATGGTTACTCCGACAAGACCCTTGAAGTCCCTCGCTAAGAAAGCGAAGCAGTGGAAAGGT  
CAGACAGTGGTCTTCGAGAGTAACTTCGGGGATGGTATGTTTGGTAAGGTATTCAGCCCT  
GTGCTCCTGAAACACCATGCAGCGCAACTTGAAGAGATTCGTGCTCGCGGTATGAAGGAA  
CTACGCATTTGTGATACGCTGGAACCTGTACTCTCTACGCACCCGCCTTGTGATTCGTGAC  
GAGGTGATTCGTGAGGACTACCAGACTGCCCGTGACGCTGATGGCAAGCATGACGTTTCGC  
TATTCGCTGTTCTACCAGTTGACCCGTATGGCTCGTGAGAAGGGCGCTGTGGCCACGAT  
GACCGACTTGATGCGTTAGCATTGGGTGTGGAGTTCCTACGCTCTACGATGGAACCTGGAC  
GCCGTGAAGGTGGAGGCTGAGGTGCTTGAAGGCGTTCCTTAGAGGAACACATGGAGCACCCA  
ATCCATTCGGCTGGTCACGTAGTCACCTCTATGGTTGACGGTATGGAACCTCTATTGGGAG  
GATGACGATGTGAATAGCAATAGGTTCACTGACTGGTAGTTATGCATATTGAGTGCATAA  
GGAATCATTGAGACCACGGATGGTCACTTTAAGAACTCCTTAAGAATCAATGAGTTTGA  
ATTAACCCTCACTAAAGGGAGAGAGGGGACTTAAGCTACTATATAGGTTAGTCATTCAG  
GTTATGCAATGACCCTTTATGCACTTTAAGTCGCCTCTATGATTGGTGATATTATCATTG  
TATAATCACCTACCTTAGAGCAACTGAAAGGAGGTGGCTCAATGTTACGCTTGCTGATT  
GCCCTGCTGCGTCATAGAGTCACTTGGCGATTTCTTCTGGTACTTGCTGCTACCCTTGGG  
TACGCAGGTCTTACTGACCACCTCGGTCAACTGGAAGTGGCCTTTTGTCTATACTCTCT  
TGTGGGGATTAATAATTATTGTTGATGAACGACAAGCGGCTCTGAGGGATTCGTAGGTATAG  
TTTCACTACACCAACTCATCCCTGTAGAGTCAACCCTAAAGGTTATACCTAAAGATGCC  
TGATGTTTCGTAATGGTCTTACAGGGTCTTTAAGTGTCTCCTATGGTCTCACCTATGGTGT  
GGCCTTACCTAAAGTGGTTGCCTAAAGAGACCTTTAAGAATTTACCACAAAATCTGAAT  
GGGTATCTCACAGTTCAAGAACCCAAAGTACCCCCATAGCCCTCCTAAAGCCACCTAAA  
GCCAGCCCTACCCCTAGGGTTTAACTTCGGTTAACCTTGGGTATCTCCTCAAGTGGCCT  
ATAGGATAGCCTAAAGTGTGCTAAAGTCAATACCTAAAGTGATTGGGTGGCTTAAGGA  
GGCCTTAAAGAGTGTCTAGTGTACCAGTTCGATAGTACATCTCTATGTGTCCCT

>NewGenomeName\_252

CGATAGTCAAAAAGGTTATCAACAGTGGACTAGTAAAACGATTTCTCGTTTTTTGAGATAA  
AGGATTCATACTATTGGTGAGTTGACTTATCATTCTGCAAATTATACTGCTCGTTATAAC  
TACTAAAAAATTAGGTGTTAAAGATTATAAGGCATTGCAGTTAGTACCTGAAAAATTAAG  
AATGTCAAAAAGGAATTGGTTTAAAGTATTTTATGGAAAATAAAGAGCGTATATATAAGGA  
AGACAGTGTTTTAAATTTCAACTGATAAAGGTATTAAGATTTAAAGTTCCTAAGTATTT  
TGACCGTCGTATGGAGCGTGAATGGCAGGATGAGTTTTATTTAGACTATATTAAGAAAA  
ACGAGAGAAAGTGGCTAAAAGGACGCTCTTTCAGCGTCAGATTGTTAGTTCAAGGAGTTA  
TACAGATTATTTAGGTGATGAACAAAAAATAAATAAATATTGTAAGGTTGACTCG  
ACCTTTGAAAACCTGGTAAAAGTAGTTGTCTTGGGGCATATATTACTTGTATAATATGC

CCCATTGACGACAGAAAGGAGTGTTGATTGTGAGACGCAAGGTTAAGAACACAAAGCGTC  
ATCAGTGAAGGTTGACTCATTCTGCACGTTCAATTAACGTGCTAATAATAATGCCGTCAA  
ATCCTCGTGGTGGACGTCGTTTTTAGAAAAAATGTTTCACGTGAAACATAGGAAGGAGAT  
AATCATATGGCTTATCGTGGTTTTAAAACGAGTCGTGTTGTAAAACATAGAGTACGTAGA  
AGATGATTTAATCATAGAAGACGTTATAGATAGGAGAATACTTATGAAATTAAGTAAGAA  
AAAAATGCAACGTATAGATAATACATTAGAAAAATTATTTGAATGAAGTCATTTAAATGG  
ATATGATAATTGACTTACTAACCAACTTGCATTGGAGAAAGAGATTGAGCAAGGTTATCG  
GTGTGAAACTTGTAAAGTTAGTTATTAATCTGTTAATAAAGATGAAATAGTGTGTAAATG  
TATTAATGAGAAACGTTAATAATAAATTTTTTGAGATTAACAAGAAAGGAAAATATTA  
TGGATAAATTAATAAGTTTTAAAAGATGTTATGCGATTTATATTTAAATTTGGTTTACCTG  
GTTTGTGTATAGCAGTTGGTTTAATTGTTATGGTTGCAAATAAGTGACTTGGTATACCTT  
GACCTTGTTACGTTATAGTAGGCAGTGTTAGTTTAAGTTTTGGTTTAAATTTGTTTATTG  
TTCAAACATAAAAAGAAATTATAATTTATAGAAAGGAAAAAAAAGATGAAAATATATACT  
CAAAGAAATAATAAAGTAGAGTTTTTCAGATTCAGGTAGTTCTGAGTATTCTGAGTATCAA  
CGTGTTATTGATGCTGATACTAAAGAGAATACTTATGAAATTGTGGCAACTTATAATCGT  
TATGATGAGATACAAGAAGCCGGAGAAGGTACTGATTTGCGTTCAATGCTTGATAAGTAT  
GGTGATGATTATTTAGAGTTGTTGCCACCTGCTAGATTAGGTGGAGATGATACTATTTTG  
CCGAAATCTGTTTTGGAGTTAGAAAATATTAGATTACAAAATACAGAGTATTTATCGTTA  
TTGGAAAATATTAATTCTAACTTGATAAGCAAGGTTTAGGTGATTTAGATAATTTTATT  
AAAAATTGACAAGAAAGTCAGAAAAAATAGAAAATGAGAAAGGAAAAAAGAAGATGAA  
AAAGAAAATGAGTAAATTGAATGCTAGAGTACACGATTTTTCAATGTTTAAAGGAAATCA  
TATCCGCGTTCAAAAATACATATTCCTCATAAAAACAATTAGAGCGTTTAAATGTTGGTGA  
GATAATTCCAATTTATCAGACGCCTGTTTATCCTGGTGAACATATTAATAATGGATTTGAC  
TAGTTTATATCGTCCTAGTACTTTTATTGTACCTCCTATGGATGATTTAATCGTAGATAC  
ATATGCGTTTGCTGTTCCCTGACGGATTGTTTGAAGATTTAGAAAAGTTTTTTGGTGA  
AAATCTGATAGTTGAGATGTTAAGAATGCTCCTCCTGTACCTGATATTGTTGCACCTTC  
AGGTGGTTGAGATTATGGTACTTTGGCTGACCATTTTGAATTACTCCTAAGGTTCTGG  
AATTAGGGTTAAATCTTTAAGATTTAGAGCATATGCTAAAATTATTAATGACTGGTTAG  
AGATCAAATTTAAGTAGCGAATGTGCTTTGACTTTGGATAGTTCTAATTCACAAGGAAG  
TAATGGTAGTAATCAAGTACTGATATTCAATTAGGTGGAAAGCCTTATATTGCTAATAA  
ATACCACGATTATTTTACTAGTTGCTTACCTGCTCCACAAAAGGTGCTCCTACTACTCT  
AAATGTAGGTGGTATGGCACCTGTTACTACTAAATTTAGGGATGTTCTAATTTGAGTGG  
TACTCCTTTGATTTTTAGAGATAATAAAGGTAGAACTATAAAAAGTGGTCAATTAGGTAT  
TGGACCTGTTGATGCTGGATTTTTAGTAGCACAAAATACAGCGCAGGCTGCTAATGGAGA  
GCGTGCTATTCCTTCAAATCTTTGAGCAGATTTATCAAATGCTACTGGTATATCAATTTT  
AGATTTACGTTTAGCAATTACTTATCAGCATTATAAAGAAATGGATGCTCGTGGTGGTAC  
TCGTTATGTTGAATTTACGTTAAATCATTTTGGTGTACATACGGCAGATGCTCGTTTACA  
ACGTAGTGAATTTCTTGGTGGACATAGTCAGTCATTGTTAGTACAGTCTGTTCCACAAAC  
ATCATCTACTGTTGAAAAAATGACTCCACAAGGTAATTTGGCAGCGTTTTCTGAAACAAT  
GATACAGAATAATTTAGTTAATAAGACTTTTACAGAACATAGTTATATTATTGTTTT  
GGCAGTTGTTGTTATAAACATACTTATCAACAAGGAATAGAAGCAGATTGATTCCGTGG  
ACAAGATAAATTTGATATGTATGATCCTTTGTTAGCGAATATTAGTGAGCAGCCTGTTAA  
AAACCGTGAGATTATGGTACAAGGTAATTCACAAGATAATGAGATTTTTGGATTCCAAGA  
AGCGTGAGCAGATTTGCGATTTAAACCTAATCTGTCGCTGGTGTATGCGTTCATCACA  
TCCGCAAAGTTTAGATTATTGACATTTTGCTGATCATTATGCACAATTGCCTAAATTGTC  
GTCTGAATGATTAAGGAAGATTATAAAAATGTTGATAGAACTCTTGCTTTAAAAGCGAG  
TGATAATACACCACAATTACGTGTTGACTTTATGTTTAATAACCATTGCTGAGAAACCTAT  
GCCTTTATATTCAACTCCTGGATTACGTCGTATATAAATATGGATTGTTGTTTTATTTGTA  
ATCGCTTGACAGATACTACATTTTGAACAAAAAATATTTTTGGTGAAGCACATCAAATGT  
GATGTTGTGATGATTGTTATAAGAATGTAGTTTGTGCAAAGGTGGTGAAATAGTATGGGA  
CCTTTATTAGGAATGGTAGGTGCCGGTGCTGCTGGTAGTGCTATTGGTGAAGGATTAGGG  
ATGTTACGTGATAAATGAAATCGTGATTTTCAAGAGCGTATGTCTAATACTCAATATCAA  
CGTGCTCGTAAAGATATGGAAGCGGCAGGTATTAATCCGTTAGCACAGTTTGGTAGTGGT  
CAAGCATCTTCACCTTCAGGTGGAGTTTCAGGTAGTAGTTTTGGTAGTAATATAACATCA  
ATGTTAGGCAGTTCTGCAAATATGCTTATGCAACTTTCTAAATTAAGGAAGATGCTGAA  
CGTGCTAATTTTGGATCTAAAAGTTCAGACTATTAATGATGCTCGTAATAATATGGTG  
CGTAGTGTAATAACATTGTCAAAAAGGGTTAATAACCCTTTTTTTAGAAAGGATATGAT



AATATGGCTTGTCTTAGACCTTTACAGGTACATAATTTAAAAAAGGAGAAAAAGTTAAT  
TTAAGCATTATTCTAATGGAGATGTTGCACGATATGATATGAATAAAAATTATATTGTT  
AATGATAGTGTGCCTTGTTCGTAAGTGTGTTGGTTGTCGTTTGGATAATTCTGCTGAGTGA  
GGTGTTCGTGCTTCTTTGGAAATTAAGTCAAATCCTAAACATAATTGATTTGTTACTTTA  
ACTTATAGTGATGAACATTTAGTTTATAATGCTCTTGGACGTCCTAATTGTGTGCCTGAA  
CATATTACAAAATTTATTAATCGTTACGAAAATATTTTGAAAGAAGAGGACATATTGGA  
ATTAATATCTTGCTAGTAATGAATATGGAACAAAAAGAATGCGTCCTCATTATCATATT  
TGTTTTTTAACTTACCTTTGGATGATTTAGAAAAAACTAT

>NewGenomeName\_253

AGCGCTGGGGCTTATTATTACCCCCAGCGCTCGGGACGGGACATCACGTGCGTCAACAAA  
TGCACGTGACTGATATAAGGGACATAACGGGTTTAGATAACGGTTTATGCGGATTAGAAT  
ATAACGTCACGTGTGAAAGCCGAAAGGCACGTGACGAAGACAAATGGATTGAATAACAT  
TTGACGTCCGGTAGCTTCCGAAGGAAGTAAGCTTCGCGGCGAAGCAAACCATTTATATAT  
TTGCGTAGGCTTGC GG CCTATAAATAGGACGCAGCTAAATGGCATTACAAACAGAGCGGG  
TGAAACTATTCTTTGAATGGTTTCTGTTCTTTGGAGCAATATTTATTGCGATTACAATAT  
TATATATATTGTTGGTTTTGCTCTTTGAGGTACCCAGGTATATTAAGGAGCTCGTGAGGT  
GTTTGGTAGAATACCTGACCAGACGACGTGTATGGATGCAGAGGACGCAGTTGACGGAGG  
CAACTGGAGATGTAGAGATCGGCAGAGGTATTGTGGAAGACAGACGAGATCAAGAACCGG  
CTGTCATACCACATGTATCTCAGGTAATCCCTTCTCAACCAAATAGAAGGGATGATCAAG  
GAAGACGAGGAAACGCTGGACCTATGTTCTAATACACGGTATATTAATATACGAAATATA  
AATGGGTATTGATGTAATGATCATAATAATATATGTATGATAATGAAACATATTGTAA  
TATGTGAATTGTAAACGAGAGTTGTATGTATAAAACATACAACACGCTATGAAATACAAG  
ACGCTATGACAAAAGTACTGGTATATGATTAGGTATCCTAACGATCTAGGGCCGAAGGCC  
CGTGAGCAATATGCGTTCGAAATAATGTTTAAACAAACAAATATACATGATACGGATAGTTG  
AATACATAAACAACGAGGTATAACAATAACAACAACTGTTGTAAAGAAATAAAAAATAAGA  
AGAGATAGTATATTTGTGTTGGATAAGCCTTGCAACCACCACTTTAGTGGTGGGCCAGAT  
GTCCCGAGTTAGTGC GCCACGTA

>NewGenomeName\_254

ACGAGGCGGGTCTAGTATTACCCCGCCTCGTTACACCTCCTTGTTACACTTTCTCTCTCT  
AGATGGCTTCTAAGCGCTGGTGCTTTACTTTGAACTATAAAACAGCTGTAGAGAGAGAAA  
GTTTCATTTCCCTCTTTTCTCGAGACGAATTAAACTATTTTCGTCTGCGGAGACGAAACTG  
CTCCTACTACGAATCAAAAACATCTTCAAGGTTATGTTTCGTTGAAGAAAATGATTTCGTC  
TCGGTGGATTGAAAAAGAAATTTGGTTATCGTGCTCATTGGGAAATTGCGAAAGGAGACG  
ATTTTCAAATCGCGACTACTGTACCAAAGAAACCCTAATTTCTGAAATTGGGGCTCCTG  
TGAAGAAAGGCTCGAATCAAAGAAAGATTATGGATTTATATCTTCAAGATCCCGAAGAAA  
TGCAATTGAAGGATCCAGATACTGCTCTTCGCTGTAACGCGAAGAGATTGAGAATTGAGT  
ATTGTTTCGTCGTTTCGCTGTGATATCGCTTCGGCCATGGCAGTCTGAGCTTCATCGGGTTT  
TAATGGCAGAACCAGACGACAGAACGATAATCTGGGTTTACGGATCTGATGGAGGAGAAG  
GTAAATCAACCTTCGCGAAGGAATTAATTAAGTATGGATGGTTTTATACTGCAGGAGGAA  
AGACGCAGGATATTCTGTATATGTATGCTCAAGACCCAGAGAGAAATATCGCGTTTCGATG  
TTCCAGGTGTTCTTCGGAGATGATGAACTATCAAGCTATGGAGATGTTGAAGAACAGAG  
TATTTGCAAGTACAAAATATAGGCCCGTAGATCTTTGTGTTAGAAAGAAAGTTCATTTAA  
TTGTGTTTGC AAACGTGTCACCTGACCCACAAAAATAAGTGAGGACAGAATTGTAATTA  
TCAATTGTTGAATAAATATATATTTATTGTTTTTGTAAACTCCGCGAAGCGACACGTGTT  
CTTTTTTTGGGAAGTTGCCCAAAAAACCTCGTTACACTATATAT

>NewGenomeName\_255

CTGGGGCGGGGCTTAGTATTACCCCGCCCCAGGTTACGCGGAGTCATTTAGACGTAAGG  
ATAGCCATTGGATTGTAAGACACGTGTACAATCAGGATCTGTGATTCGTGAAGCGAATCT  
GACGGAAGATTGTACGCAGCTTCGTTGAAGCTTCGTGGTAGGTCCCATTTGTTGCTTTAT  
GTTTACTTTATTAAAGTAAAGTAAGATGCTGTCCCTTACTTTATTCCCTTTGAGTGGAAT  
ACAGCTGTCTTTGCTTCCCTCACGAAGCAAAGCATTATTTCTCTCTCTATAAAAGCTACAT  
CTGTTTTTTCGTTGTTTACATAACGAAAATGGCGAGTAAATGGAATTGGTCTGGTACGAAA  
GGAAGAAGAACCACGTCGTCCTTATGGTAGACCATATAAGTCGTCTGTTCTTACAACG  
AGAGTCGTTGTTTCAATCTGCTGTTTTGAAGAAGGATGAAGTTGTTGGTACTGAGATA  
AAACCGGAAGGAGATGTTGCTCGTTATAAAATGAAGAAGGTGATGCTTACATGTACTTTG  
AGGATGGCTCCTGGAGAGTTAGTGAATTACCTTATTGTTAAATGTAATTCACCTATTTCC  
AGTTGGTCTGCTGCGTTTACTAGTCCTGCTCTGTTAGTGAAGGAAAGTTGCCAGGATATG

ATTACAATTATTGCGAAAGGCAAGGTTGAATCTAACGGTGTGGCTGGTACCGATTGTACC  
AAGTCGTTTAAATCGTTTTATTAAGCTTGGAGCTGGAATTACCCAAACTCAGCATTATAT  
GTTGTATTATACACGAGTGTTGCTCTTAAAGCTGTTCTAGAACACAGAGTTTATGTTGAA  
GTGTAATATGTTATCAAGAACAAAATAATAATGAATAAGAAATGAATTTGATTTAATTAC  
TCCGCGAAGCGGTATGTTTCCTTGTGTTGACAAAAATGCCCTTCATTAATGAAGGG  
GTAATGTCTATTATGTCCTTGTGACGTCACCTTGATCCCTTGCTGAG

>NewGenomeName\_256

AGCACAGGCGGCCTAGTATTACCCGCCTGTGCTCCCCATCCTTTGCTCCCTATAAAAGGG  
AGCATTCTCTCATTGGTCATTTTACCAAATGCCAACTCTTCAAGGCACTTTCTGGTGT  
TTCACCCTCAACTTCTCTGGAGACGCTCCATCTCTCTCGTTCAACGAGAGAGTTCAATAC  
GCATGCTGGCAACATGAGAGAGTGTCCCACGACCATCTCCAGGGTTATATTCAAATGAAG  
AAGAGGTCTACTCTGAAGATGATGAAGGAATTACTTCCAGGTGCACACCTGGAAGTATCC  
AAAGGAACACCAGAAGAAGCGTCGGATTACGCCATGAAAGAAGAAACAAGAGTTGCAGGT  
CCTTGGACTTACGGTGAGTTGTTGAAGAAAGGAAGTAACAAAAGAAAGCTACTAGATAGA  
TATAAAGAAAACCCAGAAGATATGGAATTAGAAGATCCTGCTAAGGCGAGACGTTGTGCGA  
GCTAAGATAGACAAAGAAAAAATTTATTGCAGAGTTCAAGGTTGAAGACGATGAACAGGAA  
TGGAATAAATATTAGAAAAAGAAATTGAAAAGATTGCTTCGCCTCGAAGTATTCTTTGG  
GTGTATGGCCACAAGGTGGAGAAGGAAAGACGAGTAAGCAAAAGAACTAATAACGCGT  
GGTTGGTTTTACACGCGCGGAGGAAAGAAAGATGACGTGGCTTATAGTTATGTGGAGGAC  
CCCACAAGGCATGTGGTATTTGATATAACCACGTGATATGCAAGAATATTGTAATTACAGC  
TTAATAGAGATGCTTAAGGATAGAATTATTATTAGTAACAAATATGAGCCAATTACAAAT  
TGCCAAGTGTATAATATTCATGTAATTGTAATGGCTAACTTTTTACCTGATGTAACAAA  
ATATCTGAAGATAGAATAAAAATAATTTATTGTTGAAATTCGCGTAGCGGTATGTTTTAG  
GCCATTAGGCCCAATAAGGCCCATTAAGAGGGAGCAGACCGTACAT

>NewGenomeName\_257

CTGGGGCGGGGCTTAGTATTACCCCCGCCCCAGGATCAGCGGAGTCATTTAGACTCATT  
TAAGCCCTTAGATGTGTAGACACGTGTACAATCAGGATCTGTGATTCGTGAAGCGAATCT  
GACGGAAGATTGTACAACACGCTAAACTGTATATGTACGCGTGTAAATGCTATTGGTC  
CATATAGTAGTGGAGCTCACGCGTTTTCTTTAACGCGGTTACTTTATCAGTGGGGACC  
ATTAGTTGCTTTGTTACACGAAAGCAGATTCTTTTGTGTTGAAGAAGCTTCATATATTG  
TTCTATAAATACATAGCTTCTTCTTCTTCTTCGTCGTCATCATTTTTCTGCAACTGCAA  
AAATGGCAGATTGGTTCGCGAGTCCTTTGAAGACATGTACACATGTCTGTGATTTTCCTA  
CTTTAGCTGGTGATCCATCACAAGAGATTACCTGCTGTGATAGTATGAAGAATAAATTA  
ATGATTCCAGGAAGGTGTTACTTGTGAGTTGTAGTGTAAAGCTTCAATGGCAGTTTCTATG  
GAGGCAACAGAAATGTTTCGTGGTCAGTTGCAGATATCTATGCTTGAAGACGATGGTGT  
GTAGACCAATTGGTTATGTTCCAATTGGTGGTTACTTGTATCATAACGATTATGGTTATT  
ACGAAGGTGAGAAGACATTCAATCTCGACATTGAATCCCAGTATTTGAAGAAAGATGAAG  
ATTACAACAGGAAGTTTATTGTGCTGTTCTCAACGAGAATGGATTAGATAGTTTATGTG  
ATTTAAAGGTTTTTATTGTTTCATGCTCTTAGGATCAAAGTGTAATAATCATATTTAATGT  
AAGATTATGCATATGAATAATAACTAACAATAATACATTTGTTTTAATTACTCCGCGT  
AGCGGTATGTTTAGGCCAATAGGCCCAAATGCTCTTAAGCCCAAATAATTGTGACGTCA  
TTTGATCCCGTGCTGAG

>NewGenomeName\_258

GGCACGGGGCTTAGTATTACCCCCGTGCCGGGGTCAGAGACATCACGTGACTCTCACATT  
ATTGTTTAAATATATATATGTGTGTTGGGTTGATTATTTTATTCAATAAAATATGGCTAGA  
CAAGTTATATGCTGGTGCTTTACATTAACAATCCTCTCGCTCCTCTCTCTTCATGAA  
AGTATGAAATACTTAGTTTATCAGACTGAAGCTGGTGATAATGGAACATTCATTATCAA  
GGCTATGTGGAATGAAGAAGAGAACTTCTCTGGTGCAAATGAAGAAATTGCTTCCTGGT  
GCTCATCTGGAGAAGAGAAGAGGTTTACAAGGAGAAGCTAGAGCTTATGCTATGAAAGAA  
GATTCAAGGGTTGAAGGTCCTTGGGAGTTTGGAGAGTTTAAAGGAGGTTTTGGAAGATAAG  
CTGCGTTCTGTCATGGAAGACATGAAATCAACTGGGAAACGTCCAGTTGAGTATATAGAA  
GATTGTTGTAACACTTACGACAAATCTTCTGCAACGCTGAGAGAGTTTAGAGGAGAATTG  
AAGAAGAAACAGGCAATTGAAGAGTGGCAGTTGCAGAGGCAGCCATGGATGGACGAGGTT  
GAAAGATTGATGGAGACGAAGGACTGTAGACGAATAATTTGGGTGTATGGCCACAAGGT  
GGAGAAGGGAAGACATCGTACGCAAAGCATCTTGTGAAGACGCGTGATGCTTTTTACTCG  
ACAGGCGGAAAGACAGCCGACATAGCTTTTTCGCTGGGACCATCAAGAGTTAGTGCTATTC  
GACTTTCCTCGAAGCTTCGAGGAATACGTCAATTACGGCGTCATTGAACAGCTAAAGAAT

GGCATTGTACAGTCTGGAAAGTATCAAAGTATTGTAAAGTATTGTAATTATGTAGAAGTT  
ATTGTATTTGCTAATTTTATTCCGCGAAGCGGTATGTTTAGTGAGGATAGGATTGTAATT  
GTGTATGCGTAAGTGAGATGACGTCATATGTCTCCGCGACAGGCT

>NewGenomeName\_259

TGCAGATTTTGGTCTGTACGGAACCCGGGGGTTTCGCGGTTTCCCCGAAATGGGGTCTGA  
CCTGCGGTTTTTCGCCACACTTGTGATTCCCGAAATGGGAGGAAGTCATGCCACCTGTAC  
CTAAAGATCCTTCTGTGCGTGCTCGTCGCAATAAGTCTGCGACGCGGGCTACGTTGTCTG  
CGGATCATGATGTGGTGGCGCCAGACCTGCCGGATGGTGTGCGTGGCATCCGTTGACGG  
TGCCTGGTGGAAATGACATTTGGGCGTCGCCGATGGCCCCGGAGTACACAGACTCGGATA  
TCAACGGGTTGTTCCGTGTGGCGATGCTCTATAACGATTTTTGGACTGCCGATAACGCGA  
AGGCGCGGGCGGAGGCTCAGGTTTCGGTTGGAGAAGGCCGACACTGATTACGGGACGAATC  
CGCTGGCCCCGTCGCAGACTGGAATGGCAGATTGAGGCCACCGAGGATTCGAAGGCTAAGG  
GGTCGAAGCGGGCGGAAGTCTGAGGCTGCGCCGGTGTGCCACCGGAGCCTGGTGACGATC  
CTCGTTTGAAGCTTGTGACCTGACGGCCTTATGGCTGTCTTGAAGTCCCTCCTGTGGAT  
TTAACGTTTCCTACGTTAGGTCCCCAGGTTTGTGACTTCATTGAAGATCGGATGGTGTTC  
GGCCCTGGCTCACTGTCGGGGCAGGCCGCACGTCTCGATGATGAGAAGCGCGCGCTGGTG  
TATCGGCTGTACGAGCTGTATCCGCGTGGGCACCGTTTGGCTGGCCGTCGGCGGTTTCGAA  
CGGGCTGGTGTGCAACTCAGGAAGGGCGTAGCCAAGACCGAGTTCGCGGGCGTGATTGTC  
GGTGTGGAGCTGCACCCGGAGGCGCCGGTTCGGTGTGACGGGTTTCGATTCTGCCGGCAAT  
CCGGTGGGGCGGCCGGTGCGGTCCCGGTGATTCCGATGATGGCGGTCACCGAGGAACAG  
GTGTCAGAGCTTGCCTTCGGTGTGCTGAAGTACATCCTGGAGAACGGCCCCGATGCTGAT  
CTGTTTGATATCAGCAAGGAGCGGATCGTCCGGTGTACCTTCGGGTGGTGAGGATGGG  
TTCGCTGTTGCTGTGTCGAATGCTCCGGGGTCTCGCGATGGCGCGCGGACGACGTTTCAG  
CATTTTCGATGAGCCGCACCGGTTGTTTATGCCGAGGCATCGTGATGCGCACGAGACGATG  
TTGCAGAACATGCCGAAGCGGCCGATGGAGGACCCGTGGACGTTGTACACGTCTACGGCT  
GGCAGCCGGGGCAGGGCAGCATTGAAGAGGATGTGCTTGCCGAGGCGGAGTCTATCGCC  
AGGGGCGAGCGGCAGGACCCGTCGCTGTTCTTCTTCCGCCGTTGGGCTGGCGATGAGCAT  
GATGATTTGTCGACGGTGGAGAAGCGTGTGCTGCTGTGCGGGATGCTACCGGTCTTATT  
GGGGAGTGGGGTCTGGTCAGTTTGAGCGGATCGCGAAGGACTACGACCGTACTGGTATT  
GACCGCGCTTACTGGGAGCGGGTCTATCTGAATCGGTGGCGTAAGTCGGGCTCGCAGGCG  
TTCGATATGACACGCCTGGTGCAGTGTGATGAGACGGTCCCAGATGGAGCGTTCGTCACC  
GCTGGGTTTTGACGGGTGCGGGTGGAGAGATGCGACGGCTGTCGTGGTCACTGAGATTGCG  
ACGGGACGCCAGATGTTGTTGGGCTGTTGGGAGCGGCCCGAGAACGTCGAAGAGTGGGAA  
GTCCCTGAGCATGAGGTGACAGCGCTCGTTGTGGACATGATGTCGCGGTTTTGAGGTGTGG  
CGCATGTA CTGCGATCCGTGGGGCTGGGATTCGACGATCGCCGCGTGGGCGGGCCGTTTC  
CCGGATCGGGTTGTGGAGTGGGCTGTTGGCGGCGGCGGCAGTTTGAGGCGTGTGGCTGCT  
GCGACGCAGGGTTATGCCGATGCATTGGCGACTGGTGACGCGGCGCTGGCTGCCAATGTG  
TGGCGGCCGAAGTTTGTGAGCATATGGGTTCATGCGGGTTCGGCGTGAGCTGAAGCTGGTG  
GACGATACGGGCCAGCCTCTGTGGGTTATGCAGAAGCAGGATGGCCGTTTGGCCGACAAG  
TTTGATGCTGCGATGGCGGGGATGTTGTGCTGGGAGGCGTGTGTTGATGCGCGTCTGAT  
GGTGC GCGTCCGCGCCCCGAAAGTGTGTTGCGCCTAGACGGATCTACTAGTCGACATAGAGA  
CAGAGAGGGGGTCACTGTTGACTGCTTCAACGCCAGCGGAATGGCTCCCAGTATTGACG  
AAGCGTATCGACGACGAATGTCGCGGGTGCCTTTGTTGGCGCGTACTCCAATGGGGAT  
GCTCCGCTGCCCCGAGTTGACGAGGAACACATCTGCGGCGTGGCGTTCGTTTCAGCGTGAG  
GCGCGCACCAACTGGGGTCTGATGGTGCCTGACTCTGTTGCTGACCGAATCATCCCGAAT  
GGCATCACGGTTGGTGGTCCGCCGATAGTGATTTGGCGTTACGTGCCCGGCGCATTTGG  
CGGGATAACCGCATGGATTCCGTGTGTAAGCAGTGGGTCAAGTATGGGCTGGACTTCGGC  
GAGTCGATTTTGACGTGCTGGCGTCTGATGACGGTACGGCGACGATCACAGCTGACTCT  
CCTGAGACGATGGTTGTCAGCGTTGACCCGCTGCAGCCGTGGCGGATCAGGGCCGCTATG  
CGGTGGTGGCGGGACCTCGATGCCGAGTCGGATTTTTCGATTGTGTGGTGGGTTGACGGG  
TGGCAGAAGTTCGCCCGTCCGTGCTTTGTGCAAGTATCGTCCCGGCGCAGGCTGGTGACG  
CGAATCTCAGACTCGTGGGTTCCGGTTGGCGATGCTGTAGTGACCGGTTCCGCCCGCCG  
GTGGTGGTGTACCAGAACCCTGATGGCATGGGCGAGGTGGAGCCTCACATTGACATCATC  
AACCGGATCAACCGGGCTGAGCTTCAGTTGTTGTCCACGATGGCGATTACAGGCTTTCCGG  
CAGCGGGCGTTGAAGTCGACGGAGCATGGGTTGCCGAAGGTCGATGAGAACGGCAACCGG  
ATCGACTACGCCTCGATCTTTGAGGCCGCGCCGGGAGCGTTGTGGGAGTTGCCACCTGGG  
GTTGATATCTGGGAGTCCCAGGCGAACGACTTCACTCCGATGTTGTGCGGCGATCAAGGAG

CATATTCGACAGCTGTCGTCGGCGACCAAGACTCCGCTGCCGATGCTGATGCCGGACAGC  
GCGAACCAGTCAGCTGAGGGTGCGCACAACATTGAGAAGGGGCTTCCTGTTCAAGTGTGAG  
GATCGGTTGTCGATAGCGAAGATCGGCCTGGAGGCCATCTTGGTTAAGGCGTTGCAGATT  
GAGGGCGAATCGGTTGAGGACACCGTTGATGTGTCGTTTGAGTCGCCTGACCGTGTGACG  
CTGGGGGAGAAGTATTCCGCAGCATCTCTGGCTAAGGCGGCCGGCGAGTCGTGGGGCGTCT  
ATCCGGCGGAACATCCTGAACTACAACGCCGATCAGATCAAGCAGGACGATCTTGATAGG  
GCGCGTGAGCAGATAACCCTGTTCCCGGCAATCCGGTGCAGCGTCCCCAGGAAGATGGA  
TCACGCTGAGTATGCGGCTGCGACCGCTGAACTGAGGCGCAGACTGCTCGAATATGTGTC  
CGCAGCGTGGACATCGGTAACGCTGTCTGACAGTGGACTGCAAGAGCTGACATCTTCGGT  
GGCACCGGTTGTCCAAGCGGCCCAAGAGTCGATGGCTGCCATGACTTCGGTTTACATCGC  
AGAAGTCACCCAGCAGTCACCGGTGCAGGCCGTGAGGTCTCCAAGATTCGCGGTGTGCC  
GTCGGAGAATGTGTACGCGCGACCTGTGATCACAGCACGTACGGCACTGTCCGGAAGGTAA  
GAGCGTCGCAGCGGCACTCCGGGGCCGGTCAGCGTCGTATCGAGAACCTGGCGGGCACCGA  
CCTGCAACTTGC AAAGACGCACCAGGCTAGGGCGTTCGTTCCCGCGCAGCGGCCGTCCAGTT  
CTACCGCCGCGTCTTGACCGGCAACGAGA ACTGCGCGCTGTGCGTCATCGCATCAACCAT  
GCGGTACCGCAAAA ACTCGTTGATGCCATT CATCCGGGCTGTGATTGCGATATTGACGT  
GATCCCGCCGGGGATGGACTTCGACACGATCAGCACGGAGCTTCTCAACGAGACGCATGA  
CCAGGTGAAGGCGTTCGCGAGTATCGCGGATCGCGGCGGACGCGCCGTTGACTACCGAAA  
GTTGATCGTCACTCGGGAGCACGGCGAGGTTGGACCCGTCCTCGCATGGCGTGACCAGAA  
GTTCTCAGGCCCCAGAAGCATCCAGCGCTGACCCCGGCGGTCTGGATAACGCACACATG  
GCCCGTAACGGGCATGTCACAAAGAAAACCCATCCGCAAAGGAAACAAACCTCATGTCT  
GATGATGTGACAGCAGAAACGTCGGAACACAGCGCCGTAACGGAGCCAGTGGAACCGGCA  
GGCGACCAGGACGCAACCGCCACGGTTGAGGAGCCACGCAAGCTCCGAAACCAACCGAG  
ACGGTCGAGTTCTGGAAGAAAATGGCCCGCAAGAACGAGGCGCAAGCCAAGGAGAACTTC  
GCGGACGCCAAGAAGTGGCGCGAGTCGCAGGAAAAGATCGGCGACGACCCGCTGTCCCGG  
ATCGAAGAACTGGAACGAAAGTTCGAGACGGCTGAGCGTGAACGCATCCGCAGCAATGTG  
GCGCGCGAAACGAAAGTCGACCCGGAGTTCATTCATGGCGATACCGAGGAAGAGATGCGC  
GAATCCGCCGACAGGTGGAACGAATTCGTCAACAAGCGGATCGAAGAAGCGCTGAAGGCC  
AAAACGGCATCGTCGGCCGTGCCGACGTCGGAAGTCACATCAGACAAGAAGGTTGAAGGC  
CCGAAGCCTCTACCCCGGCTGAGTACGCGGCGCTGCCGCCTGCCGAGCGCAAGAAGGGC  
CGCGAAGAGGGCCGACTTGACAGCTATCTACGTGGAGA ACTCCACTAACACAGAAGGGAG  
CCAAAAATGGCTTTCAACA ACTTCAATCCAGAACTCTGGTTCGGACATGCTCCTGGAGGAG  
TGGGCCGCCCAGACCGTTTTTCGCCAACCTCGTCAACCGCGAGTACGAAGGCATCGCAAAC  
AAGGGCAACGTGGTCCACATCGCCGGCGTGGTGTACCTACCGTCAAGGACTACAAGGCC  
GCTGGCCGCGACACCTCGGCGGACGCGATTTCCGACACCGGCGTCGATCTGCTCATCGAT  
CAGGAAAAGTCGATCGACTTCTTGGTCGATGACATCGACCGTGTTCAGGTTGCGGGTTCG  
CTGGAGGCGTACACCCGTGCTGGTGCCACGGCCCTGGCAATTGATACCGACAAGTTCATC  
GCTGACATGCTGGTGGACAACGGGACCGCGCTTACCGGTTCCGGCGCCTACGGATGCTGAT  
GATGCGTTCGACCTGATCGCCAAGGCGCTCAAGGAGCTGACGAAGGCGAACGTCCC GAAC  
GTGGGGCGTGTGCTTGTGCTGAACGCGGAGATGGCGTACTGGCTGCGGTGCTCCGGGTGCG  
AAGCTGACCAGCGCGGACACCTCCGGCGACGCTGCTGGTCTGCGCGCGGGCACCATCGGG  
AACCTGCTGGGTGCCCGGATCGTGGAGTCGAACAACCTGCGGGGACACTGACGATGAGCAG  
TTCGTGCGGTTCCATCCGTGCGCTGCTGCGTATGTGTGCGAGATCGACACCGTTCGAGGCG  
CTGCGCGACCAGGACAGCTTCTGACCGTATCCGCGCTCTGCACGTGTACGGCGGCAAG  
GTTGTTCCCGGACTGGTGTGGTCTTCAATAAGACGGGCAGCTAGCCACAGCGATGT  
TGCTTGCTACCGCGATGACGTTGCTGCGGCGCTCGGATTGCCGAGCGCCGACGCGCTAA  
CACCGGAGCAGTCTTCCCGTGTGGATGGCGTGTGGCCGTGTCAGTGACACCTTCCAGC  
GCGTCACCGGGCGGGTGTTCACCACCGGGGCCACTCGGGTGCGGGCGCAGGTGCTCAATG  
GGCGCGTGTGGCTGCCTGGCGTGGTGGATGAAGTCGAAGCAGTCACGCTTACCGGTGGAG  
AAGAAGTCGACTTCAACCAAGACGGTAACTATGTGGATGTCACCCGAAATGGGTGTTTAC  
TCGTTACCGGCACAGTGGTGTGTCGAATATGTTGGCGGAGGTGTGCCCGACTCTGTAA  
CAGAGTTCGTGGCTGCGGTGCTGCACGTCACCTTACGGTGACGCCGGGTTCCGGTTTCAT  
CGCAGGCGGTATCGCTGACGGCAGGGCCGTTACCCAGCGGAACGCAGAGTGGGTGTCCG  
GGACGGCAGTGTTACCCGGGACGAGTTGGAAGATGCGAAACGGTTCGCCAACCTGCAC  
CTACGATCACGATTCACCGGCTATGACGTTTCCAACCGCGTACACGGTGACGCACTATCC  
GCACGTGCGGTGACTCGTCGGATGGTTTGGGTAACACGGTTCGCCAGTTCGGTTCTGGGGT  
GTCTGTTCCAGTGATCCA ACTTGCCCCGCATGTGCAGGTGGTGGGGACGTATTGATTGT

GGAGACCGAAACGATCGATGTTGACCTGTACTTGCCGCCCGTTACACCGGTGAAGGTGAA  
AGACCGTGTGGGGTACGGGCCGGATGTGTTTCGATGTGGTTGCGGTTCTGACTGGAACAT  
GGGTTTTACGGTTGGGCGCCGGTTTTGGTGGCAGAACTTCGGAAGGTGTGATGAATCGT  
GGCTAACGGTCCAACGAGGAAGAACCCTTTGGCGAAGTTCGGTGTGCGGCTGGACGATTT  
CGACAAACTGCCTGAGGTGAATCAGGGCGTCAACGAGTTCATGGACGAGGTTGTTGCCCG  
GTGGAAGAACAATTCTCCCCTGGGCACCGGCGCTTACCGTGATTCTGTTACAGGTGACGGA  
ACGGTCCACGAACAAGGGTTCGCGGGAAGGTTCGGCGCGACTGATCCGCAAGCGCATCTCGT  
GGAGTTCGGGTTCGGCGCACAACGACGAGTACGCGCCTGCCAGAAGACAGCTAAACAGTT  
CGGCGGCAACCGGTATGGCGACTGATTCAGCGCCGAGTATCCACCGTGTACTGGTGGCGT  
GGCTGTCCCCTTTGGGGAAGGTTTCCACTCGCCGTTTGTTCGGGTGATCCGTTGCCGCACC  
GTGTGGTTCGTCGTGTCGATGGGCGTGATGTTCCCGAGGAAGGCAGCGATGTGGCTGTCG  
TGTCGGTGCATACGTTTCGCGGCGTCTGATGAGGCCGCCGAGAATGAGGCCGAGTTGACGC  
ACCAACGAATGCTGGAGCTCGTCGTTAACCCGCTGACGGAGATACCGGTCGGCGGTGGTG  
TTGTTGCGCGTATCGACTATGCGCGTGTGCTGATGAAACCGGTCCTTGTCGAGTATGACG  
ACGACGGCCACTTGGTTCGCGCATGTGGGCCGCTACGAGATCGGTGTTTCAGTACATCTAGT  
TGAAGTTTTACGCCCTGACAAGGGGCTGGCGGATAGTGCCGGGTCCCTTTTTGTTTCGCC  
GGAAATTTTTCGCAATCCGGTCCCTTATCCAAATGAGAGGAGCGTCCCTATGACGCAGCCA  
TTGACCGGCACCGACTGGAGCGCCGGCGGATTCACTGACATTCACAAGCCGTTTCATCGAG  
CGTGGCGGCCTGCAGGCGGTTTTTCATCCGCGACAACCGCGGTGCCGCGACGGACATGTTCG  
CCGTTTCGAGGATGATTGCGTGACGGTGAAGTGGTTCGCCGTTTTCGCGCAGGACGGGAAGCTT  
CGCGACGACCTGTTTCATCCGCCGGAAGGTGAACGGCAAGTACGAGTACAACACCGATCCG  
AATGAGGGCTGGTGGCACATCCGGCTGCAACCCCGAGGATGGTGGCGCGGAACGTGAACCG  
GACGTCACCTCTGACGATCTGATGGTGTTCAGTTCGAAGTTCGCCGTCGATTCTGAGGTG  
ACGGAAAAGTTCGTACTCGGTTCGGTTCGTTGGCGCTCGGTACGGCTGATCCTCTGATTCAC  
CGGCTGGAGTCGGAGTTGCCGTTGTGTGACAACGCCGTAATCCGCTGGTGGCTCTTCCG  
GGTACCCCTGACTACGGTGAGGGTCCGCTGCTGGACGCGGATTCGGCGGAGTACCAGCTG  
CTGCTGCTGTACGCGCGCCGCACCTCGGGCGGGTTCATTTACCGCGCTGAGGGTTACCCG  
GCGGTGAAGCTGGACGACCAGGCGTCGAAGCAGCGTTCGAAGACCGACCCGGACGCGGCT  
GACCTGACGTACAAGGTGTTGCCGAATGAGTACTTCATGCGGCCCGACCCGGCGGGGACG  
ATCGCTCTGGTTCCCGGCTACTTCTATGTGTGGATGGGCGGCCCGGGTTGGGCTGCGCAG  
TATTCGGACGGCAGCTAGCCGTAAGTCGTCTTCCCGGGTGGGTTGGTTTGGGGCTGGCA  
CCCACCCGGCAGGCACCACACAAAGCCAGCCCACCGCCCCTGTATCAACCCCTTTTTGAA  
GGAAGCCCCTGATGTCTGTGAAGAAACCCGAGAACAATGGTGCCGCCGCGCGTGAACAGG  
CCACCGAGTTCGATTCCGCCGTTCCGCCGATCGTGTCTGCGCTTCGATGACGGCAGCACCA  
TGACGATCCCCCGCACCCGAACCTTCGGATGCTCGACGACGATGCGCTGGAAGCGTACG  
AGGCGTACCTCGAAGAGATCGAAACCTATGACCGGGAGCCTGACCTGTACATCCCTGAGC  
AGACCGTGAAGGACCGCGACGGCAACGAGATGGTCTTCCCGGCGGAGACCCGTCCCGGCG  
CGGTCAAGGGGCCCGCGTATTTCAAGGACGGTAAGCGTGTGTGCCCGCCGCGTGAAGGTG  
GGATCGTTCAGGTTCGTGTTGGGCATGGACTCCTACGAGGTGTTGCGGTCGAAGCAGATCA  
ACGGTCGTCTGCTGGTGGCCGGGATGTGTGGCGGGCGTGGACCGAGCAGGGCTTCACGA  
TCGCGGAACGAGCTGAGTCCGACTCGAAAAGTATGGAAGCTCAGTGGTTCGAGACTG  
TACCCGAGACAGATAGCGAGTATCTGCGGCGGTTTTTCGGGCTGAGCGTCGCCGATTGG  
CATCAGGGCAGGTTGTCCAGTTTGGAGTTGCTGGACCTGTTCCGGGTGCGGTTTCGTGGAC  
AACGCTGAAGAACCGGTTCCGGGAGTTGTATGTGGATTTCCGCGCCGGTCAATGGCGCGGTG  
GCGCGGGCTGTTCCGCGGGGGCCGCTGGTCTGAGTCGGAGTTGATTGCGGCGGAAACGTAC  
AACGAGATCGCCCGGTTCCAGGGCGTCAATCCATGCATCGAGAAGCCGTAAAGCGGCGTAT  
GAGCCGTTCCGCTTTTGAGGATCCGGTTGATCGGTTGGAGAAAGCGAGAGCGTCCGTTGAG  
GCGCACGAGTTGCAGCGTGAGGTTGAGGCCGATCTGTTCCGGCTGGTGACGGGAGGTGAGT  
GTCTGATGCCGATCTATGTGGACATTATTTCTCGTCTTATGAGCGTGTCTGCTGCGGTGG  
CGGCGAAGAACAATTGAGCGTGAGATGGAGGCGGCTGGGGCGCGTGGCGGTTCCGGCTGCTG  
GCCGCGGATCGGCGAGAACGTCACCAAGGAAGCTGCTGCTGCGGGCCGTAACGCTGGTG  
AGCAGTTGTTCGCGTGAGGTTGATCGTGCAGCAAGGCTGCGGGTTCGCGATTGTGGATG  
GTTTTTCGTCGCATGGTGTGTCGGCGGGCCGGGGTTTTGGGTCGTCGTTTGGTTCGTCTT  
TGGCGTTCGTCGTTGCCGTGGCGGGACGGTTTTTCGCTGTCCTGTCGGGGTATGAGGGTG  
CTGCGTTCGAAGGCTGGCGCGTTGGCTGGCCGCGCGTTGGGCACCGCGTTCACCGCGGCCG  
CGACAGGCATCATCGGAGCAGCCGGTGTGTCCTGTTCAAGGGTTTCGACAGGTACAAGT  
CTCTTGATGCGACGTGCGACCGTCTTTCCGCGATGGGGAACAGCGCCGAGCAGGTCAAGA

CGATCATGTCGGATATCAACGAGGTCGTCGTTGGCACTCCGATTGCGTTGGACGAGGGCGG  
CGAAAGCGGCTACTCAGTTCCTTGCTGGTGGGGTGAAGCAGGGGCCGCCCGTTGCAGGCGG  
CGTTGACGGCGATCGCGGACGCGGGCGGGGCGTCAAGGCAGAAAGTTCGGCGACCTGGCCG  
TCATCTTCAACCAGGTGTTCAACAAGGGCAAGCTGCAGGCCGAGGAGATGTTGCAGCTCA  
ATGAGCGTGGCATCAATGTTCAAGGCGGCGTTGCAGAAAGAGTTCGGCCTGACGAGCGCCG  
AGATTGAGAAGATGTCGCAGGACGGCACGATTCGTTTCGGCATGCTTGTGCAGGGCGATTG  
AGGGCCAGTTCGGTGGCATGTCGAAGAAGCTGGCCGACACCGTTGACGGTGCCTTGTGCGA  
ACATGAACGCCGCTGTGGGTCGTGTTGGTGCGAACCTTCATTCGGCTTTGTTTCGGTGACC  
CGCTGGACACTACTGAGGGTCCCAGGGGCGCTTGCAGAGTCGATCAACAACGTGACCGACA  
AGCTGAATGACTTGAACGCGTGGATCGTTGCCCAACAGGACGACATCAAGGATGCGTTTCG  
AGGGTGCGGTTGAGACTGCGCAGGATCTGTGGGATGCGCTGTCGAGTGTGGTGCAAATGC  
TGGACCGGATAGGCATCAGCGTTGGTGTAGTAGTGACCGCGTTTATGGCGTGGAAAGGCTA  
TAGCTGGTGTACCAGCGTTGACGCAATCCCTTTC AACAGTGAGCACTACCCTGGCGGGG  
TTCCCGCGACTGCCGATAAGTCGGCTAAGGGAATTTCTGCTGCGTTGTGCGGGTGGCGG  
TCCCGCGTGGTTGGCGTTCCTGGTGCAGCAGAACGGACCTGAGATTGAGCAGGCCATTC  
AGGACGCGATTCCAGGTGCGGAGAATTGGAATCATTGCAACACGCCGGATCAGTTGGGTC  
GCAGTGCCCGTGAGTGGTGGGACCGCAACATTCAGGGCGGCACGGGGGTTGATCCGCAAC  
CGTCCCGTTGCCGACGCTCGGCGGGCGGGCCTGGGCCTGGCACGCCAACGGTTGGTGGTA  
TCCCGATTCCAGGGCTTGTGGGTACGAACTCGAACGGTCCAGCGTCCCCGTTCCGGTAACC  
TTCCCGGTCAGGTTCCATTGGATGTTTCCGTGGAGACCGACGCGGGCGCCGTGGTGGTG  
GTGGTGGTGTGCTGCTGATGCGGGTCTGATGGTCCGTTGGCTGATTTGTTTCCGGGGC  
CTGCGGGTAGTGCCGGCGGGTCTGCTGCTGTCGTCGTTGCCCGAAGTTGCCGGATGCACCGGTG  
TGCCGTATGACACGACGTTGCCGCCGGGGATTCTGGCATGCCGACGACGCTGCCGTGT  
TCTCCGCTGAATCGTCGTATCTGGATGCCCGCCACAACTGGCGGAGAAGCGTGCCCGCG  
CGGCCAGTTGGAGCAGTCCACCGAGGGCGACCGAAGAGGACCGGCTCAAGGCCCGTAACG  
ATGTGATCGAGGCGGAACGTGACCTTCAGGCCGCGGAGATGCGCATGTCGGATGCGCGGG  
CGAATCAGTACGAGAAGTTGACGAAGCAAACCGATCAGCATGCCAAGGATTTGGGGCAGA  
TCGGCGCCAAGCTTGATCAGGATTTCCGGTATCTCGAAGGGTTTGGCGGGGATTGCGGAGA  
ACATCACGAAGTTCGTGGCGAACCTTGCCGCCGCGCCGTTGTTGGGGCAGTTGCAGGCCA  
TTTCGGCCTATAACCCGACCCAGGGCGGGCACGGGTTGATGGGTGTCCTTGGGGCGCAGG  
GAGTGTTCCGGCCCGCAGTACCAGAACAAACAGTACGACCGGGGTTCTTACCCGTCGGCCG  
GTGCGACCGGTCCGTACGCGTTCGGCGGGCAGATGGGTGCCGGTACACCGCTGAGCATCA  
GTCAGATCGACCAGATAGCAGCCAGTTCGGCCTGACCAAGTCGTCGGGAACCTCGCCCCG  
GTGATGACGGATAACATGGCAAGGGACTTGCTGGTGACTACTCCGGTAGCCCGCAGGCGA  
TGCGCGCGTTCGCCGACTACATGGCCGCCAACTACGGCAGCAGCCTGCTCGAACTCATT  
ACGATTCGCCGGGGTTGCCTCGAACATCAAAAACGGAAAGGGCGTCGGCAAGTTCCGGCG  
ACTTCTACACGCTCGGGCAGGCTGGGGCGTACGACGATCACGTGCATATCGCCGCCGACG  
GTCAGTTGTCCGGTGGCTCGGGCAGCGGGCCGGTGCCGGTCAACGTTGTCAACGGCAACA  
CGTACTCAGCGGGTTCAACTGGGATGCGGTCCGCCCAAGGAATCGGGCGGCAACTGGG  
CCAACGCCGACACCGGGCGAAACGGGCACTACGGCGGGCTTCAGTTCTCGCCGTCAACGT  
GGAATGCGTACGGCGGGCAGGAATTCGCGCCGATGCCGCACCTCGCCACGCGCGAGCAGC  
AGATGGCGGTTCGCCACCGTACGGCGTTCTACGGCTACAACGGCACACCGCCCGCAGGGGC  
TCGGCGCGTGGGAGGTGATCACCAACGGCTCGACGGCGCCCTATGGCATCACGGTCAACT  
CGCGACCGCCCGCTTCGGCGGGCGGGCGCGCTGCCGTTTATGGGCGCTGGCGCCCCGC  
AGGCGGGCGCCGTTGCCTCAACCCGCTACGGCGGTGTTGAACCGTACGCCGGGTCCGGTT  
CCGGTGGGATCGGCATGGACGGTGGCGGGCGCGCTCGGAATGGCGGTGCAGGCCGGCGGGGA  
TGGCGTTGGACGCGATGGCACCCGGCGCGGGTTCAGGCCGCTCAGACCGGGGTGAAGCTGA  
TCAACCGTGCCATCGAGTACGGCGGCCAGGTCCGCCGCGATCGGGCGCCAAGGGTTGATGG  
AAACGTTTCTGCCACGGGTGGATCGGATTTGGCGAACAACAACCTGGATCACCCGCATTG  
CGGGTGGTTTGGCGGGTGCGGCCCCGGCGTTGCCGAACCTTGCCGGTTCAGGCGTCCCAGC  
AGCGCAAGGACATCGACCCGCAAGCCACAGGCCAGGGCCAAACCCAAGTCAACCAGGGCG  
ACACCAACATCACGGTCAACAACCAGCGTGCCACCGAAGACGGCACCGGCCGCGACATCG  
CCTATCACCTGCAAAACAGTACGTACGTCATGCCGGGAGGGTAAATGGCTAAGAAGCATTACC  
CCGCAACGGATGTAACCCCGCACGGCTGGTACCACCTTGCCAAGGGTGAGAAACCCATGA  
TGTGGCTCGACGCTACGACAAGTCGATCACCTTCCACATGATGGGAGGGCTAGCGGTCC  
CCGAGCGGGTACAGCACCCGAGATGGTGCATCTCACGTCCCTTAAGGGTCTGGTCCCGC  
CGTGGAACACATCGACCAAAAGGGTGCTACCGAAGACGGCATCACCAACATTGATGCC

TCTACGACCCGATCGAAGTTGAGATGGGTGTGGAGTGCCGTGGCCGGTCGCCGAAGTGGA  
CGCGCCGCGTCTACCGGGATCTGATCGCGTCGATCGACGCCAAACAGGAATCCACCCTGA  
ACTTCCTCACCCACGACATGGGTCAATTGGTGGGCACCGGTCAGGTGGTTCCAAGGCGCGC  
CGCAGGCACCGCTGGAGATCGGGAAGCGGCAGCGTGAAAGTCTTCGTTTTCGGGGCCGATT  
CGGGGTTCTGGCGGACGTACGACTACACGGCGAGTTTCCAGTTCGACTACGAGTCGATGA  
CCGACACGTTCAACTACGACACCACGAGCAGTCAGGACCTCGGGCGCGGATTGGCCGCTGT  
ACTACGAGGGTGACGGCGGCGGATACATCTACGCCAATGGTGACCAGGCGAGGTGGCGGG  
ACGATCCGGATGATCCTCTGACCACCGAAACCCGAGAAGTGGTGTGCGGCCCGTACAAGG  
ACTTCGACACTGACACCGACAACCAGGTTGTGTCGATGGTGCTTGGTGGGTTTCAGGAGT  
GGAGTGTCCCTGATAGTGGGGCGAATGACCTGTGGGCGCGCATGGGGCCGCGACAGCAACG  
GCGACTGGGACGGTAACGGTGTCCGCATGCGTGTGCAGGGCAACTGGATCAAACCTGTCGA  
GGTTCAACAACCTTCTCGCAGACAGTGATGTTCCAACGGCCGCTGCTGGTGGCCCCGCTGA  
TCGGGGAAAAGTTCACCCTGGTTCGCGGGTTATGAGGGTAATCCCCGCACGTTCAAGGTGC  
TGCGCAATGGGTTGCCGATCTTGTTCGCACAAGGAAACCGGCACCGGTAGTGAACCTCGGGC  
CGGATTATCGGGGCATCGGGTTCGGTATGCAGGCCGGTGGCGCGTTGATCACCCAGGCAA  
CACCAGCCCCGGTGCGGAAGATATCCGCCGGCGACAACGCGAACGTCACCCAATCAGGTT  
TTGTGCCGATGGTCAATGTTGGTGACCAGCCGATGTATTGGGATGCCACTCTGTTCCGGTC  
CGGGCACGTTCCGGTGTACGACGGCCCGGGTGGCGGATGAGTATGTGGAGTTCGGTCCGC  
TGCTGCCGAATCAGATTGTGTTCTACGTACCGACCCGCGCTCACAGACGACGTTGGTGC  
AGGATTTGACGTCGGTGC CGCCGTCGCCG CAGGAGTTGAACATTTTCCAGCAGGCGGTGA  
AGTCGTTGTTGTCGTTTTTCTCGGAACGGAACGCATTCACCGACCAGATTGGGTCGCTGT  
TCGGGATTGTTCCCCCGCAGGGCAATTTCTATAAGTACCTGTCCGGCCGGTTCAGTGAGA  
ACGCGGCGATCCCCGCGAAGTCACTGGCGAACC GGCGCAGCAGTTCTTTGTGAAGACAG  
AAATTGTTGGTGGCAACGCTGACTCGAAGGTGATTCTTTTCGGGGACTCCGTTGCGCCGCT  
ACCCGATGTAGCCCCTGTAGTGGCAAGCCCCGGCCGATACCTCGGTGAGGGGTGAATTTG  
TGCGCCTGTGAACCAGGAAAGGAGGGGATGACAGTTGTGCAAGTTTGAACGCGAAACAG  
CCGCATGGCAATCCGCCCTCCAGTCCGGCGACCCCAACAGGATCGCACGAACCGCGCGGG  
CGTTGACAGAACGCAAATCGAAGGTAGACACGTCGTTCCGGTTCACGGTGTGCGACAAGT  
TTTGGCAGCCGATGGGCGCTGTCCGGTGGCGACCTGATCGAGGCGTCGGGTGCTGACCCGC  
GCAACGATGTTGAAACCGGCCGGATCGTCCTCAAAGGGAACAGCCCTCTCATCCCTTTGT  
TCATGGACTGCAAAAAGACGATGGTCCGGTGTGTCATCGTCGAGACAGCCGGTTTTCGGTATG  
CGTTCTACACGAAGAACCACACCTACGAGTACCGCGACAGCGCATGGACCGGCACCGCTG  
AACTGCGCGGTATCCGCGACATCCTCAATTACTACGTGATTTGGCCGTCGTGGTGGCTGC  
CGATTCAGGCACAGCCGTTCTCGCACGCGATCTTCGTGTGGGCGCTGCAAACCGTCGTGG  
AGAACATGGTTCGAGAAATGCGCTCTGCGGTTG CAGTCCGGGTGGCTGGAGTTCATCAACA  
ACGGCCTGTGTTAAACCCGGATATCCGGGCATGGTTCGGCACCGTTCTGCAAGCACTGT  
CGCGTGACGGGCTGTCCGGTCCAGGCGTTCACCCGCATGCTGCGAACCCCGGTGTATGTGT  
CACGCACCAATCCACTGCTGGACACGTCGCCGATGGTGGCTCGCACAGTGC GGATGGAAA  
CCGTTACAGCCGTCATCAAGGACGTTACCCAGTCGTACGGTGTGGATAACCCGCATGGATT  
TGTGGCTTCCAGGTGATCCGCAGCCTGACAGGTGGGCGAACCTGGATCAGCCTACCTACG  
TGTTTTCCACAGTGGACCGGTGCGAGATCACTGGTCCGACGAAAACCGTGCTCGATTCCG  
TGCTGCGCACACGATTGACCTTGGCGGGTTCGCTGGGGGACATCTTCAAACCTGTCATCA  
AGCAGGTTCCCGCATGGACGGCGTGTTTTATGCGCCC GCGTTGGGTGTGGATTCGAGC  
AGCCATACGCCTATTTCTGTTGGCCCCGAGCCGGGTGAGGACACCGGTATCGATGCGTGCA  
CGATCACTGACCACACCTGAGGGTTGGCAGCACATTATTGGTGGCCGTAGCCCAAAGT  
GGTTGAACGACTTGATGAATGCCACCTTCGCATGGCTGATCGACTCGCTGATGATCGTTG  
TTGGATTCACCGGCATACCGTCCGATCTGCTGTCGGGGTTCTGAACAACAGCTTCTCTGG  
CGTTCCAGTTGATTCAGCATTACGACCGCCGTGACGAAGTTGGCCCGTACCATCCGGCGA  
TCGAGCGGTTCTATCCGACAGCCTCAGCGCCGTACAACATCGAAACGGTGTTCGCATTCA  
TCAACGCCTTGTTGATTTCG CAGGGCAAGACGACGGCGACGGTGCAGTTCCGCAACGGTG  
CCCAGTATGCGTTGGGTTCGGGACGTTTTTTCGCGGGCGGCCTGATGTCGCTGGTGTTCATGT  
CACGTACCCGAATGGTGACTGACTACATCGAGAATGTGATGTGGCGGGTTACCCAGGATG  
AGCGGAAGGTTCTCCTGCAAATGGGGGATGGACGCAAGTTCGGAGGCCCGTTGGCGAAGC  
ATCAGCGGTTACACGGGGATTTTTGAAACGTTGTCGGTCCCTCACGCTGTCACCTCAGG  
GATAAGCAGCGGTCGTCCTTTCTTTCTGTAACCTCGCCCAATGTGAATGGAGCGTGCCCTT  
ATGTCGTGGCCTTTGAAACCCCGCTGGGACTCACTATTTGTTT GAGGGGATCGTGGAGATT  
CCTGTCGATCCGACTGCTGGCGCGGCGATCCTCCAGTTGCGTCCGCAGGGCGGTATCGGT

GTTGGTGTGCCCGCGATCGAGAAGGGCGACCCGGGTGTGCCGGCCACGTTTCGATACGACA  
GTGAACCTGACGGAGCTGGACCCGGACGACCCAACCCCGGCGGAAGCGTCGTTACCGAG  
ATCACACCGCCGTCCACTTCCACGCCTGGCGTGTACCGGTTGAACCTCGCCCTGCACGCG  
GGAGCTAAAGGCGCGGATGGTGAAGTCGGTGTGGGACCCAACGGATGTGGACCCGTCCCA  
GTTGCGGGGCAGGTGCCGGTGGTGAACCTCGACCGCTGACGGGTTTCGTGTTGGCGGGCGAA  
CGTGTGGGGATCGGTATGTTCCGGCGTTCGATCAATAACACCGCCTCGGGCAATGCGAAC  
TCGACTTTGGCTCAGGTGTCGATCCCGGCGCAGCCTTTTGATTGGCGGGCCGCGTGTGCAG  
GGGTACACGGTGGTCACCGGTGAGGGTGCGGATGTTCCGGGTTGATTTGGTGGCCCGGTTG  
AACGGTGAGACTGGCGGCAACGTGATCGGCCGGTGCCTCCGGTGTGGCGCAATCGGAGCGG  
CTGATTTTGGTGGCGGGACCTGCGGCTGGTTCATCGGATGGGTTTGACCGTGTGGCGGCC  
GGTACACCGGCGACGATCTATTTCCGGTGTGAACGTCAGGCGGGGTCGGTGACGTACACG  
ACTTCTGCTTCTACGTCGATGTTTTCCGGTGTAGGTTTGGCCGCTGTCATGACGTCATCGT  
TTGATCCGTTGCCGGAGTGGGCGCATGCGGTGCCGTCTGAGCCGGGTATTCACCCGGAAC  
AGTCGGCGTTGCAGTGGCAGCGTCCGTTCACTGTTACGACGCTGCTTGAGATTGGTGAGC  
AGTTCATCGAGCAGTTTTTGGCGTGGGTGGTGCAGCGCGGTCGCTGGGGTGTTCATCCCTG  
GTGAAGCGTCGTTTCGACCAGCTGCGCGACTGGGCTTTGAACATCCCATCCTCGGGGACA  
TCATCGAGGCGATCACCGGCCTTGTGGGTGGCGGAATTGAGGAACTGACCCAGTTTTTCG  
GCAACATCCGCAACTTCTTCCAGTCGATCGACTTCAACAGCCCAAGCTTCAACCCGATTC  
AGGCTGCGGCGCAGTTGGTGAACATCATCCTTGCGCCGCTGCGGAACCTGCTGCCAGTC  
TGTTGACGATCCTGCCTATCGGTGGCATCTCGAATCAGACGCCGAACATTCTGCCTGCC  
CGAAGTTCCTGAGGGGTCGGTGGGCGAGAACGCGGATTGGGTTGTGGACCCGTCGCATT  
CTCGCAGCGGTGATGGTACGGGCGCGGGCGAAAGTTATTGCCGACGGCACGTTGAAGGCAC  
TGCGGTCCGGGCGAGAATGTTGGTGAATTTCTTCGCGGTGAGCGAAGGGCAGACAATCACTG  
CCCGGGTGTTCGTGTCTCACGACGATTATGTGGGTACGGGCGCGCCGATCCGGTTGCAGC  
TGGTGCCGTACATCGACGGCGTTGCACAGGCCCTGTGGATTTGAACGCGTACGCCCCC  
AGGACGCGAACTTGGCGTGGCCCGGTAAGGAGCTGTCCGGGGAGTATCGGGTGGCCGCTG  
GGGTGACTGGTGTGCAAACCCGGTTCGTGGTGACCGAAGACGCCGCTGCGGGCACGTTCT  
GGTGGGATGACGCCGAGGTCAAGCAGACCGGCGTTATTACGACGTCGTGGGTTCGAGGGTC  
TTCCGGAGATTCTGCAAACCTTGTGGGCGCGGGTGCAGTTGACGATTGACACGGTGGTGT  
CGGCGATCCGCGGGCGGCGTGCAGACCGTTGAGAACACGCTGGAGGATTTGTTTCGACGCTT  
TGCGCAACATCTCCCCGGAGTCAATCGCGGGCATGCTCGGCCCGGAGAACCTGCGGGAAA  
CCATCGAGAACATCGTCAACAGCATCGTCGGCGGCCTGGTAGGCCTTCCGGGTATTGGTG  
CGGGCATCGCCGACCTGTTCAACGTGTTGCAGGAGATCGCCTCGCGCGCCAGCTTGGGGT  
TGTTCTCGTGGGACATCCTCGGCATCAGGACCAACAAGCCCGTCGATAGTGGTTTGTTC  
CGTCCGAGCGGTCCAACCTTCCCGCTGTCGAACGTCACGACGTGGCTTGAAGCTACGCAGA  
GCAACTCGCTCATCGGCGTTGACCTGATCGAAGAGTCGATGCCGCTGGGCGTGGTGTTCG  
GGATCGGCTACGGCCTTTCAGGGATCACCGAGTTCTACGTCAACATCTGGAAGGTCGACT  
TGACGTCGGGTAACCTGGACGCTGGTGCACCATTCCCCGAACATCGTGGGGCTTTTGGGCG  
GCACGGCCGCGCCCGGGGAGTTCATCTCCTACGAGCTGGATGACCCGATCCCTGTGGTGG  
CGTCCGAGGCGTACGCCTATGAGCTTGTCCCGTGGGCGGTACGCATTATGTGCGTGGCC  
GCGTAGCGAATTTGCCGAATCATCCGACGTCGCAGATCGTGTGCTGGCGGCCACCAGAA  
ACAACACGTCGCCGAATAGCCCGCCGTCGTCGATTGCGAAGGCGTCGGTGACCCGCTCGG  
GCGATGTGCCGTGGGTGAGCATCGCCGTGGACACAGGCTCTGGTGGGGACCATCACGATC  
CGTTGAAAATCTATCTGGGCACCGCGGCCACGGCGTTCCCGGTTCCGAACCTGGGTGAACT  
ACATCGACCCAGTGGCAGTCGGCGCCGGTGGTGGTGGTGCACAAGGCTGGGCCTTGGGCA  
TCAACGGCCAGGCCGGCCAGCCCGGGAAGTTCAACGCCACCACATGGGTGCGGGGTGAAC  
ATTCGGCGACAACGCCATCATCACCTCGACCCGGGCGCTGGCGGTATTGGCGGTCTCTG  
GTGACGGCGCCCGCGGTGGGAACACCACGTTGTCTATCTCCACACCGGGGGGTGACACGT  
ATTCCATTGTGCGCCGAGGGCGGCGCGGCAGGTACCGCTGAGGGGTTCTGTGCAAACCTG  
TTGGGCGTGGTCCGGGGACGTTACGTTCAATGGGCAGGACTATGTGGGCGGCGGCGATC  
AGAAGGTCATGGGTGGACACGGCACTCCGCCTGGTGGTGGCGGTAACGGTGGTAAGGGCG  
CGTTGGCGTCGTTCCAGTCCGGCGGCAATGGTGGCCCTGGTGGTGGCTGGCTGTTCTTCC  
GGCCGATGCTTTGCCTGATCCTGACCCGGATCTGACGCCCCGACGCCTCCAACGTTGG  
TGGAGCTGGTTCGATTCAACTTTCAGCACTCTCACGATCACGTGGTCTGGAGCAACAGACG  
TATGACAATCAAAGGCTATTTTCGTTTACGCGAAAGAGAAAGACGCCCTGGTGATTTTGT  
TCAGTTGAATCCCGACCCGGTGTGTCGCGCGTATGGGACGAACGGTTTGAAGTCGAACAC  
CACCTACGAGTTTTATGTGAAGACGGTGGACAACGCTGGCTGGTTGTGCGACCCGTCGGA



TACGTACGAGTTCACCACTCCAGCGCACACTGCGGGTGATTTGTTGTCGCCGGAGGACCA  
GGCGATGGTGGATTTGATTGTGGAGGAGTCCCAGCGCGGAGACCGGCCAGCCGGGAGTGAT  
GTTGCAGATCACCGGTCCGCGCGGCAATTACGCGAAGGCGTATGGCACCACCGTGGGCGG  
CACGGTTCGCCCCGTTGACGTTGGATGACCATTTCCGCATGGGCAGCTCCACGAAGATGTT  
CACCGCGATTGCGTTTTTCCAGGCCGTCGACAAGGGGTTGATCACGCTGGATGACACTCT  
GGAGCAGTACGTTCCGGGCATCCCGAACGGCACGGCGATCACGATGGGGCACATGCTGTC  
CATGCGGTCTGGGATCGCGGAGTATACGGCGGGTATCAACGCGCTCTGGGTACGCTGTT  
CCCTACGTGGCCGTGGACGGGCGCGAAGGACTTCCTGTCAACGATGAAGGGGCCGTCAA  
TTTCTATCCCGGCACCGATTATCTGTATACGAACCTCGAATTTTCGCACTGATCGGCATGGT  
GCTGGAGATCGTTGACCCGGAACACCGGCCGATCAAGCAGATTTTCAAAGAAGACATCAT  
CGACCCGTTGGGGTTGACTGAAACGTCCTGGCCGCCGATCGGTCCAGTTCACCGCCAGC  
GTCGATCGCTGACACGTTCAACCCGAACCTCCTCGACGCTGCCGGCGCGTTGGCGACGAA  
CATCAACGACTACACCAAGTTCGCGGAAGCGTTGCGGGACAACGCCATGGGCCTGTCACC  
GGAGTCGTATGAGGCGTGGCTGTCAACATTCTGGAAGCACTCCACAGGGTGGGACCAGTA  
CGCGAACGGTTTCTACATTCCCTCCGAGTACTACTACGGGTACGGGATAGAGTCGTTCCG  
TACATGGTTCGGCCATCCCGGTTTGTTCGCGGGTGGCTGGTCGTCCACGCTCTTCTTTGA  
GCGGGACTCGGGTGCACATTCACGCTGCACGAGAACTCGAATACCTCCAACCCCCCGGC  
CGCGGGCTATACCCGCATTTGGGTGCGGGTGGCGGAGTATCTGTATCCGGGGACGATCAC  
GAATGATCAGAATTGGCCGGTTCGCGCTGCCCGGTGGATCTTGGGTTTGATGTTGTGTC  
GGCTCCGTTGGCGGGCTTTGGCAGTAAGTCGCTGCAATTCAAAGCCTCTGAGGGTTCGAC  
GGTGTTCGCGGTGGTGGCTTGGGACCGCGCGGGCTCAGCACCGTCGGTCACGTATGGCGG  
CGCCGGCGGTGTAATCTCGGGTCCGTTTCGCACAATGGCGATCCGGCGAATGGGGGCCT  
GGCTATTTTCCGCATGGACAACCCCGGAACCTGGTGCGGCACGCACGTTGAAGGTGACCGG  
TCCGGGTTGGGTTAGCGCCTATGGCATCTCGTTTAAAGAATGTGGCGTCGGTGGGTGAACC  
GAGTTACGCGTATGGCAGTGGCACTGCGCATTCGCAGGCAGTGACGGTGGATAGCGGAAG  
TGTGGTACTGCAGGTGTTCCGGCGCGGGCGCGGGTGGCGGCCCGTCGTATGACCTTGAACA  
GATCGTGGGCGCCCGGTTGCGCGCCAAGCAGGAGGGCACCAACCCGTTGTTGTGCGTGAA  
CACCACAACCAAGACGGGGACGGTTAACGCAACTTCGACCAAGGCGAATAAGTGGTCCGG  
CATGGCGGTGAATCTGCAGATTGGGGGATGAGCGTGGCTGTTGGCTGGTGGGCTGAGTCC  
CACGTCTCGTTCGGCGTACCCTCACCCCGAGGTGGGATTCCACTACGGCGGGCCGAAG  
CTGGAGTTCGGCGTGACCCTCACTCCCGAGGTGGGCATGGCCGCCGTGGCCACAATCGC  
GTGGGCTTCGGGCTGTCGGTGCCGATTTTCGCTGGGGATGGGGGCGGCCAGCCACAGTAAG  
GCTTCGTTTCGGTCTGGTTCACGCCGTATATCGCGATGCGCGGGCCTGCGGCGTTCGAG  
CCGGTGTTCGGTTCGGAGGATTTGTATCCGTCCGTGTCGCTGTTCCCGACGCCACGCGCG  
CAGTCTCCCGGATTCGGGTTGTCGTTACGCCAAGCTTGGGGTTCGAGGCCGCGCCGAAG  
TTTGCGCGGTTCGGTATCGAACTGGACCCGCAGGTCCGCATGGGTACCGCACTCCGG  
TTCGCGAAGGGCTTCGGGCTCGAACTGTTCCACAGGTTGGGATGTCCGGCGCGGAGCGG  
TATTACCGCGAGTTTGGCCTTGAACCTCACACTCGCCATCGGCATGGGCGGCGAGGGCAAC  
AACGGCGTGATGGCCAATACGACGCCATCGGCACAGGGGCGGGCGGGTTCGGTAGCGTC  
TCCGCCTTTTCTTCACGGCAGCAGCGGGTGCAGGACGATTTTGTGTTATCTGCCAAGAC  
CGATCAGGGGCCTTCACGGGAGCCGTGTCCTACGGTGGGGTTCGCGATGAACTTGGTGACC  
TCTGCTGCACACAACAACAGTGCTGGAAATGGCGGGGTTTCGGTGTACAGGTTGGCTGGG  
GCTGGCAGCGGATCGGCGAAAACCGTGTCCGTTGGGTCTGGAAGTGGCTGGATGATCGCC  
AACGCAGTCTCTTTCACCGACGTGAGACCGTCCGTATCTGCAAGTATTAATACGGGTTCCG  
GGGTCTGTCGCATCGCAGTCAGTCACACTTTCGCCCCGGTGGGTTGCAGGTTTTCTCT  
GGCGGCAACGCCGGCGGCCGACGACAACATTCTCTGGATTACCGGTGTCACAAATCGA  
TACAACGTTAAGCAGACCGGCGGCATCTTGGCCATCAACACCGTCTCAACGTCGGGCTCA  
GTGTCAGCGTCCACGAACAACCCGTGGGCGGCTGTGTTTATAGATCTCTAGGAGGAGGAT  
TCCAATGGGTATTCCCAATGCAACCCACAAGGCGGCATCGGACGCCATCGCCGGTCTCGG  
TAACTGGATCAGTGTGCATAACCGAGCTGCTGGCACCACCGGGGCGAACGAAGCCACGGG  
TGGTGGCTATGCGCGTGAACAAACGTCGTTGGACATCAGGCTCCACGGGCACCAACACCGG  
CGACGAGGTTGAAATCTCCGTGGCGGCAGGCACCTACGTGGAGGGCGGCATCTGGTCCGGC  
CAGCTCGTCCGGCACGTTTCGTCGGTTCGGAAGCTTTCGACGACGGTGACGTGGAGGTGTC  
CGGTACGGGGGCGAGCATCTCCGTGACGCCCGCATAGTCGCCTGAAATCCTGGATAGGG  
GAACTGTTTTGAACATCAAACTGATCATCAGATCGTTCGCATTCCGGCAACGACATGATGG  
GCTTGTGTTGACCGTGACGGCACGCTGATTGTGCAGGCCCGCCCGGTGGTCCGGCGGGTGGG  
AGGTCACCGCCGAGGGGACGCCCGGCGACCGTGTGGATCGGTCTTCGGCGATCACCG

AAATGATCAACACCGCCCTCGCGGTGCTTCCGGGTGACGGTTATTCGTGCCTGGTGCCGA  
GGGTTTTCGGGGCGCAACCCTAGGAGGGGGTTTGGTATGGCTTATTCGAAGCAGTCGTGG  
GAGAACGTTCCCTCGACGAACACCCCGTTGTCGGCGGACCGTCTCAACCACATCGAGGAC  
GGTATCGAAGGGGCGCATGAGGGGCTGGACGATAAGGCCGACCTCGCCCACGACCACGTT  
TTGGCCGATGTTACCGATGTCACCTCTACTGGCGCGGCTATTGCTGGCGCGGCGGATAAC  
GATGCAGCCCTGGAGGCTTTGACAGCCGGAGTTGGACAACAAGATCCACGAGATCGTGGAC  
TACTACGCGACCAACGAGTTGGATGTTGAGGTGGATGCTTCCGATGTGGTGTTCGGGCACG  
CTGAGCATTAAATCGCATCCCCGTGGGTAGTAGTGGTTCACGGTGTGTGTTGGTAATGAT  
TCGCGCCTGTCGGACCAGCGGACACCCTTGGACAACCTCGGTGACCCTGGCCAAGATTGAG  
GACGGTGCATACCAACGCGAAGATCAATACCGGCGCGGCGATTGCGAAATCGAAGCTG  
GCTTCGGATGTGCAAACCTCACTGGGTAAAGCGGATTCGTTCGGTGCAGAAATCCGGCAGC  
GCGTCCGGGATGTGGATGGGCACCACCCTTCTGGTACCGGCACGGCGGGTGTGTTGTAC  
GTGGTGGTTCCGTGAAAGTTTGGAAACGGCACGGCGTTCGTTGACCCACCGCGTTCAAGG  
TGTGGAACGGGTCGGCGTTCGTCAACCCTGAGCTGTACACGTGGAACGGGACCAGCTTTG  
ACAAGGTGTGGCCGTCGTTTGAACCGTTCAGCATCTCCAGCGAAGACCCCGGCTACGAGG  
ATCTGATCGACGAGCCGGTACCCGAGGGCGCATCCGGTTGCTGGGTACCCCTGGCGGTG  
CGGGCGGCGGCGGCGGCTCCGGCCGAGATCCAACCTCCGGTACCGCTACGGCGGCGGGC  
GCGGGGGCGGCGGTTGGCTACATCGGCCGCGTCTGGATTCCACGCGCGTTCGCTCGGCTCGA  
CGTATAACCCTCGTCCGGGGCCTCGGTGGCGCCGGTGGAGCGCGGGCGGCGGGATCGTCCA  
ACGGCAATAACGGCACCCCGGCGGCTCGACTGTGTTCTCGTCCGGCAGCGTTTCCCTGA  
CGGCTAGCGGAGGGGCGAGGCGCGAGGGGCACTAACTCGTTCGTCAGCGGAAGCGGGC  
GGGCCGGCGGTACAACCAGCATCTCCGGCATATCCGCAACAGGCTATACAGGTGGCAAAG  
GCGGCAACGGCGGTAGTAACCCAACCTAGCGGGGAGAGCCGTTCAAACGGTGCGGGGCGCTG  
GCGGTTCGGGGGGCTGGAGGCGTCTGTCCAACGACAACAGCATCAGCGGCGGCGAGCAACG  
GAACCAGCTCCGGCCCCGCGGGGAACGGCGGGCGGGGGGACCGACGGAGCCATAAACACGG  
GCGGATCAAACGCAGGTAGCGGCGGTGACGGCTACGTCCTGGTTCGAGTGGGAATAACCCC  
GCTAACGGTTCGGGTCACCAGCAGCGCGGAGTTGATACACACGCTGCTTGGAAATCTTCA  
GGGCGCGGCCAATGTCATGCCACGTGATGCCGTGGACAGTCATCGCCTCGTAGACGAGGG  
CAGCCAGTTCGGCATCAAGCTCGGCGATAGTCGCTGCGCGTTCCTGCGGTTGGCGATCA  
TGCGGTTCGATGATTGTCACATCTAGGAGTGTATCTCAAAGAAACACTTGTGCACGTGGTC  
AAACGCGGTTAGACTCGCGTTCATCAACTTGAAGACACCGCCCGGCGGGGCGATAGGCCTG  
AGAAACCAACCCCGCCGGACGGCCACCCCAACAGGAGGCCACCAATGCTACGCACCA  
CCACCGCGACTGTCTTCGCAATCGCCGCACTCGCACTCGGAATAACCCGCAGTCGCTGATG  
CCGCACCCGCCCCTGCGCGAATCACGGCACCCGGCCACGGGCAGATCTACAAGCACGCAT  
GCGCCACCGGCAGCGGCGGCGCAGGAGCCGACTGGACATACGCCACCCACGCCGACGGCA  
CACCCAAGATGGACGGCACCAACACATCTACAAGTGCGTGCGCCACTGCGGCGGCGGGC  
GCCACCACGTCGAAACCACCGACACCTGGTGACCCGCCATGAAGATCCACGTTCAATCCC  
GCGGCCCCGCGGCTGGAACGCAACAGTCTCTTACCACAGGAACCGTCTGACTGTGCG  
CTGACGACCAAGGTCGACAGGCACCTGATCGACACGTCCCAGTTCACGGTTCAGGAGACTGT  
CATGACCAAACGAGTAGCGGGGGCATTTCGGAACCTGGACTCCTCGGCGGTGTCGCCCTCAC  
CGGACTCATCTCGTGGATGTTTCGCCACAGGACATCCAGCGATCGACTTCTTCATCGAACG  
CGACACCCTCTTCTACATCTGAACAACCCCCACAGAAACCCCGCCACCACGAGGTGCGCG  
GGGTTTCTGCATGAAAGGACCCCGACATGGACCGTCTCGGAATTATCCTGCTCAAATTG  
CTCGGACCGCTGGCCGATAGGATCGCTGACCGCATCGCCGACAGGATCACCGAGAACCTG  
CCCGATCTGTCCGATTTGGATGATCAGATCGTCGCGAAACTCCCCGACCTGACCAACCTT  
CCAGCGCAAGTCGTGGACATCATCGACGGCGCGCTGCGCTCCATCCCCGTTCTCGGCGGA  
ATCCTCGGCGGGAGCAAGCGGTGACACACACCAACGACACCTACGCGCGCGAAATCCTAC  
GCGCCGGAACGACCTCGGCATCACCCCGCGCGGAATCGTCATCGCGTTCGCAACCGTGT  
TCGTAGAGTCCGACTGGTACATGTGGGCCAACGCGAAAGTCCCAGAATCACTGCGCCTTC  
CACATGAACGCGTAGGTAACGACGGGCGCAGCGTTCGGCCTATTCCAGCAGCAAGTGGTGT  
GGGGCAACGGCGCATGGTGGTGGGGCGACGCAGCCACCTGCATGGACCCCTACAAGTCCG  
CCCGACTGTTCTTCGAACGCCTCAAGACCCGCGACTACAGCACCGGCGACCCGGGAGCGC  
ACGCCAAGCCATTCAACGCTCGGCATACCCAGATCGATACGGACAGCGCATGTCCGAAG  
CGCAGAATACTACAACCAGCTCGCAGGAGAGGACGCAAACGTGGGATTCAGCGGAGATC  
CCGTCTGGCTCGAAGACGTTCTACGAGAAGCCCTCGGCGACCGACTCGTAGTCGCCACAGG  
CCGACTGGAAAGAACGCGGGACCGGCGGCGTAATGGGCGACATCTGGGGCGTCATGATCC  
ACCACACCGGCAACGACCGAGAAACCGTCGCCGGAATCCGTGACGGCCGCCCGACCTGA

GAGGCCCACTATCGCAATGCCTCATCACCCCGACGGGAAATGCCACCTGATCGCCGTCG  
GCCCATGCAACCACGCTGGGACCGGCTCGTATCCCGGCGTCGGCACCAACAACGGCAATC  
AGCGGCTCATTGGCTTCGAGTGCGCCTGGCCCACCATCCGCCCCGACGGCTCGTTCGATC  
CCGCGCAGCGCTGGCCCGACGCCAGATCATACCATGCGCGACGCCACCGCGGCGGTGC  
TGAACGACTCGGCCATGACTCCAAGCACGTCATCGGCCATAAGGAATGGGCCGGGTGCCA  
CACAGGGCAAGTGGGACCCCGGCAACCTCGACATGAACTGGTTCCGCGGCGAAGTCCAGA  
AAGACCTGGACGGGTTTCGTGTTCCCGGTGAGCAGCCGTCGGCACCGCAGCCTGGCCCGG  
CCTTGCCGCCCGACTACGACAAAGAGGTGTGGGATCAGCTGCGCATCCTGTGGCCGCAGC  
TCGGACACCGCACCTCGTTGACGCCGTGGCGGGGATCGGGCGGAAGCTCGGCATCGAAG  
GCTGCTACGACGTCAAGGGCAAGTCCTGATGCGCATCGACGGGCAGTATGTGGGCCTCGG  
GTTGGGTGATTCGTCCGAGGAAATCCGCCGGATCAAGACGTTTCATGCGGAAAAAGTTCGC  
CTCCTACGCTGGGCATCTCACCGACACCCCGCTCTACGACGAGCAGATGACCGCCGCGGT  
CGCTGAAATGCAGTCCCGCTACAACGCGGCAGGACTGTTGCGCGACGGGCTCTACATCCC  
GGGGATTGTAGGGGCCGAAACCAAGTACGTTCATGGGCTACCTACCGCGCCCCGTCGTGGA  
CACCCGGCCTGTTCTGATCACCGTGTGCGGCACCGGTGTTCCCTGGTGGATCGGCCCCGA  
CGCCGACACCGCCCGCGCCGTCGAAGACAAATACCTGTGGCAGCCCGTCGGTACCCCGC  
GGCCCCGTTCCCGATGGGCAAATCCATCGCTGCCGCTATCACTGAAGCTCACAACCAGGC  
TAACCGGTGGCGCCAACGCATCGAAACCCACGGCGCCGCCCTAGCGGGCTACTCCCAAGG  
CGCGGTAGTGGTTTCCGAACTGTGGATGAACCACATCGCACCCGAAACCGGCTCCCTGCA  
CTGGATGAAGCCGCACATCGAGAAAGCCGTGACGTGGGGCAACCCGAAACCGCGAACTCGG  
TCACGTGTGGGCTGATCACGGCGGCTCCCCAATGGCCCCATCGAACACTCAGGGCGTCTC  
ATCGAACGGTATGCGTGACACCCCGCCGTGGTGGCGCGACTACGCCACCAGGGCGACCT  
ATATGCCTGCACCGAACCGGGTGACACACAAGAGGTCCGCAACGCCATATGGCAGATCGT  
GCGCGACCTGGACCTGTTACCCGGACCCGATTCGCTGCTCGCCCAAGTGGTTCGAACTTGT  
GCAGGCACCGCTACCGGAGGCGATCGCGATACCAAAGCGTTGTTGGACGCCGGCATGTT  
CTTCGCGAAACGCACCGGCCCGCACGTGGACTACAACGTCCAGCCCGCCATCGACTACCT  
ACGCACATAAAGGGGGACCACCTGATGTTGACACGTTTCGTTTTGGATCGACGCCGCCGAA  
CGCGCGGCCCGCACGTTTCGCCCAAACCGCGATCGCCACACTCGGCGCGGGCGCGGTTGAC  
CTACTCGCCACCGATTGGGTGTGAGTGTGTCAGTGTCCGGCGGTGCCGCAGTGGTGTCA  
CTGCTGATGTCTATCGGCGCGGAACGCCGCGGCAACCCCGGAACGGCTTCGGCGACTAGA  
GCGGTCACCGCCGCATGATGTGGGAATCGGTGCGCGAAGCAATGGACGCCGCGTACCAGC  
CAGACGATGGTATCGACCTGATAGGACTGCTCATCATCGGTTTACCTTCAACGATCGCAG  
CGATCGGAACGGGAATTGTGCGGTGTCCTCACTGTTTCGAGGGCAACGCAAGGGCCGGGAAC  
GTGCCCGAAAGATCGACGCGAAAACCGATGAGATTCACGAGCAGACCGTCAACACCCATG  
ACACCAACATGCGCGACGACCTCGACGAGATACGCGATCTGGTGCGGGACGGATTCAAAC  
AGATTCAACGGGACATCGGAGGGTTGAGGGAGGAACTGCGAACCGAACGCCTCGAACGCA  
TCGAAGGCGACAAGCGACGCGACCGGTGAAACACCAGGAAAGGGAACACCAAATGTCACT  
CTTGGCCGATCTTGCAGGTTTGGAGCCCCGCACCTGCCCCGCATGTGATTGGGTTGGTGC  
CCGGTCGAAGCAGGAACGTGCAGAGATCAAATCCTCGTTGGAGTCCGCGAAACGCGGCGA  
CGTCAGGTTACCCGACATACTGCGGGTCTCGTCAAACACGGCATGCCAGACATGAATCC  
AACAGCGTGGCGGCACCACGCGAGGAACCATCATGTCCCTGACTAGCGACCTGCGTCAGG  
TGCGCATCGCCGAAGGTGTGCGCAACAAAATCCTGATCCTCGACGTTGAACGGCTCCCCG  
GAATCACCGAACAAATACTGGTGGGGCAGGGGAGACCTGAAGAACCGGTACGTGCAGTACG  
AGACGGTGACCCGCATGCCGCGCACACGATTGTGTGCGCCAAGTGGTATGACCAGCCCCG  
AGGTTATCCAGCTCGCCGAATGGGACAAAGGTGGACGCAAACGGTTCCTGCGGGCGCGTCC  
ACAACCTGCTATCCCAAGCGGATATCGTCGTCGGCCACTACATCGACGAAGCTGACGTGC  
CGTGGCTGAAGGGCGATCTGCATTTGGAGGCCGGGTTACCTCCGCTGCCTCCGTTCAAAA  
CCGTTGACACGTTGAAGGTGCTGCGCCGAGAGTTCAAATCCGGTGCCCCATTCAAAGGTT  
TGGACGCGTTCTGTGATCGTTCGTTGGCCTGCCCGCCAAAACCTGACCGCTACGACCGGGGCG  
CGATGGAACGCGCCGTGACGGGGAAGAGCGCCGCTGATCGGGAACGCTTGGTGTGCTACT  
GCGCTGGCGATGTGGTTGCCACGCAGGGGTTGTACGACTTCTGCGGCCACACATCAAAA  
ACCATCCCGCACTGTTTCGTTGACGGCGAGGACAAGCTGATGGTGTGTAACCGGTGCGGTG  
GTGAAACTGTGGTGTATCCCGCGGCGGTACGTGGCGAATGTGTTGACGTACACGATGCGCC  
GCTGCACCAACTGCGGGGCGCATTCACGACTGTCCATCGAGCCGGAACGCATGAGCGCCG  
TGAGAGGGGTGTGACCGATGAACGTTTCGAGTGTGCACGTTTCTAGACCACGGAGTGACGG  
TAGGGTTCTGTGGGACGCGTTGAAGTTGTGGGTGCGGTTGTGAGGCCGGCCGATCCTGT  
CCGGGCTGCGATCCAAGAGAGTTTGGATGCGCAGGGCGACGGCTGGCAGGTAGCCCACTA

TGTGGCGGTTGTCGGCCTGGAACGCATCACCGGTGACCGGATGGACTTGGGCGCGACGAC  
GGTGATCACACCGGTAGGGCAGCCGGGGTATCTCACGGACGGTTTGGTGAATCGTTACTG  
GGACGAATCAGACGATGAGTGATCCGCAGTTGGAGTTGTGGCGGTTCGGTGTGGCTGGCTG  
TCGTCGCGGGGATGATCGTCGCGCTGTTAATTCACGTCCTGGCTTAATCCACGCCTCGTG  
AAGCATCGAACTTCAGGAGAGGTTACGGGGCCGCCACGCTTGCACACACTCTCCAGTGC  
AAGCGGGGCGGCCCTCTTTTCGCGTATCTACTAGTGCTTGGGGTTTCGGGCAGCTCTGTA  
TCGTTTCGGAGGCATCCAGGTTTTGGCATGTGTGGTGCACCTGGGGGAAGGGTGTGCGATAAC  
TGTCTCCCCGTTTGAACGGTTGACCGCACCGGCCGCAACGATCATCGGTGTTTCATCAG  
TTGCACATCTCGCATCCGTGGCCGGTCGGGTAGGTGTCTGATTCACCTATGTGGCTCAGG  
TTCCGACTGCCAGTGGGCTGCATCAACCGGACCTCAACAGAACCACAAGCGGTGCACATG  
CCGTAAACGACGTCATCCGACTTCACCTCACAACCACCACACATCACAGCTTCGTAGCGG  
TCAGTAGCTGCAGTCATTTTCATCCTTCTTTTCAGCCATCGTTGGGAACCGTGATCGCTGTC  
CGCCGACGCTCCAGATGCTTCAACCGCTCAATCGAAGGCACAGCAAGCTCAGTTGGATCC  
TCATGCTCCCCTAATGAAAAGAGAGTACGACGGCGCGACGACATGTAGGACCAGTGAAAA  
CCCCTATAGGGTTACCTTTAGGGTGATCCCCTCTGAGGCTTATGGCCTCTGACCTGTGCG  
CCGTGAGGGTTTCGAACCCCGACCCGCTGATTAAGAGTCAGCGGTTGATAGGCTGCATA  
CCAGGAGAAACGTTGTCAAACCCGCAGGTAGACACCCGATACTGCGCAGTTCTGCGTAAT  
GCTGCGTAGCACCGTAGGGTGAACCGTAGGGTGACCCCTGGGAGGGATAACGATGGCAA  
CTAAGAAACGCAGAACTCGCGGAGACGGAGCGTTCTTCCAACGCGCCGACGGCAAATGGA  
TGGGGCGAGTAGAACTACCCCGACCGCAACGGCAACCGCCGCTACAAATGGGTGTCTT  
CCGTGGACCGCAACACCGCCATGTCCAACTCAAACAACCTCCGCCGCGACGTCGAAGAGG  
GCCGCATCGCCACCACCTCATCCACAACCTGTGGAGAAGTGGATGCTGCACTGGATCGACA  
ACATCCACGCCAAACGTAAGTCCGCCCGCGTCTCAACGACTACCGGGCCGCCATCC  
ACAACCACATCAACCCGATCCTCGGCGCGAAACGCATCGACAAACTCACCCCGCAGCATG  
TGCGGGACCTGCACTCCGAGATCGGGGCCCTCCCGCACCGCCGAGCTGGTCCATGTCATCG  
TCCAGAAAGCCTTGGACGATGCGGTAGCGGAGGGTGTGGCGACCAGGAATGTGGCCGCAT  
TGGTCGACAAACCTGAGTACCGGAAGAAGAAACGCAACGGCTTCCCGCGGACGTGGCGC  
AGCACATCATCCACACCGCGTTCCAGGTGTGCGACGAACCAGATGCGGTGCGGATCGCCG  
CCGGTTTCTGACGGGCGCCCGCGTGGGGAACCTCCTCGGCCTGCGCTGGCCCTACGTCG  
ACAACCCCGCTCAGGGATGGATCACCATCGCTTGGCAGTTGCAATCGGAAACCCGCGTCC  
ACGGCTGTGGGGATCCTCTACCCGAACCGTCACCGCTGTCCCGGCCCGACCGTATGCCCA  
AAAAACCCCGTACTGGCCTTGCGGGAAGACACGGGCATGGGCATGCCCGCAGTCCCGGT  
GGGACCTGCCGGCGCATTTCGAGTATCAGGAATGTGAGGGGTCGTTGTTGTTACCCGGC  
CGAAGACGGACGCTGGTTGGCGTGAGGTGCCGTTGTTGCCGCCGTTGTATGTGGCGATGC  
AGAAACTCCGCGCCGACAATCCGCATGACTTGGTGTGGCACAAGGAGGGGAAGCCGATCG  
ATCCCCGTTCCGACTACGACGTGTGGCGTGGCGTGTTCGCGCTGCTGGGGTGATCGGTC  
CAACCGAGTCGTTGCCGCCGCAACTCGCGGCACACCACGTCGACATTGCTGCGCGCAG  
CGGGTGTGGATGAGCAAACGCGTATGGAGATCTTGGGTCATGCGAGTGTGGATGCGCAGC  
GGATCTATGCGCATGCGGACCGGGCGAGGCATCTGGAGGCCATGCAGGGGCTGTCCGAAC  
TGCTCCCATCAACGTTTGCCTTAGAAACAAAATAAGGCGACCGACTGTAAATGCGCCCTG  
CCGAGGGATTACCATCCCCGGCAGGGCGCTTTTTTGCCTTCTGGCGGGTGGTCACTCCG  
TCATGGTCCAAGTTCGCGAGCCGCTCGTGCGGAACACGATGCGATGATCCCCGTTGATTG  
TGCCGGTCCACGACGCGACACCATCGGGTTGGATGTTTCGCGCGGACGGTGCCGGATGGTG  
CTTACCTTCGCGGAGTGTTCGCGCCGCGGAGTTCGGCGATGCTGACGACCGCCACG  
TGCAGCCGGGGGAGCTGGGTGGGATGGTGGCGGTGTAGGTGCCCCAGTCGTATCCGTCTG  
CGCCGCCATGTTGTGGGTGCCGTCGCCGGGGATGGTGGGTACGGGTTGGGCCGTGTAG  
TGGTGGTGGTTGGTGTGGTGGTTTTGTGATGCGCTTCTGTCTGTCGTCGTCGTTGTTGTTG  
GTGCGGAGACGATGCCTACGACGGCGAGCACAGCGAGCGCGGTGACCATCACCTTCCCTG  
GTGACACTGCGCGATCATTGGTGGTTCATCTGGTAGTGGGCTTTCTGTGTTGGTGGCTAAC  
TTTCGCGCACTGGCGTTATCTGATCGTGACATTCCCATGTTTGGGCTTCCCTGTGTCGATT  
TTGGCAATGATCCGTTAGCGTCTACGCATCCGGTTGCGAGGGGTGACCGGTGCTGGTGAT  
TTCGGTAGGTGCAGCCATGTTTGTGATGACGAACTCGACACTCTGCTGGTGGGATTTTGA  
ACGCGATGGATGAGTGTCCGCCAACAACATGGACGTTGCGCCGGGCACGTCTAGTCCTTG  
CGGCGTTGACGTGCCCGGACGCTCCTGGCGACGCGATCACGAATCTCCGCCCAACTGTT  
TCGCCGGTCCGAGGTTGGCGCGGCTGCGTCTGTCACTGGCCGCGGCGTCTAGGTCGCC  
TCCTGGTCTTGACGCGCTTCGCGCGGTTCTTCTTCTCCGTCTGAGCTTCCATGACATCT  
CTTGCTCCTTTAGTCGTCGCCGACTTCGGCGAGAAGTTCGTCTGTCGTCGTCGTTGTTGTTG

ATCGCCGGCTCGGGTAGCGGCGGTGGAATGTCTGACTGTTGAAATCCGGCTATCGCCAGA  
GCTTCGTTGACATCCCATTGGACAGCTCGGGCAGCGGCCACGGTGGATGCGGTCGTT  
CCGATTGGGATCAGTGTCCCTTTGTTGATCTGCCACCCCGTTTCCAGTTGCTTCCACCGT  
CCTGCGCTGACGGCGGGCTTGTGCTGCTGCTGGTGGCGTTGTGCGCCGTGAGGCTTCGCGC  
TGAGATAGCCCGACGCGCTCTCTGTGCCGCTTGAGTTCTGGCCCCGAATGGCCAGTCTTCG  
CGGTGTTCCCTTGTCTCGTTCACGCCTACATGTTTCGCGTGCAAACAGGTGCAAAGTCCAC  
TGCTTGACAACCCCAATTCTTTGCAGTTACGCGCTTGTAGTTTTCGAACATTGCAGGTC  
ACAGCATTGTTGGCGCGAACTGCGCGCGAACTCTTGCGGTTTGCAGTTGTTTCGCAGTACA  
GTTGGCGGCATGGTCAAACAGTCCTACGGGGTGTGGCAGGAACTCCGGGTTCATCCGTGAG  
CGCACAGGTTGGTTCATCCGCCGAACGTGCCCGCGAAAGCGGAGTCTCTGCCCTTACCTC  
TCCCAGCTTGAGAACGGTGACCGGTGGCCGAACGCCACCGTCACCAAGAAGCTCGCCGTC  
GCGCTCAAGGTTCCCGTCTCCGTATTGGAGCGGCCAGCAGAGCAGAAAAACCCCGCCGCA  
TAAAAAAGCCCCACCTGTGTGGAGCAGGTGAGGGCAGAAGACACCTGAGAGGAAGGCTC  
AAATGTCTGAACTACAGCATAACGGGTGACCAGTCACCATTGACGCCGGACGCATCCCGT  
GCACCCAGGGCGGAGAGTGCCGGTGGTCTTTCTACGCAGAGCCACCCAGATCCTCAAGA  
GAGGACATGGTGGTGTGACCGTTGGACTCGGGGAAAACAACGGATCCGAATTGGCCTACT  
TGTACGTCGGTGATGGATAACGCGAGGGTGTGACGTTCTCCTGGATGCCGATGAACTCACGG  
ATCTGATCGACCAGCTGACCATCATCCGCAACGCGATGAGGGAGACGCGATGACGTTTCA  
TTCACGCCCCGAGGCCTCCGATTCAGCATTTCACAGAAGCCGAAGAAGCCTTTGTTCCAGT  
CGAAACCTAAGGATGCGAAATGAGCACTCCAGATGGGCCACGTTCAAAGAGGCCGCGTC  
ATACCTCCGCTTGAAATCAGACGTGCTGATACGGGAAGCGGTCAAAAACGATGGGTTGAA  
GGCTTATCCGATCGGTAACGGTTCGGGAGGGCGCGTGTGACCTGAATGAGGTTGATGAGTG  
GATGAAGTCGCGTAGCTATGAGCCGAGGTCCGCGTGAGTACTGAGTTGCAGAGGTATGTC  
GCAAGTTTGGACGTGTCCGCATGAGTGATGTGGTTGAGCGGGCCAAGAGATCGCTGAACA  
TCTACGAGTACTGCAGAGCGGCTGGCGTTGAGATGGGTGCGTATCCCGACAATCTCGTGC  
GGGAGCTGGTCCCGAGGTTGAGCGGCTGCGGGCAGAGAAGCTTGGGCTGGAAATCTCGG  
AATCCAATCTGCTTGTGAGCTACGCAACGAGGTTGAGCGTCTGCGTCCCAGGGTGATTG  
AGACCGTCGAACAACCTCGACGCGCTGCCGGAAGGTTTCGATCGTCGAGGCAGTTATAGGCG  
TGCCCGAAGTCAAGTGGGATGGCTGCTGGTATGCGATGACGGCAGATGCATTCGAGCCTG  
ACTTCCGGCCCCACGTGCTTTACATCCCGGAGGTTCGGCAAGTGAGTACGTCTGCTCCTAA  
GCATCGGAGTGTGTGCAACTGTCGGGTGAGGTTTCGCCAGTCTGGGTTGTGGAAAGCGTT  
GGCGGAGTTCGACGCGAGGCAGATGCGTGAGGATGCGGAGTTGGAGGCGTTGCGTGAGGA  
GAACGCCCGTCTGCGGTGCCGGCTACAAGAGCTAGGGGAGACAGCGTGAATCTTGTGAG  
CGTTTGAATGCCAGGTTTAAACAACGTGATTCATGACGGACTCGCCTTGGTGGGTGCTGTG  
GTGGATCCGTGGTTGGCGCGCCTTGAAGCGTCAGGACATGAGCAATGCGTTGGGTCCGGAT  
TTCGGCCTGGACTGCGGGGATGTTCTTGTGCTGCTGCGGAGGCTGAGGAAGAAGTCCACGAA  
CCCCGCATCTCCCATGTCCGTGGTACGGGTGGTGGCGGGGGAGGGGGCATGTGCGCCGATT  
CAAGATCGGGCTCGTTCTTCTGCCGAGCATCGGGTTTCGGCAGACTCGTCACCCACTGCG  
GTGGGTGACATTGGTCCCAGCGCGGGCATGGTTCCCCCGCCCCCGCGCCGGGACCCTCC  
AACGGCTGGGACGAACCTGCACAAGCAGGTAGGGCCGAACCTCGCCAAAGTGGATACACGAC  
GCCATCGACTCCACCAAGCAGTACTGCCTCAGCTTCGCCCGCGAATTCCTCGATGATGAC  
GAGTTCATGGAGTTGGGGGAGTTCCTGGATTCTGCGACCGCGGAAGAACTCGCCGCCATG  
AGGCATCAGCATGCGACGGCCCGGAGTTGGAACGCCATCTGAGCTATTCACGACCGCG  
CCCGGCGCGTCCGGGGTGAACCCCGGCGTTGTGCGCCAGTCCCTGCTGGAGACGTATCAC  
ATCACCCGAAGTAAAGGCGGGCCCGCCCAATTGCGCGGGACGACGGCCCTAACCCG  
GAAACACACAACCTAAGGAGACAATTCGGATGTCAATCCAAGATTCTAAACCCTCATGGT  
GGGACCACCACCAACCAACTGGGCCGACCTGCCCGTCACCACCAACCCACCAATGGCTG  
ACTTGAGCCATCTCCAAGAGTTCGAGGACCTGGCAGCGGCGGTTCATGAGTGAACCTGGACC  
GTGTCGGTGGCTGGCCGTTACATACCGCCGTGGCACTGGGAAACGGAGCCGACGATCTGGG  
AGCAGGTGAACGGCGACGCCGTCGTGGCGTTGTTGCGGACTACCTCACGACAGGAGAAG  
CAGCATGAGGCGCAACGAGAAGTCCTGGCGCTACTGGTGGACGATGCCCTGCTGATCGC  
TGCGGGCATCATCGGCCCGGACTCGCCGCACCCGCAGCCACGCAGATATCACGTCCGA  
CGCGTTCGTGATGGCACTCGACTCCGAAGGCATCACCTACAGCTCCAAACCGGCCCGCAT  
CAACGCCGAAAAGCCGTATGCGACGTCCTCGACACCGGCTACACCATGTACGAAGCCTC  
AGTCTTCGTGTACAACAACCTCAACCTGAACCTGTATGACTCAGGGTATTTCTGTTGGTGC  
CGAACCCGCATCGTTCTGCCCTGAACACCTGACCGGGACGGGGTGGGTGTGATGGCGAAC  
TCCCCGTTTCATCCAACCTGGCAGAAGTCCACACCAGCGACTGGCGTTCCCGCGCGCTCTGC

ACCCACAAGGACGGCGACATTTGGTTCCTCAACGAATCCGGCCACTACACCAACGACGCC  
GCCCCGCCATCTGCTGGACCTGCCCCGTACAACCGCAATGCCTGCAGTGGGCGTTGAAG  
CACAAACGAGTTGGGTGTGTGGGGCGGGTTTTTCGGAGAAGGAACGCCAACGCATCAAGCGT  
GGCGAGCTGGCACCGGTGAAGCCGGCCAGGTTACCCGACAAGAAATGCCAGCAGTGCGGA  
AACGTGTTTCGAGCCTGTGACGCAGCGGGCACGGTTCGCTCACCGAAGTGCAAGAAGCGT  
GCGGCCAATGCTTTGCGGTCAACAACCGTCCCTGAAGATCTGCACGCAGTGCGGGCGGCGAG  
TTTATGGGGACTTATGCGAAGACCTGCTCGAATGAGTGCCGACGGGCGCAGAGGTGGGGC  
GCGTGAGCATCGACTGGTTCGCTGTGGAATGCGCCGTGAACGGAACCTCCCATGCGGCTTA  
ATACCGAAGAGCGCCGAATGCTGGTGCGGGCGGCCCGAAACTCCCCGAAGTGAGTTGG  
CGCGCAGGGCGCACTGCACGGTCCGCACCATCGAACGGGACAGGGCTGAACTGCCTGCAG  
CAAAGTTGCAATCCTGCCCGGTGTGCGGGGAGGACGCGTGGGTACGACCGATGGCAACA  
TGGAAGCCCACCCAGACAGGCTGTTTCAGGAATGCCCACTGTTCGGAGACGGATTGGGAAT  
CCCGTATCGCTGCAACAGTCATCTGGTTGTCTCGGGCGTATCCGTAGCGGTGACTCCCTGC  
CCGTGTGGGCCTATCTGACAAGCCTCCCAGAAACCGAACGCCTCAACTGTTGATGGCTG  
CCCTTGCCGGTGTGCCAGATGTTGAGGACCCGTTTCGCGTGGATCACAGAACTGGAGTCCG  
TGGCATGACCGACCTGTCTCATCTCCTGGTCATCATCAACGAGGACCGGCACTCGTGGCG  
AGACAAAGCCCTGTGCGCCCAAGTCGATGTGGGGGACATGTTTTTCCCCGGTAAGGGGGA  
GAGCGGAAGCCGGCGAAGAGAATTTGTGCCCGGTGTGAGGTGCGGGCCGAATGCTTGA  
GTTTCGCGTTGGCGAATCGTGAGCACTACGGGGTGTTCGGTGGGTGTTCGGAGCGGGAACG  
GCGGCCTCTGCTCAAAGCGAATGGTGAGGATCAGGTGGCATGAGCAACGGGAACAGGATC  
ACCCCCGAGCAGGTGCAGACGATTCTGTTGATGACTCGTGAGGGGTGTTCCGCCAAGCAT  
ATTGGGGAAGTTGTGGGTGTTTCGGCTCGGACGGTGGTTCGGGTTCGGGCGGCTGGTGAT  
GCTCGTTTTGGCGTCGCCGGATCAGTTTGTGTCGTTGAGTCAGGAGCAGAAGGATTTCCGC  
CAATATTTGCTTGATGACGGTGCCCCGTATCGGGAGGTTGCCCGCACGTTGGGTGTGAGC  
CGGACAACGGTCGAAAAGTATTTCCCTGGTTACGGGTGGTCAAGAAGCAGGCTGCCGAG  
TTCAGAGCTCTGGTCAAGAAGTTCCGCTGGTTGGAGGCTTCGTGATGTGCGTGTGCGGCC  
ATAACCGGTCTTTCCACCGCTACGAGTGGGACAAGTTCCGCGGCCGGTGGGACACGGGT  
GCGACGCCGCCACGTTCCGACCAGGGCGGCCGGGAACGCTGCCACTGCTCCGAATATCGAG  
ACAAGGACGAAAACCTGATGGTTGTTGATACACGGGTGATTACCGCGAGGGACGACGCGAA  
AGCCGCCGCGGCTGCTCTTGATGACACGCGGTGTGCTTTGCATGAGTTGTTGTCTGAGGG  
GGCGCCGTTGCAGTTCCTGGACCGTGAAGCGCTGGAGTTGAACCTGGATGTGGTGAACAA  
GGCCCTGTCTCGGGTGGATGCGGTTATCGGGTTCGTTGGATCGGTTGGCAGACAGGTGGAC  
AGCAGCATGAGCGATCCGACTGCCACGTTGGCGTGTGCAAATGGTTGGAAGACCGGCTA  
AAGCAATGGAAAGCAGAAGCCAAACAACAACCTCGGGTGTGTTGGCGGGGGAGCGGAAAGCC  
GCCGTCGTATCCGGCCAAGTCATCGGACACGTGTTCGATGGCGAAAGGCCGCAAAACCGCC  
AAAGTCACATCCGAAACGGCACTGCTCGCCTACGTGAAAGCGAACTACCCACCGAAATT  
GAAGTCGAAGAACGCGTACGACCCGCGTTCCTCAAACAACCTCCTGGACGACGACGCTAAG  
AAGGGTGCCTCGTTGACGTCGATGGGGTGTGATCGATGGGTGATCGATGTTGTTGAG  
GGTGACCCGTATCCATTGTGAAGTTGTTCGGATGACTCGGATGTGACGATCGCTGGGTTG  
TTGGCTCGGGGTGCTCTCGGGGTGTCCGGGTGAAAGGAGATCGAACAATGACCCTCAAAA  
CCCGTCCCCCAACCGGCGCTGTCCCATGGCCGCTCATCCTCGTTGAAGGTGGTGAGAAAG  
CCGGCAAATCGTGGGCAGCAGCGGTCCTTTCATCCTCAGAGAAGGTTCGGCCGCACCTTTT  
GGATCGACTGGGCTGAAGGCGCAGCAGACGAGTACGGCGCAATCCCCGGTGCCCGCTACG  
AAGTCATCGAACACGACGGCACCTGGACCTCCATCATGGAGCAAGTCCGCGCCGCCAAGG  
ATGAAGCCCAGCGTGCCATCGACTCCGGGGAGAAACCCGTAGTCCTCGTGATCGACTCGA  
TGACCGCCGAATGGGACGACCTCAAAGAGTGGGTTCGACACAAAAGCCCCGAAGGCGCGAGT  
CGAACCGCAAAAAACTGGAGAAGGATCCCGAGGCGGAAATTCAGATCACCACCGATCTGT  
GGAACCTCGCCACTGCCCGCCACAAGGAACTGATGCGGGTGTGATGCGGTTCCCCGGCA  
TTGTCGTGATGATCGCCCGTGGTGTGACAGGTGGCGATGGAGAACGGGAAACCCACCT  
CGCAGCGGACGTGGAAGGTTGAGGGCCAAAAGAATTTGGCGTTCGACGCATCCGTGTGGG  
TCAGGTTGAACCGGGGTGAGCATCCGCAGATCATCGGGCGCCCGCTCCGTCCACGCAGGCA  
TCATCCCAGGCGAAGACAAACCCCGCCGAGTCCCGGATTTGACGCTGGAACAACCTGGTGT  
TCGACATCCTCAAGTGCGACCCGAAGACCGCCCATGTGCGGGAGTTGGAGTCCGTTACAG  
ACCGGGTGTGGAGCTGCTGGATTTGATTGCGGCTGCTGAGTCTCGTGATGTGTTGACGG  
GGTTGTGGCGGGATGCGAAGGCTGGCGAGTTGTTGAATGTTGGTGCCGCGGATGGGCCGA  
CTGTTACAGGAAGCGTTGGCGGCGCGGGCTCAGGAGTTGGAAGCCAGGCAGGCGGACGCCT  
CATGAGCCGCCGTTTACGGGGTTTCCCCCGGAAGTCAAGGAACTGATCTGGGAGCGTGC

TCACGGTCGTTGTGAACGCTGCAACGAGTACGCCTCAGACGCTACTGCACACCATCGCAG  
GCCCCGTGGTCTCGGGCGGCTCTCGACGCGTAGACACCAACGTGGCATCCAACGGGCTGTG  
GGCTTGTGGTGCTTGTTCATCGTTGGGCGGAGTCCTATCGTGCGCAAGCATTTCGAGCACGG  
TTGGCTTGTTCGTCAAACCCAATCCCCCATCCAAACTCCCGTCCTGTACCGCGGCCAATG  
GGTGCTGCTCGACGACGACGGAAACACCTACCGGATACCTAACCTGTGGAGGCTGCTAA  
GTGACCGGCCACGTGACGTTCCGCAATTGCCCGTTTGGCACGACCGATTGCATGTCATAC  
ACCGAGTTCGTGGCGGCGAAGGCCAGGTTTCGACAACACCTATGGCCATCAGGTTGACCCG  
GGCGAGATTCACTCGATGTTGTTGCCGACCCAGCGCGATCTGGTGCGTTGGGCGGTCGCC  
GGGGGTAGGCGCGGATCTTCGCGGCGTTCCGGCCTGGGCAAGACGGTGATGCAGCTGGAG  
ATCGTGCGCCTGTCGCTAGCCAAGCATGGCGGTGGGCGAGGCTTGATCGTGATGCCGCTG  
GGCGTGCGGATCGAGTTCGCCACGACGCCAACATGCTGGGCATCGAAACCCGGTTTGT  
CGCCGCACAGAAGAAGTCGGCGGCGACGGTATCTACCTACCAACTACGAGAGCGTTCCG  
GATGGAAAGCTCGACCCGACACTGTTACGGCCGTTTCACTCGACGAGGCGAGCGTGCTG  
CGCTCGTTCCGGGTCCAAGACGTACCGAGTCGTTCCCTGGAGCTGTTTCGACGGGGTGCCCTAC  
CGGTACGTCGCGACGGCCACGCCATCGCCGAACCGGTACAAGGAGCTGATCCACTACGCG  
GGTTATCTCGGGGTGATGGACACCGGTGCGGCGCTCACGCGTTGGTTCCAGCGGGACTCG  
ACCAAGGCGAACAACCTCACCTGTACCCACACAAGACGAACGAGTTTTTCTGTGGCTC  
AACACCTGGGCTGCATTCGTCCAACGACCATCCGACATTTGTAGGTGCTTATGCCACGGA  
GACATCCACAACCTCGAAGGCCAACGATTCGGCAAGCTCGTCGTCGAACAATGGGACCCGG  
ACGCCAAGCGCGACGGCGCCTGGATCTGCCGATGCGAGTGTGGTGGAAACGCATATGCCA  
CCACAACCCATCTCCGCGCCGGCCGGGTGCTCAGTTGCGGGTGCATCCGGCCTAAGCACG  
GCGGAAAAGGAACCCGAATCTACCGAATCTGGCAGGGAATGCACGATCGTTGCCGCCGGC  
CGGGACACAAGAAGTGGGCCGACTACGGAGGCCGCGGGATTACAGTCTGCGAACGGTGGC  
GGTCTTCCCAAACCTTCCCTCGCAGACATGGGACACCCACCAGACGGACACACCATCGATC  
GAATCGACAACGACGGCAACTACGAACCGGGCAACTGCCGGTGGGCAACGCCAGCGGAGC  
AAGCCCGAAACCGTCGACCACGCAGGCGCTCAGTGCCCGTGTGATACCGGCTATGACCTG  
CCGCCGCTGGAGGTGCTGTGGCATGAGGTTGATCCGCCGGCCGATGAGTTCGATTTTCGAG  
CGTGACGGGCAGGGCCAGTTGGTGCGCGGGGTGAACCTCGGGTTACCGCAGGCCGCGGCC  
GAAAAGCGCCGGTTCGCTGGATGCTCGGCTGTCCAAGCTGACCGAGATCGTCACCGACCAC  
GCCGAACACGGTGAAGGCCAGATTGTGATCTGGTGCAGCCTCAACGACGAGCAGCGCGCC  
ATCGAGAAGGCCCTCGAGGACGCTGGGTTGAGCTTCTCATCGGTGTACGGGTCACTCGAC  
CCGGACGAGGTGGAGCGCCGCCTGTCCGACTGGAAGAACC GCGACACCTACGCGCTGATC  
GGCAAACCGGTGATGCTCGGGCAGGGCATGAACCTGCAACAGGCACACACCTGCGTCTAC  
ATCGGCATCACACACAAGTTCAACGACCTCATCCAAAGCCTGCACCGGATCCAGCGGTTCC  
GGCAAACCCACCCCTGCACAGCCCATCTCATCCACTCCGAACCGAACGGGAAGTGGTT  
CGCATCATCCGCGAGAAATGGGCACAACACCGAGAGTTGACATCAACGATGACCGACATC  
ATCCACGAATACGGGCTTGACCCCGAGGCAATCTCGGAAGCGCTGCAACGCTCCATCGGA  
TGCGAACGCATCGAAGCATCCGGCGAGGGATGGCTGTTTCGCCAACAACGACTGCGTACCC  
GAAACCGAGTCGATGGACGACAACCTCGGTGGACCTGATCGTCACCAGCATTCCGTTCTCG  
AACC ACTACGAATACACGCCGAGCTACAACGACTTCGGCCACACCGACGACAACGCCCAT  
TTCTGGGCCAGATGGACTACCTCACGCCGCAACTGCTGCGGGTCTCTCGCTCCTGGCCGG  
ATCTATGCCTGCCACGTCAAGGACCGCATCTTGTTCGGCAACGTCACCGGCGCAGGCGTC  
CCCACCGTCTCCCCGTTCCACGCCGAGGCGATCTTTCACGGCCGCAAACACGGCTTCGAC  
TACCTCGGCATGATCACCGTGGTCACCGATGTGGTGCGGGAAAACAACCAGACGTACCGG  
CTGGGCTGGTCCGAGCAGTGCAAAGACGCCACCAAGATGGGCGTTGGCTCCCCGGAATAC  
GTTCTGCTGTTCCATAAACCGCAGACAGACAGGTCGAAGGGATACGCCGACACCCCGTC  
ACCAAATCCAAGGACGACTACAGCCGTGCCCGTTGGCAGGTGGACGCGCACGCGTTCTGG  
CGCTCGAGCGGCAACAGGTCACTGACAGCCGACGAGCTCGCCGCGATGCCACCAGACCAG  
CTGGCCGCACTGTTACCAAGCACAGCCTGCAGGACGTCTACGACTACCAGTCACACGTC  
CGCATCGGTGAGCAGCTCGAAGGTCGCGGGTGCCCTGCCTGCCACGTTTCATGGCCATCGCC  
CCGGGATCGTGGTGCCTCACGTGTGGCACGACGTGAACCGGATGATCACCTTGAACGGG  
GAGCAGAAACGCCGCAACGTTCAAATGCACGTGTGCCTCGCGCGTGGATCGCTGGTGCTG  
ACCAAGGGGGGATACAAGCCGATCCAAGAGGTCAACGTTGGCGAACTGGTCTCACCCAC  
AGGGGCCGATGGCGACCAGTTCTCGTCAAGCAGAACACCGGGGTTCCGGCCCGTGGTGAAC  
CTGCGCGCGCAAGGCGTTCCCGGCGCGGTGATGACACCGGACCACAAGGTGTGGACCCGA  
GACACCCGCGGTTATGCCAGTCGGTCATTCAGGACCGCGAAACGTCAACAACCTAGATGG  
GTAGAAGCGGCCGAAACGGTTCGGCTCATACTGAAATCGCAAGCTTGCTCCGGAAGAATCC

GCCGCCGGTGATCTGACCTTGTGGTGGACCGTCGGACGATGGCTTGCAGATGGTTCACATC  
GACGGCCGCGGCTGTGCGGTTCATATCGGTTCGGTTCGCGACAAAGCCGACGAGTTCAACGCC  
AGGATCGGCAGATTCGGCGGCAACCCCGCACGCGAGCTCACGGCCCTGCAATACCAGCTG  
CGCGACCCTGGCCACGAACTGCGGGCGATTCTCAAGGACTGCGGGGCGGGAGCTGCGGGC  
AAGCACCTGCCAGCCGTCGCATACACTCCCAGTGGATCAGGCGCGCGCGCTGCTCGAT  
GGGTACTTGTCTGGCGACGGGCATTACCTACCAGGCAGGCGGGCGATGGACGGCGAGCAGC  
GTGTCCAAAGAACTGATGCTCGGCATCGCCTACCTCGCGCAACGCGTCTACGGCGCGGTT  
GCCAGCGTGTACCCCGGCCGGCTGGAACGCGATGGTGTGATCCAGGGCCGCGCAGTGCAC  
ATGCGTCAGGACTGGGTTCTGTCTGTTGACGTTGATGACGATCAGCGCCGTAAACGAGCT  
CCGATCCTCGATGACGGCGCGTGGATGAAGGTGCGCAGCGCCGAGCCTGTGCGCGAGGTT  
GAAACCTGGAATCTGCGTGTGGCGGAGGATGAGTCGTTTCATGCCGAGGGCCTGGTGGTA  
AAGAACTGCCCTTGCAGTTCGACATCGTTGACCGGCTGATCACTCGCTTCTCGAATCCT  
GGCGAGTTGGTGTTCGACCCGTTCCGGCGGGCTGGGCACCGTGCCGTTGCGGGGCACTGAAA  
CTTGGTTCGGCGCGGCCGTTGGTGTGCGAGTTGAATCCC GGCTACTACTTCGATGCTGTCAAG  
TATCTGCAAGCCGAGGAGCGCCAGCGCGACATGCCGAGCCTGTTTCGACCTAGAGGACGCG  
TCATGACCGCCGAGTCGATGTTGTGGTTCCGTGCCCGCCCGCTTCGCACCGTTCCGCGT  
GGGGGCATCCACGACCACCCGCACCACCGAAACCACAACCCATCACAGGAGAACCGATGA  
GCAACCTCACACCCGAACAACCTCGAAGCGATCGCCTACATCGTCCCTCGCATTACCGGAC  
CACCGTCGCTGGCGTACTTCCTCGTGAAGGGGCTGTTTCAGGTGATGTACACGGTTTCGGG  
GACGTGGCCCCACTACACCGTACACCGGTGGAACCGAACCACCGAAATGCTTCAACTCCAC  
CGTACCGCCGTCAAATACCTGGAACAGATTCTCCAGCAAGGCGACACCATCAACTGGCA  
GGTCCCATGATCACCGTTGCTTGCGCCGAATGCGCCCCGCACCCAAGGCCGCCCGTCACC  
GCCGAATTCACCACCACCGACGAAGCCCAAAGATTCATTCGCCGACACCACGCCCTCGCC  
GACCACCGAGCACACGTTGAGGAATCTCATGACGTGCCTGTTGTGTGATCATCCCCGCTC  
CACCCACACACCCCAATGCCGAACCCGGCTGGGCGTGGATGCGGATGACATGACCCGATA  
CACGCAGTGCCTATGCCAGGATTCGAGACCGGTCTGTGTGAGGTGTGCGGGCGGAAACGG  
ATGCGCAGACTGCGAGGAGGTTTGTATGCGGAAAAACGTGTTTTACCAGCGTGTTCGGGT  
AGTATCGAACGTGAGTACGAAGACGGCCCCGGCGGTGCTGGTAACACCGTGACCCCGGGC  
CTAACCACTGGATTGGAGTGGCTGTGACTGATGATAGTCCACGCATCCCATACGACTGGG  
CAAGGGTGGAAATGTCCTACCTGCGGATCTGCCCGGACACCCGCTGCCGCGCCAAGTCGG  
GACGAACAACCGACGTTACATGAAGCGCGTAGATCTGGCATTTCGAGCGTTACGCCGAGA  
TTCGAAGGTGGCGCATCCACAACGCCGTCATAAAAAAGTTGTTTCGGCGGTGATGCGTCGT  
GAGGATCAGGTCCATCAAGCCTGAGTTCTGGCGGTCCGATGACATCACCAAACCTGCCTAT  
CTCGACCCGGCTCACGTTTCATCGGCTTGTGGTTCGTATGTAGATGACAACGGTGTGGCGC  
AGACAAACTCGTCTCCATCGTTGCCGATCTGTACGCCGATGAATTCGCCCGCGAGCCTCT  
AGAGACCCTCGAGAGAGTCACTGAAGATCTGGAGAGACTAGCCAGCGGTGGACAGGTGAC  
CCGCTATAAAGCCGTCCACAACGGAAGTCTCAAGGATCTGCTGTACATACCAAAGTGGAA  
ACAGCATCAGCGGGTGAATCACCCAGTCTTGGCCACAAATATCCACTCCCACCAGCGGA  
TATGGTCAACACGTCAGTGTCCCTCTTGAGTTCCTCTGGAGACCCTCAAGAGAGTCTCAC  
CCACGAACAGGGGAACAGGGGAACAGGGGAAGGGGAGCAGGGGAGCAGGGGAGCAGGGGA  
CGAGGAAGTCCCGCTTCCGCCCAGCCACCGCCCGGACCGTACGACTCACCCCGCTCGT  
CGTCGACACGGAACCGGTCTCAATCGAACTCGTCAACAAGCCCTCGAAGCCGCAACCATC  
CTCCGTTCTAAGACCGTTGTCCGGCAAGAGCTTGAAGCAACACCTATCCAAGAGCCAC  
TGTTGATCGGCTGGCAGTCCAGGTTGAGAAGCTCACCCGCGAGGGACAGCCGGACGCCCT  
TATCCGGGAAGCGTTGCGTGAATGGGAACGAAGGCCTAACTGCAACCTCCCTGAGTACCT  
GCCAACAGTCCCTCGGGGATGTCATCAAGTCGTCTCGATCAAGCAACCTCACCGCCGGCGA  
AGCGAAGGTCCTCGGATGGGCTGGCCTCGGAAACCCTGACCAGAGAAAGGCAATCGGACA  
ATGAGCGACTCTTATCAGATCGCGGCAAATGCTCTTGCGAAGTGCGCCGCATACGACCCG  
TGGTTTCCTCAGCCGAACCGCGCCACCGTTCGAGGCGTGGGCTGAGCAGATCGAACTGTGG  
AAGTTCAACCAGGCCGACGTGTTGGCCGGGGTGACGAAGATGTATTCCGATCATGGGAGC  
GGTTTTCGTCCGTTGCCGAAGGATCTTGTGATGCTGCACGTGCGATCCGGCGGGATCCG  
TGTGAGCGGGAGACTTCGGCGGAGCGGGAGGCTCGTGAGGATGCCCGTGATGCGGAGTTG  
GAGCGCCGTTGGCTGCGGCGGTTGGTCCGGTTCGCTGAGATGAAGTCGATTGATCGTGCC  
TGACCGGTACGGGGATCCGACGCCGGAGCCGCGGGTGTGTTGTGCGTCCGAGGGTGAATGC  
GTTGACGGTGCGGTGTTCGTGGTGAAGGCGGGTGTGGGTTCTCGTTGTGTGGTTGCGGG  
GACGGGTGTGGTGTTCGCGCGGTTCTTCGTTTCATGACGTGAGGGTTCGGGATGCGGAGTT  
GGCGGCTACGGGCGCTTTGGCGCGTGGGCGGATGTCATGAGCGCCGGTGACAAGGGGGAG



GGCGTGAAAGTCGCTCCACGTGGCGTACAGCCCCGCAATCAACAACAGGAGACGAACAG  
TGAGCATCGAGATCCGCCTCGGAACGCGCGGACCATGCAAATGCCCGGACCGTACGGAC  
CGGACGAAGAGATCCAATGCAGCCACTGGTGGGAATGCGACTGGGGCGTCATCGAACACT  
CCGACCCCCGACCAGACCGAGGCGAAGTCGGTCATCTGATGCTGGCAACCACCGATTACG  
TGGACCTGCTGTGGAACAACGGACCCATGCCTTTCTTCATGAAGGGCGGACGGGTGGACA  
GCGTCAGCGTGGACGGAGATCGGTTATTCGTTACATCGAGTGGGGTGGGAAACGCTGGA  
CGTGGGAGTTGTTTGAAGGCGCACATATGTGTTCGGTAAGGGTTGGCCACACAACCTGCTTA  
TTGGCAGGTGGCCGACTGATGACGTTGTTTGTGTCTGCTGCGGATGATCCTCGTGTCCA  
GGCCGCCAATCCGCGCGGTCTGTGACATCTGCAAAGCCCCAAAGGCAAACCCTGCAG  
CAACACGATTTCGTCGGGGAAGCCGCTGCCCGTCCGGTGTATCCATTTCCGGGCGGCTCAC  
GCAACGATCCAAGGAGAACAACATGACAACGCCGAATGATCAACTCGCCCGTATCCGCG  
AGTTCTGCAACAGCGTCGCGGAACACGATCCGGGCTACGAGGTGGCGTGTGACATCCGAG  
ATTTTCATCGACGGACATGCAGACATGACCCCGATGGGAATGCTCAACGAGATCGCCGACC  
AATTCAGCTTGGTCGCTGAGGTGTCTCGTCTCCGGGCGCAGGAAACACGAATCCGGAGGC  
TGGCTGAATCGGGCGGCGTGTACGAACCCGGACCCGACTGGATCTCAAAGCGCGCCATCC  
TCGCTGCACTGGATAACCGAGGGGGAAGCGTGAGCGGCGAAGCCCAGAACGTGATCGCCGA  
GGCCATCGGATCTCACCGGTACGACATCTCTGATGTCCACGTCCATCGGTGCGTATGCGG  
CAAGGACATCGGACGCGCGGACGACGCATTGGACATGCACAGGGCTGAGGAGGTTGATAA  
AGCCCTCGGAGGACTCACCCGCGAAACCCTGCCCGCAAGGGAGGGTTGGATTCTCCCGCC  
CGGATGGATTGGGGACCGTGTGCGGCCCCGCTGGGTGTCCGGATGGAGCGAGGCATGAGC  
GACGCGGACACCGCACGCCGCAACGGCTGGACAGTCGGAACCCGACTCGCCGGCGACAAA  
GGCCGCGGCGAAACGATCATCGAAATCACCCGCGATCGGCGAGGAAACACGTGCTCGCGAAA  
GCCATCTCCTACGCAGGCCGACCCGCGCCGTACCGGGAGTCACTGTGGACTTTCAGGTTT  
CGGGATTGGCGGGAGGTGCCTGGTGCCTGATCTGAACTCTGTTGCTTATCAGGGGTTGAT  
TCGATGATCGTCGCCGTTTCTCCAGGTAGGCAGCCGATCTGACAGCGCACACATGTTTCC  
GATTACCGACACTCGTAGGGAGATGACGACTATGCCGACCACAGAGCATGGATCAGACGT  
CCAGCACTTGAGCCCTGAACACCCGCGATCGTGCTTGGCGCGATAGGTTCAACGCCCGGTG  
GCACTATGACTACGGCGGGTGGATTTCGTACCAGGCCGCAAGGATGAGGCGTCGACCTTCG  
TTTGATCCCAACCAAACTACGGACCGTTCACTGAGGATCACTCGTGTCTGCTGCCTGCCT  
GGTGGTACACCCACCTGAGGATTGCCCGTCTTAAGTGGAACACCCGACATGTTGGTTGT  
TTTCGATTACGACACCTCGCCCAACAAGGCACAAGCGGATACAGCTGACGATGACCCAG  
ATAACGAAGACGAAGAGCAGGAGTTCACCGACGTGAGTAAGCACGGCAACTGGAATCTCA  
AGATAAACGCTGATGAAGGATCCCTCCCGATGACTAAAGAGAGTGAGGCAGGTGTGAGTG  
AAGCAGCCATATGGATATGGGAGCAAGCAAATGGGTGACATGACGTACGACAAAGTAACG  
TTCATGGCCCCAGCCTGAAACCCGGTGTGCCAGTGCCGGACGGGAAACAGGTTGGAGAG  
GTGTTCCGCCGACGGCGGCAGACTTTTGGTCGTCGTTGTTGACGGAGTGGTGCATATCTAC  
CAGCGTGGCGACACCAGTGCAGGATTTTGTGCTGCACAGCAGTGTGGACACGAAGACCGCG  
AAGCAGGCCGACGTGCGCAGGAGCCGTAACCTTGCAGCGGGAATTCGGCAATGACTAA  
GCGCCTGTCCTTCGCACATGGGGGAGAGGAAGCGATGAGCGGGGAGTGGGCGGCTACAGA  
GGAGGAAGCATGAGCGACCCGGTAACCCGCGCAAAGCCGCGCTGGAAGTGTTCGGAGAT  
GGTCCGTGGACCATCGACTCCGAAGATGGCGAACCGATTATTCACGAAGCCCACCACTAT  
GACTCCGCGGACGAGTGGTACGACGTGGACGGGCCAAATGGCGGGTGGGTGGCGCACTGC  
GAAGACCTCCAGTGGCCGAGTTCATTGCCTCTGCCCGCACTCTCATCCCTGAACTGGTG  
GCCGAGGTTGAGCGGCTGCGCAAATTGGTTGGGGAGGAAGCATGAGCGATGTTGTTGAGC  
GCGCCAAGGCTGCGCTGGAAGGCGTGACCGAAGGGCCGTGGACGTTCCAGCACTGGGGCG  
GACAGAACCAGAACGGCGACTACGCAGAGTCGATCCTCTTCGACGGCGCTGGCGAGTCCA  
TGACCTACGGACTGCCCGACCGTGACGGCGAGTTCATCGCCCAGGCGCGCACTCTCGTTC  
CTGAGTTGGTCGCTGAGGTTGAAGAGTTGCGTTTGGTGGTGGCCGCTGCCGCTGTCGCGT  
TGCAGGAGAGACCCGATGACCTTGAGCGATGCAATAGACCTGATCAACGCCGAGCGCGT  
GAAGTGGCTTCGATTCTGCGAAGCAGCCACGGCCCCGCGGCGACAAAGAGGACTGCCTAGT  
CAGCGGGGGGCGGGCCAGCGGCCTGGCAGACGCACTGGTAATCCTGGCGAAAGTGAGGCC  
CTGATGAACGAGCAGAGGACGCGATACAGGAACTGGGGCGAGGACGGCAAATGGAGGTGG  
CGAGAATGAGCACCCCGTGGTGGATCGTGTGTTTGGGTTCATCCTGACAATCGAATTGTTCA  
GCTTCGCGCTGACGTTCCGCGCCATGTCGTTGTGGCGCCGGATCGACCAGCGCAACCCCA  
ATCTAGCGGGCGGCCTGTGGGGATTTAGCCACCCCTACGGTCCACGGCTGCGGGTCCGGCG  
AAATCAAGCCCTGGTATCGGGAGGATTGAGATGGGACTAGACACTACGCACGACTGTTGG  
CCTGGGTGTCCGGATGGGGCGAGGCATGAGCGATCGGTTCTATGTCTTGGACTGCGATAG

GTGCGGAAAGACGTTGGGTTGGACCACCAATGCTGCATTCCCGATGTGTGGGTTGACGCG  
GTGCACCGACTGCATGCGGGAGGCGATCGCGTGATTTCAGGTTTCATTGTTCGGGAGTGCAAC  
CGTGTCTGGGACCAGTCGTGCGAAGACTGCGCTCAGTGGAAAGCGGATCGTCACTCGATC  
AACACGGGGCATAACGGATATTCACATCATCCCGGACACCACACCCCCGCGGCGTGTGGTG  
GATCAGGGGTGGGCGGAATGGCTCACGAAAGGATCGTCCTGCTGATGCCGTGGGTCAAGA  
TCACTTGCACCGAGCGCGACGAACTCATGTCCACCCGCGACCTGGTGCCGTTTTCTGCTCGT  
GCACCGATCTGGACGCCGAGTTCCATAGCGAGCCGCAGATGGACATCGAGTGGGCCGAAC  
GCGGCGCAGACCAACCGGTGCTGCGCGAACACCGATACCCGGCACGTACCTACCTCAGCG  
ATGAACCGGGCACCGTCCGGCCCCGACCGAAAGCCCTGCGAGCACTACCGATAACGAGGCC  
AACCATGACTACCCCTGAGCGTGCAGCTCTGGTTGAGCGGGCCGCGCAAGCCATCTGCGA  
AACCAACAGCTCCGGCCGCATGTTCCCTGGAACACCCTGTTCGGAGCAGGAGAAGGACGC  
GTGGCGCCGCATGGCTGATGCTGCGTTCGATGTCTCATCGACGCCTGGGCTCCGCCGTT  
TTGAACGGCCGCAAGATCGTCAACCCCGCCGATCACATTGACCGGGCCAAAGACGAAGCT  
GCCGCGGGGGATTACCAGGCAGCGCAGACTCACGCGTTGATCGCTATCGCCCAACTACTA  
GCCGAAAAGAACCAGCAATGAGCAACCTTCGCCTCCCTGCATGGACTGCGGGGAACCGA  
TGAACCGGATCTACCCGAACGCCAGCGAGGAACTGGCGTGGGCGCACACCTCACTGGAGG  
ACGCGGAGCTGTGCCCTCGTGACCGATCGGTCCGCCCGTGGCCTATGCCGAAACTGGAGG  
ACCAACCGTGACCTTGTCTGTGATTCTCGCTTCCAGGCCCGGTTCCCTCACTGAGAGCCC  
TGTTTGTCCGGCGTGTTTCCAGCCCCGCACCGAGCATTCCACCGACTGCAAAGGACACCA  
CAAATGAGCGTCTACGCACTGAAGCAACCGCGTCCCGGAGGGGGCGAGTGGATCCAGGAG  
CACGACAGTCTGGAGGCCGCACTCCAGTTCAGTCGCATAGCGGCGGCATCCTTGTCCGC  
CGCGAGGCCATACTGGGCAGCCTGGACTGTGGTGGGTAGAGGTCAACACCGACGATCTG  
CCCAGCGATGTCGGATCGGTTGTGCAGTCTGAACCCAACGAAGCTAGGAGGCCTGAGAAG  
TGACCAAGCCGATCGACACCGACGCCCATGCGGAAACACCCACAAAACCCAAACACATGA  
ACCCCAACAAGCTGAACACCAAGGTAATAATCCGAATCTTGGAGGTGCCCATGAGCGACAA  
ACCTCATATTCTTTACCGCTTCTACAACGCGGAAGACGATCTTCTCTACATCGGAATCAC  
AAACAACCCGAGAAGCCGATTCAACCAACACCACGCCGACAAAGCATGGTTCAAATCAGT  
CGCCCGCTCCACGATGCAACACTTCGCCACCCGCGCTGAGCTCGAAACCGCAGAGGTAGC  
AGCGATTCAATCGGAGATGCCGCGATAACAACGTCGCGCACGTAGTCCACAACAAGGGAGA  
GCTTCGACCCAAAGTCAGTATCCCGACGACCAATCAGTCCCGACGCCAATAAATTCCATGC  
CCCGGACGCCATACAAGCGACGCTCCGACTGTTGAAGACCGCGAAAAACGCATGGACGA  
GATCGAAGAACAGATCTCCCGAATCCCCAGGCTCATCCCCGGCGAACGATGCCCTCCTG  
CGAAATGATCCTGCTCGCACTCGAATACGACGGATTGGTGAAATGCCTCAACTGCTTGAA  
CATGTGGACACCCGACGAACTTCAGGAAACCCTATGACCCAACCAGCAGAGGATGGCAAC  
CTCCCCGCCGCAAACACAGACTCGGAAACGCCATCTCCGCGCTCATCGACCCAAAACCC  
GAATACACCGAAGGTGCCACCAGATGGCGCGACTCCCTCTACGACCAACTCACCGAAGAA  
ATCCCCGGCTCCCAAGGCAACGCCTCCCGCATTCCGCAATCCTCACCAACCCCTCTGCATC  
GATGCCGTGCAACTCAAACCGAAATCGACGCCACCGTCCGACGATGGGAACCCTCAAGC  
TACTGGGTGTTCCGGACCCCCATAACCCGTTCCACAACGCGACCTCACCCGCGAACACACA  
CCACTAACGGTGCTACGCCTCCAACCTATTGGAACGACGCCCATGGCGGCCCAAGACGCC  
CACGGCATCGAACAAATCTCCGGAAGGATCGAAGCCTGGTGCGAATCCATCAAACGATG  
CTCAACCCGCCACCGAAATGGTCACTCCCAAACCCGTGCCAGCCTGCGACACCGCCATC  
GTGTACCGGAAGAACTCAGCCGGCGAAACCGTCCGACAACCCGCACTCAAATCGGCCCA  
TCAGGATGCGTCTGCCAAAACCTGCCACCACGAATGGGGACCGCAACTGTTCCAGCACCTC  
GCCAACGTTCTGGGCTACGAACTACCCGCAGGAGTCTCGAATGAGACACGCCAACCTCC  
CCACATCCCCTAGCTTGCTTGCACATGCAGATTCATATGCCATCATTGGGTCCGGCAAGT  
GAAGTGTGCCAAAGCCCGAAGACCTCCACAGGTTCCGGGCTTTTATTTCATTCCCGGGGAG  
GCCAACCATGAGCACCTTCCCCGCGCCCCGCACACTCACCGAACGCATCCAAGGCGCACA  
CCTCAACCTCAAACCTTGACGCGCAGGCAGGCAACCCGGACATCATCGCCGCCGCTGAACG  
CATACTCGACCAGCTGATTGACCGGTTACCGAGATCCACACACCAGGAGTAGTTGCCGTG  
CCAACCAAACACTTGCGGGTGTGTCCCAGCCCTTGCGGCAAGGTTTCGTTTCTCGGCGTGC  
AGCAAGGCTTGCCGACTCCCGAATGATATTGATCCGGAGTCGTGGCGTATCAACTTGCAG  
GACGGGGCCGGCACAATCGGCAAGGCCAGCAGTGACGGACGACGAAAAGACCGAACAGC  
TCCGCAAGGAAGCGTTCGCATCCCTCGAAGACACCATCGCCAAATTCGCGGACCTGCAAA  
ACCAACACAACGCAGTGACCGACACAGGCGCAGAGATGGCCGTCGACGCTGTCCTCCTCA  
TCGGCATGCAATACCTCGATGACGACGGTGACCGCGGGCGGCTACGTCAACATCATCCCC  
GTAATGGTTGGCAGCCCGGATACATCACTGCGGGTCTTCTGTTCGATGGCCCAGGCAACGG

TGGTGGAGAGCCACACATGCAGTGGGCAGGACGACTGATGAAACCCGGCGACATTGACGT  
CATCGCCTCCGCCGACGATGAGCAACAGGTCATCGACAACACCCTTGCTGATCTCGGCTT  
AACCTTCGATGAGCTGGCGGAAGAAGCTGAAACGCGCAATTTTTCAACCGTTGAGGCTCG  
GTTGGCGTGGTTGTTGATAGGTGAGCTGTATTACAGCCGGCCTATCGGTGGACAAGCCTT  
CGGGCGGGATGAGTGATGTTGCCATGAAACGCCGCGCGGCCCGCATCATGCGACGCCTCG  
CACGCCGCCTCATCGCCGTGTCCCGACGGTTGGACCCACCCAAAGACGAAACCCGCCTGT  
ACACAGGCAACATCACCCAAGCCATCCTGGACCGCATCGAAACCACACCACCGTGGATGC  
GTCAGTCCCTCACTGTTTCGGGATCCTCAGCCGTGGGAACACCTCGACCTGTACCGGCCAC  
CGTCCCTACTCACGCGCATCTGGTGGTGCATACGAGGATGAACCTCACAGAATTTCTCAC  
CGAGACGCTGAACAACCTGGTTCACCCCGGGCGACGAAAACACCAAACCGTTCCCGATCCT  
CCTTCCGGGACTACGAACTGTCAGTGTCCCCCGGAACTTGCCGGCCAGTTCGCTGAAGA  
AGCAGGGCTGCCGCACCTCGACACCCCGAAACTGGTTCGCGGAAGCACTCGCCGCGGGCAT  
CACACAAAATATGTGATCCTCACACGCGAAGAGCACGACCAACTACGCCAGCAAGCGGC  
CGACGCACCGACCGGGCACCCGCGTCATCAACATTCGCACCACACCCACGGGCCAGCCTGT  
CCTGTGCATCACCATCGACAAGGCAAGCAACGATGTTGTTGTCCCCGCGAAAGCGTTGCA  
GAAAGCAGCTGAACAGTGATCCACATTGAAGTTGACGGGAAAGTGCTGATGCACTCCGAC  
CCTGGCGAGTGGATCACCACACCTCCCGACATTCCAGCAGTCCAAAAAGCTGGCCCCAAC  
GAACCGTGGATGCTTCTAGTGCAAGCGGCGCTCGCCAAAGCCGCCACCCTCGCGATGGCC  
GGGAAGAGACCTGAAGAAACCACAATCTGTGTCACCACACGGAAAAACGGCTGGATAGTG  
GACTACACCAATGGATGACGCAGCACGCGCCCGACTCGAACTCCGCCGATCCAACGCGGC  
CCAACCCACCGCAACCGGCACCCGCGAACAACAAAACCGGACGCATCACAGACCGCACCAT  
CTGCTACTGCGGAGACGCCGACTGCGACACCTGCGGCACCTGGTACGAATAACCACACAG  
GACGGAACCGCGAGAAAATGAACGAAGTGGTGGTCAACGGAACCTCGATACGTTCCCGAAA  
CCGCCAGCGGCGCCACCACGATCGGAATCGGAGTCACCACCCGCAACCGGGCGCGACGTCG  
CCGACCGGACCATCGAACACATCCGCAGCCGCACCCCAACGCCAAACTCGTCATCGTCCG  
ACGACGCCAGCGACCAGCCATACCCGGCAGCGACCTATCGGTTCCCTCAACGCGCAGGCA  
TTGCCCGAGCCAAAAACAAATGCCTCGAACTACTCAACGGCTGCGAACACATCTTCCTGT  
TCGACGACGACTGCTACCCGATCGCCGACAACTGGTTTCAGCCTTACATCGACTACCCG  
AACCGCACCTGATGTACCAGTTCGTTGACCTGGCCAACGGGCATCGGCTCAACGACGTCA  
CGAAGGTCTACGACGACGGACACCACTTCGCGTTAACCGGGCGCGCGGGCTGCATGATCT  
ACGTACACCGCAGCGTCATCGAAACAGTCGGCGGCCCTCGACTCAGAGTTCGGCGGGCTGGG  
GCTGGGAACACCCCTCCTGGTCCGACCGCATCTACAACGCCGGCCTCACCACGTTCCGGT  
ACGGCGACGTCTGCGGATCCAACAAGCTCATCCACTCCATGGACGAGCACCTAGAGGTGA  
AACGCTCCGTCCCCACCGAGGAACGCAAGCCGTCGCCGCCCCGCAATGCCGACCTGTACT  
GGAACACCACTACACGAGCAGCCACCACATCCCCGTAGTGGAACCCGACCGGCGTGTGG  
TGCTCACTTGCTGTGTCCAACAACCTGACCCGCAGCGCAACACCCGCATGCGGCCCG  
ACGTCAAACCTGCTCGACACGCTGATCACCTCCATCACTGGAGGTGAAACCGTCGTGCTGT  
GCGACAACCCACTACCCACCCGCAGGCGTCATTCGAGCGAGTCACCAGCCCAGTGCATA  
ACCCATACTTCGCGCGCTGGTACCTGTACTACCAATGGTTACGCGCCAACCCCGACGTCC  
AATGGGTGTGGTGCCTAGACGGCACCCGACGTCGAAATGCTCACCCCTCCGTGGGAACACA  
TGGAACCCGGGAAACTATACGTCGGCCACGAACCCGCGCTCGTGGGGATCGACTGGATGC  
GCGACAACCACAAAGCCACCCACCTGCAAACATTCATCGACACTCACGCCGACCACACCC  
TATTGAACGCGGGGATCGTCGGAGGTGACCGTGAAACCGTCATGACATTCACCCACGACA  
TGATCGCCGACCACGAAGACCAACAACGACGCATCTGGCACAAAGAAGACACCAAAGGCA  
CCATCATCGGTGACATGGCCACACTCAACTATGTTGCCTACACCAAACACGCAGACCGTC  
TCGTCTACGGGCCGCGCGTCCGCCACCATATTCAAAGCCAACGAACGCAACCCGTGGAGCT  
GGTGGAGGCACAAATAAACATGGACCAGAACCTGAAACCCGGCGACGACGTATGGGTTGA  
CTTCGACGGACTCGAACACGAAGGCGTCGTCGAGAAAATCCAATCCAGCGGATGGGTCAG  
ATGCTCCATCGCCATCGACCCCGAATACGACTACGGCAGCATCACACCACGACTCACACC  
ACACACCACCGTCGCCGTGAAAACCACACGCATAAGGCCACGATGACCCACACCATCGGC  
ATCGTGGCCCACACCAAACGCGCCGAACAAGCACACCCGGCTCATGGAAACCGTGGGCGCC  
GCATACATGAGCATCGACAACGGCACACTCGGATGCGAAACCAACCACCGCAAAGTCTGG  
CAACACCTCACCAAGTTCAACACCGACTGGCTCGTCTGACTCGAAGACGACGCCATACCG  
TGCAACAACCTCCGCGACCAACTCGACGCAGCGCTAGCAGTGGCGCCCAGCCCAGTGGTC  
AGCCTCTACCTCGGGCGAGAACGACCCCGCGAATACCAACAACGCATCGCCAAAGCCGCT  
GACACCACAGCACACTGGCTCACCTGCCGACGACTACTCCACGCAGTCGGAATCGCCATA  
CACGCCGACCTCGTACCACACATGCTCAACCAACTGCCCAACGGCAAACCCATCGACGAA

GCAATCAGCGCATGGGCACGCCACCAAGGCCACACCATCGCCTACACATGGCCCAGCCTC  
ATCGATCACGCAGACGAGACGCCAATGATCGCCACCAGAAACGACAACCAACCACGAACA  
CCAGGCCGCGTCGCATGGCAACACGGAACACGCGACACCTGGACCACCGACACCCAACCA  
ATCTGATGCCACGAGCACCCAAAGTCTGCCGACACCCAAGCTGCACCACACTCACCACAA  
CCGGCACATGCCCCAACACACCACACACCGTTGGGGGCAACCACCAAGGCCGCAAAGTCC  
CACACCGCCTGCAACAAGCCACATTCCGCCGCGACAACCTGGACCTGCCAACAATGCGGCC  
GCCAAGCACAACCCAACACCGGCCGAACCTCCACGCCGACCACATAACAACCCCGATCACGCG  
GCGGCACAGACACACTCGACAACCTGCGCACCTATGCAAGTCGTGCCACGCGCCCAAGT  
CCCGCGCCGAGGCGCACGGGTCGAACACCTGATCGAACGCGGCCCGAAAGTTAGCTGGCG  
GCCCAAATGTGCCCTGACCTGCGCAAACGCCGACACGCCCGCAAGCCTCTGACCTGCGG  
AAACACCCCCCAGCAACCCCCCCCCGGGGGGGTCTGCGCGGCCCCGGACGGCGC

>NewGenomeName\_260

CTCATAGTTCATAAACACCCGAGTTCCCCCCTATGGCCTCCTTCAGTTCACCCAAAGAGT  
GCCACCCTTATGGTAACTTATGGTTTACTTAATGTCAATCCTTATGTGAGACATTGGGTT  
AACTCTAGGTGTTACCACTAGATATAGGGTGTGGTATACCTTATGACCACTATATGTAGA  
CCTCTCTGTGTCCCTATCTGTAAGTGACCTTGAGTCATCACCAGGTTTCTCTTTGAGTGA  
CTACATTATGTTACCACTGTGGGACTCTATCCTTATGTTAACCTTCAGTCGGTGCCTTCA  
GTTTATCAGTGACCTATAGGCTTAGTCACTAAGAGAATCACTATCTTACTCTGTTTAGCA  
GTCTCTGAGTAATGAGAGAGACAAGTAGAATTGACTGAGTGCTTATAGTGCCTTAAAGCC  
GGCTTACAGTCAATAGCCTTTATACGACTCACTATTGAGAATGGTTGTTTATGGTCTTAT  
TACTAATACCTTCCTTATAGTGAAAACCTTAAAGACCACTTAAAGACAACCTATTTGTTACT  
TTAAGTATTGACTCTAAGATTAACCTGTGAGACTATAGCAACCGTTGAGAGACACAACGC  
TACCAACTACCAGACAAGACCTAGAGTTATCTGGTAAGGCTGAAGGGTCTCAAGTAGTCA  
TCAACCAGACATAACGAAAGTGGTTGACTCAACGAAAGAAACAACGTAGTATAGCAGTCGT  
CAACAACCTGGTCGCCCTCTGAAACAACATGAGGTGTCACGGTGAGAAACAAAAGTAGTTG  
ACAAGTAGTAACGATAAGATGTAAGATGTACCACGACATAACGTTCTTGTGATGTCCCAC  
ACTGAAAGGGACTCGGTGCTAACAAACCTGCACTTAAAGCTCTTTAACAATTTGGACAAT  
AAGCACTCTTGAGATGACGGCACTAACAGCGATTAACCTCAAGGGTACACAACAAGCAACA  
ACGTGTACTCTTTATGATAATCACTGCAACTGAGGCAATCATCATGATTCACACTAAAGA  
GCAAGCTAATGTTTTCTATGTACTGGTAAGCGCATTCCGTTCTAACCTCGACGATGAGGT  
CAACATGAGTCGCCACCGCCACATGGTTAACAACCTGCGCAACGCACCGGGTCTTTATGG  
TAGCGTTGAGTCTACCGATTTAACTGGCTGTTACCGCGAAGCCATCTCAAGTGCACCGAC  
TGAAGAGAAAACAATCCGTGTACGTTGTAAGAGACAAGGCACAGGTTCTCAATGTCGCACG  
TCTGGCATGTAATGAGTGGGAACAAGATTGCGTACTGGTCTATAAGTCACAGACTCACAC  
GGCTGGCTTAGTGTACGCTAAAGGCATCGACGGGTACAAAGCTGAACGTCTGCAAGGTAG  
CTTCCAGCGCATCCCTAAAGGTGCACCAATCCAAGGCTGCTTCACGGTTGACGAGTTCCG  
CAAATACTGGCAGGTAGCATAACATGGTCGCACTCTTCGTAATCACGATGTACGCTCTGA  
TTGGGGCGTACTTCCTTCGAGACTTCCGCAAGGGTCTCAAGGTACACAAGGCTAACTTCT  
CGCACCTGAAGTATGGCTTTCTACCACGATTCACAGTCCGTGAACGTAAACGGGCGCTTTA  
AGGCTAACAAAGGTTGGTATCTTCTATGTTGCAACGCACTGATGACCTGAAGAAAGGTTAC  
ATGCAGAATGGCACACTCTATGCTGCAAACAGGCGCATAGTGAGGACATGGAGGGAGAAC  
AACCTCGAACGCCGCAAGGAACAAGAGAGGGCAGCTTGGCACAGGCGAAAGGAAAAGGTA  
AAAGCCCAAAGCTGGCAGCACTCGAACAAGCATTAAACAATACACTGAACAATCTTTCT  
TAAAGGACATAATCTAATGAACTACACCGACATTCAGGCACGTCTGGCAATCATCAAGTC  
ACTCCCGATTAGCGAACTGGACAAGCGCCAGCCTCTTCTGGTTGCACTGGCTGCTGACAT  
CGTGAACGGTGAGACAAGCGATGGCAACGCACTGAAGGTTCTGAACGGTCTGGAGCATCA  
AGACTGGTGGCACACCTTGGGCGCACTCATGCGTGATGCTGGATTCAAGATGTTAGGCAA  
TGGTCACTTCAGTGCGGCCTACTCGCACGAAATGTTACCGGGTCGAGTCATTAAGGTTGG  
CTTTAAGAAAGAGGATTCAGGCGCTGCATACACTGCATTCTGTAGGATGCACCAAGGTCG  
AGCGGGTATCCCTAACGTCTATCACGTAGCACGTCATGCAGGTTGCTATACGGTCTGACT  
GGACCGCTTAAAAGCTGTGACCGTTACGCTAACGATGTTACGCAAAGTATGCAAGTGC  
TGCGCAGGAGTTCATTGAGTGCTCTGGAGGTGATGCCAATTGGTACGCACAATATGTTAG  
CAAGGAGTTCATTGAGACATGCAAGATGATTCGTGAGTTCTTCCACGGTATTGCATCTTT  
CGACATGCACAGTGGGAACATTATGTTGATGACAACGATGTCCCGTACATCACTGACCC  
GGTTAGTTTCTCACATGACCGTGAACGTGAGGACGGTTTCCCTCTGGACCCTGATGCACT  
GATTGCCGAGGTGAGGCGATAGCTAACGAGCGCATCATTGAACGGTGCAGCAATCGTAA  
GGCTAAGTGTGACCCTAACGGAACCTTTCAGGTTAACCGCAAGGCAGCAATGAAACGCCG

TAAGCGTAACCGTAAGTTACGTGCCAAGATAGCAGAACGTGACCGCTTACACTTTATGGC  
AATCCGTAGGGAACGTGGTGTAAATCGAACGGAACGAGCGCCGTGCTGAGATGCTCATGGG  
GTCGGCTTGGCATGACTTCTGGCTTCGCAATGGCAACGCAACGGTACGCAAGGTTGACCA  
AGTGAACGGCCTTAAGTGGCAACTAGGGGACCGATTGGCAATACAGGCTGGTTCGCCCTTT  
GAACATCGACAAGGTACTTGACTCTAACTTATGGGCTGATAAGGTGTATCTTCAAGGTC  
GGCACTCACTGCTGGCCTTCATAGATAAACTTTCTTAACAACGAGGCACACAATGAACGT  
AATCAACGCACCAAAGAATGACTTCTCTGACATCGCTAACGCAATCCAGCCGTACAACAT  
TCTGGCTGACCATTACGGTGCACAGCTTGCAGCTACGCAGCTTGGAGTTGGAACATGAAGC  
GCACACTGAGGGCGAGAAGCGTTTCCTTAAGGCAATGGAGCGTCAAATCAAAGCTGGTGA  
GTTCCGGTGATAACGCAGTGGCTAAACCGCTCCTGTCATCCCTCGCACCGAAGTTCATCGA  
AGCGTGGAACACTTGGTTCACCGAGGTGGAAGCGAAGCGTGGCAAGCGTCCAGTAGCCTA  
CAATCTGGTACAGAAGGTTGCACCTGAAGCGGCAGCTTTCATCACACTGAAGGTCACACT  
GGCTTGCTTGACGAAAGAAGAGTTTACCAACCTGCAATCGGTAGCAACCAAGATTGGTTCG  
CAGCATTGAGGACGAGTTACGTTTCGGTTCGCATCCGTGATGAAGAAGCGAAGCACTTTAA  
GAACCACGTACAGGAGGCACTGAACAAGCGCGTTGGTATCGTCTACAAGAAAGCATTTCAT  
GCAAGCCGTAGAAGGCAAGATGTTAGACGCTGGTCAACTGCAAACAAGTGGACTACATG  
GACACCTGAAGAATCAATTCACGTTGGTGTGCGCATGTTGGAAGTGGTTCATCGGGTCTAC  
TGGTCTCGTTGAGTTACACCGACCGTTTGCTGGTAACGTTGAGAAGGATGGCGAGTACAT  
CCAGTTAACCGAGCAATATGTTGACCTGCTGTCTAAACGTGCTGGTGCCTGGCTGCAAT  
CGCTCCGATGTATCAGCCTTGCCTGGTCCCTCCGAAGCCTTGGACTTCTCCGGTTGGTGG  
TGGCTATTGGGCTGCTGGTTCGCAAGCCTCTCTCTCTGGTTCGTAAGTTCGAAGAGGG  
ACTTGAGCGTTACAACGATGTGTATATGCCTGAAGTATAACAAGGCGGTGAACATCGCACA  
GAATACTCCTTGAAGATTAACAAGAAGGTTCTGGCAGTGGTCAACGAGATTGTGAACTG  
GAAGCATTGCCCGGTTGAAGATGTTCCCTGCTCTGGAGCGAGGGGAACTACCTGTCAAACC  
TGAAGACATCGACACGAACGAAGCGGCTCTTAAAGCGTGAAGAAAGCGGCCTCCGCAAT  
CTATCGCAAAGAGAAGGCACGAGTGTACGCCGCATGAGCATGGAGTTCATGTTAGGTCA  
GGCCAATAAGTTCGCACAGTTCAAAGCTATCTGGTTCCTCAATGAACATGGACTGGCGCGG  
TCGTGTGTACGCTGTACCGATGTTCAACCCGCAAGGCAACGACATGACCAAAGGGCTGCT  
GACCTTGGCTAAGGGTAAACCGATTGGTGTGATGGGTAAGTGGCTGAAAGATTCACGG  
TGCTAACACTGCTGGTGTGGACAAGGTGGACTTCGCTGAACGTATCAAGTTCATTGATGA  
TAACCATGAGAACATCATGAGCGTTGCGGCTGACCCGATTGCTAACACTTGGTGGGCTGA  
ACAAGACTCTCCGTTCTGCTTCCCTCGCGTTCTGCTTTGAGTATGCAGGAGTCCAGCACCA  
TGGGATGAACTACAAGTCTCTACCGCTGGCGTTCGATGGCTCTTGCTCTGGTATTCA  
GCACTTCTCCGCAATGCTCCGCGATGAAGTCGGTGGTTCGTGCGGTTAACCTGCTGCCAAG  
CAAAGAGGTACAAGACATCTACCGCATCGTTGCTGAACGTGTGAACGAGATGCTCCGTGA  
AGCGGTAATCAACGGCACTGATAACGAAGTGGAAACCGTGACCAATAAGGACACCGGAGA  
AATCACTGAGAAGCTCAAGCTGGGCACGAAGGAACTGGCGGGTTCAGTGGCTGGCCTACGG  
TGTGACTCGCAAGGTCACCTAAGCGTTCGGTTCATGACGTTGGCTTACGGTTCCAAAGAGTA  
CGGCTTCCGTGACCAAGTTCCTGAGGATACCATTACGCCAGCTATCGACGATGGCAAGGG  
CTTGATGTTCACTCAACCGAACCAAGCGGCTGGCTACATGGCTAACTGATTTGGGAATC  
GGTAACAGTGACAGTGGTTGCAGCGGTTGAAGCAATGAACTGGCTGAAGTCTGCGGCTAA  
ACTTCTAGCTGCTGAAGTCAAGGACAAGAAGACCAAAGAGGTTCTTCGCAAGCGTTGCGC  
AGTACATTGGGTTACTCCTGATGGCTTCCCGTCTGGCAGGAATAACAAGAAGCCAGTACA  
GACCCGCTTGAACCTGATGTTCTTAGGCCAGATTCTGCTACAGCCTACCGTGAACACCAA  
CAAGGATAGCGGGATTGATGCTCGTAAGCAGGAATCAGGTATCGCACCGAACTTTGTCCA  
CTCAATGGATGGAAGCCACCTGAGAATGACTGTAGTGCCTCAATGAGGTCTACGGTGT  
GGAATCCTTCGCACTGATTCATGACTCCTTTGGCACTATCCAGCCGACGCTGGCAACCT  
GTTCAAAGCTGTGCGTGAACTATGGTGAACACTTACGAAGAAAACGATGTAAGTTCGCGA  
CTTCTATGAACAGTTCGCTGACCAGTTGCACGAGTACAGCTTGGACAAGATGCCTGAGAT  
GCCAGCTAAAGGCTCTCTAGACCTCCAAGAAATCCTCAAGTCAGACTTCGCGTTCGCTG  
ATGGTAATCTAATACGACTCACTATTGGGAGACCCTTGGGGTTTCCCTACTTTAAGATAA  
CTTTAAGTTTAACTTTAAGAGGAAACATAATCATGTTTACTTTTCACTTTCAGTAGGCG  
CTCTCGTATCAACCATTTGCGGCAACATACTATAATCGTTCAAAGGTATTTCTCACTA  
AGCTAATCAAAGAAGAGAAGAACTCTCATGCACTTAAAGAGCGACTCGAAGATGGCTGGC  
GAGAGAAGCAGGAACTAGCTGGTTCGAATCCGTACCTTAGAGTTCGAACAACGATATGACA  
TGTCGAACCAACGAGAACTCATTGAGCGTCTACGCGCTGAGGCAGTGGAGTACCGCAAGG  
AACTTAAAGAGGCAAAGAGTACCATCCGTGAGTACACTCACAGTGACATCACGTCTATCA

AGTTCACTGCACACATACCGGATGCTGGATGGAAGCGCACTGAGTTCAAGCTGGGTCTTG  
GCTCATGTGGTAAGCAAGTCACATGTCTACATTGGGTTGAACAAGCCGACCGCTATCTGC  
TGACACAGACGTGCACTGACGGTGAGCGCAAAGAGTTCACCTACTATAAGAAAGATGTAG  
CGGGTCGCATTGAGATTGCACGTAAGGTGGAAGACAATACGACTCACTAATGGGAAACAC  
TGAAAGTTAAACTCAAGGTCATCACTTCTGGTGGCCTTCATGATTAAGTGTCACTAACTA  
AACACACACACACAGAAGGAAACAACATTATGCGTACCAACTTTGAACCAACCACTAAGC  
GCAACAACGTAATCAACGAACACGGTGTGTAATGGCAGGAACGTAAGACCGCATGAAGA  
AACGCCACAAGACACAACGTGGCAACGCTGAGAAACGTAAGTGGAAAGGAGGCACTCTAAT  
GGGTCGCTTATACAGTGGTAACTTAATGGCGTTCAAGGATGCCATCGCGAGACTTAAAGA  
AGACCACGATGTTAGTGTGGTACTGAGACTTCCGATATGAGAAGTACGCACAGCGCCG  
CTGGGTCTCCGGTGAGACGCTTCGTGTTGTTCTGCGTAGTGGCCTCATACTGACATCCAA  
GTGTTTCGAACAGGCAGACGAAGATGTCCGGTGCAACGCACAGACTGAGTGGCTCCGCAA  
GGTACACGCAGACCTGAAGCACTGGAAGTAATACGACTCACTAATGCGAGAGGTAAGTCT  
AAGGTCATCTTAATGGTGGCCTTTGTGATTAAGTCTTTGATTACTTATTAACCGACACT  
AAAGGAGTTCATCATGGAAATAACATTCAAGACTAACCATTCAAAGCAGTATCCTACG  
TTGAGTCTGCCATTAAGAAAGCACTCGACAAGGCTGGCTACCTGATTGCTGACACTAAGC  
ATGATGGTGTACGTGGTAAACATCGTGGTGGACAATACGGCTGACTGCCTGTGGCTGTCCC  
GTGTCTCCAAGACCATCCCCGCGCTTGAGCACCTTAATGGGTTTCGACCAACGCTGGGCTA  
ATGTTCTCAAAGATGACCGCTGGATTTTCCCTGATGGCTTTATGCTGGATGGCGAACTCA  
TGGTCAAAGGCGTAGACTTCAACACAGGGTCTGGCCTACTGCGTACCAAGTGGACCAAGC  
TATCAAACGCGGGGTATCACCACAAAGAGTATGAGGTGAGTGAAGTAAAAGGTAAGGTTT  
CTTTCGAGTTAGACCCTCAGCGACTGAAGGTGCTCCTCTATGCTGCTATGCCGTATCACG  
ATATGGTAGAAGGCAAAGAGTACGGCGTTATGTCCCTCCTGATGCAAGAGCATGTGCGTT  
CCCTCATTCCGGTTCCTTAGTGAACACTTCCCGGAAATCACTTGGGAACTCTCTGAGGCCA  
AAGAAGTCTACGACATGGTGGAACTTCAGGAACTCTACGAGAAAGCTCGCGCCGATGGTC  
ATGAAGGTCTGGTGTGCAAAGACCCGCTGGAAGTCTATAAGCGTGGTAAGAAGTCTGGCT  
GGTGGAACTTAAGCCTGAGAACGAGGCTGATGGAATCATTCAAGGTCTTGTGTGGGGGA  
CAGAAGGTTTAGCCAATGAAGGTAAAGTAATCGGATTTGAGGTGCTTCTGAGAGTGGTC  
GCGTAGTTAACGCCACAAACATCTCTCGCACCTTAATGGATGAATTTACTAACACAGTTA  
ACATCGAAGGTGAAACCTACTACAACGGGCACGCTTGTGAGGTTGCCTACATGGAGGAAA  
CTCCTGATGGTTCCTGCGTCACCCTTCGTTTCGTTATGTTCCGTGGTGTGAGTACAGACC  
CAACGGTCAAGATGTAATTGAACAACGGTCAAGTCTTAACGGGCTGGCCTTTTTGCGTTT  
CTATTCGACTCACTATGGAGGAACAACCTCATGCTATTTCTAATTGTTGCTGTTATAGTT  
GCCACGTTTGCATTCGTTATAATTGACGACAACCTGCTGGCCTGATTGCTAATACGACTCA  
CCTATGGAGGAAACACTTATGCTACGATTACACTTCAACAAATCAAACGGTATCTTTTCT  
GCTCGTGGTTCGACCGCTCGACGGTTCGGCCTCCGAGAAACATGCAGTCAATCCTAAA  
GTGCTTGGCTCGACCAATTGAGTTAGCACCTCGTGTTCACGCTGTGATTACGACTGGCTTA  
TATAAAGAAGCGACCACTGGCTCCCGGCCTTTCATTCCGGTTCCTCGTCACCCGTTTCCCT  
AAAGTCCGTCTGGTAATTGCACGTATCAAGGAGGTGTTCTAATGGGACTGTTAGATGGTG  
ATGCGTGGGAAAAAGAAAACCCGCCAGTACAAGCAACTGGGTGTATAGCTTGCTTAGAGA  
ACGATGACCGCTACCCACATACTGTGAACGTGTAGCTAAACCACAAGATATAGATGGTG  
TTCGAACCTCCTAGCCACTATATGTTGTTGATGACATTGAGGCTATCGAAGTGATTGCC  
GGTTCGATGACCCGCGAACAGTTCAAAGGGTACTGCTTAGGGAACATCCTTAAGTACCGCC  
TCCGTGCTGGTAAGAAATCCGAACCTGGCATTCTTAGAGAAGGACATGGCGAAAGCTGGGT  
TCTACGGTGAACGTACGAGAAACATAAGGGTAAGTGCTATGCTTAAACCTAGTGAATGG  
TGTGAGCGTATGTTTGAAAAGACAGGCAATGCTGACTACTTAGAGTTATAAACCTGTGG  
AAAGGGAGAGGACAATGAGCAATTTAAACAAAGGGTCACTGGTCAACGGTGACAAGAAGT  
TCTTCGCTACGGTAGAAGGCCAAGGCCAATCGTTTCGAAGTCCCTGTGTTTCGCTACGTCTC  
TCGAAGAGGCCAATGAGTTAGCTGAATGGCAGTATGTCCCGGCTGGCTTCGCAGTGACAC  
GCATCCGTCCAGACCGTAAGGTTTAATAGGACTCACTAATGGGAGACACAACGTTTCCCG  
CTTTAACTTTAGAACTTTAAAGGAGAATCATTATGGCATTTCGAAAACGTAAAGTAT  
TCACTTCCGCTCGTGGTGTGCTGAACCTTATTGCTATCTGGCAAAGCCGGACTTCGGTA  
GCGGTGACTTCAAGAACGAACGTGGTGTCTACAAAGTGTCACTTACTGTATCCAACGACG  
ACCCTCGCTGTCAGAAGATGATTGACGAGATTGTGCAAGCCCATGAGACGGACTACGCTG  
CTCGACTCGAAGAGTACGAAGCGAACCCGCCGAAAGTTGTCAAGGGTAAGAAACCGCTGA  
AGCCATACGTTGGCGACATGCCGTTTCATGGATAACGAAGATGGAACCACTACGTTCAACT  
TCAAGTGCTACGGCTCGTTCCTGACAAGAAGACTGGTGAGAACAACCAATCGACTTGG

CTATTGTGGACTCCAAGGGTAAGCGCATCCGTGGCGAGCGTCCAGCTATCTCTGGTGGCT  
CTGAAGTGAAGATTAATAACACTCTGTTCCCTTATGGTTGGTCTGCTGTGGCAGGTGCTT  
CCGTTAAGCTGCAACTGGATTCCGTGATGCTGATTAAGCTGGTCGAGTTCGGTGGTGGTG  
ATGACGATTGGTCAGACGAAACCGAAGAAGATGGCTACGAAGCTGATGAAGCACAGACCC  
GCAAGCCGCAGAATGGCTCTGGCTGGAACGAAGAACCAGAAGAGGAAGAAGACGACGAAG  
GCGGTGATTTTTAATGGCTAAGGGCTATGCAGGTCGAGGCACTCGTGTGGGTGCCTTTCG  
CTCTGGCTTGGAGACAAGGTAAGTAAGCAACTCGAAGGTAAGAACATTAAGTTCGACTA  
CGAGCGTTGGCGTGTACCATATGTTGTTCCCTGCAAGCAACCATACTATTGCCCGGACTT  
CCTGTTACCTAATGGCATCTTTGTGGAACCAAAGGTCTGTGGGACAGTGACGACCGTAA  
GAAGCACTTACTTATCCGTGAACAGTATCCTGAACTTGATGTGCGCATCGTGTCTCTTC  
TAGCCGCTCCAAGCTGTACAAAGGGTCTACGACCAGTTATGGCGAGTGGTGGCAGAGAAGCA  
TGGCATTCTGTTTGTGACAAATTAATTCCAGTTGATTGGCTTAAAGAGCCTTCTAAGGA  
TGTTCCATTCGATAAATTTAAAGAGGTGAAGAAGAAATGAGTAAGGTACAATTCAAACCA  
CGCGCTGTGACAGAAGCAATCTTTGTACACTGTAGCGCAACTAAGGCGACCATGAATGTT  
GGTCTGCGTGAAATCCGTGAGTGGCATAAAGAACAGGGCTGGCTTGATGTAGGCTACCAC  
TTCATTATTCGCCGTGATGGTACAATCGAAGAAGGACGTCCGGTAGATGTCGTCGGGTCT  
CATGTGAAAGACTGGAACAGTAAGTCAGTCGGCGTGTGCCTCGTTGGTGGTATCGACGAT  
AAGGGCAGACACGAAGCTAACTTTACGCCAGCACAGATGCACTCTCTTAAAGAGAACTG  
GCAGACCTGAAAGACCTGTACCCGGATGCAGAAATCAAAGCGCACCCACGATGTGGCTCCT  
AAAGCGTGTCCAAGTTTTAACTTGAGTCGCTGGCTGAAGACTGGTGAATTAGTAACAAGT  
GATTGGGGATAAGATTAATGATGATTATTCATGAGATGGGCATGTACGATATGATTTACC  
GCTGTGTATTCGTTCTGGCATTGACCTATATCTTAACTCGTAAGTAATAGAACTCACTAT  
GGGAGAGCCGAAAGGTTTCTCCCTTTGTTTCGCTAAAATTGTATAAGGAGTAACCACTATG  
CGTAAGCTATTTGGTGAAGCACTTCCGGTGACACTTTTGGTCATCATCATTATCGTTTGT  
GGCGCACTGCGTCCGTTCCCTGTAGGAGTCCTATCATGGATATGGAAGAACAACAAGAGAG  
TATATTCCTCTATCATTACCTTGTGAGAAGTGTGGGTCGTCAGATGGTAATGGCATGTA  
TTCTGATGGACACCAGTATTGTTTTGTGTGTCAGAACCATGTGCGTGGAACCGAGGAAAC  
TCGTGAGACCGTGGCGAAGACTCGCAGAAGCTCATAACAACACTGGAGGTGACAAAATGTC  
TAACCTGTAAACTTTGGGGATTCAGATGGTTCGCTATACGAACCTCAAAGCTCGTGGCCT  
TATGGAAGCTATCTGCCGTAAGTATGGCTATTGGGTAGCGAAGGTCAACGGAGAGATGCT  
TCAGGTTGCGAACTACTATGACGTTGAGGGAAACCTTGTGGGTCAGAAAGTGCGCGACAA  
GAACAAGGAGTTCTCAGCAAAGGGGAAACTCAAAGCTGACCTATTGTTTCGGTAAGCAGTT  
ATGGAATGGTGGCAAGAAGATTGTTGTGACAGAAGGTGAGATTGATTGCTTGACTGTAGC  
CCAACCTCAAGAAGGGAAGTATCCCGTTGTGAGTCTCCCTATGGGTGCGCAAGCCGCAAA  
GAAAACATGTGCTGCAAACCTATGAATACTTCGACCAGTTCGATGAGATTATCCTGATGTT  
CGACATGGATGAGCCGGTTCGCAAGGCCATCGAAGAGTGTGCTCCTGTCCTGACCTAGCGG  
GAAAGTCCGAGTCGCTGTACTGCCTCTTAAAGGATGCCAATGAGTGTTCGCTCAATGGACA  
AGCCAAAGCAGTAACCGACCAGATTTGGAATGCGCAACCTTGGGTGCCTGATGGTGTGT  
CTCGGCTGTGTCACTTAAAGACCGTGTGCGTGAAGCTATGGTCAAAGAGGAAACAACAGG  
TCTACTCTTCACGGGTCAACCGAAGCTCAACGACATGACACTTGGTGCTCGTGGTGGTGA  
AGTCATCATGGTAACTTCCGGTTCGGGTATGGGTAAGTCAACATTCGTTTCGCCAACAGAT  
GCTCATGTGGGGCAAAGGTGGTGCGAAGGTAGGCTTGGCGATGCTTGAGGAAGCCGTTGA  
GGAAACAGTTCAGGACTTGATGGGATTGAACAACCATGTTTCGTCTACGTCAAGACAAAGA  
ACTCAAGATGCAAATCTTAGAGGACGGTTCGTTTCGATGAGTGGTATGACGTGCTGTTCAA  
CACAGACATGTTTCACCTCTATGATTCCCTTTCGCGGAGTCACAAGAAGACCGCTTGTTTC  
AAAGCTGGCCTACATGGTAGACGGTCTGGACTGTAACGTCATTCTGCTTGACCATATCTC  
TATTGTGGTCTCCGGGATGGAAGATAACTCTGATGAGCGTAAGACGATTGACCGACTGAT  
GACCAAGCTGAAAGCCTTTGCGAAGACTAAAGGTGTGGTTCGTTGTGGTAATCTGTACCT  
CAAGAATCCTGAGAAGGGCAAGAGTCACGAGGAAGGGCGACCAAGTATCCATAACAGACCT  
GCGTGGTTCAGGCTCACTTCGCCAACTAAGCGATACCATAATTGCATTAGAGAGGAACCA  
ACAAGGTGATTACCCCAATCTCGTACAGCTTCGTATACTCAAGTGCCGCTTTACTGGTGA  
TACTGGTATCGCTGGTCATATGGTATAACAACAAGAAACAGGATGGCTTGAACCGTCTGA  
GTCACCTACGGAAGAAGGAGATGGAGATAATGGCTGGACTGAAGAAGACGGACAAGACTT  
CTAACTCCGAGCGTCTCGCTGGGTTTCTCAAGGAGACTCCCGGTGGGTGCCTTGAGTTTC  
AGGGAGGCCGTGTCCATAAATATGGTGTGTTCTGGATGAATGGTAAGAATCATCGGGCAC  
ATCGAGCCGCTTTCGAATTACACCACGGGAGAGAACCTAATGGTATTCTATTACACTT  
GTGATAATCCTCTGTGCTGCAATCCCTCTCATTATCTGAGGGAACCTCAGTCTGATAATA

TGGCTGACATGGTGC GAAAAGGAAGATCACTCAAAGGAGTGATGAACCCTAAGTGTAAT  
TCACTGAGGAAGATGTAGCATTTCATCCTCACGTCAACAATGAAGGTTAAAGACCTCGCTG  
CAAAGTTCGGAGTTTCCCGTCGCACCATCTCAAACCTGGCGAAGGAAACAATAAGACTCAC  
TAAGGGAGAACAACTATGCGTAATCGTAATGTAATCGAAGCTGAAATCTCTAAGCTGC  
AAGCTGAACTGGCTGATGTCAAAGAGTATGAATGTGCTCGTGACTCTGCGGTACACATCC  
TGAAGA ACTTAGGGTGGACCCGCTCTCGTGGT CAGTGGGTGAAACCTAAAGCCACTAGCG  
GTAGCGTTGGCTGTCAGACATTCGACTCAAACAATATGACCCACATCAAGCCCGGTGACT  
TCTGCACCTCTCTGAGTAATGCAGACATCTGGTATGTTTCGCAAGGTTCGAAGGGACAGACA  
TTTGGTGTCTCCCGTGTGACACGCATTGATGCGATGGGTACAGTCGCTGGGATT CAGTATC  
ACAAGATGAACCACAAGAACCTGCGTGTTGTTGACCCTAAGA ACTTCATGGGCTATCGCC  
GTTCAACATTTTAAGGAGTAAACACAATGTTACTATCCGACATCGAAACAACGGGTTGC  
TGCACAACGTTAGTCAATTTCACTGTGCGGTGACTTACGACTACACA ACTGACCAGTACA  
TCCGTTATCGACCTGATGACTTTGGGGCATA CATTGATGCTCTCGAAGCTGAGGTTGCTC  
GTGGTGGTCTCATTGTGTTTCATAATGGT CACAAGTATGACATCCCGGTAATCGAGTTGC  
TCGCCAAGAACTGTTAGGTCGCGACGTTAAGTTCCCGAAAGAGAACGTACTGGATACCC  
TCGTGATGTCCCGCTTGATTTACTCTAACATCAAAGACACCGATGCTGGTCTGCTACGTT  
CTGGCAAGCTGCCGGGTAAACGTTTGGTTCCACGCTCTGGAGGCTTGGGGTTATCGCT  
TAGGGCAAATGAAGGGTGAGTACAAGGACGACTTCAAGGCTTCACTAGCTGAGTCTGGTG  
AAGAATATGTTGATGGTATGGAATGGCTCCTGTTCAACGAAGACATGATGGAATATAACG  
TGCAAGACGTTGTAGTCACCAAGGCTCTCTTCGAGAACTTTGTAGCAACACATTCTATT  
TTCCTAACGAGACACCCGCTGGAAGCACAGAAGCAGACCGTTTCTGGAATGGTAGCCTTG  
AGGCTGTTAAACTGGAACATGATGCTGCATGGTTGTTAGCCAAGATGGAACGTAACGGTT  
TCCCGATTGACATTAAGTCTCTTGAGAACCTGTACGCAGAACTCGCTGGTAGACGTGGTG  
AGCTACTCGTAGAGTTAACCAATACGTTTGGCTCATGGTACTCCGCTAAGGGAGGTA CTG  
AAGCATT CAGACACCCTCGTACCGGAAAGCCGCTCACCAAGTATCCTCGTGTTAAGTACC  
CGAAACAGGGTGGCATCTTTAAGAAGCCTAAGAACAAGAAGCAACGTGAAGGCTTAGAGC  
CGTGTGAGTTGGATACCCGCGATTACGTTGAGGGTGCTCCGTATACTCCGGTTGAGCACG  
TTGTGTTTAACCCTGCGAGCCGAGACCACATCACTCGTGTTCTCACCAAGGCTGGCTGGG  
TTCCCGTTGAGTTCACCCCAAGTGGTGCACCAAGGTAGACGATGAGGTCTTAGAGCACG  
TTAAGGTAGACGACCCTGATGCACAGCGTTGCATTGAGTTAATTAAGAATACCTTATGA  
TTCAGAAACGTATCGGTCAGGTTGCTGAGGGCGATAACGGCTGGCTCCGAATGATTGGAG  
AAGATGGTCGTATTCACGGAAGCGTTAACCCGAACGGTGCGGTA ACTGGTCGTGCAACTC  
ATAGCTTCCCTAATGTGGCACAGGTGCCTTCTATCCGTGCTGCTTATGGTGAACCTTGCC  
GTGCTGCTTTCGGTGCCGAGCACAAACATGAAAGACGGTAAGCCAGACCCCTTGATTCAAG  
TTGGTGTGGATGCGTCCGGCCTTGAGCTACGTTGCTTGGGTCACTTCATGTATCGTTATG  
ACGAAGGTGAGTACGTGAGACCATCCTAACGGGTGACATCCATACGAAGAACCAGTTGG  
CTGCGGGTCTACCAACTCGTGACAACGCTAAGACATTTATCTATGGGTTCTCTATGGTG  
CTGGTGTGCGAAGATTGGACAGATTGTTGGTGGTACTGCCGAAGATGGTAAGCGACTCA  
TCAAGA ACTTCCTTGAGCAAACCTCCGGCTATCGCTGCATTACGTGAAGCAATCACAGGGA  
CACTCGTCAAGGACTCTAAGTGGGTTGGTGGAGAACAGAAGGTGACTTGGAAAGCGTCGAT  
GGGTTTCGTGGATTGGATGGTCGTAAAGTCCATGTCCGTAGTCCTCATGCTGCGCTGAACA  
CCTTGTGTCAGTCTGCTGGTGC ACTTATTTGTA AACTGTGGATTGTCGAGACTGAACGCC  
TGTTACTGGAAGCTGGTCTGAAGCATGGCTGGGATGGTGACTTTGCGTACATGGCTTGGG  
TTCACGATGAAATTCAGGTCGCTGCCCGGACTCAAGAGATTGCTGATAAGATTGTCGAGT  
TGGCACAGCAAGCAATGCGTAATGTGGGAGACCCTTTAACTTTAGATGTCAGTTAGATA  
CCGAAGGTAAGACTGGCGGAACTGGAAAGATTGCCATTGACATAAGGAGGTATCCTATG  
ATGTTACAACACTCGACAGGCTCTGCCTCTGAGTTATTTGCAGCCTATAAATTTATGGAG  
AGAGGACATGCAGTTTTCTTCCCGTTACTAACACAATCGAAAGCAGACTTCATTGCTGAT  
GTTGATGGAACTTACTTAGAGTTCAGGTGAAAACAGGGACTCTGATTCAAGACAAATAT  
CTTCAAGTGAGGCTTGGTGGTTGTGGCAGACCTTTATATAAACC CGGTGATATGGATGTT  
CTTTGTATTGTGTACAAGGAAAGACTGTGGGTGATACCTGCTGAGGTCGTGCGGAGACAAG  
ACGACAATCAGTTTTAATCCAGATAAGTCTGACCGCAAGAAGCGTAATGACTTCGACAAA  
TATGTATGGGAGAAATAATCATGGCTATTA ACTAAACGTTTTAAAGTATCATTTGAAGTTA  
CCGCTGTAATCAACTCTGAGATGGAGAAAGGCTTACCGAGGAACTGGTTCACTTGGCTA  
AGAAGGCTGCGGCAGGTGAGAAGATTAGTCCTCGTGACCGTGA ACTTCTGGTACAAGCGC  
TGACTCATGGTGTGAGGGTGCTATCTCCTTTGCCGCCAAACAGGGTATGCGAGAGTTCA  
TTCGTA CTGAGTTACCTGAAGATGGTCTGAAGGTTTCTCCAGCAACTATCCGTGAGGTGA



AGTAATGGGTGAATATCTACGTGTACTGGCGGCTATCAAAAGCTGCCCTAAGACCTTTCA  
GTCGAAATATGTGCGCAACAATGCGTCACTGGTGGCTGAGGCTGCGAGTCGAGGTCATAT  
CTCTTGCCTATCAGTCGATGGGCGTAATGCAGGCGCTTGGGAAGTAACAGGCGCTGGTGT  
CCGATTCTGAAGAAGATGGGAGGTTGCGTATGAGTCTGCACACAGACAACGTTACAGTG  
ACCCGTGAGGCATGGAACGACATGCAGTCGTACATCCAGTCACTGGAGAAAGACCAAGAG  
TTCCTGAACGCTCTGAGGGCGTGTGGTGTGACAATTGGGATGGCTACTCCGATGCTATC  
GAAATGGTATACGGGGAGGATGACGAATGAGCGCATTAAACCCTGAAGCAATTCTATGAGT  
TACGTCAAGGCAAATCTGACAAGGGTGTCTTGGTCATGGATGGTGACTGGCTGGTATTCC  
AAGCGATGGCAGCGAGCGAAGTCGAAACCGATTGGGGCGATGATTGCTGGACATTAGAGT  
GCGACCACGGGAAAGCGTGGAACATTCTGGTTGACTCCGTTAAGTCCTATGCGAGCCGTA  
AGAAGGCTTGGCGTGATGCACCTATCGTGTTGGCCTTCACCGACTCTGTGAACTGGCGTA  
AGGAATTAGTTGACCCAACCTATAAGGAGAACCGTAAGGCATCCCGTAAGCCTGTAGGCT  
ACCGTGCCTTCGTCGAGCGTGTTCAGCCTGTGAGGACTGGACGTCTATCCTTGAGGACC  
GACTCGAAGGTGATGATGTAATGGGAATCATCGGGTCTGGCGCTAAACACTTTGGTTTCA  
AGAAGGCTGTGCTGGTCTCCTGTGATAAGGACTTTAAGACCATACTGATTGTGACTTCT  
TGTGGTGTACCACTGGTAACATCTTGACTCAAGACCGGACCCTGCCGACTACTGGCACA  
TCTATCAGACCATTAAAGGTGACTTGACGGATGGTTATGGTGGCATTCCGGGCTGGGGCG  
AGACTACCGCTGAGTGGCTGGAGAACCATATGCCTTTGAACAGGTTGAGAAAACCTTTCA  
AGTCTGGTGCCCGTAAGGGTCAGACAGTTCTAGAATGGAAGAAGGTTGACATGGGTGAGC  
GAACCTTATGGGAAGCTATTGTGACACTTGGCGCGAAAGCTGGGATGACCGAAGAGGAAA  
TCATTAAGCAAGGCCGGATGGCTCGCATCCTTCGATTTCGAAGAGTACAACCTTTATCGACA  
AGGAGATTTACCTATGGTCCCGGAACAGTTGCGTTCGTAATGTTCCGCAATCGTAGTCCT  
CGCAATGGTGTGGGCTGCATTCATCGCAACACTTTGAGTGTGTAACCTTAGGCATTCTGA  
CCCTCGTGAAATCAATACGACTCACTATGGGAGAGGGGGTGCCTATATGATACCTACTTT  
AAGTTCTAACTTTAAGGAGAACATCTATTATGTTAACCCTATCAAGAAGTACATGGAGA  
ACCCACAAGATATTCCTAACGTGCCCGGTGCAACTATGGAGTATCTACAGGTTCAATATA  
ACGCTGGATATGCCATTCAGTCTGGTCTTATCAACCGATTGAAACAAGCTGGATGGTCTG  
AAAGCTATATCGCCGGGTTCCCTTGTGGACTGAACTATGCGTCTCAAACCTCTGGACGACA  
TGGAGGCAATCCGTAAGGAACAGGCTGAGTCCAATAAATGGAGGATAGTCTATATGTGC  
TGGTCGCCTAAGATTAAGACACCTAAAGTTGACACTGCCAAAGTCCGTGCGGTAGACCCT  
GCACCCTTACTGAGGAACCGAAAGGCATCCTCTTTGGTGGCGATGATGATACCGATAAG  
GACACCGGAACCTCTTCTGAGGTGCCAACTGGTGGTAAGAAGTCACTCAAGGTA AAACTG  
GATGACTCCGTTGAGAAGTCCAAGAAGGCAGATTCAGATGCTGCCAAGAAGAAATCCAAG  
TCTGGTATTCGTACCAGTGTCTTTAAGAATAAATAACTAGGAGGTGTATCATGGGTTTGG  
GTA AAAAGATTAAGAAGACAGTGAAGAAGACTGTAAGA AAAATTACCAAGCCAGTCGAGA  
AGGCTGTAAAGCAGGTTGGTAAGGCAGGTGAAGACATCGTTAAAGGCGCTGCTGGTATCG  
TTAGTGGCGCTCTTGGTCAAGGTGGAAAGCCTGATGTTCAAGGTAATTGAACAGGCCGCTC  
CAGTTGCTGCACCGCCTCCGGCTCAAATCATTGAGGCTCCAATAAGGGTGACGTAGAGA  
CCGAAGATGATGCACAGACTGAATCAGGTAAGAAGAAAGCCCGTGCTGGTGGCAAGAAAG  
CTCTGAGTGTGCTCGCAGTTCTGGCGGTGGTCTTAACATTTAATAAGGAGGCACTATGG  
CAAGCTCACAGAAACGTGAAGGCTTTGCGGAGAATGGTGCCAAGGCTGTGTATGACGCAT  
TGAAGAACGACCGGAACTCCTATGAGACCCGTGCGGAAA ACTGTGCGAAGTACACAATCC  
CCTCGTTGTTCCCTAAAGACTCCGACAACGCATCGACCGACTACACCACTCCGTGGCAAG  
CAGTAGGTGCTCGTGGACTGAACA ACTTGGCCTCTAAGCTCATGCTCGCTCTGTTCCCTA  
TGCAGACTTGGATGAAGCTGACCATCTCTGAGTTCGAAGCGAAACAATTGGTGGCACAAC  
CTGCTGAACTGGCGAAGGTGGAAGAGGGTCTCTCAATGGTCGAGCGTATCTTGATGAACT  
ACATCGAGTCAAACCTCCTACCGTGTGACACTCTTTGAGACCCTCAAGCAGTTAGTCGTAG  
CTGGTAACGCTCTGCTGTACATTCCTGAACCTGAAGGTA ACTTACAATCCAATGAAGTTAT  
ACCGCCTGTCTTCTTATGTTGTCCAACGAGACGCATTCGGCACGGTACTACAGATTGTGA  
CCTTGGATAAGACTGCTTATGCAGCGCTGCCAGAAGACGTAAGGAACTCTCTGGACTCCG  
GTACGGAGCACAAAGGCGATGAAATGATTGACGTGTATACTCACATTTATCTCGATGAGG  
AATCAGGTGAATACCTGAAGTACGAAGAGATTGATGGAGTCGAAGTTGATGGTACAGATG  
CTTCTTATCCGGTGGATGCTTGTCTTATATCCCGGTTTCGCATGGTACGCATTGATGGGG  
AATCATAACGGTCGTTACTACTGTGAGGAATACTTGGGTGACTTACGTTCACTTGAGAACC  
TTCAGGAAGCTATCGTCAAGATGTCCATGATTAGCGCAAAGGTTATCGGCTTGGTTAAC  
CGGCTGGTATCACACAGGTTTCGTCGCTTAACGAAAGCACAAACAGGTGACTTTGTGTCTG  
GTCGTCCAGAAGACATCTCGTTCCTTCAGTTGGAAAAGGCCGCTGACTTCTCTGTAGCGA

AAGCTGTAAGTGAACAGATTGAAGGCCGACTGTCCTATGCCTTTATGTTGAACTCTGCGG  
TACAGCGTACTGGTGAGCGTGTGACGGCCGAAGAGATTCGTTATGTTGCATCTGAACTTG  
AAGATACCCTTGGTGGTGTCTATTTCGATTCTCTCACAGGAACTTCAGTTACCAATGGTTC  
GTGTCCTGCTAAAACAACCTTCAAGCAACCAATCAGATTCCCTGAGTTACCGAAAGAGGCCG  
TTGAGCCTACTATCAGTACCGGGATGGAAGCATTGGGTTCGTGGTCAAGACCTCGATAAGC  
TGGAACGTTGTATTGCTGCGTGGTCTGCTCTTGTCTCTATGCAGAATGACCCGGACATCA  
ACATTGCGACCATTAAGTTGCGCATTGCGAACGCTATCGGCATTGACACTTCTGGTATCC  
TTAAGACACCTGAAGAGAAGCAACAGGAAATGGCTGAGGCCGCTCAAGGTACTGCTCTGG  
AGAACGCTGCTGCATCTGCTGGTGTGCTGGTGTGCTGGTCTGCTGGCTACTGCAAGCCCTGAGA  
ACATGCAAGCTGCTGCTGAACAGGCTGGAATGGTTCCAAATTAATACGACTCACTAATGG  
GAGAGACAATACGTCCTCCCTTTGAGTTCAACTTTATGAAATCTAAAGGAGATAACAATT  
ATGGCTGGTGAATCTAACGCTGACGTATACGCATCTTTCGGTGTGAACTCTGCGGTTGTC  
GGTGGGTCTACTCCTACTGACCACGAACAGGCTATGCTTGAACCTCGATGTTGCTGCCCGT  
GATGGCGATGATGCAATCGAGCTAGTTAGCAACGATGACCCTTATGGCAATCCAGACCCA  
TTCGGTGAAGAGGATGAGAGTCGTACTGAGATTCGCATCTCCACTGATGGTGAACCTGAA  
GTAACCGAAGAAGGTGAAATCGACTATGAAGGGACCGAAGATGAAGGCTCCGAAGAGTTT  
GAACCAGTTGGTGACGTTCCAGATGAACTGAACGAAGCCTCAAGTCAACTCGAAGAGCAC  
GAAGCCGGTTTCGAAGAGATGGTCAATCAGGCTGCTGAACGTGGTCTGTCAGAAGAAACC  
ATCGTGCGTATCCAACAGGAATACGGAGAGGACGGTCTGTCTGAAGAGTCTTACGAAGAG  
TTAGCCAAAGCTGGTTACTCCAAGTCGTTTGTGACTCCTACATCCGTGGTCAGGAAGCA  
CTGGTAGAACAGTATGTTTCAGTCCGTTATGGAGTACGCTGGCGGTGAAGCACAGTTCCAA  
GCAATCTACAATCATCTCGAAGTGTCCAACCCGGATGCTGCTGAGTCTCTGATTAGTGCC  
TTGGAGAACCGTGACCTCGCAACAGTTAAGGCTATCGTCAATCTCGCTGGTGAAGCCGT  
GCGAAGACTTTCGGTAAACCTGCTGCCCGTAGTATCTCTAAACGTGCCGTACCTGCTGCA  
CCTGTACGCACCAAACAGTCTGGCTTCGAGTCACAGGCTGAGATGATTGCTGCAATGTCC  
GACCCTCGCTACCGCCACGACAGTAAGTTCCGTGCGGAAGTTGAGCGCAAGATGATGTAC  
AGTCAGTTCTGAAATTAATACGACTCACTATTGGGAGAGACATTACGTTCTCCCCTTGAG  
TGATACACAATGAGAACCAACTCGTTTCAAGTAGTACCTCACATAACTTATCTTTTAAAT  
CAACAGAAGGAGATTCAACATGGCTAACATTAATGGTGGACAACAGATGGGTAAAGACCA  
AGGTAAAGGCATGAGCGCTGGTGATAAACTGGCTCTGTTCCCTGAAGGTCTTCGGTGGTGA  
AGTTCTGACTGCATTTACCCGTACCTCCGTAACCTATGAACAAACACCTTGTGCGTTCTAT  
TCAGTCCGGTAAGTCTGCGCAGTTCCCTGTGCTGGGTTCGTACCAAAGCTGCTTACCTGCA  
ACCGGGTGAGAACCTTGATGACAAACGTAAAGACATGAAGCACACTGAGAAGACCATTAA  
CATTGATGGTTTGCTGACTGCTGACGTTCTGATTTACGACATCGAAGACGCTATGAACCA  
CTATGACGTGCGTTCTGAGTACACTGCACAGTTGGGTGAATCTCTGGCAATGGCTGCTGA  
TGGCGCGTTCTGGCTGAAATGGCTAAACTGTGTAACCTGCCGTCTGCTAAAGATGAAAA  
CATCGCTGGTCTTGGTAAAGGCTCATGTAAGTGGCAAGCAGTCTGATCTTCGTGG  
AGACCAAGTTAAGCTGGGTGAGGCTATTATCGCACAGTTAACTCTGGCTCGTGCCAAGCT  
GACTAGCAACTATGTTCCGTCTGCTGACCGTGTGTTCTACACCACTCCAGACAACACTACTC  
TGCTATTCTGGCTGCTCTGATGCCTAACGCTGCAAACTATCAGGCTCTGATTGACCCGTC  
TACTGGCTCTATCCGCAACGTTATGGGCTTCGAAGTTATTGAGGTTCCGCATCTGACTGC  
TGGTGGTGTGCTGGCGAAGACCGTCCAGAAGAGGGTGTAAATCCGACTGGTCCAGAAACATGC  
GTTCCCTGAGACTTCTCTGGTGACACCCGTGTTGCTCTGGACAACGTTGTGCGTCTGTT  
CAATCACCGCTCTGCCGTTGGTACTGTTAAGCTGAAAGATATGGCACTGGAACGTGCTCG  
TCGAGCTAACTTCCAAGCAGACCAGATTATCGCTAAGTACGCTATGGGTACCGGTGGTCT  
GCGCCCTGAAGCATGTGGTGGCTGGTTTTCAACAAGGCTTAACTTCTCGCAAACCTCGTA  
GGGGACACTGAGTCCCTTACTGAAGTTGAGCAAGAGCTAACGCCACAACAGAAAGCTGCC  
CGTACCCGTGCGGCAAACAAGGCTCGAAAGGAAGCTGAGTTAGCTGCTACTGAATGATAA  
CTATATGAAACCCCTTGGGTGCCTTCGCGGGTGTGAGGGGTTTTTTTCGTACCACTAAT  
AGACTCACTAATGGGAGGAAACCTATATGCGTTCCTATGAGACTACCCTAGAGACTGGCG  
AAGAGTTGGCTGCTGTCAATGACATCTTGGCCTCTATCGGTGAACCGCCTGTGTCCACTC  
TGGAGGGTGATGCTAACGCTGACGTTGCTAACGCTCGCCGAATACTCAATAAGATTAACC  
GTCAGATTCAGTCCAAGGGATGGACGTTCAACATCGAGGAAGGCCAACAGTTATTGCCAG  
ATGTGTTCAACGGCCTGATCCCTACATGTCCGACTACCTTGCTGTGTTCTCTGAAGGAG  
GTACTACCGCTTACGTCAACCGTGGCGGCTATGTGTATGACCGAGAGAACAGCACTGATG  
TCTTCAAAGACCCAATCACTGTGACTATCATCCGACTGCGAGAGTTCTATGAGATGCCTG  
AATGCTTCCGCTACTGGATTGTCACCAAGGCCGCTCGTCAGTTCAACAACAGGTTCTTTG

GCGCTCCTGAGATTGACGCAGTGCTGTCTGAAGAGGAACAGGAAGCAAAGATGCAGTGTG  
CTGAATACGAACCTGGACTTCGGTAACTTCAACATGCTTGATGGTGATGCCTTCACTGGTG  
GTCTGCTGTCTCGCTAATAACTTAAGGAGGTCTCTAATGGCTCTTATTTACAATCCGTC  
AAGAACCTGAAAGGCGGTATCAGTCAACAACCAGACATCTTAAGGTTCCCCGAACAGGGT  
GCCGAACAAATTAACGGCTGGTCGTCTGAAACTGAAGGTCTCCAGAAGAGGGCCGCTTTC  
ATCTTTACGAAAACCTATCGGTGACGCTGGGTTCCCTGGTGGCGCACCTTTAGTCCACCTG  
ATTAACCGCGATAGTATCGAACAGTATTACGTTGTGTTCACTGGAAGTGGTGTAAAGGTG  
TTTGACCTGAATGGGCGCGAGTACGCTGTTACGGAGACACCTCTTATGCTAATTGTGCG  
AACCTCGTGATGACTTGAGGATGGTCACTGTGGCTGACTACACGTTTCGTAGTGAACCGC  
TCTAAGGTTGTTCAAGCCAACAAGACCCTATCTACACTATCCGAGAAGATGGCGAGTGT  
CTCATTAAACATCCGTGGTGGTCAGTATGGTCGTACCTTTACGATTAGACTGAATGGTATC  
TCTGCGTCTATAAGATTGCTGATGGTGCCAATGCCCTGAAGTTGAACAGACGGATGCA  
CAATGGCTAGTTAAGAAGATGGCACAGCTACTTCGAGAAGGTGGTGCAAACACTTGGGGA  
TGGACTGTCAATGAGGGCGCTGGGTATATCCACGTTGTCTCTCGTGGTGTGAACCTATC  
TGGAAGGTAGAAGTAGAGGATGGATATGGGGGTCAGTTGATGTCTGCTGTAATGCACACC  
AGTCAGTCATTCAGTAAGTTACCCGCTGAGGCTCCTAATGGCTACTCTGTGCAAATCGTA  
GGGGACACCTCGAAGACCTCTGACGCATTCTATGTGCAATATGATGCTGCCCGTAAGGTG  
TGAAAGAAGTGGCTGGCTGGGGAGTACAGAAGGGACTCAACAATGGCACGATGCCCCAT  
GCTCTTATTCGTCACTCCGATGGTTCCTTTAAGATGGAAGCATTGCCGTGGGATGAACGC  
AAGTGTGGTGATATGAACACCAACCCCGACCCATCAATCGTAGACCAGAAGATTAACGAT  
GTGTTCTTCTTCGTAACCGATTAGGGTTTCTTGCTGGTGAAAACATTGTGATGTCTCGT  
ACCTCCAAGTATTTCTCACTGTTCCCTGCGTCGGTTGCCAACCTATCCGATGATGACCCA  
ATTGACGTTGCTGTATCACACAACCGAATCAGTACGCTTAAATATGCTGTACCGTTCTCC  
GAAGAGTTGCTCCTATGGTCTGACCAAGCACAGTTCGTACTGTCTGCCTCTGGCATCCTC  
TCACCGAAGTCAGTTGAGTTGAACCTAACTACTGAGTTTGATGTGTCCGACAAAGCTCGT  
CCATACGGTATCGGTTCGTGGTGTATACTTTGCGTCTCCACGCGCTTCCTATACGTCCATC  
AACCGTTACTATGCGGTACAGGATGTTAGCTCCGTGAAGTCTGCGGAGGACATGAGTGCT  
CACGTTCTTAGCTACATTCCCTAATGGCGTGTCTCCATACGAGGCTCTGGCACTGAGAAC  
TTCGTTTCGGTGTTATCTGCCAACGCCCAAGCAAAATCTTCATGTACAAATTTCTGTAC  
TTGAATGAGGAAAACGTGCAACAGTCGTGGTCTCATTGGGAAGTACGGGAGTAACGTAAC  
GTATTGGCTTGTGATTCTATTGGTTCACCATGTACCTTCTGTTACGCAACCAGTCCCAT  
ACGTGGATGGCACGGGCACACTTCACGAAGAACTCCATCGACTACCTTGATGAGCCTTAT  
CGAATCTACATAGACAACAAGCTGGAAATCACCATCCCCGGTGGCTCCTACAATGATGAC  
ACCTACGAGACAGTAATATATCCCGTTCAGTTCTACGGAATGAAGACCTATCATGGTAAG  
TATTACATCGTTGCGATGGATGGTAAGGTGACGTGGTTTGATGAGCCTCAAGGCGGCTGG  
CCTAACGGGGAACCTCGCTTGGCACTCAACGGGAACCGAGAAGGCGAGAAGGTGTTTATT  
GGACAGGCAATCAACTTCCGATATGTATTCTCTAAGTTCCCTCATCAAGAAGGCAGCGGAT  
GATGGCTCAACGGCTACCGAGGACATTGGTCGCTTGCAGCTTCGCCGCGCATGGGTCAAC  
TATGAGGATTCTGGTGCGTTCGTTGTGGAAGTCGAGAACACCTCACGGCTTTTCAGCTAT  
GACATGGCAGGTGCTCGATTGGGTTCCAACGTTTACGTTCTGGTGGACTCAACGTTGGC  
ACTGGTCAGTTCCGATTCCCTGTGTCCGGCAATGCCAAGTTGAACGAGGTGCGCATCATC  
TCTGACCACACTACACCACTTAACGTGATTGGATGTGGCTGGGAAGGAACTACCTGCGT  
CGTTCTTCTGGTATCTAAACCTAAACACCCCGACTCAATAAGTGAACAATACGACTCACT  
ATTGGGAAGGGGTTTATACTATAGGAGAGAACTCTATGTTAATAATCAGACCTACTAAA  
GAATCAGACTTTGTTAGGTTCACTCCGTCACCTGAAGACATCGCTGAGGCACATGCCTAC  
GGGATTGAACCATCATTTCCACCAGCCAAGGAGTGCGTCACTATGTCACTTCACGGTATG  
CCAGTGGCTATCGGTGGCAATCGTGGCGACAAAGTGTGGTTTCGTAACGTCCGCTCGTGTT  
TGGAACCTAAGTATTAAGACCCGAAGAGAGTTCCGAAAGCTCATTCTGGAGTATCGTGAT  
ACCATGCTCAAACAGTATCCGATTATCTGGAACCTACGTTTGGGTCCGCAATAAGTCCCAC  
ATTAGGTTCTTAAAGTCTATCGGTGCGGTATTCCACAATGAGTTTACTGGTGACAGTAAT  
CAATTCAACTATTCACAATAGGAGGTTAACTATGTGCTGGATGGCTGCAATACCAATCG  
CTATGCAAGGCGCCTCGATGGTCATTGGTGGTATGCAGGGTGAACAAGCCAAAGCTGCAC  
AGATTGACCAAGGCAGACGACAAAGCTGGCAGATGATTAAGGAGATGAACTACAATGATG  
CTAACCTAAAGTTAGAATCTCGTGACCTCCTTGACTCGACTGTCCAAGACTTAACACAAG  
CCAACATGAACCGAGTGCGGAACATGGGGACAATCCGAGCGGCTATCGGTGAGGGAATGC  
TTGAAGGTAACCTCTATGGAACGTGTAGCTCGCGTTACTGAGGGTGACTTCCTTCGAGAGT  
CTCAAGGTATCACCGAGAACTACCAACGTGACTACAGTGTCACTTAGGTAAGCGTTTAG

CTAACCGTGAGAATACCGTAAGTCAAATCAATGAAATAAACAAGTCCGAACCCACGTCTGA  
AAGGCAAGCTGGAACAAATCATTGACCCATTAGGCTTAGGCTTAACGAAGCTGGTTCGATG  
TGGCAACTGCTGGTAGCCCTCTGACTAACAAGCTGGGCAAGAAGGCAGCTTCCAAGGTTA  
AGGCTTCGGATGCTAAGTCTACCGGACAAGGCAAGTAAACACAGGAGGTAAGTGTATGAG  
TAAGTTAGCACAAAGCATTAGGTAACATGGGTGCTCCTGCTGCAAGCCGACTCCGTGGTAC  
TGGTCGTATGGATGTTAAGGCTGCGACTGTCTATGAAGACCCAAGCTATGCCAAGAAGTC  
CGCTCTGATTGGGACTGTAGGTAAGTCTGCTGAGATGGGTGCGGATGCCTATATGAAGTA  
TGACCAGCACCAGAAGGACAAGGCAGATGAGCGCTCCAACGAGATTATCCGCAAGTTGAC  
TCCTGAGCAACGCCGTGAGGCCATTAAGAATGGAACACTTCTGTATCAGGACGACCCTTA  
CGCAATGGAAGCATTGAAGATTAAGACTGGTCGTAACGCTGCCTACTTGGTTGACGATGA  
GGTTGCACAGAAGGTTAAGAACGGTGAGTTCCGTACCCGTCAAGAGTTGGAAGAGTTCCG  
TCACAGCCGACTACAGGATGCCGCAAAGAACTATGCGGAACAGTTTGGTATCGACGAGAC  
CGATGAGTATTACCAGAAGGGTTTCAACTCCGACATCACTGAGCGTAACATCGCCCTCTA  
TGGTGCTCACGATAGCTTCCCTGAGTGACCAAGCTAAGAAGGGTGCTGTTCATCAACAGTCCG  
CGTAGAGTTGAACTCTGTGTTGAACGACCCGAAACCCTACGTTCCCGTATGCTGGTGA  
GTTCTTTGAGAACTACTTCACGGCTGGCTTGACCCTGGTAGTATCCCTAGTGATGACCA  
AGCGTTCACAATGATTAGCCAAGGTCTGTCTGACGTGGTTAACCGTGAAGGTGGCGGTCA  
GTTCTACAACAGATTGAGAACCGTAAGGTGAACTCCACGGAAAAGAGACAACCTTCAA  
GGAAGTATGGGTGCCGAACAGTGGAACAATCTGATGGTTAAGGCTCAACATAATGAGTT  
CCAGTTGAATGCTAAGAAGACCGAGGCGTTCCAACCTAATGTGAACTCTGCGTTGAACCA  
AGAGAACGTGAACACTGGCTGGGAACAGTTGCAATCCATCAAGGCTGAACTGGACACACT  
GCAACCGGGCGAAGAGATGACACCTGAACGTCAGGCGTTAATCAATGCACAGACGCAGAT  
GCAGGACAGGATGAAGCGGGAGACCGCTGAGTTAGCCAAGCAGATGGACAAGCAACAGAA  
GTCGATGAACAAGATGAACGTCATTGACGCACAGTTCCAGAAGCGACTCAATGGTCAGTA  
TGTGTCTACTGCGTATGGCGATATGCCTACCAACGAGAACACTGGTGAGTTCACCCATAG  
TGACATGGTTAACTATGCGAACAAGAAGTTAGCCGACATTGACGCTATGGGCATCACTGC  
TGAACAGAAGGACCGAATGAAGCTGGACTACCTCAAGGCTGACTCTGAGAAGGGTGCTTT  
CCGTAAGTGGTGAACCTATTGGGGACGCTGAGAAGGAGTGGACGTCCGCTGTGAT  
TAACGGGAAGATGCCCAAAGATGGTGGAGTGGCACTTAATGCTCTTCGTCGTGTCCGTAA  
TGCTGACCCTGAGTTATTTGCTGCGCTGTATCCTGATAAAGCCGAGATGTTCCCTCACTAT  
GGACATGATGGACAACCAAGGGATTGACCCGCAGATTCTGCTGGATGCAGATAAGGCTCG  
ACAATCTCTGACCAAGGATATGCAGTATGAGGACGACAAGGCATGGGCTTCTATGATGAA  
CAACTCCGAGTCTCCAGAAATCAAGTACATGCCTTCCACTGTTCAAGCGGGTGCTCGTAA  
GATTTACGACTCCGTTAAGTACCGCACAGGTAAGTCTGATATGGCAATGCAACAGGTTCGA  
TAAGTATCTCAAAGAGAACAACAACGACTCTCACTGGTGATGATGTTGATGGTGATAACCAT  
TGGTGTCTTAACGAGAACTCTCTGCGTGTGACCGATGACCCGACTCTTGGAACAGGG  
TAAGGACATTATCGACACAGCCGCAAAGAACTCGCTGAGACTAACCTTGGGTGACTAA  
CAAGCAACTCACTGTGTTTCGAGCGTGGTGACTCTATCTACCTGATGGACACGACCCGGACA  
GGTAAACATTCGGTACGACAAGCAGTTGCTCTCGAAGATGTACCAAGAGAATCAGGCCAA  
GTTGGATGCGGAAGCACGAGACAAGGCACTCAAAGATGCCAACAAGCGAACCCTTCATAC  
ACGAGCTATGAACCGTAAGCGTGAACGTGAAGCCAAGAACTAAGCGTTCTGGTAGCAT  
GTACGATTCGGTAAGTGGTAAAGGTATTCTGGACACGCTGACTGGTAAAGACTAACAGAC  
CACGATAGGAGGTTCCAAGTGGATAAGTATAACCCGAACGAACCCGCATGAATATGATGCG  
TTATTTCAACAAGCTGCTGACACACATGGAGTCTCCTATGGCCTTCTTCGGAAGGTCCGT  
TGGGTAGAGTCCCGATTCAATCCGAAAGCTCAATCCAAAACCGGGCCACGAGGTGTCATG  
CAGTTCACTAAGGCAACTGGTCAGGCTTATGGCCTACAGTCTGATGAGGACTTCAGCGAC  
CCGGCTAAGTCTATTGACGCTGGCGCTCGCTACCTTGCAGACCTCGTTAAGAAGTACAAT  
GGTGACGAACTCAAAGCTGCCCTAGCGTACAACCAAGGTGAGGGACGTGATGGTAAACCT  
CAATTGGAAGCCTACGACTCCGGTAACTTTGCCAGCATCGGTGATGAGGGGCGCAACTAT  
CTCCGCTCACTTCTGGATGTCGCTAAGTCACCTAAGAGTGGGGACATTGAGTCATTCCGGT  
GGTATCACCCCAAAGGCTAAAGGGATTCCGTTTGATGCTGCGATGAGTGGTATCGGGGAAG  
AAAGGAAAGGTAACAACCTGAACTCCCTGAGTCTCACTCAATGTCCTTTCAAGGTAAAGAA  
CAGGCCGCTCCCAATCAGCCGTTCCGAAAAGACTATTGGGAAGCAAAAGGAACTACACTC  
GACGAAGCCAATGAGCGTTCAACCTTCTTCGGATTCCGGTAATGCTGCTGAAGCAGAATC  
TCCAACCTCAACCTTGGGTGTGGCCTTCCGTGCTGGTAAGCGTGATAATGGTTTCGATGTT  
GTTACTGATGTAATCAACCGACACGGTTTAAACAGCCACATTTGGTTCGCTGAAGAATC  
GAAAAGATTTCGCAACGAAGTGAAGAACCCTGCGTACATGAACGTAGTGCTGGGCGGTTCC

TCTGAGAATCTGGATGAACTAATCAAGTTAGCCAATGAGAACTTCGAGTTGGACTCTAAG  
GCTGCTGACGCTGGTCTTGGTGCCAAATTGTCTGCTGGCCTTATTGGTGCTGGTGTGAC  
CCGCTGACATACATTCTATCGCTGGGACTGCGGCTAAAGGATTCAAACCTGGTGAACAAG  
GCGTTGATTGTGGGTGCACAGGCAGGCGCTATTAACGTTGCCTCTGAAGGTCTGCGTACA  
TCGGTTGCTGGAGGTGATGCGCACTATGCTGAAGCTGCCCTTGCTGGGATGTTACTGGCT  
GGTGGACTGACTGCTGTGGCAGATGGTGTGCTGCTGGTCTCCGTAAGTCTGGTGCTGAA  
CAGATTGAGAACCCTTTGCTGCTGCACAGATGCGCTTCGAGGCTCGTGAGACTGCCCGT  
AACACTGGTGGATATGATGGAAGTCGTATGCCTCCTAGTGAAGACCGAGTGTCTCACAG  
CACAACGGCGTTGAGTATGCGCCTCTCGAACTGAACCGGGTGCTGTAGTCTGAAGGAT  
GGCTCAATCATTAGTGATAACCAACTTGGCTAACCCAATGACTGCCAAAGAGTTCGCTGAA  
GTGGACCCTGAACGTGCTGCTTGGGGATTGCCTATGCGTGGACTAAGTGAAATCGGCTTG  
AAAACCTCTACGTTACAGAACACGCTGAAATCCGTGGTCTTGCAAAGGACTTAGTGCGCTCA  
CCTACAGGTATGGAGTCAGGCTCACATGGTAAGTTTGGTTCTACTACATCTGACATCATA  
GAGCGACTGCGCAGTCTCAACCATCGAACCTACAATAACCTCTATAGTGTAATGAAGGAA  
GCGATGGCTGACCCTGAGTGGTCTGTGGGTATGTTCAAGAGTGGTGCTCAAGGTGCCCGT  
CAAACAATCTATCGTCGTATTAGTGAGGCTATCGAGAGACCTGAACTTCAGGCTAACTTG  
ACCAAGGAAGAGCGTAAGGTGATGGACATCGTGAAGGAACACTATGACCTCAAGCGTGAG  
ATGATGGAGAACCCTGCGATGTTCCGTAACAAGGCCACCTCTATCTTCCCTAACAGTCGT  
CACAAAGGGACTTACGTTCCCTCATGTGTACTCACGGGAAGCCAAGCAGGTGTACTIONCACAG  
GCTCTTGGAGGTTCTGATGGTTTACAGGAAGCAGTTGCTGCAAGCCTGATGGCATCATAT  
CATGCACGTCCTGAAGTCAAGGCCCGTATTGATGAGCACTTAGCGGAGACTTTGGGCATA  
GACCCTAAAGCTGTTACTGAAGATATGGTGATGAAACACGCCAGCGACAAGGCTTATGGT  
ATCGCGAAGACCGATGAGTTCAACTCTTCAAGTGTTCATCGATGATAACATTGAGGGTCTC  
GTAGGTATTGAGAACAACCTATTCTTGAAGCCCGTAACCTATTCGATTCTGACGTGCCA  
ATCACTCTACCGAATGGGCAACAGTTCTCTGTGAATGACCTTCGTGACTTCGATATGAAG  
CATGTGATGCCAGCATATGACCGCCGTGTTGATGGTGATATTGCTATCATGGGAGGCACA  
GGCAAGACTACTGCTGAAATCAAGGACGCTATTATGGCTCTTGATAAGAAGTCTGAAGGT  
AAAGGCACAATGAAAGGTGAAAGTGAAGCACTTAAGGATGTCGTTAAGATTGTACTIONGGT  
CGTGCTCGACGCAATCAGGATACTGTAGGTGACACTATGGTTCGCGCTCTATCCGATATG  
TCATTCTTTACGAAGAACGCATACATGGGCTTGCGAAGCCTAACTGAAATCTCTGGTCTC  
TTGGCGAAGGGTAACACCCGTGCGATGCTGCATGGCATTCTGCTCTGCGCGACCTAGCG  
TTCCGTAACAAGCCAGTGTCCGGTAAGGAACCTTAAGGAACACTACTCTATGGTGTTCCGGT  
AAAGAGTTTGATGACTTAATCAGACCGACACGTCAGGACATCATTACAGCGACTCCGTGAA  
TCTACGGATAACCTGATGTTGCCGCTAAGGTTGTTGGTACGGTTAAACACACAACCTCAA  
GAGTTGGCTGCTCGCTCTCCGTTCACTAAGTTCCTCAACGGTACTTCCAACACTACATTCTG  
GATATGGCCCGTCAGGGTGTTCATGGGAGATGTGGTAACTCACGCCATTACTGGTAAGGGT  
GCCAACAAGTGGATTAAGGGCGACATGCTGAAATCTGCGAGTATCTCAAAGGAACAGTGG  
GAAGGCATTCAGAACCCTATCCGTGAGAACGTCACCTCAAGGTGCTGACGGTAAGTACACC  
TTCAAGGACAAGCGCAAGCTGGCTAATGACCCTCGTGCTATGGACCTGTGGCGTTTAGCT  
GATAAGGTTGCCGATGAGACTATGCTGAGACCTACAAGGTTTCTTACAGGATTCCCAT  
GCGTTTGGTGCTGCCGCTAAGTTGGTCTTACAGTTCAAGTCTTTCGTAATCAAGTTCGATG  
AACTCTAAGTTTATCCGCTCCGGTCACGAGGCTATGAAGAATCACCGAGCTATGGACATG  
GCGCTGACCTATGCTATCTCTGGTGGTATTGCTGGCTCCTACTATGTGGCACAGGCTCAC  
TTGAAAGCTGCTGGACTTCCCTAAAGAGCAACAGAAGGATTACTTGAAGAAAGCTCTCGAC  
CCGAAGATGATTGCCTATGCTACGGCATCCCGAAGTTCACACTTAGGGTCTCCGTTGAGT  
ATCGCTAACTTCGCTATGGGTGCTGCGGGTTACGACCAAGGTCTTATGGTTCGCTCTACG  
ATTCTACCGAAAGGTGATGACAAACGTCACCGCAATAAGGCAGTGACTTCTCGTGACATG  
GGTGATTCCATTATGGGCGCTATTGGTGAACAGGTTCTGCTCTTGGGTTTCGCTGGTGCC  
ACTCTTGCTGCTGGTTCGAAATGCTTACGGTGTCTTACGGCTCCCAACAAACCGACCGAG  
CGTGAGATGATGACTGGCTTAATGAATGCTCACCGAGAGATGATTCCCTAACGACCCAATC  
TCCCAACAGATGCTCATTAAAGTTCTATGAGGCTAACGGGGTTCACATCAAGGCTGACAAG  
AAGTAAACAATACGACTCACTATTGGGAAGGCTCTCACAGCTTCCCTATTTATTCCAACCT  
AAGGAGGTACGCTATGGCTCTTAAAATTCGTACCGTAATGACTTACCCGCTAACTGGTGC  
TGTGGACTTTGCAATCACCTTTGAATACTTGGCCCGTAAGTTTGTGACGGTAACTCTAAT  
TGGTAAAGACCGTAAGGAACCTGTTCTCAATCAGGACTTCAGGTTTACCACTAAGACTCA  
AATCACAACAACCCTGCGTGGACTGCTGCTGATGGTTATGACTCCATCGAGATTCGACG  
CTACACCTCCGCTACAGACCGTCTGGTTGACTTTGCTGATGGCTCAATCCTCCGTGCGTA

TGACCTGAACATCGCACAGATTTCAGACCCTACACGTTGCTGAAGAAGCACGAGACCTCAC  
TGCGGATACCATTGGTGTCAACAACGATGGTCACTTGGATGCGCGTGGTCGGCGTATTGT  
CAATGTAGCTAACCCGGTAGATGACGGTGATGCTGTTAACTTAAGGTCCTCAAGGTGTG  
GAACGACTCTGCCCTTAATTCTGCCAATCGAGCGAAAGAATCCGCAGAAGAAGCGAAGAG  
ACAATCAGATTGGGCTGGACGTATGCGCAATGAGGCCGAACAGTTCAAGAATGAGGCTAA  
CACTCACCGAGGCCGTTGCTGAGTCTGCTAAAGACCAAGCCATTGCTGCTCGTGATGTGGC  
TAACTCCGCTAAAGACCAAGCGTCCAATAGCCGTAACGAGTCCTTTCGTTTCGCTGAGGA  
ATCTAACAGTTACATGGGATGGTCTAAGAAGTGGGCTGTTAACCCGGTCGATGTAGTCAT  
TCAGGATGGTGAAGTCTCTGCGAAGCACTGGCAGCACTACTCAAAGGTTGAAGCTGACCG  
CTCTAAGAATGAAGCTGACCGAGCAACTAACGAGGCCAACAAAGTTAGGTAGCATGAACGC  
TCTTGCTGCCGCAATCGAGAAGGTTGATGGAATCCGTGTGTTCTGGAAAGGTGAGCAACA  
TTTGGATGGACGATTGTATATGACATCAAATGGTTTCGACTGCGGACAGTACCAACAGTT  
CTTCGGTGGGGTTCCCGGTCGCTACTCCGTAATGGAGTGGGGTGATAAGGACGGATGGCA  
CTTGATTCTGAGCGTCAGACTGAAGGTGGGACTCCAACGTTATCCCTGCGCGGTCACAT  
GAGTGCTGGTGGTGACATCCGTTCTGCTGGTAATCAGTATGCTAACAACCTGTTCCAACA  
CGACAGGGAACAGCATTGGCCGGGTCGCGGTGCCTTTGCGAATCAGTATGCTGACAAGGC  
TGCACCATTTACCAAGACTGGTAGATTCCAAGCCCCTAATGGATACGGTGAGTATTACCC  
TATCCTAAAAGGCACAGTTGAAACACAAGGCCACGGCTATGGCACAGTTGCTACGTTTGG  
TATGTTGACATCTGGTAATGGTCGTTTTGCTAATGGGTGTATCCACGTAATTGGCGACAA  
CGGAACCAACGGTCTCTGGCAGTTTGACCCCAATAATGGAGCGTTCCTACTCTCGTGGTGA  
TGTTAAAGTTGGTGAAGTATCTACCAGAACGGTGACATTTGGGGAACCGTTTGG  
GGGGAACCGTCCACTCACACAGTGGTTAGGAGACCAGACTGTCAACCATATCGCCATGGG  
AGGCCGTAACGATTCTCCTGTGTGGAATGCCTATGGTATTGGGGATGGCGACGGAAAGGT  
TATCACTGGTGTAGTTAATGGTAACGCTGATGGTGCCATTGACACAATTCAGTGGCGTGT  
TATGCAATATGTTGAAACAACGGACAACGCTTTAATATCTACTAATAACAAAGGAGGA  
AACACTATGAGGGCTTTACGTCACTACAAGAAGTTCGTAAAGTATACCCCTCGTAAAACC  
AAAGAGAATGCTGACCTGCTAGAGCATGGGGTTGGCTTCTCTATGGACGAGAATGGTAAC  
GACTGGTACGAACTTCGGGAGACCTTTGAGAAGGACACATGGAAGCTCGTGTATGCTAAG  
GATGGAAGTGTCAATCAATGTGAGAAGGACGTACAGGAATTAGCTGTGCAAGGCTCTGCT  
GGTGTCAATTGAGTTGGAGAGTATTCCGAAAGAGTACTCACGAGACAACATGGTACAGTGG  
TGGTGGGATGGAGAGAAGCTAGACTGGAACCCTCGGTACTTTGAGAACCAGAAGGCTCGC  
TTGATTGCACAGGCATCCACCAAGATTGACCAGTATGCTGACTTCATTGAGTTGGGCGAA  
GAGGGTCTTGAGGGCATTCTCAAGGCATGGAGAAAATATCGACTGGCAGTGTTTAAAGTG  
GACTTAAGTGTCTTCTTCTACGACTGGCCTGAGAAGCCGGAAGCGTAAACAGTAGAC  
CACGGATGGCTGACATTAGGAGGACACAATGTTGTCATTAGATTTAATAACGAAGTAGT  
TAAGGCTGCTCCGATTGTAGGGACAGGTGTTGCTGATGGTGCTGCCCGTCTGTTCTTCGG  
ACTGTCTCTAACGAGTGGTTTTATGTAGCCGCAATTGCCTACACAGTGGCTCAAATTGG  
TGCCAAGGTAGTCGATGTGATTATCAAATGGAAGAAGGAGGGTAAAGATGTCTAATGATA  
AATCCTTAATTCAATTCCTTGAGATGCTGGACACTGAGATGGCTCAACGTATGCTTGCTG  
ACTTGACAGAACGATGAACGCCGCACACCTCAACTGTACAACGCAATCGGGAAACTGTTAG  
AGCGCCACAAGTTCCAAGTCTCCAAGTTACAGCCAGACCGTAACATCCTTGGTGGACTGG  
CAGATGGACTCGAAGAGTACCAGAACATGGTAGGCTCCGATGGTCTCACTGAAGACGAGA  
AGTACACGCTTAACTGATGGTAATACTCAAGGTCTCCTTACGGTGGCCTTTATGAATTAT  
CAATAGGAGGTGCTATGTCTATTCCAGAATCGGTTCCGCTTACCGTGAGAAGAAAGAGG  
CACGTAGGGAATACTCCAGACGTAAACAGGTAGAAAGTAAGTATGGTGTGTCTTATGAAA  
CTCTAGGGGACATGCTGGATAACAAGGAGGCGTCTGTGGGATTTGTGGGGTTGAACTCA  
CCTTCCACCCGAAGGCCACTGCTTGTGTAGACCATTGCCACTCCACTGGAGATGTGCGTG  
GTATTCTTTGTGCTAAATGTAATGCAGCAATTGGTGCCTTGGGGACACTACATCTAGTG  
TGGCTAAGGCGGTTGCATACCTACAGAAGACGGCGCTACGTGCAATCTGAGAAATGGGGA  
GGGTAGTTATGCTCAAGAATTTAAAGAGCTACGCCATCGCTGTGGCCTTTGCCTTGGGGA  
TGACCCTTGCCTACAACCACGGCTATGACAAGGCTAACACTAAATGGGAACAGGAGGTGC  
ACAATGAGTACGTTAAGAAAGTTGAGGCGACTGCGGATAAACAGACTGCTCTCAATGAAG  
TCTCACGACAATAACCAAGAAGACCTTTCGGCGCTGGAAGGCAGCACTGATAGGGTCATTA  
ATGATTTGCGTAACGATGGTAAGCGGCTGCGTGTCAAGCTATCAGCCACCTCACGAGAAC  
TCCAAGCTAACGGTGGATGCCTCGTTGATGGTAGAGCCGAACCTTGACGAAGAGTTTAGTA  
AGCGTCTTATCGGAGTAACTCAAAGAGGGGATGCGTGGATTAAGCGCTCCAAAATACAA  
TCAAAGAAATGCAACAATAGGAGGCCACAATGTCTACTCAAGCAAACAAAATGCGCTCA

TCGTGGCGCAACTTAAGGGTGACTTCGTGGCCTTCCTGTTTCGTCTTATGGAAGGCTCTGA  
ACTTACCTAAACCAACCAAGTGTCAAATTGATATGGCACGTACACTCGCTAACGGCGACC  
ACAAGAAGTTTATCCTTCAGGCGTTCGGTGGTATCGGCAAGTCCTTTATCACCTGTGCGT  
TCGTGCTGTGGGTCTTATGGCGTGACCCTCAACTTAAGGTGCTCATTGTGTCTGCCTCTA  
AGGAACGTGCGGATGCTAACTCCATCTTCATCAAGAACATCATTGACTTGTGCCATTCC  
TCGCTGAGTTGAAACCTCGACCCGGGACAGCGTGACTCCGTGATTAGCTTTGATGTAGGCT  
TGGCTAAACCCGACCACTCACCTTCTGTGAAGTCCGTGGGTATTACTGGTCAGTTGACTG  
GTAGCCGTGCTGACATTATCATCGCAGATGACGTGGAGGTTCCCGGTAATAGCTCTACTA  
GCTCTGCTCGTGAGAAGCTGTGGACATTGGTACTGAGTTCGCTGCATTGCTTAAGCCGT  
TGCCTACTAGCCGTGTTATCTACCTTGGGACACCACAAACCGAGATGACGCTCTACAAGG  
AACTGGAAGATAACAAAGGGTACTCTACGGTAATCTGGCCTGCACAGTATCCACGCAACG  
ACGCTGAGGCTCTCTACTATGGCGACCGCTTGGCTCCTATGCTGAAGGCTGAGTATGATG  
AAGGCTTTGAGTTACTCCGTGGTCAACCTACTGACCCTGTTTCGATTTCGATATGGATGACC  
TCCGTGAACGTGAACTCGAATATGGTAAAGCTGGTTACACGCTACAGTTCATGCTAAACC  
CTAACCTGAGTGATGCCGAGAAGTACCCTCTGAGGCTCCGTGATGCCATTGTGTGCGCAG  
TGGACACTGAACGTGCCCCATTGTCCTACCAGTGGTTGCCGAACCGTCAGAACCGCAATG  
AGGAACCTCCTAACGTGGGTCTGAAGGGTGACGACATTCACAGCTTCCATGTGTGTTCCCT  
CTAAGACCGCTGAGTATCAGCAAAGATTCTCGTCATTGACCCCTCTGGTTCGTGGTAAGG  
ATGAAACGGGTTACGCAGTCCTCTACACCCTGAACGGCTACATCTACTTGTGGAGGTCG  
GTGGGTTCCGTGGTGGCTACGATGACCCTACCCTAGAGAAGCTCGCTAAGAAGGCCAAGC  
AGTGGAAGGTACAGACGGTTCGTACACGAGAGTAACTTCGGTGATGGTATGTTCCGGTAAGG  
TATTCTCTCCGGTTCTCCTGAAGCACCACAAGTGTGCCTTAGAAGAGATTTCGTGCTCGTG  
GCATGAAGGAGATGCGTATCTGCGATACTATCGAACC GTTGTGGGTGCACACCGCCTTA  
TCATCCGTGACGAAGTAATCCGTGAGGACTACCAGACCGCTCGTGACCTCGATGGGAAAC  
ATGATGTTTCGCTACAGTGC GTTCTATCAGATGACCCGTATGACTCGTGAGAAGGGCGCTG  
TGGCACACGATGACCGACTTGATGCTATCGCATTGGGTATCGAGTTCCTTCGTGAAGGGA  
TGCAGGTGGACTCTAAGGTTGGCGAGGAAGCTATGACCCTTGAGTTCCTTGAACATCACA  
TGGAGAAATCTATCATCGGTGGTGACATGGCTCGTGAGTTAGTGTCTGGAGGTGTGGACA  
TCTACTATGAGGACGATGGTGATGGAGAGTGCTTCATTGAGTGGTAATTAGATAAGTATG  
CGGGAAAGGTGCATGGGTAAGCACTTAGTACCGCTACGTTACCATCAAGTAACTTACTGA  
TATACATGAAGAAATTAATACGACTCACTATTGGGAAGGGCACCCCTAAGACA ACTTAAAG  
ACACTTATAGACTGCATATGCAAAGTGCATACTTAGTGACTACTCTTAGAGACCCTTACA  
GTGAGGGATGGTAGTAATAGTAATTACATCCCCACTATCAGTGTAACCATCAAGTATAAC  
AAGGAGGACGCTCTATGCGCTTACTATCCGTGCTCAAGACACTGGCAACGCATCGAGTGA  
CCTACAAATTTCTCGCTGTACTTGCTGCTTCCATTGGTCTCGCATCTAGTGCTGAACACA  
TCGGTGAACCTGGAGACTCTGCTTTGTTCTCTACTCGCTTGTGTTTCCTTAGACTGCTCATT  
GGCGCTTATGCGCTCTTAGTGATTATGGTCGATATACATCTTCCCTATAATCACTGTAAG  
AAGTCAACTCTAAGAGTAACCCTTATGTACCCTCTATGGTCTACAGGGTCTCTTAGGGTC  
TTACACGCAGTCTAACCTTATGATAGCCACTCTGTGGTGAACCTTATGAGACTTGATGTA  
CCCCTTTAAGAATCCTACAGAAAAATCTGAGTGAGTATCTCATAGTTCATAAACACCGAG  
TTCCCCCTATGGCCTCCTTACAGTTCACCCAAAGAGTGCCACCCTTATGGTAACTTATG  
GTTACTTAATGTCAATCCTTATGTGAGACATTGGGTAACTCTAGGTGTTACCACTAGA  
TATAGGGTGTGTTGATACCTTATGACCACTATATGTAGACCTCTCTGTGTCCC

>NewGenomeName\_261

GGCAGGGGACATTTTAAAGCCTTTAACCATGCGGTTTTAAAGCGTTTTGTCCACATTTTG  
TCCACATTTGTTTTATCTTTTCGTGCTGTTGCGTGATTTTTGTTCTTGCAATTGATGAGCAT  
AACTTCAAGCGTGATGTTTTCAGATTTTCATGCCCTAAAACCTTGCGATACAGAAATCAAGT  
CAATATCGTGGGCAATTAATAGCTAGCGTAAGTGTGCCTTAAATGAGTGGACACGTA  
CACGACCAACGATTTTACGCAATGTCTTATTAACCTGCATTGTTGGATAGTGAGGGTAGTA  
GTCTACCATCATCGGTTGGTGGCAGTTGGTCAATAAAAATTTATAAATTCATCATCAAGCG  
GTATCTCTCGGATACTGCTTTTTGTTTTTGTGGGCATAAATCCAGTATTGTTCTTGTAGT  
CCCATGTTTTATTGACTGATAGCATGCCAGTATCTCGTTTGATATCATCCACTGTAAAGC  
CCAGGCACTCAGCAAAACGGATACTGTTTTGAGATGATATAGAGTGCTGCATAAGACG  
CATACTCTGGATGCTTGCTCGTCTCGTAGATCAATCGCTCGTATTCTTCGACCTCTAGGA  
ATTCGTTTTCAATATCACGCCCTTGTCTTTGCGTTTTATTTTAGCAAACCTTGCAAAAGT  
TACGCTTGATGTATCCTTCATGCACAGCCATTTCAATGCACGCCTTGACATGCACATTA  
AACGCTCGACAGTATCTTGGAGCATGAGTTTTAGCGTAACTATTCAGCACACGTTGGTACT

CAGTGGCAGTAATAGATTTTCAGCTTCTTATCGCCGAAAAATAACTCTATCTTGCGCTGAC  
TGTTGATATATGCCTTATAAGTTATTTTCGAAACAGTTGGCTTCTTATAAACCCCGCACC  
ACTGTTTAAAATAATCGTATAGAGTAATATCTTCATCGACATTGACGTTATCTTGTAGCT  
TAAGTTCCATCTCAGCAGCAGCCTTGATAGCTTCTGATTTAGTCCTGAAACCACCCTTAG  
TTTTCGGTTTGGCTTACCAGTAGAATCGTAATAATTTATACGATATTTCCACCCATTTG  
AGCGTTTACGGTATGATGCCATTTATTTAATCCCCCAAAAAATATAGATTTACACAATAA  
CCAAAATTCTAATAAAAAGAACCCTGCACTCATGATTCTCAAAGTTTGAGAGTGTGGGGC  
TTTTTGTTTTATTTTTTATTTAGTAGTAAAGACTGCACCGCAGTTCTTGCAAGTCCACTC  
TTTTTACCCTTCTTTCCAGCAAAACCAGCTAGAGCACCAACACCGCCAGTCATAATAGT  
TCCAGCAGCGGCTTTACCAATTGAGAAGCTTTTTCTTTGCTGTACCATAAATTCAACGTC  
CGTACTTTTGCAATAAGGGCATTTTACAGCTCTTGCTTCTGCCATTGCCTTTTTAAACTC  
ATTTCTCGATTTTCGAAATTCCTCTTTAGCTTTTGCTCGTTCTATTTTTAATTGTTCTTT  
TTGCTCTTTAGTCATAGGGTGTTTTATCTCCCAAAAAAGTCGTGCGAAGAGTAAAGCAAC  
ACCCACAAACATTAATAACCAAAAAGGAGGAAAGATAAAAACCTAAAATAAGCCCACCAA  
AGTACAGCCAAAAGTTGTTTCGAATTTTAAAGTAAGTAGGTACATTTCTAACATCATCCAT  
TTTCATTTTCATTTTCTCCTTTTTTTTTAAATAACACTTTGCTGAATTTTCCTAAATTCAT  
CTTGTATCATCGCTTCGCCCAAGTAGTGGAATATTATACTGTGCAGCAAAGCGAACC  
AATTAATTCGTAGATATCAGTAGATTTTAAATAATCAACTAGTAATTCTCGAATCATAA  
ATCTATCAGCTTGATTTTCATATTGTAAAAGTAGTCTCTTATAATGTTTTGGGTCATGGT  
TGACATGACCGATTTTCATGTAAGATGACTTTTTACGCTCTTGTTTAGATAATGATCCGT  
TAACATATATTCGTCTTAAGTCTGGAAAGTAGAACCCAGACCTTTCCACAGTTCGGCAG  
GGAAAATGAATAACGATATTTTATATTCTTTTAAAAGCTCATCAATCTTCATCTCCCGTT  
ACCTCAATTGACAGTCTAATAATTTGTTCTATTTTCTTAAACGTCATCATCAGATAATGGC  
TTTCCGTCAAACATTACGACTTTTTACGCAAGTTTGAAAGGTCGATTGATTCTTTTTTG  
ACATCAGTTGATTCATTAGTATCATATCCCATTAACCAAGCTTCTGATACGCCTAGTGT  
TTAGATAGAAGAATAATTTATCTTGGTCTGGAATAGACTTTCCGCTAACATATTGAGAG  
AGGGCGTTTTACCAAGTTTTATTCCTAATTCTTTTTGGAATTTTTCCGACTGTCTAAGA  
ATGTCAACTTGCCTCAAATTCGGTTCTTTCATTATTTGAGCCAATCTTTGAGCTGTGTTT  
TCTTTCATAATTACATCACCTTTCATGAGTGTATTATATAGTATATTTTCATAAAGTTCA  
AGAAAAAAGTAAAAAAGTTCAAAAAAATGAACAAAAAGACTTGACTTTGTTTTTTGAGG  
TGCTATAATAAAATCATAAAGTTCAAGAAGTTGAACAAAAAGAAAGGAGTAAGTATGATT  
TACAAATATGATTATTCCAAATTAATGGAAAAATTGTTGAAGTTTTTGGCACAAAGAAA  
AAGTTCGCACAAAGCATGAACTTGTCTGAAAAATCAATATCTGCCAAGACAAACAACAA  
CGATGCTGGCAACAGTCAGAGATTTCAAAGCTTGCGAATTGTTACAAATTCCAAGTGAT  
GAAATTAATTCATATTTTTTTAGATATAAAGTTCAAGATATTGAACATAATTAGAAAGGA  
GCAATGAATGACAGATCCATTCAAACCATTTGGCTGACCGATTCGATAATCTTCTGACCAC  
TGTCATAGCAGACAAATCAAAGCGTTTGACATAGATCAAACACTGCCACTGATTTAAC  
TGCTAAACAGTGCCAAGAAATGTTAGGAATCGGTAACCTATACCGAATTCCTTCGGATAAC  
TAATCTTGACGTTTCCCAAAGATTGATAAAGGTGCTGGTAGTCAAGTTAGATATCCAAG  
AGACCAAGTAAGACAGTGGTTTAAACAATCACTGGCAAGATATAGCATAATCATTAAAAAA  
ATATCACTAGTCCCTTAGTGCAGTTAAGGAAAGAAAGGAATTTGAAAAAATGAAAAACTT  
ATTTAAATGGATTTTATCTAAAGATGAGAAAGAACAAAAACCAGTATGGACACCATACGA  
AGTAAACGAACGCAAATACGAAGAACGTCATAAACGTGAGCAATTATTAATGAAATAATA  
GTTACTGTTCTTCAATCCGTAGCCACACCCTGGTGTGCGGAGTGCAACCTTATACCCCAA  
AATAAATATAAATAAAACCAAAACTACCTTCTTAAATTTGAATAATTTCGAAGTACATCAG  
GGGATGGGTGCGGATTGAAGCACTAAAAAAGCACAGGTAATGGCCTATGCTTAATAAAA  
CAACTTAAAAGGAGTATACCATGAAAACATCTAAAATTACAACAATTGAAGTGGTGGGAA  
GGTAGGAATTAATTTATGGCAACATTATATGAATTAACAGATCAATTACTTGAAATTTAT  
AATATGGATGTCGATGATGAAACAAAATTAGACACCCTCGAAGCAATTGACTGGACTACA  
GACTACGAAAATAAAGTAGAAGGATATGTCAAAGTCATTAAGTCGCTTGAGGCAGACATT  
GAAGCTCGCAAAAATGAAAAGAAACGTTTAGACGGATTAATAAGTCTGATCAATCAAAA  
ATTGACAAACTAAAAACAGCGCTTGCAGTTAGTATGGCTGAAACCGGTCAAACCAGAGTC  
GATACCACGCTATTTAAAGTTGGTTTTAGAAAATCTGAAGCGGTGGTTGTTAACGAAGAA  
AACTTCCAAAGGAATATCAAATAGCGACTTATAAGCCAGACAAGAAAACACTCAAAGAG  
TTACTTAAATCTGGAAAGCATATTGAGGGAGCTACTCTTGAAGAAAGGAGAAATCTTAAC  
ATAAGATGAAAATTATCAGAGCAAATGATATCCAGCGAACCAAGAATTGGCGAATACTGA  
TTTATGGTAAGGCTGGATTAGGGAAAACGTCCCTGATAAAAAACATGCCTGGAAAAACTT



TGGTGTTCGTTAGATAAATTCTTCAAAAAGTGCTAGCTGGCACTGAGAACGTGGATATCA  
TAGATTTTGACCGTGAGCATCCAACCTGAATTTATCACAGAGTTTCTAACCCAAGCAGATA  
ACTTAATCAAAAACCTATGAAAACCTTGTTATCGATAACATTTCAAGTTTTCAATCAGATT  
GGTTTATTGAGCAAGGTCGCAAGTCAAAGAACGGTATCAGTAATGAGCTTCAACACTACT  
CTCAATGGACAAATTAATTCTTGAGAGTATTGACTGTTATCTACAGCAAGCCTATCAATA  
TTTATGTGACAGCTTGGGAAGACACCCACGAACCTCAATTTAGAAACTGGTCAGATTTTAA  
CTCAGTATGTACCACAGATTAGGGCTAGTGTACTCAACCAACTATTAGGGCTTACCGATG  
TCGTTGGACGTATTGTGGTTAATGCTAAAACAGGTGCACGTGGACTTATTTTGAAGGCA  
GCGAAGGTACTTACGCTAAGAATCGCCTCGATAATCGAACAGCTTGCAAGATTGAAGACC  
TCTTTAAATTTGGTGATTTAGATGGAACCTAAGGAATTACCAGAGTGACCTTGTTAATGAT  
ATCAAGCAATCAATCTTAAGAGGTAATAAGCGTATCATGGTGCAGTCACCACCTAGAAGC  
GGTAAAACCGTGGTGATGGCTCACATTGCCAAAGGTGCGACAGATAAAGGTAACACTATT  
CTGTTCTTTAGTCATCGAAAAGAAATCAATGAACAAGTAGTTAATACCTTTAAGCGTAAC  
GGCGTTGACATGAACTTAGTAACCATTGATAGTGTACTAAGATAGCACGAAACCTAGAT  
AGGATACAAGAGCCTTCGATTATATTAATTGACGAAGCTCACCACGTTAAAGCTAAAACC  
TATCTCAAATTTATCGAATACTATTCTAACAGCATTGTTCTCATGTTTACTGGTACACCT  
GCCCCACTAGATGGCAGTGGGTTTGATGATATCGCAGACGACATCGTTCTTGTTAAGTCA  
GTAAAATGGCTACAAGACAACGGAAACATCGCACCATTTAAATATTACGCCCTTCTTTA  
ATTGACACCACAACTTAAAAAACGTGGTGGAGAGTTTACTAAGAAATCTGTAGACGAC  
ACAATGAAACGTGTGATTTACGGTGACGTTATAAGACACTATGAGAAGTTAGCCAAAGGC  
AAACAAGCTATAGTATATACATAGCGTAGAAGCTTCTGAGAGCGTTTCTAACACGTTT  
AACGAGCAAGGCTATACTTCTATCGCAATCAGTGGTAAAACGCCACCAGAGGTTGCGAGAT  
AGGGCAATGCAAGCCTTTAGAGACGGAAAACCTACAATAATGGTTAATTGTGAGCTATTC  
ACTGAAGGAATTGACCTTCAAACGTTGATGTTTGCATCATGTTAAGACCTACTCAATCG  
TTATCACTCTATTTACAGTTTGCCATGAGGGCTTTAAACCCAAGAGAGGGCAAACAGCT  
ATTATCATCGACCACGTTGGAAATGTAGATAGGCATGGACTTCCAACGCTGACCGTGAA  
TGGTCAATAAAAGGTGTTAATAAAACCAAGAAAAAACTTAAACTCGGTGAACCAACAAC  
CGGACTTGTGATGAATGTTACGCAACTTTTTGGAGTGCTGAACGTATCTGTCCGATGTGT  
GGTCACGAAAACAACCGACAAAAGAAGAAGTTGAAATAATTCGAGAAATAGAACTCGAA  
GAAAGACGGCAAGAGGTTGCTAGTAAAGTTGAAACTTTCGTTACTAGTGACCAATGCCAA  
ACAGTAGAAGAACTCAAAGAGTTCGCTAAACAACACGGATATAAGCCCGTTGGGTTTAT  
TACCAACAAAAAGAAAAAAATATATGGAGATAAAAAACTATGTTTACAATTGATTACTCA  
CAAGCAAAAGAATTCGGATCTATCAAAGACGGTACTTACGAAGTTACTATTGATTTAGCA  
AAACAAGATGCTACTCAAGGAGGAGCTGACTACCTTGACATCCGTTTCCGTTTCCGTAATTCGCAAG  
GACTTCCAACAAGAATTCCAAAATAACATTATTTTCTATCGTATCTTTGCTAAAAAAGAA  
GACGGAAAATATCCAGTAGCTTCTATCATGAACATTGCTAAAGCCGCAGGAATTCCTGAT  
GGTACTAAATTTAGTAGCTTGGAAAGATTATCTCAACCAGTTGGAAGGAAAAGCTCTTAAA  
GTTACCGTTAAAACGAAAAATCTGAGTGGCAAGGTAAAACCTACGAAAATCTAAACGTT  
AAACGTTTGAAGTTACCGATATCCCACCTCCAGAAGTTAATACTGAGATTTTCAGAAATT  
GACCTTCCATTCTAATTATGGAGATGGTTGATTACGCAATCAACTATCAACGCATGGGCT  
ATTCTGTTATCCCTATATCAAAGAATGGCAAAACCCCTCTTATTTCTTTTCGCTGACAAAC  
CACCAATGACTGAAAACGACATTCGGAGGGTGTGGCGAGATAATCCAGATGCTAACATTG  
CACTTAAAACAGATACATTCTTTGTCATTGACGTGGACATGCATGGCGATGTTGACGGTT  
TAACTAATTTAAGGAATTGGGAACATGCAAGACTTATACCCCAACATTGCAAGCTATAA  
CCCCAGCGGTGGGAGACATATCTACTTAAAAAAAGACCCCAACCATCTATATCGCAA  
ATATTGGGATGATTGAGGGAGTAGATATCAAGGCACACGTTAATAACTATATATTAGTGC  
CACCGTCCAATAATTCCAAAGGATACTATGAATGGGATACAGTGCATTCGCCAAAAGATG  
GAAGCATAACAGAAGCACCTCTTGCCTTGATAAAAAGTATTGCAGAAAATGAAACCAGAAC  
CATTAAAGCTATGAAGTCTCATCGTTTGTAGTACTGTGTTAGAAGTACAAAAACCACAA  
AGTTATTCGAGAGCATCTTACTAGGTTTTGGAGACAAAGGAGGTCGAAACAATGCACTTG  
CCGAGTTTGTGCGTGGGCTACTCCTTAGAGGCGTTGACCCAGAAATCACTTATCATCTTG  
CAAAGATGGCAAACAACAACACCCAAGAGCCTTTGGGCGATAAGGAATTTGAAAGGACAT  
TTAAGAGCATGTTAGACAAAGAGATAAGGAGGATTGGAATTGACAACGATTGATTTTCGAT  
TATTACAGAGAACAATTTGCAAGCTCTAGTCTCTCACCAGGTAAACCGAGCAGCAGAGAG  
GGAATTAAGAATAAGCTTAAAGCCTACCGAAACGACTGGTTTGA AAAAATTC AAGGAAGAA  
AATCCAGATAAAAAAGAACC AAAGGCATTGCCAGAATTAGCAGTAGCTAAAGGTTTAAAT  
AAATACACTCATGTTATTACCCTCGAAAATGGGAAAGTAGCTATATATGATCCAGAGCGT

GGATACTACCAAAAAGATTACAGATATGCCTACCAGCTTATCTATGTCTTAGAACCCACA  
TTCAATGAAACAAAATGCCGCAATGTTCTATTCTTGCTATCAAACATGAGCAGGGAATAT  
GAATATAATAACATGTATATGGACTTTGAACCAGAGTATAGAGACGTAAGACGCTTTATA  
CTCGTTAAGAATGGCATCTATGATAAGCGAAAGAAGAACTGTTATCGTTTGACTATAAG  
TTTATTAACCTCAGTACAATTGAAACAGAATTAGTTGAGAACGCCCTAAACCAACAATA  
AATGGATGGGATGTTGATAGTTGGTTGCTTGATTTAATGAGTGGTGATAGTGAGCTTGTC  
GAATTACTATGGCAAGTCATTGCAGCATCGCTGAATGGTAACCACTCTTATCGAAAATCA  
ATTTGGTTGGTCGGTAACGGTAATGACGGTAAAGGTACGTTTCAACAGTTAATTAGCAAT  
CTTGTTGGATTA AAAACG TAGCTCCCTTGAAACTTAACCAATTTTCAGAGCGTTTCGGT  
CTTGCCATTATCGAAGGTAAGACAGTTATCATCGGGGATGATGTCCAAGCTGGTATATAC  
GTAGATGAATCTTCTAATTTTAACTCAGTTGTCACTGGTGAACCTGTTTCGATTGAGAAA  
AAAGGAGAAAACCCCTACTTAGCACAATTTAAGAAAACAGTTATCCAGTCTACCAACGCT  
ATGCCAGTGT TTA AAAACAAATCAAACGGGACATATCGACGTATCGTGATTATCCCATTC  
AAGAAAACATTTGGCATCAACGATGATAATTGGGCAATCAAAGATGATTACATCAATCGT  
AAAGAAGTTTTAGAGTATGTGCTCTGGAAAGCTATTAATTTAGATTTTCGATAAATTCAGT  
GAACCAAAAGCGACACAAGAACGTATGCAAGAATTCAAGGAAGAAAATAACACAGTTTAT  
AAATTCCTTAATGAATATTTGTCAGATGTCGTTTCCACTCGTATTCCAGTTAGATTCTTG  
TGGGATGTATACCGCTCATGGTGTACAGAGGGTAATCATACTATCCCTAAAAAATCTAAC  
TTTGAAAAAGAGTTGGCACAGAATTTACCAGTTGGTTGGATAAAAGATAGACAAAAACCT  
CTTGATTTTTTTAAACCAACTAAAGATAAGCCAGTTTATTGGCATGATTTCAATTTAAT  
TGGGACGAAAACGAGGCGAAGAAAGCAGCAGTAGTGGTTATGGTTACTCAGTAACCGCAG  
GTTATTGCAACAAGTAACCGTAAAACCCATTGAAAATAAAGGGTTTCGGTTGCTTTAGTT  
ACTTAGTTACTACTTTTTAAATATATTTATAAATAAATAAATAAATAAATAAATATATATA  
GAGAGAGACTTAAAAAAACGTGTA ACTAAGTA ACTAAAGTGGCCAGAAACCTTGATATAT  
AAGGGGTTTGCGGTGGTTACGAGTAAAAGTAACTGTTACTGTAATCGAGTAACAAAAGGA  
GAAAAAAATGGAAATTC AACTTAGAGATTAATCAAGAACACGAACCTAATGAAAATAT  
TAGTAATTACATCAAAGATTTTTCTGAAGCGGCAACAGTTATAGATGTGCAATGCAACGC  
TATTCGGTACATTTTGAAAAGGTTGGAGAAGACTATTGGACCGATGAAGATTATGGCAT  
CAAAGTTGTTGCGTTTATCAAATATGAAGATAACAAAGAGGCAACTCCAGAAAAGAAAA  
ATGGTTGAAAGAATTC TTTGACAAACATATCGATAAGGAAACAAAATTATTTATCGATGA  
CCTTTTGATAAATTGGGCGACAAAGGGTGATGAAGTTTATGTAGATACGTTTCGTA ACTG  
CTTATTCCAACAAGCAAGTATGGCTTATACTGACAAACAGATTGTGAGCATTTATAAAGA  
ATGGCTACAGAATCACTAATTC AAAATCAAATACGAGTGGAATTATCCAAGGCTGGCAAC  
ATGGTATTTAGAATTAACGTTGGTAAAGTCAGAATGGCAGATGGACGTTGGTTTCGACACT  
GGAGCACAAAAGGTTTTTTGCGACCTATTCGGTTTTAGACCAGATGGACAGATATTCTTC  
ATCGAAGTAAAAAATGAAAAAGGTCTGTTTGAGAGATGACCAAAAAGAGTTTATGGAAGCC  
ATGAAAAACGAGGAGCACTGGTTGGTGTGGCAAGAAGTGTA AAAGATGCAATGGATATA  
GTAATGAGAAAAAATGTTAAAGACAAACTGGTTGGTATATATGCACCAGGTCATTATGA  
ACATATAAGTGTGCTAGAGGAGACACAAGAGTTTTCAAGATGGTTCTGGGATAACCACGA  
AGACATGGAATTTATCAGCTCTAAGTTAGGAATAAGCACAAATAAACTCAACAGGATACT  
GACACTAGAACAGTTACCAGACGAGGAATTGTTAGCAAGGATGGGAGAACTATGCAAGTA  
AAGGAATTTGCCTTATATAAAGGCGAAGAAATCATAGCAATGGGA ACTAAAAGTGAGATT  
GCTAAACAGTTAGGAATTT CAGTGCATTCCGTTACTGTATACGGAACACCATCATAACGCT  
AAACGCACAAGTGAAAAAGATGGAAGAAGGTTAGTTAAGTTATGAGATATAAAGTTATCG  
TATATTATGACCACATGGAAGACGACGTAGAACTTATGAGAATAAGGATGACGCTATCA  
ATAGATTGCATCATTTGAGAGGGGTTAAATATAGAAATTC AAGATTATATACAGTAGAAA  
TGGTTGAGGCGTAAGAATGACAAAAGATGAAGCAGTTAAGAAGATTGCAAGAGAAGGATA  
CATATCAATAGAACACGCTGAGGAACTATATGATGAAATTATTCCTAAACCAGTAGTGCC  
CAAGTATGTGGCTGATTATATTGAAAAGGTGAAGTCTGATGGA ACTTTTTTCGGTGGTAGG  
AGCTATACTTGAAGCACCTGATGGAGATGTTCAAGATTGGCTATTCGCAGAAAGCGTGGA  
TACATTTGTTCAAGCATGGGTAAACGGATATAATGTGCGAGAAAGAGCCTAGATACAAGGT  
TACTTTTTAAAGGTCTAAATATTAATAAACATCTATGTTGCAACTGGACACGTGAAAATTG  
GTATTTGTGGTGTGAGAAAGAAAGTAACACGCGCTATACGAGCCCACTCGCAAAGAGCT  
TGAAGAAGCTGATTTTGGATGGGTATTTGATTGCGAAGGTATTGAAATTGAGGAGGTGGA  
ATAAGTGAATAGAATTAAGCAGTTACGAAAACAAAAGGTTTAACTAGATGAACTAAG  
TAAAGA ACTAAAGAAAAAATATGGGTTATCACTTTCTACTGGGCAATTATCTTCTTACGA  
GAATAGCAAACGTTTACCTAGAGAAGAAATTGCTTGGGAAATAATTGCTGATTTCTTCGG

AGTATCTACGGGATATCTTCTAGGTTTTGATAGTGTATTAGTAAATAACGGTATCACTGA  
TCTAATCGCCAAAATTAACGAGTGGGCTATTAGTCATGGACTGGATAAAGGAAATCCTAA  
AATTGAGTGGATGAAGGTTACTGAGGAAGTCGGTGAGATTAGAGACGTGTTTCTAAAGCC  
TAACGATTTTGATGACCCAGAATTGGCTCTAAAAGACGCTATAGGCGATTCTATTGTTAC  
CCTAGTGGTATTATGCCTACAACCTGGTTACGACGTTGAGGAGTGCCTTAAAATCGCTTA  
TAACAACATTAAGGACAGACAAGGAGTAATGATTGATGACAACCTTTGTCAAGAAAACAAA  
AACGAGATAACCAGCTAAGGGTTTTAACAGCCTTACTACTAATTTCAATAGTAATCAACG  
TGACTACCATCATAAGAGTGACAAATAGACCTGTGGAAGCTATTGTGGTGCATAAAGTTG  
ATAACGCTACTGTATTGCATGGTAAAATCACAGGTAAGCAGATGGTAGGTAACACTATAACA  
CAATAGATTGCGGTGCTTACGGTAAATTCCTTGTGAGTAAGGAACAGTATGATAACGTAC  
AGGTTGGAGATGATATCCCTAGCTATTTGAAAGGAAATTAAGATGACAAAACTATTGAA  
TTACTAAACAGCTTTAAGCCAGATTCGTATGATTTTGGAAACGCTAGGTATGGCTCATTG  
GAAGAACTTAAAGAGCTCTTGGTATATAAACGTATAGTTAAGTGGGATAAAGACCCATA  
GAACTTGAAGATGGTACAAAAGTAACTATTGAAATGTCAGAAAATGATTGCTGTGCCTAT  
GCTGGAGGCAGCTTCAAAGATGTAAAGCTAGACGCTATTATCACTGACATTAATAATTGGT  
GAACAAGAAACAGTGGGATGCGAAGACGGGTCATCAGAAAGTTATAATACGGTTACTATT  
TACCACAATCAAAATCCAGTAGCTTTGGCAGAGTGTGAGGCTAACGATGGCAATGGTGGT  
TTTTACTACAGTGTAGGTTGCTAGTTATTGGTGACATTCATTTTCCAGTTGTGGAGGCG  
TAGGATTCATGAGCGGTAAGTACAATTACGCAGGACTGACTAAAGAGTTACATCAACGGC  
TTGTGTTTGAATTTAACGCATTGAAAGAGAAACACCCTAGAACTTTCACACATCACATAA  
TGAAAATAAGCAGTGCAACCGACAGTATGCTAGAAAATATTGTCAAAGGTTTGACAAGG  
TGATTAAGAGCGTTCTAAACTGTCCTTCTCAACGTTGGATGATATGAGCGAGTACCTTA  
CGGAAGGTCTTGTAAACGACTTACAAGAGTATCTATCAGAGCACTATTCTGCTCCACGTT  
GGTCATGTAAGACAGATAGTGATAAAACTAACGCAGGACTTACCGAGGAACTTTTCCTTC  
AATATCGAAATGAAATCCAAGAGTTAAGAGCAGCACATCCTAACTGCTTTGCTAACTACA  
TCATGGAAGTAAAAGGATGTTCAAATCAACAAGCTAAAACGATTTGCACAGCCATTAACA  
CAATATATACAGAAATTGGCATTTTAACACCTCGAAAAGTAGTCCAAGTAGAAGGACTTC  
TATCAAGAGAATTATTCGAAAGATTGCTAAGCACGTCTTTAACAAGTACGAATGGCCAG  
AAAGCCTAGATAGCGAAGTTGATCGTATCTATTTAGAATATCGGACTAAAGGTGATTTAG  
GTCTTGAAAAGGAAAGTGTTAAACGTGCGTTATATAAAGCGATTTATATGGGCTTATAGT  
GGTTCGAATCCACTATGAGTCATTAATTACATTAAGTTTGGAGGTGATAACAGCGTAACT  
GTCGCTATAATTCAAATCTTTATTCTTGTGGCTGTCAGGGGTTTCGACTCCCTTGTGAG  
TCGTTAGTCTGTCAAGACTAGGTAATTTTTTCGACAAAACGTCAAGCTGACAGGCCTTGA  
CAACAAATCCAGTAAATATTTTATAGAAAAGAGGAAACCAATACATACTTTTTACTCTAG  
TCTTGCATTGCTGGTAGCAGACTGGAATTTAACTAGAGGGGGTGATAAAAGACCAAAGA  
ACAAACACTCTTATCTTTTCATAACCTCTTAATGTTTGTGCTTGGTTAAAAAAAACAAA  
AAAAGACCGACACAATTGCCGGCACTTTATGAAAGTTAGCACTACTATTATATCAGAGAG  
GTTAGTACAATGCTATTGCCGGAATTTGATGAGAAAGCAACAGTCAAACGTTGCAAACGA  
AACTTCGAGAATATCCAAGATGGCGAGAGATTGCACACGATAGCGCTGAACAGAAAATA  
ACACAGGAATTTACTTTTATGCCACGTGGTGGTAGTGGAGTGAATAAACGGTGGAAAAT  
ATCGCAGTAAGACGTGTCGATGCATTGAGCGAGCTAGAAGCCATAGAGCAAGCGGTTAAT  
GGGCTATATCGTCCAGACTATCGCAGAATACTTATAGAGAAATATCTAGCTTATCCGCCT  
CAGCCGAATTGGAAAATAGCACAGGCTATTGGTTTTGAGAGAACAGCATTTCAGAATTG  
CTAAAACATTCTATCCTAGCATTTCAGAGCTATATAGAAATGGTCAATTAGTCGTAGAA  
CGCTGAAATAATGGTATTTTGACGGATAAAATACGGTATCTTACAAGTGTTTAAAGTGGT  
ATTATTATATTATCGAAGAGAAAAAGAAAGACGGCTCATTTGTGGGCTGTCTTTATTTAA  
TGCAAAGAAATCTAGCAACTAAGGAGGTGGATTTATTGGGCTAAATCAACGACAAAAGCT  
ATTTGTTAGCGAGTATATCAAGCTTGGAAATGGAAGTCAAGCAGCTATCAATGCTGGCTA  
TAGTCCGAAAACCTTCTGGAGCGCAAGCTGAGAAATTGCTGAAAAAAGTTGAAATAAAAAA  
CTCCATAAACGCAGAAATTGAAAAAATGCACAACGAGAACATCATGGACGCCAAGGAAGC  
CTTATCCATTTTATCCGATATTGCAAGGGGAAAGCGTGATGAAGAAATAGTCATGATGAA  
CCCAGTTAGTGGCGAAGTGGAGCGTGTCAAAAGAAAGCTGATAATAACACCGTTATCAA  
GGCTATCACCGAAATTCTGAAACGCTATCCAACAATAACAAGCCGAGAAGTTACAGCT  
TGAAATAGAAAACTCAAGTCTCAAATTTGGTGGCAATGAAGGACAAGATGAGAAAATCGC  
TGGCTTCCTAAACCTTATCAAAGGAGCTGTAAGCGATGGACTTGAGTAAGCTCTATACTA  
AACGGCAGTTAGAAGTGCTTAACTACATTTGGAATCATGATTGGTTTATCTGCGGTCTTC  
ACGGTGCCAAACGAGCAGGTAAGACCGTTGTTAACAATGATACGTTTGTCACTGAATTA

GCCGTGTAAGAAAGATTGCTGACCGTATGGCTATAGATGAGCCTATTTACATTTTGGCAG  
GTACGTCTTCAACAGCAATTCAGAATAACGTCTTACAAGAACTTTATAACAAGTATGGCT  
TTGAACCAAAATACGATAAACATGGCTCTTTCGTTTTCTGTGGTGTCAAAGTCGTGCAAG  
TTTATACTGGCTCAATAAGTGGCCTTAAGCGTGCACGTGGTTTCACAGCCTTTGGAGCTT  
ACGTTAACGAAGCATCTTTAGCAAATGAGCTTGTTTTCAAAGAGATTATCTCACGCTGTT  
CTGGTGATGGTGCTCGTGTGTGTGGGATAGCAACCCTGACAATCCGAATCATTGGCTTA  
ACCGAGATTATATCGGTAAGAACGACGGAAAGATTATAGATTTTAGTTTCAAGCTAGATG  
ATAATACGTTCTTATCGAAACGCTATATCGATTCTATCAAGGCAGCAACCCCAAAAGGTA  
AATTCTACGATAGAGATATTCTAGGGCTCTGGACAGTAGCAGAGGGAGCTATCTATGCTG  
ATTATGACAGCAAGATACACGTAGTTGATGAATTGCCAGAAATGAAACGCTATTTTGGGG  
GTATTGACTGGGGATATACTCACTACGGATCTATCGTGATTGTTGGTGAAGGAGTAGATA  
ATAACTTCTATCTTGTGCGATGGCGTAGCAGCACAATTCAAAGAGATTGACTGGTGGGTAG  
AGCAAGCAAGGAAGCTTACTGGCATCTATGGTAACATTCCGTTTTATGCTGATAGTGCCC  
GCCCAGAACACGTAGCAAGATTTGAAAACGAAGGGTTTGATATTATGAACGCTAACAAAT  
CTGTGATAGCTGGTATCGAGCTTATCGCTAAATTTAAAGAAAAGAAATTATACGTTA  
AGCGGGGATTTGTACCTCGCTTTTTTCGATGAGATATAACCAGTATCGATGGAAAGAGAACA  
GCACGAAGGACGAGCCATTAAGAGTTTGATGACGTGCTTGATAGTGTGAGATACGCTA  
TATATTCTGATTATGTCATCGGTAGTACAGAACGAGCAAGCTATGACGACTTGCTTAGTA  
TGTTTAATTAGGAGGAATGATGGAACAGACATTATTTACGGACAGTACAGGACAAGACCT  
AGTTTTGAACTTACGTTTCCATCGAGAGTCACGCATTTCGTTATCGAGCAGACAACCTAGA  
GGAGCTCATGGTTAATAATTGGGAATTGTTGAAGAATTCATCAATCACCATAAATTGAG  
ACAAGCTCCACGGATTCAAGAGCTTTTGGATTATGCTAGAGGTGAAAACCACGACGTTCT  
TCAGTTTGAAGACGTAAGATAGGGAAATGGCTGATAAACGAGCTGTGCACAACCTACGG  
TCGTATGATTAGCAAATTTAAAACAGGTTATTTAGCTGGAAATCCTATCCGTGTGAATA  
TGATGATAATGATAAATACTCACAAAATGACGATACTATTAAGCGAATAGGTGCAATTA  
CGACATAGATTCACACAATAGAACGCTTATCAGAGACTTATCTCAAACCTGGTAGAGCTTA  
TGAAGTTATCTATCGTAACGAGTATGACGAAACACGCATTAAGCGATTAAACCCGTTAGA  
AACATTTGTGATTTATGACAATTCATTAGAAGATAATTCAATCGCAGCTGTCAGATACTA  
CAATCGAGGAACGCTCCAAAACGCAAAAGATGTAGTTGAAATTTACACAAACGAACACAT  
CTATACGCTTGATGCATCAGATGACTTTAATGAAATTCAGTTACAACCTCACGCATTCGG  
TACAGTACCAATTACAGAGTTTCTAAACAATGTTGACGGTATCGGTGATTATGAGACTGA  
GCTTTACCTGATTGATTTATACGACAGTGCAGAGTCTGATACAGCAAACCATGAGCGA  
TATGGCAGACGCTATCCTTGCAATTTATGGGGACCTTGCCTTGCCTAAAGGTATGCAAGC  
TAGTGACATGAAACGCACGCGCCTTATGCAGCTTAAACCTCCTAAATCAGCCGATGGCAA  
AGAGGGAACAGTCAAAGCTGAGTACCTCACGAAGTCTTACGACGTGTCTGGTGCAGAAGC  
ATATAAGACACGTTTAAACAGAGATATTCATATATTTACTAACATCCAGACATGTCAGA  
TACAAATTTACGCGGCAACACGTCTGGTGAGGCGTTGAAATACAAATTGTTTGGGTTAGA  
CCAAGATAGAGTTGATACGCAATCTCAATTTACGCAAGGTTTGAACGACGCTACCGTCT  
TGCCGCTCGTATTGGCTCATTAGTTAACGAGTTTAAAGATTTTGACGAAAGTCTATTGAA  
AATCACATTCACACCAAACCTTCCAAAATCGTTAAATGAGCAAGTATCTATTTTGACAGG  
ATTGGGTGGTCAAGTATCGCAAGAACTGCACTTAGTCTTTCAGGATTGGTAGAGAGTCC  
TAACGAAGAGTTGGACAAAATAAATAAAGAAGTGTCTGAAATCGATTTTAAGGGGTATTC  
TAATGACTTTAATGAACACGTAGGCAAATATACCGACGAGGTAAGAAAGAAACGCATACAGA  
CGATTTTGAGAGGGCATATGAATGACTTACTGGTCAAACGTAACCTACGCGAGAGAGAA  
GCGAGCATCAAAAAGGGTGAAGCTGAGTTTAAAGAAAGAACTTGAAGCACTATATAACTTA  
CAACTCTCACAGCTCCGAAAAGAGCTAGACGCGTACATTCAAAAATACGCTAATAAAAAC  
GGATTAAGCGTTAGTGATGCTAAACGAAAAGCAGACAGTTTTGATGTCAAGGCTTTTGAA  
ACAAAAGCTAAACGGTATGTAGCTGACAAAGACTTCAGTCCAAAAGCTAACAGAGAGCTT  
CAAGACTATAACTTCTCTATGTCGGTTGGTCTGCAAGAACTGCTTATTCAAGAATTAGAG  
CTCGAACTATTAGCACTATCTGAGAGCGAACGACAATTAACCAATGATTATCTGACGAAT  
GGTTATAAGAGTGAAGTTGTAAGAGAGAGCTTACTTGACCAGACAGTACCGAGTGGTAAA  
ACTCTTGAAAAGTATATGAAAGCTGCTGTCAATGCTAACTTTGAAGGTGCTGAATGGTCA  
GAGCGTATCTGGAAGAGGCAAGAACAGTTACGAAAAATTTGTGAAGACAGAAGTAACAAGA  
GCTCTCATTTCGAGGTGAAAACGGTTTGACGATTGCAAGACGTATCAGAAAACATATGGAT  
GCATCTCGTACAGAAGCTGAACGGTTGGCAATTACAGAGCACGCAAGAGTGCAAACGTTA  
GCTCAGGAGAGCATCATGAAAGAGAATGGCTTTGAGCATTTCAGCTCATGCCAGAATCG  
AGAGCATGTGATATTTGCAAAGATATTGGTAAAGAGACAGAAAAGAATCCTGTCAAAT

GCTGACATGGAAATCGGAACGAATGCTCCACCTATTCACCCATACTGCCGTTGTGCAGTC  
GTTGAGGTTGAATAGTGCGCCATGTTTTAAAGAAACCGTAGAGGGCGAGCCTCTAATGGT  
GCATAGGGCTATTTTAAGCCCTAAATAAATAACTAGCGTGGCTCGTAGGTGAGTACAC  
TAGACAAGACTAGATAGGGAGTAGCTAACCATATCGTGGCTTAGAAAAGTGTATAGCTTAT  
GGGACTAGATAGGAGAACAATAATGGAAACAGATAACACAACAGTTGAAACGGTAGAAGAT  
GTAGAAGTAAGCCAAGACGTTGATAGTAATCAACCGAGCGACTTCCAAGCGCCGCAATCA  
CAGTCAGAACTGGATAGCATTGTGAACAAAGCAGTCCAAACTGCCTTGAATAATCATAAG  
AAGGGCGAAGAAAAACGAGTAAACGAAGCTATCGCCAAAGCGTTACAGAAAAGAACAAGAC  
TATTCAAAACCTATCTGCTGCTGAGCGGGCTAGCAAGGAATTTGAAGACCAAAAAGCAGAA  
TTTGAAAAACAAGTAGCACAATTTGAATTTGAGAAACTCAATATGGCAGTTAAACAAGAC  
CTTGTATCAAAGGGATTACCAAGTTGAATTGGCTGAGATGTTTAGCCATGCTGAGAACGCA  
TCCGAAGCTCTTAAATTGGTTGGTACTTTTGAGAAAGTATTTAATGATGCAGTAGCTGAG  
AAAGTAAAAGCTACTATCCGTCAAAAACACGCCAAAAGCCGCAAGTGCTGGAGGTACTCAG  
ACGGATAATTTTGGCGCTCAACTTGCTAAATCTACGAACGTAACGACTGCTCGTTTTATC  
TAAAGCAGAAAGGAAATTTTAAATGCCAACAACAACAATTTTGGACACATCTAACATTGT  
TCGCTCATTGCCTTATAAAGCGGTGTCAGCGACAGTAGACTCATCTTATCCGGGTGTATT  
GGTTGATGGTAAGAAATACATCAAAGCAGGTACACTCGTAGCAGGTAATGGCGGATCAAT  
CTTCGATGACCGCACTAAATCAGTTGTAGAAAACAAAACCTGAACCTGAGGGAATCGTTCT  
ATATGACGTAGATTTGACAATCGATAAACAAGTATCAGTGCTATATGCTGGTGAGGTTTA  
CAAAGATAAAGTTAACGGTGGAGATATAACTGATACTGTTAAAAAAGCATTGCCACTCGT  
TAAATTTATCTCTGAGAAATAAGAGGAGGATTATTAACAACATGGGACTTATTTACGATAA  
AGTAACAGCATCTAATATTGCTGGATACTTCAATGCCTTGCAAGAGAATGTTAGCTCAAC  
TTTGGGTGAGTCTATCTTCCCTGCACGCAAACAACCTGGGACTAAATTGTCTTACATTAA  
AGGTGCTTCTGGTCAATCTGTTGCATTGAAAGCTGCAGCTTTTGATACTAATGTAACAAT  
TCGTGACCGTGTTAGTGCTGAAATGCATGACGAACAAATGCCATTCTTCAAAGAAGCGAT  
GCTTGTTAAAGAAAACGACCGTCAACAGCTTAACCTTGTTAAAGATTCTGGAAACGCAGT  
ATTGGTTAACACAATTGTAGCGGGTATTTTCAACGATAATTTGACGCTTGTCATGGTGC  
ACGCGCTCGTCTTGAAGCTATGCGTATGCAAGTGCTTGCGACAGGTAATAATTGCGTTTAC  
AAGCGATGGCGTTAATAAAGATATCGATTATGGTGTTAAACCAGACCACAAAAACAAGT  
ATCAAAAAGCTGGGCTGAACCTGGCGCTACACCTCTTGCTGATTTGGAAGATGCTATTGA  
AACTGCGCGTGAGCTCGGACTTAACCCAGAACGTGCAGTGATGAATGCTAAAACATTTGG  
TCTTATTCGCAAAGCTGCATCTACAGTTAAAGTTATCAAACCTCTTGCTGGTGATGGTTC  
AGCAGTTACTAAAGCAGAACTTGAAAACCTATATCGCTGATAATTTTGGTGATCTATCGT  
TCTTGAAAATGGTACTTACCGAAACGACAAAGGCGAGGTTTCTAAATTCTATCCTGACGG  
TCACTTGACTCTTATCCCTAACGGACCACTTGGAATACCGTCTTTGGAACAACCTCCAGA  
AGAGTCAGATCTTTTCGCTGACAACACAGTTAATGCAGAAGTTGAAATTGTTGATAACGG  
TATCGCAGTAACAACCTACTAAGACTACTGACCCAGTCAACGTTCAAACCTAAAGTTTCAAT  
GGTAGCATTGCCATCATTGCAACGTTTGGATGATGTTTACATGCTTACTGTAATCCCTGC  
GGTTTAAAGAGTACTACTATGAATGTCGTAATAAAGCTTTTAAAGGATAAAAACAGATGGA  
AAAGTATACTTCGCTGGTGATTTGTACGATGGAGAACGCACTGATGAACTCATTGAGTTA  
GGACACGTCAAAGACGACAAACCAAAAAAGAAAACCTAGAGCTAAAAAGACCACTGAATAG  
CGAGGTATGGCATGATGACGTTAGATAAAGACAAAGTTATAAAAAATGTCTCTGTTGACC  
TTAATACTAATGATGATGCCTTGCTTAAATTCTATTAGAGCGTGTGCTCAACCACTTCA  
AATCAGAATATGGTGTTGAAGAGATTGATGACAAGTTGGCTTTCATTTTCGAGGACTGTG  
TCATCAAACGTTTCAATCGTCGAGGTGCAGAAGGTGCTAAATCTGAATCAGTAGATGGTC  
ATTCAATGTCTTATTATGATAACGAGAACGAATTTAAGCCTTATGATGATATGCTTCAGC  
GTCTATACGGAACCTTCTGGACAAGCTAAAGAGGGTGAGGTGCTATTTCTATGAGATATGC  
CGATAAAGTAGTGCTAAAATATATCGATAAGACACCAAAAACACTACGATCCTGATTTAGG  
ACGTATGGTAGGCGGTAAGGAATGGACTAAGACAACAGCATGTAATGTTACTGGTGTTAG  
CCTTGATTTACAAGCCGAGCTAGGAGATCTGTTAAACACTAATAGCATAGTCGTTAGGTT  
TAGAAGCACTATTTGAGATGGAATTGACACGATTGAATACAATGGTGCCAAATACAAGCC  
TGTGACTGTCAGAAGTTATCTATCTGGTCGTAACGTCATCTATGCTAATAAGGTGGTTAG  
ATAATGGCTACAATCGAATTTGAAGGATTGGACGAAATGGCTCAAAGTCTTCTAAAAAAC  
GCTTCTCCTGAAAAACGTTCAAAGGTTCTTAGGAAGTATGGTTCAAACCTGAAAGAGGCT  
GCTGTTAATAGGGCACAATTCACAAAGGCTATTCAACTGGTGCTACTCGTAGAAGTATT  
ACTTTGCAAGTTGAAAGTGATAAAGCAACTGTAGAAGCCTTGACTAGCTACTCAGGTTAT  
CTCGAAGTAGGAACACGGAAGATGGAGGCACAGCCATTCATGAAACCAGCTCTTGACGAA

GTAGCACCCAAGATGGTTGAAGAATTGGCAAAAATGGGATGAAACATGAAACAACCAGATC  
AATTACTTCACGATGAAATGTATCGTATTAGTTGTGAGTTAGGTTACAACACTTACACTT  
ATTTGCCACCAGATGACGCAGCTTACCCATTTGTCTCATGGGGGAAACAATGGTCTTGC  
CACAATCCACAAAATCGCACTTGATAGGTCGTTTATCGTCTACAGTGCATGTTTGGGGGC  
ATGTGGATGACCGAAAAACATTATCAGATATGGCTGGACAGTTAATGTCTAGCTTTTTTG  
CTATCAAAAAAATTGGCGGCAAGCAGTTTTTCAGCAGAAGTCAACGAGTCGTCAATCGATA  
GCAATCGAGACAATAGCACAGATGAAGTTTTATACCACTTTATCATCTATACTTATTTCA  
AATTTATTTAATTAGGAGGAAAAAATGGCTGATAACAATGAAGCCCTTTTGGGTAAAGAC  
AAAATCTTAATGTTCCGAAAACCTCGGAGACAAAACAGCGGCAGCTAAACTTGCCCTACAA  
ACAGAACATGAGTGGGAATACTCACGAGATGCAGATAGCACTAAAACCTAAAGACGGTGCA  
GTGGTAGCTGACGGAGGTCTTGAACTAACTATCAATCAGTGCTATCGGTACTAAAGAC  
GACCTAAACGAAATGCTTAAAAAATCAGTAGTTGACGGTTATAAGGTCGAAGTTTGGGAA  
ATTGATTTGGCTGATAAAAAATCAGACGGTAAATATGGCGCTCTTTATGCAATTGGACGC  
TTGTCAAACCTGGAAAGTGCCAGCTAACGTAGAAGACCTTGTAGAAATTGAGTCAGAATTG  
ACTATTGAGGGTAAACCGCAAGCTGGAGAAGCTACGTTGACTAGTGATCAGATTAAGAA  
ATTCAATATACATTCCAAGACACTACTACGCCTGCAGGAATCGGCGTCTAATAATATGTA  
ATTATCTTGAGCCAACTTTTACAGTTTGGCTTTTTATTTTAGAAAAAATAGGAGTAAAC  
AAACAATGCACACAATCACTATCGATAAAAAAGACTACACTTTGACTTTTGGATTTGATT  
TCATTCGCGAACTTGACAAAACGCTATTCAATCTCAGATGGTGGCGTTTCATTTGGTTTTG  
GTGTACAGCACGCAGTTGTTGATTTGCAACAAAAAATCCAGTAATTTTGTCTGACCTCA  
TTCAAGCAGCAACAATTACAGAGCGTCAAAAACCATCTGTTAAAGGGATTGAAGAATATG  
TCGTTGAAGAAGCTGAGAAAGGACATCTTGACTCGCTATTTGATGATTTTTTATCAGCAT  
TGCGAACCTCAACCATTGACAAAAGCAACAACGAAACGAGTGGAAGAAGCAACAGAGTAGC  
CAAAACAACGAGTGATAACCAAGACTCAGCTGAAGTATATGAGGAATTAATCACGAATGC  
TATGGCTGATTTTGGTGTGTCATTGCTTGAAGCACGAAGAATGACACTTAAAGAGATGAA  
ACTCTATCAGAAAGCATATAAGAAACGTTTTTTGAACAAAGAAAGAGAAATATATCAACT  
TGCTTATCTGAATAGGTTGGCTAATGCCACAACCTAAAGATGGCAAAAAGTATTATTTTGA  
AAAATTTGACGACTTCTATAATGCTAAAGAACGTGCTCGTGAAGTTTTTGGGCGAAAAAAT  
CACTAACAGCAAACCTGTTAGAACGAGCTCGAAATAATCTTAATTATAAGAAAGAAAGAGG  
GTTGCTAGATGGCAGATAAAAACGTTTAATGTAAGAGCAATATTGAGTGCTCAAGACAATG  
GCCTGTCTAGCGCGCTCAAAAAGCACAACAACGCTGAAAACCTGGGAAAAACAAGCA  
CTAAGTTAGGATCAGTTTTTCAAAGTGTTTTTGGGCGCTAATTTAGTTAGTGCTGGTATCA  
CTAAGGGTATCAGTACTATAACCAGCGGTATCGGTGGCATGATTACCGAGCTTAAACAATT  
CAACAAAGGCTTGGAAAACATTTGATGGGAATTTAAGTCAGCTTGGTTGGGGGAAAAAAG  
AAATTGCATCAGCTAAGAAAGCGATGCAAGATTATGCAACTCAAACCATCTATTCAGCGT  
CTGACATGGGAACAACATTCTCGCAAATGGCAGCAATCGGTCTGAGCGATGCTGGGGATT  
TGGTGAAGCTATGGGTGGACTTGCTGCTTCTGCTGAAAACCCTAAACAAGCGATGAAAA  
CATTGAGTCAACAAATGGTCCAAGCGATGACAAAACCTAAGATTCAATGGGCAGATTTTA  
AGTTGATGATGGAACAATCACCAGCTGGTATGTCTGCTGTTGCTAGAGAGATGGGAATGA  
CTCTTGATGAGCTTGTACCAAAAATACAAAACGGAGAAATAAAGACCGAAGACTTTACAG  
AAGCATTCAAGCGTGCTGGTAATTCATGCAAGATTTGGCCACCAGATATAAATCAGTAG  
ATGAAGCTGTTGGTGGTCTCTACGAAACTGTTTCAAACAAATTGCAACCAGTTTTTTGAAA  
AACTTAGTGCAAAGGCAATCAAAGGTATTGAGGGCATCATTGATGCTTTTAGCAAATTTG  
ACGACAGTAAGATTCAAAGCTTTGCTAACAACTGAGCAAAGGTATTGATAAAACGGTTA  
AAGACATAAGTCAGACCGTGCAATCTTTTTGGGAAGGTTTTAGCAATACAAGTGCAATAA  
AAGGTCTTACCAATGCTTTCAGATATGTTGCAAGTCAAATAAGTTTAGCGTTTTAAAGGAA  
TCGATTTTTAAAACCTATTTAAAGGTTTTAGGTGGTGTGTTTGGAGACATAGCTTATGGCA  
TTTTCAAGAACCTTAAACAATTGCCACTAAATCAGTTAGCAACTTTATCAGCTCATTGCTG  
ATACAGGAGCATTCAAGGCATTTAAAACAGCCTTAGAAGATGTTTGGGTTGTCGTTAAAA  
AACTTGGTTCGTCACCTCGCTGACGTTTTTAAACAGCTCTGAAATGCAAACGATTATATCTA  
TACTGGGTACGGCGTTTGGGACACTAGCCAAGTGGGTATCACAAGCTGCATCAGCAATAG  
CTAAATTTGTAAGTTCAATTCCTAAAAGTGTTCTCAACGGGATCACCAGTGGCATACTGG  
CAATAGCAGCAGGTTTTGTGACTGCTAAGGTTGGTATTTTCAGCGGTAGGTGGAGCTTTAA  
AAGGCTTGGACTTCATCAATAGTCTAAATCCATTCAAGAAGTTTGGTAAGGATGCAGCTG  
AAGGAACAGAACAAGCTGCTAAGAGTGCTAGTCTGTTCTAAATCAACCATTACTCAGTTGT  
TCAGTGGAATATCCAACGTTATCAAGTCGTCTGGTAATGCAATCAAGGGAATCTTGACAG  
CTATTTTCAAAGGCATTGCAGAAACCTATAAAGGTTTTTGGGCAAGGGGTGAAATATGCTT

TACAAGGTCTTAAAGGGTGAACCCCGCAACCTTGCTTTTCATTCGGTGCTGCCGTAGCCA  
TTGCCGAGTCGGTATCGGTGCTGGTATTGGTATTATTGTGGCATCATTCACCCTTTTGG  
CTACTCAATCCCAAGGGGTTTCACAAATATTTAAAAGCTTTGGGTACAGCATTTAGCACAG  
TCGTCCAAGGTATTGGCAAAGCTGCAGGAACCTATCATTGAAGCATTTCGGAACCGCTTTTGG  
GAATTGTCGTCAAGGCAGTCGGTGAAGCTGCGCCCGGACTGGCTAAGCTATCACCATTAG  
TAGAAGCGATTGGTACTGCTCTAGGAAACGCAGCACCATTTCGTTACAGCGTTTGGCAATG  
CGTTTAGTTCTATTCTGAGTGTATTGTACCTGTAATTGACGCTTTCAGTCGTTTTGCCA  
CAGCTCTGGGTACTGCAATCAGTGGGGTTGCAGAGGCAATTACTCCGATTATTCAAATTA  
TTGGAAACACAATAACTGCAGTAACTCAAATCATCGCTAACGCTATCGTGGCAATCGCTC  
CAATAATTGCCGATTGCATTGTCCAAGTTGCTCAAGTAATTGGGCAATTCGGTCCACAAA  
TTGCAATGATTTTACAAGTTATCGTGCAAGCCATCCAAGCATCAGCACCAGTCATCATGA  
CCTTGATTCAAGGTATTGTTAAAGTCGTTTCAGATAATGGCTCCTGTAATGACTCAAGTGG  
TTTCTGCCATCATTACCGTTGTTCAAACGTTAGCGCCTATCATAAGTCAAATCATTTCAG  
CTATTGTTACAGCGATAACACAAATTGCACCTATTATTTTCATCAATTGGTGGTGTCA  
GTGCAGCGCTTCAAGGCATTGCTAATATAATCCAGTCAGTTGGTACGGCTATTTCAACTG  
CTGCACAAGGTATTGGCCAAGGTATTCAATCTGCTTTGGAGGGCGTTGCAAGTATTATCA  
GCGCTACTGGTGTGCAATTGGTGCAGCTTTGCAAGGAATTGCTAGCGTAGTGAATCAG  
TCGGAACATCAATCAGCACAGCGGCTAAAGGTATCGGAAACGGTATTAAGTCAGCATTG  
AAGGTATTTCAAGCGTAATTACTTCTGTAGGAAATGCAATCAGTAGTGTATTGAATAGCC  
TAGCTAATGTATTCAACTCAATCGGTACAGCGGCTCAAAAAGCGGGTGTGGTTTCAATC  
AATTAGCCAACGGTGTAGTTAAGATTACTAATACAAACCTTAGGAGACATGGCTGCATCTC  
TTGCGGCAGTCGCTCATGGTGTGGTTTCGATTAGTGATAGCTCAGCAGGTCTTGCTCAAG  
CTGGTGCAGGGATGGCTCAACTTGAAATGGTATGAGCAAAGTGTTCGGCATCAGCAACTG  
GCGCTGTTGCTGGTTTGAGTCGTTTCACAAGCGTGACTACAAGTATACAATCAGCATTTA  
CTAGCTTACAATCACTGCTAACTTCAGCAGGAACATCGTTCAGCACGTTCTCAATTCAAG  
CTATGCAATCACTAACTGGATTGTCTGCTATCGCAGGGCCTATCACAACGTTTCAGAACAC  
AAATTATAATGATAGTACCATCACTCATGCAAGCAGCTGCTGGATTGAATATGTTTCAGCA  
CAGTAGCTATAGGATTGACTACTAGTTTACTTCAATCGGCGCTGTCATGACTATGTTAG  
CTACACAGCTAACACGTTAACAACTAGTTTCACGATGATGGCTTCTATCTCAGCTATGT  
TGGGAACAAGCTTCACCATGATGGCTACTAGCTCATCTATGCTAGGAACCAGCTTCATGA  
CTGTTGAAACATCGCTAACTATGTTAAATAGTCAATTCATGATGTTTGCTTCATCTCTCA  
TGCAGTTAACACACAATTCATGACAGCGTCAATACCACTTAAAATGTTCAACGTGGCAC  
TAACCATGATGACACCAGCCTTGATGATGGGGGCTTCTGGGTTTCGTGCGATTTAACGCTC  
AAGTCATGCAATCTACAGCTGGTATGTCCACACTATCAGCTGCTATCTCTACTATTCCAG  
CAAACTTACATCTGTAGCAAGCGCTGCTAATATTGCAACGTCATCAATTATGCGCATTG  
CAACTAGCGCACCACGAATCGCTAGTGCTATGAGTAGTGACAGCTGGACAAGTACAGTCAG  
CTATGCAACGAATGGCTCAATCTGTGCAGTCTAGTAGTCAACGCATGATTCAAATGGGTC  
GTC AAGCAGGAACTCAGACTGGGCAAAATATCGCAAATGGTATTAATCGTCCGTTGGTG  
CTGTATCTTCTGCAGTTGATTTCGTTAGTAAATGCTGCGAGAGCACACGCAATGGGTGGCG  
TTGGTGCTATGCAAATAGTAGGAGCGATGATTGGTAAAGGTTTGGCTAATGGTATGATAG  
CTTCTCTTGGAGCAGTAACAGCTGCTGCTAACGCTCTTGTAGCTCAAGCAGAGCGTGCAG  
CTCAAGCAAAAGCTATGATTCATTCACCATCGCGTTTATTTTCGTGATGAAGTTGGTATCT  
ATATTGGTCAAGGTATGGCTGTTGGTATTGATAGAAGTGTAAATACGTTAAGTCGTCAA  
TTGAAAATATGGTTGATACTGCTAGTCGTTACGCTATTAGCTCACGTGATTTGTTCGAAG  
ACAATAATATCTTTGATAGTTTTGGCTGGGGTAATATGCGTGGTAGCGTTGATTTGTCAT  
TAAGAGACGACGATAGAATGGATAGATTAGAGCAAGCGCTTGACCTTACTGACTTAG  
TAGGACGTCCAATCTCACTCAATATCAATGGTTCGTGAGTTTGGCTTACGCAACCGCAGATG  
ACATTAGTGGTTATCAAAAATCACAAGAATTTACTTACAAACGAATGAGAGGTCTCAATT  
AATGGCTTTATTTCAATTTAACGGATATGATCTAACCAATTATTTCAAGCTAATAAAAAGT  
AGAGCATGAAATAGGAAACGAACGGTCTATCTCAACGGATTCAGCGCCATCGATTGGAGT  
TAACGTCCAACGTGTCGAGATAGGGGCTAAGAAAATAAACTCACAGTCAGCCTAGCAAC  
TAGAGACTTAGCTGATATGACATTTATTGATCCAAATGAACCAGCACCAGTTGACAACGT  
GCAGTTTTATCGTGTGAGAGAAGAAGCTGCCAGAGTTCTAAACACCAAAAAGCGGTTAA  
ACTCTACTTACCAACTGAACCTGACCGATTACTTAGCACTTGTTAAAGGTGAGGTCGG  
TCTCAAAGGTATTTCTGACTGGTATGACGAAGCCACGATTGAATTTTTAGTACCTGATGG  
AGTAGCACATTCAACTACATAAAGCGTGTTACGGACTATCGAGAAGAAGATGGTAAAAT  
GATTTTCTCTATCGATAACGAAGGTTTCGACGAATGCTTATCCGATAATCACTCTAAAAGC

AAACGCTGAAAATGGCTACTATGGTCTTGTAAGTGATAAGTTTGCCTTTGAAGCTGGTAA  
TACAGAAGAAGCTGACGGTAAAATCATTTCAAAAGCTGAAGTACTTTACGATTTTAGGGG  
TGACCGCATTCCCTCAGGCATTTTCTAAAGGTGCTAAGAACGTTGGGATTACTAACGTTAA  
AGAGGATTTAAATGGGACACTTGAAATTAATAATGTTTGGAACAGACCGCATATTGGTTT  
GAGAAATCCAGACGCTAACATCAATCAGCTTCAGACAGCGTCGTTAACACTTGACATTCC  
ACCCGATAGTAGCGGTAATGTTGGAGCTTTAAATGAATATATCTGGTGGAGGCAGATTTT  
CTGGGCTGGGGATATAACTCAATATGGATTCTTAAACTAACAGTATCAGATGCTGAAGG  
TAATTTTCTGTATGGAGTTGAGACATTCAAGCGTAGTTTAGGACTTGAATCAGAATATAA  
CGCTTTAGCTTCAGATGGTTATGGAGGCTTTAGATTCTTAAACAATGGTCATTTCTAGC  
TACGGAATATGAAGATCATAATCCATTCAATGAACCGCGTGGTTGGTCTGATATCAAGCG  
AGAAGATGACAAAGTTACATTTTACTGGTGGGGAAGTTATAACGCTTTCCTACTATTCCAGA  
AATTAAGGGAAGAAGTCAGCAAAGATACACTTAACGATTTCAAACATTCCGTCAAATC  
ATTTGTGACGCACGCTTATTTTCGACCAATTGCTTTATATCAAACGAATAACGCCTTCTT  
CGAAGACATTCCTAACAGATATATTCAAGGTAGCAATCTTATTATTAATAGCGAAGACGA  
CACACTAACGCTTAAACAATCTACTTAATTTGGATGAGATTGTTGACGGTCTTTGTGGCC  
GGTAATTCCTCCCGGAATCTCAGAAATTGAGGTTATTCAATCTCCGTGGTCTAAGAAAA  
GCCTAGCGTAACTATCGAATTTGAAGAAAGGTGGATTTAATGTTACTAACGATTCATGAC  
ACAATCTGCAAAAAGTAGCCTATATAGACAACGAAAAACAATCCACGTTAAATTTTTTC  
AACGATAAATGGACTCGTTCGCTTGAAAGTGGGACATCTGTTTTTGAGTTTTCGGTTTTT  
AAGAAAAGCATTAAATCTGATTCAAAGGTAGAGATTGCTTATAAATATCTTAACGAGCGA  
GCTTTTGTGACGCTTCAAACACAAGGGCAAGTCGTATCTTTCAATGTCATGAAGGTTGAA  
GAGGATGAATATATTATTCGATGCTATTGTGAAAATTTGAGCCTGGAATTACTTTTAGAG  
TATCGAGGTGCTTACAAGTCATCAAATCTATGACATTCAAAGAGTATTTTGACGACTGG  
GGAATGGGACGATTCGCTAAATTGACTCTTGGTGTCAACGAGGTTTCTGATCAAAGAGA  
ACTCTAGAATGGGAAGGACAAGAACTACTCTTGCTCGACTGATTTGCTAGCTAGGAAT  
TTTGATGCTGAAATAGAATTTGAGACAAAGTTACAAGCTAATAGTCAACTTGATGAGTTT  
GTTTTAAATGTTTACAAGGCTCATGATGATAAAAATCAAGGTGTTGGTCTCAGACGCTCA  
GATATTGTTTTGAAATATGACAAGAACATAAAAAGCATTAAAGCGTAGCATTGATAAGACT  
CAGATTTACAACCTTATCACACCTTATGGTTCGGAAGTCTGAAACTAATAAAGAAACAAAG  
CGAATTCAGATCCGGTACTATTCAAATCCAGTTGTTATTCCATCGGATAGTGTGGA  
AAGAAATATACTGGAGGTGACTTGACTTATGCAGGCCATACGTTGAGTGCTAGTTTGGTT  
CAAACCATCTTTAATCTATGTATACAGCGAAATCTTTTGCCATCAGGCGTCATATCTCAG  
CTCTATCTTGAGTCGTTCTGGGGTTCTTCTAATGTAGCCAGACGTGACAATAACTGGAGT  
GGCATGACCGGTGGTGCACAAACGCGTCCATCTGGTGTGCTTGTAAACCACGGGTAGTCTT  
AGACCAGCTAGTGAGGGCGGAACATATATGCACTATGCTAGCGTTGACGACTTCATGAAA  
GACTACACTTATCTACTTGCAGAGCAGACCAGTGGTGGTAGCAAGATGTACGGTGTCAA  
GGCAAGCAGACTATTGAAGACTACACTAAAGGGCTTCCGAGTTGGAGGAGCTCTTTAT  
GATTACGCTGCAGCTGGATATAACCACTATATCTATCTTATGCGAGATATCCGAAATGGC  
ATCAACCGTTCAAACGGAAACATTCTAGATAAACTAGACGATTTGTGGAGACAGCCAGAC  
AATCAAATCACTCAACCAAACCAAACAGTAACGAGAAGTGTAAAGGCCGATAAAGTTATC  
GCCGTCCTCAACGAAATGCAAGGCTTAAAAGGTGCTCGTGTAGGTAACGGTCAATGTTAT  
GCATTAGCAGCTTGGTATTCTATGAAGCTAGGTGGCCCCGGTCTCGGTGCAGGAGTAACA  
GGTAAATCTGGTGTAAATTGGTGTGGTATGGCTGCCGCCAAGATTGGTACTGACTATGCT  
TGGGACAGATTTGGTTGGAGTGTCGTTAGACCTACAAGTGTTGACCAATTAACCTGGG  
GCTATCGCTAACATCAAGGCATACAATAGTTATCTAGGTACGTCTGTTGGGGACACGTT  
TCAATTATTATTTCCAACAACGGAAAGCACCAGTTACGGTTTTGGAACAAAACCTACGCAGG  
CGTCAATACGTTGTCCAAAATAGCTATCCAGCCAGTGCTTATTTAGGAGCTATTGAGACT  
CTATGTTATCCTCCAGAGTTAAAAGAAGGTAAAACAGTTGAGGGTAAAACCTGAAACAGTT  
AGCACTCAAATGTTGAAGTGCAAAAAGTAGAAATTCACCTATAGATGTTGAAGTTACT  
TCTGAAAGCACATCTGCACTTACTATTGATAGCAAACGAAAACAAGAGTGGAGAAACGAT  
AAAGGGCAAGTTGAGTTTTATCTTGAAAATGGTTCGCTATATGCTCCTATTTCAAAGAA  
CTATATCCATCAATTTAACCAGTAAAGAAAATGGCGATAACTGGATTGAAAAGATATG  
GAAATAGACACAGACAGCGAAGATGTGCTTATTTTCGACAGCTCTTAGAAACCTAAGAAAA  
TTCTGTTACCCATCTATTACCTATGAAGTTGATGGTTTCCCTTGATTTAGACATTGGAGAC  
ACTGTTAAAATCCAAGATACCGGTTTCTCTCCTATGTTAATGCTTGAAGCTCGTGTGACG  
GAACAACAGATTAGTTTCACTAATCCCGTCGAGAATAAGACAGTATTTGCTAACTACCAA  
GCACTTCAAACAAGTTTTCAGACAGTTTGTATCCCGAATGACTAAATTGGCTGAGCAA



GCTATTCCTTACGAGTTGAAACTTTCAACTGATAACGGGACTATGTTTAAAAATAGCACA  
GGTCAAAGCGTGCTAAAAGCAAGACTTGAAAAGAACGGTGAAGTTTATCAACCGATATTT  
TTCTTTAAAAATGGCGATTTCGATCATCGGCACTGGTAATCAGTTAGTTGTTAAACCAACA  
GATTTTGAAAATACCTTACAAGTAAGTGTGAAAGCTTACCTTGATGACGAGTTAGTAGCA  
AGTACAGAGATCACATTCACAGATGTTTCAGATGGGAAAAATGGCGAAAAAGGCGACATC  
GGTCCTAAGGGGGACGACGGTGTAAAGTCCTATAAATTTAATAATCGAATCTTCTAACGGA  
TATCAATTTAAAAACAATATCATCAATACAACTTTTACAGCAAAACTTTATCAAGACAAT  
AAAGAGATTGACAAAGATGGCACTAGATATGCTTATGTGTGGTCTAAAGTTAATGCTGAT  
GGAACATTAGATACTGCTTGGAACTTGGCTCATCAAGCAAGTCAAAAAATCAATTACAATC  
ACAAATCACGATGTTTGGCAAAGAGCTACATTTAACTGTACTGCCGAACCGCTTAATTA  
TAGGAGGAATTAATATGTCAATTGTCTCAAGTGGACAAATCACAATCACAGATTTATCA  
GATGGTATGCAACTCAATGCTTTTCACTTACTGCAAGCGGAGTTACTACTCAAACCTTACGAT  
GCAACGGCTCAAACATGGTCACCAAGCTATGCTACCAATCCACAAGTTTTAACCCCTGAAT  
CTTACTAAAGCAGGAAGTACAGATTCTGTAATCAATGGTATTTTCAGGAAATATTACTTGG  
ACACGTAAGTACGGAACACTACAACAAATACTATTACATCAACTAGTGGAACAGATACTGAA  
TATCTTAGTGGTCACGCAAATAGTGTACTTACAACAAAAGTCAACGTCCCCTCGCTAAC  
TCAGCATCACGATTTACTGCATCAGGTATTTGGATTGACCCAAACACAGGTCTAAAAGT  
CCATTCTCAGCTGTTTTAGACTTAACTGTTGTACAACCTTGCTAAGTCGGCTGTTCTTGCT  
AACGTCTATACTGGAAACGGTGGAGCGTTCTATAACTCTAAGCCTGCTAGCTTGACAATC  
AATGCTGATTTGTACAAAGGTGGAACGTTATCACAAGGAAATAAAGAGATTTATTTTCGGA  
TACGCTGACAGTTCAGTAAGTTCAACTGGCTCAGCTGGTTATAACTCAAATCTTGGGTTA  
GGTTGGCACTTGTGTACTTCATCTACAACAGGTCAAACACCGAATGTACCTGCAGGTAAT  
CGTACAACCTTCTCAAGGTGTATTAACGGTTCTACCATCAGCAGTTACAAATGCTCAAAGT  
TTTAAGGCGGTAATCATTGACCGTGAAGGCGGAACAGCAGGAACATCTGTTAGTGGAATT  
GTTACTCTTTTAGATTACTCAGACCCAGTAACTTGTACGATTGAGAGCACAGCAGGTAGC  
ATTTTTAAAAACGGTTCTGGTGAAACAACACTTACTTGTGCGAGTTTTCCAATCTGGTGAC  
GAAATTGATACAAATGGAAAAACTTATACTTATAAGTGGTCGAAGCGTGACCAAATGGT  
GTATTAGATGCTAATTTTGGCGGTACTGGTAATCAATATAGAAGTGGTAAGACAATTAGT  
GTTAAAGCTTCTGATATAAATATCAAATCTCAATACACTTGGCAGGTAAATCAATAATGA  
AAAATAAATTTTATGCCAACGTGCGAGCTTGGAGGAGAAATCACACAAGTTAGTTTTCAAG  
CAACAAGTCCAAGTGATGTGATTGAGCAGATTTGGCGAACTTATGGTATTTCAACTCCAA  
TCATTGAAATCTGGGCGGAGTTAAGCGATGAAGATAATAACACGAAATGATATAACTCTA  
ACTAACGTCTATGATGGTACCGATGCACCAACGGTTTTTCGTTAAGTCCTATACATATTCA  
GCAGGTTCAAGAGCAGAAATTAAGCTGACTGGTCCTAATGCTTTTGAGCAAACGGTATAT  
AGCCGAGGACATAATGTATGGGTTCTTGATGTTACCACACATAAGCTCAAAGAGTTTGTA  
AATTGTGATACCTATATCACAATGTACTTCAATCATAATGGTGTTAATATTACATTTGCT  
GACTACCTAAATAGCCTTACAGATAGCATTGTCGTGATAGCCGCAGCAGATGCAGATCAA  
GTTGACCAAGATGTTAGGGATGTACTTAAACAGGATGGGTGGTACTCCAGAATTCGGAACA  
TGGGAAAACGGAAAATGGTTGTCGAGAAGTGGTCACGTCTTTATCGGTATGTCCAAGAGG  
TCTGATGGTACATGGCCACTACAACCACGACAGGGATATGAAGAAGCCATTCAAAAAGAT  
GGTTCAACACCAGAAATTGGATGCACGCTGTCGATAGGTGGAATAGTAGCTAATGGTGCA  
GCTGGTCCGAAAGGTGACCAAGGTAATGACGGACTACCCGGTAAGGACGGAGTAGGAATA  
AAAATACTATAGTAACTTATGGCATTTCAGATAATGAGAATACTCAACCAACTAATTGG  
TCTAGTCAACTACCAACTTTGGTCAAAGGGAAATATCTTTGGACTAAGACAGCTTGGACT  
TACACTGACTTATCTAGTGAGACAGGCTACCAAAAAACCTACATTGCCAAAGACGGGAAT  
AATGGTAACGATGGTTTACCAGGGAAAGATGGTGTGGTATTAGAAACACCAGATTACT  
TATGCAGTAGGAACATCTGGGACAGTAGCACCAACGAACGGCTGGAGTAGTCAAGTACCT  
AATGTACCAGCAGGACAATATCTATGGACTAAAAGTATCTGGGATTATACTGACAATACT  
AGTGAGACTGGGTATTGAGTTGCAAGATGGGAGAACAAAGGACCAAGGGTGACCGAGGT  
GAGCAAGGCTTACAAGGTCCAAGAGGTGAACAAGGAATCCCGGGACCTAAGGGTGCTGAC  
GGAAGAACGCAATATACCCATATCGCTTACGCTGACGCTATTTCTGGTAGTGGTTTTAGT  
CAAACAGATGTCAGCAAGCCATACATCGGAATGTACCAAGACTTCAATGAAGTTGATAGT  
AATAACCCACAAGATTATCGCTGGTCTAAGTGGAAAGGTAGCGACGGTAAAGATGGTGT  
CCCGGTAAAGCTGGAGCAGACGGACGAACACCTTACGTGCACTTTGCTTATGCCGATAGT  
GCAGATGGACGAACAGGATTGAGTTTACCCAGAATGGACGTAACGCTACCTAGGCGTA  
CTTACCAATTTTCATCAAGAAAGATAGTACTAATCCTTCTGACTATAGTTGGAATGACACG  
GCTGGCAGTGTCTCAGTTGGTGGTGAAAATCTCATTGCAACTCAGCGTTTCCAAAAAAT

CTGGATGGCTGGGGGCATTGGGAAGCACCTCAACCTAACTCAAATCTGTCCATTTCAAGT  
CATGATTTTTACTACAATGACTCTAAACCACTATTCTTGCTTAATTCATCATCATCAGGA  
GTGCCAGCGGCTACGCTACGTTTTCCGGTTAAACGAAACACTGATTACTCATTCAACATT  
CAAACGTTTGGCGACTGGAAATATCAAAGGTGTTACTATCTATTTTCTTGGACGTAAGGCT  
AATGAAAAGACAAGACGTTTACTAAAGTTGTGAATGTCAAACAATTAATGGATCACCG  
TCAGTAACACAAGCTGTTAAATGGCATCTGACATTTAATTCTGGAGATTGCGATGAAGGT  
TTCATTCGAGTTGATAACAATGGAACGACTGACGGTAAAACGTCTATGCTATTCTTTGGA  
GAACTAGACTGTTATGAAGGCACCACTGACAGAGCATGGCAAGCTTCACCTAAGGACTTA  
CAAGAAGAGATTGACACTAAAGCTGATGCTGCCATGACACAAGCACAGATCAACAGACTT  
AACGAAGAGGATAGTATCCTCAAAGCTGAGATTGATGCTAGAGCAAAGCTGATATCGTA  
AATAATTGGATTAAGATTACAATGATTTTCTTGAATTAAGTGAAAGAGAACGTGTTAAA  
GCAGAGCAAGATTTGAAAAATGCTCAACAGCGCTTGAATGCCATCAATAAAGACCTTAAA  
GAAATGACGGAACGTTGGAATTTCAATTGACACATACATGAGTGCTTCTAACGAAGGGTTC  
GTAATCGGCAAACAAGATGGTAGCAAGAGCATTATGCTTAATGCCGATGGTGGTATTACA  
TTTTTTAGTGCAGGTCGTTGACAATGACTATTTCTGAAGGTAAAACCTGAGATGAATAGT  
GGGGTAGTCAAAAAATCTCTCAAAGTTGGTAGATATATTGAACAGCCGTACCACGTCGAC  
CCAGATATTGTTGTCATTAGATATGTAGGAGGAGAATAATTGGCTGAATTTTGGAGTAAT  
AATGATAGAGGCTATAGAATTAGGATGTGGGTTGACCAAGTCAGTCAAGACAAAGTAGCC  
AATACAAGTCAGGTTAGATTTCAATTAGCACTGCTAAATACAACAACACTACTTTTGCTCAG  
TATTCATGTAGTGCCTATATCGATTTTGAAGGTCAACGTTTGAATTGGTCTGGTTCACCT  
AGCGTTCTAAGTTGGTATCAAACAGTACCATTGATAGACCAAACAGTGACTATCAATCAT  
GATTTCAACGGGAAAAAACTTTCTCTTTTTCAGCACAGTTTAATGGATCAGGTGGTTGG  
AGTCTCGTACATTAACAATAAGTGGTGTGTCGTTTACATTAACAGACATCCCACGAGGA  
AGTACAACAAGTGATGTTACAGCAACAATCGGAAGTCCTGTCACTATCAAGATTAATCCT  
CAGTTAGATAGTTACAGACACTCAATCTGGGTCAAATATGGTAATTTTAATCAAAAAATC  
ACAAGCGAGAATGTCAAAGATTCGTTACGTGGACACCACCGATAGAGTTATGTAATGAA  
ATCCCAAACACTACACTAATGGTCGAGGGGAACTTACTGTAGTTACATACGACGGTGGACGA  
GAAGTGGCTAGCGATACTAAAACCATATTCCTAAATGTTCCAGATTATGTCAGACCAAAC  
TTAACTGGAATATCATTGACGGATACTAATGTAGTAGCTAGAAATATCATTTCAAGCTCA  
GATTACTTCGTCAGACGCTATCTAATATAAGAGTGTCGTTTGATGGTGCTACTGGTGCT  
TATGGCTCGACAATCGAACACTATAGAGCTGAAATTGTTGGTTACAATCAAACAGTCGAT  
TCCAATGAAGGAACGCTTGGTAATATGAACTTTAATGGACTAGTTACCATTAGAGCAACT  
GTCACTGATAGCCGAGGTAGACAAAGCGAGCCATTCGATAAAAACAGTTACTATTCTTGAA  
TATTTTCGCACCCTCACTAAAATTGACGTAAAACGCGTTGGTGAAACATCTAGTACTTTA  
GAAATTCTAAGAAATGCACAGATAGCACCCTGACCATTAACGGCGTTCAAAAAACACC  
ATGAACTTACTTTCAAAGTGTGCGCTTATGGTAAGAATGATTACACAACCTGACAATGGA  
CCAGCATCTGGTGAATGGATTGGCGTTTCAAGTATAGTCAATAAATCTGCTGATTTAGCA  
GGGAATATAGTGCCAAACATTCATGGCAAGTGTTGGCAATTTTAGAAGACAAATTTACT  
AGCACAAGTGTTAAAGTTGACGTCCCTGTAGAAAGGGTGGTGCTTTCTTATGACAAACAA  
GGTTTAGGTGTTGGAAAAATACGTGAGTTTGGTGCTCTTGATGTTCTTGGTGATATTTAT  
GCTAATGATAGTCCTATCCAACAGTACCAGCTAACCTATAACAACGGTGGTCCCAAACGG  
AATGTTAGCAATGCAAACAACCTTTATGAACCGGGACAATACTGCCTAGGCCATCTGCA  
CCGGGAAATCCTAATGGTCAGTGGGGGTTTCTATTCCATTACAGCTACAATGGAAATAAT  
ACTGACGATTATAAAGAAGCCATTCAAACCTTCTGGAGCAATGATGGTCCGGCTATTTTTC  
AGGCATCATCGATGGTTCGAAAGTAATTGATGATTGGGAGCCGTGGAAAGAGTTTGCAAGA  
AACGATAACACTAATCTAATCAATACTGGATGGCAGTATGCAGGATACAATAATAGTTTC  
TATAAACGGGTTGGAGATGTATTGACAATCCGTTATGATTTCGAAGGAAATGGTGAATAT  
ATAACGTTTGCATCTATACCACAAGAAATATTTACATCTCCTCAAACCTATATGTTAACT  
ATTGCTTCATGGTCAATTGATGGTTCTGCCAACACACACGTTCAAATTAACAAAGGTGGT  
TGTAATTTAACAGCTTTATCAACCAAAAACGGATGGTCTTATGCTGGTCAACTCACAATC  
ATGCTATAAAAGAAAGGTAAAAATAAAATGAAATTTGAGTACGAATCAAATCGAAAGAA  
TATGATGCTAGCGGCGCAGCTTATGCGACAAAAGTAGTTTTGAAAAACAGAGACGGGGCT  
TACGTACCCGCTTTTTTGCCAGTCGATAAAAATCGACTTATCAAATACTGATTTGTTAAAA  
GAAGCACTAGAGGTTATCTATCAAGAAAACCTCCCTCAACGTGCTGAAAACGAGAAATTT  
AACAAAATTGAAGAACAATTAAGAAACATCAAGATGTATCAAAAACAGTACAAGTAACG  
TTAATGGATATCGTTGATAAACTTTACGAGAAAGAAGTGTTGACTGATGAAGACTTGACT  
GATGATAAAGAGAAAGGATAAAAAGATATGTTTGCTAAACTATTCGCCATCAATATTGTT

AATGATAACTACACATTTAAACGAGTTCCAAAAGTATTTAAAACCAAAAAGTAAAAGAACTA  
ATCGCCGCTATGGTTAATGACGACGAACCTCTTGGCAAAGCTCACACAAGAGTAGTAAGAG  
GTGCGTGCAATGCAGAAACCAGATGGCCTATATGAAGTTTTAAACATCGTTCGAGTTTTC  
TACGAGCATGGCATTGACGAGCATCTGTCCGGTATGCTTACTGATTGAAATGATTGGAAGT  
GATATTGTTTTAGGCGTTTTCAAGGGCGTGGGCTTTTCACGAGCTTTCAAGTTTTAAATTT  
AGAAAAGGGCTTGTAAAGCCATTTAGCTACATCTCTTTTTTGTAAATAATTTTTACCCATTC  
GCCCTTTTCATGCATTTAGGAAGCGTGATAGACACTTTTCATATATGCCATGATGGCTGCA  
TACGGTTCAAGTATATTGGCTAACCTGTCATCTTTGGGAGTTAAATTCCTTACATAGAC  
AGGTATATTCGATTAAACATCGATAAAGAAAAATTCATCCTATTAGATGAAGAAGAGGAA  
GAAGAAAATGATTAATTTAAAATTGCGACTAAAAAATAAAGTGACATTATCAGCTCTTAT  
CTCAGCAGTATTCGTTATGTTGGGACAATTTGGACTTGATATTCCACACAATATTCAAGA  
TGGTATCAGTACTCTATTGATGATATTGGTTATTCTCGGAATCGTTACCGACCCAACAAC  
TAAGGGGATTGCTGACAGCGAACGAGCATTGACTTACATCAAACCACTAGATGACAATGA  
AGGAAAATAGTATGAGCGTAAAACAAAACACTAGTAGATGGAATGGTTAACCTTAGAGGAA  
AAATCACTTACTCGATGTTTGGTTCTCGTGATGGTTCTGATGGAACCTGGTGACTGTTCCGG  
GTATTATGTCTAGAGTCTTGAAAGAGGCAGGAATTAATATCCAAGGGTTGCCATCGACTG  
TAACTCTTGGACAACAACACTAGCAAATAATGGCTTCTATCGTATAAGTCGTAACGAAGACT  
GGAATGCTGAAACTGGTGATGTTGTGTTGATGTCTTGGGGTACTGATATGTCTAGCTCAG  
GTGGAGCTGGTGGCCATGTCGGTGTTATGATGGATGCTACATACTTTATCAGTTGCGACT  
ATTCAACTCAAGGAGCAGTAGGACAAGCTATCAATACGTATCCGTGGAATGATTACTATG  
CAGCTAATAAGCCTGCATATATCGAAGTTTGGCGCTATGCTGACTCTGCCCCACAGACTA  
ATAACAAAGCTAATACAGCAGTAGTAACAAAAGAGAAGGCATATTATGAAGCCAATGAAG  
TCAAATACGTTAATGGAATCTGGCAGATTAGATGTGATTACTTAACACCAATTGGATTCG  
ATTGGCTTCAGAACGGGGTCCCAGTTTCAATGGTTAACTGGGTGATGCCAACGGTAACG  
ACTTACCAGACGGTGCAGACCAAGATTTCAAAGCTGGTATGTACTTTTCATTCTCTGGTG  
ATGAAGTAAATGTCACGGACACAGGAAACGGTGGCTATTATGGTGGCTATTACTGGCGTC  
AATTTGAATTTGGTCAGTTTGGTCCAGTATGGCTATCTTGCTGGAATAAGGACGACTTGG  
TAAACTACTACAAATAGACCACGAAAACATAAAATTGAAAAGGAGTATATCACCTCCCCT  
CACACTGCAATAGGGATACCATGGCAGTAGTGGTCGAAGCCTCAGCATTGTGCTGGGGCT  
TTTTTTGTGTTATGATATATCTAGGAGAGTGCCAGTAACTCTACGGGGTCTGGTGCGTTT  
TTATTTTTTTGTGCTATAATATACATATATCAATGGCCTCTCACGAATAAGCGCAGATAC  
GTTCTGAGGGAGGTTTTTTTATTTGCTAAAATTTAAAATGTGGTATAATATAAATATCCA  
TTCAACCCATTTTTTTATTTCTGAATTAACATTTACCATACCTTTTTTTCTTTGCTTTAAT  
ATACTTTTAGCACGTCCTCTACTTGTTACAAATTCATAAAAAATGACAAAAGGCTATGG  
GTTTATCTCATAGCTTTTTTTGTTTGCTTTTATCATAGATAAGTGTTATGATAGTTATTGT  
AATATTTGGCATCGTTTCAATAAATCTCTATAACTGTACCCTGAGTTTTGGTCAGGGTTT  
TTATTTTTTTGGTTTTGATAATTCTTAGATATATAATATTTACATGTAATTAGAAATTTA  
ATTTTAAAAAATAGATTGAATGTGACGCTCAGAATGATATAGAATTGGTGGACTTATAT  
GAAGAAGTTTTGGCATAGCGGTATGATTGACAAGAAAATTATTGAAAACGTGAACATGA  
TGAGTATTTGAATAAATTACATATGACTATTATTGAGTTGAGAAAAGAACCACCTGAAAC  
TAAACCTTGCTCTTGTACAAAAATGTAGATATTAATGAATTAATTACTATATTGAGTG  
GAATGATTATTATACATGGTTTTAAAGATTAATAATAGAAGAAATGGTGTTTTAATATGAG  
AAACGATTTTTATTAATAAAGTCTATGATGAATTAATCAGATTATTAATCATTGGGCTAA  
ACAAAAATATTTAAGTGATAAGATTTTTGAATATACTAATACTTTTAGTATTAAGAAGGT  
TTATGGACTCTATTGGGAAGTTAAGATTTTATGTAAGAATGATTATCGAATTTTGTGAG  
ATTTTATAAAAATTATGAGTGGTATAATGATTCTAATATTTAAATGTATCTGTATTAGC  
ACCTGCGGTGGAAAGAGTTAAAATGAAGATGGAAGCGTTGATGTTTATCCAAGTAAAAT  
AATTAAGATAAAAATTGAATTTATTGAAGGTAATTTTGATATTGATGGAGATGATTGGGT  
AGATGAAGTGTTGGAATATATAAATAAATGGGTAAATAAAGATAAAGCTGATGTGGAGGT  
ATTAGATAAATGATTGGATTTGTTATTTGGATTTTATTTATATTAATGTGGATATTAATA  
GGAGGACTTATATTTTAGGAAAAAGAGGGCAATCGCTCTCTTTTTTTGCAAAAAAATATA  
AATTTATTTATCAAAAGTGTTGACGTATGTCAACATGTAAGATATAATGTATACATAAGA  
TAAAGAGAGAGGTATACAAAATGAAATCACAAGTAATGAGCCAAGCATGGAAAATCGCTA  
AAGAAGCAGTTAAGAAATTCGGTGGTAAAGCTATCGAATACATCTCTGAAGCTATGAAAA  
TGGCTTGGGCTGCTGCCAAGGGTGAAAACACTAGCTTAACTAAATTTCAAGCTGTTGAGG  
AAAAGATGCGTAAAGCTGGCAAATACTCAATGATTCAAGTTCTTGACTTTGCTAAAGAAG  
TGAAATTCACGAAGTAATGCATAAAGTTGGTGCTTACTACGGAATTGAAGTTATTGCTG

ACGGAGACAGCATTGGTACTTACTTTATCGCTGAAAAAGTTTGGGATGTAGCTTAATTA  
AAAAAAGAAAGAAGGAAGTAAAAATGACACAAATTAAGATGGTTGGCACATGGTTTATG  
ACGAAAAAGTGTATGTAGAGAGCGGGAAAGTTGTCCGTGGAATAACTAAAGACAATAACA  
ATTCTGAAATAGCTTGCTACCCTTACGAATACAACAAAGACTATGATTGCTGGATTAACA  
TTTCTGGGAAAGTAACTCTATCAGCTTATAGATCAGGTCGTAAGGAAAGGGACAAAATGTA  
TGAAGTGAAGAAAGAAAGAAGAAAGAAAGGAAGTAAAAATGGCATAACGGAAAAAGCAGATA  
CAACTCATATAGGAAACGCAGTTTCAATAGAAGCGATAAGCAACGTAGAGAATACGCACA  
AGAAATGGATAGATTAGAACAAACATTTGAAAACTTGATGGTTGGTATCTATCTAGCAT  
GAAAGATAGTGCATATAAAGATTTTCGGAAATACGAAATTCGCTTATCAAATCATTGAGC  
AGACAACAAATATCATGACCTAGAAAATGGTCGTTTAATTGTTAATGTCAAAGCAAGTAA  
ATTGAAATTCGTTGATATCAAATGTTACTATAAGGGATTTAAGACAAAGAAGGATGTAAT  
CTAAAATGATAATAAACACTGCACGAGTTGAATTAGTTTTAATGAACAAAGCTATAACCAG  
CAAATTTAGAAAGCGAAATAGGTATTAGTCGTTGAGCAATTACTAGGGTAAGAAATG  
ATGAGCGAAAAATAGAGAATCTGAAGCTCGAAACAATCATAAAAGTCCAGAAATGGATAG  
ATTCGGGCAAATACACATTCTTATGATTATTCCGACTTGATAGAAGAGTTGGAAGAAG  
ATATTGCAAAGGTCTGGCAGGTAAGTATATCTACGTTGTCAGAGGACCATAACAACGAGA  
TTTTAGAGAAATGTCCAATCATTGACTATTACTACTTCCGAAGAGATTGAAGAAGGAG  
AGCTCGCAGAGAAGACCTTGACAGCTTCTGTCTTGGCTGAAATGAAGTCAGACAACGAAA  
TCTTTTAACCGTTCAAATGAGCGGTTTTTTGTCCGTCTATTAGTATGGCGTTGACCACAA  
TTATGTCCACATTTTTTGAAAATCTACGAAAATAAATAAAAAATAAAAACTATAAAAACTT  
AGTAAAATTAAGTCTTTACAGCTTCATTTATTCTCAAATTTTATATATTTTCGTT

>NewGenomeName\_262

ACCCCCGCCCCAGGTTACGCGGAGTCATCACGTGAGACGCACATGACTTTCATTTATAAA  
TAGCTCAAGTTGTAATATTTTATTGTATCTTGAATAAAATATGGCTCGGCAAGTTATATG  
CTGGTGCTTTACATTAATAATCCTCTCTCTCTATATTTCTTCATGAGTCCATGAAGTA  
CCTTGTATCAAACTGAACAAGGTGAGTCTGGAAATATTCATTTCCAGGGATACATCGA  
AATGAAGAAAAGAACCTCCCTAGCTGGGATGAAGAGATTAATCCCAGGTGCACACTTTGA  
GAAGAGAAGAGGAACACAGGGAGAAGCCAGAGCTTATGCTATGAAGGAAGAATCAAGGAT  
TGAAGGTCCATGGGAGTTTGGTGAGTTCATCGCTTCAGTTGAAGATAAGCTCAGAGAAGT  
CATGAATGATATGAAGAACACCGGTAAGAGACCAATTGAATATATTGAAGAGTGTGTAA  
CACTTATGATAAGTCTGCAAGTACGCTTAGAGAATTCAGAGGAGAAGTGAAGAAGAAGAA  
AGCTATTGCTACTTGGGAGTTACAGAGGAAGCCATGGATGGACGAGGTTGATGCTTTGCT  
TCAGGAGAGAGATGGAAGAAGAATCATTGGGTGTATGGCCACAAGGTGGAGAAGGGAA  
AACCTCTACGCTAAGCATCTTGTAAGACGCGTGATGCTTTTTATTTCGACAGGTGGAAA  
GACAGCCGACATTGCTTTTGCATGGGACCACCAAGAGTTAGTGCTATTCGACTTTCCACG  
AAGCTTCGAGGAGTATGTAACACTACGGCGTAATCGAGCAATTAAGAATGGTATTATACA  
GTCAGGGAAATACCAAAGTGTTATTAAGTATAGTGATTACGTAGAAGTTATTGTATTTGC  
TAATTTACTCCGCGTAGCGGCATGTTTAGTGATGATAGGATTGTATTTGTATACGCATG  
ACGTCATTTGATCCCGTGCTGAGCTGGGGCGGGGCTTAGTATT

>NewGenomeName\_263

ACCCCCGTCGGGTTACAGAGTCACGTACGGAGTGACTAATAGCCGTTGGATTATCTTAC  
ACGTGGACGATCAGGATCTGTGATTCGTGAAGCGAATCTGACGGAAGATCGTTCACACTC  
ACGTGGTGGGTCCCGACAATTGCTTTTGTCTTACTTTATCTAAAGTAAAGCAAGTGGGTC  
TACTTTAATTATTCTTTTTTGGTGGAGTACAGCTGTCTTTGCTTCTTCACGAAGCAAAGG  
ACTTTCTCTCTCTATAAAAAAGCTGTATGTGCAGAAGATGAATTCGTTCAATTCATCT  
TCTTCTACATCAAATCATCTTCTCTCATCAACATTAAGCTTATATAGCTCTATGCCTTTG  
GTCGATTATTTGTTGGTTGATGAGGCTACTGAAGAGTTAATAACGTCAGAGAGGAAACGT  
AGATCAGTCGTATGTTCTGATGATGATTCTCAGGTAATCAATGTCAAAGTTGAAGATATA  
GCTATTGATTTGGAAGACAGAGTTGTCGTTAAGTTGAAGTTCAGATTATGTTATAAATAC  
AGGAGGTTGCTTGATTTAACGCTTCTTGGCTGTCGTATGAAAGTTCATACTGTATTGAAG  
ACCACCTCTGCTCCATCGTTGAAGAGTGTTTTGCAGAAGAGACTTAATATGATTTGTGAT  
GGTAATCATTTAATATCAATTAGATTGTTTTTCATTAATATTAATCAGTTGATTAATAAT  
TGTAATGGATATCATCTGTAGAAGATGTATATCCAATATGTACTTTGTATCATATTCAA  
TATTCAAATGTAATTAATGCTAATGAGATATTTAATAATACTTAATATGTATTTGTTTAT  
ATTGATATTGTTTTTTAATTAATCTGCGAAGCTATATGTCTCGGCCAATAGGCCCAATA  
GTCTTAAGGCCCAATAAATTTTACATTAATTTGGATCAGCTGACGTCAGCTGATCCCGTG  
ATGACGTAGGGACGGGGCTTAGTATT

>NewGenomeName\_264

TCAGTCTGCGGCTCTCCAAATCCGGTTATCCCCCCCCGGTACCTCTAGAGTTTTGGGAATTC  
CCGCGCTACCTACCCACCTTGTTAACTCTCCTTCTACCCAATCATCTGTCTGTACTTC  
TAGATCAAGAGAAGCCTTCGGCTGTGCTGTGGATTGATCCTGTGTCACCACAACCATTCT  
CACTACTCTGGAGTACTACCATGTTCAAAGCTCTCAACCAATTCTTCGCTATGCTGGAGT  
CCATGTTCCGTGCTGTCACCAACCTGACCAAGGCTGCCGAGAACGTAACCGAGTGGGCTG  
AAGAAGAGTCTGCTCACTTCAACAACAAGGCTCGTCTGCAACGTGAACAAGCCATCGCTC  
TGCTCAACATCGAGAACGCCAAGGAGCTTCAGGAGAAAGGTCTCACCGAAGCTGTGAGT  
CTGTCCGTAAAGAACGCTCCAAGGCTAAAGCCTAACCTATCCACCTATCCACCTCTACT  
CCCTAACCCGGAGTAGAGGTTACCTTTTCAAAGCACACATAAGATCAACATCACACAACC  
AGAGCACACACCTCTCTCTCAGGGACAGTAGGTTGTAGGAAGGAAGGGATACTCTCTCTG  
GTATTCAACTCATCTCTCGTGTGTAGGAGGATAGGGGAGATAGTGGGGTCTGGCAGTGCA  
TCAACTCTACATTCACCTTTTCATCTCAATGTTTCATTCCTCTACCTTTCTCAACCCTATA  
CCTTGTATCACTCTCCCATCTACCCGATACACACCGTATCCCTATCTCTACTTGGGTTAG  
TGTCTGATGTTCCCTCTACACCTTCGGTGTAGGAGTGGTATTCGATTCTGTACTTACTTCA  
TAGTCTCTATAGGTATCAACCATGGACCAGAACATCTACACCCTGCTGTACACCAACGA  
GTGTCTCCACTCCATCGAACATGAGTTCGAAGCTGACTCTGATGATCATGCTCGTGCCAA  
GGCAGCTGCCATGTGCAGAGGTCAGGAAGGACTCTGGTCTGGTATCTACCTGATCAATCC  
CAATGGTGAAGAGATCACCTTCGAACCATTCTGACTGAAAGGAATCACCGGTATGTCCCT  
CATTACTCTGACCCTCAAGAATGTGATCCGAACCAACAAGTGTACAGTACGCAAGGTAAC  
CAATGGTGAAGTGGTTACCTCACCTGTCATCAACAGCCTGGAAGAGATGCGTGACTACAT  
CCGCATCCACTGCAAGCTCACTGACACTGGCATCCGTCTCTCCTACATGTCCGGAGACAGA  
GGGCTGTGAGGTGATCCTCGCTTACTTCAACCACTACGGGAACATCATCGTATGACTCCG  
CTAGACCGGAAGATGGCAGAGAAAGTCTGCTTCGTAGGCTTCACTCGTGATGGTGTCAAC  
TATCAAACCAACCGTGTTCGTACTTTCGGTGAAGCCAGACACTTCATCACCTTCAACTGT  
AGTCCCAGTGACAAGGACATCCGCATCTTCTACTTTCGTGTCAGAGGATGTGGAAGTGGTC  
ATTGCTCGTCTGGATCTCACTGAAACCAAGGAGAACATCTGATGCTCAAGTTCGCTCGTC  
TCAACCGTATCCGTAACATCACCGTCGATGACCTTGCTCGTCTTAGCTGGTCCAAGGGAT  
TCCAGTTCGAGCAGTGCAGGTTGCTGCTGATGTGGTTCGGCTTCAGTCCGATCCAGTCT  
GGGAAGAGTTCCTCCGTGTCTGGAACAAGCTGGACCAAGACTTTGGGGACTTCTGCAATA  
AGTACGACTGTCTGCTGATCCCATCGGCTTTGCTGACGTGAGGGACTGACCCATGCGTA  
CCGTTGCACAGCTGATCAAGCTCGGCTTGGAGTACTACGTGGAGAAGAAGAGTCTCCAT  
ACATGTGCTATGTCCTGGCCGATATGTTTCGACCGTAAGCAGATCACCCAGGAGGAGCGCA  
CCCTCTGCAAGGAATGGGTGTACGAGAAGATCCCTTCCTATGCTCCGCCAGTAGTGCTGG  
GCTATCTGAAGATAGCAGGGCTGCCGGATACCAAGGAGAAGTGGTTCAGTTCCTTCGTCT  
GGGCCTACTACGACCTCATCAAAGGAACCACCATGAGCACCAACCATAACCTCACTCTC  
GTTGGCCGTCTGTACAAGATCAAGATCATTCCACCAAAGGGAAGCTGACTGGCTTTTCGT  
GTACAGGTAACCTGATCAACAAGGGATTCCCTGACACTGTACTCACCCACGTAGTCATG  
TGCGGTAACGAGTACACGGCCAGGACTCTGGTATCTGCAATCCGTCATCGTTCGTCGGCTG  
AACCTGAAGCACTGGTACTGGGTAGGTGTCAGTAAAGACATCCCTACCGGCTGTACCAAC  
CGTCTCAAACCAACCAACCAACTCTGGAGATCTAACCCATGGTAGCTATCGCTTGCTTC  
GTCCTCATCGCCATCTGTGCCTACTTCTTCATGGTCAAGTGCCTGGCCTCTTTGGCCTGT  
TTCGGTGCACGTGTTTCGTAAGTGCCTGGAGCCGAGAAGATCGCTGCCCTGCTTGGCCTTGGC  
TGGAACGTGTTCTGGGCAGTGGTCTGGTGTTCGCAATCAGCTTCCTCTTCCACCTTCCG  
TAAACCAATCCCTCTAAACCAAGGAGTCTGTCATGACTATCGTTCAACTGTTGGCCATCA  
TCGCTGTCTGCTGCTGGTGGTGCCTACTGTGCTCAGCTTCCTTCGCATGCTCGTATGGG  
CTGCGGAGACCTGGGTACGCTGTGAGACTGGCCGTGGTAACCGTGGTACCGCTGCGGTTAG  
CTACCGTCTGTACGGAGTGGCTACCTGGGTGTGTGCCTACCTCTTCTTCGTCGTGGGGG  
CTTACCTGTGATCATCCTCATCATGTTCCCTGCTGTTTCGCTGTGGGTCTGTCCATGCTGGT  
GATCGGCCTGCACAGGCAATGGGTGATCAACGAGATGCTCAGGTTTCCCCTGAGTGTCTC  
CCGTCGCCATGACCTGTGCATCCAGAGAACCCATGCCTGGGTCATTGCTGTCTGTGGCCT  
TGGCCTGCTGTTTGCAGGCTGTGGTCCCCCTTTCATCTTCCCTCGCTGGAGGTCTGCTTTG  
AGTGACGTAGAAATCCTGATCCTGTTGTGCCTGTACATCGCTTCGTCAGTAGCCGTGCTG  
AACGGCTACATGAAGTGGTCCGCCAACAACTACACCATGCAAGCCACTTGGTATGGCTTG  
GTGATCGACATCTTCGTGATGCACATCCTGACCTTCTCCGGGATGTTCCGCCCTGATCGGG  
GCAGTGTGCATCGCCTTCAACTTGATCGGCCTGCTGTAAGTCTCATGGCCTACGGCCAT  
GGGGTGAAGTCCAACCCTCGTAACTCACTGTTTACTTAGGAATTCATCATGATCGTTC

TGAACACCCGCAAGGCTACCTCCATCCTCGACCGTGGCTATCGTGAATGCCTGGACGCCG  
AGAGCGTTGCACGCGAACTGCATGCCATTGGCATGTCTGCGGTCACTGAAGAAGACGTGC  
TGAGCCACTGGGCTGACTGGGACAACGACCTGTCCGACGAACCCCACTGGGTGTAAGAGC  
AAGAGCAGGCTACGCCTGTGTAATGGCCTGCGGGCCGAACCACTTCTGATCTGTATCTAC  
TACCTCTCCTTACAAGGAACCTGAATCATGGCATTCAAGAAATCCAACGCTCGTACCAAC  
ACCGCTGCTCAGTCCGACGACACCCGTGCTGCCAGCTTTCGTCAACATCTCCATCGGCACC  
CGTGGCGGTGATCCGGTTCGCCTGGGCAATGGCATTCCGCTGCGCCTGAGCGAGGCCGTA  
GAAGCACAGCTGCACGAGTACTTGGCCGAAGCCAAGGACGACAAGGAACTGGCCAAGCGC  
ATCGAGAACCTGCGTTCGCGTCTGATCCTGTCTTCCGCATCGTGCCTGACAAGTCCGAG  
CTTCAGCTGGACCTGTAACAGCGTCCGCCACATCCTCACTCGATCCTGAGTAGGGTGTG  
GGCTGTTTTTTTTTTAGACTATCGGTTTGGGTGAGTCGAGAGGACTGCCCAAGCTGGTC  
CGTTTGATCAAACCAATGAAACTCATCTGGTTTCCCTGACGATGAAGTAAAAGTCTGGAAT  
CGGCACTTTTCGGCTGGAGAAACGATATGCCAACTGACCTCAAAACACCCACCGGGGGTA  
CTGTAACCTGGTCGTCTGGTCGTGGACCGTGACTACCTGAACAAGCTGCTGGAAGTGC  
AGTACAGTGGCTGGAAGATCGACATGGTGTACATAGACATGACCGCACTGGAAGAAAGGA  
TGATGGCCACATGCTGGACCAACTACCAAGCCAGTGAAGAAGTCCAAGCGTATCCCCA  
AATGGGAGATGCCTGTGCGAAACCATGAAATCAACCACCTGGGCAAAGGCCACGCAACA  
AGTTCGGGGGATTCAACTGATGGAACCAATCACATGGTGTTCGTGTTCCGGTAGCAACA  
TGCTGGCATCCACGGGGCTGGTGTGCTGCCCTCTATGCACGAAACAACAAGGGTGCAGAAAT  
GGGCGTAGGGGAAGGGCCGACTGGCATGTCCTATGCCCTGCCACCAAGTACAGGGCCCA  
CGGTGGGAGGCTGGTCACTGTACATCAGTGACGTAGCCAAGGCCGTACAACGGTTCAT  
GGACTTCGCCAGGGAGCACAGCTACATGAACTTCCAGGTGACCCGCATTGGCTGTGGTCT  
GGCTGGCTTCCATGACAGTGACATAGCTCCGCTGTTTCAGGCTGCACCCGACAACCTGCTA  
TTTCAGCGAGGCATGGAAACCATGGCTCAAACCAACCGCCAAGTATTGGGGAAATGAATG  
ATGACTCGTACCTACCTGAAGCGTGTAGTAATCCGTGACGACAACGGCATGTTTCGTTTCG  
GACGGAGACTCTGATCGACGCACTGCGTGAAGTGAAGCTGAAGAACCTGCTCAAGCAG  
CTGACCGTCCTCGACCAAGATGAAGGTCACCGCTGGATGTTCCAGTACAGCCACGTCAAC  
AACCACATCGTCTGACCAAGCAGTCTCTGACTGCTGCGATGGGATCATAAAATGGGG  
GATCTACTGTAATGCCACAGTTCGTAGTAGGGAACATGTGGGAAGTCTTCGACAAGGCTG  
ACCACTTCATCGTGCTTAGCAACAGCACCTTGACCTCCACCGGTGCAGTAGTCATGACCG  
CTGGTATGGCTGCTGAACTGGTAGCACGCTTCCCAGGATGCTGGTATCCAAACCAGCGTGG  
GAAAGTACATCGCTGAGAATGGAGGGGCTGGTGGCATCTTCGGTTGCCGCTGCCAATCCA  
AGGTAGGAGTATTCCAGGACAAGCGTCACTACCGTGATCCCACCGACCTGGGGTGTGTCA  
GCACCAGCACCCTCAGCTGATGTGGCGGGCACAGGAAAACCCAACCCACCAGTACCACC  
TGGAGCAGCCAGGACAGAACGAGCCTTGGTGGCTGATCAAGGACATCCTGGCTCGACTGC  
CCGACAACGTAACCATCTGGAGCCGTCCCTAATGGGATGGCTTCACTCTAGTGCAGTGG  
GGTAGTTGGCGATGAGGATCAACACGCATAACAAGGACGCTTATAACAACGGTGAACATGC  
AGGAGATGGAGCAAAGCATGGCCCAGTTCCTACTACGATGCTGATATCTGACTCTCTGC  
GTAAAGGAGAGTCTGTCTGTACATCTTTGATGGCTTGACAGAAGAGATATTCCGTAAG  
ACCTATCCAATGTAGCTAGCGGTCTGATGATGAGCAGACTCAAGAGCTCACTGATCCGT  
TCAAGCAACTTTATAACCAAGCACAATGGCAGGTGGTTCGTCTTCAGCAGTGACTTCAATC  
CTGTTGCAGAGAAGCTAGTACCACCAGAGATCCGCGCCCAATCACTTCTGTTTCGATTAAG  
GAATCGTTCCATGACCATTACCCACATGCTGCCCCGAAGATATGCAACGCGCCAATGAGTA  
CCGCTTTGCACGGGCTCACATTGACGGGTACATCCGTGAGTTCATTTCGCGGTGACGAAGA  
TCTTCTGGCTTGATGGAGCAGGGAGTAGCACTACTGGAGGAGTATCGCACCCTGAGTA  
CAGCTATAACTCCAAGAACCTTCGTATGGAGACTGTTTCGTAACCTGGACCTTGAGCACAT  
TGTGTTTCGAGATCATCGTAGCGTCTGCGTACTGTCAGGTACCGGACATGTTTCATCAGCTT  
CACAGCCAAGCTAGCTGGTGTACTTGGCTTCGACGACAAGGCTGACAGCATCAAGACCAT  
CGCTGAGATGGTTGCAGTGCTGGCAGAGCTTACGCTGTACGACATTGAGCAGGTGTCCAA  
GTATGGTACATAACAAGGTCATCTCTAACATTCAACTACCGGAGAAGCTTCAGCATGCTGT  
TGAGCGAGCTATGTACCTTCCCTCCTATGGTGTGCAAACCATCCAAGCTCACTGGCAACA  
GTCGAAGCTGCATCTTACTCTGGAGAAGGAATCCCTGATCCTGAACAACAACCATCACAA  
CGAAGACATCTGTCTCGATGTGCTGGATAAGATGAACGCTGTTGAGTTGTGCCTGAACAC  
TGAGTTCTTGAGCACCGTGGAAGAAGAGTCCCACAAGTACTTGGATACGCAGGACAAGAA  
AGACGACTGGTACAGATTCGTTTCTGAGTCCCATGAGATGTACAAGCTCATGGTTCAGCA  
GGGCAATCGGTTCTACCTCCTGCACAAGTACGACAAGCGTGGCCGTGTGTATGCACAGGG  
CTACCACATCAGTACCAGGGATCTCCTTACAAGAAGGCCATGCTCGACTTGGCCAACAA

GAAGGTGGTCACTGGTGTACCCGAGCACTTGAAGATCAAGTGAAGGAGCAAGCAAGTGAG  
TCACTACGCCCTTCTACAAAGAAGACGATGTATGGAAGTACGTAAAGTACGACGGATTGCT  
TGAGCTTGTGCAAGCTGCGTCAATGATGTCCTGCAACCCACAAGAAGCAGCAGTGTGTAC  
CTGCTACAAACTGAATGGAGTCAGATGGTGGTGGATGGGTATGACTGATAAGGATGCGAT  
AGAAGACGTGAATCTTCTGCCAGCAGACCTTAGAGCAATGCTTGTGCATCTGGAGTCTTGA  
TCAACTACTGGAGTGAGATATCTATTCACAGTTACGAAGAGGACATGTAAATGGAACTCG  
TGGTTTGGAAAGACGGTGTGAATGGCGAGTGTTCGCTGATGATGCTACCCCGCCTGTGG  
ATGGTACCGTAGACAAAATTGCAGAGGGTCTAGCTACTCTCTGCCGAAAGAAAAAGAAC  
CTGTTGTGTTACCAGGAGGAAGAACGCCCTTCTATGATGGTCAGTACTGGCTTGTGTGGA  
GGTACTACCCACCTACGGACGTGCATATGGTAAGGAAGCATCAGATGAAATGATTAAAG  
AACCCAGTGCTATTGCACTACTTGCAGGGTACTAACCAATGAATGTAGCTGCATGGCTTC  
ACAATGGCGAGTGGCACATGTTACGTGTGAGTTGAATAGGGTTGTATCGGACCAAGCAT  
ATTACCAAGCTGGTCTGAAAGGACCAGATAAGCGGGATTTAGTGCTTCTCAGAATGACCA  
CAAAGAGGAGAAATACTGCTTACTGGTTTCACTTCAGGAAGGACAACCCTTTCAATAAGT  
ACATGCCTGTAGCTTATACCGAGGAAATACCGAAAGAACTTCAAGCACTGTTGACCATCT  
ACGGTCTTTAATTCCAATCCACCTTCGTTTAAATGGGAACTAAACCATGACCCCTTACACC  
GCTTTCGAATACTTGCTGATCGACGCTGCAAACCAATGGGCCATGACAAGTGGCTCTTC  
GAACAACGTATCCAATGGTGTACGACAACCTTCGACGACCTGGAGAATCTGGAGTGCAAC  
GAGAAGACTCGTCCGCAGTATCTCAAGGCTGTCATGGCCATCCGTGCTGCTCAGCGTGGT  
GAGCCTGTCGGCCACCTTGTAGGGCTGGATGCCTGCTGCTCGGGCATGCAGATCATGTCC  
GCCCTGGGTGGCTGTGAATCTGGTGCACAAGCCACCAACCTCATCAACACTGGCTTCCGT  
CAGGATGCGTATAGCCTGGTCACCACTGCCGCCTTACCCACCTGGGTAAGTCGGTAGGT  
GAGATCAAGCGGTTCGGACATCAAGACTGCAACCATGACCCACTTCTATGGCTCGAAGGCT  
GAGCCGAAGAACCTGTTCCGGTGAGGACACTCCTGAACTGGAAGCCTTCTACCAAGGCGTG  
GAGATGGTAGCTCCCATCGCCAACGAGATGCGGGATGACCTGATCAACACTTGGCAGCCC  
TATGCCATGAAGCACTCCTGGGTGCTGCCGGACAACCTTCCACTCCATCGTCAAGTCCACG  
GACGTGTTTCGAGACTCGGGTGGAAAGTAGACGAGATGGAAGGTGCAAGCTTCGAGTACATC  
TACAAGCAGGACTGCGGTGTAGAGCGTGTGTGAAGAATGCTGCCAACGTCATCCACTCC  
ATCGACGCCTACGTGCTGCGTTCATGCACCCGCCGCTGCAACTACGACCGCGAAGCCATC  
ACCAAGGTAATGCAGTTGGTTTGGGGAGAAGTATGATGGACCGTCACTCTGGTGTAGTGTGAA  
GCCGGTGAACCCCTGGACGCCAAGCTGGCTGTCTACGAAGACCTGTACGACCGCACCAAC  
ATGGTCGATGCAGTGTCTTCAACCACATCAACGCTGTCAACGTGCGTCAGCTGGAGACT  
GACCACCTGGAAGCTCTGTGTGCCCTGTGGGACACCATGCGGGTTCACGAACCCTTCGAA  
CTGGTCACCGTGCACGATGAGTTCAGTGTCCACCCGAACCTTCTGCAACGAGATGCGCCAG  
CACTACATCAACATCTTCGCCGAACCTGGCCGACAGCAACGTCCTCGACGATATCGTTCAC  
CAGATCACTGGAAGCCATGTCAGCTACGACCGGTTCGATCCACAATCTGTCTGAACTGATC  
CGTGATAGCGAGTATGCGCTGTCTTGAGGTGAGTGGGCGTCTTCCAGACGCTCCATGAAC  
CCGAATTTGCCTGATCCCAGAAATGGGATCGGGCGCTTATTTTTTTGAGGGGAGCTTAGA  
AACCATGAGTAAACACAGGCTATGCAAGTACTGTGGTAAGCCAATAGTGTTGGTCCCAG  
TGCGGAAGAGAGGGCCAAGAAGTTCGGAGAGTCTCCCAAGTTCTACCTCAATCTCTTCTA  
TGCCCATGGAGAGTGCATTGTGAAGAGCAGGGGTTGAGCGTACTCCGTACGCTTTTTTGCA  
TTTTCGCTGATTTCCAGTGAGTTCATTCAATTGAAGAAGGAGTAACACCATGCGCAAATC  
GTACCTGAAATCCCTGGACACCATGGCTTGGATCGCTGCTGTCTGCTGCTTTCGTAGTCGT  
GGCAGTCGCCGCCCTGACAGTCTACAACGGCCTCGTGGCCCTGCTGGTAATGCTGGGCGC  
TGCTGTGCGCATCGGCATGACCTTCGGGTTCTGGTTCCTGGGCTATGGCATCTACGAGGA  
ACTCCAGAAGCTCAACGCACGCTTCGGGCCTAAGCCATGCAGGTCCGCAATTTACCTA  
CGAGGACGGGGGGTGGGTGCTCGATGGCATGGACACCTTTGATCCTGGCGATTCTCTGAC  
AGTTATCCATGACTCGTTCGAGCACATCGACAGCACCGAGGGCCTTGAAGCTGAGTTGCG  
GGCCTTCGGTGCATGTGGTGGCTCCGTGGTGGAGACAGATTGGTGGTGCCGTTTTCTAG  
GATGGACCCTCGTCTGAGCAGGTGATGTAACGACATCGCCACATTCATCAGGGAGAA  
CGACTTCTCATCGACAACGTGGGGAAGCGGTTCAAGCTGGGCGTGGACGAAGAGAGTTT  
CCTCGACGTGCTACGCAAGCTTGTGCAAGATGCCCTGGAGAGAGACAGTCAGTACCTCGA  
CAAACCAAGTGGCAAGGAAGGTGATCCAAGAAGCGGCAAGCACCGCTATGGATTGGCTTCG  
TGTTGGGTACAGAGCAGCCCGTAGAAAATACCCTGACAACCTTCGCAGTTGCTGATCTCAT  
GTACGACATCTATTGCCGTGTCTACGCACTGAACTTCAGAGCGCTGGAAGGCAGCATGCT  
GCAACTCAAATACACCCTCAACGGCAAGCTCGTTGAGATCAGTTTAGATGGAGAACCCAT  
ATGATCCCATTTCGTTTCCCGCAAGCGTTTCAACGAAGCCCTGGCCAGTGTGACCAAACAC

TACGAGGACAAGGTGCGTCGCAGGGATGAAGTCATCAATGTACAGAACAACAAGTTGCAG  
GCAGAGCGCGAAGAAACCCGTGCTAACCGGCGGATGTACGCACATGCCAGAGCGATAAC  
TACCGCCTCCAGAACCAGATCAAGGATCTGAAGAAGGCAGTGGAAACCCGCGATTTGAAG  
ATCGCGGAACTCATCAAGCCATTCCATGGTGACCCGGATGACGTTCCGGTAATCGTCCCG  
GAAGAGACAGTCTTCGAGCCTGTGGACACCGGCCTGGAAAAGCAGCTGGCCGAAGCCAAAG  
AAAGAGATCGAGATCCTCAAGGACAAGGTTTCGCAAGCAGCGCCGTAGCGATGCCGAAGT  
ACCATGGACACCCTAGTGCATGCTGTCATGCGTGAGTACACCAACTTCCAGCGGAGCAAC  
AATCCACACCTTCTGCTTCGTTCTTGCAGAACCTGACGAAGGCTCATCGTCTGTCTGGTG  
AAGGGTAAGCGCTGATGGACAAGATCACGTGGTTCGTCGTGGGGAACCCATAGAAGTCC  
CCATCGAGCGCTGTCTGTACTTCCCTGGCTGACGGCAAGCTGGTGCAGTTCCTGTACTACG  
ACGAAAGAGGTCTTTTTTCAGATTGCCCATGTACCGGCATCTCTGTAGGCAAGATCTACA  
GTGCCGTCAAGGGTAAGTTCGTGTACGTTCCGCATGGCTTCATCGTTAAGAACGAGCGGG  
TTGGCATTACCTCGGCCATGGGGAAGACTACCGTCGTCTGTATGCGTTTACGTGAAGG  
GTTTCGAGCACGTACGGGGTTCACTAACTGCCGGTGCCAGGAACTCATCACTGCCAGT  
TACTCGGGGACCACGTAAGACTCTGCACCAAGCAGAACATCGGCGGCACCCTGGTAATGC  
TTCCAGGGGAGCCGGGTGAGCGTGTACGGAAGAAGGTCATCATCGAAGAGATCGGCACTG  
ACATCCATCGCAACTGGTGCGGTAATGCCTGCTTCGAGATCGCTGTGATCGACAAGCATG  
GCCGCCGCTACACCGAACTGAACGACCATTTCCAATACTACGGGGTGAACAAGTGATGCT  
GATGAGCGAAGACAAGTTCCAATACGAGATCTCTGCCATGAAGAGCAAGATGAAGCGATT  
GCGTCGTCCGGTAGAAGTGCTCAACAACAAGCGAGATATCCTCCTAGAAGATATCGATGC  
AACCAACAAGATGGTGGAAAACCTCAGCGGTCAGGTTGAAACGCTGTTACGGGAAGCCAA  
CAAGGTCAAGGGTCCGGTCATGCAACCGGGTCATCTACACCAGAGCGACGTACTGCTCAC  
CGGCCAGAACATCCAGGGTATGATGGACTCTGGGGAAGCTGTGCGCCAATTCGAGGTGAA  
GAAGGGAGACGACCAGACCACCACCTGAAAGATGCGGTGGTCACCCAGATGAGCAA  
CAAGCTGGCTGAACTACTGGATGCCCTCGGCTTCGGCAAGGAGCATGTTCAGAAGCATGG  
CCTGGACGAACTGTCTACGATGCGTGCTTGTACATCCAGTCCCTGAAGGGCGGCGAGGC  
ACTGCTGAACAATCTGCGTTCGATGCTGAAGTGATCAGCGACAAGCTCCGCAAAGAATTC  
GAAGAAGAGTACCGCCACTGTGTGTGGTCTTCGCCGGGGTAGTCATCACCCAGGAAGAA  
TTGGCGAGTAAGCGTAGCCGTCTCGGAGACTACGCTGACAACCTTTGATTTCATGGGTTT  
TTCCGGGGCTGGCTGGCGGGCCGCTTCGGTATAGAAGGGATGATGTACCTCACAGGTGAA  
CAGGCTATTATTAGCGTACTCCGTACGCTCTTGTCTGTTTATTCTTTCTTTCACTGGT  
TTAGGAGCAAGTGCCATGCATTAGCGTTAATCCTTTAACTAACTCCCTGCGCATAGCGTC  
GCATAAGGCGAGACAGTCTAAGTAGACTATTAGTACATAAAGAGAATGCCGAGTTTCCAA  
ACTGCACAGGATGCAGTCCCTGAGTAACTATCGGCATTCTACTGTGTGTATTAAGACAAG  
AATTAAGTAGGAGAACTATGCAGTTCAGTGATCTCAGTCCGGTGGAGCAGAAGCTCTAC  
CCAACCCACAGTTCCTTAAAAGAAGCCCTCGAAGAAGCAAGACATCTGCTTCCCTGGGGG  
AGTCATCATGACTTCATGCGAGCCATGATGGGGTATCACAATACCCTTCTACTCTTTGTA  
GGTGAGTGGACCCCTTCCGAGTAATATTTGGGGTATGCATTCCAGATTTATTAATCTT  
CCCGTTTAAAGGAGACTATCCAGTGTCCCAAGCCAATGAAAAACAATCGAGCGGATCGG  
CAAGATCCTTCTCATCTTCAAAGCGTCCGAAGGCGAGATTCGTCCTCACTTCTGGTTGAC  
CGGCCCTTCTGGTTCGGGCAAGTCTTCAACATCATGGACCAGTGCAATCGCCTGGACAT  
CATGCTGCCCATGACCGAGGTCAACTGTGCATCGCTGACCAAGGAAGGCTACTCCGGCCT  
GAGCCTGAGCAAGGCACTGGCCCCACTGGCTACCCTCGGCAATGTCCCCAACGTCGTATT  
CTGCGACGAGATGGACAAGCTGTTCTCTCTGGTAATTCCAACGACAGCCATGCCAACGA  
GATCAGCATCGGCGTGCAGAACGAGTTCCTGCGTGTGCTGGAAGGCAGTACCACACAGAC  
CTTCGGCGACTACGGCAAGTACAACACGGTCAGCGTCGAGCGTTCCTGTTCATCTTCGC  
CGGTGCCTTCAATGGCCAGGAGAACATGGACGCCACCGAACTGCTGAAGTGCGGCGTCAA  
GACCGAGTTCATCGGTTCGACTGGTTTGGTCTACAACCTGGAGAAACCGACCCTGGAAGC  
CCTGGTCCAGTACCTCAAGGAATCGGAACTGTGGGCGAACTATCGCTCTCTGTTCCCGAA  
GGAAGACCACAAGAAGGCTGAGAAGTGGCTGATCAAGGAGATCGGCCACCAGTATCCCGA  
CAGCAACATCGGCGTCCGTCTGATCAATACCTTGATCCACCAGTACTACATCAACGCCGG  
CGAAGACTCCAAGCCACAAGCGGGCAAGAAGGAGTTCGCCCGTACCCTCGACTTCAGCAC  
CGGGAGACTGAAATGAGCAAGCTGCAAGACTTGCTGTACTGATCGACCGTCCCTGGGAAC  
TACGTCACTCGTGACGGTTCGCCGTGGTGATCTTCATTGTCACCGAGCGTCCCGAAGGC  
TACTCCATGCTGACCTTCGACGCTCGTGGCAGCTACACCAGGGTCAACAACACGGCCAAG  
CCTGAGTGCTGGCATATCAGCGGTCTGTCTGCACGCCTTCAGGGAGCATCCGAAAGACGTA  
GTGGCCAAGGCTTAAACCAATCAAATCAATCGTTTAGGAGTTCACCATGCACTTCCCCCA



GGAACAAGAAGTATCCATTTTCGATGCCAAGTTCATTGCCGAAGGTTTCCTGCGTGCCGG  
CCTGAAGCCGATGATCCACGGTTCGCCGGGCATCGGTAAGTCGGCAGTGGCCTGTGAGAT  
CGCCAAGGAAAACAACCTGAAGCTCATCGACCTGCGTCTCACCCAGATGGACCCGGCTGA  
CCTCAATGGTTTGCCGAACCTCTCTGGTGAGCGTGCCAAGTTCAGGTATTCGAGCAGTT  
CCCCTGGTTCGGCGACGAGCTTCCCCTCAATCCCGAAACCAACGAACCCTTCGCTGGTTG  
GCTTCTGTTCCCTCGACGAACTGACCAGTGCAGGACGACGACCGTCAAGCAGCGGCCTACAA  
GCTGATCCTCGACCGTCAGATCGGTAACGAGGATCTCCATCCGAAGTGCCTGGTTCATGGG  
TGCCGGTAACCTGGAAACCGACGGTGCCATCGTCAATCCGATGTCGTCGGCCCTCATCAG  
TCGTCTGCACCACATCGTGGTTCGGAATGACCTGAAGCGTTGGCTTCAAGTCGTGGCTCC  
CAAGCTGGACATCGCCACCAAGGTACAAGCATTCCTGGAGTTCAGTCCCCGTGCGTTCTA  
CACCTTCGATCCGCAGAACAGCGGTCCGGTCTATGCGTGTCCGCGTACCTGGGAAGACTT  
CTCGAAGTGGTTCCCTGAAGATGTCCCCGGAGCAAGACCCTCGTGCCCTGGACGACATGCT  
GAACCTCGCTGCTGCCATGGGCATCATCGGTACCGTGGCCACCGACTTCAAGGCGTTCCCT  
GGCCTACTTCGGTTCGCTGCCGAGCCTGGAAGAGATCCTGACTTCCCCGAGCACGATCTA  
CGTGCCGAAGGATGAGCCGGGTCTGATGTTCCGCATGTGCTCGATGCTGGCGGATAACGC  
CAAGGTGGACAACATCGAGAAGATCCTGATCTTCCCTCGACCGGTTCAACCCGGACCACAT  
GGTGATCACCTGCGCATGGCCTGCCAGCGTAACAAGGGCCTGATCCAGAACCCGCGTAT  
CTCGGAGTGGGTGAAGAAAACCTGAACATGTTATAAGGAGAATCCAGTGAGTGGTTCGAT  
GGGAACTTTTTATGGTTCGTCAAGAAGACCTCACAGGTCAAGCAATAGTTGACGAGTATG  
CAAACAGCGACTACCCCAATCGACTACTCACTGGAGAATTCGAAGGCTGGAGAGTTAGCA  
TCTATGAAAAAGATATCCAGAACGGGATCAAGCTCGGTACTAAATCAGTACTAGAAAAAC  
TAGCATCTGAATTTTGTCCGTACGTAGTTACCGTTAAGCCCCAGACGGCTCATATATAA  
CACCTGGTCTTTATGTGGGCCACTGCCGTAATAGTGAAGGCCAATACATCCAGAGTACT  
CTCGACTAGGTGGTACCGCAGCTTCAATTAATGAAGTGGTGGGGCTAATAAGAATAACCA  
ATCCACTAAATGGTCACTGGATTTTTGACGAAGAAGAAGTTTTTCGTGGCCCAGTCTCTGG  
CTGTTGTTTCCTTAATACCTGAAACCCACAATCAAGTTGAGTGGTGAAGTTCGCTAAGG  
CGATGGCCATCATCGGAGGTGAGTAATGACTGATCGTTCTGCTGAAGACATCGCCCTTTC  
CAAGGCGAAGATCCGAATCATCGGAGACTCCAAGGTGAGTTTCTATGCCAACATCATGAT  
GGCCTGAAGTACGTGTGGGAAGAGGGCATGGGTACTGCCGCGATAGACGGTGTAAACCAT  
GTTTCATCGATCCCAAGTTCCTTCCCTGTCCTGGATGAAACGAGCCGTAAGGCCGTGATTCT  
CCATGAGATCGAACATGTGTGGCGTCACCACATCGGTGAGACTCGAAGGGGTGACCGTGA  
TCCCATGCTGTACAACATCGCAGGGGACCACGTGATCAACAACAACCTCTTGGCTTGTGG  
CTATGGCCCCATCTCCTGGACCGACTACAAGACCGGTGCCAAGTGCAACTGGGTATGCGA  
TCCGAAGTTTGCCGACATGTCCACCGAGGAAGTCTACGATGCCCTGTACCAGGAACAGAA  
GTCGCAGAGCGGCGGGCGGATCCGGTGCCTAGACCAGGGCAACAGCGGTAACAACCCGGT  
ACCGTTCGATGACATTTCCCGGCCTACACCAACCAAGGAAGATGGTACCCCATGTCCGA  
GACGGAGATCCAGGGAGCCATCAACGATCTGATCCTCAGTGCTGCTACTGCTGCCCGTGC  
CAATGGCAACCCTGGGTCCATCCCAGGGGAGGTGCAGGTGTTTCATCGACAGCCTGATGTT  
CCCCAAGCTGCCCTGCCTCACCTCCTGCGTCAGTTCTTCCAGGTGGTGAAGCGAGGCGG  
CTTCACCTGGGCACGTCCCAATCGCCGGCTGATCAACAGGTACTACCTGCCCTCACGTGC  
CGGTAAGGCACTCCTGCGGATTGCCATCGCAATGGACCTGTCCGCATCGGTTCAGCAACGA  
AGAGATCCGCCGCTACCTGTCCGAGATCGCCAACATCTTCGTCACGCTGAAACCAGCACA  
GCTGGATATCATCCAGTTCGACGCTTCCATCCGTTCCGGTGGATACGGTCCCCAACCTCAA  
TGCCCTCATGAACATGGAGTTGAAGGGCTGGGGTGGTACCTGCATTGCACCCGTGATGCA  
GTGGGCCGAGAGAACAAACCTCATGCATTGGTGGTGTCTCTGATGGGGAGTTCCACCA  
CTACAACGACAACCCAGGAGTACCGATTCTATGGTTGATTACCCGTACAGCAGGAAATC  
GAACTGGAAAGCCCCGTACGGGCAAGTGATCCTGTTTCGACCCGAAGGAGTAGGTAAGCCT  
GCCCCCTTCGTAAGTACACCCGGCCAGGAAGCCGGGTTTCAGACCTTCATCAACTTCTAC  
ACCAACCCTGATGCCAGGTAATGGTCCCTCAAGGGCTGGTCCGGAACTGGCAAGTCCACT  
CTGATTCGTGCAATCCTCGACGAGATGGAGTCTCTGGACCGCGCCCTGTCTACCCTGGAC  
GACAACCTTCGAGCCGTTTGAACCCCTGCTGACAGCCACCACAAACCAAGCATGTGATGCT  
CTGGCGGTGGCCATGAAGGAGTTCAACCACGAGGTCAAGACCATCCACCGGGCATTGGGC  
CTTCGTCTCCGCACCGACTACAAGACGGGCAAGAGCGAACTGATGCCCATCCGCAACTTC  
GACATCCCTTTCGCTGCCTGATCGTGGTTGACGAAGCCAGCTACATCGACTCTGCTCTG  
CTCCAGTTCTGCTTCGACCGGACGTACTGCTGCAAATTTATCTTCGTCGGCGACGACTGC  
CAGCTGACTCCGGTCGGTACCAACATCATGCCTGCCTTCGCCATGAAGGACATTGTGGTG  
GAACTTACCGAGGTCAAGCGGCAGAACAGTGGTCCCTTGTGGACCTCTGTAACGCTTTC

CGCCACACGGTGAAGACGGGTGAGTGGCCGAAGATCCAGTTGGACGGTGACCAGCTGATC  
CATGTACCACGGGACAAGTTCGTAGAGATGGCGGAAGAAGCCTTCCAGAACCCCCAGGTG  
CACGGCAGCACCAAGGTATTGGCTTACACCAATGCCTGTGTGACCGAGTACAACAAGCAC  
TTCTCCCAACTGCTGCTTGGCTCCAGCGATCCGCAGGTAGGTCAGAAGATGCTGGTGAAC  
GAAGCCGTCATCAACAAGCATGCCAGCTGTCCAACGGATCCGAGGTGGTGATCGAAGAC  
ATTCGGCCAACCAGAGAGTGTGACGTGGACGGCTACCTCGTGAAGCTGATGCACCACAAC  
AGCAGCTTCTTCTGCCCCAAGTCCCTCAAGGACCGCAAGGACCGGGAGAAGCTGGCTCGG  
AAAGAAGAGGATTACAAGATCCTCCAGCTGATCGACCAGAAGTGGGTAGACCTACGGCCT  
GCCTTCTCGTGCACCGTGAACAAGTCGCAGGGTTCACCTACGATACGGTGTTTCATCGAC  
CTGGACAACATCTGTGGCAAGGTACACCGCCCCGAATGCACTGGCACGCCTTCTTTACGTT  
GGCTTCAGCCGAGCACGTAGACGGGTGGTCATGACAGGAGACATGTGATGCAAGCGAGAA  
CCCCGGAGTTCCTGATCTTCAAGAGGGCAGTGAAGGACTGCTTGGATCACTTCTCTATG  
CTCCGGTGAGGAAGGCTTTCAGGAGCGGATGAATGAACTGATCATCGCGGATGCTGTAG  
CCCGAGGCGATGGTATCCGGGCGTTCGCCATCGTGGCCGCAACTTCATGATTCCTGGAG  
AGAAGCCCAACTTCCGCTACTTTCGCCGGCTGAGTCGTAGCAACCGAGTACTTGTTGACA  
GTCTGTTGGCAGAGTACGACCCGGTGTATCCGACGAGCGTGACTCTGTACTCACGTTCA  
TCAGCCAAGTGCTCAACAAATCTGACGAACCGTCGGAGTACCTCAAGATGTTCCCAAGTG  
GTTTACGGGAGCCTCTGAAGAAGGCGTACGAGCATTGTTGGCTTGGCCGGTAGATGGGGCGG  
AATTCCCGACCGAAAAGTCCCATAGGTTCAAACCAAGAAGGCTGGGATAAGCTCTGCACCC  
GCGTTGGATTGAACCTTGTACTAGGAGGACTGTGATGAAGTACATCACCTGGGAAGAACA  
GGATAGCTACCCTGTGGCTATCCTGATCAAGGAGGCAGCGGTGAGTCGGTCAGCCGCTGA  
ATCCACCTACATCAAGCAACTGGAAGGGCTTGGTGTTCGCCGCAAGAATGTCATCGTGAT  
CTCTTTGGATTATGAGGGCAAGAAGGTATCTGCCAAGGCGATCAAGGAGTGCATTAAGA  
TCGTGACCAGCTACTGCGGGATCTCGGAGTACAGTATGCCTACGTGGCTGACTCCAAGTA  
CTTCAAGGAGTGGACCAAGCGGAAGACGGACGCCGACTTCGGCAACCTGTCGCCCCCTGC  
TGGCTACGACCCTGGGTACCTGGTGACTCCGGGCGTGAACCATCAGGTGCTGCTGTTTGA  
TCCGGGTCAGATGCACAAGCTCAGCCGTGGCTTCAAAGCCATCGTTGACCATGCCAATGG  
TGTGTATCGGCCTGTGCGGATCTGACCTGCTGCACAATGTCACGTACATCTACCGGGGCCA  
TGTCAGCCAAGCCAGGGAAGCACTGGCCAGGCTCATGGACAAGCCAGAGATATCCTGTGA  
TATCGAGGGCTTCAGCCTCAGCATGTTTCGACTCAGGCATTGCCACCATTGGCTTCGCCTG  
GAACGAGCATGATGCTGTACAGATCCAGTGTGACTACAGGGAGATGATCCAGGACGAGAA  
CAAGCACCACGGTTACTACGAGCCGAACGCAGAGATGCGGGAAGTGCTCAAGTGGTTCTT  
CACCGAGTACCCTGGGCGAATCATCTACCACCGTGCAAACCATGACGTGAAGGTTCTGAT  
CTACACCCTCTTCATGGAGCATGACCTCGATAAAGAGGGCATGCACCGTGGCTTGGAGAT  
CATGACTCCACGGATGGACGACACCAAAATCATCGCGTACCTCGCACTGAACTCAACCGC  
TGATGTCAGCTATTCCCTGAAAGACCTGGGGCAGGAGCATGCGGGCAACTGGGCACAGGA  
CGATATCAAGGACATCCGGCTGATTACGCTGGACGACCTCATGAAGTACAACGCGGTGGA  
TGCGGTGACGACCGTATGGGTGAAGAACAAGTATTACCCCATCATGGTGCAAGACCAGCA  
GGACGCTCTATACCATGGCCTGTTCAAGGACAGCTTGGACCTGATCATCCAAATGGA  
CGTGGGCATGCCTATGAATCCCCGGAAGATCACAGAGGTCAATACTGAACTGAACAATCT  
GCGGGACGGCTACCACAATACTGTGATGAGCCATCCAGCGGTGCGCAAGGTAGAGGTGCT  
GATCCAAACCAGTGAGATGGAGAAGGCCAATGCCAAGCTGAAGACTATCCAGCACCCGCT  
GAGCAAGTTTTTCGCACATTTCGGTTCAACCCCAACTCTGGTCCGCAAGTAGCACGTCTGCT  
GCATGAAGTGCTCGACCTTCTGTACTGGACGTAACGGCGACCAAGCAACCCTCCACCAG  
TGGAGGTACGCTGAAGAAGCTGTTGAACCACATCAAGGCGGAACCGTACAAGGATCTCAT  
CCAGGCTCTGATGGACTTGGGTGCCGTAGAGAAGGTCATCTCTGCTTTCATGCCAGCCTT  
CAAGGCGGGTTCGAATGAAGGCGGACGGAATGATGTACCTGCATGGCTCCTTCAACCTTGG  
AGGAACCATCTCTGGTTCGGTTGTCTCGTCCGATCCCAACCTGCAAAACCTTCCGGCTGG  
CTCGACCTATGGCAAGCTGGTGAAGTCTCTCTTCTGTGCACCTCCCGGCTTCTCTTCGG  
AGGGGCGGACTTCGCTGCACTGGAAGACCGGATCAACGCCCTGCTCACTCAAGACCCGAA  
CAAATCAAGGTGTACACCGATGGCTATGATGGCCACTCGATGCGTACCTTTGCGTTCTG  
GCCGGACAAGTGTGATGGGATCGTAGACACGGTTGACTCCATCAACTCGATCCAGAAGGT  
CTACCAGACCTGCGAAGCAAAGCCAAGACCCACACTTCTGCTCCAGTATGGGGGCGAG  
TTGGATGGGTCTGGTGCGGCAGGTAGGTTTCTCGGATGAAGAAGCCCAGGAGATCGAAAC  
CAACTACAACAAGCTCTATCGCGTAAGCAATGAGTGGGTGGCTGGTGAGATCGACAAGGC  
AACCAAGACGGGCTACGTGGAAGTGGCCTTCAATCTGCGGCTGCGAACGCCGCTGTTGGG  
GTCCACCATCTTGGCTTGAAGGCGACTCCCAAGGAGGCTGCTGCTGAATCCCGTAGTGC

GGGTAATGCGGTGTCCGGCCAGTCCTGGGGTCTACTGACCAACCGTGCTGCTGTGGAATT  
CCGCAAGCTGCTCCTGGACAGCCCCTACAAGCTGAAGGTAGAGATCATCTCTCTGATCCA  
CGATGCGATCTACGTGATGTGGCCAGACGATCCTGATGTCACTGTGTGGGTCAACAACAC  
GCTCTGCAAGTGCATGGCGTGGCAGGAAGACCCCAAGATCAATGACAAGCGGGTTCCTCT  
AGGTGCTAACCTGGACATCTTCTGGCCCAGCTGGCGTGAAGCCTGCACTCTGGACTATCC  
CATCACCAGGAACGCCTCATTGAACAGTGCCGTGAGCATGCTGCTGCACTGAAGGAGAA  
AGCTGCGTGACAAGTACCTGCTGGGTAAATGACCACGAGATCACCGTGTGCAAGGCGTA  
GTAGCCGTGCGTAAGGACGGTGTGCTCGTCCATGAATGTGGCGGCCTTTGGGCTGCCTGA  
GACTTTGCGAGAGGTATCAACAGTGTGAAAGCCCCGGACCCGAGGTCGATGAAGTACAG  
GAGACTGTACATGTCGATAGCGACGAATGCGGCCAAGCAGAGTGTAGCTGAACGCCATCA  
AGTTGGAGGGGTGCTGGTCACTACGACCGGTGCCCTCTTCACTGGGTGGAACGGCACCAT  
GCCTGGAAGTGAACACTGCTGTGAGAACGGCGAGTACCTTCGGGAAGAGACCCGCTTCAA  
AACCACTCCCTACGGGGTGATCCACGCCGAGCACAACATCTTGGCTTGGGCGTCCCGCTC  
TGGTGTACCCCTGGACAACCTCTGTCCTTTGGATCACCAGGGCACCTTGTGTTTCGTTGTGC  
CGAAATGATCGCTACACATGGAGTTCATCTCGTGCTGTTCCGAGATGATCATGATGAACC  
CGAGGGGATGACAGTGTGGCCATGGGCAATGTGAAAGCCATGAGTTGGAGCACCTTGGAA  
CTCCCTTATCACCGAACACGGGGGTCACTACGTTGTCTCGAAAACCCTGCTCGCTAACTG  
ACCGGAAGTCCACTGGGCTTCCTTCAACCATATGATCAAGCACTTCGGAGGTATCGAAG  
AAGCTGAGGCTGCTATCGCTTCCGGCAAGGCTGTCTATGGGAAACCAACAGTGCCCAAGG  
GCTACATCTTGGGCACCGACATCAAAGGCATGTACGTGCTGCATAAGGAGTAATCATGGC  
GAAGAAAGCCAAACTGAAAGCTGATTGGACTCCAGGAAAGTTGGGTTCATGCGCCTGTCAA  
CGGACGGTATTTCTTCGTCAACCGTGAGACACGCATGACCCACACCTGGACTATCGGTCA  
ACTGCCTGTTCTGAAGGGTACGAGCAGGTGACCATGCAAGAGTACGACAGCTTCCGTAA  
GTTCAACGGAACCTTGTGCAAGAAGAAACTCATGGCCTTTATCCGAGGGGACGCCAAGTG  
TTCGAAGGACGCAGGAAAGAAATCCGAGAGCGAATCGAAGCCCGCTGCAAAGTCAAGAC  
ACGGGCTTCGTCTCGACGGTAAGCCAAGTCCCTGCCACCTCTGGCAAGGCCCGGATTTCG  
GGTACGGGTACGGGCAGGGGCAGGGGCGGTGGTTACGGTCGCATGAGCCTGGACGGCCAG  
ACAGTGGCCGTCCATATCGTCATGTTCAACCAACTACTTCGGCTATGTGCCGGGTAAGAAA  
CAGATCGACCATCTCTGCGGGCAGCGATTGTGCTGCAACCCCGCTCATCTGGAGATGGTC  
ACCCATCTCACC AATCAAAAACGTGCGCGCTAAACGCGCCAAGTCCAAGGAGTAATCCATG  
CAGGTA ACTCATCAGAAAGACTACGCCACTCACGTTGTGATCGGCCGCAAGCAAGCAATT  
TCCATGGGCATCAGCGATGACCCGGCCTTCTTCCAAGTTCTGTGCGAGTTCCTGTACACG  
GACAAGATCCTTGCCGTGTTTCGGGAAACTCTCTGCAACGCCTATGATGCCCACAAGATG  
GTCGGCATCGAGAAAGAGACCCCGGTGCGAGATCACCTCAAGGACGACGAATTCGTTCATC  
CGTGACTTCGGCCCTGGGATCCATCCCGACGACGTTGGTACGATCTACGGCGTCTACGGT  
GGCTCCACCAAGAAGCACGACGGCTCCAGACTGGCGGCTTTGGTTTGGGGTGCAAGTCT  
CCCTTCGCTACGTGGACA ACTTCCAGGTGACCATTACCATGAAGGGAAAACCAACGTC  
TACCGCATGCAGAAGGCTTCCATCCAGAACGGTGGCCGTCCTGCCATCACCCCGGTGGTG  
ACCGATATCCCTACCGACCAGACTGGTCTGGAAGTACGGATCAACATCAAGAACGAAGAC  
GTACGTGCTTCGGTACCCTGATTTCGTGCTATCGTGGCCAACGCCGAGATGCTGGCCAAC  
TTCAACGGGGTGAAGCTACCCACCCTGCCCTTCTCCAGGTGACCGAAGACTGGTCCATC  
GCTACCGAACAGGTGCTCGAATAACAACGGCCACATCATCTGTGTCCGCTACGGTGATGTC  
ATCTATCCCGTAGAGCGGGATGAGTTCATCGCCGAGGTGTATGACCCTGCTCACAAGTTC  
GTGAACTCCCTGCCGGGCAACGTCAACGTGCTGGTCTCCAAGCCAAACCTAACTCGGTG  
TCGATTACACCGTCGCGGGAAAGCTCTGTCCATGGAAGACCACACCCGCAAGACCCTCCTC  
CAGCTGCTCAACAAGTTCCTCCGTGCAACGCGGAACATCACAAGGAACGCAGCGACATC  
CTGGCGAAGTCTGTGAAGAACTGGTACAAGCCAGGAAAGGTGCGATGGTGCAGCCCGAA  
GAAGTAAATGCTAATCGTGTGCTCGTGAGTTCATGTGTGGGTCTAAGCTTTGTACCAAG  
GGACTCATGTCTACCATGGAAGAGGTTGGCTTGAGCCAGCTGTACCATTGCAACAATCGT  
AGCGAGAAGGAGCACTTCAAGGCACTGTTGAAACAGCTGTCCCTCATCGGTAAGCAGCCG  
AGAAACCAGGGTAATACCCTGTATCTCTCGTTCATTCCGGTTGCTGAAGAAAGTAGGTCTG  
GCAGATGGAATCTCACACTACGAGCGCTCGAACTTCGGAGAACTATTGAGGTTCAATAAG  
TCATCTGGCAAGCACTGGAGGTGCAGAAGTGGGGTCAGAAGCACTTGGTTTCCAAGCTG  
CTGCCACTGATCCACGAAGAGGGTCTGTGCCCACTCGCTTGGTCTGGTACGGATTCCGGT  
CGGAATCTCCACAACGGCGACTCTGTGCGCAACTACAACAACCATGCGGGCGTATCCGCTG  
GTTCCGGTACTGGTCAAGAATCCGATGTCTATGTGCCGCTGTTCCGTGCTGTATTGTGTC  
CTGACTCACAGCCCGCTGACATCCACAACCGTGTGAAGGATCACGACGAGTGGGTAGGT

GGTTACGGTGCTGACGATTCCCTCATCGCTTACGTGGTTCCGCGTAGCGAGAAGAACTA  
CAGGAAGCCAGGAAAGCACTGTCTACCCTGAAGGGATGGTCCGGTCATCGACCTAACAGAA  
GAGTACGAAAAGGTGGAGTACTCCAGTGCTTCGTCCTCTTCGACTACGGTGGCAACCAAG  
CCAAGGAAGAAGGGTTATCCGATGCTCTCGGCTTGCCAGAGTAGCGGCATCTTCTCCCTG  
GAGATGGCAAGGACGGATTCTGTAGCTCGGGTGGAGAATCCCTCCTACTACGTGCGTCTC  
CCTACCAAGAGCGACTACTACACCCGCAAGTGTGTACGTGGCTTGGACAAGGTGTGCTCG  
GCCTATCTGCTGAAGAACTTCGGCGATGTGGGTGCAGTTGTGTACACCGAAACCCAAGAA  
GCCAACATGGAGAAGAAGGGCATCAAAGTGCCCGTGACTTCCTGCTGGTAAAGCTCCTG  
GAAGAGGTTGAAAAACCTGAGTTCAGCAAGGCTTGCTCTCTTCGCTACACCTTGTTGTTG  
GATGCTGCGAAAGAGCCGGAATACGTTGATCTCATCAGGAAGATGATGCAGGTGGAAGAG  
TGCCGTAAGGTATTCAAACCTGCCGGAGCCTGAAGATCCTGCGGCTGAAGAATTGCTTACC  
ACGGTCTATTCCATGGACTCACGCTTCTTCACACAGGAGCAGAAGGAATCCTTGGAGACA  
CTGGGTAAGAAAATCAAGGCAATTCCGGGCGACAAGCAAGTGCTGGAAATGCTGAAGAAG  
ATCTCTGAAGCACCTTAGTGGCTCTTCTGAATACCTCGGAAGTGCGGGCGTGCACCTCGGC  
GATAAGAAGACTGTCACCTCGGCAGTCAAACCTACTGAAAACAGCTATTTCGTGGCTGAAGG  
AGAAACCAATGAGCAACAAAGTAACTGTCGTAGGTGCTGTCCTCGACGAAAGGTATCTGA  
CGTTGTACGTGAAAGGGTCTGCCGAGCAGATCCGTATCCCCCAAGGCGATCCCCGTGTCG  
CCGTCTTCGTCGAGAAGTACGTCCCCATCCTGAGCCAGGGTGGTGAAGTGGACTIONTCCG  
AAGACCTGCTGGTCATCAACAACGTCTACGAAGCCGCGAGAAAAAGTCCGGTGGCATCA  
TGCGGTTCTTCGCGTGGCGAAGAAGAAGGTCGCAGAGTTCTTCTCGGCGGCCTCAGCAT  
CCGAGCCGGCTGCTCCCGTCCGCTCCCGTACCGCTGGCGCGGTTCTGGCGACTGCGCAC  
CGGACACGGATGCTGGGCAGGATGTGGGGGAAGAGGTGGTTCGAAAAGGTCACCATCAAGG  
ATCCCGCACTGGCCAAGGCTGTGGATGACATCCTGGCCCACGCTGTACCGGCATCTGCCC  
CGCAGTTCAGTTCGCTGGACCTGGAAAACCTCAGCGAGGACGGCGTAGAGTCGGAAGACC  
CGGATGATGACGTGGGCGAAGGTGACACCATCATCGCCGTGACCGACCAGGGTACGATCG  
TACCGGATGCCCAGAAGCTGAAGACCCAGCTGACCGCAGCTGTTCAAGTCGAAGGCCAAGG  
GCAGCACTGTCGGCATCGAGAACTTCCCTCCGCCGGGCTGGTGTGTATCCGTCAAGCGCC  
AACACAGCGTGCAAGACCTGATGCGCTTCATCGAACGTGGGGATCTCCCCATCGCCGATG  
ATGGCTGCATCGTGATCTACAAGCTGCTGTTGAAAGGCGGCCCGGACGGTACAAGGAGT  
TCTCCTACCGTGACATCCACTCGCAGAAGGTACCGCAAGGCGTCAGTACTCTGGTGTGCA  
TGAACGAGTCCCTCGTGGACCCGGATCGCCGCAACGAGTGCTCGAATGGCTTGCATGTGG  
CTCGCCGTCAGTACCTGGGCAGCTTCAGCGGCAACGTGTGCGTGCTGGCCAAGGTGGCAC  
CGGAAGACGTGATCGCCGTTCCGTCCTACGACGCGAACAAGATGCGTGTCCATGCCTACC  
ACATCCTCTTCGAACTGCCGAACGAAGCCATGGTGGCCCTGAAAGCCAACCGCAGCATGA  
CCGACATCAAGGAAGCTTCCCGCATGCTGGGGGCTGCTCTGTGCGGTCAGCACAGCGAAC  
CGGCCTACCATGTGGAGATCACCGGTCACCGTGGCTCCAGCATCGTGGTGCACAAGGGTC  
CGGCGAGCACCAAGAACAAGGTGCAGACCGCTGTTCCGAAGAACGCCCCGGAAGCTCGCT  
CGCTGCCGACTAAACCCAACGAAGTAGTTGGGGAGAAGGTGGACGTTCTGGACGTGGTGG  
ATACCGTCATGACGGAACCAAGAAGCCGGAACCGGAAGCTCCCTCGTTGACCAAGGATG  
TGCCGGTCGCTGAGCCGAAGCCCGTCAAGGCCGAGAAGAAGTCGAAGAGCCGTGTGCCTG  
CCCGCAAGGCCAAGAAGCTGAAGTCCGTCAAGGTGGAAGCCAAGCCCGTGGCTCAGCCTG  
TCCAGGACACCTTCAAAGCCAAGGGTAAGCCCTGCCGTCCGACAAGAAGACTGCCATGA  
CCCTGGTTCGAACAAGGTCAGGTTCTGTGGCAAGCCTTCGTAGACAGCAAGGGCGACAAGG  
CGAAAGCTCAGGCTTGCTGGACTTCAAGAAAGCCAAGAAGAAGGGCTGGACCGTTCTCG  
GTATGCCCGGCGACGCGGCTGACAAGTTGGCCAAGGCACTGAAGTAATAAACCAGGGGGA  
GGCAACTCCCCCTCTTTCTTTCACAGGAGAAACCATGGACTACTACTTGTGTACTTGGC  
TTTGGGCGCTGCTTGGTTCTTCATAGCCATCGGCGATGTGTACAAGGTACCGTTTAAACAT  
TGCCTTCAGCAGACAGTTCACGCGTCTATCATCGTCTCCCCAGCTTCTTATTACCTT  
CATGTTCTACCTGTTCTGTGGCCTGTTGGTGTGCATCGCCAGCATTTGGCTACGGATGCG  
CAAGAAGTCAACTACCTGATGGATACCCGTGTGTTCCAGTAAGGATTGCTTTATCATGGC  
AACTGGCTGCTATACGGCCTTGAACCTTGTGGAGAGTACCAATGCCTTGGAAAAGCGAC  
CCTAACATCTGGGGGGTGTGAGTGCATTGCACTCAGTGTACTTAGTGGGGTGATCAGC  
CTCACTTCAAGGATTGCAAAGGGACACCCACCTAAATTTGTGTGGATTGTCTCCGAGCTA  
TCTCAGCGATCCTCGTCGGCTATCTGATCTACGACGTGTATCCCGTGATCCAACATCTG  
CTCTACGAGTGGATGACCATGCCAATCTGCATTGCAGTTGGCGGCCACCTGGGAGGTGCA  
ATCTTCCAGTGGGTTGAGTTCAAGTACAAGGAGAAATTCGGTATCCCGGACTCCTACTAA  
ACCAACCAGAAACCCGCTTCGGCGGGTTTTTTATTGCCTGGAGGAAACCATGGCTGAAGT

AATCACCACCGTTTTGGAAATGCCAACACCGTCATTGCAACGGCTGTCGGTGACAAGAT  
CATGGAAGCTGACGCCTACCGTCACTACCTGGAGTCGATCAACGTTGATCCTCAGTTTGT  
ACTCGAAGAGTACATCGCACTCACAGAAGCCAAGGACAAGGAGGTATGGAGCCATGTCTA  
AGTACGTGCAGGAATTCGATACGACGAAGGTTCCACGTTTCTACTACATCCGAGCTATCG  
CCGATAGCAGGAATTTGGTACGGATCTACAAGACTACCTATGTAGGCTTCCTTGAAACCG  
ACCGAGCCTATTGGGTTGTGGACGAGGATTTCCCTGAAGGAACTGGAGTTCACAACCTCGCA  
GGAAGGGAATCACTGCACCGAGTGATGTTTCGTGACTTCGCCAAAGAACACTTCTGCGCAT  
TCCTGGCCCTAAAGGACGGGAGCACCAAGCGTGCCCGCCTCTCTGTGAAGGCTGCGTACC  
AGAGCATGCTGCGTCGTCGAGAGCGTCAGCTGTCGATCCTGGAGCGGGACATCAATACAG  
CCCAGTCGATCCTGTTGAGTTCCTGGATCGATAACAAGGTGGCTGAGCGTCTGGAGATGC  
TGAACCTACTACGGTGGCGATCCCGAGTTCCTGGGACATGGATCAGCAGATCCTCACCG  
AGCACAAGCGTCTCCACGAGAACGAAGGACACGAAGAAGGTGCACTGGCCTGGGAGCCCG  
ACTTCTGACAGGCATTAACAAAAACCCCCGAAGACCGCAGTCTAAGGGGGTTGCGCATGGTG  
TCGAAGGAGACTACTGGGGTGGAGCGTGCCCCAGTGACTTCACAATAGCGTAGCTCTTCT  
GGCATGTCAATCCTGCTGCATGGCTTCGGTCAAGCGCTCCTGCGAGTTCTTGTGCGATGGC  
TGACACAGCTTCCGTACAAGTCGGCGAGCACACAGAGGCAGCGTTGCTTGCATGCCGCT  
CAGTGGTAGCTCTGGCACCGTCGGCGATGAGGTCGTCACGTAGACGGGGGACTTGCTCCC  
GCAGGCTACGAGACTGAGCATCAGCAGCAGCAATGCGGGAAGCTTGATCAGCCAGTTGTT  
CATCAGCATCTTTTTTTACCTCGTTCATGGCTTCGAGCAGACTCTGTTTCGATGGCCTTTT  
TGTTTTCTTCCGCAGTCTTTCGGCCTGCATCATGCGGAGTTCCCACTCCGCATTGGTCT  
TGGTTTCCGCCTTCACGAATCCCTTGTGTAGGCGTAGAGGGCGATGATGGCGAAGAGCA  
GCACCTCTGCTACCCACCGGATCTGACGGGCTGAGATAGTCATTGGGTCACCACCCTTAC  
CGCCTTGCGGTACAGTTCGGGCCATGTGGCTTCGTGGGGTTGCCAGGACGCCACTGCCG  
CAGGTAGAGATCCCATGCTTCAGCCTGGGCCTTGATGGGTGGCAGACGGTGAGGATCCGT  
GTAGAGCAGGATGCGAGCCAAGGCACAAGCCAAGACATCATCATGCTCCAGGGCATCCCA  
CACAGCATCTTGGGTGGCTGGCACACCTCTGGCCTTGACAGACCGAGTGGACCAGTTCCTT  
GGTGGATGGCTTCCAGAAGTTGAGCAGTCCCTTGACGGCCCCACCCTTCTCCATCTGCCA  
GTAGCCCTTGGCCGGTCCAAGTGGAAGAAGGACTTTACGACCTTCGCTGTTGATGGAGTT  
CACCAGCTGCCTACGAGAAGCAAAGCGGGACTCCTGCAAGCCAATGGCCAGCAACATCAC  
GCTGGCCTCTGGACTGTTTCATGCTGGCCGGAAGCAGCTTGTAGGCTTCCGGTAGCACTTG  
GTTGTAGATCTGGTCAGCAGTCATTTTCGGTTCCTCCGGTAGGGGGTAGCGTTCCTGAATC  
TCTTTGACCTTTTCAAGCCAAGGAGATAGGTGAGCTGTCTCCCCGTTCTCCATCGCCAGA  
GCTTCCAGTTCGATCCGAATCGGTTTCGCTCTCCGACTGGTAGGCTATCGCTCGAAGGTTT  
TTCACCTCCTTGAGCGCCTCCTGATACTTCGACATTTCCAGTTCCTTCGGGTTATGGAAG  
TCGTTCCAAGCGATAGAAGTCAAAGGGCATCTCCACGGGACCGTCCTCGGTACCAAAAA  
AGGTTTCGATTATCGACTCTTGAGCATCGAAGATCTCCAGAGTCACTTGGTGAATATAACCG  
GATGAAGAGGTTTCCGTCTTCATAGCGGATGTCCTGGAAAGGAGTACGGCCAATGTAAGC  
CTGTGGAGGGAGGTACCCTCCCCAATGAAGGAGGAGAAGTCGTGTTCCCTCACCATCCAC  
AGTGAGCTTGGTGCCGGAGACCGACACCTTACTCACTCGTTCCTGACCTGGAATATCCAC  
TTGCATGTCAGGCTTGAGGATGAATTGCATTATTTCCACCGTCTACTGCGATCAGTGCG  
CAGTTAATGAATGAAGTACTGGCAAAGCTGTGCCCAGTATACCCAGCAACCCGGTAGATC  
TGCACGAGAGCATTTCATTGCCACGTTGTAGGTGAACGGACTGGTCAAAGCGTAGTAA  
GGCATATCGTTGATATAAGCAGAAACACCCAGTATAGGTTGCACAGTGATAGTAGGCGGT  
GCTACGAACCTCATCGGGTAGGTGTAGGTGTAAGTACTGCAACACATCCACCGAAGAGTAGGTG  
AGCTGTATCGTTGCGTAGACGATCTGAGTACCGTCAGCGAAACGTACAGAACGGCCACG  
TTCTGGTTGTTGTTGCCGTTGTTCTGGAAGATAGCAGTAGTCAGCGGTTTCAGTGGTTACC  
GAACCCTCCAGTTGGTTCGAAGCCAACAACCGCACCCAGCTTTCCCATCCATTGTTTCGAC  
CGAGCACGGTAGAACACAGAGGTAGCGTAGGAACCAGCACCCAGTACGCGGGAAAAGC  
AGCTGGTACTTCGTGGAGTTGTGCAAGACCGAAGTGATAACAGCGTGGCCGTTTCGTACCT  
TCCATGCCAGCGGAAGACCAGCAGTTCATTCCGGCACCGAGTAGAAGCCGTTGAGGGCT  
GCGTTATCGATGTGGTTGCTTGGCAGGGACTGGTTTGAATGGGCATACCACCCAGGTAG  
TTCAGCGCACCCAGCCGAGGAAGCACCCAGCAAAGCCACACCAGTAGGCGTGGTAGAC  
AGGTTACGCCAGCCACCGTCTGCACTGTCTGGATCGGTACGAAGCCAGTCAGGGAAGGA  
CTACCAGGCGGATTGAACAGCGGCAGTTCATGAACTTCAGGGTTTCGTGGCTTGGTGACG  
TTGTTCTCATCCAACAGGTGAAGGTAGCCAGTTCTACCGGGTCTGCCACGTACCAGCA  
GAGTTGGTAGTACGGATAAACAGACGGCCAGTGTAAGCCGGGTTCCACAGCTGCCAGCCC  
TTGTTGGTGTGCTAGGACTTGTGGTCCACGAAGCCAGGGTAGTGTTCAAGCCAGAAGGC

AAGGGGTTACCTGCACCAGCGGGAACATGGTAGTAGCCGCTACGTACACCTCCGCCAGAC  
AGCTGAGCACCGGTGCGGCTATCCATGGTGAGTTCACCGTAGCCGTACCGTTGAGTCCAG  
TCTTGGATGAACGTAACCACGTA CTCTCGGTGTTGGCGATAGCCTTCCGTAGGGCAGGAAAG  
GAGTCTGCGTGGGTACAGTCGGAGTACCAGTAAAGGCCGGGCTATCCAACGAAGCGAAAC  
CATTGGTATCGCTGGAGTTGGAGAAGAACTGGCCGAGCTTGTAAAGCGATCTTCTGTGCCG  
AAGCATTGGTCAGATGCAACCCATCACTCGCAGCAAGATCAGGGTCCATGTACCCGTCCT  
TGGCGATGAGACGTGCTATGTCCAGGGTCTGGGCCAAACCATTGACCTTGGGCAGTTCGG  
TGTTCCACC ACTGGTTCGGTGTAGTCCCGTAGCTTGACCGTGTGGACGAGGCATCATTGT  
ATGCCTTGGTACCCTGCATGGAGTTGAACAGCACTACCTGAGCACCGACAGCATGAAGCT  
GGTCGATGATGGCTTGGGTATCCGACGTACGCTTGGCCATGGTCATGGTGGCGTCTTTCA  
CGTCATTCGTGCTGGCATGCATGAAGACTACCTTCACGCCGGAATTGGAGATCTCCGACA  
GCTGGCTGAGGTACTGCCAGGTACGGCGGCCTTGCACACCCTGGACAAGCACCAGGTTGT  
TCCGGTTGGTGGCGTAGAGCGGAACCTTGCCGAACCAGGTACCAGCCCAGTTGCGATTGT  
TGTTGTAGGGGTTGTTACCACGGGTTACCCCATACTCGTTCTGACCAGCAGCGATGCTAT  
CGCCGTAGCAGATGAGGTTGGGCTTGCACACCGAGATGTAGTCCAGATCCAGCCACCAGT  
TCTGCGGTGCTACAGGCATGGACGAGACTTCGATGAAGGCCGGCTTGATAGCGTCAACCA  
TCAGACGTCCACC GCCCTTCTGCCAGATGCCATTGGGCATGCGACGGAAGAGTTCGATGT  
GGCGGTTACCCGCATCGTACTTCACAGCAAGGTCTAGCCAGTCCTCGGTTCCCAAACCAG  
TGAACATGGTTGCAGCGTTGCGGGTACCACCCTCGGTGCCTTGCATGTGGATGGTGTAG  
GTTCCACCAAGCCATTCGCATTGACGTTGAAGTAGACCACGCAGTCCTTGTGTGCGGCAG  
CGATGAACCGGATCTGGGCAGACCGGTTCTGTGCGGGCGGTACCGGTCTGGGTCTTCACAC  
GCATGTAGACGATCCAGTGGCTGTCCGGGAAGGTC ACTGCCTGACGCAGGAAAGCACGGG  
AGCCGCTACCGTTCGGTCTTGGTCAGACGCATGACGTTGCCGTCCGAGACAGCCGTAGCAG  
GGCCAGAGACAGTCCAGCGGTAGGGGTCGGTACCTTCATAGGTGAAGGTCTCGTTCATGC  
CCACCAGCGGAGGCAGCGAACC GCCCTCGACCTTTTCAGCCACGGCATCAGCCAGATCCC  
GTGCCCGATCAGCCTCGCTCTTGGAGCGGTTCGGCTTCCGTCTTCGCACGGTTCGGCTTCCG  
TCTTCGCACGGTTGGCTTGCCTGTTGGCTTGGGTGGCAGAGTTGGCCGCAGCAGTAGCCG  
AATTGGCTGCGTTCGTGGCCTGGGTAGTGGCTCGGTACGCTTCCGCCTTGGAGCGGTACG  
CCTGGGCGGTAGCCTTGGTACCTTGCCTTTGCAAGGGTCACTTGCTCAGCAGCCAAAC  
CAACCTGAGCCTTGCACGGTACGCCGACTCTTCGGCATCGTCTCGTGCATTGCGAGCAT  
CGACCACCGCCTGGGTGATCTTGTTCATGGCTTCTCGTCCCATGGCAAGTTGTTGGGCG  
GAGGCATCAGGATCAGTTCCTTGTACGTAGACCGGATCAACAGAGTCCGGTACGTAGAAGG  
TGAAGGTGTACTGCGAGCAGGGATCGTCTCTCGTACTCGTCTCATCGCCTATAGCAGTGA  
CACGGTAGGCAGAGGTAGACGATTCCAAGTCCATGGTGA ACTCGCCCTTGGCGTTCGGTCA  
CCATCTCGTAGGTTTCGGGAATAACGACACAGTGCTCTGCATCGCTCATAACCAGGACGGG  
TGAGCCGCACAGTGA ACTTCTCGTTCGCCTGTGGGCTACCGTCCGGGCTATGGAAGGTGA  
AGATCACCTTGGTAGTCATGGGAATATCCTCTTCGAAGGGAGCGTGCAGTGTACCGTTTA  
TTCAATGGCCAACAAAGCGTGGTCAATGGTGTACCTCGGCCTGTTGTAGGATACGAAAGC  
CGAATAAACATCCATCCGGTAGGACCGTTCAACATAACCAATGGTGA AACCATTGTGCTG  
GAAAGTGGTATTGCCGAAGTCAACTCGGAAGTACGCACCCTGTTTAATCTTGGTTGCATC  
TGCCACCAACTGGCAAGAGATCGGCCACCAGGGAAGTTAGGGTTCATCCGTAAGGAGC  
GAACCTCTGAATAGCACCTAGGAATACCGCAGGCTTATACCCAGTATCGAATACCCCGTT  
ACCGTCCCCGTCGAATACCTGCAAACCCCATCCAGCAGTCTTGGGCATATGGATGGCAAC  
GATCTTGTACTTGCCAGAGTACACCGATGGAGACATAACCAGGAAGTTGGTTAGTACGAA  
CCGACAACCAGTCCAGTTACCGTTCGAACCAAAACCACAAGAAGTCTGTGAAGCCATGAGG  
CCCATCTTGCTTGGCGAAGAAGATGGGAAGACTCTGCGACCGAATAGGAGTAGGGAACTG  
GATGTAGATGTAGTCTGCCCAGGGCTATCGTACTTGTACGTACCTTCGTGGACTACCAC  
ATAGACAGGGTTCATCTCGTCGATGCAGATGTGCTTATTGTGCTTGATCAGTTTGATACC  
GTAAGTCATCGGAAGCTCACCACGTTCAAGTAGGCCCGTCCATAAAGTGGGGGCGAAGTCA  
TCCAACCAACGAATCTGGTTGTTGATGAATGAAAAGTCCACAAAGCGAGGCCATGGGTCT  
GGGTTTAGGTGGAACCACGTCAAGAAGAAGAAGTCCGTGTTCCGGTTCGAAACCAGGAGGC  
ATGGGTGTATAGGCCCCCTGAAGGGTAGGAAACACCTGTTGCCGGTAGACGGACCGAAAT  
GACTTGTGGTGGAGTCCACAGTGACGTTACCGTCAGCGTCGTAGAAGCGAAAACCATAA  
CTCATGCTTGCAAGTTCCCAATGTGCACCCGGAGTTTACCTGCTTGGTCAAACACCTTGA  
TGGTGGCGTTGTTGATAGTCATACGGCCAGTACCAGCCGTACCGTTGATTTCCATGATCC  
CGTTGGGACGGAATGCCAGCCTTGGACACCTGGTGTGGTAGTTGTCCGACTGGATGTTGT  
TCACCACGATATCTTGGCTTCGATGTAGTCAGCCTGGATCTTACCGTTCTGAACAATGA

AGCTTCCATCCTGTGCCCTGAGCTTGTGCGAAGGTCAACTTCTGGATGGCAGCTTCCTTGA  
TGTAGACGATGTTGTTGTCGATGATGAACGGGTAGCTGCCTGGGTTCTTCGGAGTGCCAG  
GACGACCGATCCAGAAGCGGTCTACGTTGAAGCCAGCTTCGACAGTCCGGCCATCGTTGT  
AGACACCGAAGCCACCGACCAAACCATTCACATCAACAGTCGCAGTCCAGCGAGCACCGA  
TCTGGGTAACCTTGCCGTCCAGAGTCTGTACCTCGGCAACCAAGCCAACCTTACCAGAGG  
CCGAGTCACCGTTGACCGTGGCGTTGATGGTGGTCACAGACGAAGCCAAGGCATTACCT  
TGGTAGCCAGTGCAGTGTCTCTTGGCTGGATTGCTGCAATGTTCCCGTTGAAGTCTGCGT  
ACATAGTGTGACTGTCTGAACCAGAGAAGTGTGAGCAGTCACACGAGCACGAACCTCTT  
CCTGCAAGATGGCAGTATTCTGATCCATCTTCGCATCGATCTGAGTGAGACGAACACCGA  
GAGCATCATCGTTCTTGGCTCGTTCAATCTCTTCCCTGGGTGATCCCCAGTTTGTTCAGTT  
CGATCTGAGCGATCTCTTTGCGAAGCTCTTGAGACAACAACCCATTGTCGATCTCGCCAG  
TAAGCTGCTCAATCATCTGCTCGATGAGTGGACGAGCAGTAGCCGTAGCTGGACCAATGA  
TGTCCCCATCAGTGCCATTGATCGAAACCAACTGAATCCAATAGTAGTACCGCTGATCTA  
CCTTGAACCAGGGTCTGTCTTGTGCGAAGTAGAAGTTACCGTTGACGAAGGCACGGATAG  
TTGCACCAGCGAAGTTGGCATCAGTGTCTCGGAACAATCGAGTAGTACCAACTGCTCCTG  
GGTTTGTGGTGGCCAAAGTGAATCAATGTCGATAACCACGAAGGCAGGAGTTGCCTTCA  
GTAATAGGTCATTCATGTTGGGGTACCAGGGCTTAGGACCATTCCAGTCCCCGGTTCCGC  
AGACCCCATGATGTTGCAAGTGTCTACCATGTTGGTTCCTCCAGAGTTGGTCAAAGTAT  
AACCTCCCTAACCTCCCCAGCCTATCCACGCAGGAACGCAGTCCGCCGAGGATCGAGCG  
CAGCGAGCACCGCAGAGCGAGACGGGAGTGGATGCGTGGATAGGCGGAAGGAATGATTGA  
ATATTCAATTTCCCCCGTCCAGGGGTACGGGTACCGGGTACCCCTTGCGGGCCTCGCTGC  
GCTCGCTCCTCGGGCGACCACTTCACCTGACCCCTTCCCTGGATGGAGAAGGGGGAGGGT  
GAGCGTAGTGGTGCCTTGGGACGGCCCCTTCCAGGGGCGAACCCCTTCGAAAGAAGAG  
GGGTGAGAGTCCCCTATTATATAAAGACACTTTCGTGATCATTTTTTAACCAGGAGGTT  
TTCATGGAAAACTCACCGCTGCGGACGTACCCTTCAAGGACTTCCCCATCGACTCCATG  
CCAAACCTCCTGGCTCAGCTGGGCAAGGCTCGTGCTGACACCATCAGGTTTCATGGCTTG  
GATCGTAGATCGATAGGAGGACCACGGACTCGTTGGTTTACCAACCCCCACGCAAAACGC  
CTACAGGGGCTGCCTGATGCGTTTTTACAGCCGAGGGGTAGAGGACATCCTCTCAGGCATC  
GCATCAGCCACAGAGGGCTCCAGAGGGCCGTTGTCGGCTGCACGTCTGTTTCGTCCTGCTA  
CAAGAACCTCAGCTGTGCTATGACCTGCTCATGGGTGGCATGGCTTTGGAGAAGCGACAA  
GCGCTTCGCTACATGGCAGCAGTCAAGCTAGCCGTGTTCCACCTCAACCGATACTTTGGA  
GCAAGCCAATGAGAGATCCACGATACTCGCCTCACCCCGTGTGTAAGGCACAGCATCCAC  
AGGGACAGCCCTGTGAAGACTGCGAGAAGCTTACCAGCAGGTTGCCGGTCAAGTCAGTAG  
AACCGTCCAACAAGGTTTACGCGTGAAGCTGCACCCCTGAACCGCTACCAGCGTCCGCTGC  
CCAGTACCTGGAAGTACCTCGACGTGTACCGGATCAACATGCTGTTCCCCCTGGGTGAAC  
TGGATCCGTCCGGTGCCCTGGACCATGCCCGCAAGAAGCTGATGGCACCAGGTCAACGGA  
GCGGGCGGCAAGAGCCTCTGGCAGGACGTGAAGGAAGCCAGGGATAACCCTCAATCGTTGGC  
TTGAAGACAACGCAGGAGAGGACGACTGACATGGGTGATCTACACCAACCAGACGGGT  
ATTCCGATGGCCATGGCTTTGTGGCTGGCTTCGGACTACTACGACTACAGCGAAGCAGGG  
CTGTCAGCCACCACCTGATGAAACCAATCAGGCAGGTAGTCCCTGGCTCGCCGGATCAAG  
CCATCCGACTCCATGGCCGATATCGAAGGCATGATCGCTAACCAGCATGGGAGCGGCGATT  
CACGATTCCATCGAGAAGGCTTGGACCATGAACAAGGACCGGGCACTGGATGCCCTGGGT  
ATCCCTGCAAGCGTCGCTAAACGTGTGCTGGTCAATCCCACCGAGGCAGAACTCAAGGCG  
TTCAACGAAGCCAACGAGCAGCCTGCCATCACCGTCTACATGGAGCAGCGATCCAAGAAG  
GAGTACGCAGGAGTAACGGTATCCGGCAAGTACGACTTCGTGGCGGACGGACAGGTGGAA  
GACTTCAAGTCCACCACCCTTCAGCTACATCAAGGACACGAAGGACAACGACTACATC  
CTGCAAGGGTCAATCTACCGTGCGCTCAATCCTGAGCTGATCACCAAGGACACCATGCGA  
ATCCACTTCATCTTACGGATTGGCAGAAGTTCATGGCGAAGCAGAACAAGGACTACCCT  
CAGAGCCGTGTGGCTTCGAAGGTATTCAACCTGATGCCCATCGCCGAGACGGAAGAGTGG  
ATCACCAACAGGGTGAAGTGGCTGATGTCCCTGAAGGATAACCCTGAAGCGGATCTGCC  
CTGTGCAGCGACGAAGAGCTATGGCGTAGCCAGCCGGTGTACAAGTACTATCGTGACCCC  
GCCAAGGCTGACCAGAAGGGTGCTCGCAGCACCAAGAAGTTCGACAGCCTGTGCGAAGCC  
ATGGCTCACCGTGCCAAGGATGGGAACGTTGGCGTAGTAAAGACCATCCCTGGCCAAGTG  
AAAGCCTGCCTCTACTGCCCGGACATACTACTGTGTACGCAGAAGGACATGCTCATCGCC  
AAGGGCGACCTCATCGTATAAACCTGGAGTAAGTGTGCTCACGTACGAGGAAATGCAAC  
ACCACCCGACCTCGGAACGCATCGTCGAAATTCTGTGCGAGAAGACCCAATCCAAGAACC  
ACAGGTTTTTCAGGATCTTGGTTGGCTTCCAGTTCTCGATGATGGCAGCGCACATGCGTT

GCCACATCAAGACGCACGAACGCGGGGAGATTCCGGTCAACATGTACGCCCTCAACCTGA  
TGCCTTCTGGCGCAGGTAAGGGCTTCTCCACGAAGGTGATGGAGGACCAGATTACCTATG  
GCTTCCGCCATCGGTTTCATGGAAACCTTCGACACCGCAGCCGAGAAGCACCTCGACGATC  
TGGCGTTCAAGCGCCACATCCGTAAGGGGTCTGAATTGCCCCGACGAACAGGAAGCTGTCC  
GTAAGGAGTTCAAGTCTCTCGGCCCCCTGCTGTACGACTTCGACTCGGGCACTGGCCAG  
CCGTCAAGCAGATGCGTCAACAAGCTGCTGATGGCCAATGCTGGTGCAGTCAACCTCGTCCG  
TCGATGAGATTGGCTTGAACCTGCCTGCCATGACCGAGATCATGCCGACGTTCTTGGAAC  
TGTTTCGACGTGGGTTTCGGTCAAGCAGAAGCTGGTCAAGAACAACAACGACAACCTTCGCG  
GCGAAGAGATCATCGGTCGTAACCTCCACCAACCTCATGGCTTTCGGTACTCCCGGTAAGC  
TGCTGGACGGCGGCAAGACCGAAGACCAGCTGATGGAGTTGCTGGAGACTGGTTATGCAC  
GTCGGTGTTCCTTCGGCATGGCTGGCGAAGGCAAGAAGGTGGACATGACCCCGGAAGAGG  
TCTATGACCTCATGACGAAGAACTCCACCTTACCTTCATCGAAGATCTCTGCGATGATC  
TGGAACGTCTGGCAGACGCGAGCAACATGCGTTCGTGTGCTCACCATGGACAAGGACACCG  
CTCTGCTGTCCATCGAGTACAAGCTCAAGTGCAGAGAAGATCGCAGCAGGCTTGCCGGAAC  
ACCAGGAAGCCAAGAAAGCAGAAGTGACGCACCGGTACTTCAAGGCTCTCAAGCTGGCAG  
GTGCCTATGCTTTCGTGGACGACTCGCCGGTACTCACCATGGATCACCTCTATGCGGCCA  
TCAAGGTTGCCGAGGAATCGGGTGAGTGCTTCGACATGCTCATGACCAGGGATCGTCCCT  
ACGTGAAGCTGGCGAAGTACCTGGCTGCCACCAACGCGGAAACCACCGTGGCTGAACTGG  
ATGAAGATCTCCCGTTCTACCGTGGCTCACGTCAGCAGAAAGACGACATGCTGGTGTGG  
CTACTGCCTGGGGCTACAAGAACAACATCATCATCAAGAAGACCTACGAGCAGGACATCA  
TGTTCTCCGTGGGGAAGCACTCCAAGCCACTGACATCCATGACAAGAGCATGATCGTGG  
CCTACTCGCAGGACATCGCGTACGGCTACTTCAACGATCTCGCCACTTGGGATGACCTGT  
GGAAGATGACCCAAGCCAATGGCATCCACTGGATCAACCACCACCTAAACGGTGGGGAAG  
ATCGCAAGGGTCATCGCAATGAAGAGAAGTGCCTGGTTCAGCGTCAATGCAATCCACGGCAAGG  
ACATTGACCATGGGTGCAAGATGTCCACGGCCAAGGAATTCCTGAAGGGCTACAAAGCCC  
TCCTGTACACCACGAAACGCCATCAGACGGAAAACAACGGTGTGCTTCCGCATCATT  
TGCCGTTGAACTACACCCTGAAGATGGACGCCAAGGAGTACAAGGAGTTCTACAACGCCG  
TCATCGAATCCCTGCCTTTCGAGGTGGACGATGGCGTTCGGTTCAGCGTGCACGGAAGTGGC  
TATCTCATGCCGGCCACTACGAATACCTGGATGGTGTGAGTTGTTTCGACGCACTGCCCTACA  
TCCCGAAGACCACGAAGGATGAAGAGCGTTCGGCGTAACCTCAAGGATCAGGCGTTCGATGG  
ACAAGCTGGAGCGTTGGGTAATCAACAACACCGGGCAGCGCAACAGGAACAACATGTTGC  
TCCGTTACGCAATGATCCTTCTGGATGCTGGCTTCAGCGTCAATGCAATCCACGGCAAGG  
TGAACGAACTCAACTCGAAGATGGCTGACAAGCTGTTCGGAGATCGAGATCGCTTCCACCA  
TCATGGTCTCTGTAGCCAAGAAAGCTGGGGCCAACGGCAACTGAGCTTAGGGGTGCCTCC  
GGCACCTTTCGCTTCCAACATGGAGTCAATCATGACGCAAGTGAACGACCATCTGGTCT  
TGGTTTCTGGTCTGTCCGCTACTGGCAAGTCTGCCTGTCTGCGGAATCTCCGGGAGCCGG  
AGAAGGTATCTACCTGAACTGCGAGGCCGGTAAGCGGCTGCCGTTCAAGTCCCGCTTCA  
TCGAGCGGACGGTGACCGATCCCTACCAGATCCCCACCGTCTTCGACGCAAGTGGTGGAAAG  
GGAAGGTAGAAGCCCACACCATCATCATCGACACCCTCACCTACCTGCTGGACATGTACG  
AGTCCCAGTACATCTACCGGGCTGCCAACGGGCAGGCTGCATGGATGGATTTCCAGCAGT  
TCTTCAAGGATCTGATGCAACAGAAGGTTGCCAGCAGTCCCTGCAAGGTGATCTTCTCTGG  
CCCACACCAAGGAAGAGTACAACAAGGCAACCATGGCCATGGACGTGTGTGTCCCGGTCA  
AAGGCGCCTTGAAGAATAATGGCATCGAGTCTTCTTCCACGGTGTCTCCACCAAGA  
AGGTGGAGCTTGGGAAGCTGGAGCCGTTCAAGGAGAACAACAAGCTCTTGGAGATCACGC  
CGCAGGAGGAAATGCTTGGCTACAAGCACGTCTTCCAGACGCAGATACCAAGGAAACTG  
TCGGTGAGCGCATTCGTGGTCCCATGGGTATGTGGACGCACGAGCAGACCTACATCGACA  
ACGACATCCAGAAGGTTCTTGACCATCTGGACTGGTACTACAACCTGATTCACGCATCGAA  
AGGAAACAGCACTATGTTTCGGTAACCTCAGCACCAGCAACAACAGCGACATCAAGGAAGC  
CAAGGACAGCATCGGTGGCGGCAGTCGCATCTTCGACACCGACATCTACGCCTTCAAGAT  
CCTGGCCGCTACGGCTCCGAATCCTCCGGGGGCGCACTGGCAGTGAACCTTCGAGTTCTGA  
AGAGCACGGCACCGGTTCGCAAGCTGAAGATTCAGCAGTACGTGACCAGCAACAAGGAAAA  
AGGCCAGACCAACTACTACGTGAACGCCGAAGGCGAGAAGCACTATCTGCCGGGCTTCAA  
CATCGTCAACGCCATCTGCCTCATGACCGCCGAAAAAGAACTGGCAGGCTGTGCACCGGA  
ACAGCGCACCCCTGAAGATCTACGACTACGACGCCAAGGCCGAAGTACCCAAGCAGGTTCC  
GGTCTCACCGACCTGACCGGCAAGGACATCTACCTGGCCCTGGAGAAGATCATCGAGAA  
CAAGCGCGTCAAGAACGAAGCCACCGGCCAGTACGAAGATTCGTTCGGAAACCCGCGAATC  
CAACGACGTGGCGGGCGGTCTTCCACTTCGGCACCAAGAAGACCCTGAACGAAGCCCGTGC



CAAGGCTGAACCCGAGTTCTTCGACAAGTGGAAGAAGCCAAGGCCGGTACCGTACGCGA  
CAAGTCCAAGAAGGTTCGAGGTGGCGGCGCAGCTTCCGGTCTCCTGCACCGGCAGGCGG  
CCAAGCAGGTGGCGGCAAGCCCGCAAGCCTGTTTCAGCTAAGCCATGAAGGTCCGGGA  
GCTCGATTTCGTTGAAGCGGCAGTTGAGCTACTGCACGAACCCGCAACAACGCGAACGGT  
GCTGGACCACACCTTACGCATCCCTGTCCTTCGCCCGGAACTGTCGGGGCGAGGCCATC  
TGTGGATGTGCTAAGTGTGGTTCTTGGCTTCGATTGGGATAACGGTTCGATGTTCTGTGA  
ACCCAATTCCGACATCAAGCTCACCGTACTGACCCCGAAGAAGTGAAGACCATCATGGC  
AAGCTACAGCAAGGGGACATCTTGGTTTGCCTACCAGGAAACCAAGAAGCTACGGGAAGA  
GATCACCCGGCTGAGAAAACAGCTGGAGCTACTTGGAGGTAGCGAATGAAAGTCAACCCG  
CAAGACGTGAAGAACATGATCGTGGAAAGAGTCTTTCACGATCCTTCCCAGCGGACTGACC  
ACCGTATGCCAGCTTACCCTGGTCAACGGCTGGACGGTCACCGGGCAGTCATCCTGTGTG  
GACCCCGATGAATTCGATGCCGAGATCGGAATCGAAGTCGCTCGTTCGTAACGCGGAAGAC  
GAGGTGTGGAAGTTCGCCGGCTACGAACTCATGCAGAAGCTGCACAAGCGGAGAATGGGT  
GCACGGGAACGGCTGAAACTGGAACTCCAGGAGCTTCGTGAGCGGCAAGAAAGGTTGTCC  
AACCTGCTGCATACCGATGCTGCCGTAGACATCCCGGAGTACGCCTACAGCCTCCTGGAA  
CAGCAGGAGACTGCTCAGCGTAACCTCATCGAGATCCTCGAAGAGCGGCTGAAGCAATGG  
CAAGACTGAACGTAGTCGGCATGGACCCAGCATGAGCAACTGGGGTCTAGCCTGCGGTC  
AGTACGACACAACCTCCAACACCCTCAGCCTACGGCATATCGAAGTCATCAAGACTTCCA  
AGACCAAGGACAAGCAGATTTCGCGTCAACAGCGATGACTTGAACCGGTCTACCGAGATCA  
CCACCAGAGTCATGGAGGTGATCAAGGAAGCCAACGTAATATTCGTGGAAGTGCCTGTAG  
GATCCCAGTCTGCCGACGCCATGAAAAGCTACGGCATGTGCATTGGGATCCTCTCTGCCG  
TGAGAGCAAGCGGCAAGCCCTTCCACCTGCTCACCCAACTGACCTGAAGGTTCATGGCTT  
GTAATTCGAAGACAGCTTCGAAGGAGGCCATGATCGAATGGGCAGTCAAGAAATACCCCC  
ATCTCAATTGGCCATGACCCCGAAAGGGGAAGTGCATCGCCAGTCGGGCTGAACACATGG  
CGGATGCCTGTGCAGCAGCCGAGTATGGGGTCTTCCATCACAATGATTTCAAGCTGGCCC  
TGGCCATGCTCACTTAAAAGGAACCAAGATGAAAATCGAACTGCACCAAGCCGAAGTCGC  
CGCTGGCATCGCTACCTACCTGACCGCCAACGGCCTGAAAGCCGACGCTTCCCAGCTGAC  
CATCTCCTTCCAGACCACCCGCAAGGGCGACGGCGGCATCGTGGCCTTCGTTCGAAGTACC  
GGAAGTGGCCGTAGCCAGCCTGGTCGGCACCAAGGCACCGGTTCGCTACCGAACCGCAGGT  
TGCGGAAGTGGCCGAGAAGAAAGTTCGTAACACCCGAAGCGGCCCGCCGGCCTGGCAACTGC  
CGTTGCCGAATCCAAGGCAAGCGAAGCAGCGCCGGTTCGAAGTAGCCACCGAAGAGCCGGC  
AGCCGAACAAGCAGCCCCGGCCAGCACCGGTGGTAGCCTCTTCAGCTAACACCTCTTCCA  
GGCCGATAGCCCCGTAACAGGGGGTGTCTCTACCGGAGTAAACCATGAAAGCCAAGTC  
GTACTACCTCCTGGCCTTCGCTGCACCCACAGGCGTAGGCACCGTATTCCAGTCGGCCAT  
CCATGCTTTCGAGCAGGGCAAGAGCCACGACTTCACCGTACCCCTCATCGCTCAGATCAA  
GGAGCGTAGCGGTATCGGTGCCAACTCGATCATGCTCAGTGTCTCCTTCTGGGAACCAT  
GACCGAAGCTGAGTTCAACCCACCGTTCCTGGAATGGATGCCACCGTTGCATACCT  
TGAAGGTGTGCGTGTGGCTTGGAGAAGTCCGAGAAGGACAACCCGTACCCTACTGGTTC  
GGTTCGAAGCAGCAGACTACCGTAATGGTCGGATCTCTGGCTTCAGCATGCGTGAAGGTCA  
GCAACCTCCGCAGGATCACAGTCCACAGTAAAAAGAGTATTCCCTTTTGTCCGCTGATAC  
GTCACTACCTTCATTCCTTTTCTGAAGTTCTCGTAATGGTTACGGGTAGGCGGACTCTTT  
TTAGTGTTGACTGCCATGTCAGCCTCCTGTAAGTTGAGAACCATGAAGTGGAGACAACCT  
CTTACCACCTCATCGGCCCTGGATAACCACTACCAAGTCCCCCTTGTCCCCCTAGATCCA  
AGGGGCCGTTTACCACCTCCCTTAACTGATGCCTCTGTAGACCAAGCCAGCTACCCCCAG  
CTGGCTTTCTTATGTCTATTGAACCAGTAGGCATAAGGGAGTGTCTGGCCCGTTGCAAC  
GGGTACACCCACCACCCCGCAATGGGGTCCAGACCAGAGCACTCCATCCCTTACACCCAA  
CCAGAAGGAACTTCGCCATGGGCGATTTGAGCAAAGCGTGCATGCTGAAAAACATGCACG  
TCACACGTGTGCTACACCTCATCGAAATGCGCAACAAGCTGACGAACACCTTACGGGATA  
ATGCCACCGACGACGGTATGGCTACCCTGGAGATGTTTCGACGCTGCCCTGAAGCAGGAAA  
CCGACCGCTTCCCTACGAGCCTTCCGTGCAGTCGGCAACGAGAACATCGCCGCGACCAAGA  
AGGTAGCGCAATGAGCTTGGTAGATGCGGTAGTAGAAGCCAAGCGCCAGGGCGTACAGCA  
CAGCCTCCGTGGCAGCAACTACGAGTCCGACATCCCGCCGAGCCTGAAGGCTCTCCTGGA  
TGAAGCACTGCGACTGGCCAACGAGCACAGCATCCCGCTGTACTGGTCTGCCAGTCTGCC  
GAACGGTGTGATGACTCGTGCAGCACTCGGCGAGAAGGGTGAAGAACATCCACATCCAGTA  
CCTCATGTCCTACGCGGCTGCGGTGCAGGATCCTGCCCTTGCACAGGAAGTTGTGCAGAA  
AGGTATGGCCTTCCCTCGACAAGAAGTAAGGAGTCCGTATGGGAGTCCCTGAAAGGATTGTT  
CGGCGCTGGAGCACTAGCAGGAGCCGTGATTGGCATTCTGTTTATTGGCTTCGTATTCAG

CTGGATATTCAGAATACTCGGCGTGGTAGTAGCACTGTTCATCGCGCTACTCATCCTCTG  
CTGGGTAGGATGGGAATGGTTGAAGTATTGCTTCAGCAGGAAGAAGGAGGGGGAGCAATA  
GCTCCCCCTTTCTTCATTACAGGTTTCATCAGACCTTTGATACCTGGTAGTTCGCTCAAGC  
TGGATGGCCAGGACCACGGACCAGACTGGAACGGGTTGTGCCCAATCCGGTTGATCCAAG  
AGCTATCCATTACCGACTGCAAGCCACTCACAAAGTAGTTGGCAGCAACCAGAGCCAGTG  
CACGAGCAGGCTTCTGACGGATCAAGCGAGCGATCACCTTCTGCACACGCAGATAGTACT  
TGGTGAACATCACCAGACCCATGTCGTTTCATGAACTGAAGACCACGGCCAGAAGGCACGT  
CGTAGTTGATGAACGATTCTTCAGCCTGACGCAGTGCATCAGCTTTACTCAGCGGATCCT  
TCGCACGAGTAGTAAGGTGCTCATAACAGAGTGTAACGAGCAACCAGGTCACTCAGCTGAG  
TGGTTTGGCTCAAGAACTTGTACACAGCAGTGTCTGGGTCATGTAGACCTGACGGCCAA  
TGTCCCGGACCAACTTCGGCAGCTTGCTGGTGTACTTCTCAGTCTTCTTCTGGAGCAAAG  
ACTTGTAGCTGTACTGCGAGTCAATTAGCTTCCACATCTTCTACGATGGTGGGCATCAGTC  
CAGCATCTACCAGCGGCTTGATCGGGTTGCGATTACAGGCGATCCATCAGCACAGCGATCT  
CATCACGAACAGCTTGCTCACCGGAGGGCAGGTAACCAACGTCAAGTGCACGCTGAAGCT  
GGATAAGCTTCTTGTGTCTGACGATACTGGAGAGCAGCCTTGATGCCGGTAGCGTGAG  
CACGTACACCTTCGGCCAAGCCAACACCTTCCAAGCCAACAGAGTCATGTTTCGAGACAA  
TGTTGCCTACGAGAGTGGTGTGTTCTTGATTACCAGGATGTCTTGGCTTCACGGACCA  
GTTCTGCATCACATCCTCAGCACGACCAATGCGAAGTGCAGCCTTCTCACCCAGAATGG  
CTTCAGCAACTCGTACAAGCACCTTCTCAGCGATGTTGCGTTCGTCTTCTGCCAAACCAA  
ACGGAGTAGTCAGACTGTACTTGCAGTAACCCATGATCATGTTTCAGTTGATCAGCAGGGA  
TCTGCATGTTGTCGCTACCCCAAGTCTTGCAGGATCTCACGCTTGGTGTCTCCGGCAGCA  
GTTGGTACAACCTCAAGCAGCTGAGGATCAGTACTGTCCTTGCCTACAACCAGGTAGCTGC  
TAGGACGGTTGGCGTAATCCTCGCGGAACTGGTCGTACATAGCAAGAACAACGTCAGCGT  
TCTGGATTGCGGAGTCAACCTTGTCCACGATCTGTCTTGCAGAGTACCAAGCACCTGTT  
CCATGGAGTTATCACGATCCAGCAGACTGTCACGGTTGTGCTCAGTCATGGTATAGCGGT  
AGTCCACGATGGCTCCATTCGGGTTACCACAGGAGACACTCGGCCAGGCTTCTGCTGGC  
GAGGATCGTAGGAACGATCACGCAGGAACATGTCACTCACATCCTGTGCAATGTTGCGCT  
TGATGGTAGTGATCGCGTTCTTCGCAGTTCCCGGAGCGGACGACAGCATGTTGGTAGCCT  
GTCGATCAACTTTGGTACCACGAGCATGCACACCGGTGTAGCTCATCGCACCCAGTCAGCA  
AGCCAACCTGACCACTACCACGACGGGTCACCAGAACCTTGTCCGATTCCAGGCCAGCAC  
GTTGGTCTACCTGCACATCACCAGCAACAGCGTAGCCGCGCTTCTGGAAGTAGGGCAGGT  
CACTGCGGTCTACGGCCAGCACTTCGATCTTGGAGTCGAAGATGTCCGGTACATAGCCAT  
CGGTGTACAGACGTTTCGGTGCCTTGGAAACAGGGGCATCCTTGGAGCGCTTACCCAAGCCAT  
GATGCATGGCCAGGATCAGATCCACACCGTTGCCATCGGTACGGTTGGATTTCGGTCTTCA  
GCACTTCACGGGCACGGCTCTTCACCTGGGAACCCGAGTACTCCCACCCATAGACAGCTT  
GCAGCTGGTCCAGCAGTTCGATGGCTTTCGCACGATCTGCCTTGGAGGACTGGAGCACAC  
GCTTGGTACCAAGCATGTCTGCGATGTTTCGCACTGTTTCAGCATCAGGTTTCGGACTGACGT  
TGCCGCCAATCACACGGTGGTAAGCCAAGTCCTTCACAGCACCCAGGTAATACTGACCAT  
TCGGCAGTGCCAGAAGTTGGTCTTCGAGGTCTTTGCGGAGATTGGCGAACTCGCCATTGT  
CCAGAAGGACTTCTTCAACCGATCCATAACCCAGAGCTTCACGCAGGTTGCCATGTTGG  
TACGCAGGAAACCCTTGGTTCAGTGCAGCACGGTCTTCAGTGCTCAGGTAAGTACTGACCGT  
CCTTGAAGCCCTCATTGATCATCGCAGCGGTGTACTCGATGTGCTGCTTACGAGCCATCT  
CGTTGGACTTGGCTTGGCTTGAACAGAGTGTGTGCAGCGAGGTTACCCTCGTGTGCTCCAC  
GCATCTCGTTCACTACCTGCATGGCCATGCCGTGCTGGCTCTTGAAAGCGTTGTACGGGA  
TGCGAGTGATAACCGTCCAGGACCAAGCCAACACGCTCATTGGTGTGTTGCTGATGGTCT  
TGCCAGCTACCCGAACGAAGGGGCTGTCCGACTGAGTGAAGAAGGTTCGATTCAGCGATCC  
GGTTCAGGTTGTCTTGTGATGGCTTACCAGTGTTCGCCAGGGCAGTTTCCACCTGGTCCA  
GGGCACCCACTTTCTGGTTCAGCCAGACGGCCACGACGCTTGGCTTCGATGTCTACCAGAC  
GATCCACCAAAGTGAACAGGCGGCTCTCAGCCACTTCACCCGGACGGGTCTTGTGCTGCA  
GCTGACCCAGACGGGTAAGCAGGCGACGGAACATCTCCACCAGACGAGTAGCCAGTGGCA  
TACCAGCCAAGGACTTCTCGCTGCTACGGGTAGTGAAGTGAAGCAGATTTCGCTACTTCTT  
GGCTCGCTACACCCAGGGCAGCAAAGCGGCTCAGGTAGTCGCTGCGGGAACCCACACGCT  
CAGGACGGAAACAGGAAGTTGTAATTCTCTGGGCCACATCCTTCTCTGCTTGGGTGGCTT  
GATCCCCTCGCCAGAGAAGAAGTCCTTCGCAGTCAGTCGATCCTTGGCTTCACGCCACA  
GATTCTCCAGGCTGCCGCGTACGAAGATAACCGTCGTTGCTGTTTCAGGGTAGTGGCCACAG  
TAGCCTCGACCTGCTCCAGCACGTAGGCTTCTGCGGGCTGACAATGAACGCCGAAGCCA  
ATGCCTGAGAGGCGAATGGCAGGCGGCCAGTGTCCAGGGCCTTCAGGACAGCATCAGTGG

TGGTCAGTGCTTGGCCACGAGCAACCTCGTTGCGGAATGCACCCATGGGACCGTAAAGCT  
CGGTGACGATGCTGTTTACGGACAGACTTCAGCTTGTGCTGTGAGCCTCGGTAAGCGGGG  
TCTTCTCGCTCTCTAGGGCATTGAAGATCTGCTCACTGCTCATGGCGTTGACCTGATCTA  
CAGCGTCTCGTACTTCAGGGTCAGATCGCTACGCTTGGCCATTTGTGCAGCAGCCTCAG  
CGAACAAGCCAGAGGTATTGCTGATCACCAGAGCCATGGCATTGGTATCGGACGGCTTGG  
TGTCACGGAACAGCAGGGCAGTCAGGTTACGAATGAACCGCAGCAGCCCGTCAGTGAAAC  
CAGCATCACGCTTACCAGCAGGCATCTCCAGCTTCTTCAGGACTTCTTCTGGAAGCCCT  
GGTTGGTCATGCCCCAGCTAACAAAGCTCATGCACGTTTCGACACAGCGTTGGCGTACTTGG  
CAGACAGACCACCGTTCTTGCTCAGCATGTCGCTAGCACGGGAACGGATCATCTCCAGGT  
CGTTGACCATAACGCCAGGGCATGGAATCGTAGTTGGAGTTGGCTTGGCTTCTTGTCCAGTT  
CACGCTGGATGGTACGGCCCAGGCTCACATGGAGCAGTTCGTGGGTCAGCATCTCTTCGG  
TGATGCCCCGACTCGACGAACCTCAGGACTCTTCACATAGAGCGCTTCGAAGTTGCCCTGGG  
TTGCATAACCAGCCACGAGCCTTGCTCACACCCTCACCGATGGCACCGTCAGGGCCAGTGG  
TAGAGGTGACCAGCTTGACCGGTACATCTTCACGGATGGACCGGAGAGCAGCACGCAGTA  
CCTGCTTGCAGAACGGGTATTGGTGCAGAGCTACCAGAGCCTCAGCCAGACCACGAGTGG  
TCAGGTCAATTGGTTTCGGTCAGCAGATCCACCAGTGCTTGGTCAGACGGAGTTACCGGCT  
GGCCAGTTACCCCCATAACCGAGGTCTTGGCACGGCTGTTCTGTTGAACGGCCTGGACCA  
CCTCAGCAGCACGATCTTCCGGCAGGATTTCTTGGCAGACTCCAAGCTCAGGTTGGACT  
TCTCCATCACCTGGGCTACCTGCTGGATGTCCTGTTGCAGCTGACCTTCAGCCTTGATGC  
GGTCCATGGTGTTCAGCGTAGTAGCCGGAGCCAGGGACTGTACCGAGTCATTGCGCAGAG  
GCTTACGAGCAGCGGGCTTGGCTTACGCGGAGTAGCCTTCAGCTGAGCGTCGATAGCAT  
CAGCCATCGTTTCCGCTTCAGGGTTGAAGGTGCTACCGATCTCTTCGCGGGCCTTCACAG  
CAGCAGCACGGTCAGCATCGGTGACGATGTAGCTACCGCCATCGGTGGCGTACTGACCCA  
CTGCACGCATGTTGGCCAGCATGTTTACGCTTGTGCGGTGTCAGCCTGTTTACGCGACGTGAC  
GGATGCTGGCCAGCTGAGTGGAGACGGTAGTTTTCTGGCTTTCAGGTAAGTTGCCGAAC  
GGTTTGAACCTGCGGATCCTGTACCCACTTGCTGAAGCCAGCAAGGGTACGCTCGAAGG  
TCGAAACCATCTCACTGGCTGCCGAGTAGTTCAGCATCAGCTTGAAGGTCTGCTCGTTCA  
AACGTTGGCCAGCAGCGTCCATAACCCAGTACACCCACACCGTGAGCATCGTGGATGTTCA  
GGACATCTTACCCATCAGTGCATTGTGGGAGATGAACGAGTCACCTGCGTGGGTAGCAG  
TGATGAACGGAGCTACACCCGGACCTTCGTTGACGGTGGTCATGCCACTGGCACGGGAAGC  
TCTTCACGGACTGCTTACGGCCTTCTCATCGGTGAACTCCAGAGGTTTACGCGAAGTGG  
CTTCCGAGCGGTACAGGGGAGAGTCGTTTACGTTTACGACGAGTCTTCGCCATCAGCATCC  
CCGAATCCAGGTCACCACTAGCTTTCGAGAAAGCGGTGTGCAGGATCGGTTCCATGTCT  
TCAACTCGTTGCGGATCTGGTTCGATCTGAGCACGAGTGAGGTCAGCGAAGGGCTGGCCAT  
CATTGCCACGAGGCAGGTTGGCCGAAGCCAGTAGCTCATCACGGCGAGCCTGGAAGACAG  
CTTCGTACATCTGGAAAGCCATGTTTCGAGTCTTGTGATGGTGTACAGGCGAGCGATGA  
AGACCTCGTAGGTATCGTTCAGTGCATCTTACCTTGCTACCCAGCAGGTCATAGAAGG  
CAGCCTTGATGGCGGTCTGCTGGACCGGGGAGTAGACGGTATTCAGTGCTTGGCTCGAAGC  
CCATGTGCGGTAGGCCACAGCTGACGCTTGTGCTGTTCTTGGAAACCAATGAGGCTGTTCA  
CAGCAGCGATCACCTTGGACAGGGCAGCTTGGTACCAGCATTGGCAGCATCTTCCATCT  
TGGAGTAGATGGTTTCAATGAAGGCATCAGCCATAACCGCTGACAGCAGTCTTGGTGTGG  
AACCAAACATCATTGCGGTGAGGGGCTTCTTGTGACGTTACGACCCTTGGACGATACAC  
CGCCTTCTCGTTGGTTCAGCACACCAGTGATGACTTCCACAGAGGACAGCAGCGGGTTCAT  
TGCCCAGACGGTCCAGCACAGCCTTGATGGTGCCCTCGTACAAGTCCAGGTTGCCCTGTG  
CCTTGTAGTCGTTGAACTGGGTGTACGGATCTTCCAGGCTGAAGAAACCACCTGGTTCA  
AGGTGTGGAAGCCCTTGGCACCGGACATCAGCAGGGACAGCATAGGACCGTTGGTCACGC  
CGTCCACTTCGCCGAGCAGCTGGGTAGTGAAGGATTCAGCACCGTCTCACGGGCGATCT  
TCTCTTGAGCCAGTGCTACCAAGCCATCCAAGCTGAAGAACTTCTCACCAGCTTCGGCTA  
CGGCTGCCAGGATTGCGGACTCGTTGGCCACAGTGTCTTGGGCCTCGCCACGGAGGATCT  
CAGCCAGGGCAGATAACCGGCCTGGATTGCCGGAGTGTTACCTTACTGTGCTACTTGG  
CCAGCACTTTCGAGGTGTTGTTACCCTCGGTCTTACACCCGAAGGACTCCAGCACACGCA  
GCTTGAAGCTATCCATCTCTGCCTTGTGGACAGGTTGATGGTGTCTCCCAACCTTCCA  
TTGCCAGCATGTGGCGATGCACCTTGCTGGTCTGCGGGTTGATCATGTTGGCAGTCAAGC  
CAACACGCTGAGGCTTCCACACGCTCCGGTCGAAGTACAGCGGCTGTTCCACGCCAAGGT  
CAGAAACCTCCTGGATCCGACCGAAGAACTCGTTGAAGTTGTGATCTGACGCACCAGAC  
CATCGTTCTTGGCTTGAAGTGCAGCAGGTTGGCCTTGTGTACGAACCCACCTTCGATGT  
CTACAGCACAGCATGGTGGCCAATGCGTTCTCGGACAGGTTGCCCCACACTTGGTACA

TGTCCTGACGAAGACGCATGGGACGCTTACCTGCGTCGTCCAGGATCTTGGCCAGTTCTT  
TGGGAACAGGCTGCTGAGTACGCTTGGCATTCTTCTGTGTGAAAGGCACAGGAGTGAAGC  
TCGGCTCAGTCTGACCTTCAGTCGAACCGAACAGCTTGGCCAGGATGGACTGGCTACCGG  
TATTGGCTTCACGGATCTGGCGAGCAACTGCACCCGGAACAGCTTGCCATCTACACGCT  
CACTGACAGGGGTCAGGAAGTAGTGCTTGACACGAGGGTTGGCCGGTTCGTTGGAGTCCA  
TCAGGGACTTCAGCTTGGCATCGCTCACAGTGGTGATCTTGGCCACGCCCATCTTACCA  
GAAGAGCCAGGGCATGTTACCAAGGGAAGCTTCCAGTCGAGCACGCTCGTTCACAGGAG  
CATTCCGGCAGGACTTCCAAACCAAGGACATCAACGATCTTGGCACCCAGTTGGGAAGCTG  
CGGTGGCCTGGCGAGTACCTACGTTGCCAGGACTGCATAGGCAGCAGGAGAGACTTCTT  
CATCAGCGTCCTTGGCCAGGATGGCATTGATACCGGCATCGGTGTTACCAGGTTGTTGG  
CAGCATCGATAGCCCAGTCGTACGCACCGTAGGCAATGGCGGTGGTCAGGTTCTCGTCCA  
GAGTACCGTCAGCATTACCAGGAACTGAGCATAAGTCCCAGGAAAGTAGTAACGTCTGGCGT  
CACTGGTCTTCGAGGTTGATGGCTTCAGCGTACGCTCGATGATCGGCTTGGCAGCACGTT  
GGAACCTTCATGAACTGCTTGATGGCAGACTGTTGCTGACCAGTGAAGCTCTTACACCAG  
CGAATTCAGCCATGCGGCCTTACCAGTACGGATCTTGGTAGCGAAGTCTTTGACTGCTA  
CCAGAGGCTTCTGAGTGTACCCGTCGTTACGTGCCGGGGATTGCTGGAAGAAAGCAGAAA  
CCAGATTGGTAGTCTGGTAGTTCTCAGCAGCAACTTCTGGCCACGCACAGCTTACCCT  
CACGGATAGCCGTGAGTTCACCAGTTTTGGCCTCGGTAGCAGGTTCTGCCTGGATCGACT  
CGTTTTACTGACTGGGACATCTTACGTGACCTGAGCGATAGGCGCCTTACCGGGGCCA  
CCTCTTACAGTACCTGTACGGGCGCTTCTGTGCGGGGGCAGCTTCTTGCACCACAGGGG  
CCGGACGAGCAATAGGACCAGCCTTGACCAGTTCACCCAGGGACTCAGCCGAGCGAGACA  
GTGCAGTGGCTTCCAGTGCTACAGCATCACGCAGCTTGAAGGAGCGAGCGGAGATCTCCA  
GACCACCAGCCGACTTCAGTTGGCGGGCAGTCATGGACTCCGGTGCTTCGGTCCAGTTGC  
CAGCTTCATCACGTACGATACGGATGGAGTTGTGCGTACCCTTGACCTGCTGATACGCAG  
CGTCGATGGCATTGAACTTCGCCACACGACTGTCAGCGAAGGCACGCAGTTGGTCTACCT  
GACCAGCAGCCGCTTCTTCGTTGCCGTTTCATCAGAGCCATACGCACAGCGTTGCGGTA  
GAGGCAGACCTTTGAAGCCATCACACCAGACTCGATGTCAGTGCGTACACCGCTCAGAC  
CCGTGAGTTGCTTGAGTGCAACCTGTGCTTCGCTGAAGCTACGCAGGGATGCACGCTGCT  
CAGCGGTAAGGGTGTGCTGGTGTGAGTACCCAGAGCATCTACTTGCTCCAGGCTCAGAG  
CATCCGGGTTGATCATGGTTCAGGGTGACCAGACGCTCGGAGGCTTCCGGCTGGACAGCAG  
CTTCTGAACCAGAGTCTTACCTCGGCAGCCTTCCGGAGCGGCTTCCACTTGGAAACGCT  
TGATGGCGTCACGAGTAGCGGTACGTACCTGCTGAGCATCCTTCAGTTCCTTGGCTTGAG  
CCTGACGCTGCTCAGGAGTGATGTTGCGGATCTGCTCACGTACGCCGCTCAGGTTGGCCA  
GTTCTTCGTCACAGGCGGGCAACGGTAGCTTCATCAGCACCTTGCTTGGCCTGCTCACGTT  
GTTTCGATGGCTTGTCTCGACCTTGGCCAGACCTTCTTCACTGAACAGGACTTGTTCCTGCT  
CCAGCTGGGATACACGCTGGGCAGCTTCTGCTCGATGGTGTACGCTGCTCCAGGGCAC  
GGTCTTGACCTTGGGTACACCATCAGCCATGACTTGTTCCTGGAGAACTACCACTG  
CACCAGCAGGGTTATAGGACTCCGAGGTCACATCGGTTCAGGGCAGAGATGTCGCCGGTTT  
CACGGGCAGCATTACAGCTTACGCGAAGCCAAAGCAGCCTCAGCACGGGTAGCACCAG  
AGCGGGCACCTACAGCAGCACGGCCACCGATGTTTCATGGTTCCGCCGACAGCAGCACCAA  
TGTTGTCAGCTTCGACGATCTTCCAGGCTCGTGTCTTCAGGTGGGCAACGTTCTCAC  
CCCAGGTCTGGTAACCCTCGGTACGCCTTACAGAGCGCTGGAACCAAGAGTAGAGCGGA  
TCAAACCACCGCTTACCACGGATACTACGCAGGATGCCAGCAACGGCTACCTGTTTCAG  
CTACTGCCAGGGAGGCAGCAGCAAGACCCATCCTCAGACGATCGTCAGCATCCGGCAGCT  
GGCCTTGGTTCTCGGCCTGGTACTCGGTGATGCCTTACGGTATTCATCCGAGGCATAGC  
CCACGTTGGTAGCAGCACCCAGTACAGGGTTAGCGGCATAGGCCAGCATCTGCGGAGCGT  
TCTCCACAGTGTACTCGCCGACTGCCAGCGGGTTGGTTGCCGATGCACCGATAGCGGTAG  
CAGCGGTCTGGCCAACACCGAGTGCACCTTGCACCAAGCCATCCAGAATCTCGCCACGGC  
TGAAGGACTCGCCTGCATTGCGGAGACGTTCTACGCCACCAGCAGTCGCATCAGCGATGT  
CGTCGCTCAGTTGGTCACGGCGAGTAGTGTCTACGATGCTAGACCAGTCGAAGAAGTTGT  
CCACGTTGGTAGAGAGCTTGGCGGAGTTCGTCCACACCTTGCATGCGTTGCAGCATGGTCT  
GGGAAACACCGTCGTCACCGGCAGCAGTCTGGCTCAGGATGGCTTCATCGCCTTCTGCA  
TCTGGCCGGAGACATAGCGGTTGTAGGCTTCGATGGCTTCGTTGGTTACGCCAGCCTGAC  
CCATGTCAGCAGCAGCGTTGATCGGCAGAGCAATCACGTGCCCGAGAACACGGCCAGTAC  
CGGATACGAAGGAAGCAGCAGTGTGAGGATCTCAGTGCCAGCAGCACCCGGGGGTGATAC  
CCATCTTGGCGATGAGGGATTCTTCCACGTTGCGCTTCTTGGCGCTCGCGGATGCCGTCGA  
GGTCGTAAGCCTTCTGCGAACCCTTCATGTCCAGGCCACACTGGCAAAGTCCAGAGCGT

CGAATGCCGGGGTAGCCCCGGCATTTCGCCTCTTGACGATCCGACAGGAATTGATCCAAGT  
CGAAATCAGCCATCTATCGTTTCCTCCCTCGTAGTGCAAAGTTAGATCATCGGTTGGGT  
CCATGGTAACACCCTTTTCCCGTTCTGCCGAGCGAGTTACCTTAACGGCATTGACCGTT  
TTTGGTTGGCGATGTCCGACACGGTTTTTCAGGAAGTTTTCCCGAATGGTTCGGAGCGTCTT  
CTCGCATCTGAGTCATGCCATCAGTGGTTCATGAGTTCGATAATCCGTTTCTCCACGTCAC  
CGGCATTATTGAACAGCCAAGTGTTCGTGGTGTGTAACGCCTGCTCCAGCAGCTTCGACG  
GGACTACAGCAGTACGTCCGTCCGGCAGCTTGATGCCATTGGTGGCGAAGTCCACGAGCA  
TGTTGTTGAGATCCTGGCGGTACCTTCCCAGCCGAAACCAGACTTCACAGCCTTGTCTA  
CGATCTTGTGACCGAACCAGCGGATCCTTGTCAGGCTCGACAAACGGGTTACGTGCAA  
CTTCCCGTTTCGTAGTCTCGGTAGCCGTCCGTTGCAGGGTATCCAGTTCTGCGTTAACCG  
CACCGATGGTTGCTTCAACCTTCGTGCGATCTTGCGGAGCCAGACCCTCCAGGGATTCCC  
GGAGTTCCATCTCTTGCTTGGCCTGGGCGATAACCCTTCGAGCTTACCCCTGCATCCACGA  
GAGACTTGAGTGCAGCATTCCGCCGCTCGGTAGGAGAGGTATTGGCTTGTACACCAGCTT  
CGTTCAGCGCATTGCTGAAGGCATCAAGCTGGTCTTGCGAAGCACGGCTCATGTCCGGGCA  
TGCCCTGGTCATCGGTAGGCATACCGACTTCCTTGCCCACGATCCGCATGATCTCGCTCT  
GAGCCTGGCGGGACTCGTCGTAGTCTGGAAGGTAGTAGCGATGGTTCCCGAAACCAGCT  
TCGCTTCATCCCGATCACGGCGTAGTTCATCACGCTGCTCACGAGTGAAAGCCAGGTTCT  
CCCGACCAGCAGCCATAGAGAGGGAGTGTGCTTCAGCTGCCCGGTTGGCCGCTGCCTGTG  
CACGCTGTTACCAGCTGCCCGGTACTGCCGATTCTGGATAGCATCCTGCACACCGGTGA  
GTTCTTGCGGATCTCGCCCTCGTTGATCAGCTGTTGCTCAGCCAAGATCTGGTTGACTT  
CGCCAGCACGGCCTTCAGCTGCCAGGGTACGAAGCTGATCTACGATGCCTCGTTGACCTA  
CCTCAGCCTGCATGTGTCGAACCTTCGAGTAGCAGCCGCTTGGTTCTGCTGAGCACTGA  
TCTGCTTGGTGCATCGCATCACGAGTAGCAGCACGATCCAGGTTTCATCCCATCGCATCAC  
GTTGGGCCTCCAGGCCACTGCGATAGTCTGCGTTGCTGAGTTGTTCCAGGGTGGATGCTG  
CCACCTGGTCCAGATAGCTTTGCGTGTGGCTTCACGCTGCAACTTGGCATTGTTGACGT  
TCATCTCCTGTTGACGGGAGATGATGTCACCCAGTGCACCAAGTGCTTGTGGACACCGG  
AGCAGACATCGAAGATGCACTGCCAGGACTTACCGTTGCACCAATGTTACGCCAAGTGAT  
CTCTTGGGCCATTAGCGAATCCGGTTCCGTTCCATGTAGGAATCCACAGACTCATAGGCC  
GTGGGGTTAGATGCCACTCGGGCACGCTGCCGGTCTTCAGGTTGGTATTGATCGACTGG  
CGTTGAGCACCATAGTTCATATCGAACTGACGGCGAGACTCTGCCAGTTGATCCCGTGCA  
GCACGCTGCTGTCGGTTGGCACCAATAGCACCGAAGACAGCTTGGCCAATGCCAGGGCA  
GGCATCACCCAGCCACCGGTCTGAGCACCGCTCGGAGCTACACCACCGAACATGGAATCA  
CGGCTGAAGATGTTGCTGAAGCCAGACATGAAACCACCACTACCAGAGGCAGCAGCATTC  
ACGTCTACAGCAGGCATCTGCATCTGTAGTTGAGTTTGGGGACCACCCAAGCCAAAGGAA  
CCGAGAGTGGAAAGTATCCAACCTCGACTCCGAAAGGCATATCACTGTACGGATAGGCCATT  
GTTGATTTCTCTATGGTTTCGTTTATGGAAGGAAGCTGTAGCTTAGCATCTACGAAGTA  
TTCCGTCAGTTGGAAGCTTGACAGCCCAATGTTCCCGCATGTACAGTTCTGGAGAAGAA  
GTCATCAGTACTTTCACCCAGGATAGCCAGCGGACGGTTCACGAAGTCTTCACCCTGAAG  
TGCTTGGAACTGAACCAACCAAGTTCACGACGCTGGTCTTCCAGACTCTGGAGTTGGTC  
AGCGTAGTACGTCTGGTTCCGCTCCAGTTCCTTCAAGGTATCCATCAGACCAGCTTGTTT  
CATGGTCTGCGATTCTTGGCGATACCATGGCTCACTGCCATGAGGTTCTCGCTCCAGGT  
AGCGTTGTTGGACATCCCATAGGCACCAACAGCCAGGGCAGCTACCGCAGCCAGGATACC  
CAACTCAGGCCCAACAGCACGGACGAACAGCTTCACACCGTAGCTGACGGCCAGGGTAGT  
GACGATCATCTGCACGATACCATGGTCAGAGCAGCCACTCCGAGGGAGGCTGCTGCGAC  
GATGGTTCCCGAGGCACTACCAGCTGTGAAGATGGTGACTGCCACAGACACCACAATCAG  
GATCACCTTGAAGAAGCCACTGGCATAACCAAGGGGTCTTGATCTGTACCTGGGTGTTGAT  
CGCCATGTGCAGGCTACGGCACAGGAGTTGTTCCCTGCGCCCTCAAGCCAAGCTGACTGAG  
TACTACTCGGTCCACAGGGATCAGCAGTTCAGGTTGACCCAGTTGGGCTACGTGCCCTTT  
CTTGCTGGTGATCTGGTAGTGCATTGCCGGGTTGTAGATGATCACCTCGTCGTACATGGA  
GTCCATGGCCTGACGGGTGTAGGTATACGCCGGCTGCTGGGTCTTGATCTGTCCAGAGGA  
CTTGTCGGCCATACCAGACTTCACGTTGATGAAACCAATAGGCCCAACCTTCCCCGACTT  
GCGGTTAACCGTGATGCCGCTGAAGGAGAAGTCCATCTTGAAGTACTTGTCCCGCATGGT  
GATCATCTGGTCAGCCGTGTTGGAGTAATCCCCAACTTGCCTGGAGGTTCTCTGCCTT  
CTGGATCTGAGCCAATGCCTCAGAGTGCAGCAGCAGGTAATCGAAGATGTAGGTCAG  
CTGGTCCCTGGTTTCGTTGCCCTGGTGGCACACCGTAGAACAGGACTACCTGAGCCACGTC  
ACCAATGTCCGGGTCAGCATGAACCCCGTCGATAAGCTCATCGATCCCGATACCGGAGAT  
CTTGGCCACCTCCTTCACATCCCTGTAGGCATTGCCTGGGATGTCCTTCACGTTTCATCTT

GTTGAAGCGGCAGTACATCCAAGGGTAGTAGGTACCCTGCTTTGTGTAGTCGAGGTTGAA  
CACACCATCGATCAGCGGATAGGTTCCCTTGCCGTCTTGATAGGTGAAGAATCCTTGGGT  
TCCGTTCTGCCTGCGGTACCGCACCTGATGGTAGTCCAGGGACAGGTCCAGGTTTCATGAG  
CATGCGGATGGTTTCTGCTTGATCACACCTGAGCATCCTTCCACTCGTAGGTCAGTAG  
AACGTAGTCTCGCCGTAGGAGTTGTCAGTACGGTAGGGTGACCAGCCAGCGAACTGCC  
CATTCCTCCAATGGTGTGTACGGTTCGGCTTGGTGCATACCCAGACTTCGGACTGAAACC  
AAAGTCCTGGAGCATACCCTTGTTTCGCTGTCTCGTCTGCCCATGCCACAGTGTCCGGTCTG  
GAAGACGGGGATCATGTCGAACAGGTAGACCTTTGAACCCTTCGTGGTGTGAGTCCAGG  
CAGTTCATTGGTCAACGGGTTGTACTGGTACAGCCGAACCAATTCAGTGAATCCCCAGTG  
CAGGGAGTTCAATGGACCGAACTGGTTGTAGTAGGTGGTGTGATCGTACCTTCACTTCGTGC  
AATGGTTTGAACCACTACAGCACGAGCATCCACTCCATTCACTACCTTGGACTCTGGCAA  
GCCCCAGTAGTAGTTATTCTTTGCGCCACAGGTACGCAGTGTGGCCCGTACTCCAAT  
GGAGTCAGCCAGCTTCTTAGGATGTTCTCGACGATCCAGTCTCGTGGGTAATCCCCTG  
GATCACACCAGTACGGGGAGAGTCCGGGATGTGAGCATCATCGAACACTCGTTGCACTGT  
AGTGTTCACCACAGTCTTCTTCTTGCTACTGAACAGACCCATGCTGTCTCCAATAAAAA  
AGGGGAACCGAAGTTCCTTAGTGTACAGCACGCTGTTTAGGCACCGACACCAGTCATC  
AGCATGTTCACTACCCGCCCGACGTTGGCATCGTCCAGCCGGTGGTGGTGTGGCTTGA  
GTACCGGTATCAGTGGTACGGCGTACGTTCCAGGTATCGATCAGGATCTTGGCAGCCTTC  
TGCTCAGCATCACGCTTGAAGCCATCAGCCTGAGCCTTGTACAACCTCTTGGCGACCG  
ATCACAGAGTCGGCATCCACACCAGCACCGATGGTTTGGGCACGTTCCGGAAGCTACCTTC  
TGGCGTACCAGAATGGTCTGCTCCTGGGTGTTTACAGCCTTGGTTCCTTGGTTCAGATCGAAC  
TGAGCCTTCAGCAAGCATTCTGAGCCACGAGGTTCAAGAGTTCCTGCTTCATGTTTCAGG  
ACTTTCTGAGTGGACTCCAGTACCTGCTGTTCCATGACCTTGGTCTGTTGGACAGCAGTC  
AGTACGTCTTGCTTGGTCTTCGCAGTCTGCTCTTTCACAAGCAGGTCTTGAAACCAGCA  
GACAGGATCTTGGTTCGATCCGACGAGTCTGTGCAGTCTGTACCTTGGTCTGTTCTTGA  
ACCAGAAGATCCTGGAAGCCAGCAGAACGAATCTGAGAATCCAGCAACTCACCTTGCTTC  
TCGGTGAGCTTGATCTGTGCTTCGACCAGTGCAGCCTTGTGGCGGCTTCATCCTTCTGA  
AGCAAAAACATCACGGCGTTCTGAAGAGCAGCCGTGATGCCACCAGTGAGAACAGCTGCG  
TACTCTGCCCCTTCAACCGCCCTGCATCGTGTCTTTGGCCAGATGCAGGCGGGTGACT  
TGCAGGAGTTGGTTCGAGAGCACCTTTACCGTCTAGCTTGACCTCGGTGAGGTCGGCAATG  
GTAATCGGCTCTACGGCCATGGCTTAGTCTCCTTGAAGGAACCGTTGACTGCCTGCTGC  
TTGCGGAGGGATTTCGAGTTCATCCTCGCTCAGCTGCGGCAGGATCTCCACGGAGAATTCA  
CGTACCGACTTCGACCGGCGTACCTTCTGCGGACCCATCGGGGTCTGCTCGGTAACCGTG  
TAGAAGTGCTGGTACTGCTTGGACTTGATGAAGTTCAGCAGGGCTTCCGGCACATGCCAG  
TCCACCTCGTACGGAACCAGGCGGGCGGATCGTACCGATCTCGTCGTTACCGATGCTGAAG  
TACTCGGCATCCCAGTCGTTCTTGTTCGGGTTGTGGCAGGTGATGCGGCAGCGGATCAGA  
CGATGCGCAGCCAGCCGGCGATCACGACGCAGTTCACCTTCGGTCTTCGGACGCGGTGCT  
TCGGCGGCCTTGAGGGCAGCTGCACCAGCTTCGGCGGACGGCTTCGGGATGGACGAGGTA  
GCTTCGGTGGCTTCGTCTTCTCCTCGTCGCCGACAGCTTCGTCTGTTTCAGGACGGCATTG  
ATCTTTTACGCAGCTTTTCCACGCCGGTATTGGAGCGGAAAGAGATGCCAGGGCAGTA  
GCTTTTCTTGCAGGACTTCCAACCTCGGAACGGGTATCCGGGGATTCCAGCGGTGCTTCA  
CTCAGGTTTTGCAGTTCGTCGAGGGACATGGGTGATTCTCCAGGGTAAGAGTTAAGAGGG  
GGAGGTTACCCTCCCCATGCCTAGTTACAGGCGTGCCACGGTCTTCAGCAGGGCGATCC  
ACTCGGGGCGGAACACCATGAAGCCGTAGTACCCTTGTGACATGAAGCCCATCTCGC  
CGTACGGGTCAGTGCAGGTCGGCAGTGGCTTCGCCAGGGCGCTTGGTGTGATCTTGAAC  
TGACGTTCTTGCCATCGGTAGCGAAACCGACAGTGGTGAACGCCTCGGAAGCTACACACA  
GCATCGGGAAGACACTGTACTTGCCGCGGACTCATGCATCGGAACCTGGTTCGTTCCGGT  
CCACGGCCTTGCCGACGCCGGCCAGTGCATCATCTGCGGGTTGACGATGACGCGGAAGC  
GACCCAGCTGGCCGACTTCGCCGTGCATGGTGGCACCACCGGCAGCGTACTTCTCGATGG  
GGATGAAGGCCGGATTGCCGTGGTTGTCTTTCATGGCTTCGATGGTTCGGAACCAGATCGG  
AACCAACGTACAGAGCACGGGCGTTGCCACGGTACGGGTGTGATCATGCGGGTACCGG  
TGATCATCTTGATCTTGGTCGGAGCACGCGCGTTGTCCAGGTCCAGACGCAGACGCATCA  
GCGAGTCGTAGGTGACCTCGGTGGTGGCGTCGACTTCAGCGTCGGAGGTTGCAGCGCCCG  
GATAACGGACGGTGCCAGCCGAGTTGAGCAGGTTCGATTTGCAGCAGGTCTTCGGTGTCT  
CGTTCGCGCCCTTACCATTTCGGTGGTGTGACGTGACCTTCATCGCCGGATCGCTGTGCA  
AGTCGAGTTGCTCTTGGGTGTACTCGCGGAAGAAGCCGTACTTCTCCAGCTTGCCCTTGA  
TCTCGACACGCTTGAACCAACACGGTTCACGCGACCGCCGATCTCGGTGAGGGTTCGGCA

TCTTCGCGGTGATGTTGCCACGTCACGGCTCGAACCGTAGAGGTTGCCGTTGGCGATGG  
TAGCGCCGGAAGCGTCGATAACCTGGTCGTTACGTTGCGGTCGTCGAGCAGCGGGATGT  
AGTGCAGTCGCACGATCTCTTTGCCGTAGTGCTTCGGCATCGAGAAGGTATCGGCCAGCT  
GACCGAAGTACGCTTCTTGGCGGCGTCGATGAGCGCGCGCTTGTACCAGTAGCGGGTAT  
GGATCTGGGGACCGATGGAAGACTCTACCCCGTTCGCGGGGTCGTTGTACTTCATCGGCT  
TGATGTTATCTACAGGACCGGCCATGAGATGTTTTCTTATTCCAGTTTCAGGGATTGCT  
TAGTTGAAGCCCAGCTTCTCGAATTCTTCGTCCGACATCGCCAGGGGATCGAACTGGGCA  
GGCTTAGCCTTTCCAGATACAGTTTTGGTCGGAGCCGCAGCCCGACGTTTTTTCTTTCACA  
GCCGCTTCTGTGCCTTGGTGCGGGTGGTGACTCGCTTCACCGGTTTCAGCGGGTGCTTTA  
CGTTGGCTTTCAGTGGCCGAGGCTTGAACCAAATCGTCGAATGCACCTTGAGCCTGAAGC  
TCATCCCCAACCGCCTTATATGCGTGCAGGTACGGGGTACTATCAGTGATCGTGCCGAAT  
GCCTTACGGCGCTGGATCTCGGAGTCGATTCGGTTCGAATACCCCATTTGGTCATGTGCTGT  
TCGAAGTAGCCGATGACTTGAGGATGTTTCGGAAACCAACTTCTGAGAAGTTTTATCCAAC  
TTGCCAGCGTAGTAACCACTCGGTTGTAGGATGGACTGTGCTCGATGGAATCGAGTTGT  
TCGTCCAGTGCTTACGAACTTGGTTGAATGGTACAGCAGTCGGTTTGTAAATCCGCAACA  
CTCTTCTCATCCAAGTCGAGCGGATCTACACCGGCATCTTATGCCAACTTAGCGATGGCT  
TCAGGTTTCTTGTGTTGAGAAGATCGACCACATTGGCGATAGTCTCCGGGTTTCAGCAA  
CCAGCATCATCCAAGTACGCATCATGTGCAGGTTTCGGTTTTCAGCGCGGACATCTTGTGG  
TTGTAGTTAGCACCCATCTGCATCAGACGGATAGCCTCTTCCGGCGTCTTGACCTGGAGA  
TCACGGCCATTCGCTTTGAACGGTGCAGTGATCTTCGCCATGAAGTCAGCAGGATCTACC  
TCTTGCTTGGTAGCCTCGGACTTCTTGGCTTCAGGTTCTTCTTCAGCCGGAGTATCTTCC  
GACTCTTCTTGTGCGCGTCTTCTTCTTCTGCCCCGACTTTTCTTCAGTCCGTTTCTCT  
TCCGCAGGAAGATCGCCGAGTTCATCGTCAGGCGAGTTGAGAGGATCTTGTTCCTCCTCC  
TGTTCTTCTTCTGCTCTTTCATCAGCAGGTTCTTCTTCTTCTTCTTCTTCTGGAACA  
GACTGCACGTCGCTTGTGTTGCTCCTTGTGCTCGGGTCTTCTTGTATCGGAGCGAGTCTGCTCT  
TCTACTTCGTAGAACTCGGGCAGATCGTCGTCACTCATTTCGAGGAAGTCAGCCATTACT  
CTTCATCCTCCTCTTCGCGTACACGTTTCGAGTTCAGCGTCACAGTCCTTGATGGCCTGTT  
CAGCTTCGTCACCACGTACGCCGATCAGTTGGAAGTAGGTGTGCAGAGCGCCGACCGCAT  
CGATCTCACGGATGATGCGAGCCTGCATCTCTGGGGACTCCATGTTCTTGTCCGCCTTGA  
GCAGGACCAGGCGTGCAGCGTTGTCCTTGAAGGAAGTCATTGAGGATCAGCGCTTGGAAAGT  
CCCAGTTCTTGTGCAGACGCAGCATTGCGTCACGCAGCCGGACGAACCTTCTCAGCGTTCT  
TCCGGGTGATCTGAATAGCGTGTTCTTTCGTTTCATCTTTGCAAATCCTGTCAAGTAAAGGG  
GTGTTGGTTCACCGTAAAGGTGAACCAAATAAGTGAAGTTAACTACTTTTGGGAAGTCC  
TTGCTGAAGTAGCTTCATCGAGTCGCTTCAGTTGGCTGTTTCAGCATGGCCAACTTACCCT  
GTGCTCGGACTGTGCCTGTTGCAGTTCACGCTTACGTGCCTGCTGTACACCGGACTCCT  
GTTCCAGGAAGTTCAGATCGGTCATGTTCAGCCTGGCTAGCAAGAGCACGAGCCTTGGCTT  
GTTTCAGTACCAACCTTCGAATCCTGCAAGCCAGCACCAGACATGTAGTGAGCAGCGCGTG  
CACGTTTCAGCTTCGATCTGTGCCTGGAGCAGCATGAGTTCAAGCTGTGCCTTCTGCTGTG  
CAATGGGATCGGGCTGAGGCTGGAACCTACGGATACGCTTGGCGAAGTCCGGCATCTTCT  
TCAGTTCCATGATCTGACCCATGATCTGCTGAGCCATCATCGGGTCCATGTTTCGGTCCCA  
TGGTTTGCAGCATGAAGGTGAGGTCATTGACCTTGGCGTTGTCTTCTTCGGCAGTGGAGA  
TGTCCAGCTTCAAATCGAAGTTGCCAGCAAGGTCATCCCTGCGGATGTCCACGAAGTGCT  
CATTGCTGATCCGTACCACTTCCACATCGTCCAGGAACTCAGCGTTCATGGCTATGATCT  
TCCGCCGATCTCGATGATGCCAGCCGAGAGACGGCGAAGGATTCCAAGCTCACGCTTCG  
ATGCAGCATCCAATGCACCACGTACAGCAGTAGCGGTGTCACCGAGTGCAGCACCAGAGA  
TGCCAGCGTTGAAAGCCTTACGCCAGTCATGGATTCAGCTTCTGCTTGTGTCAGGTTGA  
TCATGTACTGAGCGGACTGCGGGATCTCTGGGAAGGTGTGCATGTGCACAGCAGCCCGTG  
GGTCTGCACCTGGGTTGAACTCATAGTTCTACCCCGGTCGAAGCGGCGACGGTTGGTTA  
CGTCAAGCGCACCCCTTCATCACACCGACTTGGCCATTGGCCGAACGAGCCATGGTGTGCA  
TCATCCCTCGGGTGACAGCACCAGTATCCGCTGGTTGTGATGAGCAGAGCACCATCAC  
TCTACCGTAGAGATCCCGCTTACGAGGGATGTAGTTGACCACCACGTAGGGGATACGCT  
TGTCCGGGAATGGGTTCTTCCATCCGAATCATCACAGCACCAACCCAGGTAGCTACGA  
TGGGATGCAGGACACCATCACCATGGATGTCGTAGTAACCCAGTACTCGTGAACCACGA  
GACGCTTACGGCTTGTGCTTGGAAAGTCGAAGTTACGGACACCTTCGGAAGGTCCGGTGT  
AGTCCGGTTCGGATAGAAGGTTCTGCCCTTCTACCTGGATCTTGTCCAGGTTCTGATACC  
GACCGTCAGCCTTCAGTTCGGCGTAGGAACTCTCGAAGGTTTCGATGAGGAACCTTCGCCT  
TGCTGAAGTCACTGCCACAGGAAGGGTCGATGACTATGTTGTTGTAGTCGCACACCTGAA

CAGTAGGATGGTTCTCTACCGTCTCTTCCCGTTCTTCTTCTTCCGAACCAACAGGCACTG  
CCCGTACCTGGATAACCGTTGGCTTCCGTCTCTTCCAAACCAAGACGAACATCCTCGGGGA  
TCTCCGGGTACTCCGAAGGACTCTCTTCCCGGATCTGTGCTGCGGTCTGGTAGATCTGTG  
CCAGTTCTCGGAACGTGTCGGGCATCATCTCGTAGGTGACTACCTGCTCCTTCACCGTAC  
GGGATTGGTAGTTCCAGCCTACCTTCACGATGATCGTACCTTCGTCCACACCAGCACGAA  
CGTACTCGTTCGATGAACCTCTGCTTGTTCAGCTTGGTATTGAACTGCTGGTTCAACACCA  
GACCGTTCTGCCTTGCAGACTCAGCATCTTCCAGGTGACAGGGTTCACTTCGAAGATGT  
TGGGACTGGATAGGAAAGGTTTACAGACAGAGACGAGTATCGCCACTCTGCTTGGCTTCCGAA  
TAGTCGGAGGCTGCACAGCGGACTTGCCTTTCTCTGTCTTGGGCTTTCCTTCACCACGGA  
CGTGCATGTAGTCGAGCCAACGATTGATCTGCGTGATCTTCTCGTCCGGTGACCTGCTTCG  
CCTCCTGGTAGTCTTGTTCAGCTGAGCCAGTGAGGGAGCATTGCTCCACTCAGGCTGGA  
GTCGCTTACTGGGATCCCCATCCTCGTTGGGAAGGGTCAGGTAATCTTCGTCCACGTCTG  
CCATAGTTACTCTTTCAAACCAATGAGGTAAGAATCTTGGAATTAACAACCTGAGCC  
CGAACTTTATCATGCCCGTGCCTGCGTGCAGTGATACCGCAGGTGGGTCCGACATCTTCATGC  
CGGAGGGTGGGGTGGCTTATCCAAACCAACCAACCAAGGTAAGGCTGGGCTTCTCTGCTT  
CTGTACCGGAAGGGCATGTAGCCTTGTGCTGCCTCGCTCGGGTACGGGAAGTAAAGCAG  
GTCTTCGCTGCGTAACACCTGCGGAGTGATCGACTCCGACTATCGTGGGGAGTGGGTAG  
CTGTAGTCTCCACCGACCGCGAACCTTCCACTGGGAAGCCGGTAACCGTGTGCTTCAGA  
TGCTCATCGTTCCGGTGGCTACACCCGAACTTCAACTCGTCGAAGAAGTGTCCGAAACCA  
ATCGTGGTGAAGGCGGCTTCCGGCTCCACTGGGGAATAACCCATGCAACTGATCAAAGAGT  
ACGAACACGCCAAGCCCCTCAAGTTCAAGGGCTGGCAGGTAAGCGACGACCATGAGCAGA  
ACGTCCAGGCTCTGCAAGAAATGCTCAGCACCTTCCCCTTCATCACGGCAGCCTTCGGCG  
ACAACGCTGATGGCGAACGTGTCTACTCCCTCAGCAACTTCAACGAGGGTGCCACCCTGG  
ACGTGAAGGCCGGTGAATGGATCTTCGTCAACGAAGAAGGTTCCATCGAAGGCTGGTCCG  
CTGAAGTCGGTGTGTCCGCTTCAAGGAAATCCAGGCGTAAAAAAGAGGGGACCGTCTT  
GGTCCCCTCACCTTACACCCAACCTCCCCTTGTGAATCGGTCCTGGTTTCCCTACCGGAT  
CGATACGCAAGTTCTGTGCGTCCAGATTCGCACACTCTGCTTCGTACTTCTGCGAGAAGT  
TGAACCCCTCTTGTGCAAGTGTCTCCATGAAGCCAATCGGAGTCTGGCAACGTGAAGCAA  
CAAAGTACAGCAGAGCTTGGAGGTGAGTATAAGGCAAATCAATGTCGATGCAACCCCAAC  
TGTCCAGGTTGTCCACACAGATCTTCATCGGTGTAGGTGCACGACGGTACCGTACTTCCA  
GAGTCTTGCTCGACGAATGACAGTAGAACTCATCTGATCTCCAGTACATCGAACTCAG  
GAGTAGTGATATTGAGCGGCTGCCAGGTATCGTTGAGGTAGTACTCCACTCCATTGTCCC  
CGATGATCTTCTCGATCTTCAGGATGGACTGTCTGTCCAGCTTGTTCCCCCTCAGTGATGA  
ACTGAGGTACTCCAGGCTTAGGCTTCTGTCCCCTTGGTATGCAGGACGTAGAGGATACA  
ACCTCCGGCCTTCTTCAAGTTGGATCTTCAGCATACTTCCCTTGAGCAGGAACCTCTTGT  
GCAGGTCCAGTACTCCAAGGTTGATTGCACGAATCAGCGAAGGAACTCGCTCCAGTACGA  
GAGCACCAGTGTGATGTTACGTAATGATGTTGCTGAGTTCCCCTCTGCTAGCAGGT  
CAATGACCTGCTTGAGTTGGATTGTCATACGATGTAGCTCTCCCCTGCTAGGTAGGTATT  
CTCTTGATGAGATGCCTCTTCCAGATCATCTCACTGTCATTGTACTCCATGCGGATCTC  
TTGGCTTGGAGGGATTGGATTCATCAAAGCCAGCATAGAGATGGTGTGCGAGGAAGTCATC  
GTGCTTGGATCTGAAGCCACCAGCTGAAGCCAAGCGAATCTCATCTTCAACTCTACCAT  
GCACCGTGTGCTTTCATGTCGTAAGGGAAGAACATCTTCCCCTCGCTTGAATGAGGAAC  
CATGGCCATGAATCGCTCCAGCTTGTGGTAGTAGGACGCAAGCCAGGAGTGCTACTACC  
CTTCTCCGAAACCATGTGAAAGTAGACATCCTTGTTCACCATCTCCCCTGGATCAGTGG  
GATGTACCCGCCCTGCTGGCCGGAGACTTCGATGCCTACCCCAAGTGGACGCCACTTGGC  
ACACAACCGGAAGAGATCGTCCAGGTTGCTCCCATGTCCCTGGCGTTCACAGATACCATC  
TACCCACAGCCAGTCCCTCGTTGTGAGAGTAGGCCAGACACTGATGATGCTGAAGTCACT  
GGCCTTCTTTCGAGAGGTAGCGAAGTCAGTAGTGACGTAGAAGTTGTACCGCTTCTTGT  
GTCCAGCACGTTGCGACGCATGTACCAAGCCACCTCACCATCCTGGATGAGTCGGTCTTC  
GTCGGACATGATCTGGAGCATAAGCTCCTGGTTGAACGTCTCGATCTTCCCCTGCCTTCTT  
GGCCAGGGTGTACTTCTGCAACACGAAGTCATAGGTGAAGCGGTCAGGCCATGCACCACG  
GAACTCTTCCCCTTGAAGCAGGGGAACCGCTCACATAACCGGGTAGACGTTGACCTTCCAAGC  
ACCAGACTCCACTGCTTTGTACAGTGGATCCTTCGCGTTGAACGGTGTACCCGACCAGAT  
GATCATGTTCTTCTTCGGGTGCAGTGCATAGTCCACTGCCTTGTACACCGTGTCTCAAT  
GGCTGCGATGACAGTGGGCGAGCGAGCATCTTCGTCCGAAACCAAGTCATCCAGTACCGC  
AAGCTGCGGACGTTTACCCATCTCCTTCGCACCACGGACACCAGTCTTGGCACCGTAGCC  
TTTGACGATGAACACCTTCCCATCCAGGTTGGTGAACCTTCCAACGGATATCAGTGAAGCT



GGTCTGGGGGATGTACTTCCTCAAGAACTCAGAGTTCTCCCAACGGAACCTCCAGGTTCTT  
ACGCATGTTCTTACACCGTTGTCGATGGAGTCCGATACATACAGAGCAAGGTCTACCTT  
ACCGAAACCAGGAAGCTCACCGTACAGTGCAATGTACAGGAACAGGTAACCCATCAC  
GGTGGTCTTCGCTGCACCACGGAACACCATGTTGGCGATCCGGGTCTGACCAGATCCAAT  
CTGGTCAAGCATTTCGACAGGTGAAGTACTGGTGTCTTGTCTCTTCCCCTTCGTTGCCGTT  
GACCATCTTGATGAAGTCAACGAACCTGCAAGGCAAAGATGCTGGGGATGTACGAAGAGTC  
ATCCCCATAGACTACTTCACGAAGCCATTGCTCTACAGACTTGGAGGCTTCATCCAAGCC  
AGCGAAGTCCACCTCATCTGCAACAGCTTTCGCTATTGGTGTGGCGTCCAAGTTCATTAG  
GCAAGCTCCCCTTCGATCACTTCACCGAAGTCCATGTTGCGTTCAGCTACATCCTTCGCC  
GACATCTGCTTGCCTGCAATCATCTCCTGCTGGAGACGTGCCAGTGCTTCAGCGTTTTGC  
CGCATGATGTCGATGGCATCTGCTGCACGATCACTGACATCTATCTTCAGCTCCGTCTTC  
TCCGGCGACTTCAGGTGAGTGAGCAGACTGTTGGCGGATTCTGCTGCACCTTCTCCGAC  
TGAGCATTTCGATCAGGTGGAACAGATGGTTGATCGCCTTCTGCTTGATGTCAGCATTG  
AGCACATGGCATGGGATCAGTGCCTGTTCCAGGATGAGGTTCCACCAGCTTCGATTTGTTG  
TAGCTGGTGTAGTGTAGCTGGCCATGTCTTGTGGCTACACCCTGCTGGGTCCACCGTTGG  
ATCTTGGTGGGGAAGGTACGGGTGTAAGCCTCGGTGTTGTTCAACCCCATCAGCTTATAG  
GTCACGTACTTCGAAGCATGAAGGTAGTTGTCCAGCTTGAACCTCCCTTCCTTCATCACA  
TGGGTGTACCCAATGATGTTGTCCCTGAAGGCTTCCGCCATGTCAGGATCGGACAGCATG  
TCATTGAGTGTCTTCAGCACTTCCGGGGAGATGGACTTCTTCATCTTGTCCGGTAGCACA  
GAGCGGAACCTCATCTACCGTCAACATCCCAGGCTGAGCAGTAGTGGCGGGGGTGGTGGTC  
ATCTTAGTACCTCGGTTGTCTATAGGTTGTGCCGAGGATAACACAACGTACAAACCAAGG  
AGTAAACCCTGAAACAAGAAGCTTACGTACGCCAGATAGTTAACGGTGGACTCTCTCCCC  
GTAAGTGTCTGGTAGAACTGGGTGCCTCTGTCTACCTGCTAGAACAACAGGGCATAACC  
ATGCTGACCAGGACTCACGTTGGTTCCTCGCCGAGGTACCATGGTTCGGGTATCGGGTA  
TGTCTACCGCCTGACGGACAAGGGGAACATCCCTCTTATCGTGGTACAGAAGGACAACG  
CAGATGGCGTGGTCTACTTCGCTTGGTTCAGCCCAGGATCACCTCTGCTATGCAGAGTGCC  
CAGCTGATCGGGTACTGGAGATCTACAGAACAGACCTGATGCTGAAGCTCCTAGCGAAGC  
ACGGCTATCAAGATGTTGTCCATGTAGCTGCACTGCTACAGAGCTACGGCATCAACAAGC  
TCAAGGAGGATCTTCTCTGATGGACATCAGCTATGCGCATGTCCAGATGAAGCTGAAGGA  
TGAGAAGACTACCTCCACAAGGTAGAGATCCCATACTCACTCAGTGAAGTACAGGGTGA  
CTTCTACTCTACCGTAGCTCAGATCCTCAACCTGGTACGGAGGGAGACTGGCGTCTCTGT  
TCTGAACGTCACCTCACTCACGAGTACTCTTCACTGCGGGGCCAAGCCAATGAAAGCAGAC  
TGGGTGTCCAACCTGATCTTCGCTCTGGTCTGGTCTTGTACGTGCCCAAGCCAGCAAGC  
GAGGAACACCTCTGGCTCTTCCACCTGTTGCACTTCTTCTCGCACTCATGCTGTGGACG  
GCGATGGACGTGATCAGGTACTTACCCGAATGGCGAGAGAAGCCTGTCTTCGCCTTCATC  
ATCTTCGCACCCATGGTACCGATGAACCTGTACGGAGCCATGATGCTACTGGAGTTTTTA  
TGGAAGTGAACGACACGGGCAAGGTTTCGATTATCCTGACCATCCAAGGCAAGGCTTACT  
ACCTTGATAACCCTTCTCACCAGGGATGAATGGGACACCATGACCGACGCGCAGAAGACCA  
AGTACATGAACGAGTGGGTACTGGCTTCGGTGAGCATCCGTCCCAGATGCCTTCCTCGG  
AATCGGACATCCTCAAGCACAAGATCCGTGAACTGGAAGTGGAGGTATCCCGTCTGAAGA  
AGCAGGCTACCCCGACCTTTCGGTATCCACCGGGTGTAAACCATCGGTTCATCTTCCCGACC  
AACGGTAGTATTCCGGGCACAAAAAGGAGGCTTTAGGGCCTCCTTCTACCCCTATATA  
ATATATAGGTAATCCCCCGTGGGTGAGTAATAACCAAGGGTACCACGAGGAATTACCCTCG  
TCAACCCCTCGCTCCGCTCGGGGTTGACTCGGGCCGAGGCGCCGAGGCTCACCCTCCC  
CCACCTCAACGCGTGCAGGAACAGATTCAATGGAACAGAGAACCGTACTGAACATCAA  
GCTACCAGGACAAGAAGTGGTAGAGATCGACCTCAACGTACCTTGGAAAGACTACCAAGA  
GAACGATAGAAGCAACCACGCTGGCTTGAATACAATGACCATAGTTGATGCGCTGTGGAA  
GTACTGTGAAGTATTCCAGCTGGTACCTGTAGACCCACAGCAGAAGATAGCTGAACTGGA  
AGCCAAGGTAAAAGAACTGGAGGGCAAGCTCAAGGCTACCTCTACAGAAGAGAACAGGGA  
GAGTTTCTGTGCAGGGTAACCAGTCGTGGTTCGTAAGCAGGCTGATATCGTTAAGAA  
GGATGGCTTGTCTACTGGGTAGGTACCATCCGAGGTACGACACTCAGAATGGAGAGTAC  
CTTCATGGATGCAGACTTCGATCCTGTCATCCGTGATGCAAGGGATTGGGTGAAGACACC  
TACTGTAATAAGCGGCGGTCTTGGTGTACTGGTTCATGAGTATCGTGCAAGAAACACAG  
ACTGGAAGTCTATTGGTTTGCAGCTACTGGCTTGTTCCTGTTGTTGTTGTTGTTGTTGTTG  
GACTGGCTTAGCCTATGTATCTCCAGTCAAGCACAAGGACTGGAAGGATGCGTGGAGAGA  
GAGATAGGCTGCTACATCCAAGGTAAAGGCTAGGGTGTGTATATCCTGTGGATAACTTGA  
CTATAGATATCCACAGGTATCCATAACCCATAGCTTCGGACCAGTCATCCTGCTCACCTC

GCTGCGCTCGGTGCTTGGCGACTTAACCTCAGCTATGGGTTATGGGAGCTAGGGGAAAGG  
GATTGGTTTGGGGGAGGGAAAGGATTTGGGTTTGGTGAAAATCAGTCACAGAAGTCTGAT  
TGCAGTACTTCAGTCTGCGGCTCTCCAAATCCGGTTATCCCCCGGTACCTCTAGAGTT  
TTGGAATTCGCGCTACCTACCCACCTTGTTAACTCTCCTTCTACCCAATCATCTGT  
CTGTACTTCTAGATCAAGAGAAGCCTTCGGCTGTGCTGTGGATTGATCCTGTGTCACCAC  
AACCATTCTCACTACTCTGGAGTACTACCATGTTCAAAGCTCTCAACCAATTCTTCGCTA  
TGCTGGAGTCCATGTTCCGTGCTGTCACCAACCTGACCAAGGCTGCCGAGAACGTAACCG  
AGTGGGCTGAAGAAGAGTCTGCTCACTTCAACAACAAGGCTCGTCTGCAACGTGAACAAG  
CCATCGCTCTGCTCAACATCGAGAACGCCAAGGAGCTTCAGGAGAAAGGTCTCACCGAAG  
CTGTCGAGTCTGTCCGTAAAGAACGCTCCAAGGCTAAAGCCTAACCTATCCACCTATCC  
ACCTCTACTCCCTAACCCGGAGTAGAGGTTACCTTTTCAAAGCACACATAAGATCAACAT  
CACACAACCAGAGCACACACCTCTCTCAGGGACAGTAGGTTGTAGGAAGGAAGGGATA  
CTCTCTCTGGTATTCAACTCATCTCTCGTGTGTAGGAGGATAGGGGAGATAGTGGGGTCT  
GGCA

>NewGenomeName\_265

ACCAGCGCACTTCGGCAGCGGCAGCACCTCGGCAGCGTCAGTGAAAATGCCAAGCAGGAA  
AAGCGGCCCGCAACCCCATAGAGGTGGGTGTTACCCCTTAATAATCCTTCGAGGAGGA  
GAAAACAAAATACGGGAGCTTCCAATCTCCCTTTTTGATTATTTTGGTTTGGCGGAGAGGA  
AGGTTTGAAGAGGGTAGAACTCCTCACCTCCAGGGGTTTGCGAATTTTGTAAAGAAGCA  
GACTTTTAAACAAGGTGAAGTGGTATTTTGGTGCCCGCTGCCACATCGAGAAAGCGAAAGG  
AACCGACCAGCAGAATAAAGAATACTGCAGTAAAGAAGGCCACATACTTATCGAGTGTGG  
AGTCCCGCGGAACCAGGGGAAGCGCAGCGACCTGTCTACTGCTGTGAGTACCCTTTTGG  
GACGGGGTCTTTGGTGACTGTAGCCGAGCAGTTCCTGTAACGTATGTGAGAAATTTCCG  
CGGGCTGGCTGAACTTTTGAAGTGAGCGGGAAGATGCAGCAGCGTGATTGGAAGACAGC  
TGACACGTCATAGTGGGCCCGCCCGGTTGTGGGAAGAGCCAGTGGGCCCGTAATTTTGC  
TGAGCCTAGCGACACCTACTGGAAGCCTAGTAGAAATAAGTGGTGGGATGGATATCATGG  
AGAAGAAGTTGTTGTTTTGGATGATTTTTATGGCTGGTTACCTTGGGATGATCTACTGAG  
ACTGTGTGACCGGTATCCATTGACTGTAGAGACTAAAGGGGGTACTGTTCCTTTTTTGGC  
CCGCAGTATTTTGAATACCAGCAATCAGGCCCCCGAGGAATGGTACTCCTCAACTGCTGT  
CCCAGCTGTAGAAGCTCTCTATCGGAGGATTACTACTTTGCAATTTTGGAAAGACTGCTGG  
AGAACAATCCACGGAGGTACCCGAAGGCCGATTTGAAGCAGTGGACCCACCCTGTGCCCT  
TTTCCCATATAAAATAAATTACTGAGTCTTTTTTGTATCACATCGTAATGGTTTTTTATT  
TTTATTCATTTAGGGTTTAAAGTGGGGGGTCTTTAAGATTAATTCTCTGAATTGTACATA  
CATGGTTACACGGATATTGTAGTCTGGTCTGTATACTGTTTTTCGAACGCAGTGCCGAG  
GCCTACGTGGTCCACATTTCTAGAGGTTTGTAGCCTCATCCAAAGCTGATTCCTTTTGT  
ATTTGGTTGGAAGTAATCAATGGTGGAGTCAAGAACAGGTTTGGGTGTGAAGTAACGGGA  
GTGGTAGGAGAAGGGTTGGGGGATTGTATGGCGGGAGGAGTAGTTTACATATGGGTCATA  
GGTTAGGGCTGTGGCCTTTGTTACAAAGTTATCATCTAGAATAACAGCAGTGGAGCCAC  
TCCCCTATACCCTGGGTGATGGGGGAGCAGGGCCAGAATTCAACCTAACCTTTCTTAT  
TCTGTAGTATTCAAAGGGTATAGAGATTTTGTGGTCCCCCTCCCGGGGGAACAAAGTC  
GTCAATATTAATCTCATCATGTCCACCGCCAGGAGGGCGTTCTGACTGTGGTAGCCTT  
GACAGTATATCCGAAGGTGCGGGAGAGGCGGGTGTGAAGATGCCATTTTTCTTCTCCA  
ACGGTAGCGGTGGCGGGGGTGGACGAGCCAGGGGCGGCGGCGGAGGATCTGGCCAAGATG  
GCTGCGGGGGCGGTGTCTTCTGCGGTAACGCCTCCTTGGATACGTCATCCTATAAAA  
GTGAAAGAAGTGCCTGCTGTAGTATT

>NewGenomeName\_266

ACAGCTATATAGTCCAATATCGTTCTACCATGCTATTTAAGAGCTTTAAATAATAACCCA  
CTATGTACCCTTAGGTTTTATTTTATCAACAATATAGCTTAAAATAGAAATATAACCTAAG  
TGCTTTTTACTATACTACTATTATTTATCGGAGTTAATTAAGAATGTCTTTTTTATCTACC  
GAAATACACCGATCCAATTGAAGCAATCGAATGGAAAAAGAACGGTGATATACTGGTGA  
TGGCGTTATCAATAATATCAACCAAGGTGCTATTGTTGGTTATGCTATACCTACTAAAGA  
GTCTACTCTTAGTAATGCGATTTGCCATTATGTAATCTAACTGAATCTAGTCATGGTAT  
TTTACGTGTAGGCCAGATAAAGATAAAATTGTCTGTCCGGGTGATTTTATTATTTAAT  
TCGTAAAAATAATGGGCGTATACTAGATTACAAATTAATGCGTCAACGTGAATTTAATAA  
ACTTTATCAACTGGTAACAAAAGAGGAAGCTAAACAATGGGTAAATGATGTTGGATCCAGA  
AAAGAAGGACTAAAGTTATATGAAGCTTTAGTTGAGGATATAATCATACCAATGATCTT  
GGTACTGGTCTTCGACCATCTCTTAATATAACCACTAATGATGGTGTAACTAGGAATGTT

ACATTTGATCAACTTGAGAATTTTATTAAGTTATAAAAAGCCACGCATGATACGCAA  
ACTGTTGGCACTCCATTACAATGGTGTATTTACAGGTATGCTCCTAATTTAGTTAAAGCTCGG  
TATATTGCAACTAGTTGGAAAATAACTGTAGACCATGTTAAAAAGACTTTGAATTTTCAA  
GGTACTTTAAACCACGAAGGTACTGTAGTTGATCATCCTAACTATGATCCAGATATTACC  
GCAAGAGAATAATGTTTCGATGAACTATTACTGATTTTAGTCGATTTGAACAAATTGCT  
CTGTCTGGAAATATCGCTAACTTTAAAGAAGAATTCAAATGATGAAATATAGTTTTGAC  
TTTAGTTACATTATTGAAGTTAGTAATGGCATGACTAGACTCAAGGAGTTAGCTAATGAT  
CAAAGTGGATTATCAGATTAATCAGAAGTCAATCATCTATTAATAGATTATTAGTTAA  
AACTTAGATGGCACTGTTTATTTTAGAACAATAAAGAAGACGATTTAAAAGACTT  
ACCTGTTAATCTGATTAGTCTACAAGTACTTATAAATCTATTGATAGGTTATGAAGGACT  
AGATATTACAAGTATTGAGGAATTCACACAACAGATTAGTCTGATTCTTTGGGACAT  
GCCTATACTAGAAAAAGGCGAAGTGGAAACCTCTATATTGAACAAGATATTAAGTTGAA  
TGAATTAGTTATTAACATAAAAAGACCTGGTGTATTGATTGATGAGAAAGTATATGGTGA  
ATTAACGCTATTACAAATGGCTCAAATTAATTACCTATTAGCGTCTACATTTAAGTTTAA  
AACTAATTTCACTTGTGTAGTTGGGCTATTGAATTTAAAGATAATGAAGTATCTTGTA  
ATTCTGGCCTAAGGAAAATTAATGGCTATTAATTAATCGTTGCCCATGACCTAAATGGT  
GTCATTGGATATAATAATCTATTACCTTGGCATATACCTGAGGATTTAGCTTTCTTTAA  
GAAATGACAAGTGGTTGCTGTGTTATCATGGGTAAAATACTTTCTTATCCTTAGGTTAGT  
AAACCGTTACCTAATCGTAATAACATTGTTGTATCATCAAGTTTATATCGTAACGGTAAT  
TATCCAGTAGCCTATGATAATAAATTAGGTGACTCCCTAATCTAAGTGCAGCTATTGTT  
TATGCCACTCATTTCATAAAGAACTGGAAAGGATGTATGGATCATTGGCGGTTCTCAA  
CTTTATAAAGAAGTCATTGAAAAGGATATTTTAGACGAAATGTACATTACTACTGTCAAG  
ATGGAAATAGATAATAGTAGTTGTGTTTATTTCCCTAAAGAAATCATTAAATGGGATAAA  
TGGAAATCAACCATTATTAAGAAACTGACCTATGTACATATACCCATTGGATTAAAACA  
TAATAATAGCCTTCCCCCAGGGGAAGGCTTTATGTCATGTATTCAAACATATTTAAACAG  
TATATTACAAGGTGAATTAATATAGATTATTCTATTTATTATTGAGGAGTGCAGTCCA  
TGAAAACTCTAAGAAAACAACCTTATAATGCAATCGATCTAAGTAAATTAAGTAAAGATA  
TGTTCAAGTGGTGGTAGAACCTGGGCAGCGGTTGAGTTTGCAATAAATTGTGCAAATGAGT  
TAATGGAGTTAAATAGTAAAGGAAATACTATTTTATTTGATGACGATATTGTCGACAAAG  
TTGAATTTGAAGTAAAGATCTATGATTGGTGTGATGCACCACATGGCTGTTATCTTTATA  
GATCTTTATGGAAGAATACTCAGGAAATTGTCTTTGGTGATAATGTAATAAAGATGGAA  
GACTTGTATTGACTAAAGAAGAAGTACGTGAATACTTTTCAAGATTCAAATTTTCCGTA  
GTGTCATGTACTTATCCAACAGTATTAAAAAGTTAAAAGGGTAACCCTCCCCTACCGATA  
ATACATTCAAACCATTTTAAACAGTATATTACTAACTTGATATTTAACCTTCAATTAATG  
TAAAAAGGAATCTATACCATGTTTCGAAATTAATTTTCTAAAAAAGAACAATTCCTGGC  
CGTGGTCACTGCATCGAACTTTATGGTGATTATGTCACCGAGCGTGTATGGCATGCAGTG  
AAACAAATGGTTGAATGTAACATTACCAATCACGAGTTTTATAAGGCAAAGAAGGTTTC  
TGTGTATTCTTCCAAGGTGGGCATGATAACCCTCATGGGAAATGGATCCTTCTGGAATTC  
TGGGTAGACGACATCGAGAAGACTCGTGAGTTCGTTCTGTTCTTGACCATCACTATTAAT  
CGAGTATTGACGGAGCGTTTTACTCAAATCTGCGTTAACCTAATCAAATGGGTTATGCA  
GATGGGGCAGGTGCATATACTGTACTTGGCGAAATCCATAAAGAACTGGATGTCGTGTT  
AATTGGGGTAGTCCGACTACACCATTACCTTCTATCCAGAAAATAACTTGGAACATCGT  
AAAGTACTCGACTTGTGTGAAACCTTCGAACTCCCAGTAACTAAATGGGTATAATTAGAG  
GATAAAGTACCATGTACATCGTTATCCACAGAGACGAGTCTGAAAGACATGAATTGACTG  
TAGGTGATCCTAAAGATCTTATCGCGATCTTAGTCATTCTGGAGAATAGTGATAAAGTCA  
TTGAATATAAGGTTATCGATTCCGATGTTGGTGAATCAAGGACTTTAGATACTCATTG  
GTTGGGGTAACGGGTTCTTCACTAAAAATGCAAAAGATAATTTTAACTGGAATCAATCGA  
GGAAATAATAATGGCTAACAGTAAAATCAGTGGCGAAGCTGTAATGAAATATCTACGTT  
TCGAAATGACCACGTGGATTTTATGCGAGATAAACTGTGCGTTTACATTGAAAATGATGA  
AGTGGTAGTTAAGATTATAGATACTACTTCAGGTGGTTCTGCAACACACCACTCAGGTTA  
TGATGTAAACAACCTTTGAAAGAACGTATGGTCAAACCTAACTAAATAAATTAGTAACACTT  
ATTGGCGACATACACCCTCCCTTCGGGGAGGGCTTTATTTTCAATATAGACATATTTTTT  
TAATACATTAGTTGGAGTTTAAAAATGTTTAAATAAAAATTTTATCAATGGTATTCAAATT  
TTTGTGGCCGCAACTACTGTTGCTACAATAATTGTTAAGTTAGTCGAATCATAACAACAA  
TTAAATGAAGAAAAATCGGCTAACGATGTATGTAAGAAAATCCATATGGAAATCCATAAA  
TTAACTAGCCTGTTTATCGAACAAGATATACCTAATGAAGAACGCTGTGTTAGGTTACGT  
AAAAGTGTGATACATTAGTTAATAAACACTGCTCTAAATTAAGTGGCCGCCGGCGACTC

AGGGCTGTTGCAGAAATCACTCGACATGTAGATGACTATTGTCGTCTGTGGAAATGAAAT  
AATACATTCAAACCATTTTAAACCAGTATATCACAAACAGTGTAATTAACCTATTAATCA  
GTAAAAAGGAATCAAACCTATGACAACTTTCCTGACTTTTAAATCTGACGAAGACTTGGAG  
AAAGAAGCAATCCGTCGTGCACGTGCTATCATGGGTTTCCGTGGTGACCGTGATGCAGCT  
ACTCGTCAGGTATGCATCAATCCTGTACGAGGTAAGGATTACCGTAACTGGTTATCCCAT  
AGCGCTACCTGGAAAGATGGTAACATTGTTGTTGATGAAGATAGTCTCATTGAGCTAGCC  
CGTGCCATCATTGATGAGACCTACCTGCACGATATGTAATAACTACTACTCCCTTATTCA  
AACATATTTAAACAGTATATTACTAACTTGATATTTAACCTTCAATTAATGTAAAAAGGG  
ACTTTAAAAATGAAAGCATTTCGCACTAGTGGTTATTGGTTTGACTTTTGGTGGACTGTTT  
GTAAACGCTAAGTTTGAAGAGCAAACCTATTTCTAATGAAACTGTTATCCTCGGTCATCGT  
ATCGGTCCCAATGGTCAAGAAATGCTCGTAACTAAATAGAGAAATAAAAAATGGAAAAGTC  
CGTAGCAGTTAAAGTAATCGACAACATGTGCCGTCCGAATATCGTTGCTCGCATGAATGG  
TAAACTGGTCTACCATGCTCGTAATGTAAAAATAGTAGAAGGTAAGGATCTATGGCCGAA  
CCGCACTGACGTAGATGATGTTTCGTGTACTGGTCCGGTGAAGCCTTCCGTAAACGGTGAATG  
GGTACCCATGCGCAGTTCTAGCCTGGTTAACGTAGATGCTGTTACCGGTGTATACGAAAC  
CCTCAACTCTGTTTACATTGCTCCGGATCTTCTGGGAAGTCTCTCGGTGGGTCTTGATAT  
CTTCAATGATGATGCAACTTTGAAAGGATAATCAATATGAACTTCATCAAAGAAAACGCA  
CTTGGTCTTGGTCTTATTGCACTGGCAGTTGGCGCAACAGCCGTTGCTGCCATCCTCGCG  
GTCAAAGCTACCGTAAAGGAAGACGGTCAGGCTGTAGCCGAACAGATCGAAAGCAGTATC  
TCTGATATTCTTATCGATAAGATCTCCACCTACCGTAAACAGTGAACAACATCGCAAGCTG  
GTAAATCATCTTCGTGAGATCACGAGTTGGATGTCGCAGAGTTCATCTCACGGACCCAA  
TTGGACATCGCGCTCAACATTCTTCCAGAGGTAGAAGTACTTCTGGAATCTCATCGTGAT  
CAGCTGACCGTGGAAGAGTTCGATCGACTGGTTGCAAATCTCCAACATTTTCGTGCAACGG  
ATCATCACTAAGTGAAAACCAAAATAGTGGTAGGTTTTCTTGCAGTTCTAATAGAACTCA  
CTACTGCTGGTAGTGAGTTCTATTATGAACTGACCAAACCCGAAGGTAAGGTTTTCGAAGG  
AATGGTGTCAACAGCCGGCTAAACCGAAATGTACTATGTTTGTATTTACTATTACTGAGG  
AATAATAAATGGATAGTCGTCTGTCGAGAGTCTTCCAAAACGTGGACCATGTGTTACCC  
AAGAACAGACCAATGAACTGGTCAACCGTCGTAATGAAGACATGTTGTTGACTGTACAGG  
TTGATGACATGTTGGCATTGATCCATAACGACCATGTTAAGTACAGGGACCTAGTAAAGA  
TTATCATCGAAGATACTATCGCCTTCATAAAAAGCAGAGCGTCTCTCGCTCATTGGTATAG  
GTCTTTTCAACAAGATGGTCTATGTTGATCAAGGCCCGGATGCTGTTGGCTTTTTAGAAT  
ATATTAAGGTAGCTGAGTACACATCCACTCACGTGGATGAGTCCAATGCATGGGTAAATA  
TGTATCGCAATAAGATAAAGACTTTCATGCTACCAATTCTCTCTCAGCTTCTGTGATATG  
AATAAACCAGCGCCCGAGGGTACTGTCAAAGAAGTACCAGGAATAAAAAGATGGGACTC  
TTCGGAGACTCCATCCCAATGTATCTTGGAAAGGATGCATTGGGATGTACATAATCCAAA  
TTAATCGTAAAAAGGAAAATACACCATGAAACAATATCGTGAACCCGTAACCCGTCTGAC  
CAAAGAAAACTGGAATGGGTTATCAGCCGTGTAAGAAAGAAAGGCCGAACAACCTTT  
CGGTCGTGCCCATTTCCCTGCCGGTACTCGTGCTATCTTTCGAATCCTGCTCCCTTCGTTA  
CCTGGATGAGAATGAACGTGTGTATCCTGGACAGCGCTACGAGACATTTCGAAGCTACTGT  
TCTCGGCGTTGTGGCCAATGGTCATAACAGTTATGTGCTATTCTGGACATGCCCTGTGA  
TCTTACTGAAAGCCGTAACAAGGCAATCAACGTCAGTTGGTGCCGTGGTATTGTATCGCG  
CGGTGAAGGTAATTTACCTGGTTCAAAGAAGAGTCAACCGAGTATGATCGCAATCATGG  
TTGGAACATCCGTGAGAAACATCCGACTGTTTCGTTGGGCAGAAGGTCCTCGTCCTACTAA  
AGTACGTAGCCTTACCTGGGCAGAGGAATTCGATTATAACCGCGCAGTAGATCCGGTATA  
CATCGAAATCAACAAACATCACAGTCAGTACTATACACTGACATGCGTTTCGTTTGTGAT  
GTTCACTCTTCGGGAACATCCTGCTTATGCAAACCTCGTTTAAAGATCATCTGCACAACT  
GGACAAGCTAGTCATGGCGCTGTACTCCGATCCGACTATCAAAGCAGCTGAAGTAAAGCT  
GTCTCGCTACTCTGTTAGCTGGTTGATCAGCAAGAAGAAGTTCCATAAAGTCCTGCAACG  
CCTGCTTCCGTTCTACAAGACTTCTCGTCGTAAGGCGCAAGAAGAAGACGATAAAGCAAT  
TAGCGAGATGTATGAGGCTGAACTGGACCGTGACCTCAGTGAACAGTATGGTGAGTCTGA  
TGATACCTCGGATGAATCAAGCTATTCATGGAATGACAGCACGCCCTGGATGATGATGA  
TCTGAATGTGTTTGTATGTACGACGACTCGGCATGCTCGCGTGAAATCAGTGATGATGT  
TCAACCCAAAACCTATTGGTGAACCTGCGTGAAGCAATGGAGAACCCTGAAGAAGAGAA  
ATCCAAATAGTTATTGGAAAGTATGGAACTCTTTCTAAAGCGGTTATCATCAAATAGAT  
TACACGCAATAATGGGAGTCTTCGGACTCCCTTTTATTTTCTACATCGTATTATTTTTT  
TATTTAGCAATATATTCATAAACTGTAAAAAGGAAGATATCTCATGATCATCAATGCAAC  
CATCACTCGCGCAATGCTGAGTGCTCAAACCTACAGAATCATCACTTCTGTTTATTCTGAC

ACACCTACATGGCAGTCCAGATGCTACTTCGTCGGATATGAACGACACCAAGCGCATTCT  
CGCCTCTAACGATCCTCTAGGTACCCTGTGGCAATGTGGTTGCCATTTGGTCGTATCGGA  
AGACGAACGCTGGTTCATTTCTCCATTTGGTGATACTGTACGCCTGGCATAACCAGCACA  
AGTACGTGGTAGCTGGATTACTTTCCGCATAGACCTGTTTCGATCCGGAAGAATCCGAATC  
GGTACTATTGGCTATCCGTAGGCGGCTCCGCACCGGTTTCCAGCAGATGAACTTGAAGT  
TAACTGTGGTATCAAAGGTTACCTCGAAGAAAGTTACGAGGTCAACGGGACCGGTTTGTG  
GAGCGTAGGTGCAATCATTCTGGCACTGCATCCCCTAGTACTTTCCGTTTTGCTACTCT  
GGAACGTTTGCACGAGATTGCTAAGTTCATAAGAAGTACGCTGACATCGTGGATGATGT  
CGGGATCAATCATGATCGTGATTACCTGAATAAGATCGTCGATGGGAAATGGGTGGTCGA  
AGAGAAAGATGCTCAAGCTGTATTGAACAGCTACTTCACTTCGATGCTGAAGTTCTTCTT  
CAATCGCGGTTTCTACTATCAGGACACTATCGATGGCGGCAGGATCGATGTTTCGTAGCAA  
TGAAGGATCGTACTACCTCATTGGTGGTAATACCACTGTAAATACCATCAATATCACTTA  
CCTCAGTGCTAACAAAATAGAGATTAGTAATGGAGAATGGGAGTTCGCTTGGGACTGCAA  
CAATACTGAATACTTTCCCATTTGAAAATCCGGTAGATGCTCTGCTTGGTTTCCACAAGCG  
TGTAGGCCAGGAACATATCTACATGGCTTCTGGTCTGGGTACTAGCCTGGAAGACATCCA  
CAAGGTTCAACATACTCTAAAATAAGGAAAATTAATTATGTTCGTATAGCTTAGGTATTGT  
CACTCGCAATAAGTCGGCACTGATTGTTACCAGTGATTACAAATATGATGAGTTCGTTCT  
ACTAAAACCGACCAATGGTCTCAAGGTAGAAGGCCAGTTGGTGCAATTGGTCTGTATCTG  
TTTCGGTGACAAGGAAAACGTTCTCTGACTCACGAGATAATGGCCAATGCTGAACAAGC  
AGATTACACCAAGGACGATATCCTGACTATTATGAAGGAACACGGTGTAGAAGTGCAGT  
GATCACTGATAAGGCAGTTCATGTATTTCAATACATTCGCGACGTGGCTATCCATGGTGT  
GGTTGATTCCAATAACACCACCTTCTGGTTCGGCGACACAGAACACCGAAAATTGTTTTA  
TCCGTAAGGATGAGGGTAAATCTTTTCATCATGCCCTCCGTGATAAAGAATTGTG  
TCGGGTATTTGAGTTTGTCACTGTAATCAATTGGTAACGATATAAATACCCTCCTTCGGG  
AGGGTTTTTTATTTTGTGATTAGAGGAATAAAAAATGGCAGGTTATCGTATTATTGCTTT  
TAATGGTACTCAGTGGGAATCTCCGAGTGGGTACACCATTCAGCAAGCGGTGAATGAGTT  
CCTAAAGAAATATGATTTACATGAATTAGATATTCGCAGTATTACTGCATTACACTAAAT  
CCAATTTTAAATAGGAATACGTATTAATGAATTATAATGCAGAGAAATATAACCGCACTGC  
TAGTTTCAATTGCAGCAAACATTGACACTGTAAATAAACTACCAAAGAGATTTTATCGT  
CTTCTGATAATAGGGATTTTCTCTATGATGTGCATCAAATGACTGACATGTCCCTCGCCA  
GTCTTCATACGCATCTAACTAAAGAAGTCGAAAAGTTGGTGGAAACAATGGATCTAGTTA  
AAGATGGCCTATATGTCCAGGATGTTGAACTCATTAAGGGTAAGGGAAACTGGCGACATA  
TCGCGGATAATGAACCTACCATCAACGCTATTAAGCACTGCGTAAACACATTGGCGAAA  
TCAGTGCATTAGAAGCTAGAAGTGTGTTAAAGGTTACAAGGCAGGCGTCTTAAAATAAC  
ATCGAATAGTATTAAGTCTACCTCCTAGAAGATAGACTTAATAAATCATGAGGAAAATAT  
AATGTCCAATATGAAAAAATCTAGTTTGAAGAATTCTTCGAACATATCACTCAGGCTGA  
TCCATTTAATCCTTATTCTTCATCTACTCCAGACCTATGCAATACGCTGGTGAAGATAG  
CGAGTACGCACTACATGTTACGTATGTGCATGGTGCAGCTTACATTGAAGGTCTTGTGG  
CCATGAAGGAATCAGAATCAATGTATTCTACAATAAACTCCAAGGTATTCAACTTTGGAC  
ATACTTTGATAACGAACCTCGTGTGATTTCATGGCCGTATTATCAAGTTGATGCAGCTTT  
AGAAGAAATCATCCGCCTGACTAACTATAAACTCTATTTATAAAAATAGGTGAAGAAAA  
TGATCTATCTAGGATGGTTTACCATTATCTTTGTTACAATGAGTCTGTGTCTGTTTTATG  
TATTTTGTACCGTAGTATTCGTGAATCACACCCAGGTGTAATAGAAAAACAGACTACTC  
GAAAAATTGTTATTTGGGCTGGTATTCTATTGGCACTCGCTTACTTAAATGAAATCAGCC  
GAGTTTATATAGAGCAGATGGTAACCTAAATATTCAATAACTCCGAAATAATCAAACTA  
TTAATATATCAAAAGGAACTTTCAATGTTTCGAACTCAAGGCGTTCTTACTGATGAAC  
TCTGACAAGCTACGAGGGATACTGACTGACCTCGGTATACTCCCACCTCGCTTTGTTGAG  
AGCACCGATATCCGTGTCGGCAACTTCCGATTTTCAGCGCTGGAAAACCCAGGTCTCTAAA  
CCTGCTGCTCCTGGTTATCGGAAGTGGATTGACGTGGGTAGGTTAGAATGGGTGGAGGTT  
AAATACCACCTCAACAAATTACTTAAAGAGAATAATCTCAATATCCAAGAAGAAAGTAAT  
CGGTCTGGATAACCTCCGGAAGCTCCTGTCAGATCAACTCAACCCGCCACGTCAGTTAAC  
AGACGCTGTACGCGAGAAAAATCTTCACAGCAAGTAACGATATAAGGCCCTCCCTTCGG  
GTAGGGGTTGTCTATTTCTTAAACAGGAAATTCTAATGGAAGACTTCAAAGAAATCG  
AGATTTACAGTATGACGTTTCATCGACCATTCGGAAAATGCTTCTCGTGTAGTGATTGCAC  
AGATCACTACTCTGGATGATCGTACTGTTTACGGGGTAATGGAGGTCAATGGTTTCGGCG  
GTCAGGCCACTACTAATCTGCGTCGGTTCGAACAGAACCGTCAACACGCTCGTACTTCT  
TCACCAAGTCGGTAGCCACTGCTCACGCCGAGGCTTACGTCAAGTACCTGAATGACGACA

TGGTCGAACAAGACTACCTCGATATGAATACCGGCTACAACACTACACCGAATTTATGAACA  
TGGTAAATATCTGAGGTCATCATGGACAAAAAATTGAAGGAATCCAAGCAGTGACCCCT  
GGTGTGATCGTTTCGTTTACTGTGAGAAGACTGACACCTGGCTTCCGAAGGCTACTCGT  
CCTCTGGATTGTCACCGTAATAAAAACGCGATAACAGCATTTCGATAAAGCCAACGAAGAA  
ATTCAAGAACGTTGGTTCTACTGGTGCATTGCATGGGAGAAAGCCTCTGTTTCGACCTACC  
ATGGAAACCGAACTCTGGAAGAACCCGTTTCATCTCCGCAGAAGAGCGACTGGAGATTGCA  
GAAGGCGCCATTGCATTCCGCAACGAAGTAATCAGAAATCTTCAGGGTTCGTTTGGTTTCA  
CCGACTATCGCTGAGTTCGAACTTAACAAAAGAAATGGTGGAAGCTATTCTGGATAGCGAA  
TACATCGTAAAAGATTTTCGACCGGAACTCTGAAAATGGAGAAGTCGAACTGCGTTACCAA  
ATATCCAATAACTTCCATACCCGAGAAGTGGCACGTGATACTGTTACCGTATCATCAAT  
GCTCTCAAACAAGTACTCCGGTACGAAGTAAAAGGGTGGGATGAATAATGGCGATGCAA  
CATAAAAAGGATGCTGAACCTTACACCCACAAAGAGGATGGTGGGATTTACTATTACCAT  
GGCTTGGCTCATGGTACTGGTGACCAACGCGGGGAACTGTTGCACATCTACAGTGATTAC  
TTCACTGACATGATGTACTACCGTAACCACACCTGGTCAACTCGGATGGAACGTGTTTCT  
GCTCCAGGTCTTCGCCTGAGCCGTTCTTGCACCCGCACCTCTGGATCACCCTCTGATC  
GGTTTGATTGTCATTATCATTACTCGGGTGTGTTTTCGGCACCGAGTTCAATGCAATCACA  
CCCCAAGAGATCGTCGGTACGGCCATTGCAGGTGTACTGGCTTTAGGTGTTCCGAGTTTC  
ATCCTGCACCAACTGTACAAATGGAAGTACAAAAAGCCTACTAAAAAGAAGGTTCGAGAC  
AACATAAAAAGGAATCCCCATTGGCCGCTAAACCAATGGGGTTCCAAACAGTGCATTTCG  
GACTACACTGTCAGTAGGTGTCATCCAAGAGAAGTGCAGGATTAGCTACTTACCCCTCGT  
GGCATTTCGCTAGCAGTATTATAACAATACCGTAAGTTCTGAAAAAGATTAGCCCTCCT  
GGTGCAACAGGAGGGCTATATGTCGTCAAGTTTAAGCTTGACATTTTCGCCAAAATGGG  
CTTTCTTGCAGAGGAGACTTCGAATGAAAGTCTTTGAAACAAGTTCCAGACCTGATCCAA  
TTTATGGATACATGGCTGGTTTAGAAGTAACAGCATTCAATGGTAAGCCACTAGTCTACG  
GACGAAATGAGCTAATCAAAAATTGCTGTATATGATAATAAACTTTCCTAGGTTACATTG  
GCAATGGTCAGCTTGTAAACAAGATTTCTGATGCTAAATGGATTGACGGATCGTCTAACT  
ATCATATTAATTCTAACTCCAGTAATCTTTTGTTCGCTAGAGTTGCTTAACTTCAAATAC  
CCTCTTCATTGCGAAGAGGGTAACGTATTATTATTTTTTTTGTTAATAACCAACTATTT  
TAGAATATCTGTTAATACGCACTCTACGTGTACGCTCTGCACGAGCTTGATTAAACATGG  
CATCAATACCTACACCCTGCTATCATCAATATTAACACGTTTAGACAATTGTTTCAAAC  
GCATTTCTAATTTAGCTGCAATCATCGGGTCTTTTCACCGCGAAGCTGCTCAATTATCT  
CTTCAAATTTCTTTCGACCTTGCTGTTCTTTCTTTCATGATATTTTTCAAGTTGACTTG  
GTTCTTTATCACGTAATTTTGATTTACCTAAGATGGGAACATTGATACCATAATAAGATA  
AATTCTTACCTTGTATTAATAACCAATGGGCTAATAATAATGATACCCTAAGTCATCAT  
GGTCCCCTTAGCATGGTCAATTCTACCATTACGGATAGTAAGTGCTAATAACTCCGTGC  
TAAGTGGTTTATCATAGATGGTCTTACCCATAATGCATTGCTGATGGTAATGCCACCT  
TAAATAGATTATCACGAGAATACTCGCCAGTACCTGACGTTGCATAGCCAAAATAACGTT  
TAAACCTATCATAGAACGATGGTTGTCTTGCTGATAACGGAGTTTGAATGTCTCTGAAAT  
CATTTTCTCTTCTGATGATTCATTGACAATTCTGTTAAAGATACGCCGGAATGGATCTA  
CTCCTTTAGTATGTAGAATCAAGATAACATGGTCAATTAACGATATACTATTGATTTAC  
GTTCTGGTATCCAAAGAATATTAGGATATCTCAATAGCATTGTTGCAAAGAAATTACCCA  
TTGATGGCACTGATGATTCATTGTATCTACCAACACACATAACCTCATGTGTTTCTACAT  
CAACTACAAGTGTGCCGGTGGCGTCATTATCTTACCAAGAAGTTCAGATGGGTCCGGTAC  
CCATAACGAACCTACCCTTCATCATCCGTGAGGCTACTTCTTCTTTGGTATATAACCAAC  
GAAGTGTGTAACCATCATCCGTGATTTCTGTCCAGCTTGGCTCACGCATATTGTTTTTAA  
GTTTATCTTTCTCATCTGATGATAAGGGTGAACCTTACCACCAACTGTCCAGATATTGA  
AGAAGTCCCTATCGGCAATTTACCGAATGAACCTGATTCACGAAGTGTGTTATATAACC  
ACTCATCGGTACGTCCTAATTGACGGTGGTTAAATGCACCATAAACTAGAGGTTTCTTTC  
CAGTAGTGCCTTTTTCTACAACACGATGTAGAGTTTTCTGATCTGGTAGATCAAAGAATT  
CCTCTGACCATGGGCAGCCACCTGTTAAGAAGTGATATGCAAATTCACCATCACGGGTAG  
TGATGTTACCAGCTGTAGTTGTATAGATGTTACCATAAGGCTGGTTCTCACGGCGAGCTT  
CATCACGAGCTGCTGAACCTGATGCAAGTGCAACAGGTAGTGAAACACCAATTAAGTTAA  
TATATGCAAGTTCGTCAAAGTGCAATTTGGTACTGTAAGACCACGACCTAATTTATCAG  
CTGCGTTAACATCATTTTCGACCAACAGCTGTTAGATACCTATTACCTAATCTAATACATG  
TCATCAATTCGGAGTTATCCGCATCTAATGGATCAGTATAGTGGATATACTCTGGTAACA  
AATCACGCATTACTTTTAGACGCTCGATGTTAGCATTGCGTAGTTTGTATCTTTAGTAA  
TAAGGTTAATCTTAGTGTTCTCACCCAGATATAACATCATGCCTGTATTGAGCACGTCAG

TTGATACGGACTTACCTGTCTGACGAGGCTGTAATAAACCAAAAATCTACGTGATTGAAAT  
AACACCAGAATAAAGCAATATTACCACGGTTAGCTTGGAATGGAATTGGATTATTACCCG  
AGTTAGGGGGGATTCTTGCCACTTCCCTAAAAAATACCAAGGATTATATTTGCATTCCA  
TGTTAATACGAACTTCATTTCTTCGCTAAGATTAGGGTCATATGGATCCACCCCAATTA  
AACCTTGGTCCAATATAGCTAGTATAAATTTGTAATTTTAAATACCCATCTTTTTATAAG  
TCAATGCTAACTTTATAAAAAGATTTATTTTTAGTAGTAAGATCAACACTAGCGCTGTAGT  
ATTTATCCCAATCACTATTGAAAAGTATAACGTCCATACTACTGCCCTTTAAGGTACTTAT  
TTTTAATGTGCCATAATAAAGCCGTATTGAACGGCAATTGTAAAGTATAGTCTCATATGGA  
TAATGTGTTAAAAGACGTTATAAAGCCCCCTAGGAACCACCTAGGGGGCTTTATATTTAA  
CGTTGTAACAAGGTAATGCGGTAATGGCTAACTGTAGGTCGGTATCATACTCAGACGA  
ATCCAGGTGATTTGTAGTAAAGCACCATCGGCCATATCTTGAGCATTAAATACGCAATGCA  
GTATTCCATTGACTTACCGTATACTCATACTCGTTATGCACTGTACGCACCCGGAAATGC  
GTAGGTGTGGGGGAGTAGCTTCCATTGGACCAGTTAATGGCTCAGCAGCAAAGTACATT  
TTCTTAAGCCAGGCAGCTTGTGACTGTGCGCCATTAGCTAACCGGAGATCCCAAAGATTA  
CCATTGATAAATTCGATATCGGCTTTAAGATCACGACCATATGCTTCACCTTGGTCAGGG  
CGTGAATAGATTTCCAGTTAGCATTCCGATTATTACCAGCGCTCAATAGTGCTACTTGG  
AAAGTAGATGCAAATCGAACTGGTAGGAATCGCCATCAACTTGGTTTAGGTTAACCGCA  
TATGTTAGTGTTTGGATAGTACCATAACCACGTGGGTTAAAGGGTGCTGAGTTTGCACCT  
AATTCAACATATGGGGTAATATTCCAAATTTGTTGACGATCAATATTGGCTAACCGAAT  
TCTAATCTGTAACCCACTGCCTCATTAACCCAAGCTGGATAAACAAACATACGGCAACTG  
TAAGCACCTGTACAGGCGTGGTACGCGCTGTATATGTCTCCTGAATACGACGGTTAGCC  
GAAGGAGTCGATAAGTATGATAACTCATCTTGTGCTAATTGGTAAGATAGAGTTAATTTA  
AACTCTTGCCTTCCCTCAGTGGCAATATAGTTACGTAAACCATAAATTGCCATTGCCGTA  
CCATCAATATTCATCACATGCTTCTTACCATCACGGTAATGAACAGCACCCATCATCGGT  
AATGATTCAACTGGTACGTTTAAATGGGAACCTCAATAACTTTCGGATCAGCTGGCGAGATA  
AATGGTGATTCAATAGTGATACCACCTACATATTTCTTGGAGGTATCTTCTTGTGCTATA  
ACTTCAGTATTCATTACAACGAGTTGAGCAATCGAAACAGGCCACCCACATCATCATAA  
GCTACTAGAGTTACACGTTACCATTCTGCATTTTCTCAGCAGTCTACCATTCAATTAAC  
GCTTTAACAACATTCTGTTGAGTCAATGGATCGGGTACTGATTCAACTGGTATAGTTGGC  
CCTAGATAATTACCAGCATTATCATAGAACAGGGAAATCACTTTACCATGTATTTCTGAT  
ATATCTGAACCTAGGAAAACCTTTATAGCCATGTACCATTGATCCATAAAAATGTAATCGC  
CGGTCTGGGCAAATATTAATGGTGTTACAGACTGATCTAGGAATAACCGATAAGATTCT  
GAGCTATATCCTGGACCTACAGCAACTAGTAGGTTTTGTTTCATTTTCATTGCCTGGTTTT  
TGGGGCATGTACCATGGATCTAAGATAGATACCCAGTTGTTTCATCAACTTCACGAACA  
ATAAACCAACCTTGTGCTGCGTCAAATACTAAATCTCCTTTAGCAGGGATTGCTTTGCCA  
GTCTCACCAGCATATGAGACAATATCACCTCTAAACCAGAAATGGTTTTTATGCTGTGGT  
GGTTGGTACTGGCTACTTTCATATGACGTTGTCATGGTTGATTCCTTTTAATCTTAACGA  
ACAAGGATAGTGGCGGTACTTCACGTAGATATATCGATAGAATACGATTTAAATATTCCC  
ATTGAAAATATCTAGTTCTACAGGTTTCAGTATAACCAATGTGGATAAACTACAACCTTAT  
TTTTGTTGTAGCCTTTATTGATAATGTCATAAGCTGCTAACCACTCGTAATCTTTTAGCT  
GCTTAACAATATCATCGTCACTATAACCGTCCATTTTGATATGGGGGTTTGATATATTCTT  
TTACGATATCATGAATGATCTTACATGAAAACGCTGAAAGCACCTGGTATCTATAATCGA  
TCTTGTCCGATTAGGTTGAGGTTTCATTGGGAAATATTCAGTCATAAAATCAGTGACTT  
GTTTATCCCGTGATCATCCTTAATCCTAGCTTGGTAATCATCATTATAAACATCGCGGA  
AGCGAGCCTGTGGTGTGGTATTTGGAATGGTGCACCATTGCGTTCATCAGTGATAACAG  
TAGTGCCTTGATCTTCTTGGAAATCAAGATCAGCAGGGTCACGATAATGACCATCAATGA  
TTATGCGTGATTGTTTATTTGAATGTACTTTATAAATACCATCATTAGACAATACGCCAT  
ACTCAATGAAACCAATCTCGCCAGGTTTCGTATGGTTTTAAATCTGGTGTGGGAAACCTG  
TTCCACGTAGAAGAATCGTATTAACCTGCATTTGGATCTGCATTTAAATATTCCAGATTAC  
ATAATACAGTTTGGAGGCCATTCACGCGTGTAATCAAGACCTTCAATGATAGGCCGACCAT  
TTACAAACACATCATACTGACCAAAATGGTATCTCCATCAATTTATCGACTTTTACACCAT  
TATGAGTTTCAGTATTACGTATACTCCATTTAATGATACCATCAGTTTTATTAACTTTA  
ATTCTTTTAGATAGAAGTACTCATCGGTTCTTACTAGGCCATAACCACTCATTGACTTAG  
CTATCCAAACCAACGTTTATCGTCAAGTGGTATCATCATAAAAACCCAGTTGTTTCGAT  
CTGGATGGTCTGTTATATCTTGCCATTTCGCCAGTTGGTACGCCAGCCAAACAGGACTAA  
CATAAACTCGCCAGTTGTCACCATCACGTAAAGGCACGGGATCATTCCCATATGCTTCAT  
GTAGATCTACACTTCTTTACCATTAATGCATTCAACATATGCACAACGACTATCTTTAG

GGAAATATTTGCGACCTGCTGTATGATAATTATAACCTAATAAGATACCTTTCTCATCAT  
ACTCAAATACAGTTGCATCTAGCCAGTAGTTGTATCGTAAATCAGCGGTCTTTAGACCAG  
CATCATTATAAACCCAAGCTGGATTATAACCTTGAATATTAGCTGCTTCATAATAACCAA  
AAACATCACCAGCCATATTCTGCGCTTCTACCTTACTAGGCGATGTTTCTTCAGGTAGAT  
TGAATGTTAATGGGTATACGAACTAGATGGTGCTGACATGAACCAGCAATATGGTGATT  
GCTCTAGATTTTTCAGCTCGCCATAAAGGATTACCAGAATCTGCACCAGTCATAGCCCTTA  
TGATATCTTCTGATTTTAAACGATACAGAATTTGAATACGATGTGAATCAGCAACTAATG  
GGCGATCATAACCAGAATGATGTATGTAGATTCTAAATACTAGATTATCTAATGCTTTCC  
AGTTTTGACTTGGCCAACGAGTAGGATCAGCACCACGTCGAGGATCTTCTGGATGAAGTG  
CTTAAACTGATCAATTCGTGCAGTTGGTATAGAATAATCTTTATGTGTAAGCATCCGCA  
TCCAACGGCTCTCGTTATGATGGTAATTAACACCAGTATAACGATTATTACCTAATGGCT  
GATAGATATATGCTTCAACATCATCAAAGAACTCAATTGTTTGCACAGTCTTATCAGTGT  
AGTGTAATAATATATTTTCTTCTACTATCTATTTCTGACATGAAAACAGGTAATGTACGTA  
GATCAAATCTACCATCCTTTAATGGATGGATCTAGAATGAAATCACAAACATCACCGA  
CTGTTGCTGTAACAGGAGATATCTCATTAAACATATCTACCATTTACAAAGTATTTAGGAA  
CACCACCTTTAGATGCTATGGTATCCATTATCTTAATCTGAAATTGAGTTAATTCAGATA  
TTGTTTTAACTCGATACGATTCAGAACTAACCATCTATGTCCAGCTACATCCGATCTAT  
TTGATTGAAAGTAAGCATTGTTATAAACATGAAGATAGGGTTGATTTTCATCGAGATCAG  
GGAATAATGGATCTATCTTAACAGCAATTAAGATTTTTCGGAACCTGGTTATTAACCGT  
ATGTATCATTACGTGAATAATTAATACCCTATTTACATAAACGTCGTGCTAAATTTAAAT  
GGTTTTGAGCCAATTCATTTAGGCTCATCCATTTATTGTAAACCTTAGGCAAGCCCAGGT  
GTTAGGAATCATTTTACCAATTTGATAAAGATGCCAATAATCACGTGTACTTTGGACTG  
GTAGCTTATACCGGGTGTAAATCAACCACCCAGTTTACCCTCACGCCGTAGCGTGGGGTAA  
GCTGTTTCAGTTCATAAACAACTGTCGGTCTGGGCTGGGTTACACCAAACGTTATCAA  
TCGCATGTCGCAATAGATATGCGTTCATTGATTCACCCCTATATTTACTTAACGAATTGG  
CTACTTACAGCTTCATTCACTAGATTAATAAAACGACTTGCATCGTCAGAACGTGAAACC  
ATTTCAACTTTCTGACTTAAAACGTTTACGGTATGAGCGATCAGCTAATGCCATGTAG  
ATCAGTGTGATGTAAGTTGGCATGTGTTCTAGTGCCACACCTACGTTTTTCACGGGAAGCG  
GTACCAAACCAACTCGGTGATACTAATAATTGTAGATCACTGAATTTTAGTTTACCCATC  
CTGATCGAACGACCGTTAGTTGAAATCTCATAAGCTAGATCACCGGCATTATGAAGTGGA  
CCTAATGTATCAATAACATCTGCAATAAAACCAGCTGGAATATATGTAAGACGGGAAATA  
ATTGGTATTAACCGATCACGTTCTGACCTGGTTCTGTTAGATCATCATCTTGCATAGCA  
AAGTAATAAACAGCACAGATTACCCAAATAGCTTGGGTTGATTCAGGTGGTAGGCTGTAT  
TTTTGTGTTAGGATGCCTGAGATCCAATTATAGAAAACCTTAACTGGGATATCACCTAAG  
CGATGGAGGAAGTCCGGGCCTTACGTAATAGTTTGTATTAAGTGCCATCCGAATATAT  
TGAACTGCCATTCGTTCTGCTGAATAATCCTAGGAATACCAGTACGTTGTTCAATCTTT  
TTATATAGACGAGCATCAACGACTAGCTTAGGATTATCACGATCACCGATATTGACAATT  
TGAGTAAATTTCTTAATATCCTCAAATCATCAACTGGGGTAATCTGTCCACTATGCTCT  
AGCGTTTCACCATTACGTGCATCAACAGGTGGAATGGGTAGATACACATTGGCTTTCTTG  
ATCGCATTTTCAATTTGATCAACATATTGTTTAGGATATAATTTTCCACCGCCGGTGGGA  
TTGTATAGAGTTTTACAACTGTAGTTTCATACGGTAGCAAAAACATTACCGCTACTCCT  
TAAATGGATAGTAAAAATAACTAGTATGGTCAACTATGATTAATATCTATGATTGACTG  
TTAGTTAACTCATAACATCGAGTTCAAAGCTCCAACCTGGGAGAATCAAAAAGATGGC  
ATATTACAACGCTGTCCCTAGGGTTGTGTTAATGGTATCCGGGATCGTAGCCGCCGGCC  
CCTGATCCGTCCGGACATCACGTTTCGACAACTGTCCGCTATTACGTCTCTTCACTGA  
GACAGGACCGACTGAAACCACTTATGTCCGGTATTCTGATGATGGTTTTGCATCCATCTA  
TGGTCAAGCATCGCTTGATCCACGTAGTAAGTTTTTCAATACACAATCACTATTAGCACT  
TAACCTTCTTGGCCGTGGTAATGGTTTTTATGTTAAACGTCTACGTCCTGAAGATGCAGC  
TAATCCATCTCGGTTAATTGTTGCTATTGAAATTGTGGAAGATGAAATCCCACTTACGAT  
TCGTCGTCTTAGTGGTTTCAACTATCCAAACAGTGTTTCGTGACATTGGTAATGCACCAGT  
CCCGACTACTGATAAAGTTGATGGTCTAAAGGCACGTATTATTCTTATTGAAGATAATAC  
CTCTGAAGTAGGTACACAACGTGTAACCTACCAGGTAATTTAGTATCAGATAAAGATGGATC  
TCAATCACTAGTATATCCGTTATTTGAAGCACCGGTTTCTTCTTTGGTAAATTAGGTGA  
TTCTAACGGTATGCGTGTATGGAGTACTACAACCTGCTGATATCGAAGAGTTCGATGAAGC  
AGCTATGGCGAAGTTTTAAAACCTCGTCAATTCGTTATTGAGTAAATTGAGAAGCCTGAAGT  
AGGCACTAGTCCAGTTATTGTCAAACCTGCTGACCAGCAAGATTATCTAAACATTACATT  
TGATAAAGGTGTTTACAGCGATATGTATAACGCTGACCTTTATGTTGGTGATGTATTAGT



TGATTCTTACTCAGATGATGGTGTAGTCTCTGGCCTAAGTCCACTTTATTCACCGTTCTC  
TCAGTTCTACGTCTATCATGAGAACATTGATCTTGTTTCGTCAGATGATTTATGACACTGA  
GATGCGAGTTAACCCAGCCGCTGCTGCGCATACTACTGCACCTGGTGAAATTGACTTCCT  
AACCTTCTTAGCTGTTGATGGTATCCTTACCAGGGTATTCAAGTACTCGGTCCACTAGA  
TGGCGGCATTACGTTAGGTAAAGATGGTAACATCTATGCTAGTGGTGGTACTGACGGTAC  
AACTGATCTAGAAGAATATGCCAAATTAGTTGATATTGAAAATATTAACCTTTGGCAAATT  
AAATGATCGCTATAATAACATTGCAGAATATCAGTTCGGTGTCTTTATGACACTGGCCT  
TCCGATGGAATCAAAATATCGGGCAATGCGCGTACTAAGTGCGCGGGCGTGATCTACAATA  
TTTCTTCACTACATTCGTAGAACTGATAGTCGTCTACCTGATGAAGCTACTGAGCTAAG  
TCGTGTTCAACAGATTATCACTCGCCTAAAAGCTTTCCAGAAATCCACTCTATACGGAAC  
TGGTGTGTTGTCGCGCTATGATTGTAATGCAATCTGGCAAATAATGGATGGTACCTATCG  
TAAATATGTACCGCAGCTTTTAGACGTAGCTATGTCATGGGCACGCTATGCAGGTGCTGG  
AACTGGTAATCTAGTTCAGGTATGGAAATGGATGTAAGTCCATAAACCAGTGTACTTT  
TGTTAAAGATCTAAATGTTAAATTCTTTGATGATCGTGTACGGGCACAAGCTTGGGCGAA  
TGGTGTACTTTGGAGTCAGTCATATGACCATCGTAGCTCCTATTATCCGTGCCTACGTTT  
AGTAATGCTAGATGATACATCTGTACTTCTATCACCATTACTGTTAATATTTGCTGTGT  
ATTAATCCGACTGATCCATAAAGTACACGCTCAATTTAGCGGTAATGCTACACTAACACC  
TGAACAATTAGTTGAGCGTTGTGACGAGTATATTCTCGATCTAGTACGTGATATGTTCCG  
TACTCGTGTCAACATTATCCCGCGTACAGAGATCACTCCGATTGACGCAAATAACGGCAC  
CAGCTGGACTTGCAACGTAACGTGTTGAGGCTAATAACCCGCGGACCACGTTGAACTTCAA  
TCTGGAAACTGTTTCGTATTGAAACCCACCTGCTCAGCAATGAGTGGGTGGCTTTCAGAA  
TGAGGAAAAGTTAAATGGCTCGCTATAATGATCCGATGGCACCCGAGACTGGTTATGGTG  
CTGGTGGTGCCCGTAACACTGTAAACCTTGCTCAGGCTGGTACTAACGTATTTCCGGCCTG  
ACTTAGCTAACCTGGCTACTAACACGCCATATGTGGCACGTAACCTTAGTGCCGTTCTCTAC  
TAGATGCTCCACGATTCTTTAAGTATGCTAGTAATACTAACTGGTTAGTTGCATGTCTTA  
AGGCTTTCGTTGAAACGCATACTCGTACCATCGATGGTTTACAACGTACGCTTACTGTAG  
ATAACGCTGAAGCACCTGGGGTGGTTCTGGTGAAGTTATCCAAACGGCTACTAACGTAA  
CCCGTGCCCGGTCTAACCCAACTTTGGTTGCTGGGAATTACAAAACCGCGCTATCCAAC  
GTTTCTTACAATGGTGGATCAACTATGGTATTGCAGATGAGAATACCAAAGTACCGCGTA  
TTGTATCAGATGGCATTGTACCGGTTGAGAAATACGACGCTACCTTCTACGGTATGACTG  
TTCTATTCGTAGAACCTGATCCTACCTTCCAGGATTGCGTTAACGCTTATCTTTGCACCA  
ACATGTTCCCATTAACTACTGGTCCTTGGGAAAACCGTAAAGATGCATCACAGATTGGTC  
AGAACCTTGATCTAAACGTTGAGTTCTCTGCACTGACTGATGTTTCTGAAGGTGTACAAG  
AATACGCTCGTCAAATGTTCCGTAAACTAAACATTCGCGGTATGAACCCCAATAACCAGA  
AATTAGACTGGGGTGGTTTATCTGCTGACGTACTACGTGCACGTAATGGTATTCAAGACC  
AGATTGAACGTGCAGTTGGTAATCGGGTAACTTACGACGGTGTAGGATTAAGCTAATGGC  
AAAAGTATATCCGATGGTCCCACCTGGGAAGACTCGCAACCAAGATCAGAACTTTGATAT  
CAATGCATTCTTTTCTCCCGATGTAGTTGCGGCTGGCAATGGTCTGGTTAGTCAACTTCG  
GCGAAATGCTCAAACCTGAAAAGAATGAGCAGACTGTCCGGTACTAACCAAAAAAGCTAAAG  
CATATCGCCTCCCTTCGGGGAGGCTTTATGTTGTTAAAACTATGCTAAAAAATAATTA  
GATATATATTACATGTTTGCTTATTCAATAAGTAAAACCTAGATTGTAAATTTTAGAGAGG  
TTAAAATGAAAATTAATGAACTTACAATACTGATTTATTATTAGAAAACCACTATTA  
ATAAAATTGATTGTTTACTAGGATTACTTTATAAACATAACTTCGATAAAGAATTTACAT  
CTAAAATTAATTTTGGTATTCTAACGCAAATGACATATCAGAAGGATGATGTCAGTTTCG  
TAGTGAAGCCTAGCTTTGAACAAGGTTTTATTAATATCACTTTTAGTAATGATACATCAT  
GGAATGTTAATTTTGCACCTATCGATGGTAAACCTAAATACATTGGTTATACTGATCAAG  
AAGTGACAATTGAAGAGCCGCATAGCAGGAATATTACTCTAACAAAGTGAGAGTATTC  
GGCAATTAACAATTCAAGTATTAATTAATACATGGTATCAAGTAAATAATATTTCAAGCG  
AAGTATACGAGTATCAACATCACTGGAACTGGATAAAAAATATTCTTAACGATGATGATA  
TTATTCGATACTATTATCGTTTCATTTAGCTACCTATTGGGGAATGCCAACACCTGATA  
GACAAGCTACATTTGAAAAGTGGTTAGAAAATGACATTGCAAATGGGGAAGGTGATGACA  
CAACTAATAGTCATTTAAAATGGCTATTCAAACAGGATCATTCTAATATTACTGAAACAA  
CTAATGTTAGAGATGAAATTAATGCATGTAGCATCCACCACATTTATCCGTCAGGCAATA  
TTACGTGTGTTTTAACTGATAATAAGAAACCCACACGTTGGCGAGAATATGTAATGCATG  
CCTTCTATAAAACCATTGGGTATACTTGGGTAAATCCAATTGAACTATATTGGCATAAAG  
GTACTTCTGTGGAGTATGTTAGTTTAGAAACGGTTAATGCCAACCTTTTACTAGCTGCAA  
ATATTTTCACTGTATACAGTAATTGGAATATTACGGAAAATAGCCATACTTCAGATAACT

CTGTATCTATCCCAGCTATTAACCTATTTTGCATCAATAGTGAAAATAGTCAATATGCAG  
TATCCTTTAAGAATAAAAATAATAACTCTTATGAATTATTTGATTCATTATCCTTAAGTG  
GAAATCAAATAATTTTCATACACTGAAACCGCTATTGAGAAATCTAATTGTTCTGGTCCAT  
TGAAATTTGTAAGTGATCACGTTATCAAGTTTATTTGTAAGGAACTAACAACGTGTGCAT  
GAAGAATGAAATTGATAGTTTAACTAAAATTATTAATGATTTATTA AAAAGAGCACTTTAC  
TAATCGTAAAGAATTTATTACGAAGATTGGTAATAAACGTATAGTCGTTCCGGGTGCTCT  
AGTTTTCTTCAAAAAGTTACGTGGAGAAATTACGGCTAAGGTTTATGCAAAGCGTAAAGT  
AGATGGTGGCTATCATGAGCCAGCTATTAGCACTGTATGCGTTAGTAATACAAATGTATC  
ATGGGGTGGATTACAGTGGTACCCCGCGTAAGGAAATTAAGATAGTTTAACTATTTTTAC  
TTATGTGGCTATTTACGATGCTCTGAAAAATTTATGTAATGATCAATCTAGCTAATGTTA  
CTTAACAGCATAAGCCCTCCCATTGCGGGAGGGCATTATGTTTATTTTGTTTTTGTATAG  
TAATTTCTTAGTCATAGCACGTAGAATTAATAACAACATCAACCCAGTCCTAGTTGCTGCG  
ATATATGCAGGTACCCTAGAATTAGTCGCATCCCTAACTAACTTCTCACCTTCTTCACGC  
ATGAAAATAACTTGAGCATTCTTCTGTTTTAGATGCCATTATCTTTGCTCGTATTTTTACA  
AGCAATGTTTGTAGATCATTATTTCTAGCAACCATTGTACGGAGTGATTGCATATAATCG  
AAAGCATAACAATAAGCACTCATCTACGAGTTTCTCAAGCTTTTGTGCCCTAGGTTGACCG  
ATGTTACGGGAAAGGTGTCTAAGTGTCCGATGAACATTTCTGGTGGCATTGTGGGCATT  
ATCTTTTCAATAATACCGACTAACTCAGGTCTAATGAAATTTTGTCTTGTGCGCAACT  
TGATGGATATAAGTAAGATATGAGCGATACCCAGTAGACTTATCGCGTAGAATCTGCTCA  
CCATCAGAAATTAATAGCCATGTCTGATGAAATAACTAATTTACCACCTGATTGCAGTGTT  
CTGATATAAACATCATAGTACTTGTGATTAATTCACGTAGACGTGTTGAGTATCAGAT  
ACTACACGACCAGACCAATAATCCAGTTCTTGTGTTTTACCAGTTAAGAAAGGTGCATAA  
ATAGAATCAGGTGCAATGATACCTTCAGCCCGTTGCCTAAATAGTTTCTCCCATGACCCA  
ATTGTCTTAATGTCAAATCGATAATTGAGTGCGGCGAATGCAGCTTCGGCTACTTCTTTA  
CGTGCAGGATATTTAAAGCGTGGTACAAGTAAAGATGTTAGATATTTAAAATGCAACACC  
ATGAAACAATAACCATTGCTTCATGTCTAATATTCAAAGGAACATTAGTTGTTTTTAAA  
AGCCTAGAACAATATAGGCAGGAAGATGATTGAATACATCTGACATTACACGATGGTTA  
GGGTCAATGAATTCAACTGACTTAAAATCTTGGACTAACAGCGCTTCATCAATTCGTAAA  
ACATCATCATACCAAATCTCACGATCCGTATCGAAGAATTTAACTTGTGTACACCTAGT  
AATACACCACCAAAGAAAGCAGAGTGATCAGCATTCTTATTCATAAAACTGATAGTAAAG  
TCAATAATTTCTTTTACATAAATCGCGATCAAATGAAATCCTTAAAATTTCTATCAAGG  
ACTTCTTTAATAGTTGCCATTGGGAAAACCTCCTGGAGAATCAAATCATAAGTCATAAAA  
GTACTIONTATGTTATTTATTCCATGTAATTACATAAATTAGAGGATAATAAAATGGTTTATA  
AAATGATTAGTTTATTAACCTAGCTAACCCTAGTTTAAATTCAGCAATTAAGTCAATCGG  
TATCTAATGAAAAAGATCTAGAAAATCTTAGAACTAGTGGTTGGCTAAAAGATGATCTTA  
ACAATAATGTGTTTTTCATTTATTCTGAAACATCTTCTGATATTCTAGCTAGTCTAAGGA  
TTAATTTAACTATTGACCCATGGATAGATAGTGATAATCCCTATCAGAACTAGATGTTG  
GTC AAGTTAGTCGATACATGACA ACTGCACTTGCTTGTACTAATAATGATTATGAAGTTA  
ATGTTATTA AAACTATTTCTAAACTATTATTATCGTTTTATTAATAATCAGATATGTT CAG  
TTAATAATATTAAGTTTAAACAATAGTGGTAATGAACTCAACTATCAGTTGGATTAATAC  
ATAACTCTTATACCCTGGACATAGATTTAAATATTGGAATGAAATCATTATTGATAATA  
AAACTATTATTGATAAATATAAATTATTTGAAACATCGTTGAGTAAA ACTAAGAGTGAAT  
TTAATTTTTCTATAGTCACTAATGACAAAGTTAATAAAGTTGCATCCATATAACAAGACCG  
CATCTACATGTGAATATGATGATGCAATTCTATTTAACAAAGATTCGCTAGTAAGTATAA  
AACCATTTATTGATGGTCATTCACTTATTACTACTGATCTTATTGAATCACTTATCAAAG  
AAATTCAAAATAAAGAACTAAAAAATTAAGTTAATCAAAGTTATGTGTTCCAACCATT  
ATCAGAGAACTCATGGAGATTTAATCACAATTGTCTTATGCAGCCCTGTTAATATTTGGT  
CCATAACTATCTATGTATAGGTAACATATGGATTTAAATCCTCATGACATCGATAATCAA  
GCAATATTTAATTATTTAGAAATGTTGCCATCTACTTTTAAAGATAACTGAATCTACTTTT  
GTTGCTGCTGATTTTGATAGTAATGGCGATGTCATCATACTAGAGCAATCATT AATT  
TATACTGGTTGCTCTTTATCTAAATTTAATGCGTGTTTTAACTACTATGTAAATATAATGC  
CCTCTCCTTATGGAGAGGGCTTATGATGTATTTTCTCTTTTATCATCTGTAGTACAATAA  
CTCAAATATAATTGTAGAGGTGTGTAATGAGTTGCTGCAAAGCTCCAGTCAAGCCAGATA  
CGTCTATTGATATTGATCATCTGGTGGTGGCTGCCAACTTATAATCATTTACAAGATA  
TGTTTTTCTATTTAAAAGAAGAACGATTAACGCTAAGCCATGTGATTTATCACGGTACT  
CTATCCAGTATTCATACGTTGACTCTATGACATATCTGTATGTTTTAACTGATGAATTA  
CTGGTGAAACAATTTCTTGGTCAGTAACTAAGGAATTTGAGAAAGAAAGCCCTCAGGCTG

CTTTTGAGAGAGATTACATAGAACGTGAACTCATCTATAACCGTGGTATCAAACGTGCAC  
TAGACGACATGCTAGAAGGTTTAGCAGATGCTGATCCTAGCAATGTATATAAACTTGAGC  
GTACCGATTATGGTTATCGTATACTTAGGCGTATTAATGACGAACTTGGTGCTGTTATCT  
TTAAGCTTAGCTACACCATTCATCGTGGTCTATTACTCCATTTAGTGATAAAATGTA  
CTGTTCCCGAAAATGTTCCCGATATATTCCCAACTGAAACCCAACGTGCATTATCCAGAT  
TGGTGTATCGTTTTTCATAAACTGGGTGTTATCTTTGGTGATTGGGTTCCAGATCATGTAC  
AGAAATATAACAAGATGGAATTAAGTGGATATACCCGGAGAACAATGGACTCCTATGTAA  
TTCTGAATATGGCTATTCAAAGTATCAATTTAACTGATCCTGAATTAGTCACTTACCATA  
AATACTATTCTATCTAAGGTACAACCATGGCTAAACGAAAAGCTCGCGCAGTAAGTGCAC  
CGGTAACATTATCAGAAATTAGTGAAATCCCTAATGAAGTAACTAATGCAGAGGATAGTG  
TCAATGAACTTGAAACCACTCCTACTGAAATTGTTTCTACTGAATCAAGTGAAAATGAAA  
ATACCACTGCCGATTACAGAAAACACAGCCACAACCTGACTCGACAACAGATGAAGAATCAG  
AAGACACGTCTTCTACTGAAGCAAATGGAGATGGGGAATCAGAAGAGCCCGATCTATCGG  
AGAATCAGGAAGATCCGAAGGAGCCTATAGAAACGCCTGAGGAGCCCGTTGAAGATGATG  
ATGGTTCAAGTGACCCTGATGGTGGCACATCTGAAGAAAAGCCAACAGAAGGCGATCCAG  
AGGATCCTGAAGAGCCTACTGAACCTACTGGCCCTGAAGAACCCACTGATCCAATTGATC  
CGGTGGAACCGCCGCTGAAGAACCTAAAGCATTCCAATTAACCTAGCTACAGTGAAAT  
CACAGTTTGGTGATTACCAACGTATTGGGCTATTGAGTTAATTAACGTTATTTTCAGTG  
CGCCACCTGGTATCTATATCCAGATGTAGTCGATAACCCTGATTTCAAATAATGGTTC  
AACAAAGTGAAATTCTTTGGTAATGGTCTACGTCCGATATATAACTCTAAGAACATGATTA  
CTTTCACCACTATGTTAGAAGGTGCAAGTGAAGCAACAATCTTAGAGGATATGAAGAAAC  
AACAAACCGGCACTACTAAGTTTATTACCTGGTATGATCCAAACGCTGAAATAGATAAAT  
GAACATATCGCCTCCCCTAGGGGAGGCTTTATGCTGAGTTAAAAAAAGTTTAAAGATCTAT  
ATTACTAATTTGCAATAATAACAATATTCAAATAGGTATCTATAATGACTGAATCAACT  
ACTTTTAGTTTTACCCTAATCCACATCTAAAAGAAATATACGATAATTTTAAAAATAAA  
TATCCTAAAAACAGTGTAATCTACGGTTGGATAAATAAAGAAAATAATAAATGGGGAATT  
ACCGGTAATACGAAATATAATTCAATTACCGGTACTGGCCATAATGTTCAATACATTAAT  
CATCTAATTTCTAGACTACTAGAAGAAGAACAGCATTTTGAGAATACACGTATTGAAAGA  
GCATGGCTTAATTTAATTGAGTCATATGAAGACAGTTATAAAAGCGATGTATCTCACTAT  
ACTAATCTGCCATTAAGCCACCTTACCAATTGGTAAGCTCAATGTATTTCAAATCGGA  
AGAGCACACTCAGATGAACTAGGTATGATTACACTAAAATCTGCCAATGTATCAGAAATC  
ATTATTGAGTCTAAATCAGCTCTTGATGAAGCTCTTAATTCTATTGATTGCATTATTCAT  
GAAAACATTAAAACTGATTTTAAAGTACTCATGCATGAATTTTATAAAAATGAACCATAT  
AGGCCTGATTGGTTAAAGAAAATGGTACATGCAATTTATTCAATCAACCTTTAACATT  
GGTTCATCATTTGATTTAATTTACTATGGATGGAAGTGGGAAGGTGTAACCAGAATTA  
ACAAGTGATCGAGATGCAGCTGATATGCTGTATTCTGGTATTATTATTAATACATCAAAA  
TTAGTTAATGATCCAGATAATGAACCGTTATTTGAACAATTAGTTAATGTATGTGAAGTA  
TCAACTGCTAAAGTAAAATAAGTGTATTATTTTAAATAAATGAAGAGGTTAGAAAAAATG  
ACTCAATTTAACATCACCTGGGAAGAACAACCTCCAAGCCCTATCTAAGCTAGATGGTTA  
CATCATCCACATAAATTAGAGGATATCTCCGTTCAATTGGGTATTTAATCCAGTAGATATT  
TCAGTTTTTGTACATGTGCGACCATGAGTAGTCATAACACCCACTATACTTTTAAACCG  
CAGTCAAGTCCAGATGATGCCATGGTGGGAGAATATGTACTATCTCGCATTATTGCCGAT  
AATCTGAAATATGTTGATAATTTATATCTAGCGGCTGGTGGCCTTATTTGCGGTAATGAC  
GAATACATTAGTGATGGTAATGTGGTTGGCATTATATAGCTGATGGCGTAGGAGGTAAC  
AAGCTTATTCTACCAGTCATTGAATTTATGCCAGGTGTTTCATGTTGATGATATCAGTGAT  
AACTAATCAAGTCGTCATCCTATCAAGGTATTTTCAAACAGATAACCTTGAAGAGTTT  
GAATTCCTTGTTGATAAGAAGAATGCAATAAATGTAAAAGAATTAATTCTAGCCTATACT  
GATTATTTTCGCTAATAAGTTGGCCTTTAAAGATCCAGCTGAACCAGCTGTAGAAATGTAT  
CAGTTTATTGATCGGACTGAAGTATATTTTAGTTTTGAAGGATGCCATCCAGATGTTGAG  
GAAGTTCTATTTACCATTAAGATCGTACGTTACAATCAACCACTCAATTCAACTGCAATG  
CAGGTATTTTTGAAAAACCACTACTCTCGCACATCCGGACAGTTGTCCGGCAGGACCTT  
CCGGCGAAATTTGTGGGCGGTGACTATTTAATTTTTGAGAAATTCATTACTTTAATAGA  
CTGATTTTCTTATTTATCTCTTTTCTTCTAAAAAGAAAATTATATAAATAGTATATTA  
TGTGGGGGGGACCCTTTGGGGGGGTTCCCATATAAATTTCTTATTATTAGAGATGGGGTA  
TAACCTATCCTTAGTTGAGAATCTAATACTTTTAGTAATAAGGGATTGGCTATAAAGAG  
CCAATACCGTTTAAATTTGAAAATAGAAAAATTGGAAAAAATGAAAAATGTCTGAACAGAA  
AGATTACACTCTAGTACGTACTCCACTAACTCATGATGAGCTAAAGAAAGCATTTAAGA

AGATAACATTCATGCATCTGATGTTCAACTAGATAGGTTAGTTAAGTTATCTGAAGAAGT  
ATGTAGTGCTAAAGGCAATTACAACATTCGTCCTTTAGCTAACTCAAAGGAATGGTATT  
TGAATTCACCAACAAAGATGGTGAGATCATTGCACTAATTCCTTTTGATATTTCAAAGA  
ACGTAAAAATGCCAAAATCCCAAAAACGAAATGGCTTACTGAACTTCTAAACGTTTATCG  
TTATAAAGTTAGTAAGATTGAAGTTAAGAATGTACTTAACATGATTATTGATTGTGTTAA  
GTCTGGTGGTACTTGGCAAACATACATGTGTGCGAGATAAGATGGTAATCGAATTTAAATC  
TGATACTGGTAAAGTGGTTAATGAATTAATTGTTTCATCAAGAACGAACTCATGAAGAGAT  
CGTTACTTTTAAGCACTGATACCATTTACAAGTTGGTATATGAAATTATATTAATCACAA  
TGAGGTGTAATGATGTCTAAAGTAAAACTCGAATTTACTTTTGTGGTGGTGGTGGTTTC  
CGTATTGGTGAACATTTCCATGGTTATCATGAGGATGTTTGCTACATTGATACCAGTGTA  
CAGAATAAACACAAACACAATACTGACGATAATACGATCATTATTGAAGCGGATACTAAG  
CTAGCTGACCAGACTGCACGTAACGTGCTATCGGTATGGGTAAAGATCGTAAGGCAGCC  
GCAGAACTAATCTCTGCACATATTCCTGCCATTGCCCATCATTTCCCAGCAGGGGATACT  
AACATCGTGGTATACTCAATGGGTGGTGTCTTGGTTCAACCATTGGTCCCTTCTCTTGT  
AGTCATCTACAACAACAAGGTGAAGTAGTTGTAAGTGTGGTCATTGGATCTTACGACAGT  
GATATTAGTCTTCGTAATAGCAGTGGTAGCCTTAAGACTTTTGAAGGGGTTTCTCTGT  
AGTAAAGTTCGGATGATTATTAATCATGAGAATGTTGAAGGTATACCGCAATCAATG  
GTGAACCAAACATTCTTGAAGTACTAAATGCACTAGTAATTCTATTTAATCAAGAACAC  
CAAAGTCTTGATCTAATGGATATCACTAACTGGGCACACTTCCATAAGCACCATGATGTA  
CCTGTACAGACTGTCCAATTACACGTGTGTTTCGATCGTCAAGAAGCTCAGGCTATTCTG  
GATCCAATTTCTATTGCTTCACTATACACTGATCCTGATCGCGATGTATCAATTAGTACA  
GTTCTAACTCGTACTACTGGTTATGCTGATCCTGAAAAATATGATTTTCGATCAAATGCAT  
TTTGTGATCAATGGCCTATCTATTGAAGATATTCGTAAGCGATTAGAAGAACGTCGTGAA  
ATGATGAATCGAGCCAAAGCTAATATGCGTAAGCGTCAGTCTACTCTAGATGTGGATGAC  
CAAGCAACTAGTAGTGGTCTTGTATTCGATTAACTTATACTGGAGCCCTTCGGGGCTCCT  
TTTATTTTTTTTTGTAACGAGGTGTAATATGAAACCAGTAAATACAGTTACTTATATTCCT  
TTGCATGTAGCTGAATCATTTTATTCCCCTAGAAATATGATCTGTCTACTGGAGAAAGGT  
AGAGTCCCCTTTATTCAGCAAAACATCTTAATTATTTACGTATCAATGTTGATGACATT  
GAGGATTATGTTGATTCTTCTTATGATCTATTTGATCATCGGCATGCACAACGTATTATT  
TCCTTCTGTGAAGCTCTTGGTAAGGGTCAACACCTATTCGTACACTGTGAGGCAGGTATT  
AGCCGATCGGCTGCTGTAGCTAAGTTTCTGTGCGATAAAAATGGGATTCATTCATGTACCG  
CATAATCCATCTTTATTTAATTTTGTATGGTTACAATGGTCACATTTATGGAGTTTTATGT  
AATGCTAAAGCAGGGAAGCTTTATTATGACGATAGAGCCGATGGTATTTTTATGGGTAAA  
GTAAATCAGAATTTTGCAGATATTAATAACTAGCGATAATTAATAATCTGTATATTAGG  
AGATAACCGATGGCAAAGAACACTGCTAAAAAGCTCGACGAGCAAATGGCAGCTGAACTT  
GATCTGACGTTATCTCCGTTTACTATGGTTCTGAAACACGTAGTTTCGTCTCCCCAACATA  
GTTGAGGGATTTATCTTTGTAATGGTTAAGGATGGAATTATTAGCTATGATCGGGTAGAC  
AAATGGGCTGAAGTAAACGGGATGCGTTCGCGAGTTCCTCGTTTCAAATCGCATTCCGGT  
ATTGAGAAGCGGTTAAACGATAAGCTGTATAGACGTTGGTATGTTTGGGGGAATGGTATT  
TTATATCCATTACAAACATCCAAGGTTGAAGATTTAAAAGATAATTTCTATTTCAAGATT  
GACAGTAACCCCACTGTTGTACCATCCACATTCCAAATATTGATGCAGACAGTATACGA  
AATAATACATTACCATTTTTTCGAAAGAGTCCACCCTGGATGGGGTGTTATATTAATAAT  
TGAGATTTACGTATATGCTATTATTGATTGATTATCCTGAGGTTAAGGAAGTGGCAGATT  
ATGTAATGTCTGAATTTGAACAATATCCTAAATTAGTTAGTGGTTCTATTCTTTCACTTG  
AACACCACACTAAAGGATCATTGATTTTATCTGGAGATATGACGGATGTGTTGATATTA  
GATATAAAAATCATATCTGTGGGACTATTACATTTATGGGTTTCATATCCAACCTATTAA  
CTTATAAAAATGTTATTACCATCAATGTCCAAGATATGATTATTTCAATTAACAGATATCG  
AGAAATCATTATGTCAACAGTTGCTCAGTTAAGTATTTATGTAAAACAGTTTGTTCGTCT  
TAATCTTAAAGATGAGGATGTTATTTTAGCCGATGGCGAGAAATGGAATATTTTTGTTTT  
AAATAAAAATAAACTATTGATCCGTGATAGTGATCGAATAGCAGTTACAACCTATCGATTA  
TGATTCAATTCGGTAAGATTATTAAGATTGATCATTCTGATTTTGTCAATAGTTCCATGGC  
AACTGATAAGGCATATGAGGTATTAAAAACATATATAGCTCATCGCTATGGGGTTTAAATA  
AATATTTAAATACATTTAAAGGCTATATTACAAACATGATAATAATCCATGTTAAAGGAA  
TAATCATGAATAGCCTTGCATATAAAAACAACTGTTGTATTCGGTAAGACATATCGCGTAA  
CAGGTAACAAAGCATTATATCCATTCTAGATTCACGTGGCAATATTTGCTTTGAATTA  
ATATCGTTGAAAAGAAAGCATGTCAACCGTGAATAACTTTAGACGGTATTGTTTCAGGTA  
TTGGTATTGCACCTGGTGTATCTCATCAAAAAGATTCTCAACAGTATTAATTGATGATGGG

TTATACCAGTATGTTTTTAAATATAGTGTTATTTAGATATTATCTTAATGGCATAAGCCC  
TCCCGCAATGGGAGGGCATTATGTCTTTTTTTTTTTTATTTTTTTTTATTGAGCGGCTGTGATT  
GTCCGAATATGATGTCGCTTACCTTCAGGATCATTGAACTGCCTGGATATTTTCATCCAA  
CGCATTAAATTGTTCTGATATAGTTCTTCAGCATCGGCATATTCATAAACCTTATCACGG  
AATACACCTAACTCAGCACCACCTGATAACTGTGCTTCACCCATAGATACAAATAACTCA  
TTGTAGATGTATGACTTAACAGCATACTCAATGAGTTTTGAAAATGCAGGTATGGCTGTA  
GGTCGTATGGTATTTAGCTCCTCATCATTACCTACGCGACAGGCAAGGAATGATGAGTAG  
TTAGGGATATTGATATACCTGACCATGACAGTGTGTGGGTTAATTAAGTTGATATATGCT  
GTTTGGGCGACTGGTAACTGTCTAGCTGAATCTAGTACACGTCGTGTTAATGCACCCATA  
CTTGATTCATTATAGTGCATAGCATAGCCAGCAGTATGGAATCCTAATACTCCAAAATGG  
ATACTGTAACATTGGATAAATTGGGCGTTGCTGAGTGTATTTCGTCTGGAATGTAATAAACC  
ACTGTATAAGGGTCAACATATTCTGCTTGCCTGGAAAATCTAGTGGAAATGAATACTTTT  
GAACCACCGACTAAATCAATATCTAACATAACACGTGGTTCAATAACAGCTTCGCGTATC  
CTGGTTTCTAGTGAGATAGCTGCACCACAGCCTGACATTTTCGCTAGATAAGAAAACAGTA  
TTAATATCTGTTTTGGGATCTTAAAAGAAATATCACGTAAAGCCTTAGTAATTGGATTTC  
ATAAAAACGTCCTATAATGCGCTGTACGCGTTTTTTTCGATGGAGATAATACCCAATAAG  
GTATAATATACATCGGCTTACCACGAACAGATTTGACTAAAAATATTTTTAGATCTATAT  
CATGTTCTGAACATTTAATGAGAGATTGTACTGTGACTACTCCCAAGTAGCTGACCTG  
TATGTAGTAGATGTAACGAGGGTGATAGCCAAGTTAGTACCAAGATCGCCAAAAGAGCTA  
ATAAATGCTCGTTTAGCAATTAGGTGCCAAAGCTTTGGAATACATCCAGATGACTATGGT  
ACATTAGAGCATATATTTAAATCAGTAGAGGACAGCTTAATTGATGACTTCTTTAAATAT  
TCTATTGACTCTTTTGAATTCATGTATACTACTGGATATAGCCAATAAATAACACTCCT  
CAAGAAATCCAATGGTTTCATGATAATCATGAAGCCGCATCTGATCTTTGGGATATATTA  
AAAATTATACCTAGAGTAAATGCAGGTAAGTTTGTAAATATTCTATCGGTTAAAGAACACA  
GTTTGGATCGCTATTCCAAAAAATTAATTGGAGAAATATAATGTCTGAATAAGCTCATTGT  
ACTTGATACGCGCCACCAAGAAAAAGCAATATACGATTTACTAGGTCAGCTTACAGCTTC  
AGCTTCAATTGATGAAGCGATTGGGGTGAAATTGAGTAAAGATGTGGCTCAACAGTTTTT  
ACATCTAATGGTTGAAAATATAGTAGAGAGTTTAGTTTTCATATAAAACAGCCAAAGACCA  
GTACACCAATCTTAAGATGGCAGCAGCTATTTTTAATTGTGCTGTAAGTACGCTAGATAG  
TAATAAAGTTGCTTGGGTAGAAAATCTAATGAAACTACCTTATCTAGAACTATCTATCT  
AGATATCTATAACAAGTAGCTAAATATATCGATAGCGGTACATGGATCCAATGGGATGT  
AGTTAAAGCTGGTTCAGTTATAACTTTAATCAGTGGCAAAGATTATCGTATCGCGGAATA  
TGATCGTGTCCATGGGATTGATAATGGTGATGATCATGCAGTGGTATCACTTAACCTACT  
GAACCCATTAAACTATTTATTTAGTGAATTTCTCCGTATATTCTTCCATGGCTTTGACAG  
AATTAATTTACAAACACTAGGTTATAGTATCTACGAATCTAGGCGTAAACTCAGCTATC  
TCTTGCTAATGGTGGTAGCTATACTTTAAATAAAGACCACATCACCCTAACCATGCATA  
TAACATCGCAGTAGAATATATTCAAGAACAGTTAACTGCATTACTTATTGGTGTAATTGT  
TAAACAATATAGTAATATTAAGTATCTTATCTAATACCTAAGGTTAACCATGATTTCTT  
TGCAAGTTTAGGACTTGATAATTTATTACTATTTGAAGAGAAATATATTAGCCCTCTAGT  
TAGTTCTATTAACATGGCATAATTTTTCAACCAGAATTGAGCATGACGTTAAGTATGAACT  
AGAGTATCATAGCTATGTAATTTCTGTATAACAAGAATAAGAATGCAACTTATCCTATTGA  
GAAATTAGTATTTGAATATCAACGTGGTGATTATTTACCTGATGATCAGCGAGCGCAAGC  
TGAGCGATACATTTTAGAAAATAATTTATACTAAATAAAGCCCTCCTTATGGGGGGCTTT  
ATACCGATTATAAGGTTTTTATAATGAACATATCTAATGATAAAGACACATCAATGTGTA  
TCAGAAATGGAAGTAAGATCTTTTGTACAAGATCAACATTCTGATATTTGGAAATCTATAA  
AAAATAGTATTGGTGCAGAATATGCATTAACAATTGTATTGGCAGCAGCGTCTGAGAGGG  
CATCAGGTAGCACATCTAATGATGTCATAGAATAATTAATCAGATGCTGGGTTATAGAG  
ATATTTGTGATATTGATTTAACAACCTTATCTGTATAAATTGTTCTAACCGGGTAGTTCTAC  
CATCAGCTGGTAAACATCCAGTTAAATAGGGTTATTTATGATACTGAGAAACCAGAAGATC  
TATACGTCACCATTACCCACACCACAACCTCGTTTTTTACTAAGAGCGACTAAAAGTAAA  
CTTATTAAGATGATAACTATCTAAGATTTGTATTAGACTTTTTAGATATTAGTTATATC  
GAAGCAATGCATTTGCTTGTGCGATTGGCAGAACAGAAGCTTATGCAAATGGTCATTAAA  
GAAGAGATGTTCTATGAATATGCTAAAGATATTCATTTTCATGCATAAATAAAGAACTT  
CTCGATGAAGGTGCTGAGCAGATCATGCATCTCATTCCAACAAATACTAAGGAACTGTGG  
TATGAAACAGAAGCACGAGATGGATTGTACATCGGAGGAAGTACAACGTCTGGTATATGT  
ATTGCCAATCGAAGTGGTATTCCACAATTAATCACATTGATAAAGAAATTTACTTACCT  
AACAAATAAAGATGAAGCTACAGTCATCGCCTTATTAACCTCAATGGGTTGTTAAGATGAT

GTCTAAATTACAACAGGATAATACGGTTATTCCTTTTGTGGATATACCAATACAACACTAGG  
AAATGGTCCAGATTGGGATGAGTTCATTAATTTGTTCTATACAACACTGGAATCCAATTACT  
ACATAGAACACCGAAGAATTTAATAGACTATAAGTTCATTAGAGTAATAGATAATAAAGT  
TGTTCTATTAAGTACTAGTCACTGGTAAAGAGTGGAGTCAATATGCAATTGTTGCTAATTT  
TGAAACCGCGTTCCTTTACGGAAGAGCTAGGTGTAGGTGAGCCGACTGATTTTGTACTAT  
GGTGTATTAATAGACTTCTAGCAGCATATGTAGAATACTTTAACCACTGGCAGAGATTAG  
ATTGGCCTACCTTTTTAGAGCAATGGTTAGAAGATTACTTAAGCGATACCTATATAGAAC  
CAGATAGACCGATGAGCATGATGGTATTTGATCATCAGGGAAATCCTAATACTATCAATT  
GGCACTTAAGATCTGCTGAGATTATCGAAAGAGTATTGGATTTATTTGGAACACTGATTTCT  
TAGAGATAATCCAAAAACAAGTTATTCAGGCAGGTAATCCTTATTACTAGTCTTAAATGTA  
TAGAAGTAGATAAATATAAGATGGTAACTAAATTAGTTATGAGGTCTCAAACATGATGCA  
TCCACTTCTTTATAGACAACAAGAAATGCAGCGGATAAATGATGCTAATAACATAACTCC  
AGGCCAACAAAGGAATGACGAGTTTCGTAGTTATTAACATCAGTGATATCTGGCCCATTGT  
TAATAAAATGGCTGATGTAGTTGTCAATAAGTCTTACAATACTCCTTACCCATATACTGA  
ACACCAGTCTATAGAACAATTATGGTATCAGGCAATTAATTCATATATTGAATTTCTAGC  
GCAACAGCCTACTCAACCAATTATAGGGGTTGACTATTATTTACAAGAATACTTTCCATC  
GGTAGCACCTGTGATTATGCAAGATAAATATGCATTGAGTATTCTTAATATGTGGTTTGC  
GACCGTGTGTA AAAACATTGGCTAGCAA ACTACAATCTGAAATAGCACATCTCTATCAGAA  
TGGATATGGTGTAGAAAGAATCCAATCAATAGCAGTTGATCAACATAATCAGGGTTATAT  
TCTAGAAGGTGAAGACTTTGGTATGGACTGTTACAATGATGTGGATTAAGTGACACATAT  
TAACAATTGACGCAAATAGGAAAGCCTATCGGTTACATAGGCTTCCTACTAGGAACCGA  
TATGGAAAAACGAGTATTTATCGTATTTAAATCTAAAGAGTCAGAAGTATATTCGCAACA  
TTTGCTTCGTGAATATACAAAACGAATGATATATCCAGATTGTCCAACACCCTTGATTT  
ATTTGAAGAATCACGTAAGTTAAGTTATATGGATACGCTTAATAATGACATATACATCCA  
TATGCTGATGTATGGACATGACTCATTGATGATCCTGACGAAGATATTGAGTTAGAGAA  
TTATTCTACTAAAGGATATGTTATTGAATATTGTACCGACTTTATCAATAGCTTTAAAGA  
AAAATATCCAAATGGACATGTATTAATTACAGTGCCAATGGATACAAAAGGTCTGTTTGG  
TGTAGTTGTATTACTAGATGAGTAATACCCTATGTAACCAACTATTTTAGGGTATTACCA  
TGGCTGTTAATATTCGAGACATTC AAGCAGGTGATAGGATCTCATTTCGAGGTCTATCCAT  
ATGCTATCCTAGGTAATAATTTAAGAACGTTACAGTTCGAAGGTATTGTTACTGCGTCTG  
TAGCATCTGCAATGGGTTTTGATGTAGCTGCTGCCGGGCAGCAAGTATATCCAAGTTTAC  
CAGCAGGATCAGCTCCAGTTGATCCAACACAATACAATTACATTTCGTGTACGAATGGCCA  
ATAATGAAAGTGTGATGTTTATTGGTATCCCTTGGATTGTTGCGAATACATTAGAACGTG  
TAGATGGTAAACGTCTGACATTAGTATGGGATGATGTCGATAATAAAATGTATGATCGCA  
TTCTATTGGCAGTGCGACAAAATAATGCACCACCAACTTCAGTGACATATGAATAACTAT  
AAAGGAGCCATTATGGCTCCTTTTTATGTTGTTTTATTTTTACTTACTTACATCATCTAAT  
GTGAATGTAAGTTGATGTGCTACCTCTCAATTTAGGGTACCCGTATAGGGTACCCATTCT  
TTCCTTTTCTTTTTTAGTTAAAAAGAGAGAAATCATTCACTATAATTA AAAAATAAGTAT  
ACTGAGAGATATGTGAAATGACCGCATTGCCCCAACCAATCCGTTTTTAAAAGATGTCA  
ATGATTACCATCGTGATATTGATATCATTAATGCATGTCTTGATGATAATGCCAAATATC  
TTCAATTAATGACAAAAGATGAATTAATATTAGTTTAGAAGAATGTAAAGAATTTGTTA  
AAGAACAATTACGTCAA AATGGTGAATATGCACTTCGTAATCCATTAGCAACTATTCTAG  
ATAAAAATAAGTTTGGTGTAGGGAATTAAGACGGTTTCATTTATGGCTTTTCTTAACC  
GTGTTAAGAAACAGAATCTATTATTATCTCCATCAATGACCGCATATTTACCAGAGTCTG  
TTAGACAGTCTACGCACTCCATCTATATTGCCGAAGGTGTGAAAAACCGTAAGCGTGTTA  
AAGGTGAACAGATGCAGGCTGAACGTGAAGCAGCTGCTTTCCTACAGGCCGCGGATAAAG  
AGAATTCACAAATTA AAACAGAACTTGCACAAGTACGTAAAGGCGAGCAAGAAA ACTTCA  
AAATTAACAATAACTCATATTCAGGCGGTACTGTATCTGCTGCCACTATTCTTTATTATA  
AGTCCACACACTCTAGTTTAAACATCTACCTGTAGAACTGGTACCTCTTATGCTAACTCAA  
ATAATGAAAAATTCATTATGGGTAATAGGCATTATTATACTCCAGAAATCACAAAAGCTA  
ATTTAGTAAACACTATTAATGTAGCTGATATGGAGTTAATTC AAAAAGCAGTAACTAATT  
TTAATCTACATTGCCCAACGCCAGAAGAAGTAGTTGATATGGTTCTTTATTCAACTAAAC  
ACTATTGGCAAATAAGTACTACACGGCGCAGATTTTAAA ACTAGCTACTGGGATGACAC  
CAGTCGAACGAGCAGCAGTTATGTACGTAGGTGATCTATATCACTTATATAAATACAATA  
AAGAATTAATCAAGAGCTTTCTAATTAATTAAGCCAGGTTGGAACAAAAGAACAATCA  
TCACTGAAGAAGAATATTC AACTTATGATGGTGTATGGATCTATTGGCTAGCTTTATTT  
GCTTTGATACTGTTAAAGGTCGATCTAAAGCTAAACTAAAAGAGTCAGATCCAGATACAT

TAAACCAAGTTTATGCCACTGGTCGAAATATCGCTGAAACTCTTAATGAATATCGTCTAT  
TGATTGAAGCTTTCTTCTTGACTAAATGTGTACCATCAAGCATTTCATGCTTTTCCAACCTG  
TGTATAGACGAGCTGCTGTTATTTTCAGATACTGACTCCACTATGTTTACATTACAATGGT  
GGGTTGAGGAATTTCTTTGGTAAAGTAACTTTTAGCAATGAAGCTAAGCGACTAGTATTCG  
CACTAGTGTTCCTAGTGTCTGAAGTAGTTATGCATATCTTGGCGATTCAATCCGCTAATA  
TGGGTGTATCTAAAGATAAGCTTCGTCTATTTGCAATGAAGAACGAATATTATTTCCGAG  
TACTGGCCTTAACTACTCGTTCTAAACATTACTTTGCATCACAGGATGCCCAAGAAGGGG  
TAATGTTTAATGAGTCACGAATGGAGATCAAGGGTGTAGGACTAAGGGATAGTAAAGTAC  
CTAAGAAGATTAATAGTCGTGCTAAAACACTCATGGAAGATATCATTAAAACCTGTAAAGA  
CTGAAGAGAAAATCGACTTGGCTTCAATTCTAAAAGAAGTTGGTGATATCGAAAGAGAAA  
TTATTGAGTCTGTTAGAAGTGGTAAAGCTGAGTATCTGACAAGTGGTCAAACCTAAACGAC  
CTGAGTCTTATAAATCTGAAGATAACTCAACCCATAAAAAGGGATTAGTGTGGAAGACTG  
TATTTGCTCCATCATTTGGTGACGCTGGTGATCCACCTTATTCACATGTAAAGATCTCAG  
TACTCTTAATAATAAACTGCGATCAAAGAATGGATTGATGGTATCGAAGATAAGAAAT  
TAGCTGCTCGTATTCAAGCATGGGTTACTGAAGAAAATAAAAACCAAGTATTGGTGATTTC  
ATATCCCGAGTACAGTAGTAGAACTGGTTCGTATTCCAGAAGTTATTACGCGTGTTGCTG  
ACGTTAGAACTATCATTGGAAATACTATGGGTGTATTCTATCTAACCTTAGAGTCCCTAG  
GTATTTTCTTATTGATAAAAATAACGATCGACTCATCTCCGACTTCTATTAAGAAATAT  
AGCCTCCCCTAGTGGGAGGCTTATATACTAAAAATAATTAAGATTTATATAGTCTGATT  
GCCAATTACTAACTTAATATGGTTCAATATAATGACAAATCATAACCGAATTTAATTTTGA  
CTTAGATCGGATGAAGAAGGCAATTAATAGCGGCACTATCACATTACCAACAGTACCATC  
GGGATTAACCTCGTGAAGAGAAACGAGCTTTTATCCGAAAATATATTAAGATAAATTA  
AGAGGTAGATGATAATGGAAAAGACTAATGAAGTTCGTGTAATCACTTGGAATGATTATA  
GTAAATTAGTAAATGATAATCGTATTAGGATCCATGGATTAGCCCCTGATGATTCCACCA  
AAGCAACAGCCTATGTTCTTTTGGATGATGGTACTGAGGAATTGGTATATGTAACCTTATT  
CTAATGAATTAAGAAGCTGATGTTACTACTGAAACAACCTGCAATTACTAGTGATAAAA  
GTTCACTAGATGATGTTCAACCAATTGGTTAATTACCTCTAATAACGAACCACCAAAGT  
TAAATAGTCTAAATGACTATATCGATGAATTCAATTGGCACTCAAGTGCTGACAATGATT  
ACAATAATGTCTCACTTGAATTAATGCTAAATACCCATCATACAACTCTTTGGGAATGTG  
ATAATATTCTAGTAAAAGACGTAACCTATTAACAAGCTCTTAAAGAAGGTGTTGATAAAC  
AACTTATTAATACTGATAGTTCATTCGATGAACCTGGTTACGCATCTAAGGCTAACTGCTA  
AACTATTATGGATCCATTAGATGAAATGGATAATGGAGTTAAAAGCAGTGACCAAGCTG  
TAGTTGATCAATTACTAAATCATGACCGTCGACCAGGTAAGTTTAGTAATAAAATGCTAT  
TGCCAGCTATCCCAGGAATTAACCGAGCTGAACGTAGAAAATTACTTTCTAAAATGAAGA  
AAGGTAATTTCTAATAAAAACGGCATATAACCCCTCCAATTTAGGAGGGGGTTTATGTCA  
CATTTCTTTTCTTTAAGTGCATCTATCATCCAATCAACTTGTGCCTGTTGAGCTTTTAC  
AACTCGCTATTTGCTTGTGCTTAAATGCTTGATCATTAGATGCTTCTATAAGATCAAT  
TAATACAGCGTTAACAGAAGATTGATCATAACCAGTGTTCTTTAAAAGCTGTCTTACAAG  
ATACTTAATGAAGGGTGTGCGAGCCAATACATAAGCCCATTCAATTTCCTATTAATAGG  
TTCTCGTGGGAGTCGCATCATATCGAACAAATTAGATTGTACGATAGCTGGTGTATCCA  
TGATAAACCTTCCATGTCTACACCTTTAATATGGATTCTCTATTGATAGTTGTACATAG  
TTTATCAATACGTGGATTTCATATCAGTGATGTAATAATGGATGCGGTATAGGGAATGTTGG  
ATTTTAAATATCTAAAGCATTTCCTTGCTAACCTGTTAAAGAAAGAAATATCTAAATAAGA  
GTCAACCATATTTGGCAATACAAATGATCCTATAAACCTATATGTATCTTCAACTTCATC  
AGGATTCTTCTCAACTTGCCATCGATACCAGTAACGGTACATCACAAGAAGCATTGGTAT  
ATTTACTAGAGTTACACCATAGCCTCTACCCTGCGTGGTATTGTTTCATGATAGGTAAATT  
AGTATCAGTACGTGTATGATACAGATACGTAACAGGGGAAAGTTTATACCATGTTTTATT  
TAGATCTTTTAGATCAAAGCTCTCTGATGTGGATACTAGAACTTCTTCAGTTTGAGGACC  
AAGTGTAACACCACCTACATGAACCTTACCTTTATTTAAAGATGATGTAATACCAAATGA  
ACGAATAATAGCACGTGAACGATCGTCCACGTTCTTTATAAAAAGTAGCATCATCACTTAG  
TAACTCTACGTTAAAATGTCGAATCATTGTTGCTAATATATTTTTAGATTCAACATACTT  
CGGTGCCCGTCTATAATAACTTTTAAACGTCCCTAATTTGCTCAGCGTAGATTTCGTCGGAT  
ATAATGGATGTTAGGATCAACCACCTGCCCAATTTACGTGACGGAGCATTCTTAAATAA  
ATTATACATGGTTATTATCCGATTAATAAATTAATTGAGATCTATATCATAGTTTGGTAAAC  
AACAGTAGTAATTACAAATAGGAATATACAATGGCTAAAATAATGTTGAAGACCCGCCA  
CTATATTTAGGTAATAACAAAGATCTTACCGTATACATGACTAGCAAAGAAATTGTAGTT  
AACTTTTTCAATGTAGAGCGTAGAGTTAAGATAGATCCTAATGACCCCAATCCATTAGCA

ACTGCTACTAAACTCCATGAGGAATTAGTTAAGCTATTAGTCGCGCATCGATTTGGTAGT  
GTAGTTAAAGTAAATGAAACATCTGCTTCAGCACATTCACCATTGTTGCTAAATTTGAC  
ACAACACTGATAATAATAAAGTTGATCCAGTTAGTAAACTATACGAACTGTACCATTCTCTT  
TTTGGAACAGTTTCGTAAATATATGCAAAGTAAATGATAACTGCATTTTATAAAAAACTG  
ATAGTTATTATTTAATACAGGACTGACGTAAATTAGTTTCTGGATTCAAACCTTTATACCC  
ATAAACTCAAAAAAGAAGATATGGAAATTGTAATAATGAAAAATAAATAACTCAGATTG  
TAATAATATGTAGTGAACATAGTGTTTCGTTACGATCTGCTGATAGCAGATTATAGCGTCT  
ATGTTGTAATGAAAAAATTTGAGATTTATATTACTAAATTGAATCTAGTATACTAAGTA  
CTTAGGTTCTTCTTGATCAAGAAACCATAATCGTAAAGGTATTTAAAATGGCTGTTAACG  
AAAACGAAATCGGCACCGTTCAAACCTCAAGCTACTGCTCCTGCTCCGCAACCCACTGCAC  
AGCGTCAAGCTCAACGTCCTACTGGCGCGCCTGGGTCTACTACTGGCATTAAACCATCTAA  
TGCCTCGCTCTGGTCGACTAGATGGCTCTGATGCTCGTTCAGCAGATGCCCTACAAGTAT  
TCACTAAAGTAAAAGAAGAAGCAATCCGCCATCAGGACCTACCTGATGACTTCGATATCC  
ATCGTTTCGATCGTGATGCGCAACAAGTTGGTATGGCTGGTCTACTCATTGTTAAACTAG  
CTAAAGATATCAATGGTTCATGAAGGCATTTCGTTTCGACTCTAGTACTCGATAACCTAC  
CTGGTACTCGCATCCGTCCTCCCGTACCCACAAAATCAACAATGGTCTAACCGACGACATCA  
TTGAAGAGAAGGTACTACCGCGTGATGTATTCACTGCTCAATACTGGAGCAAGATCGGCG  
AGTTCCTACGGAACCGTTACAACATCCCTGGTCTAGAAGTACTATCTGCCGGTCCCGTG  
CAGTGTATGCTGACTTCGACTTCAAAGATGAACTAGCTGTTAAGAACCTACTAGTTGAAT  
CTGTTAACATCTGTGAAGATGCTATTGCACGTCGTAACAATGAGACTCCGTTCTCTATTG  
CGACCCACATCAAAGCAGAAAACGAACAGCTTACCTGCAACCTAGACTACAATGGTATTC  
CGTTAAAGATAGCTGTGGTAATCCGATCCGTTCTGACATGGTCATCTCCACTAGCCGTG  
GTAAGAAAACCAACGTACCTGAGAACGAGTTCTATGATACCGATAGCCAGCTAAACCAAG  
TTAGTCTATTCGTAGATCTACATTGGACTCCGACCACTGGCCAGCAACAAGGTATGTTG  
GCGTAACTCTACCTGGTGCAGCTCTACCTCCGCAGTTCCTCCTTACATCGTTATCACTG  
ACGTTTCGTAAGGCATCCTGGATCCAAGCATGGACTCTAGAATGTGGCTGTTTCGCACTCG  
GTAATGCGTATCGTGCAACTGCATCCCAGGCATGGGCTCGTACCCTAATGCCGAAGATCG  
CTACTAGCAAGATGCGTGATATTGGTGCCTTGGTTATTACTCAGAGCTAGGTAAAGCGA  
TTGAAACTCGCACCGAAGCATTTCATGGCAGACGACAGCAACTTCGTAATGCTAATGAACA  
AGATGGTTAACCGAACCCTGCATTCCAGATCGATATCGATCCAATGGGCGCAACTCAG  
CTATTGAGCAAGTCATCCTAGATGCAGCTGGTGGCGTAAACCAAGCTCGTGCAGTTAGCC  
TGATCTTCCAAGCTCTAACTAACCTATACGGCACTGATTTCCGTCAGTTCTATAACCTAG  
CTGAAGCTGGTCCGATTATCTTTGACAACCATCATGAAGTAGACCTCGGTCACTACACTG  
ATGAGCATGGCGAACTAAGCGACCGTCGTGATCTTGACGTTCTAGGTGCCATGAACATGT  
CTGAAGGTAATGACCAAGAGTGGAAGACCTGGTATGCTACTCAGGTAGGTAATGACCACA  
TTGTGCGTCGTATGAATAACAGTAAAGGCTTCGACAAGATGTACCTAGGTAACGTTACCT  
ATACTGGTTCGTGCTCGTCTAACCTTTAACCCGAAATTCATCACCGCAATGGATGCCG  
CAGCAGCAGCCGCTGGTGTAACTGTAACCATGGAAAACCTAATTACCAACTTCGGTCAAC  
AGCGCTTCGCTGGTTACACCGGTATGGGTAACATGGCTGTTTCTGGTAGTGCACAAGTTG  
GCATGGCTGGCAGCATGGGTCAAACCTTACGGCGCTCCTTCCTATAATGCACCGGGTACCT  
GGTACTAATAGGAAATACCTCGGTAGATAGGGATGTTAAATAAGTAACATCCCGATTCTA  
ATACTGCGACCCTGGTTCACTTCGGTGATAACGGTTAGGAGTAGGTTCCGTGAAGTAATC  
GACTAGTGGACTTAGTCTAGGTTCGACCTATCACTACACGAGGATGATAGATCACTTAACC  
GAAAGGAGTTACTCAAAGGTAACGTGTGATCAAAAACCTACAATGGATGGTAAATGAGAC  
TAGTGCCGGTATGCTACAAAGAAGAGCGGAGGTTAAGCTTTGTAGATGACGCTAGGCTCG  
GGCCAGGCTCCGTTGGTGGTCCATTGTAAAAACCTGATATAGCGGCTCCTTCGGGGGCCG  
TTATATCTCCTTTTTTTGTTAATCGATAAACAGGAGTTTGGTATGGGTCTTTATGCCAAA  
GTTGTTGATCATAATGAAGTTCATGATCAATTTACGGGTAAACGAATTTATGCCAATGAT  
TACAATACGAGTAACTCAGATGAGAAAGAAGAATTTGATAGGCATTTCTATTCTCATTTC  
CAAGATTCAGAAGCAATTGAAAGTAGTGTAAGCTGTGATTGTTCGAGCAATCGAAGACGCA  
CATAAACTCGGAGTAATCTGTGATATTTGTAATACTCCAGTTGTCAATACTTCTAGCCGC  
CCTATCGAACCATCAATGTGGGTTTCGTACACCAAAACACGTACGTAGCCTAATTAACCCA  
CGTTAATCATTATGCTAACCGGATATCTAGTAACTAAAGAATTCGATTTCTTAGCATAT  
CTAACTGATACTTCTTATCGATACGATGTAGAATCTATTGGTTCTAAAGAAACACGCAGG  
AAAGTAGATAGGCTACTGCATCGAGGATTTGAAAGAGGATTAATCACTTCATTGATAAT  
TTCAATGAGATCTTCCAATTCCTACTAGATGCAAATATTATCTCTAATAATAAATCCGAA  
TTCGCTCAATTCGTTGCTCAGAATAAAGATAAGTTATTCCTAAATATTTACCAGTTCCT



TCTAAACTCTGTTTCGTAGCAGAATCAACCACATCTGGTACTTACTTAGATAAAACCAATT  
GAAGCAGCAATTGATGCTACCTTAACCTTCGCTAGTATTGATGCATCATCTGTACCACTT  
AGTCCAATTAAGCTCAGAATAGGACTATGCGAGGACTAAGACTATATGGCCAGTTCTAC  
GAGATCTACGCAAATCACGAATTGCTCAAAAGCCTGGTCTTGCTCGGCGTCACATGTTT  
GGTGCTCGTCTCAACGCTACGGCACGTGCAGTAATCACTTCTATTAGTGACCCGCATGAT  
TATGATGAATTACATATTCCGTGGGGAGTAGGTTGTCAATTATTAAGTATCATCTAACT  
AACAAAGCTAAAAGCTAAGTTTAACATGACAACCTCGTGAAGCATTCTCATTGTATATGAG  
AATGTACTTCAATATAACCAAATCATCGCAGATCTATTTAAAGAGTTAATTGCAGAAGCA  
GCCCTTATAAAGGAATGGGTTGTACTTTTACCAGAAATCCAACGCTTCAACGTGGATCT  
ACGCAGCAGTTCTTTATTACTAAAGTAAAAGATGACATTAATGATAATTCTATCAGCATG  
TCAGTTTTATGCCTTAAAGCGCCTAATGGACAATTGAATAACTAAATAAGGGTAAAAACA  
ATGGAACAAAACGGAGTAGTGTCCGTCTTTGATCCGGCTTCATTTAAATTTGAATGGCGG  
GATATTCCTGGATACTCAGCATATGAAGCTAGTAACTTAGGAACAATTCGTCATAAGCGG  
TTAAATAGAATATGTAATTTCTTCCCTACTAAAACATCGATTGGGACATATCTCAATATT  
GGTGCAAAAAATGATGAAAAACATCTAAGAGTAAGGGTGTTTCATATATTAATCTGTTTA  
GCTTTCCATGGTCCATCACCTGGACCAAATTATGAAGTCAATCATAAAGACGGCAACAAA  
CATAATAATTTACCATCTAATTTGGAGTGGATGACTCGTGGTGAAAACATTGAGCATGCT  
TACAAAATGGATTAAGAAAAGAAAATAGACGGGTAATTGCAACTGACGTTACCACTGGT  
GAAAAGACTACTTATTACTCGATGAGTGAACCTTGCTCGGGCATTAGGAGTTAATAAAAAT  
ACGGTTTGGGTTATTATACGTGATCATAAGACTAAGCCGTATAGAAATAGATTCACATTT  
GAATTTATTACCGGTGAGACTAAGATTGCTGATCGAGATAGTACCAAGACAGTTTATGTT  
TTAGACTATAAGACTAAGACATTACATGTGTTTCATAACTTAGCTGAAATGGAACCTGCA  
CTGGGTACTAAACGTAATAAAGCCTATTACCATCTAGTTAGAGGTAGTAAGGAAATCATG  
GATGGTTTGGTATTCTCATATACCGCTAATCCTGAAGATTTCCCTAAATACACTCAAAAA  
GAAATTGAAGCCTCATTTGGAAAACCTAGTAATGGAAAAGGTACTCCAATTGAAGTAACT  
GACACCATCTTGAACACTACCAAAGTGTATCCGAGTATTCCACACTTTGCAAGAGATGTC  
GGTATTAAGCATCCGAATACTGTTTCGAAGAGCAATCTTTGAAAAGAATGGGGTGCTTGAT  
AAATACCTTATTAAGTTAATCAAATCTAGTTCCCCCAATGAGTAATCGTTGGGTTGAGTT  
CTCTCTAATTGCTGGGATATCCTGTTAAACTAATCTACCACTGCGAGTCGAAAGACAAAG  
CCAAGGTTTGAAAAGATTAGGTAGGGCCAATCAGCAGCCAAGCTCCGTAACATTCCATT  
TAGGAATAGGAGAAGGTTCAACGACTATTACGGTATCAGGTGCACCGGTCTAGAAATAG  
GATGTAGGGTCAAGTGACTCGAAATGGGAGACACCCCACTCCGAAAGGAAGGGTGAAGAT  
ATAGTCTGGTCTTCTAGCGAGAGCTAGAGCTGCACGTAATGGTGCGGGTATCAATTAACG  
ACTGATACTGAACAATACGGCTGATTTTGACGGCGATCAATTGAATCTTACGTTAATGCC  
TGATGTGTATCTAACTAAAGCAACTGAACGCATTGCACCACACACGTGGGTTCTATCTAT  
TGATGAACCACATGAAATCTCAGGTAACCTTGAATTACAGGGTCTGTGTAGAAACAAT  
TATTAAGTGGGCACATGAGAAGTATTTACCGCCATTAGAAGAATGGCTAAAAGCAAAATA  
AATTAATAGGGGAGTCTAACTCCCCTATTATTTCTTTGAGGCTGGTAGCATGCATGATTT  
AGTCATCTATTGGAAAGCTCATGATGGTTACTACATAACAAGATGAACATGGCGAACATCC  
TGTAACCTTTCCAATTCGCAGAAATTAATTGGAATTTACCAGGAGCTTATGAATACGGTGG  
TTCTGAATTAATTGATGATCACTTAAGGTTTGGTATAGATTTCAAAGTACGTGATATTGA  
ATGGCAAATTAGGTTTGAATTAACGGTAAATTTACTCTGTACAATATGTCAAATAATGA  
TCGGGATGATACCTTTGTAATTCCAGCTACTTCAAATTTGCCCAATTCTTTAAAAGAC  
AGGCAAACATGTAGTTACTAATGAAGTTATCACTATCCCAATTAATTGCTCTTTTGATAA  
GCAAATTTATTAAGGTAATAAAGGATGAATAGTAAATGTAATGAATGTAAGCAAAAT  
CGATAATTCATGATGCACCAAAAACACTTGGTATCTGCCATAAGCATTATCGGTTTACG  
TGTATTTGGGGATAATGGTTTACTTAAAGATTCAGATAAACTAGTTACATTTAACTTAA  
TAAAGAACTAATCTATTTGAATGTATTCTAGAAAATACTAAAGGTGAGTATACGGGATT  
CCATCATCCTAAGTTTGGATTCCGTATTAACATGATGATCCAATCACTATTGTGGTGAC  
TGCACCTGAACATGACATCTATGTTGAATTAAGTAACTGTAAGGTTGAAGGTGTTACAAAAGC  
TATCAATTGGATCGGTCAGGAACTAGACACATTTAACTACCTATACAACATCCGTTTAA  
TCTATGTTGGTCATATACGGCCAATAACTGAAGTGTATAATGGTTATAGATACTCATGGT  
GTGGACCTATTGGACAGTTGCGCCGTGAAGTTATACTGAATTCATTTTCAATTTTATATT  
ACTAAGGTGCAATAGTGATAAGGGGAATACCCAATGTCTAATATTCGTGAAATTTATCGA  
CGTAACCCGGAATGTTTATCACAAGCTGAACGAGATGAACGTGAAGCCAGATCGGTAGCC  
ATGATAACTGGGAGATATATTACTCGTGGGAATGGTGTAGTGGTAAACAGTAGGTTT  
GTCGATGCATATGTCGAAATGATCTCTAAGCTTTAAGGGGTAATCTATTATGCAACATCA

ATTTAATCTATGCTGGGTATATGAGTACAGTATCTGAGGTGAATAATGATTGTAGATGCA  
CATGGTGTAGACCTCTTGGACATCTGTGCAGGTGGCCATCTTACACAGCAAACAACACTCAA  
TGGTTGGGTGAGCGTAGCCAGGCATTGCGTTCAACTATGTCAACTGCTGCTGCTAGCTTT  
TTCAATACTGCACAAAATATGTACAGTATGATTAGTGAATCAGCTGCTGTTCAAGCACTG  
CGAATCTAACCACAAAGAAAGATAATTTATGGCAGTCTAACAAACATTGTGTATCTTGAG  
ACATTAGCTGAACTACAAACAGCTGGTCCGATTATGCAACGTTGGGTTATGGCGCATGAG  
CGTCTAAGAACTATGTATCTTAATAATGAAGTTGATGGATATGGTGGTTCTTATAATAAC  
ATCCAAGGTGATGCTGTAGGTGAACGACAGTTTGATTATCGTCGCGTGATGGATGGAGTT  
ATGTATACCGATAAGAAAGAATTCGGTTATAAAAACTATCACGAAGATATCAAGAGCGAT  
CGTAAACTTAGTCTGCACGAGAAAGTTGACATTATCCGTATGTGGAATGCTATTGATGGG  
CATCTGGACGCAGGTGAAGAAGATCCAACCTCAGTCGTAGGTAATCTTCTAGGTTAAATA  
AATGAGAGTCCCTACATGGGGCTCTCTTCTATCGTTTAGGAGAGATCTATGTCAATTGAT  
CTACTCGTACCAAATAAACTAAAGATGTTTCAAAAAAGTCCAGATGGTACGGGATATATG  
TACTTTAATAGTACAGATGGGATAGA ACTTAAACACGATAATCAAACACGACTATTGTAT  
CTTCCTGATAATGTCTATGTA ACTGGTGATTATGTTTCACCTGATACTAAATTTATTTTC  
ACAGTTATTGAAGGTGAAGTGGTCTCTATTA AATTAGATACTGGCGAGGAAATACATAGT  
TATAGTTTTTGTGATGAGAGTCCATTGTGGAACCATCCACATATTGCTTTTTTACGTTAAG  
GAAAATACAGATGCTATTAATTAAGCGTAATGACTCATCAATGCCACTACACCCTATTCT  
TAAATTA ACTACTGCTGTAGTTGATTCAACTCGTTTTAATCTTGAAGAATATTCTTATCT  
TAAAGAAGCATTTAAGAATGGCACTCTACGTATCTATGTA ACTGGATATGACTATGCTTA  
CCCATCTGAAGATGGTCATCTTGTATTAAAGACGACCATCCTAATGTATCTAGCAGGCC  
ACCATTTGTACATGTTGGTAGGGATCCAAATGGGCTAGTTGATGATACCCAGTTATATGT  
AGCTACA ACTCATTTTTTCAGGGACAAGTAGTGAAATTACTGCCAAACCCATTAGTGTACA  
TGCATGTGTTACTGAACACGATATCGTTTTAACAAGTACACTCAAGAAAAAAGAAGGTGC  
TGTCATCGTATACCACATTGAATTAATTGCAAGTAAATATTTATATGCTAGTTAATGTAA  
GTATTTAACTGTATGTATCAAGCAATATAAAGGGAGCCATTTGGCTCCCATCTTAACTTA  
ATTTTTTTCTTTAGTTTTGGAGTTCAATATGCCAAAAACGATTCCAACAGTATCTGTTAG  
TGGTTGGATTGATACACCTGAACAAGTAGCCGATAAAACGATTTCCATACTTCATTCTATC  
TAATCCATCCCAAGATATTATTAATAGGGAAAGAAGTACTTCATTACCTTATCTGTTGAA  
GGTATATGCCAATGATTATCCACAATTAGAGATAGA ACTACGACGCATCTTAAGCGATAA  
GTTTAATATCGTATTTGGTAATGAACTAATTGATTCTAACGTAATAGTAAAAGATGAATC  
AAATACAGGTGATGGTAAAATGTCCATCACATTTACTGCTACTATATTAGTTCAAGGTAA  
ACCTGTT CAGATCGGTAAGCTCGTACGTTATCAATATTCTAATATTCTTGAAATTGCAAG  
ACTTAATAATGGTGAATAAATGACTAGTGAAGTTGAGAAAAATGAAAGCGAAGCTATGAA  
CTCCATGCTATTAAAACGAATTCATATGCTAGAAGTAACAGTTAGGAATCTAACGAAACA  
TGCTAATGTTGTAGATGAAGCTTTCCAACAATTAGTAAAAGCTAAAGCTGAAGAACTGC  
AACATTTAATATTCGCGTTAGTCGAGTTCTTG CAGATATTCTTTGCAATATGGGTGAAAG  
TATTCGGCATGAAGTTGATGACGCAATGCGAGCTATCCATGGTGATACTAAACCAGTATT  
CGCACTAGCTGAAGTAGATGGGGTTAATCAGAAAGAACATATGGAATCAGTCATTGTTCCG  
TAAGGGCGGTGATAAAGGTTATATGTTTGCTACTGTTGGAACGCCTAATAAGTTCACTAC  
TGAAA ACTGCGATGCGTTGATTGATTACCTAAATAGTAATCCTCAACTAATGGAAAACAA  
AGAAGAAGCTCGTTTTAATATCATCACTACTCTGACTAAACAACAGATTGAACAAGTTAT  
GGGTAAAGAAGATGGCAACTCCGGAACCGAACACTAGAGTTACAGATAGCGATAACATGA  
TCATGGATGCAATGCAAGCCATGGTTAGCATT CATCAGAAAGAGACACCTATTGTT CATG  
AGGACGTTTTTTGTAAAGAATATATTACCATTACTTGAATGCCCGTGGGCACCTGGTGCAT  
TAGATGAATATCGTAAATATGTTCTGTGAGCTATCAAATCCGTTACGCGTAGCAAGTGTC A  
ATACCAAAGAAGCGGTTGTGCTTTTTTACAGTTCCAGCACTTTATCCTCGTCCAAGTGTTG  
CAATCTCATCTGGTGAGAATGTTGCTAGCATT TCTAACGTAATGGATTATTATAATAAAG  
AACATAACCGCAATCCACGTGGTGGGTTTGCTAAAGAAGCAGCTCAATTCTTAGAGCGGT  
GTATTTATAATGAACCATTGGAAAAACA ACTTTTTACAAGTGTTAATCCAAATCTTAGCAG  
CATATGGTCGGGTATTA AAAAATACTGATGGTACTCCGTTATATGAGTTACCGAATACAT  
CTTCATCTAAATCTGGAGGTGTGCAAGTAGATACACCTGAGAATGATGAATGTGTTTACG  
GTGACGAATATGAAGACTGATAAAACAAAGAAACCTGGCATATTTTCGATATTTAACAGTA  
GGCGATGTCCATATGGGGCATCGCCAAACCCCTACTGAATTAATCATCAATAACTTTTGG  
AAA ACTGTCCCTGATACAATTTTAAAAGATATTGATATGTTGATTATTACAGGGGATTTA  
TTTGATCGTCAATTAACAATGGCGATCCAGCTGCATACGCAATTGATAGATTTATTACA  
ATACTTCTTACAAATGTGAAATGTATAATGTAATGATCCGTATTGTTGAAGGGACCCCA

TCACATGACCGTGGGCAAAATGCAGTTTTTCGTAGAACAAAAAATAATGCAAATATTTAA  
GTTGATTTGCATTATTCAAAGATTCTCGATATTGAGTATATTGAGAACTAGATGCATAT  
TTCCTTTATGTCCCTGATAAATGGAATCCATCCACATCAGAGACTTTAAATCAAGTAAAA  
GATTTAATGCATAAGAAAGGTATATCTCAAGTTGACTTTACTATTTTACATGGGGCATT  
AACATCAGCTACCAAGTATTGTGGAAGAGCCAACACATGATCCAGACGAATATTTAGCA  
TTAACTAAATATATGATCAATGGTGGGCATGTTTCATGAGATGTCTATCTATGAACGCATT  
TTAGCTGCCGGTGGATTTGATCGATTAAGTCACAACGATGAAATTCCAAAAGGATTATTT  
GATGTTGTGGTGAAAGAAAAATGGCGAATGGACTGCTACATTCCTTGAGAATAAGGGTGCG  
CGTAGATACGATACTTTGAATGTCCATGGAATGGATACTAAGCAACTTAATTACACTGTT  
AAAGAACATATCAAGACACTACCAACTAACTCTGCAATTAGGTTAAGATGTAATCCAGGT  
GATGTAGCTACTGGTGATCTCGATACATTTCAAAAATGAATATCCTAATTTTTTCATGGAGT  
ATCTTAATTGAAAAAGTTACTACAAAGAAAAATACTGTGTCAGATAGCCTAAAGAATTTT  
GATTTATCAGAATTTTTGGATATAACTCCAGAAAGTATTTCTGATTTAATTATCCAGAT  
ATTGAAAAATTTACAGCGGACGCTGCTCAGATCCAACGGGTATTGGGATTATTGACAGAG  
TTCAAATAAAAGGCAATAATAATGGATATTATCGAGAGAGATGTAGGTGCTAATATTCGG  
ATTAGCATTGGAACCTTCTTTTGCTCTCGAAGGGCTTATAGGAACACATCCACAAAAGCCT  
AGACAACCAACTGATGTTAAGTCTATTAAGAAATATGGATTAATGTCCGTACTIONTGGCA  
AGAAATATGTGGCAGGCTATGAAGTCTGAACAACAACTAATATTAACTTGGTTGCAGCA  
GTCGATGTTTTATTTCAAGAAGCACAAACAATCCCGGTTGCTTTACGGCAATCGGGGATA  
AAAGCAACTGTAAAATATTACACTGGTCGAGATGCAGTGAAGTGGTTATTCCTAAA  
GCTACATTTAAAGTATCACGAACACCGCAACAATTAGCTTATGATGTTTATGAACGATTT  
GTATCAATTGAACTATATCAGAAGTTAAAAGATACAGATTTAATTACAATGGAAATATCT  
AATAAACCTCCAAAGGTTGAAGGTACTGTTTTACTATTAACCCATTTCCCACATGAACTA  
TTATGGAAACCCCATTTTAATAGACTTCTTTTATTGGAATCCCATACGGGTAAAATAAAG  
ACATACAACATGTGGTATACTAACTAAATGGTTTAAAAGAAGATACTCCATTTCTTTTT  
ACATCATTTGCTATACAGATATTTGGCGATAAACAATTACTTGAACCACAAGACAAAGCT  
ATTCGTGCGCAATTAACAACAATTGGCACAATCTAGAAAATGGACAGGATTAACAACACCA  
GATAAAGTTCATCATGACACTACTGCTTATGGTTCTAAAGAGTTAAAAGAAGCATAACAAG  
AAATTCAAATAGAAGAAATACTTGTGCGATAATATTACGTAGAAATCATTTCCCATCTA  
GTTAAAAGAATCTAGTTTTAATTTGGAGTTATCACATCATGTCACAACAGCAGCCTAATG  
CACCCGTAGTTAACCCTTTTAACGTAATGAATACTTGGCTACATGCCAAACCATGCGAGG  
GTTCTCAAAAACGACCGACGCTACGATTTGGTCTGTTTAAAACCAACCACGGGTTACTG  
TTCGTAATAATGTACCTGGTGATAAAGACCATGGTAAAATTGAGTTCAATACTGACCTAG  
CAACCTTTGCATGTTTCATTAAGTTTGCAATGGACTTAATTGAAGGTAAAACCGAAGATA  
CTGAACGTGTCTTTGTTTACCGTAATAACTTCGTAGCTGGTAAGAAGCGTGATAATTTTA  
TTGAGCTTTCTAAGCTACATGTTGGCCGTGCACAAGATGGTTCGAATTTACATCGCAGTGC  
TAAGCACTCAACCTGATCGTCCAAAGATCAAATTCCTTTGGCCCGTCCCAATTCATG  
ATATCCGCAAAGCAGATGGTAGTCAGCTATCACCTAAGGAAATGTCTGATGCTTATGCAT  
ACGGTTTCCTAGACCCCGCATATAAACTAGTAATGCATCTTCTAGTAACTGAATTCGATC  
CAGATGCTAAAGGTGTATCTAACCTGCTAATTTTAATCAGGGTAACGGTAATAGCGGTG  
GTTACAATAATGGTGGTCAGCGCAATAACTATAACAACGGCGGCAATAATAGCTATGCTA  
AGCCGGCTAATAATAGTTATAATGACTCAGCTTTTGATGAGGATATGCCTTCCTTCTAAA  
ACATATTTCCGGTGCTTACTCTCGAAGTAGGCACCGATATGCCCTCAGTACTAAATGCCGT  
TATACTAAAAAAAATTTGAGATCTATATTAATAACATGTATCTACATTGGTAAAAGAGGT  
TAAAATGCAAATCATCGTTACAGGAGTTCAAGGTACTGGTTTTACTGAAGTGGCTACAGA  
ACACAATGGTAAACGTTTAACTTGGACAACACTACGGCTTATAGTAAAATTCGTGTACAAGA  
TCAACAACGAGTATTCCAAGAAATCAATGATTATTGGAGTGGCCTAAGTGCTGAGGCACA  
ACAACATATCTGGAATTGTTATGTAGAAATTCGTAAGATCATGGATATGGCCATGGATCC  
GATGAGGATTGCAATGAGTCTATCCTATTACATCAAAGAGATGTATAAAGCCATGCCGAT  
GAATAGTTTTTCGGCGATGGCTACTAACTATTGGTAAACTTTATATTCCAGTAGATATTGA  
AGAAGTTATCACTGATGATTCACGATATAATCGACCAGATCAAACATATCTGAAACATGA  
CTATATTAACCTTGCATCTGTATCACTAGCTCTTCGTCCTTTAGTACCTATTTGGGGCGA  
GTTTATTGATCAGGGCACTTCTCAGGAAATGCATAAAGAGTGTGAAGTAATTAGTCTCAT  
CTCGGATTGTGAGGTTAACCATTGGCCTGTTGATGAAATATCAATTGATGGAACCTCAGT  
AGAAACAGCTTATGATAAGCTAAGTGCATATGTTAAGTTTTGTGTAGAAGATGAAGCACC  
CACCTTAGCCAACCTTTATAGAGGTATGAGTTCAGCTGAAGTGCCGGATATCTTACAGGC  
TAAAGTTATGGTTAGGCGATTAACCATCCTACCATTAACGATGCCACCTCACATTCCAT

CGTTTCAAATATGTTTATGATATGTTAAGTCAAATCTAAACCCTGCTGAACGATCAACTGC  
TGACCGGGTTAATGATAAACGGCCAGATAAAGGTGGTATTGATGATGATGATAAACATC  
ATTTATCGAATCGCATAAACTAAACAACGAGTTACTCCTGGTGATATTGTAGCTTATAA  
CTTAGATGCTCTTGATGTAGTTAACTGGTTCACAAAATCGATGACACTGTCCCAGTAGA  
GTTAATTCAGGAATGTCTAGATTGCGTTGCAGTTACAGCTACTAAAGATATCTATCCACA  
CCAGATATTACTTGCACAATGGGTGATGCACAAAGCTTTCCTGCAAGAGCATTTCAGCCA  
CATTAAATAAAAATGCAGTTAACCATTTGTTGGCAGCAGCTCAGTCACTAATGTGGCATTG  
GGGTTTCCAACAAGTTGCTGTATTTATGCAAGTAGAGTTGTATTATAGTGGTGAACATGC  
AATGTCCATTCAACCACGTAATAGCACACGTATTCAAATTAATAATAAGGACGTAATGGA  
TGAGCTTTATCCACATCAACGACAACAGCGAGCTATTAATGGTGTTCAGTAGCACCTGT  
AAATATTGCGGGCATTGCTGTGCAATCTGCACATGCATCCATTAGATCTAGTAACTGGAT  
CTATCATGGACCCGATCGTTTATTCAAAGAAGCAGAACAGGTAACCTCAGAATAAAGTCCT  
TGTTGTACCGGCCACAATTAAGTCGGTGATCACCGAACTGGTAATTCATCTGGGTAACT  
TAATCAGTAATAATTGAGGTAGTTCTATGTTAGGTTTTAATAATTCAGCAATGGGTGGTA  
ATACTGAAGTACAGATTGAATCATTCTAGTACAGACTGGTACTTATCAACCTGAGC  
ATGTTTCGACCATTTACGGTAGAGGTCAGTACTGAGAACTCTATTGAACGTTTAAAAGAAGCAA  
CTAATGACGGTCGTAATCTAGGTGTTGCAGCTGTGCAGCAAATTGCAGCTGATGTGATTG  
CACCACGTGCTCAAACCTCAAGGTGAAGTCCCTATCGTCAATGGTTGGGGTGAGCGCCGGT  
TTAGGTTTCATGATGAAAGTATGGGAGAATAACCGTTTCTTTGGTAATACCCGTAATTGCC  
GGATTCTATTTGGTTGCTCTGACCATTGCTCTATTAGTCCGCTTAGCAGTAGTCTAGATC  
CTAACATGCGTATCTATTTAATAGTGAAACTGTTATTGTAGAGCGCCAACGACCAACTG  
AGTTCGGTGTAGTCAAACAAGCACATATCCTAGGTTCTAACCAGATCCTTGCACCCGTTG  
ATATCATGAGTGATATTACTATCCCTCAGAACGGGTTTAGCATGTATACTGGAACCTTCAT  
CATATCTTCAACGACCGGAAGATGTTTTCCAGATCCAGCAAACGATGCAAGTAGCTAAAC  
GCATTGAATCAACTGGACTACATCAAGGCGTATTTGACCGGATCATTGATCAACGCTCCA  
GTGTTGGTGAAGCAGGTACTTTCCAATATTCAAATCGCCGCGATACTTCTCCTACTCGTT  
ATCTATCTAGTACTCTTAATGCATGGCAGCATTCTGTAAAGAAGCTGAGATGGCTAATA  
ATGATAACGATAAATATCTTTGGAGGTGTCTCTGATGAAGTGATGCTAGGTGATGCATCTG  
CTGTACTTCGAAATCAAGATATCCATTCCAATATGTTTCATGCGCATTCTAAAAGAACGCT  
GCAATTACATGGAACGTTGGCTTTGTTACACTGGCTGACCTACAACGAGTATTCCTGAAC  
TACTGGTTGATGGTGTAGTTAAAGCTGGTATGGATAATGGTAATTCTCAACGCTTCGTTA  
ACCGAGCAGAGCATTCCATGCATTGGGGTGGTGCAGATCATCACACTGTTGCAGCATCGC  
TACTTGCACAAGTAGTTCCAGCAATCATGATGGATAACTATTTCCGGGTAACCTCCTTTG  
CAATTACAAATGGACATGGAGCTAATAACTATCTATTCGAAATGCATCCAAATGGTACCA  
GGAGTATCATGGATGGAATTGATATGACTCCACAGATCAATGACTTTGAACGTCGTCTTA  
TTACCGATGCGATTAACAGTATCTCTTATGGTAACCAGATTCCGTTTAAAATCTCCATGC  
ACTCTGACTTAGCTGGTGATACTGTTATTGATATCAGTCTAAATCATGAATCGGTAGAAC  
GATTCATCGCACCGACCTTCATTGATAGTCTGTTTAGTCCAGTCATCACTCGGGATGCAT  
CAGCACCGGCTATGATCTCTAATGACCTTACCTATCTTGTTAAGAATGTTATCCCCACTA  
AGACTCAACAAAACATTCTAAACAGTAGTGGTCAGCCGGTTAACATGCAACCGTATCAGC  
ATCCTGTAGCTCAACCTGCTCAAATCAATCCTAAATTTGGTGATAACAATGCCTACGATT  
TCTCTTTCCAAGTTCTATAGTGATCAAGTATTACCTGCTTTCCGATACAAAGTAGGTGAA  
GAGGATATGATCAGTATTCTCGATCCACTTGGTCGACCTGCACCTGCAAAGGTAGATGGT  
AAGCGACTAGTGGTACCTACTAAAGATTGGCTTCGTAAAGGGCTAGGCGATGATTACATC  
GCCTTCCACCCGCTATCTGAAAAGATCTCTCGGCTAGGTACTTCTCAAGTACTACAGCAT  
ATGCAGCGTCAAGTTAAGGCTAATCTAATGTTTACTGTGAAGTATCTTACTTCACGTATT  
TTAGAAGTAGCTGCCGACTCCACTCTGCATAAAGACATTCCGCCAGAATGTTTCAGACTTC  
CTAAAGAACTATCCGGTGCTAAGCCAGATAACCATTGAGTGGTTTAATAAGGTTGTCAA  
GCTGCTGAAAAACGCTCACGTTTTGTAAGCGTGTATCTAAAAGCAAATGGTAAATTTGAT  
GGGAAGACAGTTAACCGTATCTGCGTTATTCGGTTCCCTATCGTAGAGGATCTTTATTCT  
AAAGATGATATCCTTGGAGTAAATGTACCTAAGAAACAGCGGCCAGTTCTAATTGAACTA  
TTTAAACTGGTTGTACCATTTGGTGATTCACCAACTGAATATTCAGCAGGAACTGTTGAG  
CGGGTAGCACCTTATTTTGTATGTCTTATCCAGGCATTTAACAAAATCACTACTCAACTA  
AATAGTGTTATTGATAAGTATCGCCTGATCTTCGATGATGCTATTCAACCTTATTCAAAA  
GTTGATGAGAAGGTGATTGCTGATTTTGCAAAGATGCAACGTGAGATCCCCTCTCTTGAT  
GGTAATGAAGGAGTCAGCAATGAAGTAGAAGAAGAAGCTTCTGAACTGTAAACCCAGTT  
GCCCAAATTCCTGTCCAGAAAAAGGATAGTGTAGTTAAAGTGGGTAATACTGCTAAAGAA

CAAACACTTCTACACGTGTACCAGTAGGCACAACCTGTGAATGTTAATCCATCCATGAGT  
CAAGCTGTAGCAATGACTCAGGCACCTCAACGTCCCAGCACAACAAGTTCAAACCTAGCAAT  
AAAGCATCTATCCAAGATCTTCTAAATGCTGGGCAGAAAAACCAATTTGCTCAACCAGGA  
ATGATGCAACAACCTGTTATGATGAACAATAACTTTGCAATGCCTGGGATGATGCAGCCG  
CAGCAACCAATGATGGCTAATATGCATCCGCAAATGATGCAACTCATGGGCAATCAAATG  
CCGATGGGTGGTGGATTTGCGCAAGCACTAAACCCCGCTCTAGCTGGTAATGGTAACACC  
GCGATGATGAATCTAGGTGGAACCAAATGATGGGGCGTCTACTGTAATACGGCATAAAC  
CAGGGGGCCTAAGGGTCCCCTGGCTTGCTTTAAAACCTTTTTAGTTTGATATAGGCTAACG  
AGGTGCTGAATCATGTCGTTATTCGGTATGATTAATAAGCTGGTGTAAATCATTAGCTGAA  
GGATCCCTTAGAACTTTACCAAATCATAAGGGCTAACTAAACCATTAACACGCATTTGA  
ATCCACCACATATCGGGATTGACACGGCGTTCTGCCATGTATCCATAAAAGTTTCCTTCG  
AACTGGTAATAACAATTCAGGTGGAATCTGAATACGTGTGGATCTGACATTACGTAAGATA  
TTCAAATGAGTCTCAATAATTAATCTGAACCCTGGTTCATAATAAACAGATTACCTGAA  
TCTGGCTGATTAGCTAACAGTGTGAATGCCATAATAAATTCATAATAAATTTATTTAAGA  
TCTATATCATAGTTTTACAATTACCCAAAAGGAGGTAGTGATGAATTATGGTAATAACCA  
TAGACACACTCAAGAACTGTAATAGACCAACAAAAAGATTATAGATATCCACAATTTAC  
TGAGCACAATGTGCAGATAGATCCATATGATCGTTTCTACATTGGTGGCGTCCGTGGTAT  
GATGTTTTTAGATGAAGTAAAAAAGAGGTGAAGTATGTCTCAACTAGGTAGACGTGAAAT  
TGATCTAACTTTACTAGGTCATACTGGTTTAGATCCTTGGTATGGCACTACCTCATCTGC  
ACGGGGTGCTATGTTTGTAACACACATTGGACAAGCACCAGAAGTAAATGGAAATGAATC  
GCGTTATTTCCCTAACGGGTGCTGAATTAGAGTATGCCAAGTATACACATGATGTTTCGTTT  
TCCTGAGGATTGTCGTGTACTACATGTTCTTAGAAAATATCCAACGGGTATTGGTAAAGA  
CAGTATTAGATCTAACCCGGTAACAACCTATTATCTACGAAAACCTATTTTGACAAATATAA  
AACTATTGGTGTCTACATGTTCCCGAATACATGAGCCATCACCAAGACTTTGGTTATGA  
ACTTGTAAGAACCAGAGAAGTGTGGGAAACCATTGCTCCAAATGAAATGTTCTCTAAAGA  
CACAGTAATTGCACAGTCTGGTGCAGTTAAGAAAGATGGTACTTTAGGGATGGGTGTTAA  
TGCTAATGTTGTATTCTATCTGCCGCAGGTAATGAAGATGGATTTCGTAGCTAATAA  
GAATTTCTTAAAGGATGATGCCAAGTATAGCACGGCTGTAGCTAATGCTGGTAG  
GAAAGCTTTCTTCTTAAACATGTATGGCGATGATAAGATCTATAAACCATTTCCAGACAT  
TGCGGATGTTATCCGACCAGATGGTGTAAATCTTCGCCATCCGTGACCATGATGATGATCT  
AGCTCCTGCCGAGATGACTCCTAGGGCACTTCGTACACTAGATAGGACTTTTCGACAGAGC  
TGTTATTGGCACGCCTGGTGCAAAGGTTATTGATATTGATATCTGGCGTGATGAGCGTGT  
AAATCCATCACCTACTCCAACAGGAATGGATGCGCAATTAGTTAAATATCATACTCATCT  
TAGCAGTTATTATCGAGAACTATTAAGATCTATCGTGGTCTATTAGCGCGTCGTAAAGA  
TGATCTACATATCACTGAGGAATTTGAACGTCTTATTGTAACCGCACAAATGTTCTTACC  
TCAACCTGATAATGTCCGTAAACTATCTCGATTCTATCGGCTAGACCCACTAGATGAATG  
GCGAGTCGAAGTAACTTACAAAGCTCAGAAGATGCCAGCTGGTGTCTTCAAGATGACTGA  
TTTTCATGGTGGTAATTAATATCCATCCATCTCTTGGGAGATGCGATGAATGAAGAGTTT  
AAAGTAATACCAGGTTATGAAGGATATGCGGTAACCAAATGCGGTGTGATTAAGTCTATA  
GAAAGAGATTTGATTTTATCCACATTTATGTTAGATGGTTATCGTGCAGTCAGTACCTTT  
CGTGGATCACTGACTAAAACGTTACCTGTCCATCGAGCGATTGCATTAGCTTGGATAAAT  
AATGATTCACCTGATACGTTGACAGTGGTTAACCATAAAGATGGAGATCCACTTAATAAC  
GATCTTGAGAATCTTGAATGGACAGATTATTCGGGTAACAACCTACCATGCGGTTAACAAT  
GGATTAAGACGTGATCCAATTGCTTGCTATACACGGTGCTTCTTCCACCAAACAAGTAATG  
GCATTTAATTCAATTGCACAAGCATGTGTACATATGGGTCTTCCAAAAGACACACCATTT  
GCAATGTTGAAGCCTAAGATGTTTCGGTAAGTTGATAGCTGGTAAGTTTCGAATTTAAATAT  
GCTAATGAAACGGATCCTTGGTTTTATGAGCATCGAACCAGAACTAGTAAAACCATCACGT  
TATATGGTGACAGTTATCAACCCAGATGGCTATGCCGAGGAAATCTATTCCAACGCAGCT  
TTCTTGAAAGCTTACCAACTTTACGATAGTCCCTATGGGAGATCGATTCTTGGTCTTGCA  
AAGTACGCAACTGAAAAATACCCAGCTTATGAATTTGTGGTGTGAGAGACTCGTATACAGAG  
GAGCGGTATCGAGTACACAGATCAACAGCTGGTAGTCAGCGACAATTTGTTCAAGCACTC  
AAGAATAAAGAGTGCATTGGGTTTAACTCGCTAACTAGTTGCGCAAAACACTTCAATGTA  
GACCGTTCAGTTATTAAGCATCGGATAAAATCCGGTGAAAATCTGGATGGATGGATATTT  
TCAAATTGCCTGCTTGATCTCGAAAGAGTCAAGTAAATCCTCTCTAATTGCTGGGACATC  
TCAATGAGACAATCAGCAGCGAAGCTTCCAGAAATGGATTGAACGTTCAACGACTATCC  
GGTTACGCGGAGTACACTCAAGCGAGTGGAATGGGAGGGACCTGACCACCTAGGGTGAA  
GGTTAAGATATAGTCTGGTCTGCATGGTGCATGCAGCTGCCTGCAATACGAGAGGCGGG

GTAAGCGTAGCGAACTTACCTGAACATAACGAAGGGCGTCATCTGTAAGGTAATGGAAGA  
TGAAGATATGCCTATTGACGAAAATGGTAATAGGGCAGATCTAATTATCTTTGGTGGTTC  
AACCATGCGTCGTTCAAATTATGGTTCGAATTTATGAACATGGTTTTGGCGCAGCTGCACG  
GGATCTAGCTCAACGCCTACGCGTTGAAGCTGGATTAGATCGACATGCCAAACCAACCCA  
GCAACAATAAATAGTGTAATGGGCAACACACAATGGGTTGATTATGCATTTAAAGAACT  
ATTAGGTTTCTATGAGATCATTGCTCCAACAATGCATAGTAAAATGATGGAACACCCAAA  
TCCAGCAGAACATGTTAAAACAGTACTAATGGATGGGTTCCCATATATCTACGCACCAGT  
TGATGATCCAGTGGATCTAATGGCAGCAGTCAACAAATTAATTAATAGCGATAAGTATCG  
ACCACACTATGGGAAGGTATCTTATCGAGATCAAGCTGGTAAGTGGGTAACAATAAAGA  
TAATGTCTTAATGGGTCCACTTTACATGATGCTACTAGAAAAGATTGGTGAAGACTGGTC  
AGCAGCAGCATCTGTAAAAACACAACCATTTGGTCTACCTTCTAAGTTAAACAATGCTGA  
TAGGGCTAGCACTCCTGGTTCGAGAAAACAGCTATCCGGTCATTCGGTGAATCTGAAACTCG  
GTCATATAACTGTACAGTTGGTCCAGGTCCGACTGCTGAAATCTTAGACCAAACCTAATAA  
CCCATTGGCGCATGCTGCGGTTATCGAGTCTTGGCTAACAGCAGAAAAACCTTCATCTGT  
ACCAGTTGCAGTTGATCGTGAAAAGATTCCATTTGGTGGATCTCGCCCAGTAGCTATGTT  
TGATCACCTGCTTGAATGTAGTGGTATTGCATTAGAATATGCCCTGATCATTGATCAGG  
GGTTTAATAATAACAAGAGGTAAATAATGAATCTTAATCGTTATAAAGCGCGTGATCTTCT  
AAATCTAAGTTATGATGATTTATGGTCACTCCCTTCAGAATGGCATCTAATCGAATTTGA  
TGATGGTAAAACGGTTGTGTCAGTTGACCGTATTACCAAATTATCCGTTCTGTGTTGGTA  
TCCTCTTAAACATTATAAAGATTGCCCAATTCCATCTGATCACCATATCGATTTCAATCG  
CATCTTAACTGATAACCCTAAAGATTATCTAAATGTTGAAGGTGGCCGAGTAACATCTAA  
AGCCATGGTCAAGCATTTAAATAAGGCTATTTGGAACATCTATGATTGGTCAGGTGAAAC  
AGTAGATCCTGAAGTACTATCTAAACTGGCTATTGAAGGTAAAGAACTGGCTGTATAATCA  
GACCACTGTAAAACGTCTGAATATCTAGCGACCTTGTCAATGTTTGATATTGCTGAAGT  
ATATAATCATCCCAAGGTACGTGAGGCTAACATAAATCGAACCAACTACTTATGGTAT  
CGAAAAAATTAGTTATGGTAAAGTCAAAGAAGTATTTAATGATCCTACCCAATTCATTGG  
TAATAGCATCATTGAAGGTCTTCGTTCTGGTACTCAGAAAACCTGAACAGCTTCTACAGGC  
ATTTGCTTGGCGGGGCTTTCCAACCTGATATTAACCTCAGACATCTTTAAATATCCAGTAA  
GACTGGCTATATTGATGGTATTTGGAATCTGTATGAGAATATGATTGAATCTCGTTCAGG  
TACTAAAGCACTACTATATAACAAAGAACTACTGCGAGTAACTGAATACTTTAACCGGAA  
ATCTCAACTTATTGCACAATATGTCCAAAGGCTACATCCTGGTGATTGTAAGACTACAAT  
CTTAGCTGAGTATCCTGTAACCTAAGTTAACTTTAAAAGCATTCAAAGGAAAATATTATCA  
AAAAGAAGATGGTAAACTAGACTGGATCCGTGGAAATGAAACACACCTAATTGGAACCTAA  
ACAGAAATTCAGGTCTGTATTTGGATGTAATCATCCAGATAGTCAGGGTATCTGTATGAC  
TTGTTATGGCCGACTAGGTATCAATATTCCAAAAGGAACTAATATCGGTCAGGTTGCTGC  
CGTATCGATGGGTGACAAAATTACTTCAGCAGTATTGTCTACTAAACACACCGATGCGTC  
TTCTGCTGTAGAACAATATAAACTTGGCAAAATTGAAAGTAATTATTTAAGAACAGGTGA  
AATCCCAGAGACATTATATCTAAAGAAAGAACTACTCAGAAGGATTATCGTTTAGTAAT  
CGCACGGTCAGAGGCAGAAAACCTTGTGACATTTTAATGATTGATGACCTTACTGCATA  
TCCAGCTACTTCAGCTACTGAACTAACCAGCCTGGCCCTAGTCTATGATGATGAGGTGAA  
TGGTGAGTGTGGCGATGTTCTGACAGTATCACTGTATAACCGTAGGGCTAGTCTATCTAT  
TGAAATGCTAAAGCATATTAAGATGGTCCGTTGGGAACTAGATCAGCGAGACAATATCGT  
CATTAGTCTTCGTGGTTTTGATTTTAACTACCATTCTTGACGCTACCAAATAAGCACGT  
AAACATGTATGAAGTAATGAAACGATTCCAAAGTTTCTTACATTCCGGTAGTGACTCAGC  
CGAGGCAGGTAAACTAAGCACTGAGAAAGTTGGATATACATCTAAAACGTATCTTAAAAA  
CTACAAGTCACCAATTGAAGCACTACCTGTATTTGCAACAATGGCTAATGAAAAGATTAG  
CCTTAATATTTCCCATTTGTGAGATCTTGATATACGCTATGATGATCCGTTTCAGCTCAATA  
TCGAGACTATCGCTTACCTAAACCCGGTATTAATGGCCAATTTGAAAAATATAATAGGCT  
AATGCAATGTCGTAGTTTAGGTGGTGGCGATGGCTTTCGAAAAGCAGCATGAGCCACTAAA  
TAACCCAGGCAGTTTCCCTTAAACAAGATGAGGAATGACCATCCATATGACTTACTAGTTAA  
AGGTGGTAAACTGCGATAGACGTGGAGGACGTGAGGTTTGGGGAGCACTGCTCCCCTTAC  
CGATCGTTGATTTTTTTATGAAACCGATTCTTACAGCAGAACGATACACCCATGGTGTTT  
GTTTATCCGGTTACGATCGGGAAACATACTTAAAGATGACTGGATATCTTAATAAACTGG  
TTTTAAAAGAACCTAAGAAGATACCTGGTCAACGCACCATAATGGAAATAAAGAAAAAAT  
ATTATGGTGAAACAGAAGATGGTAAATCTGTATTCCATCCATCGTGAATGTCTTCAAGAAC  
TTATTAATTATCTGGCCGATAAGAATATACCATCTACTAGAATTGAAATTGTAGATATTC  
CTGTACCAACAGCTGTAAAGTAGACTATACTTTATTTGAACATTATGTTCTAAGGGATT

ATCAGGAAACCATCCGCGAAGATATTCTAAGACCACATTTACATTCAGCACGTGTTGATT  
TACAGACTGGTAAAGGTTAAAACATTAATACTAGTTTAGCTTCAGTTGCAGTAATGAAAGAAC  
GTGGTGTGTTATGATTCCACCTAAATATTTTCGGTATTTGGGAGAAAGCATTAAAAGAAA  
CATTTGTTGGTTATGAAGATCAGCTAGGTATAAAAATATTTAAAAGTATCTGGATCTGCTG  
AGTTACAGAATCTAATTAATCGCGGACTAGAGAATGATTTAGAGGGGAGTTGAAATTATTC  
TCATTAGTTCTACAACATACCGTGCATATATCGATACTTTTGAACGATTAGGTGAAAAAA  
TCGATGTAGTTGGATTTAATGTACCACCACCTAGATTCCATGAGGTTATTGGAGCAGGTT  
GGCAGATCAATGATGAGATTCAAGAAGATCCAGGATTAGTATTTTCGTA CTGATCTATATA  
CCAATGTCAATAAACAAATCTATTTATCAGCTACTCCATACACTGGTAATCAGTTTGTTA  
CTAAAATGATTGATGTCATGCTACCTGCTACTACAAAGTGTAGGTTACCTGCATATGACT  
CATACATCAATGTTATTGGCTTGTTATATAGTGAACCAACTATTAACCTAAGGACTATT  
TAACTCCATTTAAAATAACATATAACCACGCTCGTTATGAAACAGTAATGATGAAGAACC  
CTAGGCGACTAGACTTCTATCTAAAGATGGTTAAACGTATTGTAGATGGCGTTTATATAA  
AGGATCGTATTGAAGGTCAGAAATGTTTGCTATTATGCGCGACTGTAAACTTTATCGATG  
TACTGACAGATTATCTTAAGAAACAATATCCAGATCTTCAGATTAATAGACATGTTTCGG  
GTAGTCCGTATGATAGATTAATGACTAATGATATCACTGTATCAACTATTAATCATCTG  
GTA CTGTTGATATTAGGAATTTAAGGGAAGTTATTCTATTACAAGCAACTGACTCTA  
AAAAGGACAGTATCCAAATTCCTGGACGACTAAGACCATTGAAGA ACTGGCCTGATGTAA  
TACCAAGGTTAACATTCATGGTTTGTAATAACATACCTCATCATTGCAGATACGCTAGAA  
ATAAAGAAAATCATTTCATGGGTAAA ACTAAAAGTATGCGCATGATGCGTTTATAGTAAA  
TGGCATAAATGATCCCTCCCTTAGTTGGGAGGGATTATGCTTTTTTTTTATTTTTTGTAT  
TTAAAGCATTTTAAACAGTATATTACAAATGTGATAAAA ACTATAGGGTATTTACAATGAA  
GAAAAAATTGATTATGATTACAATTGTAGTTATAGCTTATAAACTATGGGAGTGGAATA  
ATGTATACAGTTGATCAGATCTTTGGTGCAACATGGCTTCTAGTCAGTACTTTGATCTTA  
GTTGATATTCTTCTAACATGCATGCTGATATTTATTATTA AAAACATATCTTGAGTTAAA  
GATATCTTTAATAAAAAGTGCATGCCAGTACGCTATGCTTTTTCTCTCCGTAAGCATTGTA  
TTAGTTACCATATGGGTAAGTACTATTGTTAGTTGCTGGACTAACTATTCAGTACATGT  
ACA ACTTATCTATTTTGATGAGGTGTCTATATGGCTCGGGTATTGTTATTTTTAGTACCA  
CTATTAATTGCATTTAGTGGATTAATAACTTCAATTATATTTCTTGCTGCTGCTAAAACA  
ATCAAAACAAAAGCAATGATTGTAAGTGGCTTGATTTGCAGTATGTTTACCCTTATGTTA  
GGGTTGTGGTTATTTAATATGATAATCATGCATATTAATAGACATGCTATGTAAGAACA  
ATTGATCATTGTTCTCTAATAATAAGAGCATCCC ACTATGGTCTTTTTGTGTCAACTTAT  
AGTAATAGCCCTTGTGGCTAGTATGGGATATAAAAGTTATCAGATTTATCTTTATGTCAA  
GTTTGACTTAGATAAAGATAGTATTAATCCCGGTATGTTCCGCCAAAAGACACTGCTTGT  
TGTTTTATATGGCTTCTTTGCTTTATTTCCATTAGGATATCTGATGGTTAATAAATATT  
ACCCCGCCTTTTATTGGTGGGGTAATATGCCATCTTTATATCAAAGACTTTTGAATATC  
ATATCCCATCCTGACAAGGAGTAGACCATGCAAGTACGAATTGAGGTAATCAATAGTGAG  
GGTAATCTGGATATCGAAGAACGGGTTGATATCCACCCAATAAAAGGGTTAACGGCCTGG  
ATGGTCGTTCTAGCTATCAAAGGTCTTG TAGCTAGCTTTGCACGTAAGTAAGACGACATA  
AACCCCTCTCCATGTGGAGAGGGGCTGTCTTTATTTTTTTTTATTTAGTTAACGGCTTG  
TTAATTCATTTAACTGGTTATTGTTATTAACAGCCTCATTATGAGTAATATTCCTACAT  
AATTCAATTATGTATTCTACCTCAGAATAAGCTAATTCAAAGAATTCAGTTAATGACATA  
TTAGATAAGCTACCTACTTTATACTTGAAGAAATCTCTAGTCAGTCTCCTTCTCAACCCA  
CCTTCGATAAAAATCCTCTTTAGGATTTACTTTATTTAACCACATGGGTCCGTTTTCTGGT  
GAACCGATATCGTAATCAAGTAGATATGCTTCTCTGTTAAACGTGCTGCTGTAGACGGT  
CTTACTGCCCTACTGTCGATAATAGTCTATCTAAGTGTGTATCATCTTCAGTTAACTTA  
TCATAACCAAAGTTTGGATGTAGGATGTGGCCACTATCTTCCGTGAAAGTGGCCTCAAGA  
CGACTATATCTCAGATCATTAACTACACCATCCGGTTTGACTTCGAGGCCGCCAAAGTAA  
AAAAGTTGACAGCATGTCAATAGGGATTAAGTGTGGGAAACGTTCTTTAAATTTAGTAG  
CAGCAGGTGACTCACATACTGGACAATTCCA ACTTGTAATTGCAATCATTCCAATTAGTT  
GTGAATCAATGAAGTACTCACCGCATTATAAAGCGGTCATTATATTCGGTGTGGATA  
GAATATTAGTTAAGA ACTTTTCAATAGTTTCACGATTAGTGGTTGCAGTACGAATATTGT  
CTTCAGAACTTTACCATCGTCATCTTCACGACTTTAATTTCTTTAACAAAATGTGAGA  
ACTGACGGGCAATAGAGATCTTTTGTAACGTGCAATATACTGAGAACGTTGTGGTCCAT  
CAACCGGCTCATTAAA ACTACCTTGAGTCATATCGATAATTGAGTTAATCCA ACTATCAC  
CAGACTCTCGGCGATCAGCAATTGTGCACATCTCAAGAACAACACCAACGTCACCAAACA  
TTTCAGTTACTTGAGTTTCAATACGGAATCCTTCTTTATAAGTCTTAAGATCAGATTCAG

TGCATGCATTAACTTACGTGCAATATATTTCTTTTTGTTCTTCTGAGAATGCCAGTAGAT  
CATATTGAACAAGCGTTGACATATTAAGTTTCGCTGTTTCAATATGGTTACATGTATTGG  
CATCTGCAATACATGGATAACTATAATTAATCCATCTGGGTACATAGTCGCTGCTAGTG  
CATGATGTAAGAACGGCTCATCAGCTACTGAGATAACATGCTCTAGATCAGTTGGGGTGT  
TGAACCTATAGTTGGATTGAATAACACATGCAAGTGCTAACTACTAACCATGTTAAGTA  
ACACAGCTGCCATGTTTGAGAACAGCATACTTTTTGATTCAGCGCCTAGCCGGATCTTTA  
ATTGTGCTAGACGTGCTTGTAGGGCAGCTACTTCAGTACCAGTAGGTGCACGTAGTTTTA  
CCCAAATACCTGAATGAGGTAGGAAAGTATCATATGGCGTACCGATGTTAGCTTTACGTG  
TTAGGAAAACCTAGAGTTTCATCATCGGTCATTTTACGACCACTGGTATTAATAACAGGTC  
GTCCAGGTCGAATGATCTTTTACCATAAGGAATTTCACTAGACCATTAGAGCCTTCTC  
GGGCAGTTGCACCAATTGGCGAATCTTCAACAATAGAGTGAGCTAAGCCCTCCAGAATAG  
CAGCTGTCCACTTTACACCATCACTAGTGTCTACTTTATTATCAGCAAATGCTTTAA  
ATAGTTCTTTATTGTGATCCAGGAAATTATAAACAGTCTGGGGATTCTCACGTAGTAAAG  
TAAGAATGCTAGCACTATCTTTAATAGCCGGTTCAGAAGCATCCCGGATATTTCCAGTTT  
TAGCATTACGTGGAATACGTAGTTTAAATTTCTTTTTGATCAGGAACGAAAGGTGGAGTTT  
CCACCTCGTCATTATTTTCAATACTAGAGTCAGGATCGTGTGCGCATTGATCTCATCAA  
TTTGATCTAGTAAATTCTCTTCTGGAGTATCATCGTACTCATTATCGAAGTCAGCAGTAG  
CCATTTAAAACCTCATTATTGTTGAATTAGTTTTTCGTCCCAACCAGCTTCTCGAAGAGT  
GCCGATCATCGCTAGGATTACACCATCAATACCGCGTTCAATAGCACCTTCAATACCAGT  
GTATTTAGTAACAAGTTCCTGATGAGTTTTAGTTCATCTTCATTATTTGCTGGACCAAC  
CTTACCTTGATGTTGTACATATAGGACACTGATAATTTAGTTAGTCGATTAAGGTCAGC  
AATAACTGTTTGTAAGTTCTTTTGGAAATCCAGTAGGATCAGATAACGTCGGAATGATTC  
ATTGATCTTATTAATAACTGGATTAATGAATACTTCAGTTTGTAGAATACGTTTACCTAC  
GGAACCTGCTAGTACATTGACAACATCCCAACCATCGCGGTTAAGAATATGATCAGCTGC  
GGCAGCTGATGCTCCAACCTGCACGTTCAAATAGACGTAGCGTCTTTTCTGTTCTTTAGT  
TAGAGTTGGTTCTTTAGCTTTATTTGACATCTTGTTATACTCCGATAGAGGCTTAATTTA  
ATATTTGCCAATATAAATTGACAAATGAAAAAATGATTAGTTCAACATATATTTAACACA  
TTTGGTAATTTTACACTATATTAAGAATAACTATCTGTCCAACCCTATGTTAATAATTC  
CGTATAAAAAGGATATCGTCATGAAAGATTTCAATTGATAGTTATCTTACGCCTCTTATAC  
ATGAAGAGCGTAAAGAAGTTATCCTAGACTGCGTAGCATCTTTTGAAAAGATTAATTATG  
TTGCAGCTCTAGATGAACTAAATACAGTATGTCAGATTCAATCAGGTATCTCAGATAATG  
CAATGCTTCTTTCTCGCATTGATGATATCATTTCGCATTGCACAAGATGAAATTCTAAATG  
AGCATCTTATTAATAATTAGTGATGAAGCAACTCAGGCTGAGCGGCAAGCTGTTGTTAATA  
CACTCCTTAGTTTAGAAGATTACATTATTCAGATGAAGTGAATGATATTCTGTTAGCTG  
AATATTCACCCGAAGAGACATTAGCGCATCTGGTAGAACTTATTGATACAAGTGTAGATT  
TCTTAAATATCATTGACTTAATTGAAAGTGTATCGCCAACTTATTAGTAATATTACAT  
CATTTATTCAGTCAGTACTTACTACCCGTGGTCAAGCATATGGGAATGTAAGTAATATCG  
AACGGATTAATTTAATTAATCGCCTTATTCGTATTCATACGCGCGCATCATTAAAGTTAG  
CTATGGAACCTAGTTAATGCAGGATTACGTGTTGGTAAAAGGAATATTGATGACCTATTAC  
AAATTTCAATTTGGCCATTAGATGCTATGACGCCTATTGAAGTTGCTAAAGAAATTGTCG  
GATTGGTATTAATTTCAAATACTGAACAGAATGAAATTAGTAGAACGGTAATGGGTATTA  
TAGATGATTTACATCTAACAATATTGAACGATCTATTATGGAAAATGAAGCTAAAAGA  
TTTTAAATAGCATAGGTGATACTAATGAAATTACGTGATTATTTTCTAATGGGTATCAAT  
GCTGGATTAGATAAGAAACGAGCATGGGTTAACGTTTTTATTTAATATCGTTTATAACCCA  
AATGATGGTGGTGAATATCTATAACAAGCCATATTTCAAAGATGGTAAAATGTTCTTCTAT  
AAAGAAGGCGATTCTAATGATGAAGTTGTTTATATCGACGATTATATTGAAGGTAAACAA  
CCATTAGCATTTCGAGATGAATTCATTTTACAACCTGGTGAAATTGAAAACCTATAAAGGA  
CCAGGTGCATTAAGAACAACCTTATGGTAACGTTTTTGTAAACCATTTAGTATTATGTTTA  
CCTTTCCGGTATCTGTTCCCATTTCAATCTGGTTATTTTCGATATTGGTAAAGTTGAGAAA  
GAAATTCTTAACCGCATGATCGATGATCCAATTGATGATGATAATCCACCGCGTGCAACT  
GATGGTAAAGTTATATGTATGGCAATATCGGATGTTTGCAGATCATTGTTTAGCATTGCCA  
GCATATGCTAGTACCTTGGTAACATCCATTACTGAGAAATCAATGACCTCTGCACCAGAC  
AGAGATAAGTTACGCAAAGAAGACTAGAAGAGAAATATAAAGATCGGTTAGATGATCCGGCT  
GTTATTGCAGAGATGGGTAATGCATTAATCAAGCTAGATGAGGACTATCTAAAAGACGAT  
CCTTCTTATGAGTTCTATGACACTAAACATAGTAAATTATTTGGTGGCGTGCGTAAGAAA  
GTATTTGGTATGTTTGGTGGGGAAGCGCCATTCCAAGATGGTACGTCAGTTGAATATATC  
GGTAAATCATTGGAAGAAGGCATTGACACTGACCATATGCCAGTAATGAATAACTCATT



CGTTATGGCTCATATAACCGTGGTGCACAAACAGCCCTTGGCGGTGAGTCAACTAAAACG  
ATTTATCGAATGGTTGGTACAGTCAGGATTATTATGGAAGACTGCAACACATGGATAGGT  
ATTCCAACCAATGTTTCATCAATTTAATAAGAAAGATTTTCATTGGCTTGTCTTATGTTAAG  
AATGGGAAATCTATCCTTATTGAAGAACTAATATTGATGAACTAGTTGGCACTGAGATT  
GAACTACGTGGTCCAATGACATGTAAGGCCGGTGGTGTATCCAGCTAATGGTGTAAATAGGT  
AGAGGTAAGAACGTATGCGCTGTCTGTATGGGTAACAACAAATGTCAGAGAACCCTAATGGC  
ATACCGGCAGCGGCAGCAGGTGTTGGTGGTCGATTCCCTATCCATCTTCATGTCTAAAATG  
CACAGTGCTGTTCTTAAGACTGTTAAATGGTCTTATCGCGATCGCATCAGTTAAAATAGA  
TGGAGAAGTTACTCAGCTTCTCCATTATTTAGATTATAACCCGAAAGGAACTAGTAATGT  
CTAAAAGAATCAACGATTTGGAAAGTTTCTCAACTCAATCGTTTACCTGAAAAACCCA  
TTGTCAAAGACGAAGTTTTATCAGAAGCAACTGAAGATAAGCCAACCTTCTGAAATTGGTC  
GAGGATTAACAAATATTGAATTAGTATCTCCTGAGGAAGTATATGCTACAGCAGATGATA  
TTAATTCTTCAGTTAATACAGATAACGATACCTCAGAATTAGCTGAAGTTAATGTAAATG  
CACTGCGTACTGACTTCGATATTCTGAAACATGGACAGATGAAAATGTCATTGAATGGT  
TTACCAATGATGGCATTGCTAAAGGTAACACTGAACTCGGTAGCTTTGTATTTGACCCAA  
CCCGTAAATATCGTCCTTATGATGAATGGTCAGATGATGAACTAATCGATGCTGCTAACC  
ATCGTCTAACTGGTGTAGTTAATGATATTGCCGATATTGCTGATGATATTTTAACTAAAC  
GGGCTAAAGAGAATGAGACTACTGAGGAAGTAATTGTACCGGTAGTTAATGAAGATACTC  
TGAAACAAGATATTCGCAATACTGAAGACAGTATCAAGCTTGAAGAATTAGTCAAGCAAC  
TGCATTCACACTAGTGATATTCCTAGATTGGTCTACCCAAGAAGTGGTTGATTTTG  
TTAAACAAGGTATTACTCCACCAAAAACACTACGTGGTAGTTGGGTTAATAGTGTTATTC  
GTGATAATGCTCCACCTACCGATTGGACGACAGCAGAGCTTGAAGACTGGGCTGAAGGAC  
TTATTAATAATAGTAATTTGATAAAAAGATTTTAAAATTGCTATTGAGTTACGCGATCGTT  
TATTCTTACCTACCTAGTCAAGATATTGAACTATTGTTGAACAATGGAAAGTATTCT  
CTGGTAAAGATGATATTAACCAACCGGGGAAGTTAAAATCTTGAATAGTGAATCAACAT  
CTAATGAACCTGTACTTCGTAAAGGTATGACCAAAAATGAACCAAGTATTTATCGAATCTC  
GTCTAGAGCAGTTTGGCACTGGTGCTAAACCTGGTGACTATCACTATCGAACGTGGTG  
GAGATGCACAAAAGAACTAGATGATGTATTCAACTACGTAATGACAATCGAAGATATTG  
AAGGCTTTAAATCAGGCATGGATATTATCTTTGATTTTCGTTAAGAAAAATCGTAATACC  
TATTTAGTGAATCTAACGCCTTCGCTTTGTTGCTACTCTACCTACTCAGAATAACCGTC  
AAGAAGCACACATTAATCTTCTTACTCTATTCTGCCTATTTACTAGTGATGTATCAGATG  
CGTTTATCAAGTAGATATCAACTATCTTGCACGTTTCATCCCTGAAGGTAAACGGCAAC  
TCGTTCTACACTTCTTCCGGCAGAAAGCTGGTATGTAAACATATTGCCTCCCCTAGGGGA  
GGCTTTATGCTGATTATTACTTTTACTAGGTACTAATATAGTACGTAGATAAATATCAAT  
ATGTGCTGAGGTTATAGCAATGTCTAATGAACAACAGGTTACAAATAAGAAAAAGATTAA  
GGGCATTGAAGCCAAACATATTACTTATTGTACTGATCAATTTGGTAAGTTTACAGATGC  
GCATTTTCGTTAAAGAACGAATTCATTTTGAAGATGGTACAACCTGCAAATAATTTAAGGAT  
GTGGGAAACTACCAGCGTCCTTTTTGGATTACCGCAAAGGAATGCGTAACCATAAAGA  
AAAGAAAGATTACGAATATGAGCGTAACTTAGTTAAATACATGTCAACTCAAATTTGACAT  
GAAACGTAAGATTAGTAAAATCCTAGGTGACTATTCGGCTAGATCTCTTCGTCAACTAGC  
GCGTAGTCCTTACCTATATGGCAGTGATGTTAGTTCAACCTGTTATCTGAAGCATGATTA  
TCAAGAACGTTATCCTGGTCTAATCTCTCTAAACACTGTTGCTGGCGGTGACATCGAAAC  
CAACGTTTATGAAGCTGAGAACGATGGCCAGATTATCTGTATGTCAGTTACACATAAGAA  
CAAAGCTTTCCTAGCCTATTTAAAACGATGGGTTAGTGATATTGAAGATCCAGTGAAAGA  
GACATTAGAACAAGCACAAAAGAAGAGGTAATCACATCTAATTAAGAACGTGGTCT  
AGATATTGAAGTAATGGTTGTTGAAACACCAGTAGATATTATTATTGAATGTTTTAAACG  
ACTACATACCTGGAAACCAGATTTCTTCGCATTCTGGAATATTAGCTTCGACATTGGCAG  
AATCTTAAAACATTAGAACACTATGGCGTTAATCCAGCTGATATTTTTTCTGATCCATC  
GGTACCTAAGAATTATAGGTATTTCCATTTTAAAGATTGATGAGCCTATGACCACCTGC  
ATCTGGGGTCACTAAATCTAAAGGACCAGAGGATCAATGGCATTGGATTACAGCACCCCG  
TAGTTTTCAATGCATCGATTCTATGTCAACTTATCGAGTAACTCGATTAGCTAAAGGACG  
TGATCCTAACTATCGGTTAGAGTCTATTCTTAGAAAAGAACTAAACATCGATAAATCTAC  
GACCATTAAAATGATAAGGACTTAGAAGATTTTATTGAAGGTTTTAATAACAATTGGT  
AGACCGCCCTGGTGGTGTATTACTAAATATATTAATAAATATAGGCAGTAATGAATGGAT  
CAGGGTAGATGATTTTATATTAATGATAACTTTACGTATGGTGATTCCATTAGATACAT  
GATGGAGTTTGGTAAATTAACATTTGAGGAAACGATGCATCTTGGAGGTATCGATTGGCA  
CCGTGAGATGCAAATAAGCATAAAAATCAAATATGGTCTTTATAACATCATCGACTCCAT

TCGACTAGAACAACCTTGATGAACAAGTAAATGATCTTGGTCGTTCTATAAGTCTATTCTC  
TAAAGCATCCGATTATAAGAAGCTTTAGCTCTAACCCAAAACGACTATGTGATGACATGCA  
TTTCTGGTATCTAAATAGACCAGATCCATGTGTTATTGGTTCGAGTTCTGATCAGATGGT  
ACATGAGTTAGATCAGTATGTTATTGGTCATAATGACTGGATTGTTACATTGCCATCTTA  
CATGGCAGGTCCAAATGGATTGCAGTGTGTTAAAGATTTACCAAATTATAAAAACCTTAAT  
CTTCTGTCATATCGCCGACCTTGACATCGTGTGACATATCCTAACGTTAGTCAGATTCT  
AAATATTGCACGTGAAACATGTGTGATGGAATTCTCAATGATGGAAGGAATTAGTGAACA  
CCATCGCCGTGAAGTTGGTGTAAACTTAAACAGGCGGTAGGGTTAACGCTATTGAAATCAC  
ACAGAAGATCATGGGCGCTCCTAAAATGGACACCCTACTAGAGAAGTTTATTAATACCCA  
TAAGAACCCAAAGTAATATATCAGTGGAAGCGCCGAGGAGGATATGAATGCTCATCTGTT  
GGTGACAAAAGATTCTCGGCTCTTTACGCAAGGCTTCCTGATGGTAGAACAATTGAGGAA  
GCTTGGCAGTTAGATTGTAAAGGATATCGCAAATACTCCAACCACTGGAAAGCTGGTAAA  
GGAAAACCACCACTAGACGGATATAATCCTAAATATGATGATTATAAAAAATCTGTGGAAA  
GTATGGGCTGTATCTAATAAACATCTAATGGATGAATTACGTCAGAATGCAAAAAGAACAT  
GATAACTATCTTTCTGATGTTTTGCTTCTACTGATATTTACAGGCACGTGCTTTAGCA  
GAACTACTCAATGAAGGATATTAATAAATGGAAGGTATTCCTAATTAATATTATCAATTG  
ATCATTACTGCTAATAAACTTCGACACATCATAAAACCCTCCCATTACGGGAGGGTTT  
ATTCGTTAACTAATTTGGTATTTTAAATTCTGATTACCGTTTAGAACATAAATCTTACC  
ATCGTTATTAACGTAATTGGCAAAAACCTGCATCCACTAAACCAGTTTCTAAATTACCTAA  
ATTTATCCATCGTGCTAATCGTGGTTCATAACTTAAATTGGTGCATTATTTGATTTT  
ACCAGCGATTACATAAAGTTCACCAGATGGGCGTATATTAATAGCTGCACCAAGAGGTAT  
ACCTGTAGTTATTGGTTTAGACCAATTATTGTTGGTTGATTGTACGATATGATTCCAGT  
ATTAACACCGGCACCAACCATAACCACCAATAACACATACGCTATTATTATAAACACTCAC  
TGAATAATCTTGGGTATATACCCAGTATCATTAAATGCTGCACCACTGGTATATGTATC  
TGTAGTTGGATTGTACATTAATGTAAATCCACGATTATTTGTTGCAGTTGTATCAGCTGC  
ACCTAATATGTAGATTAACCCATTAAGACTAGTTCACGTGCATACCGACAAGCTATCGT  
ACCTGGTGATTTTATTTCCCATGTATTAGTTGCAGGATCATAAACACTGCATACCTTTAGT  
GAGTACACCATCTGTGGCACTTTCACCACCATAGAAATATACTTTACCATTAAATGCAAC  
AGCCGAGCATTGTTAACTGCTATAGGTGTACCAGTTGGTTGTAATGTTGTTAACTTACC  
CGTGGCTAAATTCAATGTACGTAGAGCAGTATTAGCATTATTCTTACCACCGTAATAATA  
GACTAAGTTACCTATTTGGGCACCTGCTGCCATTTCTGTTATCAGTTTCAAATCAGTAAG  
TTTAATAACATTATCTTTAACGAATGGATATGTACCACTAGCATAAACCACTGGACGCCA  
ACCTTGGGTTGCAGCACCCGTTTCACTACTTGACGAGCTAGTTATATCAATCGCATAGTA  
GCCACGATAGAGCTGGTCATTAACTGGATCACTACCTGGGTCTCTTCCCAGTTAGTAGT  
ACCATCAGTGCTAATAACCACGACCGCTTGGTTAATACTAAGTCATTATCTGTAAA  
TTTATAAGGCCAGTTAGCACCATTAAATTAGATACGTGAACATTATAAAGTAACTTTG  
CCATTCTGATGTGGCACCAGCCATTGTTAATAAACCAAATTTATAAATGTTCCCATAAA  
TCTAACTTCATAGTCACCATTACGGAGTCCGGCATTATTAAGCCGTGATTTTTGTATTGA  
TTTACGAGCTGGTTTCTTTGGTATGTAACAAGTAACATTTTTATTAGAGAAGTTAAACCA  
TGTTTGTCCATCATTGATTACTGTTCCAAATGTCATATTAACTAATTTAGCTGCATCATC  
ATAACCAAATAATTCTGAAGATGTTGTTTCACCATACAAACCTAATTCCTTGTCCCAGC  
TATCAGTGTTTTAGGACCTGGATAAGGATCGGAATATATAGGCGTATTTGTTAGTCCAGA  
AGACAACAATAACTCAAACATTTTGTGTGCGCCTCTTTTATAATACGTAGTGCATAAGAT  
TGAATTCTATAACGCAGCCTTATCTTTATGATTATAAATTAATACTGGTAGAGATATA  
AAATGCTACATACGATAGAAATCTCTAATGAAGTGTTAGATGTGAATGTTAAGCGTGACT  
TAGGTCCATTGATCGAAGAACATCTAACCAAGATTCGTGATAAATTAGATAATCAACAGA  
GAATAGATATTAATGATTTTAGGTCAGTGTGATGATGTTTCTAAGATCCTCAATATGA  
ATATAGAGTTTACACACCTGGATGATCAGGGTATAATGGGTGGTGCATACACATCCTTTA  
CAGTTGGACATACTGGTAGTAAATTTGACAATATTAATCGAGTTACTTTAGCAACTGAGC  
AAGGTGTCAATACATTCATTAATATTGATTTAACAAATTTAAAAGTTACGGGTGAGGCTG  
TTTCAACTTTTAAATACAAGGTCGGTTTATCTATTGGTTTATTATCGGCTATTAACCGTG  
TTAGTATAGCAGAAGCTACTGCCATTACATTACATGAAATTGGGCATTGTTGGGAAACAC  
TGGCTACAATGGGTGACTACGTCTATCTTAACTATGCACTTACTGAAGGTATACTTATCT  
TACAGGGTAGGAAAGCTAATAAGTATAAGATTCAATTATTGGATGAAACATGGTTAAAGA  
AAAACGTTGATCCAGCCGATTATGAGAAGTTTGCTAATGATAGGACTGAAGGAAATATTC  
GTAAAGTCATTCTATCATCATTTAAGAAAGCGCAACGTCCGCATTTAACTGGTGATGTT  
AATCACGTAAACGCGATGAACAATTAGCTGATTTATTCGCCACTCGATTAGGTTATGGAA

GGCCACTGGCAACGGCATTAACTAAATCAGGTCGGTATTATAATGACCGTGAATATAAAT  
CTGTTTCTAGCCATATTACTGCTGAGGTATTCAAAGGTCTATTTATGATCATTGGTTTAC  
CTGTTACGCTAGGTATCATTGCCGGTAATTTAAAAGTTGGATATGATCCAATTAGTTCAC  
GTTATGACAAACAACGACAACGTTTAAATGAAAATTAACAAGATCTAGTAGCACAACCTTA  
AATGGGTAAAGGACTCATCTAAACCAGGAATTGATGATGACATTAAGTAATTGATT  
CATTGATAAATGATTTAGCTAATGAGTGGACCATTTTTGATAAAAATTTAGATTTCCCTTA  
GTCCCAGCGTCGTAAAGATAAACGGGCTACTGAATTAGAAGATACTTTAGAAAGTCTAT  
TAAATAATGACTTATTTGTAAGAGCCTACCGCTTAACTAAATAGAGAGAAAAATCATGCA  
ACAATTAGGTTTTGAACTTTCCCGTATTCTAAAGCAACTGCCTAACTTAGGTGGTTCTGA  
TCGTAAAACCCGCGCAATGCTCCTAGCTAATGCGGTGGCATTACAGATTCCATTTGAGAT  
TTTACTTGATTTCAATGAACAACAGGATAAAGCTGTTGCTAAATTTAAGAAAATCTTAAG  
TAAAGTTAATGAGAATATTGCAGTTGATACTAACTAGCCGTAACATATTTTAAACAATAT  
TCTTCGCATTCGCCAAAGTCTTATCAACGGTATTACTGATCCATGTCTTGTCAAAGCTGT  
ACTGACATCTGATACCGCTAATGATTATCTAACTGTCGATGATATCAATATTGTCTCTGC  
CGTTGTTAATGGCCAGATTATAACCGTATCCAAGCAGACATGGGTAATGCATTAATCA  
ATTAATCGGTAGTATTGATGAGTGAGGTTAAACCCATGTCTCATGTTAAAGAAGTAGATG  
TCGAAGAGGAAAACTTTTTCTTTGATGAGAACCAACCAGAGATGGTTGAAGGCGAAGAAG  
AGACTGTTTCAAGTGCCTCGGCTCCTGAAATTTTAGCTAAGATGTGTGTAGCTGTCGAAG  
CGATTCATCAGCTATCTGATATTTATGCAATCACTAACTTGAAGGCGTATCAAACCAG  
ATGTTGATGGTATTCGAGCATTAGTTAAGCGCATGAGCACTGAAGGGTTTGAAGCTCCTA  
AGAAAGCAGTAGCTTCACTTGAGCAATATGCTTCTATGTTTACACCAACCCGTAGTACTC  
TTAATGTGACTATTTCTCAAGAGGCAGTGATGGCTACCATCATTAACTCTTAAGACTT  
GGTTTGAGAACTAATGGAATTTGCTAAGCTGATGCGTTGGATTAGTGATTTTAAAGA  
AGCGCGATGTTGTTGTAGCAACTCGTTATGGAAAGATTGTCCGGGCAGTTGATCAAGCAC  
GTA CTCTCTTTCAAGAGTTACTAGTTAAAAATCGATTAGGTAATCGAAAGGATGCGCTAC  
TAGAAAAGTTTGATGCAATTGCACAATCAATCATTGATGATCCTAAAATCCTAGCTAGTC  
GTGTATATGCTGCTGCATTTGGTAGTGTATACTACCAGAAAGAAATCATTAAATTAATA  
ATGAAGCACGTA CTGAACTAGGTACAATGGAAAAGCTAGTTGGCACTATCATTGAATATG  
TTAATTACAATGGTGATGATTATCGTGCCTTATGCCTATCGCTAATATCCGTGAGATTG  
GTAAACTAGCTACCCGGTGCAATGAACTATCTACAGTGTATCCTGATCGTTCAAGCATT  
CAGATTTCCCTGATAAGAATTTCTGGAAAACTCACATCTGTTAAAAGATCGTTTTGTCTG  
CACCCTTGATGATTTGTTAAAAGCATATCGCAATAGCAGTGATACTCTACGTAAGTTAA  
AGCAACTATCACGTAATTATAGTCAAGAACTATTGATGCTATTGGTGAGTCTGTTCAAT  
TAATCAACACTTCCCTTGAAGGTATGCGTCGTATTACTGATACGATGTTTGAATATTCTC  
AAGCACAATATCTAGCAGCTAGTTGCGTACTTAACTATTATGGTAAGTGTGCACAAGTAG  
TTAGTGAAGATTATAAGATCCATGGCTTCAATGATGCTATTCGCGAATGGCAGCGTCGAT  
TTGATAAAGTCATCGATGACTTTAAACGTGGTTATGCAATGTAAAATACAACATAATGCC  
CTCCCCTAGGGGAGGGCTTATGACCTTATTGAATTTGCTCATGTCTTAAGAAAGTAATAG  
ACATGTCATCTTCAATGGTTAGTTCCCTGGTTAGCCATAACAGTAAGCTTCTTACGTAATG  
TCAACCTAACTGCATCGTCATCTACTGTAATAATGGAATAGTTATTAGAACCACCTAAAC  
CACCAGCATCAATCTGTAACACATCCTCACCAATAGCTGCTTCTAAAGCTGCAATGATTT  
CAGATAATGCAATTGTTTTACGACCAAGCATGTCATTAACAATTGTCTTAACTGTCTTAA  
TTAATGACGGTCTGATAGTAGAGTTAGCAAATGCAGATGGTTTTAGATAACAATTGTAA  
AGAAGTTCTGATCAACTTGTACAGTTGATTTCTGACCCTCTTAACAGAAACAATTGTAT  
CGCCAAATGTAGTTGTCGGATATAGATAGAGTTACATGTCTCTAATAGACGTTGATCAA  
TATAATCAATATCATTCTGGATCCATTTAACGAACTCCATTGGTATCTCTTTGCGATAAG  
CTACAGCTTCCCTGTTGAGTTGCAAAGTAGAATAGACCATCCACCATTAGTACCATCATT  
CACGTAGAATCTTACGTGGTTCAAGAAGAATAGGTTTACCATTAGCGTCTAACTTAGTAT  
CGCCCTTTCGATACTGCATTACAGGCTTACCATTAGCATCTAGA ACTGGATCACCTTTCT  
TATGTTTAACTTTGTAACTGGTTTTCCGTCTGGTCCTATTGTAATAACAATGTGACCAG  
TTGAATCAGTTTCAAATACATCTTTCTGATAGTAAGCAGGTACATCTGCTGGCCAGGTCT  
GATATGATTCTTGGCTAAAAACAGTTCTATTACGGTGCCATATCTTAGTCATGTCATAAC  
CAAGCGTTGTAATTAACCGTTCCCTATTAATAACCATGAACTCAGATGGCAGTAGATGCC  
TTTGAACCAATGAGTCTAATTCATTTGGTATATAACCTGGAGTGATTGTATTTACTACAA  
TGATTGATACATCAAATCAGTATTTAAAGGAGTAGAGAATACTTTCTGGA ACTGATCAT  
ACATTGACATGTTAGTGGTATAAATCGCACCCTTGAATCAATATCATAATTAGTTTCAA  
TGATAA ACTCATAGACACGCTTTTCTTCTTCAATGCCTAAGA ACTTACCATTAATTGATG

CATACTTTGTTTCACCTTTAGGCTGATATCCAATCTGAACAGCAATTTGCTCATCAGCTA  
ATTTCTTAAATTGTTTCGCCTTCATCTAATCGAATCTTAATACGATAGCCTTCAGTGACGC  
GATCAATTTCAAATACATCAATACTAGCTTGTAAGTACTGAGCTGTATCATTCTCACCAACAA  
AAGTCTTCTCATTGATAACTGGATTATCTAAGTAGTATGGGCGATAATCGAAGTTATCTT  
CCGTTGCATCAAGTACACCATGGAATGGACAATAAACTGTACGTGAGTCGTTTATTTGAC  
GTGCAATAGATTCTGCTGAACTACTTAAAATAGAATCTAATTGTGCATCTGGTACGACTG  
ATACACGACCATTACTAAACCTATAGAGCATTGATGGTAGGATAGTGATTCTATCACCAT  
TATCTTTAACATGCTTAGATTTAACTAATTCATTCATCGATACTTGTAGCTGAGACATTG  
CTACACCTGCACCTGAAATGATGTCAAGTGTACGAGGAGCACCTAGTCGCCTACTAGCAA  
GATATTGTTTCTTTGTGATGTTATCGATATTAGTTACAAGGGTATAACCACGTCTAGCCA  
AGTCAGCACTTAATTGTACATTGGTGATTGGTAACTGTTGTGGACCAGTGGTATTATCAA  
TAACCTGGTTACGAAGCGTATCAAAGTCCATTGAATTAGAACCACCAGATACATAATAAG  
TACTAAGTGCACCTTATTCGAGCAAGTTTCTTAAGTGGTTCAGTATACTTTGGATCATCGT  
CGATATCATTTAAACTATACGTAAATTGGTCAGGTTGATAACTACCATAATCGATTTCAA  
TCTTACCACGAGTAGAATAGATATCAATACGAATTACACCTGTAGCTAGTCCAGTAGTAT  
TATAAATAGCTGGTATACTAACTTGTAACCTATTATTAATAACTTTTAAAACCTACGGTTA  
GATTAAGAGGATCGTATACTTGATCAGTATGTGTAGTTATTACTTCTTCCCATTCCCTGTG  
CATCTACTGTCCGTTTAAATATATGCACGTGCATAATAAACTGATCGGAGAAAACATATT  
CTTTCTCAAACAGATTAGATGGATTAAGTGTTTCTTGATATCGAGTAATATCAAATTGTT  
TAACAGGTATGATCAGATTCATTAATCGATGTCCACGACCATCATTGATCATAGTCATCT  
GTGCAATGTTTCGTAGAGAGCGTTTCAATAGGAGATAAGCTATCGGTATTATATTCAGCTA  
CAACGCCACCATGGCGCATTACACGCAGTTCTAGAGGGTATTGCATGGTGTATGATATAC  
CCGCCCTGTAAATTTAGTTAAACGCGGGATAACTAATTTACGTTGACCTTGATCCCCAT  
AAGGAACAGCATACTTAATAACTTCATCATAATCTAAAATGAAGTTAAAATAGTTCTGTG  
CTGGGATAGCAAATCTACCAATATAATCTTCATCGGACATGTGTAGATAAAGTTCATCAC  
TGGTAATCGCTAAGCGTGGATAAAGACGCCTACTTAAAGCTTCCATTTCAGTAAATGCAG  
CCGATACTCCGATAACACCCATCTCCATTAATGAAACGAAAGGGTTTGCTGAATCAGGAA  
TATCATAACGTTCCCCAGTCTCACCATTAAGTTGTTTATCTAGTTCAGATAACATTAATG  
ATTGCATCAGTACTGGATTTTCGTCTCAGGTTTAAATAACTGATTTTTAAATTCACTTGCCA  
TTAATTAACCCTCTTTCTGAGGTGGTGGGGGATTGCGTAAAAGACCAGGTAACATGGCGT  
TATAATCTTCTTTAGATATCCACCCTCTAATTCACTGTTATCTGTATTGATGTATGGAT  
ATACTTTTGTACTACTAAAATATTCACGTTTCATAGATTTTAAATCTTTTGCATCTGTGTAT  
ATCGTCTTTCATCTGACATATTGGGGTTAAAGTCTCAACTAAGTCATTGAACTCATAGA  
ACAGAATATAATCATAAACATCCATACCCATGCATCGTATTGATACAGATAGTAAATCAT  
TCGCATTCTGGAATGGTGTTCGCTACCATCACCAATAAAGTCACCAGTACGTCCAGTAT  
TAGCATTTCATGAAAATAGATGCTCCTGAACAGAATATCCTGGTAATATATGTCCTAGTTA  
CATCTGTGACTATTCGCCATACCCTAGTATTGTAATCTACTTCCTTTAGTAAGATCATCT  
CTGGATAAGGCCATAACCTACCTTCTTTACTAATGCAGAATAGCGCTCCCACATATATA  
ACAAGTTAGTGATAGGGTCACCTTCCATATTTCCGAAGCTTGCTTGCAAATCAAATGTGT  
TAAATTGATACGGGACATCATCTACATATGACATAGCGTCCCGATAAATACCTGGGTTAG  
TTGTAGCCAGGTTTAAATTGGAAATCTTCCCAACCTGTTAAACTAACTAGGTTGTTTGATA  
AAAGTGAATAAATGGATTAAGTGGATCAACATCCACCGCATTTCATTCCATCCCTATTTG  
ACCATGGATCTAGGATAGCTCTTATTGATCTTGATAAGCTATAAAGGATTATCATTTAATA  
GCATTGTGAGCTTTCTATCGATCTTACAATTATCGTATGACAAATTAAGTATCGGCCTGG  
TAAAGAATGTAAAACCATGGTTCTCTGATTTGGGGCAATGGTTCGAGTTACGGCCAATGA  
TATTAAGCCCCCTGATAGAATCAGAGATGGCTTTATCACGTGGCGACTGACCAATGTTTT  
GTATGATCTGATCTAAAATTCGGATGCTGCCATTTTTTATAACTCTCTGCAAACCCATA  
TAGGAAGAGAAAAATGCCATTACCTGTAATCGCCGGAGCAGTAAGTTCTGCTCTGATGAC  
TGTTGCTGCTGATCAAGGTGTACGTGGTCTAATGCAGACTGTCTTACAAGCCACTAAAAA  
TGGTGTAGAGATTTCTTCTCTAACCAGTCTAGCACGTCCAACCTCGTGTTGAACCATTGGT  
CATCGTAGACCAAACCTTAGTTGATCAACCTTACATGAAAGACGTTATGAAATTTGTTTC  
ATCGTCTTTTACTGGTTATTATCTACAAGCTGTTAATATGCTTCTAGGTGTGGATAAGAT  
TGATACTTTAAAAGTATTTCGATACTATTAATCCTAACCGTACAGGTGTAACCTCGCACTAG  
TGATTTCTCTGCCGAAGAGTATTCTGATGGTCTTCCCTCATTAGAGTCTTTTGAGAAGCC  
TGTGCATTTACCAAATATCGTTCGCTGAACACTCACATGAGCGTTGGGTAGCTTCAATGGA  
AGCGAATGACGAAAGTACAAGTGCACAAAGTATTTCTAGTGGTGATACACAAAAGATTTA  
TGAAGTTGAAAACCTTGCCGTTGGTAAGCTGGTTAACGTTGATGTTAAATCAGGAAAGCA

GAAAGCTAAAATTCCCTGTTATGATCCGTTTAATTCCAGCCGCTGTTAGTCCTCAGATTAT  
TGCGCACATCTTTAGTGCTGGTGGACGAGATACTTGGCTACATCGCCTATTTCTAGTAAA  
AACTGGTCAAATTAATTTCTGGCGTGACTTCGTTCTAGGTCAAGATATGATCGATGAACA  
TTATCGCATTCTAATGAATGATAAATCAGGTGTTTATAAACAAATCACCGATCGCCGCCG  
TAACAACCTGGAAACAATCAGTTCGCAGTGGTACGGTTTCATTAGCAGATGCATCAAATAT  
CGCGATTGTATCAACTTCAACTCTTAAAGCTGCTTCTAATTCTCTTTATGGTCGTATTGA  
TGATTTCCGCACTCGGCAAAAGATCTTTGACAATAGCTATCTAATGATGCTTGTGTTAT  
TGATGACCGTTATGAGCGAGTAACTATTTATCATCGTGGGGTTGATCTATCTACATCTCA  
CCGACTTGATGAAATTAATAATGGCTGAAAAGAATAAAGGTCCGGATATCACTGAGATCTT  
TAAAATGATGAATAAAACCATGTCTACCAATATTTAAGGACTGAGTGATGAGAATTATTG  
ATTATGTACGTGAACTCGCACCAAGTACTGAACGTCGTGAACTATTAATCAAATCCGTT  
CATTACGTGAAGAATATGATGCAACTCTCGCACCAATTATTGACGATGTAGGTGAAGTAT  
TTGGTAATATGCAACTTAAATCAGATTTAGGTATGCGGTTATCTACTGAACTACGGCGAG  
CGATTAGTTTTAATACTGAACCGATTAACTAGTACTGGATACTCTTCAAATATTCGTG  
GTAGCTTTGATATGATCGAAAGCGAAATCCGGCGTTTATTTGCTATTCAGTTTACTAACT  
CTAATCTAACCTTTGACCGTGCAAACATGTTACGTTTTGTTGATGGTCTTAGTTTTCTATA  
TTCGTTATGGCCGTAAACTACTACTAAATCTAATTGCACAAGAAGCAATGAAATTAGGTA  
AGGCTACAGAATTAATAATCATCTCGTGCTGAGAAAGAATGGCTATACACTAATATGGCGC  
AATTCATTACTCTGTATCCAGCAATGAGTCTTAAGACTAATGAACTGAAACAACGCTTAA  
GTCGTGCATCTAGTGCTGAAGTCAATGAAGGTACTTATGATGTAGCTGTGAGTGCTCTCT  
CTATAGCTCAACGTGATCCACTTAACATGGATGGCTTCTCACCTCGTCAGAACCCGTTCCG  
TGCTATTTGGCAAGTTCTTAGCTGAGTATCAGGTTGAACGTTTTAAAGAAGCTGAGCAAG  
AATTCCTTGCACCTCAACTACGTTTACAAGAAATGCGGGAAATGCAAAGTAATGGTAAAG  
TGGATGCACGCCTACAGAAGCTTATTAAGAGTATGAAATTCGTATCTCTGATTATAACT  
ATCGCCTAGGTATGATCCAAGATCGCGCATCTGAGTTCCTTGCTAACCATCGTGATCTAC  
TATCTCTTGGTCACTAATGGAGGGCATTGATATGCCAGCAACTAATGCTGTACGCCATT  
TGGTCGTAATTACTCAGGTGGTCAACAACAGGCCATTTACGGTTCCTGCTCGTCCCGG  
TGATCCTCAAGTTGAAGAATAATCTTATCTTTACCAACTTTCCTGCACAACTGCATA  
TTGGGAATTCCATAAGAAAGTTCTAGCTTGTGCTATTCGTCTTTTTAGCGGAAACTATAA  
TTGGTTTATTCTACAGGACAATAATAGTAATATTGATAGTTATAATTATCAATTCCTATT  
AGATACTGTTTCGATACATTGCTACGGGTCATCGACGTATTTCAATTACCCAATGGCCAAT  
GTTACTAGCTACTGAACCAGATGCTGGTGCACAACTCATTGAACCGCGCGCTGAAATTGC  
TACTCTCTTTAATGAGTTAAAATTAGATCTAGATACTGTTTCAATGATCCAGAATTGGGT  
TAAACACAAAACGGTATGAATGATCTAATGTATACCCTACATCTACTATTTGGATCTGT  
AGAAGTAATAGATAAGGACTGAGGACTATCTATGACTAATAATTCATTTAGTCATTCGGT  
CTTACTTGAATCAATCGACGGGGACAGCCCCGTCGATATGATCGCTACATGCGATGGATA  
TCTAAAAGAATTATTGCCATCAATTGAAGATATTCAAAGTAGATTAGAATGCACTGAAAA  
AGACATTTTAGTTAAAACCTATACCGATGGCTTATTTCAAAAATATGCAGATAACCAAGA  
TGTTGTTAGTGAACACATTCTAAAACCTGAGAATGTGTCATTAGAAGACCTATCTAAGAC  
AGCACGAAATACCTGGGATGAAATGAAAAAATCCCAAGCAAAGCATCGAGATGAGTTAAA  
AGAGTATGCACGTGTTATTACACAAGGTAATCAACGTACTCTTGAACGAATAAACATGCT  
TTTAGAAAGAGCTGAAAATATTAAGCATGAGCCATTTAAGCAAGAATTAATAATTTAAAAA  
TACTAAACGATTTAGTATTGATGGTAAATTCGAACCGACTACAGTTGATCCGATACTCAT  
GCAAGTTAACAACCTTGATAGCTTTCTATGATAAATCCCTACTCTTGTATATCCAATCTGT  
AGCGGATATCCTTAGGAAATTATCATTGATGAAAAATGGACTGATAGAGCTGCACAAGA  
CTTTAGTAAGTTAATGTTAAGAACTGGATGAAGGGTGCAGTACCTATTAAGAAAGATGA  
TAGATTTAGAGTAAGTTCTACAGTTTATCGTAGTATGCCAGTTCAAGGTAATAAGACTTT  
ATTTGGCGCAGGGCCAACCTGAAACACAGACTGAAGAGATCAGGGATTGGGATTTTTTAGT  
AAATACTGTCCGTGATTTTGCCTTTAAGTTTTATACTATTCCTACTATGAAGGATGCACT  
TGAAGGTAACAATACCTTTAAGGTTAATGATACGAGTTCAATTGGAAGACGGTTAGTATT  
ATTAAGCGAAATGGCTAAACGTATAGATGCTAGAAAAGATTATGCAACTAACTAGATTT  
TGAATTTGGTAGGTTAATGCAGTTAGCCGAGACTAATCGTCAACAAGCTGGTAGGATTCG  
GGCACAACAATCTAATATGCGAAATCGTCAAGCAAAAAGTTCAAGATCCTGATGCACCTGA  
TGGCATCCCTGCTATCTCAAATATCATTAAATCAATTACATTAATGATCAATAATGTAAG  
TCGCGTTGTAACAGATTTTAGTAATGCTCTTGCTGGTTTTAGTCAGAGTAATGGGTCGACT  
AGTATTCGTGACCGAGTTAGAATTAAGCTTACCAGCGTCCAATTCAAAGACCTACGCA  
AGAACAAGTAATAATCCCTCCCAGGTAAGGTAATTAACATGTCTCTACTTAAAATGCTA

GACAACTATCACTTGAATCAATTGAAGATCAAGGCACTACGATTCATGGTGATGTTGAA  
TTAGTCGTTGAAAATAAACTTCTGCTGATGTATCATCCGTTTTAGCAGAAGTAGATCAG  
ATTGAAAATAATCCCGTAGAAGAAGTTCTTGATGCAGATGATGCTATTCAACCAACTGCA  
TTAGATACTGAAGTAACTATTGTTCAAGCTGAAGATGAATTAGGGCTAATTGAAGATGCT  
AAAGAAGCACTTGAAAAGTTCCAAGGTCTTTACTTCAAGCTGGTGAAGATGGTATCTCT  
CGACAAGCAGCTGCCTTCATGCATGTTGGCATGGAATCAATCGATCGTATCCTAGGTATT  
GAAAAATCTGGACTCACTGCCGCGCTTGAGAATTACGATGCTTCTCCACGCAGCGCTATT  
CAGAAAGCAGCTGTTATCTCTCTTGAGGATCTCAAAGAGAACTAAAAGAAGCAGGTAAG  
AAAGCTTTAGAGATTATCAAGAAAATTGTTGCAATGATAAAGCAGAAGATTAAGATTTT  
AATCCTAAGCTGATTGCACTCGATATGCGTATTACTAAAACCTATTGATGCTATTAAATCA  
CTCAAAGCCGGTGATCTAAAGAAAGAAGAGATTAAGTTCACTCCTTCTGAGTATATGGTA  
TCTAGTAGTGGCTTTATTGCAAATAATCCGAAGACTATTGCAGACTTCATGACTGTATTC  
TCAACTCAGTATGTATCTGCTCTTAGGAAATATGGCGAACTTGGAGTACGTTATCTCAA  
GGTGACAAGTCTATTGATATTGATCAAGTCACCAGTGATTTACAAGCTAAGATGGCTGAA  
GATATTAATAAAGCCGTTGAGAAAGCTCCTGGTAATGTTAAGTTAGAAGTTACTTCTTCT  
AAGTCAGGTGTGAATAAGTGGGAAGTTGTTGAGGGTGATGGGGAAACGGATCTACATGAA  
GTTGAAGTTGATGTCGTCACCGAGTAAAATCTTAGCACATCTTAATATTCTTAAAGGT  
CTTGTTATTAACCTACAGGACTTTAATAAGATTGATTACAAGATTGCTGAGAATCTTGAA  
AAGGCCCTAGCTGATTGGAATCCTGACGAAGCAGGCATGTCAAAGAAACAGCGCGTGAT  
GCACTGAATATTGGTGGTATTGATAATAGTGCAGTAACTATATTGCTAAATGCATC  
GCTGCGCAGTATACATTTATTGTTAAACATGAATTAGCTGCGTACGGCAAAGAACTTCT  
AAAGCACCTGAGAATGATGAGAAGTAACAAACATAATGAGGAACCCTTCGGGGTTCCTCT  
TATGCTATGTAATTAAGTATTCTTGAGGAATTGTAAATGAACTTAAATAAGTTACTTGAT  
AGTTTAGAAGGTTATGGTGTGTCGAAGTAAAAGAAAAAGTCGCGAAAGCCAACTAAAG  
CACGCTGCTACAGACGACAAGCAAATATCTAAAGAACCAGAAGAAGCTGCCAAATTAATT  
GATGAATTACCAAATGATGTAAAAGCAACTAATAATGGGTTAGATGTTGAAGAAGCACAT  
AAACCTAATATCCATTGGAAATCAGATCGTGGTTTAGTTACTGAAGTTGATTCATTTGGT  
AAAACATACGTCGCATCAGAAGAATATCCAGCATCACCCCATGATACCCGAGAAAGTCTT  
GATAATAGACCTACACCAGTGGATGGTAAAGATTTAGATAGTGATGATGATCATTAAAT  
ATCTTTGCGTATGATACACCTCCATCTCAAACATGACATATCAGCTAAATCAATTACTG  
CATGCGCGTACTAGTTTAGAATGTTTTATAGATTTATTAATACCGCTGGTGATAGAGGT  
ATTACTAAACAATCAGCTGCTTTTATGCACGTTACATTAGAATCAATTGATAAGCTTATC  
GGCTTTGAAAAGATTAGTATTGAAGATTTAATGCAACCCCTAGCAGCGCTATGCGTTTT  
GTAAATATTTCTCAAGAAGAAATAAAAAGAACGTATTGAAAGTATAGGTAAAAGATACTT  
GCTTTAATAGTCCATGTTATTGAACAAGCTAAAGTAGCGGCACAGCGTGTACTAACTGGA  
ATCAAATCAGTTGAAGATAAACTGATGAGTTAATTGAAAAAGCGAAAAGTTTAATCAAT  
AAGCCAACTGTATCAAATGAAAGGGTAACACCTGATTTTGATATGTCAATTAATAATTGAC  
AATCCTAAAATGTTATTCATTGGTGATGAATTTGTTTTAGACGATTTAACTAATGAAACA  
AAAGTTAGTCAATTTCTAGCTAAAGAATGGCCAAATATAGCTAGATCAAACATTGATAAA  
GTAGTTAAATTAATTAAGACTACGACTTAGAAGATAATGAACTAGATAAGTTTAAAGAG  
GCTTTTGAATTTATTGGTGAAGCTAATCAGTTAGATAAAGTAAAAGATACTTCTCTACCT  
GGTAATAGTAACTTATATTCCAGAAAGATAAATATGCTCCACGACTTGGTGAAGATAAA  
CATGGTGATGGTCCAGATAACAATCACGATCGAGCCAAGGCCGCTGTTGAAGTGCGTAAA  
ACATTAGAAGTTAATAAAGAAGCTATTCGTCGTTTAGGTGATCTATTTAAAGCTGAAAA  
GATGTCCTTGAACAACTGAAGAAGGTTGCACAGGGCATTGAGGACATGGAGCTACGTAGG  
TCTAAAGCTATTTGGAAAGGTGCTCGTGATGATGCAAATGAGATTATATCTTTAGTTAAT  
GGCTTTATTACCGATATGTCACCAGAATACGCAACACTAATTAGTTACCTATTACATATT  
GCAAAGCAACGAAATGCTGTTTGTAAATATGGAATTAGAAAGATATGGCCAATAAATATAT  
CTAAGTGTTCAATTTTATCTAAGTACCTAATTTCTATGGTTTTATTGTTAAACGCGCGCAA  
GAAATTCCTTGAGGAAATAACATGACATTTAACTCAATGAGTATCTAGATAGTCTAGAA  
GACTATACTGAGGTACCTATTCCCTGAAACAGCAGTTGATAAAGTAGCAGCCATGACTAGT  
GGCGATTGTATTTCTGAAGACGCTGTACCTGAAAATACTATTCAAGATGTGACTGACAAT  
AATGTTGGTGTAACACCAACTGCACCAGTGGATGCAGATACCCTATTGTTAATACTCCT  
AATAATGGCGTTATTGTTGAGACTCCAGCTGCTACTCTAGTTGAACAACCAGCTGTACCA  
GTTACCGTAGTTGAAACAGATGTAGTAACAGAAGTACCCCTATTCTGAAACAACCTAAT  
ATTGCTGTTGAAACAGTTATTCCAGCAGGTGCCGAAGGAGAGGAACCACAAGGTGGTGAA  
ACAGTAACTCAGCAAATCGCTGATCAGGCTGCCAAAGATAGTTCTATTCCACTAGCGCAT

AATGGCGTGGTGCCACAGATCGCTGTTGCAGTGGATATGGATAAACCTACTGATTTTCATG  
GACATTGGTAATGCACAAGTAGTTACTACAGCAGTGCAGATATTAATCAAGGTCTAAAT  
ACCGCATATGCCCTAGAGTCGATTAAGCTCTTGTTCGACAAGCTGGTATTAATGGTATC  
AGTCAAAGTACAGCTGCATTTATTCATTCTGCACTCTTACCACATCGTCATGTACTIONGGT  
GATAACTTTAACTAGCTCATTAGAAAATAACGACTGGTGGTAAAAGTCATTTATAT  
CCAGTTAAGATTTCAACTGAGGATATTAAGAGTAAAGTCGTAAGGCGCTTGCTTATATC  
AAGAAAGCTATTGCTAAACTACGTGAAATTATTAGCCACGTATGGGATAGTCTTAAGAAT  
AGTGTACCGCGTGTGAGCGTAAAAGTTGATGAACTCATTTTAGCTATCCAAAATGCTAAG  
TTTGAAAATATACCCAGTGAATTAACGGTTCCTGTTAAAAATGGTGGACCCGTATTTGCT  
AATGGTAAATTCATTCAGCCTTCAGCTAACGTTGGATATGGCCCTATCGTTAAATGGATG  
GCATCTGTATATGCAAAGACTATGCCACCTACCTAACGAATATTGGTACTGTGCTTAAA  
GCTTGGGATCCAGAGCGTAATGATGCTAGTGAAGTGTGAGAAGATGGACAACTTCAA  
GATGGACCTCTCAAACACTACGCTAGTACATCTAACACTTTACCGGGTAATAAGCTTGTA  
ACTACGACTGCTACTCAAGTATATCTAACTAATGATGAGACAGCCGCAGAACCTGGCACT  
GAAGTGACTTTAAAGAACTTTGATAAGAGTCAAGCTAAGAAAGAAGCAGTAGCTCTACGT  
AATCTGGTTGATGATGCAGCTGATGTTATCACTGGCGGACGGAACATTGTTAAAGCCATT  
AAGCAACTTGAAGATGATGTTGATCAACTTTCACGGAACTAGAGAGTGATAAAATCGAC  
GATGTTTCTAAAGAACAGATCGAAGAAGTATCACGTAAGGTAGCATCTATTATTACAGAT  
AGTGCACCTAAACATGACTCCATTATTCGTGAAGCAATGCGTTACGCAAATACTGCAACT  
GGACTTTATAATAGTGTAATTAACACTAAATTCCAAGCAGAATAATGATAAGTGACGACA  
TATCGACGGGGCTCGGAAGAGTCCCGTCTTATGTTAGGAGTTAGCAATGGAATTAATTGA  
TATTTATAAAGATACCCAGATGAAATGATTATTGATCTTGATGAACCTAAAAGACTTGC  
AGATTTATTATCAGGCGATGAAGCATTAGCTAGGCGAGTGATGGATCTATTAGGCGGTAT  
GGAAGATTATAATCAGATCCAAGGGGTTATCAAAGAATTAGAGGATGTTGTATCTACTGA  
AGATATTAGTGATACTATTAACATGTTATTGATCGAGTTATAAACTATTTGTTACCAC  
TATTGAGAACTGATGGATAGTGGAGTAGTGCTAGCAGCTACTGCTGAATATGTTGCAAT  
TCGAGCAGAAACTTACGAGTTAACAGTCGTGCTAGAACTCGTAAAAATAAGAATCCTAC  
ATTCCTAATTACAACCTCGTATTCAGAACTTAAAGTGTTAGATATAAACCTATTACCAATAG  
TGCTAATTTGTTATCTCACTTACGCGTATTGGAGACAGTAGTTGATGGGTATATTAATGG  
ATTAGACAATGTGATTCTAAGGCCAGCTAATATCATACTTCGTATATGAATCCAAATGC  
TAGTCCAGATGCTTTAGCAGAACTACTATTAATAGTGCCCCAACTAAAATAACCCACACC  
ATCTGTTTATCGCGATCAAGGTAATCGATTTGTATCATTGCATTTGCTAGGTAATCATCA  
AATTGTAATTAATACTATAATCCCGATAAGAATGCAAGTGCTTATGATCAGTGTAGGGATAT  
TTCTTCACGGTTAGTTCCATCTGAAGAAACCCCTAGACCACTACCAGTCGAAATAGAATT  
TGAACATTTCAACCATCAAGTACTGAAAGTATTATTGATCGAGTTGTTAAGGTAGTTGA  
TAAGATCAATCGTGCAAATGCTGCATCAATGCGTACTCGTCGAAATGAACGGTTAAGGAC  
TCTTAAAGGTGCATTAATCAGGTTTAGAGATGAACTAACACGTGCTCGTAATGAAGGGCG  
ACCTGATAGAGAAATACAAGAACTTGTTCATTGGTAGAAACATATGTTGATTGGTTGGC  
TATTCCTTATCACGACCTATTTAAATTAACATGTCGTAATTTGACTGCCATACTCAATGT  
ATGCGATGAAAATCTAAAGTAAGATTCCAGCGCAATATTTTGAATGTTAACGTTTCGTGCG  
TTGGAGTTATGACTAAGACGAATAGCATAACTCATAAACTCTGTACAGAAGGTATATTA  
CATGATGGTAAATATTCACAAATATGTAGCCAGCCTTGAGAACCAAGATGGTACGGCTGT  
GGAACAGGATGTATCCAAAGTCGAGACATCTGTTAAAGATGATCATGAACTAGTTCAAGA  
TTTAAAGAAAGATAATGATGCATCTGCAACTATTGAGAATGAACTGTTAAAACAGATAC  
TGATATTATCTCTGCTGAAGAACATGAAGAAACAGCACATGCTGCTGATAAGTCAGCAGT  
AATTGTTGAAGAAGTTGTACCAGAAGAACTGTTGTTGAGGAAAGTATTCCTGAACCGCT  
AGCTACCACTAGTGTGGAAGAAGGCGAAGAAGCAGTTAAAGTTGCTGAAGCTGAAATCGC  
TGAAGAAATCGGTACAATTTCTGAAGGCGGTAAGAGGTTTTAGATTCAACCACTGAAAT  
TATTGAAGCTGCACAAGATGCGGCTGATGATACTGAACTAGTGCCTGTTGCAGAAGCACC  
TGGTGAACAGCAGTGAATTAACCCCACTGAAGAAACCCCACTTGGTGACGAACTCC  
GCCACCTGCACCACTATCTGAAGAACTCCAGCTGGTGAATGAACCCGTGTCATCTACCAT  
GGATACTACTACCAGATGAAGTGTTAGATGCTGGTGAAGTTGTAAGTGAAGCAGTTCTGG  
TATCGATGATGATGTGACACCGGAAGAAGCCGGTGTGAACAGACAACCTGCTGATGAAAG  
TTCCAATGAATCACCTGATGTAGAGATTACTGAACTGAAGAAGTCGATATTACTGAACC  
AGCTGTAGCTGATGCTGAAACAGAAGTTGTTGAAACCGTGGAAGACACGCCGGATACAAC  
TGATAGTGAAGTAGCTGAAGTAGTAGAGACGGAATCTGAAAGTATCCCTGCTGAAGCTGA  
ACCGGATGAAATCGTAGCAGTTGATGAAGAAGTAGCTGTAACCTGATCCAATTGTAGAAGA

AGCCGCCGAAACAGCAGAAGTAGCTGAAGAAGGCTTAAGCGAATTGGAAGAAGTTCGGGA  
TGAAGCTGAAGAAGAATTA ACTAATGATGACAGTGATTCTACTGATGTATTAATTAATGA  
AGCTGAAACTGAAGAAACAGTTGCTGAAACTGAAACAGCATCTACTATTGCTGAACCAAC  
AATTGAAGAAGGTGCAGTTGAAGATGATAGTGAAACAATTGTGCTGAAAGCTGATGATGA  
TGTTTCAGAAGATGACATCGAAGAAAAGTTAGCTGAAGGTGAAATTGATATTCCAGATGT  
CGATGTAGAAGTA ACTGAAGATGATGTTGAAGAAGCAGATGAAGCTGCTGATGAGGCAGT  
TGCTGAAGCTGATGATCTTGAAGATGAAGTTGAGGACAGTAAGAAGACCATTGGTCAATT  
ACTTGAAGAGCAGGCATCAAATGAATCAATGCTTGAGATTCTGCATTATGGACTAGAGCA  
TAAACAGTATAGCCCTCAGTTCATCGTTCATGCTAATAGCTGCTTAGAACGCTCTACACAA  
TGCCTTTGATGTCTATTACCTGGTATTCCAGCAATGGAAGATTATGGTTATGGTAATCT  
AGAAGATTACTATAAGGCGATGGTTACTTCACTAGAATCATTTAATAGCACTATTGGTAA  
GTTTGTTCGAAATATTATCGACAATATTGCTGAAGGTGCAAATGCATCCATCCATGTTAA  
AGCTAACCAAAAAGA ACTCGCCGCAGCTAATACTAAAGCTGACCAACTTCTAGTTAAGCT  
TAAAGACACTGATAATTTTGAAAATAAAGAAATCAAATTAATGGTATTCTAAAAGGTGA  
TGATAATCTAGTACGCGGTGTTGCTGGAGAAGTTCGTCGTATTAGCGATATTATTAACAA  
ATGCTTCAAATCGATGGTGAATACATCGAACGTTTAGTTGGTCACCTATCAACTGCTAT  
TGAAGCTGATAGTGAAGAAGCTATTGATAAGGCTCTAGAAGAAGCAACTAAATTAGAAGT  
ACCTGTTAAGAAATATCCTGAGAGTTCATTTATCAGTGGAAA ACTAGAAGGTAGTTTTAC  
CTTCGAGAAGTCTGGCCGTGATGTA ACTGGTTCGCACTAGTAAAGATATTGAACGATTAGC  
TGCTATTGCACTTCCA ACTGGTGAATGGGGTGCTACCGGTACTGCTACTGCTAAAGTTAG  
CCGTAAGGACGTTACTGAACTAATGAACTTTCTAAAGTTCTAATTGGTCTTGGTAATGC  
CTCTCTAAAAGTTAGCGGTAACCGCGGTGTACGTCGCTTGACCAAGCTAACCGTGATAT  
CTCTAAAGTGGCTAGCATGGATAGTAAAGCCGGTAAAAAGAAAGTCCGGCAACTAGCTAG  
TGCAGTATGGGAAGTTGTTGGCCAATCGGCTGAAAACACACCGTTCTAGTTGATTACAT  
TGTAGCTCTTACCAATGCAATTAACACTGCTGTGAATCGTGCCATTAAGTAACAAACATA  
ACGGGGAGCCTTCATGGCTCCCTTTTATGCTGTTAGACCATGATCTTATGATCTTAAACA  
CATGGAGTTAAACCCATGCCTAATAACAACACTAGTACTACCTGATGTATACGAATCTGTA  
ACCCGTCGGGTAGCAGCTGATATCATCGGGCAATTGGCCAAGATGATGGGTTTACCCGAA  
GACACCTTGTCCAATTTCCAGGTAATGTTCAAACAGTGCCAATGAATGGCGGTATGTTT  
GGTAATTGCTGTGATAGTGCCAATGTGGTTAAATTCGATCCAGAAGACCACATTATTATC  
ACTTATGATGAAGTAGCTGATGAACGATATACATTATCAACTGATGTTAAGAATCATCAG  
AATTTCCCATGGTTCGTAGATGAAACACGTGGTGTACGTATCACACCCGTTCTGATAGTTT  
GTGGACGTTAGATTTGACATTGAATATAAATCTAAAAATATTACATTAGCGCAACGATGG  
TTAGATGAACAGCGTTTATGGTTTTCTAACAATGGTCAGGAATTAGTACACACATTAACC  
TATCATGTTGATGTACCAATGCCCGTTCAAGGAATATTAGCAGCTATCTATAATACTGCT  
CAAATTCACATTGGCCAATGGAAGAAACATTCCCAGAATATTTGAATAAATATTTTACG  
TTCCCAACTACAGAATTAGCTGATCTTAGTCAAAAAATAAATCACTGGTTATATACGAA  
AGACAGGTCGATGTTATTGGTTGGTATGATTATACCAGTACACCACCTACTCCTGAATAT  
GACAGTGAAAGCGATGGTTCCTATAATGTTAGATTTAGCTATTTTCTAACATATGCTAGA  
CCAACACATGTGTGGATTGAATATCCTTTAACAGTGCATCAGTGTTTAGTTCCATCTGTA  
ATTAGACCTAAATACATCTATGAGA ACTATCAGCAAGTAGATCGTAAAGTTAGCCAGTTT  
AGAGGATCTCTTTATCATAAGTTCCTATTAATTAGAGATAAGAAGATACCTTATATTCAG  
CATCCAGATATTGATACATGGGATACTGATAATATTCCAATCAATCAGTTGACTTTCTTT  
AGTGGTCTATTAACACTGTGCCCTGATGAAATTGAATCCGGTACACTAATGTCATTTGAC  
CAATTAGGTAGATATTCATTTAGCCATTCTTCTTAGAATATTTTGAAGGGGTAGGTACA  
AAGGCAATAGACCAAAATGGTATCTTCCAAGTTAGGTTATATGAAAATGATAACTATACC  
AGAGCTGAATGTTATTTAGATGGATTGATGCTTAAAACGAAATGGAAGCTAGATCCATGT  
AAAGTTTATCATGTACAGATATCAATACATAAAAAATCTATTGTTAGTATTTGATGATAGA  
TGGCGTTGTTTACAACGTTATCCACGTGTATGTTGGACTATATTTAATTTATTTGGTGTC  
GGTATTGGACGCAAACCATTTGAAGAAGTTAAGCTATTAGGTAAAGGTAGGGATAGGTTA  
CCATCTGAGGAATGTCCAGGGGAAGGTACTACCTGTCATACACAGTGCCTTAATCCGACA  
ACTGAAGGTGTAATTA ACTGGAAAGATATTGTGCGATGCCAGAGAAGAAATGAATACACGT  
ATTGGACCAGATTGGGATCCA ACTTACTTAATGGGACCATTGACAGTTCTATATGGAAAC  
ATTATTACTGAGAGAAAAGAATAATGGCATTATTAACAATTGAAGATGAAGA ACTTCCAG  
TAAATCCTGAAGTTAAACCAGTTAACCCTAAAGAATGTCCAGATGTTTTCCGTGGTATTG  
CTGTTGATACCAAGTATGTACCACGTT CAGATTTGATGGCATGGATAACTGGCTCAA ACT  
GGCGTGTAGATTACTTTTCACAAATACTACGCGAAGATCAAGAACCAACTGCATTGGATA



TTCATCGTCGTCAGATAAACAGCAGTATATTGCTATTAAGGAATGGATCTAAAAGTAA  
CACAAGCTCTTCAGTATAACCAAGCTGAAAACACCACTAAATTTAAAGTGGATGGTACAG  
GCTTTACATATCCATTCTTAGTTCCGCAAAAAACGATATGTTTATAGCGGATGTTGGTG  
ATGGACGATCAGGATTATTCACCATCACGTCTGTTAGACGACAGACCAATTTGCGTGATT  
CAACCTATGCTGTAACATGGAAGATGATCCATTATGTAACCTCAGCAGGAATATGATGATT  
TAATAACTAAATCACAGATGAGTTATTACTCTTCAACCTCTTTGATGAATGGATGTG  
GTCCATTTGTTACTGAGCAAGAACAAGAAGATAATACTAATCTGACTAAGTTATATAAGG  
AAATAATTAGGAACTATATCACTGAGTTTTATTTCGCCTCAACATCAAACATTCTTAGTAC  
CTGACCAACTTACAAAGACATACGACCATTTTCGCAGTTAAGGCTTTCCTACAAATGGTAG  
ATGCCTCAGCTGATCCACGTATGTACAAAATAAAGCTACTAAATGTGTTCTCTGAACCAG  
TGATGTCACAACCTACAGTATGGGATGCTATTGTTAGACAAGATGTAGCTAGAATGTGTT  
ATGCAACAGAAAAAGCACATTTAGTTACTACTAAGATTTTCACGTTGGAACCAAGTATTCC  
AGGCTATTGGTTTTACAGGTATAGCTAGGATGGTATTCCCAATAGATGCCCTATTGATG  
TTGAATCTCGTTATGATGGTGAAACTATGTGTCGGCCAGATGGACAACCATTCCGTGAAG  
GCAGACCCATGCGTGAAGCACCAGGTCCATATAGGACCCAAGCTGAAAGGAACTTACCAT  
GGTTTAAACGAATCGATCCACAATATGAGGATAGAGTTAAACCATGGCAAATACCTGCTG  
ATATATATCCAATAGTTCGCGATAACTACTATGTTTTTACAGAAGCTTCTATCGTGGCG  
ATAAGAACTTATGTCTAAATTAGAGTTATGTGTTTGGGCGATGATTAATGGTGAGGCAG  
TAAATGCTGACCAGTTAAGAGAAGTTGCAAAATGTTACGTAAGTTGGGATAACCTAGAAC  
GATATTATTACCATATCGTCTTATTATCCCTTATTAAGTACTCATTGAGGTAATACCATG  
GATTATAAGCTGGTTACTCGTAACTCAGCTGCATGGCGCATATGGAACCTGCAATACATG  
GTGCAGGTTCCATGATCGCTGGATATAGCGCTGAGTATCTTCGTAAGAATCCATTTAAC  
ACAACCTGGCGATAAAAGAGTAGATAGGCTACGTAACCAGTTAGAACTGTTTCGTCAG  
ACAGCCGCTGGTTTAGCTTTAATACTAGCTGAAGGACACCCTATTGGTTTTTATAAACAT  
TCCGATTGTGCTCAGATTTATCATGATATCCAACGACATTTTCAAGATTGGTATGATCTG  
ACATTAATGGGTGCTGATCCAAATACATTTCCACCTATTGAAGATTTGCGTGGTTTAGAA  
GATCTTTTAAATGGAAGTATATTTACAGCCATGAAATTAGAGCCCCAAGTTGAAAGACGT  
AGCAGTGTTTTTGATTCAATCATTACAATGAACATGCGTTCGTAACCTCCATGGCCACTAGG  
AAATTCCTAGACAAGCGTGTTCAGACCAAAAACAAAATATTAACCATATAAGTCACTA  
GTTGATGAAATTGAAAAATACGTATTGATGGAGGATTGATATGGCAGTTGATGCATCTTC  
ATTAATGCGTGAAGTTGACACTATTATTAACCTCTGCTAATAATTACAGTGCTTATAAAAT  
CGAAGCTAAAATTCTAGTAGGTGATTTTTGATTGGGTAGTGCCATTACGAGTAGATTATTT  
CGATACATTTAGAACTATGCCGATGGTTCTTATGGTGACCTCATCTTAACAGAGTTACT  
TATTGGTACTGGTGATTTTCAATTCGATATACTACCTCGTCGAGATGAACTTAGGTGCGA  
TGTTAAATTTATTCCATTATTACCAAACTCATCTCTTTTAGATACGTCTCGTAAAGCCTC  
TGTAACACGCTATAGGTGCTTCGTTGTATTATCACCTGAAGACGATATTACACTAACTAA  
TAAACAATCACAACCTGACTAGTAAAGAGGCTATGAACCAATAAGTTATAAGCCTTATAG  
ATTCAGCTTGTGAAAGAAAGTGTATATCAATCACTGATGATAACCATTGGTAAAACTT  
CACAAATGTAACAACAGCAGATGTTTTAAGAGCATTCTTAAACAATCAATATCCAGTT  
GACCGAAGCTGACGATAACCGAGTAATTGACATCAATATGGAACCTGGGTGGAATACAGA  
AGTTCGTCCAGTAATACCTATTCCTGATGGTACGCCATTAAGATCTACCGAATATACT  
TCAAAATAAAGAAGGTGGTGTTTACGCTACAGGACTTGGCCGGTATATTCAGGGATCTTA  
TTTATATGTTTATTCTCTTTATGATACTAAGAAATATCAAAAAGGGGCTAAGACATTA  
TATAATTAACGTTCCAAATGATCGCCTTTACGGAGTTGAGAAAACGTATGTGAATGGTGA  
TACTTATAACAACCTTCTGGCAACAGGTGATGCTAGTTCGCTAGATAAAGCTCTTTATGA  
GATGGTTGATAATGGAAGTGGTTATAGATTCGCAGACGCAAATAAGCTATTAGATGACTT  
TACTATTAGTAAAGATAATAAAATGCTTGTAGATGCAGCTAGTAACCTGTATGAGGTTAG  
AGGTGATGGATTAATAACTGGATTCCAAAATATCCAATGGACTAAACAAAGATCCACATC  
AAATCCATTTAAACATTATACAGAGTTAGCAAAGCGTCAAGGCCAGTTTCTTAAATACA  
ATGGAACCATGGCGATGCTGATATCTTAACGCCAGGTATGCCTGTAAAGTTTCAAACAGT  
TGACAACAATGTTGTTAAAACCTACTACGGTGTATTATTAGGTGTAGATGAACAATTTGC  
AGCTGGTGATAATAATCCTAATCCGCATCGATATGTATGTGTTGTTACATTAGCTATATT  
TTTAAATAGATCTGACCAAAATGAAATAGAGCCCTCCACTAAGTGGAGGGTTTATTTAG  
GTGATTATGGAACAACCTTTATACGAGTTGATGTGAGGTGGTCAACAACATTTCTTTTC  
TGAATTAACAATACTTTAATTATACCGCAAAGATGAAGATGATCTTAACTACTTGAT  
CATTCTTTATATTAAGAACGACATAATTTCTTTTGGACATGTGTTCCAGATAGATACAA  
TGATGTAATGTGTAGTTTCTATAAATCAATTTGTGGTTATCCAATAAATCCTAATATCAT

TGCAATAGATTTGATCAACTCTATCGTGAGATTATGAATAGCTTATTACAAATAAAAGG  
TATTATCAAAGATATAGTTGCTGTTAAAACAAAAGAAGGGGATATCGAGGGATTCAATTAT  
ACATTCTGAATCACTACCTAGGTCCTATCCAAGACCTACTAATTGGAAAGGTGTATTTGA  
AAGATCTTAAACAGTATATTACACATATGAACTAATGTGGAGTATATACATGGAAAACAT  
CCTTTAAATAAACCTAAACAACCGGTAGTACCTGAAACATGGATAAAACTTCATCATGT  
GGTCGTGTTATTCATTCTCTCACTAATAGGAACTTTAATCTTCAATGGTATTTAGGAGGA  
CATATGTCATTTATAATTGCTATATGTCTAGCAGTAATGGTAATAGGTATTTTTACTATT  
GGATCTAAAGTTAGAGCTTTATGGTATCTTATAAATGGTAAAACCTTTAAATGAGCATAAG  
AAATGGCGCGCAGACTTCAATGAAGTAATTCATGGCTTCATGAAGGTGCTTTCTTTACT  
AAATCAGGTTTATTTAAAGATCAAGCTATCTCGATTAGATTGTGTGAGCTATCGCGCAGT  
AAGAAATTATTCCAATGCTACGGCGTTCTAAGTTCGAAGTTATAACTGCTAAGGTATTT  
AGGGAAATAACTGGTGAGCCTTCAGAGTATAATTACTTGAAATTTAATAAGGCTTAT  
ATTGGCTTCTACAACGCTAATCCAGAAATCCAATAAGCCTGGAAATGCACCCAATCTAAT  
GAGAAGGTCTATGTTTTGATCTTCTCATTAGTACTCTTGTAGAAGGAGCCATTATCATGG  
CTGAATTTATTATAGGTAAAGATATATTCAATGTACCTGGTGATCTTTATCTAATCACTG  
TTAATGTTGTTGGCGTCATGGGCGCTGGTTTAGCCAAATCGTTTAAAGAAAAGTATCCTG  
AACTTTTTGAAAGATACAAACACGATTGCAAAAAGAGAATTACTATTGGTAATCCGG  
TTATTTACAAAGCATCCGATGGTAAACGTTTCATGATGTTTCCTACTAAGGATAACTGGC  
GGAACCCATCTCAAATTAGTTTCATTGAACGTGGTCTAGAGTGGATGATGGAGAACGTAT  
CGGATTCTGCGGAAAATGAAGAAGACTGTATTCATCCAGATTGGAAAATTATCATAACCAC  
CTCTAGGGTGTGCTAATGGTGGATTAGATTTCTCTGATGTTAGAACTATCATTGAAGATT  
GGTCTAATCACATGCCTAACCCAGATTGTGGTTGTTTATCCACCGTGGATAGATTCATCGG  
TTAACATTGGCCTTCCCTCAGGGGAAGGCTTTATGTCGTATATTCAAACCATTTTAAAC  
AGTATATTACATTTGTGACAATACTGTAAACATTATCATACAACTTAATGTAAATAGGTG  
GAAATAAAATGGCAAAGACTAAAAAGCAGAAAGTGCAAGAGGCGATTACTCGTAAATTGA  
TCAAGTTCTATAGTGATACATTTCCGGAGTTGATGAAAGCTATTGAAAACCTGTGATAGCA  
GTGGCGAAGAGCATAACCTCCACAATGTATTTGATAATTATAAGAAAACCATTAATAATGG  
CAGAAGAAGCCAAGGTTGACCTTAGTCTTTATGGAGTAAATTTAATTGACAAGGATACAT  
ACACGAGTCTTTTGTGGTTTATCGAAGGTTGCTATGTATGGGACATGATTAAAAACTTA  
ACAAAGCAAAATATGACAATGTTCCCTGAACTGGCCAGAATTACACAATGGGATGAACTGG  
ATGACGCAAAGAACTTCAATTCAATAAAAAGTCGAGATTACATCATCAAACGACTGAAAG  
AAGTAACGACTTGTGAACATTTAGAACTATTAATAGTTTTAATATTAGTAAATAGGA  
ATATTTATTATGAAATTCATACGATTGCAAAAAGGTGTATCTTTTCTTCTGGCCACTGCA  
TCACTGGCTGGAACCTGGTATGTTATCTACAAGAAGGCTAAAGAGACTAAAGCCAACCTTT  
GACAACTCATGGGTTTCAGGGATCAGTTTAAAAGTATTTCAAAGAGTATGGTGAATCA  
GATGAGTTCATGATGTTTCGTCAATGCTGCAATGACTGAGACAATGGATAGTGCTGTTGCT  
GAGAGCAATATTGAAAAACATCGACTGGATGTAATTCGTAATAAGCTGTTCGATCATTAT  
GGCGATGACTATACGAATCAAGTATTCGATACAGTTCGTAAGATGTAAAAATGGATAGGG  
CCTCACTGAGGCCCATTCAAATATAATTACGATAATAAAATTATATTTGAATGAGTTTG  
TTAAACCTTCAATTAATCGTAAAAAGGAAAATACAAATGAATATTGATAAAGTTAACTT  
CAAAAACCTTATCGCGGATGTGCCCGAGGCACCTAAACATAAGAAGATTAAAAACGTCATC  
ACCAATATGCGGAGATAGCACTAGGAGTATATGTTGGTATTATAATAGCTAAACGTGTT  
CTAAATATCAAGTTTTAATATAATCAAAATAAATCTACATTCATTAACTAATAGGATATT  
ATCATGCTTTCCATTATCGGTAATGTTGTAAAAACTGGTCTCATGCTGGCTGGTACCATC  
TATGTGTTTCGAAGTCAGTGTGACTGTTTATAATGAGATTAATTAGAAAAGAATATCCGT  
GAAAAGTAAAGGACTATTCGATTATATCAAATCTAATTCAGATAATACCACCGTGGAA  
GTAATGACGGACTTTATTGAAGTAGAGCTTATATACGTTATTAATGATGGATTGGATATG  
TTAACACCATCAGTGATAAACATCGAATTAATCAAAAATCCGTAACCTGGATTAAGGAT  
GCAATTAACAATGAACTCTAAGCTATCTCTTACATTAGGGATGGTAATGTGGAGCCGTAC  
TCGGTAAGCTTGCTTGGGATTCTAGAGAAAACTCTATGAATTCTATTATGGACGAATTA  
TTATCCATAAACTGAAAGCTTATCAAAAGACCATGGATGTCGATAAACTACCGTTCCATC  
CAGCAACAGCAATGGCCATTATCTTAAGGCTAGCATTAAATGCATCCAAGGAGACACTTG  
TGTCACTGGATCTTCTTGAGAGCATTAAATGAAGTAGGGCTTAAATATATTGAATCAGTGC  
GATGCCGTTATGATACTGCATGGCAAATGAGTCTGCACAGGAGGCTTGTCAAACGGCAGA  
AAGAGATTGAAGAAGAGAATCGTTCGTATCGAAGAAGAAGAACGACGTAATCGGAAACAAC  
TTGATCTGTTCGATGATGTGTCAGATGTGTAACCTGATAATGGGAGTCTTCGGACTCCCTT  
TTATTTTCTACATCGTATTATTTTTAATCACTTCAATAAACGTAAATAGGTATACAAA

TGAATATTGATAAAGTATCACTCTGTCTTGGTATTTTTGTTGGTTCAGTTACAATGTGTG  
CAGTTGGTAAAATCTATCATAAAACTGTTATTGATGTAAAATCAATAAGTTGCGTAATG  
CTGCTTCAGTGTCTAATGAAATTCTTACAATGCTTTCTAAGCGTGCCTCTGTTATTCGCG  
CTGAGGTTATGCCAACCGCAGAAGACTTTATCGATTGTGAAGGTAAAGTACACAACAAAC  
TCACTGAAGAGTTACAGGACATCGTCGCTGGTTTTAAAGTAGCGCCTGAACACGGGGCTA  
GTGTTAATACACGTATTAATGATTGGTTCCTACAAACGTTCCCAACTGTTTACTAATAGG  
TGATATATGTCAAAGTAGTATTTCTAATGGTCTACTAATAGCGCTCATGCAAACTTC  
GATCACACTCTCGAATGTTTTGATCATGATGTTAGTGTTTTTAAAAAGGCACTCAGTGAC  
CTAGATAATAAAATTAAGGTGGTATTAAGTCACTTGATAATGATTACCCTAATGCTAAA  
ATTGCATTAGAACGCATTCTTGAAGAACTTTTTAAAGAGGATTACATATCCCTGGGCCT  
TCTGGAAAAGCATTGTGTCATTGAAAAAGTTCACATTGTAGATAGCACAGGTGTGGCTAAG  
GCATACCGTGTGAGTTACAATGATGAAAAAGCTATGCCTGAATATGTATCAGCCGATAAT  
GTATGGGGTGCCTAATTCATATCAAAAACGTAGTCGTAGTGCAAATCCATTCAAACCA  
ACTGCGTGAAAAGGATCTGATGGTTAAAGCCATAATCCATTATCGTATTACATAATACCT  
GCAAAAGAAGGAATAAGTCAATGAGCGAATCTAAAGAAGTTATCAACATGGTGGAATGTT  
TTATCAGTGAATCTTACATGGAGCCAGGTGTTGACCACAATCGTCGGATTTTGATGCGTG  
AATACGGGATCAACCCTAACAGCGGTATAACACTTCGGGGGAACTGGGTTCTGCGTAACA  
TGCTCACTGGGGAATTTATCGACAATGATAAATACCTCAACGATATTGTTGAACGTAATT  
CCATCCAATTCGAACGCAATACCTTCGTCTAGCTATAATTAATCCAAATCTGAAAATAGG  
TCAAACCATGAACGAACACATTCAAAGAAAATCAACCAGGGTACTGGCAGACTGGCTAT  
GTGCAACTTCGACAAAATGAACTATGTTTCAGGGTTCGTGAGTACTATGCCATCTCAGATAG  
TGGTTTACTTGAACAAATCGTTGCTCTATGCGCAGTTCAGTGGCCTCAGGAAATGGCCAA  
CTACCTGCATGATGAAAGCGCTCTGTTCTGGGCTCTTTTCGACCGTGGTATCGTAGCTGA  
TGGTAAACCTCGCGCCGACCGTAAAGACTTCATCTACGAACGCCTTGGTTTCATCCACAA  
GAAGAAGTTCAAAAAATACGGCTTGTCTATTCTACAGCGTGCGCGCACCCGCTCGATGGC  
TAGTTTTGAGAAAGCTCAAGAGACTTGCTGAGCTATGCTGCAACACCAATACGAGGATCG  
TTAATTATGAACCGCATGATTCCTGCAAATGAGCGTGACAGTGAACCTCAGTCTCTATGGC  
TATTTGACCTCTGTTGTAACCTGGTGGGGTTGCTTGGGATTATAACCCTATCGTTCTGCTG  
GAGAAGATGTGTAATCGTGATGATGAGGCCATCTGCATGGGTGAACCCAATTACGATCAA  
TTACGTTTGATCGGTGCAAGGGGTATGTTGCAACAGATCTCTGAAAACATCCTGTCTCGC  
AATGAACAAATCATGGATGGTGTTCGTGATTTCTTCAAAGATGGTCTCCAGTTGAAAACC  
AATGTAGATGACATGTTGGTGAGACTGAATTATCAAACCTGTGCATAACGGGACTGATATG  
GGTGAGGTGATCATGGTAACTTGTTCAAAAAATTGATGGTGATTATGTGGTTGCTCAT  
AAGTGCACATATGACCCTCAAGATTGGAAACATGCGTTATATTACTTCACCAATGCCTCC  
ATGATCAGTCAAAAACAAAAATAAATATCATGCATATCCCTTCAGGTAATTTAGAGAGG  
TTATTATGAGCAATAAAGATGTATCAATGATCCCAGTTTATGAAAATCACTTTGTCACTA  
CTGGTGCTACTCCACGACATGAAGCAATTGTGGTATGTCGTGAATATGGTATTAATCCAT  
TAGATGATGCACCATTCGGGGTTCATGGGTGATGCGCTACCGAGAGACTGGAAAATTCA  
TTGATTGTTCCAGGGATATTGATGATTTAGCTAAGAAATATAATCTGACCATTCATAAAC  
CAACCATTGAATTATACACCAGCACGTATATTGGTCAATAGAAAAAAACCACCCTATATA  
AGGGTGGTTTATAAAAGAGGTGAAATATGCATAAACTTAATCCTGGTTGTTATCCATTAA  
CTATAAATCCTAATGGTAAGTTTCTGAATAAAGACGATTTACGGAATCTTCCCAATGGGA  
TTTATGTAACCTTCTCCGTTACATGGTCCTAGGGTATATAGCCATGATCGACGCGTTATGG  
TTGATGGTGATTATTGTTATCTAATCACTGCACCGAACATAAAATTCAAGGTAAGTGATT  
TCTTTAAATATAATGTAGTTTATTATCCGAGCATTTACCTCAAGAGGTAATAAATAAATG  
GCAAACGAATGCACTCCCGGTGTCTGGGATACACTAGTTGACTCGACAAAAGAACTGAA  
AACCTACGTATCCGTTCCCAACTCATGCGGGCTCTACCCGTAATAAAGGGCTGGGAT  
CTTCCGCAAAAAGACGCTGCTGCTCGCCTACATGTTACGCAACCGAGATTGAATGATCTT  
CTCAAAGGCAAGATTGACAAGTTCTCTCTGGACGCCCTGGTAAACCTACTGGACGCGGCT  
GATCTGACTCTTGAGATATCAGTGATCCCACGTGCAGTATAAACCATGGGGACGCAGCTT  
GATACGGCCACCGGGTGGTTTCATGACAGCAAGGAAATAAAGAAAATGACAACTGATAAA  
AAGTTTAGCATTAAAGAACTCGGATGGGAAAAAGCCACTAATCTACCCGATGGTGAATAC  
TACACTATTCCTAAACATGGACCACAAAACCTGGCGGTATGATCGCAAGATTATCAAACCC  
AAGAACAGTGTAAAACTGGTAAATGAACCAGATTATAGCTGGTCAGCCCCATTCTTTTTC  
GAGGCAAATAACTTGTTAATCGAAGAACCATGACTATGAAACGATCACCAGGTTATTTTA  
AAAGAGTAGTAAAAGAACTAACTGAGCGAGAGAATATTATACATCAGAAAGTTCTTAAAT  
ACATCAATGATAATCCGAATATTTCTTATAAAGAAGCACGTGAGATAGTAACTAAGGAGA

TTATAAAGTGACTATTTCAATTCCTGCATCAGTTCGTGGTGAGTTTGGAAATTTATTACAA  
AAATAATAAGAATCTTCGACTGGGTCAGGCATGGCATAATTACATGCGTCTTGAAAATAT  
CCAAAATGAAATGGATAAAGAATGGGCTGATAAACTCTGGAATGCTTCTGATAAAGAAGC  
AGCTGATATGGTTGATGAAGCCACTAATTGGACTATGTAACATAACAATATTTACTATAG  
TAAATAAGGAGAAATACAAATGACTAATGAAGAAATTATCGTAGATGAAAGTAAATGGGC  
CGATGACAGCGAGATGGTTGGCTGTAAACCAGTTGATCTGTTTATTGATTTTTACTGGGT  
AGAGCCCCTCATCATACTCAAGAAGGAAAAGAGGATAATTAACATGGGTGAATATACAC  
AGAATGGTATTCGTCATTTTCGTCCGGATGATACCGAAGATACCTTTTATATCTTGGGTG  
ATTGTTATGTAGCCAATACTATCGCCGATATTATCGAGATGGCAACTAAGAAATGGGGTG  
ATGGTATTACTCTTGATATGATTAATATCAGTACTGAATATATTCATACAAGTTGTCTAG  
GGTATGATGAGTACGACCCAGCGATTACAGTAATTTATTTATGCATCTCTCGTGTAGGG  
AAACATCGCTGGTTAAATAAATTAACGACATAATCCCTCTCCTTCGGGAGAGGGCATTTA  
TTCAGTTAAACTTTTAAGAATAAAAGAATTAGCCCTACTGTTACAGCAGTAGGGCTATAT  
GCCGTTGAGTAAAAATACTCAACATTTTCGCCCAAGTGGGCTTGGATTAACAAGAGGAA  
CAATCATGTTAATTCAGTTACCGCTAACAAATGTTAGCCCTGACCTGCACAGAATGCAGG  
AAGTAGGTTTCTTTTTCAAGAGACCCGATGGATCAACCCATAGCATGTCGGTTGCGAAAA  
CGCAAGCCGATAATGTTATCCAATGTCGAGATCGTAGAGGTAACCTTCATTGGTTATTGGG  
CTGGCCCTACAATAGGATACGTCAACAACGCAGGTTTAGCCGTATCCATCAACCCCTTCG  
ACAATTCATAGTAACATACTGACATGGATCAGAAGAAGTTCTATGTAACCGAAAGGA  
GAAGCCTATGATAAACAACCCCTCTCCTAAAGGAGAGGGACTTATCTGAATTCTTTTTT  
GTTTAAGTGAGAGCCGCCGCTAAAGCGGCTCCAAGTGGAGTTAAGTCTCCCGCTAAAG  
AGAACTCCAGAATACATGGGGTAGCGACTCCTCATGTAGATATCCTAATTAATCTCTTT  
AGCTAGTAATCAATACCCGTTATCACTCGTTGATAATTGATTTGTTTATTAACATAATTTG  
ACTTAATCAGAATGATCAATACATATTGTTAATAATCTAGTATATTATTACCAGTATCAT  
TGAGTAATACTGGTAATCAAATATTACTCATGAATCTTACCTAATGTGGAAGTGAAGGAA  
CGGATCGCCCCGTAGGGGCTTTTATTTTATAATAAACTATACCGAAGGTATATCCTTATT  
CTAATAATAACAATATTAGCATTATTCTAATAGCGTTAGCTAATACATACTGTCTCCCT  
AAAAGGAGACACAGTATAGATTATTTTTTTTTAATTAATAAATAAAGTCTAGAGATAG  
ACTTTCTTTATGCCTTAATACTTCTAATTTGCTCTATAATCGATTTTATTTCGTTATTC  
ACTAGCATATTAGCCATACGACATAAAAGCCCTCCTATGAGGGCTTAAATGCTTTATTTT  
TCATTAGTCGGATATAGGAGTACAATAGACTCTGCGCATACTTTAATAACTTGGATATTT  
TCACTGTCATTATTTTTTTGATTGTTTATTTTTAACGCAGTATTCAAATTTGTTGGGATTTG  
AGTTTATATACGTTATTGTTCTCTTCTCCAGTATTCCTCCAAATACCAATCCTAGGATA  
AATATTAATAAACCACCAATAAAGATAATATAAACATTACCATAGTACATATTACATTA  
CTCCTTTACATCATCTGGAATAGATTCACACCGATCTAAATCCCAGTAGATGTGTGTATA  
GTGATCTTGGTTTACGATACTGATAAAATCCCCATTAGGATCGGGTAATGGTTTACGGAT  
AATATCAACGTAAATAGTGTAATATAAATAAAGATCACTGATGAGTTCATCAATGTTTAA  
ATTATTACCCTCTGCATATTTCCCATATTTAAAATAATGGGCTTCTTCTGCTACAGCATA  
ACGGATTTTATCGTAATTTTGTGATGCGGCATATACACGTGCAAATAGAGGGCGATTAAA  
CTTTCTACATTCACTAATATTTTTTCTTAAAGTATTTACTAAATTATCAATTGCACTCAT  
TTAGATTACCTATTAATAATTATAGTGCTCTCCCCGAAGGGAGAGCTTTATGTTGTTAATA  
TCCCCAGTCATCTCCACCAGTGGCTTGCATATTGCTAAGACTTGGTACAAAGTCCATGTA  
ATTGTTTTCTTCTTTATCGATATCCCATCTAATACCACCAATACGGTCTGGATCAAACGG  
CATAACAAAATAGTGATGCTTACTATCACTTACAACGTTACGGTGTTTACCACGTTGTAC  
GGTTAGATAAATACTTACCCTACTTTAACAATGTGGAAGAAGAATTCCAGATCAGGTTT  
TTGTCCAAGTCGGCGACAACCGTCATAGTAACCTTTGTTAGCAACTTGTTTAACAAAGTC  
TTCTGGTGGGATATTATCCCTGATTAGTTCTAATGCCTGAGAACTTAACTGATGCGGACT  
AAAGAATGTGATACCACGTGGTGCAGTATAGTTACGCATTCGCCTAAATAGGAGACGAAC  
GTCATCACCTGCTACACTGGTCACTAATCCAGTTTTAGGCAACATGTTTAGATAATCTAC  
GCAGAGATATTGTAGTTCATAACCACGTGCTTGATATGTATCTAGGTAGTTAACTAAACC  
AGCAATCGTAAATTCAGTTGGGTCAAACGATACATTACTGGTTCAAACCATTTTTACG  
GAGACGAGCTGATACATATTCAGCTGCTTCAGCTTTACTAATAGAACTACGATCTACCTT  
GATACCTGTTTCATTTTTCGTAAATAACTCATAAATGAAAATAAGGTTATCCGGAATCTC  
ATTCTCAAGAGTAATAAACATTAATAATGGTTTCTTATTGATATCACGCATGTATGGTTT  
ATTAAATAGACACACATGGCAAATAAGACTCATAGAAACGCCAGATTTATATTGATGTTG  
TAGGCCACCACCGATAATAAATTCACCACGTTTTAATGCACCCAGATCACCAAGCATCCT  
GTTAAAACCTTTCCATCCAGTACGGAAAGCACCATTTGGGGAAAGAATAGTTTTAGCTTC

CTCAAAGAAGCCTTCAATAGAATCTAAATTACCAAAAATCAAGTGCACCCATTTTCAGCTGG  
GTGTTTCTCTTCAGCACGCGCGCAATATATGGGTCAGCTCTGGTTGCCATTTTCATTAAT  
GATTGCCGGAATATCAGCAGAGCCTCTATTGAAAAGAATTTTTGATGAACATTCTTTTAC  
AATAGCTTTTACCTTCTCATCAGCTAAGTAGCTATTTAGATCACGACGATATGAAGTTAC  
ACGCATGGCTAATGCCATGCCATTTGGAAATTTCTTCTTCTACTGCATTTTTTAACAGCATC  
GTATAGATAACTTTCTTCACGACAACATACTTGTAGTGATTGTAATACCTGTTGGGTAGC  
TGGGAAATATGCTTTCTGTTTCTTATTTAGATCCACTAGTAGATTACGAAGATCTAAAAA  
TGTTTGTGCGACCATGATCTACATCTAATGTACCACCCTTATCATTTAGAGTATCAAGAAT  
CTCAGTAACCAATTCATTGGATGGTTCCTACTGGAGAATCTTCTCGATTTTTCTAAACATAA  
TAGAGTGATACATGAAACGAGTAATTGTTTTGGACTTGACATTTTTATAGATTTCCAATT  
GTGAAATTAAGAGATGTACAGTGTATCATTAGATAGCTAGTAATTTTAGTGAATGTATT  
TGCTATATTGCTATGTAGACAGTTCCCAAAAAGCCTAAAGTTACAATATAGGTACTTTCAC  
AATGACCCAAGTTCTGGTTATGCCAAAAGCTGTTTTTGAATCATATAAAAACAGCAGGTGT  
ACAATTTAACAAATTGTTAGACACCAACTATATAGTTTCCGAAACCTCCGTAAATGATCT  
TGCGGAGATACATCAGGCTTTAACTGCTTTCCCTTTCTATTACCAGAAAACTAGATAT  
TAAGTTAGCAGTAAGCCCGATAATCAAAGTTGCTGAGTTAGGTGAAATAGACGGTCTCTGA  
ACAATTTAAGATGAAGGATTTACACAATCGTTTAGAGAGCCGCCTAGCGACTAATGAACT  
TAGGGATGCAGGTAACCGTAATTTAGTGTACGATTATTACCTATATCCTGTAGATGAGAA  
TCTGTGGGTTGCGGTGCAGCAGAGTGCGCACATTGCAAGTAGCGATCCTAGACGTGTCTC  
AATTCAACTTAACCATACTTTCTTTGATAGTATGATAAATGAAATGTTGAACACCCGCC  
ACGTGAATCCGTGGCGTCAACACAAATTTTTACCTATTATTTGGAGAGCTGCTAGGTTGA  
TTCCGGAAAAGATGCTTAGTAGACCCAAATTTTTAAACCAAAAACCTCATCCTACGTAGGA  
ATAAAAAATGAGCGTACATGCCCTAAGAGAAGTGTAAACACAAAGGCGAAAAGAATTA  
CGAAGTCTTCTCAATGGAAGATTTCAATTGGCCGCCTAGAAAGTGAAATTGGTCTAAATGA  
CAGCGTTGTTAGTCAAGGTCGTTCCCTTATTAGCAGCATTTACATGAAAACCTTCGGTAC  
CGTGCAAGCTACCGACATTCAAGATGCCGCTGCAATTTATAACAAAATGCAAATGCTCGT  
TAACGACTATGGTTTCGAACGAGTAAGTTCCAGTGATCCTCAAGTACGTGCTCGTGAAGA  
ACGTGTCCGTGAGAACCAATCACTGCTGCTACCATGGCTGCTATCGCCTGTGCTGATGA  
AACTAAATATATCCGTGCACTACGTGGTATTACCAAAGCTAAAGCTTCTAATGAAGATCA  
TGTTAAGGTTGTACAGCATCAGTTCAATGGCCCTGCTGGTGGCATTCAAGTATTCGAAAA  
TGGTGTGGCCTAGAGAACTATAACGAGAAGTCACAGCGTGATTTCCGTGTTGTAAGTAT  
TGGTTATAACCTAGCTGCTAGCCGTCAGGATGAATTCGCTGAGCGTATCTATCCGACCAC  
CGTTATCAACCCGATTGAAGGTGGTGTGTTGTTGAGGTTCTTCCCTTACATCGCTGTAATGAA  
AGACGTTTACCACGAAGTATCCGGCGTTAAGATGGATAACGAAGAAGTGAACATGGTAGA  
AGCCTATCGTGATCCTTCCATCCTCGACGACGAAAGCATTGCACTAATTCCTGCCCTAGA  
TCCGGCTGGTTCCAATGCTGACTTCTTCGTAGACCCGGCTCTTGTTCCTCCGTACACCAT  
CAAGAACGAGCAGAATCTAACTATCACTACTGCTCCGCTAAAAGCGAACGTACGTCTTGA  
TCTAATGGGTAACCTCAATGCTAACCTACTCATTACAGCGTGGCATGCTTGAAGTTTCTGA  
CACCATTGATCCGGCTGGTTCGTCTAAAGAACCTATTCGTTCTACTCGGCGGTAAGTTGT  
TAAGTTCAAGGTTGACCGTCTACCTCGCGCTGTGTTCCAGCCCGATCTAGTTGGTGATAC  
CCGGAACGCAGTTATCCGTTTCGATAGCGATGACCTTGTTGTTAGTGGCGATAACCACTTT  
CATCGACGGTTCAGCTGATGGCGTTATTAACGACCTTAAGACTGCTAAACTAAGCCTACG  
TCTAAGCGTTGGTTTTGGTGGTACTATCAGCCTATCCAAGGCGATTCTAAGTTTGGTGC  
TACCGACACTTACGTGATAAAGTTCTAAACGAAGATGGCCAGGTAATGGATAATGCTGA  
CCCGGCTGTTAAAGCTATTCTAGATCAGCTAACTGACCTAGCTGTTATCGGTTTCGAACT  
AGATACTCGCTTCACCAACACTAACCGTCGTCAGCGTGGTCACCTACTACAGACCCGTGC  
ACTACAGTTCCGTCATCCGATCCCGATGCACGCTCCTGTAACCTCTACCGATGGACACCAT  
GACCGATGAAGGTCCGGGTGAGGTTGTTAAAGCTCTAACTGTTAACACCAACATCCGTAA  
CAGCAACAACGCTGTTAAGCGCATGCTTAACTACCTTGCTCAACTACGTGAAGTTGTACA  
CAATGGTTACAACCGTCCGAAGTTTGGTATCATCGAAGGTGCACTATCCGCTGTAATGCG  
TCCGACCTATCGTTACAAAGAACTAGATCTTGAGAAAGTCATCGACACCATCAAGTCTAA  
AGATCGTTGGGACGACGTTTGCCTGCGATCCTAAACTGTGTTAAAGCTGAGCTATTCCC  
GGCTCACCGTGATTCCAACATTGAAGCTGCCTTCCGTGTTATCTCCGGTAACCAGGATGA  
AACTCCGATGTATCTTCTGCTCCGACAAAGAGATTGCTAACTATCTAATGACTAAAGG  
TGACGACCGTACTCTAGGTGCTTATCTCAAGTACGATATCGTTTCCACCAACAACCAGCT  
ATTTGATGGTAAGCTAGTTGTAATTCCGACCCGCGCAGTACAACAAGAAAACGACATCCT  
CTCCTGGGGCCAGTTCTTCTACGTATCTACTGTTATCGCTGACCTACCGATCACTCGTGG

TGGTCACCAGGTTACTCGCGAAATCGCGGCCATTCCGTTCAACCTACACGTCAACAACAT  
TCCGTTTCGCGCTAGAGTTCAAGATCACTGGCTTCCAGAAAGTCATGGGCGAAACTCAGTT  
CAACGGTAAGCTTGCTGATCTTAAGCCGTGAGCTGGAAAGGGTTACCGTTATCTAGAAAA  
TGGGACTATCCGTTATTTGGAAGACGGTAATGCCCGGAAGTTAGAAGAGTAACAGACATA  
GGCCCTCCCTTCGGGGAGGGCTTTATGTTGTATTACATTAATAAAGTTTAAGATCTATA  
TTACAGTAATGATCATGATCTTCTAATTTAAAAATAGGTTAATCCAAATGAACGTTCAAT  
TATTTCCAGAAGTCATCGAAAGATGGCAAGATGCCCTAAGGGTATCTCTTATAGAAAAA  
ATACCATGGTAGATAATAAGATGTCTACCGTAGATGATGATAAATACATTAATACTTTCT  
TTGAAGAATTCCATCCTGTTTCAGGATGCCTTTATGCCCAAAGGGCTAGAGGACTTTATTA  
CTGATTATGCCAAGAAAAACATTGAGGAGATCCTTCAAGAAAAACAGTTTAAGCGGGCCA  
CCGAAAAGTTATATTGTTTCGAGTGACCCGCATAAATGGCAGAAATCAAGTAATAAGGAAA  
AGAGTGAATCCTTTAAGGGAAGGTCCGTACATCAAATAAAAAGAGGCTCCCCAACATTG  
TAGATTTGGAGGCCGTTGTGATTAAGGTAGATTTCAATGGTAACACTAAAAATTGCGGGG  
CTTACTCAAGTATCAGTTAAGCCTACTATCGATCACCCGTATGATAAGAAATCGGGAACT  
GCATACACTAAGGGTGATCCATACGCTAATTGGAATCTCCCTGTCTCACGTTTTGTTGAG  
TATCGGAATGAATCATTTTCATCGTATTACTGTAGTCGATTTCATCTGGTCACGCTATCAAT  
ATTGGGACATCCCGTAAGTATGTAATGTCTAATAGACTAGTAGTTAAGGTCATTTACCGA  
TGGAGTGGTGATGATAGTTTTAACTATGAAGTTATGGCTAAATCTATTCCAGTTTTTACA  
CCTGAGGAAATGTTAGAATATATTCAGTCATTTAGTCGACAGACATTCGATCAGTTTAAT  
AACCAGCTATCTGAGATTACTATTTGGTATTCAATTGACTTATCAAATACTAGTAGATCAG  
TATCATGGCGGTTGGATTTCAGAGTTTAGGTATCCAAGTATTTAAACTGAGTATAGTCAG  
TATTTTGAATTTTATCCAAATAGAAATATTAGTCCTCCTGGTTACAGCGGACTTAGTCCA  
GAAGAAGAAGCACTTTCTAATCAAGTATGGAATGAAACATATTCTTTAACGTATAATACT  
GACATCAATAAACCAGATAAATTGTTTTATGTAATGGCTGGCAGAATTATGGCCATTGAG  
TCAATCTATAATCCATCATTAGATCCTGGTCTTATTGTTAATATCCGTGGTAAGCATGGG  
TGTATCAGTCATAATGGCGAAAAGAGATATGTAATACCTCCTGAACAGTTCCATGAAAAT  
GGTTTTCTTTAGAACACATGAAGAAGCTGCTGCAATGGTTGGAATTAAGATAAGAAAGTT  
ATTGAACGTCTTAAGACTGCGCTCTTAACAGCAGCTGATATTAAGGAAAGGGAAGCCCAG  
GAAAAGCAGCTGGTACGTTTGATAAAGAATTCAAACCAAAGATGTTGTATTGATTCAT  
GGTCTAAAATGGGGTGATCTAACTCCATTGCCTCTGATCTAGTATCATCCATTAATAATT  
GTAGGTTCACTGATGGATTTAATTTTGCCAAAAGTTTAGGAGTTTATAATGCCGGATCCA  
TTTCTAATTGAAAAGATTTCGTGAAAATACGCCTTGATGAATCCAACACTAGCAAATGGT  
ATCACAGTCGAACACACCATGACTCGTGATCCAAATACTGGTGTTAATATGACCAGGCGT  
TATATTGATTCTTTATTTGATATCAGTTCAGTTCTATTTCCCGATGGCTTCAAATATGAA  
GGCAATCGTGATGTACACCGCTTAAGCATTTTGAAGAGATTACTCGGGAATATAATGCT  
AAGCGTATTGCCAATATTGCTCCAATGATATGTACATGATTGACCTAATGTTTAGTTAT  
AAAGGGGAAATGCTTTATCCTCGTCCAATGTTGTTACCAGCTTTTAAGAGAGGCAATATG  
GTAATCAATGGTGCGAAATATATCGGTTCCACCAGTATTAAGTATGTTGGGTTCTCT  
GTAATGATAGCATCTTCATCCCGTTTCGTGCTACTAAGCTAACCTTTAAACAACT  
GACCACCATTACATGTGCAATGGTCAGCGTAAAATCATGTATGTGATCTGGTCACAGATT  
CACAATGAAATGGCTAAGCGTACTAAACGAGATCTGGATAATCGACCACATATTGAGTCA  
TGTTTAGCTCATTATTTCTTCTGTCAGTTTGGAGTAACTCAAACCTTTCAAACAATGGGCT  
AATGTAGATGTTAAGTGTGGACTGCTGTCTGATTTTCTGAAGAAGAATATCCACGTGAA  
AAGTGGAATATTTATTCCAGTGCAACATTAAGGCAAACATCCCACCGGTGAAATGGTT  
CTTGTATACCTCGTCATCAAGAATCTATTTTGGCCACACGACTTATCGCTGGTTTCTGG  
TATGTGGTCGATGCATTTCCAATGCGGTTTACTCGACCTGAATATGTAGATAGTACCAAC  
TTATGGCGTGTTATCCTAGGTCACATGGTGTGTTGGTGATTTTGGAGCACAAGGTAAAGTA  
GAGGAAAACATTGATTCACACCTACACAGTTTCTGTAATTCCTAGACGAAATGACTATT  
GAAGAACTTAAAACAGTTGGTGTCAATGTAAGTACTATTTGGGAACTTCTTTACGAGATC  
ATGACTAGTTTGGCTCATCATCTTTATGCTACTGATATTGATGAAACTAGTATGTATGGT  
AAAAGGTTAACAGTACTGCATTACTTGATGTCAGAGTTTAACTATGCTGTAAGTATGTTT  
GGTTATATGTTCCAGTCTAGGCGTGATCGTGAATGGACTGTACAAGAGCTAAACGAAGGT  
TTAAAACGTTCTTTTAACTACAGACAGCTATTAACGATTAACAGTGGACCATGGTGAA  
CTCGATACAATGAGTAATCCAACTCCAGTATGTTGATTAAGGGACATCTATCCTAGTT  
ACACAGGATCGCGCTAAAACAGCTAAGGCTCATAATAAGTCTCTAATCAATGACTCATCT  
AGGATTATTCACGCATCTATTGCTGAGGTAGGTCAATATAAAAACCAACCTAAGAACAAC  
CCGGATGGTTCGAGGTAGGCTTAATATGTATACCAAAGTGGGTCCAACCTGGACTAGTTGAA

CGTCGTGAAGAAGTGCGTGAAATAATTGACAACGCTCAATTAATGTTCCGTGCAAATAA  
ATTAATCTTTAACTACTTAATAGGTATTATTACATGAACTATGCACAGTACAATCTAC  
CTGTGATTTTGAGAGTGTAGATACCAGTACTTTTCGATCCTAACCTACCTAATGGGAATT  
ATCTGTTTAGCCTACCGCTACAGTTATCACCACATCAACAACATCCTCAACTACAACCAT  
ATTTCAATGGTGTAATTGGGCTGTTCCGGCTGAATGCTCAAAATGCTGCTACTACCACC  
AGCTTCATGCATTTGCGTATAATCTGCTATCTAGTAATGGTTTTTCAGAATAACTATTATC  
AGCAGTGGGCTCAGAAAGTTATTGACTTTCTAGAGTTTCTATTTATTCATCGTCAAATGG  
TGAATAACCCACAGCAGGCAATGCAGCAAGCTGCATCTCTAGTATGGTCTGGTTTTGTTG  
GTAAATGTGCTCAAACCTTCCCGCAGCTACAAAGTCTAGTTCAACATCTAATGCCGAATA  
TCCAACAGGCACTTGGTGTAAATCGGGCAGATTGAATCAGATATCCAAAAGATGCGTATGG  
GTGGTAACACCATGATGCAGGGTGGATATCAACAACCTGGTGTACAGCCTGGAAGTTTCC  
CTGGAATGGGTGCAGCAATGGGTGCTCCTGGCATGAGTTCACAACCTACCTCCAATTAACG  
CAGGTATCCAACAGACCTATGGTCAACCGGCTACCATGGCTAATCCGCAGCTGAACATTC  
CAGGGGCATATACACCAACAATAATCATGACACTGGTCCATCAATTGCAAATGCTGCAT  
ATGACGTACCTGGTTCTTCTCCTTTCTGGAAAACAAACCAGTCATGCAACCTAAAGACT  
CTTGGGGTGCCACTGTTGAAGTATCTCCAAATAGTAGTTATGATACAATCCCTGGTGGAG  
GTGATGTAATGATTCTACCTGAACTACAACAAAATGCAAATACTGTAACATAATGATAATA  
CGGATCTACCCATCCCTCAAGATGTGAAAGAAGTCTGATTCGATCCGAACCTATTATGTAC  
CCAATGGATTTGTAATTAATAAAGATCGTCCGATGGATGTTATCTATAATCCAGGTGGCA  
TTGAAATCCGACCTGCTCATCTAGTTGCAGATAAACCTGATTGGGTACGTACTGCTAGTT  
CAGCTAATCCATACAGCATCCTAATGGATCCGGCAGTATATTGTGCTTCCCTTGCTAAAT  
GGCCTGATAACACTGTACATGAAGTATATCGTAAGTGGGAGAATCACATGGAAATGGATT  
ATCTAAAGCATGAGCTTCAAGATGATCTCCGTCGTCAAGCACATCGTGGTGGTGGTGGC  
GTACTGCAACCAGTTATAAGCTATCTACCATTATGGGTGATGCCAAACCGGTTAAAGAAG  
TAGCCGAAGAGTTTTACCAAATGATGCTGGGTTAACTGATAATCGTGAACATGATCCAG  
TTATCCTAGAAGGTTATATTGCTTGTGCAAATAATCTTGAAGCAGAAGCTGGTGCCTCA  
ATGCAGTTCGTGAAGCACTTGAGCTAAGTGAAGATGATGTAGTTCCGGCACATGAGTATC  
GTGCAGCGTCGTCCCATCCATTTGATGCTTCAACTGAAGTTATGTATGAGATCGAGGATA  
TTCGAAAAGAACCCGATCCGCATCTAATTGCAAAGCGCCTTAAGCAACTAATGCTAGATG  
GTAAGCTGACTCAACGCTACTATCGGTTCCCTAGTTGAAAGGCTAACCAGTGCAGTTAATG  
AGTTCCTGGCTGATTCAATGAGTCAGAAGGTAACCATTGATGACTTCTGTGAAGATATCG  
GTGATCTTATCGCATATCTTATCGGTAAGAAAGGTAAGTCAGTAGCTGATAAATTTACCG  
CTAGTATTCGTTTATTGTTGGACGGAGTATGTGTGTTAATATTGATCCAGAAGAAGGTA  
ATTCTATTCTAGATCTATCAGTGCCTTCCAAACTGGCTGGCGCCTTGAGGAACTATCCT  
GCCTAAATATTTATACCGAGAAAGCAGTACTTATCAGTAAACTTACCGAACCTAAGATTA  
CTCAAGTAATCATGGGGATGGCAAAGCGCCTAAATAGCTCTAAAGATTGAGATGATGCAC  
GTACACACAAAATGTACATTATCACTGCTGATGGATCTTATCTACAAGTTATTCGTGGCG  
CTCTTGTTGATAATGCTGTTCTACTTAAGCTTATCAAATAAGCATAAAAGCCCCTCTACG  
GAGGGGCTTATTTATGAATGATGTGTTGTTTAAATCAAATATTGTAATAAAAGGAGTAATAC  
AATGCTAGCTAAAATGAATAAATCTTCAAAGAATTACTAAACAAAATAACGGTGAATAT  
GGCAGGGCTATTCGATGATGTGGTATTGATGAATAGTTATAAATACTATAAAACCAGATTT  
CAATGACACTGTAGAAGTAAATACAAAATGTGATCTACCGGCAAATGGTAAAGTCCTAGT  
TCTATATGTCGTTCAAGATAACAATGGATATGTACATTTGGGATGGTCAACAATATCTTTC  
TTATAATCCATATTCTACTGAGCAATTAGCACCAATGATTGATGACCCATCAGCATTAT  
TCCATCAACCAAAGCCAATACCTCTCTAAAAGTAACTATGGTATCTGGGCCTTAAGAA  
AGATTTAGAACTATCCAGAAGTATTCAATTGGAATGCACACTCTGCTTGATAAACATTC  
ACTAGCAAGAGTTAACGATAAGAATCCTATTAATAAGGTATTCTTCGAAACATGTCATAA  
AGCCCTATATACTGCACTTCGTGAATCATACAAAAACAACATGGTTAAACCACAAATTGC  
AGATGCAGTCACCAAGGAAGGATGTTGGTTTTGGGCGAGATCATCGATCTAATAAACTGTC  
ATTTAAATGCGGTGAATTTAAGGTTGAATGGTAATAATTAAGTAATGGCATAAACCCCTC  
TCCGCATGGAGAGGGGCTATGTCTTTATTTTTTTTTTATTTAACTGCTTTCAAATTCAAGA  
GTTACTGGTATTGTTGGTATCCATGACAAATTATTAAGTATGGATGTATCGTAACCGTA  
TTCCCAGTAATAGGCTGCGGTTGTATCTCTTCTATAAATAAATGGAATACCGTAAACATCT  
CTTAATTTTTTCAGCTACTTCTAAATTATCAGTATAGTCAGTTGGTTTACCCGGTACCTTT  
ATGCCAAGACAGTACTCTGGTAAAGAGCGTCTATTAAGTAAATAACTGCCTCACCTTTA  
AAATAAAGTGAAGTGGTCTTCGCTCTCATTGTTGTTTTGGCATTGTACCAGTTGCTAAG  
AATGTATCGGTTCCCTATGAATTCACATCATCAACAGTTAAATCCCTAGGCCTACCATTA

TTATCTTTAGGTTTATTAGCCACATTCCAAGCAGCTACCAATTCAGCTCTTGTATCATCC  
ATTACACACCTCAGTTATAGTGAATTAATAAACGGCCATTGATATTAGGACACATGGTTT  
TAGACAGCCTTAAAACCATCACATTAGTGATATCGTTCCTAAGGCTATATGCTGGTACCA  
CTGGTCCATTATAATCCACTATGAAGTTATTTACCCCATTTCTAACGATGTTAGTAATGT  
TGTAGTCAGTAGCATTACTCTTAGCAACAAAATCTAAACCAGTTACTTTCTTTAAGATGG  
CTGCCATTTCTAAAGAATATGGATTTTCTTTGAATGCTTTAATCGGTAATAGAAAACCTAC  
GATAATCTGTAAAGTCTAAAGACATGGTAATGAATTCAGCAGTTGGTTTATTACCATTTCC  
CGGCTGGCCATTTAACAATAGTTGGGAATGAATTTACTTTAGTTAATAAAGAGATATCTT  
GCCTAACCGTATTTATAAGCTTTATTTTAAATTCACCCACAAACCTTAACGAATCTGGAT  
TACATGTGATAGTCACATCCTGATTATAAGAATTTATTTCTTGATGATAGAAATCATCTA  
AATCAAATTTTATATCATTCTTTTCACAGATTAGTTTTGCTAGATCTAGTGTTGTAAAAG  
GTAGATACACATCTTTACTTCTACTACTTGCGGAACTTTAAAAAATTCATTAAGTCTA  
AACGTTGATAAAAAGAATTCGGTACGTTCAACCACAGGTAGTAATTCACCTGGCTTATTAT  
CTCTGCATGGATCTATCTTGATACGTGTTTCGTTTATGATCAATAGCTTCAAATTTCTAATA  
GCTTACATGTACCAGGAGTTAACTGGTACATGTAATTATTATTAATCATTTCACAACATCG  
CCGTCCAAGGATCAACCTTACAGTAATCCCTAGTTATAAACATCTATCGCTCCTTAAGGT  
AAGTTAGGCCAATTAGGATCTGTTGAATTATTGTATTGGCCAAGACCGCCATCAGGTGGT  
GTGTGTTTACAGATACTTCTTACAGTATATTGCCATACATTAACCATACTTGGAAATTTGATAG  
GTGTATTCAGATAGGCTTAATTCTTTAATAACCAACAAATGGATTAATCCACCATCTGTCT  
TCAGCCCAATAAGACCAGTCATTAATGGAATAATATCTACGTCATTAATGTAGTACGTC  
ATTTACAGCTGATGTACGATATGTTAGGACATTGATATTATTGATTGGTACAATATGGTTG  
GCATTACCAGCAGCTCCATAATCACCAAGCCTAGGCATTACAATACCGAGTACATGGAAA  
TCTGTAAAACCTAACATTACGTAGAACTGTAGTGGATAAGATGATAGTTTAGAAAACCTAAT  
CTAACAGCTCCCTTTGAATTTACCTAATGTAATAACACGATTAAGGTCAGAGCCTGTT  
GCAATATTAATAACAATCAACTACTAATTGCTCATATTCAGAAGTTGTTAAATCAGCAATA  
GCAAAGCAGAATCTTTGAAGTACTGTTCAAAGAAATATCTTCATTAACGAGTTTACAC  
ATTCTGTTAATATAGAACGTCTTAACAGATTGTTCTAGATAACAACGAATATCTTTATGA  
TCATTAATGAATATAATTCCCAACCTTTCAAATATTCCTTGTGGAATCTTGAGCTATCA  
GTATAGAAGAGTTCAGTTGAGATATAATCGCCATTGGGGTAAAGTTATCTCTGACTGCA  
CCTAGTAGATTAGGACCTACCAGTTTCTTATCAACTTGTACCTGAAGTTCTTCATATGTC  
GGGAATGGATTACGTAATACTTCATAAGCAGGTACACTAGGTATTTTATCAAATTTAAAA  
TCCTTTGTTCTACCGTAAGAATAAAGCATTACAATGAATGCATCCTTAACAGTCATTAAC  
ATGTATTCACCAGTCCTTGGATTAGGAATGGATACATATGCACGATAACGACCACTGGTG  
GATAAATGTAACCAGTTATTAAGTAGGACATTCATTAGATTTCTTACAGAGCTATTAGAT  
CTATCGATAACCTCTGAATCTAGTACACGTGTAGGTAGATTGCTAAAAGCACTAGTAGAT  
ACTTGTTACAGTTATTTCTTTTTTCGGCGTCATATTTAACTAGTGGGTTATCACGTGCAATT  
GGGTCTTCCCTAGTTAATATTTCTAACACTGTGTTTTTATCTTGACCAGGTTGCACAACA  
GGTATATTCATGTCATGCTTAACCATCTCAACATCTGGTTTCAGATTAGGCGGCATGTTT  
GCAGTATTTTGTTCAGAGTATAACTAATAACTGGTATTCCACGTTTCAGTTAATATCTTT  
TCAACCAACTGGTCAAATATTGCTTGCTTACCTGAGTTTCTACGTAAGAAGTGTATGTTT  
CTGTATAACCATAATTGTTGAGATTTATTCAGATATGGCATGAACTCATCAAGACGATTA  
GCTGATGCTAGATATTCACGAATATGGAACTATGTACTCGTCTAGACCTTGCATTACCT  
AGTCGGATGTTTCATGATCTCAAGAGGAAGTAATACTGTTAGTTCCCCTAGGAAAGCAGTT  
AAATAAAGATCATCTGTAATAAGGTAAGTACTGGCTATTATAGTTAGAGTTATAAAAATGCTTTG  
ATCCAACCTTTGTAGTTTCAGGAATAAAGTTATCTTCATTCCCTTCAACATACTTGTATCA  
AAATACAAAATATCCCCATTATCTGAATCTATGGCAAAAATTGATATCAATTGGATATAGT  
ATCCCATTGATTAGTCCAGCTTGCCTTGGATATTTTAAATACTAAGTTATTATAAGACTGA  
CTACCTGGTGTAAACTCCCGTGCAGTTGCACGATGTAGCCTGAGGTTTTCTTGGTGAAC  
TCGATGCGTTCTAATGTGTCAGCAGATGTGACATACATCATCGTATCAGTTTCATGGTAC  
TCACCAGCAAGATTCAGATAGTATTTCCAGGTCCATGGTTTATCAGGATCTGCTTTAAAT  
AAATAATCTCGATAAAGCTCTGTATTTATTTGATCGGCAATATCATCAAATTTTATGACT  
ATTGAACGAGCCAATCGGATAACGTCATCAAGGTATACCTTGAAATACACACTGTTGCTG  
TTATTCATTGGTATTTACTCACTTTAAAATTTAGGAGCCTCAAATGGCTATACCAGGGGT  
TAATGAGGGGCGTTACGAACCTCTCGCCAATTTGCAAGTAGGTGGGCAATACCCAACACC  
ACTGGCAGCTACGATTGCCAAACTCCGTCATGATCCAAAAGAAGCTGGGGCTTCGACCAA  
TAACCCACGTATTGTTGTGGATCAGCATCAATTACAAAATTTATCTCGTGAAACTTCACA  
GAATATTATTGACTCAGATTCTATTATGCAGGTATTACCTGATCTAGAATTAAGTACGAGAC



AGTATTAGTTGGTAGTATTCTATCACCTAAAGATCTAGCTGAAGCTGATCTAACTTTTTA  
TTGTGACCAAGATATTTTTGATAGTGAGATTGGTTCGATTACTAATCGAGCCAGTTGAGCG  
ATATTTCAAACAAGACTATAAGATTAACGAACGGCTAGACCTCATGTTACGAGATATCCT  
TTATCATAAAGGATCATCTGTATTAGCTGTTTTACCAGAAAACGTTTTAGATGCAATTGT  
TAATGGGCGACGTGAAGTTAGCATGGAAAGCTATGCTATGGTTCGCAATAACCTTAATAA  
GGGTAGGCCACTAGGTATTCTTGGACATCCTACTAATTCAAGAATATCAATGGAAGGGCA  
TAATCTAAACAATGATAATTCTAATTATATCTGTGGCGATAAATTATTATCAGTTACTGA  
TAACATCGATGTATTGAAAGCACCACATTTATCTAACCGTATTAGGCGAAAACCTTATTAC  
TAATAAATTACGCAAATACAATACATCACTAGTATCGATTGCAACTGAAACACATCATT  
CACAAATGATCAGATAAACGAACCTTTATCAAAAGTCACGTGGCGGTGTTGAATATACGCA  
AGTTATTTTCATCTCCAAAATTCATGGGTTCGCTCTTCAGTTGGTCATCCGCTTATTCTACC  
ATTACCGTCTGAAGCAGTTATTCCAGTATATGTGCCTGGTAGACCTTATGAACATGTTGG  
ATATTTCTTACTAGTGGATCTAAATGGATACCCCGTATGTAAGGAAGCTACACGTGATTT  
CTATGGTGAACACTACAATCAGGATGGCAGAATGGGCGTTCACAAGACAATAGTTCTGAAAT  
ACTACGTCTAACACGTGATGCACTAGGTATTAATAAATCTAACTATACTGAATTAGAACA  
ACATCAAATCAATGATGCTTATGCAGGTATCATCGTAAACGAATTACAAAACCGTTTACG  
TAATGGAATGTATGATGAAGAGCTAGAAGTTGGGTTAGATGAAGAAATTAACGCATCAT  
GCTTTATCGTTCTTGGAAAGGTAAGCAGACTCAATTAGTATTCATCCCAGCTGAGATGAT  
GGTCTACGTTGCATTCAATTATAATCGACATGGTATTGGTGAAACTCAATTAGAACGGTC  
TAAGTTACTGGCTACTATGCGTTCAACTCTACTCATGGCGGATGTGATGGGTGGTATGCG  
TAACGCAGTGGGTTCGTAACGCGTACTATCCATCTTGATCCAGATGATCCAGATCCAGA  
AGACACTGTACAACATGTTTCAGTCTAGTATTATGGAAATGGCGCATCGTGGTTTCCCCT  
TGCTTCACCTGATCCATCTCAAGCAATGGATTCATTGATGCGATCTGGTTATGACTTTAA  
AATTGATCCGGGTGATAATCCAGGGTATGCTTCAACAGCTGTTGATTTTCGATGATTACAA  
TACTAACGTCCAAGCAGGTAACCCTGAACTCCAAGATCGTTTAAGGAGAATGCACATTT  
ATCTATGGGTGTACCACCTGAGAAGGTTGACCCAATGACATCTCCTGATTTTGCTACAGG  
ACTTGTGCAAAATGACCTAGTGTCTCCCGCAGGGTTCGTGAGTATCAGCGTGAGTTTGT  
TAATAAAATTAAGCTAGTGAATAATTCTCAGCCAATAGTTCTATCATCCGTAAGA  
AATGGTTGAAATATTTTCAGCTAATGTTGGTATGCTTGATACACCAATATTTAAAGATCT  
TTCAGTAGATGAAGTAATTGATGAATTTATTGAATCAATTTACGTTACACTTCCTGCTCC  
TGATAATACCCAACATACACGTCAAATGATGCCTTGGAGGAATACTCTAGGTTACTAGA  
TCTCGTTCCTTTCAGCTAAGATCACTCCAGATCTATTCTCTGATGAAATGTTAGGTGTATC  
TGGCGCAGCCGAGAAATATCTAGCTGCTGCTAAATCATACTTCCTACGTCAGTTTATCGC  
TGAACAGAATATTCTTCCTGAAACTAAAGTTCTAGAAGAATTAGACGGCGATGATAAGCC  
AGCCTTTAGCTTACTTGATTGGCTGAATAACATTCAGAAAACCTCAAGGTTTCAGCATTCTT  
GGAATTCATTAAGGTGAAGCCGAGATTAAGAAAAGACTAGATGCTGAATATAAGAAATA  
TCGGAGTGATATGGATGAATTAAGTGGCGGTGGCAGCGGTGGTTATGGTGACTTCGGTAG  
TGATATGGATGACTCATCCGATGATTTAGGTAGTGGTGGTAATAAAATGGAAGCTGGCTT  
CGATACACAAGCTGGCTATGATGATTTATCTGAATCTGAATTAACACCAACAGATGAGGA  
TGAAGTTGATATGGAGGGACTATCTGACCCGGCAGCCGCTGCTGAGGCTGAGGAGCTAGA  
AGACGAGTCAACTGAATCAGATGAGATTGGATAATTTCTAAACAACATAATGCCCTCCCA  
TTACGGGAGGGCTTATGACGTTAACCATCTACACCTAATATTCTAAGATATGCGGTGTCA  
TGTACAAAAGGCCAAGCCGGATATCTTCCACCATCAACTACTTTCTCAGTCTTCCAATCA  
TGTGTGTGCGCATCGAAATATTTCTAATATTTAATGTGCAGCAATAAACAGAATGTTTA  
TCTTCGTGTATGAAGTGATAATCTAACATCTTACCATGTGCGCCAACCTACTGGTAGTTGA  
TCAGGTTTTGTATATTTTGGATAAACTTCAGTACGTGTATTAGTTGCCTGATATCTGCCA  
GGAAGTTTTAATGGTTCAAGTGGTACAAATTCTTGGAAATAAAGAGGGGCTATCTAATACG  
ATGAAAATGTTTGACTTAAAGTCATGTAAGCTTTGATAACAGAATCTTTCTAATTTGT  
TCTACACTTAATAGAGTTTTATTTTTGTCATCAATTTCTAAACCTAATGAACTTAGGTCA  
ATTAGTTCACGTGACTGCATGTATCGGTTCGAACATAGATAGACTACCAAAGTCTACCCTC  
CAAGTACGTACACCTACCCTATTGAAACCTTTACCTAATACGCATAGATAACCACCTAGC  
GATAATAAGATAGTCTTATTAGTTAGGTCTATATCTTCAGGCATATCAATATAGGTAGCA  
TCAAATAGCGGTGCTCCAACCTGCTGCGGATAAATCATATCAGTTTTAATAGGGACATAT  
TTAATATCACCTATTGTTTCAAATGAATATAATCCAATTTGATTGTCATTAGCTGTTCTA  
ACTGTTTTGTTTCCATCGATGATTCTTACACCAGCACTAGTGAATCAGCTAGATGAAAC  
ATTGTATTTACAGTTATAAGACACTTTTCGACAAACATCTTCAGGTTTATGCTTAGGATGG  
GTTAAAAGAATATCTTCTTTCTTAAACTTAGAACCGCCATCCGTGACATGTCCGTTTCTA

GCAACAGGTTGCGCAATATAACCTGCATGCCATGCTTGTGCATATTTTACTAAACGTACT  
TTTTATTAGGTAGTTCATCATCAAATGGTAGTGATTTATCTCCAAGAGATGTTAACCAT  
TCTTGTACGGTTAGATCTGGATTAGCTGAACTAATCTCATTAGTAACATTTACCCAATGT  
AAAGCATTAAATATAGGGGCAGTTGGCCCAGGATATTCGATATATAAATAGATATCTCCA  
AACTTTACAGATAGTGTAGATATCTTTTCATTAGCTAGATCAACATCAGTCCAGCGCCCC  
GACTTACGATCTATTCTGTGGCGAGAACGTACTAGTGTGTACATCTATTAGTCTCCATGG  
AATGATTGGACAATCCTATGTGAATTTACATCATTACGCTAACAAATTGCGCAATAGCG  
TTTTATTAAGGAGGGCAACCATGGCCCACGGTGAACTGGGTTATATCCATTTCGACCCC  
AATGGAACAAATCCCCAGAACTTTATTAAGGTGAGCGCCAAACTCTCCAGGTACCAGAT  
GGTGATGATTATTATTTTCATTATACCATTTGCTGCACCTTTCTTTGTAGATTTCATTACGA  
CTATTTAACCCACTGACCAATCAGACTTATGTAGAAGGTGTTGATTACCTTATTGGGCAT  
TGGTTTATTGAAGCTATGGAATCGATAGGTAGACCTATCGCTGGATCTATACGTATCATG  
AAGCGTTCGATAAACGCTATGATTGGTATGGATTATCGTACAATAGGTGGGCAATGGGGA  
TTAGTAATCAGCAGATCCTGGCTGAGCTTGCACGCAAACAGTATAACCCCTTGATTCCG  
TCATGGGGTGCAATTGGTCCATTACCTGCTTCTTTCCACCTTTAGAACACAATCAACCT  
ATTGATTCATTAGTAGGTAGTAAAGAGATTCTTGAAGGTATCGAAGGGATTATAGAAGCT  
ATCCGTGCTGCGGCTGCCGGTACAACCTGACCAACATATTCATGATTATAATAACCCACAC  
AGGGTAACTAAAGCACAAGTTGGCTTGTCACTAGTTCCAAACTATGCAATGGCAAGTGAT  
CAACAGCATTAGATGCTAATCGTAATGATCTATTTACGAACCCACGTGGTACATTAGCA  
TTAGTTAATAAGTTTGGCGTAAATCCGCTTAATGCCACATAGCGGCTAGGGGTAACGTA  
CACGGTCTAACAGCAGCTGATATTAATTTAGGTAATGTTCCCTAACTACCCAGCTGCAACA  
CCAACTACTGCGGTAGACGTAACCTAATGATTCCGGTATTATTAACACCTTATACTGCATCT  
ATTCTCTATAGTCAGATTGGTGATGCTTCTAGAATTAATGAACTAGAAGAGAACTTAAT  
CAACATATTAGTAATGAAAATAACCCACACGTTGTAAGTGGCGACCAGGTTAATGCATAT  
ACTAAAACACAAGTTGATCAACTACTGGCAGGACTAGGTGGTGGTGTGCTTCTACCTTT  
GGTGGATTAACACCTGAGCAATGGAAAGATGAATTCCTCATTCGGTGATATTGAAAGG  
ATGGCAGCCGGCTATAACGCTAACTGGGATGATGTACAATTAAGATAGATACATTACCA  
GTTATTGTGGATGATACTAGTGAATATGACCGAATGGAATTAATTCAAGGTGTCACGGCA  
GGTTCCATGCTTATGCTGGATTTAATAGTTGGTGGGATTGTACAATTGTCAGAGATGAC  
TGTGTAGTTCATCCTAAATCGCCAGCTAACCCCTTATGCTGTTATACCAGAGCGTTTAGGA  
TATGCTCAGGAATCCTGGGTATCTCACCGATATGGTCAGTATTGGGTAGAGAATGGTGTA  
GCCAAGTCAGCATGTATCGATGAACTAAAGTTCGATGAGATGATACCAATTCCAGTAGAA  
TGGACTGCACCTATAGATGGAAATATTCCTTCAAGTATCTGGGCGAATAAAAACATCTCTG  
TATATGTTAACAGGTAAGTTCATCTTTAGTTCAACAGGTGAATCAGCAATCTTTGAGCAC  
CAAGATCTTTATCGTTGTGTTAAAGGTGGTACATCTGAACTATTAGTACCTGCTGCTAAT  
AAACCATGGGCTATATTTACCAATACTGAAGACACCTATCCTGGTGAAATGACAGTTGTT  
GTAAACATAGGTCCAGCTAGCAGTGCTGACTATGTATATACAGCTTATGGTATCCCAAGC  
TTCATTAGTGCTTTAATGATTTTGTTAACAACACAATTAACCATTGAATCATGTTATT  
GATTCAATGTCAATTGGTTGCACCCACATCATCATGCATTCAATAGATCCATTAGTTGCT  
CCTGAAGATTATACATCTGAATCTAGTAAAGTACATGTGCATGGAAATCATCCGCAATGGT  
AATGATACATCCTTTATGGTTATCTCGCCATTATGGTTTGATGGACGTGGTAACGATGTA  
ACTGCTAATGTAAATAGTAACCCAATTGGTGGTGTATCAGGATTGTACACACATTACACA  
GTGATGTATGGTGATGGCCAAATCGCTTTCTTCGGAAATAACGATAATGGACAATGTGAC  
GTAGATGACCATGCTGGACCATATATTCAATTGGCAGCAGGGCATAATTTCACTGTGACA  
GTAAATACTTTGAATCAAGTCATGTTCTGGGGAGATTCACCTGATAACTCCTTATTATGG  
AATGGCAGGGGTACACGTGTGAAACATATTGAACCAACTCCACCCACTGGTCCATAAGAG  
GATTTAAAATGGCAGAAGTTACACGTCAAGAGATGGATGCTCAAATAAATGTTTCTATT  
AGTAATCAAGGCTTATTTACTAAGGCAGTCCTTAATAAATTCATAGCCGTTATTAATAGG  
ATCAATGGGCATATTGCAGCTAGAGGTAACCCACATAATCTGCAACCATCGGATATTGGT  
CTTGGTAATGTGGCTAACTATCGTCCAGCTACTAAGAAGCGTGCACAAGAAGGTTTCAAT  
AACACTACGTACATGACTCCTAAACGGACAGATGATTATAATCGAGTGCACATATACGGT  
CCACTTGCGAAATTATTTAATGACGCAGCAGACCGTCTATAAACATCTGACCTGGCATAA  
GAGACACAGCCAAAAGCTGTGTCTCTTTTTGCTGTTTCAGTTAAAAGGTATTTCTTATGT  
ATAATCCTATTTTACAATTACCATTTGATCCATTAGGTACAAATCCAGATTGTTTCATTG  
GTAGCGAGCCTCATACTCTAGTTCAGTATCAGGGATTTCGACTATAGAATCATCAAGTTAT  
ATCATGGTGGATTCTATACAAAAGGGTTAGAAGTTTATGATGGTAAATATAATCGTTTAG  
TTAAAGATATTGATTATATTGTTACTTATTATCACAAAGATGCTAGTGCATGTGCGGTC

AAGAAATATGTTTCAGCAATTGTTTTCTTAAAAACACCTAGTACACCAATAGTGTATACTT  
CAGCTCACATGGTAGGCGGTGATCTAGCGTTTAGTTTCACAGTTATCGACGATTATATTA  
ACTGGTGGAAAACAAATGGTAAGCCAAAGCCAAAAGATCTCGACTACACTGGTAACGAAC  
CATATTGGAAAGACGGTGAGTTAGTTGGCGAACGATGGCATCTTGATACGTATCAGCCTT  
ATAATAACGAGATGGAGTGGATAACACAGGCACTCATGGCTGGTGATAACAAGCGGTGAAG  
ATGAATACCGTAGTAAAGTTAAAGAGATTTATGATGAGTCTTAAAGAAATTTAATGATC  
GCCTAGAAAAACATATTCAAGATAAAGCTAATCCACACAAGATTACCCCAACTAATGTTG  
AACTAGGTTTAGTTAATAACTTTCCATTGGCTACTCCAGCCATTGCTCAACTAGGTCAAT  
CTAATGCACATTATCTAACACCGCAGTTAGCATATGGCGTATTAGATGAAATAGCTATAA  
AACCCTTAATGCCACATAGCTCGCCGTGATAATCCACATAAAGTCAAAAATACGCATG  
TACAGTCGTATTTGAAAAGTGATTTTGATTCACGAATTACTGGTAAATATTTAAAGACTG  
ATACAGTAGCTAATACTAATATGGTTTATTATAAACCTAAAGGGCAACCAACTGCTACTT  
TAATGGGTTATAGCGATCTTATTTGGTGGATGCGTAAGAACTTTGACACAGACGTGAAC  
TTACAGCTGGCGATGGCCAGAGTAATGTCATCAATATAAATCGGATTGGTTCCGGGGCAA  
TGGGACAATGGAAAGCACCCTCCGTGGGAATGGTATTTTTACACACTTTGATCAATTAG  
CCACAGAGTATTCATATCCGGTTAAGTTAAAGTTTTATGCACTAGGATTACAACCATCCG  
TGCAAGCAGCATTAGATTTCTGTAGAACTAATCCACTAATCCAGATGCATGGCCTATTA  
GATCTACTGTATTCTTCACTATTAAGAACAGAAAATCCAGGCAGCTGGTAACGGATTGA  
TTTTCGTTGATTATACTCCTAACTACGTGTGTTTCCGTTCAAGGTGGCTGGGTAATTC  
CATAAGGATAGTTTAGATGAATCCACTTTTACCTCTTCCATTTGATGAACTGGAGA  
GAGTTATAGTAACCGAACAAAGGGTGAATACCATTCACTAGCAAAAACAGAAAGGATTCCC  
CTATCGCATCATCGTGATGGATAAGGGTTACTTTTACACTAAAGGAATGGTTATCAGAGA  
TGGTAGGCAGAATGAGTTAAATCCAGAAATGGATTATCAGTGTACTGGTATTAATCCAGA  
AGTAATCGAGAAGACTGGACTTGAAGCGTGTTTCAAGTAATTGTTATTACAAAACAAGATGT  
CCACGAGGATTTTACATTGATGCTCAGATGTGCGGTGGTATATACTGTAACCTTGCCCC  
TTCCATATCTGAGCATGCTAACGCTCTTTTAAATAATACCCGTAAACCACATTGGTCTAA  
TATTTTAGATATTCCTGACCAATTTAAACCTAATGGACATATGCATGCCTATTGGGAACT  
TTATGGTTTTACGCCTAGAGTTGTTAAGTTAAAAGAAATAACTGACTTATTAAGAAAAG  
CTCATCAGACTCATATGACTCCATTTTAGATGAGTTTAAATATCAGTTAAGTCTAATAGA  
AGCTGATCTTAATACAATTGAAGCACGACTTACTACACACATCAATGATACCACCACTAA  
CCCACACCAGACACGTAAAGGGCAAGTGGCATTAGGTAATGTTTATAATGCTGGCATTGC  
AACTGAAACACAAGCCAAACAGCCAAATGGCGCTATCATGAATGTCTATGCTACGCCATG  
GTCAATGAAGTTATCAGTTGATACCAATTATACAGTTCAATATCTGGCACACGTTAATGA  
TGTCACCACTAACCCACACAGGGTAACGGCTGAACAATTAATACGTATACTGTTACTCA  
AGCTAATATTTTACTAAATCAAAAATTAGATAAAGGTAAAACAGCCAATACGTCTAAACT  
TTTATTTGGTCAAGATGTTTATAGCATGGGTGAAACAGTACGTGCTAAAATGCCTTTAAG  
TGTATTGACGACTGGTCGACTAGCACCTGGTAGGATTGGTAATTCAGCTACCTGGCCAGG  
CCGTGATTGGACATTGATGCCTAATGGTCAATGGACTCATTTCGGTTTTATATTTAATCG  
CTTCCAAAAAACAGGAACGATGGTCCACTGGAATAACACCAACTTTAAGTCTATTCAAGA  
AGCAATTGCTTTCCATAACACATACTTCTCAGATCCTGAACAATGGTGGCCTGGTTCGTT  
AGCTATTTGCCATTACGATCAAGAATTCGTTATTGGACATGGCAATGGTACAACAGCTAC  
TTCCTATAGGAATACTCTATTCCCTACGTAAAGTTGGATCAACGTGGACTAATATAGGGGA  
ACCGGCATAATGATTACTTTTTTACCATTAGATCTAAAAGCTAAATTAGCATCTAATTAC  
ATTGTAGATGAGGATCACACACTTATTCAAGTCAATAATAAAACACATCGCGTACTTATG  
TGTACACATGGTGGTTTTTATACTAAGGACTTTAATCTACGTGATAAGAAGACTGGTTTA  
TCTTTAAACAAAGATCAATATAAAACAACCTATCTTTATTCACAGTTATCTGAAATGACT  
GGCTTAGAAGTAATGGGTATTGTTGTAGTAACTGATCCTAATGTTAGTCTAATGTCCAA  
GTTACATATAGAGCAGTTGGTGGTTTCTTTAGTATTTTACGATTAGAAGTTAAAGCTGTT  
TTTGATAAACTTGAATTAGATGAATTAAGTTTCACTTGGGATGATATTATTGGTAAACCC  
GATGCATATCCGCCTGCACCTCACGGCCATGAATATTGGCAGATTTATGGCACAGATACA  
ATGGTAACTGAATTAACCGAATAGCACATGCTTATCGGGTCCGGTGAAGTGCCATGGAT  
AATGCTGCCGATGATTATTATAAAGTTTATCTCACTGATGCAAAAACCGCTGTGGACGAT  
TATAGAGATCGAGTTACAGCACACTTAACTGATTATAATAATCCGCATGCTGATGATCGA  
TTCAAGTTAATTCCACCGCTTGATAAGATATCCAACCTGGGGTTTTGCTACTGAAGCTGAG  
TCAGTTAATAGAAACGTAAATAATAAATACATGCCAATTGGTGGTATTTATCGTATTCTT  
AATATTGATACGTTGGCTAACTTGCAGCACATATTAAAAACCTTTAATAACCCACATGCT  
GTCACAGCTGACCAAGTTGGATCATATACCAAACCAGTGATGGATTCTAAAATAACTCCA

TTATTAGGTATTAATGAACAAGCTGCTAATGCGACCACTATTGGTGCTACTACTAATAGT  
CAGGGTTATCCAGTTACTGGAACAGGTAAGGTATATCAGAATTTCTGGAATGATGTTCGA  
AAAGATATTCCAGCTGAAGAAGTAACTAGTGGCGTATTTAAATGGAATGCATTAGGTAAA  
GGTAATGCATCAATATTAATGACCCTGAGAGATATTATCTAGCGAGCGATGGTACTTGG  
CAAGACTGGGTTGAAGCTTTTAAAGAGTGGAACAAAGATAAGATTAAGCCATTACCTTA  
GGTCAGGTAAATAGTGAAGCAGAAGCATTAAACACGTTAAATACGATGTTTACAGATAAT  
ACCAAATATCCTGAAGGCACTTACGCTGTTGTAGGTGTTAGAACTAATACCCCCTTTGAA  
GCCTATTATTACCAGCAATATGTAGCAGTTAGAAATAATGGTACATGGCGTTGGATGATT  
CGAGCTGGAGCACTTGTATAATGAATAATCCGTTATCACTCCAAGAACTATCTTTAGCTA  
CTGCGCCTACTGAAGATAAAGTAAAAGTACTATTAATGTTTAAACCGTACTTCTGAGGTAT  
TCCTACAAAGCGTAGGCTATCTACCTTTAGATGCATTTCGATGCTAAGTCACGTGAGCACA  
CCATTTTTGTTGAAGCAGAAATGGGTACTTATGATGTAGTCGTAAGTAATACACCTGGTA  
AACAACTACACTTTCTGATTGGAAGATTGTTCCCTAAAGAAGAAGCGCCACAAGTGATTA  
CTGAAGATCACTTAAATAGTAAAGTGGCCTACAAAATTACTGAACGCTATCCAGTGACTG  
AGCAAATTAATATCCTTGCACGTGCAATTAACAGCTAGCTGAAAAATATGGTCAAGAGT  
TAGATGAACTAGAAGAAATGCTTGATTATATTGATCTTGTTAAACGAACTAATCGCGCGC  
ATAAGGAGGCCCTAATTGAGAGCCCAGACGTTATCTATAAATCCAGGGAAGATCTCGACG  
CTGAGAAAGCACATCGATATGCAGGTGGCCTGCATGAGCTTATCGGCCACGAAAGATCG  
ACCAAGGACGTGTTTTAGCTGAATTTGCAGCTGACCTTGTATCTTATCTGGATACACTA  
GGAGATTCCTGGTGGTTTAAATCGGAAAAAATTAATAGTATCCCAACTAAAGGTATCACT  
GAATGTGATTATTGGTTTTTAGGTCATAACCAAATGCCAATGGAATTACGGGAATTACTA  
TTTCATATTGCACCTAAGGTAGAAGGTGCTTGGTTAGGCGAAGTTCTAATCAACCGATAT  
GAAATTGGTACAGGTATGCCTGAACACATCGACCAAGCTGTTTATCGTTACAACATGGTT  
ATTGCATTAATGACAATGGCGATGGTATAACGATCAATGGTGAGTTTTATCAGGATGTA  
CCAGGTAGGGCTACTATTTTTCCAATCCGTTTCAGAGCCACATGAAGTCCCTCCAGTTAAA  
AATAAAAGATACGTCCTTATATATCTCTACGAGTAGGGTACAACATGGCAATTAACCTTA  
AGACTCTATCTAAGACAGAACTAAAAACATTAACAAAGCTTAAAGGTGAAGTTTCATTTA  
GAGACTCATATGGCCACCGTATGCGAGTTGGCACTAATGGCCTTAAAGCATGTAGTGTTT  
ATAATACTTCAAATGGTTTAAATTGGACTGCTAAACAGCGTAAAGAAATTAACCAATTT  
TAGGCGAAGAACTATTTAACAAAGCACTGCAAGTATGGTTTTTAGATTTCCCCAAAATAG  
ATGGATTTCTAGATGAGATGAATTATTGGGTAGATAAACCCGAGTCCGGTACTATTCTTG  
CTTGGAATATTGGACCTGATGCTAAGTTCATTTTAGATGGTGAGGAACTATTAATTGGAA  
AAGGTGAAGGATTAGTATTCCATCTATCCCAATTACATGAAGTAAAACGCTCCCATAATG  
GACAATCATGGATCTGTGTAATGGTACGTGGTGCTCCTGAAAAATTTGCTTAACAGCATA  
AATCCCCTCCATATGGAGGGGAACTCTTACAAATTTACTCAATAGTACAGTGTACTAAAT  
TTTAACCATCTACTGCAAGGATTCTAAAATGTCTGCAATTGATCAGCAGTATATTAACGT  
TACACGTACAGCATATGGTTCATATCTGCAAACGTGTAATATCTAGGTATTCCATTCAA  
ACTAATTCCGAATACCACACTTAATGAAAAGTTTTCTATTCAACAAAATGTCGCACCATC  
TGCTGGCCAGATTCCTAATGTTTCAGTATATGGTAATTGGCAACCGTGGTCATTATTTTGT  
TAAAGGACCAGATGGTTCTGATGAAGTAGAAAATAATATCCATCGAGCGAATGATGCTGC  
CCTCTATAATCACATTCCTTTTCGTATTACGTGAAGTAGCTGATGACTTACCAGCCCAGCG  
TCGTAATATGTATCGGTTACGTCGATTAGAAGAACATAATGGTAAACAATATTTTGCCTA  
CTATGCGCGTAAGATTGATGTCACTGGTGTGTACCTAAACTATTAAGATCACTATTGT  
TGATGGTGAACCAGTTGTAACACCATACGTGCCTAACCGCGATGATCTTAATCCAACCTCC  
TCCGACGATTTCTAACCAAGGTACTGTAGTTGGTTCAAATGAATCAATTTCTGCATCTGC  
AATTGTGACTGTTAATTTAACAGCTGAAGAGATCTTAGAGATTACCACAGCACACAGGAT  
CAGGACTGGTTCGTTCGGTCACCTATCATTCTGAAATCGGACTATGTTTCAGGTGTAGA  
TAAAGACGTACAAGGACAATCCGGCGCATCTGGTAACTTTATTTATACCGAAGTCATTGC  
ATGTCAGATTAACGTCTTCATTGCTACTAACCATGCTGTTGGTTATAATAGCGATGGTCT  
GAAGTTAACCTTTGATATTGGTGGTGTGTAACCCATGTTAGGTAGCAAAGCTATTAACGT  
AGCAAATTTGTACCTAAGGATTAATATGCTTAAGCTTCCAGCGAGTGATGAGCCATTT  
CGGGTACTAGCATTAGACCCTGGTTCACAAAACCTCGGCATAGCTATTCTGGAAGATAAG  
TTGGATGGAAGTAATAAGGTGGTACGTAATGCATTTACCTGCCACCTTAAAGATACAAAT  
CCGGCATATGCTGCCATCTCCGAGGTTTCATGGTAGTAGATTTACTAGAATGCAGCAAATG  
AGTGATGTGGTACTAAATATACTACATACTGAAAAACCATGCAGTTATTGTAGAGTCT  
AACTATCTTGGTAAGTTTGCCCAAAGCTTCGCTGTACTTGTAGAATGTGTGACCTATGTA  
CATAGAGCATTATACGAGTATGATAGATTTATACCTTTATACATGATTGATCCTACTACA

GTAAAATCAATGCGGGTATGAAAAAAGTAAAGGGTACTACTAAAGATGATGTTAAAGAA  
GCAATGCGTTCTCGTACTGACATCACATGGAACATCGATATAGATAGTCTAGATGACCAC  
TCTATGGATGCTTGTGCGATAGCTTACTACTACCTTACTAGGATTGTTTAAACAATTCGAG  
GTAACAATGTTTCTATTAGCAGGTATACGAAAAATAATTGGTAGCGTGCCATTGCATATA  
TGGTACTATTAGTTATTCTGATAGGTGCCTTAATTGGTATCATATATTACAAAAATAGT  
TATGAGACGGAACCTTGTTTCGCTCTACAGATTTAATTGGAAAAATTAATCTTATGAAGCG  
GCAGAAAAGGTTAGGATTGAATCAGATCGTATCTCCGATAAAATTCAAGCTGAACTAATT  
ACTAAAAAGAAAAGAGATACAAAAAGAGCAGGCGCAATCACGCACTGAGGTGATTGATGAG  
TACATTAGTTTATCAGGTTCGTGGATATACTCCACCTGTATGGCCTGAGGTTAAAGCTAAA  
ACAATAATGGGGAAAGCACCCTACTGAGATTAACATGAACTGACACAAAAAAAGAT  
AACATTAATAAGTCTATTAATGCTATTGCTAAACGGATGTACGAGCACTACTGTGCCGCC  
TCCCGTGAAAATACCAGTTGCAATCCCAAGTAGTTTACTTCTCCCTTGCGATGTGGAAGC  
CCCACCTACAGCTAATGAGATCATCAATGCATTAGATAGATATAAAGCTGTTGGGGTTAC  
TGATGAGAATGAAGCACGTTTCTTACTTATGACCGAACATTGGCTTTTACAACTGATGC  
ACTTGGACTATGTAATATCCAAGTAGACAAATTGCGTGAATGGAACGAACGTCAACGTAA  
TTTGGAGAATAGTCATGACCCTAGAGGACGTTCTGATTGAGATCGATGGTAATCCTTTAT  
CTTCTTCTAAAGACTATGGAAAGAAGATACGTACCTATTTGAATAGTGTATTGGAAAAGG  
AACACGTATAAATCTAAGTATAACTGGTGAGGAAGTACTTAGTCTAATTTATGCTATTA  
CCGATTCAGATCTTCAATATAAAATTCTCAGCCGGGAAATTGCTGAAGTGAAGGCTAAAG  
ATTCTTACCGTAATGCGGTATTGGTATTAGCTGGTGGCGTTACTCTTATTGGGGCATCAG  
TATCTACTATGGTAGTTTTATCTGGTGCACCTATGTCAGAAGAAAGTGCCAATGTGTTAA  
AGACTATTGTGCAAGGTACCTTTGAATTAATAAAGATGCTTATGCAATAAAAACTATAAT  
AGCCTTCTCTTCAAGAGGAAGGCTTTATAATGCTATGTGGATTAACATTTTACCCTA  
TAGAGGTTTGACATGCAGGATATCTTTCGGTATGACATGGCATCGAGGAATGCGCTAGTA  
AACTTGC GCGGGATGATTTAAAAATAAACTTCAAACCAGAAACAGTTACATTTGAAGAT  
ATGTTTTTTAGTCCAACCACGATTGAGCCTGGACGTACATTTATTGAAATGATCGACATC  
ACTACTGACATTAAGTACATGTTAACTTACCGTCGGTTAGATTTTGCTGATCCACGTGCT  
ATTGGTGAAGGATCTATCCTTAAGATAGTTGGTACTTTAACACCTAAAGCAATTGCTGAA  
GAAATTAACCGTTCACGAGGTTGGAAGCTTGGTCCAGATGATGTTTCATTTGATACAACA  
CCAATCAATGCAACTACGGATGTTGTTCCATACACGATAGTAGCTATGTCGAGTAGCTAT  
GCTTACTATGGTGAATGTAATATACTAATCCAACGTATTGATGATACGTCAGATACTATC  
CGACTATTAGAGAATGGTGCAGCACGTTATCTAGAAAATGGTCAAATCCGTTATCTAGAA  
AGTTAAGTAATACCCTCAATGAACCTAACCCAGGGTTCATACTGGGTAAATATGTAGAGG  
TTATATCATGAAAGTATTACGCAAAGGCGATAGGGGTGATGAGGTATGTCAACTCCAGAC  
ACTCTTAAATTTATGTGGCTATGATGTTGGAAAGCCAGATGGTATTTTTGGAAATAACAC  
CTTTAATCAGGTAGTTAAATTTCAAAAAGATAATTGTCTAGATAGTGTGATTGTAGG  
TAAGAATACTTGGGCTGAATTATTCAGTAAATATTCTCCACCTATTCCTTATAAACTAT  
CCCTATGCCAACTGCAAATAAATCACGTGCAGCTGCAACTCCAGTTATGAATGCAGTAGA  
AAATGCTACTGGCGTTCGTAGCCAGTTGCTACTAACATTTGCTTCTATTGAATCAGCATT  
CGATTACGAAATAAAAGCTAAGACTTCATCAGCTACTGGTTGGTTCCAATTCCTTACTGG  
AACATGGAAAACAATGATTGAAAATTATGGCATGAAGTATGGCGTACTTACTGATCCAAC  
TGGGGCATTACGTAAAGATCCACGTATAAGTGCTTTAATGGGTGCCGAATAATTAAGA  
GAATATGAATATTCTTCGTCCTGTCTTAAACGTGAACCAACTGATACTGATCTTTATTT  
AGCTCACTTCTTTGGGCCTGGTGCAGCCCGTCGTTTCTGACCACTGGCCAGAATGAATT  
AGCTGCTACCCATTTCCAAAAGAAGCTCAGGCAAACCCATCTATTTTTTATAACAAAGA  
TGGGTCACCTAAAACCATCAAGAAGTTTATAACTTAATGGATGGTAAAGTTGCAGCACA  
TAGAAAATAAGATGTAGCAATAGAATGGAGTCTATGGTATCATGTGAACTTCCCCTCAT  
GATAAACCACATCTTGTGCCAATGTAACCTTTTTGAGAGTCTTTCGGGACTCTTTATGTT  
GTTAAAATATTACTCATTAGCAATAGTACATTACTGTATGAGTCTTCTTCGAAAGACTAA  
CATGTTAGTGTCTTATAACAGCAAGGAAATAAAAAATGGCAAATGTTACAGACAAAGGCA  
AGATCAGTCAACTGCCGGATCTAGCTACTCTTAACGATAGCGAGTATATTGAATTAATTC  
ATACCGATGCAGCTGGTCAAGTCGATAACTATAAGTTTCCGCTGTCAAACTACAGACTG  
GGGCACCCGGTCTTAGTGCGTACGAGATTGCCGTTAAAAATGGTTTCCAGGGAAGTAAA  
CCGAATGGCTTGATTGCTTAAAGGTAAATCTTCTTATCAAATCGCAGTCGATCTAGGTT  
TCGTTGGTACTGAAGAAGAGTTTATAGCATCCCTTAAAGGTGATGCTGGTAAGAGTGCAT  
ATGAAGTAGCTGTGGAAAACGGTTTCCAAGGTACTGAACAGGAATGGTTAACATCACTGC  
ATGCAACCATGACTGCTGAACTACTCCAGTCGCTCTTAAATCAACAAGGTTACACAGTTA

AAGATGTA CTGCGT GTA ACTGGCAAGA ATGGTGGATTATCATCCAACGCTGCTTTCCATA  
ACTTTGCTTTCCCTGTTTGATAAGCGTCTAAATCAAGACGACTTAACTGCTGGTGATAAAA  
TACCTCAGCGTATGATGGAACAAGGTCGTATGGAAGCAGAAGGTTATTCTTATCTAAAGA  
ACGCTTCTGCGCCACTACGCAAGGTGCATTACCCGAATTACCTGAGTCTGAAATTCGTA  
TTTATGACAATGGTGAATTCCAGATTGGTAGTTTAACTGATTACATTGCATTCAAGAATG  
ACGGTAATATCCGTATTGTTGAAGGCGTTGATGAAACGACCGTTGATCTTAAGAACCTTC  
CTAAAAATGAAGGTATTAGTGGCGGTGTATTTCGTCAAAGATGTACAAGCAACTGACCCCA  
GTCAGAACGTAGGTAGTATTGTGCGTACCCCGATGGGCACAGCGTACAGTCATGCCTAT  
CAACTACTAGTAATGTTGAGTTATCGTTGATGCAATAACTGGACATTCTAGTTATGTAC  
CTAGTGTTAAAAATCAATAACATAGATGCAGTTGTA ACTCCTGGCGTTAATCCACCTATGT  
GGATTGCTACTGCCGATATTGATCTTGGTGCACCCACTACTGAAGGTTATGCTGATATTG  
TTGTAGAACACGCCGATGGGGCTAAATTCACTACTAAGGTATTAGCCGATACTCCCGCTA  
ATATTACTAGTGCTGTATTTACTGGCGGTTATCCGTTAGGTCAAACAGA ACTTAAAGAAG  
ATGACCTTGTTGCAATTAAGTAGT TACTGATGAAAATATAGTAGCATAACGAAATTGCTG  
ACTTTGGTGC ACTGAAAGAAAGTAGTGGTACTGTTGCACCTACTAAAGA ACTAGAGGTTA  
CTGGTCTTTACGTAGCTGACCGTGGTAATACTACTAAGGCATATGGTTTCCGTGTACGTG  
TTCAGAAATCCACTGGTTCATGGTCAGAATGGTTTACTTCCAGTGATGCTGGTTCCGAAG  
ATAAAATTAACACCATGCAGTTAAACGATCTTCGCCCAGTTGTTAATATTGGTCAAGTAA  
CTTATCCGTCTGGTCAAAGTGCTATTAAAGTAGGTGAAACTGCTACTGTAGCCAATACAG  
TATCTAATGCTGATAGTGTGGTTTATTCCCTACCAAATGATCAGCTCACTATAATCAGTG  
CAAATGAAGCAGAAATTGCTAAGGTAGT TACTTATAAGTCTGGTACTTATAACGACAGCA  
CTAATAACCTATTAATTACTGCTAAACGTGCAGCTAATGGTAGTGTAGCTACGGCTACTG  
CTGTTGTAGCTATTGCAAATGCGGTACCTACTGCGACGGTTACCTACCCTGCTGCTCGCC  
TTCGTT CAGGTGGTAACTTTGGAACCCAAGTACAAAGTCATGTCATTACTTTAACCTCTA  
CTCAGAAACTAAGTGCAGCTCCGGCCATGAATGCGCCTGGCGGTAAGTGGGGCTACTGAGG  
ATTGGAAATCTGATGCCACTGGTAAGGTATGGACACGTGCATTACTAGTACATGACGATG  
ATCCTAAAGGAACCTACGATTTTAAACAGTGTGGTTCTAAAAGGTTTAGCTGGTGTGAAG  
CTAATAGTGTAATGGTGGTACTTACGTACTAGGTGGATTTGTATTCCGCACTCTAAGTG  
TGGCTGCTTGGCCGAACCGTGAAACTGATATTGGTACTGAAGTAACCAACTGGTAAAC  
TACGTTGCAGTAACCTATCTAAAGGTTCTACTGGTAGCTTAAACTTCACTTATAAGGCGG  
ACGATGCAAATCAAGTTGACACCTACACCATCAAGGATGGCAATAAGTGGTATAACTGTG  
ACTCAGCAAACGCTGTATCCAACACCACTGGACTGATGAAAATCGAACTTGAGGAAGTAG  
TATAATGGCTTCTGCATTTGAAGATTATGTAAACGGGGA ACTCCCAAACGGGTATCATC  
AATTGATGAACCCACTTCTGTAGTTAATGGACACATCCCGGTTTCTACCGGGGTGGGTCT  
TAATACCAC TTTTCGTTGATCCTGTTACTATACTGGATTAAAGGGTGAAGATGGTCAGCC  
GGGTAAAGATGGT GATCAAGGTCCTCCTGGCCAGTTGGTCCGGCTATTAACATTATCGC  
TAATGTTGATCTAGCCACATTCGAACAAGAAATTAACCAATTAGATACGCATAATGTCCG  
TGATGCTTGGTTCGTTGAAGATCGGCTATGGGTATGGGAATCACCGCTAGGTAACGAAGA  
TCCCCCTGTA AAAGGTCGTTGGGTTGAAACAGGTTCACTTCGTGGTCCAGATGGTACTGG  
TCTAGTTATCCGTGGTCGTTGGCCTAATAACTTAGAATTACCTAAGACTGAAAGTAATAA  
ACCTGGAGATGCTTACTCATGGAATAATCAACTCTGGGCGTGGATGCTTATCTCAGGTAA  
TAATCCGCCAGAGAATCCA ACTATTGATGACTATGATTGGTTC CAGTTACACCACAGGG  
TGAACGTGGACCTGAGGGCCCTGAAGGTCCGCAAGGTAAAGATGGTGA AATTGGTCCTGA  
AGGTCCTCAGGGTGAACCAGCAATGCCGTTTACCATTAAGGATTC ACTACCATCACCAGC  
TGATTTACCTGATCCATCTGTAGCTAAAGAATCAGAAGCATACTTAGTTACTATGGAAGC  
TGGTAAACCAGAACATCTATTCATCTTTGTAAAAGGGGCATGGTCAGACCTAGGTACTTT  
CCAAGGCCCTGAGGGTCCACAAGGTAAACCAGGTAAATACAGGTGATCCGGGTCCCGATGG  
TAAACAAGGTGAACCTGGTCCACAAGGTCGTA ACTTAGAAGTAGTTAAAGCAGTTGAAAC  
TGCTGATGATCTATTAACCACCACTGGTGTAGAACAAATACCAAGGTGTTTCAGTACGTTT  
CACCAATACGGTTTATGTACTGACTGGTCAAGATCCGACTGTTGATATCTCATGGACAGC  
CATGGGTTTCATTCCGTGGTCCGCAGGGCCCTGAAGGTCCGCAAGGTGAAGATGGCGAACA  
AGGTCTACCTGGTGAACCAGGGGCACAAGGTAAATCGGCTTTCCAAGTAGCATTGGACAA  
TGGCTTCACTGGTACTGAGGGTGAATGGTTAATCAGTCTACATGGTAAGAACGTAGTTAT  
TACTGGTGCTGTTGCCAATGAGGCAGCCCTGCCGGCAGATGCTCCTGATCAGGCAGCGTA  
CTTCACACAAGACACATCTACCTTATTTGTTAAGATAGATGGTAATTGGGTAAATAGTGG  
TACACATCGAGGTCCTAAAGGTGAAGATGGCGCACCTGGTAAAGACGGTGATCAGGGACC  
AGAAGGCCCCGAGGGTCCAGAAGGCCACAAGGTCCCCTGGTGAACCTATCCAGATCAT

CGCAGCGATTGACACTCCTGAAGATACCCACCAGAAGCACTTGCCGATAACCAATGGAA  
AGCATATACTGTTAAGTCCACGGGCGAAGTATTTGTTAACATGGACGGTAGTCGCTGGAC  
TAGCGTTGGTATTATGGCAGGTCCGCAAGGTAAACCGGGTGAAGGTTTAAACATTAAGG  
TGTTTTAACCGATGCTTCACTACCAAAAGAAAGACACTGATCCTGACTTAGTAAGTGG  
TGATTCATACTGGGTTGAACTAATGAAGGTACAATGCTCTATACTTACCAAGGTCAGGA  
AATTGATGGCTATATCGGCCCAATTAATCTAAATGGTGAGCAGGGTATCCAGGGTGTGCA  
AGGCCACAAGACCCTGAGGGTAAACAAGGTGGTGGTCTATTAATTATCTATGTTGGTGA  
TGATGCTGGTAAACCAGTAGCATCTACTGATAACGTAGGTAAAGGTATAGCTATCCATAC  
TGGTACCGAAGGACAAGTAGAAGTATTCGTATGTATTGATACAGCCGGTACATTTACTTG  
GGAAAGTCTAGGTGTTTTAGCAATGGGTCCAGAAGGCCACAAGGACCTGAAGGTAAACA  
AGGTGTTCAAGGTATACCTGGTAAAACCGGTCAGAAAGGCGAACGTGGATCTTCATGGGT  
TATTCTACCAGAAGGTCAAACCTGCACCCACTTCTATCGATGGTAATCGTGGTACTGGTG  
TATCGACAAAACCTGGTACCGTTTGGTATAAAGATGCTAACTGGGTTGTATTCTACAAATT  
AATGTCAGTTCAGTTAGTGAAGTCGATCCAGAAGATGTCGATAAAGAAAATGGTTCGGTA  
CAAACCTCGGTTGGACTGAACTACCTGTTGATGAGGTGGTAGATGCTGAAGTAGGTGTCTT  
CTATGGTCGCCGTAAAGCAACCGCTGACGGGGCTGTTGAATGGACTGCTATTGAATTACC  
AACACCTGCCATTGATGCTGTACCTAGTCCAGTTGTTAATGCACAATACGTTTCGTAAAGG  
TATTGCAGGTGGTAAAACCTGAATGGGCTACCATTACATTCCCAGAAATTCCTTCAGATGT  
AGTACGCGATACTGCACAAGCTACTAAGCCTCAAGGTCGTGTAGCTGGTAACTGGGTTGA  
TGTAGCACCTCTGCAAACCGATGATACTCTAATGGGTATGCAAAATGGTGAATGGGTAGC  
TGTACCAGCCGCAGTTATTGGCGAAGTACCTAGTGAAGGCGCTAATGGCACTAACTATGT  
ACGTGAGAAAACAGCTAGTGGTTCTAAATGGACACCTGTAACCTATTATAGTTGATCAAGC  
TGATGCTACTAGTGGACAACCTATTCTACGTAACGCTGCGGCTAAATCATGGACTCTATT  
CCAAGGTCCGAATAATGATGTAACCGCTGATGGTGATTGGGTACGTAGCCGTACTGGTAC  
TAATATTACTTGGAAGAAGCTAGATAAATCATTTCGATGTATATAGTCTGAAATCAAGTAC  
ATTCAGTGGTACAGCTTTAACTCTAACACCAGCTAACCAACAGTGCTATAGGGTTCAAAC  
TGCTGCTAACCAACCATTACACTAGAGAATGGACCTGTTGATCGTATGGTAAACGGTTGT  
TCTTGTACTACTTGGTAAGGTAGCTATGCCAACACTATCTAGTGCAGTGCTACAGTGGAA  
CAATGGTACTCCATTAATAGTAGATGACCTAGGCGATACTAAAACAATTCTTACTCTCCT  
ATGGGACGGTACTAATTGGGTAGTTTCCAAAGGTGCTGTTATTTAAAACGACATATTGCC  
CTCCCTTCGGGGAGGGCTTTATTTTCGTCGTTAAGACACTTTTTATATTATCTATACCAA  
TGTAGTAATTATAGCTTAAAACAGCATAGAAAGCCCTATTAGGGCTTTCTATTGGGTATC  
ATGGCTTAAACATGGAAAAGTATTCAGCATCGATGAAATCAAAGTTCGATATTAAGTTTAT  
GCTTTAGCTGGAAATCCATGATAATAAACTGTTTATCTTCAACAGCTAATTCAGTTACGT  
CTTTCTCAAATAGCTTTGGACCAATAATGGTAAAGTCAGGCATCAACACTTGTCTAATT  
CAAGAACATGGGTTTTACACCATTCTCCAAAATTATACATAATCGCCATCGAATAGATAG  
AGTTTAATCTAGAACAAGTAAGGTCTGTTAATTGAGTATTAATCAGGGTGATCTGAATAT  
GATCACCTATGTACTTATGTAAGCAGTATAGTAATTCATCTTGAGCATCTGGTGTTAATT  
CATATGGCCAGATATTAACCTCAAGACATGTTTCAAATTAGCATTAACTATACCGTCTA  
ATCTATTCAAATCTGATTGAGCTATTAATTGAATAATAAATGGAATGATACCAGTGAATA  
TAGAACTATTGATAGTATCAGCAGTATTTTCGCCACCACGTTTAGAATAAGCTTCGACAA  
ATTGTTCAATTAGTTACTAAACCATCTGTTAGTTTAGTCCAATCATCCATTTCCCTATGCC  
AATAAACTTGACCATTGGTAACAAGCTTATTAGCCGCATCTTTATTTAGTAACCTAATGG  
TCCCTAACCGTGTATCTAATAGTGAATCAAGATCAATTAAGATTTTACGAAACATTATTA  
TTTACCGCTTCTTTTTAGATGGCTTAGCTTGAACCTGGGATAGATTCAACTAGATTAGTA  
ATATAACGGATATTTAAACATTGACAAATAATCCAAACTAACCAATCATTTTGGTATAAA  
ATGTCAGTTAATTCTTTTCGTGGAATTAATCGCGCTAACATCTCTTGGTCAACAATAGTT  
GAATTAGGTTGATAAGGATAAATAGAATTAGCTAGTAATTCACCACACCATCCCAATCA  
GTAACAGCCATCTTAAATCGACTAACTAACTTAAAGATGGGTTGAAGACGATTACCTTTG  
TTACGGAATAAATTCAGATATCCCTAATAACTGTTTTATCAGCAATGTGATACCAATGG  
GTATTAGTACTCCAGTTATTTAGTAAATCCAAAATATCCGCAATGATTTTCAGCACTGTAT  
CCATTTACTAACTCAGTATTAGATACAATTAAGCTTCACACATATCTTCGTAAATCTGG  
CGATTATTCATAGTTACACCAAGTTATTTTGTAAACATCATGCCTTTTAGATAACATGCAA  
ATGTTTTATTAGATTGCACAGTAGTATCATAAGTAGACATGATGGAATCAACAGAAGCAC  
TACCAGTTTCGATAATAGAGCGGTTTATTGCATTATATGCTTTCTGGTACCACCACGTA  
GTTTCATGAATTCAATCATGGAATAACGGAGACCTTTTGAAGCGTTAACCTGAATCTCTG  
GTGCAGACATACGTGATCCTTTAGAATCACCAAGTTACTTGCCTGACCTCTGGTCAATCA

CATGACTAGAACCTGGAATACTTTTTCTTTTTCTCAAGCATTGTACTTGACGACGGATTG  
GTATTAACCAACTAAATGTTTATTAGCAGTTCGATATACCTGGCCAGTACCTGGGTCAG  
TTAAAATGATGTGTTGGAATAAATTATGACCAATCGCTTTAGCAACTTTATAATTTTCGCT  
TAATAGTTAATTTAGGCTTAGCGCATAAAGTTAGGGGCATATAACGCCAACATCTCTTCAC  
CAGAATCTAACTTATTAATCCACTCCTCAAATTCCTCATCATTTCGTGCAAACATTT  
CTTTATAGATATCAACATTACTACTACCAGGTAGAAACATGTCAATAATCCATAGGCATT  
CTTTTTCTACCAATTCTCGTTTAGTCATGGTAATTTCTTTAAGGTTGTTAACATACCA  
TTAGCTTGAGCGAGATACCCCTTGATAGACAGGTATTGAATTCTGGTCAGTACATGGAGG  
CAACCTATGCCTCTTAAGAATTGGTAATATGTTGGCTAGAAAATTAGCATAACCATACTTC  
AAAGGTGACTGAATCATCAATGGTAGTTCTAGCTGTCAACGTCTGACTAGGGTATTGAGC  
TAATAGTTGTTGAAAGCAAGCTGATAAAGTGGGTACATCTGTACACACTGGTAATCGACG  
TAATAGATCTTCTGATAGTTCAACATCAAACATTCGTAGACGTTGACAAAGTGTTAAACG  
ATAATCTTCTGTAGTTTTTCATTATAGTTCCCTTAGGGTCTTTATTTACTTTGATATCTCA  
CCACAGTAAATGACCTCTGTTTTTGTTCAGCCATTCTACTAATAAATGCCGGTGACAG  
AAATTACCAGCACGACAATAACAACCTAATGCTACTTCTCTAATTGGAAGAACCATTTA  
AAGAATTCTGGATTATCAATCAATGATTGCTCTAACATACTGAGATATGCTTCAGTGTAT  
TCATCATCTGATATAATTCCTTTCTTATGTCCCATAACCATTAACCAAGTAGGTGCGAGT  
TGATACGCACCTGATTTAACAGTTATGTCTAGAGGTTTTATTCCTTTCTCTATAACTAAC  
TTATATTTAGCTATCTGATAAGTGTAACATTCATATACCAAACCTGACATAACTAGGGA  
TCTTATTGACCCCTAGTTATTTTGAACTGGCGATAACATCTATACTAACATTAAGCTTT  
TGCTTTAGCTAGTTCAAGAGGTACAATTTAGCTTTTTCTTCGTCAGTCATCCAGTATGG  
TTTATATTCACTTTTACGCATACGTAGTAGGTCATACGTGGATAGGAATTTTTTATCACT  
AAACTGTTTCGTCTTCTTCGAACATCCAATAGCCACGAGTATTATTAAGAATAATATCCCA  
ATCATAACCCATTACTTTAAGATCAGCATATAGCTCAGCTGGCGTTACTACATAATCTCC  
AAGATTCCAACGTTGGAATTGAATTAATTGTAGCATTTCAGATTGGATTTCAACAGCTCG  
TTGTAGAGCAGGGTTATCCATCAATTTCTTACGAACAGTGGTCCGACTTAGTTTGATATC  
AGGACATAGCTCAACGAAGTAGTTAATGTTATTACCACCAATCCCCAATCATTTTCACG  
GCAATAATGGAATTCTGATAGTGATGGAAGAATACCTTCAGTTTGTGAAACAATGAGATG  
GAATGGTAGACCAGTAATTCCACCTTTACCACGTAAGTTAATAACTTCTAGAATACGTAG  
ATCTGTATCGCCTTCAATAGCAGTTGAATTGTCAATTGGATATAAAGGCATTTTTTCTTT  
ATTGACTAACGTTTTATTAGATTCAATAGAAAACACATTATTCGGTAGAGAGTAGAAACC  
ACCTGACACCCCTTTAAGAACCGTATCCTTCTTCATATGCGATAGATTACGTTTATCAGT  
AGGGTACATCTCAATTTGAATGATATCTCCAACGTGTGCAGTGAGAATCATGTATGTACT  
GGTTTTAGCACAGATCTGCGGTAGCTGGTTAAATAACTGATTCTTAGCTTTACCATTAGT  
CATTGCATCAGTGTTTACTTTAGAATCACCGATAGCATTTTTAGCATAACATTCAGACAC  
AGCTGAGACAATGAACTTTGAGAACTATCAATGAACCCGCCAGTTGGGTACAGTGCTTT  
CTTATTATTACCATTCACATCAAGAAATGGGGTAGTACGTAGATAATCTTTTTCAGCCTT  
TTCTTTTTCAGATAATGCATCGCGGAAGATTTTGAACCACTCATCCCCAGTATAACGAGA  
TAAGTCAGTAAACATGTATTGCTCATCATTTCCTCAATCGATAGCAGCTAGCTCAGGATA  
AGCTTGTGCTAAAGATGTAATCGAGCACCTGGGTTTAAATGTACCTTCTGTATCGTAAGT  
CATTGCATGTGCACCGGGGAAAGCACGGCGCATCATTGCCATGAGGTAGATACCTAATGC  
AGTTTTAAAATTGTTAGGTCGTGAAGCAATACCAGTTAGTGATCCCATACCACCATTTAG  
AATCATTTACCATGCTTACCTTGTTTACTACTTACCAGTTGAAATGTCCATAAGGCATCC  
GATGTTAAGAGCCGGTCGGAAAGCTGGACGTTTCGAAATGTTTACCAAACATGTTGACTCC  
ATTTTTTAAGTTAAACAGTCAATTAATTGATTTGGAGAGTAATTTTATGTCTACATATTC  
AACAACTCTTGCGCAAGGAAATTAAGACATGTTTAAACATCCATAAATACGCTAAAAGTAT  
TTCCTAGAAAATGATTGTCAGGATCTAATTGAATCTGACAATATTGTTAATGATGATAT  
TAGTTTAGTACAAGTTGATCCAAAACAACAGCTTGTAGATATTACTGAGACTATTTCTCA  
AGAAGCTAATTTTCGCAACAAACGCTATTAACATTATCAATAAACGCGGTGCTAATTTTGC  
TATCGCTGCTCGTAATGCATTTACGTCGATGACTAACTGGAGTAATCAAATTTATTCCTGA  
GTTCCATCCAGCGCAGATGCGCCATTTAGTTTCACACATTGATTATTTAGAAGTAGCAA  
TACAATCGTGCCACAACCAGTTGGTTTTAATGGTGAGATTCCAGACTATGTTGATTATCT  
ATTAACAGAAGCTAAGGAAATGGCCACTATTATTCAGCAGTATTAGACCCGGTTAAAGC  
ACAACCTGGGTATTACCTACAACAGCGTGCTGATCGAATGGATAAAGCGTGGCTTTGCTAA  
TTCATTTGCAATGGCATCGATCAATGACCTTGCTAAAGATGCTTCCTTCTATGACAGTGA  
CAACCGGTCAAGTACAGCTGAGTTTGGTAAGCTTTACCCATCATTAAATTCATTTGTTGA  
TGCAACAAAGAAAATGAACGATATTCGTAGCATTTTATCACGTGTTTCGTCCAAATGATGT



AAAACGTGCTTCAGAAGCGCTTAGTCAATTAATTGATAGCTTTATGGAGGATGTAAAGGA  
TAGTAACTCTGACACCTCTCCAGAGCTGTTACAGACATTAATTGAAGGGGTACATGGGC  
AGCAGACCATGTTGAACGTTATTCAACACTCTTCACTAAGATTGTTGAGACTGCGAACAC  
AATGAAAGCCACTGAAGATATTCTTCGTGAAATCATTGGATAACAGCATAAGCCCTCTCC  
CAAAGGAGAGGGCATTATGTCGTACCAATCAATTTGGAATACACTTCTCATGTAAACTT  
AATTTAAAGAGGGTTTTCAAATCCTTTAAAAAAGTTGCATCATCAGCATATTTTCATCCAA  
CACGGAGTCTTACGAATAAGCCTCATGAAAAATTGATCAGTGGTTAGATCTGCTTTATCA  
ATCTTATCGATTGCTATCACGCCTTTCCATACGTACGGCCATAATGAATAGGGAGTCGT  
AAGGCAGCTTCATCGCGTACTAGTTTCATGTTAGAATTCAAATGAGAGATCTTTTCACAC  
TCATTTGTCTTACACTGTACTATAACGGAGTACAGTGACGCCATGACGCACATCCGCTTT  
AGTTTCGGGATCAGCATAGTCCCAGAGCTTAATCCAAATTGCCCTGAAACCATTCTTAACC  
GACTTTTTGAATCTGCTAATAAGGTTTCATGGAATACCCACTATTTTGGGAGAATAAATTG  
TGTATAGGGTGATTGATAGATAGCTGAGCCATCATCCGTCACGAACACAATTGAATATGA  
ATAAGAATATGGGCCTTCAGCTACTACAAGAATTTCCATTTTAACTTTATTAGCTCCAAT  
ACGAGCTAATTGGTTTTCTACTTGGAAATATCGATATTTAATAACAAGCTTTAATTTTATCTT  
ACGATCTTTAAATGTGATCGGAACTTCTACAAAGCCTGTATTAGATGTAATCGTCTTAAG  
TAGTTGATAGCCAACCTTTCTTACCCTTTGCGACTTCCCTCGAAGAAGTGCTCGGTAATATC  
AATAATACCAACCGACTCTCCAAGTTTACCAGCCAAGTAATCTTCAAGACGACTGCGCAT  
AACATTAATGTAGCTACAGCATCATTGCCATACGTGGTGGATTAAGAGTCCGACTAAT  
GAGTTCATCTGTTGGCGTTGACAAAACATTGATATCTTTCCATACGACTAGAGCAGGTAG  
TCCCATGGATTCAATTTTCTGTGCAATGGTTGCACGGTATGCGTTTGCCAAATTGATGAT  
ACCCAGTCTGGATTTTCAGTACCCAGTGCTTCTGTATGCATATTAATTAGTAACTGGAG  
ATACTCATCTGGCTCATTGTCCTTATATACACTGAAGGTTGCTTCAGAGATACGACGCC  
TAAAATTAATCAGCTTTAGCTAATTTATCTTTAGCAGTGTCTTTTGGTTTATGACCATA  
GTTATGCATACGACCTAAATTATAGGTGTAATAGAACCCATCTGGTTCTTCTCCAGAGTT  
AATGGCGAAGAGTAACCTACTTTCGAGGATAAGTGGATTAACAACCTTGTTTTTAAAGTTT  
GTTAATTTCTTCGCCTTTAACCGAAACCATCACTGGCTTATCATTATTCTGTCCCGAACC  
AAGCTTAGCATTAGCATCAGCTTTTTTCAATTACCAATGTCTCCGTTATGACCGCGGACCCA  
TTGGATGCTTAATGGTTTATTAGTTTCTTCCCATTTAGCTTTTAGTTCGACCATCTGTTT  
CCATAGGTCTGGTTTGCTACCGGTGTACCGTCTGATTTAATCCAATTGGACTTAATCCA  
TTTGGGTAAATATGCGGTCATACCTTTTCTAACGTATTCATCATCCATGAGCATCGTTAG  
TCTAGGTGCATCTGCTTCATGGGCTATTTTGAAGCCTCAATTGCAGCGGTTAGCTCACC  
TGTATTATTAGTAGGGTTATTAGTTACACTACCAATGCATCAATATAATTTAAAACAGT  
GCATGTCTCATCTGCACCTACATCTAAGTATCCCTTAGCTGTTGGTTGCTGTTTGGTGCC  
TGCTTTAGATTTCAATTGCAACATTTTCATAGGTATAACCATGAATACCCCAACCAGCTTT  
ACCCTGTCGGAATGATCCGTCAGTGTATAAAACCATACCGTCTGACATTATTGTTTCTC  
ATGTGATCGATTACTAAACTAGATAATAATTCTAGCAAGTAAATTAATCATCACACTTTG  
CACGCCATTCTTCATATGCTTGCTCAATTTTAGCGCGCTCAGATACAATATGTGACTTTA  
ATTCTTTTATATAGTCAGTCAACAAGATATCGATTTGTTCCGGAGTTTCTATAAACTCTG  
TAATAATCGGTGTTGGCGGTACCGGTTTCTTTCTTGGTAGTTTCGAAAACCATACACTTCT  
TACTAGTATCCTTACTATATTTTTTAGGTGTAGGCAGAACTTTTTGTATTACCTCTTCTT  
TAGTTGTAACAACAGATGTATGATCATCTGTAGAAGAGGAGTGCTCATATTGGACCACAG  
TCGTGTTGTGCGTGTGGTACTCATGTGGCGTATAAACACAGCCACTGATAAGTGGTAGGA  
GTATTAGAAAGAACTTTCTTGACATGTGATCCACCAATTTGGTACTTACTTTAGCAAGTC  
ATTTAAACGACGGCGGCGCTCAAGCATTTCAGCCTTCTCAGGCGTCATTTTCTTGAGTCG  
ATCCATTTCCGGCTTTAACGGCCAGTTGCTTGCTTTAACTGACTTCAACTCACTAGTCAC  
TATGAATAAGGTACCTAGTAATATTACAACCTAGGATTAACATTGCCGTGACATGTTTGT  
TTCCAGCAACACTTCTTAATTGTTCTATACCAAAGATAGCCCTCTTAAGGAATGGCCA  
AACGAAGAGCAAGGCTTTAATAGTCAAACCGAGCATGATGACCTCTGTTAGTACTATGCC  
TACCCATAAAAGCCAGTATTGGCATTCTATCAATAGACTGTTACAAGGGTATTACGTAA  
AGCTCATAATAACAGACTTTTTTATTTTAAACACAACCTAGAACAGACTGATTTTATAGATGG  
AAACCCATCGCGCTCTAATTATGAGGATTAATTCATGTACAACCTTGAAGGTTTTTACGA  
GTATCCTAGTCTCATTGATAATGCTACCGATAAAGTAGCAAAAATTTGGTGAGATCTCGGA  
TAACAGTGCAACCTATGCAAAAAGACAAGAAAATCCTGACCAGTGAGTCTACACCATCAAC  
GGCTTTTATTGCTTTTCATAGCGTAAGGGACGAAATTCCTGTTGACATTACAGCTGAGTA  
TCAGTTACAGGTTTTAAAGATTGGTGAGTTCCTACTGAAGCAAGGAAATTCAGGCACTAT  
TGAAAGAACACCACCCCAACTCAAGTTAACCAATGCTCATGACTGAGTTAATGGTAA

GCTAAGTACGGTGC GTTCTGGTCCTATTGGTAATATGAATACACGTTTATATTTACCAGA  
ATATATTGAATTTTCACTTATCGTTACAGGTAATGAACCCA ACTTAATTCGTGTTTGGTT  
AGCAGATGATGCATTTGCTGGTCAGTATGACGAATTTAAAATTGAGGTGGTTCACCCTAT  
TGGTAAGAATGCACAAGGTA ACTATGACGATTGGTTTAAAGGATCCTTTAGAAGTTAAGAA  
ACTTCTAGATAAATTTGATCTACCCACCAAACTTGAAGAAGTTCAAGCAAAAACGTGCACA  
GTATCCATATACGTATCAGAATGCTTATCGATTTGATTATCACAATCCACGTGATGATAC  
GATGCAATTCCCAGCTTATTGGATTGTGATTATTTACGGCGTTGCTGGTAACA ACTTAGA  
TATCATTAAAGATGCTATTTGTGATGAGTTATTAGATGGATCTGCCCATACCCGTGAGGA  
GTGGGAAAAGATTCTACCTGAACTTTTTTCGGACA ACTGAATTCATCATCTGTCCTTTTTG  
GAATCAATTAGCTTTAGAGAACTCAGATTTCCGAGGGCGGTATCTATAGTCCCATTATCGA  
TCCACGTAAAAGGATCGCTTTAATGCGTCG TACTGCACGCGGTAGTGGTTATACTACAAC  
TTACTTTGATAGTCACTATGAGTTAAGTTGCAATATTTATCGCTCTGTTGGTTTTAGTGT  
AATTGGTAATGCAAAGA ACCGTAATAATTTAACTCAGTTCTCTCAAGTATTCCCAGATTA  
CATAATTGCTACTAACACATCTGAAGACATTAACCGAATTAGTGTGAAACACGTGAATT  
CTTATTAGTCTTTGCTGATCTATTGAAAGCTGCTGAAGATATGGATCGTTACACTACAGT  
ACCAATGGGTATGTCACGAATGATTTCGCGATGATGTTATCTATGCTGCTAAAGTCTATAA  
GAATATTA ACTACATGGTTGTA ACTCGTAAGAGTGTAGAACAATTTGGTTAATGCATAAA  
TGAGAGAGGGCAAAGGCCCTCTCTTATATTAATCTAAAGGTGGCGCAATGCGTAGATTCA  
CTCTTAATCTGGCGGATAA CCCGCGTGGACAAGATCCACGAATAGGTTTCTTCAAAGCAG  
TTACAACAGCATATCCGGATTTAGGTTTATCTGAAGATAAGTCCATTATCGTAATGGTAA  
TGGATAGTGCAACTATCGATGAGCCTAATAGGGCATTGTTCGTATTCAAAAAGATGCAA  
CTAATAGTGCTGTTTATTACGACTTTCTTTATAATCGTTTTAATGTTAATGATTATATTA  
AAAATCCATATTGGACAGCATCGGAAGTAACGGTTGTTCAAGGATTA AAAAATAGCGAAG  
CTTTAGTTGCGTATGTTGCTAATAAAGCTAAATTAATTTTACTGCTAGTGACATATGGT  
TAGAAATATCTAATAAACGTATACCGGTGGTAAGAAACAACCAA ACTTTTTATTTAAAG  
CTATTGATTCATCACTATGGTGGAGAGGATGGTTAAATCTATGGTTACATTCAGGTGGTG  
ATGTTGACCCTGATCCGCCG GACCCAGATCCAGATCCTGATCCAGAACCAACAGATGGCT  
ATCAGATATTCCCGCAATTGCTTGTACCATTTACAATTACAGTTGATAATGAAACAGGTA  
AATTTGGTAATTGGATTTGTCCGCCTTATGATCAAGCTATAGGTAGGCTATTGGTACTAA  
TGCCTAAACCAGATGGTGCTCAAATAGCAGAGTCACCTAAAGGTGTTATACTACCTTCTG  
GCAATAGCGAGAACTTAAGGCTGGTGCTGAATATCGAATACTGAATTTAACTAATGAAG  
ATGTTGATATAGCTACTGCTTATCAACAGAGTATCATTAGGCCAATGTATAACAAGTACTG  
GTTTCTTACCTAATAATGGCTATACTCGATTTATCTGTTATAATGAAACA ACTAAAGCGA  
TGTATACACTTGGTCTGTCATGGTGGATGCAATCATGAGCGAATTCTGTTATATCTACCC  
ACCTATGAAAGTAATTGACACGTCTAAAGCAACTGGACGTAAGTTTGATATTGACTCAAC  
TTATCTTAATGCGCACATTATCGTTGAAGATCCTAATTATACTGATAATGATAATTCAGA  
TAGTCCATTTATAGTAAATTTACCAGCTACTGCCTATGATACTAAAAAAGGTAATATGT  
ATTTACTATTGCTAATAAGACAAATGGATTATTGGTGATTTCGTGCTTATGGTAATCGTTT  
AGTTGGTAACCGTGTATTCAAAGTTGACTGTCAATTAACA AAGGTGAGGCATGTGAATA  
TAGAACGGTTTATGATTCATTAGAAAATGAATTATACTGGTCTATCGAAGGACGTGTAAT  
GACGGATGTACAGGAGTAAATCATGGCAGATACATCAAAATGTGATAATTTCAATTCCTGG  
TGCATTTTACACAACAATAAATAAATATCCATTA AAAATGAAACACCCTCTTTATGGAGA  
TGATGTTATTTATAATCTGTTAGATGTTAAAGATTATTTTGATACTAACATTATCTTTAA  
AGAAGAAGATGGATATGTATCATCAACAACAACCTACATTTATTGGCACTGTTATTAA  
ATATAATACATCATTGCCAAATGGATTTACTTTTCGTATTGAGTTTCTATGAAAAAGATCC  
TATTAATGGCAAAGAGACTAGGGACTCATTAAAGTTTTTGGGCACAAGACAAAGATGGTAA  
ATTAGTTATACCTAGAGGTTTTCCATTTGAAGATGCTTCTGTGCGCGGTACGGTTGGACA  
ACGATTTATATTAGTCAGACCTAATGGCCAAACA ACTGGTGATTATATTTGGGTTTGTCC  
TGGTCAAGCATTTTAATTTAAAGCGGATCTGCTTTAAAGTGGATCCGCTATTATTTCTGC  
TTAAAGTAACTATAGTGCTCAATTGAATGAATAATTAACCTATTGGGGTCTATAATGGCT  
ACTGAGAAAAAATCTCTAATGATCCCACCAATTGGGACTAAAGGGCGTTATGAGTTAATT  
TCACCTTTTGACAACTCATAAAACCCAATACACTTTATGTCAATAGTGCTGTACGAGCA  
TTTATCGATATTGAGAATAATGGTAGAAATGTTTATGATACTTATTATAAACCATTAAAT  
ATTGATATATCGGAATACAATAAAGATCGTGAGAATGGTGAATATATTGTTACTCTCACG  
ACTGAACAATATAACCCGGTATATGTACCAAGCAGTTATATCGCACGTTATCCTGATTTG  
AACGGTGTGCCATACCAGCAA ACTGTTCTATCCGCATCACTAGGGGCTCTTCCAGTAACA  
TTAGACTTAACTAATCTACAAGCTAAAGTAGCCGGTGTTATTTCTGATGTGATTGGAGTA

GAACCTGTTATAAATCTTGGGTCAATGCCTCTTATGTCAGACGTGACACCACAACAACAC  
GAAGCAGCAGAAAATGCACGTGAAGCGAAAATCAAAGATCGTGAAACTGATTACGCTAGA  
ATTGTTAAGTTAGAAGCAGATAACACAAGTCTATCACAAAGGTTAGCAATTGCAGAGAAT  
CTTCTCATTGAGAATGGTATTATCTCCTAACACCTTATGAACTTTAATACTCCGGAGTT  
TTAAAATGGCTAAGAAAAAACAGTTCCCGCAATGGATTTCTTTGCAAGTCTTGAGCGCG  
TTTCTGATGCTGAAGATAAGAATGTCAATCTTGATGTTGGTAAAGAATTACCAGAACAAAT  
TAAAAGATGATGAAGATGGTAAAGTAAATCCATGTGATGAAGTTACCAATGTCGTTACCA  
ATACCCCAATTGACGTATGCAAAGGTCCAGATGTTGATGGAAGTCTGATAAGATCAATG  
ATAAGAAGATTCATGTTAGTCAAGGGCTAAAAGAATTCCAAGTAGCTAAAGGTGATCGTG  
TTGAAAATGAAATCACTGAAACAGCTGATGAAATGATCACTAAAGTAAGTGATACTAAAG  
ATCTTAATGTTAGTACCAAAAAACACACCAAATTGCAGATGTCCCATCGAATGAAGACA  
TTTCTATTATGGAAGCCAATGAGACTGAGCAGCTAGACCATGGCTATGATGCCACCGCAC  
TACTGGAACTACTGAAGATATCATCACTGGTGAAGTACTAGATGATCATCTAGAATCATTAT  
CAGTTGAAATGTTTACAATTGTAAATGAACTGACTAAAGTAGAATCTGTTCAAAGTGCAT  
TAGAAAATATATTGGTTTAGTTAGTAACCGCCATCATCGCGGGCATGATGTCGATCATG  
ATCTAGCTAAAGCTATTAGCATCGCGCTAGAGTCAATTTGACTATAAATATTTTAATAACA  
CTGTGCCATCAATGGAATCCTTTATATCACCGCTAACTCGGCCTAAAGCTTCTATTGAAG  
TATTAGATAATCTACAAGCTAAAGCAAAGAAGTATCTACTGTTGCATTAGATTTTATTAA  
AGAAGCTAATTCGCATTGTTGTAGAACTTATCAACGTATTCGCCAGAATGTCAGTAATC  
AAATAGAACGCGTTAATAAGATCATGAAACGCGTTAAAGAGAATGAACTACCCGATGAAG  
TTCGTAATTCGCAATTCACGCGATCTGATTCTAGGTGACACTGGTGAGAGTTGGGTTG  
GTGTAGACCCTGTTGAGGGGTTACTGTAATCCGTAATCTATTTGACAGCATTGAAAAGA  
ATGGACTGCGTGCTCTTAAAGCAGCCTTAGCTGGAAAAACAAGTATGATAAAGCACTGG  
CTTTAGCTAAAGGTATGTTTGAACAGCTACCAAAATTAATGCTAATGGTGTCCGATATG  
CTAGCCCGGTTGTGCCCGTAATCGTGTTTATACCTTTGGTAAAGACAAAGCTGCGGTAG  
ACTTCTCCATTCTTGATGCACCGGGTAAACCCAACTATGGAATTACTGTTGAACTATTAG  
TTGATAAGAATGTTGTTATGGCTCAGCTAAAAGCAGTTCATAACCTCCTAAATCATCTAA  
ATAATATTCGCGGTATCTCTAAAGAGTCAACTGCTGAAATCATTGCACAGATGACTGATA  
AAGAAGCAACCAATGTTGGTAAGGCTTATCTAACTGGCACCCTGAAGCTAGTAATGATC  
TGTTTAAATGTGTGATGATCTGGATCACCGTACTTGAGAACTAGTTGATAGTGAAATCA  
AGGAACTGAATAGGTAACATAATGTCCACATATGCAGAACTATTAATTACCAATAATG  
AACTCAAAGAGGCTATTGTTTCTGTTGAAGCATATCGCCATCGATTAGCTCGTTATCAAG  
ATCTGCTAGATGGACGTGACGTAGCATCTGAAGACCTGTCTAAAGCGATGTCATTTGCTT  
TAGAAAGTATCGATCCCGCCTTCTCCATAAAAAGAAGGCGGTATAATTACACTACGTGCTT  
TAAAAGATGCATTAGTTCGAGCTGCTAAGGCTGCACGAGATATTGTGCGGATGGTAATCG  
AAACACTCACGGCATTCTACGTCAAGTTTACTGGCAGTATTTACATGTGCGTAAAACAC  
AGCAAAAATTATCTAGGCGACTTGCAAACTAGGTAATCGTACGACTAATACTCGATTGA  
CTGTTTCTGGTTTACAGCGATTATCTATTAACGGTGAATTCATTGGTGATCGACCAGATA  
ATCTTTTAGATATCAAAGAAGTCACTAATTATTTTAATGACTTATCCTAAAATGACTT  
CTAATATTGCTCGAAATATTAGTAGACAAGCATTGAATATCTTAGATAATCAAGGCGAAG  
ATACCACTACAGAAATCATTGATGAGTTATTACAATCTTTTGCCGATATAGTGCGTCTGTG  
ATTTTAAAGCGCCGCCAGGGGATGAGCCATTAAAGAAAGGTGAGACTACTTCTACTGGTA  
CCCATAGAAGTTATATTTTACCAGCTAATCGTGCATTTGTTTATACTGATGCTGACCATA  
TAGCTACATCAGTTACTAATAAAACAATCTGCACTAGAAATGGTTCGCAATACATTTACAA  
TGGAATTTACAGAGTTACAAATCAATGCAATTGATAGCACTGAACGAGATATAGAAGTAC  
CTTCTGTAACCTACGCTAAGTGATATTGTAACCTGGTATTGCTAATATTTTAAACGATCGCTG  
AACGTGCTAAACAAGGCGAAGTAGAATATAAAACAGTTAAGGTAGTTGTAGATGATTCAA  
TTCGACAGCTAGCTGAACGTAGTGAGTTATTGGGAAGGGCAAATGGCGAGGCAATTAATA  
TGCTCGCTGAGATATCCCGAAAATTAGCAGAACCTGTTGGTAACTACACCCATTGGTTAG  
CAGTAACTCTTAAAGTCTGGTTAACATTTGTTAGTCACTGCATTACTCATTATGAGAATG  
AAGGTATTTAACAGCATAAGCCCTCCCATAGTGGGAGGGCATTATGTTCTTTAACTACCA  
CAAGTAAGATTAGGTCTACCAGTAGCTGTGTGTCCACAACCTAGCCATACTACCTTGCAA  
CACACAGGTATACCAGCAATAGCCATCTTTACTGAACCTTGAATCATCCTAGCTGAATCA  
TGCGGCGTCTACCATGACCTGCAACTGCGCAACCAATAACGGCAAATGGTTGACCTTTA  
TAAAACACTTAAACATTAGGACCAGGTAATATAACACCACCTGCGCTATCCATATTACAA  
ACAGCTATTCCAGGCATATTAACCTCTTAAAGTAAAGTCATAGCGTGGAGCAGTAAACAAC  
ATATTACCACCTGCTTTATGTGTCATAGTGCCACCAGCTTCCTGAATATGAGTACCCTT

GATTTGATAGTGGTATTGGTTGTATTAACCTTTAAATTCAGTCGGATTTAATTCTAATGTA  
GAACCACCTGATGTCAATTTGATATATTGATCTGCATTTAAATCAATAGCTTTCTTCTCT  
ACTTTCACAAAAGAATTATCAGCATTCAATTAACATCAGTCGTTTATCTTTAGAACTAAT  
TCAAACCTATTACCAATATCATCAAGTATATAGACTGCACCTGTACCTGTATTGATTTGT  
ACCGAGTAACGATAAGGTTACCATTTGGCTTTAGATGTCCCAATAGTTACGTGTTTATCA  
TGCGCTGAGAACTGCATGAAATAACATGTATCAAAATTTCTTACCGGCGCCACCAGGAGAT  
AAAGATGCATTAAGGTGTACACTACAGATTCTAATGTCTTAAATCATTGATAAACC  
ATCGACCGCCAATAGAATTGACTAGTATCACCTAACCTGTATATTGCAATTTTCTACCA  
CGCATTACATCAGGTGGCGTTGCACGGTTATCTTCATTAGGTAACCATATAACAAGGTATA  
TCACGCGATACACTAACTTTAGTAGTATATGCCCTACCATCGGCATCTACACCATCAACT  
ACTTCTTCAACAGGGTTGAATGTTGTTTCACCATCAGTAGCAGTTGCCGACTCAATAGGT  
AGTACCATTAGTGTAATGAATTACGTGGTTTATTTTCAGTAGCGCGTCCAATGCTCCAT  
AACCTAAATTTCTGATGTTTGTATTTCACTATCTTGCATATTTGATAAGAGTGACACAGCT  
TCGTCCATTATAAACTCCAATATTTACTAGGGTTATTAACCTCTATAGAGTAAGACATTAT  
TAAGGGTTAATCATGCAGATCAAGCTACTTAAGCTAATTGGCTATACTAGGTTGATGGCC  
AATAATACACATTATTTTGAATGGACTCCAAGCAAACAGATGATGGTTATACTTGGTAGT  
AATGGTTCTGGCAAATCATCTATTATTAGTGAACCTGACACCTGTTGTATCTAGCAGTTCA  
AACTTCAAGCAAGGTGGCGAGAAACATTTCCATTGTCATGCAAATGGTAAAGACTATAAA  
TTAATTTCTAAATATAACCGTGGCACTGGACATCATTCCTTTTTATGTAATGATGAAGAA  
TTAAATAGTGGTCATACCTTTAAAGAACAAGAAGAACTTGTAAATGGCGCATTTCGGGTTA  
AACCGAGAACTGCATGAAATGTTGACAGGTAAGATGCGTTTTACAAAGTTAAAACCTAAT  
GAACGTAAAGCATGGTTAACTAGAATGTCTGTAGTTAACCTTGATTATGCATTTAATGTT  
TATAACAAAGTACGTAAAGAATTATCTAACCAGCAAGGTACTGTTAAAACAATTAATAAG  
CGATTGGTCACAGAACACCATGGGGTATTGAATGATTCAGAAATGACACAGTTGAAAGAA  
GTGAAACAACGGTTAGTTAGTCGTATTGATTTACTTTATAAAACACGTGATAAGAAAGGT  
GTCCTTCATTTTAGAGATGAAACCACTGCACGTAAAGAATTAGATTCTATCTTAGATGAA  
GCTCGTTCATTGTTAATGTCATTTCCAATGTTACCTATTCAAGTTAAAGTAGATGGGTAT  
GAATCTTTCTTAGAACTAAATAATAAGAAGATTGAAGAATATAAATCTATAACAAGCAGTT  
ATTGCACGTTTAGTTGAAGAATTAGAAGAATTA AAAAGCTCTAATCCGAATACAGCTGAA  
CGTATGTCTCCAGAAGAAATACAAGA ACTTAAGGACAGACATGAACATCATACACGCATT  
GCTGAAGAAGCTATTAGTAAATATAAGAAGTATACCGGTAGATTTCTTTGGTTGACATT  
TCTGTTAACGGTGATCCATCTGGTAAACTTACTGATCTCTCAGATCGTTGGATCAA ACTT  
CTCACTACATTTCTAATAATGAGAATGGTTACTTAAGTAAAGAACTGCTATTA AAAAAT  
GCAGAAAGGCTAAAAGAATTA AAAAAGTAAATACTCAACCATGGAAGGCATGTATTTACAA  
ATTAATCAACGCCTAAATTCATTTAAGGAATGCGCATCTATTACTTGCCCATCATGCACT  
CATTCAATTAACCTGGTGTAGTGAACAAGATATCACAATAGCAGAAGAGCGCAAAGCT  
AAGTTAGATGAAGCGATGGATAGCTGTTCAAATGAGATCAAGGTTCTTGAACAGTACATG  
ACTGACTTCAATGAATATGTAAGTTATGTACATGGCTACGTTCAATTAACGAAAGAGTAT  
AACGAATTTGATACATTATGGA ACTATGTAGCTGAACATGTTCGTAATGTATCGCACACCA  
GCAAATATATAAATGATGCATTAGACTGGCGAGATGCAATGCAGCAACTCATTGTCTCT  
AAGCAAGCTCATGCGGAAGCTACTTTATTAGCTCAACGACTACGTGTTATTGCTGAGATG  
GATCAAGATGCATTAGGGTTCATTAAGGCACGTACA ACTGCACTAGAACTGAAATTAAT  
AATAAAACACATGTAGCAGCTGACTTACA AAGAAAAGCATCTCATTTCATAAAGCTGGT  
AATGCTATTCGTGAATGGGAAGATAAGTATCATTCTTTTATTGAACGATGGGAGCAGTTT  
ATTA AAAAAGATAGTGGATACAGCTGATAACTTTGTAGATAAGGCATACCAAGCAGAGATT  
GATGCTGTTAACTTAGAACTATCTAGTGTGCATAGTCGTTTAAAGTGAATGGAACGTCAT  
GAAGAACGTATTAAGTTTTAGAAATCAGAAGTTAACCATGCACAACAAATGGCTACTGAT  
TTAGCTATTCTTGAAAAGCATTATCACCAAAAAGTGGTATTCTTGGTCGCTATTTATTA  
GGTTTCTTACAAGGAGTAGTTAAACTAGTAAATGCATACATCAATGAGATTTGGACTTAT  
AGGTTAGAAGTATTACCTTCTAATGTTGACAAAGATGGCATGGATTATAAGTTCCCAATG  
CATATTGCAGGTGGTGACGTTTCAGCCACCGGACATTGAATACGGGTCTGACTCACAATTA  
GAGATTGTTGATTTTGCTTTTAGAATGGCTATCTTGAAATTTTTACATCTAGATGACATG  
CCCCTTTCTTAGATGAATTTAGCAGGACTTTTGATGAACAACATCGAGCCAATGCTATT  
CCATTCATTAACAGGTTAATTGAAAATGGCATTGTTAATCAAGTGTCTTCATCAGCCAC  
TTTGAATCAACACACGGTGCATTTAACCAAGCTGAATTTATTGTACTTGATCCAGCTAAT  
ATTAGTACTCCAGAAGTATTTAATAAAAATCTAGTATTA AAAATAATTATAAGCAACATAA  
GCCCTCCCGCAATGGGAGGGCATTATATTAGTAACTATCTTTATAAGTGCTATTAAGTGA

AACTTTCAAACCTCTTTTTATTTTTATCAGCCTCAACAAAGTCTTTACCAACTGATTG  
TGGTACACCAACTTTCTTAGCAAACCTTCTTATCATTGGCTACAGCAGCCATGAAGTTATG  
TTGTTTTTTACTTTTACTAGGCATCGTATATTCCTCTAAGTTTTCCAACTACACTAAA  
AATAATTAAGATATATATTACTACTATGCATACAATATCTTAAGAGGTTAATGACATGTT  
TAATCAACAATATAATCCAAATAGTTCAGCTAAGGTAATGGAGACATTACATGCCTGTGC  
TAACTTATTAAGGAAATGTTTTATTATAATGATCAATATGTTCAAGTAGAATCGGCTTA  
TACAGATGATCCAATCCAAGCATCCATTGAAACAGTAAATGATGGGTATTACAGATTAGT  
TATTCAAGACACCACACCAGATAGTACGTGGCCAGTGTGGGCAGTTGTTTTTATCAGACA  
ACGTGGTGGAGATATTAAGTGTCTCCATATTATCAATCGTATTACTGGAGTATCTGCAA  
TATAGATACGCAATTCAACTGTGATTCTTTTTACTCTGTTATTGATTTACTATTAGATCA  
TTATCGAGTATTAACCTTCGATGGAATACTGATATACATATTACCCTCTCCTTCGGGAGGG  
GGTTTATATCGCATTAAATTTTTTTATTACACTAAAAAAGTTTAAGATCTATATTACAGA  
CATGTATCTATATTGGATACTTATTA AAACTTAATGATTAGGAAAATAGAAAATGAAAGT  
ACTAAAGATCGCAGCTGCAATTATCTCAACTGGTGCCCTCGCTGTTGCCGCTATTAATCT  
ATATAAGGCCGTTTCTAAATCAACCGTTATTGATGACACCGTAGCTGATGATGATACGGT  
ACTAGACAGTGAAGTAGATATTCTAACTGATGAGCTAGATAAAAATCGATATTGATGATAG  
TGCTCAACAAGTCGATTAATAAATAGGGTTATCGCTAATGGCGGCATTCACTTTAGCAA  
CTTAATGGGTGAGCTAAAGAAGAGTTCGTCATTGACTTATTCAACGATGGAAAGGTCAA  
GGCAGAACTCTATCCAGCTCATATGACATATATGGGTAGTGTGGTTGACTTACATCGTGT  
AGGCGATACATTCAGCTTCTATGTTGCAGATGGACATGGAGGCGTCACACGCTATCCATG  
TAGTAATCAGATTCTTGAATCGATAACATTAGAACCAGATGTTTATTATAAGTTAACTGG  
TAAAAAAGTTATTGAGAAAAGAATTGAATTACCAGCTGTTACAGTACCAATTGAAGAACC  
CGCTAAGCGCATGCCGCTGGAAACAATCACATCAGTTGCTGTTATTGGCGGGTTTATTTT  
GTACGTTGGTACACGGTTTTATAAAGCATGTAAAAAATTAATAACGGTCATGCAGT  
ATACTTTAGGTACAATAACCCTAGAGGAACTGCAATGGCCGTATTAGACCGTCAATTTA  
ATATTCGTTTAAATGGTGCTGATTTAGATAAAACAAAAGCGAATTATTAAAGAAATTTATA  
CCAGGATTGCAAATGTGAATAACACAGTAATCAATGGTACTACTGTAAGACTGATTTTAT  
TTGTTAAAGCTAATGGCCAAGTGGCTACTGGAAGCGATGCTATTA AACTAATCAACGATG  
CAGAACTAATCTACAGGCGTGGGTTCTTTCTAATCGCTTTATCTTTAAATGGATGTTTA  
GCCATGCTAGTGATTTTGGTGCAATCTCTTCCAATTTTGAAGAAGTTTCACCAGGTGTTT  
ATGATTGGAGTAAACGCCGTAGCTTTAATAAAGAATTTGATGATGAGCTAGCTAAAGCAA  
AAGAACGAAA ACTAATTCGTCAAATAAACCTACTCTATTTAAACTATTAAGAAAGTAG  
GTAAAGCTGCATATGAAACTATTTAGATAACTCAACTGCAATCGTAAGTTTAACTGCTA  
TTGGACTATTAGCTCTTAAAGTAACATCTGATCATAATCAAGTTATTAACCAAATGAATG  
TTATTAAGAAATCAATTGGTAATATTGAGCTACCACCTGTTGAAGTAATCGTAAATACAG  
TTGGTGATGATTAGATATCGATTTGTATTAAGTGCATAACGCCCTCCCATTACGGGAGG  
GCTATATGTCGTTAATATCAATCGTTTTCTAATCTTTTTCTCGCGCAGCATCCATCCGC  
TCCATAAATGCATTGGATTCCTCCATGATGATACCGATTTACAGTTTCACCTTCTTCAATA  
GTGTAATTCTCAAATTCCTCATCAGGAATATCTGGAATCTCACGTGGTGTGTCAGGGACA  
TCATTCCGATCACGTATTAATGGATTACGGTTCAATTTGCATCTTAACGAATTCAGCAAAG  
CCTTCAGCAAGTTCACGGTTAGAGCGTGCACCCTCAGAATCAACTTGAATACGACGGTTA  
GCAATTGTTGCTTATCCATTGAATCTGTTAATTTAAGAATCATATCAACTGATTCTTTA  
TCAGTAGGTACTTTACCAGTTGATTTTCTAATACAGCTTTTAGTACTTTCTCTTTAACT  
GATTGTGTATACCGTATCTGCTGCTCATATTCTAGATCAGCATATACTTTTCTTCTGTA  
GTTGATGATTTCTTTTCTAAAGGCTCATCAGATAAATCTGCACCATGGAACATTTTATTA  
TCTCTAATTAGTAATAGTAATACCTAACATACTTACCATATGCTAAGTATCTGAAAAAT  
AGGTCCTATATCATGTTTAAAGAACTTATTCAATATTTCCGGGGCTTCCAAAAGGAAGTT  
GGTAAAGAACA ACTTCTAACTGAATTAGAACGGATAGATAAAGATATTATTTACGGTGAA  
GAACGATTA AAAAGCTATTAATAATTTCTGGCAATTAATTAATCTGGATGAATTA AAAACT  
CTGACCATCAGGAAGATGATAGGTGTTCTGTCTATCTAAGACATTACAGTATTGGTTAT  
TTATTAGATGCTCTAACTAGGTTAAATGATCATATTGCAAATGAAGATGATCTAAAGATT  
AGTGAAATGTGTCGTA CTGAGTTTATCGACAGGAAATCAATTGACCTTGATGAATATTTT  
ATAAACAGTAATGATAGTTTTATTGATGTATGTAATCTATTGAAACTATGCGTGACTTA  
ATTTGGCAACAACTGAATATCTTGAACAGATTAACCATCAAGCATATCAGCGCCAGATG  
GATAGAATGTACTATGATATTATTGAACTATCAAGAGCAATTATTAAGTTACTATGAGGT  
GCAGACTATA CAAGTATAAATTAATAAAGTGTGTTTATTATCAATTCACCGTAGGTGT  
AAAAAAGATGGAATCTGTAAAAGACTTATTAAGCGATCCTCAAAAAGGATTAAGGCAGGC

AGAAGGGGTTTTGTGTTATGTTTTCCGGGAAGTACTACTGTGGCGTAATATGACACAGTT  
TGCTTGGGATAAACGTTTGAATGCATACTTTCAAAAACCCACATAACAAGAATAACCCAGA  
TAAAGGTAATCTTAATAAAGCACTTAAAGCTGATACAATGAGTTGGGATGGCTTTAAGAA  
AGCTATTGATTTCTTATCACCTGTAAAGCAACATTAGAGGTACGTCTGATTTGGGGTAC  
ATCAAAACCTGATTCAGTTTATACGATCAATATCGATCCAACCTGAAGATGAGGTAACCTG  
CTCTGCAAATGATTTCCCCTATGAAGAATGTGAAATTTTTAAGAATCAAAAACCCAGCTAC  
AACTACAATGGCCCATCTGTATAGGCATATTCTCTGGAAAGAAGGAATTAACCAGGAGAA  
GTGGGATAAGCTATGGGAAGAGTTTTTAAATAATCCAGTCAACCTTGTAGGATTGGATAA  
AAAGAACTTACCTCATTGGCTAATACACAAAGGCGTGGTTTACTATCGCCCAATATGTC  
TTGGAATACATTAAGACGTGGATTCCACTACTACGGCCTAAAGAGGAGAGATACACTCT  
TTCTCTACAATGGACTGATGATCCTAATCTTCGAGATAAACTAGAGGACAGTGTGCATAT  
TGTTCTGTACCTGATCCTCATTGGGTGGAGCCTAATTCAAATGAATAATCCAGAAACCC  
CATGGGTACAAAATAATTATCCTGTAGATAGCATCATTGTAGATCAGAGCGGTAATACAC  
CGCTCCCTGATCTATTTTCAGTTTAAATGGAAAAGAGAAGAAGACCACACTTGATAATGAGA  
ATTTCTTTTCATTCAAAGGTCTTCGGATGTATCTCATCACTGGTAAAAAAGAAAAGGCTT  
TTCTTCAACCAGAGGTTAATTCCCATTATAAATTAGACTATGGTTTAAAGTATCAATACG  
TAGATGGACTTACCAATATCCTTCGTGATACCCTATTATTAATCTTAATAGTCGACCAT  
TCGTTTTATTTAAAGCAAAAAGTTTTGGTCCATTAGTTTTATCAGGAGCAAACCTAACCA  
TTCAAGAAAAAGAATGGTTTGAAATTGTTTGTGATGTTATTAATCAATCAAACAGAGAT  
AACTTAATGCATACTGAACATAGCCTTAAAATCAGTAAAAAGATTAACCTTCTTGTGCAA  
GTAGAAGCACGTATTAATGAACATATCAGCAAAGACAAAATATGTCAATTGATCAATTC  
TCAAAAGAATTTTTCAATGAATCACCTGATGTAGTTAAACAAGCTATCACTGAGCTATAT  
ACAACATATCCATTCCAAGATGAACTAATCCAAAACGGCAAAACCTTCGTTTAGCTATA  
TTTATCCACGATAATGATGTTAGTTGGATTAGTTCAATTCTAGGCGTAGATGAATTTAAT  
AATGTTTTAAGGCACGCAGATATTTTTTATAATTATGTTAGTAGTTGCGGAGACTGTTGTT  
CAGCGTAATTATTATGCGTCTTTACCAGATTACCGTGGCTACATGTATGCTATCTATGAA  
GAGGCATTCAACCGCGTTGCCCACTAGTCAATAAGTATTTAGATATTGATGCACATGAC  
AGTGTTTCATTTTTAGAAAACACCCCATGTTCTACCAAAAAAGAGTGTATCTATTAAGAT  
ATTATTGATCCATTTGGTCCATATAAACCTAATTACTGTATTAGTGATATTTATAGTGCA  
CAAGCTACACAAGTAACAGAAAATACATATATCGCAGTTAATACATTTATCCGTAAGT  
GTATATGAAAGACTATGTGCTGAAGGCGATACTGTAGATAAGATTGTTATTTTCAGATAAA  
CAAAGTATTATTAATGATGAGGATTATATTAACACTAGTCCAAGATAAGATTAATGCATTC  
CATAAAGAAATGGTAGATAATGATTTTATACTTTATGCGCCGTTAATATGTCCAGGTTA  
ATTTATGTAATGAAGGCTAAATATCCGATTAAAGTTACTATTAGTTGTAAGGGATTCAAG  
CATATTGGAAAATTTATTGCTTATAAAAAATAGTAGTTTTTAATATTGGGGCTTGATATT  
CCTTTGGGGTATCTGGCCCAATCTTATAGATTATTTTTTTTTGTTGGAGACTACCATGGT  
TGATTTTGCATTACCTTCATTTATAGGTACAGGTAAAGACGAAGTTGCTAAGATCGACGC  
ATATACCGAAGTGTCTTCGGATGTGCGAAATTCCTTAGTATCAGGTATTTCGAATTTTGA  
ACAAGGTTTTAGCGGTATCCTTAATCGGACTCTTAAAGCTGTTTCGTGGTATTGGTGACTT  
AATCCCATCAGATGGGATTAATCTAGCAGATGCTTCACGACGTATTCAAGGTGCTTTAAA  
AGGCTCTAGATCGGATTTACAGAATATTGCCCAAAGCTTAGAGAACATTATATTCGGTGA  
GCTAACTGGATCAAATGGTGGTCCAGGGTATGTACAGCAAGCTACTCGAATGGCCAATGA  
AGTAAAGATGATCATTAAATGGAGTGGACGTTTATAAACAAAACAGTAATTATCAGAATAT  
GTCTTCTATTCTTAGTTTCTTAGAAGACATGTCTGGTTCTAACGCCATTATTAAGTTCTT  
TGATTTAGGGGCCGAGGCAGCCGTTTTAAGAGGGGTATTACAAGAAGTAGCACAAATGGGG  
TATCCCTGACCTAATCGACGATACATTCGGCGCTACAAAGCGTTATGATGGGTCAGGTAA  
CTGGGTTGGATATGATTACAAGTATAATGATGATTTTAGATTCACATTAACCTAAACGTAC  
CGCTGACTCATTGGGTAATAAATTGACCTAGATGTAATTGATCGAATAATTACACACTC  
TGGAGCTGAGGCACTTACTGCCGATGTACCAGATTATCCAAATAGGATAATTGCTAATTA  
TGTATTTCTGAAGGTACAAAACCTGAGGACTATCCAACCTATTTTAAGTAAGTTAGTAAG  
TATCATGGACAAGCTAAAACCAGATTGGTTTTGGACATTACGTAATACTCAAAAAGTATT  
TAATTTCCGGTGTACTGCAAACAGCCTCTGACGATGCTACTACACTGTTTCTAAGTAATGA  
TACATATAGGACACCTATGCTTGTGGCACCCTTTTATAAGCCAGCTCAAGCATTAGAGTT  
ATTTAGGGATATGTATCCAATGATCGCTATTCCAACATGACAGCATAAGCCCTCCCATTA  
CGGGAGGGCATTATGTCTTTTTTTTTATTTTTAACGCATGAAGCCAGGGCGCCTATGTTTA  
ACTGGTGAAATATCCAGCCAAGACTTTTCGCTAGATCTGTACATTGGTGATATCAGAA  
CATTCAAAACCCATGTTAATTTGACGTTACGTTACGCTGTACCTGATATAGAGTATCA

GGCGTGATAACCATTAATTGATCTTCATAGTTCTCTAATGCAGGGGAATTCCATTTATTA  
GCACCGTAAATACCACCTTCCCCAACCATATCCCAAGTTGAAATCTCACGGGTATATTTG  
ATACCGCGCATAGGATCATCTTGAGTTATTGACCTTACCGAGCAATAAGTATTCTGAGAA  
GGATTGGTAATAGATGCTTCGAAGTACTTACCAAAGGACCGTATGGTTTGCATTTGCCA  
AGTACTAGTTAATAGGAAGACCTTTCTCATCTGTAGAATCAACCAGAATAAGTTCCTTA  
ATATGCGCACACACGATCATCATCGATTTGACGAATTCGCATTAGGTACTCATGTTCA  
TTCATCCGTGTGCCATCTTTACGATAGGGTTCAGGGTGTGGTATTCCATGAATAGAACA  
CCTTTTTAAACACGGCGCATTAAAGGTGAGTCTGGATTAACATAGATACGCCGGATGCC  
ATTTCATAGAACATACCAGCTGAATTTCCGGGTACCATAAGCTCCTAGTGGAGTTAGATAG  
TAACCATCCGCATCAGGTAATAACACCTTTTTTATTAGTACCGGCTAACATATCACTG  
CCGATAACTACTTGGTTATTAGTACGCTGTTGCAAACCAGAAAAATTAGAATATGGTTGC  
ATAACGCAACTCCTTAGGTCCTGAGGAGTTCTTCAATAAGCTCTACTGACTCAGATGGGT  
TAACAAGTGCTGATGTGATACCTTGATCAAAAATAAGCCCCATTGAGTTTTGATGTTGTGT  
CTGAAGTATTCCAGATAACTGAACGGAATGGTACGTCGACTGGTGGATTATCCACGATAT  
CACTGTGTCTAGTTAACACATGTCGATATAGTTGTGATATATCATCCGAGGCACGCTGAG  
TGGTTGAAATAATAAGTTGTAATGTAGGCCATCCACCAAGGTTAACACCAGCGTGTAAT  
TAGCTGTCTCAAATAATTTGGCTTTGTCATAATAGTTAATATACCAAGGGAAGTTTCCTT  
TGTTAATTAACTCATCATAGACATAGTAAGTTAATGTATCATTAAACAATAAGTAAGTAT  
TCTGGAAAATCTTACTACCTTTATCAAAAATGAAATTCTAGATAAACTTCACCATTGATGT  
GGACGCGTTCAGTAGAGATTGGATTTATCCGCATCATTGCAATGGTATTATTTACTGCGT  
AATATTCATCATTAAAAATAATAGGAAATATACCAATAGTGAATACTTCACTACCAATAA  
CAGCTAGATGTCTTCTGTAAATCTTTCTGGAATCTGTATTTTACATGGGGCATTAGTTA  
CTACTGAATTATCTTCTAAATCAGTTAGATGACTGTGGACCCGTTCTGGATCCCGTCGAA  
GAGAACGTACGTCCATTATCATGTCCTAATTGTTTCAATTTATGTAAAGATTAAAATACTTA  
ATCAAAAATCATGCACCTTTAAATATTCGCTGTATTACTCCGGTATCCTTCCAAATACCGG  
AGTTTATCATCGATTGCATGTTTTAATGATTATTAACCATTAAGATAATTTAATTAGAAA  
CTTCTTCTTCGATTTCAACATCATCTAAAGTTTCAGTGCTATCATCTTCTACAGTTTCAA  
TAACTTCTTTTACTGGTAGTTTTGCATAAGGATCAACAACACCAGTGAACCGCTCAACTT  
TAATCTGTTGAGACAGCCATGCTGCCATTAGTGAATTAGTGATTGTGTATTGAGTTCAC  
GTAGAGTGGCCTCAGGATACATTTGACTAAATTCATCAACTGCTAGCAGATATTGCCAGT  
AAACATTTTCTGTAAAGAATGTTTTACAGATAAGTTTACCAAAGGTGATATAAGGATTCT  
TAAGATCTTCAGTCGTCATCGTACTCATTGCTTCTTTAATACGATATTTCGAGTTCATTAA  
CATGGCGATCTTTAAGTTCAGTATTAATGACACCATCCATAAATGATTCATGAATGTCAT  
TGCGTAGTTTACGTAAACCTTTATCCATAGCCGATTGTTTAAATCAGCGGATAACTGATA  
GCCAACGTTGAATAAACTGTTCTGAGTTATTAAGAATCTGTTCTAGGTAAATGTTATTAC  
TACCTGCTACAGCTGCACCAAGGATAGCTTGGATGTCACCACCGGCTAATTCAAATTGAG  
GTGCAACATCACCATTAATGATTACTTTGCAACGAGAATTAGCAACTACATTATTAGCTT  
CTGAGGCTAGGATGAGTAGACCCGCATCACGATCAGCTTGACGACGTTTATAAGCACGCT  
TGAGATAGAATCCAAACATCTCATGTAGTTTACGAATAGTTAGTGACCATGTTTCTAGGT  
CAACATCACTCTCGCCAATAACTTCAACCGGGTTATCGATGTAGTGACCGCAAATCATGT  
AAGCCAGAGCTAGTGAATCAACAGTGAATGGGAAGGACCTACCCACAACATATTCAAGTT  
CACCTGGAATGAGAAGACGACCATCATTGAAGATAGAATTCCACACACCTTCAATAACAG  
CGGCACTATTAGGAATAGATAGTAGCCATTCTTCAACTTCAGTTTGTATCTAGATGCGGAT  
TACCCATTGACACTAACCGAATAATTTCAATTAGCATCAATTGATTCTAGAATAAAGGTAC  
GATACTCAGGTAGCGGCTGTAAATTATTGTATCGTGTACTAACGTGTGCAGTTAAGCGGG  
GATCACTATGAACTGCATTATAGTGGTAGAATGTAGCGCTTACATCTGGTTGACAACATA  
TGCTTTGACGCTCATTAAAAACACGTACCATATATTCAATTGCAGGGCAAATAACATTCT  
GCGTATTGAATTGGATCTTTTGTAAATGATGAGCAGACATGTGCAATCAGAGCTTCTTGCT  
CTTCTTCTACACTAACAGGTTGCTCTTGGTTAGCTTCTCAGAAGAACTTCTTACAGATG  
CTTCCAGCTCTTCAGAGAGGGCAACTTTATTAGAGTTGCCATCTACACTGAAACCATCTG  
CAAAGACCGCAAGGGGATATGTTTCATTAGGGATAACTAGAACAAGGTTATCCTCAGTTA  
GACTACGTGCTGAGCCAACAATCGCAGCTTGGGTTTCTTTACAGAACATTTTAACTCC  
TTAGATATTGAGGTTCTTCAATTAAGCGAGCGTTTAAAGCTGCTGCAATATCAGCCTCAGT  
TAAAACTCCCCATTACAGAGATGGGGAGCTGGTGGTGCCACCAAGCGATTGTAGAATTGC  
TTGAGTACCTAGTTTAAACAGCAGCATGAAGAACAGCAATGTTCTGACCATGTGCTACATT  
ATTACTTAGCTTTTGCATTAGTGTTCCTCTATATACAGCTACAAGATGTTTTCCAGCTG  
CCCACAAGATACCAGTTGTTGTAGCAATGATTTTAGGAGATAGAACCATTTCGTTCTTCTA

CCGATGTATTACCGAATAGTAGATCAATATTACGGCCATCTTCAGTTTCATTACGTCCAG  
TCATTACACGGGAGAATACCGTTTTTCATCTGGTTAGCTACTACGCCTTTATCTCCAACAC  
CACATGGGATATCATGATCGATATACACTCGAATAATCATGTGGTCATATTCTAAGGCTC  
GTCCTTTCACTCGATAGTTAGCATCTACTTGTCCAGTGAAAGTAGGTTCTTTCAATGATT  
TAGCTCGTTCAGCGCGTTGTTTATCTGACGTATTAGCTAATGCTTGTAACCTTGGTGTCA  
TATCGTCTATTTACCATGATAGAAGCATTCAATCTTTGATACTGTACCTACGAGCTTAG  
CACGTGGCGAATATGCTGATAGTTTGCCTAATGTCTCAATAGATGCCTCGTCATATAGTG  
AGTGAGCAGCTGTTTCAGGATCTTCAATTATACATAGAATTGAATTTAAGTCGACATGAT  
CCCCAACTTTACCATAATCTCGAATAGTCTGATCAAACCTAACATCGATATTCTTGATTG  
CAGTTGTTTGAGTATTTAACCTTTTAGCTAGGTCTTCAGAAATAACTGAACCGTCTTCTA  
AAGTGTCAAGGTTATCATCAAATGCTACAACAGCCATACAACCGGCTTTCCATAATACTT  
GCCAGGGCTATACCTATCTTCAGAGAAATAACGTTTGTTATATGTGATAGTATCTCCAC  
GTTTAAACTTATCACCTTTCTTTAATGAGGTAACAAGAATGTGTGGATAGTTAACACCAG  
CTGCTGTGCCATGAACTGTACCTAATTGATATCCAAATACATTACCATCGGCATATTTAA  
CTTGGATACCATATTCATCAATAGCTACAACCTCACCATCTTGTTCTGCTGCTACAGCAA  
AGATAGAACTAGTCCTTTGGGCTATGATTTGTTTCATAGCCTGTACGAACTGGTGTAACTG  
TATACCCATCAGCATAAATACCTTGCTGCTGCTGAATTGAGATAAAGTTAATTGCTTAG  
GGTCATCATGTTTCGGTTGCAACACCAAGCAGTGCCTAGTTGAGAGTAGTCTAGCTGGCC  
CATCTGTCTTTGGATCAAACATACGCGTAACACCACGCATGTTTACAAAGTTAGCATCAG  
GTACTAAGTAAGCAATAACACCAACGTCACCTGAGTCCACAGTTGATTACTAACCACAC  
CAACATCCGCTTCACCGTAAATACGTGTACGTGCAACCATTGAAGTTGGACCGCGTCCAC  
CATCTCCACGATAAGTCATCGCTTCTTGTTACGGATATTTGCAATGGGGTTAGAATCTT  
CAATAGTGGCTACTGTCGGATCTTGTACAATCTTGCGCCAGATCACGTGTGGATCTAACT  
CGACAGTTTGCCTGACCCACCATTACGCATATTAATAACACGTACCGCTCTATTGAGTT  
CATTAAAAATAGCCCCTGCCATGCGCTCATAACCACGATAGCGCATATATGCACCATCTA  
CTTCTGCTGGACTCCAGTCGTTGTTAATAACTCGACAGACCGATAAAGCAATCCTTCAA  
AAGTAGTTGGTTCACCCATCTCCTTGAGTAGACCCTCAGTGATTGGATCGACCCATGCTG  
AGAAGAGTGTATCAATATCACGTGTAAATCTATTACTTAATCCAGCTTCTTCAAGAACC  
TGAAGTAAACATCTCGTTTATTGAAATCATAAACAGAATAACGCCGAGTGATTTATGAT  
AACGTTTGAGTCCACTTAATACAAGCATTGCTTTATAATCAGCTCGATCAAATACTAGGA  
TCTCATCAGCGAACGCTAATGTATAATCCGTAATTTGACAACAATCCTGGTACCACGCT  
GATGACGCTGATAATTAACATTCAACTTCTTAAGTAGATTGTTTAAGCCATGGTGATATG  
CTAAAATGAAACCTAATGGTAGCTCTTTACCACCAATTGACATTAGAATAGCTTCTAACG  
GCGCTTTGGTTAGATCTAAGCCAAGTATATCTGTAATGGTACCAATAGGTTCTAGCTCAT  
TACCTGTTTTTCATGTAAAAGATGGAATTCTTATCTAACAAGATAGCATCAGTGCCATTGA  
ACCCACCATATCAAATCATCAGTTTCATAATCTTCGATATGTAATCCTTGTTTTGCAA  
AGAATTCATTACGATCTTTGAAATTAATAAGAACACATTACGGTGATTATGGAAGCCTT  
TAAAAGCTGTTCTAAAGTAGTGTACACCCTTGGTAGAACATAGTTGGATTGATCTAATT  
CAGCATAGGTAACCTGAATGTACAGACATATCACTTCCATCTAATGCACGGTTGGTAATCG  
CTCTGATTAACCAATTATCAAAGTTGTTTTACGCACGTTTCAGATCTGGTCACAAAGGTCT  
TATTATAATAAGAGGTCAATGCAACTTTACGTGGATTAACCTTTACGAATTGGAATATCAG  
CACGTTGTAAACGTTGGCGATATGTTACCCCATAGACATGAACCTACCGTCATTATCAA  
TGACAGGGATACGGAACATTACTTGTGAACTTCTACCACGAATAGGCTTTAATGTAACCT  
TGTGGATTTGGTAATGGTTACCAGAATCGCGTACAGTTTCAATTTTGTAATTAGTTACTG  
ATACGCCTTGTTTCTGAACAGATAACACACTGTTTAAAATATCTTTCTTTAATAAGACCT  
TGTTGATTTGCGTTGGATGGCTTTTAACTTACTACCCAACATTGATTTATCAACAATGG  
TTGGCTTATCTTCAAAGTGGTGTCTTCTGGAATCTTAAGATCATCTGGATGATATTCCA  
TCGCCTCAGCGATCGTCATAGGTTCTACTGATTCATCATTAGGATCGGTAAATGGATCAG  
GTAGACGACGATAATAATCGAATCTTCTTGAGCTTGCTCGAATGTATTTCGCAGAAATCA  
TATTCACGCGATACATGTCGTATGCTTTAGCTCTAATGGCATCGATTAGTTTATCTTCTT  
CATCAACTTCAGTATTGATGAATAACTCATCTTCTGGTACATCTGTTACAATGAGTTCCT  
TCTCTTCTTTAATTTGGCGAGAAGGTGAAGATTCCAGTGGATCTTTTTCAATGATAAGCT  
TTGTTACCTCAAGATCACTTTCTGGTGGTGGGGTATATGTTACCTCAATTGCGCCAATAT  
CAATTAAGTTAGTTAAGTTGGTTGGGTCAAATTGAACATCATCAATAACATCAACTTCAG  
TACTTCTTCTTCAACGTTATTAGACTCAACATCCTCAACCTCTTCTGCTTCACCTTCTT  
CATAACTAACCGGAGTTTCTTCATCAACAATAATATCTTCATTAAAGATAGGCGTATCTT  
CTTTAATTAATGAAGTATTACCTTGGTTATATTCAACCATCGCTGATACTAGTGAATAA



GGCGCCTAGCTATTTGCTGGGTATCATAACCTTTATCATCTTTAATTTCTGGATCACGAC  
GCCATTGATCAAGCATCCCTAAGTTAATAACAAAGAATGAACCTTTGTACACGGAATAAAA  
GATTAATGTTACCGTAATACTTAGCATCGATGACATTCATGAAAGAACTTTCACGATCAT  
CAGAAACCCAGCGAACTAAATCAAATATATTTAGAATATCAGGTGTATTGAATTGATTAG  
CTAGATCTTGAGTTAAACCCCTCGTAGTTTATTA AAAAGAAGAAGGAGGTGGAACCTA  
CAGGTAAGTGTACATCAATGAACTGGTTCACACCAGGAAAACGTTACATGCAGCCGCTA  
CGCCACTCCAGAATGTACGCATGTCATTTGACCAACGGAACCATGTAGCTTTATAAGAAG  
CCATATAATTCCATTGAGGGTTAATTA AATTATAATTCATTACCAGAATGTTCTGGTTTG  
ATAATTTAAAACCGGTATCACTGCGTAAAGGTTTAAAGAAAACGGTTCGCGGCGAAACT  
CTTGAATCATTGTTGCTGGGATATTTGAAGTCCTACGTGGATTACCTTCAAATGTAAGCA  
TATCAGTAACATGCTCAATATATACTTTACCTTGATGTTTGGAGAATAATGGGTCTGTTT  
GACTAGGACCCATTACTGCATTATTACCATCGAAGAAGTATAAATGGATTTCGAAAGGTA  
GATCAAGTTTATTTAGAGCATGCAACTTAGGTGACTGAAGTTTAGCATATTCGCGTACAC  
TATAATTTTTTCAGAACTGTGTAATATTTAAGCGCATGATTAATCCCTTTGTTTGGGTTT  
CCCAGTCATGTACCGAAGAGTTAAATTGAGTGTATGGACACCAACACTAAATGCCAGTCG  
ACCATCGGCATGTATATATGCAATACGTTTCTTAAAGAAAGCATCTGTTTCAGCGATAGC  
TTCCTCTGAATAAACTGCGTTAAATGATACAGTGTCCCGTCGAACGTTATGTTTCAAGTAT  
CAGTCGTTAATTGATACCCGCACCATTACGTGCAGCTCTAGCTCTCGCTAGAAGACCAGA  
CTATATCTTCACCTACAGCATTATCTGTTTAGGTGCTCTCCATTTTCGAGTCACTTGACCC  
TACGGGGCGCAACCCCTAGTCGTTGAACGTTCCACATATTACAGTTAAGTAACTTAGCG  
GCTTCGCTGCTGATTGTCTCTACCTAATCATTTC AACATTCGCACTTACTGTTTCCAG  
TTATGCTGTAGTTGATTAGTTTAAACGAGAGTTTCCAGCAATTA AAAGAGTAAAACATATT  
CATTTCCGGAATATGTGGACTTATGTATTTTACTGCATAATTTCTAAAATACAACCATGT  
TCAGATTTTCTTAGATGATAACCTAAGCAACCTGGTGTGACATTGAAAAACTCAGCAGCT  
TCCTTCAGTGAGTTTTTTTATTAATACAGCTTCAGATTCTAATGATTCAATATGAATTCTA  
CGATGGGTTTCCACATATACGAGATTATCATTATTCCATGGCGTATCGTCATCTTCGTAT  
TTAAACTGTAATGACTGATTGTAACAAGATTACTATTTTATAGTTAAACGTAATCTTAAA  
GTTTCACCATCTACACCAATTTCTCGGGCGCAGTGTCTATGCTGTAATAACGAGTTATA  
TTGGTAGTTATAAGGTCTCTGACCAAACTGCTTTGGAATTATGAAGTCCATTGATATGC  
GCATGTTTCGCAATTTCTTTTACGGGTAGCCATTCAAGGTTTGTTAAATCATTACAATCT  
TTAATTGTATTTAAATGATTCACATCGAGTGAATCAACATTACCTGGATATTTTAAAGAAA  
GCTAGACTAAGAAGACGGTGCATTCTTACAATTGTACGTTTACCTACATCCGGCTGAACA  
CCATACATCAGATAACCATCTTCATTCATGTATGGTGAAAGATGATTACTGTAAACAGTG  
CTAAGTACTTGTCCAGCGGATTAATCATGTATCTACTATATCCGGGAATATAACAGTAT  
TCTTTTATTAATGGATGAGTAAGTTCGCCTTCAGGACACGCCCAAATAAAATTAGTTAGG  
CGATGATTACTTTTATTACCGTCTTTGTAATAACGCGTAGTTTATGTAGTAACCGCATT  
GGTAATATGCAGTTTCTATACGTAACACCTAATACAACAGATAGTGACAAACCGTCAAAC  
CATTCACCTGTTATATGTTTCAGGAAAAAGATGTTCTCCTTCATCACTAACCATTGTGGTC  
AGTACGCGTTTACTTATACTTTCTCTAGCGATACCACTACAGCTGATTTACATACATGCCA  
CCAGTATGTGGTATCTTTTTAAATCCTGGATTTTCAATGAATTTTTTTAACATGGTTGTT  
ATCCTATTTATTTCTATAGGATAACTAGATATACAGTATTACAATTAATCCGCCCCCAA  
TGGCGCGAGAATAGAAGGCGATATGGATACTGAGTCGTGCCACTGGGCTGGTTTATTTAA  
TTCAAACACAGGGAATTCTAAGGCTGGTTCACACGTATCATCACGTTCCATTGATCATT  
TAACGGATAACGTAATTCACCCACTACAGTTGTTTTAACATACATCTTACAGGGGATAGA  
GCTATTGTAGTTTTCTACAGGATATCGTGTAAACAACGCTGAGTTTGTTCGCCACATACT  
TAATCCACTGAGGTAAACTA ACTCAGCGTATGTGATAGGTCTTACAACTTCTTATTTAG  
GTTTGTAGGTAATTCGTCAATATTGCGGAATATCCTGAAATTTTGTATTATCATCGACGTA  
GATAAGTGCTAAATAATGATCAGCAATTTCAATTGCACGTGAACGTTTTTCAATGACATC  
TAACTCATTGATGATTTGTTCTTGCCCTTCAGGAGTTCCCCATAAATCCATATCTTCGTT  
AGATATATCAACCCATTCTAAACGTAGTGTTCCTTATTGATGAGCTGCACAGTGTTAGT  
AACTGTATCAAACACTTCACCAACTACACCTTGCCCTTAGTGCAAAGATTGTACGCGGTGC  
AACAGAACGAGCTGCTTGATGTAAGCCA ACTACGGCATCTTTGAATGTTGGTCGATTAGG  
TGAATCAAGATCAGCCGATTAGTATCTAGCGAACTAATGACGTTACGGGTACCATTGGC  
AATACGACGGGATGCCATTTAGATTGGATATAACCTCGTTTACTACCTGCTAATAACCT  
TTCATAATGTTTATAAATAGCTAATACTGTATTTTGCATCGCTACTCGTTTGGCATCATA  
GATACTCAAGTCATCGTTTGGTCCAAA ACTGTCAGGTACACCAAACGACTGATTTAATAG  
ATATCTATAATGTTTATTGACCTCATCCATCTCAACACGATTATTCTCATCAATCTCTGC

ATCACGATAAGCAGCAGGTGTTACAATCATGTCTTTAAAAATACAGTTATCTTTATATTT  
TTCGATTAATTGTAACCTTGATAGCCGAATCCCTGACTTAGTGGTCCCAAAGTCAATTCG  
TTTCCAGTTATCAAAAAAGAATGTATAACCAAGTTTTACCAGTTAGTTCATCAGCGCGGAT  
AAAATCTTTAATAGATTCATCAAATACTGCAAATGCCTTACCAAGAATAATTTCTTCATA  
GAAAGCTTTTAATTTAATTAAGTTTCGATATACAACCTGGATGGATAAGTTCTAAACCTAA  
ATGGATATATCCAAATAAACTCTCACGATCAGTTGATCCAACCTCTTCCAAAAATGGAAC  
AGAGAACAAACCATCTTCATGAAAGTTACCACCTAAACCTTCAAATATCTCATGACTCTT  
TACTTGACCTAAGAACTTTAATTGTTCTTTAGTAGGAATAAGTAAAGAAATATTA AAAAGG  
AACTAATGCCTTCTTCATTTTCTATTTTCTATTTTGGTAATACTAAGTTAAACAACGAT  
ATGATACTTTACTAATCGTCAATGGAGTTTAATATGGCCAAGAAGGTAACATTGCCCAA  
GGTCAAACCTGGTGCAACCGGTACAACATTAGGGCAGGCTGGTAATATTCTTGACTTAAGT  
GATGTCGATGATATTTTTGGCGATACGCCAAAAGCTAAAAAGGGATCACCTGTCACTGAA  
TTTTTTAATGGTATTAACAAGGACTCTTTGACTCTGTTAAACCACAACAAGCTTTAAAA  
GCATTCATGCGGTCTGCGGCACCAGATGGCTTTTCACGTATGTTCCGGTGTATATGAAGAT  
ACGATGTCAACTATCCGGGATGTCAAAGATTCTGTAGAACGTACGAGTGCTAGTGATTTA  
CTCTTTTTAACAAGAGAAGCACAAAGATTTAGCAGTTAAGTTAAAAGATAAAGTTCCAGCT  
TCTGTTTTTGACAGACTTAATAATCGATTAGAAAAGTCAAATCGAAAACATAAAGTACGCT  
GAAGATTCAAATAGAAATTATAAAGAAATCCGTCGTCGCATGGAAGCTGAACGTGACGAG  
GATGAACTTAAATCTGCTATAGATCAAGTAACTCTTGTTCAACGGGATTTAGCTATAAAA  
GCTGAACAAGGCGAAGTTAAACGATTTCGCTATTGGACAAGCTGAACGTGGAATACGTGAT  
AAAGTATCGGCTGATAGATTTGACTGGATGGCTAAGGCTATGGGTCAAACAGTTGATAAT  
TTATCTAAATTAGCTAGTTATAATGAACAAGTTAATTACAGTATTCAAAGAAAGGATTA  
GAAATCCAATTTTCGTTCTATGTTACATCTTCGGAAAATTGCACAGCAAACCGAAGCTACC  
ATGGAATTATTAATAATGGTTTTGCAGCACTTGTTAGAAACACAGGGATCCCCGATCAT  
AAAAAGTCATCAATGAAGGATCTTGTTGGCTTTAATGCGGCTCAACGGGTATCGAGTAGT  
TTTGTTGACAACGCCATTCAAACATTACCAAATTTCTTAGGTAATTTGGATCAGCCGTA  
ACTAATAATGCTACTCGCTTTGCAAATGAAAATATCCGTAACCTTTGCCGATGCTGTTTCG  
GCTGGAAACATGTTTGGTGACAGATGCATGGGAGAATAGATACAATATAGCCGGTCAATTC  
GCTGGCTCTTATCTTGGTGATTGGACAAGGAATTCAGTTATACCTGTATTAGGTAGGATG  
GCACGGCCAGGCATAGAACGATTCTTAATAATTATCTAGGGGGTTCGACATAATCAAGCA  
TCTTATTTACTTGATAACTTCCCTGCCTGGACACAAGAATACATGAATAATTACAAAAC  
ACTTATGGTGCTCGTGGTATTCTTCGTGACATTATGGCTCCATTTATTCCCCAGTTCACA  
TTACAAGATCGATTAAAGACTGGCTCCTATCAAACAATTGGTTCAGGACAGTGGCTTTAAT  
CAACTAACACAACGTA CTATAGTCGAAGCTATTCCTGGATATCTATCTAGGTTACTACAA  
GAAACAAGAATGATCCGGACTGGTCGTGATGATATTACACGTGAAGTGTTTGATCTCTCA  
ACTGGTTCATTCATGTCTGTAGAGGATTCAGCTGCAAACACAGAACGTGCTCTAGTTAGT  
CGTTCTACTGTACGTGGTGTAAGTGGTGCTTTACCGATGTTCTTGAAGCATTTGACCCA  
AATAAAGAACTATCAATAGATGCTAGGAAAGCACTAACTGAACGTTTAATTCGTGATGCC  
AATATGAATAAACGTTTTGATCCCGAAGCATATGCTCGTGCTGGTGGGTATGATCGTTCT  
AAAGTGTCCGGTGAGACGATTAAGAATTAACGGAATATATTAACGGCAATACAATATT  
GGTGCTGATGGTAGGATGGCAAGCACTAATGAAAACCTTTGCTAGGCGTCAAGAAATATCT  
ACATTATTTCTAGACGTTAGAACTTCTCACGTGACCCTATTAAGAAATTGAGCGTTTA  
ACCAATGCTGGTAAAACCTGATCAATTACGTGAAATGGGTATTATCATAACTGAGCAAGGT  
ATTGATCGTATTAATTACCCACGTATTTGGGAACCTGATGAGTTCAGAAGTAAAATACGAA  
GGATGGGGTAATGATAATCCATTTGATCGTTATAGTGATACACCACCTTCTGATAATGGT  
GGTCCAGAGCAACTCTCCCCACTAGGTGATCAGAATAACCCGCACTTTATTGGCCCAATG  
TATCAGTCACAACTGAACGAAAAATGCGTCAAGCTCAAGAGCAAGTTATTCGTGCCTCT  
AAACTGGCTCAAGAGCAAGCTAATAAAGGTTATGATTACGCGCAACAAAAAGTATCGCTA  
GCTACGGATTATGTAAGGGATAATGTACCTAATCAATTTAGCGAATTACGCAGGAATGTA  
AACATACCGGCGTCAATGAACTTTGGTGATTTAAGAGATCAACTATACGGCCAAGCCGGC  
GATATGTATAGTCGTGCTGTTAACTATAGTAATCAGCTCAATGGATATTCTGATATAATC  
AATCAATCAATAGCTGATCTATATACCAAAGCTAATACTTTTACTCCAGTTATCAAAGGA  
ATGGATTTTTTAAATGGAATTTAATTGATATTAATACTGGTATGATAGTAGAGAAAATA  
TCTGATATTACTGGTGAAATTA AAAACCAAGCTGGCATAACTGTAGTAACCGCTCAAGAA  
GTAGCTACTGGTCTCTATAATCAACGTGGTGACTTATTAACCAAGGCAACTGATATTGCT  
AGTCAATTACGTGATAAAGCAGCGCAGATTGCTGGCGATGCTAGAGAACGGTTAACTCAA  
GGTTTAGATAATGTTTCTGATATGGCTAAAGATTGGTATATACCTGGCCGTGAAGAAGCT

GTTATTCTTGGACGTGATCTACTAGCCGGTGAGTATATCGATACAGCAACTAATCAAATT  
ATAACTAATTTGAAAGATGCCAAAGGCACTATTATTAATAGGGCTGGTGATGTTGTCGTA  
ACTGCTCAAGAACTGGCTAAAGGTTTAATACGGTCAGATGGTTTCAATCTACGAAGGAAT  
ATAGCAGATACATCTAACTGGATACAACGAAATGTACTAGGTGGTGGATCAACTACTCAG  
AAAATCTTTAATGCAATGGGTACAGTCGCTAATAAAGCAAAAGACTTTACTATTGGATTA  
GGTAAGGATATTCTAAGTAATCGAGATGCATATTTACCTGGTATGCTAAAACCAGTATTA  
CAGAAAGTTAAACTAAAAGCAGGCGAGTATTATACAACAGCTGGTAACCTATTAATAATCA  
TTCGATGAAATTAATGGACCAGTTTTAGATAGGGATGGTAACATTGTTGTTGATGAAGAA  
CAAATCTCTGAGCTTATCAACTCTGATGGATCTAAACACACTGCTGCTAAGAGTAAGGGT  
TTATTCCGAACTGGCTTAGGTAATCTAGCCCGTGGTTATGCCAATATGTCAATGCGTTAT  
TGGAAGTGGTTAGGTAAGAAATCTGTAGACACTGCTAAAGGAATGGCGGGTTTAGGATAT  
AAATTGCTTGGATCACCTTTCAAGAAACGTTTTAGTGCATTCCTGGTAAAGTAGAAACA  
CAGATAGATAAGAAAGCTCTAGATACAACCACTGATCAATTATTAGCAGGTATATGGGAA  
GAACTACGTAATCAGAAACCAGATGCTAATAAACCTCGTTCGTGGTTCCTGGCAAGATCTA  
ACATCACGTGTTAGCGATACTTTAAATGGTAAAATAACGGTGATGAAGAAACCACTGAA  
TCAAAAGGTCTTTTTGGTAAACTTGGTGATACCCTAAAGAATATCTTTGGTAAGAAGAAA  
GGCGATGAGGAAGATGAAGGATTATTGGAAGACCTAGGTCTTGGTGGTAAGAAAGGTGGG  
AAATGGGCTGCTGCCC GCCAAATACTTGGTAGAGGTGCTTTAGCTATTGGTGGTGGAGCA  
TTATCAACAGCTGCTGCATATGCTAGTTTTGGTGGTACTGGTGCATCAACAAATGATAAA  
TTAGCTGGTGCAGCTATTGTAACCAGTAATCCGATTATGTGGGCCTTAAAGATTTCTTA  
ATAAAACCTGTATTAGGTTGGAGAGGAAGTCAGAAATTCAAAGATGACTTAATCAGTTAT  
CGAATGATGCAGTACGGTCTACAACAACCTGATCAGATGAACAAGGTTACTGAATTAGAA  
CAACTTGTATCTAGTGTAGCTACACGTGGTGGAGATGCCTCCTTTGATGTAAGGGCTCTT  
AATGCACGTGACATTATTAAGATATTTGGATATGGTGTCTGATGATGGCCCAGCTATCATG  
CGTTTAGCCAATTGGATCGACTTCAGATTTAAACCGATCTTTGAGGCATGGCTTAAAGGA  
CTATCCAAAATTAATCGTAGTGATGTAGATATCAGTGAGGTTGATAGTAAAGTACCTAAT  
GAACTAAAAGGACAGCTCATTAGATCAGTATCATTCCCATACGAAGGTAATACACCTTAT  
CTAGTTCTTAATAACCCATTTGGTGAAGAGGACTTATCAATTGATGTTGCTTCTATACAG  
ATGAAAGAAAAGGAATTATTAACAAGTATAGCGCTACAGAGAAAACATCTGTCCGACCT  
AAAGCAACTTCCAGTAGTTTTAAGGAAAGTACTACTGATGTGATAAATGATACTATTACT  
ACGATTAAGTCTAAGTCAACTGATATTACTAATTGGTTTAGGGATTCAACTATTGGAAAA  
GCAATTAAGCGGTTAGTCCAGTTGAATCTATACGTAAAATGGTAACTACAACAGTAGAC  
ACAATTATTCCTAAAGCAAATGCAAGTGATTCATTAACCTTCACTGCAAGCATTACGTGTA  
CATGCTTATGGAATGCAAGGTTTAGACTTAGCTGCTGTAATGGATTATTATCAATTGAA  
AGTCTTGTTAATGATAAAAATGCGAGTAGCTAATGGTAAAGCTACTTATACAGGTGATATA  
GAGGAATTAATTAAGTGGACTGGCCAAGCATTGGTATGGTTACAACCTAGCGATGGCCCT  
GACCGTGTTAAAGTGGTCGATTGGTTATATCGTCGATTCCTACCTGTATTTAAAGCATT  
ATTGTTACTGCTCGATCAGTATCTACATCGATAACGCTTAGCCAAATAGAAACATTAACA  
GCAACTCAGCGCGTCCAGATTGCTAATGCGATAATGGGTGCAACTGATGATGAAGGTATT  
TCAATATGGAAAGCACCATCAATATTTAATATTGTTGGCGATATGGATTCAGTAGAAGAT  
CTAGCTAAAATAAGTCTTGATGAGATAAAGAAAGAAGCTGAAACTGAGGTAGCTGAAGCT  
CCAGGTAAATCTAAATCTGCACAGATAGCAGGTAAGAATGATGCAGCTTCAGGACGTAGT  
TTTGCTAGTCGGATTATTGATAATGTTAAATCAACATTCAATAGTGCCACGACCAAAGTA  
ACTAACTGGATGGAAAATACATCAGCACGAGTTAGTCAAGTTATTGGTAGAGCCCAGAA  
GGAGTAACTGATACTTACTATACGGCTAAGTATAAGTTAGGGGCAGGTGGTGAATTAACA  
CCAACCTGGTCAGACTTATGGTCAATTAGCAACTGGGAATGGTGGTGTATGGGAGAATATC  
CCAATGCCGCAATCTAATAAGTCTAGAGATGCAGCTCAAGCTACATTTAAAGCTGTATCA  
GAAATGACTGGCGTACCAGTGGAACTATTAATATTTTCTGTGGCATTGAATCATCATT  
AACTATAATGCCAAGGCACCAACCTCATCAGCAGCTGGCTGGTTCCAATTTATTAAGAGT  
ACCTGGAAAGGGATGCTTGCTAAATATGGAGCTAAGTTTGGTATACCTGCTGATGATGAA  
AATGGTTCCTACGGTTTGACCCACGTATAAATGCTCTTATGGGCGCGATGTTCCCTTCGT  
GACAATTATGAGTATTTAGAAAATGCATTAGGTAGGGCACCCACTGATGTGGATCTTTAT  
CTAGCGCACTTCATGGGTCCAGCTGGTGCACGTAAGTTCCTTACACGTGACCAGAACTCT  
ATTGGTGTGAGATATCCCTGACCAAGCTAGGGCTAATAGATCTATCTTCTTTAAACG  
GATGGTAGCGCTAGAACCCTTAGGTGAAATCTATCAGGTCATGGAGAATAAGGTTGCTAAG  
TTTAGAACTGGCGGCGGTAAGAATGCCAATAGTCAATCACTTGGTAAACCTAAATCAACA  
GAAGAGTTGATGAATGATGCAGCAACTGCTAAACAAAAGATATGGCTACTGATAAGGAG

CTTATCGGTGGTGGCTGCTGATACATCAATAACAGATAGTTCTAATAATAAAATTGGACTT  
GGGAAGATAATGTCTGGTATGGCATCACCATTAAGGACGAATGCTCCATCAATGATGCTA  
CCTGGTGCACCTTCATCTGCGACTGATGTGTCTTCTGGTCAACAGCCAGTTGTAGATACC  
GGTGC GGCAACACAGGCTACAGTGC GCGCCTCTCAAATAGAGGAACAGCGCAAAGTAGTT  
ACCAGTCAAGATAAAGCCATGTTAGATATAGCAAGTGAGCAATTAAGTGTACTGAAGCAA  
TTCCATGCCGATATACTTAATTACATCAAAAACAAAGCGGCTAATCCATCTGCACAAACT  
GGACAAGAGCAAGCTAATACTATAGCTCCCTCTCAACGTCCTGGTCCGGGTAGTGGATAAC  
CGTCCATTGCCAATTAGACTACGTTAATCTATTAAGGAGCCTCCCTATTGGGAGGTTCC  
TTATTTTGTCAAGGAGATTCCTATGGCGACAGATAGTAAACCAATTTGGTTAAGGCAAGC  
ATTTTATTGCCTACTCCAGATGAACGCCAAGTTGGTTTTGGTTCAAGATCAAAAAGACG  
TAATGCTGCCTCAGCTGCTTTTAAATTCATAACACATCTCCTGGCGGTA ACTGGGCAAT  
TAATCCATTACCCAGTATACCCGTTATGCAGATATACGTTACCAGGAATTGGCAGGAC  
TTATGATGAACGACATTTAGGAATGGGTGCGATATTATAGTGAGGCGCATGACGACACAGC  
CCAATTAATCCATATGTCATTCGGTGTTCCTCGTTTTAGTAGTTGGGCTAGTTTCTTTAC  
AACTTCTATGATCGGTCAGCTGCACAATTCGCTAACTCTGGTACAACATCAAGAGCTTG  
GTACGAGTTAGGTAATGCTGCCGGTTATTTAGTATCATTGCCATTACAGCCATTTATCAT  
TGGAGTCACGGCAGCAAATAGGGTTATTA ACTTTCTAGCCAAAACACAGCCTTCTAAATG  
GTATTATTTTAAACCGACTATGCATGCTTACTGGTCAGCTGTGAATACATTAGCTAACGA  
ATTTGCTATTAATTTAGGTATTAGACCACGTGTTTTCGATGGTATTCAGAAAGACCTAGA  
AATACCTGGTCAAACAGTAACCCCTGCCGATCTAGCTAACTTCCATCGAATGTTCCCTGG  
ATTAATAAGGGAAGATGGTTCTTTTGATATAATGTCTTTATCAGGTAGAACACAGCGTAA  
ATCCGATGAAGCCAAAAGATATGGGATACATTGGTTGAGAAAGCACGCAACCAAGATGA  
TTTACATAATGTGGTAGATAACTATCTTCGTAGCTCTTTTAAAGATAATGGCGACTCAA  
AGTTTCTGCGCGGGATTATCTATTAAGTTATATTGAAGTTGATAGAAAACCTGGTGCTGG  
TGTAATTGATTCTGAAAACTTTTATCATGGTCTAAGTTGAAAAATGTTTATGATTTCTG  
AGTTGGCGCTCAGCGGGATGGTTCACAATTTGTA ACTTTCCGGGTTGAGCATAATGGAGA  
AGTATCTGAATCATTACCAATACCACAACAGACATTGGTGTAGCTCAA ACTTTAAATAG  
TAAAGTACAAGAAGGACGAGCTGCTCAATTTAACTTTATGCAAGGTAATGTTACTGAAAT  
GATGGGTAATGTTACTAGAGGCGTAATGGATTTCAATTGGTGGTGCTTTAGATT CAGTTAA  
CATGGCTGGGTTGGCTACATTAGCGGGTTCCGCATTTGTTGATGTACCCGAGCATTGGGA  
AAATTCAGTTGCTTCATTGCCAACAGCATCTTACACAATTCCTTTAGTATGTCCTTATGG  
CAATGTGATGTCGCGCTTCTTGATATTTTTATCCCATTAGCCATGATCTTACCGATGGG  
GCTTCTCGTTCAGCTGGTAGGTCAGCATATACATCACCATTTATTTGTCAGATATTCCA  
TCAAGGACGGGTACAGCGTCAACTAGGTATTGTTGATTCAATTACCATTAGAAGGGGTAC  
TGGTAATATTGGTTGGAATGCTGAAAATCACATGCTTAACTGTGAAGTTCAAATAAACGT  
TAAAGATCTATCTAAGATAATGCACATCCC ACTAAAGGCAGGTTTTGCTGACGGTTCGAT  
TATTGACACTGCTTTTAAAGCAGCTGGTGCAACAATTGGTGAAGCAGTTGCAGAAGGGAT  
TGGTGCAGATGGTGATCGTGGTATTGGTGTAGGTCTAGCATTAACTGATGGTTCAGTATG  
GGATGAACAAAGTTTATTCCAAGATTATACAGCCACATTGACATCTCAGTCATGGTCTGA  
TTTCTATTATGTTGAAAACGTATGAACCTAAATATAACACGAGCTACGCAATCCTTTAA  
GAACTGGAGAAGCCATCTAACTTCTTATCTTGGGTTCTTGATGGTGAACCAGCACGTGC  
ACTATCCGCATTTGCTAACACC ACTGGTTCGTTCTAAATACTTGGAATAGTTATTTATTG  
TAACCATTCTTAAACCAATGTAATAGGTAATTAACATGTCTCTACTTAAAAAGATCGGTC  
TAGCTTTAATTGGATCAGAAGGACGTAAGGAAGTTTTTGAACAAGAATTA ACTAAACTAT  
CAAATTCTAATGCAGTTATTGATCAAATGGTGATTAATTTACTGGGTAGTAAGAAGAAGT  
TAGATGACTTCCTAATTAAGCTGAAGAAATTGATAATAAGAACTAGGCTTCATTA AAA  
ATCGAGCCGA ACTTATTA ACTAGTCAAATCTAAATATTCACAAGACCCTCGGGTTGCCG  
ATGTAGTAGTGTCACTTTACATTGGTGGTTTTCATTTATTGAGGTAAGTATGTCTAAACCT  
AATCTTGAGTGGTTAGCTTCCTTAGAAAGTAAAGAAGCTAAGAGTACAGTAGATTCTTCC  
GATATGGATAATGATCAAAAGGAAGGTAGCGATAAGTCTCAACAAGATGAAGCTACTGAA  
CCTGAGAAGAAAATTACTGCAACTGATGTACAAATTGCAATTGAAGAATATGCGCGTATC  
CGTGCATTAACCACTACTAAAGATCTTCCA ACTGACCCTGAACCAGGTGATACTTATCAT  
GTAAATGGGGTAGATTGGATTTATCAAGAAGATGGTGGATGGGTA ACTATGCAAGGTATT  
TATGGCCATGAACATTTTGATGAAAATGGTCTAAATATTGAAGCAAGTGGTATTGATCAG  
AAATCAGGTGCAACTAAACGTTATGTGGTAACTGGTTATAATGCTCAGACTAACCCAGCT  
GCTATGCCTGGTGATAATCTGACTGAATGTGTTATCCTAATGCAGAATGGACTTGTTCCA  
GAAGTTGGTGTAATGGCCTAACTGCTGACTGTCTACTTAAAATCGTTAAAGATTTATTT

GAAGGTTATCAAGCAGGCCCATTTGCATGTGAAGAGAATCAGGTAGTGATTAATTCAATG  
GACCGTGCTCTTAGTGCAATTCATCAACGCCTCGTAAGACGTAAGAACAAGGTAAGTAA  
GGTACCTATAGTGGTAATTGACATAAATGCCTCCCTTCGGGGAGGCTTTATTTTCGTATTA  
AAAAAATTTGAGATTTATATTACTAGTGTGTAATTAGGAAACCATCTATCTAGTAAAGA  
GGAATCACAATGAGCGTTGTAATTTTCACTGCCAGACCTATTGGTTATAAAGTTCCTGGC  
GCTAATTCCTACTGTAATAAGTTTGCCTAAATACAGCTAATGCACCTAGTGTATATAGT  
TCTTCACCAGGATCACCAATTACTGCTCAGGAGAGTAGTTGTATCTATACACTCACTTCA  
AATCATGAGTTAATCGCTGGGGACACCGATAAAGATAACTCCCTAATGAGTTTCAAACCTA  
GTGCTTGCCTATAATAACGATACAGCTAATTATCTAATTAGTACGCAGGTTATTGATAGT  
ATCGATAAACTAAAAGGAGTGGAAATTATTAGTGAAGTTCAGTTTCAGTGTAAATTGATACT  
GGTGCACATATGATCCGTAGAGTGAATTCGATCGGTGTATGTGAGGCTGTCGCCGCTCGA  
TGGTCTCCAGTTGCAATTGAACACGTGGCTAAAGCAACCGAGCGTGAGCACCTGGTACT  
CCCATCGGTGATGCTCGTGAGATGATCGACTCTGGTGAAGACCTGGGTGACGTATGTACT  
TCATATATCAAATCGAGTAACTAGCATGGTAGATAAAGACAAAACAATGGTAGATTTGAT  
TAAGTCAGCGCAAGAAGTACTGACTTCACATCTTGGCCACTGAATAAAGTATTAACCTACCAT  
TAATCTAATTGGTATGCCAGATGCTTTAAAAGAAGTAGTTAAACTCCCCGATGTAAAATG  
TGTTGTATATAAACGACCATTAAGTATAAATTAAGGTTGTCTTTAATGATGGTAG  
TTGCTTTGTGATAAAAGATGTAAATTAACCACCACCGTAAATAGAGAGAGTACTAAAAT  
GTCCATCGAAACCACCAAGAAGTTTATCGAAACCCACAACCTAAATGAAAAAGTAAGCAT  
GTCTGATGCCGGGGTATTTGAGATCCCTGACGGTCTATTTGAAGAAGTTGTTCTTCAACC  
AGCAGGCGTTACTGCCGAGCAGTATGCGCAGGTACATGAAGGTGCAGGTCAACTAGCAGC  
GGCTGTAAGTTATGTATTTGCTGAAAAAGCCGCACCGTACATGAAAGAAAATGAAAGCAT  
TGCTGAGCTTGGTTATTCTTATAATGCAGGCGGTGCAACTGTTTCTGGTATCATTGATCG  
CAGTGGTGTCTTTGTAACAGTTGTAGATACCAAATATAAGAGTAGCGCTATGACTGACGT  
TGTTGAAAGTGTAGCCAGCTTCTTTGAAGATGTCAATAGCTAATATACTAGCTATTTT  
AATATAAAGATCAGTGGGTGCATTGCCACTGGTCAATTTTTTATATTAATAAAGTTTA  
ATGGCTAAATAGTACATTTTAATAATTTAAGGAACTGAGTATTATGGCGGATCAGAATTT  
ATTTAAAGAAGTTCATGGTGATAATAAAAAATCACATTCTGACAATATCAAATATAATCT  
AGTTATTGCAATTGTACAAACTGCCCGTCAAAAAGCCATTTCTCAAAAAGTATTGATTGA  
TGATGTTTTCACTAAACTAGGCATCTCTGATGAACTTAGTGAGAATATTAATAATGTTTAA  
TTTACCAGCTTTAAGCATTGATGTATTAGTTGATGTTCTATATAGCTTAGGTTATAGAGC  
TTCATTAGAATTATCGCAACAAGATTTAGAAGATAATGTTGAAGCAGTAATTAACCTTAA  
GATGAGGGATTAGTAATGAATGGTTTATTTGTATGTATCGAAGGAACTGAAGGTGTTGGT  
AAAACAACCTGTTACAAAGATGGTTGTTGAGGAACTACGTAAGCGCAATTACGATGTAGTA  
GCAATGCGTGAACCAGGTGGTACAGCTACATCGGAAAAGATTTCGACAAATGTTAATTTGG  
CCAGAATTTAAAGATGAAGTTCGTCCGCCAGAATTCGATGTATTGATGCATAGTGCAGGT  
AGGATGCTTAATGTAGAAAACATTATTCGACCTGCTTTAAAAGATGATAAAATCGTTATC  
ACTGAACGTTTCATTGCATCTACTTATGCTCTTAATGTAGTACCTTTTGAAGAACTAAT  
CCATACCTATCAAAACTATTTATGGATATTCTTCAAGGAACACTACATTCTATTCCAGAA  
CCGGCTACTTTCTTTTTAACTGCTCCTGAAGAAGTTCGTAAAAAACGAATTGAAATGCGC  
GACCGAGGTCTTGACTATTATGAGTCTAAGGGTTCAGTTACTTTAATAAAGTAGATGAA  
GGTTATGGACGCTTAATTAATCAACCTAGTTCAATTGTTGTAGATACCAATCGCGATCTA  
GACATCATTGTTAATGAGATTGTTGAATCAATTATTTTCTGCGTGATAAACAGAAAAAT  
AAACAATCATCATTTGATGAACAACCTAGCTAAAACCTACAACCTAGTGATCAGTTTGATGAT  
AGTGTAAGTTCTGAAATACCATGGAATGATGAACAGCAAGAAGATACTGTCGCAACAACC  
GATGACACTATTAATTTTGTATCTAGATGCTGAAATCAGTAAGTATCTTGATGAAAATATT  
ATCCCTCAGTTATTCGAAGGTGATGATCGTTTCTTGCATCTGGTAAGGTTGTGGCACAG  
AAGTACTGCCAACGAGTTTACGATCAGCTACCTGATAGTGAAAAGCACAAGATGTTCTTA  
GGTTCAAATAAAGAACGTCTAAATCAACAAATTCATAGTTTACTTTACTATGGACATCAA  
TTAGATGCATTCATTGCAGAAAATGATCTAATTGGTAAAACACTCTGGAAATAAAATTA  
TTTATTATTTTCGTAATTTGGTGAAGAAATTAATGAGCACTACCCTGACTCTGAAAGAATC  
TAAATACATCCCTGCAACTAATCTAGATAACCTAGAAGATTATATTGGTCGTACTTTTCT  
AGTCGAACGAAATGGCGTGTCTACAGCGCATAAGCTAATTAACCTCTCTCGCCGAGATGT  
TTATCTTGGTTATCCGGATGGTAGGGAAGATTCATTTACATTGTCTATTAATAAATCCG  
GAAGTTTTATAAACTAGCACCATCTAATCGCGATAAAAAATAAAATACGATATAATAGAG  
TCCCCATTACGGGGACTCTTCTTTATAATTTTTTTGTTAAAAGGTATATCAAGTGTTCAA  
TAGAATTGTTAGAGCTTTTACATTATCGATAAAGACCAATCTAACATGGTGAAGTAA

TCTACCACAATGGCCAGCCTATGTATCGGTTACTCCTAAAGTTATCGATATTAGGGATAA  
AGAATTTAATTATCATGGTTTTATTTACATATCAATGCCCTTTAAAAGTTATAAAACC  
AGATGAATATATTAAGCCAGGTATACTTTATCTTCATACTTTATCCATCAGAATGAAGG  
AGATGATGATCCAGTTGATGCACCAGGTTTTAGTATTGACATTGAATACAGGTTAGTTAC  
TCAAATACTAAGACATGGCATTAGATATCAACATCATCACTGATAAATCAATTAGTTA  
CAATATCGAAAGTATTCTAAATGCGGAATTCATGTGTCAATGTCCATTTAATCTTTATAT  
AAACGGTAAATAGCTAATCATTATAATAGAGGAAAGAGTATGTTTAAATCCTTGAACCT  
TAACTACACCCTCAACCTTCTACTGAAGGTATCTGTTTGTATATCGGTCATGGCGATAT  
TGGACTACTTGAGGGTAATAAATCTTCAACTGGCATTACTAAGAAATTAGAACAATGTCC  
TTATTACCTACATGTTACTGTTGGTGAATCAAATACAGCTAACCAATTGACCATTACTGG  
TTATACTAATAACCAACCTAACATCCGTAGTTGGCATGGTCAAGAAGCTATGGACATTCT  
GCTGAATAATATCAACAGCAATAACAATGTGGTGAACGAGAACTTAACTTTGAAGTACT  
CATTGAATCAGTTGAACGTAAAGACCCGCGCTTATTATACTAATGGCGCTAGGTGCACT  
TCCATCTCAAGATTACCCTGGTCATTTTGATGATTTAGCATCCGATAAGCAACTATTCAA  
ACGGGTAGGCTCTTTCATTGATTATAATGAAAAAGAATATAGTGATACATAACAATACCAT  
TACACGCAAATTATTTAACCTGTGTGGCTGTGGTTATCCAGAAGCGGAGTTGCGTTATAT  
TGATGATGTATTGGATATATATCGCCAAGGTCGGAATACTTCTAAACGTAATGAATGTAA  
TAAGAAATATGGGTTTGGTCCAACCTACATTCATGCTACATTATCTAGATAGTCTTGGATT  
TGCCGAGCATGGTACAGGCGCTGCTGGTTGGCTGCTCGATGAAGGTGCATGGGTTAATGT  
ATTAGTAAAATTGGCAATTAAGGAAACCGAGGGTGGATGCACTGATGTTTAAATTATCGA  
TGCCTGATTTTGTGCGGTATTTCTGATTAGTATCGGCATGTGTACTAAAGCTAGTGTTA  
ATTACGAACCCTTGCTTTTTATGGTGTACCCTATTCTACTCTAATCATACTCCGCGAA  
TTGCTCCATGTAACCTTCGACCAACAATCTGGACTTGGTAGTTGCGGATGGACTAGTTATC  
CAGAATATTCAGTTATTCATTAGTTAAACCAAGTGATCCAACCTAACAGATTCTTGTTA  
ATTATTCGATGTATCAAGAAGTCATCTGTAATGATGAACAATGCTTTACTTCTGATTATC  
ATGAGCCGTATGGTTTACTTTCAGGATTTAAAGGCACCACATATTGGTCTGTGCCAACTG  
GTTATTATCTACTAAATGGACCCAATGGTGTACATGGTGTAAAGTTTGGTAACGGACCAT  
TAAAAGATAATTATCCTATTCGTGATTTTACATGATAAATAATGATAGAGATATTGATG  
GCGAATACCTCTCTAAAAATACTAAGGGAATTTATAATGTGATGTGTAGTCCATTGA  
CCCAGATGTGTAAATATTTGGGTAAAGAGTACACTCTATTGGAACCTAACCAATTGATTC  
CTTTTGTAAGACTACCATTTGTGATGAATACCTTTGTTACATCGATAATAGTAAAGGCA  
AGGTTGCAGGCATAAATCCAAAACGAAAGGATATTTATGAGGGGTTATAATGAATATTAC  
CAATATAAAGCTCATCCAAACGATGGATGATGTATTGAAGGAACTCACGAAATATCATGA  
TAACCTCAAGCCTCATGTAGATATTAATAAGAGGTTTCACCGTGGGGCGCTAAGTGTAC  
ACTCTTGTCTGAGGATACGGTTCGTAAGGTAGTTGTTGAAATCAATATAGATAAACCACT  
AAATATGTGCGTAACCTATTTCTTTGATGAGAAAGTGGTTACTAAGATTAACAAAGATAA  
TTCACATCACCATACTGAATTAGCTAAACAAATAAATACGTTCTTTTCGGATACAAGTAT  
CCCAACACGAACATTCGATTACCATGGGTTCCCTAGATTATCTTGGATTCTAAAAGGAGAT  
TACAATGGGTTCTCTAACTCTTGAACAGGGCGACAGATTGAGCATTATTTGCTGAATGC  
TATTAGTACCCATATTAATGCATCCAGATTGACGCTACATTACGTGAAACAGTTAATGT  
CATCGATAACCCTGTAAACAAAACGATCTATCGCATATGTGGTTGAAAGGGGCAAGGATAT  
CCGCATTGCAGTTTATGATACTAGTAATGATCATCATGCCATGATATCTTATATTGAGTC  
TGGTGATAGTGAATTTAAAGTTCTTAATATGGCACAGGCTGTTCCGATAACCAAATTCTC  
ATTGAATCAATTTGATGAAGCAGCAACATGTGCAGTAAACTGGCTTGCCGGGAATCCATA  
ATACGTCATTAATTAAGTGTCACTACAGCTTAATACTCAATCTCAGTCTAAACACTGAT  
CTGATTAGATTGAAGACTACTGAGTCAACCCACTATTACCTAATTCTAATTGATATAGG  
TAAATTATAAATACTAAATCAGGTAATGTCATGGATTCAATAAAATAACAAACATTCTC  
TTATGCAATAAAGCATTCAAGGCGATTGTGCAACATCCACTTCAGATTAATCTGATAGG  
TCTACTAGTATTCAAGTATTAATAATGAATTGAATTATGGGTTGACTTATATCTTTCAT  
GATGCTGATTCCACTAGAAGTGTGAAATTAACAGTACGTTACGGTAATGTAGTAATCTCA  
TTAGTGGATAGTAATAATAGATTAGAAAAAGAATTTACCTTTGATAATGAACTAGTTAT  
CAATTAATGGGTAAAATAGTTTATTGTTATTTACGTAAAAATAAAGATGATTATTATCGT  
GGATTAAGTGATAGTGGATATTTACAATGGCTAGGGATTACTTAATATGCTATTTAATAA  
AGTTATCCGATATTTTAAAAGAAGGCGGTGTAATACGTCTGAATTAATTGAGATTAATGA  
ACTTATATTAAGCAGCTAGGCGACAGAATTATGATCTAGGCCATTTAATTAGTTATCT  
TGGTGATGGCAATGATCCAAAATTTATTGATTTTATAAAGAAAGAATATTCTGAGATACA  
CGCTTATTACAATTCGTTATTCAACCCAGCTGACTTCGGTAAAAACTATAAGACAAAGTT

ACATTCTGATCTATTAGAAGCTGAAACTAAATTAATAAGTTTAAAGAATTATGTAAAAA  
ACATAATATCGACTATTCACACATTGTTGAAGATGAAATACCTTTCTAGGCGGAAATAAA  
ATGGAATTAATCAGTGTGAGCTCAATGGCATTATTCTTTGGTTTAATTGTAGCACACTTC  
ATCTTTGATTTTTATTGCAAATGATTTTATTGCAAAGGCTAAAGATCATACCACTGAA  
CTAGGTTCTCTATATTGGAAATGGGTATTACCCGCGCATAGTTTTATGCATGGCGGTGCA  
GTTTATTTTCATCACTGGTTCATTAGTTTTAGGACTTATTGAAACAATTGCTCATTGCATT  
ATTGATTATTTAAAATGTGATAATAAAATTACATTTAATCAAGATCAGTGGTTACACATT  
GGTTTTAAACTGATGTATACTTATCTAATTGTTTATGAAGTACCTTTTGTAAATGTACGGC  
TAAAGTTATATATTACCCTCTCCTTCGGGAGAGGGTTTATGTTTAAATTTTTTTTTGTTA  
AGTTTTATTACCCAATCTGATAGGGCTATAATGGAGTTTAGTCTTGTGGAAGTTTATAAA  
ACCCTATTGGGAAGAGAACTACAATGGTTATTACACATCAAACCTGTAGACCAGATAGATA  
CACAAGTGAGTTTAGGTTTACCTATTGGTTACTATGGTGCTAATGATGATCTATCTACAT  
TAATTAGGATGATTGGTGATTGGAACATCAGACCCATTGAAGAGCGTAGGACACTAGGTA  
CAGGTTATATTGTAGCTGTCCCATCGAATACTCGTACACGAGTGATTTACACTGCTGGTC  
GTAAGAAATGGCTAGAAGCATTAGATTTTTAGCCCCGAATTAGCCGAGAAGTATATTCGTG  
CTTGTAGTGCAATAAAACGATGCTGGGACCACGATGTCGCAACCTTTGTCCTAACACATA  
ATAAAATTAGCGACGAATTACTTAAAGAATTGATGAGTGTTGAGAATCCTAAAGCTGTAC  
TCAATCACTATAAAATTCCTGTAAAGATTTCTAGAAATAGAATAATTGCAGCTTGTCAA  
TAATCTTCAATATTCGTGGACTAAAAGTCTAATACTTTTATAGGAGAGAACCATGATGGT  
TCTCTCTTTTTGACGTAAGTGCATTATTGTTATGATAAGACTTTCGTACAAGGAAAATA  
CTATGTTACTTTTTGTTGATACAGAATTTGATACGCCTACTGGTACTCTTATTTCACTCG  
GTATTGTTAGTGAAGATCGACGTTGTGAATTCTACGAAGTTCTACCATATGACAATATTG  
AAGATGAATGGGTTAAAGAAAACGTTATTCCTATTCTTCAAAAAGAACCAATCTCTTTAG  
AAGAATTCCATGATAGACTAGCCAAGTTTCTTGGTCAGTTTGCTCGATTACATTTTATAG  
CTAATCATGTTAACGATATGGTTTACACTGGTAAAGCTATGGATATGGGTAAAGGTAAAC  
AAGTTGTTGAGTTACCAACTATATTTGAATTAATCATGAGCTAAGTGGAAAAGGTTCTA  
AAATGCTTCACAACGCACTATTTGATGCTCGTGCAACTCTAGATGACTGGGAGCGTTTAA  
ATGGTGTGAACTAACCTTTTTGGGATAGCCATCATGACTAACACCTTTGAGAAGATGTCA  
GGCGACAAATATAGAAAAGTCGTCCAGAAATCGTACTGCGTTTGCTGATCGCAACCAGT  
TTTCCTCAATCCGTTTTAGCCGATTTGACTTTTGATATTACTAAGCAAGTTGGTATTACT  
GATAACGATGAATTAGAGAAGATTGCTAATGACATGCGTGATGTTGAACGTAAGTTTGAC  
ATGACTGATTTTCGTTAGATGTATTGATCTACGTCGTAATGGTAATGACGTAATATAACT  
GTTAATTGTTGGGATTTTGATCCACGTGCTAAAACATCGAGGATCGTGCGGAGAACCAT  
GAATTCCTGGCAAACAGTAATATTACCTTACATTCACCAGAAGCAGATTTTAATGATCCA  
CGTGAACCTGGCTAGTAAATTAGTTGGACTATTTTTTCGTAGCAAGATAGGTCAAAGCCA  
TCAGCTAGTAATTTTACTAAGGGATGGAAAATTCTTAGTAAACCAATTAGTAAATCTAAA  
AATACAGGTGATATAGAATCAATCGATCTAGTTGATGCTATTGAACTAGTAGCTCAGAGT  
TTAGCTAAACGTAGGTTTAAACATTAATAATTACCACAAGCGCTATTTTATTACTTGATCAG  
AAAAGACGGTTATTTAATATAACGCGTGGTTAAAACAACATAATGCCCTCCATTGCGGG  
AGGGCTTATGCCGTTAAACTTTTTACAAGTTTATCATTTTTCTATTTTCCAATTAGCATGGA  
AAGAAATTGGTTGACCAGTGGTCTCATCAAGAATGTCACCAGTCTTTAACCTATTTTTAA  
TAGCTCGGTTATTTCCAAAGAATGGAACCTAGTTTAGCTACTGTTACATCAGCTAATCCTG  
GATCTTTCATTACATAACCAGCCAGGTGTTGAAGCCAGTTCATCATACTGGACAACCTTAG  
AAGTATCTGCAAAGATAACAATATCACCATGTGTCGTCGGTTCTGGACACGTTGTGATAGT  
TACCCCATGTGGAGTTATTATCATAAACATATACATTAGCTGTATTTAATGTCTCACCAA  
GGAATGTACGGCGTAATGCAGTCAATACTATTGGTTTTATATTAATGTTATTCTTATATG  
CATTGCTACACGATACATACTTGGTTCATGCTAAGATTAATATATTCATAAATTTTAG  
CTTACTTATCCCTTTATAATCATCCCATGCCATTGTACCTATAAGGGATGCTTCATTAT  
AAAGAGAAGCAGGTTTTGAACTAAGTACCACTTGATGCTGCATTGTGTAAGTATAAGGTA  
CACGTACGTTAATACGTATCTGATCATTATCATGGATTAAGAGAGTTGATCCATGAGTTA  
TCAGATCCCCTGAGTAATGCCCTGACTAAATAAGAATGATCCAACCTAATAGCCATTTA  
TTTGAATATCGCCTAGATAATCCTGATGGTCAGTACCATTTGAGTAACTAGATTAAGAT  
CAAATAACGCTTAGCTGTTAGTATCTGAGTAGTATCAATAGCTTGGCCATTATCACGTG  
CAACAAAGATACCATCATCTACACCAACTTGGAACTAAATGAAATAGCATAACGGTTTAT  
TAGGATTTTTCAGATGTCGTACAAAGAAAATTGTAAATGTACTCGCCAGTATGATCGAAGG  
TAAATTCAGGAATATCTTCTTTGTTATACGCTGGGAAAGTAACAAGCTTAATCTCACTTT  
CACTTGAATCACCTTTGATAACAAAGTCAGTTACTTGACCATTACCAATAGATTTATTCA

TACCTGTAAACAAACCAGATGATGCAGCTTTTGGTGACCAGCTTAGCATCTGATTTACAG  
TATATTGAACATCTGACCTATCAACAACACCAGAGAAATAAGAACCAAATTAAGGCTA  
GTCTATTAGCGGTAAATGCAAACTACCATTATTTTCTTTAGCATCTTCAATATTAGTGT  
AATCTCTTGAAGCAGAATCAGTTATAACAAAGATACCATTACCCGATTTACGCCAAGTAG  
CTAGATTATCAATAGTCGCCTGACTCACTCTTTCAGGAGTTAATGCACCAGTATTATGAT  
CTTTAGTAGAGAATAGAATACATGCATAATACTTATTAAGATCTGTAAAGTAAGGTCTA  
CTGTGCCACCCATCATTCTGGGTAATAAACATCATAGGTAGAATCTTGTACACGAGCAG  
CCGTATCTAGTATCTTTTTAAAACCATTACCTGACGTATTGAGGACTGAATAAGGTTTAC  
TAGGATTACTATCTGTGATTACTAAGAATTTCTTTCAGTTGATTTCGTACTIONACTACCAT  
TCCTAATAAACCCAATAGCATTATAAAAATATCTTACCCATCCCCATAGATCTTGAGGGT  
TTGTTGTATTAGCCGGAATTTGGTAAGTATCATAGTTTAAATTATAGAATTTTGGAAAAC  
TACAATCATAAAGAACATTACCAGTGCCATCTTGCACAACAGCAATAAATGGACTACCAC  
CTGTTGCAGGGTCACCATCATAAGCAATGTATTCAGAGAGCACCAGGAGGTAACCTCCGGGC  
TCACTGTATAATACACCTTCTGAATATCTGAACTAAAGTTAAATTTAACTTTAGAGTTTA  
GTGCCACAGGACCCGGCACTTGCAGCGGGACAATAGAAGGCATTTCTCACTCCTTACGGG  
GTATACACGGGAATATCAGCCGTCTTAATAGGTGAGTCAACTCGAATATAATAAGTGATT  
GGTACAGACAGGCTATACCCACGGATATTTAAAATCCCTGTAGATGAATCGAGATCCCAA  
CCAATACTAGCAGAAGCGCTAATAAGCTTACCAGTACTAGGACTAGTAGTTTCAGGGTTCG  
ATAATCTTGAGATCAACGATGGATGTAGCCAGAGTATAATCACCCATAGAAGTAATAACT  
TTGGAAAGATCATAAGTAACACTACATCTCCTGGGTTTAAATGTACCAGTTTGAAATAGAATT  
GGTTTTAAACCAGTACTAGGACCTGGACCAGGGCCACCACCAGATTCTAGGATGGTTGTT  
ACTTTGTCAACCCACCTTAAAATCGCATTATACATTTCTTCACTGGTGGCTTCAGGCCCA  
AGAATAAGATCTTACCAGTATTAGATGAATGTGGATCAGACATTTCTGTCTCCTTTAAA  
ACCGCATATATGCGGGCTGATATGGTTTATACATACGTGTATCAAAGTCATTAATAATCAA  
TTGCGATATCATACTTCTCAAATGATTCTTTTAGCATCTGATAAATGATTTTATTTTCAT  
CAAATTATTATTTTATCAACATAACTTTCTAATGACTCTGTGATCTCAAATGGAGATT  
TAATACCATAATAGCTTCAACCATTGCCTGACTCCATTTTAGAATGTCATCTGACCTTG  
TTGAGATATTCGGTTCATCTTCTGTATCGAGAGTACATTGATATACGACTGTTTGTGAAT  
CCTGACCTTTACGGTAAATTCGAGCAATAGCTTGTCTAGAATGTAATGCCTAAACGGTG  
AATTAATTGTCACCATAGTATCAGCCATCGTCATACGGACCGCTGTTGAAAGGGAAGCAT  
ATGTAGCTACCAATGGATTTAATTTAGGGTCTTTCTCAAATCTACTGATTATTTGAGGTA  
AATTGTCATTGGTTTTACCATAACACCACCGCCGGATGCATACCTAATTTATTGGTGTACT  
TATCAACAGTATCAACAACCTCAACAACGATGTAAATGCAATCGTTTTCTTCATAGTTG  
ATTCAGTGATACCAACCCAGTCAATATACGGTACCATGTCCACATGGCACTGAATGCGTT  
TAGCACCTAAAACCCTTCCCAAACATTCACCTTGTATCTTTAGCATAACGTATTTTATAA  
CTGATTTAATATCTCTAAAAGCAGCTATTTTATTACGAGGTAAGTTGGCTCTATAAACA  
TTTTTTCATATTGGTTAGATTCTTTAATTTCTTACCAATGTATCGCGGGTCTTGATTCT  
TCTGAATTATTTAATCAAATCTTATAGCGAGCGAAACCATCTTTCTGCGCCTGGGTCT  
TAAGAGAGTTCTCGTGTATCGCCATTAGTTTAGCCCAATACTTCTCATCTTCTGGTTCGGC  
GCGCAGCATAGAACTTTACACGTTCTCTAATAAAAAGCTTCACAATCACGTTAATGGCAT  
TAAGAGTATACTGTGATCCATTTGGTATCTTGATACGATACGCTTTTATCCTCGGTGGTA  
AAACCTCAGTATCTTTCTTTTCAATGACGTACGCAATTAACCCAAAGCGATGTTGGACAA  
TATCTAATCCTTTCTGTGTCTCTTTTCCAAATGCTTTCTTAAAACGTTCTTCAACCTCAT  
TGGTGAAGAGATCGTCTAATACTCTTAATGCACCTACTAATTCAGAACCAAGTGCTTTAA  
CAGGGGTACCTGACGCTAATAATCTGTTATTAGAGTTAGACATAAAACATATTTGCTGGA  
ACTTAAGAGATTGTGCAGAATTAGGATCGTTCATATTGTGTGATTCCATCCAGAATCACCG  
TAATGTTCTTACCTTTGAATATACCGCTTCTTAATAGATCAATTATTTTATCTTGCGCCT  
GGTAATGGGATATAAGTATTCTTTGACCGTTGTAGGCTTTATCATCAATGGTTCGACCATA  
CTTTTTGTCTTTCTTATAACATCTCAATAATAGATGGCTTCCATATTAGATCAATAGACT  
TCTTTTCACAAACAACATAAATGATATCCGACTCAACCATTTTCAGCAATAGCCATCGTCA  
TGAATGTCTTACCAGTACCAGGTTTACCTGCAACAATATCACACGTAACCCATACTGGT  
CAATTCGATAATTATAATTTTCAAATAAGCTTTTTGAGACTCATCTGGTGTAAATGTCA  
ATTTGTCTAACATCTTGAATTTGAGTCTACCTGGTACAGAGTTGGTATCTACAGGACGAG  
TATTTTTAACCAGGTATATTGAAGCATTGCTTACGGATGGCATTAAACAGTTTTAATAG  
AGATGTATCTACTTCTATAATTCTTTACTGCTTCTAGCATGTAATATATTTACAGGAGCAA  
AGAATTTATAAAATGAAATACTACGACGACTAACCGTGTTAAATAACTGCGTAGCTAATT  
TAGTGGTTCGCCAATACTTGTTAATATCTCTAATGAATGCAGCACCATCAAACCCTGA



TGATAATTTCTTGATCAGTTTCAGTAATTGATAGCGAGCCCATTAGCTTCCTAAATGAGT  
CTATCATTGCATTTTTCTTAAGGGGTATGTAAATATAACTCTAAGTCATAAGATTAGCT  
AACGAATAAAAATACGCACAGTGCAATGATATAGAGCAAGGCAGTTTGCGTAAAACGCAC  
TGCACTTTAAAGGGGGTATCCAGTCGTAATAAACCGGGGTAATAAGTATCGTCAGGAA  
CGACACGAACCCCAACTACGGTGCCTTGCTACTCACCGACCTCTAGATAGGGGTTCGGACC  
TATTACATTAAGGAGCCCACCAGGGGCTCCTTTATGCCATTCATTATAAATTAATTTAA  
ATCTATATTACAGGATTACCATAAAGATATTTATCCTTTTATAATGAGGAAAAGATTATG  
TCCGATATTAATAGCACCAATGTAACAGATGAATTAGTACCTTATTTCCATCGGCGGAT  
GCCATTACTAGTTCTACTATTAGGGATGAAGTAATTCCTAATATTTTGTATTCTACAAG  
AATGCTTTTAGTGACTTCCAACACGTTAGTAATATCACAGGTAATAACCAGATTGCATCA  
GGTTATTTACCAGGTGTAGGTTATTATTTTCGAGTATAGTGTTACCGGTAATGCTAATCTT  
ATTCCACCTGAAGCAATTAAGTATTACGTAATGTAATCACTAAAAATGGATATAAAGAT  
GACATTACCATCACACCAAAAGGTTTTGGCCTAATCAATTGGTTCATTGTAAGAGTATAC  
GTAGATGAGCAAATTAAGAAGACTACTCAATAAAGAATTAGAAAAAGAGTTAGTTAAAAA  
ACTAGATTTTCTAGAACGTGATTTTAGAGCTATAAAAGAAGTTATCAAACTGGAAAATA  
TCCTGATCCTGTTAATCCGAATCGCAGACAAAGTGATTATGATTTATCTTTTAATAATTA  
ACCTATAAGAGGATGCTATGGAAATCACATTTCCATCTGTAAAAGAAGTAATGACAACTG  
ATCCAGCATTTATTGATTTGGTTCTGAAAAGTAAATTACTTACTATCCGTAAAGCAATGA  
TTGATGTTATTCGAAATATTGAGAATACATCACTAGCATCTAGTAGGCTTGTTAAACAGA  
AAAGCTATCCATATCAAACTACTTTTGAAGTTGATTTAAACCCAAAGGTTTTAAATGGT  
TTGATAAACAGATGCTATCAATATTAATAAATATTCTTCATGCTGAAGTAGTTAACCGG  
ATTGGGAGAGTATTGATATTTCTTATAATGGTAGGGATATACATGGTTTTGAAAAGTGA  
CTATTGTATTAACCTCTATGAAAGATGAAGCTATTAATATGATCTTTCAAAGCATGAA  
TTAAGATAACATATACCCTCCCCTTTATTGGGGAGGGATTATTTACTTATATGTTTAATA  
GAATAAGGACTCTACCTTGGAAATAATGCTAATGCTCTTCACCAGAGAAAAGAGATATATA  
GATAGACGTATTACACATTATCAGGTTGAGTAGTAATTAACAACCAATAATACGTTA  
TTCAATATTGAAATAGTTGTTATAAAACATTTATATTAATCTAATACAGGAAATAAAGAA  
AATGGGTGATTATGTATTTAGAACTCAAGCTAAAGTAAATAATGAATGGATTGGTAT  
CGAAGATATTGAACTAACACAGAATTATGATCTTTATGCATATCTACTTGATATTCGCAA  
TTATTGGGATGTAAAACCATTTGCTTACCATAATGGTGTTCCTGATGATCTGAAAAGAA  
ACCAGAATGGTGGAGTAGTTATGATGATGATCCACGCTGTGATGCATGGATTAGTGGTGA  
AGCTATTCTAAAAGGTATGAGTGAGCTTAAACCAGTTACTAAAACAGTATATATGAGTCT  
ATATACTTATATGTCCTGGGATCGTATGTCAGAACCAGATTGCTATTCACGGTATAGCCC  
ACGTCTTGTAACAGATGAACCAAAAATTAATAAATCTCTCAAAAACAATTACAGTATTA  
TAAGAATTTAACTGAAAGTTTTTATTCTCTAAACCTTAAAGCTAATTATGATTGGAAGGT  
TATCGACGGTCGGTTACAACGAGTCGGGCCTAAATGTGGTAAGAATCACCTACGTAATCT  
ACGTCGAGTATCGCGTTATCTATCTTTCTGCAATGTTCCCTAATGAACCTATCAAAGTAAC  
TTATACACTCACGGCTGATCAACAGCGAAAAGAATTTAAACCTTTTATTTATCAAGTCCG  
AAATGCCGTTCTTAAGTACGGTGTATCCGTCTTCTAATGAGGGTTAGATAATGGCAATG  
ACAGCTATTGTCGGTAGTCGCTATGCCCTACATGGGCCCTAGAATTGATGATACGCGCA  
GGAAGAACATTTGTTGATCTAGGTATAGGTATTTTCATCAGGCGATGCATATGGATCAGAT  
AGAGCTGGTTGGTATGGTGCAATTCAGTCTGATAAATGGGATACAGTAGAAAGTCGTATT  
TACATTATTCGAAATGGATTTCTTGGAAAGACGAATTGAGAATCTAGCGTGGTTTCATGAT  
GCCTCCGTATATACTGATACCATTCCCACAGCTATGGCAATGGCCTGTGCAGCTCGGGGA  
AGTTTCAATGGTTTAGGTAGAACAGGTATTGAACTACATACTCGTAATGTATTTCAAATT  
CATGGCCATACTTTACGTGAACCTGTTTCAACTATTATTGCATACGGTGAACAAAAGACA  
CCAACCTCTGTAATTAGTGGTGGTACTAATACAGCGTGGCAGTTGGCATTAGATGCAAT  
GTGCCAACTATGTATAACCTATACTGGTCCGATGATGTAAAGAGACTAGAAGAATGGTTA  
AATAAAAATGAATCTGATGAGCCATATATGCCAATTGATTGGTCTGAAATCTTAGATCCT  
AGAGATAGCCGTCTACCTGAATTGATGGATGAATATAATAATTAATTTTCTCAAATGAAT  
TAGTTATAATAGCCAAAATAAACCCCTCCTCTTAGTAGGAGGGTTTATATCGTCTCAAATT  
AGATTATCAATTAGAAAAGGAACATCAAATGAATTATCGTAATAGCAAACCTTACGTTAGT  
CCAGCAGAAGTGGATTGATCGTTTTATCTCCATTGCTATGGAGGTTGATAATGGCCGTGC  
AATTTCCAATGCATATCGCTATACTCTTAATGAACAGGGAATTAGTTCAGATAGTGAAGA  
TCTACGTATTCATCTCCTTTTGGAGTTGATAGAAAAGAATTCATCAAAGAACAAATTA  
CAAACCTATGTGATGAAGTTATAAGCCCTTTAAATCTGAAAGCATTGAGAATTAGTGGTGG  
TTTTGCATTACTAGATGATGAAGGAATCATTGGTTTCCTAATGAATGGAATGGAAGGTAC

CACTAGTCAGAACTTTAGATTATACTCCAATGAAGAACTGATCAAAGTATTTAAATTACG  
TTTTGAAGAAGTATTTGATCAGACTCGTCCACCTAGTATTTAAAAGAATTCGGGTTAACTA  
TCAAATAATGAACTATATAGCTTTAGTGAAGTTATTTCTGTTCGTAACACTACAATCCAAA  
TATGATGGAAATGTATCCATTCCAGATCGATCTCCAGCTGAAATCTGGACTGAATTCGC  
TGCATCTGAATCTAATGTTCTACTATTGATTGGTCTCTGGTACTGGTAAGTCTAATTA  
TATCAATGAGATTATTCGGGCTCGTGGTTATAATGATCGTAATGTGTATCTAGCTGATCA  
AGATGATGTACTTGGCCACGCCGGTTGACTAATTTTATTCGTGGTGTGAGGATAATTC  
ACTCATTATTACAGAAGACTCTGATAAAAATGGTGGCTAAACGTGTAGATGGTAATAGTAA  
TATGTCAGGGCTATTAATGCTACAGCTGGTCTAGTATCTACTAAGACCAAGATTATCAT  
TTCTACTAATCTTCCGACTCTTCGTGATGTTGATGAAGCTTTAGTTCGACCTGGCCGTGC  
TTTCGATATTCTTACCTTCAAACACTTACTGCTGAACAAGCGATTGCAGCTCGTTTAGC  
TAATGGTCTAGATCCAGTTGAGTTTGTTCGGTAATAATCTTACTTTAGCTGAAGCATTGAA  
TACTAGTTCTTGCAGTAGCCACGCAAAGCAAGTCGTGTAGGTTTCTAAGGAAAAGTAAAG  
CTGCTTTTAAACTAGCGAAGAAACATGAATTCCAACGTGTTGTTTATAATCCTGATGACC  
TTAAAGTAAAGCATTATTTACATACGGAGATCAGCATGCAGCGCAATAATGACCCGCAG  
CAAGTAATCATGTCGATTGAGATGTACAATAGCCTACTGGCTATGGCTAATGATTCACCT  
CATTACACGACAAAACCTTATCCAACGTCACGTGCGAAAGATGAATCCTTTTTTACAACCT  
GCACATCTAAAGAATGTCAGAATAAGGAAGCTATTCGGTCCCAACGTATTCGTGAAGCT  
CGGACTTTCTTGAAGCCAATCATAGAAAAATTCTGTACGCAAAGGTTGATATGGGTAAC  
TGTAATAAAGGAGATGATCCGGTTTACTTCCCATGCATATCTGAACGTATTGCCAAGAAT  
AGACAACTAATCCAAGTTCGTCATGCCAATGAAGTTGGTTATGGACGGTGCATCCGGTTG  
GTAGAGGCTAAATATCTCACAACCATTATTCCTGATGGATATATCCAAGGAACTGGGCCG  
TATAAAAAATATCTTGTTAAAGAGAATGGTCTTACGATATCCGTGAACAAGAAGAAAA  
CGTAAACAAGCTTTTTTCGAGTGAGATAGCTAAGAAGTTTGGATTCAAACATGATTCTTAC  
GATATGGATAATCTCAAAAAGAATTATTATACACAATGAGATTAGTATAAATGGACATTA  
GTTTATCTCCAGTATGAGTATTCCAACCTTCTTAAATATTACTAAAGAGCAGACTATGAAT  
ATATCAGTGTGCTCTTTGGAGGTAATTACTCTGGAGCATCTAATATGTGTGCAATTCC  
TGTAATACCTGTATCAAATGACATCACTGTTATTAAGCCAGGTGATACAGTTTGGTCAAC  
AGGTGTTCTCGGTATGAAAGCATCCTGTGAGCATCCACCAGCGCTATTCTGTATACGGGG  
TGATGAACTTGAAGTTCTAGAAATTAGCCCTCCCACGGAATATGAGAAAAAAGCAATGTA  
TAAGTGCCGCTTAAAAAGAGGCACTGGTCATTTCTGGATTTATCGTAGTGGGTTTACTAA  
AACAAAGCCATTTAATCACAATATGACTGGTTATGAGTTTTGGGATGGTGAGAAAATTAG  
AGAATATGGTGGGTATTAGAGTAAAAGAAAATGACTAGCGAAAATAATAAATCAGACATA  
CAACATGAACAAGAAGAACCCATATTCAAGATGCTTTTTTCTAAGTGCAGTTATAGGT  
GGATCATTATGGGAAATAATTAGACAGTGGTTTTAGCCACTGTCTTTATAATGTATTTTG  
AGTTATAAAAATGTCCATAGAAAAGCCTATTCCAATTTAATAGCTTCAATTAACAGT  
TAGAAAACATTTTCTAAATTAATTCAAGAGAAGAATTTAGATGAGGAATTACGACGGGA  
GTTTACGACTCCTATTCAATTCGACCCGACTAAGAAATCGGGAAACTCCTTTTGATAACG  
AACAGTCAGAAATGGATAAGTTAAAACCAATCGATGACTTTTGGAAAACATAAACAATTA  
AACCATCAGATGCTTATTTAGAAAGAAAGAATGAGCAACTAAAGATGATTAATCCGCATA  
AAGTTTATAATCCATTCAATGAAAAAGATACGATATTAACCTATTTCTAAATTATAAA  
AAGGATTTACTATGAAACAAGATCATCAATTCTGGCATGATAAACCATTTTCAGAAAATG  
AAGTTAGGAAGAACTTGGCGGATCGTCATTATCCAAACTAAGTACAGAACAGATTTTAG  
AAGAGTGGCGAACAGAACATATTGAACGTAATACTCCTTTAAGTAAAAGGCTATATGACA  
TTCGTAATAAAGCCATCAATGATTACTCACTTACTGATAATCAACAAGTTAATAATTTGT  
TGCAATGTGCAGTGGATCAAGTCTTAGCAGATGTGATCATTATGTTAGATGGTTCAGTGC  
CACATAAGCAATTTCAAATTTCTGAATATGAAATTGAAATGGACAGTAAGGAATTATCGA  
TTAAAGAACAATACTCGTCCAATAACTGAAGATCTACTAAAAAATTATTTTGAATTGGTGA  
ATGGCAAATGACTGAACGTATTCATTACTCAGATCGTAAGTTACCGCTGTGTTTTAAAGG  
TGTTTATGACATTCCAGTTGTAACCATCGAAAACCTATTGTAAGTGGTATGGTCTTAATAT  
TGTCTATCCAGATGGGTGTGTTGAATGGGTTGACACTGATTTACTTGGCTGAAATAGAACG  
GGAAAGCAAGTTCTCAGTAATGGGTGATCACAACATCATCCAATTCTGCTGGACAAAGT  
AGCTGAGAAGATTGGCGGGGTGGCATGTGAGGTTGCACGTGAGTTGATGACTGGTCTGTTG  
GGTACTAGAGGTTATGGACGGTAAAATCCCTGGTCAAGAAAAATTCTGTTAAATGGATGA  
TTAAATGGGTATTGATGTTTTCCCTGTAGTTACCAAACGTTCCACACGTTCTTCAGATG  
GTGCACGTGTACTTAAATTCATTGACATGCATACATGCGAGGCTCTTAACTTTAGCCGTT  
GCTATTATCTTTGGGATTGGTTAACCGATAATAATGAGTATACCAACCGATTCTGTGCAC

CGACTCTTAAAGGCTGTGGATTTGGTACACTCGTCAGTGATGACTCGCATCCAGTATGGA  
ACAACCTTTGAAGGTCGCCTTTCACAAATTGTCAATTCCAAACAGGACAATCTAACACCGT  
ACGCCTATTATAGTGAAGATGGTTGGTACCCACTTACAATGATCTTCAATATGGAAGACC  
TCTGGAACCTTCGATTATGATCAGAAGCCAACGATGTTTCGATCAAGATGTTAATGGTGAAG  
TCATTTTCGAAAAAACCTATCGCCAGCTATTTTTGAGCAATGGTGTGGATGATGGTTATT  
TCAAGTTCCTGGAAGAACTAAAAAGATGGAGTGTGTTCACTTCATCGCCCCGATTCTGGG  
GATGATTACTTAACAGGAAAAGTTAAAAATGGCTATTCTATCTGATAAAAACAATCACTGA  
CTTATCTAAAGGTCGTGAACCAATGATTACGGATTTCAATTGGTCACCAGGTCCGTGAAAA  
AGATGGTAAAAAGATTATTAGTTATGGGCTTAGTTCATATGGGTACGATGTAAGGCTAGC  
CCGTAATTTTAAGATCTTTTCTAATGTAACAAGTGCAGTTATTGACCCATTAGACCCTAG  
TGATGGATTCTTAGTAGATTGGACTGGTGATTATTGTATTATTCCACCTAACAGTTATAT  
TCTTGGTCATACTGTAGAATCGTTTAATATTCCAGATGATGTCCTAGCTATTTGCACAGG  
TAAATCAACCTATGCACGACTAGGTGCAATTGTTAATGTCACTCCTATTGAACCAGGTTT  
CAAAGGACAAGTCGTTATTGAGATTGCAAACCTGCACTACACTACCTCTAAAAATTTATGC  
TGATATGGGTATTGCTCAGTTTATGTTCTTTAGAGGTGATGCCCCATGTGAAGTTAGTTA  
TGCAAAACGTAATGGTAAATATCAAAATCAAATTGGTATCACAACAGCGAGACTTTAATA  
ATGCTTAGTCCTAACCAAGAAAAGTTTGTGAGTCGGCTAACTGAAATTACAAAAGCATCT  
GATTCAGAACCTTTGTGCAGTTAATGATACAATCTCATTTGATATTTCAACTGATAACATG  
CATGCTGAATTCCTTAATTTGGTTGCTGAACTGCATTTTAAGATTGTTTCATATGTTTCCA  
ATTAACCAATATAACACTCGTTATCGGGTTGTTATTCATGAACCATTCTATCTATGATTG  
ACCAACATAGTGGTTTATACATTTAAAGCATTTTAAACAGTATATCACAAATGTGATATA  
ATCAACATATATAGGAGATTCTAATACATGTCACGCAATACTATTTCTTCCCTGGAGTGAA  
CTTGGTTCAATGCTGGGTGTACAGCCGAAGCCGGTTCAGAAGAAACAGAAAAATCGAGCT  
AAAAAGAATCATGAAGCTGCGGTTTCGTA AAAAATTCTAGGGAAACCTTTATGGACATTGCT  
GCAAAACAACTAAATCAAGTCCTAACTTCCGTAAGAACAACAAAAAGATGTTTCGTCAT  
TGCAGTGTATGTGATAATATTAACCTAAAAGAAAATGGTATCGAAGAAGGGCGGGCCAAA  
CCAATTGGTATGACCGAATTAGCTAAGTTCAAAGTTGAGCTAGCAAAAAATGGTCTTGAG  
CTATTCGGTTGTGAAGTACGTAAGCAAGAATCTTTTGCAGATGCATTTTATGGTAATAAT  
ACCATTTGTGAAGAACTGCAAAGCTGATTAAAGCATAACCAGGAAGAGTTTGATTGAGTC  
TTCCGCCGCGCTATTACTGCCTAACGATATAGGGGACCTTCTGGTCCCCTTAGTCATTAT  
TATTTTTTTTTGGATTTTAGCTATGGATGATATTGAAAAGAAAATAGCCAAAATGGAAGC  
TCTATTTAGGTACCATGGTATTACCGTTGATATTAACCATAAGTTGAAACCTAATGCTAA  
GACAAAATTAACCTCGTGCAGGAAATTAACCGATTACAAATACAATATGATAAGCTTTTAGC  
TGAACGCGAAGAAGCTTTAAAAGCAATTCCTTAAATTATTGAGGATTTATAAAATGTTCA  
AGCGCGTTATGAGATATATTCGTGTTTTGAAATTAATTGTTATTTTCTATGTTAGGCGAC  
AACTGGGTTTACACGATTATTGTACACGAAAAAATACAATTGCATTAGATCGTGAAAATA  
ATAAACGTGTTCAAATAAATGCTATTTCTCGTAAAGTTCGAAGAAGCATTATTTAAAGTTG  
AACTAGTTGCGATAATGAGTAAGCGGTAATGTTGTCATAAAGCCCTCCCTTCGGGGAGGG  
CTATTGCACTAAATTTTATTTGAGATCTACATTATAGATTAGCATATACTAATGGAAACA  
TCTACATGAGGTAATTATCGTGAACGAAGCTATTATTTCACTGGACCGCAGAGGAGCCCA  
TCATTTAGGATCTCGCGGTTATCCAATTAGATCAATTGGAGATGTTACAGTATTTGATTT  
GAATCATAATCAACTATATCCCAAATCCATTCTCTTAAAGATCAAATCATGATGGATG  
GCACTCCATTAGTGTTGATGATGAAAATGGAGTAACAGCGTATACGTTTGTTTTGAATAT  
GGATCTTAATCTAGGATGGCTAAGACCTAAGCAGCCTAATGTTGGTGGTGGATATATCAA  
AATCAAATTTGAACAATAAGCGGTGTGTACACCGCTTTTATTCCGTGTTTATACTCAAAA  
GGTAATTTATGATTATGTTAAGTACTTAAAAAATGTTATTGATATTTTAAACAAACCAA  
AAAAGGTAGATACATTAGAACA AAAAGATAGCTAATCTAATGATAAATACATCAGAGAAA  
ATGTAGATGTTGATCAAATTGATATTCTGTCAGGTTATTTACAGGAATGCTATCTGGGA  
AATTACATGATCGAAGTTTAGTATGGGGTTATTATACCAAAGAACTAAGACATGGATGA  
TTTATTTTGTGTAACAAAATTTGATTCATTCATGTATAAAGTAACTAATAATTCATTAG  
ATATTATTAATCTAACTGATATAGAAGATCTTAAATTATTCTATTTCTCTAATGAACAAT  
ACATACCTGTAAATAACCAATCAATAGTGATCTAAATGTGGCTGTAATTTTACATCAA  
AACCCTCACTAAGGATTTCAATTGATCCATCTTTAATAGATCAAGTTAAATCAGTTAATA  
GTAATTACAAGATTGTGATGGGTGGGTTATCTAATAATTCCAAATTTGATAGTAACCCAA  
TAACTCTAATTGTAGAGTCTTATGAAGCAGATGGTGATATCGTCGTAGTTGAACTAACTA  
ATGGTACAACCTGTGGCCATCAATAGAAACTACTTAATATGTTTATGTATCAGTCAAGAA  
TAGTTGATACATGTAATAACTCAAAGTGCTTATAGATTTCAATGGACGGCTAAAGTTCA

CACCTATGGAGAATCATTAGGTGGTATAAATAGTGCAATGCATTATTGGTCAAGTAATG  
GAATTATCAAATAGGTGTGACTATAGTATCATATTAGATCTAGATAAGTTTCCAGAGA  
TTGCTAATCATATTGGAACTGGATACATATTGAAGCTAAGACAATTGCAAAAGTAATTG  
ACTCGTTGTGGTACCATACTTAACAAATGGGGAGCTTAGTACGCTCATTGTTGATTTAG  
ATAATATCGATATTCAGTATCGTGGTTAACATTATCTGGTAATATCAGCTTGCCTGATC  
GTTTAGATAAATGCAAAATCAAAGTATAAATCCATCAACTGATCCATATGAGATACCTA  
GTCTAAATGGTAAACGTGATGTCCATGGTTTTTATAGAGTAGATGGAAGTTTATTA  
GATTAATAGTGTATTAGTCTTTTTTATAAATAGTTAATGAAAAGATGTCTCCACATA  
TAAGAAATTAGTTACATTAGATAGAAATGGATACATTTTCAATAATAACAAGATCTGTA  
TTCGATTAATCTTTCCTCTATCTTGAACCTCATTATTAGTACGAAATGACTATATTGT  
TCAAGAAATTATAATGTGTCTAAGTTCTAAGCCACAAGCAGTGAAAGAACTATTCCTTGA  
AGACCTAAGTACTAATAATCAACTACATTATTCATTGTTAGCTTGTAAAATAATGAATGA  
GAGGAAAATCATTAATAAGAATATTAATAAAGCGTGTGCTAAAAATATGGCTACTTTTT  
AAAGGGTTATTTCCCAAGAGACTACTTCACTTGGTATAGTTGTCTCTATTTAGCCCTATC  
GGCTAAAAATAAAGCTGAGAATAACAAAGTATCTGTTATTAATGAGTAAATACAATACTA  
TGATAGTATTTCTATTACGTACCTTTTCGAGGCATATACTCCATGACTTATGTTGTGGG  
GTATATGTGTTATAATGTTAAGAGGTTAAAATGCAAAAGCAACTAAATTCTGATGATCT  
AGATGTTCTTGACTCCTTTAATGCAGCATGGGAAATTGTTAAGGAAGAACAATACTGATCT  
ATTCTCACGTATAGCAATGATGGCTATTAATAAGTTAACTGATGATGATATCTCAGTCAA  
TGATACTAAAGTAAGTATTCAGCAAGTAGTTAATTTCCATGAGAGAATTCGAGATATCAT  
TCCTAGCTCTGAGATTGTTAATCTTACGATTGTTAAAATCTTAGGTGAAATGAATGG  
TTGGTTAGAATTTGATGAACTTAATGAAGAACTATTTACAGCATTAGGTAAAGCTTATAG  
CACTGTTAACTTTAATTGATCATTAAATATGAAAATTAACAATAATAAGTGAGGCATGTG  
CCTCACTACATAGTAGAGGACTAACACATGCAGATTCAATTAGATCCATTAATGGTTTAC  
CATGGTAGCACTAGATCTTTATTTAATGAAGATTCTAGTTTAAATGTTGTTGATGTAAGG  
GGCATTCAATTAATGCTGAAGGGATAGCTGATAACAAAATTACTATTTTGATTATGGA  
CGTAAGAAAGATGATGATGGTGAATACTCACTATTTACGTACATGATCGAAATGTAGCT  
AAAGATTTTATTGTACTGTACGTTGAATTCATTTAGGCACACATAAATTTACATACGTAT  
GTACATCCACAATATCGGCATAAATTTCCAGTATTAGTACTGGAGTTATTATTCGTTTAA  
TATTAAGGGACTCTTAATGAGAGTCCCTATTTATTTTGCGTAAAGTGTATATATGAAAAG  
AAAGCATTATTTGAACTAGTCTAAAATATTCAAACACCAAATATAACAAAGCGATCATC  
TGTAATGAAATAAAATTTCAAACGGTACTAAACATACTAACCCCTATGAATTAACGCACG  
GTGGTTGTATGAAAATCTATGGTTCTTCTTTTCATGAAGTCACACTAGAATATGGAAAAC  
CCTTTATACGCAATGGGGTTTTAAAACATTTACCTGATCTAGGTACACCAGACTTAGGAT  
GGACTGATTTTAAATATCCTTGAATTATTCCAGGACCAGGTTATATCGATAAGAATACTC  
TAACTTTTATAAAGAAAGAGATTGCTTATTTCCAGCAATCGTCAGGTTTACTGTATTTG  
AAGAAGAGCGTAATCGTATTATATCAACAATTAATGTTGATCTGGCGAAAAGGAATTAG  
AGTGAATAAAGACTGATCGTTTTTGGGAAATCGAAAATTTGCAATTAGATTCCAATTAA  
CTCAAATCCTTATTCAGTTTTATGGGCATCCAATGGATCACTATAGGTGTCATATGCTT  
ACAATGGTTCCGTTATACCCTGGTGTGAGAGGATATCTTGAAGACTCGGTATTTTCAAAG  
AATGGGATTAATGATATTGGTTATCATAAATGGCTATCCCCTAAACGAGTGGTAGGTCCA  
GATGGGCTAATCATTAGTGAGGTAAGATAACTCCACGTATAGCCAGAATGGAAGGCGAA  
GTAATTCTTAAAGTATGGGATAAATGGCGAAGAGCCCAGCCTAAGCTAGTTGCTACTGTG  
TATATTGATCCTAAAGATAATTCATACAGGGTAGAAGTAGAGCCTTTTTATGCATGTCGT  
CGGATATTACTTGAAGTGGATTTATGGGCTCAAGTAATACCTGGTGACCGTGCACCATTT  
GTAAATGACTCTGTAGATGGTACATGGGCATCAAGAGATATTATTTAATGCTTATACCAA  
TTAACTTCGTAAGACATTTAAAAGACTGGGCAAAAGACATTCTAAAAGAGTGTGGCTG  
CCCAGTCATCTTTTCTGCCGTTTGGTGAATTAACGTTGAGGAAGCAAAGAATGCCTAAGA  
AAAATAAAGAATATATTCTTGATGTTATTGATACTAATACTAAAGAACTACAGGCACAGA  
TTAATACGTTAAGTGAACCTTGTATGTGAACAACAGAAACAAATTAGTTTATTAACAGAA  
CACTAGTTGAGTTACAAGATAATTTGAAAAAAAAGATAGGGATTAAAAATGAATGTAGT  
TGATGAGTACCTACTTTTGACCTTATTCTGGATAGTTGTTTTATTTTCATTTATCCATGT  
ATCGCAACGTTATAAACGAATTAAGAAAAACGAAGAGTTGATTTTCTAGTTAAAAGAGA  
ATTAGTATATAATTATTTCAAAGTAACAGATCCTTCTGAATTAATAATGATTCTATAGA  
AAGTATTATACTTAAATTAATTGGTGATAATTATAGAAAATTAACAGATATGCAGAAATT  
AGTAATTAGGGCAGCAGCAGGTCGTGGTTATATGTATAACCCTAACAGACCAATTGGCAA  
ACATTTGAAATATATGTGAGTTATAAAAATGTCAGAAAACCGCCCGTTATATATAGCTGC

TATTA AAAAAGATCTTTTAAAAACAACAGGTTTGTATAAACCTTATAATGATTCACCAAT  
AGCTGTGGTTAGTAATGAAACCAGTAAGTGGCATGTAATGCTAAATATATTACGCATGG  
TTGGGAATGGATTGAAATACCTGAAGGTGAGATTAACAACCGGAAAGTTACCATGACTA  
TGTTATTCTAGCATTAAACCACTGTATTAAGTACTTTAGATTATAAAAAATGATCCAAA  
CTCTGATAAATATATCAAGCAAATAATCTGTACTGATATAGCACTAAAAGTTGAATATGA  
TAAATTAATCAATGTGCTAGAGACAAGTAACGAGTTAGATTTAGCTGATGAATACACCTT  
TACTAAACAAGGTAATCTCAGAGGATATTTCCATTATGATGAGTATTATGGTTTAGATGT  
ACTGGCATGTGCATCTTATGTGATCTGTTACACATATCGAACTAACACCTAGAAATGTTAA  
ATAATAGGAACTACTGATGAAAAAACGTACCGCTTATATCGATCGTGCTAAATTCCGAGA  
TTTTCTAGCCGAGAAAAAATTAGCGTAAGTAGCCGACAGTGGATTGAAAAGAGCCACCC  
AGATCATAAAGAATATTACAAGGCAATCCTAGATTACGTCGTATCTAATGTAAAATTCAA  
AGAAGAACGTTATATTGAAAAGGCAAATGAGGTTATTATTAATGGGTGTATTCGATATCA  
TCTACCCATTCACGCTCAACGTGCACTAACTGTAGTTGAAGAAGAATTCATTAATAATGC  
TAGTCTTCAATTTACTTATCTGAATGATAATGATACTAATATTGCCAATATTAACCTTGA  
AGAAGTTCTTGATGCACAAGTAAGTACTGAGAATGAACTGAACTAAGACAAAGTTGGGAATA  
TGCAATTGTGATATCAACCCATCAGAATACTTTATTGATGTTGTTGATGTACCAGAAGA  
ACTAATTCTTCGTCTATCTGTATTCCGTTTTGTACACAGTATCAAGAACTGGAAGTAAA  
AGATAAGTTAGATCTTGCCGATGTTGTAGGTAAAGATCTAGTTATTGAAGATGGTAACGT  
TAAGGTTGTAGAATGATTTAAGGCTATTTTAGTAGCTTTATATTCTGATCTTAGCAACCT  
AGGTACAACGTGATGCAATGTTTAAACACACGTAATGAAGTTAGTGGCCGTATTAAGTACG  
TTGTTATACGTATCAAACCCACTAGCTGCATCGTTGGTAGTTGACGAGAATTACTGTAAT  
GGTGTGCACTTATAGCACATGCCACAGCAGAAGCACGTCAGCGTAAAACACCCATTTTA  
CAATGGGAAGAAAACCTACGATCCCTAAAAGGGTACGGCGTGAAGAACAAGATAACGTT  
CTTTACAATGTTCTCCAGCAGCAATTAAGAGGGTGCACGTTGTGTATTCACGTAGACAA  
AGCCACGTGATGCATACGTTACATCATTTAAAACCTGTATGGATAACAACCTACGGTAAA  
GCTGTGGTTGTAAAATAAATACCAGCCCTTCGGGGCTGGTTTATTTTCATCTAGATGAGAA  
TCTGTGGGTTGCAAATGTATAAAGTATTTGTTATATCAATGATAACACTAACGGCTATAT  
CAACATGTGTAACCTTCATTATTAATAAAAAATCATTATATTCACTGGATGGGTGTTT  
ATAAGTTAGATATGTATTAGATAAAATGCCAATGGCATAAGTTATTTTTTCTATCAA  
ATGCTGTCCAAGACATTATAGATAAAGAATCATCTAAAATAACAAATCAACATATTTTTA  
CATCTTTTATTTACGATATCAACTCATTGATTATATTA AAAATGTAATAATAGGGAAACAG  
CAAATGAATGATATCATGACAGTAATTATAGGTATTTTGTCTGATTATAATGATGGCT  
TTAATTAACCTGGGGTTATTATGCCATCAAACACACGATAAAGTGTAACAGGCTTTATAAA  
GAAGCACTATCAATTATTGACAATATGAGTGATGGTTTATCTGAATACCAGTATACAGTA  
GCTATTGGACGTTTACGTAAAAAGGCATACTCTATCGACCATTTAACTGCTGTAAAATG  
TTTGAAGCATTAGACTTAGTTATTAAGATAAGTCAAGAAAGAAAAATAAATAAGCATAA  
ATAGGAGAGCTATTTAGCTCTCCTTTATTGCATTAAATTTTTTTTGAATCTATATTACA  
TATTTGGTCAAGTCATATCAAATAGGTAGTTATAATGCTAGCATTACATTCACTACTAT  
TATTAGTTATAGTGATTTGTTATATAATTCATAAGTGGTTGTGGTATACTTTCAATATGT  
TTAAACTAAAAGACATTATTA AAAATAAAGACAATTTAACTAATGATGAACTATTA AAAAT  
TACTCATTGATAAAAATAAAGGCAACCTAATGTATCCATTCTTTACAGGTAATGAGAAAGT  
TACTGTAGATGTTCTTGATGATAAACATAATCTACATAGAAGTTGGACTGATTATAACA  
TCCCATCACGACGCGTGTGGACGGTAAACTAACCAATGTGTGGTATAAAGTTGAACCACC  
GATGAGTGCTAAGGATATTGAAAATAACTTTACAATTGACAAAGATAAAGTTAAATTATC  
TAATCGTTTGCACCAAGCTTTAGATGCAACGTTGATTA AAAATGAATTAGAAGAGTTTAA  
CAAATTAATTGATCTATGCGTAAAACATGTTAATTCAGTTAGTATTCATCTAGGTCTTAC  
TATTTGGAAATTAGCAGATACTGTAAAATATGAAAAGCAGATTTAAAGAACTATTTAA  
TGCACATTATACCAAATCTACTGAACTTGTAAAAGAAAAGAATATAGTGCCCTCAGTAGA  
AGATATCTTCCTATAATTTATTTAAAGGTAATACAAATATGCTAAAGGTA AAAATCATTAC  
TCACTGGCCATATTTCTCGAGCTACCTATGATTGGTTTCTTGAGAATAACTTCAGAGATA  
TTCTAATTGTAGCACATACTCAATTAGTACCTGATTTATCTGAGGTAGCTCTAAAGCATG  
CGAAAGAAGATCACACTATCACTTTCAATATCCATCCACGCTGTGCAAAGAATTTTTATA  
TCAGTGACGAATATATCTCTTTCAATGTAACAGTAAATGGAGTTGGGGTCAGTATTAAC  
TTCTCTTTATGCAGTATTGGGTGTAGTTACACCTATTGATGATAATTCTAACGCATTCT  
TTGAAATGCCACTAGTAGATAGATATCTCAATGCAGATACTATTCGTGCAACATTAGAAG  
GAACTGTTAATAATGTAGTTGACAAAAACCCAGTATTA ACTACCGTAGGTAATGTCACTG  
AGGTTAATTTTAAAAATAAAGCCGATACCCTAATGGTAAGTTAGTTGTAAGGAATACAT

CTGAGAATGAGCATGATCAGATGATTGAAAGCGCCATTAACAGAGTAACTGAATTTAGTA  
ATCCAGAATTAGATGCACATATTAGAGTAGCGGTAACCTGTAATTAACAGAATGCACCAG  
AATTAATTATGGATTGGTGTGAGCGGGTTATTAATTGTACACGTAATGAAAACCTATCAGG  
ATAACATCAATGTACTTATGATGGAACCTCCTCAGTTACCCTATTTCAAATGTGGTTAGTG  
AATCAACTGTGGACTCGGGTGATAATACATCTAATTCATTTGACAATGATGTAATAAGA  
TGGTTGAGGATTTCAATAATTCTTCCAATTCGCAGGTTATTATTAATAAACCTTCTCGTC  
CTACCGGTACACCAAAAACCTCACTGTTATTAAGGTGGTAAGAAATGAATGCAACTTTAGC  
AATTTCTTTTATGATAGTATCAGTATCGCTGGTTATCAAGCCAATGGTGCATCGTAGTCAAC  
CGCTGAGTTCTCTGACATGGCTACTTGTTTTAGCGCGATTGAGCGCATTCAAAAACCTAGC  
TAAAGCAAGTGCTATTCGTAATAATGTAGAGACTGTAAAATCAGTGATGGTGTCTATT  
ACGTTATTTTTCTTCTAGTACTAGTAAAGTAGAACATACTCTAATCTGTGTAAATAAATA  
GGTACGGATATGTCTGAGAAAATGTATTTATCTTTTTCTGGAATTGGACACAATGACGTA  
ATCAAACAAGATCTTAATGGATTCGTTCCAATGGATGTATCAACTATTGATAATGAAGTG  
GCTGATCGATTATTTTATACTCCATTCAATAGTTCTGAACCAGGTACCTCATTACCTAAT  
GTTGCTAATGTGGTATTCAAGGTATTACCTATCCATATCGAGGATAACACTATCTGTGTT  
TTAGATAGTTGTTCTAGTACCGAATACTCATTGAATGACTTAGTTGATACCAGTGTCTCA  
TCATTAGAAACATATGGTCCATTAATAGATTTACGTAGTAGTGATCCAATTGAGACATAT  
GCTAATCAGGCAGTGTATACTTGGTTAAATAAGAATATCTGTGATATCGAATTTGAAGTA  
CATGGCGGGCTGCAAGTGCAACTAACTGCTGACCAAGTGCGTTCCAATGTTAATGCATTT  
GTAGCAGGTATTGATCTTGACATCGACGATAAATTGATGGTATATGTGGTGATTAATAATC  
AATGATCGTTTATACGATGCTTGGTCTAGTCAACATGTGGTGGAACCATTAACAATGTAT  
CATGTGCAAGGTGGTCATGAGCCTATTGTCTATAGTGAGACCCATATTGAAAATAGCCTA  
TTGCGATATGCTAAAGAGAAAGGTTGGGCTGAAATTTTGACTCGTATTGGTCTGTAATAA  
AAATACTTCTTATAGACTAATAATATAGGTAAGATACTAGCCGATTGGTTAGTTGCGCTT  
AGGGAGTCCTTCGGGACTCCCGTATATCGTCTAGGAGGTTTTATGTATACAGTTACACTT  
GAACAAGTAGGACACCGTATACCGTCTAGTTTAAAGTGCTTTTGTAAATTAGACCGTTTGAA  
AATACCATTACGCATAATGATACGTCTTATTACTTGATCATGGGTAAAGATGATTTTCGAT  
AACATGCACATGGAATGGCGAGATGTAGCTGTAGTTGATAGTCAAGCCGTTATAGTTGCT  
ACATACACTCCATCGAAAACCTCATTTAATCTTGTAAAAAATGAATTAGGTATTCCAGTT  
AATATCAAATACAAACGGATAGAGGTTGATCTATGATTACCAGTAAGGTTAGAGGAATGA  
AGTATGGATCGTCTTGATGAAAGAATCGCATTCAAGTGTAAAGTCGTACAAAATTTTCAAT  
GCTCTCTCCCATGGCCGAGTTTCGGGCATTGATTATTACTTTAAAGATGGTAAGGGTACG  
ATCGTATCTATTAGTGATGATCGCCGCCATGATAAACATCTCTGGTTCAACTGTGGACTA  
GTAGACAATCCGAGGATCAAGTAATGGAACAATATCTTAATTCAATCCGTTTAGTTAAAG  
AACACGGTGTACATAAAGGTGACCGTACTGGTACTGGTACTCAGAGCATGTTTGGTCAAC  
AAGAACGTTATAGTCTGCGTAATAATCGGCTACCAGTTGTAACCACCAAGAAGATTCATC  
TAGCTTCTGTAATTCATGAATTGTTCTGGATGCTGTCAGGTGATACTAAGGTGGATTACC  
TGATCGCTAATGGTGTACGCATCTGGAACGAGTGGGTTAAACCTGAAACCGCAGTATATG  
AGCCGATGACCGATGAGGCCGTTCTTAAAGCAGTAACTGCCCTCATTGGTGCCCCATTTCG  
TAATGTACTTACATTGTATGAACGATGACTCTACTCCATTCAATTGAGACTGTAGCGGAAT  
TCGAGTCGGGTATGACTCCAGAGACTATTCAGGCCTTCTGGGATGAATATCCAGTTAACC  
GTGAGGAAATCCAATACATCATTGGAGTTAGCGTAACGTCGTGGAATAGGTTTCGCTACTG  
AAGGGTTCGATGAAGCCAAAATCCTGAAGGTATTCGTGCTGAATATAACAAGCGACTGT  
ATCGTGCTTTGATGCATAAAGAACCAGAGCGTCTGGTTCGGCGGCATCTAGGTGCTGTTT  
ACGGTAAGACATGGCGTAATCTTGAAGACACTCGTGTAATCCCTAAATATGAGTGGTTTG  
ATTATGAGAAGCGTGGTTTTGACTTCGTGGCGGATATCCCAGGTACAACCATGGAAACCG  
ATAGATGCGTGGTACTCGACGTATCGACCAAATCCAAGACATCATCGATCAACTTCGCA  
CCAACCCGATTCTCGTCGGATCATTGTTTGTGCATGGGCGCCACATCTTATTGATGAGC  
AGGCACTCCCACCTTGCCACGCATTTATTCAGTTCTGGACCCGTGAACTGACCGTAGATG  
AACGAGTGCAAGCTCTAGACCAAACCCAGTTCGAAGCTGATGCTTATCATGATAAGATTA  
GTGGTGAGATTACTCGTGGTCAACCTCCATTTCGATAGTGCTGAGCAGGTTAAAGCACTTC  
TGCGTGTCTGTCGTGGTTATGAAAAGGCTACAGATGAAGCAGTAGTAGAATGGCTGGATC  
AACATGGTGCTCCGAAACGAGCCATCAGTTGTCAACTCTATCAAAGATCTTGTGATACTT  
TCTTAGGAAAACCCTTTAACATCACGTTCTATAGTCTGCTGACTCACATGTTAGCTAACC  
AAATGAATATGATTGCTGAAGAGTTTATCTGGACTGGTGGTGTATGTACATATTTACTCTA  
ATCACCAGAAGACAGACTGATCTTCAATTAACCTCGTGAACCGAAGGTTCTACCAACTATTC  
GTTTCAAACAAGAAGCTATTGGTAAAGATATTCGGGAAATTGGTGTAGATGATTTTGTTA

TCGAAAACACTACGAATATCATTACACATTGCTGGTAAAGTTGCTGTCTAACATAAATGCC  
TCCCTTTGGGGAGGCTTTATTTCCCTATGGTTCATTTGGGATATTCAGCGAATACTACTA  
TGCACAGACTCCTGCCTAGTGGACCGATGTAGTACGTAAATACAATACAAAGGAATTTGT  
CCTATGAACAACACTGAACTGAAGCGTCAACTTCAAATGGTTATTGAACTGATGGGGGTC  
TTTCCTGATCCTCTCACGATCGGTATCGCCGGTAATAGAGTAACCAAAGAACTCGCTGT  
AGCCTTTTTAACGGAAAAGATCCAGGTGAAGAGTTTAGTATTGGTCTTGGTATCAGTAGT  
CGCAAGCAATGGTTGAAGCTTGCAGATCATGCACTGATTCTTACTAAGCCCAGAAAGAG  
CCTATTGTCATCCCGTACGAGGCTATATGCGAACTATCGGCACCCTGAAATTCGAAGAG  
GAACTTGTGAGCAAAGGTTGGTTTGTATACAACTTGCTGGGTACATCGATGTTTCATGTAT  
CTGGACACAGGTAAAGAAGAAAACTCAAATTTGAAAAGGTTGGTGGATAATGGATCAAC  
GTCATCCAGTTAACGATGAGATGCGGGTAACGATTAATGTAGAACTAGACCGTATCGAAA  
AGAAATATGGTGTAAAGATTATTTATGCTTGTGAGTCCGGTAGTCGTGGATGGGGCTTTG  
CTTCAACCAATAGTACTATGACGTTTCGTTTCATTTACGTTAACCATCCGAGTCATTATG  
TTCGTGTGGATAATGAAGCACGTGATACTATTGAAGAGATGGTGTCTAAAGAAGTAGACC  
TAGCTGGTTGGAGTATCACTAAGACTCTTCAGCTTGCTTACAAGTCTAACCCACTCTCT  
TGGAAATGGCTAAACTCCCCAATCGTTTACCGTAAGGTTGATCGGGACTACAAGTTAATCC  
GTGATGCTGCGCTAAAGCACTTCATCCCTGAATCGAGTTACATGCATTATATCTCGATGG  
CCAAACAACCAAAAATGCGTTGGTTGTCAGATGAGAAAGTCCGGATGAAGAAATACTTCT  
ATTCTCTTCGTCCTCTGTTGGCTGCAATGTGGGTCCGTGAAAGTCTGGAACATCCACCGA  
TGGTATTCCATGATCTACTGCCTCTTCTAACAGATCCTATCCTTTATAAACGTATCCAAG  
AACTGGTTAATGATAAGGTTGGGGCTACTGAACAGGATCTGATAGATCGTTGCCCTATAT  
TAGATCAGTTCATCGATTTTCAATTGAGTCGTGAGAAACCAGACTTCGGTAAATACGAAC  
GTCCGGACATCTATGCACTTACCGATCTAGCCTGGCATTTTGTTGACCAGTACAAGATCG  
ACACATTCGCGAAACTACAGGGCATCGAACGAAGAAAATATTAGTCAATAAAGAAAAAAG  
TTAATAACCATCTTATTAAGGAAAATATTTTATGCTATTTAAAGATGAACTATGCATC  
GAAAATATCTTAGTAAAAGAAAACTATATCTAGTTAAAATATTGGTTCGGACTCGTGAG  
GTATATCCTAATCCAGAAGTAATGTATAAGGATATTAAGAAGTTCACTAAAACGTATGGT  
GTGATTCCAATGCAGTTCTTAGGGCCACTACTTCATGAAATCGTTGAACGAGAAGATTT  
GCCCTAAGAGAAAAAGAAGCACAGAAATTCATTGATAATAATCCTTATACTTTAGTTGAA  
CCTATCGGTAATATTCATCTTGACTACGTTATTCGTAATTATATTATCCCAACTACTACT  
GATCCAGATTGTAATAAATTCACTATTAATCTTTATAAGTATAAAGAATTTTTAGAAAG  
GTTACTAATAGGTTAAACATGCGACCTTTTTGGGCTGGCTGGATGCCTAATCGTAATTAC  
TACTGGCGATGCGTGAACGTCTACTTACCATCCAGGATATTGTGGAAAATTAATGAAGT  
TTAGAATGTTAAAAGTTAATGTATTCAATTTACTCTACTACATACTTTACCCTACTCCAT  
ATTGGGGTAGGGGTATTAAGGTGGGGTATAAATATGTCAAGCAACAACTATCTGCACAA  
CTTAATCGTCATACAATACTCGTATAGTTAATTATTATGTTTCACTAGCCGCGAGTCGT  
TATAATGACACTAATCCTTCAGCAAAGGCTAAAGGTAAATGGCGTAAACATAATCCGTTT  
AACTGCGGTAGGTCTCGTTGTATGCTATGTGGTAATCCGCGTAAACATTGGAATAGGATT  
ACTCTTAATGAATTAATAATAAATATTTTATTAAAGAGCAACTCAATGATCTTTATGTA  
GATTATACTACGCTGGCTGAGGATTAATTTATGCATGAAGAATATGAAGCAATTTAATAG  
TTTAGATTAACCATTCGAAATAAATTTGGAATTAGCAAATGAAAGTTAAAATAAGCAAC  
AGCCTAAGTTTGTCAATCTAGCTACTATGCAAGCTGCTTGGCGGCTTAATAATGCAGAAC  
TCAAAGCTAAACGTGAAGCTAAAGAGAAACAAAAAGAGTAAAACCTATTTAGTTGCATAAA  
GAGAGAGGATAAATTCCTCTCTCTTTTTATGTTGTTTTATAATTTGTATACTACAGGTAT  
ATTTCAATATGGAATCTTATTTACACATAACCTACTGAATGCAGCTATTCATGCAATGC  
ATAATGAAATGATGCGTATTCTATCATCGAAGTATTCTTTAAATAAACTGCCGCAAATTT  
TAAATAAAAAATACTATATTGGGGATGATGTATTTTTTAATATAGCTTGTAAACATGGTGA  
ATCATAACGCTAATTTAATTACAACACTACAATTGAAGTTGAGGCATACATTCCGGATTTAT  
CCATATCTGAATATATGTATCGCTTTATTCTTTCTAACACTTATATAAAAAATAATGATC  
TAATATCAATAGCCAATGGAACCTATTCAACTAAGTATTAAGATAATTATGAACTAGATA  
GAAATATCCTAACTGATATGTTTGTCTTTATTCTCAGATCACTGAACCTAAAGAGGATT  
TTTAAGATGATTGAGCATTAAATAAAGATAACTTCTTTTCATGGGGTGCTGTAGTAGGC  
GGTGTGCTATTACAGTATTTTGAATAAGGTTAACTTGAAGGTGGGTATGATATATCTAAA  
TTCAGTGATTATGCCAACGGCCTAGTTATTACAGGTGGTATAACTCATCGAAAAAATATC  
GGGATCCTGAGTGGTCAAGGTGATGATGAAGATCTGTTTTTAGTATTTGTCATAAGTAAT  
ACAGATAGTCCACATGTTGTATGGTATTATGATATTTATAAAGATAATGAAGGTATTTGT  
TTTACAAATGCTTCGCCTACTAGTGGTTCGTATTTTTAAATCAAATACTGATGAAAATAAT

GACCTGTCGATAAGTCAATTACTTAAAGTAGTTAAATACTTAGTAGATGAACGAGTTCGT  
TTAAATAAAAATATAGTTAATTCATCAGGTTATGAAATCATTGAAGAAGATAAAGACTTT  
CAACTATAATAGGTCTTTTACAAAGTTACCATAAAGTCCTCCCTTCGGGGAGGCTTTATA  
TTGTGTTTTTTTTGTATTCAAATGTATTTAAACAGTATATTACACATATGAATTCATCTT  
GAAAAAAGGAGATATGTCATGAATATGTCAACTATTTCCACTGGTGTCTGGTACTAGGT  
GGCATCGCATTGGTTATCATCTTTTTGATGGGGCGCGCTCCATTTACAAAGAATGGTCT  
ATGGAATACATTTACAAAAAGCAAATGGCTAAGGTAAGGAGCAGCTTACCGAATATGAA  
AATAAGTATGTTGAGATTCCATCAATAGCTGAAATAAATATCTATATCGAACCAGTTCTA  
ACTGAAGCTTTAAATAAACTTGATCGGTATAGCTACAGCTGCTTCTTACATGATGTCGAA  
CAGTACATCGAGTTTATTATTGATAATTATCGTGTAGTTAATCGATAATAAGAGCATATG  
GCCCTCCCTTCGGGGAGGGCTATTGCACTAAATTTTATTTGAGATATATATTACATGTGT  
GTATTACAAAATCAAATTAATGTGTGCGAGGTTTTAATAGATGGACGTAGTTACTAACATT  
TGGGAGGACGTTCTTACGAACGTGCATCACAACTAAAGGTAATGGCCACTACTGCTGGC  
GATGTCATTTCATACAGTGGAAACCCAAATTAATGAAATGATTAATCGAATATTAATCAA  
CTACAGACAGAAAGGTATAGTCTTAGTTTTAAACAAAACCTAAAGACAATAAATACTACGCA  
AAATACCATGATAATCATCATGGCTGGGATGTTTATTTATTTGTTGAACAAAACCTAGGTAT  
GGGGCTATTGTTGGTAGTGGGTTACGCCATCGTGCTAAAGAAGCTTGGGGGCTTAATAAA  
TTCAGAGAATATAATCTTATCAAAGTAAGGTGTACTCGACAAAATAGTGTGTTGATAGT  
ATTGTCTTCTTCGATGATCCATCTGAATATTTTCTTAGAGCTGTAAATAAATTTTAAATT  
AACTAAAAGGTAAAAAATGAATAATCTACAAGTTAATACCACTATTAAGAATTACATA  
AACTTCTAATCTGTAATATTATTGATGGTAACTAATTGAATATAATGACATTGTGAAAG  
AACTGAAAATTACTAATGATGAATTAGATAATCTACTAATAGCTATTTCAAAGTTATCTG  
ATACACCAATTAATAATATCTTTAAATCGCTTTCCTACTAGCGATTGATCTACGTACGATTA  
CACCCGTCATTGAAAAACTTAGTAATTCTACGAACTATCTAAAAAAGAAATCCAACCTAG  
ACCTGTTAACTAGTTTAGGAATAAAAGATAATTATTTTTCGAATAGTTGCACTAACGTGT  
ATCATGAACTAAGTGATATTATCAAAAAGCTTGAACATAGTGATAAACTATATCAAACAG  
ATTATCAAAAACCTTTATTATTGATAAAGTAACTAGTCATTTTAAAGATGTATTGTATTCCG  
CTGGTTATGCAATCAGTGATATTTATAAGTACACTGATTCTAAAGTAGTTAATGTAGATA  
AAAATGGACTATTGATAGGTATGAGCATTACCAATTATAGCTTCCATAATAAGGATGAAC  
CAATTAGGACTATTGGTTTTTCATTAATTGATAAAACCGAATGTTGTGTTGGAAAATCTG  
AACTATTAAAAAGTTTGATGTTGAAGATTTTCTTAATGCAATGGATACTATCAATATTA  
ACCCTACTTCTATTATTTTTTCAAACCAGTATCGAGAAAAAGACTTAGCCATTCATAATG  
GGATCATGAATGAATTTAAGGTGAACAAGATTTCAAATAATACCCGTGATAATATAGTAT  
CTTACTATATTGACATGATGGGACATAACTGTATTATCTCATTTAATCACAATGGGCTCC  
TATTAAAAATTTAATAGAATATTAATTAAAAATTATCTTATGTAGTTTATCTAATTAAGG  
AAACAAAAGAATGCCAACTTATATTGAATTAATCAATATTGTCAATGATGATACTCCTG  
TAGATGATGCAGTTATTAGTGATCTGATGAGTCAAATGAATGATAAACAACTGTTCTTG  
ACAGTTGTCGTATCAATCATAAAGGCTATGCTTATTTTAAAGTTCCATGTTAAGGGATCAA  
TTAGTAAGGATAAACTTAAGGCTCTAAATGAACTTTAAAAGATTCTAATCTTGTGTTGTA  
CTGATGCTAGTACACAACGTGGTTTTCATGCCACCTAATAAGTTTGATGATATCACTTATA  
CTGAAGAGAGTGTTGGTTATAGGGCAATGGTCTGGACAAGCTTCACTATTGAAAAGCTAC  
TTGTATAATAAGAGCCCTTCGGGGCTCTTTCTATTTTCGCAATTAGGTATCTGTATTAAT  
GGATAAGTATCCTATTCTACAAGCTATGTCTAAAGAAGAGGCATTTAGACTTTTAGACAT  
ACAAGGTGAGTTTAGAAAACTCAAATGAAAGAAAGGTATTGGAATGAGGAACTGGTCT  
ATGGTGGTGGGAACAACATCCCGATGTGAAATTAAGGATAGTTGCCGCTGCAATAGATG  
GAAGGATGTTTATTTCAATTGCAGCGAGGCATTCATCAATCATAATGACTCAACAACAGCT  
AATGTATGGTGGTCTTAAGGTATTGCATGAATATGCAGGAGATGATCATGAACAAGGTTT  
TATTGATCAGTATGAAAACCTTCCACTCTAGGGAAGAAGCAGTAATTATCGCTAAGAATAA  
TAATCAGTTATATCGAGCTGAATTAGAAAATAGATTAGTAACTAAATATTTATTTAGTGA  
AGACCTATATTAGGTTTCCAATAATTTAAATAGGAATATAGCTATGCTAATGAATGAAAT  
TATCGATATTCTAGAAGGAGGAAAGAGAATATTCTCTTAACTAACCATCTAGGTAATGG  
CAAATATTCCAATGCGGGTAATGCAATGGCTGCATCATATGCCATTGCGGCACATACTGC  
TGTTGGTCAATTGCGAGATGGTTCAGGAAAACCTTACTGGCATCATTTATTACAAGTAGC  
TGAGATGGCGCAATTATTCGACCTATCTCACGCTGCTTATAAAGCAGCATGGTTACATGA  
TGTAATTGAGGATACTGCTGTAACCTGCTTCTGATCTAACTAACTAATCTCAATCCCTGT  
TGTTAATTTAGTAACTGAACTAACAATGTAACCTTACGAAGGTAATCGTAAAACCTAGGAT  
TAGTTTACAACATGAAAGACTTTCTCGCATTTTCATGGAGTGGTCAATCTCTTAAAGTTACT



AGATTCCATTTCAAACATGTGGTCGATTGTTAATGATAAGCCTGATTTTTGCTGAACTGTA  
TCTGACTGAGAAAGCTCAACTAATCAGTAAGTTAAATAATTGTCACCCCGCTATTAAGA  
TCTGGCTATATCTGTTCTCTATGGCAGGTGTACTATGGTTGGTGGGGATGCACTAAAAGA  
ATATAATAAACTATTTTCTGATAATGAAATTGTATGTTAAAATAATTACTTAATATACAC  
CCTCCCTTCGGGGAGGGTTTTATTTATCTTTTTTTGTATTTAACTATTTAAAAAGCTAT  
ATTACAAATATGAATTTAATAACCAAGAGGGCAATACAATGACTGAACGTTTGAAATCCG  
TATGGTGCCTTGCAGCTTACTGCGTGAACGCTGGAGACACATCCAAGACATTGCTGTCTG  
GGGATGAACATCATGTACATAGTAAAAAACGATATGCTGATGGTGTTCGTGGTCAAGTAC  
CGGTAGGTAGCATGTACCGGGGTGACAGTGACCCACTCATCTACGAGGGTGGTGCCTGG  
AAGAATTTACTAAAGTTGTATTGGATTTAGAATTCAATACTCGTGGTGAACCAATAGTT  
AATAAAATTAATTTTGGAGTAATTCATTATGAAATATGTAATTGTATTTATGTTGTCTAT  
TGTAACATCACTGCTAACTCGGCTGTCATGTACACTAATCGTGATTTCATGCATCGAGTT  
TGTA AAAACAGGCAGATGAATTGTTTGTAAAAGGTGCATCTGTAAC TGAAGTGCAAATGAA  
GACTTATGAAAGGATTCATTATATCCTTAATAACACTAAAGATCTAAAGACCAACCAGTC  
TAAAGTTGAAGAACTCACTGGTCTATTTTACCTATGGTCTAAGGTAGATAAAAATGGCAAT  
TGAGGCAAGTTTGCCACGTGCAACAAATGCTGCTAAAGTCTATAAGACCACTCCTGAGAA  
ATTCATCATTGATGGTTATTTCCAGCGTTGTGTAGCGGCAGGTGCGTTTGAAGCAAACC  
ACTTACTCTAAAATAATGGAGGTACAACATGCTTAAGAATTGGCTATTATTCCTTTTCCT  
GCCAATCCTGTCCATTGCATGTCAGCCTGCCACGCTGTAGAAGTGGGTATTACTAAGAA  
ATCATGTAATGTGGCAGTAAATCTTTTACAAAAAGCAACTGAGCTTTATGATAAGAACC  
ATCCCAATTTGAGATAATGATGCAGTTAGATATGATCTCTCGTAAGGATATGGATGACTT  
AGAGTTCTATGCAGGTACCGTATATGCTAAATTAACCTTAGTTGATATTCGCGTAAATAA  
ACGAAAAGGATTTACCAATGGAGCTATTCTAGATAGGCTAGCTGAAAAC TGTGTTGAAGC  
AATTGGTACTAAATTTAACTTGGAGTAGAATATGGTTAGTATTTATATTGTCATTATACT  
CATGGCTATGCTAGCTGCATTGACATGTGGTAATTTGGTAGATAGCTGGGTAAGGCCAGC  
TATTCTAAAGTGGTTAAATGATGATGTCGCTATTCATTTACCAATGCTACCTGGATGGT  
TGGGGGGATCCCTAATAGTGTTC CAATGCAACTAGGTAAAGCTGTTTGGTTACCCAAATA  
CGTGGGTGACGGAATACGTCTTTATATCACGGCTGATGAAATAAAAATTTGGATGGAATGG  
TAAAGAAAAAGATGCTTTAGCACGAGCCATTGTTGAAGTTATCTTTATTGGTAAAAATCC  
AAATAGTAAACTTCTTGAAGTAAGTATTA AACCTATTTGGTTACACCCTTCTATCCAAA  
AGAAAGTTTCTATTTAATGTTT GATTGGGAAAAGCTTTATACAAAAAATGAAGAGATGCG  
TATTTGTTGGAAGACAATACGTCACACTTTTTTCTATGGATTCCTAGGTTTGTATTTGG  
CGGTAGTGCCAATGCAGATAACCTTGTATTA ACTGAACGTGGATGTGACCAATATGAAGC  
AATGGTGAGA ACTATTGCATCTAAAGCTTATATTGGATTAGATCCAGTTATGGGTAGGGA  
ATTCATTATTAATGATCCTGATATGTTAAATGCCCGTGAGAAAGCACAACGTAATACCCG  
TATCATTATCGATATGGTGGAAACTGGACAAGAACC CAAGACATTGCATTATGGATGAA  
TACTCAATGTAAACAAGAAGCAGTGTCAAATTTAATCAAACAGTGAAAAAGGCATAGATA  
TGAAAAGAAATTTTGAAGATGATCACGTGGTAATGGCAGTGGAAGTATATGAGAACTGA  
AAGAAGCTGCTGCTTATTCATTACACTCTTCTGAAATTAGTAAGATCGAACGACATATGC  
GTAAGTTTAATCGTGTTCAACGCGATAAACATATTGAAAATATGCATATGGAAATGCTTG  
AGAAACGCGAGGCTATTAGAAAAGCAAATCTTTCTTTTCTCAAAATGCCGGTAAAATTG  
GTTGCGTAGTAGATAGGCTTGTCAAAGTATGTGAAGTGTATAAAATGGATAAGTCTATGG  
TGGTTGTTGAGTTTCTCCAACATAAATCTAAAATTAAGTTCCAGTAAATCCTGAAAAAA  
TTACTATTCTTACCATTAAATAAATGAAGAAGGATTTAAAATGAAAAATGTAATTGCAGC  
AGCTTTCGCTGGTCTCATTGCCATTACCGGTATCATGTTCAATACCGCAATGGCTGAAAT  
CAAGATTGGTAAAAAAGATGCTCAACTCACTGTGCAGTCGTGTGCAATGGTTGAAACCAT  
TACTAAACAAGCTGTATTTCGAATGAGTGAAGGTCATAGCGCAGATGAAGTTGGTGTGCT  
TATGCTCAACA ACTCTGCTAAACTCAAAGATGAGTTGGATACCAATAATTGGATTGCGTT  
AACATTCGATTCAATAGTCTTAATAAAAATCAATAATGACCTTAACAGTAAAGAGATCCA  
TGATTATATCCGTAGTCAAGGTTACAATGTGACTACTCCTAATCTGGCAGCTTTTATCAG  
CGGGTATTATGGCAATTACTGCATGAAGCATATTGGTGAGAAATTCACTCACATGGTAAT  
TGTTGAACTCATTTAATTCATATCGAATACTTTCAAAGGAAAAATAGGATGAAATACGTC  
TTCTCGCTCATTATCACTATGGTAGCAATGTCGGTTAATGCACAACCCGTAACCGTGTCA  
TCTTGCTACGTGCTGCACAGCTTGGCAAAGAATATGGTTCAATTCTACTAATGGCGGT  
GAGCCATTGGAGATGTATGCAATACTGCAAGATGAACTATCCATTGCCATAGATAAAAAC  
CAGAGTGATAAGGCACTCGCTATTAATATCGCATTGGATAATGTGCGATGTAATATACCAA  
AATCTCACTGATCCCGCACTTAAGCTTTTGGCAAAGAGCGAGGGAAGTGATCTTGGTGAG

ATGCTGACTGAAAACTCAGTAATGGGTGTTTCAATATAGTCGGCGAGGAGTTGTATGAT  
AACTAGAATCATCCTAATTGTTGCATGGGTATGGGTAATCTCTCTTATGGGAATGATTAC  
GTATGTTCTTTATGATACGTATCAATTTTCGTAAGAAATTAGAAATGCCTGTTGTAGAATG  
GGAAGATAAGGCGAAGGACACTCCTGTAAAGAAGTGTCCAGATGAAGTATTATTCGCTGA  
AGACCCAAAGGATGGCAAACCTCAAATGGGATGCCCTGAGAGTTATAAGAAATAATTAGA  
GGACCTTCGGGTCCTCTTTTTAACCGACTGGACGGTTAAAACCTAGGTGGGATAAATTTAA  
CTATTTGAGGAAATCTAATGCAACTTAGTAATGAACTTTTCTATGTGGGTATGGTAGCTG  
TATCAATGTCAATCGGTATGCTATTTAGCTATATTTATCACACTCATAAGAAAAAATATA  
AATAAAGTCATAAACCTCTCCCAAAGGAGAGGGCTTTTACATTAATTTTTTTTTGAAAT  
CTATATTACACTAATACAACATTAACCTATTAAATAGGTAATTAATAAATGAATGAAAT  
ATTAACGCTCATTATTGGTATGCCACTGTCTATCAATATTGGTAAAGATATTGATTTA  
TCAATGTATGAACGAATTGTATTTGTATCACAAGTAGATAAAAAATGATATAAAAATACTTT  
GTTTATAAATTAATAAATCCAAATTTAAACATGAACCAAATGTAGTTAATTACGCCGAA  
ACAGATAAGGATATTATTATTTATCCCCCGCTTGATTTCAATTCAGACAATTAATGAATAT  
TATCGAGTATCATTGGAAAATGAATTTATGTGTCATCCTGTTATTCTAAAAGCAGATGAT  
AGTAATAATCAAGAAGTATTTTTGAAAACCTATTAATAATGGTACATGAGTATGTCGATGAA  
TAACTGCGCATTATTAATTTAAGGCAACGTTTAGTTAATGATAAACTAACCTATGTGAT  
TCATCCCATAGTGAAGGTTTATGATTTCACTAGAAAGGCTATTAGACAATTAACCTGATTT  
TGCTATTTTAGATAGTTATAACTTCCCAGAGGAACTTCCAATATTAGTGTTTCAGCCAAC  
TATCACAGATGATACTAATAATAGAAATTTCTTTGATACATCTTGGGGTTATAGAAGAGCC  
TGATTTTGGACCAACTAGATTATACGCCATCTTAGATAGAGAAATCAAAGATGATTCTAA  
TCTAATTGAAACAACCTGATGATGGCTGGTATACATTGGATGAGTTAATTCTAGTTGAAGA  
CGATATGGATGAATTCGCGCGACTTATTGTTTCAGTACTTGCGAACCTATTCCGAGGAAGCC  
ACAATGGTTAACTTCGACAAAAGATGTTTAGAAATAGAGCCTAATCAGTTAGGTTATGTA  
TTTACAAAGATCGGTTGGGAAATATGTGTTACTATTGGCATAACGACATATATGTGCTAAA  
ACCTATTATACAGTGTATTCACTTAATGATAAATGCATTTATTACATTGAGCATTACAGCG  
CAATTTACTAAACGCATAAAAACCAAACCTATATACAAAGGTTTCATGTTCTATGATCAATA  
CAACCGATAAACTATAGTTGGTATAGGATTTGAAACAAAGGTTTCAGATTCACCGATTG  
ACAACCTGTAAAGAAAACCTAAGACTCCTAAGATAAATAAACAAGAAATGGGAGAAAG  
TAGATGATCCGAGAGAATATACAAAAGAGGAACAAACCTTCTCTCTTTGTAAATTGGCTTC  
AAAGCACACGTAATTACTGGCATAAACAGTATACCGATACTCAAATAACAGATAAAGGCAC  
TATCTATCAGAGATATGCTTGATGGATTTATATATAGCATCGCAGCTGGCCTAGATGGCA  
ATGATCCAAATATACCCGGATTCAAACCTTATACCTAATGTTACTCAAGAGGATATTGACT  
ACCTAATAAGTATTGGTGAGAATTATTGGCCAGTAAACCCAGTTGAAAATTTAAAAGATA  
ATATCCGTGCAAAGTGTGATGCAGTTGATATTTCTGGTAATCTACGTTATCAAGTTTCTA  
AGACATTTACGGAACCTTTCAAAGGACCACATGCACTATTGAACCATTTCCCTTAGTTTAG  
CAGGTGAGAAACCTGTTAAGTATTACTCGGGTAATTTTACGCAAGAGCAACTTGCTATGT  
TAGTAGAAAAAGCTAAAGAAAAGCGGAAAAGATACAATCACAAATAGCTGATGATATCA  
GTCGAATAATGCGTTAATGAACTAATAAATTTATAAGCTACTGATAACAAGGTATGTAAT  
TATGATCTATTTTGAAGGCGATGGTAATGTTAAACCTGTAACACAGGAACAAGTTAAAGA  
ACTATTTATTAGTAGTGTGTCATATGCGTGATAATGCTATCAATAACTCTAAACTTGA  
TCAATTTACAGAGCCAGCTGATCGGGACAGGGCTGTAGCAGATAGTGTCATTACAGGCAT  
GCTAGATATACTAGATGGCAATAATGACGATTGCCAGCGTTTCATTTAATTCCAGCAGT  
TGGTGAGGAAGAATTTAGCGGCTGTAGAAGCAGGTGCTGATTATATCCCTTATGATGA  
TGGTAGTGATAATTATCAACCATTAGATTTAGCTGGTGAACCTACGAGATTATTTATCTT  
TGTTAATAGGGGTTAATAATGGCTGATATAGTAATTGCACTAATCCTGTCAGCAATTATT  
GTTTATCTAATTAATATTTTTAAACACCCAAAATAATTTATGCCAATAGTGTAATGAT  
AATGTCCTTCAATTGTTACTGGTTGCTCTTATATATCTGAAAATAATGAAGATGGTACATTA  
ACAACCTTTTACCTAAATTAATAAATAGGTTAATAATTGATTTAACTAAAGGTCAACCC  
AATAAAGACTTTTATATTTTCAAGTATTAGATAACACACTTAAATTCATCACACTGTTGAT  
GAAATCATCACAGCTAATAAATGGGAAGCTTTATTTAAAATTAGCATAACCAAAGAGGAT  
GTGTGTATCTCAGGAATGTCTCTTAAAAATAAACACATTAATGTAATTTACTGGGTT  
ATAGTACCAGGTAATAATGGCGAATAAATTGTAATAGTTATTATATTGCCCTCCCATTTGCG  
GGAGGGCTTATATTTTATTTTTTTGATTTAAAGCATTTTAAACAGTATATTACAAATGT  
GATAAACTATCTAAATTTCAAATAGGTAATCAATTATGTTGGATTATGCTTTGGAAA  
GTGTCGCGAGATCCCTTATGTAACATCGTCAACGTGTTTATTAGTCACTTACTGATAA  
GCGTGGCAGGATTATTAGTGAAAGCCAAAATATGTATGGTAAAACACATCCTGTTACAGAA

ACGTTATTCTCTAAAAGCAGGATTGTCTGATCTACGTTGTGAGATGCATAGTGAGTTGCG  
TTCTATCATCCTCTCCAAAGGAAAAGGATATAGGATCTATGTTGCGCGGGTTCGGTGTCTGA  
TGGCAGGCCATTGGATGCGTATCCGTGCCCCACTTGTGAGATGGCAATTAATGACCATGG  
TAAATTAAGAGGTAATTGTATCTATTGGTAAATAATAAACCATCAAAACGCGTATTAA  
AATTTATTTAACTCACGGGGAAGTACTGATACGATGACTCTTGGTATTTCAAAAATCTCTTTG  
GAAAATGCAATCAAACTCTTCAAATAGAACTGGCAATTGCTCTATTCCGACCAAAAAT  
GAAATTCATGCAATGTTGGTTGAACGGCAAGCCAATGAAGTCTGTGCGGGTATTTCGGAGA  
AAGATGCTTGAAGACCTACCTGGTTTCAACAACCTCCATTTTATTCGCAGTTATGAAATT  
GTTGTGCAACATAAGGATGAAATTGCTCCATCTGTAATGAAGGTTGTTAAAGCACGATTG  
CGTGAAGCGGGCTGGAGAAAAGTCGAGTTCGGTGAGCACGATTGCGGTATTACAAAGATT  
AGGATTAAGCTATGAAAAATACACGCTTAGTTGAAGTTGCTGAACATGCATATTGCCTGA  
TTGGTGGACTTCTAAACCAGAAGAAATGGATGAAGCAGAAAAAGAGTATTGGGCATCTG  
TACCAAGTGAGGATATTAATTAGCTTCATATTGGAAAATGGTTCAACCACCACTATATG  
CCCTAGTGATGAAATATAGTGGAAATTGATTACGAAAGATTTTATCCTTATCCTGGTGGTC  
CTTCTCTAACACTGACGAGCTAAAGACTTTTCAGGCTCAATGATATCGATGAAGGTGCGC  
TTATTTGGCGTGATGTCTGCATTACTTGGTATAAACGACCAGGACGGTGTATGTGTGTTT  
CACGCGACATCGCAGATGATGAACTCGTGCAACTTGAACAGGAACTCATTAAAGCTATCG  
CAAACCGAAATAACTTATAAAAGAAGTTTAAACAGATTTTAAATCCAACATAAAAGGAAAT  
TGTAATGCAACATGTAAGTGTAAAACTATGAACTCTGGACTGAAAGTCATTGATCTGG  
ATGGTATCCGACTCAAAGACAAAAATATTATCCAGCTACGTTCTATTATGAATCACGATG  
CAGCAAAGCAATCGTCAGCTTTTATGCATCACGATAGCCAGTTCAATAATGTACGTATTG  
AATTTTGGCGCGAACCATCAGCGCGAATTATCTCGCTGATTAAAGATGCGGTTCGCATGAC  
CGTTTCTTTTAAAGAAGGTAAGTAAATATGTCTATCTCTGATGTAGTATATGAAGCCGCTG  
TCAAAGTGGTGTAGTCTTGAACACCTTGGTAAAGAAGAGCCTATTCTAAAAATTCGCT  
CTGTTAAAGAAAGTGATGGATGGGATATCATCCTCTATTATCCTGGTAAGATTACCAAGA  
CTGTGAACTACTATCAAGCGATGTAGCTGGGTCAGATGCATCAAAGTTTATTGAACATG  
TATTTGGAGATGTTCAATTTGCTAAAGAAGCAGTACGCAATGCTGAAGGCATTGTAATAA  
AATAATCAATCTGGAAAAAAGGAAATATAAATGTATATTGATGAAAAGTACTGGGCTCA  
TTCTGTAAAAGCTATGGATAACAAACATCCAGTTTTGATGAATGTGCATGGTCTTCATTG  
GTGTTACCCGCTTTTGGTTAATTGGAGCCTAACTGCCGTCAAACGCGATGGATCACTTTC  
ATCAAAGAAGTGTGATATCACTAGCAAATATGCCAGCCATCTCATTGATCATGAAGT  
TAAAATCGTTAATGATCAATTGGTCTACCTGATCAAAAATAATCTGATTAGTGGCATTAC  
TGAGCTTGATGATGGTTTCTTTGTATTTGCAAATATTGATGGCGAGTCATGGTCCATGCA  
TGTTGAATTGAATGCTTGATGGAACATGAAGAAAATTGGGAAAAACTCGCTGCCGTTAA  
GTGCAATGAGTTGACCATTCTGCATTCTAATTAATTATGAAAATGGGGGTCTAAAGACC  
CCCTATCTATTTAATAGAATGAACTAATCTTAATAATGGTGAATACTAATGAATAAATA  
TTACCATTTGAAGAAACAGAAGGATGCTACATGGACAATTGAATTTCTAGGAAAGATGCG  
TAATTTTAAATTCAACCATGTAACATAACAGAATAATAGCTGGGTTAGCATGGGTATTGA  
AGGTTATCCAGCACTTAAATTTAACTGTGATGGATTTGGTAGATTAGAAAGTATTCAACC  
CATTGATGATGATTTAACCATCGATGAAATATTTATTCCACGTAAACATTCTGTTTCACA  
GTGTATCGATATAACAACACTTTACATAGGTGGTCAATGTGACTGAGATAATATTAGTTA  
TTTTATCATTGTTTGTCTTTTCAGTCATAACCGGCTATTGTATAACCCGGTTAGAGAAAA  
CCGAAGATATAGCCTATTATGTTAAATCAATTACGTATTACTTAGGTGAATCCGGTGATA  
CATTTTTTAATAGTGAACCCAAAGTAATACAGCTGGATAACCCTGTAAAACACTAGTTTTCA  
CTAATGAACCAGTTCAAATAAAAACACTTTATTTAGACCTAGATAAGAAAGAATTATATC  
TTAATCATCCCGAACATGCTTGTATTGTAATGCGTGTTATTTCTTTTTAAATTATCATA  
ACCAGAAAAAATCATCGGTTATTCAGATGAGTACTATCATGACAATGAGTATGTTGATA  
GTGAGTTTGATATGGTCATAAAGAAAATTAGTGTAGAATGCTATAAAGGTTTATAATGGT  
CAATTTTATAGACCATCAATCAGGAGTTAATAATGAGTGTCTACAACAGCTAGGAAGTT  
TCCCAGTATATAAGAAAATAATGGTGAAACTCGATTTCTATTAGACCATGATGTTGCTA  
TCAGCATGGTTACAACACTGAGCAAGGTAGTTTTATGACTGCCCCACTAAAACAGATGGGG  
TAGAGTTCAATCTATCTGAAGTCTTTGGTGATTATAAAAAATTCGATAATGTGATTGTAG  
ATAAACTCTACTATCGTGATTTATCTGGTAAAATGCAGTCTAAAAAAGTACCAACTATCC  
CACAGCTTTATAAAGACATGACTGTATTTAAAAGTGGGTATACCACTAAAATAAATAACC  
TTCGCTGGGGTATTGTGTAACATAAAAATGATGGTACAGCTAAAATTTGGACAGATT  
CTAATAGTCTATTTGTGGTGTGTCAATTCGTTTCACAATGTAACGTCATAATGGCCTCC  
CTTCGGGGAGGCTTTTATATCCCTTTATATAAACAGGTATATTCAAATGAAAATGAATAA

TAAGGTAATTGACTCGGGCGTCGTATATGTTGGCTAATACCGATAAGTTCATTAGTACTGT  
ATTTCGCTGGTGAAGACCGGTATATTGAGTCCTGTACTGGGCTCATTAGCGCACATGGTGA  
TAAGGTGGAGCAGTACCGTAATGGTTGGGAAGAGGCTGGATTAGACTTTAATAAAGCACA  
AATAATCTATCTTCTAACCTATACTAACTACTAGGTGATACTCCTAAGTATATGTCTAA  
TCAATGGGTGATTGACAACCTATTCTAAATACAGTGAACCTATTGCCATAATGCATAAATGG  
TTTATTATAAGTAAATTTAAAAATATATAATAACCATGCTAAGTTAGATAATCATTATTT  
GAGGTACTCAAATGGAAGGAATCAAATATGTAGCACTGTTTTTTGATTATAGCTATTTTA  
AGTAGTACATTAGTTGGTATTAATAAAAATTATTAGTATAGGTGATATCGATGGATATAGA  
TCAGAAAAAGAAAGAATCACCGAAATTCAATCCCATCATAAATAGTATCTTTAACAAGTC  
ATGGTTAACTGAAGATAAAAAGTGGTAAAGAGGTAAAAAGAAATGAGTACAACAGTGAGCT  
GTCTAGCAAACGTGCTAGCTAATGGTATTAGTCTTATCGCTAAGAATAAAGTTCAAGTAG  
GTATGATTCTACAAGCAACACAGGATATTTGGATCATGCGTACTTGTAAAAAGAATGGTT  
ATTTAGAATGGAAGTTTGCTAATGAAGGTGATGACCTAACCGTATTAGGTGTTGATGAGG  
GTAATCCCGAAGGCGGCTTTAGAGTTTTAAATGCCGACAATTATAATCAAATTGAAACTG  
TACAATGTACAGATATGGATGATATTCTTTCACGCCTATAACTGAGGTGATATATGTCAA  
TTCATTTAAAGCCGGTGACAAAGTTGTAGTCAACACAGATATTATTAATAGCACTGGTGA  
ATGCGGCTATGATCTTACACTATGCAAAGCTGGTACTGTAGTTATAATCGAATCTGTAA  
TGGAGACCATCTGTTAGTATATCCATCTAATAGCGGTCCTAGTAATGGATTTTATGTTCA  
TCTACATCAGGTTAATGCACAATGAACTTGAATGCGTAAGAGATACTGCACAGATCCTC  
TACAGTAAAAGAGCTTTTATAAAAAGGTAATTATATTGGTAGCGAATATCATATTTACCAA  
TTACTAACCCATCTTCATCATCGTATCGTTAATGCGCTTATTGAAATATATGATGATGAT  
TCACTAGCTGATGTGCTAAATAAAAAGTCCCTGATGATATTATTATCTTATTCTCTAAACAT  
GCGACTAATGCGTATCAGCATTACAAAGTCTTTCGCCAAAATATAAATGCTAAGATTGAA  
GAAGTAAATGCATCACGAAATAGGTATACTCTATGGTCTAACTTAGTAGAGGATATTCTT  
AAGTTTAGACTATATTGCAGTAACTAAAGGTGGGTTGAGATGATCGAAATTAATTCTGC  
TGAAGTGGAAATGCTTGTGAAACGATTACTGGTGATTTGTTCTGCTCTATCCATGACGG  
CACATATCCAGCTGAACTTATTGGATGTTTAAAGCAGATGTTGCAATGTTGGATGCATG  
GTTTGCTAAAATTTATAAGTTTGGTATGTTAAAGCAAATCCCATATGCCAGTATTCCATT  
TGCCAATCTGGTGGATGTCAACTGAGCGGCTATTCCAATATATGGCCAATCTGGCAGC  
TGATCTAGGTGATTTTGAAGATGTCCAAGAACCTATTTTCAATATCATCAATAAGATCCA  
TTCAATGTGGTTAGTTTATGATAAGTATTCATGGACTGGTAGCTAATACTTGACCGTCCA  
ATTAGATAGTTATAGGACGGGAATTAACCATGTTTATAGTTGATGATAAGTGTTATAGTT  
GGTCAAGTACTTCGCACGGTCGTGGGAAAAGAAGCGAAATAGTTGGAGCAGGTGTTTATG  
TTATTGAACACATTGCAACTGGGAAGTATTTAGTAGGGCTTTCAAAGACTGTTAGTAATG  
AAGTTGATAAACATATCGCTGCATTACGTAATAATAGTCATCAAATAAAGGCAATGTTGG  
GTTTAGTACATCGGGACATGGATTTACGTTTATTAGAATACCCCATTAGTAAGGTTAGTG  
ATCAGAAAGCACTTATTGCTAAGATCCGAGCCACCACTGAACCTAAATATCTAATGCTTA  
ATTAGGGAGGGTAATACCTCCCTTTTCTTATATGAGAAAAGGAAATATACAATGAGTAAC  
CCATTAGTTATCAAATCGGCAAGTGATCTAGTAGAACCAAAGAGATAGATTACAAAGCG  
CCTATTTTTAAGGCCAGTCACGAATATGCATCTATTTCGTGAGAATAGCAGACAGTTAATT  
GAAAAGCAAATGAACTATCCAAAAAGCCTTTTGCCGTGCTTGAACGAGAAGGTGATATT  
GGTCCCAATGTTGTTTATTACACGTGTGGGTGTAATAAAGAAGATCCACTCTTTCCTGAA  
CTGGTGATCACTGCATGCATCACTAAGGAATCGGCAGTAAATACCTTTTACGCCATTTT  
GAAAATTAAGAAGTGAACAGATCACGGGTAGCGTAGAGATTGCAGATTTACTGAGC  
GCATTTGAAGAAGATCAAAGGATGGGACGACAACCTAAATTTGGTATTTCGTCTAATTGAT  
ACTCATCAGTTTGTATATGGGTTCCGGTGGTAACTCCACGCATACTACAATATGGATGAC  
TATTATAACCAATTGCCCATCTGGCAAATTTCTCATCAGTGATATTGAAGGATTCCTACCC  
ACTGATAGTGGTTATCTACAAACAGTTTGTCCGCAGTTTCTTCTAGCCGATAAACCTTTC  
GGACAAGCTGGTAATATCTATCCTACTGACATTTTTAAAACCTATGAAATGTCGTCCTTCT  
GCAACAGTTATTCATTAAGAGGTTAATATAATGCGTGAGTTTCGTACTGGTCAATATTGT  
ATTACTAAAATTGATATTCTCATCCAAAACCCAATGCATTAACCTGGCCCAACTTATTTA  
ACAGCTGGACAGCAGTGCCAAATTATCGTTTATGATCCATCGAAAACACCTTCTACTGGT  
ATTCGTAAAGAAGGTGAAAACCTTCGCAATGGTTTATGTAGAAGAATCTGCACTAATTGCT  
GATCCATCAAACCGGTTCCAACCTCTATGATATTTAAATTCTTTGATGTTAATGGAGAGT  
ATGATCCACGTAACCTTGTGGTTACCCGCTGAACGTCAGCTATATATCTCTATTATTAATC  
CAGAGGGTCATGAGGTGCTCTGGTATGCTAGAAAACCAGGCACTAATGTAGCTATGTTGA  
CACCTAAGCGAGATGATTATGAACTTGTAAATTGTTCAAATATTCTGAAGGCTAGGAATG

TTCTATTGGTTAATCATGAGGCTGGTTCAGTAGAAAAAGCATTACGTTATTTTGACTTAC  
CTGTTAAAGGTAATATAAATTAGCAAGTCGTACATGGGAATGTAGTGAACACTATTCCTC  
TTCAATTTATTGAATATAATTTTTAAACAGGTAATTATAAATGGCTCTTATTTGTGGATA  
CGGTGAAAATGCCGTGCTATTTGGCGGGGATGTTGATGTAGTCGACTATGCGATGTCTCA  
AAGAAAATATACTTAGATAATAAATTCATTATCCGTGGTATCGCTGTTATGAGTGCTGA  
TAAAAAGCGCGACATAGTTTCTGCCGAGCTAATAGTGAGCTGTTTCTTAGCCATCGCAC  
AAAAGACTATAATGTAATCACACAACAATTCCAAGAATCGGTTAATAATTATAAAGTGAT  
GGTTTACATTGTATTTCGATGACGAACTAGCCGTCTTTGTACCGAATACACCAATCACTGT  
ACTGAATTATAAAAATAATCCAGATGGAGTTACTGTGATTAATAAAGGTTTCCGATATAA  
ACAAAGGGAGAGGCTTAAAGTTCTCATTAAAACATATCACGATGATCTATTGTTATTGGC  
TAAGAATATTGCAGATAATTCATTGAAAGATGTTAATCAACTAACTGTCTTTAAAGACGG  
AACTACCCAACGGTTTATTTAAGGTATCTTTACATGACCACTAAACAACAGCGCATTACC  
TATCACTATCATTGTAAAGGTCTTAAACAGACATATCACCCAGTCATTGGTAAAGATGGG  
GAATTGAAACTGTCTGTACTTACACCTGATAATATTTATAGTCAATATCCATTATACGAG  
GATGTAGAAGATGGAGCTATTGATAAATTATGCGATCAGGTAGAACAGCTACTGAGAAAA  
GAACTTGTGGGTGTAATTGCTATTAATATAATGTAGATTATCTAGCTACCCCTGGTGAA  
AAATTAAGAAGTATATAGACTCGTAATTTAATAATGGTATAATTGCCCTCCTTCGGGA  
GGGCTTCTATTTTCGTA AAAAGGAAAATACAAATGAAAGCATTTCAAAATGGCGCCA  
AGATCCAAATAACGTTGACCATAAGTATGGTTATGAACTGAATGCGTACACCTCTGTTTC  
TGGTACTCGCGTCTTCATCGAACGTCGTGTTGAATACTACAATAAGAAAAAGAAACAATG  
GTGCGATGAAACAATTCAAGTAATTCATCTTGGTAAACTGAATTGTTATATTTGGAAACA  
CTATCCAGTTATCAGTTTCAGAGATGTTGGTGTAACTTACGGTTCGGTTAGAATTTGATGA  
ACTAAAGAAAGTAAATAAACTTATTCAGAGTTCAAATTCGGTATCTATTGAACTGATGGA  
ATCTATTTCAAAGAATATCAGGTTTATATCACAGCTGTAATTAATAACATCAAATATGT  
GTTTACGCCCTGAACGCACTTATGTATCTGATGAGGGTTACGTAGATGACTAAAACACTCC  
GTGTAGTACGTGTCGGTGTATGGGATCGTTGATAGTCTTAATAACGATGGTCTATGGGTTA  
ACAAACATACCTTTTGTATGGAGGAGGTATGGGAAGCCCAAAACAACCAACTTC  
AGTCTTACAACCTGGGGGACTATGTACTTCGTTAGTGAAAATGATGTAGCATGTAATCCAT  
ATCCCATCATCAATACCGTGAGGTATGGATCTGTCAACGAGGTGTGCAACAAAAACTGG  
AACTATGTGAGGATTTAGAATCCGGTATAGTTGGGGATGATCATGTTGTAGTTATTATGA  
CTACTACGGATGGATTAGATTATAGTTTTGTGAGTGGTGTGTATGGCGACCGTATTA  
ACTACAGTCTTACTATGGTGATGCCATTTCTATACCTTGTACCAATAATCAAGAAGCAGACG  
ATGTCTATCATAGCCTAGCTAAAATGGCCAATGGCATAAGTCTATCTGTTCTCTAGTAA  
TGAAGCTGATTAATGAAGGAGTAATGATTATGGATTATAAATGGCATGATAAGTTCATT  
ATAGAAATTATTAGTAAAAGTTGTA AAAAAGATGGAATCTGTA AAAAGTTACTTAGTACGT  
AAAGGTTGGAGAGATGTTAATCAGCGTGATTACGCCATTTTATCACGTATTGGTTTCCAT  
GACACTCTTTTGTGATGAACATGAAGTCGAATACTATTTGAACAATGTGGTATTTGAT  
ATCGTAAAGGCCGTATGGGAGTCTGAAGGTAAACCAAAAGATACTCATATGCATATTCGG  
GCATTGCGTGTAGATATGGATAGTCTATCTGATAGATTCAAGATATATGCTGATGTAAAA  
CTAGATATGGATAAGCACCGGAAATCGTAAAAGATATCCATCGTATACATTTATTAATAG  
GAACCTACAAATGCAACTAGATAAAGACAAATTGAAAGAATTGGTAAATATCATTGAAGA  
GAATACACGCCTTAAAGGTAAAGTATTCCACCAGGAAGTCTACTCCAGTGTTACGGTGA  
AATAGAGGTTTCGAGTTACGCTGGTACTTTCACTTTTTACAAAGATCATAACCACTGAACA  
TTATGCAATGTTAATGTAGAGTTTGACACACATGGTAAGGTAGTTAGATTCATAGCACC  
TGCATATTACGTGCGACTGTCATTTGGGAATTGAACGAAGAACCGGAATACTACAAAAT  
CAACATCGAGCATATGCTGATCGAAGCAGTAACCAATCACTTCAATACGGCCACACTGCT  
ACCTTGAAGTTAATTGATAACCATAACTCTTATAAAGCATAGTGGATTTTATTATGAATA  
AACCAGAATTACTTTACCATGGTTCTCTTTATAACAAGATGAATTAATGCCAGGATTTA  
AAAGATCTGGTGAACCTGTTATGTGGGATGGTATTGAGTCTAACCAATACCTATATGCAA  
CGTCATCTGAAAAGATGCATCTTATTTAGGTATTGGTAGCGCTATCGAAAAGTTATTTG  
ATAGTGATAGATATGCTACTGTTGATAGGGATATTACAATCTATTGTCAAATAATATCG  
ATAAAAAGTGATATTTTAAAAATGGTTGTGTATGTTTATAACCATTCCATTTAGGGACTCTG  
ACAAATGGATTAAGAATAATAATCCTCACAATAGCATTGATACTGAGTGGATTACGAAAA  
ACACTATCCATGATGTTACTGTAAGGAAATTAGATATTGGTGAATTTTTAAAAGGTGCTC  
GCTTAACTGTCACTAAAGCACCAGTGGATGTTGATCCATTAACATCATGTCACAATATC  
GTTTACAGTAACAGAGCGTTATCTGTTTTAATTAATAAGGTTAATTATGTATCACATATCGA  
CAGTATACCTTGGGGATTATGTTTTATTAAGGCCATATATTCCAAGTAATAGAGCTGATG

GCGAAGACAGTGTAACCAACCGTATATGTGTGGCCCCATCAGTTATTGAATGTATTGCAG  
CTAAAAGCGGGTGTATGATATCGATCTTAATTTACTTGGTTCTAAATCAACTATTTACG  
CATAACGAAGTAATTCTACTGACTACATTATAGGAAATGTACCTGATCAAAAACAATATA  
GGGAACACTGGTATTTAAAACCAACTTTATTTGCGTATGTTGGCTCTCTGCAATTATTAG  
AGACTGGGGTGATTAAGGTAAGTAGTGAAGTCGATATGCATTCTAAATTAATGGTATCAC  
ATCGGTTAACTACTTCAATAATATTATTAGTAAAGAAGAACTAATACACCATTGGCATA  
TAGAGGCTTTATCTATTTTAAATGGTTAGATCATAATTTATTTAAGATCTATATTACAAG  
TGTACTATCAATAAACTAATAGGAGTGATACAAGTGGATTTTATAATTGAAATTATCGAT  
AATCCCAATAGTGATACTGCGTTGTATGTTTATGATTATTGGGGTACCCTAACTACGGTT  
GTGGGTAATGCAAAAACCCTGGCAGAAGCATATAGTTTTAAATATTCATCCATTGACAGC  
ATTGAAAAATTAAGCTGTCATTGGTAAAAATATCGAATGCATTTTTAAAGAAATGCAT  
GATCAATCGAATAAGGTAATTCGTGTTAATATCGTAAAAGTAGATCTAGAGAATAAGATT  
ATTAGTAAGCGCATCGAAATTGTA AAAAGCTATAGTGTTATCAATAGTGATGGTGAACCT  
ATTCTAATCACAGATGTAGTACGGTAATTGAATAAATAATTCATTAATTTAACATAGGTG  
ATATAACCATGGCACGTCGTTCTAATAAAATTCGTATTGGTTTTAACGTATCGCTTAAAG  
CGTTGAACGAAATGGATCTGATGTAATTA AACTACATGATGACATCATATCTTGTTTTA  
GTGA ACTATATCAAAATTACGTAAAAATTGATACA ACTACTGACAAAGATGACAAATCAC  
TAAAACAAGGCATTATTGATGTCGTGGTGTATGTCGATCTAAATACAGCGAACCAAGCCA  
TTCGTTTTAAAGGTATTAGTGATCTGGTAAACCATCTACAGTTTAATGTAATGGCGAATG  
ATGTTATCGTCGATACAAGTGAATATATTCAGCCTAGCCATATGTCATATATCGAAGATG  
GTCACCTGAATATGTTAGTGCCTGAGAAAGGTAAGAGGTTATCAAAACCATTTTCTACTG  
ATGAATATGGTGTGATCCACTAGTTAATAATGGATCAATAGGAGATGGATGTAGTGTTT  
CCGGGATCTATCTAATCGGTGAAGAAAATCGGGTTAATAAACTAACACGTATTGTTTCTA  
ACAACATTCGCAACGGAGAGTTTAATTTCAAGACAGAAGTAAATATCCGTAAATTCTATT  
GGAGTGTACTCGGAAAACCAAGTGCCTATTTAATGAAATATGGAACCGTAATGGTTTTCT  
ATGTGGATGTACTTATTAAGCTAACCAATGGCAAAGTTTATAGTTATGCTAAGAATGGTT  
TTGTTGGTGGACCTACTGAACTAGAATTCCATTATTATGGTGTA ACTGATCGAGAAAATT  
GGGATAATGCATCCGACAATTTCCCTATATCAGGAATTCGAGCAACACTGGTCTGTAAAAA  
TCTAATATATAAAGGGCTCTTCGGAGCCCTTATTTTTTTCTTTATTTGGCAGGAATATA  
AAATGCATCGTCGAACTATGTACAGATTTAGCTTATCATATTTCCAATAAACTTATTAATA  
ATAACCCACTTGGCTTTACAGTCGAGAGTTATCTTGAAAGCTGGTTTGACAAACTCAAGT  
GCCGATTA ACTAAAGGTTATACCAAAAAGCCATGCTATTCATTTTCGTGGAAGTTGGAAT  
ACTTTGAGTTAGATCAATATAAGAACAATGCTTTCTTCAATCAATATCACATGGTGATGC  
AGTCACTAGAGGATCTAGAAAGAAAGATTAGTGGGGTGATTGGGTTAAGTATCAAAATCA  
CTAAACCAGAACGACATTTATTTTATGTTCTATTTAACCATGAAAAGATTATTCTATCCC  
CTAATGGCATTATCTTTGATGTACGTGTTCCAAAACACACCGTGATAGCTAATCCTGAAG  
TTATGGGATATCGTAATTGCAATGTAGATAGACTGGCGGTATTTGGCGAGCGCTCTAAAG  
TTAACTATGTGGTTAAACAAGTACGTTATGCCTTAAAGCAGAAAGGGGTGACAACTGTTG  
CCAATAGTTCAATGGCTCGTTTTTTACATGACCTATTTTATCCAAAATACAGAGACAATC  
AAATTTATAACTACGGCATGACTATGTCTGATGTTTATGTAATGGCCGTATTCAAAAATG  
GGTATACGGAAATCTATGGTAAAGATGTAGGTGAAGTATTTGAAAGTCATACTCTAGATT  
TCCTAGAGCGTGAGTACATGATCTGTGGACAATATTTTCCCATGTTATCCAGAGGGCTGC  
TAGTATGATTATAGAGACCTTATTGCAATATTACGCCATGTTTATCGACATCTCTCAAAA  
GAATATGGTGATGGGTGGTGGCATTGGTATGGCGATTGGTGGTGTATTATGGACCACTAT  
CCGAGGTCTACCAAGTAAGATAGTTAGATTCACATTAATCAATTTACAGTTAGTTTACA  
TATCACTAATACTGGTAATGGTTTTAAATGAGAAAACTTTGACTCATTTATGGAGTGGTA  
TATTAACAACCATTAGCTGGATTTAATCGCCGTTTTTCAACCAACGTTGATGAGCAAAG  
TTATAGTGCAACTAAACAGAAAATTGGTGTTGGTTTTGGCTTACATTTCTTTCTGTTTTAA  
AGGTAGGTTATTCTGGTTTTGTA AAAAGCACGCCGGGATAGCCAAAATGCCAGTCGAGACCA  
GATGGACATTACTATCCGTGGATTATCTAGAAGTAGTAACTTATTATTGATTTAGTTGA  
TGCGTACCCTGGCGTCCAAATGAAATGGGTCTTACTATCTCACATTGGGATGGTAATCG  
CTGGGGTAATGAAATCGAAGTTACTAAACGCGATATCAACACGGTGATTTTTCGTAAAGA  
GATCAAAGAAGAATTCCTTAATAAGATTGAAGAATTCTATTCTGATCGGAAATGGTACGA  
TGATCGTGGACTACCCTATAAATTCACTTGTGTTCTAACAGGTCCCTCCTGGTACTGGTAA  
AACCTCAATCAGTAAAGCGATTGCCTCACATTTTAAATAAAAATGTTAGTGC ACTGTCATT  
AGCTCTATGACCAATGATAGTCTTAGGCGGGCATTACTACACTACCTAAAGGTAATAT  
TCTTCTAATTGAAGATTTTCGATGATACCCCGGCAGTTAAAGATCGTGTTTTAAATGATCC

TGTA AAACTAGATAAAGAGATAAAGGAATTAGAGAGGAAATATTCTTTTATTGATTTAAT  
TGAAAAATATCCGTCTGCATGGGTTGATCTTAAAGATGACTATGAAGGATACTCTGTAGT  
TGGGTTTAATGACACCATCTATATCTTTGATGAAAATAGCGATGATCAAGGTTTTGGGAT  
AAGTGCTTATGCTATGGCTGAACTGGGTGTTTCAAATGGGCCGATGAAAAAGATCCATT  
ATTTACCACAATTCGCCGATGGTGGAAATTAAGAAGTGCATGAAGAATGGAATCACGTA  
TGAACAACCAGCTAGCGGATTAAC TTTGTCAGCTCTATTAATGGGCTAGATGGCATTGT  
TCCACTAGATGAGACTATGACCATTCTAACTACAAACCATCCTGAGAATATTGATAAAGC  
ACTTCTAAGGAAAGGTGCGGTTGATTACATGGTGGAGATTCCATATCTACGAGATCAAGA  
AGTTAGGGAGTATATTA AACTAATGTTCCCTGACTTCGATATTCCTGAAGATATCAGATT  
TAAAGATCAGCCAGGGTGTGATGTAATGGCGGCTTTTTCAAATAACCGTTATGACCCTAA  
TGCTTTTATCAATAGTCTATTGAAATATTAATATACTAAAAAGGAATCTGTAAAATGAGT  
CTACTCAACATTCTAAATACCGTTGCGGCTGCTAATGGTAGGGAAGTAGATGATTTTAAAT  
ATCACCTATTTAAACGATACGGATGTGTCATCTAGTTATACCTCATTTCGATATCGGTAT  
GTTGATGAGGATCGTATTGCACATATTTTCATTGTTTCTGAAAAAATCGAACAGGTTCCGC  
TAATTTGTATTGTTGGCAAACTAACTGGTTACAATGTAACCTGTAATACATGTATTTAA  
TTTTGAAAACATACTGGAGTTATTGATGTATTGAGTTGAAACTCAATAATAACTCCTACT  
TTAATTTAAAAAATACAAAAGGAATATTTCCATGGCGTCAATCATTAGTCTACCTTTTAT  
CAA CTAGTAATCAGCCGTAATAATAATTACACTGTTAACCATCAGTCAGGTGCTGATAA  
TGTACCTCATCTATGTGTTAAAGTAAAACATTCTAACGGTTATGCCTGGTTCGGTATTAT  
CATTGTTGATTATGAAAAACGTACCAGTGGTTGGACTGAAGAAGAATTCAATGCAGTTGT  
AACTCGTTTCCATGAAGCAATGAATTCTCAATGTGATATCCAACGATTAGAAACAGACAT  
TAACCGACTAATGGATTCCATCCAAGATGTTGTTACTGGTTCGGAACGACCAACCCTATT  
CGGCGGTGATAGTAATGACTTCATTCAAATGCATCTTCAAATAATATCCA ACTTGATAT  
TTATCGGAATGAAATTAACGAAGATACTCTAACCTATGGTGGGTATCGTGGTAAAGTAAG  
TCTTCGCCATGGTTATGATGAATACAGCTTCTTCCTGTATCATCGTGGTATTATTCTAAA  
CCATTACATCGATGCAGAGATTGCTAAAGAGCTAATTGAAGATGCTCTTAATAAGACTTT  
CCCGGAGATTACTTATCTACCGCGAGCCACTGTCGAACCTACAGCAGTGGAACGCACTCG  
TAATAGACATCTGGATAAAAGTTAAAATGACTAGTCAACTTATCGTAGTTGATTTACAAA  
ACCCTAGAAATAAACATATATACAGTGAATTA ACTCATGAACATCCTAGAACATAACAT  
CACATCTAGTTGAAGAATTAGATGATTTTGATGTTTCATCAATATTCATACCAAGCGGAGT  
ATAAATCTGGGATTGATCTTAGATTAATATTCTTTTGGGATGGACCATACTGAACCAA  
GAGAAGAAGGTTACGAACCAACTGATCTAGAGAAAAGGTGTGTGAAGTTGTGTAGGCAAT  
ATGAGGCTGCGATTAACGGGCAATTATCTGTAGTTGATCACTCTCGGTTCCGGACGGTGT  
GTACCTTCAGATCAGATAATAGTTTACCAACA ACTTTAGACTGGATT CATAAAGAACCCC  
CATCTAAAGAGGTTATGTAAAAAATAGTAAAAGAAATACACTATTCTATGTAGTTCCTTT  
ACGATTGCTCTTTTATCTTAGTTTCAGTTTTGCTGAAGAAGTACCAATGAGATACCCTCC  
CCTGATCGGGGAGGGTTTTTGACATCTAAGAGGAAAATATAATGTGCGAACAAACATCGTG  
TAGTATCTATGAAAGTTACATGCACGCAAGCTCGCTATCCGATCGGTCTGTGCGATCTCG  
GATTTGATAATGCTGCTGATGCTCGGCAATATCTACTAGATGTGTCGTCGAGTACAATATGG  
ATCGTCTCCACCCACAACATGCTAATACATTCCAGCTACAAAATCTACAAGACGGGTTCCG  
TAGTATCCTACGATATCGAAAAAGATGGATCCGTTTATCTTCGGTTAACACTGGCGGCTG  
TAGCTTATCAATCAATCGATCTTGAGTTGGGGGTTACCGTTAAAGAAAATGAAGGGATCA  
GTGTTGTAATCAAAAATTGGATCAATGGTGATTATACTGCGGGGAACA AATACTTGCAGT  
AATACCATATGTAAAGAATACCCAAATCGGGATCTCCCGGACTATCTCCCTTCAGCGTTC  
CCGTCCGCAAATGAAGGTGCCGCCGAGATCCCACCTATTGATAATGCCCTCCCTTCGGGG  
AGGGCTTTATTTTCGCTTAAGCCTATTTATTTTATTATAAGGAGTGAAAATGACATATATC  
GTAAATGATGGTAAAGTCATGATTGCAGACTGCCTATTAATTGAGCGGAATAATGCAACT  
GATAGCATTGGGCGACTTCCAGTATTAGATAACGGTTATATTGATCTAACTGCTAAAGCT  
GAAGGTGTAGATGTATATTACAATGATTGCCACAAGATAATTTTTTCATCCGACTGTTACT  
TGGCAAGGCAAACGTGTTAAACTATGGCTTTTGTCTGGA ACTATAGATAATGTTTATGAT  
CTATTGAATGCCCTTACCGCAGGTGTTGATTTAGCTGATTGGTTTAAAGTTGAAGTAAAT  
ATCTTGCCAGTCATAGAACGCAGGTTGTTAATGGTAATACTTCTATGATGTTCACTATG  
GAGAATGGTGACATATATACAGTTATTCTTAAAGATATGAGTATCGAGATCACCAAGAAA  
GATTGGGCTCATTTAGGTAGTGGTGTAGATGCAGTTAATAGTGTACTTGAGTTTATCCCT  
AATTGTAATGATAATGGATCAACCAA ACTAACTGCACTTGAAGCATTGCTATTGCATGT  
GCACATACTACTACTGTAAGTCGTA AATTTGATTATTACATCCATGCTACAGGTGAGTAC  
AAGCAAAATCAGGAACTATCAACTAAACA ACTAAAATGGATTCTGGCGCGTATTCAAAAAG

CGGATGGATCTTACCTGCATTTTCAATGACCGCGAATATGCCAATAACATATGGGGTTGA  
TTTGTATGAGTGATTCTAATATGGATATGCTATATTACACTAATGTAAATTGGGAACAAT  
ATTTTCATCACGTGAAACAACGGGCAGATGATACTGTTAAAGTAATGTATAAACCTGAAT  
ATGAAGATCTTATTGATGAAGCATGTAGACCATTGATTAAATGGTTTAAACCAATTCACCA  
ATATTGCAACTATTTATTGCTGTTCAAGGTCATGTTGATGAAGAACTGGTGGTAGCCCTG  
GATACATTAGTATTTTATTTCAAGATACCAATGCAGAGAATTCTGTAATGCGTTTATTGC  
GTGAAGCAATGTGTAAGGGGCGTGAGTGTAAGATCCCATTGAAATTGAACTGGGGGTTT  
ATTTGCGGCATCTACATGAGACCATTGATAAAAATCACTGGGTCGCCAATCTAATTATCC  
GCACCAATAGCTACAAACGTAAAAATACGTATGATCGCTATTGGCATCGTCTTTACAACA  
TCATAACAACATGTAATACTGAGGGTTTATACACCATCTAAAGAATCTGAGATAATTTAA  
TGAATGATATTAATAACATTATTAGTTAGATTAAAGAGGAAACAAAAAGCTAAGCGTA  
TAGATAAATTGCAAAGACTAGGTTTATGGTTTATTCTATTGCTATGTGTATCTAATCTAT  
TTGTCCAATTAATAAAAGGTATATTCTAAATGGCAGAAAAGCTAAGTTTTGTTGATATAT  
TTAAGATGGCTAAAGAGGAAAATGTTAAGCTTGAATTGCATTGTCTAATTGGTACTCGAC  
CAGTTAGGGGTCTTATTAAGGTTTAACTTTAATCAAATCAGACCTGATATATACGAAT  
CTGTTAATCTATATGTAGATGATTTTCTAAAGTAGTAGAGACTAGAGTAGATCTATCGA  
GTACTACTGCTGATTATGGTTGCTGGAGAATGACACCAGAACTAAGAATTATGTAGATA  
GTAAATATAACTTACCAGTAAAAATGGATATCACTAATCCAGATATCGTTAGGAGTAATA  
TTAATTATTATCTCAGTTTACCTACTCAGGAACGCATTGAATTATTTAATAAAATAAATA  
ATCCTAATGTCATTGAGGCGATAAACAAAGAATGGTCTAAGATGGTTGTAGAATATTATC  
AATCTGAGATCGATTTGTTTATTGGATTAATTGATTTTCGATCATGTCCTTATCAATAAGT  
TCATGGCATTAACTGGATGGACGATTTATTTGAGTATGCTTTAAATATCCCATTAAAC  
AAACCAATACAGTAAATGAAGGCACCTGTTGCTTACTGGTTCACAAAGATAAAAAGGCAA  
CATATACCCATCTCACTGATATTAATAATCTTATCAAAGTGAGTGTATAATTACGGCATA  
AACCCCTCTCCGCATGGAGAGGGGCTATGTCTTTATTTCTTTATTTAAACTCACTTAGA  
ATAATCTTCTACTGGAATATCATCTAGCCAATCATTAAAGTAGTTTAAATTGTTGAGGGTG  
TTGCATCTTAGTTACTTTACCGTATTTAACACTAATAGCGTAACCACCAGATACTGCAAG  
ATCCACTAGTTTTCGTTTCATATGCATTAAATTCATCATACCAACGGGTATGAATAAGTTT  
TGCTAAGCGTGCATATGCAGTCTTACGATATTGATCTTCTGTTCCCGACGTAGGACTTC  
AAGTAGTTCTTTCTGACGCTGCTTCTGCTGGCGTTTCTCTTCTTCTTTCTCTTTCTC  
CAGTCGTTTTTTCTCAGCAATGTGTGATAGAATGGGTAGCTTGAAAAGCAGACTTAGAAT  
TAGTTGAAAGAATTGTTTCATTAGTATTTCTCAGTTTGATTAAATAGATAATTTACAAA  
TGGCAATCCGCCTAGTTACATACTAGATAGCTGTAAGTATTTTAAATCCGTTACAATATCT  
GGATAACGTTTCATCAATTAATGATTTCTTATATGCAAACCTCACGTACCTCTACTTCTAAC  
TTTTCTTTAGTTGCATATGTAGTGCCGATTACAATAATTGAATCATTATTAATTGATAAC  
TCTACATCATTATCTTTTCCAAATACTAATTTAAAAACAGTATTTAATTCATCTAATTGA  
TTTTGAATGGACACTGTATCATCATGGATTGCCCTAGATGGCTCTTCTAATAAACCCCTCT  
AGTACTTTATAAGACTTTATAAAAAGAGTATCATTAAAATCTTCTTTTAGCCATGCTAAT  
TCAAGTGTATATAAATCAACTACTCTATTAAGATTTGAAGTAGTTATATCTGTTTTCCAT  
TCATAACCTAGATAGTTAGTTTCATTACTCATTATAAACTCCTTTGATCAATACATATTA  
AATAATCTGGAGTATTATTTCTTTGTAATACGATAACCAACTGACCATAAATCTACACGG  
ACGAAACCTTTTCCATCATGTTGACCGTATACACATACACGTAACATTCTATTGCCTGTC  
TTCATGTCAATTCGTGTTATCTCAAATTTATTAGTAATATATTCTTGGATGATAAATAAT  
AGATGACTCATTATTTATTTTCTGATTAATGACAAACATAAGCCCCTCCATATGGAGGG  
GCAATATGATTTACTGAGTCTTTCACGTTCAATCCCATCCTAACTAATATATTTAAGAAT  
AGTTTAAACCTCAGTAAATTTGGTGCCGCCACTCCGAATCGAACGGAGGACCTACGCATT  
ACAAGTGCGTTGCTCTACCTAGCTGAGCTATAGCGGCGTAATCTTCTACATATAGTGTAT  
ATGAAAGTATTATTTTAAATTTATTATAATAAATAAAGTTATATTCAAACCTATTTAAAAG  
GTATATTACAAATGTGATATTACTAAAAGTAATATTTTCTATTAATTGTAAATAGGATAC  
TAAATATGAATATTGATCCAAAAACTCTTGGCATTATTATTAGCACCCTATTGGCACCG  
TGGGTGCTCTTATTCTTACGTATGGTATTGCGAGAGCAGTACGTTGGAATAATAAACCTG  
ATGTAAGATGTAGCAGAGTAAGATAACATAAAGCTAGCCCATTAGGGGCTAGCTCTTA  
TATTTATTTTTTATTTGTTTTAACTTAGAGTACTATAATAAATAAATTTAGTTAATTCAT  
CTTGTGCTCTTTGATTATATTATTTTTCGTTTGTAAACATTAATGTAATATTCATAA  
ATAACCAACGTCTATCATGTTTGGCTAAGTCTTTGAATTCAATTTTCTCAAATCGCCATG  
ACTGTACAGTAGTCCTAATGAGATTACCGGATTTATTGATAATATACCCTTGCATGGTGT  
TAATTTGATCATCGATAGTAGGCGTTGGTAAAAATATCAAATAAACACCATCTGTATTTT



TAGTGTGCATACTTTTTAATTTATACATCATTGGGTTAAAGTATTCATCACTTTTATGAT  
AATCGCTTAATTCTAACACAGCATCAATCATCATTTTTAGCGCTTTCAGTAACACCAACAT  
TTAGTAAATAATCATTAAAGCTCTTTAATGAATTATCTGTAAGTGATGCATCTATGTGTT  
CTTCACTTATAGGTTCACTATAAACTAGTTTATTAATAGTTGAATTAACAATATTTAGCC  
TATCGATATCATAAACTGCTAGTGTGGTTACCAACATTTATTTTTAAGTCTTTACCTG  
ATTCATTGATAAAATCATTTAAATCTACTTCAGTAAAATGAAAAGCCATTTTTATACACC  
TTTATGTTTTCCGTAGTGTAAATTTTATTAACACCCGGTTTCAAGTTGAGTTATGTGTA  
GAACTAATCTACAAATAATATTAATCTATGTATAATTTACTTATAAATAGACCACTCT  
ATATAGAGGGGTATTAAGTCATATAAAGTTATTTTAGTGTGGGTCTAAATACAAACATTA  
CGTCTACTTCATCAGTTGGGTGACATCATATTCTGTCCCAGTATTATCAATCGCAACCA  
ACATTCTCACATTCCTCGGTAAAGGGCTTTATGTGATTTAGATAGGCGAGTGATAAAATA  
CCTAAATGCCTGAGATATTCTCTGATAAATCCTTTACTTTTTATTAATAATTATCACCTAC  
ATGGACCATTCAATCACTTTTATGTAGCTTGATTTCAATCAATTAAGGGGTATAACGAAT  
GTAATGTATTTATACACGAATATAGTTATCATAAGCTCAACTACTTGGGGTAAAAGAGTG  
GACGGAGATCAGTCTCATGGTATTCATCTTTGATATGGGAAAAGTACTTATTGAAATTAT  
CCACACTATACGAAGTTCTAAGCCCATTTGGCCAAATCACTAACATGTCACCAACTTCGA  
ATGCCGTGATCATAGCCTCAAAGTCTTTTATGTTTACATGATCATTACCAAGTTTCACGA  
ATCGACATGCACGGAAACCACATTCCCAGTCAGACGACATCCATTGACCAGCTTCAGTAA  
TCAGCTTTGCACGAACTAATGTCTTAGCCATACTTGGTACCCAGTTTATCGTTTTGTGCG  
AGAAGAGCTTGACTAGGTCGTTTATTACGAATCTGATTCTTAATAGACTCATTTAGCTCT  
TCCATCGTTTTCCGAACCTTAACTAATCGTTCCTTTTGTTCATTTGTAGGAACTACTA  
ACTATATCTTGCAATGCTTTAAGTGACATGTCTTTACCCTATTTGTATTTAGCTATAAGA  
TTCAACTACTGGGTACTTTTTACAAGACGACATAAAGGCAGCATTAGCTGCCTTTATAGTT  
TACATAGTAGTAAATATAACTAAATCTAAAATATGAATTGGCTCCGTGACCTGGGTAA  
GAACCAGGGACCCAGTGATTATGTTTTTGTATATTAATCTACATCGAGTATATTTTTATT  
GTGTGGGGGCCAAGGTGCTAATACCCCATTAGTGCTGACCCTAATAAACCTAGCTGGAA  
TATTGATTTTGTATGACCGACACCATTACGAATTGCATTATCCGATACCCATACTTTT  
CTCCTATTTTACAAGAGATAACAATGTAACGTCAAGGACGAATTGTTCTTTAGATGGTC  
GATCAACCTTACGTCGACCTTTGGCAGAACACTCAGGGTTACAGAATTTAATCAATTTAT  
GATTCATTACCCTACCACAAGCACCACAAAGTTTTGTAGGATAGTTCTTTGGATCAATGC  
CCAGTCGTTTCATCCATGCATGTAGTTTTAGATGCTGTGATTGAGGGAGGATCAAAAGAT  
TATCGGGATGGTTATTGAGTTTGTCTCATCCAAATGATGAACCTCTTCGTCATCGTAAA  
GAGGTCTTCCGATTGTATCTTACCGACTACACGGTGTTCGTATACCCATCCAAACATTT  
TGGGGTTAGCTTTTGCCTGCCGATGTTTCCAGGTAAATACAGAGCCCGATAACCATTAATTA  
TTTTTTTCTTTCATATCGAACCTAGGGTTTAAAAAATAGATAGCTAGTTCGATCTATAGA  
ACAAGATAAAAGTAGCCAGCTGGCTACTTTTAGAAATTGGCTGGTAAGGTAGGATTCGAA  
CCTACGGTGGGCTTTCCGCAACGGATTAACAGTCCGCTCCCTGCTGCCACTCGGGTACTT  
ACCAATGAAATCGTAACAGTCATTTGCTCTACCGACTGAGCTATCACGGAAGAATTATGG  
CGATTTTATATTAGAGATGAGTTACTGACAACCTAATATAGATATGTAATAACTACATAT  
TATTACAATCTGAGTATTATTTATTTCTTGTATGACATTATGTAATAACGTGTAGTTA  
ATCTTATTAGAACTATCAAAGTTACTAATTCTAACTAAAACGAACCACCATTACCTCTG  
TACCAAAGTATCTGCAACCCACTGGTTAAATCTTTATCAGTGATACCGCGTAGGTTCA  
GATTAAATGAGGCATTGTCAACAAGAATATATTTTACAGACGATATTAATTCTTCTTTAA  
TATCTTTTTGAATAGATGATTCTTACGGTTGATGAATATATTTACGGAGTTGGTGTGTAA  
TTAAACAAGAAACAATATTATCTTTAGCATTCTGGAACCTTAGCCAGTACAGCCTGTTTAA  
TTTTATCTTCTACAAATACAGCTAGACATTCGCCAGGATGACGATTAGCAAACCTCAATCA  
ATGCAGTTGTACTACCACATTGCCGACCTACAAATAATCCAACAGTCCCTGTATTCACGAA  
TAACAATATGACCAATAGAATTAGATCGATAATTAACCCAGTTCTCATTCTGTTTTTTGAA  
TTAAAGCATCTAGGATATCTTGGTACTTTACAATAGTTCTTACAAACGGATTAGAGTTAG  
TCATAATAGACTCCTTTATTACAATGTAGCATAGATTCAGTTTTTTAACTGGAATTAAT  
GCCGATTTTGAAGAGGTGATAAAACCTTTTCTCATCTATAAATGAATTTATAATAGTAAC  
AATGAATATAACCAGGGGTGGCAAACCCCTGGCATTAGACACACTCTATAATAAGTTCT  
ACCACCGAGTGTGTTTAGTGGATAGATTTAAGAATACTTTATTATAGTACTCTTACATAA  
TATCATCGTGCCAGTATAATTATCTAAATAGTTATAAATATTATTATTTAATCAATGAT  
TAATGGCGCTAGTTTTACCTGATAGATACCTGATAACAATTGGCTTTTCAACATATATGC  
TCCACCACCAACTGGCATTTTAGATCCACCTACAATGATCATGCTATTATCCGGACCTTT  
AGCTATAGATGAAATATTAAGGAATCCGATACCTAGTTCAAATGGTTCAGCCCATTTCCG

GCGCCTAATATTAACGTTGTGCAAACATTTTAGTTACACCGCCGACATCAACAGCGTT  
AAGGTAATTAATAAGTCCCCATCTACATAACCATTACCTTGCCAGATTGTTCCCTTATC  
AGCAGGTATAATCATCCAAGGTGTTTGTCTCCCATATTAAGGTAGTTGCATTATATCGATA  
AACTTCAAGATTAGGTATGTTCTTTGTATTATCCCAACCACAAAATGGTAAAAGTAACC  
ATTATAAAGAATAACTGTTGACCTGAACGAGCACCACCTGAATAATCTTGCCCACTAAG  
CCATGTCTTACCCGATGGTTTTAACCGCATTGCATTTACCCCAACTGGGTTAACACACAT  
AATAAGATCATTACCATCTGATGCGGAGGCTGTGCCCAAAGTGGTACGGGACCACTATA  
TCGCTCAACCCTATTGCCTGTAGCTATATCAAAATGTTGTATAAAGTTAGATGTTCCCGT  
ACCACCATTACCAGCCGAGTTCATCCAGTAATACCGCCATAAACAATAAAGTTATTCTT  
ATGTAATGTCCCAAATCCTAAAGATACCCCTGGTAAGAATGTTCCAGAAGCAGTTGCACC  
TATATCGGCAAATGGCGATATGGTAAAACGTCTGAACACAGTTGCAGCTGTTTGTCTTC  
AGTATGATGACCAGATCCAACATACAGTGTATTTCCATCCACATATGACATTGTACCAGC  
TAACGCTACAGGTAGATCACCTAATTTAATAATTTCAATTAATCCAACCAAGGGTAACCTC  
TTCGCTATATCTGGCGATAATAGTAATTCAAACATGAGTGTGCTCTCAAGTAAATCATT  
TTAATTCATAAGATAACCCATGGCAACATAAAAGAGTAGCCGAAGCTACTCTTTAGAATA  
TGGCTCCGTGACCTGGACTCGAACCAGGGACCCAGTGATTAACAGTCACTTGCTCTACCG  
ACTGAGCTATCACGGAATTAATGGCGCGCCCAAGGGGACTCGAACCCCTGACCACCCGG  
GTGACAGGCGGGTATTCTAACCAACTGAACTATGAGCGCAAACGTATGGACATGACTTCC  
TACATAGTATTACATAACCAGTAATATTTTATTACGGGCGATCAGTCCAGTGCTTGAAAT  
AGTTACCATCCTTGGGACGATCGTACTTAGCAAGAATATTTTTAAGTTCTTCGCCGGACA  
ACTTAATACTATCGCCTACTGGGCTATCCAGTTCAGGGCAAGGTTCAAGTTTTACGTGTAA  
TGATTAATTATCAGTCCCATCTTTGAAGATAAAGATAAACTGCGTTTCATTAGCACTAA  
TCTTTTTCTTAACGCAATGCTTTACTTCTGGATGTTTCTTGTGGATCGCTACAAAAGATT  
CAACAAGAGTTAGCTTTATAAACTCAGGGCTAATAAATGTGAAATATACAGCGCTCTGCG  
TTGGGGTTAGATGATCCATATTTACTCCGTATGTTTGAGATAGGCTTTAACTGCTTTAAG  
ACCTTTATTAAGAACATAGCTTCAACATAAGTAATGTTACTTACATCCTCGCCGATAAG  
TTCCCATTTGATGCAACGTGTAACAGCGTTGATTGTAATATCTAATCCGTTTGGGAATAG  
GGTACTTCATCGGTCAGGTGAATCCAATCGGGAGCCTTCGCTCCATTACGTAACGGGG  
ACTAAAAGTAAGATTATAAAGTGTGTAATGGTTGTCTCAATAGTTCTTTTTGTTCTTG  
ATGTTCCATGTATTTTCTAGAGACATTTAAAAATATAAATAGAATGGTTATCTCTTTTCG  
GTTATCTTTAGAGTATTCTCATTTCGAATAACTTCAAGAGACTTGTATTTATGTTCCAGA  
ATATCCAGATGAGAAATACACTGTTCCCTATTTTCAAATAGGATATTACTTTCATTAGTC  
GAAATGAAACCAAATAATCCAACCTTTGATAGATAATACCAACATTATTACTGTATTCATG  
TTTTCTCAATGAGACAGTATAAAACCTCCCCAAGTGGGAGGCTAGTATATGGTGGGCC  
CAGCAGGACTTGAACCTGCGACCAAGCGATTATGAGTCGCCTGCTCTAACCAACTGAGCT  
ATAGGCCCTTTTTATTTATTCTGGTAAGAATGTTCCATCTTTTTGACGGACTAATACACC  
TGACCATTTGAATGTATTTGTATCACTAGCAGGGCACTCTCTAATTACATTGGTTCTAAA  
TGTGCCATGTGGATAGGTTACAGTGAATGTAATATGGTTATTACAAACATGTAATACAGA  
AGACTTTGCTTCTGTTAGATAGTGAAGCCTTGAGCTAATTGAATATTAGTTAATTCAGG  
GTCACTAAGAATAGCGTAAAGAGCTGTTCCCTATAATTTGATGTTCCCATGATATCCATTT  
ATTATCCATCCTATTTACCTATTATTAATAAATGGTCGGAGTGGGGAGACTCGAACTCCCGA  
CATCCTGCTCCCAAAGCAGGCGCGCTACCAACTGCGCTACACTCCGTATTTAAATTGGTG  
CCCGAAGTCGGATTGCAACCGACAAGACCGTAGCCGGAAGATTTAAGTCTTCTGTGTTT  
ACCAATTTACCATTTCGGGCATTGTGCTTCAATACATAACATGTAATGCTAGGTATTTTA  
TTACAACCTATTTTAAATTCAACGTGGCCATTGTAAAGAAGTTATCTTATTACCATTAAT  
GTAGACATCGGTCACTTCGCACCAATCATTAAATTCTGTGTTCAATAATTGGAACATCATT  
TCGGCCAGCCACTCCAATCATATTTCCATTTAACATAAATATTCATTAGATCAATTGTTAA  
TTTCTCTTTTATGAGTTTAGGAGAAATTAATTTAATATTATTAATGTTAAAGAAGTAATT  
ATTAACCTTCTTAAATATTCAATTAGTATTAGTAGTACTAACTTTGCCTTCATGTTCAAG  
TGAGGATGGTTTATTCTGATTTACAATATTGCTCACTAGACTTCTTAAAACGGCACTTGC  
CCTACCAGCTTCGCGTCTTTTTATACTTATCATAGTCTTTTACATTAGCTGCAATTTTATC  
AAATCTTTTTGGGCATAGATTAGCCCTGGTAAAAGTTCATTTTTGATCATTTTATAATT  
ACTCTATGTTGTTTATACATATTTAATATACATACGTAAAAACAAAATATAAAGCCTCC  
CCGAAGGGAGGCGATATATCGTCATTAATGCCAGCAAAGAGTTTTACTCTCTGGGAGCC  
AGTTGGAAGGGGGACTGGCTCCGATCTATTATGACTAATGTAGAAACAAGGGGGAAGGAT  
TATTTCTACATAATATTAGATACATTACTGGTAGTTTTTCATTACCCATTGCTAACCTACC  
TTTTATAGACCGATCTACCCATTTTGCGGCGGCCCTCCATGATATCAATGAATGAGTGGTA

TTGCCGCATTTTATTAACCTCCATCACATCATCAATCCCAGGGCCAAAGCATGCGAA  
TAACAAATCATTCCAATCATAGTAATCGATACCAGCTATTGGACTAGGGTTATCCAACAT  
ATCGTAGATTAGTCCTTCCAGTGGATCTGGTAAATCAGGGAACTTGAAGCTAAGAGTTAT  
CTGACGTTCCAATGCCGATATAATTAAGTTCATGGCCTTAGCTGCTTCTTCTTCAGTAAG  
AGCTTTGAGTTTACTATCAGTAGATGGATATTTTCGCGACCACGGTGCAGGTGAATTATA  
GGTACCCTTACCTGTAATAGTACCGGCAGGCCATTTAACACTAGTCTTGAATCCAGCACG  
TGCCTTGTCTACGATAGCCTTTGCTTCTTTGTATACGTTAGCGTCTAGGTATGTGCATT  
CTTAATGAGTAGATCCAATGCAGGTTTAGTCTTCTGCCTGTAAGACTCCATTTTCGCGATT  
AGACTTTTCTTCGAGTTTGAAGAATGGTCTACTGCACGAATGGCATCCTCGATACTGAC  
TTTACCATTAATACTCAGTACGTTAGCTATACCATTACTATTGATATCGCCAGTAACGAA  
TACCTGCTTATTAAGCCATTGTGGATTGCCAAATGTAGATTCTAGTTGTTCCAGAAATCC  
TCTTGCCTGGACGATGAACGCCAGATACGTTTCTGATCACCTCGATTAGAAATGCCAAG  
AACTTTTTGATTGAATCGATAAGACCTTCATTTGAGACTTGTATAAAACCGGGAGTATT  
AATGATGGACTTCTCTACATACCCGCCACGAATAACCCGATTTATAAAACCATTAAGACC  
ACTACCAGTTTCGGCCATATCTTTCATGATTTCTATATTCGTTTCACCGGCCTTTGGGC  
ATTGTATAAATAATAAGAACCATCTTTGAATTTTCAGTATAATCCAGTCATCCCCAGTTAG  
ATATGAATCAATATTAATCATACTTTGATATTTAATGAATTCTGGATTAGTACT  
TAATACTTCTTCAATGAATTTCTTCTAATGCCGCGAATTATTAATAGCATCAACCGGTAG  
AATTTACCATCAATGGGTTTCAGTAGTTGGACCAGTAACAATGGCAGGTAACGGATCCTC  
CTCTACAATAACAGTTTCTTCCACTGGTAGAGCACCGCAAGATAAATCAATTAGTTTATT  
AAAATACTAATGATCTCACCAAGTGCTACAAGAACTGCTGGCTGTTCAACTTGTTCAAC  
TTAGCAATACCAGTTTCTGTAAATTCTTCAGTAATTCGGTTATAGACTTCCACTAATTG  
ATTAGTAAGCTCTGCTACTTTTGGCAGAGTCTGCTTAGACAGAGGTTCAACTACAGTTGT  
ATCTGCTTCAACAAAATAGAGTCATCTTCTTCTAAACGGCTAGTATTAGCTGAGCCAGC  
TGTGAAGTTATAAGGCATATCTTGAATTACTTCATTAATTTTCAGATGCCTCCATATCTTC  
ATTTAGACGACCACTATAAGTACGCATCATACTTCTGCTTCTTTAATAGTAGAATGCGC  
TAAGCGTCCCCAATCACACGCATAATACCGCGCTCGGTAAGACCGCGTGCAGCTGAACC  
AAGATCAATAGGTTCTTCAATAAATGATTGTTCTTCAACCCACTCCTCATTACTGTAACA  
TTCTTTTAGAATGGTTTTAAATTTAGTACTAAAGGGTTGTAGAATCTTTTTATCTACTTG  
TTCAACATTTGTTTTAAAGTGTTCTAGACTTGGTGTAGCTTTTGAAGATACTTTTTAGT  
ACCGCTATATAGCGTACGGTTTAGGAAGTTTAGCATTTTATTTCATGTCTACTCTCTCGTT  
GATGACTGTTAATAAGAGTGCTATAGAATTGTTAGCATAAACCCCTCCCAATTAAGGGAGG  
GTCATTATGTCTACATTATATCTCGTGTACCATCATTTCATTTCAACAACAGTGACTTTAT  
CACCAACCTTTGGTTTTTTCATTGGTAAGTGTGTTGAACCATGTACTGCTTGCCATCTGTAT  
TAACAATCAGTTTACATTGAAATGTTTCAGTAGCACTAACATTATTACCGACTGCGCCGC  
CTGCGGCACCACCGATTAAACCACCTACCCAACCTCCAGATTTACCAAAGATTGCTCGAC  
CTAATACAGCGCTGCGGTGGCTCCAACCGCACCTCCAACAGTAGTGCCGACAACACTAC  
TATCTTTAGCAACTAGCTGACATTCTGAATGTGCAATAATACCATCTGTAGTTGATTTTA  
CTTCAGTTGCTGCAAATAGGACAGTGGACCACATTAAACTACGAATGCGATAATCTTAA  
TCATAAGAAGTCAACCTCAAATTTCTTCTTCTTCCACCAACATCATTTACAACGTTGACCAT  
GTAATCAGGCTTCTCTTCTTCTGAGGAGATGCTTGGGTTGATGAAATATCTAGGTAGTC  
TTCCATATAAAGAAGTGGGTTCTTCTCTGGCCAAACAAAATCAAATCCAGCTGATTTCTT  
AACTCCACTTGATACTGTTCTACAACATCATTTCATAACTTAGGAATGTTGCTGCGGC  
ATTAGCATTGAAAAGTACCCAGTTAATAAGTTTAGTCGCATTAACACCAGTTAGTTCACG  
ACCTTCAGAGAATAGATAATTAATCCAGGTAACCTCAGTCTTTACAATTTCCCATAGTAG  
TTCAATGATTTTATCTTTACATTGACTGTAAGCGAGTTTACCGCGTTCAGTTGCCAGTAG  
TGCACGAATAACTTCTTGTCCATATTGTGCATGGATTTTCGAATTCGTCTTGGGCAATTTT  
CTTAACAGCGGCTGCAATTTGCTGGAATGCACCAGTACGACCAATAGCAAAGGTTACTGC  
AAAGGATGCCATGAACTGGATACGTTCTAGGAAATATAGAGCGATGAAGAACATGAATAC  
TTTATTGTAAAGTTCTTGATCATTGGGTACCTGATTAAGAGCATAACGCATGAACTGCGTC  
ATGTGCTTACCCATAGTGCGGGCTACTGCAACCATTTCGTTCTTGTGCTTCTTCTACCCT  
AAGAATTTTCGTCTAGAATAACTTTAGGATCTTTAAAGCTATTACGTACAATTTCAGAATA  
AGTTAAAGCATGTACGTCTTCAATTATCATTAAATACGTACATATCCCGCCATACTCGTGA  
ATCTGTACATGACAGGTGATAGAATATTAACAATGGAACGACTGGCTACAGAGTCAGCTTC  
CCATTGCCAGGCCAGTGTCTTAATCATCATGTCATAAGTTGATTTATCACACGTTTCAA  
TTCTACTAGACAAGTGGAAAAGTCAAATTTCTAGCTCATCCAATCAAGCATCTTTAGACG  
CTTATATAGCTCCACATTTTAGGATAATGAGTGTGGATTGAATCTAGTAGACCTGGATC

ATCTCCAAGAATAATTTCCGGTAGATGATAATCACTCTTAGCAACATTGAAGATTTTCTT  
TGGTAGTTGAGATTTAGTAGACATATCAGTTCCTTTACAATTTAAAAATATTTCTTACAA  
TAAATAATAGAGGTTAGTATAAATTGGGAATAACACCCTCCCAATTAAGGGAGGGTGTAT  
ACACTTAAAGAGTGCACGAACCGCCTGCACACCCAACCTTCAGTATTAGTTACCTCAACAG  
CACGTTCAAGTGATTTAATATCAAGTCCTGCTGCTGTTTCTAGATTTACATAATACCGGG  
TTTTCAATTCCACGTTTACCATGTAGAAGTGATTACCTAGCATTTCATTAGAAGAGATCT  
TTTCAGAACCTACAATGCGTCGGTAGAGGTCCGCACTGATTGTTTGATCAGTCCACTTTT  
GAATAATGGCATAGCAATCAATAAGATCTTTAGTGGGGATATCATAAGCTGATTCATACA  
CATAGGAGTCATCATCTCCATATGGAGCAGCCATAGCACACGTGCACCATTATCAGTCT  
TATTAAGAATTAGGCGACGTACCGGGTATGGACCATTAGTTGACCCTAGTGCCTTAGATG  
ATGCTTCACCAGGCATGTATGCAGCTAGTACGGAGTGTGCAATACCACCATTCTCCTTAA  
TTTCTTTCTCTAGCTCATCCCATGGATAAAGTTCTTCAAAGCCACCTTCAATGATAGTAT  
CCACTGACTTATTATAAGTCTTACGTGGAGTCCATCCCTCTGGCCATTTAGTCTTATGAA  
TCCAAGGCGCATTCCCAGTTCCTTTAGAAATCTTAAGTGACGCCTTGATAAGGAAGTACA  
TATGCCGTTTACGCAATGAAGTGGATTTTACGCTTTACCAGCATCGCTGCTATATTTAAGGC  
CAGCACGTGCCATATGTGTGGCTAGACCCATGATACCAACACCAGCACTCATTGATTCT  
TAGCGGTTAGTGCAAGGTGTGGGAAAGCATACTCTGCATTAAGGATACAATAGTCAATCA  
TCTTAAGTGCGTAGTAAGCCGCCATTTTATAAGTTTGTCTTATCAGGAACGTTATCCACTG  
CAATAGCAGCCAGTGAACAAGTAGCAATCTCACCGCGCCCGTGATCCTCACTAGAATAAA  
GATCTTCCATTTCGATAGTAAGGCTTAGTGGGTTCTGCGATTTCAAGGCATAGGTTAGAAC  
TGTAATAGGTTCTTTAAATGGTGTATGATGATTGAGTTCATCAATTTGAGCTGAATAGA  
TGGTTCAGTCTCATATGCTTCAACTAGCATTGATTTGAGAAGATCCCAGCATTACAT  
AAGTTTTCTCAAATTTAGGATCCGCTTCATATTTTTCATAAAGCTTAATAAACTTATCAA  
TATCACCCTATAGAAAGCATCATGTAGATCTGGAGCAGTAAATGGATTGAATACAAAGA  
TCATGCCATCTTTCTGAGCCGCTTTCTTAGCAAAGAACTTATTACTTAGGAATGCATAGT  
GAAGATCACGGTCTTCTTATCCTCAGTAGAACGTGGATTACGTAGCTGAGTAATCATAT  
CTGCTTCAGGATCGAAAGCACTGTAGTAACACGTAACAGCACCCACCTCGACCATTTTGT  
GGTTAGCCCTTACTGCTTTACCAATTACATCGATGTATGGTTTCTTACCTTGGTGAATGA  
TTAGGCCATTACGGATAGGATCACCAATTGACCTAGTCATTAAGTTAACACCAATGCCTG  
CTGATGATTGGGTCATGATGTTAGCAATATAATCGCCCATTGCCAGTGATACACCATTAT  
CACCAGAAGCAAATAGGCAACATGATGCAAAACCACGAAGCTTAGTACCTAGGTTAACGT  
AGTTAGGTGTTGGCGCACTAAGAATTTTATTAGAAAGTAGTTTATAGTAATTTCTCCACAT  
GAGTCATGCGAGTTTTCAGCTGGCTCTTTTTTTCAGCTAGAGCCATTGCCATTCGCATATA  
CAAACCTGGGCAGTCTCATATTTCTTGACCAGTTTTTACGATTACGTAGAGCATACTTTCCAC  
GAATGTGATGAAGTGAAAAATGCGGACAAAGTAGGTCAAGATCGTGATCAATGATCTTTT  
CAATCTGAGCGTATTCTTTACTACTATAATCTAATTTAACAAATGATACCATCTTTACGCA  
TCTTGGTTTGAAGCGCTTTAACAGTTGGGATGCCATTTAGACCATAGAACTTCTTACGAA  
GATAAATCGCATATAGTCTACCAGCCATTAGATAATAAGACCATGTCTTACGATTTAAC  
ATTCTTCAATAAGTTGTAATTGTAGTCTTGTGATGAAGTTTTATCACCAAGAGCTTGAA  
CAGCATCCATCACAACTACTCCAATCCACCTTATCGCCAAGATGTTGGGCTGCCCAT  
CACCCCAACCATTAATCTTAGCAGGTGAGTATGCTTCTTCAGTACCGTCTAGTTAATGA  
TAGTTTTTAACATTGTTAATTTCCAATTGTGAGTCGTAAGTTCATGTGAAAAAGTATTCA  
ACATATCTTTAGATCAACTAAGTATTTTTACGACCCATTTTAAATGAATTTAGTTGATCT  
ATTGTAAGCATATTATGGTACATTGGATATCTTTATCTTAAAAACCTCTGTAGCCTTA  
GTGCCTTAAGGGT

>NewGenomeName\_267

TTTTAGTATATAGCGTAGTGATTTCTCCCTCCCCCTCCTAATGTAAATGTTTTTTCAGAAA  
ACACTTTCATAAATATTTCTGTTGACACCACAGCTGCAACATGATATAATTAATACATAA  
ATAAGAAAGAGGTACACAACATGGTTCACAAAGTAACAACACGCAAATCACTAACTGACA  
CAAGCATTGACAGATTGTTAAGCACATACGCGCAGATTGTAGCGACTTACGGCTCACCAA  
ATGTTCAAATAGTCCGCTTCGTTAAGAACGGAAATAGCGCAACAATGACTTACGACATAA  
CAATATTAATTTAAAAAAGTAAACTTTCTAGTTGACAACGACATAACGGTTTGATATAAT  
TAGTATATAAAATAGAGATAGAGGTAACAACAATGACATTTCAAAAAGTCTTAGATTTA  
AAGACGTATCACGTGAAGAGATGATGAAAACTACAGGGAATTAACAGCCCGCTATGGTA  
TGAATAACATCATCTTAGAAGATTTGAAATACGACGTTGAATACAACGAATACTCATTCA  
ATATACTAATCAAGCTATAAGGAGATATTCCATGAAAATTAGAATGAAAACAATTTACAC  
TTTTTCAACAACAATAGCAACACTAGCTCTTGGTGTAAACCTATTAATGGATAAGGGAGA

CAACAACAATGTTAACACTGATAATACTTTTTAATAATAGCAACCCTATTGTACAAGTTGA  
CAACAATTCTAGTGAAGCCACTACTACTATTACTAGTGATACTAATGATAATCAAGTGGC  
TGCCGACGATACTAATGATACTGAACAACACTAGATTATTTTCAACCATACGAATACCTATA  
CATGCCAAGTACAAACGTATCATCAATTAGAGACGGATACTACTTAGTATCAGGTGGTAA  
TACATTAGCAGCTGTTCAAATAACAAATGGTTACACAACACTGATGAATTTAGACTTAAAA  
TATATCCGCGGAACAATGGACAGTATCTCAACAACAATGGAAGACTTTGTTTACTGGTT  
ACGTGAAGTTAGTCCAAGCGGATACAATCAAAAAAGTCTAGAAAATAATTTTAAAAATTTT  
TATCAAAAAGTAGTTGACACTGATAACACAACATGCTATAATAGATACATAAATAAGAAA  
GGAAGTATCCAAAATATGTTTTATACACCAATTAGAGAGTATAGGTTAGATTATTATGAC  
GGTGA AAAAATACCAATCAGTCATCTGCACAGACCATGAGTTAAATCAAACACTATCTGAA  
TTAATCAATAAATACGGTGAAAGTAATGTGCGAACCAATAAAGGAGATTAGATAATGACAG  
CTTTTATTGATACAATCAAGAAATATCAACTTGAACCAGACGAACCAAAAACGGTAACAG  
TAGAAAAAAAAGTGAAACAAAATATAGACGCCATCGCCTCATTATCAACAAGACGGTA  
TTGAACCTATTGAATATATAATGTCCACACAACATGAATTTCAATATCGGAAATGTTATCA  
AATACGTAACAAGAGCAGGCAAGAAACAGGGTGAGCCTATAGAGAAAGACTTACAAAAAG  
CAATTGATTATTTAAAGTTTGAATTAGAAAGGGTTAAAAAATGACCAAATACCTAGTAAC  
TGTTATCAACGACCAACACGTTTTAAGCGAACATGAATTCACAAGTAAGAAACACGCTTT  
AAGTTTCTTTAAACGACTACAAGCAGACGAAACTGTCCTATCATCAGAAATAGAGGAAAT  
ATAATATGAAAACACAAGAATGGTACTTAGTAAATTTTCGGTTTATACGAAACCAAAACAC  
AAGAAATGGAAACAAATTCTAGATATTTTGAGGATAAACAAGCCGCCCTAGACTTCTTCT  
ACACTCTAGCAAACGAGGGATACTACGACTGGGCGCATGTATATAGCAACTTAGAAATGG  
AAATTATCTTATAATGAAACAAACAATATCGACGCCTTTTCGGAAAAGGAGACCACCA  
GTTAATGAACAAAGAAAGTAAATACCTATCAACATTATTTATCAATATAGAGGAATTATC  
AGTACATTTATCATCAGTAACTTTATTTATCGATGAATATGAACAGTTAAAAGAAAATGC  
TATTAAGAGCAAAAACGGTAAATGCTTGAAACTCGGTAATACACTATACTTTACCAATAA  
TAACTACGCTACTAAATTATATAATAGCTTACTAGCACTTGGCTTTAACGGTGCTAACAG  
CTTTTCATCAGGTGAACAAACATATGTTATTTCACTAACAGGCGGTAATGCAACATTAAC  
AACTGTCAAACACATTATGGAGATGTAAAATATCACTATAAACACGAAAAATTACCAGT  
TAAGAAGATTGTCAATGATTTCTGGTTATCGGAACAAGAGTACGTATATACTAATTCAAT  
TAAATTAGCTTACGCATTACTTGATTTATATAAGACTATGGGATACTCAACACTTAATAC  
TATAAAATAATTTCAAAAATAAGAACA AAAAGTATTGACAAATATAATAAAAAGCTGTTATA  
ATTAATATATATAAGTTAAGTAAGAAAGAAAACCTTACAGTCAAACCTCACGTCAATATAAA  
AACATTAGGAGAAAAACA AAAATGGCAATTA ACTTCACAAACATCGGATTCATCAACTTCA  
ACAAAGAATACAACAAAGTTCTTAAAAACGGAGCTATCACAGCTAGCATGTCAGCGTCAC  
AAAAAGACGTTAAAGGTGAATACGTAGACGAATATCACAAACGTA ACTATTCTAAAAAAG  
TAGCAGACCAAATTAACCCTTATTAATACAGAATTATGTGACATTCAAGGGGTTATCT  
CTCGTAACGATAAGTATACAAACATCACCATCTTAGGTGCTAAAAAACACGTCAAAGCGG  
AAGCCGTAGACGTAGCAGACGAAGATTTACCATTCTAATATAATTAATGAAAGGAGATGA  
GGAAAGGACAATAAAAAGTCTCTTTCTCTTTTTAAATATATGGCTAACAAAAGACAACG  
TAAAAACA ACTAAAACAACAATATGGGGTTGGTCATAAATATACCCCTAACTAAGTCA  
AACACAACAAAAACAAGCTGATTTTCTAAAATCAATCGGTCAA AAAATTCACTAATTATCA  
AACAGTTACAATTGATAAAACATATTCAAAAAATCAAGAATTGCTAGATACAGCTAACGA  
AGCTCTTCATAGACTAGGTATCTTCTTTGATGGTAGTGAAAAAATCAAGTTGCAGCAGGT  
GACAGATGATGATTTGAGATATATCATTAAATAAGTTACAACCTCTTTTGGAAAGTGTGAC  
AATGAGATATAAGAAGTTTCTGACAAATACATACCGCTCAAACAATAGAGACTATCGATT  
AGACTGGTACTTAAATCGGCCATCTCTAAAAA ACTTAAAAACGCTCAAACAGTTAGGGG  
TCTAGTAGTTGCCATTAATAAAAATGGATAGAGATTTTAAAGGAATACGATAAGAAATTACG  
TAAATCAAGTAAACAAGGCAACCCATTTGGGTTTGTGCTTGTA AAAATATAGTGAAATGGG  
GTTAATGTAATGGCAAGAAAAGTAAAGAAAACGATAAAAACAATCTTCAAGAACGAGGAA  
GAGGAGTTTAAAAACTGCTTAATGACTATCGCAAGAAATATTTACCATCTAAATACAAT  
CAACTAGAATTACTTGATTGGCTATGTTTCAGACGAAATACTTCACTACATGTCAATAACT  
TCTCGTGGTGACGGTAAATCGTTTAATTACATTGGGGCATTGGCATGGCTATCATATCAT  
TTAAACTTTGGA ACTATGTTATTGGTACGTC ACTGGTCATTAATGGACAAAATGGCTGAA  
ATGGTATTTGAAATTATTAGA ACTGTTGGTATGTTTGACATTGAAAATGTTGGGATACAA  
GCTAAAGCTGATTATCTAACAATAACTATCGAGGGTCGAGAAGTCTTTATTATAACCAAT  
CTAAACAACGCTAGT GACTTGAACAGTCATCAGCGGTTCTTCGTA ACTACCCAGTTGTT  
TTATATGATGAATTCCTAACATTAGGAGAGGATTACGTCACAAATGAGTTGGCAAACTA

CAAACAATTATCAAGTCCATTGACCGTATGGGTAAACGACCATACATAAAAAAGGCCTAAA  
ATAATTTATCTAGGAAACCCAGTTAATTTTGACAGTCTTATTCTACCAGCTCTAACATC  
TTCTACGCACTACAAAATCAAGAAATTAATACTATCCAACAACATGGTAAAACAATTCTT  
GAATTACGTTCGGAATGACGAGGTAAACGAGGAAAAGACAACCTGGTTACTTTGAGGATAGT  
GTTGATAGTGATATTACAGGTGAATTTAACTTTTCAAACCTATCGGCTAGCCGACCAACAA  
ACATATAATAAAGCACTAACCAACGGTACACTATATAAGATAAGACTAGAGGACAAGCTG  
TCATACGTTATTTTGGAAGTGACAACGAATATATATTATCCATAGAAGAAAGCAAACCT  
GATGAAAATTACTGCATACACCTTAAAGATGAAACGGCAACATGTGAATACCTAAAACCA  
AGTTTTTATAAAGATAGTTTCATAAAAACGTTTCCAAAAAGGTCATTTTAACTTTAAAGAC  
AGTTTCTCTCGTACATTCATTGAGGGTAACGAGGACTTACAACGCTTAACTTCTTCAA  
CTTAACGCTGTAGCAAGTACAGACCACGAAGACGCTTACGCCAATATTGTTAGGGAAAGT  
TGGATTTCAAGACTTGCTAAAATCTATGAACAATGATATAATAGTTTATAGAAAGAGGTA  
TCACAATGAAAGAATTTGAACAATATCTAAAGTCATTCAAAGGTCAAAGGTTACCTCTG  
TTGACTTATATTGTGATATAGAAACCGCAACTATTAATAAAAATAGCGGACAGAAACACG  
CTAGTACATATCACTCGTTTACCTATTCATTGGCCGTATCATACTTCAAACCTGGGGAAAG  
AATTCCCTAGTGTTGTCGTGTTAATCACTTCAAACAGTTATTTGATTTTATTGAGAAAA  
GCAAGATTAGAAAGTCTATCGAATTTGTTTAAATATTTTACAATGGCGCTAAATACGATA  
ATCATTTTATGGTTAGTGAAATACAACGTGATATAGATAATGTGCGTCTATTTAACCAGA  
CTATTAACAAGTTAACCATATAACAGACCTAGATTTATCAAAAAACAAGGTAAACAAA  
TGAGGAATGATGTTAATATGGTATTGGAACGTTCGGGTACGTTTCAATAACCTTGATG  
GTGATATGTGGATATATGGCCGACATTATGAAATGGTAGATAGTTATCGTAAGACTAATG  
TGTCAATTGAACCTATGTGGACGAATGCTTCTTAACAACGGACTTATTGACGAACAATACT  
TAAAAACAGATTTTGAGTACGACAAATACGATTTAGATACAGATTTAACTTGGCACGAGG  
TTAGAAAGTACCGAGAATTCATCTTCAATGACTTAGATGAAAAGCAGATGAAATATATCC  
ATAATGATGTTATTATTCTAGCCTTGACATGTAAACACTACTCTAAATTATTTTATGGAT  
TTGATTTTGAAGAACAGACATTCACACAGAATATCAAAGAGGAATACGCCAACTATAATG  
ACATGGCTAAATTCCAACCTGTTGAAACAAATTGGCGATAACATGACTGGTAAACACTTGA  
AATTAACAGACTATTTTATTCAAGGTCAAATGCTTATGACTACTTTAAAAATTATTATA  
ATGGTGGCTTAAACCTATATAACGATAAATATATCGGAAAGAACTAGTTAGAGATGGGT  
TCTCTATTGACCTGAATAGCTCATATCCAACAGTGATGTATAAGGAAAAGTTACCAACCT  
TTTTAGTAATGGTAGATAGTAAACCAACTGACCTTAAAAATATCGGCAGCACTGACGGTG  
ATTATATGGTATTTTTTAAACATGTTAATGGAAGATGTAAACGACCAAATCCTATCACGAA  
TTAAGTCTAATGTTATCAAAGTGCCATAGTTAAATATTGGCGAGTGAAAGACGGCTATG  
TGTGGTTAAACAATGTAATGATTAGTTTAAATAGAGGAAATAACACATCAAAAATTCAACA  
ATCTACATGTTCAATCATTTAGTGTATTTGAATGTCATCACTTCGGAGCTAGGGACATTA  
TAGCTAAAAATTATTTTCAATTAACACAAGGAAAGATGAGCAAAGCTCTTAACTGTACAA  
TGGAACAATTGACCCGTTAAACATTGAATTAAGTATAAGGATAAACCTAAAGAATATG  
ACTTCTCCCATGAAATGGTAGAGGGTTCAAAGGTACTACTAAACGGGATATACGGTATCC  
CTGCCTTACGTGCTTACTTTGATTGTTACAGACGGGACGAGAACGGTCAGCTGTATAACG  
TATCAAACGGTTTTGAGAATAAGGAACGTAACATTGTATTTTCAGCAGGTGTAACAGCTT  
TTGCAGTAAGAAACCTATTGCTGCCACTAGGAAAATTAACACAAGATGAAATAGATGATT  
ATTTCTGGTATGCTGATACTGATAGTCTATATATGGATAAAAGAGCATTGCCTAACTAC  
CTAAATCAATGTTTCATAAGATGAATTTAGGAGGTTGGGATATTGAACACGCAAACATAT  
CTACATTCTATGCCTTTAACCATAAAAAGTATTGTTTATACGATGATGATGATAATGAAA  
TAGTTGTACGTTGTGGTGGTATATCTAAAGCCTTAATCAAGAAATGGATAGCTGAAAGTC  
GCAACAATATTGATTATTTATTAATAACTTCTTCATTGACGGTGTAACAATCCCTGCAA  
CCAGAGCTATAAGGAATGAATGGAATACCATTACGATTTATGACGGCACTAGCGAATTA  
AAAAAGGGGGGGTGTACTACAAAAAATATGACACGAATTTATTACAAAATATTGAAAGTG  
AATTAGCAAAGTTAAAAGACGCAATATTAACAGAGGAAAGCGAAACAAGTTTAGACTATT  
CCGAAACAATGTACATTGAAAGTAATGTAGGCTCTTTCGGGGTTAGCGACCTATAACA  
TTAAAAGAATAACACTCTTAAAGCAATCAAGTATGATTGTAGATGAGTACGATGTCTTCA  
AATCATACTAATCTATTGACAAATAAAGGCCACTATGCTATAATAAGTGTAGGAGGTTT  
TTTATGATATATTTGTTAATACTAAATCCGCTGACTTTATTAGCGGTATACTCAATGGT  
ATTGCATTAGGTGACATATCTAGTAAGAACTAAAAAAGGAATTATTGGCAAGTTGCTG  
CAATGGATTGTTATTGCTGTAACAATTACAATGAAACCAGTTATTCATGTTGACTTACTT  
ACATATGTTATCATATACTACTATATAATGGAAGTAATTTCCATTCTTGAAAACGTGCA  
TGGTACTTACCAGTGCCAAAGAACTGCTAAATGTTTTAGCACAAATTAAGAAATAGAA

AATGAGGTA AAAATCAAATGAGCAAGATTAATGTAAACGTAGAAAATGTTTCTGGTGTACA  
AGTTTTCCTATTCCATACCGATGGAAAAGAAAGTTACGGTTATCGTGCTTTTATTAACGG  
AGTTGAAATTGGTATTAAGACATTGAAACCGTACAAGGATTTCAACAAATTATACCGTC  
TATCAATATTAGTAAGTCTGATGTAGAGGCTATCAGAAAGGCTATGAAAAAGTAATGATT  
GAGGAGTGGGTCAAGCACCCCTCCCTCAATTACTATATAAGTAGTTATGGCAGGGTGAAA  
AACTCTAAAGGTTTAATAATGAAACAACACATATGCAATGGTTATAAGCGAATTAATA  
GTAAAGGACGGTATAAAAAAGAATTACTATGTTTCATCGCTTAGTTGCAGAAACATTCATA  
CCTAAACTACATGTTGACTATGTTGTACATCATATTGACCATGATAAACTAAACAACCTGG  
GTACATAACTTAGAATGGTGTCAATTATCAAACCTAATTATATGAAAGGGAGAATTTA  
TTAATGAGTAAGAAGTATACACAACAACAATACGAAAAATATTTAGCACAACCAGCAA  
TAACACATTTGGGTTATCACCTCAACAGGTTGCTGATTGGTTTATGGGTCAAGCTGGTGC  
TAGGCCTGTTATTAACCTCGTATGGGGTAAATGCTAGTAATTTAGTATCAACGTACATACC  
TAAAATGCAGGAATACGGTGTATCATATACACTATTCTTAATGTATACTGTCTTTGAGGG  
AGGCGGCGCAGGTAATTGGATTAATCATTACATGTACGATACGGGGTCTAATGGATTAGA  
GTGTTTGGAACACGATTTACAATACATACATGGCGTCTGGGAACTTATTTTCCACCAGC  
TTTATCTGCGCCAGAATGTTACCCAGCTACGGAAGATAACGCAGGTGCTTTAGATAGATT  
TTATCAATCGCTACCAGGCCGAACATGGGGTGATGTTATGATACCTAGTACAATGGCTGG  
TAATGCTTGGGTATGGGCTTATAACTATTGTGTTAACAACCAAGGGGGCTGCCCCATTAGT  
TTACTTTGGCAATCCATACGATAGTCAAATTGATAGCTTGCTTGCAATGGGAGCTGACCC  
GTTTACAGGTGGTTCAATTACAGGTGATGGAAAAATCCTAGTGTGGCACTGGGAATGC  
TACCGTTTCTGCTAGCTCGGAAGCTAACAGAGAGAAGTTAAAGAAAGCCCTAACAGATTT  
ATTCAACAACAACCTAGAACATCTATCAGGTGAATTCTACGGTAACCAAGTGTGTAATGC  
TATGAAATACGGCACTATCCTGAAATGTGATTTAACAGATGACGGACTTAATGCCATTCT  
TCAATTAATAGCTGATGTTAACTTACAGACTAACCCCTAACCCAGACAAACCGACCGTTCA  
ATCACCAGGTCAAACGATTTAGGGTCTGGGGTCTGATAGAGTTGCAGCAAACCTAGCCAA  
TGCACAGGCGCAAGTCGGTAAGTATATTGGTGACGGTCAATGTTATGCTTGGGTTGGTTG  
GTGGTCAGCTAGGGTATGTGGTTATTCTATTTCACTCAACAGGTGACCCAATGCTACC  
GTTAATTGGTGATGGTATGAACGCTCATTCTATCCATCTTGGTTGGGATTGGTCAATCGC  
AAATACTGGTATTGTTAACTACCCAGTTGGTACTGTTGGACGCAAGGAAGATTTGAGAGT  
CGGCGGATATGGTGCCTACAGCATTCTCTGGCGCTCCGTTTTATACAGGACAATACGG  
CCATACTGGTATCATTGAAAGCTGGTCAGATACTACCGTTACAGTCTTAGAACAAAACAT  
TTTAGGGTACCAGTTATACGCAGCACCTATGACCTAACACATTCCCTATCAACACTAAC  
TGGTTTGATAACATTTAAATAAAAAAGAAGAGACTGTAAAGTCTTTTTCTTATTTTATA  
ATGACGTTATTAACAACCTGTGTTATTAATCATGTCACTTTCTTTGTGCCATAACCTTACA  
CCTGCTTCAAACAAAGCTCTTAACATATTCATATGCCAGTGTCTACGTTAGGAAGAGTC  
CATATCCCTTGAATTGAACCAATTACAAATTGACATAGATGTAATGTCTGAAAGTTTT  
GTTGAATAGTCGTTACACTCATATCCGAACATGTTGTAATACTTCTTAACATTGTTAAC  
TCGTCTTGTGATATACGACCCAATCTCAAGTGTACACCGAATTTGTCTTGTTTAAATAAA  
GGAGCATATCCAACATGCCCTCCGTAATGGCATTGGTAAAGCGTCCATTTGTTTAAAC  
TGGGCTTTTTGGTCTCTGTAGTGTTCATATTCATTGTTAAAACCTGATAGTGCTGACTTA  
ATAGACAGTCCACCTGACAGAGAAATAGCATTGAACAGTCTATCTTTAAACTGGCGTCA  
TTGTCAAGTACGGTATTGATACGTGATGACATTTGACGTGAATTAGATAACTCAGACTA  
TAGGCTGAATTGGCTTTTCCTAACTCACCCTGTCAACAGAGAAACCTATAGTATCAAAG  
TTATTTATTGTGAGGGCATTGTCAATGTATTGACCAACGTTGTTACCTCTAGCGTTATAG  
TTTTTAAACATATACCTTTATTTTCGTTCTTCGCTCCCATAGTTACAAAACCTATCAAATTC  
AGATTAGTTTCAATTAAGAAAGGTCGATTGGTAAACGATTACCAGCGTAATCTGTTAGC  
TCGGCTGTTACTATATTAGGCCTTAGTAAATGTTTATCATTGATTGGGTTTAAACCTAGC  
GTAAACATAAGTGATTGATAATCTAAACTAATAGCATTAAAATCTTTTTGATTTGATACA  
CCCTGCTTACCTAATTTACGAACAGACAAATCACCACCGTTAACTGGTTCGTGGTTCGTTT  
AACTTTCTTGTTTAATAAAGCCACTTGGAATAATTGTTACGTTTTTTTATTGATTGTTGT  
ATCCAAGGGTAGCCTGTGAGATAGTCCATTACCTCTTTTAGACTTTCATAGTCATTAAC  
CAATACATGTCATAAGGGTTGTAAATACCATCATGTGTTGAACCACTAGAAGATGGAAAT  
TTAGGCTTTTCTGCCGTACCAAAGATTTACGTAAGTTAGCTCCTATTGTTAGTATGTAC  
TCAAGTTGTGTGAACAACCTCTGATTTGATAGCGTGTACTCTCATAGTGCTTGTAGCTAAA  
ACGTCATTGTTAGAACGAATTTGTTCTAAATCTGTTCATATTCAGTTTGAGTATAATGT  
TGACGTATAACATTAACGTTATTGAGTGTGTTAATAACATTTCTTGAGTATATGTCATA  
ACAACGTCTGGTACTAGAGACAGTTCACATACCTTGTCATTAAGTTGTTGAATGTCAGTT

ACAAATAAGTATTCAACTCTGTTTGATTGAATGTATTGTACTTGACAGTAGTTAACGCC  
ATTAAGTCTCAAAGCATGAACGGTCACTTACTAAGTCTATTGTAACCCTTAGCACCCCT  
TTCATATTCCTATAGTTAAATGTTGATGTAAACTCATGTACATCAAACCTTACTATTGAAA  
TAGGCGTCCCGTTCCTCATTGAAATTGAAATGCAAAGTATTTTGCATGTTGTTAAACGGT  
GTATTATAGAATAATTTTATTTTGTATAAGGTCATTCTTTTGTCCCTCCTGCTTCTATTA  
TACCATAAAAACACTAGCTAGGCTAGTGTTATTGTTTATTTTCTAGTTTTTCTTTGATA  
AACTCATCAATTTGTTTCTGTTCAACTTTCTTGTCTGACATTGGTCTCTTTAGTAATTCA  
TTGATTTGTTCTTGTGTTAGTGCCATTGTTTATCTCCTTTCTAGCTGTAAAAGTCTTCTA  
CAGTTACCCATTGATTAAATGGTTTATGTTTATAACCGTCTGCTTGGTAAGCTGGCATGT  
ATTCTGTACCCGTTACAGGGTCTAACCATGTTTCAATAACATATGGTGTACCAGTTGCAG  
GTGCTCTAAAGTTATCTAGAGACTCAGTATCTAAACCACTAGTTCCTAATCCTTGGGCCA  
CTAGGTACATTTCTTCTTTATCGTCAATTACCGTATAACGTGAACACAACGGGATACCATT  
TTTTAACTTGTGCGTTGTTATCAAATTGGTGGGAAGTCATTCATTGTGATAGCATTGTTG  
ATAGAACATGTTTCAACCTATCAGTTACACCCTCTGCGTAAATGTCTAACATGAAATAAT  
ACATGTCTGCAACTTGTTTCAAGGCCACCCAGTGCCTCTAAATGTCATATGCCAGATGTCTA  
ACAAAAGGAATTCAAAACGTTTAGTAACGCCCCCGCACTTGGAAATGTATGGGATTGATATA  
GTAGGTTCAATCCGCCGTTAGGGTCAATCTGCGTACCAGTGCTAGCATTTCCAACTGGGT  
TAAACCTAATAGCTTTTGACCCCTCACGACTACCGAATGTTGCTAAGCTGTTTCATCATT  
CTGTATATGTTGAAATTTGTTTACACCTAGAATATCTGCGTCTAACAAATCAATCTTTT  
GTGTTAGTGGGTCAATATCTGGTATGTCAAGAGCAATTAATCGTTTTTCCATGTTATCAA  
TTTGAAGTTTTAGACCTGCGTCACTTCTCCGAATTCCTGCGATAAATTCATCAATCATAG  
CTCGGATTTGTTCCATTGTTACGTCTGAACCCTCTGGCGTTAGAATTCATCAATTAGTT  
GCTCAATTTAGCAATTTTAGATGTGTAGTCAACGACGTGTAACCCGTCAGTTGTGATT  
TTAAACCGTTATCTGATTGTGGTGCTACCTAACATCTACCTGAATGCCATTATAGATAT  
TTGACTTGGCTGTTGATGTTTACGACCCCTTTAAATTACCAAGAAGATTTTTATTCTCGG  
CCGCTTGGGCAGCAACTTCGTCAATTTGTTGAATGATTTCAAGGTCGGCATTTTTTAAAT  
CTTGTACGTCTTTATCGTGACCATCAAGTCTACCGTCTTGTTCGATATTCTTTTCACTGT  
TAGCGTTAATAGCGTCTGCTACTGCCTTACTAAATTGTAATTCCTTCCAATGTTTCATGGT  
CGTGATGTGACATGTGGTTCGTGATGTTGGTCAAATGGATTGATATAAAATTTTCATATAAT  
TAGTACCCCTCATAGAATAGTTGGCTGAATAATTTAATATCTAGCTCATCAAAAATCTTC  
TGCTTAAATGCTTCGTATTCTTCTAAAGCTTTAGTGTTAAATTGTGTGTTGGTTGAATTT  
GAATTATTGTTACTACTTCCCTGACTACTACTGATACCTTTTGAATGTGATACGTTAACA  
CTTTCGTTATAGCTCTTATCAAGGTTATCTGCATAGCTTAGGTTAGCTGTTTCTAGGTCG  
GTATCGGTTACATCATCAGGGTTTGTGAGTGAGCGTTAGCTCCTCTGTTTTACCGTTA  
CTTTCGTTTGTGCTGTTATCTCGACTTCTATTCTCATTAGATGAATGTCCCTCACTCTTA  
GACATGCTTTACCTAATAATAATTCTGTTGATTTTAAAGTACAACATATTTAGCACAGCT  
TCTTTTGTTTTTAGTATTCCTTTTAGTTTCGCTCTAAAGATGTATAGACTGTCCCAATGT  
GGCTCTCTGTTAAAGAAGTAGTTAACGAATTCCTCTCTAAAGTCTTCGTTTACCTTGCTG  
CCAGTGAAGATAAGTTCATTAACAACCTTTTGTACATCTTCATCATAACATCATTATCTTT  
GTTTCAATTTGTGCTTTGTCCTCAAACACTACAATTCTATTTTCAAGGGCTGCGGAACGGT  
GAATAACCGTTCCTTACCCTTCTTTATAAATTAACCTCGAATAATCTCATTGTGCTACCT  
CGTTACAATTTGAAGCTTCTCAATACTTGATAATTCAGCAACCATATTATCCCTGTATT  
CAGCATGAATATTAAGGCCGATTTTATTATTAATAAGGTTTAAAGGCTTCGTTGCGAATTC  
CAAGATAAATGTTTTCGTTTCTTAAAGGCTGTATTGGATTGGGCTTCAATTTCTG  
ATACGCCACTTTCTTTATCAACTCCTAGAGTATTTAGTCTTAGCATTGCATTCAATTCAG  
AAATTTTATTCTGTTGTTACGTTTCAATTCCTGGTAAGAATGAAACAGCCGAGGCATTAT  
TGAATGTTAGTATATGTTCCCTCTGGGTGCAATTTAGGCGTTGTTGCTGTATAAGGTACAC  
CGTTAAAAGATTATTGGCCATGACTTGACCGTCTTTGCTGCCACCCTCATTACGTATAA  
AGGTATTAACCTTAGCTTGAATGGAATACTATACTTGAATTGGCTATTTTACAGACATTT  
CCATAACATAATGTGTAATAATGTTATAATCGCACAAAGAACTAGCTCTTTTGTACGTA  
ATACAACAAAATTACCATCACTGTATCTTGTAGCTCTTTATACTTTCCTTTGGGTAGTA  
TGTTATTGTGAATGAATGTGATGTCTTTGCCTTGTAGAGGCTCTTTAATTGGTTGTAAGT  
AATTTGATTTACAGAACAATATCCTAGTACGTCAATCTTACCAGTTTTAGTTTACCCGA  
TGGCCACCCCGTACCAGCACGTAAATAACTTTGATTAGTAACTATCTAAATCATAGT  
TTTCATATGAAATTAGTAGTGGTAGGAATTCACATATCTACTATAAATAATATTAAGT  
AGTTTTGTTTATGTAACCTTTACCCTTTACGCTATATCATCTGTAAAAGTAGACATTTTGT  
AATTCATTTCACTAGGCTTAATTCCTGATGTGATTTGCATGTATAACCCCTTTCTATATAA



AAACAGAGGACTTGCGCCCTCGTTAATTAGTTAGCACGCTTAATTACTACCTTATTGTAG  
AAAGGACTAATAGCTTTCATTGAGTAGTAGTGAATCCAATGTGTTACTTCGTCAAACCTCA  
CCGTTATAGAATGGTGCTTTC AACATGTTACGTGTATAACGTTTGT AACGAATTGAACGT  
ACATCGAAAATTGCTACAAATTCATCACTGTCAGGTTTAACTTCGACTAGAGCGTCAGCT  
TGGTCGCCCCAGAGCTTCTGCGGGAATTTTCGTAAGTGAATACTGTTCTCTGCTGGGATAACA  
TCACCTGCTTTAACTTGGTAGTCTCCCATGGCAGCCATCACACCTTGAATAGTTGCGTGC  
ACTGTAATGTCCTCGGCTGCTTTATATACACCGCCTAAGTCTTCAAAGAGATAATTTGT  
GATGTAATATCCAATCCCTCTGCGTGGAATGTGTTAGCAAGGAAGCTGTTTAGGATTTCA  
ACTTTCATTTTCGTCAGTTGTAACAATTAACATATCCTTTAGTTTTGTGTTTGTGTA  
CGTCCGACTGCACCTCCTGAAGCTTGTGCAGCTTCGTTATGCTTAGCAGAGTTGTTTTGT  
AAGTTAAGGATAGCTGTATAAACTTTGTTGATGAATTGTTGCATTGTAGCACCTGATTCA  
ACTTCACGTACGTCTGCAATGTGACTTGTGTAGTCCATAATAATAGCCTTTAGCTCTTGT  
TCTCTGAAATGTTAATATCAGCGATTTTCTTTTTGTAGACTTGTACTGCAAACCTTTGTT  
GCGTCTCCTAGAGTAGCAAATTTGTTGACGTTGGATATTGTCATTAAGAGTGAATTTAAGT  
TTTTTAAGAATACCTGCACCGTACA ACTTAGAAGCAATTTTTGGATAGTTGCGTCTAGC  
ATAAGTTGTGCTGATTTTGTATAAGTCAAGTTCAACTGGGACGGTGTCAAGGATAACGTAT  
TCTTCTGAATATTGTCCGATAAAGTCAATTTCTTTTGTAGCCAATCTAAACGGTTACCT  
GCTGCTGTTTCAACAATTAGGGTCTCGTTCAATTTAGGGAAAAGATATTGATTAGTATAT  
GTCTCGAAGTCTGTACCAACTGCATTCCAATTAGTACCGAATGTCCAAGATTTACCGTTA  
TCTGCGTTAAAATCGTTAAGTGAAGCGACAATAGCGCCAGCTACGTTTGTAGTTTCATCT  
GCCATAATATAATTTCTCCTATTTTCTATTTTTCTATTTATTATAAGTTAAACAAAGC  
TGTTGTTACTTCGTCTTGTGATTTACCTTGGCCAATCGTCATAGTTTCGTTAAGTTCATT  
TGACTTATCGAGCTTTGAAATACCGAAGTCATCTTTGGTCATGTTGTGGATTGTGTTTGT  
GTGTTCTTCTGGTAGCATGTTATTAGTCCTCCTTTAACCATTCTTCAATTTTCGTCAATTG  
GTGTA ACTTCTGGCTCTTGTCTTCTTGTGCTGTTTTGGTTCATCAGCAGGAGCAGGAGCGG  
TAGCTAGTTCTTCAAGACGTGCTGTCTTTTCTTCAAGAGCTGCAATCTTAGCTAGTAGTT  
CTTCTTTCGTCATTA AATAGTCTCCTTTCAAATAAAAATATCGGTATTTTTACTTGGTTA  
TCCGATAAAACAAAGTTAGGTCTAGGGTTCGTCTAATTATGTGCTTATAGTCTCGTATGAC  
CTCAATTCTAATTAATAACTCTTCCCTATTTCCCTACTACTCTTTAATTATATCAA ACTA  
TTTTAGATATGTCAAGCTTTTTTATTTAATTTCTTTTGTTCGTAGAAATAGTCTTTAAT  
CATATCACCGTCATTTTTAAGAGTTAGCATAACTTTGTCTCTATCCTCTACATCACGAGT  
AACGTATACTTTAATCCATTTACCATTAACATATGCGTAGATGTGGTACTCATAGTTTTT  
ACCGTCTTGTTCCTCTAGTGGTTTGTTCAGCCATTTGTATTCTCCTTTCCTTATTGTT  
ATATATAGTATAACAAATTGTTTCGTGATTGTCAACTGTTTTATTGAAAGTTTTTAAATT  
TATTTTATAATGTCGTAAACCATTGTTACGCCCTCATTGTTTCATAGTGAAGCTGACTACC  
TTAACATTTCCATAACCATAAGTTGCAACCTCATGTGCATATATATCGCGTAGCGTGTCA  
ATGCTTGTTCGGTACTGATATGTGTGTTGTTTCGTGTGTGGTTCATGTTGTGTACCTCT  
TTCTTATTTATGTATTAATTATATCATGTTGCAGCTGTGGTGTCAACAGAAATATTTATG  
AAAGTGTTCCTGAAAACATTTACATTAGGAGGGGGAGGGAGAAATCACTACGCTATAT  
ACTAAAA

>NewGenomeName\_268

TTTATTATTA AAAAATTTTCTATTATTGTATATTTTTATTTGCAATGCGAGTATACATACC  
ATCCATGCCACCAAGAAAACACACCCAACAAAAGAAGAACTTCTCCAAGACCCTCTCCT  
ACAAGAATTCATATTTTCCAGGAACATAAAAGAAAAAACTATAGAGACATACATTGCAGC  
AATACAACACTACTCACAAGTCACAGGAAAAACAATCACAGAATTAATAGAAGAAGCGGA  
AAAAGAGGAAGATTCAGGGGTTAAAAGAAGAAAACGCAAGATCAGACAATATTTCTAAA  
ATACATTCAACACCTACAAGACCAGGGGGTCAAAGGATCAACTATCAGATTATACATCTC  
CAAATCAAAGCACTATACAATGAATATGAGATTGACCCCAAAGATCACATACAAAAT  
TCGACCTGAAAATAAATCCATGGATGATCTTATAAATCTCCATGAGATCAAAAATGTCT  
GGACAACACCCATCCACGGGAAAAAGCCATGATCCTCCTGCACCTCACCAGTGGGATGGG  
ATCCGCGGA ACTTTCGAAGACTCAATGTTGTTGATTATAATAAGGCCATAGGTTTCAATGT  
CCTCGGAGAGGATTATGAGGATGCCAGAAAACGCATACAAGATGAAGAGATTGTTGGAGT  
TTGGAAGGTAAATAGAGTAAAGACAGGAATGCCATATGTTACTTTTCAGCACTCCTGAGGC  
TAATATAAAAATCCTTGACTATCTAAGGTACCGTTCGATTAATGGAGGACCTTTAAAAGA  
GACTCAGCCTCTATTTCAACTCAAATGGAGATAGACTCAAACCGATCACTTATGCTAA  
CATTTTCAATCGTCTTAATGACAGATTCTATCTTGGAAAGGGATGCAGCGGGTAATCGTGC  
TTAACTTCCCACAACTTAGGAAGCTTTTACGACCATCCTTTATAAGGAGGGGAATGGA

TAAGCTGGCAATTGATTGGCTGCTTGGTCATAAAGTGAATCCAGTCCAGTCCAGAGGGCGTATTT  
CAAAGTGAATATAGATCACCTTGAAAGAGAATACAGAAAAAGGATGCGATCTTTGACTTT  
TGAGAAGACTGTTACAAGACGAGTAATGGCCCCTGAGGTTTCGTGAGATTGTGAAAGAACT  
GGAAGAGAAGGAGAATGAGATTAAGAATTGCGTGAGTCTCAGGAGAAGTTAAGAGAGTG  
GGTGAGGAAGACTGAGAAGTTGTATAATCTTATATCGTCTCATCCGGAGATACTGGAAAA  
ACTTCAAAGATAATGCTTTAGTTTTCTGATGCTCTCCTTCACTATTCTTATTAATTTTAT  
ATTTATTATCATTAGTTAAGCCTCAGGATGGGGGGTATATTCTTGACGCCACCAAGAAA  
ATACAAGACCCCTCCTGAGGCGGTGCATCCCAGGGGGATACAATGTATAGTAGAATTCA  
TGCTGTATATATAGGTGCCCCCTAACTGTTTTGGAGTTGATCAGACATTGAGTTGTGGG  
GGGCTTTTGATCATGGATTACATTTCAAGGTGTTCTAAGTATTCTTTGTTGTGTTTTATG  
AAAAGATCGATGGCTTCCCTCCAGGCGGAGGTCATTGGGCTTTTCTCATATTTGAGCATC  
GCTATTACTTTGAAGAGTTTGAACCTTTCTTGAGTTTATGTATATGCTTGTATGATTTTT  
TCATTTTCTTTTCATGTTTTATTCTCGGTGTGCATATCTTATATATTTATCCTCTCAAATA  
ACAACATACCAAATAACAATATACCAAAAAAATATATACTAAGAGATAGAATATACTA  
CTAAAGGAAAAGGAGTTGATCAGACATGAAACCAATCCTCTCAAAAAAAGAGAAAGCCTG  
GAGAAAATACCAGGCACTAAAAAAGAAGGACGAGAAGAAGAAGCAAGAAAGGCCTGGGA  
AGAATACGATGAACTCAACAGAGTCATCGTGAAAATCATGAACAGAAAACCCCACTCGA  
GGAGATGGTCCACGACCAGATCCTCGGCATCCGCAACAAGAGAAACCGCGAGAATCACTCC  
CGAGGCCATCCGCGCCCTCGAAAGATACCTCTCCAGTCTGGCCTGGAACATCCTTGAAAG  
CGCCGGGCAGACAGCACACATACAAGACTTCACAAGGGACCTCGGGGAAACACAGAATGA  
CATCACCATAGACGAAGAACACATTTACCTCGGCTATCTTGACATTCTCTCATAACGGA  
TGAGGAATCAGTGGAAGAGTACAACAGAATCCGGGAAATACTCATGGAGGGGGAGTAAAT  
GATGCCATTAACCAAAAAGGAACTTTACAACAGACTCCTTCTAGCAAGAGACATTGACGA  
TATACACAAGTACCGGAAGACTGTGGATGATGTGCTGAAATGGCTAAAAGTACACTTGA  
GAAGGGGGATGAATGGTGTGATGTCCGATCTGAACATGAGGGCTGTGATCCTCATCCTCCTA  
ATACTCCTCTTTTTTATTTTCATGGGACTTATGAAGACACTTGAAGTTGCACCATACCAC  
ACACTTGGATGTTAGGGGTTGATGATATGGAAAAACTCTTAAAGGGGGTGTGAATATTG  
AATGACCTGCTACTGGAATTAGAGAATGATAAAGGATGGGAAGACCTGAACGAATCAGCA  
ATGTTCTGGAACCCCATGGAGGGAGAAAGTATACGTGGCATCTGCAAAGGCATCAAGGAG  
ATACACACAAAAGTCCGGCAGCCTAAAAGTCATGACCCTCAAACAGCAGACGGGGAATAC  
TACGTGAAAGGCCACAAGGCCCTGGAGAAATACTTTGACAGGATACAGGAAGGATGGGGT  
GTCTGGATCACATACAATGGAAAGGCAAAGTCACAGAATGGTACGGAATACCACAGTTAC  
ACAGTGAAGGTGAAAAGACTCAATCAAACCACACAGTTAGGAGTTCTCCATGAGAATGAC  
TTCCAGGACAAAAGCATCCAGGCACTTATCATGTTAACCCGCGCCGACAAAGGGACGACA  
ACACTAAAGAATGTGCTGGAAAAGCTTGATGAAGTCTATGGTGAGGGTGGTGTACAGAA  
TCAGAGTACCTCAAATCAAGGAAGAACTAGGGGTGAACTAATGGATAGAGTCAGGACCA  
GCATAATGCTCCCTGAAGGAGTGTACACTTACCTGAAAGACATTGTGATAACAGCACAGA  
ACGAAGGAGTGAAACTATCCATGAATGAAATCATCAATGACGCCATCCTCTATTACTTGG  
ACTATGTGAACATCGAGAGAGAATACCTTGAGAGGAGGATGCGCTGATGGCAGGAGAACA  
CCTACGGAGGCTGCGGAAGGCGCAGAACATCCAAGTCGAACCTCTACCTGGGGATGATGC  
ATTACTACCATTTCATCACCCGGTCAGAGAATGGGGAATACCTTGTACAGTACTGGATAA  
CATGATACGATGCGAATGCCCTGATTACCAGTACCGTCATGGCGATGAGGGTTCATATAT  
CTGCAAACATTGCTGGGCAGTCTGTCAGCACATACTCAACGAATCATATGAAGAATACGG  
TGACCATGAATGCATGCGCACATTCAAAGTGCCTGCTTGGCTTGGCTGAAGAAAAAGGACT  
CAGCAGAGAAAGAGTGACAGGAACAATAGAACATGAAACACCCAAGGCCATACTGCTAAG  
AACACCCAAAGGGGAGTCTTACTGGCTCCCCAAAAGCCAGATCCATGAAGAAAGGATCCC  
CGCTGATCAAACCACCCTGGGGGTGAAAGGATGAGAGGAAACGTTGATGAGGAAGAAGTCC  
CAGAGTGCTATGGAAGCATGGAGTAACTCATCAGATGGGCCCATAGATGGGGGGAAGAA  
GGATGCAGAGGAGGATCTGCGGAAGGCGAGATCTCCAGAAGGCCATAAAAGAATTACTCA  
GAGAATATGGGGAGTTGAGTGTGGAGGAGTTGCACAGGCTACTCCTTCACAACTATGAAT  
TCGGAAGGAATTATGATGTAACCCGGCAGGCTGTCACAATCTACACGCGTAGGGTGGCGG  
CAACTACGGGTATAACAGTGAATAAGTATGGGAAACCAGTTAGGGTGTACACATTGGAGG  
CGTAGTAATGGATGACAAGTTTATATTGACCGAGGAAGCCTTTGAGGAAAGTAAAGAATT  
AGCTCTTAAGACTGTGAGGTTATTCGCTGATGAGGGGGCGCATCCATTAATTGGGTTGGA  
AGCGCTTCTAATCGCCTTAGAGGCCACAATTAAGGTACAAGTATAAGGGAGTCAGAGAC  
ATTGGTGGCTGTTACAATAATGTCACTAAAGAAATTATTAGATGACGAGGGGGGCCAATA  
GTCTTGGAGGTTAAAGTGACTTTAAGAGTAGACGATGAACTATACAAGTTCTTCATGGAG

AATGATGTTGACTTGGATAGGGTCATGCAGTTATTCATGAACCAGATGAACTACTACTTC  
AGGGAGACAATGAGCATCTATTCCTGATGCGACAGATTCTGTGGGAGAAGTCCTCAGA  
AGGATGGCGTCAGAGTACGATGAGGATGAAAGGAAGAGTAAGGAGAAATTAAGGGAATAT  
CATGAGAAAAATAGGCTAAAAGGGTCTTAAACAGTGAAGCACCATGAAAACCGCGCGAA  
TAAATGTCAGGGTTTCAAGGGTTGATAAGGAGACTATTAAGAAAAGCAGGTACACCTATG  
CTGATGCCATCGAATATTTTGAAGGTTACTCAGGAAGAATAAGGGTATAATCCCAGAGT  
TATATCTGAAAGCACTCAGGGAAGAGTTAGATGAGATATCTGAGAGGAAGATTGAATTAG  
AGAAAGAATTGGAAAGATTGAATATGGAAGAGGATCGATTGAAAAGAGAGTTAGAGAGGT  
TTTCTGAGCCTGTTGATGAACCCATGAGGGAGGTGAGGGAAGCTGCAAGGTTTGTATGG  
AGAGACTTGAGGAGAGAGAGGGTATGGTTTCCCCCAGTGAGGTTGTAAATGATCGTGTTG  
AGGATCTGATAGAGGTTGCTAGTAGGATCTATGGGGCTCCTGAAGAGGAGATTTTAAGGT  
TACTTTTAGATATGGGAGTCTCCTTATAAATTTATCTATTTGTACATACATCTTTTTCTC  
TTTGTACATACATTGACGAGAGTACCCCCAGCACATCATGTACATACAGCTGTACAGGGC  
ATGTACAGTCGACTGTACAAAGCTCCCCAGGGATACCTTCGCCGATGTACATACATCTTT  
TTCTCTTTGTACATACATTGACGAGAGTACCCCCAGCACATCATGTACATACAGCTGTAC  
AGGGCATGTACAGTCGACTGTACAAAGCTCCCCAGGGATACCTTCGCCGATGTACATACA  
TCTTTTTCTCTTTGTACATACATTGACGAGAGTACCCCCAGCACATCATGTACATACAGC  
TGTACAGGGCATGTACAGTCGACTGTACAAAGCTCCCCAGGGATACCTTCGCCGATGTAC  
ATACATCTTTTTTTCTTTGTATATGCAATAAAAGGAGTTAGTGTGTTAAACATCAATATT  
AAAAGTGATGTAGTAATAGATAAAAATTAGTATATGTAATCTTCATAATATACACTATGA  
TGAGAGACCCTACCTTAGTTGAAAATTATGTTAAATATTGTGAAATAGCTTCCCAAACCT  
TTAAAACGGGGAACATAATTTAATGCAGTTGTCATGGGTTTATCCAACAACCCTTCTCC  
CGTTTTTCCATTTAAAACAAGAATTCTCATTTAAATGTAGAGCGAGTCCTGAAATAAGTA  
AGTATTTAAAATTTATGGAGAAAGGAAAGTTATCAAAGGAAGTACTTATCTCCCCTTTG  
TCCAATTAACAATGATAAGTCTGAAGAGATTTTAGATTATTTGCATGATATGTTAGATG  
AAGATTATGGGGGAAAAATGCTCTGTCATACTTACTTTGTGAATTAAGTATAACATTT  
ATCAGCACTCTAAGTTCAATTCAAGTTATATACTAGCTCAAAGTATCCTAAAAAAGGTT  
TTATGGAAATATGTTTCCTTGATGATGGTATAAGTATCCCTGGGAATTTTGAGAAACATG  
ACTACCCATTTGAGGATGATTCAGATGCTATAACTAAAGCTATGAATGGAGTATCTACTA  
AAGATATTCATGAGAGAGGTTATGGTCTTAATAGTATACTTCACATTTTAAAGATAATG  
GTGGGAAATGTTAGTGGTATCCCGAAGGGGAGTTTTTTATAACTCTCAAGAGACATCCG  
AAAACCTACCTTCTCAGGAAGCCCAATGAATTTCAAAGGAACCCTAGTCAGTCTCCGAGTAT  
ATAAACTACAATCAATATATATGATTATATATAATATATTTAGGAGAGGTTATATCATG  
AGATAAGTTAGGGAGGTTGGAAGTATGGAAAATAAAACTGAGAGAATAATAATAAGAAT  
TTTATTAATAAGACTCTAGGTTTTAGGGATTCTGCAGTTTATCTCTTTAAGGAAATAAAT  
AAATTAGAAGTGGAAAATGTGGAATTAGATTTCAAAGGCGTGGAATTTATGAGCAGATCA  
TTTGCTCATGAATATCTCACACAGAAATCAAGATCAACAAAAAATATCATCGAAAAGAAC  
CAGAAGCCTTCAATAGAGAGAATGTTAGATGCTGTTGAGAATCTTTTAATAGACCCAAT  
AAAATTAAGGTACACCCCGTTAAGGAATCACCCCTCATTCTAATTTAAGGGGTGAAATTA  
TGAAAATCCTTGTGGACACTAATATTTTGTATTTACAGGGAAGATCAGAAAGTTCTTGGA  
GGGATCTGCAAAGACTTTTAAAGCTTATAAATAAAAGGAAAGGCTTCGAAATCGTCGTTT  
ACCCTCTTTCTATAAAGGAGCTCCACAAAGATAAGAATGAAAAACGTGAAAAAATTGTTT  
TCTCCAAAATTGAAACCTATACAATCATTAGAGATCCGCCAAGATTTGAAGAAGATGAAG  
AGTTTTGTGAGAAGTTAGGTAAAGATCTTAATAAACTTAAAGATAATGACTATGTTGATA  
TTTCATTACTTTATTTGCTGTCAAAGGATCATGTTGACCTTTTAATAACTGAAGATCAAC  
GCCTTTTGGGAAAAGCCGCTCTTTTCAACCTAGAAGATAGGCTCTTGAGTGTTAAAAGG  
CGTTAGACATCCTAGACTTTAAACCCCCAAAACCCCTCCTCTTATTAAGCAGACTAAAG  
CGAACATGTTAAATTTTGAAGATAAAATTTTTGATGGCCTGCGAAAAGAGTATCCAGATT  
TTGATGACTGGCTTAAAGAAAATAAAGAGAGAAGGTAGGGATGTTCTATTCTATGAAAAG  
ACGATGGATCTTATGGGGCTTTACTAATTTATAAAGAAGAGGAGGAACCAATACCTCTAG  
ATAATGACCAGTTACCACTAAAAGAAGATTGAAGCTCTCAACTTTAATTGTAACAGAAA  
CAGGGTATAAAGTAGGGGAATTTCTTATTCGTTGGTCATTGCATTATGCCTTGAAAACA  
ATTTGGAAGAAGTTTATTTGACTCACTAAAGAAGATGACTATCTTGTTAAGTTGA  
TATCCGAATATGGATTCGAGAAAGTAGGATCTAAAAAAGGTATGGTAATCCCCAACCTG  
AGGATGTTTTTCTTAAGTCATTGATCACTGAGGGTAAACCAGTATCTACAGCAGAAATTA  
AAAAATGTTATCCAAAATTTTATGATGGTCCAGATGTTAAAAAATTTTTGGTCCCGATAA  
AAGGGGAGTACCACGATAAATTTTATTGAGACTTATAATAGACAAACTTCATTATTAG

AAACATACAGTTTTCTTGTGTTGAAGGCAATTCATAAAAAAAAAATATATCTTTCTAACTCTA  
AGATAAAAAAAAAATTGGCCCCAGGGGATATATTAATTTTTTACAAATCGAGGAAAAAAAAACGA  
TTTCATGTGTCGGGGTTGTTGTGGATGTTAAGCGAGATTTTGATAATTTAGAAAATCTAA  
GGAATTATGTATGGAAAAGAGCAGTATTCTATGAAGAAGAAGACCTTAAAAATTTTGTGC  
AAGGTCAGGCAATTTCAATTTATATTCATTGGCTGTTTTAACGAATTTCCGTTATCAAAAAG  
TCGGGGAACCATAACCTCAATCAATCAAACAGATAAGCCATAAGACCTATTTAAGAATTA  
AGGAGGAGTGGGAAAATGAAAGTTTTACTTTCAGTTAAACCTAAATATGTAGAAAAAATA  
ATGAGTGGCGATAAAAAGATATGAGTTCGAAAAAACTATTTGGAAAAAAAAGATTAATGAA  
GTTTATATTTATTCAACGACCCCGGAAAAAAAATTGTGGCTTCCTTTACTTATAATAAA  
GTGATAAAAGAAGACCCCGAGACTCTATGGGAATTTTATCACGAGGAATCCGGTTTGACG  
CAGGGGGAGTTTTTTGATTATTTTCGCGGTATTA AAAAAGGTTATGCAATACCCATCAAG  
GAGTTAAAACCTTTTGATCCTCCACTGGAGTTATCCTTAAACAATATAAGGCCCCCTCAA  
AGCTTTAGATATATATCAGAGGAACAAGTATCACATCTAATTTAATAGTCCCCATAAAAA  
TTCATTCTACCTCTAATTTTTATAGTCTATGCTTTTTTTATTTTTGTATATGGGAGTAAGT  
GAATCCTTAAACCGAAGATATGATATGCATAATTCTTCTAATGGTGAATGGAGACATACT  
CAACACTACTTCTTCTGGAGACAATATCTGCAGACCTCAACCTCAACAGGACTGACATA  
CAAAGAATACTCTACATAACACGGAGGGTGGGGATCAAACAATTACATAAGCGCGCATCA  
ATGGAACAGGTCCTATTGGCCCTTGACAGTATTCATCAAGGAGGAATCAACGGGCCATCCC  
CTAAGGATAGACAGGTACACTATCCTTAAGGAATACAATGTTAACTATAAATTGTACACT  
ACTGTCCTCAGGAATCTTCTCCAATATTATCGTAGCAGATCCCCTGTTGTGAGGGGATGA  
ATTTGCAGGATTACAGGATATCCAGGTCAAAGTATATGATAATTATAATTTGTTTTTTGA  
GTGAGGAGGAGAAATGCCCTGAATGTGAAGGTATCCATTTTGAGTTGGATGCCGAGTATA  
ATATTTGCTGCAGGTCATGTGGTTTGGTCCTGTCAAGTGTGTTGTTGTTATGTTGGTGGAG  
TGAAGTTGGACTTACCCTGGGGCCTCCTACTTTAACACCAGTTTTGCAGTATTCTCTAA  
TAACTCTGTTGATGTTCCGACTACGTTACATACTATTATAGGAGAGA ACTGAGGTGACAA  
AATTGGATCGTGAAGCACTAGGACTCACAGGCCTTATCATATTGGGGATGATATCCTTGT  
ACTTCAAACAATACGAATTAGGCTCTGCATGTATTGGGGCCATCGCAGGATACATAGCCC  
GCCCAGGAGAAACAACATGACAAAAGAGGGACATGGATGCATACAAAAGAGAGGATAAC  
AAGCCTAGAGGAGAGACTGAAAACGTTGAATACGACATCATCGACATCAAGGAGACCAA  
TAAAATGCTAATAGACCTCCAAGCAGAAATAGCAACCCTCAAAGCCTACCACAAAATCAC  
CATGATACTCCTAACAGCCCTGATCATTCCAATAATCATCACACTCATAACGCACAATATA  
ACCCACCCACAAAATCACACAAAACAACACATGATCACACATGAAAGAAACACCAACCC  
AAAGGAAAGCATTTCGAATACTACTACTCCCTTGGCGACAAAAGAAACCTGAAAAAAGTCG  
CTGAAAAATTCGGATACTCATATGACACAATCAGAGGATGGTCATCCAAACTCAGGTGGC  
GGGAGAGGATATACCAGTACGAGAAGAAACA ACTCCAGGAGATAAGAAGAGCGCGTGAAG  
AATTATCAGAGGAGTCAAAGGAGTATTATGCTGACCTCTGGAGCAAATACCTTAAGGCTT  
GCAGCCTCACACTGGAGGGTTACATTGAATCCATCGAGAATGGAGGGGAAGGCCTCACTT  
TACAGACATCTAAGGACCTCCATAACCTTGGATTAGCAATAGCATTAGGCCTGGGGGATC  
CTACTGAGATACATGAACACCGTGAAAGTGGTGGTGA ACTGGAGGATTTGCTGGAGGATC  
TTGTGTCGGCCACGAAGAACCTGAAGGATGAGGGTATGGATGAAGGCCTGGATGATGAAG  
AGGCTGAAGGTGAAGGTGGCTGACTGGAAAAAGAACTGAAAGAATCAGAGAATATTCTGA  
AGCATCCTCCAGGGCCTCTCTGACAGGGAATTGAAGCTGTTCTATTCAACGATAATATTG  
AACCCATATATCCCTGTGAACCCCTTCCATAAACAGATTAAGTTTTTTATTGTCAGATGAA  
CGTGAAGTCCTGTATGGTGGTGTGCTGCAGGTGGCGGTAAATCAGTGGCTTTACTTATGGGG  
GCTCTGCAGTATGTGCATTACTCTGATTACGCCGCCCTAATCCTGCGCCGAACCTATCCT  
GAGCTCAGCCAGGAAGGAGGCCTTATAGACATGGCAAATGACTGGCTTGGGGGGACGGAT  
GCAGAGTGGAAATGAACAGAAAAACGGTGGACATTCCCCTCCGGCGCTGCATTGCAGTTT  
GGGCATATGGAACATGAAAAGGACCGCTACAGATAACCAGGGGTCATCATATCATTATATC  
GCATTCGATGAGCTCACAGAGTTCCTGGAGTCTCAGTACAGGTTTATGTTTCAAGGTCATTA  
AGAAAAGAAGCGGATGACCCTATACCCCTACGCTTCAGAGCCACCAGTAACCCCTGGAGGT  
ATTGGGCATGAATGGGTTAAAACCCGGTTCATTACAGGTGAAAAGACATTCATCCCCTCC  
ACTTGGAGGGAAAACCTTATCTTAACCGGGATGAATATGAAGAGGCCCTGAATATGCTT  
GACCATGTCACACGTCGGCAACTAAAAGAGGGTACTGGGATGTTAGCATCCAGGGCGGG  
GTTTTCAGGCGGGAATGGTTTGAAGATCATAGACACACCACCCCATGACTTGGTGATGAAA  
CTCAGGTA CTGGGACCTTGACGCAACCCCCCATGATGGTTCGAATGATCCTGATTACACG  
GTGGGCCTATTGATGGGTGTTGATCAGGATGACTACTACTATGTCCTTGATATTCAACGA  
TTCAGAGGATCCCCTGGTGAGGTGAAGGCCAGGGTCTTGAGGACCGCTGAGGAGGATGGC

CGGGAAGTCATCATAGCCAAGGAGGAGGAACCAGGGTCTCTGGGAAGATTGTCACCGAT  
TACCTGCGGAGTCTACTGCAGGGTTACACGCTCCGGGCGGACAGGGTAAGTGGTGATAAG  
ACGACACGGGCCCTGCCAGTATCCAGTTATGCTGAATCCTTTCGCATTAAGGTTTTAAGG  
GCCTCATGGACACAGGCATTCTTGATGAACTTGAAGCATTCCCTTCTGAGGGCGTGCAT  
GACGACCAGGTCGATGCCTTCAGCGGAGCATTCAATACATTGGCCATGGAGATGAGGAAG  
AAGAGGAAGATCTATATCTCCGGACCTCTCAGGAGGATGAGTCATGTTTAATTACTT  
ATCAATCAAATCATTAGAGAAATACCGGGCAATCAAGGGGGATACGGATTCACAGGCCCT  
TAAGGAGGATAGATTTGAGGAGTACGTTGAACCAAGGTCCACCCACTAGTCTACTCTC  
ACTATTACAGGTGAATCCTTATCATGCCAGCGCCTGCAGTATTAAGGCTAATGATATCCT  
CCGTACAGGCTACCTGATAGATGGTGATGATGGTGGGGTTGAGGAGTTATTGAGGGCATG  
TAGGCCCTCATTTGAGTTCATCCTCCTTCAGGCCCTTGAGGATTTGCAGGTCTTCAATTA  
TTGTACATTGGAGGTTGTCAGGGATGATCAGGGTGAGCCTGTCCGGTTGGATTATATCCC  
CGCCCATACGGTCCGGGTGCACAGGGATGGTTCAAGGTACATGCAAACATGGGATGGGAT  
CCATGTAACCTACTTTAAGGATTACCGGTATGAGGGGGAGGTTAACCCGGATAATGGTGA  
GGATCAGGATGGTGTGGGGGCTAATGAGATTATCTTTATCCATCTGCCTTCACCAATCTG  
CAGCTACTATGGAGTCCCAGGTACCTCTCAGCAGCCCCCTCTATACTGGCCATGCAAAA  
GATTGATGAGTATAATTACGCCTTTTTTGATAATTACACGATCCCAGCTATGTTATCAC  
TGTGACTGGGGAGTTTGAGGATGAAATGGAATTAGGATCGGATGGTGAACCCACAGGCCG  
AACAGTGCTTCAGGGCCTCATTGAGGACAACCTTTAAGTACTTGAAGGAGGCCCCCATA  
CCCCCTTGTCTTCTCAATCCCCGGGGGAGACACGGTTGAAGTTACGTTACCCCCCTCAA  
CACTTCACAGAAGGAAGTGGTTTCAGGGAATATGCGGCTGAAAAGAAACATGATATCGC  
CGCCGCCATATGATCGACCCTTACAGGTTGGGGATAACAGACGTGGGGCCATTGGGTGG  
TAATTTTGTCTGAGGTGGCAAGGCGCACCTACTATGAATCTGTTGTGCGCCCCAACAGGA  
GATCGTATCATCAGTCTTAACGGATTTTATACTCAAACTGAACTGGACCCTGGCGCCCGGT  
CGTCTTCAATGAGGAGATTCTCATGGAATCAGAGTTTGTGCATAATTATGCTCTCCTGGT  
GCAGTGTGGTGTCTCACCCCCCTCTGAGGTTAGGGAGAACTCTTTGGTTTGGATGGGGG  
CCCTGACATGTTTCATGGTCCCATCTAGCATAGGCAAGTCTGCTATGAAGCGGCAGAAGAG  
GAACTATGAAAAGAACCAGATCAATGAGATCAAGAGGACCTATGCCAAGTACAAGCCCCG  
CATCCAGGAGATCATATCCTCAGAGTCCCCACTAGAGGATAAAAAGAAAAAATCGATGA  
AGTTTTATCGGACTTTAGGGCGGAGGCATATGAAAACGGTAAGAAGATGCTCAGCATAGC  
AGGGGATATGGGGACCATGTCAGCCATCAACAGGGGCGTCTCCATGATCCCCCACAACC  
ATCAAACCTAGAGGCCTATGAGGATCTCCTGGCAGCCTCTGTGGATGATATAGTGGAGCG  
GATACGACATTACCTTTACAAAGTCATAGGATGGAGGGAAGTGAATAATTTTGTGCGCCA  
ACCAACCCCCACAACACTTGTTTTTTCTTCAGCCAATAGAATACCCCCCTGTCCGCTGCAA  
ATCCCTCCTAACATGGCTTTTATGGGTGGTTGGCCGGCTCCCTACTAACAATCTCATGGT  
GAGATGATGGCACGTCCCGGAGGAATAGATTACAACCCAGAGAAGCTGAACTCCATGATA  
GATGATTTTCATGGACTCCACAGAGCATATCATGAACCGGGTGAGGGTCTCCAGTGTAGAG  
GCGTTCATAGATGACTTGCAGGCCCTCACAAGGGAGGAGTTCATCAGAAAATATGGTGTG  
ACCCGTAGGGAATATGATGAGCTCATAGCCGCCCTTGAGGACATGAAGGATGAGGATATG  
GATGAGGCCCCATCAGAGGATGAGACTGATATGAGGGGGCTTATCTATTTCTGGGCCTT  
GCAGTAATCTACCTGACCCGGGATGCTGAGAGAGATGCTGAGATAGAGGCGTACAGGCGG  
CACGCGGAGGATTATGGCCGGGACTTATACTTGAATTGGGTGACTATGGGGGATGATCAT  
GTCTGCGATACCTGCCAAGAATATGAGGACGCTTACCCTACAGGGTTGAAGGGTTCCCC  
CACATACCTCACCCCTTTTGTAGGTGCCATCCGGAGCCCTGTGATGAAGAGGGGAACCA  
ATAGATGACCTTTCAGAGTACAGCGGCCCTGACCTTGAGTACTTTGATGAGATCATGGAG  
GATTTTCAGTGATATCGGCATTGATTTTGAGGTTGTACCCCCACCACCATTCCATTATA  
GAGTATAGGAGTGTGATATGTTGTGACATGGAAACTGAATAGGAAAGGATATGATCATGC  
CAAGGGACTGATACAAGCCGGGAAGGTGAATGATGGCAAGTGGGAGAAACCCAACCTTGA  
GGATTTCAAGGATATCGAGGAATATGCACTATTCCACCTCGGGAAGGACCCTGAGGCCGA  
CCCCAACACCGCTGAGGCCTATGCCTACCCTTATGGCCGTGGAGGTGAAGTGTACATCCA  
GGCGCTCAGGGCCATCAAGTCCTACACTGCGGGGGCCAGAGGCGCGCCAGGAACAGGA  
GATATATGATGCTGCAAGCGAACTCCTCGAGATGGCCAAGGAGGAGGCATCGGAGAAAAC  
ATACACCTCCAGTATGGGAACCATGCCGTGAAGATAAACAAGGATAAACGCTGGTCAC  
AGGACCTGTTCTCGTCCCGGATGAACCTGACCTAGATGGGGATGTGGTGACGGCGGAACA  
GGTTGAAGAGGTTGCCTACAAGTTCATGGAGGACTACCAGAACATTGACATTATGCATAG  
GTTCAGGAACGTCGCCAGACCAGTGGAGTCTACATCCTCCGTGCTGATGAGGAAATCAA  
TGCGCTCCACTTACCCCGGGGGACGTGGATGATCACAGCGAGGATCTACGATGACGGCAT

ATGGGAGGGGGTGAAGACGGGGAAATATACTGGATTTCAGCATCACAGCCGTGCCCGCACA  
GAAAGCACAGAAATCTTACCCGAAGACAACCCTCCGTGAACTGGGATGGCCATGGGAAGT  
TGTCATCTCAATAGTTGACAAGCCTGCCGTCCCTAAGGCCAAATACTTGAGCATCAA  
ACGAGATGGAGGTGATGATGTGGATGAGAAATCTCTCCTGAAGCAGATCTTACAACCCT  
CAAATCCTACTTCGATGATGATGAGGGGGGAGAGGCTGTGAAGGATGAAAAACAAGAACC  
AGAACCGGAAGAGGAAATAACCACAAATACCATCCTAGAAGCAATCCAGGAATTGAAAA  
AGAGATATCCAAGATACATGAACGCCTCAATGAAATGATGGAAGAAGAGGATGATGATGA  
GGACGAAGATAAAGTAAACCCCGAACAAGTAGTCGATGAAGCCGCCACGTCCAAAGTAGA  
ACCACAATCCCTGAAGGGGCAGGTGGCTGAGAAGAAGCATAACGATGCAAGTGACTTAAA  
AATCATGGGTGTTGACCGTTTCGGCAGGCCATAAAAAGATGATATGAGGTGGTAATATG  
GATTTTCTGAACAAACCATTCCAATAACCCCTAAGATAGACGTCCCTGACCTTGGAAAA  
GGGATACTCGCGGTTTCAGAGGTTTCGGGGAGTTCGTGAGGGAAGTCCGTGAAAACTCCGCG  
ATAATAAAGGATGCAAGGGTCCCTGAATGCCCTCAAGTCCCTATGAGGTGGACATTTCAAGG  
ATAAGCCTCGGTGTTGAACTGGAACCTGGCAGGAACACATCAGGGACAAAGGTTGCCCCG  
ACTGCTGATGAAGTGACCGTGAGCACCAATACACTGGAGATGAAAGAAGTCCGTAACCAAG  
GTCGTCCCTGAGGATGAGGCCCTGGAGGACAACATAGAACAGTCAGCATTGCAACAGACA  
ATCACATCACTCCTTGCAAGTGGAGTCACCTATGACCTGGAGTGCTTCTTCCCTACATGCT  
GACTCCAGCCTCACCCTGGCAGGGAACCTCTACAGGATCAATGATGGATGGATGAAGCTT  
GCAGGGAACCAGTATACTGATGCAGAACCTGAAGATGAGAAGTGGCCCCTCAACCTCTTT  
GACGGCATGATGGATGAACTGGACACGAGGTAATTGCAGCTCAAGCCAAGGATGAAGTTC  
TACGTCTCCAATGAGATATAACAACGGATACAGGAAGCAGCTACTCGTCAGGGAAACAGGA  
CTCGGTGACTCGGCCCTCATAGGTGCCACGGGACTGCAGTATGATGGTATACCAATACAG  
TATGTCCCTGCCCTGGATGCCCTCGGCGACGATAAAGCAAGGGCCCTCCTCACGGTCCCC  
ACGAACCTCGTATACGGGTTCTGGAGGAATATCAGGATAGAACCCAAACGTGACGCTGCG  
ATGAGGAGGACTGAGTACATTGCCAGCCTCAGAGCAGATTGCAACTATGAGGATGAGAAT  
GCGGCAGTCGCTGCGGTCATAGACATGTCCTCAGGTGGATGAGAATGGCAGTAGTAGATC  
CCTCCTAATAATCACAGTACACTATCTTGCCATGGTGATAGAAGGAATGCAAAATGAACC  
CTAAGCATGACATCTACATCCATCTTGGCCTGGACGAAGCGGATGAATCCCTACAGGCAT  
TCATAGATAGGAAAATAGAAGAGTACAGGGCAAGAGCTGAGAGGATCAACCCCATGCAC  
CTGAGGACATCGTGGACGAGTATGTGGTTGCAATGATACTCAATGACCTCACAAAGGACA  
TGAACCTCACCGATGGACGGTTCAGCATCACAGAACAGGCTGAGGATGTGAGGAGGAGAC  
TATCCCATGCTCTTCTAAGACTACAGGGTATGAGGATCTGGAGACCAAGGGATGATGGTG  
ATGAAGAGGATTAAGGAGGGTTCCAACGGTTGCTACGGAGGTATGGACAGGAGGTTACA  
CTTGTGCACCACAGCCTGAAGGAGAGGGATCAGCGAGGACAACCAGTCTACGAGGATGAT  
ACCAGGCCTCTGAAGGCATTTTTCCATGTGAACCGTGGAGGGGAACGCATCATCAATGGG  
CAGAGGATCAGTGATTATGACGCATACGTACTCATACCACTCGGTGTGTCCATCATGAGA  
GGGACCACATCCTCATCGGCGAGGACAAGTACACCGTTACTAGTATCATCAAGAACAGG  
ACACATATCGAGGCAACCCTACAGAGGATAGCGGACACGTGAATGCCATGATAGAGATCA  
GGATAGACAAGCCAGATGCTCTCATGGAGAAACCCCATGAGGTCCAAGGGAAAATCGAGG  
AGACCCTTGAAGATATTGAATCAACTCCAGGGGATCGCTGAGAACACAGCCCCAGTAA  
AGACAGGGAATCTCCGCGACAGCCACATCATCAGCATCGAAGGAAGCACTGGTGAACATA  
GTAACCTCGCATACTACCTCCATTCGTACTCCATGGACGTGGATGGGTGTTCCCGGTCC  
GGAGGAAAGCTCTCTGGTGGCCTGAACTACCCCATCCAGTCGCCTATGCGAGACCCGCGC  
CACCAAATGACTACTTCAGCGCCGTTGTGGCGTACAGTGCACCTGAGGGTGTGGTGGAGG  
AAACACTCATAGAGTGGTTGAGAGAATGATCTCTGAGATAGAATTACTATTCAAGGAGAA  
ACTGGAGGAACCTGGAGTCGGCACTGTCGTCCCTCGACTTCAATGAGAGGATTGAGGGTGA  
ATCAGTCATAATACTGAACATCTCAAAGCTCAAACGCCTCGAACCAGTTTTGAAATGGTTC  
TGCCTACGAGGGGGAATTCGAGGCCCACATCACAGGGATCTGGAAGGTGGCTGAGGGTAT  
CACAGATGCTATCGAGAAACGGAACACTGTCCTTGAAGGCTGACCTCTGAGTTCATGTA  
CACGAATCTCGGCACTGCAAGGGTGTGGTACAGGCCTGGGATAAGGCCATATGGCAGGA  
TGTGATGGATGATACGCGATACTACGTGCGATTTGACATCACACTCACTGTGAAAAACAT  
GATGAGGTGATATATATGCTGGTGGATAAACTGGCAGAACTATACTTACAGGTGAAAAT  
GTTGGGTTTTTCTTGGGATAACCCATTACTGGTGAATAATACTGGGACTTCAGGGGAA  
TTCATGGTAAAGAATCCCCCGATCTTCCCCCGGTGATGTAATTCGCTTAGCGTGAAACCT  
GAGGATGTGACGGTACTAGTGACAGTGACGGGTCAACCGTTACCGTACTGGCATAATT  
GAGGATGATGAAGGACGAGCGGTTGGTTTTGAAACAGATGGATCAGAGACCACCGTGACG  
GCTAGTTATGTGGAGGAACTGGAACCCTTCCCTGGCGCAGGGGGTACACCGTTGATATTAAG

CAGGATACTAAGGAAGTCAGTATACTGAACAATGCTGCGAAGCTCACAGCATAACGCCGGT  
ATGACAATAACGATAAAGTCAGATCAGATACTCAGTGCGAATGGGCTTGAACAGTTCAAG  
AAGCTCATGTTCTATGAGGAATCATCAGGAACATCAGAGTCAGTGTACAGGCTCATGGAC  
AAGCCACTGAATCTCTACGGTTACATGACGTTTACGTTGCGGATGAAACACTTGGAAAG  
ATATACTTTGAGAACGTGAAAATGTCCCCAGCCTCCCTGCCGCGAAGGCAGGTGATAAC  
TTGACATTCGACCTGGAGATGACCGTCGCCGAAACACCAAACTGATTCTTCTAAAGAA  
TAGTGTGGGGGTGACTGATTATCACAACCCCAAGGTTTTTCATTTTTTAAGAAGGAAGTCA  
TCGATCTGAATGGTGTGGAAGTGGAACTGGAAGGGTACAGGGTGGTGGACAGTGAGTACG  
TCATCCCCCTCATGGAGAAACGCAATGAAGCGCTTGAGATTTCTGTGAAGTATAATAACT  
TGATGAAGAAGATTGAGGGAAAGACTGAGGAGGAGATCACAGAGGAGGATGCTAGGAAGG  
TTAAGGAGATGAAGGATCGTGTGGACCGGCTCCTGGTTGAGACCAGTGAACCTGGGTTACA  
GGTTAGCACAGAGAGGTCTCAAGAGGAGTCTGTACAGGGATGAGGAGGATTATAAGGAGG  
CTGAGAGGGATGGTCGCTTAACGGAGTACATTGATAGTCTTCCAGACGTGGAGATACCCC  
CTATGATGGTCAGGACAGTTGTAGACACCATGCTGAAACTTAGTAATCCTGAGTTGATAG  
GGGAGCCCTCTGACAGTGGGGGTGTTAAGGGGAAGAAAAAGAAGGGTTCAAGGCGGAAGA  
AGAGTGGATCCACCTCAAAGGATGATTCTGAATTTAAGTTTAAAAGGGGGATGGATGGT  
TAATAGGATCCTGGAGTTCCATACTCCCTCCTCGTGGAATATTATCTGGCACAGATGGA  
CCCCCATCATCTGTTGAGGGGTGGTTTTCTGTGGATGTGGAGGAGAAAATTGAGGAACT  
GAAAAGGTTGAATTATCAGAGAAAAAAATAGGGGGGGTGACTGGTTAAGGCTGGTTTCTG  
ATGGCTTTATAGGTGGTTTCCACAGCCATGAATATTATGGTTAATCCTATTATCCCCATC  
AGATAGTTCCTGCCCTGTGAAGATATTGTACCATGCCGCTCCTATGAATATTGATGGG  
AGGGGATTCACAGTCCTCAGGAACCGGGGATGTTTCTTGTATAGGATGTTCAATATGATG  
AGGAGGGGGAGGCTTAGGAGGCCAATACTTAGGAGCATGCACTGGTCTGTTGTAACCTGT  
GGGTTCCAGATGAGTGTTATTGCATCGAGGATTATGAGGCCTATGAGTCCTGGGGCAGGG  
TCATGTTGAGGGCTCTCCTTCAGGGGGCCTCCGCATTACAGACGTACCCCTCCACCTTT  
TCTCCTTCGGGGATTGTGTATTCAAGTCCACATTTTTTCACATTTACCTCCATCATGATC  
ACCTCTTGATTTATTATATTAGTATATTGGTATATGTTCTTTTTCGGTCGGTGGGATAGAT  
GAGTGACCATAGCATAGCCATTGAAGTCCAGATGGACGCTGAAAGCGTCGTGACTGGACT  
GCAAGAGATGAACGAAACCCTACAGAATCTCCCCGGGGATGTTTCAAGATCAACCTGGAGGG  
GGGGGGGGACAACCTCACCCCATACTTACTCGATCAACAGCAGCCTCGATGAACTACC  
TGAGGAATTACAAGTACACCTCTCCGCTGAGAATGAACTCACAGACGTCCTCACAGACAT  
ACTCATCCAATTAGACCACATCCCTGACGATATAAACATTCACCTCACTGCAGAGGAAGA  
TGGAGTCATAGATGTCCTGGAGAAGATCAACCAGAACTTGACGAAGTTGAAGAAGCGCA  
CCTGAAGATCACAACAGATGATGACGCTACCAAAACCCTTGACATGGTCCTTGAAAAGTT  
GAATGAACTCCCAGATGAAGTCACCATAAAAGTGGGGGTGGATGATAACGCCACAACCAT  
CATAGAATCCATCATCAAATCAATCCATGAAATCCCCAATGACATCACACCACAGTGCA  
CGCTGAAGTGGAGGGCATGGATGACATCAAAGACCTTAACCATGTAATGGATGATCTGGA  
GAGAGAATACTCCACAACCGTGGAGGTTTTCAGTTGAAGGGGCTGAAGGGGTAGATGAACT  
GAAACATAGTATCAAGGAAGCAGACGGCCAGGAAGTGAACGTTGAGGTTAACACGGAGGG  
TATTGAGGAAGCGGAGGACAGGCTATCCAGCATCACATCCGCAGTCTCAGACATGAAATC  
CCAGGTCATTGGATTGTTAGGGGCATACATGAGCTACCAAGGTATAACGTCAGCCCTGAA  
CTATGGGAAGCTCATAGATCAGACAGCCGTCCTTACAAACGCCACGAGGGGGCAGAGGAA  
AGAACTGGAGAAAACGATCGAGGCGAACTATAACTACACCCTCGGGATGAAGGGTGGGGC  
TGAGATAATGTACACCCTCGCATCATAACACAGTACTACACACTCACCATCGGATACTA  
TAAGGCGGCACTCACAGCAGTCGCAAGGAGTGGGGAGGATGCATCCACAGTAACACTCAC  
CCTTGCAAGGGTTTTTCAGGGACTTTAACATCACGGTCGCGGAGAGTGAGGGCCTCACCCA  
TAAACTCTTAGAACTCTGGAGACGGTCAGGGTTCTCCAGCTTCACCGAGTTTCTCGGAAT  
GGTTGACCGTACAGGGTACTACCTGGACCAAGCGGGGGTGTGAGCTGACACCACAGCGAA  
GATCATCGCCAGCCTAGGGCCACGGGGGACAAGGGTTATCAGGCAGCTGGGCAGAGAACT  
CGGAAACATCGGACGTGAATGGAAGGAAGGCTCCGATGTGGTGGAGGAGTATGGTAAGAA  
ACTGGAGAACTCGGGATAAGTGTTAGAGACTCATCAGGGAACCTGAAGAGCTTCAATGA  
GGTGCTGGAGGAATTCCTCACATACTTGAGCACCATACTGATGATGCGGAGAGAGCCCG  
AGTGGCTACTGAAATCTTCGGTGAGAAGGCCGGCCCGGCTCTTGCAGAGGTTGCTGATAA  
ATGGGATGAATTGGGGGATGTGAGTGAAGAGAATGCTAAGAAGACAAACAAGGCGCTGGG  
TGAGTCAGCCGCTGCGCACCGTGATATCCTCACAGAGATAAAAGGGAATCTTGACAAGTT  
TATTGATGATATTAATACTTTCTGGAGGGAAGTGGGTATGTAGGGCAAATGGTAGCATC  
TATCCTATTCTTTTCCATCGTTAAGGATATCTACGACTTAGTTAAAAAAGCCCTGAAGAT

AGTGATTA AAAAGATATGGGACGTCCTGAAGGATTC ACTTAAGAATGTTAGCAGGGAGAG  
ACTAACAGGATTCGCTGAATCCGTGAAAGACGCATTGAAAAATGCCTTGGATGATGCTAT  
CACCCGTCTCAAGACGGATGATTTTGTTCAGAAATTTTGAATAAGATGGAGGACTCTCT  
GAGGGAGGTGGCCCGGAAACTCTGGGATCGATTAAAGAACCTGCTCAGGGATGAAGGTGG  
TAGAGCCTTTGATAGGCTAGATGTTGACGGGGTAATCACTCGTCTCGGCACGAACCTTGA  
TGATGCTGCCAGCAGTATTCTTCCTAGGTTCCGGTACCAGTATAGGGAGA ACTCTCGTGAA  
GGCTGTGGGGGAAGGCGTCGGGGTGGCGCTGCAAACAGCAGACATACTCTACA ACTTTAA  
AGAGTACTTGAGGGACATCCTCGAGGATCCATTCAAATTCGTCAGTCTGTTCAGAGTA  
CAGTTACCCTGAATGGTTAAGGAGGATCTTCTCCCCAGAAACAATATTCAAGGCCATCAT  
GGGACCTGAAGAGTGGGAAAAAGCGAAGAACATACTCCTCGAGAATGCCAGAGTGTACAT  
CCAGGAACCGTTCAGGCGTGAAGTTGAGA ACTTCTTCAAGGACCCTGCAAGATACCTTAA  
AGAAGGGTTCAGTCAGATGTGGAGTGATTTCAAGGCGTGGGTGTACAGTCACATCCCTTC  
CTTTGAATGGCCGAGCTTACCCCTATTAAGGTCCCTGATATAGTGGGGGTCATGAGGAG  
CAAGTGGGAGGAATTTAAGGTGTGGGTGTACAGTCATATCCCCTCCTTTGAATGGCCGAG  
CTTACCCTCTATTAAGGTCCCTGATATAGTGGGAGGCATACGGAGTAAATGGGAGCAGTT  
CAAGGCGTGGGTGTACAGTCGCATCCCCTCCTTTAAATGGCCGAGCTTACCCTCTATTA  
GGTCCCTGATATAGTGGGAGGCATACGGAGTAAATGGGAGCAGTTCAAGGCGTGGGTCCG  
CTCAGCCTTCAAATCATTAGATGGCCAACCTTCCCAACATCAA ACTACCAGACTTCGC  
AGGGCTTATGAAATCAGCATGGTCCAAATTTAAGAGTGCCGTGTCATCCTCGTTCAAGTC  
ATTCAAATGGCCAAGCCTACCTCTCCCTAATTTCAAGTGGCATAGCCTCCAAGTTCAGGGA  
GTGGGGGTCAAGTTTCATATCTAACCTTGCAGCAGGAATCCGTTCAAGCGATTCCTAACCT  
AAACCGTGTTCCTTAGCATCATAAGAAGGTTGTTACCATCATCACCACCAAAGAGGGGCC  
ATTATCCACCCTAACCTATGAGATTATGCATGAATATGGTTACCTCCTCGGGACACACTT  
CAATAGGGGATTGAGTGCTACAATCCCCGGTACCGTTGAGAGCCTCGGGAAACCGAGTCT  
CGTAATAACCATCCGATGTGACTGCTGGTTCGGGGGTCATCCATGTTGATGGGTGGTTTGAA  
TCTGCAGATAAATACGAATGTCTCCGTGGATAAGATTGAATCTGAGGTGGATGTGGATGA  
TATGGCTCGGAGGATAACGGATAAGGTGAAGGAGAATATGTGTGATGAATTGAACAGGCA  
AGGTATCCTCCCCTACCTGTATGGCCGCGGATATGTGAGGGGGGTGAGATGATCATAGTC  
TATGGTGATTGGAGCATAACAGGGACATAAACCATCAGGGATAGTATCCGTGCAGGTGAAC  
CTCCCAAAGGTCACCCTGCAATGCGTGGCCCTCCCAAGCCCGGAAGACCCCCCTGGAT  
GAGGTTAAACTATTCATGGGATTGGCGAAGTACCAGGTCAGCAATGATTTCTCCTAAAT  
AAGGGGACCTATGTGCAGGGGGATAGGAGCCGTGACCTCCTAACCATCACAGACGGTGTG  
AATGTATTCAAGGGGATGATCGAACCCCCCTCCTACCAGTTGGACAGGTTCAAGTATGAG  
ATCATAGAATACACCCTAACCATCCACCTGGAGCTACCCTCTGATATAAGCAGGGTCTTC  
AAGGCAGGGGACTTCTCCCCACATATTTCAACTCTTTCTATTTCCATGTTGGCGTGGAG  
TGATCCCATGGTGATGGATTTCAAGTTCATAGAGTTCGGCGGCCGCGGGTGGGTGGACCT  
GGAGGAGGAGTTCATAGTAGCCCGCGTGGTGACACAATCAAGGGCTACGCTATCCTAAA  
AAACACAGGGGATGAGGTCATTGAGGACCTCCTAATCATGCCGGCCCATGATCCCTTCGC  
CTCCTTCAGTGAGAAACAGTCATGGATGAATGAGCTAATGATATCCTCCCTAACCTTTAA  
GGAGCCCCGCCTCCCTGACAAGATCATAACCCGGGGATGAGGTGATGGTAGAGTACACGCT  
GCAGCCACCATGCACCGGCCCTTCCAGTTCATAATCCTGGCCACCGCCACTAACAGTC  
AGGAACAGCCTTCCCCGGATACCCCGTGAATTACCGTGCGGAGATACCCGTGCCAGCAG  
CGTCAGTCATGAGGAGTGGATCATCGATTTCAAACCTCCCAACCCCCACGGAAGAGCAG  
GTTTGACTATGAGGATATCCTCATAGAACCCTAACAGAGAGTGGGGGTATAGCAGGGGA  
TAAGCGATTCATCCCATGGATCTGGCTGAATAAGGGGGGGGATGACAGGTGGAAAATACG  
GGCCTACTTGAGGAACCCCGGGGATAATTGGATGGGCTTCATCTACACAGGCTTCAGTGT  
CCCTGTGGATCCTGGGAGGATGATGAATTATAGTTGGTTGAAGTACAGTACACCACATTT  
TACTGTGGATGTGTCCTGGGAGGAGGCCACGATAGTCACGGATTACTTCATCTTGAAGGG  
GGTGATCCGGTGAAGATCCTGGTGAACAACCGGGAAGTCCCGGTGACAGGGTTAAGCGTG  
AATCACATGATCAACTCTGTTGCGAAGGCCACATTCTCCACCCATGAGGAGGTGCGTGTG  
GGTACTCTGTAAGTGTAATCTCCGATGATGATAAGAAAATCTTTGAGGGGTATGTGAAT  
CATGTCACCCTCGATTATGGTAGTATGACATCTAATTGCTGGGCGATCTCCTCACCAATA  
CATAATCGCCTCATGCAATACTCTTACACCTTTAAGGAGCAGGAGTTTCACTCATGGGGG  
GTTGTCCTCCTCCGTTCCCTGCAGTCTGTGGGATCACATTACACCCCCACTCCTGCATC  
CCTGCACAGTCACGGGTTAATGCAGGGGCGAGTTACCTCTATGGAACCATGGTTCAACCA  
GGGAAATCCTCCCTGGAAACCTTCATGAAGTTGCACCCATTTTCATGGGATGGTGGAGACA  
AAAGATGATGTGAAGGTAATCACGGTGACATGGAATGACCTGATCCAAAACATTATGGAG



GAAACCGGTCGTGACATTTTCTGGATCCTGCATGGGAAAATGATGTATATCGGATGCAAG  
GGTAATGCGGGTTTCGAGGTCAACCCTAACCTCCTAAAATCATTAAAAATCACAGAGGAT  
GCAACAGAGGTTGTCGAGTCTCTTGAGAATCTGAGGGTGGTGTACTGAATTGGTCTCGGA  
TAAGTGGCTGCAAGAGAACCGTGGCTGGTACCGCGTCCCCATTAAGGATCCAACCTCTAGA  
ATACCTTGAAAGTGATGATTGGAACGTCGACGTGGGTTGGGCTTTAGGGTGGACAAGGAA  
GAAGACAGTCGCGTACTCCCCATTTACGAATCCAGGGGCCTCCGCTGCAAGATTCTGCTT  
CACTCATAAACCGGTGGAGGACTGGCGTTACATGGTGTATTGAGGTCCCTGACTTCAGTAC  
ACCAATCGGGGTTTCGAGTAAGGGTGGCGCTGTGATGGCGCAGGGGGGCGAGGCCATCCGC  
CACTGCCGGGATATGGACCGTAGCATGGGAATATACAGTCGGACTCAGGATTTATCCTTA  
CTGGGATGAGGAGATTAAGGCCCTCGTGATTGACCCGGGGTACTATGTGAATAAGGAGTG  
GGTTATTCAGATGAAGTACTGGTCCTCCGCAAGGTCAGGGCCTGTGTTTCAGTGTCTCAAC  
TGTGAAATTGTATAAGGTTGGGCCGCTGGTGGTGAGGGTGTCCCCTTCCCATTATTTGA  
TGAGTCGGAGTATGAGACTCCCGAGTGGGGTAACAGGAACCCACACCACTCCCATCAGC  
GGGGCCGAAGTATACGGATTACGGGCCAAGTCATAGTGGGGGGCCCGTCCGCGGGCCGCAA  
CCCCCACTAAAAGAGGAGAAAGTCTCTGATGGCTCCCCTACTGACACGGGTCTCTTTGA  
TAAAGTTAAAAATGATGATAAAGATCCACTCCGTGAGAACCAGAGAGTATCAGAGAAGGC  
CAAGAGGCCAACAGTGAAGTTGAATGCGTAGTGGAGGGATACTTCGATTGTAAGGTAGG  
GGATCATATAATCATCCCCGAAGACCCCTGCGGAGAAGGTTTCATCGTGACAGAAGTGGA  
GTACGAGTTCATGGGTGGAGCTCTCAGGACACATATACGGGGGTCTATAGATGGGGATAT  
AAGATACACCACCGCAACAATCATCACAGGAGTTGTGAATTACTTGTTTGGTAGGAGATA  
GAAATCCTGTTTGGTAGGAGATAGAAATGGGGAGTGTGAAGTGATGGTGTTTAGAGTATA  
TCATAAGAAGGTTGCATCACAGGAGCACAGGTGACTGGTGTGACTGGAATGATGAACA  
TGCCATTGAAGATATGGATGTCTTCATGTCCAGTATTGGGATAGTGTGAAGAAGGTGAG  
TGTGGGGTGTAGTTTGGTTTTTCAGAGTGTATCATAAGGCTGTTGCTTCTCAGGAGCATC  
AGGTGACTGGTGTGACTGGAATGATGAACATGCCATTGAAGATATGGATGTCTTCATGT  
CCCAGTATTGTCTGCAGATCCCCCGGACGGGGGCGGGGTCTGAGACGGCGATAAGTGGTG  
AGTACACTGTCAATATGAATTATACTCATAACGAGTCTCCCCTCAGAGTTCCTCATTGAGT  
TCAAATGTCAGGGAAAGAGGACGGATTCCAATGATGCTCCTGTTTATCTGCGGGTGGATA  
GTGATAGTACTGAGTCGAGGTATTCTGGGTCATATTTCCCTTCTTTCTGCCTCGGGGCCAA  
GTTATGGTGCTACGAGTGGCCCCGGCCTCCCCCTCTTCACTCTTCCAAGTCCATTGACGG  
AGGGGAATGCATTGTTAGGTGGCAGGTTGGAGGGATATCTGCAAGGGTTCATCTTTGACTA  
TGCGGTGTAAGTGTGTTTGTAGTCTAATGAGTTGCGAGTGTGACTGGGAAGTATGTGAAGG  
CATCTGATTTTGTGAATAAGCCTGCGTGTCTCTGATCATCCCGGGGAATGGATATGTGG  
ATCAACTGGTTTGGAGGGTGCATAGTCTATGATCTGGCATAATCGGAAGATTAATGGCCC  
GGTGACGGCGGGGGATTGGAATGATGATCAGCACATGGTTGATAGGGAGGCCCTCTTGA  
GTTTCTGGGTAGGGAGGCCCTCTTGGAGTTTCTTGGTAGGGAGGCCCTCTTGGAGTTTCT  
TGGTAGGGAGGCCCTCTTGGAGTTTCTGGGAATAAGCTCGGGTGGGGGTGGTGGAGATGG  
AGGTGGAGGTGGCAGTGGACAATGGGTTTTACTTGATGATTTGGAGTTTCAGAGTCCCCT  
TCAGTCACTTCTTGCCACGGACGGTTATGATTTCTTGGAGATTGAATATGCTGTTAT  
CGTGACTGACCCTTCTAATATAGCAGACCAACATTTTGTATATACCCGAATGGGGACAC  
CGATAGGGAGAATACTACTAGTTTCATGCATTATACGACTTCGGGTGGTACACATAACCA  
TTTGTCCAATTGGCCGTCCTTACCCCTTATTCGCAATGGAGATATCATCGAATGTCCA  
ATGTGTGAATATTGGGAATATATTGATTTCACTTAAAAATGGGATTAGGAGGCTGTTTGT  
CAATGAAAACAGTAGAATAGACAACAAGAATACTGTTTCGAGGGGAGAGCATATTGCTCG  
ATGGACGAATACATCATCTGATGTTACTTCATTAATAATTTCAAGCCAGAATACTGTGCTC  
GACCGCAAGGTGGCTGTTTATGGGTGGTGTGTTTTACCTGTACATTGACTGTATTTA  
TCAGTATCATGATATGTGAGGGTGTTCATGATGAAAAGCGATATTAATATGTATTGGAT  
GTTATTAACAATTATCTGTATGTTACTCATTCTGAAGATACTTGAAAAAAGGTGATTCAA  
TGGAAGTGGGGCTAAATGAGTTTCTTGATATGAAGAAGAGGTATGAGGACTTCAAATGA  
AGAACAAGAGGGAACCACGCTATGTAACAACAAGAATGGATATAAGGTGATGTTACCAG  
TATTCAAGGACATGCTAAGGCGCTACGAGGATTTTGTGAGGATTAATGGCCGTGAGCCTA  
ATTATATCAGCATTCAACCTCAGCCAAATGGTAAGATTGAGATAAAGAAGTTTAGGGATA  
TGCTAAGGCGCTACGAGGATTTTGTGAGGATTAATGGCCGTGAACCCAATATAATATACC  
TTGAACAAGGTAAAAGTGACCATGTTTCTTTAGGAACATTCAAGGATATGTTAAGGCGTT  
ACAAGGATTTTGTGAGGATTAATGGCCGTGAGCCTAATTATATCAGCATTCAACCTCAGC  
CATCTTTAAAAGGGCATTGGACAATAAAGTCATCGAAAAGATAGGTACTTTTCATGATG  
CAACAAGCCTCTATGAAAGGGTGAAAAAGACCTGCAAGTATAAATATTATTATAATGATC

AGGTCCCTAATCATGTTGCAGTCATGAGAATGACAACAAGTGGGATTAAGTGTACTGACG  
CCTGCCAACTCTTCAGCAAGGTCCTCGAAGAGATGGGCTACGAGGTGAAAATCGAACATG  
TTCGGGTGAAGTGTAACGACGGGAAATGGTACGGCCACTACCTCCTGAGAGTTGGCGGGT  
TTGAGCTCAAGGATGGGACGATATGGGATTATGTCTCCGCTACGAAGACGGGCCGGCCCC  
TGGGGGTGCCATGTTGCACAGCAGGGTTCCAACATCTTGGTTGGGGGATAGTGGGTCTG  
TTTATGACAAGTGATGATTGATATTACATAAAAAAATAAATAAGAAGAGATATTGTTTGT  
GGCAGAGACATGCATGTGTTGTTGTGATTGCATTGAATATATTACTTCCTATAAGTATCA  
GTACGAAAATTTGAAGGGAAAATTAACCTTTCTTGTTTAATTTTATTATTAATAAATTT

>NewGenomeName\_269

ATGGCATTCAAGAGGTCGTCGGTTCGATCCCGATTATCTCCACCAAATTTTATAGCTTTA  
TCAATTAGTTAGTTATTGATAAGGTTTTTCTCTTTGTGTTTGTGCCAATTTTGTGGCA  
AAAAGTTGAACATTGTTGGCGTGGTTTTGTAAATGCTCAACAGATAAATGCGCATATTTT  
CTCACGGTGTCTGATTTACTCCACCCGCCAACTCTTGCAGCACATATAACGGCGTTCCC  
GACATAATGTGTCTTGTGCGCCAAGTATGGCGCAAGTCGTGAAAACGGAAGTCTTTGATT  
CCAGCTCGTTGTAATGCCGCACGGAACGCTTTAGTGTTTGAATGCGAACCGGCTTGCCCT  
TTATATGTGAACACGTTTTTCTTTGTGCTTGCCAAATTGTGATACAATCACTTCAATAGCT  
TTGTCGTTTAAACGGTACGCCAATGCTATTACCTGTTTTTGTATTGTTCCGAATTTATCCAA  
GCCTGTCTTTTGGATAAGTCAATTTGCGACCATTTTAGCTGGGTGATGTTTCGACATTCTT  
AACCCAGTCAAAATAGCAAATTGAACAATTGGCTTTAAGTGCTCCGGCAATTCTTCTATG  
AGCCTTATTTCTTCGTGTTGGGTCAACCATCGTACACGTCGTTTGGGTTCAGGTAAGAAT  
TTTATTGCTGGGCATTTATCCAACCAATCCCACTCAACCGCCGCTCTTAATATCACTCTT  
ATCTGCTGCAAAACGGCATTAAATTGTTCTTGCCTTAACGCCTTCCTTCGCTTTTTTCATAT  
TGGATGAATTTTATTAAGTGCGGTCAATTTTCGTTGAGTTTTTTATCACCAAGATATTTA  
TCAAGCCATACTAACCCGTAAGCATGTTTCTATCTTGTGTTGCGCTTTGGCTTTTCATCA  
AGCCATTGTACTACGGCTTCCTGCCAGGAATAATTTGGGCGCTCACCAAGTTTAAATACT  
CGCCAGCATTGTTATATTCCTTTGAGGCTAATTGCTGCGCTTGATTTTTGTCTGAAGTC  
CTAGCGCTTCGGCGTACGCGCTCACCATTTGGCGACGTGAACGAGTAATGCCAGATTTCC  
CCTCTTTTCTTGAGGGAGATGATTTGACGTGACATATATTCTCCTTATGCCCCGCCTCTT  
GCTCGGGGTGATCTTTATCCTTTTTCAAGAATTTTCAAGCTCTTCAACATCAAATTTCC  
ATTTTCTGCCGATCTTGTAAAGCGGGTATTTCTTCTTGTGTTGCCATCTCCCGTAGTGTGA  
CGGGGTGCATATCAAGGATTCTTGCCGCTTATCTGTGCCTATTAATTCATAATTTCTC  
CAAAAATAAAGCCCATTTGTGCGCTTATTATCTAATCAATATCACGGTTTAAATTTTCG  
TTATCTTGTACCTGATTTCTGCTGAATGAAATCATTATCACTTTATAACAATCGCCATT  
TGTATTTAAGAGGTATATTTGTGCTTGGACCGTTTTTAATTGATATTTCCATTTTCGTAGA  
AATATTGGAACCCACGAATTGTTAATTTCTTTGATTTATGCTGAAGGTAATAACCATCAA  
AATCCCATTCTTCACTATGCTTAGAAAGGCTAGTGCATAGCTCAAGATATACACCGTTAA  
GTGGATAGATAAAAGAACATAACCAAGATATAAATATTTTAAACATTTGAATTTCTCCTG  
TTTTGATAAAAATAAAAAACCGCACTTTCGCGGTCTGTTGTTACTCTTGATACCGTTTAC  
CAGTTAACATCTCAATAACTTGGATTACGTCGTCTTTTGTATTTGTAATATCTGCCATGCT  
CTAGTGCCGAGTGATAATGCTCTTTGGCTCTTACGCTTTTTTACGAGCAGCTTTTGGTTTA  
GACCCGACCCAAATAGTATAAATATTCTGCACCATCCGGTATCTCGTAGATTGGCTTAG  
GCAATTCACGTAAAGGCGCCTTAATTGGCTTGGGTCTCGCCACATGCCGACAATGTCTA  
AATCTCTACGACTACCGTCAAATTTACCTTTATAAGCCCATGCGGCCGCAATCTCTAAGT  
CTGGTTCGGACTCATAATAACCAAGTAAATCATGACATTTGAACGTTTTTAAATTTTTTAA  
GCAAAAAGCTTTGTTTCCGCCTTCGAGCACAAAAGCTTCGCCTCCCAGCGCCCGATCTA  
AATCAAATGTTTCGGGCTTGCTTGCCTTGCCTTGCCTTTTAAAGAAATCTACCTCAACCC  
ATAAAGAAACGCTGGAATATCCAATAGTTACGCTAACATAGGTGTAAAATTTAATTTT  
GTCCGGTTGCTTTTTTCAAGCGTTGATTTGTACCATTCAACAAACCATCGCGGCTGCTCTT  
TGCTATTTTCGTCCTGTAACTCCTTGCCTATTTGATGCGCATTTTTAATATCAAGAGCTT

TAATGATTTTGTCTATATATGTTTTCTTTTACTTGTTTACTTAGTTTCATTTTTCCACCTT  
AATTTTAAATAAAAAAGCCACTTATTCAGCGGCTTTCATAGTTTCTAAAATTTCTTCTGG  
AGTTTCCGTCACCTCGGTAATATGAATTAGCATCCCCGGAACAATGTAAACTTGTTCATGCT  
GTCGTCTCTTGACATGCCTTCAATTAATCCATGTTTATGAATATGACGCTGTTTATTGT  
TGATAACTTGATAAAGTTAGCCATTTTAAACCTCAATTTGTATTAATGTGGAGCGTTTG  
CCTTGATGAAATCCACTAACTGCGTTCGCTAATAGCAGCACGTCGTTTTCCATCTCCGGAT  
AGCGGTAATAATGAAATCTGTGTAACGCTCTTGATGACGCACTTATCCGGTTCCGCTGCCG  
GGGTGATTTTTTGGAAATAAGTTATAAGTAAACTTACTCATAACCAGCCAAGATAAGTAAC  
ACCGCCACTGCATTGAGTCGGTGTAAATTTCCGCGTCAATGTATGCAGTGAGCTTGTGAT  
CAAAAACACAGTCGCTTTCCATTGCATCAACTACGCCAACGAATGTAACCAGTTCATCAT  
TTATGCGTTTAGCGATTTCAAATTTGAATTCTTTTATTTCGCGGGATGTGAATTTCCGGTAT  
CAATTTTCGCTAAAATCGAATTTAAAGCCATCTTTCTCAACAAAAGCTAGTGTTCATATTTT  
CATAATCTTCCAAGACCTTATGAAAGGCGGAACCGGCAAGCATAGCTTCATTTGGTATCA  
CTTTCTTTTCGAGATAAGCAATCATTCTTCAATAGTCGCTTCCCTCGTTCTCAAGCCACC  
GCCGATAGGATTCAAGTTGTGTAGCAGATATGCGGATCATGATTCAATTTCCCTCAAATTC  
TTTTGTTTCGGCGTTGAATTTAAATCCGCTTTTCCGCGCATAGTCCAATAGCAGTTTTTT  
GTGAAGGTTTCGACATATTTGGATCGATTGCAGAATTAAACTGCTCGATTGTCATCAGCTC  
GCTAAATTTTGCGTGAATATCATCTAATTCCTTTTGCGACTGTACAGCTTCGGCGGATTG  
TTTGTTTAATCCGTCTTTTACCCTATTAATGACGCCATCAAGGAATTTGGGTTCGGCTTT  
GAAATTTGGTACCGGAATTGCGTCAAATTCGACTGGATTTTTACCGAACCCGGTAGAGCT  
TGGGTAAAATCCAAAACCTCTTTTGTGTGTCATCAAAGCGCAATCGCCCCATCAAATC  
CGCCACTTTGTAAATTTCCGTTTTTGTAGCTACCTTGTATATCCAAGCGTTCTACGAATTC  
ATCTTTTTGCTGCTGTTCTGTTCATGTGAGACAATAGAACAACATCTTTACCAAAAACCTGCG  
CAATTTGTGTTAGCCATGAACTGAATGCGTGTTTTAGTGCGCCGTAACCTTGTTCGTTAA  
CTCACCACCGCCGCGCGTTGTTCTTTAACATTACGCCGAACAATATCTGCCGTTAAAAT  
ATCCAGCGCGCGCCCCACGGTATCAACAATAATTGTGTGCGTAAGTTGCTAAGTCGCTTTC  
GGTAATGTTTGTACATCAGACCAACTATCAACCTGCACGGTATCTTTGCGGAATTGTGA  
GCGATAAGATCCGTGATCAAAGTCGAGTAGTAATGGTCTTGAAGCTGTAAATGCGGTTGA  
GGTTTTGCTGCCCGGGGAGCGTATAAACAAACAATAATTTTTAACCTCGATCGG  
TTGTGCTGATGAAATAATTTTTCAGTGCCATATTGACTTCTCCTAATAAACTTTATTTTCT  
AACTGTTTTCTTGCCACAACTCAATCGCATTATCGCGTAAGGTTTCTAACTTATCCCAC  
GCGCCGGCGCCGATAGCTAACCAATTGGAGGTTTAAATCATCGTCGCTAGTGGAGATTGCG  
TTGTTGATTGCGTCAATCAGCACTTCATCGCCGTTGCGGGCTTGTTCGTCGATTTCGTGCT  
TTTTCCGGCTTCAAGTTCGGCTTCGTAACGTTTCGCTTCAATTCGTGCATGATATTCA  
GCCTCACGTCGATTTTCCCATGCCGTTTGTAAATCCGTTTCATAGTTAACCTCAAACAATC  
CGCGCACCATGCAGGCACTAATCGCGGTTTCTTGGTTTATCATCGACACTCCTAAAATAT  
CAGCTTTGGGATAAGACGTTAAAACGCTTCTACTAATTCGGAGAGTGCAATTAACGCAT  
CCGTTTTCGTTTTTTGAATTTCTCGTTCCCGTTCCACAATTTTTGTTTTTGTGTCGATAA  
TTAAGCCTCTAAATCCGCCGTCATTTGGTAAAACCTTCAACATATACTTATTTGCCATTT  
CGTTTCTCTGTAAAAGTTCCGGTATGTTTCTCTAAATAAATTAGACTTTCGGTTGTTAAA  
TTCGGCTGGGCGTCTCCATATTCGGCTATCCATTCGGCTTTGGCCTTAGCCTCCCAATCG  
GTGGAGATTTGCTGACCCATACCGTTATCGCAATAATCTGTTGTGTTATCTGCGTGAGCG  
GTTATAGTGATTAATGCAACGGCGTATAACATCATCACGCCGGTGATAATTGCTATAAGT  
GCGGTTGTAATAATTTGTTTCATAGTAGTTTCTTGTAGTTAAAAGCTGAATTTGAGGT  
GTGAAAATCCGCCGAGGCTTAAAAGTGCGGTCCGATTTTGTGTTGTTTTAAATGTCCG  
TATCGACCCTGCCGAAGATTTTTTTCGTTAAAGCTGCGGATATGCTTCAGTACGCGCCAGT  
TTGTTTCTGGATCTGCTTCAATGTGCGACGGTGATACGTTTTCACGACTTCGTTGAAGCGGC  
GTAGTGTGTTGCGATATTCAACAGCATTATCTCTTGTTCGACGGCGAATTTTGAACCGA  
TGGCAGCAAGCGGGCTGTAAAGCTCGTGCAGCAGGTTGTTGTTGCGTCGGAATGCGAAGC  
ACGCCAAGCGACGGTTTGCAGTTCATATTCGTTAGCGTGACGGTATATGTCTTCTCCG  
GTTGCGGCAGGGCAAGTTGTTTCCGCTGTTGGGCTTCGCGGTCTAAAATATCCAGCACCC  
AGCGGCGGAAGTCTTTGGCTACTTTGGTGTGGCTTAACATGCCGATGAGGTGTGCGCCGC  
GCAAGGAGAAGATGCGCACTTTTTGGATTCCGCCATTTGTCCGCATATCAATAAGTGCGG  
TCATTTGTGGGGTGAATTCGTCCGGCTGGCGGTCGTAGATATTTTTGACCGACTTAAAAG  
GATCTGAATAGCCTAATGCTTTTCCAATCTCTGTAACCGTTAGCCAAATTTGATTGTTTT  
GATGAATAGCCGAAAGAGTTGTGCTTTGAAAAGTTAATGTAGTCATTCTGACTGTCTCTG  
TGTTAAGTTTTAAAACCTTCATCACGAGTAACGCCAATTACTGGTGATGAACTGATCAAG

GTTGGCGTACCGTAACACGGGTGTAACGGCGATCTTTCGATCCCTCAACCAGTTCATCAT  
TGACTACTTTTGAAGGGGGGTATCAAATTGATGTACCCCTTTAAAGGGTTTGATTGCT  
GATTTTCGGCTATAAAAAAATCGCCATTTAGGCGACTATAATTTCTAACCGCCGTGTTAT  
TCAGGACGCCAATCCCGACTTTCTGTTGAAAGTGGGGTTAGTTTACTGAATTGAGCGGTG  
GGTGTCAAATAAAAAATCCCACGTTGTAAAGTGGGATTTTGAATAATTTAGTGTTTTGCTG  
CTTGGTTAGCGAAGTATGCCCAACCTATCATTACAGCTGCAAATACTGCTAACCCGAATG  
TTAAGCCCATTATTGCACCTCCTCTTTTCTGAAATTTGCGACCTGCGAACAGACC  
ACCATAAATCCCCAAGCAAAGCAGAATGCTGTTTAGCAATTTTATGAGGATTGGATCTTT  
GCCATAAAGAATAACAGGAATAGCCAAAATTGCAACTTTTGCCACATCTACCGAAAGTTT  
CGCCAATCATCTAAGGTTTCTTTCTCAAAGGGCGTTTAGTGATATGCTACGGTTTGGC  
TGTCATAACCTTTAATTTTATTATCTTGTAAACACGCGACACAGTTTTCTGCTTGGGGGT  
TACTCGACTTAAATCAGCCGATAATTTATATCCCGCATGAGACCAAATTTGTCTAAAATTC  
AAAACAGGTTACTGATGAGTGCCTTTCTTTATGCTTGTAAAGGCTCAAGCCCTCTTGTATG  
CGACTACAGCGAGGAATATAATGCTCTCTGCGACTACAATTTAATCAGAGGAACATCATG  
GAAGAGTACGCCAAGTTGCTTAACGCCATACTTACCAAGGTAGTTTTTAATCGCATGACC  
ATGTTCTTCGTTTTCTTGTGTTGGCTTTACGTTTCTTCTACCGAATTAACGTTGTAT  
CTAACGCCAAAACCCCGGCATTCTTTCCTGATTGGTTTACGCTTGCCAATTTTGGATCG  
TTAGTTTTCGGCTTTGTTGCAACTATGATTTGGATTCTTAGCAGTAATGCGATTAAATCG  
CTCATCAACAAAACCCGATGCTCAATTAAGGCAAATTCCGAGCAAGCAAATTTGCTTGAG  
TTATTACCTACTCTTTCGGCACAGAAAAGAAATTTCTTGCACTTTCTTGCTTAGGTGAA  
CAAATTTGGCGAGACGATTTCAAACCAAATTTGCCATTGAAAACTGCTAGAGCTAAAG  
CTCATTTCTATGGCTGGGTATCTAATCGATATGAAGTTAATCCGCTTATTCGTCCAAGT  
TTAATTTCTGAACTGGATAAGCTAGCCAATACCCATCAATAACCTGTTTCAAATTTTTAA  
AGAGCGACTCAAAGTGTGTTTGTGTTGATGTGGTTATTCTACTCAAAGTAGAGATTATTGC  
AACTAAAATTTGCATAAAAGTAGAGATATTTTCTATTTAAAGTAGTAAGTGTGTTTT  
TGATTGAATTTATTTTTGATTAATTGCCGAATTTGTGAGCTGAATCACAAAAAAGAGTA  
GATGAGAGTGGGATTTTAAAAAGTGCAGTCGGCGTTTAGCACAAAATTGAGAAGAAAGGG  
CAAATTTGGACAGATGAACTTGTTTCAGTGAACAAAATAAAGTGCGGTAGGAATTGCAGGT  
AAAAGAAAACCGCCTGAGGGCGGTTATACTAGGATTGTTATTTTAGGTTTATAAATGTAA  
GAGTTAATCGCCTAACATATCTGTTGTTAGCATGAGTAGGTTGTACATAAAAACCGTAG  
ATGTAATGAGTAATGTATAGCTTAATAACTCACCTGACAACAACGACCCCGCATAACTCA  
ATACACTTGTAAAACTAAATCCAATGAGTAGATATTTCAAATGTATGAGTATTTCTTGAT  
ACATACCGTTATCTCTCATTTTTTTAAATGAGGGAATGTTCTGTAATGCTTACCAATATGG  
CGATAACAGCAAAGATGAACCCAATAAGAGTGATTGATGATGTAATAAATCACTCATCA  
AATCTCTTAGCTCATCTTTTTTGAACCTCTCTAAGAAATCGTAATACCAAATTACAGTAT  
GTGCTGTGATCGCTAAAATTCAGATATAGGTTTATAATATTCGATTTTTCATTGGGTATC  
TATTGGATGATTTTTTCCAACAGTTTAGCATAAGACGATTTTAGTGTGCGAATATTATTA  
AAAATATAGGATTCTCCAGATGTCCATTCTCGGCTAGGGAAACAGTAAATTGCGCCTTT  
AAAACATCTGAAAAAAGATCTATTGGCTCATCAATATCTTCTAGTTTAATTTTGCATTTT  
CTTGCGTGTGGATTATCTAGAATAGACTCGACCATTTCTTTTAAATTTACTTTTGTTCAGT  
CCTGCTGCGGATTTTGTAGATAATTTTGGCGTGAATGTTCCGGCATTACAATCCTCCATT  
AAAGCAAATTGAGACTGCTCCCATTTAGGTTCTTTCTCATCAGGCTTATACTTATAACGA  
GGCTTAGCGAGTTTGTATTCAACATAGCTTGGTTTTTGTTCAGAATGTTCTCCAAGTCA  
AAGTCATCTTTGCCAATAGGGTTGAAATACATACCTCCATCAAGATTTTCATTTCTTAGC  
AAGTTAAGTATATAAGATGAAAGATCGTGAATTTCTACCGAATCTTGAATTTTGATATATC  
ACAATCTCTGAACCGCTAGGGCGAGGGATATGACATGAAATATGTTTTCTCAATAATCGCT  
TCGTTATCCGCAAATGAAGAGGTTCTTCATCTCCAGTATCCATATTTCCCTTTGTTAGC  
AATTCGTTTTCTGTAAGTAACAAAGTATCCTGATATTGTATTATTTAAATCTGAACATACT  
TTTACTCTATATGAATAATCATTAATTTCAACTAATGGTGTTATATATGTATGTTGGCCA  
TTGCTGTATTTTCTTAAAAATGAGTTAGATTTTTTACTCGCCATTTTATCTGAGGCACAT  
TCAGTGGAGTAAAACGCATATAAAATGTTTTTGTTTTTTGTGCGCCATATTTTTCCCTTAG  
GACTTGGTTAGTTATTATAGATCAACAATATCTAGTGTTAGTTTCTATAGTAAAACCTGAA  
TACCAAAAAACTTTTCCAATGACTGATATATCTTGCATGTCTGCTATCTCATCCGGGTGT  
TCTTCACTGTTATAGCTGCGGATTTTACTTGTTCGTTTGGCATATTGTAGAGTAGTTTA  
ATGCGCAACAAGCCCGCGTGATTGATAGCGTATATCTTGCCGTCTCGGATTGTCTTATTG  
CCCAAATCAATTCCCACCGTTGTTCCATCAGGGATTACAGGCTCCATTGAGTTTCCATCA  
GCGACGACGCAGACCGCATTTTCTACTGCACCCCTTGTTTTTCTAAGGGTTGCTTTGGAG

AAACGCAGTTTCAAATTGTTATAGTCGGCAATGTCATCAGCAAATCCGTTCCCGGGCGGCA  
AGGCGAATATCTTGATAAAACGGTACGGCGTATTCATCACTATTTAGTGGCGTGTTGCGA  
TCCCATAAGTCAAAGGCACCTACCTCTCTCACATTTGATTTTATGCTTTCTGTTGATTGC  
CCTTGTTTTTTCGGTTTCTTCACTCGCCCCATACTTTAAGTAAGCGGGACTGACGCCGAAA  
TATACCGCCATTGCCTCTATCTTCGCATCTCTCGGCGTGGCAGTTCCTAACGTATATCTC  
CTAGCCATTTTATAAGTACACGCCAAAGCGTCTGTAAATCACGAATACTCTTGTTTTGT  
TGCCTCATAAGTTCGGCAAGTCTGCTCGCAAGTGTGTCATATAAACTCCCATTTCTACT  
GTAGGTAGAAGATACATAAATAAAATAGTTGATTCAATTCTATTTTTAGTAGTAGAATTA  
TGCTACTTTAAATAGATATGAGGGGTTAAATGCTACCAATCGAAAAAGCTTACAAAATC  
GTGGGTGGGATTTTCGGCTATGGCTCGTCATTTCAATCTTACTCCTTGGGCAGTTTCCAAG  
TGGCGTGAAAGAGTTCGGGCGGAACGTTGCGCAAAGATTGAAGAATTGACGCAAGGTAAA  
GTCAAGAAATCCGAATTGCGCCCTGATTTATGGAATTAATCTACCAACAGGCGATCGCAA  
TGGCACGCAATAAACTCACCAGATCCGCAAAACCACTTTCGGATCGGGTTATGAACAAAT  
ACTGGAAACAGAAACAATGCGGAGATTGCGGACGAGATGGAATGTTCCGCGTCCACGTTGA  
GCCGTTTTGTGACGAATGAAGACGCTAATCAGGCGTTTAAATTTTATTGCGGCAAATGGGT  
TTGATGTTTTTCGATGTGAATTCTCACGTAGCAATTGAGAAATCAGAGTTGGAAGTCTTT  
TATTGGCGGCAAAGGCTTTGACGACCGGTTGCGCGAGAAATATTTGGGCAAATAAAAAC  
CACGGCTGCAACCGTGGCTAATTAATAAAGTGTTAAACGAGGTGATTATGGCAAATCTAA  
TTCAGATTAGCAACAGCAAATCAACAATTCCGAAGTTAAAACGGTAAACGCGAGAGAAT  
TGCATTCATTCTTGGAAAGTCTCAACGAGATTTTACAGACTGGATTCAAAGACGAATCTCAG  
AATATGAATTCGTTGAAAATCAAGACTTTGTAGTTTTACTCAAAAATGAGAAAAACCTG  
TAGGGGGGCGACCATCAAGAGAAATCCATATATCCATTGATATGGCAAAGAATTATCAA  
TGGTTGAGCGCAACGAAAAAGGAAAACAAGCCAGACAATATTTTATTGAGATGGAAAAAG  
TGGCGAAATCTACTGATCCTATGGTGCTATTAATGACCCGGTTTACTTGCGTGCGGCAC  
TTGCAACGTAATCCGAAAGGGTGATCGAGCTTACCCCAAAGCGGAGGCATTTGATCGTT  
TAGCAACCGCAACAGAAGGCGCAATGAATCTACCAATGCGGCAAACACTTACAAATGC  
AACCAAGAGCATTAAACCAGTTTTTATTTGCTCACGGATGGATTATAAGCGCACCGTTG  
GATCTGCTTGGATTGCTTACCAAGATAAATTACAGCGCGGTTATTTAGAGCATAAAGCGC  
ACCCTGTCACACAACCTGACGGGACGGAAAGAATTTACCCGCAAGTATTAGTAACGGCGA  
AGGGTCTTGCAGAAATTATCAACAATGTTAAACAAGGCGGTGGCGTGATGAGTAACTTATT  
TGACCCCGAATATGTAACAAACGCTTAGCGAATTAGAGCGGTGGGAAAAATACGAAGAAGT  
AAAGCGTAATTTAAGAAATTCAAATGCCACCGTTGAAGAATGCGACAGAGTAACAGCTAA  
AGCGATTGAGGAATTGGAAGTATGAAGCCATCAGAATTTAGAGAAACACAGGAAGATCT  
ATTGCATACCGCCCTAATCTTGCCCGTTTATTTGGTGGCGTCGTAGCAGAGATTTTATTT  
GAGCAAATCTTTTATTGGCAAGACAAAGCCGATCCTGTTCTTGGTGTTTATAAACTCAA  
GAAGATCTTGAATTTGAAACAGGATTGTCCCGCAAAGAGCAAGAAACCGCACGTAAATTA  
TTACGTGAAAAAGGCGTTTTAATTGAAACTCACAAACGTTTAGAGCATAGACTTTATTAC  
AAGATCGATCTCGATGCTTTAGATGCTTTATTAGCCACTTTAGGGAATGAGACAAAAGAA  
CATTCCCGAATGCCGAAAGTGACATTCGGGAAGAACCGAAAGTCGCATTCGTTAATACA  
CTAGATTACAACACTAGATTACATACAAATACCCCCCTTACCCCCCAAGGGGAAGATTTCG  
CCTAACGGCAAATCAAAAAATAATCACCTTGCTGAAAAAATTGATTATCAAGCGATCGCC  
GATGCTTGGAAATCAAGTTAACGAAAATTCAGGTGGGCAATTACCGTTCGTGGAGAAAATC  
AATAACGACCGTAAACGCGATATTAAAAAATTTCTTGGGGAAGTATCCAAACCAACGATT  
GAGTGTGTGAGAAATATTTTGGAGGCGTTTTTTGCGGCGGTAAAACCTCACACCTTGGC  
GAGAACGATCGAGGTTGGCGAGCAAATTTGATTTTTCGATTAAGCCAAGACAAGTTTTG  
AGAGTGCAGGAGGGAGCGCTGTGATGGAAAATTTAAAATCGTCCCATAACAACCTTGGCG  
CGGAACAATGCGTACTTGGCGCCCTGATGTTTCGGAAGTTTGGAGCAAAGACGCATTGGTGG  
TATTGGATTTTGTAAAGCCTGAAAGTTTTTATCGTTTTGAGCATCAACACATTTTCGCCG  
AAATCCAAGCATTGGCTAAAAACAATCAACCCATCGACCTGATGACCGTTGAAAGCCGCT  
TAAGCACAAGGGCGTATTGGAACAAATCGGCGGGTTCGCTTACTTGGCGGAATTAGCCA  
ATAACACTCCAAGCGCCGGAATATCCGCGCTTACGCCGAAATCGTGAGAGAAGACGCAA  
TCAAGCGTTTTACGATTGCGAAATTACAGGATTGTGAAGCGCTAATCTTGGCGCAAACG  
ACCTCAAGGCGGCAGACCGAATCGAAGCTATTAGCTGTGTGATGTCCGAAATTTACAGACT  
ACAGCCGAACAGGAAAATCAAAGGGCTTGCAGCAGTGGTCGTGATGTGGGAACTGATTGGC  
TTGATAAATACCAATTGCGCTTAGAACAACCAGAAAGCGTGCCTGGAATCTTAACCGGCA  
TTAAAGCGCTTGTGAAGTGTGATCGGGTTGAAAGGGTTGGTTAAGCAGTCCCTTGTTCGT  
TAGGTGCTCGTCTAAATGCGGTAAAACGGCATTTTACTCCCTGATGGCGGAAAACCTGCA

TTTTGAACGAGAAAAAGCCTGTGTTGCTGTTTAGCCTAGAAATGTCCGCGGAACAGATTT  
TTGAGCGTATGTTGGTTAAGCGCGCAAACATCAACGCAAATTCACTTTACGACACCGGGT  
TAAATGACGATGAGTTTTATCTCAAATACCACTTACACAAAGACACTGTAATGACGCGTG  
TAACGCAGTCTGTTGGAGAGTTGGTAAATGATGACTTGTGTATGTTGATGACACTCCGA  
ATGTCTCTATGTCCCACATACGCAGCGAATGCCGCCGAATTAACGTGAGCGAGGAGATA  
TTGGATTTATTGGTATTGACTACTTAACGCTGATGAAAGCCGAAAAAGCCGAGCGTAACG  
ACTTAGCTTACGGGCAAGTTACCAAAGAATTAAAAAATCTTGCGCGTGAAATGGATTGTG  
TGGTTTTGCTTTAACTCAACTGAATCGTGGGCTTGAAAGTCGCTCAGATAAACGACCAA  
TGCCAAGTGACAGCCGTGATACAGGACAAATTGAACAAGAGTGTGATTACTGGTTGGGAC  
TTTATAAAGAATCCGTTTACAACGAAAACGCCGACCCAAGTTTGACAGAAATTATCGTGC  
GATTAATCGCCATGGTGGAAACCGGTAAAGCCTATTGCGATCAGAAATTTGGTGCAATGT  
TTGAATGCGATCAATTAGACGCAGAAAGACGATCGCAAATCGGCAAAAAAGAAACAAAAC  
AAGAAACAACAAGATTTTCAAAGGGAATAAGGGATTTTAATCATGGCAGACTTTGACAA  
AGATACCTATCCAACATCATTTTCACTATTTAACCCGATTCATGCTGAATTTGGCTTCAC  
GATTGATGGCGCCGCACTGCCCCACAACGCAAAACTTGAGCGATATGTAACGCCTGAAAT  
GGATTACTTAACTTACCCGATACAAAACGAGCGTATTTTCATCAACCCGCCATTTAGTGA  
TCCGTTAAGTTTTATCAAACGTTCCGTGCGAACTGTTTGAAAATCACAACCTGCTTAGTGGC  
TATGTTGTTGCCGTTGATATAAGCACAAAATGGTTTGCTTTGGTGGCTGAAAAAGCAAC  
GGAAATTAGATTTATCATCGGTGGCCGCGTGAAATTTTTAAATCCTGCAACGGGCAAGTA  
CACAGATGTTTGGCGTGGGAATATGTTTGCAATCTTTAATCCGGCTCACAAAGGCATGAG  
CCAAGTTATCCGCAATGTTTCATATCAACACCTTTAAAAATTTGGAGTGGCGGCAATGATT  
AGCAATGATTTTAAATGTCCTAAATGCGGGCGCACCTCTTGAGGATTTATGGGATTGTCAC  
CTTTAGGAATGATGCTATGAGTCAATACAAACCTTTTTTCTTGCGCGATCAACGCATTAA  
AAATAATTGCTTAGATTTAATCAAGGAAGTGCCAACGGACGACAAAAAACCGTTGGTAGT  
CAAAATCCAACCGATGACGCGCAACCTTGAGCAAAACGCGAAGCTCCATGCGATGTTAAG  
CGATATTAGTAATCAATGCGAGTTCGGCGGAGAGAAGCGGGATATAAATACTTGGAAGAT  
GATTTTTTGTTCGCCCACCGAATCGCAACGGGAGACAAAGCAGAAATGGCAATTGGGCT  
TGAGGGCGAGGTGATTAATTTACGCGAATCTACCGCACAAATGAGCGTAAAGCGCATGGC  
AAGTCTTATAGAGTACGTTACCGCATGGGGCGTAGCGAACGGGGTTAAATTTAACGACAG  
ATGGGGATTTTACGGGAGATGAAATTTTTAACTATTTTTATTTAATTGTTGTGAGTTGT  
TTTTGTATTGCAAACGTTACTGATGGTGCAACTGGTGTATTTTCCTTGGTTTTATGCTTT  
GTCAGTTTTATTTTTGGCGTGAATATCCATGCGGATATTGTCCGTGACAAAGCTAAAAAT  
GGTGAGTTACTTGAAATAGGCAAGAAATATTACGCAATTAATACGCTAAAGACAAGGTG  
GAGTGATGAGCAAAGAAAAATTTGAACGCACTAAGCCGGTTTTGAATGTCGGAATAATCG  
GACACGTCGACCACGGTAAAACGGAATTAGCAAAAGCGTTATTGAGACACCGTGAAAAC  
GGCGTAAATGGAGACAATCCGGCAATGCGAATTTAATTAATGGGGTGCGCAATGAACCAG  
ATTAATTTTACGTTATTGGCTGTATTACTAATGCCTGTATTTTTACTGATTTGG  
TCGCTATTTTTCGCCGCTGATAAATACGCCAATAAGATTTTTGTTTATTGCCCTGTCGCT  
TGTGTTTTGGGCGTTTTATGTGGGTAGCGGTGCGAATTGGGCTTGGATTGACCGCACTT  
GTTGGAGGTGCGTAATGCGGGTTAAATCGCTCAAGCCTAAAAAATGTAATCATGCGGGG  
TGGAGTTTATCCCCACAACTCACTACAAAAAGTTTGCTCGCCAAAATGCGCTATCGAAT  
TAGCCCGAAAAACGCACAGGAAGCGCATAGCAATGCTGAAAAGAAAAAACTAAAGGAAC  
GTAAGGCTAAGTTAAAAGATTCTGATCGCGGTCACTGGTTGAGATTATTGCAAAGGGAGG  
TGAACAAATTTATTCGCCTGAGAGACAAAGGAAAACCTTGCATTGCCTGCGGCGCGCCAT  
GGAAACCCAGCTTTCAGGCTTCCCACTTCATCCCGCAAGGCAGAAGCTCATTTTTACGAT  
TCCACGAAGACAATATTCATTCCGGGTGCATTAGATGCAATCTGTTTGTGGCGGTGGGA  
ATATACACGGATATAGACCAAGACTGGTAGATAAGATTGGCTCCGAAAAAGTTGAGTGGC  
TTGAAGAAAATCAACACCAAAACAAAAAATGGGAAATAGCAGAGCTGAAAGAGATGATTA  
AGTTATATCGTGCAAAAATTAAGCGTTAGAAGGAGCCAATTAATGCAGTATAGTGTAGA  
GAAAATTTTAGTCCGCTGGGGCAATTGCTGGGGGAGAGACCGTATTGGCACGGAATATCC  
AAGCGTAACGCCAAGCATACTGTTTTACCGTCAGCTCCGCGTAAGGCATGGTTAAAACA  
TTTGAGCGATGATGAATGTTTAAAAATTGAGGGCGCAATAATGGCATTGCATCGGGTGA  
TTTAGCGGCATATCAGGTTACGATGGCACTGTATGTGCAGCAACTCGGCGAAAAGGATAT  
TACGCGCGCACTGGCAGTTTCCCGGCTAAAATGTATCGCCTGCGCAACCGTGGTATCAG  
TTTTTTACAAGGTGCGTTTTCTATGCTGAAAATTAAGTATCATTATATTGGTTAAAATCG  
CAAAAGCCCCTTGACACCCGAGGGGGTTTTTTATTAGTATGTTTCCCAAGGTGTCGAAAC  
CTTACAAACAGCGGAAATCCGCACCCGTCAGACAAGCGTTTTTTTTATGTCCAAAATTTA

GAATGATTTTCTGCCATTAGAAATCGTTTTAAACACTCAATGTTCGGGCGGGAGGAGAATA  
CAATACCCGAAAGGGGAATAATCCAGCCGTCTGTTTTCGCGCTTTCGAACCCGCCCCGACAC  
CCTATTTAGGGTCAATATCGAAAATAACAAACAGGAGACTTTCTATGTCTAATCAATCTC  
AATTATCCACATACAACTTCGAGTCACACACTATCCGCACCTTAGCTATTAATAATGAAC  
CTTGGTTTTATTGCTAAGGACGTTTTCGATGCAATAGGCATTGATAACAACCGTAAGGCGT  
TATTGGCATTAGATGAAGATGAAAAGGGTGTAACTTTAAGTAACACCCTTGGCGGAAAGC  
AAGAAATGAACATCATCAGCGAAAGCGGAATGTACACTTTAATTCTCCGCTGCCGTGACG  
CAGTGAAAAAAGGATCTGTGCCACACCGTTTTAGAAAATGGGTAACGGCAGAAGTGTTAC  
CGGCAATTCGCAAAACGGGGAAATACGAAGCGAAAACCACGGTAGATGATCGCACAGGTT  
TACGCAATGCCGTGAATATGTTGGTGAGCAAGAAAGGGTTAATTTATTCCGAAGCCTACC  
ATTTAATCCATCAGCGCTTCAATGTGGAATCAATCGAAGATTTAACCCCTTGAGCAATTAC  
CGCAGGCAGTAGAATATGTTCAAGATAATTCTTGAGGGTGAATTAATTACTGATGTTG  
CTTTGCCGGAGCCAAAACCAAAAACCTACACCATCGAAATGACTGAAAACGATATTACCG  
TTTTACTCTGGTTATGGTTTATTTCCGTGCGTGTGATTGGCTCGCTCAAAATGTTGGTAA  
AACCCTTAACTACTACAAGCACCAATTGCGCCGGAAGTTGTCAGCCAAGCAAACGAAT  
ATCCGTTTACGGTGGAAACACGCCCGCCGAATCTTGCTCAAAATGAGTAAAGATTTAGAAG  
CTGATCCATGGCGCGATGATAATCTTTCTCGCGTGCTGCCGAAGATTCGAAACTTCAACG  
AATCGGATTTAGCCTATCCGGGCAATCGCCACGAAATATAAAACGCCGCAAAATCCGACC  
GCACTTTTGCAAAAAGTGATTGATTACTTGCAAGTGAAAGTATATCATTCTGTGTAAGTT  
GCGGTTTTAGCGCATAGCGAACGCACAAGGAATTTTACAAGCCCTGATCGGAAACGGT  
CGGGTTTTTTATTGGGTAAAATATATGCAACAGAACGGGCAGCTGAACGGGACAATAGAT  
GTTGTTACATCGGTTATCGCTTTTCTGTTTTCCGGTTTGGGCGGCATCGTTAAGTGCATT  
ACAACAGCAGAGGCGGAAGGAGATAAAGTTAGAATCGATATGGTGGCATCAAGTTTTTTT  
ATTGGAGCATTTAGCGGCATGGTAGTCGCTTTTTTTTTGATGTCGCAAAAGATTGATACT  
TTGATGATTATCTCTATCGCAGGTGCATTCGGATATTTCCGGGTGCCTGCTTTGTGGGGG  
TTGTTGAGAGTGTTTTTCCGTCAGATTGGCGGAACTGTAGATGATTTGAAGTCTGGCTAT  
GAATTAACAAAAACAGAAAAGCAAGAACTAGCAGATGAAAAGGACGAAGATGTAACGGAA  
TATGACGAACTGCCTCCAAAAGGAAAACATCAAGGAGAAAGTCAAAATGAGCCAAGCGC  
AAGCACTTAGAATAAGCTCAATACTTGATAATGTATTTACATTTTTACTACTTATCGGGT  
GCTTAGGGCTTTTTGTACAAATCTACAAGCAAAACGATAATTTATCGGCATTGCAAAACA  
AATACGATCAGATGGTTGTATTGGCGGACCAGAGAATGAAACGGATTGACGCGTTACAAG  
CTAATTTGTCTGACCGTAACGACAAAATCGAGTTACTAATGCAAGCTCAAGAGGAAGAGC  
GTAAAGCAAACGGGGAGAGAATAGATGCTATCAGAAAAATCATTAAAGGAAAACCGTTGCG  
TACGCAATAGCGGTATTAGTGGCGACGTCATTAACCGCTTGCTCAAATCTGAATAGCAAC  
AAGCAACGAATTAAGATTGTGCGTGTATCAATCCCAGATGAATTATTAAGACCATGCCCC  
AAACCAGCATTTAGGGGAGATAGTGCATCAGATATTGCGGTCTACGCAGTTAAAGTGACA  
GACCAGCTCAAAATATGCAACCAACGCATTAATCAGATTAATCTTTTGTCCGGCAAAAT  
GATTACGAATCACCCTTAAAGATGGTCACAGTGGCGAACAGGGAGGAGGTCGCGAGACA  
GAAAGTATTGGTGTTGGTGTTGATGGCTAGCTAAAAAATGTAATTTTTTCACACGGAAAGT  
GAAATTAACCTAAAATAAACGCAATTTTTGAGGTCAAAAATGTTTATCACACAAGCTAAAT  
TCAAACCTGTTTTTCCGCAAGCGGTTAAAGGTATTTATCCGACAATTGCGGCCTACGCCG  
AAGAGTATGGGCTAGATACAAAGCAAAAAGAGGCAATGTTTTTLAGCGCAATGCGGTCATG  
AAACGGCAGGCTTTACCCGCTTTGCCGAGAATCTCAACTATTCGGCTGACGGATTGTTAA  
GAGTATTCCCGAAATACTTCAACAAGCATAACCGCACAGCAATACGCCCGCAAGCCTGAAG  
CAATCGCTAATCGCGTTTACGCAAACCGAATGAACAATGGCGATGAAGCAAGCGGAGACG  
GCTGGAAGTATCGCGGGCGCGGAATAATCCAAGTGACCGGAAAGAAGAACTACCAGGCTT  
TCGAGTCTTGGGTTGGGGAAAGAGTTACTCCGGAATCATTATCCAGTGACATGGATTTAT  
GCGTATTAGCAGGGTTTTGGTACTGGTCTGTAAACGGTTTTGGACAAAATCTCCGATATTG  
TCGCTGTAACCTAACTTATTAACGGTGGGACTAACGGATTAAGTGACCGTAAAGCGTTAT  
ACGTAAACTTATTGGGGTGATTATGCTTTTTATCAGCAGATACATCACGGCTTCATTAGG  
CTTCATTATTTTTGGGCTTGGGTGCGTGGTCTGGAGCCAATCAAACACCATTACTAACTT  
AAGAGCGGAGAATAAGACGCAGGCACAAACCATTAAAAACCAGGAAGAAGCTAACAAGGC  
TTTAAACATTGCATTGCAGCAAGAGCGTCAAGCGGTCATTGAGCAGCAACAAAAAACA  
AGAAATCGAAAGGGCGGCAAGTGAAAATGCGGAAACCGTTAAACAATCATTAAACTCA  
ACCTTGTTATCGTACTAAGCTCCCTCAGTCTGCTCTTGAGCGGCTGTACAAGTAAAGTTA  
CAACCAAGGCGGAATATATTTACCCGCCTCAGGCTTATACCGCACCATGCGCTAAGACGC  
CTTTTACCGGCGAGACATACGGCGACGCAGTATTACAGCTTGTCAAAGTGACAGCCGAGC

GCGATAAGTGCGCAGCCAGGTTGACAATATTAATAAGTGGATAGTCGAAAGTAAAAAGA  
AGGAATAAACGATGAAAACCGAAAAAATCGAAATGGCAAATAACAAAACCCACGGTGAGA  
AATTAGTAGGTATTGATTTCAACGTTGGCAATCGTGGCGATGTCCATGATTGTAAACGGC  
GTTTCGCAGAAGCTATTAATCACTTGGAAACGCACAGAGCGGAAGCCTTTGAACATGGCA  
CGCTAACGGCAGATAAAGAAATGCTATTAGATGAAGCTCAAAGCGAATCATCGACGCAC  
AAATGTGGGCGGTCAAGGCCATTACTTGGGGATTGTAAATTTAATCAAACAATAAAGGCG  
GTCAATAACGATCGCCTTTGTTGCATATATGCTACATATTTTAAATCTAATTCCAATGTT  
GGTATCAAAAAATCTCGGGATTATATTTAAGATATGTAATGTATATATGACAAATCAACT  
AAAAAGGATTAACCATGAGCAAAAAAGACGAGGTTAAATCCACGTCTAGGCGTGGTGAAT  
CTAAATTAACATAAAGCAAAAGCAATTCATTGAGGAATACCTCATTGACTTAAACGCAA  
CTCAAGCCGCTATTCGATCTGGGTATAGCAAAGATACTGCGAAAGAGATAGGTTACGAGA  
ACCTGACCAAACCTTACATTCAGCAGGCTATTGCAGAAGCTCAAACAAAAGGTCAGAGC  
GAACTCAAATTAAGCAAGATGATGTTATCCGAATGTTGCTTGAAAACATAGAAATCGCCT  
CCGGTAAAAAAGCCGTGATCAAGACCGAAATAAGAAAATCGGAAGACGGTCAGCTTGTGG  
GCGACGATATAGCGCAATTCGTTTATGAATCATCTAGTGTGAATAGATCTTTGGAGTTGC  
TTGGTAAGCATTTTGGCATGTTTAGCGAAAAAGTGGAAGTTTCGGGTGATTTGCATATTG  
AACACGAAACGAATTAATCTATCGGGTTTGGATATTAATGAACTTGAGCAGCTTGAAA  
AATTACTCGAAAAAGGAAATCCTGAACAAGATTAGGATTGAGAAAGCCAAGAAATCATT  
ATGCACTTTACCACGCAGACAAAGCCTGATTTTATTACCGGTTTCTTTAATATTCTGATT  
GCACAAGAGCTGCAAAAGTTTTATCAAGATGTGTCGACGGCAAGCAGCCCCGATTAATG  
ATATATGCGCCGCAAGAAGTGGGAAAAGTGAGTTATTTAGTCGCCGTTTTCTGCGTGG  
GTGTTTCGGACAAAACCTGAACATAAATAATCGCTTGTTCCTATTCTGCTGATTTAGCA  
AGTCGCATGAATCTCGACGTACAACGAATTATTGACGATCCAATTTATCACAGCATTTTT  
CCCAATACGGCGTTAAACATTA AAAACATTGCCACTATCAGTGGCAAACCGCTTCGTAAC  
AGTGAAATTTTTGAAATTGTTGGGCATCTTGGAGCATAACCGTTCAGCCGGTGTAGGTGGT  
GGTATTACAGGTATGGGGGCGGATATTGCAATTATTGACGACCCGGTAAAAGATGCGAAA  
GAGGCTAATTCGCAAACGGTTAGAGATAGTATTTGGGACTGGTACACAACACTACGCTTAC  
ACGCGTTTATCGCCTAAAAGCGGTGTTTTATTGGGCATGACGCGTTGGCATGAAGACGAC  
TTGGCAGGTAGGCTAATTAAGAAGCTGAAAATGGTGGCGACCAGTGGAGGATTGTAA  
TTCCCCGCGATTGCGGAAGAAGATGAAGAATTCGTAAAGAGGGGCGAGCCGTTACACCCG  
GAACGATTTGATTTAGAGCGACTAAATAAAAATACGTCAAGCGGTTGGTTCTCAAGCATGG  
AACGCGCTTTATCAGCAACGCCCATCAAACAAAGGGGGCGGTTATTATCAAGGGTTCTTGG  
TTTGGCAGATACAAAGTTCCACCGATTATCAAAGTCAAGGCAATCTACGCCGATACCGCG  
CAAAGACAAAGCAGCATAATGACTATTCGTTTTTCATCGTTGCCGGCAAGGGTGCCGAT  
GGGAAAGCTTATATTCTCGATCTGATTCGTGGTAAATGGGAGGCGCCGGAGCTTGAGCAA  
ACATTA AAAAGACGTTTGGGCAAACATAAAGCTAAAAAAGAACTGGCATTCTTACCCGC  
GCGAATGTAGAGGATAAAGCCAGTGGCACAAGCTTGATTCAAACATAACGCCGCAATAAT  
CAAATTCGATAACGCCAATTC AAGTTGATGCCGACAAATAACGCGCGTGCTTGGTGT  
CAGGGCTACATTGAAAGCGGTTATGTATGCTGCCTGAAAGCGCGCCTTGGATAGCTGAT  
TTTATTAATGAATGTGAAGCCTTTACCGCAACAGATAGCCACGCTCATGATGACCAAGTG  
GATGCTTTAGTTATGGCGATCTCGGATATTTTAGGTAAACCAAATCACTACTGGATTTA  
TAACATGAAATTTTTTGACGGCATTAAATCGCTTGCGCTGAAACTGGGAAGTAAGCAAGA  
GCAGACGTATTATTCGCCTAGCTTGAGTTTACTGACGATCTGGTGAATTAGAAGCCCT  
TTGGCGTGATAACTGGATTGCTAATAAAGTTTGCATTAAGCGCCCGGAAGACATGGTGCG  
TAACTGGCGCGAGATTTATTCAAACGACTTAAATTCAAAACAGTTAGATTTATTCACAAA  
ATTTGAGCGCTCACTCAAATTCGCGGAAACACTTACTAAAGCGCTTCAATGGTCAAGCCT  
TTACGGTTCGTTGGTTTGTGGTTGTAAC T GATTTCGCAAACACTAGCGCGCCGTTAAA  
ACCGACCGAACGTCTAAAACGACTGATTATTTT GCCGAAGTGGAAAATCAGCCCGACCGG  
CACTAAAGACGATGATGTGCTTTTCGCCTAATTTTCGGCCGATACAGTGAATATTCAATCCT  
TGGCGGCAGTCAATCAATCACCGTCCATCACTCCAGATTAATTATCCTTAACGCCAATGA  
CGCGCCGTTATCGGATAACGATATTTGGGGCGTGTCCGACCTGGAAAAAATTATCGATGT  
ACTGAAGCGGTTTGATAGCGCTTCAGTGAACGTGGGCGATCTGATTTTTGAAAGCAAAT  
TGACATATTCAAATTCGCGGGGCTGTCGGACAAAATCGCCGCGGCATGGAAAACGAAGT  
GGCAAGTGTCAATTTCTGCGGTGCAAGAGATTAATCTGCGACGAATAGCCTGTTACTTGA  
CGCCGAAAACGAGTACGACCGGAAAGA ACTGACTTTTACGGGCTTAAAGACCTGCTCAC  
CGAATTTCTGTAATGCGGTAGCGGGTGCAGCGGATATGCCGGTAACGATTTTATTCGGTCA  
GTCCGTTTCAGGGTTGGCAAGCGGCGACGAAGATATTCAAAAC TACCACGAAGCCATTTCG



TCGCTTACAGGAACTCGATTACGTCCAATCTTTGAGATTATCGACCCGCTGATTTGTAA  
TGAGCTGTTTCGGTGGGCTTCCTGCCGACTGGTGGTTTGTAGTTCGTGCCGTTAACTACGGT  
GAAACAGGAGCAGCAAATCAATATGCTAAACACATTCGCCACTGCCGCGAATACGTTGAT  
TCAAAACGGCGTGCTTAACGAATATCAAATAGCCAACGAATTGCGCGAAAGTGGCTTGT  
TGCTAATATCTCCGCCGAACACATCGAGGAACTGAAAAATGCTGATGAATTTGCCGGAAA  
TTTTGAAGAGCCAGAAAAAATGGAAGGCGCGCAAGTTCAGAACAGTGAAGACCAGTAAAC  
GAACCGAACTTTGGTATAGACAACAGCTTAAACAATTCGTCAAACCATGACGGACGACA  
TAGAAAGAGCTTTGCAGCAACCGCAAGGCTCTTTTTTATGGACGACGCCGAGGGATTTA  
AGGCGATTAGTGCGAAAGCCTTGTGGCATATTTGGAAAAGTACGAAAAAACCGACCGCA  
CTTACAGGCTGAAAATATAGCACAGGGTTTTGTTAGTTCGTGGCGACGCACAAAACCAGG  
CGGAAGTATCAACCAACCTGAAAAATCAAACAGGCGTGGATTTGGCGGGATATTTGCGCA  
ATAGCCCGAACATTGCCGAGAAAGTCAATGCGTTGACGATTGATAATGTTCAACTGATAA  
CCAATATAAGCTCACAATATTTGGATAAGGTTAAAAGTGCGGTACTAGAGCAATGGTTA  
GCGGCTCTTTAAACAAAGATTTAGCTGCGCAAATTAAGGCCATTGGGCAAAAAACCGAAA  
AGCGCGCTGCATTTATCGCCCGCGACCAATCTTCAAACCTAACGCCGCATTGACGCAGG  
CACGCCATGAAGATTTAGGTGTTAAAAAATATATGTGGAGTACGGCGGGTGTAGAGCGCG  
TGCGGGATAGTCATGAGGAATTAGACGGTAAAGTGTTTAGTTATGACAAACCTCCTGAGG  
TTGGCAATCCGGGTCATGATTTTAATTGTTTTCTGGTCAATCAGA ACTTAAAGGTCTTC  
CACGTCCTGAGAACTCTACCGCAGATGGTATAGCGGTAAATTGACCGAGCTCGTTACGG  
ATAACGGTACAGTCTTGCTTGCAGACCTAATCACCAATATTGACGAGTAATGGAATTA  
AATCTATTGATTCCGGTTAACGTGGGTGATTATCTCGCTTGCGAAATTAAGCAA ACTTTTCG  
ACACAGTCAA ACTCAACGGCAAGA ACTTGATACCCACGATTGAACAAGTTTTTAATTCTT  
TGCTTCTGAATGGCGTTAGAACTTCTATATCTTCCAGTAAAAGCGGTAAGTTCCACGGCG  
ACTTTTCCGATAGCGAAATCGAGATTATATCCATCGACAGCTTTTTGATAGATGTATTGA  
ATGCCTTGTTTATCAAGAAATTGCCTGAACTCGGGTTCACCAATGCCGATATGGTAATTT  
GCAAGGCTTTGTTCTCTACTGATAGCCATTTGATCTTCTCAAGTGTGCTTCTGGTTCGA  
CCGGTAGCAGCTTTATGAGCAGATTCAACTTGCTTTGTTCTTTGCTCGTCGCTCATTGA  
CTCCACTTGAGCTTTTCTGCCTCGGATTGGGTGCGAATATTGGCATTATTGGAAAGCAA  
TACCTGCGAATAACATTTTCGAGAGACGTTGAAATGTTTAGCAATCATATTTTCGCTTGTG  
CCGCTCTCATA CATGGCAAGGATTT CATCAACTGGCAAAGAGATCGCATTATGTCTTGG  
TAGCGCCCAATTTTGGACACCGTTACACCGATAGCTTTGAAACGCTTTCTAAGCGTCTCT  
TGTTTACAACCAATAATAGTGCTAACTTTGGCAACGCTCAATCCTTGGGCATAGAGTTTC  
GCCGCGTGGTTAATAAGGTCGTCACTCAAGCGTCTTGTCATATTTATAACCTCCAAACTG  
TTTCTGGTTATTATAACATAAATTCCGGTATTTGTAAGCAA CTGCCGGTGGTGGCAATTC  
CGGTGTTTCGACGAGGCGCAGTCGAAAGCTAAAGCGCAAGAGACACTATCGGAACCGGTAA  
AAGAGAATTTGACGCTTTTCGATTGATAAACTTGTTGAAAAATCAAAGAAAATAGAACAGA  
CAATTACGGCAGATATTAACAATATCACCATAAAAGCAGGTGGTAAACTTGTCGGATTAG  
AAAATCGTCTAAAAACTGCGCCTTCAATAAAGAGAAAAATTGAAGCTGAGGTTGCAGATG  
GATTTTCCAAGTCGCTGTCACTGAATAAAATTGGTGATGCCATTCCGGTACACGACAGTTT  
TCAAGGAAGGGGATTTTGTACTCGCTATAAAGCAATGCAGTATTTGTTGGCGATCAAGG  
GGTATAAAACTATCATAGTCAAAAACACTTGGAAAAATGATAGCGCATATACAGGCGTTA  
ATACATTTATCCAAAATGAAGATGGTGATGTTTTTGAATGCAATACCATACACAGCAGA  
GTTTTGACTTAAAAAATGGTTTATTGCATAAAATCTATAAGCAATTTAGAAATCCAAAA  
CGCCATTCCACGAAAAAGAGAAGTTATTGCTTGAATGCGTAAGCTAAGTAGTAAATTA  
AGGTACCAAAGGTATTGAACTTATTGAGGATAAAAAATGAGTTTTCAATATTACTTAGC  
AAACATTGGCGAGAATCGACAGAACTTATCAGAGGAAACCTTCTGATTTATTATCTTT  
TTCGGTATTTGAGCCAAAAAATTAGAGTGGGATTCCTCACGAGGTATTTTCATGGGCTGA  
GCGCTTACTTGAAGTGGTTTTAGTGATTTCAAGGTTATTTCCGAAAGTGACGCTATTCG  
ATTTATGAGAACTGATAATGAATCTATCAACAAGAGCTGAATTGTTTCGCGAAATCAATC  
CATCATAATCAGGTGGATAAGTAGTGTA AAAGGTTGGTTATTTGGTGTCAATCCTTCTCG  
CGTGAAGCCTGAAATCAAGGCTAAACTCATTGAATATCAAAAAGATTGGTACGAAGTACT  
TTGGGATTATTGGAAGCTTGGTATTGCTAAGTAGGAAGATATTAGACAGCAACGAGAGGT  
TCTGGAAGAAAACGAGAGTGAATCTAAAAACGAGGTAGTGAAGCAGCTCGCGCACTGCA  
AAAGCGAAAAATGGA AAAATATACCTATCAAGAAATTGTGGTGCGTTTAAACGCAAATGGA  
GCAATTGAGCTTTCCGTTTCAAATTA ACTAACCGCTTACAGCAATGTAGGCGGTTTTTTA  
TTGGGGTAAATAATGAAATTCACAGATAAAACAGCGCAGGCAAAAACGCAGCGTACCATC  
ACCAAGGACGGTTTCTTAGTTGTGCCGGCAACCATTTCCAAGGTTGGCGTGTTTACTAT

CTGGCAACCGAACTCGGCTTGGGAAGAAGAAGGTATTAAGAAAGTCGCCCGAACGGAGAAA  
TCTTTGTTTGGTGACGAAACCATTAAGAGTTTTGAAAATGCCACGCTGACTATCGGACAC  
CCGGAAGACGGCGTAAATGCCAAAACTGGAAACAACTTTCAGTTGGTGTGGTGCGCAAT  
GTGAAGCGCGTTGGTGATGAACTGACAGCGGAAGCGTGGATTTATGACGAAAACGCGATT  
AAAACCGTGCAGGAACAAGGCGTTGAGCAATTGTCTTGCGGCTATGACTGCGATATTAAG  
CTGTCAACCGTACAAGATGCAGATTTTGGAGATGTCGCCGATGATCGGCAACCACGTAGCG  
ATTGTGGCAAAGGGTTCGTTGCGGTGGAGGTGTA AAACTTGCCGATGAGGATAAAACCATT  
ATGGGTAAAACCGCAAAATTCCTCGATGCGTTTTTAGGTGCGTTCGGTATTAAGTTATCG  
GACGAGCAGAAAAACAATCGAAGATGAAGATGAAGAAAAAAAAGGCAAGGATGGTGAA  
GGCAAACCGGAAGGGGAGAAAAAGCCGACTGAGCCTAAAAACGATGAATCCGATCCGAAA  
AAAGAAAAGGAAGACAACGTGGACAAAGAAGAATACGAAAAAAATTAGCGGCAAAAGAC  
GCTGAAATTCAACAGTTGAAAGACGCACAAGCGAAACAGGAAGCAGACGCGAAAAAAGCT  
GCCTTATTAGCTGACGCTCAAACCGTTTTCAAAGATGTGAAGTTCGCTGATAACGCAACC  
GTTTCGTGAAATTCAAGAAAGTGCGGTAGTGGCCCAAGGCATTTTCACGAAAGACGAAGCT  
GCTAAGTTATCCGATGCGGAGATTTCCGGCGCATATCAAACCTGCAAAGCGGTTGTGGCG  
AAATTGGCTGATGAACGCAAATCACTTGGTAGTATTTTGCTTGGTGACGCTGCGCCAAAT  
AAAGCTGCGCCAACGATTGACTTCAATAAAAATTACAACAGTTAAGGAGGGTGACTAAAT  
GAGTTACGCTTATGAACAAGCGCCTGCGCGTGCGGGTGAGTTAGGTAAGGGCAACCTTGC  
CAGTGCAAAAACAAGTGCCGAAATGGTTTCTGGTGGCGCATTAAAAGCAGGGTTATTCGT  
CGCGTTAAATGCTGCCGGTGGTGTA AAAAGCCTTAGCAGCAAAAACCTGACGTTATCGCCGG  
TG TAGTTTTGGCAAGCCGAATCCAAGACGAATGGAAGGAAGGTGAGTTGGTAGATGTCAT  
GCATATTGCGCCTGCCGACGCAATTTGGGTGATTGTGGCAGATGGTGA AACCGTTGCTCG  
CTGCGACAAGGTTTATGCTATAGCCGTAGAAAATGGCAATAAAAAATCAGGCACAATCCA  
AGGCAAAGCGGACGCAACCAACGCGATCGCAACTGATTACAACGTAATTGATGTTAAAGG  
TCAATTAGCGTTAATTACCAAACCTTTAAGGAGTGATCCAATGTCATTATTGGCTTATGTA  
AAAAATGGCTTAACCGCCGTAAGTAAGGATATTGCAGAAACAAAATATCCTGAAATCGTC  
TTCCCGCAATTTGTTTATGTAGATCAGCAAACTGCGGTAGGCATTACCGAAAAACTGCAT  
TATGGCGCCGATGAACACGGTTCCCTTGACGATGGTTTGATTACCGTAGGCACAAGCACC  
CTTGATCAAGTGGAAGTAGGCTTTACGCCGACCCGCTTTACATTGTACCGTGGGCGAAA  
TCCGTAACATGGACTAAACCTGAGCTTGAGCAAGGTA AATTATTGGGCTTAGCGCTGAAC  
ACCGCAAAAATCATGGCATTAAATAAAAATGCACAACAACTTTGCAAAAAGTCGCGTTC  
TTGGGTGATGCCAAAGATTCCCGTTTAACCGGTTTGCTGAACAACAAATCTGTGGAAGTG  
TATGCGATCAAAGGTGCTGCACAAAACACCAAAGTTCAGGCAATGGACTTTGATAAAGCC  
GTGGCTTTCTTCAAAGAAATTTTCTTAAAGGCATGGAGAAAACCAAACGCATTGAAGCG  
CCGAACACTTTCGCCATTGATAGCCTTGATTTGGCTCACTTGGCATTGGTGCAACGCGCA  
AACACCGACACTACCGCGTTAGAGTTTTTA ACTAAACATCTTTCTGCGGCAGCCGGTTCGT  
CAAGTTGCGATTAAAGCGCTACCATCCAATTACGGTACTCGCGTAACAGACGGTAAAACCT  
CGCGCGATGGTTTACGTCAACAGCAAAGAACACGTTATCTTTGACGTGCCGATGTCGCCA  
ACTGTATTAGACGCACAGCCTAAGGGCTTATTAGCCTTTGAATCAGGTTTGCGTATGGCA  
TTTGGTGGTGTAACATTCATGGAGCCTGATTCAGCGCTTTATGTCGACTACTAAGGGGTG  
AGTTATGCCATTAACCGAAGATTTTTTATTGCGCTATACTGAATTTGGAAAGACCGATGC  
AAAACGTATCGGTCTTTTTCTTTCTGACGCACAGGCGGAAGTAAGCAAAGTTCAGTGGGG  
TAAATTATACGATCGCGGTGTAATGGCATTAAACCGCGCATTGCTCAAACCTTAGTGCGGA  
CGCAGAAATTAGCGGAGGTGCCGCAAACCGTAATCTCGCAAGCGAAAGTGCGGGCGAATT  
GTCGGTGAGTTATACGGCACCAATTTCCGCAAATGGTTCTGATGATTTTTATCAGCTTAC  
GGCGTATGGGCAAGAGTATTTGCGCTTGCCTAGATTGATTGGTGTAGGCGTTATGGTGGC  
TTAAATGGCGGTA ACTGTAACGGCTAATTTACAGCGCGGCGAAACA ACTGATTGAGCAGAT  
GAAGTCGCTAAAAGAAAAGGCGGTTTATGTGGGGTTCCCCGCAGAGTTTGATGAGAAGGT  
AAAAGGGAGTGAAAACCTTAAATCTCGCTTCTTAGCGGCGGTGTTGGAGTTCGGTAACGA  
ACATATTCCTGCCCGTCTTTCTTCTGCGCCAGACGCTTGAGGAAAATCAGGAAAAATATAC  
CGCACTTTTTATCCAATGGTTCGATCAGGGTGTACCTGCTGCGCAAATCTATGAACGATT  
GTCCGTTATGGCGCAAGGTGATGTGCAGATGAATATCGTCAAGGGTGAATGGGTAGCAAA  
CGCAAATCAACCATTAGACGCAAGAAGTCAAGCAAGCCTTTAATTGACACAGGCAAAAT  
GCGCCAATCTGTGAGGGGTATTGTCAAATGAGCCTAATTAATCAATCGGGGCGCTTTTTA  
AATAGCCGATTTTCGTCAGCAAATCACTGTTCAAAGCAATCAGGATCGCATTCTGCAAGT  
GGCTTTGATGTGAGGTATGAAAAGCAACAAATCACCGCGATTGTAATTCCTACATCGCCT  
AACGATGTTTTGCTATTGCCGGAAGGTGAGCGCTATTTGCCGCTATTAAAGTTTACACG

CAACAGCAGCTCAATATCGGGTACCTGGTGGACTATCGGGGGCAAACCTACAAAATCAAA  
ACCGCAGCAAACCTGGGGAGATTATGGATACTACAACAATATCGGGGTTTCGACATAGTCAG  
ACTGCGAAAGTTGATTCAACAGGCTTTACAGTTACCTGATGGTGTGGTATTGGTGGGTG  
GTTGCTGAAAATCCGTTAAGTGCATTTATTACCGTAGATGTACTGATGAGCAGTGA AAC  
GGGTATCGCAAGGCGGGATTTTCGACGGCAAGCGTGAGAGGATCACCATGTCAATGCAAAA  
CACGGTAAGTTTTTCTGCTTTGGCACAAATGCCATGGCACAGTGTTACAAGCTGAAGGC  
CATCTTGCAAAGTTCTGTGATACTGCAAGCCTTAAAAACAATGAATGTCGGCATTGTGAG  
CTTCTCCGATGTGCGCAACCTCACGGCAACCATCGGCTCCGATTATGAAGAGCGCGGGCA  
GTTTGACGCGGTGTTTCAGTCATCATCATATCGTCGATACGCCGCTTGATCCGATTAAGCG  
CGTAGAGCAACGAACAAATCATTAACTCAACAAATAGGAGAATAGCCTTATGGCATTAT  
CTATTTTCGCATATTGTCAATGTACAGTTAAACACGGTGCCGAAATCTGCTGCACGAAAAT  
CATTCGGCATTGTGCGGTTGTTACGCCGGAAGCGGGGCAGGCATTCGCCGACGAGAAGA  
CGCGTTATGTATATGTTGAAAATCAACGCGATGTGCAACAGTTATTCGGCACCAATTCAG  
AAACAGCAAAGCGGGCGCAACCGTTTTTTTTCGCGCAAAGCCCACGCGCTAAACA ACTAATCG  
TCGCTCGTTGGCAAAAATCAGCTTCAACCATCGAAGCAACCAAAAACACGTTGAGCGGTG  
CGACATTATCAGACGATTTGGAGCGCTTTAAATCTGTTGTTAATGGTCGTTTTTTCGTTAA  
CTATTGGTGGTGACGTTAAAAAAGTTGATGGGTTGTCTTTTGCACGCCTTGCTGATTTTA  
ATGCGGTAGCCACAAAATTCAGGAAAAATTGACCACACTTTCTGTTGCCGTGTGCGATTG  
CTTATGACGAAACCGGCAATCGCTTTATTGTCAGCGCAAATGTAGCCGGCGAAGATAAAA  
AAACCGAAATTGATTACGCCATTGATGAAGGTGGAGAAGGTGAATATATCGGCGCATTGC  
TTAAGTTAGAAAACGGGCAAGCGAGCCGTAAAGTCGGTAAAAATTCCGTATCCCTGAAAA  
AAGAAACCTTGGGCGAAGCGTTGTTAACGTTGCGGAAGTAAATAACACTTGGTACGGCT  
TCACCGTGGCAGCGCAATTAACCGATAGTGAAGTGAAGCAGCGGCGAAATACGCCCAAG  
CCAACACAAAACCTATTCGGGGCAAACGTGATACGCGCCGAACAAATTGAATGGTCTGCCG  
ATAACATTTACAAGAAATTGTATGATGCGGGCTTAGATCACACCTTAGCGATGTTTGATA  
AAAACGATATGTACCCGGTATCTTCGGCTTTAGCCCGTTTGTTATCAACCAACTTTGCCG  
CAAACAATTCAACCTTGACGCTAAAATTCAAGCAGCAGCCGACCATCACGGCGGACGAAA  
TCACCGCGACAGAATTTGCCAAAGCTAAGCGCCTTGGAATCAACGTTTATACCTATTTTG  
ATGATGTGGCGATGATTGCGGAAGGTACGGTTATTGGCGGTAAATTTGCTGATGAAATCG  
TGATCTTAGATTGGTTTTGTTGACGCGGTGCAAAAAGAAGTATTCGCCCGCCTTTACAAAT  
CACCGACTAAAATCCCATTGACAGATAAGGGGCAGGCGATTTTAATTGCGGCGGTTGAAA  
AGGTTTGTCTTGAAGGCATCAACAACGGCGCATTTCGCACCGGGTAAATGGACAGGGGCGAG  
GGTTTGGTAATTTATCTACCGGTGATTACTTAGACAAAAGGGTTTTATGTCTGGGCGGCGC  
CAATGGATACGTTATCTGACAGCGACCGACAAGCCCCTCGCGCAACACCGATTCAA ACTG  
CGGTGAAATTAGCCGGTGCAATCCATTCAAGCGATGTGATTGTAACTATAACCGATAAC  
CCCAAAGCCAGGACTATTCCTGGCTTTATTTTTTAATAAGGAAAAACCATGGCAGTTTTT  
GATCAAAAACAAGTTGTCGTGTTATTAGACGGCAAAGAAATCAGCGACTGGGCAGACGGA  
GCAGATGTTATTAACGCCACAAATCAGGTTGACGCTGGACAAATGGTTATTGGCGCAAAT  
GGTACGGGTGTTTTTATCGCCAATCCAGACCAGTCAGGCAAACCTGATGTTGAAAATCAAA  
CAACATTCTGAAGATAACGCTTATCTATCCAAGTTGTTAATCAGCAAAAAACAAGCATT  
AGGACCTTTTTGCCTATTACCCTCGCTATCCGCGACTTAATCAACGATGACGTGGTAACG  
GGAACCAAAGGCTATTTACTACGCCCGCGCCTTATATGCGCGGTAACGGGCATAATGCG  
ACCACATGGACCATTGTGTTTCGAAAAAATGACGATGAATCTTGAAAAAGGTGTTCAATAA  
TGGAACAAAGCAAACAATTTACGCTTGAAGACATCACCTATAACATGACACCGGCAAATG  
CGACGGCGTCATGGGCCGATTA AAAAATGCGCTGAAATTGGTGCAACACGTTGACTTAT  
CAAATATCGGCAAGGAAAAAGGCAATAATGTCGGCGCTAATATGTTGACGGCAATTCCTG  
CCAATTTAGGCGATCCAAGCATTAAAGCCTTGGAAGATATTGTCTTGAAACACACCTCCT  
GCGAGCAGGACGGAAAGCAATACCGCTTATCAGAACGTTTTGATGCGCATTTC AATCAAC  
ATCGCGGGCATTATTACCCTACTGAAAGAAGGTTTGGTGTATCAATTAGCCGATTTTT  
TTATCGGTGGGGGCGGATTGCTGAGTTCTATGCTTGCAAATCTGAATCAAACACAGTAAG  
CCGGTCTGATTCAAAGGTTGATTGGTTTATTTTTACACCTATTGTTAAGCGCTTCTGTAC  
GCTGCATGAATTAAGGTCGGTATATTCTTTAGCCGACCTTTTGTCTTTTCATGAAGTGAT  
TGTGGAGCTAAACCAAATGGAACAATCCAATGCTACTCAATGAACTACTTATTA AAATCG  
GCTTCGACGCTGACAGTCAGGCTATGCAGCAATTTGAACAATTGCTTAATACGCTTGAGC  
AAGGGGCGAATGGTGCTGCCGAACA ACTAGGTGATTTTGCAAAGCAATTGAAGATGTTG  
CAAAGAAGCCGTTGAGCAAGCAAAGGAAATGCCTGAATTCTCCGAATTTTTTAAGTCGT  
TAGACGATTTACAGGAGAAGACCAAGGATTTATCGCAAGATGAAGCACTTGACGCATGGG

TTCAGAAAATCCTTGAAAGTGACGAGCTGTTATCTGGTTTTGGGGAGGATTTCCACCACCA  
ATGCACAAGAGCTTGAACAAGGTTTGGTTTCCCTTGGATTGAGCTCGGAGGATGTGCGAAA  
AGGTTATTGTAAAACCTCAAAGACGCTATCGAGAAAAAGCAAAAAACCACCGAACACGACA  
CCAAAAGTACTCAAGAAAACACTGAAGCACAAAAAGACAATGCGCAAAGTGCCGGTAATT  
TAGCCGATAAGATGATAGCCCTTTGGGCGACCAAATACGGTGCTGATGGGCTGATTTCAA  
AATTCGAACTGCTCGGCATCAGTATCAGTAAAACCACATTGAAATTTGTGGCGTTTGGTG  
CGGCGTTTTATGCGGCAACCATCGGAGTAAAAAACTTTGTGCGATAATAACCTTGATGCC  
TGAATGAAATTAACAGCTTTCGGCGGTAAACAGGCGAAGCAGCAGACCAGATCTACAAAC  
TTGGTAAAGTTGCCGAAGTTAACGGATCTTCTTCACAGGCAGTGCAGGCGTCAATTGAAG  
GGTTGTCACGCACTATCGGTGAAGCGGGCGGCGGAATTGGTCCGCGTGCACAAAGTATTTG  
AGCAGTATGGATTAAGCGCTAAAAAAGCCAACGGAGATGTGAAAACGTCGAGTGAAATAC  
TTGGCGAAATCTCTGACAAGATGAAAAAAATGGGCGAGCAGGAGCAGATTGCTATGCTTG  
CCAAGCTTGGCATTGATGGTTCAATGATCCAGCTTTTTCGCTCTTGGTAATGATGAACTTC  
GCGAGCAAATCGAACTTGCTGACAAGTTAACGCTCGGTGTAGGCAATGCGGAAAACGCGA  
AAACGGCGGCGGCATTTAAAGACAATATGACGCAGCTCACGCAAGTTTTTACAGCAATGG  
GGGAATACCTGTCGTTACGCATTGCGCCCGGATTTCTCGCATTATTGAGCGCTTTACAA  
AATGGTTTTTCAGAAAACAATGATTTGATTAAGCCATTTTGAACGGCTTCGGCAGGGTGT  
TTTCATTCTTGTGTTGAGTTAGCTGGGGCAATTGATAATGTGGTGTCAAATACCATCGGCT  
GGCGTACTGTGATTTATACCCTGGGCGCGGCGTTGCTTTGGTTAAGTCGTGCGCATGATTT  
TAGCGTTTGCTACCAATCCTATTACGCTTGTGTTGGCAGCGATTTACAGCCGTCTTTTTGT  
TGGTTGATGATTTTATTGGATATTTAGAGGGTAATGAAACAGCCTTGGGTGAGTTTTGGA  
AACCTTTTAAATCCGCGCTTTTGTGGGTAAAAACCACATGGCAAACCTTTATCGATAATT  
TCACTGTAGATCCTATTGGTTCAACACTATCACTGGTTACCAATATGATTGAGCTGCCTT  
TTAAGCTCGGCTTGGCATTAGTGGTTGGTTTTGTGGAATTTATTCACTGGTCAACAGTTAG  
ATCTTGATGTGATTGAAAAGGGCTTCGCTAAAGTCACCGATTGGATTAAAAAACCGTTCC  
AGTCAGCCTTCGATTGGGTAAAGGGTTATTACGATGAATACATTGGTCCGATTATTGATA  
CGGTGAAAGATTGGTTTGGTTCTAGCGGAACTGGCAAAGTGAGTGAGAACACAAAAGCCT  
ATGATGCAATGATGTTTGACCCGAATTACTATGCGACAGCCCCGCAAGTGGCAGCCGCGG  
GATTGGGGCAGGGGACATCAAACGCGGATAACAGTATCAAAAACAGTAATAACAAGATCA  
CCATCACACAAAACATTCAAGGCGCGGACAATCCTAAGATCGTTGCGGATCAGTCTGCTC  
GTGCAATTAGTAATCAACTTTCGCTATTGTGGGGTAATCAATGTTTAATTTTGCACAGG  
TCTCTAACCGGTCAATTGGAACGATTAATTTGATGTAGTGACAATCGAAGATCATCAAT  
CTGATCTCTCCATTACCGAAAATCCTATTGAGTCAGGTGCGGAGATTGCCGATCATGCAG  
TGATTCAACCTAAACAGGTGACAATCAATGGTATTATGGTCGATCAAGATCACGGTGCTT  
TTGGTTTGAATGCAGGTTATATCGGTAATATCAGAGGGGGAATAGACTTCTTAAATAATT  
TACCATTGCCCCGCAAAGTGGTTACGCAGACCGTACAGACTATTGCAAAGTAGCGCGTA  
TTGTGACTATCGCTGCTAGTCCAGGTCTTAATGCTACAGGTCAAGCACGAAAACCTTGCTC  
CTTGGTTACCTGATTTTTCTGTGATGCATTTATTAGGTAACCTATTAGGTGATAGTCGGG  
TGCAGAAGTGCTATGCAGATTTAGTCGCTTGTGAGAAATCGGGCGAAACCATCGAGATTC  
AGACCGGCATCCACTTGTACAAAGATATGCTAATCCAATCTGTGGCGGTTTTGCGAGGCGC  
AAGATGGTAGCGCCACATTCACGATCACCGCGCGAGAAATCTTTGTTGTGAACACCGCAA  
CAACGAAAAGCGGGAAGACTACGACGGCAGGCAATAAGAAAAGTGGTCCGGGCGGGTTTCG  
AATCCGCCGCAAAAACGCAACAAGGCAATACACAGCCTGTGCGAAAAGAGCCGAAAAAAA  
AATCAGCGCTCTTGAATATCTTTTCTTAGGGTGGTTTAGATGATAATGCAACAAATTCCC  
GTAACACAATCACACACCAAGAACAACGTTTCGAGTTTAAACGGAACCAAGATTCGCCTC  
ACGCTTCGATTTAACAGTGTGGGGCGTTTTTGGGCAATGGATGTATTTACAGCCGGTGAAT  
CAAAAACAAATTTGCACAGGTCAAGCGCTTGCTTGGGCGGTTCCGTTACTTGTCCGCAGT  
ACGCAGCCTTATTTTTTCTTCTTGAAGATGAGAGCGGTGCAGAGTTAGATCCGATGGAA  
ATATCGGATTTAGGCACTCGTTGTTTTTTGTATATAGGTGAAAAGTCATCGTAAAAACGA  
CCGCACTTTAGAATAAAACAAACCCCGATAGCTGGTAACTATCGGGGTTTTTTCATTCCAA  
CTTTCCCAATAAAGAAGGAACAAATTTTGTAGTAAGTATAGCAAAACTAAGTTAAAAATCC  
ACTTAAAAGAGGGGTTATAAATGGAAACAAATGCAATTCTATTCTGCGCGGTGCAATCGC  
GTTTTCTATTGTTATTGTTGCCCTTGGATTGTTTGTCTTATGTATCACACCGTTAGCTAA  
TGTTTTGATTGAAGTTATAAAATAACTTTAAGGGGGATGCATGAAGCAATTCGGGGCGACG  
ATGGAACTTGACATAAGCAACGATCAGGAAACGTTGAGCATCGAACAATTGCGGGTGGC  
ATTTGAAATTGATAAGACTATCAACGAGAAGCCAAACCCGGCAAAAATCCAAGTCTGGAA  
TTTAAATCGAGATCACCTCAATCAACTTTTAAAGTGGTGCCTTCAAAAAGTGGCTTTATC

GGTTGGTTATGGCGAATTGCGCCAGATTTATTCCGGTGATATTACAAAAGCACGTGTATT  
ACGTCATGGCTTGGATTTTCGTGTTAACGCTAGAATGTGCGGACGGACATCAAGCCTATAC  
GAAATCTCGGGCAACAACGACACTTAAAGCGGGTGCAACAGATGAGCAAATTGTTCAAGA  
ATTACAGAAAACCATGCCAAAAGTGCGGACGGGCGCAATAGACATTCCGAATCAGCGTAA  
ACTTCTCGCGGGCGTGTATTAACGGCAACAGCCGGGATATTCTACCAAGATCGCGCG  
TAATAATGGGGCGAATTGGTCTATTCAGGACGGTTCCTTGGTTTTTTTGGCCGAAAGACAA  
GGTGTGAGTGATGACGCCGTTTTGTTGTCGCGAGGAAACAGGCATGATTAACGCACCGGA  
GCAAACCGATGATGGGCTTGAATTAACCTGTTTGCTTAATCCTGCATTGCAAATAGGTGG  
GTTAGTCCAGGTGGAATCAATCTTAGAGTATTTCAACGGCGAATATAAAAATCGTGAAGCT  
TGCGCACAGTGGAGATGGTATTGGCGGAGATTGGAAAAGCAAACCTCACCGTGATTGACGG  
CAAGTTCAAAAAAGTGGA AAAACCGAAGAAAGACAGTAAAAAGGATAAAAAATGAGTTAT  
GACCAATCGCTTGCTACCCAGAAAACGGCGACAGATCAGCAAATCCAGCAAGATAGGCTG  
AACTTACACACCGCTTACC GGCTAAAGTGGTCAGCTTCGATCCTGCAAAAACAGACAGTT  
ACCCTTGCGGTGCAAATTA AAAATGCAACTTGCAGACGGAAAGCGGGCGTGACATTCCTCCG  
TTGGTTGATGTGCCAGTAAGTTTCCCGCGCGGAGGGGGCTTTGCAGTGACGTTCCCACTA  
CAGGCTGGCGATGAAGGCATTGCTATTTTCTCCGAACGTTGTATTGATGGCTGGTGGCAT  
AGTGGCGGTGCGTCGTTGCCACTAGATTTTCGGCTGCATGACTTGTCTGATGCTATGTTT  
ATCCCGGGCGTCTGTTCCGGTGCCGAAAGCGATTAATGGATTTTTTACC GGCGGTTTATCC  
ATGCAAACCTTGACGGTGGCACGTATATTCGCATTGTGAACGGTTCAATCAAGATCAA  
GGCAATATTGAACACGACGGTAACACAAAACAAAAGGCGAATTACATTCCAGCGGGCGAA  
ATTATTAGCGATACGGACGTAAAAGCGGCGGGTATTTCCGGCAAGTCACATACTCACCGG  
GGCGACAGCGGGCGGAACAACAGGAACACCACAATGACAACAAGAGTAAGACGGCTGGATA  
AAAATCACGATTGGACGTTTGGGCAAGGTTTTTCGAACTACGCCACTGAATCTGAAGCTA  
TCGCACAGAATGTACAAAACCCGCCTTTGGTCGTTTGCCAATGACTGGTTTCTAGATCTGG  
AACATGGCTTGCCGTGGCTTGAACAAATGGGGCGCGGTGTGAATCTGGCGGATTGGGAAA  
TTAAAATAAAGCGGCATGTATTGGAAACGGAAAGGAGTGTCAAAAATCACCGATTATCAGG  
CAGATTTTGAACCCGATTTCGCGCAAACCTGACAATATCCATTGATTATCAGGACATTTACG  
GGCAACAACAGACCGCACGCTATACAGCTTAAAGTGCGGTGTTTTTTTTATGGGGAAATTA  
TAATGGCGAAGCTGATTCAAACCGGCATCCAGATTGAGCGATTAAGCGACATTATTACGC  
GCTTTGAAGAAGGCTTCTGCAAATTTACGGTCAAATATTGACCTTTCGCCCCGATACAC  
CGGACGGACAGATGGTTGGCCTATTGTGCGCAAATTAAGATGGATATTGAAGAAATGGCGG  
AGAATGTCTATCGCCAATTAGATCCGGACGTAGCAACCGGCGCATGGCTTGAACAACGCG  
TAGCTTATGCCGGTTAATGCGTCGCGCGGCAAGTTACAGTTATCTGCGCTCGGTAGTTT  
TAACCGGTGAACCCTAACACAGCTTTATGCTGGCATTGTGCTTTCAGACCCTCATAAAG  
TGCGGTGGGTTTTGAATGCAAATGTGCAGTTAGACAGTAACGGTTCGCGCGGGCGGATT  
TTCGCAGTGAAGAACTTGGCGCATTTAATCTTGCCAAGAACACAAATTTAACGATTGAGA  
CTGTGACGCTTGGGCTTAACGCGGCCACAACGCTTGAAAATGCGGAAATCGGCGTGGAAG  
AAGAAACCGATCAGCAATTACGAGAACGTTTTTTCATTAGTTCGAACCAAAAATGCGCAAA  
ATTCGGCGGACGCTATCCAATCAAAAATCGCCGCCTTGCTGATGTTAAACAGGTGAAAG  
TGTTAGAGAACAACACAAAACAACGGGACAAAACGGCGTTGAGCCACATTCTTTAAACG  
TTATTGTTGATGGTGGCGAAGATAATCAGATCGCGCAAGTGATTTACGAAAACAAGGGCG  
CCGGCGTAGGGTTGCAAGGTGGCACAGAAACGACTTTGACCATAAATAATGAGCGTTCGCA  
CATTACGCTTTGATCGCGTTGTCCAGGTTGATGTGCAGGTGTCTATGCGCTGTGTGCGGT  
ATGAAGATTTTACCGAAGTGGATAAAGAAGAAATTAAGCGACTATTATCTATCCAGAAGT  
TTGAAATAGGGCAGAATTTATCGTTATCGCGTCTTACTCGCCAATTAACCAGGTGGGCG  
GATTCTGGGTAAAAGA ACTGAAAATTGGACGCAAAGGGCAGGCATTA AAAAGCGGAAAATG  
TGGCCGTCCAGCCGCGTGA ACTGGCTCGTATTTTAGCGTCAGATATTACTATCGAGGTGG  
AATAATGGCTTATGCTGATTTATTGATTTGGCAATATCGCAATAAGCCGAAAGCCGTTGC  
CACTATCAAGCTGATAGAAAGCATTATCGCCCAGGGCTTTGTTGATTTGTATCAGTTGCA  
AGACGTGTTAAATATTGAAACAGCAACAGGTCATCAGTTAGATCTCGTTGGAAAGCACGT  
TGGACAAGGGCGAATCATTAAACGGGTATCAAATGCGGAAGTTTTTTCGGCTTCCGAGGGTC  
TACGCAAGCACTAGGGTTTAGCAAGTTAAGAAGAGGGGGCGGGCAATGGTATCGCAGACG  
CGACCCGCTGGCTGATTCGGTGCGATTATCCGATGAGGATTATCGATTTATGATCAAATG  
CCGAATTTTGAAAATATCAAACCGGCACGCTACCAAATATGATTGAGGCGTGCCGGTT  
TATTTTTGGGGACGGCTGCCGCGTCATCGATAACTATGACATGACAGTATCAGTATCAGT  
ATCAGTATCAAACCAAAAACATATCCGATTTCAAAAATTTGCAATCAATAATCTTGATAT  
TTTGCCGCGCCAGGCTGGCGTGCAATATATTTTCAAATTAGTGTAAGAGGTCATTTATGG

CATTAGTCAACAAACCGGACGAAAGCATTTTTTGCGTCATCTGCAAAACAGGGCGAAGTGG  
ATAATTTCCCGATTATTGCGCGGTTGGGGGATTACTTTTCGATCAAACGCAAGGCATTC  
CACCTATGGAGTGGTTAACTTTTTATTCAAACGGCTGGACGAAAAGCACGCCTATTTAA  
TGCAGCGCGGATTGCCGGAGTGGTCGGCTACACAAGACTACAATAAAGGTTCTTGCGTAC  
AGTTTGACGGCTTAAGCTATCGCGCACTGAAAGCAAACCAAAAACAACCAACCAAAATGAAG  
CTAATTCGCAATATTGGGTGCGTTGGGGCTTTACGCTAACTGAAATTGCCCGTGCGACAT  
TAACCAATACGGCTTAACTCAACTTTATACCGGTTACGACAGTCAGCGCGAGGATTTAG  
CATTAAACGCCTAAAACCGCATTTTTGCTAAAGCAGCTTATTGATTCCAATACAAGAATC  
TAGGTGATGTTATTCCGAACAGCAAAAAATCTGATGAAGTGAATAGTAACTCGTCTGATA  
CTGTAGCGACATCAAAGCGGTTAAAACGGCTTATGACAAAGGCGTTGAAGCGAAAACCG  
CAGCAGATAATGCACAACATACGGCAAACCTCTGCTGAAAATATCGCAAATAATGCTAATG  
ATAACGCAAACCGGCGTGTGTCAAAGAGCGGCGATACAATGACAGGCCAGCTTTCGGTTC  
CAAACATTACTAAGCACCACGGCACGGGCGGCTATCATAATCAATTTGACATGCAAG  
CCCCATTTTTCGTTGATGCGGTAGGTTATACACGCGAATCAACATTTTCATCCTTTTATAA  
AAGGCAAAGTTAGAACAAAAGGAGACTGGGGAACAGTCTTTTCGATAGGATATACGACGA  
AGCAAACCGGATATTACGAGAATGGTGAATTTGGACGCGGCGTTATAAATTTAAACGAAG  
ATAACGGAGCTTTTAAAACTGGGAGTTTGAGCATAACGGTACATTCCGGTTCGGCTGGTG  
ATGTAGTAACATCAACCGGCAGATCATTAAATAGTACAATCTACAAAGAAGGCAACCCAC  
ACGATATTGCACTGTCATGGTTAACAGATGGATTAAGTCCGCGTTGATACAACAGATT  
TGGGAAGAGTGGTATTTTCGACATGATTTCCAATATCAAAAAATCGGCAATTTTGAAATCC  
GCAGGTATCCAGACGGGACCATGATTCAAAGCTACATTATCTATCAGTACGACTTAAAAG  
ATTTCAATGATGAAAAATCATTAACTGGGCCAGGCATTTATCGACACGCCAATTGTCA  
TCCCATTTATTACCACAGAAGTTAATGATGCACATGATTGCGGTGTAACATTTTAACTA  
AATCCAATCATGCCACAGTATTTTATCGCGAATATGAACATGGTAGTCTAACCAGGGAA  
ATTTACGTATACAATTTTACGCAATCGGGAGATGGAAATAATGACAATGTACTACAAAGA  
CGTTTTCTATAACGATGAAAATGGTGGCTATGTACCGCAAGGTGCAGTAGAAATCACCGA  
ACAAACCTACCGCACTTTACTTGAAGGACAATCTGCCGGTAAACAAATTATTGCCGACAG  
TGAGGGCAAGCCAATTTAGTTGAACCACAGCCAAGTCATTTGCATGAATTCAAAAACGG  
CAAGTGGATAATTTTCAGAGAAAAATAAGACCGCACTTTTGCTGGAACAGCGTAAAACAAT  
TTGCGCCAAAATCAATCAACTGCGTGATGAAAAAACTGCGGGCGGGGTGTATGTGGAAAG  
TATCGGTAAGTGGTTCGATTCGGATGACAAAGCGCGCGCGAACGTCATTGAGCTGAAAGC  
AGCGTTTGATGTGTTGGGTGATGAAACGGTGCCGTGGACGACGTATGAAAATGATGTGGT  
CATGATGGACCACGAAAAAATGAAAGCGTTATTCAAAGAATTGAAAGATTCCAAGATGCA  
CAATCATCAAGTTGCAACAAAGCACAAATTAGCATTGGAGCAGTCAGCGGAGCCATTAAA  
CTATAATTATTCAACCGGATGGAGCAAACCTATGCAGATAAAGAAAATTAAAATTTGGG  
GCTACCATGTGGTTCGTGGCAATCGATCAGTTATTTAATGCGCTAATCGGCGGAGCGGCAG  
ACGAAACATTGTCAAGCCGCACTTACCGCCGCGCAATCCTCGCGGAAAAGCCTAAAAAGC  
GCTGGTGCCTTTGGTATCGCGTCATAAATGCCGTGTTTTTCGACAAAATCACTGCAAAA  
AGGCGTACGAAAGCGAAATTAATCGCCGACAATACTCAGGACTTTCAATAGCAAAAAA  
ACGGCGGGTAATGTCGTGAAGTGTCATTTTATTTTCCTCGTTTTATGAGGTTTGCATGTG  
TGTTGATGTGTGCCATTTTGTGCCATTGATAAACGGCTAACTGCTGCTATTTGCTTCTG  
ATGACTACGATTAATTTATAAGCAAGAGGCGTAAGGCATTGTTTTACAATGATTTATGTA  
TAGGCTTTCAAAT

>NewGenomeName\_270

ATGGCTCCGAACAAGACGCTGAGAAGGTTCTGCTGGACTCTTAACAACCTATACCGAAGAT  
GACGTCGATCAACTTCAGAAGGACCTCCCTGAGTTATGTAAATTTGCTATATTTGGTAGA  
GAAGTTTGCCCTACAACCTGGAACAAAACATCTGCAGGGATTTTGGTAAATATAACAACCTA  
GTGCAATTCGAGAGATAGAAATGCCAGGAGAGCCGCCCGACCCCGCTACGAGGGGGTCA  
CCCCTGGCCTCGCTACGCTCGGCCGGGGCCCCGACCCCTCTACGCGGGGGCGGGCTCCGT  
GCATAGTGTATAACATGTGTGTCTCATTTTCAGTAATCTGCAGCGACCCAAAAGATTCAA  
TAACATTCGCGAAATATTTAAAGGACGCGCGCACATTGAAGGAGCTAAAGGATCAGATCA  
GGATAATCAAAGGTAATGTTCTAAATCTGGTGAGGTTTGGTCACACGGAGAACCATGTAA  
TCAAGGAGCTCGAAGCGATCTCGAAGAGGTTGTTTCTATCATTAAAGGAGGAGAAAGAGA  
TGTTAAAGCAGTGGCCCTTCAGTGCCCAACAGCGTACATTAAATATTTTAAAGGAATTGA  
AACTACATTAGAATATATCATGCCACTCCAGAGCGAGATTTTAAAACAGAAGTGTACTT  
CTTCTGGGGACCAACTGGAGCAGGAAAATCCAGAAGTGCACGCGAACAAGCGCTCGCGAC  
TGGATTACGGGTATACTACAAACCTAGAGGAGACTGGTGGGATGGATACAACGGACATGA

ATGCGTCATCTTCGATGACTTCTACGGATGGATAAAAATACGACGAAGTACTTAAGATATG  
CGATCGTTATCCTTATCGCGTACCAGTCAAAGGTGGATACGAGAATTTTATTGCGAAAA  
AATATGGTTTACGTCAAACAAACCACTTGAACAAATATACAAATTTATTGATTACGAACC  
TAGCGCATGGAGAAGGAGATTGACTGTAGAACGAGAATTCCTTTATGAATAAAATCTTTAT  
TAACCCAAAAAATCTTTTGATTATAAAAATGTAACCTTTATTTCCGTTTCGATTTTCATAT  
TGCCTAATGTGTGTAGAACCCCTCTTGCTGGTCTGCGGACCATAAATATAACCCGCAATAA  
TGCGGAAGAGTCGCCGTATTTGAATTGAGTTCAATCCGCGGTGCGCAATTAATTTTCCCA  
TATTGGGGCGTCGTAATCCCAGCATAACCAGTAGCAGTAAGAACAGCAGGAACAAAACGC  
CGCACGGACCCACTGAGCCCATTATACGACTTACACTTGTCGATAGTAACGATCCCAGTT  
GAATTAATAGAAGTAGGGCCAGGCTTATGCCAAGGTGCTGAATAATATCTAGGTACCGGA  
GTAGTATCAGCAGCAACGTTAAATAAAGGGTTGACCTTGACTTTAACAGACCAAATACGA  
TAGGCTTCAAATAAATTAATAAAAGTGGCGGCTTCGGTAAAATCCGAGACAGCCGGAGAT  
ATTTGCAGTAGGTATCCAGTTTTGCCCTCTACCGGAGCAACGTATAAACTCTTCATAGAA  
ACCGTGATATTTCCCTGTCCGCTGACGTCTGACCTTGCGTAATCGTCGGCGTACGTGC  
CGAATTGCGCGTCGTTTTCGCCTTATCGGTGCGCGCATGCGCACTCCTCGGCGTCTGAAG  
GCCATCTCTGTGCTATGCACGGAGCATGTCTATATATAGATCGGGCGCGGAGTGGGGGA  
CCAATCAGCGTGCGTTACGGAGTGTACGAAGTGGCGGGTAATACTAGCCCGCCACTTCG  
TTGCCTATATAATCGCATAATATTCGTGCTAAGCCCAA

>NewGenomeName\_271

ATGGCAAACCGTACAGTAAGGCGTTTCTGTTTTACGTGGAACAACACTACGACGACTCTGCG  
TACGAAAAGTGCGAAAAGTTTATCGAAAAATTTTGCAAATATGGAATCGTGGGAGAAGAA  
TCAGCTCCAACCACTGGGACGCTTCACTTGCAAGGGTTCTGTAATCTACATAAGCCAACA  
CGCTACAGTACCATCAAGAAGCATCTCGATAACAGCATCCATATTGAGAAGGCAAATGGG  
ACAGACGAACAAAACCAAAAATACTGTTTCGAAATCAGGCATATTTTTTTGAATCGGGTATT  
CCAAACAAACAAGGGACACGGAATGATCTTAAATCTGTGGTGAATCAATCAACAAAGAA  
GGTGCTACGCTGGGAAATATTGCCACCGAACACCCTGAAATATACATACGCTATTTCCGT  
GGCATCCAACAACCTGCTGCAACTGGTACGCCAATACGTCAACGCGATTTCAAGACTGAG  
GTTTTTTTATTACTGGGGGCCGCCAGGATCTGGGAAATCTAGAAGAGCGCTTGAGGAAGCG  
AGGCAACTTGACGGAGAATCCATATACTACAAACCCCGAGGATTATGGTGGGATGGCTAT  
GAACAACAGCGCAGCGTTATAATAGACGACTTCTATGGATGGATAAAGTACGACGAAATG  
CTGAAAATAATGGACCGCTACCATAACAAGGTACAAATAAAAGGAGGATTTCAAGAATTC  
ACATCAGAAAAAATTTTTTATTACTTCAAATGTCGACGTTTGTGACTTATACAAATTCGTA  
GGTTACGAAACTGCCGCCTTTGACAGACGCATTACATTAAGAATACATGGATTAATTT  
TTCATAGCCTCTACACTCTGGGTAGGAGGATACGGAGACACATGTAAAGATGTTTGATTT  
GAAAAAATACAATAAACGTCCTCTACAACATTAATGTCGATGTTCTTCCTTCAAATTA  
CCCTCTCCCTGCCAAACAACCAACAGAAATATATCCTAGGCTCAAATTTTCGTTTGATCA  
TACGGCACAGTCGGTTTCCATATTATAGTATTCATTCCTCGCACAGTGACGTCATCAGGA  
CTGCTCTGAGTCCACGTATTACATGTAAATATCATTGACCACGTTCCGTCTGCCTATAT  
ATCTTAGCACGATCACTACTAATAACTTGATTAAGAAAGACTTCTTAGCCTCACCACCTTTG  
TGCCACGGCAATATACAATATGACGGAATAATTGTAGTATTAGCATTACTAACATTTTGC  
ATAGGAATTACACGAACTCGTTGTTTGATAAATTTGCAGTATTCAAATTCGGGGCAAGC  
GATTTATATTCAGGAAAATCAGAAGGAAGAAAGCTACACGAGTAAGTAGAAGTTGCATTA  
TTCGGAACTTCATATGTAGACACTTTAGTAAGTTTACACATAAAGGAGCCCTTAGAAAGA  
CGCCTACGTTTCCGATAAGTTCTTCGACGACGAAATCTCCGACGACGCCCCACGCGCCTA  
CGCCTATATACGGCCCTGAATCGCGCCATGCCTTTCACTTTTACGCTCGGTTAAAAATAA  
CTCCTCTCAGGCGGCAGACTGTTGCCAAGTGAACGTTGCGCCCCCCCCCTCGGCCGGGG  
AGCCTGCCCGGCCGGCCCCCGGCGGGGGGAGGGCGTGCGTGTTGAAACCTGTTTGGGCGG  
ATGTAGCGGCGGTTACGAAGTGACGGTTACGAAGTGACGGGGTAATACTATGCCCGTCAC  
TTCGTTGCAGA

>NewGenomeName\_272

ATGGCGAACGCAACCCTGCGCAGATTTGTTTTTACGTGGAATAACTATAACGCGGACGAC  
ATAGAAAAAGTTGTTAAGTTCATCAAAGAAAAGTGCAAATATGGAATAGTTGGTGAGGAA  
ATTGCACCTACAACAAATACACCACACCTGCAGGGGTTCTGCAATCTAAAAACACCTATG  
CGATTCAAAAGCATCAAACCTCATCTACACACAAACATCCACATAGAAAAAGCAAAGGT  
ACTGATCTACAAAATCAAGAATACTGCAAAAAAGGAAACAAATGGATAGAAGAAGGAACA  
CCATGCACCCAAGGAAAACGCACTGACTTGGAACCTTAGTAAGTGCCATAAACAGCGGA  
ACAAATACCCAACAAAAAATAGCTAAGGAATTCCTATATGCTACATCAAATACCACAGA

GGAATCAACGAATATCTCAAACATAACATCCTATTGAACCCCGCAAAGAAAAACATGG  
GTCTACTACTACTGGGGACCACCAGGCACGGGAAAATCACGACGAGCTCTGGAAGAAGCA  
TCCCAAATCAACAGCAATAGTATATACTACAAACCACGTGGACTCTGGTGGGACGGTTAT  
CATCAACAAGAAAATGTCATCATAGACGATTTCTACGGATGGATAAAGTACGACGAACTC  
CTCAAATAACTGACCGCTACCCATATAAAGTACAAATCAAAGGAGGATTTGAGGAGTTC  
ACATCAAACGCATTTGGTTTACAAGCAACGTAGACACCGATAAATTATATCATTTTTATT  
GATTATAATAATGCAGCGTTCGAAAGACGCATTACATGTAAAATTCACATTACTTAAATA  
TTCATTATTGATTGCCCTGTAAACCGAACAAATACATCAGTCTTTATATTAATGTAGTT  
GTTCTTCCAGCCATATCTGATTGTCCCTGAAACGCTACTACTCCGCAGCGTACACGTGGC  
AATGAATTCCCATTTTGATTAACCGTTCGCACATAAGGTTCGCCATTGAATTGCATCAACA  
TCCTCCGCAACTTTCCAGAAATGATCCAAAACAGACGTTAATAGTCCAATATTTGGTACA  
TAGGTCTGACTCATTACATGCGTTTGACGAGACATCTTTGACTTATCCATTGACAAATAG  
TTTTGAAAATTTTTAGGCAAATCCATAGCATAATGCCACGGTGTATGGCAAAGCAGGG  
ACAGACGACGTAGAATTATTAGCAACATTTTGTAAAGGGAACAACCTGTAATACGAACTTTA  
AGGAAGCGAACAAATTCAAAATTTTTTCGACAAAGACGTAAACTCCTTAAAATCATCAGGC  
ACAAAAGAGCCATCCCACACAGAATTTATATTATTCTAACAGTAATCGTAGCCACCTTA  
GTAAGTTTACAAAACATTGAACCCCTACGCGAACGAACCTTCCTCCTTCGGTTAGGAAAG  
TACCGCCGCATCCGACGAACCGCCCGCAACGGTTCGTCGGAAACGACGAAAAAACGTCTT  
AATCTTACCATTGCTCAAGGCCAACTGGATGCGCGGACGTTGCAGGGGCGTAGGCCTCCG  
CTACCGCTCCGGCCACAAGGTGTGTGTGGGGGGGCATTCTGCACAAACCTGTTTTACC  
CCTAACCAGTTTACTCAGCCTCCCTGCAACGAAGTCGGATACGAAGTGGCGGGTAATACT  
ATACCGCCACTTCGTTTCATACC

>NewGenomeName\_273

ATGCCTCGGCAAACAGTCAGACGTTTCGTATTCCTTGGAAACAACCTATCCTATCGAAGCA  
TACGACAAGTGCGAAAAATATCTCACCAAATTTTGCAAATATGGCATCGTTGGAGAAGAA  
ATCGCTCCGGAAACAGGGACGCCTCACCTACAGGGGTTTTGTAACCTACATAAACCCACA  
CGTTTTAGTACCATCAAGAAGCATCTCGATAACTCAATCCATATTGAGAAGGCAAATGGA  
TCCGACATTGACAACCAAAAATACTGTAGTAAGTCAGGCATCTTTTTTGAACGGGACAG  
CCCTCTAAACAAGGACAGAGGTCGGACCTTGCTGTGCTTAGTAACAAAATCTTGGAAAGGA  
AGTACTACAATACGAGATATTGCCACCCAACATCCTGAAACGTACATCAGATACTTTTCG  
GGCATTTCGAGAACTACAACGATTGGTCAACCCGATCTCTCCTCGAGACTTTCCCACACAA  
GTATATTACTACTACGGTCCGCCAGGAACAGGTAAATCCAGAACTGCTTTGGAAGAAGCA  
AAAAAAATTGATCCGACTTCCATCTACTATAAACACGAGGTCTGTGGGGGGACGGCTAT  
ACAAACCAGAAATGTGTTATTATTGACGACTTCTACGGATGGATAAAAATACGACGAACTA  
CTGAAAATTTGCGACCGTTATCCTTACAAAGTACAAATAAAAGGGGGATTTCGAAGAATTC  
AACAGCACACACATCTGGATTACTTCAAACGTCGATACAGATTTATTGTATAAATTTACA  
GGATATTGTAACGCTGCATTTGAACGTCGTATTACAATAAAAAAATATTTTGCTTAAGAC  
AGTCCATTTATTATAGATTGATTCCTCATTTCACATAAACATTAGTAACTATATTAAC  
CGCGTACTCCGACCAGTTGCTGAGGGATCACCCGTAAATCCTAAAGCGCCACAGCGAATC  
AAGGGCTGATCTTGTGCAGTTGTAGTCCATTGAACGGTAGGCTTCCAATTAATCACTGGA  
GCGGTAAACTCATTGACGAAGTATTTTGAGCTGGGGATATAGTATTCCGGCACAAAATC  
ATAGTCAACGGAACAGTTTGTGGACGAATCTTGGCCTTATCCCACTTAACAGCGTTCCA  
AAATCTTTAGGAATAGGTACCCCGTAATGCCAAGGGTAAATACAATACGAAGGCACAGAG  
GACGTAATTTGTTAGACACATTCTGCATTGGAATAACTTTTACAACACTTTTATTAAT  
TTTGTATCTCGAAATTAATTCGATACGAGTCCACTCAGAAAATGACCCAGTTGAAAC  
GAACAATCCCACGTAAGTATTGAGTTCATTCTGAACAACAATCGTATGAATTCGCGTAAAT  
TTAGCATAACAGATTTCCAGGTTTCGAATACCGGCCTTTACGTATCCTACGAAATCGGGCA  
CGGTACTTCCGCAACGGTTCGCCGAATGCGGCGACGATACTTTCTAACTCGACGATACGCC  
ATATGTAGAGGGGGAGCTTCCCTCGCTACCGCTCGGGACAAATATAACCCCCCTACTAAC  
AACCGGTTTCAACATGCTTTGTGTAGCGCTCCCCCAGCTCGCCCCCCCCCCCCCCCC  
TCCGGTACGCTCCGGGGGGGGGGCGTTCGCGCCGCTGTGGCGCGTGCAGCGTGGAAACGTGT  
TCAAGGCTGAAAGTGAAAGGTGGTTACAAAGTTGGGTTACGAAGTGGCGGGTAATACTAA  
GCCGCCACTTCGTTGTAACC

>NewGenomeName\_274

TTATTTGGCCGCTTCCACGGCCTTCATGAATTTAACGATTTGAGCGACCTGTTCTTTGGA  
AAGAGTACCACGTCGTCCCATGTATTCTGACACAATATGATAATTGGTTTCAAATTCAT  
AACCATTTTATCATCATTATCGTAAGCATTATCTTTAAGCTTATCGAAAATTTTAGCACA



CAATTCTAACTTCCTGTTTCAGGTCCTGTTATCAGCACCTGTGAATCGATTCCATCCCCA  
GCGATTATTTACTGTTGAGAGTTTTGCAAAGTCTTTACTGATTTCTTTGTTCTTAGAGCT  
AAAATATTTACTAAGGAAATTAAGCTCTTCATTACGAGTAATATGATTCAAATAAGGCTG  
TGCTCTACGACTTGGTGATACATACTCATCATAATCCACTTTATCAATTAGCGTAATATA  
GTCATTAATTGATTTTTTCGAACAAACATTCTACTTCACCAAGTTTACGAACTTTCTTAAC  
AATCTGCGGACGGACTACAGTGAACTCTTTAATACCTGACAAATCGGCAATACGAGTCAA  
GAAATTAGAATCATAGTTCAACCAACCTTTATCTGCGTCAAGACATTCAGCGTTAGAACG  
ATTACGAATTACAACATAACCTTGAATCTCATCAGCTTTACCGGCCGGAATAAAGAGATC  
TTCTGATACCCAAACATCGTTTTTCATTCTTAAAGAACCGATGAGCACTTGGGGATTAGG  
ACGAGGCTGCGATGAACGTTCTTTAACTTCAATCCATGGTTTAACTAATGCAAGAATTT  
AGAGGTCTTATAAAATTTAAGGCTATCACCAGCGAAAATAACCTTTAATCGTTCCAGAAG  
TTTCATTGCAACTTCATCTTCCGGGTTAATGAATAATACGCTACTACCCCGTCCGGAAGG  
AACCTTATCAACGAGTGTGATGCATCTGTGGAAGTCAAAGCATCGTTCAGAGCACGCAT  
CATTGGTACGCGGCCTTTCACATCGTCAATAACAATATCAATATGCTTACGACTAATACC  
TAGCAGGCTATTAATTGAAATAGTTGCAGACGAGCTTCCGCTTTCACGAATACGACGAAG  
ACGTGGGTCTGAAACGATATCATATACAACGCCAAGGTTGCACCATTACAGGTCCCATTTT  
AAAACGTTTGTACAACCTCAGAATAAGTTAGCTGTTCTTTAGAATATTTACAGTGATTCAAT  
ATTAGAACCAGCTTTTTCCATGTATTTACGAGCAGAGTAACCAAGAGAATCTATTTACG  
GAATACATGACGTGGATATTCACAATCAATCCATTTCTTAGAATCTTCAGCAAATAATTT  
TGCATCAATTTCTGCAACACGTTTATGGATAATTTGCTACTGTACGTTTATCAAATGACAA  
TGCTTCACGAGACGGGGCTACATCTAGTTCACCCATAGGGAATTTAATATAAGCTGTAGT  
GCATCGCGTCATCATCCATGTTTGTCTTTAATAACACTTCCGATTGGATATACAATACC  
ACCATAAACAGCCATGATATTACCACGTTACCCCATGGAGCTTCCCTGGCTAAATAAAC  
ATCATCGAATTCAGGGAAGTATTTGATATCTTTAACACCACGAACTTCTGCAATATCGCC  
GAGAGGACGCATAACATAAGCAATTTCCGGATGCGAACTTTTCAAATCTTCTGGGTTAAC  
AGGCACAACACTTCAACGCCGGTCCGGTTCATCAGGACCCATCTTATCTACAAAGGTTCG  
CTTAATTTGTGGACCTGTGTCATCTTGGTAGATTACGTAACCACGAACTTCACCATTATG  
ATAAGAAGTAATGTTAAACGTATCAGTATATGCTAATGGAGCTTTAGAACCGAGCCCGAA  
TCCACCAATGAAATCGTTACTCGATGTTTTAGTTGAAGCAAATATGAGTTATAAATTC  
TGGCTCTTCGTCATTACCTCGAATGGTGAATCGCTCATACCCGGTCCAAAATCACGAAC  
TACAAAACGTGGGTCTAAACGACCTGGAGCCTGAACAATAAACTTATCAGTGCAACCGTT  
AAGAATTTGTCCATCGATACAGTTTGTAAATTAATTCACGTACACAAGCCAATTCTTTGTT  
TGTATAAAGGTCATTAGACAAAATCTTATAAACTTTGCTATTGCCTTGAATAGTGAATGC  
TGTGCTCTTACCGCCTGAACCAATAATCGTTTCTTTAGCCGTTTCGATAATCATGTTTTT  
CTCTCATCACAAGTTACGTTTAAAAATTTCTGCCACTTCGAGAAGTTCTTCTTTAGTAGC  
TGTGTCGGTTTTGTATTTTATATCGAATTTCTTTAAAGCGTTCTTTAAAGGACTCTGCTGA  
TTCGATATCAAAAATCTTTGGATAAGCCGGAATTCCCGGAGCACTGCTTTATCAAAAAG  
TTCCAAGTCCACGTTATATGTTCTCATAATATTCTCTTCAGTAGATTCCTAGGGCGCTAT  
TACTAAAGACCATATAATCTATCATCTTATGTGTAATAGTGCCTCAGGCTATTCAGGATT  
TACGCTGTGAAGATTTTATCCCACATCGCAACAACCGCATCTCGGTTATACTTCTTCCAT  
ACTGCTTCAGCACGTTTAACTCGAGCTTCGTATGTGTCAGTGAATTCTAATACAGCTTTT  
ATGTAAAGCGCAACTACTTCTTTTTTAGGAGTAGAGGAATCAATTTCTACACGCACAGTA  
TCTGGGTCGTATTCAAATGTCGCATGAGGATAATCCTTAAAAACTAACTGGATTACAGGG  
ACACCTTTAGAGATGGCTTCAATAGAACTATTCTCTACCGTACCTGTGTCAGGACACGTA  
TTAATAAGTGCTTTAGCTGTTTTAAGACGTTCCATAATTTCACTATGTGGAGCATCAATA  
ATAACAGGATATTTAGCTGGTGGTGCCATTTACTAGGACAGTATCCTGCACCATTTTCG  
CCTAGTGCTTTAATCGCTTCAAGAGCAACATCAGTACGACGCATTTTAGTGTATAGCGT  
TGTGCACTAATAATCAGATCAGTCGCCGGAAGAACTTCAGGTTTCTCATTCAAACAAATA  
ACCGGATAATCTTCGGCTTCAAACAACGGATTTGCTCGCCAATAATCATAATCGATTTTG  
TCAGTCAGACCTGAAGTCATATAACAATATTTGCGTTCAAATTCACGGAAGGCTTTAGTA  
GGAGCATAACTCTTACCACCATTCTTATGAATTTGAATAGTCTGGTCCCAAATTTGAACA  
ATGCCACGAGATACCGGTTCAAATGGTGTGTCATAAAAATTTCTTATGAACTTTAGAGAGA  
CCTGCGTCTTTAATTGCCTGAACGGTTAGTTTAGTTCGGTTCATAGTAACAACAAAATCG  
TATTCATGGATGCCGGCTAGTTCAAACAATCTTACGAGCCATAGTATAACTCATACTAGA  
CTGAATTTAGTCAGATGACCAACAGGATGATGATTAACCTTCCAATCACCAATGTGTCA  
TTATCAAAGCCAATATAATCAATATCAGCACCGATGGACACAAGATATTTCAACACATTT  
AAATGTACTGCTTCAAGACCACCTTGTACACGGTTCAGGGTTAAATGGGACTGCGCGAGAT

GGGATAAACATAACTTTTCATAATTAAGCCTTATTA AAAATTA AAAATGAAGCTCCCGAAGGA  
GCTTAGGACATCCATTCTTTACGAAGTTCTGAATCATCACCCATCAACATTTCAAAGAGT  
TCTTTCCAATTTTCAGGAAGTTTAACTACGTCGTACACAGGGTTCTGAATCATTTTACGA  
TATTCTGACTTTTCAAGGGAGCCTAATCCCTTGATGTATCGAATACTATGCTTAGGCAGT  
GTATCTTTAGCTTCTTCATACTCAGCTACAGTATAAAACCATTTTTGAGTTTTGCCAATT  
TGTGCAATAATTACAGGCGTTTTAACAAAGCGAATACGTCCTTGTTCAAACAATTCAGGC  
CAATTACTAAAGAAAGCAAGCAAAGCCGGATAAATACTTCCAAGGCCGTCATGATCGGCA  
TCGGTCATAATTGCAATATTACGATAGTTCTGTATTCTCTGCCTTTTACCAAGAATAAGA  
CCTGTGATAGCACAGATATCAAAGAGCTCTTTGTTCTTCATCATATCAGCATATGACATA  
CCCAGCTATTCATCACCTTACCACGTAATGGGAATCCGCCGTGTAGTTCACGGTCACGA  
ACATCAATGAGATATCCAATTGCCGAATCACCTTCTGTTAAGAACAATGTCGTATCTGCA  
TCTTTACCGCATTGGTTAGCTTTAATATGCTTATGAACCTTAGCTTTAGTTGCCTTTTTA  
GCTGCTTTAGTTTCTGCAGCCTTTTCTGCTGCCAATTTACGAGCTAATGCTGCTTCAACA  
ATAGGCATAATCAAGGCTTCGTTTTTAAGAAGTGCCTGAGCAATTTTTCTTAGCATCTAAT  
TGGATATGATTACGAATATCACCATACGTTGACGTTAAACGTTCTTTAGTCTGAGAATCA  
AAACGCATGTTGCTCATATCTCTAATAAACATCAACATTGTGAGACATTCTTTAACACGA  
GCTTTAGTGACTTCAATACCCTTATAATTTCTTTTTAATAACCAGGCAAAGATGTTTCGCAG  
ATATCATCCATTACACATTC AACATGATGACCACCATTTTTAGTATGGATGTTATTCACA  
TAAGTTAAATGACGGAAGCCATCTGGTGATGTTGTGAATGCTATAGAGACTTTATCATT  
TCTTGAATGATGTTATCTTCGCCAAATTGTTAGCAAATCGTTTAAAATTACCATCAACC  
TTTTTACCATTAAATGTGAACCTTGATATCAGGATAAACGACTGCCAATGTTTGAAGTCGG  
TCTAAAGTAATATCTAAATAAATTTGAGATAAATTATGCTCTTCAAATGAAGTGAAATCA  
GGAGTGAAGATTACTTTAGTTCCTTTACCTTTAGATTTCTTAGAAGACCATGATTTGTTT  
TCCATTCCGTTTGAACAGTTAACAGTGATTTCAATTTTCGCCATCTGACGTGATGCCTGTA  
AACAAACGTAGAGAAGATATTAGTTAAACTACTCCCGACGCCGTTTCATACCACCGGTCTTG  
CGTTCAGAGTCATCGCCAAAGTTACCACCAGCCTTTGGAATAGTCCAGGCTGCTACAGGC  
CCAGGAATTTGTTACCCGTTTGGTCGGTAACTAAACCTTGAGGAATACCACGTCCGTTA  
TCTTCCACCGAAACTTGATTATTTTTAATTTGCACATCAATTTTATTTGCAAACCTTAAAT  
GATGTACGAATAGCTTCATCAACCGAGTTGTCAATAATCTCATCGATTAATTTAACCAGA  
CCAAGGAACATTTCAACTGGTGAATAATTACCAACCAAAAACGGCTCGTGGGCTTCTTTA  
GCAGAAAGAACCAATATACATACCATACGGTTTCTTAATAATGGTTCTACATCTGACAAT  
ACCCTAATTTCAATTTTTAATCATGTTGTCTCCTCGTTATGAAGGTATTCTATCATCCGAA  
ATCTAAAGCAAAAAGGGCCGAAGCCCTTATTTAAATTTAATTTTCTGAAGTGCATCAATT  
GCAGCCAAACGCCCTTGTTCACTTTTAACTGTAATGACCACATCGCCTGATACGATCACC  
GAACCATCAACAAATTCTATAGAGCCTTTTTTGAATCGACAGCTGTATCTGGTTCCGGA  
ACTTCTTCAAAGAATTTAAATTCTGCACCATAAAGCAGAATATCACCTTGCATACTAATG  
ATTGTACGTCCAGGTCCATCGGTTTCAGCGGCAATCATTGAAACACCGTAACCAATCATC  
TCTTCTACAATAAAATCTCTTGATAATAAACTGTATGCAGAGTAGTGTTAAGACGTTTA  
CCAGTTGTATTAAGAATTCTCAAGAAATTATCTTCTTGACCTTTGATAATACGATATTTT  
TTACCAACTTCAAACCTTTAAAAGCCATAATTAACCCTTCTTAAGTAAGTCGTAAAAAC  
CACCGTTCACATGTTTAGGAGCAGAAACCCGACGAGTAGACAGACGATGACATTCAGGGC  
AAACATCGTTTTCTCGTTCAGAAATCTTTTTAATTTTTTCATATTCATGACCACAATCTT  
CAGATTGGCATTATATAGTCGTATAACGGCATTATTATTCCTTAAAATATGCTTTCAACAT  
TCGATACAAAGACCACGCCTGGTCGTTATTTTCGATAGTAATCGTCATCACAGGAAATTC  
AGACAATTCGTCAAGTTCACCAGAATCTTGCTCTTCGGACGCTTGATATGGATTTCCAAC  
TTCGTCAAAGAACTCTGCTTCATTCGTGGAGAGCCAGATAAAGTTTTTCATCAAGGATATC  
ACCGCCTGTTGCGTATCCAACCATGCCAGTAGATGTCACAATTTTAGTAGGACGTCCAAG  
ATGGTCAACATCTAATACTTTAAATGGTTCCATGCCAAGACGTCGTGCGTAAATCCCATT  
ATCAGTGTGGTCTTTAATAAACTCTTCTTGGGCACGTTTATCTTTAAATTGGTACCATGA  
GTTAACGCTGAATTTATTAGCCATTAGTAAGTTTCCTTCCAATAAGTTGTACCATTTTCA  
GTGATTTACGGAAGATACCATAGATAGGCATTTTCATCACCGAGTTTTTTCGTAACATAA  
ACCACTTCAGTGTAGCATAAAAATTCAGTCCAGTTTTTCTGTACAACAATAAATCAGGA  
TTAAACAGAACATCTTCAAACCTCGTCACGATTCGATTCAGTGGTTACATTTTTAATAATT  
TGACGTTTCATAATATCTCTCTTGTTTTGATAGGTCTATAGTATCATAGACCATAGTT  
GTTGTACATCATTTTAGCAAAAATAAAATCAACTTGTTCTGCTAACGAACGTCTGAACATT  
AATTGACAACCTCCGAGTATGAAATCAAGTGCTTCATAGACCGCGATGTAGTATCCTTTA  
GCTTTGAAGAGTTCAACATCCACCTGGTCATCAAACCATGCATAAACCGCGTCAACACTT

TCAAATCCAAAATAGAACTCTTGAGCCCAATCTTCGTTCAATTCAAATGTGTGCTCAATT  
CTATAGTATCTTAAGATATTTTGTTCAGGAGTTTGTCTTCATTTACTGTAGGACGATTA  
GGGACATTATAGTTGTCGCCGTGATGGTAGAAGTTACCTGAGATTATTCCATGTTTATCA  
AGGAATTCCCATGTTTCTTCAGAGTTGTCAGTGCCAGACCAACCGTAAGGTGAGCGAGGT  
TCTTTATTCCAAGAGGTTTCCCAAATTCTGACGGCTTTACCGTCTTCGATAGCAATTCCT  
GGTAATGATTCACGTTGAGTACAAAACACTACGTTCTACGCGGTAAACTAACATATTATTC  
TCCTCTGGTTGATATGGGTTATAATATCAAACCAGAGGAGAAGTAAACAACCTTTATGCG  
AAAGCAGCTGGGCTATATTTTTTAATTTGGAATTCAGGAACTACCATGAACTGTCCAGCG  
AAAACGATGTTATAAAGCTTAACACCATCTTCTACCCAACGGTCGCTAATAAAACCAGCA  
ATTTGCTTAGTTTTCCATGGCGTTCCATCAGTTGCCGCAGCAATAGTGAATTCATGGTCT  
TTTTCAACAGAAACTGATCTGCATAGTCCCATTTGAACGCTTTTTCTTCTGGTTCAATG  
AATTGGCTTTTAAACGTAACCAATGTTACCATCGGCGTCACGAACTTTAACTTCATTACGT  
CCAAAACCGGATCGCTCACAGAAAGAACTTCAACCAACTTCCCGGCAACTTTAGAGCGA  
GAAGCATCTGATACGTGTACATAATCACCAATAGAGAGATTTGCAATATTCATAATAAATT  
CCTTAAGCTTTACGAGGAGACACATAGCGAGTGATTTTCAGATTCTTTAACAACCTCGGAAG  
TCACCTAAGAATACGATATTGTATAACTTTTACCATCTTCAACCCATTGGTTCGCTAATG  
AAGCCACACATGGTATCAGTTGTGCTTGGATAACCGTATTCGTCGATGTAATCAAATTCT  
TTATCGGTAATAAATTCAACACCTTTGCAAAGGGCCCATTTAACTGTACATTAGGTTCA  
GTAGAAGCAAATGAGCGCTCACAGGAGTTTCCAAAATTTAGGACTTACGTAAGCGTAC  
CGAGTTTCAGTTTTCCAGAACTAGGAATGATTCGAACTTTAACTTCTTTAACACGACCA  
GTACCATTAGTACGAAGTCCACTTCAACTAGACGACCTGCAGCTTTAGAACGAGAT  
GCAGTTGATACACGCTTAATTTACCAATAGTAATCATAATTTTTCTCTCTTTGTTGTTA  
AGATTTATACTCCATCCGTCCTTGGATGTACAACATTAATTAAGGATATTAACCACAGCA  
CTACGTGGAACACTACTAAAATCACCTGCATGAACAACGTTTCAGAAGTTCAACAACCGTC  
TTCAATCCACTGATCAGTTACCATCCACTCACTGGACCTGCGAAACGGACGTGCAATTG  
AAACAGCTTTACACAACAAATCAGTAGGCTCAATAGGCTTAATCAGAGTACCGTATATAC  
AAGCGATATCCATATCAATACAGATGTCTTTAACGGGTTCTACTTCTTCAATCAACAGTT  
CAAAGTCTGTGCTTGAAGGGCGGTAGTAGAAATTGTACCATATGAATTTTTAATTTCTA  
AGAATAACCAAGGGCCTTCAGCTTGTGTTGATGAAGTTAACAATAGTGAAACTATTACCTT  
GAGTGGCGCCTAAAATTTCAAAAACCTTTTATAAGCTCGCACTGAAGCACCGTACCAGT  
TAATTTGTTTTTCGTCTTTCAGGATGTAAGTAGCCGTAGTATTGATATTCATAATGTTTT  
CCTGTTTGGTATAAGATAGAAAGATTATACTCCAACCATCCTTGGTTGTAACTGTTTTA  
TCGCTGTTTTACTTAAACGGGTCAGGATTCTCAGGGACATCTTCAAGGCCAAGCGCATA  
ACGCTGAGCATATTTTAAACATCAAATATCTTTAGCACAAATCATGAATACTATCATGGGC  
AACGAATCCTTTTAGCGTACCCATCGGTAATGGACACATACTTAATCCTCGTGTCAACGA  
GTAAGCTTCGATTGCTGTACGAATATCGCGTTGAGCCAGAATTTAACCGGTTCTAATTT  
ATCGGTATCAATCTCTGGTTCAAGAACACCTTCATCACGATAGAGGTCACGAATCAAATC  
GACCAAGATCGGGAAGTCAAAGCTCATACCACGGCACCATCTGTGATTTCCATTGGTC  
AACTTTATTAGCTCGACAATAATCTAAAAGATTTTAATGCCTTCAAGCGTAGTGACATC  
GTCTTCAGACGGGGCCAAGTTTTTACGTGCTTCAGCCGATTGTTCTTTCCACCATTTTCAT  
AGTGGATTTAGCGAAAACACTCGCTTCCCTTTCTGAGAAGCTAAATTAATTTAATTCGCTT  
ACCTCGTTGAACAAGTTCTTCAAATGATTCAACAACCTTCAGGGTCCGAATTATATGCAAT  
AACCGCAAGGTCAATAACAGCCGCTTTTGATGTATTGCCGAATGTTTCAAATCTATAAT  
AACATCAGTGCTCATAATTTTCTCTCAAATAAAATGGACGTCAAACGACCACGAGTTGT  
GCCGACATACAATAACTGTTTAGCTAATTTCTGAATCAGCATAATGGATACACGGTGTATA  
AACAAAGGCCGTGTCACAGACATACCCTGGGCCTTATGGAAGGTTGATACTGGTAGTGC  
CTTACCTTAGTGAACATACGTTTAGCATCCAGAAATTCGCTCCATGGAGCTTTACCACC  
TTTATTCCAGAATTTGTATGTTTCTGCGGTCTTAGCCAAAACAAATTGAATTTATAAAG  
CTCTTCTTCGGAAGAAATAACCTTTATATCCTCGCGGATGATTCTTCATCATCCCCATA  
TGTTTCTACTGTAAGATTCCAATATCGTATCATATACTCGCCCGAAACACCACGTGCTTT  
AACGAATGTAGACGTTTCTACAGCATCTCGAATACGAACGAATTGCCCGTTATTGAAAAG  
CATTTCCGGTCATATTTTTACCATCTAGCTTGTACGTCTTAGTAAATGGCTCTTGTAGAAC  
AATGACTTCGTCTTTAATAAATGGTTTTTCTGTTTCAAGAAGTTTTTCGGCGAATAATTGA  
ATTTAACTTGTCCACTGACTTATTTGTGAATGCCATCATCCGATTTTCGAAAAGGTCTTC  
AGGAGTTTTAACGACATTAATAAATAATTCATCATATATGATTTAAGGTCCGGTATATCCATG  
AACACCATGCCCCTCAACTACTTTATCATAAATCCATTTGCCATTACGAATATCGGTTCGC  
AACATCAATAATTGGTGCATTGCTACGTTTAACTTCTGTAAGGTTCGATTGCACGAAGTC

TTTGTGAGTGAAGAAAGGACTTAGATATGCAGTGGATTTCGCTGGGTCTACCGGTCGAAT  
CTGACATCGGTCGCCAATTCCAATTACTGTGCACCATTTAGGGATACTAGCTAACATTAT  
TTTAAACAGAGAACGGTCGCACATTGACGCTTCATCAAATAACAGTACACGACACAAGGC  
TAAGTCGGGAACCTTTTTCTGTTCAAACAATACGTTTTCTTCGTATGTAGTTGGGTTGAT  
TTAAGAATGCTATGAATAGTCGATGCTTCTTGACCAGCAAGTTTGCTTAGAACCTTTTT  
AGCGGCATGTGTTGGTGTCTGCTAAAATAATACCTGATTCTCCAGAAGAAATAAGAGCTTC  
AACGATAAATCTAGTAAGGGTTGTTTTACCTGTACCGGCAGGCCATTAATAGTTACGTG  
ATGTTTTCTTTCTTTAATAGCTTTTCATAACAACGTTGAAGGCGTTTTTCTGGCCTTCAGT  
CAAATCATCAAATGTCATCGTAAAGTCCCTGCAATTGGAATACTAACAATACGGCCTGTG  
TCCAGGATTTCGTTGATACAATCTTTGCGTCTCCGCATCTAGTTTAACGTGTTTCATTTCA  
AGCTTATTAACCAGAACTTACGCGGAGTTTCGACCATTCTTAGAACTCCCATTTTTAAA  
TCTGTTTTATACTGTGTTTTCAAAGTATCGAAAACCTTTATCTGCAATATCCTTTCTAAA  
AATACTGCAGGACGATGCTCATCAAGAGGAACCGGGACAGTAAATCCTTCCATATCTCGA  
TAACTATTGCATATACATAAACCATAATTAACCTTTAATCAGTTGGAATAATGATGCGC  
TAAGTGGTAAGCCACGTTTCAATTTTAATTTACCAATGAAACCAATCTTTTCAAACGTT  
GCAGACCTTGGATAACTTTATCATATGTATCGAAAAGCGATTCAGCGTCAGTTAATTTAG  
TTTTAGTTTTCCAGTCAGAGCCTTTAAGAAGAACGTTGAGTTTAGTAAGTTCATGGCCTT  
CTGCTTGATGTGAGCCATTAATGCGTGTCTTCAAAGCAACAATTCTAAGTTTAGATTCTG  
TAGATAAAGGTTGATTTTTTCATCATGTTTGCCATATGCTTAACACGGTTTTCACGTTTTG  
CTCGGATTTTTAAAATAGTACCATAAACCTTTTTAATTTGGGCCCATTTCTTCTCGTCGA  
GATTAAGTTTCTCTACTTTACGAGCAGAAGGATTAGCGATACGTCTTGCAATAGCATCAC  
GTTTCTCAATAAGTTCTTCTAATGTTAAATCAGAACGAGCCGTGTTATATTTTTTCTTAA  
CTGGGATAACATTACCTTTAATGTAGCCTATATCATTATTAACGTTCTAAGGATAATT  
TCTCACCTTCAACAGAGTTATTGAAAGATTCACCTGAGTAAGCGCAGACCTTTTGATCAA  
GAATGTTTTTAAGGTAATTAAGTCTAAGTTAAAATCCTTAGAGCGTCTCTTCGCAGAAG  
CTCTGGTGTGGTCAAGACGACGATTGATTTTGTAAATTTTATTATTGATAACATAATAT  
TTTCTCTGTCTTACGGACGTTAAGGTCATTTAGCTGATAAGTCTATAATATCATGCCCT  
CAGGTAGTGTACACTCTTTTTTCATAAAATGCTTTAATTTTTTATGTGTTATAATGGTTC  
TGAGTTCCATCCGGTTATTCCAATTCAGTCAGTAACTGACAATAGACAGATTCCAGATTG  
TATAATGTCCATCTTGAATAATAGAATCTACACGCAGTGTAGTCCCTATAGGGAGCATAA  
ATTCACATTCGTCAGATATAAGTCTAGCGTTAGACCGTCTTGTCGCTTCAGGGAAAGCTC  
CATTGAACTCACAAGATGGCGCAGCCAGAATCATGTTAAGCATATGTTACGGAAGTTGA  
AAGCAAATGGTGCATCTTTGATGCAGAACATATTAATGTTCCGTAAAAATTATACGAAG  
CAAAGTTACGTGCTACACCGAACACTGGACTGAAGCTCATTACTCTGTCAAATTTAATAA  
TACTACCAATGCCTTTATCATCAAGTGTGGCCATAGTTTTCTTAGAGATTCCACGATACA  
TTGTCTCAGGAACAGAAGACGACCAATTTCTACGAACAATTGCACTTAAATCTTGTGGA  
TGCTATCAGGCTTGTTTTCCATACACTGCCATAGTACACTTTGTTCAATGTCACTGAATT  
GCTCATCGATTTTGTACTGAAGCATATCTTGATAATCCGGGCATTGAGCACGACGAACCA  
TTTCTTCAATTTCACACTCGTTATACGGCATAAACATTTAGGTTTCTCCTATGGTTGATA  
AAGGTATAGTATCATCATCGGAAGAGTTTGTACACTAAAATTTCAACATTTTCAAATGAA  
TGATTTTGTATAATCTAGATAAAGGGTCATATTCTAAGTCTTCAATTTCCACAATCTCAA  
ATCTAGAGATACCTGAGACCATGTACTCTTGTTTCAGATTCAATCATATCTAGGACATCAA  
CACGTGTTTCTTCCATAACATGCTTAGGGTCTTTCCGGCAAGTACAATGTTAATCATGT  
TTTGGTAGTAATCAAAAATGAATGGAGCATTCTGAGACTAAGAATAGTGTACGTCTGAT  
ATTCCCATCTCCCGGAGAATTGACGAGCTGTACTGAAATCAGTTGTGAACGATGTTACTC  
GTCCAGGAGACCAATGGCATCCAACAGAAAGAAGTGAAGACGTTCTACTTCTTCTGGAG  
TTACACCACGGTAGAGTTCTACTGGTACTGTAGAAGTCATATGCTTACGAACAAGATGGT  
CTAATTCATAGTGGAAATCCGGGTCTTCTTAGAATCGGTGCAAGCCCAGAGAATGTTTT  
GTTCTTGGCGGGTGAATTTGCTATCAATCAGATTTGTTAGGTATTCGCGTTCTTGAAGTT  
CAGATTGACATGTCATGATAGACCTCCATTTAAAGATAAGCCTATCATAACATGAGAGGA  
GGGAATGTAACTACTTTTTAAGCTTTTCTACTAAAGGTCCATCAGGACCGGGTTGTTCT  
AACATGAATAAGGACGCTTTAAAAGCAATGTCAACCCTTTCACCATTGATACCATGTC  
TCAAAGTCTTTTTCTTGTATTTCCAGTAAGAATTTCTCTTTCAATTTCTTTTCAATTTCC  
AAGGACTCCATGGTGGAGGGTCGTCATAATAAGAGGCAAGGTCTTTCAGGGCTTCGACAG  
GCAAATAAAGCCGTGTCGTTGTATAATACTATCTAGTTCATCAACAAGTTCACTACGAT  
GCACTTTAGGAGCCTCAACTTCAGGCTCGTCAAACATACTCATAAGGTCCATATTATTCA  
CCTAAATAAAAACACTAGGCTGCTCGGAGAATGTTTCTAGCGCTACACCTTTTGTCTTAAAA

AATTTCCAAATAGCTCGTTGCAAATGGATTAAATCTGCTAATGATGTAATAAAGTATTTT  
TTGGCAAATACTTATGGTCTCGCTTTTCAAACAAATCTAAACGCTTTTCTGGATTACACA  
TAAACGGCATTTCCTGAGATTACATAACCTAAGTCCTTTATGCCTTCTTCAAGACTAAAC  
GGAGAATTTTLAGAATGAGTAATAGCTCCAACCTCGCTCTACACGAATTTTGTAAACCTTT  
AGGAATCTGCAATTTGCAGAATCTTCTACGATATATTGCGGATTATTTAGACTTTTGT  
AATGAGAATAGCTATTTCTAGTGGAGTCTTATCTTCCACTGGTATATGTTTAAATGACTT  
GGCTTCAAGCAAATACATTTTAAATAACATAGCATCCATTATAATTTCTCGATGGTTCA  
CCCATATAAAGTTTACAATACGTTTCGCTTCATCTTCGACGAGCTTTTCTTCATGTTTC  
TGGAGTTCTTTGACCATTTTCTCTTCAAAAACATCTAACCAATCTTCTGGTCCGACTCCA  
TCATTCAAGCTTTTAAACCATTTTACTACTCTGTTTCATTACAGCTCCCTGAGCTTGAAC  
CACAAATCAGAATAACTTGACCCAGAATCACCGGACCAAGACGATACGTAAGAATGATTAT  
AACTTGAAGAGCTTGAAGCATTTCGCTGGTTTGTTTTAGACGAACAACCTTCTCCATCA  
TTCCATCACCAATATATTCCCAACTTTTTTGATGTGTATCAGGAATACGAATCATCCCTT  
CGCCGGGTTTAAACAACAAACAACCTTGTTGAGCATCGGAAGCATTAAATTGTTGCGTCAAC  
AAAACGAACACCACCATCATCCCCAACGGATTTGGGCATTAAATTTGACGTCTTACCAT  
CCATCATGAATGAGTGTACGAGTACGTCATCATAATATCCAAGACCGTATTTCAACGAAA  
CTTCTTGAGCAATCAAAGCACCTAATGTGTTATTAGGTTTAAATCCAACGATTTAACATAT  
TGTTCTCCTCTTGAGTAAGTAAGAATATCTTAAACATAGTTTTTAGTGGTTGTAAACTCTA  
GAAACGAAAAAAGGAATCCCGAAGGATTCCTTAAATTATTTAACCACTTACTGGTGTAGG  
GGTAAACATTGCAGCGTTCTTAGTACGCCAATCTGCTGCGTCAGTCACCACAGTAGTGTA  
AGCAGCTTTTTCAGATGGGAAAGTCTGATAATGAGCATCAGCAATCCGATGTTTCGTTTGA  
ATAAATCTCAAACGGTACAGAACTTCCATACCTTTAACTTCTTTACCTTCACCAGCAGG  
ATGCGTAAAGGTTTTGATGTTTACATAACCACCATAATTAACTCCTTTGTTGTTTAAATT  
ACAGGTGTATTTATATCAATAATCGTCGTAGAAATCACTCAAACATCGTATAGCTCTTT  
CTCATTATTGCAGATTAGCGACTTAATTGCGTCAGGGTGAGACTCCAGTGCACAAAGCTA  
TATTGGCCGCGTGATGAGAATGTTTCTCAGATTCATATCATCATTAGGGATGGCAATAAC  
CAATCGGGTCTTTCTCGTAAAGGTCGTTTATTAGTAACCTCGGTCTTGGCGAGCGAAGTT  
TTCAGCATTCTTCAGGTAATACAGTTTGAAGATTTCTTCAGCAGTGAGTCCAAGACCCTG  
GAACATATTCAGAACAAAGTGCAGAATATCAATCATTTTCGAATTTAATTTTCGAGCTGGTC  
TTCAGGAGACAGTTCATCGATACGACGATTTTCGATATTCAGCATGTTGTGCCTTCCACGG  
CTTCCACACAGAAGAGGCAGCTTTCTCGCCGTTGCTCATACCGCCAAGTGAAGTCAGCAG  
TTCACGAAATTCATCATCAATATAATCTTTCTGATTACGCAACCAATCAACAACATCGCC  
AGCAGTAGCCAATTCATCAGGATGTTTGTATGTTTCAGGCTTGTCAATTTGCTAAGCGAAC  
CTGTAAAGATTTCTGCATATCAAGCATTACCTGCAGTGGGTCTTTATCTTCGTGAATCAG  
AGCATTAAAATAAGCTTCTTCTGCTTTATCAACACCAGAAATAAGTTGTGAACATTCGTT  
AAAGTGTGCCATTATTTTCCCTTCAATTCAGTATAAGAGAGTTAATTCTAACATTAATT  
TTATAAAGCGTAATAAATAATAGGTAACCTAAGGAGATATTATGTTTAAACTTCCATCGTT  
AATCAACGCTATTAAGGCAATAAAAAGAAAACCTGCTATCGCTGCAATAGTTGTAGGTGG  
TATTATTTTCATGGAACCTTCGGGATTGCACCATTGTTAGTTGCCATGGTATTATAGTTCC  
TTCTGTTCCATTGGATACTGTTGTTGACCTAGCTTTTGTCTGTTATAGGGCTTGTTTAAAT  
CTTCGAATAACGAGATAATCTCATTTTAGCATGCAACCCACTTGAAATATTCTGTTTCAT  
ATATTCTAAAATTTCTTGTGGTGTGCAATTTCTTTCATTACCATATCATTCACATCCTT  
TGAACCTCATGGAGCTCGGTCCCAGAACATGACACGTTTCGCTGCATCAACTAATCGCTT  
CATGCGAGCTATAGTATCCGGATGCCTAGGTTTATTATCCATTACCATAACCCGACGTTT  
TTTAAATGGTACCACATCTAAATCTATCGAGCCGCCTGTAATAGCGATTGCATTAGGTAT  
GAATAAACTATCAATAGGGCCTTCCATTACCAGACGCTCCTTCCCTAACACGTTCAAC  
ACCATAAATTTTGTGTCAGACTCAAACGCTTTAATAGTGATATATTTCTGAGGAGCATC  
TTTACGAAGTGCACGTCCTTGAATGACTCGGCCTTCCCGTCTTTATTAATAAATAGGAAT  
CACTAAACGTGGTTCGGGAATCTCTTTCTTATACGTACCAGGTTGAATCTTGTGACCAA  
TTTGGGCCATTCTAATGTGAACCATAATCTGTTCCATGATTCTTTAGGAATACACCGAGA  
CTTAACATATTTACAATAGGATGCTCTTCAGGCAACTTGTCCAGACGAGAACAAGACGG  
CAAAGAATTTATAGTCTTTTCTTCTGGCTCTGGCTTAGCTTCAGGAACCTTTTCAATCTT  
TGGTTCCATTCTAGCTTTTCTTTACGAACTTCCATTAGATATTCGCGATAAAGCTCTTC  
ATCATACTCCTTTAAGTATCCGGAAATTGTATTGTGGTATTGACAGTTATAGCAATGTAC  
ATTACCAGGAGTACCGCCATAATACCAACCGCGAGCTTTCATTGCATCTGTCTGGGAGTC  
GCCACAACTGGACAACGAAACGTTAATTTAAATGTGCTTGAATTATTGATTTGTCTAAA  
ACGAGGGAGGTGAGAAAACGCACGATAAGCAAATTCATTATCTATCCATTCAGCCATAGT

ATTCTCCAGAGGCCTTATTAATTTAAGGCCATCATATCACAACCTTATTAATATTTACTTT  
AATTCGCTTTCTTTTCTTGGGAAGGAATTTGTTCTGGACCTTTATTTACGACTGCACCTGT  
AGTTGTTCTGATGCAATAGCTTGAGGACTGCCGCCTGAATCACCAGCAACCATATCCTC  
AAATAAAGGGAGTTCTTTAAATATTTCTTTCTGTTGTTCTTCTGTAATGTTATAGCGTGA  
AGCTACAGCACTCCAGGCGGACATCATTGAGGCCATTCCATTAAGACCTGGAACAGTGCT  
CATCATTCGCTTCATTGAACGAACCTGAAGCATGAAAAGGTGTATAAGCCGCTTCTCTTCA  
GGAGTGGAAAGGACGTTTAAGAACAACCTTCCACGTTTCATCGATGATTTTGGCTTCGTATGCT  
TTCCATTCGGTAAAAGGTTTTTGCATTAGTTCGAATAAACTTATATGCATAAACAGAATCT  
ATTGCAGTGTTAATAATACCCATAGGTACCTCCTGAGTATATTTAATCAATTACAAAGAT  
TGCTTTGTCACCATTTATATCTGTGACTTCATATGTGGTGCCTTCATACTGTGGAATATT  
CCAAATTACACCGTCATTAGCTTTTACGCTAATATGGCATTGGTGTTTTGAAACAACCTTC  
ATAATCTTCAAACTTGTA AAAAACAATAATTTAGAACAGTGCAAATTGCAGTAGTCAT  
TTAAACCTCGATTCATAAATGCATTAATAATTTGGTTCATCAACAGAAATTTCTAATTCGA  
CTTCAATTGCTTCAGCCTTTTCTTCAGGTGGTAATTCGTATCCACACACTACAATTTTTT  
CATCGATATCAAAATATACAGAAGCAATACGATTAATGTTATTTTCAGTTAAGTCCAAAT  
CAACATCAACATCTTTTTGGCTTACACTTAGAGGATAACTAATACGGGTATTTTTATTAT  
CTTTAACAAAGAGTCCACCAACATACTCTGTACTACGTTTGAAGTTTACACGTTTCCGAA  
TTGAAAGATATGATGCATCTTTACCGTGAGCTCGGCTCATAGGACATAATGAATAGCTAG  
AATAAGAGATGTCAAATCCTACACCTTCAATATGAGCCAACGTGTCATGATTAACCAAT  
TATAATCATATGCCAAATCCATTATATTGTAATATGTGAAAGGCACAGGATTAACATCAT  
ATGTTGTACCTTTAAAATCTGCCCAGGCAACGATTTTCGTTATCTTTAACAAATTACAAAA  
TTACACCGATATGGTATCCGTTATTATTTTCATTCGGCGTTATATTATAACATTGTGCAT  
TAGGAAATTTACCATATTTAAATGGCGCGTTTTTGTGCATGTAATAAATCATATTATTCA  
CCTGTGATTTTCGGTTATGATATCTTTGTTATCGAAATTAGGGTCAACAACAAAACATAG  
TTGTAAGTGCATGATACCGCCAGACTTAAGTTGTTCAACAACCTTTATTAACCATATTAGGA  
CGGTCTCGTTTAGTGATGTTTCATGATATCAGAGAAGATTTGTTGTTCAACATCTTCTTGA  
TTTGCAGTCATTGACCACTCACAGAGGTCTTTATCATAACCTGCCGTAACCTGGAGCCGGT  
GCACATGATACTGCAAGTAAGATTGCTGCCAATGATAACTTTTTTCATTTAACTCCTTAG  
TTGATTTGATAGGACTACTATACTATAGTCCATCTATAATGTAAACAAGTTTATTCTTTT  
TCGCGAATAATAAATTACTTGTGAGGCTGCTGAGCCGATTTCTTTTCGGCAACGATAGAC  
CAAATTAAGTTCCAATCCAACCAACCATCGTCCAGTTAAAGAGTAAAGATACAAAGAAG  
ATTGCTGTTGTGCTTTTTTGTGCCACGAATAAGTGCATTACCCAAGGCAACATGTAATG  
ATGATTGAACCAATACCTGCGATTA AAAACTGCTACTGAACTAGCTACGAATAATTCCATG  
TTAATTTCTCTTGATTTGTTATGTTTATAGTATCTTGTTTTAACTTTGGTGTAACCAA  
TTAATTA AATTTGTTTAAACGTTCAATACACTGGACGTAGTTATTCGCGATTTGTTTCTG  
GGTAGGCTCTTTACCAGTTGTTTCAACATAGCGAATGAACGCGATTTTCAGTAGCCTGTAA  
GCAATGTTCTTTAACGCGTTGTTCTTTTGACAATGCTACAGTATCAGAATCACGATAACG  
TTGAGCATGGGCATCAGCTTGAATCATTTCGATTACCTACAGTAACCGGGTCTTCCACTTC  
AACTTTAGGTTGGTTGTACTGTTTAAACATTCGGATTGTAATCAGTTGGCCAACGTTATT  
AGGGATAAAGCCATGGGCACCACATCCAGTTAATCCGAATACCATTGCTAAAGCGATTAA  
TTTTTTTCATTTCAATTTCTCTGTAGTTGATAGAAAGATAGTAACACAGTATGTGGTGCT  
TGTAACAGCTATTTTAACTTTTGCGAAATTTGCGTTTTTCTTGACGAATCTGTCGTTT  
AGTCGGACGTACAGCAAATTTAACGAAGTCCACTTTGCCGTGTGGAAACTTTTCAGATGC  
TTCACAGTCCATCATTAGTTCCCATCCTTCCAGAATAAGAGCTTTCCATTGTGTAGTTGA  
TGCAAATTCGTATGTTGATGGTTTAAACACAGTTGAATACATATTATCCTCTGAAATCAG  
CTTCAAAAACCTTCTCGTCATTAATAAATGCTTTAACTAATGCATTGTTCACTTCAGCAA  
GTTGTACCGTAACCCACTCGATTTCTTCGCGATCACCTGATAACATGATATCTTTAGTGA  
ACATCTCACCGCTTTTAAACCAACCGATAAAAAGTAACTTTAGTTAATTTGCTCATATTTT  
CTCGCAAAATGCCATTCAGCGTGATAAACTGTAGCACCTTTAGTATTATTCATTTGAAC  
TACGCTACCGGAGAAATTA CTGATAGAGACGTGGTTACCTCCATAAGAGCGTGCTGC  
TCGTCCTGCATAAATCTTTGCTAAACCGATATCTTCAGTAAAGAATACACGATCCAAGTT  
TTTCTTACGTCCAGTTTCAGACAGAACTCCTGTTTCTCAGGAGGACAAAGCATGTTTTT  
GATGTTAGCTGAACTACTTGAACCGTGATAAAAAATCTTAAATTCTGCTTTACAATCGAT  
GGTTTTCATTTGTTCTCCAGTAGGTGATAGGTCTATAATACACAACACTACTGGAGAAGTA  
AACTTAAAACGTAATTTAGATATATCTGCGTTGATTTCTGTTTTGGTTTTGCGTCGTATGC  
AATTAACGAACCGCTTTAGATGGGTTCATTCAATGCATAGAAATGATGGAACATTGCTCG  
AACGATATCACCATTTACGAGTTCTACCTGGATAGGAGAACCTTTTTTCGAGTTGGAAATG

TTCATAAGCTTTGATGGTTCGCAGATAATCAAGTTTTTGGATTTCCGGCTCCAACAATTTG  
TACGATACGTTTGGCCATGTTTTCCATACGAGATACAATAGTTTTAGGAGCAAGAATAAC  
GTAGGTTGCCAGCGGAGAACTACTTCAACAGTTGTGTTTTCGGTGATTGCAGTAAAAAT  
TGCTTGAGACATATTCATAATGTTTTCTCTTGGTTGGTGTAAAGTACATCATATCATGTC  
TAGAGGAAGATGTAAACCCCGAAAGGAGACCGAAGTCTCCTTTTTATTAATAATTTAACT  
CATTGGCTAAGCTATCTAGGTCAGCACGTGTTGCTTTGGCTTTACCTACGCGTTCGGTAC  
GATTCACCTCTGCCTGACGCATCTGAGCACCTGCGTTTTCACTTACTGTGTTAGGTGTGT  
TCATGCCTTCTTGCTCAATCTCAACCCATTTCTGATTGCCTTTACGTACACCCATCAGGA  
ATTTATTCCACTTATTCTTATCGCCGTATCGTGATTTGATTTGCTTGATAAGTTGTTGTT  
CAGCTTGTGCAAGTTCTTCGGTTTCAATTACAGCCAACATGAAATCTGCCGTTGCTGGTA  
AACCTGCTGATTCTGCGATATCACTCATGTTTATGTCTGAAGCATCCCATGCTGCACGTC  
CTACTTGAGCTGCAGTCCATAGAACTGTTTCAGATTCTACTGCTAATGCACGAAGTTCTT  
CTGCGATAGCTTTAACTAATGTGTAGCTATTTTCAGTGTAAACTCTGATACGACAAGACC  
CACAAATACCTAAGTAATCAACCATGATTACAGATGGCACAAAGTTCTTCTTAAGTTTTA  
ACTCATTAAAGCAATGCACGGAATGTATTAGCATTAGCTCCACCAGTAGGATACTGTTTAA  
CTACTAAACGTCCTAATGTTGTTTTTGAACGCCATTTTTCCATCTTGGCTTTATATTAG  
CATAAGATACGTTACCATCATCAATATCATCAAGTGATACGTCAAGCATGTTTGCATCTA  
TACGCTTAGCGCAAACCTTCTTCAGCCATTTCCATAGAAATATAAAGAACGTTATGACCTG  
TTTGAAGATAATCTGCAGCAAGTGAACAAAGGCCTAAAGATTTACCGACGTTAACACCAG  
CCATTAACCGTTTGTGTACCGGTTTCAGCACCACTTTGGTTATTTTTATTCAAATGT  
TTAATTTGAACGGGACCTTACGTGCTTTATTTAGATAAGAAAGCCAGCGTGCTTCGTAGT  
CTTCCATCCAGTCATGTCCAACATAACTATCGAACGAAATTGAAAGTGCTTGACGCATAA  
TATCAGGAATAGCTCCTACGTCAGGCATTTTCTTGTACGTTGTTCTGGAGGTAGTTCAG  
CATTAGACTGAATTTCAATGATTTTGGACGTAGCATTATACATCGCTTTTTGCTGGACAT  
ATTTCTCAGTTTCTTTAAACCAACCATTCGTGGTCTTCAGGAGTATCAGCCAATTTTTCAA  
TTAGGTCTGAAGTTCCTTTATATTCCGGCTTCAGTTAAAGAAGTGTATCTAAAGCCACCT  
TTAATGCATTGATAGATGGCATTGCATTATATTCGTTAACGTGGCTCTTTATAATTTTAA  
AGACGTTTTTTGCCGGTCCACGCTCAAAGTAATCAGAATCCATATAAGGCCAGACCTTAG  
AAAATAAGCCTGGTCATATACTAGATGAGACAAAATAATTTCTACCACGATAACTCCTT  
AAAAGAATTTAAATTTTTTCTTGGCCCGTTCATTAAGGCTTGTTGTACTTGCATTGTAA  
CACATTTTTCAACATGTGGTGCAAGTTCTGCCTTTTCTGTCTTGGTCAAGAAGTGCAAAG  
TCCATTTTCGATTTTACCATCAACCCAGTGCTAGTTTTGTAATATAGACTTATATGATGGG  
AACCGTCTTCAAGTGTAATCAGAATCTCTTGAATGACATTTTCCATTGCCGAACGGATAA  
TTTTAAGAGATTCATTAACACTCGTTCTTTGCGAATGTCTTCCCCTTCCGAAGAAGGGG  
ATTCATCAACGATTTCTAGATTTAAATCATCGAGATTATTCATCGAAATCTTCCATTTTCG  
TCAAGGTCGTTTTCTATATCTGCTGCAGACGGAGCATCAGAAGTTTTAACCGGAACCTTA  
GTTGTTGCTTTGCAATTAATAAGGTCGTTAACAGCGTCATCAACTTCTTTAATAGAAGAG  
ATAGCACCTAGTTTATATTTAGTTTCAATTGCATCTCGGAAAGGTTTGTGTTTAAACAAC  
GGTCCCCAGAATTCTACACAATCAGTAGCTTTAGCACGCCACGATTTCTCTTACGAATC  
ATTTACCTGTTTCTTCGTCAAGGAATTCACGAGCATAACCACCGGCTTTAGGCTTAACC  
ACAAAACCGATTTTCAGTTGCCATTTCTAACAAGCCACTGAATGGGTCGATACCACCATCA  
AAATTAACCGTGATTGGGAAAGTAGATTTTTCTTTAACGGTGCAGATTTTTCTGCTTTC  
AACGTGAAGTCATAACCGGTCAATTCTGTACCTTCTTTAACCTGACGTTTLAGAGATAAAA  
AATACCGTGTTGGCAGAATAAAGAATACCTGTACCACCACCATAATCTCTTTAGGATAC  
AATCCGCAATTTCCATTGCTGTATGGTTGATTGCAACACATGGAATATCTTTAATAGTC  
AGATAAGGAGTCACAATGCGGAACAGAGATTTAAGTGCCTTAGCACGAGACATATCACCT  
ACAACCTTCTCGTTCAATGCATCTTCAGTTTCTTTCTTAGACGCAGTATTACCAATCGAG  
TCAATAAAGATAAATAACTTTATCACCGCGTTCAATAGCGTCAAGCTGATTAGTCATATCA  
ACTTTAAGTTGTTTCGACAGATTGAATCGGAGTATGAACTACACGGTCTAAATCAACACCC  
ATTGAACGAAAATAAGATTCTGAAGCACCGAATTCTGAGTCATAAAAACAACAGATTGCA  
TCTTTATATTTCTTCATATACGCTGCAACCATAGTTAGTCCAACAACGTTTTTAAAGTGT  
TTAGAAGGAGCAGCAAAAATAGTTAAGCCTGATTGCAACCCTGCATTAGTGCACCACCT  
AATGCAATATTCAACATCGGAATACGAGTAGGGACTTCATCGCGATTATTAACAGCTTA  
GACTTAGTCAAGTCTGCAGTCATTTTAGAAGTAGAAGCTTTAATCAGACGAGATTTTAAA  
TCAGACATTGTATTTTTCCATAGGCATCATTATATTTACTCATGTTTAAAAGATAAGAT  
GATTATATACTAAGGGTTATACAGCATTTAAAACCTTTAAATGGCTCTTAACGAGCCCATT  
TGATGATTTCTGTAATCAAATCATTACGTTTCGCTTGCATTAAATCCTATAACTTTGTTAG

CACCATCATGATTAAGTAATTGATACGTTTGGATTTTCGTTATGAATTGCAAACCTCTTCAA  
AATGTGAAATGACTGTATTA AAAACCGAATGAAGACAAAGTAATAAGGTCGTCTTCAA AAC  
TTTCAGTCATTTTCGTTACGTGTTAAAATAATTGTGAACACATCATGGTTTTGGCAAAGAC  
GAACATAATCCTGTT CATAAACGTCAAGAACCGAGTCCGCATCTTGT CGAATACGTCCAT  
AAACCCAGT TACTAATATATCCACGATCTAACAGATAAATCTTAGTAGGGTCTAAATAAT  
TCAACATCGTTTTCGAAACAGCCAACTTCATTTTCGAGACTTAACATCAA AACGTCCATCAA  
CTGTTTCGTTTAGGGAAATCAATCTTTACATATCTTTCACTAATTTCCATTATGTCATTAA  
TGAAAGTTGTTTTACCAGCATTATCCGGGCCATCTACTAAAATAATTTTAGCCATTTTAT  
TCCTCGATTACGACATCTTCATATTTAGGTATATTATACGGCGAAGAAATTAAGCGTTA  
AAGTAGATGAACTCACCAAGACCTGGATGGAATACTTCTTCAGGATTTTCGAAATATTGA  
ATCTTCGGACGTCCTTTAAGAATTTGATAGTACTCAGTTTTAGTTGGTTTAAAAATTCGA  
ATCAGCGCTTCTTCAGGATACTTATTTCTGT CGAAGCTATTATTTGGATCGGTTATATAA  
AGCGGTTGGCCTAATTGAATTGCACATTCAACCACTTGTTCAA AACGATAGCACGGGTCA  
CTAATTCGAAATGGATGAAAAATACCATCTAGATGAATAGGAGCCAAATCACACTACAAG  
ACGCTGCATGATGGAAGGACGTATAACTTTCTGCGTTACGATAATCTTATTACCATCTGC  
ACCTGCGTTAACCCAGCACTTCTTTTTGACGTTCAATTCAACACAGTAGTTTGAAGTGAACG  
ATTAACCGACAACATATCGGTTTTTAAGAATTCGTCAATATAAAAACGTGGTTTTATTAGG  
GTCTGCAGTGATATTGAAAATGAATTCCACATCAA AAGCGCCGTCATATCCAGTGATATC  
TGTGATTAGAAAATCACAATCATAATAAGCAATTAATGAATCAACCACAAATTCATTTTC  
AGACCAGAAATATTTACGAGTGTATACGCGTTATCTTTATACCATAATGGAACAAACTT  
AAATTCGGGAAAAGACGTTTCGCATTCTTTAATATCAGATGCATTACGTGGATATGTAAT  
CACATCACCTGGATTAGCACGGTGC AAATGAAGTTGGAAGTTGCCATCCTTAAGGATAGA  
ATACTGTCCAGTTTCATAAGACCGCATACTCAAGATAGGTACGCGGAAAATAGCCATTAG  
TCAAGGAATCCTTTAACATAATCAA AATCACGTTCAAACACATGGGCACTTACCATGGTA  
TGAGTATAATCACC AACTTCTACACCACATTCGTTAGCGATATAATGAAGTAATTTTCCT  
TGGAGATAAAAATCCA ACTGCATAACAACAGCACAGTTCTGGGAACGCATATGGCAGTGG  
GTATAAAGCTTACCATCACGAATATAATAAGTCACTGAGTCAGTACATGGATATTCAAGC  
GTTTCGTCCGAATCAAGCAAAGCCTGATCAGA ACTTTCTAGAATTTGGAACACA ACTCTT  
CGGGAGTTAGGCTTCTCTTTAAGTTCTTTTAGAAGAGCTGGTAATTGGGCGCAATGCGA  
GGACCGTAGAAAGTGTTGAAGTTTGCAGGCCAAAGCGTCTGATTTAGGTTTAGAAATAAAT  
TTAGCAACGTTAGGATATGCCTTAAACGCTTCTTCTGCATCAGTACCACCAGAAATCATA  
AACTTCCAGAAGTCTTCGGCATATTCATAAGAGATGCGGTTAATACGTGGGTCCGGTCATT  
TTGAATGATGATGGAGTGTCAACA ACTACTGT CATAGACCCAATTTCAATTACAACGTCCA  
ATACGAGAATCAGTTACGAATTCCGGGTTTTCTAAAATTTACGATTGACTGCTTTAAAT  
GCGGTTTTGAAAATCTGCGGCTTTGATATATTTCAATTGTGTTATGTTTTCCCATGTTTACC  
TCAATACAATTTATTATATACTCAATTCATAAAGCTTATTTGAATTTCTTAGCGATGTTG  
ATATAACGTAAAGCTTCAGCATCGATATTTCCAAGAACTATGAAGAAATGCATCAGCG  
TAGTATTCCAATTGAACAGGTTCTTTAATCACTTTAGCCGCTTTAGTTTCAAACAGGCC  
ATCAGGGCCTTTTTAAGAATTTGTTTCGTTGCTGTTAATTTTCATAGTCAA AATCTCTTCA  
TTAAGTTGGTGGTTAAAAGTTTTTCTAGAAATCATTCTGGGTACCTCAAAGCGTCATCAG  
AGTTAGTTACATCAATAATAGATATAGAATTTTCTGATAACCCATTTTTAGATAACTGAC  
GTTTATAATATCTTTCACAATATGTACACGTCGTC CCCGCAGATTTCAATTAGCACAAATCGA  
AATCTGGATGTCTGAACCACCTTTTTTCTAAAAGCCATCTAACAAAGAGGTTTCAATAT  
TTACTGTATGTGAAA ACTCAGTTTTCGTTTTCAAGAGTGAAAATAGTCTCTAAAGGCTTCC  
ACAGTTCTAACAAATTACCTTCAA ACTTTTTCAGAAGCGTATGCTTCAAGA ACTTTCAAAA  
TGTAGTCTGTGCTACCTGTACGTCCTGAAACTTTGAATTGAGTGATACCAATATCATTAT  
AAAGTTTCAAATCTTGAGGACGAACAAAACGAGTTCTCAACCAGTTAAATGGGTCTGTAT  
CACGAGCTTTAATACAGTGCTGCATAGGATATCCGTTTAAGGATTTAGCATCATCAGCTG  
TAACATCAGTACTATGGAAAATATAGCAAGAGTCACGATAGCTACAATGTGTTGTATAACC  
CTTACCAGCATTAGAACAGAACTCATTTACAAGAACTTCAAATATTATATTGTTCTTAT  
TGCAA AACTCTGCTGCACGCTTCAGGAAAGAACTGAACGGTTTTTATGAATTCACAGC  
AGACCTTTTTGATATTATATTGGTCATGCAAGTATTTGATTTGAGTTACAGCATCGACAT  
GTAGAATTGTTGAAACTTCAATCTCAATGTCTTTATTGACTTCACGAACAATTTCCATAA  
CAACAGGGTTAGCGATAGTAATACGCCATACGCCTATTGACCAAAGATACTGAACATAAT  
CCTGAATAGCTTTCTTCTTCCACTCAACTAGTTCTCTTTTTGAACCAGGATTTATCGTGT  
TGAGTGTATAGTTAAAGCAAATACCTAATTCGTTACAACGTTTAAACGTAATCTTCTAACA  
TCTTTTTGTCAACGTCAGGAAGCCTAAAATCAGGTCTGGCTGCTACAAAAGCCATTTCTC



TTGTAGAGCCGTATACTTCGTTTATCAAGCTATTAGGATAAGTTTTTATTGAGCTCTACGA  
TTTTATCAAGAAGAGCTAAATCAAATTCGTTCCGATTTTAAAAGTATTCATTTTTTTGCA  
TCTCGCGTTAATTGATGCGATGGTTTTTGCAGGTCTTACTTAAATTATTATAGATTCGGT  
TTATATGATTTAAATGTTTCGAATTCGCCTTTATTCATAAGAGCTTTGAATTCGTCAGGA  
CGCATAGCTTTGTGCGTCGATAATCCAATCATATACTGGTTTATGTGTTAGCAAATTATGG  
TACTTCAAGCCAATGTTTGCCAAGTCTGAATCAGACTTGGGAGAATGTCAATTGCTATA  
CGTCCAGGACCTACTGACTTCATACCGCGAGCAGTGTAAGCGTTATGGTATGCCCTGCA  
TCATACAGAGCATTAAATGGCAGACACCATTTTCGACGTCTGGTTTGAAGTTCACGTAATCA  
CGATTGTTATTCCACTCTGTTATACAATCATCGACATCAAACAAAGATTAAGCATGTTT  
TCTACATGGTGCATTAGATTCGTTCCCATGATGAGTGATATCGCCACCGATTGGACGAT  
AAGAAACACCAGTTTCTTTATCGGTTAGTACCCATTTACCAGGATTTTTTGTAAATCAGAG  
TAGCCGTTACAGGTTCTGCTACGTCATAACTAATAGAGCCGTCTTGAAGTACACGGCCCA  
TGTTACGTAATTGCTTAGTCAGAAGTTCATACCTTTATAATACGCGGCTACCGCTTTAA  
GTGGATTATTCTTGAATAACCACCTAATGCAATCCAGATAATTGCTACAGCCAAATGAT  
GATACTCGTTAAACGAACCTCATCTTTCCATATTTGTAAACTAATGGATTGATGTTAATAG  
TCACATTACAAGTTGTTTCGTCATAGTAAACTGTCCCCAGGTTCGGATTAGCGTTGAATT  
CATCATAACCTGAAACGGCATAAAGCACTTTAGCTTCATCGTACAATTTTTGGTCCGTAAA  
TCTTGGTTTTCGCCAAAATATCCACGAGGGTTCGATAAACTTGACTTCGCCGTTATCAGTAA  
TCATAGTATTACTGAAGTTCGGGTCACCGTGAATAACAGAGTACTGTCCCTGAGAACGGT  
TATGATAACGAATAAGGTGTTCTAAAGCTTGTTCAGCATTGGCTTCAGACGTCCAATCT  
TAGTGTAGTTCACATGTGTGATTTTACCAAATGAATCAATCAATGGTTGAATGCTTTTAC  
AACGATCAATAACTTTTCGTATAGAATTCCTTAGTGAAATCACGACGAACAGTTTCAGGAC  
TTACAAAATAAGTGTCTGTGCTGAATTTTCAGTGCATCTAAAATTGCATCAACAATTTGTG  
GACGAGCAAGACTTGATTTGGATTTAATATATTCAAATGCCGGCTTACCTTTAATGCGTT  
CCATTTCAAAGTTATTTTCATTAACAGAACTAACTGAGGAACTGAATCTGATTTCACTT  
TAAGATACCATGAAATCTCATCTTTCTGAAGAGCTCGACCATGTTCCGGTTAATGCGAATT  
TAGTTACAGTTTCTTCACCAATTTTCGAACTGCATTAAACTACGATTAAGTTCACGAACT  
TCATGAGCTTTTTCAAGTTTAGGCATATCACCTAAATCAATTAGATTCATAAGCTCTGAT  
TTATTGAATGCACTGCCGTAAAGGAATTCTACGAAATCACGTCCTTTGCAGTATTCGTGA  
ATTTCCCTCATCAGTAGAACCCATGTAGAATTCACAGTCTTTGAACTGATAAATTCCTACA  
ACGTTACCGCCTGTTGAACCTACGTTAGTGATATTTTCACCATCGAAATTATATCGACAT  
TCATCACCTTAAACATAGATTGCGTTAACATTCCAAGACCATGAACCAAATCAGGAATA  
ATATCACACCAGTTAACAATTACGTTATGGCCATCTAAATCTTTGTATAATTTAGCAAGA  
GCATAAGCAGAACCATACGTTTCATCAACTGTACGAATAGTCACATTGAACCCTTCTTGC  
TCACAATAAGCTCGAACAGTTTCAGCAAATTTTGAATGAACTACTACAATAATTTTCATCT  
GCGCCAAGGTCAGAATAAATTGTATACAAATTGCTCAGAATAGTGTCTTGTTTATAGTTA  
ACAAGCACCTTAGGAATATGATGCGTTATTGGATACAAACGAGTTGCTAATCCAGCACCA  
AGAATAACAGCTTTTTTCATGTTGAAGATCCTCATTGGTAAGTAGGTGTATTGTACACTA  
TTCTAGTTAAAGCATTTCATACTTTGCTTGTAGTCCAATCATAATCCATCCAATTACAAGT  
GTTGGAATCATTACTGGAGCCGTTAAGCTCCAGTAGATAGTCATGACAAGCATCAATAGT  
AAAAGTCCTATTGTTATTGCTTTCATTGTTTCGCCTCGTAACATAGCACCTAGTGCACCCGC  
CTGGATGGAACTTAAGGAAGTCATTAGAGGTAAATCCACGTTTCAGACGAAAGGTTGATAG  
CAAACGTATCGATAAGCGCTAACAAACAATGTAGTGGACATAGTCGGAGCCAGAGAATTCT  
CATCAACCTTACCGCGATGCCTGTACAGAAAGAGTAATCAAAAAGGGCTTCATTTTCTT  
GTGGAATGTCTGGGTTACAATGCAACAGAATCTGTTTGACGTTTCGGTTCGAATCATTTTAA  
GATGCTTAGCCACGCTATCATTTCTTTCAGTTTTACCAGAACGACTAATATGAATCAACA  
CGTCATTAGGCGCAATAAATCCTGCATCACCGTGAGAATAATGCCAGTGTTCAAGTACA  
TACTCGGGATACCGAGTGAAGCAAATGTCTCAGAAGCTTTAGTTGCAATATTAGCATTCT  
TACCAACACCTGTAATAATTACTCGGCTTTCATAATTACTAAGTCCCAGGGCGTTCGAAGAG  
TTTCTAGAATAGCATTATAACGAGCAGGGTTTTGACTAATTACTTTGGCCATAGCGGCCA  
AAGAAGAAGCTTGTTTTATGATTGCGTCAATAGCGATAGTAATAGGAGTAGTTTTTCATAT  
TTCTCTCATTTAATTAGTTTACCGTCCATGACATTATATCAAAAATCGAACATATCGAAC  
AGAGATGCTTTCTTCTCGTAATCGAGTTTCGCTGCTGATGTGAATCCTTCAAGTGGTTTA  
ATAAATGTCTTCTCAAGGAGAACAGTGTAGTCCATCCAATGAAGTACGTCGTCTTTAATT  
AAATCTGTGATTTTCAGTACCAGAAGGCCATGCGATACATTTATCACCGAATGGGTTTCTT  
TCACGTAAAGGCAGAACATATACTTTTTTACCTTCTACAACCTTGTGGTGCATCAATATTA  
CCTTTGATAGCTCGGTTATATGTCAGAATTCCACGAATATGGAACGGGCATTTGGGACCA

GGGAATCCACCTACGTCATATTTAGCAATGTTATTCGCAGAAGATACCGACGCGATGCTA  
ATATAATTCAATTGACGGAATTCTTTTTCAAACCTCTTTAAAATATTCTTGTAATGATTCT  
TCACCTTCTTGAAGCATACGACGAATACATTCTTTAAGAGCTTTCTGTACTGCTTTAGGA  
GTCGAAGATTTCTGAGTCTCTAGACCCATGATTTTGAGTTTAGGCTCAGCGTAACGAGTA  
CCTTCCATATCCCACACGTTTAATGCATAACGTTTCTTACCAGTCCAAAATCCGCCAATA  
CCTTTAGAACCAAGCGGAGGCCAGCGATAGCTTCTCGGTCCATGAACATTAAGTGTTGT  
TTATTGTTTCATGTATTACACATTTACACGAAACCTCTATCAATAGCTGGTTCACATCGT  
TCACGTGCAAACCTTATCTAAGAAGTCTACCCAATGGTTGGTATCACGGAATTTAGATTCA  
CCAACCTTATCGATAATTTTATCAGCAGATACGTAAATAGAGTCTGTATCACCATAAAGA  
ACGAAAGCTTCACCTTCTGTACCACAACTTCATTCAGATATTCATTAACCTTTACGTTCA  
ATCCACTGTAAAGCCATTTGCCCGAATGTTGTGATTGCAGTAGCATTACGCAAATCATAA  
TAACGGAACCAAACGTTGCCAAGTGCACCATAAAGTGAGTTGATAAGCAATTTACGGTTA  
ATTTGTGCAGTCATACCTGCAACTTCAGTACGTTGAGCTCTAAACAACATTTTCATTAAGA  
GATTTAGCAGACAACCTTTTTAATCTTTTCTTTAATCTCATCGCTGAAGTCGAAACGATAA  
TCAACATCTAATGGTTCGTCAACAGAAAGATTAGGATTATGCAATGCCTCTTTAATTATT  
TCACCATTACGTTGAGCTGCAAGCATGTAACCTTTATGTTCTTTACGTTGATTAAGACC  
TTAGTGATTTTCAGTTGGAACCTACACCATCACGGTCTTTATAATACATCATGCCGTTAGGA  
GAACAACCTGTACACATCAGAAGGACGTTTCAGCAACAGCGTTAATATAATCATGCAATGGA  
GCTACTTTAAACGTTCCCTGCTATTGTTTCTGGGCTAATATTCACTTGGCGAATAATACTT  
GGATATAGAGATGTAAGGTGCGAACTCATTACATATTTGTATCGATTTGGAATAGGTTCC  
TTAACAAAAGCGCCGGGATAAGGTTGAACCGGGTGAGAACGACCTTGTGGAATCACCTTG  
TTCTGCTCTTTAAGGCTATTAATAATAATAGCATCCCATGTTTTAATTGGGCTAAACACA  
GATTGAATCTGTATCTTAGCATAATAACCCATGTCCAACTCAAGTTGATGAACTGACGC  
TTAGCATCAATTTGCAATACACGATACACGTGATAATGTTATAAGAAATATATCGTTGG  
TGATTGCTTTACGAAGCTTAGAAATAGGGCCGTCATATTTTCAGTTTACCAACGTTCAAT  
TCAAATTCTGAAATGTAATCCAGAGAATACGACGGTTGATTGGTAAAAGAGAATTTTTTG  
TAAAGGTCAATGTAATCAAGAACAGAGATACCGAACAATGTAATGATTTACGAGAACCA  
TACATGTTTTTCGATAACTTTAACACGAGTTTTACGATGTGGTGATAAACGTTTCGCAGTT  
GATTCGCCAAAATATTCTTGATTTCGGTTATACACGTACGGAATATCAAATGACTCAACG  
TTCCATCCAGTCAAATGACAGGAGTTTTCTGTTGCCAGAAGTTGAGATATTCATCAAC  
AATTCTTTTTCGTTATCGAACGGCATATAAATGATTTTATCAATAATTTTCAGATGGAAC  
TCATCACCACCTTGTCTTGAAGCTTAGCAGCGATTTCAATAGACCATTCTTCTACATTA  
CCATATGGAGAATTCAATAGATCAAATACGTAGAACCTGTCGTCAATTGAGTCATAATGG  
GTGATAGCATCAATCGGATGTTTTGCTTGTGACGGCTCAGGGAACCCATCCGGAGATGTT  
ACTTCGATGTCGAAGTTAGCCACACGAATTTTTGTATGGTCGTATTTGATTTCATAGTTA  
TAAGTGTCAGACAAATACGCCAATTTGAAATCGTCCATGCCAAGTGCTTCAAGTCCGATA  
TCTTCCATGCGTTAATCCATTGGGAGGCATCACGCATATTAGCGAACAACCTTACGAGTA  
CACGGTTTACCGTAGATATCGAAATATTTTCGTAGCCTGACTTTCTGGACAATGAGCAAAC  
AGTGATGGTTTATATTCTACTTCACGAGTACGTTACGGCCATTAGAATCGATGTAACGT  
TCAAAAATTGAATACCAATCTGTTCAACCGTTAAGTAAAATTTCTTTCAATTTAATTTCTT  
TTAGACGAGTTATTGTCTTTTGTGTTGTTGATGAACTTATTATACTCCAATGGGACCGAA  
GTCCCATTTGCTTTAATTACCAATTGTATATTTTGCTTTCAAAGTCCAGTCATCTTTCTGT  
TTAAAAGAGATAACACGGAAGTTATTAGTCAGGCCAAACAGATCTTCACGAGCAGAGTCT  
TCAATAACAATCAATCCCCAGTCTTCAAGCAACTGAGCAATCGAATCACGTGCTGATAG  
TCTTACCATCAATATCAACCTGACGTCCGTCCATACGCAGCATTCTTTAAAGTGGACG  
ATGTAATATTTACCTTGCTTTTGGAGGATATGACAGGACTGATAAAGAACTTTATCCTTG  
TTATTAGCGATGCCCATACGGGTCAGAGTCTCTTTGACTTTCAGAAAATCTTCAGGGTTC  
TTCAATTTAATTTCAATCATTTTTTACCATTCCAATGCTAATTTTTTTAAATTGTTTTTGT  
CTTTCACATTTTTTTGTAACCTTCTTTGAGAACTCATCAGTGACCATTGGCCTTCAGTTCTT  
TAAGGACTATTGGCAACTTGTTATTTTTTTTCAAGGAGCCGTTTATACTCGGTGGCATTAT  
TCATGTTGATTGTGTAATGTTTCATCAACAATTTGATAACTAGTAACTCTGAAGTGTCTT  
CGACTAGTTTAGCCATTTAGAGAATCGACGACCACGCGGAATTGCCGCCATCATATAGT  
TGAAGTGCGCTTCATCACTTAATTCAGAACCGACTAAGTTCATCATGTAAACGGCTGGCA  
TACATTCTGGGAACTGGGATAATGAGTTCTCAACCATAAATTTTGAGTAGTCGACCTGAG  
CAATTGACATAGATTTCTTTTCATTAATAGCATTAAATGATTTTAAAGAATTCATTCTCAG  
GTTTTTCTTTAAACATATCAGCACATTTTTTGAATCGCATCAGCGTCATTAGACTTCCATG  
CAATTTGATGCTCGTTAAGTTGGACGTCATCATCAAATAAGTTCATATTATTTCCAAGTC

AGTTCGCAGGTCAGTTGAAGAAGCATATACATAACATGTAATTCAATATTACTTGCTAGT  
CCATGAAACTTATTATTTTCGCCTGCAATTTTCGTAAAGCGAAATAATACTTTTACCAGGT  
GCAACTTGGTCATAACATTCTGAACTAATTTATCGATGAACCATGAATAATCTGCAGCA  
TATTTTGGAGCTAATGCACGAAGTTGTTTGATATCTTTGTTCTTCATTGCTTCGATAACA  
TCAGAGACTGTGCCACGGTCATTAGTTACGATAGACAGAATACCTGCATCAAGAACACCT  
TTAGACGAGTACTGGTCTAATTGGCCAATTGTACGACGAAAGTCCGGGAAGTTCTTTTTA  
ACCAGAGCTGCAACAACCTTTCATATCAGCGATTTTCGATATTTTCATTCTTACAGATTTCA  
ACCATACGATGAATCATTTTCTTCATCATCGAGATTTTATCTTCTTCGGTTGGACGTCCG  
AATTCGATAACTCGACAACGACTACGTAACGGTTCAATAATTCCATCGATGTTGTTAGCA  
GTAATAATAAGAACAGTTACTAGAGAATTCTTCCATAAACGTACGAAGGTGACGTTGT  
GATTCGGCGAGGCCACTACGGTCAAATTCATCAATAACAATAACTTTTCGGCTTGCCTTCC  
ATTGAGACTGAACGAGCAAATGCAGTTAACGGACCGCGTACAAAATCAATTTTACAATCA  
GAACCGTTGACGAACATCATTTTCAGCGTTGATATCGTTACATAATGCTTTTGCACGGTT  
GTTTTACCGGTACCAGGAGATGGAGAGTGTAATAATAATATGAGGAAGTTTTCTTTAGAT  
ACTAAAGACTTGAATGTTTCATGGTCATACGCAGGCAGAATACATTCGTCAATGGAAGAA  
GGACGATATTTCTGTTCTAGAATGTGTTCTTTGGAATTGATAGTAATCATGTAATTTTCC  
TCATTATCATTAACTGGAGGATTTCTCCTCCATAATCGTACTACATTAACGTAAAGCT  
TTGACTTAGAAGTCGTGGGTAGAATCGGCTTCCATCGCAATAACATAACTTACTTGAGAG  
CTTTCAAACCTTAGCTGCAACTTTATCACCAGCTCCCCACAACATTACTTTATAGTTACCT  
GGCTGAATTTTCATATTAGCCATATTGATTACGAAGTTAAAGTTGTTAGAACCATCATAA  
TCGGTAAGAGTCAAAGAATACTTAGGACGAGTTAGTCCGGAATCTTCAACTTTATTATAG  
CCATTGATAACAATTTTACCATCTTTATTTGTAATAGCAATTGTATCAATCTGAAGACCA  
CGTGAAACTCGAAGCAATTGTTGAAGGTCTTCGGCTTTAATTTTCAGTAATCACAGAAGCC  
ACTGGGAATTGAATTGGCTTATTAGGAAAAACAATGGTGCTCTTGTCAGCGGCAGGCCAA  
TAACTGTGGAACGTGTATCTGCAATTTTAATATTACCATCAGTGTGCATTGAAATTTCA  
GCATCGTCAGACACTAGACTCAAATGCTTAAGAAGCTATTCAAATCATAAAGTGCTACG  
TCAAATCAATTTTCATCAGAGATATTTGCTTCCGCATAAGTGGTGCCATTAACTGCACGA  
GTCATAATAAATTTACCTTGACTCAGCAGAATGCCTGAGTTAATAGAGGCAAAGTTTTTC  
AGAATAGCGATAGTATCTTTAGACAGTTTCATTTTATTTCTTTCAAGACAATTCAAAGT  
TTATAACAAATTTATTATGCAGCAACCATCTGCTTTTTAATAGCTTCAGGCAGTGATTCA  
ATATATTCTGGAATTTTAGAAGCAACAATTTTCGCCAGCTGCAATTAGTTGTTTCGTCGGCA  
TCAACACAATAGAAATCTTCTAGACGCTCAGAACCGTCTTTATCAAGAACGATTTTTTCCG  
CCAGCTTCAATAGAATCTTTATAGTGCTTACGCATCAGATGAATCCACATATCAGATACA  
TCGTTATCAATAAAACCATAAATCATAAAACGAGTTTCTTGTGGCAAAGATTGAAGTTTT  
TTAGCACTTGCATCACAATGCAGGACCCATGCTTTACGAACACGATTATGGTTATGT  
GGGTTAGCGTCAGTACGGATAGAAGTAACTTTTCAGATCAGCAGCAGTGAAACCTTTAGCA  
GTAGTAAACATATTTTCTCTTATTTCGTAGAAGTCGGTAACTGTCCATGCGGAATTG  
CGATTAGACATTATTTTATTATACTCATCTTTAAAAGCAGATTTGAGCATTGTTCAGTA  
ACAATATGTTCTTCACCTGAAAACGTATTGGTCAGAACATATTTTTTAATTTTCAGGGACA  
ACAAGAAGATGTTGACCGGTTGAATACTCCATGTTGTTCTCCATTTAATTTGATGTGGTC  
ATTATAACCACATCGTGTTAAAGCGTTTATGAAACAGTCATTACAGTAAATCGTCCA  
TTGCTCATTGGAAGATGTTGTCCATAAGCTTGTGGGTCATGGTCTCTGTGACTAATTATA  
AACACGTTTGCATCGGTTAGAGAGTTAAGAATTGTTGAAATAGCTTTAATACCTTCAGAA  
TCAGTCGCTGAATCCATGACTTCGTCCATAATTAATGTATTGATTCTAACACCAGAGACC  
TTTTTCGGCAATATCTCGCCATGTAACAACAATGCGATATCGATACGTGCCTTTTACCT  
TGACTAAATGAAGCATAACTAACTCTTCACGGCCACGTGATTTTATAGATTCATTGAAT  
TCTTCATCAATAGAAAACACGTAATCAGCTTCCATGATTTTAAGGTAATGGTTAATCTGC  
TTGTTGAACAGAGGCACATATTTTTTAATGATAGCACCTTTAATACCAGAATCTTTTAAC  
ATATCTGTGATAATAACCACGATGGTATTTTTCAAGAACGATATCCGATTTTGTTTAATG  
ATTTTATCAAGTTCTTTTTGAAGCAAAGCTATCTCATCGGCATGGTCGATAAATTCCGCC  
GAGGCTTGTCTATTGCAGCTTTAACTTTCTTAGCTTTATCAATAGTGGCAATCATTGCT  
TGTTTCTTGGTACGAATATCAGATGCAAGGTCTGTTTAGTCTTAACATTAGCTCTATAT  
TCGTCCACTAGGACACTCAGATTATCTCTGTGACAGGTAAGTTGCTCGAATGAGTGATTA  
CATTCATGAAGCTTATCGGTAATCTTAGAGACAATAGGATCACCTGGTGCAACTGTGAT  
GCACAAGTAGGACATGTACCACCATCATGATACATCTTAATAACTTTGTTATATGAGTCA  
ATTTTAGATTTAATCAAGAATGCTTCTTGTCCGATCTTGTGGAATGCCTCAGTAGGGTCT  
TCATCAAGAACGATATTAAGTAGTCGCTCATTAGCTTCTTCGATTTCTGCTTTTAATGAA

CGAGCTTCTTTGGCTAGGTCGTCATACATATTCTGTAGACGCGCTACATTATCACCAGAT  
AATTTCTTTTGACGTTTCGATATTCTCATTATAAATCTTAATTTGTTGGATAACACCATCT  
TTCTTGGCATCGAGAACTTGTCCCTGGGAATTAAGTTCTCGAACTTGAGACTTATTGATT  
TTATCCATTTTCAGCGAGTGTGCCAACTTCTAAAAGGTCTTCGACAAGTTTTCTACGAGCA  
GGGTGCTAAGAGCCATGAAAGGGGTATACCCTGCCGTCCAAGCACAAACGATTTGTTTA  
AAAGACGCGTATGACATTCCGATGCTACGTTCAAATTTCTTCTTGGAAAGTCACGACTGCTG  
GCAGATTCATCAAGACGAACACCGTCAACGGAGATTTGAAAATATTGGGCTTTTGGCCA  
CGTTTAATGAAGTATTTTTTATCATCGAATTCATCCAAAGCTCAACTAAGAGCTCTTTC  
TTGTTTCGTGCTATTAATGATTTGTCCTTTCTTAACATCACGAAATGGTTTACCGAAAAGT  
CCGAAAGTAATGGCTTCTAACATCGTAGATTTACCACCGCCATTTTTACCAGTGATTAAT  
GTCTTTTGGACTTTATCTAATTGGATATCAATAGGATTCCCACCTACCGACATGATGTTT  
TGATAACGAACACGATTTAATTTAAATGATTTTCATATGTATTCTCTTCGAATGAAGTCT  
CTACATATTTAACATGTCTCTATCAGCAAAATACTCGTCTAGTTCTGCATACATAA  
CAACACCCGGTGCCTACTCACAGGTAACATACATTGTTCCAAAGAAACGAGGAGTTGTCT  
CCTCGTAATTCTCAGTCCATTCAACGATACCAATATAACCGTCACCAATACTAAATTCAT  
GACGATGGATTTTCATAATCAGTCTTCGTCATTATACGCATCCTTGATACATGCTTCAGCC  
ATTTTAAGAATAGAGCCAGGAGTATCGTTGTCCATTATATTAAGCTAAATTCATAGCC  
CAGTCGGTGCAGACATGAACTGCTTTAACTTCATCGCCTTCAACGCGTAATGGCTCAATC  
CAATACTTGATAGTGTCTCGAATCCATCATCATCTTTAACGTCCATTTCAACTTCAAGC  
CTGAGTCCAGCATTGTTAAATTCATCTAAAGTCATTGTGTTGCCTCAATATAAAGTTCGT  
TGGAATATTTGACCAGCGCTTCTCTGTCTTCGTCTGAGATATCTGGAATCGCGTCAATAT  
ATTTCTTAATGATATCTTGAAGTGATTTAATCTCGATTTCTGGTTCGTCATCAGATTCAA  
CACTGTTATCAACTTTAGAAACCATACGAAGAGAGTGAACACTTTTTCAAGTTCAGATT  
CAAACCTTAGTCAACTCTGAATCAATTTCTGATACTATAACACGTACGGCTAGATTGGTAT  
AATCAGAATAATTGATTTTGCCTTTAAACGGATAAGTGATTCGTCGATGCCATGTTGTTT  
CATTAGGAATAAATTCATACGTTCAACATCAGTGTCAAATACCAGAAATCCGCGCGGGT  
CGTTCTCATCACCTGCAGTAAGAGTCCATGGTGTCCCAATATATTTGACGTTAGCAGCTT  
CAGAGATTGTGTGGAAGTGGCCGGACCAGACTTGTTTATAAGTCTTTAAGAAATCAGGTT  
CAAGCCCATGAGACTTCATCCCTTTATAGAAATAAAAGCCATTCAGTTCCCAATGACCAA  
CACAATACGCGGCAGAAGAAGTCTTGATGTGCTCTAAGATTTACCTGTATTTTCTTCAC  
ACATCCATGGAACGATATCAATCAGACATCCGTCAAATCTACAGTAGTTGGATGCTCGT  
AAATAGTAAAGTTTTCAAATGAGTTAACAATTCAGAAACAGTGTAGGTGTTATTGTAT  
TCTTAAACGCCATGTCATGGTTTCTATCGTGACATGAACGTGAATACCTGCTTTAGAAA  
TCATATCAACGATTTACGATTGAATTCATTGTACGATGTGTTATTGCTTTACGGACAT  
CAAACCAATCGCCGTAAGTGAATCCAAGTTTTAATCCCGTGTCTTCTAGAGTATTCAATTG  
CTTGACGAATACCATCACGTTGAATATCTTGAACCCATGGGTCTGCTTGTGTTGACTCCGA  
TATGGAAGTTCGCTAAGTGCAAAATTTTCATATTTCTCTCATTAGTTAATTCATTTTA  
TCATCCGTTTATAAAGCAAAAAGGAACCTCCGAAGAGTTCCTATCCACATAGTACACCGT  
ACAGAGGCTCATTGAACTTTTAAATCGAATGGGCTTGTATGTAATAGTTCCTTCGGCTT  
TAGCTTTATCATAAGACTCTTTAAAACGTCTCGTCTTTCTGCTTTGCCTTTACGGATTT  
TATCGAAATTTTCAGAGGTCAGGTCGTTTCGTCATGCATAATTATCTCTCAGAAAATACCT  
AAACCGATTTCTCTCATCGTTTCCACCATTCTTAACTTGAAATGAATCAACCCACACGA  
GTTGTTTTGGGTCTGCCTTTACAATAGGCGGACAAATTTCTGTAATAGAACCGTCGTGAT  
ATTCCTTTTCAGAAATTTAACACAAAGAGGACCTCCCAATTTAAGGGTGAACCCCTGCGT  
TCAGCTTCAGACGTTTAACTTTGTTTGAAGTACGCGCATTAAATGATGTCTCAATAGCT  
TGACGAGTAGTAACCCACTGGATTTAATTAACCTTGTCATTGTATGGTTGTCGTAGAATA  
TCCCGAGATTTCTTAATAGCATATTCGTAAGCTTCGAAGTTGTTTTGAATTGCTGCTTCT  
TGAGCATGAGCATAAAGACGGTTTAGTTCAAACGATTCTTTTTAAGAATCTTTTCGGAT  
TTTTTACGTGCTTCAGCTTCATTTTTCTTTTGGATTTCTTGTAGCATTTTAGCTACTGCA  
TCTTCTGCTTCTTTATTTTCAATAATCTCGGTAGTCATATTATCTCATTAATTAATA  
AAAACGTCCATCCTCTTCAATACAGAAGTCTGACTCAACTGGAGTCCCATTTATTGAAA  
TGACACGTTCATGCGGGTTCAAAGGGTCGATGTCAAATTAATTTTAAATTCACGACCCAA  
CAGTTTTACCAAATAAGGGATTGCTTCGTCAAAGGTTCTTCTAAGTAGTTAGAGATGTC  
AATTGTCATCCTCATATAAAAAATCCAACTAGGCGAATCGCTAACAACTTCCTTCTTTT  
CAGCCCCAGGAGCTTTATAAGCGGATTTCTTCAATGCGTCATTTTATCGTAGATGTCTT  
GAATAAACGTTTCATCTACCAACGCTACCATATCATCGTCATGACTGTCGTAGACATTAT  
GAACGAAGTAACTATATTTCTTTGCAACTTCCTTACGTTCTTTTTTGGATACGTTGGACAA

AAGCATTA AAAACAAGCTCGAGTTATGTATGCATGTGGGTTATTGTACTTAGTTTCGTGCA  
AATTATGAAGTCCCTTAATAGAGGCTTCAATCCCATCTGCAATCATCTCCTGCTTCCAAG  
ACTGGGTATATCCTGAAAAGTTGAAACGTTTGGACAGGCCTTCGGCGATAAGCATAATTG  
CTAAACCGATGGTATCATTCTGACGAATAATTTTGTGGGTCTTTATTATTTAAGAGCT  
CCTTTTCCACTCGATTATCCCGGCGAGAAGCTCTTATTATTCACATAGTTATTTTATG  
GTTTTGTTCAGTCATAAGTACCTCTTGGCTCAATTCATAGGTCTATTATATCATAAATAT  
TTAGAGACCTATCTTAAAGCACGAGATACTATCGGAGCAAACAATAAGCCCGAAACACTT  
TTCCATTGAACGTTTGAACCTCATTGATATCGATATAAAGCTCAGTAAGACCGGCATTAT  
AAAGAAAATCTAAAAAGTTCTCATGTGTTTCGTTATAGTCGCCTTCGTTTAATTGAGATA  
CATGAGTTTCCCAAAAACCAACACCTTTAACGAATGGAAAATACGTGACTTTCATGTATT  
CGTCAACATAAAAATTCGCCAGCTTTTCTTCAGTTATACTGATTCGAGTTAATTTTCATTC  
TATTTCCCTTTGCTGCTTCAAGAGCAGCATCCAGCGAATCAAATTGGTCGACGAAATCAAT  
ATTCAACGCATCGTCAACCGTAGCATATAACCACCATTGTTTGAATTCATATTCTAGGAT  
AAATCCAGGCCCTTCAATCTGAGGAAGACCTAGGCTATTTGTACCAACTTCGTAACCAGC  
TAGACGCAGGTCATTAATCAAAGTTTCTGTTAATACGCTCATTTTACCGCCTTAACAATT  
TTCAAGTCAGCGAATTTTTTCTTACGTTGATTTTTTCATACTACGGATAGTCTTTTCAGAG  
ATTTTCATGTTTCTGATAAGCTTTAGATTCAACACCAAATGCAGCACCGTCAAATTCAGAA  
AGAATATATTGTACTCGAATTTACGAATAGAATTACGTCCAATTTTCTGGTCCGTGTTT  
TTGCATGATTTCCATAAAGACGGAAATTTCCACGCGTCAAGAACTTGAGGAGTAACAATA  
TTGCCAGATTCCAGAAGAGCAACAACCTTTATCGAAAGCGAAAGAATTAACACTACGCTTTG  
ATTTTAGTAGACATATTATTTTCCCTCGGTTATTTTATTATCCAACGAGAGAATTATACTC  
ATCTCTCGAGAGTTTGTATACTATTTTTGAAGCATGGAAAGTAAGTAATTTGTATCACGT  
GGAGTAATATCAACACCCATATCAAAGATGCCTTTATAGATTGGGTATTTGTTTTCGGTT  
GTATGGAAGCTGAAACTATTTCCATCACAACCTAACAGTAATAGCATCTGTAAAATGTCA  
TACTCAATCCTAACAATTGAATCCCCAATTTTAACGTTCGAGGTGTTTTTTGAATTTGATA  
AAATCTAATTCTTGGGCCATGATATTTTCCCTCATTTTAAGACGATAGGAAGATAATAACA  
TGTCTTCCCTATCGTTGTACATTATTAACCGAACTTTTTTGGCGCCTTTCCAGCCTTCGT  
ACATAACTGCACAAGTCAGTAGTACAGCGTGTGGCATTCTTTGTATTTGTAAATCCAGA  
ACCAGCGTAAGAAGTCTTCATCCTCAACGCCGGTGGATTTTCATATTGGCAAAGAATTCGG  
CACGTTCTTCACGAAGCTTTTGGCGATAACATAGATTTCAGGATTCATTTTGTGTTCCACAC  
CCCATTTTCATCGATGAACTTAATCCAGTCATTTACAGACCATTTAGTTGTATCACCTT  
TGGATTAACATTTAAAGTATATAATCCCTGCTTAAAAAGCATTTCGTTTGATATTCATAAT  
TTCCTCAACTGTAACGATAACATTCGTTAGCTTTACGTTTGGCTTCAGTATGAGAAGTAT  
TATAATCATAATCTTCTTACTGTAAACATCTTTTTTCAACTTACGAACTTCTTTGCGGA  
GTTGTGCGATTCATTTATTCTTACTTTCAGAAATCAACGCCTTTCATACGTTTCCATTTAT  
CTGAGCGGAAAATGTTTTCAACCATGTCTTTGTGGCTAACACCGTCAGGAGCTTTACGTT  
TACCAATGTAATAAAAATCTTTAGAAGACAAATCTTTACGACGATACGTTTTACCCATAA  
GTACCTCAGAGATTGATTTCAATGATACGTTTGATATACTGCACATCACTTACTGAAAGG  
TCTTTAAGACCAATTGATTCTAAACGTTGTGCAAATGTTAACATATGGGTGAAGTCCAAT  
TGCGTTTTAGTCATTTGATAAGTGTGAATGCCATTAGCAAATTC AACCTTCAAATCGTTA  
ATGGTGACGAAAATCATTTCGTTTCATTCATGTTAAGAACTAGAACAACCTTTCTTTGAG  
TCTAAACTAATCATAGTTTAATTTCCCTTCGCAATTGAACAGAAGATGCCACGGTCAAAA  
TCATTTACCGATTCCAGGATACTTGATTGAGCGATACCAAACATCTAGAGTTGAAACTT  
TGGTTATTATAAATAACATTGCCGTTAACGGAATAACTGATCAACCTTAATTTCTTTAT  
CTTCAATTGTCATTTTGTTTTCCCTCTGTGGTAGATGATGCTAATCTTAACATATCTATCG  
AGGATGTAAACTGTTTTATGAAAATATTTTTGATTTGAGAGGGGCACAAGGAGATAGTGA  
AGTGAAGATTCCAATGGATTATATTAGAAATGAGATAAAGAAGACCAGGCGGCACCTGGT  
CAATCTTCTATGATATCAGAGTCGTATCCTAATGAAATCAAGGACTTTTTAAACTCTGCA  
ATATCTTTGTTTCTTATCATTTAAAAATATGACAGGATAACGAATATTAAGTGAAGTGAA  
TCCTGCACGTTTAGCAAGAGATACGATTAAAGGACGGTCATATTCAATCTTACCATTATT  
AGTGAGGACTTTATAAAATGTATAAGGAGCATTGAGCTCCTTTAAAAGTTTTGTAACAGT  
ATAACATCCTGGACAACGTCCAACCTTCTTCAGGGATGCCATATATTTCAATCTTGTCTT  
TAAGTTCGAGTTTTGTTCCACGAGAAATAATTCCTTGGTAAGCCCAATAAGGAGGATTAA  
CAGAATCCTCACCAGAGTTTTCTTCAGGAAAATAAACCTGGATAACAAATCCAGATGCAT  
CAAAGGTAAAATAAACCGTAGGCAGTTCACCTAACAAATTCGGCACGAGCATTAAATTTCTT  
CGAGATCCCGTTCACGTCCAGCCCAAAAACCTAGGATTTAGATTACATTCGTA AAAATAAT  
AGTCATTACCGAACATATCAAACCCCTTCCAACCTCTTACCACATACCGCTCAAAAATAA

TCATAATTAAGCCTTTTTATCAAGAACAGAATTCAGTTTATTAGTAATTTTGTCCAAACG  
TTCATTGAATTCGCTGGAGGATAAACCCTTTTCCGGAGAAATTAACACTAATCACGAAAA  
TACACCAGTAAAAGGAATAAGAAAAATAGCTCCAACCTGCCATAAACAGAAAGAATGTTAC  
AGTTGTAAGAAAATCAGCTAAACCTTTACGAAATTTATACATATTTACCCTTAATTAATT  
AACCAAACATTGATAAGCACTAAACTATATTGCGAATAAAATTCTGGGCCAAAATGAAAA  
ATCATATCATTATAGTGTCCATAATGTAATTCATTTAATCATGTTTCCACACCCCATC  
GGTATTTGACCAAAGTCGCTGATTATCTGATCCTCGCCATAGCTTTTTGGTCGGAAGATT  
TTTCTCATACTTCCCATCAATAATAACATCAACATATTTAAGCATTCTAGTTGTTAAT  
ATCTTCAAACCTTGATCCTGTCCACAACCAAATGCTTTTTATTGGGATAAAGATTTTTTAC  
TGTTTGAGCAATGCAATGAATAACATCTCGATTGTCAGGATAGAGAGGGTACCTCCGGT  
TATAGTCAATCCTTCTATATAATCGTTATTCAAACATTCAATTAATTGTTCTAGTGTTTC  
ACCAGTGAATGGAACACCATTTCTAGCATTCCATGTTGATTTATTATAACACCCTTCACA  
TTTATGCAAACAACCTGTAACGAAAAGAACGACCCTACAACCAGGGCCATTCACAAAATC  
GCAAGGATAAAAATCTATCATAATTCATTGGTGTTTAACCCCTATGCATGATTTCTTTATTT  
TTACCGAGATTAATCCGCGTTCGTTCCGATTTCCCAAATAACCGCATGTTCTTCTTATG  
GTGTTTCATCTTTTTAGGATCAGTTTCTCCACAAATAGAACAAACAAATCCGGTTTCAGTA  
GGAGTCATTTTCATGGGTACTTCCGCATGTAAAACATTTATCTACTGGCATATTAACACCA  
AAATAATCTAAATGTTGTGCAGCATAATCCACACGGCCTCAAGACCTTTTAAGTTATTT  
TTCATATCAGGAAGTTCAACATAAGAAATGTGACCACCTGTCGCAATGAAATGATATGGC  
GCTTCACGAGAAATCTTTTCAAACGGAGTAATATTTTCTTCTACTGAAACATGGAACTA  
TTAGTGTACCAGCCTTTATCAGTAACATCCTTTACACTTCCATATTTTTCTGTATCAAGT  
TTACAGAAGCGATAACAAAGGTTTTTCAGCAGGTGTAGAATACAAGCTAAAAGCAAACCCA  
GTTCTTTTCAGTCCATTGTTTAAGAAGAGCATTCAATTTAGTTAAAATTTCTTGTCCAATA  
TCACGACCGACAAGAATATTCAATTCGTGAATACCAATGTATCCTAGGGACACTGAACTT  
CTACCATTTTTAAATAACTCAATTATGTCATCATCAGGTTTAAGACGAACCCCGAATGCA  
CCTTCTTGGTAAAGAATAGGAGCAACAGTAGCTTTAACTCCTTTTAAGGAACTAATTCTA  
CACATCAAAGCTTCAAACACAGGTCCATTCGCTCATCGAACAATTCAGTAAATTTCTGT  
TCATTGAACTGTGTTCCAATATAAGAATCTAACGCAATACGAGGAAGATTTCAGTGTTACA  
ACGCCAAGATTATTGCGTCCATCAAGAATTTCAATTGCCAGTTGAATCTTTCCATATGCTC  
AAGAACTACGGCAACCCATTGGAGAAACAGGAACTGAAGAACCGGTAATAGCTTTATTA  
TTCTTAACCGAAATAATGTCAGGATACATTTCTTTTGCTTGCGCACTCTAACGCAAGTTGT  
TTAATATCATAGTTTCGGATCATCTTTATAAAGATTAACACCTTCTTCAACAAACATAACA  
AGTTTAGGAAAAATAGGAGTTATTCCATCACGACCAAGACCTTTAATGCGGTTTTTAAGA  
ATTGCTTTCTGAATCATTTCGTTTCAGTCCAGTTCAGTTCCCGTACCAAATGTAATTGTTACA  
AAAGGCGTTTGTCCGTTTGAACATAAGAGAGTATTTACTTCATATTCATAAGCTTGAAT  
GCATCGTATACGTCTTTTTCTGTTTTAGACTGGGCATAATTCAACGCATCAGCGATTTGC  
CATTTTTCTGCATCCTCAATATGTTTTGCATAGGTGCGTTTAAACATAAGGAGAAAGTACT  
TTATCTACATTAGCAAAGTCGTTCCGCCGATTGATGGGAAGCAACCTGTGCAGTAATT  
TGTGCCATAATTGCAGTAGCAACGCCAATAGATTTAGGCGTTTCAATTTGAGCATTGCCT  
AATTTAAATCCATTCTCAAGCATCCCCTTTAAATCGACTAACAGCAATTGGTAAACGGA  
AGAGCAGGAGAATAATCAATATCATGCATGTGAATGATTCCGCTTTCATGCGCATGCATA  
ATAAAAGACGGGACCATATTTTTGGCAATGTGCTTAGACACAATACCAGCCATAAGGTCC  
CGTTGAGTTGGAAAAACAGGAGAATCTTTATTAGCATTCTCGTTCAAAGATCTTTATTA  
GTTTTATAAATTAATCCTTCAATTTCTTTTTCAATTTTCATTTTAACTCTTTCTAAGCT  
GCTTTTTGAATGAAGCTATTAATTGTGTTTTAGTATCAGATTCATTATATTCAAATCCTC  
TTTGAAGCATCTCAGCCATCATTTCTTACCTAGTCTTGAGAACTCTTTAGTTTTGT  
CTGGAACAAAATTAGGATGGATATTATTATCAGAATAATCTTGTTTCAAATAAGCAAGAA  
GAGCTTCAAGCCATTCTAAGTAGTCAACGTTTTGTCTTTCAAACCGGAACGGTTGAAC  
TATGCTTCATTTGACCTTCTGCTGCGTTGCACAGATTACAGAGTAATCCACGAACTCTAC  
CGGCTTTTGGCCCGTTTAAATTCATGGTTCGTTGTTCAAGATGGTTACCTTGAACATCAGGGT  
CTAATTCACGGTGGCAAATAGGACACTTACCGTTCTGTGCATCATAAAATTTTTGTTTTT  
CTTCTTTATATTTTTGCGCCTGATAATAACATGATAAACCTTACCTTAAATAGATAAGGG  
TATTTATAATTTAGTAAACGTTATAAAAAGTCTCGATGAAAACGTTTATATTGACGAATCA  
TTTTCTTAGTAGGACGTGTTACTGAAATAATTGAAGTAGTCATAGTCGGATTGTTTGGAG  
CGCCAGTCATAACAAATTTCCAGGATTTTTGGCCATTTTTCTTTCACCATAAAATAATT  
CAGTTTTCATAATAAACCTTTAACTTAAACGTCTTTCTAAATATTCAATGTATTCCGCTG  
CGGCTTGCATCAGATTACCTTCAACCGTCATTATTTCTTGGGCGGCTAATTTAGCTA

AAGCATAAGAAATACGTTACCTTCGAATTCGCCAAGTCCACCATCACAACTACTTGGT  
CAATTTCTTCGAGTTCATCTATTGAATGGGATTCCCAGAAGCACCAAAGAGAAGTATCAC  
GGTCATAGATGCAAAGTTTCTCACCTGTGTTCAACATCACTTCGATAATGCCATGGTCGC  
CATAACCATCTTCGGTAGTAGTACCAATTACCTTGATGATTGTTCCTTTCTTTAATTAG  
GAACTTGACTTGTAGTTCCTCATCTTCTTTAACAATCTTGAACCATTACCGCGAGTTT  
CAGAAATATTCATATCAATATTCTCTATAAAAGTTACGATGAGAACGTTTLAGCTTTGCGA  
AGCTGACGTTTAGTAGGACGAACTGTAATGGTTGTCCAGAGAAAAAATTCGGATCGGTT  
TTAATAAGCAAATACCAATCATGTTTGCCATTTTTTTAATAAACGGTACAATAATTTAAC  
TTGCATAATAATCTCTCCCATTTCCATATCAATTAATTCATTTATTGAAGGTTTCATCAT  
AACATGGTTCTTCGTCGTTGTAAACCGTTTCGACGTCCTGGCTCGACAGTCTCCCATCGAG  
CAGAATACCACGGTTTAACCCCGGAGTTTATTGAGCTCTTCATAATCAATCCAGGATTCT  
AGCCCTGACGGCAGGTACATTCAATGTTCCACAGAAGCTCTTCAATGGCTTGCAGGCGA  
TTATATTCTTCAACGGTAATGGTAACCATTGGTGCAACCGGTTCTGCCTTTTTAACCATC  
ATATCGTTCATCAGGACGTAAAGGTCATCACGAACGACAGTGTCCGTTCCAACCCCATGA  
TTTGGCTTCGTAAGCTAATGATGAAGGGAGCACATTTAAAACCTTCAAAAATAGTTGGAGC  
ATCAGGACCAAGTTCATTGGCACAACTTCGTATACATCTTGGAATCTTTAAGATTTAA  
TGAATATGTCATTTAAAATATTCTCGCAGTTGGTCAAATCCACCAATGTGACTTCCGTC  
GGAGCAAACACTTGAGGCATAGTCAATCCGACTTGTGATTCACGTCCAAGCTTAACCAGA  
AGCTCAGCAATTTTCTCATCATCAAAAACACCTTTTTCTGGCATAACATTAATGAATTCG  
AACGGCTGTTTCTTAACAGTCAGCAATCGTTTCGCATTATCACAATAAATGCATTTATGA  
ATAGTAGAGTCATACCCGTACACTTTAAACATTATTTTTCTTTTCATCGATTAATATGC  
AATGCCAAATACAATACATGTAATAAAACCTGTGATACAGATAGAAACCAACAACACTGT  
ACCAAAGAACCAAATCAAGTTATCTTTAGTAGTTTGTGTTGATATCCATCTCACGAATTC  
TATAGCTATCGTATCACCTTTATTAGAAAGCGTATAAAACGATGGTGATACACGCCTGTC  
AAAACCTCGTCCTTGCTCATCTTTATAGACTGCAATAAATTCTAATTTAGAATATTTTTCC  
TGTAGATTGGCCTGAGATTAATTCCACTACCTCCACAGGAATTAAGTTTCCATGTA  
AGTATTCTGGCTGTTCCAAATGAATGGAATAATAGCAAAAACCTAAAGCTGCGATAAAACA  
ACGAAGGCTATATCTCATTATAATGTTCTCTCAAATTTGTGGAAGCATTACGGCATTTC  
AATTTCAAGTTATCAGTGGTCCAGTTAACCAGTTGGACTTGGATAGTTCCACATTCGGGA  
TATGGATGGTTTGATGCCGATTTGGCAGCATTTCACGTCGTTCAACCATTTTCATTATT  
TCGTTCCATGCTGGAGGAACGAACCTCTTCTCACCATGAATTTTATCTCGCTGAACAAAT  
TCAATCTTTGAACTATCGTCAATAAACTTAACCAAGCCATGATTAGTGCTCATATCAATA  
TCCTCTAAAAGACGTAGTTTCATTATAACACCTCAATGGCATTTCGTAAACCATCCGCTT  
TCGCATTCAGAGCTTTTAACGATTTAGTTTGTGTTCTGCAATCTGGGCTTCGACTTCTTTCA  
GACGAGATTTGAGATATTCGCGTTCTTCTCTTAAGTTATCAACCTTTTCTGCTTTAGGTT  
CTTTAATAGGCTTAAACACATTAGGGTTCTTCAGTTTAATTTAATTCGAGAACTGAATA  
ACATTGAACCGTTATCTTCGGTTTCACTGTGCATTTCTACCACGTCCATGATTCTTAACA  
TCATGCCGAAGTTTATAAGACAGCGAACGAACGGTTTTATTGTGCTTCTTAATTTCTTCAG  
CTTTCATGGTGCCGAGATTACGTGAGTAATAATAAGGAACCTGAATATCAATTGATAATG  
ATGCGGTACCATTACCGGTTGGTTTGAACACTGCAGTAACCCAATCTTTAACATGAACTT  
TATTTGTACGATCATCGCCGCCAGTGAATAATTTACAAGAATGTTTAAAAGCATATTCA  
CTTGGTTATTGAATTCACAAGCAAATTTATCAGCAAATTTAGTTTCAGGAATGGTAGAGA  
ACCAATCAGCTAAATGAGTCTTTTTAACATCATTAAACAATAGTGAATTCAACCAAATCGG  
TTTTAGATGTCACAGATTTAATAAAGCTCGGCTTCATAAAGTTTTTGATGTTATCACGAG  
CTACAGTAGAAGATAATAAACGAGAACGTTTGAACCATTGAAGCAGTGTCCCTAATGAAT  
GAGAATACGCATTCTGAGTATCTTTACAGATATGATTTTCTTGGCCCGTGTATGTACCAA  
AATCGCGAAGAATACCACTTACTACATCTCGGTGTGGAACATCAAATCCTAGTGCACCAA  
CAGCGCGCTGGGCATGAACGTTAGCGATAAGACCGGCAAAGTATTCAATGTAATGTGAAC  
GTGTCATAATGTTTTCTCTCGTTAAGATAGAAAGATTATACTCCAACCATCCTTGGTTG  
TAAACTGTTTTTATGATTTTAAATGCATTCATTGCGTTAAAAAGTTTAGAATACTGCAACT  
GGAGATTCGTTACAACACTTTGAGCATCACGGAGCTTAGCTTGTGCCTTGTCCAGTTCAA  
CAGACAGTTGGTCCACGGGGGCTTTGATTTGGTTGTAATGGTAATCTTCGGCCGGAAGAA  
GGCATTAGAACATTTAGTTTTACTGCCGACAGTTTGCACACATTTGGCAACCTTTAACAT  
ACCAGTTGTGCCGGAGCTGGAGAATATGCACCTAAGACTTCGGCATTACCAACTGGTGT  
TGCAGTAATTGACGCTTCGAACGTTGCATTTTCTTTTTAAGATTTTGATAGTATTCAGA  
GTCTTTGTGCCACCATGGCGCAGGAACCTTTTTACCAATAGATACACGAGCCTGGATAGC  
AATATGACCCTTATTCTTGATGGGGTCGATAATATTAAGCTCACGAGAATAAATTGCTTT

AATCTGGTGGATATTATCACCTAACACTTCCAACGCTTGGTGGGAATACACGAGCAACGTT  
ATCATTCTTAGGTTTATACGTAAGAGTGAACCTATTCTACTGATAACCATGATTTCCAA  
CTTATCGTAAGTATATTTCAAATGTTTCATGTTAATTGCTTGAGGACGAATACGAGAAGC  
AATGGCCAACAGATTGTTAAGGTTATTTCTGAACTGTTAGCAAAAATATTGTCCGTAGCC  
GCCGATACAAAATTACGAAGTTTCTGTTGGCTAATAAACGGCTGAACTCACCATTTTT  
AATGAACTCTTTAACGGGTGTGTTAGTAACGCATTCAAATTGAGTAAACTTACGAGAATT  
AATCCCATAATATGAACAGATTTCCCTCAATCTCTTCAGGAGTCTTTACAGGCATACGGAT  
AGGATTAGGTCCTGGAGTATATGCGTTCGAGGTAATTCTTTGATAAGTTCTCTACGTGT  
AATAGAAGCCATTTTATATTCCTCATGTTGAAAAATTTATTATACTCCAACCATCCTTGG  
TTGTACATCATTCCCTAAGAAGTTTTACTACTTGAATAAGATTAGCTCGTTCTGTTTTAT  
TTTTACCGTTTAAGCCTGCTAATCGTGAGATTTTCATCGTCAGTCTGTTGAATAGTTACAT  
TAAGTTCGTTAATCAAAGCTTCAAAGTATTTGATTTGCTCAGCATGTTTTGATTCAAATT  
TCTGAACCGGAATAACGTCTTGGTTAGTTCGTCATAAAGGTCTTTAAGAGCATCTTCTT  
GGTTGATATCATATTCAACTTCTTTTATTTCTTCAACGAGCTCGTCTTTATATCTAACGT  
CTTTTAGTCCTGGTGCTGGTCCTGAAATCTCTTCTTTAAGAGTACAAACATACCCAATAC  
GGTATCCAATGCCGTCTCGCTTGATATCAACTTCGTCGATAAATCCACAATGTTTAAGAC  
CAGAGCCGATTAGGTTAAAATATCCTTGACGTCGTCCTTCAAACGTTACACGAACTACTA  
AGACGGTTTTTGCCACCGACCTTTTGAAGCTCACATTTATAAAAGTCAGTTGAACCTGAAT  
AACGTGGATGAGTTTTAAAGTTCATCTGACGATCTAGGCCATTTGTAAACGTGCTGATA  
CGGCCAGAAAACGTGTTTGGTTCTCGTTAAGATGAGCAACAATCTGTTTCAAAGGCATTT  
TACCCTGTTACGTCGGAACAAATCAGTACGTCCTAGATTACGCAGGATGTTGTTAGAGT  
TAATCATCGACAGAACGTTAAGTTTATTCAGCGCGCTGAAGATTCCATCAGCCATTGATT  
TTCCATAACCTTTACACGCTTTAATAAGTGCTCGCGGCAGATTAGTATAGATTTTCAGACG  
GCATATGAAAATCAAATTTACTAGTCAGTAATTGATGAACTTGGATAGCAATTTGCTCAT  
AATTAAGTGCTCTGCGATCGTTATGGTCTTTAAACCACACTTTAATCTGTGAAGCACATA  
AACCGTTAATTTTCATGTTTTACCGCATCAGATGTAATGCTCATAACTATTTCCCTCAGATT  
GAATTGGAACCTCAAACCATTAATAACCCGTCCTTGGGTAAAGCGTTTATGCGTGAACCGT  
CTTTAAACGTTCTTCAAATTTCCGAAGAGTACTAATACGTTCTGCTTTCTGTTTTGTATA  
GTTTGAATACGTTCTGAAGTGAGAGCGTATCGTTCGTTTACTGTTTCTTTCATGAAGTC  
AGGGATTTACAGAGAATCTCCAATTTTCATCAAACCTTATCGAGTACTGCCTGGTCTTCAGC  
AATTAATTTTCGTACATCTCGATATCTTTCTTAATAAACTCGATATCTTCCCTGGGTTAC  
TTTGGATAAACGAGATGCTTTATCCTTTTTGTGCTGTTTCGTTAGTTTTCACGAGACCAGAA  
TAATGTACGTTTTTTGTTAGTGTTTTTGTAGACTTCCACAATTTCAAACCTGAATCGATGAT  
AACAAATCCAATTTCCAGCGAGATTTGAAAATCTGACCTCCGTCCACGGTAATCTCGTTACC  
ATAAGCAACGTCATTAAGAAGACTTGCTTTGTGCTTCAGATTTAAATTTACCGTCGTTATA  
ATTTACCAGGTTGAAAATATCTTTAGCGTTCATGTTTTACCTCCAGTAGTTGATAGGTCT  
ATAATAACATAACCATAGACCTTGTAACAACCTAAAAGAACTTTTTTCGGTATTTTTTC  
CACTGAACCAAACCTGACTTCCGGGATTTTTTGTAAATTTTTTCAGATTTAAGTTTCTCTTCT  
GTTCTTTCTTATATACACCCTTGTCGTAAGTACTGGAGCATCTCTAGGGCATTCTTTTGCAAAC  
GATCTAAGGTAATTAAGGCTTTAGTTTTTCTTTTCAAGGAAGAGTCTTGGCGAACCTCCT  
CGCTATATTGTTCTGTTGCACTAATCATAACGATGGGCATATAATTCACGACGGGCTTGGGA  
TATTCATAATTTCCCTCATTTCAGTAAAGTAACTTCCGAGATTTCCCTCCCAACCATCTTTA  
TCCAGTTGAAATAAAATCTGCTACATAAAGAGCCGTACGTAATGATACATTGCGAAGACG  
AGATACGTTAGCCTTCATCCAGGACAATGCTTTGTACGTTTCTGCATCCGTCAGGCCACG  
TTTCTGCATCATGTCAGTAGATAAATATTACATCTTCAAACCTCTGACCATAATCTCTTCATT  
AGAGTGTACTCCAAGGTCCAATAACACTGAACGAGATACTAAAGCTTGAAGGTGTGGAGC  
AAGTTTTCGAACCGCGTTCTAACTCTTTATCGATATCAACGTTTGTAAATGAAAACGATAGT  
ACCTTCAAACCTCAAATTTCTTTATCGATACCCTTATCATCAAGATAAGATGATGCAGTGCT  
CCAGCAAACCTTTGCGTTTATCACCAGTATCTAATGCGGCTTTAAGAAGGTTCAAGATATC  
CATATCTGAGAATACGTCAACGTCGTCGATTAAGAGAACACTGTCTGCATCACGGTTGAG  
CCAAAGTTGTTTCGTAAAGGCCAATAACAGAGATTTTGCCATTAATGCTTTTGTATTTGAT  
GAAACCATTATCATTAGCATTATTAAGCGCTTTATCCAGAGAATACGTCTTACCAATACC  
TGCTGCACCTGAAATAATGAGTGAACGAATTTTGCCATCAATAATGCCATTCGTCATCAT  
GTTCACTACTTTAAAGCGTTTGTGATAACGAGTTTTTCATATCTTTCAGCGCTTTCAACAAC  
TGCAACTGGTGATGTCTCAACTCCTTCCATTACGATGTCTGATTTGAAGACCCATACTCC  
ACGTTTCAGAACCATCAATCATAACCGAAAATTTTACCGTACCTAAGTGGGAACATTCAGG  
ATTAAGCTTTGCCGGGAACCATGTCTTTGTGGCAACATAAGAACCAGAGATTTTCGTTATT



ACGATAGATACCTTTTTTGGATTGGAACGTTGAACATTTTATTCTCCAAATTTACTCATT  
CGTTTCGATAGGTCTATAATAACATGTTTAAAGCAAAGTAAACAATTATTTGCGACGAG  
ATTTTTGGTAAGAGGTTGAAAGAACAACACTGCTTTACCAGCAGGAGTCAAAGTGACTCGTA  
ATGCATTACCGATTCCAAGGATGCTTTAACCAGACCTTTAGATTTTCAAGTTCACCGAATG  
CTTGACGTTGGTCTGCATCACGAGTGTTAACCATAAGACCTTTATCACCAGCTTCACGAA  
TCATTTCTAACATTTTGGTTTTTCATTTTGTCTCCTCTTGTTTTGATAGGTCTATAATAA  
CATATCCTAAAAGCATGTACACTACTTTTTTAAAAATATTTTGACCCCTAAAGGGCCCGA  
AGGCCCTTATCATTATAGTACGAATTGTGGTTTTCTAAGTAGACTTGTTCAGGAAGTC  
GTCCAGAACTCATATCTACTTTTTGCTGCATACCGTCTTAGCAGCTTGTCTGCCGC  
ATGTTCAACTTGGTCAACGATATCTTCTAAGAATTCCTGTACGGTTTTAAACGTATGTTT  
ACCAAGCTTAACATCGAGAATAAATGGAGCATCCTGAAGCGGGTAAACCAGGTGCGCCGGT  
TTTGTAAATTTCTAAGAGCTGAAGTCCACCACGGCATGCATGACTCAATGCTTTCCAGTC  
AATACCTTCGTTAGCTTCTGCCTTACGAGCACGTTACCATAGTTCTCTCCAGTTTAAAC  
CAGGATGGCATTGAACTCTTTATTGGTTAACGTATCTTGGAAATTTACGGTCTAACAGATT  
ATAGAATGTTTGTCTACCTGTTTTCTCGTTTTTCAAGTTTCAACCCACGAAGCAAATTCACC  
TACAGGCAGAACATTTCTCATATGTGATAAACGAATTACTGCACCATTATCAAAGTATTG  
TCCCCATTATTAGAACGTTTAAAGGGCTTGACGAAGAACAGCCAGTCGAGAACCCTTGAC  
ACCGTATTTAGAAGCTTGTCTACGGACATACCCTAAATAAGATTTTCAATGTTAGTGGTATA  
GAAACGAGACCTGTTATCTTGAATATACTTCCATACATCAGGCAAATCAGATTTAACTAC  
TAGACTTTGTGGAGTGTGAAGCATATCTAATGCGACGGTTTTACCATCTGCAGCTAGTTT  
AAAGAAATATTTGAGACTATACAGCTCATGGTCCACGTCGTCTTTTGTGTTCTTAGAAGC  
AGTGTATTTCGTGTTCTTGCTCATGTGTTCTTAAACGTTACCGGTCAAGATATCACGAGC  
ATGAGGGACATAAATTTCTTTAAAATCAACGTCAGATTCAGGAGTAGACGTTCCATAAAG  
GTGGCTACCAAAGTAGCCTTTCATAATTGTTTTTATCATTTAGCCTTATATTCAAGAGTA  
GGACAGACTTTTTCTTACGAGCTTTAAGGTATTCACCTATTAATGATTTCTTACGTTCA  
ATAGGCTCAAGTCCATTTTTAATTCGTTCTTGGTTTTGTGCAATGAGCTCAATTTCTTTA  
TAATATTTTCTGTCGTTATATTTGTCTAACAACCAAGACGGACCAATTACCAACCCGGTA  
GAAATAAAAGCCATGACTGCTACAATTAACCGCCTACACCAATTGAGGCTGGAATAAT  
GTCCATAGACTGCTAAAAACAAAGAAATTTAGTTAAAATTTTCAATGGCCAATGATTGTGACT  
GCTGCTAAAATCGCAAATCCAATAATCGAAACAGCCAATACCGGGAGAAATGTTTTCCAA  
AAATAAGAACACAACGTTTTTCGGGCGATTCCATGTACTATTGAATGCGGCATAAATTTA  
TAGTGCCAAGAGTTTTTATTGATAATCATAATAATTCCTTATTTCAAAGTCGGGATAATA  
GAATCAAGATAAGCTTTAAGAGCAACTGCTTCATCTTTGTCTAATGTAATGATATGTTGA  
CGAAGGTCATCAATTTGGCGAATAACTACGACATCACCGTCTTCATAAGAAGGATTAACG  
CCTAAGACTGTTGTATAGTCAGGGCGGTCTGATTTGTAATAAAAGCATTACGGCATTTA  
GCCATTGAAGTTTTGGCTTTTTTACTGTTTCAGATTCATGAATTTCTTTCACCTTAGTG  
ACGAATGTTTTCCAATTATTAATAGAAAAACATTCGTCTTCAGTTTCGATATTAACCCCA  
CTATAAAGTCCGTGATAAAAACGAACTTGAAGGTCTTCGTCAATGTTAATTACAGATGCA  
TGGCCTGGTGGATTGAGTTTCAAATCTTGTCCAGTTCATAGGAAGAATAGTAACAGCA  
TCATCTTCTTGTGTCAGAACGTAAGCATAACCACGTTTTTTCGATACATAAATCGCCAAAC  
AACTCGGTTGTTTCAATTACAGTTTTTCAATTTACCAATTAAGTTTCAACAAAATT  
CACCAAATCATTACAGACAAGCATCAACCTGATTTTCATAAAAGTCTTCGTTATCATTAC  
TGCATGATAAGCTACATCATTCAAATCTGATTCGGCCTCACGTAAGTGAGGGATAAGTTC  
CATCAATTTATTAGCTTGTTCACGGGTCATTTTACCATACTCGCTTCAATAAGATTAATT  
ACACCATTTACCATGTTATACGTAACATCGGATAATTGTATTGTAATAACATAAGCG  
ATAAGCAAAGTTTCATTTTGTCTCCATTTGTTTTGATAGGACTACTATAACATAGTCC  
TACCAAGATGTAAACTACCGATTGTGTTTTAAATGTTGATAAAGTTCTTCAACTTGTTTA  
GGGTCCAAAACAATTAAGTCATTTTCTTGGCGAAGATAATTCCATCCCTTATCCCCAGGG  
CCATTTTTACAAAACATCACCGTCGTCATATCATCATCAGCGCTTTCAGGTAAAAGTTTA  
AGTACACCGTCTTCAGATTTTCCAGTATAATCGTAAAGCATAATGTCCTCACATAATCTC  
GTTAACATACATTTGCAATTCGGTGTGGGCGTCGGCCATCTTTTTTCAATAGCTCTGTTAAT  
GTCGATGTCTCCATCTTCGCAACCATGAGCATTTCCTCAATCGGATACAGAATTAGCATA  
CTCTTCAATCAAAAACATCAACTTAGAAATCTTTTTCTTACGTGTCATAACGTTCTCCTC  
TAGTAAGTAAGGACTACTATAACACAACCTGAGGAGAAGTAAACTGATAGATGCCAAAAA  
GCCCAACCTTTCGGAAGGGGCTAGTAAATTAGATAGATGTAGGCTCTAATTTTATTTT  
ATGAACTCAGCAAATTTTCTGGCAGTTTTTATGCCTTGTTTATGACATTCAAATGCATCA  
TCACAGGGGCTATTTTTGTAATGCTTTGCCATATACTTATAAAAATTTTTCAGAATTCTCA

ACATTTTGAATTTTCGAACAAAGTATATACGTTTTTAATCCCTGATTCCATAAAAGTTATCA  
AAGTACGGGTCAACATATGCAGTGCCAACAATAGGAGTCGTTGCTGCAAAAACCCCAGC  
ATCGCCACAATGGCTATCGCTCTTAAGGCCATATAGGCCTCCTGTTAATTTTGGCCAGTA  
TTTATTTTTCGCCTTTGGACGGCCTTAACATCTGCGAGGTATTTTCCAGCTTACGCTTA  
CGAGTATAATCTGCTTTAGAACCAGTTTGACGGATATCCTCATTTAAATGAGAAATAGAA  
TGTCTAATTCTCTTCGGATTTTCATCCAATTGGGTTACAGTAAGATTACGAAGTTGTCTT  
TCGTTTAATTGCTGCATATATACCTCTTGGTTAGATATTAGTATTTATAACAACCCTGTC  
AAATCGTTCCAATGCTTCCGGCATAATGACACGTATCTATCGGTATCACCAATTTCAATT  
TGACTGCCATCTGTAATTGGAAGTCCGTCTTCCGTGACTCTAGCTACCATTGTGGCCTTT  
TTACCGCAATGACAGACACCTTTAAGTTCAACAAGCTTATCGGCAATAGCCATTAATGCT  
TGAGAACCTTCAAATAGATTACCTTTAAAATCTGTTTCGTAGTCCGTATGCCATTACCGGC  
ACATTGTATACGTCAACAATACGACTAAGTTGATACACCTTTTTCAGTAGTTAAGAAGTGA  
GCTTCGTCAACAAATACACAGTGAATATCCTTTTTGTGCTGCAGCCCATTATAGAATTCA  
AAGATATCCATGTCTTTTGTAAATTATATTGGCGTCCTGACGAATACCAATACGAGAGACT  
ATTTACCTTTTGAATCGCGAGTATCAATAGCCGGTTTAAGAAGTAAATACACCCATGCCA  
CGTTCTTTATAGTTATGTGCGGCAGTAAGTAATGAAGCAGACTTACCAGCGTTCATAGCG  
GCATATGTAAAAATTAAGTCCATAAGAGTCCCTTATAGTGAATTCACGTAGTCAATG  
AGTTCTTGTCTTTTCCCTGTCAAAATGATTCCATCAATGCGTGATATTCTTCATCTGTTAAA  
GGAGCATATTCATCGTACGCATTGGTGGCTGCTTGTTCATCCAATAGGTCATGGATAAGT  
TCGAACAGTTTAGCTTTCTCTTTAGTTAATTTCAATTTAGGTTCCCAATCAACAATCA  
CAATTTCTAGTTTAGTGAATACGTATCTAAAATCTCTTCGATGACATCCCAGTTTCCGC  
CACCGATACCTGCACCAATTCTTGGCATATAAATTACAGGCTTTGTTATCTTATTCTTTC  
CGAATTCATTTAATTCTATTATACAATTCATTAAGCAGAGTACTCAAATTAGGTCCCG  
GCTCAAAGTGCATATAAAGATTAAGCAATAAGCTTTATGGGTCTTAAAATATTTTTTCAT  
AAACCGAATAAGTCCCGAGTTTAGACTCGTCTCCAAATTCGGTTTGAAGTTTATCGGCTT  
CCAGAATTTTGGATAAGCCTTTGCTAATTGTCCTGCCACACCACCGCCCATTGTATGAA  
ACAATTACATCCATGAGCAATATTATTACCTTTAGAAAACAGGGCGACAATATCGCCCT  
TGATATAGTTTTTAATCACTTGCTGCAAGTCCCTCTAGTATAAGAGTCAACTAGACGGTCC  
ACCATAGAATTGCATGCTGCCTTATCTTTAGGTTCCGCCACCGAGCATTCTAATATTTGC  
CATTTTTTATAGTATCTTTTAATTAAGGTAGACGCCTTGAACCTACTAGACGCCCCATCT  
TTTTCTCCGTCTTTATACGCATATAACAATTTTTGTGAAAAATCTACTTTACTCTTGA  
CTTTTACCGCAATAATCAGACGCGTCTGTTTGTATACTCCGTTACATCAGTATATGTA  
GTATTAGCAAGAGCGTTAAATGAAACCAAGCCAACTATTAAGCCAACATTTTGGTCATT  
CTTTTATTTCCAGTAGTTTATTTGATTTAAGGTAATTAGCCTTTTCTAGGACTTCAGAAG  
CATATTTACTTCCAGCACTTGTCTTCCATCCCGCATTATATGAGGATATAGCTTTTCTTA  
TATCCCGTTATGTATATTTAACCAATAAGAAAATTCGATATAAGCCCATCTGGCTGAAT  
TAGACCGCTTAGATAGCATTCTTAAATTTGGGCGTCAGTCATATTATAACCAAGCTGGT  
TAATTTCTGCCCTCATTGTCCGTAGATAATTTTGGAACATTCATACGCATGGTGACCTT  
TCTTATCTTTAAGATTAATACCGGCAGATGATTCCTGCCATAGTATTGCGGCCATTATGT  
ATCCAAGTCTTTCTTATGCATATTTTCATGCGTTTTAAATTTTCCGTCCTTAGAAAAT  
GTTCCCAAAGTGCATAAAGCATAATTCAAGTTATCGAGTTGGACATTACTAAAAGTATGCT  
CGGAGCTATGTGCTGATAACGAAAGAGCAAATAGACCAGCGAGTAGTGCTTTTCTCATGT  
TTACCTCTAGATTTTAATCACTGCTTTAGAAGCTTTTCCCTGGTAGTCGTTTACTGTTAAT  
AATAGCCATTCTGCATTGAAGAGTCTTCATTTTGAATGCTGGATTTTCGCGACAAACTGT  
AAGTCCTAACCAAAGATTTCCATCAGTTATTTCTAAACGGCCCGGGCGATATTCGACACC  
TTCGACAAAATCTTCATCAACATCTGGACGTGCCGGCATTGATAAAAATTTCTGCAACTTC  
TTAACATGATTTTTTACTTTATGAAATAATTCAAAAACGTAATTCTCATCTATTTCTCT  
CTGGATGGCACGATCTAAGAGATGTTGAGAATACTTGATATGAAAGCCTGGTAGTCCAAG  
AGACTTTGCAGCATCTTTTATACTGGCATTATTTTTCGCGAACTCCGTTTCAAAGATTTCG  
ACGGAGTTTATTACGGCGGATAAAAACGTCTGAATTGATAGTCATTTTGATTTCTCCTCT  
AGTTGACAGGTCTATAGTAACACAAGTAGAGGAGAAGTAAACTACTTTATTGATAAAATG  
AGAGTTAAGGCCAAGATTCTTTAGATACTATATTGGCGAAGTGCCTCATCTCTTCGATT  
TGGCGACGACGCTGGTCAGCATAGTCTTCTTCGCTTCTTCTTACAATCTTCAAGGTCT  
TCTTCAAGATACTTTAAGTATTCACTACAAATTTTGTGACCTTTTCTGGAAGTCCAAC  
AACCCAGTAATAGTAGAAGCCATTAGTATTTTTCTCAGGTTCGAAATACTGCACGACATG  
CCCACATGCTGGCTTCTTTTAGATGTTGCTTAGCATACTTAAGAGCCTGCACTGCATCCA  
TATCTTCTTTGGTTTGTGCTCTGTTTCATTTTCTTCAAGATATATGCTTCTTCAATCA

GAGCATCAAACATCAATCCAAGACGGACTTCTGCATCTTTAATAGCGTTCACTTTACCGA  
TTTTATCATCGGTATGCGGCTTGTAGCCTTTGATGTCTTCAATCGACATAAGGAATTTCC  
TCATCGGTGGCAAGGTCATATTCGACCAATTGGATAGGCTCGTTAATACCATATCCACGT  
ACAGTGATATCGGTTGTCGGATATTTCCAGTAATATCACCCATTCTAAATGCTTCAGTG  
AATGATTGCTCGCCTGAGCAACTAAACCAGGCGGCAAAACATTTTAAAACATCTTCAGAC  
CCTTCTATAATCAATTTAGCCATTATAGACTCTCAGTAAAGGTACGAGCGATAACGTCGC  
GCTGCTGTTCCGGAGTCAGAGAGTTAAAGCGAACTGCATAACCGGATACACGGATGGTCA  
GCTGCGGATATTTTCCGGATGCTTAACTGCATCTTCCAGAGTTTCGCGACGCAGAATGT  
TAACGTTCAGGTGTTGACCACCTTCAATTTTAACTTTAGGTTGATGTTCAATTTCAATTT  
CACGGGCATTCAAACCGTAGAAAATTTCCGGGTCTACAATAGAGTCTTCTTTAAAAGTCT  
TAGAGACAATAATCCGGGCTTGTAGTACCGTCTTCAAATAAATAGTGCCTTTATGTGCAC  
CTTCAAGAATTTGATATGCTTTCATATAACCTCAATTAGAAAATAAATTTATCCAAGTTT  
TTTCTTTAATCAAAAATGGGTTCGGAATTAACGCCATTAACTTTGAGTGATTAATCCCT  
TAAATGGCCCATCAATAAATTCATTTTGAATGCGGAATACTAGTCATCAACCGTGCAT  
TAGGAGCAGTACAAAGAACCTGCTGCCCTGCGAACGGACCTTTAGTCAAACGGTATCGTT  
TAGGTTTAAAATGGTAAATCTCGTAATTTTCTACAAGAGCCCTTTTATTGCATACTGGGC  
TGTTATAACAATATTCAAAAACCTTCAATAGTGGTTCATCATTGCATTCCAATCACAAAAA  
TTGAGGACGAGCAATACCGCCGATGCAATATTTGCTTTTGAACAGTGTGGACTGTTTT  
AATATGTATGTCGTAAATCTTATCCATATCAGGAGCTTTAATAGGCTCGTCAATTATATA  
CAGAATACGAGAAAGCGTTAATCCACGGAATTTAGAACCCTTATTGCCAATAAACTACG  
AACAGAATCAGTAAATAAACGGAATCGAATATCGTCGCTAGAATAACGAGAAAATTTCTT  
TTCAATGTTGCCAGCAGAAATTTTAGCATAAGCTGAAGTATTAGAAAGAACAATAACTGT  
TCCACCATCATACAGCCAATTAGCAGCAAAGTTAGTCACAGCAATTGATTTACCTGATTG  
TCGGCCCGCTTAAACGAAGTGTACAGTACTGCTTGTAGTACGTCTTCAAATGGTGGGAC  
ATAACCGTTCTTACAAATTTCTTCTACTCTAGCATCAGAATGGTGTGTAAGCATTTCAT  
CAGGGATAGATAAGGTCCAGTTAAAATGTTCTCATATTATTTCTCTTAAGGTTTTGGCC  
ATTCCGTGGCACATGTTAGGTCCTTAGACTCGCTATGTAAACCCATTACCGCATTGCGCT  
CGACCTTATTACAGGTTGGAAAAGGTACATCACTCAGAGGACTCGACGTTTATAAGGAGA  
GGTTGCGTTTCCCTTTATTAGGCAAGAATTACTCTAGGCTTTTGAGCTTGTGGTAT  
TGGATTCCCATGCGGCTTTGGTAATTTGTTAGCGGCATAACCAAAGGCATTAGATAGAA  
CACCTTTAGAGTTGAATACATCCAATCCAATAAGTACACCGGCTGTGTTAAATTTAGGAG  
CAAAGTACGCATTAGTTTTAGAAAGAGCTTTTTTCAATTCAGGGTCTTGAACCAAGCCAT  
CAAAAACGCCTTTACTATTTACTTTGTATGTTACTTTGGGATTTTTACCTTCTTCGATAG  
CAGCTTTCTGTTCCGCAGATAATGTAAGTGCAGCGATAAACTCCTGATATGTTTTCAATT  
TGTTCTTATTGTTTTAATTTATGTTATTCTTTAGGGAAGTTTTTAGAGTATGCATCATAA  
AGTTTTATTACCAATACGACGGAAGACTTTCAGCTGCAAACGGTTTTTCAAGGTTTTTAAAT  
CATGATTTGCATCATGTAAGTTCCTGCATCCGAAAGAGCTTCTTCATAGTACCCATTAAT  
TTCTTTAAGAGTCTACGTTTACCGCCAGGACCGTCAACAGTAATTCTCCATTTACCTGT  
AGAAGTGCGGCTCGGTGGCTCAACTTGTTCATCCAATATAACCACCTTCAACGCGTTG  
GTTGGCGGATTCTGCAATAAATCTTTATACGTTTTTCATTTTTGTTCCTTGTGGTTTT  
GATAGAGTAATTATACCATATTAATACTTAAGCGTAAACCGTTTAAAGCTTGACCGCCAGA  
AATAATTCCGAAGTTGTTAAAATCGTATCCAATATCGTCAACATCTACTTTAGGACTTAC  
TACAACATAAGCAATTTCACTACGTTTTGCATAGGTGTTGATTTCTTTACCATCGCCACC  
TAAGAAAGAATACCCATTACGTTTTAATGAGCCAAAATCTTCCGCATCACCAATGAAAGC  
TTTAACTTTAAATTTAGGGTCTTTGGCATCTGCTTCAATGATAAATCTTGATACATTTT  
CATTTTTCTTAGTAAATGATTTACCATAGTATTTGTACCAAGTTCGGACGTTGAGCAAT  
TTTTTCATCTAAGCGTGCTTACTTATCGCAATGGACGCTTCGGACGGGACATAATTATT  
ACGAAATTCGGCAGGGATGTCGGAAATATCCTGGACAGTCGTGTCCTTGATTTTGAACC  
ACGTTTCAAGCATTACAGCGATTAGTTCGATTTGACGTAAACGTAAAAATTTCGAGTTTGT  
GTAAAAGAATGTTACGTGACCTGTGCCTAAGATAAATGTTGGAGAGATTTTAAAATCCTT  
TACACGTTTACCGTTTTGAACATGTTTACGGACTGCACCAATACGCGTGGTAATTCACG  
ATACTCAGCCATAAGATGTTGGTCGGTCAGTTCAGAAACAAGTGTTAAATTGATACGAGT  
CATAATTTCTCCAAGTAGTTGATGAATGTATAGTATCAAAGTCTTGGAGGAAGTAAAC  
ACTATTTTTCTGAAGCGCCTGAAATATATTTTTCAAGACGTTGTTTCATTAGCGAGCCGT  
TCTTAGCGATTTCTTCCGGTTTATCGCACATACGCAACAAGGCTTCAAGCTTAAACGATAT  
CACTGGTGCCTCAAATTTGCGAGTATCTATCTTGCTAGCAAGTTCAGAAATACGTGCTA  
ATAGACTTTAGCTTCAACCAAAGCTGCACCTAGCTTCGTGGCAAATGTGTCAGTAGCTT

CGTTAAGAGATAGATTCTGATAAAAAATTCATGTATGTTTTTCATATATACGCTTTCCAAGT  
TCCTGTTTTAAATGTTGAGATTACGCGTTTTCGCGCGATTAGGTGTCTGACGATACCATT  
AGATTGGGCTAGATTTACTGCCGCTTCGTCCCAACGTTTTCTGTTGAAGCATACGAAGAGA  
ATTAGTAAAACCGGCGACGCCTGATACACCCATTTGGAAGACCATATTGACCAATGCACA  
CCGACGAACCTGCATCTAAAGAATCATATACCGGTTTAAGTTTAGCATTACCCAAGATTCC  
GCGAACGGCTTTATCAACGTCTTCATTAATAGCTTTTCAGCCTCATCAAGGGTAATTGT  
ACCGTTGCATTTACGGCCGATCATTCTGTCAAGTTCAGCTTTAGCTACGGCTAAAGACGG  
GTTCTTTGTTACTAAATGGCCTATGCCAATCGTCCAAAAGCCTTCAGTGTCTTTGTATAA  
AGTCAGTCTAAGACCTTCGTCAATTACGAAGCATTTCAAATATATTCATAATACCTCCCAC  
GTTTATAGGAGGTATTTATTACTTATAGGAGGGTAGTGAGCACCTTATATAATGATTTGC  
CCATTACATATTCCCATTGAGAAGGTTTAATTAAAGCGAATGCATCAAATTCAGGAATCT  
GTCGTCCGTCTGGGAATGTATGATAGGAATTACAAACACTGTTTTCTGAATTGCTCGTGT  
CTACAGGGATGGTATATAGGAACAGATGAATATTCTTATTGTCTGAGTAATGATGTTAC  
CTAGGTCTTTCAGGAAGGCAGGGTCATATTGTGTAAACCCAGTTTTCTTCTTCGCATTCAC  
GAATAGCGGCTTCAATAGGAGATTCGCCAGGTTTCGACACGGCCTTTAGGAATATCCCACC  
GATGAGCTAATGCACCTTTAGGACGAGAACCAGTTACACGCCCCATGAATAATTCTTTAT  
CTTCGGTAAGGAAAATAATACCGGCTGATAGTTCTTTCACTTTATTTTTCTTACTCATCA  
TCTCGGTCCCATGATTTGGCCATTAATTCGGACATAAATTCTTCAATGCGCGTTTTCTTTA  
GATGGACTTTCACTATTAGAGACCGCAAGTTTGTAATCTGCAATAGGACGGAACAAATCA  
AGGTCCATATCAAGGTCGTCTTTGATTTGTTCTTCAGGTACATCTGTATCATACGTATAC  
AGATAACTATCAAGTGATTCTGATTTAACGTAAATTGCTATACTCATCTCAAATTCCTGC  
ATTCGGTAATAAAAACGTTCAACTTCATTATTCTTGGCCTTTATCTTGTCTTTACGTTCT  
GTAAACTACTTTTAAACAAGATTAATAATGATGCCTACAGTACCTCCACCAATAATACCAC  
CAATAATACTTACAATAGTAGATGCTAATAAGATAGCGATAATATCTGGTACAGCAAAGG  
CACTTACTTTAGTACTAAAAAACCATACCGACGGTACAAATATAATCCATCCTGTTATCC  
ATTGGCACTTATTGAAAACTTTTCAAGCTCAGCTTGGGTTGTTTCGTATTACTTCATCGA  
TAGGTTGATATCCATTAATGTATCTGTTACAGATAATACCTGCTGGTTTGTCGATTTTAA  
ATGCTTGACAATGGTGTTCCTACTAAGTAGGATGGACATCCTGTCCAATCTACTGAATAGT  
ATGAAATACCTTCGTGCGCCACCGTCCATGTTTGACCAGTGAATTTTCTGTATCATTACCA  
ACCTTCCATAGGGAATTCAGATAAACTTGAGCGTTGACACGAATTCATTGGTAATCTT  
TTAACTCGGTCCGATTACGAGATACACGTCCGAACCAACGCCATCCATTAATAATTGC  
ACGAGAACCAGTGTGCCATGTTTGCCAATCAAACCTGAAGAAGAGTACGGTCTGGAGCTTC  
CCATTTCTCTAGTTCGCCTTTTTTCGATTTTTTTCGAGGACTTCTTTGTGCCACTGGCGATA  
GATAAGTTCGCCATCAGGAATCTGACTGAACTCTGCAGTTCCTGTTGCAAAAATGAGTAGG  
ACACACATCAGCGTTAACAAGACCAAGAATATGTTTCAGACAAATAGCGAGGATTGTCATA  
GTCAGGTGGTCTGTCAGTAATAAAGTGTGACCAACCGGAATATCTGGGCGTGGTACATC  
GTCATGGTGATAACCTGGGATAGCAGGATACCAACCAGGCATCAGCATGTGGACTCGTGA  
ATCAAATACTACATCCGAGTCTTTCCAATCGTCAAGGAGATTTTGGATAAAGCTACGAGT  
AATTGGACCGCCGTTATCAAAGCAAATTCAAATCGCAATTAAGAACATAGGCTCGTT  
TTAATCTGGTTCGTTTTTAAATCGCATGAGCAAACCACCTACTGCACGAGCTTGACTATT  
AAACACTTTAGAATAATTCATATTAATTTTCTCGACATTCTTTAATGAAATTTTCTAGAT  
TGGTAGATTCAATAGCTTTTTTACGAGCTTCTGCGTGTCTTCTTCAGACAATTTACGTT  
TATAATTGACCCAGACATTATGGTCGAAACTAGTCGTGGCATATAATAACAATGCTCCAA  
CGAATAGCAAAAACGGCGATAAGAATACAAAACCAGGAACACCATCCATATCGTAAGCCT  
TTTGTAATACTGCAACAGAAAGGGCTGCGTAAAAAAGTGATGCAAATATTGTTAAAAGAC  
CAATTCGGTTGGTTTCGCCATAATTCATAATATTCTCCTCATGTTAATAGGACTACTAT  
AATATAGTCTATAATTGTGTAAACAGTTTTTTCGAAATTTTGAAGGTTTTTACCATAT  
GGAAATTTTGTGTTGAAACGTTTGACGTAATCGTCATGTCCTAAACTTTGGTACATACTTA  
CTACTTTGCTGTAGTTTTTCCCAGGCATACTCACGGAACCAACCAGAGGTGATGCTTGTAC  
AGACTTTTTCCAATGCCATCATAAAACTGGCTTCAGGGTTAATTTTTAAAGTCATTAGGAA  
TTTGAGAACGTTCTAATGCTAGTACACATGATTCTTCGTATACACCAGCCAATTTGACCA  
TTTCTGGTAATGATTGAACTTCTCGCGTGAGGTCATGACTTCAGAGCCGTCTTTCATAT  
AAAATGTATACGCTGGACGGTCTGTTAGTGCAATGGCTTCATGAATAGTATCATGGTCAT  
ATGTATAGATGTCATCTTAAAGAACGCACTTTTAGAAGTGTCAAGAACCGGGTGAGCAT  
AGTTCAAGGTTTTCTTCTGGCGTTTCAGCATAATTTTCAGTAAGTTCATCGTTCAGTGTA  
CACCTTTACCACGAAGATACTGAATATGGTTCATAGTCTTTAAAAAGAATGGATTATTTT  
TCTTGAACGATGAGACATCTTAATTGCAAGACATATCTCAGGAGTTGCCAGTAAAACC

CGTTCAAACGGTCTTTAGTCAAATTTTTCTTGGCGTATTTTAAAAGGTCATAAGAAGACG  
TGAAATCTTCAGGAGTGAGTTCACCGATTAATTCACGGACATTAGTGATTGCCGGAACAA  
TATATGCTTCAAATGAGTTTCGCGTCCATTATGGAAGCATTGAAAACCTTGGACATCAG  
GGTATCTTGGTGAACATATACCCCATCATTTGATTTTTGAATGCATTCCAAGAACATT  
GGTCCGCAATAAAGTCCCAATCGCTATTTTTGATAGCGCTAGAATCAATAAGACCGTGAT  
AGTGAAGTGCACGAGAACCAATAACCAACATCATAATATTTTCTCTGATTAATTCATTA  
ACTTAAATTTACGACATGCGATATCATATTCATCCCAGAGGTCATCGTGTGAAGCCTCT  
ACCAATGGAACGATTGTGCCGTTTATGTCTTCATTATAAGGGCAAATTGTACAGTGCGCA  
TCTTCGAATCGGATGCCTTTGTGTTTTCAGATTTTTTATAACGCATATCGAATATCTTTGCA  
AACTTTTACGAGTAATGGTTTTAGCAACCACTTTGGTTCCGATACTTTTCGTAATAAATC  
ATTGTGGACTCCATTTAATTTGATAGGACTACTATAACATAGCCCTATCTTGTGTAAAC  
TGTTTTAGCAAGAATAACTAGATGATACCCAGCCTTGAACAGTAATACTATTATTTGATA  
ACGAGATTGCGTCCCTGGAGATTACAGACCTGCGTTATCTTCAATCCATAATGTAACCTTCT  
CGCGTTCTTCTGTTGCAATTTGGAACAGGTTTTCCAGAGCAGCTACTGCCGTACGTACAG  
CACAATCTAATTCGCGAGACATATTGTTTCCTTAGCAAGTGTGAGAAGATGCGACCCAAC  
CACCAGTTTCGAGGCTCAGGTTGTAGTCGTATTGGTAAACGTCAGCCCATTACGCATAGC  
CGTTTTTTGTACAACGTTCAAGATCGGCTTTAAGATGTCCGGGTGAATGATAGGTTCCAC  
CCATACCATAAGCTGGGTACAAGTCGAATGTTGTGTTTTGTTTATCAGCAATTTCTTTGG  
CAGCCTCAATAGCTGCATAGATTTTTGCTACAGCTTCAGTCAGTTCGGTTTTGTTCTTTAG  
ACATAATGATTCCTTAGCACAAACGCAGGAGACGAAACCAAGCACCTTCAGTAATAACGT  
AACCATTACCTTACGCTTAACATCGCCACCATTATTTTCAATTTTCATTTTTCATACCAC  
TGGGATACGATTTACCCCTTAGGATAATAAGTACGACCCGCTACCATAATCACCTACAGAA  
AATGATACGGCATATTGGTCTGCGATCTTTGTTGCTTCTTCTTCGATACGTTACGCTTGA  
TTCAGAAGTTTATAAATTGCATCTGAAGCGGATTTGGCATCATTAAATTCTGGTACTTTA  
ATTCGATAATCTTACTCATTTTCTACATTCCTTAATAAAGTTTTCTATTGTTTCATTTT  
CACGTTTAGCTAGGAGTTCATTATAACTAATCATTTGAGAAGCGTAAACCTTTTTATTTT  
TCTTGTTATGGTTTATAAAAATCGTAGTAAAAATAGACTACAGTACAAAATGATGCGATGG  
ATGCAAAGGCTTGGGTATACCGTAAGTCTGCCATTGGTCTGTGAATCCGCCAGTGTTTC  
CTATAAATCCTAACACAACGCCGTCAATAAGAAATCCAATAATCCAAAGGCAAATCCCA  
TGCCAATACTCATAATAAAAATTAGAATGTTCTCACCAAGAGAAGGCCATACGGTTAAGA  
GTTGAGGCTTTTGCATCTTATTTCTTAACGAATTCATAGCTTCTTCATATTCATACTT  
TTAACAGCTTCATCATACTGAGCTTGGGCTTTTGCGCCTGAACCTTTCCACTCACGAAC  
TCGAGCTCTGTGATGACGGCCTTGGTGCCAATATCCTACCCAATTAATAGGCATTAATAA  
AACGGTACAATAAGTGGTGCGACGAACATTAATGAAAATGCTGCATCAGACGATATAAC  
TTCCTAGAAATCTAAAACAGCTCCTATAATCATAAAGATTAAAAATGCTAAAGCTAAAAT  
AGGGCCAAATAGTACTTCATTAGGAATTAATTTACGTTTGTATTCGTATGCCCAGGGCTT  
ACTTGGCATGTATAGGGTTGGCTTTGACATATCTCTACATTCCATAATAAATTGCTCAA  
GGATTAATTTGTTAGTGAAATTAGGACTAACAACCATAGTTTCATAAAGCGCATCAATAG  
CACTTAAGCATCAACTCTTTAAGCAAAGGCTTGCCTTCATACATAGTTTCAGAATCGA  
TGATTAACGTAAGTAATATTTTTTATTATCGACTAGAATCTGTATCGATATAAAACA  
TATTAGACCTCAGAAGCTTATCTCTAAAACCATAATAATCTTCAGAGCGTTCGCTGATAT  
ATTCCCATTACAGTGTTTAAACAACAACAGACCATGTAGGAGCAACGAAATCAGTGAATC  
TAATATCATGGTCTGCAACTAGTTTAGCAATAGCTCCGATATCATGAATCATAAATACCTG  
GGGCTAATAAAGATTTTCTGCTATGGCTAGCCGTTTTCTCGGTGGTCTCATAAGAAGACG  
ACCAGTACCATTTACGTCCGGTTGCAACATATCGTAATGAATCAACTAAAGACGTAGGTG  
GATTTACCTTATCTCGGAACCTTCAAACATTGAGTCAATATCATTATTTTGGTTTCGCA  
TGTTAACTCCTTTATTATCCAAAAGGAGGACCGGAGTCCCTCCGATTATTTTATTTCAA  
GAGTTAATATATTCTTGTACATCAGCAGAAGTGGTTTTCGACACCAGCTGGAGTGCCATTG  
AACGTTTCAACACGAGTCAGAGTGTCTTCGATATCAACCTTAGTCAGTGCAGCGATTTCA  
ATTACATCATCGGCCGTAGAGATACCAAGGGCATTGGCTGCTCGAGTTTCACGAATGTAT  
TCGAGTTTGATTGCCAGATTCTGACGAGCATCATCAAGTTCAACCACCTTACGAGCAATT  
TCAATTCGCATAGCGGCATACCCGTCAGCTTTTGTATTAAGTTGTTTCGGCAGTTTCGACGA  
TACAGAAGACCAAGCTTAGCATGCATGGTAACATCTTGTCTTCAGCCAAGAGCTTACGA  
ATTTACGTTCCCTTAGAAGCGGCTTGCTTGTCTTTTCAATTAACAAGTTTCGCGAATACGT  
TTTTCTTCATTAATAGATTTAACAGAAGCCGTTTTTAGTTCTTTGATTTGGGTAATCAAC  
TTATCTGCAGCTGCGTTATACTGTTCTTCGACAGTCAGATTTTTAGCCATAGCAGTACCC  
AGTTTAGTGCGGATGAATTCAACAAGTTTCTTCAGTGTGTTTCATATTATTACCTTTCAAT

TGGTGGTTTATTATCCAACGAGAGCATTATACTCTGCTCTCAAGAGTTTGTA AATTATTT  
TTAATCAAATTGACATAAACTTGGCGTCTTCGGGGTGCATGCCTTCGCAGTATTCTTC  
AACCATGAACTTCTTAACAGCTTCATAAAGGACCACTCAGATTAAGCTCAGTTGTCCAGAA  
CTTGGAATCTTGGACTGAATCGATACGAACTTCAGGGTGTTCGGTTGCGAATAACTTCTTC  
GGTGTATTACATAATCAACGACATCAATACTAACTTTAGCCATTTTGTATTCTCGTGTTT  
TGATAGGACTACTATAACATAAACTTACTTAGATGTAAATTATTTCAACGTCACCTTTAG  
CTGCTTTATAACCTTCAGCCCAAGATACAACAGAGTTTTTATCTGAGGATTCAAATTCAG  
GCATTGGACTTTACCAATATTCACACAGTATGTTTCTTCATTTTCATCGAACCAATAA  
TTAAAGTAGTCATTTTGTTTACTCCTCTGTAGTTGATAAGTCTATAGTATCACCATCCTT  
GGTGCTTGTACATCATTATTTTTAATTTTTCCA ACTTAACTTGTAGTGTCTTCATT  
CATACGTGGTTTATCCCAAGAAATACTAATATATGATTCACTGTCAATAGAAGTCGCCGG  
GTTTTTCTCTACCGTAAGACCTTCACTTTCCAGCCATTCAATAGTATTTGCGCATAAATC  
AGAAGAACACCTAATCGGAAACCGGCAAGATTTTTACCTTTAGCTGCAGCGTTATACAT  
CTTTTCTAAAATACGCTTTTGCACGTTTTTAAAAATAGTTTCAGCAGATTCTTCAGATTT  
TTTATTCAGTTCAGTATAAAGACTCATAACATTCTTCTCATTAAATAGGGCTCATAATATC  
TCAATCATAAGCCCATGTACGCGTTTATTTTCATATTATCGAAATATTCTTCAGCGATTT  
GACATTATTATGGTAAACTTTAGAAGACAGTTTAAACATAACCTTCAGCAGTGAACATGTT  
AATCACAACCTTTACAGTATACCACTGACCATCTTCATTACCCATTACTGCGTAAGTTTC  
AAACATCGGATGGTCAGGTCCAATAACTTTAATATCATTACCGTACGACCGAAATCTTC  
TGGAACGCATTTCATAAAGAAGTTGAACAGTTCACCATAATTATCCATTTATTCTCCAA  
GTTTTTCTGTATCGGTAGTTGATAGTTGTATAGTACCACGGAAGAACAGGGATGTAAAC  
AGTTTTGTGAAAAAAATTTTTAAAAAGTTTTGTGGAATTCTAGGGCAGGGAGAGGAAATT  
AAAAGGTAGGATAATATATTATAAAGGGTATAAACTAAATGATGCCTAGAGAGGCCCGGA  
AAGGCCTAGATACAAAAAAGCCCTATCATTAGATAGGGATTTAAAATTATTTACCTAGT  
TTAGTTATTATAGCTTCGGCAGCAGCTTTTAGCTTAGATGCAGTGTTAATACGATTTTTTA  
ATTCGGTATACGCATCGCCAAGAACATCAAGGCTATCAGAATAAACACTTACACTATTG  
CGTTCGCTATTTTGAATAGAACCTTTAGTTTTACGATCAAAATCAGTGTACACGTCTTGA  
AGACACGGGCTGCCTTCTTTGCATCATCCAATGCATCAAGAGCTTTATTCAAAGCATTGA  
CATATTTTTTAGTGTCAAACATAATTCTTAGAAATTTTAAACAGGTGCACGTTTCAGGAGTAG  
CTAAGGCGGATTTAGGAACCTGCGTGCCAGATGCCAGTTTCTTAGAAATTTTGAAAAACG  
CTTTATTGAAACTATTTTCTTGACTCATCGTAAAAGA ACTAGTATCGATGTTATACATTT  
CAATAGCTTTAGCTTTCCACTTAAAGAAAATCGCCACGGTCTTTTGGATCCAAGTGGAAAG  
ATACTTTAGTAAGATCTGCTTCAGATGGTAATTTTGTCTGCTTCGGTTAAAAATTCGGCAT  
AGGTTTTCATTTAAAATCCTTGAAATAATTTATCGGTTGGTTATTAATTATTTACTT  
TGTTATTATCAGTAACAGCATTCTCTGAGTGATTCAA ACTAAAAGCCCCAACCTTTTCGG  
AAGGGGCTAAGCCTCGCGGCAACCTTGTTCGGGGTTCCACCTGCTAAGGCAAGTGTGTTGTA  
CGAAACGCCGGGATTCGAACCCGGTTATTAAGCAGTTGACGCTACTCAATATTTTTAAA  
GGCCATATCTCGACCATATCCGAACGTTCCGTCAAAAACGCTACTCGACTTACGGCAAAG  
ATATTTCTCGAATCGATAATTCGGTGCGCCGTTTCTGCTGTGATGTAAGGGGATATTA  
CGAATCATAAAGATTTATTAAGACCAGTCTTACTCAGGGAACATCAGTCCGACGACTTA  
CCGGTAGCGACCCGGCTTCTTATTTTGCATATTATCAATTTGCTCTCGACGCCGTTCGCC  
ATAGATTAATCGCTTCATTAACACATTCGGCGTTTGGTATATGACGGCAATAATATAATG  
ATTCGCGTTTCTGGAACCGATGTTGCAATGGGATTTTCGTTTAAAAGGTCTTTACGGTCAA  
AGTATTCAA ACTAGTTAACC CGGAACGGTTTTTAAAGAACTTCCAATGTCCGAATTCAT  
TTGAAAATAAACATAATCAGCATGTTGATATAATGAATTAATTAACCTATCGGAAATAA  
CTGTTTCACGTTTCGTTAAAATAAAATGTTAAATCATGA ACTACTAAGTAAACATTGCCTT  
TCATATTTTCTCACTTAAAGTTGGTTCGAGACAGAAGGATTCTAACCTTCAACCTACGGA  
TTAGAAGTCCCCGTTGCTCTATAACAATTGAGCTATGCCTCGAATATATGACCCAGACCAG  
ATTCGAACTGGTAACCTTTCCCTTATGAGGGGACTGCTGCTAACC GTT GAGCTACAGGGC  
CTAAATAACTTTCTATTATGAAAGGCACTTTAGAGTACCTTTGGTAATAGAGGGTATGAA  
TTAATAATAACACATAATTCTTAAAGCAAATCAATCATTTTAAACAGTTGGCAAACGATT  
TCTTCTTCAATATAAGCAAATTCAACACATTCAACTACACGCAAGAAATCATAATCATAA  
TATTCAGAAGCATGACCAAGAATACCAATGAGACCTTCTGATACCAAATATCCATTCTCA  
CGAAACAGGTTCGAATACACACGATTCGTCTTCTCAGATTTATTACCAAGGTCGACTTCA  
ATATCAAAGACCTTTTTAATGAATTCTGGATAAAGCTGGTCTGAGAACAGTCTTCAACC  
AAGTATTCATAGATTAAGCGGAGCAATCACTGAATGGTGTATTACCGCAATAACGTTTCG  
GCTTTGGTGCTAGAATGACGGCTCTTAAATTTCTTCAAGAGATATTTAAACTGTTGGAGC

TCATGCTCTTCCACTTCAAACAATGTTTTGGTTTTATAGTTGTCACCATCATTTTCATAG  
GTAGTGACATCAATTACGTAACCCTTAGGAATTGTACTGCCTAAACAAATATTCATTTAC  
TCACCGTACCATATTAATGTAATTATATTCAATGCAACGTAATTTCAAAGGATTCTTGAA  
AATATCATATTCAAGAGGGCCTTTTTCTGTTTCAATAAAGAAATCAAAGTTAACTGTGTT  
AAATTTATCGTCTTCACAGAGTAATTTAACTTGCGAAGACGAACGGTTCGATATAAACCTT  
TTCAACCTCAAAGTTAGTCAGAATACCATAGTCATTAAGTGTGCTTTAGCTGCACGTTG  
GTCGCTTTCATATCCGTTCTCAATGGACGATACTTTAGCATAAAGAATCATGAATGTTCC  
ACCACTTCAAAGGTATGAGCATCAACAATATGATACCAGTCAAAAATTTTCTTCTGCGTTT  
TTATAAATTTTCGCGAAGAGCTTCAACAGTTTTTTCCTGTAGCAACAAGATCGTCAATACCG  
CCAAGAGGATAACAGTCGTAACCAGCAAACAGAAGGAAATTAATAGTTTCTGTAGGTTCT  
GGATGCAGTGTACCATTGTCATCGACTACTTCAAAGAACATATAACCAGGCGATTTAGAT  
TTAATCCAAGCCCATGCTTGAGCTGCTGAATCAAATGGTTTTCGCGTATCAAACGACAATCA  
GGGTCTTTAGAAGGATTTGCTTCAAATCCGCATATACGTGATATTTTACTTACTCACC  
TTTTGCAATTTTATCCATAACAATAGCGATTAAACCGATTAGAAATGCTACTACCAATGA  
GATAGAGTTTTTCAGTTGTTGTCAGTAGTCCACAAATGAATCCTACAAACATCGAAAAACT  
AAAAGCCATTGAAGCAATTAACAGCAACATTACGAATCAGTTCAGCGCGTTTCAATTT  
ATTTCTCCATTTACTCATTTTGTTTTGATAGGACTACTATAACATAGTCTTATCAGCATG  
TAACTACTTACAGAAGAGTTTTTGTCAATAATTTTAAAGCTGAGCTACAGAAATATGCTTA  
GCTTTAAACAGTGCAGTCTCTTCAGCCGGAGAGATAACAATAGTAGCGCCATCTTTCTTA  
GCAGACCATCCATCCCCTAAGTAAACAGTACCTTTTACTTCTTCGCCGTCAACCAGACTA  
ATCATTGGTTTACCCTCACGTCTTTATTTGCTTTAATAACTTCGGAAGTAAGGGTTGCT  
TCGGTCAGAGTAGAAACGTTAGCAACAGGTGATATAAATTCCTTTATAGGTTTTCAATTTA  
GGTTCATTTTGTGTTTTGATAGGACTACTATAACATAGTCTATCGTGTTGTAATAA  
TTTTATGCCTTTAGATGAAATAGTATTCTGGCGTTTGACCCCTGTTTGTGAAAAATCATG  
GTTATCAATTTGGTCAACTCGCATAACACCAAATGCAGATTTAATTTTAGCCTTTGAACC  
TTTTTTGATACTAATTACCATATAAGTATCATTTTTTCTTATATTTCGAAATTTGTTACTTC  
AACGCCTTGATTAGAAATTGACTTAATAATAGCATTAGCGTATTCATCATCTAACGGACC  
GTTAGTGTTAATAACAAAATTTTTATCTGCTTTAGTAGCTTCCGCGATGAATTCTTGATA  
GGTTTTCAATTTATTTCTTGAGGTTGTTTATTTGATAGGATGATAGTAACACACCATCA  
TCCTTATGTAAACTGTTTTGTGAAAATTATTTTAGATCTTCGGCCCAATCTAGTTTTAAG  
GGTCTTTGTATTACGGTCGAGAATAACCGGAATAGCTACATCACCAGTGAATGATAGT  
TGGCCAACGTTATATGATAACGTTATATGTGGAGTGTAGTCGTCGAAATCATGAGTAGCA  
CCTAAAGCTCGTGCCTACTGATGACGACATCTAAGATATTCGGAATCAAGAATAAAACC  
AGTACAGCGCCGTCATCGGTTTTCCATACCTCAAGGTGTCTGATTTCGGCAACAGAATAA  
CTACCACTAGATGTAGTATATGGTATGTTTACACGTGAATAACAAATTGTTGAATGAAGC  
TTTTACAGTGGTACTGGATTAGGAATCTTAATTTGCGCTGGAGGTCTTCCAGCGCATCA  
AGTGTTAATTCGAAAATTTAGCTGCGACGTAGAGGCCTTGTGAAAAGTCTCAAATTT  
ATTATTCTTCTTCTGTGGTTTCAGCTTTAACAAGTTCACGTACTGCTTCTACCAGGTCTT  
CCAGTTTAAACAGATTCACTTGTAAATACCGACCAGTTGAGCAATCTGAGCTAGGGTATTCT  
GAAGAAGTTTAGAATCGTCAGAAATACGAGCGGCGGCATCTTGGGTATCAAGAATACGAG  
ATTTCAGAATTACGATTTTCAGACTGCAGTTTTTCAATAGTTTTCAGTGGACATTTTATTAC  
CTTAAGATTTTTTCAATTTTAGAATAAAGCTCTTCTAACGAGCCGTCGTTTGTAAATACT  
AAGTCGCCTTCTTCAATAGGCAACCCAGCTTCTGTAATATGTTTATCAGTGGATTCCGTA  
CCAGAGCGAACCACATGAATAACTGTAGCACCCATCGCTCTAGCGGTTTCCATTTTCATGG  
ACTTGGCGTGTATCGGTCACAACGTAGTAATCGAAATCACTTCCAATATAATCCATATAG  
TTAATGCAAAAAGCTTAACCCAATACATACGGTCAAATAAATTAACGACAACATCCGTA  
CCGAGGGCTTGCATAAAGACGGCGGATTGACCATGTGTCGTTGATATTATTTATAGCTTCA  
CGCAGGGCTTCATATGGTTTAAATATCTAGATATGAATACCCACCTTCTAATGATGATAAT  
ATGTTAACACCATTAATTGGCAGGTATTGTCGTTGTAATAAATAGCGTTTCTTCCATT  
AATTCAATAACATCCAATTTATTGAGATTTAATGGTGTTTCACGGTTCGATCCAATGCCT  
TCAAAGTATTCATATTTCAACTCGGTGAATACATCAGGGTTTTTCGGCATGTTTACGCTCC  
CAAGCTATTGCTAGAGCGTCTTTAATTGGATATGCTAATTGATATTTTATGGATTTAAAG  
TTTGAATTGATGTAATCAGCAGTAGTGTCTTTACCACTACGTTTGTGATGCCGCTTAAAAAG  
ATTAGCTCCATAGGTTTTTCTCATATAATTTATGAACGATTATAACATATGGAGCTAGA  
AGCGATTAGCGCAAGGAAGGGTGTCTAGAAATGGATTTAGATTCGACCGCTTGACGCGGT  
TGTTGAGATACAATGACTTCACCATCCTTTTCTATCGTCATATACGCATAGTGAATAGTT  
GCTACGCACGTAACGGCAGGGTTCGGAGTCTTCAGTGTAACTAAATTTCAATTTTCGCTCAA

TCGGAAATCCATGGTTTATAGAAATTTGCCGTCAAACCCTTCAGTCTTATTGTTGTTT  
AAAATGTGCAAAGTAACAACTCAGGACCATCGGCATGGGCTGTATTATGACCAGTTATA  
TAGTTATTAGTGCTGAGCATCCATTTATACATGTTTCATCCAGGACGTCATGTCTTCATCA  
ACTATAAATCGTACAATAAAAGGGTCATATTCAAATGTAGTGCCTGCACGCATTGCACGT  
CCTAACCCCATTTGTGCCTGTCACAGTTTCAACAACAGGAATTCTCACACCTGGCAATGGT  
GCCGTTTGGGCATTGAGCACAAAACCTGAAGTTCGTGTACTATCTGGGATATCCACAACA  
AAGTTTGTATATTTGTTTGGTTAAAAATCTGTCTCGTTGGACGAGTCATAAGCACCTCA  
AAAACGCTTTAATAAAAATGCAGTATAATGGTTTTAGGTCTCTTCCATTAATCTGGTTCA  
ACAGAATATCAGAAGAACGGAAGAGAATAGAATTAAGATTTCCAAACAGTATTTCGCAGAG  
AAACGTTTTCTTTTGACATAAACTGCTGAGTAGGTAACATGATTATGTTAGCCCAGTCT  
TTAGGAGCTATTTCTGTTATTGTTCTCTAATGTGGCCTGGCAAGTATGCTTTAATCATT  
TTGTCCGCACCTTGAATCCTTTCACCTTGCTCCAGTCTATCTTCAACTTTGTGTTATTA  
GTAATAGTAGTTGTGCTAGCATATTGCTTCAGCAATTCTTCAAGAACTGTTGTGCTGCT  
TTAGGTGGGATATAGTGCAAGTTTAACCCGTACATCAAATTAATGTTTACCTAATCCTAAA  
TAAATAATCAAAGGATATCGGTCCCAGTATGGCAGAGTATCTTTATGTTTAGCATCATAAC  
ACGTAAGTATAAATTTTGCCTGGCGCAGGCTTGACTACTTTATGACCTTTTACACTTTTC  
TTAATTGTTTCAACAACCCTTAGATGATTTGTTGTTTACTGCTGCGCCTTCATTTCTA  
ATCTTTTCTCGTATTGAACTGCGAAACGAGTTTATCATCAGAAGTTGACGTTCTTGCTTA  
TTGAGTTTATTTTTAGGTTTAGATTCAAGCGTTTCAATTTTCTGTGCAGTCTTAATAGAT  
GATGCATATCTAGACATTGCAGATGTAAACGACGAGTATTTTATTCCTTTTGATTCTGCA  
AATGCTTTTGCAGTGATTCTTTCTTTAGCTTTCTTGTATTCTAATCCTATCTCAATC  
CATTTTCTTTCATTCATAGACTGAGCAATCTTAGGGGCTTGTACGCCTTCAGATATAATT  
TGGAATATGCTCATAATTACCCCTTGTATCCGAGTTTCTTAAGTCCGTCTTCGGTTAGAA  
CTCGAAATTTTATATTTCTTTTTCAGCAACAGCTGAGGCAGCTTTCCATTTGTACAGT  
TCACAGACCACACGTAGATCTCATTCATATAACGTTTCTTTGCTGCGGTAGTAAGATTTG  
CAGGCTTAATAGGTGGTTGAGTTTCTTTCTTTGGTTTTATTCTACAAAGAACTCTTGAC  
CTGATGCATCTTTCATCCATATATCCATAAAGTATCGACGTTTTTTACCTTCTGCGTTAC  
AGAAATATGGAATTACTGCTGTTTCGCTGCCCATGCAATAATTTCTGGATTTTTATCTA  
ACCATTCGAAAAAGAATTTTCCAGTTTGAACGATACGTTATTTTGGTATGGTCTCCAC  
GGTATTTTTTTAAATTTTTTGGGACCCATTTACCAGAGTAGGCCATGTTGTCCTCCTTAT  
AAATAGTATTATTATTTATACCAATTTTCATATTGGAAGGAGACTATTTTGTATTATACAT  
TCTTCGACCCAATAGGATATAGTGCTAAAACCATTAATAAGAATGCACCTACTATTCTA  
TGACAGACATATTTTCGTAACATAAAGAGTACTTTAAACGTGTTGCGACCAACTATAGAT  
TACAACTTATTATATTAAGGTTCTCCGCGTCTGAAGAAGTACAAACATAATTTATG  
GCAACCCTCAATTATACTGGGTCCTTTTGATGTGTAATGATAACTATGATCCGTATTATG  
GTTGGATCACATCTCAGGAAGCAGCGTATCAAGCTTCTATTTCAGAAATATGCAAATGCCG  
GCGGAGACCAAATTTTATCATATTAACGAAAAACGCGAGAAATTTTATAACTTAGTTT  
CATATCCAGATGAGCCATTAGTATGGTATGATAAAGGCGACAAAGCTCGTAAGTATCCGC  
AATATAAAGGACCTTTAGCTGCAGTAGATACTTATGAAGCGGCTGTACTAGATAACGAAA  
AACTTCGTAATAAATAAATTTGTTGCAAAGGAAGATATAAACTCGTTTATCACTGATTTGA  
TTCGTGAGATGGAGATTGCATAATGGAAATGATTAGTAGTAGCCTTAATTGGTTCGTTGG  
TGTTGTTGAAGACAGAATGGACCCATTGAAACAAGGGCGTGTTTCGAGTACGAGTCGTAGG  
CCTGCATCCAGCACAGAGAGCACAAGGTGATGTACAAGGTATTCCTACAGAAAACTTCC  
ATGGATGACTGTTATTCAACCTATTACATCTGCATCAATGTCGGGTATTGGTGGTTCTGT  
TACAGGCCCTGTTGAAGGAACCTCGAGTATATGGTCATTTCTTAGACAAATGGAAAAACAA  
CGGTATTGTACTCGGTACATATGGTGGAAATTGTACGCGAAAAGCCTAATAGACTCGAAGG  
TTTTTCCGACCCGACAGGTCAGTATCCGCGACGTTTAGGTAATGATACGAACGTATTA  
CCAAGGTGGTGAAGCTGGCTATTATTCGAACTCTAACGTAATTCAAGATAACAACCTTAGA  
TTATGGTATAAACCAGATGATACAGATTTAGCAAATATTCCTGAAGATGATGACCCTAA  
TTTTACAATAACAGAAATGTTACGTGCTGACGAAGGTCTTCGCGATAAAGTATATTGGGA  
CCATCTAGGGTATCCTACAGTAGGTATTGGACACCTTATCGTAATGGAAAAGACCCGAGA  
CATGTCTCGAATTAATAAATTGTTATCCGATCAAGTAGGGCGTGAAGTAACAGGAAATCC  
CGGACTATTACATTAGAAGAAGCAACAGCTCTATTTGAGAAGGACCTTGCTAAGATGCA  
GAAAGACATTCGTTCTAATTCTAAAGTAGGTCTGTTTATGCTAAAATGAACAGGTCTCG  
CCAATGGCATTAGAAAACATGTGCTTCCAAATGGGCGTTGGCGGTGTAGCAAATTC  
TACTATGCTTAAAGCAATGGCCACAGGCGATTGGAAAACCTGCATACAAATCTGGACGCGA  
TTCGTTATGGTTCCAACAGACTAAAGGGCGTGCTTCACGTGTAACAACAATTATTTAAC



TGGTAACATGGAATCATATGGCGTTCCTGTGTTAAAACACCACCTTCACCAGGAGTCGGTGC  
CGATTTAGTTACTAGAAATACCGATCCAGAAGACCCGGCTGGTCCCTCCTGTTCCATTAGA  
TTCACGTATCCTTTTTAAAGAACCGGAATCAAGTTATCGTGGTGAATACCCATATGTTCA  
TGCTATGGAACAGAAAGCGGTCATATCCAAGAGTTTGACGACACTCCAGGTAACGAACG  
TTATCGCTTAGTTCATCCAACAGGGTCATATGAGGAAGTTTCTCCGTCTGGTTCGTCGCAC  
TCGTAAAACCTGTAGAAGACCTTTTTGACATCACTAATGGCGATGGGAATTCCTGGTTTC  
TGGTGATAAACTTGTTAACGTTGGTGCTAACGAAATATATTATAACATGGCGGACCGCCT  
CCATCAAATAGATGGCAGCGACACAATCTTTATTCGTGGCAACCAAGTTAAAACCTGTTGA  
AGGTGATGGAACCTTTTACGTTAAGGGCAATATCAAAAATAGTCGTTGACGGGAATGCAGA  
TATTCTTGTTAAAGGTGATGCTAAGTCTCAAGTTGAAGGGAATCATGACTATACTGTCAA  
TGGTAATGTTAAATGGACTGTCAATGGTAATGTTGATATGACTGTTGCTGGCAATTGGTC  
GGAGACAATGACTACAATGAGCTCAATAGCTTCAGGACAATATACTGTTGACGGATCTCG  
TATTGATATTGGGTAATATATGGCACAAATACTTCCTTTTAAATACCGACTTAGGAGAAGA  
CATGGAAGGGGCGTCTATTGACGTCCTTTTACTCCACAGTTAGAAACTACCGAACTTT  
GGTGTCAATAAATAATAGATTATGAACCAACACAAGGCATTACAGTTGACGGTAATCA  
CTTATATGGAACATATGAAAGCGTATTTAGCTTTTCTTCAGATGCATTGAAATATCGATT  
AAACGATGATTTTAAAACCTGCATCTTCATGGGAAGATTTACCGCAAGACCAAGCACTCA  
ACTATATTTGTGGAGAGCTCCTCAGAACCTCCGTAAAGTATTTAGTTATACGGTTGAAAT  
GATTTATAACTACCAAGAAGAAGGTTTCATCAGGCGGCTCAAGAAGTGACTCTAGTACAGA  
ACCTCCGCCGGCTCCGGTACAAAAAACTCTTACTAAGGTTTATACAAAACTATAGTAGG  
AAATTGGAGCAAATGGGCTCAACAATTACGAAACTATGTTTATGCGAGGCCATAAAAAATG  
TCTGGCTTAAAGTTACGACCAGTGC GTTACAACAGGTCATGAAGCATGGCCTCCTACAATA  
ATTAATGCTTCTCAATCTAAAGTATTCACCGGCGGTATTCCCTGTTCTTGTAGCAGGAGAC  
CAAATAACACCTCATAACAGAAATTAAAAAACCGTACGAGACTCATGGAGGTGTTACTGAA  
CCTCGTACATCTAAAGTATATGTCACAGGTAAAAAGGCCGTTCAAATGGCTGACCCAATT  
TCATGCGGGGATACTGTTTCTCAGGCCTCGTCAAAAGTCTTTATAAAATAGGAATTA AAA  
TGGCAAACACTCCTGTAAATTATCAGTTAGTCAGAACGGCGAATGCTATTCGCGAAATTT  
TTATCGGGGGCACATTTGCCGAAATTA AAACAATATAATAGAATGGCTCAATGGACAGA  
ACGAATTTCTTGATTATGATTTGAAGGTTTCGCGTTTAAACGTATTGTGTGACCTTTTAG  
CATATAACTCTTTATATCCAACAGTTCAGTAATAGTGCAGTGTATGAAAGCTTTATGC  
GTA CTGTA ACTTGC GCAGTTCGTTGTACAAGCGGCTCAGGATAATGGATATCTGCCTG  
CATCTAAATCAGCAGCACAAACAGAAATTATGCTCACATGTACGGATGCATTAATAGAA  
ACTATATCACTATTCACGTGGTACTCGTTTCTGGCGTATGCTAAAGGTA CTTCTGTAA  
ATCCATATAACTTTGTTTCCACCGAAGACGTCATTGTAGTTAAAGACAAAAATAATCAAT  
ATTTCCACGTCTTAGGTTAGCTCAGGGACGTATTGTTCTGACTGAATTAACATTTGATA  
AATTA AAACCTATCATTATTCGTGATAAGA ACATCGACCGTAATTTGGTTAAATTGTATG  
TTGACGGAGCAGAATGGATTA ACTGGACTCGCAAATCGATGGTTCATGCTGGTTCTACTT  
CGACCATTTATTATATGCGAGAACTGTTGACGGGAACACTGAATTTTATTTTGGTGAAG  
GTGAAATCTCTATTAGCACATCAGAAGGTGCTTTAACATCCA ACTACATTGGTGGCCTTA  
AACCTGTCCAGGGTTCTAAAATCGTAATTGAATATATTTCTACTAATGGTGCTGAAGCAA  
ATGGTGCAGTAGGATTCTCTTATGCTGATACATTAGCTAATATCACAGTTATTGGAATTA  
ATGAAAACCCAAGTAATAACCCTGACTTCGTTGGTGC GGATGGCGGTGGCGACCTGAAG  
ATATTGAACGTATCCGTGAATTAGGTACAATTAACCGTGAAACTCAACAACGATGTGTGA  
CTGCGACAGATTACGACACATTCGTCTCTGAACGATTTGGTTCTATTATTCAAGCGGTTT  
AGACATTTACGGATTCATCTAAGCCTGGGTACGCATTTATTGCTGCTAAACCTAAGTCTG  
GGTTATATTTGACTTCCGTCCAACGAGATGATATTA AAAATTATCTTAATGAGTATAACT  
TAGGGACGATAACTCCTGTTGTTATTTCTCCTGATTATTTGTTTATTA AAATGAATATTC  
GCGTTACGTATGCATTGAACAAATTACAAGAATCTGAACAATGGTTAGAAGGCCAAATTA  
TTAATAAAATCGACCGGTATTATATTGAAGACGTGGAAATTTTTAACTCGTCATTCGCAA  
AATCTAAAATGCTAACGTATGTGATGACGCAGATATTTCTATCATTGGTTCGTCTGCGA  
CTATTCAAATGGTTCGCGAGGTACAGAACTTCTACAAAACACCTGAAACAGGTATTAAT  
ACAATAACCAGATTAAGATAGAACATTAGAATCTAACGTGTTTTCAATTTGATAGTTTAC  
GCGTTGACCCTGAAACGGAAGCTACTATTAATATGACGTTTCGCAATTGTAGGTT CAGATA  
GAAATGACCGTGGCATTGGACAAGTTATCATTGGTCCGTTTGCAGATGGCGACGTTATAG  
AAAATGCTTATATTCAACCATATACTGGTGACGATTTTAATAAACTTCATGTTACGGACG  
GAAGAAACAAATATTACTCTATAGGTGAAGTAAATTATCCGGCTGATTCAATTTATTGGA  
ATATAGCTAAAATTGATTTAACTTCTGATAGGTTTGAAGTTCAA ACTATTGAACTCTATT

CAGACCCAGCTGATGATGTTATCTTTACTAAAGACGGGTCATTAATTGTATTTGAAAATG  
ACTTACGTCGCAATATTTAACCATAGATTTGGAGCCTATTTACAATGACAGTAAAAGC  
GCCAGCAGTCACGAGTCTCAGATTATCTAAATTGTCCGCAAACCAAGTTCAAATTCGCTG  
GGATGAGGTTGGCGCTAATTTCTACTATTTTGTGGAAATAGCTGAGACAAAACAGCTAA  
TGGGGAAGCAATTCCCCGTAATAGCTATAGATGGACTAATTTAGGATATACCGCTGATAA  
CAATTTCTTTGAGTCTGGTTTAAATTCATTAACAACATATATGATGCGTGTGGCTACAGC  
AGCGGAGGGATTTGAGCAGTCTGATTGGAGATACACCGAAGAGTTTGAAACATTTGAAAT  
AAACGCTTACACATTCCAACATATGATTGAAATGCAATTAGCTAACGAGTTTATTTCTGA  
AAAATTTACAAAAAATAATACAAACTACGTTGATTTTAAATAATGACACGATCATGGCAGC  
ACTGATGAGCGAGTCGTTCCAATTTAGTCCTGCATACACCGATGTGTGCATCGATTAGAAA  
TTTTATAATTGGTGAAAATCAGTATCATGAAATCCAGGGGCATATCCAGGACGTATGTAA  
AGATATAAATCGAGTATATCTAATGGAATCTGAAGGAATCTTTACCTTTTTGAAAGATT  
CCAACCTATTGTAAAAGTGTCTAATGATAAAGGCCAAACATGGAAAGCGGTTAAATTGCT  
TAATGACCGTGTAGGATATCCACTTTCACGAAGTGTATATTACCAATCAGAATATACGAC  
GTATTTGCTCGGCTATGATAAGATTTTTTACGGGCGTAAATCATCCGATATTCGTTGGTC  
TGCTGATGATGTTTCGTTTTCAGTTCACAAGATGTAACATTTGCTAAAATCGGGGACCGATT  
AAATTTAGGTTTTGATGTAGAGATTTTTCGGTACATACGCGTCATTACCAGGAAACGTATC  
ACGTATTGCAGAAGCTATTACTTGTAAATGATGACTATGTTTATATTGCGGCCAGAGATAA  
AGTTTCGCTTCGTTAAAACAGTAACGCTCCTATTGATTCAGATCCATTATCTCCGACCTA  
TTCCGAACGGTTGTTTGAACCTGAGACGTTTACAATAACAGGCAACCCTAAAGCAGTTTG  
TTATAAAATGGATTCTGTTGGTGGGAAGAATATTCGCTCTTATTATTGGTGAAGTCGAAAA  
CGTTAATGACGACCCAAGAACAAGCCTATTTTAGATTCCGTTGATAAAGGTGTATACGT  
TTTAGACCATGACGCTGGAACATTTAAAAGGATATTTGGTAATACCGAAGAAGAACGCCG  
TCGTATAGAACCGGCTTTCACCAATATGTCTACTGATGGTGTGAGCTTTATATCTCTTC  
TAGTAATTTTAAATTTTAGAATCTGATATTGTTGACGACCCAGAAACGCAATCTAAGTA  
TGGACTTTTAGGAGCAGTTAAGTATGAATATCCTAGAGAATGGCTCGCAGATAAACATTA  
CCATATGATGATTTTCGCATCAAACGAAGAAAGTAATTGGGAAACTTTTTACCAACTCC  
TATGCAGTATTATGCAGAACCTTTCTTTAGTTATTCTAGAAAATCAGGCACACGTTCTTG  
GATTAATAACTCTGATAGAGCGGTAGTGATTTATTCTGATTTGCTTTACACAAAGGTAGT  
GGAAAGCCACCCTAGCACTTCACCTGATCGTAAAGTTCATGAATACTGGAATGATGGTGA  
TTGTAAGATTGTTATGCCGAATATAGAATTCACTGGATTTAAAAAATACGCATCTGGTAT  
GTTGTTTTATAAATCATCAGGTGAAATAATTTTCAATTACGATTTTAGTTATCGTGTTAG  
AGATAACGTTTCTATAATTTGGAAGCCCCTAACGATTTTTTGACCTCCTCATTACAAAA  
CCAAGAAAAGAACTTCTTGGGTTCCCTGTTGAAGAGACAGGTCTAGCTGACCCGGATT  
ACGCCATTACTCACTACAATGATGCCAGAGTCTTATCTGTTGGATAATACAAACTTTGA  
AGCATTTTGTGAAGCGTACATTCAATATCTTTCTGATGGATACGGGACTCATTATAATAA  
CTTATTGAATTTGATTAATAAATAAATACCCACGAGAAGAACACGCATGGGAATATCTTTG  
GTCTGAAATTTATAAACGGAACATTTATTTGAATGCTGAGAAACGTGATTTAGTTTCTAG  
GTTCTTTGAGTCCAGAAGTTACGATTTTTATTCTACTAAAGGAAGTGAAGCGTCTGATAA  
GTTTTTGTAAAGTTCTTTATAACGAAGACGTTGAAGTGGAATTTGAGTCATCTGCTGG  
AACAGAGTACGATATCATAATTCAATCCGATTCTATAAGTGAAGATTTGGTTGGACAAAC  
TATATACACTGCTACAGGTAGATGTAATGTTACATATTTAGAAAGAAGCTATTCTAAAGG  
TAAATTACAATGGACTGTGACTATTCATAACCTTTTAGGTAGGCTTTTAGTCGGTCAAGA  
AGTAAAAGCCGAAAGACTAGCAGATTTTGAAGGTGAAATAGTTCGCGGTATTAAAGGTAA  
AGAAGTTGCCAAAACACTATCGATTATTTAATCGTGGTAGAGCTTATTACGTCATGAA  
AATAAAGTCAAATCTTCCGTCTCTCGTTGGAAATCTGACGTAACGTTTTGTACATCC  
GGTAGGATTTGGATTTATTGCAATAACCTTATTAACAATGTTTATTAATACAGGATTAAC  
GCTTAAACATGTTGAAACTATTATTAATAAATAAATAAATAAATTATAAGTGGGATTCCGGACT  
GCCTACGGAATATGCAGACCGCGTCGCTCGTTTAGACCCTCAAGGTAATGTAGAATTCAA  
TCCTGCTACAGGTGAAGTAATTTATGATGCCGGTCTTATGCTGGTATCGAATACCCTTT  
ACCTGCAAATTATAACGAAGAAAATGATAACTCTATTTTCCAAGGACAATTACCGTCCGA  
ACGACGCAAGCCAATGAGCCATTATTTGATGCATCAGGTACAACGTTCTCTAGATTTAG  
AGAGCTTGTTAATGAAAGATTGTTAGATAACGTGGGAAATCCTAGAGACCCGATTAATCC  
ACCACAGGTTAAATTAGATGAATGATTCAAGTGTGTCTATCGTTGATAGTTACTTCAA  
AATTTAGAAGTGAATAAATGTTGAATTTCTACAATTCAATAGGTGATGGTGATAATAAAA  
ACACCATCTTTATAACGTTTGGTCGGTCTGAACCATGGGCTGCTAATGAAAATGAGGTGG  
GCTTCGCCCCACCGTATCCAACAGACTCGGTTTTAGGTGTAACAGATATGTGGACTAACA

TGATGGGTTTAGTTAAAGTTATCCCATCTATGTTAGACTCGGTTATTCCTAGACGTGACT  
GGGAGATATTCGTTATCCGGACCCTTATACATTCAAATAAATGATATAGTCGTATGTA  
ATACAGCCCCATATAATGCCACTGAAGTCGGAGCTGGATGGTTAGTATACCGTTGCGTAG  
ATGTTCTGATGTTGGGATGTGTTCTATTGAGTCTCTCGACAACAAAGAAGAAATGTCTTA  
AATTAGGCGGTAAATGGACTCCATCTGTTAGGTCTTTAACCCCTCCTGAAGGCCGTGGAG  
ATGCTGAAGGGATTATCGAAGTTGGTGATGGATATATATGGGAGTATCTTTATGAGATTC  
CACCTGATGTGTCTATAAACCAGTGTACTAATGAATATATAGTCGTTCCATGGCCGGAAG  
AAGTTAAAGAAGACCCTGCTCGTTGGGGATATGAAAACAATCTAACCTGGCAACAAGATG  
ATTTTGGCCTTGTGTATAGAGTTAAAGCAAACATAATTCGTTTTAAAGCCTATTTAGACT  
CAGTTTATTTCCCTAATGCAGCACTGCCTGGTAATAAAGGATTTAGACAAATTTCTATTA  
TCACAAACCCCTTGGAAGCTAAACTCCGTCCTAATGACCCTAATATAAAGGCTGAAAAGG  
ATTATTATGACCCAGAGATTTACAGCGTCATTCTGGTGAAATGATTTATATGGAAAACC  
GTCCACCTATTATTATGGCAATGGACCAAACCGAAGAGATCAATATTTTGTATGTTCT  
AATTTAGGGAGACTTCGGTCTCCCTTTTCGTGTATAAATAGTATAAACTATTAAGGATTAG  
CCACATGTATATTCAAACTCCAAAACAATTGATTGACGTTGGCGAAATTGGTAACGCTTC  
TACAGGCGATATCCTTTTTGACGGCGGTGTTAAAATAAACAATGATATAAATGCTATTTA  
CAATGCGTTTGGTGACCAACGAAAAATGGCAACTGCTAATGGGACAGGACCAAATGGACA  
AATAATCCATGCCACTGGATACTACCAAAAAGGAGGCCCTACTGATTATTTACCCCTGT  
TCCAGTAGGAAGTAGACACGACATAGATGCTTCTACCGGTGGTGTTATTGTTACTGTTGC  
TAGAGGTGAACTCGGCGATTCCGTGGAATTTATAAATTCAAACGGGTCAATTTTCGGTAAA  
CAACCCATTAAGTATCCAAGCATTAGATTCTATTAAGGTGTTGCAGGTAATTTAGTTAT  
AACCACACCTTATACTAAAGTACTCTTCGTTGTATTTCTTCTGGTGCAGGTGGTTCAAT  
ATGGGATTATTCTACAGAAAGTATGTTTAGTCATACCGAAATTCCTGTAGACGGGACATG  
GAATATTATTTTCAGACTATGTCAATATTCCTCTATTTTATAAACTGAATATAATGCTGC  
TAAACTTTTTGGTTACATGCCAATCTGCCAACGGCAGAAAAATTAATCATGCGAAATAAA  
TATTCTAATAGATACAATTAATCAAGAGTTATTTCAACCGAATACGCAGTGATGCGCGT  
TGTAATGATAACGAAGAAGATGAAATTGCGAATATTAGTTTTTCGATAATTAACAATTT  
TGCCACTATGACAGTTTCTTCACATATAAATGGTCTTCGAGTGGCAGCTAAAGTTATTT  
AACTCAGAAAATTAGGGTCGCTCAATAATGAAACAAAATATTAATAATTGGGAACGTCGTT  
GATGACGGACAAGGCGATTACCTTCGTCGTGGTGGTGCAAAAATTAATGAAAACCTTTGAT  
GAGTTGTATTATGAATTAGGCGATGGCGAAGTTCATATTCGCTGGTGCCTGGAAAACA  
TACCATTCTTCAGATGGACTTAATTTAGCTGCTGAATGGGGTAAATCATAACGCAATTGAT  
ACTTCAACAGGGCGTGTCTTATAAATTTACCTAAAGGAACAGTGGAAGATTATAATAAA  
GTAATTAGAGCCCGTGATGTATTCGCCACATGGAATATTAACCCTGTAACATTAATTGCT  
GCCAGTGGTGATACTATTAAGGTTCTTCTAGCCCAGTAGAAATCAATGTGCAGTTTTCA  
GACTTAGAATTAGTTTACTGTTCTCCTGGGCGCTGGGAATACGTTAAAAATAAACAATA  
GACAAAATTAAGTTCTGATATTAGTAGTGTAGCTCGTAAAGAATTTTTAGTCGAAGTT  
CAAGGTCAAACCTGATTTTCTTGATGTATTTGGGTCTGTTTCTTATAATGTGAATAATATC  
CGTGTAACACATCGTGGTAACGAATTATACTACGGTGATGCGTTCAGTGACAATAGTGAC  
TTTGGTTCTCCAGGAGCTAATCCTGGAGAAATCGTTGCATTAGATGGTAAAAACATCCGT  
TTAAGACAACCATGTAATATTGGCGACACCGTACAAATTGAAACCTTTTTGGATGGGATT  
ACACAATTACGCAGTTCTTATTCTCGCCGCCAAATACGTATTTTAGATTTCGAAATTAACA  
ACCCGTCCTTCCTTAGAAGGAAGTGTATATGTCGCTGATTTGTCAACTTTGAAATCTATT  
CCTTTTTTCGGCATTGAGTTAATCCTTCAGAACCGGTCAATACTAATTCTTTAGAAGTT  
CGTTTTAATGGTATTCTTCAAGAATTAGCCGGTACTGTTGGTTTACCTATGTTTCAGATGT  
GAAGGTGCTGATGCAGAACTTCTACCGAGTGTTCAGCTTTAGGTGGGACTTGGGTTACA  
TCTAACACCGATTATTCTATTGAATATGATGATAACGATGCAACTATTGCACGTGCTTTA  
GTCTTTGACCGTAAGTTTGAAGACCAAGACATTATTGATATTACATGGTTTAATAACGAT  
TTAGGCGCTTTATTAAGTATCGATGACATTTTAGATACAACCTGATGAAAGGTATGTGCA  
CAAGGTGCAACCGTAAATGTGACCGGCGATGTGGCTTTGACCGATTCAATAATATCGGA  
TGGCCTAATGTAGAATCTGTTCCGGCATATAGCAGGGAATTCTCATCTATTGCAAAATATT  
TTAACACTATTTACCCTGTCGGTACTATTTACGAAAATGCAGTGAACCCTAATAACCCA  
GCCACGATTTAGGATTTGGTTCTTGGAATTTATGGGGACAAGGAAAAGTATTAGTTGGA  
TGGAACGACGATATTAGCGATCCTAATTTGCATTAAATAATAACGACCTTGATTCTAGC  
GGGAATCCTACACATAACCGCCGGTGGAACAGTTCGGAACAACGTCTAACACACTAACTAAT  
TCTGATTTACCTCCTACTCAAACCTGACGAGAAAGTTCTTATTTCCGATGAGAACGGTACA  
ATTATTATTGGTGGTTGTCAATACGACCCTGATGCAGAAGGTCCTATATACACCAAATAC

CGTGAAGGCCACGCCACAACGAATAGTACACACGTACCGCCTCAAGCCGTAAATAATATT  
CAACCGTCAATTACCGTATACCGTTGGGTAAGGATTGCATAATGACCATACTTAATACTA  
AAGCGGGAGTAATATCCCGCGAAGCAGATTTTTTAGGATTTAGAAAAAATCCTACTCAA  
TTGATATTTTAAACAACCAAGGCGTAGGTTCTGTAACCATTTCTCAATTGGCAAAAGGAT  
TCTACGATGATAACGTAGAATCTGCAATAAACGATGTTTATAATATTGCTAGAGCAGATG  
TAGGAACAGTTACAATTAACACCTCAGGTGTATCTCCTGAAGGAACTTCACAGGTAGATT  
ATTGGTCCTTTAGTGGAAGTGTAACTGACCCTAGTTTGCCCGATGGAAGCCCTGTTATTG  
TAAAAGTTTACGGGCTTCTGTTAATGCTACTGTAGGTATGACAGCCGACGAATTTGTTG  
TACAATTACGTAATACTCTCCGGAATGCGATTTCCGACCAATTGGCTATTGCAGAGTATA  
AAGATGACCCTACTGTTGGGACTAAATTACAAATAACATATTTAGATAACCAAAGACACG  
TACTCCCAACGTATTCCTCTTATGGTATCACGGTTTCTCAAGAAATAGTGTCTCAGGCTA  
AGTCCGGGTACGGCACTTGGAAATTTACTAGGTGCGCAAACCATTACTCTTGACAGCCATA  
CTTCACCTACAACCTTTTATTATTTTGTGAGAACCGCATGAGTAACAATACATATCAACA  
CGTTTCGAACGAATCAGTATATGTTGAATTTGACCCTACCGGGTCAAATTTTGATAGTTC  
AATAACCAATGTCCAGGCAGCCTTAGCCTCAATTAGCGCATATGGTGTAAAGGTGTTCC  
GGACGCAAGCGAAGCAGAAAAAGGTGTAATTCATTAGCGACAGAACAAGAAGTTCTTGA  
TGGATTTAATAGTACTAAAGCCGTTACACCCGCCACATTAATGCAAGACTTCAGTATCC  
GAACGCGTCAGAAACACAGTACGGCGTAACTAAATATGCAACACAAGAGGAGGCCATTGC  
TGGCACTTTAGACACTGTTTCTATTACTCCGCTTAAATTAACCAAACCTATTGATAACAC  
GTTCTCTACTCGTTATTCAACAGAAACAATAACGGTGTATTAAAATTGCAACTCAAAC  
CGCTGCACTTGCCGGGTCTGATGACACCACAGCAATGACTCCGCTTAAAACGCAGCAATT  
AGCAATAAAATTAATTTCTCAAATAGCTCCTAATAACGACCCGGCTTCAGAATCTATTAC  
CGGTGTTGTGCGTTTAGCTACTGTGGCTCAAACACGTCAAGGAACTCTTCGCGAAGGATA  
TGCAATTTCCCGTATACCTTTATGAATTTCTGTTGCAACACAAGAATATAAAGGTGTTAT  
ACGTCTAGGAACACAAGCGGAAATTAATAGTAATTTGGGAGATGTTGCTGTAACAGGTGA  
AACGCTAAATGGTAGAGGAGCTACAGGTTCTATGCGTGGAGTCGTAATAATTAACGACGCA  
GGCCGGTGTGACCCGAAGGCGATAGCTCTGGAGCATTAGCATGGAACGCAGATGTAAT  
TAATACACGCGGTGGGCAAATAATGTTTCTTTAAATTTAGATCACCTCACAGCAA  
TGGAATTTGGTCGCGTGGTGGAAATGTGGAACAAACGGTGACCAGCCAGTTGCAACAGAGAG  
ATATGCATCTGAACGTGTTCTGTTGGAACAATTCAAATGTTTCGCAGGTGATAGCGCTCC  
TCCAGGTTGGGTTTTATGTCATGGTGGGACCATTTCTGGAGACCAATTTCCGGACTATCG  
AAATGTGGTTGGAACAAGATTTGGCGGTGATTGGAATAATCCTGGAATTCGGATATGCG  
CGGCCTTTTTGTTAGAGGAGCTGGTACTGGCAGTCATATTTTAAATAATCGTGGCCAAGA  
CGGATATGGAAAGGATAGATTAGGTGTAGGATGTGACGGCATGCATGTTGGTGGTGTCCA  
AGCACAACAATGTCATATCATAAACATGCCGGTGGATGGGGCGAATTTCAACGTCATGA  
GGCACCGTTCGGAGCATCCGTATATCAAGGTTATTTGGGTAAGTAAATACTCTGATTG  
GGATAACGCATCATATTTCACAAATGACGGCTTCGAATTAGGTGGTCACCGCGACGCAAC  
AGGCACTCTTAACCGTGAAGGACTTATCGGATATGAGACTCGTCCATGGAATATATCTTT  
AAATTATATTATTAAGTCCATTAATAAGGTTAAAAAATGATCGAATTAATAAAGTCTACC  
ATATGTTGATGGCCCTCCTGACGAGGGTCAAAAACGTTTAACTGGATTAATAAATTCAGA  
AGAAATAACTGGCGCTGATACGTTATACGGTCTGAAGGAGTAATGAACCGTCCAATAAC  
AGAAGTTCAACGAAATGTAGAAACAATTAACGATAACGTTAAGACTATCGCAGAATCTTT  
AGATACCGCTAATGCTGATATTGTCACAATTAATAAGTATCTTGGATGTTTCTGGTGACGT  
GGATGCTTTAGCACAAATTGGACATAACACTGATGATATTGAAGTATTAATAACACTGT  
AAATTCACACGGTGTGATATTTTAAACACTGAAGAAAACTAGATGATACTATTGCTAA  
TATCGGAGTAGTTAATCCAGAAACAGATTCGGTGTATCGTACGGTGCGTAACGACCTTCT  
TTGGATTAATAACCGAATTAGGGCAATATACTGGACAAGATATTAACGGTGTCCCAACCGA  
AGGTAATGAAAGCACCGGGATGAAACGACGTATTATTAATAACAGTTCAGTGTGGTTGA  
CCAAGGCGTTCGTTTAAACCGAGTTAGAAAATAAATTTGCCGATTCTGATGTTGGGGCTCT  
GACAACCGAAGTTGAAAACCTCCGTCAAGAAATAGGTCCTAGACCATCGTTAACAGTACC  
GGTTTACACTCGTTTATCCGGTATTGATTCATCCATTTCTATCCAAACTAGAGATATTGC  
GGCATTAAAAGATTTTGTGGATATCCTAATTCAACCGCTATTAAAACCTCAAGTCGAGGC  
CAATCGTCTTTCTATATCAACAATAAATTCAGACATTAACCTCGCCTGGCGGTATTAACCC  
ACGTTTGACAACGTTAGAACTACTATAGGCTCTCCAGATTTACCAACTACTCTTCAGGG  
TAAGATCAAATTAATAACCGATTCCATTTACAGGTATTAACACAGTTTTAGGTGTTGATTC  
TTCTAGTGGTTTACGTTTAAACGTAGCATGGCTTAATCAGGTGGTGGCGTTGATTCAA  
TGGTGGACAACCTGAACCGGCTGGTTCACTTTTATATAGGACTCGTATTCTTGAAACTGG

TGTTACTGACCTAGGCAATAACATTCAAACGTTCAAACCGAATTGGGAACTAATTCGTC  
CGGTATTAAGGACAAGTGACTAGTTTAAATAAACTTATAAGCGGCACTAACCCAAACGG  
TCAAACCATAGAAGAACGTGGTATATTGCCAACAGTTAAAAACCATGACACATCAATTAT  
GGCTTTAACTACGCGTGTACCACCTTAGAAACCGACCTTGCTGCAGCAGAAGCAGAAAT  
TCAGGCCCTTAAAGAGGCTGGATATATCGAAGATGCTCCTTCAGACGGTAAATTCTATGT  
TCGTAAAGATGGTGTGCTTGGGTTGAACTTCCTACAGCTTAATGAAAAGGGCCTTCGGGCC  
TAAAGGATTTATATGTCAGGTTATAATGCACAAAACCTAAAGAATTAAGGATGTAATA  
TTACGTCGTTTAGGCGCTCCTATTGTAATGTTGAATTAACACAGACCAAATTTATGAT  
TGTATTTCCAGAGCATTAGAACTTTATGGCGAATACCATTTTGACGGGTTGAATAAAGGT  
TTCCATGTATTTTTTGTGATGACGAAGAAAATACCGTCACGGCGTATTTGATATGCGT  
GGTTCTAATGTATTTGCTGTAACAAGAATTATAAGAACAAACGTTGGCTCTATTACTTCA  
ATGGACGGTAATGCAACTTATCCTTGGTTCCTGATTTCTTTTAGGAATGGCCGGTGT  
TCTGGTGGTATGGGTAGTAATTGTGGTAAATTCTACGGTCCGAACGCTTTTGGTGCCGAC  
CTCGGGTATTATTCTCAATTAGTATCTTATATGGGTATGCTTCAAGATATGATTGCTCCT  
CTTCCGGATTTTTGGTTTAACTCTGCAAACGAGCAATTAAGTAATGGGTAACCTTAGA  
CAGAAAGATGTCATTATTGTTGAATCATAACGTTTCGTTCTTATATTGAGACCCATAAGATG  
GTAGGAAATACAGTAGGTTATGGGCAGGTCGGTCTCGTGATTCATGGTCTATTTCTGAG  
CGGTACGACAACCCGGACCATAATTTGGTTCGGACGACGAGTTGGTGAAGATCCTGCAACT  
AAACAAGGCGCATATAACAACCGCTGGGTTAAAGATTATGCGTCTGCATTAGCTAAAGAG  
CTTAATGGACAAATTTCTGCTAAACATCAAGGTATGATGTTACCAGGCGGTGTCCTGTT  
GATGGTGTTCGATTAATCGAAGAAGCTCGATTAGAGAAAGAAGCTTTACGAGAAGAGTTA  
TATTTACTAGACCCTCCTGCAGGTATTTGGTAGGTTAATATGGCGACTTATGATAAAAA  
TCTTTTCGCCAAACTAGAAAATCGTGGCGGGTATTCTCAGACAAATGAGACCGAAATCCT  
CAATCCATTTGTCAATTTTAAATAACTATGAGAATAGTCAGACATTAGCTGATGTTCTAGT  
GGCAGAAAGCATACAAATGCGTGGTATTGAATGTTTTTATGTTCCACGTGAATATGTTGC  
TGTGGATCTTATCTTTGGTGAAGGACCTTAAAAATAAATTTACTAAAGCATGGAAATTTGC  
TGCATCTGAACTCTTTTGAAGGTTATGAAGGAGCGAAATCGTTCTTCAGCAACTTCGG  
AATGCAAGTTCAAGATGAAGTTACATTATCTATTAACCCAGGTCTTTTCAAACACCAGGT  
CAACAATCAAGAGCCTAAGGAAGGTGATTAATATACTTCCCAATGGACAACAGTTTGT  
TGAGATTAACCTGGGTTGAACCATACGACCCATTCTATCAAGTAGGTAATAATGCGATTTCG  
TAAAATTACTGCAGGCAAGTTTATTTACTCTGGCGAAGAAATCAATCCGGTGCTTCAGAA  
AAATGAAGGTATCAATATACCTGAATTTAGTGACTTGGAACTTAACCTGTTAGAAATCT  
TGACGGTATCCATGACATTAATATCGATGAATATTCTGAAGTTGAGCAAATCAATTCAGA  
GGCAAGTGAATACGTTGAACCATATGTAGTAGTTAACAACCGCGGTAGACAAAATTCACC  
ATTTGACGATGGGTTTATGAATTAATAAATAAATAAAGATAAAGCAAACACCGGTCGAAAG  
GCCGGTTAGGAGAAATGATGTTTGGTTATTTTTACAACCTCGTCGTTTCAGGCGATATATCA  
CAATGATGGGCGATTTGTTTTCAAATATCCAAGTTAACCGTCAATTGTCTACAGGCAATA  
AATTAATTAGAGTTCCTATTACGTATGCATCTAAAGAGCACTTTATGATGAACTTAATA  
AATGGACCTCTATAAACTCGCAAGAAGATGTGGCTAAAGTCGAAACTATTCTACCACGTA  
TAAATCTCAAATGGTAGATTTTCGTTTATAACCCAACGTTTAAAACGAATATATTGAATA  
ACTCTTTTTGAGTAAATCGACTAAGGATATTGTAGACCAATACAACCCATCACC AATTA  
AAATGATTTTTGAACTGAGCATCTTACTCGTTATGAAGATGATATGTTCCAAATCGTTG  
AGCAAATTATTCCATATTTTCAGCCGCATTTTAATACGACTATGATTGAGCAATATGGAC  
AGGATATTCCATTTGAAAGGGATATTAAGTCGTATGGATGGCAGCAGCAATGGATGAAC  
AAATAGACGGTGATAATTTATCTCGTCGACGTTTAGAGTGGTCATTAACATTTGAAGTAA  
ATGGATGGATGTATCCTCCGGTAGGCGCAGCTGAAGGCCCTTATTAACGACTTATCTTG  
ATTTTCATGCTAATGAACGAGACCTTCAAACAGCCGCCAGTGTTTTTGAATCAGTTGATA  
CAGAAATTAACCGAGAGACGTTGAAGCACAAGATTGGAATGGTGAAGTTGAACAAACCT  
ATACTCATGATATTTCAAATCCCGACTCCACCAACCCCTCCTGGTCTTAGAAAACAATAAG  
AGGTAAATATGGAAGGTCTAGATATTAATAAGCTTTTAGATATCTCTGACCTCCCTGGAA  
TATCTGGGGAGGAAGTAGAGGTATATGCTCCTTTACAATTGGTGAAGTTCAAAGTAATC  
CTCAAACCGCACCCCGGATTTGGAAGATGACTATAGCGTTGTTTCGTAAGAATATGCACT  
TCCAACAACAATGTTAATGGACGCTGCCAAGATTTTTCTTGAGACGGCTAAAACGCCG  
ATTCTCCTCGTCACATGGAAGTATTTGCAACTCTTATGGGGCAAATGACTACGACGAACA  
AAGAAATACTGAAGCTTCATAAAGATATGAAAGAAATCACATCTGAACAAGTTGGCACTA  
AAAGTGCTGCTCCATCTAGTCAGATGAATATCCAAAATGCTACAGTGTTTCATGGGCTCTC  
CAACAGAATTAATGGAAGAAGTAGGAGATGCTTACGAGGCTCAAGAAGCTCGTGAGAAGG

TGATTAATGGAACAACCAATTAACGCATTGAATGATAATCACCCATTGAATGAAGGTGAC  
AAAGTTGTTATTCTACCGCCTCATTTAGCTGAACGTAAGAAGAAGATGGTATCCATTGG  
ATTAAATCACAATGGGACGGTAAATGGTACCCAGAAAAATTTAGTGACTATCTACGTATA  
AACAAAATAGTTAAAATTCCTAATAACTCAGATAAGCCTGAATTATTTCAAACATACAAA  
GATAAGAATAATAACGTACACGGTATATGGGTTTACCAAACCTTAAAAGAGCAAATATA  
AAAACCTCAATGGACCTATGAAATGGTTCGCTGAGTGGAAAAAATGCCGCGATGACATTGTA  
TATTTTGCTGAGACATATTGTGCTATTACCCATATCGACTACGGTACAATTAAGTACAA  
CTTCGTGACTATCAACGCGATATGCTTAAAATAATGTCTTCTAAGCGTATGACTGTTTGT  
AACTTGTACGCCAGCTAGGCAAACGACTGTAGTAGCTATTTTTCTTGCCCATTTTGT  
TGCTTTAACAAAGATAAAGCAGTAGGTATTCTTGCACATAAAGGCTCAATGTCGGCGGAA  
GTATTAGACCGTACAAAACAAGCAATTGAATTACTCCCTGATTTTTTACAACCAGGTATT  
GTTGAATGGAACAAAGGGTCTATTCAGTTAGACAACGGTTCCTCAATCGGTGCTTACGCT  
TCATCACCTGATGCGGTTTCGTGGTAACTCGTTCGCTATGATTTATATTGATGAGTGC  
TTTATCCCAAACCTTCATTGATTCATGGCTTGCTATTCAACCTGTTATTTCTTCAGGTCT  
CGTTCAAAAATTATTATTACAACCACCAAATGGATTAAATCACTTTTATGATATTTGG  
ACTGCAGCTGTTGAAGGTAAATCAGGATTTGAACCTTATACTGCAATTTGGAACCTCAGT  
AAAGAACGACTATAACAACGATGAAGATATTTTTGATGATGGATGGCAGTGGTCTAAACAG  
ACTATTTACGCCTCTTCATTAACACAGTTCGTCAGGAACACACGGCGGCTTTTTCGAAGGG  
ACATCAGGCACACTTATTTCCGGTATGAAATTAGCTATATTAGATTATATTGAAGTTACA  
CCTGATAGCCATGGATTTACCAGTTCAAAAGCCTGAGGAAGGTCATAAATATATTGCG  
ACGTTAGACTGTTCTGAAGGACGTGGACAGGATTATCATGCAATGCATATTATTGATGTT  
ACGACAGATAAATGGGAACAAGTTGGTGTCTACACTCTAATACTATTTACACACCTTATA  
CTCCAGATATTGTGTTTAAATATCTAATGGAATATAACGAATGTCCAATTTATATTGAA  
TTGAACTCAACAGGTGTTTCTGTCGCTAAATCGCTTTATATGGACCTGAATATGAAAAC  
GTTATTTGCGATTCAATGAATGATTTAGGCATGAAGCAAAGCCGTAGAATAAGCCTGTA  
GGTTGCTCTACATTAAGGACCTTATTGAAAAAGACAAACTCAAATAAACCATAGGGCT  
ACTATTCAAGAATTCAGAACGTTTAGTGAAAAGGGTGTATCTTGGGCTGCTGAAGAAGGT  
TACCACGATGACTTAGTGATGGGTCTTGTTATTTTCGGATGGTTGTCAACGCAGCAGAAA  
TTTGCAGACTATGCGGATAAAGATGACATGCGCCTTGCATCAGAAGTATTCTCAAGAGAA  
TTACAGGATATGAATGACGACTACGCCCCGGTTATATTTGTTGATTGTGCAAGTAATTCG  
GCAGAATATAATCCATCAGCACATGGCCTGTCAATGGTATAAATAAAAATAAAGCAAATTA  
AGAGGAATTAATAATGGCACTTCTCTCTCCGGGCGTTGAGCTCAAAGAACTACCGTACAG  
AGTACGGTAGTTAATAACTCCACTGGTACTGCTGCCCTGGCTGGAAAATTCCAATGGGGA  
CCTGCATTCCAGATTAACAAATCACCGATGAAGTTGCGTTGGTTGATATGTTTGGTACT  
CCTAACACAGACACCGCAGATTATTTTCATGTCTGCTATGAACTTCCTTCAATATGGTAAT  
GACCTTCGTGTTGTACGCGCTGTTGATCGTGATACTGCTAAGAACTCATCTCCTGTGGCA  
GGAAACATTAATTTTACTATTTCTTCGGCTGGCACCAACTACAGAGTTGGTGATAAAGTT  
GTAGTTAAATATTCTACAGATATTATCGAACCAGACGGTGAAGTTACTTCAGTTGATTCT  
GACGGTAAAATTTTGAATATCTTTATTCCTTCAGGTAATAATTCGCTAAAGCTAAAGAA  
ATCGGCGAATATCCTGAATTAGGTTCAAACCTGGACTGCCGAAATGTCTGGGTCTTCTTCT  
GGTCTGTCTGCAGTAATTACTATTGATTCCGTTGTAATGGATTCTGGTATTCTGTTGACT  
GAAGTTGAACTTCAGAAGAAGCTATTACTTCTCTAACTTTCCAAGAATCTATTAAAAAA  
TATGGTGTCCCGGGTGTAGTTGCTCTTTATCCAGGTGAACCTTGAGACCAGCTCGAAATT  
GAAATCGTATCTAAAGCAGACTATGACAAAGGTGCTTCAGCCCAGTTAAAATTTATCCT  
GATGGTGGCACTCGTTATTCTACTGCTAAAGCAATCTTTGGGTACGGTCCGCAGACTGAT  
GACCAATATGCAATTATCGTTCGTCGCAACGACTCGGTAGTCCAGAGCGTAGTTCTTTCT  
ACTAAACGTGGTGAACGAGATATTTATGGTAGCAATATCTTCATTGATGATTTCTTTGCT  
AAAGGCGCAAGCAATTATATTTTCGCTACGGCACAAGGTTGGCCAAAAGGTTTCTCTGGC  
GTAATCAAACCTGAATGGTGGCTTATCATCTAATGAAACGGTTGAAGCCGGTGATTTAATG  
GAAGCTTGGGATTTGTTTGGCTGACCGTGAATCGGTTAATGCACAGTTGTTTATTGCTGGT  
TCTTGTGCTGGTGAATCTTTAGAAGTTGCTTCTACAGTTCAGAAACATGTTGTAGCAATT  
GGTGATTCTCGTCAAGATTGCTTGGTTCTTTGCTCGCCTCCACGTGCAGCTGTAGTTGGT  
ATTCCTGTTAATCGTGCAGTTGATAATCTGGTTGATTGGCGTACAGCGTCAGGAACTTAC  
ACTGATAATAACTTTAATAAAGTTCTACTTATGCTGCTATTGATGGTAACTATAAATAT  
CAATATGACAAATATAACGATGTGAATCGTTGGGTTCCATTAGCTGCTGATATCGCCGGT  
CTTTGTGCTCGAACAGACAATATTTCTCAGCCTTGGATGTCTCCAGCCGGTTATAACCGT  
GGTCAAATTCTTAACGTTATTAAGCTTGCAATTGAACTCGTCAAGCACAAAGAGATCGT

TTGTATCAGGAAGCTATTAACCCTGTTACTGGTACCGGTGGTGGATGGATATGTTCTGTAT  
GGTGATAAAACTGCCACTTCTGTTCCCTTCGCCATTTGACCGTATTAACGTACGTCGTTTG  
TTAACATGGTTAAAACGAACATTGGTTCGGCATCCAAATATCGCCTATTTGAATTGAAC  
AACGCATTTACCCGTTCTTCTTTCCGTACAGAGACTTCTCAATATCTACAGGGTATTTAA  
GCTCTTGGTGGTGTATATAACTTTAAAGTTGTTTGTGATACTACCAATAACACCCCAGCA  
GTTATCGACCGTAATGAATTTGTAGCTACTTTCTACTTACAACCTGCCCCGCTCGATAAAT  
TATATTACGTTGAACTTTGTAGCAACAGCAACTGGCGCTGATTTTCGACGAACTGATTGGT  
GCTGTAGGTGGCTAATAAGACGCCTGATGGGCTATTTTCGGTAGCCCATATAAATACTA  
TATCGTTTAAAATTAATTCTATGGGCATCCGGTTAATCCTAAGCCCATAATTACTACAGA  
GGCTAATATGTTTGTAGATGACGTAACCTCGTGCCTTCGAATCTGGTGATTTTCGCTCGCCC  
TAACCTGTTTCGAAGTAGAAATCTCTTATCTTGGGCAAAACTTTAGCTTCCAGTGTCGTGC  
TACTGCTCTTCTGCTGCGATCGTTGAAAAGGTTCTGTTTCTTATATGAACCGTAAAAT  
TAACGTGGCCGGTGACCGTACATTCGATGATTGGACTATTACAGTAATGAACGACGATGC  
TCATAGTATTCGTCAGAAATTCGTTGATTGGCAAGGTATTGCAGCAGGACAAGGTAATGA  
AATTACCGGTGGTAAACCTGCTGAATATAAAAAGTCTGCTATCGTTCGTCAATTTGCTCG  
TGATGCTAAAACCTGTCACTAAAGAAGTTGAAATTGTTGGCTTGTGGCCTACTAACGTTGG  
CGAAGTATCTTTGACTGGGACAGCAATAACGAGATTGAAACGTTTCGAAGTAACTCTTGC  
TCTTGATTGGTGGGAATAATCTGGTTGGGGAGAAATCCCCAGCTTCCCGTGATGACGGAG  
AAGTCCATATAAATAACTATAATTCCCATTTGGAGAATACAATGAAATTTAATATCTT  
AAGTTTGTGTTGCTCCATGGGCAAAAATGGACGAACGTGATTACAAAGACCAAGAAAAAGA  
AAATTTAGAATCGATCACCTCACCAAAATTAGACGACGGCGCTAAAGAATACGAAGTATC  
TGAAAATGAAGCACAGCAAACATATAATGCTATGTTTCAGAGAATGTTTCGGTAGCCAAGA  
ACCAGGGCTCAAATCAACGCGTGAATTAATCGATACGTATCGAAATTTGATGACGAACTA  
TGAAGTGGATAATGCAGTCTCTGAAATAGTTTCCGATGCTATCGTATATGAAGATGATAC  
AGAAGTCGTTTCTATAAATTTAGACAACACAAAATTTAGTCCAAATATCAAATCAATGAT  
GTTGGATGAATTTAACGAAGTGTTAAATCATTATCTTTCCAACGTAAAGGTTTCAGATCA  
TTTTAGACGTTGGTATGTGGATTCTCGAATTTTCTTCCATAAAATTATTGACCCTAAACG  
CCCTAAAGAAGGTATTAAGAGCTTCGTCGTTTAGACCCACGTCAAGTTCAATATGTCCG  
TGAAGTTATTACAACCACTGAAGCCGGTGTTAAAATAGTCAAGGGTTATAAGAATATTT  
CATTTATGACACATCACACGAATCTTATGCTTGTGATGGTTCGCATATATGAAGCTGGCAC  
AAAATAAAAATCCCTAAAGCCGCGATTGTTTATGCCATTCTGGTTTAGTTGATTGTTG  
TGGTAAAATATCATTGGTTATTTGCATCGGGCTATTAAGCCGGCGAACCAATTAAACT  
TCTTGAAGATGCCGTCGTAATTTATCGTATTACTCGTGCTCCTGATCGTCGTGTATGGTA  
TGTTGATACAGGTAATATGCCTTCAAGAAAAGCAGCAGAACATATGCAACATGTTATGAA  
TACGATGAAAAACCGTATTGCATATGATGCTACCACAGGCAAGATTA AAAACCAACAGCA  
TATTATGTCGATGACCGAAGATTATTGGTTACAACGACGTGATGGTAAAGCAGTAACAGA  
AGTTGATACATTACCAGGTGCAGATAACTGGAAATATGGAAGATGTACGTTGGTTCCG  
TAATGCGCTTTATATGGCTTTACGTATTCCTATTACCCGTATTCCAAGTGACCAAGGTGG  
TATACAGTTTGATGCTGGTACTTCTATTACACGAGATGAATTGTCATTTGGTAAATTTAT  
TCGTGAGCTGCAACATAAATTTGAAGAGATATTCCTAGACCCGCTTAAAACCTAATTTAAT  
TCTTAAAGGAATTATTACAGAAGATGAGTGGAAACGATGAAATAAATAATTAAGATAAA  
ATTCATCGGGATAGTTATTTCTCGGAATTAAGGATGCTGAGATTCTGGAGCGTCAAT  
TAATATGCTTCAGATGGCCGAACCATTTATTGGTAAATATATTTCTCACAGAACAGCTAT  
GAAAGATATTCTTCAGATGTCTGACGAGGAAATTGAACAAGAGGCTAAGCAAATTGAAGA  
AGAGTCGAAAGAGGCTCGTTTCCAAGACCCCGACCAAGAACAAGAGGATTTTTAATGGAC  
GATTAATTCAAGCTATTAATCAAACGACCTCGTTGCTACTCGAAAGTTTTTTGAAAGT  
GCAATGGCAGAAAAACGGTTCGTTTGATTGAAGCACGCAAAGCAGAAATCGCTTCTCAA  
TTTTTGATTGAAGGCGAAGAACCTGAAGAAGAAAAGAAAGCTAAAGCTTCGGAAGACGAC  
GCTGATGAAGGCGATGACGACGAAGACGAAGATGATGAGGACGATGAATAATGTATCTTA  
TCCCTGAATCTTATGAATTGGTACTCGAAAATGTGGAAGCACTTATTCCTGAAGCACAGG  
GCCGAATCGATGCATTGTCTTCTGCTCTCGATATTGACGATATAAATACTATTATCGAGA  
ACATGCTTGAACTGAAACGGATTTAGCTGTTGCAATGGCTTCCATTATTAATGAAGAAC  
AGTTAAATGAGTTTATCGTTAAACATGTTTCTTCTCGTGGTGAAGTCACCCGCACTAAAG  
ACCGTAAAACCTCGTGAACGTAACGCGTTCCAAACAACCGGTCTTTCTAAAGCAAACGTA  
GACAAATCGCTCGTAAGGTGCTTAAAGCTAAAAAAGCTAACCCCTCAGGCCAAGTTAAAG  
GCTTGCGTAAAGCGTAAAAGGCTCTTAAACGTCGTAAAGCATTAGGATTAAGCTAATGAA  
TAAACCCGAGTTACTTATTGAAACTTGGGGTCAACCCGGTGAGATTATTGATGGCGTTCC

AATGTTGGAATCTCATGATGGAAAAGATTCTGGCTTAAAACCAGGGCTTTATATAGAAGG  
TATTTTTCTTCAGGCAGAGGTTGTTAACCGAAATAAACGTTTATATCCTAAACGCGTTTT  
GGAAAAAGCAGTAAGTACTATATTAAGAACAAGTCGCAACCAAACAAGCCCTTGGAGA  
ATTAAACCATCCACCTCGCGCAAATGTTGACCCTATGCAAGCCGCTATCATTATTGAAGA  
TATGTGGTGGAAAGGAAACGATGTATATGGACGCGCTAGAATTATTGAAGGCGACCATGG  
TCCCGGCGATAAATTAGCTGCTAATATACGAGCTGGTTGGATTCCAGGTGTTTCCCTCTCG  
TGGTCTTGGTTCTTTAACCGACACCAATAAAGGGTACCGTATCGTGAACGAAGGATTTAA  
ATTAACCGTTCGGCGTAGATGCCGTATGGGGACCTTCTGCTCCAGATGCTTGGGTTACTCC  
TAAACAAATATCAGAATCAGAAAATTCGGTGGAAATCACCAAAAACAGTGCTGACGAAGC  
ATTTAAAGCTCTCGCAGAGAGTTTAAAAGCATTATAAATAATAATGTAATCTAAACCACA  
GGACACTAAAATGATCAAAAAGAACAATTTTGAAAGAAGCTCAGAATATCGGAGACTTCAGT  
TGCTCTTAATAGTGTTCGAATCAGTAGAACTGTCTCCGGACGTTAAAGCTAATTTTCAG  
CACTGTATTCGAAGCCACCGTTAAGCAGGAAGCAGTCAAACCTGGCTGAATCTCATATCAA  
AGCCATCGCCGAAAAAGCCGAAGAAGAAGTTGAAAAGGCTAAAGAAGATGCTGAAGAGAA  
AGCTGATAAAAAATTGGCTGAACAAGCTTCTAAATTCCTGGACCATCTTGCAAAAAGAATG  
GCTCGCAGAAAACCAAATCGCAGTTGATAAAGGCATTAAGCTGATTTGTTTGAATCCAT  
GCTTGGTGGTCTGAAAGAAGTGTGTTGTAACATAACGTTGTTGTTCCAGAAGAATCTGT  
AGATGTTGTAGCAGAAATGGAAGAAGAGCTGGCCGAACATAAAGAAGAAACCGCTCGTTT  
GTTTGAAGAAGTTACCAAACGTGATGCATATATCAATTACGTTTACGCGTGAAACCGCTAT  
TAATGAAAGCGTGAAAGACCTGACTGAATCTCAGAAAAGAAAAGTTATTGGCCTGGTTGA  
AGGTATGGATTATTCTGACGCATTTGGTACTAAGTTAACTGCTATTGTAGAAATGGTTAA  
AGTTTCTACTAAAGAAGAAGCCGCTATTACCGAAAGTATAAATACAGTTGACAATGACGC  
TGCCGGTCTTAATTTTGTGCGAAGCAGTTGACACTACCACAACCTCAGGTAGAACAGAA  
TTCTAATGTAAGTTTATATGCGAAAGTCGCATCTCGTTTCTAATTTAAAGGTTAACACAA  
ATGACTACTATCAAACTAAAGCTCAGCTCGTAGACAAATGGAAAGAACTGCTGGAAGGT  
GAAGGCCTGCCGGAATCGCTAATAGCAAGCAGGCTATTATCGCTAAAATCTTCGAAAAC  
CAGGAAAAAGATTTTGAAGTATCCCCTGAATATAAAGACGAGAAAATCGCTCAGGCATTT  
GGTTCTTTCTTGACCGAAGCTGAAATTGGTGGTGACCACGGTTATAATGCTCAGAACATC  
GCAGCAGGTCAAACCTCTGGTGCAGTAACCCAGATTGGGCGGCAGTTATGGGTATGGTT  
CGTCGTGCTATTCTAATCTGATCGCTTTTGATATTTGTGGTGTTCAGCCTATGAACAGC  
CCTACCGGTCAGGTATTTGCTCTCCGTGCAGTATATGGTAAAGACCCTATCGCTGCTGGC  
GCTAAAGAAGCTTTCCATCCGATGTATGCTCCGGATGCAATGTTCTCTGGTCAGGGCGCT  
GCTAAGAAATTCCCAGCGCTGGCTGCTAGCACACAACTAAAGTAGGTGATATCTATACT  
CACTTCTTCCAGGAACTGGTACTGTATATCTGCAAGCTTCTGCTCAAGTAACAATTAGT  
TCAAGTGCTGATGATGCAGCTAAATTAGATGCAGAAATTATCAAACAAATGGAAGCTGGC  
GCACTGGTAGAAATCGCTGAAGGTATGGCTACTTCTATCGCTGAACTTCAGGAAGGCTTC  
AATGGTTCTACCGACAACCGTGGAACGAAATGGGCTTCCGTATCGACAAACAAGTTATT  
GAAGCTAAATCTCGTCAGCTGAAAGCAGCTTACTCCATCGAATTGGCACAAGACCTCCGT  
GCAGTACACGGTATGGATGCTGATGCTGAACTGAGCGGTATTCTTGCTACTGAAATTATG  
CTGGAATCAACCGTGAAGTTGTTGACTGGATTAATACTACTCCGCTCAGGTTGGTAAATCT  
GGTATGACTAATATCGTTGGTTCTAAAGCTGGTGTATTTGACTTCCAAGACCCGATTGAT  
ATTCGTGGTGTCTCGTTGGGCGGTGAAAGCTTTAAAGCTCTGTTGTTCCAGATTGATAAA  
GAAGCAGTTGAAATTGCTCGTCAAACCGGTCGTGGTGAAGGCAACTTTATTATCGCTTCC  
CGTAACGTAGTTAACGTACTGGCATCAGTCGATACTGGTATTTCTTACGCTGCACAGGGT  
CTGGCTTCTGGTTTTAATACCGACACTACTAAGTCTGTATTTGCCGGTGTACTTGGTGGT  
AAATACCGCGTATACATCGACCAGTATGCTAAACAGGATTACTTCACTGTTGGTTATAAA  
GGCGCTAACGAAATGGATGCAGGTATTTACTACGCTCCTTACGTTGCACTTACCCCACTG  
CGTGGTTCCGATCCTAAGAAGTTCCAGCCGGTAATGGGCTTTAAAACCTCGTTATGGTATC  
GGTGTAAACCGTTTGTGAAAGTTCCCTGCAGGCTCCAGGTGCTCGCATCCAGTCCGGT  
ATGCCGTCTATCCTGAACAGCCTTGGTAAGAACGCTTACTTCCGCGGTGTATATGTAAAA  
GGCATCTAATCTTAATTGATTAAATCTTATTTTGGGAGACTTCGGTCTCCCATTTTTGGT  
TTTATTTCTGCGCAATTTTCGATGTAAGTTTTCAAATATTTTGCCAATTAGGCATACCTT  
CTGAACATATGCCGGAGAACCGTCTTTATTTTTGAATGATGCAAGTTTATCAGTGGCCCA  
ATAACCTTTAGTTTCGAGCTTCAGAATCAACTTTCATCCATACTTTGTTGAAGGCATTACC  
ATTAACCTTTGCACCATATTTTTGTACTTTCGGTTACAGATCCAGCTTCCAGAAGCTTTTA  
CAGTATCTCGTAAGAAACGTGCTTTAGTCATTTTTGTTTACTCCTCTGCAGCTGATAAGTC  
GATAGTATCACATAACAAATACGTTGTAACAATCTTTATAAATAATCTATATCACATAA



GGGAAAAATGCAATGAGTAAAATCCAAAAATTATCGCGTGAATCTACAACGTCTACCAGC  
AACTCAATTGGTCGCCAAATCTCGTTGCTTTGACTCGCGCTACGACTAAATTAATATAT  
TCTGACATCGTAGCAACACAAAGAACTAATCAACCTGTTGCTGCTTTTTATGGTATCAA  
TATCTTAACCCAGATAACGAATTCACATTTAAAACCTGGTGCTACTTATGCTGGCGAAGCT  
GGATATGTAGACCGAGAAAAAATTACTGAGCTCACAGAAGAATCAAAGGCCACACTAAAT  
AAAGGCGATTTTTTCAAATATAATAATATCGTCTATAAAGTGTTAGAAGATACACCATTT  
GCAGATATTCAAGAAAGTGATCTAGAATTAGCTCTTCAGATTGCAGTCGTTCAATTTAAAG  
GTACGGTTGTTTTTTCAGATGCAGCGGTAACAAGCAAATTTGAAAGCTCTGGTAGCGAAATT  
TCTGATGCAAGATTCCAGATTAATAAATGGCAAACCTTCAGTCAAATCTCGTAAACTTAAA  
ACCGGCCTCACGGTTGAATTAGCGCAAGATTTGGAAGCGAATGGATTTGATGCCCTAAC  
TTCTTAGAAGATTTGCTTGCAACTGAAATGGCTGATGAAATTAATAAAGATATTCTTCAG  
TCTTTAATTACTGTATCGAAACGTTATAAAGTTACTGGAATTACTGACACCGGATTTATT  
GACTTGAGCTATGCATCCGCTCCAGAAGCAGGTCGTTTCGTTATATCGAATGGTGTGTGAA  
ATGGTATCACACATTCAAAAAGAGTCAACTTATACTGCGACGTTTTGTGTAGCTTCAGCT  
CGTGCAGCTGCTATTCTTGCTGCTTCCGGTTGGTTAAAACATAAACCAGAAGATGATAAG  
TATCTTTCACAAAATGCTTACGGGTTCTTAGCTAATGGTTTACCGCTTTATTGCGATACT  
AACAGTCCATTAGATTATGTGATCGTTGGCGTAGTAGAAAATATCGGTGAAAAAGAAATT  
GTTGGATCAATTTTCTATGCTCCGTATACAGAAGGTCTCGACTTAGATGACCCGGAACAT  
GTTGGTGCATTTAAAGTTGTAGTTGATCCAGAAAGCTTGCAACCGTCTATTGGTTTATTG  
GTTAGATACGCTTTCAGCAAATCCTTACACAGTAGCAAAGACGAAAAAGAAAGCGAGA  
ATAATTGATGGCGGGGACATGGATAAAATGGCAGGACGTTTCAGACTTGTCTGTTTTACTC  
GGTGTAAATTGCCTAAAATTATTATAGATGAATAAACAAAAAAGGGACCTTACGGTCC  
CTTTTTTCGTTATGATACTAATTCAATCCATGCAGGACGCAGAACATCTTGCACCATTTCG  
GACTAATTCTTTCTTAACAAGATTTCGGATTATCAGATGTTGTTAATAACAATACCTTCACG  
AGAAGTTTCTTCCAGAATATCTTGAACAGTCAATCCCATCACTTTGCCAAAATCTTTTGG  
CGTTACAGTCCCAATCTTAGAAATAACATTATTAACACGATTTAATGTAACATAACAAGC  
TAGAACATCAAGCAAGTTTTTTGTCAATTTTCGGTTAATGGAACCTGAGTTTTAATAGGCTT  
ATCAGACTTTTTCTTTTCACTGAATTTAGAGTTCTTGCACCTAATCGCTACACGAGTACC  
GTTTGGCAGCCATTTAGGGAAACAAGGCTTCAGAACATAACCTTCTGCAGTATTATCACC  
AATAACATTAGCATCAAATACACAATTATTTGCTTCTACAAGGTCTTCTGACGCAGTAGC  
ATTATAAGCGGCTAAAACGGAATCAAGGTCATTTGGAATCATGATAAGAGAATCAAATGT  
TCCACGACCAAGCATTGGTGCCATTTTAAAACCGAATTCATTACAGAAATCTTGCATTTT  
GTAATCGGTCAAATACGTATTATCACCCTTTCTGTATTGATAAGGATATCGAACACATA  
AAAATCTTTTTTACCAGTAGTCAACACCTTTCTGGATTCCACCACCAGCGAATTCACCGAA  
TACTTGATATGATACGGCTCGAGCTGTGTACATGAATTTCTGAACGGTTTTAATAGCTTT  
ATCATACTTCTTGAGTACGATTTTATAACCATAAAAAATCTTCTGCTGGAAGAATAGGGCC  
TGTGCGCTTGGCGCATGTGACGTTGTCACGTTCAATTTAATACGAGAAGTTGGTCCCATG  
GATTTTCTCACGTGCTACCCAAACACCAGTAGTCAAACCATTAGTGTAGAGTTTTTCAAT  
AACTTAGAGTTGTAGTGGTTTTCAAGACTGCTGTATTTCTTAAACATAAATCACCATTA  
TAAATAATAATATAAATAATTAGCAGAGACTCTATCTCCGACCCGATGTTTAATTTGA  
ATGGATAGAACCTAGATTCATTATACCATCAAAAAATGTAAAGCATATTAGAAGTTGATT  
TCTATCCAATGACCATCACGTTGGTTCGTGATTAATTTTGTACTGAAAGCCGTTATCACGA  
AGCCATTGACCGACTTGTTTCAGTTATAGTTAAATCGTTCTTTGACGGGTAGTACGTGAAT  
TGTGTCTGACCTTTGTCAGCGGCTTTCTCTGCCATCGCAGAGAAGTTAGTAATAAAATCA  
CTCAACAAATTAGCTTTAGTGGCCAGAGCCCTTTCTTAAATTCCTGTGCAAAACTCATT  
TCTTCACCTTTTTGTTAATCAAACGTTTACGGTATACAACCTTTTTCTTTTGGCTTTAACT  
TTGACCGAGCTGTCTCGGCTTTAGTCCATAGTAATCCAACCTCTTTAGGTTGTAAACCGA  
TTTTTTGAGCAATTTCTACGAATGAAAATCCCGCCTCATGTAATGTATAAACTTCAACTT  
CAGCTCTCATAATCAATCCCGTATTATTTGGTTTGTGCCATTATATACATCAATCTCACG  
TTGTGTTTTGTATGCTTTAAAACGAAGAAAGGGGCGAAGCCCTTACGATTATGGATA  
TGTATAGATGATACCAGTTTCCAAGCAGTTTTATGGATGATGTATCCATTACGTGATTC  
TTGAACATCAACTTCTGGATAGTCTTTCATCATCTTCTGAAGAGTGTAACGATGCAGGTA  
GTATTTACTATCTGGATCTTCAGTTTTCCAATCTTTACCTTCTTCAGTCATTTTTTGGAT  
TTCATCCATAACCCACCAACCGCACAGATGTAAGCTGAAGTACGATGTGGAAGAGGATG  
AACATAAGGTAGTTCACCTTCTGGCTCAATTGGAGTCTGTTCAGTAATAACAACCTTCAGC  
GGTTGAACTAATTGTCTTTGAAGTATAGTTATCTTTAGTTAATACTGCTTCAACTTTAAT  
TGTATGAGTACCAGCTGAGGAGGTATCAATACTGTAAGTATTAGTAGAATTACTTTCTGC

TACATTGTCTTTCTTCCAAGAATACACAATATTAGTATCACCTGGAGCACCAGTAACAGA  
TGCTGTTAAAGTTGCAGTTCCGCCAACAGTAGTATTAAGTATGATGGCGGAGATAAAGAAAT  
GGTGGCACTATTAATGTAGCATTATTAGTTACTACTGTTGCTTCTGCTGAAATTTCTTT  
TGTAACATAATTTGTTGCAGAAACAGATACGGTGCATTTAAGAGTTTTACTTCCGACCTC  
GGTTGGAGTGAATTTATACGTAGCAGAAGTTGCATCCAGAATATTACTGTCATCCATTGA  
CCATTGGAATGATGTAGTAGCACCTGAAGGTGCACCAGAGACATTTGCAGTTAAAGTAAT  
AGGAACACCAAAGACCGTAGTCGGGAGACTCAGGCGTAATTTTTAGTGTGGAAGAATTAGC  
CTTTTTATTTACAGTCAAAGAAACCGCTGATGATTCTACTGTTTTATCAACGTAATCAGT  
TGCAGTCACTGTGACAGAACAAGTTATAGACTTAGTTCCTTCAGATGTTGGTGTATATTC  
AAAGGTTGATTGCTTTTGACCATCAACAGCGACCCCGTCAACTTTCCATGTATAAGCAAT  
AGCAGCACCACTAGGTTGATTGCTTACATTAGCAGTGAATGTTGTTGCTGTTCCAATTC  
TACTGCCGCCGGAGAAGCCGGAGTAACAGCGACGGTAGAATTATTTCTTTCTTATTAAC  
AGTGATAGTTGTTGACGCTTCAGCTATTTCCGGATCTCCTGCGGAAAGTGTATTGGTTGC  
AACCACTTTAATTTTTTTTGTTCCTGCCGGAGAAGCAAGAGTATAATCCATTGTAGCAGC  
CGTAGACTCCTGTGCTATATCATCTACAGTCCAGACGTATGTAATAGTACCATCTGGAGT  
TTCACCTGCAGGTGTAGCAGTGAATGTTTGTGAACCTCCAATAACCCCTGTAGGAGTTAA  
AGGAGATAACGTGACAGTGAATGCCATAAGTTATCCTTATTTAATGTTACGAAAGAAGA  
ATTACGAGTTTCACGAATTAGAAGTATCCATCGCGATTAATATAATAAATTAAGCTAAA  
TAATGTTTGGTGAGCAGAAGCATGCACAAAACCTCGTTGGGTGAGATTTCCAATCTGGGGT  
TTCGGCTATCCATTGATAAATCCACCAAGGAACAGTAACATATCCTGGGCCTTTGCCTAA  
TTAATGAGTGTAGGACTAAAATTTTCAGGCAGAACAAAATTTACTTCTTTATTTACTTC  
TGGCTCAGGCTCTTTTTTCAGATTCAACAACCTGAGTAATTGCTTCTTCGAATTTATCATG  
GTCGAATTCTTTTTCTTGTTCGACAACCTTCTAATACTTCAACTTGTTCTGTTGGAGAATC  
AAACAACAGAATAGCTTCTTCTTTAACTTCTTCGTTGGTGAAATTAACACCGTCCACATC  
ATCTGCGGCAGTAATTAATCAGTAATAGATAATCCATCAGTTTCAGGTAATGGTTCATC  
AGCCAGTGCGTTAAGAGCTTCTTCGATATCAATAACAATATTATCGAACGATTTTGT  
CTTAACACTAATGCCAAATTGTTCTGCATATTCAAACAGTTTAGCTTTAGCTTCCTTTTT  
ATCAGAAAGAGCACGTAACCTTCAATATAGTCTTTATCGATCATGGTATTTCTCATTAA  
TAAATATAACTATATTTATTACATGGTAATTTGACATGACTGACATTAAGTACATTTTT  
ATGATTTTAGTCACGTGCGCATTGAATGCGACGAAAGTACGTTTTACGAACTTCGTGACT  
TTTTTAGCTTTGAAGCTGACGGGTATAAATTTAACCCAAAATATCGCTATGGGCAATGGG  
ATGGTAGAATTCGACTTTTAGATTACAATCGTTTGTACCATATGGACTTGTAGGACAAA  
TAAAAAAGTTCTGTAACAATATGAGTTATTCTGTATGGATTGACCCTAAAATCTTTGAGA  
CCGAAGACCTTACCAGGGAAGATTTTGACGCGTGGCTTTCTAAACAAGAAATTTATTCAG  
GCAACGCCAAAATCGAACACATTGGTATCAAAAAGATGCCGTATATGAAGGTCTGGTTA  
ATCGTCGTCGAATTTTAAACCTTCGACATCAGCAGGTAAATCACTAATCCAAGCACTTT  
TAGCTCGATATTATCTAGAGAACTATGAAGGTAAAATTCATTATCGTCCCTACAACAG  
CATTGACAACCCAAATGGCTAATGATTTTGTGATTATCGCTTGTTAGTCATTCGATGA  
TTAAGAAAATTGGCGGTGGTGTGATAAAGCGGACAAATCTAAAACGACGCTCCAATTA  
TTGTTGGCACATGGCAAACGGTAGTTAAGCAGCCTAAAGAATGGTTCTCTCAGTTCCGGTA  
TGATGATGAACGATGAATGCCACTTAGCAACAGGCAAAAGTATTTCTTCAATCATCTCAG  
GATTAAATAATTGCATGTTTAAATTCGGTTTATCTGGCTCATTAAAGAGACGGAAAAGCCA  
ATGTAATGCAGTACGTAGGTATGTTTCGGCGAAATCTTCCTGCTGTTAGCACGTCTAAAT  
TAATGGAAGACGGACAGGTAACCTGAGCTTAAGATTAATAGTATTTTCTTCGTTATCCAG  
ACGAATTCGCCACCAAATTAAGGTAACATAACCAAGAAGAAGTTAAAATTATTACCG  
GACTAAAACGTCGTACAAAGTGGATTGCTCAACTTTCGGTAAAATTTGGCTAAGAAAGACG  
AGAACGCCTTTGTAATGTTTAAACACGTTACACACGGTAAAGAAATATTTGAAGCTATTA  
AAGAGCTTGGATACGAAAAGTTTATTACGTATCAGGTGAAGTTGATACTGAAACACGTA  
ACGCTCTTAAAGTCATGGCAGAAAATGGTAAAGGCATTATTATTGTCGCATCATATGGAG  
TATTCTTACCGGTATTTAGTCAAGAATCTTCATCATGTTATTTTTGCTCATGGTGTTA  
AATCAAAAATTATCGTACTTCAAACCGTAGGTTCGTGTGCTTCGTAAGCACGGTTCTAAAG  
CTGTTGCTACAGTTTGGGATCTCATCGATGACGCAGGTGTAAAACCTAAATCATTAAATA  
CTAAAAGAAGTATACTCATCTTAATTACTTGTAAAACACGGTATTGATCGTATCCAAC  
GTTACGCTGATGAGAAATTTAACTATGTAATGAAAACAATTAATTTATAAGGGCTTCGGC  
CCTTAGGAGATAAAAATGGTACTTGAATTTAAACAATTTTTATACGAAGCATCTATTGAC  
GAATTCATGGGTAAAATTGCTAGTTGTCATACCTTAGAAGGGCTTGAAGAATTGGAAGCT  
TATTATAAGAAACGTATAAAAAGAAACGGAATTAAGAATACAGATGATATTTCTGTCAGG

GATGCCTTAGCAGGTAAGCGTGCCGAACCTTGAAGGGCGACGATGAGGATGCGGAAGAAGAT  
TTCTAATTAATAAAGGCCCGACCTTTTTGGAAGGGCCAAAACCATAGGCCAAAAGGTA  
ACACTATAGTAAAAGTTGGGTTTCGTTCAATTGCTCTTCTGAACTTTCTGAAACCGGCAA  
TTGTTGTACATAATTATAACAAGGACCAGGATGTGCTGGACCTTTGTCTGTTTCAACAAC  
CAATGCAGAATCGATTGGAGTTTTACAGACAACACAAATCTTATCTGACATGATTGTCTC  
CTCTGAATTATATATATCTATTTATAACCCCATCTTAAAGCGCATTTCTTGTACACGCTT  
TAAACATGCTTCCATTTCTGCTAAAAGTCTAAATACTTCTTTATAATTTGTCATATTTAC  
CCCATATCTCTCATATGCATATCAATGCCCATATCTTTAGAATAAAAATATTCATCAAGA  
TATCCGGCAAATTTTCTTTAATATAAAGGACATCTTCACCACACGGGTGGTTCGTCAGA  
ATACGAATATCCTGACGTCGTAGACGATACTTTTCCATTAAGAATTTAATTTCTGTTTCA  
AATTCTTCATCATTATTAAGGCATCTTCAATTGAATAACGCATTATTGCCCGCTTCAA  
ATTCTCGCATATCTTGAATATGTTTAAAGTGCAAAACTACGAGACTTAACCGCATCAAGTG  
CACCCTACAGAACTCAAGTAAAATTCCCCAGTATTGTAAAGTAGTCTCTATTTTAAAGCA  
CATCTTTATCTGCGGCCAGGACAGTTTTTCATTTAGATTCTCTCGTATCGGTCCATACTGA  
ATTCATCACCATCACCTCGTCCCGAGTAGTAGTCTAATCTTGCTTTTAGAGCAGTTTTCT  
TCTGAGTCTCTATACGCAACATTTCTTTACGAATAAATGAGTGCTTACGTAGCCATTTGC  
TGTATAACTTAAACATTATTCGCGCTCTCATATTGCAACTTTGTCGTATCAATAGCTAAGT  
CTGCGTCTAACTCTTCTGTAAATCTTCCAGCTTCATAATATTCTCTCTTTTAACTAATA  
ATCTCCCGGCTGTATCGGAAGGACCTAAAACCATTATACATAGGTTGCCTTGAAGCATT  
CACTCTATTGCTTGACGCTAACTGAAGTTTAAATTTGTTCAATATCGTCAGGGTTGTCTAC  
GACCGAAAATCTAATCTCTACTATAACCGTATAGTCGTCATATACCGGCGTTACACTTAC  
AGAAAGTTTGTGCGATGCGTGGCTCATAGTTACGAACAGCTGCCTGGATATTACGCTCAAT  
CGTATCGGCTGTAAGTGGTGTGATATTCTCGAAAAGTTCATCAACCAAATCGCATCCAAA  
TTCAGGGTTCGAAGGGGCGTGAGCCTTTTCTAGTTGTCACTATGCCAAGAAGACTATTTTT  
AATAGAACGAAGTCTACAGAACGAGCAACGTCCTTGTTCGAATCCATACGCATTTCTGG  
GTCGATATCTGAATAAAGTTTATTGATATTAGACATTATAGTAACTCAAAGAATTCTTTG  
AGGCCTCGTATTGTGTGAACGTGTGACGCCCCACATTTGGGACATTTAATAGGGGTTGCC  
AGATAAATTGATGGCGACACCAAAGATTTTTAATATTGATCATGTCATCTTCTGTTATA  
AGGCCGTAAAGGTCGTTTATTCTGCTTCAGTTAAATCTTCAACAGGGATGGACTCTCCA  
TTGACAAAACAGCCTCAATACATGAAGCAATCATTAAATGCGATATTTTTATCATCAAAT  
AATTTAGGTTGACGGAACCTTAAATTTAATACCGCTGAACGAATACCAGGGATCGGCCTGT  
TCATCTAATTGAGTGTGCAATAAATTCATATAGACTTGAAATGAATGCCACAGGAACAA  
TTCCAGGTGTGTTCTTGATTCACTTCACCTAATGAATGTGCCACAGATTTACCAACAAT  
AACTCGGCTTCTTGTTAGTCAAGTTTTTAGCGTTAGAGCAATTAGTGATAATATTGTTT  
ACTGCTGATTCAATAGTACCGGTAGCCCGCGCACCTATGAGTCCTAAATATTCTTTTAAA  
GTAAAGGCTCTACAATTCATCTTTATCGCCTAAACGTACGGTAAACGTATATTTGTAC  
ATGTTAACTCCTTTATTGTGATTTATAAATAATAGAAAAGGAGTAATTATGGCTAATAT  
AATTCGTTGTAAATTACCGGATGGTGTTCATCGTTTTAAGCCGTTCACTGTGGCGGATTA  
TAGAGACTTTTTACTAGTTAGAAATGATATCGAACATCGTTCGCCGCAAGAACAAAAGA  
AATAATTGCCGATCTGATTGATGATGATTTTGGCGAGTACCCTAAAACATGGCAACC  
ATTTATATTCCTGCAAGTTTTTGCAGGCTCTATAGGCCAAAACAAAAGTTCCCGTTATTTT  
CACTTGCCCTAAATGCTCTAAAGAAAAAACTGCACCATTTGAGATATATCAAAAAGAACT  
AGTCGAACCTGAACTTGATGTTGCTGGTATAAAAATACGTTTTTCTTTCCCTGAAAAGTT  
TTATGACAATAAAGCATTAAATGATAAGTGAAAACATAAAAAGAAATATATTATAATGATGA  
ATGGTACCCATGGAATGATTTGACTGAAGAGAACCAAATCCAAGTAATAGAAGCAATAGA  
CATTGACTCGCTCGAGAAGGTTATTGCTTCTATGAATCCTATTAATTTGACCCTTAGATT  
AGGTTGTTGTGAACGTATGTTAAAACATATACTGATATCTTAGAGGTTTTTAAATTGTT  
AGTTAACCTGATGAGATTTTTACATTTTATCAGATAAACCATTCCTAGTAAAGAGTCA  
ATACACATTGGATTCTATTATGCAAATGATTCCTGTTGAACGTGGTATTGCTTTAACATT  
AGTAGAAAAGGACCATAAAAAATGACAGTATCCAACGTCCAGGATATCCTAACTTAAGC  
GTTAAATTATATCAAGATTATTCGGCTTGGCAAGAAAATAGATACGTTGAACTCGCGGCA  
ACAATAACAACCTTAAACCATGCGAGATTCGCTATATGGAAGAAATGAAGGGATTCTTCAA  
TTTTATGACACTAAAACATCCACACTAAAATGGATGGTAGACAGATAGTCCAAATCTCT  
GTTTCAAATTCAAACACACCTCTCCAAGTTAGAACTCGAATTTATGGATGTAGACATTAT  
TCTGTGTCTGTAGACTCAAAGGTGACAATATTATTGCAATTGAGCTTGAACAATACAT  
TCTATAGAGAACCTTAAATTTGGACGGCCATTCTTCCCAGACGCAGGAGAATCTATACGT  
GAAATGTTAGGTGTCATATACAAAGACCGTACGTTAATTACTCCGCCAATAAACACTATT

AATGCTTATGTTCCCTGATATTCCTTGGACAAGCACATTTGATGATTATTTGGCATAATGTC  
AGAGAATTAGGACTTGCTACAGCGAGTGATAAGTTCGTATTCGTATGGCAAGATATTTTA  
GGCGTAAACATGATTGACTACGATACTCTTATTGGCCAGGAAGGCATTAAGATGGTTGTA  
GGCGAGCCAAATACCGTAGGTCAGTATATTCAAGAGCTTGAGTATCCATTAGTATGGGAT  
TTACCTGGATGACTAAAGCTAACCAATTTACAAGAGACCCTATTA AAAACGCCACGGTA  
TTCGCCCATTCATTTTTAGATACATCTATTCCGGTTATTGTTACAGGTGATGGTGATAAC  
GCTATTGTTGTGTCAAGATCCGGTGGATATTCCGAAATGACCTATCGTAATGGATTTGAA  
GAAGCAAGTCGTCTTCAGACAATGGCTCAATATGACGGATATGCTAAATGCACTACTACA  
GGTAATTTTAAACATAACGCCTGCTACTAAAATTATATTTGTTGACCAAAAAGAACCAATTC  
AAATCTGAATTTTACGTAGATGAAGTTATTCATGAGTTATCAAATAACA ACTCACAACT  
CATCTGTACATGTTTACCAACTCAATGGTGTAGAACCTGTTAACCCAGTTAAGGTTAAA  
AATGAACTTAAATCTGATTCTACCTCTAAAGAAAATAATTCTACCACAGTCTAATAAAAA  
GGTAATGATTCCCAAATTAGGGCTCAAACATTATAATCTTTTAAAGGACGTTAAAGGTCC  
TGACGAAAACATGAAAATCTTAGCTGATTCTATTTGTAAAAATATGAGTCCCGCAGATTT  
TGATTTTGCATGTCTACACATATTGGAATTTAATAACAACTTAAGTCTGAAGTTGAAAA  
AGACGGATTCACATATAAACTAGATGACGTCTATGTATGCCAACGAACAGAATTCCAATT  
CCAAGGCAATACTTTTTATTTTAGACCCCCAGGCAAATTTGAACAATTCGCTACAATCAG  
TGAAATGCTATCAAATTGCTTAATAAAAAGTTAATGACGAAGAGAAAGAAATTTCTTTCT  
TGAGATGCCTGCTTTTGTAAATCAAATGGGCAGAAGACCTTTCGACA ACTATTGCTATTCC  
AGGCCCTAATGGCCCTATTAAGGGTATAGCAGAAATTATTGGATTGCTTGAATGAAACCT  
GAAGAAATGAAATCCATGCGTAGAAATAAGGTCATTGCCGATAATAAACCAAAAAAGTA  
GCTGCAACAGCAGCTACCGATTCATTAGAAGCATTGAATAACATTTTCATCAAACTAGAC  
GATGTCCAAGCTGCGTCTGAACTCACATCACAAAGTGTAGAAGATAAAGGCAATGGAATT  
ATTGAATCAATTGGAGACTTAAAGAATTTCGACAGATAATACTGCTGAAGGCACAGAGCTT  
ATCGCAGAAGTTATTGAAAAACAACTGAAGTCACTAAAAGTATAAACGAAGTTTCTAGT  
GCAATAAGCTCTAAGTTAGACCGATTAGCTACATTATTAGAGCAAAAATTACAAACATCT  
ACCGCTATTCAAAAATACAGGAGGCACCTCTCTTGAAGTAATTGAGAATGCAATACCTGTT  
AAAGTGGTTGAGAATGAAACTTCTGATGAGTTGTTTAAAGCATTCCCTACACCTGAAAAG  
ATCGATAATAAGCCAGACGAAGATTTCTTCCCAACGCCGGTTCAAGAAAGTGCTAATTCT  
ACTTCCGATTCTAAAGGCGGGATTAGCTTTAAATTGAGCGATAAAAATTGCAATGCTCACC  
AAAACAGTTCAAACCGGGTTTAATAAAATCAATATCAATTTTCAGACAGAATTGCTGGAATG  
CTTTTCAAATACACTATAACGGCTGCTATTGAAGCAGCAAAAATGGCCGCACTTATTCTT  
GGTATTGTTATCGGTATTGATTTATTGATAGTCCATTTCAAATATTGGACAGACAAGTTC  
ACTTCTGCCTGGGATTTATTTGATGAAA ACTTTACTAAATTCTCCGATGAAGCTAAAGAG  
TGGGGTAAATTCTTAAGTGATATATTC ACTTCTATTGACTCGATAAAAACAATTGTGGGAA  
GCTGGAGACTGGGGTGGTTTAAACCGTTGCTATTGTCAAAGGTGTAGGAACAGCATTAA TG  
AACTTAGGTGAACTAATTCAATTAGGAATGGCTAAACTCTCCGCATCTATATTGCGTGCT  
ATAGGTTTTGGTGATACCGCGGACGAAATAGAAGGACGTGCTTTAGAAGGATTCCAAGAA  
ACTACTGGGAACA AATTAAGAAAGAAGACCAAGAGAAAGTTCGCCAAATATCAAATGAAG  
CGTGACGACGGGGAATTAGGAACCGTTTCTAAAGGTCTTGATATGTTACAACGCGGCAAA  
ACATTCGTTACTAACTGGGTTTCGTGGTAATGATAATAAAGAAGAGTTTAGTACAAGCGAT  
GAGCGTGCTGCGGAATCGGCAAAATTA AAAGAGTTACCTGAAGAGGAACGTAAGAGGGCA  
TATATAAAAGCTAATGAAACTCGGGCAGCCTTAGTTAGATTTGAGGATTATATCGATAAA  
ATCGATATGACTAATCCGGAAAATGCTAAAAACGTTGAGAAGTCTTATGCCGATTTAAGT  
AACTTATTAAGACCCTGAACTTAATAAAACTCCTGTTGTTAAAAAGGAATTAGATGCT  
AGATTTGAAAAGCTAAATAATAAAATGGCTGAAGCCAAAAGGCTCAGACAACAGTTAAG  
CCTGAATCTTCGTCTAAATCTCCGGAAGCAAAAACAAGTTCAGTCAATAGAGAAAGGACGT  
GCTTCTGAATCTAAACAACAGCAACCGGTAGCGACGATTAGTAATACAAATAATGTCGTC  
AAAAAGAATACCGTAGTCCAGAATATGACCCCTGTAACAAGTACAACGGCTCCTGGAATT  
TTCCATGCCACCGGTGTTAATTAAGGATTATTATGATTAGTGTA AAAAGAAATAGTAGTAG  
ATGCAAAGGATTTAAATAAAGCAATCCAGTCTCAGAAAGTGCTGGGCAAAGCACTAAAA  
CCGAAACA ACTACTAAA ACTTATGTTGCTCAATTTCTACAGGAAGAGCAGCCGGAAATG  
ACTCCACAGGAGACTTCCAGGTAACAGACCTTTATAAGAATGGATTATTATTTACCGCGT  
ACAATATGTCTGCACGCGATTCAGGATCCCTAAGAAATTTACGTCCGGCATAACGCCGGA  
CTTCATCTAATGGTATCATATCAGATTTAACTGATAATGTGAAAGATGCAGTGACTAAAT  
TCTCAAATGGATTGCTTCTGCCGGAGCTAATAAATCTACTATAAATAAAACTCCTGTTG  
CTAATATACTTTTGCCACGTTCCAAATCTGACGTTGATACA ACTTCACATCGTTTTAATG

ATATCGGTGATAGCCTTATTACTAAAGGTGGAGGTACTGCTACGGGCGTTTTAAGTAACA  
TTGCTTCTACTGCAGTTTTTGGTGCATTAGATTCTATTACTCAAGGGCTTATGGCTGATA  
ATAACGAACAGATTTATACGACTTCTCGTAGTATGTATGGCGGTGCTGAGAACCGTACTA  
AAGTCTTTACATGGGATTTAACTCCACGTTCAACTGAAGACCTTATGGCTATTATAAACA  
TTTACCAGTATTTTAACTATTTCTCATATGGTGAGACCGGTAAATCACAATACGCCAAG  
AGATTAAGTTATTTAGACGAATGGTACCGTTCAACGTTTATTGAGCCTATGACACCAG  
ACGATGCTGTAAAAATAAGACATTGTTTGAAGATTACTGCGTCATTAACAAACGTAT  
TAGTTGTAAGCAACCCTACGATTTGGATGGTTAAAACTTTGGACACACATCTAAATTTG  
ACGGGTAACTGATGTATTTGGCCCATGTCAAATTCAAAGCGTACGTTTTGATAAACTC  
CAAATGGACAATTTAATGGTCTTGCTGTTGCTCCTAACTTACCGTCAACATTTACGTTAG  
AGATAACAATGCGAGAAATTATTACATTAACCGTTCTTCACTTTATGCGGGGACTTTCT  
AATGTACTCTTTAGAAGAATTTAATAACCAAGCTATAAATGCAGATTTCCAACGAAACAA  
TATGTTTAGTTGTGATTTGCTACTACACCGTCGACCAAATCGTCTTCACTAATTTGCTC  
AATTGGTAGTTTTGCTTATAATAACTTAGGGTTGGATTCAGATTGGCTAGGATTGACTCA  
AGGTGATATCAATCAGGGCGTAACAACCCTGATTACAGCAGGAACACAGAAATTAATTG  
AAAATCAGGTGTAAGTAAATATCTGATTGGAGCAATGAGCCAACGTACGGTACAAAGCTT  
GTTAGGTGAGTTCACAGTAGGAGCTTATCTGATAGACTTCTTCAATATGGCATATAATA  
TACAGTTTTAATGATTTATTCTGTAAAAATGCCTGAGAACCGATTATCTTATGAAACGGA  
TTTCAACTATAACTCCCCGAACATCCGAATTACCGGTGCGAGAAATGGACCCGTTAGTAAT  
AAGCTTTAGAATGGATTCCGAAGCATCTAACTTTAGAGCAATGCAGGACTGGGTAACTC  
AGTCCAAGACCCTGTAACAGGTCTTCGCGCTTTACCACAAGACGTCGAAGCAGATATTCA  
GGTTAATTTACATGCGCGAAATGGTTTACCACATACCGCTGTCATGTTCACTGGATGTAT  
TCCTGTTAGCGTCTCTTCTCCTGAGTTAACGTATGATGGTGATAACCAAATAACAGTTTT  
TGACGTAACATTTGCTTATCGCGTTATGCAATCAGGTGCTGTAATAGACAGGCTGCTTT  
AGAATGGCTGGAATCAGGACTTATTAGTAGTGTTCAGGAATGTTTGGAAATAATCAGAA  
TGATTCTGGACTAGGAAGTGCAGTATCAAGACTTTCTAGATTAGGTGGGACTGCTGGTGG  
TGTGTCTAATATAAACACATTGACAGGTGTGGTGAATTCTGCGTCAAGAGTTTTAGGACT  
ATAAGAAAAAGGGAGACAACGTCTCCCTTTAGGGGTTTTATTTACGGAATGAAAGGAATGC  
TGGTGCTCGGAATGGAGTATCATCTTTAGAGTATTTAACTAATACGACCATTGGTACCTC  
TGTTTCTAAATGACCTGTCACTACACCTATAAAAATTTGGTTCGGTGTGCTCAGGGTCACG  
AAAGTTTTTAAGAGGTTCCATAGCAATATGGAATGCACCTGGGAATACTCGATTCAATTC  
GTCAATCACAGCTTCGTTAAAAACATCATCTGCTGGAATAACATTTTCAACTACTAGTTC  
TTGACCATTAAAGCGAAGCATAGATTTAATAACGGTTTCCTCATGTTGTTGATGGGATGA  
TAGTATAACACATCCATGTGCTTGTAACCTATCCTTGGACAAATTTAAACGGAAGTATT  
CTAAATCCATTAAAGATGCTAACAATTTCAAACCTTTAGGTGCGCTAGTTTTTTCTACAA  
ATGAAGAGAACGATACCGGCTCATCTGATTCGATTTACCTGTCATAGCAACCACCTCAC  
CTGTTTCCATGAGAACATCACCATCATAAATGACAGCTTCATCTAACTGGTCTGAGGACA  
TGACTTCAGCTTGAATAAATTTAAGGTTGGATTCTAAACCTGCACCAGTGTGATGACG  
CATCTGTAATTTTATTTATCTGCAAGAGAATGCCTCTAGGCAAATAATTTCTTGCTCAT  
TAGGGTGATTACTCAACTGTCCTGGATAAATCACGTTAACTTTATGAGCACCATCAATAG  
CCCATCCAACGTTAACACGGATTTGTTCTGGTGCATGCATAGCTGTTCTTACTTACTAG  
GAGAAATAGTAACACCTTCGTCATTATTGTCAATGTTAAGCTCTTTGCGAACGTTCTTCA  
GGAGCAAGTCCAAGGGCAACGTTCTTTAAACCCACCGAAAATAATAGGAGCTTGTGAA  
GTGGAAACATAGTTTTCTGAAGTAGAATACCTTATTTTTAACCATTGCTTCGTAAATAGGC  
ATTCTGATAGACTGAGCTCTATATAACGTTTGTCTTCAGGTAACGGTCTCCATTTAAAA  
ACGCCGAATCAAGACCATCAATAGCGCGTTTAACTTCATCTTCATCTGCAACATCGTAAA  
AATCTGGTTTATAACGACCTAACAACATATTATTGATATCGGTATACGCAGAAGAGGCAT  
ATTCACGAATAGCTCGTTTTTTCAGCAACAGAGTATTGTTTAGGGTCCCGATTCAATTGTTA  
TATTAAGGTTGCTCTAGCCGATTCTCGTGCATAAGTATAACATCACATTAGACAAGAACG  
CTGATTTACGTTGTTTCCAAGTTTTTTTCAGATACTTCAGCTAAAACGTCGTCGGCCAGTT  
GGAAATTATCACGTCTAAAATCTTCAAACCATTCGTCTTTAATAGAGTCTGCAATCTCAT  
TTGCAGCTTCAACAAAAGCAGCTAATGCTTTAACAGATGTTGTTTTTTTCAGTTTTAATTT  
TCTTAGCAAACCTTTTCTAAAGTTGGCTTAATAACACCACCATAAGAACTTCATCAGCAA  
ATTTAAAGGATTCATCAATACGATTATAAATCTTATTTTCGATATCAGCAACTAAAGTGC  
CTTTTGCTGTGGACGATGCTTGGGCTAGTACTATTTTCATATGCTTCAGGAAGTAATTCGG  
CTGTAGCCGGGCCACTAACTTCTTTAGCAGAATTTTCGTATTTCTGGAATAACTCACCTT  
CTTGGCGGTCCGCTTCTAAAGATTGACTTGCTGCAATAGCACGACGAGAAATTTTAGTAC

GAGCAATAACAGGCTTATCTTTACGTTTTTCTTCTACAGCAGCAATAGAACCAGCGATAG  
CCGTTTCTTTGGTGACCTTTTCGCCAGTCTTTTTACTCACATAAACTTCGCCAACATCAG  
AATCTACTTTTCGTGTACAACCTCTGTGTTAATGTTAGGGATGCCTTTAATATCTTCAATGT  
TGGCATTTTTACGAACCATCATCACATAGGTGTGTTTACCTGTGAATTGATACATTGCCG  
ACAATACTTTAAAACGACCACCGTTTTAGTAGAACTAAACGAGCAAGAAGAGTTTGAA  
GCTGCTGTCCACGTCCTTTCAATTTCTTGGTAGGGAATCGGAACAGAACTGCATCCATAC  
GAAGAGCTTTAACCTGTTTCATATACTGTATTGAAAATGGTGTGATTGCATCAATAGGAG  
CAGGACCAAGGCCATTTTCAATTCAGCGAGATTACCCTTTTCAGATAGACTCATAATAA  
CAACATGAGCGTATTTGTGCGCAAGTTTAACTTGTTTTACAGCATCACCTTCGGAAAGGT  
AAGAGAATAAGCGAACTACGATGTTTGTATCGATATCACCAATTTTCCAGACTTGTGGAA  
CTTTAGCTTTAGGGTTCAAATTGACGACAGGAAGACTGCCTTCAGATTCAAACACTTCAT  
TTAATTGTTTCAGACATAGTGTTCCTTTTAGTAATAATTTATATTTATGCCAAAAAGAG  
CCCGAAGGCTCTTAATCCACAATCTGGAGCAAAGTACGATAAACTTCAAAAATTAGGGCCT  
TTTTCGTACTTATCAAAAATTGTCCATAAAAATATGATAGGAATCGTTATTAGGAAAATCT  
AATACAATTTGGGAACAAGAGGTGGAAACATCACCACCATCTTTATTAGCGACAACACTACT  
GTTTCTAAATAAGCTTTCATTATACACCCGTCTGGTCCCAGGACCCAAATACGTCTTCAA  
ACGAATCCGCTTCTGTTTTATCAAAAACGGAACCCTTTAATAATTGGAAGGAAAATACCTA  
CAGTACCTTCACGGCCTTTAGAATGAACCCAACCATTACATTCACAATCAGCGATACGTC  
CAATCAATTTACCTTCACGAGCTTCGGACATTAATCGTTCACGGTCCAATCATGACGCT  
CGTCTAAAGGAATAAGAACCTTTACACCGTCAACTGTTTTATGAGTTGTATCTTTAAAAC  
CTGAACCACAATCGGTTGTAATACGACGACAACGTGATACGAGTTCGACACCACCCAATT  
TGTTAGGGTCTTTAGAGTGTTCATAGTATCCTACAACCTTCTAAAGCTATATCAATAACTT  
CTTTAAATTTAATTAGGTTCTTAGAGCGTTTGTTCCTTCCCAATATGAATCACGGTTTTTAA  
GGATAATACCTTCAAGACCTTGGTCAACATATTTTTTATAAACCCTTTAGCTTCGTCAA  
GATTACGAACCTAAGTATTTCAATTGGCTCAATTCGTTTTAAAGCCTTCAGCCATATTTT  
CAAGAGCAGCAAAACGAACATCGTATTTCTGACCTTTAATTTTGCCATCAGAATAGACTT  
CATCTAAAGGAACATAGTCCCAGGCTTGAAGAACCATAACCTTCAGCTTCTTTAGGAGAAA  
TAGTCCCTTGAAGAGATTTATTTGCTAAACCGTTTGAAGTGCTACGGTCTGCAACTTGTA  
CTTCTTCGGATTCTTCATTATCACCAAATAAGAACGACAGGTCATTTCTGAGCTCACAG  
CCTTTTTAATATCAAATGAATGATAAACTAATTCGCCGTCGATTAACCCCATTAGGGT  
GTCTTTCACGAGCTTCTTTAGTCATTTCCATTAGTTCATCTGCTAATAGGGTAAGACCAT  
GGTATTCATTACCAGCACGAGAAAAGAATTGAACACCATCATCGCGAACTTCAGCGAAAC  
AACGAGCACCATCTGCTTTAATTGAGCAAATGCAGGCCATTTAATATTTTTAGTAATCA  
ATTTCTCATCATATGCAGATGCTAACATCTGTGGTTGCAATTGAATAAGTCCTGGCCACA  
CCTTATTCGCGATAGACACTGAAGCACCTACTTCAAGGTCGCGCATCATTACACGACGAA  
GGACTTCTACATCATCAGGTTTACCGTCAGCGATATAACCCATGAGCTCTTTAATTGCAG  
CATTACCAGTGAGTTTACGAGTGGCTAATGTGAACTCAATAAAAATCCAACATGTATCTA  
ATTCAAGAAGACCATATGCCTGAGACCTTTCACCTGGCCCAGGCCATTTCTTAATATAAT  
ACTGAATGCCACGTGCATATGTTAAACGATACACGCGTTCAGTAATTTGTTGTCCTTAT  
TTTTCTTAAGGATTTCTGTTTTGTTTTAGTAGAACCGATCGCAGCTATTTGGTTTTAAA  
TATCTAAAATCATTGATATCCTCGATTTTGGTTACGGTCTATTATAAGCCACTTCATC  
TAGAAGCGATTTACGCGTTTTCTGATAAGTGGTAATCCGTTTACCGAGTCCTTCAACATA  
ATATTCTGAAATGTAGATGAACCCTTGTTCAACACACTCTTTAATATTTCTGCGTCTTT  
TACTGAACGAAACAATGGCCGGTCTCGAAAGAACATGTTAACGTGACCGTAGTCACGCGT  
TGTGTTTTTGGCATCTGTAATATCATGAACTACAAACATAATTAACCCTTAACAATTTAT  
AGACCAAGTCCATTTAGACGAATCTAAAGGAAAGTTTTGAATCGTCCACCACGGCTGCAT  
ATCGGTTGGTCCTGGAGTTCGCCAGGTGTACGGATTTGACGGAGCGCCAATTTGATTAGG  
CCATGCGCCTGGACTTGTGACACCAGATTCTTTAAGCAAATCCGCCAATCGTTTTAAAAG  
GTCTTCACGATCTGAATCTGAATTATGCTCGGGCGGAACCAAACGAGATTCAATATCATC  
CCACGTGTGTACACGTTGTGACAGTGCAGGAATATCATCACGTTACCACGAGCCAACCA  
ATAAATCGGTACATTAAGAATTTCTGCCGCATGGTTCACAGTGATGAGCTAAATCGTCAAC  
GTAACAAATCACGTTATATTTGTTTTAGCTAGTTCGAATAATTGTTCTTTGAAGAATC  
ATGACCACACATCATTACTTCAGAGAAAGCGCCTGGGAACAAAGCATTCAAATTAATTTG  
TCTATTCAATCGAGCATCAATTGAATCACCTAGCGCCGTCACGGCTACAAAATTATAGTC  
TTCTTTTAGTTTATTGATAACTCGAAGAGCATCCGAATAAGGCGCTAAGTAACGAATAAA  
ATCAGAGCGATTATATTTTTCTATTAATTGTTTACCAAGGTTATCGTCCGGTATTGAACAG  
TTTACCAGGAGAAATAAATTTTTCGTCTTGAATCATTTTTTAAAATATGTTCTAATGGAAG

ATTATATTTTTGGGCAAATAAGGAAGACCAGATTGCCAGCTTAAACATACACCATCAAT  
ATCAGTCAAATAGTAGGCTTCATAAAGAGTCTCTTAATAGGTTTAAACACATCAATAAAT  
TCAGCTTCAAGTTAGTATTGTATCATCTTTTGTAGACCACTAGCCATGCTGTGCTTCAA  
AATTTTCCTTTAGAGGCTTGTAAGGCATCACGAAACCCCTTGTTTTGGATCGCGGCTTC  
AAAATATGCATTTGTGTATAATTCTTTCCACGCTTCGGAGTATCTTGAAAATGGAECTCC  
TAACCAGAAGAGAGTCCCACGGTCCCTGAGCTCTTGCATAAGACCTTCCCTGCTTGCTGTGC  
AGCCAATCCAGACAACCCAAATATACTATGTTGTTGTTCAACATTTTTTACCTTACATCC  
TTGGAGAAATCCTTCAAGACCTCCGAATTGAATACCATCCATAACAAAAGGCCATTGAGC  
AAAGTTACTTAATGCACATGACGGCCACTTGAATTACTTCTAATCTCTAACTCAGGCAT  
CTTAAACACTTATAATTTCAACATCAGCCCAATGACCATAACCAGGTATACGGTCTTCGA  
TAGATAAATTTCCGTCATTTTTAGGCATTTTAATTGACGTAACGTATGGTTCTAAACGAT  
TTTCTGCGTGTGGAGAAACATCTGTACACGATAAGTAACTTCAATCGTTTCCATAACAA  
ACAATTTCTGGATTAATTTTTTAAGCATTTTATTAGAACCTCATCTGAAAGCCATGTGAT  
TTAACATTACCGCCGCCAATATCAGAAATGTTAATTTCACTTGAATCGAAGGATCGATG  
TCAATTTACGATTAAGTTTAGTGATAGCCAAAGTATCATGCCATTTACTGTACGAAAC  
TCCAAAGGACATACTACGTTGACATAGTGTTAATTGACTCGCTAGTAGGTTGCAAATGG  
ACCGGAAGTTTTTAGGTGCTTTAGAGAAAACAACCTTCACAAAAGTTTTTGCGGGTATCA  
AAATAAGTGGTCATAAACATAATATTTTCCCTCAATTGGGAAGCCGAAGCTCCAGTTAAA  
TTAGATATCGAATTCATTAAGA ACTACATCAAAGATTGCTTCGAGATGTTTACGGTTTAGC  
TCGGTTACTCAGGATATGACGAATCCAAGTTTTAACCAAAAAGTTTACGATTAACACCGTT  
CCAGCAAGGATGAGTACCTAAATCACGCTGACGGAAATCATCATCTAATGCAATTTTGAA  
GTTGGAACCTTCCATCGTGATTGAAACCGTGATGCCATTTTCAAATCGCATATAAACGTA  
ATTAGGAGTCATGCACTGTTTCGATTTTCACAA ACTGTACCGTTTTTGTGTTTCCATAAGCA  
AATAACTTCAGAAGAACCAGCGATACCGTTAGAAACATATTTACGTTTCGAAGTTGATGTA  
GTTTCAATTTTATTCTCCAGATGTTTAAGTTGTTTGTGGTACAGGTCTATAATAACATATC  
CTGTACCAAAGTAAACATTTTTTATTGATTTTTGTCCACTTAGCTGAATCAATAACACC  
TTTTGCTTTAATCTTCTCGATTAATGACTCTGCGCGATTTCTGGCATTTCGTACCATA  
AACGTCTTCAGAGTAACCAAGTTTCTTTCATCTTCGTAAGTTTTAGAACGAATACAGCCATA  
AACTGTAGAATTCAGACGGTAAATTTACCAGTGAAAAAGTTTTCGATTTTCGATATGATA  
ACAAAAATCGTCTGAAGGGCCATCAGGAGTTGTACAATAAACCCACATCACCTTGAAGTGA  
ACGAACCATCCACTGTAACCTCGTTAACAACTTGAGATTTATATCCATCATGGTCACGGCA  
TTTAATTGTAGCATTAAATTGATAGTGTTTCAATTTTATTCTCCGGTTGTTTTATTGATTA  
GGTGGTACAAGTCTATAGAAACACATCCTACAGGAGAGTAAACATCTTTTTAAACTTTTT  
CTGCCCTAAACGCACAAAAGGGAGACCGAAGTCTCCCTAAAATTATGCAACAACCTTTCC  
AAAACGAGAAGCATCATCTCGAAGA ACTGCACGTGCTCTGCGCATGATCTTCTCAACGGT  
TTGATTAATACGAGAGTTTCGACCCACGCTTGATCCAGCGCGTTTAGAGGTACCATCAAC  
TTTCTTTTCAACTGCTTTCTTTGCTTTAGCTTGTTTTGCCATTATAAATTCTCTTTAAAT  
GAAAATGCAGGACTTATTGGCGTTGCCTGCGCAAGCCCTCAACGGGAACATAGGTTTTGG  
ATATTTAACGACAGGATAACCATAAACCTCGTCATCATACCAACCACGACTTAGACAGAT  
AACCTTTTTCTGACGCGTGATAGTACAAAATACATTCAAGAGGTACACCGTAAA ACTGCC  
GGGTCTTAAA ACTATAATGATTCGCAAATCATTAAATCAGACAGTTCGACGGCTCCTCGA  
TTTACTTACTTCAGGGTAATAACAAAATGACGTACTGCTTTACGAGCCGCAGAAGCCAGA  
GGCTTAGCAAATTTAGTTTATCTTTAGCTTCCAGTTCAGCAGCCAGAGTAGCCTGAGCA  
GGATTCAGATGTTTGAATAACGCAGGATTTCCAGTGCTTCGGCTTCAACATCAATAGAT  
GCGCCGTAATTGTCATGGCCGTTATTCCATGCATGGCGTTGCAGTTCAAGAGCGTGTTGT  
AATTGTTAATCATTTTAAATTCTCAATTCGAGATAAATTTAGTAGCCACGTTCTTCTG  
AATTTACCTTCTTTTCGACAAGTCTCTCAGTTGTAGGCTACCGCTTAGAAGAGTGTTCTC  
TTCATATAGTTATTTATATCACTTATAAAGACACGGAATAGCTTTATAGTGGCATGTTAC  
GAATTTCTGTTTAAATTTCTTTAGGTTGTTTAAAGTCCCAAAGCCACAAATGGATGTGGAAC  
ATTTCGAATTTGTCCAACCGGTAGTGGAGTCAAATCACCGACTTCAACAAAACCTTCAGG  
AACATCAGGACCTACAGAATGAACTACACATAGTTCAGGAACTTCACCTTGAACACGTTT  
ACCAATCACAAGTCCTGATTCAGTAACTTCTTTCATCACCTGCTTGAGCGGGTTCAGAAAC  
CAGAATGACATATTCACCAACAGCACGAATTGGGAGTTGTACTTCAGACATCTTATTTCC  
TTGTTGTTTGCAGATAGATTAATAATACCATACTATTCGTAAAGCATATTACATAAGAAG  
CAAACGTTTCGACCGGAGTACCATCAACCGAAATTACTTTATCAAGGCGGAAAGAACGCCA  
CTGACCTAACTTGGTATCGAATGCTCGAACTGATTCACGAGGTTCAGAACGAACTTCTGT  
TGCCGGATTGTTATTTTCATATTTGACTTCAAGTTCATCGCGCGAGGCAAACATCGTACG

AATATCACCGTTAGCCTTTTCAAATACAACAATGAACGCCTACAGACAGAATAGTTTT  
AATACGTTACACGAAGAACCATAGTTTCTTGTTTCAGTTAAAATCATATTATTCACCACAAA  
AGTTTCGGATTTGTTCCCAATTCAGAGAACGAAGATTATTACCGAGAAGTACTGAATTAC  
TTCAATACCAGCTTGGTTTTAGAATGTCTGCCCAATTTTCAGGAGATCGGTTGTATAATT  
CTGCGTATACAACCTTTTTAATACCTGACTGCGTAATAGCTTTAGTGCAATCAGGACACG  
GAGAAAGCGTAGTATATAACGTAGCGCCTTCAATAGAATTACCTTTACGAGCTGCAAACA  
AAATTGCATTCAATTCCGCATGGATTTTCGTTATTAGCAGACCATGCACTATGAGCGGCC  
GATGTTCTTTAGCCAAAACAAAATTATCTGCCCGTCCAAATGCTGTAGTGCCTTCTTTAT  
GTCCAGCAACGATGGCCGGGCTTGATTTATTCTTCAACCAACCATTTTCGGATGCATGTT  
CGAACAGTTAACGCCACCTGCGGGTGAACCATTATATCCAGTAGAGATAATGCGTCCAT  
CTTTTTCAATGACCGCACCAACTTTCCATGAACAACATTTTGATTCTTGAGAAATCAAAT  
AAGCAATTTGAAGATATGTGCTAGCTTTCATTATAGTGTTCCGTATACGCGAGTTGCTTC  
AACTAAACCGTCACTGCCTAATTTAAGGCTAGTAATCTGGTCAACCATCTTTAGGATTAAC  
GATTATGAGAAAAGAACGTGGAGATTCTTGAATAACTCGTAATGTTGCATCTTGGAACG  
TTCAGACACCTTATTGATGAGTGCTTGAGCAAATTCTTGACTTTAATCTGAAATTCGTG  
TACTGTAATTGGGGTTTCACTTAGCCTTTCGATTTCCCTCATTGTGTTGGTAGAGTTATA  
GTATCACAACCTCCACCATGTTGTAAACCATTAATTTGCTTTGCATTCAATTTTTTGTGTA  
CCGAAATTGATATCACATTGGATAACTAAATCACCGTCAAGATCAAATACCACTATGACG  
TGTGCAGACCCAGGGAGAAGAGTAATAGCAATAGAATCTACTTGGTCTGGGAGCAAAGCA  
TTGAGTACATGAGTTAGTTGAGCATGAACTCTGAGTTCGGCTGCATTATCAAGCACTTCA  
AACATATTATTAGCAATAATCTGACTGAAGACTACCTTTACAATTTCAGAATAAGTTGGG  
AACATAATTACCTCAGTGTACAGTATTTACTTTAACTCGAACAAACAATCGCTCGGTCGG  
TTCACCTACAGGAACAACTCTACATGATATTCGCCTTTGTAACGAGTATTCAGATCATT  
ACGAATTCCTGCGAGTTTGTGATTAATGTAGGACTCATATTAAGTCCCAGTTTACG  
AAGCATTTTGTATGCTTCATCTTCGATTTTCATGATGTTTATCGTACATAGTTTTTCATTTA  
ACCATTCAATTGCCTGGTTCGACGTTATCAAATATACCGCCGTCCAAACGTTCTTCATGCT  
CATAGTCCAGCACATCAATACCGAACTGTCCATTTACTAAAGGCCAGGCTACAAACAAAT  
ATTCTTTATGCTGTTTCGATGGCCTCAATCACTTCATATAATCGTTTCATTAATAATCACC  
ATGGTAACTTGCCAACATTTCTAAACCAATACGACGCCACATTTCCACAACCTGGTTACG  
GTCATCAACGGCTAATTTACATCATAATAAGGAGCAATACAGTTCCAAAAGAGTTCTTC  
CTTAACAACATCGTCCTTACGAGTGTACCTTGATTACGTTGAATATGCATTTCCCATGG  
AATAGAAAACGAATCCATCCATTTTTTGTGCTTCGTAATAACACATTGAATCTTCTTT  
AGTTCCAGATTCACGACCGCTTACAGTAATAATTGTATACCGGCCCTGATGAAGCATCTT  
AACATATTCGACAACCATAGGGTTCGGGGCGTCTGTGGATAGTTTATCTAACTCATACGG  
ACCGCGAGCAACATGTAGAGCTAAAGTCCCGTCAAGGTCGAAGATAACCGCTTTAGGTTT  
ACCTGGAGTTCCTTTATAAACTGGAAGACCTTTGTATTCACGCATACGGGAATACATCGA  
ACGTGGAACATCGATAGGAACGGTCTTTGTGCCGCGCTTGGCATTACGTTTAACCAATTC  
GGTCCATGGAACATCGAACACTTGATATACAACCTTCATGACCCCACTGGTTAGCATATTT  
TTCCAGCCAAGACGACGTTTCAGGATTTAAATTGGTGTACAGAAATAATAACACCCTTAGT  
TCCATCTTGACAGAGAATCATATGTGCCGCATCGTGTTGCATATAAGTAACGATACTTTC  
TTTCTTTTTAGTATATTTGTAAGTCTGTCACGTTCTTCGTGGCCCATGATGGATTGACGATA  
ATCGTTCGCGGTTGATATTAAGAACCAGGATTCTTAGCAATAAATTCACGAGCCCAAGT  
GCTTTTACCAGACCCCGGACAACCTACAGTCAAATAATCTTTTTTCACAGTTTACTACC  
TCTTCAGCAAATTCAAATTGTCCACCAAGAATTTTAGCAATTTACGCCCTAGTTCAGCA  
CCTTTCTTGCAATCTTGATAGTCCAAGAATCACCATTCTGTGATTTACGAAGAGCCCGT  
GTATTGATATCTGCTACAAGCGTATGGATTAACCTTATCAATTTTGGCTTGGTCCATTATT  
TTATTCCTAAGAAAGTTTCAAGAATACGAATGTTATGCTCGCGTCCGGTCTTTATTAATTT  
CAGCAACGTTTTTATTAATTGACGTACTTCTAACGTTTGAAGAAATAAATTTAATCATAT  
GACTTTTGAGTTGTTGCAAATCCAAACCTTTTTCTTTAGCAGCTTTACGAAGAGCTTTAC  
CTGCTTCATCTAGGGCCTTTGCTGCATCTTTATCATAATTGACAAGTGACATTCCACGGC  
AGATATCAATATACTCATCCGACCATTTGATGTAATTTTCTAGTAATATTTTCATTTAGA  
TTTCCTCAATTATCCATAGGAGCATTATACTCTGCTCCCGAGAGTTTGTAACTATTTTA  
CTAAAGATTTCGATATACTCATGAAGAGCTTTAGTCGCTACTGCCCACTTGTTCTGATATT  
CATTTTTTCAGATTAGCACGAGACTGAACTAACAAAGCGGTCATTAGTCGGAGGCAAAGATT  
CTAATCGTTGAATCTGACGGCCATAAATCATAGCCGCCATTTACAGATTCATAGATAAGCC  
CTTTAATGTATTGCTGTTCTTTAGTCATTGGCATTTTTCTCTTTTAAACCACTACG  
ATAATAACATAACATAGTCTTCTGGTTCATGTACATATCTTTTTACGTCGTTTAACCAAGAT



ACGAAATTCTTGAGAGTCTTCAAATGGCATTCCAACCCATGGATTACCATCAATAACCTT  
TACTTGCCATTTCTGGTTATATTCAACAATAGATTCAGGCCATTGCGGATGTAAAGTTTC  
TTTAGGGCTTAAGGGCACATCCTGGGCACATCCAGCCAAAATGCCAATAGATAATAACAAC  
TGCGGTTAATTTAATCATTCTGAGAGCTTCTGAGGTCTTCTGCAAAGGAATCGAAGGAC  
CTGTTGATTTGTTTTTCGACCAATCCTGGTTTACTTGCCACCACGTTCTTCTTCTCGAA  
TCCTTACGGAGCTTTTCATTTTCGGCCTTAAGTTGGTCAACTAAAACACGGTTCTTATAA  
GTCATTTCTTCGATTGACTGATATTGAACCTTGAAGTCGTCTAATACTTTAGCATTGTTT  
TTAGCGGTCTCTTTGACAGAAGCTAATTCAGTATTCAACGAATCAACTTTGTTGTTAAG  
ACAACATTGTTACCGTAGAACTAGAGCAAAGCTGCTACTATAGCATAAAATCGGATT  
ACTTTAAGCATGTTTTAATAATCTCAATGATTTTCATCTCGGGATAATCCATTGATAAGAA  
CGTTTTTCAAACCATCACACTGGATTTTGTACGATTCAAACAATACACACAACCTCTTCTG  
CTGTATGATACGGGCTTGAATTTCCGAGGCGGTTGAATTTGTGCGTAAGAGGGTTCGAAA  
TGATGTAGAATTTTATACCTGCGATATGTACGTTTGGTTGACTAATAATGAACACAT  
TAGCGTCGTATTTAGTCAAATTATTTTGAAGAAATCTACCATGGCATTAACTGCTTCCG  
GCATCGCTTCGCGTTTCTCTTCAGCGTATCGGGTGAATACTCTTTTTGTTTTACTTTCT  
TTTTAAGATTTTTGGCCAGTGTAACACGGAGGTCAGTAAGATAACCAACTGGACGTCCTT  
TCTTAAAGACTCGGATCCGTCAGTTGTGTCTCCAAAAGCGGTTACGACCATATCGTTAG  
TAATCAATTGCATATTCATAATTTTCTCCTCGTGTGTTGATAAAAAGCCATAGTAACACC  
TTCCTTGGTGTGTTGTAACCATTAAATATCCTTCAGGGATGAAATTTTTATGATTTTTAAT  
AAAGACAGATTCTAGAGCAGTCATCATTGCTCTTTTGAACCACCTTGGTAAAGATTCAT  
AATGATGCCAAATAGCCAAGGCGACTGTGCGCCCTTACAAATGGCCTGGGCTTCTATAGC  
ATATGTTTTACGATCTTTTCTTTGTGTTTGTGCGTATGCGTCTAGGCAGATATAAAATGA  
TCGGTCTAAGAAATCGAGATAGGCCTTTTCGAAGAGCTCAACCTTTTTAAATGAAAACCTC  
GTCATCCGCATACATTGCTTTAAGGTCATCTGAAGCACCGTTCATAATAGCAAGAAACAA  
CTTTTCCGGGCTAGAGATTGAGTCCCGAGTTGTATGAAGAGCAACGTACCAGTCGGTCTT  
CAATTTGAAATGAGAACCGTCTTTCATTACGGCTACATATCCTTCGATATTTGTAGAAGA  
CTAACACCTGGGACCCAGTCACCTTCCGGTGCTTCAAATCTGTCTACAAGATATTTACG  
AAAACAGGGTCTAAATAAATGTGTCGTCATACTCGATATATTTGCCGGTATTGTTATCTCG  
AATGTTCAAAGAATCAATCGTTTTTCTGGATATGTTAGAACAATTTTATTTGATGGGGC  
AACGTATTCAAAGTTCGCAGTAAAACCGTCATTACAAAGTTCTAATAAACGATCTGCTAA  
GTCTTTGTGGTTAATATCTAGTAAAATACTTGTAGCGGAAGCGGCTTGATCGGATTTGAT  
AGACCCTTTAGATTTGAAACGAACCATATTGCCGTCAAGGTATGTCGAGACTAATGAACC  
GTCTTCTTTAGTCATCAGATATTTTACATCGTTAAGGTCAATTGACAATGTAAACGGGTT  
CTCATTTAGATTAAGAATTTTTCCATTGGACGAGAAGCAATACGTAGCGGAGTTTCACC  
ATCCATTTTCGAACATAATACCACGACACTCTAACGCATCAGGCAGTAACCAATCTGAATA  
TGAAGCAAAGTTATATGAGAAAATTCGATACTTTTTACCGATTGGACTTACGTCGTCCGA  
GTAGAAAATTTACGGTCGGATGATGATTTACACAGAGATAACAGATTATAATAAAGCTT  
TTCCATTTTGTATCCTCAGTTAGTTTTTTTTAAATTGTACCACAATCCTTGTGGTATGTA  
AACTACTTTTTCTTATGTTGGATATTCCAAGGCGGGTTGAACTTTTTGATAAAAAGTGGT  
TCTTCAAGGTCCATTGTTGCGATGGTCATTGAACCAAGTTCGTTGGTGACTGAAAGGTCA  
AAACATTGGCGGGCCCAGAATTC AACCTTTTTGCCTTGCATTAAGGCATCCAAAATCATA  
AGTGATTTTCTTGAATCTGAAGTCTGGTCTTTTCGATTTATGGCTGTTTCGATAATAGTTA  
ATGCGTTTTCTTTAAATTCTTGGTTTTACCAATATACACAAGTTCGTCATCTATAGCAATA  
GCATATATAACATTTTTCTTATTAGGGGCATCAATGGTTTTAATTGTTGCATCTTCTAAT  
AGCTCCAATTCTATATATTTAATAAAGGAATATTCGGCGGCAATATCTTTCATAATAAAG  
TGGGACCGAAGTCCCGTCCTTAGAAATATTTTTTGTATGAATTGATTACATTTTGGTCTA  
CATCATTATCAATTTGTGCGACAAGATAAGAAGTATTTC AACTTCCTGAGGAGCTGCTT  
GAACTAAATCAGAGTTCAGATATTCACGAATCCAAGGATACGGATGCTTGGTTCGGAGCAT  
CAGTAATTGGACATGGCAAACCGCACTGTTTCATACGAGACACAGTCAAGTAATCAACAA  
AAGCACATACTCTGTGTATTGATACCTGGACATGTACCGTCTTTAAAGAGGTGTGCAG  
CCCATTCTTGTACTTGACTATTA ACTTCCATAAAAATGTCAACTGCTTCTTGTTCACAT  
TCTTTAGCAATTTGAACCCACTCATCGCCATCAGTACCAGATTGAAGTTGACGGATAATG  
TACTGAGTACCCTGAGATGGAGTTGTTTCGTCACGAGCAATGAACTTCATAATCTTTGCAT  
TACCTTCCATAATTTCCATATTTTTATGGAAGTTGAAAGTACATGCAAATGATACGTAAA  
AACGAATAGCTTCTAAGGCGTTGATAACATGCAAACAGAGATAAAGAGACTTCATTAAT  
CGCGCTTGGCGTTAAACATTATTTCTTCGTACATCTCAATATCATTCTGCTGGCATGAGC  
CTATTGAACACTCATAAACTTCTTAGCATTTTCCCAATTACGAGTCTTGACTAGAACAT

CGTCATAATATTTACCTATTGATTTCAGCTCGTTTCATGATTGCTTCGTCTAATACAATCT  
CATCAAATACTTTGGATGGATCGGTATAAAGATTTTCGCATAATATGAGTATATGAACGAG  
AGTGAATAGTTTCACTGAATGTCCATGTTGCAACCCACGTATCTAATGAAGGGTTCGGAAA  
TCAGTGCCATAAGTACCGCAGATGGGGCCCTGCCTTGGATAGAATCCAATAATGATTGAT  
ACTTAAGATTGTTTGTACAGATGTCCTGTTGGAAGTGGAGGAACTTATTGAACTGTGCAG  
AGTCCAACATCAAGTTTACCTCTTCGGGGGCGCCAGAAAAATGACAGGATTTCTATAAGTT  
CTTCAAAAACCTTTATGACGCTGAATATCATACCGTGCAGACCAAGACCAGAACCAAAGA  
ACATCGGTTTCGTTCAAAACATCGACTTGTGTGATTAAAAACTGTACTCATTATATTTT  
CTCACTTAGTTATTAACCTCATCCATGAGTAAATTATAATCAAAAAGTCTTAAAGCTTACAA  
GCAGAGCAATCTTCAGCTTTAGGTGTTTCTAATTCATAGTCATCTGTACCTGACCCATCA  
CGAGTGTTATGATAGTAGAGATTTTTTCCGCCAAAGTACCAGAAGTAAAGCAGATCGTCA  
AGCATTACCGACATTGGCACTTTACCTTTCTCAAATACAGCAGGGTCATAATAAGTATTA  
GCAGAAGCAGATTGGCACACCCATTTCAACATGATAGCAACTTGGGTCAAATAAGGTTTA  
TTACCTTTCTTAGCAAGTTTCCACGCGTAGTCGTAAAGACTCATGTTATGTTTCGATATTA  
GGAACAACCTGTCGGAAGTTGCCTTCTTTAGATTCTTTAATACTTACAGGTCCACGAGGT  
GGTTCTATAACCATTTGTGCTATTTGAGACTTGACTGCTTGATTCACATGGCATGAGAGCA  
CTAAGTGTACTGTTACGAATTCCATGTTCTTTTGAGTTCAGCTCGAAGTTCTTCCAGTCA  
CAGACGTAGTTCGGGGCTGCGATTTGGTCAATCTTTTTATTGTACCAGTCGATAGGTAAT  
TCGCCTCTAGACCATTTAGTGTCTGAATAATACTCACAAGGTCCTTTTTCTTTGGCGAGT  
TTGATTGAAGCTTTGATAAGGCCATATTGCAATCTCTCGAACAATTCATGAGTCAAATAG  
TTAGCGTCTTCATATGAAGCAAAGTTAGAAGCTAACCATGCAGCATAGTTCGTCACACCG  
ACACCGAGATTTTCGACGCTTTTTAGCTTTTTAAAGCTTCTGGAACCGGATAATCTTGATAG  
TCTAACAGGTTATCAAGTGCACGTACTTGTACTTCAGCAAGTTCATTAATTTTTATCTTGG  
TCTTGCCAATCAAATTTATCTAATACAAAAGCAGATAACGTGCATAAACCAATTTTCAGCA  
TCAGGACCATTCACATCATTAGTTGGAATAGCGATTTCAACAACATAAGTTACTCTGACGA  
ATTGGAGCTTTTTTCACGAATAAACGGAGTGTAGTTATTCGTGTTATCAACAACTGTGGA  
TAAATTCGAGCAGTACCAGAACGTTTCAGTCATGAACAATTCAAAGAGTTCTAGTGCTTTG  
ATTCTTTTTCTTTCTGATTGTTGGGTCTTTTTTCAGCTTTCTCATAAAGCTCACGGAATTTA  
TCTTGATCTTCAAAGAATGAGTAATATAGTTTCGCCTGACATTTTCGTGAGGGCTAAATAAA  
GTAATATAATCATTTTTTACCAAGGCGTTCATCATGAGGTCATTAATCTGAATTCGGTAG  
TCCATATGTCGAATACGGTTTTTCATCCACGCCTTTGTTATTTTTTCAGAATAATAGGTTTC  
TCTACTTCTAAGTGCCACATTGGATAATACGCTGTAGCAGCACCACCACGAATACCACCT  
TGAGAACAAGATTTTACTGCAGTTTGGAAATGTTTCCAGAATGGAATAACACCCCGTATGT  
CGAACTTCACCCATACCGATCTTAGAACCTTCTGCACGAAGCATAACCAACGTTGATACCG  
ATACCAGCTCGTTTAGAAATATATTCAATAATTGATGCTGAAGTTTTGTTAATAGATTTT  
AACGAATCACCGGCTTCAATAACTACACAACCTAGAGAACTGGCGAGTTGGAGTACGAGCA  
CCTGCCATAATTGGGGTTGGCAATGAACTTGATGAGTAGAAACGGGCATCATAAAAACGA  
ATAATATGTTTCAAACGGTCATGAGTTTCGTCTTGGTGTAAGGCCATGCCAATAGCCATG  
ATAGCAAACCTGGGGAGTTTCATAAATCTTACCAGTTGTTTTATCTTTAACCAGGTATTTT  
TCTTTAAGCTGCATAGCACCAGCATAAGTCAGATCAAAAATCTCGCTCATGTTTAATCCGA  
GAATCAAGATAAATGATTTCTTCTGCAGAATATCTAGACAACAACCTCAGGATCATATTTG  
CCTTCATTAACACAATAAGAAATATGGTTCGATAAAAGCAGGCGGTTCAAACCTGCCCATAT  
ACATCTTTACGAAGTGCAAACATTAGCCCTTTGGCGGCGACATACTGATAATCAGGTTCT  
TCGACAGAAATCGAGTTAGCTGCAACTTTAATACAAATCTTCTGGATATCTTTGGTGCTC  
ATCCCGTCGACAAGATGGGTCTTAATTTCTTCGTACAATTCATATGGGTTCGATTTGTGTT  
CCTTCACATTGCCAAGTTAAGACTTGAATAATTTTCTGTGCATCAAAAATTTTGGGATACA  
CCACTGCTCTTAGTTACTTGCATATATTCCTCAGTATAGGTTGATAGACATTACTCCAAA  
CGGGATAGTATTTATCCCGTTAATTTATTATACACTTTTAAACTGAAGCGTTAATTATTC  
TTAGCAATAAATTTCTTTGATTCTTTAGGTGTCAAGACTGTGATATCGAAATAAACCAAT  
GGTTCTTTTTCCATACCGTAACCACCACAAAATTCACGATATTCATAAATTCGTTTCATGT  
GAATAACAAATGAATCGTTCACCTTTAACTGTGATTTCACTATTCGGTGAAGGGATATCT  
AGTTTCGGTAGGATTTTTCATTTCAAAAATTGTGGTGCCATATGAATTAATAAAAACGTAAA  
ATCATTTATACCGCCATTTTAGCTTTGATAGTTGGATGAGATTCGTAATTTTTAAGAACG  
AAATCAGAATGTGTCATCGTTCCAGTAACCCAGTCCATTTGGATTTTTGTAGGCCAATTC  
TCAAAATTACTAGGCCAATTAATTTCAAGAGAACAACAACCTTTTAGGTTACACGACGAAGA  
ACTTCTTTGCATTGTTCTACATGATTGCTGTAGATATGCGTGTTGCCGCCTGAGAACACT  
AAATCACCCGGGATAAGGTTACACATCTTCGCTACAATATGCGTCAAGGCAGCGTACGAG

GCGATGTTGAACGGCAGGCCCAAGAAAACATCTACACTGCGTTGATACCATTGTAAATCA  
AGATGTCCATTACGCACATTAAATTGATAGAACATATGACAAGGAGGAAGAGCCATTTGG  
TCAATTTTCGGCAGGGTTCCATGCAGAACTATTTGTGCGACGATCATTAGGAAGAGCTTTA  
ATACGGTCGATAGTTTTGACCAATTGGTCTACACCACCAAATCACGCCATTGCTTACCA  
TAAATAGGACCAAGTTCGCCGCTATGATATCCAAGGTCTTTTGCCTGATTTTCATAGTTG  
TCGTCCCAAATAGTTTTACCTTCAATTAGACTACCATGAGTACGAATACGCAAATCATT  
ACATTGGTAGAACCAGACATGAACCACAGTAGTTCGGCAATACAAGCTTTCCATGCAAGC  
TTCTTGGTTGTTACTGCAGGGAATCCTTTAGTCAGGTCCCATCGCAATTTAGTTCCGAAC  
AGGGCAATAGTGCCTGTGCCTGTACGGTTCGTTTCGTAGCCATTTTCTAGGATATCA  
TTAATCAGGTATTGGTATTGTTTCATTTATACACGCTCTCAGTAATTTTCGGTGAGTTCAT  
CGATTCTGTAGTAATGAGATTCTACCATAGAACGTTGAAGCATAATATCTTGGACGAAAT  
CTTTATCAAGTTGAACATCGGAATTAACACGACATTTCTTAATGATTTTAGTCATCACGA  
TTTCATCGGCATAAGGCAGTGCTTGTTTAATAATGCAGGACCACCAATAACCGAGACAT  
CAACATGTTTCAGTAGAAAGTTTTAAACGGTACGTCGGTTGAAGGGCTAAACAGGTTAATTT  
CACCACCCATTACCAAGGTAATAAATTCTGCTTGGGTGATATAGAACCGTGCAAGTTCAT  
CAGTTTTAGTCTTAGGCAGTTTTCTGGCCATATCAGTGACAACCATATGAGTACGATCTG  
GTAGTAGACGAGGTAATGATGCAAAAGTCTTAGCACCCATAACCATTACAGTGTTTTTAG  
TGCGAGCAACAAAGTTACTCATATCTTGTGTTGATATGCTTCCATGGAAGTCCATCACCTA  
ATCCAAAAGCATATTCCAGTTTATCATCAACTGTTTTAGACGGTGCGCATGCGAATACTA  
ATTTAAGCATTTTTTATTTCTCAGATTTTTCTTAATAACTTTCCAATCAGCTTTGAACA  
TTTCAACGTCGGAGTGGTGAATCCAGAATCCTGCGCTTTCACCGTCTTCGTAGAGTGGAC  
ATCCATCACATTCTTCGTTCCAACCCATTTACGTAAAGCTTCTTCAGCTTGTTCAAGGA  
GTTTCAGCGTCTTTACCGACGATGTTGAAGTACCATTTACCTCTAACTTCTGAATCTTTGA  
TGCTCTGGCGTTGCAATCTCATTTTTATTCTCCTCTTCACTTTTTATTTGATAGGGCTACTA  
TAAAATAGCCCTATCTTGTATAAACTACTTTTTAAAAGTTTTTTGCAAAAGTTTGATGA  
TTTCGTCGACGTTGGTTTCATCTACGATACAATGGATTTTTGTTACACCTAAAGTTATAC  
CTTCGTTAGTAGGTTGAGGCTTTACTAAATCTACCTCAGTAAAGTATTTGAACTCATCAT  
AATAAATCTCAAATAAGTTTCAATTTACCACCCGGCAGAACATACAGTACCATCTTCCA  
TAGTTACACTTACTACGTTTGACGTATCGCTATCATAATCAGGTTCCATTCCGTTTACAA  
CAAACACTAGGCCCGTGGAGTTCATCAATTTAACATCTTAGCGTTACTGTGTGGTGCTT  
CTTGAACAAAGTCGCTTTTAAATAAAGGGTTAATGATATAAGATTTTCCAATTTCCATTT  
TGATTTCTCATTTGTTGATGTGTTGAATAAAGATTCTGCAAACGTCTCATATGATTCC  
AGGTGTTCTTCTTAAATGCGAACTGCATGATTATCACCCGAAGAATAGAACATCTGTACG  
ATAAGAGCTTCGTAATCAGACGAAATACATGCTACGTTTTCCGGCTTCAGGCATTCATTG  
TATGTCGCAACTGGGTCAGTGAAAGCTGCAACGTTTTTGCTACCGCAGTAATCCATACTT  
CTTTGAATAATAAAAATCATTTTTATTTCTCTCATTTGTTGATAAGTCTATAGTATCAT  
GTTTAAAGGAAAAGTAAACAACTTTTTTTTGGCAATTTACAGATACTCAAAGGGGAGACCG  
AAGTCTCCCTAATTTATTATAGACCAGCTAACAGGTCATCGAGGTCGCCATCGTCAGAAG  
ACGAGGAACCTCATGAAGTCATCTTCAGTTTTTGCAGAACTAAAGGCTTCCATGTCTTTAT  
CAAATCGTCGAGGTCAGAAGCAACTTTATCTGCAACAGAAGCTGCTGCGGCTGCTGCAC  
CACCCAGAGCGGCAGTACCAAGAACTTGATTAAATTTAGTATTCAATTCTTCAAACGATT  
TGAACCTATCTTTAGAAGTCATTTTCAGAAAGGTC AACCATTTGTTTCGAACAATTCTTTCT  
GGAAAGATTCATCATCAATGTTTGAATCGCAGATTGATTCAGGAATTTAGATTTCGTCAT  
AGTTACTGAAACCAGAAACCTGTTTAACTTTTACGACAAAGTTAGCACCTTCCCATGGAC  
AAGTTACATCAACAGGAGTTTACCCATTTTCAGTATCAACTGCAATCATTGCATTGATTT  
TGTCCTCAAATCTTTTTACCAAACGGTATTTGAATACCTTACCTTCAATTATCTGGAGCTT  
GTGGGTCTTTAACAACCAGAATATTAGCCCAATAAGAAGTTTTACGTTTCAGTTGAGAAT  
ATTCAGTTTTGTTGGTATTGTACAGGTCATTTTTACTAATGTACTGACATACAGGACAAG  
AGTCATAATCGCCGTGTGTAGATGAACAGGTTTCAATATACCATTTGCCATTTTTCTTGA  
ACCCGTGGTTAACAAGAATTGCAAACGGAAGTGCGTCATCTGTTTTTGGCCGGCAGGAAAC  
GAATTACCGCTTGACCATTACCGGATGCATCGAGTTTCAGCTTCCATTCACCTTTATCTT  
CTGAAGAGAAACCTTTGTTACCATTTCAGTTTAGCCATCTGAGCTGCGAGGTCTGCGGTAC  
TTTTACGTTTAAACATTATATTTACCTTTATTTAGATTATTTAATTTATTTACAGTTGGT  
TGCTACGACACTTATACCTCGTAGCTGGTATGATTTATTTATAAAGTAATTTTAAACACAG  
ATAAAATAAAGCTTAATACTTACATGATTTTATTGTTTCTATGAACAATTTCTTAGCAGC  
ATTTACATCGATTTGAAGTATTTTTCGATATGCCTTTAATTTGGTAGAATAATTTTGCCA  
GACTAAATTGTCAGTAAGTTCGTCATGCTTATCTATAATATCAAGAATGAATCCAACAA

CAAGAAGGTTTCAAACGAAATTATATTGCTTTGTAGCAATTTAAATATGTAGCTCGACTG  
AACTTTATTATTATAATCAAATATCTCTTGAAGCGCACTAACTTCCACTTTCTTACTGAA  
ATAGTAGATGTTACGTACATCTTCAGCAAACGTCTCCTTGGCTTGTTTGAGACGTCCAAT  
ATATTCCCTATAGAAAATAATGCATCAGCGTCTGATATCTCACCAATCCATGCATCTTG  
GTTAGCAACTAAGTTACTGATGAATATCAAAGTGAGTTCCTTTAACTTATATTTCTCTGC  
TAGTTTCTCAAAGAAATATTTATCTCGGCGTTTTTGTATATGCATTATCCGAAACACGCAT  
GCACCAGTTATATTTGATTACGTCATACCGACCATTAATAATGTTGTTTGCACATCAAGTA  
TAGTTTGTATACCGATTTTCCATTAATAAACGTTCTCCGTCGGGAGGCATGCGTATTTT  
AATCATAATAAGAAATCTAACGTATTAGTTTTTTTACCACGAGCAACTGATGGGCGAAGC  
ATGTTTTCGTCAATTGCTTCGCTTGTAATTTTTTCAACAATTCCTGTAGGAATAAATTTA  
GCAAATTGTGTTTCTGGAATAGAATTTTCTTCCAAGAAAGCAGTTGTTGCTTCTAAATAA  
GACATACCAAATTGTTCAACCATGGATTTCGATAATGAATCCGTTTTCTTGACGGTCAAGC  
AATTTAGCGATATCATCTTTATCATGTTTTACTGCTAATTCTTGTTCAGATAAACCGGTC  
TCATCAACCGGTTAATATCACTTAGTGAAAACGTGTGCATAAAGCTCGACTACCTCTTC  
GTTTTCAGCTTCAAATTGGTCACGAGCATCTTTATGATAAAGAGCTAACAAACGATTA  
CATTTTTCCATCAACGCCAAGCTCTTCTTTAGCACGAGTACGAATGTCTTTAATCAGTTC  
ATTATAACCAGAAATTTAAGTTTGTTATCGGAAGCTTCCTTGACTAGTTAGCCAGTTC  
TTCACCATGCACATCTTGATTAAATTCAACTGCTTCTTTCTTAGCCATGTTTACCTCAGA  
ATTCATTAATTACACTTGTTAATTTAGAAAGACCGGATTTTACAAGTATGAATAAATCTT  
GCCTTTAGGTTGTGGTTGATATGAGTTATAACTCTATAATGGTTGAAGCAATATTATC  
AGGGATATAATCAAAATCAATGAGAACCAAATTTTCTTGGTACCGTTTATAATTCTTCTGC  
ACTTAATAATACTTCAGCTTGAGAACGATCATTGGCAAGTGCTTCAATGATCGTTGTTTT  
CATGCTTGGAGTTCGTTTCGCCTTCGACTCGAGTAAACCAGAAATCACCACGAACTCGAAC  
AGACGCAACACCATCTTTACGGTCGCCTTTAAGAATTTTAGTCATGCAATCAATTTTCGGC  
AGAACCATTCTTAATTTAACCATTTTTTTCTGCGGTGGCGACCACTGTTAACGTTAGG  
GTATTTGTGTAATTGTGTAAGTCAACATCTGATGCAACAATACACACCTTATGACCAGC  
TAATGACAAATATTTAGTTAATACGCCGATATGGTCATCCGCTTCGTATTTGTCAATATC  
CATTACAACGTATGGCATATATTTCTTAATCTCATCAACGACTTGATGAAGTGCAGTAAA  
ATATCCTTCCCAATCCCACTTTGAAGCTTCACGATCAGTTTTACGATTTTTCTTGTAGTA  
GTAAGCAAAGTCGCGTCGCCAATACCCAGAAGTAGCGTTATCCATGCACAATACAAATTT  
TGTATAACCTTGCTTACGGAACATCACTACGTTTTTACGAATTGAATCAAGACTACATG  
ACGAACCATCGGAACGGTAATTTTATCACCATCTTCAAAGTTGTTAATGCAGCTGCCAA  
TGCAATGTTACTAAAGTCTGCAAGCGCAATACCTTCTTTGTAATCTTCATCCAACATCAT  
TTCTAAATCCATATGAACCTCTTGTTTCAGTTAGTCAACTTAGACCATAGTAACATACTAG  
TTCGAAAGCGTAAATAGTCTTTTACTCATTATAAATAGTAAAATAGAACACATAATGAT  
AAGAGGACTACCATGGTTGACATCAAACGTAAGTTCAGGGCCGAAGATGGTCTTGACGCA  
GGCGGTGATAAGATAGTTAACGTTGCGCTTGCTGACCGCACAGTTGGCACCGATGGCGTG  
AACGTTGACTTTTTGGTGCAAGAAAACACCGTACAGAATTATGACGAGACGCGCGCGTAT  
ACAAAAGATTTTATTGTTCTTTATGATAATCGTTTTTATCAAGCTTTAAGCGATATTCCA  
GCTCCGGCAGGCCCTTTCTCTTTGGCTAAATGGAAGGCAACTCGTACAGATGCAGAATGG  
ATTACAGTTCAAGGCGGAGATTTCCAATTATCAGTAGGTAACCTTATTGCGGTTGATACT  
TCAGCTGGCATTGATATTAATTTCACTTTGCCTCAAATCCTTTAGATGGCGATACAGTT  
ATTTTGTCTGATATTGGCGGTAGAGTAGGCTATGTAAGTTCAAATTACTGCAGAGGCT  
CAAAGTATTGTAACTTTAGAGGACAACAGGTTTCGTTTCAGTTTTAATGACGCACCCAAA  
TCTAAAATAGTATTCATTTTAGCAACCGCTATGGCAAATGTATGTTTCTGATTATGAA  
CGTAATGCAGTCACAGTAACCTGCTAAGCCATATCAGGCGCAACCTAACGATTTTATC  
ATTCGACGTTTTACATCAGCCGCTCCTATTAATATTACATTGCCTCGCAATGCTAATAAT  
GGCGATATTATTAATTTAGTTGATTTAGACAAATTAACCCGTTATATCACACAATTGTC  
AAAACCTTACGATGATACTTCTATACGAGAAGCCGGTGTTCATGTAGCAGAAGGACGT  
AATACTGCAGAAGCGTTCTTTGTTTATGATTCTGCTAATAGCTTATGGCGTGTGTTGGGAA  
GGTGACCAGAAATCTCGTTTACGTATAGTTCGTAATGATACTGATTTACGCCCTAATGAA  
GAAGTTCTTGTTTTTGGAATAATAATGATACAATCTCGACGGTAAATCTTACTTTGCCT  
ACAGATATTTGTCTGGTGATACTGTTAAAATATCGTTGAATTATATGCGTAAAGGGCAA  
ACTGTAAAAATTAAGCTGCTGAAGGCGATACAATTGCTAGCAGTATTTCTTTATTACAG  
TTCCAAAACGTTTCAGAGTATCCACCTGATGCACAATGGGTTTTCTGTTAGTGAGCTGGAA  
TTAATGGCGATACTTCGTATGTCCCTGTACTTGAGTTGGCTTATATAGAAGATTATTCA  
TCTGAAACAAAATATTGGGTAGTTCAACAAAACACTGTAACCGTCGAACGAGTCGATGCA

TCGAGCAATACAACCTCGAGCTCGTTTAGGGTGTATTGCTCTTGCTTCTCAAGCACAAGCA  
AATGTTGATTTAGAAAATGCTCCTGGTAAAGAAGCTGGCTATTACTCCGGAAACATTAGCA  
AATCGTACAGCAACTGAAACTCGTCGCGGTATTGCTCGTATTGCAACAACCTGCACAAGTT  
AACCAGAATACCGATTTTGCATTCCAGGACGATTTGATTATTTCTCCTAAGAAATTGAAC  
GAACGTACAGCAACTGAAACCCGTAGAGGTGTTGCTGAAGTTGCAACTCAGGCTGAAACT  
AATGCTGGAACAGATGATACCACTATTATTACTCCTAAGAAATTGGATGCCCGTCAAGGT  
TCTGAAGTTTTATCTGGTATTGTAATAACACATCTACGACTGGTACTACAGCTGCTACT  
GTTTCGTGGTAATGCTGGGACTAACGTTTATAACAAAGCCGTAGATAATTTAACTATTTCT  
CCAAAGGCTCTTGACCAGTATAAAGCTACCCATACTCAACAGGGCGCAGTAATTCTTGCT  
ATTGAAAGTGAAGTTATCGCTGGCGAATCACAAGCCGGTTGGGCTAATGCTGTAGTGACC  
CCTGAAACTCTGCATAAGAAAACCTTCTACTGATGGACGTATTGGTTTAATTGAAATTGCT  
ACGCAAGCAGAACTAACACTGGAAGTATTATACTAGAGCAGTAACGCCTAAGACGTTA  
AATGATAGGAAAGCTACGGAAGGATTATCCGGCATAGCCGAAATTGCTACGCAAGTTGAA  
TTTGATACTGGAAGTACGATACTCGTATCTCGTCTCCACTGAAAATTAACACTCATT  
GATTCTTCTGACCGTACCAGTGTTAATTCTGATTCCGGACTTATTGAAGAAGGAACCTTG  
TGGAACCATTATACTCTTGATATTTCTAAAGCAAATGAAACACAACGCGGTACACTTCGC  
GTAGCGACCCAGGCAGAATCTAATGCAGGAAGTTAGATGATGTTCTTATTACTCCTAAA  
AAGCTTTTAGGGACTAAGTCCACTGAAACGCTCTGAAGGCGTGATTAAGGTTGCTACTCAG  
GCTGAAACTGTAACAGGAAGTCTGCTAATACTGCTGTATCACCTAAGAATTTAAAATGG  
ATTGTTCAATCAGAACCATCATGGACTGCTACTACGGCAATTCGTGGATTTCGTTAAACT  
TCATCTGGTTCTATTACATTTGTTCGGTGACGATACTCAAGGTAATACCCAGGATTTGAAT  
CTTTATGAGAAAATAGTTATGCTATTTCTCCATATGAATTAACCGTGTACTTGCTAAC  
TACTTACCGTTGAAAGCTAAAGCAGCTGATAGTAATTTGTTAGATGGTCTAGATTCTCTT  
CAGTTCATCCGTAGAGACATCGACCAGACGGTTAATGGTTCTTTAAGTCTTACTAAACAG  
ACCAACCTGAGTGCTCCTTTAGTATCTACAAGCACCGCTTCTTTTGGTTCCGAAGCATCT  
GTTACTCGTAGATTAAGTCTTAATGACTCTAGCGGTTCCGAAATAGTTTTACTAAAGGA  
ACCCAATCTCTTAGTAATAAAGAGAATTTTCGTTGTTAGAGCATGGGGTAATAGCGCTACA  
GCTGGTGACCGTGATACAGTATTTGAAGCGGGTGACGAAACCGGATACCATTTCTATTCT  
CAGCGCGCTGCTGATAATAAAGTATCATTTAATATTAATGGAACACTTTATTCAACAGGT  
ATTGTTTCTACAAATGGATTAATGTTACAGGTGTTTCTACCTTTACCGGGCCTATTAGT  
GCTACAGGCGAAATTGTTTCTAGTTCTCCTATTGCATTCAGAGCTATTAACGGTAACTAT  
GGTGTTATGCTTTATAACGCTGGTAACAGTTCTTATATTGCATTAACACTCAGGTGAC  
CAGACCGGGACGTTTAATAACTTACGCCCAGTACGATTAACAATGCCACAGGATTAGTT  
CGTCTTGACAACGGTGTTCAAATCACAAGTGGTGCAACAATAACTACCGGTGGGTTAACT  
GTAATAACAGGATTATTTCTAACGGCGTTAAACTGCCACGGTTTATACCGATAAACCA  
ACAGCTTCTACTGTAGGTTTTGGTCTATTGACATTAACGATTCTGCTGTATATAGCCAA  
TTCCCTGGATACTGGACGCGTGATAACAAAGGTAACCGTGACCAAGAAATTAATATCCT  
GGTACTTTGACTCAATTCGGCAATAGCTTAGATTTCGCTTTATCAGGATTGGATTTGTTAT  
CCTACAGGTGCAAATGGTGGTAGTATTCGATATACTCGTACCTGGCAGAAAATAAAGAC  
GCTTGACCTCATTGCAATGGTATTTGATAGTGGCAACCCACCTTCACCTAGCGATGTC  
GGTGCTATCCCATCCGATAATGCTGTGATTGGAAACCTTACTGTTTCGAGACTTCTTACAA  
TTAGGAAATGTGAGAATTGTTCCAGACCCGGTTAACAAAACCGTTAAATTTATATGGGTT  
GAATAAGAGGTTATATGGAAAAATTTATGGCAAGGTTTGGACAGGGATACGTCCAAACGC  
CGTTTTTATCGGAAAGCAATTCAGTTAGATTTAAGCTAAGTATAGCGGGTTCATGCCCCG  
TTTCAACAACATAATCCGTATATTTGTTCCAAAACGAGCCTTTAGGGTTGCAGTCTTTTG  
GTATTGGACTAAATGTTAGGGTGATAAATCCGGAAAATGGAAGTATAGTTGATAGTAAAT  
TATACAATTTTGCCTACAAATAATGCAACTTCAGCTGCATTTATTTTCGTTTGTAAATA  
CATACGCAGATAATTTTCAATTTTCGCATTTATTTCTAATAACAAATTTAATTTGCCGCCAG  
AAATAATTGAATGGTTTAAAGCTGCTGGGAGTTCAGTTATACCGTCAATTGAAGTTGCTA  
GTCTTGTTGATATTTCAATTCAGCGTTTTATGTTTCAGGTAAAAATACTATTGCATTAG  
AACACATAAAATACAGTAATAAGAAAACAATTTCTGATTACGCAACTCCATTAGATATTG  
TATATGACTCTATTGCTGATATAGGTGCTACCGGCTATCCTAGACGTACATATGAAGCTC  
TAGAAACGTTTTTATCTCCTGTTGGAGGAACTAACAAATGAAATAAAAAGGGTGCCTACAT  
CATCCCTTGTTACTCCTATCGCAAACCTATGGATTAAGCCTACAGATTTTCTTTATTGA  
AATTTCAATTAATGGCTGATGAAGAATTATTAGAGGAAGGAACCACAAGACTTTCAATTC  
GTTTCTTTAAGTCTCCATCTAGCTCTCCTATATCATCTAAAGATATAAACTTTGATGGAA  
CTGCCGGGGAGTGGAAGCTATATGAAGAATACGTTGAAATACCAGCTGAAGCTGATGGCT

TTACAGTATATTGTTACCGTACGGCCTCAGTCGGTCAAGGTGGACTAAGAAATGTTATTT  
TCACTGAAGTATCATGTAACGGAAGTATAGCAAACCCGCGGAGTTTGGTATAAACGGTA  
TTCGTGTTAATTACATTGATGAATCATTAAACCGGTAATGATATAATGGACTTGCCTACTC  
AGTTATCTAACGACACAGGTAAGGTATTTGGGCAGGAATTTAAAGAGTACACAGAATAAA  
GGAGACTTCGGTCTCCTTTTCGCGTATAAATACTTTAATATTAATAAGGAGACACGAAAT  
GGCCGATTTAAAAGCCGGAAGTACAGTTGGTGGTTCGGTCATATGGCATCAAGGCAATTT  
TCCTTTAATGCCAGCTGGCGACGACATCCTATATAAAAACATTTAAATTATACACTGAATA  
TAACAAGCCAAAAGCGGCTGATAACGATTTTCGTATCTAAAGCAAATGGTGGGACATATCT  
CAAAAAGGTAATCTTTAACGAAGGTGTTGCAGTCAAACAGCAGATGACCAAACGAATGG  
TATTTTTTCTGGTGGTGGTGACGCCGCGACATTCGACCAAACAAACATGGATATTGTTTC  
GTGGTATGGTATTGGGTTTAAATCATCTCAAGGTACAGGTGAAAGAACTGTTGTAATTGA  
TACTCGCACCGGTAATATAAGTTCTAAAGGCGTTATTGAAGCATCTCAATTCAGAGCCAC  
AACGTTAGCACCTTTAAATAATTACGACCTTACTCGCAAAGATTATGTTGATAGTCAAAT  
AAATACAGTTAATGCTAATGCAAACAGTCGTGTACTCCGTTTCAGGAGATACGATGACCCG  
CGCGCTAACCGCCCCAAACTTTTTCTCACAGAATCCTGCATCTCAACCCTCGCATGTTCC  
ACGATTTGATCAAATTGTTATTAAGGATTCTGTTCAAGATTTTCGGCTATTATTAAGAGGA  
CTTATGGCTACTTTAAAACAAATACAATTTAAAAGAAGCAAACACTGCAGGAGCACGTCCT  
GCCGCTTCAGTATTAGCCGAAGGTGAATTGGCTATAAACTTAAAAGACCGTGTACTTTTT  
ACTAAAGATGACCAAGGAAATATTATTGATCTGGGTTTTGCTAAAGGTGGTAGTATTGAC  
GGGAATGTTATTCATACTGGCAATTATAACCAAACCTGGCGATTATACTTTAAATGGCACC  
TTCACTCAGACAGGTAATTTAATTTAACCGGTATTGCTCGAGTAACTCGTGATATTATT  
GCCGCTGGGCAGATTATGACTGAAGGCGGTGAACTTATTACAAAAGTTCAGGTACAGCA  
CATGTTTCGTTTTTCATGATTCGGCTGATCGTGAACGTGGCATTATTTATGCACCCGGCTAAT  
GATGGATTAACACTACGCAAGTAGTTAATATCCGCGTTAAAGACTACGCCGCTGGTGTGAA  
AGCACCTATGCATTTTCGGGCAGTGGACTATTTACTTCACCTGAAGTGTGAGCATGGAAA  
TCTATGTCAACTCCTCAGATTTTGACAAATAGAGTTATTACTAATAATAAATCTACGAGC  
GATTATGACATTTATTCTATGGCAGACAACGTTCCATTGTCTGAAAGCACTACTGCTATT  
AATCATCTCCGTGTTATGCGCAATGCTGTAGGCGCTGGTGTATTCCATGAAGTTAAAGAT  
AATGATGGAATAACTTGGTATACTGGAGATGGCTTAGACACTTATCTTTGGTCGTTTACC  
TGGTCCGGTGGATTGAAAGCAGGCCATTCTATTTCTGTTGGTACTCCTGGTGGCAATAAA  
GGATACTCTGAATTAGGGACTGCTTCAATTTCTCTTGGCGATAATGATACAGGCTTAAAA  
TGGCATCAAGATGGATATTATTTTCAGCGTTAATAATGGAATAAAAACGTTTTTTATTAGT  
CCCAACGAAACAACACTAGCCTAAGAAAATTTGTAGCTGGATATTCTACCACCGGAACCGAT  
TTAACTACTCCTCCAACACTGAAAACACTATGCTTTGGCCACTGTTGTTACTTACCATGATAAT  
AACCGGTTTGGAGACGGTCAGACTCTTTTAGGATATTATCAAGGCGGTAACACTATCATCAT  
TATTTTCGCGGTAAGGGTACTACAAACATTAATACTCACGGCGGTTTGTAGTTACTCCA  
GGTAATATTGATGTTATTGGCGGTTCTGTTAATATCGATGGTAGAAATAATTCTTCTACA  
CTGATGTTTAGAGGTAACACGACCCGAGCTAGTTCAGTTGATAATATGACAATTTCCGTT  
TGGGGCAATACGTTTACTAATCCTAATGTAGGTAATCGTAAAACGTCATGGAAATTTCT  
GATGCAACTAGCTGGATGAGCTATATTCAAAGACTTACTACTGGTGAAGTAGAAATGAAC  
GTTAATGGTTCATTTGAATCATCTGGTGTACTGCTGGAGATAGGGGAGTTCACACAACA  
GGCGAAATTTTCATCTGGGGCTGTGAATGCGCTTCGTATTTGGAATAATGATTATGGAGCC  
ATTTTTAGACGTTCAGAAGGCAGTCTTCATATTATTCCAACACTGCTTATGGTGAAGGTAAA  
CATGGTGATATCGGTCCACTTCGCCCGTTTAGTATGGCTTAGATAACCGGTAAAGTTACT  
ATTCCAGATTTACAATCAAGTTACAATACGTTTCGCTGCGAACGGCTATATTAATTTGTT  
GGTCATGGCGCTGGCGCTGGTGGTTATGATATTCAATATGTTCAAGCGGCTCCTATTTTC  
CAGGAAATCGATGATGATGCTGTAAGTAAATATTATCCTATTGTTAAGCAGAAGTTTTTA  
AACGGTAAAGCAGTTTGGTCTTTAGGTAAGTAAATTCGGGTACATTTGTTTTACAC  
CATATCAAAGAAGATGGATCACAAGGCCATACATCTCGTTTTAATCAAGACGGCACAGTT  
AATTTCCCTGATAATGTTTCAGGTTGGTGGTGGTGAAGCTACTATTGCTCGCAACGGTAAC  
ATCTGGTCTGATATCTGAAAACGTTTACTTCTGCCGGTGATGTAACATAATCCATGAC  
GCTATTGCTACTCGTGTTGCCAAAGAAGGTGATACGATGACAGGCCGCTTAACTCTTAAT  
GCAAACCTCGGATGTTATTGTTATTAACAGTGCTGCAACCGAATCTGGCTATTTGAAAGGA  
CAAAAAGCCGGCGTTGATAACTGGTATGTAGGTAATGGTGGGGCTGATAATGCCATATCG  
TTTTATAGTTTCCGAAATAATTCAGGCATAAATGTTAATAATGGTGGCGATATTGCTTTA  
AACCCAGAAGGGTCCGCCACTTTTAATTTTAATAAGGACCGACTTTATATAAATGGTTCG  
GTTTGGACCTCACACCAGGCCGGCGATTGGGGAAATCAATGGCGCCAGGAAGCTCCTGTA

TTTGTGGATTTTGGCTACGTCGGTAATGATAGTTATTATCCAATTATCAAAGGAAAATCT  
GGTATTACTAACGAAGGATATTTTTTCAGGCGTTGATTTTGGTATGCGACGCATTCCTAAT  
AACTGGGCACAAGGTATTATTCGTGTTGGTAACCAGGAAAATGCTAGCGATCCGCAAGCT  
ATCTTCGAATTCCACCATAATGGAAACATGTACGTTCTTGACATGGTTAAAGCTGGAGTA  
AGATTATCAGCTGGTGGAGGTGACCCTGCATGGACAGGCGCATGTGTTGTTATTGGTGAT  
AATGACACTGGGTAGTTCATGGCGGTGACGGTCGTATTAACATGGTTGCAAATGGAGTG  
CATATTGCTTCGTGGTCAGCTGCTTATCAGATCCATGAAGGTCTTTGGGATTCAACTGGT  
GCTTTATGGACTGAAACAGGAAGAGCTATTATTTCTTATGGGCATTTAGTCCAACAAAGT  
GATGCCTATTCCACATATGTCCGCGATGTTTATGTCCGCTCTGATATTCGTGTTAAAAAG  
AACCTCGTTAAATTTGAAAATGCTTCTGAGAAGCTTTCTAAAATTAACGGTTACACTTAT  
ATGCAGAAGCGAGGCCTAGATGAAGAAGGCAATCAGAAATGGGAACCTAACGCCGGTTTA  
ATTGCTCAAGAAGTTCAAGCTATTTTACCAGAATTAGTTGAAGGCGACCCGGATGGTGAA  
GCTTTACTTCGTTTGAACATAACGGTGTAATTGGTTTAAATACAGCTGCAATCAATGAG  
CATACTGCAGAAATTGCAGAACTTAAGTCAGAGATTGAAGAGCTTAAAAAATTAGTTAAA  
TCATTGTTAAAATAATAAGAGGGGCTTCGGCCCCTTGGAGGTGTATATGGCAGTTGAAGG  
ACCGTGGGTAGGATGGTCTGCAAGGGTACAGACTGGAGATCCTTGGATGGGTGGTGCCGC  
ACAGAGATTGAGAATGGGAATTCGTTTTGGATGAGTAATATGATAGGTCGATCTGTTGA  
AGTAATTCACACGCTTGGAGCAGACCATAACTTCAATGGTCAATGGTTCCGAGATAGATG  
TTTTGAGGCAGGTAGTGCACCTATAGTGTTTAAATATCACCGGAAATTTGGTATCATATAG  
TAAAGATGTTCCATTATTCTTTATGTATGGCGATACACCAAATGAATATGTTACTTTGAA  
TATTCATGGTGGAGTTCATATGTGGGGACGAGGTGGTAACGGTACTGTAAACGGAAACCC  
AGGCACAAATGGCGGGCGATGTAATCCAAAATGATATCGGCGGAAGACTTCGTATTTGGAA  
CTATGGCGTTATTGCATCAGGCGGCGGTGGTGGTGGTGCAGTGTATTACAGAATAGCTG  
GGCGCCAAATGCTACAGCAGGCGGCGGTGGTGGTAGACCATTTGGCATCGGCGGAGGCGG  
CGTTAATTGGCCGGGTGGTAATGCTAGTTATGACGCCCCGGGCGGTGCCGGTTACACTTC  
CCAATTCGGCGGAGGCAATGGCGGTGATGCTGGAGGTGCGGGCGGAGATGGATGGGGTAA  
TCACTTATCTAGATCTGGCGGTGGTGCTCCTGGCAGAGCAGTATTCGGAAGTTCACCGTC  
ATGGGGTGCTACAGGCACAATCTACGGCTCCTGGATTTAAACGATAATACCTCTCAATTA  
TAAATATTGATAAATGGGAGGTAATATGGCAGCACCAAAGTATCATTTTCGCCTAGTGA  
TATTTTATTTGGGTTGCTAGACCGCATTTTCAAAGATAACGCCTCTGGAAATATTCTTAT  
TTCAAGAGTTGCTGTTGTAGTTCCTTTTGTTCCTAATGGCACTAATATGGTACAAAGGGAA  
TATTTTTATGGATTATTACGTGAGGTGCAAATATGATACTTACACAGAAGTAATTCAAAA  
AGAAAGAAATACACGATTTGAATCTGCGGCTTTAGAACAATAACAAATAGTCCACGTCAC  
ATCAAGGGCGGATTTTAGTTCGGTGTATTCTTTCAGACCTAAAAATCTAAATTATTTCTG  
CGACCTTATTGCGTATGAAGGTAAGTTACCTAGCACAGTAACTGAAAAATCTATGGGAGG  
ATTTCTGTGATAAAACGACAGCAGAATATTCGGTCCATTTAAGTGGACTTCACTTTAC  
TTCTAAAACAGATTTTGCTTTCTTACCTACCAAATCAAAAACCTCCGGAACCTGGCATATAT  
GTATAGTTGTCCTTACTTCAATTTGGATAACATATATGCGGGAACCTGTTTCTATGTATTG  
GTATAAGGGGTGCGATGTGTTAAATGAAGAACGCTTGGCTGCAATATGCAACCAAGCAGC  
AAGGATATTAGGGCGGGCTAAATAATTAAGTTGTTAGAATACATCGTCAAATGGCGATAAA  
TATTTTCAAACCTTCATTGAATTCACATAATCAGTGTTTTCTTTTCTTCGGCAGTTAAAT  
TTGTAATTAGTTTTCTGAACGAATTCTGATTTAGCTGCCGACCATCTTTTTTAATCCAA  
TCTCATTCAAGAATCCGATGAAATTTGCTCGGTCTTCAACAATATCTTCCCTAGAGAATT  
TAATCAAAATAGAAGCAATAGTAATAATTTACGTCAGATTTCAATGTCTTTATTCATAA  
CGTTTTATTCATTCCATTTGGTTCGATATGAGTATAGTACCATTATCAGTGTGATTGTA  
AACAGCTTTTTCTACACTTTTAAACGTAATCAGTGTAGTCTTCTGTTTCATACGAGTGTA  
GGCCAAGAACGTGGCTAATAGTTCATTATAGACTAAAGCCTCACGCTCACGTTCCGGCCTC  
TACTACGTTCTGAAGATTATGACTCATATTGTTTCTTATAACTATCAATGTAGTCCTGTA  
TGTCGAAGAATGACATTTTCATATTCTAGGACATTAAGAGCCCGTTCTTCAGTATAGTCAG  
AACCAAATACGATAGTGATTTACCAGGCTTCATACGATCGAAATCAACACTAAAATGAA  
TACGAGAACATACTTCGTCTGCCATATCTGCAACAACACTACGATACACTTCTCGGTAA  
CCTGATAAAGCTCTGCAAGTTCTTACATCGAATAACAAGTTCAGTGGCAGGATTTTCTT  
TTATTTTAGTAAGCATAGTCTTTACCCTTATGTTTTTGTGTTGCGTTTAGATTGAAGTTCC  
GATTTCTTCTGTCCTTATGGACGGAAGCCTTATTGAAATCATGTTTTGCTACAAGATTG  
TTCATAATGATTTATAACCTCATTAAACATTTATCGGTAAAAGAAAACCTTTTTAGCCAC  
AGAACATTCGATAATGTGTTCTTTCAAATCTTTAGAGTCAGTATAACCCATCTCAGTAAT  
AAAGTGGCGAATTAAGCTTTATTCTTATCATTAAACAGAATTAATAAATCTGCTTTAGA

ATCAATTATTCTCATCATCTAATTTCCCTTAATTGATATTGCAACGAGCTAATAATTTCTT  
CGTTCATTTTAATATACATGTCACGCAAGAAAGGTTTTAACCCCTTCACGAATAATTGCTA  
ATGTATCACCTTTACATAAATTAACCAAATACGGATGATCTAAAGCGTCCCAACCAGGCT  
GATTAGCATACATGCCATAGTTTTCTTCCATCATATGATTAAGACGTTTGATATCTTGGA  
TACGTGATTCAATAGCATCTTTCTGGAGTTGTTTAATATTCATTAATAAAGGTCCTCTGA  
ATAAAGTTCTTTCTCACTTCCACCACGTTCAATACGTACCTGTCCAGCATAACGTTGCAAT  
AATCATTGCTTCTTCACGCGTCCAGTAATTAGAGTATTGGTCAATAAAGCCTTGGTCGTC  
ACCACAAACTTGTGCGAGACTAATTGAGGACCAACTATATCAAGTACTTCAGCCATATC  
TTTAGAGTAATGACGAACTCCAGGAATAATCAGAGTTCGCGCCGCTTCAATTTAAATCT  
ATTAGCTGCACATACTATAACACGTTGAACTTTTTGGTCAATTGTTCCAATAGCACGTTTG  
CCAACAGATTTTCAGGAACTTCATTCATTATATCATCAGCAGAATAATTATAACCGTAGGA  
CTGGAATTTTTCTGCTAGACTTTCAGGAGTCTCACGAGACAAGGCCAAATCTAATAGCTC  
TAAACGTTCTTTAAATGATTTCAATTAAGCCATTCCTTAATACGTTGCCAAATAGATTTT  
TGTGATTGTTTATTTACACCAATCGAACGAATAACCGGTTGTGACTGCTGATATTCTTTA  
TAATCTTCTTTATAGATTTTCGTAAGCTGCATCAACAAATGAACTGATCGCTGCCATGTAG  
TTTTTACGAAGGCCAAATGGCGCGTCATTATTTTACGAATAACCGTATATTGGCCTGCT  
TTAATCTTTACAATTGTCCCTAAATAAGCCCCGTGGTACCAAATATCCCATCCTTCCTGA  
GTAGGTTCTGCACATTTACGAAGTTCGTTAATAATATTCAGCTTATTCATTATGTATTCC  
TCACAGTACGTTAGTTACAAGGGTAATGATTTCTTTGGACACATTAGGGAAGTCAATGTA  
AGTATATTTACCACCGATCTTAATCTTAAACATCATTTTCAAGAGAAGTAAACAGCTTTGA  
TTCAGTTTCTGACATGTTGTATGCAAAGATTCTAAGAGCGCCATCTCGTCGAATTTCAAT  
TTGGCGAATGCCTAGAACTCGTTTAGCGAATCGAACTTCTAAGTTACTACGGTTTTACC  
AATTTCTTTAACTTCAACTTTATCTTTAATATTTTCAAAAACAAAGTTTGCTAATTCATG  
CATTTTCAGGAGTAACTCCACGTGCTTTTTCTGGTGTACGTTTCTGAAGAAGTTCTGGAGC  
ATTTTCTTGGGCAAAGAGGTCTGCAGCTTTTTGGATAATATCCATTGCTTCGCCGGTTGC  
CACAAGTCCATCACCAGATTTTTCGACTAAACCTTTCTTAATCAATACACCAATGTTAGA  
GTTAACAACACTGATGCATTGTATTCTGCTTCCAGAGCTTCACGGACATTGGCAGCAGTGGT  
GAAGTTGTTCTTAATGATATAAACCATTATTGCAGCAGTTTTTTTCATTTCAGAGCGTTTTT  
AGAAGCTTTGATGATGTAAGTAACTTTAGACATTTTATTTCTCAAATTAGTATTTGTTT  
TGATAGGTCTATAATATCATGTTTGAAGCATATGTAAACTGTTTTGTGAGAAAAAATGC  
ACAAAAGGGAGCTTCGGCTCCCTAATCATGTTTGTCCAACCAATACAGCCAAATCACTAA  
TGCAGCTATTGCACCGAGAAATCCTAAGGCTAGGGCACTCAAAGTGCCTCCAAGTCTTTA  
GTGTACTCTGTCACAACATCAGTAGACTTCCAATACTCATTTTTCTTCTTTCTTAGCTTTA  
GCTTCTTCTGCCAGTTTACGTGATTCATCGGAAGTGATATGGAAGATGTTAAGACCTACC  
AGTTTATCGACATGTTCTTTATACATTTTCGATTTGTGCTAGCTCTTCAGTCAAAGCTTTA  
CGAGTCTTGCCCTGAATCACAATTTTCGCCACTGATAACTTTTTTGTGATGAAGTGGGCCTTA  
GCAAAAGCAAGTTTAAATGCTTTTTTTCAGATTCAAGGATTTTGTGTCAATACGTTTCTGA  
ACGTAAGTCTTACGGACTTCAACAAAATCTTTGATTAAGTCCACTACGTTATCGTAGACA  
GCTAATTTACCCTTTTCATTAATCACTGTGATGTTTTGTGAACGACGTTTCGATGAGACTA  
AAATCTTTTCATGATTTTTTTCATGACGTAGCTCTTCATCATCAGGAAGCGAGTACTCTTTA  
CGGAACCTTCACCTTAAACCCAAAGCCGTGTTACCCGCAATCATCTTCCCATGAGATTAGA  
CCTTTGTCTTCCAACGGGTCAAGAACCTTACTCACATACGTTTTCACGGTTCGAATTTATAT  
GGGATTTTCAGTTATCTGCATTTGAGTGCAGAGATGTGAACTTATATGTTCCGTGAATCTCA  
TAACGCCCATCAACTTCATGTACTTCACCACGGAATTCCGGGAATTCAACTTTTGGCTTA  
GTGACATTTTTACCTTGAAGAGCTTGTAATACGGCCTTTTTGACCGATTTAAAACCTATGA  
GGCAGAATATTTGTTGCGTAACCGGTTGCAATACCGGAGACACCATTCAAAGAAGACTGTT  
GGAATAATAGGAAGATAGAATTTTGGCGGAATGTGTTCTTTATCTTCATGAGCTGGAGCA  
TATTCAGTATCTTTATATACGTTATAGAAATTTTTACTTACACGAGCAAAAATATAACGA  
GATGCTGCAGCCTTTTGGACTGTTCTAGAGCCAAAGTTGCCTTGGCCATCTAACAGTGGA  
TAGTTGTTATTCCATGTGTTAGCCATCAATGCACCTGCATCTTGTGCAGAAGATTCACCA  
TGGTGATAACCTAAATCTGCAACACCGCCTGCAATTGACGCAAGTTTATGAAATTTTTCT  
TTATTACCACGAGCCAAATCTAACGCACGATGAACCACAAAACGTTGAACCGGCTTAAAT  
CCATCAATCATGTTTCGGGATTGCACGGTTTTCAACGGTGTACATCGCATATGCTAAGGCT  
TCGTTATCAATAATACTTTTTAGATTACGAGAATTCAAATGTCATATTTTCACCATATTA  
TGAATGAATAACCATTATAACATCTGAAATGAAAAGCACTACTTGGACTAGTCCAAACAT  
CACACCATAGTACAGAACCGTAAGCAACAACAAGAGCCCTAAGGCTCCTGCTAAGATTTT  
CTTAATCATTACTCGCCTTTTAATACGTTAAGAAGAGCTAAGACTGCTAAGGTACCTTGT



GATACTGCTTGTGAAATACTGTTGTTTCGCCTGTAACAAAGTGTTAACGAATAAAAAC  
GACCAACACAGCAATGCAATAATCCATGCTACCATTTTAATTACCTCACAAATAAATTAA  
AGGCCTATTAAGCTAGGCCTATATAAATTAGTAACTCTGCAGAATGAATCTGAAATTATC  
TGCCAGAAGACGGTTCATTTCAAGTGAGTGTTTGATATTCTGATGAATGATTGCGAGTGAA  
CGCCAGAGCCAATTGACCTTTACCGTAACCAGTAGTCAGAGGTTTCATGTTCTTAGCTGA  
AACAAAGATTACATCATATTCAATATTGTTAGTGCCCATGGTACGGGCTAGTTGCGAACG  
GCCTTGACGAATGTGAGAAAGAATTGCATCCAACCCTTGTTTAGAACGTTGACGTCCTAC  
AAAGAATCGTGCTGCTACTTGTGCGCAATCAGATGAACCTTTAACAAAGAAGTAAAAACC  
TTCACGAGAACGAACTCTTTAGAACTTCAGAACCGTATTTCGCCATTACGAACTACTGC  
AACAACTTCACCGCCAACCTGCCAGAAGGTCTTTACGAGTTAAATATTTGGACATGCTAAT  
TTCCTCAATTGATTAATGTTTTTGTAAATCCATGAGAGCATTATACTCTGCTCTCAAGAGT  
TTGTACAATTTTATTCGGTCATATCAGAACGTTCAAAAAGCTCTTCAACAGTTAAACATT  
CGGTGTCATCCTCAATAAAGAATCGGGTCCAACACGTTGGGGCGATGCAGTTATGAGTTT  
GTCCGGCTATAGAAGCTACACGAATAAGCTGCTGACCATTATTCAGGACAAATTTTTCAC  
CAATTTCAACATCTTTAAAAAGCTTAGCCATTTTGTATTTCCTCGTGTTTTGATAGGACTA  
CTATACCATAATCCTACCTTGATGTAAACAATTAATTTACATTAATAATATGTTAAAGCCA  
ACCATGTTCCGGTGAACGAACATGCGATGTAAAAACCTGTATCGCAAATTGTTCTTAGTA  
CAATAAGAAGTGCATTTTTTCATAAGTACCTCAATACAATTGAAAATATTATACAAATCAT  
AGGGATACTAAGCAACCATATTCCGATCCACATTTTAGAGCTCATATCTCAACTTCCGCG  
AGTTCCATATATCCTTTGTTGATAACCTCTTTAAGGTCTTTAGAAAGAATAACACTAAAA  
TGGTCGTTTCATATGTCCATTAACATAACGAGTTATTTCCGGCTTCAGATGACATATAAGGC  
ACGTCTGAGTCCCAATGAGATAGACCTAAATGGGTATAAATCATCCCTTCGTCGTCGTGCA  
GTGTTGTACATTGAAACAAATTCGCCTGTTACTTTATGTTTTGCGTAGAAAAATTTAAAT  
TTCATGATGTTATCCTCTTTTAGATAGGACTACTATATCATAGTCTACTTAGTTGTAAA  
CACTTTTATGAAATTAAGATGAAGATACCACCCGTTGTAGTTGCTCTTGCGGACGATTT  
TCTTTAGGTCTTCATGGTCTCCACGAACCTTTATAGAATAAGAGAAGACGTCAGGTGAGG  
TTTCTTTGACATCTAATAATAAATGCAATCTGCGACTCGATGGTTCAAGAAGGGCCCTA  
TATTGATTCCATTACCACCAGGATAATCACCCCTGTATCCTGTGGTAACCGAAATCCATT  
TACAATCTATCTGGTGCCTTTGACTTCGACACGCAACCCGCGAGTATTTAGGATGAGCTA  
ACACGTCCCATGCATACGTGTACGGGTCTTCTACGTCTTCATTACCTTTATTAACATATC  
CGTCTAGCCAATTTGCTACTACATACTCTGCAAAGACTGCAACCTTACAACGTCGAACAA  
CGTCTTCTTTTATTTGACCTGGATCTTGTTTCAACGAGTACCGAGCAGTATCAGCGATCT  
TAACCTTCATTTTCGCTAGTCAAAAACCTCATTTCGACAGGATAAATGTCGGAAGACTCTTCA  
GCCTCAACAGTCCCAAGTTCGTCTTTACCATAGATACCTCTGATGTGTAGTTCACCAAAA  
TAAATGCGGTCACCTTCTTCAAGATATTCTGCATCTACAGGCGGAATTTCAATAACAACCT  
TCGTCGCATTCTAACCAGCCGTAGTGTGCATCGCCAGGATGTTTTACCAATTTAGCACAA  
TAAACTGATTTACACTTATGATGACCACGAAGATTAGCAATTTTGGATTCTGATACGTCA  
AATGGATGAATCATAATTACCCCTAAAGAAAAAAGGGGACCGAAGTCCCAATTTATTATT  
CTGCAAATAAATTCAGTAACGTCTGAAATTACTTCATAACGACAAGTACGGGTCGTAGCAT  
CGCCATAGTCAACTGGGATGGATAACAATCACGTGGATGAACTTTAACCTTAACAACCTT  
TATCTGAGCTAGAACCAAGTAACGAATATATGATTTAGCGCAAACATGTAGACCACGGG  
AGCAGGTTTGTGTATCATCATCGTTAACACGAGTACGAGGCATTGAAACAACCTTACCAG  
GCGAGTTATCAAATGTGCCACTATAGCAATCTAAATAGTCTTTACGAACTACTTTCCACG  
CATAGAAATGTCCGTCTTCAGTGATTTCAATATCGTTTGCAACCAAGAAGTCGAATAAAC  
GTTGTACAGCTTTTTCGCTTGGGTTTTCTAACAGGTTTTCAAGGAACGGCAGATAGAATT  
TAAAGTCTTCGCCTTTTCCATAGAATCAATAATACGATTAACCAGTCCTGAACGAATTT  
CTATACCTTGATAAAATAAACTACCACCTTCAATAGTAACATTACCGTCAACAAACTTAG  
TAATAGCTTTCTTGATGTTAATAAGTTCGACAGCTTTACTAAGGTTTCTGCGACCAAAT  
TAGCTTTAATTTCTTCAAAATTTGCATGACTTGATGGGGTCGCATTGTATGCTACGCGTC  
CTTCAATGATTGAAATAAATTTAGATGATGCGTTCCATACGATTTCTGGACGATGACCTG  
TAATAATAGGTTCAATTATTTTCTGGGACCTGTTCTTTCGTCTTCAAATTCAGCTGCTTTCT  
CTTCAGCTTTAAAATTCTTAAACAATCTTACGAAGAGTATCTGTTGAAATGTCGAAGTAAT  
CGGCAATTTCTTACGAGTCCATTTGCCTGATTCAACCAGGCCGTAAGCTTCTAACTGTT  
CTTCTTGGGACAAGCATTTAATATTGTACATAATGTTTCC

>NewGenomeName\_275

ACCAGTCACTGCGGCACCAAGCACCCTGCAGATACTAACCGAAATCATGCCTAAGGCCA  
CGTCTAAGACGCGACATTTGCAGAACCCGCGACAAGATGCTCCGCGGCGCGAACAACTG

TGAAAAGATGGTGTTCACCCCTGAACAACCCTACGGCTGAGGAGCGTCGCCATATTCAAG  
AGATAATAACGGCGGACGCCGTAGACTTTGCCGTGATCGGCAATGAAGTAGGTGACAGTG  
GGACACCGCATCTTCAAGGATTTCTGAATATGAAAACAAAACGTCGGCTGGGAACTATGA  
AAAAGTGGTTAACGCTAGAGCTACTACGAGGCCGCTAAAGGCACGGATCTACAAAACG  
ACGAATACTGCACAAAGGGCGGCGATACTTACCTTCGCATCGGTGAACCGGGCAAAGAAC  
GCTGCAGAAACGATCTTCAAAGGGCGATAGACGTTGTGAAGAGATCCTCCGGGAGTATGC  
GGGCAGTTGCCGAGGCTTGTCCCGCTACTTTTATTCGTTATGGGCGGGGTCTACGTGATT  
ACGCCAACGTGATGCAGTACCGGAAGCCACGTGATTTCAAACCGGAAGTGAATGTTTACG  
TCGGAGACCCCGGATGTGGAAAGAGCCGGAAGGCGTCGGAGCTTTGTGCAGGCACCACTG  
TGTACTATAAGCCTCGCGGTATGTGGTGGGATGGATACGATGGACAAGAGAATGTAATTG  
TCGATGACTTTTACGGCTGGATGCCATGTGATGAACTGTTGAGAGTGTGTTGATCGATATC  
CTTGTAAGTACCGGTAAGAGGAGCCTATGTGGAATTTGTGTCAACTAATATATATGTGA  
CGTCTAACAAGCATGTGTGGCAATGGTATAAGTTTGAAGGGTTTGACCCCGCCGCGCTCA  
TGAGACGGGTTAATGTGTATCTTGTGTACGACAATGCCGGGGAGAGATTTGTCAATCTCC  
GTGAATCGGCTATGTATGACCCTGTTACCATGAGATATTGTTATTGAATAAACAAACGAT  
GAAGAAGTACTAAAATGCCTTTTATTTTTGTTGACAATATTA AAAAAGAACCGATCATTTT  
TGTACATTTTTTTTGTGTTTACATGCTTAACAAACAAACATAAAGTAAGGAGGTGTCTCCG  
TTAGAAGTTTCTCCGTTAGAATTGCACTGAAGTCAAGTACAGAATCCTTCAGTGCCGCGGA  
GCGCCGGTGGAGGGCCGGAGGCCCGACACCTCTGGTACGGCGTAGCCGTAGCCTACGCCG  
TTAAATCCGGTTTCTGAATAAGACGTAGTATTTGATAATTAGTTTGTACCCGATTGCAGA  
AGGGGCCCGGTGTTTGAAGGTAACCATATTTTGAGCCCGTAATGAGGTACGCCGTCTGTG  
TACTGTGTTAATCCATGCACCGGATCGAATATTCAGAAATCCGTAGTTGGTAGAGGCCGA  
AGACTTGTAATTTCAATATTGGGACGAGGAGTAAAGATCCTAATATGTGTCTCTGTTTCGA  
AATAAACATTTTTCTAGAGGAGTAGTCCTTAAACGGATCTGCAGTGCTAGTAGCCATGGT  
AGCGTCGTCGTAATCGACAGCTGTGCTACCGTAAAGGACCTTATCTCTGTCAGCGTTAAT  
TGGAACGTTGTTGAATTCAGGCCACAGTTGCACGACAACCTTACTGATCTTATAATAGTC  
CCAGTAGTTCTTTGGATACGACACATCAGACAATAAGAAAACAATTCCCGAAGAGAGCCC  
GCTGGTAGCATTCCAGGTCAAATGATCGTGTGTTGATAGCTCGTAAACGGAAGTAGGAGTA  
TCGTCTGTGTGTCGCCTTCTTCTGACGTACTTCCGTGCGCCGCATCCACGTGAGCTCCG  
ACGCCTTCCGGCTCGTCGTCTGGCACGCCTTCTGGGGAGGAGAAATCAATTAGTGACGCG  
TATATAACCGGAAGTGCCGCAGTGACTGCCTAGTATT

>NewGenomeName\_276

GGATCCTCCCCCGGACCCCCCGTCAATAAATAATTAAATAAAGCAAATTGAATTATTT  
ATTTATTTTCGGCGCGCGCGGCAGCAGCCTGTACACAGAGACGTCGCTCGGGTCTCCGG  
ACCCTCGCTCCTCAACCTTTTCTTATTA AAAATCATCACCCAGCGCGACAAACGCCACAAG  
GCGTGGTAACCAACGATATGTAAGTAAACTGAGACTCATAACCGGTACAGGGGGGTACGTC  
ATCATGTACAGGGGGGTACGTCACCATGTACAGGGGGGTACGTCACCATGTACAGGGGGG  
TACGTCACCATGTACAGGGGGGTACGTCACCATGTACAGGGGGGTACGTCACAGCCAATC  
AGAATTGAGCACGCCAGAAACGCCCTGGGCGGGCAGATCCTATCAATTAGGGGGATATA  
AGCAGAGCGCATAACCGTTCGGCAGTAGGTATGTCATCCGGCGGTCTCGGGGATTGCAGCG  
CCTGTGAGACCCGAGCCGCTGGGGGCAGTGAATTGCCGCTTAGGCAAGAGGGGGCAACTTG  
GGCCAGCGGAGCCGGATCCACGGGCAAGACACTAAATGCAGACCCCGCTCTCGCCGA  
CAAGCAACA ACTACTCGGT CAGA ACTATTAACGGCATAACGAGCATCCAACAAGTTCGTGT  
CCGCCAGCAGAAACGACCTCGATAGAGATCCAAATTGGTATCGGGTCAACTATAATTACT  
CTATCGCTACCTGGCTACGCCAGTGTGCGGTTCTCACGACGAGATCTGCACCTGCGGAC  
GATGGAGGAGTCACTGGTTCAGGAGGCTAGCGGACTCGTCACACAGGAGACCCAGACGG  
ACCAGCTCGCCAGAGATCTACGTCGGCTTCAGCGCAAAGGAGAGGGCGGCAAAAAGAAAAC  
TTGATTACCTTAAGAGAAGAGGGACCCCCATAAAAAAACTAAGACTGTGACATGGCAAG  
ATTACGACGACGACGACCTCGTGGACGCTTTGGCTTCTACCACAGAGGACGATGGCACTG  
GAGACACAGACTGCGACGAAGACGCTATTCCCGGAGGGGTAAATTTTCGATATGCGCGTAG  
AAGATCCTTTGATCGCCGCGTTAAGAGGAGGATCTTCAACCCACACCCGGGCTCCTATGT  
GGTAAGGCTACCAAACCCTTACAATAAGCTTACCCTCTTTTTCCAAGGCATTGTGTTTCAT  
TCCGGAGGCTCAAGCATTGTTAAAAGTACTTATACAAAGACTAATCTTACGGTTTGCCA  
TGTAGCCTCAATAAATGTTAACCTCCGAGAATTTATGCTTGCTACAATGCCTTTAGATGC  
AAAGAGCAAATCGGAGGCCCTAATCCTTATCCTCAGCACTTGCAGGGGTGCCAATGGTC  
AGCACAAACGACGACGACGACGATGGCCGTA CTGGCGGGCATGTCAGAGACAAAAGACC  
CAGCGTACCACCGAGTGAGTGGTGGCGCTGGGCTCTCCTGGTGTGACCCCTAGAGCACC

TGGCAGATTTTACAATGCCCTAAGCTAATGACTCTGGACGCTATGGGAGACCTCTTAGG  
GGGCTGGCAACTATTCCGTCATGTTAGAACCAAGTTCAGAGTGCTGGCCACTATGGGCCA  
GGGTGCATTCTCACCGGTTGCAAGCCTCCTTGTGCAAAATGACTATTGGAGCAGGGGGCA  
CTTAGAGGGCTTCCCAGTGAAAGGTGCACCGCCTATGTGCACCATGCAAAGAAAGACTCA  
GCAATACGGCAACGTGGAGGCGAACGCTCCAGCAGATGAGCAGTGGCTACCGGTGAATCC  
CCCAGACCCACCAGTGTACCCTAACCAGGGAGGATGCTCCCAAACGTTGGCTCCAGGCAT  
ATACCGGCTTGCAGGCTTACAAGACAGTAGCAGATGCTTTTATTCAAAGGCTTGTTTCCC  
CAGCTTTGCAGCGCTTTCTGCTATGGGGGCACCCTGGTCATTTCTAGCACTCAAAAACC  
CATTCAAAGAGGCTCATTAAACAAACATTCCATCACGGGGACAGGGGACCCCCAGGGCCG  
ACGGTGGTTAACACTTGTGCCTAAAGGCGTGGAAATGGATCACTGATGACACCATGGAACA  
AACGCAACTGGACACAGACATTGCAACACTCTTCTTAGCTCAAGGCAGCCCAATGTGGGC  
ACCCTACAAATTCGGGACTTTTCACAAGGCAATGGCCATAACAGCAATGCAGACCACCCC  
CTGGTGCGTGGTGAAAGTACGGTCCATCTGGCAGCTCGGCAACCAAAGACAGCCGTACCC  
ATGGCAAGTGAAGTGGTACAACGAGCATACTGCAACGGACAGATACAACCCGTAATTGGG  
GGGGGGGGTTTTGCCCCCCCACAACCCCCCCCCCCCCGGGGG

>NewGenomeName\_277

TTAAATTTAACATTCTTAACCAGTTTCATAAAGTCTTGTGCGCGTTTGTTCATTATGCAG  
AATACGATACCAGTTATCTACAATATCATAACAGTAACGGGCTATTCTCTTTAAACTTCGC  
ACAAACTGCTTTAATTCGTTTCGTTTGCTGCCGTGAATTTTTTCATCACAGATCTTTTTAGT  
TTCTTCGTCCATAATCCAACGAGTACGAAGGAGTAACCTTGAAACCTCTTTATTATAATG  
ACGACCGTACAGTCTGTCAATAAATTCTGGAACACAGCGTTCTAGTTCATCGTCATGAAA  
CAACATAGTGATCACACCCAGATATTCGCCATACCCCAGATGATTGGTCTTAACCTTCTT  
AGCCAGACCAGCCAGCTTACCGCGAACAAATTCTAGCGCACATTCCAATTGTTTCGTCAAC  
GAGATATTTTTGTGTCTCGTTTCGAGTAATAATACTTTGTTACCCCGAAGTAGTCAAG  
CGCCGTATGTAATGTATTTTCACTATAGATCGATTTACGACTACGGCTTTCGAATGCATC  
ACCTACGCGGAACATGTGCAAGCCTGATAACTCGGAATCTCTGCCGCTTTCATGTGATG  
GCTGGTTTTATGCCAACTGTCACCAATCTTTTCCATGATATACACGTTAGGCAGCTTGGG  
AGTCGCTTACGTTGTGTACGCTCGGTCTTTTCCGGTTTAACTGCTTTAGCACGCAGATC  
ATCGGCCTCAGACACTTTAATCACGGTCATTTCAGAATCATCATAATACTGTTTGATGTA  
CTCGAAAGTCTCCATATGTTTTTCGTTGTTCTGACGGAACACCAGTACCTTTTTATTGAT  
GCCGTATTCCTGGACCATGCCGTTAAGAGTCAGTGCACGCAGTTTCGGTTTATCGGTATC  
ATCAATAAGACACGTAATATCTTCTTTATGCATCCATACAAAATGCGTAATGTTGTATTG  
ACTGCTAACGAAAGCAGGGCGCAATTTACTGATTGTGTGACGAGTACGATACAGAGTATA  
CACCTGACCTTCTACGTCATTAGGCGAATCTTTACCCGCATTCACAAACTTATTATAGAT  
TGCTACCGGATCGTCCCATTGTCCGATCTTACCCATCTTGCTAATAAATATTGCGTTGCGT  
CGATGAATACTCGCTCATAAATTGCGCAAGTTTACGCTCTGTTTTAATGTTGGCGATCTT  
TTCTTTAACCTTTTCCAACATCATTTTCATTGATTTCTGCAATGCGTTTTTCGATGTTCCG  
TTTAGTCTCAATTGACAAGTGAACCTTCTTACGCGATGGCATAAAGTCCAGATCACCCAA  
CTCAAATAAATGTAATGGTCTGGTGCTGGCGGTTTACAGCTTCTAACCATGTTCCCTCG  
AACATATTCATACGGGATCGGATACTGGATCTTACCCATGATTGCATATACTACATAGGA  
ATCGTTATCACGCCCATGCAAACATAATAATTATCAAAGCTAGGGAAATAATTAATTTT  
GATTGCATTGATATTAGGTTTGTGTTCCCCAAAATGACGAAGTACAAATTGTGCTTCTCG  
ATGCCATGTCTGAATGTCTTTTTCTTTCACCGGAATAGTGATTTTCAGACCGTTGTCTTC  
ATAGGTCGGTTCGTCGAAAATCTGCACCATTTTTCGGCATAGAGTTTTGCACAAATGCAGT  
AAAGCCATAAGCGCGACCATTGTAGTAGTTTACGATTGTAAAGGTGTCAGTATAGCTATA  
AGCAGACTTCGCACCTAAACCAAAGATCCGATATAATCATTAGTCTGGTCTTTTGTGTA  
TTCAAAGTAAACCGTAAACAGTTGTTCTAATTCTTTCTTAGACGGAATACCAGTACCATA  
ATCACGCACAGAAAAATACGGTTCGATTGCAGTCGGTAAATGAATATCAAACGGACGATC  
TAAGGTTCCGGCTTCTTTGTGAGTGTGCGGTAGCATTGCACGAATACTCACGGACGCAAGC  
ACGCTCACAATATTGATAAGTGTCTTAGAAAGCACCATAAAAGCCTTGCTACTTGCTTT  
CAGTGAAAAATCAACCGCACCGCTCAAGTCACTGCCAAATACTTCTTCAATTATCAATATG  
CATTTTCATAATATAATCCTCACTTAATTAATAATCTTCTTTGTCCATCTCTGCGTAGATT  
ACATCCCACGCCATAAATCAATAAACGCATTATATGTCACGGTGCAATCGTTGTCAATC  
ACTTCTTTCGCATATTTCTTGATGTTTTTCGTAGGAACTTGC GGATCAATTTTGTGTTA  
CGAAGATGCGCATATTCATACCTCAAACACTCCATAAACAGGTCCATCGATTTCTTTTCT  
CGATGACACTTGGCGATCAGAAAATCAAACCTTCGACTCATTTTCTACTCCTTATACATT  
TTCAATCACCCATTGCAGATGGGCTTCTGCGTCAACCAGTTCAGCGCGGCTTTTCTCTAA

GCACTTGCTGTATTCTTTACGTTCCCAATCAGCTATTTTCGTTTTTCAAGACTTCTTCATA  
GTAAGCAATTACGCCTTTCAGGTCTGAAACTTTACGGCTTGCCAGTTCGATGTAATGGTT  
ACGCATTTTGATTCTCCTTTGTTACTAGATAACGAATTTGGTCTTGCATTGCGATCAGTT  
CCCAGCGTGCTACTTTCATCATGGAAACCGACTCTTTGAACATAATATTAGCTTTTTCT  
TATCCCTGTCAAGTAGATTTCTGCAATTTTTTCACAAAATTTTGAGTTTCTTCATTCT  
TAAACGGTTTCATATAAGTCAACCTTTTGTTCGATGGGGACATTATGATATATCCCCG  
ATCCAGTGTCAACAGATTTTTAATCTTTTTTCAATGCATCCATTACTCGCTCTGCGATCA  
GTTCTCGTAAGCACTGATAACCATGATATTTGATGGCAATGTCACGCAGATCATTAACCA  
GTTCCCGTACTTTCATGGTCTTTCAGATCGTCTCTGTATTTTCGATTTAACCGTGTCTTTAG  
GTGAATTGTGGATAACCTGAAAACCTTGTCTGCAATCACTGCGGCTTCGCGCTGGCGTT  
CATGCTGTACTGTATTTTTGATCAGGTCTGCTTCCATGAACTTTGCCATACTCATCATCA  
TGTTATTTCTTTTTGCTCATTATTAATCCTCATAAAAAGAAAAGGGAGACTCCCATTATAG  
AGAATCTCCCTTGTATGTCAAGTGTATGATTGCATCCAAATTTTGCGCTGATCTGCATC  
TTCATATAGAGCAAATCGAATAGCTCTTTATAGTTTTCCGGTAACGTGATGATCTCCAT  
GACAGGATCGTTGATCACGCGATGATAGTCTGATTCTGTGAGCGATGCTAAACCTTTGAT  
ATATCGAATGTTGTAACCTTTGATATTATCTCGGTCGTTCTCGAAATCTTCTAGGTCATA  
ATACCATCGAACATCATCACCTTTCTTTGGTTCCGCAATGATAATAGGTGTTTTGATAAA  
CCGGATTCGTCCATCTTTCGAACAATTCAGGCCAACGTGCAAAGAAAGAGATCAGACTAGG  
TTTAATAGACCCGATCCCGTCAGTATCAGCGTCTGTCATAATCGCAATATTTTTGTATTG  
CATAACGTCCAGCGCATCAACACCAAATTGCAAACCAGTGATCGCCATGATGTTAAAAAT  
TTCGGCGTTCTTAACGATCTTTGCCTCTGGTTGTTCCACGTTGTAAGAGTTTTACCTCG  
CAACGGGAAACCGCCATGTAATCTTGATCACGTACAGAGATCAGATAGTTGATCGCGGA  
ATCACCTTCGTCAAAAACAGGGTAGTTTCTGCGTCAGTTCCAATAAGGTTAGCTTTAAC  
GTGTTTTGCTACCTTAGCCCGTTTCGCTGCCTTTGCTGCCTTAGTCGCTGCCGCTTTATC  
TGCTGCCTCTTTGCGTGCCAGGACTACAGCAATAATAGGCATGATAATGTTTTCTTTCTT  
CGCAATGACTTTAGCCAGCTTTTTAAAATCAAGATCAATATGACGCTTGATATCACCAGT  
CGGGTTAGTCAAGCGTTCTTTTGTCTGTGAATCAAACGAAGGTTAGGCAATTCACGAAC  
AATAAGAATACAGGTCAATCCAGATTTAACCGCAGCTTTAGTAACATCAACCTTATATTC  
TTTCTTGATTTCGTTTTACAATCTCTTTCACAAAGATCATCTGTACATAATCAACGTGTGT  
TCCCCCGTTTTTGTAACAGACCGTTAGCAAAGGATACTGATTTAAAACCTTCTCCCTC  
GACCGCAGGAAGTGGGCAAGTGAAGTTTATCTTCAATGACAAACGGATCATCATT  
GTATAGTTTAGCATAATCCTTGAACCTACTAACAATACGTTTACCATTAACCTTAAACGT  
GATCTTAGGAAATATTACGCTCAATGATTGCAGACGATCATGAACAATATCTAAAACAGA  
GTTGTCCATCATATAACCTTCGAAGTGGTCGAAGTCTGGACAAAATGTAACATTTGTTC  
CTTCAATTTTGATGGTTTCGATGACCATGTGATATTTTCAGCACCGTTTGTACATTGAAC  
GGTCATTTCTGTTTCGCCGTCACAGGTACACCAGTAAACCAATCGCTAAAGAAATTTGA  
TAACGACGACCCAACACCGTTCATCCCTTGCGTTAATCGATTGGTATCATCAAAGTTAGA  
CCCTGCTTTTGTTTCGTGTCATGCGGCTACAGGTTGCGGAATCTGCGTACCCTCTGGGGT  
AGTAACCATATGTTGAGGAATACCGCGACCATTGTCTGTTACCGTAACAATATTGTTTTG  
GATATCGACGCTAATCACATTGGCAAATTCAAAGTTAGTGCGGATCGCCTCGTCTACAGA  
GTTGTGATGATCTCATCAATGATTTTAACCGTCCAGGAACGTATGAAATTTTTGTCCA  
TTTACCGAACAGGAAACGTTGATGTTCTTCGTAAGTTGTTGATCCTATATACATTCTGC  
ACGCTTAAGGACATGTTACGATCAGATAAAATGCGAAACTCACTCATTATTAACCTCT  
TCATAACATAACCATAACTTACTGCAACCGCCACAAAGACGGCTGCAACAATCATATTA  
AAATTGAGTGATTGTCAAGTATATGACTCATGACACGCGCACATTTTTATCATAGTACC  
GCCATTAATCCCGCGCGGGGAGTTAATCCCTGTTTGCATTCTTTACCACATTCAGGGCA  
TTCTGCCTTTTCACGCTCGGAAATTTTGCGGATTTTCTGAAATTGACCGTGTCTTCA  
AGAATAATCGTATAATGGCATATTATCCCCTTTGTTTCTTAACTGAATTTGGATCTGGAT  
TTTCTGGTAGGTCTTCCAGACCCATAGCATAACGTTGTGCATAGATTAGCATAAGAATAT  
CGCGAGCGCAATCATGAATTGCATCATGTGCGATAAAACCATCTAGCGTACCATTGGTA  
ACGGACACTCACACATCCCGCGATGCATCAATGTACGCTCAATGGCGGTGCGAACATCTC  
GGATATTCCAGAATCGCACAGGTTCAAGGCTGAACGTCTCTCGTGTATTGTGTGCACGGC  
GGATCATATCAACTAGTAACGGAATATCAAACGCATTACCGCGTGACCACAATACGGATT  
TAACCGGATCTACTCTACGGCTTACAGAAATGCGTTAAAACGCGCTAAACCTTCTTTAG  
TTGATACTTCCGTACCATTTGTGATTAATTGCTTTCTCATGCCTTCTGAGGCGGTATTCT  
TCCACCATTCAACCACACCATGATCAAACACCCTTACACCTTTCTGGGAAGGAATATCAA  
ATTTTACCAGAAAGGAATTGTCAACCAGTCTTTAAATGTAGGTGGATTGTGAGGATCTT

CTTTAAATCCGATTGCCGCCATATTGATAACCGCCCCATCAGGCGGATAACCTAACTTT  
CAAAGTCAATCATTAAATCCACTGGAAGCATTTTAAATATCCTCCGCGATATGCCGGAAC  
AACTCCAGATCGTTTTTATCCAGAATGAAACCGCTACAATCAATAATCCCGTTACCGTAA  
TTATCGGTTAACAGTCGTTCCGTTGCCATGTATGCGCGTACTTTGTTGTTAAAATTCATT  
ACATGTTGTGCATAGTCACAATGAATCTTTTGACGGTTCACGCGACAATTGATTGTAGA  
TGTATTACATTAGCCACATTATTAATAACAACCATATCAAACCCTCGCTTAGTGAATA  
TTCGATCATTTTATTGATACATTACAGCTTCACTGTCGCCGGATACGTTCCATCCATAATG  
ACCCCAACTAAAACACATGGTAACAGTTCATTGTGACGGCGTACCGTACATCGTCAAA  
TTCTGGGATACTTCGCATAATCATAATAATTTCTCAAAATATAGTCTACTCGATACCGCG  
CACGGGTAACACCAACATATAATAACTGCATTGCCAATTCAAAGTCAACATTGTCTGTAC  
ACATGCAAGGAGTATACAGGAACACGCGGTCTACGCTGATCCCTTGTGACTTATGAATGG  
TGCAAGCTGGTAATGCTTTTACATTCAAGAACATACGTTTCATCGTCCAGAAGGAATCCC  
AATCTGGTTAAATTTTGGATTCTCTTTCTTCATTTTCGCGATATTGTCCAGCGACCGTAT  
TCAGATAGATAGAGAAAATGTTCTTCTGACGTTGTTCTGTTAGAATGTTGATTTCTACTA  
AATCCGGTTTATCTGTAGTGATTCTACTGCATCTAAACCGACTTTCTGATTTAGGATTT  
CTTTGTCTTCGTCATCATCGACGTTTCCACTTTCAGAGTATAGCCTAAAACCTGGTTGCG  
GTTCTACCCCGTGCAACGTAATGTAAATTCACGCGGTATAACCTCTTTAACCCGGATCA  
TCTCACCATTGTTAAAATAACATTGGGAATTTTCTTCCC CGGTTTCATCTCGCAGATATT  
CGATCAACGGTTCCTGAGTAACCAGAATTTTCATCTACAATCACTGGTTCATCGGTGTTAT  
AAACGCGCTTGCGCACAAATTTCAATTGAGTTTTTCGACGCTCTTGTTAGTGTAAGCCAGAA  
TACGGTTTTCTAGAAGGTCTTCCGGCGTTTTAACGGTTTCGAAATAATGCTTCATAAACT  
CCGGCAGAGTTGAGCTATGGAATACACCCTCGTTACCGCACTGCTTTTCGAATACCCATT  
TACCGTTACGGACAGCGGTGCGCCACATCAATTATTGGTGCATTGGACCGTTTAACTCTCTG  
TGAGTTCTACATTCTGGAATCTTTCATCGGTGAAGAAAGGAGAGATCGACGTTGCACCGC  
TCGGATCAACTGGTCGTAACCTGGTACAGATCACCCACGGCAATAATAACAATTCGACCGT  
TGATACTCTTCATGAGAATATCAAATAGTTTCTTATCGACCATACTCGCTTCATCAACAA  
TGATGATCTGAACATCATCTAGCTTAGGAGTATCTTTTTGTTCAAATACTTGAGTATCTT  
CATAGTTGGTCGGGTTAAGACGCAATAAAGCATGTAAAGTAAATGCTTGACGACCTACCG  
CCTTACTCAAACTTTTTTAGCCTGGTGGGTAGGCGTTGCCAAAACCACACCAGTTACAC  
CACGGCGGACCATTTCCCTGAACAATGAATTTTCATCATTGCGGTTTTACCAGTACCCGCCG  
CACCCCGGACCGTTGTATGCTTCTTTTGTTC AATGCGTTTCATTAGAACATCAAAGCAT  
GTTTTTGCCCGTCTGTTAACATATCGAAAGTTAATACTCTGCTCATTATCCTAAAATCCT  
CACCTTGCGAACACAGATAGTATTGAGTTCTCGCCGTACCCGTTCTTTTTTCATATTCAGG  
AATTTTATATTCGATACCATCCCGAACAATTTTCAGAAGACCGGATTATACCAAATTTTCG  
TTTAGGCACAACCTTGTATTTTCGGTTCACCTGCCAATAGACTCTCACAATAATCTATCTG  
ATCACACATTGACGCTAACGCAGCATCATGTGTTTCGCAAGTTAGGACGCGACCTTTTCGC  
GTCCACTGAGTATTGAAAGAATCCGTCTTTATCACGATAACATACAGCAAATACATGCAT  
TATAAACCTACCTTCGCTTTCATCAATTC AATCCACGACGCATCAATCGGAAGCCCGTAT  
TTCACGCGTTCTTTTGTGCTGGCGTTAAGTTCTCATACTTAGAAAGAGATTCAATCAA  
ACGCTGGTATATTTTAGCACGATTTTCGGTATTGTTTGCAATAGCCTTAAGTTTTCTTCT  
TTCTTGTTGATTTTCGCTAAGGGCTTGCTTGAGATCTGCAATTTTCTGATAACGTTCTTCC  
ATACGGGAGAGAGTATTTTAAATCGCTCGCTCGGCTGCCTCTGCTTTCTCCGGTTCGTTG  
TGCTTTTTATGGCGCTCGATGGCTAATTTCTTTTCTTCGATTGCCATTTCTGATTTTTG  
ATGCGATTCTCGTTAAGTTTCGATCCACTCGATGTACTTCGCACGTAGGGCAATTTTCATCA  
TCAGAAAGTTTACCGTTAGTTCCTAGTTCCCTGGATCTCTTTAAGAGATTTCGATAGTGTGA  
TTGCCACGGAAAGAATTGTATTTACGTTTAAACCGGAATTACATTGCCATCAACATATCCC  
AGATTGCAATCAATGCGCTCTAAGGAGAGTCCATCATCACCTTCACCGAACGCTTCACCT  
GAATAGGCGCAATGAGTCTGACGGTAAATGTTACGCACAGTGACTAAGCTCATAGAGAAG  
TCTTTGTTGCGACGTGAAGCGCCAGCCATGATAGAGTTCAGACGGAAAACAACCAGCGCC  
AATCTTCGTTAGATTTAAAAGCAAACAGTTTCATAATTGATTCTCCTTAGTTGGTATGT  
GTGTATTATTGTCTATCTGGTTTGTCTGTCAACACTTAAATTAAGAAAATTTGTAAAT  
CTCTATCAGATCGCCGTTACACGCGTAAACTTCTCGATCTCATCAAGGATCATGGTCGT  
CCCTGTCTTGATATGCACTCGCGCTCATCTGCCAACATAGCATACAAAGACAGTCGAGT  
AGTCGGATTGTCATACTCTTTAGACACCCTCGATCAATAGCATGTTTCGTAATAATTCAT  
GCAAGGCTTGGTAGGTTTTATTGCAATAATCTTTCTGTTGCATAAACATCGGTTGCAA  
GTCCTCTGCTGTTGATTGCAGTGGCGTAAAGCTCATAGGACGCTCTACAACGAAAGAATC  
ACCCACAATTAAGGTATCCAGCTTACGGCCTTCTTTTTGCTCACACCGCGATACAAGGC

TTCATGATGCACTAACCGCTCAGTCTTTTCAATCAATCCATTAAGGATCGACATATCGAT  
ATTTTCTTTAGAGTTCATCACCTCATCAATGATGTTAAGTTCCTTCTGGTGTAAATTGCAT  
AATAAAAAAGCCTCCAATCTTTTCGACGGGAGGCATAATAAAACCATTATAGAGTAGTGTC  
AACTAATTTTTAGTAGCCGCGTTCTTGACGGGCGAAGTTTTTCAGCATTTTTTCAGATAGTA  
CAGAATAAAGAGTTCTTGAGCGTCAATACCCAGCGGGATCATCTTTGACAGAATGAAGTG  
GATCGCGTCCACAAATTCAAATTTCACTTCAAGCTGATCTTCCGGTGACAGTTCAGAGAA  
TTTACGCGCTCGCGCTTCTCCGTGGTCTTTTTTCCACATTTTCCAGATTGCACTTGCATC  
TTTACCATTGGACATTCCACCCAGCGATGTGTAAAGCTCTCGTGTTCGTCTGCGATAGC  
GTCATCCATCCGTTGCATCCAATCCAGCATTTACCCGCAAGTCTCTAGCTTAGTTGGATT  
TGGGACCAATCAAATTTTTTCGGATAATGCAACCTGCAAACCAGTTTGCATTTTCGAGCAT  
CACCTGAAACGGATCTTTACCTTCTGCAATCGCGTGATGATATGCGGCGATAGCCGCGTT  
AATATCTTTTTTCGTTAACCAGACCAGCACAGAATTAATTTCTGACATATTCACCTCATT  
AATTAATAATTTACAATATTTTCATAAACCGCATTTTAGCCATCAGACCTTGTACGGTGTTC  
TCTTTGATATATTCCATGATCTGGTTCGCGTGTAGCGCCCTCGTCTGAATCATGGCGTTA  
ACGTCTTTAGAAATGCCACGGGCGAGGATCCACAAAACAATCTTTTCCCCTGCATTGATA  
AACTTTTCCAGTCGGTGCATTGTATCGGCAGACCGTGGTTCGCATCAAGTACAAACACT  
CGCTGGTCTGGGAAAGGGATTTTCATCTAATCCCAACGTACCGCCAGTAATTGCACACCCG  
TTATCAATAAACAATGAATCGATCGGACCTTCTAAGAAATACACTGGTTTACTCGGATCG  
GCGCGTTCAAGACCATAGACCTTACTCGCTAACTCATGAGTTTTAATCGTCATATATTTG  
GTCTTTCCGTAATCCTTTCTCAATGCTCTCCCCTGAATGGATTCTATCTTGTTCGCGG  
TTAAAGATAGGAATCACTAAACGCGGTTTCAGGTTGTGGATTCTTGAAAGTATCAGCCTTA  
ATGTGATTTGCTACCTTTTGCCATTCTCTCGTGAAATACAGAAGATCCCATTATCGTGA  
GGGATGCAACGATCACTGACATACTTTATTATAGGATGATTAGCCGGAAGAGTATCTAAT  
CTCTCGCAGAAAGGCAATGTTTGCATTTCTTAATCTCCGGCTTTTCTACCTTTTTTCAGT  
GGCTTGAACGTGGTGTCTTGTGGTTCGCTTGTTCCTTCCGTCTCTCCATAAGCCATTCC  
CTGAATAGGTCCGGCTTATACTGTTTGAGAAATTCACCTAACGGCTGATTGTAGTTACAG  
TTGAAACAACCACAACGCAAACACTATCCTTATAGGTATAGATACGGAATCGCGCTTGAGTA  
TGATTTTTCTTTGAGTCACCGCAGATCGGACAACACTACAGACCAGCGTAAATGAGCTAGTA  
TGCAACCGTTTAAAATTTTCGTTTCGCGTATATGGCTTTTTCCGCTATTTTCATAATCTGCG  
TAGTAAATCATATTAACCTCTTATAACTCAAATTTTCATGAAAGTTCACACTTTTCATTT  
TCATTCTCTCCGTTTTTCATCTAAGCCAAATTTATAGACACTACCATCTGGCGATGTGTAA  
GAGAATACACGAAAACGGCCTACCGGGTCAAGTTCGTAAATTCATATTCTTTTCCGGCT  
TCAAAAAGTGCATATGTGCTTTTAAGACATTTTCATCGTAATCATTTAAGCGCCACCGACA  
ACAGGATGAGAACTACACCAACATACATTGTGATCTCGGATAACTTTTTCTGTTTTTGT  
TGTGTCCAGATAATCCGAAAACAACAACACCGACAATAGCGGACAGCAAGCCAACGATAA  
ACATGATGATACTAAGCACCGTCTTTCTCCTTTTTGCGTTTTTCTTTACCCGCTACACTA  
GGTCCACGATTGGTAATAGATCCGCTCGTTTCACCTGCTGCGATCTTCTCAGGATTGCCG  
CCAGCATCGCCAGCGGTCATATCTTCTTTGAGTTTATTTTCTTCAACAAACTGTTTAAAT  
CCAATCATAGAATAATCTCTTTTCAGTAAGTCAACAATCTGGTCTTTTCGTCAGTTTATCCT  
GATTCTCTACAATCTTGATAACACAAGCATTAACATCTTTTCGAGTCACGCGGGAGATCG  
TTTTAATACGATGAAACGGTTCGTAGAAATATACTGCTTCATTATAGAGCGCAGCAATTT  
TTCGACGCATTTGATCTTTATCTGACAAGAAAACAAGTGCTGTTTTATGACCTTCTACAC  
CCGCCACGTTATATAGTTCAGCAACACCCAGCGACCTTCCGGTTCAATCATTCCGGCGT  
GTTTACCGTCGATAAAAATAAGAATATCTCCGTTGAATGCGGTTTTAATGCTACATCTT  
CCGGTGAATCATATTTTTTCATAATATAGTCTCCTTAGAGTTTCATTATAGATCAAGCGA  
ATGTAGAAAGCAAATGTTTTGTTTCTTTTCAGTTGTCTTTCAAGATCTTTGCGTTTTCTCTT  
TAAGTTGCATTTTAGCATTATTTTCGCTGTTTTTCAACATCTTTATCGATGTGCTTAGTCC  
AATTATCAATATCAGAATAAGTTGGCATAACCAATTCTAAGCCTAATGCGGTTGGATACA  
GGGTAACAGTCCATAAACCGCTAATCTTCTTAAACAGGTGCGGGTGTAGTGTACTACCTA  
CATCTTCCGGTGTCAACTCTTTTTCTTCTTTCAGTGGTGGGATCTCGTCATATGGTTCCA  
GTGCATTTACTTTAATATCAGATACCTCATCAAAGAATCCGCGTACATCCGCAGGAAATA  
CACAAGCAATTTCCCAACCGTGATCACGCAGAGAAGTAATATTTTTCACTCCCCACCAT  
GTGTGATGATTGATGTGACATTGCCATCAAGGTCCACCGAATTTACGAGAAATGGCTTAT  
CGTCTGTCAGATCATTATAAACTGTGCTTCGGCTGTAGTCATCTCCAGAAACAGATCTC  
GGATCGGACGACCATCAGGTGCGTTACCTTCTTGGAGAGTATAAAAGCGACTTACGATCC  
ATTTTGGCGGTAAAGCATTAGCGATCATGTTATATCTCCTATCAAATCATTACCAGCGC  
CCCACAGGGCGCATTTTATTAGAAAGTCATGTTATTTGCTAGCTCGTCGAGTTTTTCTCG

TTTCTCGGCTTGCTGTGCGCTTTGTGGTTTAACTTGTGCATTCTCCTGATCTGCGATCTG  
GTTTGGTACTTCATACCAACGCTGATTGCCTTTTTTTCACACCAACGTTAAACCGTGAATA  
ATAGTTCTTGTACCGTAACGAGACTTGATCTGCTTCATGAGTTGAACGCCCATTTTAGC  
AAGGTCTTCGGTCTCGATAACACCAACATAAAAATCGGCTGTAGCCGGAAGACCTGCTGA  
TTCAGCGGTATCACTCATGTTAAGGTCGGAAGCATCCCAACCCGCGCGGGTAGTCTGTGC  
CGCAGTCCAACCAACAACATCCCCTTAACAAAAAATCCTCGCAGTTCTTCCGCAATCGC  
CTTAAGTGTGTAACACTATTTTCAGAGTATACACGCAAGCGAGACGATGCGCAAATCCC  
CAGATAGTCAACAATCACAACATCAGGTTTAACTGTTTCTTGAGTCGCAATTCATTCAT  
TAACGCCTCAAAGTGATTGGAGTTCGCGCCACCAGTAGGATACTGCTTGATCATCAATTT  
TCCAACCGGACGATCTCCGATCTTCTTATTCTTAACACGCTTCATACGTGCGGAATATTC  
CGCAAAGAAACATTACCATTATCCAATTCATCTAATGTAATGTCAAGCAAGTTTGCCTC  
GATACGTTTGGCTACGACATGCTCTGCCATCTCCATTGAGATATAACAATACATCATAACC  
ACATTCATATAATCCGCAGCAAGAGAACACAATCCAAGCGATTTACCAACGTTTACACC  
AGCAAGCAACACATTTAGCGTTTTTCTTCCGCCCTCCTTTCGTGATTTTATTCAACAT  
CGGCAGCTTAAACGGGATCTTATTCGCCTTAGTCTGATATAGCAAGAATCGTTTTTCAA  
GTCATTAACAGTCATGACCTACATCAGAATCAAACGTAATGGATAGTGCTTCCCTGCAT  
GATCTCAGGAATAGCACCTCACTCGGCAATTTCTTATTCTGTTTCTTTTTGGTAGTTG  
TGCCTTCGCCTGAATCTCTAGCGCCCGTGACATTGCATTATACATGGCACGGTCACGAAT  
AAATTTTTCGGTTTCTTCAATTAACCAATCAAGGTCTTCCGGTGTATTCTCAAGCGAATC  
AAGAAGAGTTTTAGCCCTTCATATGTTGTCTGATTGCCTCTCTCCTTGCTAAAGCAAT  
CTGTAATGCAGTTGGCGTAGGAATGTTGGAATATTCGTCTACGTGCTTTTTAATCAGCTT  
ATAAATCAGTTTTTCTTCGTCTTCGGTGAAGTAGTCCGCTTAAAGGTGAGGCCATACATT  
CGTAAAGAATGCGCCATTGTAATCAACTGTGAAAAGATAGTTTTAATCATACATAGCCC  
CCAACCTACACGCATAACAAAGGTCTTGAGTTTATAACCAGAAAGTTTCTTTTTTCAACTTT  
TCTTCTGCTTCTTTGATCTGCGCGGTTAACGCCTTAAATGACGTGTGGATATAACCACATCA  
CGATCTGACGGCGTGGAGTAGTCGACCACAATACCTTLAGTGTCTGGATCGTATTCAACA  
TTATGAATATAGACAATATGATGTTCTCCCTCTTCATCAACAATTATCAGTTCCTGGATA  
ACTGTCTTCATTGCTTCTTGAATCAAGCTGTGTGCTTCTTCTAAACTTGTGGTTTTCTTA  
TCCATAATATAATCCTCTCTAGATATGAAAAAGGGGCACGTAGCCCTTTACTACCATTG  
TTATGCTAACATATCTTCGATTTCTTTGTCAACTGCTTCGTGCTGATCACTTGCCCCAG  
CTTATAATGATCGTTGATTGCTTCGTTAACTTATCGTTTGTGCAAGTGGTTTTCCAGAA  
CTCAATGCTATTGGTTTTCTTTAGCACGGAACCTGCGTTCCTTCGGTTTTCCATCTCTCCGGT  
CTCGGTATTTAGGATTGAACGAGAATACCAGCCGTTTGACGGTTTCACTACCCAGCCTAA  
CTCTACAGCCAATTCAGCAAGCCGGAATAAGGATCGATGCCACCGCTAAATGTTACGCT  
AATCGGGAACCTTAGATTTTTCTTTAACGGTTCGTGATTTTTCCGCATTCAGGATAAAATC  
ATAACCAGTAATTTTCGGTTCCTTCTTTCTGCTGACGACGACCAATAATGAAAACCTTCATT  
GGCTGAATACATCGCGCCCGTACCGCCGGACATAACGGTCTTACTAAACATTTCTTGCGT  
TTCGTAAGTGTGGTTAATAGCGATGCACGGGATATCATTTCATAGTCAGATACGGCGTCAC  
CATACGGAACAAGCCTTTAAGTGCTTTAGCTCGCGTCATATCCTGTGCGGATTTCTCATT  
AATCGCGTCTTCAACTTCTTTTTTACTTGCTAAGTTACCGATTGAGTCAATAAAGATGAT  
CACTTTATCTTCACGGGTAATTTGCTCAAGCTGGTTCATGATTTCAAATTTAAGTTCTTC  
GATGTTCTTGATTGGAACATGCACCACGCGATCAGGATCTACACCCATAGATTCAAGATA  
AGCGGATGTAATACCGAACTCAGAATCAAAGAACAAGCAAGCCGCATCGGGATTCTGTTT  
CATGTATGCACTAACACAAGTTAATCCCATGTTTGATTTAAAGTGCTTAGACGGACCAGC  
AAAGAAAATTAGACCCGATTGAAAACCTTTTTTAAAGATCACCGGAAAACGCAATATTCAG  
CATCGGGATCTTAGTGCGAGTATTTGTTTTTTCGTTAAAGAAGCTGGATTTAGACAGTAC  
CGCAGTAGTTTTTCAGGGTAGAGTTCTTTTTTCAGTTTTTCCAGTACAGACATTATTAATAC  
CTCTATTCAGTTAATCCGTAATACTTTAATTGCTTCATTGTTATTCGATCTTTGTAATGC  
TCTTGAATTAACTTTTTTCATCGCATCAACATCGATCGTCACAAATACTTCGTTGCTGTGA  
TTTTCCGTGAACCTTTCTTGAATGATCTATGCCTTCCCTCACGTTTACGTTTAAATCTTTTCA  
ATGTCTCTCATAGTATATTTCTCACGTTGGCGGGTATCGTACCCAACACCCGCCATTAT  
ACACACTTTATCTTAAATGTCAAACAGGTCCGTAAGCGATGCCACTTTTTTCATATTGCAG  
CTTTGCAGCCGTGGTAATGTTCTCAAGTGGTTTGACGAAAGTCTTATTAACAACAAGG  
CCAGTCCAACCACTTCAACACCTCCGATTCAATTTCTGGAGGAATACGAGTACCAGACAA  
CCAACCAAAACAGATTTCTCCAACCGGATTTTCGATCTTTAAGCGGTACAATCATAACCTT  
CTCGCCTTACGAATCGGATCTAGTCCGAATTTTCGAGCATTACGATTATAACACAATAC  
ACTCTTAACCGCATACGGACAACCCTTAAATCGGATACCCGTTTGAATCGCTGTATTTCTG

TAGGTTGTTTGCAGATGATACCGCAGCAACCTCAAGATAATCAAGTTTTCTAAATTCTTG  
CTCAAAAATACCGTAGTATTCTGCAATGACTCTTCACCTTCCTGCAACATACGGCGAAT  
ACATTCTTTCAGTGATTTCTGACATGCTTTAGGGGTGGAGCTACGTTGCGTTTCCAAGCC  
CATGATTTTTAGCTTAGGTTTCAGCAAAGCGCGTTCCCTTCCATATCCCAAACATTAAGAGC  
ATAACGCTTTTTTGCCAGTCCAGAATCCACCGATAACCGCAGATTTCAACGGAGGACCAGC  
AATTGCCTCACGGTCCATAAACATCAAGTGCTCATAGTTGTTTCATGTACTCGCATAACTC  
GCGATATCCCTTGTCGATAATAGGTTCCATTTCGATGTTTACCGAAATTATCAAGGAAGTC  
AACAAAGTTTTTCGGTATCGTCGAAACGGTCTTCCCCGCCAACCTTATCAACAACATTGTT  
AACCAGCACATAAACGGAGTTCAGTATCACAATAACGAACATATGCAAAAATCAGTTGTTCC  
GCAAAGCTCGTTTAAGTATTCGTTAATCTTACGCTCAATCCACTGAATTGCAAGCTGACC  
GAACAGTGTGATCGCACTAGCGTTACGGAGATCATAAAAACGGAATTTAGGATTCCCCAA  
CGCACCATAAAGGGAGTTGATCAAACTTTTCGAGAAAGCTGGTTTGTATTGCACAAGAT  
CGACTCGTCTTTACATTCTTCCAGCAATTTCTCTAAGGCATCTTTGCTCAATTCAGAAAG  
CATCGATTTAAACGCTTCATCGAAGTCATGACGCACTTCAACGCTATAGCTAATGGTTCC  
CCCATAAACATGATTTTCATCGTGTAGAATCGCTTTACAGAGTTCAGCATTGCGATCACA  
TGCCAACATCATGTTTTTGTACTGCTTACGCTGGTCAAATACCTTTTTAATCTCAATCGG  
TACGATACCATGAATATCTTTTCGATACATCCATCCGTTAGGCGAGCAAGAATACTCATC  
ACTAGGACGTGGTGCAGTTTTATTGATATACTCGTGCATCGGTGCAGCATCAAAGATCC  
AGCGATTGTTTCCGGCGAAATGTTGACCTGACGGATGATTGATGGATACAGACTTGTTAA  
GTCAAAGCTCATCATCCAACGGTAAGCATTCCGGCACAGGTTCTTTACAAATGCGCCTGG  
ATACGTCTGCTTAGGCTGTATCTTATTTCCGGTACTACTTTACCCTCAGCTTTCAGAGA  
TCCGAAGATAATAGCATCCCATACTTTCATCGGGTTATAAACATGGTTAAATTTAATCTT  
TGCATAGAAACATAGACTATACACAAGATCGATAAATCCACGCTTTTTATCAATCGCCAG  
CACACGATCAACGTCGCCGATGTTATAATCGATGTAAAGTTGATGGTTGTCATCACGCAA  
TTTCTTTAACGGACCATCATAATCAACCTTACCGATTCCTGTCTCATATTCAGCAACATA  
ATCTAACGCATATGTTGGTTGAGTCGTAAGCTAAATTTCTTGTACAGGTCAATATAATC  
AAGGCTTTCGATCCCCATGATCGTAAATGCTTCACGCTCGTTGCCAAAATCATCCTGTGA  
GATTCGGGATTTAATCTTACCGCACGGGCTTAGACGGTTAGCGGTTCTACTTCCGAACTT  
ATTACTGATACGTTTAATGATATATGGAATATCGAATGTTTCTGTGTTCCAGCCAGTGAA  
ACCAACGGGTTCGGTTTTCTCAAAGAATCGGATGTATTCTAACAGCAATTCATCTTCTGT  
GTCATAGACGTTATAAACAACGCGCTCTACAATATCAGGTCGAAGAATAGACTTGCTAGA  
TTCCCAGATTTACCCGTTTTTTCTTTCAAATCAAATACAAAGAAACGATCATGTACGGA  
ATCATAATGCGTAATTGCATCGATAGGATATTTTCGCTTCTTCTGGTTTAGGAAATTCTGG  
GGCAGTGACCTCGATATCAACCCATGCTACACGGATTTTATTTCCGGTCATATCGAATCTC  
GCCTTTATACGTATCAGACAGATAGGAGATGATAAAAATCATCCATCCCTAGCGCCTCTTG  
CCCCATTTCTCCCATCTTTTTACGCCATTTGTTGGCCTCATTTCATAGATGGGAATTTTTT  
AGCAATGCAAGGCTTGCCATAGATATCTTTATAATTCGTAACCATAACCAGGCGCGGCATG  
ATGAAATAATGTTGGCGTATATTCAACGTAACGCTCTTGTTCCTTGTCCAGCATCATCAAT  
ATAACGCTCGTAGATCTTATCACCCACTCGCTCACATGACAGAAAATACATAATATAAAC  
TCCTTCATTTACGAAAGACACTCATTATAGGGGAATCGACCTAGTTTGTCAATACCCCTA  
TCCCATCAGTATCTTAGCGTCCGATCTGATATTTCTCGATCAGCGTCCACTCTTCTTTCT  
GTTTGAAAGACAGTACACGGAAATTATTA ACTTCGGTAGTTTCAAATCACTATCAATCA  
GGGTACACAGATTCCACTGCGCAAGAAGTTTTGCAATGTTATTACGGCGTAATTCATCTT  
CCCACGTCATTTTAACTACGACCATCTAATTTCAACAACCTCTTGAAATGAACGATGT  
AATAGCGCCCCTTCTTCTGGAGAATATGACAAGACTGATACAGTGTCTTGTCTCGATTGT  
TGGCAATGCCGCAGCGGGTTAAAGTCTCCTTAATTTTAAAGGAAGTTTTTCAGGACTAATCA  
AATTAATTTCAATCATTTTACCACCTTTCTATAATCTTTTTAAGTCGTTTCCTTTCTGTG  
TGATTCTTAGTAACACCCGCCAAAAGTTCATCGGTTCGCATACGGTTTAAATATGCTTCAAT  
AACTTGTCCATATATCCCTTTTCATTAGCCAAATCGAGATAAAACCGGGCGTCATCCATA  
TTTACACAATATGCTTTCGCCACTGCCATTA AAAACCAATTTTTGGTCCAATTCTTCTGTT  
AGTTTAGCCATTTACCGTATCGTTTCCCCTTAGAAATACTCTGTAAGAGATAATCAAAA  
TGCATTTGATCTGGGAGGCCATGACCGATTAAATTCATCACATACGCGCTATATAGGCAA  
TCTGCGTGCTGGGAAAGAGCGGTATTAATCCATCTCTGATTGTATGCAGAATTATTTCCC  
ACATTAACGCGCTGTTTATCTAAGGTGATATGATCCATCAGAGCAAATAATGCATTGTCG  
GTTTTCTCGGTGAATGTATCCGCTAATTCAGACACCTTTTCCCAATCACGAGAGCGCCAT  
GCAATTTTCATGCTCGTTTAAATTGTGTATCATCTTACCGAAAAATTGACCTAACATTACA  
CGAACTCCAATTCAACCATTAATTGCATTAACAAAAAGACAATGTGAATCTCTTTATCAG



CCGCGTGCACAAACATCTGATTATTTTCACCGATAATCTCAGTGAGACGAATAATAGAAG  
CTGGCTTAACTTGAGTATACAACCTCATTATAAAGTTTCTTGACAAATTGAGCGTATGTAT  
TGGTATAGCGTGGCGCGAGTTTACGCACATTAGCAAACCTGTTTAGTTTTAAGTGCTTCCA  
CCACATCGGTTACTTCGGTATTGCTACTTTTCGATAACCATGCTCAATACGCCAGCATCAA  
TTTTACCATGTTTAGCGTAGCGATCCAAAAGTTTCATTACGCGCCGGAAGTCTGGGAAGT  
TCTGTTTAAACCAGTTCGGCTAATACGCGCATTTCTTCGACTGGCACACCTTCTTTATCAA  
GAATTGCTTTACACCGGACGATCATTTCTTTTCATCATGCGAAGCTGATCATCTTTAGTCG  
GAGATCCAAACGTGATGGGGTCAAATCGAGATCGTAACGCTGGGATAATACCTTCTAGAT  
CGTTTGCTGTGATAATGAATGTCACGTTGTTTGAGTATGCCTCAGAGAACTACGCAAGT  
GTCTTTGAGCATCAGCTAGCCCCGCTCGGTCATACTCATCGATAATAACAACCTTTGCCTT  
TTTCTCGTTTTTCTTCATCGAGTGATACTCTGTGCAAAGCGTGTAATCTCATCGCGGA  
TAAAATCAATCTTACAATCTGCGCCGTTAACAAACAGATAATCAACACCCACATCTTAC  
AAAGCGCCTTAGCAACGGTTGTTTTACCAGTACCCGGCGATGGGCTATGCAGAATCATAG  
AAGGGATTCGGCCTTGCTTAAACAATCTGCGCGAAGATCTTTTTATCTGCTTCCGGCAGAA  
TACATTCAGAAATTGATTTTCGGACGGTATTTCTGTTCCCACTGAAACTCATTTCATTAA  
CACTCAGCATATAATCACCTCTCACAAATTACATCATTAAAACGGGGAGTATTTACTC  
CCCACAAACATTATATTAGTCGGTGTAGCTGGAGTCAAGGTCACACGCGATCATATAAGA  
TACGGTTTCACTTGCCAGCCATACAGCCTTACGGCGAGTGAAGCTAAGTTTGTAATCGCC  
GAAGTCAGTAGCAACCAGTTTCATGTTATCTTTACGAATAAAGAAATGGAAGTCTGCTGT  
TCCTGTATATTCGCCCATATCAAGACAAAACATCTCATTAGGATTATTTTTGTCAATCTC  
TTCCCAACCTTTGATCATCAGACGACCATCAATCGGAAGAAATTCAAGGCGATCCACTTT  
AAGCTGATTGCTCATTTCATAAGCTGTTTCAGATCGTCGTTGCTCAGTTCGTAATCTAC  
ATCGCTTGCAGGTGGAGTAACTCGGCCTTTCGGTGATACGATAGCAGCAGCACTAGCACC  
AGGATAATTAATTTTCAGACGATCATTAGACACACGAATGTTACCAGTGCGGTTATCAAC  
CGTAATATCTGCTTCATCGCCTACCAGATTCAGAATACCCAAGAAAGAGTTAAGATCATA  
GATCCCAATTTTCGTGTTCCAGTTCCTTGATTTCAGAGTCGCTTACCATATAACAACGTTTGT  
CATGTTTTTGGTGATCAGGACGTTTCCTTTTTTTCAGGATGATACCTGGGTAAATAGCGGA  
AAAGTTTTTCAGGGTAGCAATGGTTTCTTTAGTCAGTTTCATCAAATCACCTTTATCATG  
TTAATCAATTAATTACGGGTTTACTTCGTGCTCATTTTGAATCTTTAGCATTCTTTTCGAT  
AAATTTTTTCTCGGCTTCTTGTCGGATGAGTGAGTATACTTCAATCCAATGTAAGCTGT  
CAAGTATTGTTGCAGAGCATAGACAGTAACAGGATTCTTTGCGGTCTTTTTGCCGTCGAG  
ATATACCAGATCACACGAACATCAAACGCAAGTTTACGACGAATCACATCATCAACAAA  
TTTATCTAGGACAAAATACCACTCAATACACTCTATCCCGTGACGGTAGTTCATTACATC  
ATTATCTTTGATATAGTCAAACGGAATATGACATAATTTACTATTTTGTAGGATGAATAG  
CATTTGTTCTTTAAGCTCATAACGTTTCATTCTATCACTTCCCATCAGCAATTGCGATCA  
GACGAGTACTACTACGCTAGCGGCTTCAATCAGCAGTTCATCAGTGTCAATCTGATAAC  
CTTTTTCGAGAATATCTTTACCTCGAATAGTTTTAGCTCCTTTAGCAATTGAATCATCGT  
AATACTTGCGCATTGCCGCGATCCATTCTTTTTGCACCATATCATCAATATGCGCGTACA  
GTTCAAAGCGTGCTTGCTGCGGGATAACCTTCATTTTAGCTTTCTCGCTTTCCGGCATT  
GTAGTACCCACGCTTTACGGATCTTGTTTCATTGCTCGGTCAAATTCGAGACTGGTTTTCT  
TGTTCTGAATGTCTGCTACAGTAATTTTAGCCAGGTTTGCAGGAGTAGTCATAATATTAA  
TCTCCAAAATAAAATCAGTATATCACGTTCTAAAGTTTGTGCAACCCAGCATCAGGGT  
AATCAAGTTTATCAAAGTTGGGGACCAGCATAAACTCATGATGACGACAAGACAACATTT  
TTGTTATGTCTTCATCGCTGTATATGCTGTTTTTTCATATCCCCATACTAACTACATATT  
CTTCACCGGAATATAGATTGATTAAGGTATAAATCTAACTCCGGCTGCGTACTCTGT  
CAAATGTTAACATTCATTTAGTGAATCGCCCACGTTTAAACCATCTTGAGATGACGGCTA  
AAATCATCAGGGTTATGGTCACGATGGCTGATAATATACACGTTATCATCTAACTTGTCA  
ATGATGGAATCAAGTGCTTTTACGCCCTGAACGTCCGTAGCCCATCATAAATTTTCGTCG  
AGTACCAACAAGAAATATTAGTACCAGATACTTTACCAGCAACATCACGCCATGTAAAG  
AGCATCGCAAGGTCAATACGTGCTTTTTTCGCCCTTGACTGAATGATGTATACGAAAACGAT  
TCACGCCCCCGTGATTTGATTGTTTCGTTAAACTCTTCATCTAACGTAAAGATATAATCC  
GCTTCCATGATATCAAGATAATACGCAATCCGATCATTGAAATATGGAATATATTTCTTG  
ACGATAGACGCTTAAACCCGGAATCCTTCAACATTTCTGTTACAAATCCACGGTGATAT  
TTTTCAAGAAGTACTGTTTTGATTTTTTCAATTAGTAATCTCTACCAGTTCGTGTTCCAGTTA  
GCAAGTTCTTCGGAATTGTCAACTCTTTCTTTTTGTAATTCCTGAATTGCTTTCTGGATC  
TGTTTAGCCCGACCTACAGATGCCGTTAAATTTGCTCTCTGTGACTCTATAGCGCGTTA  
ATTTCCAAGACCTTAGTTTGTGCTGTCTGGAAAGAATTGGCTTTCTCTGCGTATTCTACG

CGTTTCTCGTCAATAAGAGACAGTTTATGTTCCGGCTTGTGCTTTTTGTTTCGCGTACAGCC  
TGATCATTACCCTGAATGATCGGTTGTGTGCACGTAGGACAGATCCCGCCTTCTCGTGC  
ATATGGATAACACGATCAAAGTTCTGGATCTGTGCACCAATCTGTGCGATAGCCGTATTG  
ATTTTAGCCAATGCCGCGCTAGGATCTTCCGGCATAACAACAGCCAATAGCTCATCGGTC  
AAGCGGTTTTCTTCGGCTTTAAATGCTTTAGCCGATTCTACCTCTTTATCATAATATTC  
TGTAACGCTGGAGATTCTCGGCACCTCGCCTTGCTAGCGTCTTCTATGTACTTTTTATGA  
GTGTTGATTTGTTGCTGAACGTGATTAGCTTTCATTTCTGCATTTGGATATTCTGGGTA  
ATCTCGCGCACATAACGCTTTATTAGTTTATCCATTTTCGCTAGCGTAGCAATATCAAGC  
AAATCCTCAACCAGTTTACGGCGACCCGCTGCCGGAAGACTCATAAACGGAACATAACCA  
GCAGTGCCTAAAACAACGATCTGTTTAAAGCTGGCTAGGTTTCATGCCTATGATACCTTCA  
AAATATTCCTGAAAGTCTTTGGTGCTTGCCTCTCGTCGATCTTTTGACCGTCGCGATGC  
ACTTCGAATACTTCCGGTTTTTGACCAGTTTGATATAAAACTCTTTCCCGTCCAGTTCA  
AACCAGACTTCGACTAACAGTTTCTTTTTGTTGACGCTGTTAATCAATTGGCCTTTCTTG  
ATACTACGAAACGGTTTACCGAACAAACACAAAGCAAAGCGCCTCGATCATGGTCGATTTA  
CCAGCACCGTTAACACCAGTGATTAGTGTCTTTTTGAATCCGTCTAGCTGAATCTCAACA  
GGTTCAGCACCCACGCTCATTATATTTTGATAGCGCAAGGTTTTAAAATTTAACTTTGCC  
ATTAATCCACTCCGCAATCACACATTCCATAATATTAATGCTAACACATCTTCATCAAT  
GTTGTAACACTTGGCGCCTTCACTTTAACTAGTGTGTCTCTGCGATCTGGCAACATGAT  
CACATAATCCAGTGTGCGCCGGTTCATATGTCATAAAGGGATCAACGTAATCCCTTTATT  
CAATGCCAGATATTCGCGAAGACCTTCTATAACCCTGTGTCTAAGGTAGGTCATCGATAG  
AATCATTTTAGTTTATGTTCTCTAAAAATTCTTCAATTTACCTTGCAGGTCTTCCGCT  
TGTTGTTCCAGAATATCGCGAAATTCACCTACAGTCAAGCGGTAATCACACTTCACCAGT  
CGATGTGGGAGAATATACCCTTTATACATCGTCTCTGACGCTTCCAGGAATACCCACTA  
TGCATGACAGAGATCCAACCTGTTAGCGTCAATGGAGTATTTCGGAAAATAATATTTGCTG  
GATTGTTTCCACTGGACGAAAGCACCATATAAATCGGATTATATTCACCAACCACACTC  
TTAATAATGGATTCTACTTTGTCTTTTACAAAGTCGCCAATGTCCATAGTTATCATCAAC  
TCTTTTGGATTAATGATTTTAAGGTAACGACGGTAGCCGTCATCATAACCACATCTTAACA  
ACTGACCGATCAATATTCGCTTTCAGATAGCCATAGATCGGATTCTTGTAATATGATTGT  
TTTAGTGTGTATGTGTGCACCAATTTAATAAAATGTTCCATTACCAACAAATCAGAATCA  
GCCGCGACCATAGTCGTATTCATAATATGTTCCCTCGTTCAATCTCATATTGTTTCAGGTC  
TTCTAAAAGTTCATCCACTGCTTGTTCAGCACATGACGCAGCGTAAAGTAATAGCTTTC  
ATCAAATTTCTATTTCCGCGCGAGGAATAGAGCGAAACTTACACTTAACGGTAGTATCAGT  
GAGTCGCTTTTCGACCATCATCCGAACCTTCTTCAATTCTTTTGGAAATACCATACATCAAC  
GGAGATCCCTTACGTCGAGCAAACATAGGCAATGCCGCATTAAATTCATTACCTTTTG  
TGCAATTGTTTTATCGTACAGACCCCATAGATCCACGCGCAATAACATTCTGGGTAATA  
TCAGCAACCTTATGGGATACGATGTTTGTAGCCCTCTTTGGTGATATTTTCACGATCA  
AATGGGATTTTCGTCATGAGTCCACAAACCATAGTTAGACCGAAATGATAGCATATACTGA  
CCATCTCGCACAACTCAAATACATGGATCTTAGTGAATTTTCGACAAACCTTCGTTGATT  
TCTTTCAGTGCATTAGTAATCATAACAACCTCCAATCAATTTTTTAGAGAGTATAACGGG  
GATTTCTCCCCGCGTCAACTAACTTTTTGCGCTATTTACTTCGGCTAAAAGTTCATCAGA  
AATACGCTTAACTGCCGCAAGTTCTTCCGGTTCTAGGTTTTGTTCTTCCAGATATTCATA  
GACCATCTGAATGGTGCTTTTAACTTCAATAACACCTGTTTCTGTGATGCGCTACTCTC  
CAGCTTATGGACCACTTTTAGCTTGTGCACAACGGCCTCTAACGCGCTTTCTAACTTAGT  
TAACCCATTATCAGCGACCGTTGTGATAAGACGCACACTAAGCCCCTTAAAGCGTTCTAC  
GTCGATTTTATCATCTGACGGGTAAGTGATAACGACATGATAAGTTTTATCATTCTGGAT  
AAACTCTTTTTTGTGTGTATCGGTATCGAATACCCAAAACCACGCGGATCGTTTTCGTC  
ACCCGCCGTTAGTGTGTATGGTGTACCGATATACGTTACGTTACCGCCATCACTGATAGT  
ATGAAAGTGACCGGAAAACACTTCACGGTATTTCTTGAGGAAGTCCGCGCTATAACCTTC  
GGATTTTAGCCCTTTATAGAAATAGTAGCCAGACAATTCCCAATGGCCTACACAATATTC  
ACTGAATGAGTTTTGAATAAACTCTAAAATCTCTGATTTATTGTCATCACAAAACCACGG  
GAACAGATCAAATGATACACCATCAAAGGTAAGTGTTCGGTTTATCAATGACCTTAAAT  
GCAATCATATTGGCTTAACTTCACGCGGTGCGTTAGGCTGGATCTTGTTTCGTTTAAA  
CATATCATGATTTCCGACCGTGATATAACAAGTAATACCAGCCTCTTCCAGTAACGGGAT  
AATTTTCGTTCTATTAACACGCATAGTTGCATGTGTGATTGCTTTTCGGCAATCAAACCA  
GTCCCTGTCTGAATCCATGCCTTAAATATTATGTTTTTTTTGAATAATCGACTGCCTTTTT  
AATAGTATCAAGAATATACTCATGTATCCACGGATCATCGTTGCCGATACCAGTATGCAG  
ATCACCTAAAAGCAAAATTTTCATATTATACATAATCTCCTAAAATTTTTAACACCATA

TTCACCAAATAAAGATCAACCGCTTTGTCATAAGCTCTAGCCGCATCTTCTTCGTTGAC  
ATAATACCCAAGAGATATTAGTTTATCATTATTTTCGTATTCTTGCAACCCATTTCTTCGT  
ATGTTTATGCCAGCTAACTCCTTTATACTTGCTTGCTTTATTCTTGTACTTTCCAACGTT  
ACAAGCATTFTTTCTTTGCGTCGGACTCTCTAAGATTGCGCGGTGCGTTGTTTAAAGGATT  
TCGGTCTATATGATCTATAATTTCTGGTTGTGTTCCATGCTCAAGAAACCATAACAACAG  
ATGTACATATGGCTTTAAAACCCCTCCATTATCCATAACGATTGCAATTTGGAGATGATC  
CTGACTTTTAAAAGTTTTACTTTATCTCCTGCCTTATAAAAACCTTTCCTTCGTAATTCTT  
TCCTCCGGCTCGGCTATTCTTTAAATGATAAAGAATACCCTCATCGTCATGTCTATATCT  
TTCTCTTATAATTCGTTGCGTTTCTTCATCCCACAATTTGGAACGTCTACTCATAGTCTC  
TTCCTCTCTTCGTTTTTCGATGCTCTCACTATATCACAGAAAATAAAAAGGGAAACCCCT  
TTCAGAGTCTCCCTTATAAAGCCATTACAGCATACTTAATACAGTTTGCCGTGTAATAAT  
CCACATAGCAGAAAGCAGTTCTGGCGTGTGTGGCTGTTTGTAGATATCACGTAACCTTCC  
GATAGCGTAGATATACGCATCACGGTTATCATCGATGATAGCTTGTTTCAGCCCACCGCTT  
AAGGCGTGCAATCTCTCGCGAGTTCTTACGCAAGATCTTTTCCGCTTCTTAGCGGCTTT  
AGCCTCTAGTTCTGCTTGTACTTTGTCTACTTCACTGCAATCTGGTCATGCTGTTT  
ATCGTAAGTCATGTTATTTTACCTCTGGGATATAATCAATTATTAAGAAAATTCATCTT  
CTGATACATTATAGCTATGTGAGATTGTACCCGTAAAGACCTCAAGATCCGGTGATTTGA  
TATTGCACGGATCGATAATCACCGGAACGCGCAATCTCTCAAAAATAAATTTGGCGAAAT  
ACGGCACGAGGTCAGTTTCAAACCTCTGCTTCTTCCAGCAAACGGGAAATGTTAATTTTCA  
ATCTCATAAAAATTTGGTCCAAGCTAGGCAATTCCTCGGTCAATACATCTTCAACCTTTGGC  
GCTTTCGGTTTATTGACCGATTCTCGTAGTTGTTGATTTTATCGTAAATGTCCTGTATG  
AATGCCTCATCAGCAATCTGGCACATATCAGCGTCGCGTTCGTCATATACATGATGCACA  
AAATATTTGTATTTTTCGGGCTGTCGCTGTTCTCTTTTTTAAATGCGCTGTACAAAAGCA  
TTAAAGCACGCTTTCGCTGATGTAAGCATGAGGATTTTATACTTTGTCTCGTCAAAAATTA  
ATCAAACCCTTGACCGCCGCTTCGATTCCGTCGTCGATCATTTCTTCGCGCCATGTTTGA  
CTATAACCAGAAAAGTTAAAACGACGTGATAGATTTTLAGAGATTTGCATAAATTGCTAGG  
CCGATTTGATCGCTCATTGGAACCTTGCCGACCTTGTGCTGCAATTTGTTGTTTCCAACGG  
CAAATTTCTTCGTAAAGCTCTTTATTGTTTACATAATCAGACACTTCGCACCCTCGCTAT  
TATTTAGGAAATAACCCTTTCGGGCTATTCCTCCATTACCATTATACTTTCTTTGCTTAGT  
TATCCACACTCTAACCATCTCTACAGATTCACCGTCAGACGGATCAAGAGTTTTTCCTTT  
TTTCTTCATGCGGTACTTAAATCCGTTAAATCTTGCATTCTCTTGCTCGTTAAAGTCGAA  
CATCTTTTTTAAATGATTTTCGCCCTTACGCTCACCGCATTCTAGCGGAATCATTTCGGTC  
TGTTATTACATTGGCATTAGGTAGAAACGTTTTTLAGATAATCTACCAACGCCCAATCAGG  
AACATATAGATTAACATTCTCCTTGCTCTCGTTGTCTCTCAGGTTACAACGCAAACATAA  
TTGAAATGCTGGTTCCAGATAATCAGACACATGACGCGCTTTCAAAACCTCGTTTGTGCG  
GAGATCACAACCTATTAGCAAGACCTTTTAAAATATCAATCTCCCATCGTTGAGGGTTAAA  
GCTGAACATCACAGCAACATTTTATGATGAATGTAAGAGTTAAGACCATAAGATCCGTA  
AGGTATCCGCTCACCAATACCATTGTACACGCTTCACGGTCCCGATTACCGGTATAAAT  
GAAGTCATCACACATTCATTTTTAACCATATCAACAAGACGTTCAAAGGTATTGTTTGT  
TTCTGACTGGTGACGCGACCATCGTTTCGGAGTCCGTCATAAAGGATGATGTTAACTCTATC  
TGTATTTTTATACTCTTTGAAATATAGTCTGGATTCTAGCGCACTCGGAACAAAATCGCA  
ATTTGCATAGTATCGTAGATACTTCCCCTATATGTATCAAAGAGATTTGCACATGCTAT  
CGTAACCTTTTTTAAAGTCTCCCCACGTACCGTGTGTTGTTATCGTTCAAGAAAACAATTT  
CGACCCATTCTTCGGTGTCTTCGTTATGTTTTACCATAACGTTGATTTTCTTCTCTAA  
TAACGCCTCATAAAGCCCTCTAAGAGAAGAATCGATCATATCAGTACCATCCTTTGCACT  
TTCTATCTTTTCTTTGATAGCGGCCTTCTCAGAGTCTTTTAGAATAAGTTCTGTAGGCA  
TTCCGATTTCGTCGGCGATTGGTTTCGCAATGCTTCGTGATAAGTTCAAGATTAGACTTAAA  
CGGATACTCATTAAATTCAACCAGTTGAGGAACTTCATCAATGTAAAGAGCATATTCACC  
AAACATTTTTTGAACGTTCCATATTAGATAACGCTGTATGTGTAATGAATATCACATCAGC  
ACCGTCTTTAACTGATTGCATTATCGACGCTTGCCTTAAAGGCTTCTTAGTCTGGT  
GCTATCAATCAAGACAGCACGACCGCCATTCTTTTAAACTTATTGTAAGATTGTTCACT  
TAAAACACGAGATGGCGAAGCAATAACCGCTTTTTCTTTGTCTCTAGGACGTGGGAAAG  
TATAGCATCAGTTTTTCCCGCCGCTGGCAATGCGATTAATGTTTCAATCTTCATTAGAAA  
CCCTTACGTCGTGCTTTCTGGCATTCTTGATCATTTTATCAGAAATTCGCGCTTAGGT  
GCAATCTCTTTCACACCGAAAGCACTAATGCCAAATTCAGAGAGAATATATTCAACTAAC  
AATTCACGCACACGCGCTTACCAGATATTCACGCCGTTATTTTTCAGATATGTCTGGCCT  
TCGACTTGCATCAGATCTAAATCTGCGTCGGTAATAATGATTTCTTCCATGCGCCCAAT

CGAGAATAAACCATGTGTGCGATTGCATTGTGTACTAACATAATATATTCCTCACTCAAG  
AATTACTTAATGATACTTACTTTACCAGATCCGTGACAATGAGCACAACACCCATCACCA  
CGCAATCCTGTTCCGTTACAGTGTTTACACTTCTTCAACGGTAAAGTCATTATAGCAAAT  
AAAGCAATAATGAACACCGAAACTAAATTCTCAATAATCATAAATCGCCCTCAGTTCTTT  
ATAGCCTCCAATGTGCTCGTTGTCAATGAATATCTGGGGGTATACAAAACGGAGGCTCTT  
TGAGTTCAGCCTCCCCGCCAGTTCTTCAATCATATCACGGTCGGGAATAATGTCAACCCC  
GACCTGCTTGAATACTGGTTTAAAGTGTATACGGAATACCCAGATCATCCAGTAGCTTCAT  
TGCATAATAACAACCATAACAATGATAAGCCTCTTTCGGTATGCCGTATATCTCGATCAT  
TTCTCAGCCTTTAATCTTTCTAGTTCTTCTTCCAGTTCCTTGATCCGTTGGTCACGTTCA  
AAGTCACGCTGTAGCTTAGTGGCGAATACTCGTTTAAACTGATTGTAATCATCGATTTTA  
AACACTTCTTCTTCGCCATAGCGACGCACAGAACTTCGTAGTTATTGAAGAATTGTTGC  
ATCATTGCTTCGGATGATAGTTCTGCTGATACCACTTTAAAATATTGATCTTCGGTAGGT  
GAAAACCAATTACAAGCATAAAGATAAACCTTTTCATTGTCTGGACACTGGTAAGCCTTA  
CCATCGATTTCAATCACAGAAACATATTCAGGTATACTAGATGAATCAATAGCTAAGACT  
TTAAACGCACGGTCCCCGATAAACTCGGAGATCACACGATTTCGCATCACTGGTTGCAAAT  
GCTTTACGCGCTTGTTCTGTTTTTCCACTGATAGGTCATACCAACAACAACATATTACCA  
ACCTCGCTCTTTACCAATCAAAAATTCAACTTCACGACGTTTAAATGTCTTCTTGAAGGTC  
TTAATCTTCTGGCGATCTTGCATGATTTTCATCCATCTTGTCAAGTGCCGCAATGAAATC  
ATCGAAACGTTCAAAGGTTTTACCTTCATTTGCTTCGCCAAATTTAACCATTGTCAGGCC  
GTAACGACTACTAAACAGACGTTTCAACTGTCCAACGATTTTAGAATCAGTGGTTATAAC  
TTCCAATTCTTCTACTTCACGAAAGAATTTTCTATCAGAATCAATAAACCAGCTAGTTCC  
TTTATGGTCTCTATCTTCGGTTGCGCTCATTAGAGTATGGTCTTTACCATCAATTTCAAT  
TACATCAATTTGCCACATGGACGAACATTTTTTAACAGTAAAAGGTCTATAATTTATTGC  
TCGTGCAATAACATAATTAAGATTAGATACGTTTTTCAGCATAATGACAGAAGTCGGTCAT  
AGCCTTATCATCTTTCCAAGTATAAGTTTTTACCAACTTCCCATTTCTGGGGAACTTCTTC  
AACTTCACGAAAGAATTTTCTATCAAATGGACTAAAGAAATATGTTGCAGTCCAATGTC  
TTTTCTGTAGCAGTTTTTCGCCGTATGATAAACACCGTCTAGCTCTATTGCATCAATCCA  
ACCGTTACCCTCGATCTCGATGATGGTAAATGGCTTGTACCAATAGCTGCACTGATATC  
GCTGTTAAGTGGAGAAAGAACACCTTCTCCGTTAGTAATAAACTCAGTTTTAGCGTTTTT  
ATCTTTCCAAGTGTAAGTTTTTACCAATTTCCCATTTCATAATATATTTCCCCTTAACCGAT  
TTTATCAAGTTCGTTTAAATGCTTTCTCAGCTTCTGTATAGCTTGCCTTTTCCGGCAT  
TTTGTCAAGAAAATCTTTCAACTCTTCAAAACTGGAGATATGACGCAAGGCGTTAGCACC  
GATAGCCGCATGTGATTTGCATTCAAAGCGGATTTTATAATTATCCATCGCCAATTTGAG  
AAGATCAATTAATTTAGATTCTTCTGGAATAATAATTTCTTCAAATCTGCTACGGTCATG  
ATCCAGAAACCAACAAGATAGACCTACATCGGTTGAACTCATATAAGTTCCATCATGAAG  
ATAAACAGACCGCACGTATCCTTTTTTTCGCATCAACCGACGCAACTTTAAACGGTAATCG  
CAGATATTTCAAATAATCAACATCATACCATTTAAAAAATTGGTTTGCATCTTTTACATC  
TTCCACGCATAGGTCTTACCAGCTTCCAATTTCATAATATCATCTCTCATTTTTGATAC  
GTGATTCTAATTGGATCATAACGGTCTCGCGTTTGTGTTGATTCTCGGATAGCACCGATCC  
GGCTAGGCATACCATCCAGTACGCTCTTAATACCTTCTAGGGTAGTAATTTTGGCAATGC  
TATTATGCAACCCCATCTTATCGATCAACTGAATGTCGTAGGCTTCCATAAGCAGACCCA  
GGCGTTCTAAAGTTAGGTCTTCTTCTTTTTTCTTCTGAATCTGGAATCTTAGGTTCAATAG  
TAACTTCGGTAAAGAAACGACGCTCACCCGACCAAAAACCACACACCCGGAACAGCCAATAG  
GGGATTCTTTTAAACGTCATAGAGTCGAAATTACTACCAATAATAGTAATTTCTCTAACAT  
CACCATCATCGTCAAGGTCTTCTACCCTAAACGGGCGACCAGCCAACAAGTCAACAATAC  
ATCTGTAAATAGACGACGAAAATTTAGTCAGTTCGGCTTTCGACGCTTCGCATTCAATCT  
TGTAAGTTTTTACCAACTTCCCATTCCATAATAATCACCTCAAATAATTTTCACTGGAATA  
CTATTAACAATCTTGTATTGTACTTGTGATTGTCAGACCCCCGCCACGGCTTCTTCGTTGGC  
ATATCTTTAATATAACGCCATCGATGAACATGTCAACTGATTCTACAATTTTTCTTTGC  
TCATCATTTCAATTGGTCAAGGGTATAACCGGACCATAGCCAAATATCTTTATTTGGCATC  
CATGATTTTACTTCATCGATGATCCGCTGTACACCCTTTAAATTGCGTTTATACAGTGGA  
TCGCCACCTAAGAATGTTAGCCCCTGAATAAAAATCAGGTCTAAGCAGATCCAGAATCAAT  
CCCATTGTATCATCGGTGAATGGTTCCCCGTTCTTAGGATTGAGTAGACTGGAATTAAG  
CAACCATCACATGCGTGTGAACATCCGGTAAACGTAAAGGGGAGACTCTCACTCCCTCACCG  
TTAACCATATCACAATCTTTAATATCGGCATAGCGTAGTTTGCCGTATGTATCAGAACTC  
ATATTCAATTACCCCGAACTCGTTTACAATCTGCGCTTTATAGTAACCACCGCGAGATGC  
TAATATATAAGCTGGGCTTAGGTTTCGTATTCACGGATTTCTACTTGTGCGTTTTTCAGT

TTCCCAAATCAGTAAAGTCCACATATTTGATTCTCCTGTAAAGTTGTATCTCGTCTTGAT  
GAATATAGTATAGGGGATCTCGCGATCCCCGTCAAGCATTATTTTAAATTTTTTCGAAT  
GTATTCAGACCATTCTTCCCTGTCAGTTCGGTCCCATTCTGGAAACTGAAATATTCATA  
CGGCATCGAGTCAAGATAAAACAGGATCATAATCGCGCCATATAATACCAATCACGATT  
AAAGTAAACTACGTTATCGCCAGTACCATCAGCACCTTTATCATAACCATCGCGGGTACG  
GGCGACCCATTGAATGGTATCATTTTTTCTCACGGATAGTAACAGGTTCCCAATATCCAGC  
ACATCCAGCATGACCACACGAACAAGTAAGGAAATATTGACCTTTTGCTTTGTTGTCATC  
CCATTCACGATGAATTGGTTTGATTTTCGTGAAACAGTGCCAAACAATCATGATTATGCAA  
CACTGGCTTACCATCAATCAATGCATGGAATGTATACAAACGACCCGTAGACAAATAGTT  
ATCTTCTCGCTCTACAAGTTCAATAGCAATCTTTTTAGCTCGTTCCTTTGTGTCGTTGTGC  
TTTACGCTTACGGTTAATGATTTTCATATTCACCTCACACATTATCAAAGGTCGCGATAT  
AGTACATTATGAAAATGAGAACTTGCATTACCAATATTGTAGATAATAAATTCTTCATCC  
GGCGCTTGCCTACAAATTGAGTATGAGCAACCGCCACAACCTTAAAAATACGATCCGTG  
ATCTTGTGTTAATTTCTGCCCTACTTCCATAGGAACATATTCATGTGTTTCTGTTTCA  
GTCGCAAACAGCCATCTTCTTATAAGCACGAACAAATCGATCGCAATCAGTACGCTTA  
ACAAATTCAAGAGTATAACAATTCTCGTGAATTGTGCGGTATAAACCAACACAGAATTATTA  
TGATAGCGAATCACATACAGGTTATTATCATCGTCAATTACGCAAAGCTACGGATTCCCT  
TCGCCTTTACTCCAGCAGATATTAACCACCGTTCCTCTAATAAAAAAACTTTCCTTTAAA  
TTAAAAGTCAATGTGCTAGCGTGCATTTTAAACAACAACACCATCGCCAATTTCCAGT  
TTACGAAGTTTAACTTCTTTGCTCAGTACACAAAACATCATGTTGTCTCTCGTTGT  
TTTCGATGTGAGCATTATACATTAGCTAATCATGTTGTCAACACCCCAAAACGAAAAAGC  
CGACCCTTTCGGATCGGCTGAAAATTACATGTGCTTAACGCGGTTTACCATCTCGGAGTG  
TTTCCCGTGGTTGAATGGACGCAGATCAACAGATCCAAGATATCCACTAACGCGACGGAT  
AACATTCATCTTTTCCAGATTGTCATTGCCGCAATCAGGACAAACAAAACCAGACTCGGT  
CGCTCTCATTTCCTTAGTAGATCCGCATACATGACATACATCAGAAGGAGTATTAACACC  
GAAGTAGTGAATTTATCCATTGCATAGTCTACTACAGTTTCAAGACCTTTCAGGTTGTT  
TTTCATGTCTGGGAACTCAACATAAGAGATCATGCCACCGGACGCCAGCCAGTGATAATC  
TTTCTCAAAGTCGATTTTCTCAAATGGAGTGACTTTCCGGTCTACGTCAAGGTGGAATGA  
GTTGGTGTACCAGTCTTTATCGGTAGCACCTTAAACAATACCAAATTGCTCTCGGTCCAG  
TCGATTAATCGATAGCAAAGGCTCTCGGCTGGCGTACCGTAAAGACTAAACCCAAGTCC  
GGTTTCATCCTTCCATTTTTTTCAGTATAATGACGCAAGATCTTAAGAATATGTTTACCGTA  
TCGCTGCGCATCTTCCGAATCAAACGGATGAACACCAAACAGGACGCTCAATACCTCATG  
TAAACCAATATATCCAAGAGAGATACTAGCGCGACCATCTTTCAGAACTTCCAAAATTTT  
ATCGTTTTGATGAATACGGAAAAATGCACCTTCTGTATACAGTACAGGAGCAACATTGGC  
TTTAGCCCCTTTTAAAGCGTCTACGCGACTCATGAGCGCATCAAAGCAAATAGGCATACG  
ATTAGCTAGCTCTTGTTTCGAATAGCTCAATTCTGCGCATTACAGACGCTTTACCAGCACG  
ACGCGCGGCAATAAGGGCAATACGCGGAAGATTTAGAGTCACAACACCTAAGTTATTACG  
TCCGTCTAATACTTCTTCGCCTTTCTCATTATGCCACACACCCAGGAAGCTACGACAACC  
CATCGGGCTAACCGGAACACTAGATCCGGTGATACTACGGTTATTCTTTCGCAGAGATATA  
ATCAGGGTAAAGACGCTTACTAGAACATTCCAATGCAAGTTGCTTAATGTCGTAGTTCCG  
ATCTTCTGGTTTAAAGGTTTAAATCCTTCTTCTAAGAACATCACCAGCTTAGGAAACACCGG  
AGTTATACCATCTTACCTAAACCTTTAGTTTCAACTTTTTCAGGATCGCTTTCTGAATCAG  
TTTTTCTTCCAGCTAGTACCATAACAAAGGTTAAAGTCACAAAAGGCGTTTGACCGTT  
GGTGGAGAACAAAGTGTTGATCTCATATTCCAACGCCTGATATCCGTCTAACGTTTCTTT  
TTCTGTCTTCTTGTGCATAGAGAGTATCAGCTTTGATTCCGTAGGTTTCGGCATCAGC  
AAGGTGTTTATGATATGTTTTCTTAACATACGGTGCTAACACCTGATCGATGTTTGCAAT  
TGTGGTCCCAGCATATTGATGACTTGCCACCTGTGCGATAATTTGAGCGGTTACAGCACA  
TGCAACACCGATCGATTTAGGACTTTCGATTTGTGCGCTACCCAATTTAAAACCATTCTC  
TAACATGTCTTTGAGATTAACAAGACAGCAGTTAGTAAACGGCATAGCGGGTGCATAATC  
CATATCATGATAATGAATATCACCATCTACATGCGCTTTATAGATGTGCTCAGGTAACAC  
GGTTTTAGCAATCTGTTTAGACACAGCGCCAGCAATCAGATCTCGACGTGTCGGGAATGT  
TCGCGCGTCTTTGTTTCGCGTCTCTTTACTTACTTCGTTTTCTTTACCCGTTGCGATCTC  
TGTAATGTCTTTGATTAGTTTTTCCATTGTATCACCTATGAAAAAGCGGGATTTTCTCCC  
GCTCGTTGATAGTTATTTTACCAGTTCTGCTAATTTCTTTTTCTTTAGCTTCTAGTTTACG  
TTTTAAGCTGTTTAAATCTTGTGCTTCTTATTAGCGGCTTCTTGCTTACTATTTCCGGAT  
AACCTGATCTAGATACAACTCCCAATCCTGAATATTTTTGATAATGTAACCGTCAACATT  
AATTGGTTCGGAGATTCAGTACAGCTTCCAGTTTAGTTGCAAAAACCTTAAATTGCTGGGGT

GAAGTATTCATATTCGTTATCTTCAAACCAATAACCTAGACTTGCATTATCAATACGAAG  
ACGAAGTTCAAGATCAAGGTCTTTATCTTCGGTGTATAGGTCTTTTACACACCCCATAGA  
ATTAACAACAACCTTTAAAACGAATTTTATCTACACCACCAAACACATCAGTAAGGATACC  
AGCAATTGAGCTATTAGCGCAAGATTGGTCGCTGAATGCGTCAAGGTTTTCTTTAGTTAC  
AGTATACCAAACATCTTGTACCCACATAATAATCCTCTCGTTGTTAAGTGGGAGTATT  
ATAGCATACTCCCTTTGCATGTCAAGCACTAACTTTTTTTCTTTACTGCTTTCACCTTCTG  
GCGAATTGCTCGAATCTCTTCGATCTCTTTTTTCAGTCTCTTTAACAATTTCTTTGCGATT  
CTGAATATCTGTATCGAGATTATCATCAAGTTTAGGCAGCATGTCAATCAAGAACTTTTT  
AAAGTCTTTCAGGTTTCGGATAACAGCACCTTCACCCATTACCGCCACACCAACACCATC  
CGGCAGATCACCAAACAGTTTAACCAGTTCAGACAGATGATCATGGTCTTCTAATGCTTC  
CTCCGGTTCAGATGGCAGTTCAACAAAGTTATAACGTTTCATCATTGCTGATCAAGTGATA  
CCAGCAAAGCCCGAAAGATTTTCGGTGTATATTCTACACCATCAATTTCAACCGCGTCAAC  
ACTTCCATAATCATCTACTTTAGTTACCTTAAATCCTTGTCGCCAGCTTTTGAACAATTT  
AACAAACATGACTTGATACAGTTTCAGCGGTAAACCAATATGGCAAATATGCTGATTG  
CTTGTAGCGTTCACCTACTTTAAATCTCTGACCATCCGCTTGCATAGCATGAAATTGTTG  
TTTCGTGATTTCCGCGAAGTATTCAAATTCGCCACCATCAAACACACAAGCCCATTGATC  
ACAAAAACGATCTGCCTTAAACAGTTTCACCTTTCGCGGTGATCATGGTAGCCGATCCGTG  
CAATTCCTTCTTCAACCAAAAAGCCATATTCGACAAAATCAACAAGTTTCATGGCTTCTTT  
GTGCTCTGGGTCATGCTCTCCCCAGAATCGCTTAAATTCTTGCAAACCTTCTGGTGTAAA  
CGAATAACATTTACCTTTTTCAAAGTAAAGTCGGCATTACATCCTCTTTCTTGTTTCATCGC  
TTCGTATGCCTCTTTGAGATGCGTTTAAAGTATTTACGCTCATCGTGCATAATCATAGT  
AGCCCAATAATAAACGATATCCTCAGCGGAATAAACTACATCTCCAGCTTCAATAGTAAT  
AACATGACCGTGGTCATCTTTTTCTAATACTTTAAAGCCCTTTTCGACGATTTTCAGCAAC  
CCGAATATGACCACGGCGGAAGCATCGGTGAGAATAATTGAATAGCGAGAAAAGTCTAG  
AAACTCATCTTTACCACCTTCACGGAATGCATAGTAATGACCTTCAAAGAATTTAGCCAT  
AATAAATCCTCTCGTTGTTTAAATGGGAGTATCTTACTACTCCCGTTTCATCATGTCAA  
GCGTTAAATGACTTTTGGATCTCTTTCAGTTCAGCTACTTTATCGGCGCTGAATTTAGCG  
TAGGTATCATGTGCAATAATTTCACTTTCAAGAAAGGTTTCCAGCCGAGATCTATTTTCA  
ATAAGGAACCTTTTCAGGTCTTCCGCGTCTTGATAAAGATTTTATTGTCAGTAATGTCA  
TCTTCAATCGCAAAGGAGATAGAGCGAACTTTACCAAACAAGTTAATCAGATCTTCCAGA  
GATTCTTCTTTCTTAACTGGTTTCATTTCTTCAAACCTGCTTTTTAGTGATGCGTTTAAAG  
TATTTGCGCTCGCTTACATCAATCATGATTGACGCACCCTCATAATCATGAGTTTCGACC  
AAATACACTTTACCCATAACATTAACAGTTAGAACTTTAAAGCCCTTGTGAAGCACACCA  
TACAGGAACCTTGTTATGTTGTGGATAGCGTTTAAACAAATTCCTCTGCGGACTCAGCATT  
CGGAAAGTGTAATAACGACCTCGTTCAAAAACAGCATCAGTTGAAGACTTAGCCGGATAC  
AATTTATACGTTTTCTGTACCATAATAATCCTCTATCATTTCACTAATTGAACAGCAC  
GAAACAGAATGCGGTACACGGAAGAAGCATAAATTCCTCAACGCGGATCAAAGTCTTTAG  
CGGTATATGTTTTCCCATCAACCGAGATTTCACTTACATAACCAATAGGTGACAATTTAA  
GAACAGTAAACCCATTCTTGATGACTTCGTAGGTATCTTTCAAACCTTCGTAGTCATCCT  
CTAAGAAGTCTTTACGTGCTTGCTCAGATTTAAAACATAGGCCACACCGGATTTAAACA  
TCTTACGCATTGTTGATTCTCCTTCTTGATTAGATGGGAGTATTTTACTACTCCCATTT  
ATGCTGTCAACTACTATCTTAAATCTTTGTATAAATTGTTTCTTATACTTCTTCGTGATCT  
CTTCTCTTGATCCGCGTCACAATAATCGAAACCTTCTGCGTCCATAATAGCAACCATCT  
CCGCGCGTGTCAAGCGTGAAATCGTTTTACTTTATCAACAGCATATTGAGGATGTAAT  
GATTGTTGGTGTAGTCTCCTTTGATGTAATTAACATAGTTTGTAGCCCAAACAACGAAAT  
CAGCACCTAAAGCACCAACACCAAACCGTTTAAAGTCTCCGGTCAACGATCCTTCTAGGC  
GGTTGCAACACGAATGAAGCAATCCCCTTACACGGCCTTGCCCTTTCCCATCTAGATCGT  
GGTCGTGGTCAAGATGGTTTTTGCTCATATCCTCAAAAAGTGGCAATTGACAAAGGGGGC  
AAATGCCCCCTGTTTTTCGAATAGTTCTTGTTTGTACTCTTTAGCACTCTTAGCAGTCA  
GTAACATAAATTCACCCTCAAAGAAGGTATTTAACCATTAATCTTGTTTTTACTACAA  
AGGATCGGAACCTCATCAAACACCGATATAATCACCATCATAGAAAATCTGCGGCATGG  
TGGCAATAACTTCTACCCTGCGCGATCCTGAATATCGGCAATGATAGAATCAATCTTTA  
CCGGACGACCGTTTTTCGTCCACACCATCATTAAACCGGAATGTAGATGTAAGGGATCTTAC  
GCGCTTACAAAGGCGCTTTGCATTCTGGCAATACTTACAGTTGTAACCTTCAAACCAA  
AAATTTCTACCATGTTATACCTCAATCTACGTTAGTTACATAAACTTCTTGCGTATCAGA  
AGACTTACCACCTGAACGATCTAGGCAATAGGTCTTATTCAACAGGACGCAGTTTAAATC  
ATTCCGCTTGATAAAGTCAAGAAGATGATCATTTACCTTTCCCTTATGATGCGTGACATT

ACTGATACCAAACCTGAAAACCACGCGCCATAATAGATTCTACCCACTGATAGAATTTAAT  
CTCTTCCTCGTCACTCCAGAACTTATTATATTCCGCAGAAGTGACAAGGTACGGCGGGTC  
CAAATAAACGAAATCACCTGGCAAGATCTCGATCTCGTCATAACGACCAGACGTAAAACCT  
GATTCGACCGTCTTTGTTTTCTTCTTAAATTCAGGACACGCTCTACCGCGTTTTTCGTT  
AAAAGTCCGGCGACCAAATAGCATTAAATTCGCCCTTCTGTTATGGCGGTTAATGTT  
GCTAAAACCTGTGCTGAATCAGAACAACAGAGATAGCGGATCTGGATTCTCATTATACTT  
CTTACGGAATGCCATGTAAGCATCTTTATCATCACGAGACAAACCATTTTCGGTAATAAT  
ACGCTTGATCGTAGAAACCGGATCAGGACACTCGTCAATCGCTTTGTACGCGTCAATTA  
GCGGTGATCATAGTCATTAGCCAGCACATCCCCTTCGACGTACAGAGACACGCTCAAGCC  
GCCACAGAAGGCATCAACAAGCGGTTATAGTGCTTAGGGAAATACTTACTAACACCTGG  
CAATAACTTTTCTTATTGCCAGTATAGGGAATTAACCTAATGCTTTCTTCATTATCCC  
TTCCTCAAATAAGTTCGCTCAATCTCTACCAGTTCGAAAAATTCTTGCCAATCACACGGA  
AAATTGCAGTTTCCGAAATGATCCTCTTTGTAAAGTCTTTACCGGATGGCAGCTTAATA  
TCTGTTACGCTGTAGTATCCGCAACAATCGCAATCACCATCTGTATATTCTGTTTTGGTA  
GGAATATCCATCATTGCCAGATACAAAGGTACATCGTCTTGCTCAAAGTTCATGTAACCT  
TCATGATCGAATGAAACAAGTTATCATCGCCACCGAAAGGGATATAATGGTCATAATCG  
GTTACAGGTTGACCGTGTAATTCCCATTCTACAATTTAACATTACCGCTAAACTTGATA  
CCCATAATTTCAACAAGAAAATGAGTATCGTCAATGTAATCTTACTAGGGGTTGGATAA  
ACCATTATATAATCCTCATATCTCAGAGAATAGAATCTCTGTTAGCTTCACTGACTGCTC  
TCTGAATGTTAGCGTATACTCGAAAGGAAAGTCAACACCCAACCTCAAAGAGAAATAGCC  
TACAGCCTCTTTATGCTTATCGGTTAGGGCAATCCTAACCAATTCCCCTTGAATCTCTTT  
AGGCGGTGAATGGATAGTAACACGGGTATCATGCAATGTCCAGTCACCATTACGAATCAA  
GATTAACGTTTTATCGTCATTGAAGATCACCGACCCCTTCCGGTCGGTGAGTGTTTTTAT  
ACTAATCATCAAATTCTAAGAAATATTCTGGAACGATATAACCGTTAAAGTCATTACACT  
TATAAAAATGTGGTGCATTTAATGCTGGATGAGCATTAGTAAAGAGTTTACCCTCTAGAA  
ACAGAATGTAATTAATAGGTCTAATACCTACAGAATCAGGGTCTAAACCTTTTTCTTTCA  
GTTACAGCCAGCGTTAAAACCTCGTCCAGATCGTAACTTAGCCATGATTTACCCCTAATTCA  
TCAAGATTATGTGCGCAGCATTTCAGAGTATTTTCTACTTCTTGATCTTAGTGTGGATC  
TCCACGATCTCATCTTCACTATCAGATAGTTAATGGCAATCGCGAGCGTGCTTTTACCA  
GCTTTCATAGTCTCTTCCGTTCAACCAATAGATCCGCGTGTTTCAATAGCAATTCTTCA  
CGTCGAACATAAGCGACGGTCAAAGCCTCGTCAGCAATTTCTAAAGCATTTCAGCGACA  
CCAACAACCATTTTACGAGTAGACAGCATAAATTCACCTCACATTATTTACGTTAACGC  
CGTCATCAATCCAGCCGACGCTATTTGGTTTAAACAGTTTACCATAGGATGCATACTTAA  
TCAAGCATGGTTTAAACATCATTATCAAATCTTCTAAACGTACTCCCAAATCAGGAATAT  
CCATGTATGCGGCTTTATATCCCATGTGCCATATTCAGAATCAATCTCAACCGGACGGC  
CTTTAAAAGCATACTACACCGTGACGGTCAATGATAACATAGCAATAACCAGCCGGAA  
GATACACAGTTTCGCCGTAACCTTTAACTGGAGTAGCCGAAGAGATAAACATAATATAAT  
CCTCACATCGTTCATTTGATGCGGTCATTATATGATAACCGCATTTCATGTCAAACAGT  
TTTTAAAATCTTCTTCCGTTTATATCGTCCGTCATCAACTGGTTTTTGGGCTGAATCCG  
GTATGTTTGC GCGGCTTCGCTTCCGTTTCCCCGCGATCGATAGTCCAAGCCATTTAAGA  
AGTTTGTATGAGTAAGCGATGATCAAACTACCCACGTTAAAGGCCATAACAATAGAACAA  
ATGGCATATGCTCCGGTATCGACCTCTTTGGTGTCTTATCGAATCTGGCATAACAAGCAA  
ATTATAAGATAGGTGATCATTGCACCAGTAGGCCAAATATAAAGCACATTAACAATATCT  
TGTGTTGTCACGTTATCCTCCTTACATGTCTTGCAGTGCATAAAAGCATTTTTCTTCGTA  
GTCATAGAAAATGTCAAAGTATGCTTTTTCTACATACTCGCCATTGATCCAAGCGGCAGT  
AACAAATCAGAGTAGTCCAGTTAGACCCGCTCTCAACGGTAAAGGTTTTAATACCAGCTT  
CGCTGCCAAGTCGAACGCAAACCGGACGCAACCACGGCAGGAAGTGATATTGGAAGTTTT  
GATTTTAAAGCCACCGCGAGTTTTAGAAATTTCTACTTTAGCGAAAGACAGGTTGCTCAT  
TTTGATTCTCCTTAAAGAAAGTGTGTTTCGTTTTGATGTGTGTAGTATAGGGGATCACCGA  
TCCCCTGTCAACAACCTTTTTTATGATTTTAGTGAATTAACCACTACATCAAATGATGTA  
CAGAGCACACCTTACGAAACACATATTCATCATGTTTCGGAATCGCCCCCAACCGCTTTA  
TTTCGCTCGCTGACACGATAAACCGTTTATCCGGTGCATTTACCTTATATGCTTCAACAA  
CGCACGGAAAACGCGTTTTAGCGAGTTCGGGATAGTTTTCTGACTCCATCAGGACAATGA  
ATACACTATTACATTGATTGTAGAATCCTGTTTTGATTTTCATCAAGTTTTCTTCTATGT  
TCAAGTCGTGCAATCTTCTTTCATGATTTTCGTTGGTTCTTGTCTTACAGTTTACCCAC  
TCAACAAGATCTTTACCCAACCTCGAAAGCCATTCTCGGTCTTGCTTTACGTTTTGTAGG  
TATGGACTTTCCGACACTCTACGAAGTGATGTTGTGCGTAACAAGAATGATCCCATGAATG

GTCGGATGTTCTTTCCATATACAATAGGACGCGAGTCACTATCAATACCTTGTAAGAAG  
GTGTATCCTGAATCACTTAGAATCATATACTTTTTTCATTTACACATCACAGTTTCCTCA  
ACCAAGTTATTAAGCTAGCAAACCATGATGCTTTTCGTGCTTCTTTTACTTTATGTGCAC  
GAAAACCACTGAAACACCATTTCATAATCATCACTGAAACATGATTCAACAGGAACACCCG  
CATTTTCGTAGTTCTCTGGTCTTTATCATGAATCCTTGACATAAGGGGCGACCTTCAACAA  
TGATAGGAAGTTTAACTTTTTCCATGAAAGTATACCCAGCACGGTCAATAAATTTCAATCT  
TCATAATATAATCCTCAATTAGTTATACCGCCCAGGCTTCATTTGCACGAAAACACCATT  
CATACTCAGGAAAATAACCTTTAATTGGTACGCCAGCTTTTTGTAGTTCTGTGTTTCTA  
CAAGATAATCAAGCCCATAACGACGACCTTCCACGATGATAGGAAGTTTAAACGCCATTCA  
TGAAAGAAAATCCACCGTCATCAATAAATTTCAATTTTACATTATCTCCATAGAT  
CTTTCCAGCAATATCAATTTACCAGCGCGAACATCTAGGATAAGATGCGGTAGGGCGTAT  
GCAGTTTTCCACCCTACTCGCTTCATTTCTGAAACAGTGACGTAAGCCCACCCGTTCCG  
TGTAATAAAGTCTACTTCAACCTTGAGAGGAAAGCAAGACTTTTTCTATGTCTTCGAATCC  
GATAATGTGTTTTGTGCTTGAATATGGAATATATCCGGTGATCATTTTGTGATCTCCTTA  
TACTCAACACACCATAAGCGGGTAGCCCATGATAAACGCTCATAACGCTGGCAGAAATCG  
GACCATAGATATTGTGCACCGTTCGGCATAGTTGAAATATGCGTTTTCTCTCCAACTTTC  
ACGAAAGAAGTATTCGATTTTGTGATCTCGACCGGAGTATATCCGAAAGCGGGTTCCAAG  
CCAACATCTGAACTAAATGCCAATTTAACAGAATTTGTTTTTCTGACCGCTGTCCGGTTT  
CCTTCTGGGTATAGCACAGCAGGTTTAGCGCCTAAGCGGATAAACTCAGTATTTTAAATA  
AACAGAATATCATGATAACCGTCGTATTCCGACACTTCCATAGTAACAGGAAAATCGATA  
TGTGCTAAACCTGGTAGATCTCGCATATCATGAAATGTAGCCATCAACTTTTTTCATCTTG  
TATGCCTCACTCTTCTGTTTCATTTCTTTTATATGGTACTATAACAGGATTAATACAGCA  
AGCACCAATTACGTTATGAGCACCACAATTTAAACATTTATAGTCATGGAACCTATTAAG  
GAATCGACCAAACCTCATAACCGACTAGCGCCGCGTGTACTTGAGTCTCGATCTCATCCAT  
ATCAGCCAATGTTTTAACCTTCATAATATAATCCTCAAATTGTAGTTTTGCGAAGATGGT  
CATTACATGCTTTTTAATGCATCGGTCGCGGTGTCATAGCGAGTATTATCATAGCACCAAT  
AACCATCTGTCAACTGATAAATTAATCCATCCTTTTTAGCTTCGATGAAAGACAATTCTT  
TGAAAGTTTTCTACTTTCTTTGCTGATACTCCACGGTCACGGCGCTTATAGAGTTTAGCTA  
AAATGCGTTCAGCTTGTTCTTATCACCAGACAGATCCCAGATGATGTTTCGGATAT  
GTTTGATTAATTGTTCAAGTGGTCATCTTTGATTCTCCTTAGTTGGTATGTGTGCATTATA  
GCACTATGATTTTCATTGTCAACAATAAAAACAAAAGGGCTATCCCAGGATAGCCC  
ATAAAATTACACGCGAGCACCGTAGATCGTGCCTACTTTATCCCAGCGTGGAGCATTACC  
AGTAACGGCTTTACCAGCAGCACCGGTTATATTCTGTACCGTTCCTCCTGAGTATTACA  
TCTTCTCCAGCAGCACCAACGTTACCGCCCGCACCGCCTGTATATGCACTAAGAGACCC  
CTCACCAACAGATCCTTTACCCGGAGCGGAAATGGAGCCAGCGGTTGCACCAGAACCCAT  
ATTAGAGGAAGACCCACCAGCACCGAATGGGCGACCACCACCGCCACCAATACTAGTCG  
ACCCCTGTTACCGCCACCACCACCGCCACCACCGCCAGCGATAGCACCGTATTTGTAAT  
TCGTAGACGTGTACCGATAGCGTTATTGATTGCGTTTCCACCAGCAGCGCCAGCCGCGTT  
ACTACCACCGTTACCCCCACGTCCGTAGACAGTCACACCGGAGTTAATGATCAATGTTAC  
ATATTTCGTTTGTAAACGAGCTAGGGAAGTCAAGACAAGGAACGCCAGTAGATTGGGAAAC  
AATATTACCGTGATAGTAATTACTACCGGAGTAGATCCTTGTGCTTTCATCCAGTTAAT  
AAGAGTGTCTTTATTGTAAGAGTTACTAGCACCAATGCTATAATGAATCTCTTTAGAGCG  
TCCGACCATTGCCGACATATACGCCGGACGACCTAAGCGAACAGCTTGCATTGCGGGCGCT  
CATCCACCGTTGACCAGTCTCGGACACAGCCGATGATCCGACCCAACCTGCTTTAATTGC  
CATAAAGTTTCTCACAAGAAAAGCCCCAATTAAGGGGCATTGATTGATAAATTACTTA  
GATGATCTCTGCTTACCATTTCAGGAAGAAAGACCATGTTTTGTTAGGATAGCGAAGCGC  
CCATGATTCGGCAGTTTTAACACCAGCTTCGAACAATTGACGGCTGGTCACTTTAGCCAT  
ACCATCTTCGATGGCAACGTTTTCAATAATCATCGGGTACTTAGCGCCACGCATGAAACC  
GAAGCCAGCGGAAGACTTGATAATTTAACAGTTGCCATTTTGATTCTCCTAGAAAGTGT  
ATCTCGTTTTCGATGGGTGTATTATGCAATAACACCGGATCGCTGTCAACACTTTCTAAGA  
AAAATTTTTAACTAATCGAATATAACCCAGAATTTACGACCTTTAGCCAGTTCTAAA  
CTTCCATTCAAGGTCTCCGTAGTCATAATTTGCAACCATCAACTGACCATTTTTTCATGC  
AGCAATCATGAGAGAAAATTTGCCCCGCATAAACTACGATAGTAATAAACTTTCTGATT  
CTGGCGGTGTGGAAGACAAAGCGACCATATGATCATTACGCTTAGTCACCAGTGATGGAA  
CAATAAAATTCGGGCTTACCTGAATACCGTTAAATTCGTTTTGTGTCTTTCATGCCATACC  
CCTTAAACACTAATAGCATAATCATGCTGGTTATTCATAATATCAATTGCATTGTGATA  
ACGAGCTAAACCATCAAGGATAAATTTCTGTTTATCCTGTTTCAGTTTGGTATCACGCGC



AGCCATAAGAGCATCAAGAACAGGTCCAAAGTGATTATCTAATTCATCTTCGGTTGCAAT  
GTTTCCTATTGCCTCGTCGATCCGTGATTCTAATGCTTGCTTTTCGTTGATCACTTGCTG  
GGTATATTCCAACACATCAAGAATATCGCGGGTAACGTCGCCATGATAAGGTGTTCCCGC  
ATGAAGGTAATCAATTAGTCGTTGAATGTCAATGTTCAATTTGTAACCCTCCTCTGAAAGT  
ACATCCCAGATCGTTGAGTCAAGGTGCATTAATTCACATAATAGAGTCATAACTACCG  
AAGCCAGAAGTAAAAATTACATCACACTGGCGATAGGTCTTATGAAAATCGGTGGCTGTC  
TCTGCATCAATAGGCATATCGTCACCGGAAAGCACCAGACATTTAAGAATCATAACTCTG  
TTAGCCGTTGGCGCTTGCTTAGTCTTTTCAGCATATTTTTCGATGATCCGTTTTCCTTT  
TCTTCTTTGATACGTCCAGACCAAATCCGGTTCGGTATTGATTCATAATAATTTCAATC  
ACATCATTTTGCATTCTTCACGGTCTCCATAATTGTTTTGTAAAGCCAGTTTAAGATGATT  
CACCGAAAACTTTGCGGTGTTACCCTTCGGATCGCGGAGCATGGTTTCTACGATCTCAT  
CGGCAGTAACAATTTCTCCTTTCTTTGCTGCATGTTCTACCATATACTTCAAAGTTTCTT  
CGGAAGCAAGTGCTGCGGCTACTGGATTAATCATTTTGATTCTCCTTTGTTGTCGATGTG  
TGCATTATGCTATACTCTATTCCGGTTGTCAACACCTAAAAACGAAAAAGCCACCCTTTC  
GGATGGCTTTTTTGATTATATTTTATTACGTCCATTTGTATAGTAGTGTGTTGAATCGACC  
TTTGCTAAACTAGTTAAACATAGTAACCAATTCACCATCCCTTTCCAATGATAAACCTTC  
CTCGTCTTAGACGGGTCTTCCGATTCGGCAGGAATTGAACACGCGAAAGTATGAGGAAGC  
CAAATAGTTGTGTTAATGCTAGTATTCTTTTACTTCTGGTATGCATCCCACAGTGACTAA  
CATTAAAGCCAGTCGAGTGAGTTTATAAATTGTTTTAAAGCATAGAGCTTTGATATCGTCT  
AAAACGCTCTGTAAACGAGCTATCAACATCATTATAAATCTCACTAGCCATTTGCGTTAAC  
TCTTGCAAATAGGCAATTTGCTAATCTCCTTGCAGGACGACCAACGTTGGCTGATAACGA  
CCAGTGATCCCAATATTGGTTTCAGTGAAATTATCAACCAATTCTTGCATTTCAAGATAG  
AACTCTTCTAGAGCCTTATGTTTTGCATAAGATCCAGGACCAGTTACCCCAAATGCGCA  
GAATGCATATAAGTAACACTCATCAGACATTCACCGATAAAGCGGTCAACCTTATTAGCT  
TTCCCATCTTCGGACGTCTTTCGAAAATCACTGAATTTTCATGTTCTCGATTCTCCATATT  
ATGCAACACAACAATTGGTTTGCAGCATATTCCCCCATAATAAAACACTGCTTAGAATC  
CATACTTACTACGAGCATAACATCTTCATAATATGGGCATGAAATTTCTGGCTGGTTTC  
AATGGAAGGAGATATTTTGTACATATACTATCATTGCGCCGTCGAAATAATCAGTAAA  
GTCACCAGTTGGATCATATTGGTCAGCACTGACGCTTCCGACCGCAGTAAAGCATATTGC  
CGCTGTTAGAGTTTTACGAATAAATGACATAAGTCATTCCCCCAGATTTAAAATATTCAG  
TTATATTTATAATCTGGGGCTTTATTTATGATTAATCTTATGTTGGTAGTACCATCAATA  
AAATGTTTACGACACACAGAGACATATTTATCCTCTGCACCAACTTCGATTTGAGCACCA  
TCGCGAATAACATTACCCTCTTTATCTACACGAAGGACCATTGTTGCTTTCTTACCACAA  
TGACAAATACCCTTCATTTGACAGTTTATCAGCAAATGCCATCAATGCCGCAGATCCT  
TCAAATAGATTGCCCTGAAAGTCAGTGCGGAGACCATAACACAGGACAGGGATATTTGCA  
TCATCAACAAGCGCACACAAGCCTAAAACATGCTCTTTAGTCATAAATTGGGCTTCATCT  
ACAAATACAGCATCAGGACGCCATCGATCCGGTCTACGCTTACCTAACGATTCACGATAA  
ACCAAGTCGAAAAGATCATCCGATTCAGTGAAGGTGATCGCTGGAGCACTTAGACCAATT  
CGGGAAACAACCTTCACTTTCTGAATCTCGATTATCAATCGCTGGCTTAAGAATTAATACT  
CGCATATCACGTTCCGGTATAGTTATAAGCACTTTGTAACAGGGAAAGTTGATTTGCCAGCG  
TTCATAGATGCATAGTAGAAATATAGTTGCGCCATTAATTAATCTCCAAAAATCCAGCAA  
GACCTAAACCGATATAAGTCCAGATACAAAGGAAAAAGAAGCAAACACCCATAGCAAAGA  
TAAATCCGCGTAGTGTCTTTGGATAACCTACCCAATATTCCCGACCATCTTCTAACCGBA  
TCAGCTTATTTCTTGAGAGTCCATATCAATTACAACATGTTTATTTCTGGATTGTAACA  
GATATTGCTTGACAATCTCAATACCCGCCATAATAACAATAACGAAATTGAAAGTCCACA  
TAACAAGGTTAATGATAGTCTCAAGCATTTTCTATCACCTCCACCCAATCAGGTGTTTCC  
TGAAATACTCCTTCGCCTTCATGATGGTCGCAACCTTTATTGCTGCAATACATCCACCAA  
TCCCACATTCCCACGGTAAACGCTGCATATCGTCGTTACAGCAAGTGAAGATAATAGGC  
CAACCACATCTAACACATCGGCAGTTTTCTTTTCATGTGAGCGGTATTAGGCTTCTTCATA  
GATGACTCCAATATAATCGACATTTACATTTAGGACAATGCGGTTCTTTAATATAATACC  
CGTCTGTCTTTGGAACACTAACAGGAGCGGTTTTTATATTGTATTTCAGTGAAACAACGAA  
AACAAAGTTACGTTTTCTACAGACTGACGTTTCACCCAATCACCGGAATATAGATCATTTT  
TATTTGTCATATTCAACCACCACAATGTTAATGTCTGGAGTAGCAATATTAATGATCTCT  
TCTACACATTTCCACTCAAGGCCACCGATACCGCAACCGATTTTAGGAATATAGAAAGGC  
TGTATAGCACCTTCAAAAACATCATTGAGAGCCTCAAATCCTTTCAGGATAGCACCATAT  
TCAGCATTTGGACCCGGTCCGAATTGGGTATAGAGATTCACCCCGCACCAGTTATAACCA  
TTAACTTGATGCGTCCAGACACTAAACCCACCCAGCTTTTCGACCTTACC GCGAGAAGTT

TGCTTGTCAATCTCTAACGCTTGC GGGA ACTCTTTTCGCGATCTTCGCAGCAATACCAGCA  
CCCATAGTATGAAAACAATTACAACCATGAATTAATGACCGTTTCCTTGTTTAAACAGG  
GCGATAAGATCGCCCTTTACAGTATCAATAATCATAATATAAACCTCTCATTAGTCACGG  
GAAGACAACCCAGCCATAAAAACGGCTTAACAGTGTGTGCGATAAGCAAAGCATAAATTGC  
TTATCAGGGGCAGTATCACACAGGTTGCGTTTTGTTTTAGCAAAGCTGGCAATACTCAGA  
TCCCATGCTCGATTTTTTCGTTTTTCGTCTCGACCTTGTTTTGTATGCTTCATCAAGTTTCG  
AGCGCGATAAAATCACTACACATGTTATCATCATCACAGAAAGTTTTAATGATCTTTTTG  
TTGATCTCAAATCCTTTGTATTCGAACTTTGGATAAGGGCGCTCATTACTAGCAAGCGCA  
CCAGACGAGAACATCATAACAATCATAGCAATTATTGTCAACTTTTTTCATATATTCCTCA  
ATAGCGTTTTAGTCTTAAGAATGCCTTTACTCTTTAGATGGTTAGCCTTTTTTAGTACGTC  
ATCAGCATAACCTAATCCGGCTTTATAATTCCATCCAGCATTGTAAGAAGCTAGCGCGAG  
TCTGATATTACCGTTTCGAATATCCAGCCAGTATGCTAACTCATCCATCGCGTAGAATGC  
AGAAACCTCGCGATTCATGATAAAGTTGATAGTCTGGCGATCACTCATTTTAACACCGCG  
CTTTGCATTTTTTCGCTTTCCACCGTTTTAAGGTAATTTTGAAATAATCCATAAGCATGATG  
ATTTTTCTTTGGTGATAAGTTTACACCCGCGCTTGATTCTTGCCATGCGATACCCGCCAG  
GATGTGACCTAAACCCTTTCCGTTATAGCGAATATTCGGATGGTACTTTTTCAACTTACC  
GCTTTTCTCGAATTGCTCGCCGTATTGATAGGCGAAATGTAAATTATCTAGTTGGTGTGC  
TGTAAGTTGTCTATCGGCGCTTTTTTGATCGGTGCGCTAGTCGATGCGTGTGTAGCACC  
AACGGCTAGTGACAGACTCAATACTATCGCTTTTAGAACTTTTAACATTAATTTCTCCTG  
TTTGGCTTAACTTTCTGATTCCATAATATAGCCCTATCACCAGAAAGTCAAGCATTATTT  
TTTAACCAATTTCCATTATTGGTCTACCTTCAAACAACCCGCCGACATTTTACCCGCCAG  
TCGTTTTGGATTCTCTATAATCATTCCGGCAGCATAGACCGTGATATGGCTTACCCTCTTC  
GATTAGATCTACTGTCATCCCGATCCACATGTTACCGTCAGTAATTTCTAATCGATTCCGG  
TCGGTCTTCCATTTTCAGGAAGTCGAAGATCTCCGGTAAACGAGTTTCTATCTTATTGAA  
TAGTTCCATTGTCTTATGTTTCATCGATATGACGATCGGTTAGACGGTCGATCATATGCGG  
ACTAAAGCGAATGAAAATATACTCACCATAACCATCATTCAAGCACTTTTCTTTGATCTT  
CGCATTGGTTTTGCGCATTTTCGGTTTTCGAAGAATCTACGCAGCTTACTACGGCGAACATG  
TACGTTAATTGTTTCCATTTTATTATCCTTTCTTAAACAAATTGCGAATCCAGTATACAA  
ACGGGATTTCTTTAACTTGAATTTCTCTATAGTTAATTCTTTAGTAGCAAGATGAATAC  
CATAAGCATCATGTGTCACGATATGCCATTTTCTATAGTCCAAATGTGAACAACCGTCTG  
GATCTAGGTTAATAAGAGTTTCTCGCTCACTAGGATTATTTTTCCACAATTTTGTAAATAG  
GATCGCACATAATTCGACCTAGCGTACCATGAATAATCTCACAAACGGTAAAGTTTTCCAG  
CAGTGAGATAGGCGCACCCGTCATAGTCGGTATAAACAACACTTCTTTAACACTCATT  
TAATACTCCTTTGTTTCGATGGGGGTATATTACTACCCCGTTTTGTTGTGTCAACTACT  
TTTTCAAGATTTTTTTAATTGCGTTCCAAAGACCTTTATTCTCAGGTTGTTTTGGTTCTT  
CGATCAGTGTCCAGTTTCGACCGTCTAAGTGTGCACAATTTTTAAGACAAATAAAAATCT  
GGTGTCCCTTATCATCACGGATATTACCACTATTCGCAAATCTTTCATGTGGTGTATATT  
CATAACAGTGTATTTGGTGTAAATACTTGC GGTTACTATAAGGTGTCATCACATACATCA  
TGGTACTAACTCCCATTTATCACCTCGAAGATGAGAACATCCACCATCAAGAAGGATCGT  
AATACGAAACCCCGCATCATCTTCAATATAACCGATAGTCGGTGGATGTTTCGTGCTCTCG  
TACCGGGGTAAAATCATAACATCTTTCCCGGTGTTATATCATTGCCTTTATTGCTATTGGT  
ATAAACTTGCATTTTCTTAATCTCCTATATTAACCTAACACGGGTATAGTGTTCAGAAC  
AACTGTCAGATGAATATATTCTAATAGATCTTTCCAAAAGTCAACATCTGGTCTTCCGG  
CATAACCGTTTTTCTTTGCCTCTTACGCGCGAGTTTAAACACGCTCGTAGAGATCTTTCAA  
TTCTTCCCGCACATTATCAAAGGTTCTTTCTCCTAACTTACACGCTAAAATAGAAGAACG  
TCGCGCGAGCGGGAATTGTAGATCACCTGTCTGATAGATTTCAAGTAGTTGATAACCAAC  
ACGCAGAGCATGAGAAAGATCTTTCAGTTACTGAAATACTTTTCAGATTTGGCTACCTG  
TTTCTTGAGATAACCAGACAAACCCACATACCAACATGATAGAATTTATCGCGATGTGT  
TCGGATGTATTTCCATTCTCTGGAGGATTCAACCAACATGTTACTAGGCGCGTGCACCAT  
GTCAATAGCGCCGATATCGCCTTTACATGCCAGATTGATAAACC GTTTTAGACTGAACAT  
ATTAACGTCAATATCGTCTTTGGTGTCTTAAACCTTGACCGCTAGTGCTTTGGTCATA  
GTGTTCTTTTCATAGATCCTAAGATAATTTCTTTTCGAGTCGGAACAAAGATACCACGATA  
ATCTTTATCTGAATTTTTCAGTATCAAGACCGTACAAGTGAGATCCGAAGACCATTTTAA  
CATTGTATGCATAATTAACCCCTCAGTTGATTAAGAGATTGCATCATATCATATAAAC  
GAAAAGCCAACCCTTTTTCGGATTGGCTTGATGAAAATTAGAGAGATTCGGTAAAGGTA  
CGCGCGATAACGTCACGCTGCTGGTCTGGAGTCAGACTATTGAAGCGCACCGCGTAACCA  
GAAACGCGAATTGTAAGCTGCGGGTACTTCTCAGGATGTTCAACAGCGTCCAGCAACATT

TCTCGTAACAATACGTTAATATTCAAATGCTGACCACCTTCAACAACCGGAGCACCATTA  
TCTACAATGACAGGACGGAAGCTAGTTGTGTGCAGTGCCAGCGAATCGACGTCTTCGGCG  
GTGATCACATGGTCTTCTGCGAAAGTTTTACTAACAATTACTTTAGCGCCGATCAGTGCT  
TTCGGTTCTGATACCAGAATCATAGGCGCGAAGTGTCCACCGATAATAGTACCTTTATGC  
TCACCTTTCATGATTTGAATTGCTTTAAATTCCATAATTCACCTCTTATAGATCAGGACG  
TTCGTCATTAATTTTACCAACCAAAAACACCATAGAGTTTATCAGGTTGGACTTTACGATT  
CTTATTGATTGTAGCACGGAATCGACGAGCTACGCTATCTTTATTTTTTCATTAGTTGATA  
CCTAAGCCAATGAAAATAGGTTGGTCTTCTACATTACCCATCCCAACACTAAGTCGATTT  
ACTTCTAAAAACTGCAATACGCTGTACGTAATCCGCGCATGGTAGTATCTAGGATAAAA  
ATTGTTTTGTCAAGACTACGACCTCGCCATGTGATCGGATTCAGGAAAGTTCGGATCGAC  
GTGCAATCTACATTTGAAATATTTACATTTTCACCGCGACCGCGATCTCGGATCGTTTTG  
GCATGTTCCCGCGTTCGTTGAAACGATAAAGACACTATAGCCTTTTCGCGTATAATGGTCA  
TATAACTTGATTGTAGCGTCTGTATGCCCTGTCTGACGGCCTAAATTGATTGAGACGATG  
GAATCTAGGTCATCAGCAAAATTGCGTCGCTTACGGCGTTCTATGATGCCATCTACGGCA  
GAAACACACGCAGCATAAATCAAATCTTTACTTTCTAATTTTACATCAATATTCATTGTC  
AAGTCTCCAGTGAACGGGGAGAGATCCTTAGATTGTCTCCCGTTGATGGTTAATATTTT  
ATTTTGGATCTGGGTATTTGCTGTGTGGCAATTGTAGATGAGGACCATCTTAAAACCTAG  
TCCAATCCCCACCCCATTC AACAGGAACACCCAATTCTCGACCAGCTTGTTTAAATGCAT  
CAGCGATCATGCGGTAATATTTTCATATTCCATGTATCCTTATCTTTTCGGATACGCTACAA  
CGTCAACCGCGAAACCGTGAAGATGACGAGATTTTCATAGTCTTAGATTTACCTTCCGCAA  
CATATTTCTTTTGCCTTTCTAGACTACGCACACCTTCCGTAATACCAAAAATCGACAGGAG  
TCAGTTCTAACGCACGATGAACGACTTTTACCAGGTCTGGATGTACACCAACAAGCCGAT  
CTTTGCTTCTTTGAGATAATTTAAACATTATTCACCCCTTTGTGAGTGATAATATTTAG  
ATTCCGGCGATCCTGCATAGAGTTCTTGTATTAGCGCCAATAAGGATAGCATTAAACGACA  
ACCATTCCCCAATCAACCCACGGATTATTATAAATGCTAAATCCGTTTGCTAGGCCAAAT  
ACAAGCATTCCGGTACACATACTCAGAGCAATAATCAACATCATGGTAAAACCAAATGCA  
AATCTCATATTATTTTCTTTTCTCTGTTTACGTTTATAAAAAGTAATACATTACCTCATC  
ACGTCCGGTGATCCAACATGCTAGGGCGGTAACAGGTTTACAATTCCCAACACACCTAC  
TGACGCGGCGCTGTCAACAGACATAGGAACAGTAAAGGCCATAGCTAACATAGCAACGCC  
ACAAATGACATTAAGCACCATTATAATAAGACCGAAGAAAACCAATTGTCAATCCTCACAA  
ATAAGAAAACCAACAATCACGCCAGTGATAAGACATGATGCACCGCTAATAAGACAACCA  
GCGCCAAGTGATTCCCACCAGATCAGAGAAGCGACAATAACGAAAATTCCCCAGACTACC  
GCAATCACAACATAGGCAAGGGTGCCCCAAACATATATTTGTTTCATAATAAACACATT  
CGCCAAACAAATAAGAAAAAAGCCATATCAACAGAAACGAGGCAATTGATCCGGCAAACA  
AAATGATATTAGAGAATCCACCGTCTACCCAGGCAACAAAACAGAATACGCTAGTATAGA  
AGCATAAACCCATTACAAAGCATACTATAAGCAACCATAGATAAAACGTCATAGAAAGTC  
CTCCAGCGAGATAAATTAGTGAGGGTAGTGGAATGTAATACTACCCGCTTTGTTAATCAACGC  
AGAGCTTCTTCTAGCGAGATCCCAAACCATCCACAAACAACGCCCATACAGACAGCTACA  
AGAAGATTCAATTCTCTCTTTAGGGATCATTGCAATCATAACAACAACCATACAGAAAGCC  
ATTACCATTGAAGTTAACATTTGTTCAACCATTATCACACCTTTAAAGTCATAGACGCAT  
AAACATTAATGCCAGGCCAGTTAGGATCGCAATTATACTCAACATCCCACAAATAAAGCG  
GTTTAGATGTATCAGCCAAGTTTTTAAAATCTTCTACCCACATTTCAAGGCTATATGATG  
GATAAACTAGGCTATCATATCCGCCGTAACGTTGGCCTACTGGTCGGTCAGTAAAACTA  
CCTCAAGATCCGGTAATTCTTTTTCAAGGATAACCGCCAGCGCATAAATAAGACGGTCTT  
CCTTGTTACGCTGCCGAAGGACCGTTGTACGTTGGTTTTTCTGGTTCACTAGCAAGCACC  
TCCACATTTTCACAGAATGAAATTTTCACAGACACAATTTTACCATAAGTGAAGAATGAA  
TATACATTATCGATATATTCAACGTCACCTACAATCACATCAAACCTGCGGATCAGCAACC  
GCCGCAACATATTCTACCAGTTCATCAAGAGAATGCAACTTAATTTTCATCAATTCGGCTG  
TATTTGGTTGCATCTTTGATTTTAAAACACGTTCTTTTCAGCTTATCAATTAGAATTTCA  
CGCGGAGTTTCAAACAGTTTGCTCATAAATAATCCTCACATTAATCTAAAATTTGTTA  
ACGACGAATTGCATAATTAGACTAATCACAAACATTGCAAACCAAGTATAAATGCAACAG  
ATAAAAGCTACATAACAATTCAATCTGGTCAGAGAATACACCGGGTAAAAGCATTAGCAAA  
ATAACAACAGTAAAGACGCTAGCGATACCCGCAACAAAACCAATATCATTTTTACTAATC  
GTCATCAAGTCACCGTTTTGTAAAGAAACACAATAAAAATCCAAGACAAGAAAGACAGTGT  
AAATGATCATCGTCAAGACAGTAAACACTGTCAGATTTTCATCGTTAGTTAATTCATAGT  
CGCCATCCATAACAATCACAAGATATAGCATTGAAAGAATGGAAGCGCCTACGAAGTTGA  
AAAACATATTCTTGAGCGTCATATTAACAACCATCGCGGCTTAAGTCAATAGCAATTGCA

TACAGCATAATGAATATGCTAGCAGATCCAAGAATCAATGCACCGTCACATTTTGAACCT  
CGCTCATCAAATGTAACATTATCCATCCGAGGATGTTAAAGGCGCATAACGCGCCTATA  
TTATCTAACCAATTAATCTTTTTTATAATATACCTTAGAAAGAAACAGTTTTCAAGAAAT  
CAAGATTTTACGTACCGAAAACAGAAAAGTAGTGTTCCTTTTTTCGGTTTTAGAGAAAG  
CGATTGTCTTCTACATGGTGACGGAAGCCAGATAGACGATCACCCAGGTCAAGGCGGC  
AAGCGTAAGTAGTGCCGTTTTTCGAAAGTAACCTCGATTTGAGTTTTGTCATATTCGCTTT  
CATAGGCTTTTTGCTGCCGCGTCCAGTGCTTTACGCTCGAAGTCTTCGAAGTGAATACTT  
CGTTTGC GTTAGCGAATACAGAGGATTCAGAGAAGATAACTTTAACAGATACTGGTTTCA  
TTTTGATACTCCTTAGTAGTTCGTGTTTCGTTTTCGATGGGTGTATTATGCTATACACCCT  
CTTGTGTGTCAACAACTTTTTTAGTCTTTTTTATAATTTCTAGAGCAGTTTCTACCGCA  
CCTTTCCAACCCTCCACATAATGGACATAGTAATGAAGTTAAAGCACCCGCAGGAATCA  
GCCTTTTTAGAAATAAACCATTCTACAAACGCTTCGCTCATACCATGCTCTTTAGCGGAT  
TCGCGTAATTGTTCAATTTGGTCTTCCATAGTATCACCTCAACACTTAACGCTATTCAA  
CGATTTTGAAGTACATATAGCAAGCATAATTTTGCTTTGGCTGTACCGTATCAGATAGA  
CACGCTTTTACAGCCTCGCGGTCCGATGGATCTACACCCTCAGCTTTAAGTAATGCTAAA  
ATCTGGTTATAGCGTACTCTTAGTTGTACTAATGGTTTATCCCCCATATTACCCCTTAT  
AGTTGATCAGCGATGTAAGCGTGACAAGCGCGGAGTTTCATTAATGCACTACCTTTCCT  
TCGCCGACGATGTTCAACTTCTAAGCGGTTCGGATGGATTTCATCTTAGAGCACCAGATC  
TGGTTAGCCAATTCCAGTTTACTCATATTTGGTTCCATCTCAAACAGTTCACGCTCAAAG  
TCGATAATTTCTTTTGCTGCGTCTTTAAAGTTAATCATTTTGGTCTCCCGTTTTCGTTGA  
TGGTTGTATTGTAGGGGAGTTATCCTCCCCTGTCAACACTTTTATCAGAAATATGCAATA  
TAGTTTGCCAGTCCACAGAGTCATCATTCCGGCATTGCTTTTACTGCCAGTTCAAACCCT  
GCTTCAACTTTCTGTTTAGCGGATTCTTCGTTATAACCCAGATTACCAGAATAGCTACT  
ACGTTTTCTTTGCTTACTGCTTTTACGTGCTTTAGTGATGCGACGTGCCATAATTTGATTC  
TCCGTTTAAAGAAAGTGTGTTTCGTTTCGATGGGTGTATTATGCTATAGGCAGGATCTGGT  
GTCAACAACTTTTTTAAAAAATTTTAGGCAATAAAAAAGCCACTCCGAAGAGTGGCTTA  
TAGGGAAGGTAGCGAATCTTCCTTGTCTCCAACCTGCTAGCGGCCTAGCAAGTGAATGCT  
TTAGCGTACCGGATCGCCACATACGCTGTAATAAATGCGGCTAGGTGACGTCCAAATCA  
TTCTAACCGCGCTGTCTTTAGTTCACTATTATTTATATCGCTTTCTCTCGCGACGTTTTT  
GGTCTTCTTCCTTGATAGAGTTAAATGCATCAAAAAGACACATGGCACTAATAATAACA  
TAACCGTATTTTCTACGATATCCCACGGCTTCGCATCAGTACAGATCCCCAAACGGTAA  
GAAATGCAAATAAGGCAGAAGAGATCACAAGCATGATACTTGCTAAGATATAAAAAAGTCA  
TTTTCATGGTTTTACCTCAATTCTTCGATATTCATCACACATCCACACAGTAAGCAAGAA  
TCCCAGCACATAAGCAACAAAATACGTTAATGCTTCTTCTGGTTCGGTGCTATGCGCCAT  
CATCAGACCAGCGAGAAAGGTCTTAACAATTACATTTAAAATAATTAGCCACGCAAATAA  
TTTCATAGTTTGCCCCATTTTCGGACGAGTATTTTCAAACCTTATACATTACGTAACAATCT  
CGAATCATCCACGTAACAAGAGCACCAGTCAACACAGACAATACGCAGAAGAAGTAAAAC  
GGTCCGGTTGCATTATCAACATGAGCAAGCCAGGTAAAGAAAACACATGCTAAGAATGTA  
AAGAACATCATAAAGCACAAAGAAAGCGAAATATTTTATACTACTCATAGCGCCACCATAC  
AACAGATCATAAGAAACCCCAACGCAATAAGAATTGCGTCAAATTTAGTGAACCTCCGGTC  
CACCTATCAACATCATTTCGTTCTATTTTCGTTTCATAGCGTACAAAGCCATTTAAAAGCACC  
ACATAAAGCGAGCAGAATACTAGGTATAAACGAGACCAAAAACAAGTTTGCAAAAATCATC  
TAAGGTAACACCGGAATAGCTACCTACTGTAACAACACCGATCATCAGACACAGAAAGAA  
AACAAATGCAATCATAAACAAGTATTGCTAAACAGTTTAGTGATCATTAGACACCCAC  
GACGATCAATTTCAAAAACTTTTTATCATCAACGAAGCATGTCACAACCTGCCTCGTTGA  
CTTCCGCAAATTTGTTGTGTCACCCACTTAAGGTCAGAGCGAAACAATGTTCTATTAATAA  
CAAATGTTTTACCGCTCTTATCCTTACCCATAAATTTTGCTTTACCCATATCCAATTCCA  
TATTATCACCTTATTTGCTAATCGCTAAACCCAATCCGAAGAGAGCACCCGATGCTACAG  
TATACCCGAAAGTTTCAAAGGCAGTAAAGATATCTAAGCCACCAGCTAACAGAGTTGCAG  
TAAACAGAGTACCAGCTACGAACATAAAAGTTTTACCGATGAATTTCAATTTTGATTCTCC  
TTTTCGTTTTGTTTGTGGGGTATCTTACTACCCCGTTTTCATGTTGTCAACTATTTTTAA  
GAATATTTTACTTCGTCTACAATGTCTTTTCATGACATTGATTTCCATTCCGGTCAGAACA  
CGTTGGAACATGTGCTGCACATACGCTTTTACGGTATTCATTTGATGGCTTGCTATCGAAA  
GTCTTTTTAGTGTAGTATCACCAGAAAGCTACTGTAATTATTTTTCGTTCGTCGTTTC  
CAAGCGATATAAGCAAATTTGCCGTTATCCCAGAAGCGAGCACTAATTGCTACTTTTTGTT  
GAATCGAATCCTACTTCGCTGTGAGATTCAAGAACTACTTTCGCTGCCAGTTTCTTTATGA  
ATGTAGTAGCGGGATACTAAGTCAAAGTTACGGGTGTAGTGACATTCGAATTTATCTTTA

AACATCATCATCATTTTGGATTCTCCTAAGTGTGTTTTCGTTTTCGATATGTGCATTATGCTA  
TAGTCGTTTTATGGTTGTCAACAACACTAAAAACAACAAAAACCCCGAAAAATTTTCGGGGTAT  
AAAATTACAGTTTGGTCGTCCACTCCAGGTCTAGATCTTCGACATACTCATGAGATCGGA  
CAATCTCTAAATCGAACTCTAGGTCTAGTGCCTAAATTTACGCGCACCAACATCATAAGAAA  
GCGTGATATGCGGTACATATTCAGGATAATCCCACGTCGCGCCTAAAGCAGTTCCGATAT  
CGTGTCTGAATTGCATGTAGTCGTTTTCAATGCCAACACAAGCGCATTAGTACCGGATT  
GAGTTTCAAACACTTTTCAGATGGCATAAGAGAGCCTAAAAACTTTTCACCCTCTTCTGGGA  
TAAACGGAACATAGACACGAGAATATAAGATAGTGCTATGCAGTTTATCACGAGGAACGG  
CATTAGGCAGATCGTAGAACTCCTGCAATTTTTCAATGCGGTCTAGTGTATCCTCAGTGA  
ATTTAACCGCCGCATATGTACCTTTAACGGATTCTCGAAACGGGGTTCATAATCAAGCCTC  
CGTGATCAGTTCTACTTCTCTTTAGCGTCTTCCGCTGCTTCGTCTTTAGGGAGAAGTGC  
TTTCACTTCTTCGACAATAGCATCAAGGGAAACAGTGCCGTTTTTCGTCTGGCTGAATACC  
CAGAATGCGTACAAGTTCCATCAATACACGCTCACGATCTTTCAGTTGGCCTTCTAAGAA  
TGCGGCCCTTTTCTTGAGTGTCAAACAGACGTACTTTCAGGACATTAATCATTGTTCATG  
CTGATTGGACATATTCACATCTCCTACTTGTGATAACTTTTTATTAAATGTTTCGCGAGA  
ATCGCGCTTTCAAATTCTTCTAATGTGCCATTATTTATGATAACTGTTTCACCGTCAATA  
GGCAAATTCCTTTTTTCGGTGGAGTGGGTCGATAACAATACCAGTATCGCGCTGAATATGC  
AACACCTTAGCACCCATAGCACGCATGAGAGCAATTTCAATAGGCTGACGCACATCAACC  
ACTACAAAATACCCTTCTTCATTTTTGCGCTTCATAAACTCATCCACAAAGAGATTACAC  
CAATAAAGCGGATTGATCAAGTTAACCATTATATCAGTACCGAGAGTGGTTAACATGAGA  
CGAATAGACCAGACGTTATTATGTTTTTCGCCAATCTCATTAAACGACCTTGTAATCTCA  
GCCAGACGATCACAAGTAAAGGAACACTACCGCCATACTTCGAATCTAGCATAAGCAGACAC  
TGAATAAACCCTTATGCGCGGTATAGGTATCAATACCTAGATCGGCTTCTCTGTCACGC  
CCTAACCCGTCAAAGTCAAGATAAGTCAGACCTAAGTCTGGTTGACATTCGCATAAGATT  
TCTTTGATCGGTGCTGCCAGTTGATAACTATGTCCATCAATGATTAACGCGGCAGTGTCT  
TTTCTACTCGCTTTTTACCACAAAGTGCAATCAATTTCAATTATATAAGCCTCTTATTAC  
TTTCTAAAAGCAGGGTGCATAGCTTTAATACTTCCACTCGCTGACGATCCGCCCGCTGA  
ATTGCAGGGCGAGGAACGATCAGTTGACCATCACGTTCAATGCTCATTGTTTTAAATGGA  
AGAATTGCAGTACACACCAGAGATTCATGCATATCATCGGTGTATGTTAACTCAAGTTCC  
CCCAATTGTGAACACCAACAACCATAAAAGTTAAAAGTGCACACAATGTTACGTCGTTCC  
TTGTCCATCATGTGAACTTGAACGGCTTCCGGCATTGAATCCTTCCACGCAGTGGAGTTA  
CCGTTATTGTAGTCTACTATAGAAAGCATCCATGTGTAAAGGTTTAGATAGCTTTCCAAA  
TGCTCATCGACAATAAACCGGACTACCAACGGGTCAAACCTCCACATGACTGGAAGGATAA  
TCTGCAATAGCCAAACCATATTGACCAGCAACTTGCTTAGTTCGGTGGAAATGGTTATAGCC  
GGAAGCGTAACACCTTGAGCATTAAAGTAAAGCCTTTTGTTAGCTGTCCATCTGGAATA  
TTGATCTGCCAGTTGCTAGGGTTAGCATAGTTAAAGAGATTAGACATTACTGATTCCTCA  
AATGAAAATATTTATTAACAATTGTGCTTTGCGACGTGCCGTAGGCACTGACTAATTTT  
TAACCGAAACAAATTTTTATTATTCTAAAGATCTTCTTCGTTTTGGTTATGTTTTAAC  
AATAACTATATTTTTATACAGTAATAAATAAAACGGGTACTATACGAGGACTTCTTATGA  
CAGAAGACATTTTGTAAAACCTCTATGATCGTTTTGGATAACGAATTAGCAACATTGCGGG  
GTGAAGTTCTCTATTTGTCTAAATGCAATACAGATCTGCTTAAGCAGATTGCAGAAAGGG  
ATGATCAAATAAAATCCCTTTCAGGTGCATTACGTGATCGCGACAAGGCATTAGAGATTT  
TACAGCGTGTACCAATAAGGAAGAATTAAGACTTCTTACATGGTTATGCTCATGCTA  
TCGATCTATAATAAAAAAGCCCGTCATTGACGGGCTTAATGTTATGCATCCTTCCAACT  
TTCTTGCCTGCTATTTCTTGCCTTTTGACATAAACTGATATGTAGGCATATAGATAATA  
TTGCTCCAGTCTTTCGGGCTAATCTCAACAAGTTTTGTTTTAATGTGTCCCAGTAGATAT  
GCTTTGATCATGTGGTCACTACCACGCATACCTTTTACATCGCTCCATTTGATTTTTAAG  
CGTGTTTTTATTGCTCAAGGTAGGAGTAGATGCATATTGCTTTAAAAGTGCCTCTAAAAAC  
TGCTGACGGGCTTTAGGAGTTACATAGTGTAAAGTTAAGACCCAGCATCACAGTATTACCC  
GCCTTTGTCTTAGAATCACCCAGACAAATGATCAGCGGGAAAACATCCCAATATGGCAA  
GTGTCTTTATACTTAGCATCATAATAAAGGTATAGATTCGCCCTACTTGCGGTTTTACA  
ATCTGGTGTCCCTTTATTCCCGCTTTTATTGTTTTAGTAAACCACTCCTGTGATTTTTCT  
TTAGGACGACTCTTTGATACAGCACGCATAGACGCACGAAAATCATTAAATCATCATCATT  
GCACGTTGCTGCTTATTGAGACCCTTTGCTCCTTTCCCTTTTAGTTTTCAACTTCTATT  
GCTGTTTTAATTTTCGCTGGCATAACGAGACATACTTTTAGTGAAAGTTCGCATAGGCTATT  
CCCTTAGAATCTGCAAATGCTTTAGCTGTCATGCCTTTGGCTTTTGCTTTCGCAAATTCT  
ACACCAATTCGACCCACTGTTTAGACTTTCGTTTTTGGGGAGACGGCTTTTCGTCTTCT

GTGATTATTTCAAATACGCTCATAAATATTATCCTCTATTTGTTAAGCCCTTTAAAGCCAA  
ACACTTTCTTTAATGCATGTTCCGGTGATGATCTTAAACTCCATGTTATGCTTTTGGCATA  
ATTTACGGCAGCTAACCATTTTTTCAGTATTTTTTGTGTATGTCCATACTTCATGCATAT  
ATCGTTGCTTTGTCTTCGCGGTCAATCTTTTTGGCTTTTCCGGTGGCCTTGTCTCTTTAG  
CTGGTTAACTTCCCATAAATGCTCCTTGCCATCATCAAACCTTAAACGTA AAAATCCATAA  
AGTATCTGTGTCTTTTCCCCTGTGTGATGACTCATAAGGAATTACTACGGTCTCAGATC  
CCCATTTTGCAACTCTAGGATTGCGGTCTAGCCACTGCATGATCCATCTTTCCAGCTTG  
AACGGTATGTGATCTTACGTATATCCCCTTTATACTTTTCTTATTCTCAGGAACATACT  
TGCCCTTATAAGTGTTAGATCCTCCATTTTAGCACCTTTATTATAAATAACATAACT  
ATTTATCAATTGAGGGTGATAAAATGCTCTTTTCTTTCTTCCCTGCCATTGAATACAACG  
GCAAGATGATTACTGACATTGTGCGCAATTACCGCGCATATTTCAACGCAATAATTTCTG  
ATTATAACATACAAACATATTACATTCAAGGTAGTCCACGACCGGAACAAGTTGCATATG  
AAGTATACGGAAACCAACAACCTTTATTGGATCTTGCTGATGCTTAATGACGTATACGATC  
CGTTCATGACTGGATCACTGATCAAGAGACAGCATATGAATCAGCCGAACAGCGATATG  
CAAATGTAGGAGGAAATCAAGTATTATAACCACGTTGATATTGACGGAAACAAGTATTGGA  
ATCTTACCGAATATCCGAAAGGATCAAGCAACTGGTATGATAAAGGGGATATTCATCACC  
GTCATTTGCAGTTTCATGGTGCATTATCGGCGGTAGACACGCTGGAAGATGCGATCCTCC  
GCAATGAGGAACGACGCAAGATCAAGATCATAGATCCTACACAAATTAACAATTTATTA  
ACGCATTCATTCGAGAAATGGAAAAGGCTGATGTGTAAGGTGATTAATTATGCTAATGTT  
TAATAACTCCGTTAAATGGTTTACCGGAATTGTAGAAAACAGGGAAGACCCATTAATGCT  
GGGGCGTGTTCAGGTTAGGATTCATGGTATACATCCCTCGCTATCCGCACACGGTGACAT  
TCAAGGTCTTCCAACCGAAGATCTATTATGGATTACGCCAGTACAAGATATTACAAGCGC  
GGCGATCTCCGGTATAGGTCAAAGCCCTACTGGTATTGTTGAAGGTTCAATGGTATTTGG  
TTTGGCTTTAGATGAACGTTATTTAAACTGCGTTATTCTGGGTACTATTGCCGGACAATA  
TACAGAGAAACCACTCACTACAGAAGGTTTTTGGCACCCTTCTGGTGCATATCCTCGTTA  
TATTGGTAATGATGTTAATATTCTTGCTCGTGGCGGTATTAACCCAGAAACCGGGCAAAC  
AACAAAACCTGATAGTGTCTATATTTCGAGATGAAAACACTGGAGTTGCAGTAAATCCAGA  
CGACGAGCCATTAGACCAAATTCGGTTGATGATAATCCTGATTTTACAATAGAAAAAAT  
GCTGCGGGGCGATGAGGGGTATCGCGAGAAATGGTATCTTGATTTCAGAAGGATATCCGAC  
AATAGGCATCGGGCATTGATCATTATAAGAAAACCAAGTATCTTGGTATTATCAATAA  
TGAACCTTCTAAGCTGGTAGGGCGTGAAGTTACAAACGGAAGACTTACCGCCGAAGAAGT  
TAGTAAAGTATTTGCCGACGATATAGAAAAGACTCGTCGTGATATGCGCAAACATCCACG  
AATTGCACCTGTCTATAATAAATGTAATGCCTCACGTCGTATGGCATTAGAAAATATGGC  
GTTTCAAATGGGTGTTGGTGGATTGGGTAAATTTAAGAATAGTCTTGCTGCAATGTTAGC  
GGAAGAATGGAAACAAGCCTATGATGGATTACGTCAATCGGTATGGGCTAACCAAACCTCC  
AGGACGCTCCAGCCGTGTTTCTAAAATTAATTTAACTGGTAACTTAGAATCATATGGCGT  
AATTGCTCCAAAGAAAGAGGAATCAATTTCTGATGATCCGCGAGCACGTTTGAGAAATGC  
CCGTATTGCTGCCTATAAGACGCGAGAGAGCAGAAGAAGAAGACCCAGAAGCACCGTTTAC  
CCCACAAGACACACGAATCATGTTTAAAGAGCCTAAGAGTTCGTATTCTGCTAGGTATCC  
TTATAACCATGTGTACGAGTCAGAGAGCGGTCATATTATCGAGATTGATGATACTCCTTC  
TCATGAGCGATATCATCGTAAACATCCTTCGGGTACATTTGAAGAAACAGACCGGACGG  
AACGAGGGTAGAAAAGATTGAAGGCGATGATTATCTGATCGTTAAACAAGGCAGGAAAGT  
AAACGTTAAGGGTAATTTGCAAGTTGTTGTTGAAGGTGACGCGCAAGTTTATTATATGGG  
TAATGTGATGCAAACCGTTGATGGTAACGTCACTGAATTTATTCGTGGTAATGTTAATCA  
GACCGTTGAAGGTACTGCTAACATGCATGTTGTAGGTGATGTTACCGCTCAGCTTGACGC  
TAATTTGACGGCTAACGTCAAGGGTAATGCTGAATTAATGATCGAGGGTAACACTACCGA  
AACAAATTAAGGTAACCTATGATTTAACCGTTGAGGGTAATTTAATATGACCGTCAATGG  
CACTAAATCAGATCAGGTTAATGGTGACTGGTCCCCTAATTGTGGTGCAAGCGTTAAAGA  
TATTGCATCTGGTACAGTTAAAATTGATGGTAGCCGTTATTGATCTTGGGTGAGGTAAC  
ATGGTTGAAATTCTTCCGATGAGTTCAAATTTGGAGGATATCAGCGAGCGAGAAATCTTT  
GAGGTGGTGTCTCTTATAAAGCAACGCCACCGGATGCAAATACCACATACACGATTA  
GAGTTTAAAGATCAGCGAGTATCGCCCTAATAAGGGCGTTACCGTTGAAGAAACTAAAATA  
TCTGGTGAGTATCGGGATAGTTTTTCGCTTGGCGCGGATTCTCTTAAATATATAACGAAA  
GATAGAATTA AAAAATCTGCCGGAAGTTTTGATGATTTACCAGATCCAATTACCGCAGAT  
CTATATTATTTAACGCTCCTACACGTCTACAGGAGCTTTATACTTATAAAGTCACCCTA  
ACCTATATCCAATCTGTTTCAGAGTCTTCTGGTGGTCTGGTGAAGGAAATAGTGGTGGT  
TCCAATAGCCGAGAGGGTGTGGTGAACCTAATACGCCTCCGGTAGTAACCGAACACACA

ATAGAGAAAGTTTATACTCAAACCGTTTTTGGAAATTGGGATGTGTGGGCGCAGCAACTA  
AGAGATTATGTACATAGGGGTGTTAATGGCTGGATTATCCTACGATAAAGCTAAAACCTA  
CAGGGCACGGAACTACCCACCTACGGTAATTAATGCAACTCAATCTAAGGTATTTGTTG  
AGGGTATCCCTGTATTAGTCGAAGGAGACCCAATTACACCACACACAAAAACAACAAGC  
CTTATGATACACACGGGGAACTACGGTCGCCAGTACCCCGAAAGTATTTGTTACCGGAA  
AGAAAGCAATTCAAATGGCAGATCGTATTAGCTGTGGCGATACCGTCGCTATGGCATCAC  
CGAAGGTATTCATAAAATGACAAAGCAAAGATTACACAAATTCCTGATATTTTTAATGC  
TGCTACATTCGATGAAATTAAGAGCGCATTAACAGACTGGATGAGAAACCAGGAAGAATT  
TAAAGATTTTGATTTAATGGTGCTGGTATTAACGTATTGATGGACTTGCTCGCATATAA  
TACCCTTTATATTCAGCAATTCGCTAACGCCGCGCTATATGAATCTTTTATCAGAACGGC  
AATTAAGCGTAGTTCAGTTGTTCAAGCCGCGCAAGATTTAGGATATTTGCCAGCAAGTAA  
AACTAGTGCATCGACTACAATTATGTTGCACGTATCGCATCCACGAAATCCGGCAAGTAT  
TCGAATCCCACGAGGAACTAAATTTATTGCAAGTGTGGATCGCCAGACGTCTTACCCGTT  
TGTGACTACAGAAGACGTTGTGAGCGTTTTAGGTTCAAATGGTTTATACTCCTATGCT  
TAAAGTCGCACAAGGTTCGTATTGTTTCGTACAGAAATGTTATTTGATCCGAAGAAACAAT  
TCTGATCCGCGATCCTGATATTGACCGCGCTCAGGTTAAGTTGTGGGTAGACGGTGCTGA  
ATGGAAAGACTGGACACGAGAAAGCATTGTTAATGCAACTGGTGCAAGCAATATTTTCTA  
TATGCGTGAAACCGTAGACGGACATACTGAAATTTTCTTTGGTGAGGGTGAATCAACTTT  
ATCTGCTGCTGGCGGTGCACTGGAAGCAAATTATATCGGTGGACTTAAGCCGTCAACTGG  
TGCTAATATTGTTATCGAATATATCAGCACTAAGGGCGCGGAAGCAAACGGTTCAGTTAA  
TTTCACATACGCGGATACCCTTGCATCTATCTCTATTGTTAAAATTATTGAGAATCCGAC  
AAATGATCGTGATTATGTCGGTGCAGATGGTGGTGGTATCCTGAATCAATCGAACGTAT  
CCGTGAACTTGCTCCGGTAATGCGTGAATCTCAGCGTCGTTGTGTTACTGCTTCTGACTA  
TGAGGCTTTTGTGTCTAGCCGTTTTGGTAGTATTGTTTCAGGCGGTACAATGTTTCACTGA  
CCGAGAAAAACCGGGTTATGCTTTTTGTTGCGGTTAAGCCTAAATCTGGCTTGCGCTTGAC  
AACTGTTCAAAAAGAAGATATGCGGGATTATCTGGCAAATATAATCTTGCCCTATCAC  
TCCGAGCATCATTGACCCTAACTATCTATATATTAACAGAATATTAAGTTTCATATTC  
AATCAATGACTTGTGAGAATCAGAGCAGTGGTTGCGCGGTGCGGTTATTGATCAGATTGA  
TGCATATTATACCGACGAAGTGGAAATTTTTAACCAGACCTTTAGTAAGTCTAAAATGCT  
TGCGCGTATTGACAAAGCTGATGTATCTGTGATAGGTTCTAGTGCAGAAATCGAGATGGT  
GCGAGAGATCGACAACCTTCTATAAAGCACCGATGGCTGGAATCAAGTTTTTAAACCAGTA  
TAAGAGCGGAATCAAGTCTAGTTCATTCAACTTCGAAAAGGACGACAAGCAATATCCGAT  
CCATTATGTAAGTACAGAAATGAACAAAGAATCCGGTTTAGCTAAATTGCTGGTTGGACC  
TTCCCTGTTGATTCTGCAATCGCTTTACCGCACTATTCCGGCACTGATTTTGATAAAGA  
GGTTATTGACGGTGCAGGACCTATACTTTGAGGTTGGAGAGGTTTCAGCATTATGACGACCT  
TATTTTCATGGGATCTGGGTAACTGAATATCAATAGCGATCGCTTTACTGGTTCATATAT  
TGAGTTGACAGCTAAACCGATTGCTGATAACATCTTTACTAAAGACGGTCTTTGATCGT  
GTTTGAACGATCTCCGTCCTCAGTACACAACCTATTAGTCTGGAGGCAATTGCTCAATG  
ATTAAGCGCCTAGTGTAAGTACTAGCTTGACAATAGAAAAATTGTCTGCTAATCAGGCGTAT  
ATCACATGGGATGACGTAGGCGAAAACCTTTTATTTTGTGGAGTTAGCCGAAACCAGA  
ACACGAGACGGGGAGATCATCCCCGTCGATGAGTTAAGCTGGGTAAACCTGGGATATACT  
GCCGAACAAAACCTGGTTTGAGGATAAAAACCTTTTTCCAGAATATTATTACAAGTTTCGT  
GTAGCAGTAGCCGCAGAAGGATTTGAACAAAGTAAATGGGTTGAGACAGAAGAGTTTCAG  
ACATTTAAAACAAACGCATATAATTTTCTATGATGCGAGAGTTCAACCTTGCAAACGAG  
TTTATAAAGGAAAAATTTACATACGATAATCGAGAGTATGTCAAGTTTAATACCGACCTT  
ATTCAAGCATCATTGATGAAGGAAGATTTTGTCTTTAGTCTGAATATGCAAACATGACA  
AATATCTCAAACCTATATTGTAGTTGATGAGAATTTTCATGAAATACAGGATCACATAGAA  
AAAGTTTGTACTGATATAAACCGCACTATGTTAGCGGAAATGAACGGTGTTTTGTACCTT  
TTCGAACGGTTCCAGCCGATCGTGAAAGTGTCAAATGATAAAGGTCAATCATGGAAAGCA  
TACAAGGCTTTAATGACCGTGTAGGCAATCCGGTTTCCCGCACATGCGTTTATCAGTCT  
AAAACCACTACTTACGTTTTAGGATATGACCGAATCTTTTACGGACGACAAGCTAGCGAT  
ACTCGATGGAGCGCGGACGATGTTTCGATTTAGTGATGATACGATCACTTTTGCAAAGGTT  
GGTGACGAAAACGACTTAGGGTTTGTGTTGAGGTCTTTGGTGTATTTTCCAGATTAACA  
GGTGACACCACAAAATACGCCGAAGCTATGGCGTGCAGTGTGACTATTTGTGGGTTGGT  
GCTAAAGATGTTATTCGCCGATTTCGTCTTAAGAATACTCCCGTTGATACCGTACAGGGT  
TCGCCTACGTTTTGGAGAAAAAATATTCGATCCTGATGTTATCCGAGTAACAGGAAATGAT  
AAAGCCGTCATTCAGAAAAATGGATGTGATCGACGGTAAATTGCTTGTATTTGTTACGGGT

GAAGTTAAACAGCGTTATCAAGATCCAACCTAAACCAGAAAACGTTGTTCCGTCAGATGAT  
GCGGGTGTATACTTAATAGGGAGTGATGGTCTGTCTTTTCAGAGAGTATTTGGCAACACT  
CCGCAGGAAAGGGAATATATTCAGCACGGGTTTCAGTAATATGTCAACCAATGGTGATGAG  
GTGTTTCATAAGCCATTATAATCATCACTTCGAAAGCATTTTACCTGATCCAGAACTGCC  
GCGAAATATGAATTGGGCGAAGCTGTAAAATATTCTCAGGAGCCAACCTTATCTAACTGAT  
AAGAAAATACATCAAACACTTTTCAGAGCAAGTTATGATGATTTGCGTATTTGGGAGTTA  
GGACCGCAAGCGTATTATAATGAGGCTGATTATACATGGATGCGTCGAAATGGTGTTTCGT  
GTATGGATCACAAATGATAATCGCCCGTTGGTTGTTTATCCAGAGGTTATCTATACTCAA  
GAAGTTGATACATCTGGCATTCTTGACCAAAAATAGGGTCAACCGAGAAGTTTATGATAAA  
GGGACCGTGACCTGTTATCTTAATAATGTTAAATTTGAAGGATTCAAACAATATGCATCC  
GGTGTAATGTTCCATAAAAACACGGGAGAGATCATAGGATTCTATCAATTTAATTATCGT  
GTTTCGTGATCAGGTTGGTGTATACTGGAAACCTACAAATGTAGCATTGTGTTGCTGAATTG  
CAAATCAGGTTTCGAGAGGTTCCCTGGGTTCCCTGTTTCATTATGACAGAGAGCAAGATCCA  
GATTTGCGACCTTTACTGAATAAGATGACGCCTGATAGCTTTTTACTTGAGAACGAAAAT  
TTCAGAAAATTCTCTGAATATTATCTGCAATCTTAAGCGATGGTTCAGGAACATATTAT  
AATAAACTAAAAAATCTGATTAAAAACAAATATCCACGCGAGCAAGATGCATATGAGTAT  
CTTTGGTCAGAGATGAACAAACGAAACATATATGCAGATAAAAACAAGCGAGATGCGGTA  
GTAAGATTCTTTGAATCCCGCAAATCAGATTTTTATTCCACTAAGGGCGTGGAGGCTTCT  
TATAAGTTCTTGTTTAAGTTACTTTATAATGAAGATGTAGAAATTGAGGTTGAATCACAA  
GCCGGACTAGAGTATGATATTGTTGTTAGTTCAACGAACATTGACGAGGATATCGTAGGT  
CGCACGATTTATACTCCAACCGGACGGGCTAACGTGACGTATCTTGAAAGGGAATATGAA  
GGTGGTTCGCTACGCTGGCGAGTAACCATTACATAACCTGATCGGGCGGTTTCGAAGAAGGT  
CAAGTGATCAAATCAGAGAAAACAGCGTTTGAAGGGATGATCCTTGTGGTGTACGTGGT  
AAAGAGTTGTTGAGTAGTTCAATCGACTATATCAACCGCTCACGAAGCCAATACACCATG  
AAGATTAAGAGTGCATTGCCAGTTTCGCGCTATGCAAATGATGTAATGCGATTTCGTTTCAT  
CCTGTCGGCTTTGGGTTTATCGGTGTTACCCTGCTTACGATGTTTCATTAACAGCGGGTTA  
AGCATGAAACACACAGAGACGATAATTCAATCTCTAAAAAATTATAAGTTTGACAGCGGA  
TTGCCTAGCGTGTATCCTGATCGGGTGGCAGACCTTGACGTTGACGGAAACATTAAGAAA  
GACCCGCTTACCGGAAAAGCATTATACTTAACGTCACCGACAATGGGCGAAGAGTTCCCC  
GTTCCCTCCTGAATATGATCAGGAGAACAGCGAATTGTTCCACGGACTTAAAGCAAGCGAA  
CGAAGATTTGCAATGAGTCCACTGTTTGACCAGTCGGCGGTAACATTCTCTATGTTCCGT  
GAACTTGTAGATAAACGGTTGAAGGATAATATAGGAAATCCACGCGATCCAAAGAATCCG  
ACACAGAGGAAAATTAATGGCTAATGAAAATAGTGTGATCTATCGCTCAATCATTACTAG  
TAAATTCAGAACGGAAAACCTTCTGAATTTCTATAATTCTGTAGGCGATGAGGCAAATCA  
AATTACAATTTATGGAACGTTTGGACGTTTCGGAGCCGTGGTTCAGAAAACGAAAAGAGGT  
GGGCTTTGCCCCACCTTATCCGACCGATTCAACGGCTGGTGTGTTGATATGTGGACCCA  
TATGATGGGGGCGGTTAAGATTAACAAATCACTTCTTGATGCGGTTATCCCTCGTAAAGA  
TTGGGGTGATACCGGACAGGATAACCCGCGCACATTCTTTATCAATGACATTGTTGTTGT  
CAACTCAGCACCATATAACCGAACTGATGTTGGTAGTGGCTGGATGGTGTATCGCGTAAC  
CGATGTTCCCTGATCGCGGTTACTGCTCGATTTCAAGCATTGACGCTAAAGTAGAGTGTTT  
GAAGTTGGGCGGAAAGTGGACACCCACTCATGAATCAATTGCGCCACCTGTAGGAAAGGG  
CGATTCTATTGATATGGGTGATGGGTATCGTTGGGAATATCTGTACACAATCCACCTGA  
TGCGGCGATCAACCGTTGCACCAATGAACATATTGTTGTTCCATTCCCTGATGAATTGAG  
ACAAGATCCGGCGCGTTGGGGCTATGACAATGTGATCACCTGGTATAATGACTATAATCT  
GCTTTATCGGTTGAAAGTAGTAACTTTGCGTTTTTCAGGCTTATATGGACTCTGCGCAATT  
CCCAACTACCGCGTTAGTGGGTAATACTGGTTTCCGTCAGTTAAGCATTATCCTTAACCC  
ATTGAAAAGAAAGCACGCCCTAGCGATCCAGACGTTAAAGCGGTTGAAGATAAGTACCG  
ACCGCAAGACTTAGAGCCCACTCAGGCGAAATGATCTACATGGAAAACCGACAACCTAT  
CGTTCCGGTCATTAGATCAAACAGAACTTGTTTCTGTATTGTTTGGAGTTCTAAGTGTATGA  
TTTAAAAGCCAATTCGAGAGAGTTGGCTTTTTCTATTTTTGGTGTGACAATCTTGCCCTG  
ATAAGGTATAATGCTCACATCTAAACAACGGAGGATAAATTATGGCACGTCGTAAATTTA  
CAGATAATTGTGAAGCAATTCAGGTATCCCCTTGCGGTTGGGATGTGATCGCGAACGGTG  
AAAAGATCGGCGAGATCATCGATCATACTCATTCACTAGCCGATTACACCGATGAAC  
TATGGGAGCATGAATAACACTAAACGATTCAAGACTATCGACGAAGCTATCTATTTTGTG  
TATAATCCAACCTTTCGGTATGTGGAGTAATAGAAAATGGCACGCGTAAACATTAACACTAC  
ACTACACAATGGGTAAACCAAAAACATCCAATGCATAAAGTGTTTTGGGGCTTGCACTTC  
AAGAAAATGGCATGATAACTATTGGTTTTGTGAGCATGATAAGAAGTGGCATTCTCAAG



ATGAAGTTAATGCGATGATGGAACAGGGTATAAAAATTTAATTACTCTAATTATGACCATA  
GCATTACTTGTATTTCGAAAATTGAAACGGTTTATTCGAAAGAATCCGCAATTTAAAAACT  
TTGTGTTCTTTATGTCTCATGTTTATTTGGGGCATAGCGTTACAGTAACAGCAAAGGTTA  
AATAATGGCAGACTTTCTAAACAAGAACAAAAATTACACGATCGGGTGATGGAGTTGAT  
TAATTCAGATCGCCAATTGACATATGAAGAAAAAGAATTTTGCTATAATAACTATCATGG  
CGATGGTCTAGGCGGTTTCAGGTGCATTCTTTACCCCAGAAGGGCTTGCATGGGATTTTAC  
CATCGATGCACATTGCACAGGAAAAGTATTAGATCTTTGTGCTGGGATCGGTTCGCTTATC  
TTTTTGTATGTTACATCGTTGTAAGCCAGAAAAGATCGTATGCGTCGAACTCAATCCAGA  
ATTTGCGCGGATTGGCAAGAGACTATTACCGGAGGCAGAATGGATCACCAGCGATGTATT  
CGAATTTGAGTCAAACGAAAATTCGATGTGGTGATCAGCAATCCACCTTTTCGGGAAAAT  
CAATACAACCGACACAAAGGATGTATTTGAGTACACTGGCGGCGAATTTGAATTTAAGGT  
TATGACATTAGGACAGAAGTTTGCCGATGTAGGTTATTTTATTGTTCCACTGGTTCCGC  
TGGTTTTGCCTATTCCGGCAGACCTTATTATGACGGGACCATGAAGTCTAATAAATATCT  
AAAATGGAGCAAACAACTGGTTTGGTGACTTATGCCGGATGTGGGATCGATACATCAAT  
CTATCGCGATGAATGGCATAGTACCAGCGTTTTAACAGAAGTGGTTGAGGTTCCGGTATTA  
CGAGAAAGAAGCCGTAGAAGCGCCTAAATCACGTCCTAACGAACAAATAGAAGAAAGTAA  
GGAGATTACCTTACCGAAACAGGAAAGCGAGTCTGGGACGCTCTCAGATTTGTTTGACAT  
TTAATTATAAGCCGTCCTTGTGGGCGGCTTTTTTGTATGTATTTTATAAATAATACATCA  
TAACATGAGGAATTAACAATGGCACAAGTTCCAAAGAAAAGAATAGACACAGGTACTGT  
CGGCAATCCATCGACTGGCGATATCTTATATGATGGCGGTAATAAAATTAACGATAACTT  
TGATTCAATATATGACGCATTTGCGGATCAGCGGTTAAAGACGTAGACCACGGCGTGGG  
AAGAATGGTTATTCATGCAACCGGATACTATCAGAAACATCCACGTCAAAGCTACGCTGG  
TTCCGCTGTTGAGATTGGGAGTCTACACGATATCGATACAACCTCAAGGCGCACTTATTGC  
TATTCTACCTAAAGCAAAGGTCGGCGAGGGTGTGTTGATTCATAAATAGTAACGGTAGCCT  
TTCAACGACTACACCGCTCAATATTCGAACTCAAGCAGGTGATTCTATTAGCGGTTATTC  
CGGTGATGCTACAATAACACAACCATTTTCAAAGTCACTGTTTGGTGTACTGCCGTTGA  
AGGTAGTCGCGTAACATGGCGATTGGGTATCGAAAGTATGTTTACCGATAACAACAACGCC  
ATTAGATAAAACAGTTAACGTAACCTGGAGTAGCAACAAACGTTGCTATTGCCGCAAAAAC  
AGAATACGTTTCCATCAAATTATTAACCTACCGCTAGCAATACATCCGGTTCAAAAATGCG  
TTCAAGTGAAACGCTACTGATGATTGATTCTAAAGCCGGAAAAGTTTATGCGACGGGAATA  
TGCAGTTTTGCAGAAGACAGAAGATGAACTATACACGGTTCGTTATTTTCATCGGTTCCGG  
CGATAAAGTATATGCAGAGTATAAGGCTACTGGCGAAAATATTCGTTTAGCAGTTAAAGC  
CGTAGACACTATTAATAATCGGGGTTGCTACATGAAACAATTAATTAATATCGGTAACGTT  
GTTGATGACGGTACAGGTGATTATCTAAGAAAAGGCGGTCAAAGATTAATGACAACCTTT  
TCTGAACTTTATACTAAGCTGGGGGATGGTGATATCCCTCATGCATCCGGCGCGTGGAAA  
ACTCACACACAACCAGTATTAAAACCAAATTTTGGTGATGCATGGGCGATTAATAACAACG  
AACAAACGCTGTTTCTGTTGAATTGCCTAAAGGAAGCGCGAGTGATTATAATAAAACAATT  
AACTTCGTGATGTTTGGCGCTCATGGGCTGCACATAACGTAACATTGAAGCCAGCACAA  
GGTGATAACCATTAAGGGATCTCCAATCGACCGTGAGTTGTATAAAGATTTTCATGGATGTT  
GAATTGGTTTATTGTGCGCCTGGACGTTGGGAATATGTTCGAAAATAAACGAGTAGATACT  
ATCACCCTTCCGATTTAAGCACAGTCGCTAAGGAAGTTTATATTGCAACCGAAGGACAA  
ACAGACTTCCCAATGTGTTTGGTTCCAATACTTACAATATTCGAAATGTTGAAGTGTAT  
TATCGCGGTAACCTTGCTTTATTATGGCAAGGATTAACCGATGATTCTAACTATGGTTCA  
ATCGGTGAAAACGGTGATATTGTTCCCTCTGGACGGTAAAAGCATTAAATTACGCTTCCCT  
TGTTCCGGCGGGTGATACCATTCAAATCATCACTTATATGGACGGTATCGCATCCTTCCGG  
TCAAGCTATATTACTCATAACAATACGCGTTTATGAAACAGGAATGACCCTTTGGAATCC  
ATCCCCGGTGAAGTTTGGGTTGGTGAACCTAGCTAATAAGAAAGAATTTACTAATGCTGAA  
TTAGGCGTAAGTAAGCGAGATCTTATTAATCCAAATTCATTTGAATTGCTGATCAACGGC  
ACACAAATGATTAAGCGGGTGATGCGGATTTACCTTCCCTTATTTGTGAAGGTGCTGAC  
GGTGAAACGGAAGAAACCTGCGTACTTGCTGGCGGTCAATGGGTGGAATCTGGGGAAGAT  
TATTCATTGATGTTTCGACGAAAACAGCGTGGTGACTGGTATTAAATTATCTAAAGCACTA  
GATAACCGAGATACTATCACAATTCGCTGGTTTAATAATGATATCGGAACATTAATGGAA  
TGGGACGGTGATAGGCGGTATTAAGAAAAAGCAGATAAAATCTATCTTAATAACGAAGAT  
GAAGTCACTCTGACAAATCGAATTGAATATACCGATTTCCAAAATCCAAGCCAAGCGACT  
AAACGCCCAATGGAAGATTATACAGGTCGTGTGATGGATATCTATTCCATATTCGATATT  
TTCTATCCTATAGGCACAATTTATGAAAATGCGCATAAACCAGCTAACCAGCGACCTAT  
ATGGGATTTGGTACATGGGTACGTTATGCAGAAAAGAATTTTTAGTTGGTTGGTCTTCT

GACGCAAGCGATCAAAACTTCGCACTAAACAACAACGATCTTGATACACATGGTCAACCT  
ACACACACCGCAGGTGGTAACGGTGGTGTATGTTGCATACCAGATCAAGAAAAATATGATT  
CCTGAATTACAGAGCGACGATCGAGTTCTTGTAAGAGATGATAATGGAAATATTATTATC  
GGTGGTTGTACAGGTAGACCCTGATGCAGTAGGTCCAGCGTTTACCAAATATCGCGAAGAT  
AATGTTAAAGTTAATCAGGGAAATACCGACCCGTCAATGATTGGTATTCTTCCTCCATAC  
AGAAGTGTCTATCGTTGGCTAAGGGTAGGTTAATATGATTTTCGAAAACACGTTCAAAGC  
TAGTGTATTTTCCAGCGATGCGGCGTTTATTTTCATACGATCCAGGATCGAAAGATCCTGT  
TATCGGTGGTTCTCGTCCTATTGGTGGTGTAAATGTTCGATCAATCAAGAAAAGGTTCTTA  
TGTAAGCAACGTTCAATCTGCAATTGATGACCTTTATTCATTGTCAATGATCCGAATTGG  
TGATGTGTTGGTTACAACCAACTCAACTCCACCACAAGCCGCAGGACAGATTGAAACTCT  
GTCATTTTCTGGTTCTGTTAACAATCAGCATAATCCAGACGCAAACAAGTATTAATTGA  
TGTTTTGGGTTATCCATTTATTGTTGATGTTGGGTCTTCCGGCGTTTCTCTATGTGAGAA  
AGTAACGGAAAAATTTACCGAACTAATGAATAAAAAACATTATGTTCAAAGAAGTAAAAAG  
AAAAGGAAGTAGCAACGACCAATTAGAAATTCCTATATCGATTCTCTTGAACACCCACC  
AACCGATATTAACAAGTACGGAATTACAATTACAGGAAATGTTGATTCTCCTGCTCGTGT  
TGGTTATGGTTCATGGTCTCGAATGGGTACAGAAGAGAAATTTGGAAGTACCCTATATTA  
TTTCAAACGTTATGCATAAGGTGATGTATAATGGCAAACAATACTATTAACCATGTAAAA  
GACGATGCTCAATACGTCAAGTTTAAACCCTGTAATGATTGGCCTCAAAGCATTACCAAC  
GTACAAGCGGCTTTAGCCGCTATTAATGGCTTTGCCGTAATGGATTACCGGACGCTACG  
GAAGATACAGCCGGGATCGCTGCAATCGCAACTCAGGAAGAAGTAAACGACGGGACAGTA  
GACAATAAGATCGTGACTCCAAAAACACTGGCTGTTAAAATGTCACGTCCAGATGCTACA  
AAAGAAGTAAAAGGCATTACCCGATTTGCCACGATGGAAGAATCGCTGCAAGAGAGCAAC  
GAGAACATGGCAATCGGTCCAGACACACTAAACCATTACTTCACCACTAAAAAGGCGTCA  
GAGAGCGTTCAGGGGACTATTAAGATATGTTCTCTTGAGGCGGCAAAGATTGGCAGTGAT  
GACACAATGGCAGTAACACCGAAAAAGATGCACACTGCCATTGCACAGATTGTACCGGGA  
TTAATTCCAGATCAAAACACAGCAACAGAAAGCGCACAGGGTTTAGTTCAGTTAGCAACT  
AATGCGCAGGTTTTACAAGGCCAGATTCGAGAAGGTTTTGCAATTAGTCCTTATGCATTT  
GCAAATGCTCGCGCCAATGAGAATCAGGCGGGTACTGTAAAGATCGCCAGCCAGTCACAG  
ATGAATGCTGGTTCAGATGATACTGTAGTTGTTTCTGCTAAGAAGTTTGAAGCACTAAG  
GCAACAACGTCTCAATACGGTATTGTTAAACTACGAGACACCCGTGGGAAGTGAGGCTAAC  
GCTGCATTATCAGCAAATGCTAAGGTTCTTCCGAGCACTGGCGGTACGGTAAGCGGAAAC  
GTCTATAAAGGTTCTAACTCAGACGGCAACCAGTTTGTACTAAAAATGAATTAGCGAAT  
CACGCAATGCCAATTGGTGGTATTATCCTTTCTGGATTCAATGCGGATCGCGGCGACTTT  
CTGATCTGTAATGGTTCGTTCACTGAATAAAAAATCAATATCCGCAATTATTTTCTGCGATT  
GGTTATACCTTTGGTGGTTCAGGTGACAATTTTAACTTCTGATATGCGCGGTTTAGTT  
GCTCGTGGTTGCGATCATGGAAGAAACCTTGATCCAGGTCGTCGATTTGGTTCTTATCAA  
GAAGACGCAATGCAGAGAATTACTGGTAAATTCCTGTAGCTGACCGCTGGCGCGGTTGG  
TATGGTGGCGCATTTACTGCACAGCGCGGTCAATGGAGCACGAAGTATAAAAAACGGTGGT  
GGTGTGATTGGGGTACTACTGTTAACTTTGACTCAGGAAGATCCGTAAGAACGGCTAAC  
GAGACTCGCGTCAAGAGTCTGGCATTAACTATATCATAAGGGTGGCGTAATGATTGAAC  
AATTAACATCCACGAGATCCACATGTTGACGGTGTACCAAGCGAAGGACAGCACCGTA  
TTATTTGGATCAAGAATGGCGAATGTTTAAAGCGCAGCAACGACACAGACTGGCAATGACG  
GGACGCTTAACCGCGCCCCGGTTGCAATTCAAGAAAACGTTGCACGCGTAAACGAAAACG  
CAAATCAACCGTCGCTAAAGTTAACGAGGTTGTAACGGCGGTTAACGATATTAATAACA  
CTTTAGGGGTCATTTCTGACGGAAGTATCATTGATGTGGTTAACAGACTGTCGCAAAAG  
TTGAATCCGTCGAAGAGAAGTCTAGGAGAAACAGCAAGAAGTCTACAAACAACGGTAGACG  
CTGTATCAGAAGTAAACATCAAGATTGGTGTATCGCCCCGCTGCCGATCCGAGCACAAAGAA  
CAATCTATGATGACATTTCTTTTCATCAAACAAGAAATGGGTTCTTATCCTAACTTTAATA  
TCAATGGTTCCCCTGATGCTGGCAGTTCCGGTTCTGGCATCAAATACCGAGTTATTCAGA  
ATACCGCAGCATTAATGACCACGGTCCCGAATCGTTCAGCTTGAAAACGACTGGCAAG  
ATTCTGACGTAGGCGAGTTAACAAGACAAGTTAACAATAATGCGCAGTGAGATCGGCGACA  
CGTCTCTTGCAACACAAGAAAATGTGTATGTTCTCGTCTCCGCACCAACGCAAGAAATATTG  
CTAACTTATCAAACGAAGTTCTAGAAGTCAAGAAAGCAATTTTGTGTTGATTCAATCCCTG  
ATATCGGGACTAAAGTCACTACGCTGGGAAGTAAATTAAGAACTTCTAAACAATGATGTTA  
ATGGTGTAGATTCCGGTATTCGTCTCTGCTTCTGGCTGTCGAGAATAAGATCGGAACGC  
CTCAATCGGCTGGAAGCATTGATTATCGATTAACCAACACAGAGCGAGAATTTTTAGATC  
TTAAACAGGTTGTTGGTGTAAAGCGGTGCTGACGGTTTGCAGCGTGAAGTTGTTGACTTT

CCAATGAGATTGGCACTGACAGCGATCGACATACTCTAGCCGGACGTATTAAGTTGTAG  
AAAACACTCAGGGTTCGGTTAGAAGCAAGCGTACAGGACATGGAACAGATTGTAGGTGATC  
GCGAATCAGGTTTGACCGCTGGCGTTATTAAGCTATCAAGTGATATCTATGGTGATGATG  
GTTTCAAGATCCATTTACTCAGAAAGGCGTGATTAATAATCGTCAAAGAGCTACAAACAT  
CTAACGGAAACAAAGTAGATGATGTACCTGATGACGGTTTCCATTATCTTCGTAAGCGCG  
GAGAATGGGTGCAAGTTGCATATGCTGCTGGAGCATTAAAAAATACCGCAGATATTACGG  
TTGAACTTGACGAACAGGATGTTTATAAACCATTCCACTAACGACATGGCGGAAGAAG  
TTAATGCGCGTCAAATGGTGAAAAGTGAATCTGTTGTTACCGTTCAGGACAAAGGTTTAT  
TCCGTTGTGATTCCGTTGTGCTGTACAAGCTCAACATAATGCAACATTCATTGTTGCGA  
TTTTCAAAAATGGACAGATGGTACATGAAGCGAAAAATGGTCATTACGGCACAGACGAAT  
TGATCAGCTATTCTACCAGTGCTTTCCTAAATATTGAAAATGGCGATCAGATTAACATCC  
GTATTAAGGGTGTATCTGCCGAAGCAGTAGCACAGCCAGTACAAATTAAGAGTTTCTCT  
TTGGGATTTCTCCGGTATAAGAAATTAAGGGGGCGTTAAGCCCCTTTTTCGTTTATAGGT  
GATATTATGTCAGGATATGTAACCAATAACCCAAGAGAATTAAGAGACGCTATTCTGCGT  
CGTTTAGGCGCACCAGTAATTAACGTAGAAGTAACAGAAGACCAGATTTACGATTGTATT  
CAGAGAGCACTAGAACTCTATGGGGAATATCATTTTCGATGGTGTGAATAAAGGATATAAA  
GTATTTTCGTTAGTGCAGAGCAAGCGCAACACGGGGTATTTGATTTAAGCGATTCTGGT  
GTATTTGCAGTAATAAATAATTCGAACAAACGTAGGTAGCGCGGCTACGATGGATGGT  
ACTGCCGTTTATCCGTGGTTCACCGACTTTCTGTTGGGTTTAGCGGGTGTAATGGCGGT  
TTAGGATCTGGCTGTAGTAAATTTTATGGTCCAAATGCAATGGGTGGTGTATCTAGGATAT  
TTCGAACAGCTTATGAGCTATAGAGCCACTATGCAAAATATGCTCAATCCGCTGCCAGAT  
TATTGGTATAACAGCGCAAACGGACAACCTTAAGATAACAGGAAACTTCCGAGAAGGTGAT  
CTCATTGTTGTTGAATTATATGTTAAAAGCTATGTAGACGTTTCTGATATGATCGGCGCG  
GTTGCTGGTTATGCTCATGCGGGAGGATGTTCTACCGCTGGCGGGATTAGCGCCGTTTAT  
GATAATCCAACCTGCTGGTTAAGCGGGATTGTTGCTGGCATGGGACCGATCAGTGAGAAC  
AAGCAGGGGCGCATATAAACCAGTTGGGTTAAGACATGGCAACCGCTTTCACTAAGGAG  
GTGTGGGGGTCCATCATGGCTAAACATCAAGGTCTGCAATTACCCGGCGGTGTCACTGTT  
GATGGTATCCGAATCATTGAAGAAGCACGCGCCGACATAGAGAAATTGCGACAAGAATA  
GAATTATTAGATCCTCCGTTCCGGCATCCTCATGATTTGATTTATTGGGGGAGTATTCCT  
CATTTGGAGTAACATATGTTTAAACAACACTCTTTTTCGCTCGCCTTGAATCGCAAAAGGAT  
TATGAGAATACACGACAAACAGAGATTCTTAATCCTTATGTGAACTTTCACAAATATACA  
AATACTCAGACGTTAGCCGACGTTATGGTTCGCCGAAGCTATTCAGATGCGAGGTGTAGAA  
TTATATTACATCCCTCGTGAATTTGTCAAACCAGATATGATCTTTGGTGAGGATGTTCAA  
AGCAAATTTACTAAAGCATGGAAATTTGCGGCTTATATTAACCTCATTGATGGGTATGAA  
GGAGCGGGTAATTTCTTCTCTAGTTTCGGGTATCAAGCTAATGATGAACTAACTTTTACG  
GTTAACCCCAACCTATTCAAACATCAAGTAGATGATCAAGAGCCAAAATCAGGTGACTTA  
ATTTATATTCCAATGAGTAATGATTTATTTGAAATTAATTACGTTGAGCCATATCAGCCG  
TTTTTTCAGGCTGGCAAAAATGCCATGCGTAAAATTATTGCAGAGAAATTCGTGTATAGC  
GGTGAGGAATTGCGACCAGAATTACAACGCAATGAGGGAATTAATGTTGATGAGTTTGC  
GATCTGGATCTTGCACCGATCACTAATCTGGACGGGTTAACAGATATCAACTTAGATCAG  
TACAAAGAAGATAAGCAATTCAGAAGCGAAGGACAAGATTTTATTGATCCGTTTGATCCT  
ATTAATGGCAAGGGTTCACCTTTCGCCGATTTTGTATAAATACTCATAAACAAGGGGGT  
AAATGTTTCGTTGGCACTATAATTCGTCAATTAGAAGGTATATTGTATTGCTGGGTAATT  
TATTCTCCGGCGTACAAATTAAGGGGTGCGTAGTGACGGTGAGCGGTTTATTAAGGTT  
CTATCACCTACGCAAAGAAAGAAAAATTCATGATGAGTCTGGACAAATATAACAATATCT  
CAAGTGAGGAAGACGTAGCAAAGGTAGAAACTATTTTACCGCGTATGTGTCTTTCTTTGA  
TTGATATGACATACGCCCAGAACTTTAAAACAATATTGCAAATAAGACAGTACCAAAT  
ATACGGCTGATGGAATCAGGAGTGTGACACAATATAATCCTGTACCATATAAGTTTACTT  
TCGAGTTAGGGATTTATACGCGTAACGAAGATGATATGTTTTCAGATAATTGAACAGATTC  
TTCCTTACTTCCAGCCTCATTTTAACTGTAAGATTAAGAATAACACGGTAATGATGTAT  
GGATTGATCGAGATATTCAGGTCACAATTAGTTCTATTACTCCAGATGAACAGGTAGGCG  
AAGATAAGTTTTCTCGTCGTCGTCCTTGTGAGTGGACTATTATGTTTCAATTTATCGGGTTA  
TATATCCTCCCGCTACCGACGTTAAGGGGGAAATTAGAACGATTTATCTTGATTTTCATG  
CCAATTCTCGTGAATTGAATCCTAGCGGTAATTTTGAATCAGTGGATCACGAGGTCGTTA  
AACGTGACGTGAGCAAGAAGATTGGGACGGAACAATCAAAGAATCATATTCTAGTGATA  
TTCCAATACCAGTTGCACCAACTCCACCGGGTCCACGTATTGTAAGAGAATTTTAAGAGG  
TATTTTATTATGTCAGATCTAGGCTTAGATATGAAGCAATTAATGAATTCGAAAGTCTA

GGTCTTCCGGGGTCATTCGACGCGGAAGAAGATCGAGTGAGCTATGATCCGCTCGTCTTG  
ACTCCGGTCGAAAGCCATCCAGAAGATCGTAATATTGACTTACAACGAGATTATAATGAG  
GCACGTCAGAATATTCATTTTCAGAATCAGATGATGATGGACGCCGCAAAGATTTATCTT  
GAACTTGCAAAAAATAGTGAGTCTCCGAGGTTCTACAAGCATTAAACGGCCTCATGCAG  
CAAATGAGCAACAACAATAAAGAATTGCTGAACATCCATAAGGATATGAAGAAAATCACC  
GAGCAAGCTGGAGAGAAAAAGAAAGATAATACCCAGCCGCACCAGTTAATATCCAGAAT  
GCGACCGTCTTTATGGGTTCTCCTAGTGATTTAATGGATGAAATCGAAGACGAGGAAGCG  
CGAGTTATTGAAGGTGAGACAGTATGAGCGTGATTGAAGGGATTAACGCAATGGCGACGG  
ATGAACACCCGCTACATTTAGCGCATCCGTCTACACTAGAACTAAAATTGATTCAAACG  
GCATTGAATGGATTTTATCAAAGCATGATGATAAATGGTATCCTAAAAAGTTTTCTGACT  
ATCTGAAATTAACAGACCCGAGAAAATAAGGATGCAAAGTACAGATCCAACAAATTATA  
AGTTCTTTAAAGATAGTGACAATATTCGCACGCGGTATATGCGATTAAAGAAGTTGCGAA  
GGGCGAATATTA AAACTCAGTATACCCCTGAAATGATCGCAGAGTGGAAACGATGCCGTA  
AAGATATTGTGTATTTTGCCGAAACCTATTGCGCAATTACACACATCGACTACGGTACAA  
TCAAAGTACAATTGCGTGATTATCAGAAAGATATGCTTAAGATCATGCATGAAAACCGCA  
TGAGCGCACATAAACTCAGTCGTCAGCTAGGGAAAACCTACCGCTGTAGCAATATTCCTTG  
CTCACTACGTTTTGTTTTAATAAAGACAAAGCGGTAGGTATACTGGCACACAAAGGATCAA  
TGGCAGTTGAGGTTCTAGAACGTACTAAACAAGCAATTGAACTATTACCAGACTTCTTAC  
AGCCCGGTATTGTTGAATGGAACAAGAAATCAATTGTTCTTGAAAACGGTTCAAGTATTG  
GTGCTTATGCGTCGTCCTGATGCTGTGCGTGGTAACTCGTTCTCGTTTATCTACATTG  
ATGAATGCGCATTTATTCAA AACTGGACCGATTGTTTCTTGCAATTC AACAGTAATTT  
CTTCCGGTTCGTGAATCTAAAATGATCATGACCACGACTCCGAACGGGCTTAATCACTTTT  
ATGATATCTGGCAATCGGCTATTGATGGTAAAAGTGGTTATGTTCCATATGAGGCGGTTT  
GGCATTCTGTAAAGAACGTCTTTACAATAAAGCTGATATATTCGATGATGGTTATGAGT  
GGTCATCTCAGGCGATCGCCGGATCTAGTCTTGAGCAATTCTTACAGGAACATAACGCTG  
AATTTTTCGGTAGTTCCGGTACTCTGATCAGGGCAACCACACTATCAAGATTATCCTTTA  
TTGACGTTGTTAATGATAACGGGTTTTATCAGTTTGAGAAACCGAAAGAAGGTAGAAAAT  
ATGTTGCTACACTAGATTGCTCAGAGGGTCGAGGACAGGACTATCATGCATTGCAAATCA  
TTGATATTACTGAATTTCTTATAAGCAGGTTGCAGTATATCACAGCAATACTACGTCAC  
ATTTTATATTACCGGATATTGTCTTTAAATATCTCATGATGTATAACGAATGTCCAGTTT  
ATATCGAGCTAAATAGTACGGGTGTATCTATTGCTAAGTCTCTTGCGATGGATCTTGAAT  
ATGATAATATTATTTGCGACTCATTCATAGATCTAGGGATGAAACAATCCAAAAGATCTA  
AAGCAATGGGATGTTCCGGCACTAAAAGACTTAATAGAAAAAGATAAGCTGATCATTAATC  
ATAAAGGAACTATTCAGGAGTTGCGCACATTCTCCGAGAAGGGGGTAAGCTGGGCGGCAG  
AAGAAGGTTTTACGATGATTTGGTCATGAGTCTGGTAATATTTGGTTGGTTAACAACTC  
AAGAAAAATTCGCCGAATATGCAGGAAAAGACGAAATGCGGATCGCCTCCGAAATATTCC  
GAAAGGAATTAGATGAATTTGGGGGAAGAATACGCGCCCGTGGTAATATATGACGGCGCAA  
ACGGCATCGAAGAATATAGGCCGCGTGAAGGTCTAACAAATGATATAAATACGATAATGCA  
TAAAAAGATGAGGAAATTCTAATGACTCTATTATCACCGGGTTTTCGAAACGAAAGAACT  
ACTCTCTCCACTACCATTGTGCAATCTGAGACTGGTCGCGCGGCACTGGTAGGTAATTC  
CAATGGGGTCCAGCTTTCCAGATTATTCAAGTAACTAATGAAGTTGAATTAGTTAATAAA  
TTTGGTCAGCCGGATAATAACACCGCAGACTATTTTCATGAGCGGGGCTAACTTCTCCAG  
TACGGTAATGATCTGCGTGTTGTTCTGTATTGAATAAAGAAAAAGCGAAAAACGCAACC  
GCACTGGCTGGTAACGTCGAGTTTGAAATCACAAACGAAGGTTCAA ACTATGAAGTAGGC  
GATACTATCAAGATTAACATAACCGTCAAGATATTGAAACGGCGGGTAAAGTAACTAAA  
GTTGATGGTGATGGTAAAGTTAAGGGCGTATTTATCCCAACTGGTAAAATTATCGCTCAC  
GCTAAAGCAATCGGTGTATATCCAGA ACTCGATGGCGGTTGGACGGCAGAGTTC ACTTCT  
TCGTCAGGTAACGGTAGTGCGGCGCTGTCAGTAACTAAAATTGTC ACTGATTCCGGTCTT  
CTGTTAACGGATCTGGAACTTCCC GCGCCAATATCACAAATCAA ACTTTCTTGACTAAA  
CTCAAGAAATATGATATGCCAGCGGTAAGCGCGATCTATGCTGGTGAGATTGGAAACTCG  
CTGGAAGTTGAAATTCTGGCGCGTAGTGCGTTTAAGAACA CTGCACCGGATCTGACCATG  
TATCCTTATGGTGGCGAGCGCACCGCAGCACGCAACCTGATTCCATATGCACCGCAGAAT  
GATAATCAATATGCATTTATTGTTCTGTCGCGATGGTGTTGTGGTAGAATCCTATGTA CTG  
TCTACTCTGAAAGGGGATAAAGACGTATATGGCAATTCTATCTACATGGACGACTTCTTT  
GCTCGCGGTTCTAGCCAGTACATCTATGCAACCGCTCAAGGGTGGGTAGATGGTTTCAGT  
GGTATTATCTCTCTTGCTGGTGGTGTCTGCTAACGAAGCAACGACTGGTGGAGTTGGT  
GCTGATCCGTTTCATCGGTGCGATGATGCAAGGTTGGGATCTGTTTGCTGAACGAGAATCT

ATTCACGTAAACCTGTTGATCGCTGGTGCATGTGCTGGCGAAGGCGATGCGTTCTCTACC  
GTACAGAAACATGCTGTTTCCATCGGTGATGAGCGTCAGGATTGCTTAGTAATGGTTTCT  
CCGCCGCGTAGCACTGTTGTTAATATTCCGGTGACTACCGCAATTGATAACCTGATTGCA  
TGGCGCGAAGGTTCAAGGAACTATAATGAAAACAACATGAACATTAATACCACTTACGCG  
GTTATTGATGGTAACTACAAATATCAGTATGACAAATACAACGACGTAAACCGTTGGGTT  
CCGTTGGCTGCTGATATTGCTGGTTTGTGCGCTCGTACTGATGCTGTATCCCAGCCGTGG  
ATGAGTCCGGCAGGTTATAACCGTGGTCAGATCATGAACGTGGTTAACTGGCAATTGAG  
CCTCGCAAGGCGCACCCGCGATCGTCTGTATCAGGCCGCAATTAACCCGGTGATCGGTGCT  
GGTGGTGAAGGGTTTATCCTGATGGGTGATAAAACCGCTACGACTGTTCCCAGCCGTTT  
GACCGCATTAAACGTTTCGTCGTCTGTTAACATGCTGAAAAAGAATATCGGCGATTCAAGC  
AAATACAAACTGTTTGAAAACAACGATAACTTTACTCGCGCTTCTTCCGTATGGAGGTT  
TCGCAATATCTCAGCACGATTTCGCTCTCTGGGTGGCATTATGACTTCCGAGTACAATGC  
GACACCACGAATAACACGCCGGATGTAATTGATCGTAACGAATTTGTTGCTAGTATGTTT  
ATCAAACCAGCAAAATCGATCAACTATATCATGCTCAATTTCACTGCTGTTGCAACTGGT  
TCTGATTTTGACGAAATTATCGGTCCAGCTAACCCAGGCATAATCAGTAAATTAGCATAGA  
TTAAAAGTTAAATCAAGCGGGGAGAAAATCCCCGCTCTACTAAGGAATATCAATTATGGC  
ACTCGATTTGAATGATATTACACGCGGTTTCGAGTCTGGCGATTTTGCTCGTCCTAACCT  
GTTTGAAGTTGAGATCCCGTATCTGGGGCAAACTTTAAGCTGATGTGTAAGGCTGCGAC  
TGTCCCGGCTGCTACCGTAGAAAAAATTGCTATAGGCTATCAAAACCGTAAAATTAACAT  
CGCTGGCGACCGTGTATACGACGACTGGACCATCACTGTATTCAACGATGACGCACACAA  
GATCCGTGATGCTATCGTTGCATGGAGCGATCAGACACATGGCACTGGTTCGGCGATCAC  
TGGTGAACCTCCTGCACAATATAAGAAACAAGCTATTGTTTCGTCAACTTAACCGTAACAC  
CGAATCAACTAGCGAAAAAACATTGTACGGTATTTTCCCTACCAACGTTGGTGAAGTAAC  
CCTCGATTGGGAACAAAACAACGAAGTTGAAACGTTTGAAGTTACTTTTGCTATCGATTG  
GGTAGAATAAATATATTATCATGCGGGGAGAAAGTTCCCCGCCTAATTTCTCCCAATTCGA  
GGTGAATAATGTTTAGTAGATTA AAAATGCTTGC GCGT TGGGCTGATTTTGACAACGACA  
AATACGAAGAACA AATTAAGATAAAGCAGAGTCTATCGCCGCACCTAAAAACAATGATG  
GTGCTACGGAAGTAGAAATTAACGATAATTCACCTGCTAGCTCGTGGAACTCTCTTACCC  
AGCAATTTTACAGCACCGACCAGAAAATCAGCACAACTAAGCAATTAGTTAACACATATC  
GCGGTTTGATGAATAACCATGAAGTCGAAAACGCTGTACAAAATATCGTTAACGATGCGA  
TTGTATTTGAAGAAGGTCATGAAGTTGTTTCATTA AATCTTGAGGCGACTGGCTTTAGTG  
AATCTGTAAAAGAGCGCATTTCATGAAGAATTTAAAGATCTTTTAAACACTATCCAGTTTG  
ATAGGCGCGGTCAGGATATGTTCCGTCGCTGGTATGTGCGATTTCGCGTATTTTCTTCCATA  
AAATCATCGGCAAAAATCCAAAAGATGGTATCGTAGAATTACGCCAGCTTGACCCACGTA  
ATCTTGAATATGTTTCGCGAGATCATTACAGAAGACACACCGGAAGGTAAAATTTATAAAG  
CAACTAAAGAATATTTCAATTTACACCGTAGGCAATAGTTCTTATTGCGCGGGTGGTCAAG  
TATTCTCTCCCAATAGTCGCGTTAAAATCCCCGCGTAGTGCTATTACATACGCTCACAGCG  
GCTTGATGGATTGTGATGATAAATATATCATTGGTTATTTGCATCGGGCTGTTAAGCCAG  
CAAACCAGCTTAAATTGTTGGAAGACGCAATGGTCGTTTATCGTATCACGCGTGCACCCG  
AACGCCGAGTGTTCTTTATTGATACCGGAAACATGAACAACCGCAAGGCTGCACAGCACA  
TGAACTCAGTGGCACAGTCTTTTAAAAACCGCGTTGTTTATGATGCATCGACTGGTAAAC  
TTAAAACCAGCAAGCAAATCTATCAATGACAGAGGACTACTGGTTACAGCGTCGAGATG  
GTAAAGCAATCACCGACGTTACTACTTTACCCGGTGCATCCGGTATGAGTGATATCGATG  
ATATTCGCTACTTTAACCGTAAATTGTATGAAGCGTTGCGTGTGCCATTGTCACGCAGCA  
ATCTCTCCGATGCTAATATGGTGATCGGTGGTGTGTTTCAGAAATTA CTGCGGATGAGT  
TGGAATTTTCGAAATTCATTAGA ACTCTGCAATCACAGTTTTTCGGAAGTATTGCGCGATC  
CTCTGAAATATAATCTGATTCTCAAAAATGTAATTACGGAAGACGATTGGGATCGTGAAA  
TAAATAATATCAAGGTGGTTTTTCCATCGGGACTCTTACTATAACAGAAGTTAAAGACGCGG  
AAATTTTAGAACGTCGAATCGGTCTAATCGAACGTATTACACCTTACATTGGTAAATATT  
TCTCTAACCCAGACAGTGATGCGTGACATTCTGAAATATAACCGATGACCAGATGGACACCG  
AGAAGAAACAGATCGAAGAAGAAGCGAACGATCCGCGCTTTAAACA AACTCCCGATGAAA  
TAGAGGATTTTTAAATGAAACAATTTATCGAAGCAATTA AAACTCGCGATCTAACGCTGA  
TCGAAAAAGAATTTGATAAGATCATGGAGGCTAAAAAAGCCAGATCATCGAATCCCAGC  
GTGTCGAAATCGCATCCAGTATCATGATCGAAGGTGAAGAAGAAAAAGACCCGCGATGATG  
AAGATATGGAAGATGAGGACGAAGATCGCAAAGACGATAAAAAAGACAAAGAAGACGACG  
AATAATAGGAAGCCAACATGATTAAAGATTTTACTCCTAAAGCTGACTTAGAACTTTTC  
TGCCGGAAGCACAGGAAAAATTGGACATGTTGGCTATGTTTGAGTCAGAAGA ACTATTGA

AAATCGTTGAAGGTATCTCCGAGGATGAGCCGGAACCTGGCGGTAGCAATGCTGTCTATCA  
TCGACGGAATTACTGTAAATGAAGCAATGGTTAAACATGTAAACGCACGCGGGGAAGTTG  
CACGTAAGAAAGATCGCAAACCCGTGAGCGCAATGCTTACATGACTACTGGCCTAAGCA  
AAGCTAAACGCCGTCAAATTGCCCGTCGTGCTGCAAAAACCAAACGTGCAAATCCATCTA  
TCGAACGTCATGCGGAACGTAAGCGCAAAAAAGCAATGCGTAAACGTAAGGCGTTAGGAT  
TATAACAGGAAACAACATGGAAAAGAACGAATTACTGATCGAACAATGGGGCGTTCCCTG  
TGCTCGCGGTAGTTCGTCATTGCTTGAATCATTGATGATAAGGCTACAGGAAATCTCTA  
TATTCAAGGGATTTTCTGCAAGCCGAAACAGTAAACCGTAATAAACGCTGGTATCCTCG  
CAGTGTCTAGAAAATGCGGTTACTAAATACATACATGAACAAGTTGAGACACATCAAGC  
TCTAGGCGAACTTAATCACCCAGCAAGAGCAATGCCAGATCCATCTAATGCTTGCATCAT  
AATTGAAAAATTATGGTGGGAAGGTAATAACGTGATGGGTAAAGCCCGTGTTATTGAAGG  
GGATAAAGGCGCAGGTGATAAACTTGTGCACTGATTCGCGCTGGCTGGATTCTTGCGT  
TTCCTCCCGTGGGTGGGTGCGTTGAAAGACTCTGGTTCGCGGATAACAATTTGTACAGGA  
AGTTTTGTGTTGACGGTTGGTGTGATGTTGTATGGGGTCCGAGCGCACCTGATGCGTG  
GGTAACTCCGGTGGTTGAGTCAATGGATAGCGATTCTAGCGCGTCAGACGCACCAGAAAG  
CGATAAAACCGAAAAAGTGACTAACCTACAGCCTCACAACAAAACATCGTAGAATCGAA  
TAATAGCGCGTTTATGGCGCTCGCAGAAGCGTTATCTAAACGCTATAAATAATAACGTCG  
TTATCAACAAGAAGGTTATAACCATGCTTAAAGAAATGCTGCTCGAAGAAGCAAAAACAGA  
TCACCGTAGACGTTGCTCTCGATGACCTGTTTGAATCCGTCGAACTGTCGCCGGAAGTAA  
AAGAAAATTTGGTACTATCTACGCTCAGGCGGTAAGGCTAATGCTGTTGCTCTGGCAG  
AAAGCCACATTGAAAAAATCGCCGCTAAAGCCGATGAACTGGTAGAATCAAAGGTCGAAG  
AAGCACGCACCGAGATTGAAACCAAACCTGTACGAAGATGCAGATAAATTCCTGAATCACT  
TAGGCGCTAAATGGCTGGCAGAAAATAAAGAAGCCGTCACCCGTAATATTAAGCGGATC  
TGTGCGAATCCCTGATTGGTTCTCTGAAAGATGTTTTCGTACTCACAATGTTGTAGTAC  
CGGAAGAATCTGTAGACGTTGTTGCTGAACTTGACGAAGCACTCAAAGAAGAAAAAGAAA  
AAACCTCTGAACTCTTTGATGCCAAACTGCAACTTGAAAGCGAAATTCGTGGCATGAAGC  
GCGAACAAGCGATCAATGAAAGCACTCGTGATCTTTCCGATACTCAGAAAGAAAAAGTAA  
CCGCGCTGATTGAAGGTCTGGAATATAGCGAAACTTTGATAAGAAATTAAGTCAATTG  
TCGAAATGGTTGCTAAGAAAGAAGACAAACAAGCTAAGATTGAAGAATCACTAAATACTG  
ATGCCGACAAGCTGAATGTTATTGCAGAAAATGTCGAAAAATCAGATAAAAAGGCAACTG  
TAGATTCCGGCGTATCCCGCTACCTGAATTTTCATCTAATGTAATTCAAATCTACTTTATA  
AATACTTTAGGTTAACAACAAACAAGGTTTAAAGAACATGAAAACCTACCAAAGAACTGAT  
GGAAAAATGGTCCCCGCTGCTGGAGAACGAAAAACTGCCGGAAATCGCAACTGCGTCTAA  
GCAGAAACTGGTTGCTAAAATTCTGGAATCTCAGGAAGCGGATTTTGCTGTAGACCCGAT  
CTATAAGGATGAAAAAGTTGTTGAAGCATTCCGGTGGCTTTATCGCAGAAGCCGAAGTTGC  
TGGCGACCACGGTTATGACGCATCTCAGATCGCGGCTGGTCAGACTACTGGTGAATCAC  
CAACGTAGGTCCGGCTGTTATCGGTATGGTTCGCCGTGCTATCCCTAACCTGATCGCATT  
TGATATTTGTGGCGTTCAGCCGATGAGCACCCCGACTAGCCAGATCTTTGCAATCCGTTT  
TGTATACGGTGGCGATCCGCTGAAATCCGGTGGCTCGCGAAGCATTCCATCCGATGTATGC  
ACCTGATGCGTTCCATAGCTCTCTTGCTGCTAAAGAGGCAACTGTAGGTTACCAAAGTGG  
TACTGCATTGCTAAACTAACTCTTTCCAGGCTATCACTGCTGGTGATATCGTATATCA  
CACCTTCGCAGAAACTGGTATTGCTTATCTGCAAAACGTAACCTGGTGATTCTGTAACACC  
ACAGAAAGTAGGTAGCGAATCCGAAGATGAAGTAGTAATGAAGCTGATTGAAGAAGGTAA  
ATTGGCTGAAATCGCTTTCCGGTATGGCTACTTCCATCGCCGAAATTCAGGAAGGCTTTAA  
CGGTTCCAGCAATAACCCGTGGGCTGAAATGTCAATGCGTATTGACAAACAGGTTGTTGA  
AGCGAAATCTCGCCAACTGAAAGCCCGTACTCTATCGAAGTTGCGCAGGATCTGCGTGC  
TGTACATGGTATGGATGCTGACGCTGAACTGAATGCTATCCTGGCTAACGAAGTTCTGCT  
GGAAATCAACCGTGAAATCGTTGACGTCATCAACTTTACCGCTCAGGTTGGTAAAACCTGG  
TATGACTCAGACCGTTGGTTCTAAAGCTGGTGTATTTGACCTGCAAGACCCGATCGATAC  
TCGCGGTGCTCGTTGGGCTGGTGAATCCTTCAAATCTCTGATCTACCAGATCGACAAAGA  
AGCTGCTGAAATCGCTCGTCAGACTGGTCGCGGTGCTGGTAACTTTGTTATCGCTTCCCG  
TAACGTTGTAAACATTCTGGCTTCTGCTGATCAGGGTATCAGTCTTGCTATGCAGGGTGC  
TGCAAAAGGTCTGAATACCGACACCACTAAAGCTGTTTTGCTGGTGGTCTGGCTGGTAA  
GTACAAAGTGTTCATCGACCAGTATGCTCGTCAAGACTACTTCCCGTAGGTTACAAAGG  
CGACAACGAAATGGATGCTGGTATCTACTATGCTCCGTATGTTGCTCTGACTCCGCTGCG  
TGCAACTGATCCGCAGTCTTTCCACCCGGTCTGGGCTTCAAGACTCGCTACGGCATCGG  
TATTAACCCGTTTGCAGACAGCAAATCCCAGGAACCGTCCGCTCGCATCACCTCTGGTAT

GTTGAGCAAAGACAGCGTAGGCCAAAAACGCATACTTCCGTCGTGTATGGGTAAAGGCTG  
CTAATATAAGCCAATTCCTGAAAACTCCGGTCCGGGTGCAATACCCGACTTATCATAAAC  
CTTATGACAGTGTAAGTGTTAATTCCAAAGGGAAGACTCGAAAGGGTCTTCCCTTTTTG  
CGTATTATAACCCGTTATAAATAAGGTTGCAAGCCTATATTCTATTGGGAGCGAAAATCG  
ATACACACAACAAAGACAGGAAGATGCGGAACATCCGGTGGGTGCTAGCCTAAATCCGGT  
GGATATGATATGTGATTTCTTTTGATGCTGGATTTATTA AACACAACAACAATCCAC  
CAATTTTCGTAGTA ACTGCATGGCAAAGGACCAATGAATGAAATGAGCGTTCATGTTGAT  
ATTGGGTCCGATAGATTTGGTAGATATATATACAGATCTTGTGTATACAGACCTTGTTAT  
GACATTCAGCGTGACGCTAGCGGTAATTTTTGGTTTTGGTACGCTGTTCCCTGAATTA  
CCAAAATTCTCCATAAGGAGGAATGCATGAGTAAGAAAGAAAACAGCTATGTTATGACT  
CGTAAGGAATACAACGAATTGATGTTAGCATTAGCTTATGCAATTATTCGTTCTGATCAT  
GCAATTAATCTGGTAAACAAAGTTAACCGTAGCGTTGATAATGTTTCTAGGAAGAAGTAA  
GTTTATTTTTGGAATCCTTCGGATTCCTTTTTCTTTTTGTATAAATATGATATATCCATT  
AAGGCAAATACAGGATTCATAAACATGACTCATATTTTTACTGAACTGTTGCGGGAATCT  
ACTTCCTCAGTAGCTAACCAGACAGCGCGACCGCAACTATTATCATTAACTCGCGCGGTA  
AACAACTGATTTTCTCTGATCTGGTAGCAATCCAGCCAACGGATCAACCAGTATCTGCA  
TTGTACGGCCTACGTTATCTTAATCGTGATGGTCAGATGACTTTCCGAACTGCTGCGACC  
TACGGTGGCGCGGCTGGTGATCGCACAGAGATTGAAGAGTTTTCAAAGAAAAATCTTAT  
GACGAAGGCGCACTATTCAAATCAGGCGATGTTGTATACGAAGTTGTGACCGCTGGTACA  
GTCGGTGAAGATGCCGAACTCCAGAATCTGCAATCTTTAAAGGCGTAATGACAAAACAAA  
ATTCGTTTCTATAGCGATTGTGCATCGGTAGAATACTTTGAAGATAAAAACACCGAAATT  
TCGTCTACCTCTATGCAGTTTGACAAGTGCCAAGTTAATGTAGGTTCTCGTAAACTGAAA  
ACCTCGTTCACGACCGAATTGATGCAGGATCTTGAGGCAAGCCAAATCAACTCTGAAAAC  
TCTGTAATTGATCTTCTGGCTACTGTTGCTTCCGAAGAGATCAACAAAGATATTATTCAG  
AAGTTGATCACTGTATCATCTCGCTATAAAATTAAGGGATCACCCCTGATGGCGTACTT  
TCTCTCGTTAGCGTTCAGGATGCACCAACACAAGCGCGTGA ACTTTACCGCTATGCTTGC  
GAAATGAGCAATCAAATGTTGCGGACTTCCTCCTTTGCTGGTACATACGTTTTGGCGTCT  
TCTCGCGTGGTTGGCCTCCTGCAATCTTCCGGTTGGATGGAAGAAACCGACAATGCTCTA  
AGCGAAGGTCGTCTACGTTGCGGTCTGGAAGTGTACGCAGACACGACAACACCTTTCGAT  
TATATGCTCGTTGGTTGTAAGCACATGATCGGTGATATGGAGAGTGTAGGTTCTCTGTTT  
TACTCCCCATATACAGAAGCAGACGGCGCTGGCGCGTATAAGAGCGTAATTGACCCTAAT  
AGCTTCCAGCATCATGTAGCTATTATGAATCGTTATTTACTCTCTGTCAACCCATACACA  
TCAAAGTTGATCAGGAAGAACACCAGGTCATCAAGGGTGACGATTGGGGTAAAATGGCT  
GGACGTTCCAGAAATGTCCTACATTTTAGGAATCGAACTGCCACCGCTTGAGATTGACAAC  
GCTTAACTAAATATCTAACCAAGACAAGTCAGATCCGCCAAGATTTTTTCGACGGCGGA  
TCTATTTTCTTGATGATATAAGTTAAAACATGGTATCCCATGTCTACGGGCAACATAAAC  
AGCAATTCGAGTTCCTCCCGAAACAATCCCATTA ACTTCTTTCGCCAAAATATCACACA  
ATCTACAGGGTCATCAAGTGTCTCACCTAAA ACTTTGAGCAACATTTCTGGAAAACAGATT  
TTGCATGTATAACGGTATCGAACGAGGATTATCATAAACGTGTTCTAATTCATCCATCGC  
CAGATTTTTTTGTTCTAAGGTTTGCCATGCAATCACATCATGACCGTTATGCTTGTGGTC  
ATAAACTTCCAATTTGGAATGAAAATTTTTCTATAATCTGGATCGTAATACTTCATGAA  
AGCATTGTCCATACCATAAGCCCCTCCAGAATGCGCTACAACGCGATTTTCTGACAATAC  
CCTCCAATGGTACTAGCCATTATCAAATGTCGCTAGGCGCTTTTCTAGAGCCTATTAA  
AGCACATCTACGAAGTGGTTTTACTCCAAATAGATCTTGTA ACTGGTCAAACATAAATTT  
TCTCCATAGAAAGCAATATCATACTACAAGTTAATAACAAATACAAGTATCCGCGTAGC  
GGAAGCGAGCACAGCGAGCAATAAAACACTTCTAGTAATTGATTAATAAATGTTTCGAAAC  
AAATTTTTATTATTCTATAAGATAAGTCTTCGTTTTGATCATAATTTAATCATAACATGTA  
AAA ACTACACAAAAGGATATCGCTTCGCGAACTCCTACGGAGTATAACATTTGTGTTACA  
ATATGTAGTGATTAATAATTAACCAAAGATACATTTTCTATGTTCTAAAGATCTTTCTTC  
GTTTTGATCATAATTTAATCAAACAGTATTAATATTGTGCACATGTAAACTAAAATTATG  
TTAATAACAGATACAAAAAGCCGTCCCGAAGGACGGCTAATGTTAATTATTTGTTGATA  
ACGATCTGATTTCCGCGAATGGTAACATTACTCTTAGAGATGATCAGATCATCCGGCACT  
ACGTTAGTTTTGTATGGTTGGAAGCGAACAAGCATCTGATTGCGTTTAGACCCTTCCTTA  
ATCTTGATTTCCATCTGGATATTGTTTCCTACGTGAGCAACCGCAATTTACCTTTATTC  
TCATAGACCCACTTGCTGGTAACGTCTCCAGCAAAGCCTTAATAACTTGCAATGCTTCG  
TCGTATGCGGTAGAGCTGTGAACTTTCAAAGGCCAGCCGTAGCAAGACGGGAGCAGGTG  
ATCGCCGGAGATTGCCAAACATCAACATTAATTTGCTCAATCAGAGTAACACCGCCATGA

TCAACTGCTTTGAATGCTTCAAACATTGCCTTTTTTCATTGCTACGTGGTTTTTTACGGAAT  
TTCATAATTAGTCACCTCTATTGATTAGTTATTCAGAATATCAATTACAAATCAGGACAT  
TGCCCGTTTTGAATGCGTCCATTATAACAGTGTTATTTGGCTTGTCAACACGTTTTTTGAAC  
TTTATTTTTAAATTTTTTGTGATGTGGTGTTTACGATAAACAACCTTTTCACGGTTGGC  
GTAAGCCTCTCGTGCCTTTTTACCATCAACCATGCCTTAGCCGCATCTTGTCCGCTGAT  
CCCGCCAATCTTCTTAGCAATATCAACAAAATTAAGACCGTGGTCTTTCGCGTAGCATGTA  
AACCATTAACGCTGTTTTCTTGTCCATCACTTCGCCCCATTGACGATTAACAGGATAGTG  
ATCAGCACCGGAAACTGGATCATGATAGTGCCAATAAACCGGATAAATGCATTTTTCTGAC  
TTCCACACATGACATGCGACTAGCTGATAGACCATTGTTGAAACCAGAACTAGGATATAA  
ACCGAAAGCGGTGTAACCTCGATTAGTCGGGAAATCTCATTACTTTCACCTCATAACAT  
TCATAAACACAACAACGAATAATACAGTAACAGTTATCAACGCCATTTTCAACCCCATAT  
TCATAAATTTTTCTTCGCCTCACGATGGACAGTAGCATGTTCGATTTCGTGCCATTATAGTC  
ATCTAAATCGCTCTGTCAAGAACAACAAAAACAACAAAAAGCCACCCCGAAGGATGGCTGATA  
GATTTCAATTAAGCAGGATGCGTTTTACGAATGCGTAGAACTCGCTCTAACGTCTCTCGGT  
CCAGTTTATGTAACCTTTAGACTGATACATGAAACCATTGCGAGATTCCATGCATGTGC  
AATCACTATATTTTTCTTCCGCTGCTGCGATCGTCTCCAGATCTTTGGCGTACTTGCTGG  
TTGAATAAACTTCTCGATCACGCCACTCTAACCCAGCCTCATTGAATTTAACAATCTCGT  
CAAATACCCACCATCCAATGTAGATAAATGAAGTTTTGCGCCACGGGATCGGGTGTACGT  
AACGAAACATTTTAACAACCTTCCATTGAACATTTTCGGCTTGTACTTGCTGCAACTTCTA  
CTGTTTCATCTTCGATCTGTTGATATAGTTTAGCAACACACCAGAATTTGGCTGTGTCAT  
CGTAAGTAGCACTCTTTTGAACAGATGACCGTCTGGAGTGATAGAAAATCCTTCCAGTG  
CTTCGCCGACCTCACTACCGATCAGAGTCGGTGACAGTTGCCCTTCGCGCTGCAAATACC  
AGTTATATTTGATCGTCAAATTAGGCATACCGCTAGAATCGCCTACAATGTCCTCTGACA  
CAACATAATTAAGTGAGATCTCATTACCTAGTGCCACGGTCTTTGATTCCACCACATCCT  
GATCTACGTTCAATGTTGCCAGCATGATTTTAGTCGATGCGCTAGCGGCTGAATCTTCCG  
ACTCTCCCCACACTTTTACAGTATACACGCCGTTTTTATCTGCTGTAAATTCTTGGATCG  
TAATATCCTGTGTTGTGTCTATAACGTCTTCGCCCTTACTCCAACATAATGTAGTTCAT  
AGTTGTCTGCTGGAGTCTTCCCACCAGAAAATTTACTGTTGCATGTAATTCTACGTCTG  
TTTGTGATGATACGTAGAAAATGCTGCGGTTCCGGTGATATTTACGATTAACCTCAGCTTCTT  
CCATGAGGAAAACCTTCAGATTCTACTGATGTCATCGTATCGGTATCTTGTACCGTGACTT  
TATAGCTACCCGCATTTTCACTTGTGCGTCTGCTACAGTTAGCGTAGCTGTGTTATTTT  
CATGTGGTTGGTTCGCTTTTTGTCCATGTATATGTCAAATTGCTGGGTAATGGTTCGTAC  
CCGCTACAGTCGCTGTTAAGGTGAAACCATCTCCAGCAAGAAAACATCTTTTGTAGATT  
GTATTGATACTGTGAAAGCCATATAAAGCCACTCCCATCGAAAATCCGAATTTAATTAAT  
TGAAATAGTTGATTGTCATCAACCAGATAACCATTGCGAGATTCCAATACATGAGTATTA  
GAATAGTGATGCAACGAGGCCGAAATAGTATCGATCTCGTCTGGGTATTTGTTCTGTTTG  
ATGTAATACATTGATTTTGTAGACATGTAGTATCCTCTTTTAAATTGCATAACGGA  
ACTACAATTAATAAATAAATAATTTTCAACTTTTATCACCCAAAATTAATTGAGTGTGT  
GGAATTGGCTATGTTTAGTCTCTCGCACCTTGACAGACCCATCGCGTTTGATATAATAGA  
TCAGTGACTTGAGGGTGTGCTGTACATACGCGTGCGGGAAACGCTCTGGATACTTCTTCC  
AATCTGGAGTATTAACGATCCAGTCGAAAATCCACCACGGGCAGGAGTAGTAACCACGAC  
CGCCACCGATCAAGCAAATGGTTCGGACGGAAGCCAGTAAGATCGCAAAAATGAATCAGTGT  
CATGTGCTGGGGAACGATGTTCTGCTTCGTCAGAGAAAATGTTGGCTACCGGAGATTCCA  
CTTTAACTTCCGGTACATCTACAACCTCAATTGTAACCTGGTACTGTGTGTGGTTTGGCTT  
CTTCTACAACCTCAATTGTAATTGGTTCTTCTTTTTGTTCTGGTTCTTTTCAATTGCTTCAA  
CCAGAGACGGATCAACTTCGTCGAATACCACTTTATCATCTACGGTGTCTGCTGCCAGAA  
TAAGATCGTTAATACTGGTTCCTTCTGCCGGAGTTTCTTCTTCCATTTCCGAAGCCAGTT  
TAGTTAATTCGGTTTCTACGAACTCGATCATGTTCTCTAGTGATAAAGTCTTTTTTGACCT  
TAATATCAAATTGTTTTGCGTAGTCAGCTAATTCTGTTTTAGCTGTTTTCTGTGCTTCTT  
TGTCGTCGGACGCCGAATAGCGCGGAGTTCTTCGAAATATTCTTTATCAAACATGTTAT  
TCTCCTGAATGGGGGTGTTTTGTATAAATATTTGTATACTGTATTTATTGAGTGAGGCTAT  
TCGCTATGCAAGATATTAATAATCACTTTCTGAACTACTCCCATGTTCAAATTGAATGTA  
GCGATTCAATTTTATTAGAAATGCGAGATTATTTTAGTTTTGAAGTCGAGGGAGCGCGGT  
TTCAAAAAAGATTTAAGTATGGTGGATGGGATGGGCGTATTCGTCTTTTAGATTACAACG  
GAAAGCTGCCAATCGGCCTAACTAAAACCGTGGGAATCTTCGCTAAAATATGGGCTATA  
GCGTATGGGTAGATCCTCGCTTATTCGAAAAGAACAAGTTACAGAAGAAGAATTACAA  
AATGGTGTAAATGACTTAGAATTATATTCGGGTGCTAACAGGATCACCCCGCACTGGTATC



AATCAAAGGCTGTCTTTGAAGGTATTCATCATAAACGCCGTATGTTAGTTTTGCCTACGT  
CCGCTGGTAAATCTGCGATTGCTTGTATGTTGTCTCGTTGGTACTTAGAGAACTACGAAG  
GGAAAGTGCTGATCATCGTTCCTACCACGTCGCTAGTGCTGCAAATGCGTGATGATTTT  
TTGATTATCGCCAGTTTCCGTATGAAGCAATTCATACTATCATGAGCGGTAAGTAAAC  
ACGTAGGTGATCGCCTGATCGTTGTTAGTACGTGGCAATCAGCATGTAAACAGCCGAGTG  
AATGGTTCAGCAATTTGGGATGGTTATTGTTGATGAATGTCACAAGGCCACTGCTAAAA  
ACCTGCTAAACATCGTTACTGATATGGATCATTGCCAGTTTAAGATCGGTATGACTGGTT  
CCCCTCGTGACGGGAAAGCTAACATGATGCAGTATGTCGGTCTTTTCGGTGATATTTCTA  
AGATCGTGAGTATTGACCGCCTGATGGAAGAAGGTCAAGTGACGAAACTGAAAATCAACT  
GTCTTTTCTTCGTTATACCGATGAGGAATGTAGCGCGGTTAAGGGTAGAGAATATGCGG  
AAGAGATCAAGTATATTACGTCTAACCCACGACGTAATAAGTTTGCTTGTAATTTGGCGC  
TAAACTCGCTAAGAAGGGCGAAAACGTATTCCTGATGTTCCGCAATACTAAGCACGGAA  
AACTTATGTATGATGCGTTACAGAAGGTACACGACAAGGTTTATTATATTGACGGTGGAG  
TTAAGACAGAAGAACGTGATGAATTTAAGAAATTAGCGGAAGGGGAAACAGGGATCATT  
GCGTTGCATCCTATGGTGTGTTCTCTACTGGTGTTCATTAAGAAGTTGCACCATGTTA  
TTTTCGGTCATCCAGTGAAGGAATCAACTATCGTTCGTCAGAGTATCGGTTCGTGCATTGC  
GTAAACATGGTTCTAAGGATATTGCAACGGTCTGGGATCTTATAGATCATCTGGCGGTGA  
AGACAAAGAGCAAGAATGCTAAGAAACAGTTTAGCCACCTTAATTATGCTCTTAAACATG  
CCCTTGAAAGAATAAAAAATTTACAACACCGATCGATTCGAATATGTCACGAAAACCATCG  
AGATTTAATAAATAGGGGCTTTAATGCCCTTTATTCTACGGAGATTAATAAATGATTAGC  
TTTAAACGTTTTTTGGTTGAGGCCGCTATTGACGGTTTCATGAGTAAGATTTATTCTTGT  
AATACTATCGAGGGATTAATGAAGTTGAGGCATATTATGAGAAGCGCAAGAAAGAAACA  
GAATTGAAACCTGCTGATGATATTTTCGATCCGTGATGCCATCGCTGGACGCCGTAAGCAA  
TTGGAAGCGGACAACGAGCCAGAAGAGGAGCCGGAAGAGGATTTTTAAGATATAAAAAAG  
CCCCATCATTGATGGGGCAAATAAACCAATTAATAATCGGTTATCAACAAATTACATTA  
CAGCATTGTTTGTCTACGAGTTGTTCTTGTCTTCGCCGTTTCGCATCTTCACTAATCGA  
ACGTTCTGTTACTAGCTGTAAGCAGTAGCCAGTATGAACAACGCCGTTTTCTGTCTGGAC  
GGATAACGCATCCTCGACAGGTTGTTTACAACAAATACAGATTTTCATAAAAAATTCCTCC  
TGCATGTATTTAGCGACAGATTCCAGCATAACGCAATTCATAGCATTCTTGATCGCAA  
GCCACGAGATTTAACGATATCAAGTGCGCGACCAGCAAAATCCATTACCATCTGGTAATA  
TGCAATTTTCGATCAAGCGGTAAGATCTCGTCGTCTGCTGCCATGACAACCTTCAATTC  
TGATTTCTCATATTCAGCACGACACCAGTCATCACTACGGTTAGTGTAAGAGTCAAGACG  
ATTTTTCATAGCCTTTTTCTTTTTAGCCTCAAGAGCAATCGTCTCTTTTTTCGCCTCGCT  
GTAAATCCTTAACCACTTTGAGTATACTACCGGATTATTCAGCGCCTCCCATTGCAACT  
AGTCGCATCGATCTTCATGTCAGCTTCTAATTGTTCTTTCAAATCGTTTAGGTCCATAAT  
ATCCCCTTATTCACACTAAGACCTATATCATATCACACACAAAATCACTTTGCAAGTCTT  
ATGCGTAGTTGTTCAAGATCATCTGGGTTGTCTATTACTGAAAAGTAGATTGATACTATG  
ATTGAGTTATCGTCGTAAGTACTGCGGAGTTACTTCTACTGTCAGGTTTCGGACCCGTGGTTCA  
TAGTTTCGGATCGCCTCATTGATGTTTTTTGATAAGGTATCCACCGTCAGTGGGTTTCATG  
TTCTCAAACAAAGATTTATTGAGATCGCATCCAAACAGTGGATCAAATGGACGAGATCCC  
TTGCGAGTAGTCACGATCAGTAGAATAGAATCCTTAACCGCTTTAATCCCTATGTTCTTT  
TTAACGTCGTTATTCACGATCTGGATATATTGAGATCCAAATCAGTATACATCTGATTA  
ATAGTTGCCATGTTATACCTCAAAGAATTTAAGGAAACTGGATAGACCTGATAATGAAT  
ATACACCAGATTCCCCGCATTTCGCACTTGATCGGTAAGCATATCCAGCACGCGGTCAA  
AGTCCGTGCGTTCAGGTGCTCTATATTGAATTGCTGATCGCCGATCACGATATATTCGA  
TACATGCAATTACCATCTGCATAATATCAACATCTTCTGTAAACTTAGGTTGACGAACT  
TGATTTTTACTTGTCTAAGTCCAGAATATACGGTTCAACTTCTGGTATCTGTGTGCGTG  
AAACATCAAGAGAGTATACTTTCTTTTATTGCATACACCACACACCCAAGTAGCATCAA  
ATTTTATCTTATTGAGGCTGTGACACCATAAGAGAAGAAAAATATATTCTGCTTCGCATT  
TCTCTAGCTCTAATGCATTGATCCCCGTACATTCATGTATGATCTCTATAACAACCTCTG  
ACAGCTTGCCAGTCTCTTTTGTGCTACCAGTTTTTGAATTCGCCGAAGGTGAAAGCAC  
GGGCGTGATCAACTTTTCGCCTAATTGGATCTTGAAAAAGTATTGCATAATAAAACACC  
CTTTATAAACACATAGAATTATTTAGTATTTTATAAATACCCGAAAGGGGGATTATACCA  
TGAATATTATCCGAATAAAACTACCGGAAGGTGTGCAGAGATTTAAACCGTTCACGGTAA  
AAGATTATAGAGATTTCTTCTGGTGTCAACTGAAATTAAGATGAATCCAGAAGAAGAAC  
AAACGATTCTTGATGAGCTATTAGAAGAAATATATCCAGACGTAGACCCGGCATTTCGTG

AATATATTTTCTGAATGTCTTTACTAGTTCAATTGGTAAAACCTAAGATACCGCTTTGTT  
TTACTTGCCCCGACTTGCAACAAAGAAAGAAAATGTTGCTTAACTTACAGGTTGAAGCAC  
TAAAACCAATCGTTCTAGAGGCCGACAGGGCTTAAAATAACTTTCCGGTATGTTAAACCAT  
CAACCGACTATGCAAAAACGTTTCTGGATGCGATAGAGCGTGTATCTGATGGTATTAATG  
ATTATCTATGGACTGAATTACCGGAAGAAGTTAGAGAACAGGTTATAGATTCAATCTCAT  
TTGCTGAATTTGAAGAAGTTGTTAAGCAGATGCACACAATCAAGATCGAACAAAAGATAT  
CTTGTTGTGAAAGTCATGACCTGAAATACATAGGTCTTCTTCCATTGTTCAAATTGTTGT  
TGAATCCAGATGAGTTATTCATCTTTTATCGAATAAACCATCTATTGGCAAAAATCAAATT  
ATTCTATCAGTGATCTTATGGATATGTTACCGATTGAGAGAAACATTGCACTGCACTGG  
TCGAGAAAGACGTAAAAGAGGCAAATAATGCAAAGAACGGGGTTTCCCTAATGTCTCAATA  
AAACTTTATCAGGATTATGAGGCATTTCTAAATCATCGCTTTATAGAGTTGGGTGCTACC  
TTTGTTACAATGACTCTGCGTGATTTCGATTTCGTGGGGTGAACGAAGGATTGTTGCAATTC  
TATGATAATAAGGTGATGCATACAAAATTAACGGGAGAGAGATCATTTCAGATTTTCGCTA  
TCCACTGCTAATACAGATGAAGTGTTAACC GAATCTATGGGATCTCTCATAGTAATGTA  
ACAATTGACCAAAAATCCGACAATATTTTAAACATTCCAGTTAAAGAGCTATCACGAAACA  
TTAAACCTTAAATTTTCTCGCTCATTGACAAATAACGCGGTTAATAACGTAACCTAGCATG  
ATTGATGCCATCTATAAGGAAGTTCCTTTATGGAAACCTACTATAAAGGGTGATAACGTT  
GTTATTCCTCGTTGTCCGTGGGTTAGTACCATAAATGACTATATGGATTTTGTGAGGGCA  
TACGGGCAAAGCGTAGAAACAGAGTCTTTCGTGTATTGCTGGGAAGATTTTGATGGTATA  
ACGATCGCTGGACACGATACAATATTA AAAAATGAGCCAATACCAGCTATAATCTGTGAG  
CCTAGACTCATGGGGCAGTTTATTGATATGTGCGCTAATCTGATGGTTTTTAATTTTCGAG  
TGGCAGACTAAGAGTAATGCTAAAGTTAAAATTCATTTAGCAATGTGACATACACAACCT  
ATTGATTTTGTACTAAGCAGTATAATAAAAATTGTTGTTGGTAATGGGGATAATATTGCA  
CACTTTGCTCATGGTGGCGCTTATGGTAATTTAACTTATAAGAATGCGTTTTTGGAAAGGT  
TCTAAACTTGCCACAATAGAACAATATGATTCATATGCTACCGCCGTGTGTCACGGTAAT  
TTTTCGTTGCGCCCCGGTATGGTTATTCGATTCTTTGATGAGAAACAACAAGCACGCAAT  
GATTTTATTGTTGACGAAGTTGTGCATGAAATTAGCCGAGAGCAATCATTAACTCACCTG  
TATATGATCGGTAACAGCGAAGAATTACAGGAAGTCAAATTTGAAGGTAAGATATAATGA  
CAGAACTAAACCTATGTTAAAATTTGTTGTTCCCTGTAAAAAATTAGAGATAAACGGGA  
AACATATTAAGATCCCAAAAATGGGGATTAAGCAACATCGATTATTA AAAAGATGTTTCGTA  
GCTGTGATGAAACATTAAGATTCTTCTTGATTCAATCTGTCCTGGGTTAAACGCTGCCG  
AGTCTGAATTGGTTATGCTTAACTTTGTGCGTTTAAATGGTAAGTGTCTGGAAGAAAAAG  
ATGGTCTTAAAGCTGTCTGATGTGTATTTGTACAGAGACCGAATTTACTTTAAATGGTA  
AAGTCTTTAAATTTAAAATCCAATGTATACTTCTGACCCCATATCGATGACGCTGATT  
TCTTGAGTCATCATTATCACGATCCTAGCGTAGACTTCCATGATTTCCAGCTTTTATTA  
TGGATTGGGCTACAGGATTAAGAAAACTATTGCACTGGATACACCGGAAGGTACTATCT  
ATGGTGGAATTAACATATTGGATCGCCTATCATGAATGACGCATTAACATCATTTCGCGG  
GATGCGCAAGGAAGCGGAAGAAAACCCGATTGATAAACTTAACAAATTAGATAAACTTGA  
TTCTATTGATAATTTGCAAGCCGCTACCGAATTGGTGGCAGAGACAGTAGAACAAAAATC  
TAATGAAGTTGTTGGTGCAGTAGAGGATAACACCGCAGCCAATGAATTGACGGCCGAGAA  
TACCCAATCTACCGCTGGCAATACCCA AAAA ACTTATGAAGAATTGCAAAA ACTCAATAA  
TTTCTCTTCTCAGATGAATGAGAAATTACGTGGTTTTTGGTGTATGATGGAACGTAGATT  
TGGTGTGTCAGTAAAATGGCTAGCGGTATTGGTGCAGTTGAAGAAGCACTGAAAAAACC  
GGAACAACCGCAAACAATGCCATCACCTCAGCCATTTTTGCCTACTGTACCGGAACAGCC  
TAATAATGACAACTATCAAGGTCTTCCAAGAAAAA ACCGGATGTTGATGACCGAAAGAA  
AAAGAACGCCACAGATAAGCGTAATGCTGATTCTATGGAAAATCTTCTTAAAGTTGTTTCG  
TGGAGGATTTAAAGAAACCATAGGTATCTCTAATAAGGTCTTAGGGATGTTATTTAAGAT  
CACTTTGACCGCTATGGCAGAAGCCGCAAATGGGGTGCTATTTTGATGGGTATTGTTTT  
TGTCATTGATACCCTGATGGTTCATTTTCAGATATTGGAGTGATTTATTTCGAAACAAAATT  
CAAGGAATTTATGGATAAGGCCGGAGGATGGGCTGGTCCTATTAGCGATATTTTAACTAC  
TGTTTCGTCAGGTTTCGAGATTATTGGTCTAAAGGAGAATATAAAGAATTAATTAATCTCT  
GGTTATGGGTATTGGTGATGCGTTCTATAAAAACCTTTATCCA ACTTGATCGAATTATCAC  
TACTGGTATTGCTAAAATTTCTTCGCATGATCCCTGGTATGGGTGATTATGCCGATAATTT  
AGAATACGGTGCTTTAAAGTCTGCTGTTGCTAAAGGCTATAAGCCAAATGAAAGAGAACT  
CGAATTAATGGATAAGGTTCGAGTCTGAACACGAAGAAGACAAATATGGAGAGCGCACAGG  
ATGGACAGGAAAAGCCCGTGATATTGGCGAGGCCATAGGCCGAATCTATTAAGATAAATT  
TAATGAAGGTCTTGTTAGTCTGGGCTGGAGAGATCAAAGGATGTTGACGCAGAGAAACG

ACAAGAAGAATTA AAAACGCGGGGAATACAAGTCTGTTTCTGCTGAACAACGATCTGCTAG  
TCGTAAACTTAAAATTA AAAAGCGAGGGAGCGATCAATAATATTAATGAAGTTATGGAGAA  
TTTGAGCGGTGACTATGACAAAGAAAGAATGGAAGAGTTGAAAAAGGATATTGATGTTTA  
CCGTGAACAAGTTCAAGATCCTACATTAGTTGAAAGTGATCGTTCTCAGTTAGAGCGTCT  
TATTGAAAAATTTGATGAGATGTATGCTGATAAACTAATGGTGTGGTTCCAACCTAACC  
TGTTCCCTGCAACTGAAACGGAAACAGCAAAACAAGCGGAACGTACTGAACAAATGCAGAA  
ACAAGCTGCAATCCAGCAACAAACGACAAATCAGACCTCAAACGTAAATAATACACAAAT  
TGTAACAAACAATAGA ACTATTA AACAGGGTGCACCAACA ACTAGAATTGATGCCCTGG  
TACAATTAATATGGGGA ACTTTTAATGAAAATTAGTGTTATCAATGATGCCGTTGATAGC  
TTAAAGCGGGGGTTAAAACCTCCGCTGGTTTTACCTCAAAAAATAAAGGGAAAACATTA  
ACCGCTCAATCCCCGCTGAACGTGCTAGCGGTAATGATGCTAGCGGTTATTATATCAAC  
GACTTATATAATAATGGTCTGTTATTC ACTGCATACGATTATACATCTCGTACTACCGGA  
TCGTTGCGTGATTT CAGGAAAAAGAAAAATGTTGCTAGCGGTTTTGGTGGTAGCGTTAAT  
ATCGCTGGTTTTGATTTAAATTTGGGTGGGAGAAATGCTGCATTTGACCGAGAGGCAATT  
GCTAATATTCTTCTTCTCGTAGTCAATCTGACGTTGACGCTGCCAGCCATAAGTTTAAT  
GATGTTGGTGAATCTGTTATTTCTCGCGGCGGTGGTACTTTAGGCGGTGCTCTTTCTAAT  
ATGGCATCTACTGCCGTTTTTGGTGGTATCGAAAGTATTACTGGTGGATACCTTGCCGAT  
CACGGTGAACAGATTTATAACTGCGCGAAGCATGTATGCGGGTGGTACTGACGCACGAACG  
AAAAACTACGTATGGCATCTAACCCACG TAGTATTGAAGACCTTCGCAATATTCTGATC  
ATATACGAAACGTTTTTAGAATTGTCTTATGGTTCTAGTGGTATTTCCAGCACC GCAAAA  
GAATTA AAAGCGGAAGTTGATGCGTGGTATAAAAATACACTATTGAGAAAATCCACTCCA  
GAGGAAGCGAAGAGAAATGATACTCTGTTTGAAGGGATCACCGATTTTCTATCAAACGTA  
ATTACTGTATCTAACCCGACAATATGGATGATCTCTA ACTTCGGCAAGCGTACATCGTTT  
GAAGGGCGTAGCGATGCATTTGGTCCCGCTCAGATCTCAAGTGTACGTCTGGACAAGTCG  
CCTGATGGTAAGTTTAATGGCCTTGCTATTTCTCCTAACTTGCCGAGTACCTTTGTTCTG  
GAAGTAACATTTAGAGAGATCTTGACACTTTCCCGTGGTACTATATTTGGGAGTGCGGCA  
TAATGTTTGATTTAAATGACTTTAACGAACAAGCCGCTAACCTTGACTTTCAGCGATCGA  
ACTTATTCAGTGTGGCATTG GCCACCCTCCAAGTAATAAGACACAAGCGATCCTAGAAA  
GTATGGGTGGTGC GGTAATGATATTATACCAAATGCATTAATGACTATTTCCGGGATTA  
CTCGTGGTGATTATACTGACGCATTAACAAATCTTGCTGTACAGGGTGTAGGCGTGCTG  
TTGATTCATCTGGTGTCAAAAAGTATCTTTTAGGTGCAATGTCATCCCGCGTAGTTCAAT  
CTCTTCTGGGGCAATTTGATGTTGGTACGTATGCGCTTGACTGGTTCAATATGGCATATA  
AGACAAGCGGTCTTCTGGTGTATGCTGTTAAGGTTCCAGAAAACAGATTGAATTATGAAA  
TGGACCGTAACCACAATGCGCCAAACATTCGAATTACCGGACGTGATTTTGATCCGCTTG  
TATTGAGCTTTAGAATGGACTCTAGCGCATCAA ACTATAGAGCAATGCAGGATTGGGTTA  
ACTCAGTAGAAGACCCCGTTACAGGGCTTCGTGCGCTTCTGTTGACGTTGAAGCAGATA  
TTCAGGTCAACTTACATAACCGAATGGGAGTTCCTCACACGATCATGATGTTTAATGGTT  
GTGTTCCCTGTTGGTGTGAGTGCACCGGAATTA AACTATGAAAACAACAACGAAATCACAA  
CATTCGATGTTACTTTTGCGTATAGGACTATGCAA ACTGGTGTGTAGGAGAGCAAGCCG  
CGCGAGAATGGATTGAGGATAAGGCAATAAACGCAATAACAAACACTTTCGGTAATAATT  
TACTTGATAGTGGGTTATCTGCTGCTGGTAATGCTTTATCGCGTCTAAATGGCGTTGGTG  
GGCGTGTGGTGAATACTGTTACTAACTGGTTCTGATAAGCGAAAGGCGGGGATAATCCCC  
GCCTTTTTATTTGCTAAATCATTGCAATATTTTAGTGCCTTAGTTTGAAATCTGCGCT  
GTTAAGTTCTTCATAACGGTCATAATCACCGTTAATGCTGCCTTCTTGCTTCTTGCTC  
TATCTGCATGTCAGACATGATAATACAGCGATCCCGCGCTTTCATCTTCTCAAGTTGTAT  
AGACTCTTCTTCTGCTTGCGCAATTTCTTCTGACGCTTCTTTTCTTCTTGTTGCTTCTC  
TTCCCGCGCTTCTTTGATTGCATCCTTGAACATCTGCGTTTTGTGGTGTCTAAACCAACTTT  
AACTCGATCTACGTCTCGACGTTCCATTTTAGAAATAAAGCATGATTTCGATCTGATCATC  
ACTTGCATATGCTGCTTTACATTCACGAAGCAAGAAAACCGGATCTGATTTAGCATT CAT  
CATAGCTTCCATGTTGGCACAACCAGTAAGCATGAATACAGCCGCAAGACCAATCAGTTT  
AATCATTTTCATTTAGTCACCTCACCGAAAATTGTAAATTGTCTACGATTCTCATCGCCG  
AAAGATTCTACTACGTCTGTTTACCTTGACGCAAGTCCCGCGCGGTAAAATTA CTTCACAT  
TCGCAAGGGTTCATGCAATGGACCCAACAACAAAACCTTTATGATCTTTTACGTCAATT  
ACCCATGATACATTACAAGAATGTTGCATCTTTCCGGTCATTGATTCATATCGATTCTCA  
CAATAAAGGCTAGTGCTGTTTGATAGCCATCCTCCAAGATGATCGGTGTCATGCTGGTT  
GACACAAAGTTTTTAAAGGTAAATTCCTTATCTTCAATAATACGCTCTATTGTCTGAATG  
TCAAGATGTTGACCGCGATAAAGAGTACCGTTA ACTTTTCGGTTTTATCCATGACGCAA

TCCATCAAATCAACAATCTCTGATATCTCATCGGTCATGTCTTCTTCCCCTAAGAGAGCA  
CCATTTACCCATTTCGTATTGCTCAGACACATAATCACAGATTGCATTATATTCTGCTGGT  
GTTATGTTGTTATGTTTGTAAATGTTTGAATACATTATCTCCAAAGTCTTCGGAGTGTACT  
TCATACATCACATTAATGATTTTCTTGACAAATCCATAATCTTGTGTCTCACGCTCAAGG  
AAGCGGATAACCTTCACATAATCATCAAAGTTAATCTGATCGCTGATCATCTCAGTGATC  
ATGTAACCATTAATCCCCTCAATGTCATATGTTTCAATATAATTGTCCATACGTTCCATC  
ATTGATTCGCGTGATTCTTCCGAAAGACGAAAATCCTGTAATTTCTTGAACATTTTAAAC  
CTCCCATATAACAGAAAACGGGGCTAGTATAAAACTAGTCCCCGTTTGTAGTCAACCATTA  
TTTCTTAAAATTACATTTTAAATTTATCTGGCATTGCGTCTACAGATAACCAGATCAGCGA  
TAAGCTGACGTAGAGTTGCCTTATCTGCTTCTTACGTTTCGGTTTTAGCTTCGCTAATGA  
AGCTGGAGAAAGACAGGTCAGAAGCAGGTTTAAACAACACCTTCACGGATGAATGCATCAC  
CGTCCGCGATCATCTCGCCAGATTCTTGTAAATGCTGCCAGTTCATTTTTGTTTATAATAT  
GTGCCTCAATGTAATAAGTTTCTTGTGAATCCGTCGATGCCGTAGCACGAGTTACCGTAT  
CAAAGGATAACACAACACCGCGAGGAAGTAAAATCTCGCATTCTTTGTAAAGCAAATGCTT  
TGTTACCTACTGGCAAGACAGGGATGTTTTCCGCGCCAGCAATGGAGAAAGCAACATTGG  
CGCCACCTTCACCGCGAGAGCCAGCCATAGAATCAACACCAGCAACGGCACTAGCCACGT  
TTGCATTCCAGCCGCCAAAATGTTAGGTGCAAGGGAAGTGCTCACATAGTTTTTAAAGT  
AAAACGTTTTTTGCTTACGTGCAGTTTCCACATTTGCGACCGGAAGTCCATACCACGAT  
ACAGAATAGTACCCGGATCAAGTTTAAACGCCATAGTTGGAGAAGGCATTATCCAGTGCAT  
CGCACATCTTGACCAATTCTTCTGGATCTGATATGCCTTCAAACCTTCCAGCTTGCGGT  
CGGTTAGGAAGTTGTTTATGATGTATGCTGCATCGGCATATTCGCTCAACACAAAAC  
CTTCCGCGCCTGGCAGATCAAGATCAATATCTGCCATCATTTCACCCATGTTGCTAGCAA  
TTGCTTCAAACATAACCGGAAGCAACATTACGTAGGGCATCGGTTTTAATCTGGGTGATAT  
GACTACGCAGCATTTTACGCTTTTACATCTGCTGGCATAGACTGGTCTACTCGATCCATTG  
CCAGGGCGGTGATCTTGTTTTTCGAATACTTCCCTCGCTCATGATTTCTTTTAAAGCGTTTGA  
CCGAGGCTGCGATAACTTCCGCGAGACAACGGATCATATTGATCCTGAACTTTTACCAGTT  
CGCTTACTGCGTATTTTGCATCGGCTTCGCTTTCAAAATAGTACGCATGAAACCATAGC  
GAGTGATAATATCACTTGTCCAGTCATTACAGAGAACGGGCGGTTGAACGTTCTAAGGCTT  
GACGGTCAATCAGAGTATTAACCTGTTTCTTAGGTTTCGGCTTCGGTGATATCTTCTCCG  
GTTTAAAGATTAATTTTTTCTGGATGATTCACATAGTCGCTGTTATAGGTCGCTTGAGTTT  
TCAGCATTTCTTCTTATGTCAAACGAGATTTAGCCGCTACGCGTTGTTCTGCTTCCGCGT  
TTCGTTCTTCTTCTGACACAAGACTAGCCGCATACGCTTCATCTTTAGTCAGAGATTCAC  
CAGTAGCCTTAGATACCCAGCGATCACCTAAATCACTTTCTACTTTAGTGAACAAGGATT  
CATCAAGTTTAAATCCCTTTAATCTTATCAATCGCCATCCCGCGACGCTTGACAACAATA  
AAGCGATCTTTTTGCTGGTCATTACTTCTGCTGGAATACTTCAAACCTTCGGTGTACGAC  
GCACCAAACGCTCTATAACGCGCTTAAACCAGTTCGGTCTTACCTTTCATGCGGGATACGT  
TAAAACGGAACATAACAGCGTCTAATTGCGATTTACGGGCTGTTTCCATAACCACATCAA  
AAGCACTTGCCATGACTGCAATCGGGTTATCGCCTAGACCATTTTTAAGCTGTACAATAC  
GACCGTTTTGTTTCAATTCGCACAGTACAACATGTGCGGTCTTGTACCCATACGAATGA  
TTTTAGGTGTTTTGTTGGTGAAGTTACAAAGACGGACAATCACATCTTTATCGCGTGTCT  
GTAATGCAAAAAGCTGTTTAGGATTCTGCTTAGGCTTTAAGCACTGTACCGGAGCAATAC  
TGCCAAAGTTTTCTTCCCTTCCGTCAACAGCCATTTCTCGAAAGATTCAATCATTAGAT  
CGTCGATTTCTAAGTTAAACATTTTATATCCTCTAGTTGATAACCTATAAACCTATATTT  
ATGAAAAGGGGGCTTAAACGCCCCCTTATTATAATGCACCATCGAGCAATTGCTCTAAGG  
TGATCCTGAATAGTCTTTTTCAATCAGGGTATATTTTCTACTCGTTTAAATCCAGCCAC  
GCATTTCAACGTATTCTGCGTAGTTGATGGTGCAGATTGTTCCATCTTCTAGCAAAGCAG  
TACCGATTTTCGTTAATGCGGTCATAAGTTACGTCGGTAATGATGATTTTCGATGTTAGCCA  
TTTGATACTCCTTAGTAGTTTCGTTTCGGTATGGGTGATTATGATATACACCCTCTGTTA  
TGTCACAACCTTTTAGAACATTTTTGAAATTAATTCTGCTTTGATTTTCGCAGAGAACATC  
TAAAGATTTCTCGTCACCTGCTTTTGCGGCTTCTGTTTGCATTTTTGAAATGGCTTCAAT  
GTCAGTGCAATTATAAGCCGCTTGAACCTTACGCGATTGCGATGATTGCCGATTTCGATGGT  
TAAGTGTTCATGTTTGAATCTCCTTTCGTTTCGGTATGGGTGCATTATAGGGGATCGGT  
GACCCCTGTCAACAACCTTTTTAGTTATTTTTAATTGTTTCACTTTCGCAATAATGCAATC  
ACATGCTGGCGATGTTCTTCCGATTGAGACACACCGAAAAAGTTTGTTTTGTAGAAATAC  
TCTAATCGGTCTTCTCGTGTGCTCTTCCATCATGATCGCGGGTAGTCCGAGATTTCCG  
AAACGTCGTTTTTCTGCTGGCGTAAAATCACTGTAATACAACATAGAATCATCATTACAA  
GCAATGCTAAACTCATCCTTCATAAAGGAGAATATTGCGTTTAAACGCTGTTTACCGTCC

ACGATTTTCGATCTCATAGCGAGAGCCATCATCAATCTTAGCCATTGCGATAGCACCAACC  
GGAAAATCATTAAATCAGGTTTTTCGATAAACATACGTTTTGTTTTTCGGTGTCCCATACTAAA  
GGACGCTGATAATCTGGGTTTCATGTTGATATAGCCATCTTCTAACCATGCTTCATAAACA  
GAGATAACAAAGTTTTTAGTATTGGTATAGTAACGGCGTTTTAGGCGTTAAACGGTTCATG  
TTATAGTCTCCTGAATGGATCATCACGTAAATCAATATCTTTTAAGAACTCATCCCATGA  
ATGGCGGATATTGTTCTTAATTCTCCAGATAAGAGCAGGGATTGAACGCTCTCCCATCTG  
GAAGTATGGATCATATGATCCGTATGCCCAATATGCTACTACAATTCCACAATCAGCGCA  
ATAGTATTCTATTTCACTTGTGGCGACCAAAGTCCATCAATATGATCGGTGATCTTGCT  
TTCGATGTTATGGCTATGACAATCAGGGCAACGGATGCAATGACCTTGTTTTATCGTAATT  
TGACGTTAGCGAATACTTAAACAATCTCATTATAGATCCTTATTTGCTTCAAATACTGCC  
TTTTGCGAATCCTCGCGGGGTAAGTGACCTGATAGTCTTTGTTTTTCGTTCTTTTCCCGCCT  
AGCTTAGAATGCTGTTTACTGTACCCTTTATTAATCTGCAAAGGTTTCTTTTCTGGCATT  
ATAAAGCCTTGTTCCGGTCCATAAGCAAGTCTTTTTTCGGGTACATATCACGGGCGGCAATA  
TACTCAGGAAAAGTAGGATGTTTATCATCTTCCGGCAAATAACCGCCATATCCCACGGA  
TGGAACATATAATCAGGCTTACGCCACATGCTAGAGATAACGCTTACAGGATTCTCTATC  
ATGTAGGGAACCTCATCCATTCACCCAAATAAGCGGTTATTTTAGCTGCCCTTACATCA  
TGAACCTGAATCAATGGTCCTTGTTCTAGTTTCTTTTCGTTCAAAGTGCGCAGCGCCACTA  
ACAGCTAAATTGGTGCACGGTGGGAATGCAAAGATAAATATCCGGTTCCTTTCCCATTTCAAGG  
TCCATTGCTCTTTCCAGCCAGTTCAAATCAATCCAGGTGTTTACATAGGTAATGTTTGGA  
TGTTCAAATCTGGTATTATATTTTTTGTATGTACCGTGGTCGCCATCGTCAGCATTAAAG  
CAGATCACCTTATGACCCGCTTTAGCCCATTCTAACCCCATTTATCCCCGACCCGTCAAAG  
TTGCAGAATATTAATTTTTGTTTCATATACGCCCTTTAATCCAACACAGATTTTAGAAG  
GTTCTTTGCCGTGCCACATTAAGTAAAGTCCGTTAATGCGGCCTTGTTTTGTATATGATT  
CTTTTCTGATCTTCTTATAGTGTGCTGTTTCTCTACCGATTGTTTAGAATACCAATCAT  
AAAGGAAGAGGAACAAAGGCCAACCATTAGCAACCTAATGCAGTTATTCAAAAATTCCT  
TATTTTCGTTTAATTAATTTTTCTTTTTCACGCTGCCCCATTGGTGTGATAGTAACAGAATC  
TAAAAGACCTTTGTTAGCCAGTTCGCGGCAAGTTTTTCAGATCCGCAACTTCCCAGCCAGC  
CGCAATCAGGTTATCAATGAGGCTGTTAGCAACTTCTTCGCTCATGAAAGAGCACTGTTT  
GCCGATGGTGTAGCGTACACGCTGTAATTTAGTTTACGGAAGCCTTTAACGTTACGGTC  
TTAGCGATTTTCTTTGCGGTTTCGATGTTAGCCATTGTTTGATTCTCCTAAGTGGTATC  
TCGTCTTGATGGTTGTATTGTAGGGGAGTTATCCTCCCCTGTCAACACTTTTTATAAAAT  
TATTTGTTAATTTCTGGTGCCTGCTAGGATAGTAACCTTCTTTAACTCCGAGGTATTTT  
GCAACCATCCCTACAATCTTCTGTGCTACTACAATGTCAAATTTTCAAGATAATCTTCGCCG  
TGGGTTTCAACGATATATGCTTCACATGCTGCTTTAGTCTCGAACATTTTGATTCTCCTA  
TTTCGTTTTCGGTATGTGTGTATTATAGGGGATCTCCCGATCCCGTCAACAACCTTTTTTA  
GATTATTTGCACCACACTGTAATTTTCTTATCATGTTGGTAGTGAATCCATCGAATATCA  
TCTTTATCAATCATGACAGTAACATACCCATTTACTAGTGATTTGTCAAACGGTTATGT  
AACAGTGCAATATATTGAAAGAATGGTTCCTTTTGTATTTGAATATATCCCTTACCATCA  
AACGTCATGACATTTTTGTGAACTTTAAATTCATTACGAAGAACAGCCGTCATTGTCCCG  
TCTTCATTAGTTTTGAGTTTTAATTCGGATTCTTTGTAAAAATATGCGTCACGGGCTTTA  
CTTTCTTCCCGTCTTGTACTCTTACTTCACTAGCATAATCACACTGATAGGTCTTATCT  
ACATTTTCGATCTTTTCTTGTGTCATATCAAAAAGCGGTGCGACCTTTTTTCTTGGCCGCG  
TGTGCTACGTTGGTCATGGACAGTGCTGCAACAACCGCAATAGCAATAATCTTCTTCATA  
GTATTCTCCTTTTTGTTTTGTGTTGGGAGTATCTTAGCGACACTCCCGTTATTTTTCAAAT  
CTTTTTATTCGTGATTAGTTTCGATGTTGTGCATTTTGCACCAGTTCAACCAATCGCCA  
GATCTTGATAGTTGATGCTTTTATCTGCTGCCATCGTTTTTGTCTTGATACCCATATGTG  
CGTTATGAGTAAGCATTTTTACAGTGAACCTCAATTTTATCACCTTTAGCTTTAACATCAA  
CCAGTTTGGTCCACTGGCTACCAGCGCCGCGAATGTTTACATACCAACGATGTTTCCGATGT  
ATGCTTCTTTGTTTTTTCAGGATTTTCGGTTGCTTTGATGAATTTTCAATTTTTGATTCTCCAG  
TTCGTTTTCGGTATGGGTGATTATGCTATGTTCTTACTTTGGTGTCAACAACCTTTTTAGA  
TATTTTCAGAAATAAATTTTAAACTTGACGTAAATGTTTCTCATCTTTGATAGTCGCCG  
GAAGTTCTTCTTTTACTTCTGTGCAAGATAGATATTTCCGTTCCAAGTGAAAGATCCGT  
CTTCGTTTACGCGATAGCTGAACATCCACTCGCAATCATTTTCGATTTTATATACACACA  
GAAGGGTGTAATCGTTAAAGCTAGTGATTTCAAGGTCGAAGCCGTGACGTTTTGCAAAGT  
TGGTAGTGGTTTTAGTCAGTGCCATTGTTTGATTCTCCTAAGTGGTATCTCGTCTTGATG  
GGTGTATTATGCTATAGTCGTGATCTGGTGTCAACAACCTTTTTTAAATTTTTTGAAATAA  
AAAAGCCGACACTAAGGTCGGCACATTTTAAAAATTTCTTGCTATATATGCAAGCCTCATA

ATCTAGAGGATGACCGCCAATCCTACCAGGCTTAATATTCCAACCGCATCGATATTTTCT  
GACCATGCTAACCGTTTCGGTTCCTAGAGCATTCTTTGCAAATCATAACCCCTAAATTC  
TTGTCTATAAGGACAGTCCGCTTTGCAAGTTGGCGGTTCTACGTCATTTAGCGGGTCCGA  
AGCAGTTGGCTTTATTATCAATTCTTTGTTTGAATAATCATAAGCACATCCCATTGAAG  
ACAATTTAACATCTTCGCAATAAGTGTGAAATCCGTCAAATACGATCACTTCGTATTTGA  
CTCCATCAGCGATAGCTTTTACTTTATACCATCCATGCTTGTATAAAATCTTCATCTTTA  
TTTCCTCAATCTCGTTTCGATGGGTGTATTATGCTATAGGCTAGACCAGGTTGTCAACAA  
CTTTTTTAATTTTTTGGGAAATAAAAAAGCCGACGCTAAGGTCGGCTAATAAAATCATT  
GGACAAATAATCATTCTGTGCAATCCGGTCGGCGTATGCTGGTGTATGTCAATCGCCAG  
CACTTTAACGCGTGCTTTCTTTCGACCTGGGTTTTCTCGTAACCAGTGCTCATGACCGTG  
AACATTTTTATACTTTGATGCTTCTTCAAATGTACGGATCGGACCTGGGTAATCAGCGTA  
AAGGATCTCTAGGTCTTCGGTGATGTAAAAATATACATCGTAATTAAGTCTCTAGTTT  
AAGCAGAGAGTTGCGAAATTGTGGTAAATTCGCGGGTAAATTCAACTACAAGATTTTT  
CATAGTGATATCCTCATTAGATAGATTAAGGGGCTTAACGCCCCCGTATATTAATAA  
CAGTCCTTCTGTACACCGTAGTAGAGTTCGTCACTGATAATTTTATTAATGCGACGGTG  
TGCATATTCCTGATTTGCGAAGTTATCAGCAAGTTCTACTTTAGTTTCGCCGTATGAGT  
CCATTTAGTGATAACTTTACCATCTGCAAATTTGAAGTTGAAGTCTTTAGCTACTGCATC  
GCGTACCAGACGTGCGAACTTGTGTTACGGATGGCATTATCGGTTTCGTGTGCAGCGTG  
AGCGAATTTGTTAACTTTAGAGTGATAGTAATGTATGCCATAATTTGATTCTCCTAGTT  
AGAAAGTGTATCTCGTTTCGATGGGGATATTATGCTATATCCCCGATCCGGTGTCAACAC  
TTTTTATAAAATAATTTTTTGATATTTTTCTATGATGTTTGTGTAGGTCACGTCAACCGC  
TAGCACCGTTGCTTCGAATCCACCGTTTAGCCAAATGGCTATGATCATGATCGTGAAAGAA  
ACCTAGACCAGTACGAAGACCTTCTTTATATTCTGCGCGTACATTCAGTTTGTGTCGTCGAT  
AAACAGATAAAACCATGAATTTTTACTAGGATTGATGATAACAACCTTTAGATTAGGAAG  
AATATCACGACTAAGAATAAACTTATCACCTACTTTGAACATAAATATTAGTCCTCACTTA  
TAAGGTCAAACCAATTGTTTTTCGCATAATGCTTAATGCGTGCTTGATCTGCTCCGCTG  
GTGATAGATTCCATGCAACCACTACAACCTTCTGACGCATCGTCATCCGTTTCTGATACCC  
AATGATTGTGATTCATACAGTTATTTGCTATCGAGTGAGCAAATGATTTTCACTGGAG  
ACGTATAATCATAGTAACGGATTTTCAGATTTTCATCAACGTACAAGTAGATCGTATACG  
GCTTATATTCAGTAACCAGTAACAGACAGTTACGCAATTCTGGGAAAATCTTTTTAGTTA  
ATTTCATTTTATAATCCTCGGTCTCGGCTATAGTACACGGTACGCCATAACAATTTTATGT  
TTCGTGTCGCTCCAGCACACGATCTCATTTACTCTTAAATCTTTGTTATCAACAAAAGAT  
GAACATTGTGACGCTTCTTTCATCATTTTATCTGCTGTTTTCTCATCAAATACAGCACAG  
ATTTCTTTATACACTCGATAATCTTTGAATTGACTCTGAATACCCATAATTAACACCATT  
CCAACCAATTGTTTTTGAGAAAACGTTTATCCACTGTTGAGTGTAGCATGTTTCTTTCCA  
TGATACAATACGAGTGGAATAATGGTTTTTGTTCAGAAAAGGACGGGCATTTTGATGC  
ATCTTCCATCATTTTTCGGCGAACTCTGGTGCGTATACTCGCAGGATCTGTTGATATGC  
TTTGTATTCTTTAAATTTGCTCATAATCATTCACTACCTTATCAGCTTCTTTTGTGTTT  
TTACATCAACTGCGATAACTCGTAAAGGTTTCGTCATGGTTCCACCAGTGGTCATGAATAT  
CAGCTTGTGATTTATCACCAAAGGAATCACGAATATCATTTTTACATTTATAGCTAATGT  
GACCTTCATAGTCAACATAAAGGTAATTATCGAAAATCGGCGTTTTTAAGATCATAACCGA  
AAAATCTTTCTTTGTGTGCTTATCCAGCGTTGCAGTAATTCGCATCATAATATATTCCT  
CTTAGAAAGGGATGGTCATTTCTTGAGCTTGTACATTCTCGTTAGGATTAACCTTCATCC  
AGCCGATATTGTCTACCAGCATATGCACATTTTTATCATATCCTACGTGAGTAGTCAACA  
CTAAATGTGCTTTACCTTCAATGATGAGTTCCATGTACTTCTGAACTTCGATAGCTTTCA  
TTTTGATTCTCCGTTTGTGCTTGTATGGGAGTATCTTACTACTCCATTTAATCATTGTC  
AACTATTATTTGTTAATTTCTGGTGCCTGCTCGGATAGTAACCTTCTTTAACACCTAGA  
TATTTTGCAACCAATCCGGTGATCTTCTGTGCTACTACGATATCGAATTTAGGTAGTCT  
TCACCGTGGTTTGCTACAATGTATGCTTCGCATTCTGCTTTAGTCTGGAACATTTTTGAT  
TCTCCTATATCTCGTTGGTATGTGTGCATTATAGGGGATCACCGATCCCCTGTCAACAAC  
TTTATAATGCTTTATATGCGTATTTTATAAATTTGTCTGCCACTTCATTGGCATGTTTCA  
ATTCTACGCCTGATTCGAGAACAATAGCTAGGTTCGGTTTCGTCATTCCCAGCGTACCAAT  
GATTTGATGTTTCGATTTTTTTCAATTGGAAATTGGTCACTTTTATCTGTGCGACAAAATA  
CATCTAAATGCTCGTCGATGTAAAAGATCCAATCTTATAAAGAATAACGGTATTAGCAA  
GATTTTTATTGCCTTCAACGAAAGGTTCCGCGACAAATAGCTTAGTTTGTTCATAGTAA  
TTTCCTCAAATATAACAGTTTCGTAAACTTCCCAATGTTTACGCGCAACACGCTTAACG  
AAAAGGTTTTCTTTGATGTTATTCATAAACGCTCTGGATGGATTTAATGCGGTTTGAAGGT

TTCCATTCTTCGTTGGCATTGCGTCGATACATCATAACATTACCAGTTCGCTTATATTCA  
GCAACCATTTTAAGACCACACATAATATTATCCTCAATTTGTGGGAGAGTATTACCCCTC  
CCAATGATTGTTATGTTATATCACACAAAATGGCGTGTCAATGCTTCTTTTTCGGGTTCCG  
CTAAGACTTTCAATCTCGCCTGGCATAACATCAACCGCCAGAACTTCTACAACATCCTCG  
GACCCTAACAGTGAGTATGGCCTTTGTAGAAGTTGATAACCAGACCACCTTCTCGTCC  
CATTTAACGCTATCGCTAGCCCACCACACATCACCGTTCGATAAAGTTGATGTAAAGCACA  
CTACGCCACATTGAATTAATTAATTTCAATACTGCGCCTTTCATCTCTTCCACGGTATGG  
TCTTCCATTTTGAAGACCTCACCTACCTGAACTTTTGCCATTTAGTCACCTCTCTTTATT  
ACATAACAATCACGCCAGCCGTTGAAAGTTGATGTTTCAACTGAGCATTCTTCTGCTACCG  
TCAAATCAATGATTTCTTGTGACGCTGCAATCATATAGCCATTGGTGATATTGTTTTGCA  
TCAGTTCAATGGTTTCTTCGTTGTAGCGGATTTTAGCGATGATTTTCGTTGAAGTTCATAA  
TTGATTCTCCTAGTTCGTTTCGGTATGTGTGTAGTATAGGGGATCGGTGATCCCCTGTCA  
ACAACTTTTTTTAAAGTTTTTCCATGATAACGGTCATAATTACATCTTCTGCGCGAGCTG  
TCAGATTATCAGCGTCAGCATGTGGGCGGTTGGTTGTTACAGAGATAACACCGTTGCGCA  
CTGGTTTGATATTGATATCAAGATGATCCGCGAAACGTTTCGTGATCCGCGAAACGTTTCG  
CAGTTACAGAATGAATTTTGGTGTAAATTTCTTTTGGCAGTGCCTTGCGAACCTTCACGAA  
TCAGGATAGCGTTTTTTCAGTTGGTTCTCCGCGCTCATGGTCTTCTGGGGTGTTCATGGTTC  
CGTCGAAGTCAATCATTGGCAGCGTTACGATGTATTTTCATTTTTGATTCTCCGTTTAAAGA  
AAGTGTGTTTCGTTTTGATGTGTGTAGTATAGGGGATACGTGATCCCCTGTCAACAACCTT  
TTTTGAATTAATTTTTTCATGAGCTTAATGGCTTCTTCCATAGCCAGCACATTTTCGATAGT  
TAGGGTATCGTGTTAGATCGTCATACATTCGCTTAAGGGTGGAACTTCCCTCAAACCTCTG  
GGTTTTCTAGATACAGTTGAACAAATTGTTTTCTCTACCATCTCTGCTTTTAGCTTGTCTG  
CTTGTTCCTGTTTCATATGATTTAGTTGGACCCAACACCAACAAAATGATAAAGGTGATCA  
ACGGGCTAATGATCAACGATAGGAGAACATAACCGATAACGCTACGGTTTAAACGGCTTG  
CGTACATGCCTACTAGGAAAACAAAAGGATATAGATAAACAGAAAGAACATATAATGGT  
TACTCCTTATTTTCTCGCTCGTACTTTTCGAAATAAAAATTCTACTGGCTGGTCATGAATT  
GACAGCAAGCCAAAGCGTTTAGCCGCTCGCAATCCCATATTGCGCTGAATGTACTTCTGG  
AAGTTCTCGCGTATACACTTACGCCAGTATTCTAAGCCCATACAGCTTTTATAAAGATTG  
CATTGCACACACGCCGGATTCATGTTATCAAGTATATCATGTTCCGGTTTATGCATTCTT  
ACAACCTTATACTTCCACGATCCATCATCATTACGGGCAATTCGTCCATTTTCATCATAG  
ACTACCTTTGAGCGTCGCAATACTGGTTTGATGTGGTCTGCGTGCCAGCGATCCCCTAGT  
TCCTCGCCACAATAGGCACAACGTCCACCATATTTTCATTTTCAGGATCTGGCGTTGCTCT  
TTCTTTGACAATTTTTTAGGTTTAGGGGCTTTTCGCCCTTCATTATCACACATCGAATAC  
CTCTTTTACTGTATTTGCAGTGGTCTTGTCGTAGCGAATACGTTTGATGATTGGGAGAAA  
TAAAGAGAACTCCGGTTCATCTTCTTTACGTGATTTGCTGCGGATATACCCGTTGCATGT  
CATCTCAATGACTTTTCCAATCAGGTTATGACGGTCAGTCCATAACATTTCTCGGTTCGAG  
TTCATTTTCGACGATCGAACGGAATTACACGTTTCAGTACCATCATCACCTTTTTTCGGTTGT  
AGTGTCGGTTAATCCCGATCCGGTGTAGTCATCATTTCGTCCGCACGCACTACGGACAGT  
AAAACCGCCTACCTTATTGGGGTCTTTACTATGCGGATATACATCAACAATTTCCGCGTC  
GAAGTCAATCACTTCTTTAAATTTAACCTGATCTTTACTACGGCGATCTTCAAATACACC  
ATGTAAATTTTTAAGGATAATACCTTCTAAGCCCATGTTTACATAGCGATGATACTTC  
GCGAGCTTCATCTATATTGTTAACTACAGTGTTCGATTATCTGAACACGAGGATCGTT  
AAGTTCTTCAACAATCTGTTTTAGTTCTTTCGAATCGATCTTTATATTGCTTTCGTTGCTTT  
CTCATTTCCGTAATACACATCACGGTCGATAACATCCCAGACAGTATAAACAATACATTG  
GGCTTCTTCTTTTGAATAGTTCTTTAAGTGATTTGTTGAGGATACCATTTCCAGTCTG  
ACGGTCTGCAACAACGGATTCTTTCACTGCTTCCGCTACTGGCGTTAATGGCATTTCCTC  
TTCTTCAAATATCCATGACAGAGTACCATCATAAACGCTCTCAACGAAGTTCTGCGCTGG  
TGTTTTCGAAAGGGTAGGCATATATACCAATTCGCCATCTAGAACAATTCACGGCCTCG  
TAGACGCTCTAAAACCGCAAACAATCATCAAGCCCTTGATAGGTATTACCTGAGCGGGT  
ATAGATTGCTAATGTTTCCCCGTCAATATCAGCCATACCACGAGCGCCATCGCTTTTAAAG  
TTGTGCATACGCCGGATATTTGATATTGGCAATGGTCTTATCAGAACATGACGATGCAAG  
GTGGCACGGCTGCTGGGGGATCAGTTTCTTCCATACCTTGTTCAGTGGTAGCGGAACA  
ACCGCATTCCAGGTCACGATTCAGGACCATCATTGCAACTTTAGCATCATCTTCTGACAA  
GCAAGTCAGAGTATCGGTAACCTAGCTGTAATGCTGCATTACCAGTTACTTGACGTGTTGC  
AAGTTTATTTTTAAGACCTGCAATGCACCGGATAAAGACAATACAGACGAATAGCGAGA  
CGGTTTATCGTATTTCTTTACGCCAAACGTAACCTGTTTGCAATATGCCAGATAAAAGCA  
TTCTTTCAGCGTTTCATTGCTCGCGGATTTCTTTCAGAATCTTTTCTTTCAGCGATGTTTT

GTCTGTTGCTGCAAGCTGATTAATGATATTAAGAATTGACATTTTCACCTCGTTTTGTTA  
AACGTTACGAATATCATTGAGGATACTACAAAATTCCGATTCAGTCAATATAGTCTTTA  
ACGGATCAGTTCCACCTATGCTATGACGTAATTTCTTATTTCCGGTCGCGAGTAATGCTT  
TACAAAATTCTGGGTTATTCGGTGCCATCGTAACAAATGCCAGATGTACCAGTCTGTAAT  
AATGCTCACTCATTTCGATGAATCGGGCGACCCTGAAAATATAACATGTGATTCTCAATCT  
TTTCAGTTCTTCCGGTTCTTTTTGCTTTGCCGCCGTGCATCAAAAAGATTTCTCTTTGTC  
TCTGAGGGTTCTTAAATCTTAGCCCCTGTAAAAATCCTTCTGTGCTGTTAATATCGCAAC  
CAAATAGACGGAATGGTCTTTTATTGAAATTACTCAATTCACCCGATGGATAAGGTCCAC  
CCGCATAGATATCAATTTCAGAAGTCATTGAACTAATCTCGCTAATCAGAGAGAACGGA  
TCATAATCGTCATTAGGAATATCGATAGTAATCGAATGAGGATTTACCCATACACCAAC  
TGGTCTTCTTCGGTGAATACTTCGGTATGGATTTCTGTGGATGTTTACATTCATAGTTTT  
ATAATAAAATTCCTTAATAATCAATAACTTACAAAATCATATAGCCAAAATATAGGCGGG  
ATTATTTCCCGCCGTTTAAATAATTAACCGTAAACTACCACAATATTCTGTTTGTGCGT  
TACAGTCCATTTTCAGGTCGATCTCTTCTTCTTCTTAACGCCGTTAATAACGTCTGGATG  
AGGAACTTTTATTCATCTTGCCATGTGGCAGTAAAACAGTTTTTACCCAGCAATTTCTTTATC  
TACCGTCTCGCCAATATCAATAATCTTACCTACCAGCGGAATCTCACCCATAGTGCCTT  
TTGCTCAATAATGATCCCCATAGAGCTTTTTACTTCGGTCCCTGCGCTTTCTGCTTTAGC  
TTCGATAATTACATAATCACCAAGTGCTTTAGGAGTTTTAACGGTCATAATTTTATTACC  
TCTTCAAATCAATACAGTTTAAATGATGAATTATTTATAAATTTTCGACGATCTGCGCTGGA  
GTCAGCCCATCTACATTAATCAGACTATCAAGCCAAAACACTACGGAAACCTTCAACTGCA  
ATTTCAATACTGGCAAAGATGTTTCTGATTTCTTACGCGGTTTTTCAACATTCGGAAC  
AACCCTTTTCGTATGTTTCAAACGGCATCAGTGCCGGATCTCGCGTGGCGATCATCTCG  
CGGACAGTACCATCTTTCTTAGTAAACTGCAAAGAGTGAGTACCGACCGAGAACATTTTC  
TTTAGTGCTTCACGAAGTGCGATATTATCAATTTGTTTCAGTCATTATCAATACCTTCAA  
ATCAGTCAATAATGCTTTTGGAAATACGCGTAAACCGTAATGTCGGCTTTATCCAAAATATC  
AGCCCAATCACGCCACCGTTTCGGTCGTATGTATCGCAATAGTATAGATGTTTAAATACC  
ACTGTTTGCAATTGCTTTAGCGCAATCTGGACACGGTGAAGCAGTACACCACATACTAGC  
GCCTTCAATCGATACACCATTACGGGCAGCAAACAAAATAGCATTTAATTCAGCGTGGAT  
CTCGTTTTTCTGTGACCATGCACTATGTTCTGGTCGTTTTTCTGGGATCATTTTACCGTC  
ATCATCCAGCCAACCGCTTTTATGTGCATGACAGCTACAATTTACTTGCCCTGCTGGAGT  
GCCGTTAAATCCAGTAGAAATGATTTCGCCCTCTTTTTTCGATCAGTGCGCCTACCTTCCA  
CGAAACACATTTAGAGTTCTTTGCGATCAGATAGGCGATCTGCATGTAAGTTTGTGACAA  
CATAATATAATCCTCACATAGTAATTAACCGTATACGCGAAAGTATTCTACTGATCCGTC  
GCTATACTGTTTTACATTGAATGTATTACACCATGATTATTTCTCATGATGACATATAC  
ACTGCGACGTTTCATCGCTAAACGGCATAAATGGCGCTGGTTCAATATCAACACTAAAACC  
ACGTTTAGCAAGTGCTTCGCCTAATTGCTTGAGTTTATCGGTAAACATTAATAATTTCTCCG  
TAGTTAACCTGAAAACATTCTACACCAATTGAGCGGTACATGTCAACCACTTGATCACGG  
TCATCTACCGCCAAAACAACATGATAACGCGGTGCAATTTTCAGAGAAGAAGATCTCTTTC  
TTCATTCATGATCAGGACGACGATCATTAGTTTCACGTTGAAAGTGATCACTAGGTTCA  
ATACCTGTTTCACGCAACCATTGCAGAGTATCTTCTTCGCAAACATCCTCACGCCCTGAG  
CATGTGATGATACGATAGCCATTATCACGATACAGTTTAAAGCATTTCGACCACTTGCGGA  
CGAGGTTTATCTTCTTTGACCTTTGTCCAGTCAAACGGATGACGACCGCCCTTATCCGCT  
AATGTTCCATCAATATCAAAGATCACTGCCTTTGGCAGCATAGTATTTCGGTTTGTATACT  
TCTTGACCCATATATTCCTGCATCAGATAAAATTGGTTACGCAAATGAGAAAGTGGAATT  
GCTTTCTCGCCGCGATAGAAATTACGTTTCTTTAGTGTCTCAAACGGTTCATTGAACACT  
TGTTTCAGTATACACCGCGTTAAATTTCTTTTGCAAGTTCTTTGTAGAATACACGATGTTTT  
TCTTTCAGATTAGTATCAGAGATAATGATACTTAATCCGCGTGATAGAGTCTCACGAGCA  
ATCATTCTCTGAATAGACTCTACCAGCTTTTCTTTTTCTTCTTAGTATACTTGTATTTCAA  
TGTGAGTCAACACCAAACAACATAAGACGAAGATCATCGCGATTCACATTACGATAATTA  
CTAAACCGTTTACATGTTTCCATCGCCCATGTAGTTTTACCGGACCCAGAACAACCAACG  
GTTAAAATCACTTCACATTTCCGGCATTATTTCTCCTTCGGTTTGCACCGTTCCTCATTAA  
GTTCTTTTCGATAATAACACATGATCAACTTACTTTCAAGTGTATATCTCTTAATATCCG  
CAAGCCAGACTCTGAATTTTTGGGAGTCTCCACGACATAGAACTCTAGGTTTACCGT  
CTATTGTATCCACTTTCAGGTTAATGTCAACTTTTTCTATTGGTGCTGGTAGTGGAGGAT  
GTAATTTCCGGTTCCTGTGAATAATGGTCCATTGTACACGAAGAAAGAGCAAATACAATAG  
GCACAGCGAAGACATGGATTATGGCGGTCTGAAAATTTCTTATGTGCTTTCTTAAACATCC  
AGTGTATCACGAAAATTGAAAACACCATCAGGATAATAATGCTTGCACCTATCCCCAGAT



AATCAACCAGATTA AAAATTGCTTATCTGCTCTTGTGTAGGCAATATTTCTATGCTCATT  
AGTAGCCTCCTTTAATTCCTTCGGTAAACTCCTTAAATGAATCATTAAAGCTGTTTCTCTAC  
CAACTGGGTTTTTGTGCTACTACATAGCCTCGTGTAGCGTCTTTCATTGCTTTGTTTTG  
TTCTTCTGCAAAGTTAGTTCTTATTCCGTACATCTCCTTTTGTAGCGAGTCTACAATCTT  
CATCTTATCATCTGTCTTTTTCTTATACTCTGTAAATTCCTGATTCAGTCGATCTACCTC  
CTTTTTATTTTCCCACCACATATTGCCACCCACCCCCAGCAATACAGATATGATAACAAT  
GTATATCAGCTTTGACATATTACCCCAACGACAAAAGGCGGGGAACTAGCCCGCTTAT  
TATTACCAATCAATCTTATCAGCCGGAATAAGTTTCTTATAATTCCGTAGATAGTAAGTT  
TTCATTGAATCCATAATACGGTCATAATCAAGACCATCAAATGCAATCATCAGACACATG  
AAAATATATGCGTGTGCATCACCGTGTTTACGTGATTTCGATAGTCGCATTTGATGCATAT  
GTCTTTCTGTCTTCTCCCGCGTGTGCGTTATAAAAATTCTGTTGCTGTCGTGAAGGCATTG  
CGAAGAATAGACCTGAATGCTTCCTCGAATAGCTCGATTTCGTTCCAGTGCTTCCGGTTCG  
CCTTCATATGCAGCACGCAAATCATCGGTTTTCGCTTTCTACGACATAGTAGATCAGGTTA  
TTAGGAAACATCGATGTGTTTTAATGTTATGCACACCAATATAACCATTCACTCTTCACC  
TTGAACATTTGACCGTCTTTAGTGCGTGCAACAATTCCTTCGATACCTTCTGCGATCCGA  
ACTTCATCAAGAATATTGCTAAAACGCGCTGAATCAACCTGTAACGCATTTACCAGATGA  
GGACGTAGGATTGCGTCAGCAAATAGCATTGATGCGGTACGTACTCTCCTGTGACGTTA  
TGGCGTACATTCAGAAGTGTTAGCGACGGTTCAGAATATTCTACAACAATTCGGTTGCTG  
GGTGCTGTATATTCAAAGTTGAAAGTATAATCAGACCCAATATCAGCAATCTTAGCGCGT  
AGATCCGCATACTTCTCTGAATACAGAAGACCGTTTGTCTCTCTGCCTGGCTTGAGTAC  
AAGGCCGCTTTAGACTTCAACTGAACATAGCCATTATCAATGTATGTGCTTACTAGACTA  
CCGTCCATTTTGTCCATGACCATTTCACATCTTCCGGCTTAAAGCGAGCGCGATCATT  
TCACCCAAATTA AAAA ACTTCTCCATAGGACGAGATGCAATGCGGACCGGACGACCTTTA  
TCGTCAATTTCAAACATGATCCCGCGACACTCTAACGCATCTGGTTTTATTCCACATTTCC  
GGTTTGCTCAAGTACAGATAGCTAAAATGCGCATAACGGGTTTGCATCGCCGTAATTTCA  
TCTTTGTAATAGAACGTATCAGATCCGTACATAGTGCCATCAGATTTTTGAACAATGCT  
AAAACTTTTTTGTTGTTTTCTTTTGTGACATAATTTGTGTTCCATTCTGGTTTAAATTT  
GGTGATCAAAACAGGTTCTTCGATATCGGCAGTGCTTATAATATCCTTACCCGTTGGATT  
CTCGATGTACAACCTCAAAGCACTGTGCGTAATAGAATGTTACTGTCTTACCTTCCTCTAG  
CGCCTTATGAATATTCTTACTCTTGCGAGTATCCGCTGTTGGTGTTTGTCTGTTAATGCT  
AGTCCGGTAATAATTGATCCGCTTTCTGAGATTGACAGTCTGACCAATATATACCAGTTC  
ATCATCAACAACAATAGCGTAAAGAACATTTAAACGGTCTTCTGAGGCGGTAGAATCAC  
ATCACCATCTTTACTCTAAACATGAATATTTAACGAATCCATAGTTTTCTATTAGCTC  
ATTAATCATTATCCTTTCCCTCACGTCACAACAAAGGCGGGATTTCTCCCGCCCACCTTAT  
TAACTTTCCAGAATATCGCGAGCTTCGTTACGCTCCTTGATGATTTTCAGGACAAATTCC  
AGTTTTTCTTTGTTGAGCGTTCCATTTTCCATTGCTTCTTTGACGGTAAACACTCCGCCA  
CCTTGCCCGTATACAGTGACAGTGATTTACCTAACATCGTGGTATGAAAACCGCCAATT  
TTCGGTGATTCGAAAGAAACAATTACCTCGCGGACAGTATTACCGTCGTTGATTTCTGAG  
AGGGTAATGTCGTTTTTGTAGGCGGTTGCTTTAACCATACGGATCAGCATAGTCTGATCT  
GGGGAGATGGTCATTTTGTCCATTGCATGTTGCAATGCAGCGTAACCGAAAACCTTTAACG  
AAGTCCAGAACGTCTTTGCGAGTTTGAATTTAATCATCTTGATACTCCTTAGTTGTTTT  
GGTATGGGAGTATCTTACTACTCCCGTGATATGCTGTCAACTGCTTTTTTATGCAACCGC  
AAACATCAACATTTGAACATTCTTGGCTGTCTGGCTTTCAAAGTTCTGACATTCTTTGAT  
AATGTCCTTACTTTCTCGCCGGAGATCTCCGCGTAAGTTTCGATTGCCATTTTCAGTAC  
CGCGTCAAAGTTGTTCAATTTGATTCTCCTTAAAGTGTATTTTCGTTTCGATGGGGGTATAT  
TACTACCCCGTTTTCATGCTGTCAACTACTTTTTAATGACAAGTTTCGAATTTTGTACCT  
TGCGTCTCGTTTTATTGAAAGCAACCCACGGACGGTTTTCAATGTAGAACAATTCTTCAC  
CAATAATGAATACTGGCTGATTGTAAAGGCGACCCATCAGGTCACGCTGGCGAATGGTAG  
TAGATTCGTATACTTCGCCTACTACAAAGTGTGTTGCTGATAGAGTCGGTGCAAGTAAATT  
TCATTTTGATTCTCCTTTGTTTCGTTTCGATGGGAGTATCTTACTACCCCGTTATTCAG  
TGTCAACTACTTTTTACTTGTGTTGATTTCATTCCACCATTGGGTGAGCTTATCAATTATTT  
TTGTGTTTCTATCCA ACTTCTCCACCGTTTTCTAGGGTTTATCAACCGGAATAGGTAAG  
GTGTA CTGTTAAGTGGACTCGGTCAATGTAGTGATTGATGTA CTGCTTTTCAATTCTAA  
GTTTCATCTTTTTACGATGAAAATATGCAATGACTTGTTCTTCTGTTTCCATATGTTCT  
CCGTTTCGATGTGCGTATTATGCTATGGCAAGATCAGATTGTCAACACCCAATAACAAA  
AAGTCGCCACTATGGGCGACTTTGAACAAACATTAATCATGACCGTGATTTGCAATATCC  
GCTCGCGTCTTATCTTTGTGATTTCTTACGTCAAAGACACGATAACCATTTTCACGCAA

ACTTTAATCACTTCTGGGTTATCCTCAAAGACTCCGACAACCTTCATCTTTATCAAAGGAT  
TTAATTACCTCTAATTTGATGTGATAGTCTTTACGGGAATCGGTACGGCCTCTCATAAAG  
ATTTTATCAAAACACACCCCGTTAGAAATTAACCAATCAATTGTTTCCATGTAAGCATGT  
GAACTTCGTCCGGTGAGGATGTAAATCAAATGCCCGTTGTCGGAAAGAGCATTATAACA  
CGAATTACATCGTAAATGGGGGAATCTCCCCACATGCCTTGTATATTCGATCCATGAC  
TCAACTTTATCAAGATTTTCGGTGGCATCTTTGCTAGTCGATGTGTTGGATCTGTGATC  
GTAATAATCTAAATCGACAAAATATATCATAGATATTTCCCGAATCGGTTGTAGTCTTCGT  
CTGTTAAATCGGTATTAACCTGAGATACCAGATACATAATCTCTACTTCTGCGCTGCAT  
TCTGTACTTCGTCAGAGTTCAACCATTTACGCATCCACGGTAACGGATGACGACGAACAC  
TAAACGGGCTTTTCAGTCCGGCAGCGGCATACGGGAATCTGCCAGGTATTCTACATAGG  
TTTTCAGAATTTCCGGTGACAGGTTAGGAATTGCCCCATTGCGAATAAGTGGTCTACCC  
ATTCTTTTTCTTGCTCGACAACATCCAGAAAGATTTTCGTTGCTTCGCCTTCAAGTTCTT  
CCGCAATCTGTTTCCACTCATCACCATCAACCCCGTTTGCCATTGACGAATAATGTATT  
GTGTGCCTTTTAAGTGAAGTTGTTTCATCACGCGCAATAAATTTTCATGATCTTCGCGTTAC  
CTTCCAGTAAACCACGTTTCGGCAAAGCTGAAAGTACATGCAAAGGACACATAAAAACGGA  
TTGCTTCCAGTGCATTTACGCAGTGTGCACACAGATAAATCGAAGCCATCAGATCTCGTT  
TTGTGTCTTCAAAAATCTTCGCGCATCATCTAATGCTGTCTGGTCGTCCTCGTTCTTCCC  
AATAGCGGAGATCTTCTTTTGCATTCTCATACTTACGAATCCAATAAAGAACATCATCAT  
AATATTTCCCGATAGATTCCGCTCGCTTCATGATAGCAGGGTTATCGATGATCTGGTCGA  
ACTACTAGCCGGATCAATGAAACAGTTACGCATAATGTGTGTATAGCTTCGGCTATGAA  
TCGTTTCGCTGAATGTCCATGTTTGCAACCATGTATCGAGAGTTGGATCAGATACAATTG  
GACCAAATGCTGCGGACGGTGCGCGACCTTGAATAGAATCAAGTAATGTCTGATACTTCA  
AGTTTTCAGTAAAGAAACGCTTTTTCAACGTCACCCATATTAAGATATTGAATACGGTCGG  
TTGCAAGTGAAATTTCTTCTGGACGCCAGAAAAATGACAATTGCTTTTCGATCAGTTCTT  
CAAATACTTGATGACGCTGAATATCATAGCGAGCGATACCCAACCCACTACCCAGAAACA  
TTGGTTCGTTCATAATATCAACATGTTTCGCGGTTAAATACGCTCATTAAATTCACCTCACT  
ATCACTTTTTAACACAAAAGAAGCTTAGTATTTCTGTTTATTTTCGCTATCCTGCTGCAATT  
CCTGCACAGCTTCAAAACAATTTTGATATGATGAAAACCTCTACGCTGGTAACAGTTCCTT  
TATTATATACGCCGACGCTAACGGAAAGCAATAACCATAATGTAGCCATTAGTTCACCTT  
TTGTTTTTCAACGCAATATAGATTCATAAAGCGTTTATTGTCTTCGCGGATAATCTCGCG  
AGCTTTAACGCAATCCTGCTTTGTTGCAAACCTCAATGCTTGACATATTTCCGTAATTATA  
CATTGAATTGCTTATTGCAATCAATAACCATACAGTAGCCATTATCCGACAACCTCAAAA  
CATTATCATCAGGAAGAATCGCCCATTTCTACACCGTATTCATCCTCGACGTAGTAGCAA  
GTCCCATCATGTGCGAGCATCATATTCATCACCAACAACAAAGCTATCAGCTAGTTCAAAA  
TCTACAGCAACACATTTTAATTTGGTCATAATAAAATCCTCACTTGTTTTTGTATGGTGT  
ATTATAGCGGGGATTTCTCCCGCGTCAACACTTATTTTACAGCTTGCAAGATGAGCACT  
CGTAGCGTCTTCCGTACCATCAGCACCATCAGCACGTTAGCGTAATACAGGGTTTTCA  
GACCGTAATATTGAGCAAACAGCATATCATCTAACACATCAGCAATATCGACTTTACCAG  
TCTTATAAGTGCTTGGATCGTATGATGTATTGGAACATAATCGCCTGATCCACAAACTTCT  
GCATGATCGCTGCCAGTGTGAGATAAAGGCTTGTTACCTTTCTTGATCAGTGTCCAAAGCA  
GGTCAATAACATCAGCATTATTCTCTACGTTTCGGAATAACCTGATTAAATTGCCCTTCTT  
TCGATCCTTTAACCGATAACAATCCCGCGAGGCGGTTCAATACCATTTGTGCTGTTAGACA  
CCTGAGAGGACGACTCACAAGGCATCAGCGCCGACAGTGTACTGTTACGAATGCCATATT  
TTTTCAGGTCTTTGCGCAGTTCTTCCCAATCCATCTCATAACCCGGATCAACCAGTTCAT  
CTACTGTCTTTTTGTACCAGTCGATAGGCAGTTCACCCGCTCCATAACGTGTTTCGTGCA  
TCAGTTCGCAAGCACCTTCTCTTTAGCCAGTTGCACACTAGCCTTAATCAGAGCATATT  
GCAAGCGTTCAAACGTTTTATGCGTAAACTCGTTAGCGTCTTCATATGTGAAGAAATTAT  
CCGCTAGATATGACGCAAAGTTAGTCACACCAACACCCAGAGAGCGACGTTTTTTTGGCTG  
TTAGAGCTTGTCTACAGGATAATCCTGATAATCTAACAGGTTGTCCAGTGCACGCCA  
TAACCATAGCAATGCGTTCTACTTCTTCCATATTTTCGATATCGAAATTACCTAAAACAT  
ATGCTGCCAAAGTACATAGGCTAATTTCTGAATCATCACGACCCATCGGTTTAGTAGGCA  
GTGCAATTTCAACACACAGGTTAGATTGTTTAATCGGTGCTACATTACGAATAAACGCC  
CGTGATTGTTTCATGTTGTCTGTGAACGTTGGGTAGATTCGACCAGTGTAAAACGTTCAA  
TTGCCACCGCTAAAAACAGGCTTTCGGCTTTAACACGAGTTTTACGAACACTCGGATCTT  
TTCCAGTTTTTCGTAAAGCTGGCGGAAACCTTCCCTCATCTCGGAAGTATAGATCCCACA  
ACAAGCCACCCGCAACATCTGGACTAAACAGAGTAATGTAATCCCGTTTAAGGAATCGCT  
CTACCATCAGGTTATTAATCTGTACGCCGTAATCAAGATGACGAATGCGGTTATCTTCCA

CCCCCTTATTGTTCTTTAACACAATCAGACTTTCAAACCTCTAAATGCCACATTGGGTAAT  
AGAGAGTCGCCGCCCGCCACGAATACCGCCTTGTGAGCATGACTTAACGGCAGTCTGAA  
AATGTTTCCAGAATGGGATAACGCCAGTATGACGAACTTCACCATGCCCGATCTTAGATC  
CTTCCGCGCGAATCATACCAGCGTTGATACCGATGCCAGCACGCTTGCTAATAACTTGA  
TGATTGCATTTGCTGTTTCGTTGATGCCCTGCAATGAGTCATCACTTTCAATCACCACGC  
ACGAACTAAATTGTCGTGTTGGAGTACGCACACCCGCCATAATCGGAGTAGGCAGAGAGA  
TTTGCTTATTCGCAACAGCATTATAAAAATCAATCACATGTTCAAGTCTATTTTCTGTCT  
CTTCTTGATGTAAGCACATAACCGATCAGCATATACGCAAATTGCGGTGTTTCGATGATTT  
TCTTAGTGCTGCGATCCTGAACAAGATATTTCTCTTTTAACTGCATCGCACCAGCATAGG  
TCATTTTAAAATCAAGTTTATGGTTCGATGAATTTCTCCAGATATTCACCTTCTTCACGGG  
AATACTTTTGCAGAATTTTCGCGATCATATTTTCCGGTTGCAATATTACGCTCAATATGGC  
TGTA AAAATCAATCGGTTGGAATTGACCGTATACTGATTTGCGAAGCGCGAACATTGCAA  
GGTACTTGCTACATATTGATAATCGGGCGTTTCTACCGTGATGTTATCTGCGGGCACCCT  
TAATCAATACTTTCTGGATATCATTGGTAGACATACCTTCTGTGAGAAAGTGGTTCAACCA  
TATCAAACAATTCATATGGATCAACGTTATGACCTTCGGCTGCCGCTTCCAGAATTTTCA  
TTACTTTTTCTTTTTCAAACGGAACAGTCAGACCGGAAGACTTAAACAACATTTTTAATCA  
TATTACCTCACTTCATATTTTAGCAGGAACAAGTTTATCCTCCATATTGGGGGCTTTCGC  
CCCCTTTGTTTATACTGCCATTTGAGCGGTGATTGCTGGATGGCTTTGATAGTTGTGAAT  
TTTAAAATCTTTTCGGAGTCTTTGTCAATACCTCATCTAAAGATTTAAATTCCGGCAACTC  
AATTGTTGGTTTATCAAACGGAACACGGCTTAACTGTTCCATAACTTGATCAAATGGTT  
TTTGTAATGTGAGTATCTCCACCAGAGAAAATCAGTTCTCCTACCTCAAGATCACACAT  
TTTCGCTATGATGTGAGTTAACAGCGCATAGCTGGCGACGTTAAAGGGCAAGCCCAAAA  
GCTGTCTACGCTTCGCTGAAACCACATAACAAGACAGTTTACCTTCATTGACGTAGAATTG  
TACGAACGGATGACATACACCCAACACAGCATTATGTGTTCCCTGTACGTTCCATGAGTC  
AATAATGATCCGGCGATCCGTTGGATTGTTTTTAATTTGTTCAATCACGTTTTGTAAC TG  
GCTTTCCCAAATCTTCGGGGCGATAGACATATTCTTCATCGTCTTTAGTGCTCGATGTGTC  
TACGTCCATACTAGCAAAGATCGTGGTATCTGGTGCTAAAATATCCCCACCCAGATAATC  
ACTATCAAGCAGATAACCGAAATAACCATCATCTACCCATTCCCTGGAATCCCCACAAGCA  
ATATGCATCATTAACAAAATTAGATTGAGTCTTCCAGTGGTCTGCTACTAAGAATAGATT  
ATACTCAGAATCAAACCTTTCATAACGCATACCACGCCAGATAGCACATAAACGGTCTTC  
TGTTTCATTGGTTGGCGTAAAGTCTTCTACCCACGGGTGTTTAAATGTATGTGTATATTT  
GCTCTTAAACGCGCTTAAATTTTGATTTACCCGTGTGGATGAATCGGTTTGCGTCCCATGC  
CATACCATACATATTACCGACATTATAACCATTGAATCGCAAAGGATTCTTTTTCTTTCAT  
ATCAAGACAGTTGCCGCGCAAATATCAAAGGCTTCCCTCGTCAAACCTTACCGCGTGTAAT  
TTCCTGTAAGCGACGGCGGTCAAGTGATCCCTCCATAAACCATAGCAACTCGCCAATTAC  
AGAGGCTGTAGCCATCTTTTTAGTGGTCAGTAAGGGGAAACCCTTGCTTAAATCAATTCG  
CATCTCTGCGCCGAATTTAGAGAGCGTACCTACCCCGTGCGGTCTTACGAGGCCAAC  
ATTATCAAGAACATCACGCAATAGTTTCAAATATTCTTTCATCCACATCACCTTTTTCT  
TGTTGATTGCTTTCTTACGCAGTTTTGCTACTGTCTCGTCAATATCGATAAAGACAACGC  
CACGGTTCGAATACAGTAGCAGGTCTTGAAATGTCGCTATTTTCCCTGTACTGGAAGCCATG  
ATGCGCTCGCTTCATCATAGAGATATTGTAAACCATAATAATCTACGGCTACTGCGTAGT  
TTTCACTGGTAGCCGTCCATAATTGAATAATACCGACTTTCATTATTGTTCCCGTCCGCA  
ATGTAAGCACCGACTACCAGCAAACATCAAAGATTCACCACAATGTTTGCACCTCATAATC  
TGTAAGAATTTTCATGTTACGCCTTCTTACGTTCTAAGATTTGTTTCGCTGATCAGGTAAT  
CATCAAGGAAGTAATTATGTTCTTCTTTTGTGCAAAGTCAAATAATAATTCCTGAATCA  
TTTCCTTAGAAATACCAACATCATATTCAAATGGATCGTTGATTCCTGAACGTTGAACAT  
ACGTTAACACAATACGGTCCGCAAAGTCAACTGCTTTTTCAATCAGGGAAGGTCCACCAA  
TAACACTTACCAAACCTTTCGCTTTTCTCCAGGACTTTTAAACAGATCCTTTAATTCAATTC  
CAGTATACACATTAGGCTGGTCCGCTTTTGGCTTTCGGTGTGCGCTTGCTGGCATCGG  
TACTAATAACCACATTAAGACGACCTTCCAGTGCTTTAGGCAGACTTTCAAAGGTATTAC  
GTCCCATTAACAACCGCCGCAAGTTCAACATCTCCCATAGTGCGCATTTTAAAGTTTTCCA  
TGTCCTTTTTGATTGGACGACCCACGGTAAACCGCCTTTAAAACCAAAGCCCAATTTT  
CATCTGACATTTTAGTGTACCAATCGCAAATACACATTGAATCATAATAATAATCTCCC  
ATCAAATCAGTTTGAAATAGTTTTCGTTTACATTTTCTTCTGTGATTGCGGTCTTAAATT  
CTTGACCGTTATCCGGTGTGATGAAATAACGGTCAGAATAATCACGAAAACGTTTTAAGT  
GAGATACCCCAACATTAACACCATTTTCCAGAAACGAAAGGTAATCATTTTTGGTTCAT  
ATCGATAGTCGCTGGTTAACACAGTACCATCACCGCGACGGGCTTCATAAACCGTAATAC

ATTCACGATTAGCGGCTTTTAGGCATTCTTCAATAGTGCCACATGAGATAATACTTACTT  
TTTCATCTACGATTTGTTCTACAGTCCACATAATATAGTCCTCACTTTGATTTCGATGTTT  
GTATTATACACTGTTGCGTTACGCTGTCAACTCTTTTTCAAAGATTTTACGATATACAT  
GATAGTGCTCAATTCAGACGGCGCTACTGTCTCTGTCCAACCATCCGGCATATCTTCTTT  
CGAGATATAGGAAGTTTTACCTTTCATCGCTTCTTGATCTTGTTCTCTAAGTCTAAGAT  
CTTTTGACCGTCTTGTAAGTTCAGTTCATAAAAGATCTCGTGGTTCGAATTTAGAAACGTT  
AGATTGCTGTTTCATTCTTTCTTGTGTTGTTTTATTTGTTATACCAAATTTAATTCCCAC  
CAAGAAAGAATCTTTAATTATTTTCTGTATATACAATACGCCTTTTTTGGATGGTCTAAA  
TCCATAATGTGCACAATTCGGACATCCTTTACCAGATAAAAAATTTTGTGCGGATGTTGT  
ATATTCTCCACAATTAGAACAACAATTTTAGATTTTTTACTTTTCCTCCTTTATAACC  
AGAATCAAAGCATACAAATGTTATATTATCACGGTCTTTAGATTCTTTAATAATATCGAG  
CATGGCTTCTTCTCGGTTTTAATCCAACCCAGCACATTTAGCACACCCGTTTCTTCC  
ATTTTTAATAGAATTTAATGATGTTGTATACTCACCGTGTGCGGTGACAACCTAACTACCAA  
ATTTTTGTGTTTATATTTTTATAGCCATCAATAAAACCAACAACAGTTAAACCGAGTTG  
ATCTGCACACTCTTTTGCAAATTAATAGCGTCTTCTTCTGAAAATGTTCTCTTAGACAC  
TGCTTTATTTTTACTACATATAGGACAGCCACGCCAACCTACAGAAATTGTAATAACT  
GGTTTTAAATTCACCATGAATAAAACATTCACAATTAATTTCTCTCATTGTTTTTTAC  
ATACCCACCTTCAAATCCGACAACCTACACAATTTCTAGTATATTTGCACGTTTCGACCGC  
TTCTAGTGTAACAATGTTTATGTCATATTTTGGTGTTCCTTTGCATTTAGGACAACCACG  
CCCTTGCATATATTTGTTATGCGAAGTTTTATATCTCCATGATGTTTACAGTTCACTAT  
AAGATTTCTGTATGCGCTTGTTTTATATCCACCGTCGAATCCTATAATATCTTCGGTTTC  
TCTTTTCTGAGACTCCATCAAACATCGGCAAGTGCTTTATTAGTTGAGTTTCTTCTGAT  
TTCAGCAACTCTATTGGTTGCACATTTTTTACAGCCATAGTTTTTTTTCGTAATTTCCGAT  
ATTTGACGTGAAGATGTTTTTACATTTGCATAATATACATGCTTTTTGTTTTAACAGAATT  
CCATTCACCAATAAAGCCAAGATATATATGTTTTTTGGATAATGATATTTAATAAATCT  
TTTCTCATATTCATAGGAGAAATAGCACTAGATGTTTTTCCAGTCCATTGAATGCTTTT  
AGCATATCTAAGAATTGTCATTGATTTAATTTTCATATTTTATCCTCCGTTGTTTCGATG  
TTTGTATTATACATTACCACATAGTCATGTCAACACCTTTTTTCATAAATTTTTAGGCAAT  
AAAAAAGCCTCCCCGAAGGGAGGCTGTAAAATTCATTACATCGCTAACAGAGAGTCCAGG  
TCATCCAGATCAGAAGCGGAGGAAGTACCGCCACCCAGATCCAGTGATGCCATCAGGTCA  
TCAGCAGAAGAATCTGCCGCCGTGCTAGCTGCGTTAATACCAACTACAGTGCTAGCTGCG  
GCAATACCAGAATCGAATGCATTTAAAGCAGCGTCAAATCGTCAAGCTGGCTGTTAATC  
GCTGCCGCAGCACTGGAAGCCGCAGCACCCAGCTACCATAGAAACGCCCATAGTTTTCTTA  
AATTTGGTTTCCAGTTCATCGAACGGTTTAAACTGGCTAGGCGCTACAATCTCACTCAGA  
TCAACCATGTTTTCCATCAGATATTTCTGATATGCTTCGTCTTCAATTTTCGGAAGCTGT  
GATTGCTGCATGAAACGAGAATCATCATAGTTCTGGTGTTTATCAACCTTCTTAGCTTTC  
AGGAGGAAGTTAGCACCCGGAGAACACACAAGTTACATCTACCGGAACCTTCGCCATGTGC  
GTATTCACGTTACCATTTGCAACGATCTTATCATAAATTTTCTGACCGAAGCGGAATTTG  
AATACCTTACCTTCATTTTCTGGTGCTTGAGGATCTTTCAGTACCAGAATATTTGCGTAG  
TAAGAGGCTTTACGCTTAATCAGTTGCCATTCTGTTTTATCGGTATTGTACAGATCTTTT  
TCGTTAATATATTTGCACACAGGGCAAGAATCAAATCACCGTGGGTGCTGGAGCAGTTT  
TCCCAATACCATTTACCATTAACTTTGAAGGAATGGTTTACCAGTTTCACAATCGGCAGA  
CCGTCTTCTGTCTTAGACGGCAGGAAGCGAATCAGGGCTTCACCGTTACCTGCTGCATCA  
GTCTTAATCTTCCACTCTTTCGGATCTTCTTTGGAGAAACCGTTGCCACCTTTCAGTGCG  
GCCAGTTGAGCTTGCAAGTTTGAAGAATCTTGGCGTTTAAACATATTCATTTCTTCT  
TTTGATTAATTTACTAGACTATTATACAGATTTAAATTTACTTGTCAACTATTTGTTTCG  
ACTTTTAATTGAGATATTTCTTTACACTCTTTAACTACTTTAACAATAATGCTCTTGCT  
TTTGGCGGTCAATAACAAGTAGTTTCTTATACGCCTTCATTTTAACTATAAAGTTTGC  
CAAATCAAGTCTTTGGCTACCTTGTGCTGTTTCGTCGATTATATTTAGAAAGCTATCTAAC  
AACATAAACGACTCAAACGATATAATCCGATTTTGCAGTAGTTTAAAGATAACCGTAGTT  
TCGGTTGCGGGATTGTATGTAATTAGCTCTTTAAGAGTAACCCCGGTTTCTCGGAGAAG  
TATACCAGACTTTTAAATGTCATCGTCAAATCGTGTTGCCGCATCAGTGATTTTACCGATG  
TACTCCATGTAAAACCCGATGCGTCAAACATCGGTGATTTACCTACCCATGCATCGGTA  
TTAGCTACCAGATTGCTTAGGAATAGGAAGTATAATTTCTTAGATTGTAATTTCCGCT  
AATTTTGCAGAAATAATACTTATCTCTGCGTTTATTGAATGCGGCATCAGACAACCGCATC  
CTCCAATTGTATTTTACGCAATCATAACGCCCGTTCATATGAGCTTTCATCATGCAATAT  
AACATATACACAGATTTAGCATTAAATTCGCATATCTGGATCTGGAGGAAGACGGTTTCTG

ATCATACATACCCCTTAAATATCGAGAGTGTGGTTCGGTTCGTCGATCACTCCCTTCCTG  
AGCGTTCTATTTACTATACATTCTTGTGTGATCTTGTCAATAATGGACACCGGAATATAC  
TTCTGATAGTGACCATATTCTATAGAGTTTTCTCTACAACTGAGTGGTTCGCTTCAAGA  
TAAGTCAATCCCTCTTCAACAACAGTTTTTCGATTGCAAGACCGTTTTGCTGTTTTGTTC  
GCGGCTTTTACCGCATGTTCAATTAAGCATTGAACACCCGATCATAGAGTTCTACCGCTTC  
ATCGCGTTCTGCTTCGAAGGTTTCGCGCTGTTGCTGGTGATACAGTTTAAACAGAATGCC  
CCACATTTTACCATCTACGCCTAATTCTTCTTTAGCACGCTGTTTGATCTCTTTGATCTT  
ATCGCCATATGCTTCTTGAATGGTTTTCTGATCGCTGGCTTCTTAAATCAGTTGTGCCAG  
GGTATTTCCGTGCACTGCTTCGTCAAATACTACTTTTTCTTTTTTCTGTTTCAGTCATAAT  
ATTAACCCTCTTTAGTCATTAATTGAAAACACGTTTCAGCTTTTGAGATTTTCGCTAGGAC  
TTAAATCGTCACCCACATATTCTAGCATCATTTCTCGGATAATGTCAAGTGCTTTTTTCAT  
CACCTGATTTTAACTCGAACTCAAGTTCATAGTGAGCATCTCCATTACTTCGCCGACTT  
TGCAATAATAGAAAGTGTCTTTGCACATTTCCACTATAGCACCTCAAGGTCAATTGTCA  
ATGACTTGCGGTATGTCATTACTTGAAGTAAAGGAACGATAAAGGTTCGGAGTTTACGCCTA  
GACTATCAACATAATGATAGAAATCATCCATTGTTGAAAAAGTAATTTCTTCTCGGTTGA  
AGAGTCCAGATTCACTATCACCTATTTTGACCATGATCAATGATCTATTAACGTCAAGTC  
GAGCATAAATTCCTTTTCGACGCAGTGCATGATCTTCGGTATCATAATAAAATTCGTGTT  
TTAGAGTGTTAGCACGATCTACTAGATTGTACCCGTCATACATTGCTACCCACAAATCAC  
AGATTGTTTCGACGCCAATTTGTGAGTGTGCATAGTATTTTAAATTCAAGTTCTTTTCATAT  
GTCAACCCTTAGAACTACCAATTTTCTGCAACATTTTAACTAACGCATTTGTTACAAAA  
TAGTTATAAATTTTACCGCGTGGTGCTGGTTTAGATTTTCCCATGACTCCAGAATCTGA  
TTCTGAATATCATCTGGGATGTAATCGAAATCAATAAGTTCGCGGTTTTTCGTCAAATCGT  
CGTGCTTCTTCTCTGTGCATCAAAGACTTTGGGTCTTCGGCATCGAAAATTTGCTCTAAC  
CATTTGGTTGCAACTGGTTTAGCTCGTTCCCTTCCAGTCGAGAGATAATGAAATCACTA  
CGACACTTGACAGAAGCCACACCGTCTTTTGCCTCACCTTAAACACATTTTACCATAAGG  
TCTTTGTAAGGGCTACCATATTTGCATTTCTTCCATGCTTTCTGTACTGGCGCCCACTGT  
TTCACGTTTTTTGTATTTGTGCAACTGTGTGTAGTCTCCATCACCGGAGTTGATCAGCACC  
TGGCGACCTTCTACAGAAAATTTTGTGTAACACAGCGATTATATCATCCGCTTCAACT  
TTGTCAACCTTAAATAACGTGATAGGGCATATTCTCTTTAAACTCTTCGGTGATCTTATTG  
ATCGCAGCAAAGATCATCTCCCAATCACGCGGATCTGCGTCTCGCTTTTCTTACGGTTG  
CGTTTATAGTAAGGTGCGATATCACGTCGCCAGTAACCTTTGCTTGAATCAAAGCAAGT  
ACCGTAATAGGGTATTGCTCTTTGAATTTTGTGCATATTATAACGCATGGTGTCAAGAATA  
AGATGACGGATCATGCCTTCATTAATAGGATCTTCCGGTTTAAAGGTATGCGAGATAGTA  
GCAATCATAAGCTGCGACATATCAATCAAATGCACACCTTCCGGCAGTTTATCTTCTGGA  
TCATCAAAGAAATCATTAAAGTGTAGCGGTAGTTTTTGTAAACGGGTTATACGTCATAATT  
AAGTTCTCTCCACTCTCACACAACATATTCGCCAAACGAGTTAGATACTTCACGATCAT  
ACCCATATTTCTCCATAACTCGCAGAATTGCATTGTTTAAATTCGGCGCGGAAATAATTGT  
AATCCTTATCAGGGATTCTGTCAACTACCCATTTTGCACCTTCTGACAAATCAACTTTAA  
CCATAATATATCATCTCTTTTGTCTTCTATCAAGCCTTATTTTATAAATATGAACATACT  
ATAAAAGGAGACCCAATAATGGCAGATTTTTTCTCAACATTTCAAGGCCACATTTGGCTTT  
GACGCTGGTAATGAAAAGGTTCGTCATGTAGCATTGGCTGATAAGAATGTCAACACCGAT  
GCGGTCAACGTTGAATTTTCAATTACCATAATGGCATTACTCAGTATGACACAACCTCGC  
GGTTATGATCAATACGGAACACTACAATTTATCAAACCGTCCATATTATGCAAAGAAGAT  
ATCACAAGCCAGCAGGTGATTTTGACCCGACTAAATGGCAAGCACTGCGCACGGACCCA  
CGTTGGGATTATATTGCAGCAACTTCCGGTGATACTCCTTTAAAGTCTGGTGATTATATC  
GCAGCAGATGGTCAATTTGCAAACCTTGACTTTCTCTATGCCAACTAAACCAGCAGAGGGA  
GACACTATAACAGTAAAAGATATCGGTGGCAAGTGTGGTGTAAACGAATTATCGTTCTTG  
AGTTCAGGACATGAGTTTTTACCATAACGGTAATGTGTATAACCGAAAATGGTATTGCACT  
ACCCCGTATGCAATGAACTATTTTCATCTTTGTTTCGGAATCGTTGGCATGTTTATCAGACG  
GGAACAGAGCCGCGCGGTGTGTACGCACAGCCAGCGATTGATGCTATTCAAATGCAGAAT  
GGTGATCAGGTATTTTCGTTCGTAGTTTCGTTGGGTAATATTACCTTAGTGCTTCTTAAGTTT  
GCCAACAATGGCGACATGATCCAGACTACAGACCTTGACGGATTAACCGCAACCAACCAC  
GTTACGGTTAAAGTTCATGAGCACGCAGAAGAACAATCAATTGGCACGTCCGGTCTAAAA  
GAGATTATCGGTAAGCGTAGCGGTGATGGTGTATTTCATCTTTGACAAACCGGAAAACCTTA  
TGGCGTTTTGTGGGATGGTGATCAGTCTGTTTCGTCTTAAACCGATCATCGATGACACTCGC  
TTGCAACCTAATAGCTATGTTGCTGTATTTGGTGATCGTGATGTTACTCTGACTCTACCG  
ACCAATGTTGAGCCGGGTGATCGTATTCAAGTTTCTATGCAGTATATGCACGGAAACCAG

AATTGCCGTATTATCACCGCCACAGAGGATACAAAAATCCTTATGTTCGAAAAACATGGTT  
CAGTTTCCGAAGCGTAGCGAGTACCCATTCAACGGGACCGACACATGGAAGGAAGTGTCT  
GAATTGTCGTTCAATGCGGCTAGTGATTATGTACCTTATCTGGAGTTCTCTTATTAGAA  
GGTGATGATGGTAAGAAACATTGGCTGGTAGCACACTCTCATCCGATCGTCGAACGAGTA  
GACCCTACTCGTAAAGATCGTGTTGGTGTAATTGCACTGGCTACCCAGACTGAAACGAAT  
AAAAACCATGAAGAGAATCCTAGCGACGAAGTTGCGGTAACACCAAAAAATGCTGGCTAAT  
AAAACCGCCAACGAAACTCGACGCGGTATTGCTCGCATTGCGACTCAAGCGGAAACGCAT  
CAAGATACTGGTTCCAACCTTCTGGATGATGTTATCGTTACGCCTAAAAAGTTAAATGAT  
TGTGTTGCTACCGAAGCCCGTCGTGGCGTGATGGAAATTGCAACCCAGCACGAAACCAAT  
GAAGGTTTAGACGATACCCGCGCTATTACACCTAAGAAATTAGAAGAACGTCGCGCTTCC  
GAAGATCTCGCTGGTATTGCTGAAATTGTTCAAGGCTGGCGGTAGTGCTGCCGCTCGACGT  
GGCGAAGCTGGTACAGGGATCTATAACATCAACGACCATGTTAAAATTGTTACGCCACAA  
AACATCAACGAAGTCAAGGCGACCGAAACTTCCCGTGGTGTGGCTATCTGGCAACTGAC  
GCGGAAGTGCAAGGGGCTACAGAATCAACCCCGCAAGATGCTTTACTAATCACGACTCGC  
ACGCTAACGAAACGTACTGCTACCGAATCGCGCACTGGTATCGCTGAAATTGCAACTCAG  
GAAGAAACAACTTAGGTCAAAGTGATAACCATATCATCACGCCTAAAAAGCTGCATACT  
CGCCGCGCAACGAAACTTTACACGGTTTAGCAGAAATTGCAACTCAGCCGGAATTTGAC  
GCAGGTCTTGACGATGCTCGCATTCTACCCATTGAAGATTAACCTTCTTTGAGAAT  
GCACAGCGTTTGAAAGTAGATCCGACTCAGGGGCTTAACCTTACTGGTGATTTGTGGCAA  
GGTATCATGATCAGCGGTCTGGATGCAACCGAAGACACAAAGGGTGTGCTAAAGTTGCT  
ACTACTCAGCTTACGGATGCTGGTCAAGATGATACTACAATCATCACGCCTAAAAAGCTG  
CAAGGCAAAAAAGCCACCGAAGGTAAAGAAGGTATTATCCGCGTTGGTACTCAAGCCGAA  
ACCGTGGCTGGTACACTGGCTAATGTAGCAATTTCTCCGAAGAACTTCAAATATGTTGTT  
CAGACAGAGGATAACATGGAAAGCAACCGAAGCGCGTCGTGGATTCTTGAAAGTTGCTACT  
CAGGAAAACCTGTTTTGTTGGTGATAATCTGCAAGGTTCTACTCAAGAACTAGGAAACTAC  
CAGCATGACGGAATTGCTGTTACTCCGAAAGGATTAACCTACGCACTTGCTAATTTCTTA  
CCTAAGATGGCAACCGCTCAGAATAGTTTGAAATTGGGTAACGTAGAGGCCGCTAAATGG  
GCGCGTAGAGACATTGACCAGACCATAGAGAGCAATTACACGTTTAATAAAAAACGTAAAC  
GTGAAGGGCGATTTAGAGTGCTTAAAATCTGGTTCCTTTGAAACTCTGTCTGTGACTAAG  
AACTCAACCGATGATCCGAGTAATGGTCATCTGGTGTGGGTGAGCGTGGAGTTGACGGT  
CACACCGGAATTACTCTGCATGGCACAACCGCATCGGAAGGCATGAAAAACTCGTGGTCT  
ATTATCGTTGGTGGTACTGGAACAGCGCAAGTTGTTGATAGTGATGCTATCGCTTTCGGT  
AAAATCAATGATGGTGGAGTCGTCGAGCATTACGCCTTTGCTATGAAACACAATGGCGAC  
GCGACAGCATATAGAGACTTTATTGCAGGTCGCAACCTGTATGCGAAACAAGGCGGTTTA  
TACATTGTTGACCAGTCTAATCCGGCAATGACTCGTTCGCCAGATGGTATGCTGAATATC  
GGTCACGGTGGAAAGTGTAAACATCAAGGCAGGTCATCAAACGTTAACTACAGAGATCGCC  
GGACAGAAATATCAGATCGTACACGCAGGAAACGCTGACGAAGTTCTTAACCGTCAGTTT  
GTTAAGAATGCTGGCGATACAATGGTCCGTAAGCTGACTATGGATAATGCGCCTATTGTT  
TCTGTTAAGCATGAAGCTAGCGCGGCAACCGCTCCAGCAATCGGTAACATCGGTTTCTGG  
AATATGCGAGTTACTACCCAGAACATCAAAGAACTTATCCAGAGAAGAAAAACGGTACT  
CTGATGCAATGGGGTACTGACGCGGACGGGCTTACCCAGCTTTGGTCCCCTGATGGTACT  
CATAAACATTATATCCGTTCCGGTACTGGTGGTCAATGGACCGCATGGGGTGAAATTTAC  
ACCAAACAGAACAAACCTACCGCCAGGAAATCGGGGCAGTGGTTGCAGAAGGTGGTTTA  
ATGAACTCTATGACGGTTCGTGATTGGATCAAAGTTGGTAATGTTAAAATCATCGCCAAT  
AATCTGACTCGTACCGTAGACTTTATCTGGGAAGACTAATTAAGGGGGCGAAAGCCCC  
TATGGGGTTATTATGACACAAGATATAGAATTACGCAACACTGGAATTAGGTTTGCGCAT  
TTCGACGAAGACTCTGCGACATTTACCAGCATTTACAGAAAATAACTCTGTGATGTATAAG  
CTGGAAGTGCGCGGATCTAATGCGGATTCTACCAAACAGCAAGAATTTCGATTTAATGGA  
GTGGAGATCGTTGGCACTGGCTATGAAAATGGCCTAAATTTTAAAGTTCTTACTCCAAC  
GGACAACCTACACGAAGAAAAGGTATTCTATGGTTCGCGGTGCTGTTTTGGCAATGCGTGAT  
TATCTTTCTTTGCTGAAAGGTGATTATATCATTGCGATGGCAACTCATGGAGAATTGTTT  
GCAGATCCGATAAGTGATGTTGTATTTTCTAAGATGGGATCTGTATCATTCCCGAATCAC  
ATTTTGTACAGCAAATGCCTCGTGTATCATATGCAGCAATTTATTCTACTAAAATGGGT  
AAAATTGTGTGCGAAGGGATGCAAGCAACTCACGGGGAAGGACAAGATTCATCTATACAA  
ATTGAGAAAGTCTATGATACTATAGATGATCTTGCTATAACAGGAACACCACAACGATTT  
TTAGATTATCCGGTTGAGTATGTTAGCGAAGATGCCGAACATTTTCGAGCTAATACAATGG  
CCTCATGATGAGATCAGCGCACCACTTGAATATTTTAAACATAAAGGCAGGTGACAACTA

TCATTATCATTGGAATTGTTCCGTGATAGTGCCGCAGCCGCAGCCAACGTAACAGCGCGT  
TTCTATCACAACACTATTTTACTGATGGACAATACAAAACCTGGCGTTCGATACAATGCCAGC  
AAAAAAGATCAATGGGAAAAGTTTGAAGCCGTCTATACCGTGCCGGAAGGTGTCGATAGT  
GTAGTAACTGGTTGTATCAGATATCCAACCAACTCAAATGAAGGTATTGTTAAAATTAGA  
AACATACTAATAACGCCGATCAGTGGAGTCGTCAAAACTACTGGTCCTACTTCATTTGGT  
GTTAATGGTGTTAGAACAACTCATATTCAGGATAACGGTGATTTTACTAACCCCTGTAATG  
AGTCTTCTTAAACTTCCTAGAGATAATAAACACATCACATCCAACAACCTTAAAGAGTTC  
GATGTTGATTAACATTTTAAACAAGCCGATCCATGTGGTCGGCTTTATTTTTTATACAGT  
TGGTTAAAATGTAACCAAAACGAAGAAAGATCTTTAGAATAATAGAAAATTTGTTTCGGT  
TAAAATAGTCAGTGCCTACGGCACGTCGCGAAGCGATATTTTGTTAACATTCTATAAA  
TACTCGGAACATAACTAATTTTTGAGGTTACTTTATGGCAGATTTGAAACATGGATCTA  
CTGTAGGCGGATCTCCCATTTGGACGCAAGGAACTTGACGATCCAGCCAGCGGGGGATC  
AGCTTTTCTACAAAGGTCATAAAATCTATACCGCTTTTGATAGACCTTCGGCTACCGATT  
TTGATGCTGTTAGTGCATCCGAAGGTGGAACATTTCAAAGCAAGTTCATTTTCGAGGAAG  
GTTTAAAGCGTAGGTAGCGCATCGGCTGGAGAAACCAAAAAGAATGGTATCTTTAAAGGCC  
AGAGTGATGCTGCTAATTTTGACGGCGTAAGCTGGGGTTTGCATTCATGGAAGTCAATCG  
GCTTTGTTAATGCCCGTGATGGCGTTATTATGGCTTATATTGACACCACAACGGGCGAAT  
TTAAGTCTAAAGGGACTATCGAAGGGACAACCATTAAAGATACAGGTCAACGCGTCTATA  
GCCCTGTTAATAAACCAACGAATAATGATTTAGATTTGGTGTCTCGTCGCGGTGATACCC  
TAACAGGAACATATAATTTAAACACTGTCACAGTTAACTATCGGTTGATTCGAAATTA  
TTGCAAGGGAACGTGATTTAATTAATTTTGATGCGACTAAGATCTATTATGGTAACGTT  
TTGATACGTTGGTATTCCGAAGTAAAGATGAGCCTACCATTTTGTTAATGGCAAAGAAG  
GTCGTTTTTATCACACCAACAATAAACCGACTAAAGCCGATGTTGGACTAGGCAATGTCA  
CCAATGATGCACAGGTTAAACGTGCTGGTGATATTATGGAAGGTAACCTGCAAGCGCCTA  
GAATGTTGGCGACAAACGATCCTGCTGGTCCTAATGAATTGGTTCGTTGAGCTACTTTG  
AGAGAAAATCAATGGTAGCAAATCCAACCATCATTGGAAACGTTGATTGGAACACTCTTA  
TTAATCGCGGTATCTATCGTGTGGAAAATGCTGGGTCGGGCACTAATAAACCGTCTGATA  
GCTATTATAATGGCGTTTTGATGGTATATCGCCCAGAAGATGCGGTCGGTACTCGTCGAA  
TTGTTACAGGTGATTATCCTGAATCTATTGACCATCCGATGTGCTGGCGTTCGTGTTCTA  
ATGAATCATGGACTGCATGGAACATGTAGATCACCGTAAATTAGCCGATATTCGCTATG  
TTAACGTAACCTGGCGATACCATGACAGGACCGTTAACTGTTCCGGCTGCAAACGGTGTTA  
GAACAGCTAAAACCTAATAACGGGGATAACTGTTATGCGGCGTTAAGCGGTGCTGATG  
GTAAGTCTATGATTCACCGCATTAGTGATATTAAGGGACCGAAAAGCTGGGGATCACCC  
ACGACTCAAAGGTCGTGTTTTTCCGTTCTAGAAACAATACTCAAACCGTGGACCGCTATC  
AGCTTTATCATGAAGGTAATAAACCTACTCCGGCTGATGTTGGAGCGGTTCCACTTAATG  
CGGTGATTGATTTGGTACTTTCTAATTTTAGCGGGGATTATCTCCCCGCTTTTCTAAT  
AATATTATTCTAATAACCGTTAAGGATTTTATAAAATGGCAGATTTAAGCAGAATCCAA  
TTAAACGCCTAGCACTAAAGGTCGTCGACCTGATGCTGGTACGATGAATCCGGGGGAA  
TTGGCAATCAACCTTGCGGATCAATATCTTCTTACTAAAATGATTTCCGGTGCTATTATC  
AATTTAAGTTGTCCTCCGGTTTATGACCGCGATGTTACAATGGCAGGTAAGGTTAAAGGT  
AATAATTATATCTTAAGTAAAACCGCTAACTATCTGGAAGATCAGACAGCGCGAGATCTT  
AATTACTTTGGTGCTTTCCGTACCAATGGTCTTGATGGTCTTCTCGAACTCACGCTAAAC  
GTTCTCATTCTTCTGGTGTTCAGCATGGTTCGAGGATTTACTTTCCAGTATGGACATACT  
GGATCACGAGTAGAAACCTATGGCTATAATAGAGAAGGTCAAAAAGCATTTAGTTATAAA  
ATGTATCACGAAGGCGATAAACCTACACCATCGGAATTGAACGTTTACAGCAAACAAGAA  
ATTGACCGTATGTTTGTTAAGAACGTTAAAATGGTTGTTCTTCTGGTGGTGCAACCCGT  
GGTATTTTTAAAATTGCATCCGCAATGATCCCGCAGAGTGGTCCGGATGGTGTCTTCTGCGA  
ATCTATGATGGTAATGGATATAATGTAACTCATATGATCAAGTTGATTTTCTTGAATTT  
GTTATTCGTAGTGGTAATAATAACCCTAAAGGTGTTAGTATTGCTGCTTATCGTCGAAAT  
GCTCTGAACGTTTCATCAAGTATTTGCGGTTAATACTTCCGGTGATAACTACGATATCTAC  
GTTAACTACGGTTCGTTACACCGATAACGTTATTGTGCAATACGGTAAAACCTAATGATGTT  
ACTCTGACAGTACATGATGTTTCTGAATTAACCTCTCGTTAAACCTTCTGTTGGTGTACC  
GATGCTCGTGTTATTACAATGTTCAACACCGAAAACAAGCCGGAACGTTGATGTTTGAT  
AATAACCCGCAAGGGACTTACGATATTATCAGTTTGAGTAATGCTGCTGATAATAATAGA  
AATTATCTGCGTAAATCCGAAGCAAAGCTAGTGAATGGTTTGGCATGAAACCGTTCAG  
GGTGCTGTATATCGTCTTGCTACTGGTGCTACAGATTCTACAGAAGTTATTAGAATTGAT  
TCTAATAGTGCAATACCGGGTAATTATAAAGGATATGTAATTACTGGTAAAATGGAATTG

CACGGTAGTGGTAATGCGATGACTTTACATCGACAGACTGGTCAAGCTGCATATATGGCG  
TGGTGGGATCGTCGTGATGGTAAAACCAACGTAGTGGTTATATCGGTCATGCGGATGGT  
ACTAGTGATGGTTTTGTGTGGCGTAATGATGTTGGTGCTAACTCATTGATTTGGAAGGT  
AGTGGACAAGTAAATTTGACTACAGGAAAAACAAAAATTGTATATACCAATGGTCAATAT  
TATCCGCTAACGCCGATGCATACCGTATGATCTTTGGTAATTACGGTGCATTCTGGCGT  
AATGACGGCACTAAAGTTTATCTTCTGTCTACTGCTGAAAATGATAAGTATGGTGGATGG  
AATGCCTATCGTCCATTCATTTATGATTTAACTTCCGGTAACGTTCAATTAGGCGGTGAT  
GGTAACGAAGAAGCATTAAACGTTAGAACGTGCTTCTCGTGCCGCTCGCTTTAGTAATGAC  
GTTTACATTAAGAAAGGGCATTGACTTTGACGCTGGGCGATTAAATCCCGCGATTAC  
TTCCGGTTTAAACCATTGGGGTGATAGTAATAATGCTCGTGATAACATCTTACAGCTTGAC  
GATAGCAAGGGTGCTCATTTTACCACTGAACGTACTTTAGCAACTGGTGCAATTAAACT  
AAATCTTCGGTGATTTGGAATCTGCTGGTCAAATTAATGGGGTAAAGGGACCGCCACA  
TCTACGTTTACTCTACGTGTATGGGGTAAACGATAGTCGTAACAATAATTTGAATGCGGC  
GATGAAAGCGGGTGGCATTGGTATACCCAACGAGCGGGGGGTCCTGGTACAAATGAGATT  
ATATTCAATGTAAACGGGAAATTTCAATCTCGGGATTTTGAGACTTCCGGTAATATTAAG  
ATAACTGGTCCAGACATTGAGTTTCGTGCGACTGGTAATAAGCACATCTGGTTTAGAGAT  
CCGAACGGTTTAGAATTAGGTTTGATGTACTGCGATGATGCTGGTGCTATTCGCTTCCGT  
GGTCAGAAACAAGCCCAGACGTGGAACTTGC GGATAAGATGATTCATCTTGAGGCGGGG  
ACTGTCGGCGGATCTGATAAAGGTTTGATTCGTGGTAGTGTTGCTGGTGGTAGCTGGGCT  
AGCTGGCGTGATCGTTCTGCCGGAATCCTCGTAGACTGTCTCAATCAACCGATTCCGCT  
CATAACATCTGGAAAGCGACTCATTGGGGAAAATATCATATTGCGGCAATGGGTGTACAC  
GTTCTTGGCGGCACTATAGGTAATGCTATAGCACGCCTAAACGTTAATGACGCAAACCTT  
GAATTTAGCGCCTCCGGTGACATGTCGGCAGGACGTAACGGTAGCTTTAACGATGTGTAT  
ATTCGTTCTGATGCTCGACTTAAAATCAATAAGGAAGAGTATAAAGAGAATGCCACCGAT  
AAAGTTAATCGCTTGACTGTATACACCTATGATAAGGTTAAATCTTTAACCGACCGTACT  
GTCATTGCCACGAAGTTGGTATTATTGCACAGGATCTTGAGAAAGAATTGCCGGAAGCA  
GTAACAACCTTCTAAGGTTGGCGATCCTGATAAGCCAGAAGAAATCTTAACAATTTCTAAC  
TCTGCTGTCAACGCTCTTTTAAATTAAGGCGTTCCAGGAAATGAGCGAAGAACTTAAAGCC  
GTTAAAGCTGAACTAGAGGAACTTAAAAGAATTAAGGAAAATCCAGGGAAAGGGAAAC  
TACTAAGGAGAAACGGCTGTGGTCTATAATATCATCATTGGTGCTTTGTCTAATTTCCGA  
ATGAAATTATTGTCAAAGTTAATTAGTGAAAAGATGCTCACTAAAATTTTCTTCTATTGC  
GCTCGTCTGTTGCGGCTTATACCAATACGCCAATTGATGATCGTTTTGTGGAAGAACTT  
TATAAGGAGTTAATAAAGATCAGTCAGAAGATAGTAACGAGCAAGATAAACCTAGTGAT  
AGTCAACTACCTAAATAAGAGTACACTGTCATAGTTATCTTAGGGCATTATATGCAAGTT  
TCTGAAAAAGGGAAAGACTTTGCTATCTCAAATGTCTGCGCGCTATTTTCACAACTAAA  
AGCACGGAGTTGCTCGTACTTCGTGTTTTGCTGCCGTCGTGTTGTCCATATTAGCATT  
GTCGTTTATAGTAAAACGAGTTATTTGCGCTTTATAAAGAGACTCGTTATGAGACTTAT  
GCTCACATTCTCCAGGTAGAGAAAGACCGCAATTTTGATAATGCAGCACAGGAGCAGTTA  
CAGATAGTTCATGTGTCGGCTGATGCCGATTTTTCTGCTGTTTTTAGTTTTCTGTCGAAA  
AACCTAAACTATTTTGTGATTTGGTGGCATATGAAGGAAAGCTACCGCACACAATCGAT  
GAAAAAAATTTAGGCGGATTCCCTATCAATAAACGAGTGAAGAATATCGTAGGCATCTT  
TTAGGTAAATCCTATTTTACCGATAAAGATTTCCAGTATATCCATCAAGAGAAAAGAAA  
TTAGAGAATATCGATATAGGTTTCATGTATTCTTGTCTATATTCAATCTCGATAATGTC  
TATTCTGGTAGTATCGCCATTTTCATGGAAGAATAAACCGGATATTGACATTGAGAATTTA  
GATACTCTTTGCAATCAATCTGCCAGAATCCTCGGAAGGATTAGATAACTTAAAGGGGAA  
GCCTTTCGGCCTCCCCTTCTTTTTATTGGCGCATAGAAGCCCCTGAATCGCATTTTGACG  
CTGTATGATGAAAACAGGTAGCGTACCAGTCATCGGCTTGTTTGTCTTCGTCAGAAAACG  
CGTAATTTTCGTTGTATGCCGTTTTCTACTTTGACAAGTGCAATAGCTGTTTCTGGAAGAT  
CAATCAATCGGACAAAATCACCATCTTCCACTCTACACGAGCAATATCATAGCCCATCT  
CAAAGTATACAATCGCTTGTTCTAATTTCAATCTGGAACTTCCCGTAAACATTCTCTGC  
CAGCTTACGTGCATCTTTTACAATATCTTTCATATAATGACTATAATTTTTAGCTAGATC  
AATGATGCAATCAACAAAGAAGTAATAGCGTCGCAGTGCTACCAGCTCAACATCTTCAAG  
ATGACCATTTTCTCCAATCGCTGAAATATGTTTAAATTCCTTTTCGGATCGCGTCCATCGC  
TACATTAACCTCTTTTATAATATCTTTCGTATTATATGCACCTCGACTAATCAAAATTTT  
GGTTAGGTCTTCTGCTTTTTTTCATGAAAGTTGTCAATTTCAAACCTCGATCATAATCACCTC  
TCATAGTTTACGCTGTTGTGTCAACATTTTTTTCGTGGTTTACTAATTCTATACATTGTA  
ATAGCATAACCAGTGAATTTTTCAATGATTCATCATCTTTCATAATCAAAATTTACCGAA



AATATTCTCTGTCATAATTCTTGCTTCGTCGATTATTTTCGTCATGTTTCATGGTGTAGTT  
ATGACCATTTAGTGCCTTAATAACAACGAGCAAGGAATCTAAAAACACTCGATACCGGGT  
ATATTCTACGCTATTTGTGAATACCGATGTTTTCTCTACTTTATCGATCAGATAGCCTAA  
AGCCGATAGCGCCTCGTTTACTTCCCTTGTTACTTTATCGGCGCTAAACAACACCGGATA  
AAGACGCGGTGTGATTAACCGCGCTGCCTCTTTC AATTCGGTCGCTTTCCATGATTCATA  
TTTGT CATAGTTAAACATTGTATAGTCCCCTTACAGATGAAAACCTGTTACGATCACCGC  
ATCGATCATAACCGCTAGGAATAAACGGTTCACCCTCTTTTATTTCAACTTTGAATTGATG  
CCATTTTCGCTAATACTTCTTCCGGTACACCCAGCGATTTCGGCGTCTGCTTTAGTTTCATC  
CATAATCCAAC TAGGCTGCATGAGAGCATAGTTTACATAGTCCATTTCTGGGGTCATGTC  
ATCAATGTTAATATATTTGCAGTTGACGCGTTTCAGAATTTCAAATTTCTTTATTGTCAAC  
CTGTACCATGTATAATTCAGTAGTTTCTGGAATCAGTTCCCACACAATCAGTACATTTTT  
CATAGTTACCTCACTTAACAAAGATTTTCTTTAATGCTTTCAGGATCGTTGCTTCCGGC  
GCTTCTTCCGGTGGAGGAAGCAATTCTACCCTTCTTCCAACCTCGATATAGTCTACC  
AGATATTCTACATAGAATGCAAGTGCTTCCATGAAATTAGATGCTACATCCGATTCACCA  
CAAGCGCCTACATGCATTGTATAAACATCACTGCGATCAAGTTTGTGGATGCTTCCCAGA  
TAGTTTTCGGTTATACCAGACTTCCCACACTTTCAACTTTCCGGTTTTTGTGATGTTTTA  
TAATCGGTTTCGTAATGATGCAATTGACGTTGCAGATCATTGATAATAACACATTTTTTCG  
TAATTGTTTTGAATTTCCATGATGCAATCCTCACTTATCGTTCAGAAGTTCTAAAACCTTT  
CTGTCGTACTTTGTCAATATTAGTTGATTCAAAACTGTACGGTATCCCCAGCTTTGACC  
GTATGATCGCGAGCAATCCCATATCCCATTTGTTCAATCTGATAGTATTCAAGGAATGG  
GTGCTGCCGAACATGATACCATCGCGATTA AAAATTACCATAATATAATCCTCACGTCA  
ACAACCTATTTTTCGGTTGTGGTACGATATGTTTTAAAATATCCCTCGTACCACGGTAAA  
ATATCTGGATTTTTACCCTATACAGACCTTTAACCATCATGTCAATAAGGCCATCTGGT  
GTTTGATAGTTTCCAGCTTTTATAAGCTCTCTGATTA AAAATCTCTCTGTATATGTCTTTC  
GGATCTTCGTAATCAACTTGTATTGTGGTTGTGGTCTCATTCAATTTGGTTTTCTGGAGTA  
TCTCGCATCGCATCCCACCAATCTTTTGTGATCTTCATGTTATTGAATTGCATAATTTAA  
CCTCTTACTTGCAAACGTATTGATCTACATCAATTGCGCCACCGAATGTAGGATGACGTT  
TTTCGAATCGAATAGTTCCGTCGTTTGGTTCGAAAACGGAGTATTCATATAGATCTTTCT  
TGCCAACATTTCTATAAAAACCCGCCTTTAGTCATAACGGTTTCTTGTACGTTTGTCTTGT  
GTACGTTGTATTTCATCAATGTATACAAAATCAACCATCTTCCCATTTTTAATGGTTACTT  
TAAGATCTCCTGGTTGGTTCCATATTTTGCATACAGTGGAGCTTCTTTAATTTTGGTGG  
AAATTCATCTTTCATACTCCACTCATAACGAACGGTGCATTGATAGGTA AAAAGTTTCGA  
CCTTCGGTTCTTCCACCCTTTTTCTTCTGTTCGGTTGTCTTCTTCAACCTTCGCAG  
AAGTCTCTGAATCGCTTCTGACGCGGTTTCTTCTTTAGGTAATACATTCATCAAGTTTT  
GGATTTGAGCGTTGTATACAGCCTCCAGTGGCTGAATCTGCCCGATATTGATCATTGTAT  
CACGAACAGTTTTATTCCAGTTGCGTTGCTCTTGTTTAAAGCGACGGGTCAATCTTAAACAG  
CCTTAAACATATACTTCATGAAGTTTAGAATCAAGTGC GGAGATAGACTCATTAGCACAAA  
TAACTTCTCTGATTTGGTAGTAGCTTTAGCGCAATCAAAGGACGCAGCGTTAGCACCGA  
AAGCAGTAGCAGAAAGAACGATAGCAGCGATAATGTTTTTCATAATATATTCCTCATTGT  
TTTGTCTTGATGGGAGTATCTTACTACTCCCTTAATCCGGTGTCAACTACTTTTTAAATT  
TCTTCTACAGTAAAGTCTTCAATGTTGTTGTGCTCGGCGAACGTTGCCAGACCAGCATTC  
CATGCATCATCCTCAGAGAAGAATACACCGTAACGTTTCATATCCTTTAGCGCCTTCAAAT  
TTAACCATTAATTTGTGAGTATGTTTCATTTTGATTCTCCTTCGTTGTCTTGATGAGTTT  
AGTATAGGGGATCGCCGATCCCCTGTCAACAACCTATTTTTTAATTTTTACCCGCTCGTGC  
ATTAATACGCATTTTCTGCATAGCCATGATCTGGTTTACTGCTTCTTCTTTACGTTCTTG  
CGTGATAACGTGACCAGATTC CGCAAACCTCTCCCGCAACTTCTTCTACGATCTCGCGAAC  
TTGAGAACGTCCAAAGATGCGGTTTCCCTTCGTAGCTCATAAATTCAGTCACTACTTGCTC  
GATAGATTTTCATGTGATTCTCCTTCTTTCGTTTGGTATGGGAGTATAATACTACTCCCAT  
TTCTTTACGTCAACAACCTATTTTTAAATTATTTTCGACCTTCAACCATTCCGCGTATTCTT  
GCGCGGCTACTTTCGGATTTAGTCCGTCTTCGTACATTGCATCAAGTAATTTTGTGCGG  
TGGGCTTATACCCTAGATAAGCCTCCACCTGATTTTTTCCAATTTTATACCAGTTCATAT  
TATCACCAGTCAAGAGCGCGTGTCTCTGCGTCTTCCCATGCTTGATCCATAACAGCCTTG  
AAAACATATTCTAAAGTATCATCTTTAGAGAATCCGAAGACCTTAGACGGAATATCTTCA  
ATTGCTACTCCCGCAACTTCTGCATTACGCGCTTGGCAATAATGCAACTCTAAGTTATCG  
AGATAGCGACCGCCTAATTTCTCCATATCATCCCAGCATTTCAGTAGCCTACTTTATCT  
GCAATTGCTAACACTTTGCTGTTTTTGTGCTCATCTTTGATTCTCCTTTTGTCTGGTAT  
GGGTGATTATGTAGTGTGGATTCTGTAAGTCAACAACCTTTTTAAAATAAAAAGCCGAC

CACAAGGATCGGCTTAATAATCAGTTACTTACTAAATTTCTTTTTGGCTTCGTCTACCGC  
ATGAGATGCCAGTACCGCAGCCGCATGTGCACTTTTATCTGTGTTGCAGAGAACGCCAG  
ATAAACATCACGCCAAAGTTTAATCATCTCGTAGATCATATCAATATCATTTTTCTTGTTT  
GTTGGCGATGCTATTCGTGCTTATCTGGTAAGGTAACGGCTTGATCTGTACTGGTTCCGC  
CATCGGGCTAATAGGTTTCGGATCTGTCATAATAGGTGCTGTTGTGGGCGGTGTTTTCCA  
TACACCATTATTCCACGGTTTAATCGTTGTGTCGTAAGTTTATAAGGATTTTTGTCTGG  
GTCAACCATCCATGCATGATGAGTACCCAAACCATTTGAAGTGATGCGTCGTTTCAGTCAT  
AATTTATTTCTCTCTGAAAATTCTTTTCATCAAGCTGTGATCTTTGCTCTGTGTTCTGG  
CGTGTTTGTGATCTCTGCTAATTTGCTCAGAGATTCAGTGGTGATCCGGTTGGATTCTTC  
CAGTGTTTCAACGACCATTGGCACAATCTTTTTATTGTTGTACACAAATGCAATATAACC  
GCCTTCTGGATATTCTTTTCATAATCAACCCTTCTTAAGTTCTTTAAGATCTTTCTTATAT  
TCCTTCATTGCGGTCGTCTTTGTCCAATACTCATATTCATGATGTTTATCGGCATCT  
TTGACCAGTCGATCATACTCTTCTTGAGTAACGCTATAACAATGGCATAGAAACTAGCTTA  
TCGGCGTATGGACGCAGTTTTTCATGTCCATTGATGGATTGCATTACCTCGGACTTTTTTC  
TTGCCCTGTAGCTCGATTTTCGCCCTTAATTACGCGATCGATAAATTCGGCTTTAGCCATT  
GCATAATTGTATGCTTCCAGCGTTTCCGCTTGCATCAATTCAATGCGTTTATCGACATAC  
CCTAATCGGATTTTCGACGAATCGACGGATCAGATCGCTCGCTTTCTCGAATACTTCTACT  
AAACCACGTTTCGTTAACTACTACGATATTCTGGGCTACTAACTGCGTTAGTTTAAAATCC  
TTCATGATTTGCTCATGTGCGAGCGGATTCATCTTCGCTTTTGAAATAATCGCGTTTCAGT  
GTTACTTCAAATCTGAATCCGTCCTTAGAGCAACGGTCATTATACGATACAATCAGATCT  
TTTTCTTCCAGTGCATCCAGTACCGCTACATATTCTTCACGGTCGAACCTTATAAGGAACT  
TCTGATATTGTCAGTTTAGTCTTGCCGTTTAGTTCATATGTACCCTCAAGAATCACACCA  
TCGCGATCATCTCGCGGGATAACTTTACCTGTGAATTTCCGGGAATTGAACACTAGGTTCT  
TTATCCAGTTTTTCCGGCAAGTGCTAGCTCTGTGCATTCAATAAGGCTTTCCAGTGAATGC  
GGTAAAATGTCAGTTTTATACCCTGTAGCAATACCACTAATACCATTAGCCAATACCATT  
GGCACAACCTGGCAAGTAGAACGCTGGCGGGATGTGTTCCAGATCTTCGTGCTTAGGTGCG  
CAATTCATATCTTTATAGATTTTAAAGAAGTTTTTCATGCACACGAGCAAAGATATAACGT  
GCCGCACCTGCTTTCTGGACTAAACGCGATCCGAAGTTACCTTGACCGTCAAGCAGTGGA  
GTATTATTGCTCCATGTATTTCGCCATGAGTGATCCGGCTTCTACGGCATTAGTTTCCCCG  
TGGTGATAACCCAACCTCAGCAACACCAGATCCAATATCTGCCATCTTACGGAATTTCTTA  
CGGTCGCCTTTACTCTTTTGCAAAGCACATTCCATAACAAAGCGTTGCACTGGTTTAAAGC  
CCATCCACTAATTGAGGAATCCCGCGTTTCTCAGCAGAATAGATCGCATATTCCTTAGCT  
TCATTATGTACAATGCTTTCAAGGCTGCGGTAAGTAAATGTGTTTACAATTTGACTAATT  
TTATCCATCTTACCTCATAACGCTTACAAATCACATTCTTTACTTTATCAGATTTATC  
AGCCAATCCAATAGCCATTTTAAACGGAAGGATTGACACAATAAACGGGGCAGCAATCAA  
AGCAAACATGATACACCTGATAATCAGGAAAACGCAAGTGACAAAACCTAGCGATAGTGAT  
CCCGACAAAACAAAATACCATAGAAAACAGAGTAATGATATAGAAAGGCCAGAATACCCA  
CTCCCGCATCTTAACTCCTTTGTATTCTCTGAATTGCTTAAAATCTACAAACAACCTCTCG  
GATAGACGCGTACAGGACCGAAAAATCATCTTTTATTGCTCTGAATGAGCAATCTTCTAT  
TTTAGAGTGACCTAGCATTATTAACCGCCTTTTCATCATTGATACTGGAATCGTTTTCTGA  
TTGGTGTATAATTGGCCTACTTCAATTTTTTCTTGAATCACCACGACGTTACAATATCCA  
CTGTCTTTAAGTTTTCTGATAATGACTCTTTTTGTTTCGTCGGTGATAGGATTGACTGTT  
CTACCAATTCACCGCAAATAATAGCACCATCTTTACAATTACCAGTAACTTTTCATGCTA  
CGACCGTGAACAACAACCACGTCACCGTAAATCACATTTTCGTCGTCGTATTTGGTAATA  
ACCGTGACCGTCATAATGTATAACCTCTAAGAAAGGCCGCGCAAAGCGGCCTATGTTGAT  
TATTGTTCTACAGTATAGCCGTTGTTTTCAAGCCATGCAATAACAATCTTTTCGCCAATT  
TCATCGAGCATTTCATCATAGCCATATTCTTTGATGAAAATCGATGGATCGTTATTGCTT  
ACTACGTGCTGGATCACAACATGTTTCAGGAATTGCGTCTAGCAGTTCGCTATGATCATA  
TCATTAACGATATCTTCAACACTAACATTATTAACCAAATCAACATCATCCATAGTCACA  
GTAACGCGACCGGACGGACGCAATGAATATTGACTACTTTCAACTTCAACATGTGCACTT  
TCGCAAGTAACTTTTCATATCAACCATAATTAATTCCTCTGTTAGTAATGGCTAAAACCTT  
CGGTCACATCTTCAACCACATAGTAACGATGACAGCGCATTTTGGCATTTCGCATAATCTT  
TCGGGATACTTACAACGTGACGCGGATCAACTTTACATTTAATGATTTCGGCCTCGTCCAC  
CGCCATAGTGCGGAATATAGTGTTCGCTGCAACGTGGAGGCCATTAGAGCAAGTGCGAT  
CATCATCTGGGTCCACGTCTTTACGCTTCATTTAACCGTGCGCCCTGGGCTATTATCAA  
ACGTATGCGTAAAGAAATCTTTATAATCAACATCAACACGTTTCCATGCATAGAAACAAC  
CATCTTCCCCGATCTCAATGTCGTTGTGCTCTAAGAAGTCAAACAGACGATCTACGGCCT

TACGGCTAGGGTTTTTCTTGCACCTTCTCAAAGAAGTTCAGATAGTGCGTATATGGCTTAT  
TCTCTTTAATCGACTCCACAACCTCGACGAGTCAGATTATTATCAAGAACAATATTATGAT  
AATACACAATACCATTTTCGATACGGAAAGCTCCGTGATAATATACTTCAACCGCTTTCT  
TAATGTCAATCAGCGTAATTGCTTTAATGAAATCATTCTGTTTAACTGCTTCCAGTGCTT  
CCTTAAAGTTAACATGTGATGGATCGGCAGTATAAACAATGTCACCACATGTAATAGTAA  
TAACTTAGTTGAGGCTATGGCTACGATTTTTGAGGAAGTAGTCACGGGCTTTTTTGCGC  
GTTACCCGCTTTTCTTTACTGGTTTTACGGCGTGCTTTACGTTTTTCTAGTGCCTTGC  
GACCTTCCGCTACTGCGTCTTTCTGAATCAGTAATACGCGGGAAGCAGTACGACGAGATA  
CACCAAATGCTGCCGAAGTGCTTCGCGGGTAGTAAACTTACCTTCGCCCCACTGTTTAG  
CCAGTTTGATTTGTTTTTCAGAATCCAGGCATTGAACGTTACGGTCAGAGACGGTGATTT  
TTGCTTTAGTCATAGTATTCATTCTCTATTAGTTGGGCGACTATCGCCGCCCGATTAC  
ATCATTATAACCAGAATTATTTTGCTTCTACAACCTTGCGGATTGTGCGGTCTGATACATT  
ATAGATTCGTGCCAGTTCGCCTTTAGTCAAGCCGCGAGCGTATTGTTTACGGATGGTTTT  
TTTCTGGATAGCGGTACGTTTAGTCATAATATCACCTC

>NewGenomeName\_278

ATGGCCGCGACTATGGCGGCTTTGTTTTGCGTGTTACTATTACCAAACGGTAATTATT  
GCTTCGGTGGTAACAATGCCCGCAGAACCAAAAGCACCAAAACGCAAATCAACGCAGTAC  
AAGCCACTCACAGCGATGCAGGAGGCTTACGCGCAGGAATATACCAAATGCCCTGAGAAT  
CAGACGCAGGCAGCGATTAACGCAGGATTCTCACCTAATACGGCAGCTGTCAAAGCCAGT  
GTCATGATGCGTGATGAGCGTATCCAGAAACGGATCGCCGAGCTGATGGAAGAGCGCAAC  
AAGCGCTGCGCGTCAGTGCTGATTACGTGCTGCTTCGCCTGGTGGAAAGTAGACCAGATG  
GATGTGATCGACATCCTGAACGATGACGGCACCTGAAGCCAATCCGCGAGTGGCCAAAG  
ATATGGCGTACCACGCTGAGTGGTTTCGACCTGTCATCGACCATCATGAATATGGATGAG  
ACATCAATCGAGACGATCCTCAAAAAAATCAAATGGCCTGACAAGGTGAAGAACCTCGAG  
TTAATCGGTAAGCACGTCGACGTCAATGCATTTAAAAAGCGCCTGGAGGTTTCCGGAAC  
GTCACAATTGCCGACCGAATGGCGAAGGCCCGCCGCGCTTAAAGAGCTGGCTGGTGGT  
GAAGAATGACAGCCGAAGCCATGTCGCCGGAAGAGCAACTCGTTGAGGATGTCGCCTCGT  
TCACGTATGACCCGCTGGGCTATGCGCTGTACGCGTTTCTTTGGGGTGAGGATGGCACAG  
AGCTGGCACACGCAACCCGGCCCGCAAATGGCAGGCCGACGCATTCCGCGAGATACGCG  
ATCATCTCCAGAATCCCGCGACGCGTCACCAGCCGCTGATGCTGTCTCGTGCATCCGGCC  
ACGGCATCGGTAAGTCCGCTTTCATCTCGATGCTGATTAAGTGGGGCATGTCCACCTGCG  
AAGACTGCAAGGTTGTGGTTACCGCCAACACCGACAATCAGCTGCGTACAAAGACATGGC  
CTGAAATCATCAAATGGTTCGAACCTGGCTATCACGAAAGAATGGTTTACCTGCACCGCCA  
CGGCGATGTACAGCAACGATCCAGGTCACGACAAACGCTGGCGCGCTGACGCAATCCCGT  
GGTCTGAGCACAATACCGAGGCCTTCGCAGGGCTGCACAACGAGCGTAAGCGCATTATCG  
TGGTGTTCGACGAAGCGTCCAACATTGCCGATCTGGTATGGGAAGTAGCAGAGGGTGCGC  
TTACGGACGAGGATACCGAAATTTTGGGTGGCGTTTGGTAACCCGACGCGTAACACTG  
GGCGTTTCCGTGAATGTTTCCGCAAATACAAACACCGCTGGAAGTGCGCGCAGATTGACA  
GCCGCACCGTGGAAGGCACCAACAAGCAGCAACTGCAAAAGTGGGTGGACGACTACGGCG  
AAGACAGCGACTTCGTGAAGGTTTCGCGTGCGCGGGATCTTCCCTGATGCGTCTGAAAACC  
AGTTTATTCCGTCTGGCTTGACGCAACCCGGCAGTTGGCAGGGTGATCACTGCTGCACAGA  
TTCAGCATGCGGCAGTAGTTCTTGGTGTGACCCGTCTCACCAGGGTAAAGACCCGGCAG  
TTATCTACCTGCGGCAGGGACTGCACTGTAAGAACTTGGCGAGTGGCAACGAACACTACCG  
ACGACGTATTGTTTGCCAAAATAATTGCCGACTTCGAGGACCAGTACCAGGCCGATGCTG  
TGTTTATCGATTACGGGTACGGGACCCGGCTCAAATCAGTTGGCGATAACTGGGGCCGTA  
ACTGGACCCTGATTCAGTTCGGCAGCGGTACGGCAGATCCCGAGATGGGCAATAAACGCG  
GTGAGATGTACAAATCAGCCC GCGATGCGCTGAAGCTTGGTGCACAACCTCGACAGCCAGG  
AACTTGCCGACGAACCTGAGCGCACCTGAATACAAAGTCAGGCTGAAGGACAGCAGGAAGA  
TTTTACAAGACAAGGACGAGGTGAAAGAATTGCTTGGCCGGTCACCGAACAATGCCGACG  
CCTATGTGCTGACATATGCCGCTCCAGTCACCAAAAAACAGTTTAACTATGGGCAGCAGC  
AGAGCCAGCAGGGTAAGGCTCTCACAGAGTACGATCCCTATGCATGAAAAAGCCCGCGCA  
TCGCGGGCTGAATGTGACATGTACAGCGTTATTCTCGTTTTCCAGCCTCGAGTATAGGT  
AGGTTTGCTTCGGTTGGTACGTAAATTACCTGGCTCTTATTCTGCTGTAATCCATCAATC  
CACAAGTAGCGCAGGTATTCTTCGTTGTTGCGCAGGCTGTCTCCGATAATCTGATTTGCC  
TTGGCAACGCCCTTTGCGCGTTCAATTTACGATCAGCAAGCATCTTTGCCGACTCCTTC  
TTGGCTAACGCCTCCTGCACTGCAATTTGTGATCCTGTGTTGCGCGTGCTAATGATGCC  
TTGCCGGATAGGTTGCTGCTCCAGACGTTGTAGTACGGGCAACCAGCCATGCAAAGAGCT

ATAAGCGCAGTAAAGAAAAACAACATGAAGAACAATGGTTCCCCATTTAACCTCTCTAG  
ATTTATCGTTCGTAATATCGGCTCATGATTTTCACCTTAAAAAATGCCACCGAAGTGGG  
CGAACTGGAAACAAGGGTGCCTTCCATGGCTTACGGGTTTACAGCGCAACGTCATCGCAA  
TGGCGTTCTGGTGTAAAAGTGACGGTGGTCAGCATCAAGGGAAACTGCCACCGCCAATAG  
CTACACAGCATCGTTCTTATAGGCGCTTCATCACGGTCTAAGGCGTGATTCTGGTGGCG  
CATGCAGGATTCGAACCTGCGGCCAACCGCTTAGAAGGCGGTTGCTCTATCCAACCTGAGC  
TAATGCCACAACGCTGAGAGCACTGCCGGTGTCCGAATCGAACTGACCATTTCTTTGCC  
AACCTCCCAACTGAATGGGACTGTCTGGAATTGAACCAGCACTTATGCCTTGCTCGTCA  
ATGCTCTCATCGTTGCATCCTCGTCTTCCGAGGTGTCACACCGTATCGCCACGATGGT  
GAGTCGTATGTCCGTGCTTACCTGACACTGGCTTGACATTCGCGCTACCCGGCTGGGG  
AAGTAGCATCAAGGGAACCCATCCGGACCGCTGCGGCACATGTGCCATATGCCGTACATC  
CAATGCGTTACATCAACATCAATTACCTAAAAGGTAATATCTGATGTTATATGTGTCAAT  
AGCCTACGCTAAATAAATCATATGTGGTTAAATTGGTAATAATTTAATTGCGTACGGAGC  
TATTGCTATGTGTATCGGCAGCAAGCCATCAGTGCCAGCAGCGCCAGAAGTACAGGCTGC  
GCCACAGGAGCAGGATGCAGCAGTTGTGAGTTCTCGCGATGACGAAGAGCGCCGCCCGC  
TGCAGCAGCAGGCCGAGCTCTACTCTGCTGACTGGTGCGCAGGGTGACACATCAACCGC  
AAACACCAGCGGTAACCGCTGCTTGGTCAGTAACGGAGTAGGCAGAGATGGCGGAAACC  
GAAAAAGAGCGCCTGCTGAAGCAACTCGCACAGCTGAAGAATGAACGCACATCGTTCGAA  
TCGCACTGGCGTGATCTGAGTGACTTCATCAATCCGCGTGGCTCCCGCTTTCTGACGTCT  
GATGTAACCGTGATGATCGCCGTAACACCAAGATTGTTGACCCCACTGGCTCAATGGCT  
CAGCGCATTCTCTCCAGCGGCATGATGTCAGGCATCACAGTCCGGCCCGTCCGTGGTTC  
AAACTGGCAACTCCTGACCCTGACATGATGGACTACGGTCCGGTGAAAATATGGCTGGAA  
GTCGTGCAGCGTCGCATGAACGAAGTGTTCAACAAGTCTAACCTGTATCAGTCACTGCCT  
GTCATGTACGCAAGCCTGGGTACTTTCCGGCACCGGCGCTATGGCTGTTCTGGAAGATGAC  
CAGGACGTGATCCGCACAATGCCTTTCCCGATTGGCAGTTACTACCTGGCTAATAGTCCG  
CGCGGCAGTGTCGACACCTGCATTCGCCAGTTCTCCATGACCGTGCGCCAGATGGTGCAG  
GAATTCGGCCTGGATAACGTCAGTACATCCGTAACAGGCATGTGGGAAAACGGCACGTAT  
GAAACGTGGGTGGAGGTTAACCCTGCATCACACCTAACGTCAACCGCGACAGCGGGAAG  
ATGGACAGCAAGAATAAGCCTTACCGCTCTGTCTATTTTCGAGTCTGGCGGCGATTCCGAC  
AAGCTGCTTCGTGAATCCGGTTTCGATGAATTCGCGATCCTGGCTCCGCGCTGGGAAGTG  
AATGGTGAAGACGTTTACGCCTCATCTTGCCCTGGTATGCTGGCACTCGGTCAGGTTAAA  
GCCCTTCAGGTTGAGCAGAAGCGCAAAGCTCAGCTGATCGATAAAGCCACTAACCCGCCG  
ATGGTTGCCCGACATCGCTTAAGAATCAGCGTGTTCCTGTTGCCTGGCGATGTGACA  
TATCTCGACGTGTTGACCGGTCAGGACGGTTTCAAACCTGCATACCTGGTCAATCCGAAT  
ACCGCCGACCTGCTGGCTGATATTCAGGACACCCGCCAGACCATCAACAGCGCCTATTT  
GTCGACCTTTCATGATGCTGCAAAACATCAACACCCGCTCTATGCCGGTGGAAAGCAGTG  
ATCGAGATGAAGGAAGAGAACTGCTGATGCTTGGTCCGGTGCTGGAGCGACTAAACGAC  
GAAGCGCTCAACCCTTATCGACCCGCGTGTTCCTCCATCATGGCGCGCAAAAACATGCTG  
CCAGAACCGCCTGACGTTATGCAGGGCATGCCGCTGCGTATCGAATACATCTCCGTGATG  
GCTCAGGCGCAGAAATCTATCGGCCTCACAGCCTGTACAGACCGTTGGTTTCATCGGT  
CAACTGGCACGGTTCAAACCTGAAGCACTCGACAAGCTCGATGTGGATGAGGCTATCGAT  
GCGTTCTCCGAAATGTCCGGCGTATCGCCAACTGTCATTGTTCCCTCAGGAGCAGGTGCAG  
GGTATTCGTGAAGAGCGCGCAAACAGGCACAAGCCGCACAAGCAATGGCAATGGGGCAG  
GCCGCAGCACAGGGAGCCAAGACTCTCAGCGAAACGCAGACCACTGACCCGAGTGCATTG  
ACCGCTATCGCTAATGCAGCAGGAGCACCGCAGCAATGACTGATATCGACGAAGAGGAAC  
TGCGCATTCAGAACGAGCGGAAAAAGCACGATCTGGAACAGCGCGAAAAGGACGACATCA  
AGTTCGTCATGGATAGCGAGCAGGGCCCGCGTCTGCTGGTCACTGCTGGAGAAAGGTC  
AGGTGTTCCGGCGCCTGCTTCAGTGTAGACCCGCACATCACAGCATTCAACGAAGGGCAGC  
GCAACCTGGCACTGGTTCTGTTTCAGCGCGTCAATGGCGCACTGCCCGATCAGTATCTGA  
AGATGGCCGCAGAGGCCAGTGAACAGGAGTAACCATGAATTTATTTGAACGTTTGCTGCA  
TCGCCGTCTTTGCAATGAGCAACCTGCTGATGGTGGCGCTGCACCGGCTCCGTCTGAGCC  
AGCCGCACCTGCAACTGATGCTCCGGCACATGCTGATGACCCGGCAAAAACAGAAAGGCGA  
TAAGTCACAACCAGGTGCTGAAGGTAACCACTCAGGAAGAAAAACCTGCTGATGGTGA  
TAAGCCAGAAGATAAAAAGCCTGGTGAAGACAAAGAACAGAAGCAGGAAGGCGCGCCGGA  
GAAATACGAGTTCAAACCAGCTGAAGGTCAGGAACCTTGATACTGCTGCTCTGGAGCAGTT  
CGAGCCTATCGCCCGTGAACCTGAACCTGACCAATGAGCAGGCTCAGAAGATGGTTCGATCT  
ATACGGCACCAAGATTATGCCAATGGTCCAGCAGCAGCAGGCAGAAGCCTGGCAGAAAAC

CACCGAACAGTGGGCTGCTGACGTTAAGGCTGACAAGGAGATAGGCGGCGACAAGCTGAC  
CGAAACCTCAGCGCTGCTCAACGTGCACTGGACCAATTCGGTGATCCAGAAGTAAAGAA  
ATACCTGGACTCAACCGGTCTGGGGAATCACCCGGCGCTTGTAAAGCGTTTATCAAAGT  
CGGCAAGGCAATGTCAGAAGACAAGGTTGTCACCGGCGGTTCATGAAAGCGGCGGCAGTGA  
CCTTATCTCCGCCTTCTATCCCAAAAAGTGAGGTATGAAAAATGGCTTTAATCGGTCAA  
CTCTGCCATCGTTGCTTGACATCTACAATCGTACTGACAAGAACGGGCGAATTGCGCGCA  
TCGTGGAACAGTTGGCTAAAACCAACGACATCCTTACCGATGCGATCTATGTGCCGTGTA  
ACGACGGCTCAAAGCACAAAACCCACCATCCGTGCAGGTATTCCTGAACCGGTATGGCGCC  
GCTATAACCAAGGCGTTCAGCCAACCAAAAACCCAGACCGTACCAGTGACCGATAACC  
GTATGTTGTACGATCTGGGCTTCGTTGATAAAGGCTCTGGCAGACCGTTCTAACACGCG  
CAGCGTTCCGTGTTTCCGAAAACATGGGCAAGCTTCAGGGCTTCAACAACAAAGTCGCCC  
GCTACTCCATCTACGGTAACACAGATGCTGAGCCTGAAGCTTTCATGGGCTGGCGCCGC  
GCTTCAACACGCTTAGCACCAGCAAAGCCGCAAGCGCAGAAAACGTATTCAGCGCCGGT  
GTAGCGGCTCTACCAACACATCTATCTGGTTTATGTCATGGGGTGAGAACACTGCTACA  
TGATCTATCCGGAAGGCATGGTTCGCTGGCTTCCAGCATGAAGACCTTGGTGACGACCTGG  
TAAGTGACGGCAATGGCGGCCAGTTCGTTGCGTATCGTGACGAATTCAAGTGGGACATTG  
GTCTGAGCGTGCCTGACTGGCGTTCAATTTCCCGCATCTGCAACATCGATGTGACCACGC  
TGACCAAGACGCATCAACTGGCGCTGACCTGATCAGCATGATGGTAGATGCATATTATG  
CCCGCGACGTGGCAATGCTTGGTGATGGCAAAGAAGTTATCTATGCCAACAAAACCTATCC  
ACGCATGGCTGCACAAACAGGCTATGAATGCCAAAACGTGAACCTTACCATCGAAGAGT  
ACGGCGGCAAGAAGATCGTTTCCCTTCCCTGGGTATTCCTATCCGTCGTGTGGATGCAATCC  
TCAACACTGAATCTGCCGTAACGGCGTAAGGAGAGAGAATCATGTTGCTTGATCAACAGG  
CTTTGTTCTCCGCGGCTCAGGCCATTACGGCCACCGCGGTATCAACCAACGTCATTGACA  
CCGGCTCCAGTAAGGATGTCGGTAAATATGGTGATATCCCGCTGCTGATTACAGGTTGTTG  
AGGCATTCAACACCCTGACAAGTCTGACGGTTACGGTGCAGACCGATGATAACTCGTCTT  
TCAGTTCTGCAACGGACGTGATCTCCATGGTTATTCCTCTGGCATCCCTGACCGTTGGGT  
ACAAAACGCCGGTCATCACGCTGCCGATGAAGCTGGAGCGATACATCCGTCTTAACTACA  
CCGTCACTGGTACCGCGCCGACCACTGGCAAAGTAACCGCTGGCATTGTTGGCGGGGTGC  
AGACCAATGTCTAAATATCGCGTAAAAGAACGCTCCTTCAATTAACGGCAAGCTCTGCGAG  
CCTGGCGATATTGTGGAGTTTCCGGGGGAGGCTGGCAAAAACCTTATCCCTCATAACGAC  
GGTGATGTCGTGGTGAAGGATGACGATCTGCCAACCAATGAAGAGCTTCAGGAACTTGAC  
CAGCTTCGTACCATTTACGAAGAGATGTTCCGGCGAAGCTCCGCATAAAAACACCAGCGCA  
AAAACCTCTCAAAGAGAAGATTGACGCCCGCGTAAAGAAGTGGGCGTGTAAGCGCTCAAT  
AAAGTGCTAAAAGCCGGGGCCATTCGGCCCCGCTTTTCTATGCGGAGACCTGAGAATGAA  
AACTGTAACATGAAAACAGGCACCGACTCATTCTGTTGGTGAAGATGGAAAACAGAAAC  
CAAAGATCAGTATCCGTGGGGGCTTCGCATCACGCTGGATAATGAATCTCTGCAACGTCT  
AGGCCTGAATGCAAAAATCACTGCCAGCGGTAGGTGATAGCGTTTCAGTTATGGCAATGGC  
TAGCGTATGTTCTGTGTCTACCCGCACCACAGATCACGGTGAAGACAGCTATGTTGAGCT  
GCAGATCACCGATATTGGCCTGGCTCCGCAGAAACGTGATGATGCCAAAGAACTGAAAGA  
TGCATTCTACCCAGTCGGGGAGGATGATTAATGGCTTCTGTTATCGAGATCTGCAACCGC  
GCGCTGAGCAATATCGGCAACAGTCGCAGCATTAAACAGCCTGAATGAAGCCAGCAAAGAG  
GCCGGCAATGCTCCCTGCATTTTGATGCGTGTGCGCATGCTGCTCTGGCTGACTTCGAC  
TGGAACCTTTGCTACCAAGCGCGTGGCGCTGGCTGATACCAATAATCCCCCTCCGGACTGG  
CAGTACGCTTACCAGTACCCATCTGATTGCGTCCGTATAACCGAGATCATGCCTACCGGC  
ATACGTAATCCTACCGCTGCTCAGCGCATTGAATATGTTGTGCGGTTCCAATGAAGACCTG  
ACAGGTAAGCTCATTTACACCGATCATCCTGAGGCATGGTTGAAGTATGTGGCGCGGGTT  
ACTGACGTCAATATGTATGACGCCATCTTTATGGAGGCGCTTTCCTGGCGTCTAGCGGCA  
GCCATCAATATGGCGCTGACCGGAAGCGCAGATCTCGGTAACAATGCACTGACGATGTAC  
AACCGTGTGATCCTGAGCGCTGGCTCACATAGCCAGAACGAATCACAGGAGCCACAACCG  
CCGGTAGATGAGTTCACAGCAGCGAGGTTGTCATAATGGCTTTTAGCTGGATTCAACCGA  
GCTTTGCCGGTGGTGAATTTGGTCCGTCACCTGTATGGCCGCATTGATATGTCAAAGTATC  
AGGTGGCACTGCGCAAGTGCGATAACTTCATTGTTTCGCCAATATGGTGGTGTAGAGAACA  
GACCAGGTACGCGCTTTGTTGGTCTGCTAAATACCCTGATCGCAAGTGCCGGTTAATCC  
CGTTCCAGTTCTCGACCGTACAGACCTATGCTCTGGAGTTCGGGCACAACCTATATGCGAG  
TTATCAAAGACGGCGCTTATGTTCTGACGACCAGCGATGTGATTTATGAGCTGGCGATGC  
CGTATGCTGACACTGACCTTTTCCGCATTAATAATCACGCAGAGCGCCGATGTTCTGACGC  
TGGTGCATCCCGCATACCCGCCGAAAGAAGTGCGCCGCTATGCGCACGACAACCTGGCAGA

TCGTCGATGTCACCACCAAAAACGGGCCGTTTCGAAGATATCAACGTTGACGAGACTGTGA  
AGGTATACGCCAGCGCCAGCACCCGGCACCATCACGTTGACGGCAAGTTCTGCCATCTTTG  
GTGCTGAGCAGGTTGGAAAACGTTTTATCTCGAGCAGCCTGCGGTTGATTCCGTTCCCTG  
TCTGGGAGACCAGCAAGACCACAGCAATCAACGACGTTTCGCCGTGCAGACAGCAACTACT  
ACCGCGCAATACTGCTGGTAAGACCGGGACCCTTCGCCCGTCTCACACTGAAGGTATGT  
CTTGGGATGGATGGGGCGGTACCGGATCAGATGATACCGGGATCCAGTGGGAGTACCTGC  
ACAGCGGTTTTCGGCATTGCAAAAATAACAGCAGTGGCTGGCGATGGCCTCACAGCAACTG  
CCGATGTGGTTTTCGTTCAATCCATCTCAGGTTGTTGGCTCCGCTAACGCCAGCTATAAGT  
GGGCAAAAATACGCGTGGAACAGCGTTAACGGCTACCCGAGCACCGTTGTTTACTACCAGC  
AGCGACTGTACTTTGCCGCGTCTTCTGCGTATCCGCAAACCATCTGGGCAAGCCGAACAG  
GAGATTATACGGACTTCGGCAAGAACAACCCGATTCAGGATGACGATCGCATCATCTACA  
CCTACGCCGGACGTCAGGTGAATGAGATCCGTCACCTTATTGATGTTGGTAACCTGGTCG  
CTCTGACATCTGGCGGGGAATATACGATATCCGGGGACCAGAATAAGGTCCTCACGCCAT  
CGGCTTTCTCGTTCAGCTCTCAGGGGAATAACGGATCAAGTAACGTGCCACCTATCGCTG  
TGGCTAACATCGCATTGTTTCATCCAGGAGAAAGGCAGTGTGTGCGTGATCTGGCCTACT  
CTTTCGATGTCGACGGGTATCAGGGAACCGACCTGACCATACTGGCCAACCACCTTTTCC  
AGAAGCATAGCATTGTGACTGGTCAATCTGCATTGTGCCGTACAGCAGCGCTTTCTGCA  
TTCGTGATGACGGCAAGTTGCTGGTGGTACCTATCTGCGCGATCAGCAGGTTTTTCGCCT  
GGGCACCGCAGTCCAGTACTGGTAAATACGAAAGCACCTGCTCAATCAGTGAAGGCAGCG  
AGGATGCTGTTTACTTCGTGGTTAACCGTACTATTAACGGACAGACAAAACGTTACATAG  
AACGCCTGTCCAGTCGTCTTTTACCAACGATGAAGATGCGTTCTTTGTAGACTGCGGAC  
TGAGCTACGACGGGCGCAATACATCATCACGCACAATGACCATCAGCGGTGGCACCCGGTG  
ACTGGAACATCAGGTTGATTACCCGGTTACAGTAAGCGGTGGTGGTATTTTCGTTAATA  
CTGATGTAGGCGCTCAGATTCAGTTCCCATATACCGGAACAGATCCAGACACCAACGAAC  
CGGTGGCTAAAGAGCTGCGAGGCGATATCATTTCGTGACCAGCAACACAGCCGTGATAG  
TTCGCTTCAACCGTAACGTTCCCTCCGGTGCTTCGCAATGTGGCCACAACCTAAGTGGCAGA  
TGGCGCGCCAGACGTTTCGGTGGCTTGTGCGCACCTCGAAGGTCAGACAGTAAACATCCTGT  
CAGATGCCAGCGTTGAGCCTCAGAAGGTTGTCACTGGTGGTTCAGTCACGCTGGAGTCAC  
CAGGTGCAGTTGTGCATATCGGACTTCCATCACTGCTGAATTCGAAACTCTTGACATCA  
ATATCAACGGGCAGGAAACGCTGCTGGATAAAAAGCAGGTCATTCTTACTGTCACGATGG  
TGGTCAACGCAAGCCGTGGAATCTGGGCAACAACGCCTGGCGGAACATGGTATGAGTATC  
CGCAGCGTGAATTTGAGTTCTACGACGATCCTGTTGATGAAGCTACCGGCAAGGTTGAAG  
TGAAACTTGACAGCAACTGGGATAAAAACGGACGCGTTAAGGTTCCGCCAGCTTGACCCAC  
TTCCGCTTTCTGTTCTTGCTGTATTGCCTCGCCTTACCGTCGGAGGATTCTGATGATTAA  
AGCTCAGATCGTACCCGCTACAGCAGAGCATATCGAAGCCATTATTCCACTTGTTCCGCA  
GGCTGATATCGATGAATTTCTTGCAACCAACGGATGGAGTCCGCGCCGTGTGCTGGAGAC  
CGGTCTGCGCACGTCAACATTTTGTGCTGTGCCGGATTGATTAACGGCGAAGTGGTACTGT  
CTTTGGCGTGGCACCCAGCATCGATGATCGGCGGGAGTGGTATCCCATGGATGGTGGGCAC  
TGACGCGCTGGAGAAATACCAGCGTACCTTCCTGCGCCGGTGGCGAAAAGTGGTCAATGC  
AATGCTGACTGTTTACCCGTATCTTGAAAATTATGTTGATGCGCGTAACCACACTGCGCG  
CATCTGGCTTCACTGGCTGGGATTCACCATCGATGAACCTCAGCCATATGGCATTAAACA  
CCTACCGTTTACCGTTTCCACATGGAGAGAAAATAATGTGCAGCCCGGCTATCGCTCTC  
GCTGGCGCCAGTGTGCGATTAAGTGGCGTTTACGCATACAACCAGTATCAGCAAGGTAAG  
TATTCGTCTGCTGTTGCCGAGCAAAATGCAGAAAGTGGCTACGGCACAGGCACAGGATTCT  
ATCAACCGTGGTAATGCTCAGGCTGATGAGGTTTCGTCGTCGTAACCGTCAGGCTGCTGGC  
ACCCAGGCGGCAACCATGGGCGCAACTGGCGCAGATCTTCCACTGGTGGAGCGCTTGAT  
ATCTTTGGCGATACAGCTCAGTTTGGCGCGCTTGTGCGCTGACTACGGTTAATAACGCA  
CAGCGTGAAGCGTATGGCTATCAGGTTACGGCTGAAAACCTACAAATCTCAGGCAAGTTCA  
GCACGCAAGCAGGGGAATATGGGTGCATTTACCACACTGCTGACTGCTCCACTTCAGGCA  
TACGGCGCTTACCAGATGGGCGGCGGAACGTGGTCAACATCACTCAAAGCAAAGCGGCA  
CCGATCAGCGCTGCCATCGGCACACCAACCGGTCGATAAAGGAGACATAGAAATGCCAACA  
GTACCAACAGTCGCCGGGCGTCAGGTTGAAAGCCGCGGCGTTTCCACTCAGGGGTTTCAG  
GCATTCGATCAACCAAACACCAGCGATGCGCTGCTGAGCACAGGAAGCCAGGCGCTTGAC  
GTATTCGGCCAGGCTAAACAGCGCGCTGATGTGCTATGGCTCAGGATGCATCGCTGCAA  
CTGACACAGACCGCAAGCGATCTGATGACCAACCCGAAGAATGGCCTGCTTAACCTGCAG  
GGTAAAAATGCCCTCGGCAAGGGGCAGGAATACACCCAGCTCTTTGACGCAAAGACTCAG  
GAGTTGGCGATGCAGTTGCCGGAGTCTGCGCGCCAGGGATTCATGCAGCAGGCTCAGCAG

CAGCGCATTTCAGTTTACATCTCAGGCTGGCCGGCATGAGATAGGGCAGCTCAATGCGTAT  
GAAGAGGGGGCAGTTCCAGGCGACGCTGACCACCGGCGCCAAAACCGCTTCGGCAATGTAC  
GGAGATAACGCCAACTATGTGCTGGCTAATCAGCAGGCGTTTCAGCAAATAGAAAGTTTC  
GGCGCCGCACACGGCTGGAGCCCTGAGCAGATACAAGCCAAAAAGGTGGAATTCAAAGAG  
AAGGTAGCTGATGGCGCGCTTTCTCAGTGGTCAGCAAATAACGCGATCGGATTCATTAG  
AGCAACGGTGAGCTGAGCGATACGGCCCGCGTTCACGGCGGGCTACTGTTAACCCCTTAT  
GGTGGTGAGCCATCATCTACGAAAGGAATGGTTACCCAGGGGAACATTAACCTTATTCAAC  
CGACCATCTGTAAAAAACGAAGATGGTACTATCAGCACGGTAAGAACTATTTCCATAGGC  
ACAGATGCTGGTGAAGTCCTGATACCAACGGTCAGTGATGACGGTAAATTACTTTCAGAT  
GATGAAGCAATCGCGCTATATGAAAAACAGGAAAGCACCTTGGAAATATTTGATAATCCT  
GATGATGCGACTGCATATGCTGAAAAGTTGCACGAGCAGCAAGATCAGTATTATGTGAAA  
GGTGATAGCGGCGATGCCAGGGGTATCCGCAACAACAACCCGGGTAACTCGAAGCCAGC  
GCATCAAACCCTTGGGTCTGGGCAGACTGGTAGTGATGGCCGGTTTGCAAAATTCGAGACC  
CCTGAGCATGGGATCCGCGCGCTGGGCGCAACCTCATATCCTACCAGCGGCAGGGGATT  
GATACCGTTGGAGAGATCATTAAACCGCTGGGCACCGCCTTCTGACAATAACGACACAGCT  
GCATACATCAAAGCGGTTTGTGCGCAGTTAGGCGTAACGGCAAACCAGCCTCTTGATGCT  
TCCAATCCTGACACGCTGCAGGCGCTCTGCGCCGCCATCATTAAACATGAAAATGGCAGT  
CAGCCATATAGTCAGGATCAGTTGTCCACCGGCGTCAGCGCAGCTCTTGGGCTGTCAAA  
CTGCCAACCCAGCAATAAACGCTACACCGGCAATGCAGCATTTCGACGCGCCACGCCGGAA  
GCACAGGCCACTTTTCTGCGCCAGGCTGACCAGATCCGCGGCGCAGCAGCAGGCCGAATAC  
AGAACGGCTATCGATAGCCAGGTTTCGCGACGCCACCGCGGCTTATATGCGCGGCGTTGAG  
TTTCCAAACCACCTGGACAAGCTGAATTTATGGCTGCCTACGGAGTGCGGGAGGGAAAC  
CATCGATACATCGAATTCAGGAATACGCAGATTGCCGGGCAGTATATTGGCTCGTTCCGC  
AACATGCCGACCAGCAGCATCACAGCCTATGTTAAACAGCTTGAGCCGACTCCGGAGCAG  
ACCGGGGAAGGGTATGCGTCGCGGGCCGCGCTTTATGACAATGTTGTCACCGCTGCTAAC  
CAGGTGATCAAACAGCGCAAGGCTGATCCGGTGCAGTTCTCACTTGCCGCGGGCAGACG  
AAGCCGATCGACATGAATAACCAAGCAAACCTTCGGTCAGAGTATCGCGTTGCGAGCTGCA  
CAGGTTAATGATCTGGCAAAGCATAACGGCACTCCGCTGACGTTCTTTTCCAAAGAAGAG  
GCGAATCAGATCGGGGCTTTCTTCCGCGATGCACCAGTTTCTCAGCAGTCTGCATATCTC  
GACACCATTTCGGCAGAGCACCGGCGGGCGGGCAGGTGTACATGTCAGCGCTTCAGCAGATA  
AGCACCAATGCGCCATCAGCAGCGGTAGCTGGGATCCTGATGGATAAGCCAGGAGGAGTG  
GTAGCTGAGAAAACTGGTTTAAACCTGATGTTTCTGTATCACCAGAAACAGCAGCGCAA  
ACCATCCTGTCCGGTGCAGCGGCGGTAAAGGAACTGATGATGCTAAGGGCATCCCAATG  
CCGAAGGATAACGATCTGCGACTAGAGTTCTCTGACATGGTGAAGGATGCGTTTGCCGGT  
GACGCGCAGGGTGCATCAATGGCCTATGAGATAGCAAAGGACTATTACGCTGGGGTGATG  
GCGAAGAAGGGTGTGGTTTCGGGTGAAATTGACAGTGACTCATGGAAGCAGGCTGTAAAC  
GTAGCTACTGGTGGCGTGCACGATTATAACGGCATGGGCAGTGTTCTGTTGCCTTGGGGG  
ATGTCTGCCGAACAATTTGATAAACAAGTTGATCAGGCATGGAAAACCTCAGGTGACTGGC  
GCAGGAATTAAGCACCGCCAGGCCAGTACGGTCTGCAAAGCTATGGAGATAGCCAGTAT  
CTGGTGAAACTCGGCACTGGGTATTTGCTGAAAGATGATGGAACCTCTGTCGTCATCGAC  
CTTACCCAACAGCGCCAGAGATTCTCAGAGGGGATCCCGCAATGAGTTACTTTGGTCTCA  
ACGCAGTTAACCAGAATCAGCAACTGGATGAAGCGGCATCTAACCTGCAGGGTTTAATA  
CCGATGTCGGTTTCTTCGATAACTCAGGTACTGCTGCTGTTTCTGGCCTGTA CTCTGGAC  
TGGTTGCCAAACCAGACCAGCTTCTTTGGGCTGGAATGGATAAGATCGTTTCACCCATCG  
CTAAGTTTGTTAACGAAAACACTTCCATCAATGATACATCGGCTGAATACATCGGCGAAC  
AGCGAAAACCTCGCAGAGCAGCAAGTTAAGCGCCTGACTCCTGATGCAGCAACGACAGGCA  
CTGCCGGGCAGGTTCTTCATGGTCTTTTCGATATGGGCGGACAGGCGGTAGTAGGAACAC  
TGCTTTCTGGTCTGTCAGGTGGTGCAGGCGGCGTCACTGCGTTGCAGGGCTTCTCTGAGT  
TTGAGAAATTGACTGCTCAGGGCGTGCATTTTCAGGACTGCTCAGGAAGCTGGTCTGGTGC  
AGGGTGTCACTGCTGGTGTGTCACATTGATCCCTATGAGTCTGGGTTTACGTGCCGGTG  
GTGCGCTGGCAGAAAGTGTTGGCGCACAACCTGGCGAGGACAGGTGAAAGTGCAGTACGTA  
ATGTTGCAGCTACTGCTGTTTCGCGCAGCTCCAGATATCGCATAACGACCCGGAACATA  
TTGCCTTCGGAATGGCACAGCGTGGTCTGACCGCAAAGACGCTGCGTGATGGCGGTTATA  
ACGAAATGGCGGCTCAGTATGATGTGTTTGATCGCCAGTTTATCGCCATTGATGCGGTTT  
TTGGTGTGGCATTGTTGGTGGTGTGGGTAGGTTTCTGAACGCCCGCGGTGAGAGCGCTTCAA  
CTCCTGAATTTTCCCCGGCTGAGGTGGATGCAGCGCTGGCAGCCAATGCCTCACATCAG  
CTGAGATTGATGTTGCTCCTGGTGTCCGGTTAATGTTCTGTACGTGATGCGCATATAC

AGGCGCTACAGAAGGCGATGAATGACGTAAGCCAGGGCCGTGCAGTTGATGTGGCCAGCA  
TTGCGGAGCCGGCTTCATTCACTGAAATTACAGGGCGCAGAAACCTGATTTCTCAGGCGA  
TCGATGAAACCCTGTATCGCACAGATGAAGGTAGCACTCAGGTTGCAGTTGACACAAGAT  
TGCTTGAGCAGCAGGCAGCGCAGGCTTTAGACGTTGAGCAGGTTAATCAGTTGCAGACTG  
ATATCACCGGTATTGAGCGATACATTGAAACACTCAACCAGGAACGCTCCGGAGTCCTTA  
ACGAACAACCTTCAGGCAGCAGACGTGAGTTATCACGTGCACGTGCAGCGCGTCAGGAAA  
GGCTGCGTGATATTGACCAGCGTATCAATGACGAGTCGGTCAGACTACAGACGGCAAAGG  
ATAATCTGGCGGCGAATGTTGAGGGAGGGGTTAACTTTGAAGCGCGGGCGGAATTAGCCA  
GACGCCAGCAGGCAGAAAGCGATCTTAACGCACAGGCTATGTCATTCTATAAAACAGCAG  
AAGTACGGACTCCTGACGAGGCTGCACCTTTTGAACCTGGTGCTGTATTGCGACAGGCAG  
AGCAAAAGCCAACGGCTGAACAGGCAGGAGATATGGATCTTCGTATCGCTGAAGATTCAC  
TGGTTGAGTCTCCGGACATGATGATCACCGTCTGGATGATGAAGGAAACCCGCAGTCGA  
GAAGCGCTAGGGAAGTGCTGGACGAAGCGAGCAAAGAGAATGAGCAGGCAATACAGGATT  
CCAGCCTTTTTGACGTGGCTGTAGCGTGTTTTTTGAGAGGATAAATTGAATGAGACAGGAA  
TGTATTCAGGCCGTGCAACAGGCAGCACAGCGCACTCTTACAGCCAGAGAAATACAGAAT  
ATCGAAGACCGCATTTACCGCAATATGCGAGCTATTGCCCGTGACGATCCGATGTCATGG  
CGTCAACTTACTGATGCTGAACGCCTGCGCCGCGCCGGGCAACTGGCCGCTGAAGATTTG  
CAGCGAGAGGGCGCACTGAAAAACGCCGTGTCTCGCTTACCATCGCAGCGCGTCAGCGC  
CTGGACAACCTCATTAAACAGTTATCATGGTGCTGACGGAAAGCTAGGCGCACTCAACCGC  
ACGATCGCCTTCAGCGCTGACGGGAAATCAAACCTTCTGTCTGTTGAGTCACGCACGAAA  
GCGACACGTGATTACGCATTAAGCCAGTTACAGGAGGCGTTCGAGGCTGTTGATCCTCGT  
TTCTTCGGGCTGTTTGAAGATGAGGCTGGAGTCCGTGATCTGGTGTTTGAGATGCGCGGC  
CAGAAAACCTGGAAATGCGAAAGCCATGAAAGGGGCGAAAGCCTGGGGTGAAGTAACTGAA  
CTACTTCGCCGCAGATTCATGATGCTGGTGGAGATATCGGCTACCTGGAAAACCTGGGGT  
ATACCTCAACATCACTCGATGGAAAAGGTTGGGGCGGTATCGAAGGATAAGTGGGTAAGT  
GATGTGATCGGTAAACTCGATCGCAAATATTACACCCGATCCGACGGCCAGTTGATGAAT  
GATACTGAGTTATCATCTTTTCTCGGTGAAGCCTATAACACGATTGCCACAGGTGGCCTT  
AATAAACTGACTGATACCGGTATGCGTATTTCCGGTGCGCGGGCAAACCGTGGCAACGCC  
TCACGCCAGATCCACTTTAAAGACGCTGATTCATACCTTCAGTACCAGCAAATGTACGGC  
GACCGTTCACTCTGGGAAATCATGGTAGGGCACCTGGAAGGTATCAGTAAAGACATTGCG  
CTGGTGGAAACCTACGGGCCAAACCCTGATCACGTGTTCCGCTCTCTGCTTGATCAGACG  
AAATCAGAGACAGCTACGGCTAACCCGCAGGATACCGGTTCGCATAGAGCGCCTGGCAAAC  
AATACTGAGAACCTGTATAACTTTATTTCTGGTAAACTCAGCCTGTTGCAAACCCGCAT  
ATTGCTCGCTGGTTCGGATAACATCCGCAACTGGATGGTTGCCAGTCGTCTCGGTTCCGCA  
CTGTTATCATCGTTCTCTGATCTTGGAACCATGTACCTGTCAGCGAAGGTTACCAACCTT  
CCGATGAATCAGCTATTCGTAACCAGCTTGAAGCTATGGACCCAACGAATCGCACTGAG  
CTTGCCAGGGCACGTGCTGCTGGCCTGGCTATGGAATCACTGCTCGGCAGTGTTAACCGC  
TGGGCGATGGATAATATGGGGCCGTCTGTCTCCAGGTGGGCTGCAACAGCGGTTATGCGC  
GCTAGTGGATTAACCGCATGGTCCGACGCGCACAAGCGTGCCTACGGTGTCACTATGATG  
GGTAGTCTTGGTGATGTTGTCACCAGAACGCCGGATCTGAAAAGCCTGTCTAATGACGAT  
TTCCGCATACTGAAAAGCAAAGGAATCACCGATACCGACTGGAGCGTGTGGAAGTTGGCG  
CAACAGGAGGACTGGGGGAAAGGCAACGATACGATGCTGACGCCGGAAGCATCATGCGT  
ATACCTGATGCTGCTGTAGAGCACCTAGGATCACCGGAGCGCGTGAAGTTTGAAGCAATG  
CGTAAGTTACTCGGAGCGGTTACCGAAGAAGTTGACATGGCTGTGATAACTCCGGGTGCG  
CGTGAGCAGATGGTTACCGGTTACGGTATCCAGCGCGGAACATGGAAAGGTGAATTAACC  
CGCAGCGTATTCTTGTTCAAGTCATCCCGATCTCTGTCTGATGCGCCACTGGTTCGCGG  
GCTATGGGTATGCCTTCTGCTGGTGGGCGGGCTGCTTATATCGCGACGTTTATCGCCAGC  
ACGACAATACTTGGCGCGCTTTCTCAGCAACTAAATGACATAGCATCAGGCCGTAATCCG  
CGGGATATGGCTGGTGAAGATGCTGCTAAATTCTGGCTTGGCGCATTGCTGAAAGGCGGT  
GGTCTCGGACTGTACGGTGATTTTTTGTCTATCTGACCACACCAGGTACGGAAGCGGAGCG  
CTGGCTTCAATGCTAGGGCCCGGTGGCTGGTCTCGTAGATGATGTCATTAAGATCGGGCAG  
GGCATCCCGCTGAATGCGGTAGAAGGTAAGAGCGAGCAAACCTGGTGGTGATCTGGTTAAG  
CTTGAAAAGGTCTGACACCTGGTGCCAACATCTGGTACCTGAAGGCTGCGCTTGATCAT  
ATGATCTTTAACCAGATGCAGGAGTATTTTTCCCCTGGCTATCTGCGCAAGATGGAGCAG  
CGTTCGAAGAAAGAATTTAACCAGACATACTGGTGGCGACCTCAGGATGTTACTCCACAA  
TAAGGATGTGAAAATGATTTCTTTTATTCTTGTGTTGGCACTCGTCGCACTTGGCGT  
AATGAACCGTAAAGGTATCATTGAAGATGGGGAATTTCCGTCGCAGTTGTTTTAATATT



ATCTGGCATAGCAGGGTACATAGGTTTGTTCATAGCATGAATGTGACATGTCACGAGGCCG  
CAGAAGCGGCCCTTTTATTTTTCATTATGTGGTTTGTTCGTAACCTGTTCTGCACAGTAA  
TCGAGATGCGTTTGCAGATCCTGCATTGTCATTTGAGAACTTGTGACGTAATTCACAAGA  
GCAACCAGTTCAGCTAACGGCCCATCAACGTTGAAACCGTCTTTATCGAGTTCCTCGCAGC  
AACTTCATAAGATGTGAGTCTCCACCAGGGACCTAACGCCTACCGGCGTGTGTATTCTT  
TCTTCAAATCCTTCTTCCAGCGGATGGTGATACTGCCGTTGCATCTCTTCTTCTCCATGC  
AAACTGTATAAACATACAGTAACAGAAGATATCATGACTATCCAGCATGGAATGCAAA  
TTACCTGTAAGGTAATAAAGCAACTGATTAATACCTAAACGATTTCATATAAGGTTTTTGG  
GTAATAGAATGATCCAGAGTGCATGCGCGCCGGGCGCATAAGCAACCTGGAGATACTTAC  
ATGACGGTCTCAACTGAAGTTGACCATAACGACTACATCGGGAACGGGGTCACTCA  
TTCCCTTATACCTTCCGAATTTTAAAGAAGTCTGATCTGGTTGTGCAGGTTGCAGACCTG  
AGCGAGAACATCACAGAATTAGTCTTGTACTGATTACACCGTTACTGGTGCGGGAGAG  
TACACAGGAGGGAATGTAATACTGTCAACGCCACTGACAAGTGGATACCAAATCTCAATT  
TCACGTGAGCTTCCAGTTACGCAGGAAATCGATTTACAGGAATCAGGGTAAATTTTTTGCA  
GAGGTTTCATGAAGATGGTTTCGATAAGCTGACAATGTTGATACAGCAGGCTATTAGCTGG  
TTGCGCCTTTCTCTACGTAAGCCGTCGTTTGTGGCTAATTATTATGATGCGCTGAACAAC  
TACATCCGAAACCTTCGCGACCCGTCACGACCTCAGGATGCCGCCACCAAAAATTATGTA  
GATAGCGTAGCTAATAACCAATCTAAGCCACACACTGAGAACTCCTGAAGCAATCCCTTCA  
TTGCCCGGGATAGAACAACGTAAAAATAAAATTGTCGCGATGAATGATAGTGGCGATCCG  
ATAATGGTTCTTCTGAGTCTGGTTCCGCTGCTGATGTGCTGATAGAACTGGCAAAGCCA  
ACAGGTGCTGAATTAATAGGAACTCTTTCTAGTAAATCAGTTCAGCAAGAGTTGATGATA  
AAGACATCCTCATTCCCAACTTTACAGGATGCTGCTAACTATGCTGTAAACGGGATAATT  
GTTGATGATGATTATCATTACTGACGGAGAACTGTTGATTTTAGTGGTAAAAAGTTA  
ACAATTGAATGTAAGGCAAAATTTATTGGAGATGGTAAATTAACATTTGAAAATTTAGGC  
TCAGGATCACGCATTGTTTCATCCACACATGCAGTCACAAACGGTGCCTTACGTTATATCA  
AGATGGGATAGCAATGGGGAGTGGATAACTGAACCCTCTACTATCATTCTACTCTTACT  
CAAAGCAGAACGCAAGGCTACGCACCTACAGTTAATGATGTAGATATATAACTCTCTA  
CCAGATAATGTTAAAAACCAAAATTTAATATCACATCTCATTATATCTAATTCATCAGGC  
ATAGATGTGTTTTATCCAAAAGCAACGTTTGGATCATATGAATCATTAAAAATAAAT  
GTGAAGTTTTGGTATCCACGTGATTTTTATGGAGACATGTCAAACGTATCGCATTACT  
GCATGGGATAGCACCGATTACTACCATGGTAATTATGTAATCGGAGGTTCAACTAATTAT  
GGATCAGGAAGTGGGGTGTGTTTTATCGAAATGATGGAGGGGTTGGCCATGATGGAGGA  
GTCATTGGTGGATTTACCCCTTACAGATGCGGTGAATCAGGTGTTAAACATAACCAGAAC  
GAAGTTAACGGGATAAGTCAAAGATGTTATAATCTTCGTTTCATCGATATCAATCCGATA  
GAAACGTAATGATGGTGTAGATCTGAATGCTGACTATGGCACGCCAACTGAACGCCAG  
CATGATTACACATTGGCGCAATACGCTTGGAAACAACCTTCCAACAACCCACATCGTTAGC  
AACATTCAAGCGTATAAGACTCATGGAGTTGGTATTTGGGGTGACGGATCTACAGGGTTT  
TATCGAGATATCTATGCATCATATTCTCGTGGCGCAGGTATATTTATCAAAGGAAGTGGG  
AAGAATTTTAAAAACCTAACTTCCATTCAAACAATGCAGCTAACACGCCAGGAGAAAAC  
CAGATTACACTTGACGGAGCAAACATAATTGATGGTGTAAATATAATAAATTACACACAA  
CCAACAGGACTTGCGATTTTTGCTCCAAATTCTACAGTCACTAATCTTAATGCTCCAAGT  
GTTCTTTCATCATCCATAAACATTGGCAATATTGAGGGGCTGGTGGTTGGCAACCTAATA  
CATGTGCAGCCAAATCTTGCAAATCAAACCTCAGCTGTGTATTTAAATGTAGTCAATACT  
AGTGTGGCATCTAAAAGAGAGGATACCATAAAGATTGGCCAGGAGCGTCAGAGGTTACC  
AGATATGTAATTTACAGGTAGTTCACCTAGGTTAACCATGAGAGAAAACCATGGCGATTTT  
GGGGCGGTAAATATTGCATTCTCTGGGACCGTCTGCCAGACGAGGCCGTACCGGATGCA  
AATTCCTATGCTGTATATTGGGATGGGACAAACCTCACTGCTTTGATAAATCACGGTGGT  
GTTCTTACAAGACAGAAGTTAACAACATAAATTATAAACGGCTGCCTGGGCAGCCGTTTA  
TTTATCTAGTTGATTATATATTTTCCGATTTTTTCAAAGGAAATCAGAACCAGGCTTT  
GTCAAGTGACCCCAATCTACAGCAGTGACAAAATCCGGACCATCTCCAACCCTTGTTAAG  
CATCCACTTTCATTGCATAGGGCTCTGTATGCTGATATGTATTACGCCCCAACTTAGGC  
ACGTTTTTCATCAAAGTACTTATCCATCCTTTAATTTTCATCGTTTAATCCATATGACATG  
TATATAGGTGGCGTTTTTTGAATTCACTTGTGTAATTTGATATCACCTTAACTAAATTA  
GCATTCATTACAGGAACAGGGCCAACAACCTATCAACCTTGATTGCGGTGATGCTTTCTTT  
ATTTTTTTATTGTTAAAGAGAGAGCTTCAATTGCTAACTTTTTATCATGAACTCCATTTG  
AACCACGAACAGACCAGTTAGTAATACTATCTCAGGTTAACCATAACCAATCTCTTTAA  
TCCTGTCAGAGTTAATTGAACCTAACGTCCTTTGGAGGTCGTCCTTACCACTAACAACA

ATGGCGGGGCGTTTTCCGTCGTGTCATTTGACTTATCACATACTTTTTATTGTTGTTTTTA  
TGTAACCTCGACAATCCATTATAGAGCGCTGCTGCATATGAATCACCGATTATAAAAATAT  
TATTTTCGGCTATTTTTAATGCAACCGTTAGATATGGCATCTTTTAACAGCACAGAGTGAC  
ATATGCCACCGCGCAATAGCTCACCATATTTATAGTAATCGTACACATTTGTGACAGAAG  
CATACTCACCTGCTGATTTATTTACGTTTCTTTCTTTAATTCCATTCATGGAATACGTAA  
CAAGTCCAAATATAACCAGTTCCAAATACAGTTATTGCCAAAATAATCGATGTGGTTGATT  
TTCTGACAGAGTGACGCAGTGGTTTTTCAATGATGTAATAAGTAGATATTGCTAATGCGA  
ATGCCAATATCATTAGAATCAACAATTCATTGGTACTCGGTGATCCAGAAAATATAGAAC  
GATAGAATGAATAAACTGGCCAGTGCCACAAGTAAAGCGGATAAACTTATAAGTCCAATAA  
AAACAAAAGGCTTTAAGCTAAGTATTTTTGATGCTATCCAGTCATTTCCATTTGACGCTA  
TTATAAGAGATGCACCAATAACCGGAATTATAGCTATGTAACCAGGAAAAGCCATCTTTT  
CATTAAATCATAACTATCGATATAGATATTATGATAACGCCTATCAATGACATTGATTTAG  
ATAAGGACGTTTTTATACCCATGAAACGCAATGTGGCTATTATGGCACCTGCCATTAAC  
CCAAAATCTTGAAGCGGGAGAGTAGTAGTTAGCCCCACCTTCATATGACATGGTAGAAA  
CGCTAATTACATAGCTAACTATAAATATTATTGCGCATGATAAAAAGTATATTACGTTTTG  
AATTTTTGCTTTTTGAAACATAGCAAAAATAACTATTGGCCACAATATATAGAATTGCTCTT  
CAATACCCAAAGACCAAAAGATGTAATAATGGCTTAAGATATGATTGAGAATCAAAAATACC  
CTGATTCACTCCATAGTGTTAAATTTGAAATGAAGTAGGCACCTGAAAAAACGTGTTTTCC  
CGAGTGATTTATAATCATCCTGGAAAAATAAAACCATCCAATTATAATGCATGAGATAA  
GAACTATTGACAGCGCTGGGAATATTCTAAGTATTCTCCTCTTGTAATAATTCTACATAAG  
AGAAGGAATTACTGGATGCAGATTTTAATATAATAGATGTGATAAAGGTATCCTGATATCA  
CAAAAATATATCAACCCCAACAAAACCACCAGGAAGAATCGAGGGGAAGTAGTGAAAAA  
TTACCACCGACAACACTGCTATTGCCCGCAACCCATCTATGTCTGGTCTGTATTTTAAGT  
GTTCCAACTTAACTACCTCAAGTTAACTAAAAAATAAGTAAATTATAGATTACTATGT  
CATAACTTTATGAATCAGTAACCATGATTGGTATTTATCTTGATAAAAAACAGGCCATAA  
GTTTGATTGACTTTTAACGGCAAAGGCCATGCACCATCTGTGATTGCTTTCATCTTACAC  
ATCCATTTGGCATTGACGAAAAAGCTGAACGTGACGGCTACGCAGAATGCGATAACGTTT  
GATATCGCCTGGCTAAAGCCTATCATGCTGAACATAACGCCGAAGCAGAGCCAGTGGATG  
GCAGTATTCAGCACACCAACAGAAATATAACGACCGAATAGCTTTAACATTATAAAAATC  
ATTGAATTATTATATTTATAGATTTTATCACCTTTAGGGTAATTTTTGTAGGAATAATTT  
CATGTGATATGATCCATATATGGTTTATTGTGTATGATGAACTCACCAACTATGGGGGTT  
CTTTATGCACATTAACGGTGGTTGCTATGTCAGCACAGCTAACCAGTGAGTCTTTAAAT  
CAGTGGCTTAGCATGGGATCTCTTGCTGCGGTTATCGCAGGAGTTCCTCCTGAGGTGGCG  
CTTGGTGCTCTATCTGGCGCGGTAATATTTATTACCTCTGCCGTTGAGTATCCAATCCGC  
CGCCGGGTTCTTCTGTGCTGATGCTCAGCTTTCTATGCGGGCTTCTATTCTACAAACCAACT  
GCATCAATTCTTATCGGCGTAGCCAGCCTGATCCCAACTATCACGCAGGACTCTTTTCGAG  
AAAGGGATCGTCTTCTCTGCTGGCGCGTTCGTGTGCGCAATCGTTCGCAGTACGTATTGGT  
ATCTGGCTCTATCACCGTTCCGACAATCCACGCGATTTAATCCCGGGGAGAAAAGACGAT  
GACAACTCATGAGCTGCTTTTACTCATTGCCAATGCGGTTATCTGTTCTGCGATAGCAAT  
CCGCGTCGGAACCTTCCGGCGTAATGGATCGCAACACCGCCGGTGGGGTGGGTGGATAGC  
CTACTTCCTTATCGTGGCATCAGCCAGCATCCCCGTCGCGCCGCATATGCAATCTGGTA  
TCACACACCAATGGCCGCCGATTTATCGGAGGTCATCATCAACGCTGTCATGCTTGCCGC  
CGTCCTGAAGACGCGCGGTAACGTCGTGCAGATTTTCAAATATCGAGGTCTCAACATGG  
ACATTAACCAGTTCCGGCGCGCATCCGGTATCAATGAGCAACTGGCCGCGCGCTGGTTTC  
CGCATATTACTACTGCCATGAATGAGTTTGGCATTACCAAACCAGATGACCAGGCAATGT  
TTATCGCACAGGTCGGGCATGAGTCCGGAGGATTTACCCGGTTACAGGAAAACCTTAACT  
ACAGCGTTAACGGACTGTCCGGGTTTATCCGTGCCGGGCGCATCACTCCAGACCAGGCCA  
ACGCACTTGGCCGGAAAACATATGAGAAGTCTCTTCTCTGGAACGCCAGCGCGCGATCG  
CCAATCTTGTTTACAGCAAGCGCATGGGAAATAACGGCCCAGGCGACGGGTGGAATTATC  
GCGGTCGTGGACTTATCCAGATCACTGGTCTGAACAACTACCGGGATTGCGGTAATGGTC  
TGAAGGTTGATCTAGTCGCTCAGCCTGAACTGCTGGCGCAGGATGAATACGCGGCCAGAA  
GCGCGGCATGGTTCTTCTCCAGTAAAGGTTGCATGAAGTACACCGGTGACCTGGTGCGCG  
TCACGCAGATTATCAATGGTGGCCAGAACGGTATCGACGACCGGCGTACGCGTTACGCCG  
CTGCCCCTAAGGTGCTGGCGTTATGATCTGGGCATTCGTCAAAGCTTACTGGAAACAGTT  
ACTTATCGTGGTGTGCTTGCTGCCATGGTTACTGGCTGTGCTATCGCATGGGTTAACCA  
TGGTGAAACTCAGTACGCAGCCGGGTATGCGAAGGCGCAGGCGGATCGCAAAGTCGAAGA  
TGATAAAGCCCCTAAGCACGACGAACAGGAGAAAGTGACCAATGAACGTGAAGCGCAGCA

GAGGATCGACCAGGCGCGCAATGATGCTCTTGATGCTGCCGCTCGTGCTGGTAGGTTGCA  
GCAACAGCTCGTTGCCATCCGTGAGCAGCTCATGCAGTATAACGCCACTGTCCGGCGCTGG  
GGCGTCAGCCGCAGACACCGGAGTTTTGCTTGCCGACGTGCTCAGCAAATCTCTCGAGCG  
AAACAGACAACCTGGCAGAGTACGCTGATCGTGCATCCGAAGCCGGAAGAGTCTGTGAAAA  
GCAGTACGATTCGCTGACCAGGTGACATGTCATTTTTTCATGGTACCGATTTCCGGTGACG  
GTATATAAAACGGTATGAAAAATTTTCATTGTTTTAAAAGTTGTTATCAGTCAATTGCTTA  
TGTTATCCGTAAATAAATTGAGTGGGAATGATGTACAGCTAACTCACAGCTAATCATTCT  
ATTCAGTTATGCAATCAACCCTCTGTTTTTACAGAGGGTTTTTCTTTATATCACATCATA  
TCTATTCACTCTATCTCACATTTTTTCATCGGTACAGGTGACGGTATTACCTTAAAGGTAT  
ACTCTTCATAACCGTCAAACCATGGATGCTTTACGGGTGAATTGTGCTTACTGATACCAA  
CTAAAAAACCTCAAGCCGCAGGACAAACTGTATAAGGTTTCGGATCGTGACGGGCTGTAT  
GTTGCGGTGCTTACTTCCGGCTCTGTCTCTTTCCGGTACGACTACCGCATTAAACGGGCGC  
CGGAAACGCTGGTCATCGGTACGTACGGTCGTGACGGTATCAGCCTGGCAGAAGCACGA  
GAAGAACTCATTGCTGCCAAAAAACTGTTAAATGCAGGCCAGTCGCCAGCTGCGGCTAAA  
CGTGACGGTATCAAAAAGATCCGCGGGGCTGAGACATTCGCGGTACATAACCGACAGCTAT  
ATGAAGCACGTCATTCTGGCTGACAGTACCCGCGCCATGAAGCAGGCAGTGATAGACCGT  
GACATACTTCCCTGTGCTTGGCAACAAGATGATGGCTGAGATCACCACATCGATGGTGCGC  
GATCTGTGCGACAGGATTGTTGAACGTGGCGGCCGTGCGACGGCGGTACAGGCTAGGGAG  
ATTATCAGCAGCGTATACCGACATGCGAATGATCGCGGTACGGTCTGTTTAACCCGGCT  
TCTGACATAAAACCTTCATCAATAGCCATGTTCAAGCCGCGCGACCGCACGCTGCAACCT  
GAAGAGATCGGCGTATTCTTCCGGGCGCTGGATAATGTCCGGGCGATGGCCACAATGAAA  
CTGGCATTAAAACTGGTGCTGCTCACCTGGTTCGCAAAAGCGAGTTCACCCACGCCACA  
TGGTGAGAAGTCGATTTCAAAAAATGGACATGGACGATACCGGCGGAACGAATGAAGGGA  
AGCCGAGCACACGTTATCTATCTGCCAAAGCAGGCGCAGGATCTGATGATTGGCCTGCAG  
ATGTGCGCTGGTGGAAGTGATTACCTTTTGCCGGGCGCTATTTCGGTTAGCAAGCCGTTA  
TCCAATGGCGCACTGAACAGGCTGATCAATACCACCGTCGAAGCGGTGAACGAGGCTGGC  
GGGAATCTGGATGATTTCTCTGTGCATGATCTTCGCCGCACAGCCAGCACGCTGTTGCAT  
GAGGCTGGTTATCCATCTGACTGGATAGAAAAGGCGCTGGCGCATGAGCAAAAGGGAGTG  
CGTGCGGTATACAACAAGCGGAGTATGCGCGGCAGCGCGCCTACATGTTGCAGCAGTGG  
GCTGATATGGTTGATTCCTGGATTAACGGGGAGCACACCGATCTGGTGCCGTTCTCCCT  
TCGAAGTTTGAGCGATGGATGAGTGAAGATGATTAATTTCTGGATTGTATAAATTCTCGC  
TGTAAGTCAACTGTCATTTGCAGTTCTTCGCATTTCTTGTGCAAGACACTGTTTTTCAGTT  
TGTAACCAGTTAACTTGAGCACTTTTCTGCACAATCACAGCGCGCTGCTCTTCCAGTTGG  
CGGATTAACCTCCGCCTCATTGAACATTGTCATGCTGCCTCCGTCCTTACAACCGGAACAG  
AGCAGCCTGGTAGCAACTGCACCGCCGGGCTTCGCACTGATTGCCCCATACGTGCAAGC  
CATGTGACGACTGGCGGGCGAATAGCTCAATGCGCGGAACATCGCCTAGCAACTGCACCA  
GTTTTTCGCGGATGATGTCAGGCTTGCGCGAGTTTTCCATGCGCGGCGCCGTGACGTGCT  
GGCAGATTGACGCATCCATGCGGGCCGGTAGTTTCCACGCACCGCAAACAGGCAGTCTT  
CGCTGTTCCGCTTGTGTCATGTGGCCATGCCGATCGCGCTGTTACCTTTGTGCTTATTCTG  
TCTTGTGCCAGGTGAATCCCTTCATGGTTCATCAGCTTGAAGCCCCACGATTCGACCACTT  
TCAACGCCTCAACCGGCTGAGTAGGAACCCACCACATTGCCAGTAGGCAATCGTCGGCGG  
CAAGACTCCACACTGGCAGGCGACAGATATCCAGCACGTTTATAACCGGATATTTGAATC  
CGGCGCCGCGCTCGCCGTCGGCTGCTTTGTGCGGATATGTCCATGGAGGATCAGCATAAA  
TCAGAGTGTATTTACCGTTCATGACGCCTCCTGAAGATTCTTCGACTTGATGCTCTGCAC  
CAGGCGTTCAGCAGCAGCTTTCTGCGCGGGAACAGAGGCAATAATCGTTGGACGATCTTT  
TTCGGTGTAGCGCAGATACCACCCAGCGTGAAATCAGGAAGAAGTCTTCCATCTCAGA  
GGAGCCCGCATTGCTCGCCAAATCTTCAATCATCCGGACGATATCGACGATTGAGTGATC  
AGCCATCAGCCGTTGAACGGCGTAGCCGAAGGCGTTAATCATCACCGCGTGGAACCTGAAT  
GTAGTCGCGCTTGTAATCCGCTGGCTGGTGCCGTGGCGTATCGCCTCGATCTGCGTCAG  
GGCAAACAGGCTTCCCAAATGGATTTCGATGTCGCCCATTTCCAACGGCTTACTGCCCGC  
GCTGGAAAACCTTCGCTGTCGCGTCGCTCAGCGCCTTAAAGCTCACCCACAACCTTACTTTT  
CGCTGGAACGACGTTGTGTTTGAAGTCGGTCACTCTGAGAAGGTGTCGTGCTGCGACAG  
GAACGTCACCATCCCTGAGCCACTTCATTACGCCGTCGTAGGCCATGTTTATCGCCGC  
TGCCGGTTTGGAACGTTATTGTTGATATCTGAGAAGAACTGCTGGCGAGCTTTCAGAGG  
AAGATTGTGCGTCAGCATAAATTGGAATGCTAATAGGCTCGCCGTAAGTGCGACAGAATC  
TGCGATACCAGCAGCACGGTGCTGGCCATCAAACAGTTTTATTTCCGCATCCATCGGGAA  
CCGCGCTACGCCAACATTTCGTATTACCAAACCTCATCAAATTCATGATCGAGTCACAATT

CCCAACCAATGGCGGGATGATGAATGGCTCTTTATTTTCGTAAGCGTTGACAAGATATTG  
ATAAACTTCTTCACGCGTGCTGGATTAATTTTCGCGTTGTGAGCGTTTCGAGCGTACTGCC  
GTTATTGTCTGAAGCAAGAACGCGTGTGAGTGCACGAGCTGGAACCGTCATCATATAAGT  
TACTGTACTACCCTGTGTTCTCTTGATGCAGGGAACCTCAAAGAAATAATCACCGACCTT  
GCTCATGCTGCCACCTTCTTGCTGTTTCATCAGCTCAGCAATGCGCTGAGCCTTTAATGGG  
TTTCTGATAATCTGGCCGCGGGGTGCCAACACCCGCGGGCAGAGTTGAATAAACCATC  
GTGATACTGCCGACGCAGATATTGTTCGTGAGGGTTAGTCATACACCACCCCGCGACATCC  
GATCCCTGCGTATTCACCACGGCGCAGGCCGTTACCTTTTCGATATGCACTGATCGCGGCG  
TATCGCTATCCTTGCGCGTTCAACTTCACCAGCCGCTACATCCATACACAGCAACCAGAG  
TCTGGCCGCGATGCGGTACTGGCCTTTTCGATTACGCTCAACAGCGCGCTTTTCTACCTC  
CATCGCAGCCGGAGTAACGGCTACAACCTTTGAAGCCTGACGCTGAGACACATAGTTAAG  
GTGATACTTTTCAAGACGGGTTAATTTGCTCATCGGATCCAGCCTTCTCTGAAAATTACC  
GCCAGCAGATACAGCCAGGCGGAAACGGCGGTCAGGAATAAATACCATCCTGACCATTTT  
TCCCAGTGCCTGATCAGCGCTGTCATGCGGCGTTACTTACTGGGCGGTAACCTCGCTGAT  
CAACCGGCGGCTTTTTTCTTGGAAATTTTTTCAGGACTTGCCGCTTTTCTTTCTTCCAGCC  
AGTGTTCAACTTCTTCTGTGTCCATGCACAGCGTTTATCTGTGATGTACCAGCGCTTAG  
GGAATTCGCCAGCGCTTTCCAGCCTGTCGATAGTGCTCATTGATAATGGCACCACCGCCA  
GGAGTTCTTCTTGCCTAATGCACCTTTCATAAATACCTCTCTTTGTTGCAGGTGTGGCG  
CCGTGGCGCCACGGTGGTGATTACATCGGTACTTCGTTTCAGTTTCGTCACAACGGATGGTG  
TAAACGTCGGTTGCTTTTGGCAGTAGGTCATCATCACCAGCCAGTTTTTGGAGCAACGTAT  
TTGTATGCTTTGTCCAGGTCAGCCTGGGTGTTGTAGTTTCATCGCCGCGCCGGAAAATGCG  
TGCAGAATCTTTCAGGACCGCGATCGTCTTTATGCTGCTGACGCTCTTCTGCTTCTGC  
TCTGGTTTTGAGTTGATCAGGCTGTTAATGCCCTGAGCCGTTGCCGCCGGTGGCGTGATA  
TCGCGCTCAACGCGAGGTGTTGCCTCCTGCAATTCGTCAGGGGTGTAGACTCCGAGCAGA  
ACATCAGGTGCATGCAGACGCGCCCAACGCTTAACGCACAGGTAAGCAAGCTGCTGGCGT  
GGATCCTGTTCCCACAGCGGAGAGTTACGGACACCTGCCTGAGCCATGCTGATGGTAAGT  
TCGCGCGGCTCTGCTTCTCCTTTCAGTACTGCCGACACTGTTACGGTCAGTGATGGAGAT  
TTATCGCTCTTGCCATTCACCTTTGACCAGTCACCATCCCAGCGGTAATTCAGGCGAGTT  
GAAAGCAGGTTTGAAGACGACACGACGGCGTTAACAGTTGTGCTTCATAGCCAAGAGTT  
CCGTTTACAACGTGCGTCTTCTGTGCAACAGCGAACGGGTTTCATGCCCCATTGCGCCGCC  
TGCATGGTACTGCCAGGCAGTCAGACGGCTTACCTGCAAGATGAGCAGGAACGGTAGCT  
TACTGCAGGCCATCAACTCAGCGAAGCGCACCAAGTTGATTTCATGCCTTCAGGACTGAAG  
ATTGCCGACGCGTCCCTACGGTAGCGCCTGGCTGTGATGTGATTGCGATATCGTTGCTC  
ATTATTTTCTCATAAATCCTGCCAGGTTGTCCTGGCGATAAATTCGATTAATTTGCACT  
TTGGATACTCCAAACTCTTGTCTAAAGCGACTGAGTTATTTGAAGGAGAATCCCTGTTA  
TGTCTGCGGCGTATTTCCAAAACCTTGTCTGTTTATTTTGCATCGCGGTACATTTTCG  
CCACGCTCTTTCATATCCCGCATGTTGTGCAACTGATACCAATCTCTAAATGCTCAGGG  
TTAATGCATGCAGGGTTGTGCGATTTATGCCTTACGAGAAAGCCATCTATTTCACTGATA  
TCTATGCCTTTTGATTTGCAATATGCGACACGATGAGACAGATAAAGTTTTTTCGCCTATT  
CGCTGTCTTCCATAGCCATCTCTTGTCTATAACCGGTCCATTCAATACATTGAGTTATC  
ATTTTTTCTTGCCACCCTGGTCTTTGTATTATCTCGACCCCAACCAATCATCGTTTTT  
TCTGCATTGGTGATAAGTGTTGAGATCGCGCCTGAACAACCTGGTAGCCAATATCTGCGTC  
ATATTCGTCAAGCTGGAACACCTTACCGGATAGCGACCACAATCGATGGTTTCGCTTAC  
TGCTATGAAGAAGAATCCGTGTGGCTGCCCGGTTACTTTCAGTGCGCCTTCGCGGTACAT  
TTCTGCCTGGACGTGGTAGCGGAATTCCTCGATGTGACGGGCAAAGCGATCCATGTCTGC  
AACCTTTTTACATCGACGATCACGTTGTGCTCATTACGCCATTTATCCGGACGGATTTCG  
GCACAGTTCGCCAGTCTCTTCGTCATTCCAGTACATCGACGCTTCACAGTGACCTGGTGC  
TTCCAGCATCCAGCGCGCCCGGGTGGAGCCATTGCGCTATCGCGCATCAGTTTCAGCTT  
CCTGCCATGCTCGGCATCCATCACAGTCATAACCCATGCCGGCAACATCTTTCAGGAATGC  
TTCTTCGCTGTTTTTCCCTGATTTGTGCGGCGGTTGAACTGTGGCGCCACGATGAAACG  
CTTATCGAATTCATCCGGCTCCAGCAGCAGGCAGTGCAGGGCAGTACCCATATCCAGCGC  
GGATTTTTTCTTCTCGTCTTCCGGGGCTGCCTTACCCATTTTCAGAAGGGAAGGGTTCTT  
GGCCACCATATCCAGTTGTGACTTACTCACGCGTCCACCGGCGTGGTAGTCTCGTTGCT  
GATGTCGAAATAAATACCGGTATTCATGCTGCATTCCTTTTGCTGTGATCTGGTCAGCA  
AGGTCAAGACGTGCGATGACGCCAGTCAATTCACGTTTGTGAGTGAAGACATCAGCTCTTCG  
AAATCATCACTTTCAAATGCCGCTTCCAGAACTTCATAACGAACACCGGCACGGAGAATG  
GCGCGTTTTGAATGACTCTTCCATTTTCGCAACCAGCTACTGCTTCGATAAGCTCAACGTGG

CGGTCATACAGTTCAGATGACAGCTGGTAGTCGCTGCTGAACTGAGTTGCTATTTTTTTTC  
AGGTTATTGAATTGCTGAATATTCACCTTGCTCACCCCATATCCCGTTATCGTTGGCAAC  
TTCGTGCGCAACCTTGTGGTAAATGCCATTTTCATGCCCTCACCCAGCGTGCGGAACTT  
CCAGCTCATCAGCCCGCAAGCTGTAACGCAGTACCAACCGTTGATGACTTTCCACTGCAT  
ACAAACCTCGCTATTACCATTTTGGTAATACATGAAGATGCAGGAAATCCACGAAGTGGT  
GGTTTCTGCCTGAGCGATGTGCTCGAGTATTACCTTTTGGGTAATAATCAGATCAAAAAG  
TGATTATGTCAATAGGCATGACGAGAAAAAATTACCATTTTGGTAATTGCGTGAGGAGTG  
AGCTTACCGCCATCGGGCAGGTAAAGCGTCAGAATGGCAGGGGATTACTTGCTTTTGTTC  
TGCTCAAACACGAAGTTTATGAATGAGGTGATCTTGTTTTTCTCTTCCTGTGGCAGAGCT  
GCATACATCCGGTGGTCATAGTCGATAATACCAGGTGCGCCGACGGGAATAATCATCTCG  
TATGCTTCATGCCGAACGCGCGTGCCAGGGAGGAAAGAACGCCGATGGTTGTACTGACT  
TCCGCTTTCATAATCCGGTTAACGGTGGCCGGGCCAATACCAGCTGCTACAGCAACTTTC  
TTTTCGGATGTCATTTCCGTGTCTTTCTCATCCAGGCATTAAGCGTGGCTGCGGCCTGC  
TTCTCTACAGTCCATTCGCCATCTTCAGTGGCCGGAATAAAGATATCAGCCTGTACTGCG  
TCCAGTTCGTGATCAACATCGAGCCAGAACTTTTCTTTGCGGGCTGCTTCTTCGATGATA  
CGCGCGGCATTCGGTCCGATATTTTTGATACCAGTACACCACCTGTTGACCAGGTTCTGC  
GAACGTTTCACCCGTTCTGCAAAGCGTAACTGGGTATCATCGAAATCCCGGAGAATGATT  
TCGTTAAGGTTTTTTCGCTCTTATGTCATAAATACTTTTCATAGCTATTGTATTTGCCCAT  
TTATTATTACCTAACACTCTAAATTTAAATGAATATTACCATAAAGGTAAAATTACCATA  
ATGGTAATAATCATTGATTTTTTACCAAAAAGGTAATAATTCAGATATGAATAGACAGG  
CTGAGATAAGCAAAATATGAGTGACGAAAAAAATTTGATTTCAAAAAGCACTGGCTGGG  
GCTGTCTCCTGATGAGCGTGAAGCATTTCAGTGAAGCCGGAACCACCAGTCATTACAT  
CCAGACGCACCTGACCGGGCGCCGCAAGATGCCGGGTAAGCGTCTGATGGAAGGACTTTT  
TAAAGCGTGCCGTTCCCGCGAATGGACAAAGTCTAAACCTGAATTAGTGCTCTTCTTCTA  
CGACCGATAATCCCTCTGAACCCATCAATGCCGTCATCCCATGGCGGCTCCTTCCTGCAT  
AAAACACCTTTATGGTAATAAAAAACCATATACGGTTGATCTTTTTTGTCTTAGTGCAA  
ATTACCAAAGATAAATAACAAAGAGGTAATCCGATGAAGCGAATCACCCAGCGTGAGGCT  
CTCGATTTGGGCCTTACTCGCTTCTACACCGGGAAGCAATGTATCCACGGTCATGACTGC  
GAGCGCTACACCCTGAGCGGGGAATGTGTGAAGTGAATAACGAACGAGCACGGCGACAG  
GCAAAGCTTCGTTCCGAAAAAATGAAGGCAGCCAAAACGGCAAGAGAGGCAGCATGATCC  
CAGCAGCCTACTACATCCGAACCTATTTGGGGGTTAGCTATGGCCGGTGACTGGATAAAA  
ATGCGTGCCGATCTGCACACGCATCCTAAAGTTGTCCGCATGGCGTCCGCATTGAAAGCG  
GACAGATTGCGGATAGTTGGCGGACTACATTCCGCATGGTGTCTTTTTGATGTCCACTCT  
GTTGACGGTTTTTCTTGACGGATACAGCGCGGAGACTCTCGACGACCTGATCGGCTTCCCC  
GGGTTTTCGCGTGCAATGATGGCTGTCGGATGGCTTGAAGAAGATGGTGAAAGCCTAGTA  
ATGCCGCGCTTTGAAGCCATAACGGACAGTCTGCCAAGCGTCGTGCACAGGACGCAGAC  
AGGAAGAGAAATGTCCGCAAAGCGTCCGCATCTGAAGCGGACAAAAAGCGGACCAGAGAA  
GAGAAGAGAAGAGAAGATCTAAAAGATAAAACCCACACATAGGCGACGAGAAAAATCAG  
CCTGTGGATAACTCAGGAGGTGAAGAGCCAGATCCACATGCGACAAATTCTGTTACTGAT  
GGATATGCACCACCAGGCGGATCCGGTTCTCTGGGTAATTCACCATGCCTGATAGCTGG  
ACGCCGATCCTGATTTACCAAAACGAGCTGCCCTGTGGGGGGTAAACCTTAAAACCGAT  
GTGACGCCATTTGAACTGGCTGATTTTATTACGTACTGGAAAGCCGAGGGAAAAGCATT  
CACCACGACCAGTGGCAGCAGAACTGGCTCGCAGTGTTCAACTCTCCAGGTCAAAGCCA  
GCGAGAACTCAGCAGCGGGACGTTAACGCAGTACCAGAACCAGACAGCGAGATACTCCT  
GGATTTTCGCGGTTAACACCGGGAGCGCAGCAGCGCATTTTTTTACATCCAATGAATTACC  
AAAAGGTAATAAAATATGCGCATTGCTATTGAAATTAACCTCGTTTGTGGTTTTAAATTA  
CCTGAGGGGTAAATCATGAAAAGGCAGTTACAGGCGCTCGGAAGGCTCAAGACGGGCCAG  
ATGAATAAAACCGAATCAGCTTACTGCCAGCACCTTGAGCTGCGTAAGCACGCAGGGGAA  
ATCGCCTGGTACCGGTTTGAAGGTATCAAGCTGCGCCTGGCTGATAACACGTTCTACACG  
CCGACTTCGCAGTGATGCTAACCAGTGGTGAGATGGAAGTGCACGAGGTGAAAGGATTC  
TGGACCGACGACGCCAGGGTGA AAAACCAAAGTTCGCAGCAGACCAAGTACCCGTTTCGCATC  
ATCGGGGTAAACGGTTAAGCCAAAGAAAGCGGGTGGCGGCTGGAACATCGAAGAATTCTAA  
ATCGATGATCCTTTTAGTTATCAACCTAATCAATAACTTATACGGGTAAGCGGGGGTAAA  
GATGGAATGCAAAGTGAGTGATCTGGTAAAGCGCGGGCATGACCAGGCCGAGAACTGAA  
ATCATCATGCGGTGCGGTCGATGTGCGCGATGTAGCGCAACTGATTAGCGATCTGGCTAC  
TCAGCTGGATGTGCAACTGGTTCGTAGTAATGCGCTGGCTGCGGAGTATGCACGGTTGTC  
TGATATCGCCAAAGGTGGGGCGTTCGTAATGCAAAGGCAGTATGAAATATGAATTTGG

TGTCGGAATGACCATGCAAGCAGAAGACTTTATCAGGGATGTCAGAAGTAAAACCCAGC  
CACCGACGCTTTTCTGGCTGAAGTGCGGGCGCAGGGTGTGGAACGTTACGCCGCACA  
CAATCGGAGGCTGAACTCGCCGACGAGGCTGGCTGGGACGGCGCCGCAAATTTTAA  
TTCTGAATCTGAAAAAGTGCTGGCATTTCGCCGCACAGATCCGCCAGGAGGTAGCCA  
AGTGAGCAAGCGCGGAATGATTTTAAACGGCGAAATGGTGCGGGCAATTCTCGAAG  
GCCGGAAGACGCAGACGCGCCGTGTATTAGCCACCTACCAAGACGCTGTGAAGTTT  
GTCTGAGTGGGATGTTAACCGGTAAGCAAATATTTATTGTCCTGGGAGAAAAAGAC  
CATAACAGGGATGAATCCGGTAATAACCGCCATTCTTGGCCCTTTTGGACAGCCGG  
GTGATCGCGTCTGGGTGCGGGAAACGTTCCGTGTCCATAGCCGGGCAACGGATGTT  
GCCACGCTGCTACCGGGCCAGTGTCCGAAACTCCTGGACTGAGCAAACCTCATCGCG  
TTCCTTCCGTTGCGGTTTGAATAAACCGGCCACACCAGAGAAGTGAGCGCCGTCTA  
TTCATATGCCGCGCTGGGCAAGCCGTATCACGCTGGAAATCACCGATGTGCGCGTGG  
AGCGGCTGAACGATATCAGGGAGTGCATGCGAAA  
GCGGAGGGTGGCCAAACAGAATGCACTCTCATTGGCGATAAGTATTACCCCGGATTCC  
CGCAGCTTATGGAAATCCATCTACGGCGAAGAGTCTGGGCGGCTAATCCGTGGGTGT  
GGGTTATTGAATTTAAACGCGTTGAAGGAGCCGCGCTATGAGCATTCTCACCATTCT  
GAATTTCTGTCTCGCCTTAATGGGGTGGCTGTTTCATCATGTTCAAACAGGCCAGT  
GGTTTATCTCTATTGCGCTCAAACAATGGGATAAGCGCAAAAAGCAATCTCGTCGGC  
AAAAAGCAGTTAACGAATTTTATGATGCGTTTGACCTGTCAAGTATCGAGCCAGGT  
ACAACGGTTTCGCTAGCGACTAAAGGCGATCTGACAATCATGATGTTTCGACAGGAG  
TCCGCCCAATGAGCAACATCGACAACTCAATGACCATGAACTGGTTGATCTGAAAAG  
AGATATAGAGAGAGAACTTAAGCGACGCGCTGAAGGGCCAAAAATCACACGTATT  
ATGTCGTCTCCTGCATCACAGATGCTGCATTTTACTGATATGGACTGCGCCTTACG  
TTGCTTAAAACGTGTCACCGAAGACCTTATGGAGTGGGTAGCGGAATCCCCAGAAA  
ATCGGGATTACGTCAATCGATGCACGGGTATTGTGTTGGGGCAAACTCCAGGTGG  
GAGGAGATGAATCTCGATCACTTCAACATGTGCGTTGCAGAAAAATATTTTCGAC  
GATATTTGTTATCCACCGGAGACAGCCCAATGAGCAACATCAAAGGTCCGCTTAT  
CAGCAGTCAGCGCTACCTCGACAAGGCAAAGGTAACGACAGAGCGGCAAGA  
TTTAAGCGTTTTATCGTATCTGTTTACCCGATAGTTCTGCGTGGGCAGCAATA  
CACCATCTGATGGATGGCCACCACAACCTACGCGGCGGCAAACTTGCTGGAGTTGG  
AGCTGGTGCTCGACGAGCAGGAACTGGAAATGCTGGCGCGGAACTGCGCCCGCCG  
TTCGCTATGGTTCGTGCGCCGTATGACATGAGCGAGTACATCGCGTTGCTTATTC  
GGCAGGATGATGCCCGGGTGGCTGGGCGTATCAAGTCAATCAGTGCTAACCGGTG  
CGGTAAGTGTGGCGATGTATTACCGGTGAGTTCGTGTCCGTGTAACGGTGATT  
CGCAATGCTGGGTGACGCGTGGCTGGCATGAAACTAAATTATCAGTGTGACATGTC  
ACGATATCGACAATAAATTGCA

>NewGenomeName\_279

ACCAGCGCACTTCGGCAGCGGCAGCACCTCGGCAGCACCTCAGCAGCAACATGCC  
CAGCAAGAAGATGGAAAGAGCGGACCCCAACCACACAAAAGGTGGGTGTTACGCT  
GAATAATCTTCCGAAGACGAGCGCAAGAAAATACGGGAGCTTCCAATCTCCCTTT  
TTGATTATTTTATTGTTGGCGAGGAGGGTAATGAGGAAGGACGAACACCCACCT  
CCAGGGGTTTCGCTAATTGTTGAAGAAGCAAACATTTAATAAAGTGAAATGGTAT  
TTCGGTGCCCCTGCCACATCGAGAAAGCGAAAGGAAGTATCAGCAGAATAAAGA  
ATACTGCAGTAAAGAAGGCAACTTACTGATGGAATGTGGAGCTCCTAGATCTCA  
AGGACAACGGAGTGACCTGTCTACTGCTGTGAGTACCTTGTGGAGAGCGGGAG  
TCTGGTGACCGTTGCAGAGCAGCACCTGTAACGTTGTCAGAAATTTCCGCGGG  
GCTGGCTGAACTTTTGAAGTGAGCGGGAAAATGCAGAAGCGTGATTGGAAGAC  
CAATGTACACGTCATTGTGGGGCCACCTGGGTGTGGTAAAAGCAAATGGGCT  
GCTAATTTTGCAGACCCGGAACCACATACTGGAAACCACCTAGAAACAAGTGG  
TGGACGGTACCATGGTGAAGAAGTGGTTGTTATTGATGACTTTTATGGCTGG  
CTGCCGTGGATGATCTACTGAGATTGTGTGATCGATATCCATTGACTGTAGAG  
ACTAAAGGTGGAAGTGTACCTTTTTTGGCCCGCAGTATTCTGATTACCAGCAAT  
CAGACCCCGTTGGAATGGTACTCCTCAACTGCTGTCCCAGCTGTAGAAGCTCT  
CTATCGGAGGATTACTTCCCTTGGTATTTTGGAGAATGCTACAGAACAATCCAC  
GAGGAAGGGGGCCAGTTCGTCACCCTTTCCCCCATGCCCTGAATTTCCATAT  
GAAATAAATTACTGAGTCTTTTTTATCACTTCGTAATGGTTTTTATTATTCA  
TTTAGGGTTAAGTGGGGGGTCTTTAAGATTAATTCTCTGAATTGTA  
CATAATGGTTACACGGATATTGTAGTCCCTGGTCGTATTTACTGTTTTCGA  
ACGCAGTGCAGAGGCCCTACGTGGTCCACATTTCTACTGGTTTGTAGTCTCAT  
CCACAGCTGATTCCTTTGTTATTTGGTTGGAAGTAATCAATAGTGGAAATCA  
AGAACAGGTTTGGGTGTGAAGTAACGGGAGTGGTAGGAGAAGGGTTGGGGG  
ATTGTATGGCGGGAGGAGTAGTTTACATAGGGGT  
CATAGGTTTGGGCTGTGGCCTTTATTACAAAGTTGTCATCTAGAATAATAGC  
ACTGGATC

CAACTCCCCTGTCACCCTGGGTGATCGGGGAGCAGGGCCAGAATTCAACCTTAACCTTTC  
TTATTCTGTAGTATTCAAAGGGTATAGAGATTTTGTGTTGGTCCCCCTCCCGGGGGAACAA  
AGTCGTCAAGATTAATCTCAGCATGTCCACCGCCCAGGAGGGCGTGCTGACTGTGGTAG  
CCTTGACAGTATATCCGAAGGTGCGGGAGAGGGCGGGCGTTGAAGATGCCATTTTTCCTTC  
TCCAGCGGTAACGGTGGCGGGGGTGGACGAGCCAGGGGCGGCGGGAGGATCTGGCCAA  
GATGGCTGCGGGGGCGGTGTCTTCTCCTTCGGTAACGCCTCCTTGGATACGTCATACCTG  
AAAACGAAAGAAGTGCCTGTAAAGTATT

>NewGenomeName\_280

ATGCATATGCGACCGGGTTTCAATGCAGGATTATGTATCCCGATATAACATTGAGGAAATA  
CTTCCGAACGATACAGTTGAGATGAATGTCAACATGGCATTAGAATGCAGACATTAGCA  
ACAGTACCGTATGACAATTTGGATCTGGATCTGTACTGGTTCTATGCCCAAACAGAATA  
TTATGGGATGGATGGAAACAGTTTTTGTGGAGAATCCAAATCCGCATGGCTGGACAAAACG  
CCTCTGAGAGTTCTGTCTGAAAACATCTGGATTCGCCAACCCAGATGACGGTATCGGA  
ACAGTATGGGATTATTTTCGGACTGCCTCTAATCAAAGAGACTACAGACAAATCAAAAAGA  
ATAGCGATCAACAGGCTGCCGTTTAAACATGTACGCTAAGGTATGGAACGACTGGTTTCGA  
GACACAAACTATCAGGAAGAAGCCCTGATTGACTACGGAAACACAGACGTAACATATGAT  
AAATCAGATCCAGCAAAAGGCGGTAAACCACTCTCAGCAAATAAATACCATGATTACTTT  
ACGACATGCCTGCCGTACCTCAAAGAGGTGAATCAGTAAGTCTGCTGGATGGTATCCGT  
AACTCAGTATTACCGGTCAGAGCAGTTGGAACCTGAGCTTGAAGGAGATAACGAACTGGGA  
ATACTCTGGGGATTGTATAACAAGAACAACGAAACAGAAATTTCTGCCGGATGCATGGAAA  
TGGTATGATATGACATATCAGGCCGACAACAGTGCATTTTTACATCAATATTATAACAAA  
GCTTCCGGTACAAGTACAGCTCCAACCTGACAAAGCAACAATGACACCGGCTAACTTAGGA  
GTTGATATCAGAGGTGCTGACTACAACCTCAAACAATCATTGTGGACGCAATGAATCTA  
ACAGAGTTAAGAAAGAGTATCGCAAAACAGCACATTGCAGAAGTCTCTGCAAGATGCGGT  
AACAGGTACGAGAATTTCTTCTCGGCTTCTTTGGTGTATCAGCGCCGGATATCGAAACA  
GGAAGAAGTGAACACTCGGTATCAACCATATGACACTCAATATCAGCGAAGTAGTACAG  
ACAAGTGCAAGTGAGGAAGGTTCAACTCCGCAGGGTAACATATCTGGAAGGTCACTGACA  
AATATGGACAACCCACACGCTTTTACCAAATCGTTCACGGAACACGGCTGGTTAATGTGC  
ATTGCAGTAGCAAGATATAACCACAGCTACAGCCAGGGAATCGAAAAAAGTGGACACGA  
TATAAACTGGAAGACTACTATATGCCGGAATATGCAAATATGGGTGACGTTCCGGTATAT  
CTTTCAGAAATATACGCAACGAACGCGAATGCACAGAATCCGGACAATCTAACAGGTTCA  
GACGGAAAAAACCTCAAGAGGATATCTGGGGATATCAGGAATACGGTGCAGGAATATAAA  
TATTCACCGAATAAAGTAACAGGATCGTTAAGACCGGATATCAAAGGCGGCCTTTCACCA  
TGGACATGGTGTGACAACACTACGATTCTGAACCTACCAACGGTGCAGGACTGGATAAAAGAA  
GATGCAAACAACATCAACAGATCATTATCGATACAGCCAACAGCTAAAGTACCACAGCTT  
TTCGGAAACTTCTATTTCTCGAACAAGCATAACGAGAATGATGCCGGTTCACAGTGTCCA  
GGATTGGAGAGAATCTAACACATTGCTCAAAGGTGGTGAATAAATGTCAGAGTACACACA  
ATGGATGACGGCACAAGCCGACAAGCAAAATAAGTGGAAATGCAGAGCAGACAGAAAAGTC  
TAATCAGTTCAATGCACAAGAAGCTCAGAAGAACAGAGACTGGCAAGAACAATGTCTAA  
TACAGCTCTGCAACGTAAAATGCAGGATGCTGAAAAAGCAGGACTTAATCCCATTTTTCGC  
ACTAAATGCACAAGGAGCAAGCACCACATCAGGTGCTACAGCTTCAGCAGATTCCTCAA  
GCCTGCAACAGATATCATTAAATGCAATGACATCTTACACTAATGCTCAAGAGCAGAACAG  
AATGCAGAGAGAGCTAGCTCTACAGGAAAACAGAGTAAATTACAGATAGCACAGATGCA  
GATGCAAGCAGAACTTCAAAGAGCGAGATTAGCAACCAACGCACAAATGGCAACAGCATA  
CGCATCAGCATCAGCATCAAGATACGGAGCAGATCGGAGTTACAATGCATCAAGATACAG  
CTCGGATACATCTTATAAAAACGTGCAATCACAGAATGAGAACAACATACTTACGAAAGG  
TGTAACCCGACCGGCGTCTTGTATAACAATAAAGAATTCCAAAGAAGAACCAACAACGC  
CATCAACAAGGTTTTAATCTGTGGGACAACATAAAAAGCTGGAGCAAAAAAAGCTTGGAA  
AAAAGTGCCTAAATACTGGGGATTCTAATTTCCACGGAATCGCTATTAGAACAAGAGGGT  
TCGCGATTCCGTACCATTAATCAAGAGGAGATTGCAAGACCATAGTCTTTCAATCTCCTC  
AAACAATATTATGAGCGTAAACTTCCGGCAATCAAGGGCAAGCTACACGGTCAGACCACG  
GTCTGACCGCCCTTGACAGCCTATTTTTAAAAAGGAGGATAAATGACGATACAACACTGT  
TTAATGCCGAAAAGAATATTTAAAAATCGGTAAAATGATAAAGAAAGATGGATCAGAAGGA  
ACAGAAATACTTTACAGATCATATGACACAAAATATGTATATTGTCAGAATGGTAAATGG  
ATAAATGTATCACGTAGAGAGGATCCACATGAAGTATACAAGCTAAGAATGAAATACAAC  
CTAATAGACGGAATAACAGTACCATGCGGTAGATGCCATTACTGCAAACCTAATCAAATCA  
TACGATAGAGCAAAAACAAGCATGGTGCAGACAGTAGATACTTTAAGTATCAATATTTTCATC

ACGATAACTTATGACGATGATAACCTGCCTATGCAAGATTTCTGCAACTCCGATGGTGT  
ATAGAAAGAGTTCCAGTTTTAAACAAAGCAGAAATTAGACATTTCAAGGAAATATTAAGA  
GATCGGGCCCGCAAGAGACACTATCAAAATATAGAATACATGCTATCTGGTGAATACGGT  
GAACAAAATGGACGACCACACTATCATGATACTACTACTGACGATCCGGAGATAGAA  
TTGTCATTATATCCTGCTGGAAGAACCAGAACAGGATAACAACCTATACGGTAGCACAGCC  
CTTGATGAAATATGGGATAAGAAAGGCATTATCAAGCTTTCTAGGGCTTCTACGGCGTGC  
ATGGCATATACAGCAAGGTACACGATGAAAAAGGCTTATAAAGGCAATGAGAAAGCCGAG  
AGGATGAAATATCTTAACTACCAACAAGAGTTCATCACATCGACACCTGGAATAGGTCAC  
AGATACCTAAAAGAACACCTAGATCAGATACTAGAAAAACCAACTCTTCAAATGCCACAA  
ACAAAAGGCGTATCATTGCCGAAGTACTTCATCAATAAACTTGAGAAAATGGGATACAGC  
GAATGGGTACAAAATCTAAAAGAAGATAACATAGAAAGACAAATTGAATGTATAAAGGAT  
ACAGAAAATCTGCATAATATGCATTATGATGAGTTCGTGAAACACCAACAATTCAAATC  
ACAAAGAAGCAGTATGAAATGTAATGTGGATAACTCGACAGTTATCCACACGTTATCCAC  
ACGTTTTCCCCCAATTATCAACACGGAAAACCGCTCAACCACAAGGGTTTGAAACGGTT  
TTTACAGTTTTCAACTACTACTACTACTACTACGGAAATATATTACTATCTATATATA  
TAATAAGCACTCTCGACAAAAGGTTACATCAGATAACAGAAATGTATAAAAATTCTGCATA  
AAATGTTTCACGTGAAACATCTTATATTCATAAAAAATTCTTAAATATATTGAAAAATTA  
TCAAATATAGGCTATGATAAAGATGCACCAAGAGGTATGTCACAGAAAGGAGGTAACGTG  
TCAGTAAATGAAATAATTCAGTTAGTCAGTTCTCTAGGGTTTCCCATCGTTTGTTGTTTC  
GTCTGCTTTGGGTACATAAAACAAAAAAGATGAAAACCAAAATATGAAATTGATAACCTT  
AGAAAGGTGATTGAACAGAACACAATCGTCACCGAAAAGCTGGTATCAGCAATAGAAAGG  
GGGATGCAATTGAGAGGAAAGAAAACAAGTAAAAACGATGCAAAGAAGTTCGCGCGAAC  
GGCAAACAAAACAAACAAGCTTAAACAAACCAAGCTACTGCCTAGAGGCGGTACAAGGTT  
ATGATCTAACGATCAACCAAAAAGGAGGTAAGATTATGAGTTACGGATTAACAATAAAAA  
ATTGAACAAAGCAATCTACATCAAAAACACATACGACATTGCAGACGCCATGTTTCAATG  
CGGGATGACATGGAGCGACATATCAGGTATCGACATCACAGACACAAAAGGAATCAATAA  
AGATAACATCTGTAACAGTACAACAAGCTGTCTATTTATCAGATCATGCCGGACAATA  
TCGCAGACAAAATCATCTGGGACCCATAGCTCATAATCTGATGAACATCTACAAAGACA  
CGATAAGAAGAAAGAGAGGTAATCTTATGAGCATCAAACAGACATCCACAAAAGGCTT  
CGACCCGATCGGTATCTATGGAATTTATGACAAAATGTCAGGGAAAATCATCGGCATCCA  
CACATTCGCAAATGATCTGACGGCAAAAACAAACATCGTCAAAGCATGGAGAAAGACCT  
GGGAGACATCCGCTGGTCAAATCGCCGAAACTGACCTGTACGATCCGGAAAACACAGT  
GGCTACATACACAGATATTCCGCTTAATTAATTCATCAGCTACACATACTCTTTTACATT  
ATTGCGATTAAGACGGCATATGCCGTCTTTTTTAGAAAGGAGACATTAATGTTATTTTCA  
TGGCAAGAAACATCATATGAACCAAATTCAAAATCGAATAAAGGTTCAAGATTAGCAAAA  
GTATACAAAGTGAAAAAAGACCCTTTGACAGGAGAGGATTCTCTTGAAGTCAAAGAACT  
TACGACTATCAGGACTACATCAACAGTTTCAGTGAAAACGCTGACCCGGTAACACTCATG  
GAAAGAGTAAAACACGGCGAAATAGCACCGTGGAACGGTGAAAATACAATGGATCTGTCA  
CAGCTACCAGAAAATGTCAGGGAAATCGCTGAATACATGGATTACCACGTAACAAGAAAT  
ACAAATGAATTCATGAAGAACCATAGAAAGAGCGAAACTTGATAAAGAAAGAGCAGAGCT  
GTTCAATGCACAAAAAACATGTTAAAAGCAAATCCTGAAGTACCTGAAGTAAAGGAGGA  
TAAGAAAGATGAATAAAGCAAATTCAGTACATCAAAGCAACAACTACAATTTTTTCAG  
AAGCAATAGGCACAGATCCGGAATTAATGCAACGTTCAACATTCATGCGGAACA

>NewGenomeName\_281

ATCTGTCAATAAAAAGCTTTTTTCGCAATATACAAGTGTTTGCTATTCTGTCACCCTTCTA  
GCATGTACACAAAAGTCAAGATGGACAAATCGCTCGACTTCGCTCGCGATTTGTGCGAAG  
GCGGGGGGCGGAGGCCCGGCTGGCCCCCGCCAACCTGGGGAAGCGTGTACACAAAGA  
TAACGCGAACCGCACCCACTTATGACGTACCCCTGTACAGCGTGACGTACCCCTGT  
ACATGGGCGGGACTGTACAGGGGGGTACGTCATCCTTATCTCCGACCAATAGGAGCGCTC  
CCCGCCACAGGGCGGGCAGATCATATCGCGCAAAGCATAAAAAGCGCGTACTAACCGGA  
CGGCAGAAGGTATGTCATCCGGCGGTCTAGGTGATTGTGCGGAGAACGAGCAACTAGCCG  
CTGGGGGCAGTGAATTGCCGCTTAGGCAAGAGGGGCAACTTGGGCCAGCGGAGCCGGAT  
CAACGGGCAAGAACTTAAAAACACGACTCTCCCTACCTGAATGGAACCGGGACTTGA  
CACCAGACCCCAAGAACTACAGAACCATCCAGGTCGGTGATATTCGAGCATCCAATAAGT  
TCGTGCGGAGTCGGTTGGGACTCTCTCCAAGAGATCCAATTTGGGCTCGGGTCAACTATA  
ATTACCGTATCGCTTCTGGCTTCGCGAGTGTTGCGGTACTCACGACGCGATCTGCAACT  
GCGGGGGCTTCAGACGCCACTGGTTCCAGGAGGCAGCAGGACTGTCCACACAGGAGACCC



AGACGGACCCGGTCGCCAGAGATCTCGATCGCCTGGTCGTGCGTGGAACGCAGCAAAAA  
GAAAATTGGATTACATCGCGAACAGAAAACTCCCAGAAAGAAAAAGGCTAAGACTGTAA  
CATGGCTAGACGATTTCCGCCGCACAGAGGAAAGTTCCGATACTACAGACGGGGAAGATG  
GCACTGGAGACACAGACTGCGACGAAGACGCTATTTCCCGGAGGCGTAAACTTTCGATATGC  
GCGTAGACGACCCAGTGCTCGCAGCGTTAAAAGGAAGATATTCAACCCACATCCGGGATC  
TTACCTGGTAAGACTGCCGAACCCCTATAACGCGATTAACCTATACTTTCAAGGGCTCGT  
ATTCATACCTAGAGCCACAAGCTACTTACCAGACACAATAAAGGCAAAAACGTTACAAC  
AACTAATGTGGCACTAATTAACGTTAACCTAAAAGAGTTCTTCTGGGCCACACTGCCACT  
AGACGCAAGGTCAAAGATTGGAGGACCCAACCCCTTCCCACAACACATCCAGGGATGTGA  
CTGGGCGGGCATAAGCCACAACCCACAAGGCTGCTGGCCATACAGTACACAAATGTCATC  
ATCTAGACAGCCAGGAGCATGGCCTTCAGAATGGTGGCGATGGGCACTTCTTCTTATGCA  
TCCTAGATCCAATGTACGATTCTTCGGATCCCCGAAGCTGATGACCCTGCCGCAAATAGG  
ACAGTTCCCTGGGGGGCTGGCAACTATTCACCCACAGATTCACAAAATTCCGTGTGCTTGC  
AACTAAATCCAGAGAATCGTTCTCCCCGGTCGCGAGCCTGCTTGTACAAGACAATTACTT  
TGCAAGAAGAGAGGGTGCAGGGCCACCAATATCGGGACAACCGCCAATGTGCACCATGCA  
AAGACTTACGAGAGACTATACAGGCACAGAAAGCAATGCTCCAGCTAATGAAACCACAAT  
ACCATCCATGCCACCAGACCCACCCCAATACCCCGCTCAAACCGGCTGCAGCACGGCAGT  
AGACCCTGGTGAATACCTCCTTGCAGGACTCACACGTACAGCAGTATCCTGCTGGTATTC  
ACGCTCAACATACCCAAGCTTTGCTACGCTATCAGCACTAGGGGCACCATGGTCATTCCC  
AGCAGGACAGAAGTCAATCAGCAAAACATCCTTCAACAAACATGTCATTAGAGGCATGGG  
TGACCCACAAGGCAAAAATGGCTCACCCCTGGTACCGAAAGAACAAGAATGGATCAATTC  
TGACTCAATGACAAAGTCAGAACTGGACACAGACATAGCTACATTATACCTAGCTCAAGG  
AACAAAGCAGAGCAAACAGCTACAAATTCAACACATTCCACGAGGTAATGGTACAAGACCC  
CATGAATGTAGCCCCCTGGGCAGTCGTCAAAGTCTCCAGCGTCTGGACACTCGGCAACAA  
CAGAAGACCATACCCATGGGATGTCAACTGGTACAACGAATTCCTGTCAGAAGGACGCGT  
TCCCCGCGACTAGGGGGGGGGGGGAAAACCCCCCCCCCTGCCCCCCCCCCCCGGGGGGGAT  
CTCCCCCCCCGAACCCCC

>NewGenomeName\_282

ACATTATACGAAGTTATATTAAGGGTTATTGAATATGATCAATTTACCTGTAAATCCATA  
CAGTTCAATACCTTAGCAGGTCAAATAGTGACCACTTGATCATTGATCAAGGTTGCGCT  
ACGTAAAATCTGTGAAAAATTGGCGGTGTTAGTCCTACAGATTTCCGCTAGCGCACTTAG  
CACCACCAATCAATCAGAGGTGAAAAATGGGATATTCAACTGCTAAAGTGTCCACTCATC  
TTGAGCTTGAGAAAAACCGTGGTTACTGGCGGGCAAAGGGTTTGATCGTGATAGTTGCC  
AACTGTCATTATCGCGCGGTGAAGAGAAAATAGAACGCACGCGCGGTGCTGGCGTTTCT  
ATGACGAGAACCATAAACAGGTAAAGGCAGAGCCGATCCTGTACACTTTACTTAAAACCA  
TTATCTGAGTGTTAAATGTCCAATTTACTGACCGTACACCAAAATTTGCCTGCATTACCG  
GTCGATGCAACGAGTGATGAGGTTCCGCAAGAACCTGATGGACATGTTACAGGGATCGCCAG  
GCGTTTTCTGAGCATACTGGAAAATGCTTCTGTCCGTTTGCCGGTTCGTGGGCGGCATGG  
TGCAAGTTGAATAACCGGAAATGGTTTCCCGCAGAACCTGAAGATGTTCCGCGATTATCTT  
CTATATCTTCAGGCGCGCGGTCTGGCAGTAAAACTATCCAGCAACATTTGGGCCAGCTA  
AACATGCTTCATCGTCGGTCCGGGCTGCCACGACCAAGTGACAGCAATGCTGTTTCACTG  
GTTATGCGGCGGATCCGAAAAGAAAACGTTGATGCCGGTGAACGTGCAAAAACAGGCTCTA  
GCGTTCGAACGCACTGATTTCCGACCAGGTTCCGTTCACTCATGGAAAATAGCGATCGCTGC  
CAGGATATACGTAATCTGGCATTCTGGGGATTGCTTATAACACCCTGTTACGTATAGCC  
GAAATTGCCAGGATCAGGGTTAAAGATATCTCACGTAAGTACGGTGGGAGAATGTTAATC  
CATATTGGCAGAACGAAAACGCTGGTTAGCACCCGAGGTGTAGAGAAGGCACTTAGCCTG  
GGGTAACATAACTGGTCGAGCGATGGATTTCCGTCTCTGGTGTAGCTGATGATCCGAAT  
AACTACCTGTTTTGCCGGGTCAGAAAAAATGGTGTGCGCGCCATCTGCCACCAGCCAG  
CTATCAACTCGCGCCCTGGAAGGGATTTTTGAAGCAACTCATCGATTGATTTACGGCGCT  
AAGGATGACTCTGGTCAGAGATACCTGGCCTGGTCTGGACACAGTGCCCGTGTCCGAGCC  
GCGCGAGATATGGCCCGCGCTGGAGTTTCAATACCGGAGATCATGCAAGCTGGTGGCTGG  
ACCAATGTAAATATTGTCATGAACTATATCCGTAACCTGGATAGTGAAACAGGGGCAATG  
GTGCGCCTGCTGGAAGATGGCGATTAGCCATTAACGCGTAAATGATTGCTATAATTATTT  
GATATTTATGGTGACATATGAGAAAGGATTTCAACATCGACGGAAAATATGTAGTGCTGT  
CTGTAAGCACTAATATTCAGTCGCCAGCCGTCATTGTCCTGTAAAGCTGAGCGATAGAA  
TGCCTGATATTGACTCAATATCCGTTGCGTTTCTGTCAAAGTATGCGTAGTGCTGAAC  
ATTTCCGTGATGAATGCCACCGAGGAAGAAGCACGGCGCGGTTTTGCTAAAGTGATGTCTG

AGTTTGGCGAACTCTTGGGTAAGGTTAACAATGTCCTTTCAATCAGTTCAGCAAGGTCCA  
AAGCGTTAACAGCTTCCATGATGAAATAAAAAAAGCCTGGCAAGGAGCCAGGCTGCACA  
AAAGAGCGGGTTTGTATTCCGCATCCAATCAATCAAGAAGGAGTATAGCACACAGGTACT  
GAAGTGAAAAAATGTGATTTCGCGATAAACAAAATATCTATCATTGCTCTAATTGATTGCT  
ATAATTGAGCCGCAGTTTTTTGTCAACTACGAAGACGTTGCCATTACTTCACTCCTTGACA  
TCATTGGCGGCCATTAGGCCGCCTTTTTTTTTGCCATATGAAAACAATCGAACAAAAAATT  
GAACAGTGCCGCAAGTGGCAGAAGGCAGCCAGAGAACGAGCGATCGCTCGGCAACGGGAG  
AAGTTGGCTGATCCGGTCTGGCGAGAATCTCAATATCAGAAAATGCGGGATACTCTCGAC  
CGCCGTATCGCTAAACAGAAAGAGCGCCACCAGCCAGCAAAACGCGGAAAAGCGCGGTA  
AAAATAAAATCTCGTGGCTTGAAGGGGAGAACACCAACGGCGGAGGAACGGCGCATCGCC  
AATGCTCTTGGCGCTCTCCCCTGCATTGCCTGCTATATGCATGGAGTAATATCTAATGAG  
GTGTCTCTGCACCATATCGCCGGTTCGTACCGCGCCGGGTTGTCATAAAAAGCAATTGCCA  
CTTTGTAGATGGCACCACCAGCATGCAGCTCCGGCTGAAGTAAGAGAAAAATACCCATGG  
CTGGTCCCTGTTTCATGCCGATGGTGTGGTTGGAGGCAAGAAAGAATTCACCTTGCTGAAC  
AAGTCAGAGATGGAGTTACTGGCTGACGCCTATGAGATGGCAAACATCATGCACTAATAA  
ATATATTATTTTTAATGATAAATGATTGACAACACTGACAAGTGACTTCAGTCAGAATCATC  
ACACGCCCGGTACGGATGGATCCCTTTTCAAATATCCATGGACGGCACAGTCTGAGTAC  
CGGGCGCTACCTTCAGTTGTATTGCTAAGCCGCCGCTGGTGGCTTTTCTTTTTTTGTAGGG  
GGCGCTATGGATAAGAAAATATGCGTTGTTTCGATGAGCGTCGGCAAACCGGCGTCAATG  
ACTGCTGCATGGATCAATAACGAGCTGATAATGGCTGAGCGGACCAGCTACCCTGAACGC  
CGCCGCGATATGGAACCTCCAGCTGCTGCGCGAATTGCGGAGAAAAGAGGAAAAGGGTTTT  
ATCGTGCTGGTGGAAGAGGAAAACAGCTTTATTACTGGACGAGTTGGCCAGCGTGTAAGG  
TTGCGTGATCCCTTCATGAACGGTAGACCGGTACTGATTGAAGCAATGCAGATTTACAAG  
GAATTGGAACGCCAGAAAGCGATCAAGTTACCGCGCAAGGAATCCGGCAAATACATCCTC  
CACCAAAGCATCTTCGATTCCGAACATGACAAAAAAGGCGATGAATTTTTCAACATCAAC  
TGGAGCGAAATAACGACAGAGCACGTTCTGACGTTGTTATGCTGCTTCGCAACGGAATAC  
AACAAACGTTGCAAACCTCCGACTACATCAGGGCAATGGCTGGAGAAGTTGAGCCACGCCAG  
GAACCATCGTTACTAAGTCCACTGATTAACATAATTCGCGGCACACAGAGACTTGCGGAA  
AAAAGCGTTCCACATGGAATCTTAACCTGGAAAGGGAAACTATTTTTAACGACCTGAGCGC  
CACTTCTTTCAGGTCGTGTTGGATGTCATAAAAAGGAGGTTTTACCTCCTTTTAAACTG  
GAATTATGGTAATGCGCTCTTGATTAACCTGATAAATATCATCATTAGCAAACCTGCGTTTT  
GAATTCAACTTTAACAGACTGACTTATTTGATTGAAAAGCGCCTGGGCATGTTCAATTTT  
CTTTTTTTCTTCAAGCCGTAACCTATCCTTACTATCTACGTTTTTTGTTTTCAATGATAAA  
GTTAAGATAATCACCTTCTGCTGTTTTTACAACATAAGCAAATCGGGTGAGTAAGTGTA  
TCCACCAGCTACCGGGATCTTAATAGAATTCTTCGGTATCTTTGAAAAACAACAACAGA  
CTGGATCTCTCTATCTGTTATATTACGCCTTTCAAGCTCTGAATCATAAAAAACTTCTTC  
AAAAGATAAGTATCTAATGGTGCTTTTGAATTATCCTGTAATACACCAAGATCACTTGA  
TAATACCTCGTCTAGAGGCTTACCATCAGCATTGTGAACTTTGTGGGATGAATTGAACC  
CGAAATCAAATTATATCCGAGGCTGAATTTATTAACGAATTGTTCAACAAATACTTACT  
AAAACCAGATTTAATTTTTCTGATTGTTTGAATATTCAGGTATTCAGTGATATTAATAGT  
GTCTTTTATATCACAAAAAATTTATGTAAAGTATCGTGTTTAACAAAAATAGTCTGTGA  
TAAGTTATCGAGAACTCTCGATAACTCATTGTGTTTAGCTTAGCAAAGTCATCGTCATC  
ACTAACAATGCTTTTTCGACATTGCCATATCATTGTGGATGTAAATTTTATCAATGCGAGT  
ATGAACGCCTGATTTGGTAAATCGTTCTGTTTCTTCGAGCATGAATGACTTGAAAATGGA  
TAAAAACTCATTTTCACTGTTTATTTTGTACTCAATCACCGCTTTTTGATTGATTAATTC  
CCATAGTTCTTTCAGCTCACTGAACTTACCAACACGCATTTTAGTGCGTCTTTTTCCATC  
AGTAGCTTTTTTGATTTTACCTGGTTTCACTCCTATAGGGAATGCTGCTGGATATTTGGA  
TTTTAAGCGGCTGTAGGCATCTGAATCTTTGAAATTATCATTGTCATCAATGATTTTCATC  
ATTGAAAAGTTCATTATTAGTGCTCTGGATGAAAGCTCAGGATACTGAGCCCTGATTTG  
TTCCTTAAGCTCTTGAGTAACTTACTTGGAAACCCTTTCTTTGAAAGAACTCTCATTGAC  
CTCTTTAACAAGTGAGTCAACAAAATCCTTTTCTGTAAAATCGACATAATATTTAAGGGT  
AAAATTGCGGTCTTTCACTCGACACATGTATTCAATCACAGGAAGACGCAAACCGCGCCC  
TACCTCTTGAAGCTTGGATGTGGTACTACCGCTCGAACGGAGCTTACAGATCTGAAAGAC  
ATTAGGATTATCCCATCCCTCACGCAACGTCCATTTGGAGAAAATGAAACGACGTGGATT  
ATCTAAAGACAGCAAAAGCTCTTTGTCATGAAGGATTTTCGTTGATTTCTTCTCGATTTT  
ATCATCCTTATCACTGTTATCTTTTAAAAATAACCGCCATGAACGGAAGATATATCTTT  
AACTGTTTTTTCAAGATAGTTACTATAAACTCATCTTTTTCTATTTTTAACAGTTCATT

AGCTTCTGCCAAAACATATTCTTCGAACTTAGCTTTCAAACCTCCGGCAATATTATTACC  
GTCACGATAACCTTCAATATCATCAATAAAGAAAAGAGTAAGAGGGCTTTATGCGTGGCCT  
TTGTGTCAGAACTCTTTTTCTAACTTAAAGTGTTCTTTGATAGCTTTCCTCATCATGCT  
GTCAGCAAGTGTCTGATCGTAAGAATAGGGGTTTATTGAGCAACCAATTTTTAGCTCAAT  
ACCATTACTCAACACTACTGTATTCTTGCCTAAGGCATCAAGAGTTAAATCGTGAATAGC  
ACTATGTGTCTTAGATAGAGATTCACCTTTTGTTAACTTAAATAAAGTTTTCTTGTTATT  
TTCATTTAGCTCAAATGTAACCTTCTCCCATCAGATTTAATGAACTTTAGGTTGGCGTC  
ACCATCACCAACAATATCCTCAATGTACGCATCAATACCTTTAACAAGGTCTTCATTAAA  
TGCATCCACAGCTGTAAGTCGATAAACTAAATTCTTATAGCCTTCACTAAAGGTCGCACC  
GTAGCGGATAATATATTGAGCATTAAACTTCTCTATATTTTCCCATGCTTTTTTACCAGT  
AGGAAATTTATGTGGTTCATCAATGATAATGAATGGTTTTACCGCACCAAGAGCTGAAAA  
GGGAGAATCAAAATGATTGTCAAGCAAGCCAACATCATAAGTGGAATTTAAATTCTTAGA  
GTGAATCATTCCCGTGTTAATAACAAGAACGTGTATATATTTCTTATTGAAATTACTAGC  
TTCAACAAAATCATGTATAGCTTGAGGCATATACGATTTTGTGCTTTTACCGGCATTTTT  
CTGACTTTCAACAACGTAAGTCTTTATTTACAGCTCATAATCATCTCTAAAGTGTTCTTT  
TAACGCATCGCTTTTCAAAAAGTTCAGTTCAGCTTTGATCGATAGAGTAGGAACAAT  
AATGATAAACTTATTAATGCCAAATGATTTGTTTCAGATCAAAAATTGTTTTAGTGTAGGT  
ATACGTTTTACCTGTACCTGTCTCCATAGAAACATCAATTACGTTGCTTCTAGCATCGTA  
ATTATTTTTTACATGTTCAATACCATTGAGTTCCTGAACTTTTTTTATATTTTTATAGTA  
TTGCTGTTTCAGTAAGCCGTAATTCTGGATTAACAAACAGGCGAATAGAAACATTATCCTC  
CTGATGAGATGTGCGGAAACAAAAACGTTTCATCACCGCATCGACACCTGCTTTCTGATG  
CGGTAAGTCTTTTTCGAATGTGAACCTTTTGACATGATTAGTTCCTTACCCTAAATCT  
AACTCAATAGATTTTTTGTAGCATAACTTTTTAGCGCCTCATTAAAGCTCCCTTTGTTTT  
GCACTTTCAAAGTTACAACCATAAAACACGACTTTGTTTGGGGCAAAATCTTCATCTGAA  
TCCAGCTTTTGGAGCAACGCTTTCAATGCTTCGCTAGTAAAATTAGGTGCAATCAAATAC  
AGACGGCCATTGCAAAAGTGTGCTGTATAGCCACTAAGATCAACATCTTCAATAGGTGTT  
GTTAACAAGCTACCATCATATACACACCATGTAGTCAATAGGGCATCATACTGTTTCAGGC  
GTTAATACCGCATCATCAAAGAATGTATGATTAGTGAGCGTAAGTTCAGACTCAACTTTT  
GCTCTAAAGTCATCAATAGTATGAATCACTTTGAAACCTATTTTAGCCGCATTATCACTT  
GTGGTTGTGCTTTTTTTAAATACCTCCTGTATCCTTTTTTTTTGTTATTTCAAAAATAGAT  
CTATAGCCAAGAGAATAGGCATTCTTTGTTTTATTTATAACTTCATCTTTTTTGTATGCAT  
ATAAAATTCCTACAGCCTGAATCTTTTTTCATTTAAATATGCAACAGCTTCTGCTGTGCGTA  
CCAGAGCCAGCAAAAAAGTCAAGAATAATGAATCCTTTTTTTGTTCCCTATTTTTTACAAGA  
TCGGTTATAAGAGGAACAGGTTTTGGTCCCTCAAATAATTTTGCACCTAAAAGATTTTTA  
AGCTCAGTTGTCGCCGTGCTTGTACTATATTCAGGTTTATACCAAATTGATTTTGGCTTT  
TTAGTTGGTAGCTCTCCAAGAGCAGGCCGCTGTTTTTTATAGATATTTTTACCATCTTTT  
ATATCTATTACTATTAGATTATAAAACTCATATTTATTTTTTTCTTTCCCCACGACCAT  
GAAAGCTCTTCACCCGTAGGGCTTACTGGGTAAAGTACATAGTCATCTTCGTTAAGAGGT  
TTATCATCATCTGTTACATAAACCTTATTTTCTGAATTGATGAATACCGGAAACCAACCT  
TTTGGTCTTGATTTTTCTAGAAGCATCTTGGCCAGTACGCTTTAATGTATCAGCTCTTTTA  
AATAGCCATATTCATCTTCATCCACTCTTTTTCAACTTCACTTTCATCAATATCGAAT  
TGCCCCAACTACAAACATCTTTGTTTTTGGGAAGGTGCGAATAAGCGGGGAAATTCTT  
CTCGGCTGACTCAGTCATTTCAATTTCTTCATGTTTGGCCGATTTTTTCTCCCGTAAATG  
CCTTGAATCAGCCTATTTAGACCGTTTCTTCGCCATTTAAGGCGTTATCCCCAGTTTTTA  
GTGAGATCTCTCCACTGACGTATCATTTGGTCCGCCGAAACAGGTTGGCCAGCGTGAA  
TAACATCGCCAGTTGGTTATCGTTTTTTCAGCAACCCCTTGATCTGGCTTTCACGAAGCC  
GAACTGTCGCTTGATGATGCGAAATGGGTGCTCCACCCTGGCCCGGATGCTGGCTTTCAT  
GTATTCGATGTTGATGGCCGTTTTGTTCTTTCGCTGGATGCTGTTTCAAGGTTCTTACCTT  
GCCGGGGCGCTCGGCGATCAGCCAGTCCACATCCACCTCGGCCAGCTCCTCGCGCTGTGG  
CGCCCCTTGGTAGCCGGCATCGGCTGAGACAAATTGCTCCTCTCCATGCAGCAGATTACC  
CAGCTGATTGAGGTCATGCTCGTTGGCCGCGGTGGTGACCAGGCTGTGGGTGAGGCCACT  
CTTGGCATCGACACCAATGTGGGCCTTCATGCCAAAGTGCCACTGATTGCCTTTCTTGGT  
CTGATGCATCTCCGGATCGCGTTGCTGCTCTTTGTTCTTGGTTCGAGCTGGGTGCCTCAAT  
GATGGTGGCATCGACCAAGGTGCCTTGAGTCATCATGACGCTGCTTCGGCCAGCCAGCG  
ATTGATGGTCTTGAACAATTGGCGGGCCAGTTGATGCTGCTCCAGCAGGTGGCGGAAATT  
CATGATGGTGGTGGGTCGGTCCGGCAAGGCGCTATCCAGGGATAACCGGGCAACAGACGCAT  
GGAGGCGATTTCTGACAGAGCATCTTCCATCGCGCCATCGCTCAGGTTGTACCAATGCTG

CATGCAGTGAATGCGTAGCATGGTTTCCAGCGGATAAGGTCGCCGGCCATTACCAGCCTT  
GGGGTAAAACGGCTCGATGACTTCCACCATGTTTTGCCATGGCAGAATCTGCTCCATGCG  
GGACAAGAAAATCTCTTTTCTGGTCTGACGGCGCTTACTGCTGAATCACTGTCCGGCGAA  
GGTAAGTTGATGACTCATGATGAACCCTGTTCTATGGCTCCAGATGACAAACATGATCTC  
ATATCAGGGACTTGTTCGCACCTTCCCTTAGCGTATACATATATATATTCATGCGTATCTG  
AAAAGCCAAAGTTATCATGATTGCCTTTGAGATTTCATGATTGTAGGGAGTTTTGCAACAA  
AATTACCTTGCCCAAATACTTCGTTCGCATAATAATCCCAACTGTTTATCTTCGTTATCGT  
CTATGGAGATGAATATTACTCCATCCTCTTTTAAAAGTTTCACGTGCAATATAAAGACGAG  
GATAAATGAATGTCAGCCATGCACTATGACTGCTTGAACCCTTGGTGGTAAATTCAAGTA  
TGCGGTTAGCCTCATCAAGCTCGATACCTGCCAGTTCAGAAAGCTGTTCTGGTGTAAACT  
TGCGATCATCGTTATAGACGAATCCATCTTTACCCGTATTGTATGGTGGGTCAATGTAAA  
TCATATTCACCTTTTCAGCATAAGCATTAAACCATATGCTTCAATACTTCGAGGTTATCCC  
CTTTGATTAACAGGTTTTGACTGTTCTTGTCTCTTCTTGTGGTTATGTGTTTTATCTT  
CTGCCAACAAACGTTTTTCGGTGGTAGATTGGCCAAACAAACGGGCATAAGATTTACCCAGCC  
AGTTTAAACTGTATGATTCTTTAGAGAGTTCAACCTCCGATGCTCTAATAATCTCAAGCA  
ATTTTTCTTGAATGAAGGCTCCGTTTTTATCAAAACACTGTGGGAAATTAGCTTTCAACA  
CAGCCAGTTGCTTGCTGTTAGCCGTTTCTACTTCGGAAAAAATCGTTTCTTTTTTCATAT  
CCATTTTAAACCAGATCATTTAGCAACAAAGCGCCGCCTCCCCAGCCCGTTAGAGCCAGA  
AGTTGTGGCACTATCACTATCTATATGTTTGAAGAATCGTGCTTCTTTGAGCGATGCTCG  
GTGAGCAAACAGCCATAATTTGGGGAAGTTTAAATCCGCATTGAGAAGCAATGCATTATCT  
ATGATGATCTGCTCCATTCTTCGAATGCCCGGTACGGACGCCCTGGGGAACACTGTTT  
GTTTTGAAATCGACGACCGTCCGCCATTTCCCGTCCGGACGGTACATGCGCAGAGCTTTA  
CTTCCCCCTTCCCTGCGCACCTCAACGTTATGCTTGTGAGCAAACTCTTGTAATGCTCGT  
AGCGTCCCATGCTTTACTGTGTAGTATCGCTTTTTCAAGTTTTCTCTCCAGCCTGTGCCA  
AGGCTTCAACTTCCAAATCGTAAGACTCAAACCTCATAGTCTGGTTCGTCAACTTCTTCAG  
GGACTGGCAGTAAATGCCAGGCTGAGTATATCTGACCATTATCAAACGCTCATGGCTGT  
AGAGCGTCGCGGCTATGAGTGTTAGCGCCGGGCGGTCATAACGGTAAAATTTGCGAACGT  
CACGGTCAACGAGACGACCGAAATTACCATAACCGCGCTCCAGTAATAATTTTTTAATTT  
CCGGCCAGTATGGGCCATAGCTGCGGTACAGGCGGGGATTTTTAGTAATCGCCCCGCGTA  
GCCCTGACAGGAAGAAATCAACGTATTCGTCTTCTGTCTTTCCTAACAAATGCCGTACGCA  
GTACCGCCTCAAGATATGTTTTATTCGGTTTTATTGTATCAGATAGTGTGGCCATATTAT  
GCGACGCCCGGCGAACCGGGCGCTCCTGTTATGCGTATTGTTGGATGACGGCCAGAACGT  
CCGCCACGTTGTGTTTTGTCTCGATAATCCACCAGTTACCCGGGAAATCGCTGTTCTTCG  
CCTTCGCTGGCAGCCAGCGAGCGCCGAATTTTCGTCTTGATTGCGTCTTTCGCACGGAAA  
GAACGCCTTTTCATGCCTGAGGCTTCCCTGAAGCCCAAATACCTCGCCAGCGGCGAATTTG  
GTGCGTACATCATCTTCAGGTTCGGCGGTGGATACGCGATAATTCAGACCAAGAGACTGAG  
CTATGCTGGTGGCATCACCTGTATTGATGATAACTCTTCTTGTCTTCGTTTCTGGCGG  
CAATTTCTTCCCTCCGTGATGTTGCCAAGGGCCAGGTTTATCCGATCAGCGTCGGCCTGTT  
TCTCTTCATCGGTGCGCCCGCAAGAACCGTGTTAATTCTCTGCAATATCTCCACATGAT  
TCTTGCGCATGCTGAGCAATTCCGGCGTAACCTCGTTAAGATCCACCAGCCAAAGGATGG  
CAAGGTTCGGAACAAACATTGATAACCAGGTTGTAGGTCATGCGATAGCTGAGTTGGCCATAGG  
CTGATGGCAACTGCACCGCATCCATTTTATAGGCATCCATAAATTTAGAGCCGTCGTTTA  
CGACATCCGCAATTGCCGGTGTGATTTTCCCTGTGGTGGCGGCCCTCCCTGATTGCTGTTA  
CCCACGATTGAGTCAGTGCGGCGACTGCATGATTAGATTGGCTTCCCGTTCTGCTGCGA  
TGCGCGCGCTTGTGCTGCCTGCTTGCCTGCTTGCCTTATTGCTGTAAATGCCAA  
TGGTGCCAAACTGTGCTGTGGTGTATCTCATAATCTGACGCCCGGAACTCATGGGTACCGA  
AAATGGCATTGGTGACCTCAAGTTCAGAATCCCCGTTACGAGTAGCCCCCTGGCTTGT  
TCTCCGGCATTCTGGCGATCGCATCCGCTATTTTCTCCTGAATTGCTTCAGGGGATAGCG  
TATCTCCATATGACGCGATTACATCGCCATAATTGGAGCCAAACAGTTCAGTCAGGAATA  
CTTCTGCCAAACGGACCTGGCGGTTATTCCCTTCAGACATCATAACCAAGCACCCATTTG  
CAATTGACGACTTCAGCGCGCCGTACGGCGATCCGGGTAAACCGCATGCTTCAGTGGGT  
CCGTATAGGTACCAACAAAATCAATGCTATAGCCTGACTCTGTAGTCTGAACGCCGTATG  
AGTCAGTGATTTTGTATGATGCGCGCTGCTGGAAACGGTAGAAATCGTCACAGGAAATGA  
TGTCGTTAATCCCGGCGATGGAGACGCCACCACTGATTTTCTGCATAACAGCATCTTCAT  
CGGGAGTTACATCCACCTGTTTATCCAGCGTCTTCACATCCAGTTACCCGATTTGGTGC  
CTTTGAAGGTAAAGATGATCTCCACGTCTGCGCGCTGGCTGTGCAAGTCCAGCGACTTAA  
TGCGAACGATATCACCGGCACAATCGTAGTATTGGCCTACACGCCATGAGCGATCGCCGA

TAACAAGGAACACTCGCATGGTTAACAGGGTCAGGATCAACATCCAGAATGCCTTTAT  
TTATTGCATCCTCCACCAGCGGGCGCAGGGCGTTTGATATCCGTCGCGGCCTTCTGAGTAC  
GGTTCAATAATTTCTCATAGGGGGAGATGGCCTGAGAGATATTAGCCTTGCGCTGAATGG  
CGTTTTCAACGACGCGGATACTGTGCTAACAAACATACGGTCTGTGTGATGGACGCTAC  
CCCAGCGGGCTTCCAGTCTGCGTTATCAGCTGCTTTGGCCATTACCGCCTGTTTGAATT  
TAGCTACCTCGGCGGTGGTCTTTTCAAGTTCGCTTTGCTTCGCTCTAATTCAGCGGTAA  
GTACCTCCACATCCTCGCCAGCTGCGTGCTGCGCCTTGATGTAGTTCTGAAGGTGATAG  
TAGCCTGTTCTTTCTGGCGAGCGGTTGCGCGGCTTTCGCCTTATCCATTTGAACCTGCA  
TCATTGCCAGACGTTCCGCATCATCCTTAGCGGTATACATCTGCATTTTCGATCATATCGT  
TGGCGTCGCGGTTCTCCATTTCAGACTTATCTGAGCGGAGGATATCGGAGATCCAGCCTG  
CTTTACGCTTCAGCGTCTTCAGTCGGTATTCATCGAAAGAACCCTTGCCGCAGTAGTAGT  
GAACGCGAACGCTTGACAGGTTGGAACCAACTCGGGCACCGCGACCGTTACGCTGTGCGA  
TACTGGCTGGTGTCCATGGCAACGTCAGATGATGGATGTCAGTCGTTCCCTCGATGCAGGT  
TGATACCCACCTCTGCCTTTTTGTTGCAGATGATGATCGGAGTCCGGCCCTCCTGGAAGT  
CGGCAGCAATCTTTTCCAGCCCAGCGACATTTTCAATTTGCTGCGCGATATAGGCGT  
CATAACAGAGCCATTTGCTCGTTGTATTTGCTATCTGTGCATCTGTTGGTTCATCCGGTA  
ACTCTTTCGGCGGTTTAAACCGCTTTCAGTTTCTTACCGGTTTTACCTGCCTCGGCAACCG  
TCTGAGCATTTCAGGATCCCCACCTTTGAAGGTTCAAGGTTAAGAGCATTGCAGATAATGC  
GCTTGAGCTTCTGGTGCTGCGTTTTTTCATCGGTGAAGATGATTTGCTTACCTTCCGGGA  
AAAACCTCCTTCAGCGTGGCGATCAGCTTCGCGTATTTTGGTGTAAACGGGGTGAGTTACGG  
TCTGTTGCTCAATGCCAAACCTGGCCAGGGCGCTTATCACTTCCCTGCTCGAACGCTTCCG  
GAACCTGCAACTGAATAAACTCGCCCTTATCTATCAGGGAGTATTGCGATTGCTGCGTGA  
TTGAATCATCACTGTCGTCGTTCTCGCTGGTGGCTTGTTTAGGCAAACCTGTCCGCCAGCT  
GCTGCACCGCATCGGCGTACTCCGGCAGGAAACGATAGGTGATCCGGCGATAGTACAGGT  
CCATGTCAGTACATACGCGGTCCATATCCCTGATTATTGAGAAGATCGGACGGGCTTTCT  
CGTGCTCAATCACGCCGTTCTTATTGACCGAGGTCGTTACGCCATTGTTGGCTTTGGCTG  
CCGCTTCCGCCTGCTGACGCAATTCTTCATACGCCGCCAGTTGTTCTTCAGTAAGTGGCG  
CATCCTGCTGGTGTTCGTCAGCTCCGGGATCTCCACGGTATCCTTAAACGCTTCCGCTG  
TTTTAAGCGTTGTCCAGCGATGGAATATGCCGCGCAGCGCATCAAGGTTTTCAAAGCCCA  
CCAGCGCCATTTTTTCTTCAACTTCACCGCTGATTTTCTGTACCGTTTCCAGCCTGGTCT  
TGCCGAAGAATTTAACGAAGTCATCAGGACCGTAGATCCCCATCTTCTGCCAGTATTCTT  
TCGGCAGAACATGAGAAAGCATGTTGTATGCATCGATCGGGGTGTTAACGACTGGCGTTG  
CAGTCAGGAGAACCGGTCCGCGCCCGCCATTCTTTTTTCATCAGGTACGCGTTTTTTGATTG  
CCATATCTCGCGCCGATTGCGCCACCGCGCTGGTGGGCAGATAGGCCAGCTGTGACGCTT  
CGCGACCATTTTTATAGCTATTGCGGTAGTTGTGGCCTTCGTCGGCGATCACGCTGTCGA  
AGCCCATATCCTCAAAGTACGGATACTTCTCTGCTTTTTTCGGTACCGGTATCTGAATACT  
CCGACAATACCCGGCGACGCGCCGCTCTTTGCGATGGGAATCGGAATCCATTGCGCTGG  
CTACGCGCCCGGCGGCAACGAAGTCATAAAGCATATCCTGTGCATGCTCATCTACGGTGT  
CATCACGTAGCGGAATGCGGGCGTATTGTTCTTTGGTAAACACGACTGCACGGTAATTTG  
AGTGCGGGATCGCATTTCATCCGCGCCGTGATAGTGGCTTCATCTGCCAGCTTAAAGAGCAT  
CGCGCATAACTGGAGTGCCATCAGTACCAAGAACAGGTTTACCGTTCTCATCGAGCACCG  
GCACCTGGCGAATCTGATCGCCATCCATCAGCACATCAAGACCGACGAACAGGTAGTTAC  
TGAATGCCTCTTCACTCAGGAACCTTTTTGCTTCGTAATACCAGTTTTCCAGCACTGATT  
TAGGCACTACATAAGCAGTACGGGTGGAGCGACCGTTCTCATAGTTGAACGCCTCAAGCG  
CCAGCGCGGTGCTGGTTTTTACCAGCCCAGTGGCGAAGCCCAGGATGCCGCGCCCATCTT  
CGGACAGTCGGCGCACCTCGCTATTCTGGTAATCAAATGGCTGGCGCTTACCGCTTAATC  
CCTTCAACCCAAGCGGATCGCCAGAGTGTTTCATACGGGATATTGCTATTGAACACATCGT  
TGTATTTGGCAACCAGCTCATCGTAGCGATCGTGCGTCTTGATCCACTTATTGAACTGGT  
CCTCAAGCAGTGCCATCTGCTCGCGGTAGCCGTTCCGCCGTCGCGCTATCTTTGCCACCGA  
TACGCGCACCATGAGATACTTTTTCCAGCTGTGCCGGGAACCCGGTCGCGTTTTTACCTG  
ATTTACGGTCCCCTACTCGTAGCGGATCTCGCCTGTTTCTTTATCCTTGCCTGGACGACAC  
CGTATCGGTGCCCCGACGAACAGACCATCACACCGTGATAGGTGTCAGAAACCATTTCGT  
CGCCTTCCAGCTGCACTGACTGCACATAGCGCAGATCCGGATAGCCGTTTTCTGCAAAA  
ATTCCAGAATGACGGAACGGTCGAACCAACGGCTATTGAGCTTAAACCGGATATTCTCTG  
CTGGCGTCTTGATGCGCTTCTCTTCGATCGCTGCCAGCTGATTAAGGACGTTGTTCTTTA  
CTGGACCGTCCGGTGGCGGAGGAATTCCTGTTTTGGAGCCACTATCTCGTTAATGT  
CGCCGCTGGTGGCGCGGGCGAACGGAACAATCCCGCCATACGGTGAAACCGCAATGCCAG

GGGTGCTGGCCAATAAATTAAGCAACTCGTCATCACTGGCTGGCAGTTCGCCGGTAAACG  
CAAGGCGGAAATCATCGAGCTGGATTGGATCGCGAGTGAGATCACTGTAGAGATAACGCA  
GGGTGTCCTGATAGCTGGTGGAGTCATAACTGGCGCTGGAATCATGCGTAACCAGTTTT  
CTGTCAGCTCGTCAGAAATAGTGCCATCCAGCTTAATTGCACCACGGAAAGCAAACCAGG  
CGCGCGCACCGCTTCCCGATAATTTAGCTATCGGACCGCGACCGGGGTTACCAAACCGGT  
CAATCTCTGCCTGCAAACGGGATACCAGAGAAAGGCGCTGCTGTTTCGATTTGTTTCAGCAC  
TATGCCCGGCGGCCTTCATATCCTGATATTCAATTAACATCCGGCCAATCATCGCCCCGC  
GATAACAAGCGTTCACGGTATTTTTTCAGGCTGGCTGTTAATCCAGTCCACCAGCTGCACCA  
TATCGTCGCTGATTGATGTGGTGTACTTATCGCGGACATTTGCCATCTGGGTAAATGTCA  
TACCGAGACGGCCTTCTGTTGTAGTCAGGTTACGCTGAAGAGCCTCCCAGCTGTCCGCGC  
CATAACTGGCAACATCAATCTTCAGCTCCTTCCCGGCATCAGATTCAATCCAGCGACCAC  
CAGCATATTTTTGCCATACGCCATTAATCAGGCGCATTTCCCTTCATCAACAACATCTG  
CGGTCGGTGACGGTTCAGCCATATCGAGCAAATACCAGTCGATACGGCTTTTCGAAACAAT  
GAATCAGCTTCGCTTTAAGAGCCTGGTTATCAATCTGACCGTCGGCACGAACCTCAATAC  
GCCCTGGAAGCCCTTTTCTGGGTGCCATGAACAAACCGGCGGCCGTCTTTTCAAACC  
ACTTGCCAGAAATAAACGTTGGCCAAAGCACATTTGCCGATTCGAGAGTGCTTTCATGCA  
CCAGGGGGATTTTCTCAGCCATCTCTGCCGGATGTTTGGCGCATCAGCACCACATCAACGA  
CTGTACTGGTCCCGTTTTCGCTCAAAGTACCGGTAGGCAAGCGGTGAGCGCCAAGAAATT  
CAGCTTTACGGGATAAGCGCAGGCGTAACCGCTTCATGTTTGAACCTGAAACAATGGACG  
GCGGCACAATCACACACATGAATCCGCCAGGTTTTATCTTGTCCAGCATGCGGAGCATGA  
AGTAAGACCCCATGTCCGTTTCTTCTGCGTAAGGCTTATCGATGTTGCGTGTGTTATCAC  
GACCGCCGAACGGAACGTTACCCACAACATGGTTCGAATGAATCGTTAGGCGTGCTTACAG  
CCAGTTGTTTCGAACGGGGAAATCTGTACGCTGTCTTCCGGATGTAACAGCTGGTTTATAC  
GACCGGAAACACTGCTGATCTCAGTCGCGGTCATACCGTACCAACCGGTTTTGTCTCAT  
TAAAAACGCCGGTGCCCGCCGATGGTTCCAGAGTGTTACCTACGTCCGCGCCGTAGAGCT  
TCATGATCTCCCAGACACCTTCAGCGATCGGCTTTGGTGTGTAATATTCGGAGACGGACC  
CGCCAATGCCGCCTTCACCGGTGTACCCAGCCAGGATCTGGCGCTGTTTCATCTGTCAGTG  
TCGCGCCGTCCACCAGCGAATTAAGCAAATCTATCGCCTTCTGATTCGCCTCCCGGCGCA  
GTCGGTCATAGCTTTTGCCTTCCACCTTTTCCACGCCGTATTTAATCGGCGCTCGGTGAG  
ATGTTATTGCCCTAATGTATTTCAATATTTTCGCTGACACTTGAACAGCGAAACACCCCA  
TAGATAGCTTGTTTCATTGGTAATCCTTAACAAGTGACTAGTGTTAAATTCCGTTCAAACA  
CGATGTGAATTATTCTAATTAAGGTGCAATCTTGGCAGACAATAAAATCACGCTATCCTC  
GGTCAGGAAGGCGCTGGCGGGGGTTTTTAAAGACAACGGAGAACGGGACAACATCCTCCT  
GTCCGCGCTGGCTGTGCACGGCGGAAGTGGGTATTTGTTTTCTCGCGCAGGGGCACCGGT  
ACAACGTCCGGCTTCTTAGGCGGCAAACCGGGCGATAGTGGCATGGCTGGCGATGGGCT  
GGTGGACGGAAGTCGCTTTATCTTTGATGAAGTTCAACTGCCAGAAGATCGCTTGCAACG  
CTATCCGCTACTCGAAGAGATGGCGGTTTACAGCACGATCGCCACCGCGCTGAACATCCA  
TATTACGCACGCGCTCTTTTCGATAAGAAGACCGGACAAACCTTCTCTATCGTGCCGGT  
ACATAACGGAACGATAGTACTATGACGCCGCGCAGGCGTTGTGTGGCGAGCTGATGAA  
CGACATCGGGCGAACCATCAACAAAGAGGTGCGCCGGATGGGCATTTATCATGTCTGTATT  
TGGGGTGGCTTATGTCAGGCCATACGCCAAAGAAGGCATAGGGATCACGTCTTTTGAGTG  
CTCCTATTACACCCTTCCGAGCTTCATCAAAGAGTTCGAGGTCAGCGGCAACCTGGCGGG  
ATTTAGCGGCGATTATCTGAAGGACGCGTCAGGGAAAATGGTTTTTCGCCGATCCGTGGGC  
CATTATCCCTATGAAAATCCCCTACTGGCGGCCTAAGTCAAACCTTATGCCTGTGCACAC  
TGGCCATAAAGCATAACAGCTTGCTGGATAATCCGGAAGAGCGCACGCGATTGAAACCCA  
GAATTACGGGACCAGCTTGCTCGAATACGCTTACGAGCCGTACATGAATCTGCGTTCAGC  
GATCCGCTCGCTGAAAGCAACGCGTTTTAATGCGTTCGAAAATTGACCGAATCATCGGCCT  
GGCGATGAATAGTCTGGATCCGGTTAAAGCAGCCGATTATTCGCGCACCATTACTIONCAGAC  
GCTTAAACGAGCAGCTGACCTGATGGAAAGACGCGCACGTGGCGCGAATAACATGCCTAC  
GGTAACCAATACCCTGCTGCCTATTATGGGCGACGGCAAGGGACAGATGACTATTGATAC  
TCAGACCATCCAGGCTGACATCAACGGCATTGAAGACATTCTCACCTATATGCGCCAGCT  
GGCGGCAGCACTTGGCCTCGATTACACCCTCCTGGGGTGGGCAGATCAAATGTCCGGCGG  
GCTTGGTGAAGGTGGATTCTGCGCACGGCAATTCAGGCCGCCATGCGTGCCTCATGGAT  
CCAGCAGGGCGTAGAAGAGTTCATTCAGCGGGCTATCGATATTCATCTTGCTTTCAAGTA  
CGGTAAGGTATACCCGGAAGGTGATCGCCCGTACAAAATCGAATTCCACTCCGTTAATAC  
CGCTCTGCAACAAGAGCACAACGACAACCGCGACTCGCAGGCGAACTACGCCACCATCGT  
TACGCAAATCCTCGATGCCGTCAGCAATAACAGCGTACTCGCCAATTCCGATGCATTCAA

ACGTTACCTGTTTCAGCGATGTGCTGGAGATTGACGAAAAAATCTCTGAAGCACTGGTGAA  
CGAACTGAAAGCGAAAAGCGAGGACGACGATCACCTGATGGATTCCATCATCAAAACACC  
GCCACAGGAACTGGCGCAAATCCTTGAATCGGTCTTTAAAGAGGGAAACGATAATGACTG  
ATGTTTTGAAAACGGTCACTGACCGCTTTTGTCTCTATAGCAATGCTCGAAAAGGTCCG  
AGAACGGGCGACAGTATGTATTAAGCGCGGTAAAGACCATGCTTGAAAGCAAGGAAACTC  
AGGAAGGTTTACGCCTTGGTGAGCTTTTCGGCTATTACGGTCACGGTCGCCGACAGCTGA  
CTGGCAAACCTGGAAGTACCAGAAACCAGCGTGATCATGGTGGAAGGTGCCCGGTCTGTA  
TCGACAATGTTCCAGCGTGCCGCACAGTGGCTATATCTGTTGACGACAACGGCATCGTTA  
CCCATACACAGGAAATTCTTAACACAGAGCCGGGTAAAATTGTCGCCGCGATGATCGAAA  
GCCGAGCTGGTGGCTGGAGCTGGGCCACTGGCGGGCGCGAGTCCGGGAAAATCGCTGTAA  
CCACCAGCTTCCATGGTGTGGATTATGTGACAACGCCGAACTATATCAGTCTGGATCATC  
CTGCCAGCGCCGGAATGTTTGAAAGCGCGGATTCTAAATCTTTACTGGCAGAGTCCCTGG  
CGGCGCATGGGTACTCCGACGAGTCAGTGCAGGCCGTTATATCCCATTACGGCAAATGG  
CTGAACTGGAATGATGGTGGAGGCGACAGAGCGTACGGCAGAACTGGAAACTGCACTAC  
TCGAAAGCCAGGGCCGCCACCTCGAAGCAATGGCCAAGATCGCAGATGCTGAAGCGCGAA  
TCGCTTTGCTGGAGAAAACAGCGGGTATCCGCGACGATGTGCTGGCAGCAATGCAAGACG  
AACTGGATAACCTCCCGATTTTCGTCTCCGCCGCCAAAAGACGCATTCCGCCTCAAAG  
AACCTGGTGTGCAAAAATCGTTGCCACACTTTTCGAATCTCTGATCAAAGTTGGCGCAC  
GCAACTTGCCTGTCACCAAGAAAATTAAGGAGGTTCCGCAAGCGGCTAACGTCCAGGCAC  
CGCGTGAGACAAGCATCATCACGTTTAATAATTCAATCAATCCGTTTAAATAACCACCAA  
AAATAACCCCGGCAGCTGCCGGGGTTCTCGTTAACTATTATCGCCTTCGCCTGCGTGCCA  
TATATTTGCGCACCGCGCGGGCGTGGACAATCTGAAGCGGTTTCTTTCTGCTGCATCAATC  
TTGCAGCCATGCTCAAAAATGTCAGGCACAGCCGAAGCCCTGCATACAATAGCGGTTCCA  
GTGGCCACGTCTCATTGAGCACATATACCGCCATGAAAATCGAGTCGAAAACCTATCGCCG  
CCAGCGATAACTTCATTGTCGAAAGTCGGCGGAGCTGCCGGAGTTTATTCATTGACCAGT  
CCCGTCAGGCAAAGCTGGCGTTCTTTTTACGGCGAATCTTTAAACCTCGCAGGGGGCAG  
CCGTTACTGTTACGAAAATCAGGGAGATGGTTACACATATTCACCCATTCCCCTTTCTGC  
GCCACTTGTGGATGGACGTTTCGACTCGCATGCCTCGCGCTTTGCTGTAGTAGGTCCGT  
AAGCTATTGCATCCCATATTGAATGCCGCGCTTGTCATTGCGCTGAAGGCATTATCGGGC  
ATGCTTTTGCCCCGGAAGTGCTGATTAATACAGCGTTCAGCGATCAGGATATTCTTTTCC  
CAATCAGCGGCGATTTGCTGGTTCGGTTTTTCGCACACCCGGCGTTACCCCGTGTGTATTA  
CCGATCCCGTCAGTCCATACCCCGCCGGGCACATGTATGGATCACGTCGGCAACCTTCA  
GCGTTACCAATCAGCTCAAGCCCCGCCTGGTTGGTTCGCACATTGCCATTACCCATTACG  
ATGGTAATCATCACCGCGATAGCGCAAATTGCACCGCCTCCTGCGGGCTGTTTTTCCCTTC  
ATAAAGACCTCATAAGCGAATTTTTACGCTCCAGGACAAACACCCATTACAGCCAATAC  
CGACTGACTCGATCCCTTTAGAAGACACAGGATAATGCAAATCACTTGTTAGCTACGTTT  
CAAAGATATACATTATTGCTCTAATTAATTTATTTTATTAGGTAAGATAAGTGGCACAAC  
GCGGTGTAAACAAAGTCATCCTGATTGGTACCCTGGGGCAAGACCCGGAGATCAGGTATA  
TACCAAATGGCGGCGCGGTTCGGAAGACTCAGCATCGCAACGAATGAATCATGGCGCGACA  
AGCAAACGGGCCAACAGAAAGAGCAAACAGAATGGCATAAAGTCGTTTTGTTTCGGAAAAC  
TTGCTGAAATTGCGAGTGAGTATTTACGAAAAGGTTCTCAGGTCTACATCGAAGGGAAAC  
TTAAAACCCGTAAGTGGACAGATGACGCCGGTGTAGAACGTTACACGACGGAAATTATCG  
TCAGCCAGGGCGGCACCATGCAAATGATCGGGCGCTCGCCGTGACGATTCACAGTCCTCAA  
ATGGCTGGGGGCAATCAAACCAACCTCAAACCACCAGCAATACAGTGGTGGCGGTAAAC  
CTCAGAGCAACGCTAATAACGAACCCCAATGGACTTTGACGACGATATTCCGTTTTGAA  
TGTGTA AAAACGACTGAAAGAAAAGCGGTGGTCCAGACGCCGACAAAAGCACGAACTCG  
CAAACAAACGCCAAAGTTGGCAATGGCACGCGCTTTTCACGAAAAGAACACCCCGAGATA  
TTGCTTTCGCTGGTGGGAAAACATTCTGACCCACCTGAAGGCGCAATACATCAGTTTTT  
AAGCAGAGAAAAGACTATGACAGCACAAAATACTAAAACCATTCAATACCGCCTACGTAA  
TGGCCAGAGTGTGGAAGTGACCATCAATAATGATGGAGTGCCAGGCGAAAAGGTTTCTAT  
CTCCGATCTGGCTATCGAAAAAACCATCATGTGCCACCTTGGCTTTACTGAAGAAGTGAG  
CAAAAAGCATGGTGTAGCTATCTGGCGCACAATGGATACTGGAATGCGCAGATTCATTAC  
TGCTCGTACCCCTGGTATGACCATGATGGACCTCATGCAGATTGCGCCGCTGTTTGAGTG  
TGAACCTTTGGATGTATTACGCAATCCAGCTATCTGCCAGCAGTTATATGGTGAGATGAA  
ACTCGCGGTTACCCCATTTGTGCTGCATGAAGGATCGCTTGCTGGCGTATGGAAAGTAGA  
GCGAATTTCAAGCTACATGCCCTTCCACTTCCATGTCAACGGCGTAATCACTGGTGAAAA  
TCAACCTGTTTCCGTTACAAAGTCAGACCTCAAGCGCGCAATTCCTGAAGCAAGTTGTCG

AGTTATCGGCCTGGGCAAACAGTCTTATGTTTTGCTTCCCCGCAGGCCAGAAAGGCCCGGC  
TGAAATACTGACGATGGATGCCGATCTGCTCTGGCAAATAGAGTTTATGATTGGGAAAAG  
CATCATCCGAGCTGAAGAAGCTCGATCAGTACATTACCTGCACGATGACGGATGAAGTCAA  
AAGTGTGGCTATAGCCAATGCCAGGAACCTGTGTCGTAATGCGCAGAGCTGCAAGA  
AAACACCACGGAAGAGGTGGAAAGTGATTAATTTTTACTAGAATAAAAAGGGGTGCCAGA  
GAGCACCTGATAATACGAAATTAAGGGAAATAAATTACATGAAGTGTAATTTCTTTGCC  
CTCTGGGTAATGACTCAAACCTTATTGATAGTGTTTTATGTTTCAGATAATGCCCGATGACT  
TTGTCATGCAGCTCCACCGATTTTGGAGAACGACAGCGACTTCCGTCCCAGCCGTGCCAGG  
TGCTGCCTCAGATTCAGGTTATGCCGCTCAATTCGCTGCGTATATCGCTTGCTGATTACG  
TGCAGCTTTCCCTTCAGGCGGGATTACATACAGCGGCCAGCCATCCGTTCATCCATATCACC  
ACGTCAAAGGGTGACAGCAGGCTCATAAGACGCCCCAGCGTCGCCATCGTGCGTTCACCG  
AATACGTGCGCAACAACCGTCTTCCGGAGCCTGTCATACGCGTAAAACAGCCAGCGCTGG  
CGCGATTTAGCCCCGACGTATCCCCACTGTTTCGTCCATTTCCGCGCAGACGATGACGTCA  
CTGCCCCGGCTGTATGCGCGAGGTTACCGACTGCGGCCTGAGTTTTTTAAATGGCGGAAA  
TCGTGTTGAGGCCAACGCCATAATGCGGGCGGTTGCCCGGCATCCAACGCCATTCATGG  
CCATATCAATGATTTTCTGGTGCGTACCGGGTTGAGAAGCGGTGTAAGTGAAGTGCAGTT  
GCCATGTTTTACGGCAGTGAGAGCAGAGATAGCGCTGATGTCCGGCGGTGCTTTTGCCGT  
TACGCACCACCCCGTCAGTAGCTGAACAGGAGGGACAGCTGATAGAAACAGAAGCCACTG  
GAGCACCTCAAAAACACCATCATACTAAATCAGTAAGTTGGCAGCATCACCTGCCCTC  
TGAATATGCAATGATGGTTAGACAAGCAAGATAGGGCGAATTAATAATCAAGAGTCA  
CTTTGTTAAGATGCGTAACATCACTTTAACACTTTATGCTTGTTCATGATATTTGCTTGA  
AGCCTCATGAATACATATTCTGATAAAATACACAACCTTATAGATATAGCCAAATTAGCT  
GTGGCCATGAGGGAACATAGGTATTTTTTCGCACTTCGTCGAGGAATAGATGTTAATTTT  
TGTGCTGATTTAAACGGGAGTGGTACACAAGGGATATTCATAAGAAAAAAAAGTTTTAAC  
GCGTATGAGCCAAGTTTTATTGAAGTAATTTTTGAACCCACTCATAAAAACGATGATTCA  
TTTCTATACGAAGAGGACCTTACTACCGATCAACGAAAAGACTACGAACCTAGTATTAAC  
AGAGGAAAACATCGATTCGTTGCCAACGTGCTAAACTAAATCTCGACTGGGACAGTAAT  
GAAATCCAACAATGGCGTTTGGATATTGAGCGACTTTCTAAACCACACAACACTCTTAAT  
GACTGGTTAGAAAATGATTCTGAGATAATGATAATACATCTCTGCGGCGGTTATAGGTT  
CGTGAACCAGTGATACTCTCTCAAAGAGACATTAATAAATATGTAGCTTCAGGATTGACT  
CTGGAAGACTTAAAAAATCGGCTAAAGTGTCAATATGTGGTGAGCGAAACGCCAAAATT  
AAAGTTTTTTGATCTACTTTAATAGGAAATGGCTTGCTTCCATAACCTAAAGCAAGCCAC  
TACACATTTACCTTAAGCACACGATAACATGCCAGAACAGGTTATTTTTGCACTATCAGG  
TAGTTAATATACTATCTGGTCTACATGATCACAAAATCATCGTCGTCGTCCTCATCGCC  
ACCATCTACAACAGGCCAATCAACAAACCAGCCAGCGTAAAGATGCAGCGTTCGGAGAAC  
ATCACTTGCAGGAGCATCAAGGGTGTCAACGAATCCCATATAGCTATTGGGATTTGCTCC  
AGCTATGGCTTCAGCGATCATGTCTCGGTAATGTCACCGGAGATAATGCTTAAACGCC  
GGAAACTTCTTCATTATCATCAAATTCGATAATGGCATCTCCGCCTAATGGCGCTGCGAT  
TTAATCTGCATTATTTAGCTCCTTTGCCACACCTAATAACAGTTCCAGCAATCCGTCAC  
CATTTCATCAGTGATGCGGCAGCGGCTCTTTGTCATGATACTGAAGAGCCATAGAGA  
ATACTTCCGTTGCTGACGTTTTGGAAATAGTCGGAGATTTCTGCCGAATTTTCCCGGTGT  
TACTTACTGAGGCTGGCGGGTATACCTTCGCCATATAAATATTACTCAATCGAGATCTGA  
AGCACCATTAGGCTTGCCACGCCACCGATATTGACGAAAGATGGCTTATCCCCTTCAA  
CATTGGCCTTCAGGAATGACCGGGCTTTCTCTAACAAACCAGGGTTACTGTACTCAAGAT  
GATGACCCAGCTCGTGCCACAGTGCATTTTCATCGTTCAAATTGACAGCAACAA  
CACCATTAAGATTTGCATATGCCCTTCCCTGGTGGTGAACCTTTGATAAGGTCGATA  
TTTTCCCGCCGGTCAGGCGATAAATATCAGCAAGTTCCTTGCGCAGGTCTATCCCACCAT  
TCTGTCCAGCGCGGACTTCTTCCACTTCTTCTGTGATAAAAGAGTCGGCCACTCAAGAG  
CTTTTTCTTCAGATACGTATGAGTTTGGGATCGCACTGTTTCATGGCAGATAACACTTTCT  
CGTGGACCGAACCCATACTTCGCTGATTCATTTGCCAGCGTGTCTGCGGGTTATATGAGA  
ATCGCTTAAGTAGTTGGTCAAGCTGCTCAAGTTCCTTCTTCACTGACATACTTTTTAGCCT  
CACCAATAATGCCAGGGAGAATATTGCCGTTAGGATTAACGCTCGCGAAAGGAAGAGTT  
TCAGTACCCCATGCCCTCCGATGCTTCAATATCACCAATAACCCGGTTAACAATGGCCG  
CACTCTTCGGATTAGCATCCGCCAACGCTCTGGCTACGATTTGCAGGGACGATACGACCT  
CACGCTGCATATCAGTCCTGATCTCATCAATAAACTCTGGCGTTATACCGTGCTCTTTAA  
GGATATCCCGGCTTCCGCCGTTACCCCATCGATATCACCGACATGTTTATTAACACGAC  
TTTGCAATGCCTTAAATGCCTTCAGAATTCACGGGCATCATCCGCTTTACTAACGGCCT



TCCTGAATGCTGTCAAGAAGTCTGAGTTAACCTCATTTTGTGTTGATCGGCCACTGAATGG  
AGGCATCTTTTCATCTCGTCCAGAGTCAGATCACCCAACGCGGTATGGTCTGTGAATATGA  
GCGACAACCTCTGAACCATTTCTGCCAATGATGATGCCGAATGCGCCGCGCTAAGGAATG  
CTTTACCCCTGGTTGGGCGAATGGAAAACCAGTCAATAGCTGGTGGCATATCTCCGTTTT  
TTATCGCCTGCGCTATCTCGTCAAAGCCATCGCGCCCAAGGGAGGATGCGTGATTTAACA  
AGCCGGAAGTAACGAATTGCTGATACCGAATAATCGGCACCATTTTTTTCACGTCCGCAA  
CAGGCATTCGAACAAAATGCGCAAGCACTTGTACAAGCTGTTTCATCATGGGGATCTGTAC  
GGGAAAGCAGCCTGATCAGATGAATAATGTCTTTGATGCCGGATGCCCGATGTAATAGCA  
AACTGGTATATGGAGCAACACCGTTGTAACACCGCCGAAACGGACTCGAAAAGACCGC  
CGGATATCCCTTGCATGCCTTCGTTTTCCAGTTCCTGAGACACCTGGCGAAGGATATCCT  
GTAACGACACATCGCCGCCGCCAAACATATCCCCAGCGCCTGGCCCTGGTGTGTAAC  
CATCATTGATACGTTGAGCCATCAACTTAAAGGCGGTGGCCATACGCTTCGCGCTACGGT  
TATTCGCGACGATGAACAACGCGAGTGCTTTCACCTCCGGGGCCGTTTTCGCTGAACATAT  
CCCCCTGAGCAATAACATCGGTAATATGCTGGCCTGACTCCTTCGATTGCCTTACCAGGT  
CTACCGCATCTTTCAATGCCGCCAGCGCCTTTTTATCGAGGCTATCCGCTGTCTCAATGC  
CATCAACAATAGTTGTCACAGCCTGCTTGTGCGCTTCTCCTGATAAAGCCTGCATCTGGA  
CAAATCATTGGCTGCCGCATTAAGCGCCGTCAGAACATTACGCATATCCGGATCAGGTT  
CTTCTGCAACCATCCTTACCAGGCGCGCATCCTTATATGCCTTGGCAAAGATCGCGTTTT  
GTATACGGTCTACAAGTTGCCGTGTTGGTCGCCCATCTTCAGTTACAAGGCCAGCCGCCT  
GTGTGGCACCAACTTGCGTCATAAATCCGCGAATAAACGCGTCATTACTGCGGCTAAGCA  
GATCTCCGCTTTCTGACGGGTTAAAAGCGCCATCATCGCCGGTGTATGCTGTCCGGCAT  
CAACAAAAGCCTTTTCACTGGCTGCCATTTCTGAAGATCAGAAATATTTGAGTCCTTGG  
CAAACCTGAACGCGGTCAACCTTAGTTAACCGGCGGCGCACCAGTACCGGAGCCGTCATTG  
ATTCAACCTTTTTCAGGAGGTATGCCGAATTCGGTTCGCATGATCAATCAGGTACTIONCACGAT  
ACCGATCCGCATTGCCGTCCTGATAGGCTTTGATGATCCCCATGGTCCGTCATTACCTG  
ACTCAACGGCATTGTCCTACCAATTATCGGCGCGCCATGGCTGGATAAACCGGAATCGG  
TAAGCTGGGCAGGACGCAAATCCTTGGATATCTGGTTGACCTGAAGAAGACTGGATGCGC  
GGGTCCGGTTCGCGCGGCTGAAGTTCTGGGGATAGTCAGGGTTAATTTTCCCGTCCAGAG  
TATTGGATACCAAAGAGCCGAGGCATCGACGATATCAAACGCTGTTTTTACCTCGTCAC  
CCTTCGCTGTCACCACATACGAAACCCGCCCGAAATCGGGCAGGTTCTTTAGCAGCTCGA  
TCAGCGTTTCTATGCTGGTGGCCATTACCACCTGATCGCTTAAGCTCATCCGTGTTACGC  
CTTATGCTGCCTCTTTAATGTTGGCGGCTATCCATGCCGCCGTGTGCTGTTAACCTGGT  
CCAGGTTCGATGTATATGCCAACATATTGACTCAAGTCTGTAAACGTACCGATAAATGCAT  
CTGTGCTCTGATCGACGAATTTATCAGCCAGGAAATCAGCAACCAGTTTTTGGCACACCAT  
CATGTTCCGAAGGTTGTTTTCTCCTCGCCACTACCGTCGCCAGACGCGCCGTACCCCATCT  
GTTGCATGATCTGGTCAATTTTCATCGCTGATATCCAGCAACTCCATGCCACTCGCGGTAG  
CTGCTTTGGACATCAGAGCATCCAATTATCGCTGAGGTCCATTAACCTCAATAGCTGATA  
GTGTCATGCTGCTACCCCGCTTTCTGGATTGCTACCAGCAGATCAGCCAGGTGGCGAGC  
TGGCCATTAACCAGCTCTTCGTTTTCTCAAACGCCCGGCAGTCTGAAGGGCTGCAAT  
CGTTCCCGGACATTACCCCGGGCGTTACGGATCTCCGCCATGTCAGTGCTTTGCATATC  
CATCACGTTATTGAGATATTCAATGGCTTTATTAGCCTCTGCATCTGCTTCGCTAACCGT  
TTCATCAGGCTGTGCCGGGGCCGGTTCTGGCTGAGTAATCTCACCGACTTCGGCCTGCAA  
TGCATTGATCATGCTCTGCACCATTTTTCTCGGTGCCAGCGCCACCCGGAAACGCAATATT  
GGGAAAGTTTTTTGAAACTGAGTTTTTCAGCATTACGCGGAACTCGTCTGGTGAGTTGGT  
GGCCAGCTCCAGAGCTTTTTGTGCATATTTGCCAAACGGACCATTAGTAAGTGTCTTCGC  
CAGGAAGTCGAAAGAATCCTCGCGAGGCAATAACTTCAGATCGTACTCACTCATTGCTG  
ATCAGAAAGCGGGGTATCGTAAGTAGCAATGCCGTAGCGTGCATATTCATAATACGGGTC  
ACCTTCATCAGGGGCGCGGAAGAATTGCTTTGTTACCTTCAGGTATCGCGCCAGGGGCCGC  
CGGACGCATTTGCAGGGCATATCGATATGCACCTACAGAGACTTCTGGTTCAGGGCGAAGA  
GCTACCGGTATCCTCCGCTGATTCAGGTTTCGACGTTTTTCCGGTTTTATGTTCTTCTGGTTG  
GACCAGATATTCCGATACATTACCCGCTTTATAGGCTTTAAACAGCTTGCCGATCGCATC  
TGCCATGTCCACACCCTGTATGGATTTAGCCTTGATCATGTACACGCTGCCATCCGGATC  
GGTTAACTGGATATACCCTTCGCCATCCCCAATGAATTGCTTCATTGATGCACCATTACT  
GAGCGTCGCTTCCCGTCCATATGCATACGATTTTTGATACTGGCAAGGCGATCCGTCAG  
CGCGCGAGAGTGCCACACAGTCATCCCCGCAGGGGCAATGGTATCGCGCCCACAGTGCG  
ATTGAGCCGATCAATCTCCCCCTGCAAACGCTCATTCTCTTCATAAAGGGAATCCGCTTC  
CGATGCAACAGCGTTAATTTTTCTGCTCCAGATCTGCCTTCTGCCCTTCTACCGCTGCCAC

CTGATCCGCGAGGTCGCTCATGGC ATCCTCTTTCTGGTCACTGTCAGCCTGTAGTTGGGT  
TATTTTCATCAACAAGGGCTTTTTTCTTCTTCTGCGCACGCTGGAATTTTGCCGAGTTTTT  
CTCTGCAAGGTTGGCAAGTTTCATGGTGACCTGCGCCAGCGTCATATCACGTCCACTCAT  
CGGAGCAACTGTGTGAGTAACGTCTTTTTTATTCAGTAAGA ACTGGAAAGCAACCAGCGT  
ATCGCTATTGGTGATCCGGTTTTCCGCTGTTCGGGCTATGAAACAGAATGCTGATAGTCTG  
ACCATCACTGAGCGGAATAATGGCTGGCAAGACCGGCAGCCCGTTAACGTTACGTGCCCG  
GCCAATTTTCAGCGCCGCGATCGCGCGCGCGCCGCTCTGGGCCACATCCCCCGTTTTATC  
ACTCCCCGCAGAGATTCCGGTACCATTAGCTTCTGGTTCAATGCCCGGACAAATGCCTG  
CATGGTCCGGTGTA ACTGCAAACGAGTAGAACTAATCGCCTCCAGTAAATCCGTAGCACA  
CCAGTGGATCGGCGTGTCATAGAAGAACGTAGCCTCGATTTCTCCAGGGTGTGGATTCC  
CGTCATCAGATAGCGGTCCCTACCGGCCATTAATGCGCGATATTCATCATCAGTCACTGG  
CGGGGGAAGCACGTCAAGCCAGGCTTGATCGTCATCCCTTTATTGATATTGAACTGTTT  
CATGTTAATTTCTGCTTTTCAGTTGCTTAAGACGACGTTTGAGTTTCGCCATTCCGTGCCT  
TTTCGTTATTGAGTTCGGCCCGTCTCCTTATCCAGCTTCGCCCGCAAATCAGTGATCTGCT  
GTTGATTGAAAGACACCGAATTCTGCGCGGACTTATAAGCGGCAACCACCTGAGCATTCC  
GCTGTTTTGCTTCTTGCAAGGCGCTGAAAGTTGGATTTAACTGCCGGTTTTCTTGTCTACCG  
GATTGGCAACACGTTTTCGCTTTGGCGATCAGTGATTTCTGGAATTTTGCGGAGTTTTTG  
GGCCGCTTGCCCCATGACGGTACCAAGCGTCTTGATATCCGGCGACTGAGCGTTAGGAA  
TAGCTTTTCCATTAGCTTACAGACGATATATCGCCAGTATCGTTTACCTGTATGGCAA  
GAATTTGTCCGTCGCTAAGAACCAGCTTTGCGGTTTTAACTTTAACGCCATCTTTTCGTTG  
TTGCGCGGTTGCTGGAGTCAACCTCAATTACCGTAACACCGGTTTTATTGATCGCCGTGA  
TAAGGGATTTAGCCCTTTTCATTAACCTGGTCAAATCGACCGTTGCATACTTATTTT  
TCGTCATCTGACACATCCTGTGCGAGATTTATTACGTA ACTGCTGCGGATTTGCTGAGTA  
ACAGGGAAAATCCGATACAACGGGTTAATGAACGAGTCGCCATGCGTAACCATGACGTTG  
AAATGCCACAGTCGCTCTCCTTTACCCATATATTCAGTGGGTATGTACAACCATCACTG  
TTTTCGCCCTGTTAGCCGACGCCAGACAACGTTGTTTCGCTTCAATCACTGTCGTCGGC  
TTCTGAACATCGCGGATCCAATATCTGACCGTTGCGCCGCGCAAAAACGGGAATTTAGAC  
CGGTACTTGAACGGCACCCGGATGAAACCCGGTTTTAATTTCCACATCACCAAGTTCTAAA  
TGCCTGATGTCCTTGCGTTTTAGCAAATAGCGATCGGCTAAGGCTAACGCAAGAACGCAT  
ACACCCAGCCAATCATTTCGCCCTCCCTTTTTACCAA ACTTGTAAAGAACATTCAGAA  
TGCTATCGATATTCACTCGTTTCATCCCTGAAATCACCTCATGACCGTTATTGCTGGCTA  
TCGTTACCATTAAGTACGTAATTGATAACTCCAGCCCTCGTGTTGCCCAATAGGTACG  
CCACCGCGCCAGCTGTCACTGCAACAAAGATCTCCGTAACCAATCCCAACAAATTGCCAG  
ACTGGCGACCGTCTCGGACATCCATCAGGAACGTGCCTATCCCACCAATTA CTGAAAGCA  
GGAGCGCAATAGCAACTGGAGCTAATTCCTGTGTGTCAAGCACAAGTTCCCTCCTACGTT  
GTCAGGAGGTAATGGTATGCAAAGTAACTTCTCAACCGGTCATTTGTTGCTTAAGAGGCA  
TTTCTATTGAGGTACGAATCAATAATCCTTTGTA ACTTTTTCAAGAATGAGCCTGTTATTG  
ATGCTGCAAATAATAGTCAACGCAATTCTGAAGACTTTCATCCATACCCTTATATTCGCG  
AAATACATGCCTATAAAGCCTGCAAGTACGGCAGCAATACACTCGGCCATCAATTGCCTG  
CATGACGCTTCGTAACGTTTTTCACAAACCCATTCAGAAACGAATGCACCCCGCCAAGG  
ATGGAGAGGAGCATTATTGTGAAATCACACATAACTATTTCTTAATAGTGAATTAATA  
TCATTGGGAAACGGTATGTACTTTGTGATTTCCACACATACTGGTTTTTTGTTAATTA  
TCCGCAGCTTGCTATAAATAACGATAGTGAGCAGAAAATATGCTAATAGGCTATGTACGC  
GTATCAACAAATGAACAAAACACTGCTTTACAACGAAACGCTCTTGAAAGCGCAGGATGT  
GAGCTAATTTTTGAGGACAAGGCGAGCGGCAAAAAGGCTGAGCGCCCTGGGTTAAAAAAG  
GTA CTCCGTATGCTTTCCAGAGGTGATAACCCTGGTCGTATGGAAGTTAGACCGTCTTGGG  
CGCAGCATGCGTCACTTAGTTGTGCTGGTGGAAAGAGCTGCGTGACAGAGGCATTA ACTTC  
CGGAGTCTCACTGACTCCATCGACACCAGTACACCAATGGGGCGTTTTTTCTTTACGTA  
ATGGGGGCGCTGGCAGAAATGGAACGTGAGCTTATCGTTGAACGTACACGCGCTGGACTT  
GATGCAGCTCGCGCAGAAGGTCGTATAGGTGGGCGTCGGCCTAAATACCAAGAAGAAACA  
TGGCAGCAAATGCGGCGATTGCTGGAGAAGGGCATCCCCGTAAGCAGGTTGCAATCATC  
TATGATGTGGCTGTTTTCCACGCTTTATAAGAAGTTTCCGGCGTCATCATTTCAATCCTAA  
ACCTTGGTTTAAGAGAACTCGGTACCAGCGGTGAAAAGATCCCCCTGTTGAGCACGGCTA  
ACACATGGAGTGCACGCCAGACTTTCAACGGCGGGATCACCGGGGCGCTGACAGGGAACG  
CCGATACCGCAACGAAATTGAAAACAGCCAGAAACATTAATGGCGTCAGGTTTCGATGGTT  
CTGGTGACATTAATATCAATACTCTGGTATCGCGCGGTCGCGTAACGGCCCTGGAGGCGA  
ATGCACAGGGAACATCCGGGATTAGCTGTATGAGGCATAACAATGGCTACCCTTCCC

CCTATGGCAATGTGCTTCACCTTAAAGGTGCCACCGCTGCTGGCGAAGGTGAGTTATTCA  
TTGGCTGGAGTGGCACGAGCGGTGCCCATGCGCCCGTACATATCCGTTCCGCGCGGGATA  
CTGATTCTGCCAACTGGTCTGAATGGGCGCAGGTCTATACGTCAAAGATTCAATTCCCG  
GCGTCAATGCCAAAGGGGATCAGGATACCTCTGGTAATGCGGGCTACAGCGACCAAGTTGC  
AGACAGCATGTACTATCAACGGTGTCTCGTTTGATGGTTCTAAAAATATTGAGCTAACGG  
CTGAAAATTTAAATCTTGAGCGAACAGTAGAATTAGCCGCTGGGTTCATTGCAGAAAAATC  
AGAACGGCGCGGATATTCCTGGAAAAGATACCTTCACAAAAAATATTGGTGCATGTCGCG  
CTTTTCACAGTTCTATTAGTACAGGTGCAGGGAACCTGGACAACGGCACAATTGATTGAAT  
GGCTGGATTCTCAAGGGGCATTCAATCACCCATACTGGATGTGCAAATGTTTCATGGTTCG  
ACGGCAATAATAAAATTATAACCGATACTGGCTGTGGAACCTATTCATCTTGCAGGTTGCG  
TTATTGAGGTTATGGGTAATAAAGGTGCCATGACCATCCGTGTAACAACACCAAGCACTT  
CCAGCGGTGGCGGAATCACTAACGCTCAATTCATTATTAATCATGGTGTGCTTACG  
CTCCTGGCTGGCGACGAGACTACAACACGAAAAACCTGCAACCTGCATTTGCTTTAGGGC  
AGACAGGAAACAGGGTTGCAAATGATAAAGCTGTTGGCTGGAACCTGGAATAGCCGGTGT  
ATGATGCAGACCTAAAAGGCGCATCAACATTAATTCTTCATTTCAATATGAACGCGGGTA  
GCTGCCCGGCTGTACAATTACGCGTGAATTATAAGAACGGCGGTATTTATTATCGTTCAG  
CGCGTGATGGTTATGGATTTGAGGCTGACTGGTCAGAGTTTTACACCACAACCCGCAAAC  
CCTCTGCGGGGGATGTTGGTGCATATACGCAGGCAGAATGTAACCTCAAGGTTTATTACAG  
GTATTCGCCTGGGCGGTCTGTCATCTGTCCAGACATGGAATGGCCCCGGCTGGTCTGACA  
GGTCAGGTTATGTCGTTACGGGTTACGTTAACGGGAACCGTGATGAATTAATTGATACAA  
CACAGGCAAGGCCAATTCAGTATTGCATTAATGGGACGTGGTATAACGCGGGGAGTATTT  
AATTATGATGCACTTAAGAAATATTACAGCTGGCAACCCTAAAACAAAAGAGCAATACCA  
GCTAACGAAACAATTTAACATCAAATGGCTTTATACAGAGGATGGAAAAAACTGGTATGA  
GGAACAAAAGAATTTCCAGTATGATACGTTGAAAATGGCCTATGACCACAACGGCGTTAT  
TATTTGTATTGAAAAGGATGTTTCAGCAATTAATCCAGAAGGCGCAAGCGTTCGTTGAATT  
ACCTGATATTACAGCAAATCGCCGGGCTGATATTTCTGGTAAATGGATGTTCAAAGATGG  
CGTAGTGGTAAAGCGAACTTATACCGAGGAAGAGCAGAGGCAACAAGCGGAAAATGAAAA  
GCAAAGTCTGCTACAGCTCGTCAGGGATAAAACCCAGCTATGGGACTCACAGCTACGGCT  
GGGTATCATTTCCGCCGAGAATAAGCAGAAATTAACCGAGTGGATGCTCTTTGCGCAGAA  
AGTCGAATCCACAGACACCTCCAGCCTACCAGTAACATTTCCCGAACAACCTGAATGAGA  
CAAGGCCCGATAGCGGGCCTTAATTTTTATTTCAGGCTTTTGTGGCCATTTCAGGATTTGCC  
GTATCCACACGGCTGACCAGAACACTGTAGCGTTCCCATGCTTCCAGTCGTGTGCGTTCC  
TCGTCTGTTGCCATATTCAGCCTGACAGCGCGTTCAGCGGCTGGATGACTGATTCAGCT  
TCGGAAAGCAATGCGGCCTTTTGTGATTTCGGCTTGTGTTGCTGTTTCGTCTGCCGTATAA  
ATCCGTTTAACTACAGCTCCATCCTTAAACATCCACTTTCCTGAATCATCAGCGCGGGCGG  
TTGGCTGTTATGTCGGGAACCTCAACGACGCTAAAACCTTCAGGGTTAAGCGTGGAGGCA  
TCTTTGGTGTGATGGCGACAATAATATTTTCATCGTAAACAATCTTTATGGTGTCTGGT  
TGAAAGTTTTTCACTTCTCATAACCAGTTTTTTCCGTCTTCAGACCACAACCAGATTACG  
TCAAATTTCTTTGTTAATTGGTATTGCTCTTTTGTCTTTGGGTTTCCTGACCTGATATTT  
TTTAAGTGTGCATAATTTACACCTGTGCGACGTTATACCATATGCCATTGATGTATTTT  
TGTATCGGCCTGAAGATAGCGTCATCATCGCCATCAACTTCACCAATAATCCTTAATCCG  
GTAAGTGCCTGTCCGGCTCTTTCATAACGCCCTCCACGCGCCATCAATTGAACAACACGT  
GTCCAAGTTCGGACATCTCTCACATAGCGTGAGTCAAATTTGCCATAATTTCCGGGAATA  
ATTTGCGCACCGCAAAGCCAGTTACCGTTATTGTCCATGTACGCCTGACCATCGGTGCCA  
TTGGCTGTCCTTGAGTTATTAATCATGTAGATGCCAAATTGCTTGTTCCTCCAGTCCACCT  
ATCATGAACCTTTCGGTCGGCGTGATTCTGGCGAAGTAACGCCTGAGTGCTATCAGTGTTA  
ACTATATTTTTCCCAAAGATAGCGTTGTTATCGCGCATCTGAATCCACATAACCATTACTG  
CTGTTAATAGCAAACGGTCTGAAAGTGTCTCCCCTGAAACATTAAGGCCACGCCCCATC  
GAAACAGCGCCAGTAGCGTTATTAATCCATAATGGCCTTAATCCGTTATAAGTCCCCATG  
TTGTCACCGGAGTTTGTCAACATGAAGTATGTATTTGAACCATCATTACGAATAAAGAAT  
CCGTAATTACCATAAGCAATACGTAGGCCGTTTGTCTGATTTTGTATGACTTCGCCATTT  
ACAATGGCATTGACAAGAACATACAAAGCATCCCATTTAAGATTCATCAGGTCTTTTGT  
GTGGTACTTTGTTTGTCTTCTCCATTTGAAATATTCATTGCCGTTGTGCGCTGTTTCAAAC  
CACATGTATGAATCAGTATCGCTGTGCGCATCATTTTTAAACCAATCTTCGCCAGTCA  
GTATTCGAATCCAGGCAAGGATTGAGTCGTTTTCAAAGTAAGTCCACCGGACAAGGTA  
TCGCCTGTCTTTGAACCGCGTTATCAGCCTTGTTTACCGTTTCCTGTAGATTTAAATCT  
TCCGCCGTTAGCTCAATATTTTTAGAACCGTCAAACGAGACGCCGTTGATAGTACATGCT

GTCTGCAACTTGGTCGCTGTAGCCGCATTACCAGAGGTATCCTGATCCCCTTTGGCATTG  
ACGCCGGAATTGAATCTTTTACGTATAGACCTGCGCCATTTCAGACCAGTTGGCAGAA  
TCAGTATCCCGCCGCGAACGGATATGTACGGGCGCATGGGCACCGCTCGTGCCACTCCAG  
CCAATGAATAACTCACCTTCGCCAGCAGCGGTGGCACCTTTAAGGTGAAGCACATTGCCA  
TAGGGGGAAGGGTAGCCATTGTTGTATGCCTCATAACAGCTGAATCCCGGATGTTCCCTGT  
GCATTCGCCTCCAGGGCCGTTACGCGACCGCGCGATAACCAGAGTATTGATATTAATGTCA  
CCAGAACCATCGAACCTGACGCCATTAATGTTTCTGGCTGTTTTCAATTCGTTGCGGTA  
TCGGCGTTCCCTGTCAGCGCCCCGGTATCCCGCCGTTGAAAGTCTGGCGTGCCTCCAT  
GTGTTAGCCGTGCTCAACAGGGGGATCTTTTCACCGCTGGTACCGAGTTCTCTTAAACCA  
AGGTATTGGATAACAGCAAGAATGCTTGTTTTGGCCAGAATATCGCGACCAACTGACGTT  
AAGTCAGTCTGAGAAACAGTGTCTGTACCGGTAAGTACGGCAATTTATTTGCGCCTGTC  
GCAAGACCAGCAAGCGCGGTTAAAGTTGCATCAAGTGGCTGTTCCCTGCCAGCGCATT  
GTCATTGTTGTCGCAAAGTTCGGGTCATTGCCAGTGCTGCTGCAAGCTCATAACAGGGTA  
TCAAGAGCTTCAGGTGATGAGCCGACCAATGCAGAGATAGCAGCCCCTACGTAAGCAGTC  
GTAGCGATCTGCGTATTGTTTGTGCCCTGTGCAGCCGTAGGCGCAGTAGGGACACCCGTT  
AATGCAGGGCTTGCCAAAGGCGCTTTGAGAGCCAAGGCATTGTTGATAGTTGTGCTGTAA  
TTCGGGTCGTTATTGATCGCAGCCGCTATTTCTTTCAGCGTATCCAGTGTGCCAGGGCGCA  
CCGTTGATAAGTGCAGTTATAGCTGCCTTAACAAAGGCTGTATTTGCGATCTGCGTGCTG  
TTTGTACCTTGCCTGCGCTGCCGTCGGCGCGGTTGGCGTTCCTGTCAGACTCGGGCTTTCTATT  
GGCGCTTTGGTATCAGCCAGATCTTTTATAGACTTAACAGCTTTAGGGGTAGCCGCCATT  
GTTTCGCTGTCGCTGTTAGTTGCGCTACTGAGCTGAACTAATCCCTTTTTCGCTTGTGCTT  
GCATCCTGTGCCGTATACTTGCTTTTCGCCAGATCGTAGGCTTTTTTAACTGCCAGCGAA  
CTTGCAGCAACATCACTTCTGGTACTGGTTACAGAGTCTGAAATATCAATGCCGATCGAG  
CGGTTGATACGCTCGGATGTATCAATCATCTCCTGGGTAATGGCAGATACACTAGCAGGG  
ATATTCACCGTACAAACAAGCAGCTCCCCATCTCCTAACTGATATGAATCGGTATAGGTT  
CTGGCAACAAATTCAGCCGCATGAATATGTGACGCGGTATTCACCTGGTAGGTATCTTCT  
CCAAGGAGGTATCTTCCCTTCAGCACAATTGCATATTTCTTGCCTGCACTAAGTGCAAGA  
GAAATATCCTTACGTTGCTGAATAGTTACCTGGTAAAATTACCAATATCCACCGACGCC  
GCGCCTGCGGTTTTATCACCATCCACTGAGGTAATTAACAGGTTTCATCCCACCGCCAGGC  
TTAGGTAAGAAACCGGCATAAAATCCCGGGTCAACAATCCCCCTGAATTTTTCGTTTAGC  
GCGGCTGACAGATATGGTTCGTGGTATTGCACATCGGCCACCAGAGCCAACGACTCGGAT  
GATGGGTAAGTAACCGATGTAACAACCTGTAACGTCATTTCATCAAGCATATCCTTATGCTG  
TAGTCGTGTTTATGGCCATAACTGCGGTATATGTTTTGCCACATAACAGCGAGTCTTCT  
GGACACAAATAATGGCGATTGGCTTGTCTCGTTATCCAGAACAACCAGAGTGTGTAATG  
GGTAGTTTTTCCCTTCCTGCAACTGGCTTTGATCAAGGTCCATTCGGACAGTAATTATCC  
CGCCTGAGTAGGTTGGGACGAGGTTGATGGTGCAAAATTGACTGGTCAGTTCTGCCAGTT  
CGAAAGCCTTTGGCAGTTCTCCAATCTCATAAGTGCCATCTCCTTTCTTAGTAACCAGCG  
AACTGGTACCGAAAACGGCCTTGCTGATTAATAAATCGAGAGCCTTTGTTAATGGACGATT  
CAGCGCGCCGCTGATAGTAATAGTCCAACAACCTGACTCTTATAGAGGTTTGTGAGACGT  
CAGACATGATTTTCCCTAATCAATGTTGTGAAGCCTCATTGTAAGATAAGTAACCTGTCA  
CCCCGCCCTGCGGACGGGGTGATTATCAGGCATCACTATCCAGCAGCAAATCATCTGCGC  
GGGTGCGATCAAACGTAGGCGTTGCTTTCACAATAGTGCCGCCCGGGCGTTGCAGTGATCG  
GAGCGCTAATCGACGTAACCTCCAGTAAGCGAAGTTGTATCCGAAGTTTCAAACCAGCAGT  
ACGCTTTTTTCGGTATCAGAAATCTCGTTCAAAGTGATCATGTCGGCGTGTTCAATTTACAA  
CAACCGACAAATAGAGCGTAAGCCATCAAACACTATATGCAGTGGCAGTAGAGGCTTTA  
CGAACTGATTAACCTTTCTGAGAATTTCTTCTGTAATTGCGGACTGATCTATCGTGCCAG  
TAATACCCATTGTCCTGGCCAGGTCGTTTATGGGAATACTGATCATCCCTCTGGAAGTCA  
GAAACATCTCGCCGAATGTGCCGCGGTAGTCTCCAGTGTGCTTTCTGGTATTAGAACCG  
TGCCATAGGGATGACGCTCAAGGTCCACCGGTGCATATATCGGATCCCATAAAACAGAAA  
TACCGTTAAATTCGCGGTAAATTGTCTGGTTTATAGGGCGTTCAGTCCCCCTTAAAGTGAA  
TCTCATCAAGACGCTGTTGTAACAACATCGGAACGGAAGATGAGTTCGACGTTCTGATAG  
TAAAGAACTGGCCAAGTTCATTTGTCTGGTCTCCAGATCCTCCTTGCTCATGGAAAAAA  
TAGACTTCCGGTTGGTAATTCGCTCCAACCATGGGTCAACAAAGGTATCCATCATTGACT  
GAACCAAATCAGCCAATGATTTATAGAGCAATGACTTTTGCTTAGCTGATGTAAGCCGGT  
GATTAAACCAGGAACGCTGCATCACTCCTCCTCATAACGAAATATTAAGGTGGAGTTTTT  
TGTATCCAGATAAACGAAATCGTAAAAGCCGTTGGACTCATTCCACTCGACAAATTCAG  
ATAAAAGTCGCGGAAATAACCCAGCGTTTTTCGATAAATGCCCAAACGCTTTTTTTCTTGAT

TAGGATGTACTTGCCGACACGGTTCGGATCAAAGAAAGTTGAGTCACGCCCAAATTTTGT  
TTCCAGTGCCGACTTCAGCTCATCAGTCACGTTCTCAATGGTCAGGCTTGCCGATATCCG  
CCCGGTGATGGTGATCTTAAAGGGTAGTTTTCTGACCTCTTTATACGAGAATTTCTTGT  
CAACTCATTCCGGCACCTTCTTAAAGGCAGCCAGGATCATTCTTCAAGCTCTGACTGGCT  
TTTGTGGATGCCATCCTGAAATAAATATCTTATTGATATTCTGAACATTATAAGCACC  
ATCTAATTTTTCTTGCTGACCCTCGCCCCATGCCTTTACCCAGGACAGTCCCAGGATGTT  
ACGCACCAGAAAATACGTATAGTCCCCGCCCATACGACCTGATCATCATAGGCAAGGTA  
ATATTGTGCACGGTTACGTGTGATCTCCGTTGTTTCGGCATCGGTACCTGCGGTTATAGG  
TGTCGTTGTCTTAACTGAAATCAAATTAGCTAAATTAGCCGCAGAATCGACAGGCGTCAG  
GTTTTGGCCAGCAACCAGGGTTATATCGCCGTTGGTGCACCATACTTAAGCGTAATTGT  
CGAGCCTTCTGGCGGTATTTGCCCAATTAGCCCATCGCCGAATCGAACCCCAACTGCTC  
GGATGGTTTATAAACTCAACGTAGACCTGGCTTTACTACCGGCTAACCGGAACATAGT  
GCTGGAAGACCACTGCGTGGTCTTACCATCGGTCTGTCACGAATACTTCCAGCTTATAGCA  
GACAGCAGTGAGAGCCTTTGATAACACGACTTCCAGAAATTCTTTGGCTGCCGTAACGGT  
ATATGTCACCTCCTGGATTTCCAACGTGTGCCACTTCTACCGTACCGGTGCCGTCAACCAA  
CCTGCATACATCCATAGTCATGTAAGGGTACTGGTCTGTCAGATATTAAGGCATGTTTTT  
GGGATTACCGCTGGGGCATCTTCACTTGTGGCGGTGATCTCAATCATCCCCGATGACGG  
TGTTGGCTTGGTACCAACGTAACCTTTCGTTTCTGCCGCTGCCAGGATAGAGGAACGCCG  
CGTCGCGGTTCGATATAAAGCCTTCAGCCAGCGCCGCATCGGCATACTGAAAGCACCTGTA  
GACAATCTGGGTAATAAACAATGTCAGCATCGAGACAAATTGAGAGCCGACAAACTTCGA  
CCAGAATGAATCTTCTCGACAAGCTCTTCAAACCTCTGCACGAATACTGTCTTTAGTCGG  
TGTTGTTTTACTCATAGCACCACGTCCTGTGTGATAGTTATATCCCTGATACGAATGGAT  
ATTTTCAACTTATCAAAGCATCTCCCTCGGCTACTGACAAGCCAGAAATCGGTATGTCA  
GGTAAATCTACCGTCAGTTTTTGCAACAGCATTGCCTCAACCGCAATTTGAACATGCGAC  
AAGTTGGTCGGTTCATGTTTAAACTGCGGTAACAACTTGCCCCATGACGGATCCCCGTAT  
ACCTCACCTGATAAGTGTTTAGCCACTCATATAAACGAGCGCCCCAGGCCCTCCTCCTGG  
GACTCATAACGTTTTTACGCCGGATAACTCCAGCGTCAGCAAAGGATCAATTTTCGTTATTA  
TTGGCCATCAATCAACTCTCGCGTAGTCATTCATCAACGGATCATCAATTGACAGTGGTA  
CCGTGCGCATAACGCCCGGTGAGGCGTGCTGACCTTACGACAGTTCCCTGGCCTTTCG  
CCGAGTCTTTGGTGTGCTCTTCAATCCTGGCAAGCAATGAGGTCATCTGCGCAAACAGCC  
GCTTCGTTTACCATCAAGTGAAACGGTATTATCAGCCAACTGCATTGTCCGCTTGGCAC  
CGGAGCCGCCAAGGTCACTAATAACCTGCCCGTCTATCTGCATACGACCGGTTGGTTGCT  
GCAAATCGTTGGCGGCAGTCGTCACCTGGGACGTGGAGGCTGGTTGAGGAGAATTATTTG  
AGCGCATTCCCCGGGCATTAATGAGTTTGTGCATACAGCCCATCAATCCCCATTTGTGCAC  
CGAGTTGGTCAAAGTAACTTGAGTTGTTTGCTACCGGACGTGCCTCTTCAGCTGGCATAG  
GTGTATCAACATACATTGCCAGCTGCCGTTGCTGTCCCCTTTCCTCGTGCGCGTTCTT  
CGAGGGTTCCCTGAACGACTTCCCGACGCATCCCCGGCCATTCATGAATTTGTTGACCA  
GATCGTTAACGCCAACAGCATTGCCGATTTTGTCTACCAGACCGCCTTCTCAAACGGGC  
TATACCAGGGGTAAACGCCAGACCAGTAGACTGATCGATAACAGCGTTATCAGGCAGTG  
GTCCCCTCACTCCATATTGCGCCCCCCCCCTGTGCTCCTGCCCCAGGTGTATAGATTTAC  
CACCTAAATAGCGAGCACGATGAGTATTGACCTTGATCGCGTACTCACGGTTTTCTTTCG  
ATAAGTCACCTGTGCCTTTTTTCCACTTATTGATAGTGCCAAACCCTGCGTTATATGCAG  
TGATGGCCTCGTTTAAGTCTCCATTGGCTTTCAGATACTTGCTCATGAGAAGAGCCG  
CAGCTTCTGCCGATTTTTCCGGATTAAAGAATCTTCCCGGGATAATCCAGTTTCCTCAC  
GAGCAACGCTCGTAAACTGGAACATTCCGAGAGCGCCACCACTTAGCTTTCATTTGGTG  
ATCTTGTAAGTGTAGATTTTGCCTTAGGATTACCACCAGATTAGTTGCAGCGATCGCGT  
AAAGAGTACCTTCAGGAAGGCCATATTTATTCTCTAGTTCAGCAAATAACGGAGCCA  
TATCGAGATTTGCCTTACCTTCAGCGCCAAGACTTCCGACTTTTACATCCAAGTTGCCAT  
TATTGTAGGTATCCGCAGCTTTCTGAATGTCATTCCTGGTGCCAGTGGTATTAAGCGACG  
ATGATGACAAGCTATTTTGAACCAATAGCTTTATCAATTTTCTGCAACGCGCTATTGCCCG  
TTTCTACGGCATTGTCATTGATAATCTGATTGGCAGTTTGTTTAACTGTTTTATTGCTAT  
CTTTCGCCGTGTCCAGTGCCGCATTTATCACGCGGGTAGCAATATACTCTGTTTGGCAT  
CGGATTCAGTTTTAGAAATCAGACGTCTCCTGGTGGCTATTAACCGGAGCTTTTAACTCTG  
GAGTGATTTCTTTCGCATTAGCCTCGCCGATCGGATTGGGTATTTTTGATACAATCATTG  
CCGCAGGGGTATTTTTAACGGCATCAACCGCTGCATCTAATGCTTTACCTGGTAAATTTT  
TAACCCCATCCCAAATATTACCAGCCGCTCTTTAATGTGTTTCCCTGGGTCTGAATGA  
AATCAATTGCACTATCAATTGCATCACTGAAAACCTGTTTCAGGTTATCGACAGTAAAGA

AGTCCTTGATGGCATCCAGCTTTTTCAAGCAGCTTATTAGATGTATCGCTAAACCATGCTG  
AAACAGCATCACCAATCTTTGCTGTGTAATCATCGAACTTGGTAGAAATGGTGTGCGCAA  
GGTTAGAAATATATGTTTCTAAGTTGGTAATCCCCTATCAATGGCCTGGGCAATACTTT  
CCGTCGAAAATGATTGCAACATATTGCCGATATCCTCAAATCCAAGTGATTTGAGAACCT  
CACCAATGGCGCTGCTAATAACCAGATACCAGTCCCCCATATCAAGAATATTAGCTAACG  
TATAAGCGGATTTTTGCTGGAATGATGGATCTTGTCTGATTTAAGCCCAAACGCTCGAC  
GTTGCGCTTCTGTATCATTCCAACCGGTTACCGCATCATAAATACCTCCAGCCACTGTGC  
CGACTAGGGGAATTGCGCGTAACGCCCTTTACCAACTGCCTTTAATCCAAGTTTACCTG  
CTGCCCAGGCAACCAAATCTCCGCCTTCATGGGCGAGAGTCTTCTTACCACCACCGCGTA  
GCATTCCTACAAGTTTCTTTGCCCCAGTGCGCCAAAAGCGAGTGCTCCAGCTTTTTTTCA  
GCATGCCACGCCCCATTAACAACGACGCGACGCCACCGGCCCTTCCCTAACAGGCTAA  
ATAGTTTGGACAGCAAGCCGCCCTTCTTTTTCCCAGTGTTTTTGGCTATCTGATCAAGGG  
CGCTGAGAATCTTGTCAATTGCCCTCTTAATTTTCGCTGGTCTGCTCCTGAAGTTCCTGAA  
CCGTCCGTTTTTGGGTGTTAACCTGAACGACATCGGCACTATTTTGTGATTTACGCCTAA  
AAAAACCTTTTTCTACGGCTGTTATCGTCATTGCCACGAATCACATCGGCAATAGACTTTC  
TGGCACCATTAAGCGATCCACCAACTTCTTTTGATATCCCGCCAAGCTCCTTCCCTGCTG  
CCCACAATGGACCAGCAACGGCATAACCTAACGCATCGACGGCACGAGTCTCTGAAGGGT  
TACCTATGCCTTCAGCTACTTTTGACAGTTTTTTTTAATAAACCTGATTCAGCATTTAGAC  
GCTCATCATCCTCTTTTTCGCCTGGCCTTTTTCTGCTCGTTCAGCACGGGCATCTTCCGCTG  
CGGCCTTACTCCCTGACTTTCCAATAAAACGACCACGCGCATCGCGTTGGTTTTGGCTTT  
TTTGGCGACCGCCTTTTTGACCGAACATTTTCGCGAGCGTGTTCGGCTGCTTCGGTCCGTT  
GTGCCTTTACATCCTCTGGTATAGCCTTCCTGCGTCGTTTTTTACCCTTTGGTGTGGTTG  
ATTTGGCCCCTGTTTCTGTTGAGCAACATCTTCTGAACTACACGAGAAACGTCCCCTA  
AATTAAGCCGTTTCATTGCCTCAACAATAGGGTCCACTGATGGCGCATTGGCCACAAAGT  
CTGGCCGGGAATTTTCGATTGTGCGATTTAATGCCGACACACTGCGAGAGACAGGATAAA  
CTGTAGCAACTCGCCCCCTTTCAAATCTTCAACGGCTTCCCGAATACCTGCAAGCTCTT  
CCAGCTCTTTTTGCGCTGGCGGTTTCAACCGTCCTTATCACATCGTCAATGTTGGCGTTTT  
TTCTTTCCATGATCTTATCGCCTACCGCTTCGGTTTAAAGTTTTTCTTCCAGTTTCTCCA  
CAGGAAAACGCATAGGATTCAGTGAGCCTTTCAGCGTCCTGAATCGGTATACCCCCATA  
CAAACCAGGTTGGACACTAAGGTCTGATAGCTTTTCAATCCCACCTGTGGAATGAAAT  
CGGTAGCCCGAAAGGGCACCCACAGACGGGTATACGCACCCTCTGTGGACTCCTTTGTAT  
CCTGGTTTTGGGCATTTGTGCGGGCGGAGACGAAGACGCATTTTCGCCTTTATCGATGTAGC  
ACGGTAAACCATGTTTCGAGCTTTTCATGAGCCAGCCGGATGTGTGCCGCCAGCTTCATAA  
ATTCAGTATCAATGGCCATCCGTTTGATCGTTCATAACGACGCTCAGCCTGCTCTTCAC  
GAGTACCGCTAACATCGTTATAAAGTTCACACTGATAAGCGAATTCCCAAAAACGCAAAT  
CAACGATCGCTTCTTTGAATTCCGCGTCGTCTTCAGGTGGCAATGCTGCACGGCGCATCT  
CCAGCATTTCCATTGCCCAACCATCAAGCGGCACGATACGCCATTGATAAGGCACGCCCT  
CTACAGACACCTCAATATCGTCAATGAACGGTTCCACTTCCAGGACCTGGATATCTTCAG  
CCAGAGCATTATATCGCAATCGTAATAATGCTCTTTACCGCAATGTTTACAGGTGTAGG  
TGAATGTCTCGACCGGTGTTTACGGGAGCCAGTAAATATCCACCATAACGCGGTAATCC  
GGTCTGCGCCGTCCATGTCAGGGGATCATAATTTTCGCGGGTTCAGCCAGCAAGGCTTTTA  
AATACGCCGTTGTCTGTTGTTCTTGTTCCTCCGGTGTTATCGAGTTGAAACGCATCGCAT  
CAGCAATATTTGGCTGACGGAACCTGGATCAATTCAGTTGGCCGCGATGGTAGCGGGAAAA  
GGGGTAAAAGCATCCTTGCTCCTTAATTCAAAGAGAAAACTAAAGCCCAGAAGGGAAGC  
CAAAGAACTTGAGGATTGGTTAAACGTGCTGTGCAATGCGAAGGTCATTGGGAATGACTT  
AAATTCGTAACCTGATCCCAGCATAGGTGACATCGCCGGTAGTGACCGGGAATACCGT  
CATCTCATTTTTCCAGTTTGGTTAAGCCGGAAGACAGCAACCGATAAATACGCACATTGAG  
CAAATATTGAGACGGTATATTTCCCGGTACCGTCCGGATTGATACCCGACTTTTTGCCGT  
CTTAAACCAGTCCAAAACGAGGCCATCAACGGTATCCCTGACCATCATTGTTATCTGCCC  
AGGCGAACGCTCCGTTGGTTGAAGGATATTCCTCCGCCGATTTTAATCGTTTCATATTC  
GATGCTGTAATCGTGGTAGGTAATGTCTTTGGCAAAGAAGTCTGCCCCCTCCAGTCCATC  
AACTTCGACAGAGAACTGCCATCCTTGCGCGAACAGCATTTTGTTCATGATGATTGACGT  
CAGCTTACCAACTTCCCGCTCACCAACGCCGGAGCCAAATAATGTCGTCGTTAATGCCGA  
AGATACATAAGACTTTACTGAAGCAACATTAAGCCCCATATCAGCCCCCTCACTTCAACA  
TGGATGAGAAAAGAACAATCCCCGGGATAATTGCCCTTGTGCGCTCATTTTCTCTTCCA  
GATCCAGCTTTCGCTGATACAGCGTGTTCGTCGGATAAATTGCTGGCATCGAGTTTCC  
CCGCGATAGATATTTCTTCGACGGCGATCAGTGTTAGGTATCGCGATTAGCACTTCCAGAT

AGTCAGAAAGTAACCCAATGATTTTCAGGTGGCACTTCCCCATTATCCAGATCCATATCAC  
GTAAATTAGCCAGATATGACACATTCAGCGGGTATACCGCTCGATGAGTATCTTCAAGCT  
CAATATTCCCATCGTAAACATCGGAGTAGACAAGATCGCCGGTGTGATCTGTAACCGATA  
CGAGCGCAAGAAAATCAGCTGGGCAAGCAAGTGAATTACTGGCCTGATCGGTGAAGCGTA  
TCCGCTTGATGTGCCCCGCCCTATCCTGGTAGGTTCCCAATGCTTTTCTTAGCAGGGATT  
CCAGTAAGGCCGGTTCATCCGCAATCAAAGGTGTGAAGCGGGTTTTGACGTCTTCGAGTA  
ATTGTCGTGGTGTCAATTGAAACCTCGTAGAATCTGGTGTGTTAACCGATTCTACGAGTAG  
TCATTTGTTCAATTGAGTAGGAATATTGTTGTCTGGGGGGTAATCAGTGTAGGTGGAATGA  
GGGATATGATATGGTTATCACATAATCAGGTTGTTTTGAGTAAAACAATAAAACGCCCTT  
TAATGGGCGTTGTGTTAAACTTAAATTGACTATCCTTTCAAACACTATTTTAATTCTAT  
GTAGTTTTTAAATTCTCCCTCATATTTATACATGATGCTATCAAATCCTTCCATTACATC  
AACGAATTGTTGTGAACATTCGGCTTCCAAGGCGTACACTTACGAACCATATCCATTTT  
ATTCTTATCCTTCGTTGTATCGACTAAGGATAGGTACCCTATAAAAATTCATCATCTGAAC  
AGGATCTTGATTTGTGAATATATATTTGACGTTTTGCTTAGTAGGTGAAAAAGAATCAA  
AGCAGGGAACATATATTCACCAGAAAAAGAGAGTGCAGCATCAATGACGTCTGTTGCTGG  
AGTGCAGTTGCTCAGAATTGGCACTAAGCTAAAATTAGCACCGGAGCACACTGCATATAT  
ATCATCCCCTTTTTTTAGTTTTAACAGAGAGTCTTGCTTTGAATCCAATATTTTCAATTT  
GATATAATTTAGTGGCGTTGCATTTTCCCCTGGAGTAAATAATTCTACAATTGGTTTATT  
ATTCACCATTCTTATGGATTTTATTTACCATAACAAATTGGAATTGTGTTCCATTTTTTC  
CTGAGCAGCAAATTCATTATCTTTAAAATCATTAAACCAACTCAGATGGCAAATGATAACC  
AAATTGATTGTTCAATTGCTTTTGAAGCAAATCCAGACAAATAGAATGCCCTTACTAAATC  
ATAATCTTCTTTGAGGTAGAAAGCCAATCTGGCAATTTATTATCAGCTATCGCGCTTCC  
AGCAAAAATAGCACAAACAAAATGTTATTACATTAATAATTTTCAATTTTCCATTCACTCAT  
TAATCGGTTTTAACTCACTAATTAATTCACCAAGACTATTTGGGTATGCTTTATAAATAA  
CATACTCCGAAGAGCCATCTGAATATTGGTAAACCCCATACAGACCAGTTTATTTATTC  
CTTCTGAATAGTTTTTTGATTATAAGAATCAACCACTGTTATTCCATATGACGATAATA  
TTTCGTTATATTCTTCAATAAGAGCTTTTCTTGTTCCTACTGAATTGCAATCTACCTTCG  
AAAAGTCAACTTCATCAGCAAAAACATTAATGTTAAAAAGGAAAGCACTAAAAACAAAC  
GAATCAGCATAAATCCACTCCTACGCATGGATTAATAGTCATTGATCGCAAAGGCGTAAA  
CGTGCCCAAGGTATTTTCGTATAATCGGTACAAATCTCCTTTACGCTTGATGCTGCATTAA  
CAGTCCCAGCCATAAATAATAACGGTAGTAATAGTTTTCTCATTATAACCTCACCTGCCT  
TATAACTCATTAGGGTACATATTTTCGCCTTTAAAAAAAAGAGGTTATTAGATCCA  
GTGTATTTATTAACAAATAATGCTCTAATAAATTTGTATTTTTTAAGTCGCGAATGCTAT  
CTTTTCGCATCATATTGACCTTTTAATCGTTCAGGCTTATAGTTCCACCGTCGTAGCAA  
TTCTGCGACCGGTTTTGACAGCCTGAATGTTAGTGCGGACAACCGCAGATTTCGATATT  
GCGGTATTTTTGTGTCCGTAAACCGCGTTACGCCCGAATTATGGTGGGGCGTGATGGGGA  
GGCTTCGGCCTGCTGGTTTACTAACGCCAGTCTGTCAACCCTGTCACGTCCTGCCACCT  
GTTTGACAGCGGGTAGCAGGTTGTTAAACCTGTTAGTGAGGCCGTA  
CAATCCTTGACACACGCCCAGAATTCATCTGGCGTTTCTATTCTGTAAAAAACACCACTA  
TCACTTCGTTATCGCAGCAACTGAAGACGAAGCACGCTCTCAATTGCCTGATGGCCCCTG  
CATTTTTACTGCCCGTTTTTCTACTAACTCGCGCAATTCACTTAGTTACTGGAACCTCCC  
CTTCTCTGCCGACGTTTACGGGGGTTTTATGAAAAACCTCTCGTCACCCGTAATGAAATA  
GCCGAAGCGATCGCTTTGCATACTGCCTGTATGCCGACACGGGAGATCCCCGGCGCAATT  
GCTAACTATTTTCATGATAACCAGGCGTTTTTATACCCGAACAGATAAGGCTGTGATCAAC  
AGGCTACTGATAGCCGAGATCAGGGATTATTTGATTGAACAAGGACGTCTACGTTACGCA  
ACAGTGGCAGCAGAAATAAGAAAGGAGGCACATAGAATGACCGGTAATAATTTGAATGTT  
GAAAAAACAGCACCTGTTACGTCAGCTACGCCAGCACCGGCGTGAATATCATCCCCAAC  
ACCGGAGACACAATCGACAGCCAAACATTTGTTGAAGATGGTCAATGAGGCACGCAAGTTA  
TGTGGAGAACCAGAGGTTAGAAACAATAAATTCATCGAAAAATACTCGATGAACTTGAA  
GGTGAATTTTACACAAAAAGTGCAAAATCCCATGGCACAAGGGCTGGGCGCTTTTTGAG  
GTCATCACCATGACCTACAAACAAGCCCTGCGAGTCCGCCGCGCGGAGTCAAAGCGGTC  
CGCCGTTTCGCTGATCGACAAACTGGAAGAATTGCAGCAGGCAAACCTCCCCTGCCCATCG  
ATCCCCCAAACATTACCAGAAGCTCTACGCCTGGCTGCCGAGTTGGCAGAACAGAAAATG  
CAGCTGGAACAACAGCTGGTGGCCGACGCCCTAAAGTAGATTTTGCCGACCGGGTATCA  
GTGGCTAATGGAATCCTGATCGGGAACCTTGCAAAGGTCGTTGGACTTAAGCAAACGCC  
CTTTTCTCATGGTTGCGCCAGAACGGCATTCTCATGGCTTTTGGTGCAGCAAAAACGTA  
CCGCGCCAACAGTACATCAACGCCGGGTATTTACGGTGAAAGAAGTGGTGTCTGGATGAT

GAAAATGGCTACCAGATACGGCTGACGCCCAATTAACGGGTAAAGGCCAGCAGTGGTTA  
ACTCGCAAGCTACTTGATGCTGGTTTGTAAAACCAGTAGCAATAGGTTAACAAAAGAAA  
AAAACCTGCCAGCAAACCTGGCAGGTTTCTGAGCAGATCGTCCAACCCGATCTGGATCGGG  
TCAGAAAAATTTGCTCTAATAAATTTCTGTTTTCTAAGTGCAAAGAATCACCATTTTCGAGC  
TGGTGATTGAAGGTTGATGCAAATTTGGAGAAAAAATGCAACAAACATTCAATGCGGATA  
TGAATATATCAAACCTTCATCAAATGTGCGATCCTTCAACCACTCTGCCCGTTATTTGTG  
GTGTTGAAATTACGACCGACCGCGCTGGCCGTTACAACCTTAATGCTCTACACAGAGCGA  
GCGGACTCGGTGCCATAAAGCGCCAGCTCAATGGCTAAGAACGCTGTCAGCTAAACAGC  
TCATCGAAGAGCTTGAAAAAGAACTATGCAGAATTGCATAGTTTTCGTTTGAAGGCCGTG  
GCGGCGGCACTTTTGCCCATGAATTGCTCGCTGTGGAGTACGCAGGCTGGATTTCTCCCG  
CGTTTCGGCTGAAGGTAAACCAGACATTTATCGACTATCGAACCGGAAGATTACAACCTG  
CTATTCCGCAGAGTCTCCCTGAAGCTCTCCGTTTGGCTGCCGACCTGGCAGAGCAAAAAGC  
AACGGCTGGAGCAAAAAATGCTTATGGATGCACCTAAAGTCGAATTCGCTGAACGCGTTG  
CTACCGCCAGCGGGGTTCTAATCGGCAACTATGCCAAAGTGCTCGGCCTGGGCCAAAACCT  
ATCTCTTACCTGGTTGCGTGATAACGGAATTCTGATCGCAACCGGTGAACGCAGGAACG  
TCCCCAAAACAAGAATACATATCTCGTGGGTATTTACCCTTAAAGAAACCGTGATCGATA  
CAAGCAATGGAAGCAGGATTTCTTTCACGACTCGTATAACCGGCAAAGGTCAGCAGTGGC  
TGATGAAGCGATTGCTTGATGCTGGTGTGCTGGTACCTGTGCGGGCAACGCGCTAACAGA  
CGTAGTAAGAACCACCAGCATTGTAATGCTGGCTAAAGTCACTTTCCTGAGCTGTATAAC  
GATGAGCGATTTTACTTTTTCTGGCTATGAATTGGCCTGCTTTGTAACACACTCCGGTCT  
ATCCCGTAGCGCCGGGCATATCCTGTGCGCAATGTGCAAATCTCGCGGCAACAACCAGTGA  
ATACTTCATTCACAAGCCTCACCGCCTGATCGCGGCAGAACTGGTTATAGCCAATCAAC  
CGTCGTTTCGTGCATTCCGTGAAGCTGTAACAAAGGAATTCTGTCTGTAGAGATTGTTAT  
CGGCGATCACCGTGAACGTCGCGCTAACCTGTACCGGTTTACACCATCCTTTTTGGCCTT  
CGCACAACAAGCCAAAAATGCGCTGATAGAAAGCAAATTAAGATCTCTTCAGCGGCAAC  
CAAGGTTAAAGCTGTTCTCGCTAAGACATTGGCTTTATTTAATTTTTTATCCACACCCCC  
ATGTCAAATGATACCCCCCTCCCCCTGTCAGGATGACGTGGCAATAAAGAATAAGAAGTC  
ACAAGTTAAAAAACA AAAAAGATCAGTTTTCCGGCGGTGCCGGAACAACCAGCCTCAAAAA  
ATTGACTTCATGGATCGCTAAGGCAAAAGCAAAGGCTGACAATCTGCGGTTATCCAAAAA  
ACGCACTCAAAAACATGAGTTC AAGCAGAAAGTAGAGGCGGCTGCGCGGAAATATGCTTA  
CCTGAAGAACAAGCGTTCGCCTGATATTGGCGGGATATCAAACCTTCGATAACCTACCGCA  
TTGCATGACGGTAAACGAAGCTCTTAATGCGGTTTTAGCCAAAAATAAAGATAACGAACA  
ATGGGGTATACCGGCAGGATTCAGAGGGTAATGAATTGCTCTAATTATAACCATGCATAC  
TTTCAACACCTCTAGTTTGCCATGAGGCCAACTCATAGGTGTCTGGTAAGAGGACACTG  
TTGCCAAAACCTGGACGCCCCATTATTGCAATTAATAAACAACCTAACGGACAATTCTACCT  
AACAAATAAGTGGAGTTAACATGTTGAACCGAAGAACATTTAATGTATTCTGCGATGAATC  
CTGTCACCTACTAAATGATCATAATAAAGTCATGGTATTGGGTGCGCTTTGGTGTCCCGG  
CACTATCACAAAAAAATGCTAGAGACATCAAGGAATTA AAAATTA AAAACACAATCTAAA  
ACCTGATTTCGAAATCAAGTGGACTAAAGTATCTGCGTCCAAGTTGAATTTTACTTAGA  
TGTCGTAGATTACTTCTTCAGCAACCCTGCATTGCGCTTTAGAGGTGTTGTTGTTCTCTGA  
TAAAGAGCAACTGGACCATGCTCGATTCCATCAAGATCATAATACTTTCTATTATAAGAT  
GTTTTTTTTATGTCTTAAAAAACATAATAGAAAGTAACAACACATACAATATCTACCTAGA  
TATAAAGATACTTTAGGTATTGAAAAAATTGAGAAATTAAGAGGGGTTCTTCACAATGA  
TCGCTATGATTACAATCATGAGTCGATAAACAGAAATTAACATATAACGATCTCATGAAGT  
GCAGCAATTGCAGCTAACGGATCTTTTCATTGGCGCGTTAGGCTACGTTTCATCGAGGAAT  
GAATAGCAACGCGGGAAAAATCCAAGTCATAAACAGAATAAAAATCACATACAAACAGGGA  
GTTACTAAAAAGTACTCTTCCAACAGAAAGTAAATTTAATATTTTCGTGTGGGAGGCTCG  
CTGATGCTTCAAATGCCAGATTTATTGTACTTCAATGGAAGTTGGCAAGAGTATATAGAC  
GATGTATATGATGTTGTTAGAGAAGATATTTTAATATCTAATATAACGTTTAAGGGTCTC  
CCTGTTTCGATTACGTTATTCACCGGAATATAATGGGAAAGAATTCGGATTTTGGCATTTA  
GTATCAGAGGGAAAAATAGAAGAAGAACGTATACCCGATCTTGAACGGTGCAAGCGAATT  
CGCTGGATCGCGCACATGATAAGGAATTATAACCATTGCGATATATCATGTTGGTCTGAA  
AGACGAGGACCAACTGAAGAGTGGGTAACTGGAATGAGTGTGAAAACCTACGTTGTTGTG  
CTATCCGCACGTAGAGACTATTGGCTTCTCAAACAGCCTATGTTGTAACCTATGACAGT  
AAAATCAGAACACTCAAACAAAGCAGAAAAAGAGCACTTGGGACATAAAAAGCTGAACCC  
GACACATATTGCTATGTATCGGGTTCGATCGCTCTTTCTACACATGGTAGATGAGTAATG  
CAAATCTAACCGATCTACTTTAGCTTTTCAATAGCTAGCTATAACTTTCCGCACATATTC



TTCTGATAATTCCGGGAGAGCGGTTGGGTTTTTTCATGCTTTTCTGCGCAGAGAAGCACA  
CTTATTCAGCAATAATAAGTGAATTCTTTGTTATCACTAAGTATTTCTACACACCAATA  
TCGTAACGTGTTCACTTCAAGTGTAGCCAGCACCTTATGTGCGAAAAGCCCCCTCCCCTAC  
ACATAACGATGGCTGACATTCTGCTAAGGCACATAACCATGTATTGGCATCATAGAGAAT  
CCAATAATGCTCCTCGGAAATAGTTTTGCATCCAATTATTTGGAATCTTCGTTCTATCGT  
TTCAGGAGAGTATGAAAAATCAATTTCCATAATATGCTCAAAAATTTTCGCTATATTGACAT  
GATTTAAGCACAAAAAAGCTCCCGAAGGAGCTTTAAAATACAAGGGATGACTCTTAATCC  
CACTCAATCCAGTTGTAGACGATACGAAGTGACGGGCGCACAGCAGCAGTCACATCTTCG  
GTAATAAGTCGATTGCATCACTGTAGATTTTTGCAGTCCAACATTTCAATTGTTGTAGCA  
GCTTTTGTACACAGCGTTAACCCCGGAAGATTTGGATTTCAGGGGTAGCAGCCATCGTGATA  
TCAACATAGTCCTTCGCCGCAATGCGATCCTTGATGAACTGAAGAATATCGCCTTCGATA  
GTCTCCACGCACTGGACCTGGATTTCCCCAGAGTTTCGAATTGGTCCGTGCTGGTTGAAC  
TTCACACCATTTCGGACCATAGTCCTCCACATCCTCGCGGGTCATTTTCAGGAATTTGCGAC  
GTGCGAACCAGTACGCTGATATCTTCATGGCCTGCAAAAAGTGAGCAGGAATTCAGAAGAT  
ACCAGTCGTTTCGCTTTTGGCCGCGTTGGCAGTATAGCGGCCCTTAATAAATTTACGGTTT  
CCCTTAGTGTTATTGTGCCCATATAAAATCCTTTTACTGGAACGCCGAACAATATCGG  
AGCTGTTATATATCGAAGAACCGGTCAACTGGAGTTGACGGTGTTTTTTCAGGAAATATC  
CATTACTGTCCCTTGGCGCATCGAGATCAAACTTAAGTCCTGGATGGCGACATCGGTGA  
TGTTGATCCGGCGACCAATGTTTAGCGTCACGCGTTCCGGGATTTGACCACCAACATTGG  
CCGCTTTTAGTTCCGGGCTAATCATGGCTGTCAACGCGGCGATAGCGCCTGAAACTTCAA  
TGAATGGATTGTTCAAAGCAATGAAAGTTACAGGCAGCGTGAACGTCGGCGGAGTCCCC  
CTTCCCAAACCATTAAGCTATTCCAACGGGCAACCGACGTTGTTTCAGTACCTACTTGCA  
CAAAACCACCCAGAGCACCAGAAACAGATCCCATGGACATACCGGTAAACGGCGCTTCCC  
AATTCTGGGCCATGTTCAATTGCCGCTCCCTGGCTGATATATCCGGTAACCTGGTACTGAG  
AGTTCGTTAAAGTAACTTTCAGATATGGCGATACACCGTCAGCCTGGCTGTAAACCCCAT  
AAGCTATAGGAGCCATTCAAGTTAAAGGCCGGAGTTCCCCGGCCTCCTCCTTTAGCCAAG  
GCGCTTACGGCGCAGTTTCATTGACTTTTTGCGGGCAAGTTTTGCCGCGCCAGTCTGGGC  
TTTTTCGACGCGCTTTTTTTAGCGCCGATTTTTGAGCCGACGTCAGACGTTTTTTACGCAG  
GCGTTTACGGATGAGTTTGATCTCACCGTTACGAACAACCTTCTTAAATGCTTCAGTCAG  
CATTTTCATCAGAAGTGCCAGCAACAACAACGCCGCTTCCAGTTCGTCGCGGTCGTCGCT  
ATCTAAACTAGCGATAGAGGCACCAACATCAGCAGCAGCGTCATCGTCTTCATCGTCAGC  
CAGTGCTTCGATCAGGTCATCATCTACACCGCATGCTGCGAGGAAGTCAGCAACATTTGC  
CCATGCTTCGTTATAGGCATCGTCCTGTTCTTCTGTAACCTTCGGAGTCGTCGTCGTCAGA  
GATACCAGCGATAGCTTGAACGAAACCATCAAGGGAGTCGAAAGTCAGATCACCGCTATC  
AGCCCAGGCGAAAACGGCGTCGGCCGCATCACTCAACGCATTCTGCATAGCACTTCGATT  
TGCAGCTTCCAGAATCATCTGGTGCCTGTTTCGACGGTCCATTCTTTACCTTCTTTCCC  
TTCCAGGATTTGCTCAGGAGCCTGGTCAGGTGGAACGTTCTCGTTAATCTGTGCCGCCGG  
TTCCGGATTATTATTAATAACTGGATCTGTTGGCGGTTGTGCGCTTGCTCGGGCAGACTC  
CATCAGCTGCACAGGATCAGAGTTCAAAGCGAAACGGGACAGTCCATTCCCCAAAATGC  
CCCGGATTGAAAAAAGTTTTTGTCTATTGTATTCCCTTACTTAATAAGCAGCGGTACGCC  
CTGGATACGACGGGCTACGCCAGTCGGGCAGCAGGCCAGACTACTTCCCATTTATCGAA  
TTCCGCCTGCGTAACTTTCAGCACATACGGTTCTGTACCGTCAGCATCAGGATCACGAGG  
AGCCACCAGAGCGCCGGAGGCGACAAAGCGATCTAAAAGTTTGGTCATCCCTTTAGTCAG  
GCCAGCCGACAGTAATACCGTCCGGGCTATGCTTCATCTGTCCGGCTAACTGGACAAAGAA  
ACGGCTGATTGCATTCATCAGGGATGGGACGTGCTGGAAGTGCAGATAGTTATCCTGCGT  
GCAGCAAGTTAAAGCATCGTCGATGATCATCTGGCCAGAGGTGCCAACAGATACTTTATT  
GAGACGGCCCTTGACCATTGCTTCTTCGTCCGGGGTATCTTCCGGATACAGCGGTTGAAT  
TGACGCACGAGCAATGACGGCACGTTCTTACCAGCCGGTGAGTAATGCCAACCACCGAC  
ATCAGAGTTTTTCTTGACGCCACGAGCTTTTCGCCGCATACGCCACGCCAGACAGACAAA  
GACCACACGGGATTGGGTCCATTTGTCTTTGCAGGAGAACGGGTAGTGATAGACAGAACA  
GCTTACATAATCGGTACCAAGTAAACCGGTATCCTCAACAGCTGGTAGTGCTTCTGCGTA  
CGTTAATGTCCGTTTACATCAAAGAAGCCATCAATCAGGCGATCTGCACAGATTTTACC  
TAATGCGGTGATAGCCGATTTGTCATAGCAGCCAGGCCAAGAACAGCGGTGTACATGTA  
CGGCGCATTGTTTCAGCACTTTCACCGCACGCAGGTACGCAGCGGTTGAGATTTTCGACTG  
ATCACCGTTGGTACCACCAGTGAACGCCAACGATTTTTTATTTGTTACTTTTCGCCGTCGA  
AATCAGCTCTTCATTAACAACCGCGCGCAGATATTTAGAACGGGCTTCCAGAGCCGTAGG  
CAGATAACACAAGCGGCCCATGTCATCTTTCGCTTCTTCCGCCAAAGACACAGTGTGTGT

CTCCAGGGTTCGTTACCACACCGAGCGAAGTCGTCTGGGTCAGTTTTTAAGAGGAAGCGTTC  
ATTACCCGCGCTGTCCGCTGTTGCCGTTTCGATGGTTAACTCACGGGTAGGTGAAATACA  
CGGATCACCATCATCAACGTAGATAGCAAAGGCTTCGCCACTATCAAGTTCAATTTTCAGA  
ACCGTATGGCAACGCACTGTAAGCCGGTTCGCCTGATTCATCGAACATAATAATCGGGAA  
CTTCGCATCATCCGGAACAGCGCGAACAACGTAACCAGACGTTTGCTGAATAGCTTCGTA  
TACATGGCGAATTGGTTCGAACTGTGAGCCGGAAGACGGCTTCAGCGGTTCCGCCGAGAAC  
ATCTTCGTAATTGGACTCAGTAACCGCAAGAACAGTAAACGGCTTGCCACGCGCAAATAC  
GCCAATACCAGCCCACAAGCTGCTATTTAATGCAACACCGGTAGATAACGTTCGCATCGGC  
ATTGATCGGGCTAACCGCGACGCCGGATGCATTACCTAATGACTGTTGAATTGAATATTG  
AGACATAACTTTCCCTGTTATGCGCCCCGCACGGGGGCGCTATGTTAAACGGAGAACTTC  
CCCTGATTACTCAGAGTCACCGGCATCAATCGTGTGCGCCGCTAATGAAGTTAAGCCCGCC  
TTTTTTGGCCATTGTCAGCGTTACACGAGTGAAGTAATCAGCGCCGTTGCGTGGGTGCAT  
ATCGTTGATAGCCGAACCCACAGCGTGGTACGGTTGACCAGCGCCGGAGTGGTTCGGATG  
CTGGAACGGGATGGCCGGGACAGCATCACCAGTCACGAAGCCTGCTTTACCCGGATTTTC  
ATCACGGACGTAGCACAGCACATCCATCGAGCTGAACTGAATGTTCTCTGTCGTTAAGTT  
CTTACAAATACCAGCAGGTACTTCGTACACTTTCACGTTACCGAACAGGGTACCGATGTA  
GTGAACATACGGAGTCTGGATATAGTCTTCGGCTGGCTGGAAGAAATCCTTCGGCAACTG  
TTTGAAGAAAGATGCTGCATCAGCACCAGCAAACATCCCCATCGCACCCAGAAGATTTAAC  
GCGCTCAATAATGTCGCGATATACAGTCTGGAATTTGCCACGAATGATGGTTGCCCATA  
ATCAAAGGACTGGTTAACCGGCAGAGCGATGTCAAAGGTGTCGGTTCGCAAGAGTGCGCCA  
GATCATGATGCGAAGACGCAGCATAATCCTGTTTCATGAGACAGGTATTCCTTCAGGGTGC  
GAACTGTAGGGAACCCAGGTCCAGACCAAATTCACGCTGTGCTTCATACGCCGCTGTAC  
CGTGTGCTCAGCCGCGATAACGAACACTGACTTGGGAACAGGGTGTATTTCTTCATTTTCGTG  
GTTGATCAGCGGGATCAGCTCAGGAGCGGCTTCAATATTGATTTCCGTCTCAATTGCGAT  
CTCAGTGCCTTTATCCGGCGCTTTGGAGAACGACAGGGCAATCTGACCAATGTTGTAGTT  
CAGAGAGCAGGTAACAGTGATTTGCTCACCAGCAGCATTAGTAAACGAGTGAAGTAGGCT  
GCCGGAACCGTTATCAACAACAGACTTAATACGGTTAACGTAGATGTTAGTGCGACCTTT  
TCGGATTGGTACATTCTGGCCTTCGAAGTCTTCCATCTTGAAGGTTGCGGTTTTGCTGGT  
GCCATCGGAGCTTGCCACCAGCACATAGCGGCGACGTAACCTGGCTGTACACACCGACGGA  
TTGCATGTCCAGAACATCACCAGCAGCATAAGAACCAAAAGATGAACCTGCCACGTTAAA  
GACTTCATAGATGTCGGACTGGTCACGCGTAACCGGAATGAAGGTACACGCATCAGCGGT  
AGCTGCCCCCAACTGAACAGGCAGGATCATCGCGAGGAATAAAGGCAGACGCATAACACC  
GTCAGAAACGCTCATCATCTCTGCTGCGACAGATTCCAGCATCGCTTTATTAGTGGCATC  
CATGCTATTGCGGGTGGACTCTATCAGGCAGTTTTCCAGCGTCTGGTGGCAGGAGGCCAG  
AATTTCCGGACGCGGCATAGATTTATGTGCTGCGGCGTAGTCAGCCAGTGC ACTTGCCCA  
CGCTGTAGCGATTTGAGCGGTGGCATTATCAGAGATACCCGCAAAAACCGGGTCTTTACG  
TGCAGCTTCAAGGATAGATGCGGCACGCGCGGCATCATCTTTAATGAATTGGTTATCAGT  
ACCGAACTGCGCAGTGCTTGCCCAGCCAAGCACAGCTTTAGAGCGTTTTTGCGATATCTGC  
AATACGATTCTGGTATTCGCGTAAGTTACTCAATTTACTCTTCTTAAACACAAGGCACT  
TGTGTGAATCCCTTTTCGGAAGAGATTTTATTGAAAGTCACTTGTGACTTTCTCGTGAC  
AAGCAATTTTTTTATTTTTTTTCGGGAGGAGGGGAGGAAGGTAAAATCCAAGGTGAAATCG  
TGGCGATTTACCTTGAAATTTAGAGTAATTTACTTTAAAACAGTCAGTTAATAGTGA  
AATTTGAATGGCGAAAGTTTAAGGCTTCGGCTTTTTATCGAGGCTCTTTCTAAGGATATG  
CCCAATCATCCTGTGAGTTCTTCTGTAACCTTTTTGAGAGTCGATTAACCTCATAAGA  
AAATGCACGGCCTTTCACGCGCTTCTTGCAAAGCGATCCTTGTCTCAAATTTCCATAA  
TTCAGTAACTACGGACTTATCTTTAGAACCTTTATCCGTGAGTAGTGAGGCTTCCTTTGT  
TATCAAGCGCAGGATTTTATTTTTAACTTCATCTTCGGCCATTTCTTCAATGGATAAGAT  
GTCGTTTATTTCCGGGGATATGTTTTGAATAAGCTGATCAAACCTCTAAATCTTGTTC  
CATTTTCGTGCGCAACAGCACAAAGCGTTTTGTAGTCCGAAAAGGTAAATTCCGACTGCAC  
AGGGAAAAGGGCGACTAATTCTTCCGGAGCACTCGCTGCCTGGAGAGCACGCGTGACCTT  
CGCCTGAGACAGCCCTTCTTTGGCTGCAATATCCTTCTGACTCATCCCATCATTTTTTCAT  
TCGCATCAAACGCAGACCTATTTCTCGAATGCTGTGCTGCAATGCTGTCTGAACGTCTTT  
CGCTAAATTTGCGCTTCTGAACGCTGATCTCCTGGTCCGTGACTAAAACCCGCAACCC  
TACGTTCTTAAGATGGCAGAAGCTCGACGCCGGGAACCATCCAAAATTTCAATTTTCCC  
TGTAGCCCGTCTAACACCTATTGCAGGGTAAAATTGCTGATGCTTAATAGTGCTTCGGAT  
ACTTTTTAATGATTTTGGCGTAAGAGATGCCTGGTCACGCCGTTGTTATGCTGATCAAC  
AAAGGTATCGCTTTCTACCTGGTTTCGGAGGTATTACCTCTTCAATAAATGTGGCCTGGCG

ACCAGTTGATAACTTGAATACCTGCTCGACTCGATCGCCAGAGGCTGAAGAACTATCAAA  
TCCGCTTAATATTGAAGGATTAAGGGTTCGCCAATTGTTGGTCTGTTTTTCTTTGACAT  
GGGGGTTTCTTACTCCTCAGTTAGATCTGATAAATTCAATACGGTCAAAAACCTGCTTTAG  
CAAATCTTCCGCGGAATTCGCGCGTTCCTCAATGCATCAGCACTACCAACATACGTTG  
CCGGGTTAGCTGAAATAACAGTGTCAAAGACTCGCCGCAGCGTTCAAACCCGTC AAGGC  
GAGGGAGGAAGACATCAAGCATATCCCCACCGAACACTTCTTTAGCCAGGCTATGGCAAT  
ACTTATGGTCTGCCTTGTACTCAACTTGGACATAAAACCAATGTTAGTCGCAAGCTGGC  
ACTCGCAGCCTTCATCCGAAATGAGTTTCACCAACTCAGGAAGGCGGGCAACGTATTTAA  
GCGATGAGTGGAATCGACAGTTGCTGGCGGCAGAGGTGTAACAGTATATTGGCCGAGG  
CAAAGCATTTTTTCAGGAAGGCGTCAAGGTGAGGACCACTATCAACGAGGATAAAGTCAT  
AATCGCTCTTCAGCTTATCAATCACATTTTTCTTTCAGGACAGCATGGATGTTCTGACCCG  
GTAGATGCTCATTGCACAGCTCTCTCCAATCGGATGCAATAAAGGCATCGTCAATCGACG  
CAGGCATAACGTCAACCCAGGTACAACAGAAGGAACAATAAACTCCTCTAACAGCTCTT  
CACGGCTTACATTCTGCAACATAGCCTGTGCAGATGTTGCGTTTACGATACCAATAGAGT  
GTTTATGGCTTAAAAACATCGTTGCTGAAGATTGCGGATCAAGGTCAATAACCAGAATCC  
TTAAATCCTCCATAAGAAGATGAGGGTGAGCACGCATTGCATGCGCCAGAGAAACCGTGC  
ATACAGTTTTTGGACACACCGCCTTTAAGATTGGAGATGAAAATCACATACGCTTCGCTGT  
AGCGATCCCGGTATTTTTGGCACTCCGCGATGTTTCATATATGTCAATGATGTTCTGAATTG  
ACATCGCATATTTCAATTGAAGAGCCAGCAGGGCGTTTATCGAAAACATAACCCTTTTCTT  
CCATTTCACTTACGGCATAAGTCAACGTTTCGCTCGAGTCAGTAGAGGCAATTTTGCCAGTG  
CCGCTTTCGCATAGACCTGGTAAACTCGTTTCGCGTGTAGCTCATCCTTTTGCAACTGTA  
CTTGTTCAAGTCAGAACATTGAGCATTCTGTTTGTCTTTGAGCAACCTTGTGAAGCTGGC  
TGAATCACTCATCGAAAGTCATCCTTTATGCTGTATTTTTGAATTTAATTAATAAATGCT  
GCATAAAATAATAATGTATGCGTAGATGCTTGTACATAGCATTCTCTGCATGCTTACTCC  
TTTGCCAAGTGTGTCACAACATGCTTTGGCATCCTCCACGCATAAAGGACGCGGATTTCT  
TCTACGTTCAAGTTGTAGCCTGAATCATTTTTGGTGATTTCTGCTTCAATGGGCAGCCAA  
GCTTCACTCTCTATCAACTGGTGAGAACGGCTTGCCCGGCAGCTTCGATGTGTGCTGGAG  
GGAGAATAAAAGTCTAAGATGTGCGATAGAGGGAAAGTCGCATTGAATTATGTGCTGTGGA  
GGGATCGCTGGTATCAAATATGTGTGCTGGAGGGAAAGGCAGAGAAATTACATGTGCACTG  
GAGGGAAAAGCGGATGGACAGATGTGTGCTGGAGGGAAAGTCTGGGCAAACCTGAGGGGCG  
TCCCCCTCCAGCGCACATCAAAAACAGGAAATTGGACAAGCCTTCCCGGCAGCACACATC  
TTTTTAATGCGGTTTTCCCTCCAGCACACACTTATTCGGGGAGTTTCAGCTTTGGATTGCG  
AGAATGGACGATTACAAAACCTTCCCGGCCTTTCTTCTCAATAGAACAGTCGAGATAGCC  
GATTGTTTTAAGCTGTTCTATCGCTTTCTTAATGATACGGTTTTGCTCGCCAACAGCTGA  
CTGCAAAGCCAGGCGCTCACGGATTCGCGCGAACGATAGCGGCAACGGGTTCTGCGGAAG  
GCTTTCGATGAAAGTGTAATGGCTTGTGCAGCTTCTTTCTTCGGAAGGGCACGCAAGGC  
GTGGTGTGCAACAGAACGCGATAATCAAGCTGGAACAGCTCCCAACTTCGAATCAGC  
CTCCAGCTCTATCAGATCAAGGTCAGCATCAAACGCCCAGCTTCAGCAGACCAGTCTG  
ATAGCCGCCTTTAGCATCTTTTCCGCGCTTAAAAGCGATAACCCTTGTTACGCAAGCGTCC  
AAGTGATTCATGAATGGTTAAACGCAGTTTCGCATCCAGACGTTTTGAGGGGAAACCACA  
GGCTTTAGCGAATTCCTGAAACGATAACTGGATGGTGTGTTGAGGACAAGCCGTATTTGCT  
GAACGCGTAGATGACACCGATCCACGTTTTGAAATCAGTATCCATATCGAGTCGAGGACC  
GGTGAATTTAATATCATCGTAACCCTCGGCTTTAGCTATCTCCAGCTGGGAAAACGCTTT  
GGTGGCATCAATCTCTTTACTTTCTCCTTTGCTCTTTGATGGCTTCGGCACGAATACCCC  
CAAGCGCATCAACGCTACAGGCTGCACAGTGTGTTGAATTAAGTGTAGTTCTTTTGC  
CTTACTTTCAATGTCTGCGTAAAGAATATCGGAGATAAATGATTGATTCATATTACTTTT  
TCCGAATTGTGTGGATAGTTTTTATAAGTGGTGATAACTACCCAAGCTTTCCCGTCAACA  
CACATCCTATATCCC GCCAGCACACATTAGCAACCCGTCAGCACACATTTTTATCCCTCC  
AGCACACATCGTTTTCCCTCCAGCACACATCGCGATACACTTCTAAGCCAGACGTGGCGC  
GGCCTGCAACGATCAGGGATCTATATGGATCTAATTGGGATCTGTATGGACCTGATTATT  
GGATCTATCCAGTGGATAATGTGGATAAGTGAAAACCGGCCAACGTAGCCGTTTGGAAAG  
GGAGTCGTATTATTCTACGCTTTCGATGAGAAGACCATGTTTCATAGCATTAAAGCTCATC  
GCCCTCGTACAGGAATTGGTATCCAATACCACCATATTCAGGCACATTAGGGAATAACTC  
ATCACTTACCGAAGAACAATCACACCAATGCAGCGATCAACGCCTTCTCGTTCTTCAGT  
GCTGAAAAATCCTCTTCGGTAAGAACATGAGTACATTGCTCATCAGCATAGGTTCGGAAA  
TACATGCTCAATGCAATCCGGGTGTTTTAAACCAAGCTGATCGGCAAGCTCGAAAGCAGC  
ACGGTATTGTTCAAGATCCTGGCTTGCCAACAGTGATTTGCTCAATTTTGTAGATTGAAGT

CGCTTTGTTGATAGTTTGGCTTTACTGTTACTTTATCAGACATAAAAAATCCCTTTTAGTTA  
CCGCTAATAGCTCGGTTGTAATCATTAAACGTTGCGATTCTTCCTGTTAATCCCCATCAGC  
ATCGTTTCTGTATCGAGGATATACGCTGGCAGATCATCAAAATATTCAGTCTAACTCT  
GGCATCTACACATAAAATGCACTTTTGGGGGCAGGGTGGTTAACCTTTGTTCGGCGTCGGC  
GTTAAATTCGCTGATCGACTCCCGGAGCAACCGCTGAGTGTGAGCAGGAATACGCTGGCG  
AACATTACCCGCCGCAACCAGTTGTTTCTGAACTTCAGCTTTTTCGTTCCATTTGCCTGTC  
AGCATACTTGGCTTGTCTGATTCATTTTTACTTTCCTGGCTGTGAAAATGTTGCTCTGC  
TTTGTTCATCGTCTCAATGGTCTGGTTAAGATCCATTATTGACTTATCACGTTCCCTAAC  
AGCCTGATCAAGACTGCCAATTTTCTCTATGGCTTGTCTTAGCTGATGACGTTCCCATGC  
AAACCCAGCACCAACAAGTGCGCAAATCAGAACAAGAACACCAGTAGCAGCAAGTTTCTC  
CTTCAAAGACAAAGCTGTTTTTAACGTAGAAAAGAATGACATGTCTTCCTCCTGAAGAAA  
AATTATCAATGAAGTCCTTTGTTACTGTGCCGCTTTGTTTAATTCATCAAGAACAGAATC  
AGGAACCAAAGCGGCAACTGCGCTGGCTGTGCTGGCCTTATTTGCTGATGCTTCCGCAAG  
CGCGGTACCGATAGCATGGTTATAAGCAGTTATGGCTACGCTGGCGCTTTCCTTCGCTCG  
TTCATACTGCTGTTGCAATGCTGCTACCGGTACTGTTGTCTGGTCGAAAAAAGCACCAA  
TTGTTTCAAGTAGCTTCCCTCAGTGCTTCAACTTGTGTTCTGTCAGTGCTGGTGGGGGAGT  
GACTGCGCCGCCACCTGAATCAGAGCCTGACGAGCTTCTGAGCCTGTGTTAAGGGTCTG  
GTTAATGTCCTCCATAGCAGCGACTAACTCGACGTATTAAGCGCATTTACAGCGTCCCTC  
AAGCGATTTTCGTTGTAGTCGCGTCACCAATGGCAATAGAGATCGGCAGTTCTGAACTTC  
TCGCTCATTAGCACGACAGTAAACATCCCAACCAATATCGAGTTGAAGGAGCATTGACAG  
ATCAGCATAACCAGCCAACAGGTCCGCGTGCTGAGTTGCCAGCCCTCCAATATTCGTTAA  
ACCGGTTGCGGTTGTTCTGATCGTTGAAACATAGCTGGTAATAGTGTGCGGGATAGACAAT  
TGTATCCAGAATTAATCCGGTCAATTCTTCTGCAAGCAGTTTTGCTGTGTTAGCACTGTT  
TCGTGCCGATGTTATGGCACCAGGTGTTTTTATCCACCGGCGGCGGCAATTTTTTATA  
TGCGGATAACTGGTAGTCTTTTTCCAGCATGATATCTCCTAACTTACCTGAACTAGGCCG  
TCTCCGGCTGCAACGGTAGAGCCGCATGAAACAGGATCACCAACGCATACGATCCCTTTC  
CCGTTGACGGTAAACCATGCCCTGGTTGATATAGCTTGCCCGCCGTGTGTGCTGTTCCCA  
TCGGTATGCTGTGCATATTGCTTACCATCAACTAACACTTCGACTCCGTTGACTTTAAGT  
AGTGGTTCGCTCTCTACGGGAGGCCTGGATGGGAATCCTCCGTGCCCGAACAATGCTG  
TCTTTTGTGCAATACTTGCCACGTCATCACCAATGATTTGCTCTGATTTTCGTTATTTT  
AACTTAGATTATTTGTGGTCTGTATGGCGTTACTTATTGCAAATGCTCTAATAAATA  
TTGTTTTTTATGTCGTGTTTTTCGGTACCATTACAGCCATCGCCCTTCAATGGGCATTTGTT  
TGGAGTCGTCAGATGCAGATGGAGCTAATAAGCCGCAAGGAGTTCGATAGCCGTGTAACC  
AGCGGTGAACTCGACAACCTTGCAAGGCTATCAAGGTGAAAGAAGGCTTTTGCCTCATTGGG  
AATCAGAGCGGAACAATCGCGTTTTTATGCTTCGCCGTACGGATTTGAAGCCATTTGTC  
TGGAAGAACGAAATGGTCCAGCTCATAAGCTCAAACGAGGGGGTGCCACAACCTAGCC  
TTTTTCTACAAAGACGAGCTTCTGTGGTTGATATTCAAGGGTTACAACATGTTTAAGCA  
CTGGAAAAACATTACTATTTATAAACTTTCTCGTGAGGGCGGATCTGACCGACTTAGAAGA  
TAAAAAGAAAATGATCCTTTTACGCCATGCGGTAGTCAGGATATGGCCAAGTTCGGTTT  
TGTATCTCCATTTGGTGATAATTCCGAAGTTATCGCTATGCATGGAAATGGTTTTATCCT  
TGTTGAAGCAAAGCGCGAAACAATAAATCTTCCCCCGCGGTTATCCAGCGAGCTATTCA  
AGAAAAAATTGAAAACTTGAGCAAGAACAAGCGCGTAACTGAAGAAAACAGAGAAGGA  
CTCCCTGAAAGACGAAGTTCTGCATTCTCTTCTGCCACGGGCTTTTTCAAAGTTTTCTGT  
TATCCAGGCGATCTACGACGGTTCAACTAAACGTATCTATATCAATGCCAGCGCGCGGCA  
GGCAGAGGATATGCTCGCGCTTATGCGTAAGTCTCTGGGTTCTTTCCTGTTGTTCCCT  
GAGTGTGAAAATCCCATTGAATTAACGCTGACCGACTGGGTACGTGATGGTAGTGCTCC  
ACAGGGATTTCAAATGGGGGATGCGGCAGAACTTAAGGCAGTGCTTGAGGATGGCGGTAT  
TGCCCGAGTGAAAAAGCAGGATTTGGGAAGCGATGAAATTTCCACACACCTGGAAGCTGG  
CAAGCTCGTTACTAAGTTGGCACTCGACTGGCAGAAACGCATTAATTTACACTGGACCA  
TAACTTCAGCCTTACCAGCGTCAAATTTGCGGATGAATTGCTTGAGCAGAACTCTGATAT  
TGATAGTGAAGATGTTGCGCAGCGACTGGACGCAGATTTCTTCCTGTTGACCAGTGAAT  
TTCGTGCCTGGTTGATGCTCTGGTAAATGCCCTTGGTGGAGAGGCTAAGCAGTGAAGAG  
CTGTGCTATGGATCTGTTTGCAGTGGAATTGAAGCCGCGAGTATTGCCTGGGAACCGTTG  
GGTATGCGTCCGGCGTGGTTTGTGAAATCGAGCCTTTTCCATCTGCCGTTCTTGCGCAC  
CGCTGGCCCCATGTCGCCAACCTTGGCGACATGACAAAACCTTGCCAAAAAAGTCTGGCT  
GGGGAAATCGAATCCCCTGATGTGCTCGTCTGGGGTACGCCTTGTGAGGCATTAGATC  
GCGGGCTTACGTGGTGGGCTTGTGATGAACGCGGCGGCTAACTTTGAAGTATGTGGAG

CTTGCAAATGCAATTGACGACAAACGGTCTGAGTCCTTCCTCAAACCGACAGTTATCGTC  
TGGGAAAATGTCCCAGGAGTCCTGTCATCGGCAGATAACGCCTTCGGATGTTTCCTTGCC  
GGATTGGCTGGAGAAGATGCGCCATTTGAACCAGGTGATCGACCTGAATCAGGAAAAAGT  
AACGCGTTCTGGCGGTGGGATGGCAAACCGGTTGCCATGCTCCAAAGTGGCCGCAGTGT  
GGTTGTATTTATGGACCGCAGCGAAAGGTGGCCTGGAGAATCCTTGATGCCCAATACTTC  
GGAGTGGCACAACGACGCCGACGCGTGTGTTGTTGTCGCAAGTGCTCGAACAGACCTCGAT  
CCCGCAACGGTACTTTTTGAGTTCGAAGGCGTGCGCCGGAATATTGCGCCGAGGGCGAAAA  
AAGAAGGAAATCGCTTCCGCCATTATTGCAAATGGCGCTGCAATCAGTGGCGAAAGCCTA  
AATCCATGCCTACACGCTGACATGCCACCCAGTATGAAATCGACGAAAGCCGTAAACGCT  
TTCAGGATGGCAGCATTGTTGGGAATATATTGACGATGAAACCGCATCGACAGTAAAGGCA  
AGAGATTTTAAAGATGCCACTGACCTTGCCGTTTTTAGCAGCACAGGAGCAGGTTTTTGG  
TCAGAAGGGCATGGTACATTGCGGGCACGTGAGCAAGAAAGCCATGAGCATCTTGTTACA  
TTGGCTTTTCCTGAGCGTATGAGCGGTACACAACATGCTGCAACTAAGAATACTTCACCA  
TCTCTAATGGCTAAAAATCCAACAGCTGTTTGCTATGAAGTAAGAAACGCAGAAGTAGCT  
GTCCGCCGTCTTACCCCTGTCGAATGTGAAAGGCTGCAAGGTTTTCTGATGGGCATACG  
TTGATCCCGACGGAAAAGCGTAAAAAAGTTAATTCAGATGAACTGGCATATCTTCGCAAT  
CACTATCCAGATTTAAGCGAAGAAGAGGCCGCGATGCTTGCAGCTGACGGACCGCGTTAC  
AAAGCGATCGGCAATAGTATGGCAATACCAGTAATGCGCTGGATTGGCGATCGGATTACT  
AAGGCCGTATGTCGGCAGAAAGAAGGAAGTGAAACAAAAGAGCGAAAAGTTAAACCAGCG  
GCAGAATTCGAACGGTCCATATTCAAATGGGCTGGTGGAAAATTTGGTGTCTGGAACAA  
ATCTTTCGCTATTTGCCAGAAGGGAAGCGCCTGATCGAACCTTTTGTCCGGTGGCGGAGCT  
GTCTTCACGAATGCCGGATACCAGGAAAATCTGCTAAATGATGTGAATGCTGACCTGATT  
AACTTTTACAAGACTCTGCAACGCGAGGGCGCATTCACTTATCACACTGGCGCATCGTTTC  
TTCCAGGACTACAACACACAGGAAGGATACCTGGCAGTACGGAATGCGTTTAAACAAACAA  
GTCTATGATGATTTACATCGCGCAGCGGCGTTTTTGTTCCTGAACCGACATTGTTTTAAC  
GGATTGACGCGTTACAACCAGGCCGGTGTGAGTTCAATGTCGGTTACGGGAAGTATAAACT  
CCGTATTTCCATTACAGGAGATGGAAGCCTTCCTCGGTGCGGAAGGGCGGTCTGAGTTT  
GTATGCGGTGATTTTGCAGCGGTGATTGAAGCTGCCGGAGAAGGAGATGTCATCTTTTGC  
GATCCGCCGTATGAACCGCTTCAAATACAGAGGGATTACGAACTATTCCGGTTCATGAC  
TTAAGTTTGAAGAGCAAAAACGCCTGGTGTCTCTGTTGACGGATGCTCATCGTCGAGGT  
GCAAAGGTTCTCATTACTAACAGTGGCGCGCCAAACATCAGAGAGCTTTATCATGACAGT  
GGCTTCAGAGTGGAACCTCTTTTTGCCAGACGTTCTGTGTCTTGTAAAGGGGGACACTCGA  
GGTGTAGCTCATGACGTTTTGGGTATATTGCTCTAATAAATTTATTAGTGTAATATCGCC  
TCAATGAATCGTGATTTATAGAGCGATTTAGCTGTTAGCCGCGACAGGGCGCGGGTAAG  
CATGGCTGGGCCTAGTCCTCCCAGACAAACCACCGAGTTGCCAGGTTGACCATGCGCCTA  
AGTGGCAACGCCGAAGTGCGTTACGAGCTTCCAGTTTGCCCATCTTCGGGTGGGCGTTTT  
TTCAGGGTTTTTCGTCATGGTTAGCGACTTTGCGGGCGTTTAGAAACTGACCATTAAAGTA  
AATGCAAACGATGATCTGATGATGGTAGCGGCTAAGAAGCCAGATGCCACGGGGTATGA  
GTCGTCCCCCGTCAAAAATCGACCGCAGAGTGTCCCCGTCTGTGTATTAGGGAACGGGG  
AGGCACAACAGGTAAGGGCGCTGGTGTGATTAACCAGATGAACGAGAAGGGGCCATCTGT  
TGGTGAGCGTCCTTTCTGTTGCGTTTTCTTTTCAGCGTAACAGCGGTGCTTAACAGCAC  
TTTGGGTACAGTTCCACGAATTTACGGGTATATCCCGTCATGCTGAAGGCGCTAATCACG  
CTGGAAGCCAGGGTTGTGCATCCCCTGTTACCGAATTGCAGCCAGGGCGCGGTGCGCCGA  
AAAGCATAACGGAGGTGGAAGCCCTCGCCGAAACGTACCCGGCAAGTGATGGTGTAGCTC  
AGCGGTTAGAGCGGTTGACTGTTAATCAACGGGTCGATGGTTCAAATCCATCCACCATCG  
CCAATGCCGGTTTAGCTCAGTTGGTAGAGCGCCTGCCTTGTAAAGCAGGATGTCAGCGGTT  
CGAGTCCGTTAATCGGCACCAGCACAACAGGTAAGGGTATTTTGCAGCGTCCGAGATCGC  
CGAGCTTGGCAGAGGGTTCGAATCCCTACGAAGTACCCTTACCGTTGTGATGAAGTGCAG  
CTCTTTGAAGCAACCAGAAGATAAGCATCTGGCTTCAACAATAAACCGCAGGAACGACC  
AATAAACGGTAGTCCGTATGGAGAACACCCCGTTGAGGAAGAGGCCTGGCCGGAACCGTA  
ACCGGCACTACAACGTTGAGAACACTGGCGTAACGGGGTTCATATCCCAATCTACGAATAA  
ATGTTGCGTTGCAGCGTGACAACCAGTGTTCTCAACATTGTGGTGAATGCACAGGCTGAT  
GTGCCGCAACTACAGTAGTGCAGCGTTTTGCGGGGCTTGCTACAACCCTGTGTCCGAGTTC  
AGCACCGACCATCACAGTTTGAATCTCTGGCATGAGCATAACGCTGAAATAAGTCCAGTC  
TGGTGCGGCCCAGTACCCCGCGTTAGCTCCACGAAACGGAGCACGTAACAGGTAAGAGC  
ATTCTCCTGTAACGGGTTTCATATCCCAATCTACAGGTCCACCAGGAATGCTCTTTCCGTT  
GCGGTGAATGCGGCTAAGCGCACGCGGGGAAATGGTTATATCTGTCCATTATTTCTCCTT

ATTTCCCCGTCCACGGTGGATAACCAGCTAAAGGACACCGGGAAGCACCCGGCACCGCAA  
CCTTATTTCCCAACCAGTAATGAGGTTAATAAATGCTCGGCATTCTCAAAAAGAAATTCC  
GCAAAGCGGCTGGCGGAGTCAAGAAGATGGAAAACCGTGATGCGGTGGAAGCGACTGTCT  
GGGGCGCATATTCCATTGCATACTCTGACGGCACCTGCGATGCGAAAGAAATTGCAGTAT  
TGAAAAAACCATTGCAGCACTTCCTGCCTTTGCGCCGTTCTCCGGTGAAATTGCCCAGA  
TGAGCGCCAATATTCGCGCTCAATATGAAGCCTCGCCGCGCCGAGCGAATGCCCAGGCTT  
TACGTGAACTGGCTGACGTGTCTGGAACATAATGATGCGGTAGATGTTCTGTGCCTATGCA  
TTGATATTGCTGACCAGGATGGCATTGGGGCAGAAGAGCAGGAGCAATTGAAGAAAATTG  
CCCAGGCTCTTCAATTACCACTGGAACAGTATATCTGATGGTTATAAAAGCACGTCTAAT  
TCTGGCTTTGGTTTTTCTCGTGCTATCTGTGCTGGTGGATTCACCAGCACAAATCCTGTC  
GGTTTTATCCGACGGGGCGTTGGTAGCAGTAGCTGTAACATTGGTATGGCCGATATTTAAA  
AACAGCTTCTAAGGATCAGTGATGGGCTTCTGGGATTTTGTCTGACAAGCATCCAATTGTT  
CTCGTTGTCATTGCTGGCATAAGTTGTAGGCGGTATTGCTGGCGTCATAGAAGCACTCAGG  
AACAGTAATCCGGCCCTTTAGCTCAGTGGTTAGAGCTGGCGACTCATAATCGCACGGTC  
ACCGGTTCAAGTCCGGTAGGGGCCACCATATTTGGTTGTAACACGGCGTCTGGCACATGC  
GTCGTTAGCGGTCTGGTGACGTTAAAAGGGGGGAACCTTGCCCCTAGCTCAGGCAACGAA  
CCAGGTAGCCGGAATGTGCAAGCCACCGTTTGGTTGTTTCTCGGGTAAAGGGATTACCCAT  
CCTGGCGATTCCGGTGTGACAGCCGGGAAGAGTCCGGCGCATTAAATCCTGATTTTCTGGTG  
ATGACTCATATCGTTAGGAGTGATTTGAGTATGCCGATTATATCTGACATTCAGCACGCC  
TGGGTGGAGTGCTAATGTCTGCATCCCTCTTGAATCCATGCCAAATCCCTTAGTGACAG  
ACAAGCTGTACTTGGTGGCTTAATGCTTGATAACTGCCGCTGGGATGAAGTTGCAGATC  
GTATAGTTGCTGATGATTTTTATACCAGTGCTCATCGTGAAATTTTCAGTGAGATGGAGA  
GGTTATTAAGTCATGGCAAACCGATTGATTTGATAACACTTGCTGAAGCACTTGAACAGA  
ACGGTAAATTAGAACGCGCCGGTGGTTTTTGCGTACCTTGCGGAGATGTCAAAGAACACGC  
CCAGCTCGGCAAATATTTGTGCTTATGCGGATATCGTTCGTGAACGCGCGGTTGTTTCGTG  
AAATGATTTCCGTCGCAAATGAAATAGCCGAAGCTGGATATGCGCAGGATGGCAGGGGCA  
GCAATGAATTGCTGGATATGGCCGAGCGCCGCGTTTTTGAATAGCTGAAAAACGACAAA  
AGAGCGGTAGTGGTCCAAAAGATATCGCCAGCATTCTCGATGCAACGGTATCTCGCATAG  
AAGAGTTGTTTCAGCGACCACATGATGGTGTAAACGGGGCTTGATACGGGATTTACCGATC  
TCAATAAGAAGACGGCAGGGCTTCAGCCGTCCGATCTCATCATTGTCGCCGCCCGCCCAT  
CTATGGGGAAGACCACGTTTGCATGAATCTCGTCGAAAATGCCGCAGTTCGTAACGATA  
AGCCCGTATTGGTTTTTLAGCCTTGAGATGCCGAGCCACCAGCTGATGATGCGCTCACTGG  
CTTCTCTTGACGCGTTGATCAGACTCGTATTCGGACAGGGCAACTTAACGACGAGGATT  
GGGCGCGGGTTTTCTGGCGCAATGGGTATTCTGTTGGACAAGCAGAATATTTTTATTGATG  
ACTCAAGCGCCCTGACGCCGACAGAGCTACGTTCCCGCGCTCGTCGTGTTTATAAAGAAA  
ATGGTGGTTTGAGCATGATTATGATCGACTACCTGCAACTTATGCGCGTCCCCGAGCTGC  
AAGATAACCGAACGCTGGAAATTGCCGAGATTTCTCGCTCACTGAAGGCGTTGGCGAAGG  
AATTACAAGTACCGGTGGTGGCATTGTCACAACCTAATCGATCGCTTGAACAGCGTGCGG  
ACAAACGACCGGTAAATTCAGATTTACGTGAATCAGGAGCAATTGAGCAGGACGCAGACC  
TGATTATGTTTCTGTATCGCGACGAAGTTTATCACCCGGATAGCGAAATGAAGGGCATTG  
CCGAGGTAATTATCGGAAAGCAACGAAATGGCCCAATTGGCACGGTGAGATTGGCTTTTA  
ACGGCCAATACTCACGGTTTGATAACTATGCCGGTGCTGACTGGCAAGAGGATTATTAAT  
GCAATGGAATGAGGAAAAGCCGATGAACATCCTGATCATTGGGCGAAAATTTGCAGCCAT  
CAGTGATGTGAAAACATATACGGAAATGTGGTCTTATAACCTGGCCTGCGCCTTTAGTGA  
GGCAGGGGTAAACAATGCAATACCATCGTCCATATCCCCTGGCGTCGAAAGCCCCGAGGA  
TTATGTTGAAGCTGTGTTGACTGCTGCGACAGCATGTTCTGCGAAGGCCATTTTGGCACC  
AGGATTGAGGTATTTTACTACGGTACCCAGGGAAATAGGCATGCAACTGTGTCGCCGATT  
CTCTGGATGGGTAGCCAGGTATATGACGGTTCTATGCTGGATTCCGGCACCAGTCGATAT  
TACTTTTACTGTCCGCGATGATACCTGGCGGTACCTGGATAATCCCAGGTCGGTTAGAACG  
TCATAATCGCTTTAACAACATGTTGGATGGGCAGCGAATCAGGAGCTGTTCCATCTGGA  
AACCAAAACGGACGATGTTCTGCGTATTTTTGTAGACCACGCTGCATTTGATGTTAGTGG  
TTTTGATCACTCCTTAAGTATCCTTATGAACCTTCAGCGTCTGACCGTTCCGTATGAGGC  
CAGAACGTTGACTGATGACGGATTGGTTACCATTGATCCGGGGAATATTTCCGGTAATTCC  
ATACAGACGGACGCCGGTGCCAGCAACCGAATTTGCAGCTGAATTGCGTAAGAGTGACGT  
TTTTATCGTTACGCATCCCGAAAGCCTTGGATTAACCTGTTCTTGAGGCGGCAATGTGCGG  
GGCGTTGGTATTAACGCCTCCCGATTGCCTTCCGCCAGATCGCCTGGCTTTGGTGAACCA  
TATGGTTATCAAGTCGCGGATTGATTGGGATGAGGTTATTGCTCGCGTTGATCGCGTGAA

AAATGCTGAAAAGGTCCAGTGTACACCTGGTCGGCAATTGCGGAAAAGATGCTTGAGAC  
GTTTATCACGCAGAAACCGTCGCGCGGTAACGGATAAAAAATTGAACCCGTCATAACAGA  
AAAGCCCGAACGCCGGGCTTTTCTTAAGCCTTGTCAACAGAGACTTGAGCGGCTTTTATG  
GATAGATTCCCGCTGGCCTCTATCGCCATACTTCCCCCGCCTTCAGGGCGACATCCGCG  
CCTGACTTTATATCGAGATTTCTGCGGAAGAGATGAATGCCGGACCTTGAGAAATGGCA  
TATAACTCCCCGGCCTCGTTGAACCCGATTGTTGTTCCACTTTTCAAGTGCGTAACGGCC  
CAGGCTCCGCCCCGCGTCCGGATCTCCATTAGTCCGTTCCGCGACGAAATAAAGTCTTTT  
TTGGCGCTGGTTGATGGTTGTGCTGGTGCACCTTCAACTTCAGGGCGGTACATAGCCTTCA  
CCTTGTCTGACGCTTCAGGCGGCACATTGGGAGCGCCACCGGATGCATCCTGTGCATAA  
CCGATTATCAATGGCCATCGCGAATCCCCATTGTAGGGAAATTCTACCCATACTTTATCG  
CCGGGCAGAAATGGTGAAAACGTGTTTGCATTGGACAATATAGCTTCTGCCACGGCAAT  
GAGGCATCTGGTAACCCATCCATCATGCCGACAACACGTATTTGTGTACGCATCAGACCT  
TTAGGGTCATCGACGCTTATCACTACAGCCCCGATACTTCCCTGTCAAACCTACCCATTCAC  
CACTCCTAACTGTGCACGGCTGACAAAACGAAAGCGGTCTTCGAAATGAGTCACGGACAT  
CACTATCATTTTTGTGAGGGATAGATTCATCGAGTTCTCCGTCACCTGCCGTGTTATGCAC  
GACAATTTTCAGCGTTCGTACCCGGAGTTAGCGCGGCATTTCCCTTCCACCAGCATATCGAG  
GCGGGGGAGAATGAATTTGTTGTAGTTCGCCAGCGCGGTAGGATCGGGATTGCTCGTAAA  
TTAATGGGGTCTTCCCTGGTTACCTGAGTAAACCACACCTTTGGTCATGTCATAACTGGC  
CATTCTGTAATTGTGGCGGCGCTGGTATTCATAATCGGCATTCAGGATGTTGAACTGACT  
AATTGTAATCCGGATGTGTTGGGATTGGCGGACTCATAAGTAAGCGATGGAGCGGCGTT  
TGCCATTTTTTCCATACTTTTAAAATTGATCATCCCCCTGGATGCCCAGCACATAGAACC  
GGTATCCCGGGCTATCTCCTGCAATACCTTGGTCCGTTTTTCTCCAACATTTAGGTGGTA  
TGTGGATGTTTTTCTGAATGAGTCAGCATTTACCTTCAGACCAGGGGCAAGAGAGGAAAC  
TACGGCTGATGGGGGCTTATCAACAAAATACTGTGCGCTGGTGGACGGAACCTTTAATAA  
CCGCACCGGGTACTAAACGCGTAAATCAGTACAGTATCGTCCTTGCGCGGCGCTTTAAG  
AACAAAGAACTCTTCCGAGAAGAGGATGCCGCCATGACCTTCCGGATCACCAAGTGAAAC  
TGTCAGTATTGTACCAAATTTACCCCCAGCTTATTGACCACGTAAGCCGTTGAATCCCT  
GATCATGAGCATAAGCTGGGGACCAGATAGCTCCCCAGGTTTCGACATAGGTACATCCTAC  
GATCATTTTCGCGAGGGATTTCTGTTCTGCCCAATTGAAACAGATTGCAGGAATAGCTGAGT  
GCGTTTTGAATCAGTTTCCGGGGCTGTGGTGGTCTTTGTGGCCATCTCATTCCCTCCAGAA  
TTTTCGCTTTTACCGTTATGGTGCCGGTGGTTTGTGTCATATAAGCCAGGATAGGAAGCT  
CCGCCACAACGGTGAGGTTCAATCCAACCGCGAACAGCCTGTTGTGCGCGGTGCCGGTGG  
TCAGATCCTGAAATGCGATTGATTTTTGCCCCCTTCTATGTAACAGGTAACCGGTATCTCAT  
AACCGCCGACATTGGCAATGTGAGTGAAAGATGCCTGCCCGAGGCTGGCATAACATTCGTA  
GCCAGAATGCTAATGCAGTTGTAACCATCCCAAGAGATTCCCTTCTCGTCACTGGCTATCC  
ATAGCGAATATTCCAGTGAGAAAGGGATAGTAGATACCAGGGCTTCAATCTCATCATTTT  
CATTGGTGACATGCCCTTCATCGTAATTATCCCGGCACAGTTCACCTTCATAAATTGAAA  
ACGCGGGAGAACGAGACAGATTCACAAGCGGCATTGCCAGCTTATTTACCGGGCCAGCAG  
AGGCTGTATCTTTGCGCCCCGGCGCGATCGGCTTCAAATGACGACAACCACTCCTTCACAT  
CACTAAAAGTGCCGAGCGTTATGCGATCTCTTGGTGTGCGTTTTAGGAACTCCCGGAACG  
ACTGGTTAATGCGATCATTAAGCTGACAACCTTGTGAGTCGAACGCTTCGTTTAAAGCCT  
GTGCGAGCGCCGAATCAATGCCATCAATAGTGGCAAATTCCAGCTTACCGGTTGGAGTAA  
GACCTTTTTTCTTAAAGATGGCCAGTAGCCATTCCCTGATTATTCAGAATCACCGATGAAA  
TTCCCTTCAAAGGCGCGTGAAGGCACGCAATAAAACAAACTGCCTACCCTGGCAGTGCCG  
TAATTGAATATTTTATGGATGTACCAGAAGCGGCGAATGGTTGTGCCGTCTGACAGCTGT  
TCCAGCCATTCGAGCATAGAACCCTGGCACATTAACGGCGGCCAACCAGGATTAAG  
GCACTGTCGCTAATTCCCGTATTATCACTGCCGTCTGATAGCGCGTAGAAGGCGTCCATC  
TCATCCGGGCAGTCGAGGGCCGTTATCAGTTCTGGATCCTGATAGTCATATATGCGTTGG  
TTCGGTTCTATTATTTAGGTTGCCGTTTTCAGGTGCATTTTTGTTTTCTGTAAGGTATTGCG  
CGATACAGAACTGCATCGAATGAGTCAGGGTCTAGCTTGATTGCTTTGAGCCAGTCCATC  
CGCACAAAGTTATTA AAAACTGCATGACCTTGATAACGGTGGCGCACACCAGAATCACTA  
AGCAGGCCGTGATCCAGATTGGGAAGGTGATTGTCCTCCACAGGATCAACAATATTACCA  
ACGTTAACACCATCGGTTTCGATTTACGCATCAATATCTTCTTCAATCAGTTCAGAA  
CCTTCGCCTGGAATATCCGGATCCGATTCGGTGTCCGGGAGGTTATCACCGATCACTTGT  
TGTGATGGTTCTGTGTCCTCAAACATGTCATCAAAGAAACCAGCCATCGATTATCCTTTC  
CGTTTACGGGCTTCGTTAATTTGTGTCTCAAGAATGCTTCGCGCCTGCGCAGTGGCAGCG  
GCCTTGTCCATTCCCTGACTCATGAAAACTTTATGAGGTTGTTCCGCTGCGTTTTGCAGG

GCTTTTTTGGAGAGCGTTCGGCTTCAGCGCGAGCCTGGGCTTCTCTCACCCGCGAGGCTTTT  
AGTTCGGCATTCTTCCTGTTTGGCGTGGTGGGAGCTTTTTTTAACAACCGGCCGAACGTTG  
TCCGTGGCGCTATCTTTTGGCGGTAGTTTTTGCCTAATGCATCCTGAGATTCAGATAC  
AGCTCATACTACGCGCAGCTTTAGCCTGATCCGTCGTTGTTGTCCGGTTGCGCGCAGT  
GATTTAGCCAGTTCGCCTTTGAAATAGGTTGTTGTCTTCCGCTTGTATCGCCGAAGGCT  
ACCTGTTGAGCTGCTTTTTCCAGGGCAATAATGATGGCCTTGTGCCATGTGGGAGACTGA  
AAACGCGTCATAGCGTGCAAAACATGTTTGGCAAGCCACACCAGTCAGATCAGGGTTGCGG  
ATTTTGGGGAATGCATACTCTTTTGGCGGGCGGACAGCATAAGTTACCAGCCGTGGCCATA  
TAACGATAACCAGTATTGATGGCGTCCACAATCACAGTCGAAAGATAACCCGGCCCTTGCAG  
AGATCGGCAGCGATTCCGGCTTTTTTCGCACCGTCTTCAGCAATTTCTCAACGGCTTTA  
TCCCATTCCTCAAATCGAATTCTGACACGGTGTATGCTGGTGGACCGACTCATCCGAGGCA  
TTAACAGATATCAATGCAAGGTTGTGTTTTAGCCCGAGGAATGTGCGGGCTTTGATCCCT  
GTGCCATCAGAACTTTGTTGTTAGCGCGTTTTATATCAATGCTGGTGGACTGCGCCACC  
AGCTGAGCATAGGTAATGCCGGGTACCGTGTCTTTGAATTTGGTTTTATGAGACTGCCTT  
GAGGTGTTGAAACTGCGTATATCTTCGGGGCGTAAAGTAGGTGCCATCTTTCTTTTTCCCA  
AGGCTGAGGAATGCCTCAAGTTCGCGGTTACGCATCCCCATAATCCTTGGGGTGAGTGTA  
CGTCCGCGGTTTTCGCCGATTCTGACGCTGCTGTTTACGGATAAGATCGAAGACCTTGTTA  
AAGTCTTTTGCACCTAATCCATCAGTCTGATAGCGACCAAGGTTGTGCGGAGCATATTCA  
GTTGGCATTCAATTTCCCTTACGCAATGGATAATGTCCCTATTACCTGGCCGTCGTATTGG  
AAATGGCGAATCAATTCGCGGATCCAGGTGGCAGGTGGGAGTTTTAATTTTTTGCCAACA  
GTCATAACCTGAGACTCATCCTCAAGCCCGGCGGCGAGCGTCACAACCCAGCGTAGCTCT  
GCTATGCCCCACATACGGTAAGCCAGCAAATCCGGGCGATATTGCTCATCGGGAAGAACG  
TAATAAATCGTCAGATTCTTGTGCTTCGATTACACATAAGCATCACCTCTTTGCGTAGC  
TCTGCCCTGAGTATTGGATCGGCTATGTTGCGGTCGTCATAACCGCGACAGAGGATATTGC  
CGGGTGCTTTGGGTTGTAGTGATTGATGTAGCCATAGTCAGCCTGCCAGAAATAGATGAT  
GGTATTCTACCGCTAGTCATTTGTTGAATATTTAACTCAATAAAAGAAAATTATTAGTG  
CAATTTTGATTGTGAAATGTATCATTCTGCCCTTAAGTAGGTTCTTCACGAGGAAACAAA  
ATTGGCAGAACGTGTTGATGATGCAGAGCTGAGCATGAATCAGTTAGAAGCTCTCAAAGA  
CATGGCCATCGATAACATCAGAAAGCAGGCACAGGTTCGTGAGCCAGGTATTTACAGGGAA  
GTGTCGTTACTGCAATGAATCGATTGAATCAGGCATTTATTGTGACGCTGAATGTGCGCA  
ATGGCACAGGGAAGAGCAGGCCGCAAAACAGCGTAAATATGGCATGCGACCGGCAGGATT  
TGACTGATTATGTTGCGCTTTACTGAGGAAGAGTTTCAGGCTTTTGTGAGCGTCGAAAT  
AAGGGGCGGTCCAGGCCAAAACCAAAAAGGATCCATTCTTATCGCTTGCGCCGGTAAAA  
GAAGTTTCTCCACATGCGAAGGCACCTTGCAGCACTGGCAAAGAACCAGACCTGCGCGAC  
GGAAATTGCGAGCACTTCGAGCAGGTTTTTCATTTTTGATTACTTCGAACGCAAGCACCT  
GACATCTATGAGCTGTTGCATGCAACGCCTAACGGAGGGAAACGTTCAAAGCAACCGCC  
GGGAAAATGAAGGCTGAAGGGCAGAAAAAAGGTTATCCGGACATGAGTCTCGATAAAGCA  
TGCGGTATTTATCACGGCATGCGAATTGAGCTTAAAGAACCAAATGGTAAAGCCCCGACG  
AAAGAGCAGATCGCCTGGATGCGCAGGCTTAGAGAGGAAGGTTACTACGTCGTTCTTGGC  
TACGGTGCAGAACAGCGATTACCGCCATCCTGGAATACATAAGTCTTAAAAAGGGTGAG  
GCTATTGAGCATGTATTGAACGGCGATAAAGTGGTTGTATGCTGCTTAAAATAATAAATTA  
ATTAGTGCATGTGCGCTCTTTGTGGTAGTGCACCTTAAACATCGGGAGAATAATCGTGTC  
TCCAAGGTTAATTATGAGTCGCTGGCATCGGTCATGCCGCGTAATGAACAGGAAACAGAT  
GCTGTAGTGGACCCTGTAATCGCTGAAATGAATGCTCGCCTGGAGGCTGAATTTGCAGCT  
GAGAATGAACATAACCCAGGGCGACTAGGACTGTTTTTTGTGTCGGTAGCGGTCCGTC  
ACTCACTCGTGAGGACTGTGCTGCTATAGAAAAACTGGCTGTTCAATCATCGCGGTTAA  
CAATTCCTGGCAGATGTTTCGATGACATTTATGCCTTATACGCCGGTGATTTGTATGGTG  
GAAGCAATACGGATCCACCATAACCGGGAGGGAGATTCCGCAAAGTGACAGCCAACCTGGC  
GGCGGCGAAATCAATTTTCGTTGGAGTACAGGCGATATTGTGGACCGGCAGGAGGGGTAAA  
TAGCGGCGCGCAGGCTATCAGTCTGGCTGCTGAATCAGGGGCTGAAGTAGTGGTATTAGT  
CGGCTATGACTGTTCTCTGCAAAACGGCCTTCATTGGCATGGCGCGCACCTCAAGCACT  
ACGGAATCCAACGCAGGTGTCTATTTCAAATGGCAACAGCAGTTCCTGGATACCCGCAA  
AAAACACGCAGATTTACATATTTGAATGCAAGTAGGAGCAGTGCAATTCATGTTTCCC  
AAGAATAAATTTAGAGGCAGTGATCGCGTTATTATCGTCCGACAGTGGCCCAAGCGCCGCA  
AACTTTGTTGCGCCGCGCGGAGTGCCGATTATAGCGGTCAATGGGGCCATCGACTGGCTT  
AACCGCGCTTCTTATTTTTTACCCTTGATCCATCCCCAGACAATATGCGGCGCGTTGGT  
CGTGGCCCGCGTCGCCGTGGTGTGTTATTGCATGGCACTACCCGATGTTAAAGAACGT



GAAGTCAGAGATGGCGTTCTGTGCTTCCGTCGTGTGGCTGAACGCGGCATGGAGCCAAAA  
AATACGAATTCTCCCGAGTGGTGGGCGTGGCGCTGGTCCGCACATTTCCGGCCTTTGCGAA  
GATGAGAATGAAATTGCCAGCGGCAATAGTGCATATGGTGTCTCTGAACCTGGCTTTCCAT  
ATCGGATTCAAACATGTAGCTCTGGTGGGCGTTGACGCTACGCAAGAACTACGCGTTCAC  
TCCGGCGGCACGCCAAAAAATCTAAGTCACCTGCCTTTGTTATTCCAGTCTGCGCGTGAA  
CAGATTGACGTTGTTTCATGCGGGAAAATGGGAGGTATTCCGCAGATGACTCTTAAAGAA  
TGGCTGAAGAATACATGATAGCACCCACAATTTATCACCGTATCGACGGTACCAAATACA  
GGAATGTCTGGGTTGTTGGTGTATCTGCATGGTTGCTACACCAGACTGATGTCCGAACTCC  
ATCGTGTGGATTTTGACCCGGCGCAGGATTTACTGATATCGGTTCGGCGACCTTATCGATC  
GCGGTACTGAAAATGTGCAATGTCTGGAACTATTGCAGATGCCCTGGTTCAGGGCAGTGA  
TGGGGAACCATGAGCGGTTGATGCTCGATGCGTTAAGTCCTGATGGCAACGTGAATAACT  
GGCTAATGAATGGCGGACAATGGTTCCTCATGCTGGACACTGATCAGGAAATATTAGCCA  
GGGCGCTGGTGGAGCTGGTAAAGCGTCTGCCCTATATCATTGAGTTGAACACCGGGCAAG  
AAACTATCGTTATAGCCCATGCCGACTATCCGGATAATGAATACCAATTCGGTAAGGAGG  
TGCCGCTTTTCAACGTTGTCTGGGCGCGCAGCGTATCAGTGATTCGATGGATGATATTG  
GTGGCGAAATTTCCGGGCGCAGATCGTTTTATCTTTGGTCACTCCGGTGAAAAGCCCGA  
AGACATTCTGGAATCAGCAGTATATCGACACTGGTGCCGTATTTTTCGGAAACCTGACAT  
TGATGAAAGTGAAAGGTGATGGTGCAGCATGAAGATTGCTTTAGTTCTTCGCTCTGGTGG  
TGAATAACGCTTCCGATGTGCAGTGGCTGGTTAATCAACTGCCAAAAGACTATGAAAT  
TATTTGCCTGACAGACCTGAAGTGTTTACATGTACCTGGCGTCAAAGTTATCCCATTGAT  
CAACCAGTGGCAAAGTGCCGTGGCTGGTGGGCGAAAATCGAGTTGTTCCGACCGGATAT  
AACCGATGATCTGTTCTATCTGGATTTGGACACGGTTATTGCCGGTGATATACGCCCAAT  
CCTTGAGAATCCACCAACCAGCTTACCATGCTTAGGGATTTTTACCATCCACAATATCG  
TGGTAGCGGTGCCCTGTGGATAACCAAATAGTGTTAAAGCGCATATCTGGAGTTCATTCTG  
GCAAGATCCGGAAGGTTGGATTTCTCGTTGTGTCACTACTGAGTGCTGGGGTGACCAGGG  
GTTCTTACGAAAGGTTATGGGCGATGATACACCAGCATTTCAGGATCTGTATCCAGGATG  
GTTTGTAAAGTTACAAGGCCGATGTTGTGGAACCTGGTTCAAATATGCGAGCGCGGTTA  
CTCCAGGGGGAATGGGGCATTACCAAAGACTGCCGAATAATCTTTTTCCACGGCAAACC  
GCGACCTCGCGAAGTGTCAGAGGATTGGCTTCCCCTTATCAGCTCATTTTTTGAGCGAGA  
ATCAGAATAATATTGCTCTAATAATTCCATATTTTTAAAACGTGATGTACACTCATCAG  
TTTTTTATTAGAGCAATCTACAAGGTGCACTATGTGGCCATTCCGACGGAAATATCACTA  
CTGGCTGATCGCCTTTGTTACGCCGACCGGCGGTATCAGGCATGTCATCACCAGGTATCG  
CAACAAGAGACTCACCTTAGCCAGAATTTTACAGGCTGCCATAGGTGAGGGACTGGATAC  
AAATTGCGTAGTCCTTCCTCCTTCACTTAGGAAAAATGACCGAAGCACAAGCTAATAC  
GGAACCTTGAATGATCACTTCAGCACAAAACCAATCAATCGAAAATGTATCTATCCCGG  
ATGTCCTGAATGCCGGTATCCCGGCCATTATCCAGAACATCCGGGCGCGCAACGCCGCG  
TTAGTTGTGATGACCTCACAGCACGTTTTTTTTGATAATGCGGTTTCAGTCAGCGGAGATGC  
TTCACGCACAGCTTATTGATGTTTATAACGCAGAAGCTGATAGCCATAACTCCCTGGTAG  
ATGCAGCTGAAAATATGCAGTTGGATCTCGGTCTGAAGGGTAAAGAAATTGAAGAGCTTC  
AGCTGCAAATTGAACATTTGAAACGCCAGCAACAGGACGCGATCGACGATGCGACGCATG  
ATGCCAACAGCGTGCTGATAATGCCGAACGTATAAGCATTGAGCTGGAAACAAAACCTCA  
ATGAAATGACCGCGATGGTTGAACTGCGGAACTCACAGATTTCAACGCTAAAATCTCAAT  
ATAAAGAGATCATGAAACTTGATCCTTTTAACTTGAGAAACGCTATAACAAAGCTAAAA  
GCGAGCGACAGGAACTGCGTAAACAGGTCGCCGACCTTAAACCAACAGCTCAAAAAACTA  
TTAAAGATGCAAGCGAAGCGCGCGTGGCATTGCTAATAAAAAAGCAGAGGTTACCGCGC  
TGGTTAATGAGAATGCCAAATTTGCGACGCTCAAGAAGGAAATGTATGGCATTACTGAGC  
GCCGTTTCCCTGCAAGCAAACCTTCATCCGACGTTAGGGCAAATCTCCTTCTTCCCGCGCC  
TCCTGGCTTATGGGATCTCATCGCCTAAAGAGTTCAATAACGAGCGTCCTTATATCGTTT  
CTAAGCTGGACTTTGCTTATCAGTTCTGCTGCGACATGGGCTATGCCATTGATATCCGAA  
TCAACGAATGGTTGATGCCAACTTCCAGCCGTTGGCAATTTTCCGCGAGTTCAGCCGG  
AAGGTTGGGTAGAGTTCTTCCATGAATTGATCTGTAAAGAGATGGAAAGCCGCCGCCGG  
AATTGGTCCGTCGAGTTGAGTGGGCGCAAGAGGTTATGTTGGCAGATGCAGAGCTGCCGT  
TCGAACCGGAATTCATTGATGATCTGGCAACTAAAGGTTGCATACCCTGTTTGTATGTTG  
TTACCCGCCGTCATGAGCAGTTGGTTGTCGAATTGGGTTTAGAGGAAACAGCGGCAAGAA  
GACTTCTCGATGTTTGTATGCACGTAGCGATGCATGGGAAAAGAGAACGGCGGCACTA  
TTTACGTTTCGCTGATAGTTACAGTGTCACTTTTAAATGCTGGTGGAGTGCGCCACCAGCA  
TTTTTTTCGTCCAATGAGGAGGGCATTGAGTATTTTCAATAAACACGCACACCCGGAAC

GTCCGTACATCGTCATAGTAGATATTGATGGGACGATATCAGAGGCAACGGAAGACAGGC  
TGCATTTACTTCCACCACCTGGCAAAGGTGCATTAACAGAACACTGGAACGAGTTTAACC  
TTGCCTGTGACACCGATACTCCCATCACTCCAGTTATTGATATGGTGCGCCAGTTATTTA  
ACGTTTACACGGTCTGGTTTGTAAACCGGGCGCTGTGAGATCGCAAGGGATAAAACACGAG  
CCTGGCTGCGGAAGTACGTAACAAACGGGGCTGAGCCTTTGCTATCTATGCGTCCTGCCA  
CCGATGACAGAAATGACGGCCCAGCAAAGATTGATCTCCTTAAGAAAATTGGTCTAAGTA  
AAATCGCGTTCGCGCTGGAAGATAAGATTGAAGTGGCGCGTGTTCAGGAGGCACGGCG  
TGCTTACGTTAATGGTCAGGGAGTATGAAAATGCGCTTCTTCATCAACAATAATTGCTCT  
AATAAATCTTGATTTTTTAAACAGAGAAAGTGAAAATAAAAACATGCCGCAAGGCGCGGC  
ATGTTTCCAATCAATCACAGGAGCTGAAAATATGAACACGGCATTCAAATCATTATGGC  
CGCGATCTATTTCTGGCTGTTCTCTATCACTTTTGGCGGCATCGTCGCGCATGGGTAAGG  
GGGATGCATGAAAGGCGAAGTGAAAGAGCGCGGCATGATTTTCAACGATGAGATGGTCCG  
GGCCATCCTCGAAGGAAGGAAAACGCAGACGCGGGGATAATGAAAATCAGCCTGCGGA  
AGTTGGTCCAGAAGCACCAGTGATGGTTAGAAAAATTGGTGCAGGTTTTTCAGTGGTACGG  
GGCTGATGGTGTAAAGCAGTGTTCATTTGCCATTTGGTATCGTCGGCGATCGAATTTG  
GGTTCGTGAAACATGGGCGATATTAGGCAATGAGGATGGTTGCAGTGTGGACTGGAACGA  
CAACCTTTGTCGTGGCGATGAGAAGAACGCAGCAAGGATTTATCGGGCCAGTTGCGAGCA  
AAAACCTGGTGATTACGGCTTATGGTCGATACCCGATGATGCCGACTGGAAACCTCACAC  
TGTGAATGAAAAGTTTGTGATGGTGGGTGGCGTCCATCAATTCACATGCCGCGATGGGCATC  
ACGCATTCTGTTGGAATTACCAACGTGCGCGTTGAACGGTTGAACGATATCAGCGAATG  
CGATGCAAGGGATGAGGGCGTTCCGCCTGCTGGAAGTTTGCTTCTTGATCACCCGGGAAC  
ATTCCTTACTCCCAAGGGGGATTTTCGCAATGGCCAAGGTTGCGTTCAGCGCCTGTGGA  
ATCCATCTACGGCGAAGAAAGCTGGAGTGCTAATCCCTGGGTACGAGGCTGGCAACTAT  
CCGGACATTCCGGATAGTTCGGTGCCAGCGAAAGGAAAGGGCGTCCCCGGTGAACGTATC  
CGAATTAAGCCGCATGTTTATCGCGAACTGGTTAACCGCCTCCACGATACAGCGGTCAAG  
TGTGCTGGCACCCAGCAATTACGAGAAAGAATTAGCCGTGTTTTGGGCGACGTTATTACG  
CCAGATCATCATAAACAAGCCGAGAAAAGTGACCTAGAAAGGTGTCACCTTGAGGCGGCA  
TTAAACATTAAGCCGGGGCATAACGCTTGGCATTATCGATGCTCTGTTGGTTCATAAGATG  
GCCATGGCTTTATTGCCGTTGGTGGATGCTGGCGATAACAAGCGAGGGTGAAGTATGAGAG  
TTGCAGATCACATCAAACACCTTGAAAGAATTATCGAAAACGGTGAACCTTAAAGAGATC  
AGATGAGACGCACGGCAGAAGTCAGAGAGGGCGATAATCCGCAGTCAGGCTGGTAAATTA  
AGCAATTGTCAGAGATTAACGCGCTATAACAAGAACAGACGTAACCGGGCGGCGCTGCGGC  
TTCAGAAAGCACGTAATGAAATTAATTTGGTGGAGGCAAAACTGAAAAAACAGATTCAGC  
GTTACGATCAGCAAGATGCTTTTTATGCCGCCATCAAGGCGGCTGCTAATGAAATAGGCA  
TCTGGAAGTTGCTGGTGGAGAAAGCAAAGACGAAGTTAAATGCCAACGAAAGCTGAACTA  
CAGGTACCCACCAGCACATACAGAAAATGATTGTTTCCACATCAAGGAGATTTTAATGTT  
TCACTGAAACATTAAGTAAGCCAGTGATAATTCATTTTTTACTGACCTTAAAAGCAA  
ATCAAACGATGATGAGGATAATAGCCAGAATCTGGCTAATAACAGGCGCATCTAAAAT  
GCACTCAGGAACTGAAAAAAGCAGTCATTAAGGTGGTTCCTTGTCAAATGTAAAGGAGC  
ACTTGCTCACGTTGACGTAGAAACCCAACCCTTATATAGTTGGATTTCGGTGAAGAAAGT  
CGTTAACGTGAGCTTACGGCACATGTTTTCGGAACAACATCAGGGAACGGCTAATTCCTT  
GATGCGGGTGGGGTCTGTAATGCAGACCCTATCTATTAACGTCATGATTGCATCTCAAT  
TTTCTCCTTATCTTCATTAATCAAATTCATTTTCAATTTGTGAAACATCACAAATATTTAGA  
AAATGGCCCTCTTGCAAGTGCATAACTTTGTGGATAAATCAGGAAGAAAAAAGTTGATTC  
TGCGCACGGCAAGGCAGATAAGCTGTGCACAAAAATCAATGGGAGAAGAAAAAATTA  
AAGTTACTTTGCTGGTTAAATAATAGTCGTTACTCAATTATTCTGGATGGGATTTGATAT  
GTACGATTGGAATATTGCAGCTAAAAGTCAGGAAGAACGGGATAAGGTTAACGTTGATCT  
GGCTGCCAGCGGTGTGGCGTACAAAGAGCGATTGAACATACCTGTCATAGCTGAACAGGT  
AGCCCGCGAGCAACCAGAGAATCTGCGCACCTATTTTCATGGAACGGCTACGGCACTACCG  
GCAGTTAAGCCTCCAGTTGCCAAAAGGGAGCGATCCGGCATATCAGAAAGATGATGCCGT  
AAAGAAATAGCGGTAGTTAACCGTTTTGAACTTCTCGTATCCTGGCAATGACAGCTTCAT  
GCTGGGCTTGGATAGCGGCTTTTTCGTTTTCAAGTCGGGCAATAGACATCTCTAATTCTT  
TGCTGTACCAGGCGAGTTGGGCCAGGTTTCATCCGTTGTGGTTCGAGAGTTGGAGACTT  
CGACGCGCTCCCTTTCTTCTGCTTTAATGAGAAGAGATTCATCTCATCCCTTGAGGAAA  
ATTCAGCAACAATTTCTTGTGATGATCCGGTCGCTGCGGCATCCTCGCCAGTATAAATG  
GCGGTTCTTTTGAACATGAATGTCGGCTGTGACCGTGTTCACCCATCTAGCCTGCT  
GTCTTTCGGCAAGTTCACAGGCTTCATCATAGTTATTTGCCAAACCAAGCACGGATGGAC

GGTCCCACGCGCCACCATTTCAGACAATAAACAACAATTTTCCCGTCATGTTCTGTAACCC  
CATAGGGATGGTCCCACCAGGCGTCCAGCTGAGCTTTAGAGCGTTTCTCGTTAGGAGTGC  
AGTCAAAATTTTTGGGCAATACAGGATCGAGAGGAATGCGATTAGGCATAGCTAATTCCT  
TATTAAGTATTGGCAACGAGGTTACGCTGATCCGTTGGTGATGAATAGTAGCAAAGCGC  
ACAAAATCATCAGCGGTTGTTGATGTACGTAACGCGTTTGCACCAAAGGTGTCTCTTTAA  
TGTGTACTGTATAAATGAACAGTATTATTGAGGTGAAAACGCTATGGGGCTTCCCTTCTCC  
TGCGGCGGATTATGTTGAAAGCCGAATTTCTCTTGATCAGCAACTAATCAGGCATCCATC  
AGCAACCTACTTCATGCGGGCAGCTGATAGCCATCACCGTGAGGGAATATTGCAGGGTGC  
TTTGCTGGTGGTTGATTCCTCGCTTACTCCGTTGATGGTTCTCTGCTTGTGTGCGCTAT  
GGAGGGTGAATATCGCATAAAGAGATAACGAAAGTATCCGCGCCAGCACCTGGAGGATTT  
AAGCACCGGGAAGAAAGAGGCGTTACCAGTAGATGACGATGGTTACACGTGTAGTAATGC  
TGTTTTTGGTGTGATCACTCATGTCAATGATGCCCGGAGTGGAGAGTTTGATGATTG  
TCCGGTCAATTAAGCTGCAAAGTGCTGGTGCTTTATGCCTGTGAAGTTTATAATTGTGTA  
CACATAACGAGTACACGAGGTGTTTATGCAATCCATTAACTTCCGTACCGCGCGCGGCAA  
CCTTTCTGAAGTGCTCAACAATGTTGAAGCCGGGAAGAGGTTGAAATCACCCGCAGAGG  
CCGTGAGCCAGCAGTAATTGTCAGCAAGGCTACTTTCGAAGCCTACAAAAAAGCGGCGCT  
GGATGCTGAATTTGCATCCCTGTTTGACACCCTGGACTCCACCAACAAGGAAGTGGTTAA  
CCGATAATGAGGCATATATCACCGGAAGAAGTATTGCGCTTCATGATGCGAATATAAGC  
CGCTACGGCGGCCTGCCGGGAATGTCTGATCCGGGTAGGGCAGAGGCCATTATCGGGAGA  
GTTTACGGCCAGAGTTGCCTACGAAGAGATCACCGACCTTTTCGAAGTCTCCGCCACCTAC  
CTGGTGGCTACAGCGAGAGGGCATATATTCAATGATGCCAATAAGCGTACCGCGCTAAAC  
AGTGCGCTGCTATTTCTACGCCGTAACGGGGTGCAGGTATTTGATTCACCTGAACTGGCA  
GACCTTACTGTAGGAGCTGCGACTGGCGAGATATCTGTATCTTCTGTGCGCCGACACGTTA  
CGTAGATTGTATGGTTCTGCGGAGTAGATTAATGGCACGCAAATACAACAAATTGTCCCG  
TGAAGCGTTAAAGATGCTTCTTGATGGCGTGAGTCGCCGCAAGGTAAAGCAATACCTGGT  
TGGTAAGCAAATTGGTGCCAGGACCGCTATTGCTGTGTTATGCCGTCAGGAAATGGTTGT  
GCTTAAACAGAGAATGCCGGGCAGCAGATAAAGCCCAATCAGTGATTAAGGTGTGATGT  
GAAAGCCATAATTACTCCCTTTGTACAGAAAGAGCTTGGCCTCGCCACGTTCAAAGTGGA  
TCAGGAGGTCAGAAAGCTGGTGGAGGCTGGCCGTAATTTATTATGGAGCCGGTGCCGCG  
TGAGTTAATCGAGCACATGGAAGACGGCCTCGTTGTTACCGAGCAAACCATGGCAACAAA  
TGAGGCATTGCAGCCGTTTTTTAACAGCGATGAACTGTTTCGCCGTATTGGTGGAATTGA  
CGCGCTGGTGGCGTGGTTGCGTAGGAAAGAGGGTCAATGCCAGGCCGCAGATCGTAGTTG  
GTGTGACAACCATATTGTCCACGCTGAACGAGACAATAGCGCGGTGTTGTTGTGCTGGCA  
TCACGATAACCATTACCGGATGCGTGGTTTTAATGAGCTGAAAGAAACGCTGCACAATAA  
TCGCGTTAACTGGATACTGGATGTCGCCCGTCAGGAAATGGGCCTTTCAAATAGCCATGA  
TTTAAGTATTCAGGAGCTGTGCTGGTGGGCTTTCATGCGCAACATGATGCACCTGATGCC  
GGAAGAAGTCTGCCGCATATCAATAAATAAGATGAAGGCTACTCCGCAGGATAGCGGACC  
TCTGAAAGAGGCGGATATTCGCCCGTATGACGATCGCGCTACAGCATATGTTTCAGATGAT  
GGAAGAACGCTCCGCGCCGATGCGTGCAAAAGTATGCCCTGTGGATGTTGACTCCGACCC  
AGGTATGGCGCATTTCAAATAACAAAACCTTCAATCGCTAAAATTACCTGAGTACATGGA  
CTTTGTTGCTTCCCGTCCATGCTGTGGGTGTGGAGCTGCGGGAGCTGGCGCTCACATTAC  
GCCTTATATCGTTCGTCATAGTCGATTATGCGCGCATGACATTTACGCAATTCCTCTGTG  
CCAGTCATGCCAGCGTGATATTGAGCGTGACCGCTATAATTGGGAGAAGACGCACGGTAG  
GTTGGCGATGCATCAACGATTGTTCTTTGATTACGCGCTTGGAGTGGGCGTTATCACAAG  
TCATTTCGTCGAGTGTTAGATAAAATTGCTCTAATGTATTGCTATTTCTTTAATCGAGGGT  
ATTATATTCACGTTGATTAGTTGACATGGGCTAATCAGTAGGTGACAGGATGTTACTTA  
ACTGGCAGGGACGCCACTTCATGGAAATAAATCACTCACGAATAACATCGTACGAGATTG  
CGGATTACATGATCCGCACTAAATCTCTTCTATCAGCGAAAGAACTCGCAGCAATTCTTG  
AAAAGGAATAACCCGCATCTGGATGTCGATAAGCGCGATGTTTATCTGCGCTTAAAGGCTA  
TCGCTGTGTCTAAGTATTCGCTCTGTTTTGATAGATGACAGTACACGCCCACGTAGATTTT  
AGATCCACTCTCTGAATCCTGAATTCCTTTCGCCGTAGCCGCGCTCCGCGCCGGTTTTGATG  
AAAAACTCCAGAACGAACTCTATATGACGCAGGACGAAAAGGAACGCCGGGAGCACCAGC  
CTTGGGTAATGGCGCGTCAACTTTTCAATAAAGGTGGCCCGTCAGCACCGTCATTACGGTA  
ATGCCACATCCGCACGTATCTGATTGATTGCTTGGCCGTTCCGGGCCCTTTGACATGTGA  
CTTTCGTTACCCTCGCGTCAAAAAGAGTTTTTACGAAAGGAAGCATAAAGTGACCTGGGAC  
GATCACAAGAAGAATTTTGTCTCGCCTGGCGCGAGATGGTGGTTACACCATCGCACAGTAT  
GCCGCCGAGTTAATCTTAACCCTAATACCGCACGTCGTTATCTCCGTGCCTTCAAAGAA

GACACCAGGACTACGGACAGCCGCAAGCCAAATAAGCCAGTCAGGAAGCCACTAAAAAGC  
ATGATCATTGATCACTCTAATGATCAACATGCAGGTGATCACATTGCGGCTGAAATAGCG  
GAAAAACAAAGAGTTAATGCCGTTGTGAGTGCCGCAGTCGAGAATGCGAAGCGCCAAAAT  
AAGCGCATAAATGATCGTTGAGATGATCATGACGTGATCACCCGCGCCACCGGACCTTA  
CGTGATCGCCTGGAACGCGACACCCTGGATGATGATGGTGAACGCTTTGAATTCGAAGTT  
GGCGATTACCTGATAGATAACGTTGAAGCGCGGAAGGCCGCGCGCTATGTTGCGTCGG  
TCCGGGGCCGATGTTCTGGAAACCACTCTTCTGGAAAAGTCTCTTTCTCATCTCCTTATG  
CTGGAGAACGCCAGGGATACGTGTATTCGCCTGGTGCAGGAAATGCGCGATCAGCAAAAA  
GACGATGATGAAGGTACTCCGCTGAATACCGTATCGCGAGCATGCTAAACAGCTGTTCC  
GCGCAGATAAGCAGCCTGATCAACACCAATTTACAGCATCCGGAATAACTATCGAAAAGAA  
AGCCGGGAGGCGGAAAAGCACGCTTTATCTATGGGGCAAGCTGGCATTGTTAAGCTGGCA  
TACGAACGAAAGCGTGAAAATAACTGGTCAAGTGTGGAAGCGGCTGAATTCATCGAGGCG  
CATGGAGGAAAAGTGCCGCCCTGATGCTGGAGCAAATCAAAGCCGATCTGCGTGCTCCT  
AAGACCAATACCGATGATGAGGAAAACCAAACAGCATCTGGCGCTCCATCACTTGAAGAT  
CTGGATAAAATCGCGCGAGAACGGGCCGAGCCGCGCGCTGATGCCGCATTGTGGATT  
GAGCATCGTAGAGAAGAAATTGCCGATATCGTCGATACAGGTGGTTATGGTGATGTCGAT  
GCGGAAGGCATATCAAACGAAGCATGGCTTGAACAGGATCTGGACGAAGACGAGGAGGAA  
GACGAAGAAGTTACCCGCAAACCTGTACGGGGATGATGATTAATGGCCAGAAGTTGCGTAA  
CGGACCCACGTTGGCGCGAGCTTGTGGCGCTATATCGTTATGACTGGATTGCGGCCGCTG  
ATGTGTTGTTTGGGAAGACACCAACCTGGCAGCAGGATGAGATCATTGAGTCCACGCAGC  
AGGACGGCAGTTGGACAAGTGTGACCTCCGGCCATGGTACTGGTAAATCGGATATGACGA  
GTATCATTGCAATACTCTTCATCATGTTTTTCCCCGGCGCTCGCGTCATTCTGGTCGCTA  
ACAAAAGACAGCAAGTCCTTGATGGTATTTTCAAATACATAAAGAGCAATTGGGCTACTG  
CTGTTAGCAGATTCCCGTGGTTGTGCAAGTATTTCACTTACAGAAACGTCTTTTTTTTG  
AGGTGACTGGCAAGGGTGTGGACAATATTGATAAAGTCCTGTCGTCGCCGAAATGAGG  
AGGCGTTGGCTGGTGAACACGCCGATCATCTCTTGTATATCATCGACGAAGCGTCGGGTG  
TGAGTGATAAAGCATTGAGTGTGATAACAGGTGCGCTGACCGGTAAGGATAACCGTATTC  
TGCTTCTTTCCAGCCTACGCGACCTTCAGGCTATTTCTACGATTACACCCACAGACTAG  
CTATTCGCCCGGAAATCCTGATGGATTGTTTACTGCGATAATACTGAATAGTGAAGAAT  
CTCCGCTTGTAGATGCAAAATTTATACGAGCAAAACTTGCGGAGTATGGCGGTCGTGATA  
ACCCCATGTACATGATCAAAGTACGTGGTGAATTTCCCAAATCTCAAGATGGCTTTCTTC  
TTGGTCGTGATGAGGTTGAGCGGGCGACGCGGCGAAAGGTCAAGATTGCCAAAGGATGGG  
GCTGGGTTGCATGTGTTGACGTTGCTGGTGGCACAGGACGAGATAAGTCCGTTATTAATA  
TCATGATGGTGTCCGGCCAGCGAAATAAACGCCGTGTAATCAACTATCGTATGCTGGAAT  
ACACAGACGTTACAGAAACGCAGTTAGCCGCCAAGATTTTCGCAGAATGTAACCCAGAAC  
GGTTCCCGAACATAACCATAGCTATTGATGGCGATGGCTTGGGGAAATCGACGGCTGATC  
TAATGTACGAACGCTATGGCATTACCGTCCAGCGTATCCGCTGGGGTAAAAAGATGCACA  
GCCGTGAAGATAAAAGCCTTTATTTTCGATATGCGCGCTTTCGCGAATATTCAGGCGGCAG  
AAGCTGTAAAATCAGGGCGTATGAGGCTTGATAAGGGGGCTGCGACTATAGAGGAAGCAT  
CAAAGATAACCGGTAGGGATAAATTCCGCAGGTCAATGGAAGGTGATGTCAAAGGAAGATA  
TGAAGAAAAAACTCAACCTGCACTCACCGGACCATTGGGATAACATATTGTTTCGCTATGT  
TGGCGAACTATGTTCCCAAGATGAAGTGCTTAGCGTCGAAGACGAAGCGCAGGTTGATG  
AAGCTCTGGCATGGCTTAATGAATAACTCATTAAACCATGCCGGATGGAAACTATTGCGCG  
CTTTCGGGGTTGTCGTTTACTGGCTGCCCTTCTTAGTTTTGCGGCTGCGCGTAACTGAT  
GCGGCTGATTTGACCTTTTTCTCTTCGCGAGTGATGGCAATTTGTTTTTTTACATTTTCA  
ATATCTGCCAGGCGATATATTTTTGCCTGCGGCCAGCGGTTCGCAGATGATCGGTTCTATA  
GAGTCATAAAGGCTAAATTTTGTCTTCTCAAATTCACCGTTGATGATGATTCATCTCGG  
AGAGTTTCATCGCAGATAAACACGCAACATAGCGGCACATGGTAACTAACTGATTTGCCA  
TCATTGTAGTTAGGGCTACTGGAAATGTAATGGACGCGCAGCATTGTTTCGCTAAAGCCG  
TGTACGCGCATAACGGAATTTTTCATCCTCCGGGTACTGCTTCATTAGCTCTTTTTGTTGCT  
TCCAGGTTCTCTATGTATTTTCGCACTGTGCTCATTGATCCCCGCGCTTTTTTGGATGCGA  
ATGTCCTTATCAATCAGATGAATAATGCGGCCAGCGGTCATATTGACGCTGTTCACTGCT  
TCTGTCTGATAAGTCGTAACCTTACGCACACCGCGAAGGATGTTAGGTACAGGATATAAA  
ATAGTCTTTGGGATATTGAGATCTGGGTACTGCTCCAGTTCGCCGCCATTAATGTCCAT  
TTATCAATTTACAGCCTGAATGCTGTCCGTTTCTTTGAACGGCAGAACGACAACCGGGCGA  
ACAGGACGACCGTTCGCTGGCGGCATCAACGTGTTGGGCGCGTGCAACAGCTTTTTTTTGA  
AAGAGATCCCTGAAGCTGACGAACTCCTGGTACAGTTGTTTCGCCGTAGACATAATTTATC

ATTGATCCTCCTCCAGAATTGACATGGCCAAACAACCTCACAGCGGATTACACTGGGAGTTG  
TTGGCCACCATTATAGAAGGATCCAACGAAAATAATAGATTTATTAGTGCATTTATTGTG  
AGTCTGGCTGGTTAGTGGCCATGAGATATTCGATTGTGTCAGTGAGATCATCCAGGTCGT  
CTTGGGTGATGCGGTA CTCTGATTGGATATCTTTGAGTAGTGTTTCAGCAATGGCGCGGG  
CAGCGTCGGTTTCGGCGGGGTCTACAGATAAAGCGTTAGAGCAATGTCTAACGTCGTCGA  
TGGTTGGTGGAATGAAAGCCATAATTATGCCTCACTGTATTGACAACACAGAGCCTGAAG  
CTCTGACCTACTGTTTCACCCATGATCCATGCTGGGGTAATCTAACAAACATTGCGCTGTG  
TGTAAGATGAGCAATGTATAGCTGTAATGCCGTTGTATAAGGTTTCCCTGTTTGCTCATT  
TCCTTCTGAGCCGCTCTACAACGCTGAAGACACATTAATAAGTGAATCCAAAGTCGTATT  
ACGAAACGGCGGCAAAACTATAATTTATTAGAGCAATTGTCAAACAACACTATGAAAAACAA  
TCCAGTTTTTGGCTGGTGGAGTGGGATTTTTCTCTCAAATTTATTGCTCTAATAATTCT  
TGATTTTTATGCGCAGCTGGACGTAAACTCCTCTTCAGACCTAATAACTTCGTATAGCAT

>NewGenomeName\_283

GTTTCTGCGTTACTGACGCGGCAAGTCTAGCGCGCCTTCGTACCACGTCAGGTAGTAATC  
GCAGAGTGCCTGCCCGCCGGTGCCCGTTGTCGTGTCGAGGTTTCGTGACGACGATGAGATA  
GTCGTGATTTCGGCGCGAGCACACGATCGGCGCCTGGCGCGAGTCCACTGCCCGTGCGCC  
GCCGGCTTGGCTTGCGCCATAAATGTGCGTCGGGTGCGCCACGCCGTGCCGTTTCGATGT  
GGTCGTACGCCGCGAGCACGGTACGGTTCGACGTCTGCGGAATGATGTCGTTGTAGTT  
CTGCACCGGAATGGCCGTACCGCCGAAATGCCCGTCCGCGCTTTGAACAGCTGCAGGCC  
GACAGAGTTGCCGAGCGCGTAGAGCGCGGATCCTTGATCAAGACAGGCTGCGCGGCAGT  
GCGGAACGCAATCTTCACGGCGTTTGTGCCGCCGCCCGCGATTGTCGGCAGCATGTA CTG  
GAAATAAAATTGATACCCAAGCTTGACGTTGACTCGACGTAGCCTTGCACGTTTCAGGGC  
GCGCAGGCCTTCAAATGCGAGATCGGCAATGGTGCCATCAGTAACGTAGGCAGTGCCCGA  
CAGCGGGCCGGTGTGCTGCCAGTGACGCCCGTGAACGTGAAACGCAAGGCACGGTAGTGCC  
GTGCTCGGTGAGCGCGATCGTGCCGCCGCCCGCGAGCGCCGTGGCGAGGTTGATTGCCGT  
TGCGCCCTGCAGCACCTGATAGGTGCCTGTCCACTGCAGCCCTTCGACCTTGAGCGTGCC  
GGTCGCCGCGCAGGACCGAACAGCTGCACTTCGACTTGACCTTTGCTGCCCTGGGCCAT  
AGGCACCGAGACGACGCCGTTGGCGATCGGAATGGTGATAGGGGTGTTGGTCGGCATTGC  
GCCCTCGTAGCGTGCGCCGCGCTATGCGTTTGCATGGAATGCAATGCCGGCAGCTTCCGG  
CGATTCTACTATTCGTCAAATGAAATGAACAAGGCCCGCATCAGCGGGCCTTGATGTGGA  
TCAAGCACTTCGACGAATCAGCGCTTGTAGTCCTTGCGGACATTCATCACGTGCCGCAAG  
TTCACGTGCGAGTCGCGCGCAAGTCGGTGCCGTGCTGCGCGCGACGTTGCACTGCATAT  
CCGATCGCGGGCGGCTTGCTTCGGGTCTTTGCCCGCCTCGATCTCCGTCCGGATGTTCTCC  
GACCGGCTCTTGTCGCTCTTGCCCTTCGATCAACGGCATGACGTGCTCCTTGCGCGGCCGC  
CTGGCGCGCGTTGCGTTACGCGATCGGCGTGAATTGCAGCTGATTGAACACGAACACGAT  
CACGGCCGTTGCAGGATTTCTTGCCGGCGGGCCTTGAACGAACGCATGAAGCCGCG  
CTTGTA CTACATACCGCTTGCCGACCGCGGATTGGTGATCGTGAGGTCTTGCTGCAGCTT  
CGTGCGATTCTGGAATTCGTACATCCAGATTTGCTCGAACTGCGCGAGCGACGGCGAGTC  
GGCCTGCAGCGTGATCGTCAGCGGGACTTCGTTGAACACGAAGCCGGCCGACAGCGTGCC  
GTCGATACCCATGCTGTATTCGCCGTTCTCGACCGCATCCGGGTGCAAAGCGTCGTCCGC  
GGCGTAGCCCTGAATGCGCTGCGCGGTGCGAAACAGCGCTTCCGTGCTGCAGTACATCGT  
CGAGTTGGCCGTGGTCAAAGTGCCAGCCATATATCCTTCTCCTTGTGTATGGTGGTGGAA  
CGGGGCCGAAGCCCCGCCGCTTAGATCACGGCGTTCGAGCCGATCGTCAGTTGCTGAAT  
GCTGCCCGCGTCCGAATACCAGAGCGTGCAGGCCGGCGTCTGTCGGTTCTGGCGCGCCTG  
GCCCGGATTGGCGGGGTGCGCGATCAGGAAGTACCAGCCACGCGTCTGCACTAGTTGGCC  
CGCACCGGCGACACCGGCCGCTGCATCGATCTGCTGCAGTTGCGAGTTCGTACAGCGTCAC  
GCCCGCGCGGATGATGCCCGACGTCACGGCCGCGTTCGATCACATCGACGCCCGCGCGGTA  
GAGTGCGGTATAGCCGTCCTCGTTGTACGGCAGCGAGTTGTAGGCGAGCATCGCCTCGAA  
TTCGGCGCGCTGCAGTTCGGCGTTCAGATAAATCTGATCGAGGTACGTATCGACCCACAG  
GAATTTGCCCGACAGCTTGCCGTCGTACGCGATCGTGTAGTTGTTTCGCCGCGTTCGCATA  
CGCGCCAATGTACGTGTAGTTGTTTGAGCGCAGCGCGTTCGCCGTGCGCAGGTCGTGCGC  
CGTGGCCGGCACGCCC GCGTTGAACTGGCGGAACGCGAGCACCGTGCGGCCGTTGCGCAG  
CTGGAAGTTGATCGACGCGGCGTAGCCCATGACGGCGCCGGCGGTGCGCTGGTCGCCGTA  
CAGCGGCAACGTGCCTTGGTACGGCGCGGCGAACACTTGCGCGCCAAACGAAGCCGCGTT  
GTTTCGTGACGATCGACGCCGCTCGAGGTTCGGGCGCGACGTACATGTA CTTATACGCTG  
ACCGCTGTTCCAGGCCGCGAACGCGAGACGATCGGCAATCACGGCCGTCCAGGCGGTTCGT  
GAAGGTCGCCCAATTGCGCGACAGGCCGACCGCGCGGTTTCATCGCGCTCGCCGGCGTATC

GGCGGCGACACCGGCAGCCTGCAGCGTCGCGCCGGCGGGCCGACAGGCCGAGCTCGTC  
GGCGAGGTTGTTTCGTGCCCGTCACGGCCGAGATTGCGGCCGCCGTGCCGGTTCGCGTTCGT  
CACGACCGTGAAGCGATTGCGCAGCGCGTCGTAGGCGACTACGAAGTCCGGCGACGTGAA  
CGCAGCTTCGATCAATGTCGCGGGCCTTTCGCAACGACGTCGCGGGCGGCGAGGCTGATGTT  
GGCAGAGACGTGCTGCGCGGCCGTGTAACCGTCAGCGTGCCGCTGTAGCCCTGCAGCTG  
CGCGAGCGTGACGCCCGTCAACGGAATGCCGTAGACGCTCGCCGGCGCGTCCGCCGCGAC  
GTAGCGCGCGAACTTCAGATCGTACGGCAGCTGGCCGCCGTTGACGATGCCCGGAAAGTA  
AGCGTCGGCGATCTTCGCCCTCGTTCGACAGCGCGCCGAACCAGTTCTCGACGTCCGTTTC  
CTGGAAGAAGTCGGCCAGCTGACCGGGCTGCACGGACGTATCCTGCGTGAGCACGAGGCC  
GGTGAGCCGGCCCGGCGCGCCGCCCGCCCGATGACGCCGGGCAGCATCTGCACGATCTG  
GTCGATCGGAATGGTAGTGGTAGGCATACGCCCTTCTCCTTGTGCGCGCGGGCGGCGCGC  
GGTTGAATTAACATCGCTTCGCGCGATTCTATCACTCGAATCAATCGAGCGGAACAAT  
GTCGACCGGCGTCGCCGTCGTCGCGGGAGCTTCGGTGAAGAACAGCTGCGGGCGCGGTCCG  
CACCTGGTTGACCTGCGCGTGCAACTTCACCATGTACCGCTGTTTCGTATTGACCTTCGCC  
GTTGACGATGTTTCAGCTGCTGCGGCTGATCGGCGTAAAGCGGGATCAACGCGGTGCCGCG  
CAGCGCGTCGGCCGACCACATAGTGCGCCACATCGCGGGCGATCGTATTGCCAGTCGGG  
CGCCTGCGGGCCGTAGCAGTCGACCTGATAACCAGTACCCGGTGTGCAGCTCGTTTCGCGAC  
GGTCTGAGCCGTGCGGTGCTAGCTGCGGATCGTCTGGTTGAGCGCCTCGCGCACCCCGG  
GCGGATCAATGCATAGGTGCCGTACAGCGTCGACGTGGCGTTCGATCGGCCTTCGCGAT  
CTGCGCAGCGGACGCTGGATCGAACAGGGACGTGACCCATTCCAGAGCGTGTGCAACAC  
TTCATCTTCGGACGGGCGCAGCGTAACGGGATTGGTCATGGTGTGCTGGTAGCGCCAGGC  
GGCAGCGGGCGGACGGCCGACCGGCAGGTTGGCGCCGTTCTGCAGGTAGGAGAGCAGCGTC  
TCGATGTTGGCGGCGTTTAGCTGCTGCGTGACCTCGAAGGCGCACACAGTCCGGCCACCAC  
TCGAGGAACTGCGTGATGTACCACCAGCCACCACGGAACGCCGCAAAGTCGCCGCCCTTG  
CCGAGCGGGCGCGACAGGTCGTCGAATTTGCCGTAGGCGTAGACGGTCAGGAATGAGTTC  
GTGTACAGCGCGCCGCGCTCGTGCTGCAGCGGCGTGTGCTTCTGCGCCTGGATTTGCAGC  
TGCGCGTTGACGCTCGAGAACATCGGCGTGAGGATGCCGCGCACGTTTCGTGCGCCCGGTC  
GACACGAACATCGTGCCCGGCTCATCCGGGTTACCTGCGTAATCGCGCCGCGTACGATG  
TCGTGCAGATTCACCTTGACAATCTCCTGCTCGATCGAATTCAGCAGATGCGACGTCCAGA  
TCAGCCCGTGGTTGAAGCCCTTCTTCCGGCCAGTCCGCGTGTGTGCTGCCGGCCACT  
CGCTGATGGTTCGTCTTGATGTGCTCCTTCATCGCCTGCCCGATCTGGCCATTGCGACCT  
CGGCATCGTAGCCATCGTCATCATGACGGTGAGCCCTTTGATCCATTCGGCGCTGCGGT  
CGGCAATCGTCTTTTCCATGAACGGCCGCGCCGGCAGTTTCGAGGTACCGTAATTGAGCG  
CCATCGCGATCATGGCGACGGGCAGGCCGGCGCGCGGGTCTTTCTTCAGGATCGTGCCAT  
CGGCGAGCTTCTTGCCGGACTCATCGGGATACGTGCGCGCCCGCGAGCACGCCGGCCTTCA  
CCGACATTGACTTGTATCGATCCTTCGGCAGGGTGAGCCCGCGACGCGTGACGCTCATA  
GCCGCTGGAATCTGGATAGTCGGCTGACCGTACGCGCGCGCCGTGCCGATGCCGCTGCC  
GCCGCTGACCATGTAGCGCGCGCTGCGATAGTGCGCCGTCGCCATCCAAAACATCGCGCC  
GTAATGCGTCTGGTTGTACCAGGGCGCAATGGCCGAGCCTTGCGGCAGCGCATATTCGAA  
CGACGACGACACGGTGCCCTTCGTCGCGCTTGACAGGCGGCCAGGCGGCCGGCTGTTGGC  
CGACGTGCGCGCGGCGCTGAACAGCGTCAGCAGGTGTGCGACGAGCATGTTGAACAGCTC  
GCGCAGCACATTGTCGTCCGTCACGGGCGAGCCGCCCGTGTGTCGAGCAGCGCAGCTTG  
CGCCTGATTGAACATCGCCTGCAGGCGCGGGCTCGGCACCGTCCGAAACTCGGGGTATTC  
GGCGATGAAGCCGGCCGGGTCGAACGTGATGCGATACGGGGGCGTGCTCATCAGGCGTCT  
CGCTTACTCGGCGTTCGGGTCTTTCGCGCCTTCGCGCTGGATCGTCACGCCGCCGTGGAT  
GCCCGGATTCTTCGGGTCGATCGGGTTGAAGCCGGCGTTGACCTGTTTCGCGTTCCTTGC  
CATCGCGGCAGCGTCGTCGGCATCTGCGAACGCGAACACGTGTTTCGTTGCGCAGCCACTT  
CGTTTCGGCGTAGACGACCTGAATCGCATCCCAATCCTTCGCGGGGATATAGGTCATGCC  
GTGGCCGGCGACGGCTTGCGCGGAGTGCAGACCGTTCAGCTCGATTGTGCGGCCATCGGG  
CATGCGCACGTTTCAGGCCGTGCGGCAGCTTGCAGGCAACGCGCACCATGCCGTTACCGGT  
TTTCTTCTTCGACTCGACTGCGGCCATGTGCAGGGCTCCTTGACTTGTGAAATGAATTCG  
GGGCGAACCTTGAAGGGTACGCCCCGAACGTTAGCACAAGTCTATCGGAATGTCACGGTC  
GATAGCCTCTCGCATTCGCCCGTCGCAATCAATGCGTAGTCCGCGTCTTTTCCATGCC  
AATGAAGCGCCGGCCGGTATTTATGCACGCCACGCCCGTGGTGCCGCTGCCCATGCAGTT  
GTCCAGCACCGTGTGCGCCTTCGCTGGTATACGTGCGGATCAGATACTCCATCAGCGCGAC  
GGGTTTTGCAGTGGGGTGTAGATTGAGTTGATCTGTAGAAAATTCCAGCAACGAATGCGG  
ATAATTCGTGAATTCTTGTGTGATTTCGCCATGGCTTCCGCGCTTTGAGAACATCGCATC

CGTATTGTATGTTTTTCATTTTTGCGTGGCTCGATCCTGGTCAAGCCTTGCGGGTTGTACGT  
CATGCGTAGCTTAAACTGCGAAGCATGTACCGTAGTGCCAGGCGAAAATACAAGTACACT  
TTCATGTTTTTGGCATCGGCTTGTCTTCGCGTGCGCGAAATTAGTGGGTGCGATTCTTCGC  
CCATACCCAATCGTATTTGAACCATTCGAAGTTTGACGCAACGAGCGCGCTGGTGAAAGG  
CTGCGCAGCCGTGAGGACGACCGCACCGCGCGATTTTACGATGCGCCGGTATTGAGCCCA  
CAACGCATCGAACGGGAGTACAGAATCCCACGCGCATGCGGTTCGTGCCGTACGGCAAATC  
GCACATTACCATGTCCACGCTGGCGTCAGGTAGCAGGCGCATCAGGTCTAGGCAGTCGCC  
CCAATACAGCTCATAGTTGACGTGCTTGTGATCAGCATAAGTATCACGTATTGAACAGT  
TGATAGCGGCGCGCGTACGCGCGAAAGCCCGCATCGCCGCCACGGCGCGCCGCCAGCGC  
CGCAGTCGCAGGTAATCAACTCGATCGCGCTCGGCAGCGCGCTCGGGCGCGCTCGAGCAGG  
CGCGCATCCGCCGCTTACGTGCGGGGCGCATTGGCGACGAGCCATGCGTGCAACGTGCT  
CAATTCGAGCGCCACGGCGCCCCGGTTCGCGCGCCTCGAGGTAGCCGATCGCATACGACAG  
CGCGCCGATCTTCGCTGTGCAACGGCGGCACTCCGGCGGGGCACTCGTCGGCTACCGG  
CGGCTGCGCACTGCATTGCGCAGCCATCGAGCGGATCGCGGGCGACAGCGGGCTCTTTTGC  
GCACGTTTGAGGCGTGCAGCGGGCGCCAGTTCGAAGCCTGAACCATCGAGCGCATCCGTAAT  
GGCGATCCAGGTTTTGAAGTGCTGCGAGTTGGCCGGTGCAGATTCATCAAACGGCGAATC  
GGTCGGTTTTGAACTGTGCGCGCAGATCGGCGATTATCGCCACTAAGTCGATGTGCGCCAT  
ATCCAGACCGGCAGCATGCAATCGCAGCGCAAACCTGTTCCAACCTTCTCGATAGGTGTCAT  
GTCAATCTCCGTTTTGTGAGTCTACAGGTTATCTATATGTAACGGCTATGTCAAGCATAACC  
GACGAAAAGAAACCGCCCGAAGGCGGTTTTCTCGCGGCAACGCCCGACGATTAGACGCCGA  
TCATCTGCGCGACGGCGAACGGGCGGAAGATCACGGCGCCCCACGTGCCTGCCGACTTCT  
TCTGACGGAAGTACGACGAGTAACGCTCGATGGAGTGCGCACGCATCTTTTCCGTAAAGC  
CGCAGGTCGCCGTGTCCTTGCCTTCGACGCGCGGGCGCCAGAGCTGCACGAGACGGCCCG  
ACGCCGTGTGCTATTCCGGGATCGTCACGAATTCAGCTTCGGGAAAATATCCTTCAGCT  
TCGCGGGCGGGCGCCAGACCGTACTGGTTCGTCTTGCTCAGGTCGGACATCGCCGTGCGG  
GCAGACCCATGCGCAGGACGTCTCTGCGTGATGATGCCCTGCGATTGCGTCTGCAGCA  
CCTGGAACAGCGCGACGACTTCGTTACGACCGCTTCGACTGCCGGCGAACCCGACCATG  
GCGTCGTAGCGGTGATCGGCGCGGACAGCGACGGATCGTTGATCAGGCCGTAGTTCTCGA  
GGCCGGCCACGCCGAACAAGTACGAGCCGTTACAGGAACCTTCGCCAGGCCGAGCGCGGACG  
AGTAGTTCAGCTCGCTCGCCAGATCGACGCGGCCTGCGCCGGCCATTTCCAGCTCGCGCT  
CGCCCCATCGCGTCCACGTCTGGAAGAAGTACGACTGGCGTTGCGGGTAGTTGATATTCG  
CGCCGCTGTGCGCGTCGGACGAGTAGTCGCCATACGTGGCAACCTTCGTGCTCGGCTCTG  
CGGTGATGAACGCCGCGACACGCGTCGTCAGTCGCCTTTCTTCGACTCGCCGACGAGCT  
CGGCGGCCTTCATCGGGGCGACGAGGATGTCGATAACCGCCGGGTTCGACGTAGGTTCGTC  
GGTAGTTCGGGATGCCCCGACGAGCCCGTCGACGACAGGTGTGGCGACAGGTTCGGCCGCGT  
CCATCGCGTACTCGGTGAGCGGCGTCGAGACGTTTTGAACGCTGCGTGCCAGGATGACGC  
CGGCCCGCGCGAGGTTCTGAATACGTTGTGCGTCACGCATGTTGCAGTTTCTCCTTGATG  
TAGGTAGGCGGCGCGGGGCTCGCGCCCCGCTATGCGTTACGCGCCCCGTATTTCGAAATC  
TGGATCAGCGAGTTGACCGTGCCGATTCACTGATGAGGATGTAGCCCGTGTGCGAGCAAC  
GTCGCCGATACGGTGCCGCCGACGTTGATCTGCCCGGCCACCACGTCCACAGGATTTTC  
GTACCTCGCGACGGCGAGCCAGCCACAACGTCCGCGTTTCGCGAAGAAGTCGCCCGTGCCG  
AACAGCGCGACCGGCATACCCGGCTGGATCGTGTTGCCGAATTCAGCCAGATACGCGACG  
ATCTGAGCATTCAATTCGCGATGCACGAAGCCGATGCGCGACGTCGAGCTCGGCGCGGCG  
CCCGGCTTGCTCGTGACGGTGCCGTGCGGCTTCAGCACGGCGAACGTGCCGACCGTGACG  
CCGCTCGAGTCCGCGATCATCTTGCCGTTGGACGACAGCTTGTAGATCATCGGGTTCGAG  
CTGGCGAAGTCGCCGGCAATGCCCTTGCGCCGGCGTGATGTAGACCTGTTTTTGAACGGC  
ATTGCTGTTTCTCCTTGTCTGGTTAAGGTATCGCGGCTGCGGCGCGGTTAGCCGCGCACC  
TTGATCTTGGCGAGGTTGGCGTCGATGCGCGACGCGGCTTCGTTTCGCGCCGGCGCTGTCC  
ATCGCGTGCGCGGGCTGGATCGTGCGGCCGTGCGCGGGCGGCGACCGACGCGGCGTTCGCG  
GCTTGCCAGGCGGCGCGCTCGCTGCCTTTGGCGACCTGCGACACGTCGACGCCGATCTGC  
GTGAGCGCCTCGCGGTAATCTGGCTTGCCTGTCAAGCGCAATGTCGCCGCGGAGCAGC  
TAACGCACGTCGCGCTTTGCCTGCTCGACCGCAGCTGCGCGCTTTCGTTTCGTTTCGCGACG  
GCAGTGTGATCGCGGTGCGCACCGACTTCGCATCCATCGCGCCGAACGGGGGCGCCTCG  
CCGCGTGCGGCATAGCCTTCGTGCGGATTCGGCTTCACGGTTCGGGTTTTACCCGCCGGCC  
GGATTCAGCTCGTTGTCCTCGGCGCTTTCGTGTTTCGTCGTCGCGGCGCGGCGTTCGGGCT  
TCTTCTCGTTGTCCTCGGCGCCCGGCATCTCGTTGTCCTCGCTGCCCTGCGGGCTGCGC  
ACGCCGTCCGGTTCGCCGTCTTGCAGCGCAAGTGCGGGCGCCGACCGCCGCCGAGCTGC

TCGAGCTTCTGCAGAATCGCTGCGTGCGCCTGCGCGTTTTGCTCGACGAGCTGCTTCAGC  
GCGGCACCAATCGTGCGGAGTTCGTTGCCGCCACCTTCAGCGCCAGCCGGCGCGGCATCG  
GCCGGTTGCGCACCGGCTGCCGGCGGCGCGCCTGCGCCCGGCTGTTTGTTCGGGAAAC  
GGCATAGCGTTATCTCCATTCAGGGTTGGATTCGGCGCACGCGGTTTCGCGAAACGCCGCG  
TCGGCGACATGAGCGCCGGATGCGCGCCCGTCGTCAACGAGCGCCACATGGTTGCCACGG  
ATAGCCGTATCCGGCCGTTCGTATGCCTGCCCGTCCGCGTCGCTGAGCGCATGACGGGC  
ACGTAGCGGTAACCGCAGGAAAGGTCGGACAGCTCATCCGATTCGATTAGGTTCGATCGCG  
TGACCGTCCCACACGAGCAGGTCGCCGCGCAGGTGTTTGGCGTCGAACCGCACGTTGTGT  
ACCGAACCGCCGACGTA CTCTTTCGCGCGGGTTGTCGGCCGTCTGCGCGACGTGCTTGATC  
ATGAGGGGCAGCCCCTCGAACGACTTCAGCGTGTTCGGGATGCCCGAGCTCGGTTCGGATCG  
CGGTACAGGTTCGTAGACGCGATTCGGATCGAGGCCAGGTTCGGCATAGCCGACCACTTCG  
CGACCGCGATACGGGTTACCTCAGCCGTGACAAGATGCAGTCGCGCACGCGCATGCGG  
CCGTTCGGCATCAAAGCTGCGCGCGGTCTGCTTGTGCAATGCGAAACATACTTCGGGCATG  
TGTCAGGGACGCATCAGTATCACGTTACGCGGCATCTTAGCACGCCCTTAGCGATTTGCA  
ATCGTCTCTATCCGATCGATTGGAAGTATCAATTGGATTGGTAAAGGTTAGGTAAATACA  
ATGTAGTTACTTTAACCGGAGGAACGATGCTTACTATCCCGTCGCACAACTCAAAGCCG  
CTCTGACACACGCCGCAAGCAGGACATTCGCTACTACCTGAACGGCATCTTGCTCGAAG  
CGGCGGTAATGGCGACCTGCATATCGTCGCAACAGACGGCCATCGCGCGTTCATCGGGC  
GCATCGCAGGCGGTGCTACGAGCTGGCCTGAATTCACGTCGCTGATTATCCCGACCGATG  
CAATCAAGGTGGCGGCGAAGAAAGGTGACGTCACGGTCGCGCCGGCCGGTGCACGCTATG  
CACTCGGTTTCGACGCTGTTTCGACGCGATTGACGGTCGTTTTCCCGACTGGCGGCGTATCG  
TACCGCGCGGCCCGGCGCAACCGAATGAGAACGACTGGAATGCCGACTATTTGGCAGACG  
CACAGACCGCGTTCGCGCACGTGGAGCGGCCGCAAGTACGCTGTCACGCGCTTGACGCCGC  
GCGGGAAGAACGCCGGCGCGACAGTCACTTTCGCGCCGACGACAGTTCGCTTCTCGGTTCTCG  
TGCCGGTTCGCGGTGCGGTAAGACGAAGTGATCGTTGACGATGCGTTCGAACCTGCCGCTG  
CACGTTAAGCCGCTTCCCGGTAGGCCCGGGAAATCCCGTAATCTCGCCAAGCGCGCCCG  
GGTCGAATTCTCGACCGCCGGGCGTTCGCGGCCATTCCGGGAATGATCGTTCGCGACGAAC  
AGCGGCAATTTATGGCCTCACCAGGTAGCACGCTGCCGAACCTTATCTCCGAAGTCGATGC  
CGACCTGCGTGTGAAAATCCACTTCTCGCGACCCGCGCGCACGTCGATTTCGGGCGCGGCT  
CCTTGCCGGCGCTCGAGTGCTGCCAGACGGCCCAATGCAGGCCGAGTTCGCGTTGCCGCG  
CGCTGTTGAACTGCGCCGTGCGCCTTGTTCGACTGGTTCGCGCGCGATGAAGGCGGCGCGGT  
TCGTCGTCACCTTTCGCGCGCTCGACGAGCTTTTCTTTCGAGCCCTTTCAGGTTCGCGGCCCG  
CGATGAAATGCCGACGACGTCGCTTCGACCGCTGTGTGGTATTCCTGCGAGATCGAGC  
GAATCAGCGCGACGTTTTCTGCACCTTCGCTTCATCACGAGGCGCTGCGAAGGCGTCA  
TGTCGAGCTTGATGTCGAAGCCCGCGTTCGCGCAGACGCGATTGCCACATGCGCTGATTGT  
CGACGTACAAATCCTGAAACGCGCCGGCCGTCACCTTCGCGCGCGAACGTCGAAAGTAGC  
GCTGCCAGTAGTCGCGCAGGCGCTTCATTTTCGTCGAACATATCCGTCGACGCGAGCCGG  
GCGGCGTGCTGGCGTCCGCGGATGTCGCGGACCGGCCACCGACGTTACCTTGA  
GTGCGCGACCACTTTCGCTCGATTGAGCGCAAGTACGACGCGGCCATCAGCGCGACGG  
CGCGCTCCAGCTTTCGCGCCGGTACATCGCTTCCGTCTGCCGGTTCGGCCGAGACGGGCGCGA  
GCACCTTGTGTCGTCGCGGCCCGGCATGCGCAGCGGCGCGCGCCATTACGCGCGCTCCAG  
GCGGTCGAGCGCCTTGCACGACGTCGACGATCGCGGCCGTATCGCGGTGCAACGGATG  
CGGACGCTCATCCGATTGAACAGTCGAATGCGGTGTGCTCGTCGTTTCAGTTCGACGTC  
AAACGGCTCTAAGTGCGCAACGAACGCGTGAAAGAACCCGTCGAACTTACCGAGCGGCAC  
GAGCTCGCCGTCGTGGTCGTAGCCAGTTTCTCTCGTGTCTCGCGCCGAGCCGCTTCTTC  
CGGCGTCTCATTGCCTTCGACCTTGCCGGCCGGCAACCCCAATCACCTGCAGGGCGCTT  
CATCAGCAGTACTTTGCCGTGACAACGTACACGGCACCGGCCGGCGCGCATTGCGGGCGTC  
CTGCGCGCCAGCCTTCGCGCGGGTTGACGTTTCGATTCACGTTTCGCGACGGTTCGGGGGCGC  
CGTAGCGCCCGCCCGCGCCCGGCCGCGCGCCAGTGTGCGCCGCTTCGGCCAAGCGCTG  
GACGTAGGTGAGCACACCGTTCGATATCGTTCGTCGGCCGGCACGCCCGGGTCGTCATTTCG  
GTCAGCTTGCCGGCATAACGGGCCGTCCGGCTCGGTGTTTCAGGCGTGCCGCTACCTGATC  
GGGGCGGATCACCTGTTCTGACGTACAGTACGTCGACTGCGCCTGCTTGTAACGCGA  
CTCGGCCACTTCGAGGTTCGTCGAGTTCGCGAAGCGCGTTCATTGCCATTTGATCGACGG  
GTCGACCGCGCCGAACAGCGACAACGGATCATCACGATCACATCGTTCATCAGCTGCTG  
CAACGCGTTACGCTGGTACGCGCGCACGTAGTCGTACCAGACGCGAATCTCGCCTTCGCT  
CGATGCGTTCAAGCCGGTTCGGCGTGATACCGAGCAGCTTGATCAGCGGAATGTGCGAGAC  
GGCGCTCATCTGCTCCTGGGCTGGGCTGCAGTGCCTCGAGCCCGGATAGCGGCGTGTT



GAAC TGG AAGA ATTC TTCC GTC GCG CTT GTTC GAG GAA AAGA ATG TTC CGG TTG TCG CGATA  
GCG GTT GAT CAG CTC GGG CGCG CATCG ACA AATCG AC GTTTC GCG CCG GGC ATCAAC GCG CTG  
CGCG AGGTCC ATCAAG ATGCC CGACAC GCTG AACTG CTTGAC GATGTCC GACACCG ACTG  
GCGTGTGCGCAGCCAGTTGTTCGATGTACGGCATCGCGAGCTGCGTCATGCTGATGCCGGC  
GAACGAATACGTCGGCTTGAGCATGTTCGCCGACCGGGCGCGATACGATCGTGTGCAGGGC  
CGTTCGCGTGGACTTCGGTGCCGATCATCCACCACGTCGAGGGT TTTGTAGAAGTCGTCGCGC  
AACGGGGTTGATCGAATTGTAATTGTTTCGGCGTCACCCAATACGGCTCAACGACACGCGAG  
ACCTTGAACGACCCTTTTCGGCACGGTGTACGGGCGCGGCACGAGCGGGCGTGTCCATGAT  
CTGGTCGTCGCTTTGATCTTGAAATACGGGTGCGCGCGGCCGAACGCCTGATCATGGAT  
GACGGTCGTGCGCACCGCGTCGCGAATGCGCAGGGCGTTCGATCTCGTCATTGATCTGCTT  
CAGCTGGTCGCCGTCCGACGTGCTCGCGGCGTTGCCGCCGGCGGCCAGGCCGGATGTGTC  
GGCTTTCTCTTTTCGTGCCGCCGATCGCTTCGCCCAAGTGCGGATGCACTCGTCGGCGAG  
CACTTCGTGCATCGCGCGGTACTCGGGCAGCTGCGCGAGCAGCACGAGCGTAGGAAAGCC  
CGGAAACCGGACGACGTGACGAACGATAGCGCGTCCATGCTCGTGCCGTTGAAGTCGAG  
CGCGTAGGACGCCCGCGCGCCGCTCGCGCGGGCGTGTAGTTGCTCACGTCCACTTCGAACTG  
GCGCGGAGGGCGCAGCGACGGCGACGGTTCGGCGACGGGCGCCGCGTTCGAGCGCATTGAG  
CGCGCCGCGCCGCGGAAGTCGGCCGGCACGGGCTGCGCGGGCGGCCGTCGCGATCGTAGC  
CGCAGCGGCCAACGCGGCCGCTTGGCGACTTCGGGCGGGCGGCCGTTGCGCGCGAGCTG  
AGTGCCTTCTTTGCGTTTCGTTCGGACATGGTTATGCCTTGTTCAGGATATCTCGTGTG  
ATCATAGCAGCGATGGGGGTGCGCAGGCAAAGCTGATGCAGCGCGATCGTCATAACCGTCC  
ACGCTATCGTCGTGGCCCGTGACCGTATCGGGAAAGCTCGTGATTTTCGTTGACGACGGGC  
CCGATGCCGGGCCGCTCGTCCGGGTGCGGCAGCATGACGCAATTGTTTCGACCAGACCCAT  
GCGACGGCGTGC GCGCGCCTCTTTTCGAGCCGAGCGGCGGCACGCCTTCGAGCATCGGG  
AAGTGCTTCTTCAGCATGTTCGATCAGCGCGGCGCCGTTTCGCCGCTTCTTCGATGTAGACG  
CGCGACACGGCGGCATGCTTGCCTTCAGGTTCGGCGATCGCTGCGCGGTCGCCATGAAG  
GCGAGTTTCTCGCGCCGCCAGTTCGATCAGCCACACACGCTCGTCCGCTGTCTTGCCCCAC  
ACGCCGACGAACACGAAGTCGGACGCCTGGCCGTCCTTGAACGTCGCATCGCACGACATG  
ATCACGCGCACGAACTGTTTCGGCAGTTTCGGCAAACGCGATAGTATTGCAGGTGATCACGC  
GGAAAGATCGCGCCGAATTCGGACAGCGGTACCTGCTGGTACATCGCCGACCACCAGAAT  
TCGCTGATGTTGCGGCGCATTTCGCGCAGCTTGTTCGGCCGAGTGCAGGTGTGGCACGAGT  
GCGCCAAGCGGCAGGTTCGGGATTGTAGCCGATCTGATCCGGGTGCTTCAGCGCGGGGAAC  
GACAGCAGCGTGAAATTCGGTTGGCCTTCATCTTTTCGCCGACGCGCGGAGCAGGTCA  
TTCGACAGACCAGGCGTGCCGATCAGAATGACGCCGAGAGCTGCTGCAGGCGCGTCAGC  
AGCACCGAGTCGTACCAGTTTTCCAAGCCGTCCTGGACGACCGCCGAGAGCGCCTCTTCA  
GCATTCTTCGTTCGCGTCGTCGATGATACCGACGTTCGATCGAGAAGCCGGTTAGCGGACCG  
CCGACGCCGACGCCGCGAACTCGCCACCTTCGGTACATCGAACTCGTTTCGACGTGTCC  
TTGTTGCCCTTGAAACCAATCAGCGAAACGTGCGGGAACACGGCCCGATAGACGGGTTC  
TTCATGATCGACTTGGCGTCGGTTGAGTTGCGGCGAGCGAGCGGCAGTGCGTAGGTTCGCG  
TTCGCAATCCGCACGGCCGGCAGCAGGCCGGTTCAGACGGCCGTACAGATAGGGTGC CAAG  
CAGCGCGAAATGAGCGACGATTTGCCGTGCTGCGGCGGCGCGGTCAGCATCAGCACCGGG  
CGCTTGCCGTCGAGCAGGTTCGTCGATGAACTTGTTCGATCTCGGCGCAGACGCGCGCGCTG  
AACGCCGAATGCTTGTAACTGGCCGGTGCACAAGCGAAACAAACGCCGCGAAGTTTCGTG  
CGCGCCAGGTTGATGAGGAAGTCAACGGGGTTCGATCGACGCGCTTGGCGTGCCGAGCGCA  
ACAGGGCTGCTCGCGGCGGTACCGGCGGCGCGTCAAGCGCGATGTTAGCGGGCATCGAG  
CAGCCCCATCGTGGCGAGCTCCTTAAGCTGCTCGATCACGGTCGCACGCTGCTCGTCCGT  
CACGGTTTCGGCGAACGTCGTGCCGTTGGCGACCTCGATCACGGCTTTGTTCGAAGCCGAG  
GAGCTTCACGAGCATCGCGAACGCTTTGTCTTTGCTACGCATCTTTGGGACGATGACGCC  
GTGCTTCACGTTCGAAGCCTTCCACGTAGCGACCGAATCGTCGCGACTTCAGCAGGTTCGTG  
ATCGATCTCGAAGCGTTCGATCGCGCCGACGCCTGCGCACGTTCCGCGAGGTTCATCATTGT  
CCCGTCATCTTCTTGTGCGAGCCCGCGAGCGAGCCGCCGTTGACCGCCATCGTAGACGAT  
GCGACCGCCACGGTGCCATCGCCGCCACAATCGGGGCAAGTTCAGGTGCGCACTTTCAG  
CAGGTTCGGCCAGGTTCTCGTTGATCAGGTCAACGAGGTCTGCGACGAGCGAGGCTTTGAT  
CGGTTGCAGGTCTGCCATGCATGCGAGTGTAACGCAATCGTCAATGCAAAGCGATAGACG  
CAGGCTATGGCGAACTGCACTTTGACTGACCTTTGATGCGAACTTTACTGAATTTACCA  
CTTTGGTGCACGCCAGTGACAGATGACAGATAGTGACAGCAAATTCCTTATGAGACCTCT  
GTAAACCTAAAAATGACGAAAGTTGTTATTGAGAACTATTCATACTTTCTCTCTTTTCA  
CTCTACTACTTATTGTTGTTGTATCTGTTCATCTGTCATTTCATTTCATAAGAAGGGTT

ATATATAATAGAATCAAAGGGTTAAGGTAGTGACAGATAGCCGATGACAGATGATGACAG  
ATAGCCTATCCGTCAGCTAGCGAAGTGGCGACTAAACGCTGGACAAAGCGCGAACGTATGCT  
AAGATTGCGCGACCTACAACACCAAGGACAAGTCATGTGCGAATCCCGGGCGTCGTCGAACA  
TTCCACACTCTGTCTCGGGCCGCGAGCGGTGGCGCAACTGCCCGGGCGTCCGTCACGCT  
GTCGAAAGGCATGCCGGACAACCTCGTCGCCCGCTGCTGCTGAAGGCACATGTGCGCATA  
GGTTCGGTGAGTTCTACGTGCGACAGCACTTCGACCTGCCCGGTGCTGCACCCGCGCGGTGC  
GGAAGCACCGCCGCAATCCGTTCCGGAAGGACTCGATCTGAAGGGCAAACCGTTGAGGA  
ATGGAACGACGATCTGCGCCGACACGGCAAGGCGTACCGCGACTTCATCATTTCATCAT  
CCCGCCGGGTGTCGAAGCGTTCGTATCGCTCGAGCAGCGCGTCGCGGCCAAGGCGATCGA  
CGGGCGACTGTTCCGGCACGGCCGACTGCCTGATCTGGTGCCCGGGCGCCCGCGTGTAAAT  
CGTGGTTCGACTACAAGTACGGCTTTATGGTTGTCGACGTCGGTACAGCCGAGAAACCGAA  
CGCGCAACTCGCGGCATACGCCGTCGCCGCGCTCGACTCGTGCACGCTGCAGGCCAATGG  
CGTCATGCTCGCGGTGTTCCAGCCGCGCCGGAACATCGGGCAACCGGGCCACAAGGTCTA  
CCTGTCAGCCGAACACGTCACCGCCGAGCAGCAGCGCATGCGCGAGGAAGTCGTGCGCGT  
CGATATGGCGGCCAACTTCGCGCCGATCGGCAATGACCCGACAAATCCCTACATCGTCGC  
GGGCGACCACTGCCGCTACTGCAAGGCAAAGCCGGCCTGCCCGCGCATGCAGGACGCGCT  
GCAGATTGCCCTTCGACGTGAACGCCGGCCGGCGCAGCGTCTCGACATGCCCGAGGATGA  
TCTGATCGCGCTGTATAGCGCACGCAGCGGGCGTGAATCGTTGTGGGAGGACGTCGAGCA  
GCGCATCGAACTGCTCGCACAGCGCGGCCACGACGCGCTGACGATCAAACGTCGCCCGG  
GCGCCGGATGTGGCGCAACGCGAAGGCCGCGCGCTCACGCTGCTTGCGCTCGACCGCAC  
CGATCTGCTGCAGCCGGTTCGCACTGTCCGAAGCGATCGCGCACATCCCGAAGCGTTGCA  
CGACGATCTGATCGGCAAATCACGCGACTCACAATCGATCGTTCGTGAAGACGCCGGCCGC  
GCCCGGTGCCGTGGCCGACACGTTTCGCGAAATACGCGAAAGGTGTTGACACGACACAGGA  
CAAGGCTTAAAGTTGTGCTTACCGCGCGGCCTTCGACAGGGACTGGCCGACTCCAGGTGG  
TGCGCAAGCATTACGCCGGCGCCGCGCGGTAATTGCAAGCTGTTAGCCAAGGTGGTGGAA  
CGGTAGACACAGCGGACTTAAATCCGTCGCGCCATCGGGCGGTGCCAGTTCGAATCTGG  
CCCTTGGCACCATCCACTAGCCTTAAACTTTGGTAACTCTTTCTTTAATCTTCGAACAAG  
GAAACGCATGTCCACCATTGACAACTCGCCGGCTACGAAGCCATTCTGACGCACCACTC  
GATCATCACGCCCCAGATCAACAAGCTCAAGCCGACGAAGCCGGCCGAGTTCTACGCGCT  
GATCGCGCTGCCCGCCGCTGCACAAGCCGATCTCTGGGCAATTCTCTGCGAGCGCGCTAC  
GTCCGCATTCGGGCATGCGAACAACCTTCGAGCACGGCATCAAGACGAACGCCACGAGCAA  
GAAGCCGATTGCCGGCGTGCCGGGTGATGCGCTCGTTCGTGCGCGCGGCATCGCAATACGC  
GCCGGAAATCTACGACGCCGACGGCACGCTGCTGAATCCGCAGAACCCCTGCACACCTGCA  
AACGATCAAGGCGAAGTTCTTCGCCGGCACGCGCGTTCGCGACGATCCTCACGCCGTTCCA  
CTGGACGTTCCAGGGGCGTAACGGCGTGTGCTTTAACCTCGCCGGCATCATGCTCGTGCC  
GTCCGAAGCGCAACGCCTCGCGATCGGCGGGCTCGACACCGCGAGCGCGTTCAAAAAGTT  
CGCGCAACCCGGCACCCGGAGGCGTACCCGCGCTGCCGGCACGCCGACGGACGCTGCAGC  
GGCCTTCGCAGCCGGCGGCAACCCGGGTGCGGCAGCCGGCGCGGGCGGCAATCCGAACCC  
GTTTCGTGCAACAAACGACCCGGCGCGGCAGGCGCGGGCGGCAACCCTTTCCTGTAAAGCGT  
CCCGACTGGTACGACCCATCGAAAGACGATTGGGACGCTGATATAACCGTTCTGAACCGAC  
GCCCGCCTCGTGCGGGCGTTTCTACACCCGACTATGCTCGAAAATCTCAACACGCGCACG  
TTGCGGCTCCCTTCCCGCCATCGCTGAACCCGCGCTTATCGCGCGGGCCGAGGGCGCGTG  
CTGCTATCGAAGCCCGCGCGGCAGTACGCAGTTGCCGTGCGCAACGCATTGCCGCCGGGG  
CGCCCAGAACGCATCGAAGGCCGCCTGTTTGTGGCGATCGAGCTATGGCCCCGGCGAAA  
CTTGCGAACAAGCGTGGGACGTGGCGAACC GCGGAGAGCTGATCTGCGATGCGCTGACA  
AAAGCAGGTTTCTGGCGCGACGATTCACAAATCGATTTCGATCTCGATCATGCGTTGGCCC  
TACGCAGAGACGTGCCACTCGGCGCGGCCCGTGTGACCGTACGATTCTTTCAGCTTGA  
CATTTTAGATAACACCTGATAACTTTCAGCTTACTTTCAGGGATAGCTATGGGCAAAGAC  
AAGTTCATCGAAAACGCCAATGGGATTCTCGCGGGCGTTCCGCACGGCGCTCGAGCAATAC  
GGGCTGGACGTGACGAACATGCACGCATCCGGCGACCTGGTGCTGCTCGCGAGCAAGCAC  
ACGGCCGTCTACGGAAAGAAGCTCGAACCTGGCGTTCGAACCGAAGTTCAACTTCGTCGAC  
ATCGCGCTCGAGCAGTTCAACTCGCAGTTGACGATTCTGCTGATGCGCTATGCCTACGCC  
GCGCTACCCGCGACGTTACGCGCGTGCAGCGCCTCCGGGGGTATCCGCATGATCCAGT  
TCTATGCGATCGGGCGCTGGCGCGCTGGCGGGCGCTCGTGGCCGTATGGGCAATCGTTTCGA  
AGCTGATGGGCGCCGGTTCGCACGGTTCGGCGCGGCACAAGGGGAATCGCGCGCGATCAACG  
ACGCGAACAAGGTCACGGCGAGCGCGGCGAGCGCGGCCGACGCTGGCCGTCAACAGCTCG  
CCACGGAGATACAGGACAATGCGCAAGCTTCTGACGATTATGCTGCTCGCGTGCTCGGCG

CTGGTGGCGTGCAAGACGGCGCCGCTGCCGTC AACGACGCGATCGGCCGCTCCAACGCAC  
GGGATCGTGCCGCGCGTTGAGTGCGATGCGCTGCTGACCGATGCCGGCCCGATCCCTGCG  
TATCCTGTCCTGGCTTCTGGCGCGAGTGCGACCGATTACGCCCGCGCTCAGCAGCTCTGG  
GCCATCCGCGCCGTCCGCATCATCGACGACGAGCGCGCCGGGCGGCGAGCCGCCGTGCGAG  
TGCTTTGCCCGACTGCGCGCTGTCGGCCTCATCCACTGAATCCAACCTGAAGGAAATTGC  
AACTATGCTTCCCCGCCTCAGTCTCACCTCTCTCGAACCTCGATTGCGGCCGACTTGCC  
GAACATTGAATCCTTTGGTGCAAATGCCGCACTCGTCCACTATTTTCGTGCGCGGATGTCAT  
CGAGGCAACCGAAAAAGCCTACTCGGCCGCCGGCTCGGGCGCACACAAGAAGGCGGCAGT  
AATGGGCGCGGCTCGCGCTTTCGTGGCGGCGATCGACCGCGACTGGCCTACGATCGCGCC  
GCACATCGACTCCTTCATCGAAACCACTATCGGTGCATATAACCTCGCCGCGACGTGGTT  
GCCAGGCTTGCCGGCCGTGCCGACGGGTACCGCGACCGGCTTCGTGAACGCCGTCGAAAA  
TGAAGTTAAGGCCGTGGCCGCAAGTGGCCGCGCCGCTCGTACCGCCTTCGAAAACACGTT  
CGGCGGCGCGAAGCCTGCGCCGGTCGTGACGCAGCCGGTTAGCGTCCCGGGCGGCTGCCGC  
GCAACCGCTGCCGGCCGCCGCCGCCGTCGCTGGCGGCCTGTAACATGGCCGCGCCGC  
TGATCGTCCGCGCGTCCGGTTCGCGCCGTGGTGTTCGTCAGGCGCGGCTCGGCCCTCGCGC  
AGTCGGGCCAATTCGACGCGAGCGTCGCAACGGCGCTGCGCCAGTGGCAGGAGGCGCACG  
GGATGACGCCGGATGGCGTGTACGGATCGCAGACGAATGCGGTGATGACGGCGCGCGCGC  
TGCCGGACATCGCCGACGCGGCTGCGCGCCTGAACGTCGACACGCCTGCGCTCCAAGCCA  
TTATCCAGGTCGAGACAACGGGTAGCGGCTTCTGCCCGACGGGCGGCCGCGCATCCTGC  
TCGAACGCCACAAGGTATGGGCGGGCACAAGCCCGGCGCAGCGCGTGCTACTTGGCGCGC  
AGGATTGCAACCCGACGCCCGGGCGGCTACGCCACGGGGCCGGACGCAAACGCGCGCGGGC  
CGGGCGAGTGGGTGCGTTTCGAGCGCGTGCCAGCCGTCACGGGCGACGAAGTGGCCGCGC  
AGTGCTGCTCCTGGGGACTCGGGCAGGTTATGGGCGCCA ACTATGCGACGTGCGGCTTCA  
CGAACGCCGTCGGTCTGATGTTTCGCGAGCGCCCTGAACGAGCGCGCGCAACTTGACGTGA  
TGGTGCCTTCGCGCTGCCGAGGCCGGCCTGCTCGGGGCATTACGTGCGCATCAATGGG  
CGGCCGTCGCGCGCATCTGGAACGGGCCTAACTTCGCGATCAACCAGTACGACACGAAGC  
TGTCCGATGCGTACACCACATTGACGTCGCGATAATAAAAAGCTTGACACAATGCCCGACA  
AGTCGTTACGATTGTCGGGCCTTCTTCTTTTCAGGCGCAAATAATGAGTCAGCTGGATATT  
GATTGGAGCGCGGCGCCGGAATGGGCAAATTGGGCGGGCGCAGGACGCGGACGGA ACTGTA  
CAAGTGTTGCAATGCCGGCCGATTGCCTATGCGACTCGCGAAGTGTGGCGTGATTTCACT  
GTCGACGGGCGCGTCGAACGCGTATCGTCCGAATCGCCGACTACGGCCATCTGGACAGCA  
ACGCTTACGCGACGCCCGCCCGCATTTGACAAAAGAGCAACCCGCCGCAAATTTGATCCG  
GAAGGCATGCTGCGCGCGCAGATCGGCCATTTGCTCGAAGATATGACGGCCGAGCAGCTC  
GACGCGCTCTATGCGCACGTGCGCCAGCAGCTCGACGCAGCGAAGTTCGACGAGCTCAAC  
CGCCAGCTCGACAAGCCATTCGGCGAAGTGCCGCGCGAGTGGCAGCTGAAAGCGTTCGAG  
GCATTCCTCGACGGCAATCCCATCGAATACCGCGACGCGGCGCGCGCTACAAGCTGGTTC  
GCTGCGCATAGCCCAATTGGGCGCCGTTCTTGCGCTACCGTGTCAAACCGAAACAATCG  
TAACCGGTTGTAACGTTGCGCAGAAACGACAAACGGCCCCGACTGCGGGCCGTTTTCTTT  
GCGTCGGCGCGAATCAGCGCGCGGGCGTTTTCTCGACGCAGATCACGCGGGCGGACAGAT  
CGTGCACGGCGCGTAGCGCCAGGAAAGAGGGCGCCAGGTTGGCGACCGTCAAGACGAGCA  
CGAGAGCGATAGCGTTTCGGGTGTGGGAGGCGTTCACGATTGCTTCTCCTTGTCGCCGGC  
GGCAGCCGGCGGGCGGTTTCGGCGGCTGCGGCCTGCTCGATGCCGAGACGGGCCGCAAAGAG  
ACGTTCAAGATAGCTGATCGTGCCTCTGCGCCAAGCCAGCCCGAGACGCCGACCATGAC  
GAACGTCCAATCGTCGGACAGACCCGAGGCGTGGCACA ACTTCGCCACGAGGAAGCCGAC  
GAAACCTGCGCCGCACGCGCCGAGGATGGCCGTCTGCCAGGTTCGAGGCTTCGCGGCGCAT  
GAGCGCACCGATCAGACCCGCCGAGGAACGCGATGGCGACCTGCCCGAGGCTCGTGAACAT  
GGTGTCCAGCCGATCATTATTCTGCGCTCCTTACCAGCCGATGGCGATCCAGTAGAACG  
TGATGTTGCCGAGCGACGAGCGCGCGGTGAAACCCGCCGTCGTCACGACATCGGCGCTCG  
TGTTGTTGCGCTCCGTCCGGTTCGTCGCGCCTGTGCGCTGGATGAAGACGCTCAGGCAAC  
CATGCGCGAACGGCTTGGGAAACGTGACTGCAACCGACGTGCCACTCATGACAGATGCGC  
CTGCCTGAATGGTGAAGCCGCTCGGGTCGACGAACCACGGCGTCGTCGTATTACGACTG  
CGTTCGATGCGCCGCACGTTGCGTACCAGGTGTTTCGTGCGCTGTCGCTCGTGAACGTGA  
GCGATACGCCCGGATTTTGTGCGGCCCGGGCGATCGGCGCGATCGTACTGGCGCTCGTGA  
CGAGCAGAAGCGCGGTGCTGCCGCTCGAGTTGTGACGCGTATAGGTTCGAACCGTTCCGGCA  
AGCTGTTCCGCCCGGGCAGCGTTCGCGGTACCGGTCGCCGAGAGCAGGAAGCGGAACACGC  
CGCCCGCCTGCACTGCCGTCAGCGTTTGGTTGCCCGTATAGGTGGTGAACCCGTTTCGAGT  
TGCCTTGCTGCTGCAGCTGCATCGGTTGCGTCCGGTGAACAGCGGGCGCTAATGTTGCGCG

CGGACTGGACGATGTTGGTGCCATCGCCCGTCACGTCGGTTCGGTTCGCCCGTTTTGCGGAA  
TCGTGATACCCGTACCCGCCCGCTTGTGATCACGGCGGCGAACGCGCCGGTCTGTGTTGT  
TCGTGACCGTCCAGCCTTTGAGCCAGGTCGGCACGACCAGTGTAAGCGCACTGGTCAACG  
TCCCTGCGACCGTGATCGAATTCTTGGCCGCCTGCGCGTTTTGTGAGCGTCACCGTGCCGC  
CCGTCAGTCCGGACAGGGCGGTCACGCCGTAAGTGGTAGCCCGGCACGTACCCGCCCGCG  
CCGGATCGGTTCGACGTATCGGGGTTGACCGCATTGTTGTTCGGCCGCGCTGATCCAGTTGC  
CGAGGAAGTCGGCACTTTGCAGCACCGCGCCTTTCGGGTAGCCGCCGATCTGCGTAGCTG  
TCGCGAACGCATTGTTCGAAAGCGAAGCCGCCCGGAGCATCATCCACCAAGCGATGCGCG  
CGACCTGGTTCAACGCGCCGTTGAAGTCTCACCTTGCGGCGGAACGCCACCGGCTTCCG  
GCGGCTGCATCGTGGCCGGCGGAAAACCGAGCGATTGGCTCGCGCGGGTTGCGTCCGGAAG  
TCGTAACGGGCAGCTCGACACGCGACGAGTCGTTCTGCGCGAACGGCACGAGGAATTTG  
CGGGCTGGTTGGTTTGTGCGGTTCATGTCGATCGCCTCACGCGGAATAGAATGGATTCTGG  
TTGAAACCGACGACGACGTTCCGGGTTTCGTGCCCGCGTTTCATCGTTCGCGGAAGCCGAACGGC  
GCGTACGTCAGCGTCTTGTAGACGTAGTGCGGGTTCGTGCCCGCCGGCTGCGGGAACAGG  
CCCGACTCGATGATCGCTTTCTCGATCGCTGTCGGAAAAAATTCGTAGTGGTACGCAATG  
TCCATCGGATGCGCGATGTCGTAGCCGACATAGCACTTGCCCCGATCGCCGAACATCGAG  
CGCATGAGCGCGTTGATCGACGGACAGTCGCAGCGCGCAATGTTTCGCGGCCGCTTCACG  
AGCAGCAGTTTCCGGTAGTACGCATCCTGCAGCGCGAATGCGACGGTACCGGCCGCTTGG  
CCGCCGTAAAACGGCGCTTGGCCCCAGGGCTTCCACGGTGTGCCGCCCGTCGAAAAGAAC  
CCGAAATTGTCGCCCGGCGACTGCGCGACCTGGAACAGCCGCGACCGACCGAGAATGCGC  
CCCCAGATGTCGAGGCCGAACCTTGGCGAGTCGAGATATCCCATACGTTTCGCGAGGAAG  
TCTGCCGAGAACTTTGCCGGGTTCGACCCACTGGTTCGAACGAGGCCAGCAGCGCCAGCAAG  
ACCGGGCTGTTGCTGTACTGCTTCTGGACAGTGCGGCCGAGATAGTCGGTCAATTCAGCA  
TCACACCGCGATCTGCGAAACGCTGACGTTGAGATTGGCGATCGTCGGCTGCTGATCGAT  
GCCCATCGTTCGACTCGCCGGTTCGGGTTTCGCGCTCGTACCGATGAAAATGTTTCACAGG  
GATCAGGTTCCGGTTGAGCACGGCCACAACAGGCTTGTACGCGGCCGCGATCAGCTGCAT  
GCCGATCCGCGCGCGCGACAGCGTGATCTTCCCGTCATCGGTTCGAGAAGCCGCTCACGAA  
CGCGGCGACGATCGCTTTCTGGATGTCCTGGATGTAGGTTGCGGGCACGTTCCGGTAGCTG  
CGCGACCTGCACGTTGAAGTAGACCTCGACCGTCGGCGGCCGCGACGAACCGCACGGGATA  
TTGCGGATAGGGCGGCGGGTAGTTGATGCTGTCCATCACGGTTCAGGTCGTCGTGCCCTG  
CCCGGAGAAGCCGCAGCCGCAGTCGAGCTTCGAGTTGATCGCGAGCGCGACGTCTGCGTC  
CGCGCCCGCCGTCACGCTGATCGCAACGGAGTGCGCCGGAATCGGGTAGTTTCGTTCGCGCC  
GTAGTTGATCGCACTGTCACTGCCGTTGTTGTAGACGTAGCAATCCGTCACCCCGGGCAC  
GGCGAGCACGGCGGCGCGCACGTTTCGCGGCCCTGCCCGATACCACCGATCGATACGCTCTC  
CTGCCCGCGCTCTCGAACTCACTGCGCGACTCGACGTCGACGCCCGCGACGCTGCCATT  
CGGGTTCGCAATGCCGAGCCAGCCATTGACCTGCTGATAGATTTTCAGCGTGTTCGGCGT  
CGCAACCGGGCCGACGCCGGCGACGGCCGCGACGTACGTAACGGTTCGCGTTGCCGGTTCGT  
CGCATCGTACGTCACGTCGGTTCGGTTCGACCACAGCGAACCGTCCGGCGATCGCGCTTG  
CAGTGTGCCGGCGGTAGCCGTCACGCCTGGCGTGCCGGTACCACGACACCCGGAATCGT  
CGCGGCGACTGCCGGGTTGCGCGTCATGAAGTAGATGCGGCCGAGCGCGTCTTGGTACGC  
GCCGCTCGATGTCAGCGGGTTCGACATTGGCGATCAGCTGCGCAAACAGCGCTTGCCACGC  
GGCGACGATAAACGCCTCGCTGCTTGCAGCTGCCCTTGCGGCGTTCGTCAGTTCCGGTTCGA  
GAGCGTCTTCCCGGCCGTCGCGAAGGCGGCGACCTGATCCGCCTGAACGCCCGCGAGAAT  
GGCTTGCTCGCCGGCCAGCTGCAGGCCAGTCGGCGTGAAGGTCGGTTGCGGGACGTTGGT  
CGTGGTTCATGCGCGCGATCTTATCACGCGCGCACGCCGATAGGTAATAATTTATGGGAGGG  
TCAGGGGCGCGTCAGGCGGTTCGATGCGAATCTGCAGCAGCGCTTGGTTCGCGAGCGCCAA  
GCGCCGCGCTTCGCCGCCCTGCGCTTGCACGTAGCTATTGCGCGCGGCGTTCGATGCCGGC  
GGCCAGTACGCGGCGCTGGAAGGCCAATGCTCATTCCGGGTTCCGGTTCGGGCAGGTTTCAT  
GTCAGCACACGGAATTGAACGGTAATCGACGGTGCGCCGGATTTGCCAGTGGCGCCGCA  
GCGGCGGCGCTTCCGGATTCCGGGAGGGCGACTTCCGGGGTAGCCGCCCGCAAGCAGGACGA  
GCTCCGTGTGCGTTCGATGTTTTCATTTTCGCAACCCCGTTCGTTGATGTGCTTCC  
ATCGTATGTAACGGTAACGGCAATGTCAAGCAACTTTCGCGGTTTCAGCTCATCCACGCGA  
CTGCTTCGCTGAACGTGAGGCAGTATGTGGCGCGCACCCGCGCCGTCGATGCGAAAGCCGG  
TCGACGACAGGATTTGTGCGACGCGGATACGGAACAGCTCGCCACGCGACGTTGATGACGT  
CGCTGCCGTCGGTTCGTGATAGCGCTTGGCTGCAGCGCGGAAAGTGGGATAGGCGTTCATGG  
TCAATTGTGCGGCGTGCCGACCTGGCCGCCTTGTGGATCGTTCGTGAATGTGCGTTCGCGTG  
CCGCACGCCATTTCCGTCGATGAAGTCCGGCGCGCCGACAGGTGCGGCGAACTGCACGGA

GCCCCGCGCCGGTCTTCGTCCCTGCGATCGTGTCTGTTGAACGTGGTTCGGCGCGTTCACGAC  
AAAGCTGGCGGGCGTTGATCGTTGTCGCACCGCCGCTCGTGAGCGTGATCGCGCCGGCTGC  
CGATAGCGTCAGGTCGCCAGGTGTATGGATGTTCGATGCCCCGCCGCGCCGGCCAGGAACTT  
GACCCATTGCGTCGGCGCCCCGTTTCAGGAAGCCTCCGAAGTAAAAGCCGTCTGCCGACGA  
GTAGGCGCGCTTCGTTGCCGACGGCCCGCCTGCAGCGTCTGATGCGAGTGTCTGTCGCGTC  
GCGCTCGGCAAACACTGCGAGCCCGATGTCACCTTCTGCCGGATCGAGCACAACGGCGGA  
TTGGCCGCCTTGCACGCGTAAGAATGGTACGTTGTAATGAGCGACTGCTCAATCACGGC  
GTCATTTCGTGTCCGTTTCTTCGAGCAGCGGCAGCACATCGACGAATCCTACGCGATCGTC  
GATGATGCGCACGGCCTTACCTCGACGGGCGTTGCCGTATGGATTTTCGCGGATCAGTTT  
GACGATCATCCATTCTGCGCGGACCCCTCGTGGAACCTGCGCTTCAAACGGCGAGTTGTA  
TGGTGTTCGGCGCGCGATCAGCCATGCGTGCCCCGAGGTGTGGCGGCAGACCGTGCTTCG  
CGCGGTACATCGCCGTCGTGATCGCAGCGTCTGCCTGCGCCGACGCCTCGTATTCGGACT  
GGCTGAACGGTCGCCACGAGCCGGCGAAACCGATGATGCGGCCAGGCTGCCAGGGTGTA  
AGTCGAGTGGGTAAACGAGTGGGTGTCATGGTGCGGTAGCCGTGGAAGTGCCCCGGCGCGAC  
GGCCGTGCCGTGATGTTTGGCGTAACCTGCGCGGGCAGCGCTGTGACACAGGCGCCATT  
CGGGTAGTTCCGGCTCGAGCGTGTGCTGAACGACCGCCGCGATCCATTGCGTGCGGTTGAT  
GTAAGCGATCGACGTGTGATCGCAAGTGCCGCGCCGGGGCGAATCTGCGCATTGAACAG  
CGAAGTAAAGGTGATGCCCGACGTCGAATAGCGCGGGCGCCTTCTGCATGCCGTTGCCAGC  
ATTCACGGGCACAGCGTCGGCGAACATTGACACCTGCGAGTCGCGCACCTGAACGCGCTG  
CAGCGAGACGTCGTAGGTCAAGTTCGGGAATTGCGCGATCGCGGGCGCAATCTGGTCGGC  
CGCCGAGCCCGTCAGGCGCACGTTTCGTGACGATGTAGTCGGTTCGTGTCGCCGAGTAGTC  
GACCACGAAGCCAGCCGGCGTGCAGATCGCTTTCAGCACGTCGCTGAGCTTACCCGGCCC  
TGCCTTCGAGTACGGCGGCATCACTTCGGCCATCAGCGCGTACGAAGCGTTCGCCTCGAT  
CACAAGCGGCACGAACGGCATCGACTCGGGATCGATGTACGAGTATGCGATCGTGCCCTG  
ATAGAACGGCACGTCGTGCTGCGGCTTCCAGACGTCGATGCTGATCGTATCGCTCGTGAT  
CGGCGTGAGCACGTCCTTGCCAGATGCGCGCGATCTGGTTCATCGTGTGAGCGGCACGCC  
GAAAATCTCAACGCGCACGTTTCCGTAAGTTCGCGCGCCGCGAGGCTGACAGCGATGCGCAT  
CCGGTGCTCGACAAACGTGTAATGTACGGCTCCTGGTTGCCTTGCCTTGCCTGCGCGTCCGGGCGCGT  
CACGGTGACCGTGACGCGCACGCGGGCGCTCCTGGAACGGGTTGTATGTCATAGCTGAATT  
CTATCGTCAATCCAGCATGAATCGAGGCTCGTTCGGATGCGACGTGCTGATGCGGTGCAC  
GAGCTCGCTTACGAGCGCCCAAGTTGCTGGATTGCGGTTCGAGAAATTCTGACGCGTGTG  
CTGCCAGATCGCGAGCAGCACGACTTCCGGCATGCCGTAGAAACGCAGGTCGGCCAGCAA  
CTGCCCAGCGCCGCGTCGACCGCGCGGGTTCGCGGGCGGCGCGGCTGCCCATCAGTACAG  
CGCGTCGACATCAATCGATCGGAACCAGACATCGTGCCGGCTGCGTTCGTAACCTGCACG  
CTCGAGCGCTCGTGCCGCACGGTTCGCGCTCGGCGCAGGCCGGCGCGTACTTGCCGTCCGT  
GCGCAGCGGCGCGCCGAGGCACGCGTTGTTACGCGGTTCGAACGCGGCAATCAGCTGCGC  
GGCCGCCGGATCGGCGTGTGCGTTCGCGTTCGCGCCAGCACGATGACGAGCGCGAGCACTGC  
GCCGCCACGATCGCGCCGACCTGGCGCTTGATTTCGATAGTCCATAGCTACCAACTCCGG  
TCAGTGGATAGTTCGGCGGCCGATCATAAGTCCGCCATCGCGTTCGGCGTAGCCGACGTAATA  
GTCGAGTGACTGGTAGGGTTCGCTGCGCGCACCCGCGCATGGCGTTCGTTCCAGCCGTTGCC  
CCAATCCTGGATGTGCTGTTCTTCCATGACGTGCCCCCTACGCGGCGCGGGCCGCTTTGA  
TCGCGTCCATCGCGATCCGATTCTTGAACGGTTCGCCCTGCAGCCAGAGGGTGTACCAGC  
CGCGCGGCTGCTTAACACGCACCTCGAGCGGCTCGTTGCCGGCGAAGCAGACGGCGTAGC  
ACTTCTGGCCGTCCGTCCGCTGGCTGCCTTTCATCGCGACTTCGACGGTGCGGAAACGGC  
TCATACTTTGATGCGCAGTTCGCGACGGACTTGGGCGGCCATCTGCTTAGCGGCCGCATC  
GTTACGCGCAATGCCGTAACACCGGTACGTCCTTGCCTTTGCCGCTTTCGATATAACGCTG  
CTTCGTATGTGCGCAGTAGCCAATGCGGATCGACGGAATTGCCTTCTTGGTTCGCGTTCAT  
TTCCTGCTCCTAGTTACGTTGTTGATGGACGTATCTTAGGGCGCAGGTAAGGCAATGTCA  
AGCAAATTTAGCGCTGCCCCTCGCGTAGTTCTGCACGCCGCTCTGGCGTTGGATGCCGT  
TGACGAGCTGGCGCGGGTCAATTCGCTACGACGGTACCGGGCCGTTGATGGCGATCGGCG  
CGCCGCCGGTTCGACTGGTCAATTCGCGGCGAAGCGCGCGCGGTAGTCGTGCGCGAAGCGCT  
GCGCGATCGGGCCACGCGCGGCGTCCCTCGGCCGCTTTGCCGTGCGCCTCGAAAATGCGCG  
AGAAGCGCGTGCCGAGCGCGGCGCGCTGCCGCCAGCGCCGAATGCGAGCCCCATGCGAC  
GTCGCTCGTTCGGGATCGGACATCAGGAAGTCGATCTGCTGGTTCGACCGTGCCAAAGCGCG  
GATCGATGCCGTAGCGCCGACGGAACGCGTTCGATGCGCGACCCGCGCAACTGGAAGATGC  
CCTGCGCGCCTTGGCCGCCGCTTTCGTGTTGTACGCCGAGGGCACCAAGCCGGACTCGC  
GCACGCCGTTTGGCGTGATAGCCGCCGCTGATCGATCGACGCGCCGCGCGGATCAGCG

CGTTCATGACATAACAGGCGGTTGTCGTCGAGTTTCGACGGCGAGCTGGCCGCCGTCGCAC  
CTGCGACGCCACCCGCCAGGCGCGCGGCCGCACCCGGCGGACAGCTTCACGCGGTTTCGGAT  
CGTCGACCGCGATGCCGAACGTCGAAGCGACCGGCGCCGGACCGAATTCGCGCGCCGTAG  
CGACTGCCTCGCGCCACGTCTGTTTCACCGTCGACGTCACGGCTGCGCCTACCTTGTCGA  
GCCCCGAGCGTGCGGCCGACCAGGCTGCCGGCCAGCTTGTCCCATCCCCACTCGAGCGCCT  
TCGCGATCGTCTGCCAGCCGAACACCGCGACATCGACCGCTTCGCCGAGAAACCCAGGC  
CGGACGCCAGGTCGTGCAGCAGCGCGGCAAGGCGCGGCGTGCCTGCTCGAGCACCTTCA  
TGAAGCCGTTTCGCGCCGCCGCCGGCGGGCAACTTCGTCCTGGAAGCTGGCGAGCTCGG  
CCGTGGCGTGCAGGTAATCACC GAATCGCTGTACATACGGCGCGGCGACCGTCATGA  
CGACGTTCCCATGTTGCGCAGGTTGTTTCGAGACGGTTCGACACCGCGTTCGTAAGACGCGT  
CGAGCGCCTGGCGGTTCTCCTCGGACGTCTCGCGCATCGACTGGTTGAACGCGTTCGAGCG  
CGTCGACGCTCGCCTTCATCGCAACGATCACGTCCGGCGATACGCCGGCGGCGTCAGGC  
GCGACTCCATAAAGCCCTGCTGCTGCGGGCTGCTCGCACGATAGGTGCGCTGCAGCTGCT  
GCAGCATGTGCGGCACATCCTGCTGAATGTTTCACGCCGAACGACGCGAGCGCCTGCAGGT  
TCGGCGCCTGGCCCGTCAGCGGCGCGAGCTGCTGCTCGCGCGCGAGCCCGGCGAACGCGT  
CGCCGCTGCCTTGCGCTCGCCGCCAAACGGCGCGCCGTGCTCGACAACGCCGACATTT  
GCCGGTTGGTCATGCCGGTGCAGCGGCGCGGCGCAGCGCCGTCTCGGTGTTTCGTC  
GTGCAAGCACCATGCCGGCGAGACCGGCCGCACCTGCGCCGACGCCGAGCACGGCGCCCG  
CAATGCCGGCCAGCTTCATCAGACCGCTGCCGAGCGACGCAGCCGCGCGTTTCGTCTCAT  
CGAACTCCTTCTTGCGCGCCGCGTGCGGACGTTTTGCTTCGCGATCCTCATCTTACGTT  
TCTTCTCGGTTGCGCGAATCTGCTTGTGATCGCTTTGTGCGGCTTCTCGTACTGTCGCG  
CGTCTAGTTCGAGCGTCACGACCAGTTCGTCGACGATGTTTTCGTTTCGCGGCGTCTGCCA  
TGGCTTAGCTCGTGAGAAAGTTGCCGACGTTGATAAGCGCCGTCTCGGCCGCTGTGGCCG  
CGCGCGTGAACAGTCGGCCGATCTGCTCGATCGGGCCGACTTCGCATCCGCCGTGTTGG  
ATAGACCGTGCAGCTCGACGCGATCTGCGGAATCTCGACGAACGTCAACGTCAGATAGA  
GCATGTTTCGAGCCCTTGTACGCTCGCGTGTGTCGACATGCGCCCGATCGTGAAATCGA  
GGTAGATGCCCTGCGGCGAGATCAGCGTGTAGAGCTGCAGCGGGTTGTTTGCCTGCATCT  
GCTGAATCGCGGCAAGCCATGCGAAGCGTGCCAAGTCGGAGCCGGTCTTGACGAGTGTGA  
CGTCGATCGACGACGGGCGACGCACCTTGTGAACACGCCGAAGCCGCCCTGCTCGGTTCG  
GATAGTCCGATAGCGCGTACTCGTACTTGACATCGAACTCGCCCCAGGATGAGGGAATGG  
TCAGCGGAAAGAACGTGTCCGACGCGACGATCGCATAGATCGGCGTTCGGCGCGTTCAGTG  
ACGGCAGTTCCGACGCGATAAGCGCCAGCACGTGCAACGCGGCGACTGTGCGCAGGCCGG  
CCACGCGCTTACTCGCCGAGGTTACAGGACGACGAGCGCGATGAGCACGTGCGCCGAGCGTC  
TTGAGCTCGCGGATATCGGTTGGCAGCAGCGGCCGAAAGCCTTCCGGATGGCGCGGGTTCG  
GCGGCGATGTGACGTCGCTCAGCAGGTCGGTTCAGAGCGCGTGCACGGCTGCCGGGTCG  
CTGCCCCGATAGCGTGCAGCAGCACGACGTTACGCGCCGCGTCCGGGTTCTCGGTGTCGGCC  
CGCGCCTCGCGCAGCTCGCTGACGAGTGTCTCGTACTCGGCGCCCTTACGCGCCGCGACG  
AGCCGACGATGTAACCGGACAACACCAGCGGCGAAATTTTCGTTGACCCGGAAGCGTTTG  
CCGACGTCGCGCGGCGCGCTCGCGTTCGATCACTGCGGAAATGGTTTCGTTTCATTGTCATT  
TGTCCCGTTTGCGCGCCGCGTATTCGCGCGCGGCTTCGACGTTGATGCACTCGGTTCAGGT  
TGTAGACGTCCTCAGTCGACAGCACGGTTTCGAGCTGCACGTCAGTCCGCATGACGCGAGT  
TTAACACGGCAGCGATAGCCGGCGAGCAGAACGTCACGCGCAGGTCGCTGCCGCCGGCCA  
TAAGCGCGCACCTTGCATTGCGACCGGGATGTCGAGCGGTTTCGCGATCAGTCAGGAACG  
CCACGTGCAACATGAGCGCGGCTGCTCGAGTCGGTCGATGTTGCGCCAGCCCTTCAGGT  
GGGACTCGAGGTTGAACTCCGATCCCGCGACGGTGCCGCGCACAAATGGCAGCAGGTAGG  
CGTGCGCGTCCGGCAGCTTTGCGACTTCGGCATAAGTGTGGAACGCGAGTCCGGCGATAC  
CGCTATCGGGATCGGCGTTCGATCGCTTTGAGCGCCGCACGTGCGTAGCGGTTCGGCCACGA  
GCGCTGGCAACTCGGTTCAGCGTGATCACGAGCCCTTCGTCGCGCCCTTGCAGATGAAGTC  
GGTGGATTTGAGCATAGGCAAAAAGAAGCCGGCACGCGGCGGCTAAGCGCTTCCTTCA  
GGAGTCAAGCATCCGAAAGACCCACAAGACGCCCTTACGGGGGATAAGGACGGTTCCACA  
TTATGCGTTTCGTCGGATGATTGTCAAGTTCAGCCGAGCGCACGCGTTGCGTTCGGCCGCAT  
CGAGCCAACCGGCGCGCCACGGATCAGATTCGTTGCGCGAGAACGGCGCGCCGTCGTGGA  
ACGCTGCTGCCCGATCGCGTAGAACGGCGATGCCTGCGGCGCGGCGACTGCGCGCCGAA  
CCGTAGCCGCGAGTCCGGCAGCATTGGCAGCGGCGCGCCGGGCGATCCAGAGTTGAGTGG  
GCGTCTTGGTCATGTTTCGTAGCGTGTAGTTGATGATGACGATTAGATTAGCTAGTCGTC  
ACCATCATGTCAAGTCTCGATCACTTCAACAACCAGCAGCCGAAGCCGCTGTCCCATGTC  
GCAGATACGCTCACAACTGCGCAGCCGTAACGCTATTGCACATGGGTCCGGTACTGCC

CCTGTATTGAATGCGACGCCCCCTGCGGTAGATGGTACAAGCGTCAACGTCCTGTGACTC  
CAACGAGCGGTCATACCGGTTACGGCAGTCGTGCCCGTCACGTTACGATTGGGTTATTC  
GGCAGAACGATCGATGCTGCGGACGCGATATTACCCGTGATGTTATCGACGCCGAGATTG  
TCTCGAATAACCCACGCTGCTGCAGCCGAGTCGGCCAGCGACAGCGGTGCGGTTGCCGTG  
TCCAATCGATTGCCGTTATCATCAGCTTGTCTACGCCAGACGGCACCGTGATGCCCGTC  
GCGAGTGACCCGCTTGTCTGGTTCGCACGTGCCGATTGTGTTGTTTTGGATCGCGACTTTT  
TGCATAGTCGCGCCTAACGAAATACCACTCCCCGTGTTCCGCCGACCCGCGCAGATTGTC  
GAATCCTTGATTGCCACTTCGGCCGTCGCATTGATCGTGAAACCGTTACTGCTCGTCGTT  
GCAATGTACGTCTGTGATTAACGAATCGGATGCCCTGGTACGATGCGACTGGTACTGCG  
CCCGTATCTTGAATTTCGCACATTGTCGCCGCCGGTTCGCACTTGACGCCCATGTGTCCGTG  
AAATTGAGCCCATGAATAACGGCTGACGATGCGGATGGGTTCGATCAACAGGTCATTTGTT  
CCTGATGTGTGCGCCAGTACGGTCGAATTGAAATATGCCCAGATAGTTTGCTGGTTTCGTG  
CCTGGAATGATCCGCGTGCCATATTTGCACATATAGGGCGTATTTTGCGAAGCCATGAGG  
CCGCCCCGATCATAGACCTGAATACCATCCGCGTTTGGCGCGCCGCCACAATAAATCTGG  
TTACCGCGCAATACCGCGTCAACCGTGCTGGCCCCGGTAGAAACGTTGCCGACCACAATC  
GCCGCGCATCCTGCCGTGTTGTAAGGAATAATCGTGTTATCGACAATGCGCGAACCAGACA  
TTTTGTGTGCCGCCGTTTCCGCTCAGGTAATGCCTTTGCACACATTGTTGAATTGTGAC  
TTCTCAACCACGAGAAAATTGTGTGCGCCAATCTCGACGATGCCGCCCTTAGTTGACGTG  
ACGCCGCCCGCGATATCCATGCAGATGTTTCGAATTGCGATACCTGCTCGACCCAGACTC  
ATAGCATCGAAGGTGCCCGCCAGCAGTCGAATCCCTGACGTGCACGTGGCGTTATAGATG  
CCCTGTCCCCCGCCGTTGCCTTCGATGTTGCCGTTGGCCGTCAACGTCGACGAAATGCCA  
TATAGGTTATTTCCGAGATATAGCGTGTGTCCGGCCGTTGCCGTGAGTGCGTTTTGCAGA  
GGTGTTCGATCATCTGCCGTACCATTGCCGGTCGCGCCGAACACCATCGGCGTGACGCGC  
TGTCTGCGGGTTGCCACAAAAACAATTGCCATCTGCAGATTTACCTGCGAACCATTA  
TCGCCATTACCGGCAGCCAATGAGCATGCCGCGTTTGAAGGCCGGTAAAACATCGCACCCG  
CCATCGCCGGCAGTTGCATAACCTGCGCGATAGATGATGCTATTGACCGGAAATGCCGCA  
ACTGACAGCGCCTGCAGTGCGGCATTGGTTCGAAACTGTGCAGGTGGCGTTTCGTAGACGCG  
GGGATACAAGGAATGGTGGCCGCCCGCCGTTACTGCACTCGTGCCATTTCCATAGAGATAG  
CCCGACAGTGAAGCCGCCCCCAAGCCGCTGACGGCACCCGAGATTGGTGTCGACAAACCT  
GAGATTGTGCCGCCTGTGATGTTGGCGTGCGCAGTGTTTAGTGCGGTTCGTGACCGTCAAC  
GTCGGCACCGTCAACGGGCCGGTGAGCGTGCCGCCTGCGAGCGGCACGTAAGTGCGAAT  
TGGCTGTTGAGCTGTGCGGCGGTCAGAACTTGGCCCCGGTGCGAACTGCGCAAATGCAGGC  
AGTCCACATGCTGTGAGCAGCACACCGAATAGTACGTGTTTGTTTTTTTTTCATGTTTAC  
CCAAAATGGATTTGTCAAGCACAAAGTCAATGTCGAGACGCCCTTCAGTCGCGAACGCG  
AGTGTCGGCTCAGGCACAATAACGGCATCCGGCGGGCGTGCCATAGCAGAGCAGATACCGC  
GTGCCGAAGCCTGTCCAAGCCGGTTCGCTCGTACCCTGCAAGTCGGCAAAAAACAACGGC  
TGCGGCAACCCAGATACTTCGCCGCGTTGATGTCAGTGCGATCCAAGCAGAGCCGGCCC  
GTTGCGACGCGCACGCCGTTATACGCCACATCGGCCGAACAGGCCCAGTCAAGTCAGTCGTCATG  
AGCGCGATCTGCGCATTCAAGCCGTCGAGCACCGTGCTCGCGACCTGGTTCGCGGTCGCC  
TTGATGGGGATCACGATCAGGCTCACAGCTGCACTACTCCGGTTGTCACGCTACCGTCCG  
ATACGACGAGCTGGCCCGTGACGCGGCGCTGCGCGCCAGCCACGTACGCAAGGTTGGCGA  
CGGCCTGCGCGACCCGGCGCAACCTTCAACGCCTCGTTGACGTAGAGCGCCTGCACGAGCA  
CGAGATTGGGCGCAAGCCCGAGCACTTGGTTCGTAGCGAATGCCTTGCCTCGCGTCATAGT  
AGACCTCGCCGAGCCACGACATGCAGCGACACGCGACGTCCCTGCGCCATGCGATACGCGC  
CGCCCGAGTAGTCGCCGGGCGTCGCATCGCCTACGGTTGCAAGATTGCCGTAAGCATCGG  
TCGTGATATCCCAGGTCGCGGGATCGAGGGGCGAGGGAATCCATGCGTGCGAGTGTAACGC  
AATCGTCAATGCAAAGCGATAGCGAAATTATATCGCCCCGGGTGTAATTACCAATCTTTGA  
CGCGAGCCTTACCAAAAATTCACCGCTTTGGTGCACGCCAGTGACAGATGACAGATAGTGA  
CAGCAAATTCCTTATGAGACCTCTGTAAACCTAAAAATGACGAAAGTTGTTATTGAGAAC  
TATTCATACTTTCTCTCTTTTCACTCTACTACTTATTGTTGTTGTATCTGCATCTGTCA  
TTCATTCATTCATAAGAAGGGTTATATATAATAGAATCAAAGGGTTAGGGTAGTGACAGA  
TAGCCAATGACAGATGATGACAGATAGCCGATCCGTCACTCGCACGCTGCGACATTTACG  
TAGACAAGCACTTACGGCCCCGCTACCATATGCCGTGAGTGCGCGCTACGGCCATCGCC  
GGCCGCTATCAACCCAGCACATTGATAGACTGCGCCAATTGGCTTTACTGGACGGCACGC  
GCTATGCTCGGACAAAACGCAAGCAATCAGGACTCACATTCCTATCGGGGAAAGCTATGC  
AGATTCAGTTCGCGCAGGTAACAGCAACAACTGCGAACTACCAAGACCTTTCAAATCG  
GGCACAACGGGCAACTGGACAGCAGCGGATCGCGCACATGACGGAGGGGTTTGCAGCGGA

TTCGCGCTATCGAGGACGTCGGGCAGCTGCGGGGCGTGCTCGAAGCGCTCACGCCGCACG  
ACGCGATCACGTGCGGCATCCCGCAGCGCGGGCAGACGCGCTCACGACGCGCGCCGGTG  
CCGAGTTCCGCCGCGACGCTGTGGCCCGCACCAACGAAGCTTTCACCTACCCGTACGGCG  
CGGCGCTCTTCCGATCGACGTCGATGTGCAAGGCGACGCGTTCAGTCGGTCGCGGGCG  
TGCTCGACGCGCTCGAATCTGCGTCGCCCTGGCTACGCGACGTGCACCGCGTCGCGCGGC  
CGTCCTCATCGTCCTACGTCGGCGCTCGCGGTTTTCGCGGGCGTGACGTGTACTGCGGGC  
TGACGAACGGCGCCGACATTCCGGCGCTCGCCAAACGCATGCAGATCGAGCAATGGGCCG  
CCGGCCACGGCCACGTGAAGATCAGTCGTTCCGGTGCCTGCTCGTGCCTCAGCTCGCCG  
ACGCGTTGGTCTACCAGCCGTCACGGTTGATGTTTGAATCGTCGCCGGTGCTGCATGATG  
TCACGCGCGACATCCCGCCGGATCAGACATTCATCGAGCGCGCGCCCGACCCGCTCGTCG  
GCCGGCCCGGCGCGTGCGGGCTCAATGGCCTGCTCGATGTCGGCAAGCTGCCGCGGGTGC  
GCGAGATCGACGAGCGTCGTTTCGTCACGCAAGGCAAGCAGGCCAAGGATGCGAAGCGGC  
GCGATGCGAAGCGCGTCGCGATCGAGTACCAGACACAGAACGCGATCGCGTCCGGACTCG  
AGCCCGAGGCCGGTGAGCGCTTCGGCCTGCTCGCGATTTCGCGCTCTCGGGCAGCCAAAC  
TGCCTGCGTTCGTGGGAAGTGCACGTGAAAGACATCGGCCGCGTCACGGTGGCGAACATTC  
TCGAAGCACTGCCCGCGTCGCTCGGCTTCCAGTGCGCCGACCCGTTTCGATACCTGGCGCC  
CCGACCTGGATGCGAAGCACTTTGGCAAGGCCGAGATCGTGATGCTGAACGGCTTACCCG  
GCATCTGGTTCGCACAAGCTACAGCAGTTCTTCGCGTTCGACGCCGACCCGGCCGCGGATC  
TTGGCACGCCGCTCGCAATGGCCGCCGAGAAGCTCTGCGGACTGATCGAATACCCCGAGT  
CGAGCAAGCGCGCCGCGCCGTTTCGTCAACGTGATGCACGCCCTGAAGTGCCTGTTTCGACG  
AGATCGATGCACGCGCGACCGTGCACGCGGCGACCCGGCGAAATGCGCCTCGAGGGTGTGC  
CGACCGAAGCCGAACACTGATCGACGCGCTGTCGCGTGTCGGGTGCGCCGGCGTGACGCCGG  
CCACGGTCAAGACGGCGATCGAGACGCTTGCCGCGTCGAACTTTGTCGATCCGTGGCGCG  
ACGCGATGATTGCGCTGCCGCAATGGGACGGCACGCAGCGCCTCGACACGTTCTTTGTGCG  
ATCTGTGCGACGCGTTGCCGTCGACGCGCTCACGGCAACGACACAGCTGCTGTTTCGCGG  
GCATCGTGAAGCGCCAGCTACAGCCGGGCGCGCCGCTGCCCGTGGTGCCCGTTCTGATCG  
GCCCGGGCGGCACGGGCAAGTCGTAATTCGTCGAGCAGCTGGCCGCCGCGCTGAAATTCC  
CGCAGCCCGCCGGCGCTCGCCTTACCGATAACAATCCGCATGACGATGGAAGCGGCCACGA  
GCGGCATCGCCGAGCTTGCCGAAATGTCCGGCATGGGGCGCCGCGAGACGGAGGAGATCA  
AGCTTTGGACGACCGACACGTCGGACACGTACCCGGGCGCCATACGAACGCCGCCCGTCCG  
CGCACCCCGCGCCGCTTCGCGCTGATCGGCACGGCCAACAAGCACGAGACGAACCACGACG  
CGACCCGGCAATCGCCGCTTCATGCCCGTGTTCGTGAACCGGCCGATCGACCCGAACCTGGC  
ATGTCGAGGGCGCTGCAGCTGTTTCGCCGAGGCAAAAACGCGCTTCGTTGAGCCGGACGGCG  
AGTACGCGGACTCGTGCGCCGTGCGTCGGCACTCGTGAAGGAATAACAACGACGCTGACA  
TGCGCGACGGCATCGGCTTGCCGATCACCGATCTCGACGACATCCTGCCGCCCGTGCTGC  
GCGCGCTGCACCGGCAGCACGGCCCGCGCATCCCGTCGGCCGAGCTGCGTGCAATGCTCG  
ACCGCACCCCGAGCGGCCGGCAGGCGCACGCGCGCGGATCGCAGGTTGGCTGCTCACCC  
GGGGCTGGCAGCCGATTCGCTCGGGCGGGCGCGCTTCTACGACGCACCCGACGGCATTCA  
TCGACAATCTGATTGACGAGAAGATTAACCTCGGCGTTAAACTCTACCTCATCACCTTTA  
ACACGCCGTAAGGCGGACAGGAGTCAACACCATGACATGGGCAGAGTTTAAGGCGAAGAT  
GGAAGCGCGCGGGCGTAACGGACGACACGCCGATCGGCTATATCGACATCGGTTGCGGGCGC  
CGATGTTGACGTCGACTTTCGTGACGATGGGTCGGTTTTCGTTTCGGACGCGTGATCATG  
AACGAGCAACCGCTGCATGAACATCCTAGCGGCCGACTGCTGCCGGACGCGAACTTCACG  
GTCGCCGAGGCGGCGCGCTTCTGGTTCGGCCTGCCTGCGCCACTGACGACAAGCGACCTC  
GGCAAGCTCGGCAAAGACTGCTCGATGGTCTGCCGCATCAAGGGCCTGCAGTGGACGATC  
CGACCGACGCCGCTCGCGCTGTGGCCGTCCGAACGCGCATAACCCGGCTGCCGTGATCCAG  
GAAGTGTCAAGACGAACCCCATGACGGCGCCGTACGTGCCGCAACCCGAAAACGCAGGAG  
CAAACAGCATGAACGCGATAGATGCTTTGGGCGAAGCGATGGAGCAAGCGCTCGAAGAGT  
GCCCGACTAATGAGGTGCTGGCGTTTTTACTGGCGGTTTCGTAGGACTGATCACGGAAC  
TCGCGCGGGCGCCACGGCGCGGACGCCTCGCAAGACATCAAATCGACGGCGGCAAGAACC  
GCGATATCACGATCCATGCGGCCAAGGCGGCATGATGGCACGCTTCGTCTATATCCACGG  
ATCGTTACATAGCGTCGTCCACTCCGATGCGGAAGCATGGGCGATCATCCGCCGATTCCC  
GCTTGGCACGCTGTACGAAGTGCGCGACGCGGCCGGCCAACCGATCGACGAATTCGAACC  
TTTCTGACTAGGCAAAGCCGTACCGCATGCGCGGTTTGTGCGATGTACGCCCGATCTTTCG  
AAAACCCGGGTCAGTACTCGACGAACTCTCCGGAATCTGCTAACGGTGCACACGCCGCGC  
GGCCGACTCGAACCCGGTTGAAGACGGGCAAAGGCCGCAACGCCACTCCTACTAAGCGGG  
ACAGATCAAAGAAAGTCAAGTACGGGGCTGCAGCGGGCTACGGTAGTGTGACCTAGCCTT



AACCTGAAAGACGGACTGGATACATCGAACC GGCCGCATGCTGCACGGCTTTGACAAAAG  
AGTGTAGTTTTGATAACATCGAACTACACTCTTTCCCTTTTGTAGACCACAACAACATGA  
CCCGAAAGACGCCACGCTGGTATCAGGCCGAAGCGGCCGACGAACTGTTGCGCGCACTCG  
CGACCGCAAAGAACAACCCGATCGCCGCGATCGTCACCGGGCGGCGCAAGTCGCTCC  
TGAACGCGATGCTGATCGAGCGCATCGCGCAGACCTGGCCGCAGGCACGCGTCATGTCGC  
TCGCCCCGTGATGGAGCTGATCAAGCAGAACGTGCAAGAGGGCGCGCGCCTTCTGGTCCG  
CGGCGATGGTTCGCGGACTCGGTATCTACTGCGCCGGCTTGCATGAAAGATCGCATGC  
ACCAATACATTTTCGCGACGCCACAGTCGGTTCGCACGGCAGGCGAAACGTTTCGGGCCGT  
TCGACTTCGTGCTCGTCGACGAAGCCACCTGTTCAACATCGATATGAAGACGGCGCGCA  
CGATCGTCGACACGTTTCGCGCCGCCAATCCGCACGTGCGGTTTGTGGCATGACTGCGA  
CCGACTTCATCATGAAAGGGCTGAAGGCCGTTCCGCTCACGCAGTGCGGTCTGTTTCGACG  
CGAAGGTGTACGATCTGACGTCGGGCCGCAACTTTAACC GACTCGTGCGCGAGGGCTACC  
TGTCGCCGGTCTGTGTCGCCGTCGCTGCGCTTCCCGCAGATCGACACCGAAGGCGTCAAGA  
CGAAGGGCGGGGACTTCGACGAGGCCGAGCTCGCCCGGCGCGCGATGGACGTGACGCGCG  
AGTGTGTACGTGTGGCGCTCGAGCACGCGCCCGACCGCAAGCACTTCATGTGGTTCGCGG  
TGAACATCGAGCACGCGCACATGATCGAACAGGGCGTGTCTGACGCGGGGCGAGTCGGCCG  
TCGTGATCCATGGCGAGCTCGAGAAGTCGGAGCGGTGTCAGGGCGTCGATGAGTACCTGA  
AGAAGCAACACCGGCACATCGTCAGCGTCGCGATGCTCACGACCGGCTTCAACGCGCCAT  
TCGTTGACTGCCTGGTTGACTGCGGCCACGCGCTCGCTCGTGCTCTGGCGGCAGATTG  
TCGGGCGCGGGCTGCGGCCGTACGCCGGCAAGGAGAATATCCTCGTGCTCGACGCGGGCG  
GCAACTTCGGGCGGCACGGCGCGATCAACGAGGAGATCGGGCGGGGCGACTCGCGCGCCG  
GGCTATGGGTCTGCACGAGCGAGGAAGTGCGCAGTCCGTTTCCGGTCAAGCTGCCCGACG  
GCACGACGGCGCCCGGCCGCGAGCGGTCCGGCATCCGTTTCCCGATCAATTCCGCCGAAC  
AGCCCGAATTCGACCTGCGCGTGATTCTGGGCCTGATGGAACCGGACAGCGAGGGGTGCG  
GCTACCTGAACGACGCTGAGCACATGACGTGTCGCCAGTGCGGGCGACCGCGCCAAGGT  
TCCTGTCCGTGCGCGTGAAGCGCGCGGCCAACGAGCGGGGCGTGCTCGCCGAAAGCGACT  
CGTACGAGATTCACGACGAGGATAGCGTCGTGCTGCGCGACGAGGCGTGTCGCGAGGTGC  
GCCAGTTGCCGGTGCACGACATGACGCTCACGCCCGAGGGCAACAGCGTCCCTCGCATTCG  
AATTTGGGACGGACTTCGGCCCGTATCGCCTGCGGCTCGACTTCGACCGCACGACGGCCG  
ACAACAAATGGTATGCGTTCGCTCGTAAGTTCTACGAGAAAGCGACCGGCCGCAAGGTGC  
CGACCGAGGCGTATCGCGTGCTGTTGCAGCGCGAATTGATCCCGAAACCTATTGACATTA  
CACTTACCAAGTACGAAGATGGACAGGTGTTTTTTGACCGAACTGCGTTCCTGCGAAACG  
AGCAACTCGAAAGCTTCCGATACGATCCGAACTACCGCTAAGGACCACACCATGACCACC  
GAAAATAGCCGCGCTGATGCGCTGACGATCATCGAAGACGCGCGAGACGGCAACTGGTAC  
GAGTTCGCCGTCAACGGGCATCACGGCCTTATCCGCGTCGTTGCCAGGAGGGAGGACGAC  
GATCTCGATTATCCGCTTGGCAAGAAGGTTTCGTGATTTTCTTCTCGCAGCGTCTCCCGTC  
GAGCAGCCCGCAACAGCGCCGATCGTCTCCACGCCGGCCGACGAGCGGGCGGGCGTTCGAT  
CTGACCGACATGGAGTGGCTCAAGGTTTTTCGAACGAGTCTGCGTCAGCATTCCGAATGTG  
TTCGGAAGCTATGTGAAGGCGTCAGCCGCTTTTGTCTCGCGAGGCTATCAGGATGTCCGAA  
GAAGCCCGCGCCGCATCTGCCAGTGAGACGGGGGCGGATGACCTGACTCACCTGACCGAC  
GAACAAATCGAGAAGAGCCGAGAGGCCGTACGCGAATGGTGGGCTCGCCGGGATGCGCTG  
CAACCCGCACCCTCGCCGGCGGACGAGCGGGCGGGCGCTCTCGACCGATGGCTATTTCTGTC  
TACGATCCGGCAGGCCCGCATGTCGAGTTCTACGACACCGACGCCGAACGTGACGCCGCA  
CATCGAGACGCGATCAACGAGTATCGGCCGCGAGGCAACGCTCGACCAGGAATGGCCGACG  
GAAGTTGTCGGGATCGTGTCCGGGATCGTCACGCACACGACCGATGAACTGAAAGTCGAC  
GAAGATAGCTATGACTACGAACCTCGTGCCGTGCGTTTCGATGCCCGCGCCGCATCTGCC  
AGTGAGACGGGGGCGCAAGGGGCGCCGATCCCGGCCGGCTATGCGCTCGTGCCGATCGAG  
CCGACGCCGAAATCATGACGGCCATCTGGCAGAACGAGCGCGATTACGTGCGAGCATGG  
GAACGCGCAATCGCTATGGTCCCGCAGCCGCCCGCGCAGGCAGACGCTCGGGTTCGGGCTG  
ACGGACGCGCGCATCGCGCGCTTGC GCGCCGCAATCGAAGGTGAGTGTGACGGTCTACAC  
GTGGATTACCACCACGCCAAAGCGATTCTGGCGTATCTCGACGATGACCGCGCCTGATCG  
CATTAAATGGCGTGTGCGCGCTCGCCTCGAACGCGAGTGCGCGAGCAAGAATCGCTACCC  
GGACGAGCTCACGGCCCGTGC GTCCGGCCTGCACCACCAGGATCGCAACAAGCTCGACGG  
GTTGTGGGTCTATGCGTGCAAACACTGCGCGGGTTGGCACCTGACGCGTCGCAACAATGG  
CCC GCGTTGGCGGGTTTGTATAGGAGGACGAAATGCTGGACCGCGCGATAAACCTGCTTGA  
CGGTTATCTGGGAGATAACCGATCCAAATATCGGGGAACTGTGCGCAGGAAGAAATCGAAAC  
GCAGCACCCGGTGTCTCGCGGCACTGCAAATCCTTGTGCACTGCGCGACCAACGCCACG

TAGCGCACCGATAACCCATGTATGCGCACGGCGATAACCGTATGCACGTATCCATGTCAAGG  
CAAAGCCCCGCGGGCACTGCACGCCGTGACCACACATTGACACAACACTAACGGCTCGATA  
AACTAATCGGGCCGCTACTCTTTGCGACACAACAATGACCGAACACTTGCTTTTCCTCGA  
CTTTGAGGCATCCAGCAAGACCGATCTGACCGAGGCCGGACTCGGCCGCTATCTCGACGA  
TCCGACGACGCGCGCCTACTGCTTCACGTTCCGGCTGCCCGGCATGGCGACCGCCGACCT  
GTGGGAATACGGCAACGTCGTGCCGAAACAGATCGTCATGCACCTCACCAGTGGCGGCCCT  
GTTTCGTGCGCACAAACGCGCCCTTCGACTTCTGGATTTGGAACCTGATACTGCGGGCTCA  
GCACGGCTACCACGATCTGCCCCGAGATTCAAATCGGACAGGTGCGCTGCTCGGGCGCGCG  
CGCTCGCTACAACGGCTTGCCGGGTTGCTTGCCGGCGCGTGCGAGGGCGCTTGGCCTGCC  
GGTGCAGAAAGATAACCGAGGGTGCGAAGTGGATGAAGGAGATCGCCGCAAATCCCGACTG  
GACGCCGACCGATCACCCCGAGCACTTCTCGCGCACCTACAAGTATGCACTGATCGACAC  
CGACGCGATGGTCGGCGTGTGGGAGAGCACCGTGCCGCTGCCGCCGCGCGAGCAGGCGTA  
TTTCGAAATGGACATGCGCATCAACGCGCGCGGCATTGGTGTGACGTCGAGGCCGCCCA  
GGCGATGGAGGACTTGAAGGCGTTCGCCGAGGCGCAGCTCGACTACGAAATGGCCTACCT  
GACCGACGGCGGCATCTTGGCCGTTACCGAGGTCGCGAAGATCAAGGAATACGCCGCGAC  
GCTCGGCGAGGACATGGACGACGCTGGCCGCGAGACGCTGAAGAAGATCGCCGCGCGCGA  
CAACCTGCCCGACTCGCTGCGCCAGCTGATCGAGCTGCGTCTCGATGCGTTCGCGCGCGCC  
GAAGAAGTCGGCAGCTATCCTGCGCGCGCACGTCGGCGGCCGACTGCAGCACCATAACGAT  
CTACCACGGCGCGCTGTCCGGCCGCTCGACCGCGCGTGGCGCTGGCGGCGCGCAGACGCT  
GAACACCGCGCGGCCGCGCCCGGGCAAGAAAACGGCGGACTGCGAGGCGATACTCGACGC  
CTGTCTGCGCGGCGATCGCGCCTACCTGTGCTGCCCCGAAGTCGGCCCGATACTGGCCGC  
GCTTGCTGATGCGCAGCGGCAGCTGTTCCGCGCCACGAAGCCCCGGCCACGTGCTTGTCGG  
TGCCGACCTGTCCGGCATCGAAGCGCGCATGGCGCCTTGGCTCGCGAACGACGTCCCGAA  
GCTCGAGGCGTTCGAGAAGGGCATCGACGGTTACAAGCTCGCCGCGATGGACATTTACAG  
CATCGAATAACGATGCCGTGACGAAAGACCAGCGCCAGGTTCGGCAAGGCCGACACCTGGC  
ACTCGGTTTCGGCGGCGCCGACGGCGCATTCGCGAGCATGGCGGCCAACTACGGCGTCCA  
CCTGCCGCCCGAGCAGGTCAGCGAGATCGTCTACAACCTGGCGGGCGGGGCGCCCCGCATT  
CGAGCGGTGGTGGTCGCTTTGCGAATACTCGGCGCTCATGGCGCTCGACCAGCCCCGGTCG  
CGAGATCGTGATGCCGGTCGGTCGCAACAACCTGCTCGCAGATCACGTTTCGTGAAGGACGC  
GCGCGCGCTGCGCATGCACCTACCGAGCGGGCGCGCGATCAGCTACCACAACGCACGCCCT  
GCATCTCGAGCCCCGGCGGAACGTGCCGATCGCGATATACGACAAGCCCCGAGGGCTACGT  
CGAAACGCTCGATCGCAAGATTCTGTGCAACAACAGACCCAAGGTCTGTGCGGTGACCT  
GTTCTGGTCGGTGCTGCTCGATGTGATCGTGTGCAAGAGATAGTGCATCACATCTACGA  
CGAGGCGCTGCTCGAGGTGCTTGCCGAGCTGGCCGCGTTCGCGGAGAAGCAGCTCGTCGA  
GCGGATGTGTCGCGGCGAGGCGTGGTGTCCCGGCCTGCCACTCGGCGCCGAGGGCTGGCA  
CGGCCTGCGCTGGCGTAAGGATTAACGTTGTGCTAACCTGATACTTCACAAACACTAAGG  
AGCAAGCAATGACCGATTTGACCGCAACCTTGGCCGAGCGCGGTGCGCGCTACGGCAAGT  
TCGAGGATCACGCCGTGATCGCACAAGGGCTGAAAGCCCAGATGTGGGCGACCGAGGGCT  
GGGCGCGTCTCGCGCCGGATCAGCGCCAGGCGCTCGAAGTCATCCAGGACAAAGTGGCGC  
GCATTCTGAACGGCGACCCCGATTACACCGACAACCTGGCACGATATCGCCGGTTACTCGC  
GACTCGTCGAAGATCGACTGAACGAGCGGGCGCCGTTATGCGCCGCTGCGGATTTGGCGC  
GGCCTAGGACAGTCGGTGAGCAAAGGGCACCCGAGCGGGGCTGGATCGAATGGAAGGGCG  
GCGAGTGTCCGGTACCAGCGGACACGCTCGTCCGATACGTAAGTACTGCGCGACTATTACAAAG  
GCTGCAAGCGCGCCGGTGGTCTGTCTGGGATGACACGGGGTCGGATAACGATATCGTAG  
CCTACAGACTATTGCCGAAGCAGGGCTGATAGCCTTAGTACTGACGAGTACTTGACGCC  
CGATATCGGGGCGTTAAACTTTAGCTACTCGATCATATACAGGGAGTTATCGACATGCC  
CAACCGACCAATAACCGAACTGGCGGCGCGCTACAAAAGCTGCCGGTCGACCAGTTCACG  
ATCACCGAACTGACCGACGCACTCGGCGTTCGAAGTGTCCGCCGCGCTGCTCGGCACGTCC  
AAGCGTGCCGTCTATAACCGTGCGCAACACGAACGTGCTCGGCATCGAACGGCACAAGCTG  
CTCATCGACGCCGTGCGCTCGAAAGAAACCGAGTGCCGCGAGCGCCTGCTGTTTCATGCTG  
CAGCGCCGCGAGCGCCGCGAAGCATCGCGCGCAGCCAAGGCGGCGCGCGCCGACGACAAG  
CAATAATCGAACCCGCTTTCTTCCACTAGGAGCAACAGCATCATGAAATTCGAATTC AAC  
AGCATCGGCGAACTGCAGGAGTTTCTCGAATTCGCCGGCTACGAGAAGCGCACCCGCGAC  
CTACTCGCGCTCGAAATGCTGCCGCTCAGCGGTGACGATCGGGCACGGTTACTCGACGCA  
TTTGGCGCGCCGCCGACGCGTGCGCCGATGACTACGGAGGACTTGGAACGCGCTATCGCT  
GGCGAAATCCCCGTGCTGACGCGCAATTGACGCCAGAAGAGCGGGCGCAGGCATTGCTC  
GCCGTGCACAAATGGGCAGAAGGCGAAGTGCGCGCGAATGCTGCGCCGCAAGCAGAGCCC

GAGCCGCCAAAGCGCAAACGCCGCACGAAAGCCGAAATCGAAGCCGACAAGGCTGCAGCT  
GCCGCCAGCGCGCCAGTCGTCGAAACACCCGCGCCGAGCGACGCGCAGGCCGACCCGAGCT  
ACGTCGCCGCTCGCGGGCGCCAATCCGTTTCGACGCATCGACTAGCAACGCGCCGGCGGCG  
ACTGCCGCGCTGAACGAGGGCGCCGGCCGGCGCGACCCAGTACATTGAATGCACTCGCCAAC  
GCACAAGTCGAAACGGCCGTACTCGGCGATGGTTCGAAATCGGTGGACCCGCGAGGCCGTTT  
ATTCAGCTGCGCGTCCGAGATGGGCGGCACGTTTCGATCCGCGCGAGCACATGAAAAAA  
TGCCTCGAGTTCATCGGTGCGCTCGGCAAGGCGAAGTACGACGAAGCGTTCACGCTCGCC  
GGCACGTCGCGCGCCGTGGCCTCGTACACCCCGGCCGACTGTGCCAAGCACATCGCCGCG  
CTCGAATACCTGCAGATCGCAGGCTGATCGTGCAGCGCGCCGCTGCGGACGGCGCTTCT  
TTGGAGGTGAGCATGTGGCTCGGCGCGCTTCTCTTACTGCTGGCAGCCTTCGCATTTCGA  
TCGGCGGGGCTCTACTACGTGGCTGCGATTCTGGTGCTATTCGGCAAGCTGCTCGGCGCG  
CTGGTTCGTCGGCGTTCATCGGCGGTGTGCGGCTGTGCTACATCGGCGCGTTCGGCTTGCC  
CGCGCGCTCTGGCGTGTGGGCGCTGGTGGTTTGTGCTCATGCGCGATGTGCTGCTGCTC  
GGTGCCGACGAGGCCGAGGCCGCAACCCGGGCGCGCGCACCCGCGCCGGCATGGTGACCCGTC  
GAATGGTTGAAACGAACGTATGTGAGGCGCGAGAAACGCGCACGTGACGCTCAATGATCA  
AAGCCCGCTTTCGCGGGCTTTGTC

>NewGenomeName\_284

ATGTATTTTAATTATAGCATGCAATAGGGCGGTTGTCAATAGTCTTGTGTGTTAAAGGTG  
TGAGTTTTGTACGCTTTTTGCATTCTGGTGACCGAGTCGGGCGGCGGAAGGGTGGAAACG  
GTGTTGGGGTCTTCGCACTGGCTGATTGCGCACCAACGTAAGTGAATAGTACACAT  
CCGCGAAGAAGCAAATGGGACCCGAAGGGTCGCGGAGTCGCACGTTCCGCTCCCCGTATT  
CGGAACATATGGGAATTATATTGCTCGATTTATGTCTATGGTTCGTGTGTCTGTGATTGCAT  
GTCCTCGTACGTGTGTGTGCGCATGCGTTCCTTGGTTACGCGTACGTGCGCGCGTGAGAT  
GTAACGGTAGTTGACACAGAGCCAGAGGTGTGCTATAATGGAGGTAAGATGGCAGCAACA  
TATGAGGTGAACATGACCAAACCATGGGAACCAACAGCCCTTGATATTCTACTAGACCCC  
CAACTCACAGAACTAGAAGCAATCAAACGAAACCAACGGCTGGCAGAGAAACGCAATGAG  
CGAATCAAACGAATCATCAACAGAGAAGAACCAACTGGCTCAGCAATCCAGTGGGCAATT  
AACGAACGCTTGGGACAATCTAGAGCCTAAGCGCCAGTTGTTTGTATGAAATACGTTGA  
GCTTGGCAGTTGGAACGCTGTGCGCAAGGCACTGAGCATGAGCTATGAAAGATGCAAAGA  
ATTGCGTCAAGACCCTCGTGTTCAGGCTCTTATCGCGCACCCAGATGGAACAACCTCCGTAT  
TCAGTCGTTGGTAAGACCTATCATGATGGAACGCGTCTTGCTTGATGTGATTGAAATAGG  
GCTAGGCGAAGACGATACTTTTGGTGTGGACAAGGATGGTATGCAATATAATGCAAAAAGT  
GACCAACCTGCCTGCAGTCAACCAAGCTGTTGCTACTCTGCACCCGATGCAAACCGACCG  
TGAGAAAATCAAGATCGAGAGTGAGAAGTCGAAAGCAGGCGGAACAGTGGTTCATCAACAT  
CGAGAATGCGAACTTCAATTCGAATCGTCACTTCGAGATGTTGGCGGCTAAGAAAGCTCC  
AATAATCGAAACCTGTGTGCGACGTCGACACTATCCCGATGCAGAGGTGATAAATGGACG  
ACATTAGACCTTGGTTCGGGGCGGAATGCGTATGCAGATGACTTAGACGTTGATGTGCCAG  
TCCTTGGCCCGAAATGGGACGAGAACACTGTCCACAAGAAACTGCCTAATAATTTTCATCC  
CCCGTGGCTATCAAGAGGAAGCATAACGACCACATCCTGTCCGAGCATTGATTGTTGCGC  
GCCGCAAGAACGAAGCACTAAACAAGGGCGAAGAGTTCAACGAGCCTGAGCCGTCTTGGC  
GTAAGAAAGCCATTCAGGTCTTGCATCGACGGGCAGGTAAGGATATTGGGGCGTTGCACT  
TGATTGCAATCGCATCGCAGCTTCGCGTAGGTAACATAAGCACATACTGCCGTATAAGA  
CTCAAGCACGTGATGCGATTTGGGATGGTATCGATGCCCTAGGGAACAGATTCATTCGAA  
ACGCGTTCCTGATGAAATAGTCGAATCCATCAACGAATCTCGTATGTTGGTGAGATTCA  
CGAACGGCTCGACATAACCAACTCCAAGGAGGCGACTCCGATAAGCTTGTGGTGCGGGTC  
CAGTAGGAATCGTGTATTCTGAATCAGCCCTGATGTCGCCCAACGTACGTACGTTCTTAC  
GTCCTATGTTGGATGAAACGGGCGGATGGGAACACTACATATTACTACGCCTCGTGGTAAGA  
ATTGGTTCTATAAGCTTGTATGCATGCGGAGAAGTCGGAGGAGTGGTACTACAAATACC  
TCACCATCAACGACACTTGGAGATGGGCATACTCATCCGAAGCGTTGGATAACCGACACAT  
TGCAACAAGCAGGTACGGCTACGCTCAATGACGGCCATGTTATTCCTGTTTACGAGTCCA  
TCCCGACTGAGCTTAAGTACCGGAATGTGGCCGACGCAGAGAAGGCTATTGAGCGCGGGC  
TAGTCAAAGGCATGTATGCGGTCAGAATCATGACCGAACGCATGGTGCAATCTCTTATCG  
ACGAGGGTCAAGACCCGTTTCATCGTTCGACAAGAGTATTATTGTGACTGGGACGTTGCTC  
TGCAAGGTTTCGTAATGAGGACCTGATGATTACCATGTACAACACGGGCAGAAATCGGCA  
AGTTTCCGCACAACCCGAATAGGCCTGTTTACGTACATATGGATATCGGCTTTAACGACT  
CCACGTCAATCACGTTTACACAGGAAGGCCCAATGGGTCAAGGCGTCATAATTGACCACC  
TGTGGGGGAGCAACAAATCCTTGCTCCAATGGGTGTATGACATAGAGGAACACGCCAACA

AACGAGACTATGCCTTGGGATTGATTATTCTCCCCACGATGCCGACAACACTGAGGTAT  
CGCATGGCAAACCTCGAAAAGAGTGGGTGTTAGAAGAAGGCCGATTTCGAAGAACGGGGCA  
TGCAATTTGACGTTCTCGAACGGGCGGACAAACAAGCAGGCATCGATGCTACTCGCGGAT  
TCCTAGCGACATGTTGTATCGATGAAACGAACTGCGAATATTTAATTGAAGCGCTAAAAT  
CGTTCCGCAGAGAGTATGATGAAAAGAACCAAACGTATCGGAATAATGCCGTTACGATT  
GGGCGTCGCACCCTGCAGATAACGTACGATATTTAGCGTCGTCTTGGGACAGTGTGTTGT  
CGTACGTCCATGTAGCAGCCAAACGTTCCCGTGGGAACAAAATGAAGGCAAACATCAAGG  
TTAAGCGCGCACTACACTAAGGAACGCTAGATGGAAAACAGTAAAATTGTTAAACGGCTC  
GACTTCTTGAAGACAGACCGCAAGAATGTTCGAGCAGATTTGGGATTGTATCCGCAAGTAC  
ATCATGCCGATGCGTTCCGACTTTTTCTCGGACTTAAGAAGCGAGGGTTCATTAACTGG  
AACCAAATCGCGAAGTCTTCGATTCAACGGCAGGGGATGGCCTAGAAACATTATCGTCG  
TCGCTCCACGGTAGTCTGACTTCCCCTGCCACCAAATGGTTTGAGCTAGCTTTCCGCGAC  
AAAGAGCTGAACTCAGATGATGAATGCCGCAAGTGGCTTGAAAATGCGACCCACGATGTG  
TATTCGGCGTTGCAGGATTCGAACTTCAACCTAGAAGCCAACGAGACATACATCGACTTG  
TGTGGCTATGGCAACGCCATCATGGTTGAAGAGGAGGACGAGGATGAAGAAGGGAGCGTA  
GTTTTCCAATCTTCTCCTATCCAAGACTCCTACTTTCGAAGAAGATAGTCGCGGTCAGGTG  
GTCAACTTCTACCGCGTCTTCCGTTGGACGCCAGCTCAAATATACGACCGATTTGGGGAC  
GAAGGCACTCCAGAAGCCATCATTAAAGAAGGCCAAAGAAGCCAGTAACCAAGCGGGCTTA  
AAGCAAGAAGTCGTGATGTGCGTGTTACTCGTTACGACAAAAAGCAAACCGGAACGCG  
GGCACAGTCTTAGCGCCCACTGAGCGCCCGTTCGGGAAAAAGTGGATTCTAAAAGAAGGC  
GCAGTCCAGTTGGGCGAGGAAGGCGGTTACTACGAAATGCCTGCCTACGCCATTTCGTTGG  
CGAAAAGCGCAGGCTCGCAGTGGGGCTTTGGCCCAAGCCATTTGGCTTTGCCCGATGTG  
CTTACCGCAAACCGCTATGTTGAGCTGGTGCTACGTTTCGTCTGAGAAGGTAATCGACCCT  
GCGATTATGGTCACAGAGCGAGGTCTAATTTTCGGACATCGACTTGGGTGCGTCAGGTCTT  
ACAGTAGTAAGGGATATGGAATCGATGAAACCGTTTGAATCACGAGCGAGATTCGATGTT  
TCGTCAATCCAACCTAACGGATTTGCGCTCAGCAGTGCGCCGTATCTACTACGTAGACCAA  
CTACAGATGAAAGATTCCCCCGCGATGACGGCGACTGAAGTTCAAGTGCGATACGAACTG  
ATGCAGCGTCTGTTGGGGCCAACATTAGGGCGATTAGAGAACGACTTCTTGTGCGCCTATG  
ATTCAGCGAACGTTTAAATATCCGATTCCGAGCGGGTAAATTGGGAGAACTGCCTAGCAA  
TTGTTGGAGTCAGGGAAAGCAGCGATGGATATCGTTTATACTGGCCCACTGTCGCGAGCG  
CAGAAAATCGACCAAGCCGCCAGCATCGAACGTTGGGCGGGTCTACTGCTCAGTTGGCT  
GAAATCAATCCGGAAGTGCTTGACATCCCCGATTGGGATGAAATGGTACGTATGTTGGGG  
TCACTGTTAGGTGCTCCACAACTTTAATGCGACCCAAAGCTAAGGTGACGTCCATTTCG  
AAAAACCGAAGCCAGACGCAGCAGAAAGCCGAACAGGCAGCTATTGCGGAAGCTGAAGGA  
AATGCGATGGAAGCCCAAGGCAAGGGTCAGGCTGCTCTCAAGGAGAACCAATAATGGGTA  
AGCGTAATTACTTTCTTGTTCACAAAGATATCACTGATGCGGACGTAACGGCCATCAAAG  
CCGCTATGGCCACCACCACTGCGGGTCAACCAGTGCGCCGTGTTTACACGGAATCAGGTC  
GCCTCGCAAGTCAACCAATCGCATCGGTTCCGATGTCAGAAGCGCAATGGACAGCGGCTG  
TGAAAGCAATCGCTACTGCTGTATACGACACCGCCAACTAATAGGTAACTACTATGGCTA  
GCCGCGAAGAGGTTGAAGCCTCTGTAAAGAAAAAGGCCGCGCAGCATTTCGCGGCTGTTTTCC  
GCTCTTCTGATGGGGAGCGGGTTTTGGAAGCAATCCGCCAAGAATTTGACAAGGACGAAT  
TGCGGGGCAATACGGTTGAGGGTACTTACTTCAACCTAGGACGACGCGATGTGCTGAAGT  
ACATCGAACAAATGTTAAGATACTCGGAGCGAGACAACGATGAAAAGTTTGAAGAAAAAT  
TCAGTAATTAGCGCCATGTGCGCAGTGTGGCCGTTGATTGCAGGTGACGAACCGCAAGGC  
GACCCAACCCCAACTTCCGTGAATCGTTGCCGGAAGACCTGCGCGGCAATTCAGTTTTT  
GATAATGTCAAAGACCTGACGGACTTAGCGACCCAATTCGCGAACGCACAGTCCTTTTTG  
GGTTCGAGCATCCGCATCCCAAGCGAAAACGCAAGCGAAGAAGACCGCAAAAAGTTTTAC  
GAGAAGGTGATGAAACACGCACCGTCTCTAATGCCCAAGCCAGACCCTGCCGATGAAACG  
GCGGTGCAAACCTGTACTGGCGGCATTGGGCGGACCTGCTGACCCATCTAGCTACAACATC  
GAAGGCGCTCAACTGTCCGATGATTTGAAAAGGCAGCGCACGAGGCAGGTCTTACCCAA  
AACCAGTTTGCCAAGATGTACCAAACACTAATCAAGCCGAGTTTGGATTCTAGCGCCGCT  
CGTGCTGCTGAAGTCGAGAAAGGCCGAGCAGAATTGGCCAAGGAGTGGGGATATGCATTC  
CAAGTTAAAGAACAGACGGCACAAGCGTTGCTTCAAAAAACGGGCGCTCCTGCGGAATTG  
GTCGATGCTGCGGCTAAAGGACAGCTTAACGCAAACACGCTCCGTTGGTTAGACCAACTG  
GCCACCTCCATCGGTGCTGAAGGTTTGGATTTGGTGAACCATGGCCAAGGCGGAAACCGT  
ATGACTCCTGCGGAAGCTCAGGCACAAATCAACGAAATCATGAACAACCGCAGTCATGCG  
TACTGGAACACATCAGACCCTGCACACAAACAGGCGGTCAAAGATGTTGTTGACCTACAC

CGTGTCATGGGTCGATAGATGTAACACCCCTTGACTCTGTGTTCTCCCTATGATATAATG  
GTAGTACATAGGGGAGAACACCCCAACCGAGGGTAGCGGAAGCCTCCGTCCTCAAACAAA  
ACACTTCTTTAGAGTCCGGAAACGGGTAGCTCAAATCGATAATAACTCTTTTTAGGAAAA  
TAGCCATGAAATTAACGCTATCATGTCGATGCTGCCTCTCATTGCGGGTGATATCGACC  
AAGCTTTCGTACAACTTACGAAACCACTTTGCGTATCTTGTCGCAACAGAAGTCAGCTA  
AACTCAAGCAATACTGTCAGCACAAGAACGAATCATCCGAATCCCATAACTGGGAAACTT  
TAGCATCAATGGATCCTGATGCGGTTAAGCGCAAACGTTACGCCAACAATCGGCTGACG  
GCACTTACCCAACCTCCGGTCAACAACAAGCCTTTTGCTAAGCGCCGTACCAACGTAGATA  
CCTACGATACTGGTCACGTCGTTGAGCAAGAAGACATCTCACAGATGCTGCTTGACCCTA  
ACTCTGCGCTTATTACTAGCCAAGCATAACGCAATGGCTCGTAAGACCGACGATTTGATTA  
TCGCGGGTGCGTGGAAGCCAGCGTCCATCAAAGGCACTGGTCAGCCTGTTGAATTCTTGG  
CTACCCAAGAAATCGGCGACGGTACTAAGCCAATCTCGTTCGATTATGTGACTGAAATCA  
CTGAGCGTTTCTAGAGAACGAAATCGAACCTGAAGTAAGCAAGGTTATCGTAATCGGTC  
CAACCCAAGCGCGTAAGCTGCTGCAAATCACTGAAGCGACTTCAGCTGATTACACCAGCG  
CAATGGATCTGCAATCTAAGGGCATCATCTAATACTGGATGGGCTATACTTGGATTGTTT  
CAACTCGTTTGGACAAGTTCGACCCGACTCAATGGGGCATGGCAGCAGAAGACGGACCGC  
AAGGCGACGAAATTTGGTGTATCGCTATGACCGATATGGCACTTGGCTACCCTCTTGTA  
AAGACATCTGGACAAAAGTGGCAGAAGACCCAAGCGCGTCTTTCGCATGGCGTATCTACT  
CTGCATTCACTGCAGACTGCGTACGTGTTGAAGATGAACACATCTTCAAACCTCCGCCTCA  
AAAACCTCTTTATAATCACGGCTGCCGTTGGTGAATTAGGGTGTGTGACATCGACACACCT  
ATTTTTATTGGAGAATACATATGACTAAGTTCATTGTAACGTGTCCATCCTTGGATAACG  
TAAACCAAACATCACGGCTGTGCGAGCAACAGGGACTGAAACGGTAGATTCTTTGGTGG  
GCGATAATCAAATCGCAATCATCATCGGCGGTCCGATTGCAGGCCGCGCTTCTTGGATT  
CTAACCGAATTCAGTGGCAGCAGCAGCATTGGCCGACTACTTTTGTTCGAAGCGCGAT  
TGGGCGAGGGCGTGAACATTCCAGCTCCACCTGAGCCGGAAGACCCGTAATAAGGCGGTG  
AGCAATGGCCACATTGATTGATGCCAGATTTAATGCACTAAGGGGGATGGGCTTTCAGGG  
CACATCCTCCGAAATGCTATTTGAGTACTGGAAAAGCCTAATCCCGTCTGACTCGGACTT  
GCCGCCTGAATTGGCGAGCGGGAGCGGTCGATGGTATTATGACTTTGGTGCAGCCCAATA  
CGCCCGAATTCGTCTGAAGTAACAATGAACGTGGGGACGGCGGTAGAAGGAAACATGTT  
CCAAGAATCCAACGCATACTCTCATGTGTTAGGTAATTTTTCGAACTCTGCTGTCTACTT  
CCAAGCTTTCCTAACGTTCAAGTCGTTGAGCTTCCGGCTGTCGACCCACGATGGTTATGT  
GGGTTTATGGAACGACCCAGAGTATAGCGGATATCTAGGCGTTAAAGTCAAGTGGATTTT  
GTCTCGTCTGGCCGAGGGCTACAACCTGAAAGTCGACACGGGCACAGGTTTGCCTGACTT  
GGTACTCTGCCTAGTAATAGCGCTTTTTCGTTCAATACCGTAGCCAGAAGTGCTTATGA  
AGGCTATATTTGGGACGTCAAGGTGAATGACGGTCTGTTTGGCATTTCCTTCGATGA  
TGGCACAGGTTCTACCGTCAAGAACAAAGGGAGCGGAGGCGACGCGTCCATTGTTGGTTT  
CTCTGAAAACAATTGGATTCAAGACGCGAGCAACTCTGCGGGTCTTTAAATGACGCGTG  
GTTTCAGGCGTTAGGCCATTTGGGTAGAACGGAAGCAACCCTGACGGACAGATGGTTTAA  
CTACTTAAGAAGCTTGAACCACACGGGTTCTGTGAATGACATGGAACCTCCAATATTGGGT  
GAGCAAGCTATGATTCAACTATTCGCTAACATCATCGAATTGGCTACAAAACGGATGGGA  
CTTGCGGTTCTGATGCTGATTGTGATTGTAGGGTACAACACGTACCAAATCAACGCAGTG  
GCCGAATCAGTCAAGTACCAACAAGACGAACTACCAAAAATGGTGGCAACGCAGTACGCG  
TACGATGTTCTGGCTTTCGGGCTTAAACACACCACTAGTGACGGTGAGATAGTCGAAACC  
GTAAAAAAGTGGAAGGCCGATGGGTGGTCTGCTCAAATGGGGGCAATCAGGACGGTGTGT  
TCAAACCACCCCGCCGTTTGTAGTTTTAATGAGCGAGGACGCAAAGCGTCTGATATGT  
CGTCTGGCAGGGTGATATGCAAAAACGTGGACATTTTGACATTCGAGAATTTGTTCCGA  
AGCAGACTTCAAAAAGTACGGGTTGAAGGCATGGCGATTCTGTGTCTCCTGCACTACTGCA  
CACGCTGAACACTCTGCGCGACGACCTAGACTGCACTATTACGGTCAACAACCTGGATGTA  
CGGCGGCAATTTTCGTTGGCGCGGCGTTCGTAGCAGCAAGAGCGCCGACTACAGCGAAAC  
GTCCATGCATTCTTGGGGTAGAGCGGCTGACTTTGATGTGAAGGGCATGACCGCACCAAGA  
AGTTGTGGTTCACATCATCAAAAACCGCGATAAGTACCCCTAATCACGTTTCATCGAGAT  
TGACATCAATTGGGTGCATATTGATGTTGGTCAACGTGAATACAATCCTGCTGAGGGACT  
GAAGTTATGGTCGCCAAAGCGGAAGTATGTCGACATCGACACATATCTAAAGGAGCAAGG  
CCATGGCTAATCCGATTTTGATTCAACTAGGGGCGCAGCTGTTGGGCGGCGTAATCAACA  
AACTGGTTGAGTCCGACAAAATGACCTGACCGACGAACAAGCGGACAAAATTCGCTGCG  
CTGTTGGTCAGGAATGTGGTGTACCAAGCGACGCAATTCGTGCGGTAGAAGCAGTGAAGG  
ACATCGTTGGTGGTGTATCCACTATCGCTTCTCTTGTGCGCGATTTGGTTTCTTCCCCGA

ACAACGATTTGGACGAAGAACTGCGGCTCCTGTTCTGAAAGCGTTAGAGCAGGAAGAAA  
AGTAATCCATATGGGCTAAGGTGTTTCAGATGCCAAGTTTAGTCAGCATTATAACAAGGC  
TTTAGCCCATGTGGGGGCTAAGCCAGTGCTAAGCGAGACAGACGCCAATACTCGTGCCGA  
GATGTGCAACGCTATGTATGAGTTTTCGCTTGCCTCAGCATTGGAAGCACGGGAGTGGTC  
GTTTGCCGCTATGCGAGTACGGCTGTTGCCAGACCCTCTATAACTCCTGCTTGGGGCTA  
TAACTACGGATATCGACTGCCTAACGATTGTATTCGTGTGTGCGAGGTCAGAGACGGCAA  
CTCATAACAACATCGATTGGGCGATTGAGTCTGGATTCCCTGTACGCAACCAGACCAGTGT  
CGATGTTAAATAACAACCGTTTGGTTGAAGACCCGAACGCATTCACCCCCACATTTGTTGA  
AGCTTTGAGTCTGAAATTGGCGTCTGACATCTGCATCCCCCTGACCGAAAACAGAGGACT  
CGGAAATGACTTGATTTCCTGTTATCTGATGGCGGTCAAGTGAAGGGCGCGGCACTGGACGG  
GCTACAAGCGTCTAGAGAAAGACTGCGCGCAGATACGCTAATCAACGCTCGCAGAGGTTG  
CGGTCGAATGGACAGACCCTACCCGCAAACGGGAAGTGGCAAGTTCTACGATATCGCTCC  
TCCTACAATCCCAGATTACCTCCATTAGGCAACATTTCTGGGCGGAGTTCAGTTCAGTT  
GGGTCAACCGTTCAGTTTTATCGCTCAAGTGACGGGAACCCAACCGATTTTCGTACCAATG  
GTACAAGAACGGAATTGCGATACCAAGCGCCACATCAGTCTCTTTTGGTGTGAGTCCGC  
GACAAATAATGACGAGGGGGAATACCACTGCCTGTTCTCAAACCTCTGCGGGCATTGTAGT  
TTCCAACAAGATTTCACTTGAGATTGGTTGTTTCCCTCCTGTCCACAATATTACTGGCCC  
GACCACTGTTGGGGAAGGTAAGTCCTTCAGCATGGTCTGTACAGTGACGGCAGGTAACCT  
GCCTGTGACATATCAGTGGCAACGGGATGGCCAAAACATAGCAGGAGCCACAACAGCCAC  
ATTATCTGTGGCAGCAGCTATCGTGGCTGACTCAGGCCAGTACGATTGTTTGGTTTCAA  
CCAGTGTGCGTCGGGTGTTTCATCCACCAACAAGGTTACGCTGGACGTGATTCCGTTGGT  
AGTTCCCACGGTTTCAATCAGCCCTACGTCGGCGTCTCCTTTGGAGCCTGCTCCTGTTAC  
GTTCACTGCGTCGGTTGTGGATGACGGCGGGCGTCTCCTCCGGTGACGTTGAAGTGGTACTT  
GAACGGAAGTCTGGTGCAGAACGGCGGAACTACTTATACTACGCCTCCAACCTGCCGTTAA  
CCAAAACCGGACAGTAAGCGTGGTAGGGACTAACTCAGTCGGGGACAGCGCTCCTGCTGT  
GGCCACTGTGACGCCAGTATCCAACCTTATTTTCGCAGTCCACGTTCAACCACTAACGCTGC  
GTTTACTCTACATCCCGATTGTACGTTTGTTCAGTTCAAGTTCAAGGATGTGGCGGGCGGCGG  
CGGCGGTTTCAGGCCGCACTGCCGGAGGCAATGACAGCATAGGCGGGCGGCGGCGGCGGTGG  
TGCAGCATTGGTTTCAGTTCTTTTCGTCCAACGCGATTGGTGGTCAAACCTGCGACTATTGT  
TGTGGGCGGGCGGTGGCGGGCGGCGGCTAACAGAGCCATTGCGGCAGGCAACGGCGGAAA  
TTCCTCTGTATCAGGAGCCGGTATTGTTGGGTTGAGCTGGACGGGAGGAAGAGCAGGAGC  
CAACGGAGTCCAAGGGTACTATGCCTCAGGAGGCAACGGCGGCAACAACCTTCCAACGT  
TGGTGCGGGGGCTGGAGCCAGTTCGGGCAATGCTGCTAGTGGCGTTAGTGGCGGGCGGCGG  
CGGTGGAACAGGGCCAGGTAATGGTGGCTGGAGAAGCGGCAACGGCGGGCGGTTCTAACGC  
TGGTGTGGGACATCCAACGGGAACAACGCTCAGGCAGCAGGCGGGCGGCGGCGGCGGTAA  
TAGCGCCGTTTGGTGGGACAACGCAGCTGCAGGCAAGGGCGGCGATGGAACCGCTAGTTC  
AGGTGCTTCGGGCGGAAATGCCACGGGCAACGGTAATGGCGGGCGGCGGCGGCTCTGGCGG  
AACCTCGATTCTGGGCAACGGCACAGACGGAAGCGCAGGCGGCAACGGTTCCGGAGGCAA  
GGTGATTATCCGTCAATACAGACGACCAATCTAAGGAAAAATATGGCAGACTTCAGTCAG  
ACCAGCTTCAAGGGGGGCGTAATTGCTCCCCGACTTCAATTCAACGAATATGAGTCGGCG  
TACCATCACTCTATTGAGGATGCTGTCAACTTTGTCGTTACTGAACAAGGAAGCTTAATA  
ACACGATGCGGCTCGGAGGAAGTTGGATTGTGCCAAGATGGCGAAGTCCGCCTTTTCCGA  
TTACCAGCTGTTGACGCACCCTCTAATGACGTTATCGTAGAGGTGGGTAATACTAACATA  
GCTGTTTGGGTTAATGACGTACGTCAGGTGGTGGCCAATACTCCCAGCGAATGGCGCAAC  
ACGATTGACCGAATCCAAACAGCATAACGACACCATAGGGGACGATGCAGGTGCAGCCAAC  
ACAGGACGCCTGATTATGGTTCATCCTGCATTGCAGCCCAAACGACTGTACCGCGACAAC  
AATAATGCATGGCAATTCGTGAACATGCACACAGGCGCGGTTCCCTGCTGAGTGGTCTCCT  
AGTAATTATCCTCAGACAGTGGGCATTTTCCAAAACAGAGTTTGGTATGTGGGTTCTCCC  
GTTACCGGACTTATTTTTGGGCTACGCGAGCAGGTAAGTTGGAAGATATCGCGCCTAGC  
ACGGCCAACAATCCTAATGACCCTATTAGTTTCGTGGGTATTATGGAGGGGACGCCTTGC  
TGGATTATCGCATCTTCTGACGTGTTGACCATCGGAACAACAATAAACGACTACCAGTTA  
GCTGCCTCTACTGGTGTGTCGGTCACAGCGGCGACGGCCATATTGCGTCGTTTCGTCTGTT  
CAGGGGACGGCGGCAAGGATTCCCTGCGGAGGAGCAAGTTATTTTCTGCTCCC  
AACAAAGTCCAAGTATATGCCATGAACTATGTCAGGGAGCAGGATAACTGGATTCCCTGAC  
GAAATGTCGAGCCAAGCACAGCACTTATTTACGCCGATTTTCGTCTGCGAAGGGTGCTAGC  
GTCCGTAGGGTCGCCTATATCTCAGATGCGGCGAAGTCTCTTTGGGTTGTGTTAGAGAAT  
GGTCAAATCAATTATTGTTGTTTTGACCGCACGACGGACACCAAAGCATGGACTCAATTG

GAGCTTTCAGGCGGAAAGGTGATTGACATCGCCGCCGATTCAACCCAGACTCCGATTAC  
GCTTACGTTGCCGTGGTCAGAAGCAAGGCGATAAACGGAGTTCAAAGAAGACTACACCGTG  
TTGGAGAAAATCTCGTCGCCTCGCACTGATTGGAAGAGAGCAGATGGATGGGTAGTGGCA  
CAAGTCAACCAAAACGGCGACGTGCTGAACTTAGACAGATACATCGGCAGAACGGCAGTA  
ATCTTCAGCAAATACGGGCTAGAAGCCGAGGTTGAAGTAAACAATATCGGTTTGACGCAC  
AGAATCAACGGCTATGACCCGAACACCGTGTACTATGTAGGGTACAAGATGGATAGCTAC  
TTCCGCACATTAACCCCATCAAATGGAGACATGAAAAAGTCGATGTTTGGGAGCAAATA  
CGGATTAGCAAGGTGCAGTTAGCCCTTTTTGATAGCATAGAGCCAAGTAAATGGCGAA  
CCTGCCGACGACCGCAGCACGGACGACATTATGGATGCGAGATTATTAGACTTTTCTTCT  
AATTCAGGCAGTAGCAACGGCACAAGACTAGTCGACTACAATCCTTTGGGTTGGGAAAAT  
GACGGCAAATGGTGATAGCCGTTGAGCAACCTTTCTTATGCGAGGTGGTCGGTGTCTTC  
TCAGTAGTTCAATCCAACAAGGTATGAGCACGATGAAAATTTCAACAGCAACAGCAGCAG  
GAGCCGATTGGGGGCAGCTTTCGGCGCTATTGGTGGGCTAAAGGCCAAAGGTTTGATGG  
ACAGAGAAGCCGAATTGCGTGGTGGCTACCCAAGAAGAAGTGCGCAAGATGGAAAAGA  
CTACAACCAAATCCTAGGCCAAGCCGAAGCGGATTTGGGTTTCGTCAGGCTTTGCCTCGA  
ATTCAGCCTCCCAACGCTCTTTGATTGAAGACACTCGAATGGAGATGGATAAGCAAAGAG  
CGTTGATGTTGGCTTTCGGCAAACCCAAAACAAAATAGACAAAGCCGCCTCTAACGAAG  
CCTTGAAGGGTTCGATTCTGTCCGGCATTCTTCCGGCATCAGCTTTGGCAGCACCGTGG  
GAGATTGGTTAAATGATTAACCTACCAACAGCAGCGCAACTGCAAACACCTGCCACTCC  
GTCGGCGCAGGGTTTGGCGTCGTCCATCATCAGCAACAACCAAAAAGTGATGGGCATTGC  
CAATCAGGCCGCTAGTGAGGTGAACAAAGTCATCCAAGAGCGTAATGACGAGCAACAGAA  
TGCGGCGTTCCTCAAGGTCAACAATGTCATGCACGACTTTGATGCCGCAAACGCGGGCAA  
AGAGTATTACACGGGTGACGAGATTTCCGACGATTTGGATTTTAAGAAAACCGAAATCCA  
AATTGACGCCGACGGCAACGAAGTCGAAGTTGTTTCGCGAGCGTATTCTCTGCATATGAAAT  
CCAAGCAGCAATGCGCGATAAGTACCATCGCAAAGCAATTGCGGCAGCGGCAGCTGACAT  
TGAAAGCCCATCTCGTCGCACTTTGTTTCATGCAACAGATGGAAGAGCGGGCAAATAGCCA  
GAATATTCGTTACTTAGAGCGGTTCGGCTGCGGAACAAACGGAGTCAATACGCAGACAGCA  
AAACGAAGACTTCACTCAGTCTTTGCTGAATCGTGATTACGAAACTGCGGCGTACATTGC  
GCACAATTTCAATGGCTCCGACACCGAGCGCCAAGAAAAGCGCGAAACGTGCGGTATAT  
GATGGAAGCGGATTCGTACGCCGATGCAATGTCCGAGGACGATGTTGGCCGAATGCAGTC  
TGCCCTCAAATTTTTGAGCAAAGATGGCTATGCAGGTGAATTAACGAACCTCAGCGATT  
GGCCACAATCGACCAACTGAAGGCGAGAATCAACCTAGTCAACAAGCGCAACGAGGCATC  
ATACCAAGGTCGTCTGACCCTTCTTGGTGTGAGGTCGACCGTACCATTGACGCCCTAGA  
AAGCGGAGAAATGGTGTGCGCCACAGCATCAGGCTCGGTTGTTTGCTCAAATCCAAGCGGC  
TAAAGACGCAGGGTTGATTTTCGAGCGAAGATTCTTCTTGGGTTAAGCGCACGGCGTTTTT  
CTCAGAGGCGGCTACTTACTCCCCTGATTTGGTGCAGTTTAAAAGCAAACCGTTGCAGGA  
GCAAGAAGCCGTAATCCGCGAAATGCGTAATTCTGCCGTGTCCGGTTCCGACTATCATAA  
GTTGGATATCTACACCAAGAACCACGAAAACGCGAAATCAATGCTGAACAGCGACCCTCT  
GATGTACGGGGCACAACAGGCATCATCGACTTGCAGCCGTTTGACTTCGCCGACCCTGC  
TGCCTCTTTGGTTAAAAGACAGAATGACGTTGCTTCTATGAAATCGCAGTATGGTGATTC  
CATGGTTCCCGCCTTTTTACCAAGCAGGAAGCTATGGAATTCAGCCGTGTGGTTCAAGA  
CGCGCCCGTTAAAGACCAAATGCGCATGCTGTCCATCATCAACGGTCAGTTGAGTAAGGA  
TAATGCAAACGCTGTTTCGGTTCGAGCTGATGGGCAACGGCGGCGGTGTTTTGGCCGTGGC  
GAGCGACGCCTTGGATAGCAACCAACCGTACGTGGCCGAAAAGATTTTGATGGGGCGGAA  
CGCACTGAAAGAAGTGCCTGAGGCGTTTAAAGTCTTGGGACACGGACGCCTCTCCCTTGGT  
TTTGAGCGAAATAGGCAATGCGTACTCCGCTAGCCCTGCAACCATGGGGCAGGTGATGGA  
GTCCATCAAAGCTGCGTATGCTGCCCAGACTGTGAATGAGGGTGACTTTTCGGGAACCAT  
CAACAGCAAGCGCTTGAATCAGTTATCAAAGAAGTCACGGGCGGTCTGATTAATAATCGG  
TTCATCCACAATCGTGTCGCCAGACAGAAACATGGATGAAAACAAGTTCGATTCATGGCT  
AAGAGACGTCCAGCCCAAATACCTCGATACGTTGGGTGGCGTCAAAGGGTACAACGGAAAG  
AGCGGGTGTGATGGCGCTGCACACACAAGTGTCAAACGGCGACGTGACAATGGTGAATGT  
CGGCAAGGACAAATACCTACTCCGAGGCGAAAACGGATTTTTGGTCAAAGAGACGACCC  
ATCTAGCGTTTTTCATTCTTCAATACAACCTGATGCTGTGTACGGGAGTAAATGGTAATG  
TGGGACAAAGACACGGTAGATTTACCAATCACGCTAACAACTTGGCTAGAAAAGAC  
GGTGTGCTGAGTCTGGGTTCCGGTTCAGCGCGTCCGTGACAATGAAATGGCG  
TCAGGGCTTTCCGTGTCTCGTTACATAATGAGCGCACCAATCAGAGAGCGAAACGCTAAG  
ATTCGCGACCTGATGAACGAAGACCCCGATATCGCCAGATTCCGCAGCGTATCCATCAAC

CCTAACACAGGATACCCTGAATCTAGTTATGATTATGATGCTGCTGCGGATTATTTAATA  
GAGCGAGGGGATGAAGGATTCCAGTCTACTGCAGAGTTGACCGCCAAATCCAAGAATCT  
GTCAAACAGACAGACGAAATGAACCGCATTATCGGAACAGAGGCCAATGCTCTGGGTGTG  
GCAGGCAGTTTTGCAGGCGCGTTCGCTTCCCAAACCATGGAGCCGCTGAACTATGTGGCT  
GTAATACCAGGCCTTGGCCAAGCAGCCAGTATGTCAGTCAAAGCAAAGGCCGCGAGTTGGG  
GCAGTCGAGGGGCGCGTTAGCATCTGCGTTGGCTCAACCCGCTATCAAAGGCTGGAAAAAC  
GAAAACGACATCGAATACACAACAAAAGACGTAGTTCTCGATGTCGGAATGAGTGCTGCT  
TTTGGTGGGGCTTTATCCGCTCTATCGCATTGGGTTTCGGGGGCGATAGGTGGAATCAAG  
AGCAAAAAGGCCGAGGCCGTCAGCACTGACAGTGTAGAGGCACTCAACGCAGCCGAGTCT  
CGTCTGAATGAGTTCAGTCTGAAGTTGAGCACCTAGATGCGCTCCCCGACGAGTTGAAA  
CCTGAGACAGCCAAGGCTGCGCTAGATGCGTTGGACGACACAGCCAAGTTAATTGCTAAG  
GGAGAAGACCAATGGTTCGGAACCTGCAAACCCTTATGCCAAGATGGCCGACGAGGAAATA  
GAGCCTGTGTTGGAGCAATCTCTTGGCGTTGAGCGCAAGAAGCCTGAGGGGGAGGGTGTG  
GACGTCGACACCCCCGAACAGGTGCTGCTAAAAGACGAGACCCTCTTCGATTTTGAAGTG  
GACGGGCAAAGGCAGCGGATGTGGTCAAAGGCTACGATGACGACATCAAAAAATTGGAA  
GACACGTTTCGCGTGTATGATGGGAGGCTAACATGCCAAGAAAATGTTTTGAAGGTTGGAA  
GGAAGAAGACATCGCAAAGATGTTTCGGGAAAACCGACACTGACCTAATCACAGCAGAAGA  
TATTGCCGACGCAATCAAAGGCAAGAAGCAAGAAAAAATCGCTGTGTATAAACAGGCCGA  
AGCTATCAAAAAAGGAAACGAAGTGTGACGCAATCGAAAGACCCTGCGTCCGCGCTCCT  
TGGTATGTTGAGCCGCGACCCTAACGAAGAAGTAAAATTCCTGTCTGCTGACCAACGGAT  
TAACGCAATCCGCGCAGTATCTAAGGCCAAAAATCAGCGACTTCATGGCGGATTTAGCTCC  
CACCCTCGTCAGATTTTTCAGGTATCGCTACAGGCGAGCGGAGACTAACGAAGTCACA  
ACAACGCCTGTTGGATGATTTTGTGCACGAACTGTACGGAAGACAAACAGGAAACGCCGA  
TGCCTGAAAGCAGCCAAGGGGTGGAAAAAGGCAACTGAAGACTTGAATGCGCGATTTCGG  
TCAGGCAGGTGGCCACATGGCCGAGTTAGATGACTGGCGCTTGCCTCAAAAACACAACCG  
CATGGCGATTAGCAAGGCAGGTGCTGACGTTTGGGTTGAAAAGGTGTGGGACTTGATTGA  
CCGAGATAAAATGGTCAAAAAGCTCCGCAAAGGCAAAGACGAAGACAATCTTCGTGAAGC  
TTTGTATTCGGTGTATAACAACATCGTTACCGACGGGATGTCGTCAAGCAAGACGCTATC  
CAAAAAGTTTACTGACATGATGCGCAGCGAACGTTTCATCACATTCAAAGATTCGGATTC  
TTGGCTTAAGTACCAACGCGAGTTCGGCGATACCAACGTGTATGCGTTCGATGTTAGGTCA  
TATCGACAACATGAGCCGAGCAATCGGGATGATGGAGACTTTCGGCCCAGACCCTGACAT  
CGGATTCAACACACTGGAACGCGCAGTCAAACCAAAAAGGGATTGACATCGCGACAGCC  
AACGGGTGCTCGTCTACCTTCGATATGTTGATGGGATACAACATGGTTCGAAGAGCAGAC  
TGTTTGGGGCAACCGTGTTCAGGTCTTCGCAACTTGTGGACAGCGTCTAAGTTGGGAGC  
AGCTGTTGTGTCGGCGTTGACCGACTCGGTTTATGCATCAATGGCCGCAAGTTATAATGC  
GATGTCTCCGGCCAGAGTATTGCGCCGGATGTTGTCTGAAGTGATGAAACCATCTAAATC  
AGAAGCGTCGCGCAAATTTGTGGGCGCAAGATTTTGGCTTTGGTGCTGAATTTGCACTAGA  
CCGTATGGCCATGACTTCCGATTATACTCAAAGCTTCGGAGGTCATCGTAGCCGAAACCT  
AGCGGAAGCCGTGATGGTGGTATCAGGCATGAACCAATGGACACAGTCTGCTCGCGCATC  
GTTCCAGTTTGAGTTCGCTACCGCCTTGACCCGCGCCGCGGATTCTAGGTGGAGCGATTT  
GCCTGAAAAGATGCGCAATTCGATGGGTTCGGTATGGAATCACTGAGTCCGATTGGGCCG  
TATTGCTGCTGCTCCCCGCACGAATTACAAGGGCAATAAAATGATTGACCCTCGTAACAT  
GGACGCAGAGCTACAGACCAAACCTTGTGGTATGGTGGATGGCGAGACAATGATGGCTGT  
CCCTACACCGGACGCTAGAACTCGCGCATTTATGGCTGGTGGCACTAAATCAGGCAACTT  
TGGCGGTGAATTGCATCGTTCGTTGTTTCATGTTCCATTCGTTCCCAATCACTACGATTAT  
GAACCAATGGAGACGAGTGTTCACAGGCAAGGGATACAGTGGAGCGTTTGACCGTATGTC  
GGCTGCGGCCATCATGGTGGGAGCAACGTTCGGTATTGGGTGTGGGCATAATCCAAGCCAA  
AGATATACTAAACGGCAAGAAACCGCGCAGCATGTCCGACCCTAAGCTTTGGATTGAAGG  
CATGGCACAAGGCGGTTTCATTCAACTACATCGGCGACCTGATGCGCAACGCTGCCTCTGG  
TTACAGCCACGATATGACTTCATATGTTGGTGGTCCCCTTCTAGCTTACGGCGATTGGGT  
GGCGATGACAGCGGCTGACATGGCTAAGGGAGATGCGGAATCTGCTATGGCTCGTACCGC  
CAACTTTGCCACTCAGCAAATTCATTCAACAACCTTGTGGTACACTAAAATCGCCACGGA  
CAGATTGTTGATGGACAGAATTCGCCGATTGTCCGACCCTGAGTACGACAAGAAGCAATT  
GAACAAGATGCGCAAAATGCAGCGCACGTCGCAACAAGAATACTGGTGGTTCGCTCCTAT  
TGGCGGTCAATCTAACATCGAGTCACCTTTTGGAGGAATAAAGTATGACTATCCAGAACAA  
AGAACCCTTTGTATATGCCACTGGTAACGGAGTGACGGCCACTATTCCTTCACGTTTCC  
GGCCAACTCGGCCTCGGATGTGTATGGTGCATCAACGGAATAGACCAATCAGTAACTGT



GGTGCTGAGTCCCGACCAGATAAATAGTCCAGGCGGAACATTGACATTTAATGGCGGCGC  
GGCTCCCTTGGGTTCAAGTGTCTTGGTCTATCGCAACACAAAGATGGAGCAGACTTTGTC  
ATACCCGACTAAGGGCAGCTTCCATCCAAATCACATGAGTCTGCCATGGACAAACTGGT  
GATGATTGCGCAGGACTTGAACCTCCTTTTAGCATCTCGTTGCTTGAGAGCGCCGAACGG  
AGAAAAATTCATCAAGGAATTGCCACCAATCCAAGAACGCGCCGGAAAATTCCTTGGCTT  
TGACCCTGCAGGTAACCCCTATGCGGCAGCTCCGATTGCGGGCGAGGACGGCACAAATGG  
TCTTCTCCTTACATCTCGGACGGTACTGATGGGTTCAACGCCGGAAACTGGGTAGCATT  
CTCCATTCAAGACAACCTCGTATAAGGATACAGGGCTCCGTGCCCTTGGTGTGATGGCTT  
ACCTCCTTACATCTCGAACGGCACTGACGGGTTACGTCAGGAAACTGGATTGTCGACGA  
TGGAAGCACTAACTATGTTGACACGGGAGTGAGGGCGAAGGGAGACAAAGGCGACAAAGG  
CGACGACGCTCTATCACCTTATGTGTCCGATGGGACTGACGGATTCACCGCAGGAAACTG  
GGTCGCGGACAATGGCTCCGGTGCCTATGCGGACACAGGAATCGGGGCAAAGGTGATAA  
GGGTGATACAGGCGATGACGGTCTACCGCCTTACATCTCGGATGGTAGTGATACCTTTGT  
TGCGGGCAACTGGATTGCAGACAATGGCTCTGGTGTGTATGTTGATACGGGTATTCTCTGC  
TCGACCGAATTTGCAATACGCCACAGAAACCACAATCGGCGGTATGCGTTGGTCATTGGT  
TGGGACTACTTTAAACTTGTATTTTACGGACGTTAATATGGCGGTATATATTCAAGGTC  
AAGAAGTGCTGAACATTGTTGTCCACGTGCCTAATTCTGCTCCGACCGATTTGGGTGAGT  
TTCGCATGGCGGAACAACACTAGCAGCGAAGCAACCCCAAATCACAGCGCAGCCTGTGGGCG  
GTTCTATTTACGATTCGCAGACTTTGGGTTTGTCCATAGCGGCCAATGTGTTTGGCTCAA  
CGGCTGCATACCAAGTGGTTGGTTCGACGGCGCTCCAATCCAAGGGGCTAACTCTACGTCCT  
TTACCTTCGTTCCGTCAGGGTTGGGTACTTTTGTATGTGACGTGTGAGATAAAAGCTTTCG  
GCCCAATGGTACGAGCGAAGTAGCCTCGGTTACAGTCGAGCAAACCTCTGTGATTTGA  
CTTGGCAAGTCTTGCCTGCAGGGTATGGTCTACCAAGCAATGTCAGCGGACTCGTTGGGC  
TGAACGCCATTGGTTCTGATGGCTCTTTAGTAGTAGGAGCCATGGGCATGGAAGGCATGC  
GCAGCACGGACAAAGGATTGACGTGGTTCGTATATTGGCAACGGGTTCCGGCACTGGACAAA  
CATCAGGCACTATCTCGGCCATTTGCGTGGTAGGGAATGTTGTGGTGGTGGGCGGAATTG  
CAGGCAGCAATATTGGGGTAGCAGGTCCGTCAACCAACGGAGGTGTTAGTTGGACCAAAC  
TTCCCGATTTCTGAACAGCGGAGCCACGGCTAGTGCCATCAACAAGATTTTGCACGTGG  
GTGGCAACAAGTTGATAGCGCTATTGGGGAGTGGATACGCAGCCGTGAGCAACGATTTGG  
GAGCCACTTGGTCTGCGCTGCCTCGTTGGCTGAATAGCGGCGGCTCGGACAACAACACGT  
CCTTTTTTGCAGGAGCGGTTACGGCAACAGGAGCTATAATTGCAGTAGGCCAAAATGGCT  
TTGCGTCAATAAGCCGGAACGGAGGCGTACTTGGTCCGCACTTCTCTGATACTTAGGCA  
TGCCGACCAACACTTCCATTGTCGCTATTGGTGTGAGCGACACTGCCATCGTAGTAGGAG  
GCAACAACGGTAACTGCGCTATCAGCAGGAATGACGGTGTACTTGGTCTGCTCTGCCTC  
TGAATTTTGGTGTGCCGATAGGGTCAGGTATCCGCGACCGTTCAATTGCGGGAGCTAGCA  
ACGGCACATTCTTAGTGGGGCTGAGTGGAAGCCCGATATCCGGCAACAACGGCTATTTGG  
CGTTGAGCTATGATGATGGCGTCACTTGGCAACAACCACCGAGGTATTTGGGTATCCCAA  
ATGCAGGGTATGGCGCGTTGGTCAACACCATCAGAAATATTGATATCTTAACTTTCTTGG  
TGGGCTTTACTGACAAGAGAGGAGTGAGAGCGGTGAGATAGGGTGTGACGTCGACACCC  
GCCATTATTTGCAGTGTTTTTCCCCCAACTGGCCATATCCTCGGATATCGTGCCAGTTG  
TCGGGGTATTGTGCGTCGCCACAAGCAATTCGCGCTAGCTTAGTTGAAAGCTGACGTATA  
CACTCGCGCTGCGCGCGGTTAATCGTAATTTAGGCTCCTTAAGGCTGTCCGAAGCGAAA  
ACGAGGGTTTGGATTTGTTTCGCTGATGGAAGAAATTTCTTGAAAATCACCATAGCGACTG  
CCGCGCTCGTTCAACGTCTCGGTCAGTTTGTCTTCGAGAGTTTCTTTGAAATCCCCACCA  
TTCATTTTCGCTCATATCTGGCATTCTTTTTCTCTGCTTCTTTGCACCCTTCGCGGTGC  
GGCAAAAATCTAAAGTCAAACAGCACTTCTTAGGTTATTAGACAACCTGCATCTCCGA  
AATCAAGCGCTCTATGGATTCATTATCCAAAAGCCGTGGTGGTGCATACCAAGCATGTTT  
CATCCAGTTGGAAACGCTTTTGTCTTCAATCAACTGACGAGAGCTTGAGCCATGTATCAG  
CAGCCATCGGGGTTGTACGCTTATGCTGCGGTCATCGATTGCCGCCAAAATCCAAGTCT  
ACGGTCGCCCAACTTGATGCGGTCTTGCATGAACCGATGCTGCGCAGGTCGCAAGGTGAA  
CCCATTATTCACGTCTTTGCAAATCTTGAGTCTATCTTCAGCGGACCGTAATCTTCCAA  
GAAGGCGTCCACGTCAGGAACCCCGACGCAGTGCCGCCCGTTTCGATTCGAGTGAACAT  
ACCGTGAGGAGCCAATTTTGGTCTTAGGATTTCCACATTCCGTGTTTCTTTTCTTCT  
CCGCTCCAGTTTCGCTCTGGGCTTACGCCACCAAACCAAATTCATCAGAATCAATAACCA  
ACAAAGGGTGACAAGGATGCCATCCGACGATGATGGCTCCGTTTCTTTGTACGTGCATT  
TGGTTCCACTCTCCACTCCTCTTTCATATCAAAGTTCTCCGTGTTTGATGCGTTCCCA  
TGCGTCGAAACCCGCACTAGTCAGGATTTTATCTATTTTGGCGTTGTTTCAGCATCGAAAA

CAAGCGGTGGCGCGTGATTTCTGCGACTCGCTCAGCGTGGCGACCAATGCCGTGTTTCATC  
AATCCACCACGCCGCTCAACCAAATCCGCGATTTTAATCAATGTTTGGCAAGTGGGTCT  
TCTATGATTGTTTCGGTGCAGTCAATCAGCCCGTTAGGTTTCGATGCCTGCTTCGCGCAGT  
CGTTGTTTGGTGACGGTCGGCATGTACCTAAAATCACCTCGTCCATGTCGTGAGTCAGT  
GCTTGCATCACGATTCGTTTCATTTTCGTCGCCCCGTAATGCCAATATGAGCACACATGTGG  
CGAGCAATCATTGCGACGTTGAACATGTGTTTCAGCTATGCTTTGGGTTCGGGTGTGTCA  
CACAGTTGCCAACGCGGGACGTGGCCAGCCCGTAGAATGTTTTGTATTTGCATCATTTC  
TTTTCTCCCGCGATATTCGGTAATCGCTTTATGCACTCGCGCCAGAACGAAGTTATAGAC  
ATCTGCTGCCTCCTCAATCACGTGAATCAGCTCTTTAGCTTCTTCTAGCTCATTACTTC  
ACCGCGCAACATCGAGATGATTTTCGTCTGTGCTGCAGTCTTCGATGCTTCCTTTGTGGGA  
GTTTCATGGCCAGTTTTACTCTGGCCATGTTTTCAATCACTTGGTGGGCATCGGAATATTT  
ATCCAAGTCCC GCGCCATATTACATCATTTCCTTCGCGCAGTTCAACATCAAGGAACGTCG  
GACCAAAACCAAGGTATTTGACCTTAGCATCGCAGTAGCGAGATTGCGCCGCCACTTCGA  
TTTGGTGCACGATGTCTTGCCAACCCATGGGCGACAGGTAGTTACAGAAGTTCAAGAACA  
CTTCGTCTGGCTGGCAAGTCCACATGGCCTTTTGCATCTGGATGAAACTGAAGCTAAACA  
CGCGACGGATTTTCTTGGTCACTGTGGTCAGCTCAGGCCTTGGCCTAGTTGTTCCCATG  
TCAGCTCTTCTTGGTCAAGGTAGTGACCGCCTGACGTTCCGCCACGCGAATCGGATGAC  
AGCGAGCAGTGCCGATTACTTTATTTAGCATAGGCAGAGGGATACCCATGTCTGCTAGGA  
ATCGAGCAGGTGTGCAGTCACGGCTAGTGCAGTACGGGTAGAATTCTTGGTTTAGAGACA  
GGCTGAAACCTTGGGCGCCTTCGCGCCAGAATTCGTTCACTGGCCATCAGTGCCATGTCCC  
ATTCTTCAACAGTACACACGTATTGAGCGATGCGACCGTCATATTGCGCCACGTCGCGGG  
CTACGATTGTGTTATTGGTTGGGTGCGCGCTGTAGCTTTTCAACCATAGCTGCCATTGATC  
CTTGGCCTGTGCTGCCGATTGATGTGGCGATTCCGACTTCAGCTTTTTTGTGTGCTTCTT  
CGTCTAGAACTGTTGCCATCGGGTGAATCAAATAGCGACCTTGTCTGTGCAACAGGTCTT  
TGGACATTTTCGATTTCTTCCATCAGACGGTTGATGCTGAAGACGCTACCTGCACCAAGCA  
TGACGCGTTTTAAGTTCGGACTCACGATACCGTTGGGCAGAACCTTGTGCATCCACTTAC  
GGCCTTCGGCGTTGATGTAGGTGTGGCCTGCATTTGGCATGTTGGCATTGATTACGGTGT  
CATAGCCGTTCTTCTCCGCCAGATAACCCGCGATTAACCTTTTCTGTGCTGCCGAATT  
GTAGGTCAATAACTAAGTCTACGTTTTTCATTTGTGTTTCTTCTTGTGTGTTGTGGGTGTC  
GACGTCGACACCCTATTCTTCCGTGTGCGGAGGTTCCGACATCAATACCGGTCATCTTGAA  
TAACAGTGCTCTACACGCGCTATGGTTCATGATTTCAAACATCCGCTTTCTTGGCCCACC  
GTGTGGATTGGCAGGACGACAGTCAACAACTTGAAGTCCCGTTCCACCTTGGCATAGAA  
TGCTGGCTTGGTTAGTCGTTTTGCTCCGTTGCGCTGACACCATTCTTGGTAATCGACGTA  
GAGCGAAGCTTTGTCCACGAACGTGGCCAATCGACTTCGTGCGCCGAACCTTTCATAGCC  
AGTGACCCCAATGACTCCGGCCTCAACCTTATCAGCCCACCATTCAACAACCTGAATCAGT  
TGTTGTGTAGCGAGCGCTGTTCCATCAATAGCTTGGTTTCAGGTGCTTTACGCAGGTC  
TGACTIONTTTCGCGGTTACGAAGCTCGTACATCATCGCTTCATACCCGCCATTTTCCAT  
CTGTTTCCAAATAGCGTCGAAGTATGATTTATCGCTAGCGAACGAATCCGGAACGTCGAT  
AACAAACCAACGTCTGGAATGCGGTCCGGCAGGAATAAACCAGTCTTCGTTTGACGCAAT  
CATCAAGCGCAGACAGTTGCGGTAAGGAGTAGCATCCAAGCCTTTGCGCTCAATCATCAG  
TTTCTTCTCTGTGACCAAGCCTTTGAGCGTACCCGCTACCTTTTTATTGCCGCCGTACGT  
GACCTCGTCAGCAAAAACCAAGAGTGCTTCCCTCTAAGTGGCCGTTGAATTTGCCAATCAG  
CTGTTCTCTTGGATGATGTGCTTGTAGTGTGGCCAAACAACCTCGCCGAACACGTTAGC  
AATCGTGCCCTTACCTGTACCTTCGATGCCTTTCATCACAACAGCACAGCCTTTTGGGTT  
CATAGGGTCTTGGAGTGCAGTACGCAAAACAGTCCATCAACCACTCGTAGTGCTCCTGTGA  
GCCAACCACCGCTTTAACGTGTTTCTTGAACAGCGACCAGTCACCTGCTACTTCCCTTGTA  
TCGCCACCCCTCCACACGTTAAAACACCCGTCCACTTCACGCGGCTTATCTGGCATGAA  
CGTCAGACCGTTTACGAACTCGCGGCGCTTTTCGTTTCAACAACCAAATGTCCGACTTTTG  
GACAGGTTTGGATTTCCCTTTTCGAGTACCGTACCACACGATGTCATTGGCCATCAAGGC  
CTTGAAATCCTGAACCGACATCAGCTTGAAGTTGTCTTGGAACGGGTTCGGGGTTGAACTG  
CTCCATCAAATCCGCAGTTTGTTCCTCCACCATGACCACGCCAAACTTCTTGTGTTGATTC  
GGCTACCACCGAGTCAGTGTCTCGGACGGCTCCTCGGCTCCCTTGGGTTTCGGTGTGTTGG  
CTTAAAGCCGTTCTTCTGAGCAAAATAAATCAAAGTCCCGACACGAATAGTGCCGTGTTT  
ATCGAACTCTGCCAACGGATGGACACTTCGTGCGGGCTTATATCTTGCTCCGCGCTGCGA  
CCATCTGTCTGCCAGTTCATAGCCTTGGTCATCAGGGTACTGACTATGCACAGCCTGCAG  
CACCGCCAACCATTCATCGTACTCAAGCTCGTCGGGGTTCGATGTATTCCAACATCCGCCA  
GATTTGGCGAGGAGTGTATCTCGTCTCCAAGTCGTCTTCATCGATTTCTTCCGAGCCGCG

ATTCATGTTGCCCGTCCACGGAACCCCAAGCGCGTCTGAAATCCACTTAGGTATCTCAGG  
CACGTCGCCTAGTGTGGGCATCGACCATGTGTATTCGCCCTCGTCGCGAACCGATGGCCA  
CGCTACGATGTGCGATTTACATGAATCTTCATCGCCGCCGCGCGTGTCAATTGCCTTGGC  
GATTTTCCCTGACGAGGATTTGGCGTACTTATCCCATTTGGAATAAGTAATGACGTCCACC  
AGTCGGAGTCTCTTGGATTGGAGCCACCAACTTGCCGTACTTCTCTTCCAGTATGGCTAG  
GTTATCAAATCCTCGGTTTCCCTTTCGAATCTTCAACATCAATATCAACGGCAAAAACACC  
GCCTCGCTTTCGCAAGCGATAACCAAGTTGAACCCACGGAACCGACCGCCGACACCAAA  
CCAAGAATCAATTGTGTTCTTGTTTTTTTGATGCGTGTGGTATCCAATGTTGTACATCTT  
TGATGGCAGCGATTTGCCATTAGGCATGACTGGGATTACATATAGACCGTTTTTGTATGTA  
GAATCTTGCCGACGCGTGTACTCTGTGCGGCGAAGTCCTTAATCTGACCAATCTCATGTAT  
CTCTTGTGCACTAATGTACATCGATTAATCCTTTTTGCTTCGGCCCAATTCTTGCCAACGC  
CATCGAATTCCAACAGTAAGGGAACGCGTAAGGTCTGTGCTCTACGGCTTTTTTGACCC  
GTTCCCATATTGGTTTCCAATTCTCGTCAACAGACATTGAGTAGGAATCGTGAGTGTGA  
GAATCATCGACCCGTCGCTGCCCAACGCGTCTTCAATTCTCAGCCAGTTTTCTTTGTTTT  
CATCAGCAGCCGTTGCTTGAATCAAAATTCCCGACGCTTTGTACGACTTGTACCCGTTAG  
GGAATCGGAGTCTTCTGCCATGGGCTGTTTGTATCCAGCCTCTTCTTTCGGCTATCTTCT  
GTGCTCTCGTCGCCAGAGTTTTACCCCTTGGATTTGAGTGTGGTAGGCGGCAATGACGG  
CTTTTGCCTCTGGACCCGCCTTTTTATAGCGAATTAATCACCCCTTCTTGTGCGGTGAACT  
CGCACCCTCCCATGGCATGCCTAAGCTATCGGCCACCGCACCATCGCCACGGTTAAAAA  
TCATGCCAAGGTTCAATTTGCTTGGCGTTTTGCTTGGCCTGAATAGGAGGCGTTGCGCGGTA  
TTCCCATCAAATCACCCACCCATTGGTGCAGGTCGAGTTCAGGGTTTTCTGCGTACGCTC  
TCGCAATCGCAGGGTGTACGCCGCCACCAGATGGGCGAAAATACGAACCTCAAACGAGG  
CCATGTGCGAATCGAGCCACAGTTGGCCTTCTTCCGGCAGGAATGCTGGCTTGATAATGG  
CCGCAATTCGCTTGTGCGAGACGGAATCTGCTGCAGTGCGGGTCCAGTGTAAAGACAATC  
TGCCTGTCCCGTCCCTCCGTCTTCTCCCTTCATCTGATTGATGTTAGGATAAACTCGAC  
CGCCGACGCTGTGCTCAACAACGTGTTTGGCCAAGAAAGTGTCTTGGTTTTGATGTTGC  
TTCTCAATTCCAAGACTGCAGCGGCTAGTGGGTCTTTCATTGCGCGAAGTGCCTCGGCGT  
CCAAACACGGGTTGCCTGTGCGCGTTCGCTCCAAAATAGTGCCATCGCGCGAAGTCCACA  
CGCCGCGCTCTTCTTTCGCGCCGAACACCTCGCGCACTTGTTCGGCGAGTTCGGGTTGA  
ACTCTCTTCCAGCCAATTGGAACATCTTGGCTTGGTTCTCCCTCACCCACGCCATCCATTT  
TAAGGATTGCCTGTTTCGGCGTAGTTTAAGTCAACCCTAACTCCACGCGCTTCGGCTCGAA  
TCAGAGTCGGCATTACCTTCCGCTCAAAGCTACTATTTTCTCAAGACCGCGCTTGGCTA  
TGAGTTCCTGCTGCTCCAGCCACAATTCCAAAGTCAACTCGGCGTCCGGACAGGCGTATT  
TTCTTACCAGTCCACTTGGCGCTCGATAGAGATTCCGGCATTGTGTCTTGCGGGTGGCCT  
TGCCTCCGAACATAGCAGCCAGTTCATCATAAATCTCAGCGTATTTCTGTGCTCCACGT  
ACTTCTTCGCGAGGTAGTCAAGGCTATAGTCACCTGCTTTGCCACGAGTCCAAGGGAAAA  
TAGTTGACTCATGCTCATTAAATGCAGCAGGCTCGTATGCCTGTATCATCAATCTGCGAAA  
GAGGTAACCTAATTCCGGAATGTAGCGACATTCTGTAGTCAAATGACGCGTTATGGCACA  
CGATTGTTCCCTTGTAGGAGTCAGCCTGTTCAACAAGCCATTGTACCGCGTCAGGCTGCT  
CTCGAATATCGAAATATCCGCTTTGCCCGTCCGGAGTTGCGACGCTGAATCCAAAGACCT  
TATCCACTTTGTACTTGTAGTCCCGTACACTCTGTGTGATAAGCCACGCCTCATATTTAG  
TCAGGTCGATGAAACCCATTCGTCGACCTGTTCTTTCCCAATCTAGCCGCATGTTTCCTC  
CTAGAATGGAATATCGTCATCGAAATCCATTGGGGGTTTATTGTATTTTGGGCGGGTTCC  
GTCCTCGTGGCTGTCACCGTACGCAGTGCCGAATTGCTTGTATCCTGAGGGCGACGAAC  
ACCTGCTGCTCTCACTTGGATTGACAAGAACTTGCCATTGTCGTGGGTTTTAGTCCAAGC  
AGAGATTCGTAATCGGCTCCTTCGACAATCACGCGCCCTACCATGTCTGGTCCGGTTGCC  
GATTTTGTGCGGGTGTTTTTCCAAGCGCCCTGAGCCAGTGAGACTAGCGTCTTGTGCC  
TGTTAAGGAGAGAGAAATGTAGTGGTTCGTCAGACATGAAATCTTCTTGACGCCATCCTGC  
AAGCCAATAGACTGTGCCACGGATGTCTACTTTCCCTGTGAAATGAGGGGATTTGTGCTT  
CTTTGGTTGGCGGTTTTTGGCAAGAGTACCACGGTTGGTGTATCATATTGAGCCATTTA  
AGTCTCTCCAGTAAAAAGAGGGTGTGCGACGTCGACACCCTAGGGTTGTGTTAAGAGGGAG  
GATTACATTTCTGCTTGGGAAATCAGACATGTCTTCCATTTCTTCTGTTGTGCTCGTAGGTA  
GCACCGCCAGTTGATGGCGCTGAACCTTTGGCATCGTTCATGTGCTGATTGACTTAGCACCA  
GACTTAACTGCTTCGTACATCGACTACCCAACGCATAAGCCCATTTCTGGAGCGTAACCA  
ACTTTCTTGAACGTCCAGTTGTAGTATTCGCCTTTTTCTGACTTATCGTCAACCACGCTA  
AAACGAAGAACGTGGGCAAAGCGGTCACCACCTGCCATGCGCAGTTGGGTGTTGAGGCGT  
TTCGACACTTTGATTTGCGACTTAGCCATCGAAATAACGGCTTCTTGGGCTGTCTTCTTG

GCAGGGTCGATAATCAGCACGAATTGTTGGTGCGTGTGCGACGATTTTCGAGTTCTGCGCGA  
TTTGGCAGTGCCTTCAACGCTTCTACTGCAGCAGCTTCGGTTGGATAAGAACCGTGGAAAG  
CCGTTTGTATCTGCGCTGCGCTCAGCTGTCCAAATTAAGAAGCTCTTTACGGAAGTAAACC  
GGAATCACATACAGACCGTTCGGTGAACAGCTCTTCGGTTGCAGTGTTGAAAGCCATGCCT  
TCTTCCGCGCCTTCAATGTACTTGGCGTGAGTCTTTTTCTTTTGGAGGAGAAAGCGCTTGG  
ATGATTTGGATTTCGAGGAATCGTCAAGTCATCAGAGCTTACGTCTTCTGAACCACGGCCT  
TGCTCCATCTTGCCTTGAAGTGGGCTGGCAGTTGTGCAGATGAGAACATTTCTTCTTCG  
TTGATTGCTACTTCAATTTTTCTTAGTTGACATGATTTTGTCTCCATTGACAGTTATTTTCG  
TTACTAGTTGCTTCGTTACTTTTTCGTTAAAAGGCTGTTGCTGAGATTATTTAACGCGGTC  
ATCGTCCACAGCCAAGTTCTACCCGCGAATCACTACTTTTTGGTCACTGCCGCTCGGTAG  
AACGGTTCGACCTTGATTAGGTGCTCAGGCAATTCGCAGCCTTCTTCACCTTCCGCATCG  
CGTTTGGCCATGTCTTAGCCCAAGCCTTAACAGTACCAGGTTGTGCATAAGGTTTGGACC  
ATTCCGCGGTGACCGTTCTTTCGAGCCATTGATAGAAGCTTTCACGATGTTTCGGCCAAC  
ACGGTGACGTAGGCATCTTGGGTTAAACCCAGACGGCCAACGCCTTTGACGTTCAATGAC  
GTCAATTCTTGTTCATCCATCATTTTCGGGGATGACGTGCAGACGCAGGTAGTCAAAGCTCG  
TTTTCCATGTTTCGATTTGATTTTGGCGATTTTGTCAATCTCCTCTTTCATCTCGACCATC  
ATGCGAGCCAGCTCAGCTAGCGTCTTACCTTTGAACTTTTTCGCGCCATTTCGAGGTCAAGT  
TCACCTTTATATCCACTCATGTTTTTCGCTCCTGTGGTGGGTGGTATACATCTATTATAAC  
ACAGTCCGGTGTCTGTGTCAAGTTATGTTGCACGGCGTGTAGTGGCAATGCGGGCGTTGAA  
GTTCTTCATCTACTAGCACCGCTAAGTCTTTCTTGGATTTGAGCGCTCGCCCTACCATCA  
AGTCCGCATCCGCTTTACACCAAATGTCAATGTAGGTACACACATTCGGTTGACCTTTGC  
GGTGGTTTCTATCCTCGGACTGTAGCCGCTGCTCCAAACTAAAGGAGTTGGAGTAATAGT  
AAGCAAATGTTGCGATAGTAAGCGTGATGCCATTCCCGCTGTCTGTTGGTTAGCGACGA  
AGAATCGGGACGGGTCAGAGCTATCTTGAAGCGAGGTATAGACGCCTTTCTGTCTGACT  
CTGAAATTCGCGCGTGGTATTCAATAACGCTGTCATCGCCATAAACCTCACGAAGTCGCT  
TGGAGATTTGTTTCGATTTTCGGCTCGGAATCTAGCCCAAATGATGACCTTGGCGTTTCTAT  
CCAAATCAGCGATATCTTCGAGCATCGCATCCATTTTCGGGTTTCGGGCCAGAAATAGGTT  
TGACATCGTACGCTCCGTCTTATCCAAAACGGGAAATTGCCGCCCAATATCTGCTGAA  
AGCGGGTCATTCGGTCCAGAACAGTAGACACCGTCAATACGTCTCCATCTTGTTCGGTCT  
CGAAGAAGTCCTTCAGCTCCTTCATCGCAGACAGTTGTTCTTTCGTAGGCGAAACGGTTA  
TACTGCGGTACACCTTTTCCGGCAAGTCCAAACACTCTGTCTTCTTCACTTGATACACAT  
AGGGAGCAATCTTGTCCATCAGCTCCTCTTCCCTTTGATAACCAAGTACCTTTTTCCCTT  
GGAAACCACCCATGATGCAGTACATATTTTCGAAAGACGAAGAAGCTCTTCAACCCGATTA  
TATGTTTCGCCAAGAAATCTGAACTGACCAAACAGGTCGATTATCCCTTGGGTGATTGGCG  
TCCCCGTCAAATCATCCGATACGCCGCGCTGTCTCCGCAGCGAATCGCCTTTTTTGTGC  
GAGCAGCATCCGCATTCTTGATACGAGAAGATTCATCGACAACGACCAATGCATTGTGTT  
TTCGGACAAAAGCCAAAGCTAATTCGTGCGCCTTGCTTGGGATAGAGCTTCCACTCCTA  
TGACCAAATACTTAAGCTTGTCTTCGTGTTTCGGATTTCGATGAAACGCATCGTCTCTTGT  
CACCGCCGAATCGTGGACGTGTGCAATCGAAGGGACTGGCGACATGTCTCGTACTTCCC  
ACTCCCAAACGGGTTTGATGGGGGTCGGTACAATGACCAGTACTCCGTCTATCTGACGTT  
GGTTGAATCGATGCCCTGCGAGGGCGATGGTGGTGAACGTTTTTGCCAGTGCCCATTTCCA  
TAAACAGAGCGAATTCTGTTTTATTCCACGCTTTTCGCATGGCTTGGGTCTGGTGTCCA  
TTGGTGAGATTCCGTCAGGGTAACGGAATACGTTGCGAGGTTCTATTTTCATATCGTTCC  
TGCTTGCCTTGGGTGAAGCGCAGCACCAACCAAGAGGCTAGTTGGTGCTACGTGTTAT  
TCTTCGTCTGCTACCTTGCCTTTAGCAATAGCAGCTTCGGCTTGGATTTGCTTTCCGGTG  
TCTGACCAACGGAATTGCTCGTGTGCGCCGTACGGCCACGTTGGCCAACTCACGAGCCAAT  
TTGGACTTGACGCCAGACTGGATAAAAAAGCGGCTAAATCGCTAACGGTCACGTTGCCA  
GCCACGTGACCGTGTGTTGATTGAGTACTCACGCACAGCAAGATTGACGTGTTCTGCT  
ATCTTGCTTTTCGAGAGAAGCTATATCATCAGCGATTTCTTTGATTGACTGAATGGACGAG  
TCCTTTCCTTCATCCGTCCATTCAGTCTCTGGCGCTTTTTCGCGCCGCTCATTATGCGTTAT  
TATCCGCGCCTGAGCCGTCTTCATCGCCGCCAGTAGTTTCGGCATCGGCTTTTGCCTTAG  
CTTTCGCTTCAGCTTTTGCCTTTGCTTCAGCTTCTTTAGCCGCCGCTTTTTCCGCAGCTT  
CTTTAGCTTTGCGTCTTTTTCTGCTTTAATCGCTTCTTCACGAGCGTTAACAGCAGACG  
CAAACCTTGTCGACCACGGTATTGAAGATCTTTCACCTTTGCCAGTCACTAGCTCCGGTA  
CTTCAGCTAGTTGAGGCTTTTCAGGTGTTTTCAGTGGAGGAATTGAAGCTGGGTCTTCCG  
CTTTCGCGATTTTGGCGTTGAATTCAGCAGTCAGCTTATCCACTTCTTTCATGTGCATAA  
CCAACAGCTTTTCGTTTCGCTTAGTACGCGCTCCACTTCTTGGCGTTGCCTTTATCCA

GTGCAGCGATTGCGCCACGGATACGGTTGCCGAGGTTTCATGCGCTGCATGCCTTCGTTTA  
GATGTTGGTATTTTCGCTACCAGTGTGTGACGTCGACACCCATCATTTCAGCAGCTACAG  
CATATACTTCGCTCAAACCAAGGGTGCTAGACCTACTGCCACAACGTCGCCGCTGTGAA  
GAGAGGTGTTGCCTTTGGCAGTGCGGGTTTTTTGGTACTTGTCTACGCCTGGGCGTACTA  
CAGTTTTTTCTGGTTGAGTCATCGTCGTGCTCCTACGATTGGGGTTTTGGTTAGTAGATTG  
AAAGGGCGGCAGGTGCGTCATCGCATCTACCTGCCGCCACTAGACTTTTATTATACCACA  
TGACTACAGCTACGTCAAGCGGTGTTGCATCTGGTTAGTGTAACTCAGGTGCGTAACGGT  
GTGACGAGTGTAGCGGCGGTGTATCTAAATCCATTACCGCTTCCACCGTCCAGAATCGGA  
GGTTATGAACCTCGTTGCCATCTTTCTGTAGGCTAAAATCCCATCGCCCTTGCCTAGGT  
TCCGGTCAAGGACAACCTGGATTTTACCACGGAAATCTACCAACACCCGATGGGCTGATT  
TCTCCCAATTCAGGCTGATTGCGTTCAACAGGTACACAAAGCCACGGTGCATGCGATGCG  
GAATTTTCGTGCGGTGCGTACGATGGGCGGCGAGCATTGACTCCTCGCTGCAGTAGGTA  
GCACCACGGACAGGCTGCATTCAGCATAGTGGAGTCTATGAAACACAGGGTCTATGTGTT  
CATCGCCACACAACATGGCCACGCAAGCAGCCATGCAGGTGTCAGAGGTTCGGTTGTTTAA  
CGAGCTTTATTGGTTTCATTTTAATACCACGCTTTCCATCAAGCCACGGGAGAAGGGAAT  
AGAACGACCGAAGTAGTGCCCGTTCCATTTCGCGGTCTTTTGTACGTGAACCAGTTCAAT  
CAAGTGAAGGTCACGGTCATCAAAGTGCCAGCTCACTTGCCCTTGGGGTGTTCGACATA  
CAACACCCACATCTGCATTTGTTTCGTCTTTTTTACGCCACACATCCCAGCCCGCAGCGAT  
AGCCGCCGACGTAAAAAACGAAAGCGCTAGTGCTCGCTCAGAATAAGCACGGTCAACGCG  
TTCCGAATCACGACTAGCGTTATTAATGAGGGTTAGCTCTTCTCTGGCAGCATCGACCAT  
GTCTTGCTCTTCTTGAGTTTCAACAATTTCTTCAAAGAAGTCAATCAGTTTTTTGATTTT  
ACCCATCTTATCGCTCCCCTTGGTGGATTCTTAAGCGAATTCTCGCCATCACTTGTTCTG  
CCTTTTCCATCATGTGCTCACCAAAGCTGATGGTTTGCCAGTCTAGTGAACCATCGGGAC  
CGGAATGAGGGTCTAGGCTGACGTATTTAACTGCTTCGTGTGCGTAGGGGATTTCTGAAA  
GGACTGACGCCCAAACCCAAATAGACCCGTACACAGGGTGGAAATCAACCGAAATCTTGT  
ACTTGTTCGTAAGTGTGACGTCTGTGGCGAAAGCCACTAAGTGGCTCATAGTTT  
TGGCCGCTAGGCGGCGAATGTCTTTGCTTGCCATTGTCTGGCTCCTTAAGTAGGGTGTGCG  
ACGTCGACACCCATCTAGTTGTTAGTTGCGGTGTTTCGACAGATTTCGTAGTGGTTCGCT  
CATGTCTTTCAGCTCTTTCAGCTTGCAGCGGAACGCGTTCAAACCACTCTTTGCGAGTTG  
GGTCACCTAGCTTCTTATCGGCTAGCACGTGCATCTTCCGTTTCCCTTGAGAATCTTCT  
CAATCAGGAAGTCCACTTCACCTAGTCGGTCTAGGTACTGCTCGGCAGGTGAGCGCTTGA  
TTGGAGATTTCGCTGCTCTTTTCTGCAGCGATGTATTTCTTGGGTGGCTCGGCTTTTGGC  
GCAGCTTCAGTTGACTTGCCTGTGCGCTCGCCTGTCATGCCTTTTTTCAGGCTGAGGAGCG  
GCGGCAGCAAGAGCAATCTTTTTCATGTGCGGGATGTTTTTGACGCTTGGGATGTTGCCT  
GTCTCAATCAGCTTTTCCACGTCTGCTTGGACTGATAGGGGTGCGTCTTTCAATTCCAAA  
AGGTGGGACTGACCTAGGTCTGAGTTCAGCATCTTTTGGCTGATTGTGCCATCTTTCCT  
GCGCGGTGCAGCAGCATGGCTTTGTTTCGCGTTTTCTTTGGATTTCGAAAGGCGTGTTTTC  
ACTCGCCACTCACCGAATTTGATGTGCTCGTTAATTAAGCGACGCGCGTCCCAATAAA  
CCGCCATCTGGATGAAAGCTTTCTTAGCCGTCATTTCTACTTTGTTGTATTCTTCGCGA  
ATAGCAACTTCGATTGACTTGAAGTTCGTTACGGTCTACCGTTGATAGGCCGTAGGTCTGG  
ATTTCTGTTGACATTTCAATTTCTCTTGTGGGTGTGTCACCATCGACACACCTATTATA  
ACACATGTACGTATGTGCGTCAAGCTCTATTGCAGCGCACCGTTGATAAAAACTGCAGGG  
AACACTACCATCAAGTCAGGCTCGCCTTCTGCTCCTTGATTTCGGGCAATCTTTTGCATC  
CCGTACTTGATTAGGTCATCGCACTTGTGCTATTGCATTGACCACTTAGTGCCGAATTT  
TCAAACATCAGTTCGCGACAACGCTCTGAATCTTTGGCAACTATTTCAACGTAGGTGTTT  
GGAAAAGCTTGGCCGACCCGAATGTGAAGTATTGGGTACATGAGTATCTCCTATTGA  
ACACTGGACGTAGGCCGTGCTGCAGCGCAACGGCGCGGATTGAACCAATCTTTTTGGCTG  
TGCGAATCATTTACACGACCAATTTCTCGCCGCCGCAATACGCATAATAAAGGAATCAC  
GCATAAACGTAGGACAACCGCGAGTGATTTTCGCGTTTCACTGAATCCGGACAATCCAAAT  
CTTCGATGCCGTAAGTGGCATAACAGGGCTTGGTAGTCTTCGCGGATTCTGGCTTTCTGCG  
CGTTGGTGGTTTGAAGCACTGTCTTGCATGTTGTTGACTGTAGCCATCATGCTCGACG  
GCTTGATGCTCGGCAGTGTGTCGACGTCGACACCGCCTTTGCGAAAGTTTTTGGAGAACG  
AACACAACACCAAGGCACTTGGTCTGAAGTCTCGGTTCTTCCACACAATGTTTTTGGTTG  
AGCGAATCGGGTCACTCTGTACCGCACTTGCTATGCTGATTTTCGGCAAAAAGTTTCATCT  
GCTGCTCCTAGAATCGATATTCATAGTCAAACGTAATCACTGCGCCGTCGCTTCCCCTG  
GAGGCAACACACCCACATTGAGCCATCCCCACTCGGAGTTGCCTACCGACACGTAAGGGT  
TGACAAAAGGAATCACAGACCCGAATAAAGGCGACATAGATACGCCCACTTCATCGTATC

CGGACGCCGCACCTAATCGGACGCCACATCAATGCCGCTCACGATTTGGGTTTCGAGGCG  
ACAAAATGCCGCTATTGAGTTGTTATCATACGAGTTTTTAAACCACAACAGGCCGAAGT  
CCTTGTATTGGACGCCTAGGCCGTAGTTATTCTCGTTGTAGTCCACGTCGGTGTCAAAT  
GCTTAGACCCGATTGGAGTAATAACTGACCATTCTGCGCCGTGTGCGTTGGTGGCTCCGA  
TGATTACGGCAGCAGTCAATGCCGTTGCCGCTCCTACTATTGTGCGACTAACGGCGGTGG  
CCACTATGGCCGCTTTAAAAGTCTTTACACATGTTAGTTTCTTACTAGTTGAGATAGGA  
GGGACACGCCCTCCCCTAAATAAAAAAATTGCAACAAAAACCAAAAATAGTGCTACGCACT  
GCAGTGTCCATTTAATCATGCCACTCGTCCTCCGTGGGCTGCGTCCAACCTGCTTGTACAC  
GCTCATTGGCATAAGTGCAGTTATAGCCGCACATCAGGTTTTGTTCCCGTCTCTCTCAGG  
TGTGTACAACCACGCCCAATAGTGAGACTTCTCTGTGCCTTGTTGGCCACGCCGTCTAGC  
CGTCCGCACTACTAGGCGTCTCATTCTGAGACTTGCTGACAAAGGTCTTCCATTTTGTG  
AGGGATTCTTTTGAATCGTCCGGTGTGCGCAATTACCTACCAGACGTCGGTACAGGTGTTT  
GTGCTCTGCGACCAATCTGTCTCTCATAGTGCAGTAAACTTCGACAACCTGTTTACC  
TGCGAGCGATGGGTGCATTTGAATCATTACGCGTTCCCCTCTGGATAGCCCACCACGCGC  
CAGAATGTTGCTTCAATAAAAAGCTGTGGTAGGGACACGACCACCTCGGTCGTAGTACATT  
GAATTGTAGCAGCGATAACCATAGGCTTGGGCAATCGCCTCTTTCACCTTGGCTTGAAGT  
GTCTTGTATCCGCGCTTGGCTAAATCTGAGGTACGTGCGCGAATCAAGTCGATTAGGGT  
GTGTTTTCCATTGTTGCTCCTTGTGGAATGCGGCAGAGTGCCTGTGAGCATGCCACGA  
TACCACACCGCGAGCATGGTGTCAATCACTATTGGGTTAAGTCCTTGATTAAAGCATAGA  
CGTGCACCACTTCAATCACGCTTCCGGTCACTGCGTACACGGCTACGGTTTCAACTCCCG  
ACAGCCCTTGGGATGTTAACCACGGGTACTCGGCTCTCCACGGCGTGTGGTGAATTCCT  
CTTCTTGCCCTGCATCGTCACTAGGTCTTTATCAACTGCCACAGCGCGATGCCTAGGT  
TGTTCTTATTGCCCATGTTTCGTTACCTGCACCAACAAGTGGTTGCGAGAGTTGAACGTGA  
ATCTAACTAATCTGTCCATTGCGGACTCCTTACATGTTCCGGGGTGTGTCGACCGTGCACA  
CCATTGTTCCCGTTCGAGTGAACCTATGGAGCGCCCTAACCCAAGGACGCTCTAACAGC  
TACTCTATGCTACCACCGCCATGATTGCGTTCGCGTAGCGTCCGGGAAAAGTGGGTAACCT  
ACTTTGCTCTTTGAGTCGGGCGTCACCTTGTAGAATCGCGTGTAGTTGCGCGTCCCTACC  
ATGCGACTGATGATAAAAAGTGCCTCCCTCATAACCGCCGTTGCTGTCCTTGAGCCGCACC  
ACGTAGAATCGGCCTTTGTACCTGCGATGATGCTCACCTTGTAAATTAGGTTTCGTAATTT  
TTCATGGTGACCCCTTACTTCACTAGAGCGTGTGGACGGTGTAGGGTCTAGGTCTTC  
CGCCGTCCAGATGGCTGGCAGTGATTCCATCAACTCTTTCACGTCGTCTTCAGTAAGCTC  
GCCACGTTTCACCGCGTTGTTGATGCGGTTGCCGAGTTCATGCGCATCTGACCATTGTT  
GAGATGGGCGTACATGCGGTAGTAGACTAGCGATTCTCGGTCTGCGCTTCGCCATTCC  
TAGGAGGAGCGCCAACACTTGAGCTACCTGCGCGTGGTTCGTAGCCTTCCATGTAACGAGC  
CGTGATTGACGCCGTTGATGATTGGCTCTTACCACCCTTTCAGTCAGCGACGGGCGATA  
GGTGCGGCGGTACTTGTGAGTGTGCCGCTCATGCCTTTTGGCTTGTATCGGCTTGCTC  
GTCGTCAGCTTGTGCGTTCAACCCAAGGGCTGAGGTGCTTCGCCTGTAACCTTGACGGT  
GTTCCCTGCGTCCAGTAGCACGGTGTGCCATCCTTTCTTAACCTCGGTCAGTTCGTAGTT  
GCTCATGTTGTGCTCCTAAGGCTCTGGTTGTTGCGGCAGCCCCCGTGCCACCTCTTGG  
TTTGTGTTCTTATTTTAAACACACTTTTCGGATGCCTGTCAAGTACCCTTGCAAGTCGGGCT  
ACTCTGGCATGCGGAAATGCGCTCTCAGATACCGTCCCTGTGGAGTGTCCCGTCCGCAATT  
CTCTGGACACGACAGATGCCCGAAGAAAGTCTCTGGACAGCCGACCGATATCGCCGACGG  
TGGGACACGGTGGACACGGTGGACAGACCCGCCATACTGCACTGGACACGGTGGACAGGC  
CGCAAGTAGCTGGACAGGCCGCGAACCCCGTCCGACGGGCGTCTGTCCACCGTGTCCAC  
CGTGTCCATCTCTAAAAAATCAGAATCTGGAGATATCGTCCGACTAGTCGAAAACGCCGG  
AAAAAACGATATCGTCCGACGGTGGACATCGGGACACGCTGGACATTTCTCATTTCGAGA  
TAAGGTCTTCGACTCCAGCCGAGGCTTTGACGAAAGATTCTCGTGCGCCCCCTTGGCAT  
CGGCCTTCGCCCCCACTTCGCGCCCATCGTTTCCGGCTCTCGGCGCGTTACCTGTGCCCC  
TTGCCCATCATCCTGCAAATGTCGCCACGATGGTGTGCTTAACGTGCACGGGCGCATTGCC  
AAACCAACGTACGCGACCCGTCGTGTGATGTGGTGTCCGACAATAGTTCGTAATCGCTGC  
TCAACATCTCGGCATCCAACCTCGCCGTGCGTTACCATGCCCAATAGGTCAATGGCATCAG  
CCTTGCGCCATTACCCGTCACGCCCTCAAGCGACTGCTCGCCAGTCATTGTGTCGTGTT  
CCATCATGTAGCCAGTCTTTGATTAATGTTGTCATTGTGTTATCTCCAGTGGTGAAGG  
GCTGATTGCCCGG

>NewGenomeName\_285

ATGACAGGTCTGACAATAAAGCAAGAGGCTTTCTGTGTCAGGCATACATCGAAACGGGTAAT

GCTTCTGAGGCTTATCGGACGGCGTATGCTGCTGACAAGATGAAGCCGGAGGTAGTACAT  
GTTCAAGCATGTAAGTTGCAGGATAAACCCTAAGATAGCCCTAAGGATAAAAGAATTGAGG  
GGCGAGATTAAGCAACGCCATAACGTCACCGTCGATTCTCTCCTCGCTGAACTGGAAGAG  
GCCAGACAAAAGCCTTAAGCGCCGAGACGCCACAATCATCTGCAGCTGTAGCGGCGACA  
ATGGGTAAGGCTAAGCTGGTCGGCCTTGATAAAGCAGATTATCGATCACACCTCATCTGAT  
GGAECTATGGCAACGAAGCCAACCACTATTCGCCTGGTAGGAGTTGACCCAGCCAATGGA  
AAGCCAAGTTGACCTCCAGATACTGCCAAGTTAGTTCCTGTATTCGCGACAGAAGGAGT  
CCGTTATCGTGGTGCTCACGGTGGACGTGGATCTGCTAAGACGCGTACTTTTGCCTAAT  
GACTGCCGTCAAAGCGTATCAAGCGGCAGAAGCCAATATCAGTGGAGTTATCCTGTGCGC  
TCGAGAATACATGAACTCGCTGGAAGAATCCTCCATGGAGGAGGTAAAGCAGGCAATTCG  
CTCCGTGGCGTGGCTTGACGATTACTTCGACATTGGAGAGAAATACATCAGGACAAAGAA  
CCGCAAGGTCAGCTATGTATTCTGCGGTCTTCGCCATAACCTAGACAGCATCAAATCAA  
AGCGCGAATTCTTGTAGCCTGGGTTGACGAGGCCGAGTCTGTTTCTTCGACTGCGTGGAA  
AAAGCTTCGCCCCGACCGTTTCGTGAAGAAGGCTCAGAAATCTGGGTTACGTGGAACCCGGA  
GAAGGACGGCAGCGCCACCGACAAACTTTTCAGAAAGAATCCCCCAAAAAGCTCAATGAT  
TGTCGAGATGAACTATGTCGACAATCCATGGTTCCTGCGGTGCTTGAGGAAGAGCGACA  
GGAAGACCTGGCAAACCTTGATTACGCAGATTACGCGTGGATATGGGAAGGCGCATATCT  
CGAAAACCTCAGATAAGCAGGTGCTGGCTAACAAATACGTCGTGCAGAGCTTCGAAGACAA  
TCTATGGAGAAAATCAGAGCGCTTGCTGTTTCGGTGCTGACTTCGGATTCGCGAAAGACCC  
CAGCACACTCATTCGCATGTTTCTTGATAACAACCTCTACATCGAATACGAGGCCTA  
CGGCAATGGAGTAGAACTCGACGATATGTGGAAGTTTTACGCAGGCCAAAACCGATGCCAC  
GCCGAAACAGCTTAAGGACTGGAAGGTCACTGACGATACGAAATTCCCCCGGTATCCCTGA  
AGCGCGTAAATGGCCCATCAAAGCCGACAACCTCCAGGCCAGAACTATCAGCCATATCAA  
AGGGCAGGGATTCAATATCTCAGCTGCTCAGAAATGGCAGGGTAGCGTAGAGGACGGCAT  
CACCTTCCTACGTGGATTAAAGAAGATCATCATCCATCCTCGCTGTAAAGAAACGGCGAA  
AGAGGCGCGGCTTTACTCGTACAAAACAGACCGTATCACTGGCGAAGTCTTGCCGATTAT  
CGAGGATAAGAACAACCACTGCTGGGATGGAATCCGGTACGGTCTGGACGGGTATATCAA  
ATGCAAACCTAAATCGATGGGGATGATGATTCTAAGCGCCTTCAGGGCAGATAGCTTGA  
ACATAAAAATCCACCGGTTATATTGGTATTCTTCATCACTGGAAAAGGATAGCGATATGA  
TCTCTGGACTTCATCACTTTGATTTCATGGCTTTCTCGTAGCACCTGGTACACTCTTCATC  
CCGATGAAGAAAAACTCTTCTATCTGGCGTTAAAAAAAATTATTGCGGAAAATCCAGGTG  
TATTGATCCACGAGCAATACGTGAGGGATTACATTTTTAAACAAAAAAGTCTCAACATTGG  
CTGATGATACCCTCAAGCAAGCTGCCAAAAAATATGGGAAGCTAGCTGAAGATATTTTCAG  
ATTACGTATTGAACACACAGTGAAATATTTTTAAATGTACAGGTGCTACGGCGGCCTTT  
TTTATTGCCTGAAATTCCTAATGAGGACTCGGCGTGACCGAATATTGGTGCAGTGCATG  
CGGAAAGATCATCCGCTTCGATTATGTTTCGCTACTGTATTACAACCCAAGGCATTGCCG  
GGCGCTGACGCTCAGAAAGGTTGAATCATTCAATCCGGCAAAGGACCAAAAATCCCACC  
GATGAAACGCTAACGGATAAACCATGACTGACAAATTAACCTCTCGCCGTCAACCATGCGT  
TGAACGATGCGCGGATGGCACGCGCCCGTATGGGGTTGATGGTGCCGACGATGGGGTTGG  
ATAATAAGCGCCATTCCGCATGGTGCGAATACGGCTTCCTGAGCTGGTCACCTACGAAA  
ACCTCTACTCCCTGTACCGGCGCGGTGGTATTGCCACGGTGCTGTAGAGAAGCTTGTG  
GCAAGTGCTGGCAGACCAACCCGGAAATCATTGAAGGTGACGATGCCGACGATAGCGAAG  
ACGAAACCTCCTGGGAGAAAAAGTCCAACAGGTATTCACCAACCGATTATGGCGCTCAT  
TCGCTGAGGCGGATCGACGTCGTCTTGTCGGTCGATATGCCGGAATACTGCTGCATATCC  
GTGATGAAAAAGACTGGAATCTGCCTGCCACGAAAGGTCGTGGGCTACAGAAGGTTCCG  
TGTCATGGGCTGGGTGCTTGAAGGTTGCAGAGTGGGACACTGGAATTAACCTAAGACAT  
ACGGCCAGCCGAAGTTGTGGAAGTACACCGAACGGTTGCCGAATGGTTCAAGCCGCCGTG  
TGGATATTCACCCTGACCGAGTATTCATCCTGGGGGATTACTCAGAAGATGCAATCGGAT  
TCCTTGAACCAGCATATAACGCCTTTGTCAGTCTGGAGAAGGTGGAGGGTGGTTTCAGGTG  
AGTCGTTCTGAAGAATGCTGCACGCCAGCTTAATGTCAACTTCGAAAAGGAAATAGACT  
TCACAAATCTGGCGTGCCTGTATGGCGTGAGTATCGATGAACTACAGGATAAGTTTAAACG  
AAGTTGCCGGGGAAATTAACCGTGGTAACGACGTGCTAATGACCACACAGGGGGCGACAG  
TTACACCCCTCGTTACATCAGTTGCGGACCCTACAGCAACATAAACGTGAACCTCCAGA  
CAGCAGCCGCAGGGGTAGATATTCCTACGCGAATTCTGATTGGTAATCAGCAGGCAGAAC  
GTTCAAGTACTGAAGACCAAAAATATTTCAACGCCCGATGTCAGTCTCGCCGCGTAGACC  
TGTCATTCGAAATAGAGGACTTCTGCGACAAGCTCATTGAGCTGAAGATTATCGATGCAG  
TGGCCAAGAAGGCAGTTATCTGGGATGACCTGAACGAACAGACCGGTACTGAAAAGCTCA

CCAACGCCAAGACTATGGGCGAGATTAACCAGACCATGCTGGGCAGCGGTGACAACCCGG  
CGTTTAGCCGTGAGGAGATTCGCACAGCTGCTGGCTATGACAATGATGACGAAGAGCCGT  
TAGGAGAAGAGGATGGCGACGAAGAGGACAAAGCCACCGATTCTGCCGCGTAACTATCAG  
GATCCGACAGGAGCCGATGCGCTGGAACGCCGGGCGATGAAAGACTTCTCCAGGCGGATG  
AATAAGATTGGCAAAGCGTACAAATCAGCACTCGATAAAAATACCTTCCTCCATCGCAGTA  
AACGCCAGATACGAATACCAGCTAAACCCAACGCTGCTCTCCATCATCCTGAATGATGCC  
AGTTACCTGGTAGACCAGGTGCTGCTTGTATGGTAACGAATACGACCTGTGGTTTTACGAG  
TACATCGCCCTGGCTGCTGAGAAAGGGACAGGGCAAGCCTTCTACAACCTCAGCCAGCAA  
TCACCTGTGTATGCAGCGGGACGCGAGTCACTGGCGGCAATCCTCGCGAGTGACCCGAT  
CAGCAACGTATGGCGCTGGTACATGCGCGTGTGTTTGAGGAAATGAAGGGTCTGACTGCT  
GATGTTAAGCGCGACATGGCACGAGTGCTGACTGATGGCGTGGGGCGAGGGCTTAATCCC  
AGTGACATTGCTCGTAACCTGACTGCACAGGCTGGCATAAGAGAAGCGCCGGGCGAACAGG  
ATAGCGCGCACTGAAGTGACTACCGCGCTGCGTCGAGCCAAGTGGGATGAAGACCAGGAG  
GCGAATGACCTCTTCGGCCTGAAAACGCTTCTGGTTACATCTCGGCGCTGTCACCGACA  
ACGCGACACACCCACGCCGTGCGCCATGCTCACCTCTACACAAATGAAGAGGTTTCGTGAA  
TGTTATGCAAAGGATGCGAACAGTATCAACTGCAAATGCAGCCAACAGTCAAGTTCTGGTT  
GACGACGATGGAAGGCCTCAGTTCCCAGACACCATTACCAAATCAAACAAGAATATAAA  
TCGATGCAGGCGCGCGGTTACGCTTGGGCGGAGAAATAACTATGCCTATTCAGGTAACA  
TCACCACGAAGGTGAACAGCCAGTCTATCAGGCGCGAGACATAACAACGGGCGTGAGCACT  
TGGTGCTGCCGAGCTACACGCTGCCGGCGAACGTCGTAATGAATGGCGGGCTGTACACGC  
AAGAGCAAATCGACGCCCACTATAAAGGGCTGGAAGGCACCCTGGCACCGCTTGGGCATC  
CTCAGGTTAACGGTCAGTTTGTCTTCTCGCCTGAGGGGATTAACGCAGGCCATA  
TCGGCGCGTGGAACCGCAACGTTAAGAAGTCCGGTAATCGCATCTACCTCGAAAAGTGGG  
TTGATGTGGCCCGCGCCAGCGAGTCTGAAGGTGGCAGGGAAGTCTTGAACGTGTGCTG  
CCATTGAGCGCGGTGAAGACGTTCCGCGGATTCATAACAGTGTTGCCGCATTCTCGACC  
AGCTTGAGCCCAACGATCAGCAGCGCGCCACAGGTGCTGAGTGGGTGGCAGATATCCACG  
GTATGGACCACGACGCGATCCTGCTGCACGAAGTTGGAGCCGCTACTCCGGAGCAGGGCG  
TTGGCCTGATGGTTAACGCTGATCTGGCGCAGTCGCTTAAGGCGAACTCAGGCGCGCTGG  
TGGGAGAATCCTACCGGGAACGCGAGCAGCGCCTCGATCGCGCAGCCAAAGCGAAGTTTG  
CGGCGGGCGCGGATGAATATGCCTGGGTGGCTGATTTCACTGATTCTCAGGCGGTAATCG  
TCAGAAATGGCGGTACTGCTGAGGTATTTGGCTACAAGTCAGATGGCGGCGCAATCACCT  
TCGACGACACCGGAACGTCAGTCGCAAAACAGGAGTCATGGGTAGCTATCGTCGCCAACA  
AATTCAAATCTCTATTCACACCGCAGGAACAGCCTGCACCAAACCACAAAACGGAGGGCG  
ACATGCCTTTAACCAAAGAAGAAGTGAACAAATCGGCAGCATGGTTAGCGAGGCCGTTG  
CCACCAATACCGAAAAGGCTATTAAGCCTCTCACGAAAAGGTTGACGCATTGCAGGCCA  
ATCAGCAGCAACTCGCTGAAACCCTGACCGCTAACACCCGCGCAGAAGAGAAAGCCAAGC  
GAGAAGCTGTAGCAAAGGTTACGGCGAAATCGTGGCAAATGCACGTGTCAGGTGATGCGC  
TGAAGCAATGTACAAAACCATTTGGTGATGCCGCACCGCTGGGTACTAACTCTGCACAGC  
AGCTGAAAGAAACAGGCGCACCTGCCGCATCTGAATACTTCAAATAAGGAGACGGGATAA  
TGTCACGTTATCGTCGCGTTAATATCGACGGGAAATCGCTCTACAAGACCGAAACCCGTA  
TCACCGCCGACGAACTACTGCCAGGCACTGCCGTCATTAACAGTGATGGTAAGTTTCG  
CACAAGCCACTGCATTAACCTGGCCGCATGTACATTATAGATTGCGCTTATCATCAGGGAC  
TTGGCATTCTGTGATGCCGTTCTGCTGCTGGCGATTCTGCTGTTGGCAACTATGTAGAAGAAG  
GCCGTGAACTTGCCTTCTGTGTGTACCTGGCGCGTACAAGAAGGACAGCCCGATTAAGC  
TTGGCGCGGCTGGTCAATTCACACTGGCAACTGGTGACACCGATTTCAGTAATCGGCTACA  
GCCATGACGAGTTCACCATCGCAGCCAGTACCACCGATTTCATTTCGCGTTTCGTATGCGCG  
TTGGCACTGCCGCCGCTGCAGGCGCGTAACAAAAGGATAAACATATATGTATTTCTCTAA  
AGAGACACTGGCGACCAACTCGCGCCTTGGTGGTCACTGGAATGAGCTTTGGGCAAACCG  
CAACATGTGGAACGCACAGCATGATGCCATGATTGCGGCAAATCGTTCTAATATGACTCC  
TGAATGGCTAGCGGTTAATGCTGTAGGCGGTTTTACGCGTGATTTCTGGGCCGAAATTGA  
CCGTCAGGTGCTGCAACTGCGTGATCAGGAGGTTGGCATGGAATCGTCAACGACCTGAT  
TGGTGTGCAGACCGTTCTTCTGTTGGCAAACAGCAAAGCTTTACAACGTTATTGGTGA  
TATCGCTGATGATGTTTCTGTAAGCATTGACGGTCAGGCTCCATTCTCATTTGACCATA  
CGAATATGCGAGCGACGGAGACCCGATTCCGGTATTCACCGCAGGTTACGGTGTGAACTG  
GCGTCATGCTGCTGGTCTTAACCTCTCTCGGTATTGACCTTGTGCTGGATTTCGCAGATGGC  
TAAAATGCGCAAGTTTAAACCAGAAGCGCGTCAACTACTATCTGAACGGCGACCCGAATAT  
TCAGGTGCAGTCTACCCGGCGCAGGGTATCAAAAACACCGTAACACCAAGAAGATCAA



CCTTGGTTCTGGTTCGGGTGGCGCAAATATCGACCTGACCACTGCCGATATGACAGCACT  
GTTTGCCTTCTTCGGGAAAGGCGCATTGTTGGTACGCTGGCGCGGCCAACAAAGTCGCTCA  
GTATGATGTGATGTGGGTGTCACCTGAAATCTGGGCTAACCTGGCTCAACCATATGTAGT  
AAACGGCGTAGTTAGCGGCAACGTAAGTGTGTGCTGCCATTTGCGCCTGTTCTGTGA  
AATTCGCCAGACCTTTGCGCTCAGTGGCAACGAGTTCATTGCCTATGTTTCGCCGTCAGGA  
CATCATTTCTCCGCTGGTTGGTATGGCTGTTGGCGTTCGTGCCGCTGCCGCGTCCGTTACC  
TAACGTTAACTACAACCTCCAGATCATGTCTGCTGAAGGTTTGCAAATCACCGCAGACGA  
CCAAGGCCTGTCCGGAGTTGTCTATGGCGCTAACCTTGTGTAAGGAAATGGTATGGCTAA  
ATACGAAGTTGTACGACCATGGTTCGGCGTAAAGGTTGGCGATGTGGTGGATATAAAAGA  
ACTGCATCCAGCCCTGAAGTCGAACGTTTCGCTGATGCGTGGAGAGGCGGGTGGTGACCT  
AACACCGGCAACTCCAGAAGCGAAATCAGGCCGACGCCGTAAAAACGAAGAAGACGAATA  
GCCGCGAAAGCGGTTTTTTTTATGCCCTCTTCGGAGGGCCATAAGAGGTTTCGCATGATTAC  
CACAGAACAGGCCAAGGAATATCTGGAGTCAGTGGGTATCACGCTGCCAGATTTTCATTCT  
GCAGGCTATCGTAGAGCAGGCTAACAGTATTCAGGAGTGCCTCGATGCACATTACCCGCC  
CGAACGGCGCTGCTAATTCAGTCCTATTTACTGGGTTAATGGCGTTGGGGCAGGGTGA  
TAGATACATCAGCTCTCAGACCGCGCCTAACGGCGCATCGCGTTCATTTTCGGTATCAGTC  
TTTTGCTGACCGATGGAAGGGGGCCTTGTACTGCTGCGTGGCGCTGACAAATTCAGGTG  
TGCCAATGGACTCATCCCCCAGACCCGACCAATACAGCGTTTGTGGTATCTGGATTGG  
TAAAGGTGGTTGCATGTGTAATGGGGATAAGTAATGGCATGGATATCGGTTAAGCAGCGA  
TTGCCTGAGCCGTTTCGTCAAAGTCTGGGTGATGACAGACATTGGTAAGCGCGTTACCCGC  
TATGTCAAAGCAACGGTGACTGGTATCTGTTGTGTCGAAAGGTGGCAGCGGAAAAACCG  
GAGGTGATCCGGTGGGAGGATGGCAATGTCTGAAATAGCACGCTGGAGTTACACCAATGT  
TGCGACCATCTACCCGCGCGTCTATGACGACTGGAACAGCACCTGGACAAACGGAACTCC  
CTACCTGATTGACTGTACCTGGACGGCGAACAATGAAGTTGCGGTAGATGCCAGCGGGAA  
AGAGTTCACCACGAACCTGATTTTCTTCACTGAGCTGAAGCGTAATGGCGTACAGCAAA  
CATGCCGACGCGAGACTGGTACATCGCCAGAGGTGACACCACGGCGCTATCAGATCCGCT  
TAAAGCCGGCGCGAACGTTATCAGGGCCGTAACCGACTGGGATATGTCATTTTTTCGGCGA  
AGAGCCAGATTACAAAATCATGACGTGAGGTAATCATGCCCGTTAAAGGTATCAAGCGCA  
TCCAGATGAATACCCGCCGAGTACTTAGTGACATAGCTGGCATAACGCACGGAGAAGGTTT  
TCTATCTAGTGATGAATGCCGGTGGCAATCATGCCGCTGTAATTACCCCCGTTAAGTCGT  
CGACCCTCATAAATAGCCAGTACAAGAAGCTCGAACCAATACCGTCAGGAATGATTGGCA  
GAGTGGGTTATACGGCTAATTATGCAGCCGCGGTTAATGCTGCAAAGGGCAAGCTAAAAG  
GTAAGCCAAGGCCGGACGGCAGCGGGAATTACTGGGACCCTAACGGTGAGCCGGACTTTC  
TCCGTAAGGCTTCGAGCGAGATGGGCTCAACGAGATTAAGGCCATCATCAGGCAAGGAT  
ACAAAGTATGACGCGTAGCGAGGTGTATGACGCGCTGAGAGTGTGGTTACAATCTCACGG  
GTTTGTATGTCGGTTACCGCGTCCAGAAACGCTTCTGGAACGAGCAGGAAGGTACGGAAGG  
GGAAAGATACCTTGTTATCCAGCAAAACGGCGGTGGTAAGCCCGAGGAAGCCATAACCGC  
AGATTTTTTTCGCATCCTTGTTCTGTGTCAGGACAGAACGACAGTGATATTAACGAAGTTGA  
AGACCGCGCTGATGCAATCCGCCAGGCGATGATCGACGACTACAGAACCGAATGCATCAT  
CTCGATGCAGCCAGTCGGCGGCATCACCGCCATCCAGACCGAAGAAGGCCGTTACCTCTT  
CGATATTTCTTTCAAACCATCATTTCCAGATAACACGGAGATAAAGACATGGCATGTGA  
AGCAGGTGCTTTCACAGGGCGTGATGTCGTCGTTTATTACGCGATTGGCTGCCCGGAAGT  
ACAACCTACCGCCAGCGCTTACCAGCGACTCGGCATGATGCGCGGTAAAACAGTTAATGC  
AGAGTGGGAAACCGCAGATGCAACTGCCGATATGAGCGCCGCGTTTACGCAGGAAAATCT  
TGTTACCTATAAGAACATTTTCGTTCTCTGGTGACGGCGTTACCCGCAAAGAGGATGTATA  
CGCGCAAACGCGCTGAAGCGTCACGTTTATAACCCGCCAGCGGAGACCAGCAACCAGCC  
GTATGTGTGGTTCAAATCATCTCTCCAAACGATATCACCGAAGGGCCATTCATGGTTAC  
TTCATGGGGTGATGAAGCTCCACACGATGATGTGGCAACGTGGTCCATTGAGGCATCAAG  
TGCAGGTCAGGTTGATGTGCGTGATGTCGGTACAGTTATTACCATTACCACCAGCCGCA  
GGGTAAAACACTGACTGCTGGCGATAACCCTGACTCTCACAGTTGCAGCTACTGTTTCAGA  
TAGCTCATCATTGACTTATCAATGGAAAAAAGACGGAATCAATGTGAGCTCCGGTGGTAC  
GACAGCTACATATACTAAGTCCAGTGCGACAACAGGCGATTCTGGTTCATATACTTGTCA  
GATTAGCTCCAGTACCGCAGCCAGTGTAACCACCAATCCGGTACAGTGACTGTCAACGC  
ATCGTAATTTCTTGCTCAGGAGGCACCGTCTCTTTTTCTTATGGGGATTCATGAAAGC  
AATCACCGATATCGGCCAGGCTGTCATTTCGCGCCGGCGACAAAGAGATATTTCTTAATCC  
TTCATTCTCGCTATGTGCGGAATTGGCTCACCGGAACAGATTGTTGATGTTTTTCGTTAA  
AGTTCACGGCGGGCACTATCCTAAGCACCGCATTAAATGATATCCAGACCATGAAAGCTGT

AAATGCCCGTTGCTTTGCTGAAATGGCAGCGTCGGCTGCCAGCGTAGTCCGCCATTGCTC  
GGAGGGTGTATGTTGCAGAGGTGATTGGTTTCGTA CT CAGTGAACGCGGCAGGACGGCTGCT  
GTT CAGGCCGGGAGCCATCCCGATCGAGGATGTTATCCAGATTGCCCGCCATCTGATTCT  
TCATGGTGTAAATGGGCGACCAGCCACCGGAAGAATTCGAAGGAAAGAAGGGTGAATACAG  
CGACAAATTTGATGTCCGGTCATTCGCTATAACCGCTGTTGCTCACCTCGGCATGAGCGA  
GTCAGACGCATGGGATATGACCATGACCAGCTTACGGGCCGCCATGAACGCTAAATTTCC  
GCAGAAAGAGAAAGCCAGAGTGCCGACTCAGGAGAAATACGACGAAGTCATGGACTGGGC  
AGAACAAATGCTGGCGATGGATGCGCAGAGGCATGGGCCGCACTAAATGGCCCGCTCAGG  
TTGAGGTAAGCGATGAAGCAGGCGCTAAAAGCTGCACCAGAATGGTGCTGAATGGATTAT  
CTCAATGATTATGCTTTTTGCGCGCCAGTAGCAGACAGCAAGCAAGAAAAAACTCTTA  
TACTTGCACCATGACATATAGCAAAGAGGATATGGAGTGGTTCAGGGAGGCGATGTCTTC  
AAAATTGGAAAAACATCGAAAAAACATTATATATCCTGACTAAGGAAAAAGAAAGCTTAGCC  
ATTCACTACCGCTAGTGCGTAATATTTGCATTGGTTATGTAATGATCGCTTCTTGATGCT  
TTGTTACCATATGCCTATTA ACTCAGGAGAGGGGAAAAATAGGCATGGTTTTGGGGGCTACT  
TGGTTGCATTCTGCTACTTTTAATTATTCTGCTAATCTGTTTTATCAA ACTCAAATCACA  
GAAAAAGAAACATGATGCTGATATGGAGAGATT CAGCAAGATTGTAGATCTTGAGGCAGA  
GGAATTAAGGTTACGCAATCAACTTAATGAAGAGGAAAAATCATT CAGAAAAAAATTATC  
TGATGATGAGGAGAGTGCCAGACAAAGCATT CAGCAAGAAATTGAAGGGAAGCGTAAAGC  
ATTCGACAAAGAGTTTAACGAAAAAAGCTCCGCCCTTGACAAGAAAGAAAAGGCAGTGCA  
GGAGGCTCTTTCTATCCATGAAGCAGAACTGGCTGCTTTGAAGTCAGAGTACAGAGAAAA  
ACGGGCTCTTCTCGTAAAGCTAACTGAAAAGCTATCCAGTGTTAGTGATGCTGCTGCAAT  
GATTGATTATGGCGTATATGAGCCAACCTTCGATTATCATGATTCAGTAGCTTATCAGGA  
AGCCATTACCAAAAATAAAGAAAGGCAAAAGATCCTGTTGAGGCAAGAGGCTGCATGTGA  
TTTCAGCACCGACTGGCAGGTCAATGGCAGTAAAGCTGAAGGCAAAAAAATGGTTAAGCG  
CTACGTGAAGTTGCTTGT CAGGGCGTTCAATAGCGAGTGCGATGCAGCGATTGCCAAAAT  
AAAAGCCGGTAATGTTGAACAACTACAGAAGCGAATTGAGAGCGCTTTCGATGCTATCAA  
TAAGTTCGGCGAGTCCATGAATATTAGAATCACGTATGATTATCTTAACCTCCGCCTTGA  
AGA ACTTCTGCTCTGTCATGAAAAGGAGCTGAAGCTGCAAGATGAGCGAGAAATACTAAG  
AGAAGAACGTGAATTGCAGCGCGAAGAAGAAAAAGCGCAAAGAGAATATGAAAAGGCCAT  
CCGCGAGGAGCAGAAGGCAGAACGTGACTTCGAAAAAGCGATGGAGCGGGCTCGCAAGGA  
ACTTGAGAAAGCAACAAGTGCAGAAAAAGAACAAATTGAACAAAGAATCGCTGAGCTTGA  
GCAGCAACTTGAAGAGGCCAGGAAGCTTTCAGAACGAGCAAAATCTCAGGCTCAACTCAC  
CCGCAGTGGTCATGTATACGTTATCTCAAATGTGGGGGCATTTGGCGAAGGTGTATATAA  
GATTGGGTTAACCAGAAGACTGGTGCCTGAAGAGAGAGTCAATGAGCTTGGCTCGGCATC  
TGTGCCGTTCAAGTTCGATATTCATGCACTTATTTATTCTGATGACGCTCCTGCTCTGGA  
GGCTAGTCTGCATAATGAGTTCTCAGCTCACCGAGTAAACCTCATTAATAACCGCAAGGA  
GTTTTTCCGCGTACCACTGAAGACTATTGAGCAGAAGGTTAAGAGTCTTGGCTTTGATGC  
TGCGTTTGTAGAATTTGCCAAAGCACCAGAGTACAGACAGACTCTGGCCTTGCTTGATGA  
GAAGAGCAAACGAGAAAGCCTTTATGAAGCGATTGAGCACAAAGTTGAAGAAGAATTCCC  
AGAAATGGCTTAGCTTGTGCAACGATATGACGTGAAACCCGCTACGGCGGGATTTGTCGT  
TCCTGCTGACCTCTCCGTCAACAGATGGTAGGATTTGACCATCTTTTAATGTGGGGGATA  
GGGATATGAAGAAGAGTTTTTGTGGTTTATCAGTTGTGGCGATCACCTTATTCTTAACGG  
CGTGC ACTCCAGTAAGGAGATGCAGGAAGCCAAAAAAGAGATGCTGAATTCGCTCAAG  
CCGTAAAAAACATTAATCTTGAAACAGCTGATGTAGGTAGCAAACCAGATAATTCCAAAG  
TCATCATAGAGTCGGCCATTCGCGATCAGTTAAAAGACCCCGAGTCTGCAAAATTTTCTG  
AATTCACAGAGCCTCGCAAAGAGGTAATGGTTGAGAATAGGAATTTTGTGTACGGCTATT  
CTTCCTGCGTTTATGTGAATGCTAAAATTCATATGGTGGATATACAGGCAAGCAACTGT  
ATTGGGTGTTTATGAGAAATGGCCAAGTCCTAAGGATTA AAAACACGAATGATGCTTATG  
GAAACATAATCTTCATTGGCAGGCCGGTAAATTGTAGTTAAATCCATGAGCTTCATTCAA  
ACCTCGCTCCGGCGGGGTTTTTTATTGCCCGGAGAAAAATGAAATGGCCGAGAACGTAGGT  
GATATTGAATATGTAATAAAGGCTGATACGGCTCAGCTGTTGCGTGCTGATAAACAGGTT  
CGCGATATAACAGACGGCATGGAAGGTGGATTCAACCGCGCAGATAAGGCTGCTTCATCG  
CTAACGTCGTCCTTTGGTAGCTTAAGCCGTGTAGCCACCTCTCTGATGGCTATCCTGTGC  
ATTCAACAGGTATCTCAGTACGCCGACGCATGGACAACGCTCAATAACAACTGGCGAAT  
GCCCTCCGCCCAAGCGAGCAACTGGTTGACGTTACTGAGCGGGTATTCAATATTACGCAG  
CAA ACTCGCGGCAGCCTGGACGCAACAGCTTCTTTGTATGCCAGACTGGAGCGAGCAACC  
AGGGAATATGGAACCAGCGCTGATGATCTGGCTAAGCTGACAACCATCATTAACCAGGGC

TTTGTGGTCTCCGGTGCACCGCTCAAGAAGCAGAAAACGCTATTATCCAGTTGTCTCAG  
GGACTGGCATCTGGCGCGCTGCGCGGTGAAGAATTTAACTCAGTGAATGAGCAGGGCAAC  
CGTCTGATCGTTGCACTTGCCGACTCTATGGGTGTTGGCATTGGGCAGATGCGTCAGATG  
GCAGCCGCTGGAAAACACTGACTACTGATGTTGTGGTTAACGGGTTACTTTACAGGGGGTG  
ACGATTGGCAATGAGTTCGCCAATAACCACGACAACTATCAGCCAGGCTTTGCAGGTAGCC  
GGGAACAACATCACCAAGTTCTTTGGTGAAACTCCACGGTGAAAACCGGCACAGCGATT  
TTCAACGATGCCGTAATCAGCGTCAGTGAGAACATCGGCGCTCTTAGTGCCATCCTGACC  
GCCGCTGCTGCTGTTATGGGTAGCCGTTATGTTGGTGCCTGACAATGGCTACCGCTGCG  
AAGGTAAAGGCCGAGTTGCTGCAAGAAATCAGTCAGCAGCAGAGATGCAGGCCGGCGCAA  
GCCGTTGCAAATAAAGCTGCCGCCGATCTGCGCGCAGCCGCCGTCGCAAAAGAACGGGCG  
CTGGACGAGATCCGCCTTGCGGAGATGATGAAGCAGACGGCGGTTAGCGCGATGAATGCC  
GCCGCTGCCGAGCAACGCTTATCTGCCGCTCGCGTAGCCGCCGCTGGCGCTGTTGATAAT  
TACAATCGCGCTCTGGCAGAAAATAAAGCGGCACAGGCTGGATTGTCTACAGGAGCAGGG  
TTGGTTAGCCGAGGATTGTCTCTCATCGGTGGCCCCGCTGGTGTCTGCCATGCTAGCGGCC  
AGTGCGATTTTATATTTCTCTCAGCGAGCTAAAGAGGCCAGAGATGATGCCAATAACTTG  
GCAGATAGCGTCAATGAACTGAGCGCTAAGTTCCAGACCATGTCGCATACCGAGTTGGCA  
GCCACCATGGCAAGTTAAGCCAGAACCCTGCCGACACTTAGCGATGCAGTAGCCGACGCA  
CAGAAAGAATTTAACGATGCTACTGCCGCTGTTTCCAGAGGCAAGAAAGGGAGATCGCTAAC  
TGGGGAACGAACACCACTCGAGGCCGTCAGGCTGCTGAAGCATTAGGTGGTGCCAGGAT  
AAATTAGCGATTGCAACTCTCGATCTTGAGCGTGCGCAGAATCGCCTCAGCCAGACTCAG  
AACGCTATTAACATCGGACGCGCCACGCTTAATGGCACGATGAGGCAAGGGATTGACCTG  
CTTCGCCGGGATGTGGAGGAGGCCGGGTGTTGCCGCTGGAATGATGGGCAAGCTTGGCGAC  
ATGATTAATTTTGCCGCAAAAGCGAAGGAGAAATTTCAACTCCAGCAGTTTGTATGGTAGAG  
CGCCAAAAGACGTTTCCAGGACTATCTTGATAAACTGCAAGACCAGGTGACACTCCAGAGT  
GAGCTTAACGATCGTAAGCGTGCGCAGTTGAAGGCTGAGCAGGATATAAGGAAGTTATAC  
GCCGGAAGCGCTAATGATGAAAAATCGAAGCAGCAGATGGAAAGGGATGTGGCCTTGGCT  
CGTGAAAGAGCTGCTGCCGAATACGACGCCAGCAAGCTCAGCAGAAAGGCAAAAAGGAA  
ACCAAAGACGCCACGTCTGAGGCGACCAAATACGCTAATCAGCAAGAAGCAATCGCCCAA  
AACTTGCGAATCTGAAGCAACAGTCTGAACTTGCTGCCGTTCTACTTCTGAGCTAAGC  
AGAGAGCAAGCGGTTCTCGCAGCGCAACAATCACTTGGCAAAGGCGCTACCCTGGAACAA  
ATAGCGCTGGCTGGTAAATATCGAGGCGAAATTTGGGACACAGCCAATGCACTTAAAGCG  
CAGGCCGCTGCTGAGAAGTTATTGCCGGAAGCGCGCAGAAACGCCAGTTATAAGCAGGAT  
GTTTCCAGGATCTGAAAACACTGCGCTGGATGCGAAAAAAATCAGCCAGCAACAATACAATCAA  
ACCAGTGAGGTGTTAGAGCAACAACATCAGGCTAATCTGGCAAAGATACGTTCTCAGAAA  
GCAGTTAGCCCAATGCAATCAACTATGGCAGAAGTTGATCCAGTTCAGCGGCTTGCCAAT  
CAGCACGCGCAACAATTAGCGCTCATTAGCAATTCGAGCAGCAAGGAGTCATCGCGCAC  
GATAATGCTCTTGCGCTGAAGAATGCCGCTGATACCGAGTATGAACAGGCACGCATTGCC  
GCACAGTGGGAAATTTCCGCAATCAGAGTCAGGCCAATGAGTTGCTGGCGTCCTCTCTG  
GAAGGCCTGCAAAGTGGAGCGACTAATGCTCTGACCGGCCTCATTAGCGGCACCCAAAGT  
CTTCAAGAAGCATTTGCCAACATCGGCACTACAATCCTCAATAGTGTTGTGCGGTAGTCTG  
GTGCAGATGGGGATAGAGTGGGTTAAAAGCCAGTTAATGGGTGAGGCAGCTGCCGCTGCA  
TCACTGGCATCAACCATGGCCCAGGCAACCGCCGCGCATCTGCTTGGGCTCCGGCCGCC  
GTGAGTGCCTCCATCGCAACCATGGGTAGCGCAGCTGCTGTTGGTTCAGACTGCTTATGCA  
GAGTCTATGGTTGCTGCTAAGGGGCTGGCTCTTGCAGGTGGTCGCCGTTACGGTGGCGGG  
GTGTCTGCTGGCAACGCCTATCGAATCAACGAGAACGGCCGTTCTGAAATCTTCCAGACT  
GCAGGTGGGCAGCAGGCATTCATCCCGAACCAGTCAGGGAAGATTATCCTGCCGATAAG  
GCCGGAGGTGGCGGTGGGGTGGTGCAGCACATCACCTTCGAAATTAACACCACTGGCGGC  
ATAGACGATGCAACAAAGGCGTGGATTGTTAAATCGATGAAGCAGGTTGCTTTGTTCCAA  
ATTAGTGACCAGGCCAATCGGCCAAATGGTATGATACAGCCGAGGACAAAACGGTAGTCA  
CCGCTTCTGGCAAGTGCTGCTACCTTTCTGGTGACATCAACGAAATGGTTCGTAATCGGT  
AAATTCAGGATTGGATTGATATTCATCGCCAGCCTGAGATTCTACAGCCTTATATTGTAT  
CCATGCCTCGCGAATTTTGTCTGCTTATTACAGGATGAGTGCCAGCATAGGGTATCAAT  
CTGCTTTTGGAGTATGGGTTCTGACGTTTATCCGCTGTGAAATTTTTTCAATATGCGT  
CATAACACCGATATGCACTGGCTCAGCAGCCTTATTACGCTCGTTTCGGTAGGCGTCGCG  
CTTCCGAGCTTCTGCCAATAAAGAATGTAACAATCCCCACCAATGGAGATAACAAACC  
AAAAAGAGGTGAAAGATGACTGATTTTGTGCGAGCATTATCCTGGCTCCTGCGGATTCTT  
TTCCCGTGTTTACGCTTCTTGTAGGATATATGAGCGGTGCGGGCTGGTTAAATTAGTGG

AGGATATAATGCCAGAAATATTCACATGGACACCGCAGAAAGCCTACTCAGTTGAGCGCA  
CGCCGAATGTTGCTGTCGTTAAATTGGGCGACGGTTACGAGCAACGGCAGGTGAAGGGTA  
TCAACCCGTTAATGGATAAATACTCACTCACCTTTCGCGGCGTCAGCGGAGCGTGCCGTA  
GTAACCCCGCGAAGGATGCTGAGGAGTTTCTCAAGGCTCGAATGGCAGTAGAAGCGTTCT  
ACTGGACGCCATCAGATACCGGAGTGCAGGCGCTATTTGTCTGTCGTTCTGGAGTTTAA  
CGAAGACGGGGCCACTATTTGAATTGACGGCAACGTTTGAACAAGTACCACGATAAGGGG  
AGATGTTATGAATTTAGACCTGAGAAGCGAGGTGCACAAAATGAACAAATACATCCTAAA  
AGTTAAGTCACTTTATTTGGTTAACGAACTGTATCGGTGGGATTAGGTGTATATTCTTC  
ACAAATGCCATCGCTACTGTTATTCAGTATGGAGATTGACATGGAGCGAAAAGGAGATGC  
GAGCCTTTCTGCTTATGAGATGGAGGCGATTGAAAAAGCCGCCTCACTAATCTGTGATAT  
TGCTGACAAATTGGAGGCGGCGGCTTAAGTGTTTATTTCAAGAACGGTTCTGGCTGATTA  
TGACCAACATAGCTCTCACCGGCGGTTGCATAAGTTCATTGATTGCATGCTTTGGCACT  
GCTGTGCCTCCCATAGTAATTTACTCAGTTCGTCATTAAGCTTTGCTTTTAGTGAATCG  
CTAAATTTCTCATCACCGCCTCGCTCGTCTAGTGCTGAAACAATGCTGTAAAGTAAGAAA  
TTTGAGGCCACTTTGATTTTCTGATTTTCTATCTTTAGGTCATTAACCTGACGGAGCAGA  
TCGTTAATTGTTCTTTCCATTTTGTCTCCTAAATGAGTTAATCAGCCATCCCTCCTTCAT  
TAAGTGCGCCAGTGTCCCACTGACGGGCTGAACGCATACATTAACCAGGGTTATTGA  
TTAGCAACACCCTGATATTCAGACAGTAGCCACCTCCGGGTGGCTTTTTTATGGGAGTTT  
GCCGTGCGCGACATACCAGCCAGTATGATTATTGATAGCGTCGATGCCGGAGTCGGCGCT  
TTCATTGACCTTTTCGAAGCAGACCTGCAACCATATGGCGGGGACCTTATCCGCTTCCAT  
TCCGGTACAAATGGCTATTACGGTAATGTTATCTGGAAAGGCAACCAGTACCAGGCTTAC  
CCGATAGCAGTGGAAGGATTCGAGTCAAAGAACGAAGGGACCTATGCCAGGCCAACAATG  
GTTGTGGCGAACGTGACCGGCCTGATTACCGGGATTAACCACGATTTTGATGACATGCTT  
GGCGTGGTAATCACCAGGCGTCAGGTGCCGGTAAAATATCTTGATGCGGTTAACTTTCCG  
AACGGTAATCCTGATGCGGACCCGACACAGGAGGCCGTTTCCCGCTACGTTGTCGAGGAG  
ATGACGGAAGAGACATTTGAACAGGTGGCCTACACGCTGGCGACACCGATTGACTGCGAT  
AACGCCATTATCCCGGCTCGCACTATTCTGGCTGACGTGTGCCAGTGCCAGTATCGCGGC  
GTTGGGTGTGGATATGACGGGCCCGCCAGTTGCAGATGAGCGCGATAATCCAACCGCAGAC  
CCGGCGAAAGATAAGTGTTCTCACCGCCGTAGCGGCTGCCGTTTCCGTTATCCGCGACCG  
GAACCAATGCCAATCAGCAGCTTCCCCGGCTCTCAGAAGGTTTCTGATGCAAGAGTTAC  
TAGAATATGCGGCATCGTCGCAGGATGAAGTGTGTGGGCTGATTATTGATGGTGAACGAC  
TATACCGCTGCCGGAATATACATCCTGACCCGGGAAAACACTTCCGTATCAGCGATGATG  
AATGGCTGTCAGCCGAGGACGAGGGAGAGGTGACTGCAGTATTTCACTCGCATCCGGGAA  
GAGTGCTTTTCTGTCAGGAGCAGACCGCAATGCACAGGTATCCAGTGGGCTTCCGTGGT  
GGCTGGCTTGCGGTGGTGTGATTATGAAATTCAGGCCTGTTCCATTGCTGTTGGGGCGCA  
AGTTCAAGCATGGTGTGTCATGGACTGTTACACCCTGTTACAGGGATGCGTATCATCTTTGCG  
GAATCGACCTTCTGACTTCGAACGCACTAATGGGTGGTGGTTGCGTGGTGAAAATCTTT  
ATCTGAACAACATGCCTCTCAACGGCTTCCGCCAGGTATCGACGGGCGAAGCGCAACCAG  
GTGACGTCATCATCAGGCAGCCATTCCCCGGCGCTGACCCTTGCCACGCAATGATTCTCC  
TCGAAGGAAACATGGTGTCTTACCACGACCACGCCGGCCATCTGAGCCGGAGAGAGCCAA  
TGCGTCCGGCATAACGTTAAGCAGATGCATTCCATATGGAGACATGAACAGTGCTCATCTT  
TAAATTTGCTGGCAGTTTACGCCGATTTTACCGCCAAATCCCTCTGAACGTAGATACGCC  
GGCTCAGGGGCTGCGCCTGCTTCTTGCCCAGAATCACGAATTCAAAAAGCATTCTCAA  
TACAAAATTCGGATCCGAATAGCGGGCGAGGATGTTGAGGTATCCGCTATGCAATGGCA  
TCTGGATCGCCACCTGAAAGATGGTTCTGTAGTCTGTTTGTGCCGGTAGTCGAAGGCGC  
TATCACTGCCGCTGCTGCGGCATGGATTGCGGTTGCTGTCAGCGTGGCTTCAATTGCGTA  
CTCGGTATACATGTCCCGCAACATGAAAACATAAACGTCAGCGGAAGCGGCTGAGACAAA  
CACGCTAACGAATAACTCATTTACCAGTGCAGGAGAACAGAGTAGGGCAGGGTAGACCTGT  
GCCAATACTACTCGGTGAGATGGAAGTTGGCTCAAATGTTATTTCTCTAGGTATCGACAC  
AAGCAACATCCAGGACTGGACGGAATCTATTAGCTAAGGTGGCATTATGTCTTCAGGCGG  
CGGCAAAGCATCAACCCCCAACTACTCGACGATAATCTCAAATCAAAGCAATTTTACCG  
GGTACTGGATCTAATTTTCGGAAGGTCCAATTTTCGGGCCCGTTGACCAGGAACACCTGTC  
GTCTTTCAAGCTCAACAAGACCCCGGTAACAGACGCGACAGGCAGCGTAAGCGTAAATGG  
CGTAAGCGTAGCCTGGCGCCCGGGGGCTGAAACGCAATCACCCATTAACGGCTTCTCTGC  
TATTGAAGCAACAACACTATCATGAACACCGAAGTAACCTATGACACGCCGCTGGTACGCAC  
TATAACCGATCAGGACGTTACCCGGGTGAGGTTCAACGTTGGTGTGACCGGTCTGGTTGA  
GCAGGACACTAAAGGAAATCAGAACAACACCACCGTCACTATGGTGCTGGAGAGTAGAAC

TGGTGCTTCAGGCTGGGTTATTGAAAAGACCGTGACTATCACCGGAAAGATATCAGGCCA  
GTATCTTGAGGCCATCTGATTGATGCTCCGAATATCAAGCCGTTTGATATTCGAGTTCG  
CCGCATTACACCCGACAGCAGCAGCGATTTGCTGTCCAACGGTACTATCTGGAATAGTTA  
CAGTCAAATCACCGACGACAACCTTAGCTATCCGTTCTCCGCTATTGCGGGTGCAGTTAT  
TGACCGTGACCAGTACACCGACACCCCTAGTCGCACATACCATCTTCGCGGCCTGATTGT  
GGACGTTCCCTGACAACACTACGATCCGATTGCCAGAACTTACTCAGGGCTATGGACTGGCGG  
ATTCAAAAAGCGTGACTAACAACCCGGCGTGGCTGTTCCGTGAACTGGCGAGGAATAC  
CCGTTTTGGCCTGGCGAAACGTGCCGGTTATATCGATATAGATGACGGTGCCTGTACGT  
CCTCTCACAGTATTGCGATCAGCCTGTTAACGATGGCTACGGCGGGCAGGAACCAAGGAT  
GACGCTGAATGCCTATATTACCGAGCAGGTGAGTGCCTGACATTCTCGACAAGATAGC  
GAGCATGTTTCGCGGTATAGCACTGTGGGACGGGATGCGACTGTCTGTCATGCTGGATGC  
GCCACAGGACCCGATTGCGACAATCACGAATGCTAACGTGGTTGATGGCGAGTTCAAGCG  
TAGCTCCGTGAAGCGTTCAGAGAAATAACAATGCCGTTGTTGTGTCATGGACTGATCCGGA  
TAATGGTTGGGAGCAGGTAAGAATAACGTTTCCGACGATGAGATGATCGCTCGCGGAAA  
CTACAACGAAACAACAATTGAAGCATTCCGTTGCACGTCTCGCGGTCAGGCATGGCGCGC  
TGGGAAATGGCTTCTTGAAACGGCGAAACGGGAAAGCAGCAGACTGTCTTCCAGATGGC  
GCGCGATGCTATCCACTTCACGCCGGGTGATATCGTTGAAATCATGGATAACAACACTATGC  
TGGTGCCTGCTTGGTGGCCGATTATGTGTCATGCAGGTAACAGAATTACCGTGGATGC  
GGTTGATTCATCCCTGATATCAGACGGCGACACCATGTCAATCATGGGTAGCAACGGGAA  
GTTTCGTTAAATACGAGATTGGCAGCATTTCGGCAACGTGGTGACGCTGAAAACGACTCC  
AGCATGGGTTAGTGACGGTACTGTATTTGCCATCTCTACCAGTAACGTTTCTACCAGACT  
ATTCCGCATCCTTAGCATTGCAGAGACCGATAACAACCTCGGTCTACAGCATCACTGCATC  
ACAACATGACCCGAACAACAGGCCATTGTTGATGAAGGTGCCGTGTTTGAAATTCCCAA  
CGATACGTTGAACGGTTACCGAGTCCCGAATGTGGAGAACCTGCGCATCATCAACACCGA  
CTCTGAGACTGTCCAGGTCAGTACTGCTACATGGGAGACAGCAACTACCACTAAAAAAGTGGT  
GTTTGAGTTATACGTATATACCGACGACGGCAAAGTGATCGCTCAGTACGAAACAGATCA  
GTTCCGCTACGAGTTCCTTGGTCTGAACGCCGGTGGATACACGCTTGGCGTTCGCGGTCG  
CAATGAAAACGGAATGAAAGGCGCTGAGACGCAAATTAGTATGGTCATCGGTGCGCCACC  
TGCACCATCCAGTGTTATCTGGACGCCAGGCTTGTCTCTGCTGACCTGGTCCCCGTCAT  
GCGCATTACGGCAACGACAGACACATCGTTTGAAGTCTGGTACTCCGGGCAGAACCCAGAT  
TGTCATCCTGACGATATTGAAGACCAGACTCAGTTCCTCGGGCGCTCTAACCCAGTGGAC  
GCTTCATGGTCTACAGGCTGATAAGACGTATTACGTTTATGTCCGCACCAAAAATGCTTT  
CGGGGTATCGGAGTTCGTTGAGGCATCAGGTCAGGCGTCATCAGATATTCCTGGAATGAT  
AGAACTCATTGATGAGCAGATCCGCGAATCAGATGCGTTTAAAAATGTTACGACAGGGTGT  
CAACACCAACCTGGACGGTATCATGTGCGAACGCGCTGGCGAACCCAGAACCGTTGAGCA  
CCAGTATCAGCAATATGGGGAGGTTTCGCGCCGACATCCTTGTGTGAAAACAACCTGTGCG  
TACTGCCGAGCAGGGGCTCGCCGATCTTCCACTTACGTACAGGCACAAATAGGCCCTGA  
AGGAGAGTTAACCTCAGCCGTAAATCAGAAAATGACCGCTGAGGTAATAGTGATGGGAC  
TGCAAAGCCTCTTACACACTCAATATGGGGATTGTCAGGAACGGTGTGAAATATAACAC  
CGGATTCGGCATGTCTATCGAGCCAGACGGAGCAGGTAGTTATAAATCTACTGCTCTCGT  
TGCCGCCGACCAGTTCGGTGTATATAGCGGTAGCGATCCGGGTAATTACAAGGCTGCATT  
TCTGGTATCTAACGGGCAGGTATTCATCAACGATGCTTTTATCAATTATGCGTCCATAAC  
CCTTGCCAAGGTTGGCTCATGGTATTCAGCCAATTACGCAGAGGGACAGACGGGGACGAT  
TATGAAAGCAGACGGTACGTTTGAAGTTAACGGGGCTGTATCTGGGCAGGGTGGCACAAA  
ATTGACGAATACCAATTACAGCGTTAAGGATGGAAACGGTGTCTTCGTGTGCAGATAGG  
TCAAATAACGGGGGTATTTTGAATGGCGTGGGGTGTTCAGACATGGGATGACAATGGCGTC  
CCTAATAACTATGGGATCAAGCCTACAATGGTACTTTCCCGTGTGAATGTGTCTAACGGG  
CAGGTATCTGGGTCGTGGTCTTTTACCATTGAGTCCGGATACCAGTTACGTTATTTGCAA  
TGTCGTTTCAATCAGTTAACTCAGCGAGCAGGAGAAAAATTAATTTCTCTGGCGGAACC  
GCATCATTATCCAGTGCTGCCAGTTCAGACTATACGGAAAATACCGAACCTGCTGTTGCG  
GGGATGATTATTTTTTATCAGGAGAAAATATAATGGCAACATACGGTGCCTACTTACAA  
CTCCTGACGGAGTTCAGTTCGTTACTCCGAACACTACCCCATCGCACTTGAGAAAAAAC  
TGACAGCAACAGGAAGTGGTATCGCTACAATAACAACGACATTTAATACTGAAGATGTTG  
TTATGCCTTTCTGTTGCACTACCGGAGCGGAGGCATATTTCACTTATACCATAAGCGGGA  
ATACAATCAGTGTTACAGGCAAGGCAAACGGTAGGACAGTCTCAGTCACTTACGCTTCATC  
TTTATCTGTTACAACAAAAGCACAGGTGCCTCCTGCGTGGGGAATGGCTATCTGGGATA  
AAAACGGGAAATGCATTCTAACCAATGAAACAAAATACTTACAGATATAACGACAGGGG

GGATAGTTGGAGAGGCTAACTCTGGGGTTAATCTTGATATTACAACCACAGGTA AAAAAG  
CCATAGCACCACAGGCTGCTGGTTTTATGGTGGCAGTATCTTCAGGTGGAGCATTGCAGT  
CACCGATTGGGAATACGTGTTATTTTAACGGAGCATCCTCTCGCATGAGAACAATGCTGG  
CCGAAACACCACCAACCGGATGGAACAGGCAGGTAATTGATTTTAAACTTCTGTAAAAT  
ATATCGATGCCTCTTATTACGATTAATTGATGGCGAGTTTTGTAATTGGTTGCTGCTGTG  
CCTGGGGACTCCCAGTGAACCTTCAGCCAAAGAGTCAGAGATCTCGTTTACGAGCTCAT  
CAGAGATTGTCAGGCTGTACGCTCATCCGCATAGGTGGATTACAGCAGCGGCTTTATGC  
TAACGTAGGTTGAATTTTCTGACAAACTCATTTCACACAAGTTGTCGTCTTGAAGTTATT  
AACTGCTACCCATTGCCAGTTAAATGGATAGCCAGCGCGGTATTGCGTCTGATTGGCGAC  
TTTACGCACTCCGTAATCTGCACGGTAGTGTCTGACCGCCAACCATTGCCTGAGCGGT  
GCAAATCGGCTTCTGCTTTTCGAGAATGCCAGCGCACCCAGAAACAAAGATTACTGATAA  
CACTGCGATTGCTGATAGTAGTTTTTTCATGTTAATCCCTTTCGTTATTGTAGGTTGGT  
TGTAACCCATTGAAAGCAATATACACAGATTTAAAAGCCATCATATCTGGTGGCTTTTGT  
ATTTTTGACGTCCTAATTCAGGAGACACTATGTCAGCAGGAACATTAACCCTGACAAATA  
ATTCTGCTGCGATTTCCGGAAGCGGCACTGATTTTTCAACTGAACTGGCATCCGGTGACT  
TTATCGTTGTTACTGTCGGCGGCATCCCTTATACACTTCCGGTTAAAACAGTAAATAACA  
ATACATCACTGACGCTGGTTAGTGTTTACACAGGTCCGACACAATCCGGCGCTGCGTGGT  
CTGCCGTGCCTCGTGTGCTTTGAACATGGTACGGCTGCCTTGGTGGCTCAAAGCGCTG  
AGGCACTGCGTGGACTGAATTACGACAAACAGAACTGGCAGCAGGTTTACAGTACAGACG  
GAAACATCACAGTGAAGCTGCCAGATGGCACTACCTTACCGGCCCGTCATGGAAATACC  
TGTCTGACAATATTGTGTTGCAGAATGATTTCTGCTCTGACAACCATAAATGGTAAAACCG  
GTGGAATTATTAACGGCGAAATTTCCCTCACTCGTTCAGCCACAGAAAATATTTCAAACA  
GAATCATCTTTACTACCATTGTTGCTGCTGAGGGGTTAACTGCATGGGCTGAGCGTCATA  
ATTTTGCTGATGGCACTAATCGCCAGATACTCAACTTAAGTTCTGTATCAGGTTCCGCGTA  
AAGCGGTACTTCATGCAGATGGTGGGGTCTCTGCAGAGCGGGTATGAATAACCTTTCGT  
TGTTACGTA CTGGATACTTTATTGATTACGAGTTAGGTCCAATCTCCCTTTATATAGACT  
CTACCCGTATGGGAGAAATACAGCTATCAGCGACCTCTGACAGGCTTTTGAAGAAAGAAA  
TTGAGTATTTATCAGATATGGTTGGTGCAGATCCTTCTGCCAATGCGCTGAATGAAGTAC  
TCCAATGGAACCCGGCAACATTCAAGTATAAGAAACGCAGCATTATCCCAGAGAGCGATA  
CCCATCTTGGGTTCATTGCTAATGACCTTGTGCAAGTCTCACCGGAGTGCGTTAAGGGGA  
AAGGGCTGGAAGATGGCTATGATGAGAACAATACAGCGGAAGCATATTCACTCGATGAGA  
TAGCTATGATAGCTAAGCTGACATTGTCTATTCAGGAATTGCAAAAACAGATTTCCGAAC  
TTCAGGCGAATGGTGTGGAAGCTGAATAATGCGCAGCCATCGTATGCAAGAACGTGCTT  
TGGTAGGCCGCTGACAAGAGCGAAGCATCAGACACTTCGCGTCCGGTGTTCCGGAGTAAT  
AACGTACTTCATCAACAGTGCGACAGATGATTTAAGTCAAGCTAAAGGTGGCACTACGCC  
ACCTTCTCATCAAGCCAGTCAGTCCAAAATTGCATCATCTCCAGGTGTGTATCAGGATAC  
GCTGTGCGGTTGTACACAGATCGAGTCCCAGTTAGTTTTATGTTTTCTCGGTGACGTGAG  
ACAAAATGGGACGTAAAGGCTTTTATATGCCTTTCGACCAATTTCTATCTTTTTTCGAAT  
ATGGGACGTGTGAGCGCAGGTATGACGCGGTATGTTGTTGACTTAAAAGGTAGTTCTTAT  
AATTCGTAATGCGAAGGTCGTAGGTTGCACTCCTATTATCGGCACCAGTTAAATCAAATG  
CTTACGTATTATTCGTACCTTCCTTATTTTTATTGTGGGACATAATTTGGGACAGAAGTAC  
CAAAAATCGAGTCAATTTGTCGAGCATGTTCAAGTCAGGTGATTTGGTGCCAGATGAGCAT  
ATCTGCGAACCATTTGATAGACTCCCAGCCACCCATTTCTGCAATACCGAAATCGGAA  
CGCCAGCCTGAACTAACCAACTTGCCACGTGTGCCTCAGGTCATGAAAACGGAAGTCTT  
CAATGCCCGCTCGTTTTAATGCTGCCCTCCATGCCGTATTAGCGTCATAGCGCATCTTCC  
TCACTACAGGTGATTTAGTTCGCTGGTTTGGTGCTGCTTTCTTGTAGACGAACACCC  
ATTTGTGATGATTGCCGATTTGCTTTTTTCAGCACCCGGCAAGCGGTATCATTACAGGCCA  
CTCCAATGGCATGATTAGACTTGCTTTGTTCCGGGTGTATCCATGCCACCTTTCGTTGCA  
TGTCTATCTGCTGCCACTCCAGATTGATAATGTTAGACCGCCTTAAGCCAGTAGAAAGCG  
CAA ACTCTACGACTGACTTTAGCGGTTCCGGGCATTCATCAATCAACCTTTTTGCCTCGT  
GAGGCTCAAGCCAGCGAATACGCTTATTTTTCGGCTGAGGAACTTTAACGATCGGAGCCT  
TATCCAGCATCTTCCATTCGCGTTCAGCAGTTCGTAGGAGTGCCTTAATGAATGAAAGGT  
GAGTTGCTTTTTGTGGCTATCGCTGCTGGCTTAGGTTTGAATACCGGAGGCTGCTTTCCTT  
TCTTCTGCAAGCTTCTTCCATCATCTTCCAGTTTTCTCGTGACGACGATTTGTCATCT  
TCTGGATGGCGGAGTAAATCTTCGTTTTCGGTAATATCTTTCAACTGAATCCCTGCAAAAT  
GCTGGAGCCAGAATCCTATCCGGCTTTTGTTCATCGTCCAGCGACTTCTTATGCGCCTTCT  
CCTCTAACCACTGACACAGGCTTCTCAAAGTTCATGTCAGGCGTCTCGCCTAATTTAC

TTACCTCCATGCTTCGGCCTTCAGCCTGTCATGAAGCTCCGTGGCCTGCCTTTTGTCT  
TTGTCCCAAGAGACTGCTTAAATCTTTTGCCGTCCGGCAATGTGAAACTGGCGTACCAGG  
TTTACCTCTGCGGAATAGTGACATTTTTCAGTTCTCTGTTATGCCATCACCCGCGCTCAC  
GGCGACAGTATGCATCGGAGACTGAAGAGCCGCAATGCAGGCTTGTGCGTGTAGTGAGGTA  
TGGGGATTTAGGTTTGGTGGGGTCTTTACGTGTTGCCTGTAGTCGGCCTGTGCGAATCCA  
GTTGGTGGCGGTAGGTCTGGATATCTTGAGAAATGCACAGGCCTCATCGAGTGTGAGACT  
GTGTGATTCCATGGTTACTCCGGATAAAAGAAATCCCCGCGAGTGCGAGGATTGTTATTG  
CTGCGGTGGTTCTGGTAGCGGCATCCAGTGGGTTACACCGATAATTTCCATACCCTCCA  
ATAGTCAAAGAACCATCATCGTCGTATGTAGCAACGAACATCCCCTGACCCAGACATTT  
TCCGGTAAAATTGCGATGGGTTTAGATTCATCATTATCTGGCATTTCGCTCATTACAGCT  
TATCCAACCATCCTGAGTTACCGGAGAGTTGAGTTGTTTCGGAATTACCGAACGACTGCAT  
GGCAGCGTTATAACCATCGGCAAAAATTTCTGCTTCTTCGTTGTTTCAGTTCAGCGCCAAG  
TTTAAAAGCAATATCTTTTCGCCATTGATGCTGTTATTTGATGGTGTTCACGATTTACCT  
CCATTGAGCATGGCGGCTCGGCAGGCGTTCCATATTTTCTGTGCCAATAACTTATCGCCT  
ATGTTATGCGCCAGCAGACTGACAATTTGACCAGCCAGACCTTTTGGCATTTCGCTGGC  
ACTACCGGCGCCGGCTGCTCTTTACTAACCAAACGCGTTATTTCTGATTCCAGGAGTGAG  
CCTAAAACCTGTGCTCGTACAATGTTTCGGCCCATTCGTTGTTTTCCAGCAGGCCAATAATA  
TTGAGAACATCATCGTAAATGCCTGTTACCGACGCTGGCGGAACGGCGTAGAGCTTTATC  
ACTCTGCGCGGGTCCGCGTTCGGTGTATCGGGTTGGCTTTAAACAGATATCCGCAGCCG  
TCCTTTTCAACCGAACGCAGTTCTTCTGCATCCGTCCAACCAATCGGTTCCGCGCTATCA  
GCCTTGCGGCGTTCCTGTAGCTCACACAGGGCTGCTGCAACATAATGGCTATTGTGCTGA  
TCAGCCCACTGAATGAGCCGAATCAGTGTTCATTTGAAACGCGTTCGCTGTGTTAGTTTG  
TTATTCATCTCCGAACAATTCCTCGTATTTAATGAACTCACAAAACACTGCAATTCAGC  
GCCAGCCAGGAAATAACCTAACGCCTCGGCTCGATCTGTATCTTTATTGAATGATGCAAG  
CGGGTAGCGCTCGTAGAATTTATTGATGAGCTCGGCGATTTTTTAATTCTGGTTTATTAGC  
TTCCAGCGATGCCAGCGCTATACGCGCCAGTTCGCGCACAACTTCTGGCGGGGCGTAGTG  
GTCATTCAGGTCATCGTACAACCTGGGTCATCTTTGTGCTGTTATCCGGGTGAACATCAGC  
GTTAGTACCAGCCAGTGCGGTGATGACCTCGTCGGCAGCATCAATTATTTTTGTACCTG  
TTCTCTGGTAATAGTGGTTCATGGGTTAGTCTCCCTGTACGGATTTAATTTGTTGTGATG  
TTTGTTAAATGGCCCCCATAACGATGGAGCTATACCACTCAGCTATTTTTTCTGCCTGTTC  
TCCTGCTAACAAAGAGGATGACTATCGGTGATATTGGAACCATTAATAAAGAAAGAGAAG  
GAAAAATAGAGCCTCTTTAATCCGGCTTTGGCGTGGGTAATTCTTACGGAATATTTTTGT  
CATCTCACTCCCCCTTCACGCCAATGCCAGCGGCGTCCCATGCTTTTGCTTTGGCGCATA  
CCGGGCAATAAAGCTCACCTTTATGCAACACCCAGCCAGCCTTCAGTGAATCATCTTTAA  
GAAATTTACGCGCTATAGAAACGCTCTTAACGCTTTCACGTGCTGACGTTATTGAACCGG  
CGTTCTGGCTAGAGAAACAGCCCTCAATATCACCAACCTTCACAACGTAATTCATGA  
AAATAGCCATTACATTTCTCAACATTGAATCCAGCCAGACGAACCTGCCGCTTAGCGAG  
CGTAATGGCTTCTTCATACGCTTTTTCTTGCTCAGTCCAGTAGCCGTTTGTTTTCGGCAG  
CAACACGGGCTTAGATAGCTTCGCCTCCAGTTCCTTGAATACGCTGGCGTAACGCTGTAAT  
TTCCACCTCAGCAGCGTCTGCGTAATGAACGTTTTTCATGCTCAAGTGGTGGTAAATCCGG  
CGTAACGACATCAAACAGTTTTTGCAAGCGCCCGGTAGTTCAGTTCGCTGTGATAACGACC  
TTTGACGCGGACCAGTTTTTTCAGCAGTAGCTACAATCGCGCTTTGTTCTGCTATGCGCTG  
ACGGGCAGACTCCAGCTCAGAAATATCCTTTCCACGCTCAGCGATATTCTGCTTCGCCAG  
TCGACGCCAGGAATTGATTTGCTTAGCGGCTTCTTGGTGACCTTTCTCCAGTTCTGCTAG  
ACGCTTTTTTGTGCTTCCAGCTCAACTCGCAGCTTCCCAACCGTAAGCGCAATATCCTC  
GTTCTCCTGGTTCGCGGAGTTTGATGTATTGCTGTTTTTTATCCAGCTCATCCAGCAGCTC  
CAGCACATCCGGGTCGCTAACATCAACTACTGTTACGCGCGATTTTTTCGTAATGCTCGTC  
AGCAAAGTACGACCAAATTTGAAATATCCATCATTACCCTCGCCCGTGCAGCCATAGGT  
AATTCGACTGGAAGATATTCGCTGGATTGTCATTTCTCGCCGCAAATATGGCATTTAGG  
TACAGGTTTTTGGGGAATAGCGCTCACGTAGCGCCTGTTTGTGCGATGTTGCTCATTGGGCT  
GACTCCTCCTTCTAATCTCTTTTGCATCGTATTTGCGACCATGATACCAACCACGGCGA  
AGCCACCTACGTATGGTTCGCATGGCATTTCGCATCACCGCGAACAGGAGCAGGAAATCCT  
CCGCATTTACCCGTGAGCGGTCCGCGCTTGCCTTCTGATTGCTCCATTCCACACTCAATG  
ATTTATCGCGATAATAGGCAAGCCAATTTTTACGGTTGCATAATGGGCAAGGTATATCG  
CCGCCGTTGTCCATACCCATTTTCATCCCCGCTATCCGCGTCCCACAAGTAACCATCACAG  
CAAAGGCTGTCCGGGTAATTCGCTCAAATTCATAACCTTGGTATCCGCAACTCATGATT  
TGGCCCCTTTGCGAAGTTGGGTTTCCATTCTTCAATCGATTTCTCTGCGTATTCACCTG

ACAAGCCGTCATCCGCGGGTAGTGGGTTATTGGCTAAATCCTCTTTTCGCCGATAAAATCA  
TGC GTGTACGTCGAGAACTTCTGATACAGGTTTATCGAGGAATCCGTGATTGAATGCGG  
CGGCGAGACGGCTGGCGGCATAGTTGATACCTTCATTACGTGCACTTGCCCGCACTTCAG  
CCAGAAAAGCGTCGGTGGCTGGGGTGCCTACCGACTTGCGAAGAATGTTATAGGCCGCCA  
TCATGGCTCGCTCCGGCACGTCATCTCAGCATAGAACGCATCAAGGCATGACATCATCG  
CTGCAAGCTTTGGCTCTTGGTATTTACGCGTCTCATTCTCCGCGGCCAGTACCGAAAAT  
TCTCGTGCGCCAACTTAACAACCTGCATCACCTGCTTAAGTGACTCCATTGCTTTATCGT  
TATCCGCGCCAACGCCGCGCATTAGCCTCAAGTCCGCATAATCAGATGCCAGCACCA  
GATCCACACAGAACGATTCAGACTGTACCGGTGGGGATAAATCTGATGGGGATGCGGTGT  
AAATTTTTACCTGTTGCATTTATCTTTCCCTCAGTATCGCATTCAAATATTTATTCTCGTT  
AATCGAGGGAAATGAATTGCGCCGCAATAATTCTTCGCGTGTGGCATTGGTTAATTTT  
GTGCCTAATAATAAGTTCAGCGGGTAGAATTTCTGGGTTGTAAGAAACGCCTCTCATGAT  
TTGCTCTCCACAAAGTCGTTAACCGCTTACTCAGTGACAGACTAAGCGTCTCGATATGC  
TTCTGTAGCTCATAAAATGATTGTGCTTCTGACGCCAGAATTTTCGCGATGGCATAACTCT  
TTAACAGATGTTCAAACCTTGTGTAGTAACCGCAACGCACAAGGACTTCATTACCGTAA  
TTTTTGCTTTTTTCGTCAGTTACTTTCTTCTTCTCGCTGAGAATAAGGTCGTGTTTGGTT  
CCGGTAATTACGTATTTACCGAGGTCGATATTTAATTTTCATGAGTTATTCCTCAGTTATT  
GCTAATCATCCCGTAACGTGAGCGGTAATTACGCAGGCGCGGGTCGATTTCAATGAATTT  
TGTATATATTGCTTTGCGGAATGGTCGTATTGATGTCTGCCTGATGAGTTCTTTTTCGTT  
ACGCTCAGCTAGCCAGATTGAATTGCGGAAATCTCTTTCTGCTTTCGTTTCTGCGGTAG  
CGACATTATCAGGTCGTAGTTTTTTCTGAATTTATCCAGCACCTCCGAGACGGAATTGCC  
GGAACAGCGGAGAGGATTGTTATAGTCAAACAATGGTTTTGGCATAATAATATGATATCC  
ATTATACAATGTTTGTGGCTTGTGTTGATTTGCTATGTTTTTATGGCGTTGATTATAAGT  
GTCTCCATATTTCTTGTTTTTAATTAACCAACATGTGTGTGGCTTATATTGTATTCTC  
TAGCAATAATTCTGTTGATCTGATATCTCTACGGATATCAAAAATCTTATCCTTTGTTA  
ATTTGAGTTACCGTTCTGTTCTCCTGTTTGATATTTTTCGCGTCCCTTATGACGCATAT  
CTGCATTGTTGTCAGAACTGTACCTACTGCTAGATGCTTTGGATTTACGCAAGATGGGT  
TGTACACAAATGAATCACAACCTTTCCCTTCTGGAATTATTCCTTTACTAACTCATATG  
ATAATCTGTGAGCCTTAACCACTTTCCATTAACGCTTATTCTTCCGTATCCTCTGTAAT  
TCTTCCAGCCATCCAAATATGGCACTCAGTTTTTCATATTTTCAGGCACATACCCTGAAT  
TAATGTCAACCTTTGCTAAAACCTATTCTTTAATTCATGAAGATAATTATGTGATAAAT  
TTTCAATCATTTTAATTAACCACTCATATTTCAAGAATCTATATCAAGATACTGGATGTG  
TTACCAGATTATTAATAATGGGATCTCATCGTCGAAGTTCATGGGAGGTTTCGTTGTGATT  
TCCCTTCTGCTGAGGTTGTTGTCTTTGTTGCTGACCGTTATTTTCGCTGATGTGAAGACTG  
TTCATTGCTTCCCTGCTTGCCACCAAGCATTGTCATGGTTCCACTAACGCCAACGATGAC  
TTCGGTAGTGAACCGATTCTGTCCACTTTGGTCCCTGCCATTTTCTTGTCCGCAATTTGCC  
TTCAAGATAAACCTCAGAGCCTTTTCGCAGATACTCGCTGGCAATTTCTGCCAGTTTCCC  
GCTCATCACCACACGGTGCCACTCCGTCTGCTCCTTTGCTCGCCAGTATTTTTATCTCG  
CCATTGTTCTGACGTAGCTATTGTCAGGTTAGCGAACGCTGTTCCCTGATGGTGAGTATCT  
AACTTCCGGGTCTTGTCCAACCCGACAAAGGATAATCACCTTATTTACGCCTCTGCTTGC  
CATTTATGCCACCTGTTTAAGCTCATTTATTCTGATATTCATTACCTGAACGCATTTTGT  
CTGCGCATCATCGTGACCAGCCAATAATTGCCAGTCGTGCTGGTATCTCTCAATTAGCTT  
TTTCTTGTGAGTTTCTGTTGCTGCATATTCACTGAAGTCTTTTCAGGATTTGCTCGCAGTC  
AACCGATGGTGATTTCTGGTTGGTATTTTCTGGTGATGGTTGATTGCAAGATGCTGGCAT  
GGCCAGCCCGGCAGCGATGGAGGTGACCAGTAAAATCCTGTTCCATCCTTCAGTTTTGC  
CCTGTGCCATCCCTGCTTTTTATCGAGTGATGTTTGTGCGAAACCTTCTCAAGGTTATA  
CAGATAACGACCGATTCCCCACTGAACGGCAGCGCGCTTCATTGCACCCGGAACGACCACC  
TTTGACGGCTTCTACCTGCGTGTTTTTCAGCAGCATCCCATTTGGTTACCCATTCAGAACC  
AATCTTGATTGATATGCCGCATTCAACGCCGCGTGTGGGAATATCGCGGTATTCATT  
GCGCCATCCTGCTTTGCCGCAAACATCGTCCAGGCGTTTCATGATTGCCCTGTTCGTGAC  
ATAAGCCAGCACCATAGCCACACTTTGCCATCGCGTGTTTTACCGCTTTGCTGTATTTCG  
CCATTCGATATCTTCAGAATTGAATGGGGCGTCGAATTTATTCAAATCCATAATTCACCT  
CAGAATGGTAATTCGGAAGGATTAGCCAGAAATTCACCTTTGTTTATTTCGCTCATTTTTG  
GCTAATGAAAGGCAATTTCTTTTCATCGATTTATTACCTGACTTGCGCCAGTACATTGCC  
TCTGTCAGGTGATACTGACGTTTTAATCTGCTCAACTTCGGTGTCCCTTGCTAAATCCACT  
GGTATCATTTCAACCTCCATTTCGCGAAAGGCTTCTACAGCTTCGCGATACATTATTTGT  
CGCCAAGATAAACAGCAATTGCGAATTTAGACTGAATAGCCATAAGTGATTTATCCATTA



CACGGCACTCCTGGTTGATTCAGGATATCGACCAGACGTTTCCATCAGGTTTCGTAATTTT  
CTGGTAATTCTGTGCGAGAAGTGATTCAGAAGGGCAGCCAGCAATGGGCCACCCGGCAAAA  
TGATATTGCATGGCGTGCTCCTTAGTTAATTTGCATAACAAAAATGCCTCGAATGAAGCG  
TTGTTGGTATGCGAAAAAGCCGCCCTGACTGCGAGCGGCAAATAACATCAAGGGATGAT  
TTTTCGATTAACCAGAACGAGTCGTCGTCCTCGTTTGGTTACGAGCGATATTGCTCGCAA  
TGCGGAATCACAGAATCCGCATTAAGTGCATCACTCACACTTTACAAACTCACCATCTTT  
ATCCAGTTGATAACCATGTATTTCGGAATAATACCGTTCTCGCCAACCTTGCTTGCTCGGAT  
ATGAATTAACTCGCCATCTTCATCTCGATAGCAAAGCACAAATAGCTCCGCCTTCAGATGC  
CCTGGCTTTCCCTTCTATTCCGAGTGATGCCGCTACGGATTGCGATCCAGACACTTCCGC  
TGCTGACTGGTAGCCAGTGTTGGTTGCTGCTGACTGGTAGCCAGTGTTGGTTGCCGCTGA  
CCAGTTGCCAGTGTTGGTTGCTGCTGACTGGTAGCCAGTGTTGGTTGCCGCTGACTGGTC  
GCCAGTGTTGGTTGCCGCTGACCAGTTGCCAGTGTTGGTTGCCGCTGACCAGTTGCCAGT  
GTTGGTTGCCGCTGACTGGTCGCCAGTGTTGGTTGCTGCTGACTGGTCGCCAGTCATGATCTGCTG  
TGCCGCTGACCAGTTGCCAGTGTTGGTTGCTGCTGACTGGTCGCCAGTCATGATCTGCTG  
TTCCAGCGATTTATCTATCTTGCTCCAAATCCACTCAATACCACGCTGAATGAACTGTGG  
AAGCGTAACTCAGCCTTAATCGTGATACTGGAAGTGGCTATTTTAGTGTACCTCTTTC  
TTCATGGTCTGTAACACCAAAAAGATATTGTTTCCGCATAGCGACTTCTGCAGGCGGATA  
ATAACGGAAAACATCGAAAGGACATTCACAGGCGTGAAATCCAGAACCCGAAGCCTCTAC  
TTTTCCATCGTGATGGAAGGTTTCACCGATTGCAAAGTCAAAGTCAAGGACGTCAGGTC  
TTTGTTAAATCCCTTGAATGTCACAATTTCTTTGGTCATGTTGTTATTCCTTAAATTTTG  
GCAATAAAAAATGCCGCATTGCGACCTGATTAGATGAGAGGCTTGCTGTTTCAGCTTTATG  
CGCTGTACTGCGTGGAATTTTGTACCGAGTGGGTTAGCATCGTGGTAGTAAATGCCGTTT  
TTCTTGCGCTCTATTTCTGCTGCTTAACTTTGTTTCTGACGTCGAAACTGCTTTTGT  
ACCCTGTCAACACGCTGCGTCTTAACTCTTGAGAAGCATCAGGAGCATCGCAGCCAAAA  
ATTGAATCGATGATATTGCAGATGGTGTGCGGCTCCATTGCGAGCTTCTGCGCCGCTCA  
TGACGGCGAGTTTTAGCATTGCCTGCAAACGTTGACTTCCCGTAGGTGATAACCGTCATG  
ATTTAATCCTCATGTGAAATGGCTTTGGTACTGGCGCCGGAACCTGTCTCAATTTCCGGA  
TTTCAAGTGGCTTCTCAGTCCGGCCCGATCGGTACAGCTAGAGGCCTAAGCTCCACCACA  
CGCCAGTCCAAACCAATCTCGTTTGGTATTTGTTGCGGCTTTGTCAGCGCATCATCGAAG  
TTAAAGAGCGTTGCCTTTCCGTTTGGCTACCAGCGTCCTGCTGATGGCTAAAATTTAAGA  
CTTCTTAATTAATGGTCAAGTGTATTTTTGAAGAAAACCTTAAATATTTTATCGTTACTT  
AAGTTTTTATTTGATTTTTAAAGGAAAATGTAGTGTGAGGGGCGGGTGCCCTTATGGAA  
GATTTGCGAGTTTTGCGTCAACAACACTACGCCAATGATTTTGCAGTTTCCGTTGATTTCTA  
TCATCGGATATTGTGGGTTTAAATGGTTTTAAAAACTTTCGGCCTGCATCCATAACTAATT  
TTTTGAATGTGGCCTCGTTTTACCTTCTAATTTTGCAACAACCAGCTTGCCGTTTCTTG  
GTTGACTTCCGGGATCAACCAGAATTATCATTCTTCTGGAATGCTTAACCCTGCCGGTG  
CTGTCATAGAGTCACCTTGGACATCAAGCCAAAATGAATCTTCTGAACAATCTACAGTGG  
TGTCGTGCCAGTTCTCTATCGCGCGCTTGTGATAAGGTTCTACAGCTTCCATCCATTGCC  
CTGCGCTTACCCAACCTGATAAGAGGGTATGATCCTCTTGGCTCATGCCTACTATGATAGG  
CAACGTTTGTCTGGCTTAAATCTCCTTTTACGCAAATAGTCAGGGGAGCACTGAAGAGCCT  
TCGAAAGTGCCAACAGGTTCTCCCATTTGGCTCAGTCTCCGAGCGCTCCCATTGCGATA  
TTGCAACATTAGACACTCCCACCATCTTACCAAGAGCGGCTTGTCTAATCTTGAGTTTTT  
TTCTTCGAGCGGAATACGCTCACCCATCAATTGTGTATTTCATAGTTAAGTCATCTTAAA  
TAACTTGACTAAAGATTCCTTTAGTAGATAATTTAAGTGTCTTTAATTTTCGGAGCGAG  
TCTATGTACAAGAAAGATGTTATCGACCACTTCGGAACCCAGCGTGCAGTAGCTAAGGCT  
TTAGGCATTAGCGATGCAGCGGTCTCTCAGTGGAAAGGAAGTTATCCCAGAGAAAGACGCA  
TACCGATTAGAGATCGTTACAGCTGGCGCCCTGAAGTACCAAGAAAACGCTTATCGCCAA  
GCGGCGTAAGCAAAAACGCTCTTTACCAATCTGAACCGCCGACAACGCGGTAAACCTATTT  
CAAAGCGCATCAACGAATGCGCACAACCTAACTATTAACACTACAGGAATGTTACATATGGA  
ACTCACAAGCACTCGCAAGAAAGCCAACGCAATTACCAGCAGCATCCTTAACCGGATAGC  
TATTCGTGGACAGCGTAAAGTCGCTGATGCGTTAGGCATTAACGAATCTCAAATTTACG  
ATGGAAGGCGATTTCAATCCAAGATGGGGATGTTATTGGCGGTTCTGGAGTGGGGTGT  
CGAGGATGAGGAGTTGGCAGAACTGGCAAAGAAAGTTGCGCATCTGCTGACAAAAGAAAA  
GCCCCAAGACTGCGGGAACAGTTTTGAGGCCTGATGTAGAAGGACTGGATCAATCCACAG  
GAGTAATTATGCCAAAACGTAGTAAGAAATACCAGGAAAAAGAAGAGATTTCGACACCCTG  
ATTCACCTGAGGGATTAGTGGTAGCAGCAGCAAATAACAGGGCGTTCGCAGAGCGACTTG  
TTGGTGTTTACAGACTAGCCAAAGCAGGAGTGAGACATGGGCGTCGTTAAGTTAGCAGAC

TACAGACCGTTAGAGCCGGTCGTGGAGCGTAATGTGGCAGATCTCGATGATGGTTACGCC  
AGACTATCAAATATGCTGCTTGAAGCTTATTCAGGCGCAGATCTGACCAAGCGACATTTT  
AAAGTGCTGCTTGCCATTCTGCGTAAAACCTATGGGTGGAATAAACCAATGGACAGAATC  
ACAGATTCTCAACTTAGCGAGATTACAAAGTTACCCGTCAAACGGTGAATGAAGCCAAG  
TTAGAACTCGTCAGAATGAATATTATCAAGCAGCAAGGCCGTCATGTTTGGACCAAATAAA  
AACATATCAGAATGGCGTATCCCTCAAATGAGGGAAAATCCCCTAAAACGAGGGATAAA  
ACATCCCTCAAATTGAGGGAGTGCTATCCCTCAAACAGGGGGACACAAAAGACACTATT  
CAAAAGAAAAGAAATACAAGATAAAAACATTATGTCCGAAAGTGTTCCGGACGAAGTGTGAA  
AAATCATCTTGCCGTCACGAAGAAACCGACAAGGCATTCGAGGAAATATTCTGGTGTGCT  
GGAATGCGGAAAGCCGGGAAGAAAACGCAGCTTCGGCTTTCAGGACGCAGTTCAGGGAG  
TGGCGTAAAATCACCAGGGGGACGGCAAGCGAGTTTGCCACAATGCTGGCAGAAGATATC  
GCGTGCAGGAACGGTAAGCAGTTCGGATTTCGACAGGTTGTTACCATCGAGCTACCTGAAC  
GGTCAGCGCTGGAACGACGAGAAGCCAGAAACCATTCAACCACAATCCAAACCATCATCC  
GCAATCACCGTATCGAAAACCTGGATACGTGTTTTTCGACAGGTGAACCATGAAATCAAAA  
ATCAAATCGCTACTGGTCGCTGGTTATAACCACGGCTGGTTAAGTATTTTCGTTTGTGCGAT  
TTATGGTTTTAAAAATCTCAATCTGAGGGAATTATGACACCGAGTGAACCTCAGCGACCTGC  
TTTGGGCGCAGGTTGACAGGGTGGCTCCGCACCTGTTGCCAAACGGCAAGAAAGACGGGC  
ATGAGTGGGTTGCCGGTAACGTCAACGGCGACAAGGGGAACAGCCTGAAGGTTAACCTTA  
GTGGCAAGAAAAAATGGGCTGATTTTCGCTGAGGGAGACGGCGGTGACATGCTTGATTTGT  
GGATGGCGTGTGCGTGAATTAACCTGCATCAGGCCATGCAGGAAGCGAAGGCATTTCTCG  
GCATCAGGGAGGACGATCACCATTTTCGACGCCAGACGTGAGAAGAGATTCTCCAGACCTG  
ACCGCAAGAAAATCGTCCGCTACGTTACCAGAACAGAATCACATCTTGAGTACCTGCAAT  
CGCGGGGCATATCGCCTGAAGTCGCGAAGCGATACGAGGTTGTCAGCGGAAAAGTCTGGA  
ATGGCGAACGAGAAGTGAATGCCCTGGTGCTTCCGTACAAACGCGATGGCGAGCTGCTGC  
AGGTCAAGCGAATCAGTACTGAACGTCCGGACGGGAAGAAAGTCATCATGGCAGAAGGTG  
ACTGTGAACCTTGCCTGTTCCGGTGGCAAGCTCTCGATGCTGGCGTGAGGGCGGTTGTGC  
TTTGCGAAGGCGAAATTGATTGCATGAGCTATGCGCAATACGGGATCCCGGCGCTATCTG  
TCCCGTTCCGGTGGCGGGAAAGGCGCCAAGCAACAGTGGATTGAGTTCGAATACCACAACC  
TCGACAGGTTTGAAGAAATATTCATTTTCGATGGACGTTGACGATGTCGGGCGTGAAGCAG  
CAAGGGAAATCGCAAGCCGACTTGGTGAGCATCGCTGTCGTCTGGTTACACTGCCACACA  
AAGATATCAACGAATGCCTGATGAACGGCGTCACTGAGGATGAAATCTGGCAGTACATCG  
GAACAGCGTCATATTTTCGACCCGGAAGAGCTTTACAGCGCCCCTGAGTTTTATCAGGACA  
CCATCAATGCTTTTTTACGGCAAGCAGCAGTATCTGTTTAACCCACCGTGGGAAACGCTGG  
CTTACAACCTTCCAGTTCCTGTGAGGCGGAGTTAACGCTAGTCAATGGCGTGAACGGTCACG  
GGAAAACGGAGGTTGTCGGGCATATGGCACTTGAAGCCATGAGGCAGGGGGTAAAAACAT  
GCGTCGCATCGCTTGAAGTGAAGCCCGGGGTTTTGCTTAAACGCCTGACCAGGCAGTCAA  
CATGCTGCAAAACGCCACCAGTACTGGAAATCGAATCAGCATTAAAGTTTTACGATGACC  
GGCTCTGGTTATTTGGCCTGACAGGTACAGCCAAGGCTGAACGCCTGATTGAAATTTTCA  
CATACGCCAGACGGCGATACGGCATCCAGTTATTCATCATCGACAGCCTCATGAAGTGCG  
GTATTGGCGATGACGATTACAACGGGCAAAGGGCGTTTTGTTGATTTCGCTGTGCGACTTCA  
AGAATAAAACCAACTCTCACATTATCCTCGTCACTCACTCCAGAAAGGGAGACAGCGAGG  
AGAAACCTACCGGAAAGATGGACGTAAAAGGCTCAGGAGCGATTACAGACCTGACGGATA  
ACCTGTTTATCATCTGGCGCAATAAAGCTCGCGAGAGAGCGCTACAGCGCGTTCAGGCTG  
GAGAGCAGATTAACGATAAAGACCAGCAGCTTCTTGCTGCACCCGCATCTATTTTAATGC  
TGGAGAAGCAGCGTAACGGGGAAGGATGGGAAGGTGGCGTACCGCTATTTCTTGATGAGC  
AGTCTCACCGATTCTGCAAACGGAAGGTGCATCCCCATACTACATCGCCAATATGC  
CGAAATCGGAATATGACGAAGCGTGGCGACAGGAAAACGTTACTGAGTACTGAATGATTA  
ACCGAATAATGCCAGAAATGCTTTTTGAATCCACGGTTCATTGCTGTTTTGAACCGATGTA  
TCGACGAAGAAGAATTAATTATTCAATTTCGAAAGGCTGTCAGGAGTAAGCCGACCACAA  
ATAGGCAGCATCCAGTAGAGTTGATGGTTGACAAAGCGACAGGATTTTATGATGAGCAGT  
GGAAACTGTTTTTTGAAGCATTATCCCGTTCGTCTATGAGTTTATATGGCTCACATGGG  
AAGACCGTGACAATGAGGAGTACTGGCAATGACTATCTACATCACTGAGCTTGTAACAGG  
CCTGCTGGTAATCGCAGGCCTTTTTATTTGGGGGAGAGGGAAAGTCATGAAAAAACTAACC  
TTTGAAATTCGATCTCCAGCACATCAGCAAAATGCCATTCACGCAGTACAGCAAATCCAT  
CCAGACCCAACCAACCAATCGTAGTAACCTATTCAGGAGCGCAACCGCAGCTTAGACCAA  
AATCGGAAGCTTTGGGCCTGCTTAGGTGACGTCTCTCGTCAGGTTGAATGGCATGGTTCG  
TGGCTGGATGCAGAAAGCTGGAAGTGCGTGTTTACCGCAGCCTTAAAGCAGCAGGATGTT

GTCCCTAACCTTGCCGGGAATGGCTTCGTGGTAATAGGCCAGTCAACCAGCAGGATGCGT  
GTAAGCGAGTTTGGCGAGCTATTAGAGCTTATACAGGCATTTCGGTACAGAGCGCGGCGTT  
AAGTGGTCAGACGAAGCCCGGTTAGCACTGGAATGGAAAGCGAGGTTTGGAGACGCCGCA  
TGAAACACTGCTACCGCTTCGGAGAAAGCAAAGACGATTATCGATTCCGGCCAAATCAAC  
CTTATTGGCACCAATGGTGTATCAGATGTGAGCGGTCGCCAGTAGGTAATTTCCCGCTGC  
CAGAGACGAAGGAGGACGTATGGCACGACAGCGACGAAGTATCACCGACATAATCTGCGA  
AAACTGCAAATACCTGCCAACGAAACGATCCAGAAATAAACCAAAGCCAATCCCAACCGA  
AAGCCAGGTTAAGACATTCGATTATGTCTACGGGCTGTTGCAGTCCAAATGGAACCGCAT  
GAGGAGAACGCGATGATTGACCCCAATCGAAGTTATGAGCAAGAGAGCATAGCAAGGGCA  
ATGTGCGCCGGATGTAACAAGCAACTGGCACCTGATGAAATTTACGTCTGTGCAGAATGT  
GTTAACGAATGGCTGGTATATCGCGATCAGAATGGAGATATGACGGAGGAAGATGATGAG  
CGATGCATCAAATAGTGCCGAGTATTTGTATTTTCGTGCTCGTTCCCTGTGGCTGAAGTGT  
CCGCGCAGAACTTCCTGATGGTAAGCGCTCATTTATGGCTATTA AAAACTCCAAGAGTTG  
CCGTGTGAAATTTGGCAATAAGCAAATTGAGAAGA ACTGGCAAAGCTTCTGCAAATTC  
TGA ACTGAAAAACGATACTGAGCTGGAGTATTAATGGCTAAAGCTCCAAGGCGTAAATG  
CAAAGTCTGCAATGAATGGTTCCACCCGGCATTCTCAAATCAATGGTGGTGCAGCCCGGA  
ACACGGAACACA ACTAGCGCTAGAACGACGAAGCAAAGAACGCGAGAAAGCAGAAAAAGC  
AGCAGAGAAGAAACGACGACGAGAGGAGCAGAGACAGAAAGATAAACTGAAGATTTCGAAA  
ACTCGCCTTAAAGCCCCGCAGTTACTGGATTAAACAAGCCCAACAAGCCGTAAACGCCTT  
CATCAGAGAAAGAGACCGCGACTTACCATGTATCTCGTGCGGAACGCTCACGTCTGCTCA  
GTGGGATGCCGGGCATTACCGGACAACCGCTGCGGCACCTCAGCTCCGATTTGATGAACG  
CAATATCCATAAGCAATGCGTCTGTGCAATCAACACAAGAGCGGGAACCTGGTTCCTTA  
TCGCGTGATGCTCATCGAGCGCATAGGGATTGCAGCAGTAGACGAAATCGAATCTGACCA  
TAAGCGGCATCGCTGGACTACCGAAGAGTGCAAAGCGATTAAGGCGGAGTATCAGCAGAA  
GCTTAAAGACCTGCGTGACAGCAGAAGCGAGGCAGCATGAGCAAATCCAATACCCAATG  
ACCACTGCGGCAATTTTCGATGATGTTGTCTATCCGCTGCATTTTCGACAATGCCGGCAAG  
GTTAGGCAAGAAATGGAAGGCGCTGTTAACTGGTTCTGCAGGTGGTGCAACGAAGAGAAA  
GCCGCTGTGAAAGCGAGATTGTTGGTCAGTTGCTGGGGTCAATATCTGAGTCATGAGCAG  
GTTATCCGGGAGGCCGCATGACACACACTGTCAAACCATTCCAGACATGCTCATAGAGA  
CATA CGGAAACCAGACAGAAGTAGCACGGCGCTTATCGTGCCACCGCAACACAGTCAGGC  
GTTATCTGTACGACAAAGAAGCCAGGTATCACGCCATCGTTAACGGCGTTTTTAATGATTC  
ATCAGGGCGGGAGAGGTGTCTATGACCGTAACCAGCATTAACCAGGCGAAACAGCAGCGT  
GAACGTGACGAGGCTGAATTACGCAGCGTCAGAGAGATGACGGAGAAACACCAGAAGGCG  
ATGGATTATCTGCATGAGCGAGAGCGTGA ACTGGTGAACCGGCTTGGATTGAACAAGACA  
TCGGGAGGCGATGCTGCATGAATCTGGAAAATGTAGTGAAGTTTCACTTCGCAAATCTA  
CTCAGATAAACGACATCCCTCGCGCAACAGCTTCAGAAACGTTAACTGGCACTGATGTTA  
TGGCAGCTATGGGTATGACTCAAAGTCGCGCCTCGTTGGGTTACAGCTCGTTTCTTGGGA  
AGATGGAAATCAGCAGCAATGACCGTGAGAAAGCTATTGAACTGCTGACTGCCTATGCTC  
TTAAGCACTGCGATAAGGTTACTGCCTTACGTAAGCTCGAAAATGATATTAAGCCAAAGG  
TAATGCAAGTTCTCGCAACATTCGCATTTGCTGACTATTCACGAAGCGCTGCCAGTACCA  
GAACCTGTGATTGCTGCGGCGGGAAGAAGTTTATCGATGCCGAGGTAATGACGATGAAAA  
GCATCGGGCAGCCGTACCTCTCAGAGCGCAAGGAGACGGTGAAAGTTTTTGTGCAATAAGT  
GCAAAGGGAAGGGGGTTCTGACCAACGCATGCCAGTGCAATGGCAAAGGTGTTGTTATCG  
ATAAAGAGAAA ACTATTCTACAAGGAGGCGTCCCTGCATACAAAACATGCAGACGTTGTA  
ATGGGCGAGGATATGCTCGGTTACTGCCTGATAGCGTTTCGAAAGTACATCTGCGCAACAT  
TGATTGATATTCCTGAAACCACATGGCGCAGGTCATATAAGGATTTCTTCGAAAGTCTGG  
TAGGTGAGTGTATTAAGCAGGAGGAATATGCAAATCAGATGTTGAGCAAAGTCACGCAGT  
GATAAATATTTTCTACTGAAAAGGAGTTCTGTAGAAAATGCTCTTTACAAAGTGGCGATT  
TTTGTTTAATATCGTTTCTAACAGTAGAAAATCCGTCCTTTGTTAAGGTGGATTTGAAAGA  
AGGCCCTGCAGCGATGCGGGGCTTTTTGCGTTTTAAGCACGACATTTCTGAAAGCGCCCT  
ATACCAATCACCAGAACACATCCAGATAACCCTTGCTCATTTCGTGGCGACGGGATAGGAC  
GCTGCCAAAAAAGAAAACCAGCGCTTGGCTGGGATTCGTGAAGATGGGTGGCAAGAGACC  
GCGCTAACAGCCTCTTGCTGATCTGCCATGCTCTTAATCACGGACAAACCAGTTACC  
GCAAATGTATCCTGGATTTGTTCTTTCCAATATCAACCAATTCATAACATTGAACAAAT  
CCTCACGGTCGTGAGGTAAGACATGAAAAAGATGCCAGAAAAACATGATCTGTAAACCGC  
CATGATGGCGGCAAAGGAACAGGGCATCGGGGCAATCCTTTCGTTTTGCAATGGCGTACCT  
TCGCGGTTCGGTATAATGGCGGTGCGTTTTAAGAAAACACTAATAGACGCAACGATGTGCGC

CATTATCGCCTGGTTCATTCGTGACCTTTTAGTCTTCGCCGGACTGAGTAGCAATCTTGC  
TTACATAGCGAGTGTGTTTATCGGCTACATCGGCACAGACTCGATTGGTTCGCTAATCAA  
ACGCTTCGCTGCTAAAAAGCCGGAGTCGATGATGCAAATCAGCAGTAACGGAATCACCA  
GATTA AACGTGAAGAAGGCGAAAGACTAAAAGCCTATCCAGATAGCAGGGGGATACCAA  
CCATTGGGGTTGGGCATACCGGAAAAGTGGATGGTAAACCTGTCGTATCAGGGATGACAA  
TCACAGCCGAAAATCTTCTGAGTTGCTCAAAGAGGATTTGCAGTGGGTTGAAGATGCGA  
TAAGTAGTCTTGTTCGCGTCCCGCTAAATCAGAACCAGTATGATGCGCTATGTAGCCTTA  
TATTCAATATAGGAAAATCAGCATTGCGCGCTCTACCGTTCTACGCCAGTTGAATTTAA  
AGAATTACCAGGCAGCAGCAGATGCTTTCCTGTTATGGAAAAAAGCTGGTAAAGACCCTG  
ATATTCTCCTTCCCTCGGAGGCGGCGAGAAAAGAGCGCTGTTCTTATCGTGAGTCGTATTA  
GGCAATTATTGCGTCTGTCAATTATCTGCATCATCGTCTGCCTGTCATGGGCTGTTAATCA  
TTACCGTGATAACGCCATCGCTACAAAGAGCAGCGCGATACCGTTACTCATAAGCTGAC  
GCTGGCGAACCGGACAATTACCGACATGACGAAGCGTCAGCGTGATGTTGCCGACCTCGA  
TGCAAGATATATAAAGGAATTAGCCGATGCGAAAGCTGAGAATGATGCTTTGCGCGATGA  
TGTCGCCGCTGGTCGTCGTCGCTGCTCGTCAACGCCACCTGTCCCGCAATGCCAACAGG  
TAAATCCACCTCCGCCGCCAGCGTGGATAATGCATCCCGCCCCAGACTGGCAGACTCCGC  
TCAACGGGATTATTTACCCTCAAAGAGCGAGTGACAACAATGCAAAAGCAACTGGAAGG  
GGCGCAGGACTATATCAGAACGCAGTGCCAGAAAATAATTTCCCTCGCATAGAAAATTTGAC  
AAGTGACTTTTCATGAAAATGCCTCGCGATGCGGGGCTTTTTTGTATCGGTATTTTACCGC  
GCACCGCAGCGCACATAACCACCGAACCAAAACCTTTGGAATGAGCCGTTGAGGATGTC  
AGTTAGTGCTGGCGAGCCTCGGTGGGCTGACTTCTGTGCGGCAACGGTTCATTTCAAAG  
GATAGATACACACCATGAAACACCTGATTAAGATTGTTAAAGGCGAGCCAGTTGTAAGCA  
CTGAAGTTATTGCGGCTGAGTTTGGTCGCCGTCACGACAACGTTATGCAAAACATCCGTT  
CTCTCATCGAAAGTGATCATTTAGGACCCCTTGATTTCAAGGAGTCCTCCTATGTGAATA  
AACAGAACAAGGTTTCATCCGTGCTATGAGTTAACTGAGCGCGGATTTCTTATTGCCATGC  
CATTTCATCGGTGGAGAAAAGCCAGAGACGGGCGAGTCCGTCTGGTAGATAGCTTTATCG  
AGTATCGAGAGAAGGTAAAACGAGAATCAGCAATTCAGGCTGAGCGTGATTTAGCGCGTG  
TCGAATATCGCCCAATGACAAACGCCATTAAGCAGAGCAAGGAAGCCGAGGGAAAAGAAG  
CTGAGCATTACCACTTCAGCAATGAAGCTAACCTCATAAACCGGATCGTGCTGGGAACCA  
CTGCGGCTAAATTCGCAAAGAGAATGATATCGGCAAACAGAAGCAATCCGGGATTACC  
TTACCGCTGAGCAGATCCGCGCAATTAAGCAATTCAGGCTGAGCGTGATACAGTCTTCATCA  
ACATGGGGTGGGACTTTGAACGACGCAAAGCCGAGTTAAAAAGTTTATTTCGATCGTAACC  
ACCGTCAGCCGCTTATCGAAGAGCAGCACCGTCTGGCAGCCTAAGCTACAAAATAGCTT  
CGAGAGCCACTTTCACAACGGCTCTCCATTACAAAGCTCATCTACGGGTGGGCTTGATAA  
TGAAACCGGAATTTATTCTGGGCAACCAGTTACGGCAGTACTGCGAAACAACCCAAGCCA  
GAAAGTGGGGGAAATAACAGCGTTGTATCGTCGCAGTATCACCGCATTAAACAATGACCGC  
AGCCCTTAATGGGAGCTCCTTCTGCGTGAGTGTGCAATGATAATCAATAACGATGCATAC  
CGGGGTTTGCAGCTTTTACGATGGCTGGTTTATCCCTCATTGCTCGCCATCTCGATGCGG  
GGGTAGAAGAAATCGAGGGTGTTTTACAGGGTTTTTCACTATGAAAGCTCTATAAAACAG  
AATTTGTTTTATATGCGCCTACGGGTGATATACCAACTAA

>NewGenomeName\_286

TCTCACAGTTCAAGAACCTCAAGTCTCCCCATAGGCCCTCTTTAAGTCCAGACCAAAGGC  
CCTACCCAGTCTATCATAAGGTTGGACCGATGGTCAAGACGTCAGGTCAACGATAGGTC  
TAGGCTATGGCTTAGGGAAGGACGATAGGTGGTGACTATTGGTCTGTCTCTGAGTCTCTA  
TCTGTATCAGACCATAGGTACAGCCATAAGTCATAACCTCTACATCTCATAACCATAAG  
TCAAAACCTACAGTCTCACTAACCTACAGTCTACAACCATAAGACACCAACACCTACAG  
TCATAGACCTACAGTTAATAGACACACAGCTATAGACTTAAGGTCAGAGACATGTTAGTC  
AAAGACTATATCCTCTTACACCATGAGGCCGACGATAGCTCAATCAATATTATTTGGAAT  
TACCTATTGACTATAGGTCCAGACTATGGCCTAATAGCTTCCGTCAACACGACACGGCAA  
CAACCGGATAGTGAAGACGCCTGGTCATCCCGGTTAAGTAGACAGCCTGATAAGTCATAC  
GAACAACAGGCAGATGACAGAAAGTAGTTGACAAGATGTAACGATAAGATGTAAGCTGTA  
CCACATCGAAACAACGGTGATGACCAACACTGAAATGGTCTACCTGAAGTCTCTGACTG  
AAGGGAATGCTCTTTAACAATCTGGATAAACTCTTAATGTGCGCCGATAGCGACTAACTA  
CAGGGCCTTTGAGTCTACATCTGAAGGCCCTGACTGATAGTCACTAACTTAAAGGATGGA  
CACTATGAAACACTTAAGCACAATCACTAATCGCAATGAAGTATTTCGTGAACACTAAAGG  
TTATGCGTGATTTCAGCTTAAAGAGATGACAGGAGCGCGTCACCGTGTGGTAGTGCGCAA  
GGTCTCAAGCAAGCCGTTTCAGCAACTACAGCGTAGATACTGTGCGTATAAACAACGAGAC

CTACCTGATAGACTCACAGATAACCGTGAGTCCTACAGCGGGCGTCTCAGCTCCTTATTT  
CGCTAACTGAGAGTGATTAACACTACAGGTCGTTAGACTGCTAGCGGCCTGACTGATAGTCA  
CTAACACATACTTAACTTTGAGAGGATATACCTATGGAACGTAACGCTAACGCATACTAT  
GAGCTGCTGGCTGCAACTGTTGAGCTGTTCAATGAGCGTATTCAGTACGACGAAATAACT  
GAAGGCGATGACTACAGCGATGCGCTGCATGAGGTCGTAGACGGTCAGGTTCCGCACTAT  
TACCACGAGATTTTTACGGTGATGGCTGCTGATGGTATAGACCACGAGTTCGAAGACTCT  
GGGCTGATGCCTGAGACCAAGGACGTAACGCGTATACTACAAGCTCGCATCTATGAGGGC  
CTGTATAACGATGTGTCTAATAGCTCTGAGGTGGTCTGGTTTGAAGGCTGAAGAGGAAGAC  
GAAAAGGCTGAATATTGGGTAGTTGACACTAGAACAGGCGAGATAATTGAGGCAGCTGTA  
TCACTTTACGAGGCTATTGCATGTGCAAAAAGAACTCTATGAGGAAGGTTTTACATGCAG  
GTCGAAGACATCAACGATAACGTAGTGTTTCGATCCTGCGGCTGCTGAGGAGGACTGCGAG  
TGATGGTAACTTATGGTCTCTGCCAGCACCACGTCACCAGCGCCCGGCTTATAGTCCAGA  
CCGGGCGGTTAACCCATGATGAGACTATGCGTCTCCTGAAGGTGGTCTACAAGCGCCGCA  
AGCGTATCCACGACAGTTTGCACGCTGAGTGATAGACGAGAGGCCGTCGACTGATAGGTC  
GCCTCAAAGATTATCACTTAAATTGATAGGAGTTAACTAATGAAATTTACAATCATCGCA  
CTTTACATCGCCAGCATTCTGTCTATGGCTAACTGCGGTCATAGTCGATGGGAATGCACTA  
CGTCTTGGCTGGCTGGCAGTGGACATAATATTCTCTCCGGTAGGGATCGTGCGCGGTCTA  
CTGATGTGGATTGGACTGGCGGGATAATCTATGAGTCTTGCCTATTGATAGCCATAGGC  
TATGGACTTATCGCCTACGTGCTGGTGAGAGACATCGACAAAGCGCGTAAAGTCTACAAA  
TTCAACTATGTACGTCTGGGCCGCTGGACTGTACGTCAACCTAACGGACGATTTCATGCGC  
AACTTAGCGAACGTCTGGGATATAGCAACTATTGGGAGCAAACCTGTAATGAAAACCGTAT  
ACATTAACAGACCATCTATCCGTTAGCAGTGTAGAGCAATACAGCGTGACGTGTTCTTAC  
ACCGCCGATGGAGGCTGAGGGCCATAAGTCCGAACTGATGTGTCTGGCGTATGGTGGAC  
GACCGATCACTGACGATGGTAAACTTTTAGTCTCAGGCTGGAAGGCGATAGACCAACGGT  
CAACCATCAAGCACACGACTCACGGTGACTTCAGTCATCTTCACGCTAACCCACTGATAT  
GCAAGTAATTATGACTTAACTATCACTATAGGACTCAAGGTCTAAGACTACAAGTGAAAG  
ACCAAAGAGACTTTAAGTGAAAGACTAATAACAAGGACTTTAAGTATGAGCGTCATCTCT  
ATTGACAAACACGACTTCTCTGATGTGTGCGAACGCCATTGAGCCGTTAACCTGCTGGCC  
GACCACTACGGGCAAGACCTTGCAGTCAAACAGCTTCAGCTTGAGCATGAGGCATACACT  
GAAGGCGAGCGACGTTTCATCAAAAACCTTGAGCGACAGACTGAGCGCGGGGAACTGGCA  
GACAATCAGGTCGCCAAGCCTTTGATGCAGACTCTGGTTCCTAAGATTGCGCAAGCCGTC  
AAGGAGTGGCACGAAGGTCCAGACGGGAAGCTGTCAACCTCTCGTCTAGCGTAGCGTTC  
ACCATGTTGAGCACTGAAGAGAGGGCCGTTAAAGACCGTTCTCTACGCATCTCCTGCGAG  
TCTGCTGCTGTCATCACTGAAGGTCATCCTCTCCAAGCTGGTCAAGCCTGAAGGGATA  
CCGATTACACCGATGGCCTCCGCGATAGGTCGCACACTTGAGGACGAAATCCGCTTCGGG  
CGCATCCGTGACAAGGAGAAGGAGCACTTCAAGAAGGCGATAGCTGATAACCTGAACAAG  
CGAGCTGGTGATCCTATAAGAAAGCCTACATGCAAGCGGTCGAAGCATCCATGCTGGAG  
CAAGGCCAACTGGAAGATGCATGGGGGACTTGGAGTCCTACAGAGGCTGTCCACGTTGGC  
ATCAAGATGCTTGAGATTGTCATCCAGTCAACACAACCTGGTTCGAGCTTAAGCGTTACGGT  
GCTGGCAATGCAGCGGCTGATGTGCGAGATGGTCCACCTGTCAGACTTCTGGGTCAAGAAG  
ATGGCACAACGTGGATTTCAGCCTTGCGGGTATCGCACCAAGTCTATCAGCCTTGCCTCGTT  
CCACCTAAGCCGTGGACGGGTGTCGTAGGCGGTGGTTACTGGGCCAAAGGTCGCAGACCA  
TTACCGCTGATTTCGCTTAGGCTCTAAGTCTGCGGTAGCACGTTACGAAGACGTGTACATG  
CCTGAAGTCTATGAAGCTGTGAACATCATTGAGAATACACCTTGGAAGTGAACAAGAAG  
GTTCTGGACGTGGTGAACATGGTTCGAGAAGCTGAACAACACGCCTATTGATGACATCCCT  
CAGATGGAACCACTGAAGCCTGAGGCTTATGCGGGTGAGACCGAGGAGGAACTCAAGGCA  
TGGAAGAAGGCTGCTGCTGGTATCTATCGCCGCGAGAAGGCCAGACAGTCACGCAGGTTG  
TCACTGAGCTTTATCGTTAACCAAGCGAACAAGTTCTCTCAGTTCAAGGCTATATGGTTC  
CCGTACAACATGGACTGGCGCGGTCGCGTCTACGCTGTGCCGATGTTCAACCCTCAGGGT  
AACGACATGCAGAAGGGTCTCCTGACTCTGGCAGTTGGCAAGCCTATTGGTGTGACGGT  
TTCAAATGGCTAAAGGTACACGGTGCAAACTGCGCGGGTGTGCGATAAAGTCACCTTCGAG  
GAGCGCATCAAGTGGGTGGAAGACAACCACGACAACATCATGGCTGCTGCTAAAGCACCT  
ATGGACAGCATTGAGTGGTGGGAAAGTTAGACTCTCCGTTCTGTTTCTCGCGTTCTGC  
TTCGAGTATGCTGGCGTAATGCACCATGGCCTGTCTTACTCCTGCTCGCTGCCGATAGCG  
TTCGATGGGTCCTGCTCTGGGATTTCAGCACTTCAGCGCGATGCTTCGTGACCACATCGGT  
GGACATGCGGTAACCTGACGCCTTCCGGTAAAGTCCAAGACATCTACCGCATCGTGTCC  
GACCGCATTGAGGAGGAGCTTAAAGTCTGCTGGTTAACGGCACGGACAACGAGATGGTA

ACTCACGAGGACAAGAAAACCTGGTGAGATTACCGAGCGTCTCAAGCTGGGGACACGAGAG  
CTGGCCCGTCAGTGGCTGACCTACGGTATGTCACGAAAGGTCACTAAGCGTTCGGTCATG  
ACTCTGGCCTACGGGTCGAAAGAGTACGGCTTCGCAGACCAAGTTTACGAGGACATCGTG  
ATGCCAGCGATTGACTCAGGGTCTGGCGCTATGTTCACTGAACCAAGCCAAGCATCTCGC  
TTCATGGCTAAGATGATTTGGGAAGCTGTGAGTGTGACCGTAGTTGCTGCGGTTGACCGG  
ATGAAATGGCTTCAGGGTGTGCTGCCAAGCTGCTGGCGGCTGAAGTGAAGGACAAGAAGACG  
GGTGAAATCCTGAAGCCTTGCCTTCCGGTACACTGGGTACACCTGATGGGTTCCCGGTC  
TGGCAGGAATACCGCAAGAAGGATACTACTCGTCTGAACCTGATGTTCTTAGGGTCCTTC  
AACCTTCAACCTACCGTCAACAAAGGTACGAAGAAAGAGCTGGATAAGCACAAGCAGGAG  
TCAGGCATTAGCCCGAACTTCGTCCACTCACAAGATGGTAGCCACCTCCGCAAGACTGTA  
GTCCATACTCACCGCAAGTATGGCGTGATGTCGTTTCGCAGTGATTCACGATAGCTTCGGG  
ACCATCCCGGCTGACGCTGAGTATCTGTTCCGTGGGGTCCGTGAGACTATGGTTCGAGACC  
TACCGCGACAACGATGTGCTGCTTGACTTCTACGAGCAGTTTGAATACCAGCTTCACGAG  
AGCCAGCGCGATAAGTTGCCAGAGCTTCCGAAGAAAGGTAACCTGAATATCGAAGACATC  
TTGTCTTCAGACTTTGCATTTCGCTTAACAGGAGAGAGAGCTATGAAATTTGCACACAAGC  
ATACTGGCGTTAATGGTGGGACTCAAATCGTGACCGTAACAGAACACAACGGCAAGGGTC  
TGGTGAAGACCACGGTCATCCCTACCGAGATGTCCAAGCAGCTTAACATCCCGTTCAAGA  
CTCTTGTAGATCTGGTCGAGTCCAGCCACGAGAAGTACCTGAAGGACGCAGTGTCCAAGC  
TGGAGCAGGCCAAATGACAGACCTACAGTACTGGCCTTGTGGCTAGGAGCACTCGCAGT  
ATTCACTTTAATCCAACGCAGAAGAGGTTAACCTAACTATCACTATAGGATTAGACTCA  
AGGTCATGACTCAAAGTCGTGGCCTTCATGATTAACCCTGAATAAACACTACTGGAGATT  
TAACCGTATGTATCAGAATACTATCAACTTCGAGCGCATCCGTGAACGTCAGCAGACTTG  
AAGGTTACATTCTAAGGGCCGCAAGCTGAACAAGACTAAACGTGGAGGTGGTATCAAGG  
GTGCTTTCCGTAACGCTGAGGGCAAAGACTCTATGGTCAACCAAGAGAAATACTTCGTAG  
GAGCATAACGCTATGGGCCGACTTTATAGTGGCAACCTCAACGCTTTCAGAGCAGCGTGT  
GACAGGCTCTATCAGTTAGACTTCGCTGTCATATCTCAAGAGTTTCAAGACCATGTGTCA  
CGCCAAGAGTGCATGAAACTCAGGGTAGAGGACCGAGCTGGTAACATCTTCGCGCTTAAG  
ACCTTCGAACACCGCGATGAAAACGTACTGTACAACACTGCAACAGGCTTCTTAACTGT  
CTCGCTAACCAACTCGACACATGGAGCAAATCATAATGACAACCTATTAACACTAACCCGC  
ACCGCGCTGTAGATTACTCTGAGTCTGGCGTTAAGAAGGCACTGGCAGCAGCCGGGTCGC  
TGGAAAGCTGAAGTGAAGTATGACGGTGTGCGCCTGAATCTCCCGGTCCTGCGTGAAGGTG  
AGACCTACTGGCTGAGCCGTGAGTCTAAACCTCTTCCAGCCTTGGAGTGGATGAACTCTG  
AGTTAGGGAATGCGTGGACCCAAGCTGACTGGCGTTGGTTCCTACGTCAAGCTGGATACG  
AAGGCGTGGGTCTGATGATTGACGGAGAGGTCATGGTCAAAGGCGTTGACTTCAACACAT  
CATCGGGTCTCATCCGAACGAAGTGGCTGAAGCCTAGCAACGAAGAGTTCGCTGAATGTT  
ATCCGGGACGAGGCAATAAGGTCCCGTTCTGGGTAGCCCGGTCAAGACTTAAGGTTGTTG  
TATACGGTGTCTGATGACATGACAACCATGCTGACCCGAAAGCCGAAGGTCTATCCATA  
GCGTAACCCGCCTGAAGGCCGAAGCTATCGTCCCTCTCCTTCAGAAATACTTCCCGGAAA  
TCGACTGGGTTCTCTCTGAGAGTCATACAGTGTTCACCTTGAGTCTCTTCGTGATTTGT  
ACGAGGAGAAGCGAGCAGATGGACATGAAGGTCTGGTAGTCAAGGACCCACTGGGAAAAT  
ACAAGCGTGGTAAGAAGTCTGGTATGTGGAAGATGAAGCCAAGTGAAGAGGCAGATGGTC  
ACGTTGTTCCGCCCGGTGTGGGGAACAGAAGGTCTAGCCAACGAAGGTATGGTCATCGGCT  
TTGACGTTATGCTCGAGAACGGGATGGAGGTCTCCGCAACTAACATTAGTCGCGCCCTTA  
TGTCCGAGTTCACAGAGAATGTTAAGTCAGACCCTGACTACTACAAGGGGTGGGCTTGCC  
AGATTACCTACATGGAGGAGACACCAGATGGCTCATTGCGACATCCCTCGTTCGACCAGT  
GGCGTGGGACGGAAGATAACCCGACCATTAAGAGCTAACTAAATGTCAACCCAGTGGTCT  
TATGACTGCTGGGTTTCTTTGCGTCTGGGCCACCAGCTAGACCCTAAGCTATCACTATAG  
GACAACCATCAACAACCTAAGGAGACTCTATGTCTAAGA ACTTAATGTTCAACCGTTATT  
CTAATACTTCCACCTGTCCAACAACCCGTTTCGCTTGCAATAAGCGCAACGAGAACTTG  
GCTACTTCGGGAAGGCCGTTAAGCTGTCACCTACAGTCTATGCTCTGATTACTCCTGGAA  
AAGCTGAAGAGGCTCGCCAGAAGCGTGAGACAAATGTGCCCGTGGTCTACACTAAGTGGC  
CTCGCGTTCGGCTGTTTGTGAGGTCGTAAAGGAGGTGTTCTTATGACTACTTATGATAA  
TATGATTATCAAGCTAATCGATATGAACGATGGTAATCCAGACCATTTATATAACTGTTT  
CTTCAATTGTGCTGGAGTTCCTTGTAACATCTGCCCGCTAAGGATGATGACGATATGAC  
CTTAGGTGAAATCCGAGCGATGGACCCGCGTAAATCTCATCTGAATAAACTTGAGGTAAC  
TCCTACAGATGACCAGCCTTCCACTGAATCAATCGAAGGTGTCACTAAGCCTTCCCATTA  
CATGCTGTTTCGACGACATTGAGGCTATCGAAGTGATTGCCCGTTCAATGACTCGTGAGCA

GTTCAAAGGGTACTGCTTAGGGAACATCCTTAAGTACCGCCTACGCGCTGGTAAGAAAGT  
CAGAACTTGCTTACTTAGAGAAAGCCAGGGCGAAAGTTGGATTCTATGGGGAAGTGTACG  
AGAAACATAAGGATAAGTGCTATGACGCGTGAAGAACTTCAAGCTGCATCGGCGAAGCGT  
AGAGCGCAAAGATTTTATCGTGCATACAAGGCGCTGCGTAAGGGTATGTTCGATGTTCAA  
TTAGGACACAGGGAGTATTGTGATAGCGACCTCCTACCGTTTGCTTATAAGAAGACACCT  
AGTCTGATTATCAAGGTAGAGGAGTATGAATATTCTGATGACTGTGTTATGGTGAACCGC  
TATGCTTAACGATGTTCTGTACTTCGGCTTAATTTGCGCTGGAGTAGGCGCGTACTTTCG  
CTTAATGTATTGGGAGATAGAGGTGGAATATGGTAAAACCAAGTGAGTGGTGCCGTGAGA  
TGTATGAGAAGACGCTCAACCCGGACTACATCACGTTATAACAACCAATGGAAGGAGCGCG  
GTTTATGACTGAGGTTGAGAAGAAATACATCGTGGAGCTTGAGGGTTCGCGTTCAGTCCCT  
CGAGGTTCCGTTGTATGCAAAGTCTCTTGAAGAGGCTACCCTGAAGTCCCAAGAGTATGA  
GGACGCTGGGTTTGTGGTTCGGACGGATTTCGTCCTGAGACCTAAACTATCACTGTAGGACA  
GACGTCCAGTTCGTAACCTTTAAAATAGGAGATTTACACCGATGGCTAAAGAGCAACTGAA  
GACTTTCACCACTCCGGTAGCTGGCATAAGTTTGAGCCTTACGCATGGCTGACAAAGCAGA  
CACCAAGTTTAAACGAGCGTGGTGAGCATAAGGTTAACCTGACTTTCAGTCTGGATGACCC  
GAAGGTCCGTAAGATGATTGATGTCTTACAGAAGATTCACGACGATGCGTATGCGAAAGC  
ACTTGCAGACCACGAGAAGAACCACCTCAGGTTACGCGTGGCAAGAAGCCTATTGAACC  
ACGAGAAGGCGACATGCCGTGGATTGAGAATGGTGACGGTACTGTTACCATGAAGTTTAA  
ATGCTTCGCGTCTTACCTGAAAGACGGCAAGTCCGAGCCTATCGTATTACGGTTCTACGA  
CACCGATGCTAAACTCATCCGTGACGTCCCGAATATTGGCGCTGGCTCAAAGCTGAAGGT  
CAAGTTTAAAGTCCGCTTAAAGTGGAAACGCTGCGACTGGTGCAAGCGTTAAGCTCCA  
ACTTGAGTCCCTGCCTTCTGGTAGAACTGAAGGAGTGGAAAGGTGATGGTGCTGGTGGCGA  
TGGTGGCTGGGGTGACGATGAAGACCTCGGTACTGGCTACAAAGCGTCAACCGATGGTGA  
CTTCGGGTCTGATGACTTCGGTGACGATGGTTCCGAAGGTGGTGACGACTCCAACTCTGG  
TGGCGATTACGACTTCTAATGGCCCAATGGTCTGCAAAACGGGGGCACTCTGTGGGTGCC  
TACCGCTCTGGACTTGAAGCCAAGAACCAGCAGTGGCTGGAACAGAACGGCGTCAAAGCG  
GAGTACGAAAGCCATTATATCAACTATGTGATTCCGGCTTCCGACCACAAGTATACACCA  
GACTTTATCCTTCCCTAACGGTATCATCGTGGAGACCAAGGAATCTTCGCAGTGGAAAGAC  
CGTAAGAAGCACCTTATGGTACGAGAACAGCACCCAGAGTTAGACATCCGGTTCGTGTTC  
TCAAGTTCCTCGCTCCAAGTTATACAAAGGGTCTCCGACCACGTATGGCGCATGGTGCAGAA  
AAGAACGGCTTTAAGTATGCCGATAAGTTCATCCCGGTTGAGTGGCTGCGAGAGACGACT  
GTACGTCTGCCTTCCGGCATTCTCATCCCAAAGAAAGGAGTTAAGAAATGAGCAAGCAGT  
TTAAACTGTAAAGTGCTGAGTGTGGCTGGCCTTGTGGGACTATCGTTACCCAGTGTGAGA  
AGGACCCCCAGCCAGCGATAGGAATGATTCTAGTTGAGTGCCAGACTCCAGGCACCTACA  
AACACGGGTCTAAAGGCCACAATACGCAACCTGAGGGAATGTGGGGAGCGTGGGTCTGTA  
CTGAACGCCTTGAAGAAATCAAGACAGAAGAGAAACACCAAGTCCCTGCCAACTTCGAGCG  
TACCTCCTGTGACTGTGAAGCGTGAAGTCCCTGACAATCGACAAGATTGGTGTGGGCCAGA  
CGTTCATCGTCCACGGCAAGCCTGACGAAGTTTACGTGAAGATTAGCAACTCACACGTCT  
TCAACCATAAGCGTCTCCAGATGCACACCACCGGACGCACAACGCTTACCCAGCACATG  
AATCTAGTGGTCGTAGAATTGGTGGTGTACAATGGTAAGTAAGGTGCAATTCAACCCACG  
GTCCCGGACTGACGCTATCTTCGTTCACTGTTTCGGCTACCAAGCCAGAGATGGACATCGG  
GGTAGAGACCATCCGTATGTGGCACAAGCAGCAGGCTTGGCTGGACGTAGGCTACCACTT  
TATCATCAAGCGTGATGGTACTGTGGAAGAGGGTTCGCCCCGTTAAATGTCGTAGGGTCACA  
CGTTAAGGATTGGAACCTCCCGGTCTGTAGGCGTCTGCCTTGTAGGTGGAATCAACGCTAA  
GGGTCAGTTTGAAGCTAACTTCACTCCAGCCCAGATGAACTCCCTGCGCAACAAGCTGGA  
TGACCTGAAGGTCATGTATCCTCAGGCAGAGATAAGAGCACACCATGACGTAGCACCAA  
GGCGTGTCCAAGTTTTCGACTTACAGCGCTGGCTGTCTACCAATGAACTGGTCACTTCCGA  
CCGTGGTTAATAAACTCTAAGGGAGAACAACCCAATGATTAACTTATCGAATTTCTTGG  
TCGTCTGGTGGTGCCTGGTTATCGTCTGTGCTTCGGTACTGGAACGAAAGGTAGAAAAGAA  
GACTGCTGATGGTGC GGCTGATGCTGCTGCTCTGGCTGACAAGCTGACCATCGCGTCACT  
GGAAGCTGGCATGAAGGCTCGTCAGGCTGATACCAAAGCTGACCAGTTGGAGCAGTTCTT  
CAAAGACTAAACTATCACCTTAGGGATGGGACCATGAGTCCCTGTCCCTCTGTTTCGATTT  
GTGATTAAGGAGTGACCAATGTCATACGATGACCAAGACGACGAGAGTGTCTTTCTGTAT  
CACACCCAGTGTCCAGACTGTGGGTCCCTCGGATGCCAATGGTGTTTACTCAGACGGCCAT  
CAATTTTGTTTTGCATGTGACCCTTCAGTCGCATGGAAGAAAGGAGACATGGAGTTGACC  
GAGGGATACACACCCTCAGGAGGTAGAAAGCAAGTGAGCAATCTGTAAACGTTCCGGTGAG  
AACGCTGGACGGTACGTCCCACTACCAGCCCGTAGTCTCAGCATGGAGATATGCAAGAAG

TACAGCTACTGGGTGGGCAACATGGGTGGCAAGATGGTTCAGGTCGCTGATTATTACGAC  
AGGTCCGGGACAAAGGTAGGGCAGAAAGTCCGAGACGCTGAGAAGAACTTCACGGCTATA  
GGTAGCGTCAAGTCTGACATGCTGTTCCGGCTCTCAGCTCTGGAACGGTGGCAAGAAGATA  
GTCATCACCGAGGGTGAGATAGACGCTCTGTCTGTGGCTCAGGTGCAGGACGGTAAGTAT  
CCTGTGGTCTCTCTTCCGTTAGGCGCTAAGTCTGCTAAGAAAGCTATGGCTGCGAACCTT  
GAGTATCTCGACCAGTTCGAAGAGATAATCTTGATGTTTCGACATGGATGAACCGGGTTCGT  
CAGGCCATCGAGGATGCAGCTCCAGTCTTACCAGCAGGTCGGGTTAAGGTTGCGTTCATC  
AACGGATATAAAGACGCAAACGCTGCACTTCAGGCCAAGGACTTCAAGGCCATCACCGAT  
GCAATCTGGAACGCTAAACCTTTCGTCCCGGCTGGTGTGGTATCAGCGGCAAGTCTGAAG  
GACCGCACACGGGAGGCAATGCTTAAGGCAGAGACTGAAGGTCTCATGTTCTCGTCATGC  
ACAACACTCAACGCAATGACCCTTGGTGC GCGAGCTGGTGAGCTTATCATGGTGACTTCA  
GGGTCAGGCATGGGTAAAGTCTACCTTCGTCCGTCAGCTACTCTTAGAGTGGGGCAGAGGT  
GGTAAGCGTGTGGGTATGGCTATGCTTGAAGAGGCTGTAGAGGAAACAGTTCAGGACCTT  
ATGGGTCTGGACAATAACGTCCGTCTACGCCAGAGCAAGGAACTGAAGCAAGCCATCTTA  
GAGGACGGACGGTTCGACGAATGGTATGACAAGCTGTTCCGGAGACGATAAATTCCACCTG  
TACGATTCATTCGCAGAGTCAGAGGAAGACACTTTGTTTCGCTAAGTTAGCCTACATGGTG  
GATGGTCTTGACTGCGACGTCATACTTCTGGACCACATCTCAATCGTTGTGTCTGGCATG  
GAAGATAACTCAGATGAACGTAAGACCATTGACAGAATCATGACTCGTCTCAAGAAGTTT  
GCGAAGACGAAGGGCGTGGTTGTCGTTGTCATATGCCACCTGAAGAACCCAGAGAAAGGT  
AAATCGCATGAAGAAGGACGACCTGTTCAATCACTGACCTACGTGGTTCCTGGTGCTCTA  
CGCCAACTATCTGATACTATCCTCGCACTTGAGCGTAACCAGCAAGGTGATACTCCTAAC  
GTTGTTACGCTTCGTCTACTCAAGTGCCGCTTACAGGTGATACTGGAGTGGCTGGACAC  
CTTGAATACAACAAAACGACAGGGTGGCTTGAACCGATTAGCTTCACTAGCAGCAGCGGA  
GAAGAGGATAGCGGCTCGTGGGAAAACAACGGACTTCTAAATGTCAATGCCCTGAGTGCG  
ACTGGAAGTCACCATAACGGAGGACACCATTAGTGTTTAAGAACTTAAAGCTCGATACCA  
CATGTTTCATGTACAAATGGTGGAGCGATGAAGCAACCTGCCTGTCGAACATTCTGGGAGA  
CCAGCGGTTCAACTCTGAGGCATGGAAGAAAGCTAACCGGAAGTTCATGTACCACTTCTT  
GCGTACAGACTTCTAGGTCTAGACTCAAGGTCATTCACAGCGAGTGGCCTTTATGATTAG  
ACTAAAGCGGAGGATTAACCATGTTTGACCTTAAGGATATTTGGGGTTCGGACATCGAGA  
CCAACGGTCTCCTTGACACCGTGTCCAGTTCATTGTGGGGTCCCTGATTAATGCCGAGT  
CGAATGAGACCCTTAAGTATGGGGTAGCGCCGATGGTCCGTATCGTCCGTGGCTTCAAAG  
AGTATGTACAGAAGGTGGAAGAAATTGCTGCAACGCCTACGGGTATGCTGGTCTTCCATA  
ACGGTATCAACTATGACGTCCCGGCTATAGACAAGCTGAAGCGTTTGTACTTTGGGAAAC  
GATTTAACTTCCCGAAACACAAGATGATTGATACCTTGGTGCTGGGCCGCTTGATGTATC  
CCAACATTAAGTTCTCAGACATGGGAGCGGTGAAAGCTGGTTCGTCTGCCACCTAAGATGA  
TGGGACGCCAGTCTCTTGAGGCTTGGGGCTATCGTCTCCGTGAGATGAAAGGTGAATACA  
AACACGATTACGTTGCCAAATGCAAGGCTGAAGGTATCGAATATAAGGCTGGGGACGAAT  
GGTTGTTCCCGTCTCAGGAGATGCTGGACTATAACGTTCAAGACGTTGTGGTCACTGG  
CGTTGTTCAAGAAGTTCCTGACTGACAAGTATTACTTCCAGTCTGAACAGTTCGCTTTTCG  
AACAGATTTATGCGTTGCGTCTGGAACATGATGCTGCGTGGACCTGTGCTAAGATGGAAC  
GTAACGGCTATCCAATGAACACAGAGATGGTTCGAAGGCTTATATCGTGAACCTACCGTCA  
AACGTGCAGAGTTGCTGGACAAGCTGCGTTCGACTTTCGGTAGCTGGTACGCACCAAAGG  
GAGGCAAGGAGTTCTTCAGGCATCCACGGACAGGTAAGGACCTTCCGAAGTATCCGAGGG  
TCGTGTATCCTAAGGTTGGTGGCATCTTTAAGAAGCCGAAGAACAAGCTCAACGATTAG  
GTCTTGAACCTTGTGAACGCGATACGCGAGACACGATGGAGGGAGCACCATTCACACCTA  
TCACTTACGTTGAGTTAATCCGGGAAGCGGGGACCACTTAGCGAAAGTTCTGATGGAGC  
GTGGCTGGGAGCCTGTGGACTTCACTGACACCGGGAAACCTGTAGTCGATGACGAGACGT  
TAGAACATGTTAAGTTACCAGACGCAGAGGCTCAGGCTTTCGCTAGAGCTGGTCCGTGAGT  
ATCTGGTAGTCCAGAAGCGCATAGGTCAGGCTGCTGAAGGTAAAGAACGCATGGTTGAAAC  
TTGTAGGGCCAGACGGACGTATGCACGGTTCATCAACCCATGTGGTGCAGTAACCGGAC  
GTGCTACCCATAGTTCACCAAACATGGCTCAGGTCACCGGCTAACGGTGCTCCGTATGGTG  
AGACTTGCCGTGGTGCTTTCCGTGCAGCTTGAACAAGACGGATGGTAAGCCAGACCCTT  
GGATTCAAGTGGGTGTGGATGCTTCAGGCTTTCGTTGTCTGGGGAACCGAGCGG  
CTCCGTTTGTGGTGGTGCCTATGCGAAGACTGTGGTGAAGGTGACATCCACTGGGCCA  
ACGCAGTAAACGCTGGGTTAGCACCTAACGTCCACGCGATAAGTTCGAACCACGACCATG  
ATGCTTTCCGTAATAACGCTAAGACGTTTCATCTATGCGTTCCTGTATGGTGCAGGGGCCG  
CTAAGATTGGACTGATAGTAGGCGGTGGTAAGAAGGAAGGTTTCAGCTCTCATGAAGAAAT



TCATTGAGGGTACACCAGCCATCAAAGACCTCAGGGAAGCTGTGAGTAATACGTTAATCT  
CTGAGTCCAAATGGGTAGACGGTGAAGAATATCGTGAAGTGGAAACGCCGCTGGCTTAAAG  
GCTTGGATGGTCGACGCATCCACATCCGGTCTCCACACTCAGCACTTAACGCCTTACTTC  
AAGGTGATGGTGCAGTGTGTAAGCACTGGATTGTTGAGACAGAACGTATGCTCGAAG  
AGGCCGGGTATGTCCACGGCTGGGAAGGAGACTTCGCGTACATGGCATGGGTGCATTAAC  
ATCATGGTGCACATTAATCTGGTGAACCTCGGTGAACCTCCTAATGGGACAATACCGAGCC  
AAGCCATAGGGAGGATGTATGAGAGGCAAGAAGTTAATTCTTGAGGGCCACTGAGACTGGC  
TGCATAATCCCTACGTCACATAAATTGAATCAGGATGGATACTTCCGAAAGAGGACTAAC  
GGTGTCTTGAGATGTATCATAGAAGTGTATGGATTAAAGCTAATGGTCCAATACCTGAA  
GGTTTCGAAGTAGACCACAAGTGTGTAATAGAGCTTGTGCAACGTCGAACATCTACAA  
GTATTAGACCGTGACTCACACTTAGTCAAGACCAACCAAGAGCGATACGCTGCTAGGAAG  
CTAGAAGCACGAGACTACTGGGTAGAGACTGGGTGTACAGGAACGAAGTTAGCCGAAGTA  
TTCAATGTGTCGTTCTCAGCCGCTGTGGGTGGATTAGAGAGTGGAAGGCGTAGAGACTA  
TCCGAAAGGAGTAGGGCCGTGGGTGAGATTCCCACGTAACCCGAAGCGCCAGACAGTCAC  
CTCAAAGACTGATGATATAGTCCGACACTTCCAGTAATGGGAGAATACAGAAAGGATGAG  
TTACAGATTGCTTGTGCTACTCAAGAAATAGCAGAACGTACAGTCGAAATTGCGCAGCTA  
GCTATGCGTAAGGTGGGTGAGTTCTATAACTTTAAATGTGTCCTTGATACCGAAGGTAAG  
ATTGGACCAACTTGGAAGGAGTGTCACTAATGGCTATGACCAAACGTATGCGAGTTTCGT  
TCTCGCTGGGTGCTGTGTTGTTAACTGAAAACGTGGAGAAGTTCAAGAAGACTCTCTGCG  
AGCTAAGCCGTAAGGTCTCAACGGAGAGAAGACCACTGGTTTTGAGCGTAAGATGGTAG  
AGGTTGGTGTGACTGAAGGTCTGGAAGCTGTAGTCGAACTGGTCTTCAAGAAAAGTATTT  
GTCGACAGTCTGAAAGAAGACCTGAGCAACTACTCTGACCAGCCGAGCTTTGGTAACTTC  
CGGGTGGAGTTCGAACGATGAGTGAATACTTACGGGTCTAGCGGCCCTTAAGTCCTGCC  
CGAAGACCTTCCAGTCCAACACTATGTGCGCAACAACGCTGCACTGGTGGCTGAGGCTGCGA  
GTCGTGGACATCTAAGCTGCCTGTCTATGGACGGGCGTAACAACGGTGCGTGGGAGATTA  
CCGCTGCTGGCACCAAGTTCCTGAACCAACACGGAGGCTGTCTATGAGTGACAAGAAGAT  
AGCTCTTGTCTTGATGGTGATTACCTAGTGTCTCATCTATGGCTGCGGCTGAGGATGA  
GACCGATTGGGGTGATGATATTTATACTCTGATTTGTGACCACGCCAAGGCTCGTCGTAT  
CCTTGAGAACACCATTTCTGAAATCGTTAAGAAGCGCAAGGCGTGGAAGACGCTAAGAT  
TGTGATGTGCTTCACTGATGATTATAACTGGCGCAAGGACGTCCTGCCTACCTATAAGGC  
CAACCGTAAAGGTTTCGCGCAAGCCTGTAGGATACAAGAAGTTCGTAGCCGAAGTGATGGC  
CGACCAACGGTTCAACAGCTTCTGCGTCTACGCTTGAAGGCGATGACTGTATGGGTAT  
CATCGGGACACGACCTCAGATTGTAGGCTGTGACCATGCTGTTCTGGTGTCTGCGATAA  
GGACTTCAAGACCATCCCGAACTGTGAGTCTTCTGGTTAACCCTGGTGAAATCCTGAG  
TCATACGACTGCTGAGGCAGACTACTGGCACATGGAGCAGACCATCAAAGGTGACACTAC  
AGATGGCTACGGTGGCATTCTGGGATGGGTGAGGATACCACTCGTGCATTCTTGACGA  
GCCGTAATACTTTCGTGCAGGAGAGCCGCGAGCTTAAGACTGGCAAGAACAAAGGCCAGAT  
TAAGACTGAGTGAAGAAGTATCCGAAGCGTGAAGACATGACGTTGTGGGACTGCATGGT  
GACTCTGGCTGCTAAAGCTGGGATGACAGAGGAGGAGCTTCTGGTCCAAGCTCAGGTCCG  
TCGTATTTGTCGAGCATCTGACTATGACCCTAAGTCCAAGGAGGTCATCCTGTGGACACC  
ATCCATGTAATATACTGGGCCGGACTTCTGGCCATTTACTGCATGTACAAGTGGTTCCGG  
TCGAACAACCGACCTAAACACTGAGTCTAACCAGATAGTCATATCCTATCAATCCAACAGT  
CATCCATAGGTGAAACACTAAACTATCACTATAGGGACTTTAGGGCCTAAGATATGACTA  
TAAGATAGACTTTAGTCTTAACTTAAAGAGGAGATTCAAGATGGCTATTAATGCTATTGA  
AAACGTTGTTAAGCAGTTACAGGAAGAAAGACTTGATGTCCCAGACATCTCCAGTCTGC  
TATCCAGTTCCTGCACGTATTGTTCAACGCAAGCTACGCTGAGAAGATGGGAGCTATTAG  
TCTCCTCAAGCAGCAGGGCTACAGCGATGCGTTCATTGCCGGATTCATCAAGGGTCTCCA  
GTATTGCTCTGACTCTCGACTCTGCGATTGCTATGCGTTCGTGAGCTGAAAGATAACCGT  
TCAGTTCGATTAACTGTAGGAGGGACTATGTGTTTCAGTCCGAAGATTAGCACTCCGAAG  
CCTTCGGTCCAAGCACCTGAACCAGCACCTCTGAGTGAGGAAGTTGCGTCAGTTGACATC  
GGGGCTGAATCGGATGTGGACACCAATGAGACCAAAGGTATCAAAGACCTTAAGGTCAAG  
AAGGAGTCTGCACCTAAAGATAAATCGTCAGTTAGCCGCGCCATGCGAGCCTCTGGCGTC  
AACATGGGGTAAGACAATGCTACCATATCTCAACTCACGCGAAGGTCGCCACATGTGCGC  
TTGTCGCCTCTGGGAAGACGGGCAGTCTAACTTCAAGTCATTTGAGGACTTCAAGGCTCA  
TACTTACCGTATGGCTGACGAGTTCGACGGTGAAGAATACACAATATACGATGTCTCAGG  
TCAACCAGTAGCGTATCTCTACATGCTGGCTACCGCATCTTGGCACCGACCAACTCCCGG  
TCTTGACCTTTCAATCGTCGCTATTCGTCGTGACTCGCAGTCCTCCCGCAAGGTTCTTGA

GACTGTCAGACACATCATAGACGAAGAGTGCAATCGTTGGGGTCTTGGCTGGTATTCTCG  
TGCAAGCATGTTTCCGGGTCGGTAGACATCGTAACAACCTAAGGAGATTAATCGTGGGTA  
AATCAATCAGTAAGGCCTTCAAGAAAGTGGTGAAAAGTACGCTAGGGACCGTTGGTCTTG  
GCTCTGATGACGCGCCTAAGGTTGTTGAGGCTCAAACCCAGCAGCACCAGTGGAAGTAC  
CGAACGACAAAGTGGAGGATGTGGATACTGAATCAACCGCATCTGACGAGAAGAAAGCGA  
AGCGTGCAGGTAAGCGTAGTCTTCAGGTCTCTCGCACCTCTGGTGGCGGTATTTCTATTT  
AAGGAGGTGACTAATGGCTGAACGTGAAGGGTTCGCTGCTGAAGGCGCGAAGGCAGTTTA  
TGATAGACTGAAGAACGGTAGACAGCCATATGAGACACGCGCTCAGAACTGTGCTGCTGT  
CACTATCCCGTCACTGTTTCCCTAAGGAGTCAGACAACCTCATCTACTGAGTATAACCTCC  
GTGGCAAGCTGTAGGTGCTCGCTGCTTGAACAACCTTGGCTGCAAAGCTGATGCTGGCGTT  
ATTCCCGCAGTCACCATGGATGCGACTGACAGTCTCCGAATATGAGGCCAAGACCTTGAG  
TCAGGACTCAGAGGCTGCTGCTCGTGTGACGAAGGGCTTGCTATGGTCGAGCGTGTGTT  
GATGGCCTACATGGAGACTAACAGTTTCCGTGTGCCATTGTTTGAAGCTCTGAAGCAGCT  
TATCGTCTCCGGTAACTGTCTGCTTTACATTCCAGAGCCTGAACAGGGTACTTACAGTCC  
TATGCGAATGTACCGCTTAGTGTCTACGTTGTTCAACGTGATGCTTTCGGTAATATCTT  
GCAGATTGTGACTATCGACAAGGTAGCGTTTAGTGCTCTACCGGAAGACGTTAAGTCCCA  
ACTCAACGCAGACGACTATGAGCCTGACACAGAGCTGGAAGTATATACGCACATCTACCG  
TCAAGACGACGAGTACCTGCGTTACGAGGAAGTGGAAAGGCATTGAGGTGACAGGGACCGA  
TGGTTCCTACCCGCTGACTGCGTGTCCATACATCCCGGTACGAATGGTTCGACTGGATGG  
TGAAGACTATGGTCGTTCCCTACTGCGAGGAGTATCTGGGAGACCTGAACTCGCTGGAGAC  
GATTACAGAAGCTATACCAAAAATGGCTAAGGTAGCCTCCAAGGTGGTGGGCCTCGTTAA  
CCCGAACGGTATCACGCAACCTCGTTCGTCTGAACAAGGCGGCTACAGGTGAGTTCGTTGC  
CGGTCGCGTTGAGGACATCAACTTCTGCAACTGACTAAGGGTCAGGACTTTACGATTGC  
CAAGTCGGTGGCTGATGCTATCGAGCAACGTTTAGGCTGGGCCTTCCTTCTTAATAGTGC  
TGTTACGCGTAATGCCGAGCGAGTCACTGCTGAAGAGATTCGTTATGTTGCTGGAGA  
GGAGGCGACCTTAGGTGGCGTGTACTCAGTACAATCCCAAGAGCTTCAGTTACCTATCGT  
CCGTGTGCTGATGAACCAACTTCAGTCTGCTGGCATGATTCCCTGACCTTCCGAAAGAAGC  
GGTAGAGCCTACTGTCTCCACTGGTCTGGAAGCGTTAGGTTCGTGGTCAGGACTTGGAGAA  
GCTAACTCAGGCGGTTAACATGATGACTGGTCTTCAGCCGCTATCTCAGGACCCGGACAT  
CAACTTGCCGACCCTTAAGCTACGACTCCTGAACGCTCTGGGTATCGACACCGCTGGCCT  
ACTCCTGACGCAAGACGAGAAGATTCAGCGCATGGCTGAGCAGTCGTCTCAACAGGCAGT  
TGTTCAAGGTGCTAGTGCTGCTGGTGCTAACATGGGTGCTGCTGTAGGTTCAGGGAGCTGG  
TGAGGACATGGCTCAAGCCTAACTATCACTATAGGAACAACAACAACTTGAGTGAGTGAA  
CGCATAGCCAGCCGTAACGGGAGGGCAGGTTGTTGTGTTTCCCTATTAACGACTTAAAGGA  
GAATGACTTAATGTCTCAATCAGTTTATGCCGAGTTCGGCGTTAGCTCTAATGCAATCAC  
TGGTTCGGTTGAGGACCTGAACGAACACCAGAAGTCTATGCTTGAACAGGACGTAGCTGT  
TCGTGATGGCGATGACGCTATTACCTTCAAGCAACTGGAAGCCGAAAACGAAGAGGCGAC  
CGAAGAAGACGAGAACGTCGAAGAGACTGAGGGTGTGTAAGACAACGAGTCCGATGACGA  
AGAGTCTGAGACCGATGGTGAGCAACCTGAGTTCGTCGAACTTGGTGATGCACCTAAAGA  
GCTGACCGAAAGTGTACCCGCTCTGGATGAAAACGAAGCTGCATTTCGACGACATGGTGTC  
TTCTGCTGTAGAAGCTGGCAAGGTCAGTCTGATGAAATTACCGCTATCAAGGCTGAATA  
CGCCAAGGACGGTAAGCTGTCTGACGCATCCTACGCTAAGTTGCAGGAAGCAGGTTACAC  
CAAGCGTTTCGTAGATTTCGTTTGTCCGTGGTCAGGAAGCTCTTGCTGAACAGTATGCTGC  
TGGTGTGGTTCGCTACGCTGGTGGTGTGTAACAGTTTAAATCGCATCCTGTACACCTTGA  
GTCCAACGACCCGTCAACTCGTGAAGCACTTGAAGCTGCTATCGTTCGTAAGGACATTGC  
GACTACCAAGGCTCTGCTGAATCTGGCTGGCAAGACTCTGGGTAAAGCTGTGGGGTGTAA  
ACCTCAGCGTACCATCACCCTCAGGCTAAACCTGTGGTTCGCACCTAAGGCTCCTCAGAC  
CGAAGCATTACGCTCCAAGGCTGACATGATTAAGGCAATGAGTGACCCGCGCTACCTGCG  
TGACGCTAAGTACACGATGGAAGTCCGCGCTAAGGTAGCTGCCTCAAGCCTGTAGGACTA  
AACTATCACTATAGGGAGACCAAGAGATGCTCTGAAATGAAGAGACTCAATGTTTCCCTA  
TTACTTCAGTCCATACGGATTGGGCGTACAGTAAGTAATAAACTTTATCTTTCAATTGAA  
TAGGAGAATTAGCATATGGCAAACGTTCCGGGTCAGAAAATTGGTACAGACCAAGGTAAA  
GGCAAATCCAGCTCCGACGCTCTTGCGTTGTTCCCTGAAGGTATTTGCCGGTGAAGTCCCTG  
ACCGCATTCACTCGCCGCTCTGTAACCTGCTGACAAGCATAATTGTCCGTACCATTGAGAAC  
GGTAAGTCTGCTCAGTTCGGGTCATGGGTTCGCACCTCTGGTGTGTATCTGGCTCCGGGT  
GAGCGACTGTGAGATAAGCGTAAAGGTATCAAACATACCGAGAAAGTGATTACCATTGAT  
GGTCTGCTGACTGCCGATGTGATGATTTTCGACATTGAAGACGCTATGAACCACTATGAC

GTGGCTGGCGAGTATTCCAACAGTTGGGTGAAGCTCTGGCTATCGCTGCCGATGGTGCT  
GTTCTGGCTGAAATGGCCATCCTGTGTAACCTCCCGGCTGCATCCAACGAGAACATTGCT  
GGTCTAGGCACTGCGTCCGTACTTGAAGTAGGTAAGAAAGCCGACCTCGACACCCCGGCT  
AACTTGGTGAAGCAATCATCGGTCAACTGACCATTGCTCGTGCGAAGCTGACCTCTAAC  
TACGTTCTGCTGGCGACCGTACTTCTACACCACGCCTGACAACACTCTGCAATCCTC  
GCGGCTCTGATGCCGAACGCTGCTAACTATGCTGCGCTGATTGATCCAGAGACTGGTAAC  
ATCCGTAACGTGATGGGCTTCGTTGTTGTTGAAGTTCGCGATCTGGTACAGGGTGGTGCT  
GGTGAGACTCGTGGTGACGATGGCATCACTATCGCTTCCGGTCAGAAACACGCGTTCGCC  
GCAACTGCCTCTAGTGACGTTAAAGTTACTATGGACAACGTTGTGGGTCTGTTCTCTCAC  
CGTTCGCTGTGGGTACTGTGAAGCTGCGTGATTTGGCGCTGGAACGTGACCGTGACGTA  
GATGCTCAGGGTGACCTGATTGTCGGTAAATACGCTATGGGCCACGGTGGTCTGCGTCCA  
GAAGCAGCAGGCGCACTGGTTTTAGCCCAGCGGAGTAAGCACTTTTAGCCAACCTAACG  
TCGCTACAGTAGCGGCTGCACCTGAAGAGGAGACTCTAACTCCTCAACAGAAAGCTGCGC  
GTACTCGTGCTGCGAACAGGGCCGATAAACTGGCTGAGTCCAACAACCTAATTGAAACCCC  
TTGGGTGCCTTCGGGTGCTTGAGGGGTTTTTGCTTAAAGTGAGAGGAGACTTATGGCTCA  
ATACATTCCACTGAATGCTAACGATGACTTAGATGCCATCAACGATATGTTAGCTGCTAT  
CGGTGAACCAGCAGTCTACAGCTTGACGAGGGGAACGCTGACGTATCGAACGCTCAACG  
TATCCTGCATCGTGTCAATCGTCAGGTCCAAGCTAAAGGATGGAACCTTAAACATTAATGA  
AGCTGCTGTCCTGACACCTGATGTCCAAGACAACAGGATTCGATTCTTGCCGTCATACCT  
TCGTGTAATGACCGCTGGGGCCACCAGCTACTACAGCAACATGGGTGGATACCTGTACGA  
CCTGTCCACTCAGTCAACCCTTTCACCGACCCTATCACGGTAGAGCTTGTGGAGATGAA  
GCCATTCTCCGAGATGCCTGTGGTCTTCAGGGACTACATCGTCACTAAAGCTAGCCGTGA  
GTTCAACGCTAAGTTCTTCGGTAGCCCAGAGTCTGAACTGTACCTTCGTGAGCAGGAAGC  
AGAACTCTATCAGCAGGTCATGGAATACGAGATGGATACTGGTCGCTACAACATGATGTC  
CGACATTGGGAGGGACTAATGCCGCTTATTACGCAAAGCATAAAAAATCTTAAGGGCGGC  
ATTAGCCAACAGCCTGACATCCTGAGGTTCTCAGACCAAGGCGAGGCACAGGTTAACTGC  
TGGTCATCCGAGAGTGATGGACTCCAGAAGCGTCCACCTACAGTCTTCAAGCGACGTCTT  
AACATCGACGTTGGAAGCAACCCTAAGTTCCACCTGATTAACCGTGATGAGCAGGAGCAG  
TATTACATCGTGTTCAATGGGTCAAACATTCAGATAGTTGACTTGAGTGGTAATCAATAC  
TCAGTGTCAGGTTCCGGTAGACTACGTTAAGTCCCAACCCACGAGATGACATCCGTGTC  
GTTACCGTGGCAGACTATACGTTTCGTGTTAACCGTAAGGTTGTCGTCAAAGGTGGAAGC  
GAGAAGTCACACTCTGGTTATAACCGCAAAGCACGAGCTTTAATTAACCTACGTGGTGG  
CAGTATGGTTCGAACCCTAAGGTGGGAATCAACGGTGGCGTTAAGGTCTCGCATAAGCTA  
CCAGCAGGTAATGATGCCGAGAATGACCCACCTAAGGTGGACGCTCAAGCCATTGGTGCA  
GCTCTGAGAGACCTTCTTGTCACTGCCTACCCTACCTTCACGTTTGACCTTGGGTCTGGA  
TTCCTGCTAATCACAGCTCCTTCAGGGACCGATATTAATTCAGTGGAGACGGAGGATGGC  
TACGCTAACCCAGCTAATAAGCCCAGTCTAGACACTGTGCAGACAATCTCTAACTACCT  
CTTGCCGCTCCTAATGGGTATATCATTAAAGATTCAAGGTGAGACAAACAGTAGCGCCGAT  
GAATACTACGTGATGTATGACTCCAACACTAAGACGTGGAAGGAGACAGTGGAGCCGGGA  
GTTGTCACTGGGTTTCGATAACACCACAATGCCACACGCCCTGGTACGACAATCTGATGGC  
TCCTTTGAGTTCAAGGCTCTGGACTGGTCTAAGCGTGGTGCTGGTAATGATGACACAAAC  
CCTATGCCTAGCTTCGTGGATGCCACGATTAACGATGTGTTCTTCTACAGGAACAGGCTA  
GGGTTCTTGTACGGCGAGAACGTAATCATGAGCCGTTACAGCCAGCTACTTTGCGTTCTTC  
CCTAAGAGTGTGGCGACACTGAGTGATGATGACCCTATTGATGTAGCTGTAAGTCAACCT  
CGAATCTCAATCCTTAAGTATGCCGTTCCGTTTAGCGAGCAGCTACTACTTTGGTTCGGAT  
GAGGTTACAGTTCGTGATGACAAGCTCTGGTGCCTTACCTCGAAGTCTATCCAGCTTGAT  
GTAGGCTCAGAGTTTGCCCTAGGTGACAATGCCAGACCGTTCGCTGTAGGACGCTCAGTC  
TTCTTCTCAGCTCCTCGTGGGTCATTCACCAGCATTAAAGCGATACTTCGCTGTAGCTGAT  
GTGTCTGATGTGAAGGATGCAGATGATACAACTGGTCACGTAAGTCTTACATCCCTAAC  
GGGGTGTGTTGATATTCAAGGTACAGGGACTGAGAACTACATCTGCGTCAACTCTACAGGT  
GCATAACAACCGTATCTACATCTACAAGTTCTTGTGTTAAGGACAGCGTACAGCTTCAAGCC  
TCTTGGTCACTGGGAGTTCCCTAAAGATGATAAGATTCTTGCCTGCTTCTATTGGC  
TCTACCATGTTTCATCGTTCGTCAGCACCAAGGAGGGGTAGACATTGAGCACCTTAAGTTC  
ATCAAGGAGGCAACTGACTTTCGTCAGAGCCGTATAGACTCCACGTTGACTCCAAGGTG  
TCTATGGTCATCCCAATTGGCTCGTTTTAATGCTGACACATATAAGACTACGGTTGACATT  
GGTGCTGCTTATGGCGGTAACGCTCCGTCTCCCGGTCGGTACTATCTGATTGACAGTCAG  
GGTGCTTATTTGACCTTGGGGAATTAACCAGTATCTCTACTGTGATTACCCTCAACGGC

GATTGGTCAGGACGTACAGTGTTTCATCGGACGGTCCCTATCTGATGTCCTACAAGTTCTCA  
CGTTCCCTGATTAAGATTGAAGATGATAGTGGCACTCAGTCTGAAGACACTGGTCGTCTA  
CAGCTTCGTCGGGCTTGGGTCAACTACAGGGACACTGGCGCTCTGAGACTCATTGTCAGA  
AACGGTGAGCGAGAGTTCGTTAACACCTTTAATGGGTACACCCTTGGTCAGCAAACCATA  
GGGACTACTAACATTGGTGACGGGCAGTATCGCTTCGCTATGAATGGTAACGCATTAACC  
ACGAGTCTAACCTTAGAGTCCGACTATCCTACCCCAGTGTCAATCGTTGGATGTGGCTGG  
GAGGCGTCATACGCTAAGAAAGCTCGTTCGGTCTAACTTATTGAAGGGCCTATAGATTTA  
CCTTAACTATCACTATAGGGACTATAGGCCCTTAAGGTTATAAGGAGACTTTATGTATAT  
TCGCAAGGCTACGGAACCAGATGTCCACTACTTTCTGTGGCATCTTTCAGCAGATGATGT  
TAATGAGTGCAAAGCAAACCTATGGGTCAACCGTTGGTCTCTCTGAAAGACTGCTTAAGCA  
CCTATCTCCGTCATCTGTGGTTTTAACGAACGGTGTAGGCGAAGTGTTTTCTATGGTGG  
AAACCAAGGTGATAACGTATGGTTCCTTGACTTCCGGTCTTGTCTATAAGCTGAGACCTAA  
AGAGAAGCGGGAGTTCATAAAGCGTATCTCTGAGTACAGGGACTTAATGTTAGACCAATA  
CGGGACCATCTGGAACACTACGTGTGGTCAGGCAATAAGTCTCACATTAATTTCTTGAAGTT  
ACTAGGCGCTAGGTTTCACGATGAGTGGACCACAAGTCCGGTAACTGGTGAGCGTTTTCA  
ACTATTCATCTCTAAGGAGGACGTATGTGCGAGCCAGTAAGTATCGGTCTAGGAATC  
ATGGCTGTAGCAGGGGCCACTATGTCCGCATCTCAACAGGCCAAAGCTGAGGGTGCTGCT  
ATCGACGCTCAGAACCGACAGGCTCAGGAGATGGTTAAGCAGATGAATTACTCTGACGCC  
AACCTAAGGATGCAGGAGCGAGACCTTAAGGAACAGCAGATGGCTGAACTGACAGAGACC  
ACGTTAAACGGTATCCGCAATCAGGGCATGGTACGAGCTGCGGTAGCTGAGTCCGGTCTG  
GAAGGAACTCTATGGACAGGATTGAACGTCAGGTAGAGGGAGATACAGTCAAGGAGAGA  
GCAGGGATTACCGAAAGTTACAACCGCGACTATGCGGCTATCTTTGGGAACCGTATCGCC  
AACATTGAGAACACCAAGTCTGCTATCCGTGGTCAAGGTAAAATCATCAAGACTAGCCCA  
CTGGCTCATGCACTTAATGTTGCTAACGCCGGTATGCAGGGATACGCTGCTGGTAAGTCA  
ATCTCTGGGGCATCAAGCTCTGGTGGTTCTGCACCGATTAGTGCTGCTAAAGGCACACCT  
ACAGGTCATAGCTAAGAGGAGGACTAATGGCTAGTAATATTGAATCAGCTCTGGCTAATC  
GGACTATGGGTCGTGGCAGAGCGCCGGGTAAAACCTATCGCCGTCAACTATCAAGCAGCCA  
GCGTTCAGGCTCCAACCTGGTGACTCAGGTCTGGCTCGGGCGTTAACCAACTTCGTTGAGT  
CTGGTACTGGATTATAACAAGCAGTTCAAAGACGAGGAGAAGACACGGGCCGACGAGCGGT  
CTAACGAGATTATCCGTAAGCTGACACCTCAGCAAAGACGTGAGGCTATCCAGAACGGCA  
CATTGCTGTATCAGGATGACCCTTACGCTATGGAAGCACTTCGAGTCAAGACTGGTCGTA  
ATGCTGCCTTTGCTGTAGACGACGAGATTAACGTTAAGATTGAGAACGGTGAGTTCCGTA  
CACGTCAGGACATGGAAGAGTATCGCCACCAGCGACTTCAGGACGCCGCTAAGTCCTATG  
CTGAAGAGGCGGGTATTAACCCTACGGACGAGTTCTTCCAGCGTGGGTTCAACGATAACA  
TCACAGACCGCAACATCGCTATCTATGGGTCTTTCAATAAGTATTTTCAGCAAGCAGTCTG  
AAGAGACAGCAATGTTGAACACCCGATTGAGATGAACTCATTCTGAACGATGGCGACC  
TGATGCGTTCACCTGAGTCTGGCAAGACATTCATGGCCTACCTTCGTGACGGACTGACTA  
CTGCTGCTATCCCCTCGGACCAGCGAGCGCGGGAGGTCATTACCCAGACGGTCCGTGACG  
CAATCCAGAAGTCAGGCGGCTCAAACCTTCTACAGCAAGTACGAGGCGAGCGAATCACCC  
TTAACGGCGTGGATGCTACAGTCAAGAGATTGTAGGACCTGATATCTTCAACGCTGCTA  
TTGTTGAGGCACAAGGAACTGAGTACAAGCTGGTGGCTAAGTATCAGGAAGACTTAGCGT  
TAGGCGTTCAGTCTGCGATTCTTCAGGACGACCCAACCATCGGTCTGGCCCAGATTCAA  
AACTCAAGGAGCAGAACAACCTGCTTCAACCGGGTGAAGA ACTCACACCTCAGCGTCAGA  
TGCTTATTAATGCCGAAGCCAGCTTACTGGAAGCGGTAAAGCGTAAGTCTGCTGAACAGG  
CGAAGGAGAACACGAAGTTAATCCAGACCCAGAACAAGCAACTGGTCAATTGACCAAGTGT  
ATCAGCGACGTCTGGCTGGAGACAACGTGTCCACCAACTATGAGGACCTTCCGGTCTCTG  
AAGCCACAGGAGAGTTCAAGCGTTCAGACATGAACA ACTATGCGTCTTCTAAGCTACAGC  
AGATTGACCAGATGGACATACTGAGGCTGCTAAGGACGCCAGAAAGGTGGCATTGTTAA  
GAGCTGACACTAACACGGTCCGTTCCGTAATGCCTTCCAGACGCTTACTCAGGACGCTG  
CTGGTGAGTGGCAAGCTGCTGTTCATCCGTGGACAGTACGACCCAGACAAGATGAAACGCT  
TCGAGTCTCTTCGTCGTGCCTACACTCAGGACCTTCAAGTTTCGCTGCTCTGTATCCTG  
ACCAAGCTCAGCTGTTCTCTACGTTTCGACCAGATGGACAAGATGGGTCTGGACCCTCAGA  
CGATGATTGAAGCTGATAAGCAAGCTGCAAGTCAAAGCCGTGAGATGCGCATGGAGTCAG  
ACAAGGCGTGGCAGGAGTTGAAGAACGACTCTCGGAATAAGGACCTTTCGCGTCTTCCTA  
CGTCTCTGGACTCAAGTGCTCGTAAGGTCTGGGACTCATGGTACTATCGTACAGGTAACG  
CTGACGCTGCAACTCAGCAGACTCAACGCTGGCTGAATGAGAACACCGTAACGTTCCAGT  
CTGAGGGTTCTGATGGTAAGTCCATCGGCATGGTGTCCAAACACCAGCTTATGGTCCGGG

ATAACCCAGAGTCGTGGCAGGTGGGTTCGAGACATTATAGACACAGCTCGTCAGCAGCTCA  
TTAAGGCCAACCCCTTGGGTAGTGAACCTCTCAGTTGTCCGTTGTTGAACAGAACGGCTCTA  
TCTTCTCCAAGACGCTACGGGGACTATTCGTATTCGATACGATAAAGAAGCTTGTAGGTA  
AACTCTACCGCGAACAAACAGCAGAAGGCACAAGATGCCGCATATGCTCAGGCAGAACGTG  
ACGCTAACAAAGCGAGCGCGTATCGTCGGGACTAAAGCTGCTGGTGACAAACGTCGAGCTG  
ACCGAGAGGCCAACATCGAGAAGCGCGGTGGGATGTACAATGACGTCTCACTGGAGGGTA  
TCGCAAATGCACTAATCGGTAAGGAGTAACATAATGGCGACTCGTGGTATTCGCAATAAC  
AATCCGGGGAAACATCCGGGTAAGTAAGGACCAATGGGAAGGAATGACTGGAGATGATGGC  
GCATTTGTCACCTTCGATAGTCCAGAGTCTGGCGTCCGAGCTTTAGGTA AAAACCTGCTG  
TCCTACGGTTCGCCAAGGTTATGACTCCATCGAGAAGATCATCAACCGATGGGCGCCTCCT  
AATGAGAATGACACTCAGGCTTATATTGACTCAGTGGTGGCTGCGACTGGTATCCCAGCT  
ACCCAGAGTCTAGACCTCTCGAACCCGGACACCCTGTCTGCTCTGGCGCAAGCTATCAGC  
TTCCATGAGACAGGTTCCCGGTACAACCTGAAGTATACCAACAGGGGGTTCGCAAGAGCA  
CTCAACGGTATCAGCCAAAGACTCCACCAGTAAGCGCTAACGTATTTGACGCACTCAGC  
GAAGGACTCAAGGCTAAACCTAAAGTAGCTCTGGGTGAGAACCTTCCGACCGCTGCTGGT  
CTGAACATTGAGGGTCAAGCACCTGAAGCTCCCAACGAATCGTTCGGTGAGATGTTCTAT  
AAGGCTACTGGAGAGACCATGCAGGAACGAGAGGATCGCTCTACGTGGTTCGGTTTCGGT  
ACGGCTACAGAAGCTGAAGTGAAGAACTCTATGGTTCGGCGTGGCTATCCGCGCTGGTCAG  
ACTGAGGACTCACTGGATGTCATTGGCGATGTGTTCAACCAACCCGATGGAATAACCAT  
AAGTGGTCTCGTGAGGAGCTGGACCAGATTCGTAACGCTGGGGTTCTGCCTCAGTATTAC  
GGGGTCATTACTGGTGGCTCCCCTCAGAACCTGACCGAGCTTATTA ACTTGGCGCTTGAG  
AACCAGAAGTTTGACCAAGAGAAGGCCAAGGCCGGGACTGGCGCTCAACTGGCGGCTGGT  
GTGATTGGTGTCTGGCGTGGACCCTCTGACCTACGTTCCCTATTGCTGGGCAGGTAGGTA  
GGTGGGAAGCTAGTCAACAAGATGTTCACTGTGGCTGCTCAGTCTGGTGTCTGGCTGGG  
GCATCCGAGATTGCTCGAACCTCAGTTGCTGGTGGGGACGCTCATGTGGCTGAGGCAATT  
ATGGGCGGTGCTCTCTTCGGTGGGGGAATGACAGCTATCGGGGACGCTATCGGCAAGGCC  
TTAGGCAAGTCAACCAACGAGTTCGCCGGGCCAGCCACACGCTCTGGAAGCCCGTGAGACT  
GCACGTAATGTTGATGGTCAGGACCTGTGCGGTATGCCAATCCGTGAAGGAGAGGAGACC  
TTAGTACCAAGGCGTTAAGTTCGCTGACGTGCCGAATGAGCCGGGAAGTGTACGATTA  
GAAGACGGTTCAATCCTGATTGGTGAGAACCCTCTGAACCCTAAGACACGTCAAGTCTTT  
GACGAAGTGATTGAGCCAGAACGTGCCGCTGCTGGTGTGAACCTTGGCGGACTTACCGAG  
ATTGGTCTGAAGCTGCTTCGGTCTGAGAACCCGGAGATTCGTGGTGTAGCTACTGACTTA  
GTGCGTTCACCGACTGGTATGCAGTCTGGGGCCTCAGGTA AAAATCGGGACCACTGCGTCT  
GACGTATTCGAGAGACTTCGTGCTGTAGACCATCGGTTCTACAACGACATCGACGATGCT  
GTTACTGAGGCACTCAAGGACCCTTACTTCCAGACAGCATTCTGGCGAGACTCTGGCGCA  
TTCCGTCAAGACATCTATCAGCGTGTGTCTATGGCTATCGAAGATGGTAGTGGGAACCTG  
AAGGCTGAACTGACTCCGGGAGA ACTGAAAGTCTATGACCTGCTGAAGA ACCAGTTCGAC  
GCCAAGCGTGAGATGATGGAGA ACCCAGCTATGTTTGGTTCGGCCAGACGCTCAGTCTATC  
TTCCGGGCAGCCGCTTCAAGGGAACCTACGTCCC GCATGTGTATAGCAAACAGATGAAG  
GAGCTGTACATCAAGGAGCTTGGGAGTCCAGAGGCGTTGCAGGAGGCCATCAAGAAGTCA  
TGTTGACCAGCTATGCGTCTCGACCTGAAGTCAAGAAACGCGTGGACGAGGCACTCTTA  
GAGGCTGACCCTACGTTGACCC CAGAAGGACTTGCTGCTGCGGTTCGATAAGTACGCCAAC  
GATAAGGCTTACGGTATCTCTCACACCGAGCAGTTCGAACGTT CATCCGTAATGGAAGAG  
AACATCAACGGTCTGGTTGGTCTGGAGAACAACAGCTTCCCTTGAGGCTCGTAACCTGTT  
GATAGCGATATGTCAATCGTCTACCTAACGGTCAGACCTTCAGTGTCAACAACCTGCGT  
GAGTGGGACATGGACAAGATTGTCCC GGCTACAACCGTTCGAATTAATGGCGATATTGCT  
ATCATGGCTGGTACAGGCAA AACCCACGAAGGACATGAAGGACTTGGTTGAGACCATGATG  
AACAAAGGCTGGGGATGACGGTAAGTTGAAAGGTGAAGTATCTACCTTACGTGACACCTTG  
AAGATTCTAACTGGTTCGTGCTCGACGTGATGGTGTGATGATGCAGCCTTCGCTACCGTG  
ATGCGCACAAATGACAGACCTATCGTTCCTTCGCTAAGAATGCCTACATGGGTGTT CAGA  
TTAACGGAGATTGGTGGTATGCTGGCTCGTGGCAACGTTTCGTGCAATGCTGCATGGAGTC  
CCAATTTTCCGTGACCTAGCCTTCCGTAACAAGAAGGTTGGGGCCTCAGAGATTAAGGAC  
CTGCACAATGTTATCTTCGGTAAGGAACTGGATGACTCAATCCGTCCGTCTAAACAGGAT  
GTCATTGACCGTCTGCGATCTTACAGTGACCTAGGTCGTGGTACAGCTACAGCTCTGGGG  
ACTGCCAAGTATTACACTGGCGA ACTTGCAGTACGCTCTCCGTTCACTAAAGTCTCAAC  
GGTACGACCAACTACCTGTTAGATGCTGGACGTCAGGGCTTCCCTGTCTGACATCGTGGAG  
CATAGCCTGACTGGTAGTAAGCGTAAGTTCGATGACCGCTGGCTGAAGACCGCTGGTATC

TCTGACGAGCAGTGGAAAGGGCATTAAAGTCCCTCATCCGTGAGTCAGTGACGCGTGGTCCA  
GACGGGAAGTACACCATCAAGGATAAGAAGGCGTTCAGTCAGGACCCAAGGGCTATGGAC  
CTGTGGCGTATGGGTGACACCATCGCTGATGAAACGTTACTCCGTCCTCATAAGCTGTCC  
AACATGGACGCCAAGGCTTATGGTCTATCGCTAAGACTGTCCTTCAGTTTAAGAACTTC  
GTCATCAAGTCCATCAATGGGCGAACCATGCGTACCTTCTATAACGCCACGAAGAACAAC  
CGAGCGATTGACGCTGCACTATCGACCGTGATGTCTATGGGTCTGGCTGGTATCTACTAC  
ATGGCTCAGGCGCACGTCAAGGCTTATGCTATGCAGGATGGTCGAGACCGTGACTACCTT  
AAGCAAGCTCTGGACCCGACGATGATTGGTTATGCGGCTCTGTCCCGTAGTTCACATCTG  
GGTGGCCACTTGGGGTAGCTAACATTCTAGGTGGCATCGCTGGGTATGAGGACACTAAG  
ATGCTCCGTTCTGCTATCCTACCTCGTTCGCCTACAGAGAAGCCTGAACGTGCCATCACG  
TTTGGTGCAGCTACAAGTGACCCTGTGATGAATGTTGTTGGTAACTTCTTGGAGCAGGTT  
CCAGCTTTCGGATATGCTGCTAACGTTGGCGTTTCTGCTTACAACCTTGGCTGGCTACCTC  
AAGGCTGATACTCGTGTCAACGAGCGTGACTACATGACCCGGGATGTATAATACGTTCCGT  
GAACTGGTTCGGAACGACCCCAATTACCCAGAAGCTGTTGCTTGGAAATGTTTGAGGAGCAA  
GGCATCCACATCAAGGACTAAACTATCACTATAGGAAACGGGAGGCGCTACCATAGGTCT  
CCGCTTAAATCACAAAGGAGGCATAATGTCCACGATTACACAATTCCCTTCAGGAAACAC  
TCAGTACAGGATTGAGTTCGACTACCTAGCCAGAACGTTTGTGTTGTTACGCTGGTGAA  
TAGCTCTAACCCCTACCCTGAACCGTGTACTGGAAGTTGGTTCGAGATTACCGATTCCTTAA  
CCCAACGATGATTGAGATGTTGGTGGACCAATCAGGTTTCGACATCGTTCGTATTCACCG  
TCAGACTGGGACTGACTTAGTGGTAGACTTCAGGAATGGCTCAGTGTTGACAGCTAGTGA  
CCTGACCACTGCAGAGCTTCAGGCTATCCATATTGCAGAAGAAGGTCGAGACCAAACGGT  
TGACTTAGCGAAGGAATATGCCGATGCTGCTGGTAGCTCTGCTGGCAACGCTAAGGATAG  
CGAGGACGAAGCACGACGAATCGCTGAGAGTATCAGGGCAGCTGGTCTAATTGGTTATAT  
GACCCGTCGCTCCTTCGAGAAAGGCTACAACGTTACAACATGGAGCGAGGTCCTGCTATG  
GGAAGAGGATGGTGATTATTACCGCTGGGATGGTACGCTTCCAAGAAGCCTCCTGCTGG  
TTCAACTCCTGAACTTCCGGTGGGATTGGATTAGGTGCGTGGGTTAGTGTTGGTGATGC  
TGCTTTAAGAAGTCAGATTTCAAACCCGGAAGGGGCAATACTCTACCCTGAATTACATAG  
AGCACGCTGGCTTGATGAAAAAGATGCTCGTGGTTGGGGTGCTAAAGGGGATGGTGTAC  
TGATGATACAGCAGCGTTAACGAGCGCATTAAACGACACACCCGGTTGGACAAAAGATTAA  
TGGCAATGGGAAGACATATAAGGTCACATCCCTGCCTGACATTAGTCGCTTCATCAACAC  
TCGTTTTCGTTTATGAGCGCATTCCCGGACAACCTCTTTATTATGCCTCTGAAGAATTTGT  
TCAGGGTGAGCTATTCAAATAACGGACACCCCTTATTACAATGCGTGGCCTCAGGATAA  
AGCGTTCGTATATGAGAATGTGATATATGCACCTTACATGGGTAGCGATCGTCATGGTGT  
TAGTCGTCTGCATGTATCATGGGTTAAGTCTGGTGATGATGGTCAAACATGGTCTACTCC  
AGAGTGGTTAACTGATCTGCATCCAGATTACCCTACAGTGAACCTATCATTGTATGAGTAT  
GGGTGTATGTCGCAACCGTCTGTTTGCCATGATTGAAACACGTACCTTAGCCAAGAACGC  
ATTAACCAATTGTGCATTGTGGGATCGCCCCATGTCTCGTAGCCTGCATCTTACTGGTGG  
TATCACTAAAGCTGCAAATCAGCGATATGCAACAATACATGTACCAGACCACGGACTATT  
CGTGGGTGATTTTGTAACTTCTCTAATTCTGCGGTAACAGGTGTATCCGGTGATATGAC  
TGTTGCAACCGTAATAGATAAGGACAACCTTCACGGTTCCTTACACCCAACCAGCAGACTTC  
AGATTTGAATAACGCTGGAAAGAATTGGCACATGGGTACTTCTTTCCATAAGTCTCCATG  
GCGTAAGACAGATCTTGGTCTAATCCCTAGTGTACAGAGGTGCATAGCTTTGCTACTAT  
TGATAACAATGGCTTTGCTATGGGCTATCATCAAGGTGATGTAGCTCCACGAGAAGTTGG  
GCTTTTCTACTTCCCTGATGCTTTCAATAGCCCATCTAATTATGTTTCGTCGTCAGATAAC  
ATCTGAGTATGAACCAGATGCGTCAGAGCCGTGCATCAAGTACTATGACGGTGTATTATA  
CCTTATCACTCGTGGCACTCGTGGTGATAGACTAGGTAGCTCTTTCATCGTAGTAGAGA  
CATAGGTCAGACTTGGGAGTCACTGAGATTTCCACATAATGTTTCATCATACTACATTACC  
TTTTGCTAAAGTAGGGGATGACCTTATTATGTTTGGTTCAGAACGTGCAGAAAATGAATG  
GGAAGCAGGTGCACCAGATGATCGTTACAAGGCATCTTATCCTCGCACCTTCTATGCACG  
CTTGAATGTAAACAATTGGAATGCAGATGATATTGAATGGGTAAACATCACTGACCAGAT  
TTATCAGGGCGGAATAGTTAACTCAGGTGTAGGTGTTGGTTCGGTAGTGTGAAGGATAA  
TTACATCTACTACATGTTTGGTGGAGAGGACCATTTTAACCCATGGACATATGGAGATAA  
CTCAGCGAAAGACCCATTCAAATCGGATGGTCACCCCTCGGATTTGTATTGCTACAAAAT  
GAAGATTGGCCCAGACAATCGTGTTTCCAGAGATTTAGATATGGTGCTGTACCCAACAG  
AGCTGTTCCCGTGTTTTTTGTACGAATGGGGTTCGCACTGTTCCCTGCGCCAATGGAATT  
TACAGGGGATTTGGGTTTAGGTGATGTGACCATTAGAGCCAGCACCAGTAGTAACATTCG  
CTCTGAAGTTTTAATGGAAGGTGAATATGGGTTTATCGGGAAATCTATACCGACTGATAA

CCCGGCAGGGCAGCGCATCATATTTTGCGGGGGTGAAGGCACCAGTTCAACGACTGGCGC  
ACAGATTACGCTATATGGTGCAAATAACACCGACTCAAGGCGAATAGTTTACAACGGAGA  
TGAGCATCTATTTTCAGAGTGCTGATGTTAAGCCTTATAACGATAACGTCCTACTGCGCTTGG  
TGGGCCTAGCAACCGTTTACCCTGCATACCTCGGAAGCAACCCTATTGTTACTTCTAA  
CGGGGAGAGGAAAACAGAGCCGGTAGTTTTTGTATGATGCTTTTCTGGATGCCTGGGGTGA  
CGTTCACTACATCATGTACCAGTGGTTAGATGCTGTTCAACTGAAAGGCAATGATGCTCG  
TATTCCTTCGGGGTTATTGCTCAGCAAATTCGTGATGTATTTCATTGCACATGGTCTGAT  
GGATGAAAACAGTACGAATTGTCGTTATGCTGTTTCTGTGCTATGACAAGTATCCACGGAT  
GACCGATACGGTATTTTCGCACAATGAAATCGTTGAACACACTGACGAGGAGGGTAATGT  
CACTACTACGGAAGAACCTGTGTACACCGAGGTGGTTATTACGAAGAGGGTGAGGAGTG  
GGGTGTTTCGGCCTGACGGAATTTTCTTTGCTGAAGCCGCTTATCAGAGAAGAAAACCTGGA  
AAGAATCGAAGCCAGACTTTCTGCTCTTGAACAGAAGTAATAAACAAAACCATTTTGCCA  
TTAAGTTGGTGGGGTAGATGTTAGAAGGTTGTGGAGGTAGAGGCTAACTACACGCTAACC  
AACGTATGTAACAACCTTTGGGTCACGGACGACCCGCTTTAAACTGGAGGTTTTATGATTG  
AGTTAGACTTCAAGAATGAGGTCCTTAAAGCCTCTCCTATCGTCGGGACCGCTGCGGCTG  
ATGGTGCCAGTCGGTTCTTCTTTGGACTCACACTGAACGAATGGTTCTACGTTGCGGCTA  
TCGCGTACACCGTTGTCCAAATTGGTGTGCTGGTCTACAAAACGATTAAAGGAGGTGGTA  
AAACATGACGCAGATGGACTTAGAGAAGTTCCTATTGATGCTGGATACTGAACGTGCTCG  
ACTCATGCTGCAAGACTTACGTGACGACTCTAAGCGTTCACCTCAGCTCTACAACGCCAT  
TGAGAAGCTGCTTGCTCGTCACAACTTTGTGTTAAGCAAGGTGTCTGTGGACGAGAAGAC  
GCTGGCTGATATGGAGGCCCTGAACGCAGAGTACGATAAGGTGCTTTCAGCGACTGAGGA  
TAATGACACCGGGTATGGTGTTCATAAAGTGTAGACTCAAGGTCATTACTATATGTAGT  
GGCCTTTATGGTTAACACTAACTAGTGGAGGCGACTCTACGTGAAAATCTGATAAACCGG  
GAGGGCAACTATGCTCGAATTTTTAAAGAGGGCGGCTCCGTGGTTACTTGCAGCAGTGAT  
GTTTGTGCTGGTGGCTACCACACCGCTAACAAATAAGTGGGAGGCTAAGGTCAATGCGGAATA  
CACCTCGAATCTTAAGGCATCGGAAGATACAAGGCTTGCTGTCCAAGCTGAAGTCAACAA  
AGTGTCCAAACGGTTTCAGGACGAAATGTCTCGTTGGAAGGCAGCACTGATAGGATTAT  
TGCTGACCTTAAGTCTGACAATAAGCGGCTGCTCATCCGAGTCAAACCTACGAGTGGAAC  
CACGCAAAGTGACGGTTCGATGCTTCATTGATGGTTACGCCGAACCTTGACGAACGAGATGC  
TAAACGTCTTATCGCCATCGGAGTGAAAGGAGACAAGTGGATTAAGGCCCTTCAAGACAC  
TGTGAGAGCCTTACAGCAAGAGAAGGAGGTGACGCATTGAGTAAAGACTTAGTGGCGCGT  
CAGGCGCTAATGACTGCCCCTATGAAGGCAGACTTCGTGTTCTTCTGTTTCGTCCTGTGG  
AAAGCTCTGTCACTCCCGTCCCGACTCGCTGTCAGATTGACATGGCGAAGAACTATCG  
GCTGGTGACAACAGGCGTTTCATCTTACAGGCGTTCGTTGGTATCGGGAAGTCCCTTCAAT  
ACGTGTGCATTCGTGGTCTGGAAGCTATGGAACAACCCAGACTTGAAGTTCATGATTGTG  
TCGGCCTCAAAGGAACGAGCCGATGCGAACTCCATCTTCAAGCGAATCATCGACCTC  
ATGCCTCAGCTTAAGGAACTCAAACCTAAGCAGGGACAGCGAGATGCGGTTATCAGCTTC  
GACGTTGGACCAGCCAAGCCGACCACTCACCTTCGGTTAAGTCCGTTGGTATCACTGGT  
CAGTTGACTGGTAGTCGTGCTGACATCCTGATTGCCGATGACGTGGAGGTTCCGAACAAC  
TCAGCGACTCAGGCTGCACGAGACCGTCTGTGAGAGCTTGTGAAAGAGTTCGATGCTATC  
CTGAAGCCCAGGAGGCACAATCATCTATCTGGGTACTCCTCAGAACGAGATGACCTGTAT  
CGTGAGCTGGAAGGTCGTGGGTACACCACTACTATCTGGCCTGCTCGTTATCCACGCGAC  
AGGAAGGACTGGCAGTCTTACGGCGACCGTCTGGCTCCTATGCTTCAGGCAGAACTGGAA  
GAGGACCCTGAGTCCTTCTACTGGCGTCCGACCGACGAGGTACGCTTCGATGATACGGAC  
CTGAAGGAACGTGAGTTGTCATATGGCAAGGCTGGCTTCGCTCTACAGTTCATGCTAAC  
CCGAACCTGAGTGATGCTGAGAAGTACCCTCTGAAGCTCCGTGACCTTATCGTAGCCGAC  
TTGGACCCAGCGTCTAGCCCAATGGTATACCAATGGCTTCCTAACCCTCAGAACAAGCGT  
GAGGACGTTCCCTAACGTTGGACTCATGGGTGACTCATAACCACACGTATCAGACTGTAGGT  
TCTGCCTTCAAGTTCGTACACCCAGAAGATTCTGGTCAATTGACCCTAGTGGTTCGTGGTAAA  
GATGAAACTGGTTATGCGGTAAGTGTACCAGCTCAACGGCTACATCTTCGCTATGGAAGTT  
GGCGGTATGCGAGGTGGCTATGAAGACTCTACGCTGGAAGCCTTGGCTAAGATTGGTTCGT  
AAGTGGAAGGTCAACGAATACGTCAATTGAGGGTAACTTCGGTGATGGTATGTACCTTGAG  
CTATTCAAGCCTGTAGCGGCCCGTATTCATCCTGCTGCTGTAAGTGAAGTGAAGAGTAAG  
GGTCAGAAGGAACTCCGCATCTGTGACGTTCTGGAGCCTATCATGGGGTCTCACCGACTT  
ATCGTTAACGCTGCTGCTATCGTCCAAGACTACCAGTCAGCCTCTGATAAGGATGGTGTG  
CGTAACCCTATCTACTCTCTTCTACCAGATGACCCGATCTCTCGTGAACGTGGAGCC  
TTGGCACACGATGACCGACTTGATGCGCTGGCTATCGGTGTACAGTTCTTCGTTGAGTCG

ATGGCTAAGGATGCCAACAAAGGCGAACGTGAAGTCACTGAGGAGTGGCTGGAAGAACAG  
ATGGAGAACCCACGGAAAGGCTTCGAGTCCATCCACACTGAGTTCTGGGACAATGGGGTC  
CGGGTAACTCATGATACAGACGAGCTGGGACTAGGGTCCTACGTTACGTTCCATTAGCTG  
AGTGAATAACTATAGGTGAAAACCTGCATGAATACGCAGTTAGTAACCTATAGTTACTACC  
AGTCTAACCTACTGTTTTACAAGGAGTTTGGACTTAACTATCACTATAGGAAGACTACCG  
GTTACTTATAGTATTACTGTAGTGAATATACATATGCAGACTTTTATGCAAGACCTTAGGA  
GGCAGACTCCGAGTTCTTACCTAAGGCTTGCACCGATGGAAGGAGGTGATATTAATCATA  
ATACCTCCAATACAGATAGTCACAGACCATAGATACAGGAGGTATGTAGCATATGGCAA  
GACCAAAGCTGTACTTAAAGCTCTGGCGACCAATCGAGCTACATACAGGTTTCTTGCTGC  
TGTTCTACTTGTCTGGCGTTACTACTGCTGGAAGTCAGTGGGTGGGGTGGGTCGAGAC  
TCTCATATGTTCTCTGGTGTCTGAGTGTCTGTTAACGCCGTAATGGTAACAATCAACGAAA  
GGAGGTAGTATGGACGAAGAGTCTTACGGTTCGTTCTCTGAAGAGGACTATAAGACGGAG  
TGGGAATACGCCATTGAAGACCTAAGGTCAGTTCATAGCTGACGCTACTCTACTGACCT  
TAGCTACTGTAGTCAAGGACTTTAGGTAACACCTTAAGAGAAGCTCACTTAGGGTCATCC  
TACTTATTGGTCTATCCTAGTGTCTGCTGACCTACGGTCTTGACCTACAGTGGCTGTGG  
CCTACAGCAGTGACGATGAGTTTTGGACCAAAGTTTGAAGACCACATCTCACAGTTCAAG  
AACCTCAAGTCTCCCCATAGGCCCTCTTTAAGTCCAGACCAAAGGCCCTACCCCAGTCTA  
TCATAAGGTTGGACCGATGGTCAAGACGTCAGGTCAACGATAGGTCTAGGCTATGGCTTA  
GGGAAGGACGATAGGTGGTACTATTGGTCTGTCTCTGAGTCTC

>NewGenomeName\_287

AGCAATATTGCTTCAGATGCAATGATGTTTTTGATTGTTGCGGGTTGAGCAATGAAGTGA  
TGAGTGAGTGAATGAAAGATTGATGGACTATCATAACAAGTTGATTTTGATCCTAGCTGAG  
CCATTTTAAGCATAACGCGTTATAAAGGTTATGCCGTGTAGATTAGTCCTTCCGCGGAAAT  
TCATACACGCCGTACCACGCCAAGTTACGCCATAGTTACACTATAATATCTATATATAAC  
AACCATTTAGTGTAATTATTATTATATATATTACTATGTATATCATGTATATCCCCC  
TTGCGGGGAGGGTTCGATAGTTTTTCTATGAAAATGACAATTTCTATATATATAAGGATAG  
GCATATACCCTCCGCGTTTTCCGCGGAAATCCATCTACAGGCAAATTACATGAGCTATAG  
CTGGGCTTGGGCGCCCAAGAGCGTAGACATTGCCAAATATAAACACGAGATAAACTTGA  
TAACGCGTATGTATGTGGTAATATGGAATCACCTAACGAAGGGCAACCAATCAGGAGTA  
ATAAAATGTCAGAACATAAAGCAGTGGTAAGTCTCGGTGAAGTGGTTCGATACATGGCAA  
AAAAGGCCCTGTCTAACGATACGAAATCATTTTTGGTGCCGGTGCATGATTGCACAGC  
AAGTGTATGGACTTGATAAAGTGGAAATGACGAGGGTGTACCAGGAAGACCTAGAGCCTG  
GTGGTAAGTACCACATGAATAAACTTAAATCATCATAACGTTTCAAACACGGTAAGTCGCA  
TGCCTGAAATCAAGTCTGCTAACGTCAGGGCTAGACTCTCAATTAAGGACGCAGAGTTG  
AGGGGGAGGTGGTTAGATGCGCGGTGATCTCACTTGTGCCAGGAGCTATCAATAGTGGGT  
CGCGCAATAAAGCAGAGGCAGAGAAGGAGGCGGCAACCATTGAAAGGTTCAAGGCTCGAC  
TGCTCAAGCTGTCACCGAGCGTCTGCTGGCCTGGAAGGCGATGAACTTAAGGGGGCCGTGG  
CAATGATTAACGCCTATCAGGAAATGATTAAGGAGACCAACTAATGTTTGATTTTACCGA  
AGAGAAGCTGACAGATGAGCAGGTTATGAGGATTGTAGAATGAAACGTTTAATGAAATGC  
ATGACTATTATTGCGGCAATGGTTGCTCTTACTGGCTGCAAGAAGGCGTCGGAGGTTTCA  
ATTGAGTCAAGTGTGAGTTCAATGTGGAGCGTCTATTCACAGTGGATGGATGTACCGCCTAC  
CGATTCCTAGATAACAGTAGAGCCGTCTACTACACAAATTGCCATGGCAGTACGCAGAGT  
GAGTACAAGTCAGGCAGGGTTCATGAAACAAGAAACAGTTCAGACAGATCGCACGAATTGG  
TAAAAGGGGATTCATCCTGACTGGTATAATCCCCATATAAAAAACGAGAAAGGAAGTTAA  
CGAATGAATCAGATGTACACCATGATTAAGCATCAACTGAACACGGAAGCAATAAATAAG  
CCCGTATACGTGTTTGACTACGACGGCACGCTATCGGACAGCTCTCATCGACTTGACAAG  
CTGCCAGCAAACGACTTGCATCTCACGGAGTCATGGTCTGAGTTCAACCGATTGTCAATA  
CGTGACGAACCTATCGAATCAACCATTGAGGTAATGAATAGCCTCTTCGACTCAGGCGCA  
TTCATAATCATCCTAACAGGCAGGTGAGATGAGACGTGTGAGATTTCTACTCAGTGGCTT  
CATGATGCCGGAGCAAATAACAACGTGATGGTCATGCGCCAGGCTAGCGACAACCGAAAA  
GACACAGTTATTAAGAGGAGTTTTTACGATACATTGGCTTGCATCGAATCACCGCCTCG  
TGTGATGATAGCCCAAATGTGGTAGAGCACCTAAGAGGCCTAGGTATTACCACGTATCAG  
GTATGTGACTATGGCGATAAACTACACACCGGACTCGGATCGCATGGCGTTCATCATAAG  
TGACGATATACGAACATAAATTCAGCAGCAGGGGTATTGATATGCTCCTGCACTATGTAG  
ACGAAAAATACGCAAAGCTCATGCTTAAGACGCATGGCGGCACAATAGCGAGGATTAATA  
TATGAGCAAGTACGACCGCAGAATCATTGGTATTGATGGCACGGTAACGACAGTAGATGT  
TTATCGTGTCTTGAAGCTTTTGGCGTATCTGACCCAGCAACGCAGCACGCGGTAAAGAA



GATGCTTTGTATGGGGTTGCGTGGCCACAAAGATTACTTAACTGATCTTAATGACTCTAT  
TGAGTCACTACAGAAAGCTAAAGAGCTTTACGGGCAGAAGATGATTCATGAATCGTCTAA  
ATCAATCCAGGCTGGTAAATAGCACGAATTGCTAAAACCGCTCCGGCGGTTTTAGTTATA  
GTTAGTTAACACCAAACGAGAGGAAAGAGAAATGAAGCAATACCCATCAAGTAATCACCA  
TAACGGTCACATCATGCAGTTCTACCGCCACAATCTGAAGACTAAGGGAGTATTTGGAAA  
ATGATTACAATTAACCTATCAGATAAAGACGCCGCAATCCTGAAGAGCATAGCTCAATTC  
AGTAACTCCAGCCATTCGAGCAGATGAGGGTTGCCAAAGAGGTCGTGACGCAGATTAAT  
AACCAGCAGTTCGACGTCGGCGACTTCGAGTCATCACGTCAGTACGAGGGCGTTAGCGTA  
AATGCGGCATACCTTAACAATTGGGATAAAGGCGAATAAGAAATGAAAGATATTA AAAACCA  
CAGATCGAAGCGATGACTCCCTAATGTTCCAGGTTGACAGCAAGACAACGAAAGAGCACA  
TGAATAAACTGGAGTCATTTGGGATTGATGTTGGCGTATCGAAAACAACATATGCCGATA  
AAATAATCAAATCAGCCATTCAATATAATGTTGGGTTCCGGGGAGGGCTGAAGGATGATTT  
ACATTCACACTTACTACACAGGTAAGTTTAATAGCGTTAAGCACGTTCCGGCTACATGAGA  
AGAAGATCGATGCGATTAAGCAACATGAAGTTCCTGGAGGTGTAGTTATTGAGGCAATGA  
AAACCCAAAACATCAAATAGCACGAATTGCTAAAACAGTACCGGGGTAATTTGTTATAGT  
TACCCCATCGACA ACTACCAAGGATTAAGCCATGAAA ACTATTACCGCATTTATCGCAA  
AGATGTAATTGACGGAGAAATGTCATTATTCGCGTTCGAGCATAAAACGGGATCGCACTG  
GCACACTTACAGTCATTACATCGTTATCCCAACCAGCGCCTGCACTGGAGACTCACTAAA  
TGAGAAGCTGCGTAATTTAATTGAGTTAGTTGAGATAATGGAAGGTTGCGAGGAAAATAA  
CAAAGTACCACGCATGTTTCGATATGATTGATCCGGTTTTTCATTGAGTCTTTAGAGCTTGA  
TTATGATGTGGTATCTAGTTGAGGAAGTAGGGTGAGCGATAGCACTTTTTTATAAAAAAG  
GATCGGACTATCTTGCTATAGTTACCCCATCGAACTAAACGAGGAAGCGCAAATGAAAT  
TTCAACAGAGCAAACCCAAGCTCCAGGCCAACCACTTCGACGGCTACGCGACATTCATCA  
TTGCCAGGCTTGCGGGATGCGTGACGAGCCACAGGTTACACCATCCACATGACCGAAG  
AACAGGCCCGAGAGTTGGCGTACGAAATTCTAGAGCAATTAACCGAATTTAACGCCCAT  
AAAACGCATTCTAACGA ACTATAATTTAAGTAAGGTGATTCATCATGGAAGTACAAGAAA  
GCCCTGTAGAGTGGTGCAAGCGAATGCAGGACGAGGCCAAAACGGGTGAAGAGGCAATGG  
CCTACTACGAGTTGACGAAAATTTGGATGGAACGGGAGAAGAAATAATGAGCTTCACTGA  
ATATGCAATAGCATGCGAAAGGCTGGTCTTTGATATGAAGACCTTCCACTGGTTCATCAT  
TAAAGATTTAATTAAGCCTTATAAGCAAGGCGTCACGCCTGAACAGTTTGTAAAGTCATT  
CTACAAATAGCACTAATTGCTAAACGCAGTCGCCAAGGATGGCATATAATTACCCAATCA  
ACACAACGAGAGATTGAGAGATGAAAAAAGCTAGTGA ACTATTTCGAGCACTACGTTGAAG  
TTTTAGGAATGGACATTGATGATGCGGCTTTGGAGCTTTTACGTCTTGGATACCCACCGA  
GAGAGATACCACCAATAAGAGATCTTGACTGCTCCGAGGTTATTGAGTTTATTTTCAGTC  
AGTTACGAACTAATGATAACTAAGCAGGAGATTGAGACATGTTCCGACTAAATGACGCAT  
ACTTTAACGCGGTAAAACGCCAGGCAGACAAGCTAAATGATGAGTACAGCAAGCTGGGCG  
CAAAGAAGAAAGATGATAAGGTTGTTGCCGCACTAATCACACAGATTTGGGGTCCAGTAT  
CAACCTTAATCGCTCGCGATAAATTCGTGTGGATTGCGGGTTATAGAAAAGGTCGCGTGG  
GTCATGACGAGAATGGGAATAGTCTTTATGAGTGAGTTAACAATCTGGTTTATCGCGGGG  
CTGATTGCTTGGGGTTACTTTTTAATCGCTTAGATGGAGATTGTTAAAAAGAGCTTGCAT  
CACTGAGTGGA ACTATCTAATATTAACCACGTAGACAAAACGAGGCCACCAAGTGGAACG  
GCGCACGGAGCGCACTACACGGTAAGTCCGTAGCTCATTAATTAGCGTATGCGGCGCATA  
AAATCCACATGGGACTTGTAAGACCTAGCGCAAATAGGCCGACATGTTCCAAGTCGAAA  
AAACTGACCGGACCTGAGCATGTC ACTAAAGTAGCTCTATGTTAATCGGTCGTTACAGGC  
GACCCCGGAGCCGTAACCGGGACTCATTCAAAGCCCCGCTAGCTCAATTGGATAGAGCAA  
CGACCTTCTAAGTCGTAGGTTACTGGTTCGAATCCAGTGCGGAGCGCCAAGCTAAACCAA  
TAATCCTGGGGGATTTATGAAAATTGTAACATTTATCGTAAAAGATTCAGAAACAGGCTC  
CGTTCAGAAGTTTAACGCAAAGATGGACTTCACGAAAACCCGAGTTATCAAAGGCTCACT  
TAATGGAGTTTCTGTATCAGCGCAGCTCCCGCATGGCTTCGAACACTTATTCGGAAAAGA  
GTCATCAAATGACGATGAGTAGCTTGTGGGATGTGAAGTTGTCCATTTCGCTTAATGGGCC  
GCTCGTGCAAGAATTGCACTCAAGATTACATCGCGTCAGTTGCCGCAATCAGCGCTGAGG  
ATGCGGTAGAGAAAGTAAAGGAGTTGTCGGGCGCTGACCCTGATACTCACA AATTCTTAG  
TAGCTTACGTTTCGTGAGCGAAAGTAAAAAGTGTTATACCCTCGTTAAGTTTCGTTTCTCT  
CGTTGTTTTAGCCCTCGCTTGAGGGCTTTTTTTTCGCCTGCATGTTGACAATAATATATGG  
GTGCGTTAGTATTA ACTCATCGGGGCGACCCACTAACCGAAGGAGACTCAA AATTATTA  
CATTAAAAGCAATTCACA AAGACGGTAGCGAGCAGGTTTTTTGAAGTCCATAAGTTCGGAT  
ACAACGTAAAATCAAATAGGATTGACGCGGTTGATGATGCTGGCCATTCACAATTTGCA

TGGGTGAGTTGATTTTCAGTCGTGTACGCAATGAACTCGAGAGGCTCAACAGTTGGTAGGT  
ACTTCAATACCGGTATAGACAGAGCAAAAGCAGAGTAAACACCAAGCCCCTTAATTGGGG  
CTTTTTTACGCCTGTAATATGGTATAATCTACCATCAACAAAGGAGGATTAAATGAGCAA  
AGCAGCATTAAAGATGGGTGAGGGAAATTTCAAGGCGCTCTACAACAAGAAGTATGGCGA  
CATTGCTATGGTGGCAATCAACCGCAAGTACACGCCTGAGGAGGTTTTTCGATTTCCCGT  
TCGATACTTCTCCTGGGCAGAGAGTGCAGCAATCAAGGCAGCCGAGACAGCGTCATTCCA  
GGGCGTAGTAACTGAACACCTCATAACACAAGCCTCGAGTGTTACCTTAACGGGTTTGGC  
GCTCTTCATGGGTGTTAACATCAATAGATTTCGCTCGCTGGCGTACTGAGGCTGGATACTC  
TGATGTGATGGAATTCATTGATAACGTAATCTACGAGCAGAAATATCAGCTTGGTGTTC  
AGGCATCATTAACTCCACCATTGTTGGTAAAGAGTTGGGAATCGACAAGCCGCAGGAGAT  
CACCATTAGCAATAACTCTACGGCTAACGATGTTGATAGCATGAAGGAAGCGCTTGAATC  
TGTGATTGGTAAGCTGTAGCACTTTTTGTTAAAAGAAGAGGCCCAATCAATGAGATAATG  
GGCCAATGAAATAACGAGGTGATGATATGAATTGGCATGATATTTTTGATTATGATGGA  
TGTAATTTATACAGAAGGGATTCTGGAAAAAAGGCTGGAACAAAAGCGGGCCCTAGAGGT  
TACATTCAGTGCAGAGTTGGTGGTGGACTACCTAAGGTTTATGCTCACAGGATTATATGG  
GAGATGCACAATGACAAGATACCTAACAGCATGGTTGTTGACCACATTAACCACATATAC  
GACGACAATAGAATTGAAAACCTAAGGTTAGTAACAGTTAAGGAAAATTCTAGCAACATT  
AAGAGATCAAAGAGAAATACAAGTGGCATAACAAGGAGTTAGGAGAAGGAGTGATAACGGA  
AATTGGTACGCGGACTTAAGAGTTGATGGAAAGCTAAGGCAAATGCCAATGCGACATTGC  
TTTGAAGACGCAGCAGCCGATAGGATATATCTTGAAGTGTACCACGGGTTTCATCCAAAT  
CATGGAGCAATAGTAAATGAGTGACCTAATCGTATGGGATGAGCTGACTCACGCTGAGAA  
GATGGCTATAAAGGCCATCTCTGAGCATAGTTTCGAGGGATTCTTGCGTTGTTTCTTCCA  
GATAACTCAGGGTGAGAGATTTAAAATGAATTGGCATGCGAAATACCTTTGCCGCGTCAT  
AGATGAGATTCTTGAGGGTAAGAGAAAGGACACCATCATAAACGTAGCTCCTGGGTCAGC  
CAAAACCGAACTGTTTAGCATCCATTTCCCTGTTTATAGCATGATTAAGATTAAGAAGGT  
TAGGAATCTTAGCTTGTCTGTTCTGACTCACTTGTTAAGCGCAACTCCAAGCGCGTCCG  
CGACCTGATTAAGTCAAAGAGTTTCAGGAACTTTGGCCATGCTCCTTTGGAACATGCAG  
GGATGACGAGATTCAAGTTCTGGATGAGAATGGTAAAGTTAGATTTGAGTCTATATCTAA  
GGCAATGGCGGGACAGGTGACGGGAAGCAGGGGTGGCTACATGACCGATGATTACAGTGG  
TTGCATAATGCTGGATGACCCGCTAAAACCTGATGATGCGCTGAGTAATGTAAGGAGGGA  
GGCTGTCAACATGCTTCTCAAGAACACAATTCGCTCGCGTCGCGCTAGCTCGGTAAAAGG  
GAAGGAAACGCCAATAATTGCTGTGCAGCAAAGACTTCATGTTCTGGATACTAGCCACTT  
CATGGAGTCAGGACAAATGGGCATCAAGTTCGATGTGGTGAAGTTCCTGCCATAGTCAC  
GGAGGATTACGCCGACACGCTTCCCTGATTGGATCAAACAACAATTTATTGATGATGTTCT  
TTCATCACCATTTGTAGAGCGGGATGGGGTTAAGTATTACAGCTATTTTCCAGCAAAGGA  
ATCAATAGAAGACTTAATGGCCATGCGAGACGCTGACCCTTACACATTCCTTAGTCAGTA  
CGCTCAAGAACCCGTAGCGCTTGGTGGCAATCTTATTAACGTGGATTGGTTCCAGCGCCT  
TAGTGATACATTCAGACCTCCAGCTAAGTACGATTATAGATTCATAACTTGCGACACGGC  
GATGACTACAAAGAGTTATAGCGACTTCTCTGTACTCCAGTTGTGGGGCTATAAAGGACGC  
TAAGATTTACCTGATAGACCAGCGCAGGGGTAAAGTGGGAAGCTCCGGAGTTGGAAGCTGA  
ACTGCTGGATTTTCGAGAAGAAATCAAGGTCAACCAGTCAGTCAGATGGCATCCTTAGAAA  
GATTATTATCGAGAAGAAAGCATCCGGCATCGGACTCATTAGTCGGCAGGAAGGGTAAT  
GCGAACACCCATAGAGCCATACGTACCTGATAACGACAAGCTAACCAGGGTAATGAGCGC  
ACTGCCGCAGATTAAGGCTGGCAATGTAGTTCTTCCAGAATCAGCGCCGTGGTTAAGCGG  
ATTGCTTACTGAGATTGCAGCTTTTACGGCAGATGACTCGCATAAGCACGATGACCAAAT  
TGAATGTCTAACAAATGGCAATCAACCTGGTACTTAACATTGCCGATGATCCTAAGGCTCG  
ACTAATGCGCATAGCTGGAATGAAATAGCACAAATTGCTAAACAATGAGGCCACGGATGG  
CGTATATTTACCTTACACAAACGAGAGGAGAAAAGACAAATGGCACGCACTTCAAAGGCT  
GTATATCTTGGCAACAACGATGATGTGATTATGGTTTACCCTAGGTAAGGAATATGAG  
ATTGTATCGTATACTGGTGTGATGACCTCATTCTGATCGCTGATGATGATGGCGAATGCCGT  
GGCATCAATAACGGGGCATTCCACAAGTTCGAACTCTCAGAAACAGAATGCGCAGCCGCA  
GCCACTGGCAATAATAAAAGACCAGATCTCAGATATTACATAAACGGACATGAGGTTGAT  
TACTTGAGTTTGACAAAGTTCGCTCTCACACCCTTGAGCTTGCCCACCTAGGCGTAAAA  
TGCGACACAATAAAGTTCGAGGTAATAATTCGAGTAACCACAAAAGCTATGATAAACTAGC  
CCCTACATGGGGCTTTTTTATTGGAGAAAACATGGTCAAGACAGACAGCTACGCCAATA  
TCTTTCTCGGCGGTAGTGATGGTAGTGAGATTTACGGGAGCTTGCAGAACCAGGCTCCTA  
CAATTCTGGCTTCGCTATATGCGGACAATGCTCTGGTGCCTCGAATCATCGACACAATCC

CGGAGACAGCATTGGCGGCAGGATTCCATATTGACGGCATTGATGACGAACCTGCATTCT  
GGTCGAGATGGGATGATTTGGAGATGACGCAGAATATCAACGATGCCTGGTCATGGGCCA  
GATTGTTCCGGTGGGGCTGCTATTGTCTGCTATCGTCAAGGACAATAGAGCATTAAACAAGCC  
CCGTCAGAGAAGGTGCCGAGCTTGAAACCGTTTCGCGTTTACGACCCGCACGCAAGTAAAAG  
TACAACTCGCGAGGAGAATCCACGCAACGCGCGCTTTGGTGAGCCACTAACCTATCGCA  
TCACAACTAATGAGAGCGATATGTTCTATGATGTTTATTACAGCCGCATTTCATATCATCG  
ATGGCGAGCGAATCCCTAACGTAATGCGTTCGGCAAATGACGGCTGGGGCCGTAGCGTTC  
TATCCAGTGACATTCTTGACTCAATCAAGGATTACACCAACTGTGAACGACTTGCTACGC  
AATTACTGAAACGTAAGCAGCAAGCGGTATGGAAAGCTAAAGGTCTGGCTGAACTGTGTG  
ATGATAGCGAAGGATTTGGTGCAGCAAGATTACGCCTGGCCCAGGTTGACAACAATAGCG  
GTGTTGGTCAGGCGATTGGCATTGACGCAGAATCTGAAGAGTACAGCGTTCTAAACTCTG  
ATATTGGCGGGATTGATGCGTTTCTGGATAAGAAGTTTGACAGAATAGTCGCCCTGAGCG  
GTATTCATGAAATCATCCTGAAGAACAAGAACGTTGGTGGCGTGTTCATCAAGCCAGAATA  
CGGCGCTAGAGACATTCCACAAGCTGGTTGACCGCAAGCGCAATGCTGAGTTGCTCCCTA  
TTCTTGAATTCCTTGATCCCGTTCATCGTGAACGCAGAAGAGTGGTCAGTTGAGTTTAATC  
CGTTGGCTCAGGAATCAAGTAAGGATAAGGCCGAGATTCTTGAGAAGAACGTAAACAGCA  
TTGCGGCACTAATTGCAGCAGGCGCTATGGATATCGACGAGGCTCGTGATACTACTACGAA  
CTATAGCCCCAGAGGTTAAGATCAATGATGGTTCAGTAGAGACAGAGGTGACAATTAGTG  
AAACCAGTAACGACCCGTTGGAAGTACCCACAGACGATTGAGAGCCAGGTTAACCGCAAT  
CTCAGTATTGCGGTAAGTGAAGTTAATTCGGCAATGAGGGAGTCTGCAACAAGGCTTAAA  
ATTGATACTGCAGAGGAGCTTGAGCAAGAGGATGGATACCTTGACGGGATAATTGCGGGC  
CTGGTGGCGTCATTTATATCAACCATCCCAGCTATAGGGGCAGCAATATACAGATACAAT  
AGTTCGCAATTTCTTGTCTTGCAATCAAGACTGGAGGGAGGTCTAATCCTAGCGTTCTA  
GACCTTGAAGTTAACGGAATAAATGGCGATGAGCCGTGGTATAATGATGACCTCAAGAAG  
TGGATTTACACCACGGATAAGTCAGCCAGAAAAGTCTAAACAACATCAAGGATGATTTT  
TTACAGACGACTGCAACAATACAGAATGGTACTACGTTAAGCTATCTGACAGGTACAAA  
ATCTACAGGAAGCGAACGGCAAACATTGCTTCTGGGATTGTTTCAAGCCTAAACTCGACG  
CTTATGAGGCGCAGGCTTGAGGATGCTGGTGTAGCCGTTATATCTGGCATGGCATGCTA  
GATGAGAGGGAGCGCCAATCACACATAGCAAGAGAAGGCCTTAGCTTTAAACTTGGTGGG  
GCAGATATATTTCCGGGCCAAGAGTATGGCTGTCGTTGCTGGTCAGTTCCAGATTGGGAA  
TCATAATAGGAGAGTTTAAATGAGTAAAATCCGCTATGACAGCGCAAAGTTTAAAGGCAAC  
AATCGACGAGAATGGATTCTTAGTCGACACACCAGTAGTCGCGCGTCTCGGCGTGCAAGT  
CTACTACATGGAGGACGGTTCGACCCGTTTCGAGAGTTTCGTCCAGCAGAGGAGGTTTTCA  
GGATGAGTCTCTGGCAAGTTACCAGGGCAAGCCAATGACGCTGGACCACGCTTTCGTTAA  
CTCGGAGAATGCTAAAGACGTAGTGGTAGGTTCCGTTACTGGCAAGGCTGAACCATTGGG  
TAGCTCGGTCGTTGCTCCGATTGTTGTTTACGACAACACAGCCATTACAGGAAGCTATGGC  
AGGTAACGCCAAAGAGTTATCAGTCGGATACACTGCGGTTCTTGACGAGACCCCAAGGCTG  
GGGAGACCCTGTTACTGGCGAATATATCCTAAAAATTGATGACAGACAGGAGCTTCAACC  
GCCAGAAGGATGGCTAGAGTTCGACGCAATTCAGCGTGACATTAAGTGAACCATCTCGC  
AATGGTATATCGCGGTTCGTGCAGGTATTGCCAAATTGAATATGGACGGTGAGCAGGAAAA  
CCCGTATACTACTGACGTTGATATCAATAAAGAGGATAAACAGGAAATGATTAAGATTA  
ACTCGACGGCGCGCAGGAATTTGAGGTCGCACCGGAAGTTCGCTTCTCACATCGAAGCGCT  
GAACGCAAAGGCTGACACCGCAATCGCTGAGCGCGACTCGCTGAAAGCTAAGGTAGATGC  
AATCCCGGCTGAAATCGAAGCTGCCGTCGCTAAAGCTAAAGCTGACGCTGACGCCCTGGC  
TGCCCTGGTAGCTGTTGCCGCTGAAGCTGGTGTCAAAGCTGATGGTCTGGATGCTAAAGG  
TATTAAGTGGCTTACGTTAAGAAGTCTCAGGCCTGGATGTTTCCGAGAAATCCGACGC  
TTACATCGACGCAGCGTTCGACATTGCCAAAGAATCTGATAAAATGGCAGAAGTACGTAA  
AGCGACTACCGCTTCCGACAAATCTGACAGCGCCGAAGAGCCTAAGAAATTAGACCCGCG  
TGCTCGTTTAGCTAAAATCAAGAAATAAGGAGTTATAAACATGGCAATTCGTTCTGTAGC  
ACTCGCTGGTATGGTTTCTGATACCTCTCTATAACATCGACGGCGCTTGTGTAGTTGG  
TGGTGC AAATGCTATTCCGGTTCGGGACTGTTGTTGGTGCCTCAGTGCCCGCTGATGAGCG  
CCTGGCTGGTCACAAGGTGATTACAGCCACTGGCATCACTGCTGATAATGTTTACGGTGT  
GGTTGTTTCGCTCTCATTATGAGACTCCTGATGGCACCCGCTCGCGTAAATGAAGCAGTTAA  
CGTAATGACCCACGGTTCGAATCTGGGTTTCGCAACAGCCTTACTGCCGCGCCTACATTTGG  
TGCCCCAGTTCTTGTATCTGCCACTGGACTGGTTGAATCAGCAGGTGCAGTTGAGACTGG  
TTGGACTTTTGCAGGTGGTTACATCGCAAACACTGGCACAGACCCACAAAACCTGAGCGT  
TGATGGCGCCCTGGTTGAAGTTCAGGTTAAGCAGAAGTAAAGCTTAAAGCTAAATTAAG

CCTCCTTCGGGAGGTTTTTTTACACCATTGCGTGGGGCTAAAACTCGTGTATAATGAACT  
CGTAGACACCTAACTGAAAAGGAACAATAAAGAATGGCCATTAATTTGATGCAGAACAA  
GCTAAAATCACTACTCACCTTGAGCAAATGGGCGTAGAGAAAGCGGATGCCGCTGGTATC  
TGGGCCGTTAGCCAGCTGACCGCAGCCCTTAATCGCGCTTATGAAAAAGAATACGCAGAG  
AACTCTGTTGTTAATATCTTCCCGGTAACCAATGAAATCCCTGGTCATGCGAAGTATTT  
GAATATCCAGAATTTGATGGTGTGGCATTGCTCAGATTATCGCTGATTACTCTGATGAC  
CTTCCGCTGGTTGATGCTTTCATGACTGAGAAACAAGGCAAAGTGTTCCGTTTCGGTAAC  
GCATTCCTGATTTCTACTGATGAAATCAAAGCTGGTGCCGCAACTGGTCAGTCGCTGTCA  
GCTCGTAAGCAAGCACTGGCTTTTGAGGCTCACGATAACCTGCTTGATAAACTGGTATGG  
TCTGGCTCAGCTCCGCACGGTATCGTAAGCGTATTTGACCAACCGAACATCAACAACGTT  
GTTGCAACTCCAACTGGAGCGTCCCGCAGAACGCAATTGATGACGTCACCGCGATGATT  
GATGCGGTTGAGAGTTCAACTCAGGGCCTGCATCATGTAAGTACATTCTGCTTCCGGCT  
TCCGCTCGTCGAGTAATGCAGGGCCTGGTTCGCGACACAACTGAGTTACGGCGAATTG  
TTCACTCGTAATAACCCGGGTCTGACTATTCGTTTCTGCAATTCCTGGACAACACTACGAT  
GGCGCAGGTGGTAAGGCTGCCCTGGCGTTTGAGAAGAGTCCACTCAATATGTCTATTGAG  
ATTCCAGAGGTTACTAACGTACTTCCGGCTAACCTAAAGACCTGCATTTCCGCTATCCT  
GTAACATCAAAGCTACAGGTTTGATCGTTTATCGCCCCCTGACGATGGCTGTAATCAA  
GGCATTACCTTCGCTTAATAAATCGCCCTCTTCGGAGGGCTTTTTTACGTCTGTACCAA  
TGGATTTGTTGAGTTATAATCACTCAATCAGATAACAAAGGAGACAAAAATGATTCGTT  
AGAACACACTGGCGCTTGCCTCATTGTTTACAAGGGTGAGAAATATTTACCTGGTGACAC  
TTTCGAGGTCGACGTAATTTGCGACGGACTCAAGCGTTTAATCGCAGAGGGTAACTCAC  
CATTGAGGGTGACGCTAAGGCAACCAAGCAGATCGCGCAAGAAATTGTTAGCAAGAAAA  
GCGCAAAGAACCGLAAAACCATCTCCGAAGCTGAGACTGGTAGCGAGTACAAATAAATCAC  
ATGGACGCTTATGCGTCCTTTATTGTATGGAGCTAATATGTTGTTATTTTTAGCAGTTAT  
GTCACTACTAATATCCATTCCGCTCGCATTGTTGGTCTAATTCTTCTTATTGGATTTCAT  
TAAAGGTGGGGCTTCTGGAGGTAACATGAATGATGCAATTTTGGCGTTTATGCGATCGC  
TTGTTCTGCGCTCAAAGCAGTGGATGACGAATCAATTAATGTGTGGATCGATTTGGCGC  
GTCTCTACGTATGTGCGGATAAGTTTGGTAATGATGCAGATCGCGCTGTGGGCCTTTATG  
CACTACACCTGATGCTTCTGATGGAGCATTAAAGGGTGAGAATGAAGGCTTGGAAACAT  
ACAGCCGTAGAATGGCAAGCTACTCACTGAGCGGTGAATTCTCTATCACTTATGATAATC  
AATCAGCAATCCAGGGTGACTTATCATCTTCTCTTGGGGCCGCATGTACAAGGCACTCC  
TGCGCAAGAAAGGTGGCGGCTTTGGGTTGATTACTTCCGCTGCTGGCGGTGGGTGCGGTT  
GCTGATGAACTATAACGAAATCGAATCAATCACTCGCGATGGCATTAAATTTCTTTAGTGA  
TGCTAATGGCGTTTACGAGATGAGTACTGGCGCTGGATATGTTGAAATCGTTAACGGCGT  
TGAAGTAGAAGTGCCGGCGCAAACATTCCAGCTAAAAGGCTTAGTGCGGGAAATCAAGAC  
GCGAGATATCGATGGTGAGTTTATCCAGTTTGGCGATAAGCGCGGAATCTTCACAGCTCA  
GGTTGAAATTAACAGGGTTATCAGATTAAGTTGATGGCGAGACTTTTGTGTTGTTGA  
CCCGCGCCCCGTTAAACCAACAGGGACGACTGTTGGTTATCGTCCGATTCTTCGCAGGGT  
GGCTACTTATGGCTAGAAACATTGGGAGTGTAGTTACGTTTGGAGAAATCTATTGCTGACT  
GGATTGACAGAGCGGAGGATGGTTTTGGGATTGTGGTATCCAATACGGTTATCAAGACAG  
CAAACGCAATTGTTGACCTTTCACCCGTCGATACCGGCAGATTCAAGGCTAACTGGCAA  
TCTCCGCAAACCTACCAGCTCAACAGTCACTCAATGAGTACGACCAGACTGGCGGCCAGA  
CCAAAACATATCTCGCCAGGCAAGCCAGAGCAGTCGCCAACTCAAAGCTACTAGTGTTA  
TTTATATCACTAACCGACTTGATTACGCAGCCGACCTTGAGTATGGGGCTTCAAACCAAG  
CTCCAGCTGGTGTTTTAGGTGTGGTGCAAGCGAGGCTTGGCAGGTATTTCCAGGAAGCGG  
TGGAGGAGGCTCGTCGTGCAATATGAATTGTCATTAGCAGCAAGGAAGTTCGTCAACGAT  
TTGTTGGTGAATGAATTTCCGGTCAGATATCCAGTTGCGTGGGAGAATGCTGCATTCCT  
CCTCCTGCGGATGGATCAATATGGCTTAAGTACGACTACACGGAGGTTGATACTGTAAC  
TACGGACTAAGCAGGAAGTGCAAATACTACGTTGGCATGGTGCAGATTTCAAGTGTCTTC  
AGTCCGGGCACTGGAATTGATAAGCCGAGACAAATAGCTAATCAATTGGCAGAATCTATC  
GTTGATGGTACAATGCTTGACAGCGGGACCATTTATGAGTCTGGAGTTGTTAACCCGGTT  
ATCAAATCCAAGTCTGGGTGGTTTATCCCGGTTTCGTTTTTATGTTTCGTCTAGACTAACAA  
AAGGAAAAATACATGGCTCATTATCAAACGGCACTCAGGTGCTCGTAGAAGGCTCCCGT  
GGTGATGCTATTGCCGTTACTGCAATCTCTAACGCCGCCAGCCCAGTCTAACTGTTGAT  
GATGCTTCTGGCATTGTTGTTGGTGATTACCTGCTGTTTACAGCATCTGCTTCCACGCTG  
CTGGCTGACAAGCAAGTTCGCGTAACTGCGGTAAGTGGCACATCTGTTACGGTAGAGGGC  
ATTGATACCTCCAGCACCAAAAATTCCCGGCAGGTTTAACTGGTGAAGTTGTTAAGATT

CTTTCCTGGTTCGAAGTTCGGTGTGTTTCAGGACGTTTCCACTGATGGCGGGCGAACAGCAG  
TTCGTTAACTTCCAGTGTCTTTCTGATGACCGTGAACAGAAGATTCCTACTTATAAGTCT  
GCGGTAACAAACCTTCACTTTCGCGCATGAGTACACTAACCCGGTCTATCCGGTCTT  
CGTGACTATGATGAGTCTGGTCAGGTTGTTGCGATTTCGCCTGTTTGTACCTCGCGCTCAG  
GAAATGCGTTCAGTCCGGCACTATCGCTTTCAATGACACCCCGACCATTGGCGTTAAC  
GAAATCGAAACGGTATCCATCGCAGTATCCATTCGCGGTCGACTGTCTCTGTGGCAGCT  
GAAGTTTAAAACACAAACCCTCTTCGGAGGGTTTTTTATTGCATAGCACTTTTTGCTAAA  
GCGCTTATTAATAATTTGCTGTATATTTACCTTATCGAAACGAAATGAGAGATTAAGAAA  
TGAAAGCAATCATCGCAATTATGGCAACCTTGTTACTTGTGGATGCAACTCAGATAAAG  
TAAAGACACTCAACGTTGACCTCACTGCAAACGAATGCAAGAACATCGTATACAACGCAA  
CGGTTAACAATGAATCATTACTCATATTTCAATCAAATACCCAGATCTAAAGGATGCCG  
TTATGTACGTATCGCACATTGAATGCACGAAAACCTGTTAGCAACTTTACACGTGGTGTTG  
TGATTGAGCGCACTGCAACATTGGCAAAGGTATCAAAGCCTAGTGACGCTTCAATTGAGA  
TGGTTTATACTAAGCTCTACAGTTTAGAAGGTTTCGCTAAGGAAGTTGGCGAGAAGCTGG  
CTTACTCACGCGTTGTTATGAAATAAAATAGAGGGCAAACCTAGATGGCAAAGTTCAAAC  
TTTCACTGGCGGCACTGCCAGACTTCAAGCTACCAGTAAAATTCAAACTGGCTAACGACC  
AGGATGTAGAGGTTATCTTTACGGTCAAGCACAAGAAGACCTCAGAGCTTCAGGAGTTAC  
TACAAAAGAAGACTTAAGCACTAAAGAATTGATTACGGCAATCGCCTCTGATTGGGATC  
TGGAAGAAGAATTAATGAAGAAAACGTCATTGAGTTTGTGACCTATTCCCAGCTTCTA  
CAGTTGCATTAATACTACTGCTTATATGCAGGCACTGGCGGGTCAGCGAGTAAAAAACTAAA  
ACGAGCGGTGTATCTACAGTACCAGTCAGACCCAACCGATGCTGAACTGGAAGCTATTGG  
GATGCGCCGCTCTGATTACGAAGATGAAGAGCCTGAAGTTTTACTTTCGACGACAACAT  
GATGAAGGCGTGGGACATTTATTGTTCAATGGCTACACAGTGGAGAGTCGGAGCTAACGG  
AGCTACAGGCCTAGATTACAGCGTGCTAAACTTCCTCTTTAGAGTGTATAATGTTTCTGA  
AGAAGAATTGGTGCTCAGCGATTTACGCATCCTTGAAGCTAAGGCTCTAGAGATGATGGA  
TAACCTGAGAAAAAATAACCCGCTTCGGCGGGTTTTCTATTATGGAGGCTTAGATGGCA  
ACAAATGAATTAGCCGGAATCACACTAGCCGTAGACGTCTCGCAGGTAGACAGGGGAACG  
CAATCCCTACAAAAGTTTAGGCAGGCAAACCAGCAAGCCGCTTCCGGCATTAGTGAATTC  
GTCAATGCTGAGCAGGTTGCTAAAATCCAGGCGAGGGATAACCGCTCGCGCACTGGCTGAA  
CAGCAAGCATCTTTAGCAAGGCTGCAAACAGCTATTGATCCAACCTGCGGCAAAGTTTCGC  
AAGCTACAAGAGGCTGCGGTAGGTCTTGATAAGGCATTTGCTGCTGGCGTAGTTCCTGAT  
GAGGAGTTTTTCCGCTTAGGCGAAGCTCTAGAAACCCAAAACGCAAGACTTGCACGCTCC  
AGAGCAGCCCTTACCGAAGAAGGTAGAGCGGCAGCGCAGGCAGCAAAGGATAAGGCAAGG  
GCAAAGGCTGAGGCAGATAGATTCATCGCATCACTGCAACGCCAGGCTCAAGCTGCGACA  
TTGACGCGCGAGGAGTACTTAAAGTTACAGGCAGCACAACCTGGTGTATCCGCAGAGGCG  
ACACCATTAATTAACCAGATTAGCACTGCAACCCAGAGAACTGTTGAAAATCTTGGCAGG  
CAAGCAGCGGCATTTAGAAAATCAGGATTAAGCGCCGGGCAATACAAGAATGCCATATCT  
CAACTACCGGCGCAGATTACTGATATTGGCACGTCGCTTGCTGGCGGCATTCCGATTTGG  
CTTATTGCAATTCAGCAGGGTGGTCAGATTAAGGATAGCTTTGGCGGCATTGCTAATACT  
GCGAGATTCTCTCTTTCTTATCTCAACCCGCTCACAGTAGCCGCTGGTGTCTTGGTGCT  
GGCTTTGCTTACGCTGCGGTAAGCATTACCAGAGCGAATCTGCAATAAAGGCAGCAAGA  
AAAGCGGTTGAGGAAACGCTTGGAGTCACGGATGAGGCGGCTAGGCAGCTAAGCATTAGC  
ATCGCCAAGATTTCTGAGGCCTCGGGAAAGACAGCTGAAGATATCGCGAAGTCATTCGTA  
TCAACCCGTGACGGAGCGCAAGAAGCAATTCTGAAGCTGATTGATGTTGGTGTAGTTAC  
GATGAAGCTAGGGAGCTTGTGGAGCGTTACAAGAATGCATCAAACCTTACCAGGTTAAC  
GCGCAAATTGAGCAGCACAGACTTGAGGCTGCAAAGATTAGGATAGCTGGTTCGAGAAT  
GCTATGGCCGTTAGCTACTACAATGATGTTGCAGTGCCGGGGCTGGTTAACTCGCCATTA  
ACCAATGTATCAGCAAGAAACAACGCAGCAATTCAGGAGTTTGCTATCCTTCTTGAGAAG  
GATGTAAACAAGGCTCTAATTGATGGAAACCGATACGTTGCTGAACAAGTTGATTTGATT  
GGCAAGGAATATCTGGCACTTGATCGCGTTGCTGGAGCGGAGAAGTCACTTGCAGACGCA  
AGAAAACAGGCCGCGCAGCAATTGCAAGGAGCGGTAATGCGGAAGCTATTGCTCAAGCTAAC  
AGAGTAATTCAGTTAAGGCAGCGTGAACCTTGACGAGGCAATTAAGGCAGAGAAAGAAAGA  
AATAAACCAGCAAAAACGAAAGCACCAAAGGAAGCTAGAGACCTTACCATTAATTATGAG  
TCGGGAGTCTCGCTCTGGAGGCTCAGTTAAGGTTGCTTCAGAATGTAGGAAGTCAGACA  
AAGGCCATCAGCACTGAGCGGAGAAAGCTACTTGAGGAGGAAGCTAAGTTTGAATCCTT  
GAGGAGCGCCAGGCGGCTGGTACAATCGGCAGAGAGCAGGCCAGACTTCTTCTTGAGAAA  
GACAAAGTTCTCGAGTTGGCCAGGCAGAAGGCTGAGCTAGGTGATCAGATTGTTTTGCAG

GAACGCGCAAATAAGCTAGCTGAAGACAATAGGAAGAAGACTCTTCAGATTAACAATGAG  
GCAAATAACATTGATTTGGGTGCTGGTTTGTTCATCTCGAGAGCAGCAGAGGGGCTAAAGAG  
ATTCAGGCTCTTCAATCCAATCAGGTTAATGCTGGTGGCTCTCTCGATGACGTGCGATTTT  
CAGCAATTACTGGAAGCGAGAAAGCAGTACTACAAGGATGAGGATGCTCTTAGGGCAGAC  
TGAAAGCTGGTGTGACTTCAACTCTCGCTGACTTGACTGAGAAGTACACTGACTACAAT  
CAGATTGCTAATGATTTAACTGTTGCGGCATTCGACGGGATAACAGAGCAAATTACAAAC  
CTTGTAACCACTGGTGAGACGAACTTTAGGGAGTTTACAGCAAGCATCCTGAAAATGATT  
GCGAAGATTGCAACTCAGTTACTTTTGGTTAAGGCCATCGAATCAACATTGACTAGCTTT  
GGTGGTGGGGGAGGTAACGCGTTTGGCTCATTGTCATCTGCCATAGGTTTTGCTGGTGGC  
GGTTACACTGGCGATGGTGGCAAGTATCAGCCCCTGGTACAGTTCATAAAGGTGAGTTT  
GTATTCATAAGGAAGCGACAAGCCGAATCGGTGTTAAGAACCCTTACGCACTAATGAAA  
GGTTACGCAAGCGGGCGGTGTTGTTGGCGGCCCTTCGGTTACGCAAATGGCGGCTTAGTT  
TCTGGTGGCACTAATGTTGATGTTAGTGGCATCACTGTTAACGTGAACTCAGGGGTTGGT  
AGCGACCCAGAGCAAGCCAAAGCGTTGCAGAACGGCGTCAAGGCAATCGTAGCGGAAGAG  
ATTGCTCAGTCATTCCAGCAGGGTGGCAAGGCCTATCAGTACCTGCGCGGATTCAATTA  
TTAACGGGGCTTCGGCCCCCTAAGGATTTCTATGGCTATCGATACATTTAATTACTGCACT  
CAAGTCCAAAATGGAGGCGGCTCATTCTAACACGAACAACGTGCGAATTGTTAGCTTC  
GGAAATGGTTATTCACAACGCGGAACGGGTGGATATCGTAGTAATACCAGAAGCTACCAG  
ATGACTTACACAAATAAGGACTGGCGCGAGGTTATGGAATTTTGTTCACCCACATCATC  
ACCCATTTCTTGGACCACACCGCAAGGTGATACATCAATGTTTGTGATTCAGCAGGAT  
AGCATTAGTGTAACCTCCGCTCAGCAAGGAAGTTCAGACTGTAAACATGCAATTCGTAGAA  
GTATTTAGCTCAATGCGTTAACTAAGCCCCATTAGGGGCTTTTTTTATTGGAGAAATAT  
ATGTTAAGTCCAAAGTTTGAAAATCAGTTGCAAAGTCTTTTCCCTGGCGAGATTGTGACT  
CTAATCCAGGTAGACGGGACGGCGTTTGGCTCTCTCGTTTACAACCTCCACAATGAAAAC  
ATTTCATATACACCAGAAGAAATAATGCTGGCCCAAATGAATGGCGAGCCACTACCAGAG  
AAGATAATCACATTTTCGCGGAGAAGAGTATGGCCCAAGACCTTTCGGTATCTCTGGTATA  
AATATGACTTCTGACGGCAAGGCTAACAAGGTCACGTTGACAGTATCAAACGTAGACCAG  
AGAATTAGCGCACTTATCCGCACCTACAATGGATTGGTTAAAGCAAAGGTTACTATCTGG  
ATTACTACGCGCGATAACATCAATGAGGATGGAAGCATTGCCGATGGTGACTATCGCCGA  
TTCGTTTACTTCATTGAGAGACCAAAGCAAGTTGATTACAAGACGGCATCATTTGAGCTT  
AGCAGTCCGATGGATATGGATGGTATCTACATTCCTGCGCGACTTGTTTCAGTCTGTTTGC  
TATTGGGCGTCAAGGGGGTGGTATCGCAGCGGTAATGGCTGCGACTACGCTGGTAATCGT  
TATTTTGACAAGGATGACAATCCAGTTAATGACCCCTCCTTAGACTTCTGCGCCGGA  
GTTAATAGCTGCAAGATTAGATTCGGCGAGAATAACCAGCTTTCATTTGGTGGATGCGCG  
GCTGCAAGCCTGCAAGCTAAAGCTAATCAATCATAGCACTTATTGCTAAGAGGATAGCTC  
AATATTGCGCTATCCTATAATCTCTTAAATTGGGGGTTAAAATATGAATTGGCATGATTA  
CTTTAGATATGAAGACGGCAAGTTATACTGGATTAGCTTTCCAAACCCAGAGCAGACAAG  
GAGCGTAAAGATAGGAGATGTTGCTGGATACAAACACCCTGACAACAAGGGTTACATTAG  
GGTTCAAGTTATGGGTAAGATGCTAAGGGTCCATCGCGTGATATGGGAAATGCATAACGG  
AAAATACCAGAAGGCATGGAGATTGACCACATAAATGGGATTAGATCAGACAACAGAAT  
TGAAAACCTAAGAATTGTTAATGGTCTTGAGAACATGAAAAATAAGGGGATTTATAAAAA  
CAACAAAACCTGGATTTGTTGGGGTTGAGAAAATTAAGCAAACGGAAAGTACAGGGCAAG  
CATAAGAGTTAATAAAAAACTTATTTTTCTAGGTGAGTATATTTCAATTGAAGATGCCAT  
TGACGCTAGAAAGAAAGCTGAATGTGAATACCTTTTCCATAAGAATCACGGAGTTAGAAA  
TGCTTACACCAAAGTTAACTGGAAATCTTCCAGCACGCAAAGAAGTTTACCCGCACG  
AATGTTGCGGGATTGTCACGCAAAGGGTTCGGGCTCAAAAATATCACAGAATCACTAATG  
CCAGCAAGGATCCAGAAAACGAGTTTATCCTTGATTCAAATGAGTATGCTGATGTTCTTT  
TTGAGTTAGCTACAATGAATCTATTGTTTACGTGGTTCCTCTCATAACGGGTGACGGAG  
CGACAACGAGACCTAGCCCAGCAGATATCTGTAGCTGCAATGAATGCGAGATTCCGTATG  
TTATCGTCAGCATTCCAGAGGGTGACATGAGAATTCTCGAGCCATCAACCATGCATCTGA  
TTGGTAGGCCATGGGGGCTTGGTAGCTTCGATTGCTGGGAGTTGGTGTGATGGCGTTTACA  
AGAAATACGGCGTCAAACCTGAATGACTATCGAGTCAATTACCCGTGGTGGGAGAAGCGGT  
ACAATGAAAACATATATGACGACAATTGGATTAAGGAAGGATTTGAGCTGGTAAAAACTT  
CAGATATTCCTATTGGCTCCATGATTATGATGCAGGTGCAAAGTGAGGTGACAAACCAG  
CCGGAATCTACATTGGCAATAACAGGTTTCATCCACCATCTCTATGGTAAAATGAGCTCTG  
TTGATATCTACTCCGATTACTGGCGAGAGCGCACAGTGCGAATCGTTCGCCATAAGGATT  
TACCAGAGGATGTAATTTATGACCCAGAACTGATTGATATTAAGTTAGGATTATCACTA

GGCCGCAAGTTTGGAAAGATTCACCAGATGGCAGTGAATAGCGTTCCCGAGGCTATGCGA  
GCACTATGCTCACAGATTCCAGCATTCAAAGAATTCATGAACAGTCATGTTGGTCAAAT  
ACAAGGTACGCCGTGTTTCGTTGATGGCAAAAATGTGAACGAGCATCGAATCTCTGATTTT  
AGTGCCGTTACAGGAGATACGCATCTTACCAATCCCTCAAGGCCGCAAGTCTGGAGGGTTG  
TTTCAGACTATCCTGGGAGCAGCACTAATCGTTGTTGGTGTGTTTTTTCAGCAATACTAC  
CTTGTTGGGGCTGGCATTTCACCTTGCTGCTGGCGGGCGTTGCTCAGTTGCTTTCACCTCAA  
GCTACCGGGTTGAAAGACCAAAGTAACCAGACAAGTAACAGGGCATCTTACGCATTCCGT  
TCGGCTGTGAACACTGTAGCTGCTGGTTATCCAGTATGCCTTCCATATGGATATCGAACG  
GTTGGAGGTTTCGGTATTTAGTGCCGGCAGCTACGCTGAAGACAATGCTTAAATATCATA  
CCGCCTAGTGCCGGTTTTTTTATTTAGTGTAGAATGGCACAAATGATCAAAAACAAACATGA  
GGCTTTGTGATATGGCTGAAGAGATTAAGATTTATGGTGCCAAGGGTGGTAGCCAAAAGC  
AGCATCAACCAGTGGAGCAGGAAGATAACCTAATTTCACTTAACAAGGTTAAGGTTCTTT  
TGGCGGTTGCTGACGGTGAGGTGGATCCTAACTTCTCATTGAAGGATTTATACCTTGCTG  
ACGTTCCGGTACAAAATCAGGATGGTAGCTACAACCTATGAAGGTGTTCCGCGCTGAGTTC  
GTGCTGGCACGCAGTATCAGGACTATATCGCCGGTCTTGACGGTGCTAACTCAGAGATTC  
AGGCATCCAGAGAAATCAAGAACGATAACCCCGTACATCATTGCAGTTAACAATACTCAGC  
TTTCAGCAATTCGAGTTAAGCTATTCTGGCCTCGACTGGTTAAGCAAGAAAGCAATGGAG  
ACCTGAACGGAACAACCTGCGAGTATGCAATTGACCTTTCTGTTAATGGTGGCGCTTACC  
AGGAATACACTCGCGGAGTTGCTAACGGAAAGACCACTACAGGTTACGACCGAAGCATTC  
GCGTAAACCTTCCGGCAGAATTTGATAGCGCGCTTGTTCGCATCCGTAAGATTACGCCGG  
ATTCAACAAGTAGCACCTGGTTAACGGTATGCAGATTACAACCTATCAGGAAGTAATTG  
ACGCTAAATTCGGCTATCCGCTTACGGCTCTGGTTTACGTTGAGTTTGGTTCTGACTTGT  
TCCCTAACGGCATCCCAACAATCTCAATCAAGAAGAGATGGAAGTTGATTCAGGTTCCCTA  
CAAATAAACCCTGAAACCAGAACTTATAGCGGCACATGGAATGGCCTATTCAAGATGG  
CATGGTCAAACAACCAGCATGGGTTCTTTATGACTTAGTAACAACCAGCCGTTACGGAC  
TTGACCAGCGAGAAGTGGTGTAGAGATTGATAAGTGGGGCCTGTACGAAGCTGCACAAT  
TCTGTGACCAGATGGTTCAGATGGTAAGGGTGGCTTAGAGCCGCGTTACCTTTGCGATA  
TGGTTGTACAGAAAGGTTGAGGCTTACACGCTAATTCGTGATATCTGTTCAATCTTTC  
GCGGCCTGACTTTCTATGACGGCGAAAAGATTGGCATCGTGGTTGATAAGCCTCGCAACC  
CATCTTACATCTTACCAATGATAACGTTGTAAACGGATTGTTTCAGTCGCACATTTGCCA  
GCGATAAAAGTCTTTACACCACGGCAAACGTTTCAGTTTGATGATGTAGAGAACAACCTATC  
AGCAGGATGTTGAGCCAGTATTTGAGCTTGAGGCTACTCGCAGGTTCCGGTTTAAATCCAG  
TCGACCTTACGGCAATTGGCTGCACTCGCAGAAGTGAAGCAAACAGACGTGGCAGATGGC  
TCCTAAAACCAACCTGAGAAGCGAAACTATCAGCTTCACTACCGGGCTGGAAGGCATGA  
TTCCGATGATTGGCGAGGTAATTGCGGTCAATGACGCAGCATGGTCTAGCAACTATCAGT  
TGAACCTTCCGGTTCGTATTGAATCAGTTCAGGGATTGCAGGTTTTTACACCGTTTAAAG  
TTGACGCCGCGCCTGGTGACAGAGTTCTTCTGAATAAGCCTGACGGAAGTCCGGAGGCGA  
GAACGATCGCAAGCGTTTCTGAAGATGGAAGAATAAACCCTTAACTGCTTTCAGTT  
TTGTAGCTAACCTGATACTGTTTTTGAATCGATAAAGATAATCTGGCCCTTACAGCAAT  
ATGTTGTGACCGGGATTCAAAAAGCAGATTCTGACAGTTCGGATTCAATTCAGTATACGA  
TTACCGCAGTAGAGTATGACCCGAACAAGTATGACGAGATTGACTACGGCGTTAATATTG  
TTGACCGTCCAACCTCAGTCGTAGAGCCTGATAGATTGTCGCCACCTGAGAATTTAACAG  
TGTCAGCTACAGCAAGGTTGTTCAAGGATTATCAGTTGAGACGATGGTTATCGGGTGGG  
ATAAAGCGCCATACGCTAAAACCTACAATGTTTCAGTGGAGAAAAGAGAATGGCAACTGGA  
TTAACGTACCAAGAACAGCTAGCACAGAGGTTGATATCGAAGGTATTTACGCAGGAATTT  
ATGACGTTAGGGTTCGCAGCGTATCAGATACTGAAAACGTGTCTGCCTGGTCTGGTATTG  
TAACTGTATCGCTAACTGGCAAGATTGGTCGCCCATCGGCACCTACGGTTATCACGGCGT  
CAACTGATGAAGTATTTGGTATCCGTGTTAAATGGGGATTCCCTGAAGGCTCTGGTGATA  
CTGCTTACACTGAGCTTACAGCAGGTTCCAGATAATGGTGTGTTACTTACAATCCTGATA  
ATGCAAGTTTGCTTACGTTGCTTCCCTTATCCTGCCTACGAATACTGGCATAACGCCAATTC  
AGCCAGGTAAGGTGATTTGGTATCGCGCAAGATTGATTGACAGAATCGGAAATACCTCTG  
ATTGGTCTAATTTTCGCAAGAGGCATGAGTACTGACGACGCCAACATTATCAATGATTTCA  
TCAAGGTTGATATTGAAGGTTTCAAGGATTCAAATACCTCGAGCAGAATGCGATTCAAA  
AGAATCAGGACATTCAGAATCAAGCTGAGGCAATTATCGAGAACGCACCTGGCTAATGATG  
GCGATGTTCCGAGAATGACAAAGGAGAACGGCAAGCGTAAGGCTGAATATGTTTCAGGCTG  
TGAATCTCATAGCCGATGAAACTCAGGCGCGGTAGAGGCTCTAACGGCCCTTAAAGGCGC  
AGATAGATGATGAAGTTGTAGCATCGATTACAGAAGTTCAGACTGCATTAGCCACAGAGA

CAGAGGCAAGGACTACCGCAGACACGACTCTATCAGCAAGACTTGGTGAAAATGAGGCGG  
CTTTAAACCAGAAGCTGGACGCATTCTCTAATGCCACATCGACTGGTGTGCAGTACGGAA  
TTAGTCTTGGCCTGAAATACAATGGACAGACTTATTCATCCGGTATGAGCATGGAGCTTG  
TCGGCACTGGTGACAATGTTCTGTAGTCAATTCATTTTTGACGCAAACAGATTCGCTATCA  
GCAACGGCATTGGTTCTGGTTCCGGTCAGTGGCAACTACCATTTCGTTGTCGAGAATGGAA  
ACGTAATCATCCAGAGCGCAGTAATTGGTGTATGGCTCAATCAGTAACGCGAAGATTGGTA  
ACTTCATTAGTCCAGCAACTACGTAGCAGGAAGCACAGGCTGGAGGATTGATAAGGATG  
GTAACGCCGAAATTCGCGGTAAGCTGTACGCTAACAGTGGGGAGTTCGCTTTTAATGGCA  
CTAATAACACAGTGCAGATTAATGGCAATGGCATTACTGTAACTTACCAAATGGAGGAA  
GAGTTGTTGTAGGTACATTCTAAAACAAAAGCCCCGAAAGGGGCTTTATCTTTAATACAT  
ATCAGGTAGGTAAGGTAGAGGTATGCCAAGTGTAACGTCTGGTCTATTTCCAATTCCATA  
TCTAACTATCCTTGTGCCCGTGCCGCTTCTTACGTTACCACCAGTCATTACCACGCCTTT  
GTTTCTCAACTCCTTGTATGCAGGTATTGCCCTTGTGTTAAACCCACACCTAAGTATTGG  
GAAGTATGAGTTTCCTATGCTCTGGTTTGAGCTTGTCAAAGTCACGAACCCAGAAACGAC  
AAGAGGCCTCGTTAATGTTGAAAAAGTGCAGTATTGTTTCGAGTTGAATATGTTTATTCC  
AGGCCCTGGGGTTGGCGCAACTTGCTGGAATATTATTAGATCAAGAGTTACGCTACCAGG  
GGTATTCCCAGTATCTTTTGTATTTATATTCGTGCAATATAGAGTTCTGTTACCATCAA  
CTCAACTGAGACACCTGAGTTATTCCACTTCCCAAAGGTATTCCAGCTATTGGCATTGT  
GTAGCTGTTTGTGAATGATACGGTTCCTGAAAATTTGCAAGTAAGAAGCCTATCCCTTGT  
TGTTATAGAGGCAAAATCAGTACTGTCAGCAACGTATATACCTTGCCCAGTTGACGCTCT  
CAATACCTCTACTACAGTTCCCGAAAATTGCGTAATACGGTCATTATAAGCATTCTCTCC  
ACCAATAGTTATCGTTCCTGAGTATTGGTTGCTGAAAATCCATTTATATAATAAATCTC  
AACCCCTATCAAGTTCAAAAGTGAAGCGCCATTTCTTGGTAGTAAGAATTTTGATGA  
ACCATTGCTACCCTTATTGGGAATGTCTTTGTAAATCCTCCGCTAGAAACGTTGAAGTT  
ACCAGCAAAAGACAACCCCTCATCCCTGAGGTTATCGTCATTGGTTTTCGACCATCATT  
TAGATCAATGTAGATGCCTTGAGCCATTAATTCCACTCCTTAGAGCCATAATCACGAACA  
GAACCACTGGAACCTTTAATACCATCGTAGCGAACATCAACCTCTCCGGCCGGCACAACC  
ACACCATTTTTCCACTTAGCTACGCATACGCCGCTTGCTTGCCTGACACCAGCCATCC  
GGACGAGGGCCTGAAGAGCAACCTACCATCATGATTGCTGCTGCGGCGATGATTGAAAGT  
TTGATTAGGTTAGTCATTTTGTATTCCTCATTAAAGTTGTTTCGTTTCGATGGAGTAATAG  
TACAACCGTCAGTGAGAAATGTCTTTATCTATTCGTGCTATCGTATACACGTAACCGATG  
TAACTCGATGTATAAATCTCATCCGCGGAAAATGATATACGCGCTGTTACGCTAATTTA  
CGCATTGGTTACATTAATAATATCTATATATATCAACCTTTTACTCTTATTATTATTATA  
TATATATTACTGTGTATATCATGTAACACTTCTATAGAGTGTTCGCTTATAATTTTAA  
TGTCATGTTGATTTACACAGTATATAATAGCCAGCATAGCAATGCACCCTCCACTAGAAA  
TGATATACACGATATACACGCTGGTTACATTGAGCTATAGCTTGGATGAGATGCCAAAA  
ACGTAACAAGCGCCAATGCCTACACGAAATTACAAGTATTCACGCGTAAGTTTGAATCAA  
CGATTGGCGAAACCAATTGGACTGGATACGGTGTGAATATATAGTTACCTCATCGAAAG  
CAAACAACCAGAGAGATACAGAAATGGCCTACTACATTATCAAAGAGAAAAACAATGCAC  
TGTTTCGGCGACTGCTATTTTCGGCGGCCCTGCTGGATACACCACAGATAAGAGTGAAGCCG  
ACAGATTCGATACCAAAGAAGAAGCCCGGGATGTAAGTACTGACTGGTTACTTCACTGAAGAAG  
ATTTGAAGTCTGTTAAAGTAGTTAAGGTTAAGGAATAGGATATGAGCTTTAAAGTTTTTA  
CTCGAGAAGAGTTAAGCAACGAGACTTACCACGATGAAACTGACCACATCTCCGGTAGCT  
CACTTGTGAGATTATCCATGGATCACCAGCCAAGTGGAAATTCAAGCAGCGCGATAGCG  
ATAGCAAGGCCCTTAAGTTTGAACGCTTAGCCACACTTACATCCTGGAAGATGACATGT  
TTGATAAAGAATACCTTCGAGCTACAGACCTTGACGCGATTGAAGGCTTAATTACAAGTC  
AGACAGGTTTAGCTTCAGCACTTAAAAAAGTTGGTATAGCTGGCACGTCCGGGAAGGGGT  
ATAGCGATCTCGTAGAGATGATGTATCGCTCTGGTGTAGGATTGGCCTGTTAAATGGCTAA  
TTGAGCAGTATGAGAGCTCACAGGCTCTTGTAGAGGGTAAGGAGCTAGTTAGCGCAGTAG  
ACTATGACAAGGTTGTAGCGATGCGTGAGGTTCTCTGCAACATTCCGGCGTATAATGCGA  
TCGTGAACAGTGAGACGGCGCAGAAAGAGTTATCGATCTTCGGTGAGATTCTAGGAGTCG  
GCGTTAAGATTGCAATTGACCACGTTGATGTTGTTGATGGAGTAGTTCGGATCACAGATT  
ACAAAACGACAGCAGACGCAAGCCCGGAAGGATTCCGGTAAGTCAGCATTCAACCACGGAT  
ACCTTGCAAAAATGGCACTTCAGCGTGATCTGTTTGTGAAAGCATTCAACGAGAAGCGCA  
AGGTTGTTGTGGGGTTGCTGGCACAGGAGAAGGTGGAGCCATACTTACCAATGCTGTACA  
CCCTAACTGACGAACAGCTTCGCATTGGTCGTCTCCAGTACCTTGAGGCGCTAGCCACTT  
ACAAGAAGTGCAAGGAGCTAGATATCTGGCCTGGTTACTCGAATGGCATTACAGAGCAAG



AGCTATTAGTTCCTGAGTGGGCAATTAACAATATAGAGAGATATAAATAGCACGAATCG  
CTAAAGACAAAATTAAGGGCGGGGTATGATTACCCCATCAACAACGAACGAGGTTAAAG  
ATGCAAATTTTCAGAATTATGCAAATCAATTTTAAAAGCGCTTCACACTGCTAAATCGTTA  
TTTGCGAAGGCTGAAAAGTCTAAGCAGAAGTCTACTTAAAGAATAAATACGCTACCTTA  
GAAGACGTTTTGGCGGCTGTTGAGCCTGGTTTATATGAGTGTGGTTTGGTGATGTTCCAG  
AGTGTACTTGATGACGAACAAACAAATCGCATGAAGGTCGAGACAAAGCTGTTTCATGTT  
GAATCTGGAGAGTGGGTAAGCTTCTTAATGATAGTCCCAATCAGCAAGAATGATGCACAG  
GGTTACGGATCAGCTTTAACATACGCTCGTCGCTACGGTATCACAGCTGCCTTGGGTCTT  
AGCCAGGCTGATGATGATGGAAATCTTGCAGCTAAAGGCGTTAAGGATTTCAAGCGAGAG  
CTAGAGAAATGCAATACTCTTGATGAGCTTCGTAACGTCTGGAAAGAGGCTAAGCAGTCA  
CTTGATGCGGCTGGATGGAAGGTTTTTGAACCTCACATTATCGAGCGCAAGGCAGAGATT  
GAGGCAAATGCGATGACTGGCTTCAACCCAGCAACACCAAAGAAAGTTGCAGAAAAAAGT  
AGTCCTGAAGAAAAGATTAAGTAGAATCACAACAAATCGACACATTCTAAATTTAACGG  
GGCTGCGGCCCAACAAACATAGAGAGATAAAACATGCACGTAATTACTGGTCAGATTTCG  
CCGCGCCCATTCACCAAAGAAGGTCAAACGCAAATGGTAACTGGAAAATGTTTGCGGT  
TGATTTAAGCGAACGATACAAGGATAAGGATGGGCAATCACAATATACGAATTACAGAGC  
CGTCTTCTTCGCTAAAGAGTCAATGTTAGATTGGTACAACGAGGCGTTCAAGGAGGGTAA  
AGTTGTTAGCGTGAGCGCTGAAAGCCTGGCTGTTGATGTTTCGTGATAAAGATGGTAAGAC  
CTACGTAACGATCAATATGAACAACCCTCGACTTGAGTTTAGTCAGCGTGGTGATTCACA  
ACCTCAGCAAAATAATAGACAGCAGCAACAACAGCAGCAGCAGCAGCAGCAACAAGACA  
ACAACCTCAGCAACAGCAGCAGTTTGATTCTGATATCCCGTTCTAAAGATAAGGCCCTT  
TCGGGGCCTTTTTTATTAAATCAATTTAACAGATCTTAACTCATTACCAGAAGTTGTAGA  
TATTGTTGTTGAACTAACTAACGTCCCAGACAATGCAAACGAAATAGCTCCAGTCGATGA  
GGATCTAGTAGCAAACCTTTGAGGTGAATCGCTTATAACACTTATCTTATTTGCTGTAAA  
AGTATTAGAGCCAGAAAACCAGTAGTTACAACCAAATCCTGATTGAGTCTAAATCCAAA  
TCCAACAGTAACAGAGGTTGACTCGCTCACAGGAATGTTAAGCCCATTAGCCGCACACC  
TGAGATATCAAAGAAATCACAAGAAGAAAGAAGCGCCCTTCTTGAAATGCCTGTTGTTAT  
TGGTAGCGTACTCTGAGACTGTCCATTGAAGTTACATACAAATCTTGTGTTAATGAACT  
AATATCATGATTAACAGAGCCATCAACCGGAGAGGCCGTATCAGATGTTGACTTAACAAT  
ACCGCCAACAATTTTATTGCCACAGGTCCATTTGGGTCTGAACCATAGTAAGCTCTAAG  
CCTTTCAACATTACAATTAACCATGTAATAGCTCCCCCTCTGGTTTGTCTCAAATATAGG  
GTATCTCGAGCTTCCGACAGGTGAAGAGAGATCATATATAGAAACGTTAGGGTTATGAAG  
ACTGTTAGCACCCATGAAAACGATATTATTTGATAAAATCCCCTTTATACTTATGTTGGT  
AGTAAACCTTCCAGTCAATGAGCTTTCAGAATTTGTCATGTCCGAGAATGGCCCCTTAAA  
CCTTGAAAATCAATAGTAAGCCCCAAGCTAGCAGATGATGGGAAAGCCGACATGTTAAC  
ATCTGATATTGAAACGTCAGAAGGGAAAAGCAGCGCACCATCTCTACTTGAGTAGAATAA  
ATTACCAGGATGAGAACTGTAGCTTCCCTGACTTGAAGTTAAGGCCCTTAATCCTAACTGA  
GTTAAACAGAGTGCTCTTTATTGGTGAGCCAGCTACAGGTCCATTTCCCTTCATAAGAAAT  
TCCATTTATCAAACCCGTCCCAGTCCAGGCCAGTACTTCTTGTGCCTGTAAAAGTAATGTT  
ATCCATGTAAAGGTTTCCGTCAAAGAAACCTCCAGCGTCTGCCCTTGTGTTATGATATT  
CCCATTTCGTATATCTAGACGCATTAATGCACTATCCCTTATATGCAAATCGCCAAGACC  
AGTAAACAACAACACCACGGGCACCGATATTGCAGTTTTCAATCTTAAGGTAGTTATGGAA  
AGGCATGTGAAAGTCAATTCTACTTAGATCACAATTTTCAAAGTTACGTTTGCGCAGTT  
GTTACTACCATTTGCGCCCCATCCTTTACCGTTAACCCTTGCCTTCATAATCCTTACGTT  
CATTGATTCACCTATTGATAAGGCGTATGAGTAAAGCTCACCAGAAGAATCTCTTGCGTC  
TGCAACAGACTCGGCAAAAAGACCATCAACTGTGATATCATATGAGTTAGCTATTGCCAA  
CCTTGTATCGCTAAACCCTTGTGTTATCGGCTTGTAAATAAAAAGAAATATCTTTTATTGA  
CAACCTTGTAGAATTATTAACATAAACTATCTGATACCGTGTGCGAAAGACTTTCATCTAT  
AGTTAAACCCCTTGATTTCCCTGAGTTGTCTTGTGTTTATCTTCAAGGCTCTAACTGATGTAAC  
ATTATTTCCAAGATCATACTTCAGTGAGTTCTCCAGATAACCCCTATTGTAAACCCCTATT  
GAGTTCAATTCTTTTCTGAACAGAATCCCTATATGTGTACATGTCCCTGATTTGTATAAAA  
AACAAATAAAACAACCATCAAGGTCACGATTTTTCAGATATAGAGTCGAACAAATTACTTCC  
AGCAGTTCTTGATTCATTAGACATGGAGTTAAAAGATGAAACAACAGATGACGAAGCGTC  
ATAAGTTGTAGGTTCCCGTTGGTTATAGTTATCTGCCCGGTCCATGAGGATGATGGTTT  
TATAACAGAGCCTGTAAAATCAGCACTCAATGAACCAATATCAATATAATCGGAACCAGA  
AACAAAGAAAACACCATCATTCTGCTTTATCTTTAGATTTTTGGATTTTTCGCTAGTTTAT  
CGCTCGATTTATACCTGAAATATCATTAGTAATACCATCTCCAACACACCCAAAATCATA

GAAACTAACATAACCTTTAGATCCTAGCTCAGACCACGAAGAATCACCAATCCCACCAGA  
AGAATATGGTGTGCGAGTTTTCCGGGACTGTCTTAGGTAGATCTCCCATCCATACGTATGA  
CTTTGGCTTACCGGAGTCAAGCCATATCATTGTTGATTTCTTGACTCTATTACACCTCC  
GGACTCAAATGATGAAATTAAGGCACCAGATAATGATTCGGCATAACCCCGTGCAGCTTG  
TTCTGATGACATTGCTAATCCAGCACTCGCTGCAGCAGAAGCCATATCACCTGCTACCTG  
GGCAGCATTCTGCGCAACCTGTGATGACATGTTTACAACATCGCCATACTGATTGTTAAC  
CTGTGTTACTTTAGATTCAAATCATTAAAGTCAAAGTTGTTAAATACATCAACTGCATC  
AGCAACCTCAGTTTCACGTGACTGATAGTAACGAAGAGTCTCAGCAACATCTTGAGCTAA  
TCCCTGAACGGTAATCCCATCATGAGCAAGAATAGCGTAACCAGTTCCAGCAGGAACAGT  
TTCAGAATTAGGGTTATAAACATTAATCTGCGTATCGCTGATGATCTCAGAGATGGTGTGA  
AATTTTTACTGGCTCAGTTTTAAATACAATGGTGGCACCTACGCGAATCAGTGTAAGCGG  
TGCTTTCCATGTTGTCCCGACACCAGTCACCTCGCCGTTTGCAGCTAATGATGCGGATCC  
CAAGTCATAAATTGCCATTGTGTAAAGTCTCCATTTGTAAAATAGCACGAATTGCTAAGT  
TGGATTGTAGCATCTTTCAGGCATAAAAAAACCTCCCGAGGGAGGTTAGTTTAGCAAGTC  
TTTGGCTTTGTACACTTTCTTGCGTATTCTGTTTTGAATGACTTCCCGTCATTAGGTAT  
CACCACATCAACATTGCGATCATCAGCGGCAATAAGTATATCAGTATCACAATCGCGGCA  
AGCAACCCTAAACTTCCCTTGACCTGTGCGGGTGGATGACCATTTCCACGTTGTAAGAGGA  
GAAAGCAACAAACACTTTCGCGACCACCTGTAGCCAAGTGAACACGTACACCATCAATAAA  
ATTATCGACAATATAAGTATAGCTACCATCCTGCTTAGAACCAATAACGGAAACAGAATC  
ACGTGTGTAATCACCAAGCAAGGAATTTAACATTTGAATCTCCATCAATAAACATTAAGTT  
GCAGAACTCATCAACCAAGACCATCCTCGTAAACCATTGAGCAGGGTACGGCATGAATCAT  
TGAGCCATCCTTAGCTATGCCAACATCGAATCCATCATCAAGATAAATACCTTCATATGT  
TGTGAGTGGGCTTGATTCAACTCTTACAGTCCGATCCATGACTTCAAGAACTTTTTTCATG  
ATCTACCTGTGCGCCATTTTGTAAACGCTGAGTCCTTGATGCTTGCTTATTTGCCTTATT  
AACCACCTCTACAGGGATAAGGTTTAAACACTCACCGAGAACATCTATACTTCACTGAA  
TGACTCCCCCTCATCTTTTGTAAACCACAGAATTCCATCGCCTGAGCCACACTGGTTGCA  
GATAATGCCACCATCACCTTCTTTGCTAACCTTGTTAGTCCATCGTGCTCGGTCGTTTCC  
TCCACAATAAATACATGGCTGATGCTTTTTGGTCTGGAAGAATTTTGGGTCTGCGCCGCA  
GATATTGATAAGTGCCTTATCCACAGGCCGCGCATTCTTGGTAAAACCTCTTTCTTATC  
GTAGTGCATATCAATCTATCTCTGAACAAATAAAAAAGGATGCACCGATTATGGCACATC  
CAATTCCTTACTCTTTAGCTTTTCGTGCTGCCTCATTAGCGGCCTTGATCTTTCTCCATG  
AACGACACTCTGGTTTGGTTGCTAACTCGGACTCAGTAACCACACGCAGCATGTGACGCT  
TCTTGCACCGTAATGTCAGCGGCTTTCCGTTGCCGTCGAATTGCAGGTCTGGTCGGCAGA  
ATGTAGCGCGAAAACCTTCTCCATTTGCTTGTAGTAGTTGTGAGAAAGCTGAGCGCCGC  
GAGCAGATATCATTCCACGCTTAAACCATTCTCTACAGCCTGTGGTGTACCTTTAACT  
GCTTTGCGATATTCGCCTTTGTGCCGAAGAAATCAAGAACAATCTCCAGTCGCGCGCGCA  
ACCCTGCCCTTACTTCATCTTTCAAACGTAAGTAACTGAAGGTCGTTTTCTGTTGTTTT  
TGTCTTCAGTGCAGGACAGTTCGTTATTACCGTTGATTGTTCTCTTGTGCGACTGTATTCA  
TTTTATTACCTCAATAGCATTTTTTGTTAAAGTCAATCTGATTTGATGGTAGTATTGTA  
CTCAATTAACGCTACAAGACAATTTTTATAGGAATTTAGATATGTTGCCTATCGAGAAG  
CTGGTTGCTAACTTTGATAAAGAAAGAATCAAACAGATTCAGAAGGATTACCAGTTTGGG  
GAGATAACCCCATACGAGTTCCAGTGCGTAACATTTGATGCTATCGGAAAGGCTATTGGG  
AAGTATGAGGCCCATTTATAGCAGACCTTTCAGTTTCTGCTGGTAAGACAATCATTCTT  
GCCATGATTGGTAAGCGCATGGAGCAATTGGGATTGCCTTATATGGTTCTTTCTCGCCAG  
TCAGAGATAATCAGCCAGAACTCAGAGGAGCTTCGTAATTTCCGCATCCGTAATAGCGTC  
TATTGCGCTGGCCTTAATGTTAAATCAGTTTACTACCCAACCATAGTTGCCAGTGAGGGC  
ACGGCGGCTAATGGCTTGTTAAGGGGCTTGGTGACTATGTTCCGGCAGTTATCGCTATA  
GATGAGTGTGCATCATATGGACCATATGGATATTGTTGAAGCAGAGGAGAACGAAGAAACA  
TTTGAACAAATGAGCACAAAGAAAGGCGAAATGGTTTTTAAGGATGGCGTAAACACGGGA  
TTGCTTGGCACTGGTTCGTGCGCAGTACACGCTAATCATTACTGAAATGAAACGTCGTTGT  
CGTGAGAGGTATGGTCGTGAGCTTCGTATATTCGGTCTAACTGGCAGCCCATATCGTAAC  
AATGATCATATCGTCGTTAGCAACCCAAACATCCGTGGCTTCTGGCGCAAAACAGTTATT  
CAGGTCCCAACCAATTACCTGGTTGATTTAGGATTCGTGGTACCAACAGTTTACGGCGAG  
GTTGGTGATTTGGGTTATGACCTTGCGGAGTTTGCGCCAGACGGAAGTGATGGTGTGAAA  
GACTTTGGCAAGAAAGAAATGGACGCCATGCAGGAAAAGATTCATCAAACAGTCCATG  
ACGCAAAAGATTATGCAATTTGCTGCAAAGTTCATGGAGACTCGCAACGCTGCGCTTGTG  
ACATGTGCCGGTAAACGTCATTGTGAGGAAGCAGCAGCAGCGCTTCTGAGGGGTGTAACC

TGGGCTATAGTAACTGACTCTACTGGTGAGAAAAAGCGTAGGGAGATTCTTTCTGACGCA  
GTTGAAGGTAAGTATAAATTCATATTTTCAGATCGGTTGTCTCACAACCTGGCGTGAACGTC  
CCGCCATGGGATACATCAATCATTCTGCGCAAAGTTGGTAGTATCACGCTTCTTATTCAG  
CTTTTGGGGCGAGGCATGCGAATACTTAAGAAGAAACATAAGGAAATGGGGATGGTCAAG  
GATGATCACGTGGTGTAGACTTTGCTGGCACTCTTGATGACATGGCAGAATTATACTTT  
GATCCAATCATAGAGGAGGTGCAGGATCAGAAATCAAGTCCTCTCGTAAAGTTGGGGAT  
AAGTCAAGAGTATGTCAGGCCTGTGGCTATAAAAACCCCCACTTGCTCGTCTGTTGCAAT  
AACGTAATTGACGGTAAACGATGTGAGCATTTTTTTTACATTTTCGCTTGTGTGAAGATATA  
GAGGACCCGCAGACAAAATCTATTATTAAGAAAGGTTGTGGTGAGAAGAATGATATTGCC  
GCTAAAAACTGTCGGTGTGCTGCGGAGAGATGCTAATAGACCCGAATGCAAAGTTATCTGGG  
AAAATGTATCGTAAAGGCGACTGGTTGCGAGTCTACGACTTTAAGATTGGATTAACAAAG  
AATCAATCAGGGATTGTTGCCTCATAACGAGGTCATGGCTCATAGTGGTGATAGGTTCCGG  
GCCTATGAGACGTTTTTTCCAGAGTCAGACCATCGCGTTTGCTCTGTAAGATGGAAATCA  
TTTTGCTCGACTCACATAGAGAGCAGGACTGAGGCTTTTAGAATTGGCAGGTTGCGTAAT  
GCTAAGATGATTATGACTAATGCTCACTTTTCCGTGCGCCATTAAGGATTACACACCGT  
AAGAACCAGAAAGGCCAGGATATTATCGCCAATAAATCTTTTACTATGGAGGATTGATAT  
GAATATTACAGACAAAGTTGATTACATTGAGTTTTACCCTGGCCCCGTTAAGTCATGCC  
TAAAGAGGATGATGAACAAATCTTTTGCTCTGATTGGGTTAAGTATAACTACCCAGAGAT  
GGTATTTTTCCACTGCGTGAATGAGGGTAAGAAAACCATTGGTCAAGCAAGAAAAGATCA  
GGCTAAGGGTCTCCTTAAGGGAGTGTACAGACTGTATGTTTCTTATACCTGAATCTATCCG  
AGGCAAATACCCTTTCCGAGCTATAGAGCTAAAGAGAGCAGGAAAAACGCAGGCAAGCCC  
AGTCAGTGAGGAGCAGAAGGCTTTCCTTAAAAGCGTAATGGAATCAGGTGGTTTTTCCGC  
AGTTGCCTACGGCAGGGAAGGGTTCCTTGCAGCATTCAAAGAAATGATTTCAAATAGCA  
CTAATTGCTAAAGGCGATTTTTAAAAGATGGGGTATAGTTACCCCATCGAAACGAAACGAA  
GAGAGAGAAACAAAATGGCTACTATCTACACTGGAAAATTCTACGAGTCACGCAAAACTG  
GTTATATTTATGAGTTGCAAATCACTGAGGATGGTTATGTTTTGGTTGATATCGAAGATT  
GCACTTACGCATTCGAGGTTAGCCCGACCTACAAGGATGACTTGGAACCTGTTAAAAACG  
AATTTGGAGAAAAATTTAATGAGGTATCAGAATAATGGCAATTTTTACATTTGAGCATCA  
ATGGGAAGCATTCAAGGTAATGGCGGCGGAGGAATTATACAACGCACATTATAAGCGTGA  
TTTATGGGGTGTGTTGAGTTGCCTGGATATGAGCTTCGAAGAAGAGTACCTGAACACTGA  
TATCGAAACATGGCGCGACCGCATGGTTGCTGATATCGAAGAGATGAAAAAAGATTGCC  
GGAGGATTTTTTATGATTGGCATCTGCGTAAAAACAAATGGCTTCTTTACACTTCTTGAG  
GATTATGAAATTAATTTTCGATTCAAATGAAATAACAGTGTTAAGCGATGATGGGGTGCTAT  
TGGTTCCTTAGTTATCAAGGTGATGGTTATTACGGTTGCAGAGATTCAGGCGGAAAAGAG  
GTTATTTTCTTAGTTCGAATAGCACTTTTTGTTAAAAATCAAATCCATGGATGGATTATAT  
TAAACACATCAACAACGCAGAGGTTTGAGAGATGAAAATTGTAGACAGAGAGATGTTTGA  
GATCGCACAGATATACGCAAATGATGCTGTAAAAACTGGCTCTGATTATTGCTGGATGTG  
CGCTAAAGAATACCTGAAAATGGCCTACGGCTTATGATAGTTGAAACCGGGCGAGCAGCA  
GTATGGGCGCATTGTGGAGAGGCTGGATTGCAAGATGACATTAAGCAGATATCCCGATTC  
TTTGACATAAAAGATATTAGCGTTGTGTTCAATGGTAAATTCTCTTATATGGATGAGCGC  
CCAAGAAAATACGTGAGAGTTAAGCCAGGTGTTAGAATTGATGTTAATGAGTTCCTCAA  
GCTGAGGGATAACAAGTTAAGATAACGAAGCCTAAGGATTAAGTATGTTGGGTTTAGATT  
TCCAGCCAGATCATTACGACTTAGTATATGGTCAAAGTGGTGCAAAGTTTAGAGCGATAC  
CTATTGCTGACTGGTTTTCTCCTGATTATGTGGATGTGAACGCAAAAACCTAAAGACGGGA  
AGTGGGTTTCAGATTTACTACTCCCAGCATGCGGAAACCTTTGCATGACTGACCTTGATC  
AGAAGTTAGCAATTAGTGCGGAAGTTATCGACTACTGGTTGAAAGAAGTTGAATGAAGAG  
CCTGATACTAGTAGCATTAGTCCAACCTGTTTAGCTTTACTATCTTATACTTTATGGTAAT  
GAATTAAGGAACCTTATAAATGGCAACTGCAAAGATTACTAACGAGCAGCTTCTTGAAGAA  
CTAGCAAACGGCATGACAAACAAGGCAATCGCAGAGAAGTACGGAATGAACATTCGCAAC  
GTTGAATTGCGTCTAGTAAACTGGCGAAGAGTGGAGAATTGCACGGAAACCCGGGCATC  
AAGAAGTTAGTTCCTGACGGTTATTTGGTTAAGGGAACCTCCACGATGATTGATGCTGAT  
GGTAACGAAAAGCTGCGCTGGGTTAAAACATCTGTAGATAATGAGAGACTTGAGGTTTTA  
ATGGAGCAAGCTCGCGAGGCATTTTGCTCTGATTTGCCAAAGGCTACTCCATCTGAATCA  
CCTAATGTTAACTTTGATGATAACACGCTTGCGATGTATCCAGTTTTTTGATTTGCACATT  
GGGGCGATGGCTCACAAACATGAGTGCGGCGAAAACCTATGATACAGCAACAGCAGAGAAG  
GTTATGAATGGGTTCTTTGACTACGCTGTAGATAAGGCGCCAAACTCTAAGAATGCTGTA  
TTGGTATTGGGTGGCGATTTCTGCTGATTACGACTCCCTGGAGGCTAAAACCCCGGCTCA

GGCCATATCTTAGATTCTGACAGTCGTTACGCCAAGATTGTTTATGTTGCAATCCGCTCG  
GTCAGGCGTGCAATTTCTCGAATGATGGAAAAGCATCAAGTTATTGATATTAAGTAATA  
AGTGGGAATCACGACGAGGCAGGAATGGTTTGGCTCCGCGCTGCACTTGCTGCGTTTTAT  
GAAGATGAGCCTCGCGTAAATGTTGATATTAGCCCTGCCGCAATGATGATGACCAGCTTT  
GGAACACGCTTATTGGATACACTCACGGGCACCAAATGCGGAAAGCCGATACTAGACTA  
ACTGTTATGGCAACTGATTTTCGTAAGTTATTTGGTCAAAGTGAGTATGTTTACACACAT  
AGTGGCCACTGGCATTTCGCAGAAGATTACAGAAACAAACTTGGGAATTGATGAGGTTTCAT  
GGTCAGCTTGGAAGTCCAGACGCATACTCTGCTAATGGTGGGTGGCGCTCACAAAGACAG  
GCTGCGGTAATCGTCTACCACAAAGAATTTGGTGAAGTTGGACGATTTATTTGCCGCCCT  
AAAATGTTTAGCTAATAGCACTTTTTGCCTAACTCATGCCGTAAAAATGCGGCATAATCA  
CCAAATCTAAACAAACGAGGATTCAATCATGGTTAAATTGTTTTGCATTAAGAACGCATC  
TAAGACACTTCCGTTCACTGAGGATAAGCCATATAGCGGTGAGTATCAGGGTGACGGATA  
CTACAAAATTTATGGTGACGACATGACGTGTATTCTTGCGCCGATTGATGGTTCGCTTGT  
TGAATTTATTATCGAAGATTAGCGCATCTAAAACATAGTGTTACGCACGGGGAGCCTTTT  
GGCTCCCCTTTTTTATGCTTCCTTTCCAAGCAGGGCCAATGTATCATTCTTTTACTAACT  
TAAACATTGACAAATAGATAAAGGTGGGTACATGAGGGAAGTAATTAACGCCGCTACGG  
CATCAACTGGCGGTGCTGCGGTAAGTGGCGGGCAACTGGTCAAATGACTATAGCAATAA  
TCAGCCTTATAGCTCTAATCATTTTTGGAGCTTGGGGTGCTTACTGGAAGTATAAGGATA  
GCCAGGCGATTTCGACGAGCGCTTGAATCAGGGGATTTAAAGACGGCAATCAAGATAAGGA  
GCAAGTAAATGAAGCAGAAGCTAGTGGTTGGTGCTGCGACCGCTGCGGCAATATACATCG  
CAGCGCCGCTTATTGAGCTTGTGAAGGCGTAGAGAATAAGCCATACATGGATATTGCTG  
GAATCCCTACAGTTTGGCGCCGGCGTTACTGGCCCTGACGTGGTTTGGGGAAAGAATTACA  
GCAATAGAGAGTGCCGAAAACCTTCTAGAGAAGCACATTCAGATTCATGGCAAGTATGTTG  
AGGATGCAGTTACCTACCCAATTGCACCTCAGACGAGAGCGGCCTTAATCAGCTTTAGCT  
ATAACGTTGGCGGCTCCTCGATGAGGAAATCTACGGCTGTAAGGCTAATCAACCAGGGCA  
AAGTGGAGCAAGGTTGTAAGGCTTTGGGTCTTTGGAATAAAGCTACCGTTAATGGCAGGA  
AGGTTGTGGTTAAGGGGTTGGTGAATCGCAGGAATGAGGAGATTAAGTTATGCTTAAGTG  
GATTGCAGCGTTAGTAATGTGCGTAGCTTTATCTGGATGCTCAGCAACATCTGCTCTGAC  
CGGATTAATTGGCAGTAAGCCAGAGATTAGCGCTCAAGCTGGTGCAGAAAATAATAAGGT  
TGGTGTGGGTTAACGAACAAGGTTGACTCAAGTAACTCAAGTGAAGCCACGGTTAAAGA  
TTCTAATGTTGGGTCACTGGATAGCTCGAGCGGGAAAAAGACTGCTGACAACTCGATTAA  
GGCCTCAACAATCACTGCCGAAAAGATTGAAATTACCAATAACGAATCATCAGCGCTTCC  
GTGGGTTGGAACAGGAGCTATGGGGTTGCTGGTTTTAATTCTCATGGCATTAACTTAAAG  
ACGTAAAAAAGCCTCCTAATGGAGGCTATATTTTTAGCTAAATAACTCGTCGTCAGTCAT  
TGTTCCCTACATTCATAATCTCTTTTATGTACTTGCTCTCATACCCGCTAAGTGCCTCGAA  
GTTGAAATCAAATGGCCTTTTCAAACCTCCCCTTGCTAACAACTCACCACACTTACCATC  
AATGTATCCAGCAGTTAACATCTTTGCGCAGAACTCCTTTGAAGCAGCACTGCAAACTC  
TCTATGCGATAAACCAGATGCCTTGCTGAACCTCTCAGAGTCCTTATGTTGGTATATGAA  
CCGCGCAAATGCTGGCGCGTAAAGTATGAATACGACTCACAGAAGCGGTATAAATCCAA  
AATGAACACTTATACCCCAATAGTCGTGGATTAACGTAAACTTTATACCAATCAGGCA  
CGTATAGTTTTTCTCATCAAGCATTGGCAGTAAGCGATCTTTAATCTTTGTCATTACACC  
AGCTTGAGCCTCAAACGGCTTAACCTTTTCGAGCTGCCTCATAACAATGAACGAATACCAAC  
TACACCTTCCCCTTCTTGCCCTTGCTTGATCAGTATATCAACCAGCTTGCTCATCTCAGC  
ATGGTCGCCAGCGTGACCAGCAGCGTTAGCTGATGACAGATAAGTCTTGCTCAGCTCCTG  
GAACATAATCACAGCTTCTTGATGGTATCAAGTTCAATCTCTCTGGATTTCTGTGGACT  
ACCGCCATTTGGGTTGAACCAGTTGCGCACAGTGTGAAGAACAGCTGCAATCCTGATGGC  
CTGCTTATCGAACTTACCCAACGCGCCACGTAACATTGTGTGTGAATACTTCCC GCCATC  
TGCAAGGTGAGGCTCCATCTCCTGACGCGCACGGTTGAGGTATTTTCATCGCTGAGTTGCT  
CACTGTCAGCTTAACATCTTGCTCATTATTATTTTCATGAACTAAACGGAAGTAATCTGC  
CTTCAGCTCGCCATTAATTGGTTCGTATGTTGAGTTGCCATTCTCATCAACGAATACGCG  
CTCACCAAGGAATGATTTTTACGAACCAAAAAGGAAACGTTTCAGATACACCGATAACCAG  
CGCACCAGCATTATGATGGCGTTGATTGTTTCATCCTGCGCAATTACAGAGATGCAACC  
CATAGCAACGAACTCATGTTATTTTTCTGCGTTGGCACGCGGATAGATACGTTACCGGC  
ATCCCATGCCTTAAGCACAAGTTCGCTGTTTCGTTTTCTTAGAGCCATCACCATAGGTCAT  
GCCAAGAAGTGAATTGACGCTAGTTGCTTCATCCGAGATTACAGCGAAGTTACCCTGTGCG  
GTTGTTTATTCGCGCAAGACCTTCCGGAGTGGTATCTGACACTGGAAATACGATATCGCA  
CATCTTTTCCAGCTTTTCTCTAAATCCTCTTTTTCTCAAACAGCGCCGCCATCTCTGA

TGGTGACTTCTCCTGCTTCATCTCTTTTGATAAATACAGATAGTTTTGCCATGATCTTCTT  
GCGCTCACGCTTTCTCAATTCATTTCAGTCGCTCAGTCTCAGCAATCATTGGAGCAATTGA  
AAGTGAGTTGATGGCTGATTTACCTGTCGATGGTGGTTGGCTTGTACGACATAAAGCGA  
AGTTGGCTGCTGAGTTCCATGATACTCAACAGTAAAACGGCCAGCATGGCAGCGGAAAT  
ACACCCAGAAAGTGCATATAAGCTGAAGACTCAGGGAACCTGAACAGAACGGGCAATATT  
GGCTGAAAGCTTACCAACAACATCAATGTCATTACCGAGTGAGATTACGGGATACTTGTC  
ATTAGCCGCATCAATCTCGACTGGTGCTTTCCAGAATGATTGAGACTGACGATAGCCATT  
AGCATTAAATAGCGACGCGCAGGGGTGGGAGGTTGTCTGCGGCAGCAATTGCCATAACCTG  
TTCAACAGATAGTTTATCTTCGTTGAAATCAAACATTACTTCTCTCCGTGTTGTTTCTGA  
GCGGCCATTATATCAACGACCGCTTATAAATTCATTATCAATTTGTGCTATTAATTGTTCT  
TAATCCACTTTAGACACATCCAGGTGCCAGCAACGTAAAGCGCTAGCTTTGCTAACTCGT  
ACGCTAAGTGTGTAAATAAAGCAAAATTAGAAATAAGCTCACTCATTTTTTAATCTTCAT  
CTCCAGAATTCATAACTTATGTAATTATTTATCATTCCAATAAGTGATTTTGGGTATGT  
TTTCATATGCTTCTTGCTGAATCTTCATCAAGATGCGCTGATATGTTGTGATAATTGTA  
TTCATAATCCATGCCATTAGTACGTATATCTTATCGTGCGCATTAAATGAAGTTATTTGA  
TTTTATTTCCCAAGCGACCAGCCCTTTCTTTTCTAATCATTTGTATTGAGCCTCAAAT  
AAGTAAGTCTGGCAAAGCGTGTAGAAACCAACGTCTCACTTCGGTAAAGCTGCCATGCA  
TTACCATCCTCATCGTAAATGTAACCGGCATTTTGTCCAGCCCTGCATGAAGTGACACC  
TGATAGCGCTCCCCTTCTTTAAAGTCTTTTTTAACCCCTGACTTGTGATTAACCTTAGTT  
ACATAAAGCGTTTTGGTCTTAATGTACTTGCCGCGCTCTTCCAGGTTAATCCATTTGCCA  
TCTTTCTTGATTTGCTCTACACCATCTTTAACGCGAGCTTTGTAGAGTACGTTTTTCGCTG  
CTAATCCAGTTTTTAGTCAGTGTAGTAGTCATTATTTGCTCTCTTCGTTGTCCACATGA  
ATTTGTTTGGTACTGATTTGCGCACTATTCGTACAACAATCTTATCAGTCTTCTGAACTA  
AACCGTAAATCTTTCCATCAAGGGAGGCTCGGTAAACGGCCTCCTCCATTGCGTCATGAA  
AGTTGTGCAACATTAGTGAGCCTTGTAGTTGGTAGAGAATTTAGCACCTTCGAATTTTGA  
AGGGCGGCGGTTAGCGTTAATTGCTTCGTAAGTTTTTTTAGTGTGCGGAGCATCAATCAC  
TTCAACAACCATCATGGCAACCATCGGGAAAACCTACTGCGATAACCATCAGAGTTAAAAT  
AATCATTTTTCTTTACCTTTTCGTTGTTTCGTTTCGATGGAAAGATAATACCGCATCCTTG  
GATTCGTTTTTAGCAATTCGTGCTATTTTCGTGCCTTTTCTATCGCCTTGAGCATAATTC  
ATGACTCTCAAGCAAGTCTTCGCGAAACCAGTCGCCGAGGGCCAACCCTTTCCGCTGTA  
TGCCTAATAACTGCCAGATCGAAATAATTTATCTCAGATGGTAGAAGCATCATTTACC  
TCGTCAAAAGTTGCAACCCAGGAATAAACATCCCAACCTTCCAACCCGCAATGGCAATC  
CATCCAGAATCGTGCTTGTGTGGTTCGCTCAGCGCCATTAATCACCCATTTCGTTCCGGGATT  
ATCTTCCCGTTAATGATTAGCGGCTCAGCGTCGTATACAGAGCCTTTAACGAATGGCGTT  
AATACTTTCTTGTGCGTACTTGTAAATGCAATTGGTGCAGCGAATTTTCATATCTAAATAC  
TCAAATAAATGGTAGGCATTCAGTGCAGCCAAGGCCATCGCAGCACAGGAATTCATCCTC  
TGACTGGAATTGTTTCGCCAGATCAATGTCTAACTTTCCGCGCACCAAGGTCAGTGTA  
ATCTTCATTAAGCCCAATCAGTGCGCATTCGCTTCGTAATTCGTCTTTCTTATTCATTT  
CCACCTCAGAAGTTACCAAGAACCAAAGACATTTGCTTGCAGTCTTGCCTCAGACAGC  
TTACCGAATAAAGTCTTGGCCTCAATATCATTAGCCTGTTTTGCATAGAATGCGCAGTCA  
CAGGCAATATCTTTAACAGCGCGGGGAGCTACCTGAATCTGCATTGCGATTTTCGTTTAAA  
GTGTTCTTGATTGCGATATCCATCTTCATTCCTCATCTCGTTTAACTTAGTGTTTTAG  
AGGTTTCGCTTTGATGCCATCGCTGCTTGTAGTGGTTATCCTGTTCCCTTCAGGAGGCCGTT  
GGCTCTTTACTTCCCACCCGTTCTCTATGTACTAACTATACTTCTTTTCTTCACTGCCG  
TTTTAACAAAAAGTGCTATTTACTAACTTTCTACTTCAATTTACTTCTTTTCGAGGAACCCG  
GTCAGACTTTGCTGCCGGAGAAGGTGTCTGGGAGTTTACCTATTCCGAAGTGACTCAACG  
TGCCCTTTCTCAACACTTGCCGGCATTTTTTCATCCGGACGATTCGACCTCTGGGAGGCAG  
CTACTTGGCGTTTCGTTCACTGCTTCCTTGTAGATACATATTACCAGTTTCTCGATTTATG  
TCTTTAGCAAAAAGTGCTATTCGTTGGATTTATGGATTGTTGAAGATATTGCAATGATTC  
ACATGATTATTGCACGTAT

>NewGenomeName\_288

GGTCGGTTATGCGGCCGAGCCATCCTGTACGGGTTTCCAAGTCGATCAGAGGTAGGGGCC  
GGCACAGAAACCACTCACATCAGGGCTGTGCGCCTCCAGGGCGCGTGAACCTCCACACCC  
CGGTGTAGTTACATCCCGGAATTGTCTCAGCGCCTCTCAGGGCGCTTCTCATAAACAGTG  
ATCTACGCCACTCCTGACGGGTGGCTGTCAAGGATACTCACCTTCCCTACTAATGAGGGG  
CTAAGAGCCCCTCTCTATAGAGCGCCGACAGGCGGCGGATAAGAGCGCCACCAGGCGC  
TCATCTAAAGACCGGCCTTGAAGGGCCGGTCATAGAGATCTATTTCGATCCGGCAACCGCC

GGATCTCAAGGCCGCGCCAGTGC GCGGCCCTATAGAGGGGTGACTCAACTGTGCATGGCA  
CTCGCTCGAGTGCCCACTGGAGCACTCAACCGGGGAAGTTCGACGTTCTCAACCTGCGAA  
TGACGTTTGAATCGTCATCCGCGTACGAAATCCCCGATCTGCGGCCGACCGACTTCGTGC  
CGGCCTATCTCGCGGCCTGGAATATGCCGCGTCACCGCGATTACGCCGCAAGAACGGCG  
GCGCGCTGCACTTCTTCTTGACGATTACCGGTTTGAGACCGCGTGGTCGTCCCCCGAGC  
GCCTTCTCGACCGCGTAAAGCAGGTTCGGCGCTGCACTCACGCCGATTTACAGCCTCTGGA  
CGAACATGCCGAAGGCGGCGCAGCTATGGAACGTCTACCGCTCCCGCTGGTGTGGCGCGT  
ATTGGCAGTCGGAAGGAATCGAGGTGATTCCGACGGCGTGTGGGCGACTCCCGACACGT  
TCGATTTCTGTTTCGACGGGATCCCGATGGGATCGACCGTCGCAATTTCTTCGATGGGCA  
TTCGCTCTTCAAAGTCGACCAGGAGCTTTTCCGGTACGGACTACGCGAACTCATCGATC  
GCACTCAACCGCAACTGCTTTTGGCATATGGCCAGCTTCGGCATTGCGACGACATGGATT  
TACCAGAGGTCCGCGAATACCCGACCTACTGGGACAGACGACGAAAGTGGGTAACCTGCCG  
ATGGGAGGCCGGGAAGTAAAGGCGGCCCGGTCCCGGAACCGGAGCACGCAACCGCAGA  
GGCGCTGGAGCCCCCGGATCGGGCGGCGTAGGCGGCGTCGGAGGGCGGGGGTGGAGCTGCA  
GGGAGCAGCGGAGGCGGCAAGGGAACGGCAGCGCCGGTACCGGAGGCGTCACCGGTGGCG  
GCGGAAGTGGAGCCGGCGGCGGTGGCAGCAGCCCAACACCCCGGTGCCCCCACCAGC  
TGGAGAAGAAGCGCGGCGAATAACAACAGATCGCCATCGACGCCAGAAACAGCACGCGC  
CCACCGATGAGAAGCGCGAGGCCAAGCGCAAGCAACTGATGGATCGAGTCGGAGGAGACT  
GGCAGGCTTTGGACCCGGATCACACGACGCCATCAAGGTGGCGATGGATGACGCCATGC  
GGAAGATCCTCTCCGAGGAGGATCGTCCACCGCACCAAGCACTTCGGCGACCTACTCG  
ACTCCGGTCGACTCAAGTCGCTGTTTCGAGGTTCGGCTTCTCAGCCGGTGGCGACACCCCGA  
CCGAACGCGCCCTCCTCGAGGACGCTGGTTTCGGCGCAGGCAAGGTTCCCCCGATCTACT  
CGGCAATCGAGTTCAACGGCGCTCCGACAGCCGGCCTCGGCATGTACGGCGGCACCAAGC  
TCTACATGAAGGACTCGGTCAAGGACCGCGTCACCGTGACCATCGGGCGACTCGCTGATGT  
CGAGCTGGGACGTATTCCCCGGCCGTCTGGCGACGGCGTGGGGCTGTGGGCCAGCCTGT  
CGAAGATCGAGGGGCTGGTCGATCCGAGCAAGACCCGCGAAGAGAACATGCAGGCGGTGT  
ACGACTCGTTCAAGAAGTACGGCACCCCTGGACGGCTTCATCGAGGCGCAGATCCACGGCG  
GCGTCTGGTCGAGGACATCAAGAAGGTTCGTGTTACGCGAGCCGCCGAGCCCGATCTTCA  
CCGATAAACTGGACGAACTTGAATCCCGTGGGAGGTGCAGTAATGGCGCAGATGCAGGC  
GACACACAATCGAGGGGTTCTGGCTGTTCGAGGTGGCCCCCTCGGGCGTTCGTTCGCGA  
GAACGGCCACGTACTGACCCGGCTGTTCGGCCACGAAGTGGGGCGGTGGCGAGGGTCTCGA  
GATCCTCAACTACGAGGGTCCAGGGACCGTCGAGGTCTCCGACGAGAAGCTCGCCGAAGC  
CCAGCGGGCCAGCGAGGTCGAGGCTGAACTTCGCCGCGAGGTTCGGCAAGGAGTGAGCTGG  
GCCGGCTCAGGCCGGCGACAGGAACTACCAGAGGACTGGGAGCTGAATTACCGGCTCCCG  
GTCCTTTCTGCTGCCAACTGGCTTTGCCAGATCAACGGTCCCGGATGCGTAAGGGCCGCA  
ACCGATGTTCGACCACATCAAGCGCGGGAACGACCACAGCCGGTCCAATCTGCAGGCAGCC  
TGCCATGTCTGTACGGCAAGAAATCAGCCGCCGAGGGCGTAGCCCGACGGCGGGAACTT  
AGAGCCCGGAGGAAGCGACCACCCGAACGCCATCCTGGGCGTCGATAAGCGGGCCAGGTG  
CCCGCTCCACCCAGGAGGTGAACAGTGGGCACGCGAGGCCCAATCGGAAAACGAGATGAA  
GAGCGGGTTCGTTCGGAACACCCCGGACAGTCCAACCGACACGATCCAGATGCCCGGTCTG  
GTGACGATCCCCGAGATGGGCGATCTAAGCCACGACGGCCGCACGCACCAGCTCGTCAAG  
GACATGTACGAGTCGATCAAGCAGTCGGCAGCCGTGAAGTACTACGAGCCGACCGACTGG  
CAGATGGCCCGACTCGCCCTCTACACACTTAACCAGGAACTCATCGCAGCCGAGAACAAC  
GGCAAGCCCGTGGGCGCGATGAAGCTCACTGCCATCAACCAGATGCTCTCCGCGCTGCTG  
CTGACCGAAGGTGACCGACCGCGTCCGACTCGAAGTCGAACGAGCACCCGCTGACCCG  
ACAGGCGGGAAGGTGTTGACGTGACCGACGTGCTCAAGCAGCGCCTCGCCAAGGCGAGC  
GGCGGGAGCTGATGGTCCCCCGAGGGGTTTCTAGAGCCGCTGCCGCTACCAGCCGCTCCC  
CCTCGGGGTAGACATCGAAAGGAACCATGGCCGACCTCGGCAACCCACTCGACCTCGA  
GATGCTCTGCCTGGTACAGGCCGGGACTTCCGCTGGACCATCGATTACCCGTGGGGTCC  
GGGAGAGCTGTTCTCGAACTCGAGACCGGGCGGCGAACACAACGCGCTGCATCAGGTCTA  
TGTCACCGGGGCGACCGGAGGCACGTACACGCTGAACGTCAACGGCACCAACACCCCGGC  
CATCGACTACAACGACGTGTTCGGAGAATCCGCAGGGGCTGGCAGGCGACATCCAAGACGC  
TCTGGACGCAGCCGTCCGAGCCGGAACGCTGTTCGTGCATCCGGTCTCGCTGTTCCCTGC  
GTGGACACTGAACTTCAACCTCAACGCCAGCAAGCCGCTCACCGAGCAGTTGGTCAACAC  
GATCAACAAGGCCGCGAACGACTTCTTCGACACGTTTCGACCAACTACTTGGGGTTCGACGT  
GGAGATGACGGTCACCGACACCCTGAACTTCAAGCTCAAGGTGACCTCGCGGCGCTCGTT  
CGATGAGGTTCGGTGTTCGTCACGTTTCGCGGTCGACGTGACCAGCCAGGCAGTCATCAACTT

CTTCAACTCCGTCGCCGAACCTACCCGGAGCGGTGAACACCGTCAACGTGACTTCTACTG  
GAACCGGACGTATGACATCGAGTTCACCGGATCCCTTGGGCTGCAGCCGATTCCGGCTAC  
TACAGCCGACATCACC AACCTGGCGGGTACCAGCAAGGCCGTCTCAGTCACGGTGGTCGA  
GCCAGGAAAGAAGAGGCTGACCATCTGGCCGTTACGGTCAACGGTGAACCGCAACCAT  
CAAGGTTCGAGTCCGAAGAGGGCCGACAAGATCCCCAACCGCTGCCGCTGGCAGTTGGTTCA  
CATGCCGACCGGCGAGGCAGCCGGCGGCGATGCAAAGCAGCTCGGCCGCGTTTACCGACA  
GCCGAGGTAACACCGCACCCATCAGAGATGGTGGGCCAGACGGCCTTCGGGCCGTTCCCT  
GACGTGTAGCTCAATGGCAGAGCGCCCGACTGTTAATCGGGTGGTTGAAGGTTGAGTCC  
TTCCATGTCAGCGAGGGCTGAACCGGACCCGTGTCCGGTGTAGGC ACTTTCCGCAGGCGG  
TTCCCAGAGCGTGGGGAGCCCTGCCCTGTACACGTAGCTCAATTGGTAGAGCAGCGGT  
CTCCAAAGCCGCGGTTCCAGGTTGACTCCTGGCGTGTATGCACACACCCCTGACTCCT  
GCTAGCGGAGTGTTCCGCTTTCCGGGCTGGGGTCTTTTTCCCGTTCGTCTAATCGGTAA  
GACACCCGGCTCTGGACCGGGCAATTGAGGTTGAGTCCTTGGCGGGGAGCCAACTTGAC  
ATCCACCCGAAAGGAACAACATGACCTTCACAGTCACCCGCGAGAGAGCGCAGTGGGTCC  
ACGACATGGCCCGCGCTCGCGACGGTCTCCCTACGCGTACGGCGGGGCGTTACCAACA  
ACCCGAGGGTGTGACTGACTGCTCTGGCCTGGTGTGCAGACCGGGGCTTGGTATGGAG  
GTCGCACCGACTGGGTCCGAAACCGTTACGGCTCAACCGAATCGTTCCGGCTCGACCACA  
AGATCGTCTACGACCTAGGGTTCAAGCGGATGCCCGAGGGCGGGCCAGCGGCCTTGCCGA  
TCAAGCCGGTGTATGCTCGTCCGGCTCCAGCACGGAGGCGGCGGGGTCTACTCGCACACCG  
CTTGACGTTGATGACGATGGACCACCCCGGTGGCCCGGTCAAGATGTCCGACCGAGGCG  
TCGACTGGGAGTCCCACGGCAACCGCAACGGCGTAGGGCTCGAACTTTACGAGGGCGCAC  
GGGCATGGAACGACCCTCTGTTCCATGACTTTTGGTACCTGGACGCAGTCTCGAAGACG  
AAGGAGACGATGACGAATTGGCTGACCCAGTTCTAGGGAAGATGATCCGCGAGATCCACG  
CGTGCCTGTTCAATCAGACCGCGTCCGACAGCGATCTGGCGACCCCTGGTGAAGGCGCTA  
TCTGGCAGCTACACCAGAAGATCCACTCGATTGACGGCATGCTCCACCCGATCCACGCTG  
AGCGGCGCGCTCGCGCAGGCGATCTCGGTGAGCTGCACCGAATCGTGTGGCCGCGAAGG  
GCTTGGGCGTGAAGCGCGACGAGGTGACCAAGCGGGTCTACCAGAGCATCCTCGCCGACA  
TCGAGCGGGACAACCCCGAAGTACTTCAGCGATACATCGCAGAAAGAGGTGGCCTATGAG  
CCCCAAGATCCGACAGACCATCTACCTGCTCGGCACCGCCGCCCGGCACTGCTGGGCAT  
CGTCTGATCTGGGGCGGGCTCGACGCTGAGTCCGGCGGCTGACCTCGGTGACATCATTGC  
GGGCGTCTGTGCTGATACTAGTCTCCGGTGCGCCGGCCGTAGCGGCAGGCACCGTACGCAG  
CCAGCGCAAGGACGGCACGTTGTCCACCAGCCCGGTGGATCAGGTCACCAAGGGCGTCTGA  
GCAGGTGCTCGCGGCCAGGCAGAGTGCCGAGGCTGAAGTCGCGAAGGTCAAGCAGGCGCT  
GGAGACCGCCGTCAGCGGTTCTCTCCCCAGCTCGGCCCGCTGGCCACGCAGATCCTCAA  
CGTGGCTGACGACACCGTCTGGCGTCCATGAGCAAGCCCTGGCTGTTACCGTCCACGGC  
ACAGGCCAGCCCGACCCGCTCGGGCCTGGTCTGCCTGCCGATACCGCACGGGACGTACTT  
GACATCTACCGGTGGCAGCCATCGGCAACTACCCGGCAGCGGGCTTCCCGATGTGGCCG  
TCGGTTCGAAAAGGGTGTGCTGAGCTGATCCTGCAGATCGAGCTGAAGCTGGACGCAGAT  
CCGTACGCGGACTTCGCGCTGGCCGGCTACTCGCAGGGAGCCATCGTGGTGGGCCAGGTG  
CTAAGCACCACATCATCAACCCGAGAGGTGACTGCACCGGTTCTGCACCGGCTCAGG  
AAGGTCATCTTCTGGGGTAATCCGATGCGGCAGAAGGGCTTTGCCACACCGACGAGTGG  
ATTCACCAGGTCGCTGCCTCGGACACGATGGGCATCCTCGAGGACCGACTGGAGAACCTC  
GAGCAGTACGGCTTTGAGGTCCGCGACTACGCGCACGACGGCGACATGTACGCCTCCATC  
AAGGAGGACGACATGCACGAGTACGAGGTGGCCATTGGCCGAATCGTGATGAGCGCTAGG  
CGATTCATCGGAGGTAAGGACTCCGTCATCGCCAGCTCATCGAGCTTGGACAGCGTCCG  
ATCTGGGAGGGAATCGCGATGGCCAGAGCCATCATCGACGCCCTCACGTTCTTCGCCAAG  
TCGACCCAAGGCCCGAGCTGGCCGCATTTGTACAACCGCTTCCCGGGCGGTCGAGTTCCTA  
CGACGAATCTGAGAAAGGAGGCGGGGTGAGCCTCAACAACCACCACCCGGAGCTTGCCCC  
GTCTCCCCCTCACATCATCGGCCCGTCTGGCAGAAGACGGTTCGATGGTGAAGTGGTATCT  
GCCTGAGAAGACCCTCGGCTGGGGAGTCTGAAGTGGCTCTCCGAGTACGTGAATAACCC  
TGGCGGGCATGACGATCCGAACCGTCTGGCGACGTTGATCGCGCTCTCCGAGGCAGGTCT  
TCTCGACAACGAGAACATGTTTCATCCCCACCGACGAGCAGGTACGCCTGGTCTCTGGTG  
GTACGCAGTAGATGACCAGGGCCAGTACATCTACCGCGAGGGCGTGATCCGCCGGCTCAA  
GGGCTGGGGCAAGGATCCGTTACCGCCGCGCTCTGCTTGGCGGAACTCTGTGGCCCCGT  
AGCCTTTTCACTTCGACGCCGACGGTAACCCGGTCCGGCAAGCCGCGTTCAGCCGCGTG  
GATACCGTTCGCGGCCGTCAGCCAGGACCAGACGAAGAACACGTTCTCGCTGTTCCCGGT  
GATGATCAGCAAGAAGCTGAAGGCCGAGTACGGCCTGGACGTGAACCGCTTCATCATCTA

CTCCGCAGCCGGTGGCCGTATTGAGGCAGCGACCTCGAGCCCCGCGTCGATGGAGGGTAA  
CCGCCCCGACGTTTCGTCGTCAGAACGAGACGCAAGTGGTGGGGCCAAGGCCCGACGGCAA  
GGTCAATGAAGGCCACGCGATGGCAGAGGTCATCGAAGGCAACATGACCAAGGTCGAGGG  
CTCCCGCACCTGTTCGATCTGCAACGCCACATCCCCGGCACCGAGACGGTCGCCGAGAA  
GGCATGGGACGAGTACCAGAAGGTCCAGGCAGGCGACTCTGTTCGACACCGGGATGATGTA  
CGACGCGCTGGAAGCGCCGGCCGACACCCCGGTCTCCGAGATCCCCCGCAGAAGGAGGA  
TCCCGAGGGATTTCGAGAAGGGCATCGAGAAGCTCCGCGAGGGCCTGCTCATCGCCCGAGG  
CGACTCCACCTGGCTGCCGATAGACGACATCATCAAGTCGATTCTGTTCGACCAAGAACCC  
GATCACCGAGTCGCGGGCGAAGTTCCTGAATCAGGTAACGCCGCTGAGGACTCGTGGCT  
CTCACCGCAGGAATGGAACCGGTGCCAGGTTCGACCTGGCCAAGTACCTGGATAAGCACGG  
CAGGGAGTTCGCTCCGCTGCAGCGCGGTGACCGGATCACCTCGGGTTCGACGGGTTCGAA  
GTCCAACGACTGGACCGCGCTCGTCGGCTGCCGTGTCAGCGACGGCCTGCTGTTTCGTCAT  
CGACATCTGGGATCCCCAGAAGTACGGCGGGGAGGTTCCCCGCGAAGACGTTGACGCCAA  
GGTCCATTCGGCGTTCGCCACTACGACGTGGTGGCGTTCGCGCCGACGTGAAGGAGTT  
CGAGGCGTACGTCGACCAGTGGGGCCGGACCTACAAGAAGAAGCTCAAGGTCAACGCCAG  
CCCGAACAACCCGGTGGCGTTCGACATGCGCGGACAGCAGAAGAGGTTTCGCGTTCGACTG  
CGAGCGACTCGAGGACGCGGTCTTGAGGGCGAGGTCTGGCACGACGGCAATCCCGTTC  
GCGCCAACACGTTCTGAACGCCAAACGACACCCAACGAACTACGACGCCATCGCGATTTCG  
CAAGGTCACGAAGGACTCCAGCAAGAAAATCGACGCTGCAGTCTGCGCTGTCCTCGCGTT  
CGGGGCGAGACAGGACTACCTCATGAGCAAGAAGGCCCGTAGCGGCCGGGTGGTGGTGGT  
TCGATGACAGCACCGCTCCCCGGTATGGAGGAGATCGAAGACCCCGCAGTCGTACGAGAA  
GAGATGATCTCGGCCTTCGAGGATGCTTCCAAGGATCTCGCCAGCAACACCAGCTACTAC  
GACGCTGAGCGCCGGCCAGAGGCCATCGGCCTCACCGTCCCAGAGAGATGCAGCAACTG  
CTGGCTCACGTCGGATAACCCAGGCTCTACGTCGACTCAGTCGCCGAGCGCCAGGCCGTC  
GAGGGTTTCGCGCTCGGCGATGCCGACGAGGCTGACGAAGAGCTGTGGCAGTGGTGGCAG  
GCCAACAACCTCGACATCGAGGCACCACTGGGCTACACCGACGCTTACGTTACGGCCGG  
TCGTTTCATCACGATCAGCAAGCCAGACCCCGCAGCTCGACCTGGGTGGGATCAGAACGTC  
CCGATCATCCGCGTCGAGCCGCCACCCGAATGCACGCCGAGATCGACCCCGGATCAAC  
CGGGTGTCCAAGGCCATCCGAGTCGCATATGACAAGGAGGGCAACGAGATTCAGGCTGCC  
ACGCTGTACACGCCGATGGAGACCATCGGCTGGTTCGCGCTGACGGTGGTGGGCTGAG  
TGGTTCAACGTCCCGCACGGTCTGGGCGTCGTTCCCGTGTGCGCTTCCGAACCGGACC  
CGGCTCTCGGACCTGTACGGCACCAGTGAGATCACGCCCGAGCTTCGGTCGATGACCGAC  
GCGGGCGGCGCGCATCCTCATGTTGATGCAGGCGACCGCCGAGCTGATGGGTGTCCCCCAG  
CGCCTGATCTTCGGCATCAAGCCGAAGAGATCGGCGTCGACTCCGAGACCGGCCAGACG  
CTGTTTCGATGCGTACCTGGCCCGGATCCTGGCGTTCGAGGACGCTGAGGGCAAGATCCAG  
CAGTTCTCTGCAGCCGAGCTGGCCAACCTTACCAACGCGCTCGATCAGATCGCCAAACAG  
GTCGCTGCGTACACGGGATTGCCTCCCAGTACCTGAGTACCGCCGACACAATCCGGCC  
TCCGCTGAGGCGATCAGGGCCGCTGAGAGCCGACTCATCAAGAAGGTCGAGCGGAAGAAC  
CTGATGTTTCGGCGGCGCATGGGAAGAGGCCATGCGGATCGCCTACCGGATCATGAAGGGC  
GGCGACGTTCCCCCGGACATGCTCCGCATGGAGACCGTCTGGCGAGACCCGAGCACTCCC  
ACCTACGCGGCCAAGGCCGACGCAGCCACGAAGCTGTACGGCAACGGCCAGGGTGTTCATC  
CCGCGTGAACGTGCTCGCATCGACATGGGCTACTCCGTCAAGGAGCGCGAAGAGATGCGC  
CGATGGGACGAGGAAGAGGCCGCAATGGGTCTCGGCCTGTTGGGCACGATGGTTCGACGCC  
GACCCGACGGTCCCAGGCTCCCCGAGCCCCACGGCACCGCCGAAGCCACAGCCGGCCATC  
GAGTCGTCTGGTGGTGGTGCCTGACCGCAGAGGAGTACGCGGGCGGCTCAAGCCGCGATCA  
CTGCGGGTCTTGCCACATAAGTCCAGAGGTTTCGCTTCGCTCTTCGTCGGTCCAGCTCTCG  
CTGTAGGTGAGTGGCTGCGACTGCTGCAGGTGCTGTTCCCCGAAATCCAACGGCGGATG  
CAGATGCTGCCGCTTGGGCAGGGACTTCTACGACTCCCAACGCGCACTACACCACCCAG  
AGCTGCCCCGGAACGAGAGGTTCCGGGGAGAGCTTCGGTGGGAGTGGTTCGTCAGAACAA  
TGGAGCCCGCTCGAAAAGAGATGTCGCAGGCGACTCTCCGCCGAGTGGCAGCTTAAAGT  
TGGCTCTGGCCGACGTTTCGCGAAGTGGAGATGGCAGCACGCCGACAGATCATCGGCGCTG  
TCAAGAACGATCCGGCCCCGAGATCGTGCAGGGCTGGGCGAGGGTTCGCCACCGGGCGCG  
AAACATGCGCCTGGTGTCTGATGCTCATCTCACGGGGTGGCCGAGCTGAATCACAAGGGCA  
ACTTCGCCTACAGCTCAGCGGAAGCCGACGGGCTCAACCTCGATGACGAGACCGTGATCG  
ACCTCTGGAACGAGTCCGGTTCACGACCTTGAGAAGTTCGCGAGGAGACCAGAGAGGACT  
TCGAGAAGTGGCACGCAGGGTGGGACTGTCTGGTGGTCCCGGTCTTCGATGTGCAGAACT  
GGCCCGGAAGAGACGCTGCCCTACGGGCGCAGCAACTTTGGATCGAAGCCAGCGACGAAG



CTGACGACCTCATTGCGTCAGGCAAGGCCCGCTCCAAGAACAAGAACACGGAGACGCTCA  
ACGCGCTCCGACGCCGCTAGCACGCGGCGAAATCACCATGTCCAACACTACGCCCTCGCTG  
CGTAGTCCCTCGAACCCCAAGGTGGGTTCTCTCAACATGCCCAGGAGGCGAAAACACATGT  
CCGACAACCCCACTCCCGAGAGCACCCCAAGAGGCCGAGACCCCGGAGGTTCGAGAAGCCGA  
TGGAACCGCAGGGCAAGGTCTTCGATGAAGCGTACGTTTCAGTCGCTTCGCCAGGAGGCTG  
CAGCCGCTCGGGTGGCGAAGAAGGACGCCGTAGAAGCGGCAGAGGCTCGAGTGAAGGCCG  
AGTACGAGGCCAAGCTCGCTGAGCGCGACACCGCTTACACCGAACTGCAGAACCAGTTGG  
GACAGGCGTGGATTGAGCTGGAGAAGGTCTACCTCTCTCTCGACGCCAAGGTGCCCAACG  
ACAAGGTTTCGGGCGTTTGTTCGAGATCCTCGAAGGCAACGACAGGGACAGCATCGCTGAGT  
CAGTGAAGTCCCGTCTGGAGCTGGTTCGGCGGATTCGGCAACAAGACCCCGAGTCTCTGCGT  
TCGACCCGTCTCAGGGTCGCGGCGGTAAGCCGCCGATCCCGCTGAACGGTGACCCGATCC  
TCGAGGCCATCAAGGCCGCTGTTCGGGATCAAGAAGTAACCCACCCAACAGATCTCAAGGA  
GAGATAACAATGGCAGTCAACCCTGACCGCACCCACGCCGTTTCTCGGCGTGAACGACCC  
CAAGGTCGCGCAGACCGGGCAGTTCGATGTTTCGAGGGCTACCTCGAGCCCAGCAGGCCCA  
GGACTACTTCGCCGAAGCGGAGAAGATCTCCATCGTCCAGCAGTTCGCCCAGAAGATCCC  
GATGGGCACGACCGGCCAGAAGATCCCGCACTGGACCGGGCAGCTGAGTGCCTCGTGGAT  
CGGTGAAGGCGACATGAAGCCATCACCAAGGGCAACATGACCTCGCAGACCATCGCCCC  
CCACAAGATCGCGACGATCTTCGTGGCCTCGGCGGAAACCGTCCGTGCGAACCCGGCCAA  
CTACCTGGGCACCATGCGGACCAAGGTCGCGACCGCCTTCGCGATGGCGTTCGACAACGC  
CGCGATCAACGGCACCGACAGCCCGTTCCCGACCTTCTAGCGCAGACCACCAAGGAGGT  
CTCGCTGGTGGACCCGGACGGCACCGGCTCCAACGCCGACCTCACCGTCTACGACGCGGT  
CGCCGTCAACGCCCTGTTCGCTGTTGGTCAATGCCGGCAAGAAGTGGACCCACACTCTGCT  
GGACGACATCACCGAGCCGATCCTCAACGGCGCGAAGGACAAGAGCGGTTCGCCCGTGT  
CATCGAGTCGACCTACACCGAGGAGAACAGCCCGTTCCGCCTCGGTTCGGATTGTGGCCCG  
TCCGACCATCCTGAGCGACACGTCGCCTCGGGCACGGTTCGTCGGCTACCAGGGTGACTT  
CCGCCAGCTCGTCTGGGGCCAGGTTCGGCGGCCTGTCTTCGACGTGACGGATCAGGCGAC  
TCTGAACCTGGGCACCCCCAGGCTCCGAACCTTCGTCTCGCTGTGGCAGCACAACCTCGT  
CGCAGTCCGAGTCGAGGCCGAGTACGCCTTCCACTGCAACGACAAGGACGCGTTCGTCAA  
GCTCACGAACGTGGACGCCACCGAAGCCTGATCCAGGCTTGACATCCACCGGGAGGGGGC  
TCCTTCGGGAGCCCTCTCCTGATGTGGAGCAGGAAGGACCACATGCGAATCCAGTCCACC  
CTCAACGGCGGTTTCGCCGAGGTTTCCGAGGAGTTCGCCAAGCAGTTGATCGCCACTGGC  
GGCTGGAAGGTGCCCGGAAACCGCGCAACACCAAGACCAAGACCGTCTCTGAGGAGCCC  
AAGAACGAGGAGTAACCCGTGGCCTACGCGACCGCCGAAGACGTTGTGACGTTGTGGGCC  
AAGGAGCCTGAGCCCAGGTGATGGCGCTGATCGAGCGCCGGCTCCAGCAGATCGAGCGC  
ATGATCAAGCGCCGGATCCCGACCTGGACGTGAAAGCCGCTGCGTCGGCGACGTTCCGG  
GCCGATCTGATCGACATCGAAGCTGATGCTGTTCTGCGCCTCGTTCGTAACCCGGAGGGC  
TACCTCTCGGAGACCGACGGTGCCTACACCTATCAGCTCCAGGCCGACCTGTTCGCAAGGC  
AAGCTCACCATCCTCGATGAGGAGTGGGAGATCCTCGGGGTCAACTCCCAGAAGCGCATG  
GCGGTTCATCGTCCCGAACGTGGTGTGATGCCGACGTGAGCGCGAGCGACCGACACCGCGCCC  
CGATTGTCTATCCGCCTGGCACTCAGGCGGTTACGCCGGATCGGGTCAACGCGTTTGACT  
GCGATCACGAAGCTGATCCTCCGGTGTGCCGGTGCCTCCACGACTGGCGCATCGAGTGGG  
GAAACGTCAAGAAGGCCACCGCCAGATCACGGTTCGGCGGTGCTCTGATGAGCCTCCTCGA  
CACCGGTGCCCGGTACCAGACCTGCATCGTCTACCCCGAAGAGATGGTTCATCGACTCCGA  
TGGCAACAAGCGGACCGAGCCGTCGAATACCGGCATCCCGGCCATCGCACGGTTCCAGGT  
AGCCAACCAGTCTGGTACGTTCGGCACGACGTGCTGAGCAGGACAACGAGGGGTTTCGAGAC  
CGAGAAGGTCTACCGGATGCGGTTTCCCGCTCGTTACCAAGGAGCACGGCATCCTCGG  
GGCCAGTCCCAGATCGAGTGGCGAGACCGAGCGGTGGGCGCTCTTCGGAGACGCCACCGT  
CTACGACTCATCCCTGCGTTGGCGCGGGTTCGACTACACGATCAAGAGGTACTGATGGCC  
AAGGTCTACGCGAACGCGAACAAGGTTCGCGGCCCGGTACGTCGAGACGAGGGACGCCGTC  
CGAGACGAGCGGAACAAGGTACCCCGTTCGAGCCAAAGCCAATCTGGCGCGGCAGAACTCG  
ACCACCCGCATCACCGACGAGGGCTACTTCCCGGCCACCATCACCGAGCAAGACGGCGAT  
GTCGACTTCCACACGATCCTCAACGCGCCCAACGCGTTGGCGCTTGAGTTCGGCCACGCG  
CCGTCTGGCTTCTTCGCTGGCACCGACACGAAACCACCGGAGGCCACTTACATCCTCACC  
CGAGCCGCCATCGGCGGCACCGTCTCATAAGGAGGTACATGGCGCGAATGCCTTCGCGTC  
CAGGCAGTAGCGGCCCGATCCTCCGGTTCAGACCCCGACTGGAGGGAGTGACGGTTCAG  
ACATGGGTTCCAGACGTGGACTTCCGAGAGTTCCCGATGATCAACCTCCGCCGCATAGGC  
GGGACGAGGAACCCCAACGCACCGACGCTGCACACGCTGCCGGTGGTTCGAAATGACCGCC

TACACCAGAGACGGTCTCATCGAGACTGAGGAGCTGTACGAGACCGCGCTAGAGGTTCTC  
TACGACGCGGTGGAGAACGGAACACAACTCCCGCAGGGTATTTGACCTCCATCTTCGAG  
ACGATGGGCGCCACTCAGTTCAGCTCCCTCTACCAGGACTCCTGGCGCATCCAGGGTCTG  
ATCAGGCTCGGGTCCGCAGACCGAGAACCACCCTCTAACCGAAAGGTAAAGCCACATGG  
CTGAAAACGACGACGCAGTGTGACTGCGGGCGGTCTGGCTACGTGTACGTCCGTGCTGCAG  
GCACCGCTGCTCCTACGCCGGCCTTGCTCAAGACCATCGACCTCAGCAAGCCCGAGACCT  
GGACCGGTGCTACCGGTTGGACGAGCGTCGGCCACACCAGCCGAGGCACGCTCCCTGAGT  
TCGGCTTCGAAGGCGGCGAGTCCGAGGTCAAGGGCTCCTGGCAGAAGAAGAAGCTCCGCG  
AGATCACCACCGAGGATCCCATCGACTACGTACCGTCTACTGCACCAGTTCGATGAGC  
AGTCGCTGGGTCTGTACTACGGCCCCAACGCCTCTGAGACTCCTGGTGTGTTCCGGTGTGA  
AGACCGGCCAGACCAACGAGAAGGCCGTGCTGGTCGTGATCGAAGACGGCGACATGCGCC  
TGGGGCATCACGCCACAAGGCTGGAGTTCGCCGCGACGACGCGATTGAGCTGCCCATCG  
ATGACCTGGCTGCGCTGCCCGTCCGGTTCACCTACCTGGACCACGAAGACGAGCTGCCGT  
TCTCCTGGATCAACGAAGACCTCTTCAACGTGCCCGAGGTTCCCGAGGGGCTGATCCCAAC  
TTGACAGCCACCCGGTGTCTACCCCGGAGGGGGAGGTTTCTTGGCGGGCCTGGCCTCC  
CCCTCCTCCCGCCACTCACAGACCCGCCGACACTGAAAGGTTCCGCATGACAAACGTATT  
CACCATCGACGCATTCCGCGAAGAGGTCAAGAAGAAGTACGCTCCGGTCTCATCGGCCT  
GTCCGACGATGTGACCGTTCGAGCTGAAGCCGCTGCTGAAGCTGGGCCAGAAGGCCCGCGA  
AGCGGTGGTCGAGGTGTTCAAGGAGTTCGCGGACATCCCCGACCTCGAAGAGGACGACGA  
CGACGAGTTGGTCGATGAGTACTCGCTCCAGGTCTGCGACATCATCGCCAAGGCGTTCCG  
GCTGATCGCCACGAAGCCCAAGAAGCTGATCGCCGCCTTGGACGAGGAGCCGGATCCCCG  
TATCCGCGCAGAGCTGTATGCAGCGGTACTCAACACCTGGAAGCGAGAGACGCAACTGGG  
GGAAGCCGCGCCCTCGCCGAGCTGATCGACAAGTTCGGCGGGGCGATCCTCGCAGACCTG  
CTCCAGTACTACCGGGTAGACCTGCGCGACCTGTTCCGCGACGAGGATCCGCTTTCGCCG  
AGATTCGTTCTGTCCCTGGTGCTCTGCCTTCCCAAAGACGGCGCGTTCACGCAGAACGT  
CGTGGTGGGCAGCAGTACCGGGGCTGGACCGAGGACCGCTACGCGCTCGCGGACATCTAC  
GACGCCATCCAGGCGGGCAACCACATCCTGCTGCTGGCGAATCGTGATCCGAAGAAGCCA  
AAGCCCAAGGCACCCAAGTCATAACCCGCGTCCCGACGACCTAGAGAAGACCACCCGAAG  
CCGGGTTTCGTTCCGCCGAATGGTCGTGCGAGCGAAGAAGGCGGCTCGAGAGAGAAGGGAA  
AGGGAGGAGGAGAGTGCCGAATAGTGCTGGCGTAGAAGTCGCCCGGATCTCGGTCAAGGT  
CAGCCCGAACACCAAGGAGTTCGCCCGGGAACCTCAAGACCGAACTCGAGAAGATCGAGCG  
GGAGCTTAAGGGCGATGTCGAGATCAACGGTCACTCTCGATGCGGCCAGGCCAAGGCCGA  
CTTCAAGCGCATGATGATGCAGCTCAAGACCGAAGCTGCCAAGGGCGTTCACGTCCCGGT  
CGACGTAACCGTTCGACAAGAAGAGCAAGAAGGGAGGTCTCCTCGGAGGTCTCCTCGGGCG  
CAGCCGGGGGCTCGGAGATCTAGGCGATGACGCCGAGAAGGCGTCTCAAGTACAACA  
CCTTGGCAAGTCGTTCCCTGGGCCTCACACGAGCCGCCTGGATAGGCGTAGGCATCGTCGC  
CGTAGCAGCTCCGCTGGTCCGCATCGTGGCCGGTCTGCTGGCCGGTCTGCCGTGCTGCT  
GTCTGCGTTCGGAGCCGGCGCTGGCGTAGTCGCGCTCGGCATGGACGGCATCAAGGCAGC  
CGCCTCGACGCTGGCCCCGACGCTGGAGACGGTCAAGGCCGCTGTCTCCTCGACGTTCCA  
GCAGGGACTACCCCGGTGTTCCAGCAGCTCGGCCCGATGCTGACCGCGATCACCCCCAA  
CCTGCAGAACGTGGCCTCGGGCCTCGTGAACATGGCCGGGTCGATCACCGACGTGATCAC  
CCAGGCTCCTGGTCTGCAGCAGATCCAGAACATCCTACCAAGACCGGAGAGTTCCTCAC  
GGCCTCGGCCCTGTGCTCGCTACCGGCACGCAGGCGTTCCTGACGCTGTCCAACGCCGG  
CGCGAACTCGTTCGGCACGCTCCTGGCTCCCCTGCAGGAGTTCACCAACGGCTTCAACGA  
CATGGTCAACCGAGTCACGTCCAACGGCGTGTTCGAGGGTGCCATGCAAGGGCTTTCGCA  
GACGCTGGGCAGCGTCTCAACCTGTTCAACCGGCTCATGGAGTCCGGTCTGCAGGCGAT  
GGGACAGCTCGGCGGTCCGCTGTGACGTTTCAACCGGGTTCGGAGATCTCTTCGTCTC  
GCTGATGCCGGCGCTGACTTCGGTCTCTGGTCTGATCGGCAACGTCCTCGGGACGCTGGG  
CACACAGCTCGCTCCCATCGTCACGGCGCTCACGCCGGCCTTCCAGACGCTGGCGAGCAC  
GCTCGGCACGATGCTCACCGGAGCCCTCCAAGCTCTGGGTCCGATCCTGACTCAGGTGCG  
TACGTTGATCGGCACGACGCTGAACACGGCGCTGCAGGCTCTCCAGCCGATGCTGCCGTC  
GCTCATGCAGAGCTTCCAGCAGATCTCCGACGTAAGTGGTGACCAGTCTGGCCCCGCACAT  
CCCGGCGCTGGCGACGGCCCTCGGCCAGGTGCGAGGCGCGGTGCTGCAGCTCGCTCCGAC  
GATCATCTCGACGTTGGTTCCGGCGTTCGTTACGTTGGTCCCAAAGGTCGCTGAGCTAGT  
TCCGACCATCGTCAACCTGGTCCAGTCGTTCCGCCAACCTGATGCCGGTGGTTCTGCCCT  
GGCGCAGGCTCTGGTCAGCGTTGCTGGCGCGGTGATTCAGGTGGGTGTCTCCATCGGCGG  
CGCGCTCATCGGCGCGCTGGCGAACCTCACGGAGATCATCTCCAACGTCATCAAGAAGGT

GTCCGAGTGGGTCAGCAGCTTCTCCAGCGGAGCCCAGCAGATCGCTGCGAAGGCAGCGGA  
ACTGCCGGGGATGATCCAGTCGGCTCTCGCCAACCTGATGGCCATCGGCCTGCAGGCCGG  
TAAGGATCTCGTCCAGGGCCTGATCAACGGCATCGGCGGGATGGTCAGCGCAGCGGTCAA  
CAAGGCCAAGGAGCTGGCGTCCAGCGTGGCTGGTGCAGTGAAGGGCTTCTGGGCATCGA  
GTCCCCGTCGAAGTTGTTACCCGAGTACGGCCAGTTCACCGCCGAGGGATTTCGGCAACGG  
CATGGAGGCAGGGTTCAAGCCCGTCATCGAACGGGCCAAGGATCTCGCGGCTGAGCTGTC  
CAGGGCGATGGAGTCGGGCACCGACCCCTCCGGGATTCTCGCTGGGCTGGATCAGAATGA  
GCTGAAGCAGATGCTGGCGGCTCTCGAAGAGGAGCGCAAGCGACTCAAGGTCGAGAAGAA  
CGGTATCCCCAAGGGAGACAAGGCAGGGCCGAGAGGGCGCTGCAGAACCAGCTCGACCAGAT  
CCAGGCGCAGAAGGACATCCTGTCTACCAGCGTGACCGCATCAAGAACGAGTCTGAGTA  
CGGCGACATGGCCGGCGAAGACCCGTTGGTGAAGGCAGCCTCCGGGCTGATGAGCGCACC  
GGTCGACTTCGCGAAAGCGACTGGCAAGCAGTTCCTTTTCGGACATCGGCATCAGCGGAGA  
TGGGTTTCATCTCGAAGGCCATCACCGAGGGCATCCAGTACATCTTCCAGATCGGCTCTGT  
CGATGAGGCGCTGTCGATCAAGGACCGCGAGGAGTCAAGAACCGCGCTGTCCGTCGTTGG  
CCGCTGACTTGACATCCACCAGGAGGTAAGCATTGATCACCGACACCATCGTTGAACTCG  
AGGGTGTCAATGGTGAAGCGTTTCAACTTGACGACCGGTGACCAGGGTGTGTACCTGGCCA  
CAGACGTGGAGGGTTGTTTCTACGACCCTCCCGTCAAGGTCGTTGTTGAAGAGCCGGGGA  
ACTACCCCGGCGCTCGCTACTTGTCCACCGAGCCCTGAAGCGAGACATCGTCTTTGGGG  
TCGTCATCCTCAACGACGCGAAGCAGGGGCCGCGCTCCTGGCTGTCGCGAGACTCCGAGT  
GGCGCAAGGCGTGGGCGTTCAACCGCACCTGCAAGCTCTACGTCACCACCCCGGACTCCG  
GTACCCGCTACCTGAAGCTGGCGCTGTTTCGAGTCCCCACCGTCAAGATGGACACCGACC  
CAAGAGGTAACCCCTTGAGGTCACGGTGATGTCGTGCATCGCGTACGACCCGTTCTGGT  
ACGAGGACGACAAGGTCTTCTCGGCCAAGACCAAGACCGACACCCGGTTCGACCCGTCGT  
TCTGGACGCCCGCTGGCCGTGGGAGGAACTGCCCAAGGAGACGCTGCGGATCAAGGTCG  
GCCGCGAGCAGGGTGGGCTAAACCCACCGACCAGTACATCTTCCCGAAGTGGACCGTTC  
CCGGCTCCACCGAGAAGGTGCCGAACCTCCCTGGCCGTTCCCCCGAACGTCCCGATCC  
CGTGGGAGACAGCACCGTTCACTCAGTTCGTCATCCCGACTACTCGTTCGAGGATGAGG  
AGTTCCGCAACCGCCGGCTCAAGACGCCGGGTTGATCTACGGCGAGAACTGCGTCATCG  
ACACCGACCGGCGCGAGGAGCAGATCGCTTCCGAGTCGGGCTCCCGGTGTGGGCTCGGA  
TGAACGGTGTCCGGTTCGCAACTCGATCCCGCCCTACACCGAAGAGGGCTGAGTTCGTCA  
TAGACGCATCGGGATGCGCTCCGGGACAGGTAGTTACCCTCCGGCTCACGAGGCCGTGGT  
CGCGCTGCTGGGGGCTAGAGTGAGTGGTCTGACGAGCGTTCGTGAGGCCGAAGATCTCTG  
GCAGAAGATCCAATTGCGGCGCTGCAAGCGCGAGCAGGAACGGCTCAAGCATCCCGACGT  
AGAGCTGCGCGATGGCGACTTCCGCTGCGCGGCCTGGTTCGCTGGCGAGCGGGTGCTCGA  
GTGGGAGTTCATCGAGAACGAGACTGGCACCTGCACCTTGCAGCTCTCACTGAGCCATTA  
CCTGGCGAAGTGGGTGATGGACCACCGGGGTCGAGCAAAGCGCAACGTCATCATCAACAT  
CGAGAAGCAAGGCGCTCGATGGACCAGGATGATGGACCACTACCGGGTCATCAAGACCGA  
CGCAGGGGACGCCTACATCGAGATCGTGTTTTTGCACGACTTCGAGCAGACCAAGCATAT  
CCGGGTATGGTGAACCCGTTCTACGCCCCGAGCTGCAGTTCCCAAGGTGTGGATCAT  
CTTCGGGCCGGCCAAGTGGTGTGTTGCTGGTGACACTGTTTCGTCAACCTGCTCAGGCTCGA  
GACGAGCTTGTGGACGCTGCCTGATGACCCACGGACATCAACGAGTGGATGGGTCCGAG  
CTTCAACCCAGCAAATTGGCGGAACATCGTCAAGCCGTTCCCGTTCCTGGCCGACAACTC  
ACCGGTCACGATGGTGTTCAGCCGGTTCGGGACGTTCTACGACACCGCCAAGAAGATCCT  
CGAAGACCATCAGCTACGCTGACGTGTCGTCGGTACATCAAGGACCGCGACCCGCATCC  
GTTTCGAAGATCTCAAGGGGCTCTGGGGAATTGATCCTGTGCAAGACCTGCTGCAGAAGAT  
CCCGCTCCGGGACGGCTGCGTGGTCTGGGACATCGAGGACAACTCAGGTTGGGGCACTCA  
GACCGGTTTCGGCGGTTTCGTGGCTGACCGGGTTCGTCCGAGGGATGGTCCAACCTGGCCGG  
CGACGGCCAGGTCGAGGGCGTCGATGTGTTACCGGGGACTACACGTTCCAGGGCGAGTA  
CTACTCCCCCTGGTTCATGGGCACCAGCCCGATAGCACCCACGTCGTGTTTCAAGAAGG  
ACCGCTGACCGGGATCAAGTCGTCGGAGTTCTCGTACTACGAGGCCACCGACACCAGCTT  
CCTGGCTGGTGGACAGAGCGCACCTGGCATCAACGAGGGCATCTCGGCCCTGGTGAACAT  
CGGTGGCGACCTGCTGACCTCGTTCATCAACAGCCAGCTCGCCGCGCTCGGCGCGGTTCGG  
TGGAGCGATTGACCTCCCGCTCTGGGCGGTCTGCTCGATGCGGTGTTGCAGCCTCTGTA  
CTCCGATGTGTTTCGGCGGTTTCATGGAAGTTCGACTCTGCGTGCGATGGGCATCTCGCT  
CCCGATCTCCGGGCTCGAGGACATCGTACCGGACTGGGCGACTTCCACTACTTCGAGAA  
CATGGCCGACGGGGCGATGAAGGCGTTCACGCTGTCAGCGTTCGAGCCATCGCATCGCA  
GATCCACAAGACGAGGGCTCGAACGACCCACACCCTCAAGGTGTCTGACGCCGCTCCGTA

CATCTTCGCGCCAAAGCCCTACGGGCACTGCTGGATCGGAGATCGCGTTCGGCACGTCCGGT  
CCTCGGCTACCCGGTTCGAGCACCAGTTGTTCTGTGGAGCGCATCCGCAAGGTGAAGTACCG  
CATCGACAAAGACGGCATGAAGCCGTTGGAGATCGAGATCGGTTACCGCGAACCGAAGAA  
CCCAGCACTACACATCCTCGAAGAGATCAAGCGCGTCAACGGCGCTCTTGGCACTGCGGG  
GATTCTCTAAACCGAAAGGCACGCCGATGATTCCCTCACAAGAGTCTCACAATCCGAAC  
GACCCGCGACAGCACGTCATGTGGGCGCTACGCAATCTCCCGATGATTGCTGGCGTCCGGG  
GCGATCACGCATCCGGGTACCTGGCGGATTGGTCAGAGCACTTGTGGAAGTGCGGCTTT  
CGGCACGTCGACTGGCTCCGGGAGCTGGCTGATGAGGACGGCAACATCCACGTCAGTCAG  
CTTCCTGACCAGGAGATCAAGTTTCAGCAGCCCTTCCGGGGCCAGCGAAGCGACTACAAC  
AACGCAGCTCGATGGGTTCGGCAAAGACGATCCTGACCCAGAGCCCGTGCGTATTCCAGAC  
ATTCGCAAGCTCACAGACCAGGAGAACAGAGCGATGATCGCGCAGTACGAACGAGACGGT  
TGGATCAAGGATGGATCCCCCGGCCAGCGATAGCCGAGGTCGTGGAGTGACCCCGTTCA  
ACCCAGACTCCATAGGCGACTACGTGACACTGCTCGGCGTTGCGTTCCTGACCTTCTCGG  
TTCCCGCATGGTTCACCGGACGAGCACGCAAGCACAGCAGTGACATCGGCGAAATCAAGG  
AACAGGTATGTAACACCCACGACACGAACCTGCGCGATGACCTCGACAGCGTCAAGGCAG  
ACATCAGCGACTTGAAAGAGATTGTGTTGCAAGGGTTCCACCAGGTGAACGAGTCGATCA  
ACCTCGAGCGCCGTGAGCGGATCGAAGGAGACCGCCGAAAGGAGGTTGCGTGACCTACCC  
CACCAACCCACTAGAGGCCATCGGCGCTGACGGCGCATTTCGAGATCGGTGGGGGCGACTG  
GAGCTTCGGCCAGGACTACACCGAACAGGCCATCCGGGCTCTGTTACGATGCCAGCGGT  
CACGATGGAGAACGCTCTCGGCCTGCTCGAAGAGCACCTGCTGAAGCTGCCTCTGGAGGC  
GCTGCAGGGCTTCAAAGACATGATCCCGGACTGGGTTCGAAGGAGCATTTCGACACGGTCA  
CGGCGCTGTGCAGGCGATCATGAACGCGCTCCAAGACGGCCCCGCTGTTCTGAAGTTCGC  
CGAGTTCAGCTCTTCTGACGCGTCTGCTGAACAACCCGGCCGAGGTCATCGGCGAGAT  
CCCCCAGACGTTGATCGACGGCCTACAGGACGCGCTCAACACCGTCAACAACCCATCCA  
GACCATCGTGGACATGCTCCTGCAGGCGCTGGGCATCACCCCGGAGGGGGAGCTGATCGA  
CCGGATCTTCGACCTGAGCGATGAGATGGAGTGGCTGCAGACCCGACGCTCGAATGCAGC  
TACCGGCATCCAGGACACCTGGAACAAGTTCTGGGGAGCCCTCACCGGGCGCGTCCAGA  
CCAGGACCAGACCGTTCGCTGAGCCCGCCGAGCGTATCGGCGAGCTGGCCGGCACCCAGTC  
TGCTAACTCGTCTGCCATCGCGGAGCTGCAGCGTTCGACTGGACAACCAGCAGAACGCTGG  
CGGCGTGGCCGGCGGTGACGACTTCGAGCGACTGAACATATCCGGTTGGGACATCAGGTA  
TTCCAACGGATCCAGCGGCCGAGGGTACTACCGTGCCGACGGCCACCAACTGGTCTGGAT  
GGACGAAGGCAACCAGCAGAACACCCGCGACGTTTCGTCCGCACCAACCCCGCAGACGAGAA  
GACAGCCACCGACTACCAGAAGATGACGTTGGTTCGTTCGGGACTATCTCCGGTGAGGTACA  
GACCGTGTTCGCCCGCAGGGAGGTTTCGCACACCCGGCTATGGGTCCGCGTCAACGACAA  
CGCTCCGACCGTTCGGCATCACCGACGGCGTGTTCGTAGAGATCGGCGGCGTATCGAAGGC  
CCAGATCGGCTACCGCCGCAACGGCAATGACACGTTTCGTTCGGATCTATGGTTCGACTGCAC  
CTGGGGTGTGGATCGATCTTCGCTCTGACCGCCGGCACGGCCAACGGTGTGAGAAGTT  
CGAGGTCTCGAAGAACGGCCCCGTGCTGGCCACATGGTTCGGACGACGGCGTCTCCCG  
GATGGGTGCGAACTACCGCCGCTGGGGCTGGGAAGGCCAGGCTCGTAACCGCAACCTCGG  
CCAGGGCACTCCGAACTCGGTCACCCGAGTGACGATCACCGACAACGATCCTACCGGCGC  
AGGCGGTGGAGCTGTCAACGTCGGAGGAGATGTTCGTAGGTGTACTCCCCATAGAGAACGG  
AGGCACCGGAGCTTCGACAGCTTCGGCAGCCCGTACCGCTCTCGGAATCGATGACCTGGT  
CGAAGATATGTCCGACGTAGTTTCGTGGATCCGTTCGAAGGACTCCCGTTGATACCGAAGAT  
CTGGGTAGGAACAGAAGCTCAGTACACGGCTCTCGCCACCAAGGATCAGTCCACGCTATA  
CTTCAGGACCGCTTAATGACTGGTATCTCGTTGGGTGTCAACGACATCCGCAACCTCTCG  
ATATTCTTAGGCGTCAGCAACAAGATATTGAAGGTTCAGTCTAGGCACAGAAAAGGTCTGG  
CCTGCGTTCACCCCGGTGCTGACCACGTTTCGCCACGGTTCGGCACGTACACCTACAACATC  
CCCGACGGGGCCAAGTTCATCGACGTCATCCTCCTCGGAGGAGGCGGGGGGTAAAGGC  
ATGGCCCTGGCTGACGGCTGGGGCAGAGGTGGAGACGCCGGAAGCTGGGCTATCGTCACT  
CTCGAACGCGGGGTACACATCCCGTTGTTCGACCAAGACGATCACCGGGCTCGTTCGGAGCT  
GGAGGCGCAGCGGGAGCTGGCTCTGTATTCTCAGGCAAGGCCGGAGGCCCTGGAGGAAAC  
ACCACGGCGTCCGCTGTTCGGATGGTTCAGGTTTGACCGCAACCGGCGGTCCCGGAGGCTCT  
GTGATCGACATCCTCAGCGTCGCCGGAAGTTCGCTGGAGATCGGACCTACAACGACCAG  
CTCTACATAGGCGGCGCACAACAGAACTCAGCTGGCGGGAACGGCAATGCTCCTGGCGGC  
GGCGGGGCTGGTGCCAGGTCTCCGCACAGAGCGGCGGTGCTGGCGCTCGCGGCCAGGCG  
TGGTTCTTCGCGTACTGACAAGAAACCCCTCTTTAGGACTCAGTGTCTTGGGAGGGG  
GGCTTTTTCGCTTTCAGGAGGTCTTGCCAGCTTGGACATCGCCTCAGCGATAGCCTCGT

CGCGGGCCTCAGACGCCATCTGGTACTTCATCGCCATCCTAGGAGTCGTGTGACCGAGAC  
GGCCATCAGCTCCTTGGTTCGTTCGCACCTGCCTGAGCGGCGAACGTAGCGCCGACAGCGC  
GGAGGTCGTGGATGCGGAGTTCCGGCCGACCGATCTTGGCGTAGCCACGCTTCAGCGACT  
TGGTGAACGCGGACTTCGACAGCCGGTTGCCCTGCGTCGTGGTACCAGGAATGCCTCGG  
GGCCTTGTTCATCTTCGTACGGTCTTCATGTGCGCTCGGATCATCTCCGCGACGTGAG  
GCGGAACCGTACAGGACGCTTCGACCGGACGGTCTTGGCGTTGCCAACGACGATCTTGT  
TCCCCACGCGGGAAGCGCCACGGCGCACCCGGAGCTTCATCGTCATGCCGTTCGTCCACGA  
TGTCTTGGCGGCGAAGCTCGATCAGCTCTCCGAACCGGAGGCTCGTCCACGCCAGGATGT  
ATGCCGCGATCCGGTAGTGCTCGAAGATCTCAGCGGCGACGATGTCCAGCTCCTCAGGCG  
TCAGCGCCTCTACGTTCGCGCTCATCGGCTGCCTTCTGCTCGATCCGGCACGGGTTCTCTG  
CGATCAGCTTGTCTCGACCGCTGTGTTTCATCACCGCCCGGAGGACGTTGTAGGCATGCC  
GGCGGGCAGTCGGGTGCTTCTACCCATCCCGGCCACCACGCACGCACCAGAGCTGGCG  
TCATCTCTGTGACCGCCACTTCACCTAGCACCGGGTAGATGCGGGCGCTCCGCGTGCCCGC  
TGTACAGATCCCTGGTGCCGTCTGCGAGGTCGCGCTCCACGAGCCACTTCCGGGTGTACT  
CCTCCAGCGTGATGGCGCTGGCGGCTGCCTTCTTCGCCCGTCTGTGGAGGGGTCCAGG  
TCTCCATCTCGATGAGCCGCTTCTCGCCCGGAGCCAGGCTTCGGCGTCCATCTTGTGT  
CGTAGGTCTGCAGCGCGTAGTACCTCACACCGTCTGCGGGTTGACGTATGAGGCTTGG  
TCCTCCCGCTGCGCTGAGTCTTCAGCGATCCCCATCCGCGACGTGCCAACTAGGTCTCCT  
CTCGTCGTGAACAAGGCTACCGGGTTGCAACTCCTGTGCAACTCTCAGGCTTCAACGCGC  
TTCTACGACCTGCAATTTCTTTCCACTTAGAGGATGCAGCCGAGAGGGGGTAAAAACCTA  
TCTTGACCGGCCATATGTGGTCGGCAGACACCCATTCTTCCAAACTAGCTACGCGGGT  
CGATTCGCGTCCCGCTCCGCTGGTTCAGAGGGTGTTCGCCCCTCTGGCCATTTTTCTT  
TCCAGGGGTCTGCAACTCTTGTGCGACTCTTCTGACCTGGGCATACGCGGTTGCAACGCA  
TCCCTGATCTGGCTACTTTCGATGCTGACAAACGAATAGAGCCCCCGCCTGCGCGAACA  
GACGAGGGGCATTACACCAGATTGGAGCTGGTGCAGTGAAGAGAATAGACCGGGACAAG  
GTTGCACCGGGAGTTGCAGCGGTTCGGAACCCTCGCCGTCGGCGGGCTGGCGTTCGCCCTG  
TCGTTACGGCTCTCAGCGAGCTGGCTGCGGCAACGGGGTGGCCCAAGCAGAGATGGTG  
CCCTTGGTGGTCGACGGCCTGACGCTCGTCGCCACGGTCGCCACAGTGGCCCTCAAGCAG  
AACAGTTGGTACGCGTGGTTCGCTGCTGATCCTGTCCACCGTCGTATCGGTGGCCGGCAAC  
GTGGCACACGCCTACCCCCACGGCATCATCGCGATGGTGCATCGCTGCGATCCCTCCGCTC  
TGGCTACTGGCGTCGACCCACCTAACCCTGATGCTGGCGAAGCAGCACTCGGAGCACGCC  
GAAGTACCTGTCTCGCGGCCAGAACCCTCGCGCCTCGGGGCTGGAGCCCGCTGCCGCTTGA  
CTGCGCCCGACCGGGACAGAAATACATAGAGAACCTATGGATGTAGGAGGCACAAAAAAA  
TACCCCCGAGCCAGCCGAAGGCCAGCCAGGGGGCATGGTTCTGCTTCAGTAGACCTT  
GCGAGTCCGACCCGAGTTGATCATCGCCATGATGACCCAGACGGGCAACCACATTCCGCA  
GGTGATGAGCGAAAGCAACAGGTGCATCGCGTGGTTTCGTCTCTGACAGGCATGACAGTGGG  
CTGCGGCATCGGAGGAGGCGCGACCGGGTACGGCGAGCCCGCGTACCACTGAGGTTCGATC  
TTGTTGGGGCGGATACTGATTGGTCATCCCGACAGCCTACTTGCCGATGGGTTCGCATCAG  
CTCCTCGACCGACTCGCGCTCCACGCGGATCAGCCGGGGACCGAGCCGAACGGCCTTGA  
CCGGCCGTCGGCGATGTAGTTGCGGACGGTCTTGGTGTGACACCGAGGTAGTCAGCGGT  
CTCCTGGATGGATGCTCTCGGGGGCATCAGCGCGGTCTCCGTGCTTCATCGGTTGTCTC  
CCGAACCCTGGATCACGCCACGATCCTTGCGGCTCTGGAGCTTGTGAGGTTCTCTGGG  
TGACGGTGTCAACCAGACATCGAGCTGGTTGGCTAGCTGGGCGACGTACCACATCACGT  
CTCCGAGTTCCGCCTGGAGGTCGTCTCGGTTCTCCTGGGTGATGACACCGTCTTTATCCC  
GGAGGATTTCTTGACCTTGTGGCGATCTCGCCGGCTTCGCTACGAGACCCATCGTCA  
CGTAGGAGAGACCCCTCGATGCTGTCGACGTCGCTGCACCGGGGTAGATCGCTGTGTGCG  
TCGCGGCGATCTGGTAGATGTGACGTCATCAGATCATCACCGGGAACAACCTGGCCACC  
GGGCATCTGGATGAACACCGGGACGCTGGGGGTGTAGTCCGACGAACCCGTGCCGCCCTC  
ACAGGCGGACAGGCTCAGGGTGGCGGCAAGGCCGATGATGGCTGCTGCGATGGTCTTCTT  
CATCTGTTGCTCCAGTAGCTAAGTTCGGACTCCAGTTCGCGGATACGCTCCTGTAGCCCT  
TGGTTTTCCAGGTACGCCTCGGCGAGGTTGGCCTCGGCGGGTACGGGCCCTCGTCTTCTC  
GACGTGGCCTCATCGATTGCCTCGTGTAGCCGGCGGATCAGATCTGGGATGGCACCGTGC  
AGACCGCATATGAAGTCGGCGTCTGCCTCGGAGAGGTGGGACGCCACCAGATCCTTGTCC  
TGGGTCTCCTGGTTGACCGCCAGATGACGTGATCCTCTAGCCCGTGGTTCGGTCTCGCAG  
ATAGAAGGCGGTTCTACCTCCTCTGGCATCCAGTAAGTCTTCTCAGCCCCGGTGGACTTC  
GCCACTGCTGGTAGAGGATGTGGAAGAACTCGTGGTCTGTTCGTTCGGCGGTAATCACA  
GATCGTCTCTTCATCCCATTTCGTGCTAGTAACACGTACAGCCGACGAGGTGCAGCAGC

CGCACTCGTAGGTGCCGTAGTCGTAGTCATCCAGTCGTCTTCGTCCATCTAGCTGTACT  
CCTTCATGATTCGGTTCGAACGCACGCGTCTGCACGCGCATCTCCAGGTCGACCGTTCGCT  
TCAACCACGCCCATTCGCCGTCGTGGTTGATCTCCCACTGGCTCTTGAATGTCGCTGTCT  
CAACGAGGAACCTCGACAGTCAACGTGTGCAGTCCGTTGTTGCTGGGCTGGAATCCGATAC  
CGTCTCAGCGATGTACCAGGGCAACTCCTGGCCGTCGAAGTAGACGGCCTTGTCGGTCA  
CCAGTACTTCAGGGAAGGTGTGCTCGGTCAACGGCGTCCCAGGTATGGGATGACGCTGGC  
CCGGAACCTCAAGGAACACCATGTTGTCCGGGCAGTCCCTCGGGGACGTTGTCGGGGCGTTC  
GGCGGTGTAGACGCCGATCTCGTTGCCCTCCAGGGTTCCAAGCTCGTTGAGCTTGATAGAT  
CGCCAGACCCATCAGCTCTTCATCGAGACCGTTCGGTGCTGGCAGTACAACCTTGGCTTG  
TGGCATTAGCCCTCCCTCGGAATTACGTATGCGCTGAACTCGACGGCCGTAATGCCGTCT  
GGCAGTTGGAATCCGAACCGCTCTTCGAACTCCTCGTTGGTGATGGGGCCGTAICTGAAG  
GTTCCGGGCACTACCTCGCCCTCCCCCTCGATCAGGAGGTACGCACCGGGCGGTACACC  
TCTCGTTCGTTCCGGCCATCCGACTACGGTCCCAGGACCGTGAACCTTCCCTCGGCTCCATC  
AGGGCACGTCCACTTCGTTGATGAGGAACCGCATCCGAGGTGGAGTGAGCATTGCCTCGG  
CTATGGCGATGAGGGCGTTCAACTGACCCTTCAGCAGCTTCTCCTCGTCGCCTGCGGGAA  
GGTGGCGCACTCGGGCGTCCATCTCCTTGGCGCGTTCAGATATTCGGTGGCTGTCAAGT  
TGTCCTCCTTAGTAATCAGCGCCGTAGAGCGAACCCACGAACGCTTTCGACCTCGGGG  
TCGGTGCCAACAGCACCGGACCCATCTGTTCTTGCATCAGGTGGCCAATGTGTGCAGCG  
GCTCTCTCAGCCTCTGAGGGCGGGCAGAGACGCGACGATCTCGTCGTGGATAGGCAACCGT  
AGGTACGGGGTGTATCCGGCCTCGTGGAGGCGAATCAGAGCCCGACAGGTACGTTCCCGC  
GACGACGACTGGATCATGTAGTTCAGCGCGGAGTATGTCCGCGAGCTGTCCACCGGCAGC  
CGCCGGCCCATCGCGTTGACGATGTAGCCGTTGCGGGCAGCTTCCATCGCCAGCTTCTTG  
CTCAGCCGCTCCACACCGGGGTATGTCGCAGAGAACGCCTCATGAACTCGTTGGCCACA  
GGGATCGAGATCCCCACTGCCTCAGCGAGAGCCTTCGCCCCACCGCCGTAGACCTTCTGA  
AAGTTGGCGGTCTTCCCAACCTTTCGCGGCACCTGGGGTGCCTCAGCGGTTCATCTGGTGG  
AGGTCCGCACCGTTCCTCGAATGCCTCGATCATGTTGCGGTGCGCCCGACAGCGCCGCCAGG  
ACGCGAAGCTCCTGCGCCTGGTAGTCGACTGAGGCCATCACATCGCCTGGCTCAGCGATG  
AAGCATCGCCGCACGATCCAGTCCGACGACGGCAGCGTCTGCGCCGGGATGCCGGTGATC  
GACATGCGCGAGGTCCGCGCCTGCAGTGGGTTGATGAACGTGTGGCAGCGGTCTCAGAG  
TCCCTGGTGTCGATGAACTTCTGGACCCAGGTCTTCCGCCACTTCCCCAGCTTCTTAGCC  
TCTTGAGCGATGGCGGCAAGCTCGTTGCCATCTTCGACCAGCTTGTCGAGCAGAGCCGCG  
TTGACCTGGCGCTTGCCAGTCTCGGTGCGACCGGTGATCTTGACGCCCATCTCCTCAAGC  
CCCTCGGCCAGATCCTCGGTGAGTTCGACTTCTCCACGCCGTAICTGGTGAAAGCGATT  
GCCTCCCAGACCTCCTGATCGGCCAACCACTTCTCGGGCAGCGACCGCGAGTACTCCACA  
TCGAGCAGGAAGCCCTGCCTGTCGATGTAGCTGCAGATCTCACTGATCTTGTGCTCGTAC  
GGCACCAGCGACCGACTCACGTCCGGGCACCAACGGTGTCCAGGCTCTTGACAGCCCTCGCG  
GTGAAGATCGTGTCCATCCCGGCGTACAGCAGGTAICTCCGGGTGGAACAGGTTCGATGGTC  
GACCAGATCTTGGCCTTGGTCGTCTTGTGCTCGGGCGGTAGCTTGGCCATGAGCTTCTTG  
ACGTTCTCGGCCTGGTCCTCGGAGATGAACTTCGCGATCAGCTCTTCGAGCGAGTGCCCG  
AACCCGCCGGCCTCGAAGGGCCGGGGTCCACCAGCTTCGCCAGGATCTGCGTGTCAAGC  
ACGCGGGGCCACAGACCCTCCATCTCGATCCCGAAGCACTGGTCGAGCACCTGGAGGTGCG  
AAGGAGGCGTTCGAGCACCATGCGCTTGAGAGCGCCGATGGCGATCCGCACGTCTCCTCG  
ATGAACACGTCTCCAGCTCCACCGGCACCAACCGGCTTCGTCCTGAGTACCGAACTGG  
ACGAGGCGGCACTCGAAGGTGTCGCTGTAGATGTCCAGCCCGGTGGTCTCAGTGTGACG  
GCGAGGCAAGTTCAGGTGAGCCCGGATGAAGTTGCGGAAGCCTTCCAGATCCTCTGGGGTT  
TCAACGACGTTGACGGTGACGAGGTCTCCCTGAACCTCATGCCGCAGCTCGATCAAAATG  
CTCTCCTACTGGAAGTACTGAGGCGGAATCCAGGTGGCTGAGGCCATCTCCTTGATGGCC  
TGCTGCATGGCCGCTTCGAACGGACAGTCCGGGTTCGATGTCCGGCTTGTAATGGGTGACG  
ATGATCCGGCTGTTGCCGCCGAAGTCGTGGCTGACCAAGCCCTTGGGGGCGAGCTTCTTC  
AGCGCCTTGATCAGTTCCTCAACCGTGGTCCCGGTAGGGGCTTGCCGTCAGGCAATGCC  
TCCCCTCCGTACGGCACGTCCAATGGGATCGTGTACCGCTCAACGTCTTGTGATCTTCATC  
GAGCCTCTTCTCTTCGACTACCTCGTCTACCCGGCGGAATAACTCCGCTAGTTCTGCGG  
GTAGCAATACTGGGTAICTTCTCTCGGGCTTCTGCATCGCTACCGCGATCCCAATCAGGG  
CAGCGAGCAGTTCATTGACGGAGTACGCCAACAGCTCTTCGCGGATCTCTTCTCGGGTCA  
TTAGTGGTAGATCCCCCGGACGGTGCAGGATCGTGGCAGGGTTCACGCCGTAGTTCTC  
GGCGAGATCCTTCTGCTTCATAACCGCCAGGTACGCCTGGCGGATGTCTTGTGACCTCGCG  
CTCGGTGAGCTTCTTGCGGTTCGGCCGGCTCGGGCCGGTCTCAGGCTTGACCTGAGCCAG

CGCCTTGCCGAACAGCTCGTTCTGCGTCCGCTGCTTGATCGCGTACCGACGGTTCGCTGC  
AAGCACCTCGTTGAGCCGCTGGGACAACCTTGACATTGGCCTCACGCACTACCTCGACCTC  
TCCGAGCAAGTTCGTGATCCGGTAGTCCTTGTCTGGTTCTCGATGGCCAACCGGTTGTT  
CTCCTCGAAAGCATCGAGACCTTGTATTGCGCCTCTCCCAGCGCAGCTTTCAGGTGCTT  
CTTCCTCATTAGCGCCCCTCTCTCGGCGGAACCTGTTCTGACTCGTCTTCGGTCATGTAG  
TAGTAGTAGTCAACGACCTTGTCCCAGTTGAAGGTTCTGGGACGTGCCGTCATCGAACGCG  
ATGATCAGGACACCCTCTTGGGTGTCTAGGATCGGCTCGCCAGCCACGACGTGGAAGCGG  
TCCTCGAGGGTACCGCAGTCGCTCTGCGTGCCATGTCAGTTCCTCTCAGTAGCTGTAGG  
GGACATCCGGGATGTCCTGGTAGGTGTTGGGTGCGATCTGTTCGGAGCTGCCGAAGCAATT  
CCCCTGCCAGCTCACGGATCTCGGCATCCGCGGCCCTCGTGCCAGCGGGCCTTGATGACGT  
ACCGCCACGCCGATGGTTGCCCGTGACGACCATCGGTGAGTTCGTCATGTTCCGGCAGGA  
CAGCTCGCGCTGCCTCGCGGGCCTGCTTGC GCGGCAAGCCCCGGTCAGCCAGCCGGTTGA  
CGATGTGTTTCGTAGACAGCGTCAATCTCAGAGCTGACGGACTCCATGATGTGGACGAGGT  
CGTCTCGGTTCGTTCGGGGTGGAGCTTGAACAGAGCCGGGGGCAGATGGATGCCAAGGTCGG  
TCGGATCCACATATCGCTGAGACACCACCGAGAAGCTCAAGTGACGGTGACGCTCCAGCT  
CGGTCAGCACCGACCTGCTGGCCTCGATGTAGAACGTCGCCGAGGCGTGCTCGAACACGC  
TCTCGTGGCCAGATCGATGATGTGGTTGAGGTAGTCTCGTTCTCGGCAGTTGCCGGGT  
TCGGTTCGGTGGAACGACCGGTAGCAGTTCGCGCCCGCGAACTCGGCCAGCTCGTCCGGCAT  
CGAAGTCGCCGAAGTAGGGATCTTCGTCTTGGATTCTTCGAAGTCATCGACCTCGAATC  
CGATGTCCCGCAACGCACCCGGATCGATCTCGGTGGCAGCGATCAGTTTGGCTTTCATAC  
TCTCCGCTCAGAGTTGGTGGAACGAGGTCAGCCAGGGGGCAGCGAAGCCCTTCTACAGCT  
CCCCTTGGCTCGTTACCGGCTTCTCGACCTCGGTGGATGTCAAGTAGTCGAGATGACTAC  
TTCTTGTTCGGGCCATTGCGCGTCACTGCTGATCGCGAGGTGCGGTGCAGGAGAACAGC  
GCGTACGGCTTGGCCGTCTTCTTCGAGACGCCGACTTGTAGACCATCTCGCCGTGCTGG  
CAGTACCGCTTCTCGCCACCAGGCGCTTCTGAGCTGCCTGCGGGGCGCGAGACTGCTGC  
TGGCCACCGCCGCCCGCTTGGCCGGCGCGGATCCACCGGAGCCTGCGTAGTGGCCTGCG  
ATCTGCTGGACCTTGTCCATCAGCGCCTTGAACCTCGGCGGTGTTGACCTTGGCCAGCACG  
TCGGCCGGGTCCGCACCCTTACGACCACCCACGGGTCGCTGTAAGTACCAGCGAACTTG  
AACGTGGCCGACACCCCATCGGTGGAGTGCTGGACCGCCATCGAGTCGCGCACAGCAGCC  
GAGGCCGTCGTCACCGTCGCCGACGGCGCGGTCTCAGGCTCAGGAGCCGGGGCCGGCTCG  
GGCTGGGCAGGGGCGGTGCTCCACGGATCGTCGTTAGGACAACCTGGTTACCTTCACTTAA  
TGGGGCATGCGCCGTTGGCGCACTCTTCATCGACACCGTCTTCGACGGCTTTGGCCGAG  
CAGATTCGTAAGTCTGCTTGGTGTTCGCTCGTACGGAGCCTGCGGGAAGCTGGACTCCG  
GGAAGATCGTGGAGCCCTTGATGAGCCCCGCGAACCTCTTGAGATCGGCTGCGACATCCT  
CGGCCTCGTAGGCGTCTGGATGGACGTTGGCGGTGAACGACACCAGCGTTGTCAGCCCAGC  
ACATCTGGTAGAGCGCCTGGAACGCCAGGAGCTGGTGGAGGGTCAACTCGTCCGGCTGACT  
CAACGATCTCCTCGTCCCAACCGAGTTCCTCGACAGCCTGGACCAACGTGTCCTTGGTCG  
GGATCGAAACCACCTCGGTGTTTCGGAGCGAAGAGATCCTTCTCGATCTCGTAACCCTCGG  
CTGCCAACCTCCGCAGCTCGGCCATGTCGCTGTTGAGGTTGAACCGCACACGCCGGATGA  
AGTACCGCGAGAAGATCGGGTGGATCCCCTCGGAGACTCCTGGCATCTTCGCCACCCTGC  
CTGTGGGAGCGATGGTTCGCTTCTTACCGGGACAGGGATCCTCAGATCATGGGCGAACC  
GTTCCGGCCTCTGAGTCGACCTCAGCGGCCATCTCCCGCAAGAACTGGGTGAACCGCTTAT  
CTCCGGGTGCCTCGGAGTACCTGCTACCTGTGAGGGCCAAATAGGAGGCAACTCCGAGAT  
GACCCACGCCGATGCGACGGTTTCGGTCCAGAACCTCCCGGCTCTTCGGGTCCGGCCACTT  
CCGAGAACGTGCCCCGATCAGGAATCTCGTCATCAGACGATGCGCCCCGGATCAGGTCGA  
GGTAGTCGGTCTTGCCGGCCGGCGTACGAACGCCGCCAGGTTGATGTGGCCGAGGTTGC  
ACGGCTCCCACGGTTCGAGAGTGATCTCGCCGCATGGGTTGGTGCAGACCACCCGGTTGG  
GCTCACCGACGTTGGACAGTGACGAGTCCCACATCCCCGGCTCTCCGTTGCGTACGGCTC  
CCTCGGAGAGTGCCTTGAGCACTCGGTGGGCTCGCTTCTGCTTGGGCATGTCTTCGCGGG  
CGACCGCGAAGCTGCCGTAGCCCTCCTTGGCCAGACGCCAGAACTCGTTCGTAACCTCGA  
CCGAGATGTTTCGTCGTCAGTGCTCGCCCCGTGCTCGCCTTGATGTTGATGAACTTGTGCA  
TCTGGTAGTCGTTCCAGTGCATCATCGACATCCGCGCCGACCGGCGCACACCCGCCGCCA  
CAACACACTGAGCGATGGCGTGGTCGACCTCCATCGCGGCGATGCCGTTCGAGCGTGATCC  
CTGCGTACTCCGAGAAGATGTTGGCGACCTTCTGCAGCATCACAGCGAACGGCAGCGGGC  
CGCTGGCCACTCCACCGAACGTCTTGAGCTTGGCCCCCTTGCGGCCGGATGCGGCTCACGT  
CGTACACCCGCTGGTAGTGACCGTGCCGGGTCGGTAGTGCGTGTTCGATCAGATCGACCA  
GCGCAGCAGCCCAGCCCTCTCGTGAGTCTCGATGGCGTAGGCACCGGCCAGTTCGTGGC

TGTAGTGTCTCCGACAGAATGCCTACATCCTTCATCGCCTGGTAGTCGACATGCTCTGGAT  
CACAGACGATCTCGACCCGCAGGGGGTTTACGACCTCGGGGTAGCCTTCGAGGTAGTGGT  
TCGAGTAGTTTCGCCCCGACTCCCCCGCCCTCCATCAGGCGCATGAACGTGAACTGGAAGT  
GGTCCGAGATCTTCTCGGGCCAGCCAGCTACCCAGCAGTTGAAGAGGTGCTGCGCGTTCT  
TGACCCCCGAGGCCACAGATGCCGACCTGCCGGCAGCACCTTGAACCTGGTCATCAGAC  
GAACGAGATCTTCTCGCTCTCCTTCCAACATATGTTCGCCGGTTCGACAAGAGCAAGATTGC  
CGTCCACGACCCTCTCGACCGTTTCCGGCCAGGTTTCCCTTCGAGCCGTCAGGCTTGGTCC  
TGGCGTAGGTTTCGGTTGTAAACGAGTTCACCGGTTGGTCCCCAAGGGATTTCGTCAGTCA  
ACTACTTCTCTCAGTCAGTTCGTATCGCTTGAATAGGCGTCGGCAGAGTCGCCGCCAG  
AGAACGAGACCCCGTACTCGACCGGGCCTGCACCACGCACCTCGCAGGTAACGACGCCCT  
TCCTTCCCCGGAACATCGGCCAGGTTCCCTTGGAGGGGTGCTTGGTCTCGTCCCGCTGGA  
CGATGACCTTGGTGCCCTTCTTCATGCCGACTTCCGTTCTCCGTAGCCGGGAGTGAAGCA  
ACCCCCGACGTACAGCTCGAGATCTTCTTGCGACCAGTTCTCCAGTCGCATCGGCGGCTG  
GTGCGGGAACAGCTCCGGGAACACCTCGGCCCGGTACAGCTCCGAACCGGGCATCCCGTT  
GAACGTTCGGATCAAGAATGTTGTGCATGGCACCTCCCTCCCAAGA ACTCGGAGATCGGCG  
GCTCGTAGAGGTAGCCATCGCGCAGCTCGGGGTTCTCGATGAGCATGATCGCGATGTTTCG  
CTGTGGGGTTCAGAGTGCCCATCCCCCTGCGACTTTCGGATGTCTGGGAAGATAGCGTGCT  
TGCTGCCCGGACCATCCTTGACGATGACCTTGCCCTTGTCTGCTCCTTCTCCACGCCAGCCG  
TGATCGCGATGATGTTGACGTGCTCGGTTCAGCGACTTGTGAGCGCGGAACAACCGGTTCT  
GCCCGCTCTTATCCTTCGGGGAGATCCCGTTCGGTGTAGCGGCTCCTGATCGCCTCTGCAT  
AGCCCCGTTCTGAGCGTCCAGAGCCTTCATCGCCAGCGGGAGGATGTGACCCAGGTACC  
GATTGGTTCGACTCCCCCTGCAGAGCCTCTTTGACGTTCTCGGACGAGTAGTGGCTGCGCT  
CCTGGAACAAGTCGCGGGCCTTGGCCGCTCCCGACAGGATGTTGCGAACCTGATTGCGTA  
CGTAGTGAACCTGCCTCACCACGGTGCAAGCTCTCCAGCGTCTTCTGGATGTACGGGCTCT  
CGAGGTACCAGACCCACAGCTCTTGGATGATCTCCTCGGCTGTCAGGTTGGTCTCCCAAC  
CGATCAGCGCCTTCCGGGTGGCCCTGCTGAACAGCTTGTGATGTCGTCGGTCAAGGCAT  
CACCTTTCGTAGGTACTCCTCCCGGTCCAATCGGCGGTTCGAGGTGTCGAGTGACCTCCTC  
CGCGAAGACCTCGCGGACTTCGCTGGAGGTGATCTGGCGCGAACGTGCGTTCTTGTGCAG  
GTACGGCAGCTTGGTGGCTGTCAAGTTCTAGACCTCCAGACTCGGCCGTCGACCGAGAA  
CCGGCCTCCGACAATCGGAACAAGCTCAGGCTTGACGTGCTGGCCGTCGACCGTTCAGCAG  
AGCAA AACC ACTCTGCCAGTTGGCTGTTGCACCCTTGAGGTACTGAGCTAGCTTCATGTT  
CATCAGGTTGCCGACCTCCATCGACCACAGCACCTTCTGGTTGCCGCCGTAGCCAGCGT  
GTGTGGCTTGTGATGCCCTGGCGGTGGGTGTGTCCGATGATCACCAGCGTGCCGAACCGCAT  
CATCGCGTTGTACGCGGTGTCAGCGGACTTCTGCGTCAACCGGACCCACCACGGTGGCC  
GTGGGTGGAGATCCAGCCTGGAGCGATCTTGTAGA ACTCAGGCAGCACGTCAACACCGAA  
CCCGTTCGAAGTCCAGCAGGTTCTGGA ACTGGAACGAGCTGACGTA CTGACCCAGCGCCGG  
GGCGA ACTGGTGCAGGTAGTCGACTGGCCGGCGGTTCGTGGTTGCCCTCGTGGACACCAAC  
CGGGCCGTCGTAGACCTGGCGCAGCGGCTCCAGGAACCGCCGCTTGC ACTGCTCGGAGTC  
GGGCTTGTATCCGCTGAGCGA ACTCTTCCCTTGGTGCCCTTGGTCCACCGAGACGGGCTCGG  
GTAGTCCATCAGGTCACCGATGTGGACGACCTCGTCAGGCTGGGTGTCCCCGATGTAGCC  
GATGACCGCCTTCAACTGCTTGCATCATCGAACGGAATCTGGGTGTCCGAGATGACGAC  
GATGCGCTTGTCTACTCAGCGACCTCGGTGAAGGGGCCCGCATACTTCTCGTGGGAG  
CTGGCGTTGCCTCCTGACCAGCGTCGCTTGCCACCTTGGTGTGGTGCAACCCGTTGGGG  
TAGTAGATCCACTTCACTCCTGTGGCGTTGGTGACGGTCTTACATCGGCAGGAACGTCC  
AGCAAGGTGTCCC ACTGGCGAGGCCCCTTGGGATAACCGCTCGTCTCGGGGAGCTGCATC  
TTCTCCAGAACGCCTGCGTAACCGGCGATGTGACCCAGCTGTCCTGGTGGTAGCCGTTCT  
TCCATGAACCGGGCGATCTT CAGCAGGATCATCATGACGGCCACGTCCTCCGGGGTGAAC  
TCGACGCCGCGCTTGTACGCGCCCCACAGGGTTCGCGATGCGTTCGTGGTTCTCCTTGGCG  
TCCCCGTAGTCTTGGGCTCGCTGTCCGTTGATGATCTTTCGGCGGTGGTTCAGAATGCTC  
ACAGTCCAGTCTCCGATGCGGTGTAGTAGTCGATCAGCTCATCGAGCTGGTCCGGTTGAT  
AGCCGAGGATCGGCTTGTGGGTGTCAGTGACGACGACGGGAACCGACATCGCGTTGAGCA  
CCTTGGTGACGTAGTCGTACGCCTCCGAGTTGGCCGTGACATCGACTGCGTCGAAGTCGA  
TCCCCGGCAGCCGTACGCTTGTCTTTGACTCGCTCGCATGGCTTGCAGCCGGGACGGGTGT  
ACACCGTGACCGGCGCGAACAGCGTTCTCACGTGAGCACCATCCCAGTCGATGTATCGGT  
CTCCATACATCAGATCCTTTCCAGCAGAGCAGCTTTGCCCTGCGATGTGACTAGTGAGTT  
GACATCCTCGCCTTCTGGCATCGGGATGATTCGGGCGTTCGGCAGCGTCTTCGCCACCGA  
CCGGGCGA ACTCCATAACCGGCGTCGTCGCCGTCGGCCAGGATGTTACGTTGCGGTAGCC



CAGGAACAGCTCTCGGAAGTACGGCTTCCACTTCTGGGCTCCGCTGAGCCCCACCGTCCG  
CAGCCCACACAGCTCGGCGGTGATCGTGTGAGTTCTCCCTCGCAGATCGCCATGTCCTT  
GCTGTATTTGGTCAGCGCGTAGGTGTTGTAGAGCCGGTCTTCTCCCCTGGCATCGACAG  
GTAATTCGGTGTGCCACCGTCGATTCGGCGATACCGGATCGCAGCTACCGTCCAGTGACG  
CCAGGGCGACCACCGCATATACGGAATCGCCAGGCAGCCCCGGTACATCTCATGTCCAGG  
GAGTGGGTCGTCCACGAATCCCAGACCGAACC GGCTTAGTTCGGCTCGGCCGGCCAGCCC  
GCGACTCGCCAAATACTCGTCGGCTGGGCTTCCGGGCAGGCTTTCTCTGTACCGGGACGT  
TGCCTCCCACAGATAGGTTCTCTGCGATTCGCTTAGCCTCTGCAAATGTCACCTCCTCTT  
CGTGACGAATGATCGAGATCACGTCTCCACGGACCCCGCAGGCCATGCAGTTGTAGCCCT  
GTAGGTCGTA ACTGACTGCGGCAGACGGCGTTTCGTGCGCCGTGGAAGGGGCACAGGCACT  
TGTTCCACTCGTGGTGGTCAGGTGGTGGTTCCCAATCCGGGTGGTAGCGAAGAATCGCCC  
TCGCGATGGGCGAGTCGTTCAATTCGTCTCGTCAAGCTCCTCGGGAGAGAGCCCTTCGAA  
GATCCCGTTCAGGACGGCGGCGAAGCCCTCGCCGGTCTCCGCTGCGTCGAGCATCTCTGC  
AATCGTCTTTGCCATGTTTCTCCTGGTGGATGTCAAGTTCGAGACAGCTTGTACGCCTC  
GACTGGAGCGATGCGCTCCCCGATGACTTGGACGGCCGGCGGGTTCAGCAGGTACTCGAT  
GGCCCGTTTGAAGAACTCGATGCAGTCCCTCGCCCAGCCAGCGTGTACTTGTTCACAT  
CGTGCAGAGCAACCCTCGGACGATGCCTGTCTTGTGATCGTGGTTCGACCGACAGGCGCTT  
CTTCTTACCGTTGGCTCGCTGGCAGATGTAGCACCGACCACCTTGGAACTCGTAGATCTG  
CCAATACTCATCGCCGGTGTGATGCCGTAGGTGGCCAGGATCCGGGTCTCCAGCTCGTAGA  
GCTGCGAGCCGTCCTGAACTCTCGGTGATGAGTAGCGCATCGTGGCCCTGGATACTTGGC  
GTCTCGCGTGAGCGGGAGCCCTGTGCGACACAGTCTTTGCAAGGCTTCCGCTTGTGCTT  
ACGGTCTGCACCCGGTACCCCGGAGACCTCTTCGCCGCCCTCGGCACGCGCGTCTCCT  
CCCGGTTCTCCATCACCATGCAGAACCACGACAGCAGCCCTGCCAGGGAGATGTAGAAGG  
CCACCAGAACTTGGCCGCTCACTTACCATTCTCGAACCCACCAGCGAGACAGCGCCTT  
ACGCCCTTTGTGCGAGCGGGGTCAGCTCGCGCTCATCGTCCTCACCGAAGTCGAACTCGAT  
GCTGGCGATCTCGTAGCCGAGGATCTTGAACGACACGTTTCATAGGCGGTCTCCGAAGTTG  
ATGACGGGAATGCCGGCCCTTTCGGCCTCTCGCATGCAGTGCCGGGTGCCGACTGAGTTG  
CCGAGGGGGAACGCCAGACAGATGTCCGCACCGGCCCTGACCATCTCGATGTTGCGGAGG  
ATGCCAGCCCGCTTGCCGTAGCGTTCCAGTCGGCTCGGTGCAGCTCGGGGAGCACGTCC  
CATCCCTCCTGCTTCATCCCCCAGGCCCAGCGGTCTGCGATGTGTCGTCAGCGCCGCGAGCG  
CCGCCGTGGACGACCGTGAGACCGGAGAAGGACCGGTGGTACTCAGTGGCCAACGCTTCC  
CAGACCGTGGTGCGGTCTTCCAGATCCGAGATCCGGTGATCAGTACTCGCCGCATCAGA  
TCGCCTCCC ACTGCAGGCCGTCGTGCGACGTGACCAGCTCCGCTTCGTAGACGCCGTAGC  
GGGTGGCCAGGAACTGGATCATCTGCGCCTGCTTGTACCCGAAGGGACATTCGTGGACGC  
CGCTGATCGGGTATCTGACTCCGTATTTCACTTGATCCACCGCTTCGCGATTTCGGTCGAC  
GTTCTCCTCGGAGACGTTGCGGGCGAGGCCGGTGA ACTCCTGGCCGTGGACCTTGGTCTC  
GATCACGCGAGGCTTGCGGGGATCCGGGCTCTCCGGGTGCATCCGCTTGTGGGTCCAGAC  
GGTCCGCTTCGTCTTGATCAGAGCGCCCAGCACCTGCTGGCGCAGTGGGTGGTCTTGGC  
GGGCATAGCGTTTGGAGTGGTCATCTGGATCCTTTCTCCTCGGTGGCTGTCAAGTCCGGTGTG  
CGTAGTGAAGCCCCCAGGCATGCGCGCCCCGCCTGGGGAGAGTTGATCAGCGCAGTTC  
GATGTCGGGCAGGATCGCCTGCGGCTTGAAGTTGACCTGGTAGAAGTCGGTTCGAGACGTT  
TGCGCCATCGACCTGCTCCATGAAGTAGGAGACGTTGTCCGACAGGCCCAGGAAGTGCTT  
CTTGATCCCGTCTTGGTCTTGCAGGTCACGTGAGCTTCTTCGACGCGGTGTCCGCGTT  
GATTGAGCACCGGCCCTGGATCTCGAGCAGGTA CTTGTCCGTGATCCCGTTGAAGAACAC  
GATCCGGCGATTGATCTCGAAGTTGTCAGCGGCCTTGTGACGTTCTCCGATGCGACGTC  
GGCGTCCGAGGTACACGCGGAGAGGCCCAGGATCGCCGATCCGGCGATGAGTGCGGTGGC  
GATGATCTTCTTCATGTTTCGCTACTTTCTGTTTGGTGGATGTCAAGTTAGTGACCGAAGT  
CGTTGATCTGCATAGTGTCTCCGACGAACTCCAAGGAAGCGAAGTCTTGTCCCGACGGGT  
CCGACTTCCCCCTCGGTTCTTGACCGTGGAGACGTTGAGCATGTCCGGGGCCGAACCCGT  
CCGATACTCGGTGGAGAGTGAGGATCATCTCAGGAACACGCCCGATCTGACCTTTGATGC  
CCGACAACGGGATCGGCTTGTGCGCCGTCGTTGTGCGGGCCGGTGACGTGGTGGAGCCCGA  
CGACGCATGAGCCTGTCTCACGGCCATCTCGTGTAGGTAGTCCATCAGCGACTCCAGAC  
CCGAGAACGGGTTCGTCTCCCTCGCTTGAATCGGTGCGGACGTTGGTGTGTTGTCCACGA  
CGATCAACGCTGGGAAGTCTCGTACAGCGCGTCATACGCGGCCAGAGCGTTCTCGATCT  
CGTCCAACGACGGTGTGCTTGTAGTTGAACCGGATCGGGATCTCGTCTAGTGAGTCAG  
CTACCGCGTCTCGATGTTCTGCTCGCGAACAGCCCGCTAGCTCGTTCGAGCGACCATC  
CGCTGAGGATGGACACCGAACGGGAGAGCTGGGTGAACGCATCAGAGTCGGCCGAGAAGT

ACAACGTCGGCACCTTCGACTTGAGCGGTAGGGCGAGGACGAACGCCGACTTCCCAGGTC  
CGGGGCCGGCGCAGACCAGGACTAGCTGGCCTCGTCGGAGATGTGTACCTTTCTGGTCAA  
GCGCGGCCAGACCGGGGGTAGCGGATCCCCCGCCGACCCTCGGATGTAGAGCGATTGTC  
TAGGTGTGTACACCTTCCTCCTCGTGGATGTGATTGACCAGGTCATAGATCTCGTCGCGA  
GAGACCAGCCGGCCCCAGGCGTCGATCCCCACGTGGATCTGTCTCCGGTGGATGTGTGCGG  
GACAGGATCATCGGGCAATGCGTGTGCCCCGTGGATCAGGATCTTGCCATCGTACGGAGC  
CTCCACTGGGTGTGTGCGTCCTCGTGGTGTGGTCCCCGACGTATGGGAAGTGGCTCAGC  
AGAACATCTGTGTGCCCGCCAGCGTCCCCGTACAGCGGCACCCGGATAACGAGCTGCCGTC  
GACACATGCTCGAACACCATCCAGTACGCACCAACCAGCTTGTGAGCATCGCGGTTTCATC  
GGGTGGGGCCCCATCGTGGTTGCCAGGATCAGCCGTTTGCGGCCTGGCCGATCCGAGATC  
CACCCGAGGGCATGTATCTGCCCTTGGTGGAGCCAGAGGAGATGTCACCTAGGATCCAG  
ACCGTGTGTCCTTGCCGACGACCGAGTCCCACGCCTTCGCCAGGGTGGCGTCGTGCTCT  
TCGACATCATCCGCCAGGTTGCGGATCTCCATCAGCCGCTTGTGTCCGATGTGTAGATCG  
GACGTGAACCAGGTGTTGCTCATGGCTTCTTTCAGAACGGCGGGCCGTACAGCTCGATC  
ACCAGCGCGTGCAGCTCCTCTGCCGCGTCTGCACGCTCGAATCCGCAGCAGGAATCGTGC  
CGGTGAGGATTGCGACGATCTGGTCTGAGAGGCTGGGCCTCACTTACCTTCTTCGGAT  
CGATCAAGGCGTCGTGAATCGGCCGACCGGCGCGAGCCGCGTGCCTCGGCCGTCGAAGG  
CTCGCTGCATCTGGTTCATCAGCCGGGTGCCGCGCAGCTTGAAGGATCTTCATGGTCCGCC  
GACCCTTGTATCCAGCGCGGTGCATCCGTAGGACGCAGGCTGTCTCGTGCGGGGCTATAG  
GTGACCTCAGCGACGGGTGGTTTGGATCCAGTTCGTATGTCTTCTCCTCGGTGGCTGT  
CAAGTTGGTACAGACCGAACTTCTTCTGGTACTGCGGGATGAAGTGGCCGGCCGTTTCAT  
GTTCCGGCTCGATACCTCTCGCGTCACGAACCTTCCGCTTCCATCTCCGACCGTCCCTCG  
AACTCGATCACGATCTCTCGTCCGGGATGACGCACGGCCTCCGCTTGGGCAAACCTGCGT  
GCAGCCTTGGGGTCGGGAACGGAACTTCTGCGAGGCGTACAGCTCCTGGTGCCACTTC  
GGCTTGTACAGGAATCGGCCCCATTTCCACGTACGTGTAACCCGCGTCGGGGTCGAGTTCG  
AGCGTTTTCTTGTATTCTTCTCGTGCCTGCCTTAGAGGGAAGGTGAGTATCGGTGGCTGTC  
AAGGTGACCTCACTTAAAAACAGGGCAGCTGTAATTCACATCACAGAAGCCGCATTTGTC  
AGGTTAGGCAGAGGCTCGAAGTACCAGCCTGGATCCGAGCCTCGACCTCATGGAACCT  
CTCGGTGATCCGCTCCCGCGTCCAATCGGTACAGGTCGTAGGGCGCAGTGGGCTTCGCCTT  
GATGCCCTTCTTCCCCGCCATGAAGTAGTCGCCCGTCTTCGGAGCCTCCACGTCATAGGT  
CATCGCGACCGCGAGCGCGTACACGCCGAGCTGGAAGTCGTACCCCGCGAGTTGCCGGT  
CTTGTAGTCCCGACTCGAAGCTCACCGTTGACCACGACGACCGCGTCGATGAACCCTCG  
GACGCGGATGCCGTCCAGCTCGATGTTGAACGGAAGCTCGATGGCCGGCTTGGGCTGTT  
ACACTCCTTGCAGTTGGTGTCTTTCCACGCCTCCGTAGAGCAGATCCCTCGCCCAGGGGT  
AGTCCAGATCTGCTGGCCCTTGTCTTCCGCCACGCGATGAACTTCTTACCTGCTCCAG  
TCCAAGGTGGAACCGGCGCTCGATGTCACGCTCACCGTTGTACGGCCCGGACCAAAACCA  
CCACTCGAAGTTCGGGGTTTCGTCGACAGTGCTCCGATGTCCTTGGCGTACTCCTCGCG  
GAAGATCTCTTGTGCCCGTTCGAGGCTCATCTCGCGGCCCTCGGCCAGAGCCTTCTCGTA  
GACCTCAGCGACGGTGTGAAACGCGGTGCCCTGCGGCAACCACGCCGAGGACGAGCCCA  
TACCTTGTGATGCGAGCCAGCTTGTACGCCTGCGGGCAACGTGTGTATTGGTTCAACTG  
GCTGACGCTTCGACGCGGCAGCAATGTCTTGGTGTCTGTACGCAGCGGCCATCCTTCCC  
TTGCCTATCGTCTCGTTCAGCGCCCCGTGACAGCGACACTGAGCAGTTTTTGGCAGCTCC  
GACATGTCAATCGGATCCTTGGGGAATTGGTCAGCCTGAGTCATCCTGAGCACCATCCAC  
TCGGTGCCCTTGTGCGAGTGGATCATGGTCGGATCAAAGCGAGTTCCCCGTGCTACGTAC  
TCGACTTTGTTGCGGAAAGAATCAAATTCGACACAGGCCGATAAAGTCGTGAGGTGTCT  
TTTACACGAGGACTGCGGTAGACGAGCAGAACTGAGACTGGGTCTTCGTCCAGTTGGCCC  
TTCCACCACGCCTCACACCTCTGCGCGAACAGCCACCCTGGATGATCGGCGATGACTTGC  
GGTGAGGTGTGGACGAGGTTGTCTGCGAACAGCTTTGCGAGCCGAGTGAGGGGCACGGGG  
TTTCCTTTCGTTGCGCGGCCTGGGTTGGCTCACACAACCGGTCGTGACTTTTAGGGCTCC  
GAGAGAAGCTCCTCGATGTGCTGTTGCCACGACCAGAGGAGTTCACCCTCGGCGGTGAGG  
TTGGTGTGCTCGTTCACCCGGATCAGGAGATCGTCATCCTCGATGCCTCGGGGGACGTAC  
CTGAACCCGCCGCCGCCATACCTTCGTAGGGCTCGATGGATGGGTGCGAACTCGAGCACT  
AAGTCGTGTCGCGGAGCATCTTCCACCACGACAATAGGCGCTTCTTCTTGTCTTCGGAC  
ATCGTGCGGAAGCTACCCACTCGCATGTACTCGCCGTGATCCCGGAGCCTCTGAAAAGCC  
TTCGACTTATCGTGAGGTTTCCGCGTGTCCCACGGCCAGTTCTGCTGGACGATCTGCCTG  
GTGGTCAACCGTCCCTCCGTAGGTCTTCTTGTGCCACGACACCCTTGTGAGTACGCCA  
TACAGCTCTGCGATTTCCGGTCTGATTAACCCCTTCTGCGAAGATCTTCGATCTCGCTG

AGAGTGAGTGGTATTCGGCTAGGGGCCGGAACCACTGCTTTGTGTTGGATTTTGCCGCTC  
ATGTTTCCCTCCATGAGAAAGGTGCGTGCGTCTCCGCCGATTACGGAGACATGTTGGTGC  
CTGTCAAGGATACCCCTAATTTAGTTGCGTCTGCGGAACCATATTCAGTTGTGTTCCCCG  
ACGCCGTGGCCGTCTCCCACTGGGCGTGGGATCGACTGGCGTTACGCGGTCGTAATGTA  
GCGGCCTGCCCACTCGGTAGCAAACCTTGTGACAGGTATCACTTAGGTCGCCTTCTGTT  
ACACGTTGACCTCGGGTTTCATCGTACGACTCTCCTTTCTTAGACAGCCTCAAGATCGT  
TACACCGGCTTGCGAAGATGTACCTTCGCCTTGAATCCGGCCCTTGCCAGCTCGAACTCG  
ACCACCTGGCGGGCGGTCTCCTTCAGGTGCGACTTCGCCGACAGCGGCCCGACGAACCCG  
TAGCTCTTGATGTACTCCTCGAGGTCGATGTGCGACGTACAGCGTGACAGGGACCACCGAC  
AAGTCACACCTCCAATTCGTGGGGCTTGATCTCGTTGGTCACGTCGTAGTCGTTACGACG  
CGACTGGAAGTCGGAGTCTGTCAAGTCGTCCAACCTCATCCTGCTCGAACGGCGCGGGCTC  
GTCATGCCACGTCTTCCACTGGTCGTGGTCGGCGCGGAACCACTTCCGCAGATCCTTGAT  
GGCCTCGTCCTCGGTGGCGAAGACGTAGGTCTCGAGCACGTCCTCGTACTCGACGGTCAG  
CGACCAGACGGTGATCTTCACTCCCCGTTACCTCCGCTTTGTAGTTCATCTCGGCGGTC  
TCCTCCTAGTTGGGTAGCAGTCGGTTGTACTCGTCTGCTGGCTGATCTCGCCAACGATGAAC  
TGCGCATCAGATTTGCGACCGAAGCCGCGTCCATCCCTTCGGGAATGGGCTTGGCGTGG  
CCGAACTGCCAGTCTCGTGAGCGCCAGCGGAACCAGAGTTGGACCTTGTCCAGTGAGGTC  
AGGTGCAGGCACTGAAACGTACATGCCTCCGAACGGGAACCTCCATCACACCTCCTGTTTGA  
CCTTGACGGTGTGGCCTGTCATTACTTCGTGGATTCGGATGCTGGTGCCGAACGTCTTTC  
GCGTCTCGGCCTTGAACCTCGGTGGAGCACCCCGAGCACTTCGCTTTGAATCGCACTAGCA  
GTACCAACGCTTTCTGCAGAATCGGGACTTGCCGCCGTCCCGGTTGTGCTTGTCCCAGCG  
GGCTTCGCCCTTCGGTGATTCGTACATGACGGAAGCTCGCCATGCTTGATGTGCCATGC  
GTCGTCGGCGACTTTTCCGCCGTGCTCGGCGATGTGCGCTGCGCTCCGGTACTCACAGAG  
CGGGGAAGCCGATGCCTCGGCGATGATCCCAGGCAGGTTGCCTAGAACCACCGCCAAGCA  
CATCAGCAGAACGACGTGCCACGCCTTCATCAGCCCAGCGCGTGGTTCATCGCCGCG  
TTGCGGCCGTGCGGCTGACCGTGGGCATAGCCGCTGAGGTCGTACCGGGTCCGAGGCTTG  
ACGTTCTTGGTGCGAGGATGCGCCTGGCGCAGAGCCAGCGCAGCTCGTTCCTTGTGCGCT  
CGGTAGAGCACCAACGCTCCCCCGCCGGCCGATTCCACGGCCTTGTTCTCCTCGGCGGTC  
AGGCGTTCCTTGACGGCCTGGGCGAAGCCTGCGATCCACGACCGGCGGTTAGCTCTTGAGC  
TGGCCAGCGGTGCTCTTCGGCTTGTACTCCCCGGTGTGTTGTAGTCGTACTIONTGTACCGAGGC  
TCGAAAGCCTGCTCCGGGCGGACATTCTCAACCAGGCGCATCATCTGCGGCTGCATGATC  
GACCAGAGGAATTGGAGCCTCTCGATGTGGCGGGGCACGCCGTAGACGTAGATCCGCTGA  
CCGCCCGTGAGGCTGGCGTACACCGTCTTGCAAGTGCAGGGCCTGAGCCATGCCGTGCAGC  
AACACGCTTGTGCGGCAACGTACTIONTGCCTGGTACGTAAGGTGACCCACTGGATGGCGTCCG  
GGCAGGTCCGGTGGTGTCCAACCCTTGCTTGCTCGCCTCGACCTGGGCCATCTCCAGCCCG  
TACTTGGCCATCAGCTCGAACGCTTTCGCCTGGAACACAGCCTCTTCCGGCGTACCGGCC  
ACGTCTTCGGCCTGGCGCAGCAGCTTGGCGACCTTGTCTGATCTTCTTCGTCTTGCCG  
TCGATCATGGTCAGTACTCCTTCTTCCAGTTGTTCCGGTTGCCCTTGCCGGGGCGCTTCA  
TCTCTCGCTTGCGGTACGGTGCGGCTGCGCCGCGTGGAGAGACGCAACTCGAGCCGTG  
CCTTGAGCTGGTGCCTCATCTTCTTACCTCTTCTGGTTCAGCGGATCTGGTTCGACGTGG  
ATGCAGCCGACGCGGTCTGGCCCGAACTCGGGAGCGAAGCCCAAGACTTCGTCTCTCTCG  
CATGGGAACGCTCGCTGGTTCGAACGTGATTGGGTCGGCCGAAGCCTCGTATGGATCGGCC  
AAGGCCATCGCTCCGACCGCTGTAGCGAATGCAACGACGACGGTGATCAGGTGCTTCTTC  
ACTCTTCTTCCCTCCACTTTTGGTCTGCGAGAAGCCTTCTGGCGATCTCGATAGGTTCTGA  
TCTCAGGAGTCACTCATCGCCCTCCAAGATCTCAGGTTGGCCAGCAGTGCATTGGCCAC  
AGCTCCGATGTGGCCACCGCCCTTACCTCCACGGCGGGAGTACTCGCGGTTCCGCGGCTG  
CATGAAGTGGAACTCGGTGAGCCGTCTCTGTAACCCACGAGGCTTCTCGGCGGGCAG  
AGCCCGGTTTCTCCACCGACATCGTGACGATGATGTGGTCCCTCTGGAGCCGAGCCTC  
GGTCTCGGCGTAGTGGGCAGCTTGGATTACTGCGCCTCGTGTGGTCATGTCTTCTCCTTC  
GGTAGATGTCAAGCTGTCGTCACCACTCTTCGACCGGTATCGGTTTGTACAGCCAGCAA  
GGATCGCGGCGTGTGCTGCGGTGATGCCCGTCCACAGCGTCTTTCGGTCCCTCGAAACCT  
CGAGGGGTTTCGAACGGCCACTCGTTCGATGAGTTGAGGATGTCCACGACTTCGTGGACCT  
TGGCCAGAACTTGCCGGTACGCCTCCCTGGTAGTTGTAGCGGGGCGTGGTCTGGTAGA  
ACTCTTCGAGCACTGGTCCGCTGTGCGGCGACGGTGCAGTCGACACCAGCGCAGGACATGC  
AGTCGCTGGCGCGGAGCTGGGCAACTTCATCGGTGGTCATGAACGCCGTGGTTCACATCGA  
GCCTTTCAGGTGTATGTCAAGCGGCGCGGACGCCGGAATCGGAGAGGTAGACGCGGTCAG  
CTCCAGGAACGGAGCCTGTGTGTTGGCGTGGACGAACGTGTCGTTCTCGTAGGGGTTGT

AGGCGATCTTCGATCCCACGAAGTCTTGCGGGAGAAGCGAGATCAGCTCGCCTACGATGC  
CAGCGTGGACCACCTTGC GGCGCTCGCGCCGTACCTTGTGCGGGCCGGCCGGAACCA  
CACCTTGGCGTGGGCCAGCAGGACGTGGCCGCTGCGGTGGATGACTCGACCCTTGAAGT  
CTCCCTCCAAGGCTTGCACCGAGTACCACGGCTTGCCCTCGCGGTGCGTGCAGGTGCAGGT  
TCTTGTAGACGAAGACTCGGATCGGCTTGGGAGTCATGAGACCTCCAGTGTGCGAACGGC  
CTTGTAGGCACTGATGAGTGACGCCCCGACAGCTCGTTACCGTGCAGGTGATACCTGTA  
TTTCAGATACACGGCTTGGTCGACCGGCTTGTACTCGACCGAAGTGACCTCGACAACCAT  
CCCGTCGATGATCGCGAAGTCTCCAGCGCGGAGATGGGTGGGGAATTTGATCTCGGTGTT  
GACTACGGTCACAGCTTCGAAACCTCCCAGGTACCAACGAACCTTGCCGTTGCGCTTGATG  
TATCCGCTCTCACGGGCTCGTACCAATCGACCTCGAACCCGTAGCGGGCGGGCGCAAGCC  
TCGAGGTGGTCGAGCAGGACGCGGGCAGCCGACGCGGTAGCTTCTCCGGTCAGCCCGCTG  
TCGTTCTTGC GGACGATGAGCTTGAACACTTGGTGCCTACCCTTCTGCGATGTCTCGGA  
GATCTCGGCGAAGACTTTCTTTGCCACGCCACGCCGTCCCAGGTGATGTGCGAACAGTGC  
CTCGTAGAACTGGTCTCGCAAGGCTTCGTTGCCGTCGGCCAGCGTTGTGACGAGCCGGTC  
GATGCGGTCTCTCGTGGAACTTGTAGACCGAGTGGTTGTACGGCTCAGCCATATTGGCGTT  
GGCTCGTTTACGTTCTCAACCACGATGGCTTCGAATAGGTGGTTAACCAGCTCCTCGGT  
CATGTTCTATCTCTCCTCAGTAGTCGCTGTGCTGGGTCTCGAAGCCTTCGAGGTCACCGA  
CCTCGTCTGTCGACGCGCTCGGGTTGCCGCGCCAGTCGTCGCGGAGCCTTTGACCGCTGG  
CGTTGTAGCAGGCACCACAGTTCGGGCAGTCCACATCGCTCTGGCCGTAGTAGCGGCAAA  
CCTCGCCCGCCGACGCTTGGCAGTCCCACGCGCTGTAACCAGGGATCAGGAAACCTTGGT  
CGTCGGTCTGATCAGGGATGCGTCGGAAGTTCTTGGCAGGCATAGCTACTCCTCATAGAA  
ACTCGTGGTTGATGGCTCGGTGGGCAGCCTCGCGGAAGGTCAGCCCGTCGTCGTACGCGT  
CCCGGTACGTCCAGTCCGCGATGTCTTGGTAACCAAGACCAAGGTCTCGGTCATGTAGC  
CGTCCAGCGCGGCCATCCAGGTCTCGAAGCTCATGTCTTCCCTCACTTCTTTGTGGTCGA  
GAACAGCACGTTCTCGCGCCGTTGACGCACAGACCGCAACGGGCACAAGCCGATCCCTT  
GTCGTTGATCAGGTCGATGGCTTTGTTGTTCTCCGGGCAGCGCACCGCCGTCGGAAACTC  
GGCCTTGCCTTTGGCGAACGTGGTGTGACGTAGGCGATGTTGATGCCCTTGTCTTCCAA  
GAAGCGCGCCACGTCGATGTTGTCCGGGTCTGCGCTGAAGTACAGCGCCAGGTTGTGAG  
CCTCTGCGAGTGCAGGTAGACAGCCGCGCTGTAACCCTTGTGTAGGCCCAGAACTGGAC  
ATCCGGGTTGTGCGCGATGACTCGACCCCAAGCGGCCACATAGGTGGGGCTGAAGAAGTC  
TCCATCCCAGTGGATGCGGAACAGCTTCGGAGCCTTGCAGCGGTGCAATCCTTGACGAA  
CTCGGCGACCATCTCGGACAGCAGCGTCACGGTGTCTGTCAAGTCAGCGTCACGCAACAG  
TTCCAGTTGTGACAGCAGGACCGAGCTGACAGCCTTGCGAACCTTCTCCAGCTTGCCGGC  
GTAGCACACCTTGGCACAGAAGGCCGTCGCGTCCGGGCAGGAGAAGCCTTGACCGGAGGG  
CAGGCCGATGCTGTTGGCGATACCTACGGTGGCGTTGCCGCCCTTGGTGACGTGGACGTA  
GTTGGTGACCTTGC GGTCGTTGCAACGCTTCAGCTTGGCCATACCTAGCCTTCCCTCGGT  
GGCTGTCAAGTTGTTGGATACAAAGCGCCCCGAGAGGGAGTCGAACCCTCACACCGCGAA  
CCGTCGCGGGGCCACCGTGCCTAGTCGATAGAGGTCACTCGACTCTCGTGGACGTAGACC  
ACGGTGTGCTACGTTACCCGCGTAGTACAGGCCATCGGCACCTCGTAGCTTGTGCCGA  
ACCGTGCCCGACGTGGCCGTCATGTCTTCCGCCAGTCGGCGTTAGGTGCCAGGTGACT  
CGCATGGTGATCCCTTACGTAGTCGGTGGCTGTCAAGTCAGCGGATACGGACGTACCCGT  
TGCCTCGAGCGACGTAGATCTTGCCGTCGATGTAAACGCGCTGCTGCTGGTTCATAATCC  
TATTCCTTTCCGGTGGCTGTCAAGTCTCAGGCCAGCGACGAGTCGTCGGCCGGGGGGCGGC  
GCACCTTGGGCGCGTTGGCTCGCGGTGCCTTACGGATGGCGGTGCCTACCGTGATCTCTT  
CCAACTGGCGTTCAGCCAGGCCGACAGGCCGGGGCGTCACCGGGCAGTTCGATCTTGTAAT  
CGAAGTCAGTCCACCCCTTACAGACCCTTCTCCAGCTCGCGATCCAACAGACGCGGAGCCG  
ACAGCTCAGGCGCAACAAACGGTGTCTTGACGCTCTCGCGGGCAGTAACCCGAACCTCAC  
GGTGCTCAGCGAAGACTGGCATAAGTTCACCCCTTGGTGGATGTCAAGCCTGAGCACCAA  
AGCTCAGGCGTAGTGGGTAGTCGGGAATCGAACCCGATAGCTTCATAGCCACGTTCTACG  
GCTCAGCCATAGCTCAGCGATCATTCCATCGCGCCAAGAGCTACCCTCCCGAATGCCGAA  
CCAAAGCTCAGCATTGTAAGTGTGTATTCTCCCCGTGGCTCAGACAGTATCTATCAGAA  
CCTAACCACAGGTCTACATTTAGTTATCCGCAGTGCTCGCACTTTAACGGCATCGAGCTT  
CCGCCGACCCTCAGTCTCTGGCAGCGAACTAAAGGTTTGAGTCGGGCTGCGGCCCTTCT  
CGGTCTTGC GTGATTCTCACTTACCGGATGTTTCGGTGGCTGTCAAGCGGGCCGTTTGTG  
GTGTTGCAACGATGCCCTCGTTTACGCGCCGCTGGCGTAATGCGCTACCCGCCTGATCTCA  
CCGGTCCAAGTTGGTGTGCTTGCAGCTTACCCGATAAACCAGGGTGGCTGTCAAACCGGAG  
AATCTTGCCGCCGGATTTTACCGGCACCGGCACGATCCTCTCGGATCCGCCTACCGCCT

TGCTGCTGCGGTGACACAAGAATGCACTACTGGCCGGGTGGCTGTCAAGCCCTAATCGCA  
AATTGGTGCCCTAGCTGCAGATATGGCGCGTTCTCGGTGGCTGTAAAGGGCACTACGTGC  
CGCTATCCGCTGGTCACGCTGGACAGTCCCGGCAGCCCGTGCCGCGCATAGGCTGCTCAC  
TACGTGCCCAGGATCGGCGTTGTCGTGCCGCTGTTCGTGGTTCGTGCCCCGTCGCTGTCGC  
TGGTCTCGGTGGCATCGCTTGACAGTCGCCCCGCTATCCCCCGTTGCCGCTGGTCAGACG  
CTAATCCGCTTATTTTCGCATAGGCTGCTCACTATCGCATCGGTATGCGTATGCGCTGGTC  
ACATATGCGTGTGGTGGTGGTGTGGTGTGCGTGTGTTTTCGCTGGTCAGCCGTGTGCGTA  
CCGTATCCGCACACTGTGCTTGTGCGTTTGTGTGTGTCGAGGCGGGCTCTCGCATCGTC  
GCATGTCAGCGCGGGTATGGGCGTGTATCGCACGCTTTGCTAGCCGCGTGCCGCGGGCGCT  
CTCGCATCGCATCGAGTGTTTGCTGTGTCTCTCATCGTCGCAGGTCAGAAGGGGTAGGGG  
GGTTCCCCCTAGGGGTTCGGTCCCTTGACCGGTTCGGTTA

>NewGenomeName\_289

CGCCAAAACCTCTGCTAAGTCCCGTGCTAAGTATAAATAGCCGCGGGGGCTAGTATTAC  
CCCCGCGGCTCCCCAACCTCTGCTAACCCCGCTTGGCTATAAATGGGTTCCCTCCATTCGC  
CGCTGGTGTCTTCACTCTGAAGTACGAGACAGAGGAAGAGGGCGGCGAATGTTGTAAGGCGC  
ATCGAGTCCCTTAACTTGGTCTATGCTATAGTTGGGGACGAGGTTGCACCTTCAACTGGC  
CAACGACACCTCCAAGGATTCATCCACTTGAAGACCGGTCGGCGACTGCAAGGATTGAAG  
ACTGTTCTTGGGAATGACAGGATTCACCTGGAGCCGACCCGTGGTTCGACGAACAGAAT  
AGAGACTACTGTTTGAAGGAACGGGTGCTTCTCGAGCACGGAGTCCCGACTCGTCCTGGA  
GTCAAAGGCCACGATTGGCCCAACGATTTGCTGAGGAACCTGATGAACTCCGCTGGAA  
GACCCAGGCGGATACCGAAGATGCGTTGTACACGGAGCTTCGGTGAATGGACAAGATGG  
GCCGCTGAAAATCCGTTCCCATTTCCATATCACAATTGGCAGCTTGAAGTGCTGTCTGCG  
ATCGGAGAGCCAGCGGACGATCGCACAATCCTCTGGATATGCGGACGAGACGGAGGAGAC  
GGGAAGTCCGTGTTTGCCAAATATCTCGGACTCAAGCCCGACTGGTTCTACACATGTGGT  
GGAACCAGAAAGGACGTATTGTACCAGTACATCGAGGACCCAAAACGAAATTTAATCCTC  
GATGTACCCAGGTGTAATTTAGAGTATTTAAATTATGCCCTGTTAGAATGTGTTAAGAAC  
AGGGCATTCAAGTTCGGACAAATACGAACCCCTTAGTTATCTTGGGTTTCGACCATGTGCAT  
GTACTCGTATTTGCCAATGTCCTGCCTGATTATTTGAAAATCAGCAGGGACAGAATAAAA  
CTGTGGAATATTTAAAGTATGTGTCATCTAAATTACACCAATACCCGCCCCGCCACGCGC  
TATCGTTTACATCTTATGAATATCCTGCCCAGGCCGAAGGCCTGGGAGGTGCTACCCGGC  
CGAAGGCCGGGAACAATATGAATCGAGTTATGGGCGGGGCCACAATAAAAGATTCCATT  
GGATAAGAACGAATCTGTTACTTTGCTTGCAGTGCACGCAACCACTTTCCACGTCACCAA  
TCCAGGTGAGTAGCTTGCTGGAGAAGAAAGCCGCAAGCCTCTATCTACCGTCCATTTGTT  
TTTTCGCGATCGGACGGCTGAGTTGATCTGG

>NewGenomeName\_290

TCTCACAGTGTACGGACCTAAAGTTCCCCCATAGGGGGTACCTAAAGCCCAGCCAATCAC  
CTAAAGTCAACCTTCGGTTGACCTTGAGGGTTCCCTAAGGGTTGGGGATGACCTTGGGT  
TTGTCTTTGGGTGTTACCTTGAGTGTCTCTCTGTGTCCCTATCTGTTACAGTCTCCTAAA  
GTATCCTCCTAAAGTACCTCCTAACGTCCATCCTAAAGCCAACACCTAAAGCCTACACC  
TAAAGACCCATCAAGTCAACGCCTATCTTAAAGTTTAAACATAAAGACCAGACCTAAAGA  
CCAGACCTAAAGACACTACATAAAGACCAGACCTAAAGACGCCTTGTTGTTAGCCATAAA  
GTGATAACCTTTAATCATTGTCTTTATTAATACTACTATAAGGAGAGACAACCTTAA  
AGAGACTTAAAGATTAATTTAAAATTTATCAAAAAGAGTATTGACTTAAAGTCTAACCT  
ATAGGATACTTACAGCCATCGAGAGGGACACGGCGAATAGCCATCCCAATCGACACCGGG  
GTCAACCGGATAAGTAGACAGCCTGATAAGTCGCACGAAAAACAGGTATTGACAACATGA  
AGTAACATGCAGTAAGATACAAATCGCTAGGTAACACTAGCAGCGTCAACCGGGCGCACA  
GTGCCTTCTAGGTGACTTAAAGCGCACCACGGCACATAAGGTGAAACAAAACGGTTGACAA  
CATGAAGTAAACACGGTACGATGTACCACATGAAACGACAGTGAGTCACCACACTGAAAG  
GTGATGCGGTCTAACGAAACCTGACCTAAGACGCTCTTTAACAATCTGGTAAATAGCTCT  
TGAGTGCATGACTAGCGGATAACTCAAGGGTATCGCAAGGTGCCCTTTATGATATTCACT  
AATAACTGCACGAGGTAACACAAGATGGCTATGTCTAACATGACTTACAACAACGTTTTTC  
GACCACGCTTACGAAATGCTGAAAGAAAACATCCGTTATGATGACATCCGTGACACTGAT  
GACCTGCACGATGCTATTCACATGGCTGCCGATAATGCAGTTCCGCACTACTACGCTGAC  
ATCTTTAGCGTAATGGCAAGTGAGGGCATTGACCTTGAGTTTCGAAGACTCTGGTCTGATG  
CCTGACACCAAGGACGTAATCCGCATCCTGCAAGCGCGTATCTATGAGCAATTAACGATT  
GACCTCTGGGAAGACGCAGAAGACTTGCTCAATGAATACTTGAGGAAGTCGAGGAGTAC  
GAGGAGGATGAAGAGTAATGTCTACTACCAACGTGCAATACGGTCTGACCGCTCAAACCTG

TACTTTTCTATAGCGACATGGTGGCTGTGGCTTTAACTGGTCACTCGCAATGGCACAGC  
TCAAAGAAGTGTACGAAAACAACAAGGCAATAGCTTTAGAATCTGCTGAGTGATAGACTC  
AAGGTCGCTCCTAGCGAGTGGCCTTTATGATTATCACTTTACTTATGAGGGAGTAATGTA  
TATGCTTACTATCGGTCTACTCACCGCTCTAGGTCTAGCTGTAGGTGCATCCTTTGGGAA  
GGCTTTAGGTGTAGCTGTAGGTTCTACTTTACCGCTTGCATCATCATAGGAATCATCAA  
AGGGGCACTACGCAAATGATGAAGCACTACGTTATGCCAATCCACACGTCCAACGGGGCA  
ACCGTATGTACACCTGATGGGTTTCGCAATGAAACAACGAATCGAACGCCTTAAGCGTGAA  
CTCCGCATTAACCGCAAGATTAACAAGATAGGTTCCGGCTATGACAGAACGCACTGATGG  
CTTAAAGAAAGGTTATATGCCCAATGGCACACTATACGCTGCAAATCGGGCAATAGTGAG  
AACTTGGCGAGAGAACAACCTCGAACGCGCAAGGACAAGAGAGGGCGGGCGTGGCATAGA  
CGAAAGGAAAAGGTTAAAGCCAAGAACTCGCCGCACTTGAACAGGCACTAGCCAACACA  
CTGAACGCTATCTCATAACGAACATAAAGGACACAATGCAATGAACATTACCGACATCAT  
GAACGCTATCGACGCAATCAAAGCACTGCCAATCTGTGAACTTGACAAGCGTCAAGGTAT  
GCTTATCGACTTACTGGTTCGAGATGGTCAACAGCGAGACGTGTGATGGCGAGCTAACCGA  
ACTAAATCAGGCACTTGAAGCATCAAGATTGGTGGACTACCTTGAAGTGTCTCACGGCTGA  
CGCAGGGTTCAAGATGCTCGGTAATGGTCACTTCTCGGCTGCTTATAGTCACCCGCTGCT  
ACCTAACAGAGTGATTAAGGTGGGCTTTAAGAAAGAGGATTCAGGCGCAGCCTATACCGC  
ATTCTGCCGCATGTATCAGGGTCTGCTCCTGGTATCCCTAACGTCTACGATGTACAGCGCCA  
CGCTGGATGCTATACGGTGGTACTTGACGCACTTAAGGATTGCGAGCGTTTCAACAATGA  
TGCCATTATAAATACGCTGAGATTGCAAGCGACATCATTGATTGCAATTTCGGATGAGCA  
TGATGAGTTAACTGGATGGGATGGTGAAGTTTGGTAACTTGTAACCTAATCCGCAAGTT  
CTTTGAGGGCATCGCCTCATTTCGACATGCATAGCGGGAACATCATGTTCTCAAATGGAGA  
CGTACCATAACATCACCGACCCGGTATCATTCTCGCAGAAGAAAGACGGTGGCGCATTTCAG  
CATCGACCCTGAGGAACTCATCAAGGAAGTCGAGGAAGTCGCACGACAGAAAGAAATTGA  
CCGCGCTAAGGCCCGTAAAGAACGTCACGAGGGGCGCTTAGAGGCACGCAGATTCAAACG  
TCGCAACCGCAAGGCACGTAAAGCACACAAAGCTAAGCGCGAAAGAATGCTTGCTGCGTG  
GCGATGGGCTGAACGTCAAGAACGGCGTAACCATGAGGTAGCTGTAGATGTACTAGGAAG  
AACCAATAACGCTATGCTCTGGGTCAACATGTTCTCTGGGGACTTTAAGGCGCTTGAGGA  
ACGAATCGCGCTGCACTGGCGTAATGCTGACCGGATGGCTATCGCTAATGGTCTTACGCT  
CAACATTGATAAGCAACTTGACGCAATGTTAATGGGCTGATAGTCTTATCTTACAGGTCA  
TCTGCGGGTGGCCTGAATAGGTACGATTTACTAACTGGAAGAGGCACTAAATGAACACGA  
TTAACATCGCTAAGAACGACTTCTCTGACATCGAACTGGCTGCTATCCCGTTCAACACTC  
TGGCTGACCATTACGGTGAAGCGTTTAGCTCGCGAACAGTTGGCCCTTGAGCATGAGTCTT  
ACGAGATGGGTGAAGCACGCTTCCGCAAGATGTTTGAAGCGTCAACTTAAAGCTGGTGAGG  
TTGCGGATAACGCTGCCGCCAAGCCTCTCATCACTACCCTACTCCCTAAGATGATTGCAC  
GCATCAACGACTGGTTTGAGGAAGTGAAAGCTAAGCGCGGCAAGCGCCCGACAGCCTTCC  
AGTTCTTGCAAGAAATCAAGCCGGAAGCCGTAGCGTACATCACCATTAAGACCACTCTGG  
CTTGCCCTAACAGTGCTGACAATACAACCGTTCAGGCTGTAGCAAGCGCAATCGGTCCGGG  
CCATTGAGGACGAGGCTCGCTTCCGGTTCGTATCCGTGACCTTGAAGCTAAGCACTTCAAGA  
AAAACGTTGAGGAACAACCTCAACAAGCGCGTAGGGCACGTCTACAAGAAAGCATTATATGC  
AAGTTGTCGAGGCTGACATGCTCTTAAGGGTCTACTCGGTGGCGAGGGCGTGGTCTTCGT  
GGCATAAGGAAGACTCTATTCATGTAGGAGTACGCTGCATCGAGATGCTCATTGAGTCAA  
CCGGAATGGTTAGCTTACACCGCCAAAATGCTGGCGTAGTAGGTCAAGACTCTGAGACTA  
TCGAACTCGCACCTGAATACGCTGAGGCTATCGCAACCCGTGCAGGTGCGCTGGCTGGCA  
TCTCTCCGATGTTCCAACCTTGCGTAGTTCCTCCTAAGCCGTGGACTGGCATTACTGGTG  
GTGGCTATTGGGCTAACGGTCGTCGCTCCTCTGGCGCTGGTGGCTACTCACAGTAAGAAAG  
CACTGATGCGCTACGAAGACGTTTACATGCCTGAGGTGTACAAAGCGATTAACATTGCGC  
AAAACACCGCATGGAAAATCAACAAGAAAGTCTTAGCGGTTCGCAACGTAATCACCAGT  
GGAAGCATTGTCCGGTTCGAGGACATCCCTGCGATTGAGCGTGAAGAACTCCCGATGAAAC  
CGGAAGACATCGACATGAATCCTGAGGCTCTCACCGCGTGGAACGCTGCTGCCGCTGCTG  
TGTACCGCAAGGACAAGGCTCGCAAGTCTCGCCGTATCAGCCTTGAAGTTCATGCTTGAGC  
AAGCCAATAAGTTTGCTAACCATAAGGCCATCTGGTTCCTTACAACATGGACTGGCGCG  
GTCGTGTTTACGCTGTGTCAATGTTCAACCCGCAAGGTAACGATATGACCAAAGGACTGC  
TTACGCTGGCGAAAGGTAACCAATCGGTAAGGAAGGTTACTACTGGCTGAAAATCCACG  
GTGCAAACCTGTGCGGGTGTGCGATAAGGTTCCGTTCCCTGAGCGCATCAAGTTCATTGAGG  
AAAACCACGAGAACATCATGGCTTGCCTAAGTCTCCACTGGAGAACACTTGGTGGGCTG  
AGCAAGATTCTCCGTTCTGCTTCCCTTGCCTTCTGCTTTGAGTACGCTGGGGTACAGCACC

ACGGCCTGAGCTATAACTGCTCCCTTCCGCTGGCGTTTGACGGGTCTTGCTCTGGCATCC  
AGCACTTCTCCGCGATGCTCCGAGATGAGGTAGGTGGTCGCGCGGTTAACTTGCTTCCCTA  
GTGAAACCGTTCAGGACATCTACGGGATTGTTGCTAAGAAAGTCAACGAGATTCTACAAG  
CAGACGCAATCAATGGGACCGATAACGAAGTAGTTACCGTGACCGATGAGAACACTGGTG  
AAATCTCTGAGAAAGTCAAGCTGGGCACTAAGGCACTGGCTGGTCAATGGCTGGCTTACG  
GTGTTACTCGCAGTGTGACTAAGCGTTCAGTCATGACGCTGGCTTACGGGTCCAAAGAGT  
TCGGCTTCCGTCAACAAGTGCTGGAAGATAACCATTACGCCAGCTATTGATTCCGGCAAGG  
GTCTGATGTTCACTCAGCCGAATCAGGCTGCTGGATAACATGGCTAAGCTGATTTGGGAAT  
CTGTGAGCGTGACGGTGGTAGCTGCGGTTGAAGCAATGAACTGGCTTAAAGTCTGCTGCTA  
AGCTGCTGGCTGCTGAGGTCAAAGATAAGAAGACTGGAGAGATTCTTCGCAAGCGTTGCG  
CTGTGCATTGGGTAACCTCTGATGGTTTTCCCTGTGTGGCAGGAATAACAAGAAGCCTATTC  
AGACGCGCTTGAACCTGATGTTCCCTCGGTCAGTTCCGCTTACAGCCTACCATTAACACCA  
ACAAAGATAGCGAGATTGATGCACACAAACAGGAGTCTGGTATCGCTCCTAACTTTGTAC  
ACAGCCAAGACGGTAGCCACCTTCGTAAGACTGTAGTGTGGGCACACGAGAAGTACGGAA  
TCGAATCTTTTGCAGTGATTCACGACTCCTTCGGTACCATTCCGGCTGACGCTGCGAACC  
TGTTCAAAGCAGTGCGCGAAACTATGGTTGACACATATGAGTCTTGTGATGTACTGGCTG  
ATTTCTACGACCAGTTCGCTGACCAGTTGCACGAGTCTCAATTGGACAAAATGCCAGCAC  
TTCCGGCTAAAGGTAACCTGAACTCCGCTGACATCTTAGAGTCGGACTTCGCGTTCGCGT  
AACGCCAAATCAATACGACTCACTATAGAGGGACAAACTCAAGGTCATTTCGCAAGAGTGG  
CCTTTATGATTGACCTTCTTCCGGTTAATACGACTCACTATAGGAGAACCTTAAGGTTTA  
ACTTTAAGACCCTTAAGTGTTAATTAGAGATTTAAATTAAGAATTAATAAGAGAGGACT  
TTAAGTATGCGTAACTTCGAAAAGATGACCAAACGTTCTAACCCTAATGCTCGTGACTTC  
GAGGCAACCAAAGGTCGCAAGTTGAATAAGACTAAGCGTGACCGCTCTACAAGCGTAGC  
TGGGAGGGTACAGTAAGATGGGACGTTTATATAGTGGTAATCTGGCAGCATTCAAGGCAGC  
AACAAACAAGCTGTTCCAGTTAGACTTAGCGGTCATTTATGATGACTGGTATGATGCCTA  
TACAAGAAAAGATTGCATACGGTTACGTATTGAGGACAGGAGTGGAACCTGATTGATAC  
TAGCACCTTCTACCACCACGACGAGGACGTTCTGTTCAATATGTGTACTGATTGGTTGAA  
CCATATGTATGACCAGTTGAAGGACTGGAAGTAATACGACTCAGTATAGGGACAATGCTT  
AAGGTCGCTCTCTAGGAGTGGCCTTAGTCAATTAACCAATAGGAGATAAACATTATGATG  
AACATTAAGACTAACCCGTTTAAAGCCGTGTCTTTCGTAGAGTCTGCCATTAAGAAGGCT  
CTGGATAACGCTGGGTATCTTATCGCTGAAATCAAGTACGATGGTGTACGCGGGAACATC  
TGCGTAGACAATACTGCTAACAGTTACTGGCTCTCTCGTGTATCTAAAACGATTCCGGCA  
CTGGAGCACTTAAACGGGTTTATGATGTTTCGCTGGAAGCGTCTACTGAACGATGACCGTTGC  
TTCTACAAAGATGGCTTTATGCTTGATGGGGAACCTCATGGTCAAGGGCGTAGACTTTAAC  
ACAGGGTCCGGCCTACTGCGTACCAAATGGACTGACACGAAGAACCAAGAGTTCCATGAA  
GAGTTATTCGTTGAACCAATCCGTAAGAAAGATAAAGTTCCCTTTAAGCTGCACACTGGA  
CACCTTCACATAAACTGTACGCTATCCTCCCGCTGCACATCGTGGAGTCTGGAGAAGAC  
TGTGATGTCATGACGTTGCTCATGCAGGAACACGTTAAGAACATGCTGCCTCTGCTACAG  
GAATACTTCCCTGAAATCGAATGGCAAGCGGCTGAATCTTACGAGGTCTACGATATGGTA  
GAACTACAGCAACTGTACGAGCAGAAGCGAGCAGAAGGCCATGAGGGTCTCATTGTGAAA  
GACCCGATGTGTATCTATAAGCGCGGTAAGAAATCTGGCTGGTGGAAAATGAAACCTGAG  
AACGAAGCTGACGGTATCATTACGGGTCTGGTATGGGGTACAAAAGGTCTGGCTAATGAA  
GGTAAAGTGATTGGTTTTGAGGTGCTTCTTGAGAGTGGTCGTTTTAGTTAACGCCACGAAT  
ATCTCTCGCGCCTTAATGGATGAGTTCAGTACTGAGACAGTAAAAGAGGCCACCCTAAGTCAA  
TGGGGATTCTTTAGCCATACGGTATTGGCGACAACGATGCTTGTACTATTAACCCTTAC  
GATGGCTGGGCGTGTCAAATTAGCTACATGGAGGAAACACCTGATGGCTCTTTGCGGCAC  
CCATCGTTTCGTAATGTTCCGTGGCACCGAGGACAACCCTCAAGAGAAAATGTAATCACAC  
TGGCTCACCTTCGGGTGGGCCTTTCTGCGTTTATAAGGAGACTTTTATGTTTAAGAAGG  
TTGGTAAATTCCTTGGCGCTTTGGCAGCTATCCTGACGCTTGCATATATTCTTGGCGTAT  
ACCCTCAAGTAGCACTAGTAGTGTGGCGCTTGTACTTAGCGGCAGTGTGTGCTTGCG  
TGTGGAGTATAGTTAACTGGTAATACGACTCACTAAAGGAGGTACACACCATGATGTACT  
TAATGCCATTACTCATCGTCATTGTAGGATGCCTTGCCTCCACTGTAGCGATGATGATA  
TGCCAGATGGTCACGCTTAATACGACTCACTAAAGGAGACTATATGTTTCGACTTCAT  
TACAACAAAAGCGTTAAGAATTTACGGTTCGCCGTGCTGACCGTTCAATCGTATGTGCG  
AGCGAGCGCCGAGCTAAGATAACCTCTTATTGGTAACACAGTTCCTTTGGCACCGAGCGTC  
CACATCATTATCACCCGTGGTGACTTTGAGAAAGCAATAGACAAGAAACGTCCGGTTCTT  
AGTGTGGCAGTGACCCGCTTCCCGTTCGTCCGTCTGTTACTCAAACGAATCAAGGAGGTG

TTCTGATGGGACTGTTAGATGGTGAAGCCTGGGAAAAAGAAAACCCGCCAGTACAAGCAA  
CTGGGTGTATAGCTTGCTTAGAGAAAGATGACCGTTATCCACACACCTGTAACAAAGGAG  
CTAACGATATGACCGAACGTGAACAAGAGATGATCATTAAAGTTGATAGACAATAATGAAG  
GTCGCCCAGATGATTTGAATGGCTGCGGTATTCTCTGCTCCAATGTCCCTTGCCACCTCT  
GCCCCGCAAATAACGATCAAAGATAACCTTAGGTGAAATCCGAGCGATGGACCCACGTA  
AACCACATCTGAATAAACCTGAGGTAACCTCCTACAGATGACCAGCCTTCCGCTGAGACAA  
TCGAAGGTGTACTAAGCCTTCCCACTACATGCTGTTTGACGACATTGAGGCTATCGAAG  
TGATTGCTCGTTCAATGACCGTTGAGCAGTTCAAGGGATACTGCTTCGGTAACATCTTAA  
AGTACAGACTACGTGCTGGTAAGAAGTCAGAGTTAGCGTACTTAGAGAAAGACCTAGCGA  
AAGCAGACTTCTATAAAGAACTCTTTGAGAAACATAAGGATAAATGTTATGCATAACTTC  
AAGTCAACCCACCTGCCGACAGCCTATCTGATGACTTCACATCTTGCTCAGAGTGGTGC  
CGAAAGATGTGGGAAGAGACATTTCGACGATGCGTACATCAAGCTGTATGAACTTTGGAAA  
TCGAGAGGTCAATGACTATGTCAAACGTAAATACAGGTTCACTTAGTGTGGACAATAAGA  
AGTTTTGGGCTACCGTAGAGTCCTCGGAGCATTCTTCGAGGTTCCAATCTACGCTGAGA  
CCCTAGACGAAGCTCTGGAGTTAGCCGAATGGCAATACGTTCCGGCTGGCTTTGAGGTTA  
CTCGTGTGCGTCTTGTGTAGCACCGAAGTAATACGACTCACTATTAGGGAAGACTCCCT  
CTGAGAAACCAAACGAAACCTAAAGGAGATTAACATTATGGCTAAGAAGATTTTCACCTC  
TGCGCTGGGTACCGCTGAACCTTACGCTTACATCGCCAAGCCGGACTACGGCAACGAAGA  
GCGTGGCTTTGGGAACCCTCGTGGTGTCTATAAAGTTGACCTGACTATTCCAACAAAGA  
CCCGCGCTGCCAGCGTATGGTCGATGAAATCGTGAAGTGTACGAAGAGGCTTATGCTGC  
TGCCGTTGAGGAATACGAAGCTAATCCACCTGCTGTAGCTCGTGGTAAGAAACCGCTGAA  
ACCGTATGAGGGTGACATGCCGTTCTTCGATAACGGTGACGGTACGACTACCTTTAAGTT  
CAAATGCTACGCGTCTTTCCAAGACAAGAAGACCAAAGAGACCAAGCACATCAATCTGGT  
TGTGGTTGACTCAAAGGTAAGAAGATGGAAGACGTTCCGATTATCGGTGGTGGCTCTAA  
GCTGAAAGTTAAATATTCTCTGGTTCCATACAAGTGGAACTGCTGTAGGTGCGAGCGT  
TAAGCTGCAACTGGAATCCGTGATGCTGGTCGAACTGGCTACCTTTGGTGGCGGTGAAGA  
CGATTGGGCTGACGAAGTTGAAGAGAACGGCTATGTTGCCTCTGGTTCTGCCAAAGCGAG  
CAAACCACGCGACGAAGAAAGCTGGGACGAAGACGACGAAGAGTCCGAGGAAGCAGACGA  
AGACGGAGACTTCTAAGTGGAACTGCGGGAGAAAATCCTTGAGCGAATCAAGGTGACTTC  
CTCTGGGTGTTGGGAGTGGCAGGGCGCTACGAACAATAAAGGGTACGGGCAGGTGTGGTG  
CAGCAATACCGGAAAGGTTGTCTACTGTCATCGCGTAATGTCTAATGCTCCGAAAGGTTT  
TACCGTCTGCACTCCTGTGATAATCCATTATGTTGTAACCCTGAACACCTATCCATAGG  
AACTCCAAAAGAGAACTCCACTGACATGGTAAATAAAGGGTCGCTCACACAAGGGGTATAA  
ACTTTCAGACGAAGACGTAATGGCAATCATGGAGTCCAGCGAGTCCAATGTATCCTTAGC  
TCGCACCTATGGTGTCTCCAACAGACTATTTGTGATATACGCAAAGGGAGGCGACATGG  
CAGGTTACGGCGCTAAAGGAATCCGAAAGGTTGGAGCGTTTCGCTCTGGCCTAGAGGACA  
AGGTTTCAAAGCAGTTGGAATCAAAGGTATTAATTCGAGTATGAAGAGTGGAAAGTGC  
CTTATGTAATTCCGGCGAGCAATCACACTTACACTCCAGACTTCTTACTTCCAAACGGTA  
TATTCGTTGAGACAAAGGGTCTGTGGGAAAGCGATGATAGAAAGAAGCACTTATTAATTA  
GGGAGCAGCACCCCGAGCTAGACATCCGTAATTGTCTTCTCAAGCTCACGTAATAAGTTAT  
ACAAAGGTTCTCCAACGTCTTATGGAGAGTTCTGCGAAAAGCATGGTATTAAGTTTCGCTG  
ATAAACTGATACCTGCTGAGTGGATAAAGGAACCCAAGAAGGAGGTCCCTTTGATAGAT  
TAAAAAGGAAAGGAGGAAAGAAATAATGGCTCGTGTACAGTTTAAACAACGTGAATCTAC  
TGACGCAATCTTTGTTCACTGCTCGGCTACCAAGCCAAGTCAGAATGTTGGTGTCCGTGA  
GATTCGCCAGTGGCACAAAGAGCAGGGTTGGCTCGATGTGGGATACCACTTTATCATCAA  
GCGAGACGGTACTGTGGAGGCAGGACGAGATGAGATGGCTGTAGGCTCTCACGCTAAGGG  
TTACAACCACAACCTCTATCGGCGTCTGCCTTGTGGTGGTATCGACGATAAAGGTAAGTT  
CGACGCTAACTTTACGCCAGCCCAAATGCAATCCCTTCGCTCACTGCTTGTACACTGCT  
GGCTAAGTACGAAGGCGCTGTGCTTCGCGCCCATCATGAGGTGGCGCCGAAGGCTTGCCC  
TTCGTTTCGACCTTAAGCGTTGGTGGGAGAAGAACGAACCTGGTCACTTCTGACCGTGGATA  
ATTAATTGAACTCACTAAAGGGAGACCACAGCGGTTTCCCTTTGTTTCGCATTGGAGGTCA  
AATAATGCGCAAGTCTTATAACAATTCTATAAGGCTCCGAGGAGGCATATCCAAGTGTG  
GGAGGCAGCCAATGGGCCTATACCAAAGGTTATTATATAGACCACATTGACGGCAATCC  
ACTCAACGACGCCTTAGACAATCTCCGTCTGGCTCTCCCAAAGAAAACCTCATGGAACAT  
GAAGACTCCAAAGAGCAATACCTCAGGACTAAAGGGACTGAGTTGGAGCAAGGAAAGGGA  
GATGTGGAGAGGCACTGTAACAGCTGAGGGTAAACAGCATAACTTTTCGTAGTAGAGATCT  
ATTGGAAGTTCGTTGCGTGGATTTATAGAACTAGGAGGGAATTGCATGGACAATTTCGCACG



ATTCCGATAGTGTATTTCTTTACCACATTCCTTGTGACAACCTGTGGGAGTAGTGATGGGA  
ACTCGCTGTTCTCTGACGGACACACGTTCTGCTACGTATGCGAGAAGTGGACTGCTGGTA  
ATGAAGACACTAAAGAGAGGGCTTCAAACCGGAAACCCTCAGGAGGTAAACCAATGACTT  
ACAACGTGTGGAACCTTCGGGGAATCCAATGGACGCTACTCCGCGTTAACTGCGAGAGGAA  
TCTCCAAGGAAACCTGTCAGAAGGCTGGCTACTGGATTGCCAAAGTAGACGGTGTGATGT  
ACCAAGTGGCTGACTATCGGGACCAGAACGGCAACATTGTGAGTCAGAAGGTTTCGAGATA  
AAGATAAGAACTTTAAGACCACTGGTAGTCACAAGAGTGACGCTCTGTTTCGGGAAGCACT  
TGTGGAATGGTGGTAAGAAGATTGTCGTTACAGAAGGTGAAATCGACATGCTTACCGTGA  
TGGAACCTCAAGACTGTAAGTATCCTGTAGTGTGCTGGGTCACGGTGCCTCTGCCGCTA  
AGAAGACATGCGCTGCCAACTACGAATACTTTGACCAGTTCGAACAGATTATCTTAATGT  
TCGATATGGACGAAGCAGGGCGCAAAGCAGTCGAAGAGGCTGCACAGGTTCTACCTGCTG  
GTAAGGTACGAGTGGCAGTTCTTCCGTGTAAGGATGCAAACGAGTGTACCTAAATGGTC  
ACGACCGTGAAATCATGGAGCAAGTGTGGAATGCTGGTCCCTTGGATTCCCTGATGGTGTGG  
TATCGGCTCTTTTCGTTACGTGAACGAATCCGTGAGCACCTATCGTCCGAGGAATCAGTAG  
GTTTACTTTTCAGTGGCTGCACTGGTATCAACGATAAAGACCTTAGGTGCCCGTGGTGGTG  
AAGTCATTATGGTCACTTCCGGTTCGGTATGGGTAAGTCAACGTTTCGTCGGTCAACAAG  
CTCTACAATGGGGCACAGCGATGGGCAAGAAGGTAGGCTTAGCGATGCTTGAGGAGTCCG  
TTGAGGAGACCGCTGAGGACCTTATAGGTCTACACAACCGTGTCCGACTGAGACAATCCG  
ACTCACTAAAGAGAGAGATTATTGAGAACGGTAAGTTCGACCAATGGTTCGATGAACTGT  
TCGGCAACGATACGTTCCATCTATATGACTCATTCCCGAGGCTGAGACGGATAGACTGC  
TCGCTAAGCTGGCCTACATGCGCTCAGGCTTGGGCTGTGACGTAATCATTCTAGACCACA  
TCTCAATCGTCGTATCCGCTTCTGGTGAATCCGATGAGCGTAAGATGATTGACAACCTGA  
TGACCAAGCTCAAAGGGTTCGCTAAGTCAACTGGGGTGGTGTGCTGGTCGTAATTTGTCACC  
TTAAGAACCAGACAAAGGTAAAGCACATGAGGAAGGTGCCCCGTTTCTATTACTGACC  
TACGTGGTTCGGCGCACTACGCCAACTATCTGATACTATTATTGCCCTTGAGCGTAATC  
AGCAAGGCGATATGCCTAACCTTGTCTCGTTCGTTCTCAAGTGCCGCTTTACTGGTG  
ATACTGGTATCGCTGGCTACATGGAATACAACAAGGAAACCGGATGGCTTGAACCATCAA  
GTTACTCAGGGGAAGAAGAGTCACTCAGAGTCAACAGACTGGTCCAACGACACTGACT  
TCTGACAGGATTCTTGATGACTTTCCAGACGACTACGAGAAGTTCGCTGGAGAGTCCCA  
TTCTAATACGACTCACTAAAGGAGACACACCATGTTCAAACCTGATTAAGAAGTTAGGCCA  
ACTGCTGGTTCGTATGTACAACGTGGAAGCCAAGCGACTGAACGATGAGGCTCGTAAAGA  
GGCCACACAGTCACGCGCTCTGGCGATTTCGCTCCAACGAACTGGCTGACAGTGCATCCAC  
TAAAGTTACCGAGGCTGCCCGTGTGGCAAACCAAGCTCAACAGCTTTCCAAATTCTTTGA  
GTAATCAAACAGGAGAAACCATTATGTCTAACGTAGCTGAAACTATCCGTCTATCCGATA  
CAGCTGACCAGTGGAACCGTCGAGTCCACATCAACGTTTCGCAACGGTAAGGCGACTATGG  
TTTACCGCTGGAAGGACTCTAAGTCCTCTAAGAATCACTCAGCGTATGACGTTGACAG  
ATGAGCAAGCACTGCGTCTGGTCAATGCGCTTACCAAAGCTGCCGTGACAGCAATTCATG  
AAGCTGGTCGCGTCAATGAAGCTATGGCTATCCTCGACAAGATTGATAACTAAGAGTGGT  
ATCCTCAAGGTCGCCAAAGTGGTGGCCTTCATGAATACTATTCGACTCACTATAGGAGAT  
ATTACCATGCGTGACCCTAAAGTTATCCAAGCAGAAATCGCTAAACTGGAAGCTGAACTG  
GAGGACGTTAAGTACCATGAAGCTAAGACTCGCTCCGCTGTTACATCTTGAAGAACTTA  
GGCTGGACTTGGACAAGACAGACTGGCTGGAAGAAACCAGAAGTTACCAAGCTGAGTCAT  
AAGGTGTTTCGATAAAGGACACTATGACCCACATCAAGGCTGGTATTGGGTTAAGGTTGAC  
ATGGGAGTTGTTGGTGGATACGGCTACGTCCGCTCAGTTAGTGGCAAATATGCACAAGTG  
TCATACATCACAGGTGTTACTCCACGCGGTGCAATCGTTGCCGATAAAGACCAACATGATT  
CACACAGGTTTCTTGACAGTTGTTTCATATGAAGAGATTGTTAAGTCACGATAATCAATA  
GGAGAAATCAATATGATCGTTTCTGACATCGAAGCTAACGCCCTCTTAGAGAGCGTCACT  
AAGTTCCACTGCGGGGTTATCTACGACTACTCCACCGCTGAGTACGTAAGCTACCGTCCG  
AGTGACTTCGGTGCATCTGGATGCGCTGGAAGCCGAGGTTGCACGAGGCGGTCTTATT  
GTGTTCCACAACGGTCAACAAGTATGACGTTCTGCATTGACCAAACCTGGCAAAGTTGCAA  
TTGAACCGAGAGTTCCACCTTCTCGTGAGAAGTGTATTGACACCCTTGTGTTGTCACGT  
TTGATTCATTCCAACCTCAAGGACACCGATATGGGTCTTCTGCGTTCCGGCAAGTTGCC  
GGAAAACGCTTTGGGTCTCACGCTTTGGAGGCGTGGGGTTATCGCTTAGGCGAGATGAAG  
GGTGAATACAAAGACGACTTTAAGCGTATGCTTGAAGAGCAGGGTGAAGAATACGTTGAC  
GGAATGGAGTGGTGGAACTTCAACGAAGAGATGATGGACTATAACGTTTCAGGACGTTGTG  
GTAATAAAGCTCTCCTTGAGAAGCTACTCTCTGACAAACATTACTTCCCTCCTGAGATT  
GACTTTACGGACGTAGGATACACTACGTTCTGGTCAGAATCCCTTGAGGCCGTTGACATT

GAACATCGTGCTGCATGGCTGCTCGCTAAACAAGAGCGCAACGGGTTCCCGTTTGACACA  
AAAGCAATCGAAGAGTTGTACGTAGAGTTAGCTGCTCGCCGCTCTGAGTTGCTCCGTA  
TTGACCGAAACGTTCCGGCTCGTGGTATCAGCCTAAAGGTGGCACTGAGATGTTCTGCCAT  
CCGCGAACAGGTAAGCCACTACCTAAATACCCTCGCATTAAAGACACCTAAAGTTGGTGGT  
ATCTTTAAGAAGCCTAAGAACAAGGCACAGCGAGAAGGCCGTGAGCCTTGCGAACTTGAT  
ACCCGCGAGTACGTTGCTGGTGCTCCTTACACCCAGTTGAACATGTTGTGTTAAACCT  
TCGTCTCGTGACCACATTCAGAAGAACTCCAAGAGGCTGGGTGGGTCCCGACCAAGTAC  
ACCGATAAGGGTGCTCCTGTGGTGGACGATGAGGTACTCGAAGGAGTACGTGTAGATGAC  
CCTGAGAAGCAAGCCGCTATCGACCTCATTAAAGAGTACTTGATGATTGAGAAGCGAATC  
GGACAGTCTGCTGAGGGAGACAAAGCATGGCTTCGTTATGTTGCTGAGGATGGTAAGATT  
CATGGTTCTGTAAACCCTAATGGAGCAGTTACGGGTCGTGCGACCCATGCGTTCCCAAAC  
CTTGCGCAAATTCCGGGTGTACGTTCTCCTTATGGAGAGCAGTGTGCGCTGCTTTTGGC  
GCTGAGCACCATTGGATGGGATAACTGGTAAGCCTTGGGTTGAGGCTGGCATCGACGCA  
TCCGGTCTTGAGCTACGCTGCTTGGCTCACTTCATGGCTCGCTTTGATAACGGCGAGTAC  
GCTCACGAGATTCTTAACGGCGACATCCACACTAAGAACCAGATAGCTGCTGAACTACCT  
ACCCGAGATAACGCTAAGACGTTTCATCTATGGGTTCTCTATGGTGCTGGTGTAGAGAAG  
ATTGGACAGATTGTTGGTGCTGGTAAAGAGCGCGGTAAGGAACTCAAGAAGAAATTCCTT  
GAGAACACCCCGCGATTGCAGCACTCCGCGAGTCTATCCAACAGACACTTGTGAGTCC  
TCTCAATGGGTAGCTGGTGAGCAACAAGTCAAGTGGAAACGCCGCTGGATTAAAGGTCTG  
GATGGTCGTAAGGTACACGTTTCGTAGTCTCACGCTGCCTTGAATACCCTACTGCAATCT  
GCTGGTGCTCTCATCTGCAAACGTGGGATTATCAAGACCGAAGAGATGCTCGTAGAGAAA  
GGCTTGAAGCATGGCTGGGATGGGGACTTTGCGTACATGGCATGGGTACATGATGAAATC  
CAAGTAGGCTGCCGTACCGAAGAGATTGCTCAGGTGGTCATTGAGACCGCACAAAGAAGCG  
ATGCGCTGGGTTGGAGACCACTGGAACCTCCGGTGTCTTCTGGATACCGAAGGTAAGATG  
GGTCTAATTGGGCGATTGCGCACTGATACAGGAGGCTACTCATGAACGAAAGACACTTA  
ACAGGTGCTGCTTCTGAAATGCTAGTAGCCTACAAATTTACCAAAGCTGGGTACACTGTC  
TATTACCCTATGCTGACTCAGAGTAAAGAGGACTTGGTTGTATGTAAGGATGGTAAATTT  
AGTAAGGTTTCAGGTTAAAACAGCCACAACGGTTCAAACCAACACAGGAGATGCCAAGCAG  
GTTAGGCTAGGTGGATGCGGTAGGTCCGAATATAAGGATGGAGACTTTGACATTCTTGCG  
GTTGTGGTTGACGAAGATGTGCTTATTTTCACATGGGACGAAGTAAAAGGTAAGACATCC  
ATGTGTGTCGGCAAGAGAAACAAGGCATAAACTATAGGAGAAATTATTATGGCTATGA  
CAAAGAAATTTAAAGTGTCTTTCGACGTTACCGCAAAGATGTCGTCTGACGTTTCAGGCAA  
TCTTAGAGAAAGATATGCTGCATCTATGTAAGCAGGTCGGCTCAGGTGCGATTGTCCCA  
ATGGTAAACAGAAGGAAATGATTGTCCAGTTCCTGACACACGGTATGGAAGGATTGATGA  
CATTGCTAGTACGTACATCATTTCGTGAGGCCATTAAGGACATGCACGAAGAGTATGCAG  
ATAAGGACTCTTTCAAACAATCTCCTGCAACAGTACGGGAGGTGTTCTGATGTCTGACTA  
CCTGAAAGTGCTGCAAGCAATCAAAAGTTGCCCTAAGACTTTCCAGTCCAACCTATGTACG  
GAACAATGCGAGCCTCGTAGCGGAGGCCGCTTCCCGTGGTACATCTCGTGCTGACTAC  
TAGTGGACGTAACGGTGGCGCTTGGGAAATCACTGCTTCCGGTACTCGCTTTCTGAAACG  
AATGGGAGGATGTGTCTAATGTCTCGTGACCTTGTGACTATTCCACGCGATGTGTGGAAC  
GATATACAGGGCTACATCGACTCTCTGGAACGTGAGAACGATAGCCTTAAGAATCAACTA  
ATGGAAGCTGACGAATACGTAGCGGAACTAGAGGAGAACTTAATGGCACTTCTTGACCT  
TAAACAATTCTATGAGTTACGTGAAGGCTGCGACGACAAGGGTATCCTTGTGATGGACGG  
CGACTGGCTGGTCTTCCAAGCTATGAGTGCTGCTGAGTTTGATGCCTCTTGGGAGGAAGA  
GATTTGGCACCAGTGTGTGACCACGCTAAGGCCCGTCAGATTCTTGAGGATTCCATTAA  
GTCCTACGAGACCCGTAAGAAGGCTTGGGCAGGTGCTCCAATTGTCTTGCCTTACCGA  
TAGTGTTAACTGGCGTAAAGAAGTGGTTGACCCGAACATAAAGGCTAACCCTAAGGCCGT  
GAAGAAACCTGTAGGGTACTTTGAGTTCCTTGATGCTCTCTTTGAGCGCGAAGAGTTCTA  
TTGCATCCGTGAGCCTATGCTTGGGGTGTGACGTTATGGGAGTTATTGCTTCCAATCC  
GTCTGCCTTCGGTGTCTGTAAGGCTGTAATCATCTCTTGCATAAGGACTTTAAGACCAT  
CCCTAACTGTGACTTCTGTGGTGTACCACTGGTAAACATCCTGACTCAGACCGAAGAGTC  
CGCTGACTGGTGGCACCTCTTCCAGACCATCAAGGGTGACATCACTGATGGTTACTCAGG  
GATTGCTGGATGGGGTGATACCGCCGAGGACTTCTTGAATAACCCGTTCAATAACCGAGCC  
TAAAACGTCTGTGCTTAAGTCCGGTAAGAACAAGGCCAAGAGGTTACTAAATGGGTTAA  
ACGCGACCCTGAGCCTCATGAGACGCTTTGGGACTGCATTAAGTCCATTGGCGCGAAGGC  
TGGTATGACCGAAGAGGATATTATCAAGCAGGGCCAATGGCTCGAATCCTACGGTTCAA  
CGAGTACAACCTTATTGACAAGGAGATTTACCTGTGGAGACCGTAGCGTATATTGGTCTG

GGTCTTTGTGTTCTCGGAGTGTGCCTCATTTCGTGGGGCCTTTGGGACTTAGCCAGAATA  
ATCAAGTCGTTACACGACACTAAGTGATAAACTCAAGGTCCCTAAATTAATACGACTCAC  
TATAGGGAGATAGGGGCCTTTACGATTATTACTTTAAGATTAACTCTAAGAGGAATCTT  
TATTATGTTAACACCTATTAACCAATTACTTAAGAACCCTAACGATATTCCAGATGTACC  
TCGTGCAACCGCTGAGTATCTACAGGTTTCGATTCAACTATGCGTACCTCGAAGCGTCTGG  
TCATATAGGACTTATGCGTGCTAATGGTTGTAGTGAGGCCACATCTTGGGTTTCATTCA  
GGGCCTACAGTATGCCTCTAACGTCATTGACGAGATTGAGTTACGCAAGGAACAATAAG  
AGATGATGGGGAGGATTGACACTATGTGTTTCTCACCAGAAAATTAATACTCCGAAGATGG  
ATACCAATCAGATTCGAGCCGTTGAGCCAGCGCCTCTGACCCAAGAAGTGTCAAGCGTGG  
AGTTCGGTGGGTCTTCTGATGAGACGGATACCGAGGGCACCGAAGTGTCTGGACGCAAAG  
GCCTCAAGGTGCAACGTGATGATTCCGTAGCGAAGTCTAAAGCCAGCGGCAATGGCTCCG  
CTCGTATGAAATCTTCCATCCGTAAGTCCGCATTTGGAGGTAAGAAGTGTCTGAGTT  
CACATGTGTGGAGGCTAAGAGTCGCTTCCGTGCAATCCGGTGGACTGTGGAACACCTTGG  
GTTGCCTAAAGGATTTCGAAGGACACTTTGTGGGCTACAGCCTCTACGTAGACGAAGTGAT  
GGACATGTCTGGTTGCCGTGAAGAGTACATTCTGGACTCTACCGGAAAACATGTAGCGTA  
CTTCGCGTGGTGCGTAAGCTGTGACATTCACCACAAAGGAGACATTCTGGATGTAACGTC  
CGTTGTCATTAATCCTGAGGCAGACTCTAAGGGCTTACAGCGATTCTAGCGAAACGCTT  
TAAGTACCTTGCGGAACCTCACGATTGCGATTGGGTGTCTCGTTGTAAGCATGAAGGCGA  
GACAATGCGTGTATACTTTAAGGAGGTATAAGTTATGGGTAAGAAAGTTAAGAAGGCCGT  
GAAGAAAGTCACCAAGTCCGTTAAGAAAGTCGTTAAGGAAGGGGCTCGTCCGGTTAAACA  
GGTTGCTGGCGGTCTAGCTGGTCTGGCTGGTGGTACTGGTGAAGCACAGATGGTGGAAAGT  
ACCACAAGCTGCCGCACAGATTGTTGACGTACCTGAGAAAGAGGTTTCCACTGAGGACGA  
AGCACAGACAGAAAGCGGACGCAAGAAAGCTCGTGCTGGCGGTAAGAAATCCTTGAGTGT  
AGCCCGTAGCTCCGGTGGCGGTATCAACATTTAATCAGGAGGTTATCGTGGAAGACTGCA  
TTGAATGGACCGGAGGTGTCAACTCTAAGGGTTATGGTTCGTAAGTGGGTTAATGGTAAAC  
TTGTGACTCCACATAGGCACATCTATGAGGAGACATATGGTCCAGTTCCAACAGGAATTG  
TGGTGATGCATATCTGCGATAACCCTAGGTGCTATAACATAAAGCACCTTACGCTTGAA  
CTCCAAAGGATAAATCCGAGGACATGGTTACCAAAGGTAGACAGGCTAAAGGAGAGGAAC  
TAAGCAAGAACTTACAGAGTCAGACGTTCTCGCTATACGCTCTTCAACCTTAAGCCACC  
GCTCCTTAGGAGA ACTGTATGGAGTCAGTCAATCAACCATAACGCGAATACTACAGCGTA  
AGACATGGAGACACATTTAATGGCTGAGAAACGAACAGGACTTGCGGAGGATGGCGCAA  
GTCTGTCTATGAGCGTTTAAAGAACGACCGTGCTCCCTATGAGACACGCGCTCAGAATTG  
CGCTCAATATAACCATCCCATCATTGTTCCCTAAGGACTCCGATAACGCCTCTACAGATTA  
TCAAACCTCCGTGGCAAGCCGTGGGCGCTCGTGGTCTGAACAATCTAGCCTCTAAGCTCAT  
GCTGGCTCTATTCCCTATGCAGACTTGGATGCGACTTACTATATCTGAATATGAAGCAA  
GCAGTTACTGAGCGACCCCGATGGACTCGCTAAGGTCGATGAGGGCCTCTCGATGGTAGA  
GCGTATCATCATGAACTACATTGAGTCTAACAGTTACCGCGTACTCTCTTTGAGGCTCT  
CAAACAGTTAGTCGTAGCTGGTAACGTCCTGCTGTACCTACCGGAACCGGAAGGGTCAA  
CTATAATCCCATGAAGCTGTACCGATTGTCTTCTTATGTGGTCCAACGAGACGCATTCGG  
CAACGTTCTGCAAATGGTGACTCGTGACCAGATAGCTTTTGGTGCTCTCCCTGAGGACAT  
CCGTAAGGCTGTAGAAGGTCAAGGTGGTGAGAAGAAAGCTGATGAGACAATCGACGTGTA  
CACTCACATCTATCTGGATGAGGACTCAGGTGAATACCTCCGATACGAAGAGGTGCGAGGG  
TATGGAAGTCCAAGGCTCCGATGGGACTTATCCTAAAGAGGCTTGCCCATACATCCCGAT  
TCGGATGGTCAGACTAGATGGTGAATCCTACGGTCGTTTCGTACATTGAGGAATACTTAGG  
TGACTTACGGTCCCTTGAAAATCTCCAAGAGGCTATCGTCAAGATGTCCATGATTAGCTC  
TAAGGTTATCGGCTTAGTGAATCCTGCTGGTATCACCCAGCCACGCCGACTGACCAAAGC  
TCAGACTGGTGACTTCGTTACTGGTTCGTCAGAAAGACATCTCGTTCCTCCAACCTGGAGAA  
GCAAGCAGACTTTACTGTAGCTAAAGCCGTAAGTGACGCTATCGAGGCTCGCCTTTTCGTT  
TGCCTTTATGTTGAACTCTGCGGTTACGCGTACAGGTGAACGTGTGACCGCCGAAGAGAT  
TCGGTATGTAGCTTCTGAACTTGAAGATACTTTAGGTGGTGTCTACTCTATCCTTTCTCA  
AGAATTACAATTGCCTCTGGTACGAGTGCTCTTGAAGCAACTACAAGCCACGCAACAGAT  
TCCTGAGTTACCTAAGGAAGCCGTAGAGCCAACCATTAGTACAGGTCTGGAAGCAATTGG  
TCGAGGACAAGACCTTGATAAGCTGGAGCGGTGTGTCACTGCGTGGGCTGCACTGGCACC  
TATGCGGGACGACCCTGATATTAACCTTGCGATGATTAAGTTACGTATTGCCAACGCTAT  
CGGTATTGACACTTCTGGTATTCTACTCACCGAAGAACAAGCAACAGAAGATGGCCCA  
ACAGTCTATGCAAATGGGTATGGATAATGGTGCTGCTGCGCTGGCTCAAGGTATGGCTGC  
ACAAGCTACAGCTTACCTGAGGCTATGGCTGCTGCCGCTGATTCCGTAGGTTTACAGCC

GGGAATTTAATACGACTCACTATAGGGAGACCTCATCTTTGAAATGAGCGATGACAAGAG  
GTTGGAGTCTCCTCGGTCTTCCTGTAGTTCAACTTTAAGGAGACAATAATAATGGCTGAATC  
TAATGCAGACGTATATGCATCTTTTGGCGTGAACCTCCGCTGTGATGTCTGGTGGTTCCGT  
TGAGGAACATGAGCAGAACATGCTGGCTCTTGATGTTGCTGCCCCGTGATGGCGATGATGC  
AATCGAGTTAGCGTCAGACGAAGTGGAAACAGAACGTGACCTGTATGACAACTCTGACCC  
GTTCCGGTCAAGAGGATGACGAAGGCCGCATTCAGGTTCTGTATCGGTGATGGCTCTGAGCC  
GACCGATGTGGACACTGGAGAAGAAGGCGTTGAGGGCACCGAAGGTTCCGAAGAGTTTAC  
CCCCTGGGCGAGACTCCAGAAGAACTGGTAGCTGCCTCTGAGCAACTTGGTGAGCACGA  
AGAGGGCTTCCAAGAGATGATTAACATTGCTGCTGAGCGTGGCATGAGTGTGAGACCAT  
TGAGGCTATCCAGCGTGAGTACGAGGAGAACGAAGAGTTGTCCGCCGAGTCCTACGCTAA  
GCTGGCTGAAATTGGCTACACGAAGGCTTTCATTGACTCGTATATCCGTGGTCAAGAAGC  
TCTGGTGGAGCAGTACGTAAACAGTGTCAATTGAGTACGCTGGTGGTCTGTAACGTTTTGA  
TGCCTGTATAACCACCTTGAGACGCACAACCCTGAGGCTGCACAGTCGCTGGATAATGC  
GTTGACCAATCGTGACTTAGCGACCGTTAAGGCTATCATCAACTTGGCTGGTGAGTCTCG  
CGCTAAGGCGTTCGGTTCGTAAGCCAACCTCGTAGTGTGACTAATCGTGCTATTCCGGCTAA  
ACCTCAGGCTACCAAGCGTGAAGGCTTTGCGGACCGTAGCGAGATGATTAAGCTATGAG  
TGACCCTCGGTATCGCACAGATGCCAACTATCGTCGTCGAAGTCGAACAGAAAGTAATCGA  
TTCGAACTTCTGATAGACTTCGAAATTAATACGACTCACTATAGGGAGACCACAACGGTT  
TCCCTCTAGAAATAATTTTGTTTAACTTTAAGAAGGAGATATACATATGGCTAGCATGAC  
TGGTGGACAGCAAATGGGTAACCAAGGTAAAGGTGTAGTTGCTGCTGGAGATAAACT  
GGCGTTGTTCTTGAAGGTATTTGGCGGTGAAGTCTGACTGCGTTCGCTCGTACCTCCGT  
GACCACTTCTCGCCACATGGTACGTTCCATCTCCAGCGGTAAATCCGCTCAGTTCCTGT  
TCTGGGTCGCACTCAGGCAGCGTATCTGGCTCCGGGCGAGAACCCTCGACGATAAACGTAA  
GGACATCAAACACACCGAGAAGGTAATCACCATTGACGGTCTCCTGACGGCTGACGTTCT  
GATTTATGATATTGAGGACGCGATGAACCACTACGACGTTCCGCTCTGAGTATACCTCTCA  
GTTGGGTGAATCTCTGGCGATGGCTGCGGATGGTGCGGTTCTGGCTGAGATTGCCGGTCT  
GTGTAACGTGGAAAGCAAATATAATGAGAACATCGAGGGCTTAGGTACTGCTACCGTAAT  
TGAGACCACTCAGAACAAAGGCCGCACTTACCGACCAAGTTGCGCTGGGTAAGGAGATTAT  
TGCGGCTCTGACTAAGGCTCGTGCGGCTCTGACCAAGAACTATGTTCCGGCTGCTGACCG  
TGTGTTCTACTGTGACCCAGATAGCTACTCTGCGATTCTGGCAGCACTGATGCCGAACGC  
AGCAAACCTACGCTGCTCTGATTGACCCTGAGAAGGGTCTATCCGCAACGTTATGGGCTT  
TGAGGTTGTAGAAGTTCCGCACCTCACCGCTGGTGGTGTGTTACCGCTCGTGAGGGCAC  
TACTGGTCAGAAGCACGCTTCCCTGCCAATAAAGGTGAGGGTAATGTCAAGGTTGCTAA  
GGACAACGTTATCGGCCTGTTTCATGCACCGCTCTGCGGTAGGTACTGTTAAGCTGCGTGA  
CTTGGCTCTGGAGCGCGCTCGCCGTGCTAACTTCCAAGCGGACCAGATTATCGCTAAGTA  
CGCAATGGGCCACGGTGGTCTTCGCCCAGAAGCTGCTGGTGCAGTGGTTTTCAAAGTGGA  
GTAATGCTGGGGGTGGCCTCAACGGTCGCTGCTAGTCCCGAAGAGGGCGAGTGTTACTTCA  
ACAGAAGAAACCTTAACGCCAGCACAGGAGGCCGCACGCACCCGCGCTGCTAACAAAGCC  
CGAAAGGAAGCTGAGTTGGCTGCTGCCACCGCTGAGCAATAACTAGCATAACCCCTTGGG  
GCCTCTAAACGGGTCTTGAGGGGTTTTTTGCTGAAAGGAGGAACTATATGCGCTCATAACG  
ATATGAACGTTGAGACTGCCGCTGAGTTATCAGCTGTGAACGACATTCTGGCGTCTATCG  
GTGAACCTCCGGTATCAACGCTGGAAGGTGACGCTAACGCAGATGCAGCGAACGCTCGGC  
GTATTCTCAACAAGATTAACCGACAGATTCAATCTCGTGGATGGACGTTCAACATTGAGG  
AAGGCATAACGCTACTACCTGATGTTACTCCAACCTGATTGTATACAGTGACGACTATT  
TATCCCTAATGTCTACTTCCGGTCAATCCATCTACGTTAACCGAGGTGGCTATGTGTATG  
ACCGAACGAGTCAATCAGACCGCTTTGACTCTGGTATTACTGTGAACATTATTCGTCTCC  
GCGACTACGATGAGATGCCTGAGTGCTTCCGTTACTGGATTGTCACCAAGGCTTCCCCTC  
AGTTCAACAACCGATTCTTTGGGGCACCGGAAGTAGAGGGTGTACTCCAAGAAGAGGAAG  
ATGAGGCTAGACGTCTCTGCATGGAGTATGAGATGGACTACGGTGGGTACAATATGCTGG  
ATGGAGATGCGTTCACTTCTGGTCTACTGACTCGCTAACATTAATAAATAAGGAGGCTCT  
AATGGCACTCATTAGCCAATCAATCAAGA ACTTGAAGGGTGGTATCAGCCAACAGCCTGA  
CATCCTTCGTTATCCAGACCAAGGGTCACGCCAAGTTAACGGTGGTCTTCGGAGACCGA  
GGCCTCCAAAAGCGTCCACCTCTTGTTTTCTTAAATACTTGGAGACAACGGTGCCTT  
AGGTCAAGCTCCGTACATCCACCTGATTAACCGAGATGAGCACGAACAGTATTACGCTGT  
GTTCACTGGTAGCGGAATCCGAGTGTTTCGACCTTTCTGGTAACGAGAAGCAAGTTAGGTA  
TCCTAACGGTTCAACTACATCAAGACCGCTAATCCACGTAACGACCTGCGAATGGTTAC  
TGTAGCAGACTATACGTTTCATCGTTAACCGTAACGTTGTTGCACAGAAGAACACAAAGTC

TGTCAACTTACCGAATTACAACCCTAATCAAGACGGATTGATTAACGTTTCGTGGTGGTCA  
GTATGGTAGGGAACCTAATTGTACACATTAACGGTAAAGACGTTGCGAAGTATAAGATAACC  
AGATGGTAGTCAACCTGAACACGTAAACAATACGGATGCCCAATGGTTAGCTGAAGAGTT  
AGCCAAGCAGATGCGCACTAACTTGTCTGATTGGACTGTAAATGTAGGGCAAGGGTTCAT  
CCATGTGACCGCACCTAGTGGTCAACAGATTGACTCCTTCACGACTAAAGATGGCTACGC  
AGACCAGTTGATTAACCCTGTGACCCACTACGCTCAGTCGTTCTCTAAGCTGCCACCTAA  
TGCTCCTAACGGCTACATGGTGAAAATCGTAGGGGACGCCTCTAAGTCTGCCGACCAGTA  
TTACGTTCCGGTATGACGCTGAGCGGAAAGTTTGGACTGAGACTTTAGGTTGGAACACTGA  
GGACCAAGTTCTATGGGAAACCATGCCACACGCTCTTGTGCGAGCCGCTGACGGTAATTT  
CGACTTCAAGTGGCTTGAGTGGTCTCCTAAGTCTTGTGGTGACGTTGACACCAACCCTTG  
GCCTTCTTTTGGTTCAAGTATTAACGATGTGTTCTTCTTCCGTAACCGCTTAGGATT  
CCTTAGTGGGGAGAACATCATATTGAGTCGTACAGCCAAATACTTCAACTTCTACCCTGC  
GTCCATTGCGAACCTTAGTGATGACGACCCTATAGACGTAGCTGTGAGTACCAACCGAAT  
AGCAATCCTTAAGTACGCCGTTCCGTTCTCAGAAGAGTTACTCATCTGGTCCGATGAAGC  
ACAATTCGTCCTGACTGCCTCGGGTACTCTCACATCTAAGTCGGTTGAGTTGAACCTAAC  
GACCCAGTTTGACGTACAGGACCGAGCGAGACCTTTTGGGATTGGGCGTAATGTCTACTT  
TGCTAGTCCGAGGTCCAGCTTCACGTCCATCCACAGGTAACGCTGTGCAGGATGTCAG  
TTCCGTTAAGAATGCTGAGGACATTACATCACACGTTTCTAACTACATCCCTAATGGTGT  
GTTTACGATTTTGCAGGAAAGTGGTACGGAAAACCTTCTGTTCCGGTACTATCTCACGGGGACCC  
TAGTAAAATCTTCATGTACAAATTCCTGTACCTGAACGAAGAGTTAAGGCAACAGTCGTG  
GTCTCATTGGGACTTTGGGGAAAACGTACAGGTTCTAGCTTGTGAGAGTATCAGCTCAGA  
TATGTATGTGATTCTTCGCAATGAGTTCAATACGTTTCTAGCTAGAATCTCTTTCACTAA  
GAACGCCATTGACTTACAGGGAGAACCCTATCGTGCCTTTATGGACATGAAGATTCGATA  
CACGATTCCTAGTGGAACATAACAACGATGACACATTCACTACCTCTATTTCATATTCCAAC  
AATTTATGGTGCAAACCTTCGGGAGGGGCAAATCACTGTATTGGAGCCTGATGGTAAGAT  
AACCGTGTGGAGCAACCTACGGCTGGGTGGAATAGCGACCCTTGGCTGAGACTCAGCGG  
TAACTTGGAGGGACGCATGGTGTACATTGGGTTCAACATTAACCTTCGTATATGAGTTCTC  
TAAGTTCTCATCAAGCAGACTGCCGACGACGGGTCTACCTCCACGGAAGACATTGGGGCG  
CTTACAGTTACGCCGAGCGTGGGTTAACTACGAGAACTCTGGTACGTTTGACATTTATGT  
TGAGAACCAATCGTCTAACTGGAAGTACACAATGGCTGGTGCCCGATTAGGCTCTAACAC  
TCTGAGGGCTGGGAGACTGAACTTAGGGACCGGACAATATCGATTCCCTGTGGTTGGTAA  
CGCCAAGTTCAACACTGTATACATCTTGTGAGATGAGACTACCCCTCTGAACATCATTGG  
GTGTGGCTGGGAAGGTAACACTTACGGAGAAGTTCCGGTATTTAATTAATATTCTCCC  
TGTGGTGGCTCGAAATTAATACGACTCACTATAGGGAGAACAATACGACTACGGGAGGGT  
TTTCTTATGATGACTATAAGACCTACTAAAAGTACAGACTTTGAGGTATTCACTCCGGCT  
CACCATGACATTCTTGAAGCTAAGGCTGCTGGTATTGAGCCGAGTTTCCCTGATGCTTCC  
GAGTGTGTCACGTTGAGCCTCTATGGGTTCCCTCTAGCTATCGGTGGTAACTGCGGGGAC  
CAGTGCTGGTTCGTTACGAGCGACCAAGTGTGGCGACTTAGTGGAAGGCTAAGCGAAAG  
TTCCGTAAGTTAATCATGGAGTATCGCGATAAGATGCTTGAGAAGTATGATACTCTTTGG  
AATTACGTATGGGTAGGCAATACGTCCCACATTCGTTTCTCAAGACTATCGGTGCGGTA  
TTCCATGAAGAGTACACACGAGATGGTCAATTTAGTTATTTACAATCACGAAAGGAGGA  
TAACCATATGTGTTGGGCAGCCGCAATACCTATCGCTATATCTGGCGCTCAGGCTATCAG  
TGGTCAGAACGCTCAGGCCAAAATGATTGCCGCTCAGACCGCTGCTGGTCGTCGTCAGC  
TATGGAAATCATGAGGCAGACGAACATCCAGAATGCTGACCTATCGTTGCAAGCTCGAAG  
TAACTTGAGGAAGCGTCCGCCGAGTTGACCTCACAGAACATGCAGAAGGTCCAAGCTAT  
TGGGTCTATCCGAGCGGCTATCGGAGAGAGTATGCTTGAAGGTTCCCTCAATGGACCGCAT  
TAAGCGAGTCACAGAAGGACAGTTCATTCCGGGAAGCCAATATGGTAACTGAGAACTATCG  
CCGTGACTACCAAGCAATCTTCGCACAGCAACTTGGTGGTACTCAAAGTGCTGCAAGTCA  
GATTGACGAAATCTATAAGAGCGAACAGAAACAGAAGAGTAAGCTACAGATGGTTCTGGA  
CCCCTGGCTATCATGGGGTCTTCCGCTGCGAGTGCTTACGCATCCGGTGCGTTCGACTC  
TAAGTCCACAATAAGGCACCTATTGTTGCCGCTAAAGGAACCAAGACGGGGAGGTAATG  
AGCTATGAGTAAAATTGAATCTGCCCTTCAAGCGGCACAACCGGGACTCTCTCGGTTACG  
TGGTGGTGTGAGGATGGGCTATCGTGACGCAACCACTCAGGCCGAACAGCCAAGGTC  
AAGCCTATTGGACACCATTGGTCCGTTCCGCTAAGGCTGGTGCCGATATGTATACCGCTAA  
GGAACAACGAGCACGAGACCTAGCTGATGAACGCTCTAACGAGATTATCCGTAAGCTGAC  
CCCTGAGCAACGTCGAGAAGCTCTCAACAACGGGACCCTTCTGTATCAGGATGACCCATA  
CGCTATGGAAGCACTCCGAGTCAAGACTGGTCGTAACGCTGCGTATCTTGTGGACGATGA

CGTTATGCAGAAGATAAAAGAGGGTGTCTTCCGTA CTCTCGCGAAGAGATGGAAGAGTATCG  
CCATAGTCGCCTTCAAGAGGGCGCTAAGGTATACGCTGAGCAGTTTCGGCATCGACCCTGA  
GGACGTTGATTATCAGCGTGGTTTCAACGGGGACATTACCGAGCGTAACATCTCGCTGTA  
TGGTGCGCATGATAACTTCTTGAGCCAGCAAGCTCAGAAGGGCGCTATCATGAACAGCCG  
AGTGGA ACTCAACGGTGTCTTCAAGACCCTGATATGCTGCGTCGTCCAGACTCTGCTGA  
CTTCTTTGAGAAGTATATCGACAACGGTCTGGTACTGGCGCAATCCCATCTGATGCTCA  
AGCCACACAGCTTATAAGCCAAGCGTTCAGTGACGCTTCTAGCCGTGCTGGTGGTGTGCTGA  
CTTCCTGATGCGAGTCGGTGACAAGAAGGTAACACTTAACGGAGCCACTACGACTTACCG  
AGAGTTGATTGGTGAGGAACAGTGGAACGCTCTCATGGTACAGCACAACGTTCTCAGTT  
TGAGACTGACGCGAAGCTGAACGAGCAGTATCGCTTGAAGATTA ACTCTGCGCTGAACCA  
AGAGGACCCAAGGACAGCTTGGGAGATGCTTCAAGGTATCAAGGCTGAACTAGATAAGGT  
CCAACCTGATGAGCAGATGACACCACAACGTGAGTGGCTAATCTCCGCACAGGAACAAGT  
TCAGAATCAGATGAACGCATGGACGAAAGCTCAGGCCAAGGCTCTGGACGATTCCATGAA  
GTCAATGAACAACTTGACGTAATCGACAAGCAATTCCAGAAGCGAATCAACGGTGAGTG  
GGTCTCAACGGATTTTAAGGATATGCCAGTCAACGAGAACACTGGTGAGTTCAAGCATAG  
CGATATGGTTAACTACGCCAATAAGAAGCTCGCTGAGATTGACAGTATGGACATTCCAGA  
CGGTGCCAAGGATGCTATGAAGTTGAAGTACCTTCAAGCGGACTCTAAGGACGGAGCATT  
CCGTACAGCCATCGGAACCATGGTCACTGACGCTGGTCAAGAGTGGTCTGCCGCTGTGAT  
TAACGGTAAGTTACCAGAACGAACCCAGCTATGGATGCTCTGCGCAGAATCCGCAATGC  
TGACCCTCAGTTGATTGCTGCGCTATACCCAGACCAAGCTGAGCTATTCTGACGATGGA  
CATGATGGACAAGCAGGGTATTGACCCTCAGGTTATTCTTGATGCCGACCGACTGACTGT  
TAAGCGGTCCAAAGAGCAACGCTTTGAGGATGATAAAGCATTTCGAGTCTGCACTGAATGC  
ATCTAAGGCTCCTGAGATTGCCCGTATGCCAGCGTCACTGCGCGAATCTGCACGTAAGAT  
TTATGACTCCGTTAAGTATCGCTCGGGGAACGAAAGCATGGCTATGGAGCAGATGACCAA  
GTTCTTAAGGAATCTACCTACACGTTCACTGGTGATGATGTTGACGGTGATAACCGTTGG  
TGTGATTCTTAAGAATATGATGCAGGTTAACTCTGACCCGAAATCATGGGAGCAAGGTCCG  
GGATATTCTGGAGGAAGCACGTAAGGGAATCATTGCGAGCAACCCTTGGATAACCAATAA  
GCAACTGACCATGTATTCTCAAGGTGACTCCATTTACCTTATGGACACCACAGGTCAAGT  
CAGAGTCCGATACGACAAAGAGTTACTCTCGAAGGTCTGGAGTGAGAACCAGAAGAACT  
CGAAGAGAAAGCTCGTGAGAAGGCTCTGGCTGATGTGAACAAGCGAGCACCTATAGTTGC  
CGCTACGAAGGCCCGTGAAGCTGCTGCTAAACGAGTCCGAGAGAAACGTAAACAGACTCC  
TAAGTTCATCTACGGACGTAAGGAGTAACTAAAGGCTACATAAGGAGGCCCTAAATGGAT  
AAGTACGATAAGAACGTACCAAGTGATTATGATGGTCTGTTCCAAAAGGCTGCTGATGCC  
AACGGGGTCTCTTATGACCTTTTACGTAAAGTCGCTTGGACAGAATCACGATTTGTGCCT  
ACAGCAAAATCTAAGACTGGACCATTAGGCATGATGCAATTTACCAAGGCAACCGCTAAG  
GCCCTCGGTCTGCGAGTTACCGATGGTCCAGACGACGACCGACTGAACCCTGAGTTAGCT  
ATTAATGCTGCCGCTAAGCAACTTGCAGGTCTGGTAGGGAAGTTTGATGGCGATGAACTC  
AAAGCTGCCCTTGCGTACAACCAAGGCGAGGGACGCTTGGGTAATCCACA ACTTGAGGGCG  
TACTCTAAGGGAGACTTCGCATCAATCTCTGAGGAGGGACGTA ACTACATGCGTAACCTT  
CTGGATGTTGCTAAGTCACCTATGGCTGGACAGTTGGAACTTTTGGTGGCATAACCCCA  
AAGGGTAAAGGCATTCCGGCTGAGGTAGGATTGGCTGGAATTGGTCAACAAGCAGAAAGTA  
ACACAGGAACTTCTGAGTCCACAAGTTTTGACGTTAAGGGTATCGAACAGGAGGCTACG  
GCGAAACCATTCGCCAAGGACTTTTGGGAGACCCACGGAGAAACACTTGACGAGTACAAC  
AGTCGTTCAACCTTCTTCGGATTCAAAAATGCTGCCGAAGCTGAACTCTCCA ACTCAGTC  
GCTGGGATGGCTTTCGGTGTCTGGTCTCGATAATGGTTTTGATGTGTTAAAGACACC  
ATTACGCCGACTCGCTGGA ACTCTCACATCTGACTCCAGAGGAGTTAGAGAAGATTTCGA  
ACAGAGGTTAAGAACCCTGCGTACATCAACGTTGTA ACTGGTGGTTCCTGAGAACCTC  
GATGACCTCATTAAATTGGCTAACGAGA ACTTTGAGAATGACTCCC GCGCTGCCGAGGCT  
GGCCTAGGTGCCAACTGAGTGCTGGTATTATTGGTGTCTGGTGTGGACCCGCTTAGCTAT  
GTTCTTATGGTTCGGTGTCACTGGTAAGGGCTTTAAGTTAATCAATAAGGCTCTTGATGTT  
GGTGCCGAAAGTGCTGCTCTGAACGTTGCATCCGAAGGTCTCCGTACCTCCGTAGCTGGT  
GGTGACGCAGACTATGCGGGTGTGCCTTAGGTGGCTTTGTGTTTGGCGCAGGCATGTCT  
GCAATCAGTGACGCTGTAGCTGCTGGACTGAAACGCAGTAAACCAGAAGCTGAGTTTCGAC  
AATGAGTTCATCGGTCTATGATGCGATTGGAAGCCCGTGAGACAGCACGAAACGCCAAC  
TCTGCGGACCTCTCTCGGATGAACACTGAGA ACATGAAGTTTGAAGGTGAACATAATGGT  
GTCCCTTATGAGGACTTACCAACAGAGAGAGGTGCCGTGGTGTACATGATGGCTCCGTT  
CTAAGTGCAAGCAACCCAATCAACCCTAAGACTCTAAAAGAGTTCTCCGAGGTTGACCCT

GAGAAGGCTGCGCGAGGAATCAAACCTGGCTGGGTTACCGGAGATTGGCTTGAAGACCTTG  
GGGTCTGACGATGCTGACATCCGTAGAGTGGCTATCGACCTCGTTCGCTCTCCTACTGGT  
ATGCAGTCTGGTGCCTCAGGTAAGTTCGGTGCAACAGCTTCTGACATCCATGAGAGACTT  
CATGGTACTGACCAGCGTACTTATAATGACTTGTACAAAGCAATGTCTGACGCTATGAAA  
GACCCTGAGTCTCTACTGGCGGGCGCTAAGATGTCCCGTGAAGAACTCGATACACTATC  
TACCGTAGAGCGGCACTAGCTATTGAGCGTCCAGAACTACAGAAGGCACTCACTCCGTCT  
GAGAGAATCGTTATGGACATCATTAAAGCGTCACTTTGACACCAAGCGTGAAGTTATGGAA  
AACCCAGCAATATTCGGTAACACAAAGGCTGTGAGTATCTTCCCTGAGAGTCGCCACAAA  
GGTACTTACGTTCCCTCACGTATATGACCGTCATGCCAAGGCGCTGATGATTCAACGCTAC  
GGTGCCGAAGGTTTGCAGGAAGGGATTGCCCGCTCATGGATGAACAGCTACGTCTCCAGA  
CCTGAGGTCAAGGCCAGAGTCGATGAGATGCTTAAGGAATTACACGGGGTGAAGGAAGTA  
ACACCAGAGATGGTAGAGAAGTACGCTATGGATAAGGCTTATGGTATCTCCCACTCAGAC  
CAGTTCACCAACAGTTCATAATAGAAGAGAACATTGAGGGCTTAGTAGGTATCGAGAAT  
AACTCATTCCCTTGAGGCACGTAACCTTGTGGATTCCGGACCTATCCATCACTATGCCAGAC  
GGACAGCAATTCTCAGTGAATGACCTAAGGGACTTCGATATGTTCCGCATCATGCCAGCG  
TATGACCGCCGTGTCAATGGTGACATCGCCATCATGGGGTCTACTGGTAAAACCACTAAG  
GAACTTAAGGATGAGATTTTGGCTCTCAAAGCGAAAGCTGAGGGAGACGGTAAGAAGACT  
GGCGAGGTACATGCTTTAATGGATAACCGTTAAGATTCTTACTGGTCGTGCTAGACGCAAT  
CAGGACACTGTGTGGGAAACCTCACTGCGTGCCATCAATGACCTAGGGTTCTTCGCTAAG  
AACGCCTACATGGGTGCTCAGAACATTACGGAGATTGCTGGGATGATTGTCACTGGTAAC  
GTTTCGTGCTCTAGGGCATGGTATCCCAATTCTGCGTGATACTCTACAAGTCTAAACCA  
GTTTCAGCTAAGGAACTCAAGGAACTCCATGCGTCTCTGTTCCGGGAAGGAGGTGGACCAG  
TTGATTCGGCCTAAACGTGCTGACATTGTGCAGCGCCTAAGGGAAGCAACTGATACCGGA  
CCTGCCGTGGCGAACATCGTAGGGACCTTGAAGTATTCAACACAGGAACTGGCTGCTCGC  
TCTCCGTGGACTAAGCTACTGAACGGAACCACTAACTACCTTCTGGATGCTGCGCGTCAA  
GGTATGCTTGGGGATGTTATTAGTGCCACCCTAACAGGTAAGACTACCCGCTGGGAGAAA  
GAAGGCTTCCTTCGTGGTGCCTCCGTAACCTCCTGAGCAGATGGCTGGCATCAAGTCTCTC  
ATCAAGGAACATATGGTACGCGGTGAGGACGGGAAGTTTACCGTTAAGGACAAGCAAGCG  
TTCTCTATGGACCCACGGGCTATGGACTTATGGAGACTGGCTGACAAGGTAGCTGATGAG  
GCAATGCTGCGTCCACATAAGGTGTCTTACAGGATTCCCATGCGTTCGGAGCACTAGGT  
AAGATGGTTATGCAGTTAAGTCTTTCACTATCAAGTCCCTTAACTCTAAGTTCCTGCGA  
ACCTTCTATGATGGATAACAAGAACAACCGAGCGATTGACGCTGCGCTGAGCATCATCACC  
TCTATGGGTCTCGCTGGTGGTTTCTATGCTATGGCTGCACACGTCAAAGCATAACGCTCTG  
CCTAAGGAGAAACGTAAGGAGTACTTGGAGCGTGCCTGGACCCAACCATGATTGCCAC  
GCTGCGTTATCTCGTAGTTCTCAATTGGGTGCTCCTTTGGCTATGGTTGACCTAGTTGGT  
GGTGTTTTAGGGTTCGAGTCCTCCAAGATGGCTCGCTCTACGATTCTACCTAAGGACACC  
GTGAAGGAACGTGACCCAAACAAACCGTACACCTCTAGAGAGGTAATGGGCGCTATGGGT  
TCAAACCTTCTGGAACAGATGCCTTCCGGCTGGCTTTGTGGCTAACGTAGGGGCTACCTTA  
ATGAATGCTGCTGGCGTGGTCAACTCACCTAATAAAGCAACCGAGCAGGACTTCATGACT  
GGTCTTATGAACTCCACAAAAGAGTTAGTACCGAACGACCCATTGACTCAACAGCTTGTG  
TTGAAGATTTATGAGGCGAACGGTGTAACTTGAGGGAGCGTAGGAAATAATACGACTCA  
CTATAGGGAGAGGCGAAATAATCTTCTCCCTGTAGTCTCTTAGATTTACTTTAAGGAGGT  
CAAATGGCTAACGTAATTAACAAACCGTTTTACTTACCAGTTAGATGGCTCCAATCGTGAT  
TTTAATATCCCGTTTGGAGTATCTAGCCCGTAAGTTCGTAGTGGTAACTCTTATTGGTGTA  
GACCGAAAGGTCCTTACGATTAATACAGACTATCGCTTTGCTACACGTAATACTATCTCT  
CTGACAAAGGCTTGGGGTCCAGCCGATGGCTACACGACCATCGAGTTACGTGAGTAACC  
TCCACTACCGACCGATTGGTTGACTTTACGGATGGTTCAATCCTCCGCGCGTATGACCTT  
AACGTCGCTCAGATTCAAACGATGCACGTAGCGGAAGAGGCCCGTGACCTCACTACGGAT  
ACTATCGGTGTCAATAACGATGGTCACTTGGATGCTCGTGGTTCGTCGAATTGTGAACCTA  
GCGAACGCCGTGGATGACCGCGATGCTGTTCCGTTTGGTCAACTAAAGACCATGAACAG  
AACTCATGGCAAGCACGTAATGAAGCCTTACAGTTCGTAATGAGGCTGAGACTTTCAGA  
AACCAAGCGGAGGGCTTTAAGAACGAGTCCAGTACCAACGCTACGAACACAAAGCAGTGG  
CGCGATGAGACCAAGGGTTTCCGAGACGAAGCCAAGCGGTTCAAGAATACGGCTGGTCAA  
TACGCTACATCTGCTGGGAACTCTGCTTCCGCTGCGCATCAATCTGAGGTAACGCTGAG  
AACTCTGCCACAGCATCCGCTAACTCTGCTCATTGGCAGAACAGCAAGCAGACCGTGCG  
GAACGTGAGGCAGACAAGCTGGAAAATTACAATGGATTGGCTGGTGCAATTGATAAGGTA  
GATGGAACCAATGTGTACTGGAAAGGAAATATTCACGCTAACGGGCGCCTTTACATGACC

ACAAACGGTTTTGACTGTGGCCAGTATCAACAGTTCCTTTGGTGGTGTCACTAATCGTTAC  
TCTGTCATGGAGTGGGGAGATGAGAACGGATGGCTGATGTATGTTCAACGTAGAGAGTGG  
ACAACAGCGATAGGCGGTAACATCCAGTTAGTAGTAAACGGACAGATCATCACCCAAGGT  
GGAGCCATGACCGGTCAGCTAAAATTGCAGAATGGGCATGTTCTTCAATTAGAGTCCGCA  
TCCGACAAGGCGCACTATATTCTATCTAAAGATGGTAACAGGAATAACTGGTACATTGGT  
AGAGGGTACAGATAACAACAATGACTGTACCTTCCACTCCTATGTACATGGTACGACCTTA  
ACACTCAAGCAGGACTATGCAGTAGTTAACAACACTTCCACGTAGGTACAGGCCGTTGTG  
GCCACTGATGGTAATATTCAAGGTAAGTGGGGAGGTAATGGCTGGATGCTTACCTA  
CGTGACAGCTTCGTTGCGAAGTCCAAGGCGTGGACTCAGGTGTGGTCTGGTAGTGCTGGC  
GGTGGGGTAAGTGTGACTGTTTCACAGGATCTCCGCTTCCGCAATATCTGGATTAAGTGT  
GCCAACAACTCTTGGAACCTTCTTCCGTAAGTGGCCCCGATGGAATCTACTTCATAGCCTCT  
GATGGTGGATGGTTACGATTCCAAATACACTCCAACGGTCTCGGATTCAAGAATATTGCA  
GACAGTCGTTACGTACCTAATGCAATCATGGTGGAGAACGAGTAATTGGTAAATCACAAG  
GAAAGACGTGTAGTCCACGGATGGACTCTCAAGGAGGTACAAGGTGCTATCATTAGACTT  
TAACAACGAATTGATTAAGGCTGCTCCAATTGTTGGGACGGGTGTAGCAGATGTTAGTGC  
TCGACTGTTCTTTGGGTTAAGCCTTAACGAATGGTTCTACGTTGCTGCTATCGCCTACAC  
AGTGGTTCAGATTGGTGCCAAGGTAGTCGATAAGATGATTGACTGGAAGAAAGCCAATAA  
GGAGTGATATGTATGGAAAAGGATAAGAGCCTTATTACATTCTTAGAGATGTTGGACACT  
GCGATGGCTCAGCGTATGCTTGCAGCCTTTCGGACCATGAGCGTCGCTCTCCGCAACTC  
TATAATGCTATTAACAACACTGTTAGACCGCCACAAGTTCAGATTGGTAAGTTGCAGCCG  
GATGTTACATCTTAGGTGGCCTTGCTGGTGCTCTTGAAGAGTACAAAGAGAAAGTCGGT  
GATAACGGTCTTACGGATGATGATATTTACACATTACAGTGATATACTCAAGGCCACTAC  
AGATAGTGGTCTTTATGGATGTCATTGTCTATACGAGATGCTCCTACGTGAAATCTGAAA  
GTTAACGGGAGGCATTATGCTAGAATTTTTACGTAAGCTAATCCCTTGGGTTCTCGCTGG  
GATGCTATTCGGGTTAGGATGGCATCTAGGGTCAGACTCAATGGACGCTAAATGGAAACA  
GGAGGTACACAATGAGTACGTTAAGAGAGTTGAGGCTGCGAAGAGCACTCAAAGAGCAAT  
CGATGCGGTATCTGCTAAGTATCAAGAAGACCTTGCCGCGCTGGAAGGGAGCACTGATAG  
GATTATTTCTGATTTGCGTAGCGACAATAAGCGGTTGCGCGTCAGAGTCAAACACTACCGG  
AACCTCCGATGGTCAGTGTGGATTTCGAGCCTGATGGTTCGAGCCGAACTTGACGACCGAGA  
TGCTAAACGTATTCTCGCAGTGACCCAGAAGGGTGACGCATGGATTCTGTCGTTACAGGA  
TACTATTCGTGAACCTGCAACGTAAGTAGGAAATCAAGTAAGGAGGCAATGTGTCTACTCA  
ATCCAATCGTAATGCGCTCGTAGTGGCGCAACTGAAAGGAGACTTCGTGGCGTTTCTATT  
CGTCTTATGGAAGGCGCTAAACCTACCGGTGCCACTAAGTGTGAGATTGACATGGCTAA  
GGTGTGCGGAATGGAGACAACAAGAAGTTCATCTTACAGGCTTTCGCTGGTATCGGTAA  
GTCGTTTCATCACATGTGCGTTCGTTGTGTGGTCCCTTATGGAGAGACCCTCAGTTGAAGAT  
ACTTATCGTATCAGCCTCTAAGGAGCGTGCAGACGCTAACTCCATCTTTATTAAGAACAT  
CATTGACCTGCTGCCATTCTTATCTGAGTTAAAGCCAAGACCCGGACAGCGTGAAGTCCGT  
AATCAGCTTTGATGTAGGCCAGCCAATCCTGACCACTCTCCTAGTGTGAAATCAGTAGG  
TACTACTGGTCAGTTAACTGGTAGCCGTGCTGACATTATCATTGCGGATGACGTTGAGAT  
TCCGTCTAACAGCGCAACTATGGGTGCCCGTGAGAAGCTATGGACTCTGGTTCAGGAGTT  
CGCTGCGTACTTAAACCGCTGCCTTCTCTCGCGTTATCTACCTTGGTACACCTCAGAC  
AGAGATGACTCTCTATAAGGAACTTGAGGATAACCGTGGGTACACAACCATTATCTGGCC  
TGCTCTGTACCCAAGGACACGTGAAGAGAACCCTCTATTACTCACAGCGTCTTGCTCCTAT  
GTTACGCGCTGAGTACGATGAGAACCCTGAGGCACTTGTGGGACTCCAACAGACCCAGT  
GCGCTTTGACCGTGATGACCTGCGCGAGCGTGAGTTGGAATACGGTAAGGCTGGCTTTAC  
GCTACAGTTCATGCTTAACCCTAACCTTAGTGATGCCGAGAAGTACCCGCTGAGGCTTCG  
TGACGCTATCGTAGCGGCCTTAGACTTAGAGAAGGCCCAATGCATTACCAGTGGCTTCC  
GAACCGTCAGAACATCATTGAGGACCTTCTAACGTTGGCCTTAAGGGTGTGACCTGCA  
TACGTACCACGATTGTTCCAACAACACTCAGGTACGTACCAACAGAAGATTCTGGTCAATTGA  
CCCTAGTGGTTCGCGGTAAGGACGAAACAGGTTACGCTGTGCTGTACACACTGAACGGTTA  
CATCTACCTTATGGAAGCTGGAGGTTTCCGTGATGGCTACTCCGATAAGACCCTTGAGTT  
ACTCGCTAAGAAGGCAAAGCAATGGGGAGTCCAGACGGTGTCTACGAGAGTAACTTCGG  
TGACGGTATGTTTCGGTAAGGTATTCAGTCCATCCTTCTTAAACACCACAACACTGTGCGAT  
GGAAGAGATTTCGTGCCCGTGGTATGAAAGAGATGCGTATTTGCGATACCCTTGAGCCAGT  
CATGCAGACTCACCGCCTTGTAATTCGTGATGAGGTCATTAGGGCCGACTACCAGTCCGC  
TCGTGACGTAGACGGTAAGCATGACGTTAAGTACTCGTTGTTCTACCAGATGACCCGTAT  
CACTCGTGAGAAAGGCGCTCTGGCTCATGATGACCGATTGGATGCCCTTGCCTTAGGCAT



TGAGTATCTCCGTGAGTCCATGCAGTTGGATTCCGTTAAGGTCGAGGGTGAAGTACTTGC  
TACTTCCTTGAGGAACACATGATGCGTCCTACGGTTGCTGCTACGCATATCATTGAGAT  
GTCTGTGGGAGGAGTTGATGTGTACTCTGAGGACGATGAGGGTTACGGTACGTCTTTCAT  
TGAGTGGTGATTTATGCATTAGGACTGCATAGGGATGCACTATAGACCACGGATGGTCAG  
TTCTTTAAGTTACTGAAAAGACACGATAAATTAATACGACTCACTATAGGGAGAGGAGGG  
ACGAAAGGTTACTATATAGATACTGAATGAATACTTATAGAGTGCATAAAGTATGCATAA  
TGGTGTACCTAGAGTGACCTCTAAGAATGGTGATTATATTGTATTAGTATCACCTAACT  
TAAGGACCAACATAAAGGGAGGAGACTCATGTTCCGCTTATTGTTGAACCTACTGCGGCA  
TAGAGTCACCTACCGATTTCTTGTGGTACTTTGTGCTGCCCTTGGGTACGCATCTCTTAC  
TGGAGACCTCAGTTCACTGGAGTCTGTCGTTTGCTCTATACTCACTTGTAGCGATTAGGG  
TCTTCCTGACCGACTGATGGCTCACCGAGGGATTACGCGGTATGATTGCATCACACCACT  
TCATCCCTATAGAGTCAAGTCCTAAGGTATACCCATAAAGAGCCTCTAATGGTCTATCCT  
AAGGTCTATACCTAAAGATAGGCCATCCTATCAGTGTACCTAAAGAGGGTCTTAGAGAG  
GGCCTATGGAGTTCCTATAGGGTCTTTAAAATATACCATAAAAATCTGAGTGAATCTCT  
CACAGTGTACGGACCTAAAGTTCCTCCCATAGGGGGTACCTAAAGCCAGCCAATCACCTA  
AAGTCAACCTTCGGTTGACCTTGAGGGTTCCTAAGGGTTGGGGATGACCCTTGGGTTTG  
TCTTTGGGTGTTACCTTGAGTGTCTCTCTGTGTCCCT

>NewGenomeName\_291

GGCGAGGCGGGGAAAGCACCGCGCGCAAACCGACAAGTTAGTTAATTATTTGTGTAGTCA  
AAGTGCCTTCAGTACATACCTCGTTAATACATTGGAGCATAATGAAGAAAATCTATGGCC  
TATGGTCCAAAACCTGTCTTTTTTGGATGGCACTATCCTGAAAAATATGCAAAAAATAGATT  
GATGTAAGGTGGTTCTTGTCAAGTGTGCGCAAGATCCTTAAGAATTCGTGGCATGAGAGAGT  
TAAAGGATGCTGAATCATGTATATGGATTAATTGGCGTTGTTGGGACCATAATCACTATT  
GCTACTAGCTTCATCCGCAACCAAGATATTTACAATGGTTGCTCGTTTGTCTGGATGG  
TTAGCTGCTTTACTTATTGGATGGTTTACACACAGAACGATTAAGCAATTAGCAACAAC  
CACACGAATGTTATAAAAAGTAATATGGAGGTAATCAACAGTCATAATGAATCCAATCAA  
AACTTGATGGCTGAAAACAAAGAATTGATTAAGAAGTTCAGAACTTCAGAACAGAAA  
GAGAAGATGGAAAGTATAGCTGCTTATCTTGCTACTCAGAACCCCAAATTAACGCTATG  
CCAAGAACAGCAAGCCGACCAGAAAATATCGATTCGGAGGCTAATTAATATGAAAGTAT  
ATTTGAAAATTACTCATACTATCCAGCCCTAAGAACACGATCAGCAGAAATGACCCGAC  
TGAATAATTTATCATATGAGAATAAGAAAAAATATTACCTTTAATTTCTTTGGGGAAAT  
GGCCTCGCTCGGAAGAAATACAGGTATCGTTAGATAAAAGTTTAGAAGTGATGAGTAATC  
TCCCATTTATTTGGATGTCACAAAGGATAATTCTCATCATTGCGCGTCAAGCTTCGAAC  
TACTCTCCTGAGAATGGTTTTAAAACCTGGATAGAGTTTTGTTCCAGAAATGATAATA  
TTATTCCAGTAGTCCAGATGCCGGATTCAGCAAACTTAGAGATATATCTATCCAAGCCA  
GGTTTTTAGAGGAACCTAAAGGTTCAATTGCATTTAGAATTAGAAATCTAAATACAGACA  
TTAATAAAACCCTGACGTCCTAGTATCGATGAACTCTCCAGAAAATGCCATAGTTTTCA  
TAGATTTGGGCTACATTAGAGGGAATGTATCTGCTATAACAGCTGCAGCAATAAATTGCA  
TTAATCAGATTAGAAGTGAAGTTCCTGAAGCCATAATTAGTGTGCTAGCAACAAGCTTCC  
CTAGTTCAGTTACAAATTTTTGCCGTGAAAATGGACAGTCCGGATATATTGATGTTATTG  
AGAGAGAATTGCATCAAAATATTGGTGGAAAGTGATGTCGCTATTTATGGCGATCATGGTT  
CAATTCATTGAGTAGTGTATGACAACATAATTGGGCGATATGTTCCCTAGAATTGATATAG  
CGTTAAATGATTCATGGTATTTTCGAGCGCCGCCCTGGGATGAATAAAGAAGGGTTCATTG  
AAGCTGCGAAATCAATTTTGGCAGAGTATCCACATTATCAAAGGGAGGACTCTTGGGGAG  
CTGCAATGATAAGAAATGCTGCTATAGGGGATATAGCAGGTATGGGAAGTCCAGCTAAAT  
GGATTGCTGTTTCGAGTGAATCTACACTTAAATAAGCAAATTGAGCTATCTGAAGCTCTAC  
AGTATGGCTTTGATCATGATGAGGAAGATCTTATCTAATAAAAAACTAGGGAAGGTTAGC  
CTTCCCTAGCCCACAACCCTTTTAAGTACTTTTTCCGGAATATAGGAAACATCATCGCCA  
TATTTCCCTAACTATAGAGTCAACATCAACCTTATGGTATTCATTTAAAGATTTCTCCGAA  
CAAGCCTTAAACTCAAACCTTAAACCAAGAATTATTCCTTCTTTTAGCTTTGCTCAATAAG  
GCAAGATCGTTTATAGATATTTCTTGATTACCATGGAGTCTAGATAAAAAATCATTAGAT  
GTCGCATGATACCTATTTTTAATAGATGTAATGACAAATTCTCTAATCTTGTTTAAAGAT  
AACTTAGATGCCAAAACCTCAAGACAATCCCTATGTAGTTCATTTGAAAATGTAATTCCA  
TACTGATTAAGCAGATCTTTAAGCTCAGACTTAAGCAAAAAACCCAAATAAACAAATTTA  
TTAAGCGAGAGCAAACCCTTCTTTTTGAATTATTTTAAAGCGTACGCTACTATTATTA  
GATTGAAATTCTACAACGCCAACATCTGATGAAACCCGTTTAGATACTTCACTGGTAAAT  
TTTGGCGCGCACACAATTGTAACCTTTTTCGAAGCTAGATTTAAAAATTTTTAACTGACCA

TCCAAGCGCTTAAGAGAGTCAAAAATCGCTTTTTATTTCAAAGCTTGTAGGCTTCCATTG  
GCAATAGCCAAATCAGCTCTTCTGCTCCAGTTAGCAACAACCATTTCATTAATGATCGTT  
GCATCACTAAGCATGCCTTTTTTATATAACCATTCAATTAGGGCTATTTAACTTCCTGC  
TCTCGCAATAACTCAGCCATGTTAATCACACTCACTTCACGTTGATTTTTATTATAGCAA  
CTAACAATAAAAACTCCAGATTATGTTACTTAACACTCATTTTAAAAATCAACCAATAA  
CTATTTTTATTTAAGTATTTCTTTGTATTTTGAATAATCATAAGGCTAATATATTTATTA  
CGTTTCATATCCAAATAATCAGCCCACCACTGCATCATTAAACGCCGCTCATCCAAATGC  
TCGGAGGTATGGATATATGCCGCACGTACATTATTACGCTCTGAGTGGCTCAGTTGCCTC  
TCTATCGCGTCATCACTCCATAACCCCGACTCCCCAACGCACCACGCGCCATAGTCCTA  
AACCCATGCCACACACCTCGGTTTTAGTATCATAGCCATCGCACGCAATGCGCTGTTT  
ACCGTGTTCCTCACTCATAACCTTAGTTGCGTCATGATCCCCCGGAAAAGCAGCTCTTTA  
TCACCACTAATCTGCTTTAACTGGTTTAAATAAAAATCATCGCCTGTCGACTAAGCGGAACG  
ATATGTTCTCTTTTCATCTTCATGCCTCGGTACGAATAACGCACACCTTTAATTTCTTCT  
CGTTTTGCAGGTATACGCCAAAGAGATTTATCGAAGTCGAATTCATCCCAACGTGCGAAA  
CGTAATTCCTGGAACGCACAAAAGTTAGCAAGGAAAGCTTGACCGCAATCCGTGTCATT  
ACACGGCCACGATATGCAGCAAGACGTGCAAGAACTCAGGGAATCGGCTAGAAGGTA  
GCAGGGTAATGTCGCGCTTTGGTTGTCGATAGCGCACCCAGCCATATCGCTGGCTGGATTT  
GAGTCGATGTAATCGTTCTGTACGGCATAACGCATAATGGCTGTGACGCGCTGTTGCAGG  
CGCTGAGCGACATCGTGTTTGCCACTGGCATCAACTTTTTTAATCGGGGCTAACAGGTGG  
CTGGTTTTAAGCTGCCGAATGTCGGACGAACCGATATGAGGGAATATAAAGCTCAAGA  
TAGCGAAGAACGCGCGATCGATGGTCTTCACTCCAGCGCTTGTTACTGGCATGCCATTCT  
CGGGCGATAGCTTCAAAGTATATGCCCCCGAATTCTCGGCCCGAGCTTCTTTTTGTACG  
ACTTTTTGGGTCTATGCCCTGTACTAAAAGCTTTTTAGCTTCATCGCGTTTTGCTCTTGCC  
TGAGCAAGCGTCACAGTAGGCCAAACACCAAACGCAAGACGATCCTCTTTTTTGTGAGAG  
GGACGTCTGATTTTCATGCGCCAGTATTTGGAACCTTTGGCCGAAACCTCAAGATACAAA  
CCACCACCATCGGCCATTTTGTAGGTTTTGTCTTTTTGGCTTTGCGGTCTCGACCTGTCTG  
GCGTTGAGCTTCATTTGGGGGCACATTTCTAATCGAAGTTAAGATGCCCCCAATTATGCC  
CCCAATGATATCCGGATTTCAACGGACAACCTCGGAAGACGCAGGACGAAAAAATCGCTG  
CAAGCATTGATTTAAAGGGATATTTGGACTTTCTCGGATGGTCTTGGAAGTAAGAATGG  
TGCCGAAGGCCGACTCAAACATCAAATAAGTTAATGATAAAAAACAAATAATAAAACA  
CAACAATGAAATATGCCCCCTTTTGTGCCCCACTGTTTTTCTGACCAATCTATTTTCAG  
CCCATCAATAAATCGGAAAGTTAAATCATTTTTAATCAGTAAGTTTGGATCCGTAGCTCG  
GATCCAAACCAGTGCATCTTTTATCCACATAAAAAATTTTTTTTCGAAAGAACTGTTAC  
ACTGTTACCTTTCTGTTTTCTCCTTTTATTTTCAGAGTGATAGGTGGTGAATAATGGGTG  
AAGGGTGAACATTCGATTCTTACCTCCGGCATTCTGCCGATGTGACTCATAACCGGTGAT  
TAATCCTCCGCACTGAAATCACTCAGGAAGAAAAAGTTTTTTTTGATTTGATTGTTTAC  
ACTGTTACCTTTCTGTTTTTCTCTTTTAAATTTTCAGTGTGATAACGGGTGAATATACGGTG  
AAGGGTGAACAGTGGATTGTTACCTTCGGGGGATATCGGGATAAAAAAAGACCGGCAGA  
TGCCGGTCAGGTGGGTGAGGCTGTTGTAGGGTTCGTACATTTTGGCAGCCAGTCGCCGTA  
GCTTTCTCTTTTCAGCGTCAGGTTGGTCTGTATCCCCTGTTTGGTATGGCGTTTCTCGTA  
ATTCAGTCCGTATTCCTTCAGCATCACCGGCAGCCCAGCCCGAACATTTTCAGACTGAG  
TACATTCCGGTAGCCGTTTGCCCTCATGTAGGCCAGATAGGCGTGATAGAGGTATTTACG  
GTAATTGCGCGGGATGATACTGGCGTTCCCATATACATGCCGCTGGTCTGCGGCAGGGT  
TTCCAGATAGCCGATAAAATCAAACGTCCGGTCCGCATCCCGTTTGATGTTTCAAGTGCCTC  
GTCTGAGTTCTGCTGGGACTGAAGCAGTGACCGGGCGAGCATCGGGTCCGCTGAACTTCTG  
CATCAGGTGACGCACGATGACCGCCAGCTCGCGGGTGATTTTGTCTTAAGCTGCGGGTC  
GCGCTCCTGCGGGGCTATCTGTTCCGGGAAGTGAATAATACCCGTCCGGGTGACACGCC  
GCCGCTGCGGTCCGGTGAAGCGCATCGGGTTATTGTTACGGCCAGAATCACCGCCGGGAT  
GTGCGTGGAGTACGCATCCCGGATTTTCGGGTCAACGGACACCGCATCGCCGCCGGTGAT  
GGCCTTGAGTCCGGCACCGTCGCCGCTCCATTTTTCTGGTCCGGCAGGCGTATCAGTGA  
GAAGCCAGTTAACCGCGGCACGTTACCGCGGGGATTCAGCGTCTCGATGGTGGCCGACGT  
GGCGTTATCCTCCCCGGCCAGCAGGGTGGCTATTTCCGGCCATGATACTTTTGCCGCTGCC  
GCCGGGACCGGTCACCTCCAGAAAGAGCTGCCAGTCGTAGCGGTTTGCCAGCACCATAAA  
CAGTGCAGCCAGAATCACGTCGCGTTTTTCCGCACGGCCACCGGCGGCACGGTCAAGCCA  
GCGCCAGAAGGCGGGGGCGTGGGTTTTCCAGCGTTTACCCGTCCACCGGCGGGGTGAAATC  
CACATCGCACAGGGTGCATCCAGTGTGACGGACTGTGCGGGTGAACGTGCCGTTCTG  
CGTGTCGAGCACGCCGTTACGAAAGCCAATCAGGCGGCGGGAGGGGGCTTCTGCTGCGG

AATAATCAGCTTCAGGGTATCCACCACGGAGGCCACCTTCCC GGAGGAGAACGGCGCACG  
CAGACGCTGAAACAGCCCCGGCCACATCCC GGGCAAAGTCTGTGGCGGCAGCACCTTCCA  
GACACCATTTTCATAGCGGGACAGAAGCTGGCCGTTGGCATCGACCGCGAGCGCCTCGCC  
GTAATGCTCATAGATACGCATGGCCTTTTCGCTGGTACTCATGGCGGAAAACCTCCGCTTC  
GCTCATGGTGTGCGAACGGGCTTTCAGCCGGTGGCCGGATGGCATCGTAAATGGCCTTACG  
GGTGGCCTCCCCGCCGTACTGCGTGAAGGCATCATTCCAGTCACCGAAGACCGGGCGGCAG  
GGCAACAACACCTTCACACGCATCTGCGGCTGCGGGCGGCTTTTTTCTGGCCGTCACCACT  
GAGGTCACGGTCAGCGGCAAGGACAATCTGACAGGCGGGGTGCTTCTGCCGGGCAAGGCT  
GGCCAGAGAAAGGAGGTTACGGAAGAAAGCGCCACCATCACCGTTTCACCGGTCAGGTG  
ATGTACGGTAAGTGC GGTCGCGTATCCCTCCGCTATCCACAGACGTTTTCCGGCCTGATT  
CTGTCTTCAAGGGTGTGACAGGTGCCCTGACCTGTCCGCCTTTCAGGGTGC GCTTACG  
GCCGTCAGCACTGATTA ACTGAAGGTTAACCAGTTCGCCGCTGTTCGTCATACAGTGGCAC  
CACAAGGTCACCGGCGCGCCAGCTCACGCCACCGGCTCTGTGTGTGCCGGTCAGCATCCG  
GCATTC CCGGCCGGGAAAGCCCTTGCGGGTCAGGTAGGCGTTACCGGTTCCGGTACGGGT  
TTTCGCCATCAGGGTTTGTGCCAGTGC GGCGGGCGTTCCTCCGGGCAGCGTCTGTTTCATC  
AACGGCGGGCGGTCGTC ACTGCCGGGTACGCCGGTGGCAGGCTGCCGGTCACGGCAGCCAC  
CTTTGCGGCCGCGTCGGACGGGGAAACACCAAAAACCTTTTCAACCAGTTTCAGGCCGTC  
ACCGGCACCACACTGATTGCAGTACCAGGTGCCGCGCCCCCTCCCTGTCATCAAAAACGGAA  
GCGGTCACTCCCGCCACAGACCGGACAGGGCTGATGACGGTTCTTCAGCACCTGAATCCC  
CAGCGCCGGGAGAAACGCGGCCAGTGGCCGAGCGCATGGCTGACGGTGGCGGTTACGTT  
CATTTTCATGGTGTGTTCTCCTTCAGTGCAGTACC GGCGCTTTTATGTGACGGGCACAG  
AGTTCATCCATACAACCAGCCCCGAGAAAGGACAGCGACGGCGCGGCCTTCAGGGGGCCG  
GATTCCATTAATCTTCCAGCAGGGCACAGGCTATCTGACGCCCTTTTTCTCACC GTGC  
TGCGCGAGATAAAAAGCCTTCCAGCTCAGCGGC GATGGCCGCCTCCAGTGACTCAAGGGTG  
AGATGCGGGTAGCGGTGCTGACGTTTCGCACACGGTCAGCCAGGCACAGGGCGACAGCGCGA  
CGGTAAAGGGCAGCGCGTAAGACGGGCGGTAAGGGTGT TTTTCATTTGCTTTTCTCCCTGT  
GACAGATGACTGCATTCCGTGCCGGTTGCATTA ACTGATAAGGCATATCTGCGTCTCCTG  
AAGACGTGCGTATCCCTGCGCGAATACGCACATTTAATTTTTCGGGGGTTCGTTTTTTAAT  
TACAGATAATTGCGGTA ACTGTTATCCGGGGTGGTTTTCCGGGTCAGGCTCCGTGCGGGGA  
ATTTCCCGCCATTC CCGCGCCACCGGTGCTGCCCGGCTGACCGGAACAGTGTCTCTGCGGG  
TAAATATCCAGATATTTTTCCCGCCATTTCTGTAATTCGGGTCTCCGGCCATTTCTTTC  
AGTACCGCATGCCGGTTTACGGGGCTGCGTTTAAACAGGTCAGGACGGTCACAGGTAAAT  
TCCCGCAGAAAACGCCCCAGCGGGATGTCTGTGGTGC GTCCGTCAGCGAGGATACGCACA  
AGGATACTGAATTTACGGCGGTACGGGTTCCAGACAATGTCCGGGCAGCGGTACGGCATT  
TCCCACGGAATACCGTCTTCCAGAATGCCGACCACGGCCACATCGGGAAAACCGGCAGAA  
CGGTAAATCTCACC GGCTGGGGAAAATCAAACATGCGTCTCTCCCGGTCTTTCTG  
CTGGGCGAGAAAATCGCGGCACAGGCCTTTGGCTTTCAGCTCATTCAGCACAAAATCAAT  
ATCTTCATTCAGGTAGCTGAAAATATGTGGAATGTAGAGCTGATGCAGGCCGGAGAGTTC  
ACGGTGAATCAAATCACCCCAACAAACCGGGATACGGCGCTGGCGCGGTTGAGCTTATG  
GTAAGCCTCAATGCTGAGGTGTTACGGGCGTCATGACGCGCTGAGACGGTCTGAGGGGC  
TTTTTTATTACGCACGGGACACCTCCACCACCGGCAGACGGGCAGCAAGGGAGAGCACAT  
AGTCACGGACAAGGGAACGGCGGGCACTGCGTTCATCACCGGCGACGGTGCGAAGCATA  
AGATACGGGGATGACGGTCTGCGCGACGGACAGCCGCAAACACAAAGACAAATTCAGGGT  
GTGAGGGGGTAAGGGTTGTAGCCATGATGGCAGCCTCCTGTGAATAGCAAATAACGCTAT  
CGCCGGAGTTCTCACGCTCGATGGCGATAGCCAGACGGGGGTGAGAATAACGGCTTCAC  
AGGATAACCGGCCAGCCCGGAGGCTGCCCCGCTGAGCTACCATTGACTCTGCGGCATAAT  
GAGCGGACGCGGGCAGGATGCACGGAATGCCATCTGCACGACTGACCACACACCACACCA  
TAATCTGGCGCTCTGTGGCATTGATTGCGACACAAAAAAGACGCGTGGCGCGTCATATG  
TCGCCTGTGAATTGCTCGGGTTCTCACGCCCGGCTGCCGATTTTTCGGGCAGGCGAAAAC  
TATATCCGCAAATGCCGGAAAAGGCAAGCCAGAAAAGGGAGTTTTTTGCAGAGCGGGCA  
TCATCATGCGTCGTACCCCGTTTTGCGTCCGGCAATGCGTCCGGCCATCCATGCGGTGAC  
TTCAGAGTGCAGCCAGGCCACATTTTTACCGCCAAGACTCACCTGCGGCGGAAATCCCC  
CTTACGGATGAGTTCGTAGATGGTCGAGCGTGACAGGCCGCACAGGTGCATCACTCCGG  
CACACGTAAAAACGCTCCTGCGTGATGTCCGGCAGCGGCATCAGTGGCGTCACTGGGGC  
GGGAGACGGGGAAGAAAAAACAGCTTGCATCGGGCTACCTCGTTAATGTCCATACAGCAC  
CGGATAAGTCCGTCCGGCTTCGGGTAGCGCTTATTTTTGTGAATATTTTCAGCAGACGCA  
ACAGGGGGGATTTGTTACGGCTGTCTTACAATGGCTGTGTGTTTTTTGTTTCATCTCCACT

TAAAGTCATTTAAAGCCACTTAAAGCAATTTGTAATTTTTATAGTGAAATACAAATCGTT  
TCTTCTTATTCAATTCCCAGGGAATTAATAAAAACAAACAGTAGTAAACAGCACAAAAGC  
CCATCAACGGGTGAACAGTGGTGAACAGACGGTGAACAGTCATTACTGCGATTGTTCCACC  
CTTTAACTTACTGTATTACTTATCTTTTTTATTAAGGTGAACAGAGGTGAACAGTAAAAT  
ATAAAAAACAAACAGTAAGCCGGTTTTTCTGCGACCTTTTCTGGCTTGCCGGTCTGA  
GGATGAGTCTCCTGTGTCAGGGCTGGCACATCTGCAATGCGTCGTGTTGTTGTCCGGTGT  
ACGTCACAATTTTCTTAACCTGAAGTGACGAGGAGCCGAAAATGTCTGACCACACTATC  
CCTGAATATCTGCAACCCGCACTGGCACAACCTGGAAAAGGCCAGAGCCGCCATCTTGAG  
AACGCCCGCTGATGGATGAGACCGTACGGCCATTGAACGGGCAGAGCAGGAAAAAAT  
GCGCTGGCGCAGGCCGACGGAAACGACGCTGACGACTGGCGCACGGCCTTTCGTGCAGCC  
GGTGGTGTCTGAGCGACGAGCTGAAACAGCGCCACATTGAGCGCGTGGCACGCCGGGAG  
CTGGTACAGGAATATGACAATCTGGCCGTGGTGTGTAATTTTGAACGTGAACGCCTGAAA  
GGGGCGTGTGACAGCACGGCCACCGCCTACCGGAAGGCACATCATCACCTTCTGAGTCTG  
TATGCAGAGCATGAGCTGGAACACGCCCTGAATGAAACCTGTGAGGCGCTTGTCCGGGCA  
ATGCATCTGAGCATTCTGGTACAGGAAAATCCGCTCGCCAACACCACCGGCCATCAGGGC  
TACGTCGCACCGGAAAAGGCTGTCATGCAGCAGGTGAAATCATCGCTGGAACAGAAAATT  
AACAGATGCAAATCAGCCTCACCGGCGAGCCGGTTCTCCGGCTGACCGGACTGTCAGCG  
GCAACACTCCCACATGATTATGAGGTGGCAGGCACACCGGCACAGCGCAAGGTGTGG  
CAGGACAAAATAGACCAGCAGGGAGCAGAGCTTAAGGCCAGAGGGCTGCTGTCATGATTT  
ACTGTCCGTCTGTGTGGACATGTTGCTCACACCCGTCGCGCACATTTTTCATGGACGATGGCA  
CCAAGATAATGATTGCACAGTCCGGAATATTTATTGCTCTGCGACATTTGAAGCGAGTG  
AAAGCTTTTTCTCTGACAGTAAAGATTCAGGAATGGAATACATTTTCAGGCAAACAGAGAT  
ACCGCGATTCAGTACGTCAGCCTCCTGCGGTATGAAACGCCGAAAAGAATGCTTGTTA  
CCGGATATTGTTGTCGGAGATGTAAAGGCCTTGCAGTGTCAAGAACATCGCGGCGTCTGT  
CTCAGGAAGTCACCGAGCGTTTTTATGTGTGCACGGATCCGGGCTGTGGTCTGGTGTTTA  
AAACGCTTCAGACCATCAACCGCTTCATTGTCCGCCCGGTCACGCCGGACGAACTGGCAG  
AACGCCTGCATGAAAAACAGGAACTGCCGCCAGTACGGTTAAAAACACAATCATATTCGC  
TGCCTGGAATGAGGGCTGCCGGTTAACACCGGCCGTCGCCGCACACCGTATTTTTATT  
CTTCAGCATGATGAGAAAGAGATAACGATGGAAAGCACAGCCTTACAGCAGGCCTTTGAC  
ACCTGTCAGAATAACAAAGCAGCATGGCTGCAACGCAAAAATGAGCTGGCAGCGGCCGAA  
CAGGAATATCTGCGGCTTCTGTCAGGAGAAGGCAGAAACGTCAGTCGCCTGGACGAATTA  
CGCAATATTATCGAAGTCAGAAAATGGCAGGTGAATCAGGCCGCCGGTCTGTTATATTCGT  
TCGCATGAAGCCGTTTCAGCACATCAGCATCCGCGACCGGCTGAATGATTTTATGCAGCAG  
CACGGCACAGCACTGGCGGCCGCACTGGCACCGGAGCTGATGGGCTACAGTGAGCTGACG  
GCCATTGCCCGAACTGTGCCATACAGCGTGCCACAGATGCCCTGCGTGAAGCCCTTCTG  
TCCTGGCTTGCGAAGGGTGAAAAAATTAATTATTCGCACAGGATAGCGACATTTTAAACG  
ACCATCGGATTCAGGCCTGACGTGGCTTCGGTGGATGACAGCCGTGAAAAATTCACCCCT  
GCGCAGAACATGATTTTTTCGCGTAAAAGTGCGCAACTGGCATCACGTCAGTCAGTGTA  
AATTCGCCGAAAATCCGCCCGTTTTTACTGAAAAAAGCCATGCATCGATAAGGTGCATGG  
CTTTGCATGCGTTTTTCTGCTCATTCTTCTGCAAACCGCGCCATTCCCAGCGCGGTCTGA  
GCGTGTGAGTGAACACTGCATTAACACCGCCCCGCAAAGCGGGCG

>NewGenomeName\_292

TCCTTCCCACCGAATTTACGTTAAAAATTTGTGTTTTTTTCAGTTAGATTTCAAATAAA  
AATTAATCTAACTTATTGAAGTAAAAGAGACTATTAATGCAACTGAATAGAGATCTTAAC  
TGTAATAATTTCAATCTTTTTTCATCATTTTTTCACTTAAAATAGATCATTGATAATAAGAA  
TAACAAGATAACCTAATGATTTTTAAATTGTTTTTAAATTTTCCGTGTGAAATATGAGAG  
TAATTGATTTTCAGTTAATTGACTGGCGGTTATCGCCATTGTTTTAAAGACAGGTTTTAAAG  
TAAAGATAAAAACACTAGATATTTATAACCGCCACTTTGTGCGCCAGTTGAATATTATTGGTG  
GGTCTGTAAGGATTCGAACCTTCGACCAACGGATTAAGTCCGCTGCTCTACCGACTGA  
GCTAACGACCCAATTAGATGATTTTTAAAGTGAATTTTAAACCTTTAGATTGGTATTTAA  
ATGGTGCCCGAAGCCAGACTTGAACCTGGCACGCCTCGAAAGGCCGAGGGATTTTAAATACC  
ATAGCTAAACCAGTATAAACAATAACTTATAGCAACATTAATTGCTTGCTCGTGCAAATA  
AGGTCATATAAAGGTAAATATAAGACAAAACCGCCAGCCAATCGCCAGTAAAATAGAGGG  
AAAAGTACAAAGGATTTTTTGAAAAATAATCCCTTTTTTACTGTGCAGGATTAGAAAGCG  
GGTTGAATTTGACCGCACTTTCTAAATGCGAAGGGGGCGAAGTGCGCATAACGCATCGTCA  
TTTCGATAGTTGAATGTCCGAGAATTTCTTTCAATACCAAAAATATTCCCACCGTTCATCA  
TAAAATGGCTGGCGAATGTATGGCGCAAACGTGGGTAAGTTGCCCTTTCGGCAATTCAA

TTTCGGCACGTA AAAACGGCATTCTCAAAGGATTCGTAAGCGTCATTGAATAATCTGCCAC  
GCTTTTTCGGTAGCATATCGAACAAATTCTTTACTGATCGGCACGGTCCTATTTTTCTTTG  
ATTTTGTATTTGTAAAGGTGATTTTATATGGCATAACTTGTGATTGGGTCAGCGTTTCCG  
CCTCACTCCAACGTGCACCAGTTGCCAAACAAATTCGCACAATCAAGCCCAAATCAGGGT  
TGCGGGAGTTATCGCACTCAGCCAATAAACGGTAAATATCCCGCTCATATAAAAATGCTA  
ATTCTGTTTCTCGTTCTTTAAATAAGCGCACACCATCGAGGGGATTCTCAGTCGTCCACT  
TACGTAATGATTTT CAGTTCGTTAAACACTGCTCGCAAGTAGGCGTGTT CACGGTTTACTG  
TGGCTTCTTTTCGGGGGATTGTTTTTATTTACCGAAAATTCCCCATCAAGGCGGGCGTTTGC  
GGTAGTCGGCAAAGATTTTAGCGTTAAATTCATTGGCAGGCGGATCGCCCAAGTTCGAGC  
ACAAGTTCTTTAGTTTGGCTAAACGAGCCTTACCGTCTGACAACGTTTACCGTGCAAAT  
CAAACCATTCCTGCACATAAAA ACTTAATGCGGGCAAGTCGCTTGATTCCAAA ACTTGTA  
CAGAATCAACCGCACTTGTGCTTTGTTCTTTGGCTTGATTATAAAAACGTAGGGCATCGC  
CTTTGGTTAAA AACCATTTGCGTGATGCGTTGCCGTTACATAAACTTCTGCAAGCCATT  
TACCGTTTTT AGTGTCTTTACGAACTGCCATTTAGACCAACTACGTTACTTTTCCCTACA  
ACAAGTTCAAATAACTTAGTTGTATTTGGATATGTATTTTTATATCCATTATTAATTTAAA  
CTTACTAACTGATACCTTCCGACTTCATCATACTAGCATGTTTTTCTATTA AACTTGTT  
GCACTATTTATATCTTTTAATAAATAACCCAAAATGGTATCAATTTCTTGTTTATTAGAT  
TTATCAAACATATATAAAGTGGATAAACTATGTTCTATATCCCAAAAAATTTTTAATTGG  
ATTGCGTTATATTCTTTTATTT CATCAATAGACTGAAATTTTTTAGATGGAAGTAAGACG  
GCATGAGTGTCAA AATCAATGATATTTTAGCAACTTTGCTTTTTAAATCGGGGGTTTTTC  
TGCTTTTTTCCAAGACATTACCCCAACAGCTGTAAAACACATTATTATTAACGTACTTAAC  
GAACTAATCCAATCCGTA ACTTTAG AATCTAACCCCTCTAACCAAAGATTTCCAATCAGTA  
AAACCGACACCAACTAATAAGCCAATAATAAGTCCTAAAAGTAATCCTACGTAGATTTGC  
CAGTGTTCTTTTAATGCGTAAAATAGATTTTTTCATTTACGGTAAATCTTCCCACCATTA  
GGATATTTACAACGGCCCAAACGATTTAACGCCATTTTCCAACCTTTCCAAAAACCGTAT  
TTCTGCAAGGCTAAAATGGCGTAATTTGAACAGGTAGGCTCAAAGCGGCAAGCGTCACGA  
ATTTTTTGTGGAGCAAGCCGCTGATAGAGTTTAATCAATTTAATGCTTACGTTAATAAGC  
ATTTAAACTTCTTTTCTAAATGTAATCACTTTATAAGTGCGCATAGTTAGTTTACCACCT  
GATAACAACCAAGCTTTTTCTTCAGTTGAAAAATTATCAATACGCCAAAATTTCCAGCCG  
TTTTCAGCCCATTCATTTACCACATCTTGTA AATAGTCTGCAGCGGCTGTCGTGATGTTT  
TTACGATTGGCAATAATATTAGGTGGA ACTTGAACCATTTTATAAGTGTAAGCCATAATT  
AACTCCTTAGTGTGTTGAGGTATATTCTTTTAGTTCTTTAAGATCAGAAAACCGCTTGCC  
GTTAAATTTTTATTTTTCCGTTCAAGTGATATTCTTTA AATTTTTTATTTCTTCCGTTAGG  
CAGTTTCAAAGTGAGGACGTAATAGAACCCACATCATCGTCACCATCTAATTCTAGATT  
TACAAGTTCGCCAATCTGTTGTTTAGAATTGCCGTTACTGGTTATGTATTCAATTTCTAC  
AATATTAGAATTTGTGTGCGGTGTTGTTTTAGGTTTTGATAACTTGAAGAAAAAGCACAT  
TTACATCTTCTCCATCTTCAA AATCACCTTCCCACCACATCAATATCACTCAATTCACA  
TTCAA AACTGAATTTGCCGCGTCTACACGGATTTTCCCTGCAGGTAACACAGTGATATA  
ACGGATAAGATGGGAGTTTTTCGACGATGACGAAGTATTCGCCATCCACTAAATTGCCGTA  
ATCGCTAGTCGCAAAGTAGGTGTGATTGTCTTCATCAATACGAAACACTTTGTCATAACT  
TTCACGGCTGTCTAAATTCGGTAAGTAAGGCAA AAGAAAGGGTTTATTTTTCTACTATGAA  
AGATTTTCCGCTTTCTAGCTTTATTGTATGAAAATATTT CAGATCGTCTGAATTATCAA  
AATCGGCTCATTTCATAGGCCACATAATCCAATCTTGCGCCCGTTTCTGACACGCAGCG  
AATGACTAATTCAGCAGGAAAAA ACCGCGTTTAGCCCAGGTGCCAAAGGTACTGTGAGG  
CATTCCAAGATGTTTCGGCTAAC AATCTTCTATTTCGCAA AACCATAACGCTTCCATGATGCG  
AGAAATAACATCCTTGCCACCGATAAATCTTTCAATTGAGTAAATTGACCTTAAAATTTA  
TATTGACAGGGTCAAACGACCCAAGATATATTTAAAGGGTCAATTGACCCAGTCAAATAT  
ATTCCATTATTTACCAATACGGGAGTTTAAGCAATGAGTAAGCAA AATGCAATTTGTATA  
AATATACATATGGAGCAGCCTTACATGACAAGAGAAGAGTTCGCTAAAAAATTAGATGTA  
TCAACAAGGACAATTGATCGGTTAAGACAGCAAGGTGTTCTGAAGTGTATCAAGATGAAA  
AATGATGAAGGAGAAGAACTGAAAGAGGTTTAGTTTTAGTTGATTTGGTAGCGATTGCT  
GTACGCAATGCGAAAAACGCATTTCAAATATAAACCGCACAAAAGTGCGGTTAGTTTCCA  
AAAAAGATTTTAGTTATAAGGGGAAGACAATGACTAAATCATCATTCACGTTTTTCTTTT  
AAGAATATTGCGAGAAACAAATTTAACCAACGAAGAAATTC AAGAAAGATTCGCTATTC  
TTCAGTATCAGGCAGAAGTCGAGCGAGATACCACTCAAGATCATCAGCAGCTTTCGGCGA  
TTTTTGCGAAATGGCGTGAAA ACTGCCACGCAAACAAGCTAATAACGATGAGACA ACTT  
CCCAATATACGGGAGCAGAACATCAAGCAATTCGGGATTTGTTTGCTTCACTGAAGCAAT

CAGCGCGTGAAGCTCATTCTCTACATCATCAATCACATCAGAGTGACGTGCAAGTCCACG  
CAAAGGCAACCCATCACGCGTTCTTGAAGCCCCTGCTGTAAGTGAAGTTGATAAAGCTG  
TGCTTGCATATCTTGAAGCGTTTTTGCATCTGATCGTTCATCTTCTGAAATCCTTAAAT  
TAAGTAATCGTTTATTCAATTTAGGGCAAGCATACAACAAAACAGCTAAATAAAAAAGCG  
AGGGCGCGCAATGTATGTGTCTGAAAACGAAAGTGCGGTAGAAAAATGGCATCGTTTAA  
ACGGTGTGCCATGTGCGAAAGCAAGAAATAGCGAAGAAGCCTTGCATGAAATGGGCTTGA  
GTAAATATCCACTGAACGCGCTTTTAATCATCTTTCCGATGAGCAAAAAGGCATGTAA  
AAGCGTTAGCAGATATTGAACCTTTTGAAGATTACATCTCGCCCGATCTGACTGGCGATA  
AGTTATGGCATTACAACGAAAAAGGCATTGATAAATTAACCAAAGCATTTCACGCCATGT  
CAGCACTTCGCACGCCTTTTCCGCGCGCTTTAACCCGTCGTGATTTTTACAATATCGACC  
CACACACAAGGGGGAAATAATGGCAACGAAAAACCGAACCATTATCAAAAAATATGCTGA  
TCGCTGGCACAAGAAGCCTGTCATTTATACGCAAAATGGCTCAACGCAAAACGCCAAGG  
CGATGAAGAAGCCGCAAATTATTATTTACAGCAAATATATTACGGCTGGAGACAACCTGGAT  
CAACTACACCAAATTTGCCATTAAGGAAAACCTTATGCAAGAACACATTATTGATTTA  
TCTGAACGTTATGCCCTTAAGTTAAACGAAAACCGTTCATATATCCTGTACAAAATTGAA  
CTCAATGAAAACGGCACTTATCAGCGCAAAGGCGGCGCAGTATGTAAGGATTTACCTTCC  
TTGTTGGACAAGCTGATTTACTGTGAATTGATGAATGAGAAAGTAGAACTCTTGAAGAT  
ATGCGCAACGTGCTACACGCCATTACAGCGAAGTAACACGCATCGCCGAAATTCAGCC  
ACTTATGCACAGGCATAAACCTTTTTTACCCATATCTATTAATTTAATTCATACAAAAT  
AAATATTTATGACTAAATTTAATCTAGAGCAAGCATTACAAGGTGCGCCAGTCCGCTTAA  
ACAACGGTTTTAAAGCTTATATTTTTGCGGATGTGAGCTTGCTTGCTATTAATGAACCAT  
ACCCACTGATTGGCGGATATGCCTATTCGATCAGTTCATTTTACGACAATCAAGAACATC  
AACGATTTGAAGAATGCCGTTGGGCAAAAGACGGCAAATGTGATCGTTTAAAGCGCATTAG  
GGTCGATTGCTGGGATGTGGGAAGATTAGCTATGCAATCAATGTGGGAACAACAACGCAA  
CAACAACCTCACTGCCAAAATGCACACATGGCGGTGGTTGCCTGTGAACGTTATCAAGC  
CGCAGAAAATGGGCATAAATTTGACCGCACTTTACTGCCTTTTGATGAAAGCTGCTATAC  
GCCACTACAGCTAGAATTATTCGCCACAAACCCTGTTGATTTTGAAGTTTATCGAACAAA  
ACTTGAACCTCCCACGCCAACGTCAGCGTGAATATTTCCGTAACCTTTATCTTAAAGC  
CTATCGCTCTGTAAGACGATGGATCCATTGCTTTTTTACTCGGCAATAAACAACGCCG  
CCACGCGAACGATTATTTACGCGATATCTTAGATGTGCGTTTACAAAAGTCTTTTACA  
ATACAACGTGAACGTAGATTTTTTGAAGCGTTCATCAACACCCCAATGGTTGTTATC  
TGTCAAAGATGAAATGCAACAAGCCGTGCAGTTCTCCACCGTACCAACCCGTGAAGA  
TGCCAAACACTACAACGAATTACATTACAGCGGTTTTTCAATTTTTCGACTGTTAGGCACCCA  
ACAAAAGCAAAAACAATTACCTTTCTATTTAATCACCGAAAGCAAATTGAAAAAATGGC  
GTATGAAATGGCAACGGCATTATTCGATTTCAATGTGATTGCTCCCACTTTTTAAAAA  
TGGCATCGAAAAAGACAACGAGGGCGACATTCAAGGCTATTTCTATCAGCTCTATAAATG  
GTGTGGCGAAATCGCCTTTTCTGCAGGTTTCAAATCCCTCACTGGGAAAAAATAGAAA  
TGACAAACGCATCAAAGCCGAACATATTGATAGCACTTTAATTCGCTTGACGTGCGAAAA  
ATGGTGGTTTAAAGCAAATGCGAGACATACAAAACGTATGGTTCGAGCATATCGCTATTGC  
CTGTGGCGAGGTGCGCGCCAATGCCGCCAGTTATATCTCTAATCAAAGTTTCCAAGAATG  
GCAACTGCAACAACGCAAGAATCACGATTACTTGCGTGCGATGATTATTGAGAACATCGA  
CAACCCAGAAGAACAGGTCGAGCTTTTCGACATGTTCTTGAAATCATCTTCTAACCCAGC  
ATTACGCAGAAATGAAATGATGGTGCCTTGCCTGGTTTGGAAAGAGTGGGCAGAAGAAA  
CAACAATGAAGCCTTATTTTTAACCTCACTGCGCCATCATCATTCCACGCAGGAAACGG  
CAATAAGAAATGGTTGGGGGTGAATCCACGCGAGACACAAAATTATCTAAACAAGTGTG  
GCAACAGTTCCGTGCGTTATTGTGAAACGTAATATTAATTTTACGGTATGCGAGTGGC  
AGAGCCGCACAAAGACGGCACGCCACACTGGCATGCGCTAGCTTATGTGCCAGCAGAACA  
TAAAGAAGAAGTCATCCGCTTATTTAAACAAAAGCCCTAGAATTAGACGGCAATGAAA  
AGGCGCAGCAGAACACCGCTGCAAAGTGGAAAAATGCGACAAAACAAAAGGCAGCGCAAC  
GGCGTACATTGCCAAATACATTGCGAAAAATATTGACGGTTTTTGCCTTGCTGGCGAAGT  
GTCAGATGAAGACCCGACACTAAGCCTACACGACAATGCCTTGCCTGTTCTGTCATGGGC  
GAGCCGTTGGGGCATTTCGTCAGTTCCAATTCTACGGCGGTGCATCCATTTGTGTTTGGCG  
TGAATTGCGCCGATTAATCAGCGGTCAAGCCGATGATGAAATTATCAATAAAGCCCAAGC  
AGCCGCAGGCATCGCGAATGACTATGCGGCATATATGGAAATTCAGGTGGTGGCCTTGC  
TAAACGTGCTGATCAACCTATCAAGCTCGATTATGAAACTAACCTGCTAATAAATATGG  
CGAACAACGCAAAGCCATTATTGGTTTAGCGAATAGATTCAAGTCTAAAACAAGTCATTTC  
ACGCACCAAAAAATGGCAAATTAAAAAACGCCCAAGATTTTGCACAACGCACAGAATC

TATGGTTGAGCGTAGCTCAACCGCTAACAATAGCGCACGCAGTGCGCCTTGGACTTGTGT  
CAGTAACTGTAACCGCTCAATTCTTGAGCAAAAAGATCAAATTACTGACACAACCGATCTG  
CGCGCCCCTTAGCGCACAAAAGTTAGACTATTTATTCAAGTATAAACGGCTAACCATAGA  
TAAATATACAGCCTTAGAACTCACCGAAAACGATGTGCAGTTAGTGAAACGGAATCAAAA  
TATGATGACGTCCTTTCCCTGTGTCAAGAACTTTCAGAACTCAAAGATTTTCATAA  
AAACCAACGTATTCAATAGGAGAAAACGCAATGAATAAAAAGAAAACAGAAACAAATCAGC  
CGAATCTTAGCGGCAAAAACGTGCGGAAAAGTGCGGTCAAATTAATGCAGAATTACAAGAA  
ACTGGCGAATATTTAGAGGGACGCGTTCATCTATTAAGAGCGAACTATCTATTAACGGC  
ATTAATTTAAAAGCCTATGTTTTAGAACAAAGTGATTAATATCAAGCACCAAATCGTAACT  
GAACGATTCGGCAATGTATTGTTAGGGCTTGCCAGTGAATGATTGGTGGGATTATTGGG  
ATGTTTATGTGGGTGTTGTGTATTCTTTAGCTTAAGGATATTTATGGAAGAAATACAATT  
AATTGATGGTAAGCGATATCTGGTACTGGAGTGTGAATTTGCTAGAGAATGGCAAGTTGG  
GAGAGAAAAGTCGAACAACCTGTGACTTATAGCGAAGCAGAAGAAATCGCAGACCATTACAG  
AAAATATTTAAAATTCCACCTGAGCGAATCCTAATTGTGGAAGTACCTAATGTTATTAA  
ACGTAGAGATTGAAAGGAAAGAAAAATGGCAGATTTACAACAACCTTATTTAAAACATCGA  
ACAATGGGCAGAAGATCGCAATTTGGTTGAGGATTCTACACCGCAGAAACAATTCATTAA  
ATTAATGGAAGAATTTGGCGAGCTATGCAGTGGCGTAGCAAAAAATAAACCTGATGTAAT  
TAAGGATAGCATTGGGGATTGCTTTGTGGTGTGTTGATTTTGGCTAAGCAAATCATAT  
TGATAGCGTTTTAGAAAAAATTAGTGATCTAGATTCATCCTTCGAAAAAATTAGTGATCT  
AAATTCATTCCAACATGTTTTTGAATTAGGCGTTGAAGAAATTATCGTAGAAACAGTCGT  
TAGTCTTGGTATGCTCGCCAGTGAATTAATGGGCCCAACCTAGAAATGCCGCCACAAGT  
TGATGCTATATTTGGATGGCCTTGCTTATCACTTAAATTAATTAGCAGAAAATATAATTT  
AATGCTAACAGATTGCGTGCAAGCTGCTTTGGGATGAAATCAAAGACCGCAAAGGGCGTA  
TGATTGATAGTGTATTTGTTAAAGAATCAGACTTATAAGGCGGAAATGATGACTAAATCA  
AATACCAAAAAATCAGATAAAGACTTATGGGCTACACCGTGGTGGGTTTTCCATTATGCA  
GAACAATATTTCAACATAAAATTTGATTTAGATACATGTGCCATGGAACACAATACCAA  
GTGAAAAACTTTATCACCCAGAACAAAACACGCTAACAGCAGATTGGCAAGGGCGTTAC  
TGTTGGATGAATCCGCCTTATAGTAACCGTTGCCCTTTGTCTTACGTGCTATTTGCAA  
AGTGTGTTACATAACAAAACGGTGGTAATGTTACTTAATGTAGATGGTTCGACAAAATGG  
TTCGATATGTGTGTGCGTAATGCAAAAGAAATCGTGTATATCACCAATTCTCGTATTCCT  
TTCATCAATAACGAAACAGGCGAGGAAACAGACCAAAAACAACAACCGCAAATGCTGGTG  
CTATTTGAGCCAAAAGCACCTTACGGCAGTTTGAAATCGTCTTATGTGTGCTTGCATGAA  
ATGAAAGAAAAAGGGATGTTGCAATAATTTTTTAAAAAAAAGTAGTTATTATGCCTATAA  
AATAGTTGTTTTATTTTTTTAAGTGGGTATAATAACCACCATTGAAAGGCAAGAGGGAGA  
AACAGTGGATAGCAAAACAGCAATAAAAATGATAGAAGAGGACGGTTGGTATTTAGATAG  
AGTTAAAGGTAGTCATCATCAATACAAACATCCTACAAAAAAGGGAACGGTCACGATTCC  
CCACCAAGGAAAGACTTGGGGCATTAGAAAAAAGCATTAAAAACAAGCGGGGCTGTA  
AAGCCCCCTTATAAGAATAGGAGAAAAAATGTTATACCAATTTGTATCGAAAAAGTAAA  
TGATGGTTATGTGGTATCTGTGCCAGATGTGCCAGGCTGTTTTTCTGCTGGGGATACCTT  
ATCAGAAGCAATGTTAAACGCAAAAGAAGCAATCTCTTTTACATTGAAGGGATGTTAGA  
AGATGATGAAGAATTGCCTAAATCTAACCAATAGAACAATATATTAATCAGCCCGAATA  
TAAAGATTTTATTGTCAGTGTGTTGATGTAGATTTAACTCATTTAATGGGTAAGGCGGA  
AAAATTAATATTACGGTTCAGCGTTATTACTGCACCGCATTGATCAGTTTATTGCCAC  
TCATCCAGAATATAAGAATAGAAGTAACTTTTTGTCTCAACTAGCAACAAATAGATTACT  
TTCTGCATAATAAAAGCCGCTATTTCTAGCGGCTTTTTATTTCATCTAATATCTTCTTAA  
ATTAGTTTTTTCTTTTTCTGAAAGTTTTCTAAAACCTAGTTCAAGTAATTTATCTTTAGT  
TAATTTGCTACTTCGTGTTGTGTGGCTAAATTCATATTCATGACAAATCTGTGACCGCA  
CAGGGGGTTTTTACACGCACAATAATATCTTGTAATTCAGTGTGATTTCGTTTCAGATCT  
TTCGATAACTGATTTGAATTGCAAACAGTGCAGTAAATATCTGTTGTTCTTGCCATTTTC  
CCAAAGCCATCACAAAAATAACTGCAAATAATTATATCAATGAATGGCTTTTTGTACA  
GGATAAAAACAAAGATTTATTTTGCGAATTTTGTTCGCGGAACTTGATTTTTAATAAGT  
TTTTGATTTCTGGATCTTGATTTATTGTTTCTGCAATAATCTCTTGTAATGGCATTCACTT  
CATCATAGTGATACACTTCACGATATTTCAACGGATCGCCAAGTCCGCCTGTATTTGTGCG  
GAATAATCCCACTTAAACCTGCAGGAAAACGGTGTGCGGTTAAAACATCTTGTGCCGAAA  
TATTTTTAATGTTGGCAAATTCATCTTTTGTTCAGTATCGCCAATCGGAATCACTTTTA  
ACCGTTCAGGATGACCGCCAGCAATATTTACAACATAGAGCGGAAATTTCCACGCCTT  
TAGATTCGCTGATCTTTCTTGCTATCTCTTCTTCCATTTCTTCGGTTAAATCGGGATCTG

TGGAGTACAAAATAAAGCCCATGTGTGCCCGTTGCTGAAATAGCGACGGCGAAATACTG  
TCGCATCAGAATTTAGCAATGCCGATTGAATACCGCCTACATAATCGGGCGATCCGTA  
CTTGTTGCATAGGGTCGTAAAGTTTAATGAAGATAATATCTTTCGCATCATAGCGATA  
TTTCTTGTGCGGTATCATAAAGCGATTTTTTCATCAAATAGGAATAGCCGCCATCTTTGT  
GTACGCGCAAATAAAGGCTGGAAAGTGGAACATAACGTACTACTTGCCCAAACCCATTAC  
GCACTTTTAAAAGCCCAACATCCCCAACTGAATTAATTTAAACATAGTGCGCGCATT  
CCATTTTAGACAAGGCTTTACCGCCCTCATAGGTTGCACTTACCATATTTGCACGGCTAT  
GTAATATGCCACCGTGTGGGGCGTTTTGATGGGGTAATTTGGCTAGTGCATGGCGATTTA  
CTGGGGGCAAATAGCAATTGTAATTTTCATCAAAGCCTATGCCGACATAATCCAATGCGG  
GCGAGGCTGTGATCTCACTCAAGGAAAAAGTGCGGTCATTAATTGGGGCAATAACAATCC  
CTTTTTATTGTCTGTTTTTACATTAGTTTTTCAATTTAGTACGCTCCATCTGCGACGTTTG  
CGAGGTTTACTTAAGGATTTTTTATTAATGGCGTTACAAATGGCAAAGAATACATCA  
GCGTGTGCGTTTTGACGGTGCCTTCTGCCGTAATGTCATCGTATTGCCACTTTTGGTT  
GATTGGTGCTTAATCATTAAAAAGCTCGGTACAATATCTAATTCGCTTTCGCTCCACTCA  
ATTTGACCATGTTCAACCAAATCATGCACTTTCAGCACCATAACCGTCTTGCTTTCGGGG  
TTGTAAATAATCGCCGTGGCAGCACGTCGGGCAAATTTCTTCACTAATTCATAAACCCCA  
TAGCCACGCCCCGTGGCATCTATGCCTATGTAGGTCATATTGTATTTTTTCATAAAGGGCG  
CGAATTTGATTGGCTTGATAGACATAGGAAAGCCCATGCCATTGATAACGTGCAAGCATG  
CGATATTTTTCGCCTGGTAACGCAGGTGGAGCAATAATCACAAAACCTGCCCATCGCCA  
CTGTGTGCAGGGTCAAATCCGCCCCAGACTTCACGATCGCCAAAAGGGCGATCCGCTTT  
GGTTAAAATCTTCCATTTTCGCAATATCTACACCACATTTTAAAAGTTGTTTCACATTG  
AAAATTGAATCCGCATCATCAATCCAAATACACATATAAAGTTGATTGAAGGCATATTTG  
CTATAGCGTTGTTTTAGTTTTCAATGTTGAATAATTTGTCTGCACCGCCTTTTAGTGCA  
TCTTCAATCGTCACCACATAACGCCACTGACCATCGGGACAAAGTCGCCACCGTCAAGC  
AATTCTGCAAAGTTGGGAATGGCACGTTTTTGCCTTAGGGTCGCCATCTCGCCAGTTG  
TCGCCACTCCAAAAGAATAGGATTCATGAAATTTGGAAGAGGGCGTGCTGAAATAGGTC  
TCACGCCATTTTTCATGTGTTGCCATGGCTGATGCCACATCATCGAATCGCTGAAAGTCA  
CGAATCCACGCATATTCATCGCCGTACACATGGCCACTATCCCTTGTTGACGTATTTTTG  
TTGGTCGATAAAAAATGCAGTTCCGCGCCATTGCTTAAAATAATTGGGTTGCCAGTCAGC  
TCAACACCGAAATATTCCCTCGCCATCTTCACGATGTAATTTTTAAAGATTTCTGCTTGT  
CGTTACTAGCTGATAAGAATATTTGATTGTGCGCCGCTAAAATGTCATCTTCCAACGCT  
TCAAAAACCTGAAATAATAAGTTGCCCAATTTGGCGCGATTTTCAAGATATTGCGCACATCG  
TGGTGCTTGTAGAGCGGATGTGTTTTGATAATCAAATAACGAATCAATAAACGGCTGG  
CACATTTGGGGGTAACGTGGGAAATATCATTTTTAAACCCGTTTTTTCTTCTTGCGCTCA  
TCGCCGTCACCACTATCAGCAAAGGCGCGCTCATTGCCAGAAACGTCCGCAGAATTGACC  
GCACTTTTTGCTGTCACTTTAGCTACCGTTGCGGCACGTTGCTTTTTATACTGAATATCT  
TTATCGATCAGGGCTTCTAGTTCTTTTATTTCTGATCGCTTTTATTTTACGCTCTGTC  
AGCGTGATAATGCGTAACGCGATTAATTCTTCAATTCGCTTTCGCTGAGTAAATTGCGC  
CAGTTGATTTTTCTGCCAGTAATAAATCGGGCGTCTGCTATTTAAACCTAATTCTTCA  
GCAATCTTTTTCGGCGTGTATTTTTTAAATATAAAAACCTTTGCCGCATAAATCACTTCG  
TCATCATAACGGCTTGTTTTTCGCTTCTTAGTTTATGTTTCAGCCATCGTCTTTTAAATGC  
GCTTTAGTGTGTTTATGTTTCATGGCAAGTATTGTGGCAACAAAACAGCAAAAACCTTA  
ATGGCAAGATTTGGATATCTTCGGATATAGCACGTTATCCGCCTATATCCTACGATATCC  
AAATTTTGGCCCGTGATTTTGTCAAAAAGATCGGCAAAAATGGCCGCACTTACGCAAACA  
AAGCGAAAACGCAGGCATTTTAAAATGAATAAATCAAAAACCTTAAAACCGATTTTATTG  
CATTGCCACATCGGGCTACACCGTAGATGGTTCGTCAAATCACTGCCCAAGAATTGCACGA  
AATGGCAGAAACCTACGACCCAGAACACTACACCGCGAATTTATGGCCAGAACATCGCCG  
TTGGTTCAACATGGGGCAGGTCATTGAGCTAAAAGCCGAAGAAAATGAAAAAGGCGAAAC  
TCAACTTTTTGCCATCATCGCACCCAATAAAGAATTAATCGAATAACAACCGTGCAGGACA  
ATACTTATTCACCAGTATTGAAATTACCCCGAATTTCCGTAATAGCGGAAAAGCCTATTT  
ATCGGGCTTAGGTGTAACCGATTCCCCAGCATCCGTAGGTACTACAGAATTAATAATTCTT  
CAACGCTGAACAAAAGGCAGTGTGCGGTGAATTTATCAAAGTAGATTTTTCTGCAA  
AGAAGATGTTGAAGAAGAAAAGGCATTACGCACCTTAGCGAATGTTTTTAAAAGTTATT  
TTCAATCCTCCGCCAAACGGGAAGAACGAACCAAATCCCAATAACAACAATCATAAAGA  
GGACCATGCAATGAACGATAAACAGTTCGCGCAATTAATTGAGGCGGTGAAAGGTTTAGA  
TGCAAAAATTGACAACCATTTTTCCGCCAAAGTAGAAACCAAAGAACCAGAAAACAACC  
AGAAGAAAAGAAAGATGAACAACCGCAAAGTGTAACAGCAGAGCAGTTCAATCACTTTT



AATAACGGTTCAGGCGTTGGATAAAAAATTCAACGAATTAAGCCAAGAACAACACCAGT  
GCCAAGCGGTGTACCAACCGTTGAAAAAGAAAATGTTTATAGCTTAAACGGTTACAACAT  
CGACTTATCAAAAGGATTCTAAACAATGAATAAACAAGCGTATTACGCCCTAGCGGCAGC  
ATTAGCGAAACACTTTAATCAACCTCTTGATTGAGTGGTGGGAGAAAGTTTTGCACT  
TAAAGCACCTGAAGCAGCATTGTTAGGCGAAAAATATTCAGCAACGTTCTGATTTCTTGAA  
ACAAATCAATATGATTCAAGTAGCACATACGAAGGGTCAAAAATTATTTGGTGCAACAGA  
AAAAGGCGTACTGGTTCGTAACAACTGGCCGTAATCTGGCTAATCTTGATCATACTCA  
AAATGGCTTTGAATTAGCCGAAACGGACAGTGGCATTATTGTGCCATGGGCATTATTCGA  
TTCCTTCGCTATTTTCAAGGATCGCCTTGTGAGCTTTATAGCGAATATTTCCAAAACCA  
AGTTGCATTAGACATCTTGCAAATTGGTTGGAACGGTCAGAGCGTAGCAGATAATACAAC  
AAAAGCGGATTTATCCGATGTGAATAAAGGCTGGTTGAACTTTTACAAGAACAACGTGC  
AGCCAACCTTTATGACCGAATCTACAAAATCCTCAGGCAAAATTACCATTTTTGGTGATAA  
CGCCGATTACGCGAATCTTGATGATTTAGCCTTTGACTTAAAACAAGGCTTAGATTTCCG  
TCATCAAAACCGTAATGACTTAGTCTTCCTTGTGGTGCAGACTTAGTCAGCAAAGAAAC  
GAACTCATTAGCAAAAACATGGCTTAACCCCTACGAAAAAGCTGCATTAGGTTTACA  
TAACTTAATGGGCTCATTGGTGAATGAATGCCATTACCCACCAAACCTTCCCAGCACG  
TGCTGCAGCAGTGACAACCTTAAAAATTTAAGTGTGTACACCGAGGCTGAAAGTGTACG  
TCGCTCTTTACGTAACGATGAAGATAAAAAAGGTTTGGTGACATCTTACTACCGACAAGA  
AGGCTATGTTGTGGAAGATTTAGGTTTAAATGACTGCAATCGACCACACCAAAGTGAAATT  
AAACGGCGAAGTATAGGAATTAACAATAAATGGGAATGCGAGATTTTCAACGCCAAATGC  
AGGCACTAGCAGAAATTAATCAAGTATCAGAGAGCATTACACAACAAGTGCGGTTGCGA  
CTCACGGTAATGATTATGCCGTGCTTGAATCGCCTTACAAAATGATGTGAACGCAGTAC  
GCGCATTCTCGACACGTGCCGAAAAATTAGATTACAAGCGTGACCGCTTTTTGCCGAAGT  
GGTTGCCCTTTGTGAATGAATATTTAGATAAAGGGGCAATTTATCAGAATGATTACTTGG  
TTTATTGCATTGTGATTTGTTTGACATTGCTGATTTTGACCGAGCCTTGTCACTGGCTG  
AAAAAGCAATTGAGCAAAATCAATCTATGCCGCAAGGGTGGCAAACCACATTGCCAACT  
TTGTGCGCAGACCAAATTTACAACCTGGACCGATAAAACCGCCTCAGCAGGTCAATCCGTGG  
AGCCATATTTTTACAAACTTTTAAAAACGTGGCGACCCAGTGGAAAGTTGCACGAAATTG  
TCACGGCGAAGTGGCTCAAATTAGCGGGCGGCACTGCTTTTACGCAGTCCACAAGGCAAAG  
TACAAGCCAGTGGTATTGATGATGCCGAAACACTTGTGCTGGCTATCCAATTGTGTAACC  
GCGCTTTCCAACCTCAATCAGAAAGCGGGTGTAAAAAATATGATTGAGCGTTGTGTATGC  
GTTTAAACGCATTGGCAAAATCGGGCGATTACGACCAGAACCCTTCCCAAAGTGGCGG  
GCTTGAGTTTGGAAAAACAGCAAATTGATTTTGATCTTGTATTGAAAAACTCACTGCC  
GCCACTCCAAAACAGCGAGGAAGGCAATGTTTAAACGGCAGAACGCAAGATTACGACGAT  
ACCGTCATCACAATAACGGCTTTTGGTTCAGATATTTACGTGGAAGAATTTCAAAGCAA  
CGTGCCATTCCATTACAAATCCTGTTGAAATGGTAAAAGCAGCGTTAGTTGCGGCAATA  
CAAGGGGTGGATTTGGATTTAGCTGACGTAGCAGAAAGTTATCGTAAAAGTGCGGTCAAT  
TCTGTGACAGAAATTTCAAGCCCTCTGATTAATGACGAAAATTATGCCGAAACCCTTTAC  
AAAAAAGCGGTATTTGCCAGAGCGAAAGCGGAATTATTACCTGAATTTAACACCCTTTCA  
GGGCGTGAAATTCATCAAAACCGTGATTACGTACAGAACAAAAAAGCCTATTGGCAGAA  
GCAACCCACGCTATTTCGTACATTAATAAGGCAAAAAACGAGGTTTCAAGTATGGCTACTGTAA  
AGAAAATGCTATATCAGCAACTGACGGCGTTTTTGGTCACTAACTGCCGAAACGTTATC  
ACGGCAATTTTTACAGCTGGATTGAAGACGGCAAATTATTGAATGAAGGGGCGACAAGTGA  
CCGAAAACGGCATTGAAGTGTGCCACCTTTCCTATAACGGTGTATTTCACTTTGAGGCTT  
TGCCATTCAACGAAATTTCCCCGCTTATCTAATGGCGCATATTCAAGTGTGGGTAAACG  
AAAACGATCCAATGCGTGATGTATTGGATGAAAGTGAATCCCATTTGATTTAGACATTA  
TCGATGATAATACGACAGATTTGATTTTCACTATTGCTTTCCGTGAGCCATTGACGGCAA  
TGGAAGATAACGAGGGAGAATTAATAAATTGATGGTGTGAATTATCGTTTAGATGAAATCG  
AAGTTTTTACGGCCGAAGAAATTGACGTTGTGCGTAAGGGTTGAACATGAACATCCGAATG  
GGGATTGATAAAGAAGACTTAAAGAAGTTCTTGAAAGATCTTGAAATCATTAGTTTACCC  
GATAAGAAAAACGTTGAAATTTTAAATCCGCTCTTTGCAAATGATTAACGCCAAGCAGTG  
AAAAGCGCGCAAACCAACGTAACCCGATGGGTGGAAGTTGGAAGAAACGAAAAACGGT  
ACAGCAAAAATGCTACGCCGAATTGCAAAGTTAGCCAACAGTAAAGCCGAAAAAGCACAA  
GGCACATTGTTTTATAAACAACGAACGGGCGAAATTGCGCAAGAACCAAGAAGGA  
ATTCCGCACTTATTTAAAAAACGGAATTTACTGGCAAAAATAAAGGTGGTATTGGGGCA  
GACCCTTGTACCTTGCGCCAAGCAAAGAAATTAAGATTTAGGTTATACCGTGGCAAAC  
GGTAAAAACAACGCAAGGCGAAACGCCGCAAGCCGACATTAAGCGAAATCCGCAGC

ACCTTATCACGTGCGAAAGCCAGTTTGATTATTCGTAAACTGGAAGAAAAGAACGGTATG  
AATCCGAGTAGACATTTAACCCAATGGATAATTCCAACGGAAAAACGCTCATTCTTAGAT  
ACACGTGAAGAAGAAAACGCCAAGATTATTCTGGCGGAAATTCAAAAATATACTCAAAAA  
CAACAATAAGAGGACAGTAACGAATGTTCCCATCTGTACAAATTAACGCCCTTAATCAGT  
TAAGTGGCGAAACCAAGGAAATTGAACGCCACGCATTATTTGTTGGCGTAGGCACCACTA  
ATCAAGGAAAGTTATTGGCATTAAACGCCCGATTCTGATTTTGACAAAGTATTTGGCGAAA  
CCGATACCGACTTAAAAAAACAAGTGCGTGCGGCAATGCTTAATGCTGGGCAAAACTGGT  
TCGCACACGTGTATATCGCACAGAAGACGGTTACGACTTTGTCGAATGTGTGAAAAAAG  
CCAATCAAACCGCCTCTTTTGAATATTGTGTCAATACTAGATATTTAGGCGTAGATAAAG  
CAAGTATTGGCAAACCTGCAAGAATGCTATGCAGAACTACTTGCTAAATTCGGTCGTCGTA  
CCTTCTTTATCCAAGCTGTACAAGGTATTAATCATGATCAATCTGACGGTGAAACATGGG  
ATCAATATGTACAGAACTTACCACTTTGCAACAAACCATTGTCGCCGACCACGTTTGCT  
TAGTGCCTTTATTTGGCAATGAAACAGGGCGTATTGGCAGGGCGATTAGCAAATCGTG  
CCGTCACCGTGGCAGACAGCCCAGCACGGGTACAAACAGGGCGCGTTAGTGAGCCTAGGCA  
GTGCCAATAAACCCTGGATAAAGACGGCAATGAACTTACCCTTGCGCACTTAAAATCCC  
TTGAAACCGCGCGTTATTCTGTGCCGATGTGGTACCCCGATTATGACGGCTATTACCGGG  
CAGACGGTCGCACGTTAGATGTAGAAGGGGGCGATTATCAAGTGATTGAGAACCTGCGTG  
TAGTGGATAAAGTGGCGCGTAAAGTGCCTTTATTAGCGATTGGGAAAATTGCAGATCGTT  
CTTTAACTCCACAACATCAAGCACGGAATATCACAAAATTATTTCCGCAAACCGCTTC  
GTGATATGAGCAAATCCGCAACCATCAACGGCAAGGATTTCCAGGGCAATGTATGCCAC  
CGAAAGATGATGCCATCACGATTGTATGGCAAAGCAAAACCAAGGTAACCATTTACATCA  
AGTTCCGCCCTTACGATTGCCCGAAAGAGATTACGGCAAATATTTTCTTAGATTTAGACA  
GCTTAGGAGAGTAAACAATGGAACGTATTAGTGGAATGAGTTTTGACTTCTATTTATTCG  
GGTTGCCTATTCATGCAGAGTCTATCAGTTTATCCATTACAGATAATAGTACCGTTGTAC  
AAACACGTGGAATTCCAGATGGTTGGGTAAAGCGGTGATGTGGCAGCAGAAGGCGAAATTG  
AATTAGATGCAAAAAATTTCTCAAATTATCAGCTGCAGCCGCCGAGCAGGAAGTTATC  
GCAGTTTACCCGAAACGGATTTTACCTTCTTTGCACAACGTGGTGGGATTTCGCGACAAAG  
TGGAAACCTTTGGCAATAAGATTATTTAACGGATGTGTTAAATATCGATCCGAAGGGCG  
GGGCTAAATCCATGAAAAAACTAAAATATTTTGTGACAAGCCCAGATTTTGTACGTATTA  
ACGGGGTATCGTATTTATCTGATGAAGATACACGCGATCTTCTCGGCTAAGCGAATTTAG  
GGGCTGACTGTGCTGACGTATAACAATAATAACAAGCAAGTGCGGTCATGTTCTAAAT  
GTTTTAAGGAAATTTTATGAATAGCAAAATAGATAGCGCAATTCGTTTATTGGCTCACT  
CACTGCGCTTATTTACAGGATATAGCTTGCATGAATGGGCATCATTATTCGGTATTTTATT  
TGGTGCGGTTTTCAGTGTGGATCGCTTACCGAAAATACAAAGAAGACGTACAAGCACGCAA  
AGATGAATTAGCCTACAAAATGTTGGTAGCAAAAATTGAAGCAAAAAAATTAGGGATAGC  
AATAGATGAGTAAAAAATTTGGTGCATGATTTTATGTTACGCCGAGCTGTGCGAGCCG  
CTTTTTTTGCCAGCAGAAAGGCTTACCAACGCAACAACAAAATCAAGTTAGCCCAAAG  
CGGTGTCAATGATTGTGAATTTAGAAGGTTGCGTGCGTAATCCGTACAAATGCCCTGCTG  
ATGTGTGGACAAATGGGGTTGGAACACCCATAACGTAGATAAAACCAAGATTTTAAACCA  
TTGATGAAGTAGCAACCGATTTACGTCGAAATATCAAAGAAGCGGAAAATTGCATTAACA  
CCTATTTCAACGGCGAAAAGATGAATCAAGGGCAATATGACGCTATGGTGTCTTTAGCCT  
TTAACGTAGGCTGTGGCAACATCAAACCTATTACAGCAAAACCCAAGGTAAACGTGTGCG  
CAACCACGATTTATCGCGCAGCACAAAGCGGAAAACCTGGATATTAATGTGTAATCGTATTG  
AAGATTTTAACAAATCAGGCGGACGTGTGCTAAAAGGCTTACAAAACCGCAGAGCAAAAG  
AAAAGCCCTATGTTTGGGGGAATAATGGAATTTAAAGCCTTATTTATCGGTGTATTTT  
GATTGTGTTTTTAGGCTGTATTGGTTCCACCTTGCACTATAAAAAGCAAGCAGAAACCAC  
CGCACTTTTACTTAAACAAAGTGAACAAACCATCAAACAAAATAAAGTGATGTTGCAACG  
GTATGAAACACAAAATGCAAAATTGACTTCTCAACTCAACCAAGCAAACAAAAAAGCCGA  
ACAACGCAGCCAACAACCTAAAGGACGTGCTAAACAATGCAGAAAATAAAAAATTGGACTTA  
TGGCCGCGTGCCTAACGATGTTGCTGGCGTGCTCAACCACCGCACCCAAGCCAAATAATA  
TTCGGTTGATTTGCCACAAACCACCGAATGCAGAGCATTAAAGCGTGAATATTCGCACTA  
ACGGCGATTTAGCAGAGAGTTTAAATAAGGCGTTAGATCGCCTTGATATTTGCACTACAG  
CGTATGCCTCCATAAACAAGTGATAACAGATTTCAACAACCAAAAACCAAAAGGAAAACCT  
AAAATGGAAAAAACACAAGCGCAATCCTTGTTAGAAAAACTGACTGGAAACCTTAAAGA  
TTCCGTACATTAATGTTGCAGGCGTTGATTTTACCTTTATTCGAGATAACGCGGCTTA  
CGATCAAATGTTAAATGACATTGAAAGTAACAATAAAGTGACGCCAATCAAAGATTATTT  
GTTGGCGATTGTTGCGCGCGAACA AAAAGAGGCATTGCTTGAAATTATTCACGTGCCAAC

ACTGGCGGCACAGCTAGCAGCGAAAGTAAATGAAGTGTTTGTGCCAGAAATTCAAATTAC  
CGTAAAAAACTAACGGAGCGTGTGGCAAGTATCGAGCGCAACGGGTTATCACAAGCCATT  
GCGCTACGTATGCACTATTTACACACGCCGATAACAGCGACTACAATTTAGCGCGCGCA  
ATATGGTTACACAAACAGTATTTTGAACAACAGGCAAACGCCGTCGCAAGCGGTATTGCC  
AAAGTTTTTTAGGATTTTCATTATGTCAGCAGCACAAGGGCTTGAATATATCATCAGCTTA  
ACCGATCAGATTTACGACCCGCTTAAAGGGGTCATGAAGTCTATTGATGATTTGGGCAA  
CGTGGCGAAGCAGCAATGAAAAAAATCGGGCTGGGTGTGGCAGGTATTGTTGGTGCAGGC  
TTTGCCTTAAAAAGTGCCTAGATCCTGCCATTGAATTAATCGTGCCTTAGGCGAAGTT  
CACTCCCTTGGGGTGGCGATGATGCGTTAGAGAACTAAGCAAAACTGCCCTTAATTTT  
TCCAGTCAATACGGCGAAAGTGCAGTGGATTTTGTGCGATCTTCTTACGATATTCAATCA  
GCGATTGCAGGGCTAAATGGTAACGAATTAGCCGAATTTACCCAAACCTCAAATTTATTA  
GCCAAGGGCACAAAAGCCAGCGCAGCGACCATTACCAATTATATGGGCACCATGTACGGT  
ATTTTTGCTGAAGATGCTGCCAAACTAGGAAATGCAAATTGGGTAAACAAAATTGCAGGG  
CAGACTGCCCTTGGCGTGAAAATGTTTAAAACCTCAGGCGATGGGATGAGTGCGGCATTT  
ACCTCGTTAGGCGCAGCCGCAAAAAGCCGCAAAAATTGATGTGGCAGAGCAATTTGGCGTG  
TTAGGTAACCTACAAGCCACAATGAGCGGAAGCGAAGCAGGGACAAAATACAAAGCCTTT  
TTAGCTGGCGTGAGTGGTGCAGCAAAAAGAATTAGGCTTAAAGTTTTGTTGATACCAATGGC  
GATATGCTAGATATGGTAACCATTCTTAAACAAAATTAAGGTAATTTGGCGATACCTTA  
GATGTCGCACAAGCAGCAAAACTGAAAAAAGCCTTTGGCAGTGATCAAGCGGTTCGATTTA  
ATTAATTAATCTTGGCGAAAACGAAAGAATTAATAAACATCGCCGATATTGCAAAA  
GTCAGCGACACAAAAGCCTTGGCACAAATGGCTCGTTCAATGGTTGATCCTTGGTCTCGC  
CTTAGTCAAATTATAACGGGTGTCAAACAGCAATCGGGGGAGAAATATTGAAAAAACTT  
GATCCTATTATGCATAAGGTGGCAGATCTAGGACAAGAATTTATTGATTGGCTAAAAACT  
TATAAAAATATTGCACGTTGGATTGGTTATGCTGTGGGGGCATTGATAGGCTTTACAGGT  
TTAACTGCTGCATTGACTTTAATGAGTGGCATTATATCAGCTATTGGTGTGGCGTTCTCT  
TTTCTTGCAAGTCCTATTATGTTGGTTACTGCAGCAATTGTGGGATTGGGAATTTTTATT  
TATAAATTCGTTGATGAATTTATGCAATTTATTAGTGGATTTATCCAAGGTTTTAAAGCT  
GCGAGTGTATCTCTTGACCCATTATTTAATGCGTTTTCTTTAGTGTGGGGAGCATTGCAA  
AAAATCGGCGCAACTATTGGGCGTATTATTGGCTTATTTGGCGGTGCTTCTGATTCAGCT  
TATAGTTTTCAACAATTCGGTATTGATCTTGGTTATGCACTGGGCGTTGTGTTAACACG  
GTGCTTGTATGCAGTTGAATTGGTCGCACAGGCATTTAATTTTGTGTCAGATGTGTTTTCT  
ATTGTGGTGAATAGCATTATAGATGGTTGGCAAGCCGTGCTAACCCCTATGGGATAGTAGC  
GCACCGATTGATAGTTTTCTAAAAATTGGTGATGCATTAGGAAATATCTTTTTAAATGCT  
TTCCAAGGTATTGTGAATGCTTTTGTCAAATGCTGAATTTTATTATTGAAAAAGCAAAC  
TCATTACCTGGCATTAAATATTCCGTTAATTCCAGAGTGGAAGATAACCCTACCGCACAA  
GCATTAAGCCCCGCGCTAGCTACGGGGGTATCAGACGGTTCAAATTTTCAGTTTAAAGCGAT  
AGTTTACAACCACAATTAATTCGATGCCTCAAGGTTCTGTGACAAAACATTGACACAA  
AACCGCACAGAACAACGCACCGTAAATTATGGTGGTGTCACTATCAATAGTAACAACAGT  
GAAGAAATTTGGCAGAAATTGCGCAATAAAGAACAGTTAGCGGCAGGGTGATAAATGGAA  
AACTTTACCTTGATTTACTGATTACGGGCGAAGACATTACGCTAGATAGCGGCAATCAG  
CCGTTAATTTGCGATAACCGAATATCTATTGCGCAAGATATTAACACGCCATTTTAGAA  
AGTGGATTGGCGACACAACCTTATCGCAGAGCGTTCGCGCATTTTACGTCGCGATATTATT  
TTACAAATGGTGTATTATTGGTTGAAGAAGATGTGCGCTTGATTCCAGGTAAGTTCCATT  
AGCGAAGAACGTTTAGGGCAGTTATTTATTACCGCTGAAACTTATGAATTTGGGCGACTT  
GATGAATTTGGAGTTACGTTTAAATGAGTGAAAATTTTAAACAAATGTTAGCTGAAAGCGG  
ATTGCCACAGAAGAAACGCAAAATCCGACAAGAATTTGAACGCTTAACTGCAGAAGAAGG  
ATTGATTACTAATAACAAGCCGAATGAGCCATTCTGGCGATTAATCACTGCCATTGCGGT  
TAAGCCTGTGAAGTGGCTGACAGATCATTTAATTGCTGAAATTTCTGCCGAATTTATTTGT  
AAAAACAGCAAAAGATAGTTGGTTACAAATTCAAGCCTGGGCAGTGGGCTTAGATTTTAA  
AGCCGCAACAAAAGCAGAAGGTGTCGTGCATTTTACAAAAGAAAGCGATGTAACCGATCT  
CACAATTAAGCGGGCACAGTGATTCAGACAGAGCGTATTAATGATGTGATTTTCCGTTT  
GATTGTCACGCAAGAAACCATTATTCCTAAAGGTGTGTTGCGTGCGCCTGTGCCAGTAAT  
CGCAGAGCAGGCTGGCGCAAATTTCAATTTGGCTGCAGGTTATTACCGTATTTTGCCAGA  
ATCTATCGCAGGGGTAAAGTGCAGTAGAAAATTTAGAAGATTGGCTAACATCGCCAGGTGC  
TGACAGAGAACTAACGACGAATTACGAGAACGTTATCGCACGCAATTTTCGAGTGTGG  
GCAACACCATATTGACAGTGTTTACAAAGGCATGATTGCGAAAGTCGCCGCTTATCGGT  
GGACAGAATTTATTTTAAACACGATGCACCACGTGGGCCAGGTACAGCAAACGCTTATTT

GTTATTGGATACGGGTGTAACAGTCAGCCGTTTATTGATAAAGTCAATCGCTATGTACG  
TGACGAGGGTTTTTCATGGACACGGTGACGATTTAATTTGCTACGCCATGCCAGAACTAA  
ACACAATTTAACGTGCGCCATTTACTTCCAGCCATCTATTTTTGTTCGGCGATGTGCGTAA  
ACAAGAAATCGTGCAACAAGTGGAAAATATGATCCGCTGCGCATTTCGCGAAAATAATAA  
TTATGGCGTAACAAGGACTTACCCTTTTACCGTTTTAGTTGGTTCGAAATTGGGCGAGGAA  
ATTCACGACAACATCAGCGAAATTGCATCTATCGTATGGGGGCAAATCGACATTCAAAGC  
GAGTTATCTATTCCACGCATTACAGCAATTATCCGTCACAGTCCAAAAGTAAGGGGCAAAA  
ATGAAAATAAAAATTGCCCTTTTGGATGGATAAAGGCGAATTAAGCAAAATCGCTGTGCTA  
TTCGGAAAATGGTGGGATTATGTGTTAAGTGCGGTCAAATTTCCCTTCAATATTTTAGAT  
GAAGAACACTGCAGTGAACGCATTTTAAATTTAATCGCCTATCAACGCGACGTAGAACGA  
TTTGAGGGAGAGCCGTTAGAGCTCTTCCGCAAGCGTGTGAAATATGCCTTTTTAAATGCG  
AAAGATGCGGGCAGTAAAGCGGGCTTTATTCGAATTTTTGAACGCTTAGGCATTGGCTAC  
GTAGAAATTGAAGAACGTTTTGACAGAGAAAATTGGGATGTTATCAAAATTCGAATCAGT  
GATTCACAATTAGCAAAGAAAACAGAATTACTCAATTTAATCATTTCGAAAATATGGCCGC  
ACTTGTTCGGCGTTATACCTTTGAAGTGATCACTAAAGAACTGTGAGTATTTATCACGGC  
GAATTTAACCATGATCACCAAAGTTTTTATGTGAAAGTAAACTGATAATAACAACAATAA  
TAAGAGGTTTATTTATGGCTAGTTTAATTACGCCACAATTTGAACGCTACGTTGCAGAAC  
AAACTATTGCACGTGGCACAGTACAGTTTGATGAATTTATTTTCGCCAATATTCCAGGTT  
TAAATGAGAACAATCTTACTCAACATCTTACGATCCCCACATCCGCACAAATTGTACATC  
GCCAAGCCGTATCGCAAAGTGGTGTGATTAATGAAAATGCCGTTGTGTATTCTGTGACGA  
TTGGTACTGAAGTAGGCGATTTTGATTTCAATTTTATTGGTTTGATTAATCGTTCTAAAA  
ATCTTTTAGCTGTTGCAGTGCAAACGGATACAGTGAAAAAAATCCGAAATAAAAATGCTG  
TGCAAGGCAACAGTATTACGCGCAATATGCTTTTAGAATTTAGTGGCGCAAAGCTCTAA  
CGGGCATTAAATGTCAATGCGAACACTTGGCAAATTTGATTTTACTGTGCGACTACATGGAC  
TTGATGAAAAAATTCGTTTAAACCAATCGTGATCTGTATGGCAGAGCAGTATTTTTCGATG  
ATAGTTTTCTGGTTAAACGTAAAACAGGCAATCAATTTACGATTCAACCAGGCAATGCTT  
ATGTTGAAGGCGTTCGTATGGATTTAGGCACAGAGCATCATCTTACTGCTAATAGCTTGC  
CTTGTCTATTTATGCGGATGTGGTGCATCATTGCACCGTAACGGGCGAATATCAAACCG  
AAATTAAGTATCTCACGCAATCAAAGCGGATTATGTAGATACTGCAAACCGCCAACATT  
ATGTACAAATTCTGGCGGATATTGACAGCCAAGGCAATGTGACAGATCGTCGCTTGCTTT  
CGCCGTTTTGGGGTATGAATCCGCTCACATTAGATGACACAACCGAAAACACTAAAGATA  
AACTGGGTCATACGCACAAATTACCGATTGCCAGCATCAAGAAACGAGGCATCACGAAAC  
TAAGCTCCGCCACTAACAGCGACAGCGAAACCCAAGCGGCAACCTCAAAGCGGTTAAAA  
CCGCCTATGACAAAGCAGTAGAAGTCAAACACTACGGCGGAGAGCAAAGTAGGATTAAGGG  
GCAATGAATCGATTCAAGGTACCAAAGTTTTGAATCTAAAATCATTGGGTTTTCGTGGCA  
TTGGGGTGGCTGATTTCGCAAATTTATGCAAATGCTAATCACCTCTTAAATATGGGGGCAA  
ATGATGGCGACGGCTGGATAGAGTATAAAAAAAGTAACCGAGTTATCGGCACCATTTCGTA  
TTCGGGCAAATGGGGAATTGTCATATAACAATCAAAAAATCTATCACGCTGGGGCAAAC  
CGAATTTAATACGGATATTGAAGGCAAGCCTAATACACTTGCTGGCTATGGTATTGGAA  
ATTTCAAAGTAGAACAAGGACAAGGCGATGCCAATGGCTATAAAACCGATGGCAATTATT  
ACTTAGCAAGCGGTCAAATCTACCCGAAAATGGGGAATGGCATATTGAAGTAGTTAGCG  
GTGGAGCAACGAATGCGGTGCGTCAAATTGCACGTAAAGCAAATGACAACAAAATCAAAA  
CACGCTTTTTTAAATGGCTCAAATTTGGTTCAGAATGGAAAGATGCAGGCGGCGACGGCCTGC  
CTATTGGTTCCGTAGTGTCAATTTCCCGTGCGGTAACCAATCCCGTTGGTTTTTTAAAAG  
CCAATGGTACGACATTTAACCAACAAACCTTCCCTGATTTATACCGCACTTTGGGCGACA  
GCAACCAACTTCTGATTTAACCCGTAGTGATGTGGGGATGACAGCTATTTTGCCGTGG  
ATAATATCCCTTCTGGGTGGATTGCCTTTGATAGCATTTCGCTCAACAGTCACACAGCAA  
ATTACCCAGAGTTATATCAATATCTTGTGATAAATATAGCTCTATTTCAAATGTACCAC  
TTGCGGAAGACCGATTTATTAGAAATACAGGGAATGGGTTAAATATCGGTCAGACACAAA  
GTGACGAGATTA AAAAGCACGTTACAGAGTGAGAACACACTGGGCTGATTCATCTGATA  
GTAGTATTTTTTATGACAAAACGAAAACACTGTTATAGATTACGATTACGCACTGCAACTA  
CAACCGATGATAATCTCAGTGATAATGGATTTATGCATCCGCTTTTAGATACCCCGATGG  
CAACAGGTGGAGATGAAACTCGCCCTAAATCGCTTATTCTCAAACCTTGTATAAAAAGCAA  
AAAACACATTTGATGACGTGCAATTTGGGTTAAAGCATTCCGGTGTGTGTTGAAAATGTTG  
GGGCTTTAGATGCGGGTACACTTGCACAAAATATGCAAGCGTTATCTGAGAGTGTGGAC  
AAAAAATAAAAAGAAAATAAACAATCTACTTTACTAGAAATAAACAATGCAAAAAGCTGATA  
TAAATCAGAAATTTTTACAGGTGCAAGAGAGTTTATCTCAAATTA AAAACAGTGTGGCAAG

GTAATGTAAGTTCTGGGCGAATTAATATATCAGAGAAGTGCTTCGGTAAAACGTTAATTT  
TATATCTTCAATCATCAGAAAGTCATAGGCTTGATGATAATAACAATATTGAACCCGTCA  
GTTTTGAAGTAGGGGCAGAGATTGAAGGTAAAAGTGGCGGTGGAGTTTATTTGTCTGCTA  
CTCATGACGTAACCTCCACACTATTCTTCTGGTGGAAAGTCGTTTATATGGTGTAGGGGTCA  
AGAAATTCGCTGTGTATGTTGGTAGAGACGGTACAACAATAGAGATTGAAGACCTTTCTA  
ATTATTTTGTAAAACGTATCGATATCCGATAAAGGAGCGTTAAATGAAAGTCTATTTTTT  
AAAAGAAAATTTGAATAGTTATCAAATTTTCCCTATTCCGCAAAACTTAAATGATTTTTGT  
GGAAATGGAAGTAGAAAACGAATCAGAGCTTGAGACTAAACAACCTTATTAATTTTTAAAAG  
TCAATACATTCTAGTTGATAGACAACCAACAGAATTACACATATGGAATGGAAATAGCTG  
GGTATTGATGAGGAGAAGCAAACCTGAAGTTAAGCGTGAACCTCATTA AAAAGACTAGTTGA  
TAGCATTGATGATACAGCAGCTAGTATTAGTGCGAAGTGGACGCGTTTTTCCGAGGAATA  
CAAAGAACGTGAATCTGCAGCTCTGGCATTAAAGAAGCGAATTTTACTGGCGAAGTAAG  
CATCTATATATCAAGTTTGGCAACTGTGCGAGGACTTGATAATAAATCAGCAACATTGCT  
AATTTTAAAACAGGCTGAAGGATTACGAACACTGCAAGAACAACCTCGCGGGCGCAGCGTAT  
GCGTAAGTATGAGCTCAAGCACGAAGAATTGAGTGAAGAAGAATTACAGCAAATTCATAA  
TGACATTATCAGAAAAATGAAAGCATTAGCAGAGGTGCAACAATGACGGAAGGTTTTAAA  
ACTAATGAATTTTAGGTGATGTTAATATGTGGAAACAACAAAACTAAAACCTATCCCA  
CAGGCAAAAACAACATTACAAAACGCACAAAAGGGGATTCTTTCCCCTTTTTCGCTATCT  
GTAAGTGGCACTAAATTAGGCGTGCATAATTGGTCGCACGGCATCAAAGAAAAATCAAAC  
CATTATTTGTCCGAGAAAATGCCGTGAAAGCACTAGCGGCAAAGTTGGTTGATTATGCC  
GATCCGAATCGCCCTAAAGGTGTGCAGGATGTGCTGGTCATTATGGTAACAAGTAGCAAT  
ATTGATCAGTTTATTGCAGAGTTGAAAAAGTGCAGAGAGCTATTGCCAGAGCCAACATTT  
AAGCAAGCGCTAGACTATGCGAAATCAAGTAAAGATTTACAAGAAACAAAAATGATAAAA  
ACGCCAACCATGGCAAGTCCATCATTTTCCAATAGTGCCGATATTACGCCAGGTTCCGCC  
CGCACGATGCAAAGTATTTTACGCAATGCGACATCTGCAGCGGTTGCGGAGCAAACCTAAA  
GATCCGATGGCGATGATTGAGGCGTTAAAGGCGGCTAAAAAAGAACGCGATAAAGCCAAT  
AATGAAAAAGTCGAAAAAATGTTGAATACATCGGCGAATGTATATGCTTTTGTGTTTCA  
GATTATCTTGAAATCGCAGAAAGTAAAATGAAAGTGAATGTGCCGAAATCCAGTAATGTA  
TTTACCGCTTGCATGTTTATTGGCTCAGATTTAACCAATATTAGAGGAATGTTGCAA  
CATGCAGAAACGTAATCCCAGTGTACAACCTGCACTAAATGGCACGCCAATTTATTTAAA  
CAATATTTTAAATGTCGGTTTCGGTCAAACGTGAAGAAAAAGACATGAGCGGTCAAAAATC  
AAGTACCAAAAAATCAGATAAAGGCGTAAAAGCCAAAGAGTTAAGCGTAACGGGGTTTAT  
TCCATACAACAGGAAAGAGTGGCTGACGCAGCTTTTCAATTTAGCTGAAGCAGAAACGGG  
CAAAGGCGAGCAAACA AAAATATCGGGTATCTTGTACTGTGGCTGAAGCCGTGAATATGCG  
CGAAGTGCAATTTAGTGGAGAGGTATCCGCAACTGAGCAAAATGGGCAGTTGGGGTGGTC  
GATTTCAATTTAGATTGCGTGAAGTCAATCCGTTGCCGAGAAAAAAGACCAGCGCAAGAA  
AAAACCAAAGGTAAAACGCAAGGTGAGAACGCGCCAGTAGCAAAAAGTGCGGGTGAAAA  
TTCGGGGAAATTAGAAGAACAGAAAGACGAAAGAAAAGGAATCGCAAAAAGATATTGATGA  
TTTTTTTCGGAGGTATTGACGGATGAAAATAATTA AAAACGTGCCTTATTGACGGCGAAGAA  
TTAGA ACTTGCCGATGAAATGATTATTTTGGAACTCAATAACTGGGCGCGGATTTGTG  
ACCGTGCGCACAGAAAAAGACTGTATTGGCAAAAAGTGCGGTCTTTGAGATGGGAGAATAC  
GATCACTATTACAAATGGTTTGACGGTATTGTTGAGCGTGAACAAAGTGCAGAAAACGGC  
TATAAAAAATTATTTATTCGCGAAAAAGTGGCTGTGTTTGA AAAAGCCTTTAAACTGTTCT  
CACAGACACATAACTTTGCGTGATTTGTGTGCTTGGATAACAAGCCAAACAAAAATCCCC  
GTAAAGGTGCCGCAAGCAGATTATGCGGATACGCCGATTTGCTTGTACTCACACGGC  
AGCGGTTATCAGCTTTTAGCCAATATTGGGCGACAATATCAAATAGCAGATTATATGTGG  
CAACAATCGCCAGACGGTTCTTTGTTTGGTTTCGCATAAAGATTACGCTGGGCAGGT  
AAGAATATTGAGTTTGACGAAAGCATGACATTAACAAGCGGCAGCAATGATATGACCATT  
CCGATTACTGCTGCTATTCGACCAGGTGCGATTATCAATGGAAATAAAAATTCAGAAAGTA  
GAATTGTCTGGCGATGATTATGTGCTTTTCGCGGGAAAAATTTAGGCAAAGATGGCAAGCCA  
GAACAAAAAAGCCCAGAACGCCGCCAAATGGAAAAAACATTCCCCGAACTGGCTGGCGGT  
TATCATTGCGGAAGTATGCTAAAGTTGTTGGTATAGCAGATCCCTCAAGCGGTGGCGAT  
ATTTCCGATCCGTTCCGACCAAAATATGCTGTGCGAGTTGCAACTACTGGACGAAAACGGA  
AACGAGGATAAACTGTGCCAGTTTATCCAGCCGCGCCTTTGCCTGTAACAAGTACAGGT  
TCACAAGGCGGAGATTTTGTCTTTTCCCTGAAGTGGGTACAATGGTTGAAGTAGGTTTTGCT  
TATGGGCGAAGCGATCAGCCTTTTGTACGCACTATGTTAGCACAAGGAAAAACAGTACCG  
AGTGTGACCTGGAGAACAACCTCAAGCAACAACGCCAGAAAGTGTGTTGAACGCACCGAT

GCAGCAGGCAATAAGATTCGCGAAACCGATCAGAAGATTACAGATAAATCCTTTGAACGA  
CACATCGAAACAGATAGTGAAGTAAAACAAATCGGCACGTCAAATGTGGCGATTGATTCT  
GATAAAACAGAACTATTGGCGGAAATAAACTGTTAGCGTGTGGGCAGTATCAATGAC  
ATGACAGCAAGTAATCGAACTGTGGGAACGGGTGGCACGCTACAAGAAAAAATAGTCGGA  
TTGGCTCAACGTGTTTCAGACGAAAAGAATAAGTTTGTGGCGCCGCTAAGTTATATGGGT  
ACTGAAGCCCAAACATATTTAGACTTTTGGAAAGATACCATTCAACTATTAGGCCGAAGTT  
GCAAGCACCTTGGCAACGCATACGCACAGAGGTTACCTCCGCCAGATCAAGCAAGCACA  
TTTAACCAGCAGGCAAACAAAGCAAAAACAATCAAAGGCAAACCTCACGCCTATCATTGAG  
TAACAGTCGTAATTCACATCAAACCAAAGCCGCACAATGTTGCGGCTTTTCTTTATGTTT  
CCGACATGTATGTCGGAGACATTAACCACGGAAAATCTAAGTTATTGTTATAACAAATAA  
ATCTACGTAATAAGCAATATAAAACAATTCCACGGAAATTTTTCACGTAAAAACACAAGG  
CACGGAAAATCCACT

>NewGenomeName\_293

TGTATTGATTCACTTGAAGTACGAAAAAACCGGGAGGACATTGGATTATTCGGGATCTG  
ATGGGATTAGATTTGGTGGGGCTTGAAGCCTGTAGTGCAAATTTTAGTCGTTAATCAAT  
GAAACGCGAAAGATAGTAAAAAATTGCTTTTGTTCATTGAAAATACGAAAAACAAAAAC  
ACTGCAAATCATTTCATAACAGCTTCAAAAAACGTTCAAACCGATAACAACCAAGCTG  
TCACCAAATGACTCATATCACAATCAGCTTATGCCGTTTAGGTATGTTACATGTGTGAT  
TATGTGAGGTGAAGTATGTTTTAGCTGGTTCATGGTTGTTATACGGCTTTTTTTACCTCC  
TGTGGTTCCTGTGAAGGTAACAACACTTTCCTGTTTATGAATCCATACTTTGACAAA  
ATCTCTTTGCGTTTTTCTTCAGGTAATGCATCTAGCATCAACGCTCTGAATACTTTGC  
TGTGAAAATCCTATAAAGCTGTAAAGTTTCTGTTTATTAAATACAAGAGGCATTAACGCC  
AACAAACCCCTTTACTTAAAAGTTTCAGTGCCTTGCCTGCTTCATCTGGTTCAGCTCT  
TCAATCATATTGATTAAGGTTGTGGTTAATTTGTTTATCAGTTCCGAAGAATCCTGTTTC  
TCATTGGCTTGAGCACCAGTATCCGGTGTGGATAACCCCAAGTGCGCAATAACTTGCTCT  
CGTTCCTTTGGTGGGCATCGACATCACATCGTATTCAACAGCTTTCCCCCCTTGACACCT  
TCCTTTTTTTGCTTCGTCCAGCCTTGAACATTTGCTCGATAGTGAACACCAGCAACAGAT  
CCAGGCATACCATCAGCAGCCATAATTTCTTGCGGCGAACACCAAATTGACTTTTCAGTA  
TTATTCTTTCTATAAAGTTACTTTTCAAATTTAAACTCCTTATTTATCAACGCGTTAA  
TCAGTAATCAAAGGAATTTACCAAAAAGCAGCTTTACAAAAGCTTTTTCAGTAATTATCT  
TTTTAGTAAGCTAGCTAAGTTTTTACACTTAGTTAAATTGCTAACTTTATAGATTACAAA  
ACTTAGGAGGGTTTTTAAATGTGTTCCAACGAAAAGGCCCGTGATTGGCATCGTGCGGAT  
GTGATTGCGGGACTTAAGAAAAGAAAGCTCTCTTTATCAGCTCTTTCCCGGCAGTTTGGT  
TATGCGCCAACACTACATTAGCTAATGCGCTAGAACGACACTGGCCAAAGGGTGAGCAGATT  
ATTGCTAACGCCTTAGAACTAAACCGGAAGTAATCTGGCCTAGCCGATATCAAGCAGGT  
GAATAACATGGAACCTTTGGGTATCACCGAAAGAGTGTGCGAATCTTCTGGTTTGCCGAA  
AACATCGGCTGGTGTGATTTATGTTGCTAAAAGCAAGGATGGCAAACCGCACTAGAGC  
AGGTGTCAAAGGTGGTAAAGCAATTGAATACAATGCGAACTCTTACCTGTTGAAGCGAA  
AGCGGCGTTATTGCTGAGACAAGGAGAGATTGAAACAAGCCTGGGGTATTTTGAAATCGC  
CCGCCCCACGCTGGAAGCCCATGATTATGATCGTGAGGCACTGTGGAGCAAATGGGATAA  
CGCCAGCGATTCCAGCGCAGACTTGCTGAAAAATGGTTGCCTGCGGTTTACGGCTGCAGA  
CGAAATGCTGAACCAGGGGATTTCAACGAAAACGGCTTTTGGCACCCTTGCAGGGCATT  
CCAGGTACAGCGCATCCACTTTGCGGGACAAGTATTACCAGGTACAGAAGTTTGCGAAGCC  
TGACTGGGCGGCTGCACTTGTGATGGACGTGGAGCATCCCGTCGCAATGTTCAAAAAG  
TGAATTTGACGAGGATGCCTGGCAGTTTCTGATTGCAGATTATCTGCGACCGGAAAAACC  
CGTTTCCGCAAATGTTATGAGCGTCTGGAACCTGGCAGCCCGCGAGCATGGCTGGAGTAT  
TCCCTCCCGTGCCACGGCCTTTGCGCGGATTCAGCAACTGGACGAGGCAATGGTTGTTGC  
CTGTCGTGAAGGTGAACATGCACTGATGCATCTGATACCGGCACAGCAGCGAACTGTGGA  
ACACCTGGACGCCATGCAGTGGATCAACGGCGACGGTTATCTGCATAACGTCTTTGTACG  
CTGGTTTAAACGGTGTGATGTCGTCGAAACATGGTTCTGGCAGGATGTGAAAACCCG  
AAAAATTCTGGGCTGGCGCTGCGATGTGAGCGAGAACATTGATTCAATTCGCCTCTCGTT  
CATGGATGTTGTGACTCGCTACGGTATCCCGGAGGATTTTACATCACCATTGATAACAC  
CCGTGGTGTGCGAATAAATGGCTGACGGGAGGCGCGCCCAATCGCTACCGCTTTAAGGT  
AAAAGAGGACGATCCAAAAGGACTGTTTTACTGATGGGGGCGAAAATGCACTGGACAAG  
CGTTGTTGCCGGTAAAGGCTGGGGCCAGGCAAACCTGTTGAACGTGCTTTCGGTGTGG  
TGGGCTTGAGGAATACGTTGATAAGCATCCGGCACTGGCTGGCGCATATACGGGGCCAAA  
TCCGCAGGCAAACCTGATAACTATGGCGACCGCGCTGTTGATGCAGAGCTGTTTCTGAA

AACCCTTGCCGAAGGTGTGGCGATGTTCAATGCCAGAACAGGCCGTGAAACAGAAATGTG  
CGGGGGCAAACCTCTCGTTTGTATGATGTTTTTCGAGCGTGAATACGCCAGAACGATTGTGCG  
TAAGCCAACCGAAGAACAACAAAACGGATGCTGTTACTGCCTGCCGAGGCGGTGAACGTTTC  
ACGCAAAGGCGAGTTTACGCTTAAAGTTGGCGGCTCCCTTAAAGGCGCGAAAAACGTTTA  
TTACAACATGGCATTAAATGAATGCCGGCGTGAAAAAAGTTGTGGTCAGGTTTGTATCCGCA  
GCAGCTACACAGCACGGTTTATTGCTACACCCTGGACGGTCCGTTTATCTGTGAAGCGGA  
ATGTCTGGCACCTGTTGCATTTAATGATGCTGCGGCAGGCCGTGAATATCGCCGCCGCCA  
GAAACAACCTGAAATCTGCGACGAAAGCAGCCATTAAGGCGCAGAAACAAATGGACGCGCT  
GGAAGTTGCTGAACTGCTGCCGAGATAGCCGAACCAGCAGCACCAGAATCACGAATTGT  
TGGTATTTTCCGGCCTTCCGGTAATACGGAACGGGTGAAGAATCAGGAGCGTGATGATGA  
ATACGAAACTGAGCGTGATGAATATCTGAATCATTCGCTGGATATTCTGGAACAGAACAG  
ACGTAAAAAAGCCATTTAATTAACGTTTAAACAAAATTTAATTACGAGGTTATTCAGATG  
AATATTTCCGATATTCGCGCAGGACTGCGCACGCTTGTAGAAAATGAAGAAACCACCTTT  
AAACAATTTGCTCTTGAGAGCGGGCTTTCTACCGGAACTATCAGTAGTTTTATCAATGAT  
AAGTACAACGGGGATAACGAGCGTGTTTCACAAATGCTGCAACGCTGGCTGGAAAAATAT  
CATGCAGTGGCAGAACTACCTGAACCGCCCCGCTTTGTGGAAACGCAGACGGTAAACAA  
ATCTGGACAAGTATGCGTTTTGCCAGCCTGACTGAAAGTATTGCTGTTGTATGTGGCAAT  
CCTGGTGTGGGCAAACCGAAGCGGCCCGTGAATATCGCCGCACCAATAACAATGTCTGG  
ATGATCACCATTACGCCATCCTGTGCCAGCGTTCTGGAATGTCTTACTGAACTGGCGTTT  
GAGCTGGGAATGAATGACGCACCACGCCGTAAAGGGCCGCTCTCCCGCGCCCTGCGACGT  
CGCCTTGAAGGTACACAGGGGCTGGTTATCATCGACGAAGCTGATCATCTTGGTGCCGAA  
GTTCTGGAAGAACTCCGCCTGTTACAGGAATCAACCCGTATTGGCCTTGTGCTGATGGGA  
AATCACCGGGTTTATTCAAATATGACGGGGGGTAACAGAACGGTTGAATTTGCCCGTCTG  
TTTTCCCGTATTGCAAAGCGCACTGCAATTAATAAAAACCAAAAAAGCCGATGTAAAAGCT  
ATTGCGGATGCCTGGCAGATTAACGGCGAAAAAGAACTGGAGTTATTACAGCAGATTGCG  
CAGAAACCAGGTGCGCTTCGCATTCTGAATCATTCACTTCGCCTTGCAGCCATGACGGCT  
CACGGTAAAGGTGAGCGTGTTAACGAAGATTATCTGCGTCAGGCTTTCCGTGAATTAGAC  
CTGGACGTTGATATTTCAACGCTGCTGCGTAATTAAGAAGGAGAAGAAATTATGATGGCC  
CGAAATATAAAAATGGCAACGGATGCGCAGAACTGGTTACAGGCGCGCGGGAGTCATGTA  
AATGAATCATATCTCGGCGTGGCGCGTCCGATTCTTGAATCACTTACCCACCGGTGGAA  
CTGGTAAAAAACGCGGTCAGAATTATGGAGCATAAGTCCGGGGTGGCCCGTTCTGTATGG  
ACGGCCCGTCTTAATGGTTGCCAGATTATCTGGAGATAACGATGTGTATTAAAGCTGAAA  
AATATATTGAATGGGTAAACACTGTCAGTGCCACGGGGTGGCGCTGACGACATATAAAT  
GCCCCGGATGTGGTGAACAGATTATGACGCAATGCTCACCCGAAAAGGAAATTCGGGATT  
CCCTGACATGTTGTCCGTGGTGCAGCGCAGTTTTCTTTAAACAGGTAAAAGGCGCGAAGG  
TAAAAGCCAGCGCGGTTATTCAGAATCAATAAGGTGAAACAAAATGGCAAAAGTAATTAT  
TGAAATTAATAAATACAGTATCTGGAATTAAGGACGGAATTTGCGCACCAGCATTGCGGT  
GGACGGTAGTGCGGAACTGGACGGTGATGAGGGTACACTTGCTGGCATGGTGGCGTTACT  
GGTGCTTAATAAAAAGCCAGAAAATAATTAATGAGTCAGCCATGAAGCTATTGAGATTTT  
GAAAAACGATGGTGTTCATCACCAGTGGTTCGTGTCACTGAAATGGCTGTTGAAAAACATG  
TCACTGAAAGGAACGCTGACAATGAATGTCAAAAATCCGAAATGAAATTCAGGCATTAATC  
CGAATTCAGGAACGCAATAACAACGGTGGTGAATTACGCGAGTTTATTTGTGCGCGTGAA  
GTTGATGGCTATGGTGAAAAAACTTACCTGATTACTTTTCGACCATTACAGCATCTGTGCG  
CGTTATTGCGGCGAAAGCATATCCCGCGCCATTGCGTCTGGCGATGCGTTTAAACGTGGAT  
TTATGGGAGTACGTCATGGACCGGGAATACATCTGCGCATCAGACCCTGAAGCCCGTGAA  
ATGTGGCAGCGTATCTGGCGCGATTACCGGTTAATGGCAAAAGGCTGGGCGCGCTGCTGT  
TATTCCTCGCTTGCCCTGAAAGCGGTTTCAAGTTATCGCTGCGGCATATTCGGGCATCACTG  
CGCGAGCCTCTGCTGTAATGGTGACTGACATGAAGTGTAATCGTAAGCGCTGGTCA  
CGCGAAGACCGGGAATTTATCGAAGCCAACGTCGGGAAAATGACCGTTGAAGAAATGGCG  
GAAAAACTGAAAGTCGCCACAACCGCCCTCCGGGCACATGCCAGAAGGCACGGAATATCA  
TTGTGTGTATACCGAATCAGTGAACACGACAAATATTTATGTCGTGAACTTTATAAAGAA  
GGACTGGATATTCATGTTATTGCCCGAAAGATGGAATTAAGCAATCGAGCTGTATCCAGC  
ATTGTATACAGCGGATATTAATTAACAGGAGCTTTAATTTATGGCTAAACCAGCAAAACG  
TATCAAGAGTGCCGACGCGGCTTATGTGCCACAAAACCGCGATGCGGTGATTACCGATAT  
TAAACGCATCGGGGATTTACAGCGCGAAGCATCACGTCTGGAAACGGAAATGAATGATGC  
CATCGCGGAAATTACGGAGAAATTTGCGGCCCGGATTGCACCGATTAACCGGATATTGA  
AACCTTTCAAAGGCGTTTCAAGGATGGTGTGAAGCGAACCAGCGACGAACTGACGAACGG

CGGCAAAGTGAAGACGGCGAATCTTGTACCGGTGATGTATCGTGGCGGGTCCGTCCACC  
ATCAGTAAGTATTCGTGGTATGGATGCAGTGATGGAAACGCTGGAGCGTCTTGGCCTGCA  
ACGCTTTATTCGCACGAAGCAGGAAATCAACAAGGAAGCGATTTTACTGGAACCGAAAGC  
GGTCGCAGGCGTTGCCGGAATTACAGTTAAATCAGGCATTGAGGATTTTTCTATTATTC  
ATTTGAACAGGAAGCCGGTATTTAATACCACCATTAATATTTAATTAATTCACATTCTTT  
TAATTATGGCGGATACGTCAGGAGATTGCTCGCGCCTGAAACAGATTACTGAGGAATAA  
AACATGGTTGATGCAAAAATTCTGAATGGTGTGAGCACATTATTACGGGCTTACGGACGC  
CTGACCTGCGGAGTTCTGGCTGAAAAAATGAATATGCTGCCCTCGTCAATGGTGTATTT  
CTGCGTGATGCGGTTGATGCCGGAGTGCTACCGAATGCAACGGATTTTATGACGTTCCG  
CGCCCGCTCCGACGCCGCTGTAAGACGAAACGCAACTGAGCAGCCTGCTGTTGATGAT  
GCGGTGTGGTGCAACTGGCGTCGCTCATTACCCTGGGTGGAAGGTAATACCATCCCCGCG  
CTGGCAAAGAGTTTGGCAGCGGGCGTGCTGACCTGTGAGTCAGTCCACATTGTTGCTGAG  
GTGGATAACAGAATGTGCGAACAGGGAATGCCCGTTTTGTGATGGCTTATATCGATATC  
CGGCTGGGGCGTTTTATTTGCAGTTCAAGCGTCTGGAATATCACCGACCATGTACTGCGT  
TATCTCATTCTTGATTGTTCTCCGGCTCCCGCAGCGGTGCAGGAGGTGGCGTGATGTTTT  
TTAAAACGTCAAATCCCGCAGCACTGCTGGCGTGGGACCAGTTTATGGCGGACTGTCTGA  
AACTACGCGAAGAAGCCCGCCATCTTGATAAGGTTCTGGGTTGTGGTTGCCGGTCAGTAT  
TCAGCACAAGTATTGGTGGGCGTTATTTTCATGGTGTGAACTTTCCGGGGAATGAGCGCC  
CTTTCTCGCGGAGCTGTGGACCGTACAACGGCCCGCATCAGGTAACAGTTGCAGGCCCA  
GAACTTCGCGGATACCTGCTCATCTCAGGGAGCAGGCAAGAGAGCTGGCGAAAATATGGC  
AGGAGAATATCCGGTCACTTACGCCCGCACAGACGCTCTTTTACCCGCACTGGGACTGG  
ATTCAGCGCAACAATATTCGGGCGCTCCAGTGGTTCGGTGTGGTGTGATGTGATTTACG  
TCATGACGGGGATGACACCCGCGCAAGGCCGCATGACTGAAATCCTTTCTGACGAATTTA  
TCCGGGCGCAAAAACAGGCGGAGGTAACAATGGAAAACAATAAAACATCGTATTCGTGG  
CTGGGGAAATTCACCACGGTGAAACAGGAATGCCCGACCTGCGGTAATGAATCCCCTGAA  
TATCTGAAAGAGTGCCCTCATTGTGGCGGGCTGAAATGCAACCACTGCGATATGGGCGAT  
GACACAGCGTGATGAATTGTGAAGGTGAATAATATGAATAATGAACTAAATTTACTCC  
CCTTAATATTGATAACGTCATGGCTGAAAAAGGGATGCTGGAACGTGTTTCGCGCTATCGT  
TGAATATGGTATTAAGCATAATCTCACCGCCAGAGAAGTCCGTGACATTATCAACCGCGA  
AATGAATCGTCTGGAAACAGTAGTGGCACTGCAAAATGAAACAGCCCGCGAGGAGTACAT  
CCGCCGAGGCTGGGGCTATCAGACCAGGATATTGTTACTGACGCTCATGTGTTTGAGGC  
TTTTGAGATCCGTCAGCATCTGGGTCTAACGAACTGATAATGTCTTCCATGATCTTTGAC  
AGTTGCAGTTTTTCGCGGCGGCTTGTCTCATTGCAGGCGCATCTTTTAAAATCTCTGCT  
GAAGAGCTGAAAATGGCTTTGCCCTCTTCTGCGGTGATGATCGCCTTCTTCACCAGAAGG  
CGCACAGTGCTGATGCAATCGCATAACCTGCAACATCATAAAGGTTGTACATTATTTTCC  
ATAAAATCCTCTCTGATTGATGTGTAATTCAGGCGGTGTTGCAGCACCGCCCCCTTTCC  
GGAGGTACGATCATGAGTCGCACATCCCTGATTAAATTAATCCATGTGCCCCGTGCGGAG  
CTACAACCTCGACGACGACACTTACCGCGCTTTTCTGATGCAGAAAACGGGCAAAATCAGT  
TGCCCGGAGCTGACGGTCACGCAACTGGAACAGGTGCTCGGTGCCATGAAAGAACGCGGC  
TTAAGAAGCAGAATAAATACCCCGTCGCCGCTTTAAGGGGCATGTCACGCCCGTGAG  
AAGGTGTATAAAATCTGGCAGCAGATGGCAGAAGACGGTTTTTATTACCGATGGCGGTGAT  
GTGGCGCTGGATAAATATGTTTCAGCGCCTGACCGCGAAACGCAACGGCGGACAGGGCGTT  
TCCACACTGGCGTGGTGTGATGGCGACACGCTGCTGACAGTCCTCGAAACACTCAAGCAG  
TGGCACATCCGCTGTATTCGTGAAGCCTTTTCCCGTCACGGGCTTCCATTGCCGGTCAGT  
CCGTCCGGTTCGTGAACTGCGCGGCTATGATGCCATGACGGCGGCTTATGCCCATGCCAGA  
AAGACACGGAGGATGGCACAATGACGGAAGATTTATTTGGTGAATTTGCAGGATGACACCA  
TCCTGGCACATCTTGACAATCCCGCCGAGGATACGTCACGCTTTCCGGCACTGCTGGCGG  
AGCTGAACGATTTACTGCGCGGGGAATTGTCCCGGCTGGGTGTTGATCCTGCCATTAC  
TGGAGATTGTTGTGGCTATCTGTAAGCATCTGGGCGGCGGTGAGGTCTACATTCCACGCG  
GTCAGGCTCTGGACTCGCTGATTCGGGATTTGCGTATCTGGAATGATTTTAAACGGTTCGCA  
ACGTCAGCGAACTGACCACCCGTTATGGTGTCACTTTCAATACGGTGTACAAAGCCATTC  
GCCGGATGCGACGGCTGAAATACCGCCAGTACCAGCCCTCACTTCTGTAAACAGTAAAGC  
CGTTAATCCGGCTTTTTTTTACGTCCTCAATATCCTGTGATGAATAACCGTACCGGGGAA  
AATCATCATGGGTAAAGGCTGGAATGCATCCTTTCATCTTGGCAGACGTGAGCGGCTGCG  
TCAGGAGTTTTTGCACCGTGTGCGCCGGTGGGCCACGTCCTGCGCCCCGCGACTATACCGG  
TCATGATGGCACCCACGGCAGTTATTACATGAAAGGCTGGCAGTCAGTTGATATGCCGGA  
AATTCTTCATCATTGCCTGCTTTACAGGGAGAAACATTATGTCTGAGCGTCTGCTCGTC



AGTGGCCTGATTTTTATCGGTGGTGTACTGGCGCTGTTATTGTGGATAAGTCTGTTTT  
GTGGCTGGCGCGCGCTGATGTTTTGCTGTGCCTCGGTTTTAGTGTGCTTTATGTGTG  
CCGCTGATTGTCTGGATGCGCTGATAATGAGCTGCCGGGTGCCTGAACATTTTGCCCGGT  
TCGTCTGGCCTCTGACCTGGCTGGGGAGTCTGTCCGGGCTGGGATTAGCCGTGATGGCAA  
CGTCTCAACTGAAAACGGGTCCTGAGCATGTCATCTGGGCGCTGGCCGGATTGCTGACGT  
TCTGGCTCTCATTTTCGTTTTTCGCGCTCGTCTGTTCCGGGTAAGGGGCACCATGTACAGAA  
AATTCAGTGATGAATGTTTTCGGGCCGTCCACGCTGATTAATGCGATAAAAGTGATTGCC  
TTGTGGTTCTGATAACCATCAGTGCCGTGGTGTATCTTTCTGTCTGTTAACCGGGGGAAA  
ATATGCAGCATGATTTATTTGAACACGATCCGGCAATTCGCCAGTTAATCGGACATATTG  
ATAACATCCCGGCCCGGAACCTGGAATCACGCTGGCCCCGTTCCGGTGGTTGATCTGATTG  
ATGTTCTGGAAAACGAACTGAAACGCCAGAACGTCAGCAATCCCCGTGAACTTGCCCGTA  
AACAGGCCGTTGCCCTGTCTGTTTTCTGGGTGGACGGCAGTTTTACATCCCCTGCGGGC  
ATACGATCCTGACCGCGTTACGCGACGATTTGCTTTACTGCCAGTTAATGGTTCGTAACA  
TGGAAGAACTGCGTCGCCAGTACCGCCTGTCCAGCCGCAGATCTACCAGATTATTGCC  
GCCAGAGAAAGCTGCATACACGACGTCATCAGCCTGATCTGTTCTCACCTGAAACCCCAA  
AATAACCGGCATCCTGCCGGTTATTTCTGTCCACATAATCCCGCACCTGCCACCTGATT  
TTTTAGACTGCCATCAGAGAATTTTTTCAGGGAAGCATGATGGCGGGGATAACCAAAAAA  
CTGAAAGCCGCACTGCTGGCTGTAACGATTGCCGGTGGCGGAGTGGGTGGTTATCAGGAA  
ATGACCCGTCAGTCTCTGATCCACCTGGAAAATATCGCTTATATGCCTTACCGCGATATT  
GCCGGTGTGCTTACGGTCTGTGTGGGACATAACCGGGCCGGATATCGAAATGCGCCGTTAC  
AGCCATGCGGAGTGTATGGCTCTCCTCGACAGTGATTTAAAACCGGTTTATGCGGCAATC  
GATCGTCTTGTGACGGGTGCCGCTGACGCCATATCAGAAAACGGCGCTGGCAACGTTTATT  
TTCAACACCGGTGTTACCGCATTGAGTAAATCAACGCTGCTGAAAAAACTCAATGCCGGT  
GATTACGCCGGAGCGCGTGACCAGATGGCCCGCTGGGTGTTTGCCGCAGGCCATAAATGG  
AAAGGACTGATGAACCGTCGCGAAGTGGAATGGCAATCTGGAATATCAGGGGGGGCGGAT  
GACCTTCGCCAGTAAAAGTTACTACTGGCAGCCGTGTTTACCGCCGTTCTGTCCGGGGG  
GTTGTGGCACAGGCTGGACAGCACCCGCCACGATAACCAGACGCTGCGCCGTGAATTACA  
GACGGAGCAACAGGCCCGCCACACTGCTGAATGGTTGTTACACGGTCAGGAACAGACGAT  
GCAGGTATTTCCGCTATCCGTGCCGCAAATCGTGCCGCACGGCTGGCAGATGAGACAGA  
ACATCATGATGCAAAAAGAAAAAATTACAACCGCCATTACTGGTGACAATTGCAGCACTCG  
TCCTGTGCCTGCCGTTGCTGCTGACAGGTTGCGGGAACCTCGAAAAACGCACCCGTGCCAT  
CGGTGGTGATCCTGCCCGAAATTGATACAGAACTGACGGAAGCAACGCCCGTTCCGCCCA  
TGCCACAGCCCCTGACGTGGGGAGCATCCCTTCTGGAATGCTGACCTGTTGATGGCGC  
TCGGGCAGTGCAACCGCGACAAGGCATCAGTCCGGGAACAGGAGATCCGAAGGAAAGAAA  
TTTATGAACGAAGACCAGAACCGGGCGGTGGCGCTGCTGCTCGCTGAACTCTGGCAGGGG  
GATACCCGTGATATTCCCCGCCCGCGGCGTATGACCCGCTGTATTGTGTGCCGGTTGC  
GGTTCGTGAGCTGCGGCCTGATGTGCTGAGACAGCAGCCGATGGCGAACTACTGCCACTGG  
TGCCGTGGAGCAGAATAATGGATTTGATTTAGCTTTTAGCGTTATGGCCTTACCTGTTGC  
CTGTTGTGGCCGGTGGGGCCGTCTGGGCGATGCGTTCGTAGTTTTGCCAGCACCGAGCGTG  
TGGAGCGTCTTGAACCGGATGACCGAAATGGAAACCCGCTACGCCAGCATCCCTGGCA  
CAGAAGATGTACACGAAATGCGCCTGCGAATTGCAGAGCTGTCCGGCGATATCCGGGTGC  
TGTCCCAGCGGGTGCAGTCATTTCCCATCAACTGGAGCTGCTGCTTGAAAACGCAGTAA  
ACCGGAGTAATTCATGATTAACGATATTCTGACCGAAGACCGTCGTCTGGTCATCCTGCG  
TTCCCTGATGGACTGCAATAACGAAGCAAACGAATCCATCCTTCAGGACTGTCTGGATGC  
ATACGGACACAACGTTTCCCGCGATGTGGTTTCGCGGCCAGATTGACTGGCTGGCAGAGCA  
GCAACTGGTCACCGTGGAACCTGCGCGGCTTTTATGTGCGTAACGCTGACCTCCCGAGG  
TCAGGATGTGGCAGAAGGTCGTGCCCGCGTTGCCGGTGTCAAGCGTCCTCGTCCCCGTGC  
ATGACAGGAGGCGTGATGGACAGGAAAACACGGGGCCGGGCTTCAAAGTGGAATTTACTG  
CCGGAAAACGTACGTAAAACGCTGCATGAAATGCTGCGTGATAAAGCGATCCCACAGGCC  
CGCATTCTGGAAGAAATTAACGCACTGATTGAAGACGCAGGCCTGCCGGATGAGATGAAA  
CTCTCCCGTTCCGGTCTGAATCGTTACGCGACGAACGTCGAGCAGGTAGGCCATAACCTG  
CGACAGATGCGTGAAATGACGTCAGCACTGACCGCAGAACTTGGCGACAAGCCAATGGGA  
GAAACCACAAAGCTGATTCTGGAATGGCCCGCAGCCAGCTTTTTAAGGCCATGATGCGG  
CAAATCGAAAACCCGGAATCTGACGTGGATATTGACCTGCTGAAAAATGCCATGCTGGCG  
GCACAGCGTCTGGAATCCACGGCAATGTCCAGCCACCGGCGCGAGAAAGAAATCCGCCAG  
GCATTCGAGAAAGCGGCAAACGCCGTCAGTGAAGAACTGCGCGGGCAGGATGGCATC  
AGCGAAGAGCTGGAGCAGCGTATCCGTGATGTACTGCTGGGTAAGGCATGAGAGGGTTAT

GAACACCAGAGAAAACAACCTTAAAGCCCTTCATGCGCCCCGCAAAATCAACCTGCGTGA  
GGAAGCCGGACTGCTCGGCGTGGATATCGTGACCGATATCGGGGAAGCACAGCCCCGCAA  
TGAACCGGTTTTTCTGGGCTATCAGCGCCGCTGGTTTGAGGATGAAAGCCAGATTTGTAT  
TGCTGAAAAATCCCGTCTACTGGCCTGACGTGGGCCGAAGCAGGCCGCAATGTCATGAC  
GGCAGCGAAGCCGAAGCGTCGCGGTGGTCGCAATGTCTTTTATGTGGGTTCCCGTCAGGA  
AATGGCGCTGGAATACATCGCCGCCTGTGCCCTGTTTGCCCGCGCCTTTAACAGCTGGC  
AAAGGCTGATGTCTGGGAGCAGACCTTCTGGGACAGCGATAAAAAAGAAGAAATCCTCAC  
TTATATGATCCGCTTTCCGAACAGCGGATTTAAGATACAGGGCGCTGTCAAGCCGCCCGTC  
TAACCTGCGTGGTTTGCAGGGGGACGTGGTGATTGATGAGGCGGCATTCCATGAAGCCCT  
GGACGAACTCCTGAAAGCGGCCTTTGCACTAAACATGTGGGGTGCCAGCGTGCGCATCAT  
ATCGACACATAACGGCGTCGATAATTTGTTTAATCAGTACATTCAGGATGCGCGCGAGGG  
GCGCAAGGATTACAGCGTTCACCGCATCACGCTGGATGATGCCATCGCTGACGGGTTATA  
CCGACGTATCTGTTACGTCACGAATCAGCCGTGGTCGCCGGAAGCGGAAAAAGCCTGGCG  
TGATGGCCTGTACCGGAATGCGCCGAATAAAGAGAGTGCAGGACGAGGAATACGGCTGCAT  
TCCTAAAAAATCCGGGGGCGCTTATCTGTCACGCGTGCTGATTGAAGCCGCCATGACGCC  
AGCGCGGGATATCCCGGTTCTGCGTTTTGAAGCCCCGACGATTTTGAATCGCTGACACC  
ACAAATGCGCCACGGCATCGTTCAGGACTGGTGTGAACAGGAGCTGCTCCCGTTGCTCGA  
TGGCCTGTCGCCGCTCAATAAACACGTAAGTGGGCGAAGACTTTGCACGCCGTGGCGACCT  
GACGGTGTGTTGTGCCGCTTGCCATCACGCCTGACTTACGCAAACGCGAATGTTTCCGCGT  
GGAGCTGCGTAATGTGACCTATGACCAGCAGCGACAAATCCTTTTATTATTCTGTCCCG  
TTTGCCCCGTTTTACCGGCGCTGCATTTGATGCCACCGGTAACGGCGGTTATCTGGCAGA  
GGCCGCCGCTCTGATTTATGGCCCGGAGATGATCGACTGCATCAGTCTGACCCCCGCCTG  
GTATCAGGAGTGGATGCCAAAACCTGAAAGGCGAGTTTGAAGCGCAGAACATCACGATTGC  
CAGGCATCAGACCACACTTGATGACCTGCTTCATATCAAGGTGGATAAAGGGGATCCCGCA  
GATTGACAAGGGGCGCACAAAAGATGAAGGCGGTAAGGCCGACGACATGGCGACTTTGC  
CGTGGCGCTCTGTATGGCTGTCAGGGCGTCTTATATGAATGGTTTTGTTATCGACGAGGA  
CAGCATAACAGGCGCTGCCACCACGCCACCGTGGTGTGATGATGTTGATAACGATGATTTTGA  
TGATTATCACCAGTTTGAACGAGGGGGCTGGTAATGGGCGGTATTCTGGATATTTCCGGG  
CAGCCGTTTGATTTTGACGATGAAATGCAGAGCCGACGCGATGAGCTGGCAATGGTCATG  
AAGCGCACGCAGGAGCATCCTTCCAGTGGTGTGACGCCGAACCGGGCCGCGCAGATGCTG  
CGTGATGCCGAACGCGGTGATCTGACAGCACAGGCTGACCTGGCCTTTGATATGGAAGAA  
AAGGACACCCACCTTTTTTCCGAACCTGAGCAAACGCCGCCTTGCCATTCAGGCGCTGGAA  
TGGCGCATCGCTCCGGCACGTGATGCCAGCGCACAGGAGAAAAAAGACGCCGACATGCTG  
AATGAATATCTGCATGATGCGGCGTGGTTTGAAGATGCCCTGTTTGATGCCGGTGATGCC  
ATTCTCAAGGGCTATTCCATGCAGGAGATTGAATGGGGCTGGCTGGGGAAAATGCGCGTG  
CCGGTGGCGCTGCATCATCGCGATCCGGCGCTGTTCTGCGCGAACCCCGACAATCTGAAC  
GAATTACGCCTGCGTGATGCGTCTTATCACGGGCTGGAGCTGCAACCGTTCGGCTGGTTT  
ATGCACCGGGCCAAATCCCGCACCGGGTATGTCCGGCACCAATGGCCTTGTCGCGACGCTT  
ATCTGGCCTTTTTATTTTTAAAACTATTCCGTGCGTGATTTTGCAGAGTTTCTGGAAATT  
TACGGACTCCCCATGCGCGTCGGTAAATATCCGACCGGCTCAACGAACCGCGAGAAAGCC  
ACGCTGATGCAGGCGGTGATGGATATCGGGCGACGTGCCGGTGGCATTATTCCGATGGGG  
ATGACGCTGGATTTTTCAGAGCGCCGACAGATGGTCAGTCAGACCCTTTTATGGCGATGATT  
GGCTGGGCAGAAAAAGCGATTTCAAAGCCATTCTGGGCGGCACCCTGACCACAGAGGCT  
GGCGATAAAGGTGCGCGGTGCTGGGTGAAGTGCATGATGAGGTTCCGCCGGGAAATCCGT  
AACCGGATGTGGGCCAGCTTGCCCGCAGTATTAACCGTGACCTGATTTATCCCCTGCTG  
GCACTGAACAGTGACAGCACCATTTGATATTAACCGCCTGCCGGGCATTGTATTTGATAAC  
AGTGAAGCGGGTGTATTTACGGCACTGTCTGACGCCATTCCGAAACTGGCGGCGGGAATG  
CGTATTCCGGTCTCCTGGATAACAGGAAAACTTCATATTCCACAGCCGGTCCGGTGTGAA  
GCCGTGTTTACTATAACAACCGGTTGTCCCGGATAACGGTTCGCAGAAAGAGGCCGCATTA  
TCCGCTGAAGATATCCCGCAGGAGGATGATATCGACCGGATGGGCGTCTCACCGGAAGAC  
TGGCAGCGTTCGGTTGACCCCTGCTGAAACCCGTCATTTTTTCTGTGCTGAAAGATGGC  
CCGGAAGCCGCCATGAACAAAGCCGCTTCATTATATCCGCAGATGGATGATGCAGAACTT  
ATCGACATGCTGACCCGTGCCATTTTTGTTGCCGATATATGGGGGCGTCTGGATGCCGCA  
GCAGACCATGATCTGGCGTATGCCGCGCGCCTCCCGCAAAGGAGGCTGTGCGGTATTT  
CCGCGCAAAGGCTACAACATCACCTGGAACCTGGTACGAACAACCTGGCAGACGCGCACGC  
CCGCGCCTTTACCGTTGCCAAAGCCACCCGGATGGATGTCCTGACCACAATCCGTGAGGA  
AGTGGAGCGGGCTGTCAGTGAAGGCATACCCGTGAGGAATTTACCCGCACACTGGCCCC

CCGGCTGCAAAAACCTCGGATGGTGGGGAAAACAATCATCGTGGATGCAGAGGGGAAAACGC  
GAAGGAAATCGAACTGGGCAGTCCGCGTCGTCTGGCAACCATTATAACGTCAATACCCG  
TACGGCGTATGGGGCAGGACGTTATGCGCAGATGATGAATACCGCCGATTTGTACCCGTA  
CTGGCAGTACGTTGCCGTTATGGATGGCAGAACACGCCCGGAACATGCGCGGCTGCACAA  
TATGGTTTTCCAGTATGACGACATTTTCTGGCAGACGCATTACCCGCCCAATGGCTGGAA  
CTGCCGCTGTCGCGTCCGGGCGCTGTCTGCGGCCCGCATGAAAGAACTGGGGCTACAGGT  
CAGTTATGGTGCATTCATGAATACCCGCGAAGTGGATGCCGGTACGGATGAAAGCAC  
CGGAGAGATTTTCCGCACATCGTCAACCACGTTTGACAACGGTCGGGTAAAAATGACGCC  
AGATGTGGGCTGGTCATATAACCCCGGTTTCGGCGGCATTTGGTACGGATCAGGCACTGAT  
TCGAAAACCTGGTGGAAAGTTCGTGACGCGCAGCTGCGTGAGCAGGTTGTTTCAGACGCTGAA  
TAACAGCCGGGAGCGTCAGCTTGCTTTTTCCCTCTGGCTTAAACGCCTGGCAGGATCACG  
TCAGACCGGTCATGAAATCCGGGCGCTGGGGTTTATGACGGGATCCGTGGCTGAAGCCGT  
ATATCAGCGCACCCGGGAATATGCCAGCCCGTCTGCTTGTAAATGAACGGGAAAAGTCTGGC  
GACCACTGCTGATGCCGCCCTGAAACCCGGAGGATTTACAGCGTCTGCCGTCGCTGATGGC  
AAAACCACAGGCGGTATTGTGGGACAGGGAGAACCACCAGTTGCTGTATGTTGTGGCAAC  
CCGTGACGGCACGGCCCGGATTGTGGTCAGAACATCACAGACAGTCGGCAGGCAGAATGA  
CCGGGCGGATGTGCTGGTCAGTATCAGCCGCGTATCTGCACAGTCGCTTGAAGCCGCGAT  
TGCTGACGGGATGATTGACGTAAGGAGGGGCATGTGGAGGTGAATAAGTGAGTCTTGAT  
ATGAACGTTGCCGTGGATGTGCGACGTATTCAGCTTGCCTGGATGAACTGGGAACCGTC  
ACACGTGACCGCGCCATTTCCCGAGTGATGGCTGCGGCGCTGCTGTCATCCACGGAACAG  
GCATTTGAACGGCAGGCAGACCCGGATACAGGGAAAGGCTGGGAAGCGTGGAGCGATTCC  
TGGCTGGCATGGCGTCAGGATCATGGTTTTGTTCCGGGCAGTATCCTTACCCTGCATGGC  
GATCTGGCACGCAGTATTACCACCGATTATGGACAGGATTATGCCCTGATTGGTTCGCCA  
AAAATTTATGCTGCCATTTCATCAGTGGGGCGGTACACCCGATATGGCACCCCGCCGGCA  
GGCGTTCCCTGCGCGTCCCTTATATGGGGCTGGATAAGACCCGGGGAACAGGAAATTTTTGAT  
GCCATCAGAAAACGCGTCAGCGCCGCTCTGAGGCAATAAACAGAATCAGGCATAAAATCA  
GCCGCACAGATTTTTTAAAACGCGCCACGGGATTTTTAAACCGGTATTTAACGGTGTATG  
AATCCCGTTTTATCTTCTTCACTTTCTTTCTCCAGTACTCAAATAGCATAACCCCGA  
TTTTCCCGCACCTCCCGCAAACCTGACTGCTCACAACCATGATGAGCAGCAGGACATGAA  
AAAACACGCGATTGGCATTGCCGCACTGAATGCGCTGTCCATTGACGATGACGGCTGGTG  
CCAGCTATTGCCTGCCGGTCATTTAGTGGCGTGGTTCGTTGATGTGACAGG  
CGGTCAGGGGTGGTTCATCGACGGTGAGATTGCCGGGCGTCTGGTTGAAGGCGTTCGCGC  
GCTCAACCAGGACGTGCTGATTGATTACGAGCATAACCAGCTACGTAAGGACAAAGGATT  
ACCCCGGAACAACCTCGTCGCGGCTGGCTGGTTTAAACGCCGATGAAATGCAGTGGCGTGA  
AGGTGAAGGGTTATTTATCCACCCACGCTGGACGGCGGCGCCAGCAGCGCATCGATGA  
CGGCGAATTTGGTTATCTCTGCGGTTTTTCCGTATGACACCGCCACCGGTGCGGTGCT  
GCAAATCCGCCTTGCTGCGCTGACCAATGACCCCGGTGCCACCGGCATGAAAAAGCTGAC  
CGCACTGGCGGCAGACCTTCCCGACATCCTTCAACAGGAGAACAAACCCATGAATGAAAC  
GCTGCGCAAGCTGCTTGCAGCTTGGGGTGACGGTCCCCGAAAATGCAGACATCACCGA  
TGAACAGGCAACAGCGGCACTGACCGCGCTGGACACGCTGGAAATTAATGCCGGGAAAGT  
GGCGGCGTTGTCTGCCGAACTGGAAAAGGCACAGAAAGCCGCCGTTGACCTGACGAAATA  
CGTCCCGGTGGAAAGCTACAACGCCCTGCGTGATGAACTGGCACAGGCGACTGCACAAAG  
CGCCACAGCCAGCCTGAGCGCCGTTCTGGACAAGGCGGAACAGGAAGGCCGATTTTCAA  
AAGCGAACGCACTTACCTGGAACAGCTTGGCGGTGAGATTGGCGTGGCGGCACTGTCCGC  
ACAGCTTGAGAAAAACAGCCATCGCTGCGTATCTGCCATGCAGACCACCACAGCGAA  
AATCCGTCGCAGGAAAAACGGCGGTGGCGGTGCTGTCTGCTGATGAACAGGCAGCAGT  
GAAGGCGCTCGGCATTACAGAGGCTGAGTATCTGAAAATGAAACAGGAACAAGAAAAATG  
ATTGTCACCCCGGCATCCATTAAGCCCTGATGACCTCCTGGCGTAAGGATTTTCAGGGC  
GGTCTTGAAGACGCCCCGTCGAGTACAACAAAATTGCAATGGTGGTGAACCTTCCACC  
CGCAGTAATACGTATGGCTGGCTGGGTAAATTCCCGACCCTGAAAGAATGGGTGGGTAAAG  
CGAACCATTACGCAAATGGAAGCGCATGGCTACTCCATCGCCAATAAAACGTTTGAAGGC  
ACCGTGGGTATTTCCCGTATGACTTCGAGGATGACAATCTGGGTATTTATGCGCCGATT  
TTTCAGGAGATGGGCCGTTCTGCGGCAGTTCAGCCGGATGAGCTGATTTTTAACTTCTG  
AAAGATGGCTTTACCCAGCCCTGCTATGACGGTCAGAACTTCTTCGACAAGGAGCATCCG  
GTATATCCGAATGTGGATGGCACGGGCAGCGCGGTTAATACCTCCAACATCGTTGAGCAG  
GACAGCTTCAGCGGTCTGCCATTCTATCTGCTGGACTGCTCCCGCGCAGTCAAACCGCTG  
ATTTTCCAGGAGCGCCGCAAACCGGAACTGGTTCGCACGTACCCGTATCGATGACGACCAC

GTTTTTATGGATAACGAGTTCCTGTTTGGTGCCAGCACCCGCCGTGCTGCCGGTTACGGC  
TTCTGGCAGATGGCTGTCGCGGTA AAAAGGCGATCTGACGCTGGATAACCTCTGGAAGGGC  
TGGCAACTGATGCGCTCTTTTGAAGGTGATGGCGGTAAGAACTGGGCCTGAAGCCGACG  
CATATCGTTGTACCGGTCGGGCTGGAAAAAGCCGCAGAGCAACTGCTTAACCGTGAAGTGT  
TTCGCGGATGGCAATACCACCGTCTCCAACGAGATGAAGGGCAAGCTGCAACTGGTTGTC  
GCTGACTACCTGTAACCGTCATTA AAAAGGCGGTTTCAGACCGCCTTTTAACCTGATTTAAA  
GGAAAAGGAGGAGCATGTGTTATGTCAGGCACTTCGCTTAATTCACAACGGCTGGACACT  
TCTCGCATCACTTGCACGGCGATTATTA AATGCCTTCGTCGCGTCTACCGCCGCGCCGGA  
ATCGCCTTTACGCGTGGCGAAAACACCGTGGAAGTCACCGAAGAACA ACTGGCGATCATT  
CGTGCCGACAGCGTGTCTGTGTTATCTGCATCGTCAGCAGAAACGCTCGCTGAGGCT  
GGGGGGCTGGACGTTCTGGGTGTGGGCGATCTGAATACCCGTATCCGTGCGACCGTTGCC  
GGTCTGGATAAGGCAAACCCGGAGCACTTTACCGCAGGGGGAGAACCCAAAGTGAAAGCC  
GTCAGTGCGGCGCTGGGGGAACCGGTGAGCAGTGCGCAAATCAAAGCGGCGCTGGCTGAG  
GCGGATGCATGAATTACGCGACGGTAAATGACCTGTGCGCCCCTATACACGTACGCGGC  
TGGATATTCTCACCCGCCCTAAAACAGCGGACGGGCAGCCGGATGATGCCGTGGCAGAAC  
AGGCACTGGCAGATGCTTCGGCCTTTATTGATGGCTATCTCGCCGCGCGCTTTGTTCTGC  
CGTTACCGTCGTCCCCTCACTGCTGAAACGGCAGTGTGCGTGGTGGCCTGGTTTTATC  
TGAATGAATCACAACCCACCGAGCAGATCACCGCAACTTACAGGGACACGGTGCCTGGC  
TGGAACAGGTGCGCGATGGCAAACAGATCCCGGCGTGGAAGCAGAACGGCAGCGTCCG  
CGGAGGGAGAGGATCTTGTGCAGGTTCA GTCTGATCCGCCTGTTTTTTCACGAAAACAGA  
AGGGGTTTATCTGATGCTGGAAGAAACCGAAGCCGC ACTGCTGGCGCGCGTTCGTGAGTT  
GTTTGGGGCAACCCTGCGGCAGGTGGAACCCCTTACCGGCACATGGACTAATGAGGATGT  
GCACCGTCTCTTTCTGGCCCCGCCATCGGTATTTCTGGCATGGATGGGCTGTGGTGAGGG  
GCGTACGCGTCGGGAAGTTGAAAGTCGCTGGGCATTTTTTGTGCTGGCGGAGTTGCTGAA  
CGGGGAACCGGTAAACCGGCCCGGTATTTATCAGATTGTGGAGCGACTGATTGCCGGTGT  
TAACGGTCAGACGTTTGGCCCCGACCACCGGGATGAGGCTGACGCAGGTCAGAAATCTTTG  
TGACGACAACCGTATCAATGCCGGTGTGGTGCTTTACGGCGTTCTGTTCA GTGGCACAAC  
CCCGCTGCCGTCCGTAGTGGACCTGGATTCGCTGGATGATTACGAGCGTCACTGGCAGAC  
CTGGAAATTCCCGGACGAAACCCCGGAATTTGCCGCACATATCAATGTGAATCAGGAAAA  
GGATCATGATGCTGAAAATTA AACCCGCAGCGGGAAAAGCCATCCGTGACCCGCTCACGA  
TGAAATTACTGGCGTCTGAGGGAGAAGAAAAGCCCCGTAACAGTTTCTGGATACGTCGCC  
TTGCAGCCGGTGATGTGGTTGAAGTCGGGAGCACCGAAAACACGGCGGATGATACCGACG  
CTGCGCCGAAAAAACGGAGTAAATCGAAATGAGCGATATTTCA TTTAACGCGATCCCGTC  
AGATGTTTCGCGTTCCTCTGACGTATATCGAATTTGATAACAGCAATGCCGTCAGCGGAAC  
ACCGGCTCCCCGTCAGCGCGTGTGATGTTCCGGCAAAGCGGAAGTAAAGCCAGTGCGGC  
ACCAAACGTGCCTGTCCGTATCCGTTCCGGCTCACAGGCCAGTGCGGCGTTTGGTCAGGG  
TTCCATGCTGGCACTGATGGCAGATGCATTCCTGAACGCTAACCGCGTGGCGGAGCTGTG  
GTGTATTCCGCAGGGGAACGGCACCGGTAATGCTGCTGTCGGTGA AATTTCACTGTCAGG  
AACGGCAGGCGAAAACGGCTCGTTGTGACTTACATTGCCGGTCAGCGACTGGCGGTATC  
TGTCGCAGCAGGTGCAACGGGAGCGGCGCTGGCTGACCTGCTGGTTGCCCGAATCAAAGG  
CCAGCCTGATTTACCGGTGACGGCAGAAGTTCGCGCAGACAGCGGGGATGATGACACCCA  
TGCAGATGTGGTTCTGAGTGCAAAATTTACGGGTGCATTATCTGCCGTGGACGTGCGCTG  
GAACTATTACGCGGGTGA AACGACCCCTTACGGGATTATCACGGCATTCAAAGCCGCCTC  
CGGGAAAATGGCAACCCGGATATCAGCGCAAGTATCGCGGGAATGGGCGATCTGCAATA  
TAAATATATTGTGATGCCCTATACCGATGAACCGAACCTGAATCTGTTACGCACTGAATT  
GCAGGAACGCTGGGGACCGGTCAATCAGGCTGATGGCTTTGCCGTGACAGTGCTGTCCGG  
CACGTATGGGGACATTTCCACGTTTGGTGTGACCCGTAATGACCATCTGATTTCTCTGTAT  
GGGGATTGCCGGTGCACCGGAACCGTCATATCTGTACGCCGCCACACTGTGTGCCGTTGC  
CAGCCAGGCGCTTTCCATCGACCCGGCGCGTCCACTCCAGACGCTGACGTTGCCCGGAAG  
AATGCCGCTGCGGTGGGGGATCGTTTACCTGGTCAAGAACGTAATGCGCTGCTGTTTGA  
CGGCATCTCCACGTTTAACTGGAATGATGGTGGTGAAATGCAGATTGAACGCATGATCAC  
GATGTACCGCACAAACAAGTACGGTGACAGTGATCCGTCTTATCTGAACGTGAATACCAT  
CGCCACGCTGAGTTATCTGCGTTATTCGCTGCGAACCCGCATCACGCAGAAATTTCCCGAA  
CTACAAGCTGGCAAGTGATGGCACCCGCTTTGCCACCGGTCAGGCCGTGGTGACGCCATC  
CGTGATCAAACGGAGCTGCTGGCACTGTTTGAAGAATGGGAAAACGCCGGACTGGTCGA  
GGATTTTCGACACGTTCAAAGAGGAGCTGTATGTGGCACGTAACAAGGACGACAAAGACCG  
TCTTGATGTGCTGTGCGGCCCGAATCTGATTAACAGTTCCGCATTTTTCGCGGCACAAGT

TCAGTTCATTCTGTAAGGAGCATTATGGCTGGAAATCAGCGTCAGGGGGTGGCGTTCAT  
CCGTGTCAATGGCATGGAGCTTGAATCAATGGAAGGTGCCTCCTTCACGCCTTCCGGCAT  
CACCCGTGAAGAAGTGACCGGCTCGCGGGTTTATGGCTGGAAAGGTAAACCTCGTGCCGC  
AAAAGTGGAATGCAAAATTCGGGGCGGTGGTCCCATCGGGCTGGATGAAATTATCGACTG  
GGAAAACATCACCGTCGAATTCAGGCTGATACCGGTGAAACCTGGATGCTGGCGAATGC  
CTGGCAGGCGGATGAACCGAAAAACGACGGCGGCGAAATTCGCTGGTACTGATGGCAA  
ACAAAGCAAACGCATTGCATAAGGGGAAACAATGGACGAAATGAATTTAGGTCCTGAAGC  
ACAGGAAGTGCATGACAGCATTGTGGCAGAAATTCAGTCCGGCGTGCTGAAACTGAAAGA  
CGGCCTGCCGTTCCGGCACCGGTGACGAGACTGAAATGCAGTATGACGTGACGCTGCGTGA  
ACTGACCGCAGGCGATATGATTGATGCACAGGCGGCTGCTGAAAAGCTGGTAATGAGCAA  
GGAAGGTCCGGTGCTGGTCAGTTCCCCGTCCCGGATGGGACTGGAATGCTGCGCCGACA  
GATTGCCAGCGTGGGCTGCATCAAAGGCCCGTTGTTCGATGGCGCTGATTCGTAAACTGTC  
TGTCGATGACTTCCAGCGTCTGTTCGCTGGCCACAGAAATGTACGACATGGCTGTGGCGGC  
ATCGCTGACACAAGAACGGGGGCGAGTGGCTGCGGTGCCGGAATGATATTGAGAAAGCGG  
CGACAGCGATTGGCGTTATTCTGAAAAGTGGCCCGGAATGGGCCTTGTCTCTCCCGCTGT  
CCCGCTTTTTCCGGCACTGCCAGCAGGCTAAAACCCTCTCTCAATATCACCGTTAAATCA  
GGAAATATCTATGACCGGGAAACGCTTAAAGGCGTCTGTCATTATTGATCTTAATGGCAA  
TCTTTCCCGGCGTTCCCGCCAGTATTCGAACCAGATAAACGCCCTGTCCCGTAGCGGGCA  
AAGTTCCTTCGTGCCCTGCGTATGGAGGTTGTGCGCGTTTCTGGTGCCATTGACAGAAT  
GGGTTCACTGTCAACCCGTACATTCCGAATGCTGTCAGCCGGGGCGCTGGGTATCGCTGG  
CGTGGGTTACACCGCCAATAAACTGTTTATTGGTGCAGCCGCCAGCGTGAGCAGCAGAT  
CATCGCCATGAACTCGCTGTATCACGGCGATAAGGTCAGAGCGCAGGCCATGATGGCCTG  
GGCGAAGCAGAACGCGAAGGACACCACGTGGGGGCTGAGTGGTGTCTGGATGAGATCCG  
TTCGTGCAAAGGCTTCGGCATGACGGATGAACAGACGAAACAGTTCATCACCATGTTGCA  
GGATCAGGGGGCCATGCACGGCTGGGATTTACCCACTGCACAGGGTGCCTCACTGCAACT  
GAAACAGATGTTTGCCCGCCAGCAAATCACAGCGGCGGATGCCAACCTGCTGACCGGTTA  
CGGTATCAACGTTTATCAGGCGCTGGCGGATGCAACGGGAACGGACGTTAAAAAATCCG  
TGATCTGGGTACAAAGGGCAAGCTGGGCATGAAATCCATTCTGACGGTATTGAGAACGCT  
GTCAGAACAGTCAAAGGTGCACAGGCCAGTGCAGTGAATCCTGGGACGGGATGTTCCG  
CCAGATGGAAGCCAACCTGCTTGAATTTTCGCATAAAGGTGGCAAACAGCGGCCCTTTGA  
AGAAATCAAGAACGAGATGCGCCGGGTGCTTAACTGGCACGACATGGCGGATAAATCCGG  
GGAAGTTGACGCACTGGCAGAAAACATTGGTCAGAAATTTCTGACCACGTTGAGAACGGT  
AAAAATCTCGGCGCAGGAATTATGGCGCTGGCTGAAACCGGGTAAAGATGCGCTGGCATG  
GGTTGACCAGAATATTGTCAGCCTGAAAAAACTGGCTGCTGTTCTGGTGTCTGTCTGGCT  
TGCCAATAAAGCCCTGAGAGCAGGCTGGGCCGTGGCAAACCCCTCATGGCAGGTTGCCAG  
TTATCCGTTTAAAACCGGGCGTTCGTATGTGGCGCTGGATGCGAAACCGCAAACGTGGGCA  
GGCAGGTCTGCCGGTCCCGGATGCCATGACGTCTGAGACGCTGTTGCAGGGTATCGGCAT  
TCAGCGTGTGTTTGTTCATCAACTGGCCCCGTGGATTTGGTACTACGGGAGTGGCGGCGG  
TCGTGCTGTACGGAGCGGCGGAAGAATGGCCCCGCTGTTACCCCGCCAGCCGTTATTGCT  
GTCCGGGCCACAGCCGCTGGCATTACCTGCACCACGCCCTGTACTGGCATTACCCCCACC  
CGGCGTACCGGTAACGGCACGGCCTGCACCATTACCTTTACCCGGTAAATCCGGTCTTCT  
GAGCAGGCTTGCAGGCAGTGTGTCGGGGCAACTGGTTACGGGAACGGTCCGAAAGCTGGC  
TGATGCCGGGCGTGCCGTTGGCGGGTGGTTTTCCGGTATCGGAAACAAACTTGCAGGCAG  
TGCGATCGGTCCGGTTGTGACAAAAGGTGCCGGGGCGCTGGGCTGGATGGGGAAAGGTGC  
CGGTCGTGCGTTGTACGTCTGGGGGGCCCGGTAATGGGGGCACTCCAGCTTGCCCCCGT  
CCTGATGGATGAGCAGGCGTCAACCCATGAAAAAGCAGGCGCAATTGGCAGTACAGCCGG  
TGCATGGCTCGGCGGTGCCGTTGGCAGCCTTGCCGGACCGCTGGGTACGGTTGCTGGTGC  
CACGCTGGGCAGTGTGCGCCGGGGAGTATCTGGGCGGTTTTGTAACCGACCTGTATCAGAA  
ATGGACGGCCACGGATAAGGAACCGCAGGAACAAAAAGTCAATGCGGAAGCCTCGCTGCG  
CGTCAAACTCGGCGAGGGGTTACGTCTGACCAGTTCCCGCGTACCAGGATGGTATGGG  
GCTGAATATTTACGCGGGCGATAACTACATTACGGGCTGGTAAGACCATGTTTGAAGATG  
CTTTAAATGCCGTTAATGCTGTCCGGGATAAAAACCGGTGGAGGCAGGAAAACAACCGGCA  
AAGGCACGTTCCGTAACGTGCCGTTTCTCGTTCATCGAGGAGCAAAAACAGGCTGGCGGAC  
GTCGCTGGTTAAACGCGAGTACCCGTTACGTGATACCGGCGGCGTCAATGACCTGGGGA  
AAAAGCTTCGCTCCCGTACATTACGCGCCTGCATTCTGAACAGCAACGCAGAAACAGCCA  
GAGATGAAGCGGGTGCCTGATGGATGCTCTTGATGCTCCGGGTAGCGGTGAGCTGGTAC  
ATCCTGATTTCCGGCACTGTGGACGTTCATGGTGGATTTCATGGGAATGCCGCACTAAAGCGG

ATGAACTGAATTATTACGCGTTCACCGTTACCGTTTATCCGTCGTTGCAGGATACTGCC  
CGGACGCAGAGACAGACACCAAGTGCAGCCGTACCGGCACAGGCCGTTGCTGTAACCGGTT  
CTCTGGGAGATACGCTGTCCTCTGTCTGGCAAACCGTAAAAGATGGCACTGCGGCGGCAA  
CCGCCGTGATGGAAGCTGTAACCGGTGTCATCGATGATATCAGTGATGCGGTGGACAATC  
TGGGGGTTACGCAGACTGTCAGCGGTCTGATGGGATCGCTTTCTGCGATGAAAGGCTCTG  
TGACCAGCCTGATTAACCAGCCTGCCATGCTGGCCTCCTCGCTGATGGGGGCGCTGTCCG  
GCGTTTCATCGTTATGCGATAACCCGGACAGCATTTCACATGGAACCGTCTGGCGCAGC  
GATTCGAACGTCGCCATGCCGCCACCGCAGGCAGACAGGGGACAATCACAACCTCGTACA  
ACAGTCCGGTTGCAGAAAAAATATTGCCCACTGAACTACGTCATGCTGGCAGCGGCGC  
AGACATAACCGGGCAGAAGCTGCCAGCCAGGCACTGACTGCGGCACTGGATTTAGTCGCC  
GGATGGATAATGCCGCCCGTGCACCTGTAAGTGGATGCCCCGTCCACCACAACCGGCACAG  
CCAGCGGGGCCAGCAGCACATCTGCTACCGTCCACAGGGACAGTTACAGTTAACTGCCA  
TAACCCCGGACGGCGGCTTTTCACAGGTATCCTTTTCAGACAGTGGTACAGCCACGCCCC  
CGGTATTTGAAAGTGTGTCCGATATCGAAAAAACCACTGCCATGCTGGGGGCGGCGCTGG  
ATAGCGTCATTCTGACGGCATCTGAGCAGGGTTTTTCGACAGACAGTGTTACAGCTTACGC  
AACTGCGTCTGCTGGTTGTTGCCGACCTGGAAAAACGCGGGCTGCAACTGGCGGGTAGTG  
AATCACACCACCTGCCAGAAACGCTCCCGGCAATGGTTGCACTGTACCGGTTACCGGAA  
ACAGCCGGAACCTGGCAACGGCTGGCCCCGAGGAACGGTATCAGCAACCCGTTATTTGTTT  
CCGGTGGTGTGAGTATTGAGGTGATTAATGAGTAATACCGTCCACTGCGAGCGGATGGC  
AGGCTGTTTACCGGCTGGACGTGAGTCTCTGTACCCGCTCGATTGAATCCGTAGCCGGA  
TATTTTGAGCTGGGGGTGAACGTGCCACCGGGCACGGATTTATCCGGGCTGGCTCCGGGG  
AAGAAGTTCACGCTGGAAATCGGGGGGACAGATTGTCTGCACCGGTTATATCGATTACGG  
CGACGCCAGATGACCGCTGACAGTATGAAAATCACTGTCGCCGGACGTGACAAAACGGCT  
GACCTGATTGACTGTGCTGCCGTTTACAGTGGCGGACAGTGGA AAAACCGCACACTGGAG  
CAGATTGCGCGTGACCTGTGCGCTCCTTATGGCGTTACCGTTCGCTGGGAGCTTTCCGAT  
AAGGAAAGTTCGGCAGCTTTTCCCGGCTTCACGCTGGACCATTAGAAAACCGTTTATGAG  
GCGCTGGTGCCTCCCGCGCACGCGGTGTAAGTACTGATGACCAGCAATGCCGCCGGAGAG  
CTGGTATTCAGCCGGGCTGCCAGCACAGCCACTGATGAGCTGGTTCTCGGAGAAAATCTG  
CTGACACTGGATTTTGAAGGAAAGACTTCCGCGACCGGTTACAGCGAATACCCGTCAAGGGG  
TATGCCCGCGCAAATGGTGCTGAGGGTGTGATGATATTGATGCGAAAAGTATCGTATCCCGG  
AAAGGGACCGCCACTGACAGTGTGACCCGTTACAGACCGATGATCATCATTGCTGAC  
AGCAAGATTACGGCGAAGGATGCACAGGCCCGCGCCCTGCGTGAGCAACGCCGCAGACTG  
GCAAAATCCATCACCTTTGAGGCAGAAATTGACGGATGGACTCGCAAGGACGGGCAACTC  
TGGATGCCGAACCTGCTGGTCACTATTGATGCCTCGAAATATGCCATCAA AACCCACGGAA  
TACTGGTCAGCAAAGTCACCCTGATACTGAATGACCAGGACGGGCTGAAAACCCGCGTC  
AGCCTTGACCCACGCGAAGGCTTTCTGGTGCCGTTGAAAGCGACCGTAAAAACAGGAAA  
GGCGGGCAGAGTAACGGCGGTATTGATGCGCTGGTTGAAGATTATTATCGCAGACACCCG  
GAGAAAACGCCCGCGTGGAAAGAGTAAATGATTCCGCCTTGAACCGCCTGCTGACGCCG  
TGATGCGTGTGTCGCTGATGCTTGCAGCGCGCTGTTGTTAACGTGATTAACGACGGGC  
GAAAGGTTGAGAACCTGCAGGTCGGTCTGCTGGATGATGAGGAATCCGATGAAGTGGAGC  
GCCTGCAAAATTACGGGCATTTACAGCGTTCCCTGCCGGGCGCAGAGGGCGCTGATTGCCT  
GTGTAGGCGCACAACTGATCAGGGGATTGCTGTTGTGGTGAAGACCGCCGCTACCGCC  
CGACAAATCTTGAACCGGGTGTGATGCAGGCATTTACCACCACGAGGGGCATCGTATCAGGC  
TGACAAAGGACGGACGCTGCATCATTACCTGTAAAACGGTTGAGGTTTACGCTGATGAAA  
GTATGACCGTTGACACACCCAGAACCACGTTTACCGGCGACGTTGAGATCCAGAAAAGGTC  
TGGGCGTTAAAGGTAAAAGCCAGTTCGACAGCAATATTACTGCCCGGATGCCATCATCA  
ATGGCAAATCGACGGATAAGCATATCCACCGTGGCGACAGCGGCGGAACCACAGGGCCGA  
TGCAATGACCGATTTAGCCATTATCTGGACGAACGGACGCGGCGATATTGCGCAGGATGG  
TATTGATATGCTGACCGACGACAGCCTGACAACCGATGTGACAATCTCTCTGTTTACCGA  
CCGGCGCGCGCTGGATTCTGACACGCTGCCGGATGGTTACAGATGATCGCCGTGGATGGTG  
GGGTGACAGTTACCGCGACCGCCCCATCGGTTCCGCGGTTGTGGCTGTTATCACGTGAAA  
AGCCACGCCGGATACGCTGGAACGCGCCAGAGGGTATGCCGAAGAGGGCGCTGGAATGGCT  
GAAAACAGCGGGCCGGGTAAGTGCATTAACTGACAGCGGAACAGTTACATCAGGGCTG  
GTTATACCTCTACATTGCACTGACATTACCGGATGGTTCCGTTATTCCTTATGAGTTTAA  
AGCAGCATTAAACGGGGTTTAAATGGCTTATTCACCACCGACATTATCATCGCTGATTGC  
CCGTACAGAACAGAATATTGAACAGCGCCTGCCGGGTAGCTGGCCTCAGGCCCGTGAAAA  
AACGCTGAGTGCCATTGCTTATGCTCAGGCGGGCCTTGTGCCGGTTGTCACGAGCATAT

TTCATGGGTTGGACGGCAGATTATCCCGTCGACAGCAGATGAAGATGAGTTGCTGGAGCA  
CTGCCGGTTCTGGGGCGTGCGCCGCAAACAGGGCAGACGCCAGCGGCCGCTGACTGT  
CACCACATCGGCAGCGACCACCATTCCCTGCCGGTACACGCTGGCAGCGTGCTGATGGTGT  
GGTTTACAGCCTGGCTGATACCATTGTGATTGACCGTGCAGGAACGACGGAAATTACCGT  
TACCGCACTGGCTGCCGGTGAAGCAGGAAATACCGGTGAGAATACCCTTTTAACGTTGAT  
CACCCCGGTTGCCTGTGTTGTTCCGATGCCATCACTGTAAAAGGGTTTTCCGGTGGAGC  
TGATATTGAGAGTGCAGCGGAGCTGCTGTCACGGCTGGAATATCGTGTCCAGTATCCTCC  
GTTCCGGCGTAATCAGTTTGATTACGTTTCGCTGGGCACGTGAAGTCAGCGGTGTTACCCG  
TGCCTGGTGTTCGACATGGAAAGGCGGTGGCACAGTCGGGGTGACGTTTGTATGGA  
TAACCGGAGCAATATTTTCCGCAACCGGCAGACGTGGAACGCGTGGCGGATTATATCGC  
CGGTCATACTGACCCGATCACTGGTCTGATTGTCGGACAGCCTGACGGTGTAAATGTCAC  
GGTATTTGCGCCAAAGGCAAAGCCGGTAAATCCACGGATTTATATATCACCGAAGACAGC  
CGAACTGAAACAGGCTATTACCAACGCCATTAATACCATGTTTTTAATGAGGTGATGCC  
GGGCGGCGCACTTGCCCCCTCCCGTATTATCCGTGCGGTGGCAGGTGTTACCGGTCTGGA  
TGATTTTGAAGTGCGTTTCCCGACAGAGATCCAGCGTTCGGAGAATACGGAACCTTAAAC  
AGCGGGGACAATTGAATGGCTGTAACACCCTGGCAGACGGCCTTTCTGCAATTACTGCCG  
TCAGGGCTTGCCTGGAATAAAAGCCCCGACAGCAAATTATCTGCGCTGGCGCAGGCCATC  
AGCGACGTGATTGCCACTGCGGCGGATGATGCGCGGCAAATGCTGCGGGAGCGTTTCCCG  
TCCACATCCCGCTGGTATCTGGGGGAGTGGGAATCATTCTGGGGTTGCCGGACTGTACC  
AGCGAAAACGGCACCCCTGTCCGAACGCCAGCGGGCTGCCGCGAATAAAATGCGTATGACC  
GGCAATCTGAGTCGGCGCTTTTATGAATGGCTGGCTGCGCAGTACGGTTTTACCGTCAGG  
CTGACGGATTCCACAGAAGGCCAGTGGGTACCGCAGGTCAATATTTACGGTATTA AAAAT  
TATCGCAACGCAACGGTGTGATAAATGTTCTGACGCCGTTACGTGTTTATGAATCGGGT  
GCGCTGGAATGTTTACTGGAGAAATATAAACCCGCGCATCAGATTTATAAATTTGTTTAC  
CATGACGGAGATAACTAATGTTTTATATTGATAACGACAGCGGCGTAACCGTCATGCCGC  
CCGTATCCGCCAGCGTAGTGCTATCGTTCGCTGGTTTTTCAGAAGGTGACGGGAATAATG  
TTATCACATGGCCCGGCATGGACTGGTTTAATATTGTGCAGGCGGAGTTATTAACACGC  
TGGAAGAAGCCGGTATTCAACCGGATAAAAACAAAATTAACCAGCTTGCCTGTCCATTA  
AAGCCATTATGAGCAATAACGCGCTGCTGATAAAAAATAACCTCAGCGAAATTA AAACTG  
CCGGGGCATCAGCACAGCGTACAGCACGTGAAAATCTGGATATCTATGATGCCAGCCTGA  
ACAAAAAAGGACTCGTTCAGCTAACAGTGCCACTGACAGCCCCAGTGAACGCTGGCAG  
CCACCGCAAAGCGGTGAAAATTGCAATGGATAATGCCAATGCCCGTCTGGCAAAGACC  
GGAACGGAGCAGATATTCCCAATAAGCCGCTGTTTATCCAAAACCTCGGTTTACAGGAAA  
CGGTAAACAGGGCTAGGAACGCCGTGCAAAGAATGGCGATACCTTGTCCGGTGGGCTTA  
CTTTGAAAACGACTCAATCCTTGCCTGGATTCGAAATACTGACTGGGCAAAGATTGGAT  
TTAAAATGATGCCGACAGCGACACTGATTCATACATGTGGTTTGAAACAGGCGACAACG  
GCAATGAATATTTCAAATGGAGAAGCAAACAAAGCACCACAACAAAAGACCTGATGAATC  
TTAAATGGGATGCTTTGTCTGTTCTTGTCAATGCCATTGTAAATGGCGAAGTCATATCAA  
AATCAGCAAACGGCCTCCGTATTGCTTATGGTAATTACGGATTCTTTATTCGTAATGATG  
GTTCAAATACATACTTCATGTTGACAACTCCGGTGACAACATGGGGACTTATAACGGAT  
TAAGGCCATTATGGATTAATAACGCTACTGGCGCTGTTTCGATGGGGCGTGGTCTTAATG  
TTTCAGGGGATACACTTTCAGACCGTTTTGCTATTAACAGCAGTAATGGTATGTGGATTC  
AGATGCGCGATAACAACGCTATCTTTGGGAAAAATATAGTTAACACTGATAGCGCTCAGG  
CGTTGCTTCGCCAGAATCACGCCGACCGCAAATTTATGATTGGCGGTCTGGGAAATAAGC  
AATTTGGCATCTACATGATTAATAACTCAAGGACAGCCAATGGCACCGATGGTCAGGCGT  
ACATGGATAATAACGGAAACTGGTTATGCGGTGCTCAGGTCATTCCGGGAAATTACGCCA  
ACTTTGACTCCCCTACGTGCGTGACGTTCCGGCTGGGAACTCAGTCACTGACTGGCGGCT  
TGTCTCGTGATTACAAGGCGCCATCCGGTCATGTTATTACAGGTTTTTCATACCAATGGCG  
ACTGGGAAATGCAGGGAGGGGATGACAAGGTTTATATCCGTCCGGTTCAGAAGAATATCA  
ACGGTACCTGGTATAATGTAGCGAGCGCCTGATTATGATGCATCTGAAAAACATTAAGTC  
AGAAAATCCAAAAACTAAAGAGCAATATCAGCTAACAAAGAATTTTGATGTTATCTGGTT  
ATGGTCCGAAGACGGGAAAAACTGGTATGAAGAAGTAAATAACTTTTCAGGACGACACCAT  
AAAGATTGTATACGACGAAAATAATATTATTGTTGCCATAACCAAAGATGCCTCAACGCT  
TAATCCCGAAGGCTTTAGCGTCGTTGAGATTCCAGATATAACAGCCAACCGCCGCGCTGA  
TGATTCAGGAAAGTGGATGTTTAAGGATGGAGCTGTAGTTAAACGGATTTATACGGCAGA  
CGAACAGCAACAACAAGCCGAATCACAAAAGGCCGATTGCTTTCCGAAGCTGAATCAGT  
CATCCAGCCGCTGGAACGCGCTGTCAGGCTGAATATGGCGACGGATGAGGAACGCGCACG

ACTGGAGTCATGGGAACGCTACAGTGTTCTGGTCAGCCGTGTGGATACGGCAAATCCCGA  
ATGGCCACAAAAGCCTGAATAAAAATTAAGGCCCGATAGCGGGCCTTCTCTCATTCTGGT  
TGTTCTGGAAACGTTACTGGCAGGCTGGAGGTGTCTGTGGATTCGACCTTCTGCGCGTAG  
AGCATCCACTCTGTAAATTTTTGTTTATTCTCGTCGGAAATGATGCCAGCCGTAGCTGT  
GAGTCCCATAGCTGTGTTTTATCCCTGACGAGCTGTAGCAGGCTTTGCTTTTTCATTTTCC  
GCTTGTGCTCTGCTCTTCTCGGTATAAGTTCGCTTATCACTACACCATCTTTGAAC  
ATCCATTTACCCGAAATATCAGCCCGGCGATTTGCTGTAATATCAGGAACCTCAACGACG  
TTTGCGCCTTCTGGATTAATTGCTGAAACATCCTTTTTCAATACAAATAATAACGCCGTTG  
TGGTCATAGACCATTTTCAACGTATCAGGCTGAAAGTTCCTTTTGTTCCTCATAACCAGTTT  
TTCCCATCCTCTGTATAAAGCCATTTGATGTTAAATTGTTTCGTTAGCTGGTATTGCTCT  
TTTGTTTTAGGGTTGCCAGCAGTAATATTTTTTAAGTGCATCATAATTAATAACTCCCCG  
CGTTATAACCACGTTCCATTAATGCAATACTGAATTGGCCTTGCCTGAGTTGTATCAATTA  
ATTCATCACGGTTTCCGTTAACTGAACCCGTAACGACATAACCTGACCTGTCAGACCAGC  
CGGGACCATTCCATGTCTGAACAGATGACAGACCGCCAAGACGAATACCTGTAATAAACC  
TTGAGTTACATTCTGCCTGCGTATATGCACCAACATCTCCCGCTGATGGCTTACGTGTTG  
TGGTGTAATTTCTGACCAGTCAGCTTTCGAATCCGTAACCATCACGCGCTGAACGATAAA  
AAATACGCCCGTTCCCTGTAATTCACACGGAACGTACGGCAGGGCAACTCCCCGTATTCA  
TATTGAAGTGGAGGATTAATGTCGATGCGCCACCAATATTTGCGTTATAGACCCCGCTAT  
TCCAGTTCCAGCCAACAGCTTATCATTTCGACAGTGCTTCTGTTTGTCTAAAGCAA  
ATGCAGGCTGCTGGTTTTTCGTGTTGTAGTCTCGTCGCCAGCCAGGAGCATAAGCATCAC  
CATGATTAATATAAGTGAATTGAGCGTTAGTGATTCCGCCGCGCTGGACGTACTCGGCG  
TAGTAACGCGTATGGTCATTGCGCCGCGAGTGCCAATAACTTCCACCACAGCACCTGCAA  
GACAAATATTTCCGCAACCTGTATCTGTAATGACCTTATTGTTTGCATAAGCCCATGAGC  
CTTTGCACATCCAGTAAGGATGGTTAAATGCCCCCTGACTCTCCAGCCACGAAATAAATT  
GTGCGGTTGTCCAGACCTGACTATCGCCACCAATATTCAGCCATGCGCTATATGCGCGAC  
AGGCCCAATATTTTTGGTGAAGGTATCTTTTCTGGAATATCTGCGCCGTTCTGGTTTT  
GCTGTAATGCGCCAGAAGCCTGATTTACCGTTTCTGTAAACCGAGGTTTTGGATAATGG  
TCGATTTTGGCACGCATGGCATGATTGGCGTTTTAAACAGGAGATCCAGAGTGCTGATT  
GGCTATGTAAGGGTATCAACAAATGACCAGAATACAGACCTGCAACGAAACGCTCTTGT  
TGTGCAGGATGTGAACAAATATTTGAAGATAAATTAAGCGGAACAAGGACAGACCGACCG  
GGATTAACCGCGCTTTAAAGCGCCTTCAAAAAGGTGACACACTGGTTGTCTGGAAACTG  
GATCGCCTCGGGCGAAGCATGAAACATTTGATTTCTCTCGTAGGGGAATTACGAGAGCGA  
GGGATTAATTTTCGCAGTCTTACTGACAGTATTGATACGTATCTCCAATGGGGCGTTTT  
TTCTTCCACGTTATGGGTGCCCTGGCTGAAATGGAACGAGAATAATTATCGAGCGAACG  
ATGGCTGGACTTGCTGCCGCCAGAAATAAAGGCCGTATTGGTGGGCGACCACCTAAACTA  
ACCAAAGCGGAATGGGAGCAGGCCGGGCGTTTATTAGCACAAGGAATCCCCCGCAAGCAG  
GTTGCATTGATCTACGATGTGGCCCTGTCAACTCTGTATAAAAAACACCCCGCGAAACGA  
GCGCATATAGAAAACGACGATCGAATCAATTAATTCGATCGGTAATACAGATCGATTATG  
CCCCAATAACCACACTCAACCCATGATGTTTTTTAAGATAGTGGCGAATTGATGCAAAGG  
AGGTGAGATGAAATCAATTCGCTGTAAAACTGCAACAACTGTTATTTAAGGCGGATTC  
CTTTGATCACATTGAAATCAGGTGTCCGCGTTGCAAACGTCACATCATAATGCTGAATGC  
CTGCGAGCATCCCACGGAGAAACATTGTGGGAAAAGAGAAAAAATCACGCATTCTGACGA  
AACCGTGCCTTATTGAGTATGAAGGCCAGATTGTTGGCTATGGTTCAAAGGAGCTGCGCG  
TTGAAACCATATCCTGCTGGCTGGCCCGCACAATTATTCAGACAAAGCACTATTCCCGCC  
GTTTTGTGAATAACTCTTACCTTACCTGGGGGTATTCAGCGGACGCGATCTGGTTGGCG  
TTCTCCAGTGGGGATATGCCCTTAACCCCAACTCAGGTCGTCGTCGTGCTTGAACCG  
ATAACCGGGGCTATATGGAGTTGAACCGCATGTGGCTACACGACGACATGCCCGCAACT  
CTGAATCACGGGCCATCAGCTACGCGCTGAAAGTTATCAGATTACTGTATCCGTCAGTGG  
AGTGGGTTCAAGTCTTTGCAGATGAACGCTGCGGACGCGCAGGCGTTGTGTATCAGGCGT  
CGAATTTTGATTTTATTGGCAGTCATGAAAGTACGTTCTACGAGCTGGATGGTGAAGTGGT  
ATCACGAGATAACGATGAACGCGATTAAGCGAGGTGGACAACGAGGCGTGTATTTACGGG  
CTAATAAAGAGCGTGCCGTGGTACACAAATTTAATCAGTATCGCTACATCAGATTCCTGA  
ACAAACGAGCAAGGAAGCGGCTAAATACCAAATTTCAAGGTTTACCCATACCCTAAGT  
GATCCCCATGTAATGAATAAAAAGCAGTAATTAATACATCTGTTTCATTTGAAGCGCGAA  
AGCTAAAGTTTTTCGATTTATCGTGAAACGCTTTCGCGTTTTTCGTGCGCCGCTTCA

>NewGenomeName\_294

ATGGTTAGGAATCGGCCGTTTGCCTTTCAGTTATGAGTCATTCTTTCGCGCAAGTCCCGTCA



GCGCGAATTCAGAGAAGTTCTTTTGATAGATCTTGTGGTTTAAAACTACATTTCGACGCC  
GGTTACCTAATCCCTATCTTTTGCATGAAGTTCTCCCTGGAGATACTTTCTCCTTGAAA  
GAGGCGTTTTTAGCACGTATGGCAACGCCTATCTTTCCTCTTATGGATAATTTGCGTTTA  
GATACGCAGTATTTCTTTGTTCTCTTCGACTGTTATGGTCGAATTTCCAAAAGTTCTGT  
GGAGAACAAGATAATCCTGATGATTCTACAGATTTTCTTACCCCCATTTAACCCTCCT  
GCTGGGGGATTTACTGAAGGATCGATCCATGATTATCTTGGTCTACCTACTAAAGTTGCT  
GGAGTTCAATGTGTTGCGTTCTGGCACAGAGCTTACAATTTGATTTGGAACCAGTACTAT  
CGCGACGAAAACATTCAGGAATCTGTTGAAGTGCAGATGGGAGATACTACTACAGATGAA  
GTGAACAATTATACGTTCTTAAGCGCGGGAAGCGTTATGATTACTTCACTTCATGTCTC  
CCTTGGCCACAAAAGGTCCTGCAGTAACAATTGGTGTGGAGGCAAGGCTCCAATTGAA  
GGATTGTATATGAATGTAAATTCAAGCAATCCTGTAGGAAAGTTTGTGGATTCTCAG  
TCTACTCCTCGTGTGCTTCAAGATTTGCAAGGGAATAAACTTTCTGGAATAGCTGCGTAT  
AATCAGACTGGGAAGCATGTGTATGTGAATTTCTGCTTGGTATACGGTGACTCCTCAGTCT  
GAGCCTGCAGCTACTTTAGAGAATGGTAATTATTACACTACTCAGAAACCTCAGATTTAT  
GCGGATTTAGGTGCAACTTCTCCTGTGACGATCAATTCTCTTCGTGAAGCCTTCCAATTG  
CAAAGCTTTATGAAAGAGATGCTCGTGGTGAACAAGGTACATTGAGATTATCCGTTCC  
CATTTCAATGTGCAGTCTCCAGATGCAAGGTTGCAACGTGCAGAGTATCTTGGAGGTTCT  
TCAACTCCTGTGAATATTTCTCCGATTCCACAGACTTCTCAACAGACTCTACATCTCCT  
CAAGGAAATCTTGCTGCTTATGGTACAGCGATTGGATCGAAGCGAGTTTTACAAAAGTCT  
TTCACAGAACATGGTGTAAATCCTTGGATTAGCCTCTGTACGCGCCGATCTCAACTATCAG  
CAAGGTTTGGATAGGATGTGGTCACGAAGAACACGCTGGGACTTTTACTGGCCTGCTCTT  
AGCCATTTAGGTGAGCAAGCTGTGCTCAATAAAGAGATCTATTGTCAAGGTCCTTCAGTT  
AAAAATTCTGGAGGAGAGATTGTGGATGACCAAGTCTTTGGATATCAGGAGAGATTTGCG  
GAGTATCGCTATAAGACTTCGAAAATTACCGGCAAGTTCCGATCAAATGCTACAAGTTCT  
TTAGATTCATGGCATTAGCTCAGGAATTTGAGAATCTTCCAACACTTTCTCCGGAGTTT  
ATCGAAGAAAATCCTCCTATGGATCGTGTCTTGTGTAAGTACTGAGCCAGATTTTCTT  
TTAGATGGTTGGTTTTTCAATTGCGTTGCGCAAGACCAATGCCTGTTTACTCTGTCCCAGGC  
TTCATTGATCATTTCTAATTTCTACTCAGTTTTTTCGGTTTGATAAAGCAAACCTCACGTT  
GTAGATAAGTGAGTACGGTGAAAACCAAACGGAAGCTGAGGCGTAAAAATGTGGAGAG  
TTTATGAATCCCGAACAACCTTACGAATACTCTCGGTTTCCAGCAGTTTCTGGAGTTGCCCAA  
GGATTATCCTTTCTCCCTGGAATAGCTTCTGGAGTTTTAGGATATCTTGGCGCACAGAAA  
CAAATGCGACTGCGAAGCAAATTGCTAGAGAGCAAATGGCTTTTTCAGGAGCGCATGTCT  
AACACGGCATACCAACGTGCTATGGAAGACATGAAGAAAGCTGGCCTTAAACCCTATGTTA  
GCTTTTTCTAAAGGCGGTGCTTCTTCTCCTGCAGGAGCGTCATGGTCTCCGAATAATCCT  
GTAGAAAGTGCGATGAATTCTGGCCTTGCCGTGCAGAGACTTACTTATGAACGTAAGAAA  
ATGCAGGCAGAGCTTCAAGATCTTCGTGAGCAGAACCGTTTGATTAGAAACCAAGCAATA  
CGTGAAGGCTATCTCGCAGAACGAGATAAATATATGCGTATTGCTGGAGTTCTGTAGCC  
ACTGAGATGTTAGATAGAACTTCAGGTCTTCTTTTTCATCTTCAGCTAAGGCATTTAAGAAT  
CTTTTTTCAAGAAAAGGAAGGTAGATGTTTAAAGTCGGCATATTCCGAAAAAAATCTGTA  
AAGATGAAGTTACACAGAAATCTTTGACCCAACAACAACAAGATGAGTGTGATATT  
AACAAATCGTCGCAAAACTCAACGCTACAGGCGTTTTAGAGCACGTAGAGCGACGATCT  
CCACGTTATATGGACTGTATGGACCCTATAGAGTATTCCGAGGCTCTAACGTCGTTATT  
GAGGCTCAGGAGCAATTTGACTCTTACCAGCGAAAGTTCGTGAACGTTTTGGAAATGAT  
CCGGAAGCGATGCTCGATTTCTTGAGCCGTGAAGAAAATTATGAAGAAGCAAAGGCGTTA  
GGTTTTGTTTATGAAGATGGAATCTGGAGCACCTCAAACATTTTTTGAAGCTGGTCTT  
AAAGATGATCAAAATGTGGCAAACCAAGAACCTGGATTAGCCAAAAAATGAGCAAATTT  
GTGCAAAAAAGTGTGCAAAAAATGCCAAAAAAGGGCCAAAAAATTGCCCCAAAAATCGG  
AGCATTTTACGAGAGAAAAACCACTAGCGTATAACAGTCTACTTGATCTGTTATACGCTA  
GGTGATAGCAACTTCAAGGAAATTTTTTAAAAACTAAGCCCTATTTAGGGCCCAAAATTT  
AAGCTTAAATGAGGTTAAAAATGGCACGAAGAAGATACAGACTTCCGCGACGTAGAAGT  
CGAAGACTTTTTTCAAGAACTGCATTGAGGATGCATCCAAGAAATAGGCTTCGAAGAATT  
ATGCGTGGCGGCATTAGGTTCTAGTTTTGGACGTTAAGGAAATCTTTAAGGTTATGCTAA  
ATTAGCTGCTATGTATAATTTGGCTCGTGACGAATGTCATATTCGCACCATTTAAATTTG  
ACACAGCAGTTGAAGGCTTAGATGTTGATTTTTAATGTCTTAGCCTTCATTTTTGGTTG  
TTGTACCTTTTTAAATGAGGCATTAATGATTTGTGCCTACCCTTTCGTATGTTTTATAGAT  
TCTGATAATCAACTCTTTTTCCCAAAGGTGTGAAGTCTTCTAAACCTTGGGATAAAGTC  
CGTGAATTAATGCTTTAGAGCAAGCGCAACCCGAAGAGTATCGAGTTCGTTGGGTTTTG

ATGCCTTGCCGTAGGTGTAAGTTTTGCAGAGTGCAGAATGCAAAGATTTGGTCGTATCGT  
TGCATGCACGAAGCGTCTTTATATTCTCAGAATTGTTTTTTAACTTTGACTTATGAGGAT  
CGTCATCTTCCAGAGAATGGTTCTTTGGTAAGAGATCATCCTCGTCTGTTTCTTATGCGG  
TTAAGGGAGCACATTTATCCTCATAAGATTCGTTATTTTGGATGTGGTGAATATGGATCG  
AAATTACAAAGGCCCTCATTATCATCTTCTTATTTATAATTACGATTTTCTGATAAGAAG  
CTCTTGAGTAAAAAGCGTGGCAATCCTCTCTTTGTTTTCTGAGAAGTTAATGCGGCTTTGG  
CCGTTTGGATTCTCTACAGTGGGATCTGTAACGCGCCAGAGTGCAGGTTATGTAGCGCGG  
TATTTCTTTGAAGAAGGTGAATGGAGATATTTCTCAAGATCATTACGGTCAAAGACTTCCG  
GAGTTTCTTATGTGTTCTCTTAAACCAGGAATAGGAGCGGATTGGTATGAGAAATATAAA  
TGCGATGTCTATCCTCAGGATTATCTTGTGTGCAAGATAAAGGGAAGTCTTTTAAGACG  
CGTCTCCACGTTACTATGATAAGTTACATTCTCGGTTTGATCCGGAAGAGATGGACGAG  
GTCAAACAAAACGTATAGAGAAAGTTATGGCTTTGCCTGAGCTAACTCAGGATAAGGCT  
GAGGTGAAGCAATATATTTTCAATGACCGTACGAAGAGACTCTTTAGAGACTATGAGGAG  
GAGAGTTACTAACTTTTTTAAAAAATAGGAGCTTTTTTCAATGAAAGTTTTTACAGTGT  
TTGATATTTAAACGGAATTTATCAGCAGCCTTTTTTTATGCAGGCTACGGGAGCGGCAA  
TCAGAGCGTTTTCCGATATGGTAAATGAGGATCCTACAAAGAATCAATTTGCCGCGCATC  
CTGAAGATTACATTCTCTATGAGATTGGATCTTACGATGACTCTACTGGAACTTTTATT  
CCTTAGATGTGCCTAAAGCCTTAGGAACAGGCTTGGATTTAAGCACAAACAGTAGGGAA  
GAT

>NewGenomeName\_295

GATCCTTCGAAAAATCAATTTGCCGCGCATCCTGAAGATTACATTCTCTATGAGATTGGA  
TCTTACGATGACTCTACTGGAACCTTTCATTCCCTTAGATGTGCCTAAAGCCTTAGGAACA  
GGCTTGGATTTTAAGCACAAACAGTAGGGAAGATATGGTTAGGAATCGGCGTTTTGCCTTC  
AGTTATGAGTCATTCTTTTCGCGCAAGTTCCATCAGCGCGAATTCAGAGAAGTTCTTTTGA  
TAGATCTTGTGGTTTTAAAGACTACATTTCGACGCCGGTTACCTAATCCCTATCTTTTGC  
TGAAGTTCTCCCTGGAGATACTTTCTCCTTGAAAGAGGGCGTTTTTAGCACGTATGGCTAC  
GCCTATCTTTCTCTTATGGATAATTTGCGTTTAGATACGCAGTATTTCTTTGTTCTCT  
TCGACTTATATGGTCGAATTTCCAAAAGTTCTGTGGAGAACAAGATAATCCTGGAGATTC  
CACAGATTTTCTTACCCAGTTTTAACCCTCCTAGTGGGGGATTTACTGAAGGATCAAT  
CCATGATTATCTTGGTCTACCTACTAAAGTTGCAGGAATTGAATGTGTTGCGTTCTGGCA  
CAGAGCTTACAATTTGATTTGGAACCAGTACTATCGTGATGAGAATATTCAGGAATCTGT  
TGACGTGGAAATGGGAGACACCACCTCTAATGAGGTGAATAATTATAAGCTTCTTAAGCG  
TGGGAAGCGTTATGATTACTTCACTTCATGTCTCCCTTGGCCACAAAAGGTCCTGCAGT  
GACAATCGGAGTTGGAGGTATTGTTCTGTTCAAGGTTTAGGAATTCATGGGGGAATTC  
TAGTGCTCCAAATCCTATAACTGCTTCTAGTTGGATAAATTCTGTTAATCCTACATTTAT  
AAATTCTACAACGCCGACGCCTACAGGAACGAATCAGATTTTGAATTATGGTCAGGCGTA  
TTATATTAAGAAGCCTGGAGAAGCAACTACAGATCCTACACCTAGGGCTTATGTAGATTT  
AGGTTCTACTTCTCCTGTGACGATTAATTCTCTTCGTGAAGCTTTCCAATTGCAAAGCT  
TTATGAGAGAGATGCTCGTGGCGGAACAAGGTACATTGAGATTATTCGTTCCCATTTCAA  
TGTGCAGTCTCCAGATGCAAGGTTGCAACGTGCAGAGTATCTTGGAGGTTCTTCAACTCC  
TGTGAATATTTCTCCGATTCCACAGACTTCTCAACAGACTCCACATCTCCTCAAGGAAA  
TCTTGCTGCTTATGGTACAGCGATTGGATCGAAGCGAGTCTTCACAAAGTCTTTCACAGA  
ACATGGTGTAAATCTTGGATTAGCCTCTGTACGCGCCGATCTCAACTATCAGCAAGGTTT  
GGATAGGATGTGGTCACGAAGAACGCGCTGGGACTTTTACTGGCCTGCTCTTAGCCATTT  
AGGTGAGCAAGCTGTGCTCAATAAAGAGATCTATTGCCAAGGTCCTGCAGTTAAGGATGC  
TCAGAAATGGTAATGTTGTTGTGGATGAGCAAGTCTTTGGATAATCAGGAGAGATTTGCCGA  
GTATCGCTATAAGACTTCGAAAATCACTGGGAAGTTCCGATCAAATGCTACAGGTTCTTT  
AGATGCATGGCATTAGCTCAGCAGTTTGAAGAATCTTCCAACACTTTCTCCAGAGTTTAT  
CGAAGAAAATCCTCCTATGGATCGTGTGTTGTTGCTGTAGATACTGAGCCAGATTTTCTCT  
AGATGGTTGGTTTTTCATTGCGTTGTGCAAGACCAATGCCTGTCTATTCTGTTCCAGGTCT  
TATTGATCATTCTAATTTCCACTCAGTTTTCCGGTTTGATAAAGCAAACCTCACGTTCTG  
AGATAAGTGAGTACGGTGAAAACCAAACCGGAAAGCTGAGGCGTAAAAATGTGGAGAATT  
TATGAATCCCGAACAACTCACGAGTACTCTCGGTTACAGCAGTTTCTGGAGTTGCCAAGG  
ATTATCCTTCCTCCCTGGAATAGCTTCCGGAGTTTTAGGATATCTTGGCGCACAGAAACA  
AAATGCGACTGCGAAGCAAATTGCTAGAGAGCAAATGGCTTTTCAGGAGCGCATGTCTAA  
CACGGCATAACCAACGTGCTATGGAAGACATGAAGAAAGCTGGCCTTAACCCTATGTTAGC  
TTTTTCTAAAGGCGGTGCTTCTCTCCTGCAGGAGCGTCATGGTCTCCGAATAATCCTGT

AGAGAGCGCGATGAATTCTGGACTTGCCGTGCAAAGACTTACTTATGAACGTAAGAAAAT  
GCAGGCAGAGCTTCAGAATCTTCGTGAGCAGAACCGTTTGATTAGAAACCAAGCAATACG  
TGAAGGCTATCTCGCAGAACGAGATAAATATATGCGTGTTGCTGGAGTTCCTGTGGCTAC  
TGAGATGTTAGATAGAACTTCAGGTCTTCTCTCATCTTCAGCTAAGGCATTTAAGAATCT  
TTTTTCAAGAAAAGGAAGGTAGATGTTAAGTCGGCATATTCCGAAAAAAAAATCTGTAAA  
GATGAAGTTTACACAGAAATCTTTGACGCAACAACAACAAGATGAGTGTGATATTAA  
CAACATTGTCGCAAACTCAACGCTACAGGCGTTTTAGAGCACGTAGAGCGACGATCTCC  
ACGTTATATGGACTGTATGGACCCTATGGAGTATTCCGAGGCTCTAAACGTCGTTATTGA  
GGCTCAGGAGCAATTTGACTCTTTACCAGCGAAAGTTCGTGAACGTTTTGGAAATGATCC  
GGAAGCGATGCTCGATTTCTTGAGCCGTGAAGAAAATTATGAAGAAGCAAAGGCGTTAGG  
TTTTGTTTATGAAGATGGAACCTTCTGGAGCACCTCAAACATTTTTTGAAGCTGATCCTAA  
AGATGATCAAAATGTGGCAAACCAAGAACCTGGATTAGCCCAAAAATGAGCAAATTTTGT  
GCAAAAAGTGTGCAAAAATGCCCAAAAAGGGCCAAAATGCCCCAAAATCGGAG  
CATTTTACGAGAGAAAAACACCTAGACTTAAACAGTCTACTTGATCTGTTTAAAGTCTAGG  
TGATACCGATTCAAGGAAATATTTGAAAAAATAAGCCCTATTTAGGGCCCAAAATTTAAG  
CTTAAAATGAGGTTAAAAATGGCACGAAGAAGATACAGACTTCCGCGACGTAGAAGTCGA  
AGACTTTTTTCAAGAAGTGCATTAAGGATGCATCCAAGAAATAGGCTTCGAAGAATTATG  
CGTGGCGGCATTAGGTTCTAGTTTTGGACGTTAAGGAAATCTTTAAGGTTATGCTAAATT  
AACTGTCATGTATAATTTGGCTCGTGACCGAATAGTCATATTCGCACTGAATAAATTGTA  
CACAAAGTTGAAGGCTTGGATGTTGATTTTTAATGTCTTAGCCTTCATTTTTGGTTTTGT  
TGTAACTTTAAATTTAATTCAGGCATTTATGGCGTGTGTCTCTCCTTTCGTATGTTTTATA  
GATTCTTATAACCAGCTCTGGTTTCCCAAAGGTAAGAAGTCTCCTAAACCTGGGATAAA  
GTCCGTGAATTAATTTCTTTTGAGCAAACCTCAACCTGAAGAGTATCGAAAACGATGGGTT  
GTGATGCCTTGTCTTAAAGTGTAGGTTTTGCAGAGTGCGGAATGCAAAGATTTGGTCGTAT  
CGTTGCATGCACGAAGCGTCTTTATATTCTCAGAATTGTTTTTTAACTTTGACTTATGAG  
GATCGTTATCTTCCAGAGAATGGCTCTTTGGTGAGAAATCATCCTCGTTTGTTCCTTATG  
CGATTGAGGAAAGAGATCTATCCTCATAAAAATTCGTTATTTTGGATGTGGTGAATATGGA  
TCGAAATTACAAAGGCCTCATTATCATCTTCTTATTTATAATTACGATTTTCCTGATAAG  
AAGCTCTTGAGTAAAAGCGTGGCAATCCTCTCTTTGTTTTCTGAGAAGTTAATGCGGCTT  
TGGCCTTTTGGATTCTCTACAGTAGGATCTGTAACGCGGCAGAGTGCAGGTTATGTAGCG  
CGATATTCTTTGAAGAAAGTGAATGGAGATATTTCTCAAGATCATTACGGTCAAAGACTT  
CCGGAGTTTCTTATGTGTTCTCTTAAACCAGGAATAGGAGCGGATTGGTATGAGAAATAT  
AAACGCGATGTTTATCCTCAGGATTATCTTGTTGTGCAAGATAAAGGGAAGTCTTTTAAAG  
ACGCGTCTCCACGTTACTATGATAAGTTACATTCTCGGTTTGATCCGGAAGAGATGGAA  
GAGATCAAACAAAAACGCGTAGAGAAATTTATGGCTTTGCCTGAGTTAACTCAAGATAAG  
GCTGAGGTGAAGCAATATTTTTCAATGACCGTACGAAGAGACTCTTTAGAGACTATGAG  
GAGGAGAGTTACTAACTTTTTTAAAAAATAGGAGCTTTTTTCAATGAAAGTTTTTACAG  
TGTTTGATATTAAGACGGAAATTTATCAGCAGCCTTTCTTTATGCAGGCTACGGGAGCGG  
CAATTAGAGCGTTTTCCGATATGGTAAATGAG

>NewGenomeName\_296

ACTCACGGACCCACGAAGTGCGGTCAGTGTATAGAGTGCCGTTTAGCTTATTCGAGAGAA  
TGGGCTATACGTATCACCCACGAGCAACAGATGCATCAGGTGTCTTGTATGCTGAACCTC  
ACGTATAACGATTCATGGTTGCCTGAGCATGGTCAACTTTATAAAGATGACCTTCAACGC  
TTTTTTAAGCGCTTGCGTAAGGCGGGTTTTAAGTTTTCGTTACGTGGCTTCGGGTGAATAT  
GGAGATTTGTCTAGAAGACCTCACTTTCATATTGCACTCTTTGGCGTTGATTTTTCTAAC  
GATCGTTTGTGTTTGGTTCGCGCTGTTGGCGGTGATCGCACTTTTACCTCCGCCATGATT  
TCTAAGTTATGGCCTAAGGGTAATCATCTTATTGGTACTCTTAAATTTGAGTCTGCAGCA  
TACATTGCCCGATATATCTTGAAAAAGATTAAGGGCTTGCAAAAGCCTGAACCTTTGTAT  
GTTGACGAAGTCACTGGTGAAGTTGTTTTGCCTAATCCCGAATTTCTTGTAATGTCCAAA  
GGCATTGGCCGTTCTTGGTTTAGGGATTTTTTtATGTCGGATGTTTTTCCGACTGCTTCT  
GTCATTACCACTCAGGGTACCAAGCCCTGTTCCACGTTTTTATAAACTTTGTTAAAG  
GAGGTTGGGTCCGATCTTGCTCTGGACATGCAGTATAGATCTTCGGTGAGAGCCGAATTA  
GATCTTGAGCGTAAAGCTTATGAGGATCTTCCGATCCGTAAAGCTTCGCGTTCTCTCGTT  
AGCTCTTCTAGAGCTTCTCTTTCAAACGTATAATTTAAAGGTCATATCATGTTTTTATT  
TGTTGTTTCTGTTAAAGATCGCGCAGCCGATGTTTTTAAACCGTCCGTTTTTTGTTCCCTCA  
TCGTAATGTTGCTATCCGTGATTTTACTGACGAAGTCAATCGCGTAGCTGCTGATAATCA  
GCTTAATAAACATCCCGATGATTTTGATTTGTATTTGTTAGGTGAGTTTGATGATAACAA

GGGTGAATTTTTCAATACTACACCTCAGGTCCTTGTCCTGCGCAAGGATGTAATCCAGTC  
TTCATGACCCTTGCACCCCTTCGGGGGTGCTTTTTTtCCATTTTTtCTTTGGAGTATTTA  
TGTTTCACAATAAATCGGTTGATGCACATAATTTTGCAATGGTCCCTCGTGCTGACATCC  
CCCGTTCTCGATTTGCTATGCAGAAAACCTCTTAAGACTACTTTTGATAGTGGTTATTTAG  
TGCCTATTATGTGCGAGGAGGTTTTACCTGGAGACACTTTTAATGTTAATGTTACGATGT  
TCGGTCGCTTGGCTACCCCAATTTTTCCAGTTATGGATAACCTCCATTTGGACTCCTTCT  
TTTTtCTTTGTTCCCTAATCGTTTTGGTTTTGGACGAATTGGGTTAAGTTTATGGGGGAGCAGG  
ATAACCCTGCCGATTCTATTTCTTACACTATCCCTCAACAAGTATCCCCAGCTAGTGGAT  
ACTCTATCGGGTCCTTACAGGACTACCTTGGTTTTACCGACGGTTGGTCAGGTCAGTGGTG  
GTGCTACGGTTTTACATTCGGCGTTACCTACCCGCGCCTATAATTTAATTTATAATCAAT  
GGTTTAGGGATGAGAATTTGCAAAATTCTCGAACTGTTGATAAGGGCGATGGCCCTGATG  
CTACTCCTTCTACTACTTATGCTATTCAACGTCGCGGTAAGCGACATGATTATTTTACTT  
CTTCTCTTCCCTTGGCCTCAGAAGGGTGGTACTGCTGTTACTCTTCCCTTAGGTACTTCGG  
CGCCAATTAAGGCTAATGCTGTAGTTAATGATCGTTTAAGCATTTTGAATAATTCTGGTG  
TTGCATCTGATTTTTATACTCCTGCAAGTACTACTCAAACCTGCTTTAGGTAATGCTAATG  
CTACTGCTAAGGCTTTGTATGCTGATTTGTGCGCTGCTACTGCCGCTACTATTAATCAGC  
TTCGTC AATCTTTTCAAATTCAAAAGCTTTTAGAGCGTGATGCTCGTGGTGGTACTCGTT  
ACACTGAGATTTTGC GTGCACATTTTGGTGTACTTCACCTGACGCTCGTTTACAGCGTC  
CTGAATATTTAGGTGGTGGTTCTACCCCTATTAATATTTCTCCTATTGCCCAAACCTAGTG  
GTA CTGGTCAGACTGGCCAGACCACTCCGCAAGGTAATTTGGCTGCTATGGGTA CTTACA  
CTGCTCAA AACCATGGTTTTACTCAATCTTTTGTGTAACATGGTTATATTATTGGTGTG  
TTTCTGTTTCGCGCTGATTTGACTTATCAGCAAGGTTTACGGCGCCATTGGAGCCGTTCTA  
CTCGTTACGATTTTTTATTTTCTGCTTTTGCTATGCTTGGTGAACAAGCTGTTTTAAATA  
AGGAAATTTATGTA ACTGGTGGTTCTTCTGATTCTAATGTTTTCGGTTATCAGGAGCGTT  
GGGCGGAATACCGCTATAACCCTTCTGAGATCACTGGATTGTTTTAGATCTACTGCTTCTG  
GGACTATTGACCCTTGGCATTATTCTCAGAAGTTTACTTCTCTTCCCTACTCTTAATTCTA  
CTTTTATTGAAGATACTCCGCTCTTGCTCGCAATTTGGCGGTTGGTGTGCTGCTGCTAATG  
GTCAGCAGTTTTCTTCTTGATGCGTTTTTtAATATTAACGCTGCTCGTCCCTCTTCCCATGT  
ACTCTGTACCTGGTCTCATTGATCATTCTAAGCCTCTATGGTTTTGCTTGCAAACCATTG  
AGGGAAAGGTTTTATGTTTTGATTGGCTTACTCCTGAGATTGCTTCTGCTGCTGCTACTGT  
TGGTGGTTTTCTTGGTCAACAAGAACTAATACGACTAATCGTCAGATTGCTTCTGAAAa  
TACGGCTTTTCAAGAGCGtATGTCTAACACTGCTTATCAACGGCAGGTTGCGGATATGCA  
GGCTGCAGGTCTTAATCCTATGCTCGCTTATATAAAGGGTGGTGGTGGTCTTCTACTCCTAC  
TGGTTCTATTGCTCAAGTTCAGAGTCCTTATGCTGCTGGTATTTCTTCTGGTGAGTCTGC  
TGCCCGTTTCGTTTTTAACTCAGAAACAAGTGCCGAAGGCTGTTGCTGAGACTAAGAATGT  
TACTGCCCAGACCGAGAATGTTGGTGcTGATATtGTTATGAAGCGTGCTAATACTATGTA  
TCTTCTTGCTCAGGAGAAGGTTGCCGGTGTACTGCTGATGAGAAGCGTTCTCATATTA  
TGTTCTTGAATCTCAAGCTAAGAAGATATCTGAAGAGATTAAGAATATTCCTACTGAGGG  
TGCTCGTTTAGCAGCTGTTGTTAAGCAGCTTGCTGCTTCTTCTGATCTTATTGGGCGACA  
AGCCCTTACGGAAGATCAGCGTCGTCTTTCAGATGACTGCTTTAGCTGTTAAGACTCTTTA  
TGAGTCTGATTTGTTGAAGTATGATTTGGAAGCTGTTGATTTATCTGGTAATCTTGGTAA  
AGATTTTGGGCAATTTAAGCCTATTATTGATACTGTTATGCAGATTGTTTCGATTCTTAA  
ACGTTAAGGAGTTTGTATGAAGTTTGGCTTCTGCTTATGATAATTTTATTCTCGcTCTAC  
TGAGTTTGGTTTGAAGTGGTTGGACGATTCTTTGACTCAGCAGCAATTTTCGCGATGAGTC  
TGATATTAATAATATCGTCGATCGTTTTATGAAGACTGGTCATTTACCTGATCCAGTCTC  
TATGCCCTCAATATGTTGATTATGAGGGTGTTTTTGATTTTCAGTCTGCTATGAACGTAGT  
TCGCCAGGCTGATGAGAATTTTATGCGTATGGACGCAAAAGTTCGTTCTAGATTCCATAA  
TTCTCCTCAAGAATTTTTGGAGTTTTTCGCAGATCCTGCGAATACTGAGGAGGCGGTTTCG  
CCTTGGTTTTGGCCGTGGCCAAACCTAAGGATGTCCCTTCCGATTCGGCTGAATAGCCGTT  
GTAGGCACAGTTcGCTACTTGATGTA ACTGTGCCTATTGACACCTTTTTtGTTTTCTGTT  
CTACTGGAGTTACTTATGAAACCTCTTCATCGTCACAATGCCAATAAGCATGCAAGCGCT  
TCTTCTTTTAAACGTAATATTTCAACTACCAAGTTGATTAACGTC ACTGCTGGTCCCATG  
CGTGGCGGAATTCGTTTGTAGGCTTAGGTTGTGTACATCTTTGGATAACATCCA

>NewGenomeName\_297

GTCAACAAAATGTATAACACCTTATCATGTACAAGACAAGTTCACTGGAAACTACATAACC  
AGTGCCATGCAGTAAATGTCCCCATGTATGAAAAGGAGGACTAGTGGATGGAGTTATAG  
ATTGATAAAAAGAGGGCGAACGTTCTATTAGTGCATTATTCGTTACATTAACATACGACAC

TGAATATGTTCCAATAACTGAAAAAGGATATATGAATTTAGATAAAAAGTATCCAAAA  
ATTCTTTAAAAGATTACGGAACTATCCAAAACAAAATTAATATTATGTATGCGGAGA  
ATATGGAACATAAAAAGATGCGCCCTCATTATCATATAATATTATTTAATGCAAATAAAGA  
ACATATACAAAAAGCATGGATATTAATAACAAACCATTAGGTACAATGCATATAGGACA  
AGTAAATGAAGCAAGTATAGGATATACATTAATAACATGACTaAAAAAGGTAAAATACC  
ATTACATTACAATGACGATAGACAAAAAGAATTTAGTTTAATGTCTAAAAGATTAGGAGA  
CAATTATATTACTAAAAATATGATAAAATGGCACAAAGAAGATTTAGAAAAACGTATGTA  
TGTAACATACCAGATAACAAAAAGATAGCAATGCCGAGATATTATAAAGATAAAATATA  
TAATGAATTAGAAAAAGATAAAATAGCTATGTATTTAAAAGACATAGCAGAAAAAGAAAC  
TGAAAAATTACAAGAAGAATTAGGAGAAACATACGAAAAAGTAATGGTAGAAAGACATAT  
AAATCAATTTAAAAGATGTACAAAAATGCCGAAATAGGCCGTCAATATGAATAAATCAA  
ACGCaAAAAAATACATTATGCAAAAAGTTAAAAATTCGTTAAATTACGAATATCAAGACC  
AATTAGGAGAAGTAAATACTTTACCTTCAATGACAATTCCAGACCAAACAATGTCAATAC  
GTACAATAGTAGACAGATACGCAAAAGGACTACCTGTAACAGCATTACACCAATATACG  
AAGGCGAAGACTTCTATATGCCAGACCCCAAAACATTAGATCTAGTAGATAAAGCCGAAT  
TACTAGAATCAGCAAAACAAGAAGTGGCGAGTATTAAGTCTCGTCAATGGAAAGAAACAC  
AAGATGTTGAAAACACTGTGGAAAACCTTAAAAAACGACGTAGAAAAGACACCAATTTAAT  
ATTGGTGTGCTTTCTGCGTAAGACAAGCGAAGCGCGTCAGAAACAAAAAGCACTAATAT  
TCCTTGATATATTAGTGCTAATTGACACTAAAACaAAAAAAGAGCTATATTTGaAAAAA  
AAGGTAACGAAGTGGACGCaAAAAAATAAACAGCGATTAATAAAAAAATGTCAATTA  
AAAACaAAAAAACAACAAACATGCCAATACCATTAGCATTAGCAGCAGCAGCAATACCA  
GCAATAACAGACCTGGTAAACAGCGGTAGTACATTATATACTAACGCACAAAACAAAAAG  
TTCAGTCAAGAAATGTATGACAGACAAAGAGCAGACGCATTACAAGATTGGGACAAACAA  
AATAAATATAATAGTCCAAGTCAACAAATGCAGAGATACAAAGAAGCGGGGTAAACCCA  
AATTTGATATATGGGCAGATGTCTAATTCCGCAGCAATTAGAAGTACCGATATGAAACAA  
CCCGACTTTGTAGCACCAAAATTACAAAATACAGGACAAGTAATGAATAATTACATAGAT  
CTTAAATTAAGAACAACAATTATCTAACGATAAACAAGCTGGAGAATTATTACGTCAA  
CAAACAGAAGGAAAAAGATTAGAAAATCAAATGTAATTGACCAAACACCATATATAGCA  
GAAGAAAGATTTCAAAGAAGTAGATTAACGGGAAACAAGTAGATAGTATTATGGAAGAT  
ATAACAATAAAAAATTAATGAACCCGTTATTAAGAGATAAAGTAAGTAATGATATAAAA  
ACAATGACTCAAATAGATATTATCAAATTTAACAACACCACAACAATAGCAGTACAG  
AAAGCCACAACAATAATAGAAGCAAAAATATCTGGTCAAGATATAGAAAATTTATTT  
AGAAAATATACATATGATTTACAAAATAATTTAGGATTAATCCTAACATTATATCAGAT  
TTATTAATAATAGGAGCTTCATCATTATTAACAACCAAGATAAATGAGAATATTTTGTATA  
TACTACAGAGGAATGGTAATAATaAAAAACCAAACATTAGAAAGAGCATTAGAATTATTA  
GAGCGTTCAAGCGCACTAACAAATAGGAATACAAACAAATAACAATTaAAAAACCaAAAA  
TGAAAAGAGGTTACAAAGGCCGTAGAAAGTTACGGCaAAAAAAGGTGGCTATAGGTCAT  
CAAAGTAAAAAGAACTTATTATGTATCACGCGGTGGAATCCGCCTTTAAAACaAAAAA  
AATGGGACAAAACCTTTTCAACAGCATTACAGCTGAACAAACCAAAAaAAAACGTCTTCGA  
TTAACGCATGACGTAAAGTTATCAACAAATATGGGACAACCTTACCCCATATTAACACT  
CGAATGTGTACCCGGAGACAAATTCGATTTATCATGTGAAAGCCTTATTAGGTTTGCACC  
AATGATAGCCCCAGTAATGCATAGAATGGATGTAACAATGCATTATTTCTTCGTACCAAA  
TAGAATATTATGGAGTAACTGGGAAAAGTTCATTACAGAACATAATAGTGAACACGTAGC  
ACCATATATGGCATATACAAATGGAGATTATACAGCCATGCaAAAaAAATTTATGGATTA  
TATTGGAATACCACAGTACCAGCTGGTGGAGTAAGTACAAACGTAAGTGCATTACCTAT  
GGCAGCATATCAATGTATTTATAACGAATATTATAGAGACCAAAATTTACAAACACCAAGT  
AGATTATAAATTAACAGATGGAAATAACAATACAGATGCTGGAGATAGAGAAAGATTAAC  
AACATTAAGACAAAGAGCATGGGAACATGATTATTTTACAGCTTCATTACCTTTTGCACA  
AAAAGGAGCAGCAGTAGATATACCTATTGGAACAATAGACAAAGATGTAGCCGTAACTT  
TAATAGTTTAGAATTTGGTGCAACAACAGTTAGATACAATTCAGCAGATGGATTAATAGA  
TATAGGCGGTTCAAACGCAGTTAATGCAGATGGTACACCAACAATGATTGCTAAAACATC  
TACAATAGATATTGAACCTACAACAATTAATGATTTACGTAGAGCATTAAATTACAAGA  
ATGGTTAGAAAAAACGCTAGAGGCGGTACAAGATATATAGAAAATATTCTTACACACTT  
TGGTGTAGAAAGTTCAGATAAAAGATTACAAAGACCAGAATATATACTGGTGTAAAAG  
TCCAGTTGTAGTATCAGAAGTATTAATAACAACCTGGCCAAGACGGAGGTTTACCACAAGG  
AAACATGGCTGGACACGGAATAAGTGTAACAAGTGGAAAAAGTGGATCATATTATTGTGA  
AGAACACGGATACATTATAGGTATAATGTCAGTAATGCCAAAAACAGCATATCAACAAGG

AATTCCACGTACATTCTTAAAAACAGATTCAGTATTATTTCTGGCCAACATTTGCAAA  
TATTGGAGAACAAGAAGTTGCAAAACAAGAATTATACGCATATACAGCAAATGCAAACGA  
TACATTCGGATACGTACCTCGTTATGCAGAATACAAATACATGCCATCAAGAGTAGCAGG  
AGAATTTAGAACATCATTAAATTATTGGCATTAGGTAGAATATTTGCAACAGAACCAAG  
TTAAACAGCGATTTTATAGAATGCGACCCAACAAAACGCATATTCGCTGTAGAAGACCC  
AGAAACAGATGTATTATACTGCCATGTTTTAAATAAAATTAAGCAGTTAGACCAATGCC  
TAAATATGGTACTCCAATGGGATTATAAT

>NewGenomeName\_298

GGGCCTATGCGTGGCGGTATCCGTCTATAAGGCCTAGGTGTGCTCAACTCTTTGGTCACA  
CCCTCAACACGGTCCTATCAAGTGCAGGACAGTGTATAGAGTGCAGACTGGCTTATTCGAG  
AGAATGGGCCATTTCGCATAACTCACGAGCAACAGATGCATCAGGTGTCTTGTATGCTGAA  
CCTCACGTATAACGATGCTTGGCTTCCCGAACATGGTCAACTTTTTAAAGAGGACCTGCA  
ACGCTTTTTTAAGCGTTTTCGTAAGTCGGGTTTTAAGTTCCGTTATGTGGCTTCTGGAGA  
GTACGGAGATCAGACTAAACGTCGCCATTTTCACATTGCGTGTGTTGGAGTTGATTTTTTC  
TGATGATCGTAGCCCTTTTGGTCGTGCTGTTGGCGGTGACCGTACCTACACTTCTGCTTC  
CGTCTTAAGGCTTGGCCTTACGGAAATCATTGATTGGGACTCTTAATTTTGAGTCTGC  
AGCATAATTGCCCGTTATATCTTGAAAAAGATTAAGGGCTTGCAACAACCAGAACCATT  
GCACATTGATGATGTGACTGGTGTCTGGTGTTCCTAATCCCGAGTTTATGCTTATGAG  
TAAAGGCATTGGCCGTTTCATGGTTTCGGGATTTTTTTATGTCGGATATTTTTCCGCATGC  
TTCTGTCATTACCTCTCAAGGTAATAAGCTCCTGTTCCCGTTATTACAAATCTTTATT  
GAAGGAGGTTGGGTCCGATTTAGCTCTGGACATGCAGTATCGTTCTTCGGCTCGTGCCGA  
AATGGAAGTTGAGCGTTTACGCTTTGAGAATCTTCCTAACCGTAAGGTTTCTCGTGCTCT  
TGTTTCTTCTTCTCGTTCTAGTTTATCTAAACGTAATTTATAATTTTTTAAGGTCATATC  
ATGCATTTATTTGTTGTTTGTGTTAAAGATCGCGCAGCTGAAGTCTTTAACCGTCCTTTC  
TTTGTTCCCTCATCGCAATGTTGCCATTCGTGATTTTACTGATGAAGTCAATCGGGTAGCT  
GCTGATAATCAGCTTAATAAGCATCCCGATGATTCGATCTTTATTTGCTCGGTGAGTTT  
AATGATAATAACGGCGAATTTTCTATTTCTGTTCCCGAGTCTTGGTTCGTGCCAAGGAT  
GTTTTGCAGTCTGTCTGACCCCTGCACCCCTTCGGGGGTGCTTTTTTCTTTTTGGAGTTT  
TTTATGTTCCACAATAAATCGGTTGATGCTCACAATTTTGCAATGGTCCCCCGTGCTGAC  
ATCCCCCGTTCTCGATTTCGCTATGCAGAAAACCTTAAAGACTACTTTCGATAGTGGTTTA  
ATTGTTCCCTATTATGTGTGAAGAGATCTTGCCTGGAGATACTTTTAATGTTAATGTCACC  
ATGTTTGGTCGTCTTTCGACCCCATTTTTCCAGTTATGGATAATCTCCATCTGGACTCG  
TTCTTTTTCTTTGTTTCTAATCGTTTGGTTTGGGACAACCTGGGTTAAGTTTATGGGAGAG  
CAGAATAATCCTGCCGATTCCATTTCTTACACTATCCCTCAACAAGTATCCCCAACAGGT  
GGATACGCTATCGGGTCCTTACAGGACTACCTTGGTCTACCGACTGTTGGTCAAGTCGGC  
GCTAGTAATACGGTTTCACATTCGGCGTTACCTACCCGTGCCTATAATTTAATTTATAAC  
CAATGGTTCGGTGATGAAAACCTTCAGAAATCCCGTGTGGTTGACAAAGGCGATGGCCCT  
GACGCCACCGCCGCTACTAACTATGCAATCCTTCGACGTGGCAAGCGTCATGATTATTC  
ACTGGCGCGCTCCCCTGGCCTCAGAAAGGAGGTAAGTCCGTAACCTTTGCCTTTAGGTACT  
TCTGCACCTATCAAGGGTTTACTGTTCTTAAACTGAGAACTATGTGAACCCTGCGACC  
AATCTTGTGATTCTGCTGGTGTAAACGTCTCCAGCTGGTTCTAATTGGTCTTCTTCTCCG  
CCTCCTTCATGGCGTATTCAAGGTAATAACACTACTAAAGTGCCTGCTATTTATGCTGAT  
TTGTCAGCTGCTACGGCTGCTACTATCAATCAGCTTCGTCAGTCTTTTCAGGTTCAAAG  
CTTCTTGAGCGCGATGCGCGTGGTGGTACTCGTTATACCGAGATTTTGAGATCTCATTTT  
GGTGTACTTCTCCTGATGCTCGTTTACAGCGTCTGAATATTTGGGCGGTGGTTCTACC  
CCGATCAATAATTTCTCCTATTGCTCAGACTTCTTCCACTGGTGTCTGTTCTACTACA  
CCTCAAGGTAATTTAGCTGCTATGGGTAATACATGGCCCAAGGCCATGGTTTTTTCACAA  
TCATTCGTGGAACACGGTTATGTGATTGGTGTGTTTCTGTTTCGCGCTGATCTTACTTAT  
CAGCAAGGTCTTCGTCGACATTGGTTCGCGTTCTACTCGTTATGATTATTTTCTGTT  
TTTGCTATGCTTGGTGAGCAAGCTGTTTTGAATCAGGAAATTTATGTGACTGGTGGTTCT  
ACTGATTCACAAGTTTTTGGTTATCAGGAGCGTTGGGCTGAGTATCGTTACAATCCTTCT  
GAGATTACTGGACTTTTTCTGTTCTACTGCCGCAGGTAATGATCCGTGGCATTACGCA  
CAGAAGTTTACTTCTTTGCCTACTCTTAATTCTACTTTTATCCAGGATACTCCACCTCTA  
GCTCGTAATTTGGCTGTTGGTGTCTTACTAATGGTTCAGCAGCTTCTTCTCGACGCTTTT  
TTAATATTAATGCTGCTCGTCTTTGCCTATGTAATCTGTTCTGTTCTGTTCTTATCGATCAT  
TTTTAAGCTCTTGCAGTTTACACCGCATGAGCCGAAAGGCTTTTTATGGGTATGCTCGAT  
TGGCTTACTTCTCCTATTGCTTCTGTTGCCTCCGGTGTGCTGGTTTTCTTGGTCAACAA

GATACCAACGCCACCAATCGCCAGCTTGCTGCTGAAAACCTCAGCTTTTCAGGAGCGCTTG  
AGCAACACTGCTTATCAACGTC AAGTTAAGGATCTTGAGGCCGCAGGCCCTTAATCCTATG  
CTTGCTTACGTTAAAGGTGGTGGTCTTCTACTCCTTCCGGTACTGTGATTCCTATGCAG  
AACGCTGTTTCTGCTGGTCTTTCTTCTGCTGAGTCTTCTGCCGTTCTTCTCTCACTACT  
AAGCAAGTTCCTAAAGTTGCTGCTGAGACTGAAAATATTGATGCTGATACCGTTAACAAA  
CGTGCTCAGCGTTATTTGATTGAAGCTCAAACCTGGTCTTGCTGGTGGTACTTCTGATGAG  
AAACGTTCCCATAATTTCTTTGATGGAATCTCAAGCTAATAAGATAGCTGCTGAAATTAAG  
AACATTCCTCTTGAAGGCGATCGCTTAATTGCTCTTGCTAAGCAGCTTCGTAAGTACTGCTACT  
GAGTTGACTGGTTTTTCAGATTGGTACTGAACAGCAACGTGCTAAACAGATGTCTTGGATG  
GCTGTTAAGACGATGCTTGAAGGTGATTTGTTGTCTTTGGATAAAGATGCTATTCTCAA  
GCTGAGAATTTTGGGAAACAGTTTGGGCAATATAAGCCCATGATTGATTCTTTGATTTCC  
GTTTTCCGTATGTTGTCTAAACGTTAGGAGTTTTATGAAGTTTATTTCTGCTTATGATAA  
TCACGATGCCAGGTCTAATGAGACCGGGCTTAAGTGTGGATTCCCTCTTTGACTCAACA  
GCAGTTTAAAGATGAATCTGATATTAATTTTATTGTTGATCGTTTTATGAAGACTGGTCA  
TTTGCTGAGCCAGCTTCTATGCCTCAATATGTTGACTATGAGGGTGTTTTTGACTTTCA  
GTCTGCCATGAATGTAGTCCGCCAGGCGGACGAAAATTTTCATGCGTATGGATGCTAAGCT  
TCGTTCTCGTTTTCCATAATTCTCCTCAAGAATTTTTGGAGTTTTTTGCTAATCCTGATAA  
CGTTGATGAGGCGGTTTCGCTTGGTCTTGCAGTTCCGCAAGCTAAGGAGAGTCCCTCTTC  
TGACGTTTCTTCTGCAGCGTAAAGCTGCTTTTGGCACAGTTCGCCACTTGATGTAAGTGT  
GCCTATTGACACCTTTTTGTTTTCTGTTCTAATGGAGTTCATCATGAAACCTTTGCATCG  
TCACAACGCTAACAAGCACCAGAGTGCTGCTAGCTTCAAGCGCAACGTCAAGACTACCAA  
GCTGATCAACATCACTGCT

>NewGenomeName\_299

AGACCACTAAGCTAGTAAATATTACAGCTGGTCCTATGCGTGGCGGTATTTCGTCTATAAC  
GTGTGTACAACCTTTTGGCAACATCCGCAACATGGGCCTATCAAGTGTGGTCAGTGTATT  
GAGTGTTCGTTTGGCTTATTCTAGGGAATGGGCTATCAGGATTACTCATGAACAACAGATG  
CATGAGGTGTCTTGTATGCTGAATTTGACTTATGACGATGCTCATTTCCTGAGCATGGT  
CAACTGTACAAAGCTGATTTGCAGAAGTTTTTAAACGATTGCGTAAGGCTGGGTATAAA  
TTTCGTTATGTAGCTTCAGGAGAATATGGTGACATTTCAAAGCGTCCGCACTTTTCATTG  
GCTTTGTTTGGAGTGGATTTTCACTCTGATCGTGTGTTGTTTGGTTCGTTCTGGTAGCGAT  
AGGACTTATATCTCTAAGTCCGTTTCAAGATATTGGGAACACGGTAACCATCTTATCGGA  
ACCCTTAATTTTGGAGTCTGCAGCATAACATTGCCCGTTATATCTTGAAAAAGATAAAGGGC  
TTGCAAAAACCTCCACCTTTATATATTGATCCCACTTACTGGTGAAGCAGTTTTGCCTAAT  
CCGGAATTTATGTTGATGTCTAAAGGTATTGGTAAGACTTGGTTCCGTTGATTTTTTCATG  
TCGGATGTATATCCACATGCTTCTGTCATTAATAAAGGATCTAAAGCTCCAGTTCCA  
CGTTATTACAAATCTTTGTTAAAGGAGGTTGGGTCTGATCTTGCATTGGACATGCAGTTT  
AGGTCATCAGCTCGTGCTGAGATGGATGTTGAGCGTCAAGCTTTTGAGAATCATCCTGAC  
CGTAAGAGCGCTCGCTCTTATGTTTCTTATTCTCGTTCTAGTTTATCAAACGTTTCGTTA  
TAATTTTTTAAGGTCAAATCATGAATTTATTTGCTGTTTCTGTTAAAGATCGTGCTTCAA  
ACGTCTTTAATCGTCCTTTCTTTGTTTCTCATCGTAATGTTGCTATTAGGGATTTTACTG  
ATGAAGTAAATCGTAGTGCTGTTGATAATCAACTTAAACAAGCACCCTGATGATTTGATT  
TGTATCTTTTGGGTGAGTTTAAATGACAATACTGGAGAGTTTGTATGGAATCACCTCAAG  
TTTTAGTCCGTGCTAAGGACGTTATTCAGTCTTCTTGACCCTTGCACCCCTTCGGGGGTG  
CTTTTTCTTTTTGGAGAATTTTATGTTTATAATAAATCTGTTAGTACACACGATTTTG  
CAATGGTGCCTCGTGCTGATATTCCTCGTTCTCGTTTTTCTATGCAGAAAACCTAAAAA  
CCACTTTTGATAGTGGTTATTTAGTTCCCTATTATGTGTGAGGAGGTTTTGCCCGGAGACA  
CGTTTAAATGTTAATGTTACGATGTTTGGTTCGACTGGCCACCCCGATATTCCCAGTTATGG  
ATAATCTCCATTTGGACTCATTCTTTTTCTTTGTTTCTAATCGTTTGGTTTGGAAACAATT  
GGGTAAATTTATGGGGGAGCAAGAGAACCCTTCCGATTCTATTTCTTACACTATCCCGC  
AACAAAGTATCCCCAACTGGTGGATACGCTATCGGTTCCCTTACAAGACTACCTTGGTTTAC  
CGACAGTTGGTCAAGTTCGTAATAGTAATACGGTTTACATTTCGGCGTTACCAACACGTG  
CCTACAATTTGATTTATAACCAATGGTTTAGAGATGAAAATTTACAGAATTCTGTAAGT  
TTGATAAGGGCGATGGTCTGATGCTAATGCATCAACTAATTACACTATTCTTAGACGTG  
GTAACGTCATGATTATTTCACTGGTGTCTTTGCCCTGGCCTCAGAAGGGTGGTACTCCTG  
TAACTATTCCCTATTGGTACTTTTGTCTCTGTTTTATGGAATAAGTACGCAGGTTCTCCTT  
CTAATTTTAAATAACTAACGCTGATTTGAACAGCAAGTTACTGCTGCTGATTTGCGTT  
ATGCCCTACTTACGGTGGTGTAGCACTGCCTAGCCCTGGCGATGTTGGTGGTTTAT

ATACTGATCTTTCTAATGCTACTGCTGTTACTATTAATCAACTTCGTC AATCTTTTCAGA  
TTCAGAAGTTGTTGGAACGTGATGCCCGAGGTGGTACTCGTTATACCGAGATTTTACGTT  
CTCATTGTTGGTGTACTTCTCCTGACGCTCGTTTACAGCGTCCTGAATATTTAGGTGGAG  
GTA CTACACCTATTTCTATTTCTCCTATTGCTCAGACTTCCGGTACTGGTACTTCTGGTC  
AACTACCCCTCAGGGTAATTTGGCTGCCATGGGTACTTATCTTGCTAAAGGTCATGGTT  
TTTCTCAATCATTGTTGAGCATGGTTACGTTATTGGTGTGTTTCTGTTTCGTGCTGATT  
TAACTTATCAGCAAGGTTTTCGTCGTCATTGGTCTCGTTCTACTCGTTATGATTATTATT  
TCCCCGCATTTGCTATGTTGGGTGAGCAATCTATTTTGAATAAAGAGATTTATGTTACTG  
GTGGCTCTTTAGATAATGATGTTTTTGGTTATCAAGAGCGTTGGGCTGAGTATCGTTATA  
ATCCTTCTGAGATTACTGGTCTGTTTAGATCTACTGCTGCTGGTACTATTGATCCTTGGC  
ATTATGCTCAGAAGTTTACTTCTTTGCCACGTTGAATACTACGTTTATTCAGGATAATC  
CGCCTTTGGCTCGTAATTTGGCTGTTGGGGCCTCGGCTAATGGTCAGCAATTTTGTAG  
ATGCTTTTTTTGATATTAATGCTGCCCGTCCGTTGCCTATGTACTCTGTACCAGGCCTTA  
TCGACCATTTTAACTTGTGGGGTTTACACCCCATAAAGGCAAAGGATTTTTTATGTCTT  
CTGCTCTTTCTTTACTTGGTGTGCTGGTGGCTTTCTTTTAGGCGGTCCTTCAGGGGCCG  
CTTTAGGAGCTTCTATCGGTGGTGGTATGGATAGAAATGCTGCCGCTGCTGATGTTGCTC  
GTGAAGCTAATGTTTTTTCTGCTAATCAGTATGCTACCCGTTATCAA ACTCAAGTTAAGG  
ATCTTCAAGCCGCCGTTTGAATCCTATGCTTGCTTACTCTCAAGGTCCGGGTTCTGCTC  
CTACTGGTCAGCAATATAACGTTACAAATCCATTTGAACGTGTTGCTACCGATTATTCTT  
CTGCTGCTAATGTTGAACGTACAGGTCAACAGATTGAAGCTGACACCGCTGTTAAACGTG  
CTGATATGTGGCTTAAAGAAAGCTCAAGAGGAGCTTCTAGTGCTTCTGCCGATCAGTCTC  
GTGCTACAACGTCTAAGCTCGAAGTTGAAGCTAAGAAGATTTCTGAGGAAATTAAGAATG  
TCCCTTTAGAAGGCGATCGCTTAATTGCCGCAGCCAAGCAGCTTAAGGAAGCTGCTAATT  
TGTCTATTTTTCAACAAGTTACTGAACGTGATCGTGCTAAACAAATGCAATGGTTAGCCG  
TTAAGACTATGGTTGAAGGTGATTTGCTTACTTTGGATAAAGAAGCTATTCTCAAAGCTG  
AGAATTTGGTAGAGAGTTTGGTCAATATAAGCCTTTAATTGACTCTCTTATTTCTATTT  
TCCGTATGTTGTCTCGACGTTAAGGAGTTTATGTGAAGTTTATTTCTGCTTATGATAATT  
TTGAAGCCATGTCTAATGAGACTGGTCTTCAGTGTTTGGATTCCCTCTTTGACGCAACAGC  
AGTTTAAAGAAGAATCTGATATCAACAATATTGTTGATCGTTTTATGAAGACTGGTCATT  
TGCCTGATCCAGTCTCTATGCCTCAATATATTGATTATGAGGGTGTTTTTGATTTTCAAT  
CAGCTATGAATGTTGTTTCGTCAAGCTGATGAGAACTTTATGCGTATGGACGCAAAAAGTTC  
GTTCTAGATTCCATAATTCTCCTCAGGAGTTTTTGGAAATTTTTTCGCGGATTCCGCGAATT  
ATGACGAGGCGGTTTCGCCTTGGTCTTGCTGTTCTAACAGCAGTCCCAAGGAGTTTTCT  
CGTCTTCTGAAGCTGCCCTTCAGGGGAAGCTTAGTAGATTGGCACAGTTCGCTACTTGA  
TGTA ACTGTGCCTATTGACACCTTTTTTGT TTTCTGTTTATAATGGAGTCATCATGAAAC  
CTCTACATCGTCACAATGCCAACAGCATCACAGTGCTACGGCTTTTAAACGCAATATTA

>NewGenomeName\_300

GCTCTAAAAAAGCCTCCAGGCACCTCACATGCCTTGCTATCATCCAATAAGTGCATATCA  
ATGCACTGATGGACAAATTGTCTTTTCAGAATTGAAAAGACACGATATATCACGCTCCTT  
GAATTTACCCTGCGGCCAATGTGTTGGCTGCAGACTAGAACGCTCACGTGAGTGGGCGAT  
TAGATGTATGCATGAAGCTCAAATGCATACTCAAACTGCTTTATAACCCTTACTTACAA  
TGATGACCATATCCCAAGCGATCGATCACTACACTATAGAGACTTTCAGCTCTTTATTAA  
AAGATTACGAAAACGGTATCCTGGACGAAGAATACGTTATTACATGGCTGGAGAATATGG  
TGAAAACCTTGGCCGTCCGCACTGGCACGCCTGTATCTTCGGACTCGATTTTCGATGATAA  
GAAATTATGGAAACGGACTGCCGCTAATAGTATCTTATATAGATCCAAAAACCTTGAATT  
ACTCTGGCCATTTGGTTATTCCTCCATTGGAGATGTTACTTTTTCGAATCCGCAGCCTATGT  
GGCTCGATACATTATGAAAAGGTTACAGGGAAAAACGCAGAACAACTATACTGAGAT  
TGACCCCGAATCAGGGGAAATCACTATACGTAAACCCGAGTTTACGAAAATGAGCCTTAA  
GCCTGGAATTGGTTACGAATGGTACAAAAAATACACTTCCGATGTGTATCCTCACGATTA  
CGTGGTAATTCGTGGAAAAAAGTCAAACCCCAAAATATTATGATAAAAATTACAAAAT  
AGATAATCCATATGAATTTGACGAACTACTTTACTTCCGAGAAAAGTCTGCTAAACTAAA  
CTACGAAGATAATACCCTGAGCGCTTGCTTGTAAGAGAGCAAGTAACTCAGGCAAACT  
TCAAAA ACTTAAACGTAACCTCACTTAAGGATATTCCTCATGAAATTAGTACTATGTTCT  
GTTAAAGACCGTGCAGCGGATGCGTACGGACGACCAATGTTTGTTCCTCTGTTGGTGTG  
GCAATTAGGAGCTTTAGCGACGAAGTTAATCGAGCAGATCCTGAAAATCAGCTATATAAC  
CATCCTGATGACTTTGATTTATACGAATTAGGTGAATTCGATGACAATACAGGATTATTT  
GCTTTACATGATCAACCAAAACAGTTATCTTTAGGAAAACAAGTAAAAAATTCTTAAAGAA



TGATTTAAACAAGACCGACTCAAAGGTATTATCTTTGGGTCGGAACAATAAAGGAGCTCG  
ATAACATGCATCGCAATAAGTCAGTAGACGTACACCAATTTACAATGATTCGGAAGGCTG  
ATATACCTCGGAGTTCATTTGACTGTCAGTCAACACATAAAACTACTTTTCGATGCCGGCT  
ACTTAGTACCTGTATATGTAGACGAAATGTTGCCAGGCGATACATTTTCGCTGAATATGA  
CGGCATTTGCTCGTCTTGCAACCCCTCTTTATCCAATTATGGATAACATGCACTTAGATT  
CATTCTTTTTCTTTGTCCCAAATAGATTAATTTGGAACAATTGGCAAAAATTTATGGGTC  
AACAAAGCGAACCCCTGCTAGTTCGATTTCTTATGTTGTACCCCAACAAGTATCACCCGCTG  
GTGGATACGCTATAGGATCATTACAAGATTACATGGGATTACCTACTGTAGGACAAGTAG  
GTGCCCTTAATAACAATAAGCCATTGTGCTTTCTGGCCACGTGCATAACAATCTTATATA  
ACGAATGGTTCAGAGATGAAAATTTACAAAATTCTGTTTCATGTTGATCTTGGTGATGGTC  
CTGATACTGCTAGTGATTACACATTATTACGTAGAGGCAAGCGAAAAGATTATTTCACTA  
GTTTACCTTGGCCACAAAAAGGTGCTTCCGTTACACTTCCATTAGGAACATCAGCGC  
CTGTATATGGTACAGGCAAGACTTTAGGTTTATCTGATGGTACAAACAATTTTCGGTATGC  
ATTACAACGGAAGTTCTATCGGTGTGGCAACAACCGATTCTTATAACACTAACATTGGTA  
CATCCACTGTAGGCGGAACATACGCAACAACGACAATCTTGGAGTTGTAACAAGTGGTG  
TATCTGGTTTGTATGCAGATTTATCGGTTGCAACTGCAGCAACTATTAACCAATTACGTC  
AATCATTTTCAGATTCAAAAACTACTTGAAAGGGATGCCCGTGGCGGTACTCGTTATACTG  
AAATTATACGCTCACATTTTGGTGTTATTTCTCCTGATGCTCGCTTACAGCGTCCCGAGT  
ACATCGGGGGTGGATCAACCAATATTAATATTAATCCGATCGCTCAGACATCGGGTACTA  
ATGCTAGTGGAACACTACCCCTATGGGCACACTTGCTGCTATGGGCACTGCCTTGGCTC  
ATAATCATGGCTTTACTTATTCAAGTACTGAACATGGCGTAATTATCGGCATGGTATCAG  
TACGAGCAGACCTTACATAACCAGCAGGGTCTGCAGCGTATGTGGAGTCGTTCAACCAGAT  
ATGATTTCTACTTTCCAGCTTTTGGCCACATTAGGCGAACAAGCTGTCTTAAATAAGGAAA  
TATATGTTACAGGTAATGCTGGGGATAATGATGTATTTGGCTATCAAGAACGCTGGGCAG  
AATACCGATATTATCCTAGCCGCATTTCAAGTCTGTTCCGTTCTACTGCTAGTGGAAC  
TTGATGCCTGGCATCTTGCACAAAAATTCACTACTACACCTACGTTAAACAATACGTTTA  
TACAAGACACACCACCAGTGAGTCGAGTTGTAGCAGTGGGTGCAGCCGCAAACGGACAAC  
AATTTATTTTTGATAGCTTTTTTGTATTGTAAGCAACGACCAATGCCAATGTACAGCG  
TGCCTGGCTTAATCGATCATTCTAATGTTTAGCGCAATAGCAAACGCGTTTAGTTCTGC  
ACCAGGCCTAGGTTCTTTACTAGGCGGTGCTACTGCTGGATTAGGTTTCGTTTTTTGGTCA  
ACAACAAGCGAACCAAGCTAATGCTGCAATGGCAGCAGAACAATGGCATTTCGAAGAACG  
TATGTCTAACACGTCATATCAACGTGCTGTTACAGATATGATCGCAGCTGGACTTAACCC  
CATGCTAGCTTACTCACAAGGCGGTGCATCGACACCCGGCCGACAAACAGCAGTTGCACA  
AAGCGCTTTAGGCGCTGCTTCTAATAGTGCAACACAAGCAGCCAATGTTATGGCTGATAT  
AACTTAAAAAGTGCCCAAGCATCTACAATAATAGTCAGGAAGATTTAAATAGAGCAA  
TCAAAATTTAGCTCTAGTTGAAAGCGCTAATAAATCAGCGCAATTACCTGGCCATCAGAA  
ATACGTTGATCAAGTAACATCTATGATCAACCAAAAATAACGCTATGGCTGCTCAAAGCTC  
TGCATTAGCAGCCAAACATACTGCCGAATTGCCAGAATCAAAGCAATTGGCAGATTATA  
TGAAGGAAACAAAGGCGCATATATTAAGGCGCTGAACGATTATCACCTGTTGTGCGCGA  
TGTCGGCATTGGTGCATCGTCAGTCGGAAACCTTATAACTAAAGGATTATCTAATCCTTT  
TAGACCATATCAACCAGATAGTAGACCACCCTCTAATAGGAGATAAAAATGTCAAAAAAC  
AATGTTTTTTACGTACACCATACAACTATGACAAAGATGCTGCGTCAAATGAGTCAGGG  
TTGCATTGTGAGGATGCTTCCCTGGCTCAGCAGCATTACAAAGAAGAATGTGATATCAAC  
ACTATTCTTCAAAAATTTAATATTACAGGCCTATTGCCTGAACAAACACTATCGCCTCGT  
TATGGCGATTTACCCGGTATCGGTGACTACCATAACAGCAATGAACCGTGTCTCGCGGTA  
CAAGATGAATTTGAGGCATTACCAGCCCAAATTCGGGCAAGGTTTCGATAACGATCCTGCC  
CAATTAATCGAATTTATGGAAAATTCGGAAAATCGACCAGAAGCCGAGAACTCGGATTG  
GTCGAAAAAGCCACTGCCGAAGACGTAGAAGTGGCTAAAAACACCCCTGAAAAGGCGGCT  
GAATAAGCCGTAGCACAGTTACCTTACTTGATGTAAGTGTGCTAGGTGACACCAAAACCT  
AACTGTACGATAAAAGGAGCTATAAAAATGATGTATAGAAAACCTGTAAACAAACGTCG  
TTCAGCTCGTTCTTTTAGAAAGAACGCTAGACGAACAAAATCAGCAAATATTCAAAAATC  
TCCACAACGTTGGAGGCTGGAG
